# Supplementary material
Source: PubMed Central journal article supplement (PMC6553926)

Raw file: 20150812\_A375SR\_Phospho\_BR1\_02  
 Scan: 7860 Method: FTMS; HCD Score: 68.86 m/z: 589.27 Gene names: E2F8

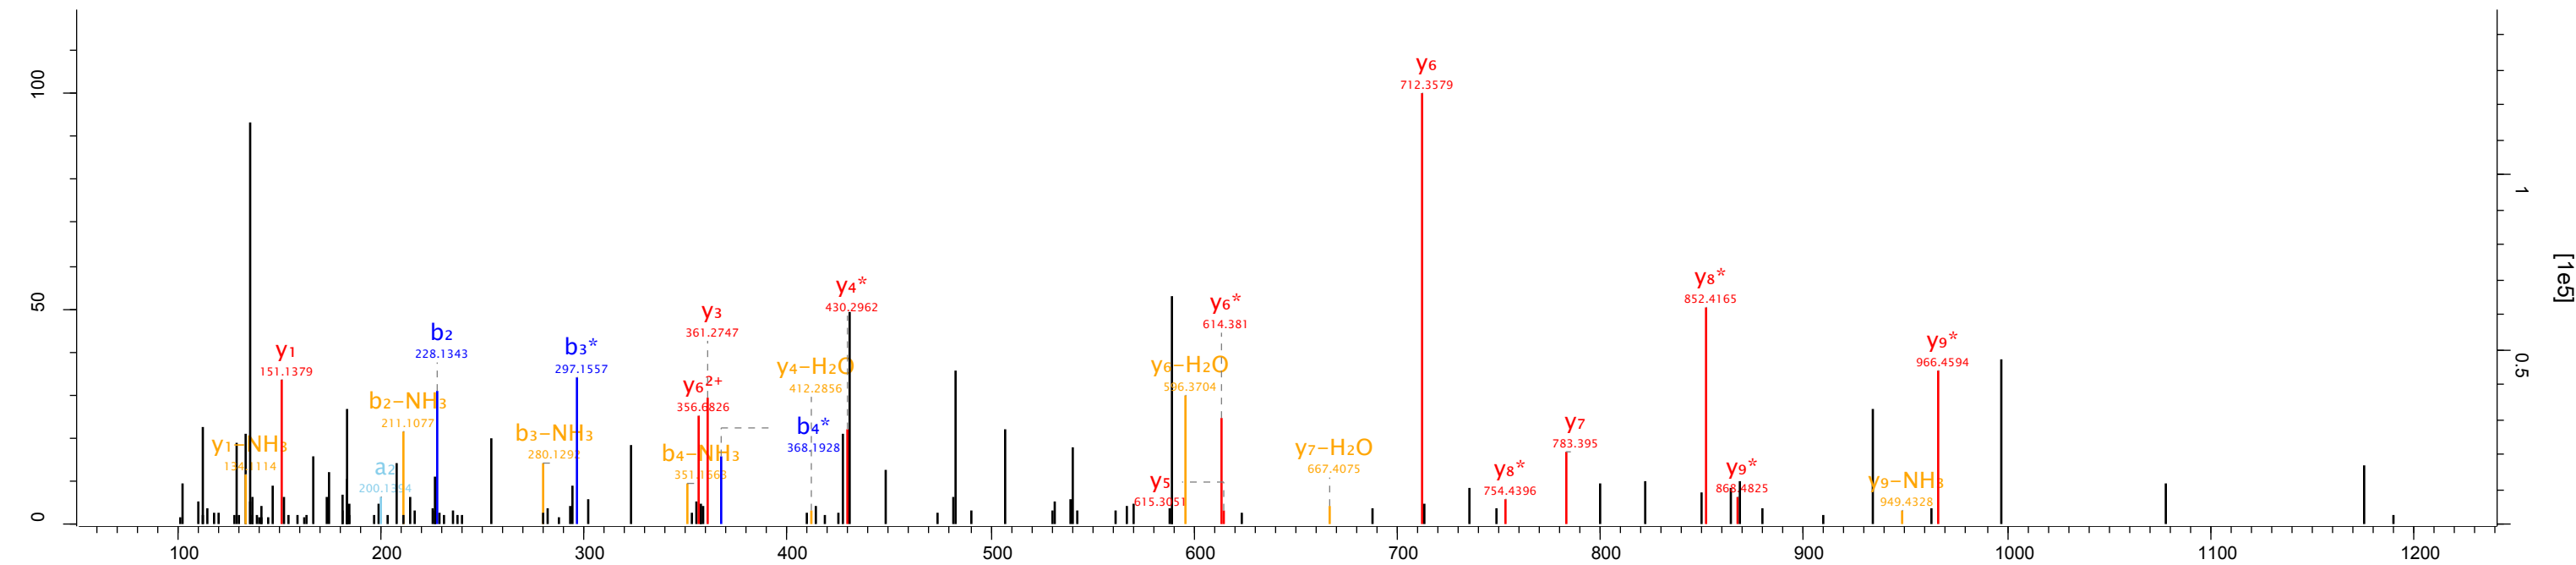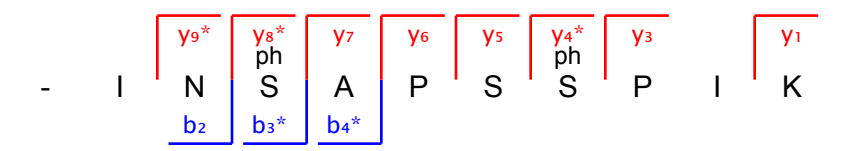

Raw file Scan Method Score m/z Gene names  
 20150812\_A375SR\_Phospho\_BR1\_03 13760 FTMS; HCD 47.82 574.23 PAG1

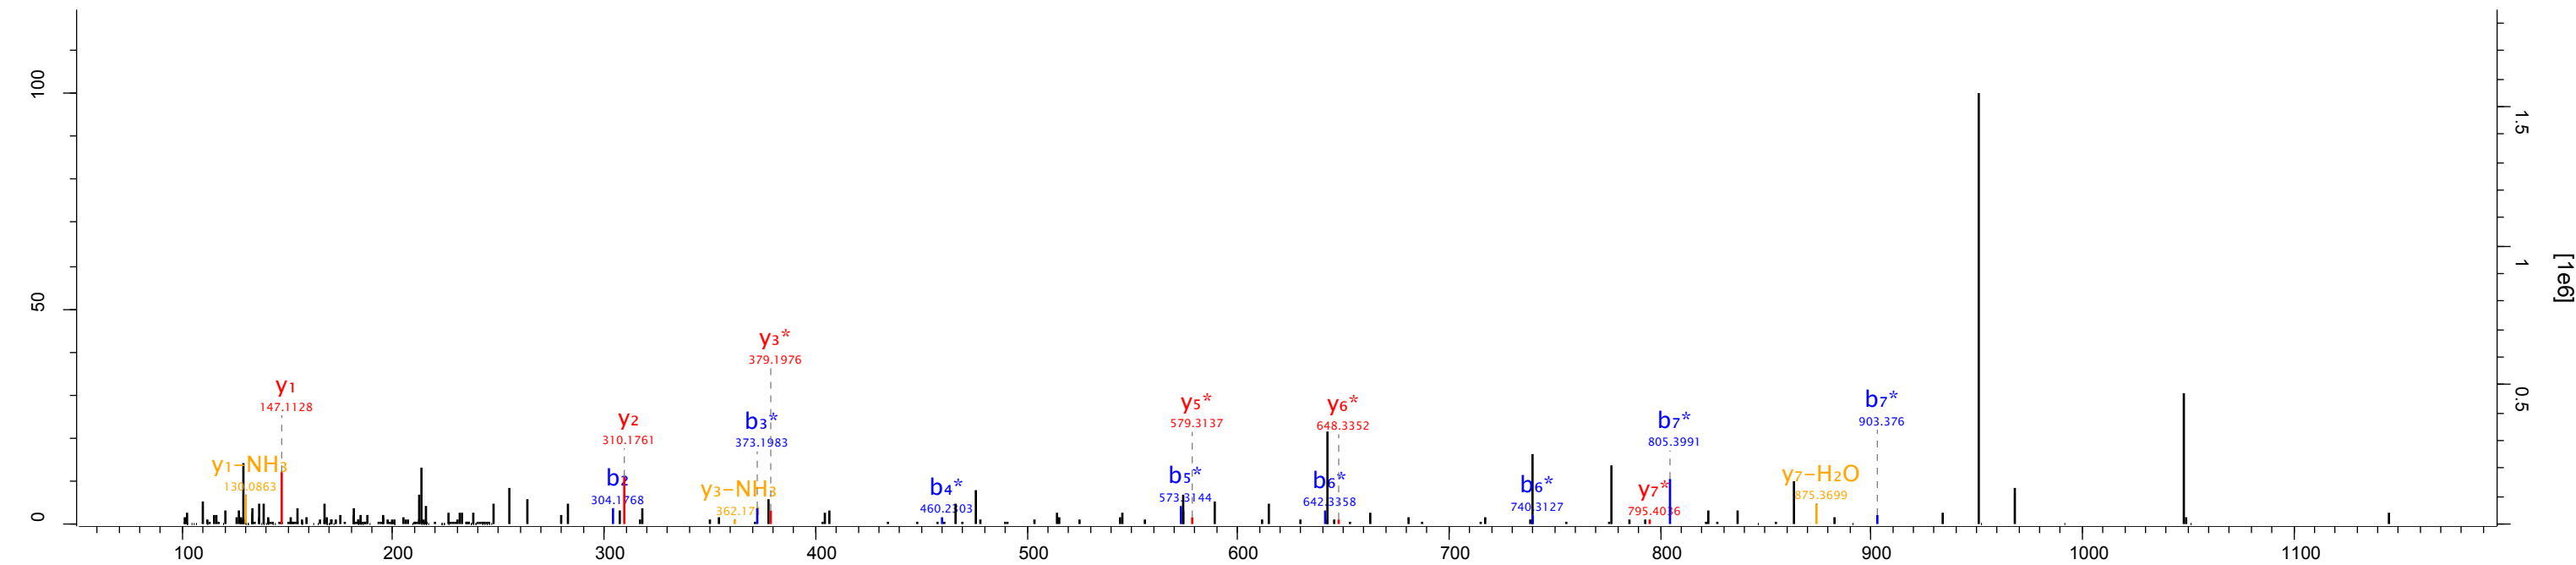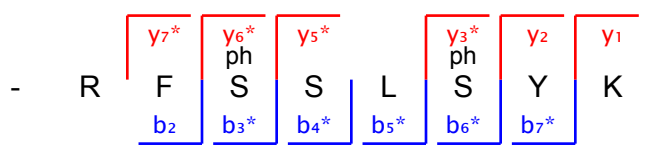

Raw file 20150812\_A375SR\_Phospho\_BR1\_03 Scan 25690 Method FTMS; HCD Score 149.62 m/z 1118.13 Gene names C19orf24

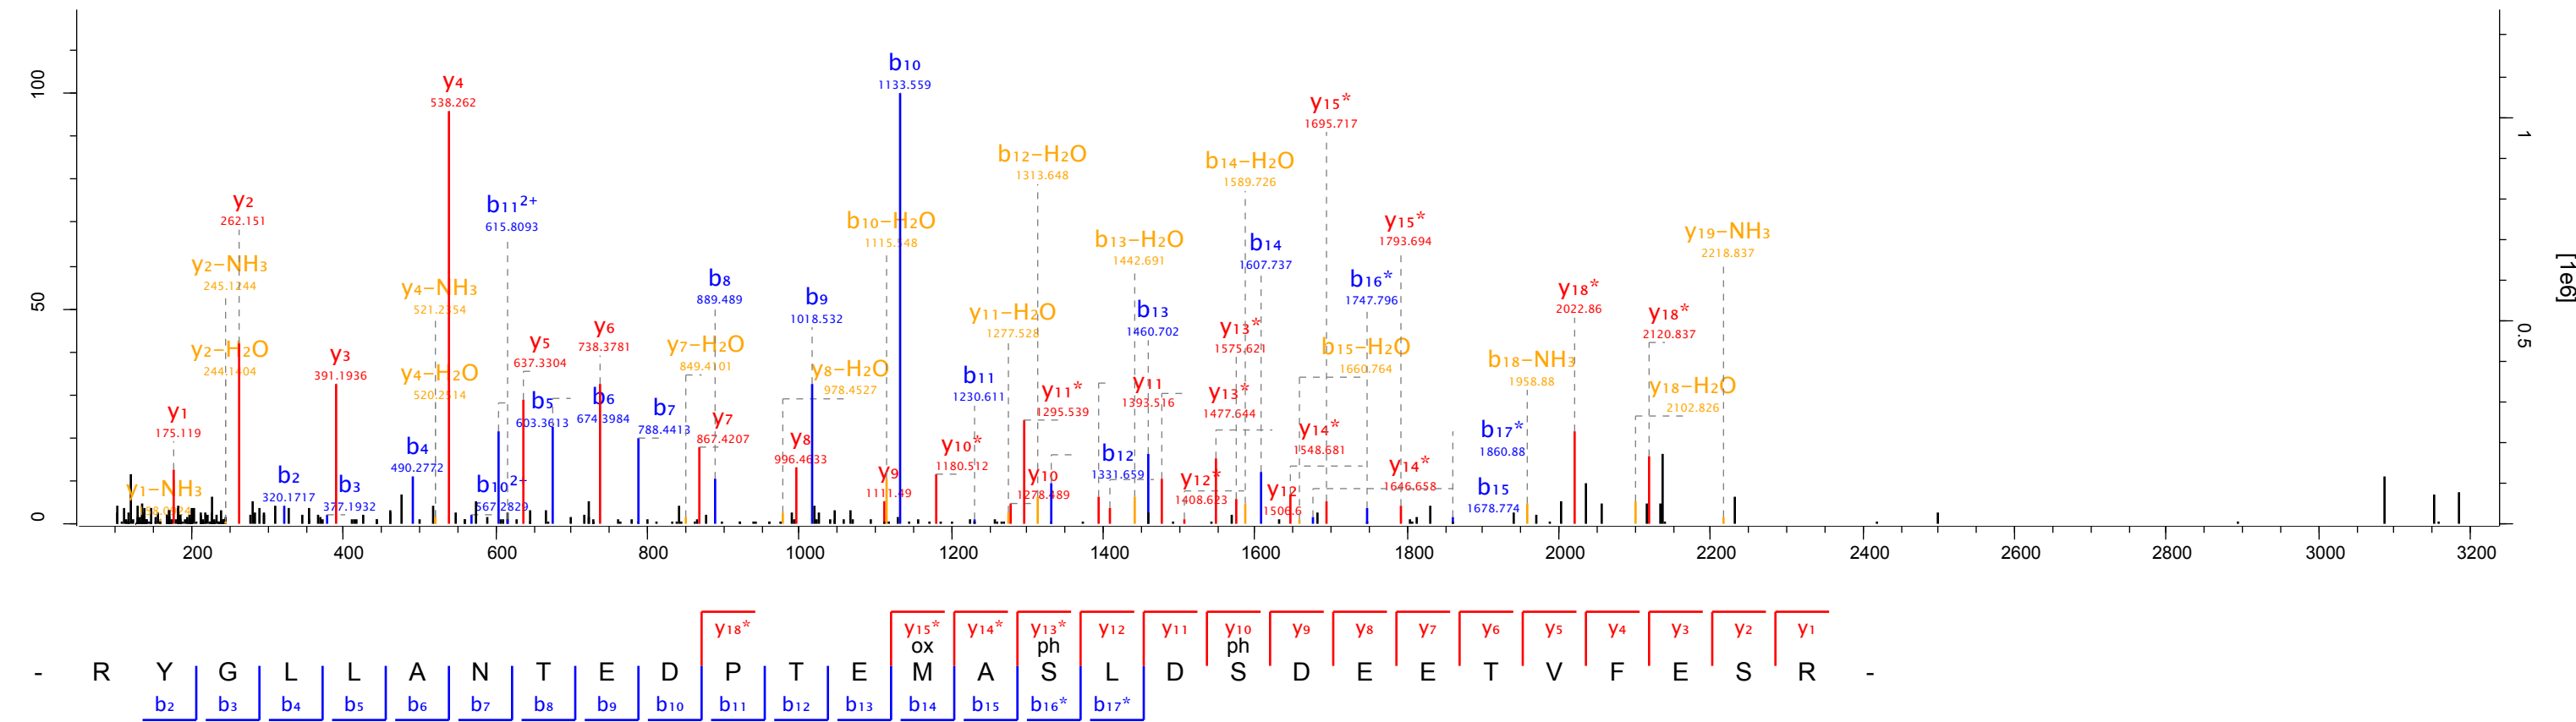

Raw file: 20150812\_A375SR\_Phospho\_BR1\_03  
 Scan: 26560 Method: FTMS; HCD Score: 165.96 m/z: 1010.92 Gene names: MAPK11P1L

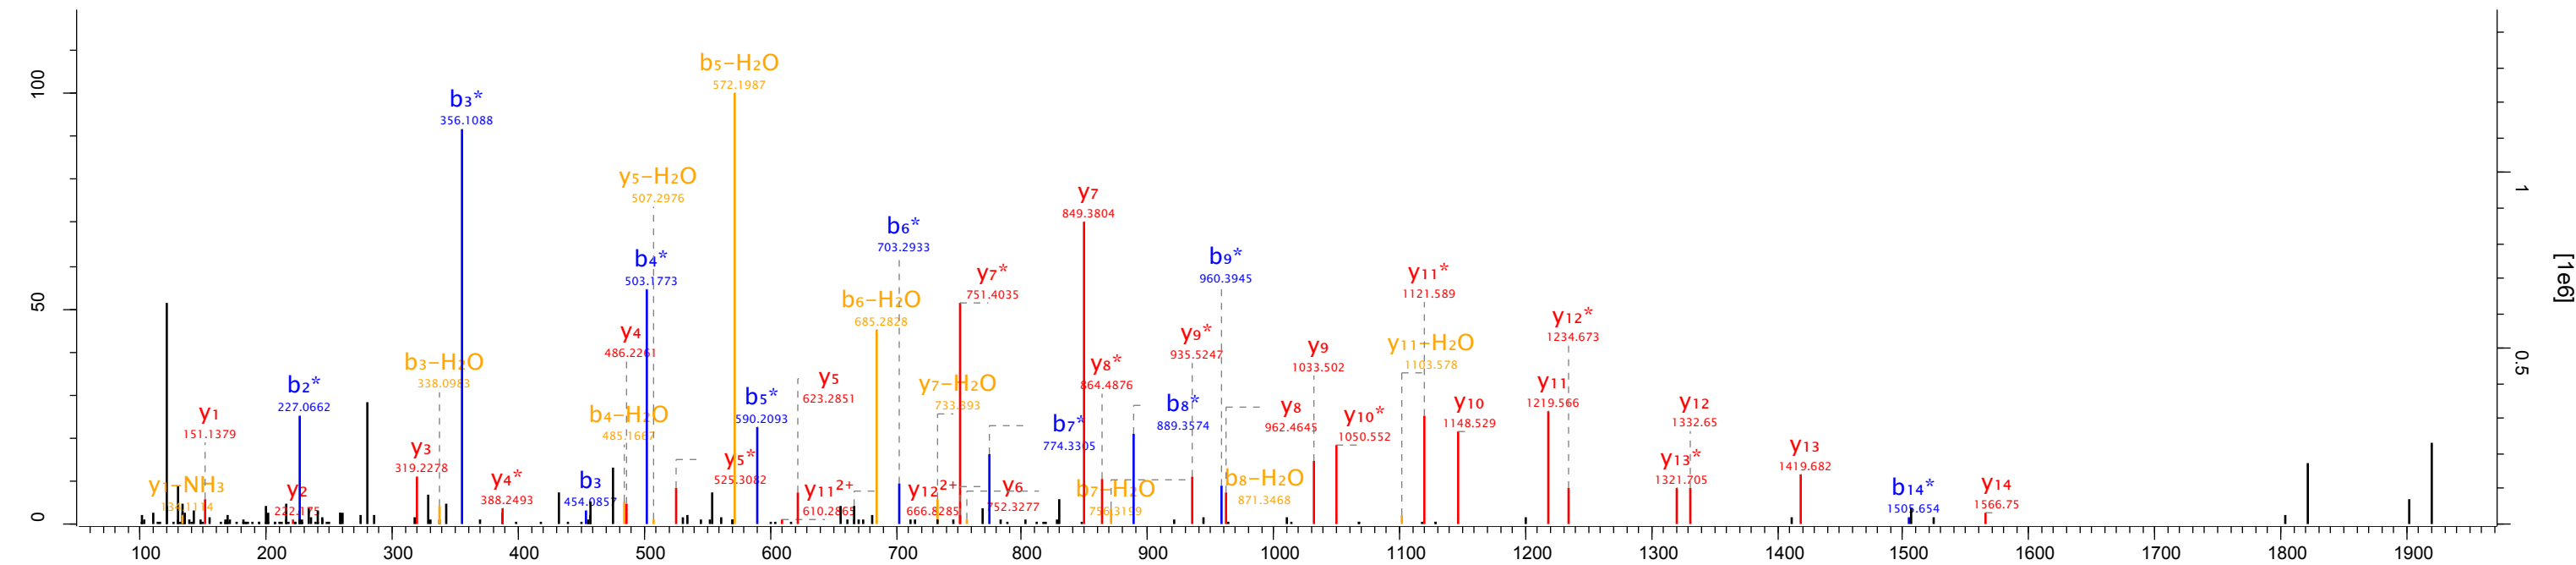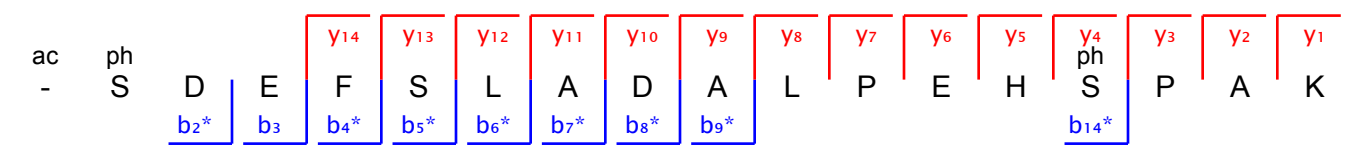



Raw file: 20150812\_A375SR\_Phospho\_BR1\_03  
 Scan: 8400 Method: FTMS; HCD Score: 96.31 m/z: 692.98 Gene names: HIVEP2

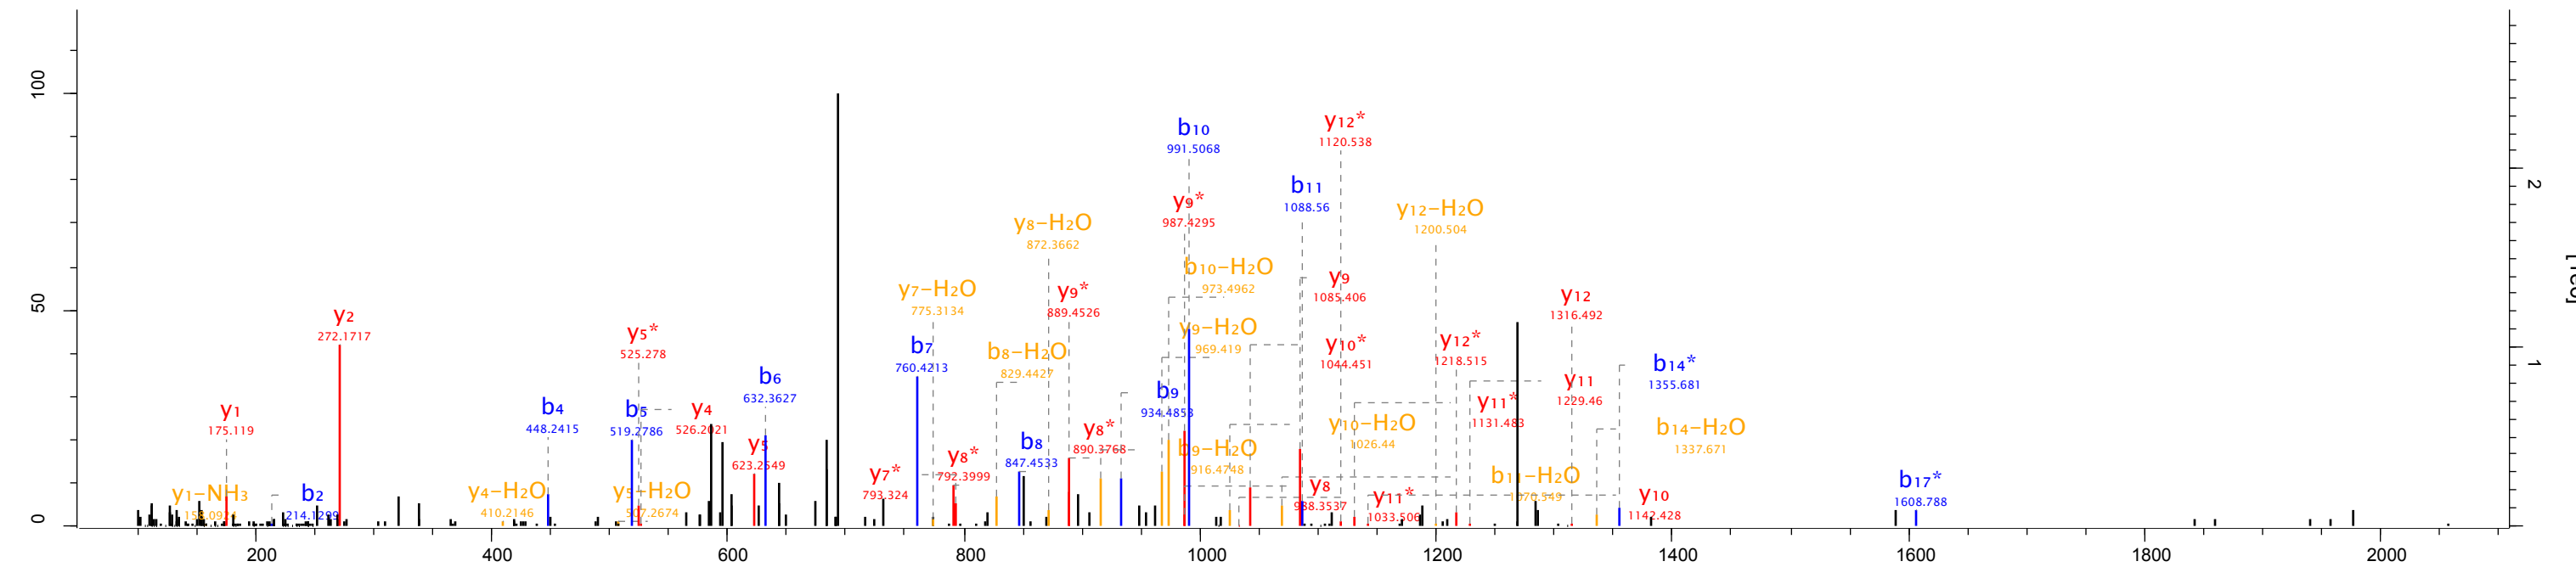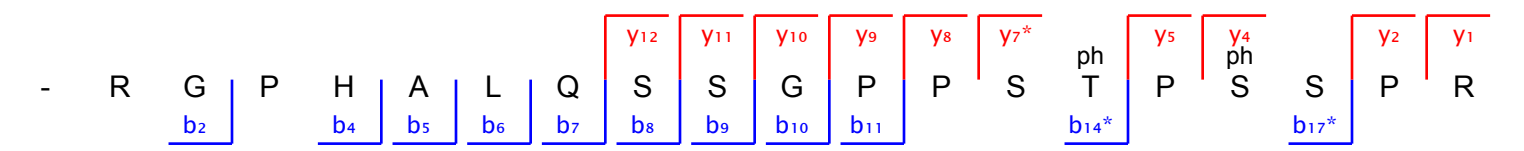

Raw file: 20150812\_A375SR\_Phospho\_BR1\_04  
 Scan: 1290 Method: FTMS; HCD Score: 47.06 m/z: 488.25

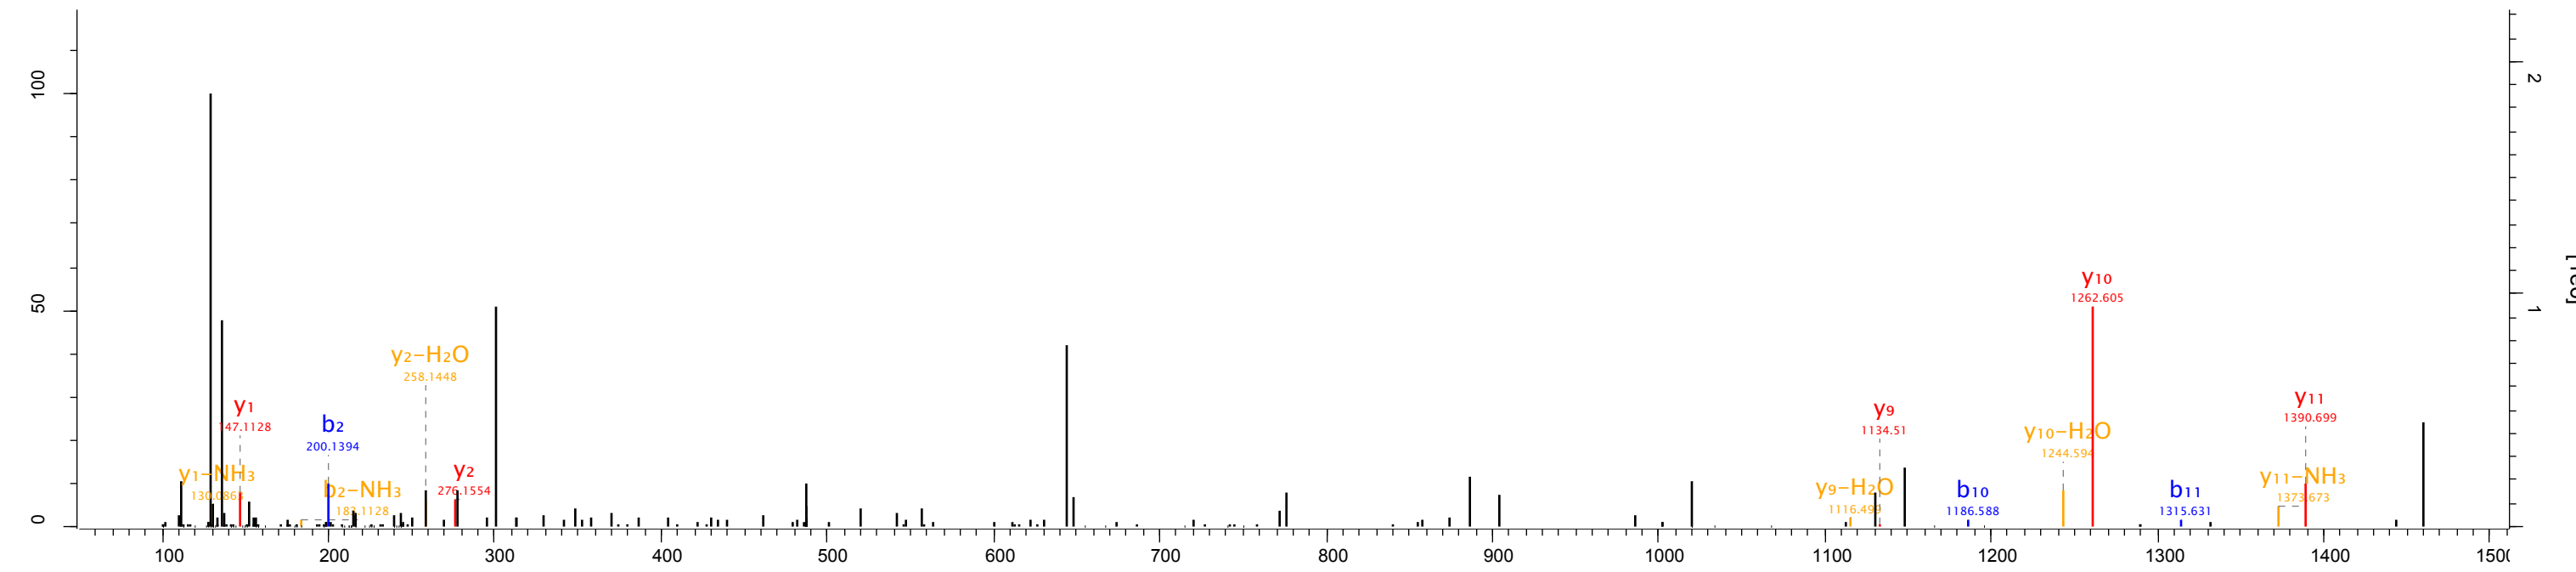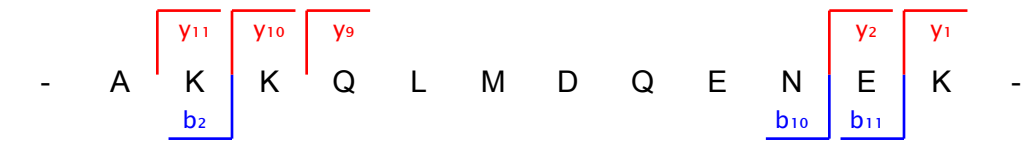

Raw file 20150812\_A375SR\_Phospho\_BR1\_04 Scan 13990 Method FTMS; HCD Score 67.15 m/z 784.86 Gene names PWWP2A

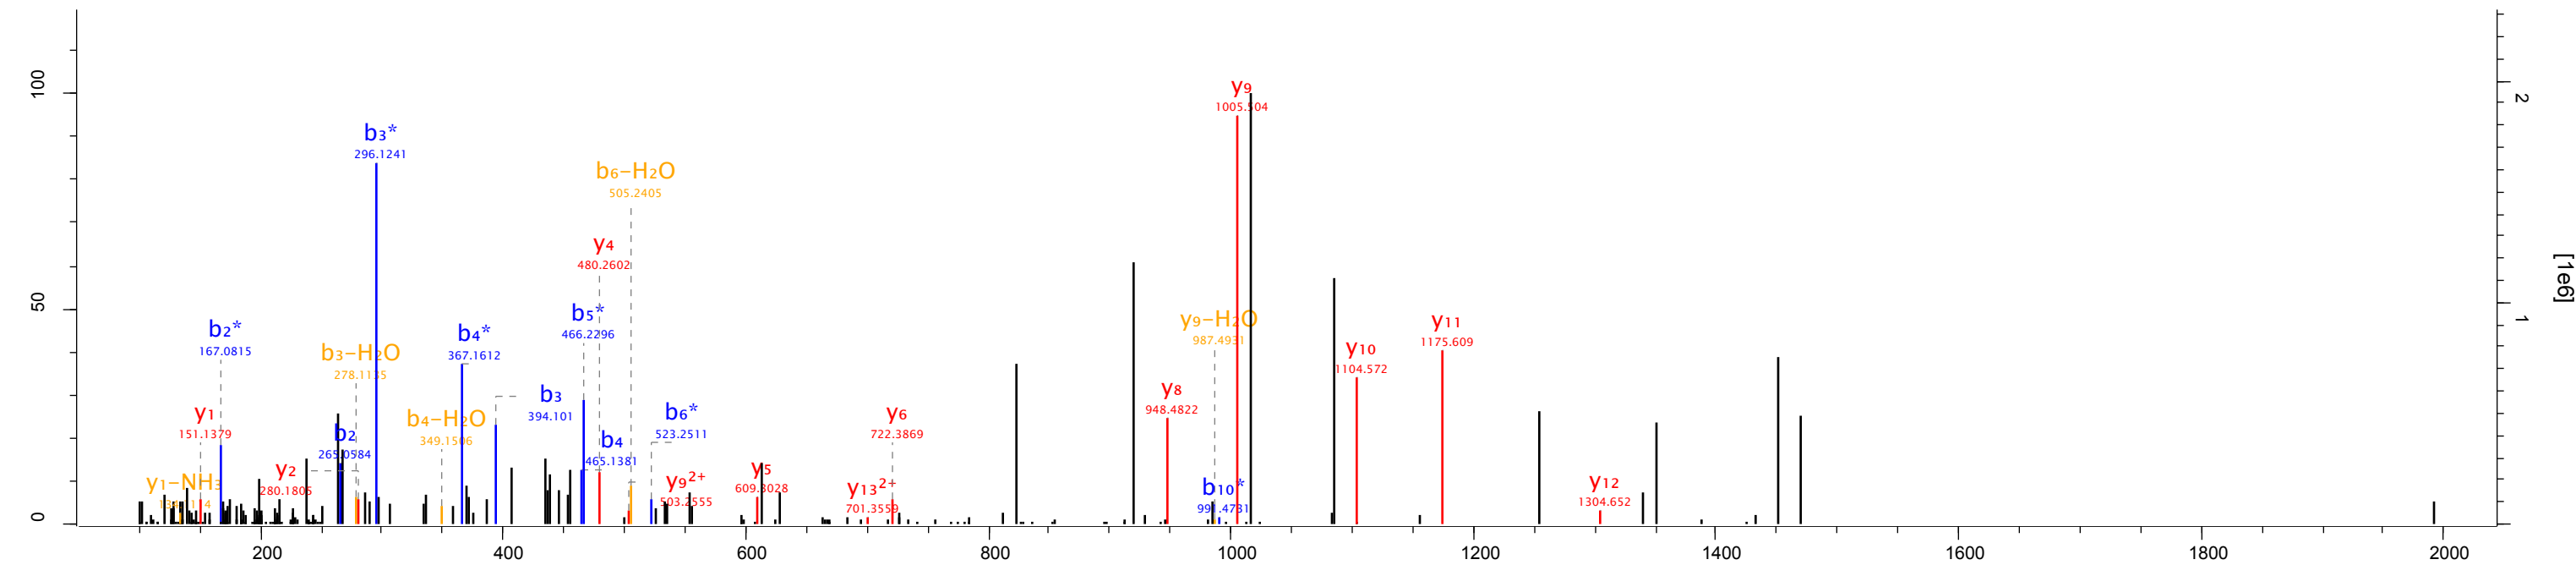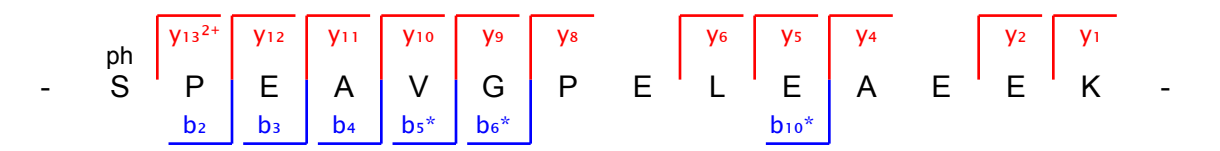

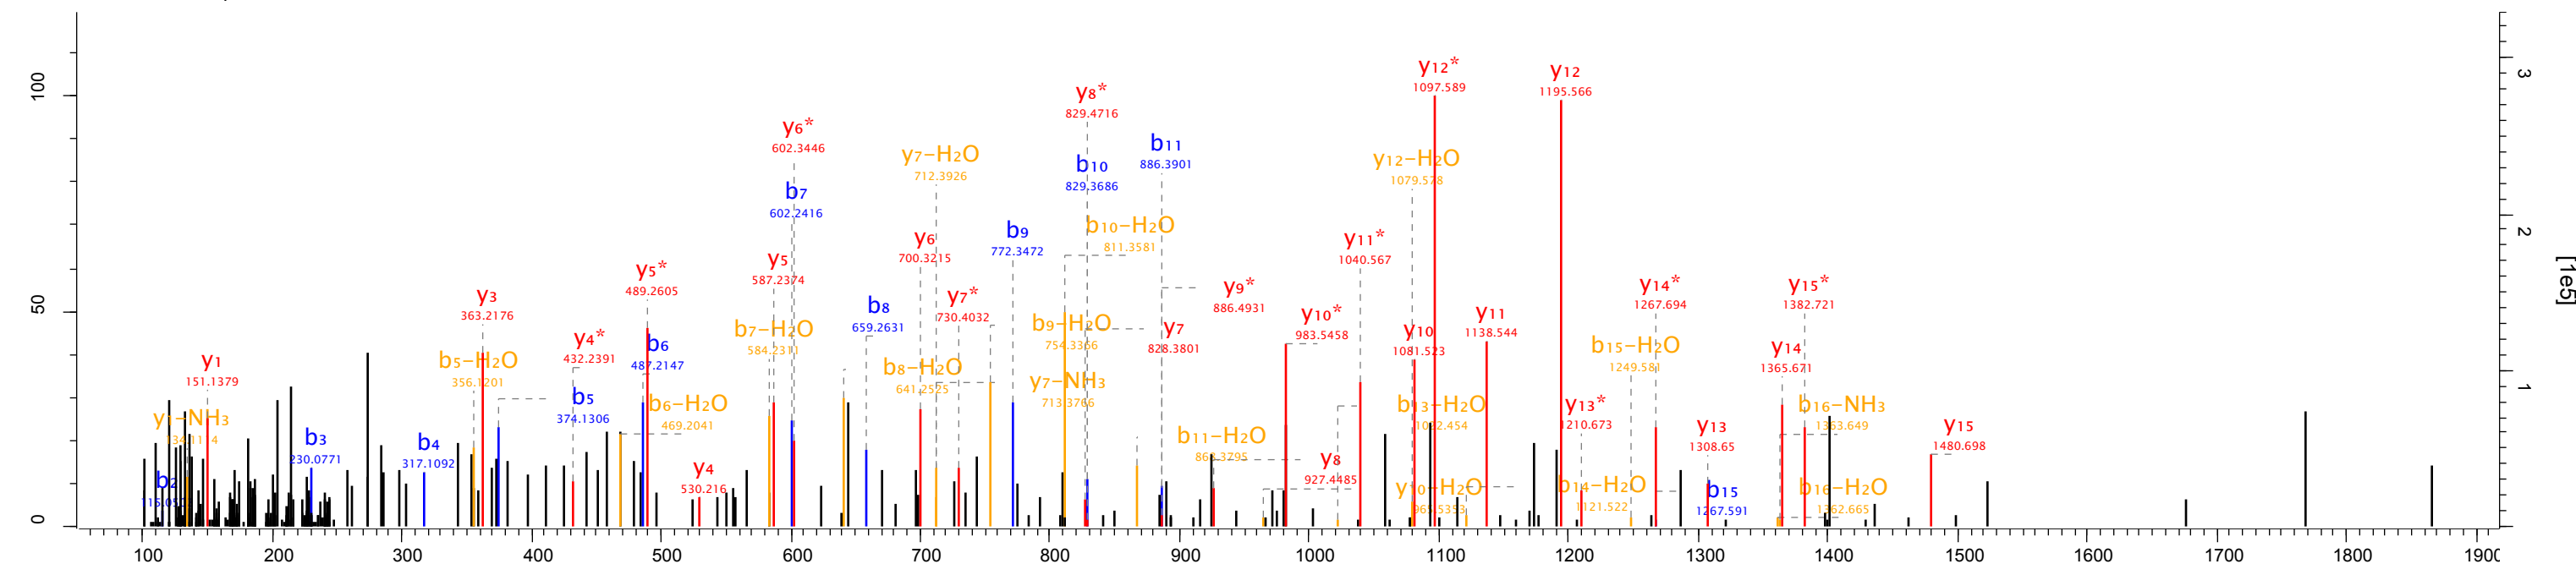

- G G D S G L D G L G G P G V Q L G S P D K -

b<sub>2</sub> b<sub>3</sub> b<sub>4</sub> b<sub>5</sub> b<sub>6</sub> b<sub>7</sub> b<sub>8</sub> b<sub>9</sub> b<sub>10</sub> b<sub>11</sub> b<sub>15</sub>

y<sub>15</sub> y<sub>14</sub> y<sub>13</sub> y<sub>12</sub> y<sub>11</sub> y<sub>10</sub> y<sub>9</sub>\* y<sub>8</sub> y<sub>7</sub> y<sub>6</sub> y<sub>5</sub> y<sub>4</sub> y<sub>3</sub> y<sub>1</sub>

ph

Raw file 20150812\_A375SR\_Phospho\_BR1\_04 Scan 6310 Method FTMS; HCD Score 72.93 m/z 426.73

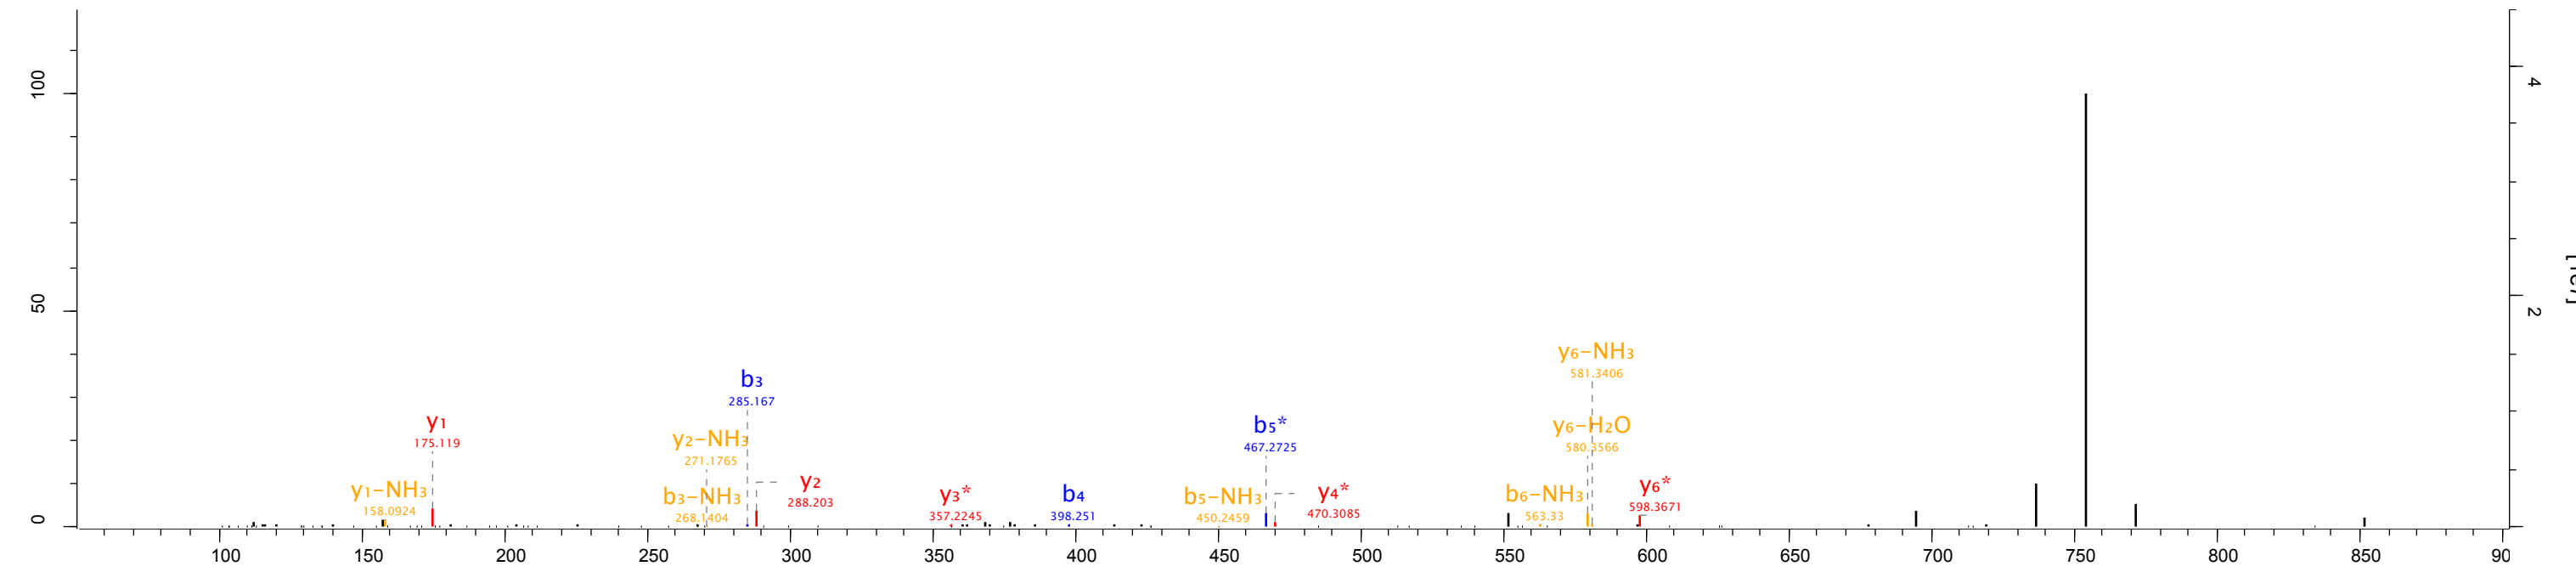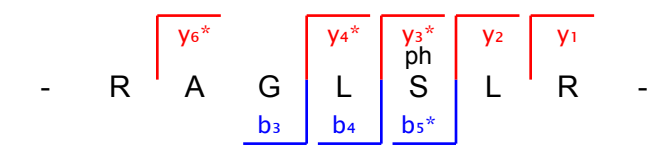

Raw file: 20150812\_A375SR\_Phospho\_BR1\_05  
 Scan: 13940 Method: FTMS; HCD Score: 174.21 m/z: 782.85 Gene names: PWWP2A

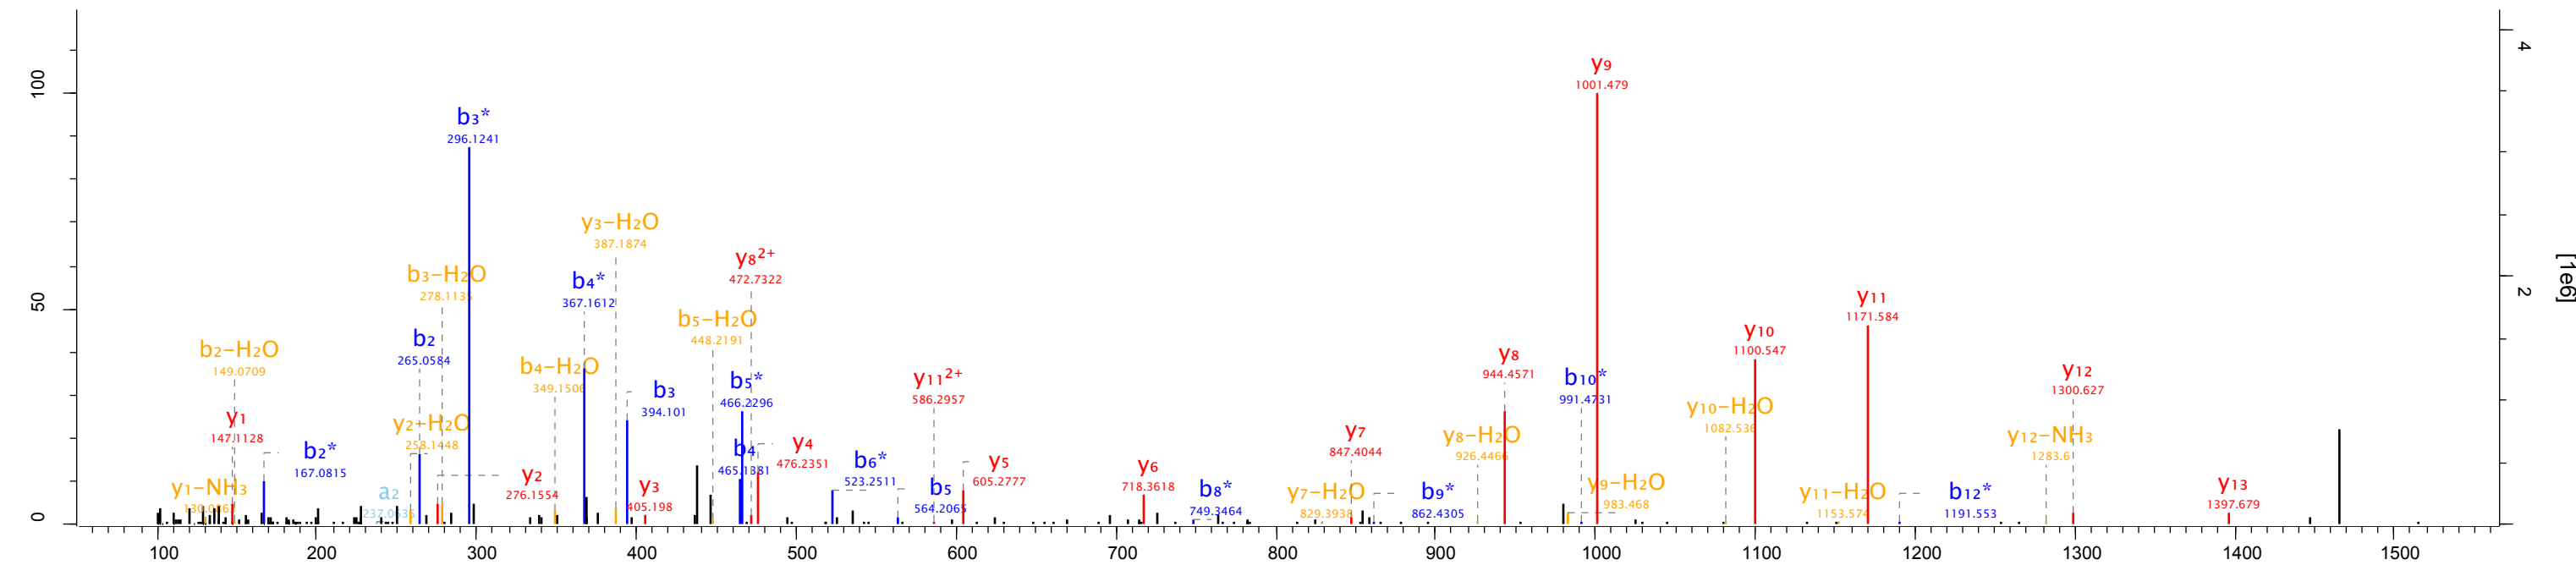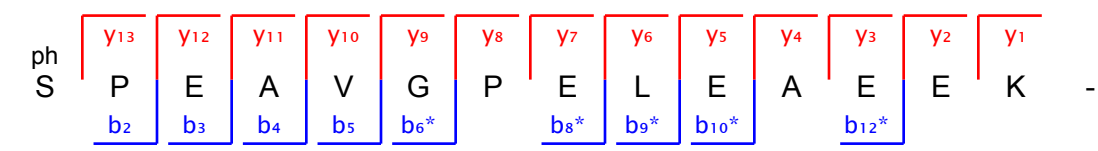

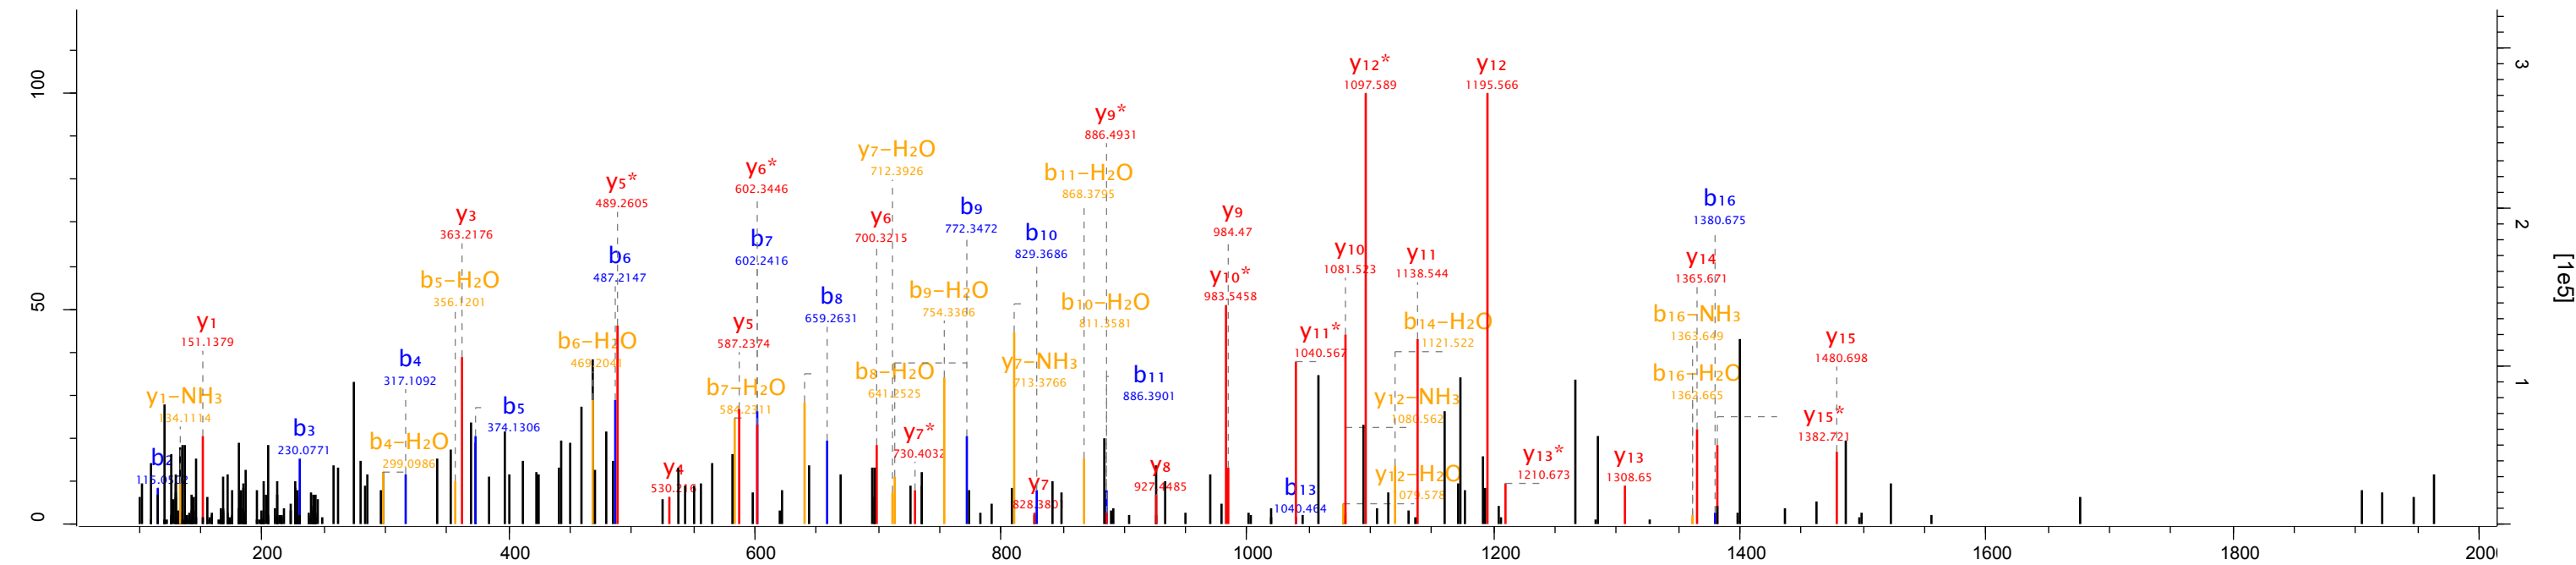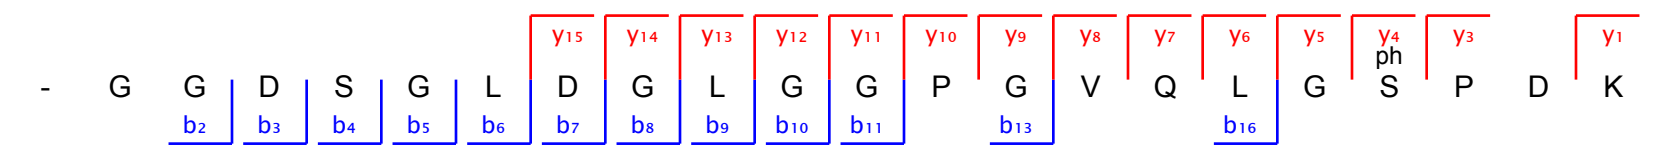

Raw file: 20150812\_A375SR\_Phospho\_BR1\_05  
 Scan: 6000 Method: FTMS; HCD Score: 126.88 m/z: 841.35 Gene names: YAF2

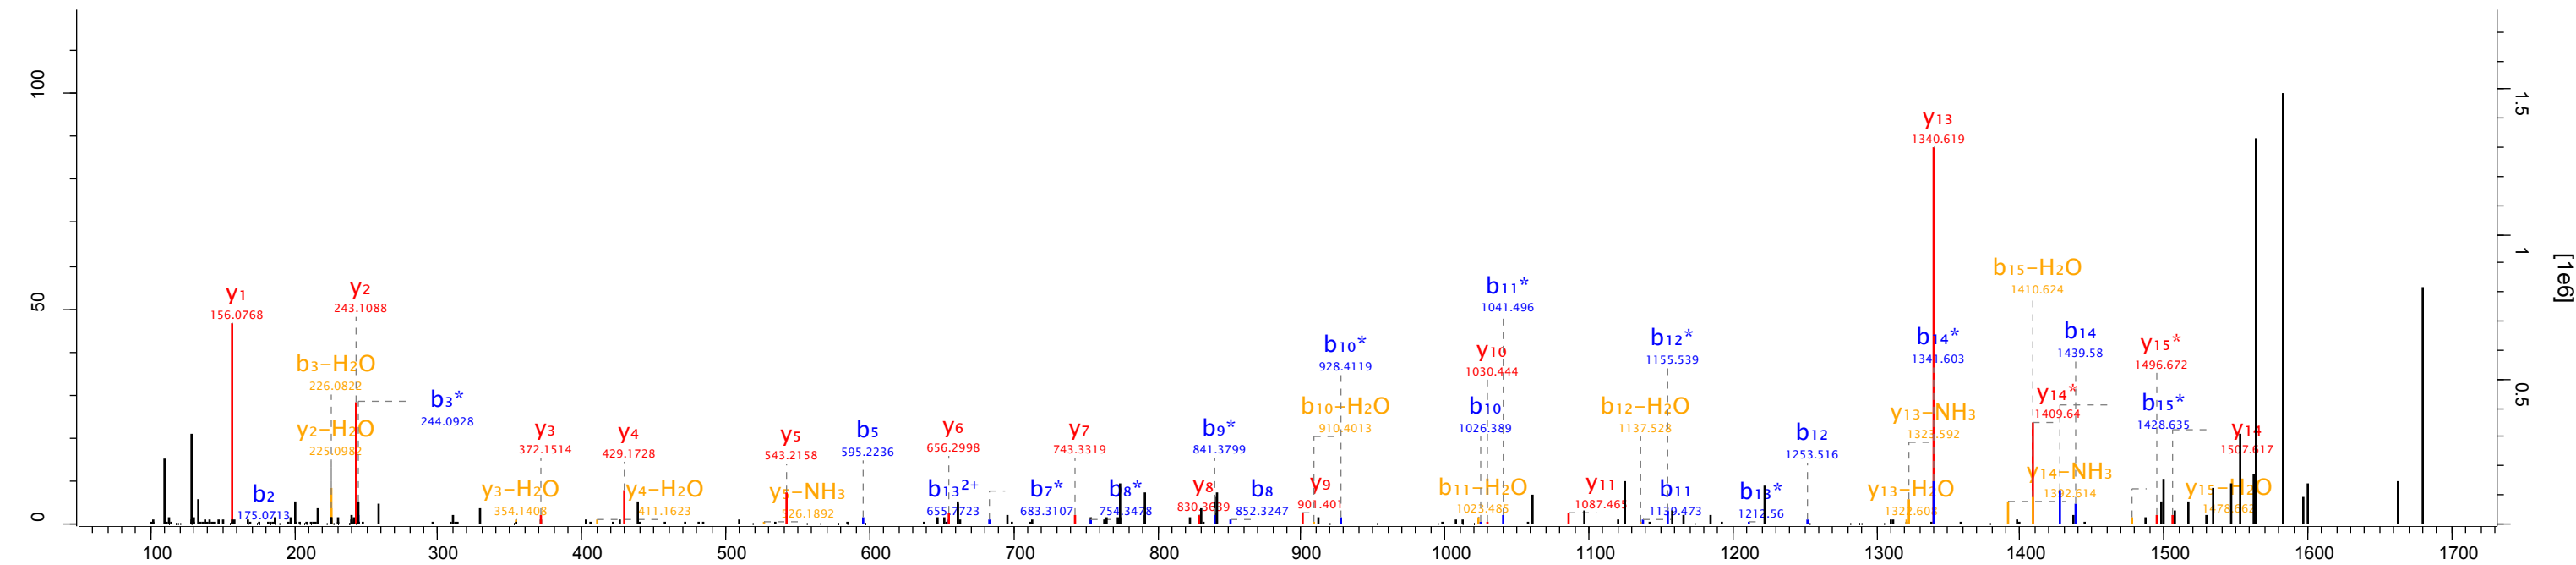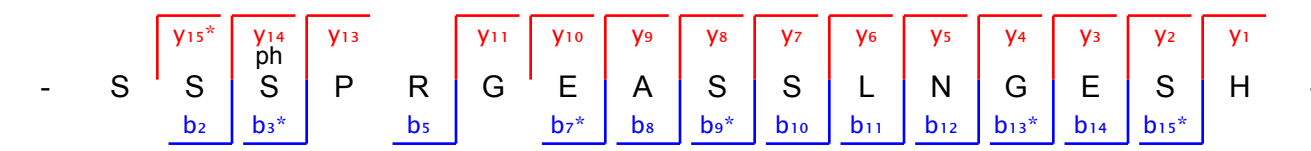



Raw file Scan Method Score m/z  
 20150812\_A375SR\_Phospho\_BR1\_05 8640 FTMS; HCD 41.54 500.92

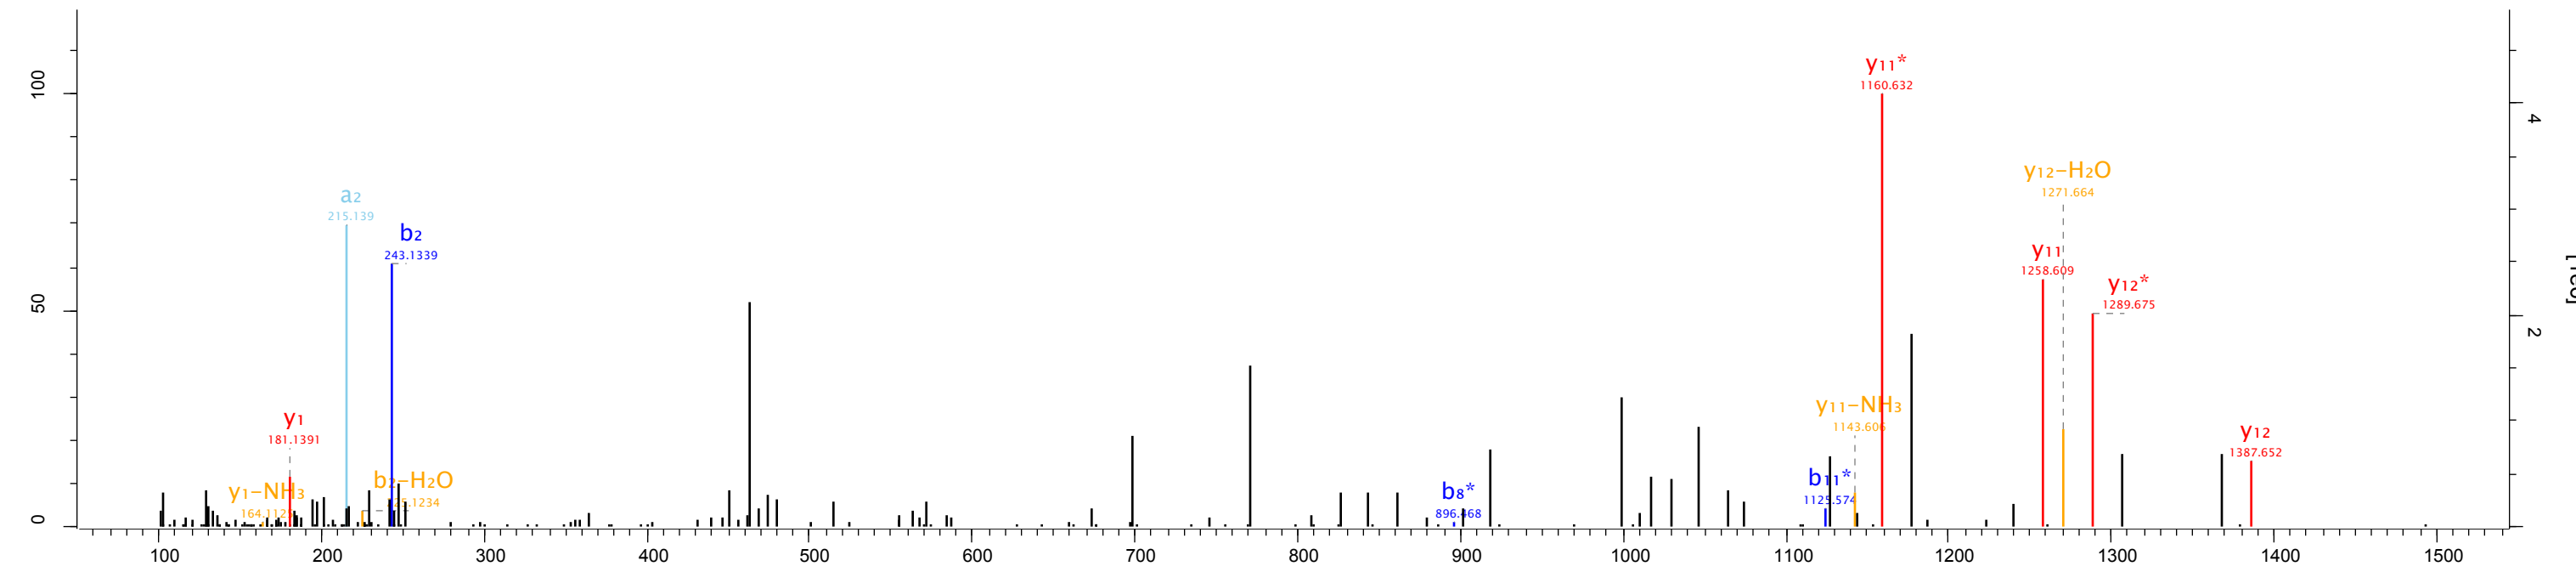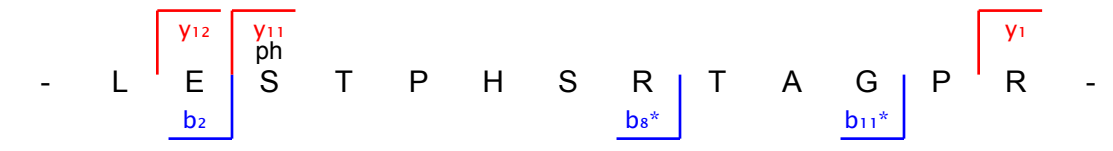

Raw file 20150812\_A375SR\_Phospho\_BR1\_06 Scan 14510 Method FTMS; HCD Score 183.73 m/z 783.35 Gene names PWWP2A

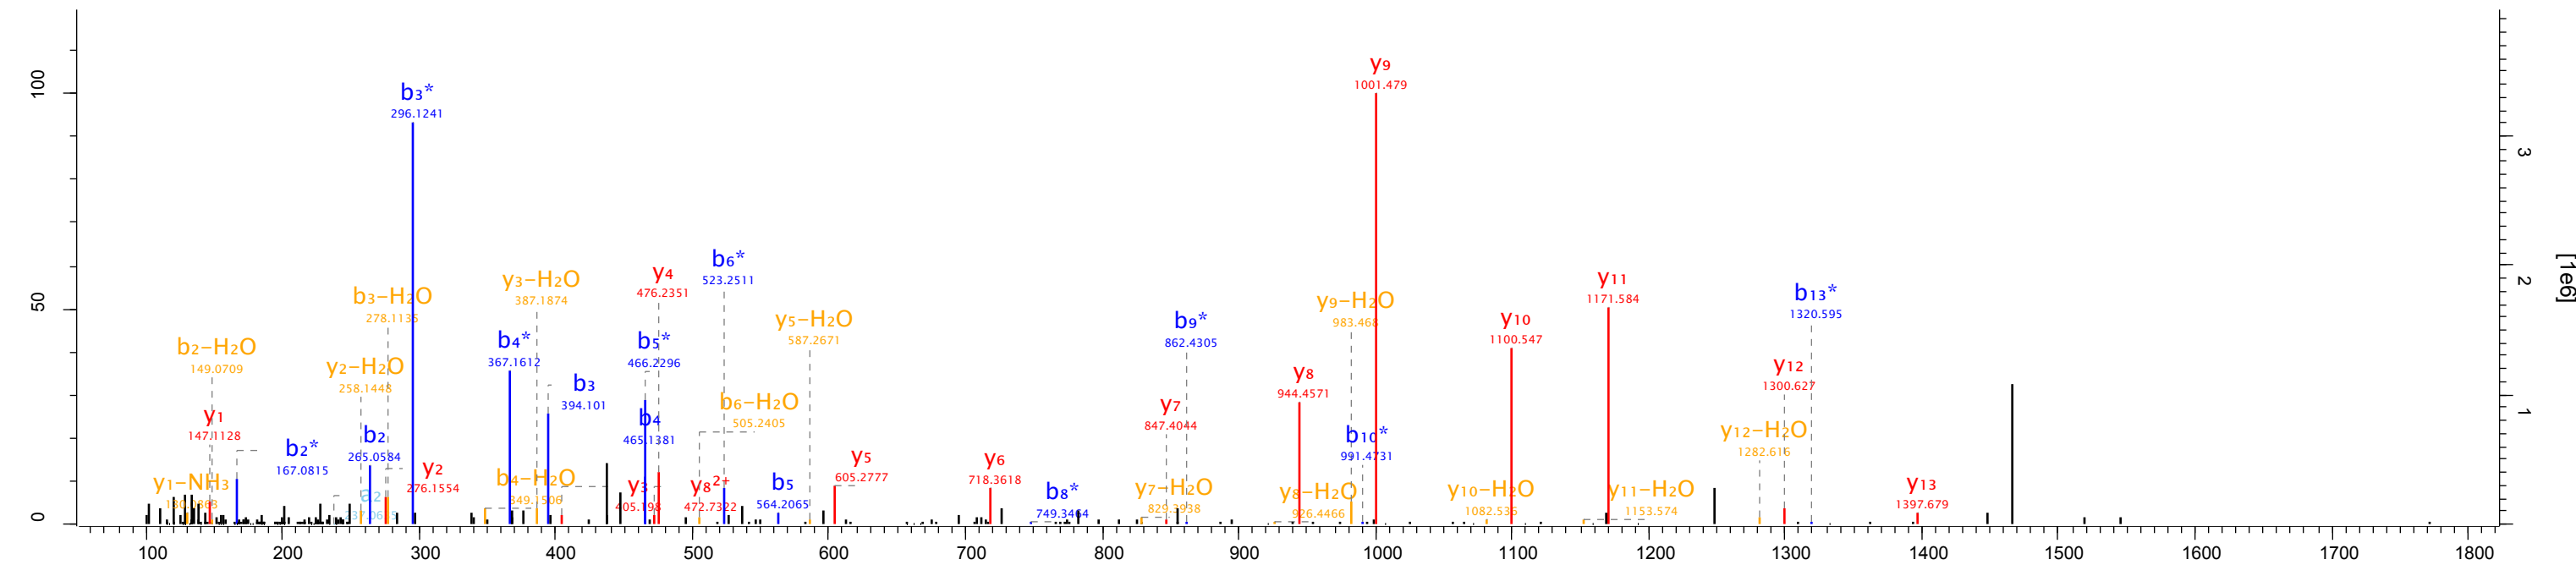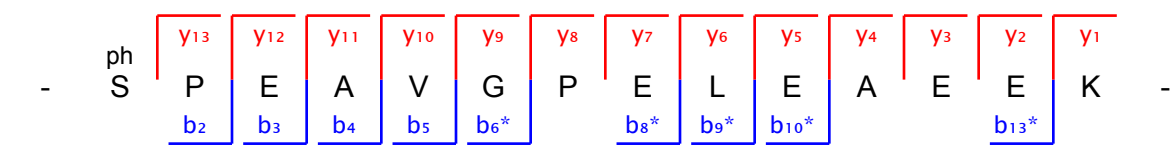

Raw file 20150812\_A375SR\_Phospho\_BR1\_06 Scan 21450 Method FTMS; HCD Score 88.18 m/z 782.76 Gene names ZNF579

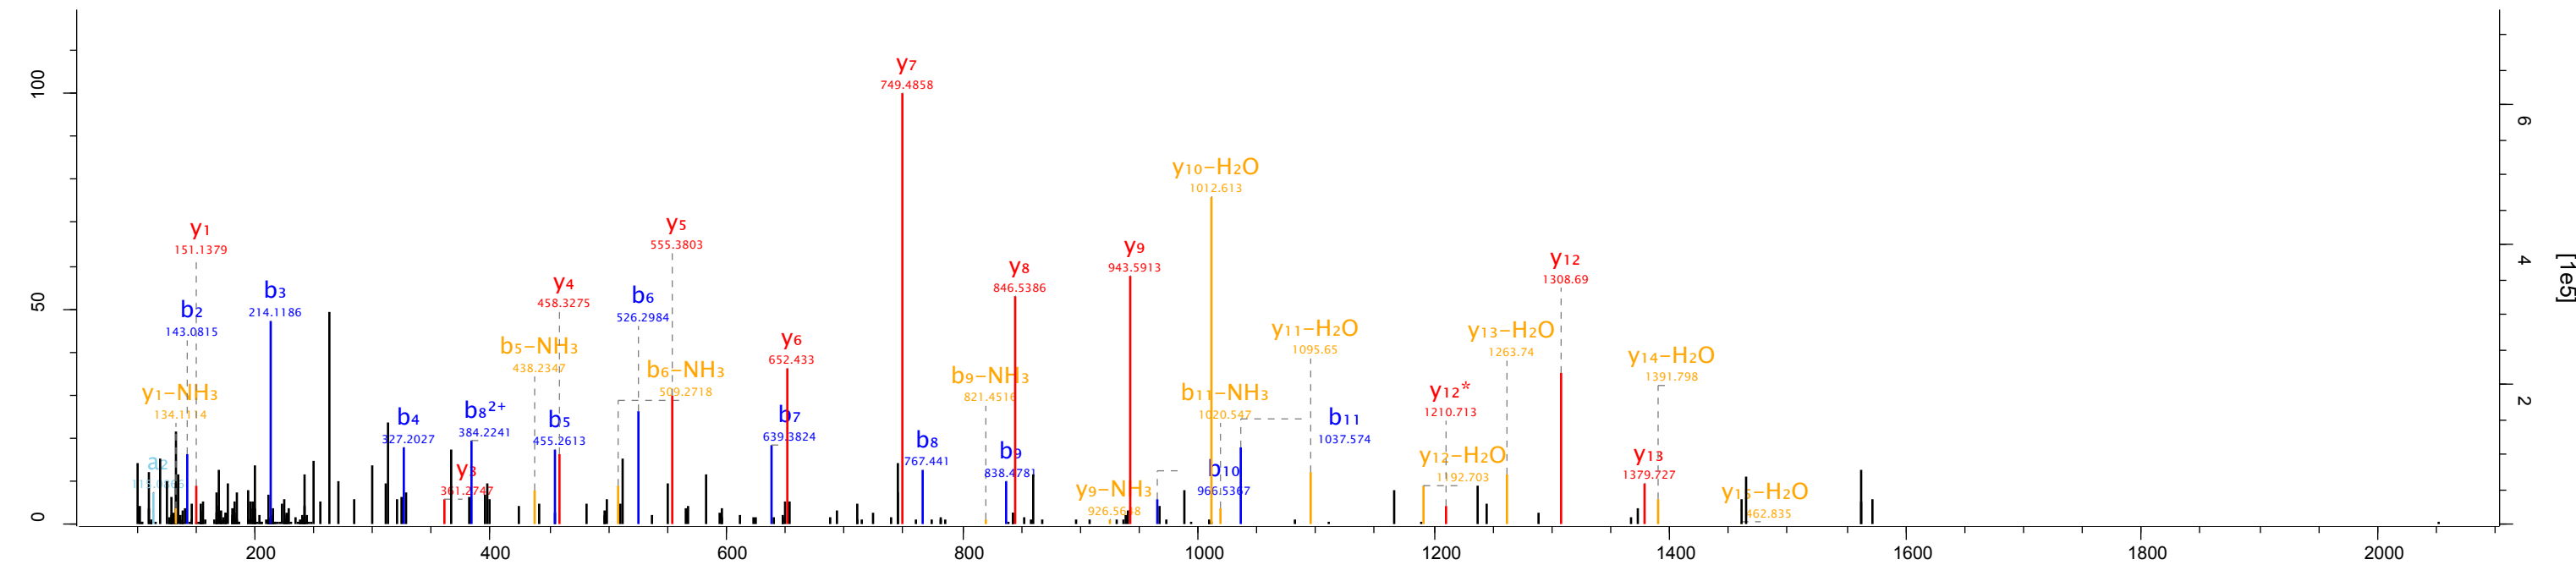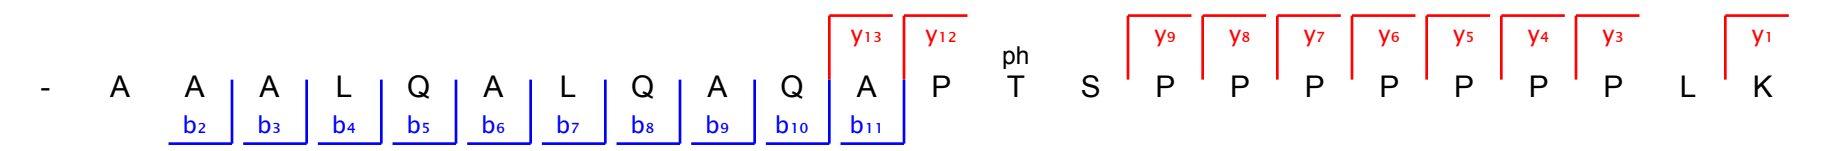

Raw file 20150812\_A375SR\_Phospho\_BR1\_06 Scan 6940 Method FTMS; HCD Score 52.5 m/z 809.37

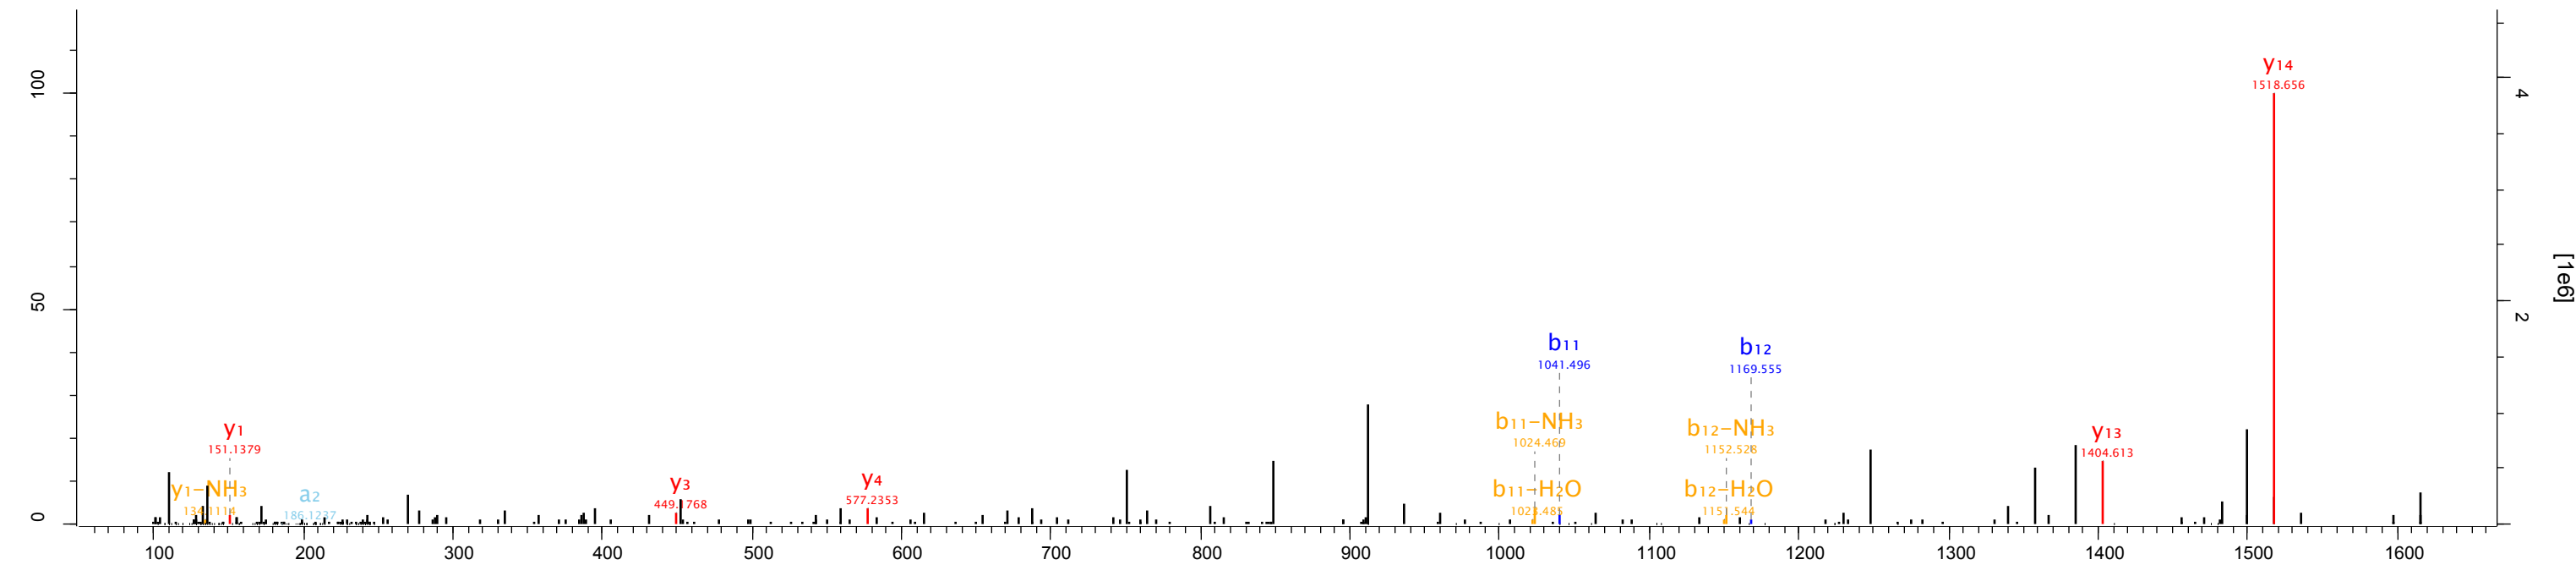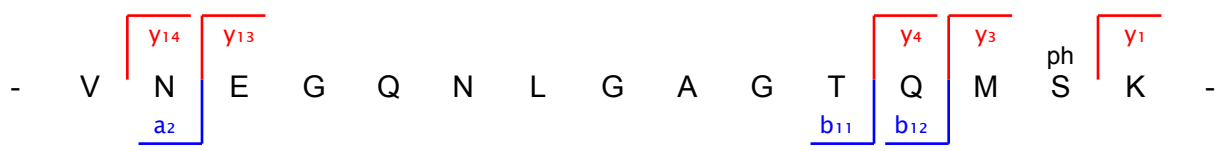

Raw file 20150812\_A375SR\_Phospho\_BR1\_06 Scan 9410 Method FTMS; HCD Score 41.74 m/z 496.9

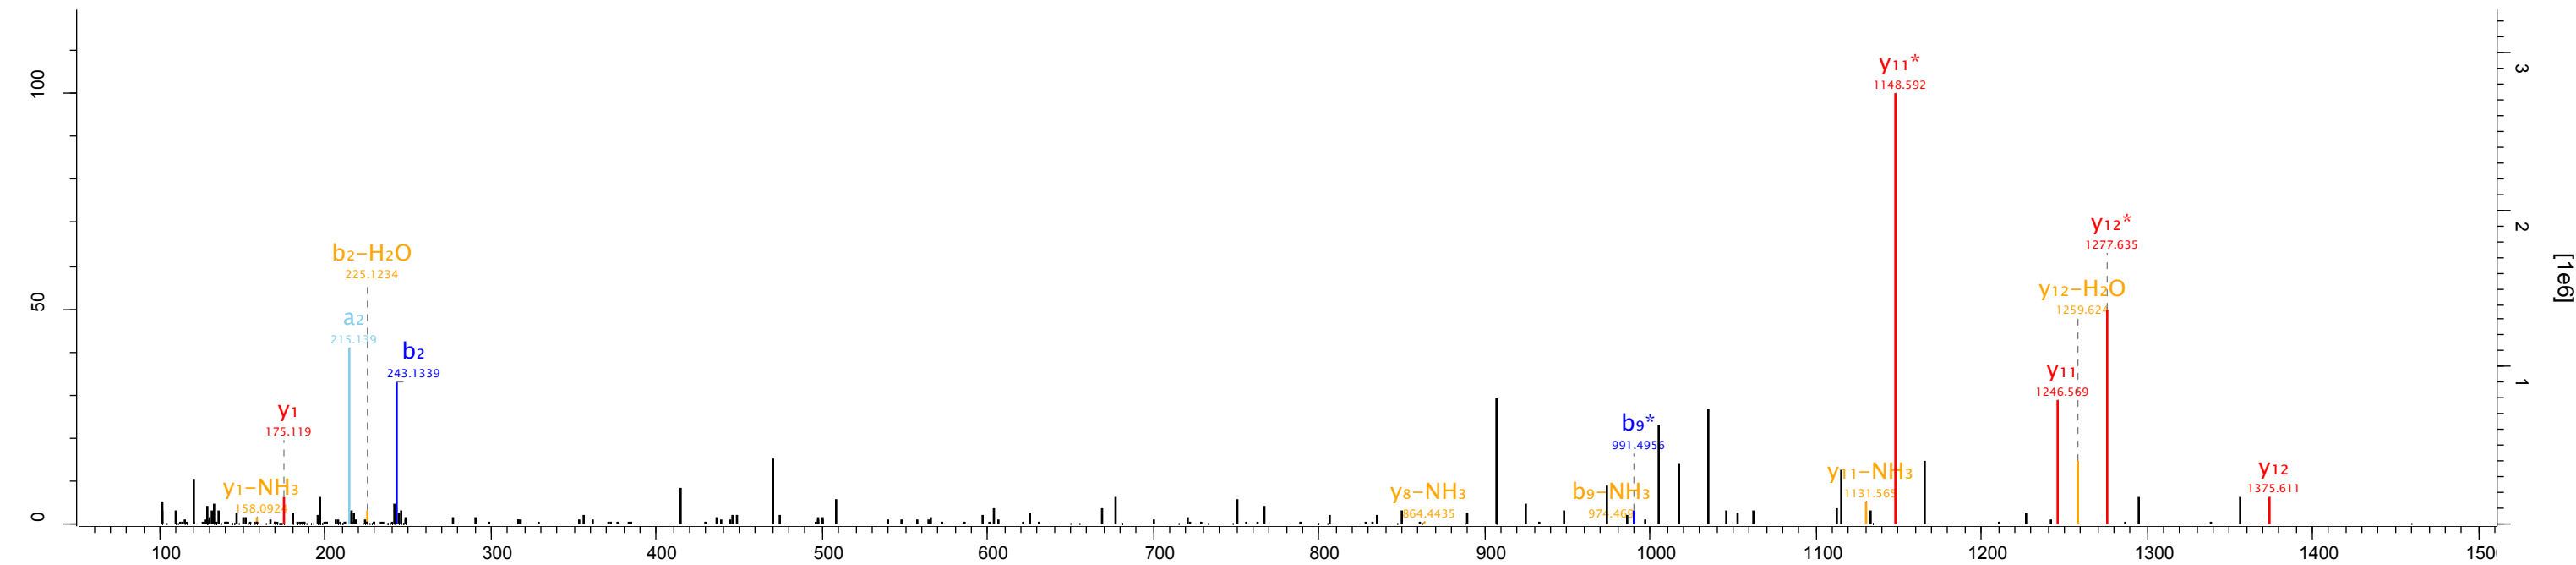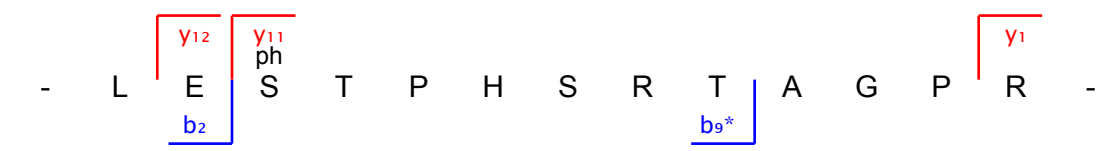

Raw file Scan Method Score m/z  
 20150812\_A375SR\_Phospho\_BR1\_08 5080 FTMS; HCD 48.94 530.24

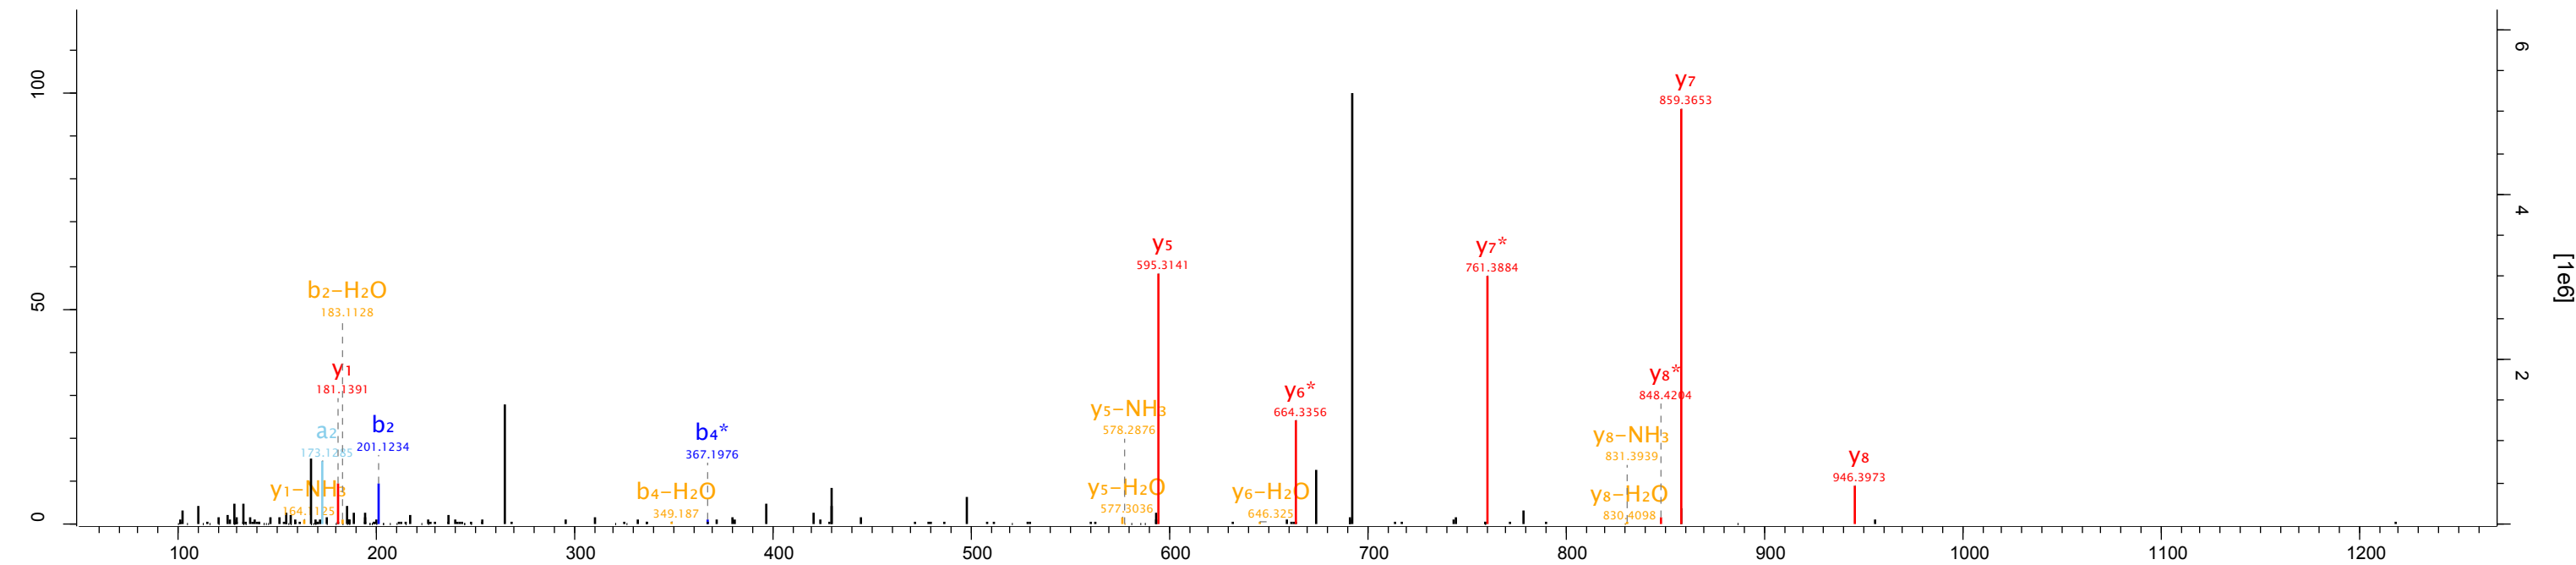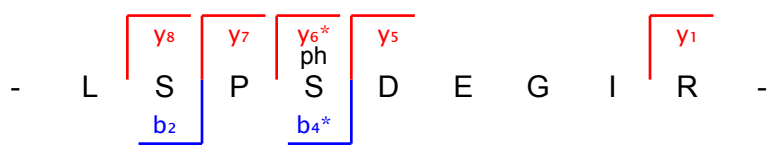

Raw file 20150812\_A375SR\_Phospho\_BR1\_09 Scan 12400 Method FTMS; HCD Score 62.34 m/z 556.27

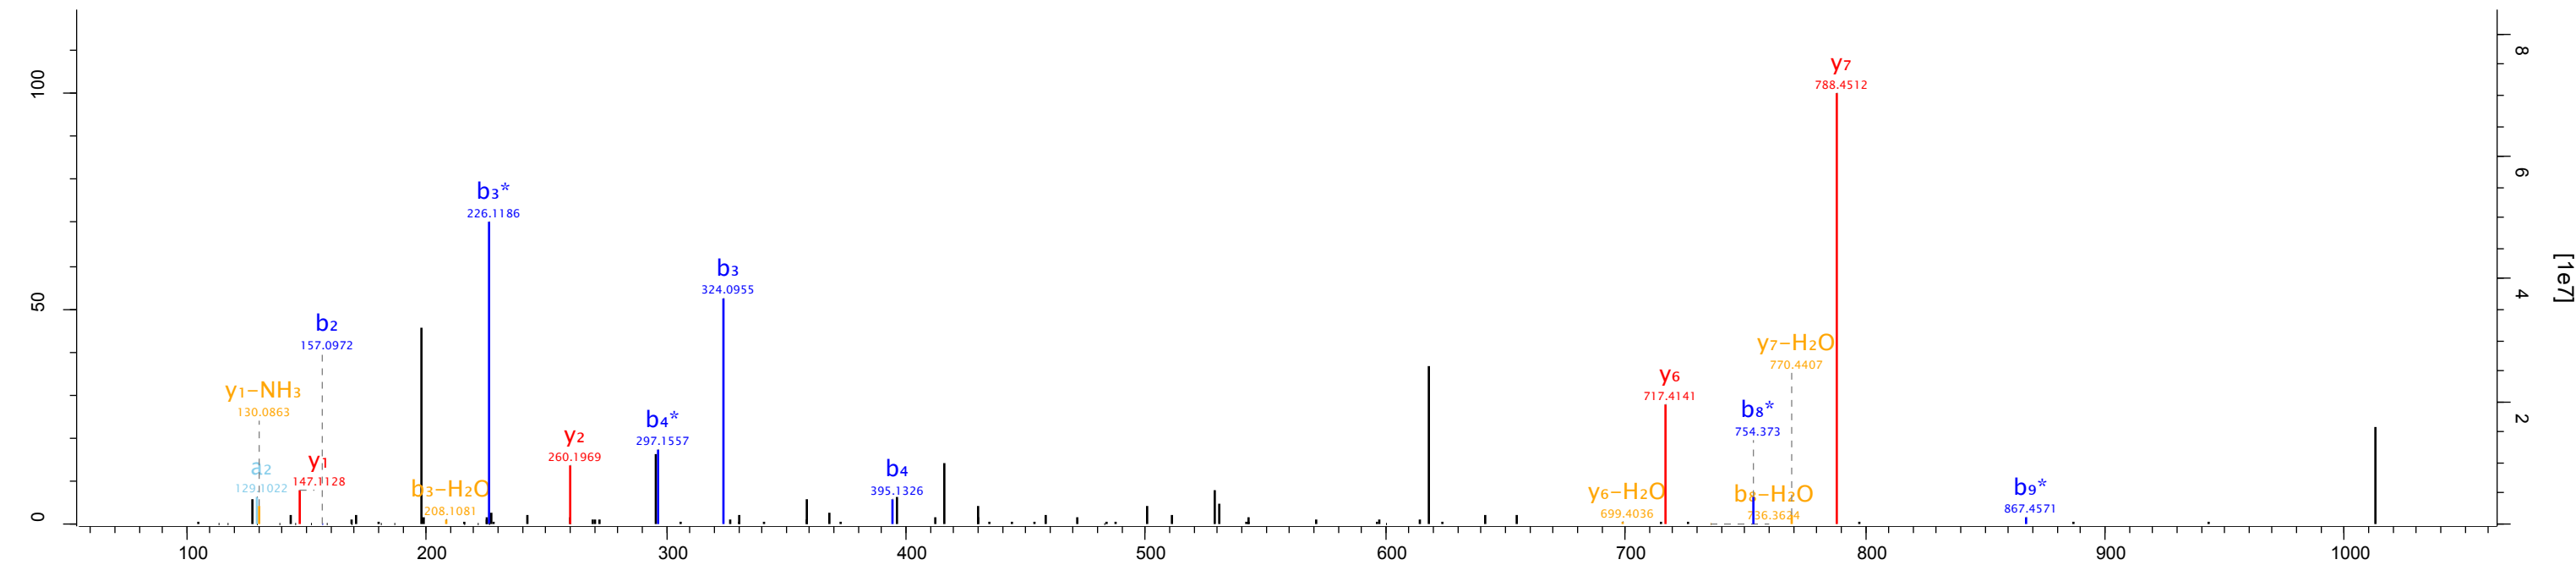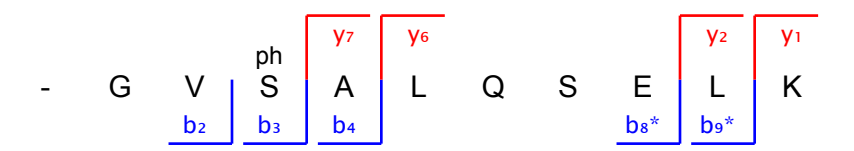

Raw file Scan Method Score m/z Gene names  
 20150812\_A375SR\_Phospho\_BR1\_09 15520 FTMS; HCD 46.16 711.63 LINC00614

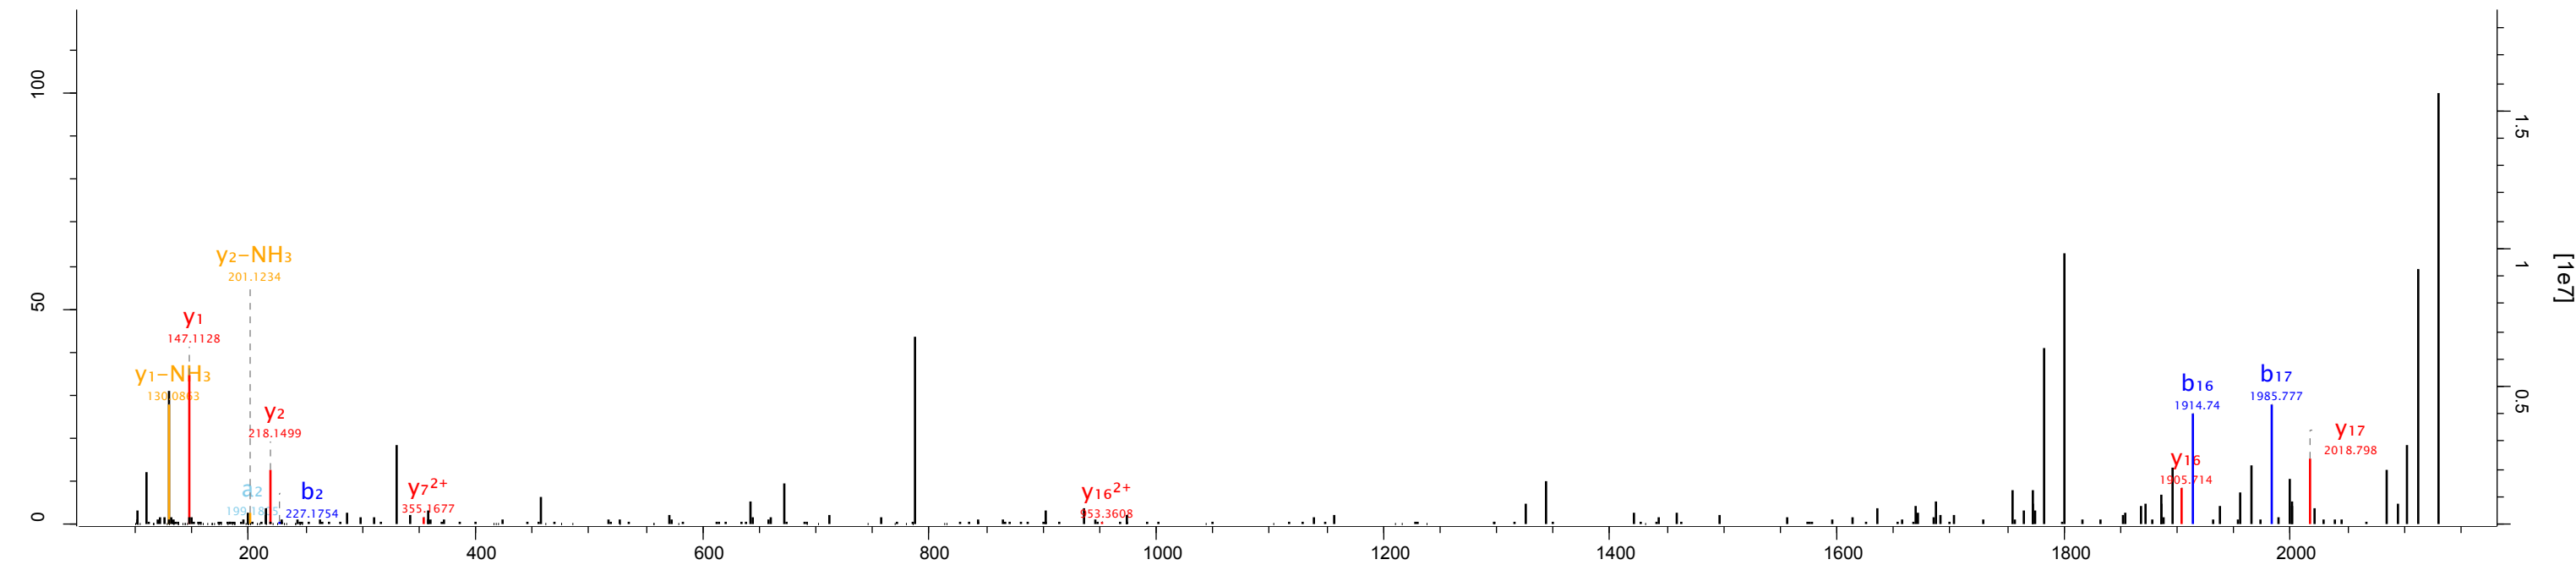

- L L L E C T Y G A L E S A G V P A K -

Annotations above the sequence:

- $y_{17}$  above the first L
- $y_{16}$  above the second L
- $y_7^{2+}$  above the S
- $y_2$  above the A
- $y_1$  above the K

Annotations below the sequence:

- $b_2$  below the first L
- $b_{16}$  below the P
- $b_{17}$  below the A



Raw file 20150812\_A375SR\_Phospho\_BR1\_09 Scan 17200 Method FTMS; HCD Score 53.98 m/z 861.37

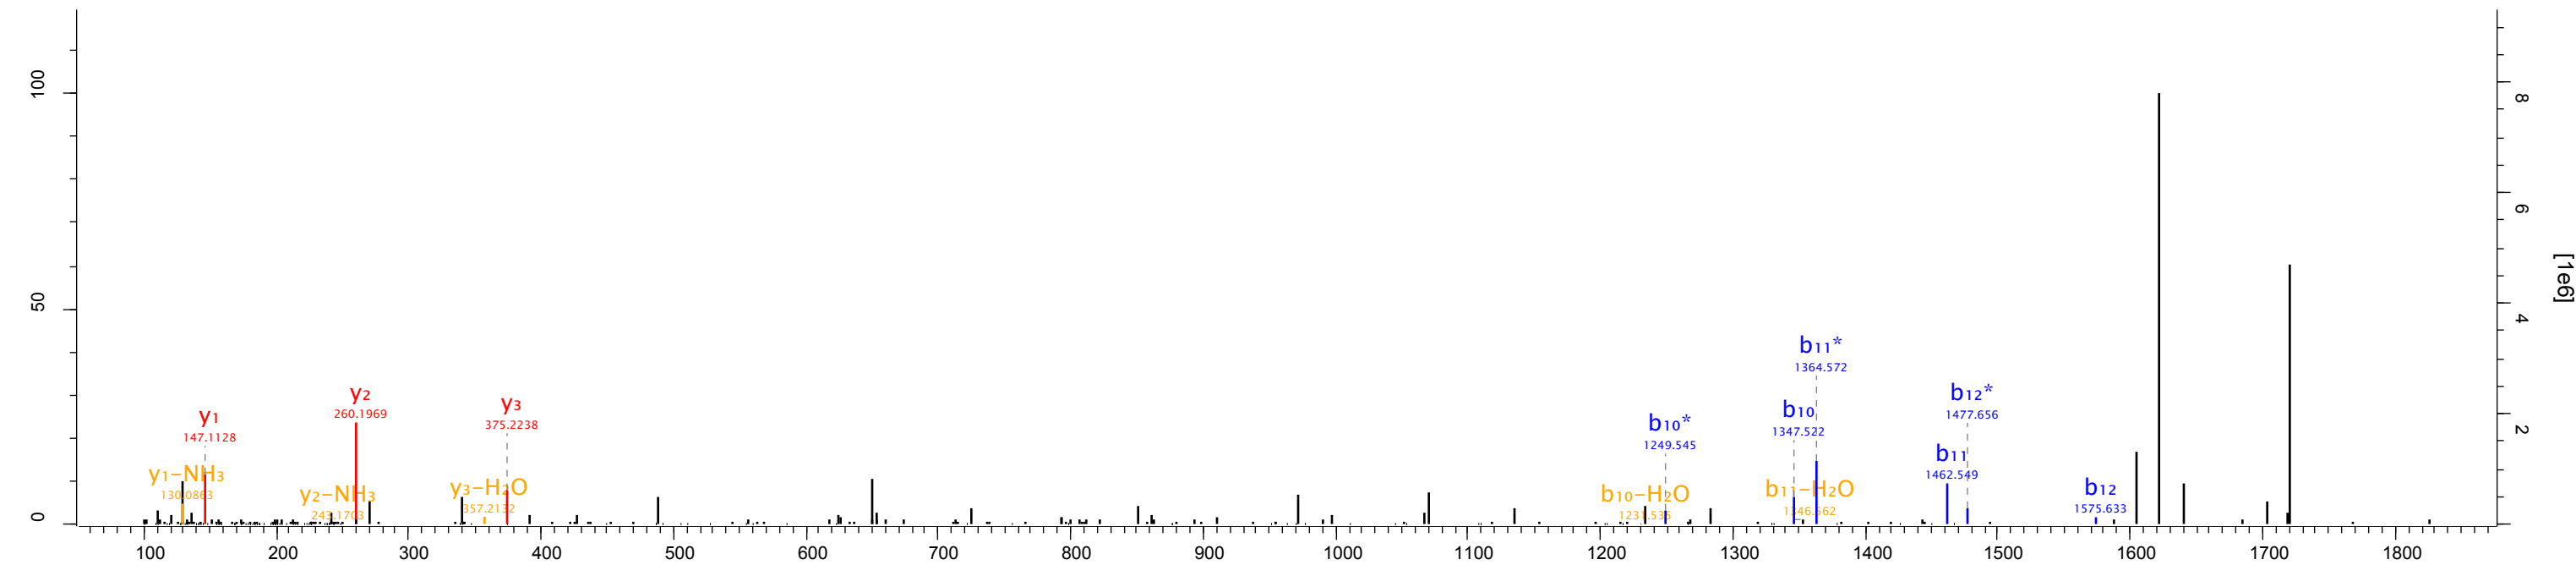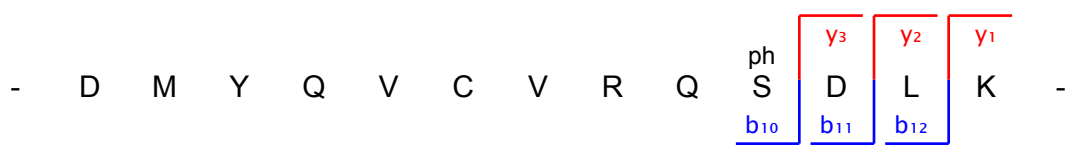

Raw file: 20150812\_A375SR\_Phospho\_BR1\_09  
 Scan: 22310 Method: FTMS; HCD Score: 124.13 m/z: 1100.17 Gene names: CEBPG

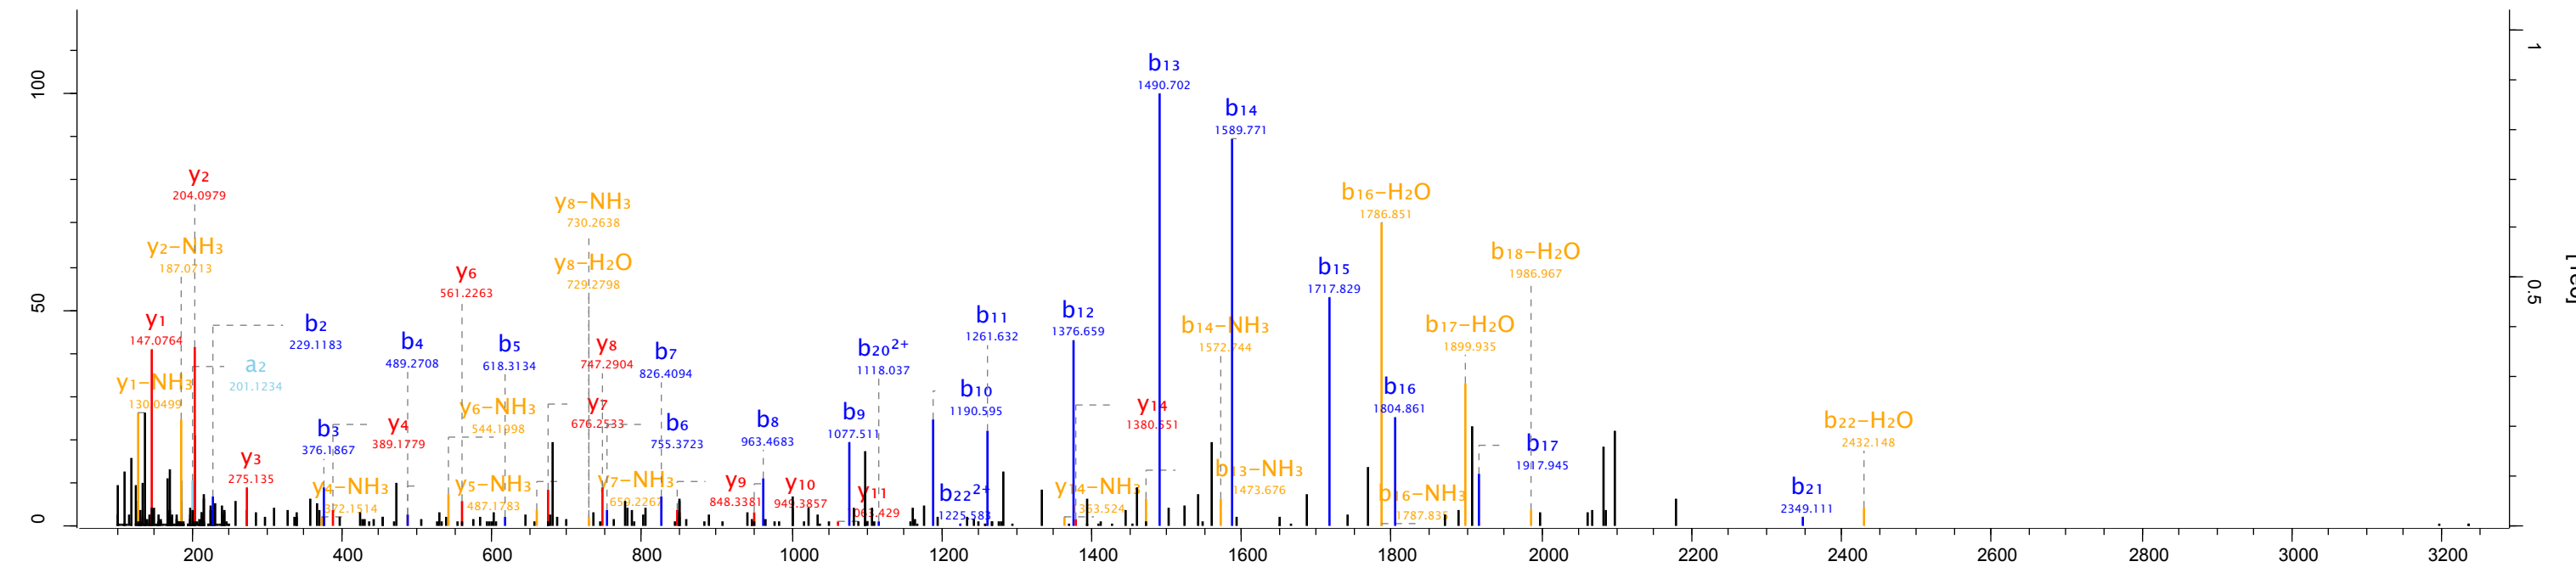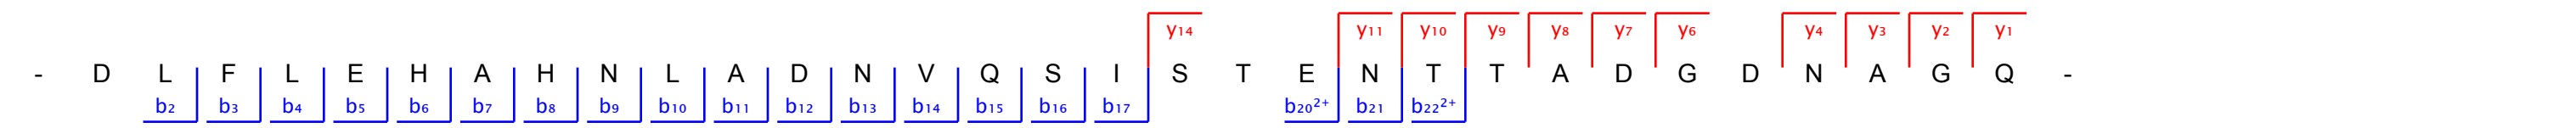

Raw file  
20150812\_A375SR\_Phospho\_BR1\_09

Scan 2980 Method FTMS; HCD Score 70.44 m/z 892.43

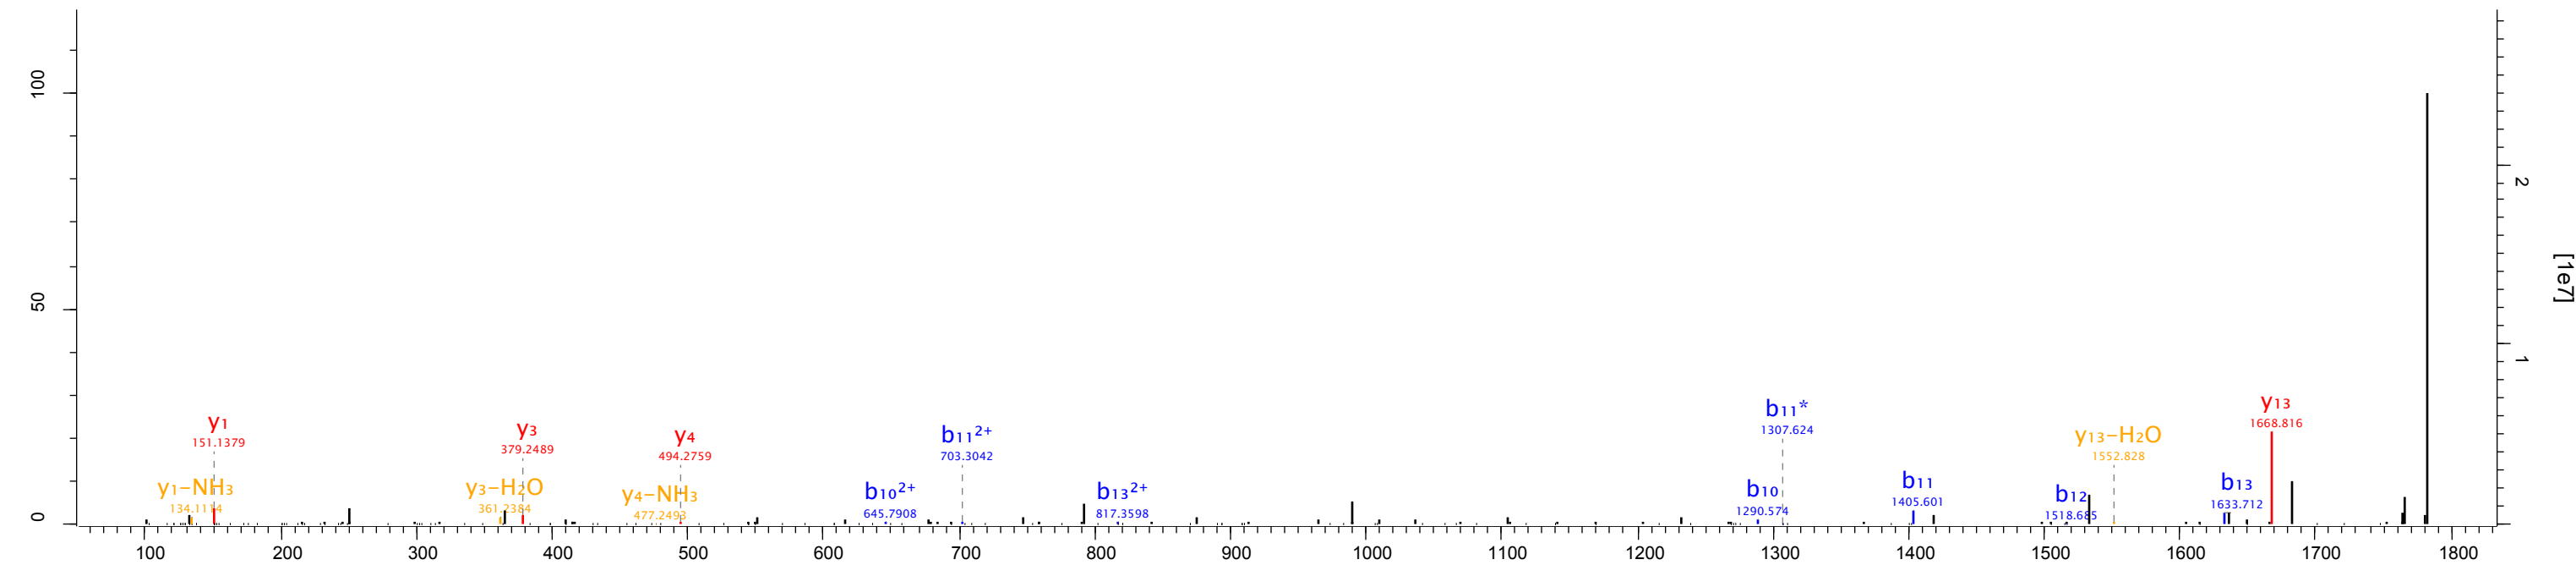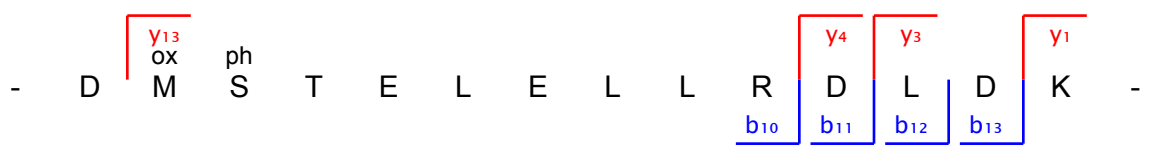

Raw file 20150812\_A375SR\_Phospho\_BR1\_09 Scan 4090 Method FTMS; HCD Score 70.55 m/z 586.31 Gene names KLHDC7B

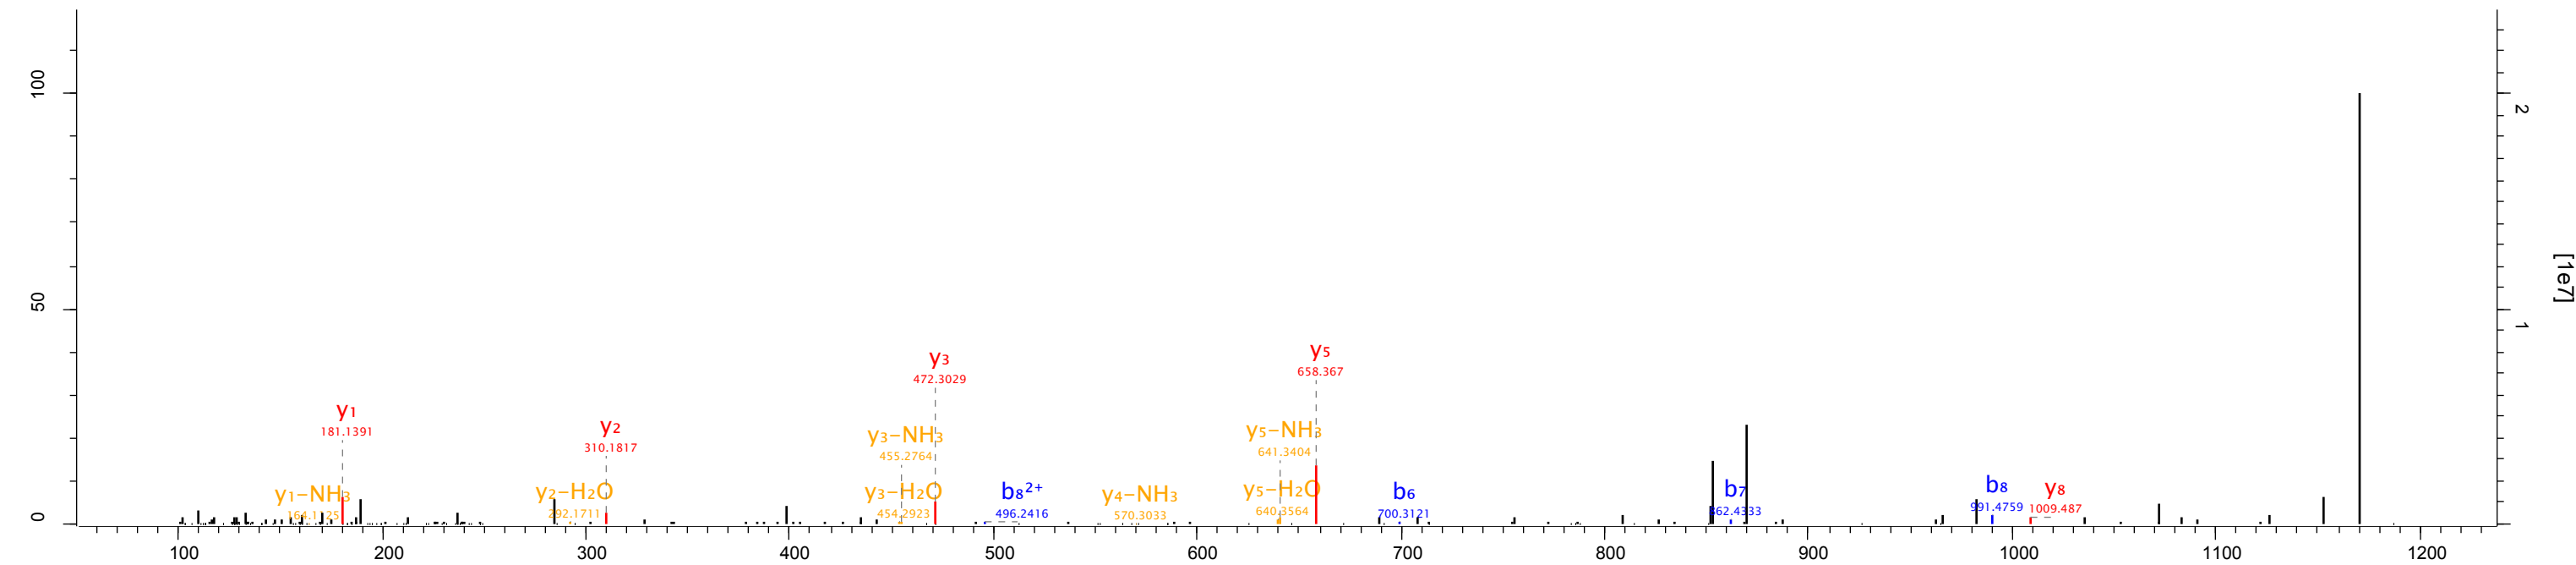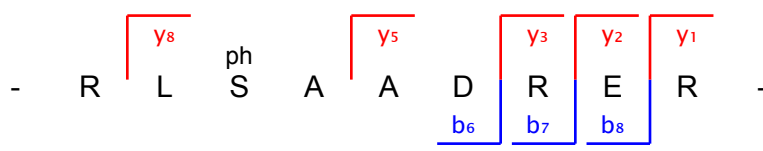

Raw file: 20150812\_A375SR\_Phospho\_BR1\_10  
 Scan: 1210 Method: FTMS; HCD Score: 72.34 m/z: 487.92

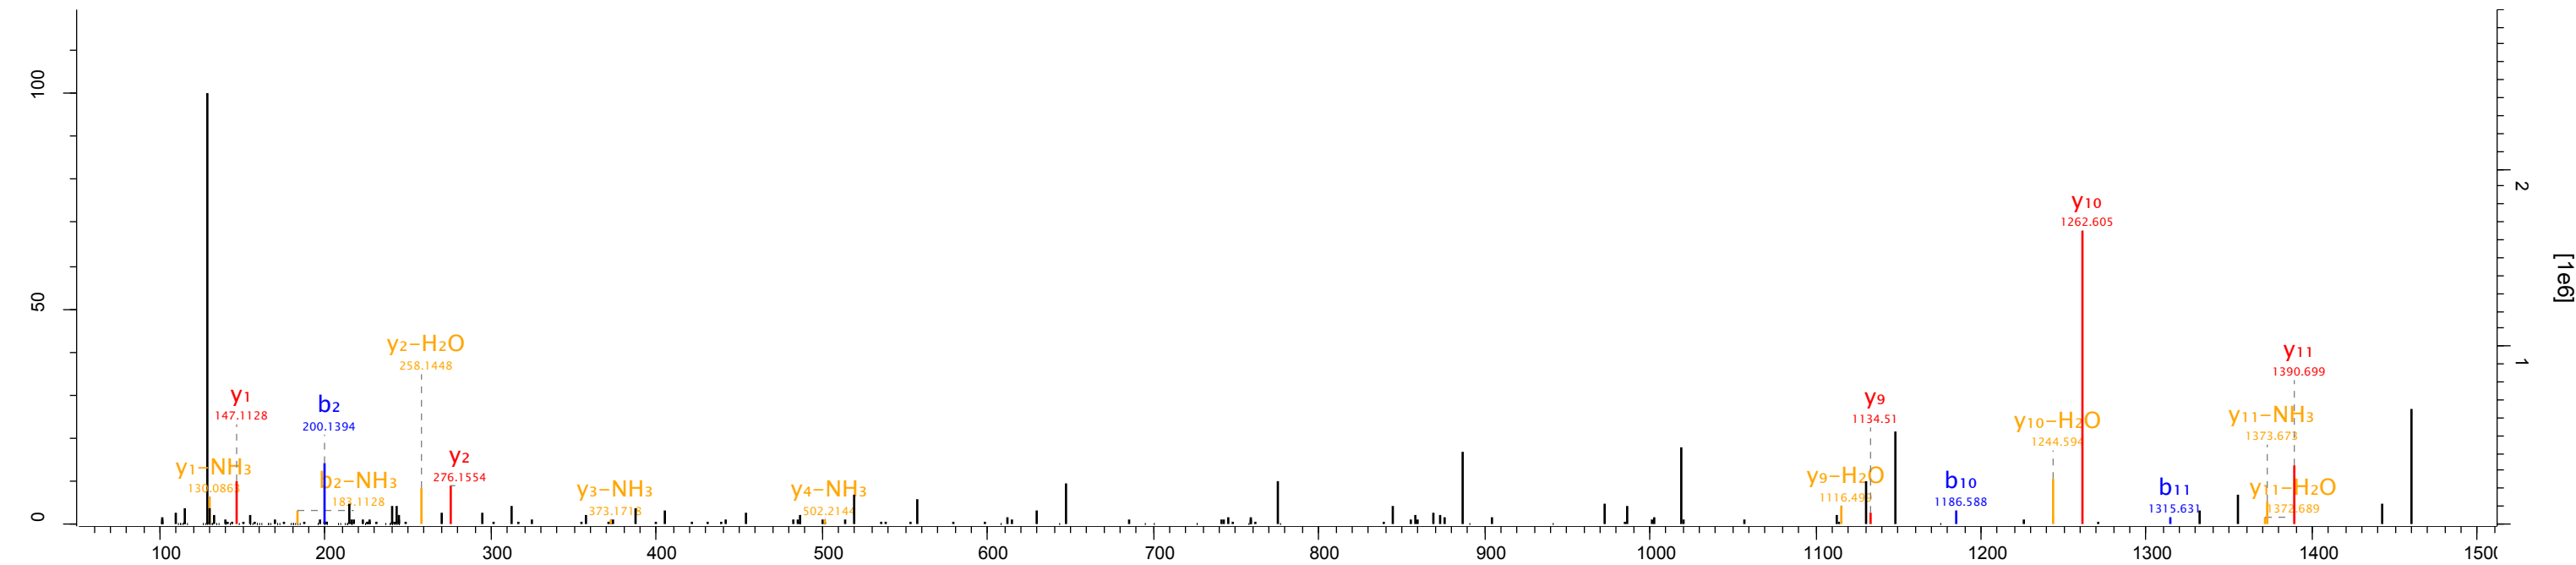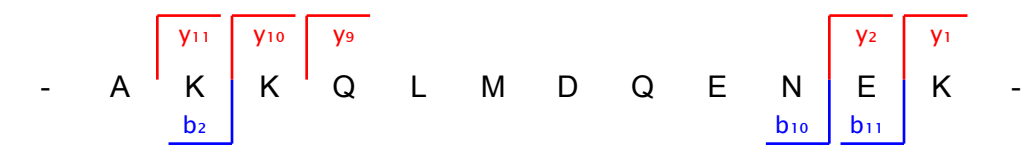

Raw file: 20150812\_A375SR\_Phospho\_BR1\_10  
 Scan: 21000 Method: FTMS; HCD Score: 42.42 m/z: 782.76 Gene names: ZNF579

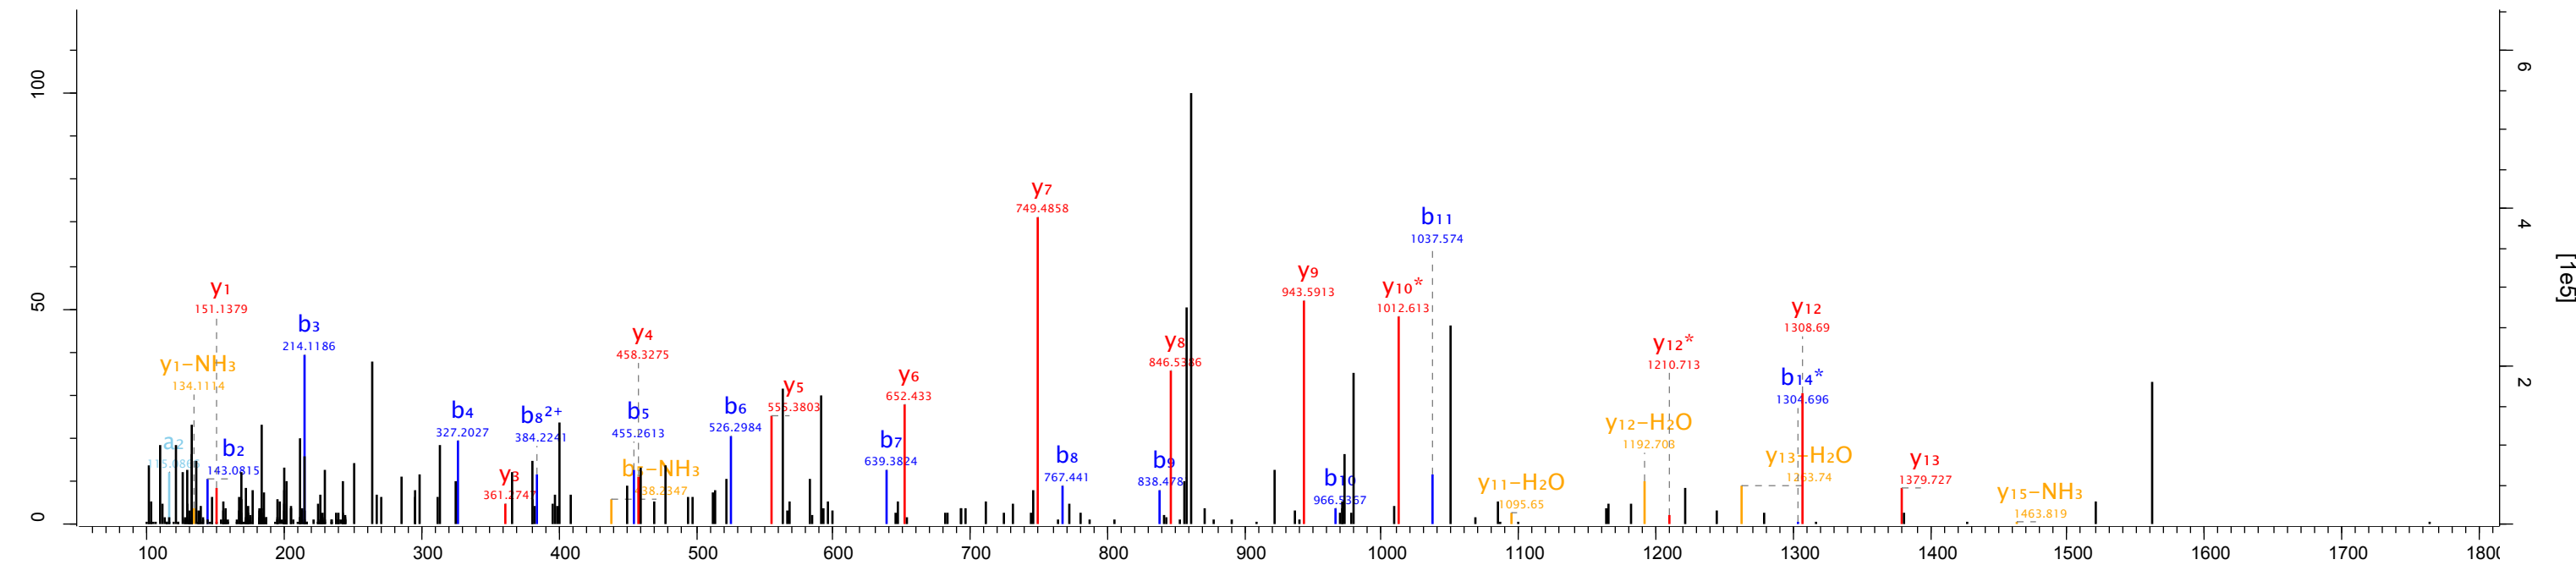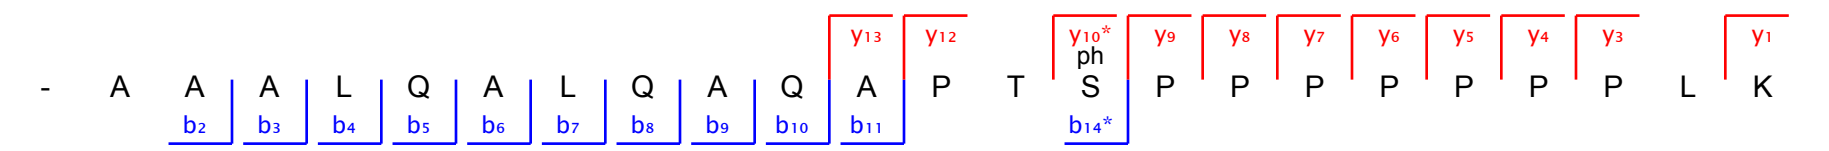

Raw file  
 20150812\_A375SR\_Phospho\_BR1\_10  
 Scan 24160 Method FTMS; HCD Score 293.33 m/z 968.92 Gene names MAPK11P1L

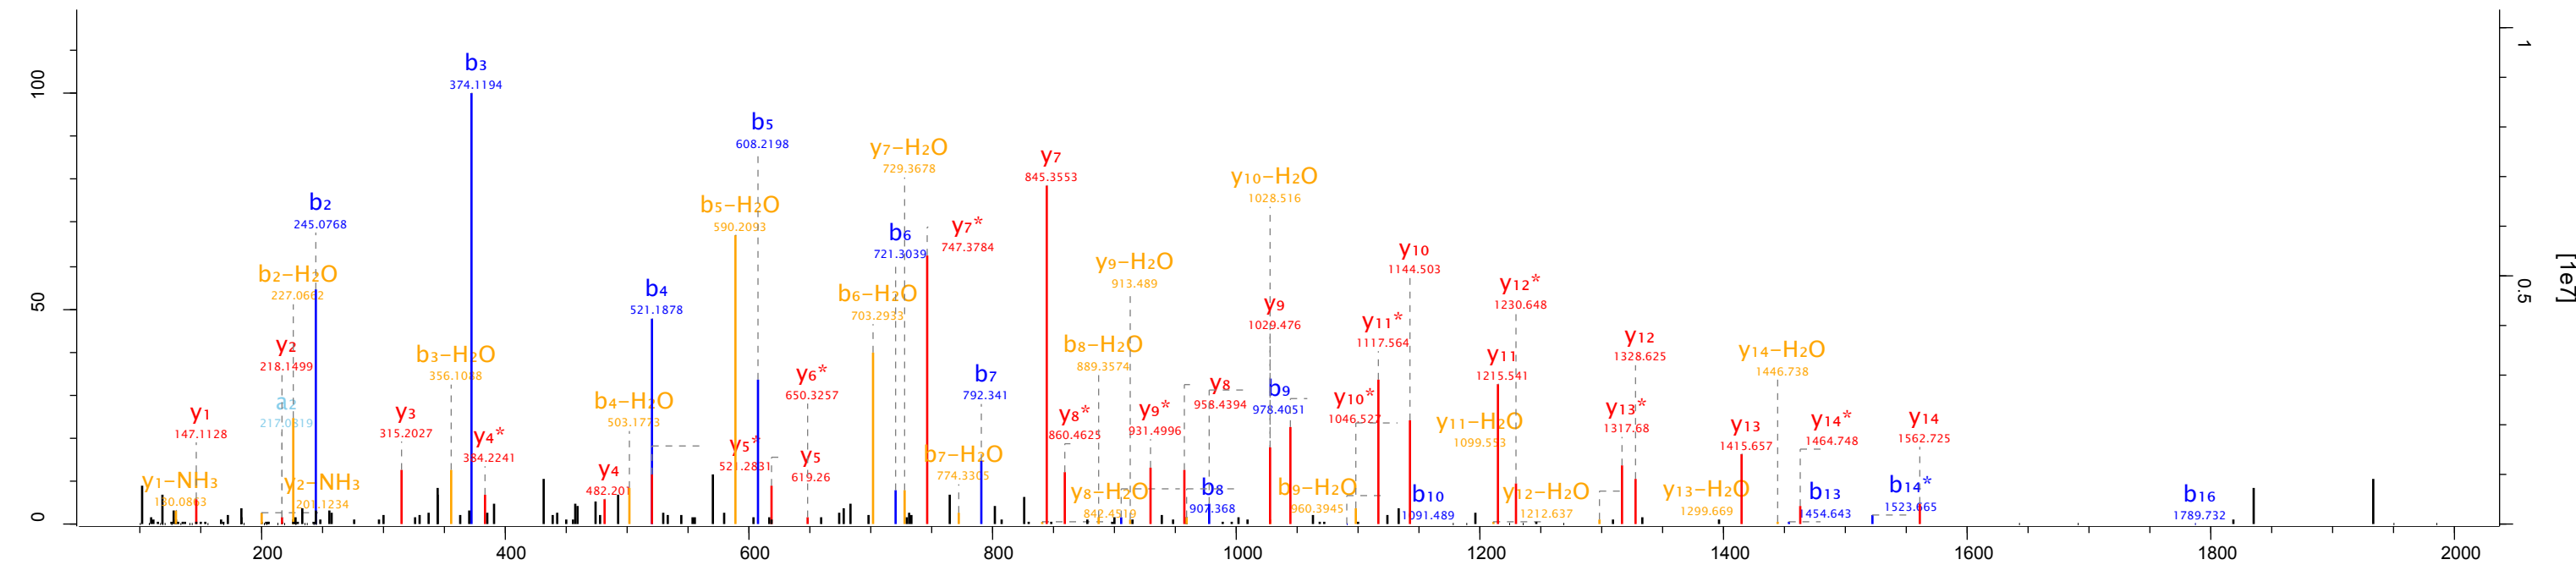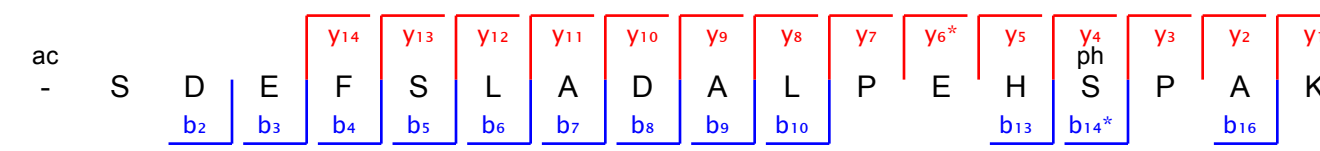

Raw file 20150812\_A375SR\_Phospho\_BR1\_10 Scan 3000 Method FTMS; HCD Score 65.04 m/z 892.43

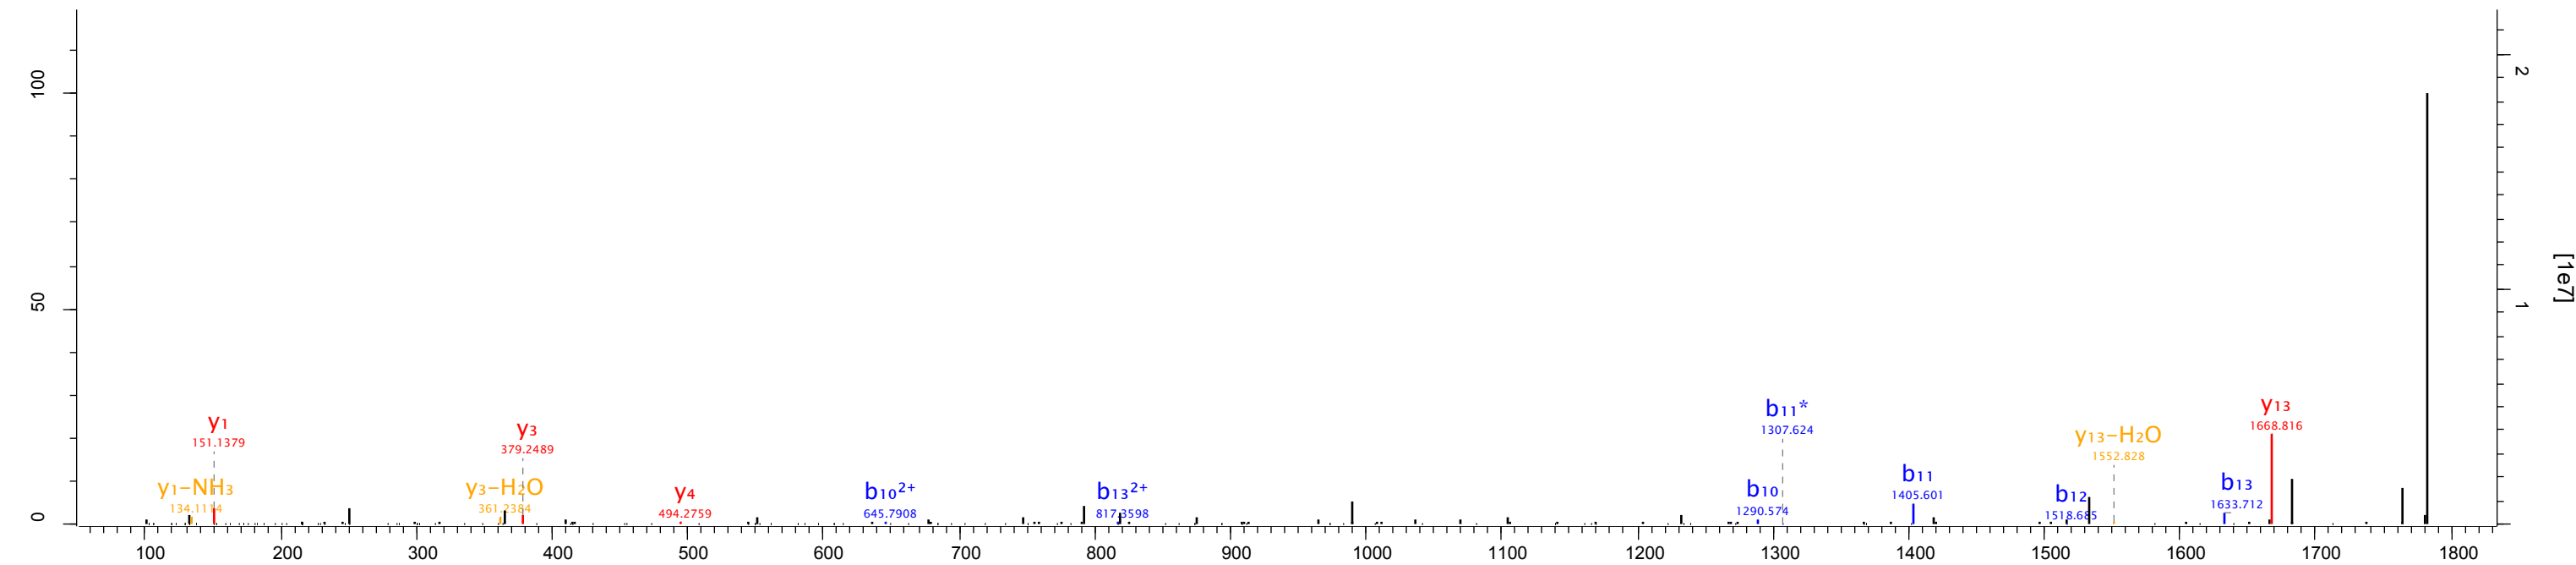

- D M S T E L E L L R D L D K -

y<sub>13</sub>ox ph  
b<sub>10</sub> y<sub>4</sub> y<sub>3</sub> b<sub>11</sub> b<sub>12</sub> b<sub>13</sub> y<sub>1</sub>



Raw file: 20150812\_A375SR\_Phospho\_BR1\_10  
 Scan: 8010 Method: FTMS; HCD Score: 46.7 m/z: 629.78 Gene names: CNTN3

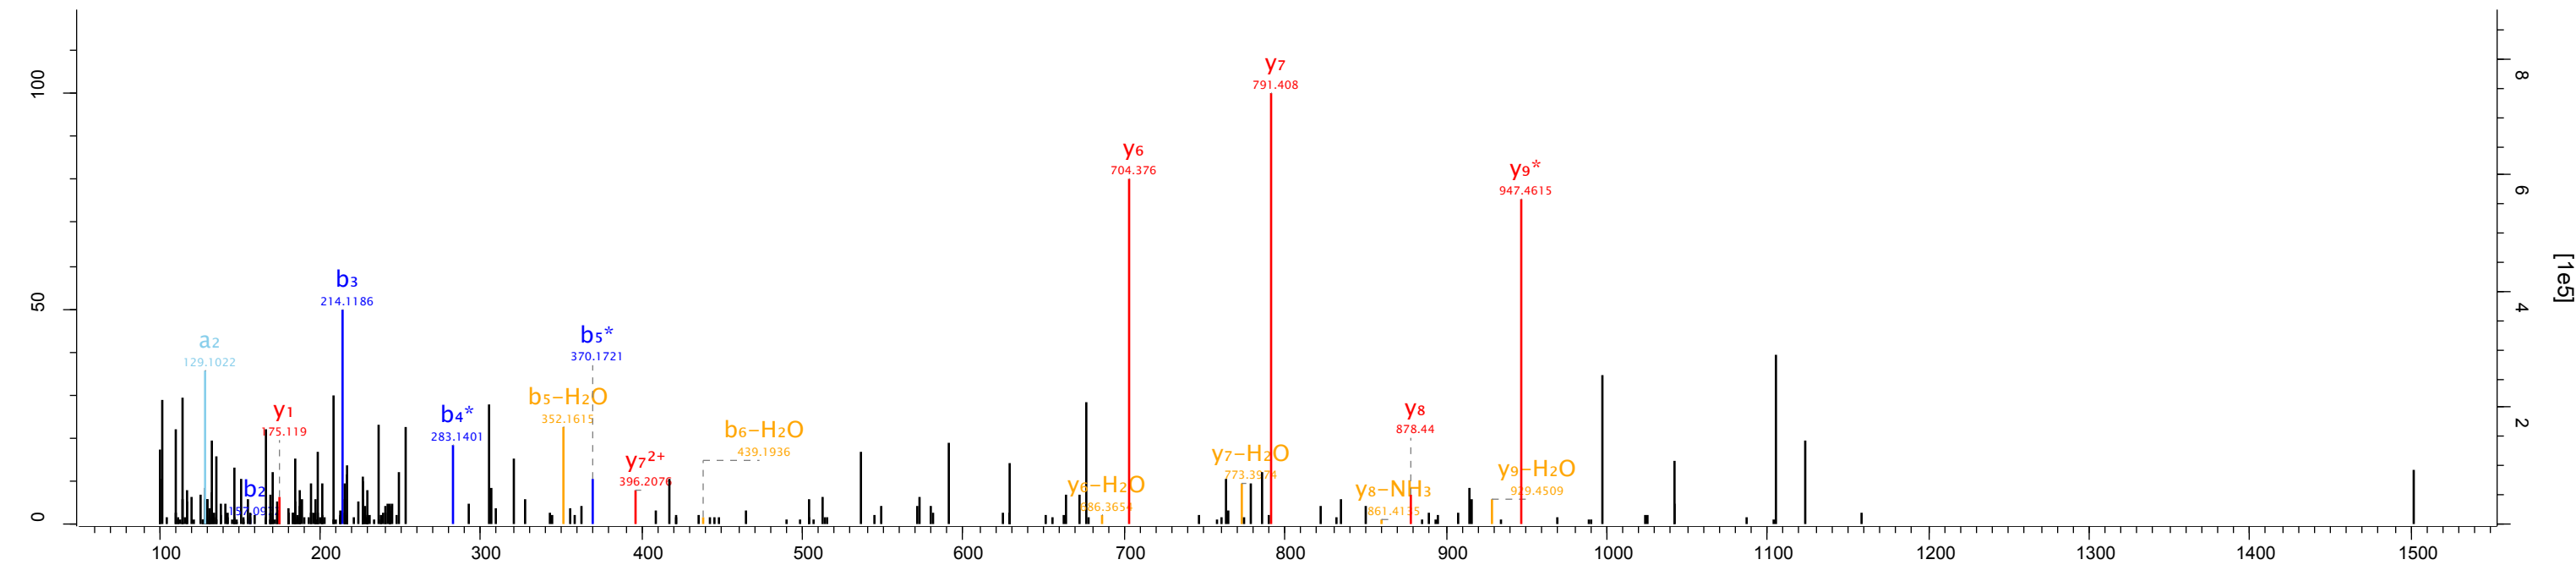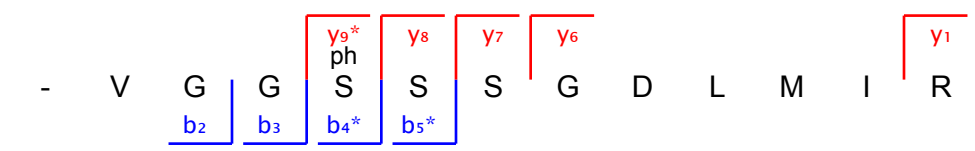

Raw file: 20150814\_A375SR\_Phospho\_BR2\_01  
 Scan: 10350 Method: FTMS; HCD Score: 46.54 m/z: 784.86 Gene names: PWWP2A

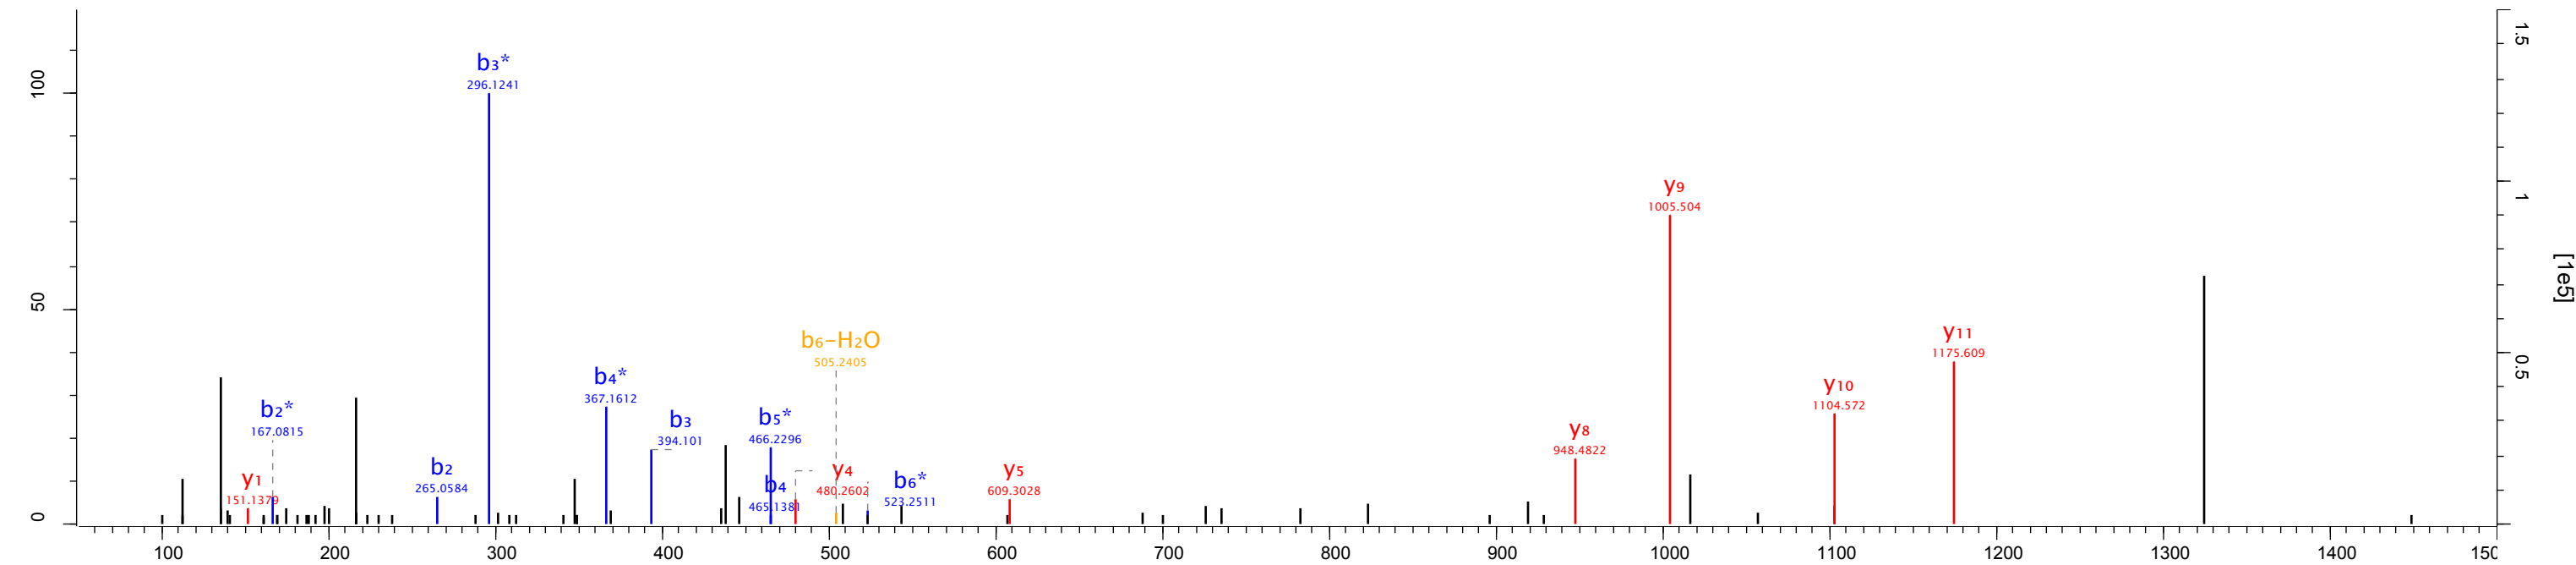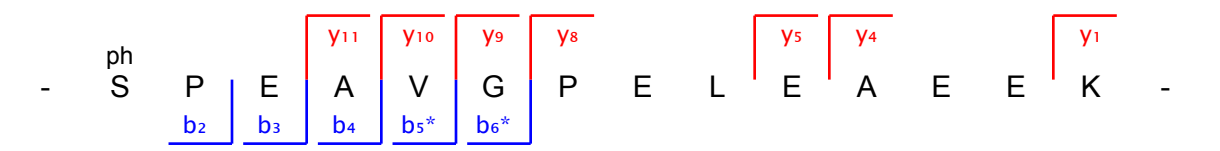

Raw file: 20150814\_A375SR\_Phospho\_BR2\_01  
 Scan: 17620 Method: FTMS; HCD Score: 98.54 m/z: 968.43 Gene names: MAPK11P1L

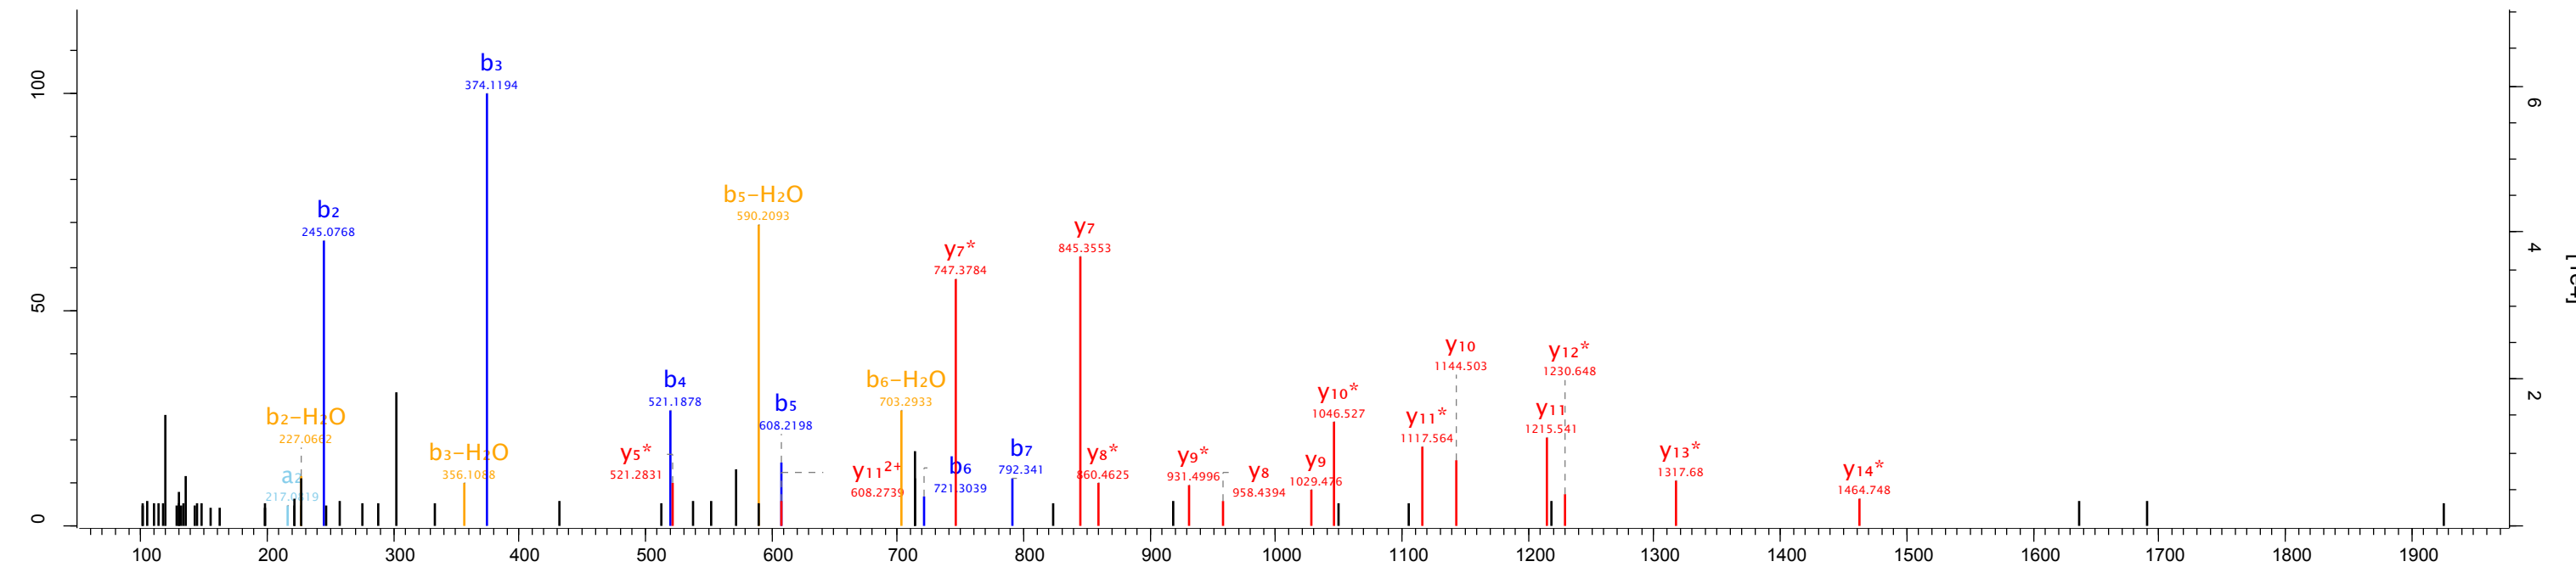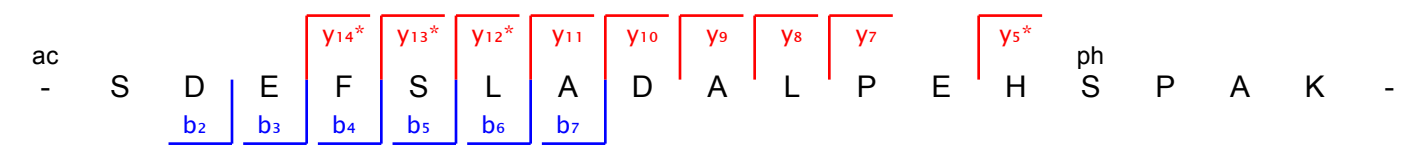

Raw file Scan Method Score m/z Gene names  
 20150814\_A375SR\_Phospho\_BR2\_03 12070 FTMS; HCD 83.45 574.23 PAG1

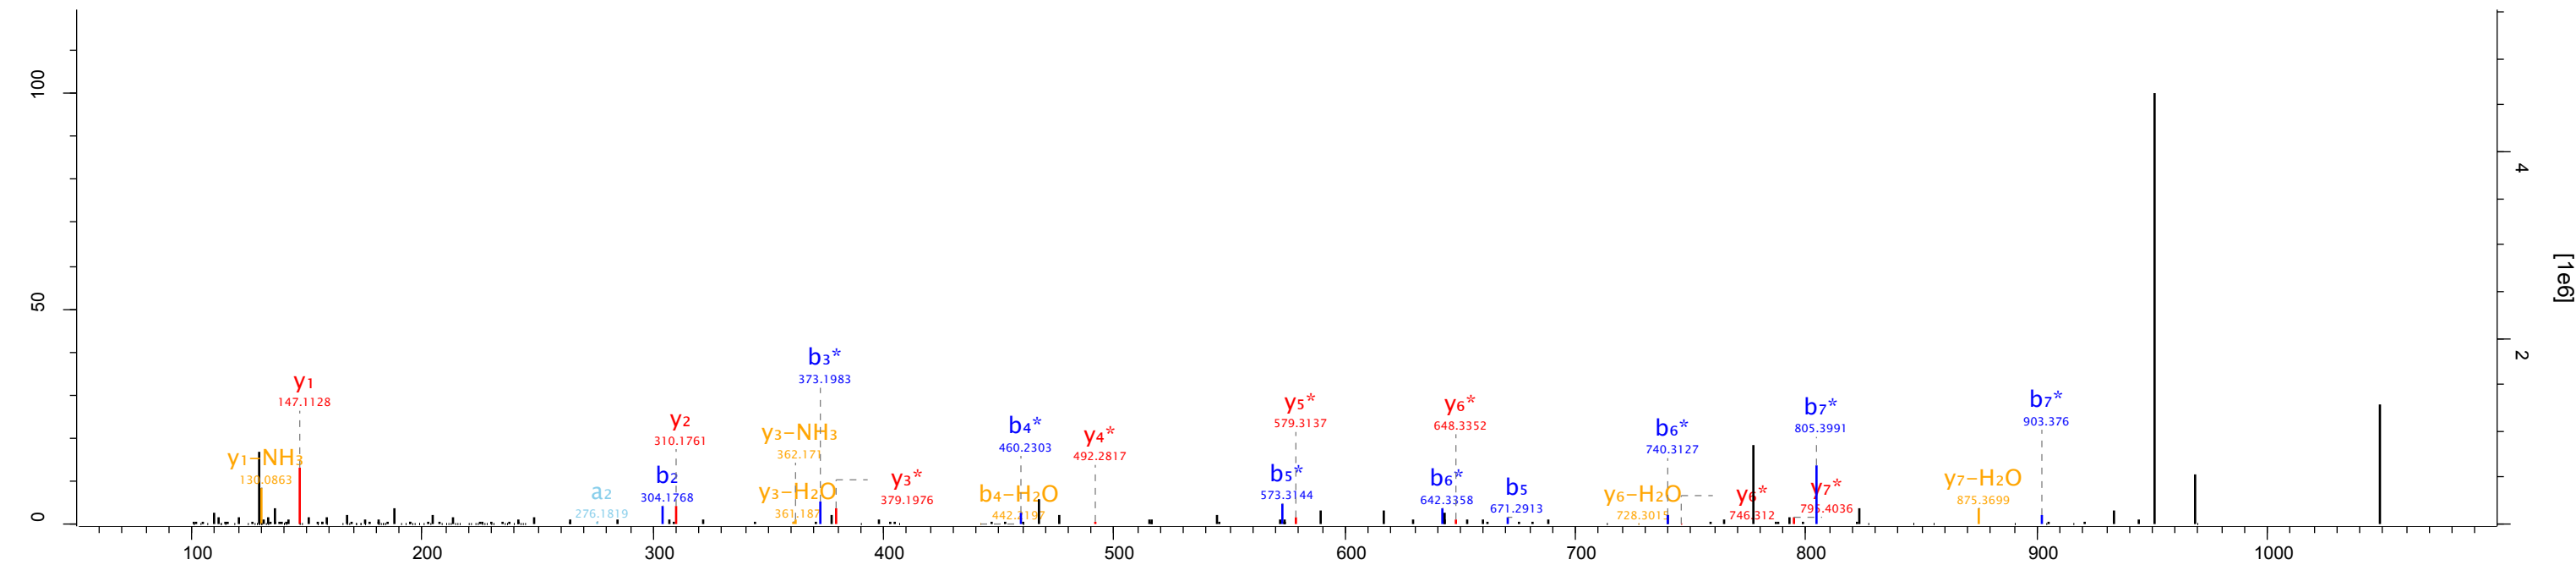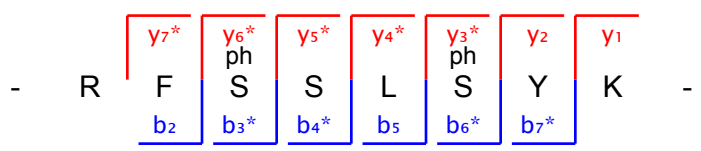

Raw file 20150814\_A375SR\_Phospho\_BR2\_03 Scan 19120 Method FTMS; HCD Score 203.5 m/z 983.96

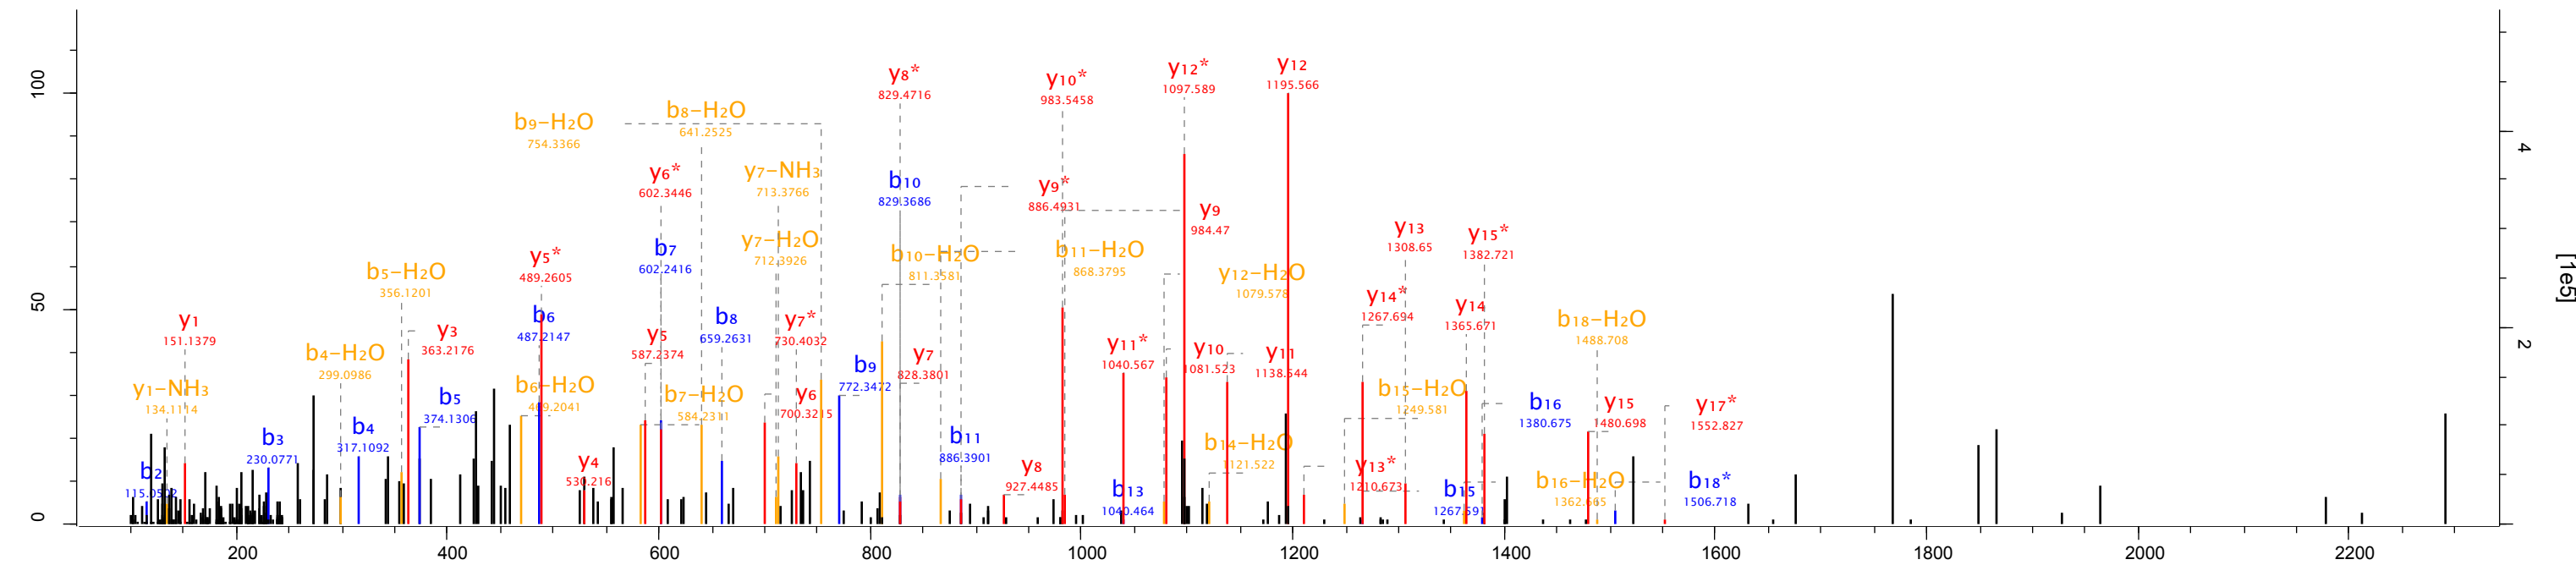

- G G D S G L D G L G G P G V Q L G S P D K -

Fragmentation mapping (b and y ions) is shown below the sequence:

- b<sub>2</sub> (under G)
- b<sub>3</sub> (under G)
- b<sub>4</sub> (under D)
- b<sub>5</sub> (under S)
- b<sub>6</sub> (under G)
- b<sub>7</sub> (under L)
- b<sub>8</sub> (under D)
- b<sub>9</sub> (under G)
- b<sub>10</sub> (under L)
- b<sub>11</sub> (under G)
- b<sub>13</sub> (under P)
- b<sub>15</sub> (under V)
- b<sub>16</sub> (under Q)
- b<sub>18</sub>\* (under S)

Fragmentation mapping (b and y ions) is shown above the sequence:

- y<sub>17</sub>\* (above S)
- y<sub>15</sub> (above D)
- y<sub>14</sub> (above G)
- y<sub>13</sub> (above L)
- y<sub>12</sub> (above G)
- y<sub>11</sub> (above G)
- y<sub>10</sub> (above P)
- y<sub>9</sub> (above G)
- y<sub>8</sub> (above V)
- y<sub>7</sub> (above Q)
- y<sub>6</sub> (above L)
- y<sub>5</sub> (above G)
- y<sub>4</sub> (above S)
- y<sub>3</sub> (above P)
- y<sub>1</sub> (above K)

Raw file  
 20150814\_A375SR\_Phospho\_BR2\_03  
 Scan 25440 Method FTMS; HCD Score 75.7 m/z 757.63 Gene names LRFN1

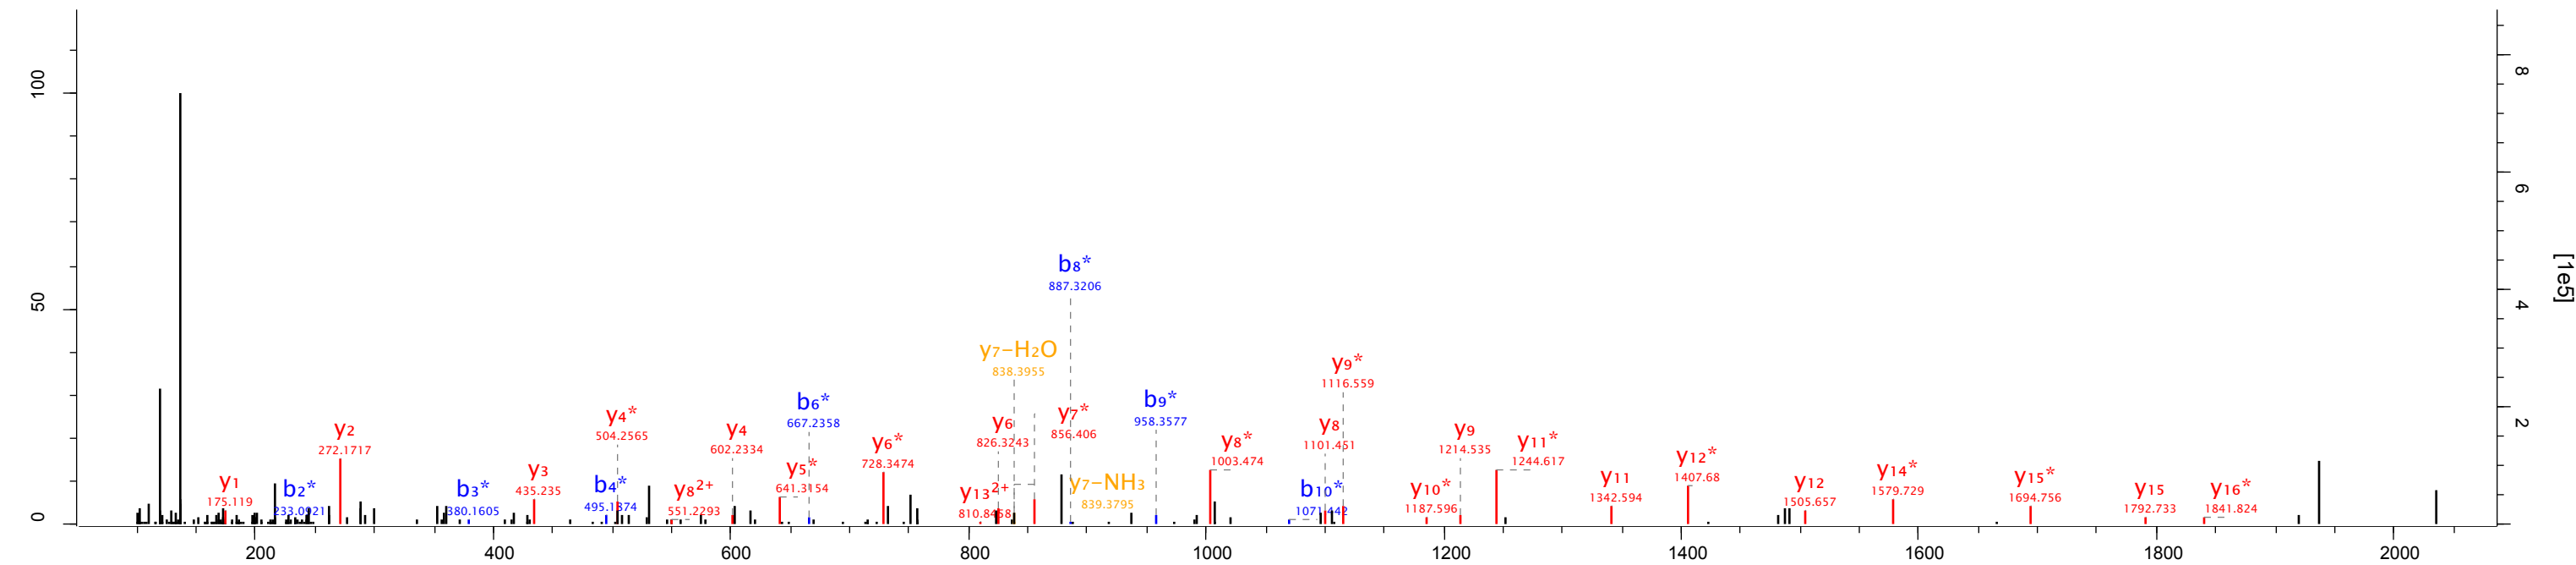

- Y ph S Y<sub>16</sub>\* Y<sub>15</sub>\* Y<sub>14</sub>\* Y<sub>13</sub><sup>2+</sup> Y<sub>12</sub> Y<sub>11</sub> Y<sub>10</sub>\* Y<sub>9</sub> Y<sub>8</sub> Y<sub>7</sub>\* Y<sub>6</sub> Y<sub>5</sub>\* Y<sub>4</sub> Y<sub>3</sub> Y<sub>2</sub> Y<sub>1</sub> -  
 b<sub>2</sub>\* b<sub>3</sub>\* b<sub>4</sub>\* b<sub>6</sub>\* b<sub>8</sub>\* b<sub>9</sub>\* b<sub>10</sub>\*

Raw file 20150814\_A375SR\_Phospho\_BR2\_03 Scan 6010 Method FTMS; HCD Score 52.81 m/z 663.78 Gene names GPSM3

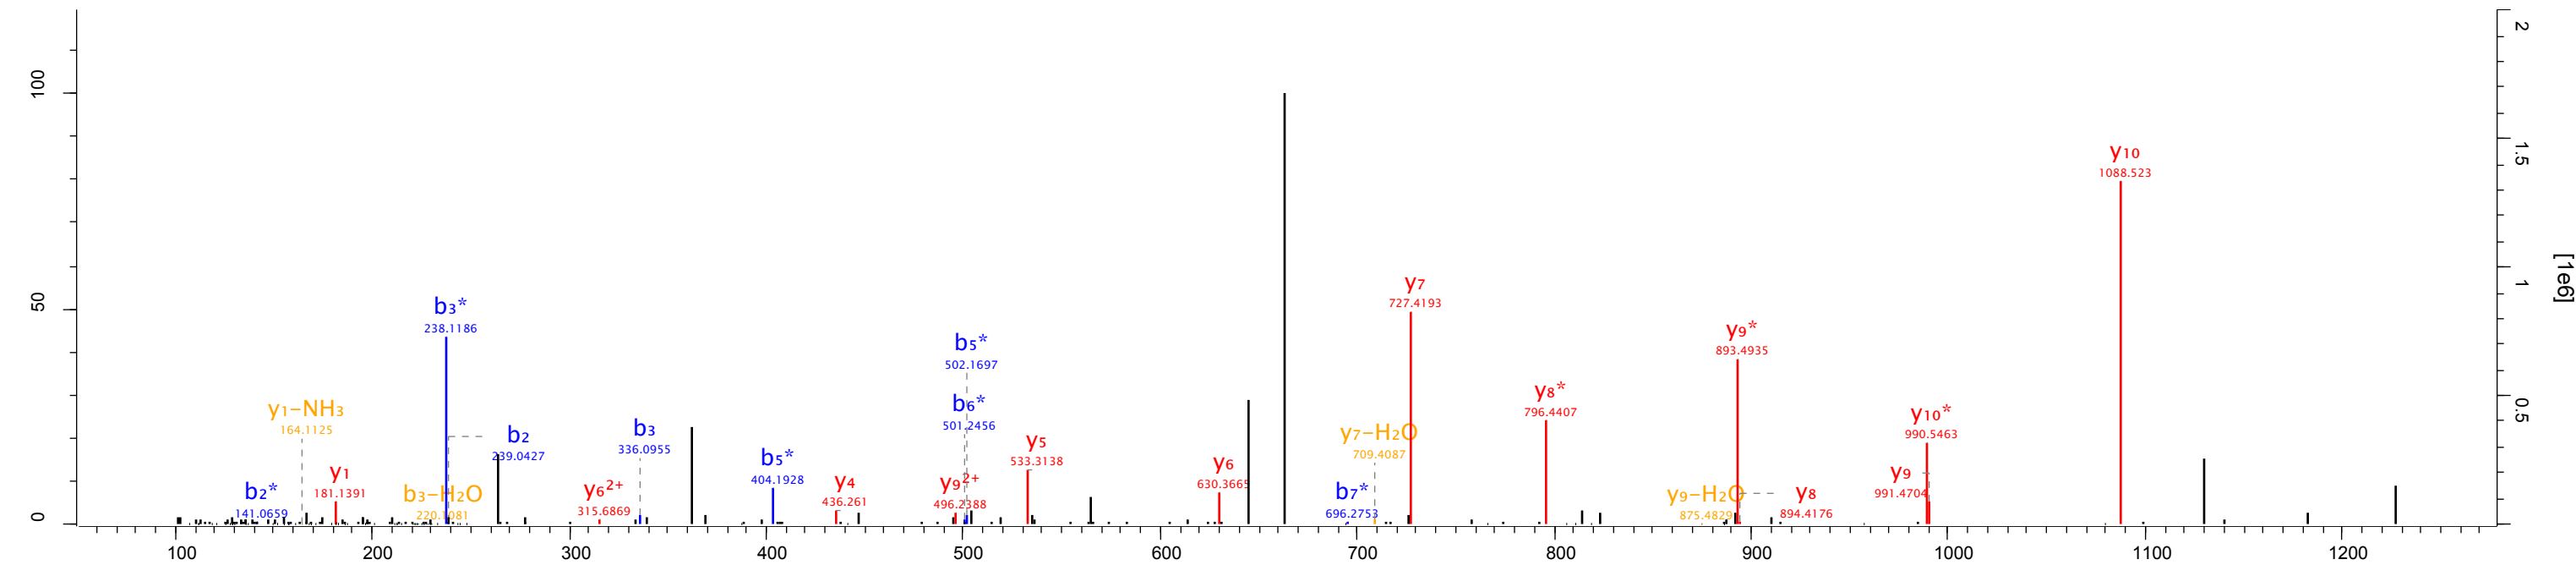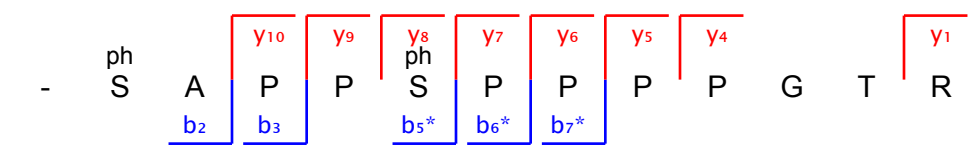

Raw file 20150814\_A375SR\_Phospho\_BR2\_04 Scan 12830 Method FTMS; HCD Score 253.52 m/z 839.43 Gene names MLLT3

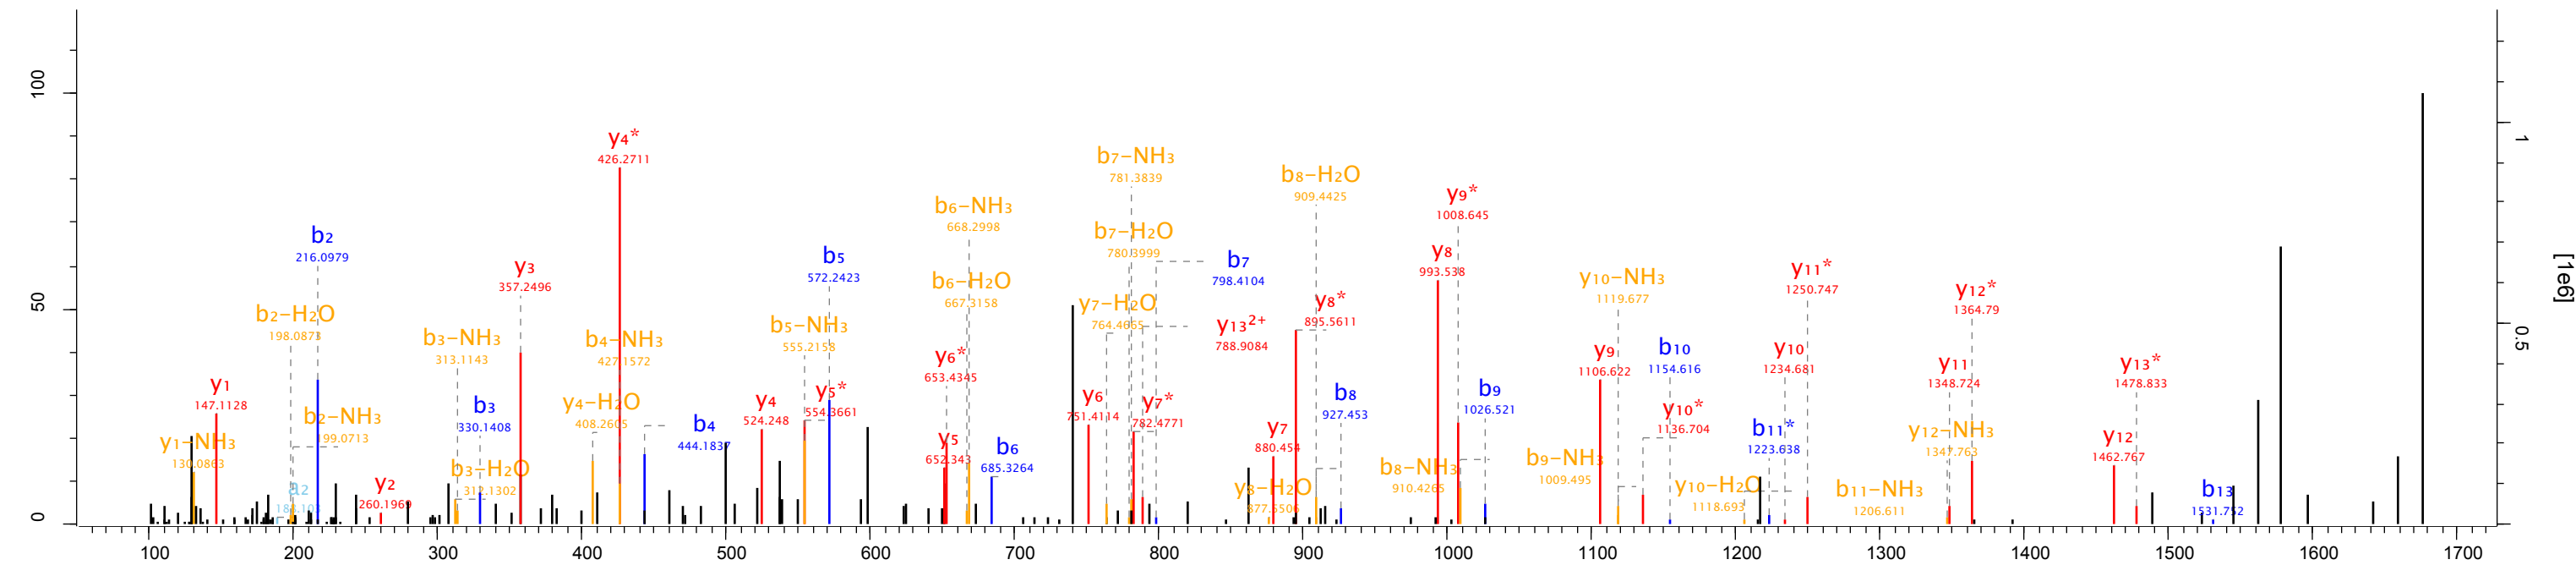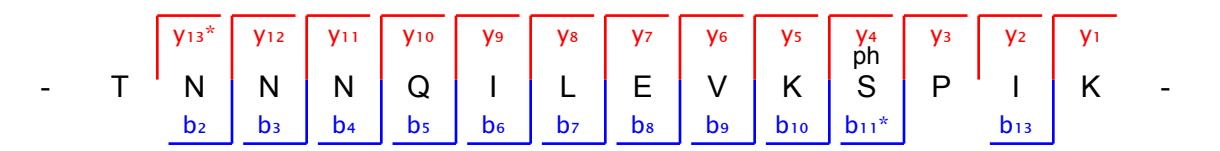



Raw file: 20150814\_A375SR\_Phospho\_BR2\_04  
 Scan: 13480 Method: FTMS; HCD Score: 185.81 m/z: 436.58 Gene names: RPL39P5;RPL39

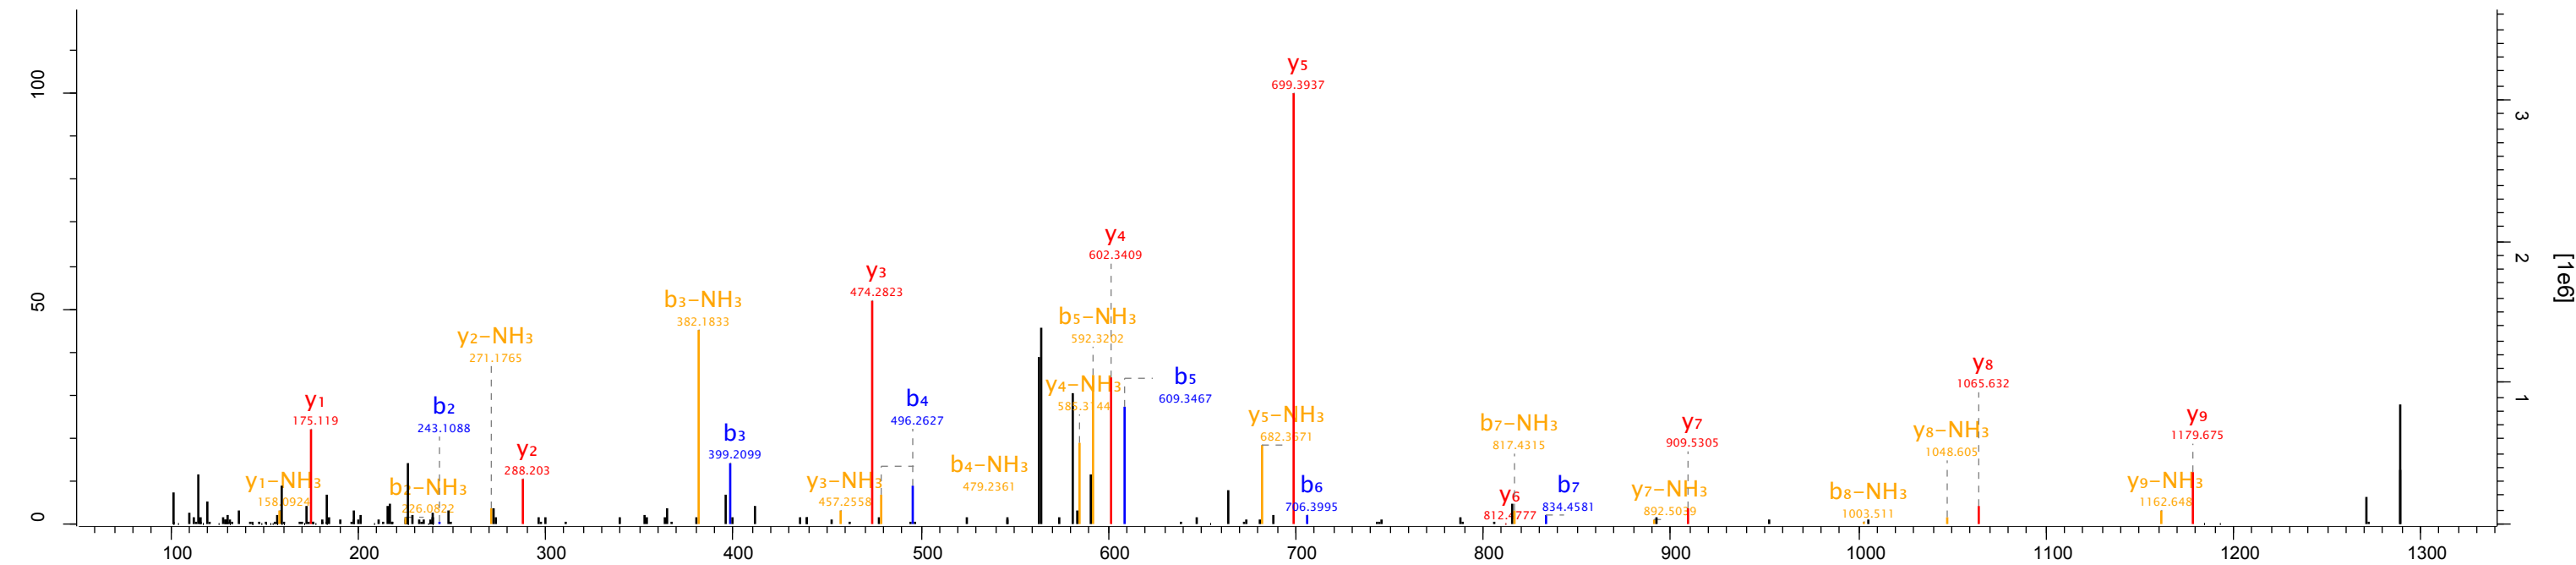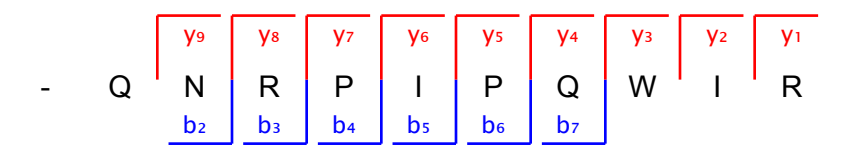

Raw file: 20150814\_A375SR\_Phospho\_BR2\_04  
 Scan: 17310 Method: FTMS; HCD Score: 101.12 m/z: 570.76 Gene names: GPATCH2L

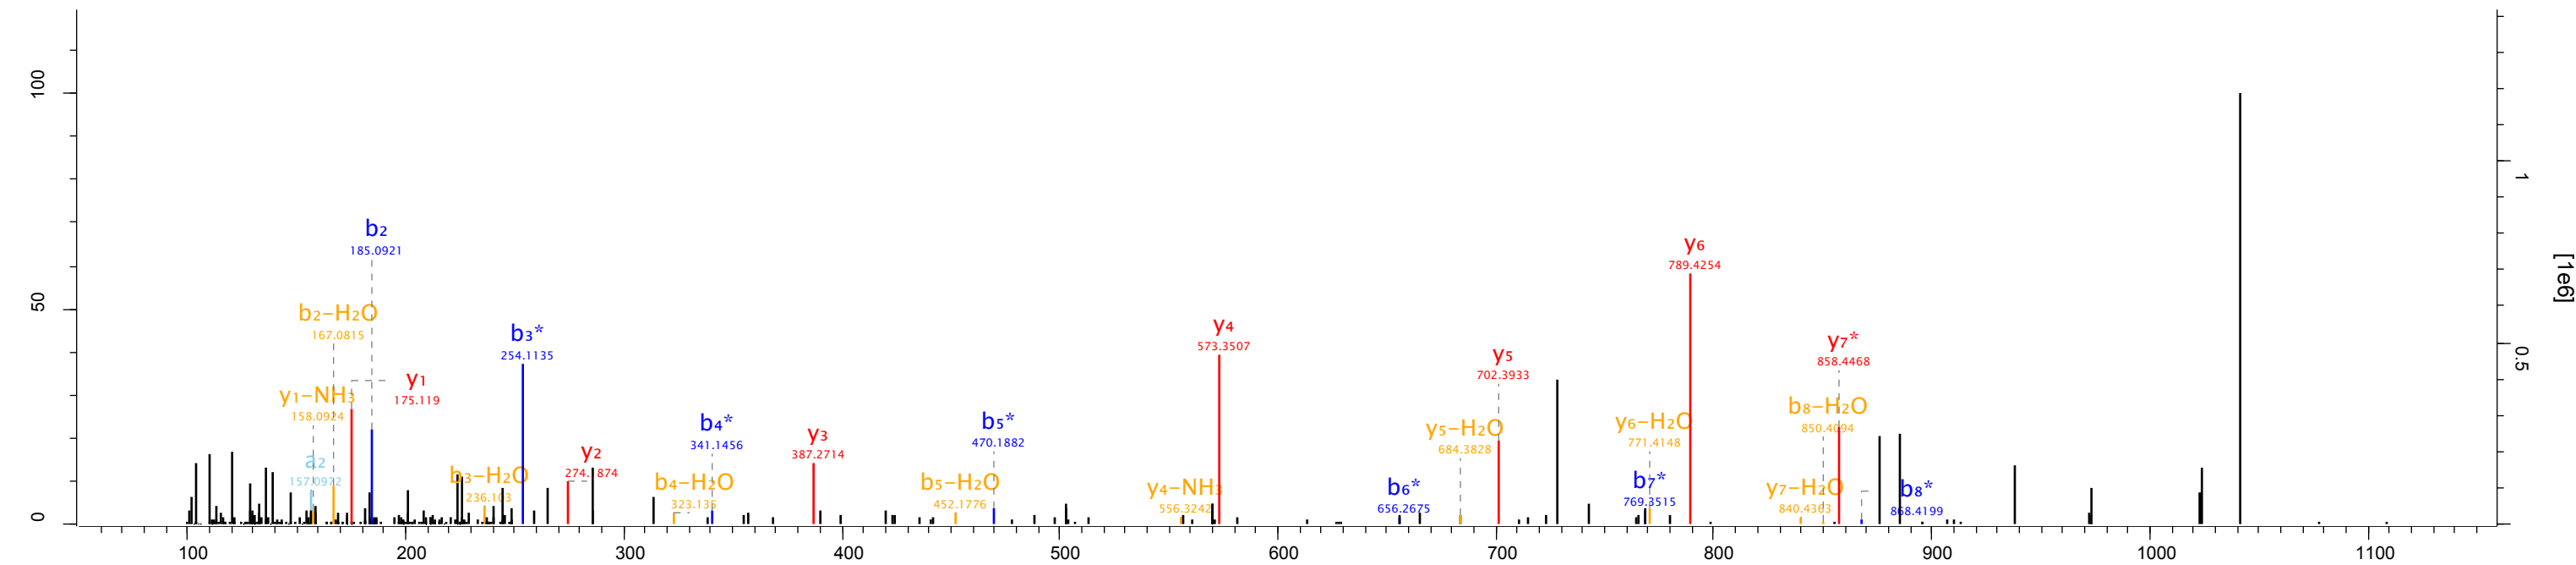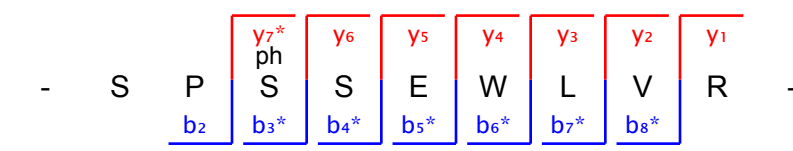

Raw file: 20150814\_A375SR\_Phospho\_BR2\_04  
 Scan: 23110 Method: FTMS; HCD Score: 123.02 m/z: 770.32 Gene names: FEZ1

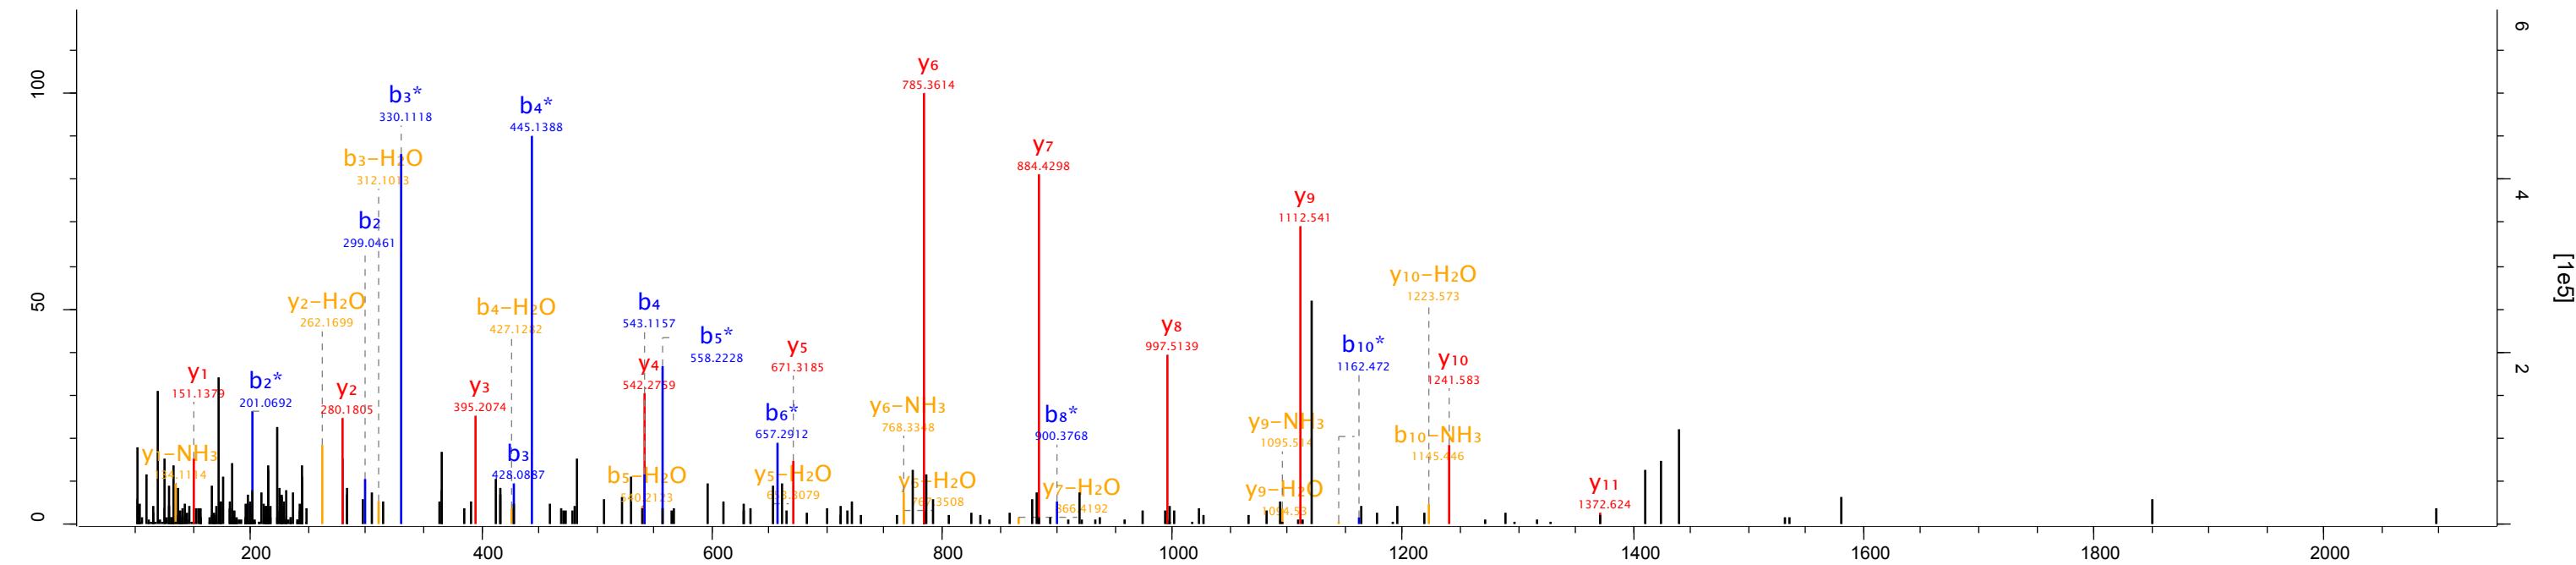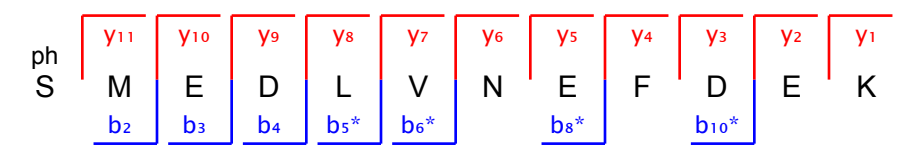

Raw file 20150814\_A375SR\_Phospho\_BR2\_05 Scan 10930 Method FTMS; HCD Score 98.51 m/z 691.34 Gene names ELK3

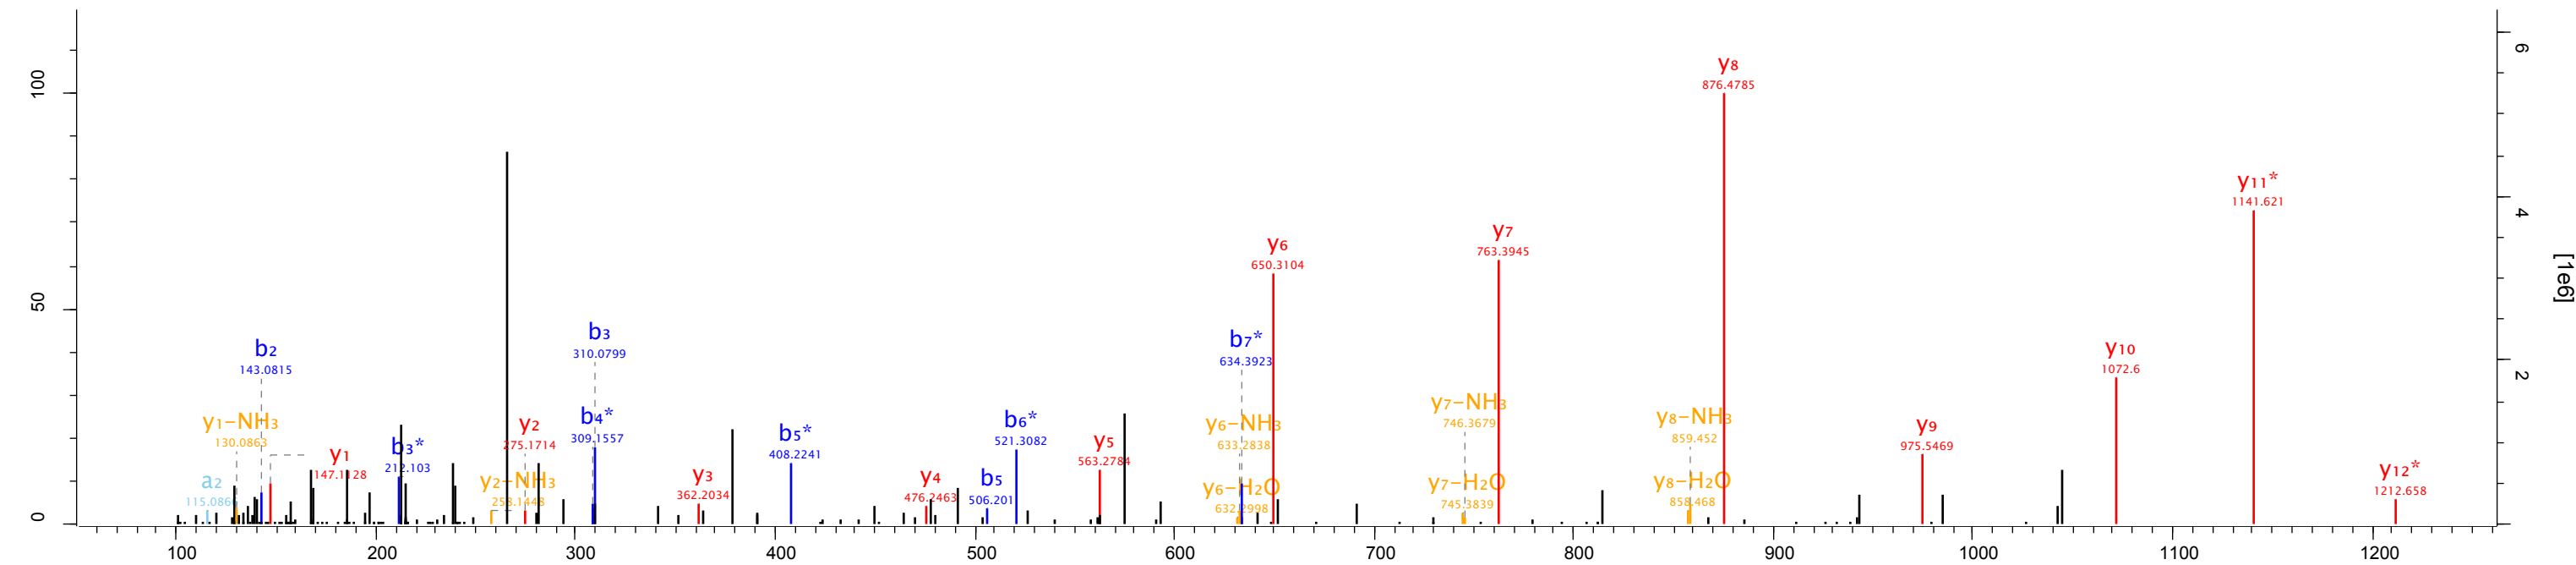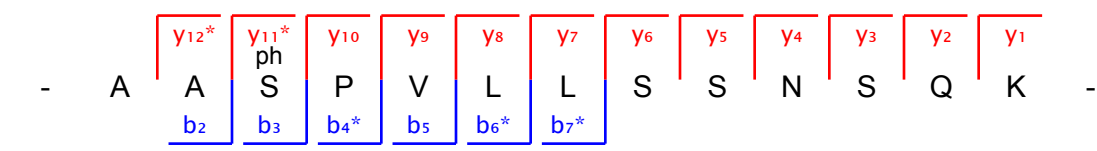

Raw file 20150814\_A375SR\_Phospho\_BR2\_05 Scan 17390 Method FTMS; HCD Score 53.98 m/z 861.37

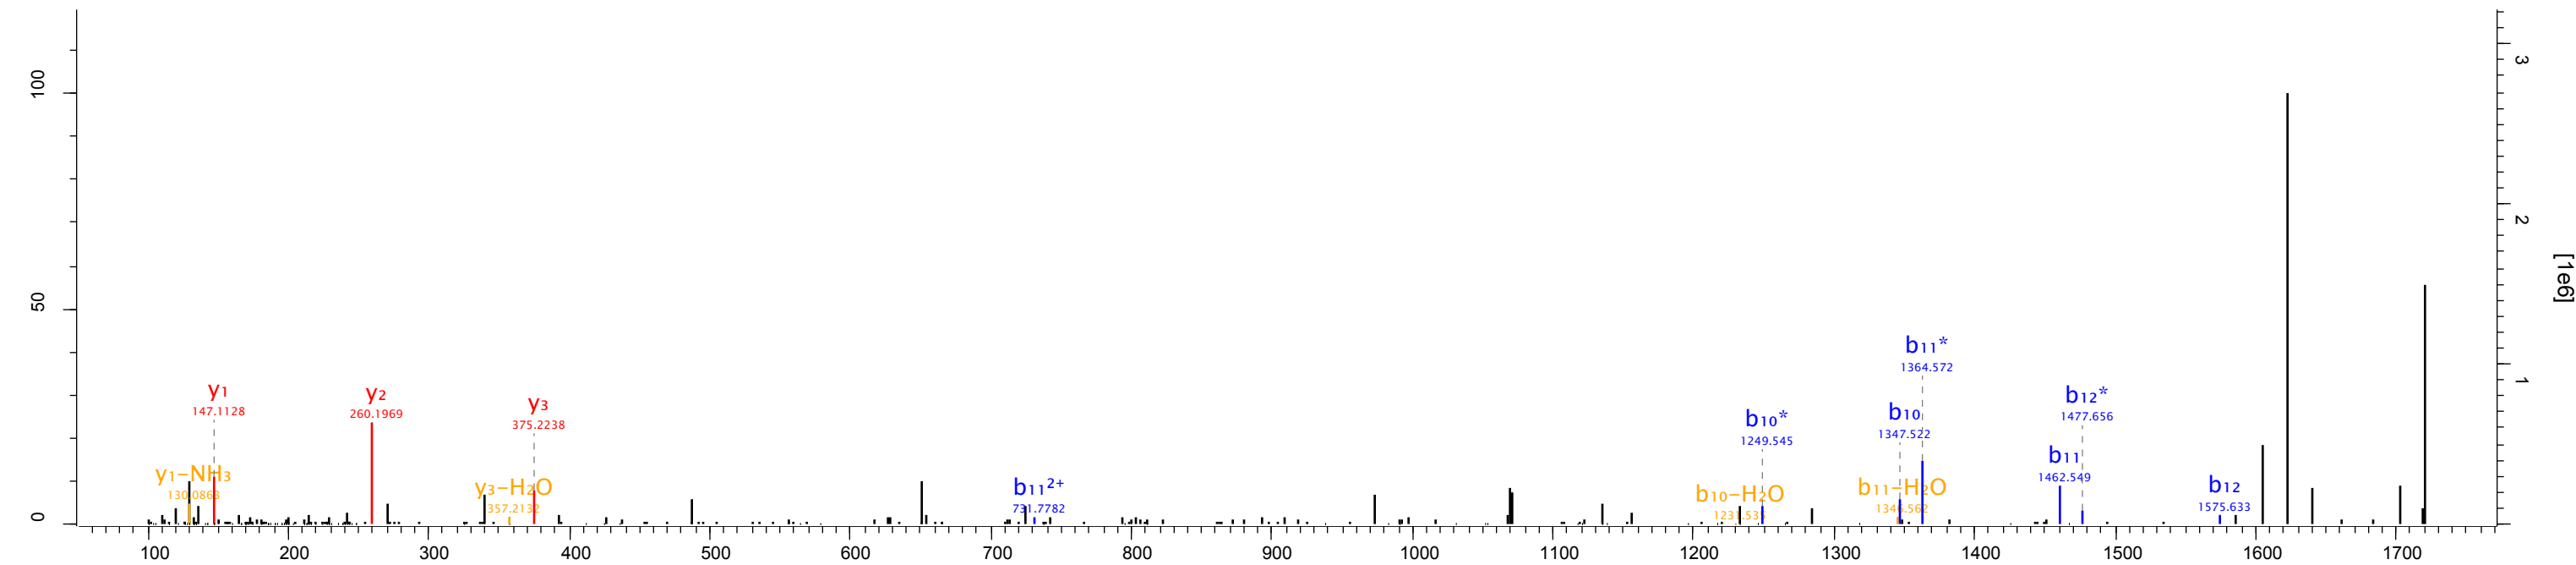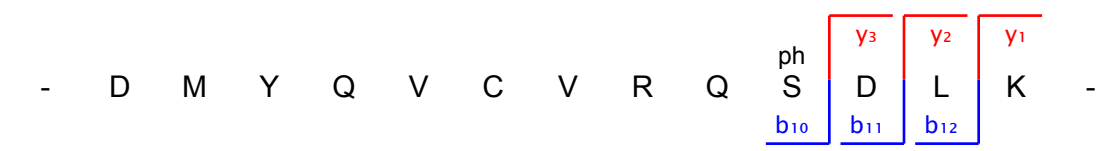

Raw file 20150814\_A375SR\_Phospho\_BR2\_05 Scan 18000 Method FTMS; HCD Score 97.22 m/z 658.31 Gene names ZFP36

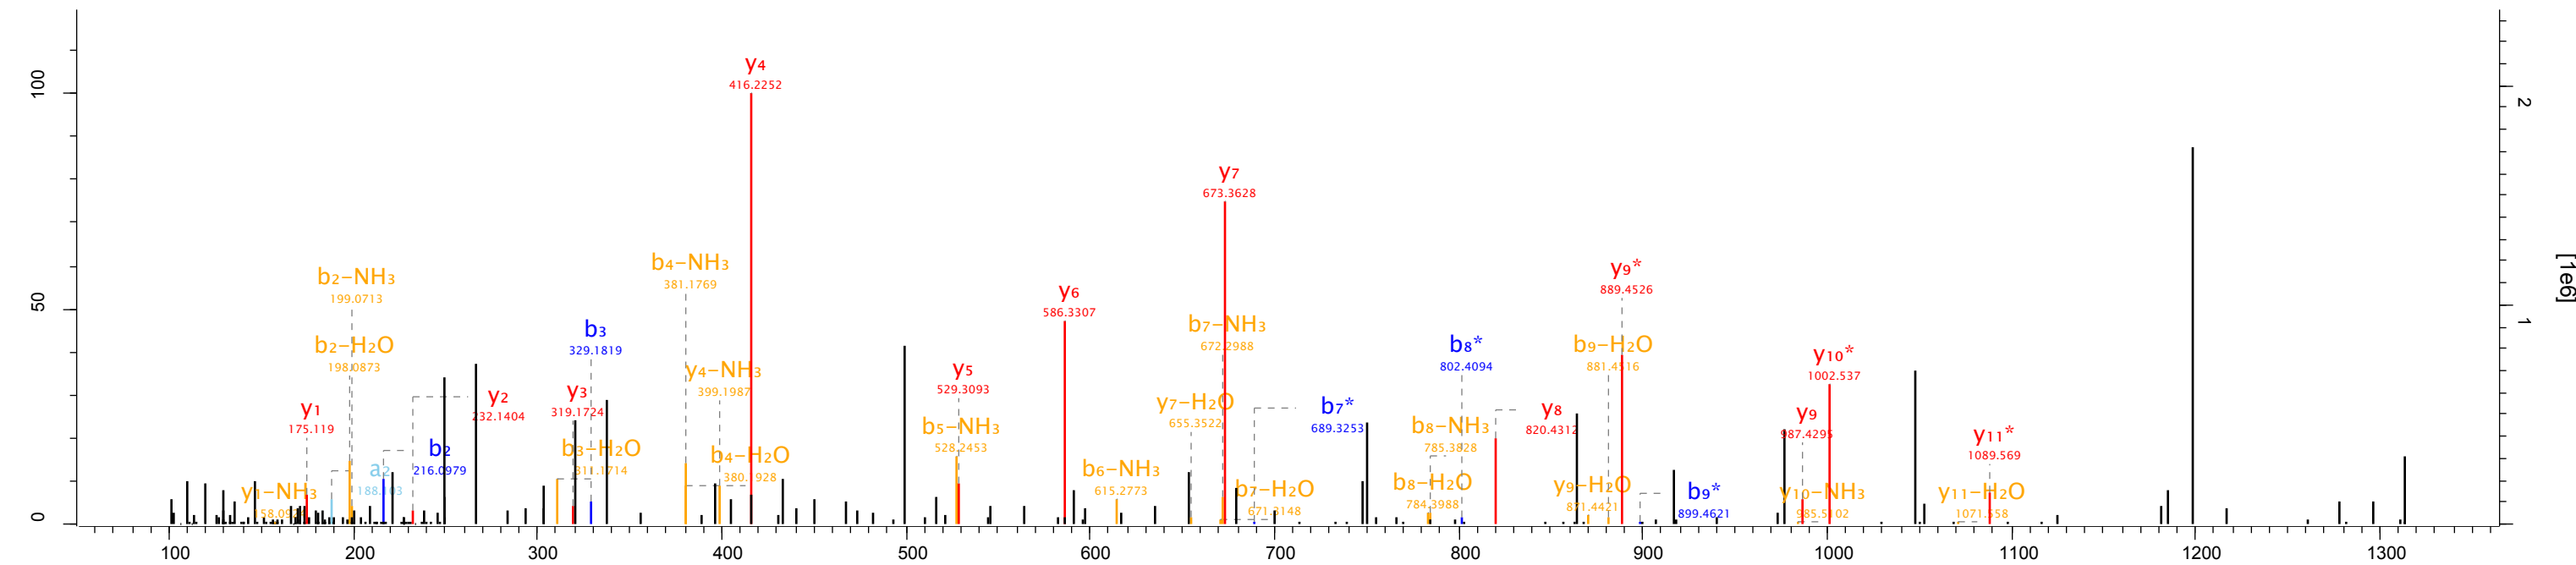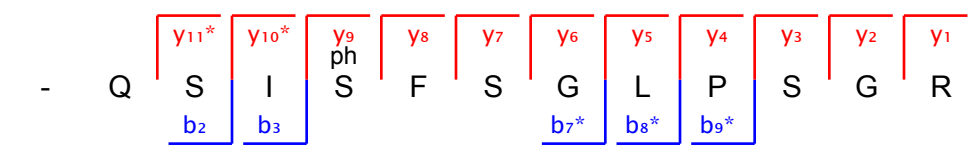

Raw file: 20150814\_A375SR\_Phospho\_BR2\_05  
 Scan: 21490 Method: FTMS; HCD Score: 79.66 m/z: 751.83 Gene names: CDC14A

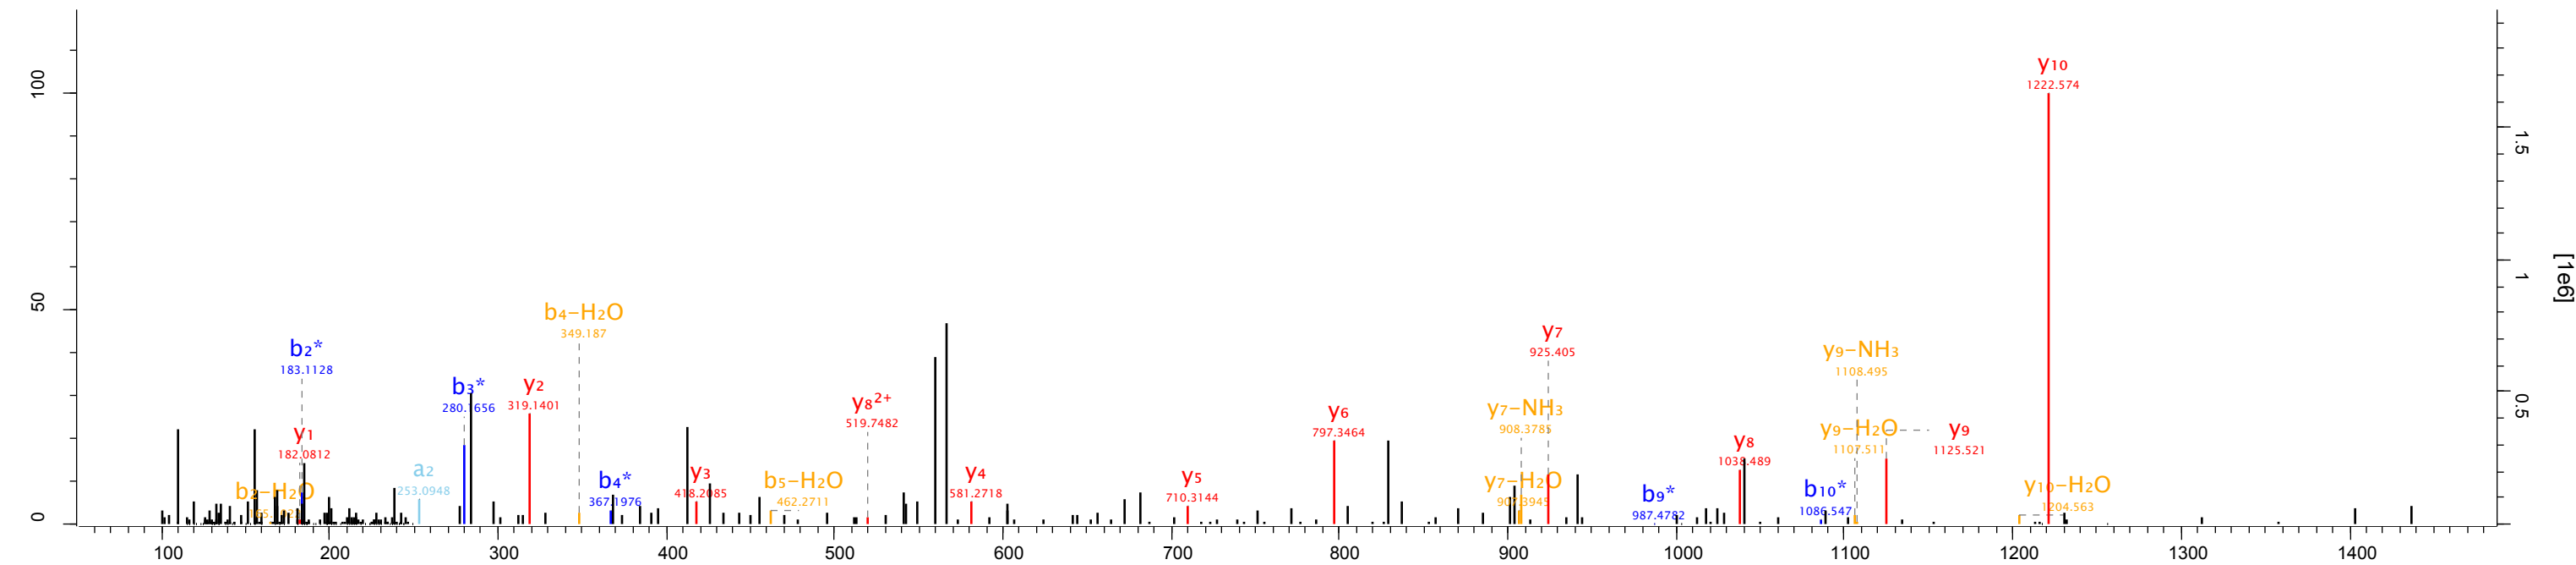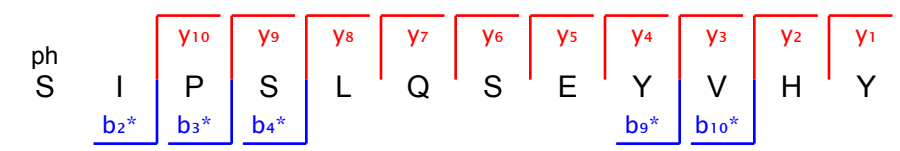

Raw file: 20150814\_A375SR\_Phospho\_BR2\_05  
 Scan: 23290 Method: FTMS; HCD Score: 130.21 m/z: 770.32 Gene names: FEZ1

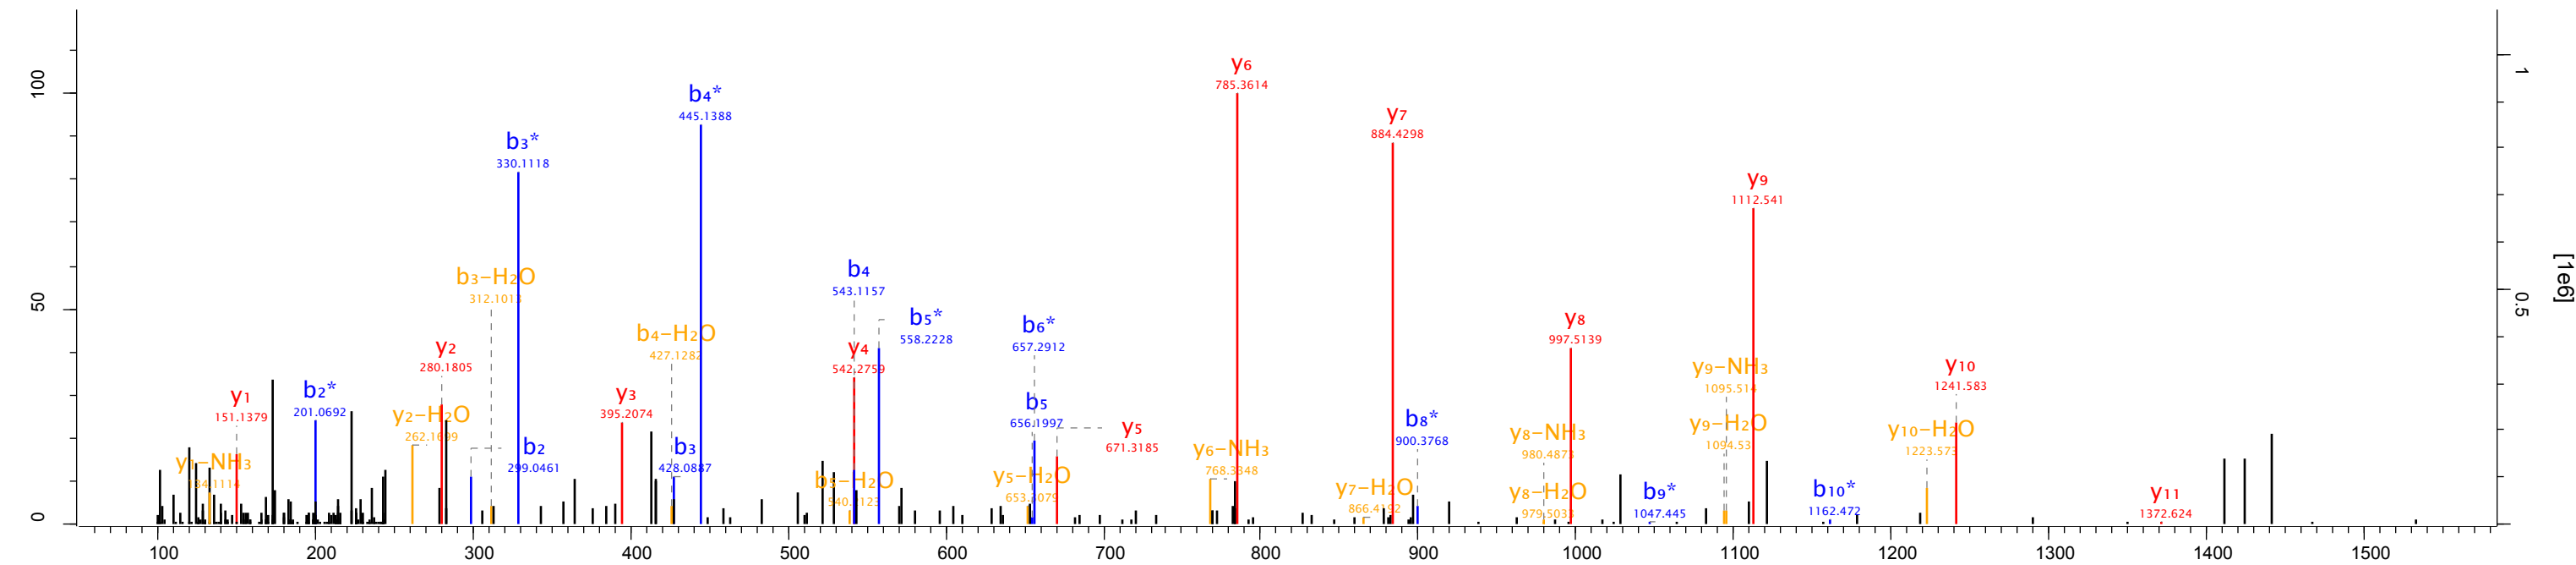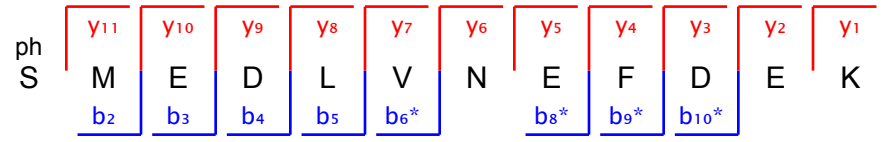



Raw file: 20150814\_A375SR\_Phospho\_BR2\_05  
 Scan: 23880 Method: FTMS; HCD Score: 125.45 m/z: 971.45 Gene names: MAPK11P1L

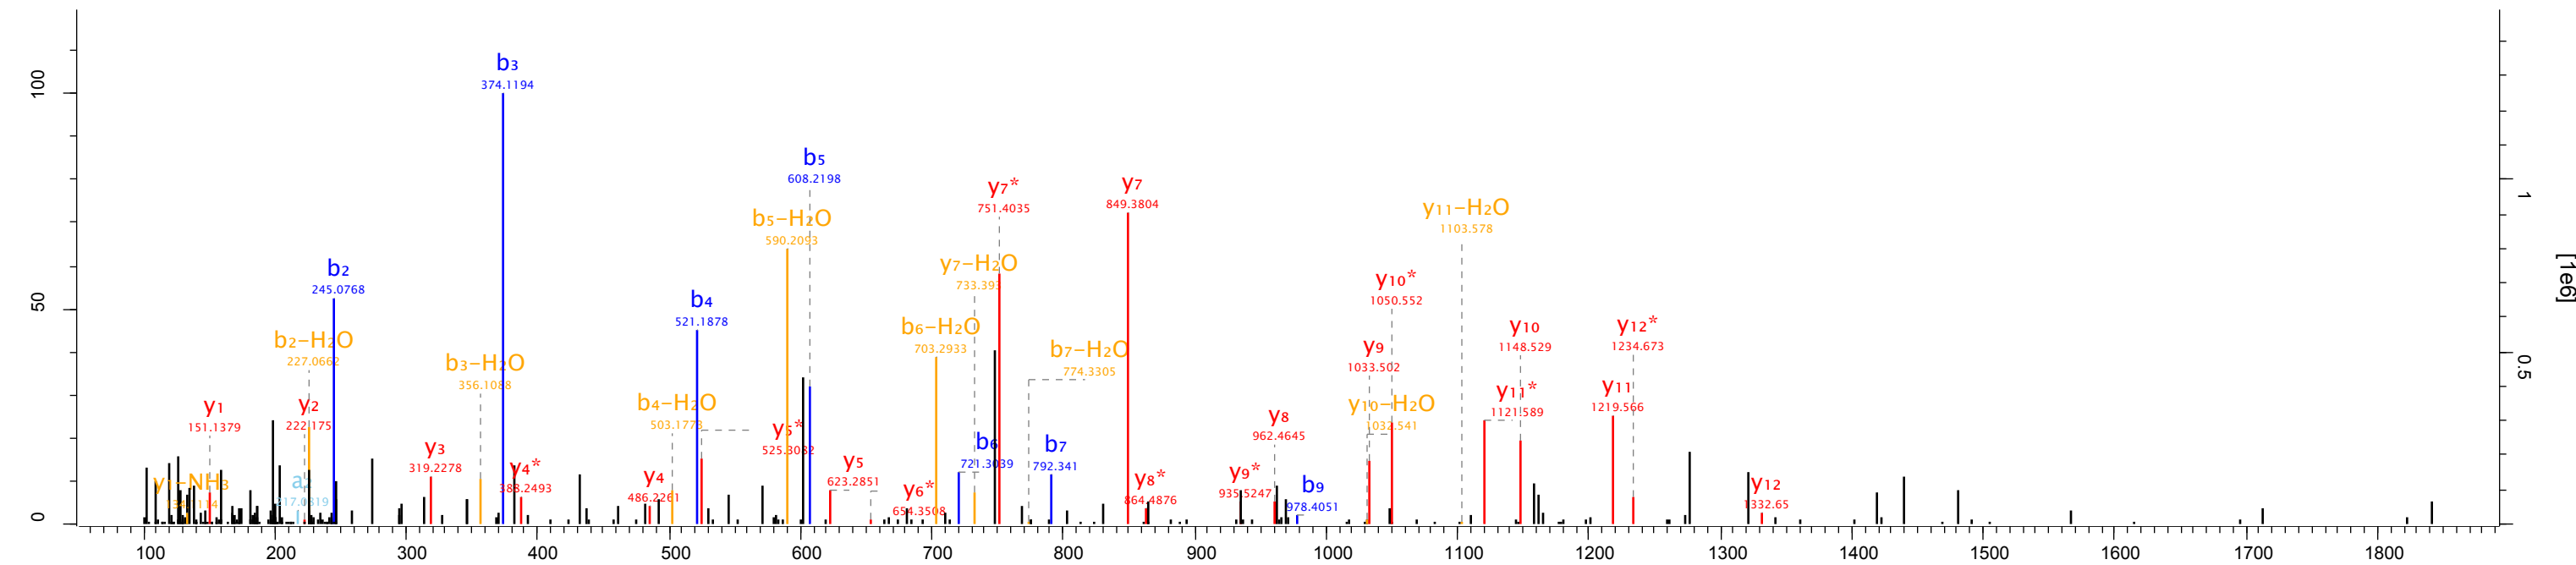

ac - S D E F S L A D A L P E H S P A K -

Fragmentation mapping (b and y ions):

- b2: D
- b3: E
- b4: F
- b5: S
- b6: L
- b7: A
- b9: S
- y1: K
- y2: A
- y3: P
- y4: S
- y5: H
- y6\*: E
- y7: P
- y8: L
- y9: A
- y10: D
- y11: A
- y12: L

Raw file 20150814\_A375SR\_Phospho\_BR2\_05 Scan 3100 Method FTMS; HCD Score 62.16 m/z 892.43

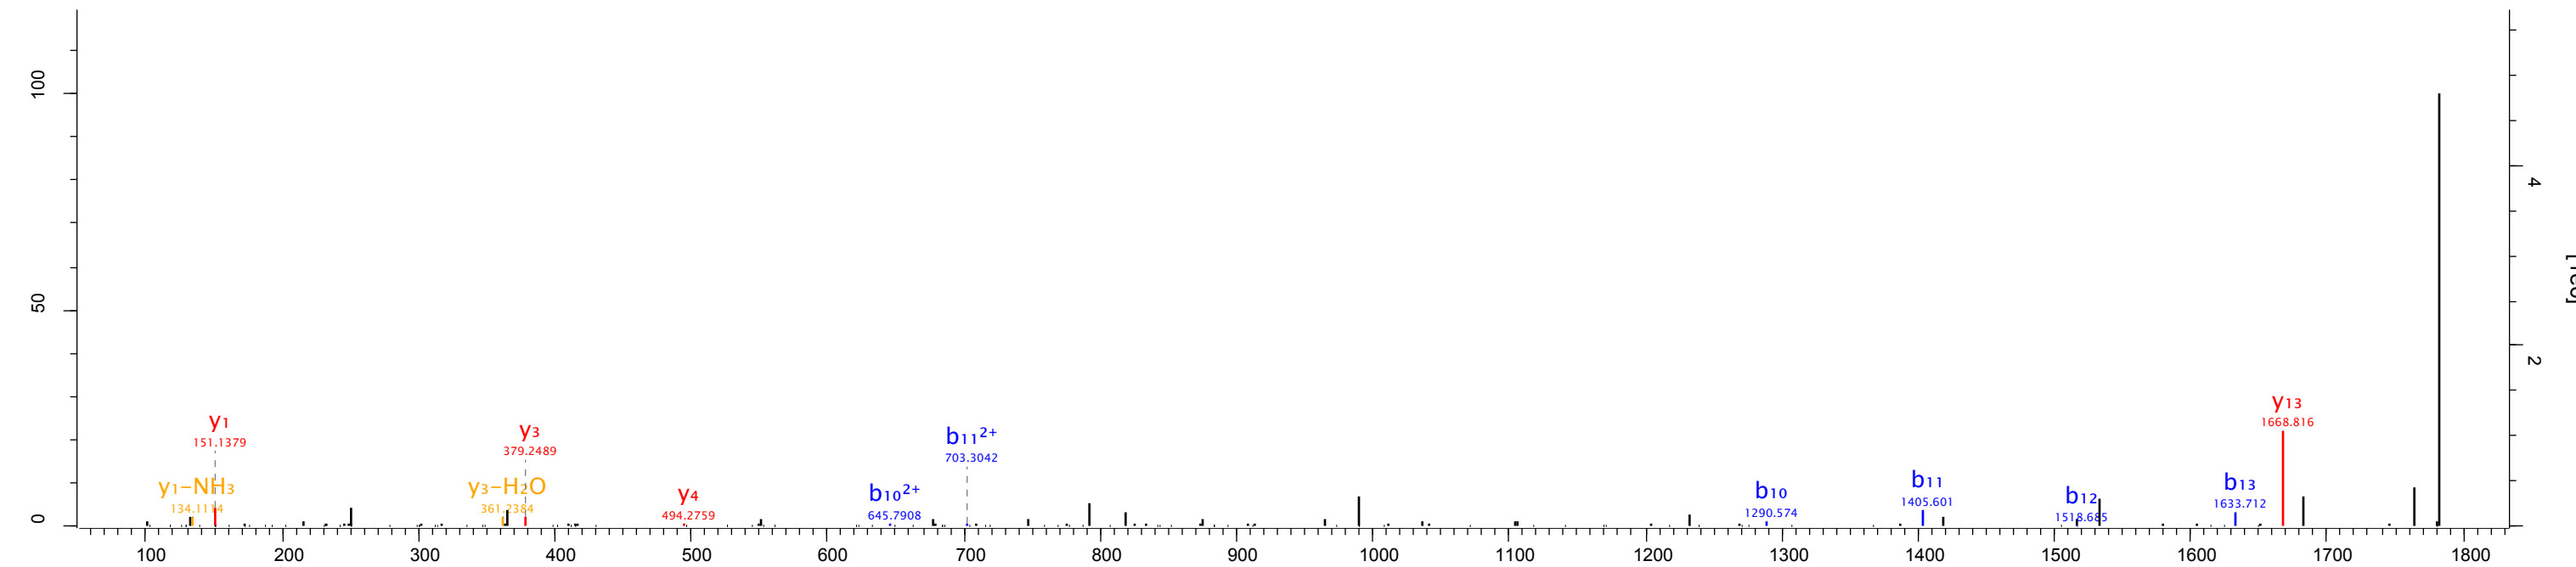

- D M S T E L E L L R D L D K -

y13  
ox
ph
y4
y3
y1

b10
b11
b12
b13

Raw file 20150814\_A375SR\_Phospho\_BR2\_06 Scan 11040 Method FTMS; HCD Score 41.84 m/z 753.34

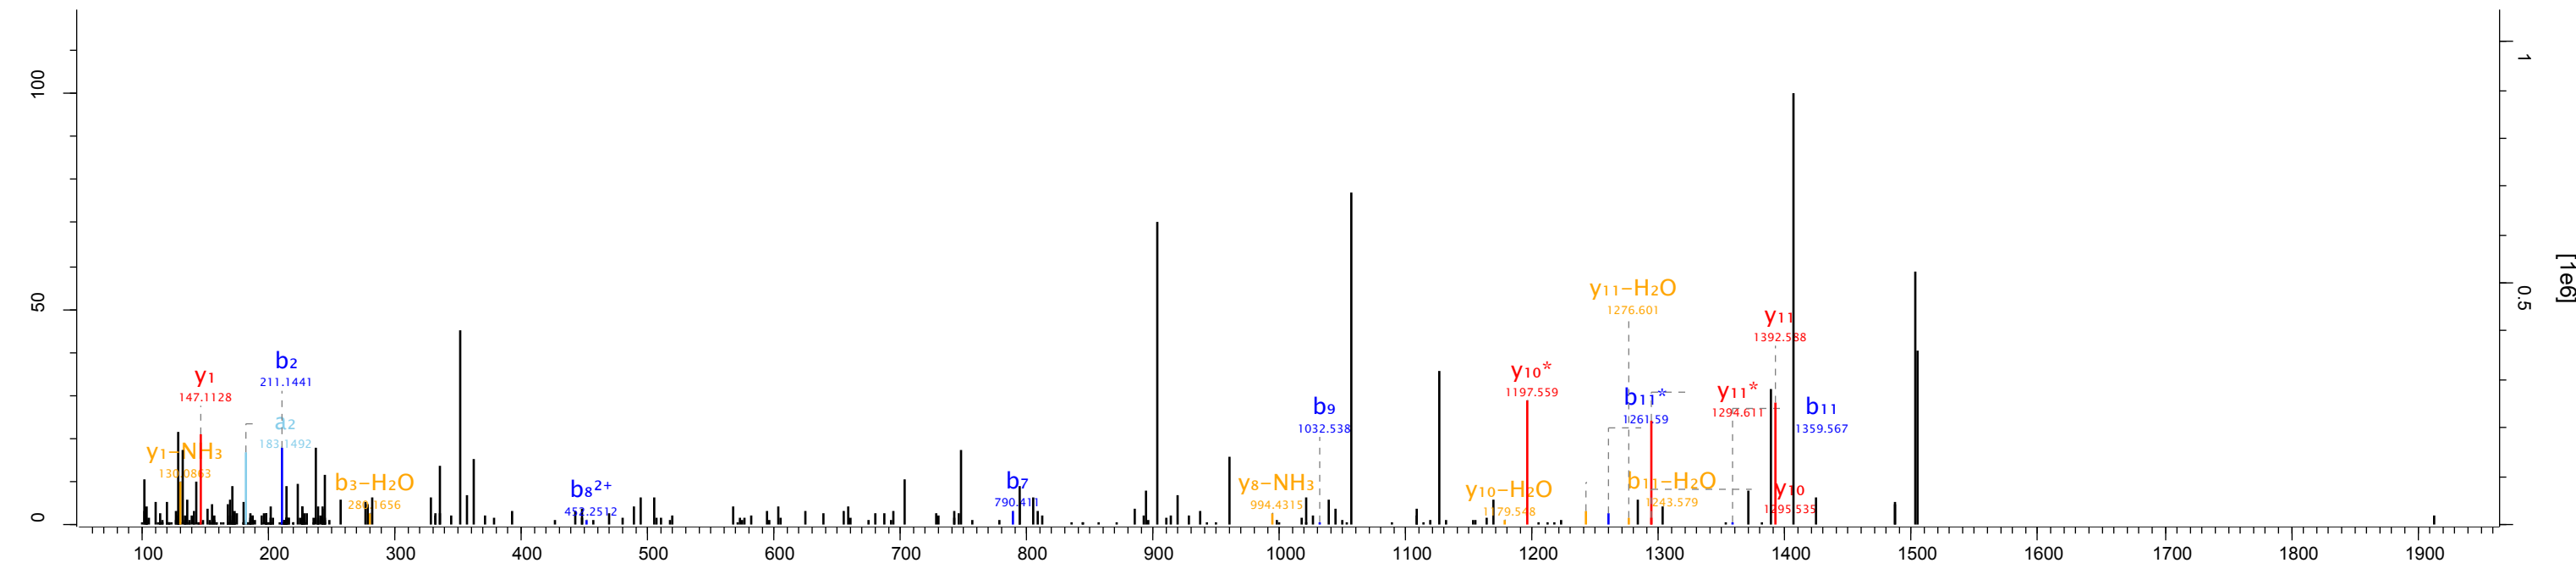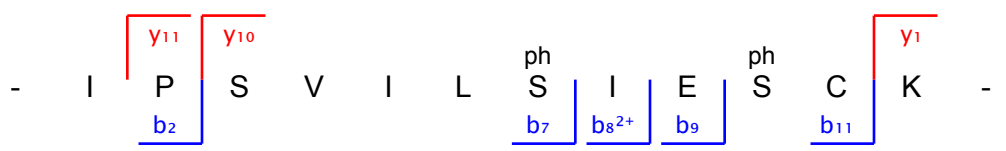

Raw file 20150814\_A375SR\_Phospho\_BR2\_06 Scan 12910 Method FTMS; HCD Score 53.05 m/z 558.29

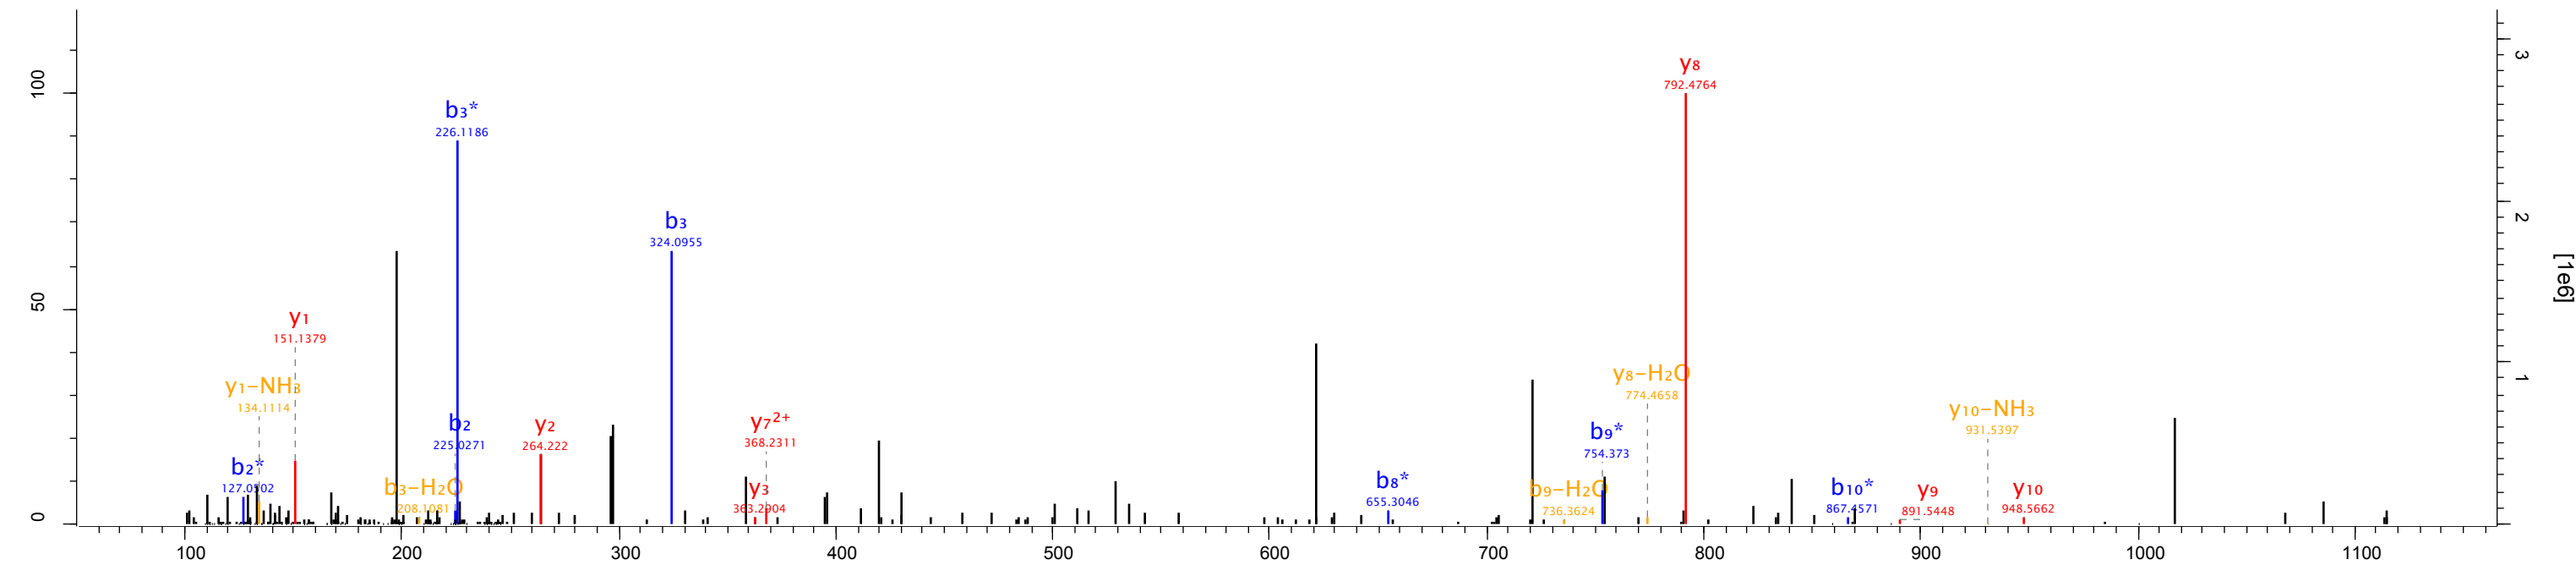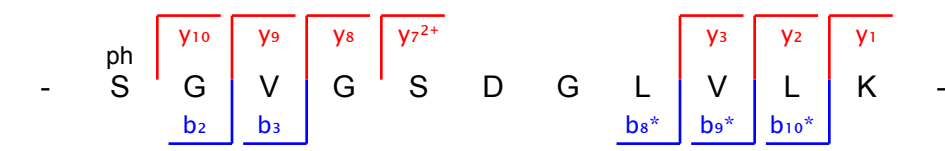

Raw file: 20150814\_A375SR\_Phospho\_BR2\_06  
 Scan: 15260 Method: FTMS; HCD Score: 72.56 m/z: 778.37 Gene names: PRICKLE1

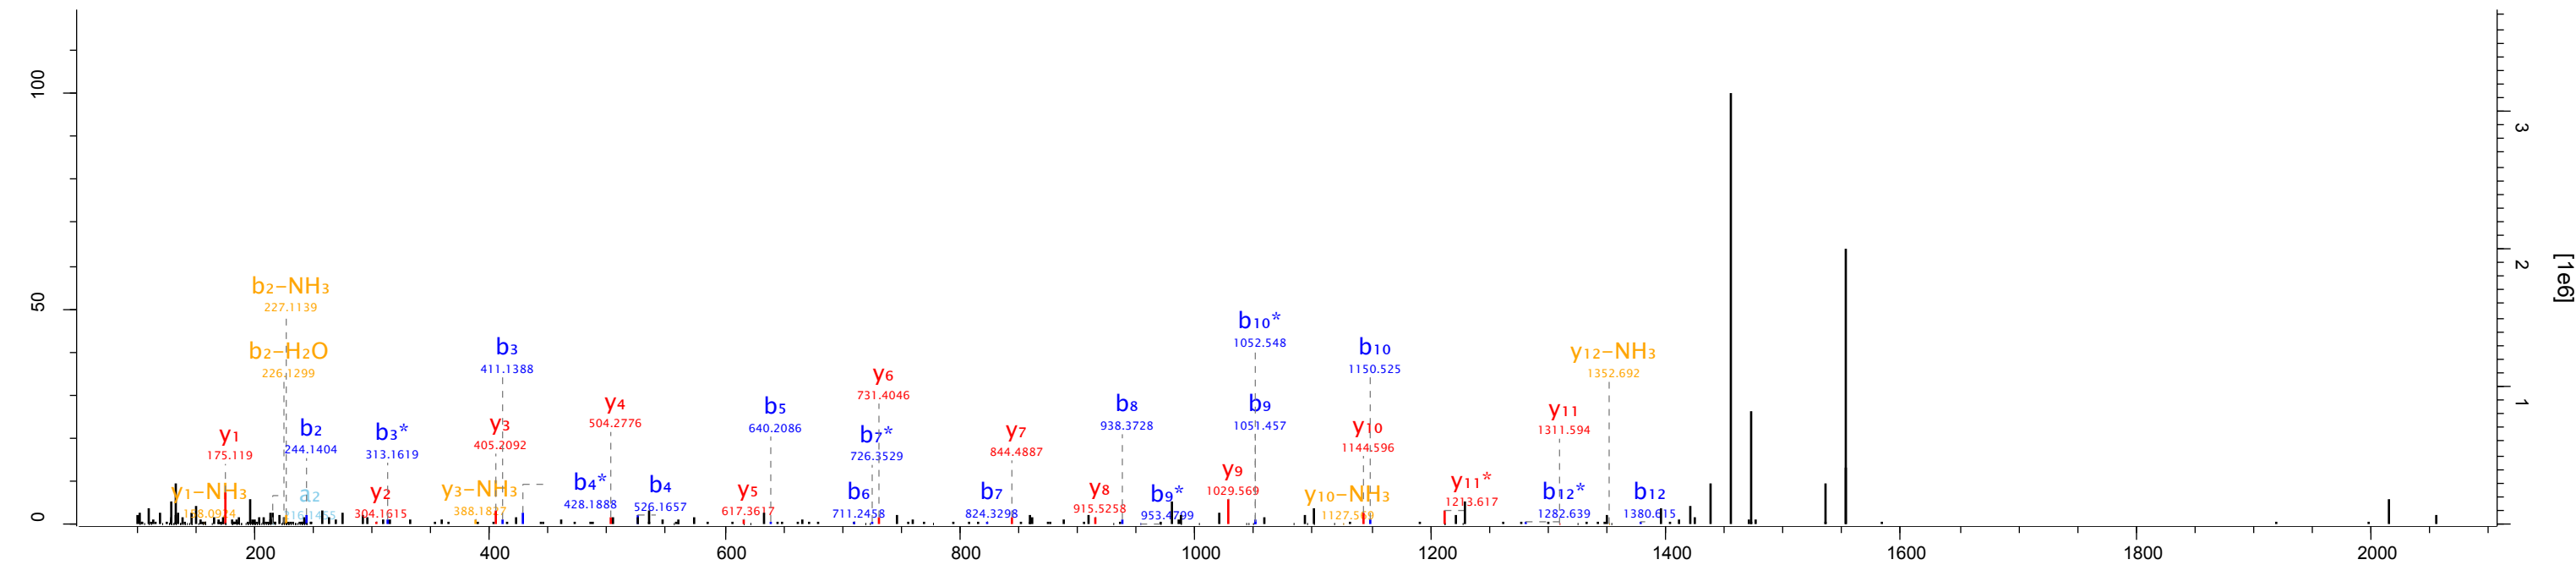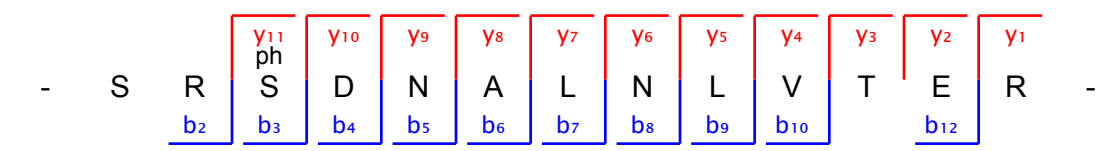

Raw file: 20150814\_A375SR\_Phospho\_BR2\_06  
 Scan: 17830 Method: FTMS; HCD Score: 73.95 m/z: 573.77 Gene names: GPATCH2L

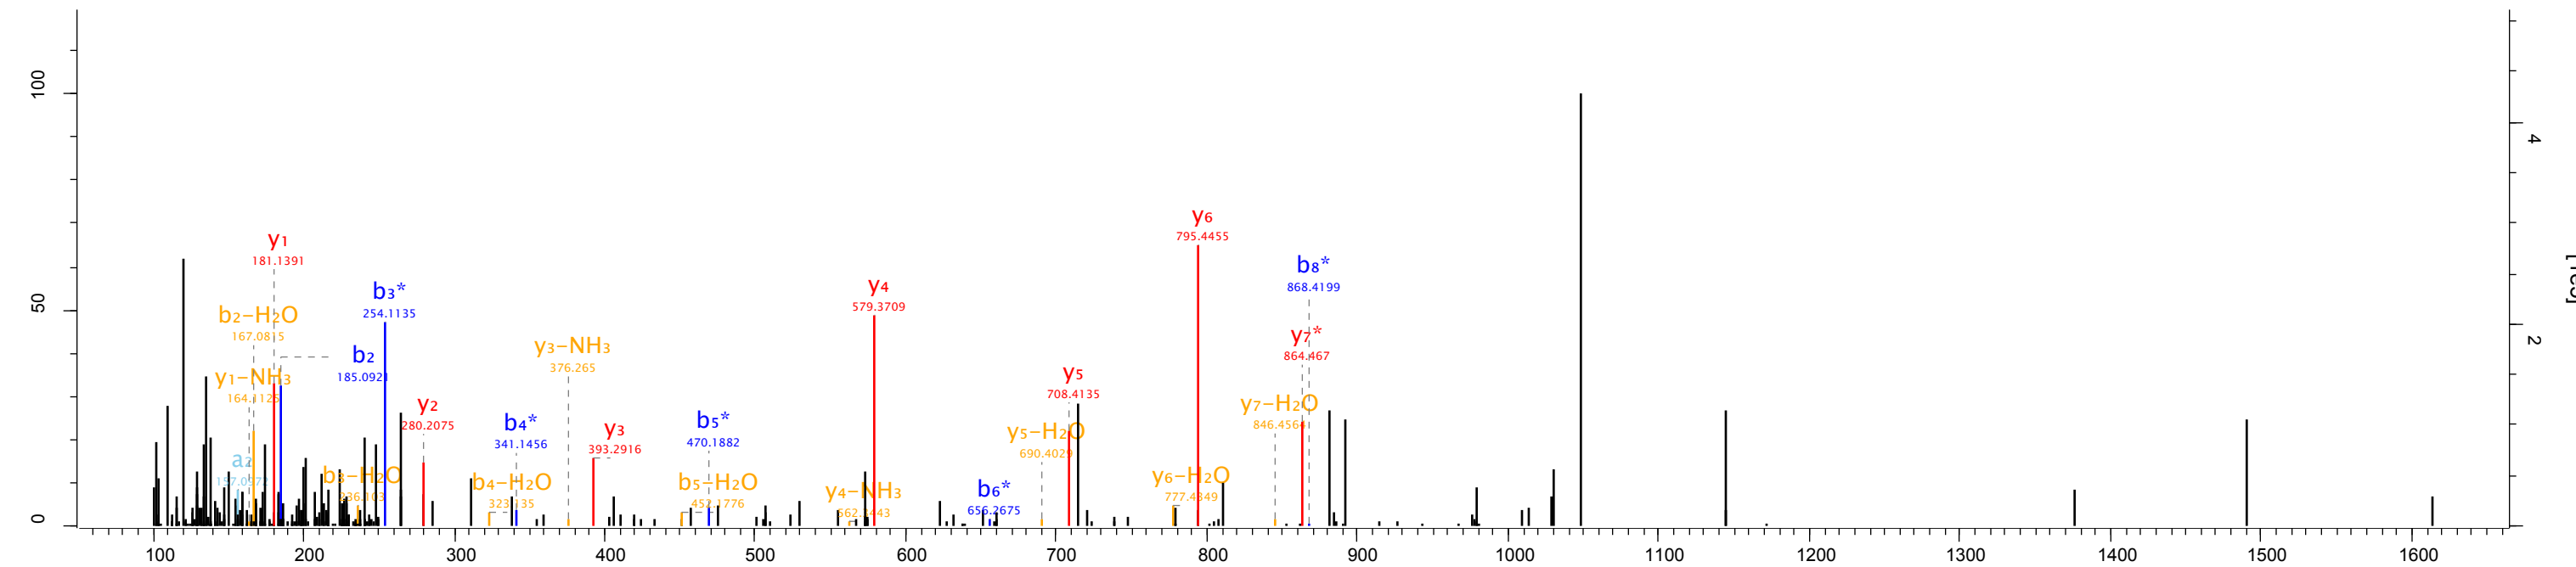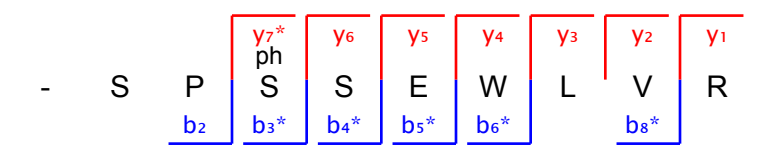

Raw file: 20150814\_A375SR\_Phospho\_BR2\_06  
 Scan: 17840 Method: FTMS; HCD Score: 49.06 m/z: 570.76 Gene names: GPATCH2L

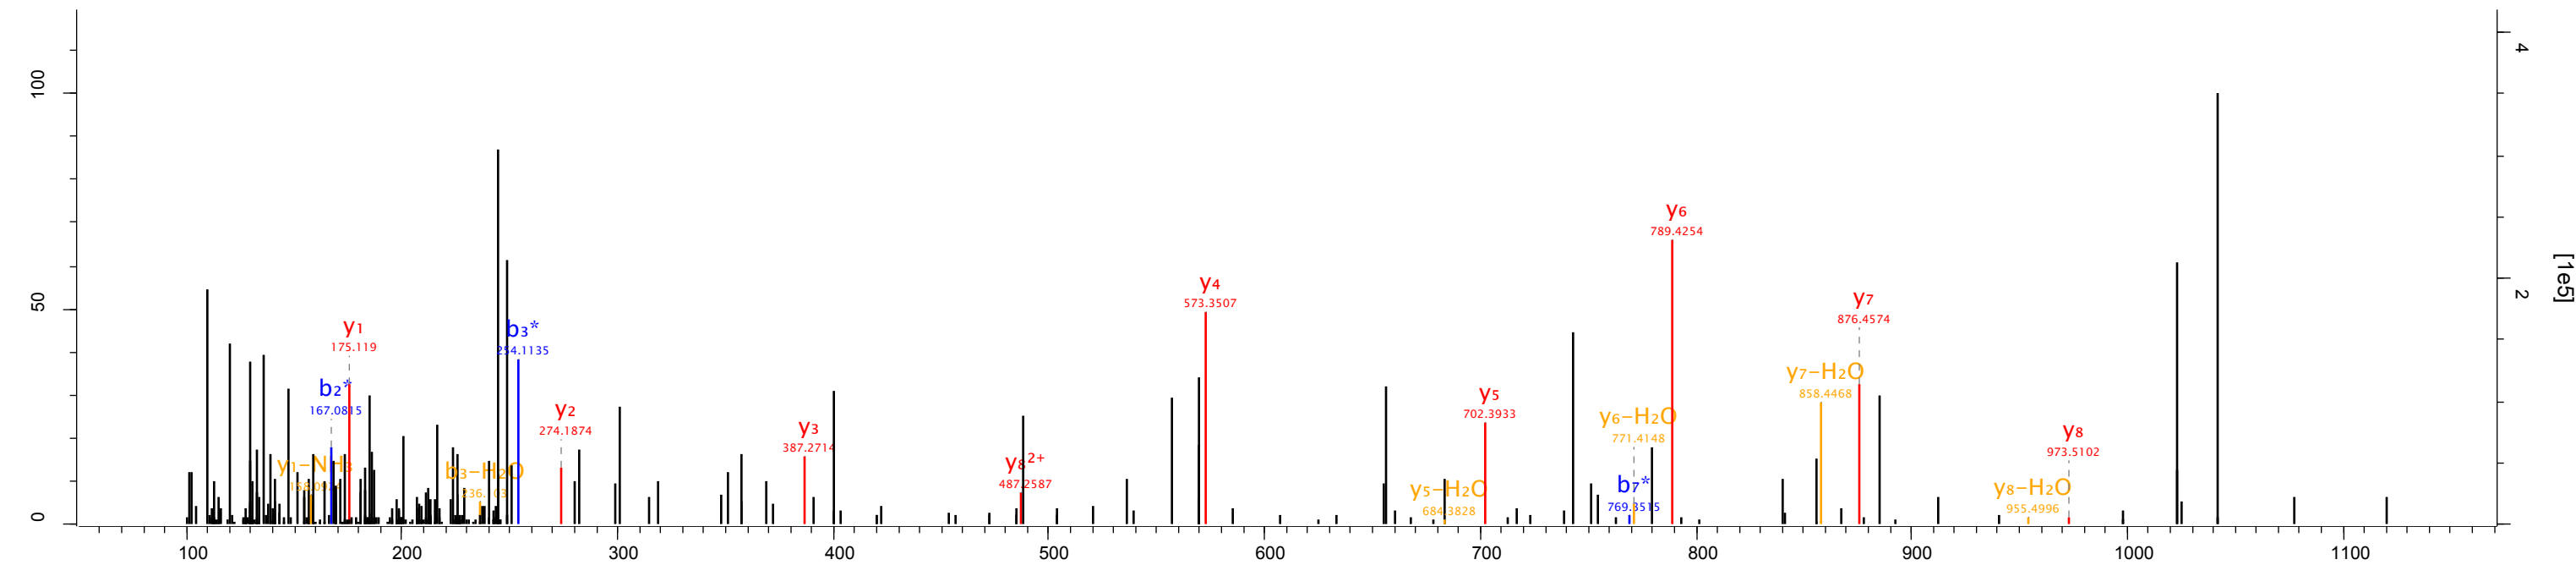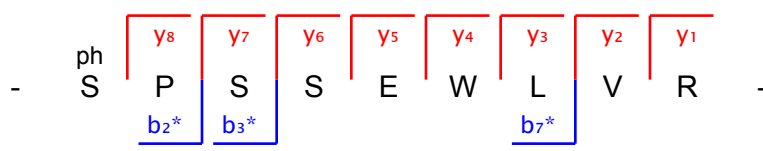

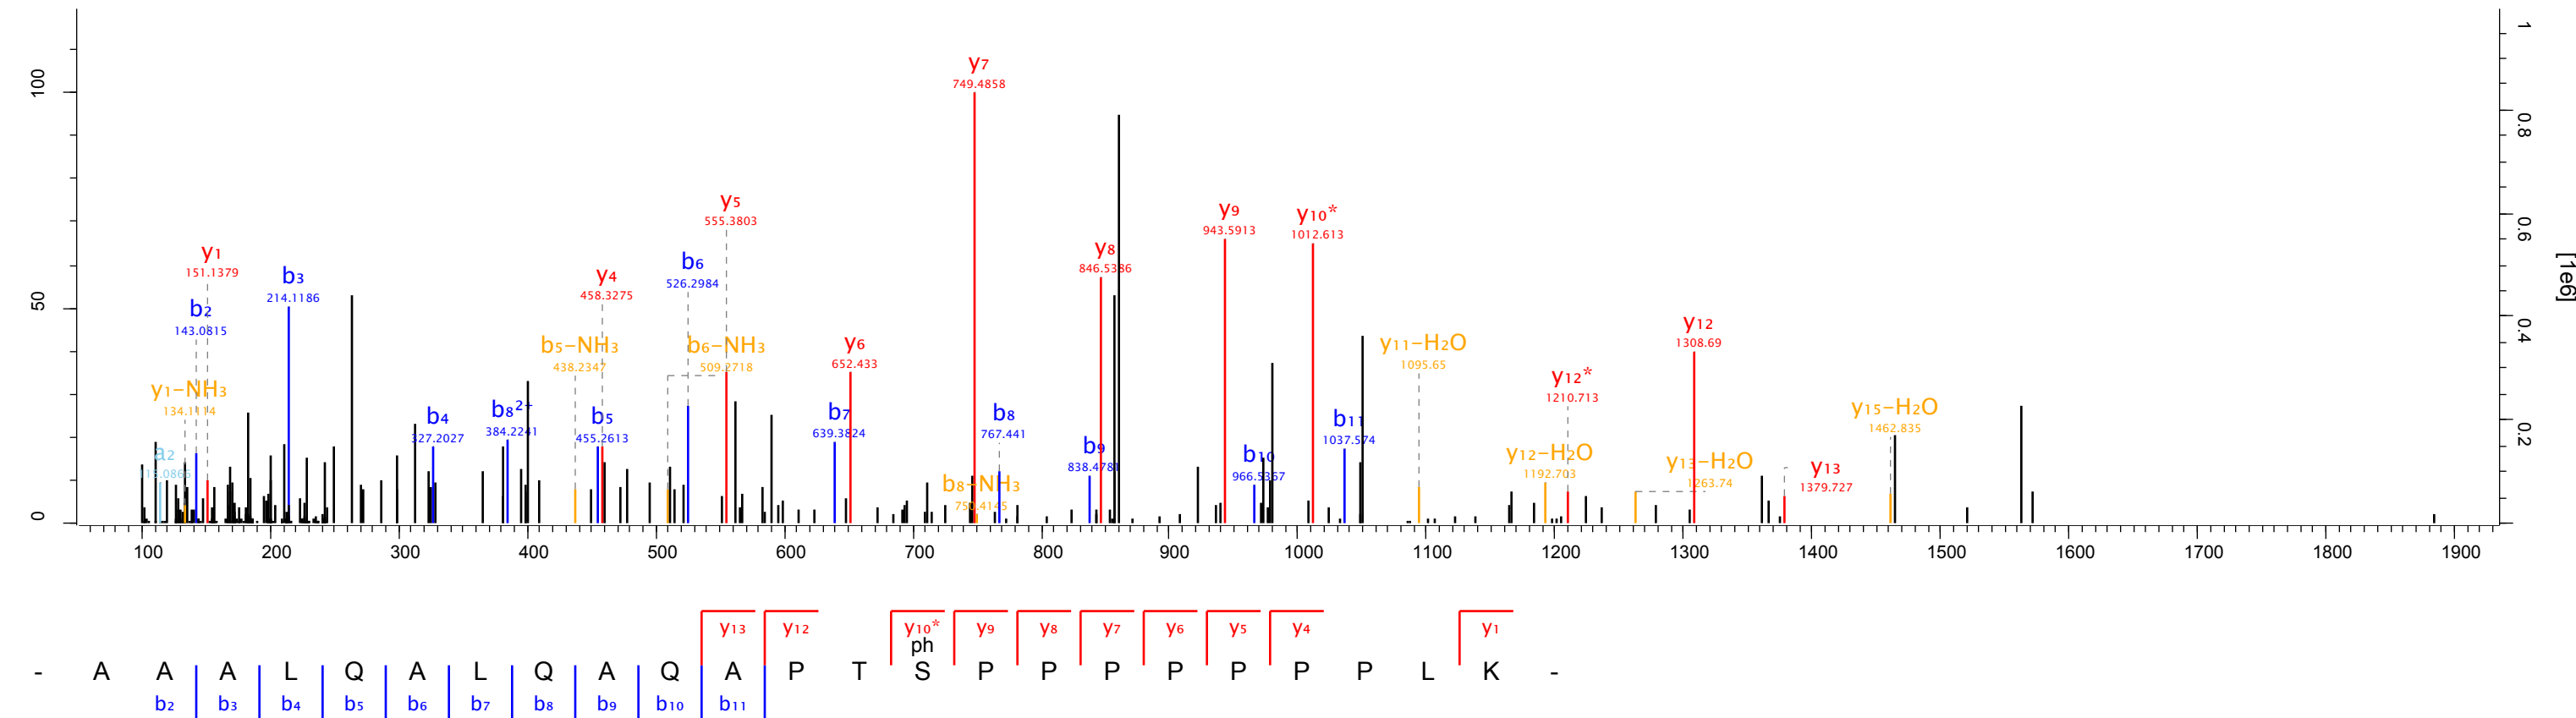



Raw file: 20150814\_A375SR\_Phospho\_BR2\_06  
 Scan: 26280 Method: FTMS; HCD Score: 60.32 m/z: 743.68 Gene names: GPRASP2

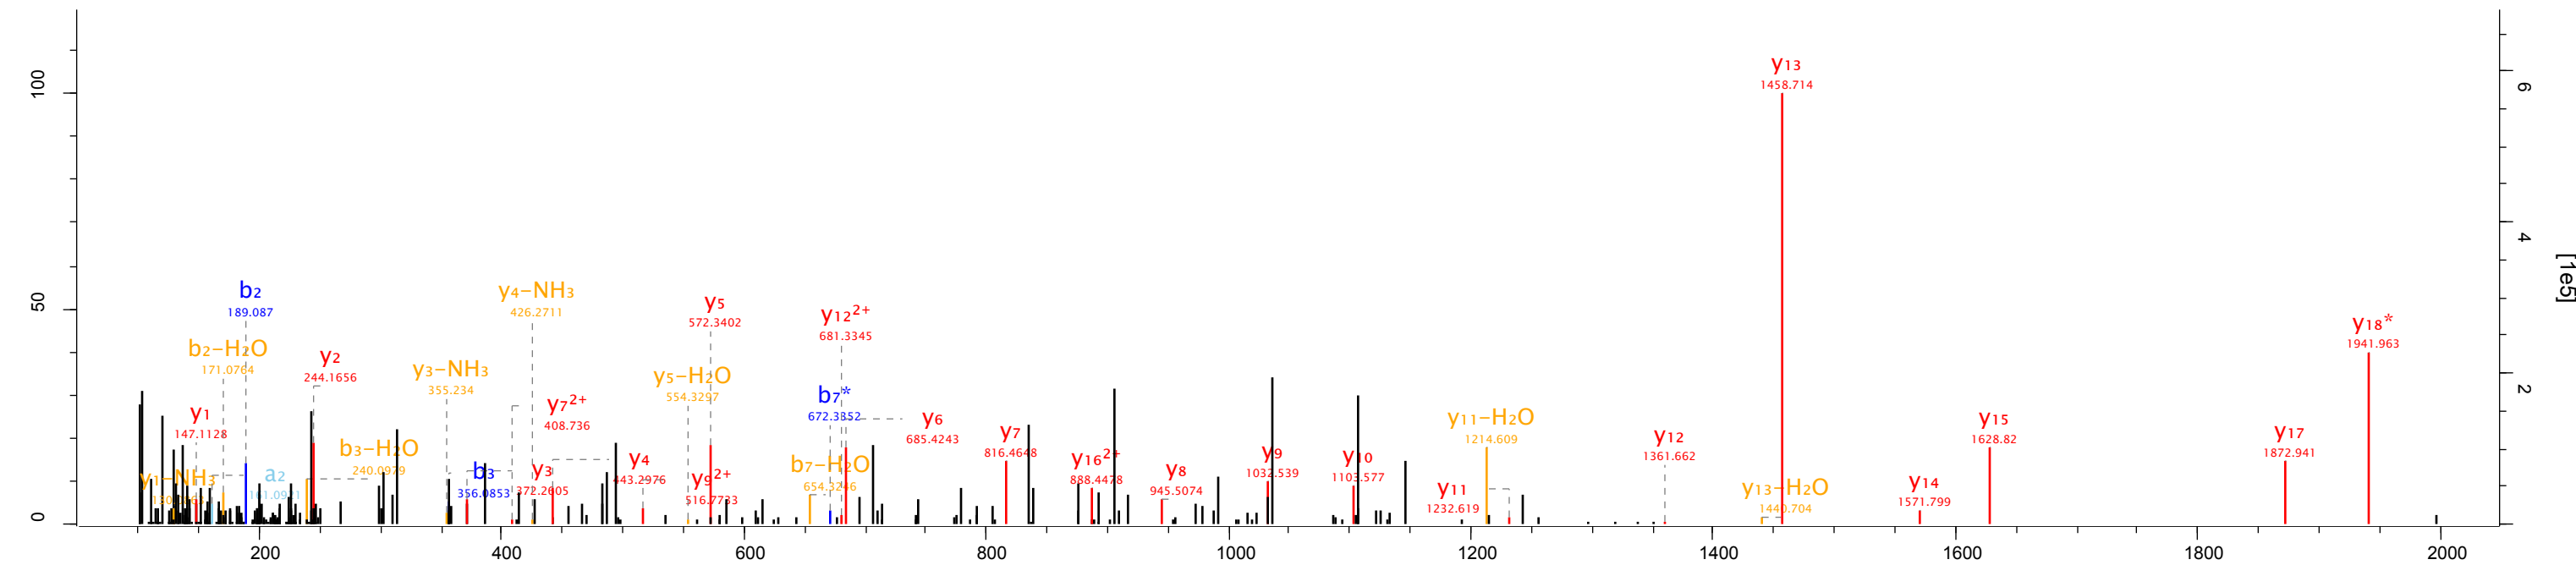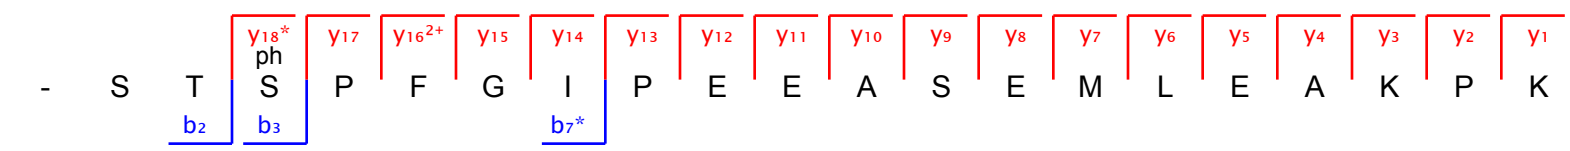

Raw file  
20150814\_A375SR\_Phospho\_BR2\_06

Scan 6330 Method FTMS; HCD Score 60.4 m/z 426.73

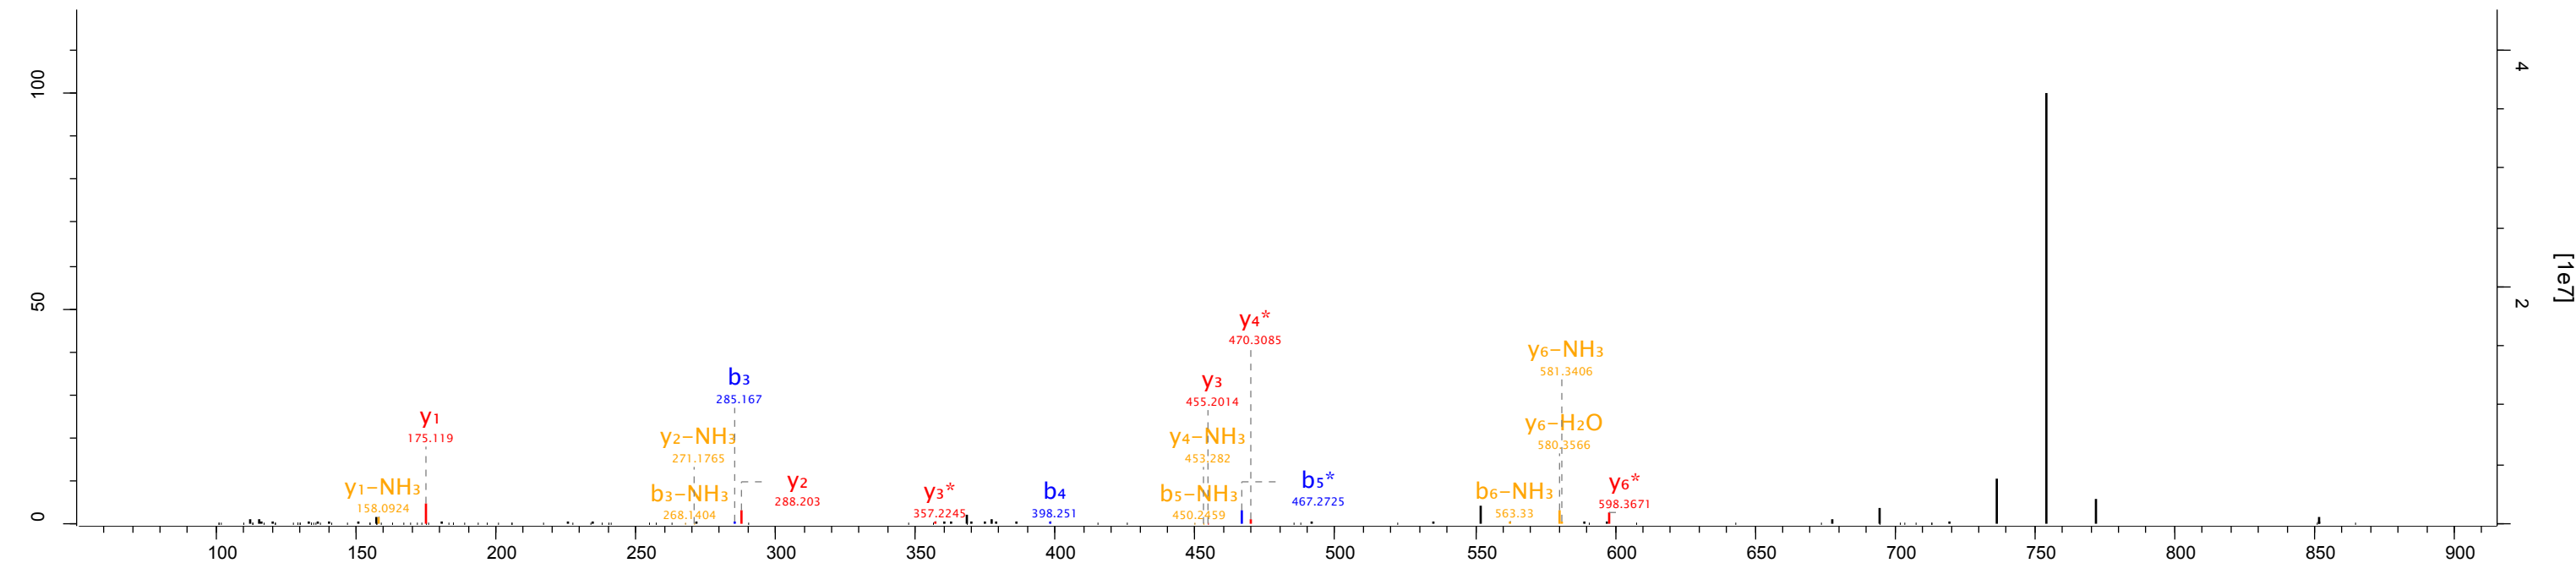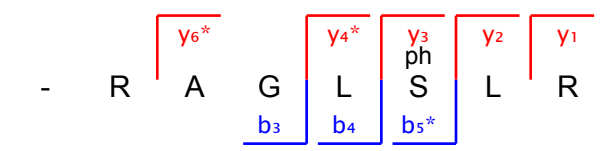

Raw file: 20150814\_A375SR\_Phospho\_BR2\_07  
 Scan: 1880 Method: FTMS; HCD Score: 71.28 m/z: 405.9 Gene names: TBC1D14

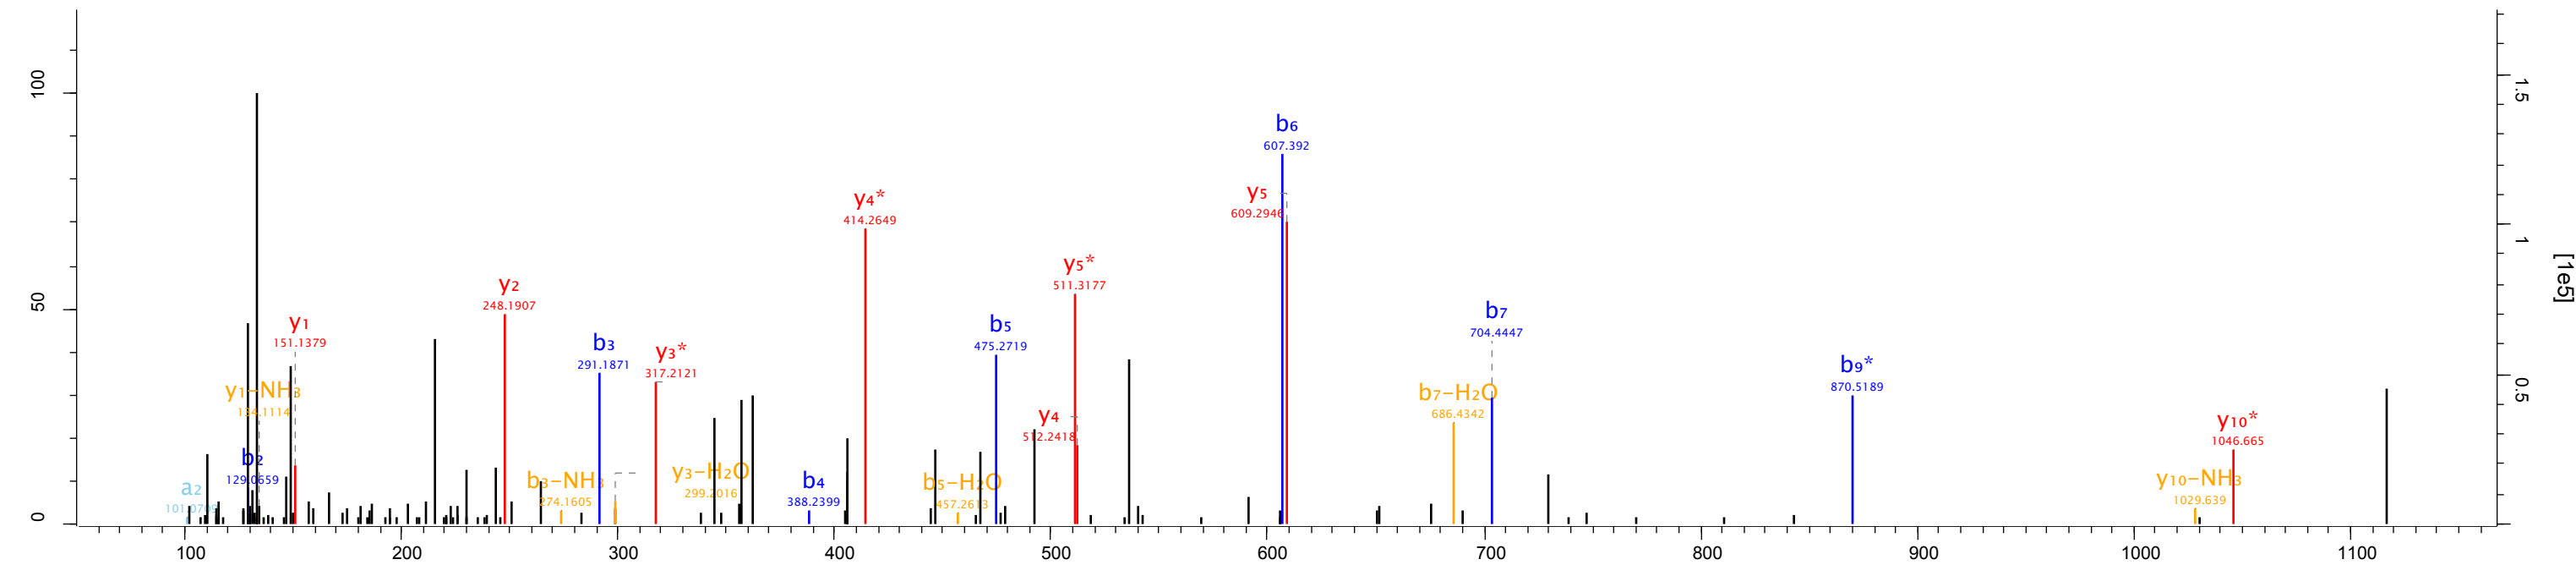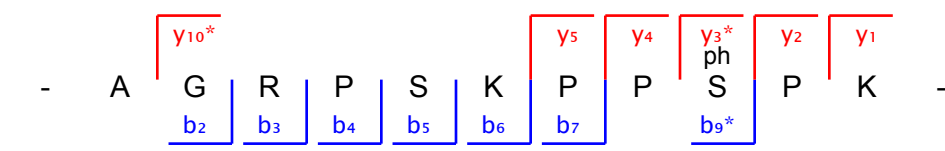

Raw file 20150814\_A375SR\_Phospho\_BR2\_07 Scan 5620 Method FTMS; HCD Score 54.19 m/z 426.73

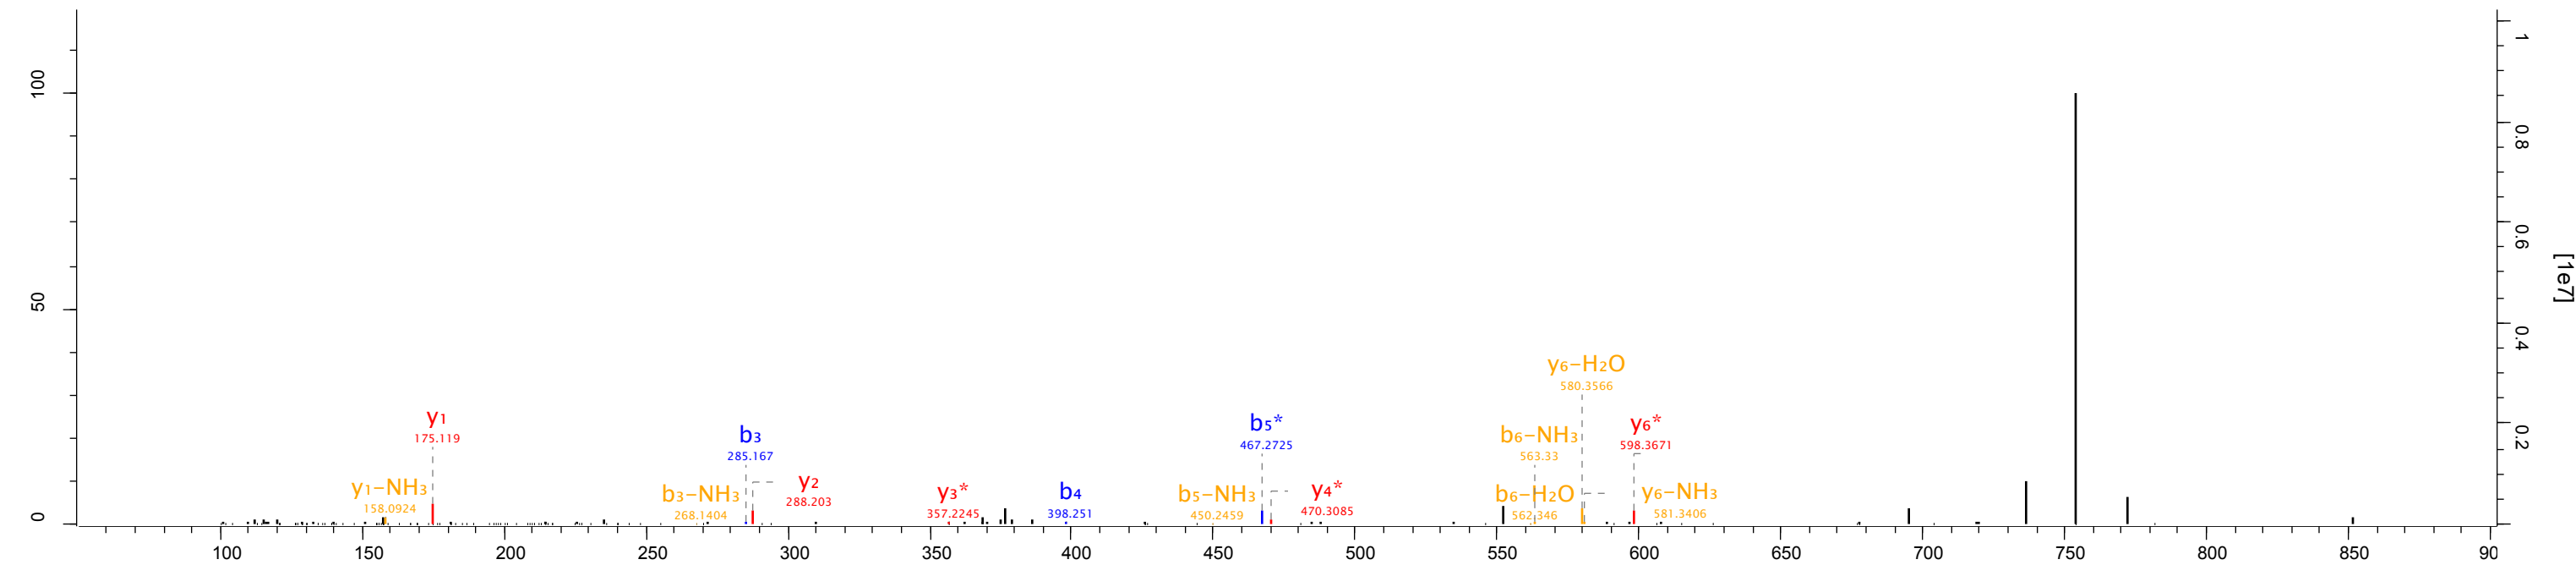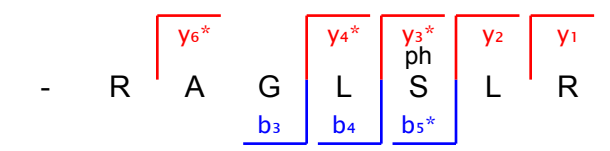

Raw file: 20150814\_A375SR\_Phospho\_BR2\_08  
 Scan: 12010 Method: FTMS; HCD Score: 122.08 m/z: 655.82 Gene names: PHACTR2

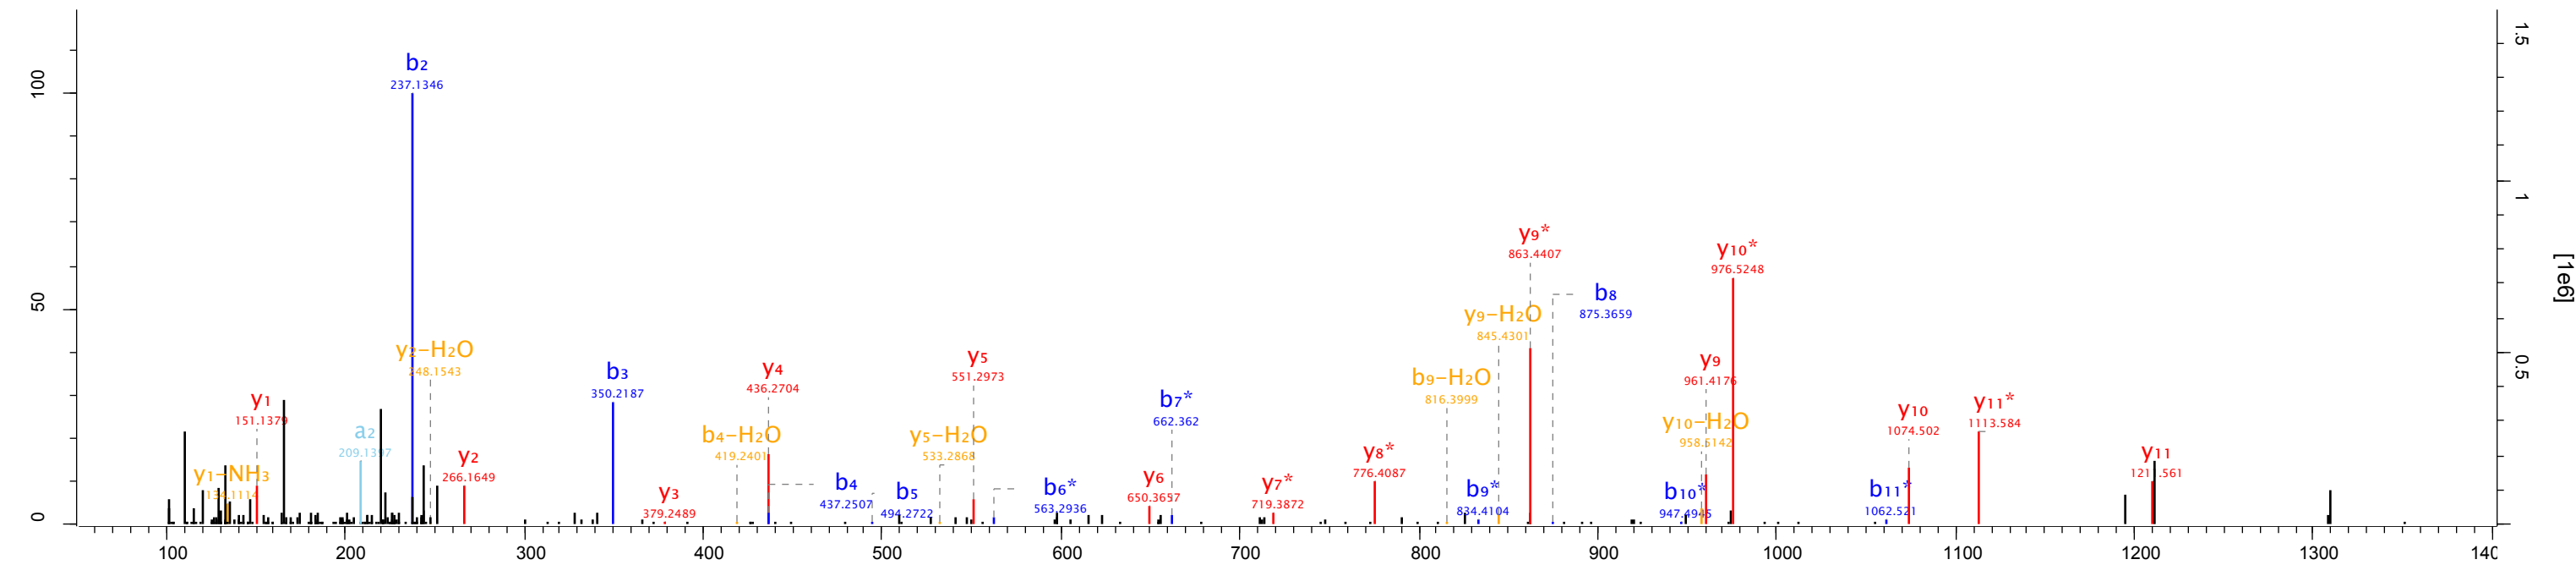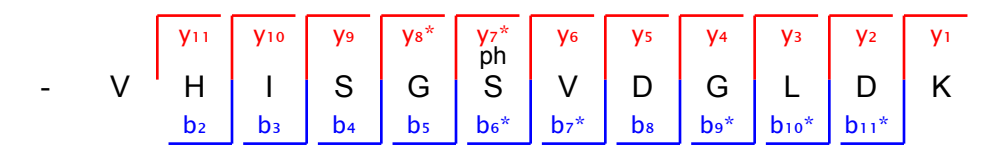

Raw file: 20150814\_A375SR\_Phospho\_BR2\_08  
 Scan: 14270 Method: FTMS; HCD Score: 148.94 m/z: 440.6 Gene names: RPL39P5;RPL39

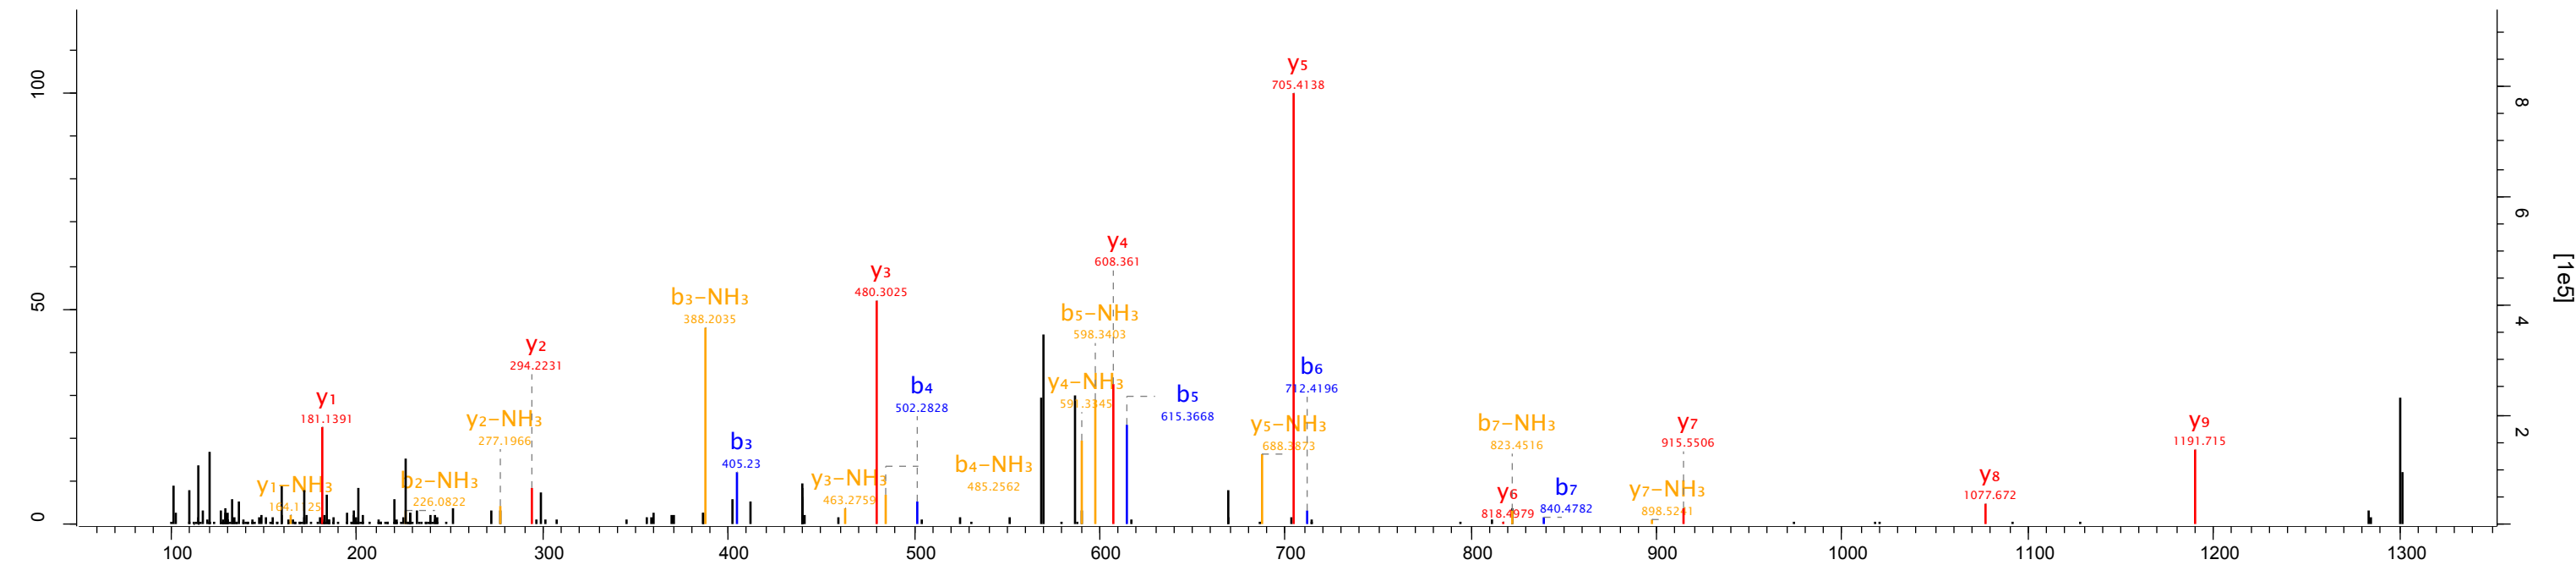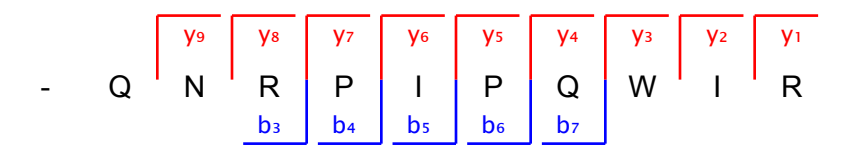

Raw file  
 20150814\_A375SR\_Phospho\_BR2\_08  
 Scan 24010 Method FTMS; HCD Score 184.68 m/z 970.94 Gene names MAPK11P1L

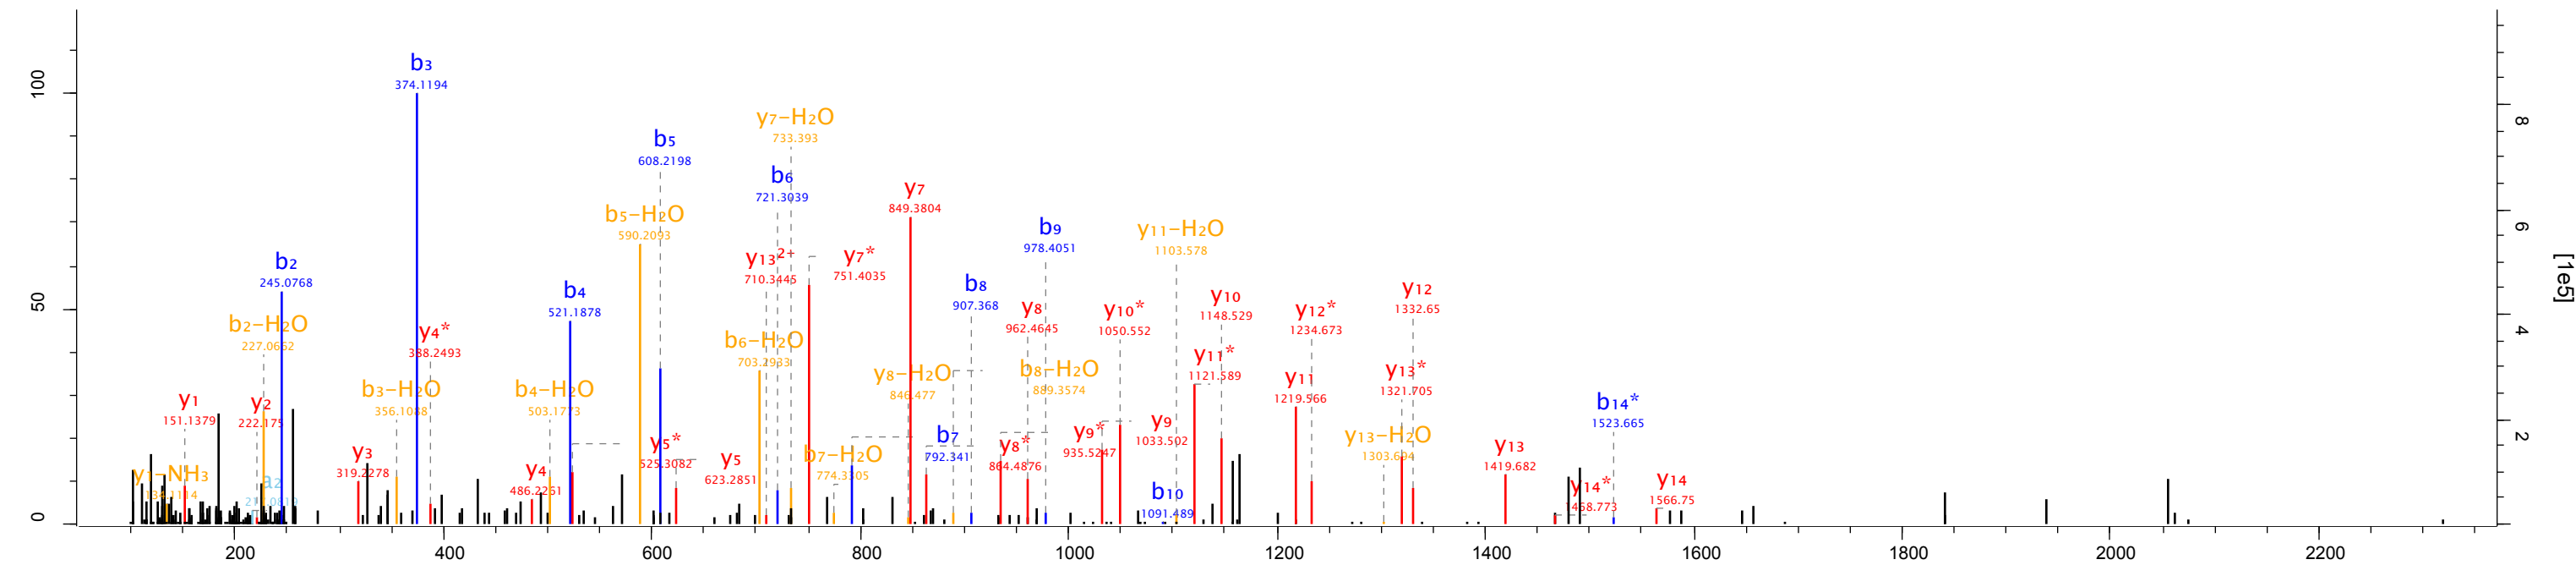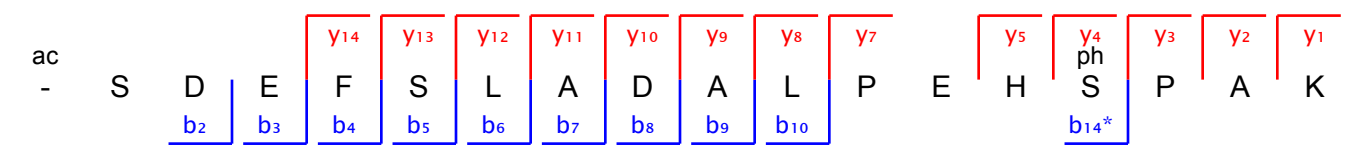

Raw file: 20150814\_A375SR\_Phospho\_BR2\_08  
 Scan: 27400 Method: FTMS; HCD Score: 58.6 m/z: 889.46 Gene names: SOBP

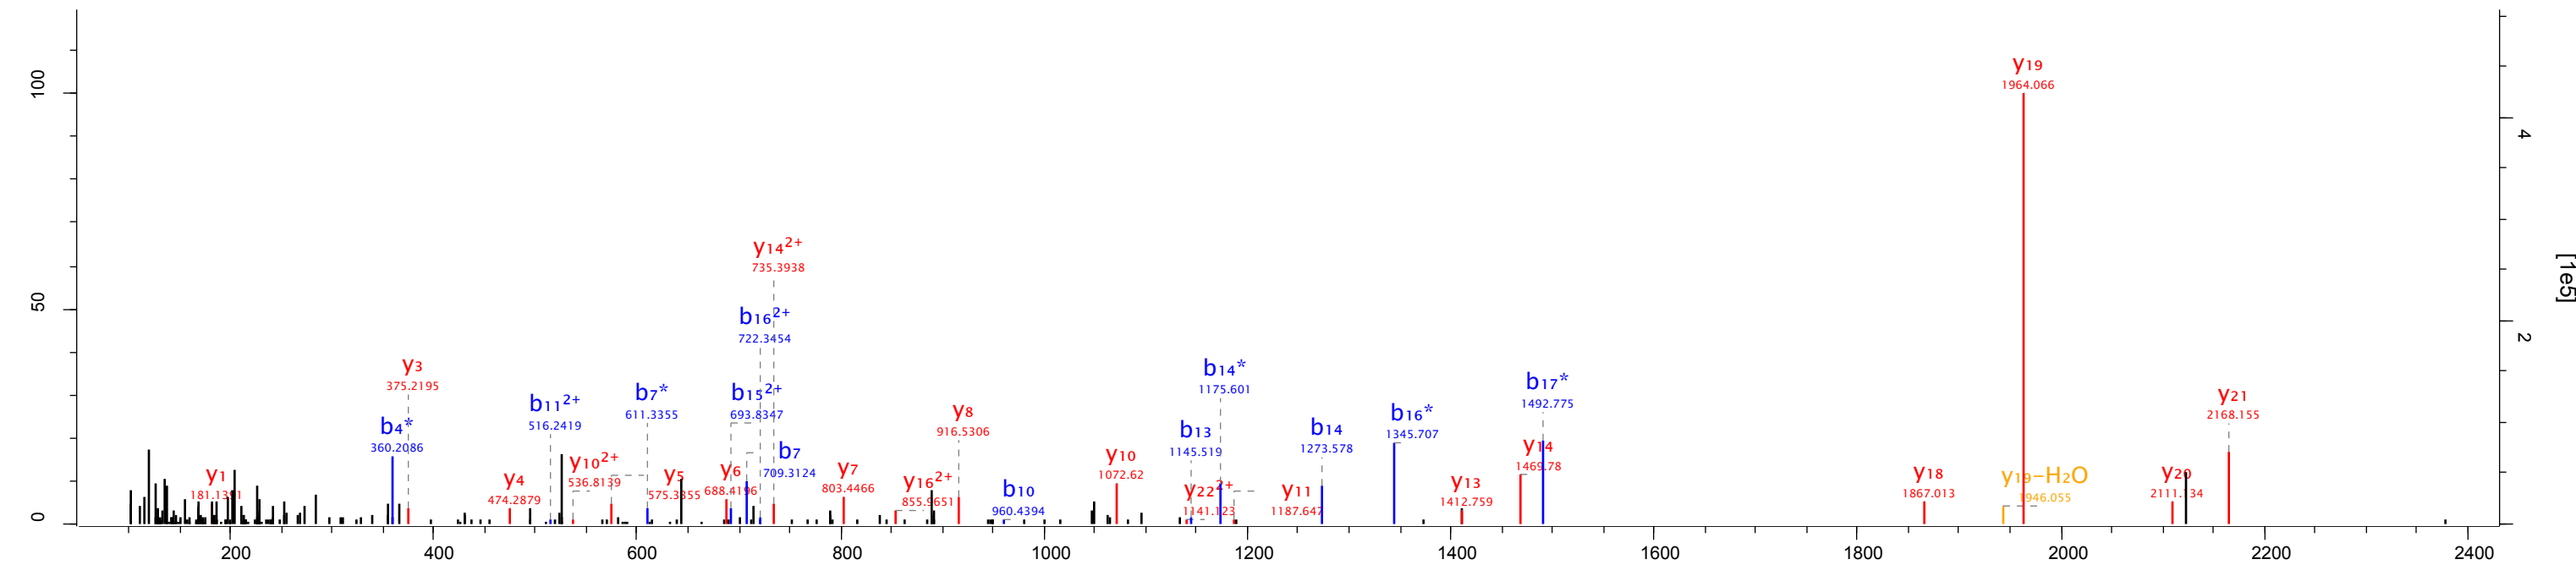

Sequence: - R A G S P P G P P G A G G Q L G F P G V L Q G P Q D G V I D L T V G H R -

Fragmentation sites (b and y ions) are indicated by brackets below the sequence:

- b4\* (under S)
- b7 (under G)
- b10 (under G)
- b11<sup>2+</sup> (under A)
- b13 (under G)
- b14 (under Q)
- b15<sup>2+</sup> (under L)
- b16\* (under G)
- b17\* (under F)
- y1 (under R)
- y3 (under G)
- y4 (under V)
- y5 (under T)
- y6 (under L)
- y7 (under D)
- y8 (under I)
- y10 (under G)
- y11 (under D)
- y13 (under P)
- y14 (under G)
- y16<sup>2+</sup> (under L)
- y18 (under G)
- y19 (under P)
- y20 (under F)
- y21 (under G)
- y22<sup>2+</sup> (under L)



Raw file 20150814\_A375SR\_Phospho\_BR2\_09 Scan 11870 Method FTMS; HCD Score 63.03 m/z 653.81 Gene names PHACTR2

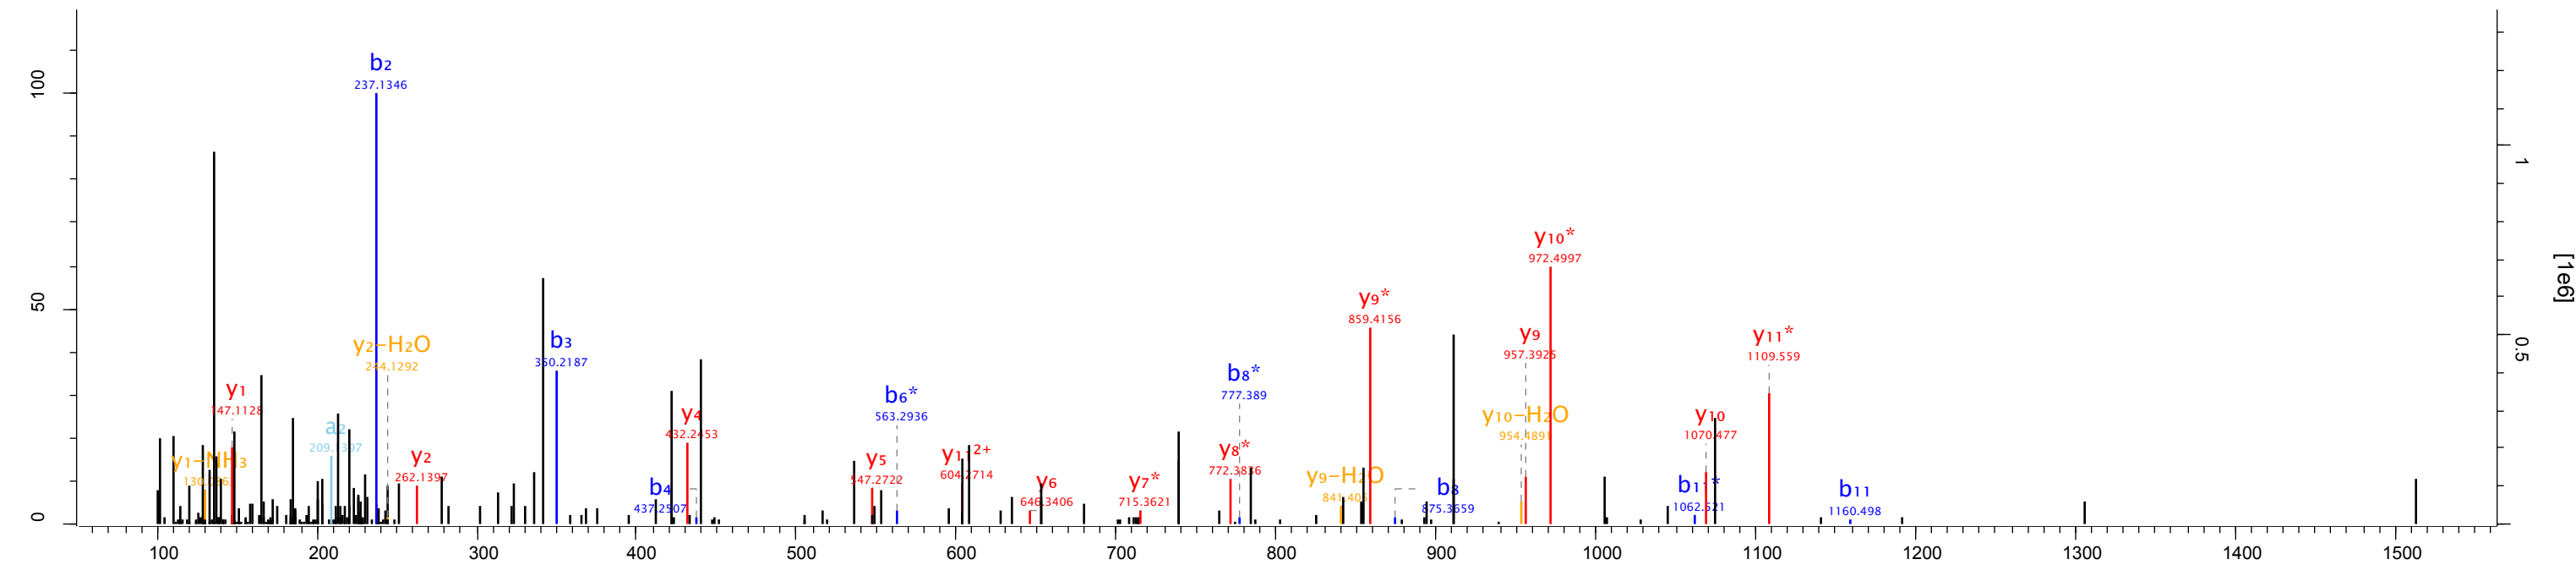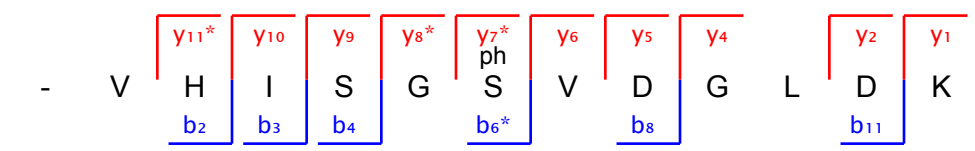

Raw file 20150814\_A375SR\_Phospho\_BR2\_09 Scan 6260 Method FTMS; HCD Score 62.56 m/z 426.73

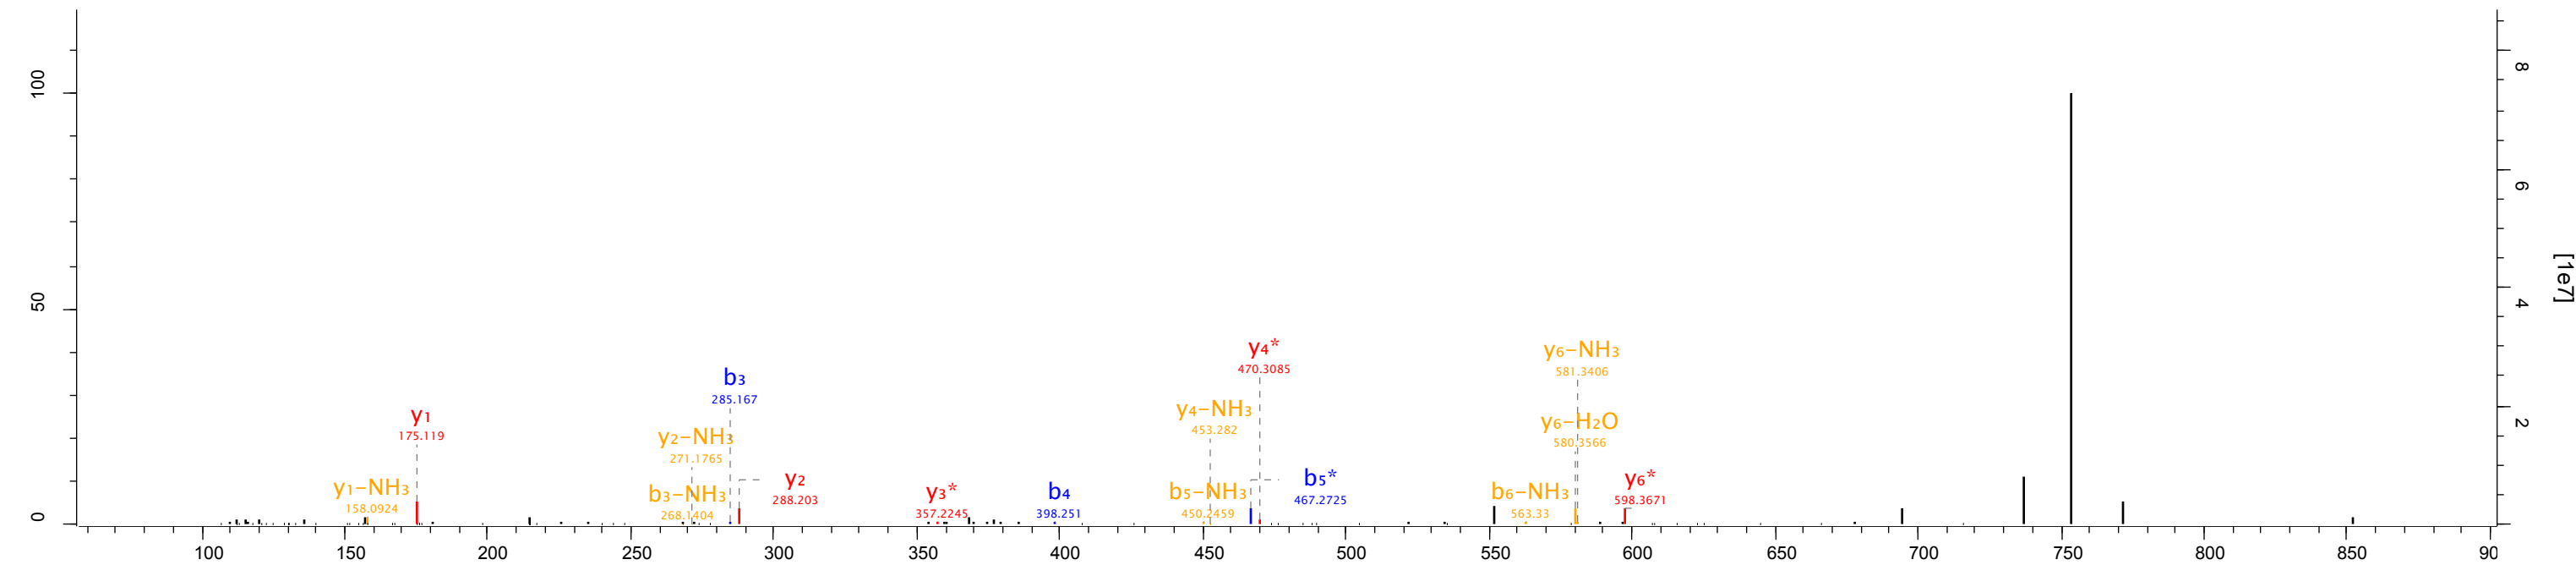

Raw file  
 20150814\_A375SR\_Phospho\_BR2\_10  
 Scan 20980 Method FTMS; HCD Score 92.01 m/z 983.44 Gene names FAM168B

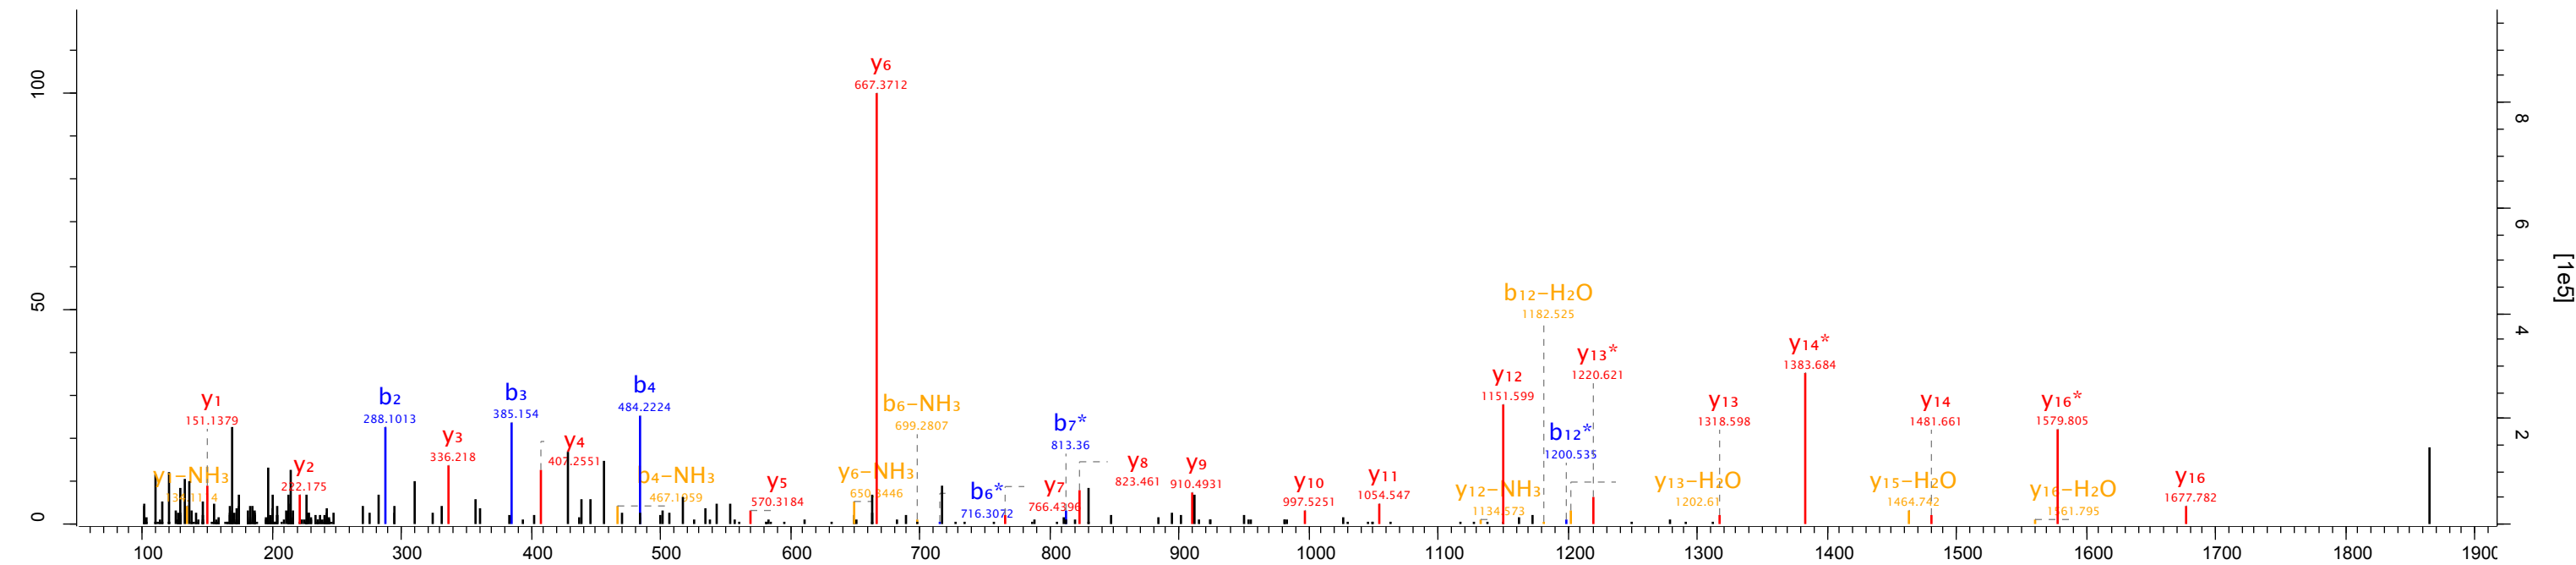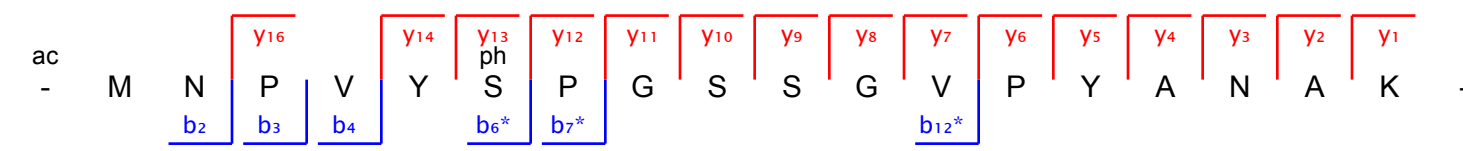

Raw file 20150818\_A375SR-Proteome\_BR1 Scan 38280 Method FTMS; HCD Score 39.62 m/z 485.27

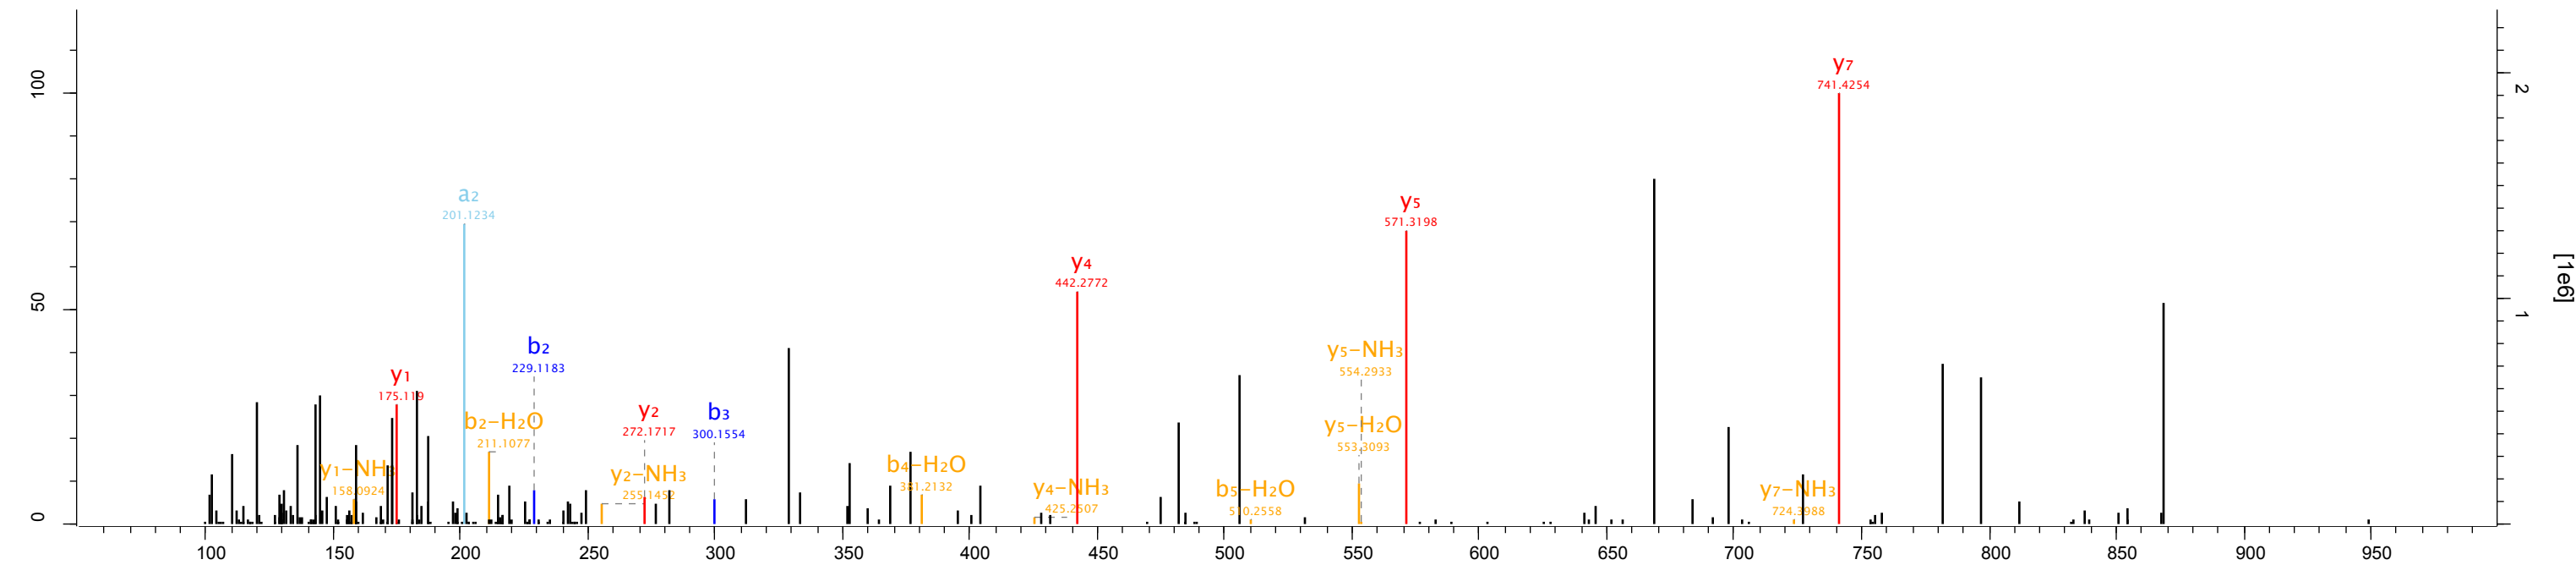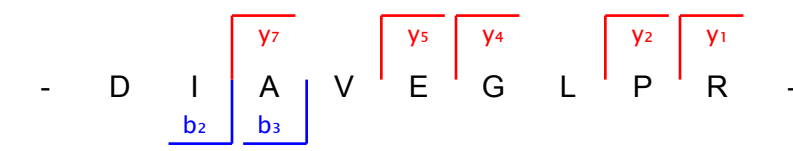

Raw file: 20150818\_A375SR-Proteome\_BR1  
 Scan: 38430 Method: FTMS; HCD Score: 70.91 m/z: 440.6 Gene names: RPL39P5;RPL39

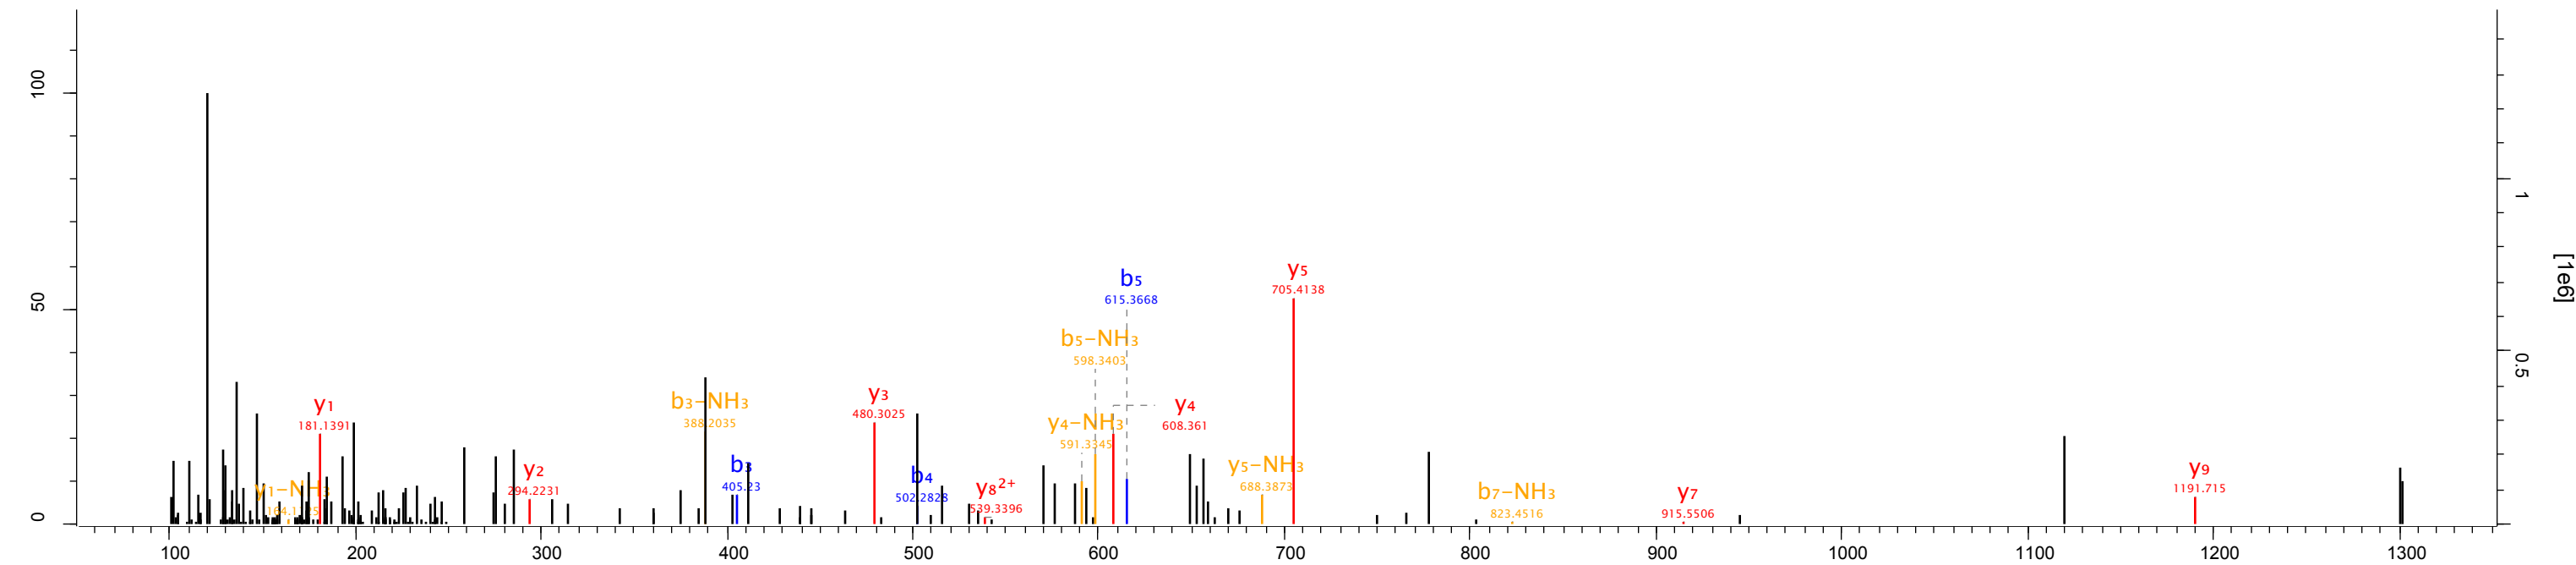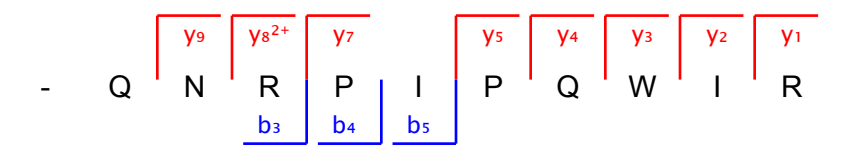

Raw file Scan Method Score m/z Gene names  
 20150818\_A375SR-Proteome\_BR1 64860 FTMS; HCD 26.5 801.64 ZNF511

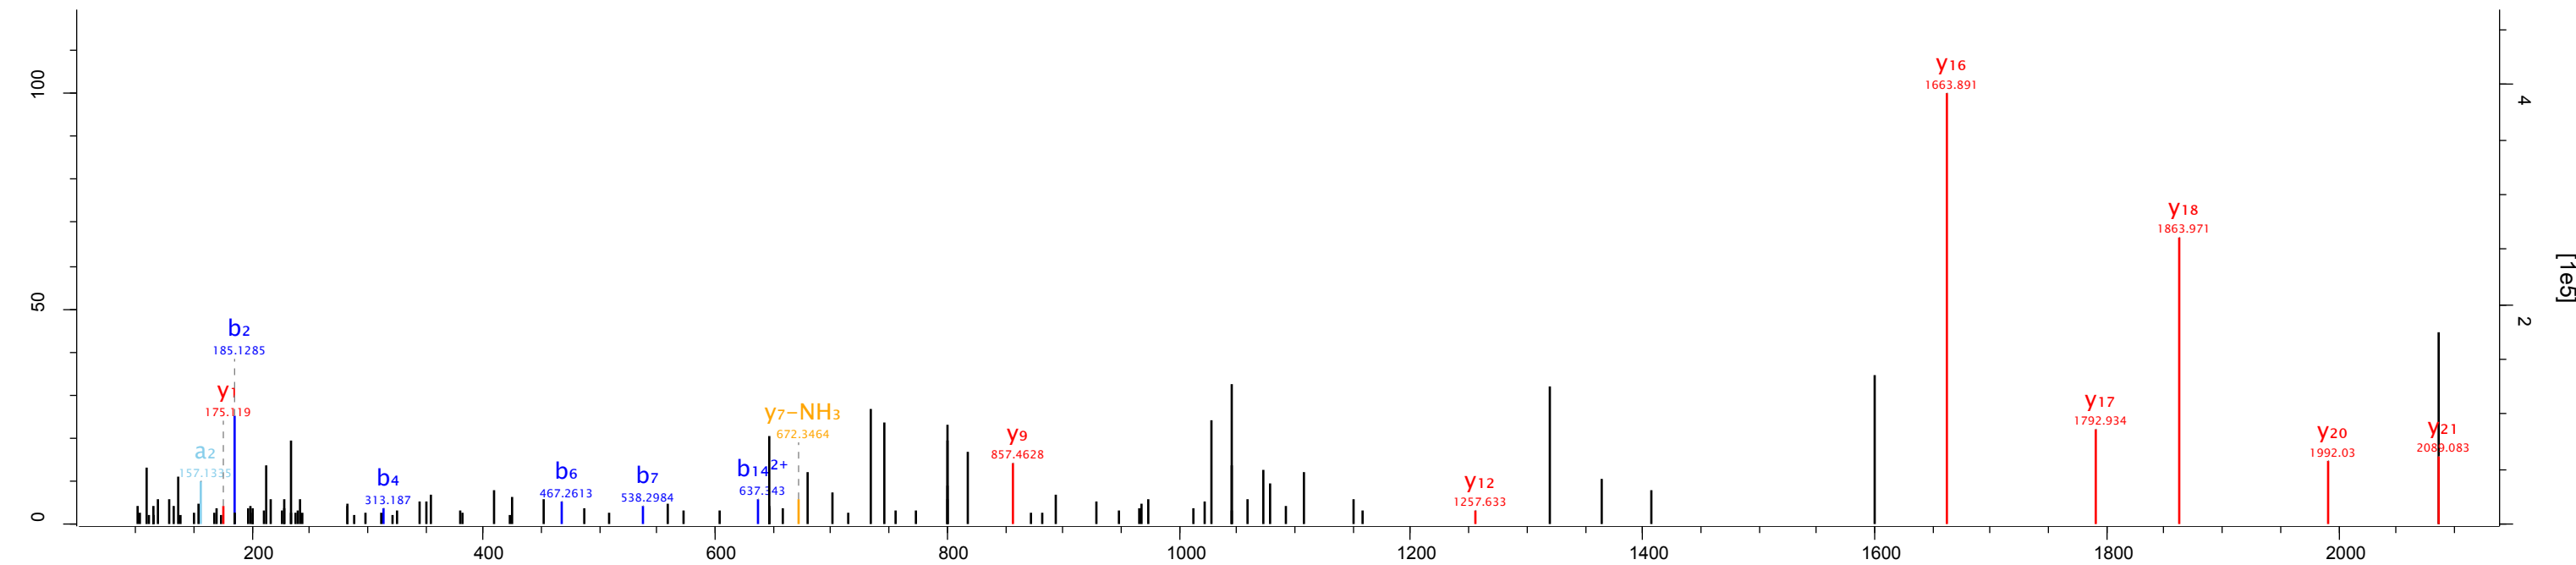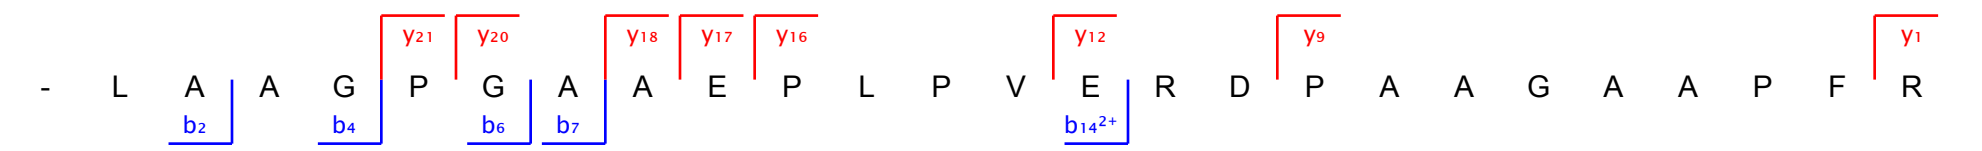

Raw file 20150818\_A375SR-Proteome\_BR1 Scan 67220 Method FTMS; HCD Score 82.65 m/z 743.42 Gene names MED21

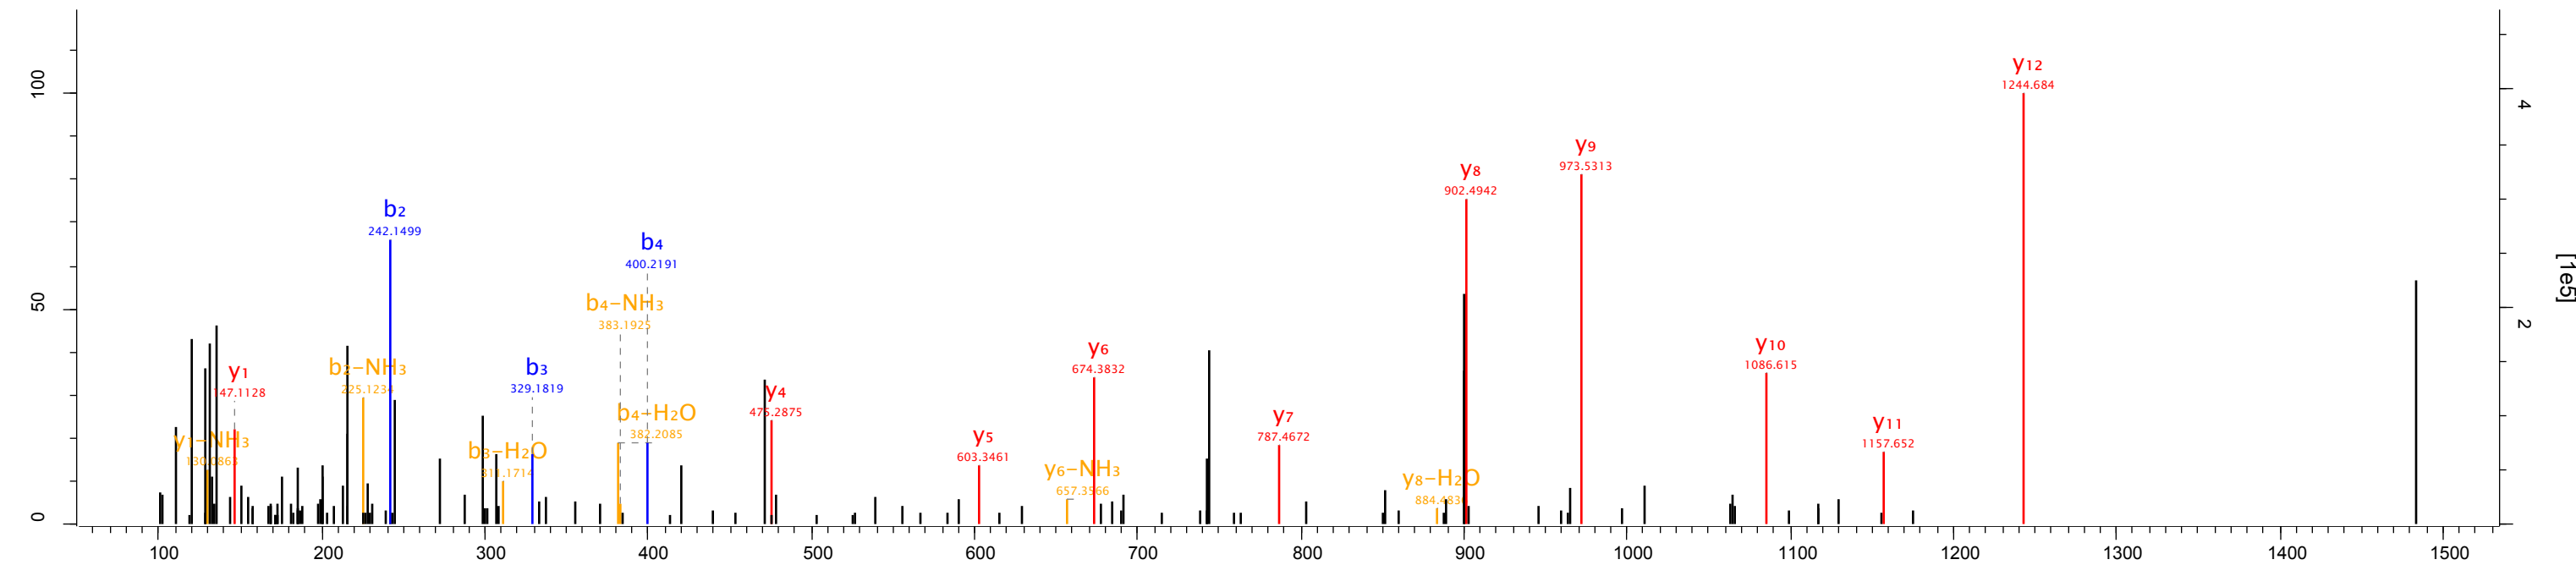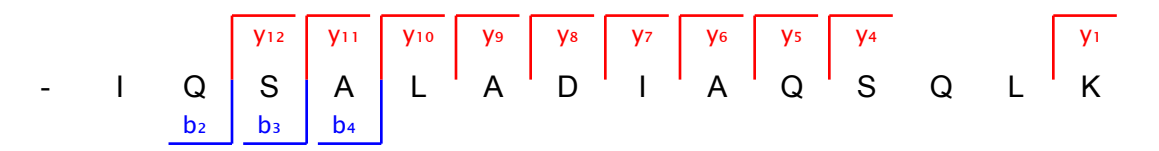

Raw file: 20150818\_A375SR-Proteome\_BR1  
 Scan: 68150 Method: FTMS; HCD Score: 67.51 m/z: 498.77 Gene names: SEPT3

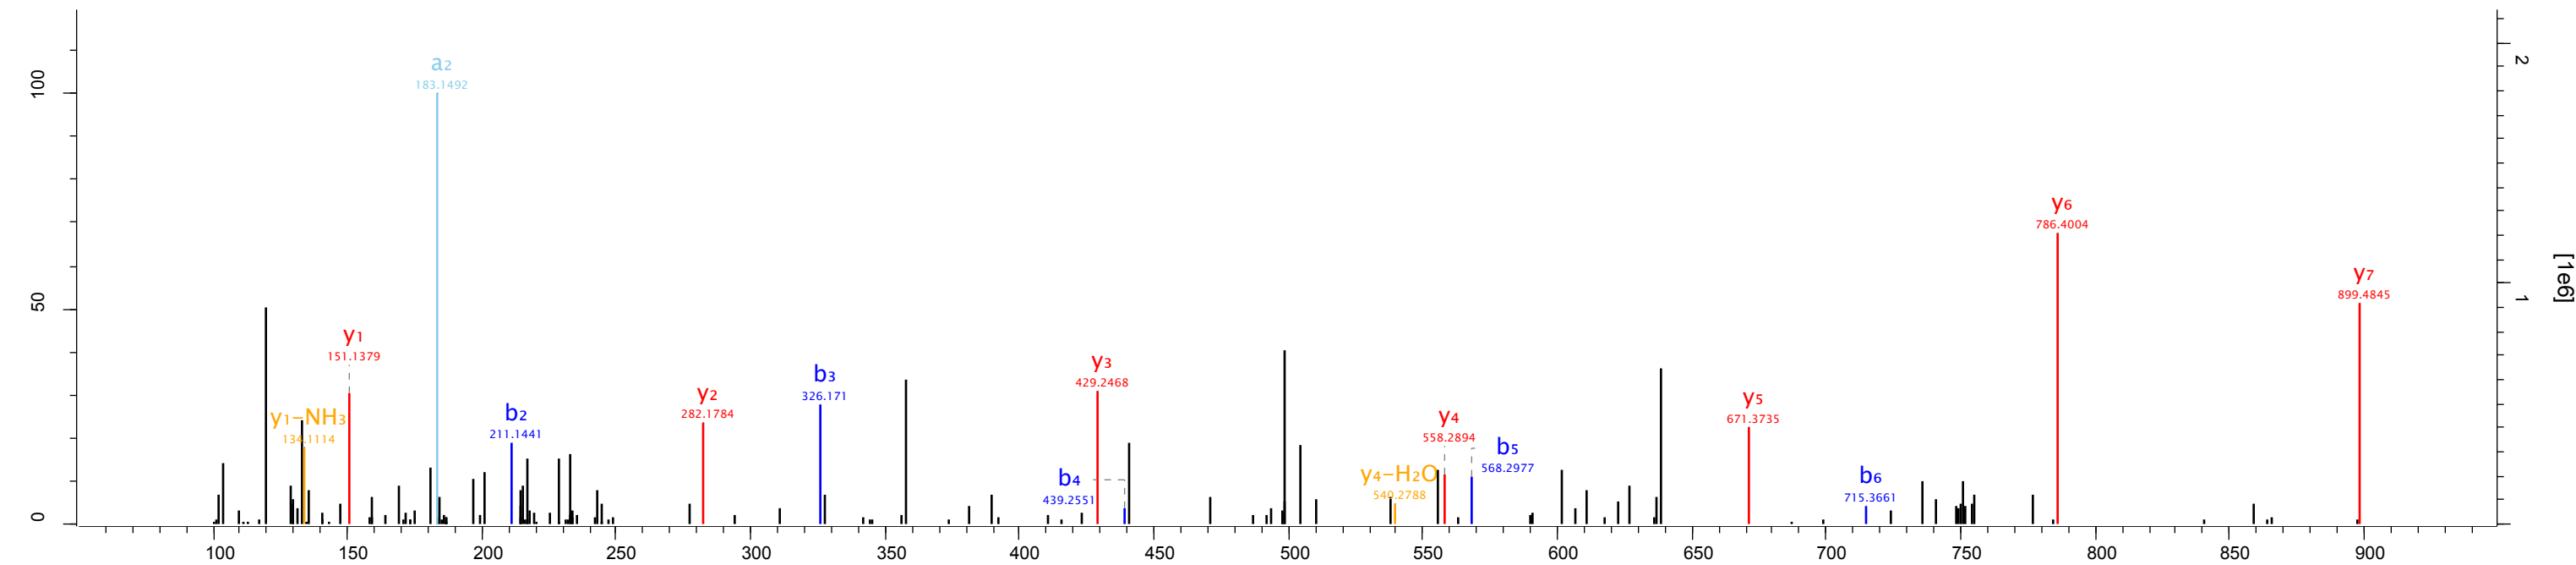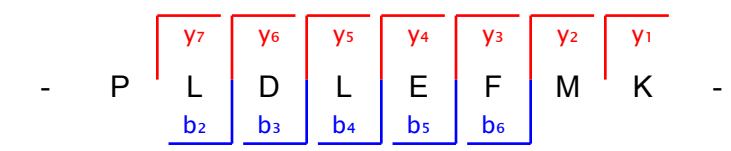



Raw file  
20150818\_A375SR-Proteome\_BR1

| Scan | Method    | Score | m/z    |
|------|-----------|-------|--------|
| 7190 | FTMS; HCD | 64.78 | 405.69 |

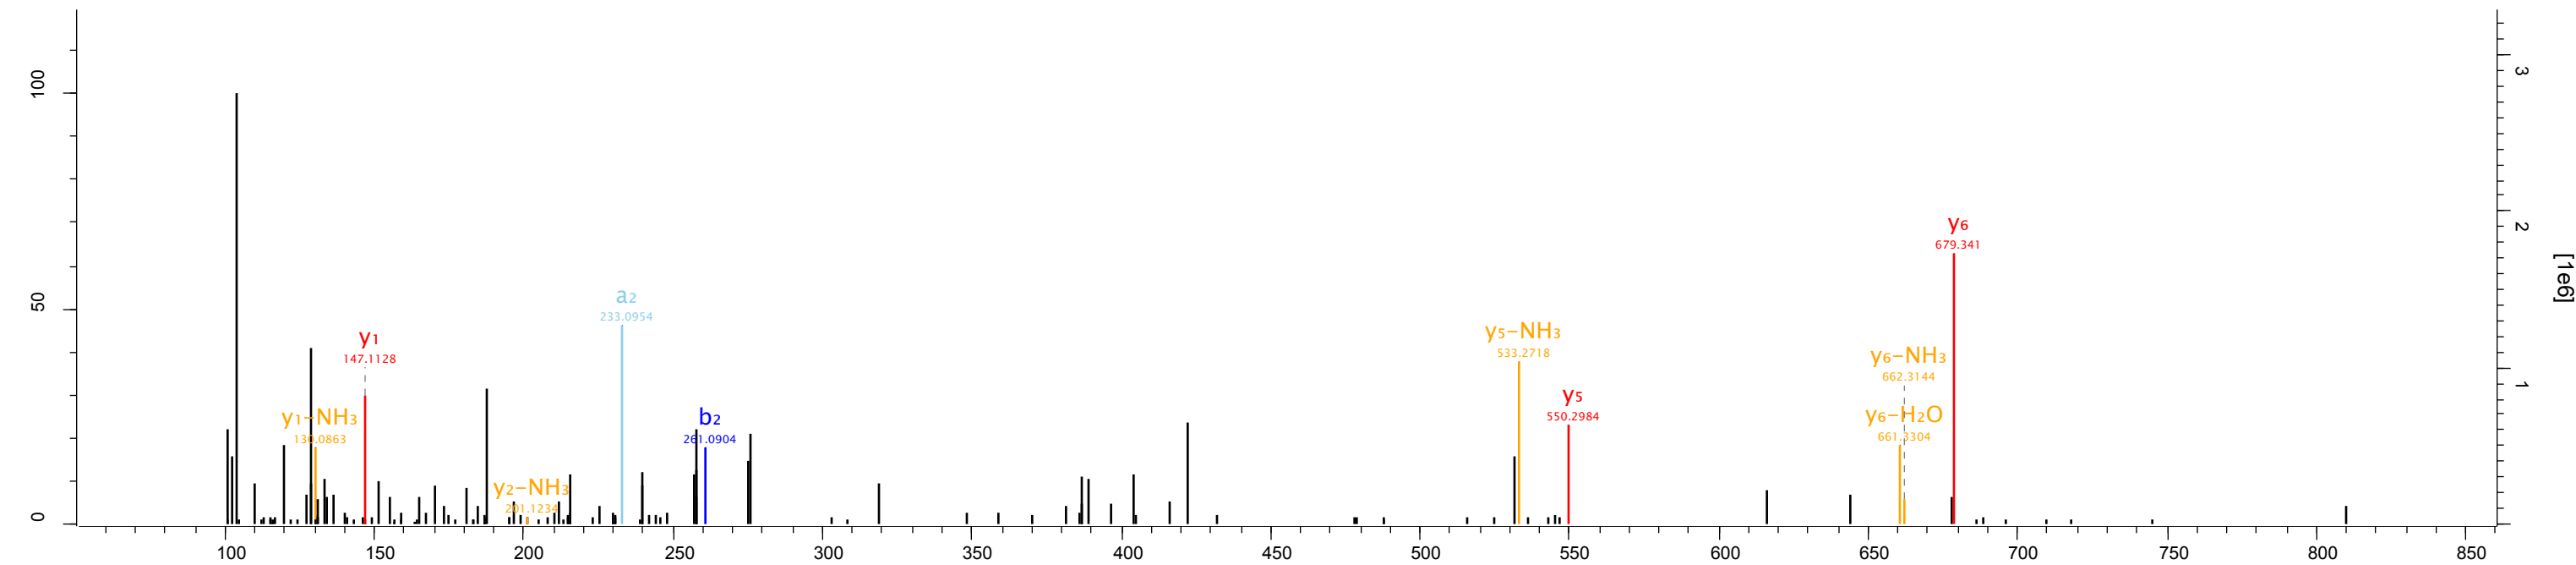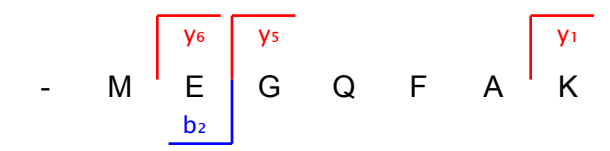

Raw file: 20150818\_A375SR-Proteome\_BR2  
 Scan: 37350 Method: FTMS; HCD Score: 120.99 m/z: 436.58 Gene names: RPL39P5;RPL39

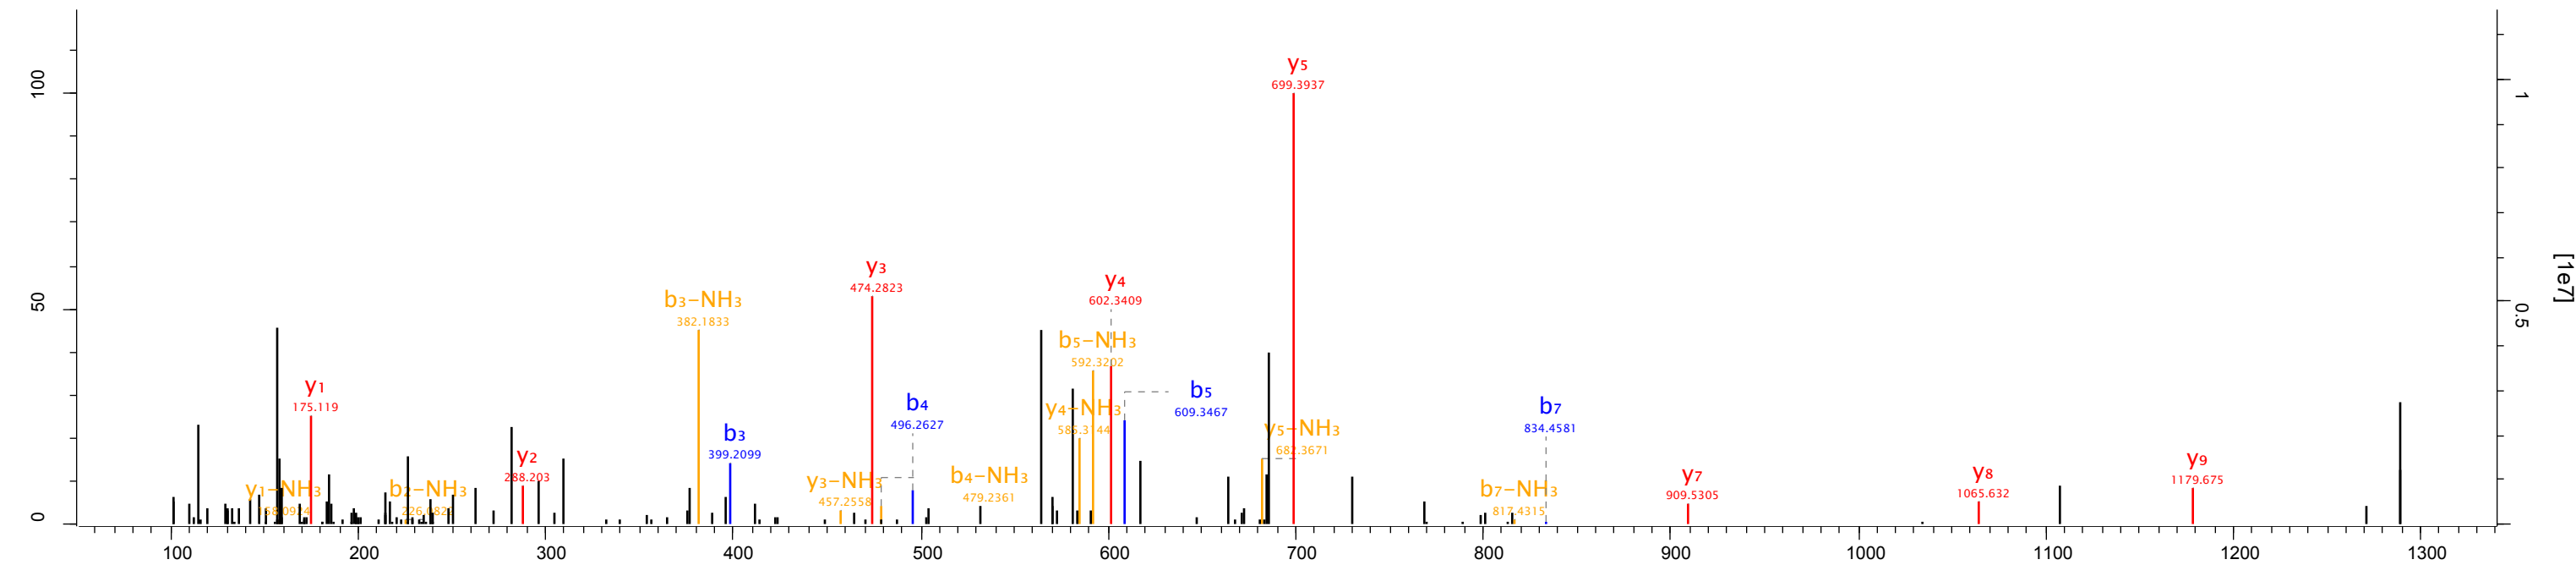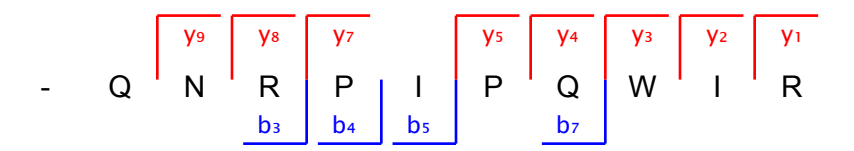

Raw file: 20150818\_A375SR-Proteome\_BR2  
 Scan: 52260 Method: FTMS; HCD Score: 60.3 m/z: 587.34 Gene names: KATNAL2

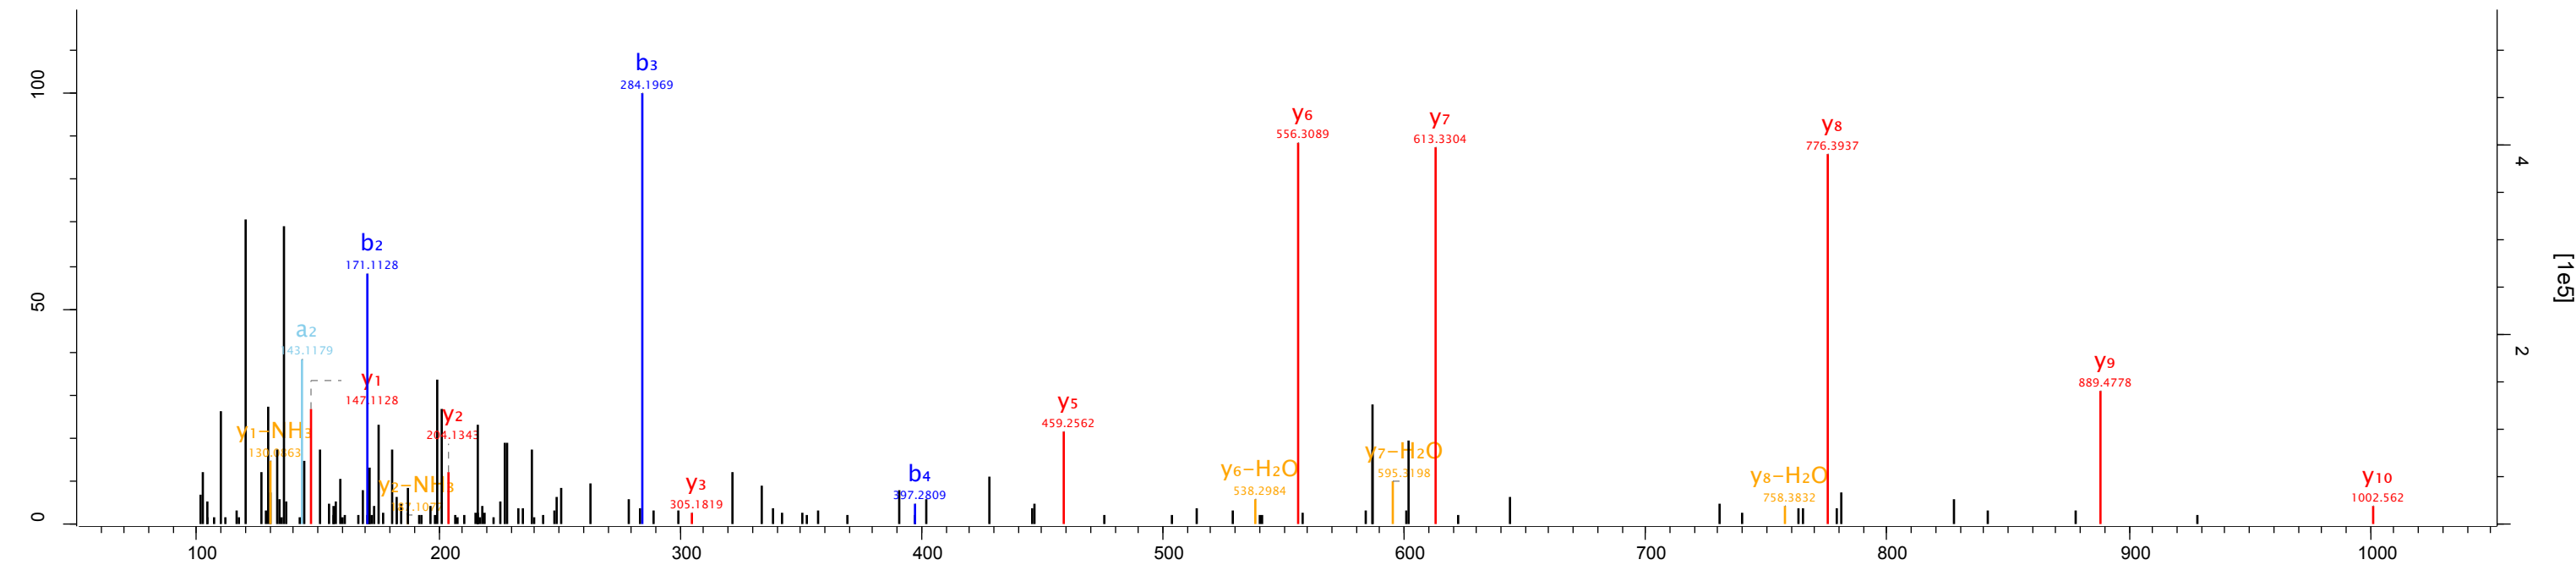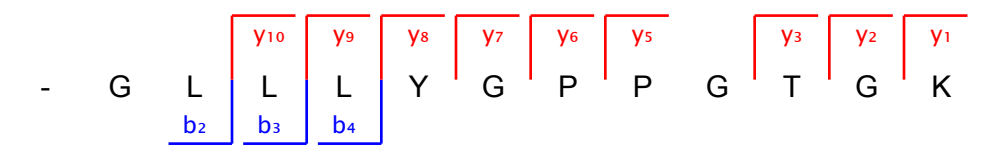

Raw file Scan Method Score m/z  
20150818\_A375SR-Proteome\_BR2 68460 FTMS; HCD 83.21 492.75

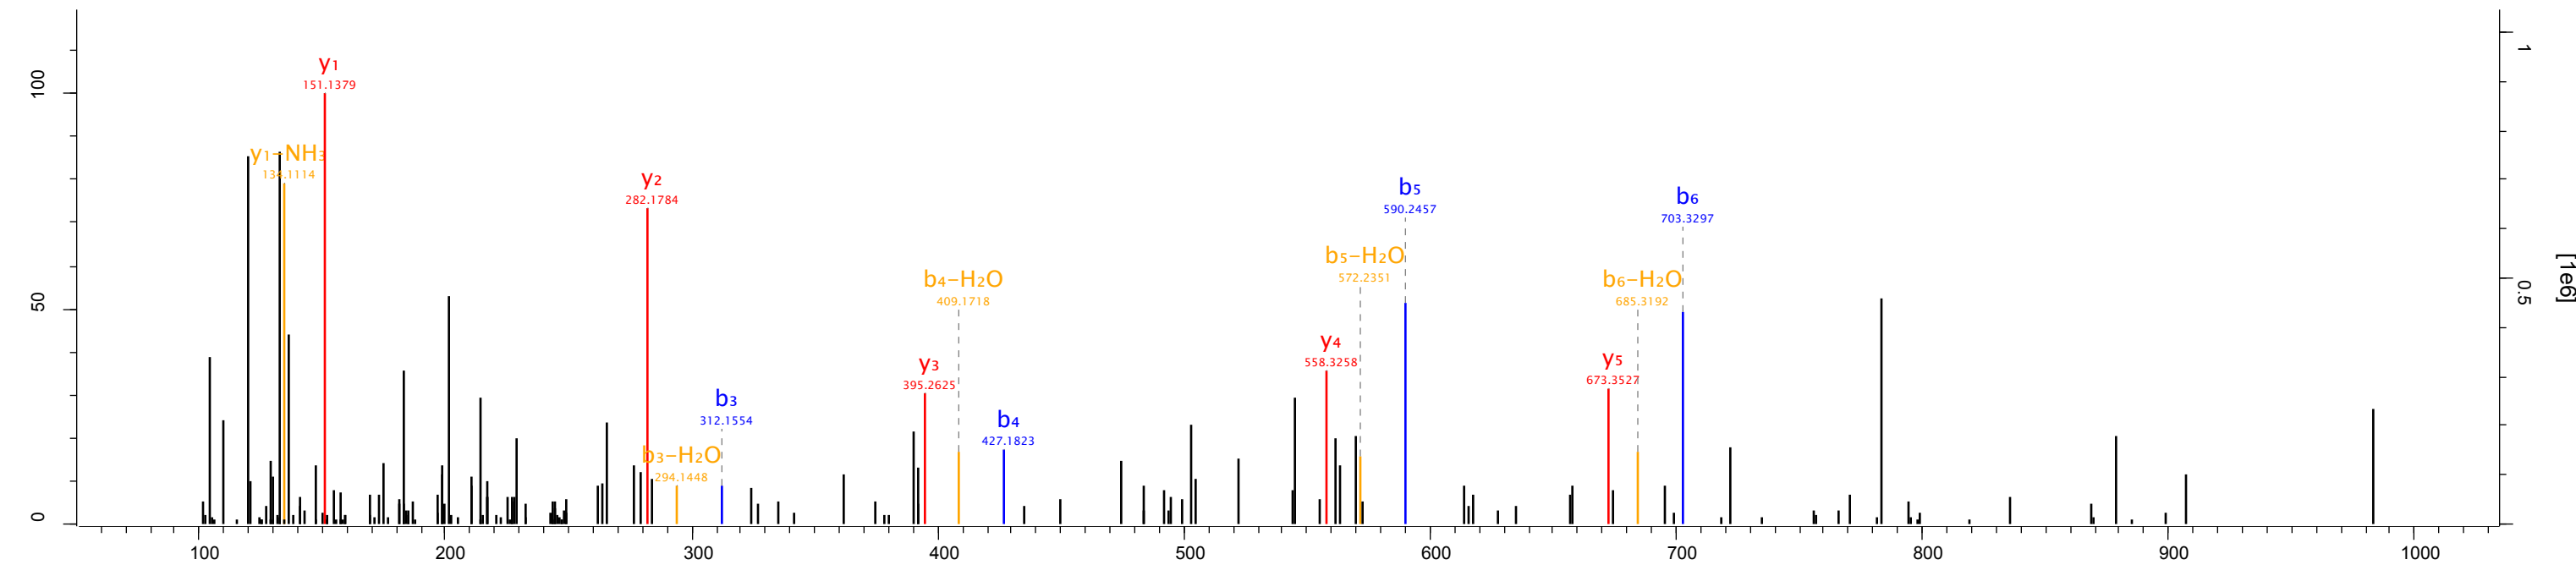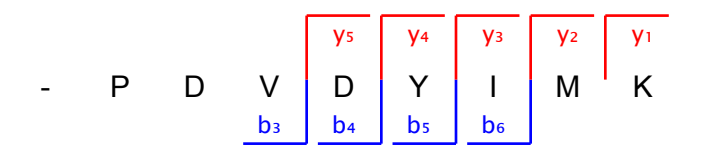

Raw file: 20150818\_A375SR-Proteome\_BR2  
 Scan: 78260 Method: FTMS; HCD Score: 105.39 m/z: 930.95 Gene names: MAPK11P1L

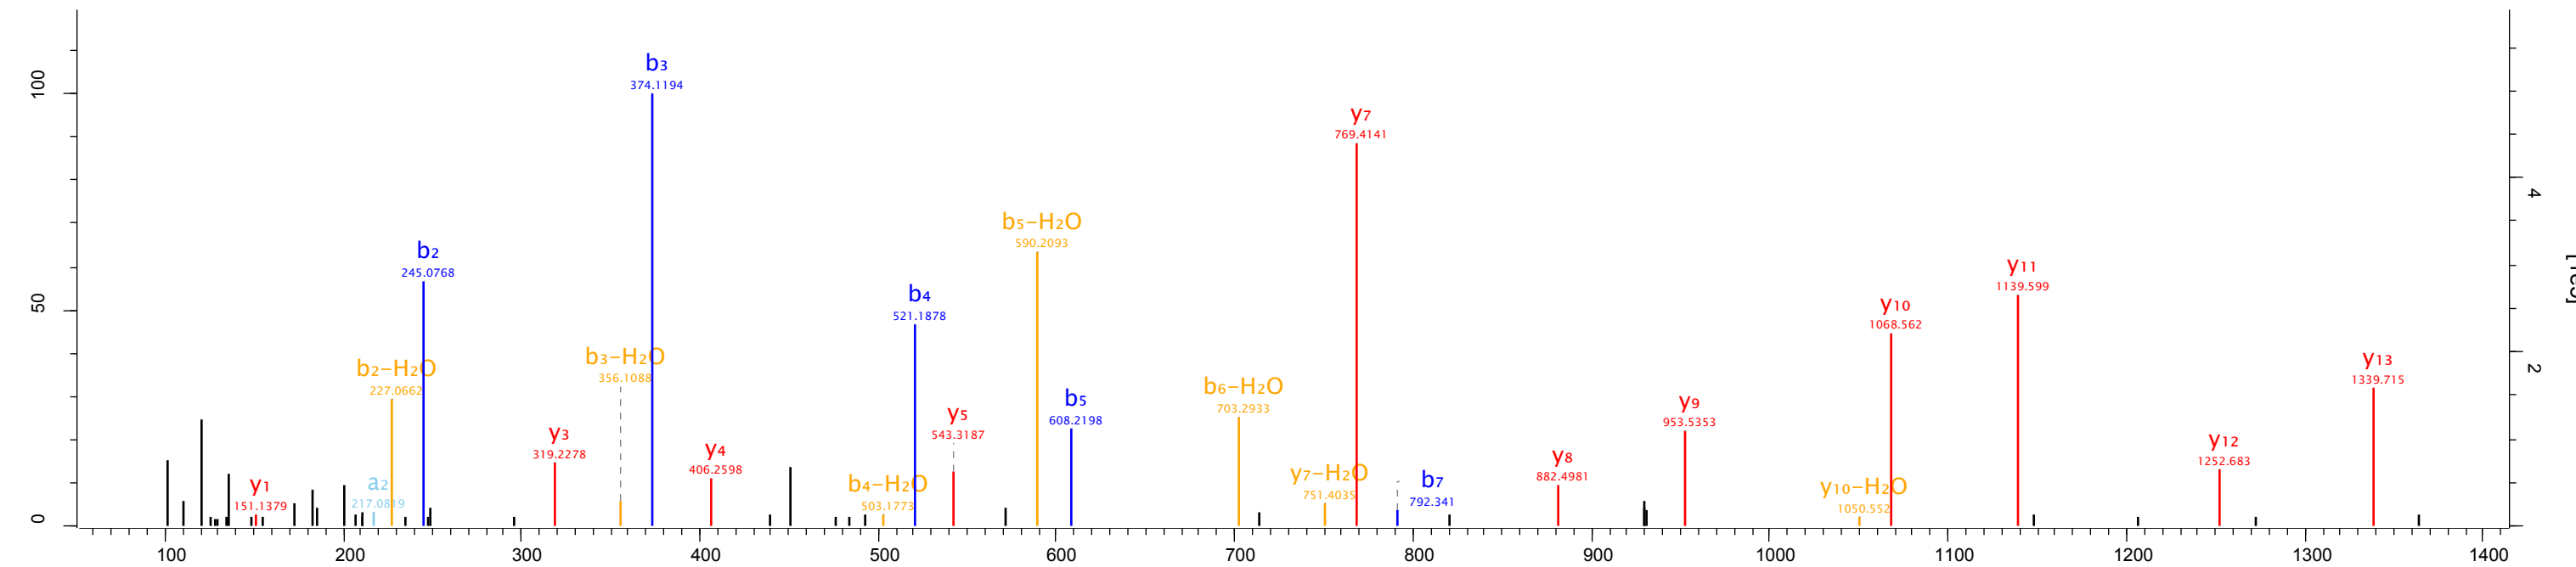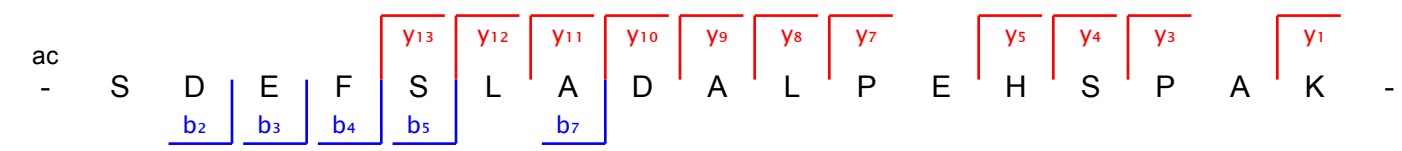

Raw file: 20150822\_A375SR\_Phospho\_BR3\_02  
 Scan: 5260 Method: FTMS; HCD Score: 40.8 m/z: 660.77 Gene names: GPSM3

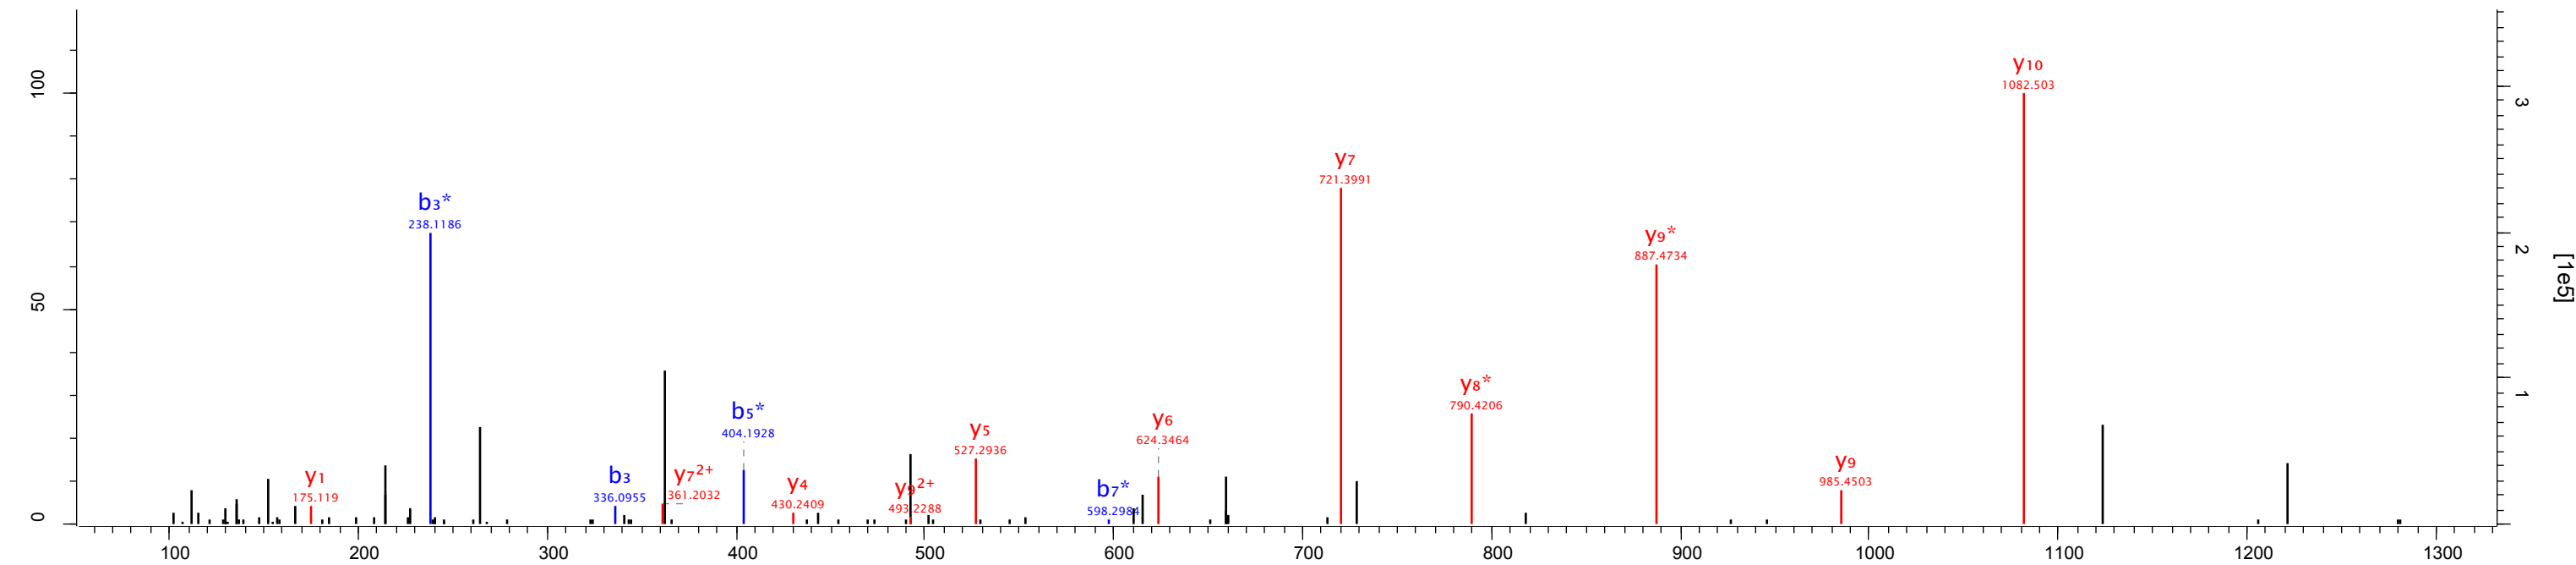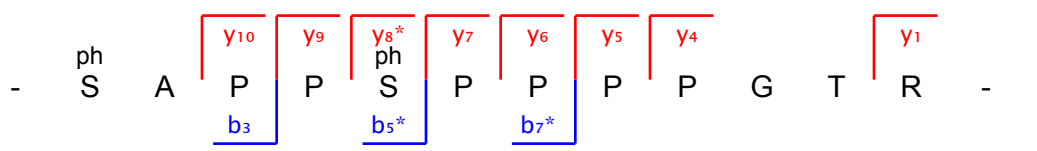

Raw file: 20150822\_A375SR\_Phospho\_BR3\_03  
 Scan: 11060 Method: FTMS; HCD Score: 60.62 m/z: 1031.41

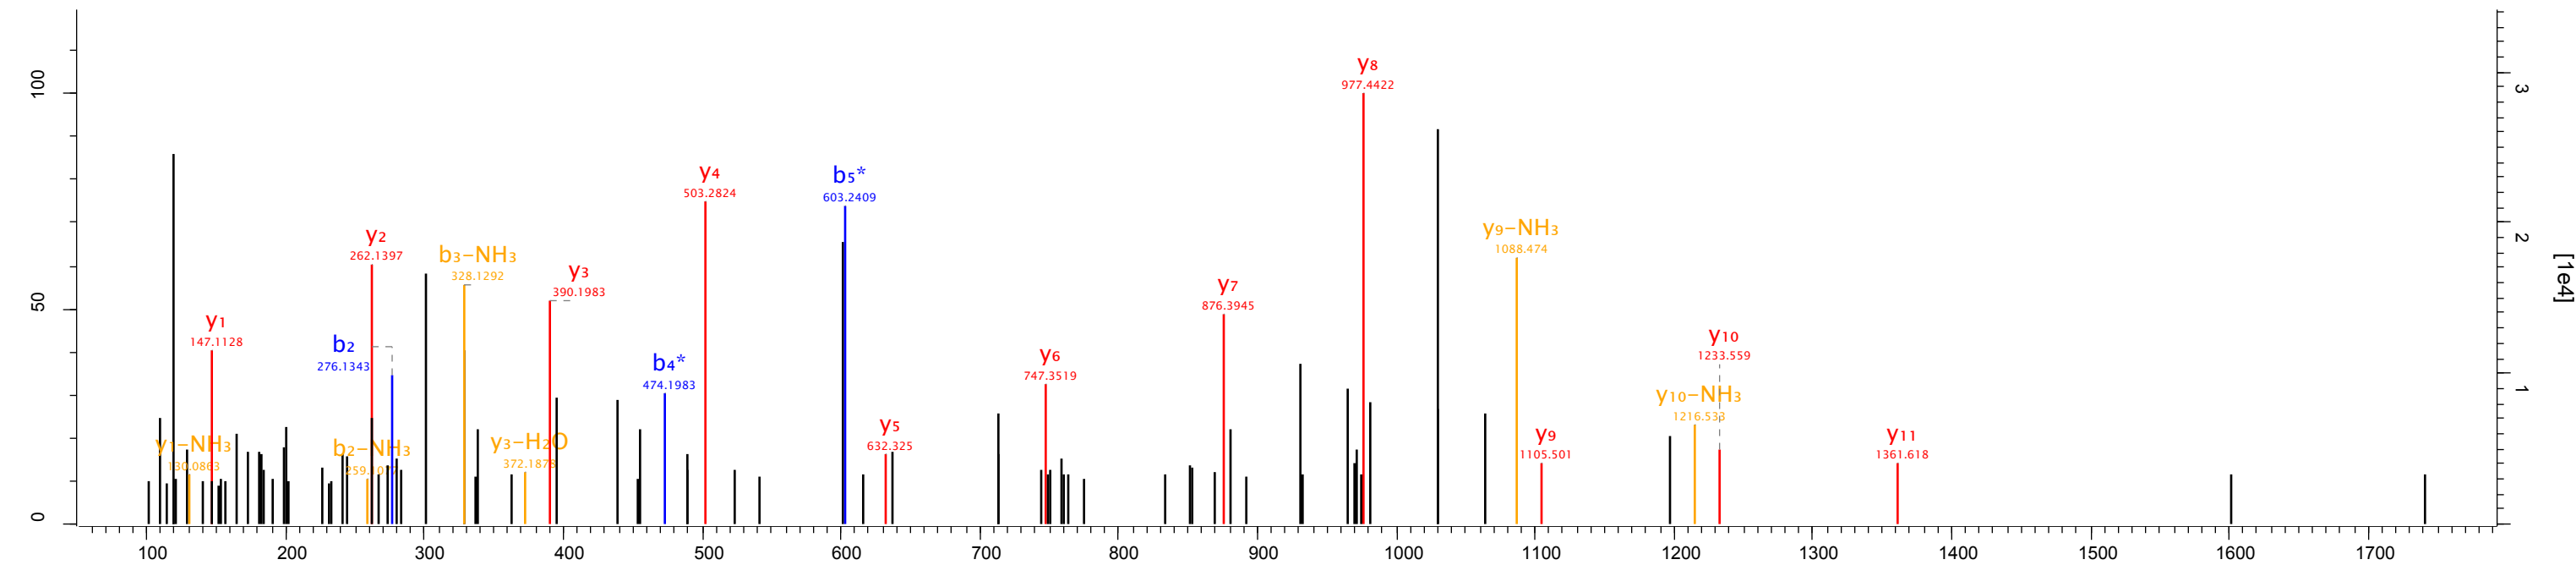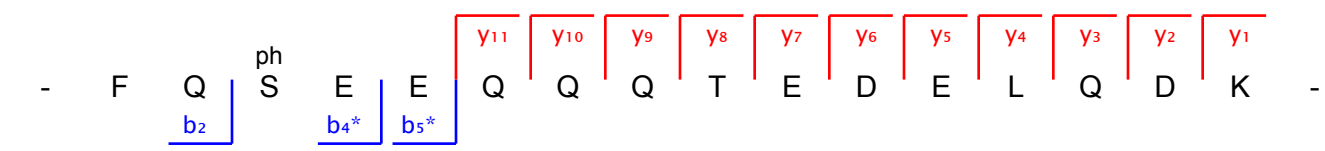

Raw file: 20150822\_A375SR\_Phospho\_BR3\_05  
 Scan: 12390 Method: FTMS; HCD Score: 101.89 m/z: 1031.42

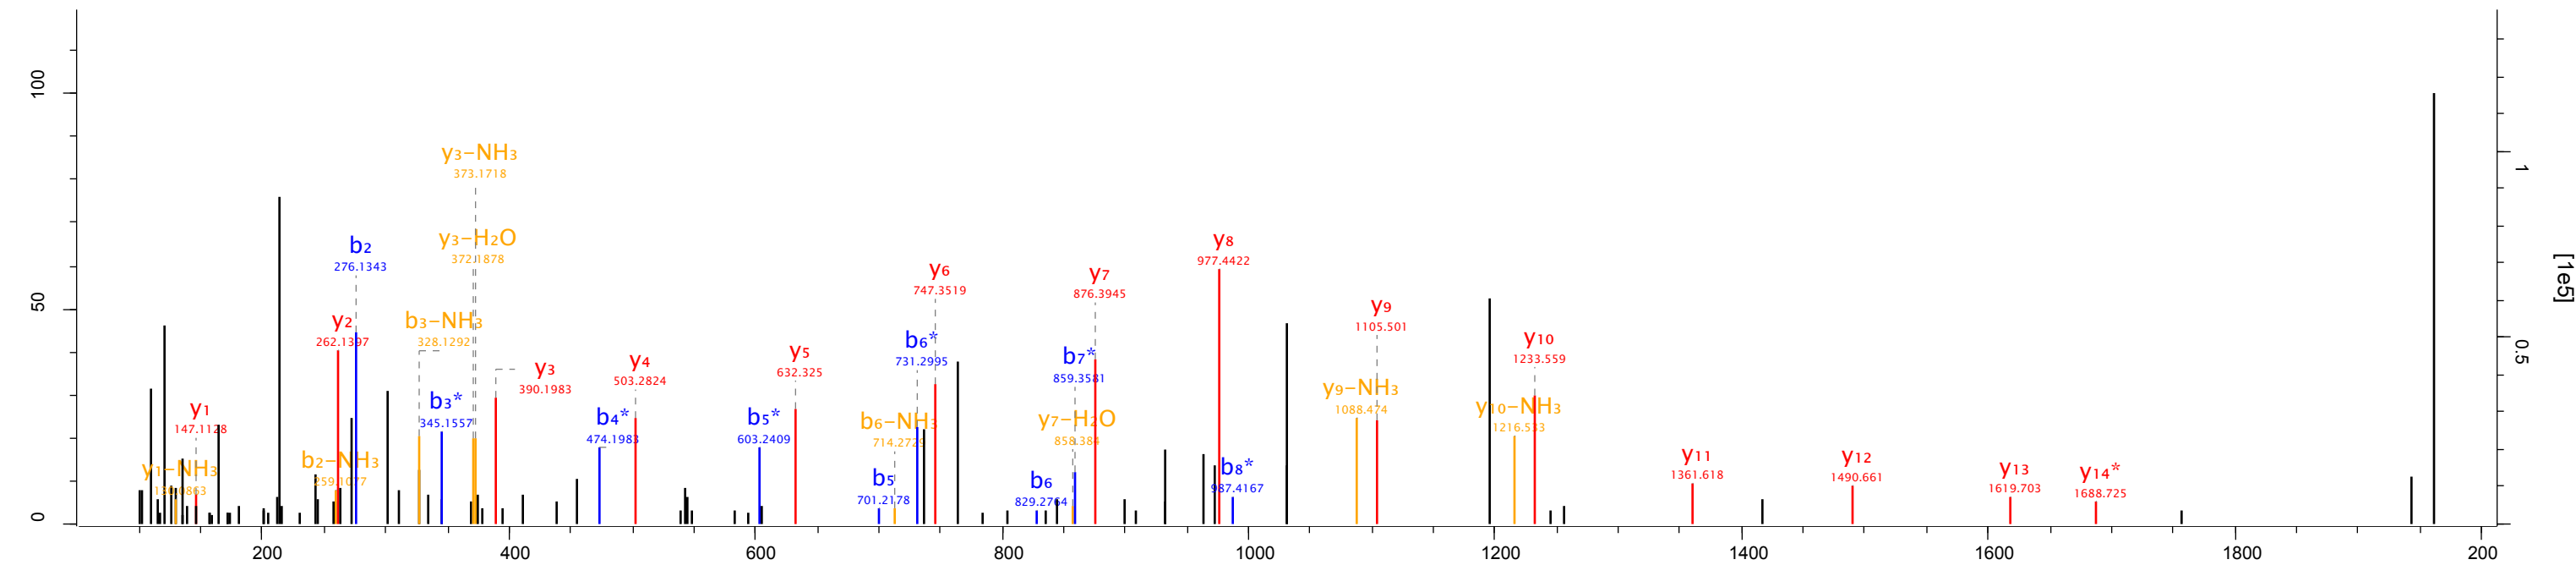

Peptide sequence: - F Q S E E Q Q Q T E D E L Q D K -

Fragmentation sites are indicated by boxes below the sequence:

- Red boxes (y-series): y14\* (S), y13 (E), y12 (E), y11 (Q), y10 (Q), y9 (Q), y8 (T), y7 (E), y6 (D), y5 (E), y4 (L), y3 (Q), y2 (D), y1 (K).
- Blue boxes (b-series): b2 (Q), b3\* (S), b4\* (E), b5 (E), b6 (Q), b7\* (Q), b8\* (Q).



Raw file 20150822\_A375SR\_Phospho\_BR3\_06 Scan 13880 Method FTMS; HCD Score 113.88 m/z 783.35 Gene names PWWP2A

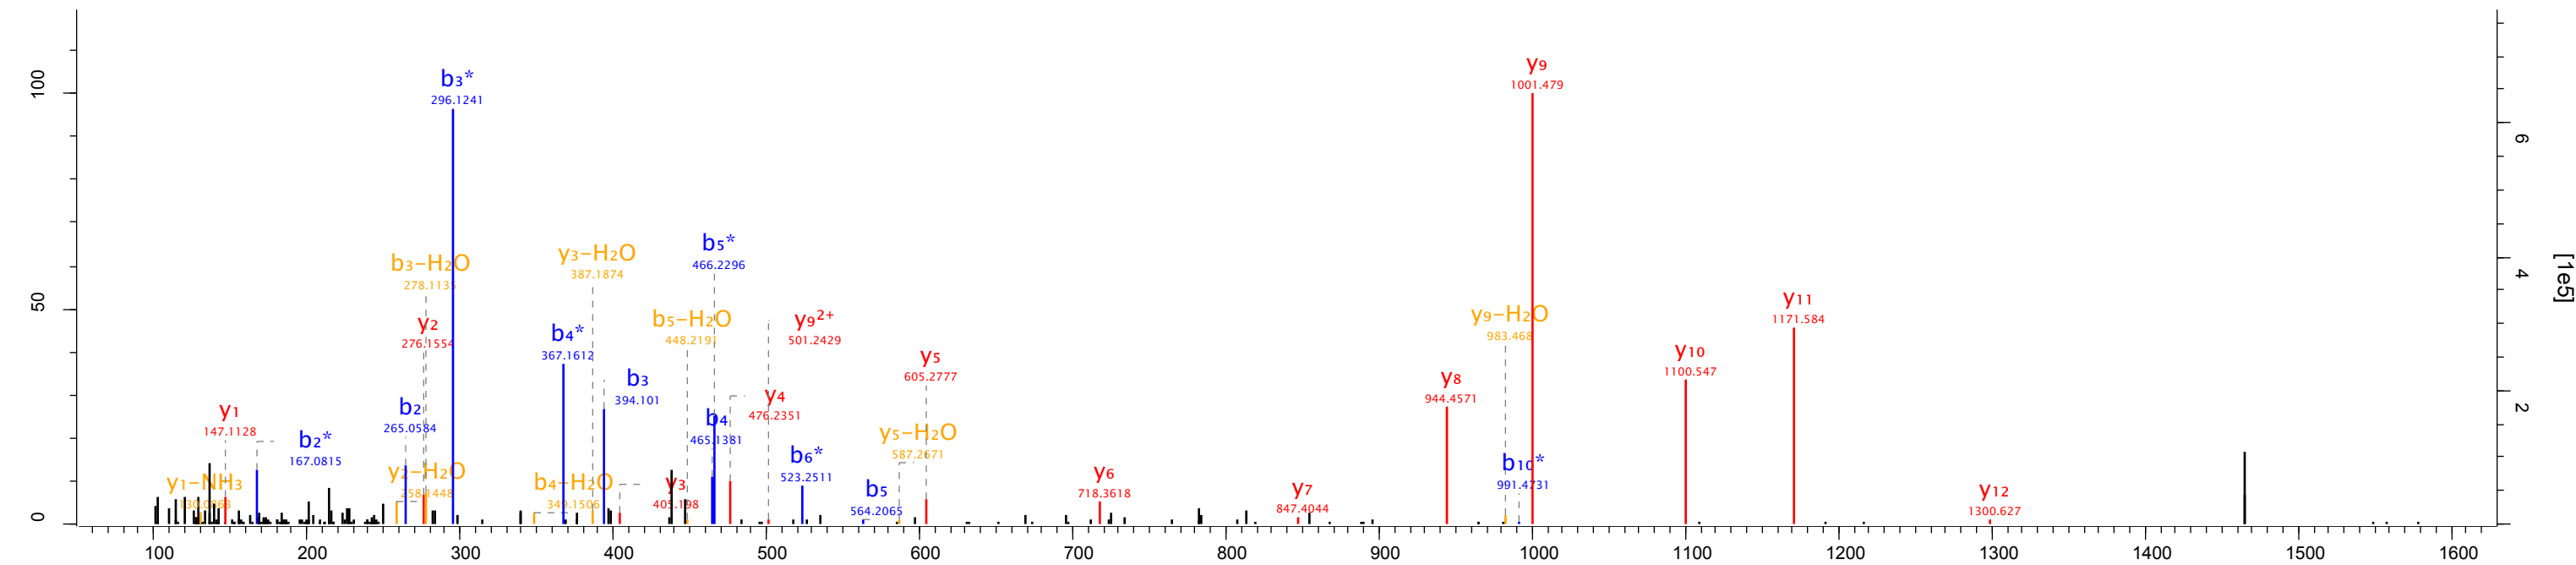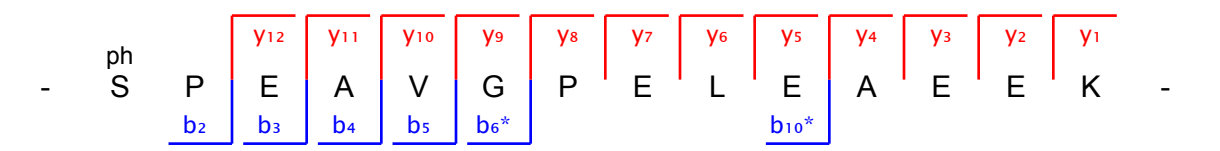

Raw file: 20150822\_A375SR\_Phospho\_BR3\_06  
 Scan: 14710 Method: FTMS; HCD Score: 66.96 m/z: 440.6 Gene names: RPL39P5;RPL39

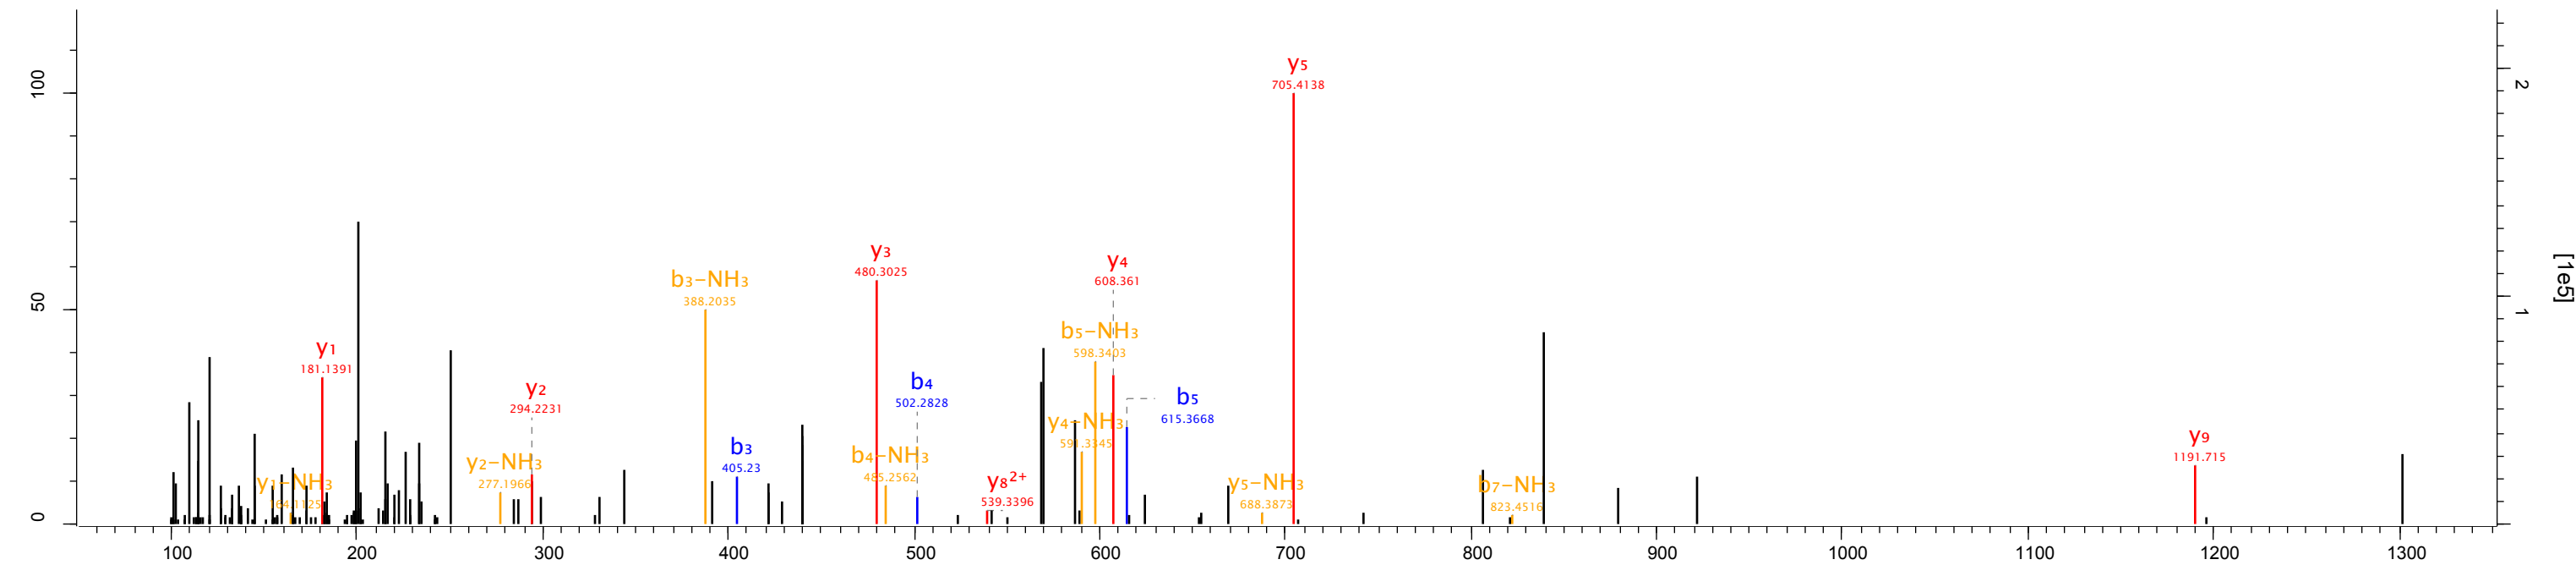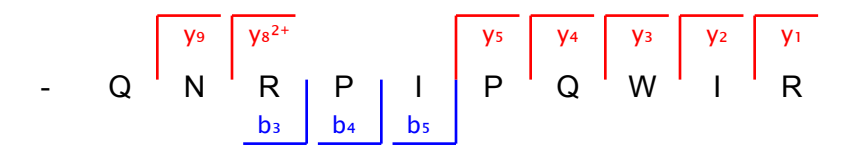

Raw file  
20150822\_A375SR\_Phospho\_BR3\_06

Scan 24070 Method FTMS; HCD Score 131.82 m/z 968.42 Gene names MAPK11P1L

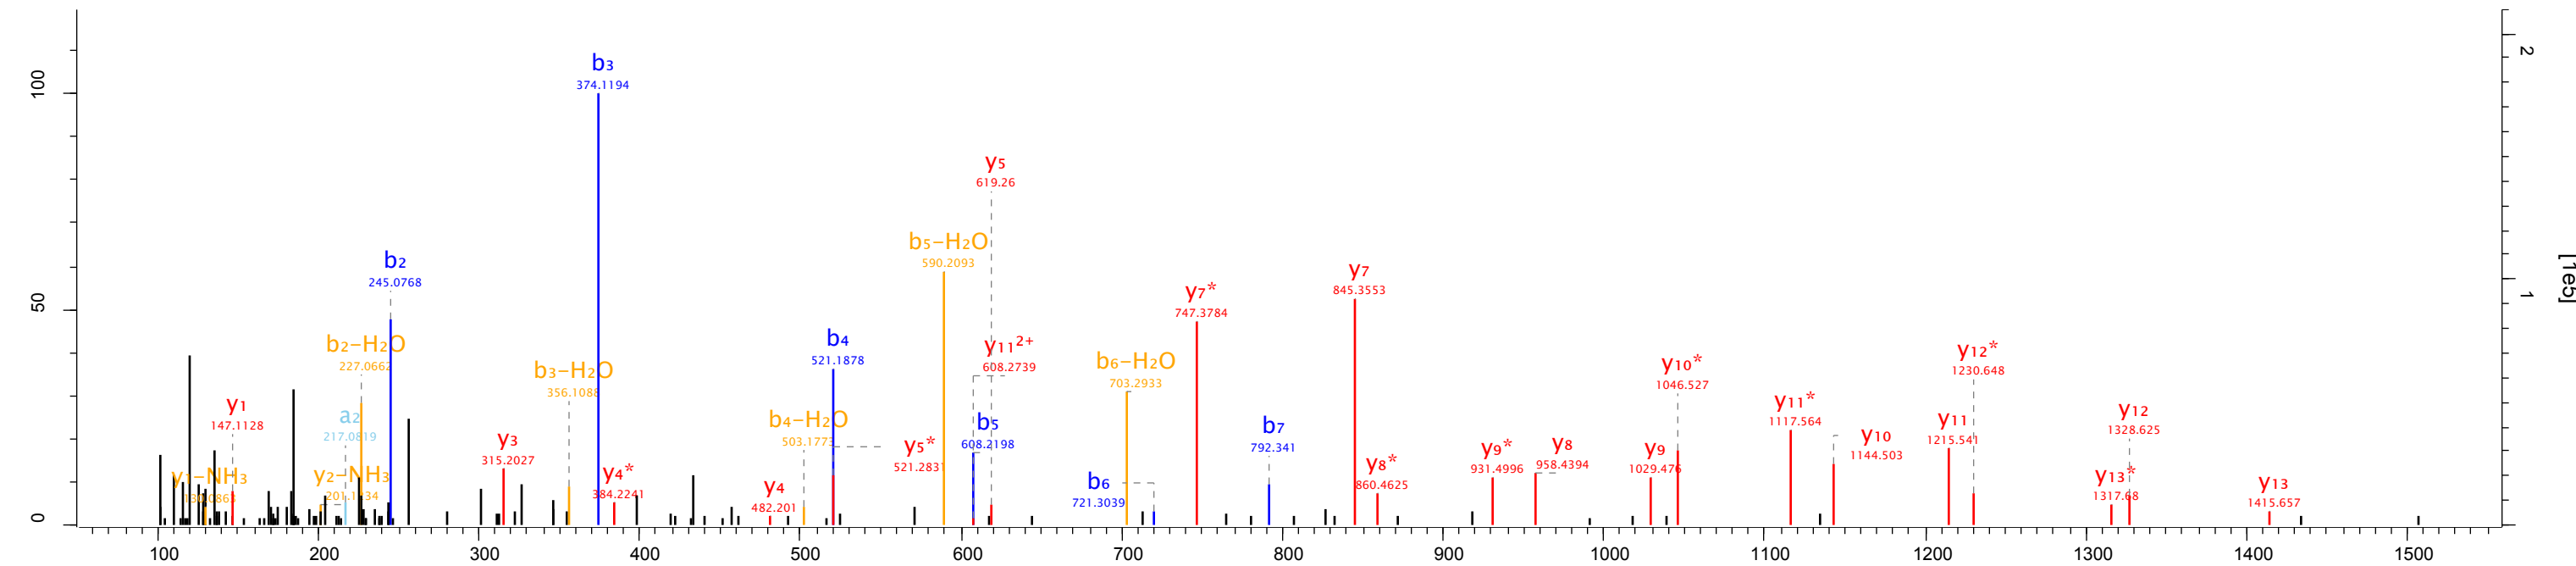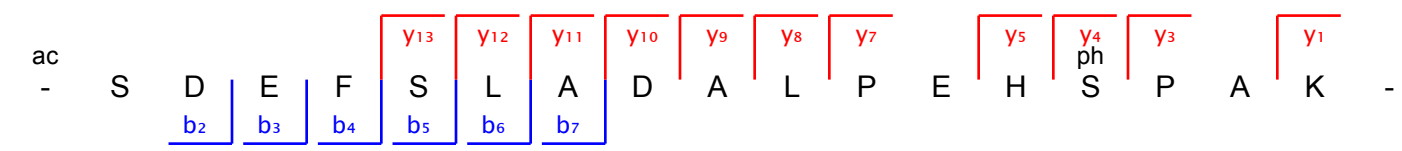

Raw file Scan Method Score m/z  
 20150822\_A375SR\_Phospho\_BR3\_06 4990 FTMS; HCD 44.61 527.23

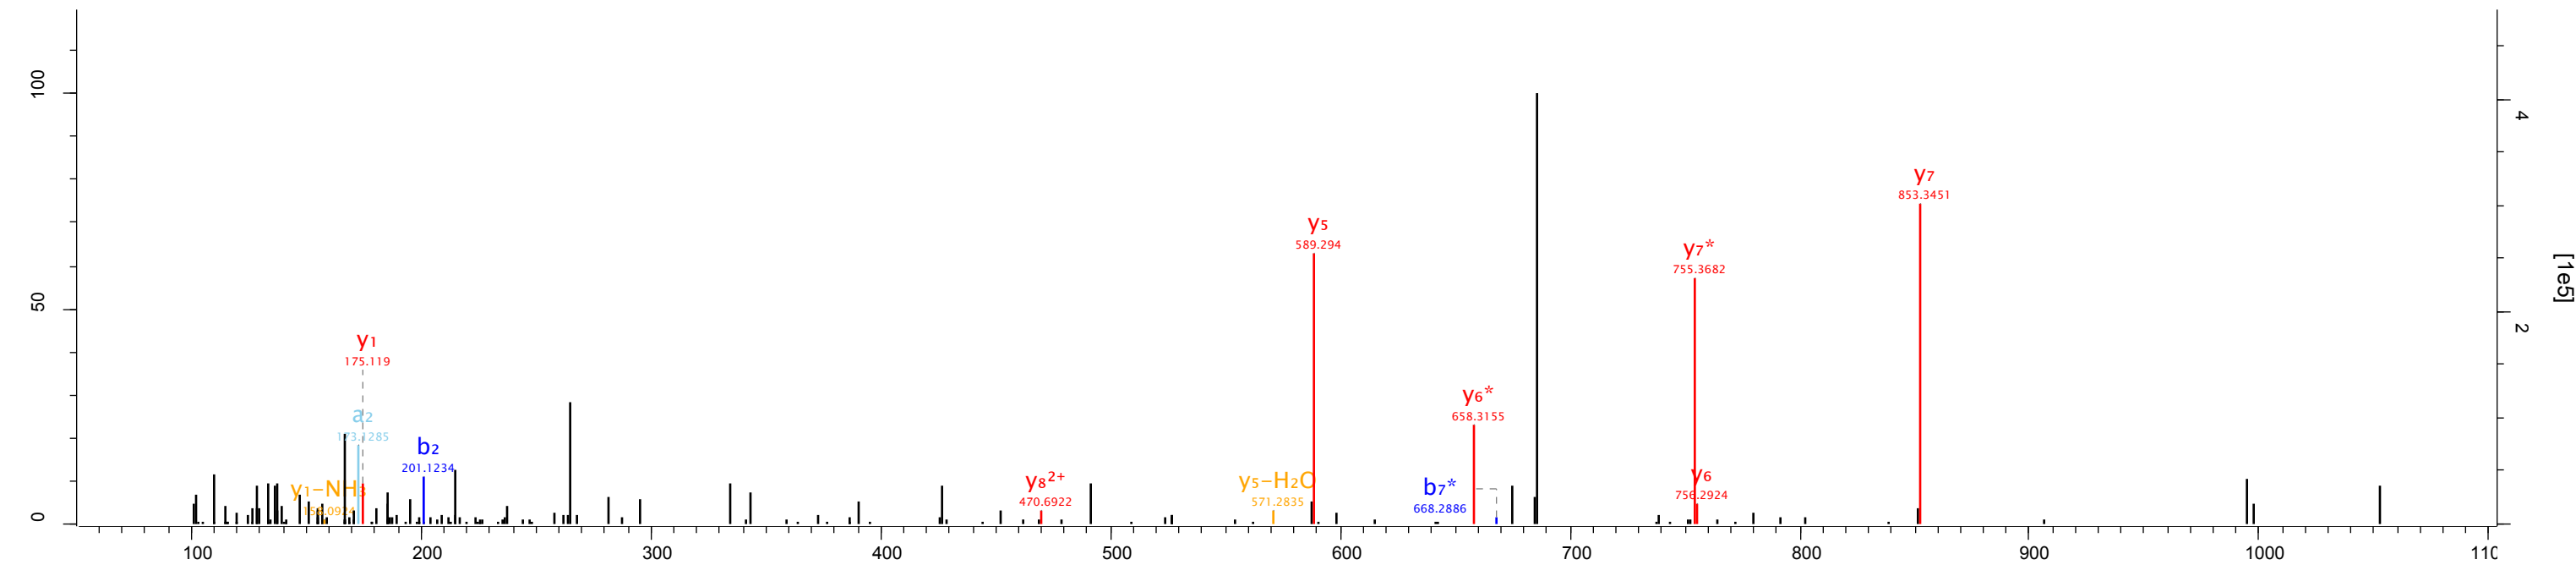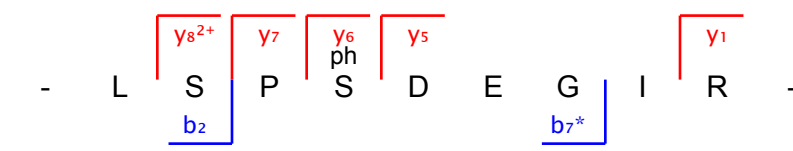

Raw file 20150822\_A375SR\_Phospho\_BR3\_07 Scan 10230 Method FTMS; HCD Score 43.22 m/z 475.21 Gene names GPR64

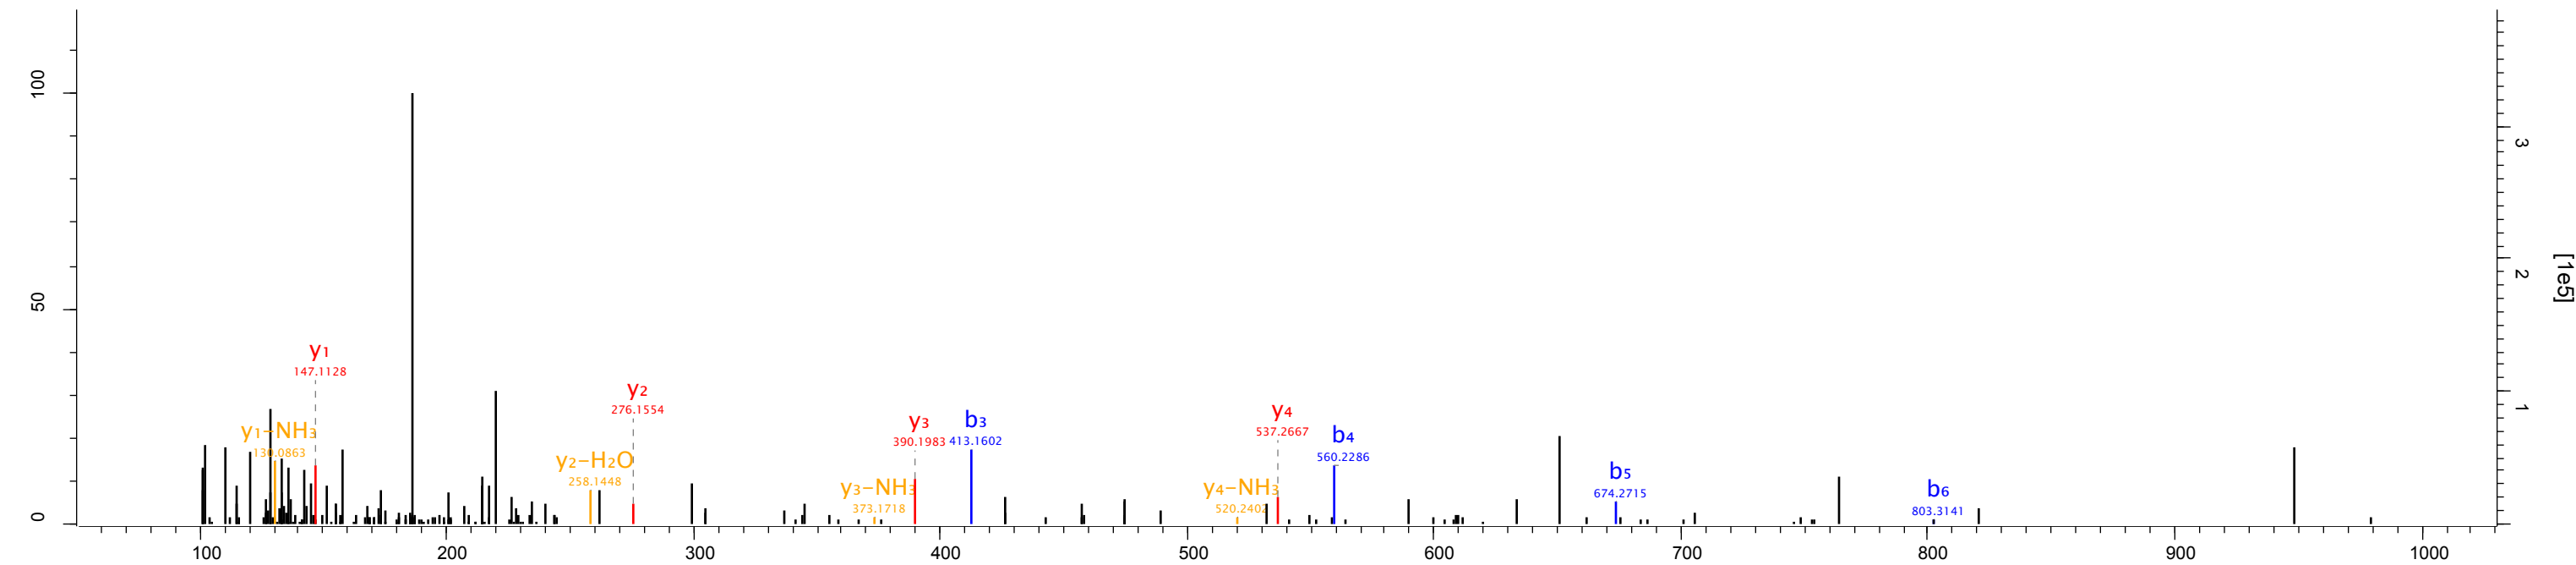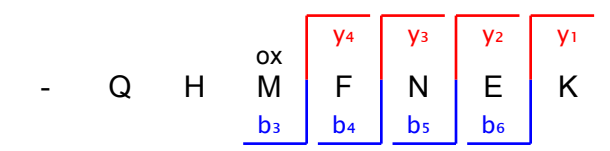

Raw file 20150822\_A375SR\_Phospho\_BR3\_08 Scan 10090 Method FTMS; HCD Score 60.12 m/z 558.79

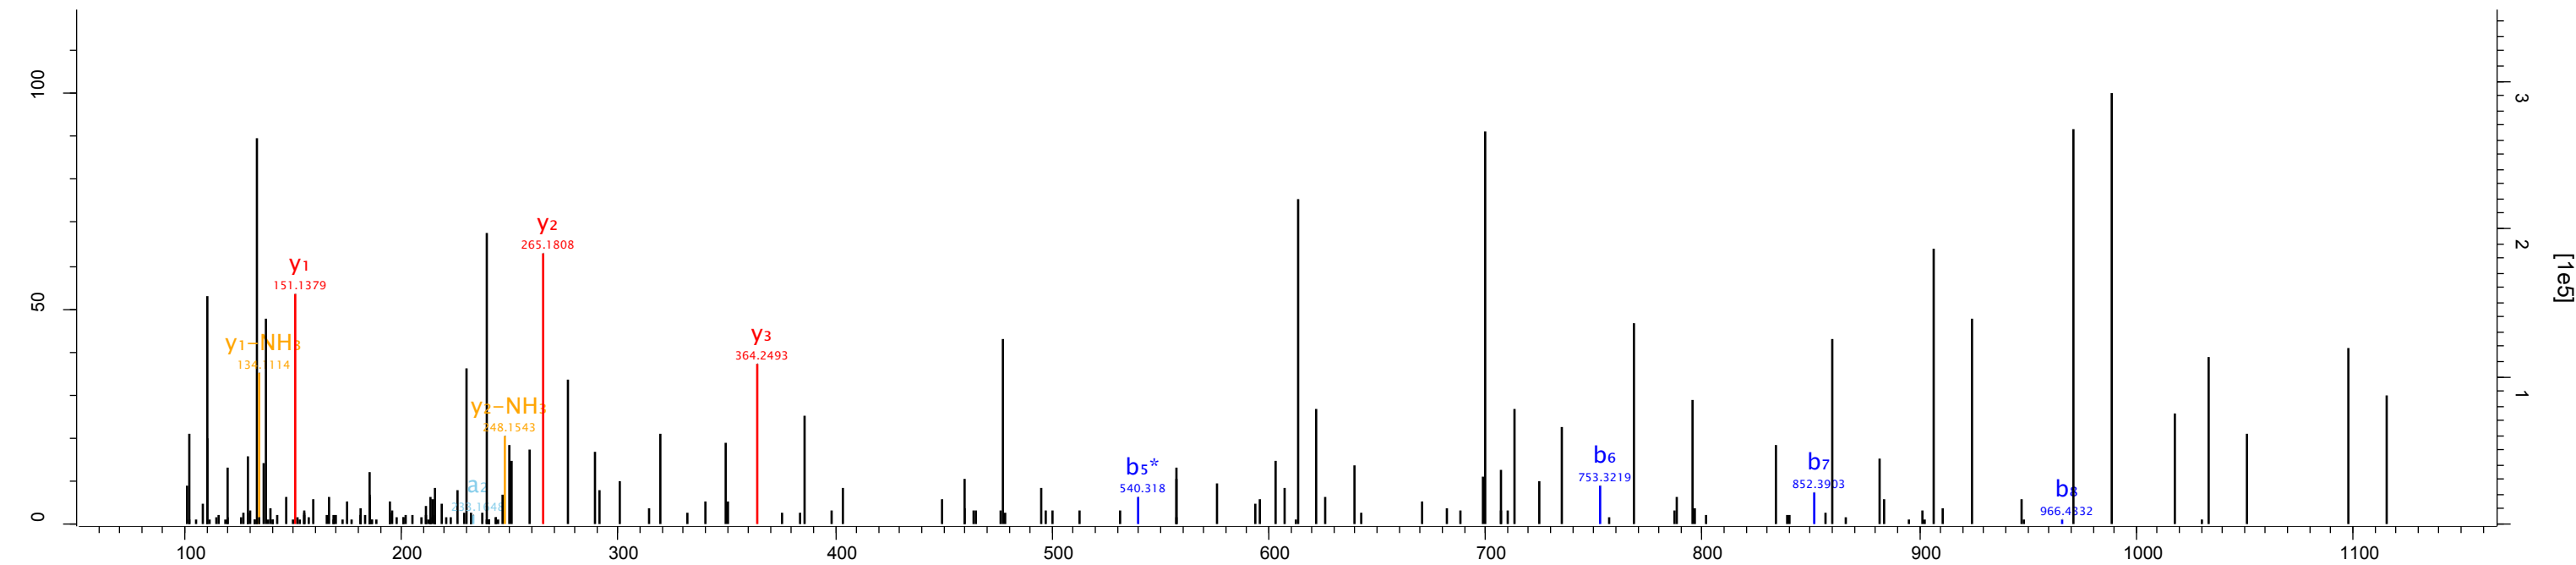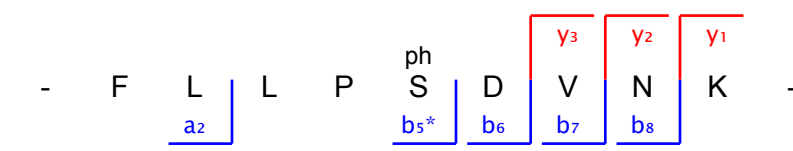

Raw file 20150822\_A375SR\_Phospho\_BR3\_08 Scan 11790 Method FTMS; HCD Score 93.77 m/z 691.34 Gene names ELK3

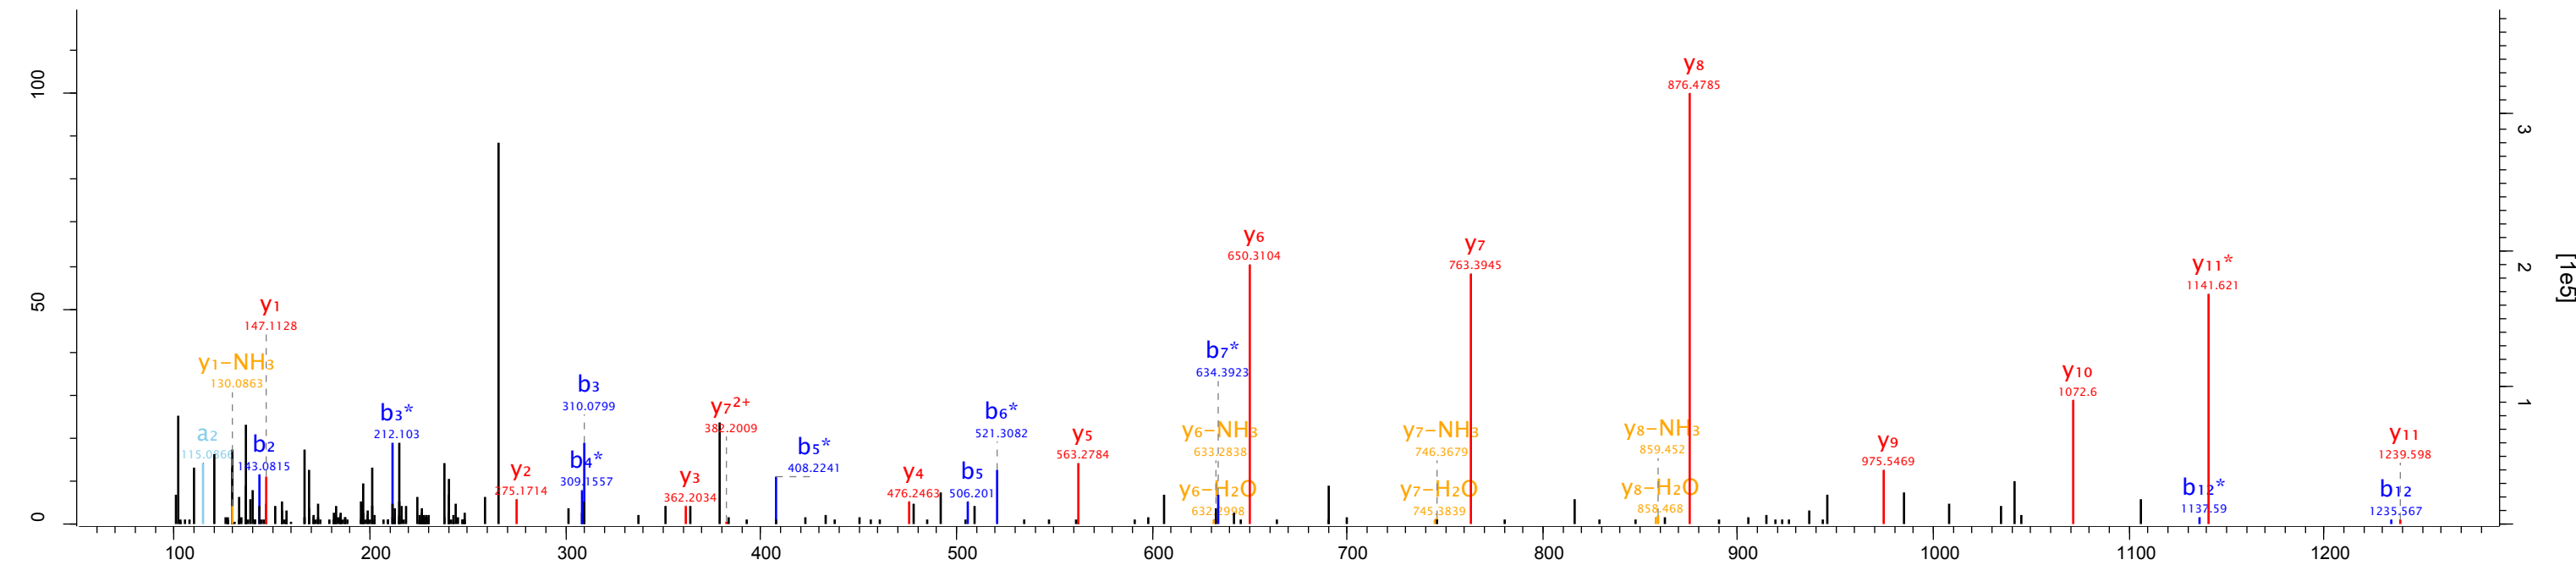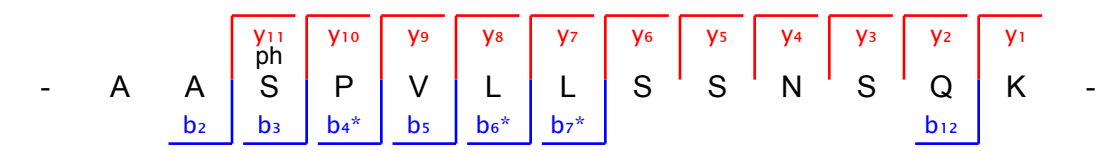

Raw file: 20150822\_A375SR\_Phospho\_BR3\_09  
 Scan: 5280 Method: FTMS; HCD Score: 53.01 m/z: 527.23

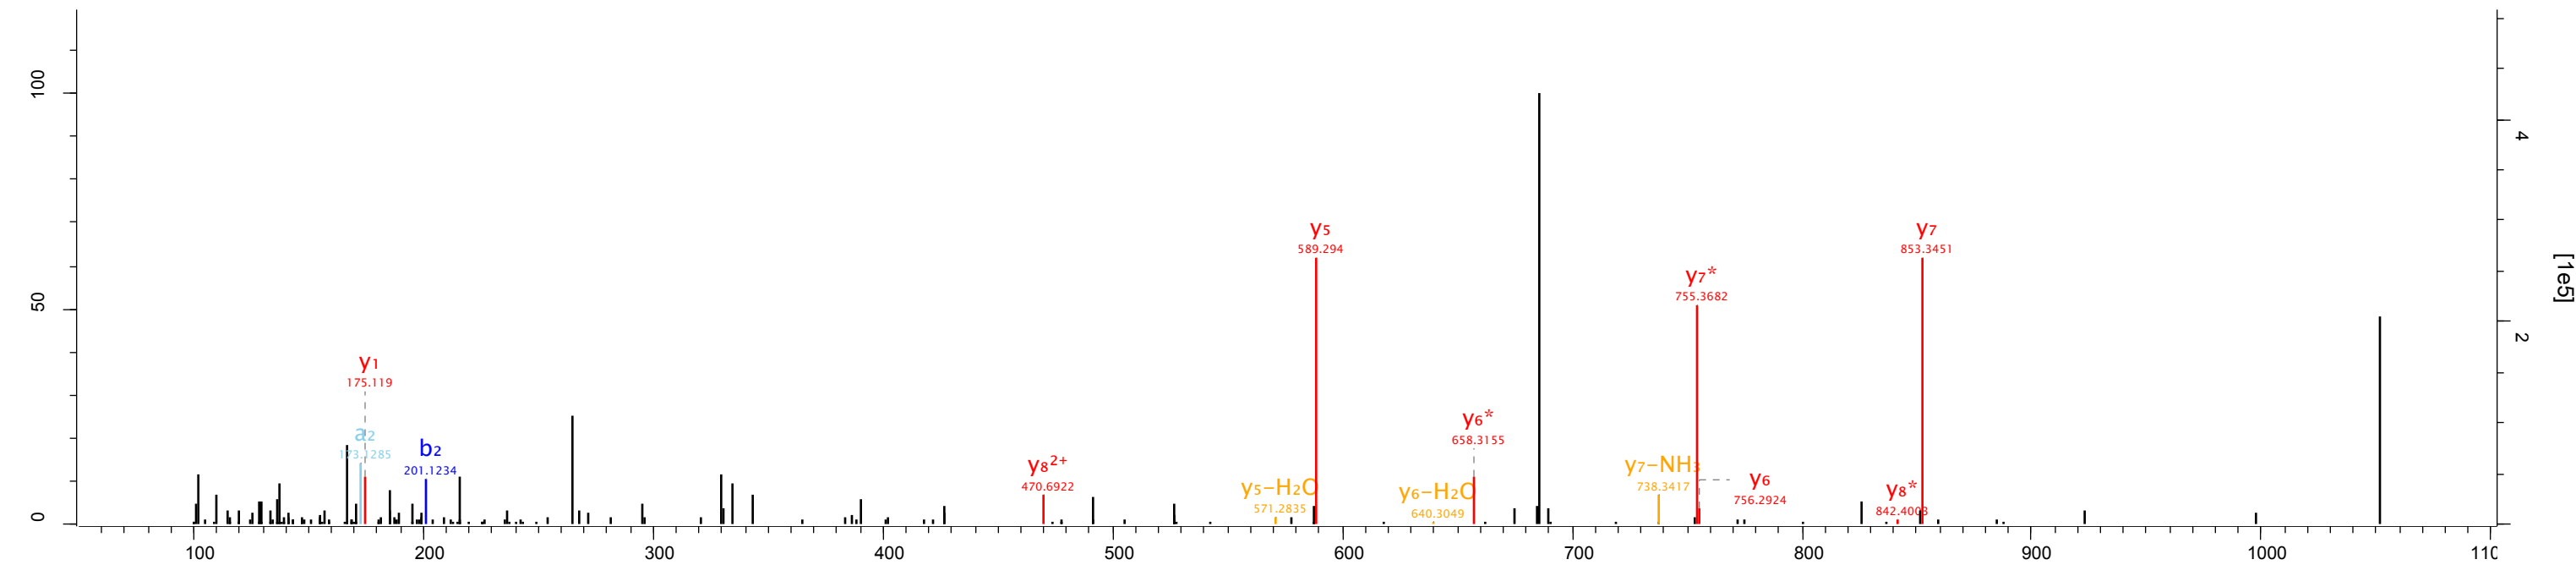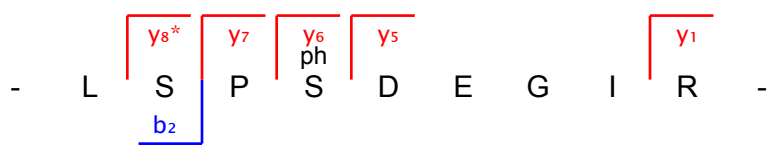



Raw file 20150822\_A375SR\_Phospho\_BR3\_09 Scan 7060 Method FTMS; HCD Score 52.53 m/z 548.61

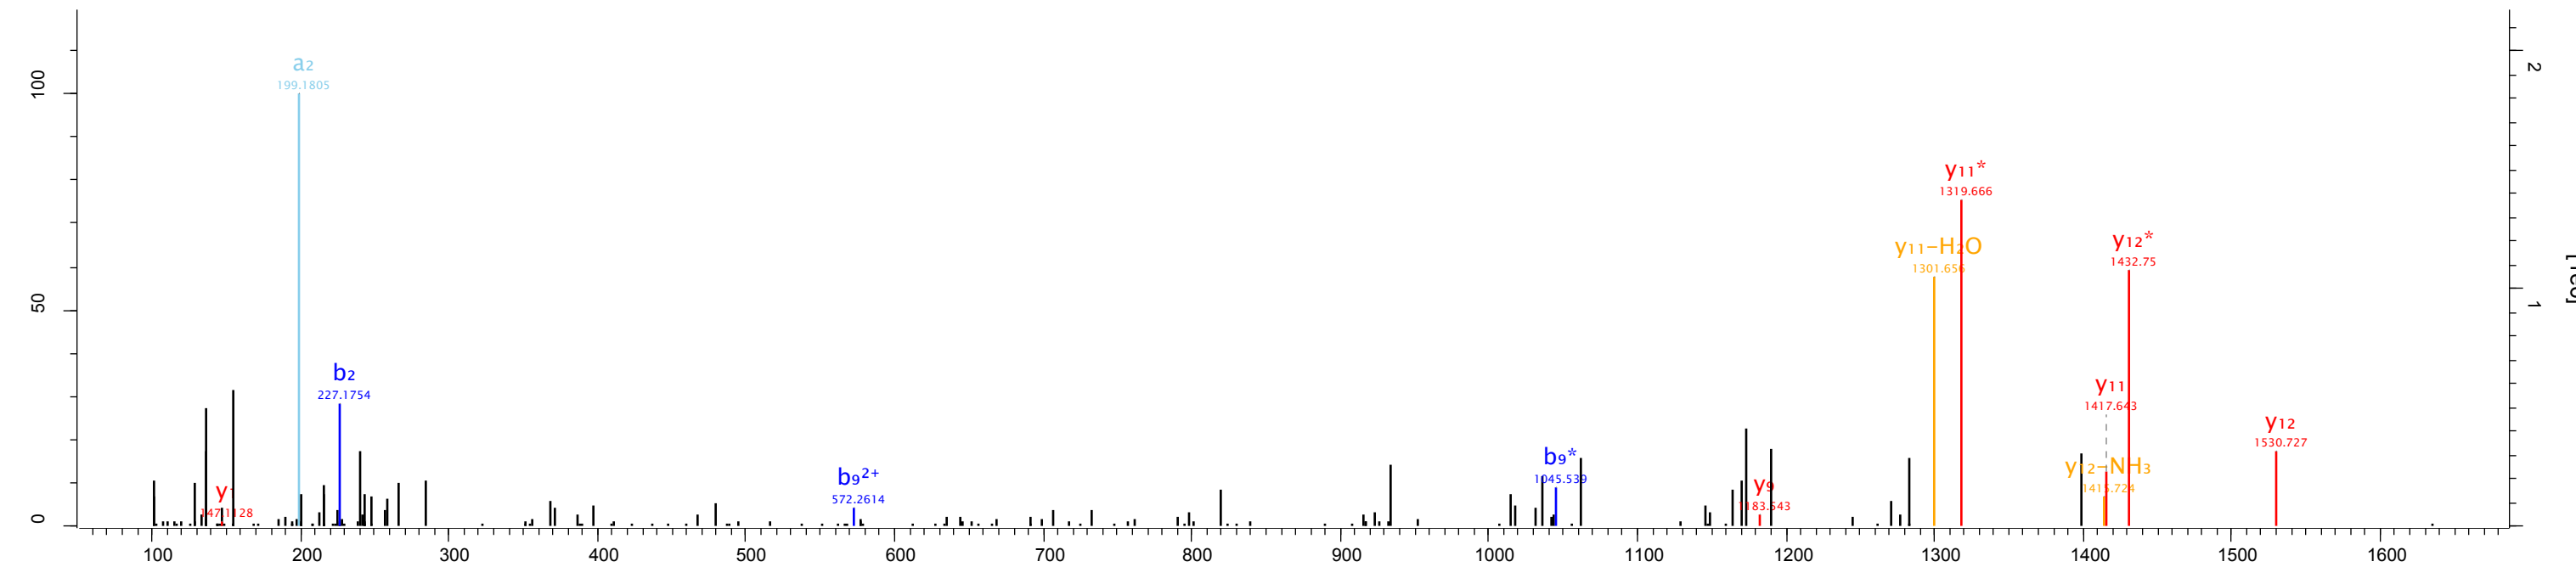

- I L S F E L C S L E K P K -

Fragmentation labels:  $y_{12}$ ,  $y_{11}$ ,  $y_9$ ,  $y_1$ ,  $b_2$ ,  $b_9^*$



Raw file: 20150822\_A375SR-Proteome\_BR3  
 Scan: 44730 Method: FTMS; HCD Score: 46.82 m/z: 654.37 Gene names: RPL39P5;RPL39

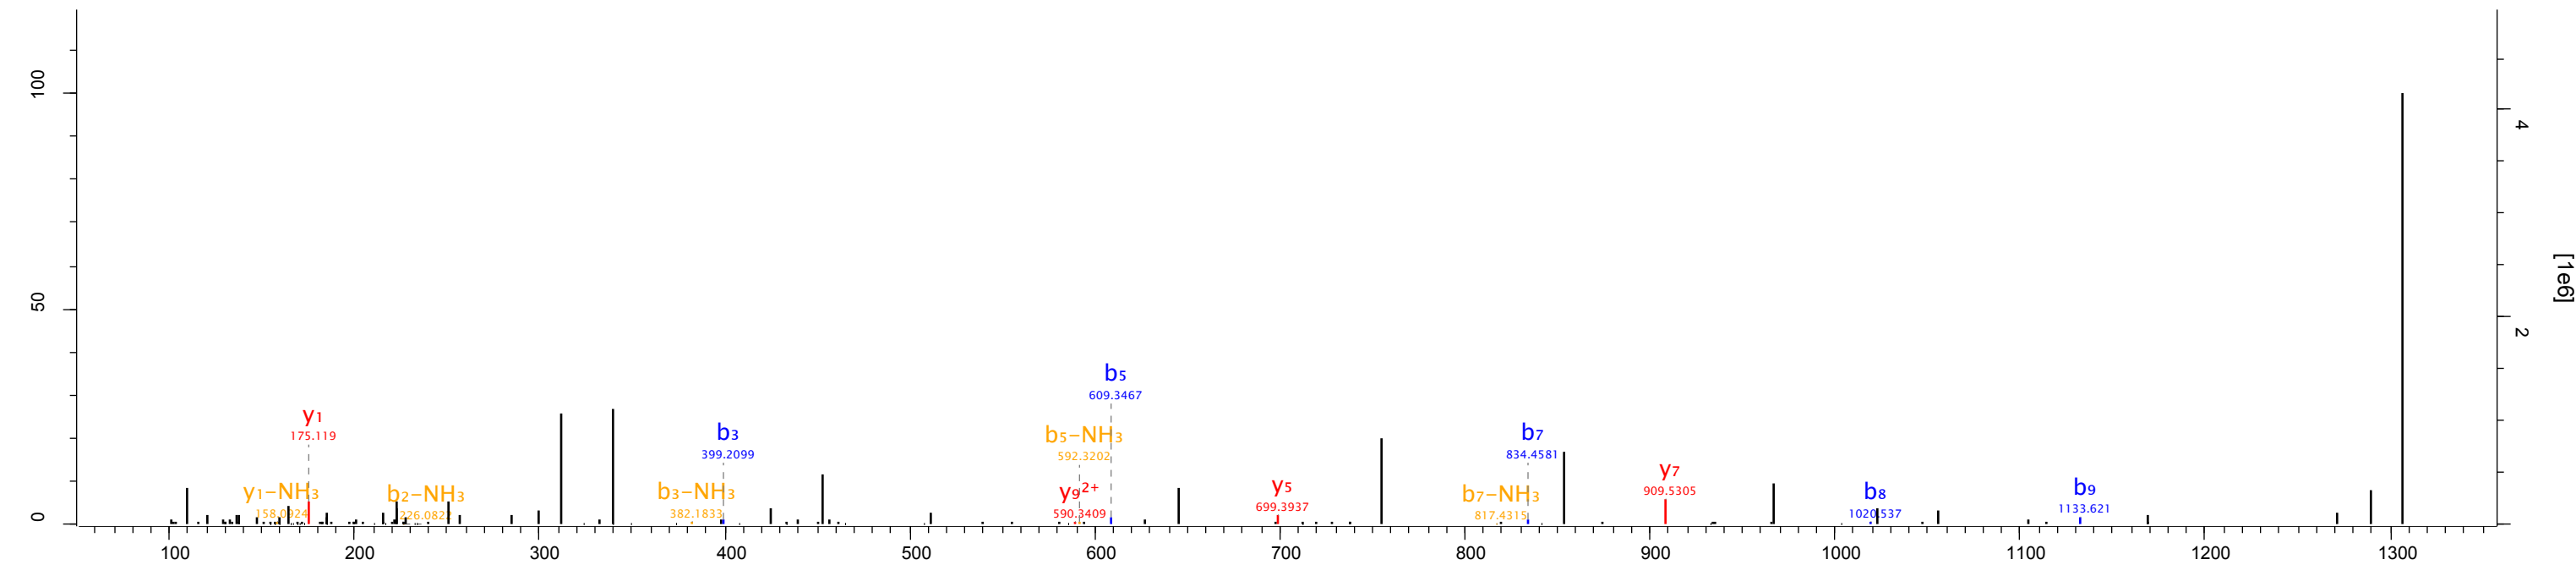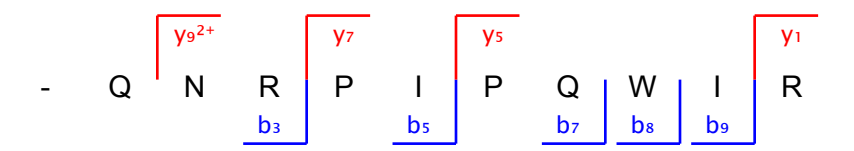

Raw file: 20150822\_A375SR-Proteome\_BR3  
 Scan: 4740 Method: FTMS; HCD Score: 44.32 m/z: 339.17 Gene names: COX7B

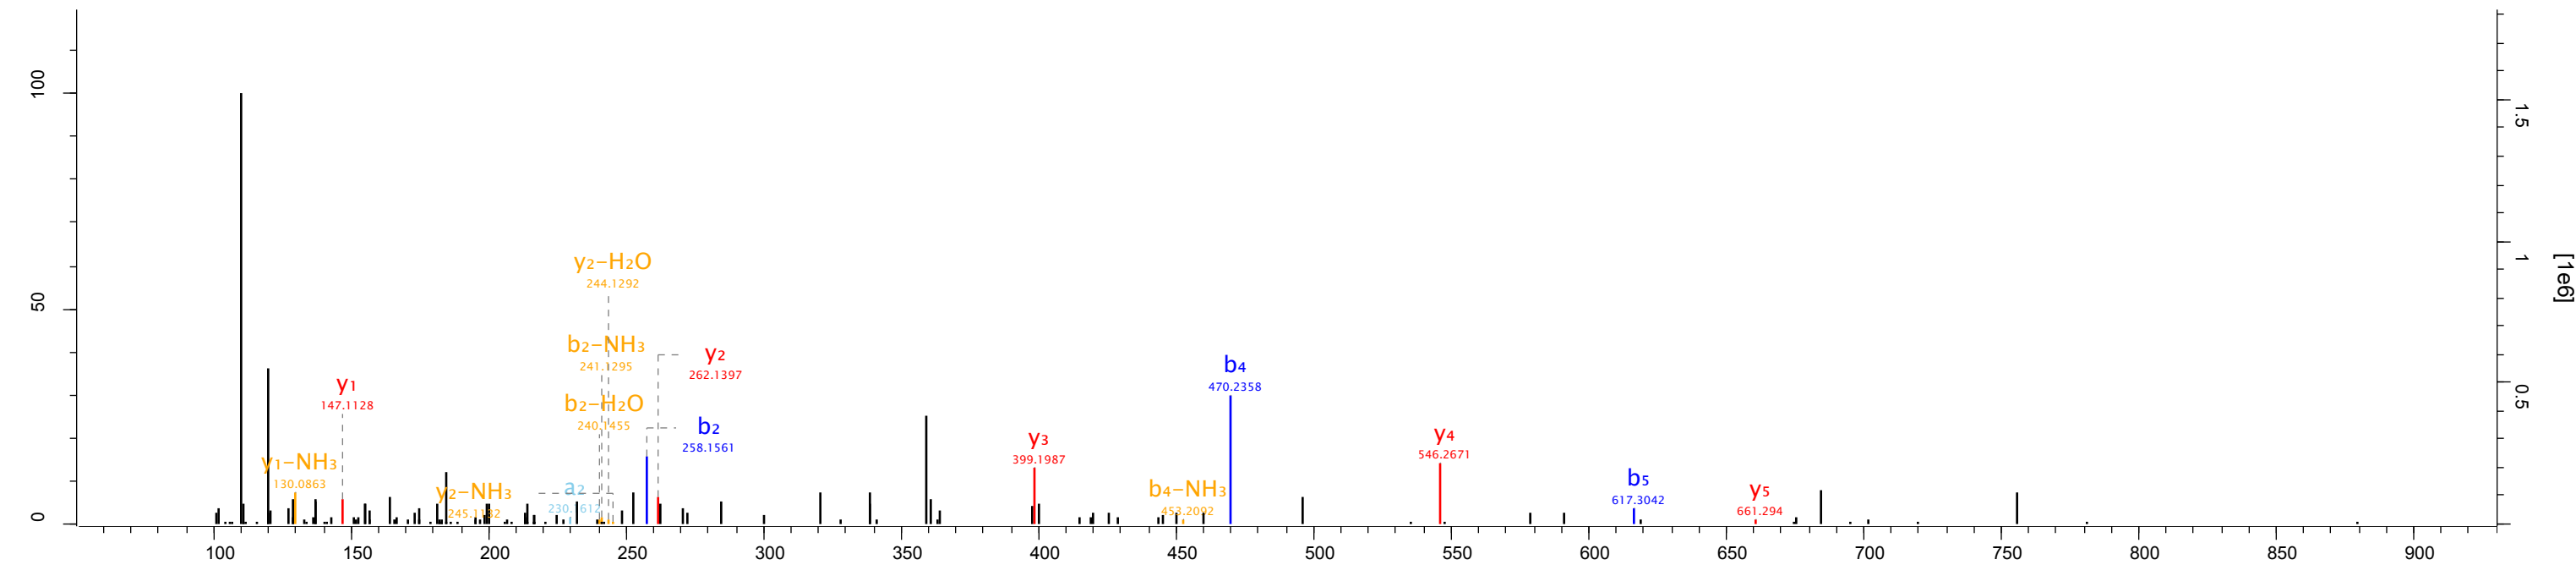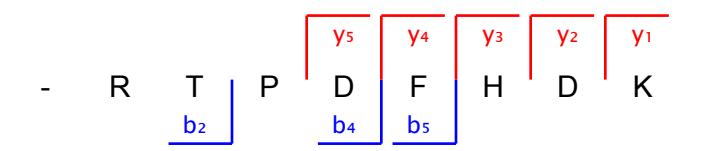

Raw file: 20150822\_A375SR\_Proteome\_BR3  
 Scan: 4750 Method: FTMS; HCD Score: 39.85 m/z: 342.52 Gene names: COX7B

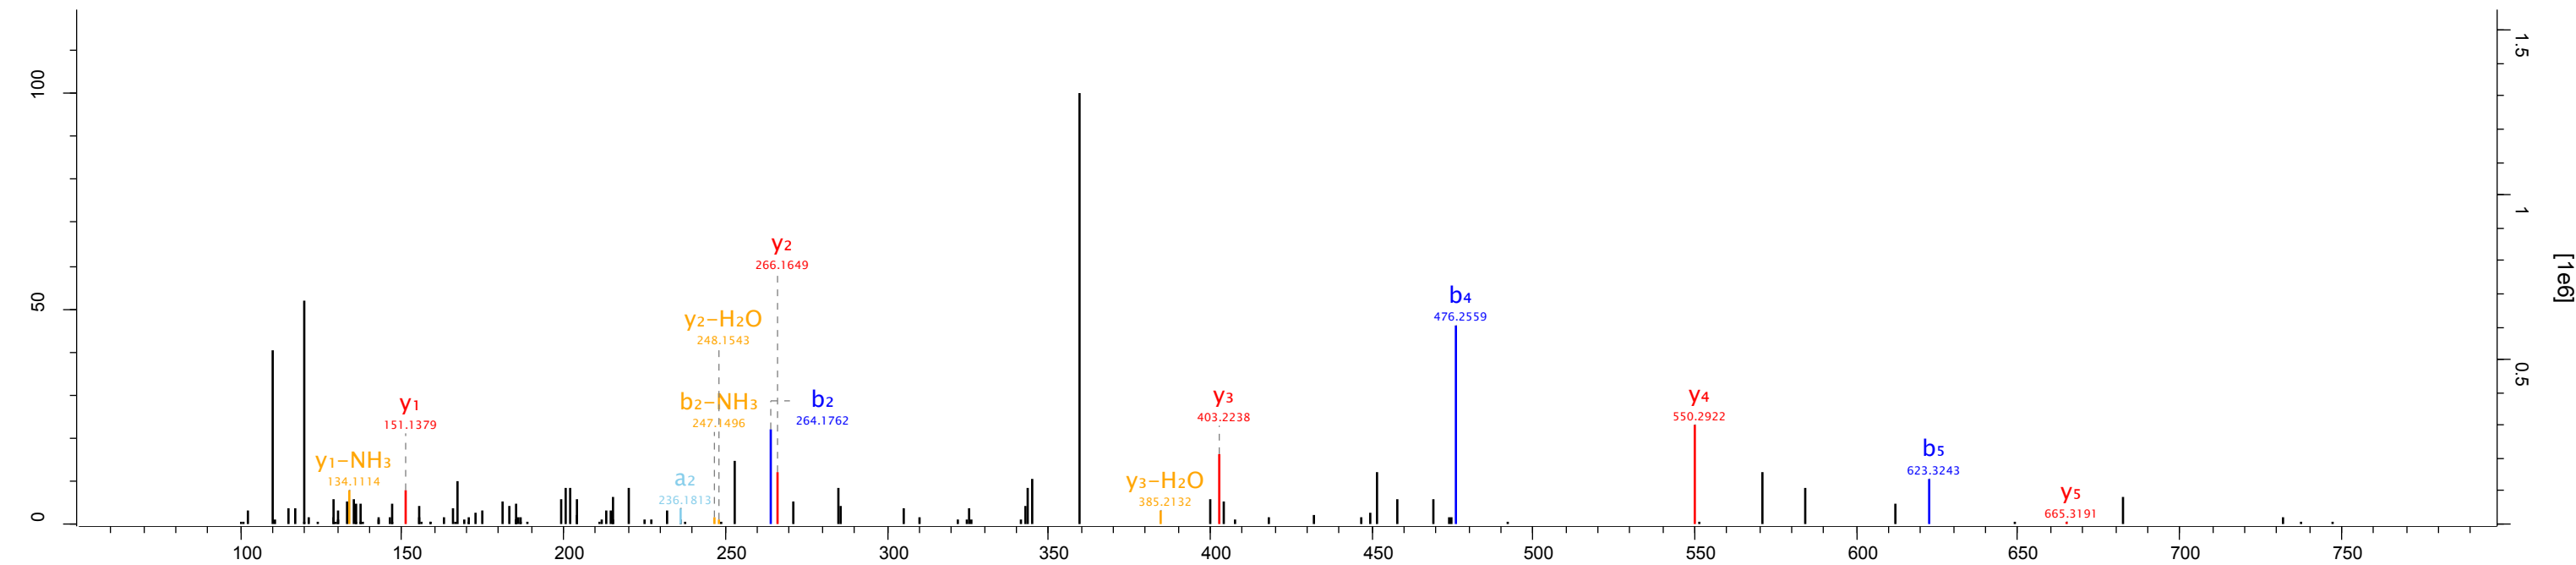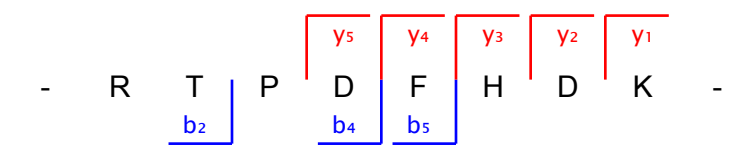

Raw file  
20180707\_MaS\_A375SR\_LM\_proteome\_04

Scan: 23850  
Method: FTMS; HCD  
Score: 11.58  
m/z: 486.29  
Gene names: IL1R1

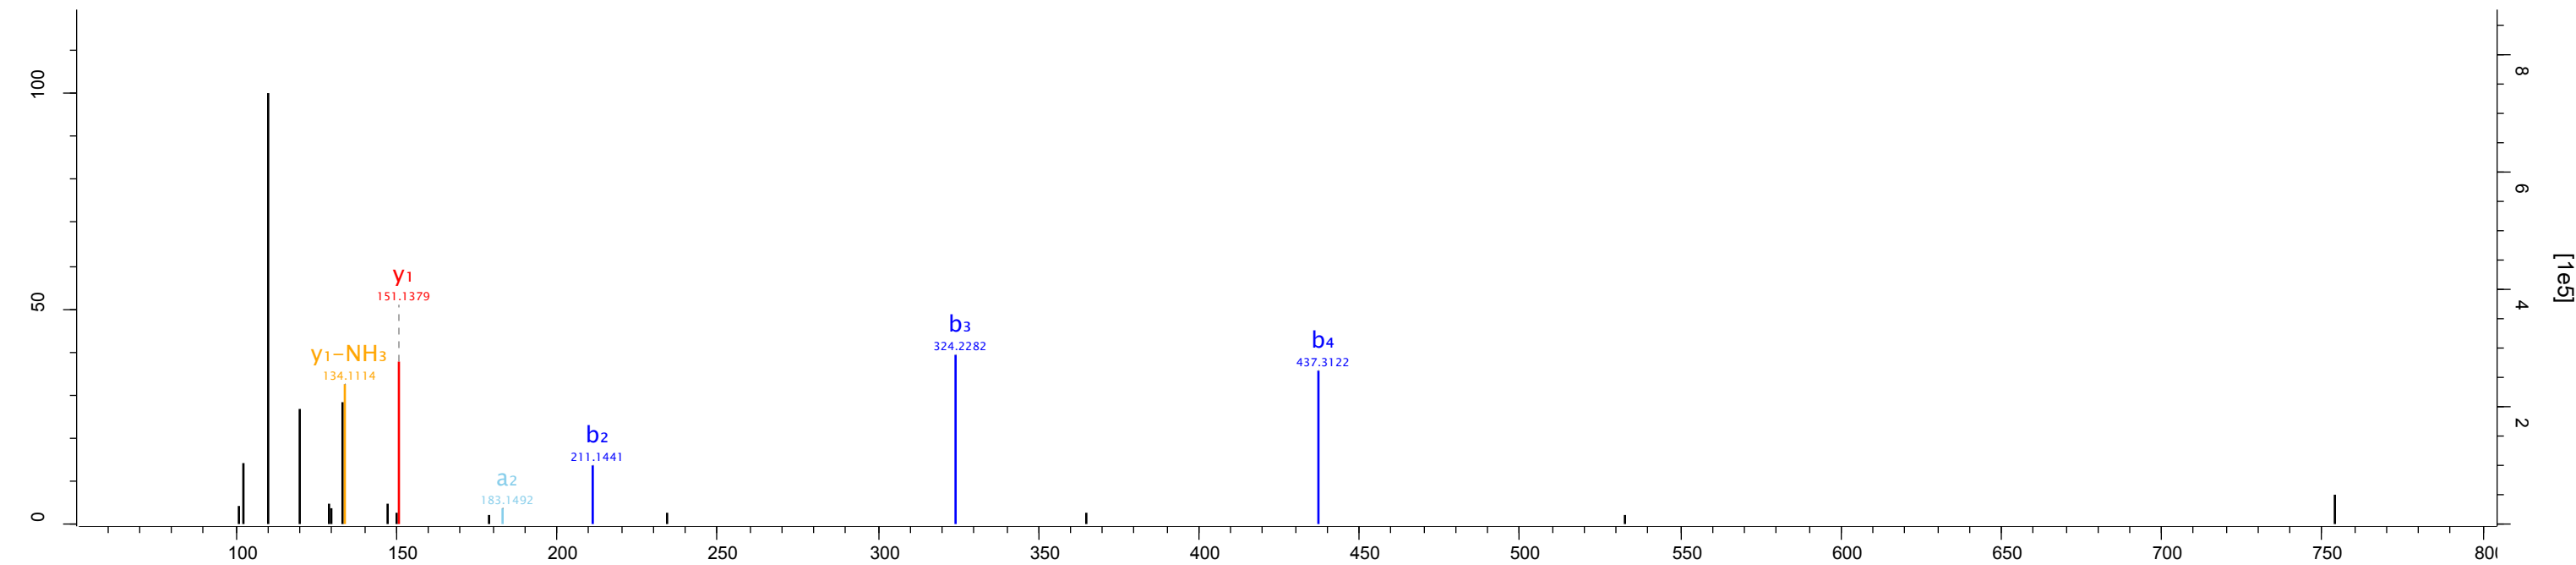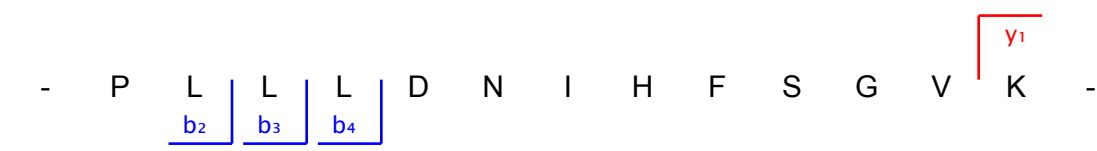

Raw file 20180707\_MaS\_A375SR\_LM\_proteome\_06 Scan 21400 Method FTMS; HCD Score 96.34 m/z 589.35 Gene names TRAP1

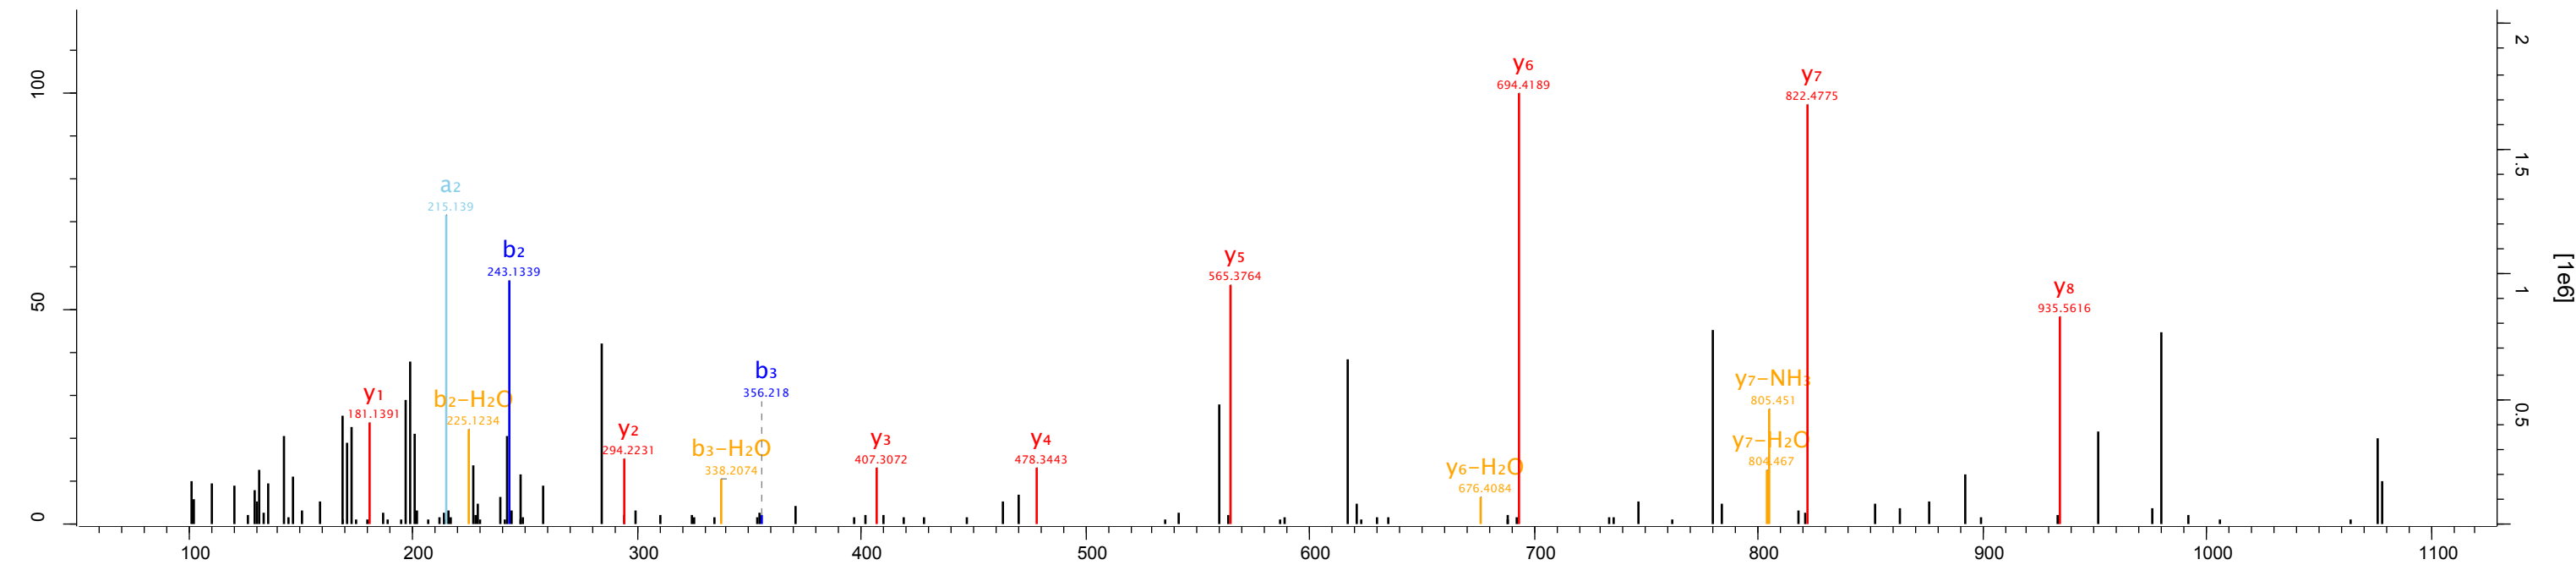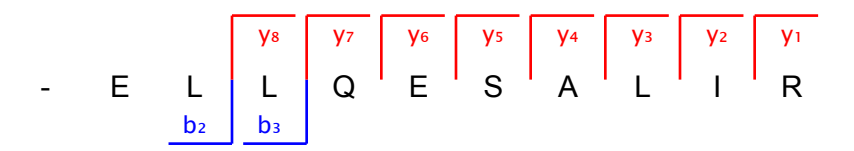

Raw file  
20180707\_MaS\_A375SR\_LM\_proteome\_06

Scan Method Score m/z Gene names  
26380 FTMS; HCD 7.01 937.5 C1orf85

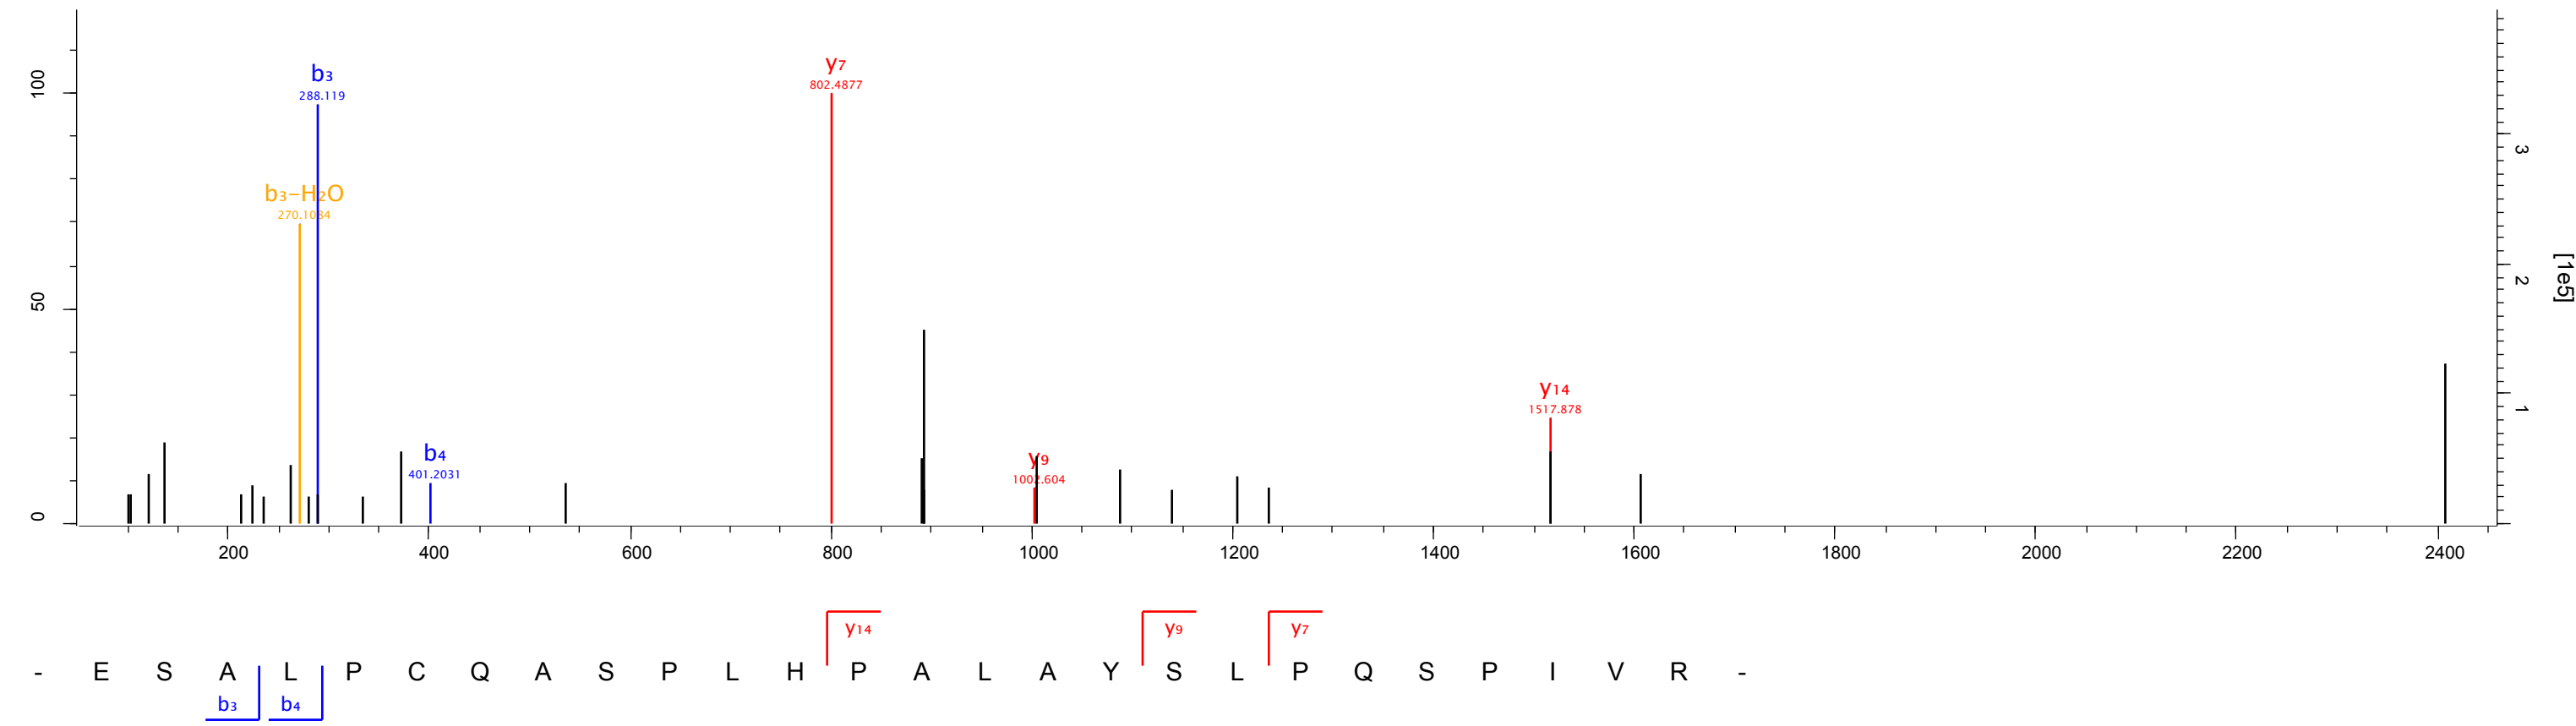



Raw file 20180707\_MaS\_A375SR\_LM\_proteome\_10 Scan 7340 Method FTMS; HCD Score 58.17 m/z 370.22

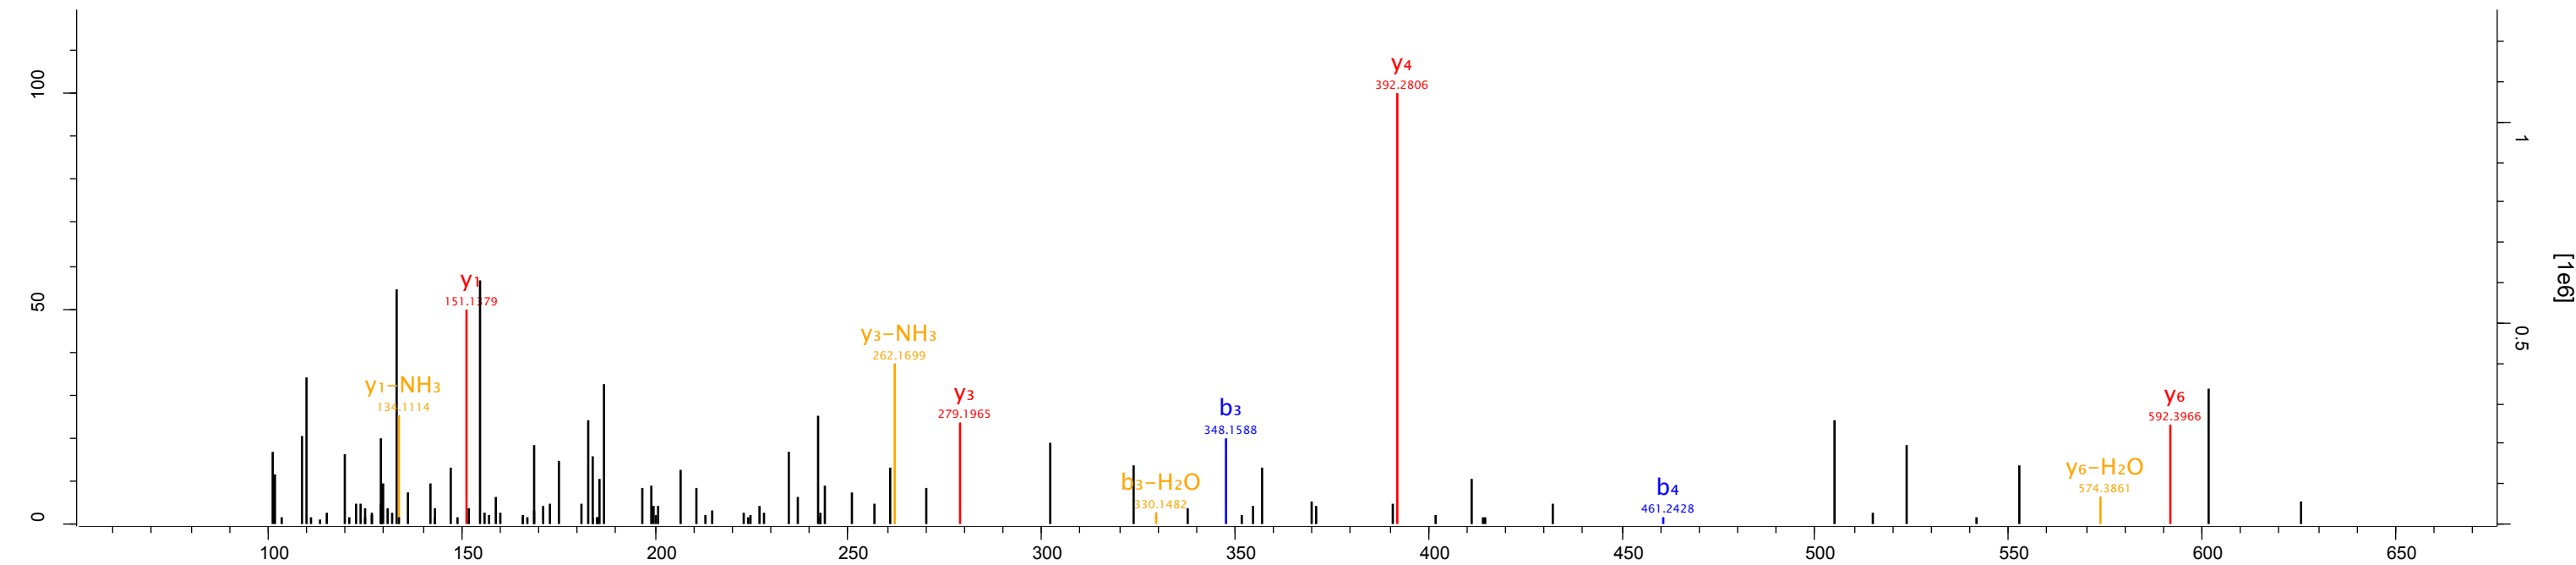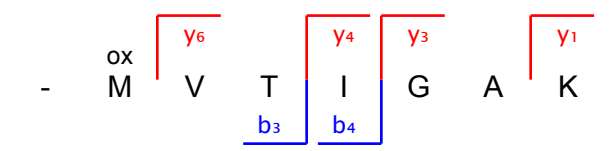

Raw file: 20180707\_MaS\_A375SR\_LM\_proteome\_14  
 Scan: 16940 Method: FTMS; HCD Score: 67.52 m/z: 712.86 Gene names: CYB561D2

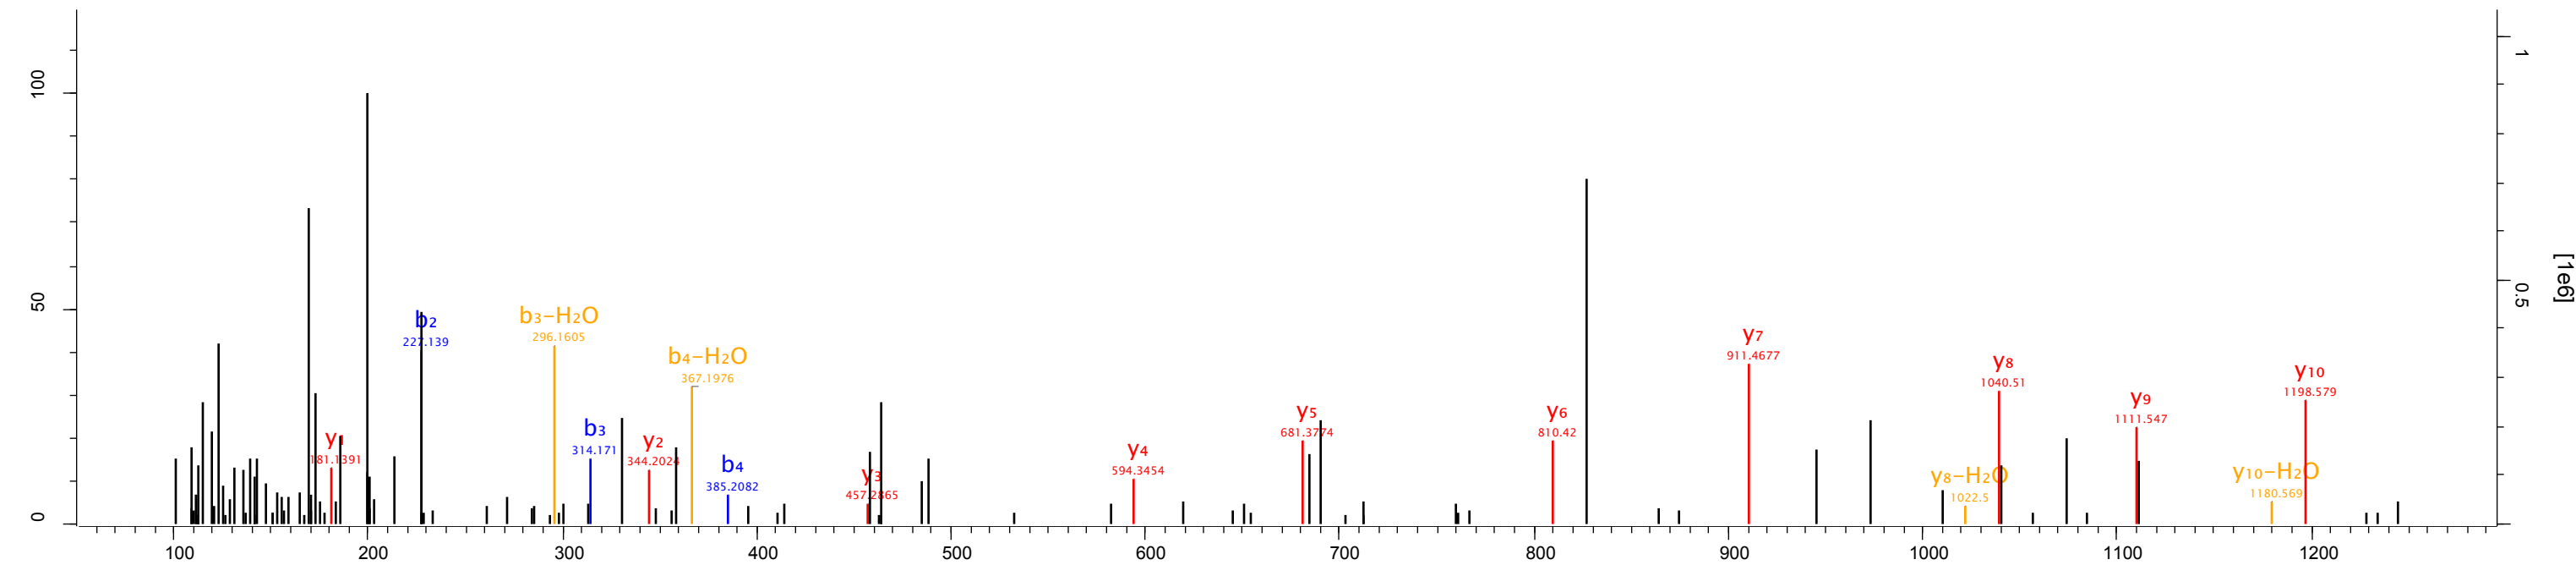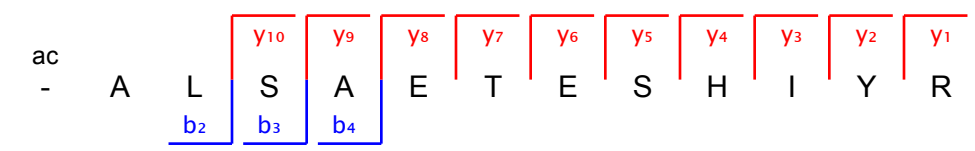

Raw file 20180707\_MaS\_A375SR\_LM\_proteome\_17 Scan 9470 Method FTMS; HCD Score 44.72 m/z 400.18

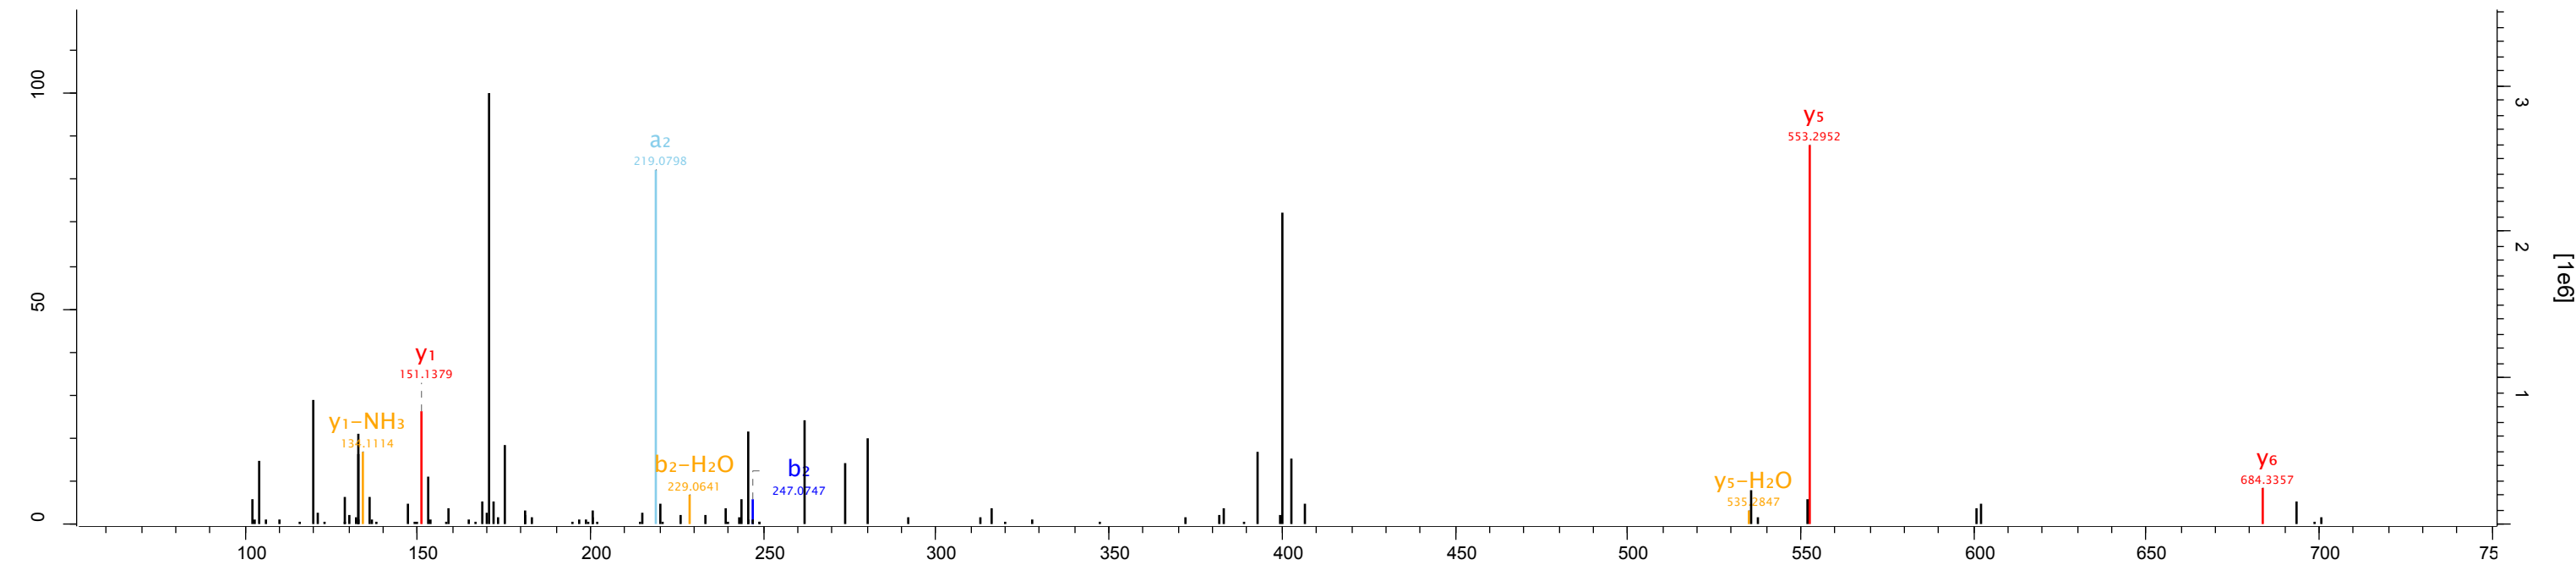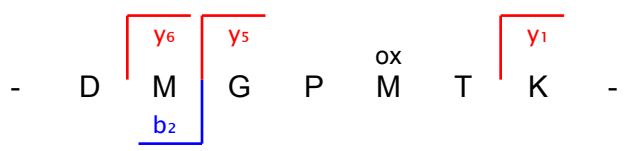

Raw file 20180707\_MaS\_A375SR\_LM\_proteome\_18 Scan 27670 Method FTMS; HCD Score 102.43 m/z 970.44 Gene names MAPK11P1L

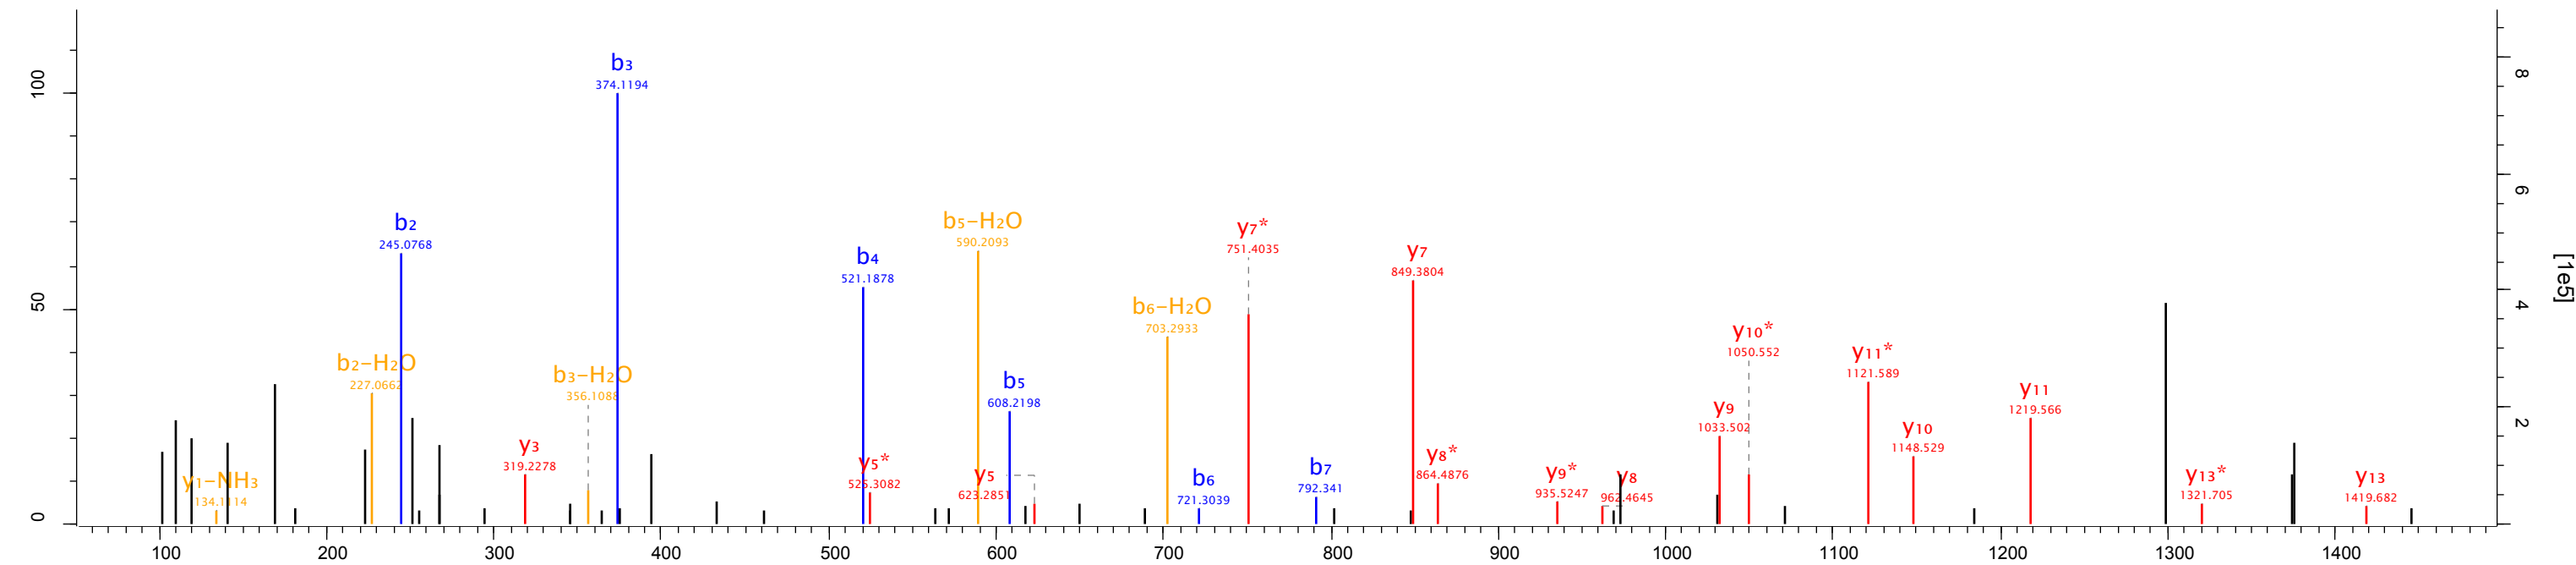

ac - S D E F S L A D A L P E H S P A K -

Fragmentation mapping: b2 (D), b3 (E), b4 (F), b5 (S), b6 (L), b7 (A), y3 (P), y5 (H), y7 (P), y8 (L), y9 (A), y10 (D), y11 (A), y13 (S)

Raw file  
20180707\_MaS\_A375SR\_LM\_proteome\_21

Scan: 25090  
Method: FTMS; HCD  
Score: 78.15  
m/z: 499.27  
Gene names: SEPT3

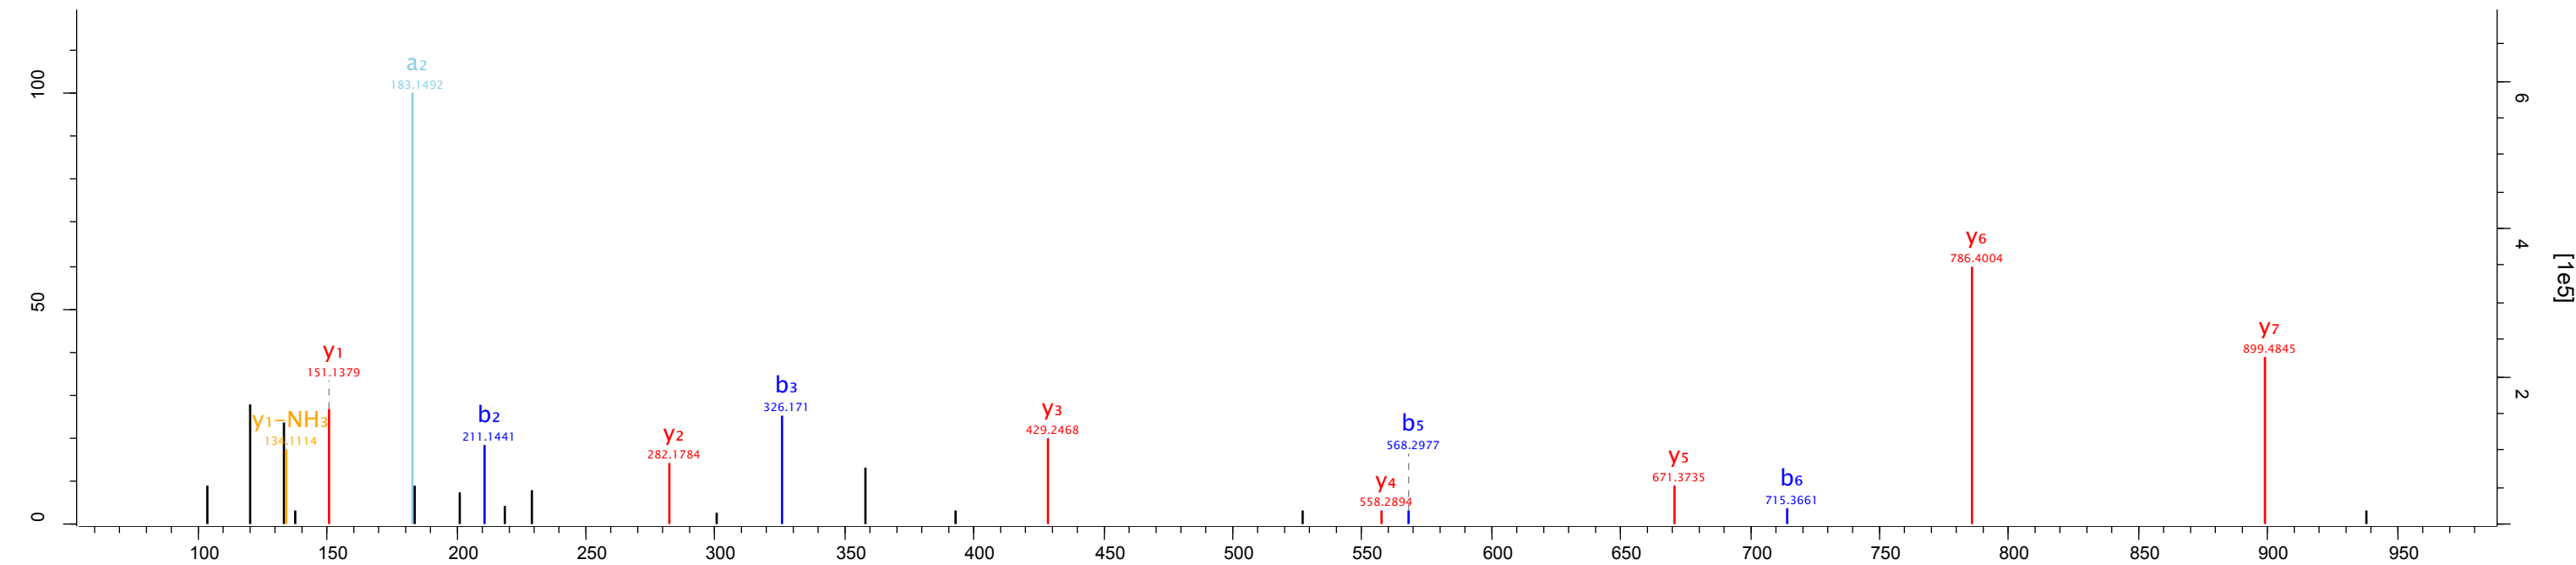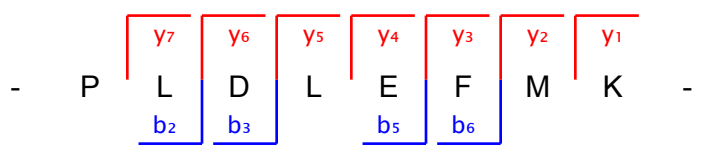

Raw file

20180707\_MaS\_A375SR\_LM\_proteome\_21

| Scan  | Method    | Score | m/z    | Gene names |
|-------|-----------|-------|--------|------------|
| 26750 | FTMS; HCD | 9.23  | 937.17 | C1orf85    |

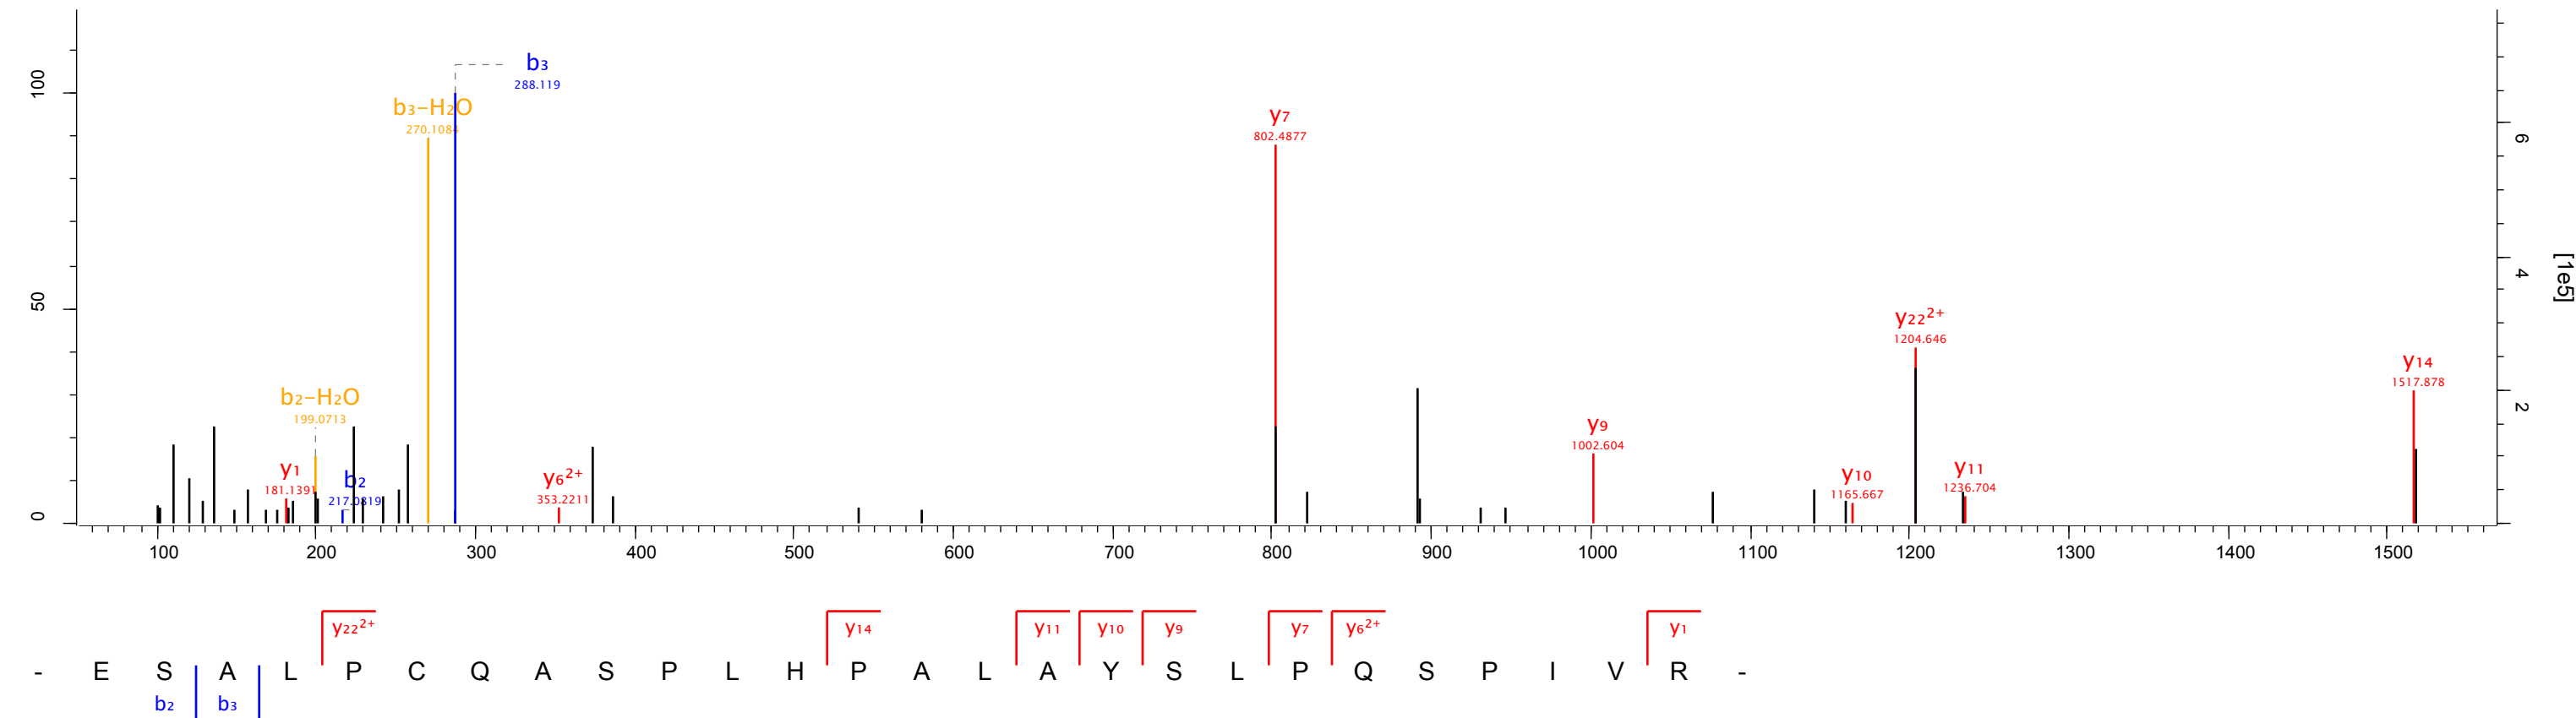

Raw file 20180707\_MaS\_A375SR\_LM\_proteome\_24 Scan 8660 Method FTMS; HCD Score 58.7 m/z 591.3

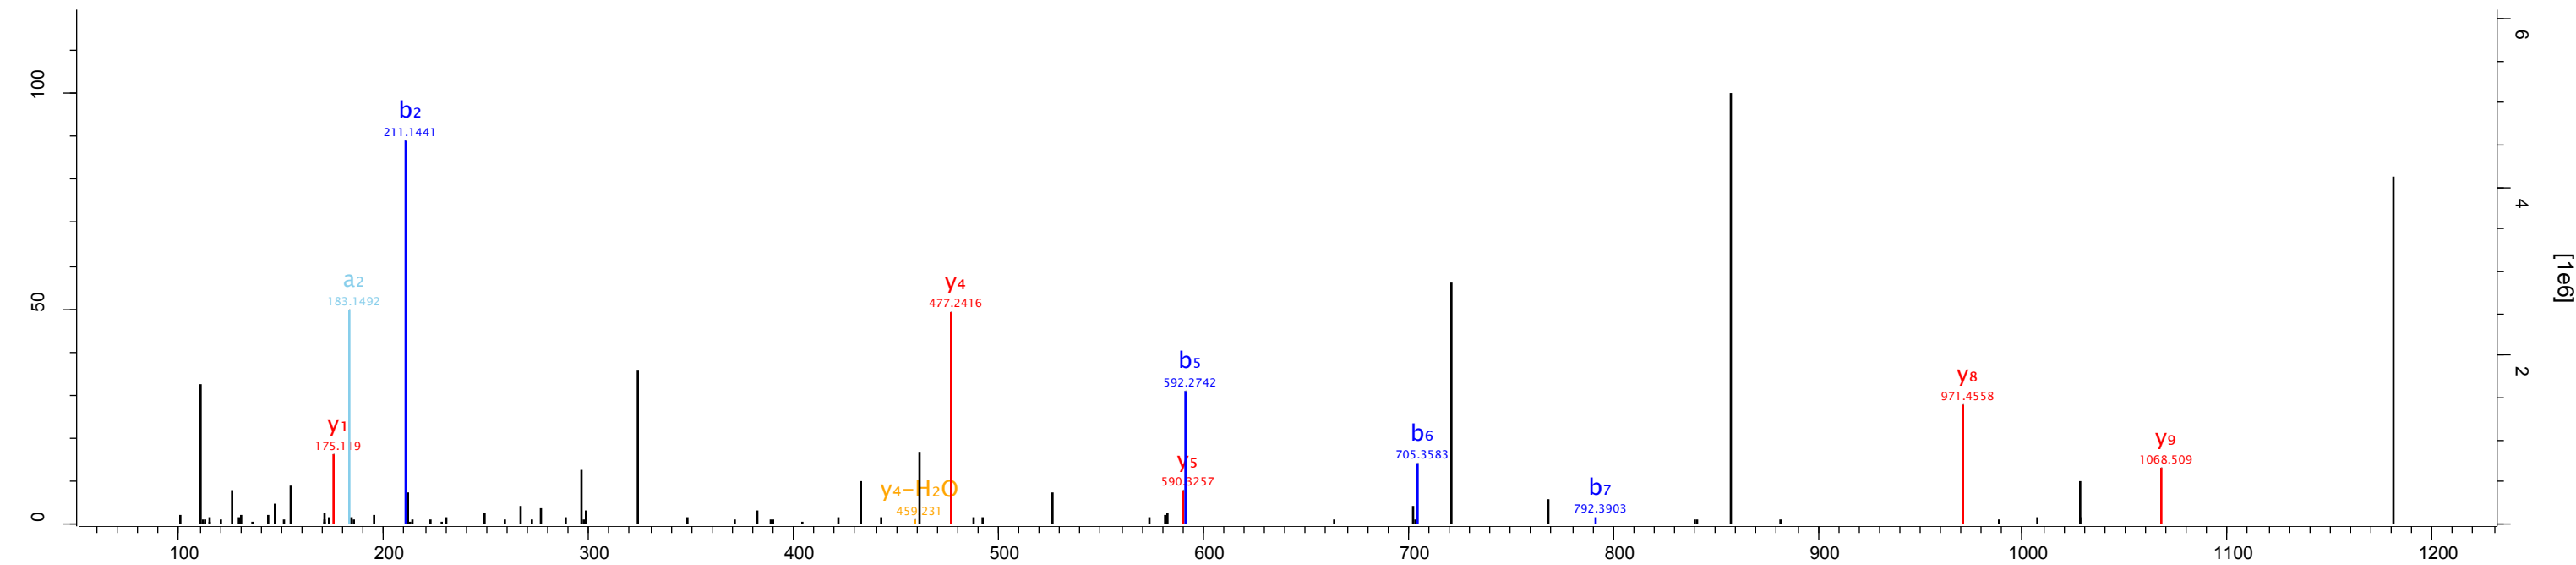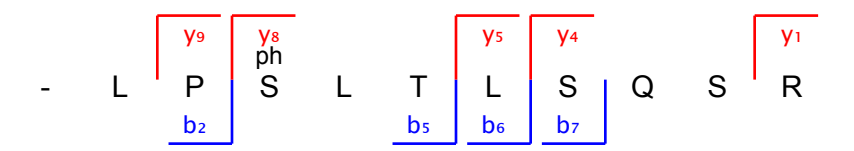

Raw file: 20180707\_MaS\_A375SR\_ML\_proteome\_01  
 Scan: 15050 Method: FTMS; HCD Score: 97.43 m/z: 376.56 Gene names: PNKD

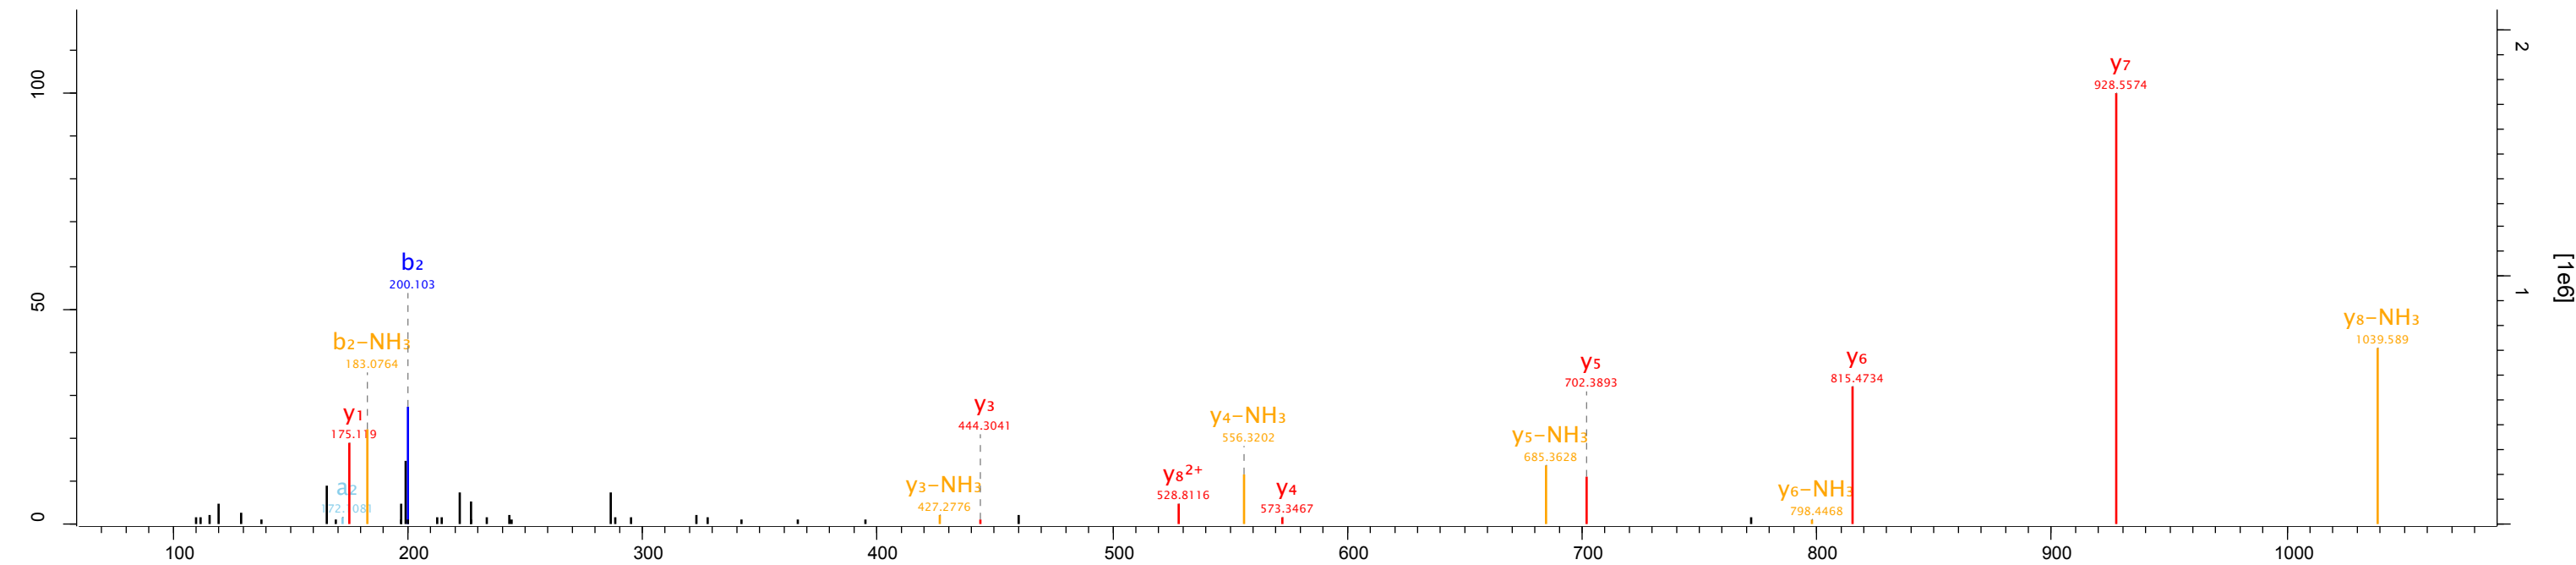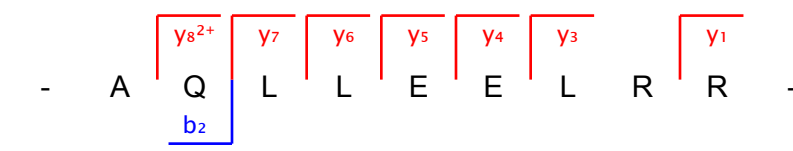



Raw file 20180707\_MaS\_A375SR\_ML\_proteome\_01 Scan 23650 Method FTMS; HCD Score 41.51 m/z 939.47 Gene names SIRT7

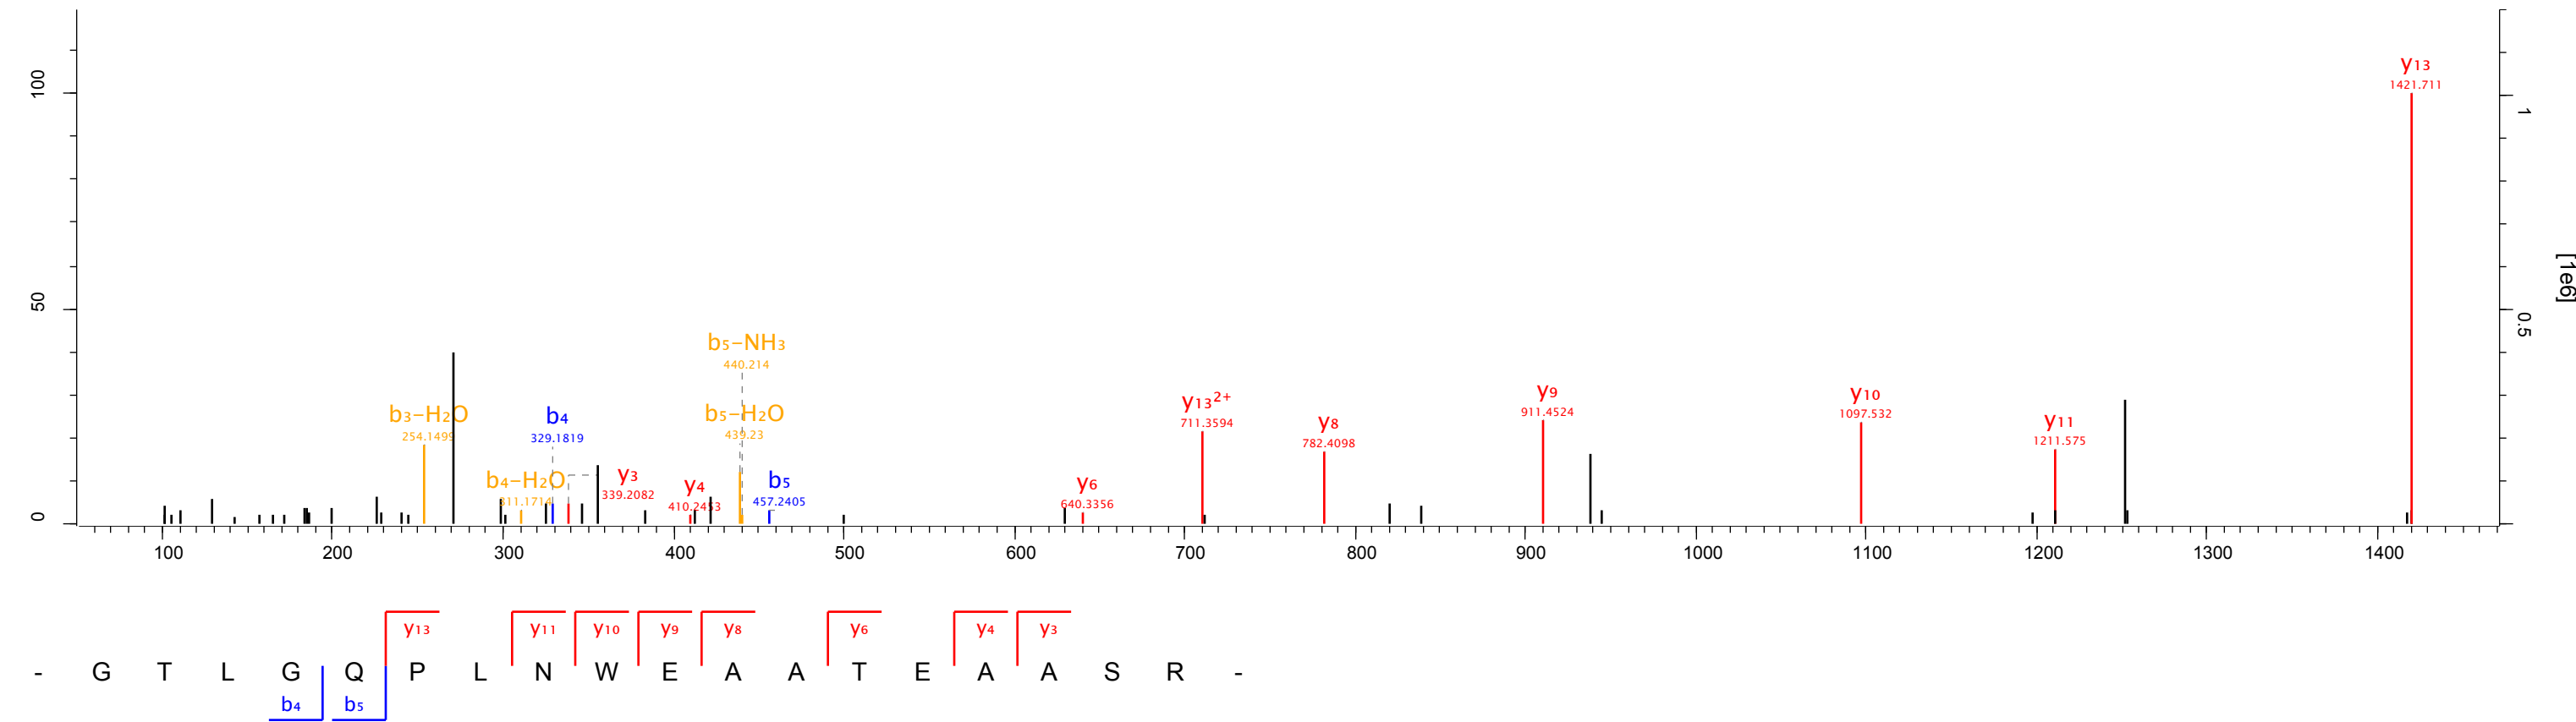

Raw file 20180707\_MaS\_A375SR\_ML\_proteome\_01 Scan 27380 Method FTMS; HCD Score 210.34 m/z 846.45 Gene names S100A1

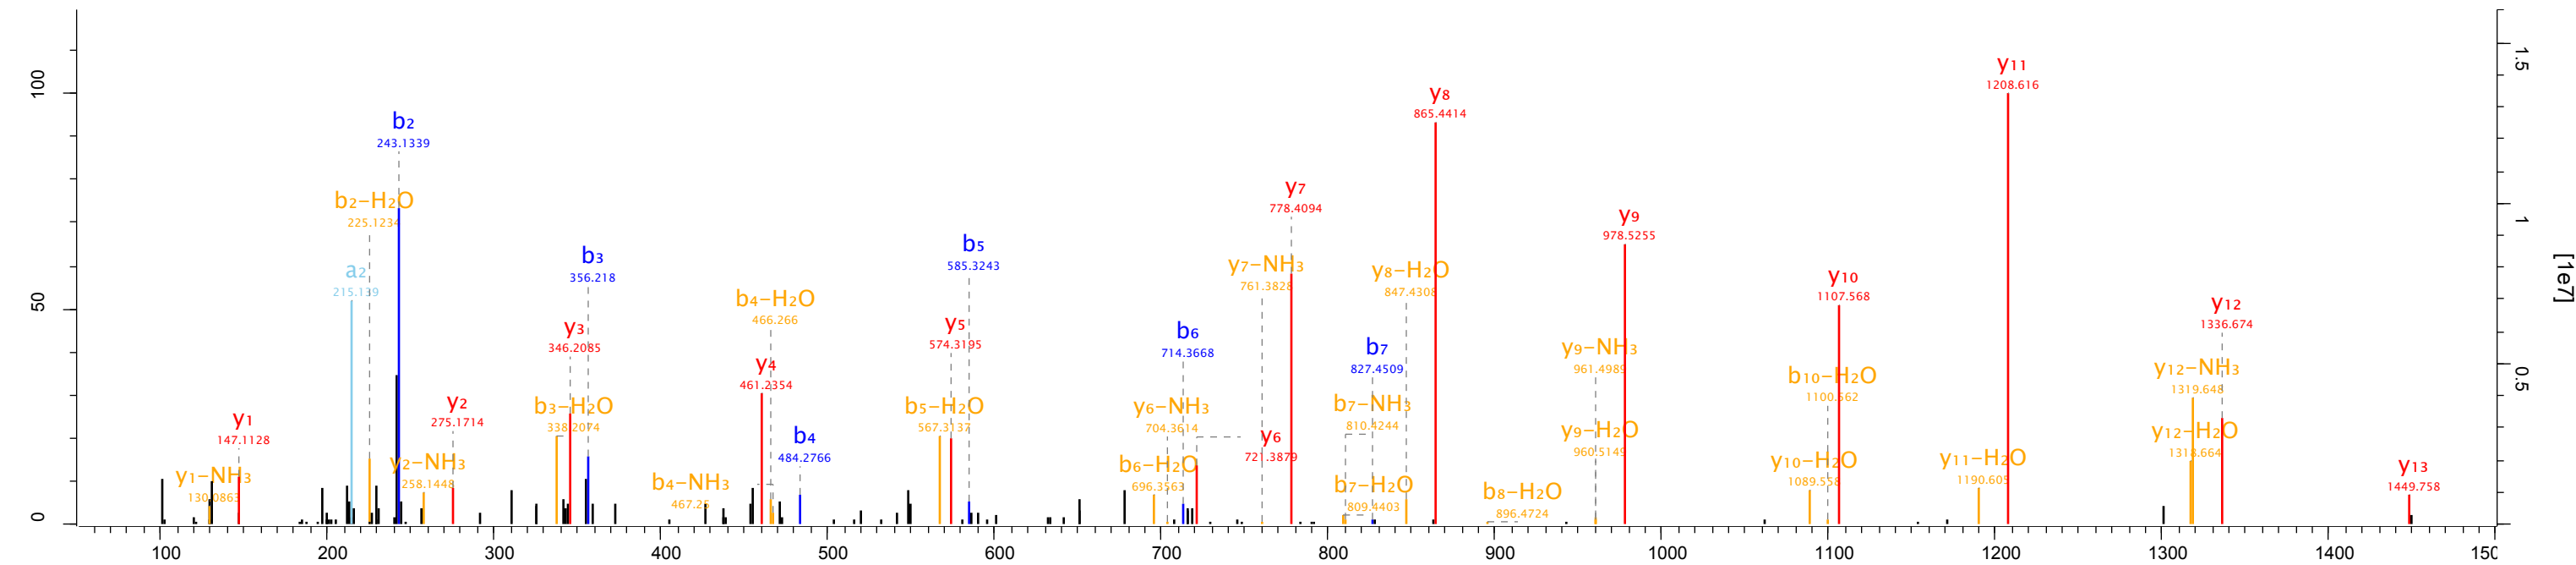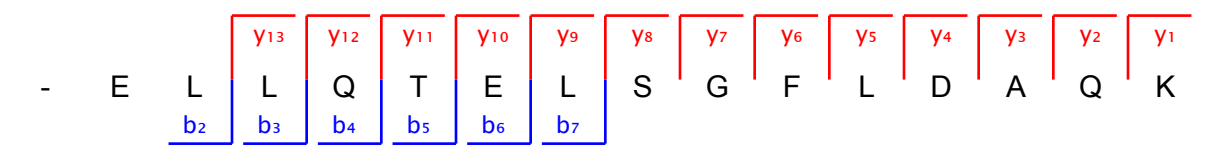

Raw file 20180707\_MaS\_A375SR\_ML\_proteome\_02  
 Scan 23900 Method FTMS; HCD Score 19.24 m/z 431.23 Gene names IGFALS

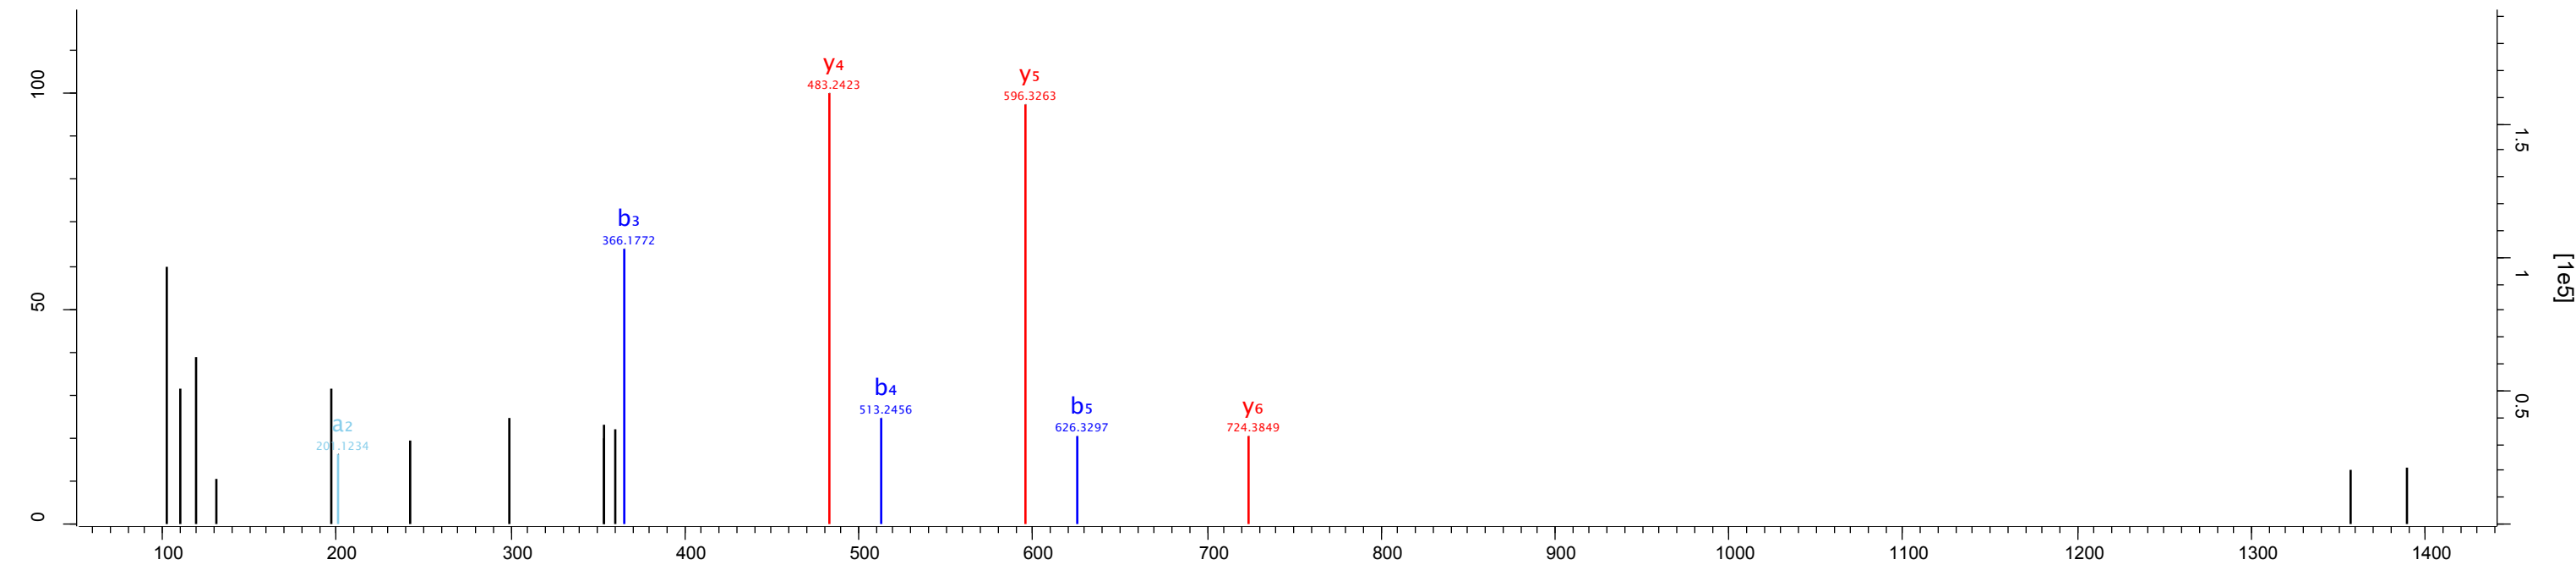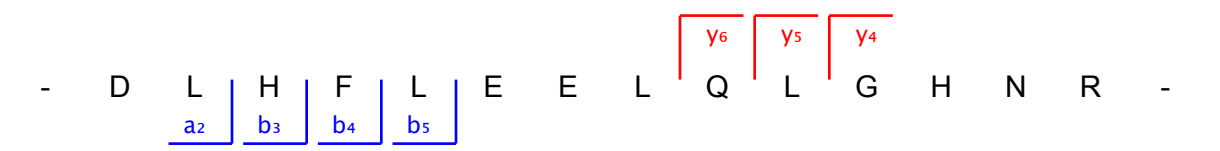

Raw file  
20180707\_MaS\_A375SR\_ML\_proteome\_02

Scan Method Score m/z Gene names  
6440 FTMS; HCD 128.57 429.21 PTGDS

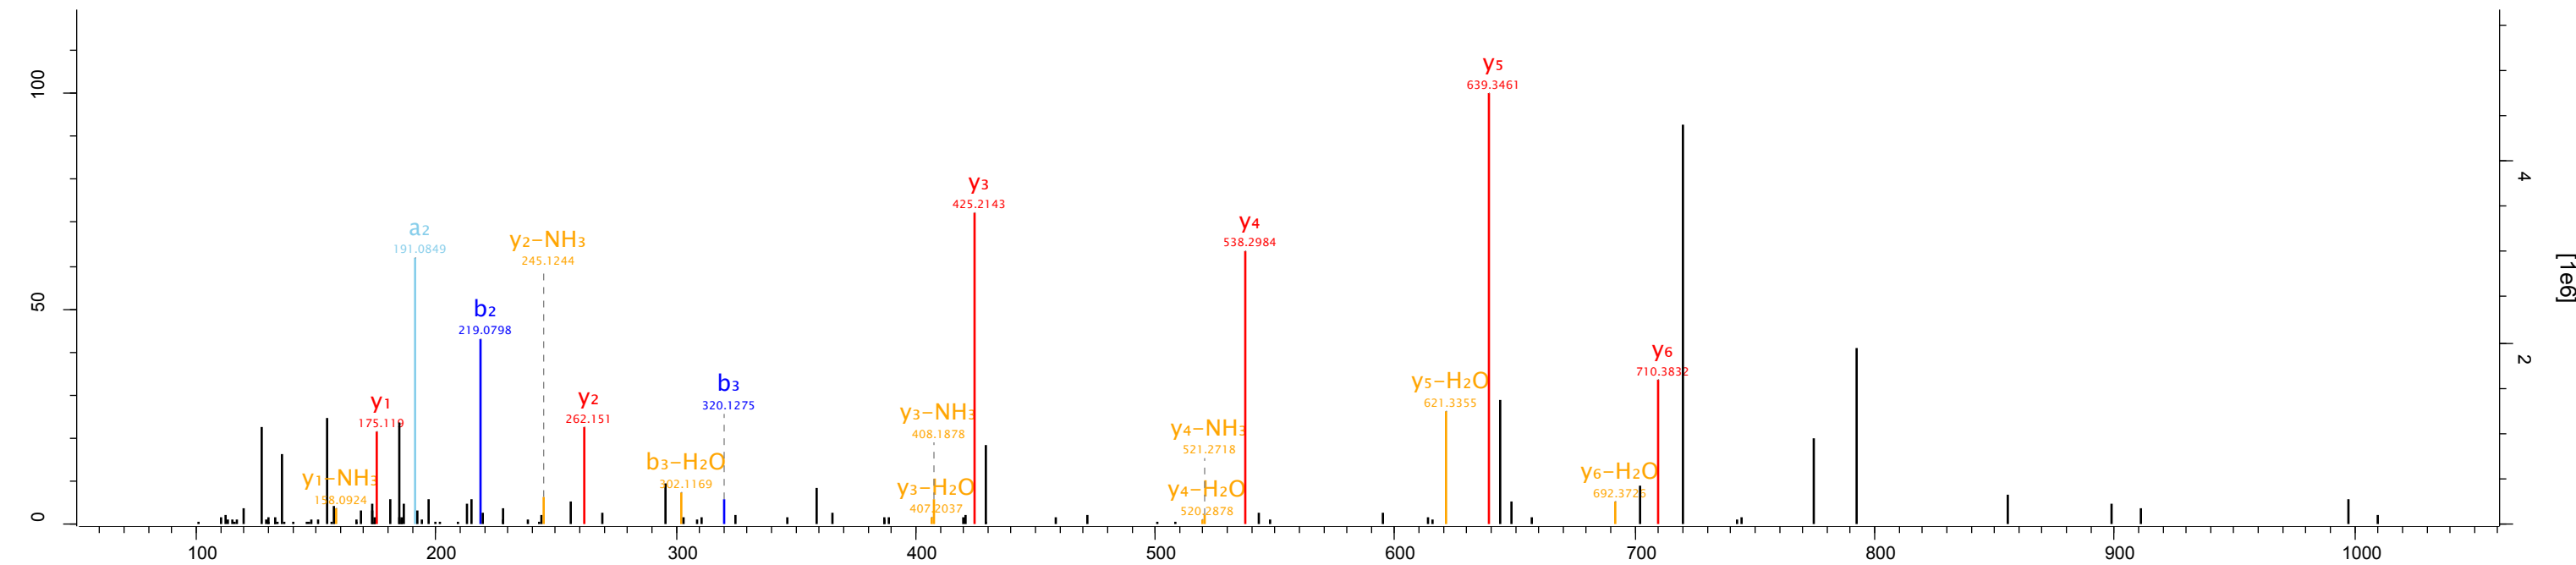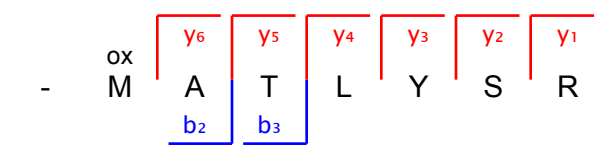

Raw file 20180707\_MaS\_A375SR\_ML\_proteome\_03 Scan 18170 Method FTMS; HCD Score 104.86 m/z 822.9 Gene names UBXN2A

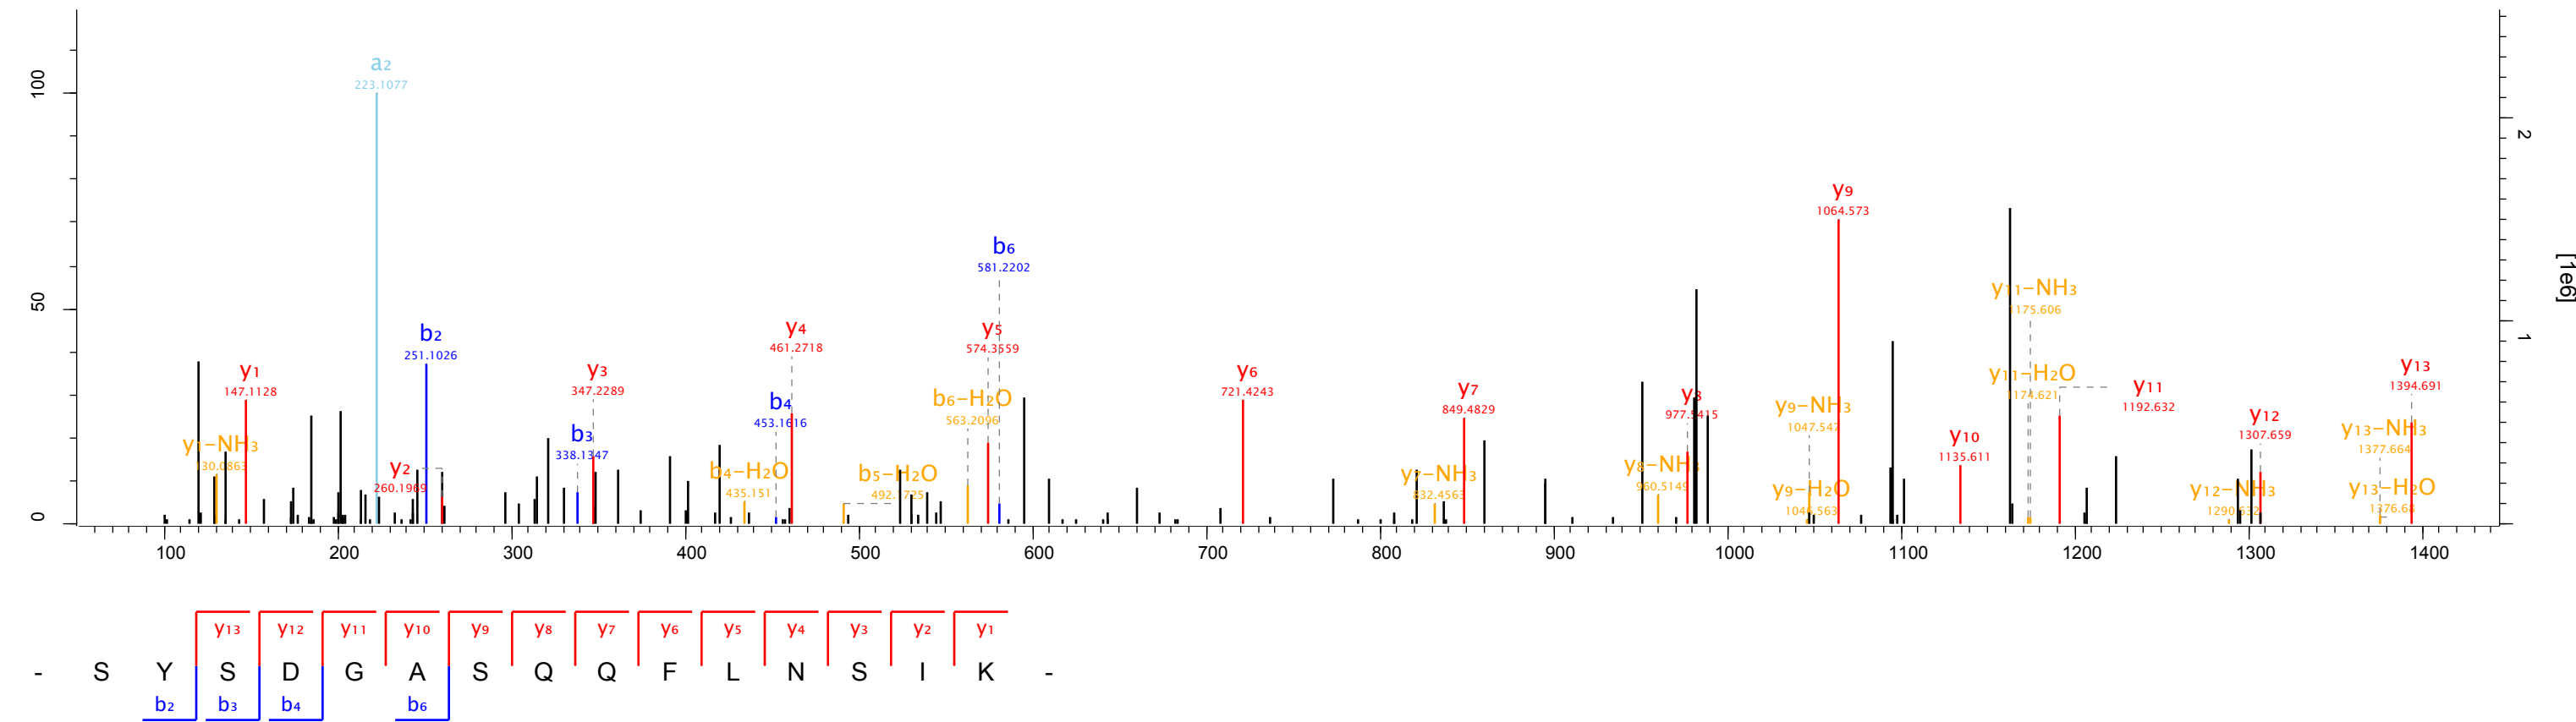

Raw file  
20180707\_MaS\_A375SR\_ML\_proteome\_03

Scan      Method      Score      m/z  
24740    FTMS; HCD    46.06    811.91

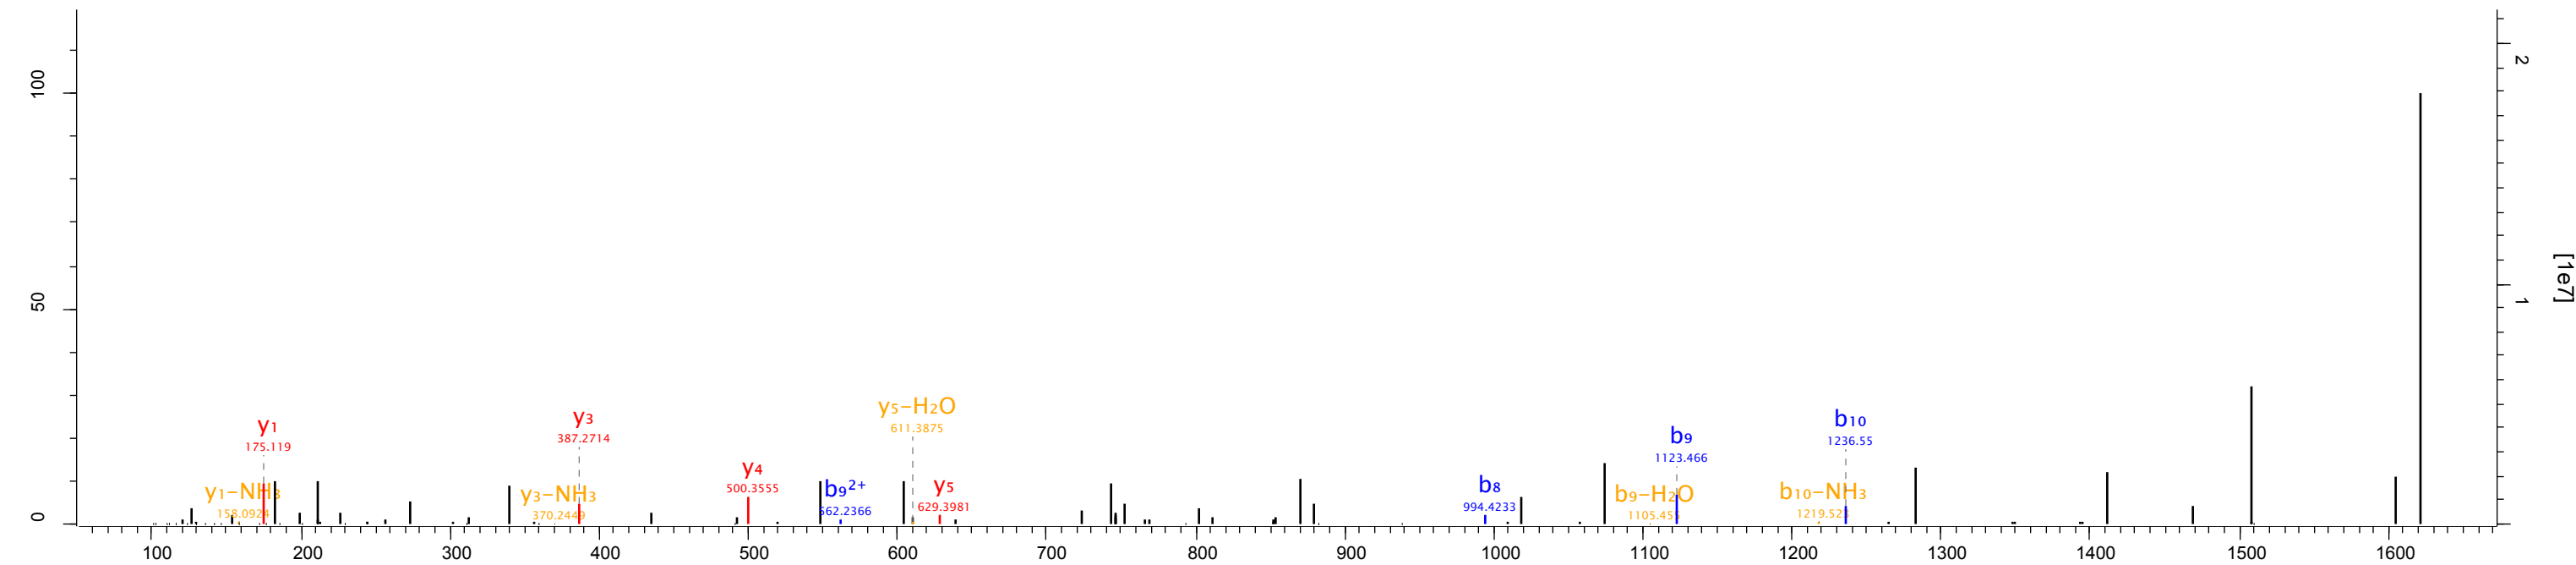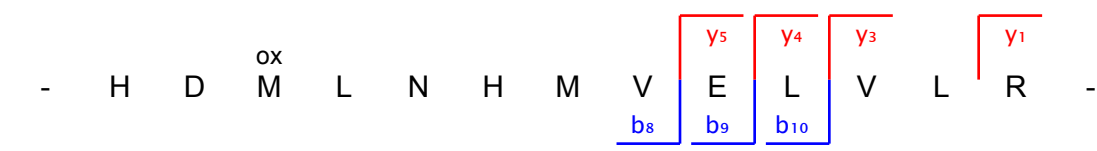

Raw file: 20180707\_MaS\_A375SR\_ML\_proteome\_04  
 Scan: 22030 Method: FTMS; HCD Score: 56.55 m/z: 600.32 Gene names: MEF2BNB

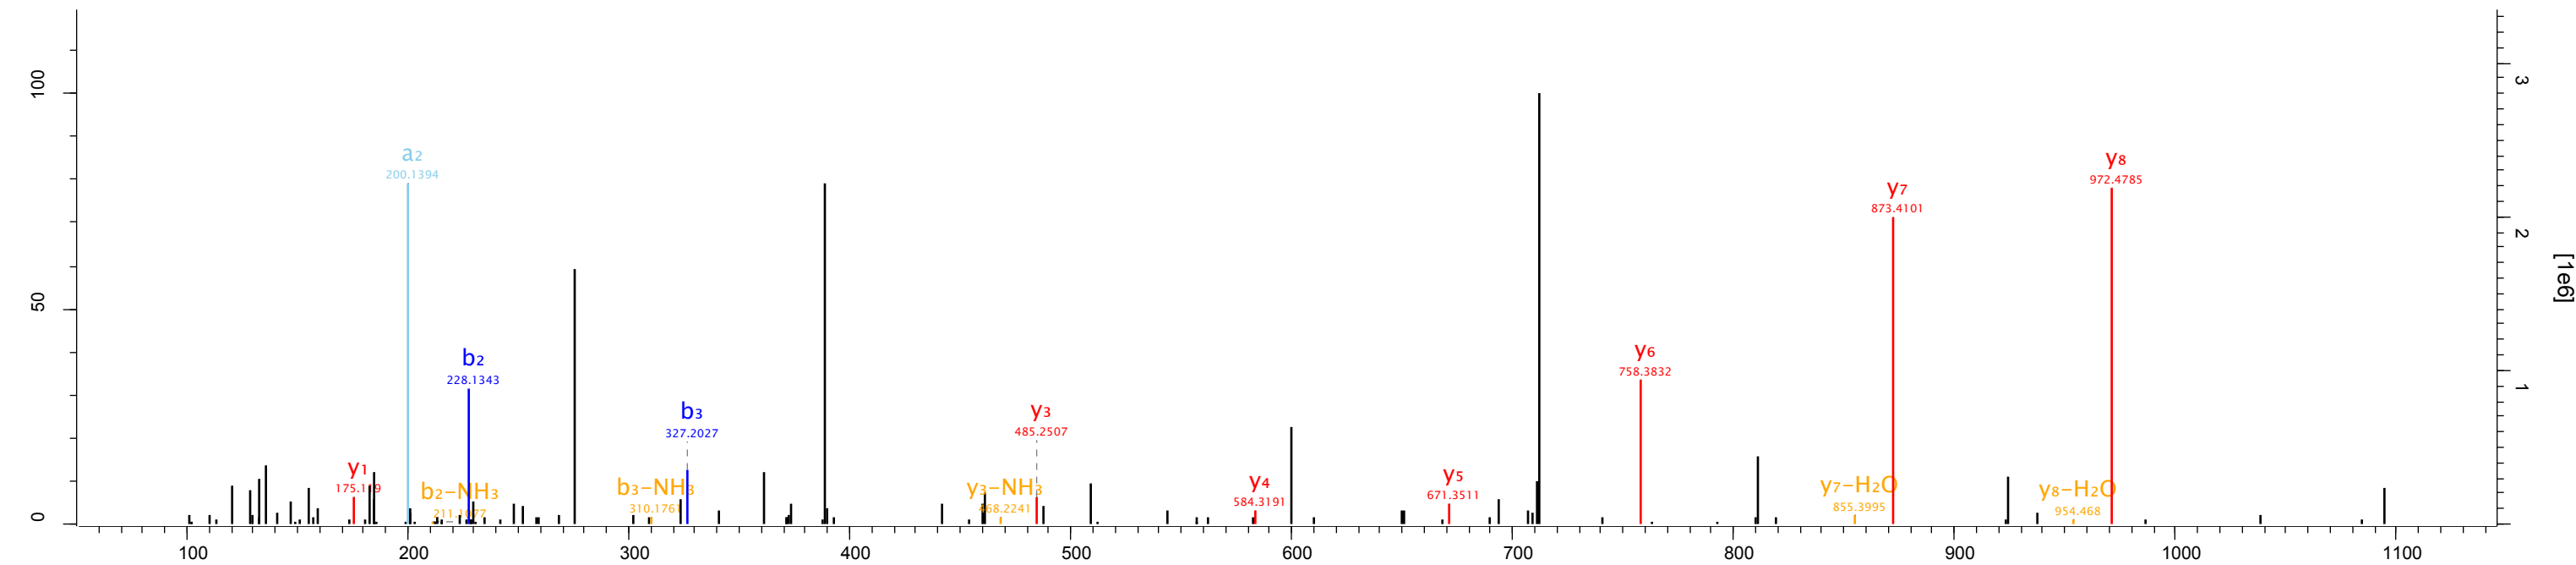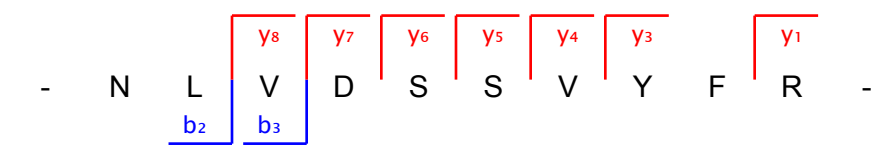

Raw file  
20180707\_MaS\_A375SR\_ML\_proteome\_04

Scan: 24770  
Method: FTMS; HCD  
Score: 78.95  
m/z: 917.42  
Gene names: MIEF2

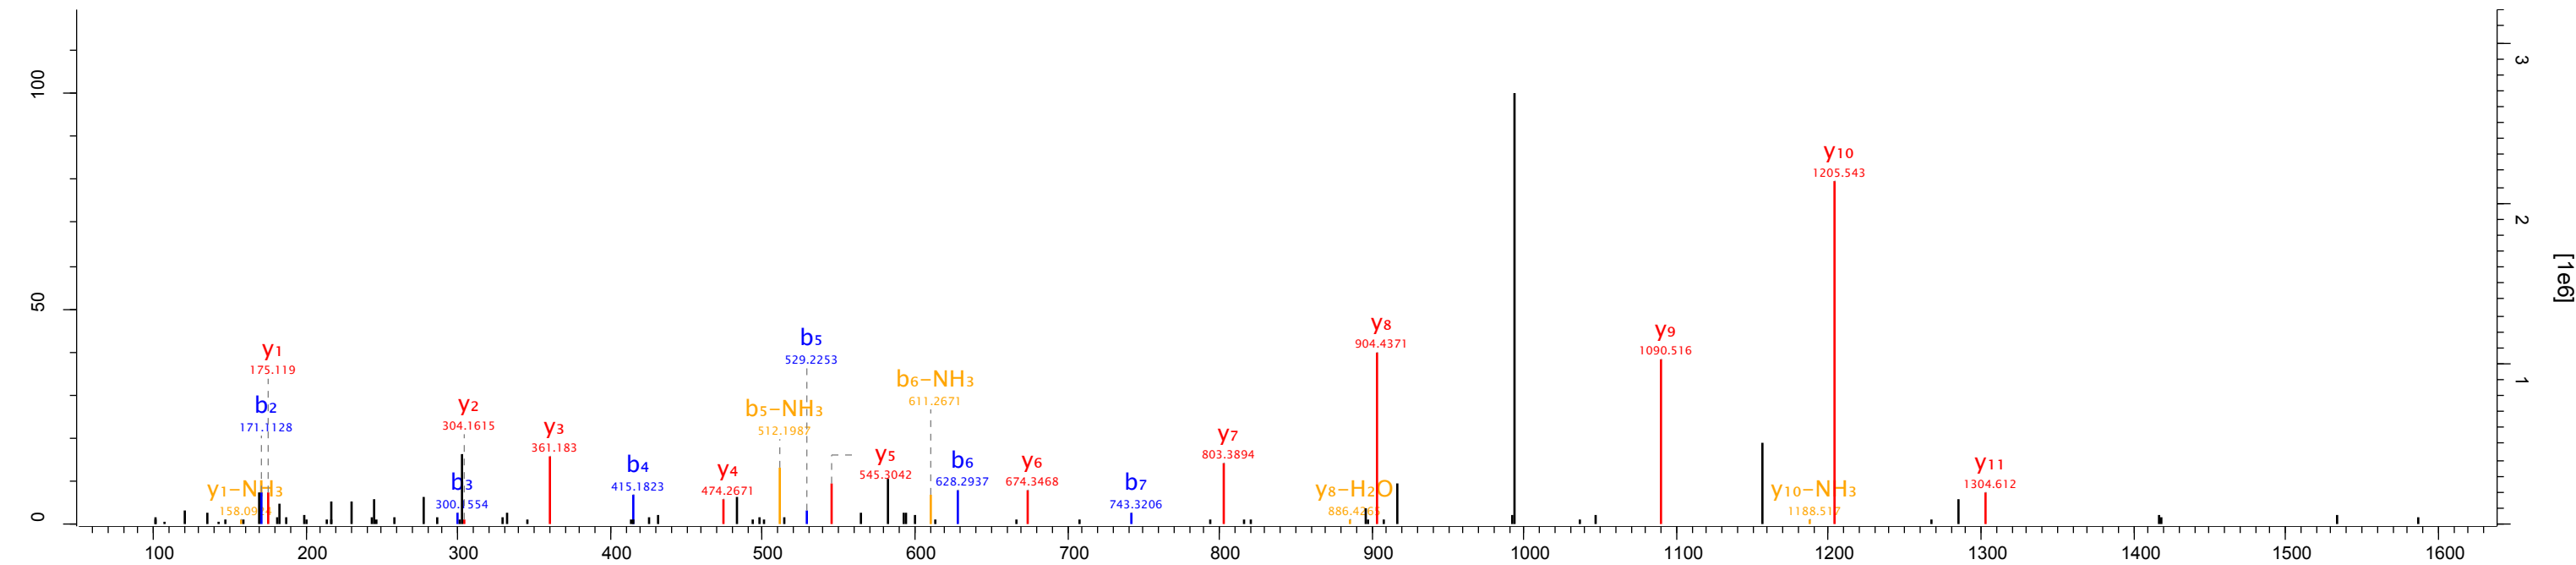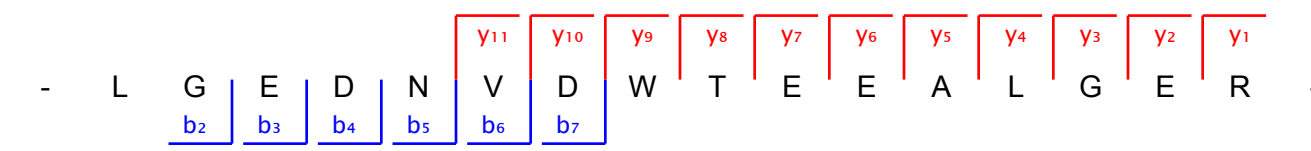



Raw file  
20180707\_MaS\_A375SR\_ML\_proteome\_05

Scan: 26770  
Method: FTMS; HCD  
Score: 80.75  
m/z: 748.88  
Gene names: PGS1;DUSP6

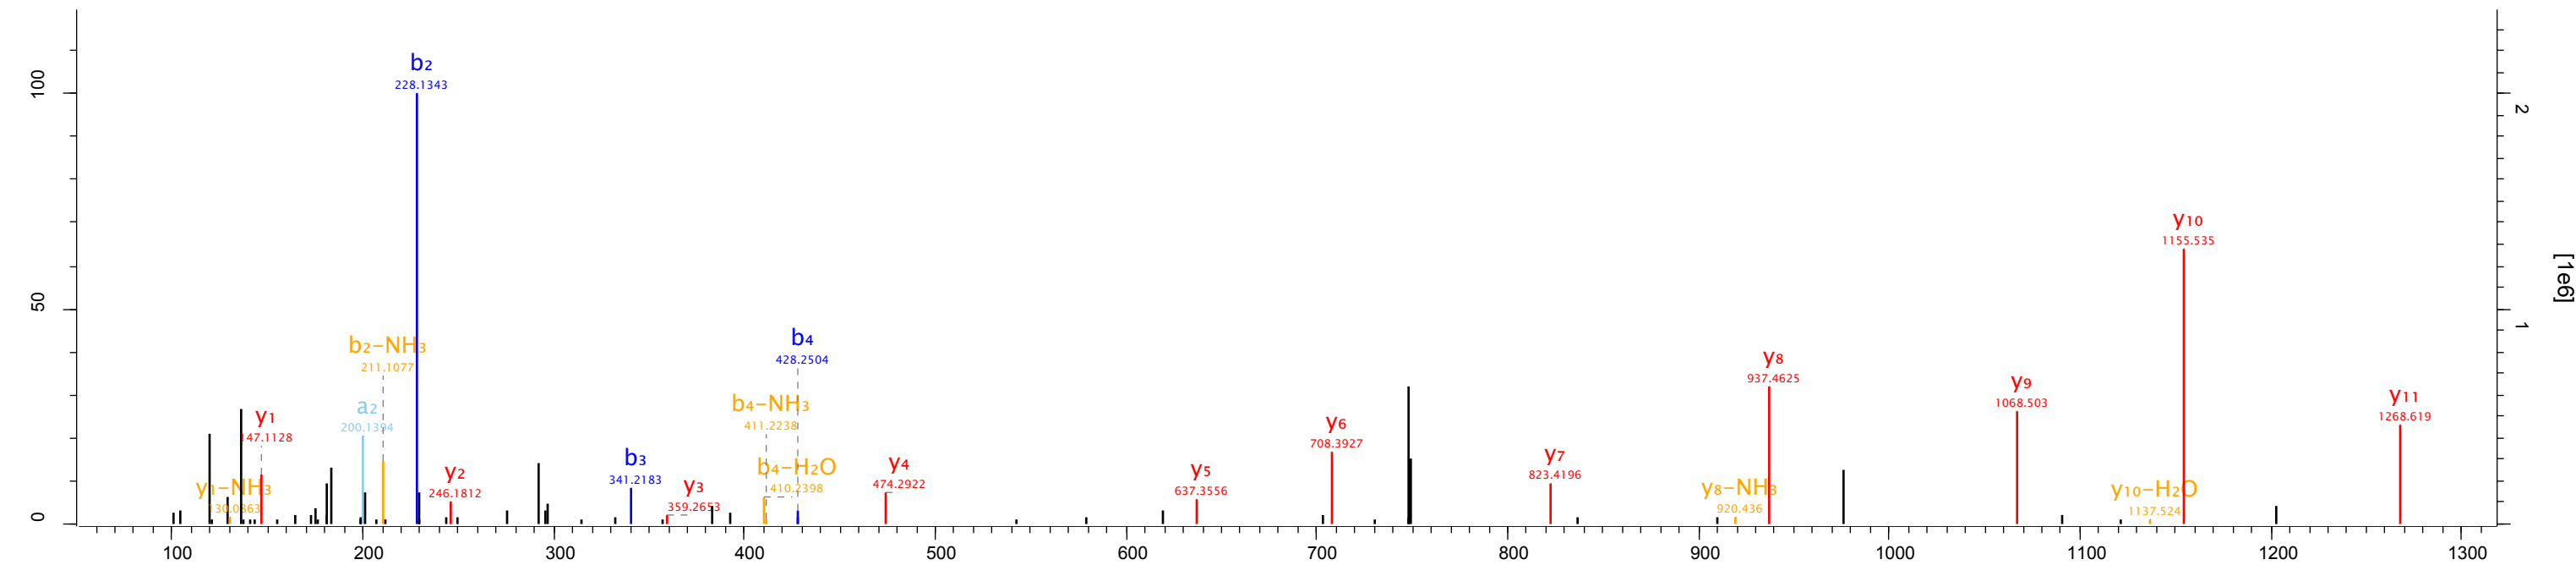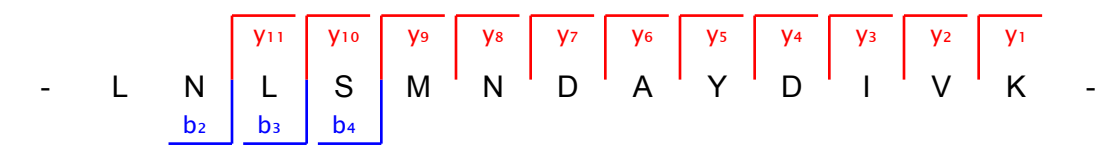

Raw file 20180707\_MaS\_A375SR\_ML\_proteome\_05 Scan 8990 Method FTMS; HCD Score 56.2 m/z 770.83 Gene names GOLGA8F;GOLGA8DP

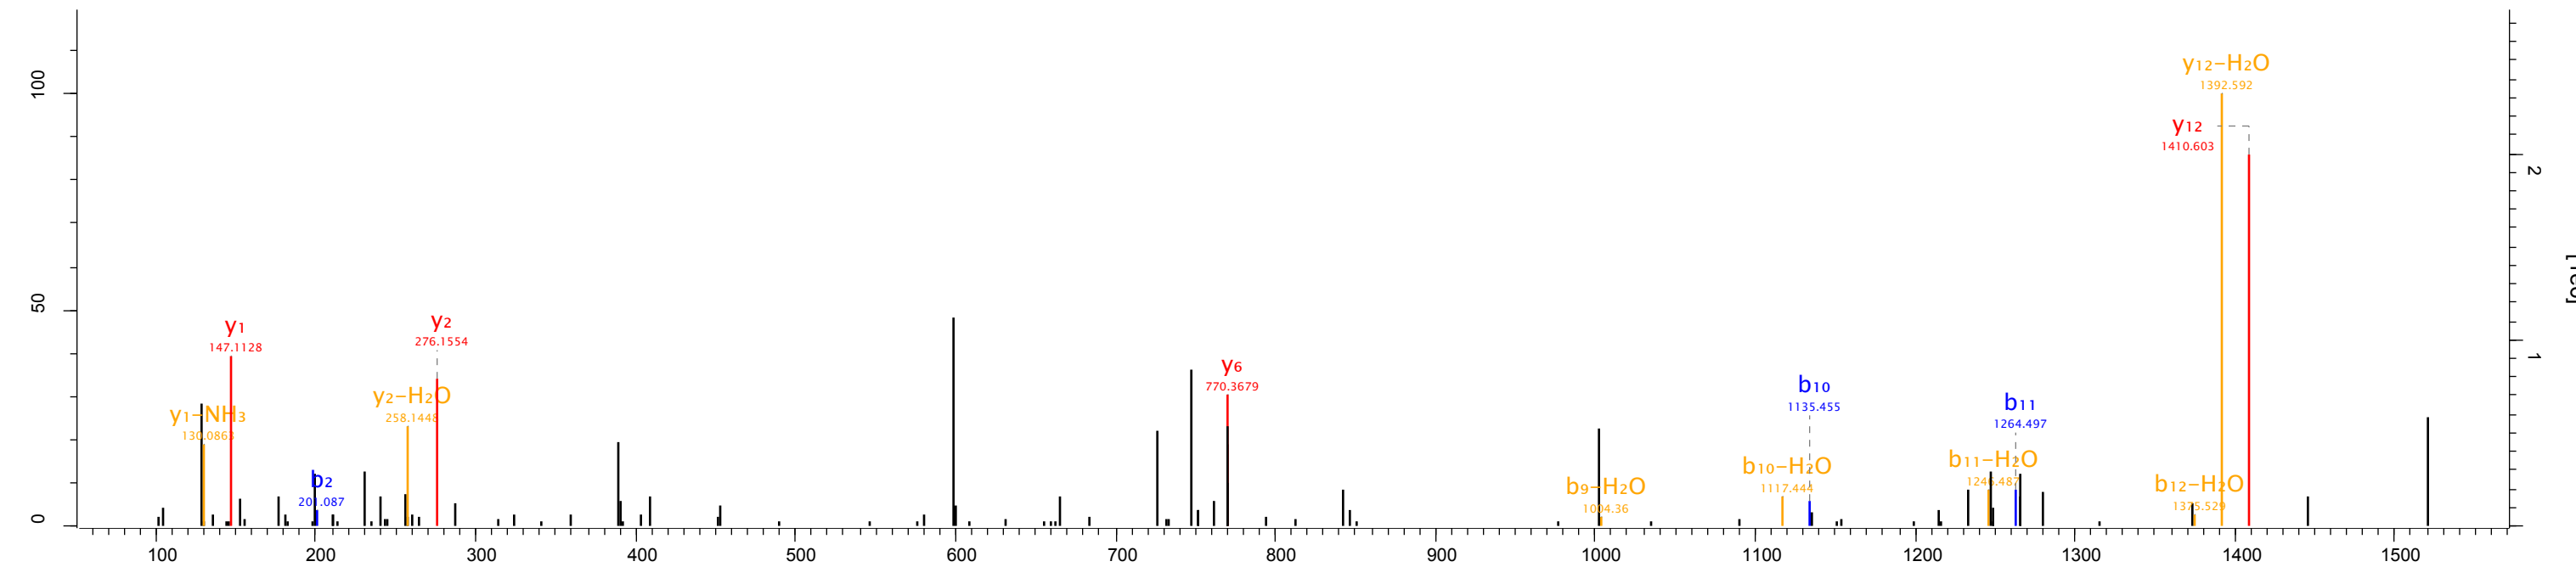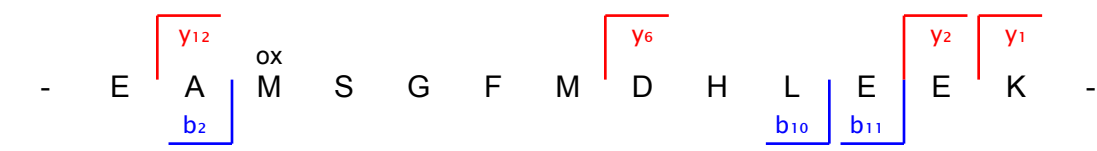

Raw file  
20180707\_MaS\_A375SR\_ML\_proteome\_06

Scan 27790 Method FTMS; HCD Score 183.24 m/z 968.42 Gene names MAPK11P1L

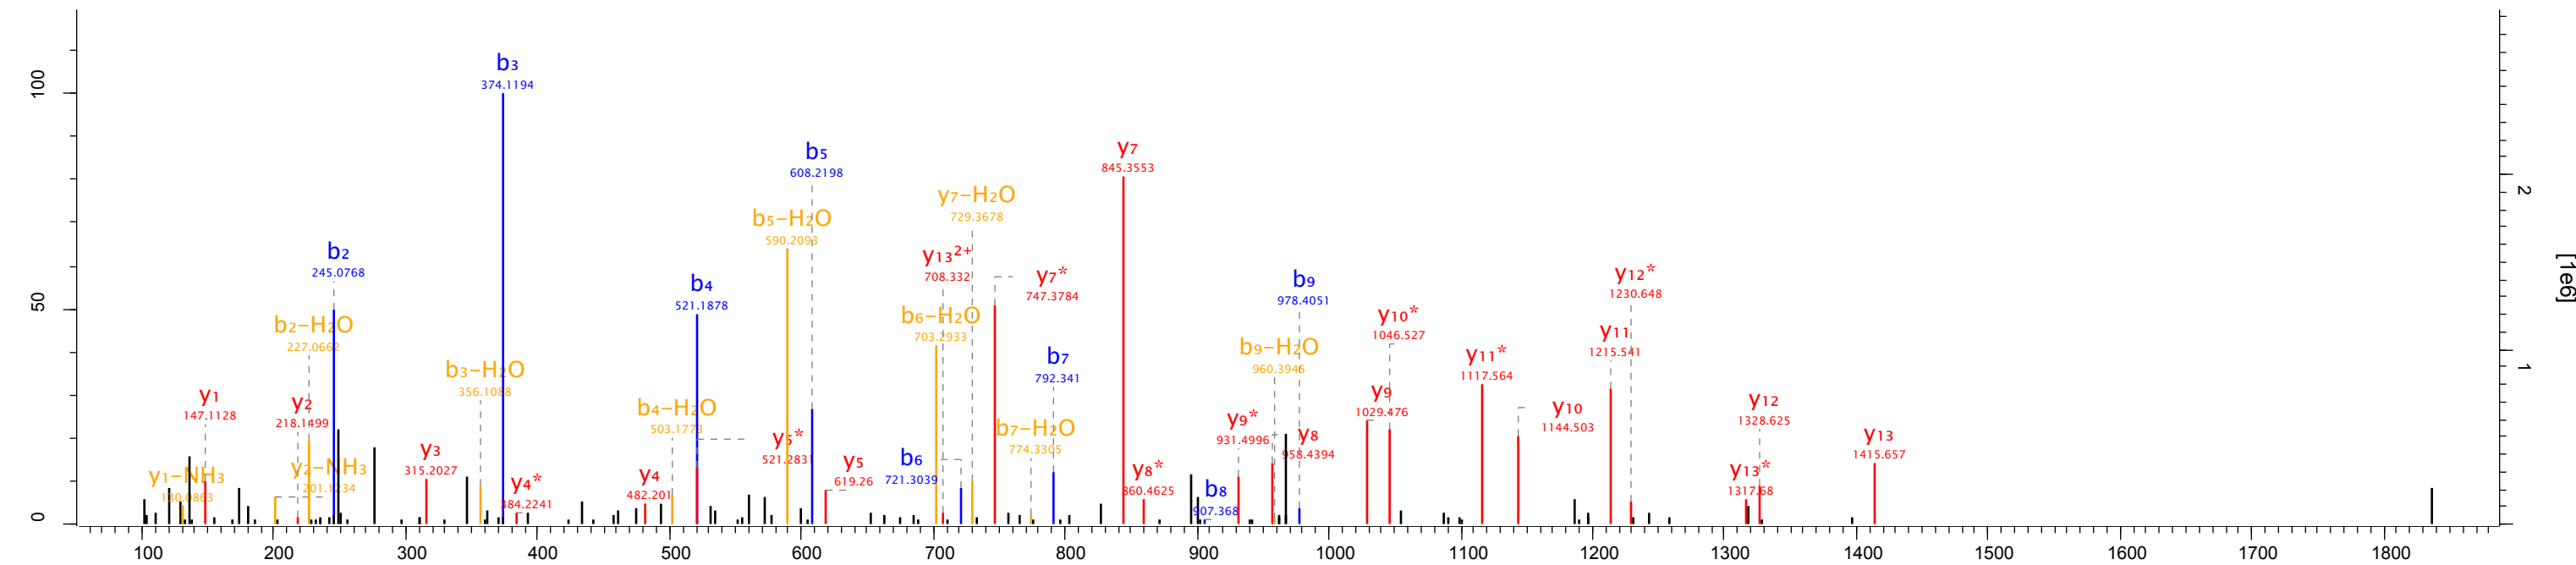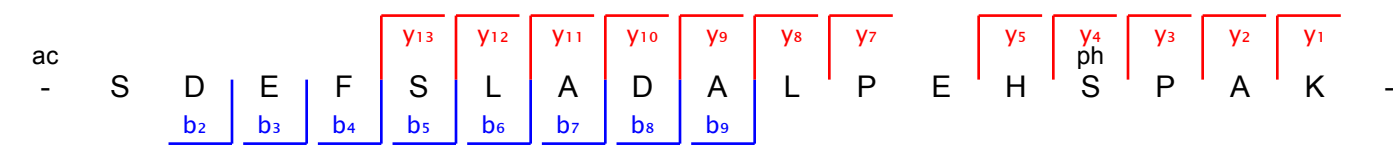

Raw file  
20180707\_MaS\_A375SR\_ML\_proteome\_07

Scan 15290 Method FTMS; HCD Score 46.02 m/z 452.75

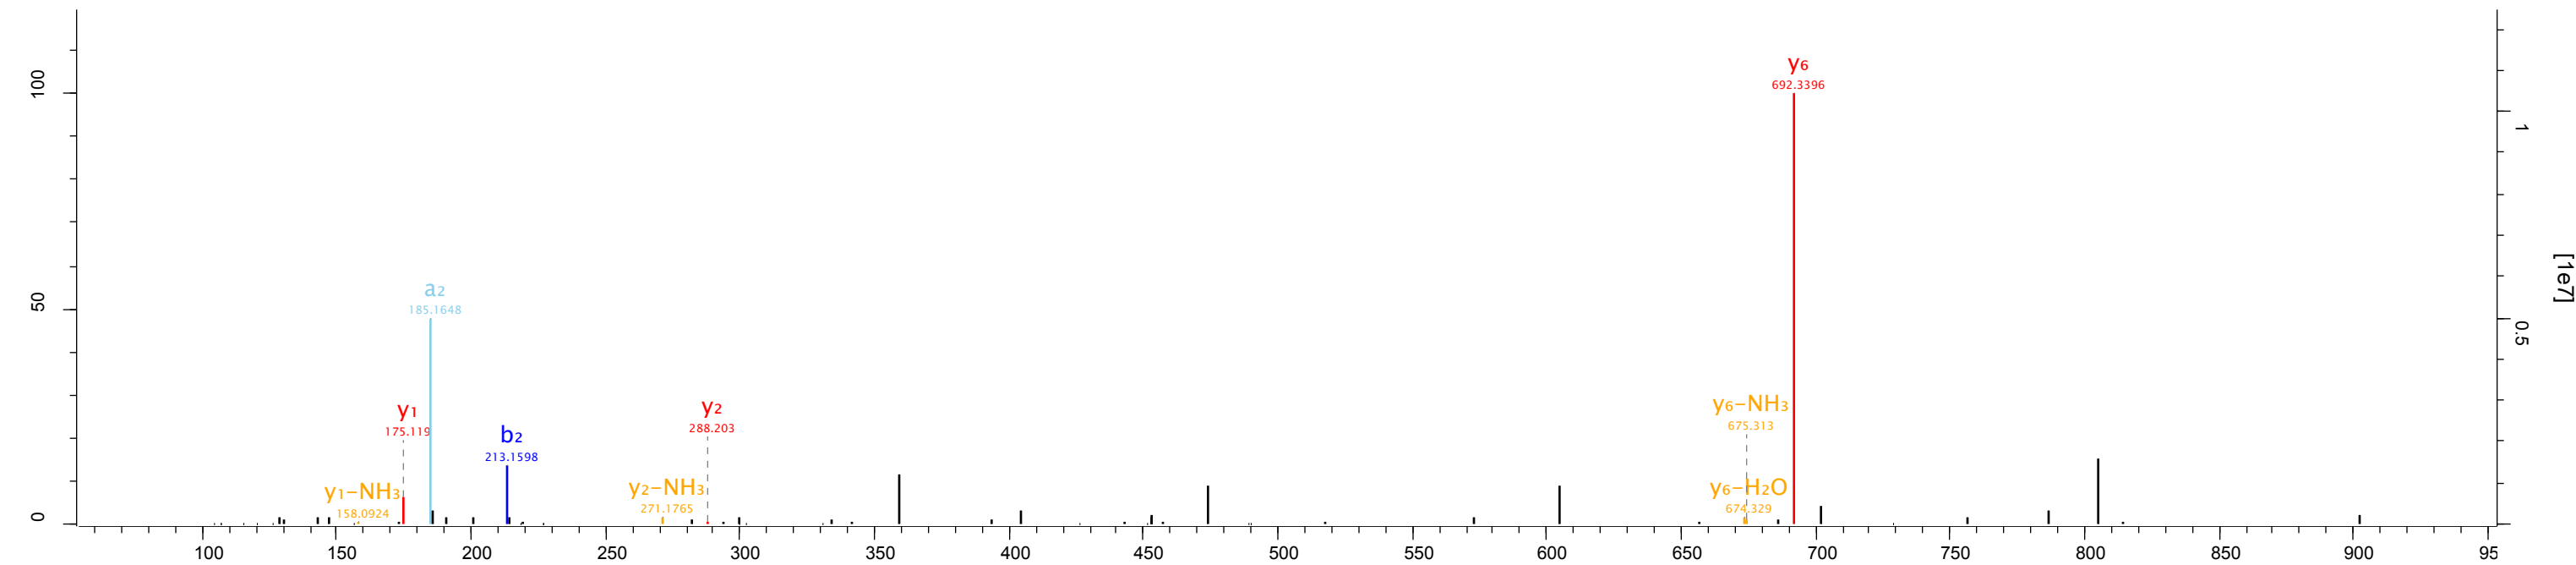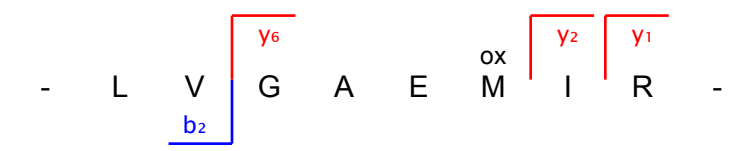

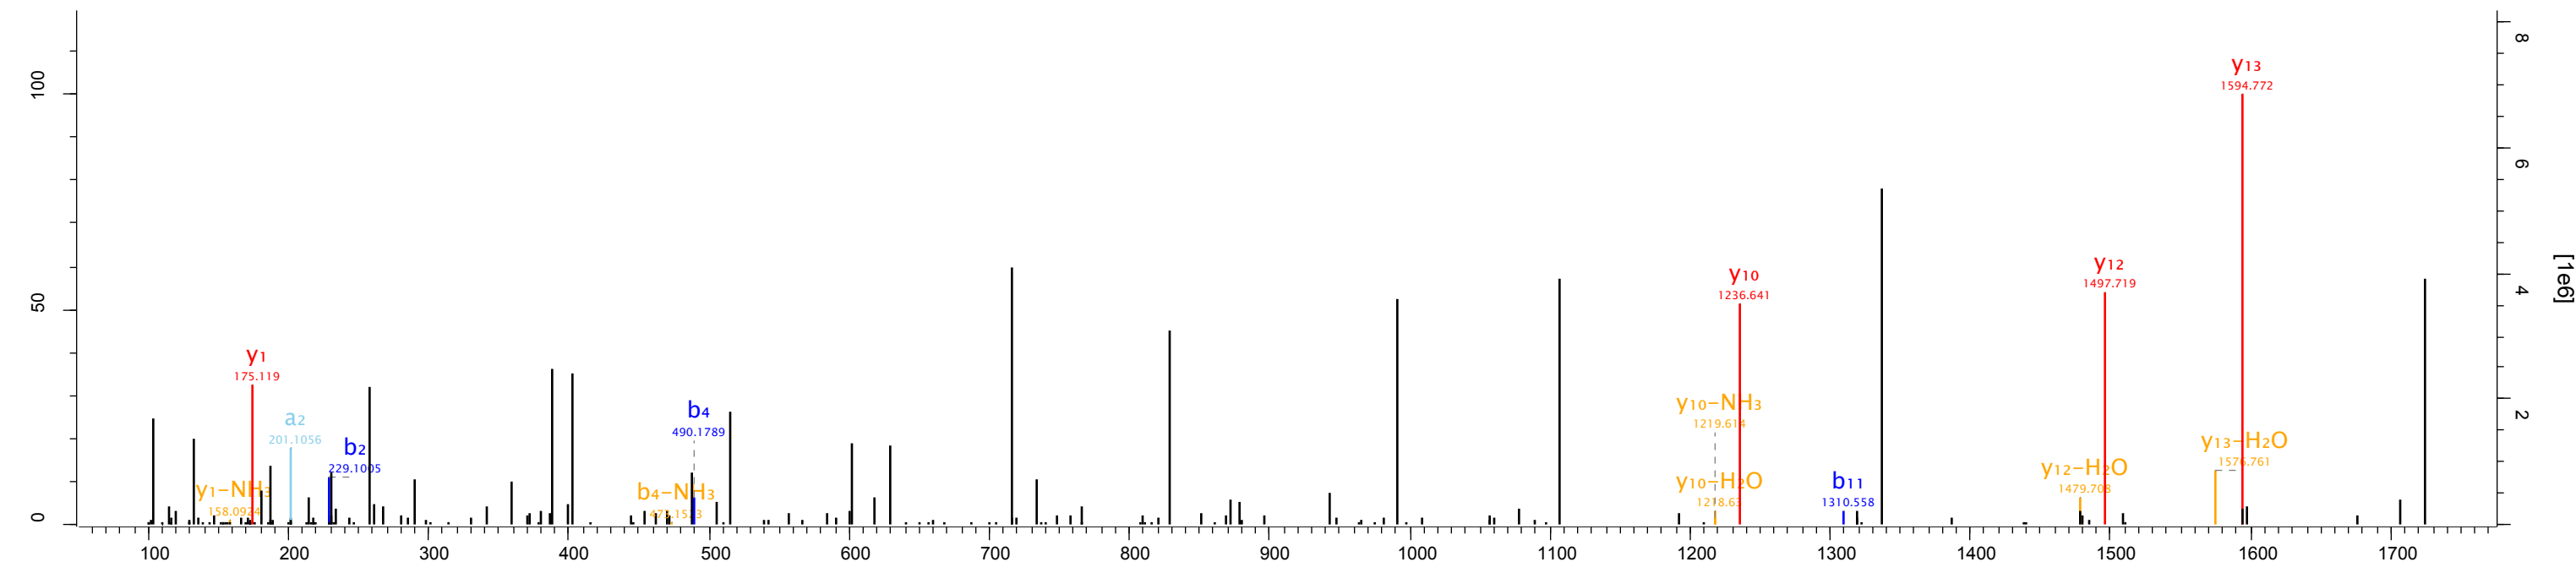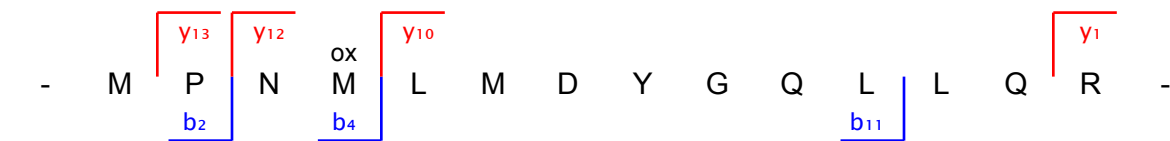

Raw file  
20180707\_MaS\_A375SR\_ML\_proteome\_09

Scan Method Score m/z Gene names  
20770 FTMS; HCD 70.84 696.34 SLC31A1

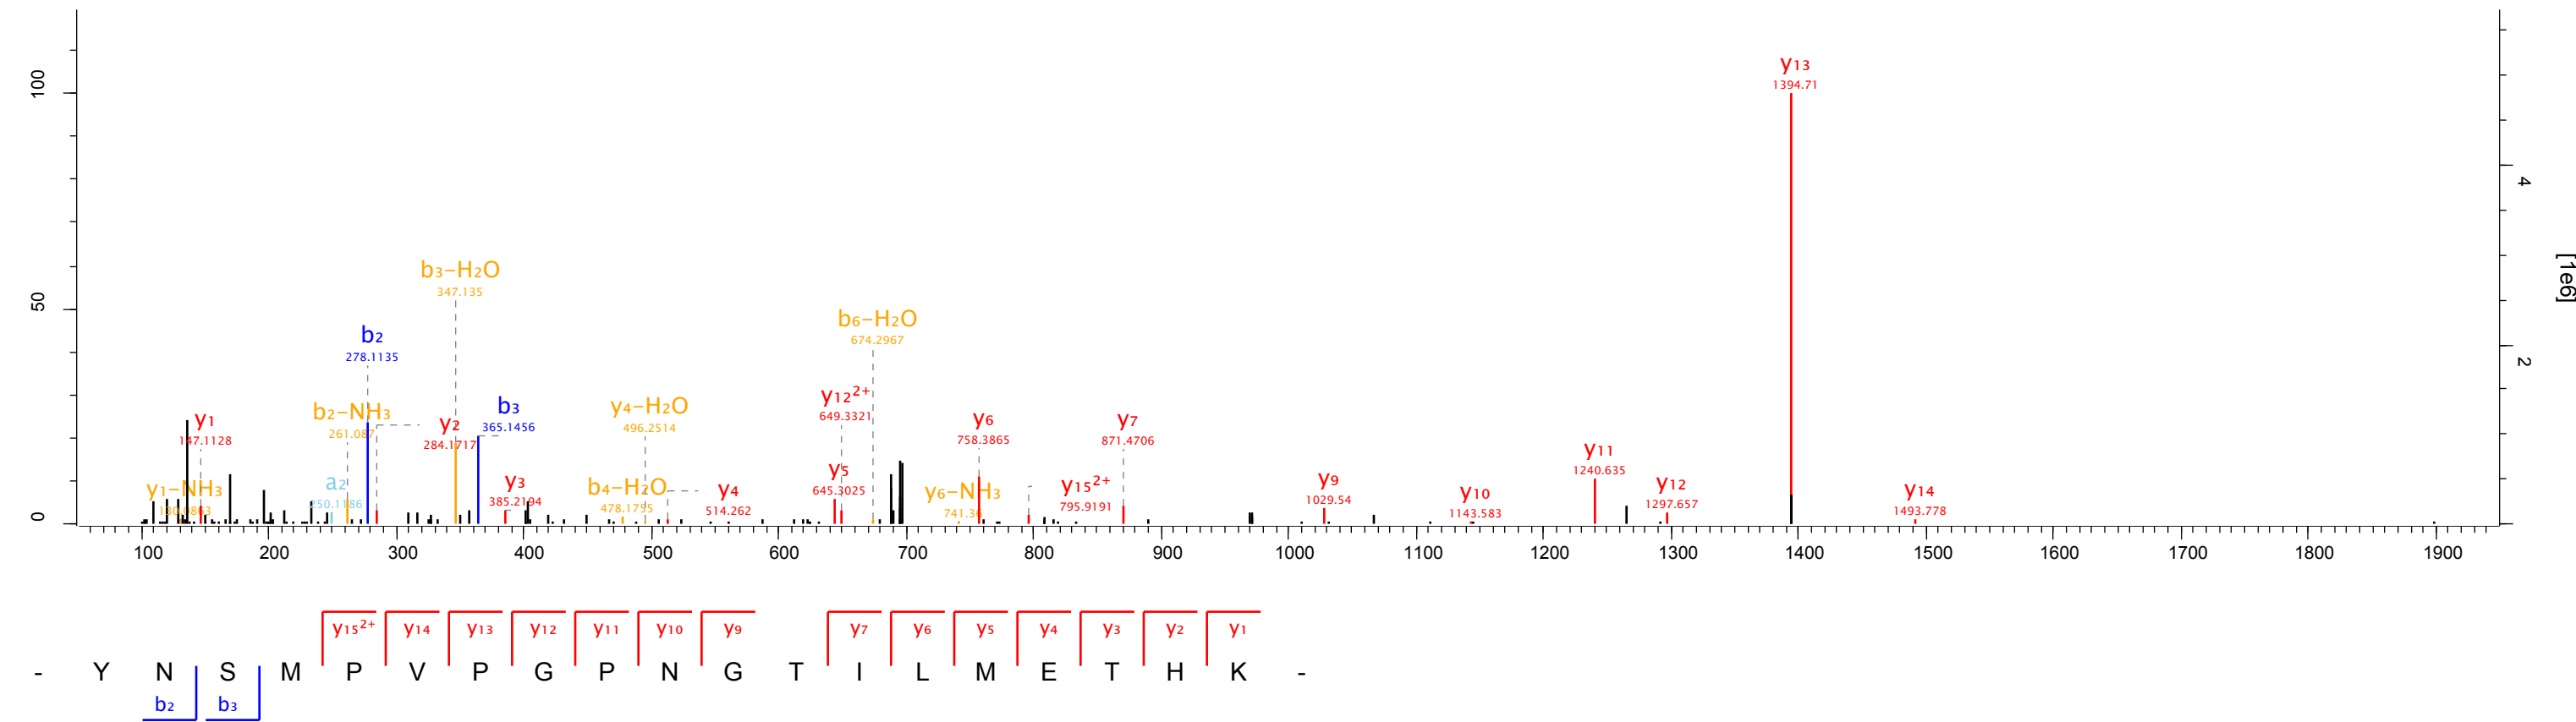

Raw file  
20180707\_MaS\_A375SR\_ML\_proteome\_09

Scan 25410 Method FTMS; HCD Score 69.72 m/z 705.33 Gene names OAF

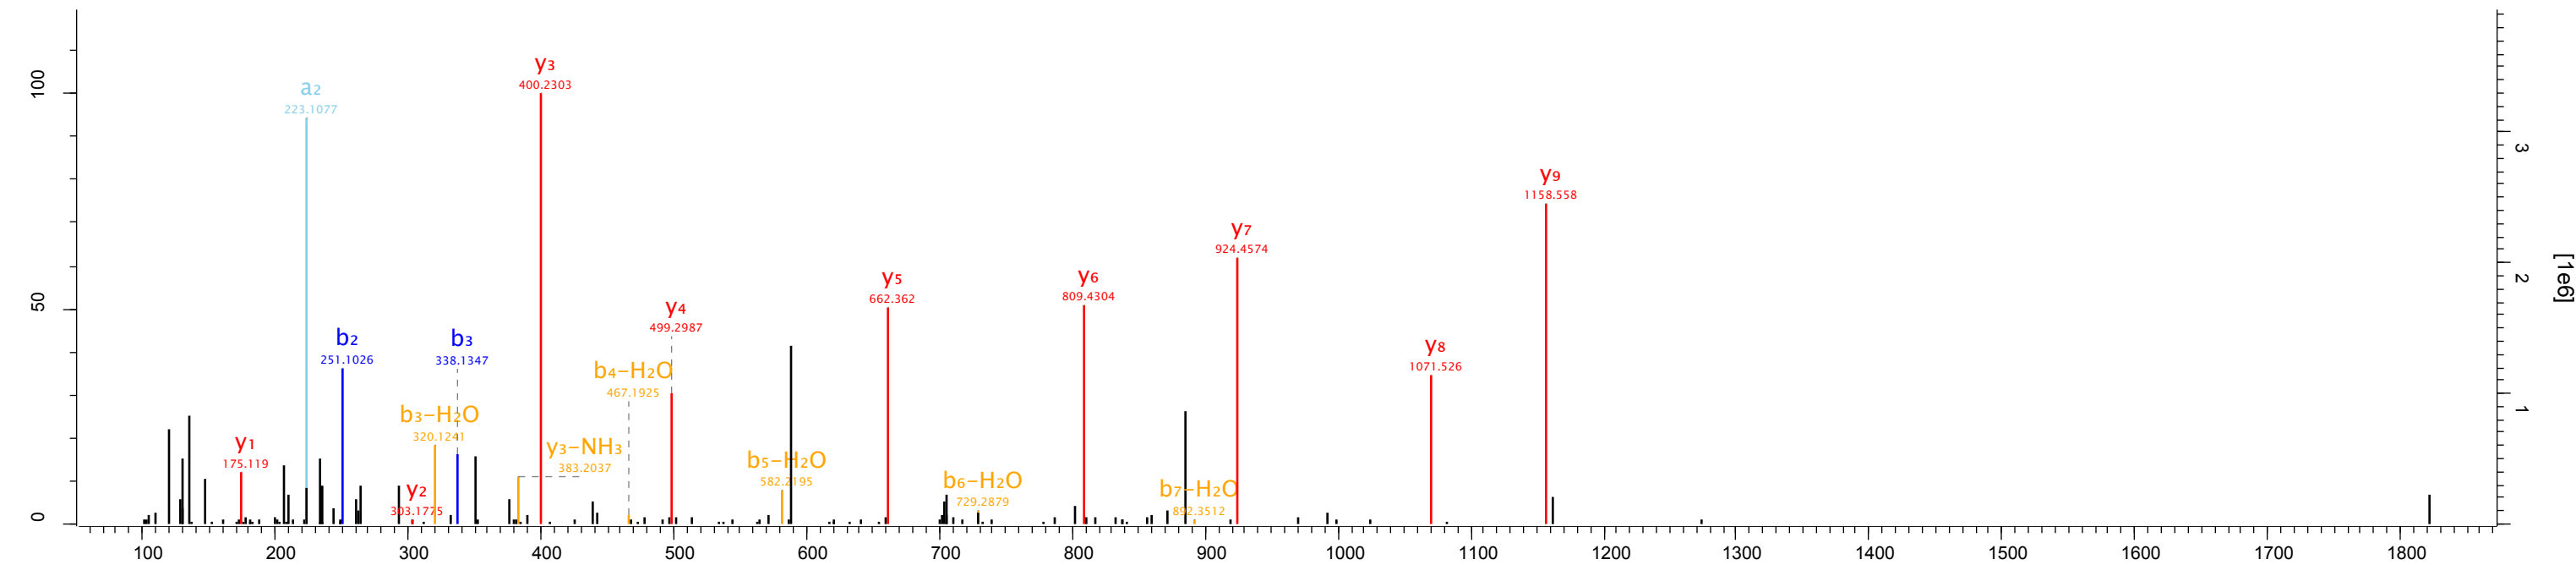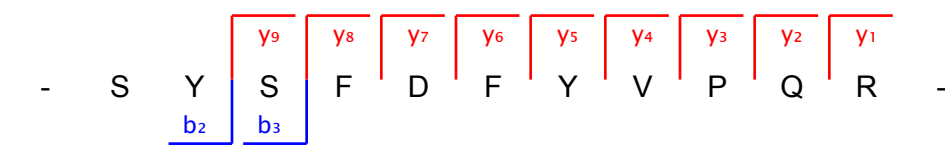

Raw file  
20180707\_MaS\_A375SR\_ML\_proteome\_10

Scan 13830 Method FTMS; HCD Score 64.76 m/z 494.23 Gene names IL1F10

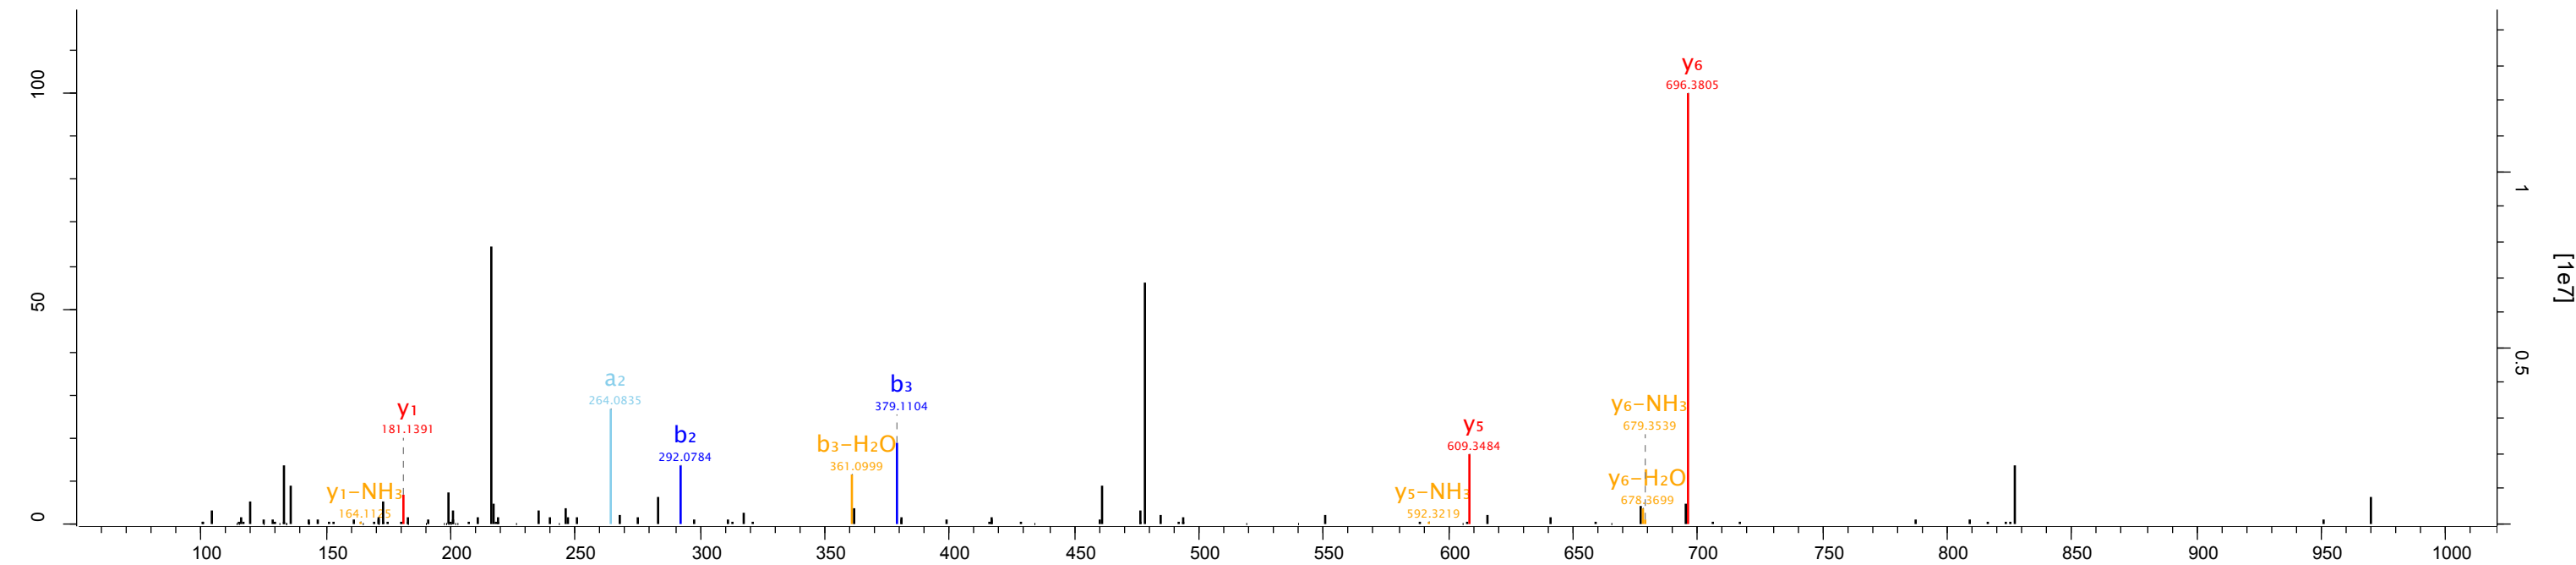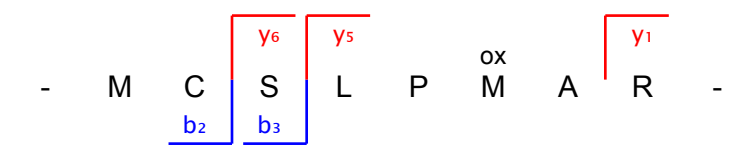



Raw file  
20180707\_MaS\_A375SR\_ML\_proteome\_10

Scan Method Score m/z Gene names  
13860 FTMS; HCD 50.13 491.22 IL1F10

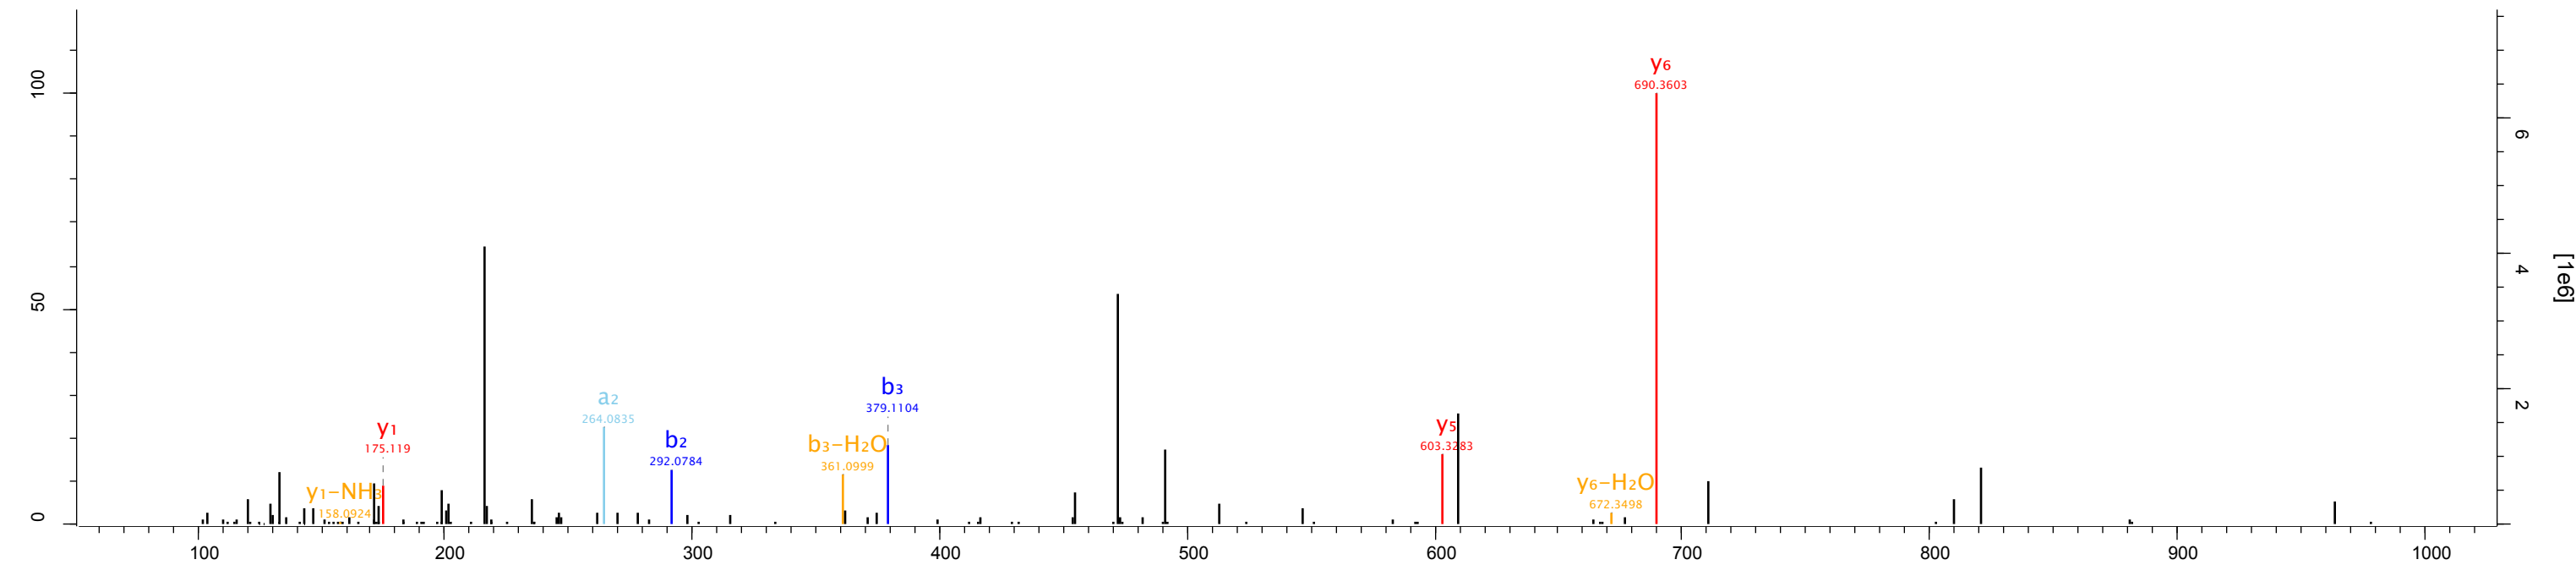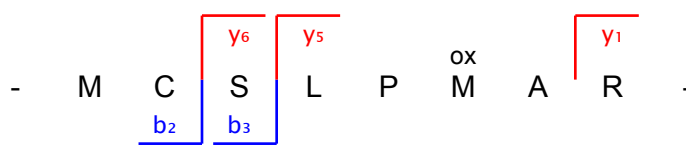

Raw file 20180707\_MaS\_A375SR\_ML\_proteome\_10 Scan 8040 Method FTMS; HCD Score 45.08 m/z 483.78 Gene names CAPN6

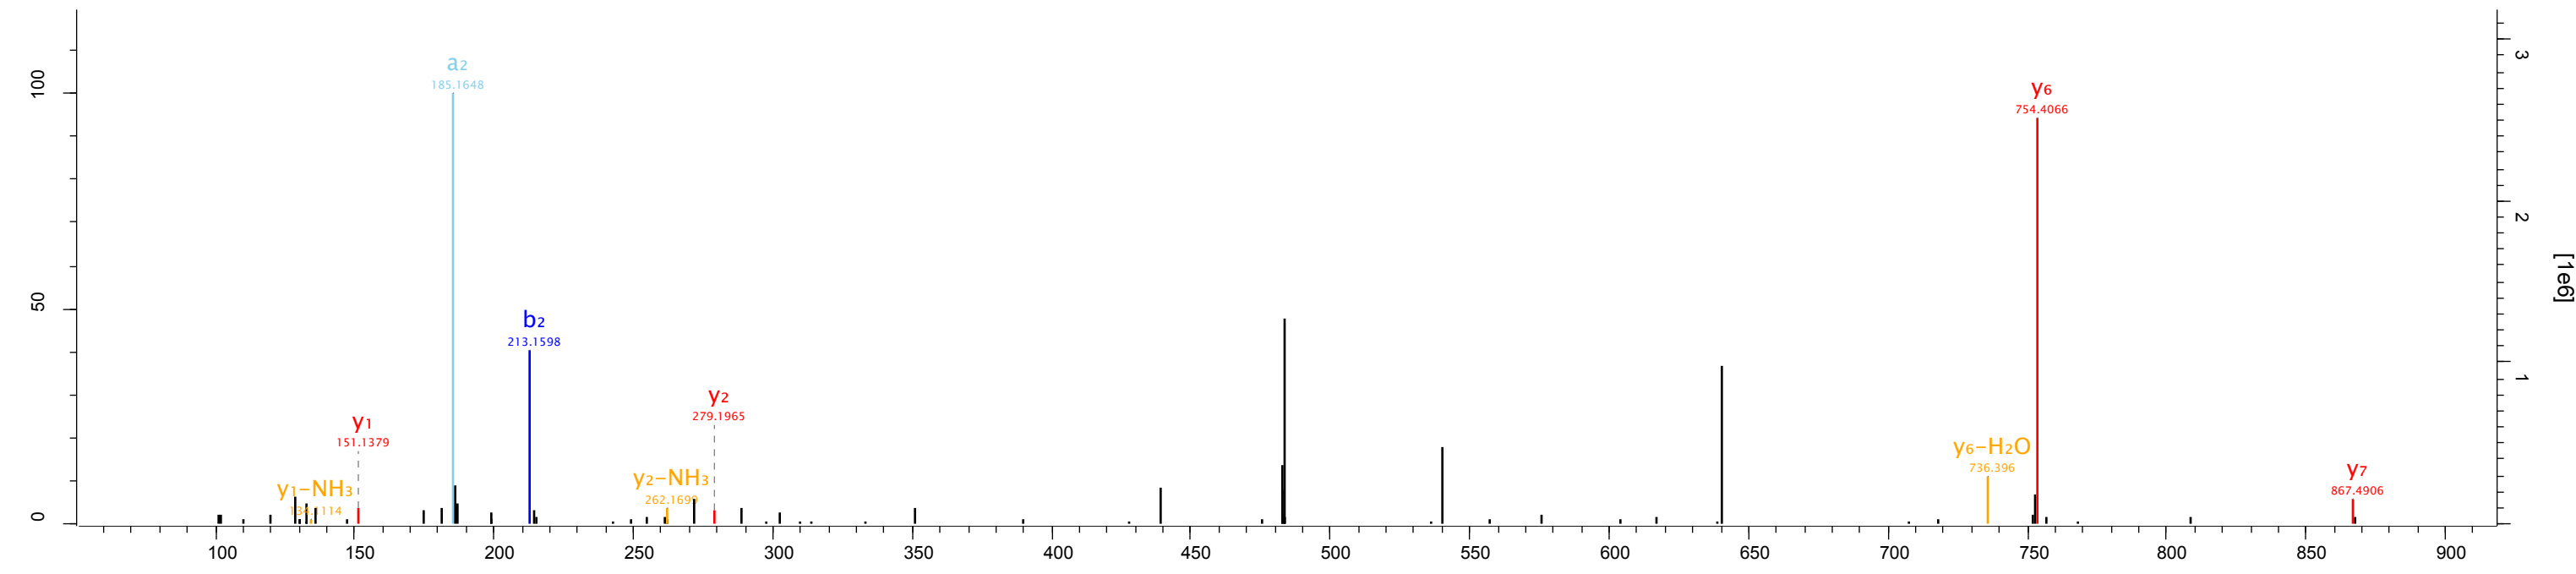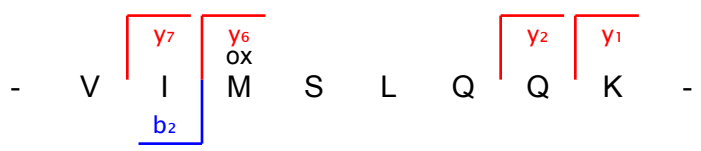

Raw file  
20180707\_MaS\_A375SR\_ML\_proteome\_11

Scan 26990 Method FTMS; HCD Score 59.67 m/z 567.62 Gene names DPEP2

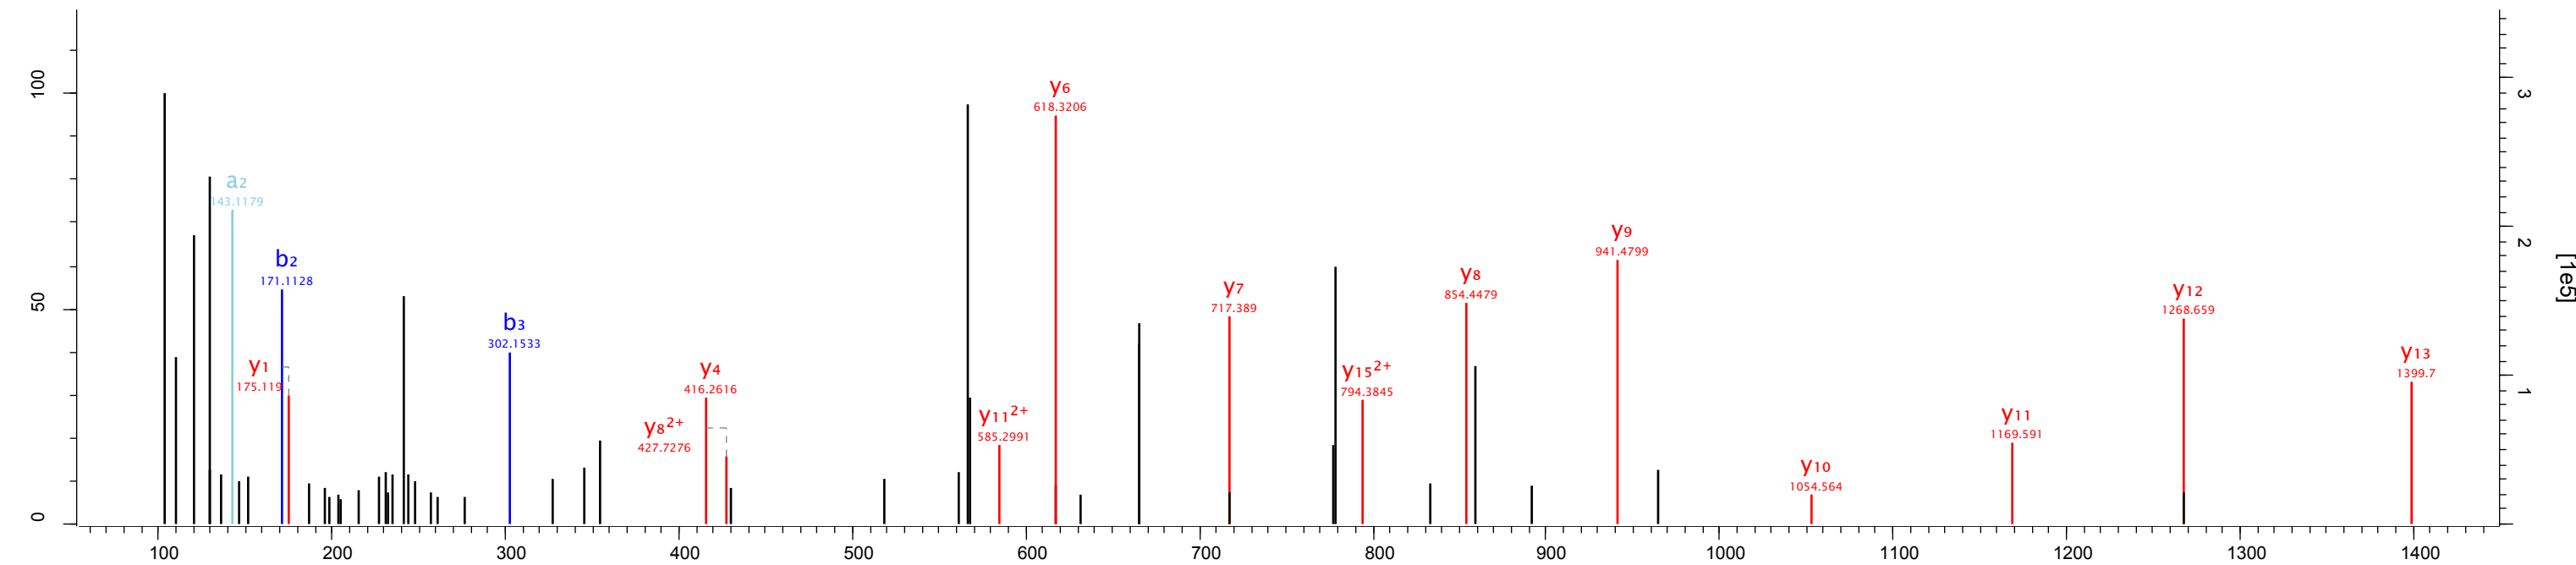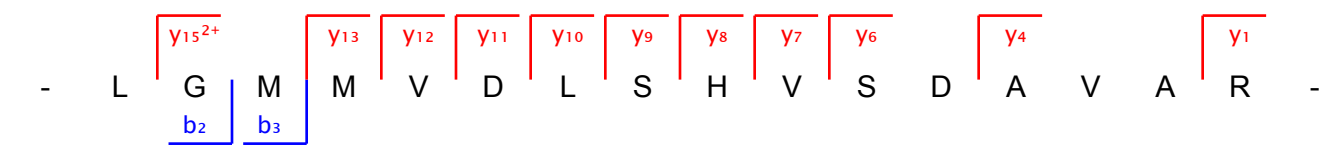

Raw file: 20180707\_MaS\_A375SR\_ML\_proteome\_11  
 Scan: 3160 Method: FTMS; HCD Score: 115.78 m/z: 538.76 Gene names: TM4SF1

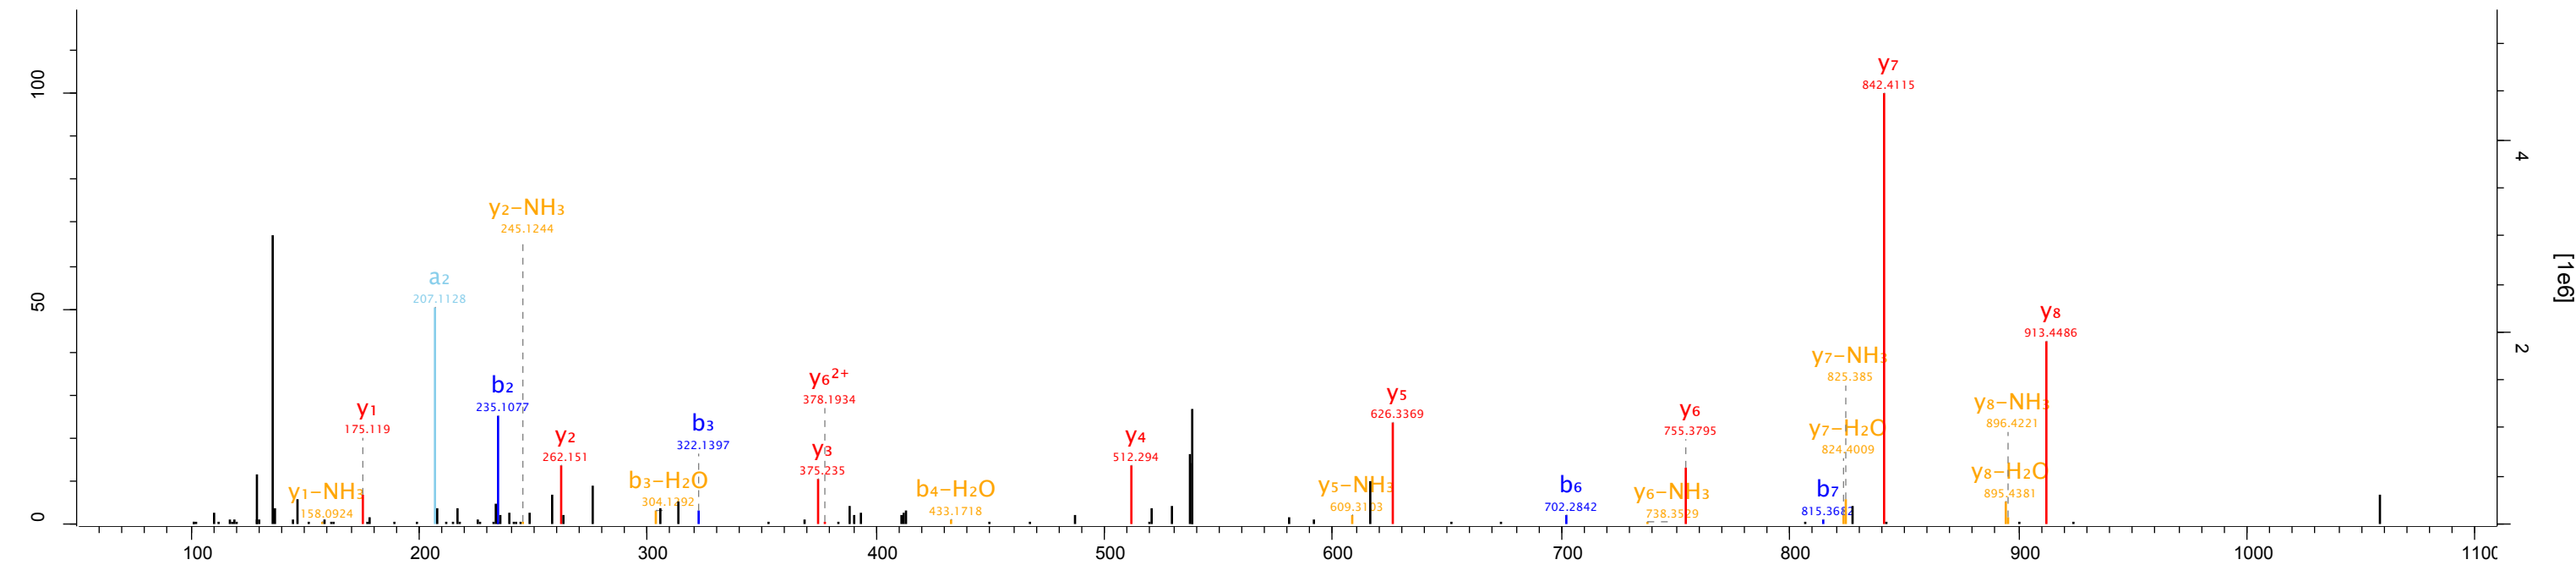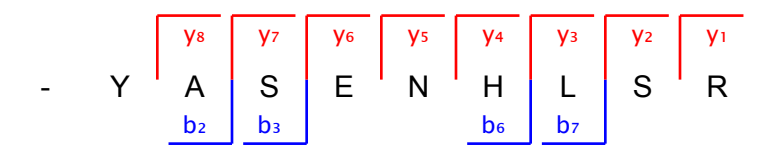

Raw file 20180707\_MaS\_A375SR\_ML\_proteome\_11 Scan 3310 Method FTMS; HCD Score 18.4 m/z 403.96 Gene names MT-CO3

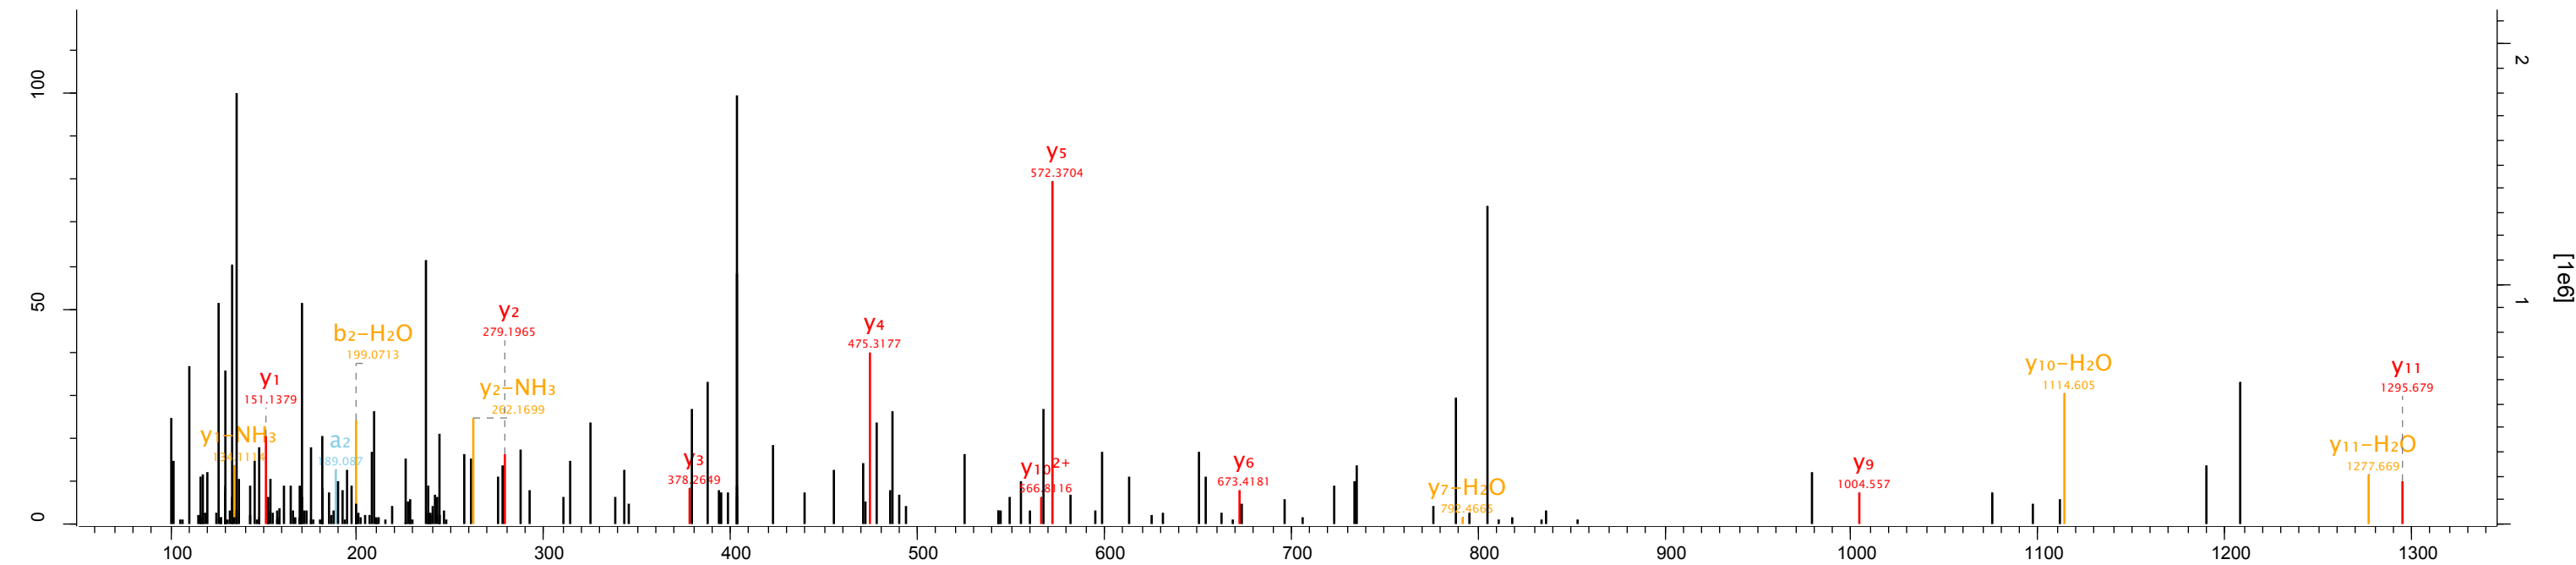

- E S T Y Q G H H T P P V Q K -

Fragmentation mapping (red boxes):

- Y: y11
- Q: y10<sup>2+</sup>
- G: y9
- T: y6
- P: y5
- P: y4
- V: y3
- Q: y2
- K: y1

Additional label (blue box):

- S: a2

Raw file  
20180707\_MaS\_A375SR\_ML\_proteome\_12

Scan 23750 Method FTMS; HCD Score 84 m/z 504.28 Gene names PGM5

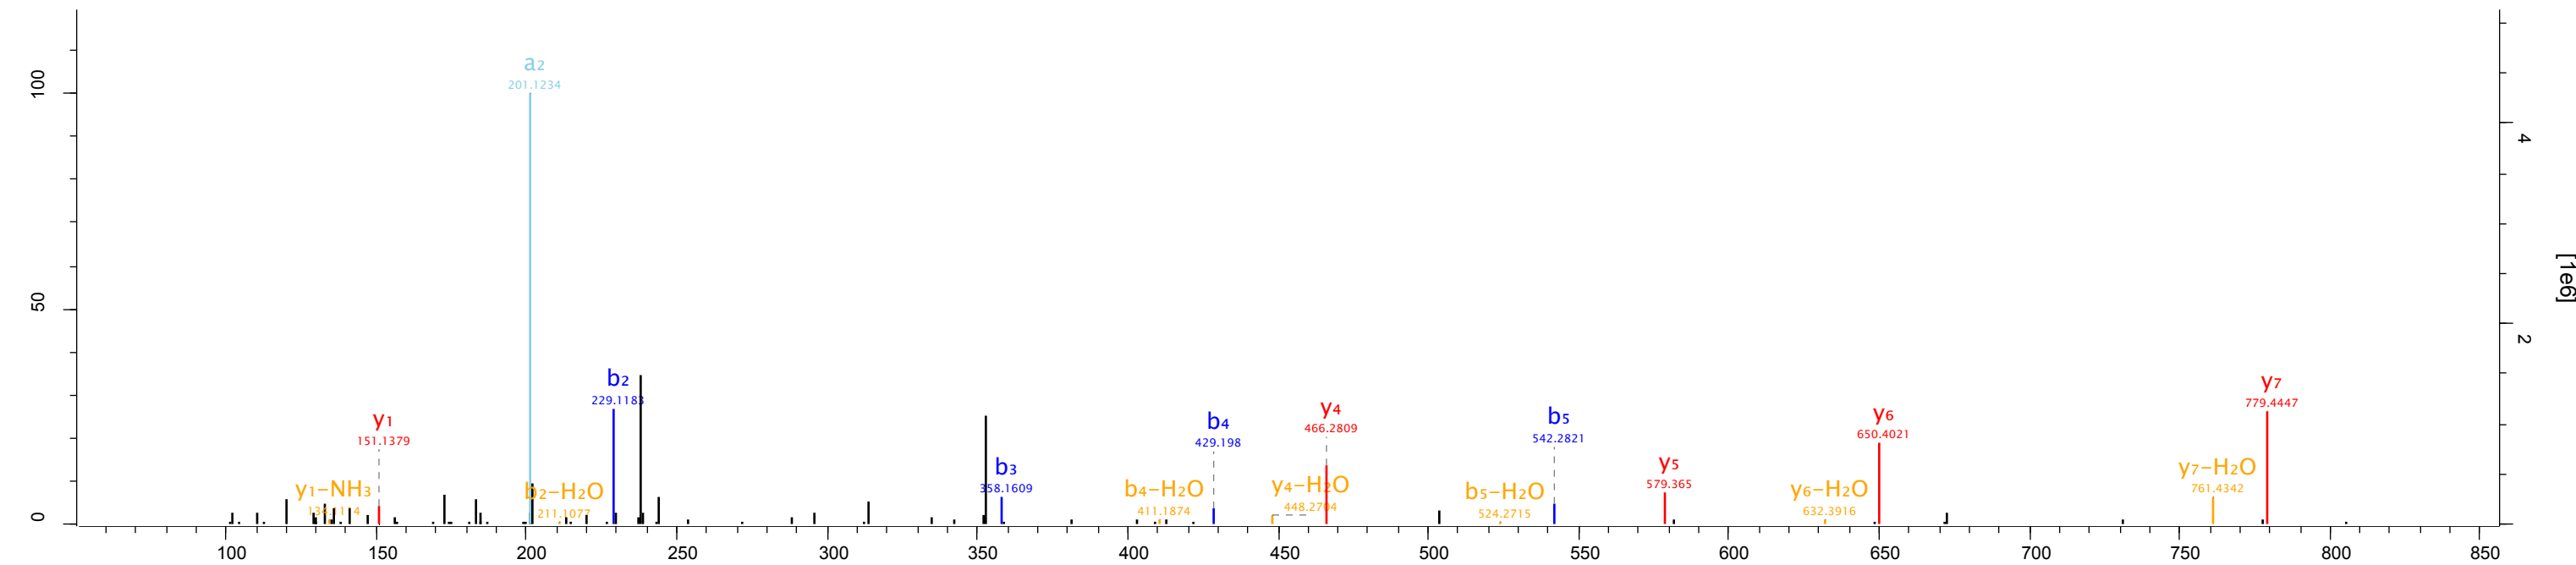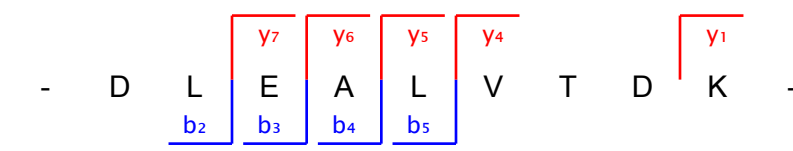

Raw file: 20180707\_MaS\_A375SR\_ML\_proteome\_14  
 Scan: 9470 Method: FTMS; HCD Score: 131.17 m/z: 691.85 Gene names: CYB561D2

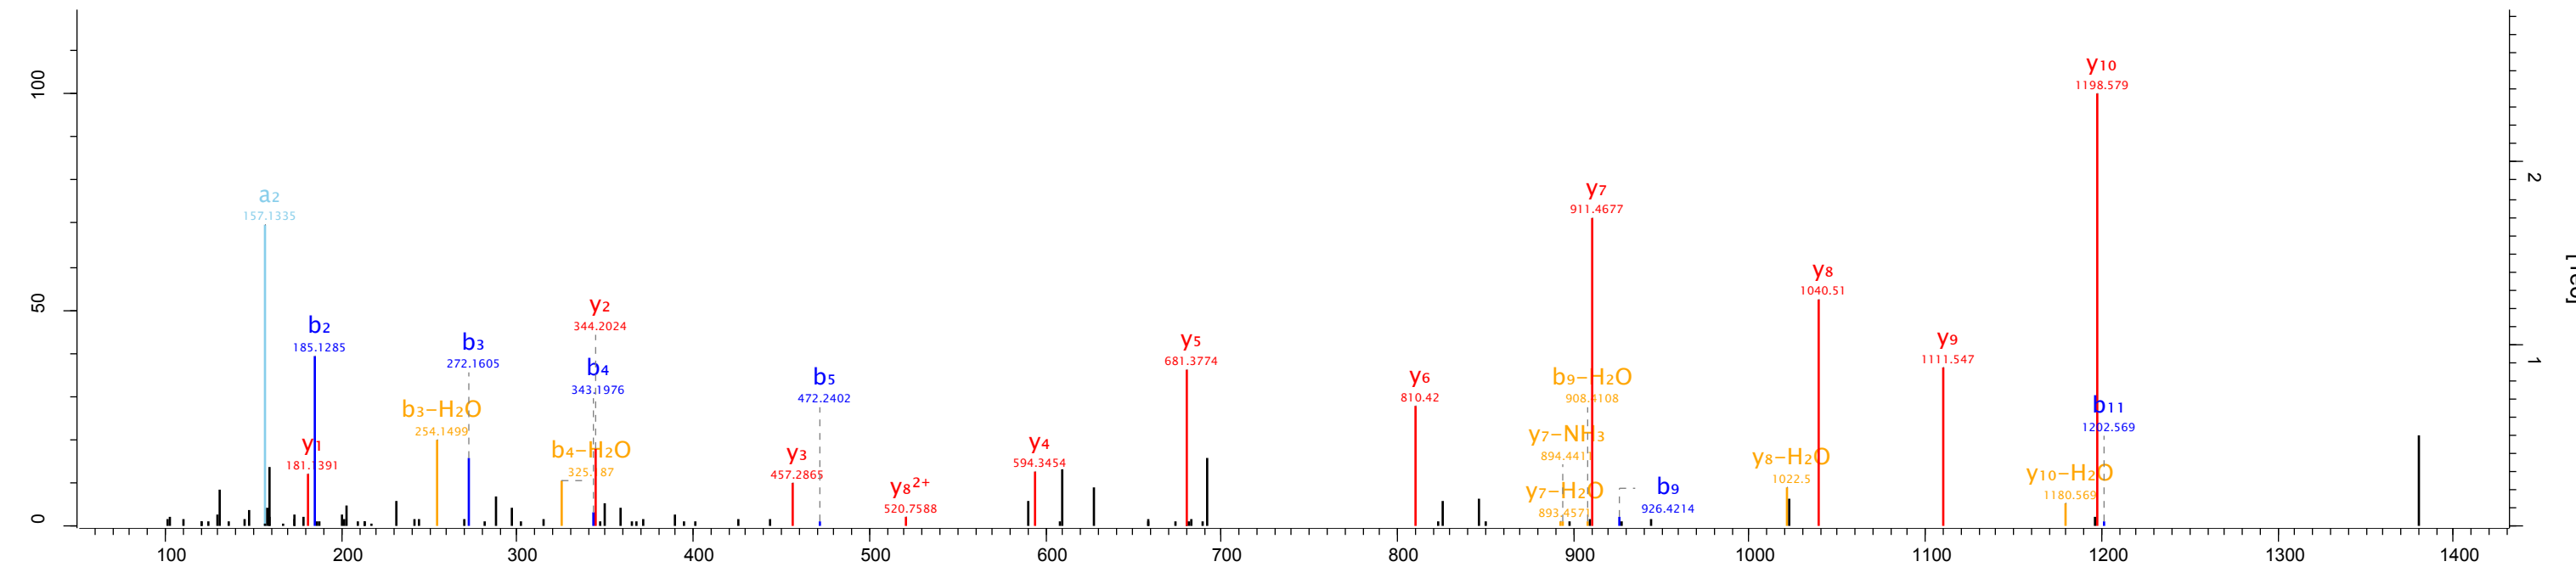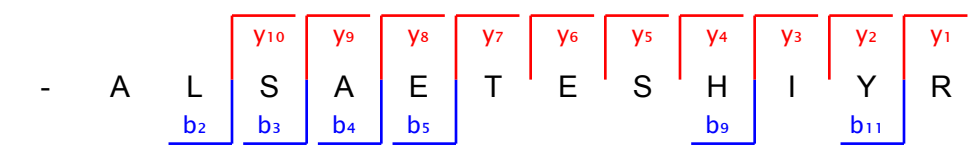

Raw file 20180707\_MaS\_A375SR\_ML\_proteome\_15  
 Scan 16910 Method FTMS; HCD Score 48.57 m/z 483.94 Gene names ECE2

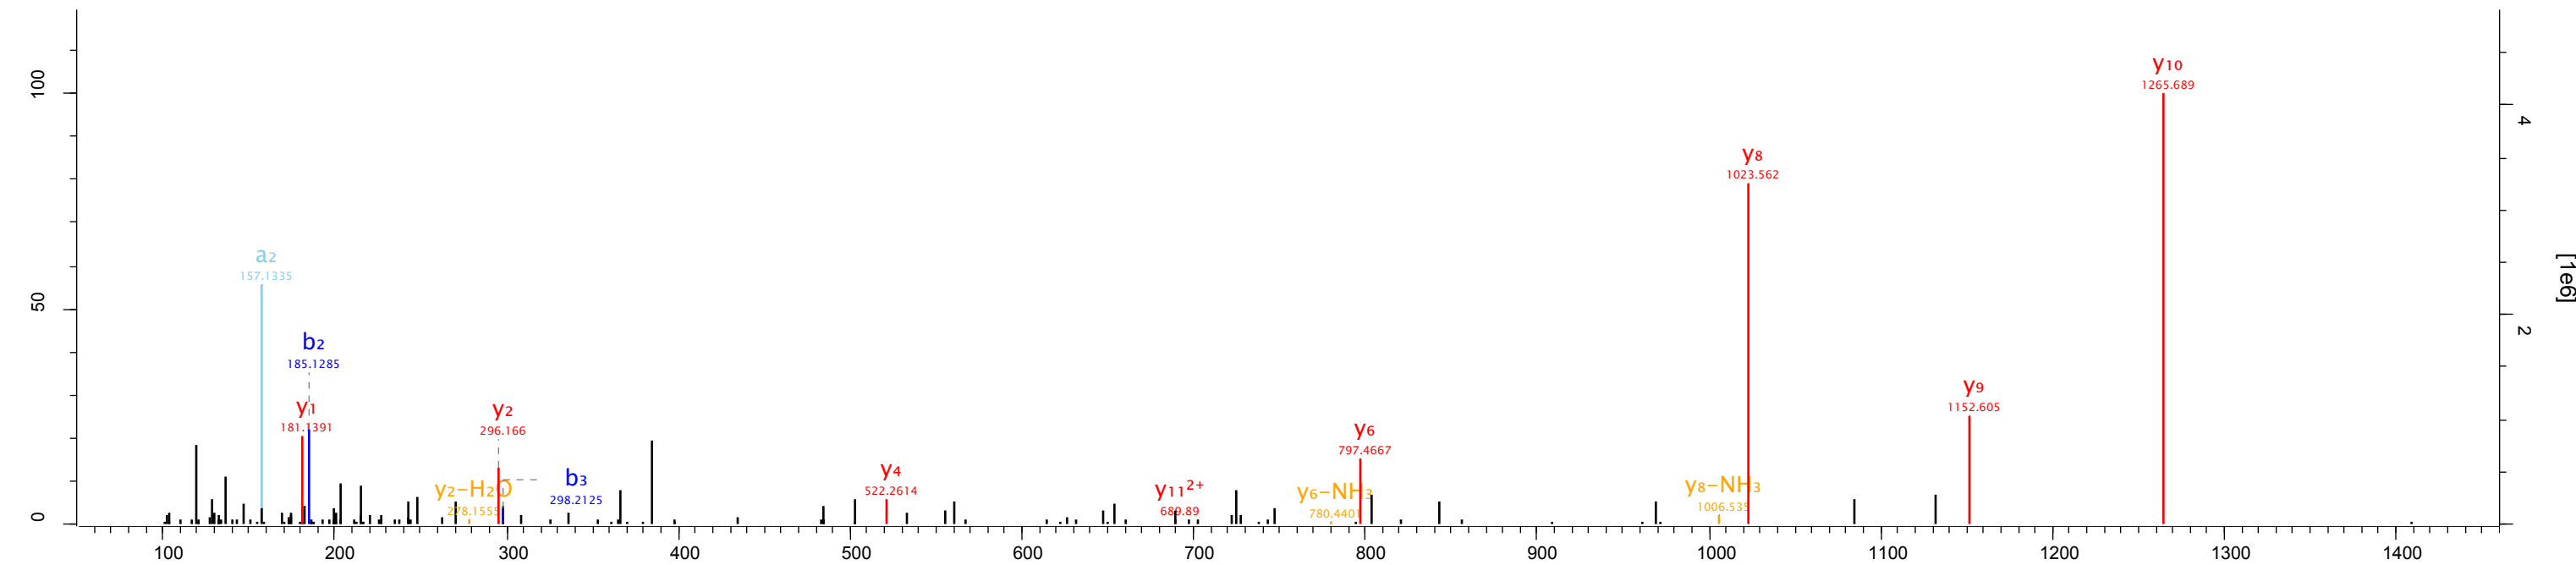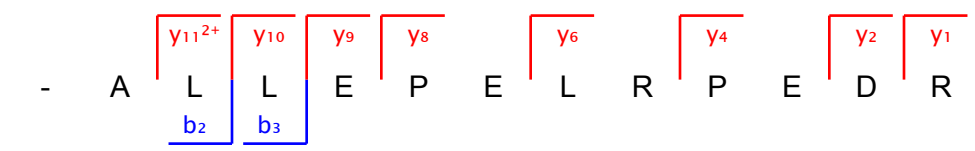



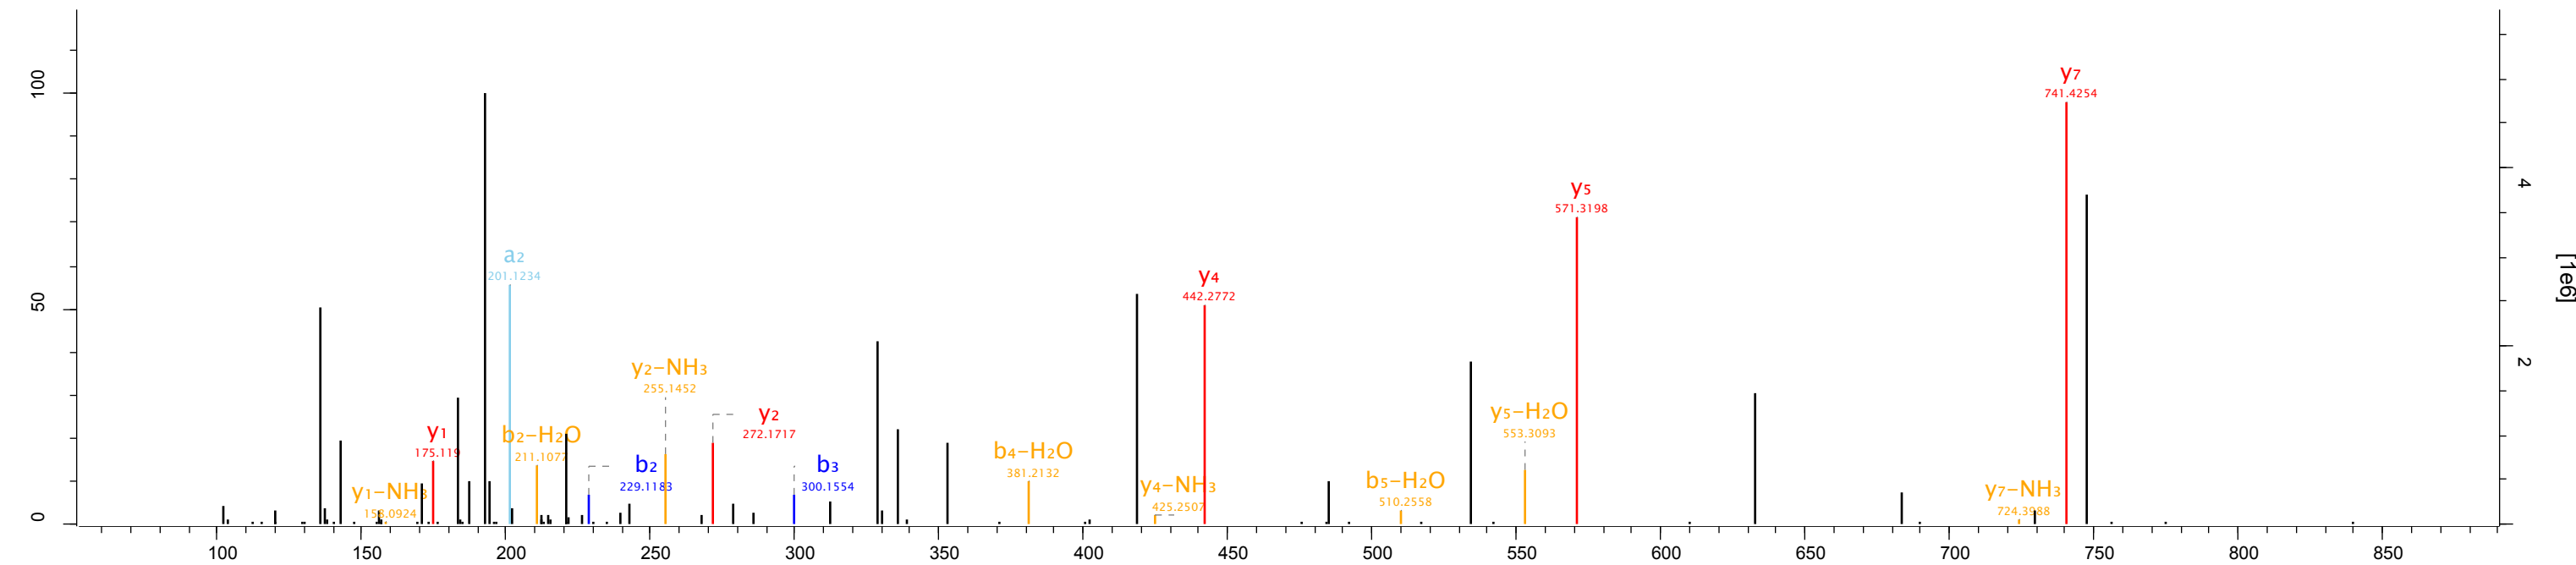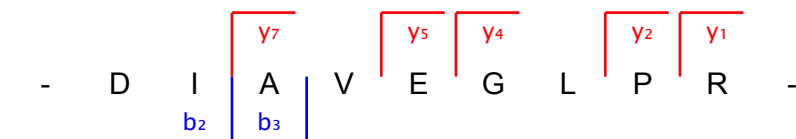

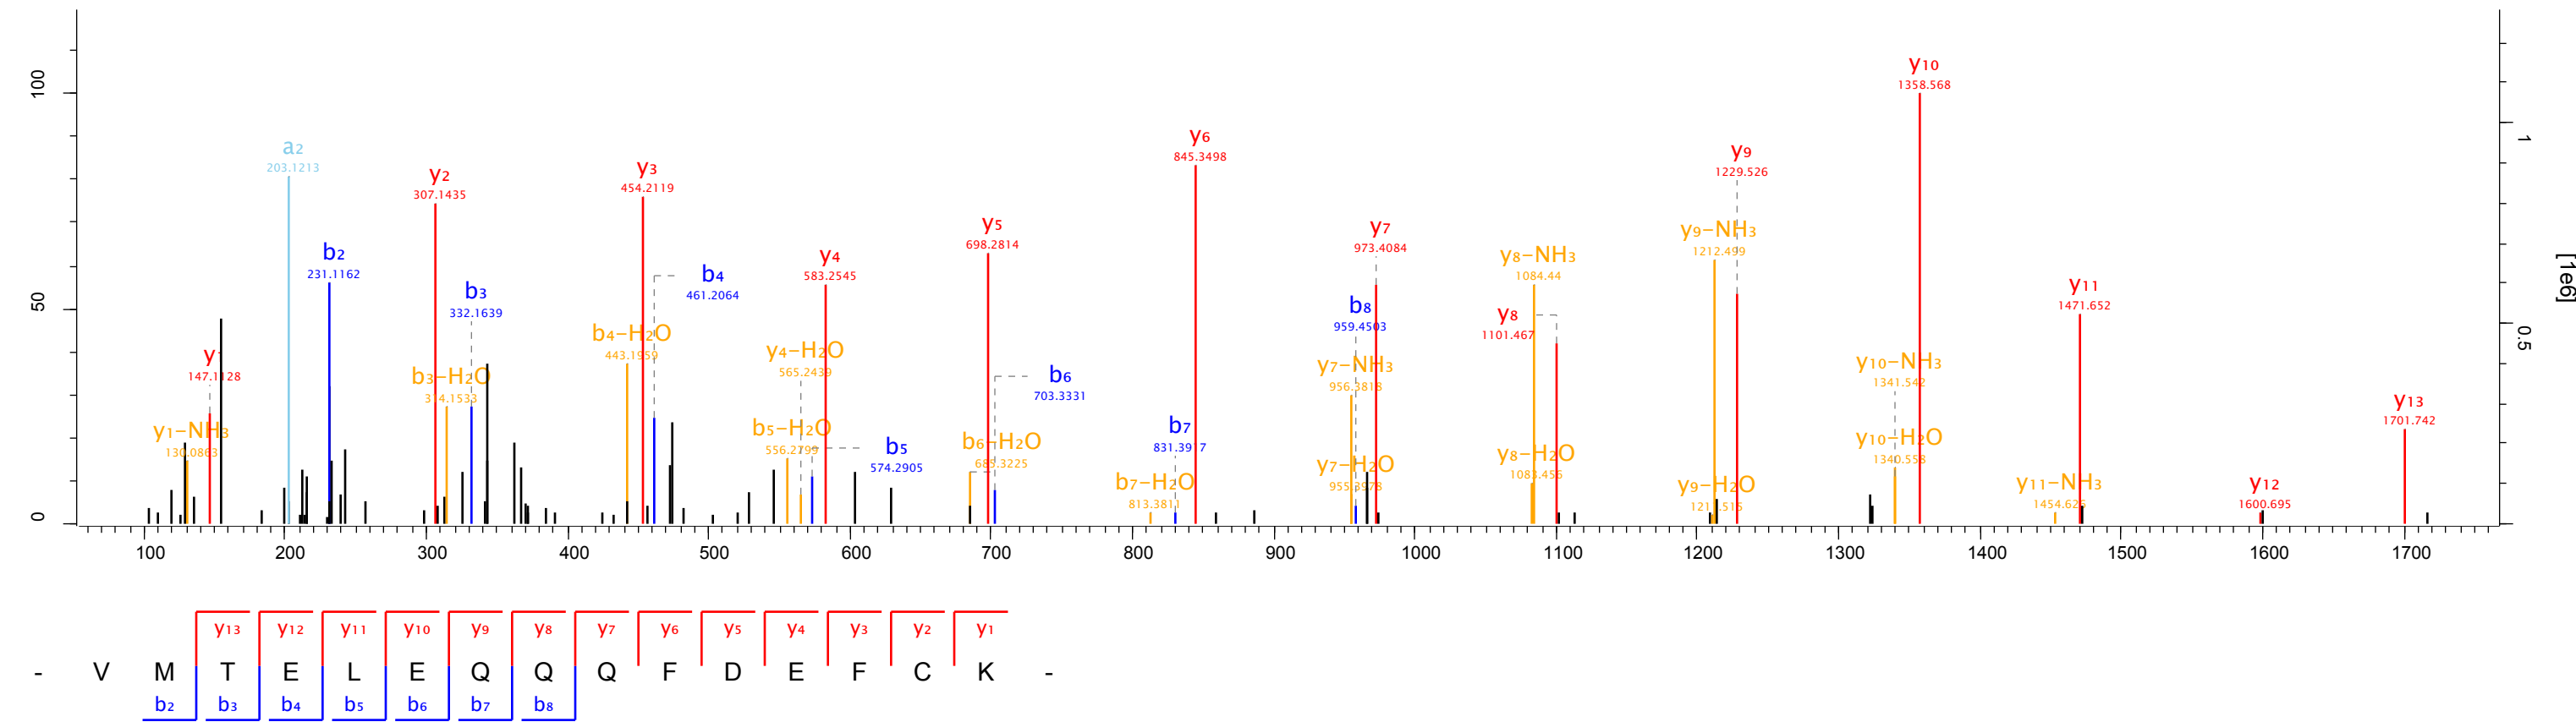

Raw file  
20180707\_MaS\_A375SR\_ML\_proteome\_17

Scan 22500 Method FTMS; HCD Score 43.77 m/z 725.86

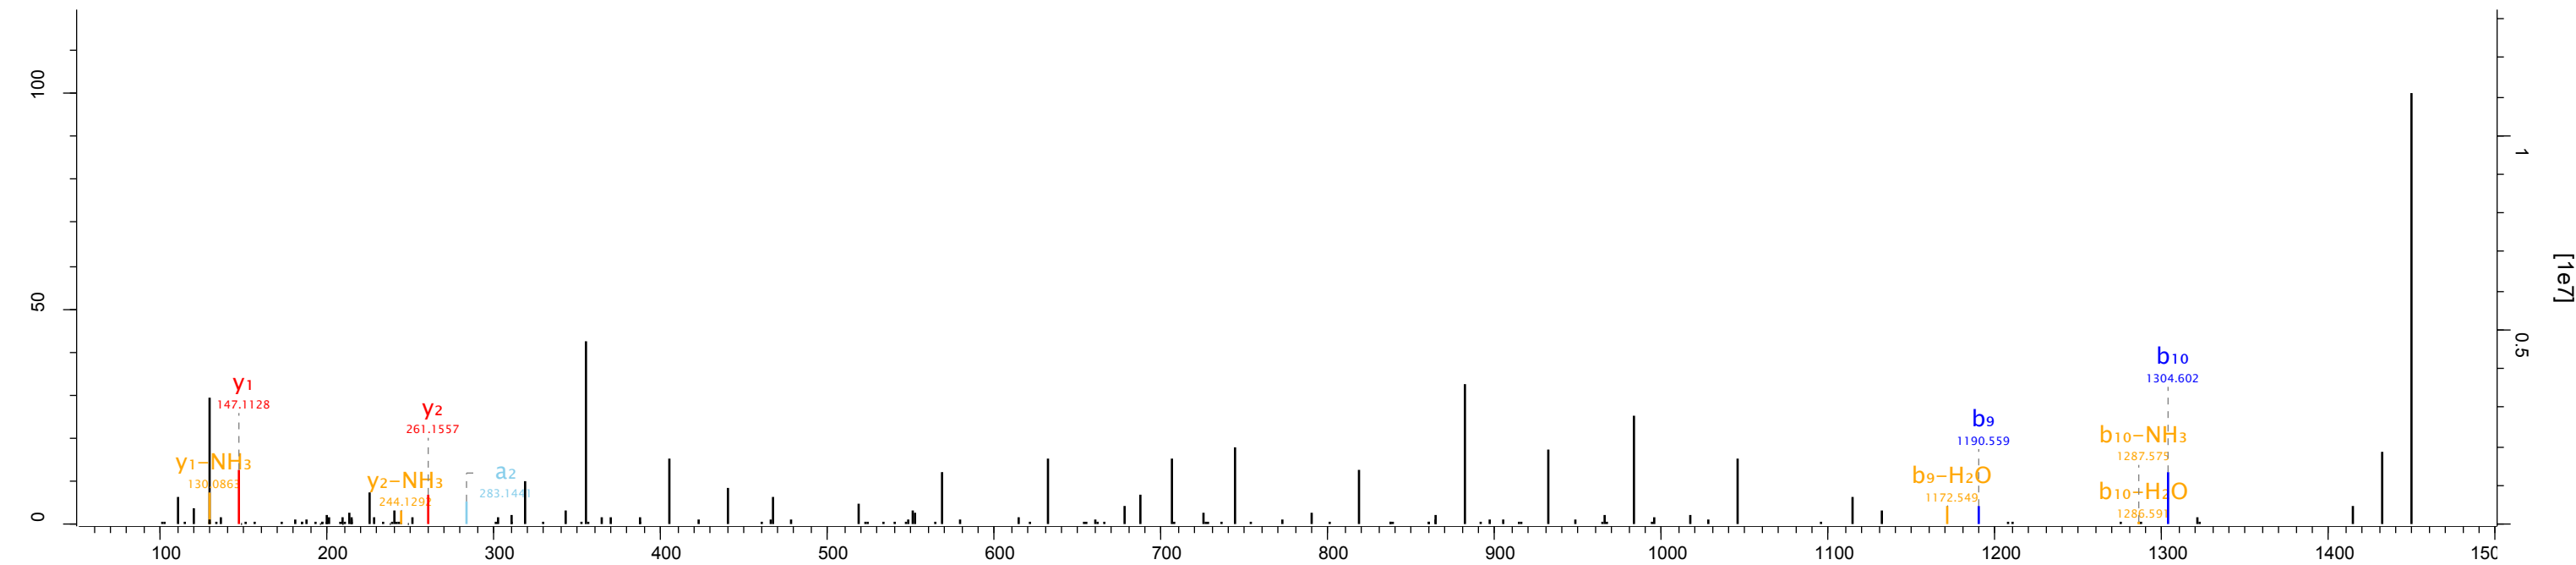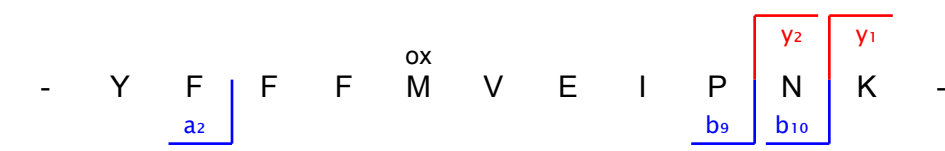

Raw file  
20180707\_MaS\_A375SR\_ML\_proteome\_17

Scan: 9980  
Method: FTMS; HCD  
Score: 58.89  
m/z: 556.3  
Gene names: LSM10

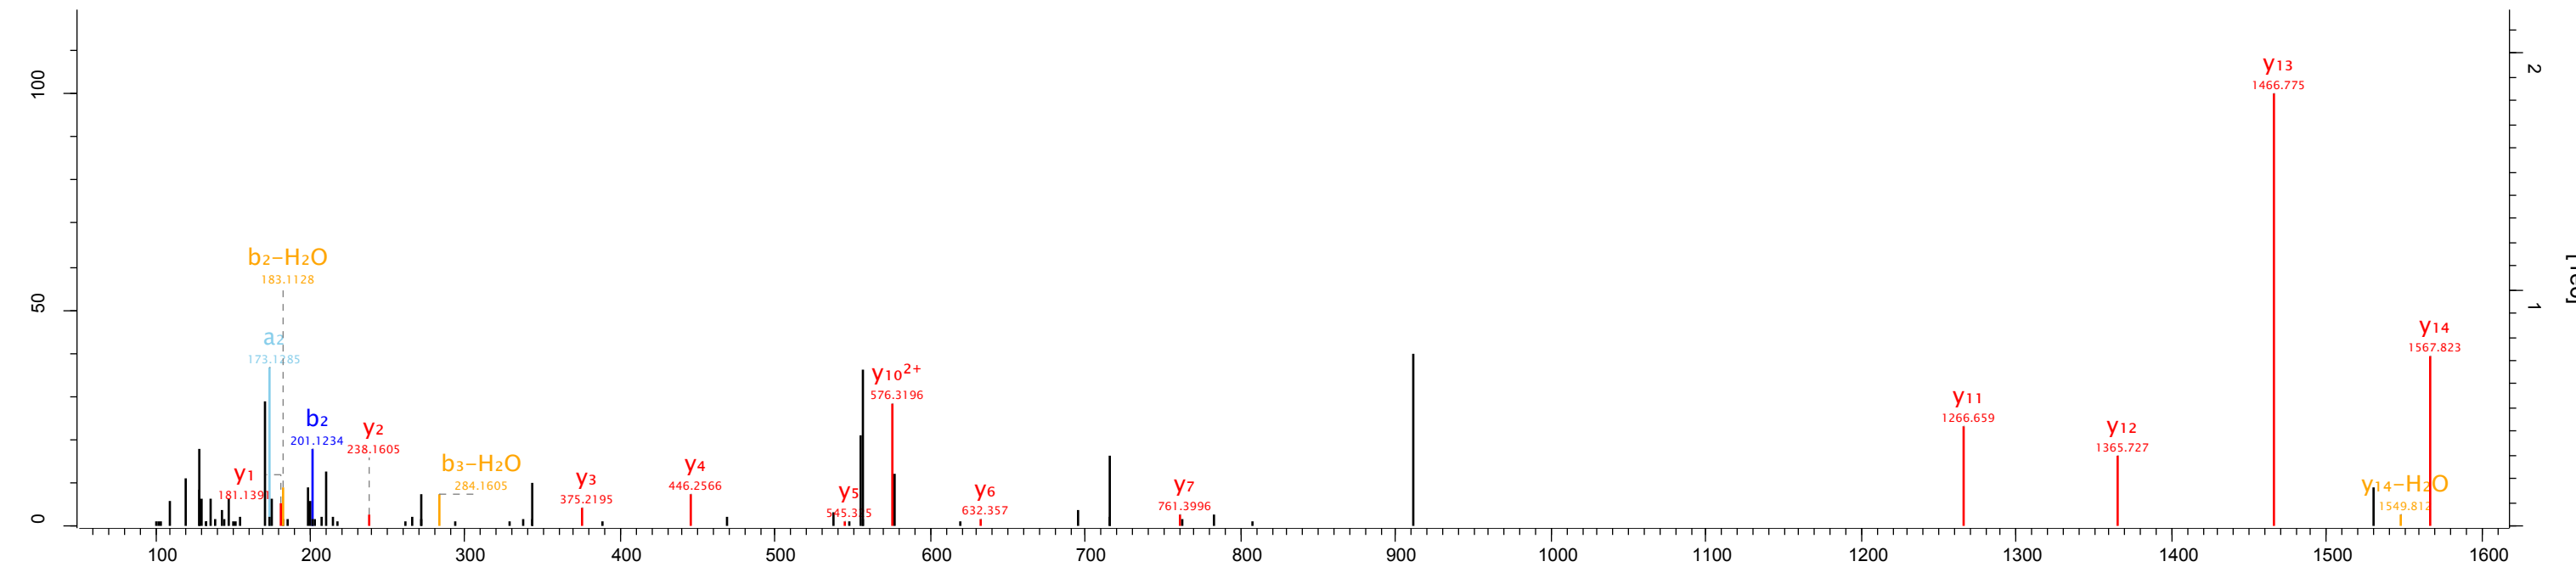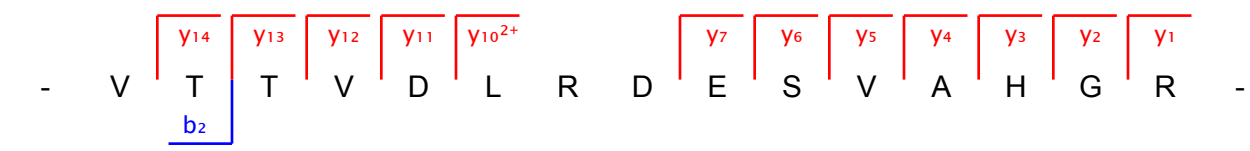

Raw file  
20180707\_MaS\_A375SR\_ML\_proteome\_18

| Scan  | Method    | Score | m/z    | Gene names |
|-------|-----------|-------|--------|------------|
| 14740 | FTMS; HCD | 35.59 | 488.56 | PIGX       |

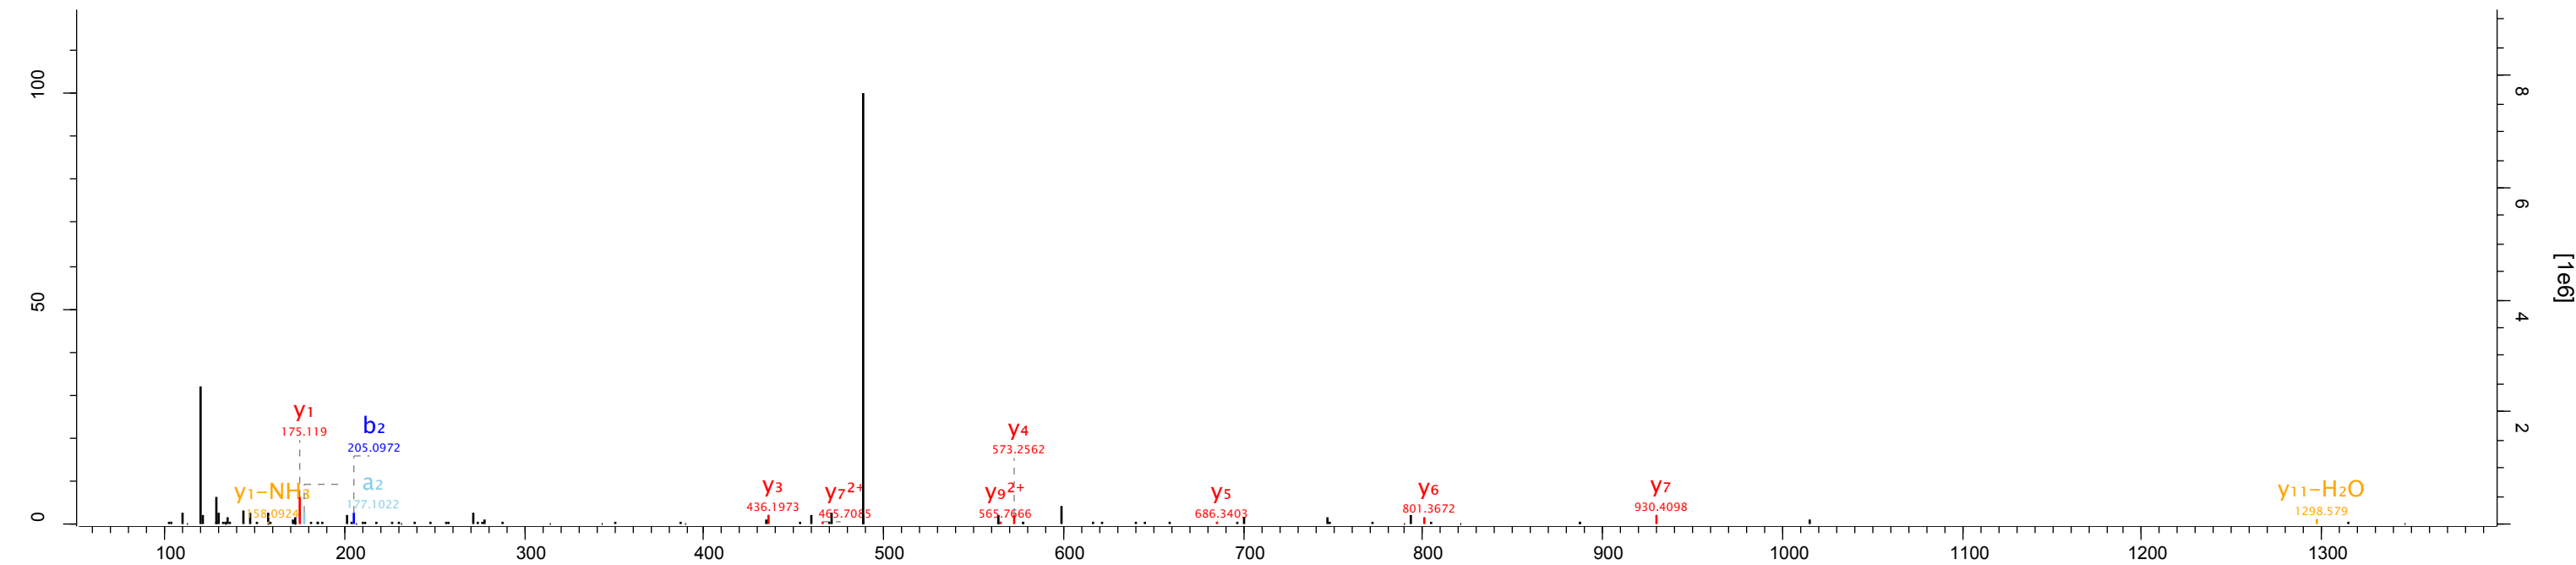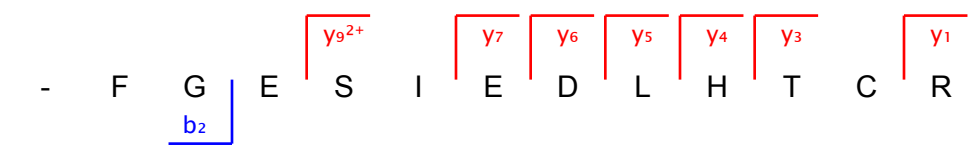

Raw file: 20180707\_MaS\_A375SR\_ML\_proteome\_18  
 Scan: 25420 Method: FTMS; HCD Score: 106.6 m/z: 507.74 Gene names: TMEM258

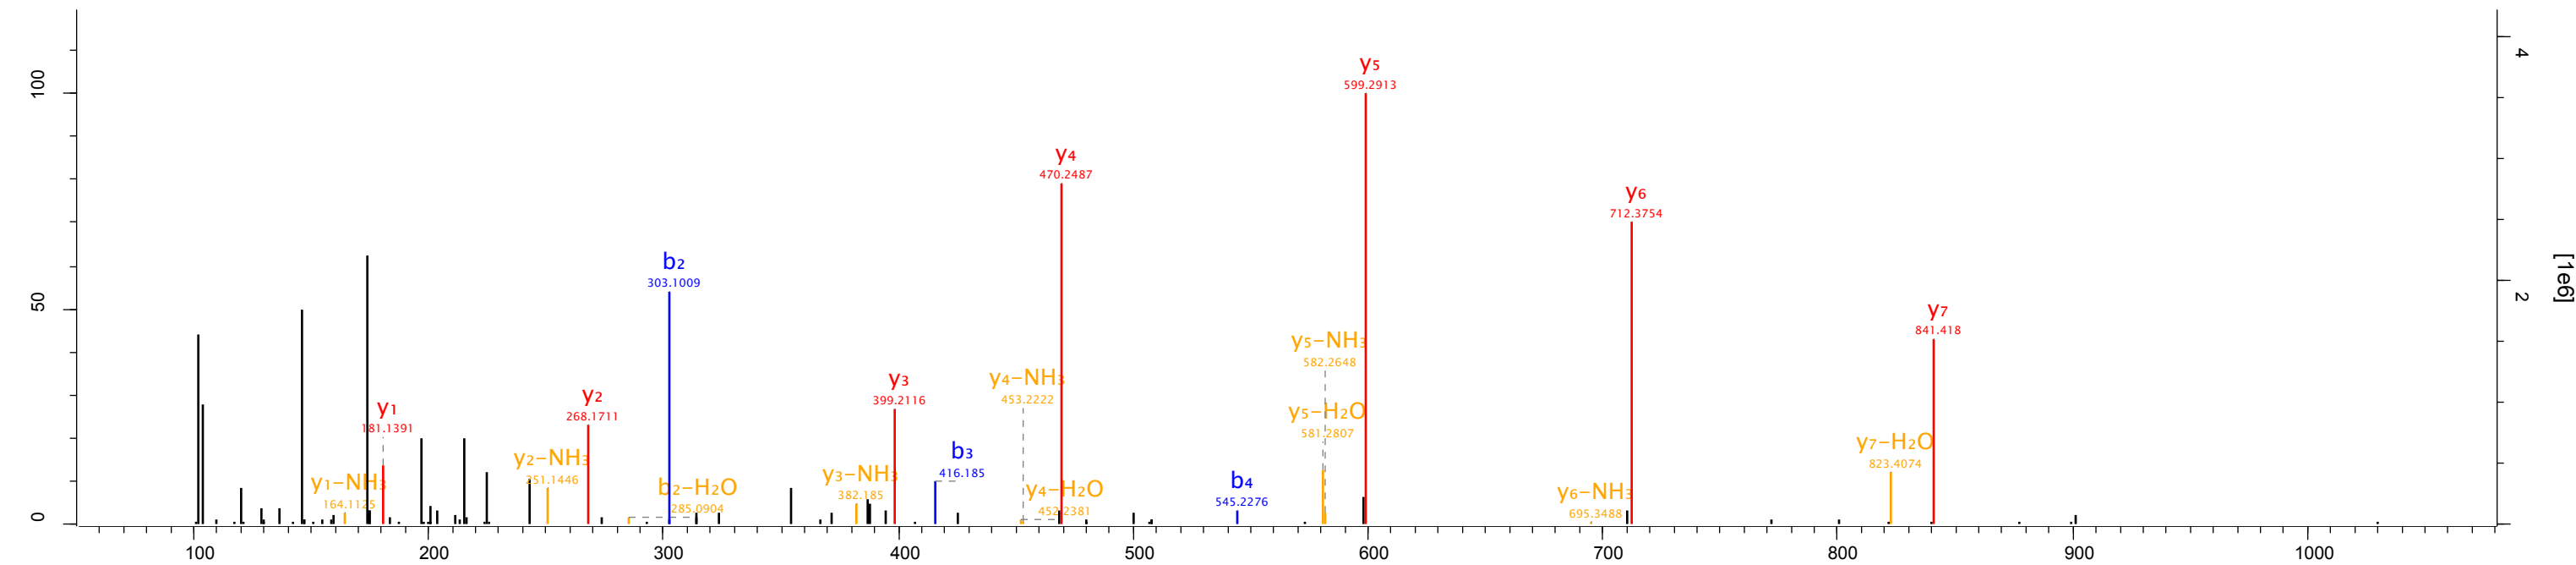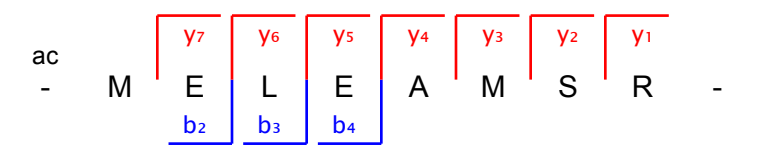

Raw file 20180707\_MaS\_A375SR\_ML\_proteome\_2\_01 Scan 25430 Method FTMS; HCD Score 44.32 m/z 618.78 Gene names ZNF442

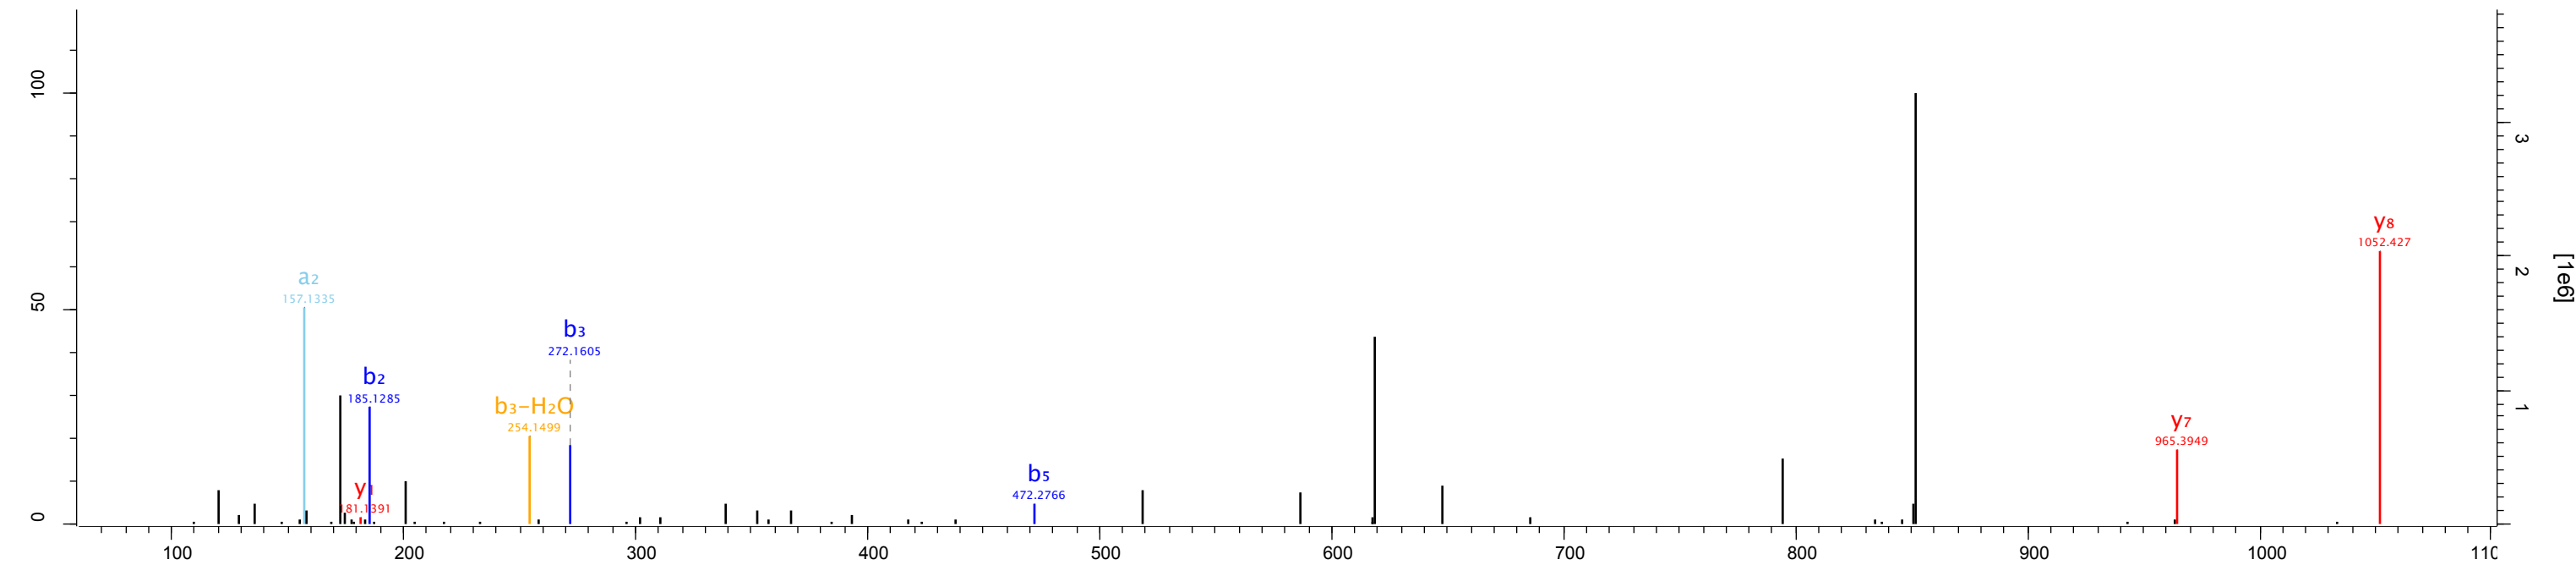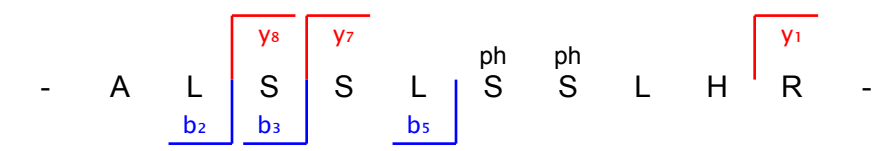

Raw file 20180707\_MaS\_A375SR\_ML\_proteome\_2\_01 Scan 26020 Method FTMS; HCD Score 89.36 m/z 772.91 Gene names ABHD14A

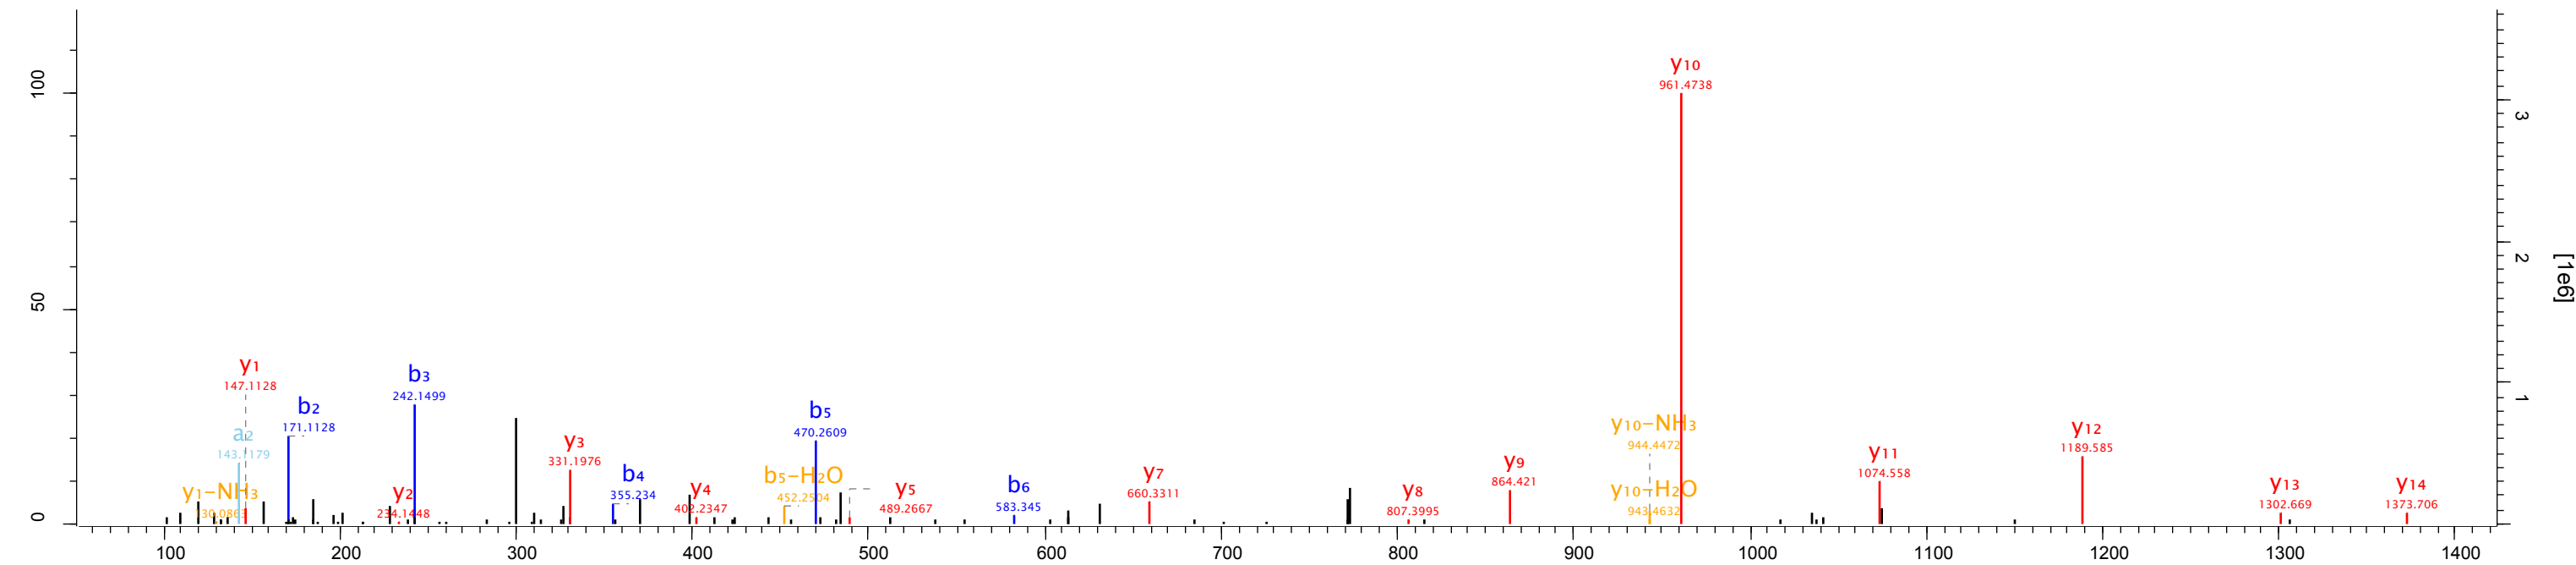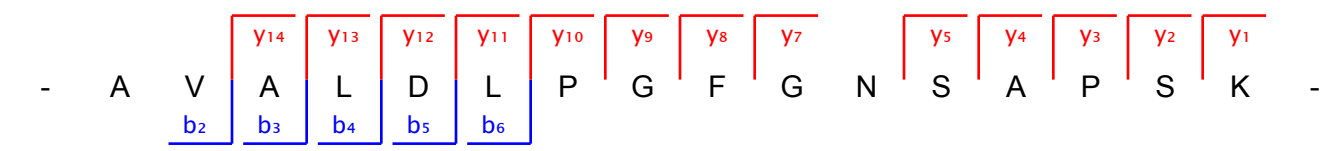



Raw file  
20180707\_MaS\_A375SR\_ML\_proteome\_2\_01

Scan 6080 Method FTMS; HCD Score 94.2 m/z 518.59 Gene names ZNF503

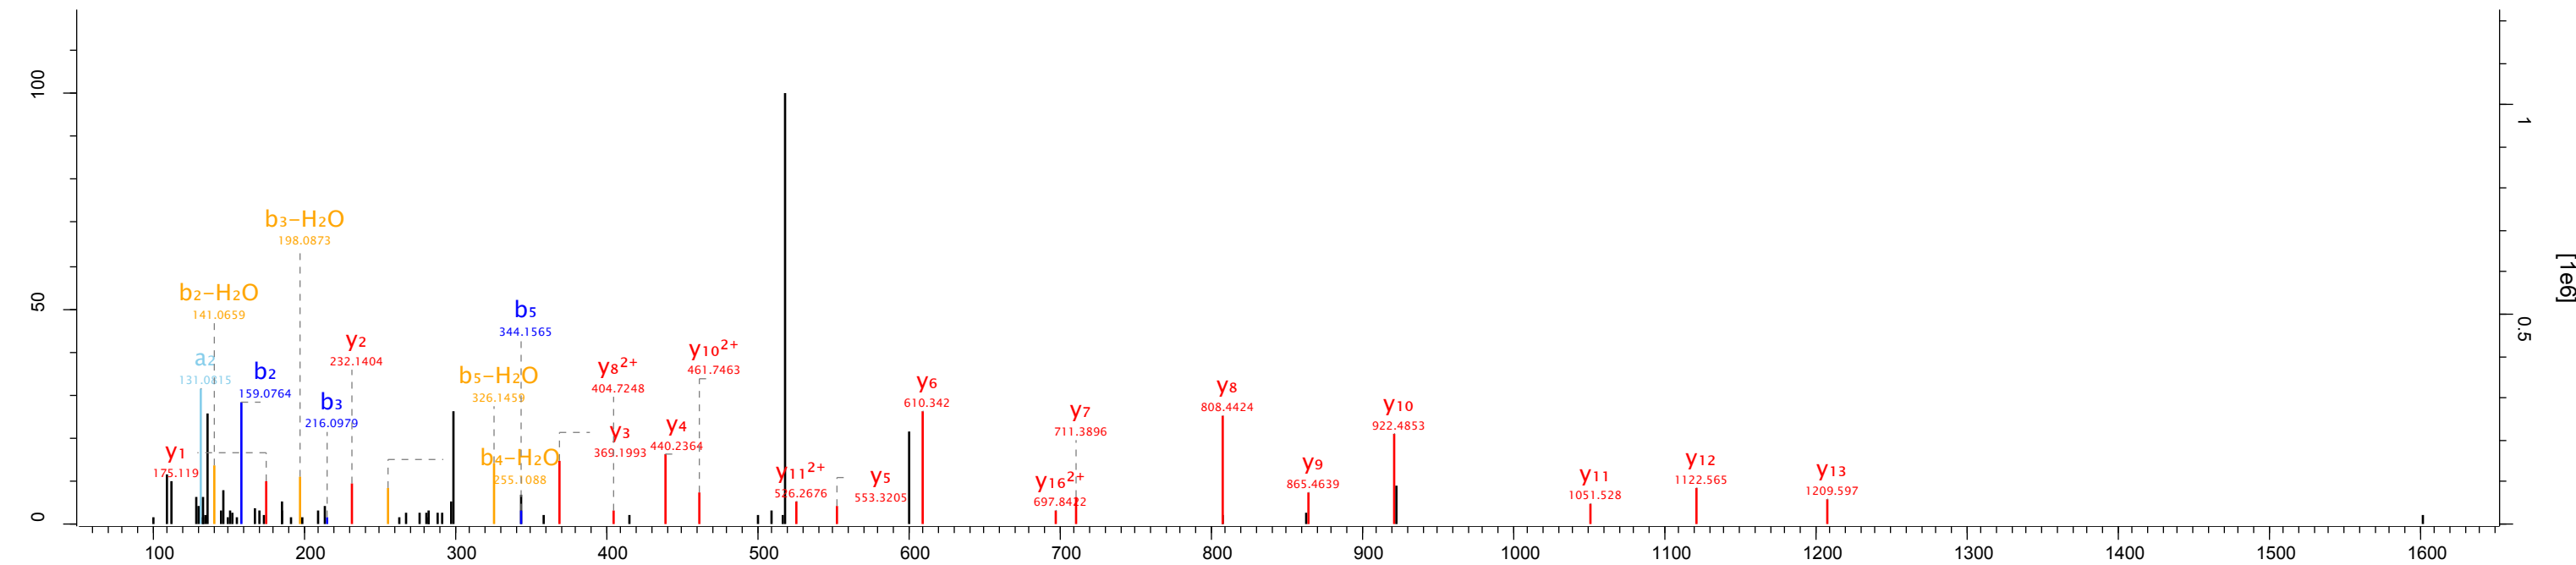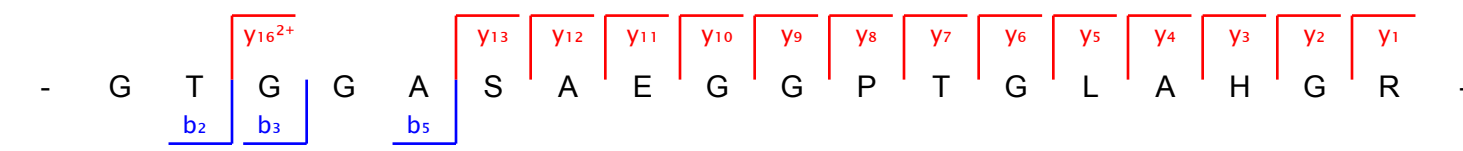

Raw file: 20180707\_MaS\_A375SR\_ML\_proteome\_2\_02  
 Scan: 10510 Method: FTMS; HCD Score: 66.25 m/z: 577.27 Gene names: SOX11;SOX4

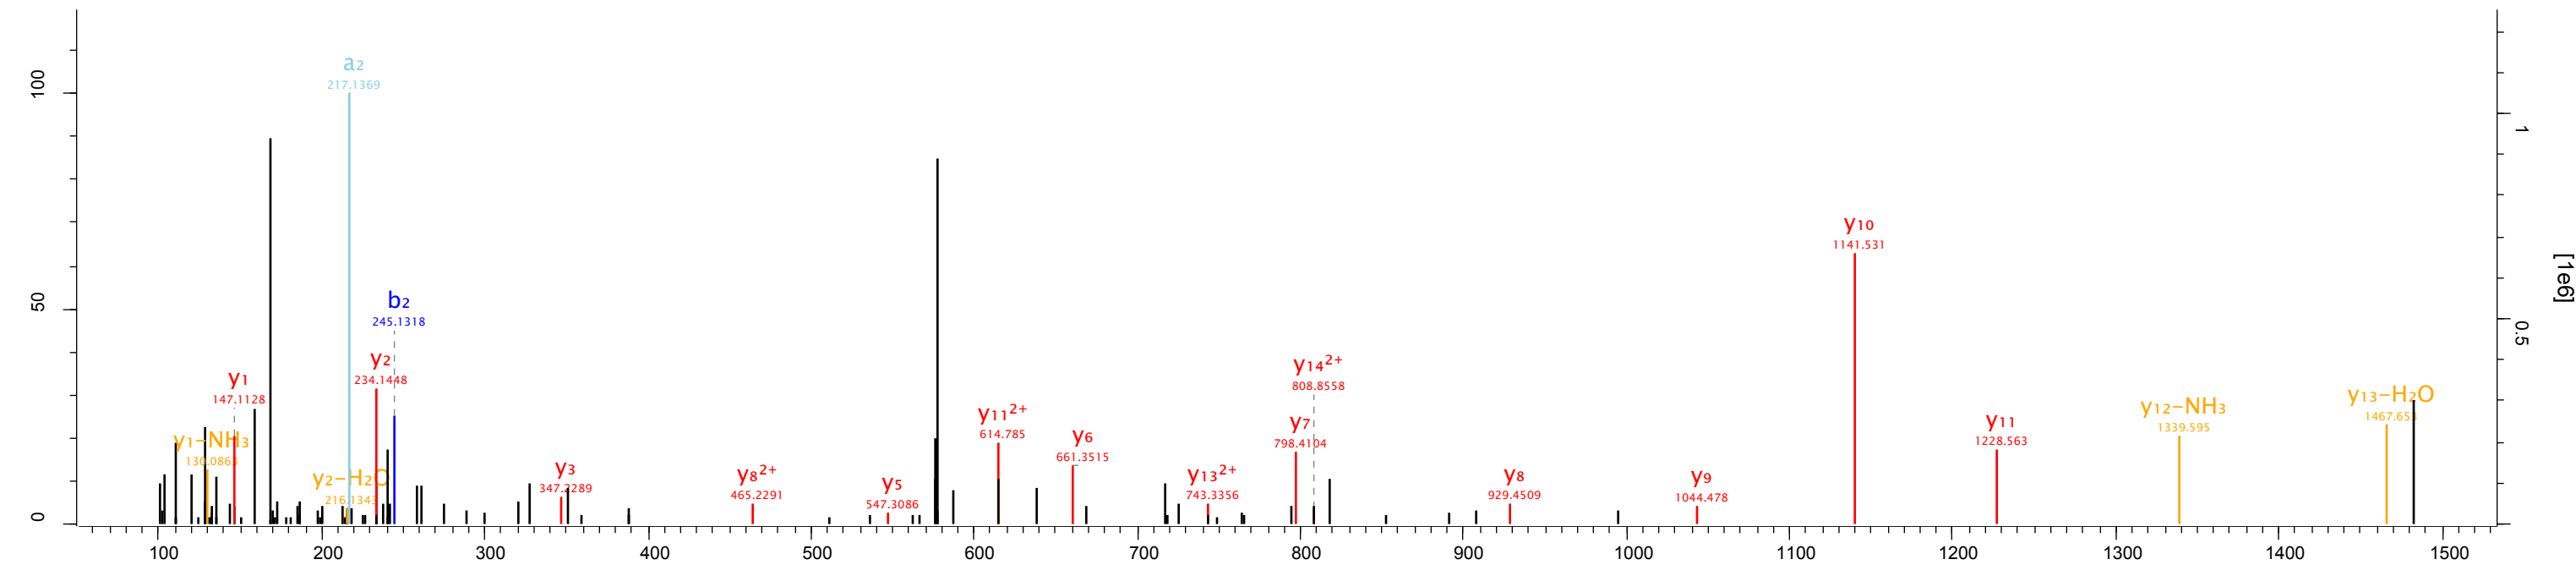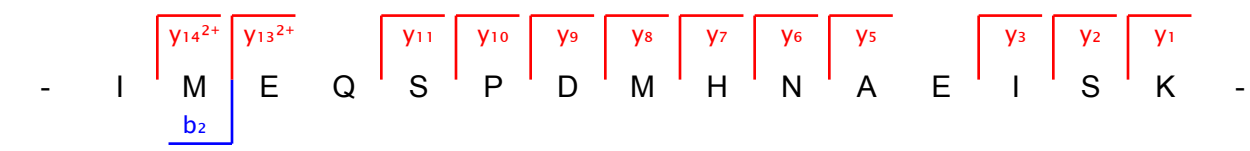

Raw file 20180707\_MaS\_A375SR\_ML\_proteome\_2\_03 Scan 25850 Method FTMS; HCD Score 102.4 m/z 687.38 Gene names TMEM106A

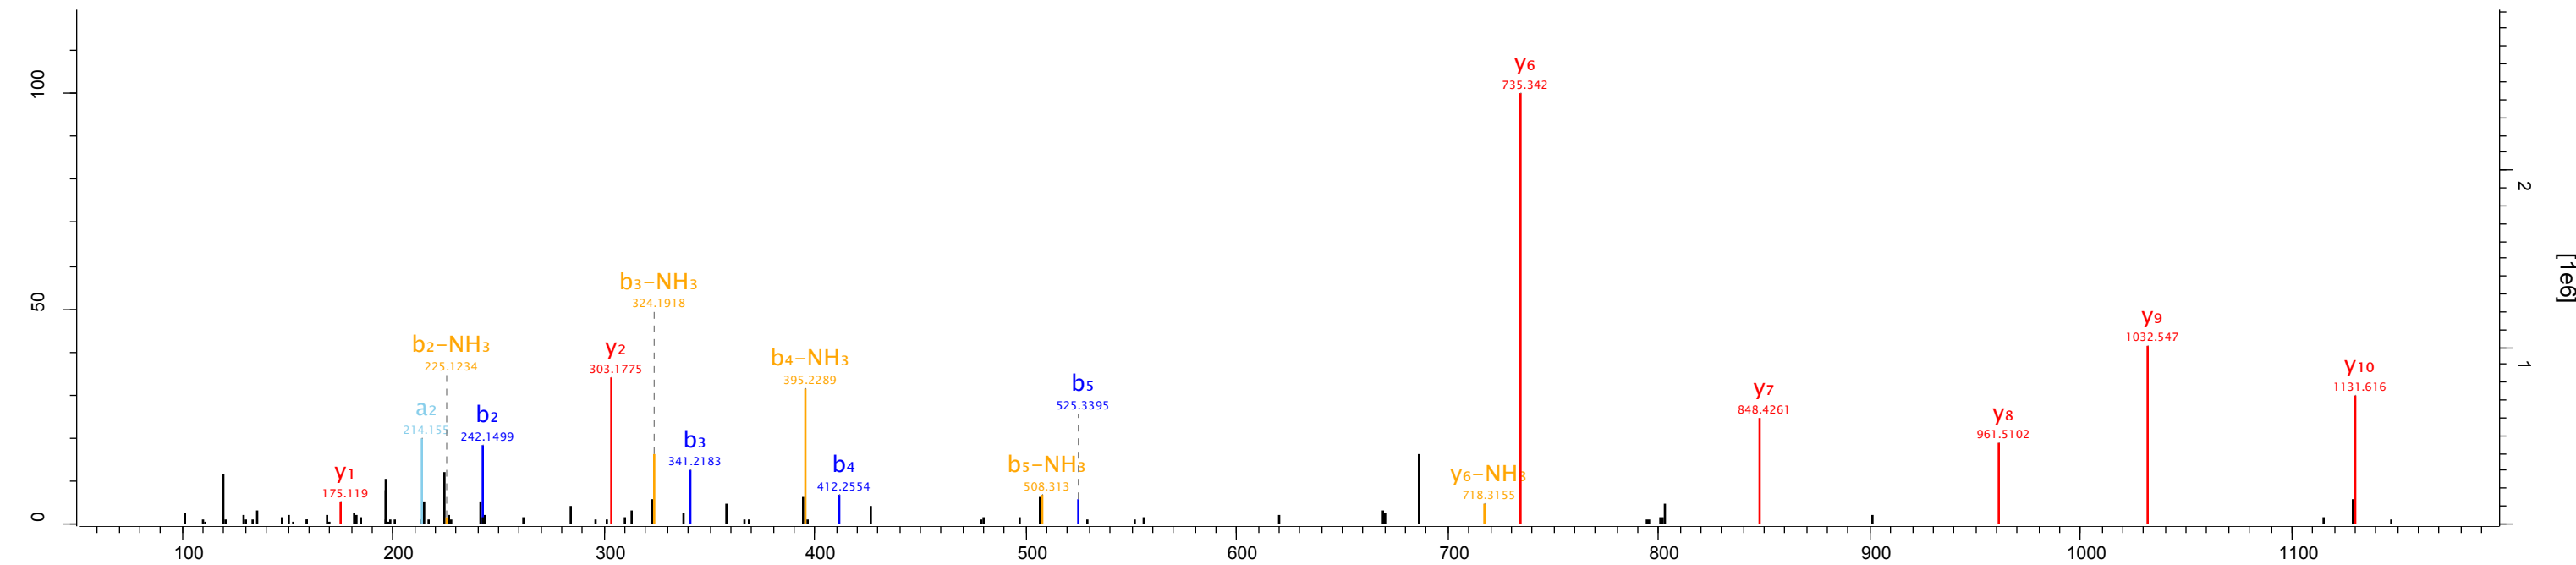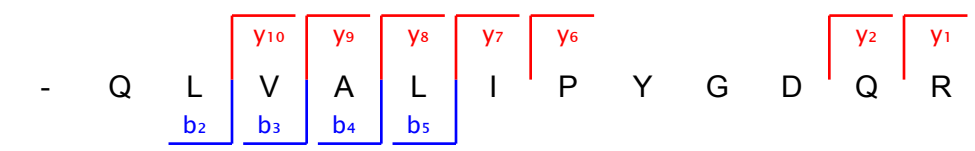

Raw file 20180707\_MaS\_A375SR\_ML\_proteome\_2\_04 Scan 11060 Method FTMS; HCD Score 56.2 m/z 716.3

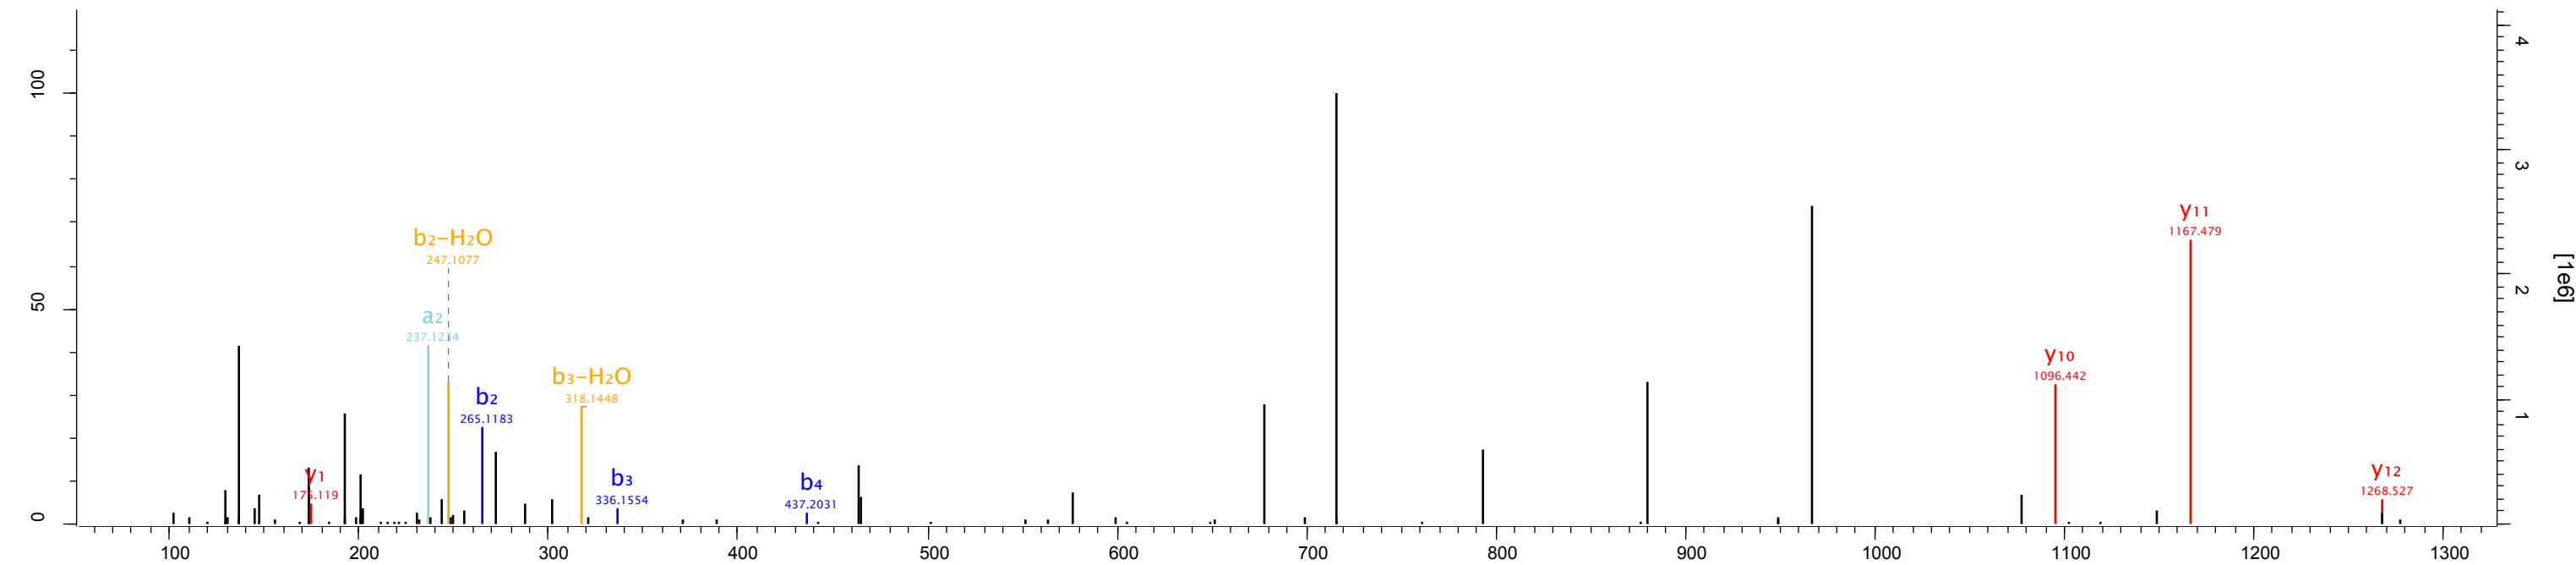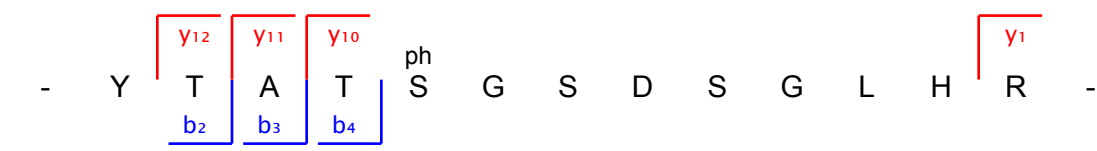

Raw file  
20180707\_MaS\_A375SR\_ML\_proteome\_2\_04

Scan 15910 Method FTMS; HCD Score 49.3 m/z 647.84

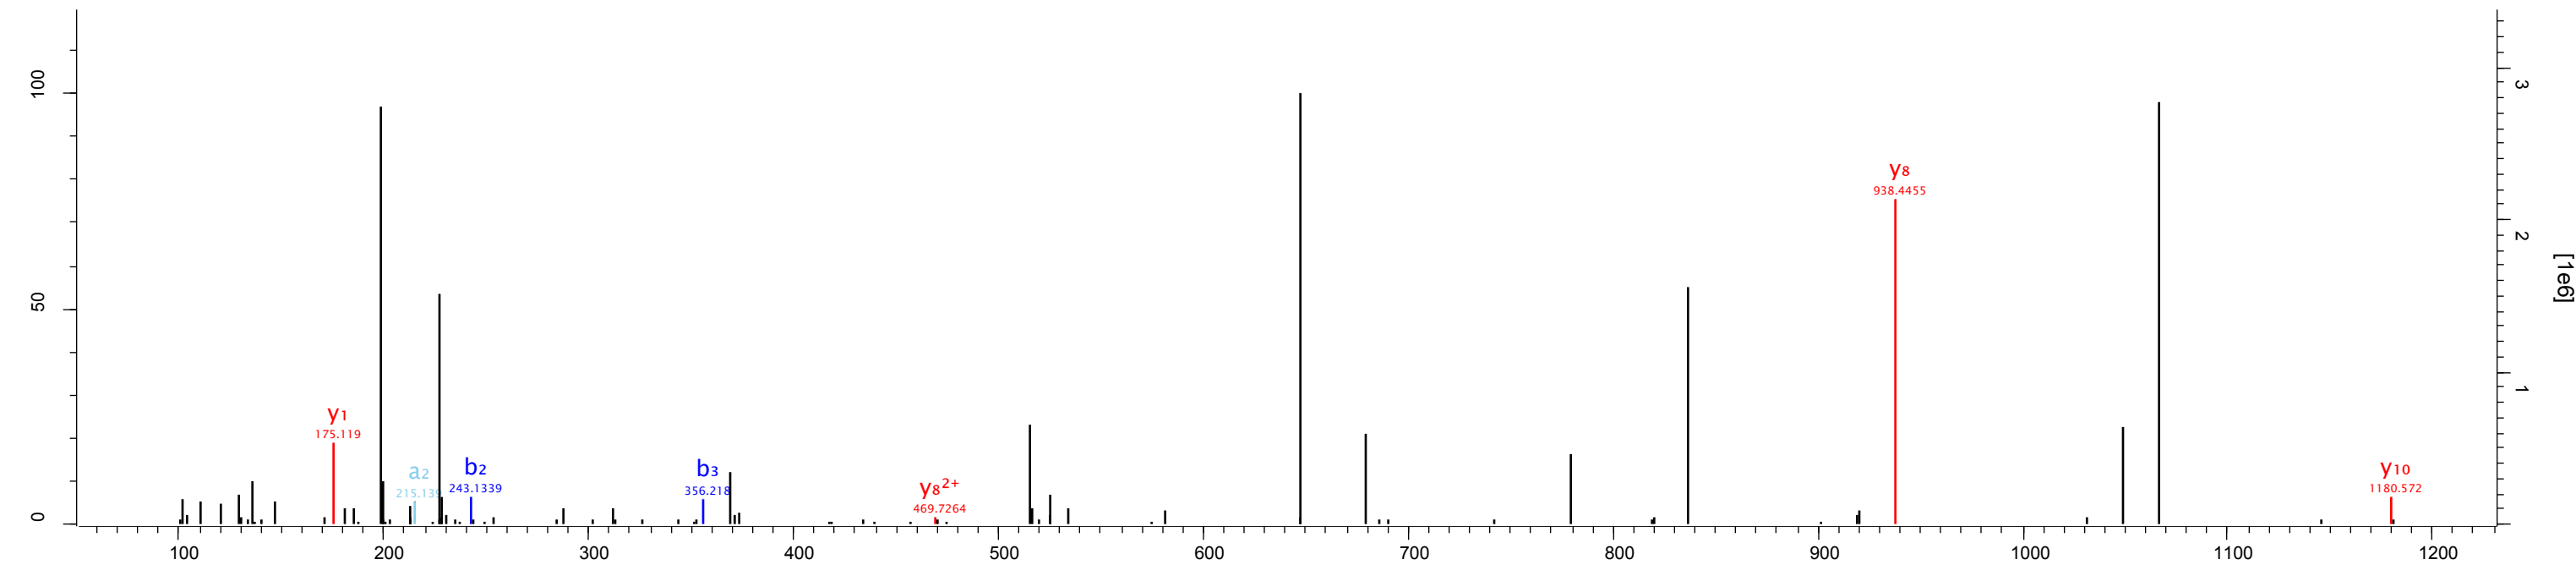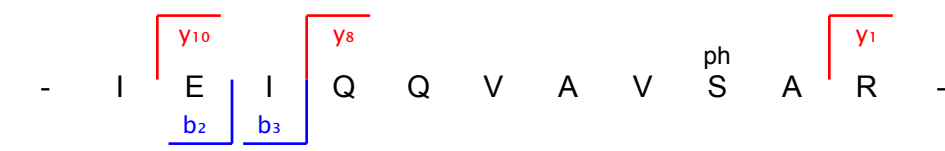

Raw file  
20180707\_MaS\_A375SR\_ML\_proteome\_2\_04

Scan 20440 Method FTMS; HCD Score 88.6 m/z 599.87

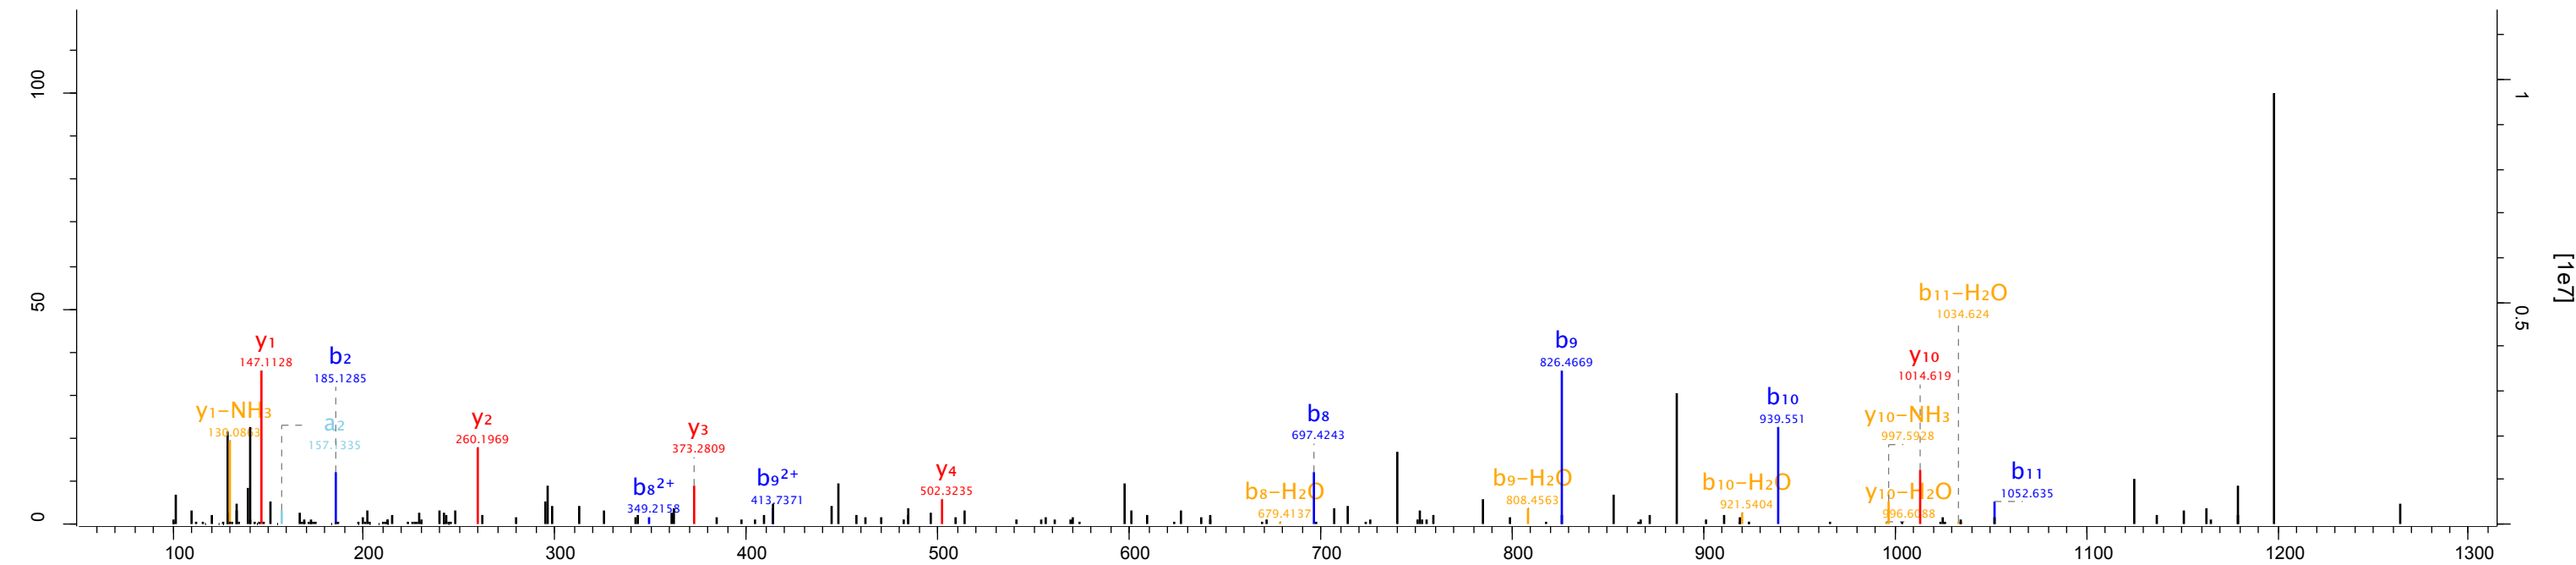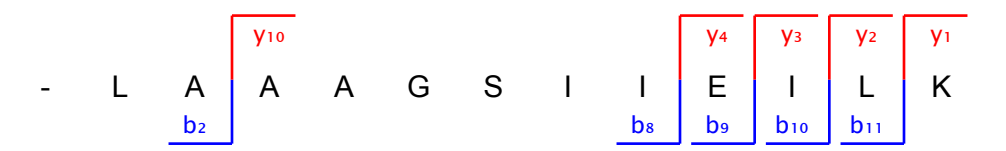

Raw file 20180707\_MaS\_A375SR\_ML\_proteome\_2\_04 Scan 23770 Method FTMS; HCD Score 64.52 m/z 743.42 Gene names MED21

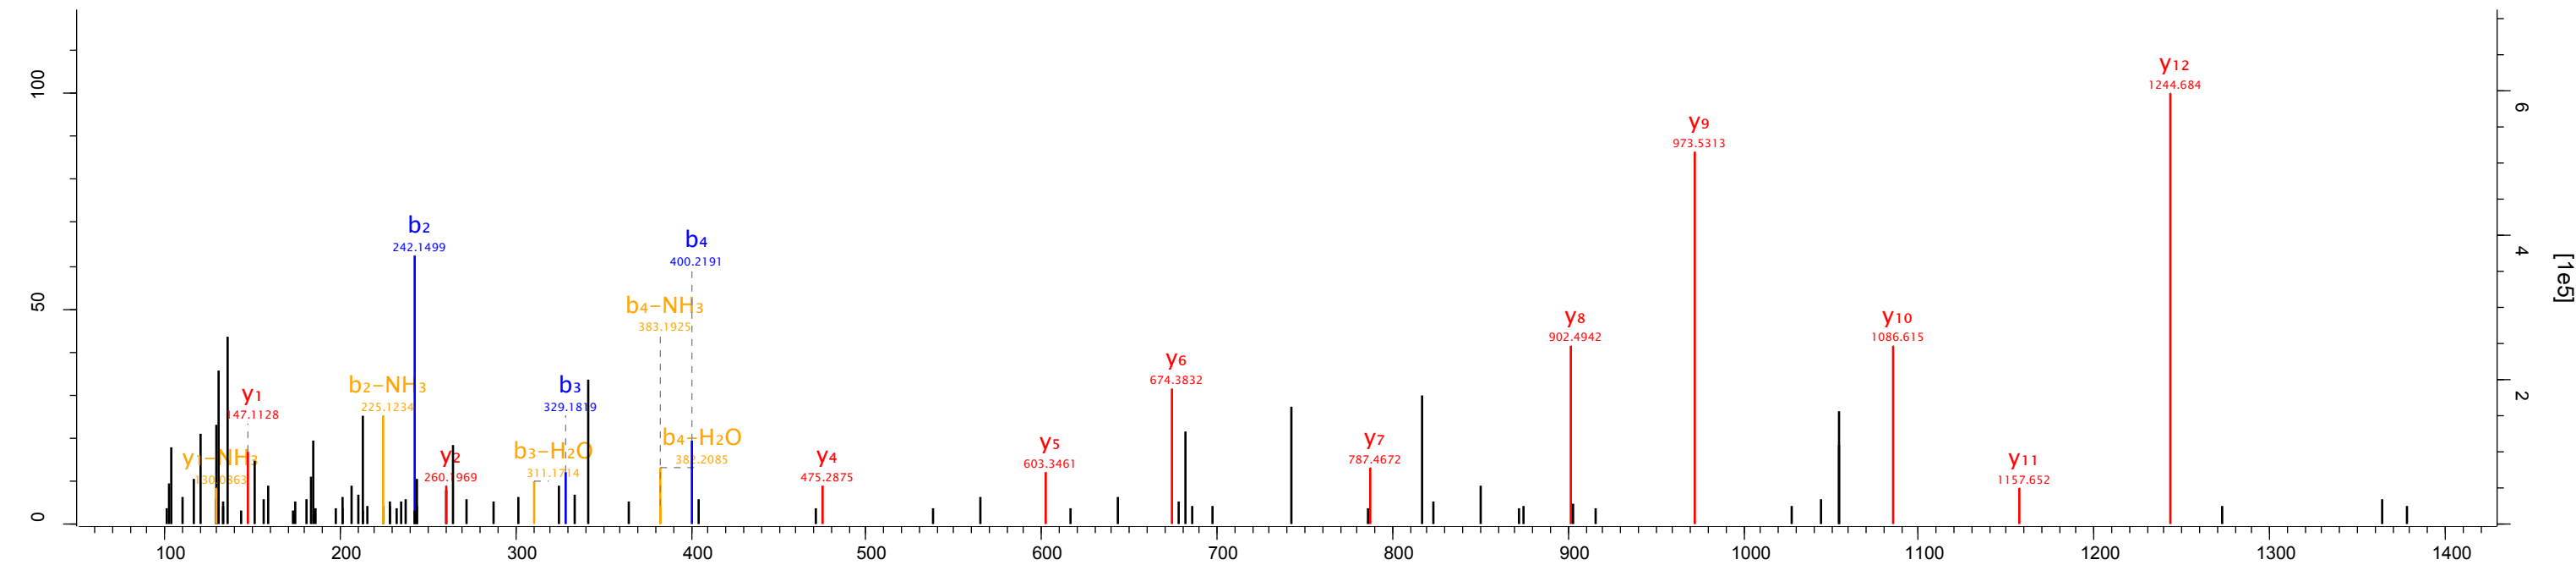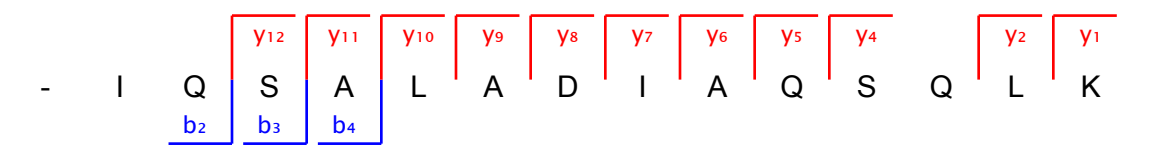

Raw file 20180707\_MaS\_A375SR\_ML\_proteome\_2\_04  
 Scan 26220 Method FTMS; HCD Score 111.61 m/z 492.81 Gene names STON2

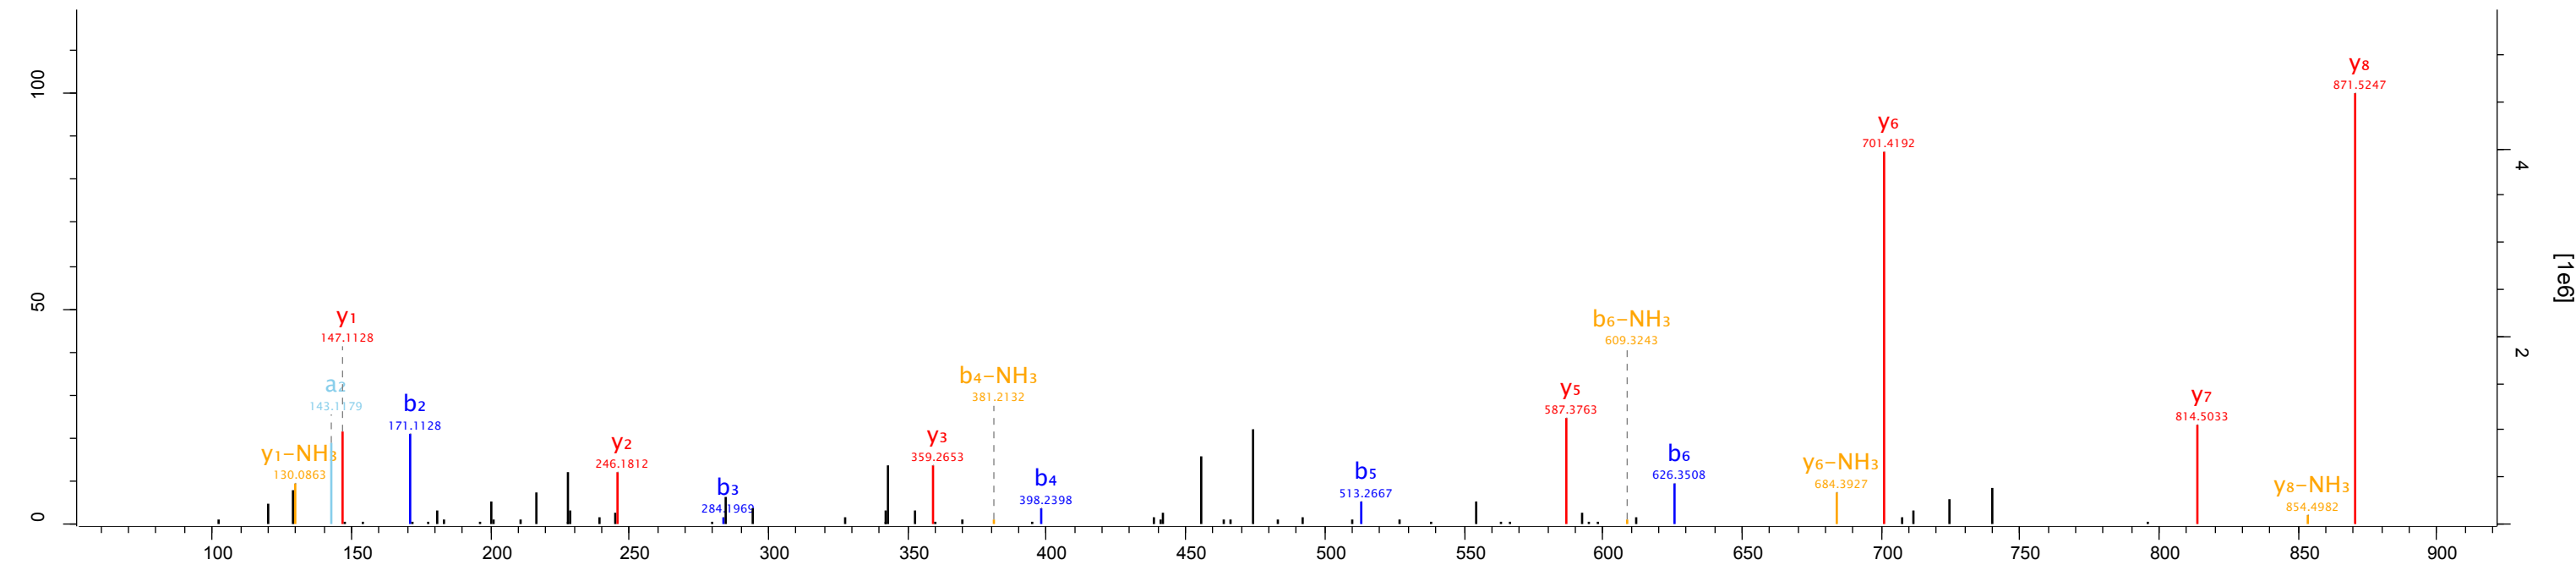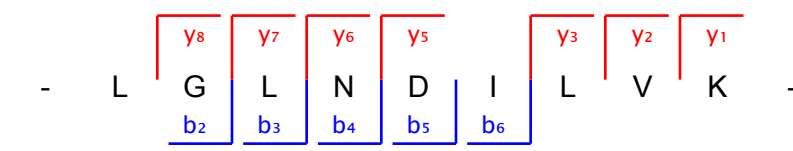



Raw file 20180707\_MaS\_A375SR\_ML\_proteome\_2\_04 Scan 27260 Method FTMS; HCD Score 70.06 m/z 533.32 Gene names CYB561

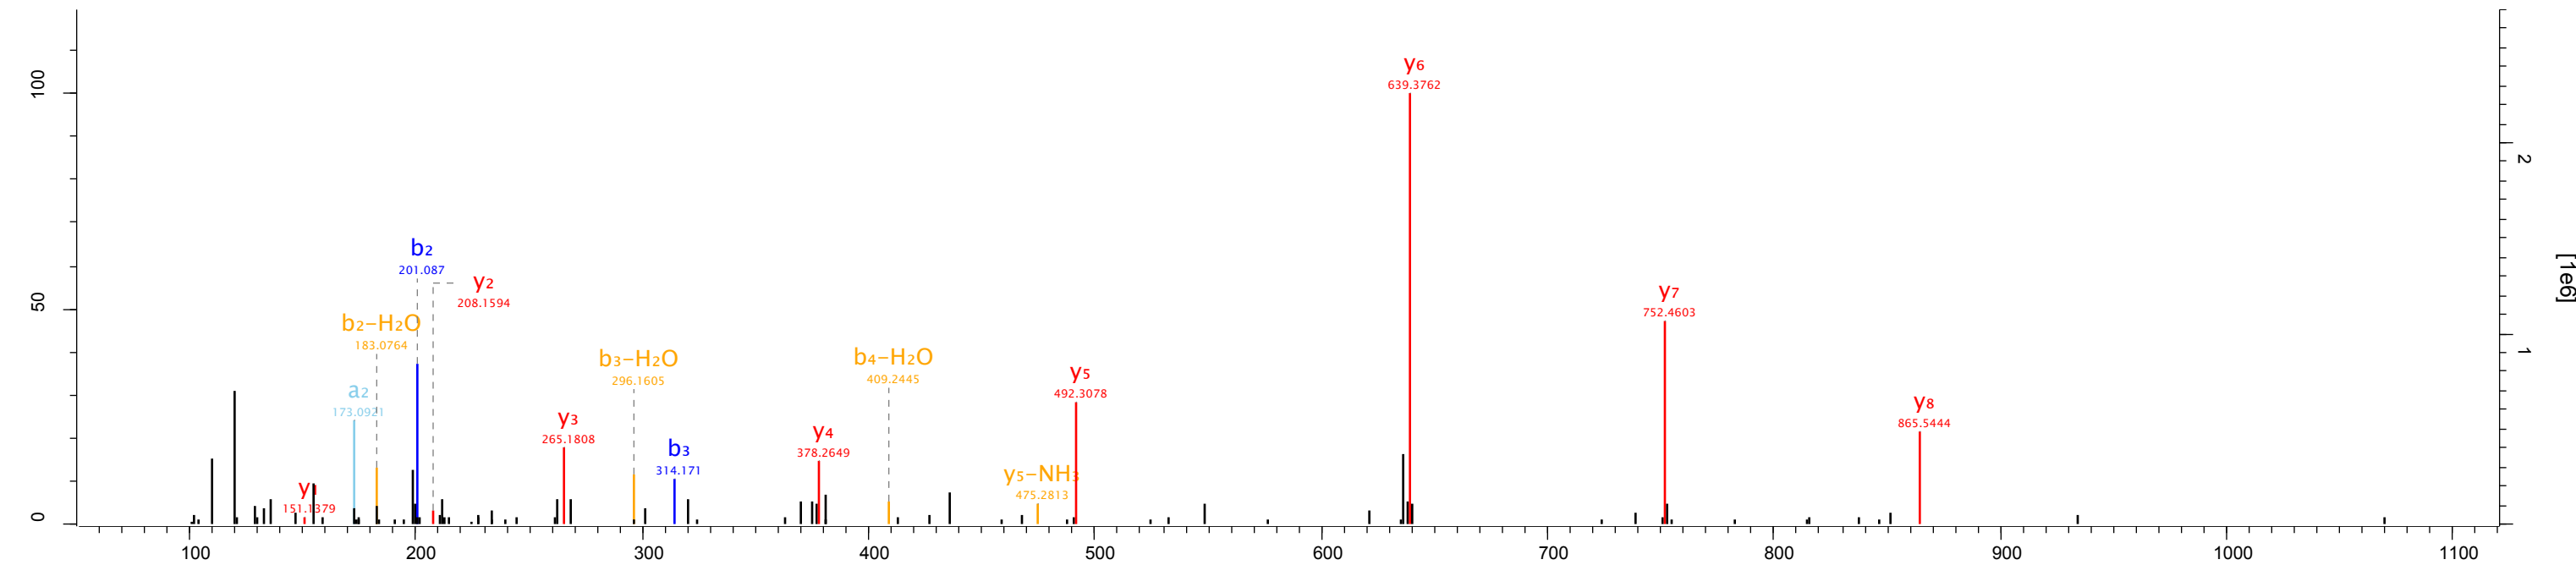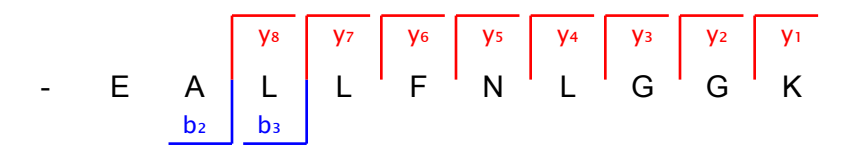

Raw file  
20180707\_MaS\_A375SR\_ML\_proteome\_2\_04

Scan 2890 Method FTMS; HCD Score 146.48 m/z 538.76 Gene names TM4SF1

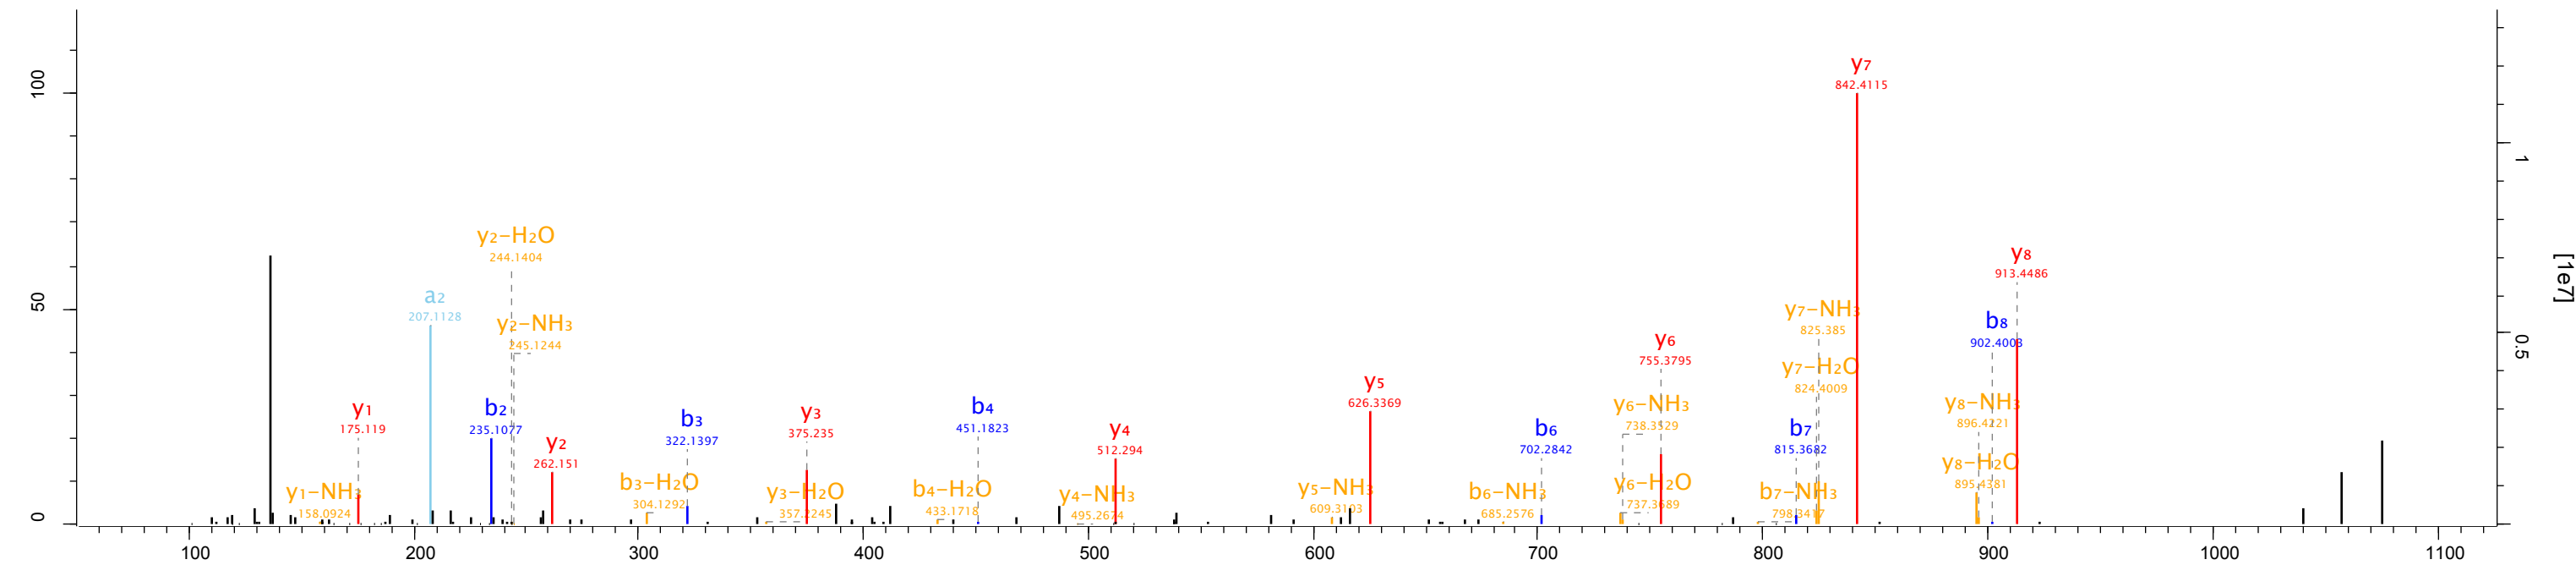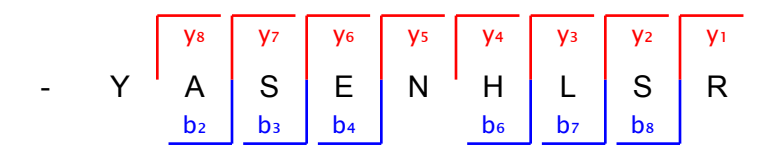

Raw file 20180707\_MaS\_A375SR\_ML\_proteome\_2\_04  
 Scan 3040 Method FTMS; HCD Score 19.75 m/z 403.96 Gene names MT-CO3

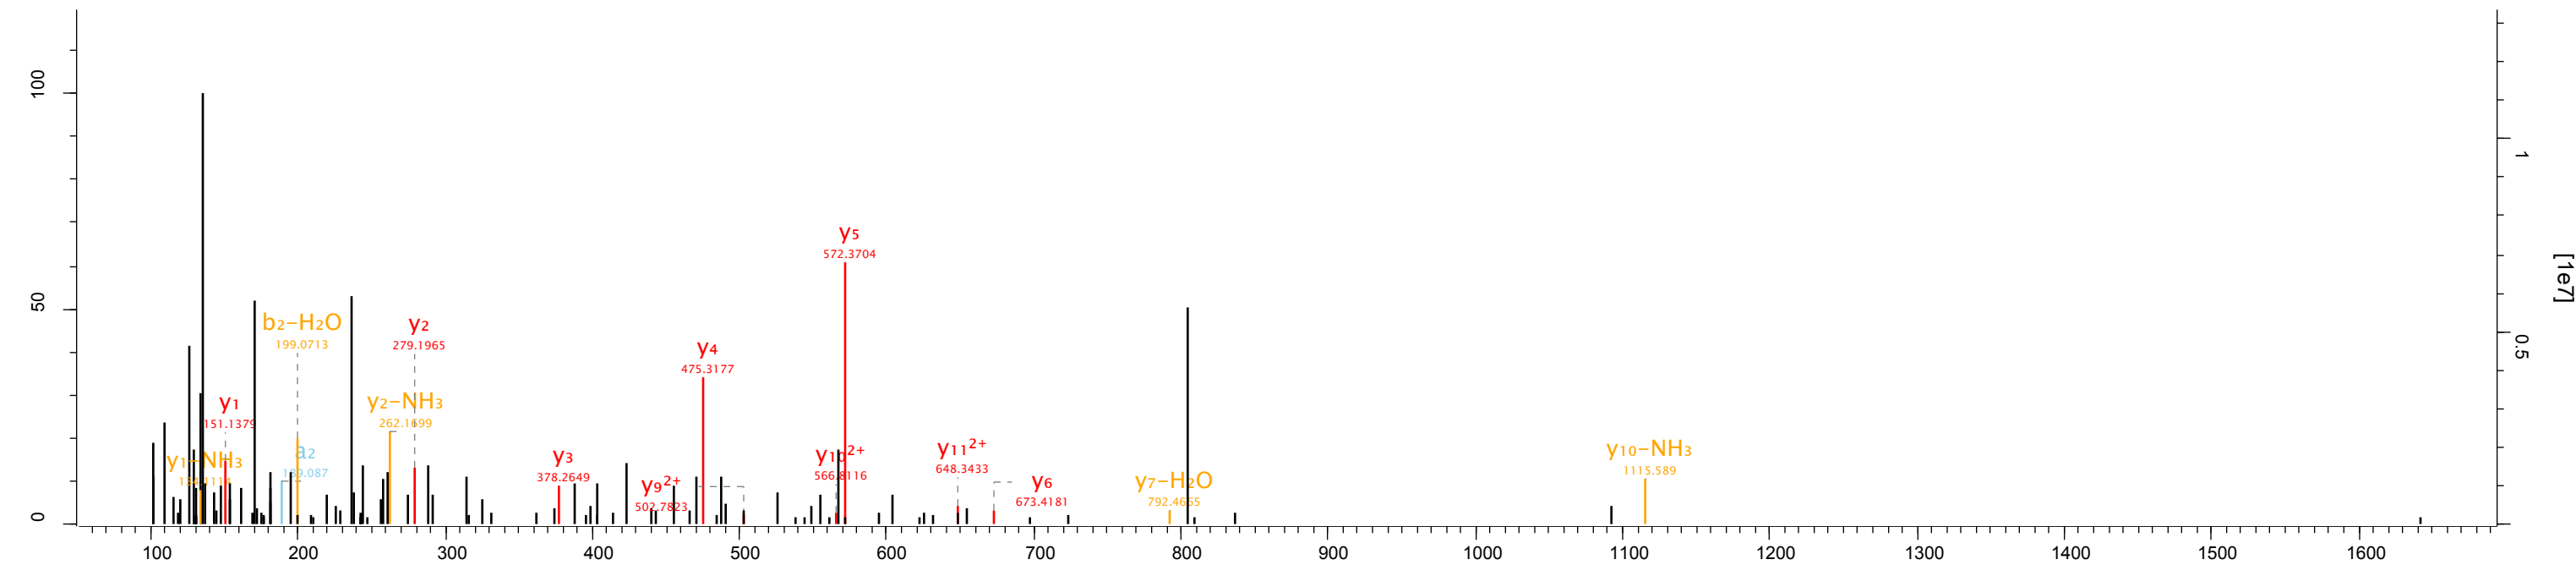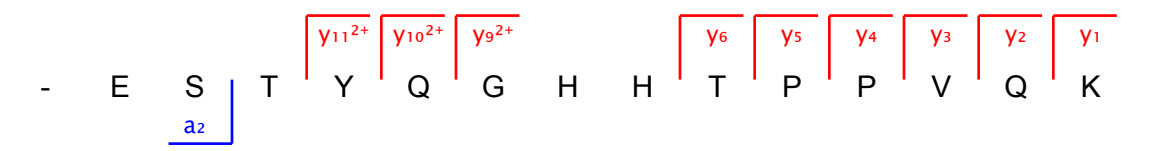

Raw file 20180707\_MaS\_A375SR\_ML\_proteome\_2\_05 Scan 23910 Method FTMS; HCD Score 78.95 m/z 681.01 Gene names PEX7

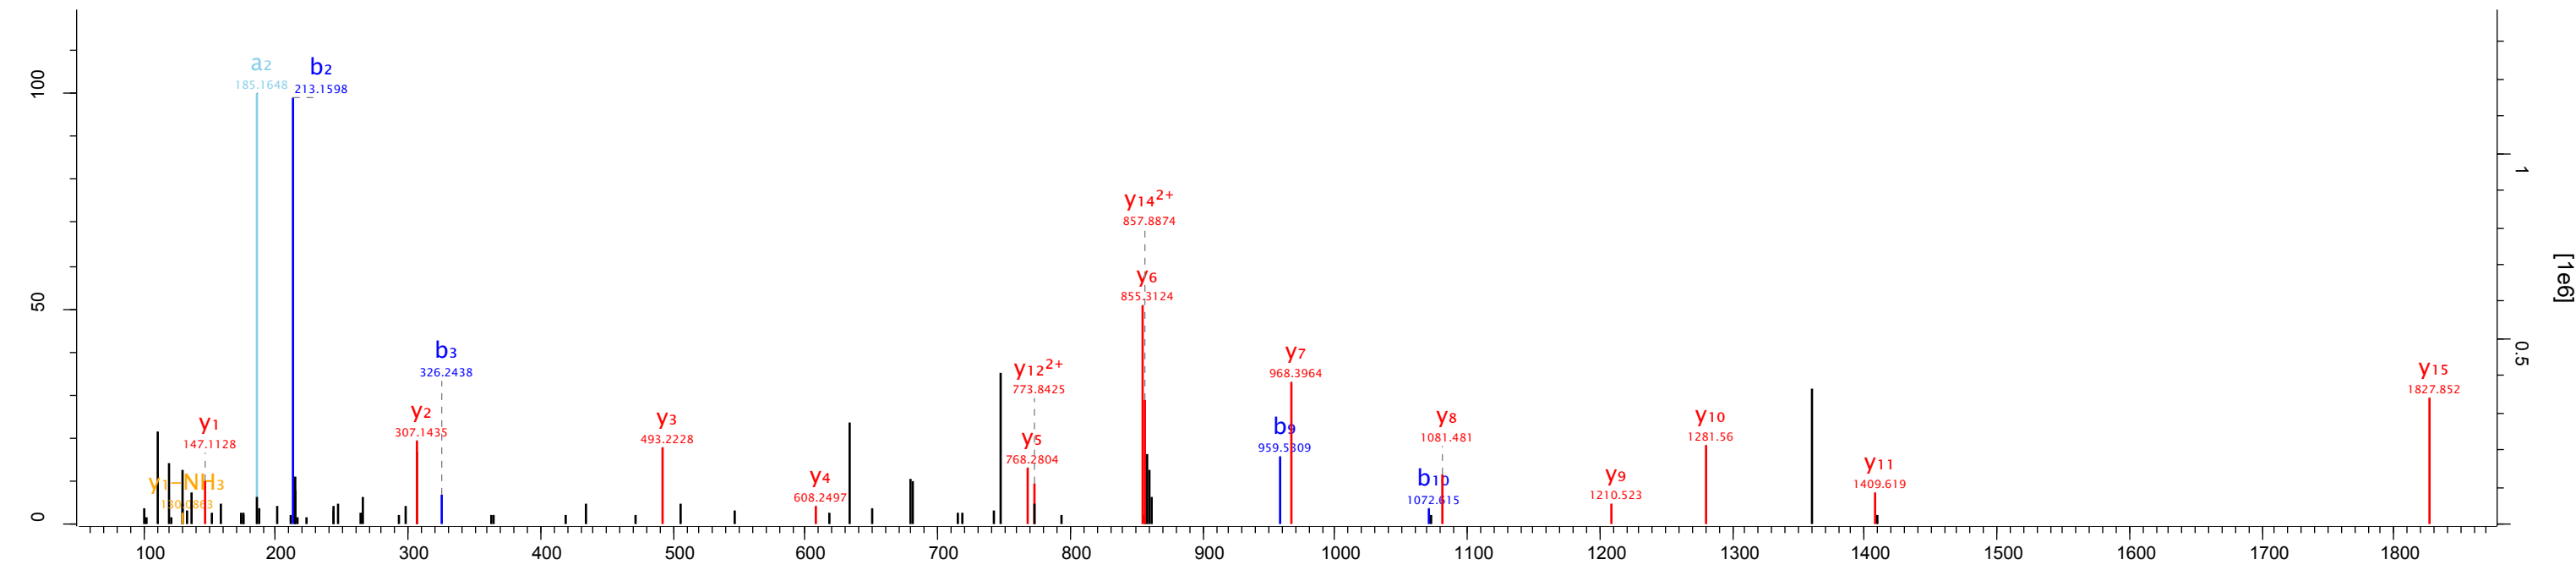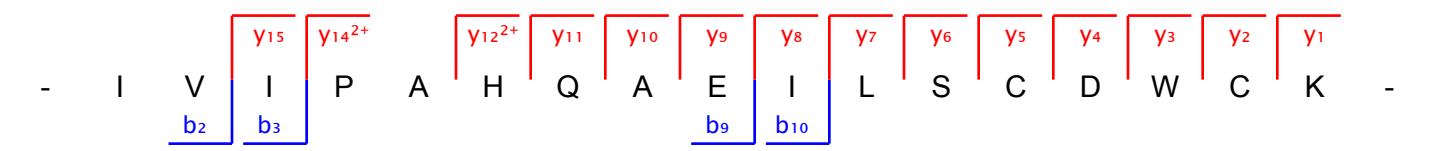

Raw file  
20180707\_MaS\_A375SR\_ML\_proteome\_2\_05

Scan 3500 Method FTMS; HCD Score 47.99 m/z 538.27 Gene names MT-CO3

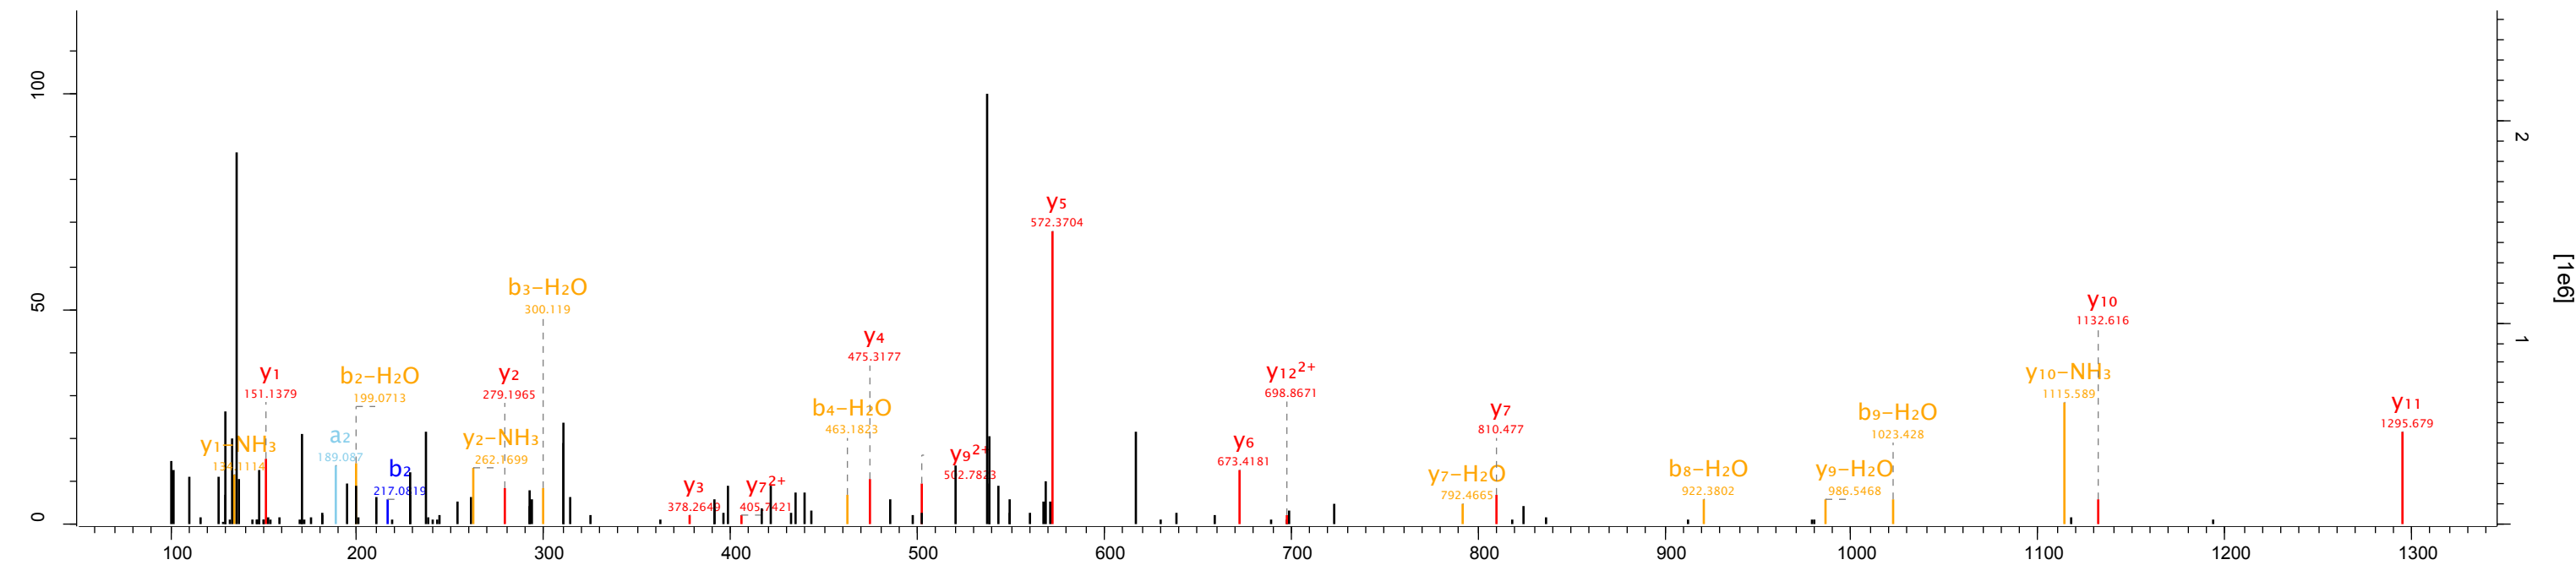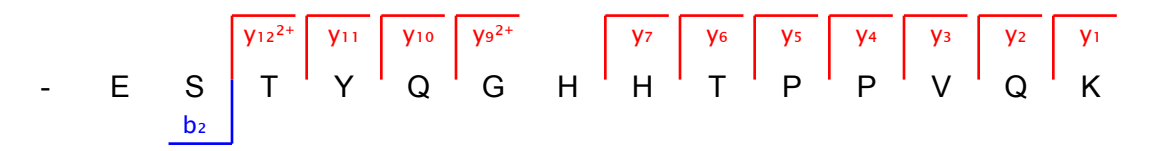

Raw file 20180707\_MaS\_A375SR\_ML\_proteome\_2\_05 Scan 8180 Method FTMS; HCD Score 76.85 m/z 591.3

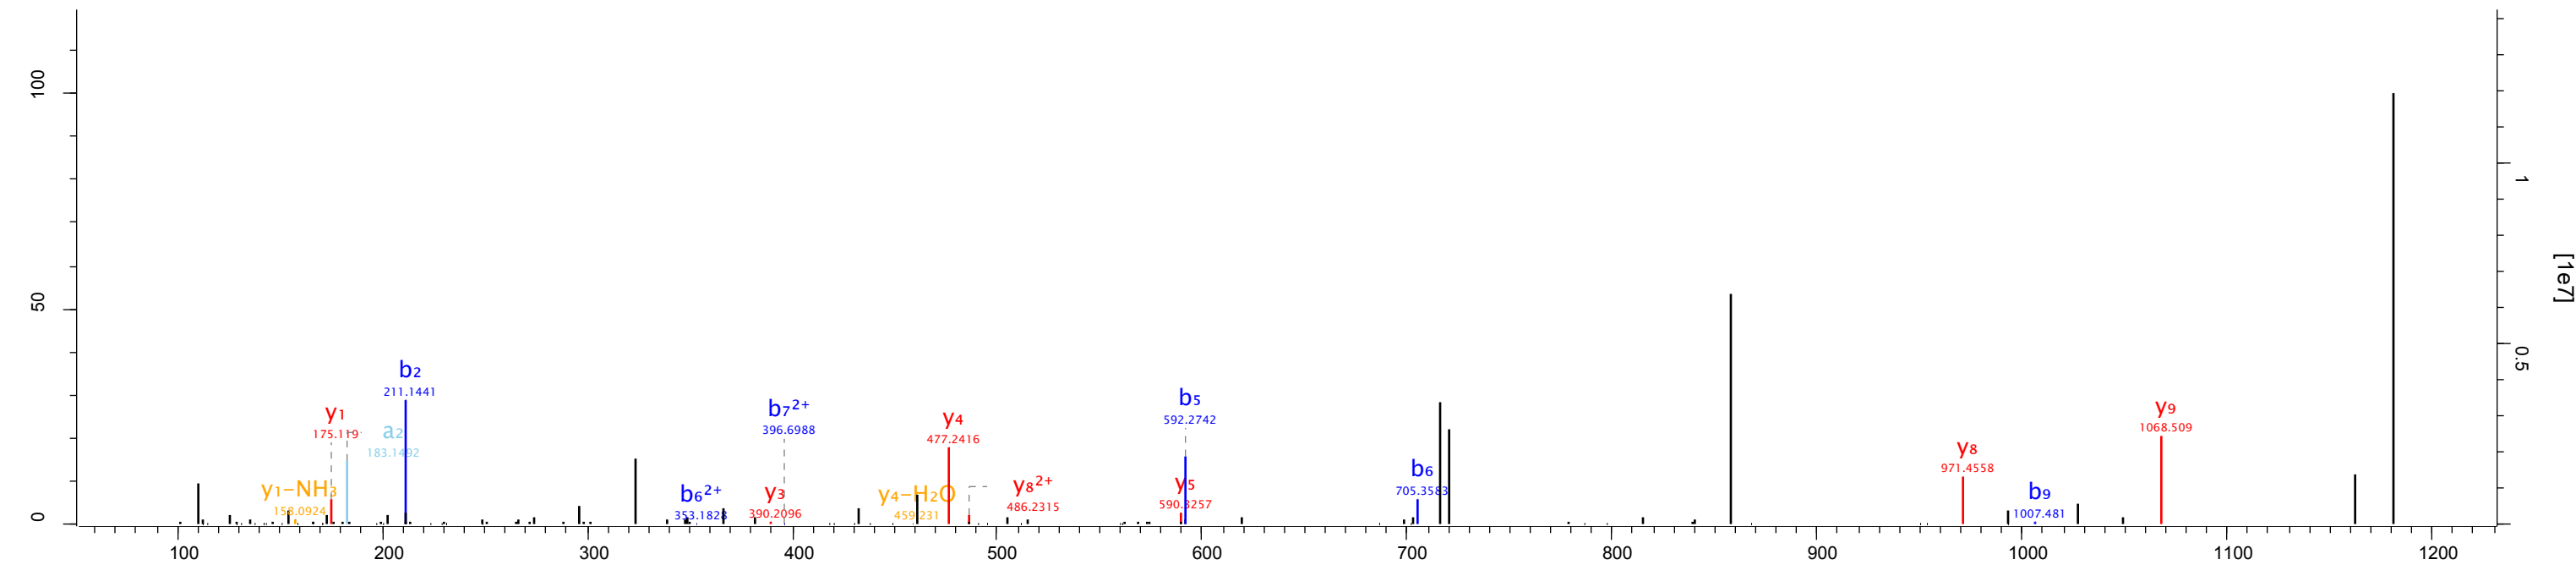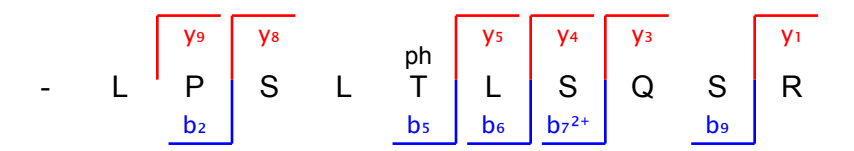

Raw file  
20180707\_MaS\_A375SR\_ML\_proteome\_2\_06

Scan 17830 Method FTMS; HCD Score 67.08 m/z 702.84 Gene names HPX

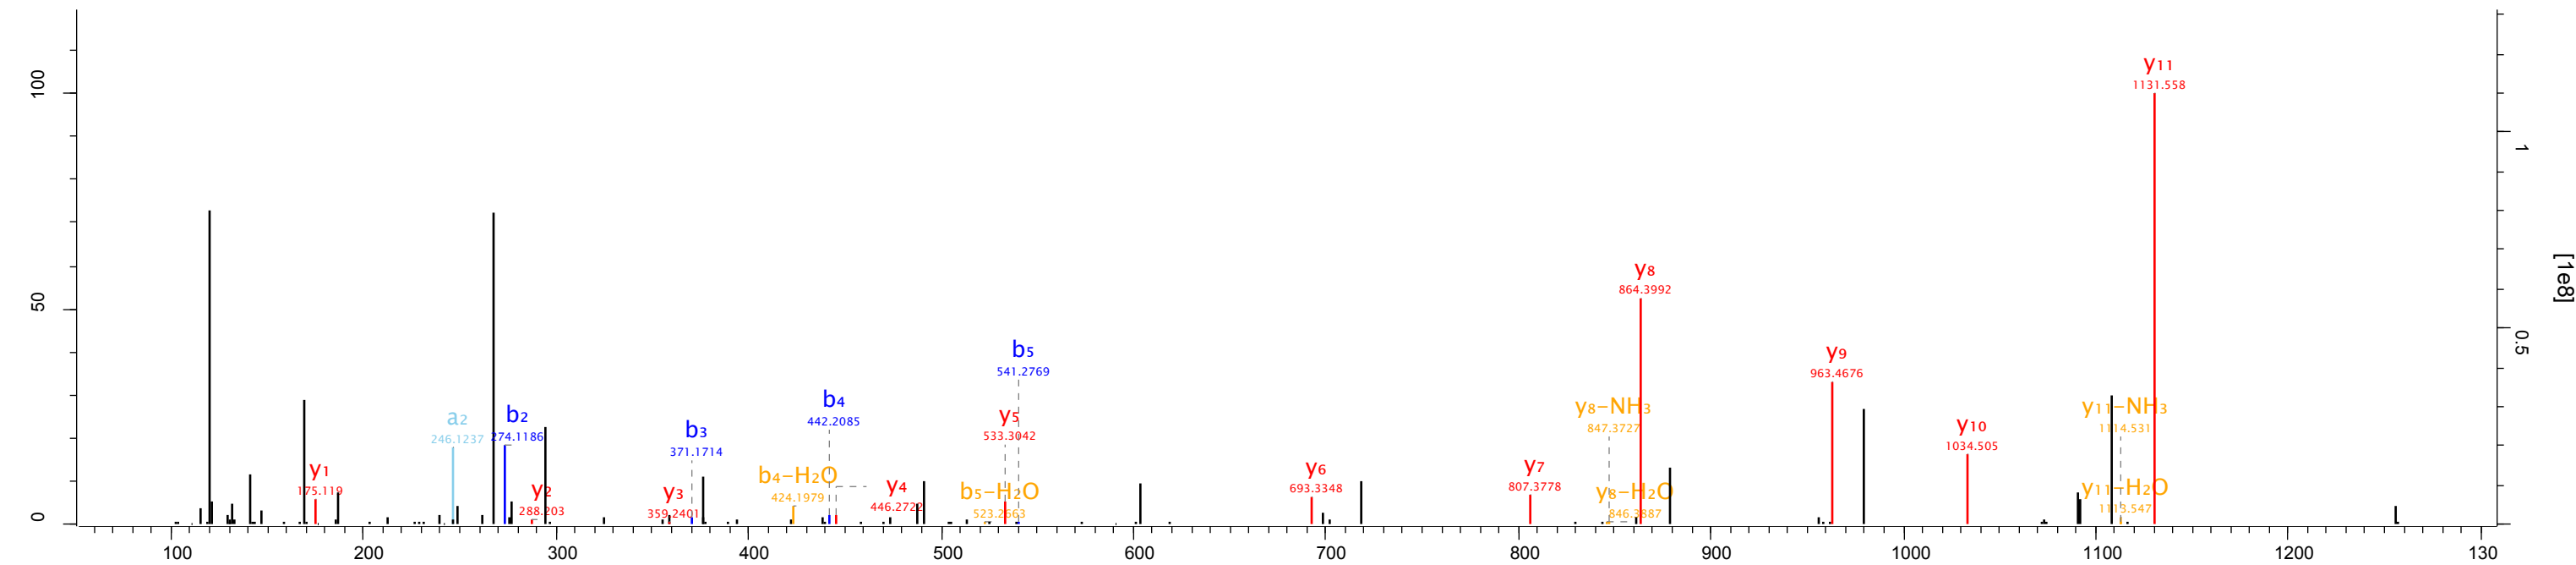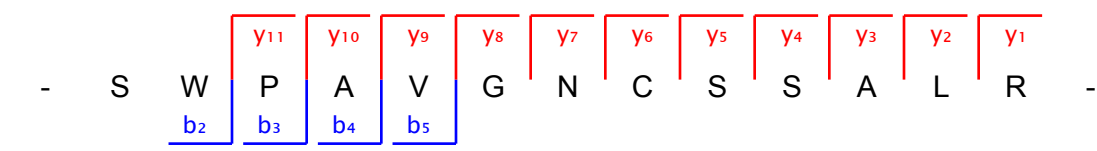

Raw file: 20180707\_MaS\_A375SR\_ML\_proteome\_2\_06  
 Scan: 9730 Method: FTMS; HCD Score: 101.66 m/z: 555.8 Gene names: POLR2F

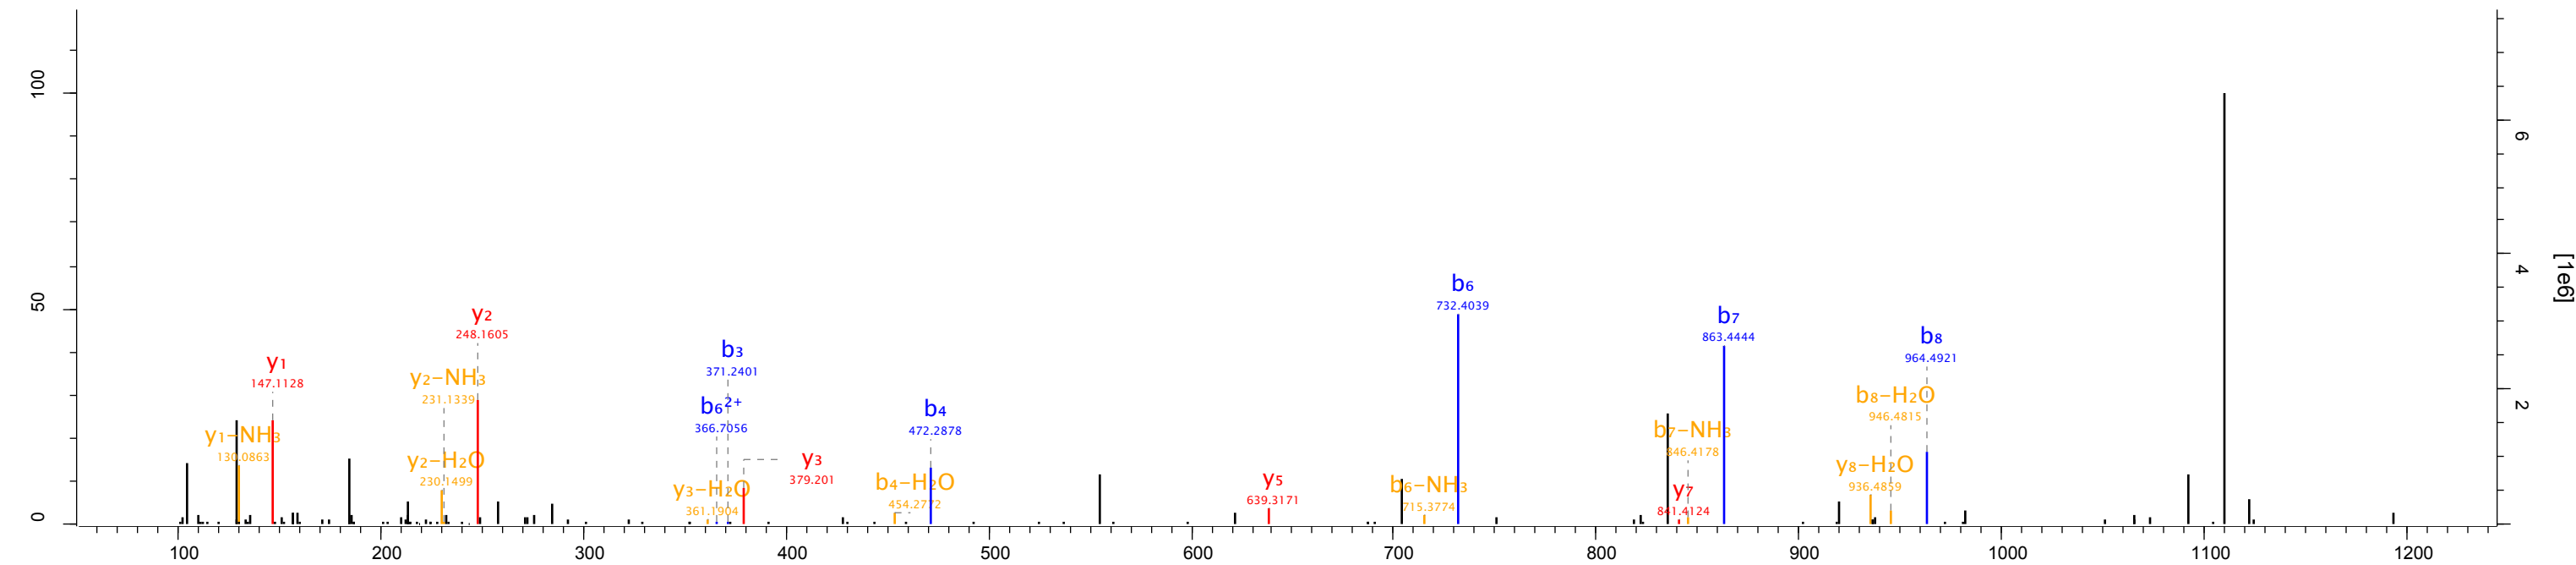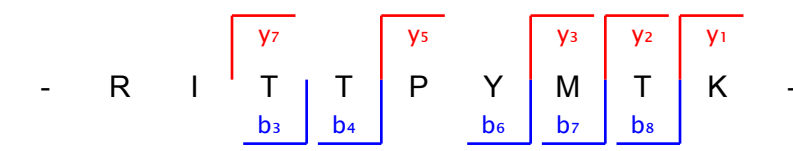



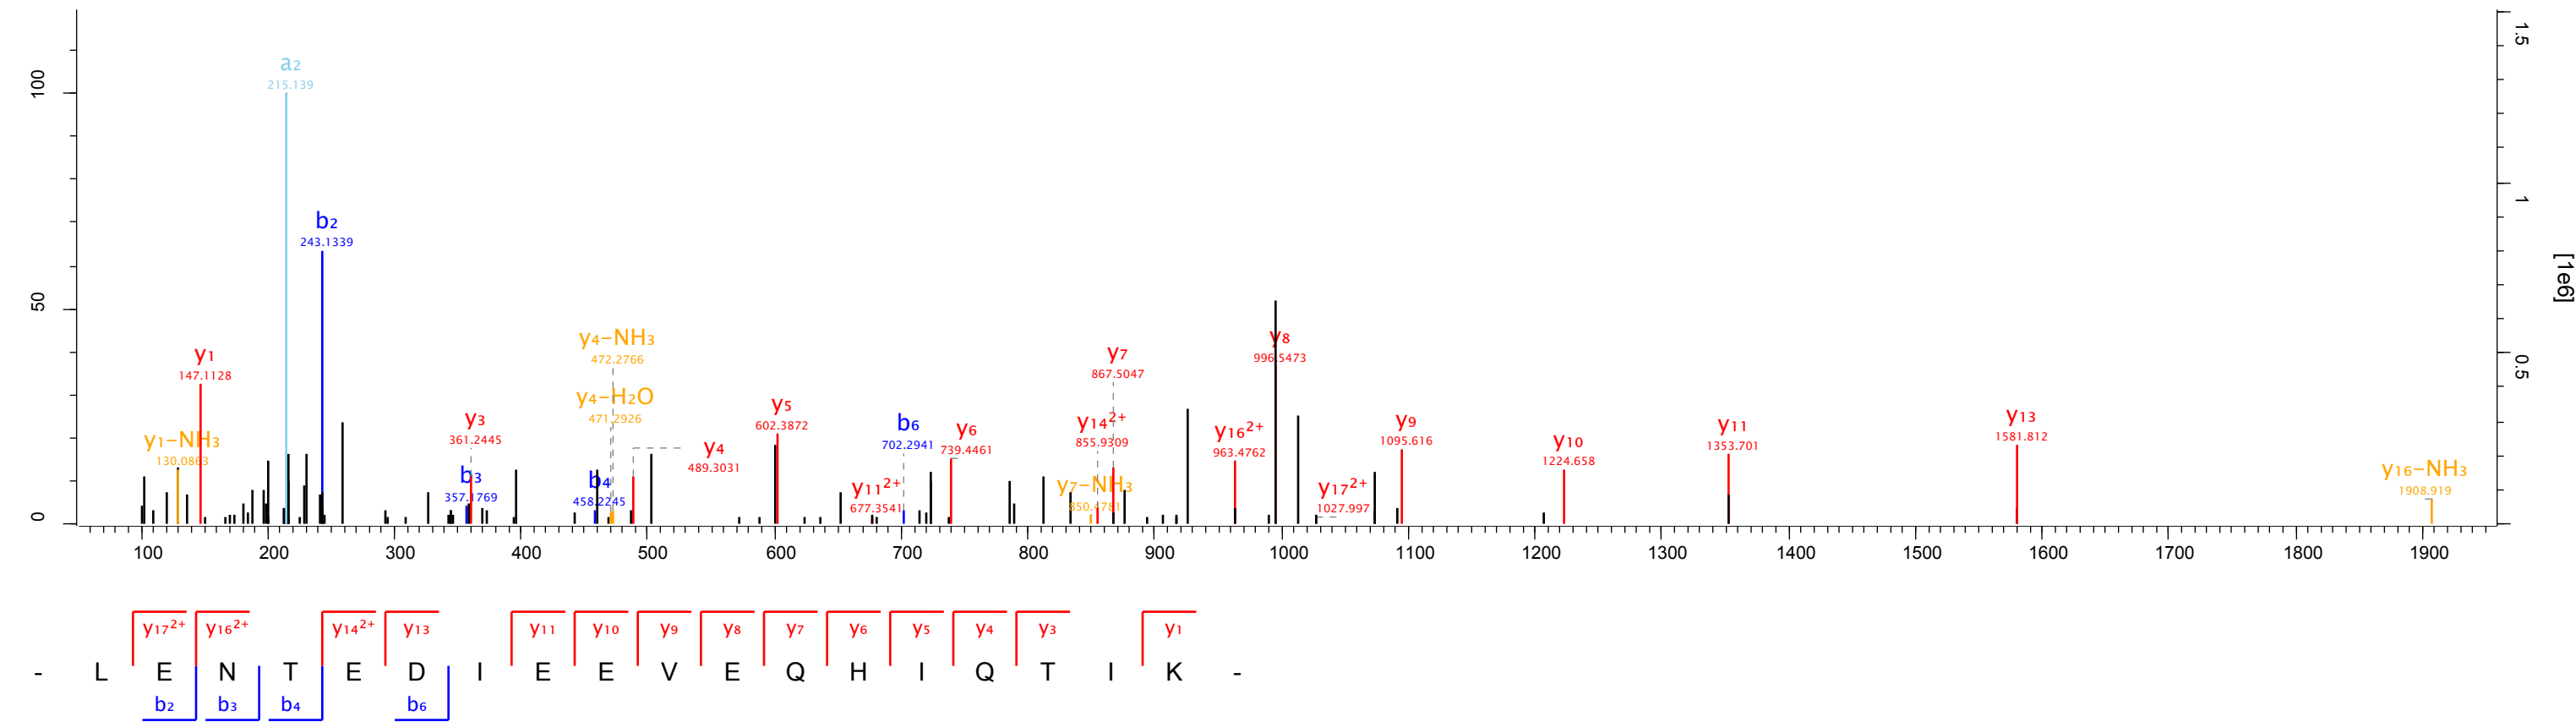

Raw file 20180707\_MaS\_A375SR\_ML\_proteome\_2\_07 Scan 27940 Method FTMS; HCD Score 51.44 m/z 570.82 Gene names MT-ND2

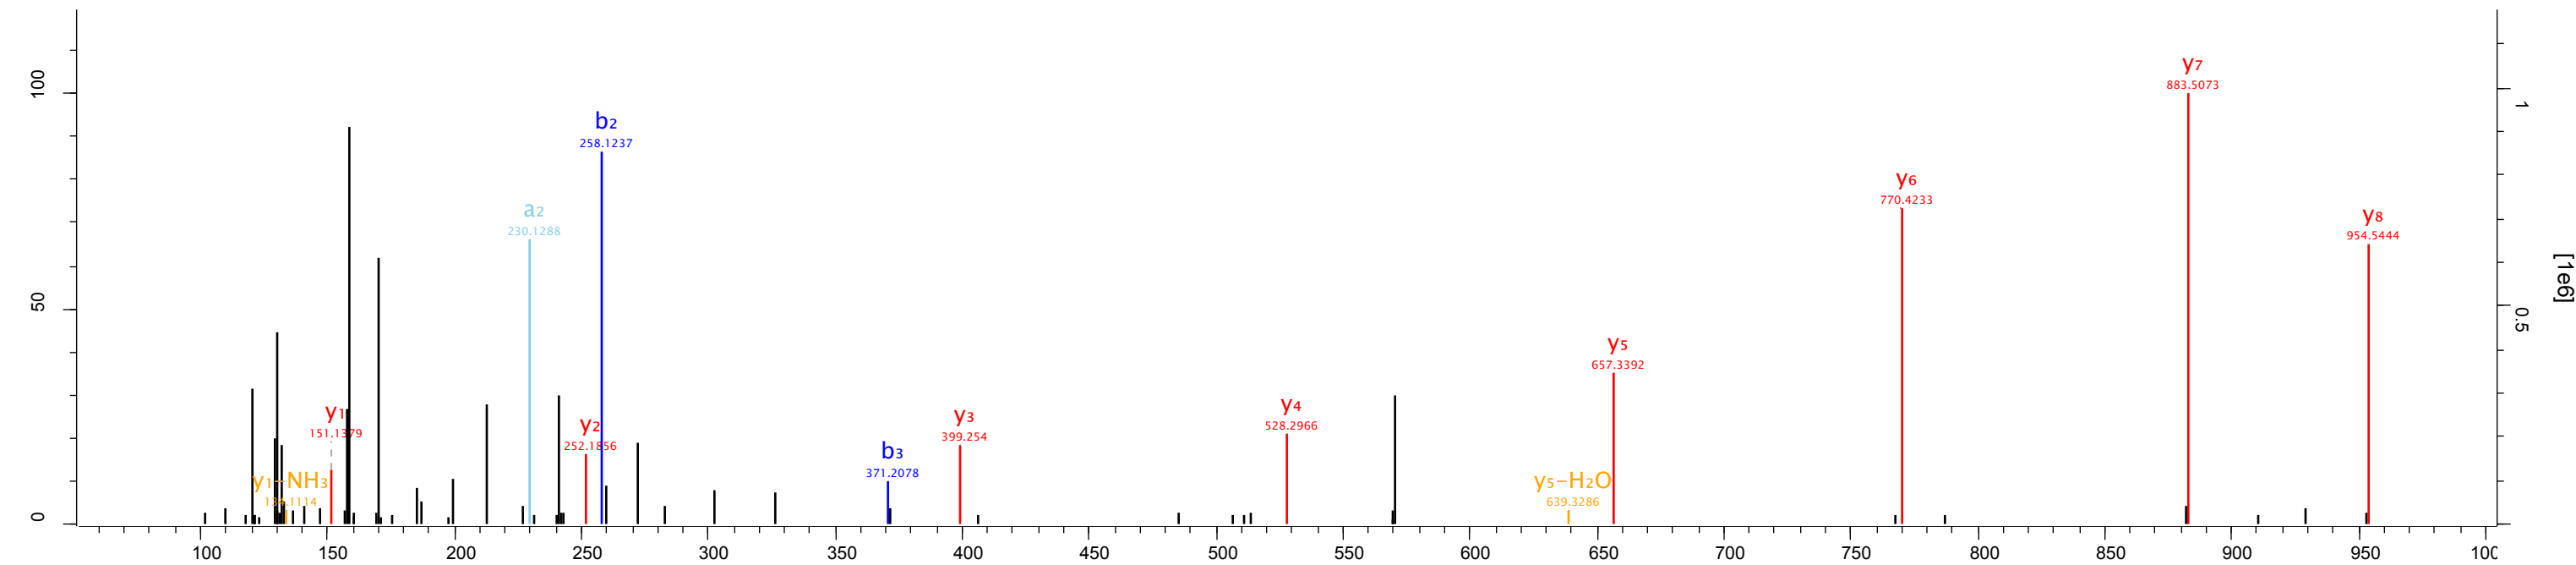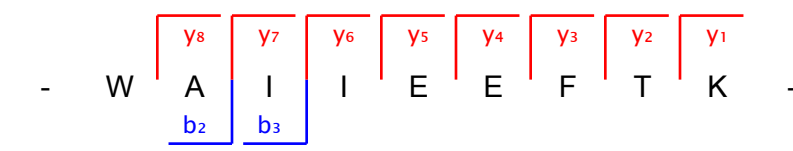

Raw file  
20180707\_MaS\_A375SR\_ML\_proteome\_2\_07

Scan 27960 Method FTMS; HCD Score 43.3 m/z 568.8 Gene names MT-ND2

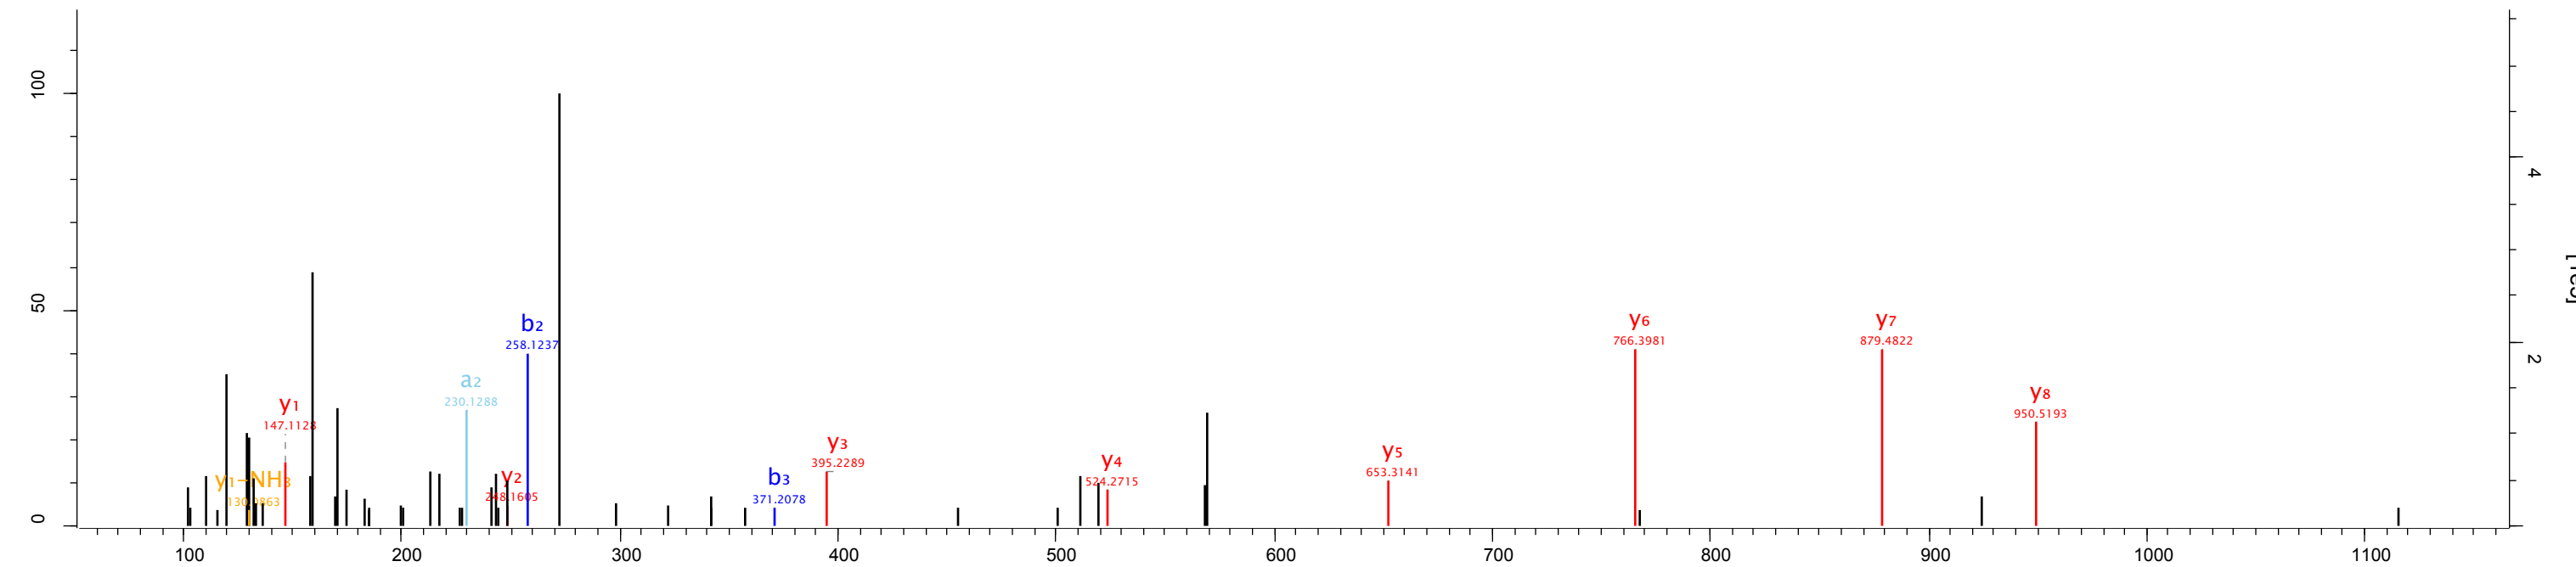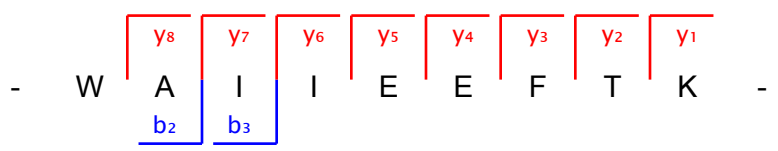

Raw file  
20180707\_MaS\_A375SR\_ML\_proteome\_2\_07

| Scan | Method    | Score | m/z    |
|------|-----------|-------|--------|
| 3210 | FTMS; HCD | 60.44 | 617.82 |

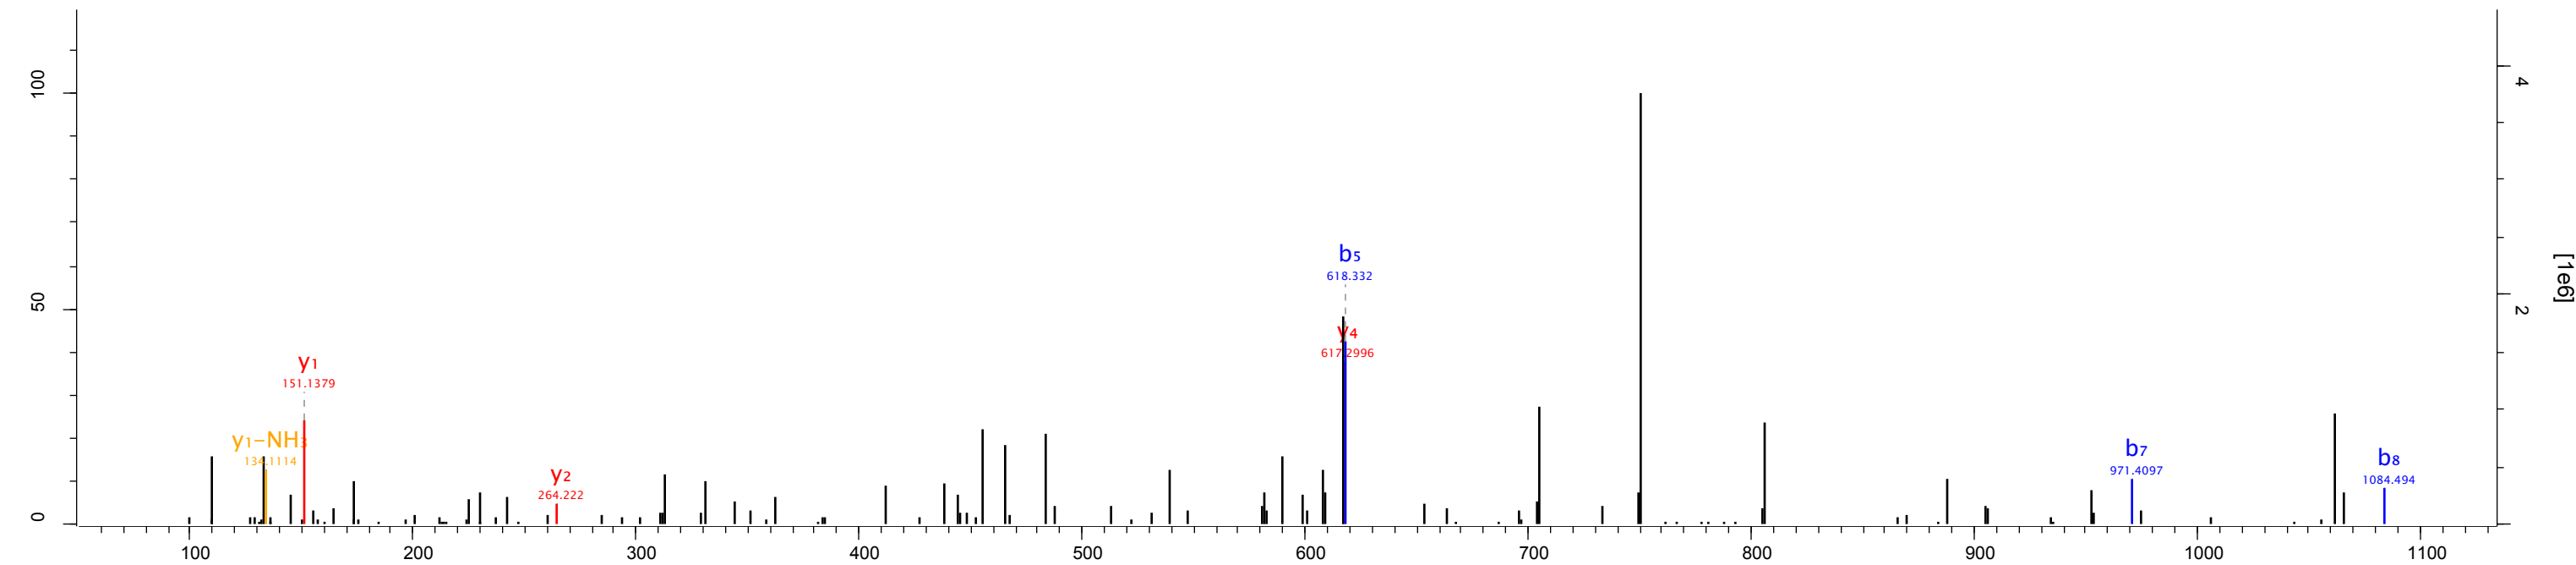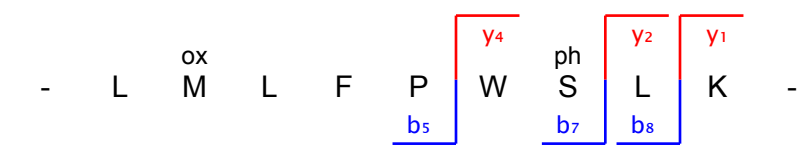

Raw file 20180707\_MaS\_A375SR\_ML\_proteome\_2\_07  
 Scan 9790 Method FTMS; HCD Score 60.06 m/z 977.4

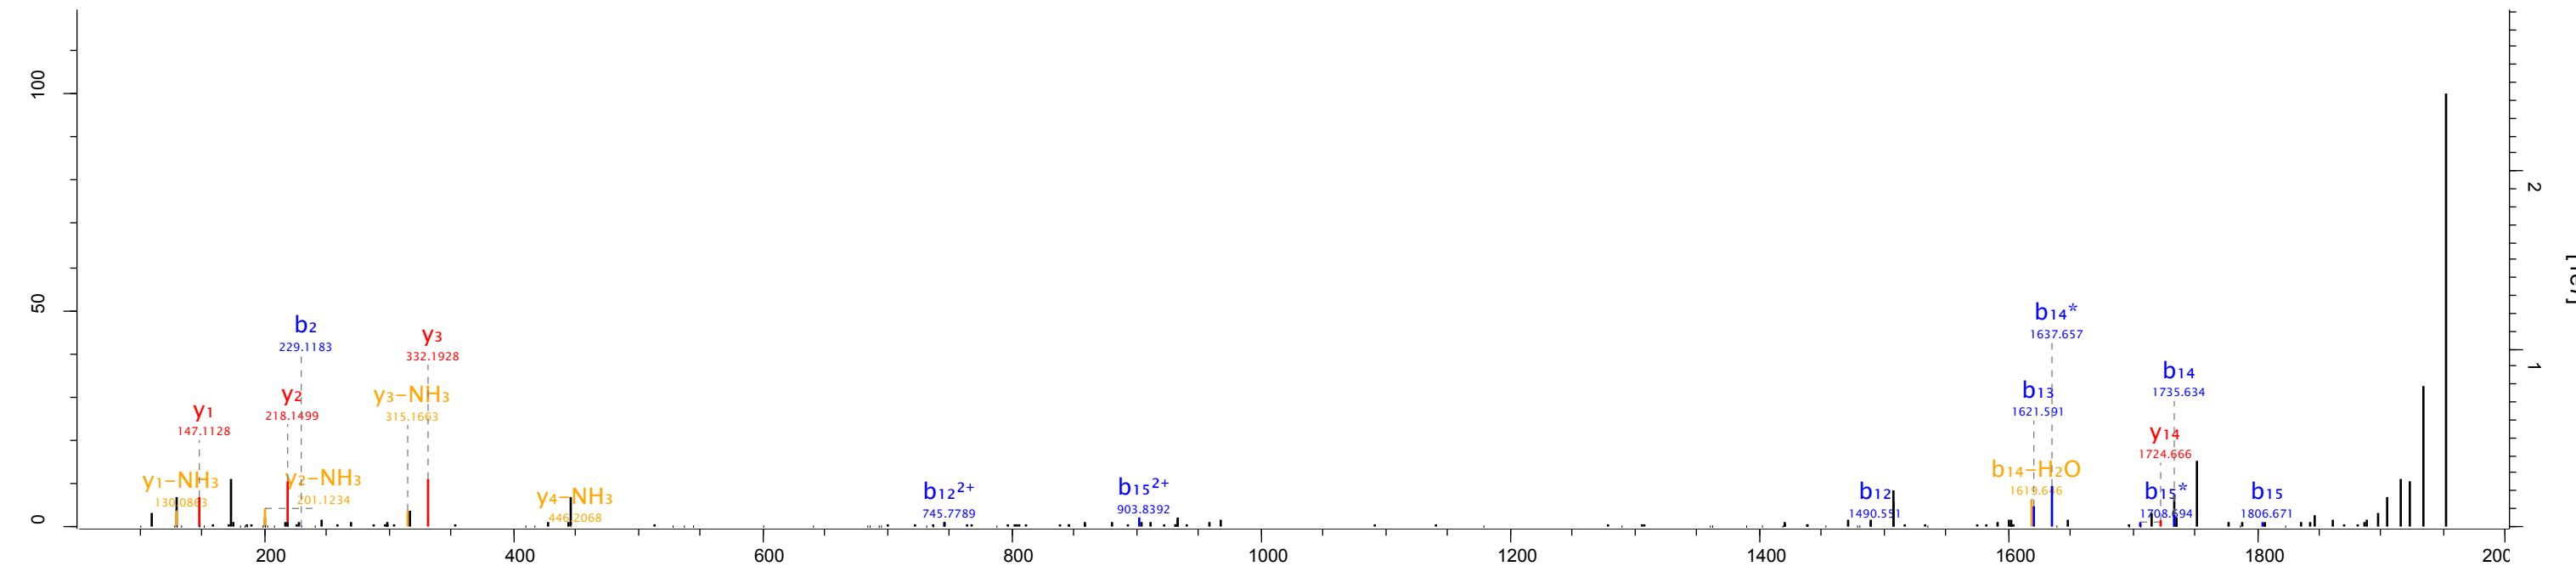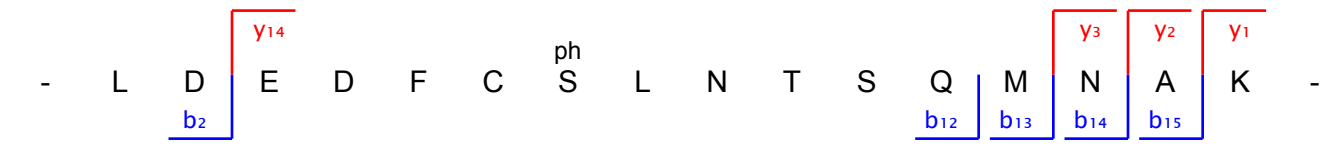

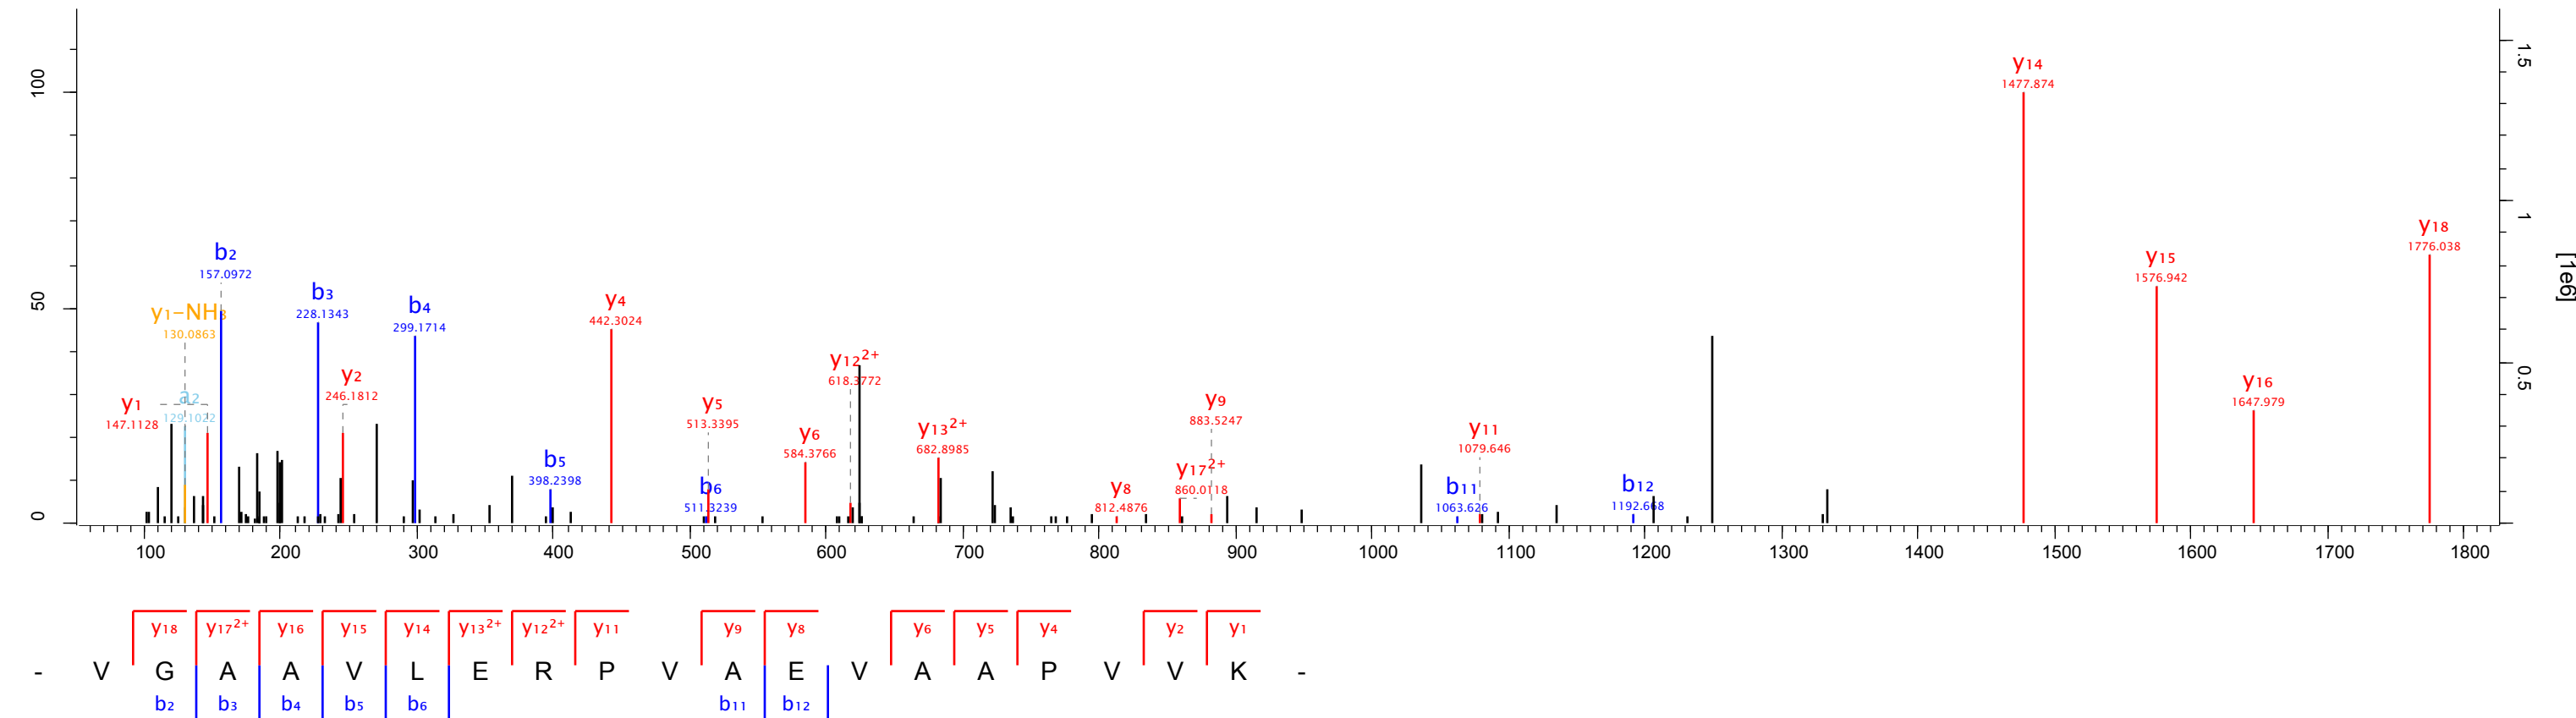

Raw file 20180707\_MaS\_A375SR\_ML\_proteome\_2\_08 Scan 25600 Method FTMS; HCD Score 52.25 m/z 501.27 Gene names DET1

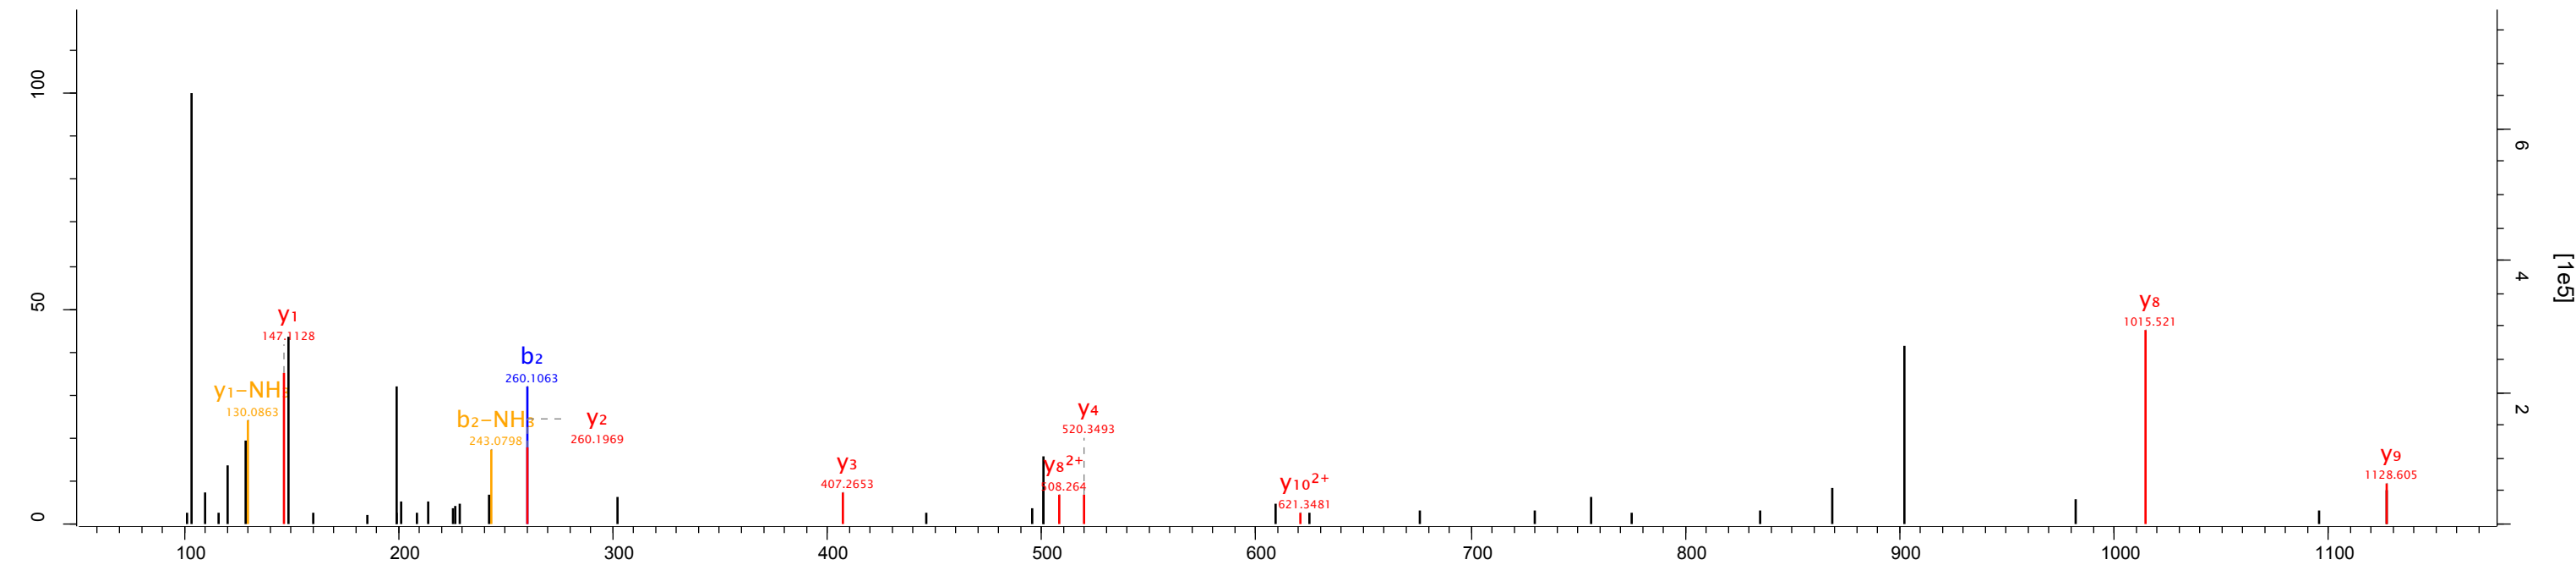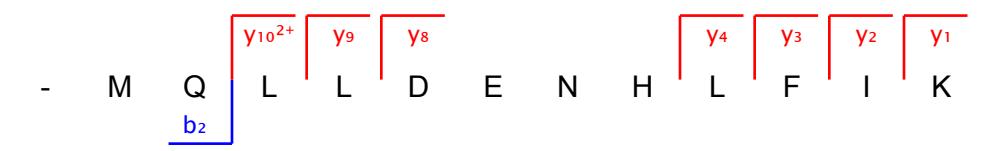

Raw file  
 20180707\_MaS\_A375SR\_ML\_proteome\_2\_08  
 Scan: 26020 Method: FTMS; HCD Score: 43.69 m/z: 1000.95 Gene names: ANKRD36BP1

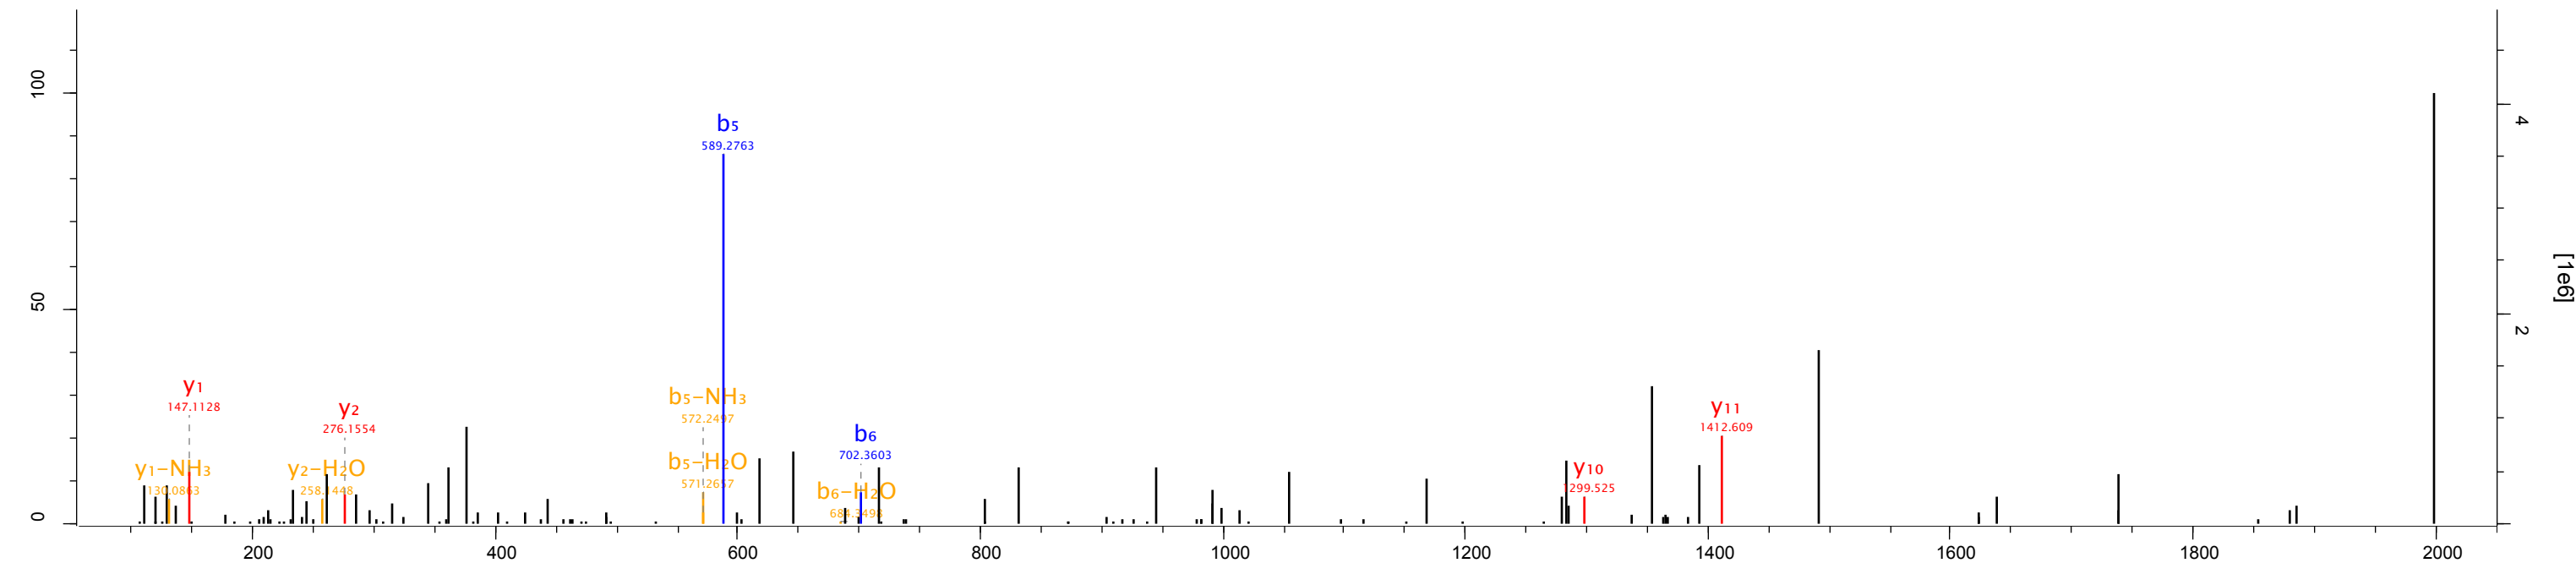

ac  
 - M G T R T L Q F E I S D S H E K -

Fragmentation mapping:  
 - b<sub>5</sub> (under T)  
 - b<sub>6</sub> (under L)  
 - y<sub>11</sub> (over L)  
 - y<sub>10</sub> (over Q)  
 - y<sub>2</sub> (over E)  
 - y<sub>1</sub> (over K)



Raw file  
20180707\_MaS\_A375SR\_ML\_proteome\_2\_08

Scan 27830 Method FTMS; HCD Score 124.62 m/z 854.41 Gene names SSR3

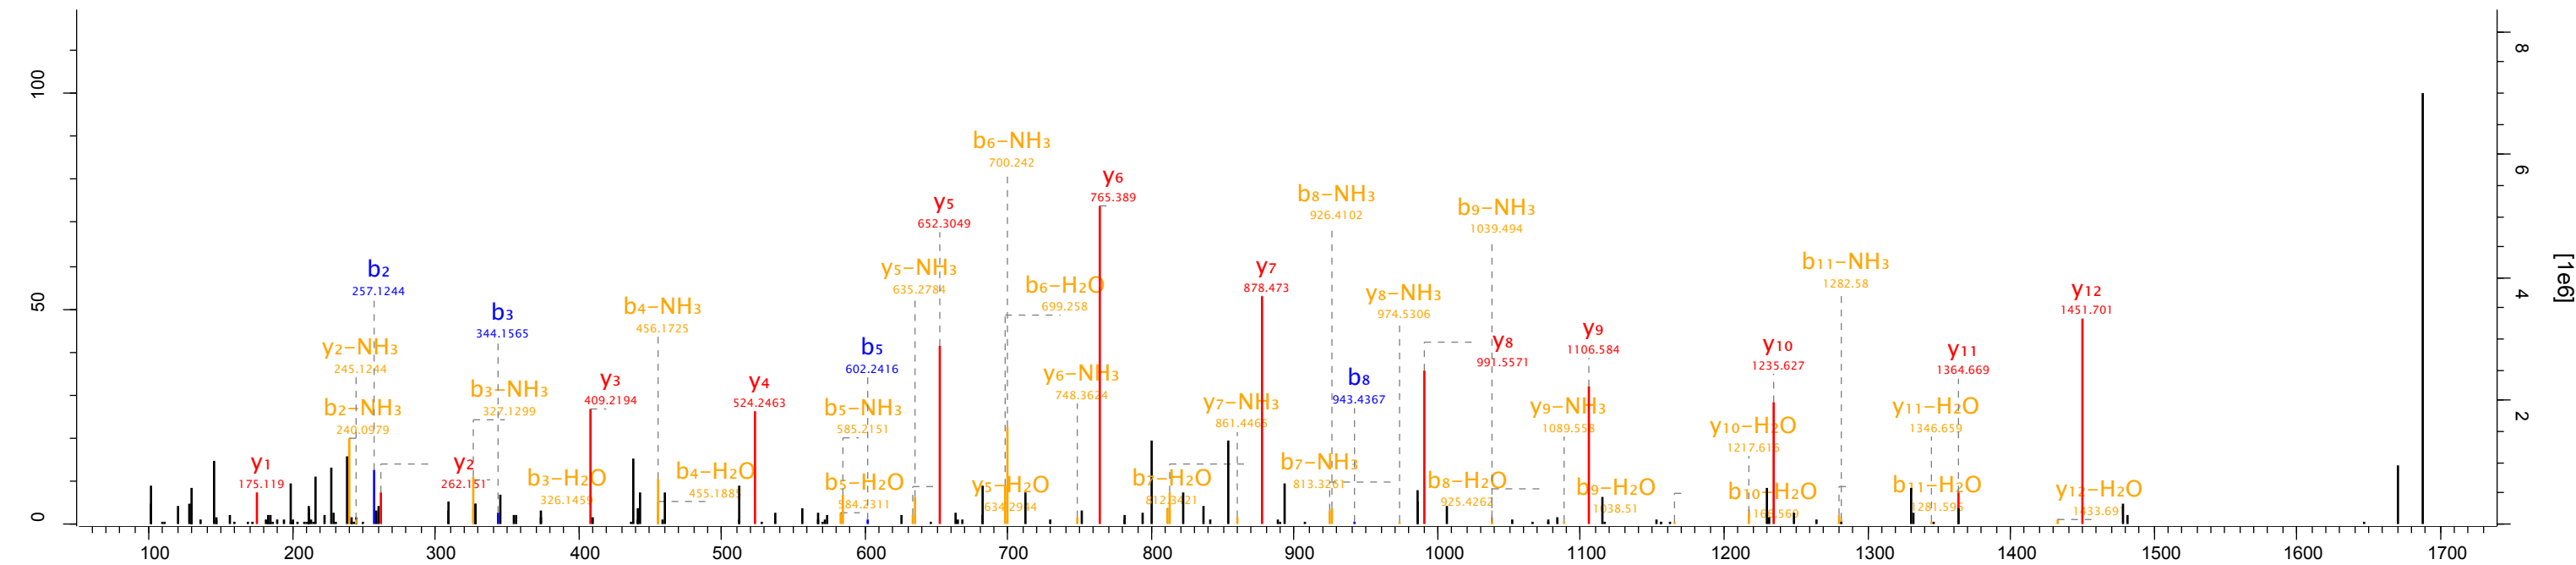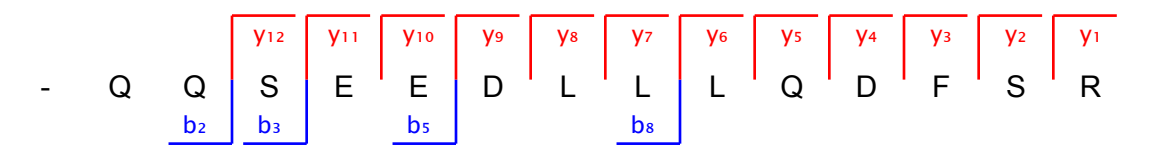

Raw file  
20180707\_MaS\_A375SR\_ML\_proteome\_2\_08

Scan 3300 Method FTMS; HCD Score 62.55 m/z 503.75 Gene names NRXN2

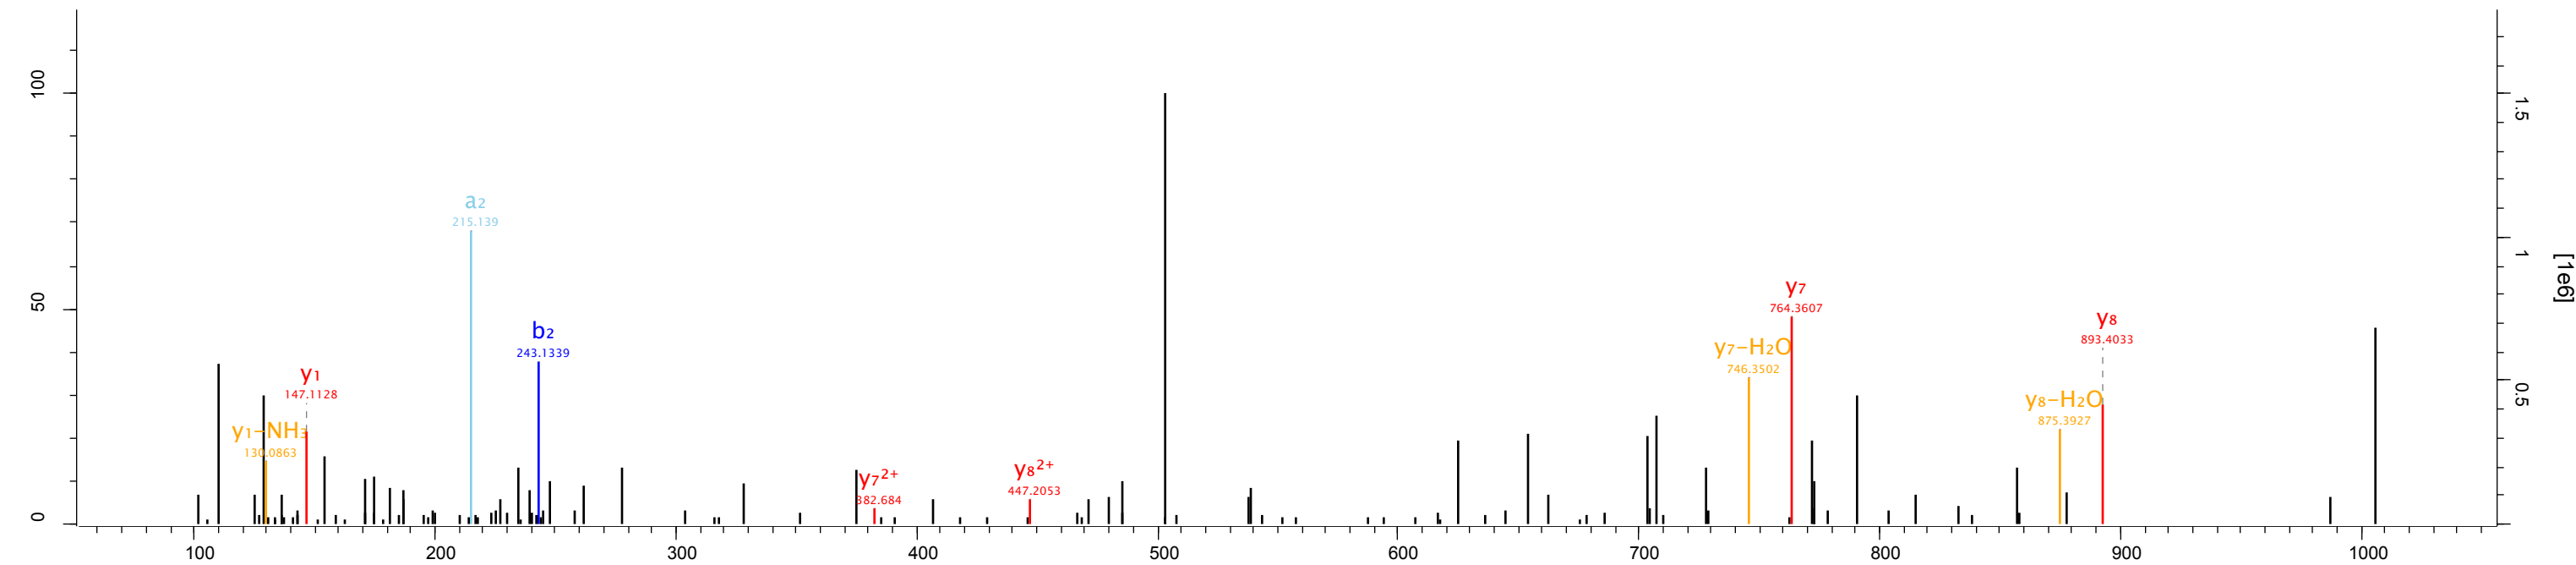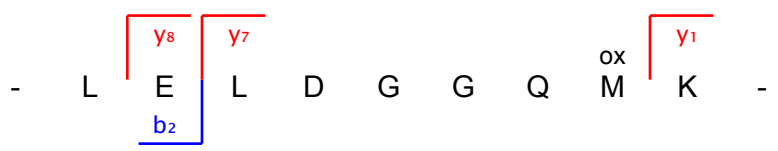

Raw file 20180707\_MaS\_A375SR\_ML\_proteome\_2\_08 Scan 9390 Method FTMS; HCD Score 56.03 m/z 400.22

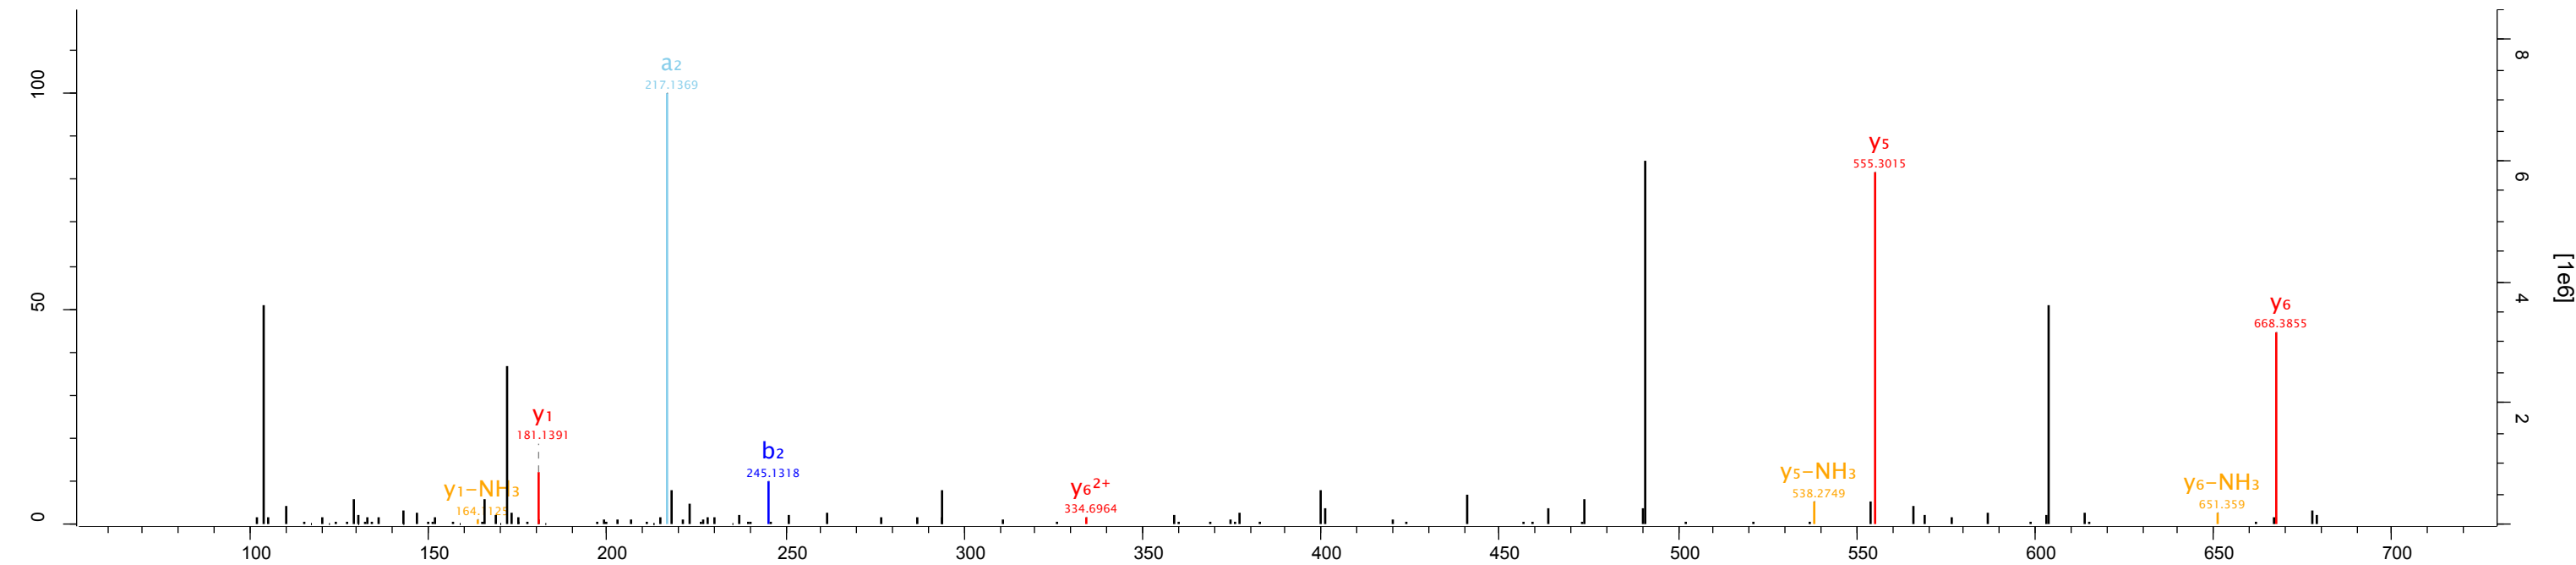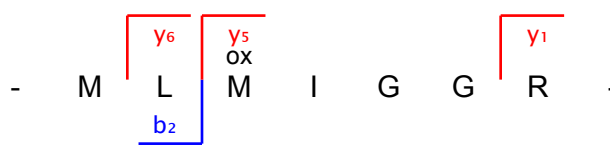

Raw file 20180707\_MaS\_A375SR\_ML\_proteome\_2\_09 Scan 14500 Method FTMS; HCD Score 60.76 m/z 494.23 Gene names IL1F10

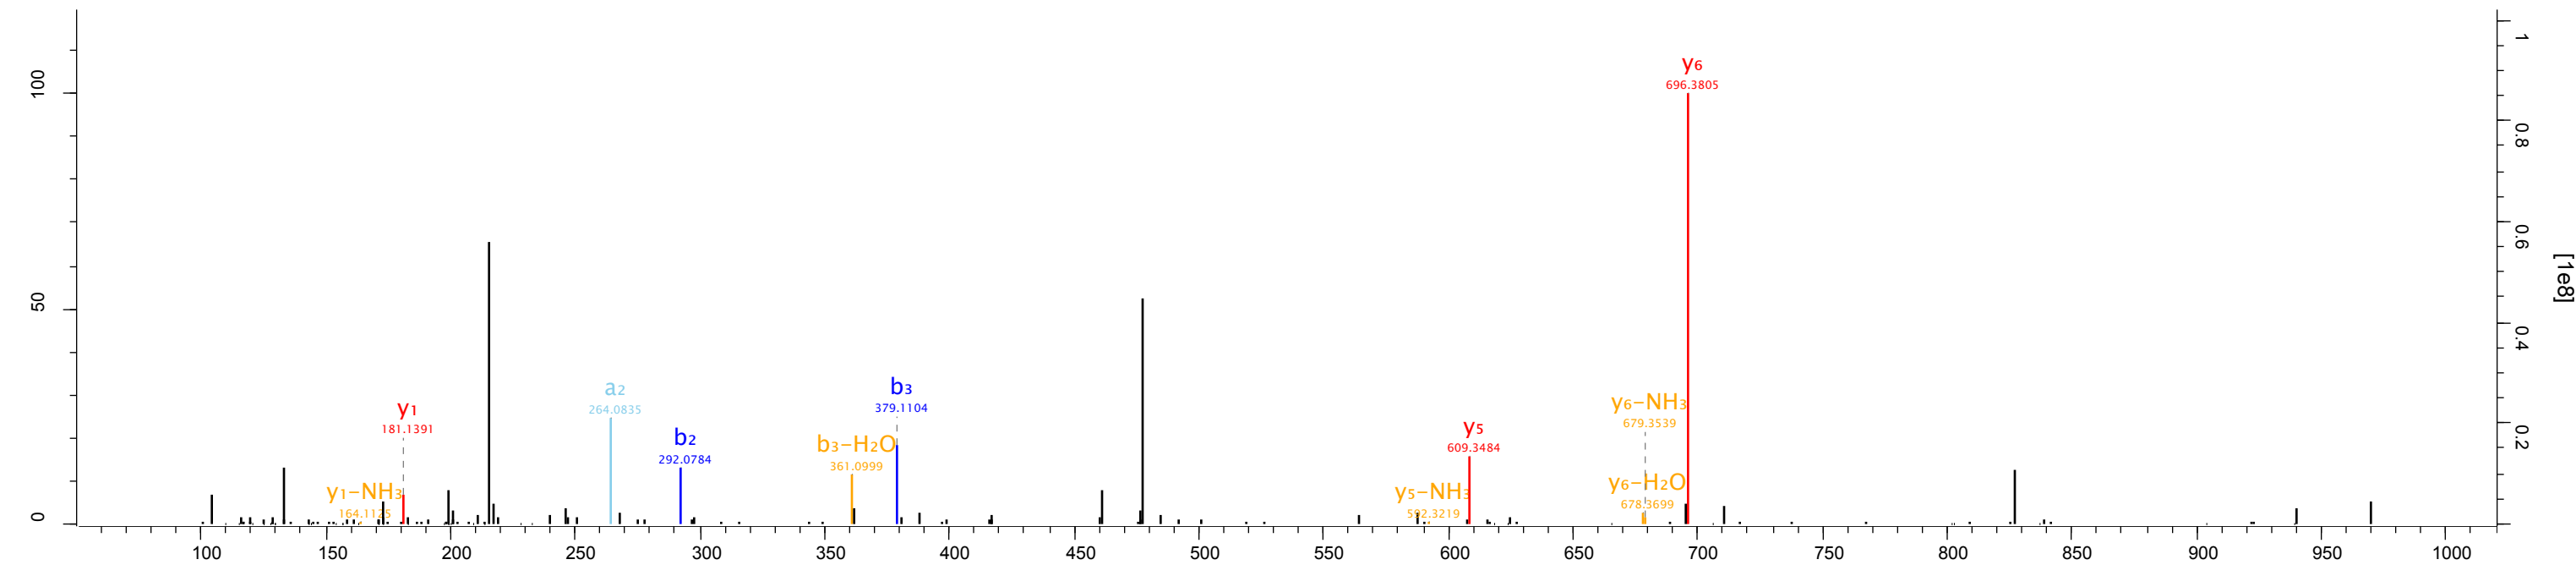

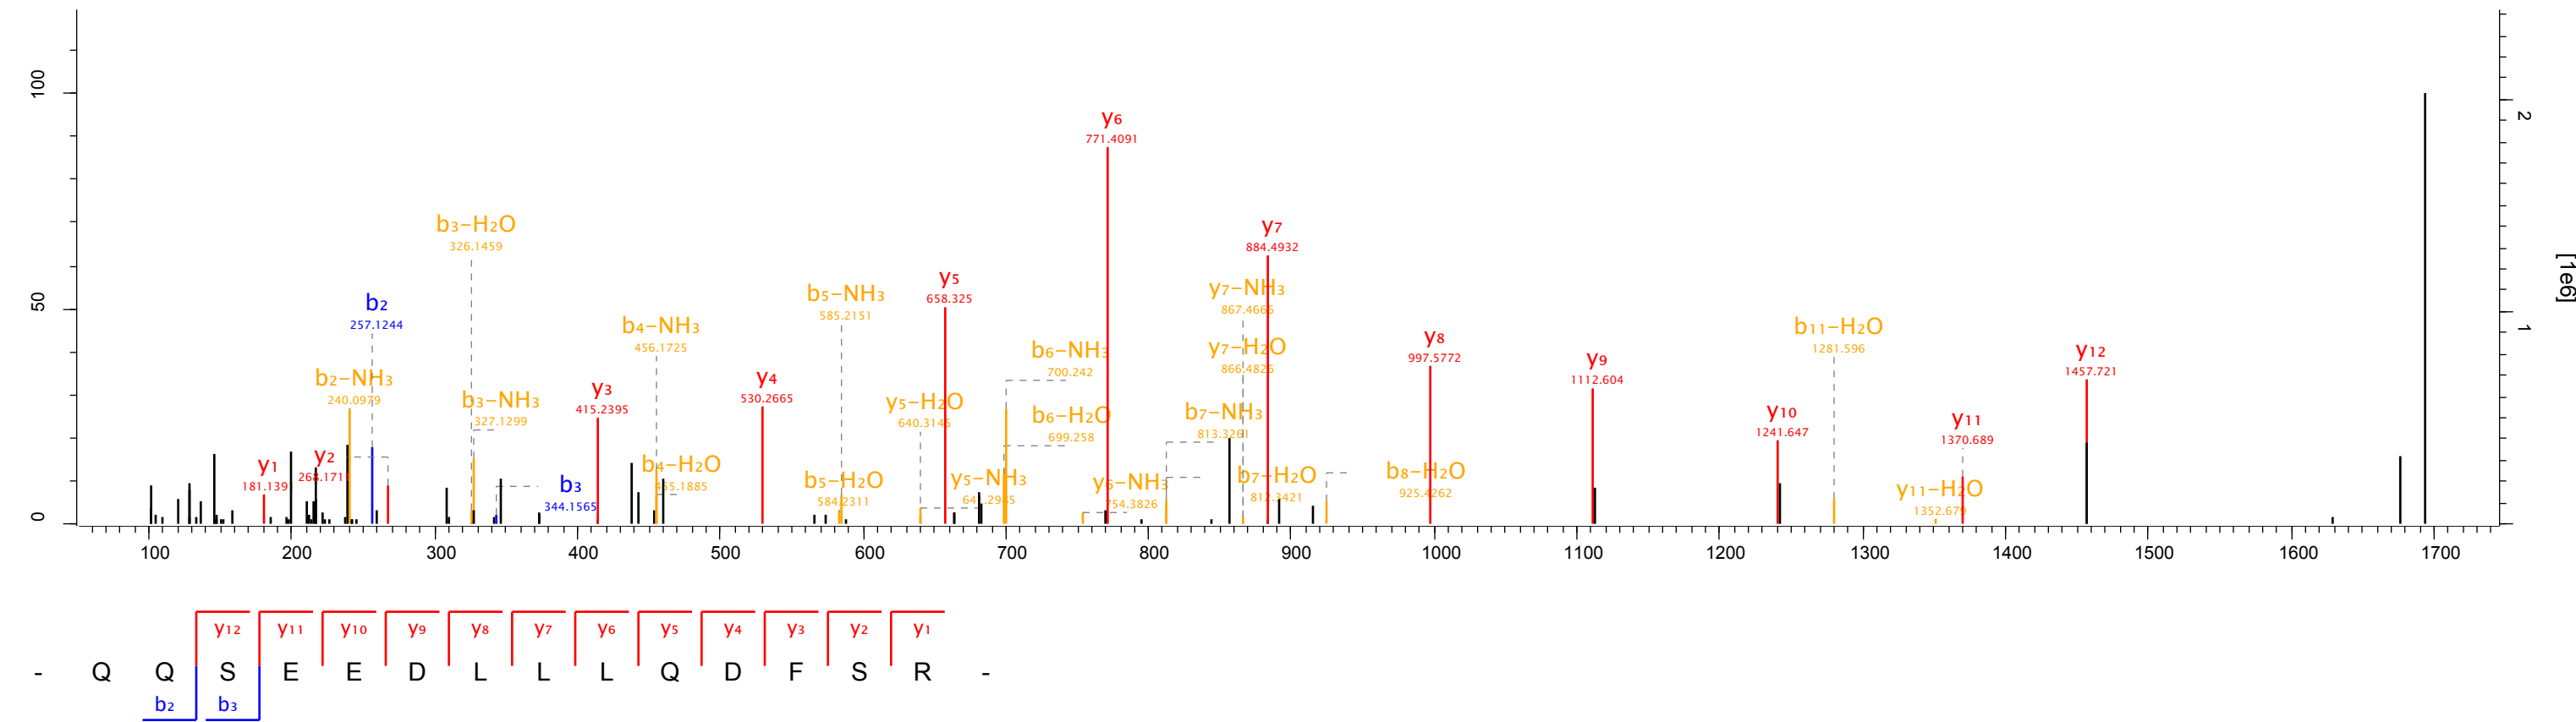

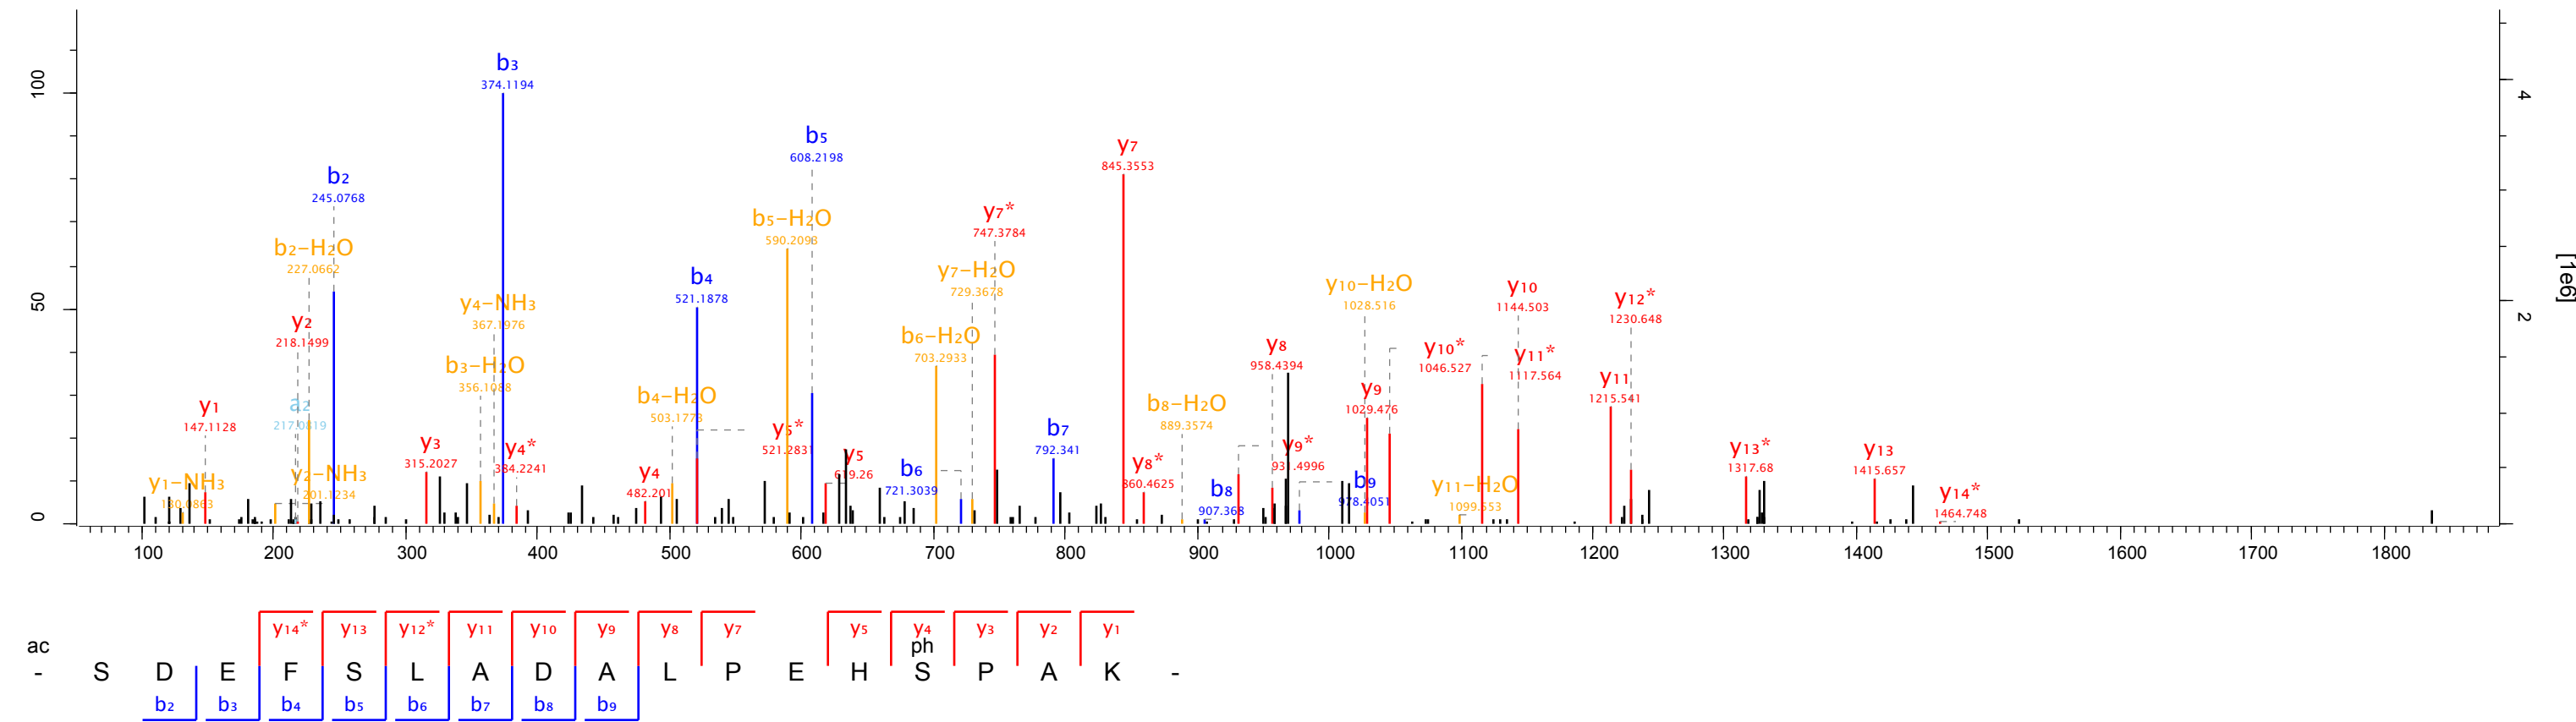

Raw file 20180707\_MaS\_A375SR\_ML\_proteome\_2\_10 Scan 23300 Method FTMS; HCD Score 88.39 m/z 546.97 Gene names EDEM2

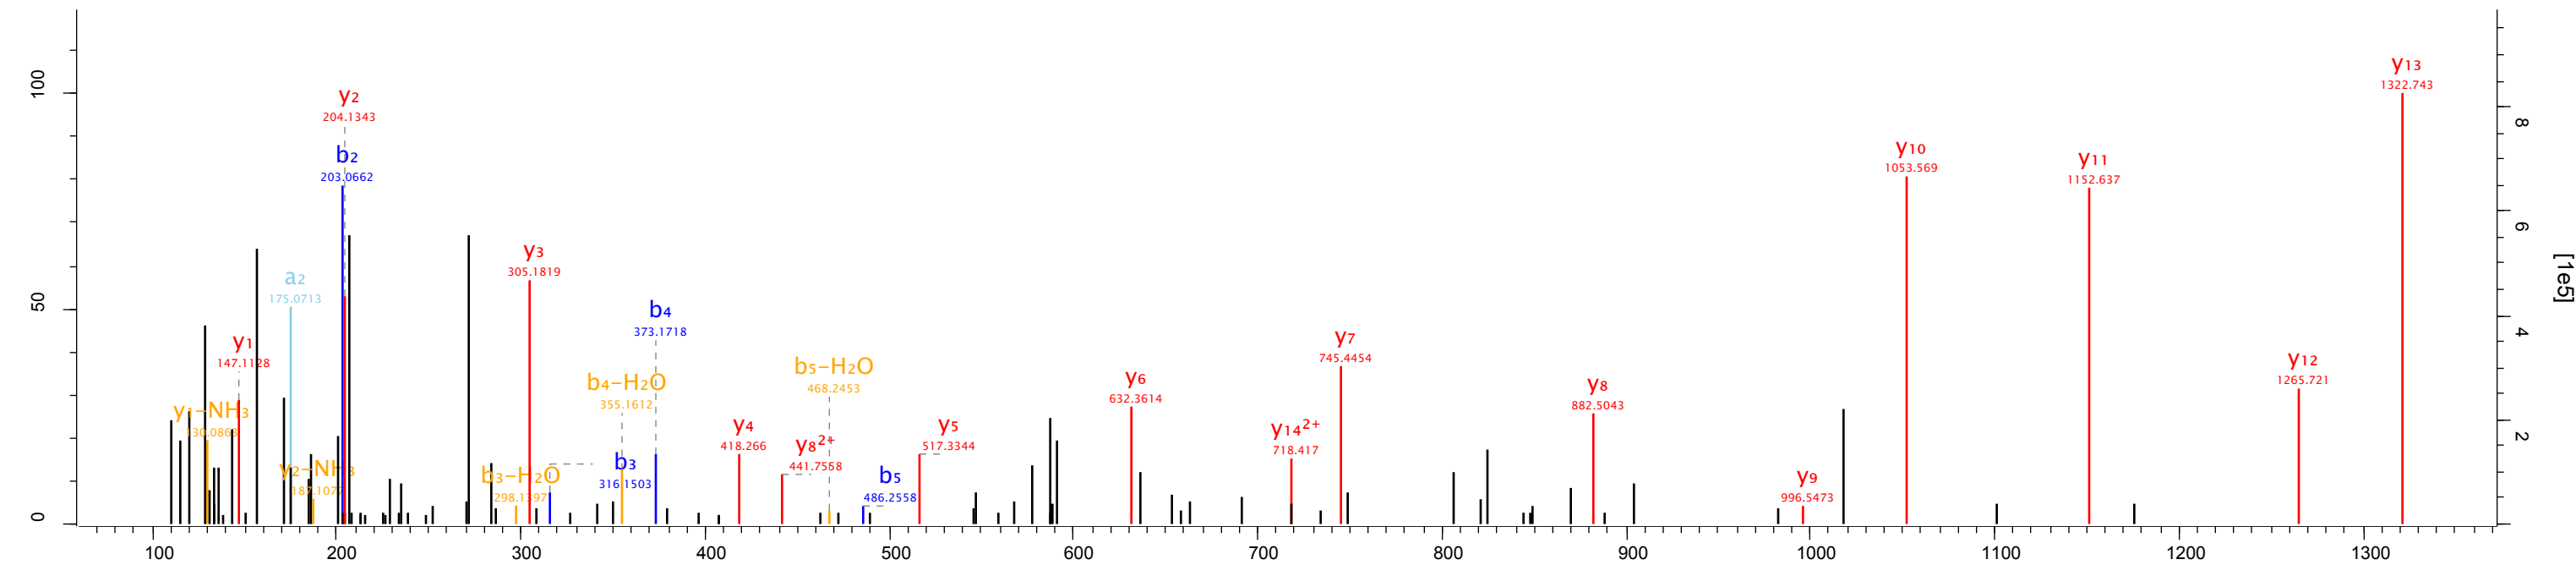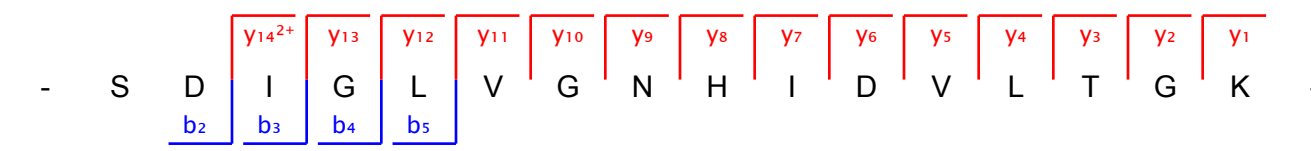

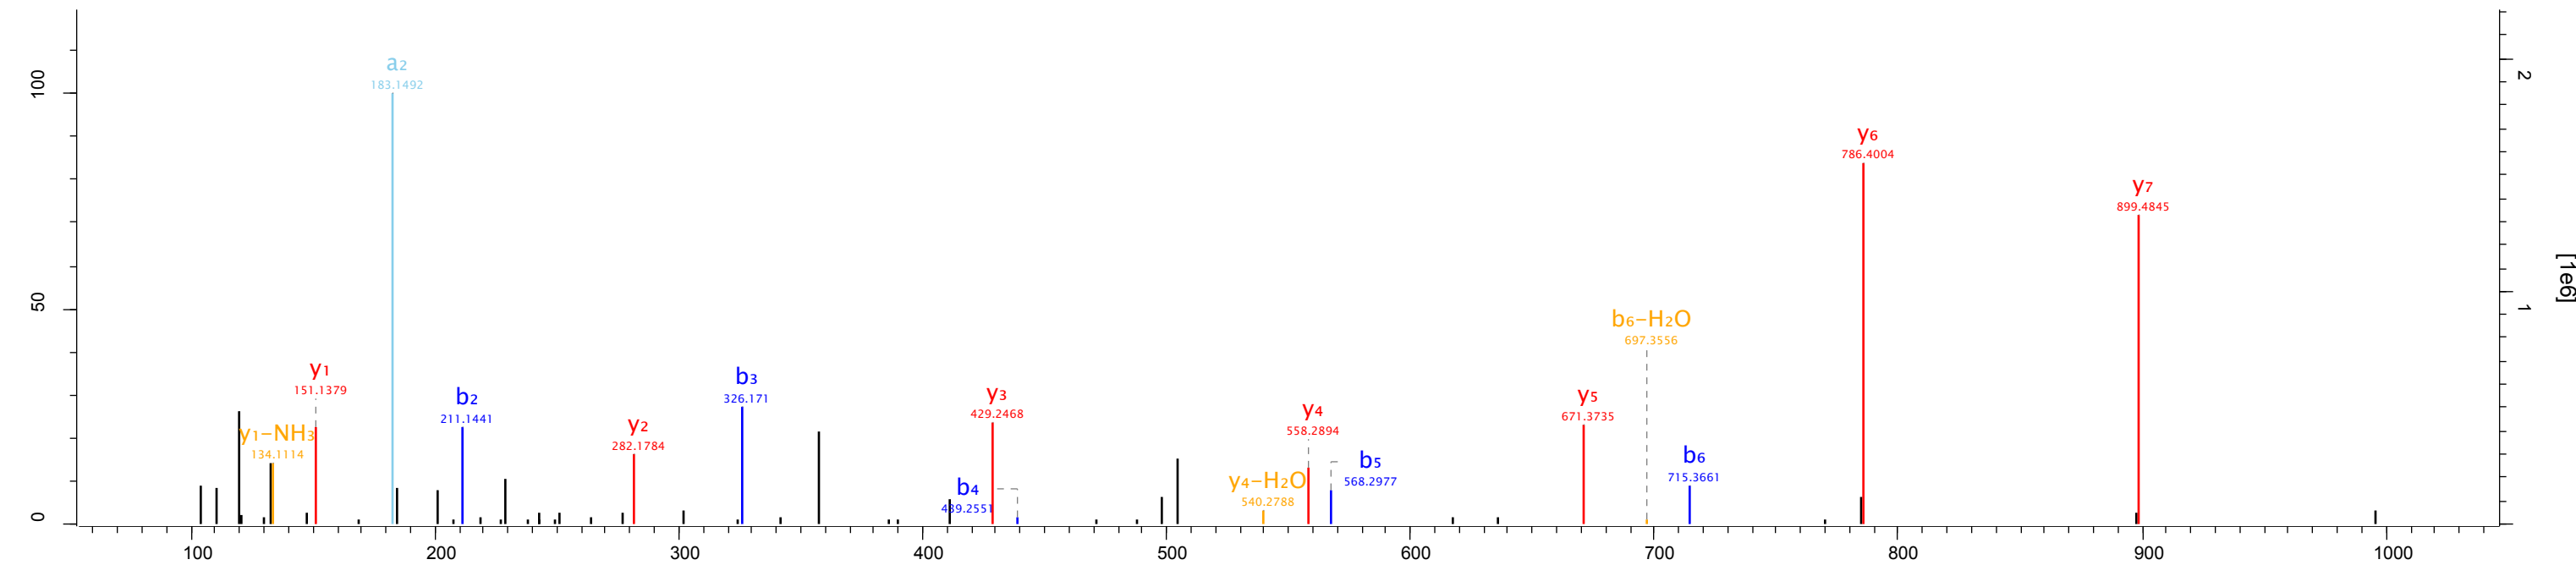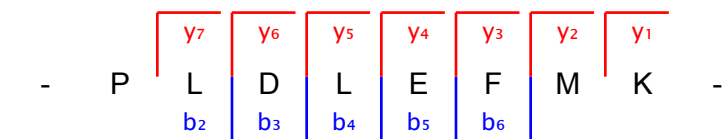



Raw file 20180707\_MaS\_A375SR\_ML\_proteome\_2\_10 Scan 28150 Method FTMS; HCD Score 91.81 m/z 751.86 Gene names STK11

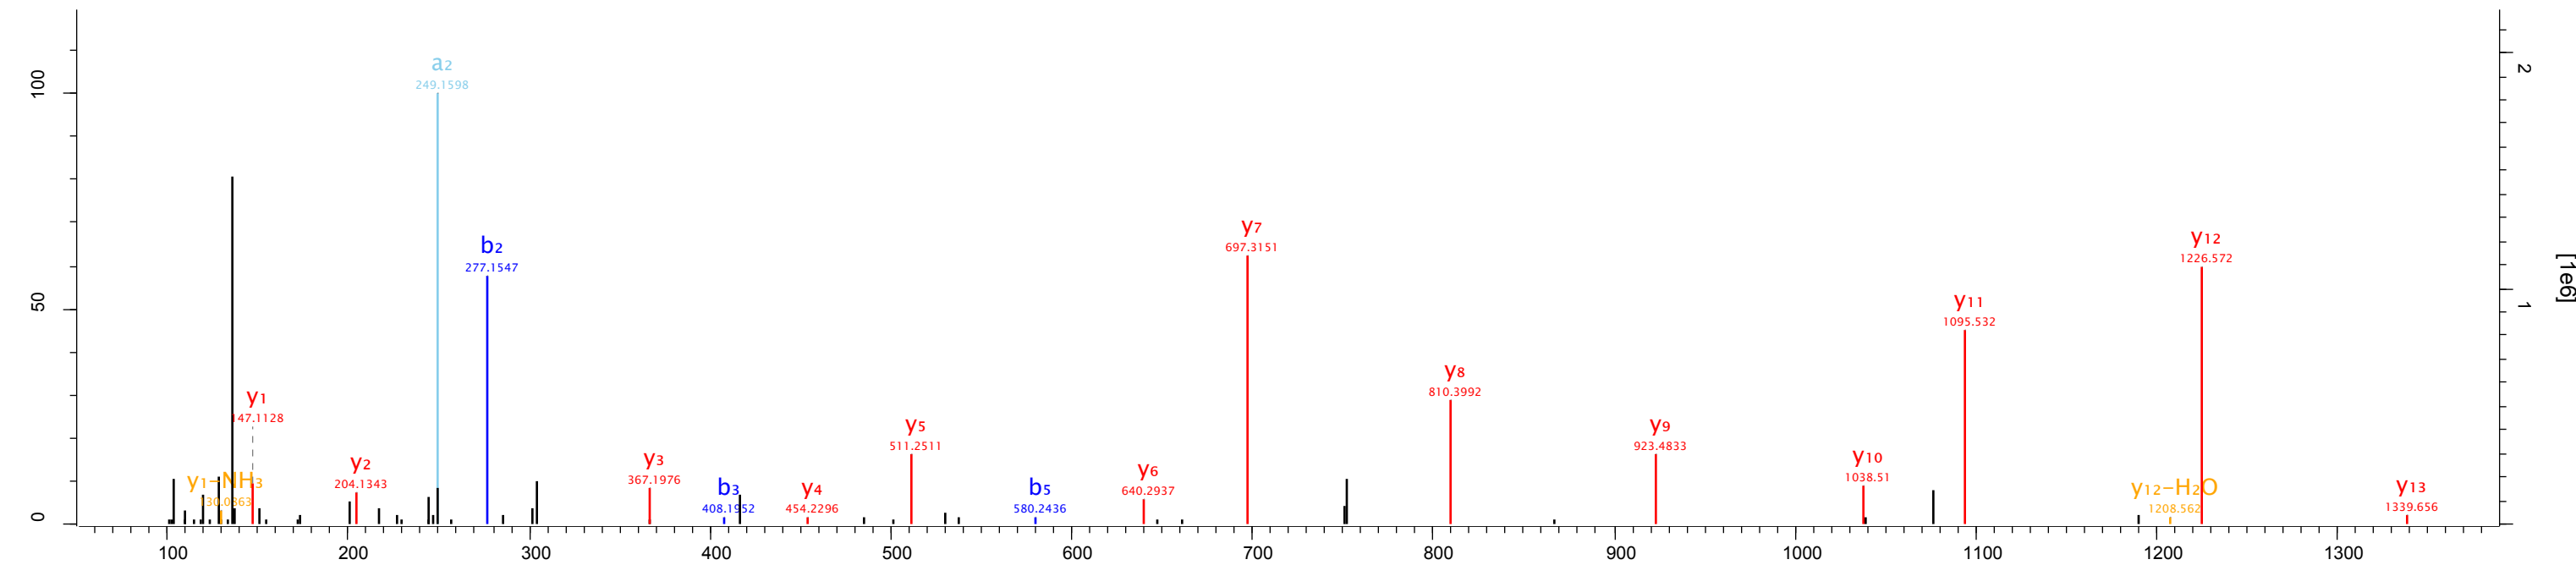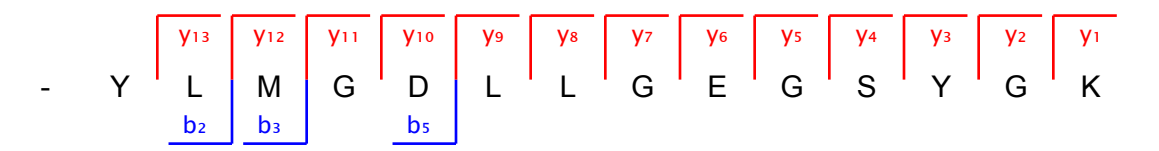

Raw file: 20180707\_MaS\_A375SR\_ML\_proteome\_2\_11  
 Scan: 17600 Method: FTMS; HCD Score: 75.74 m/z: 642.3 Gene names: FRRS1

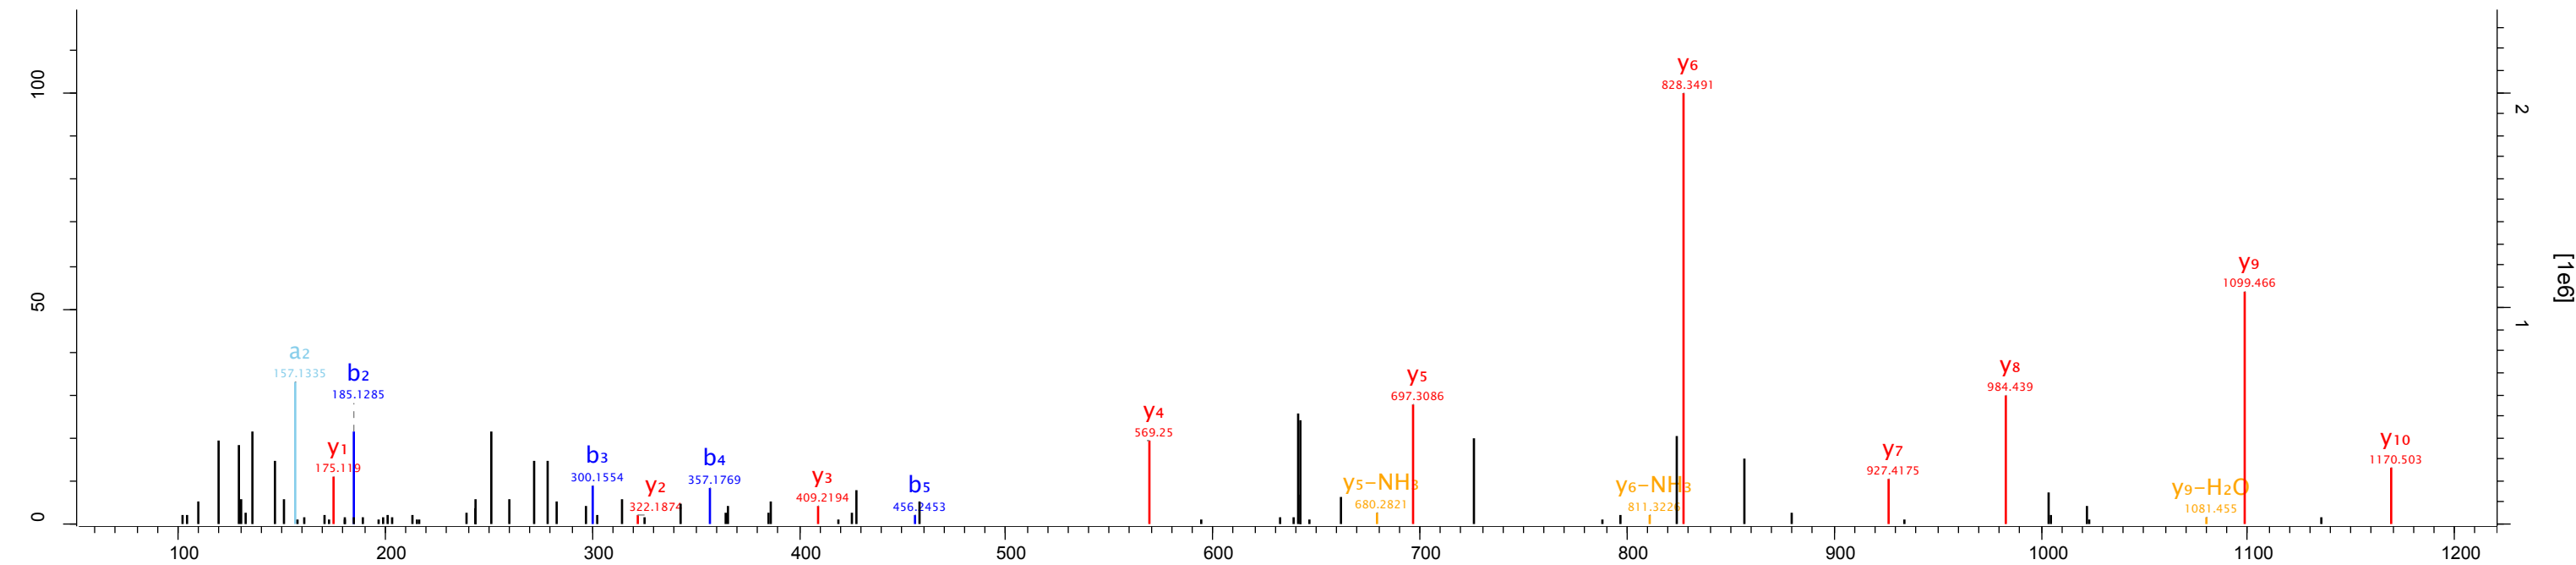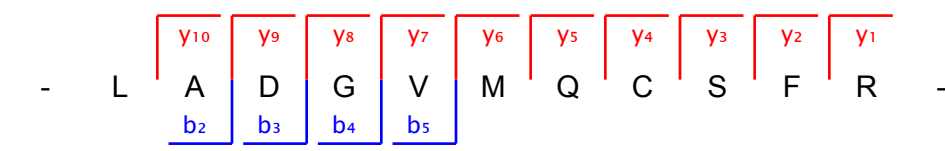

Raw file 20180707\_MaS\_A375SR\_ML\_proteome\_2\_11 Scan 17800 Method FTMS; HCD Score 40.49 m/z 711.31

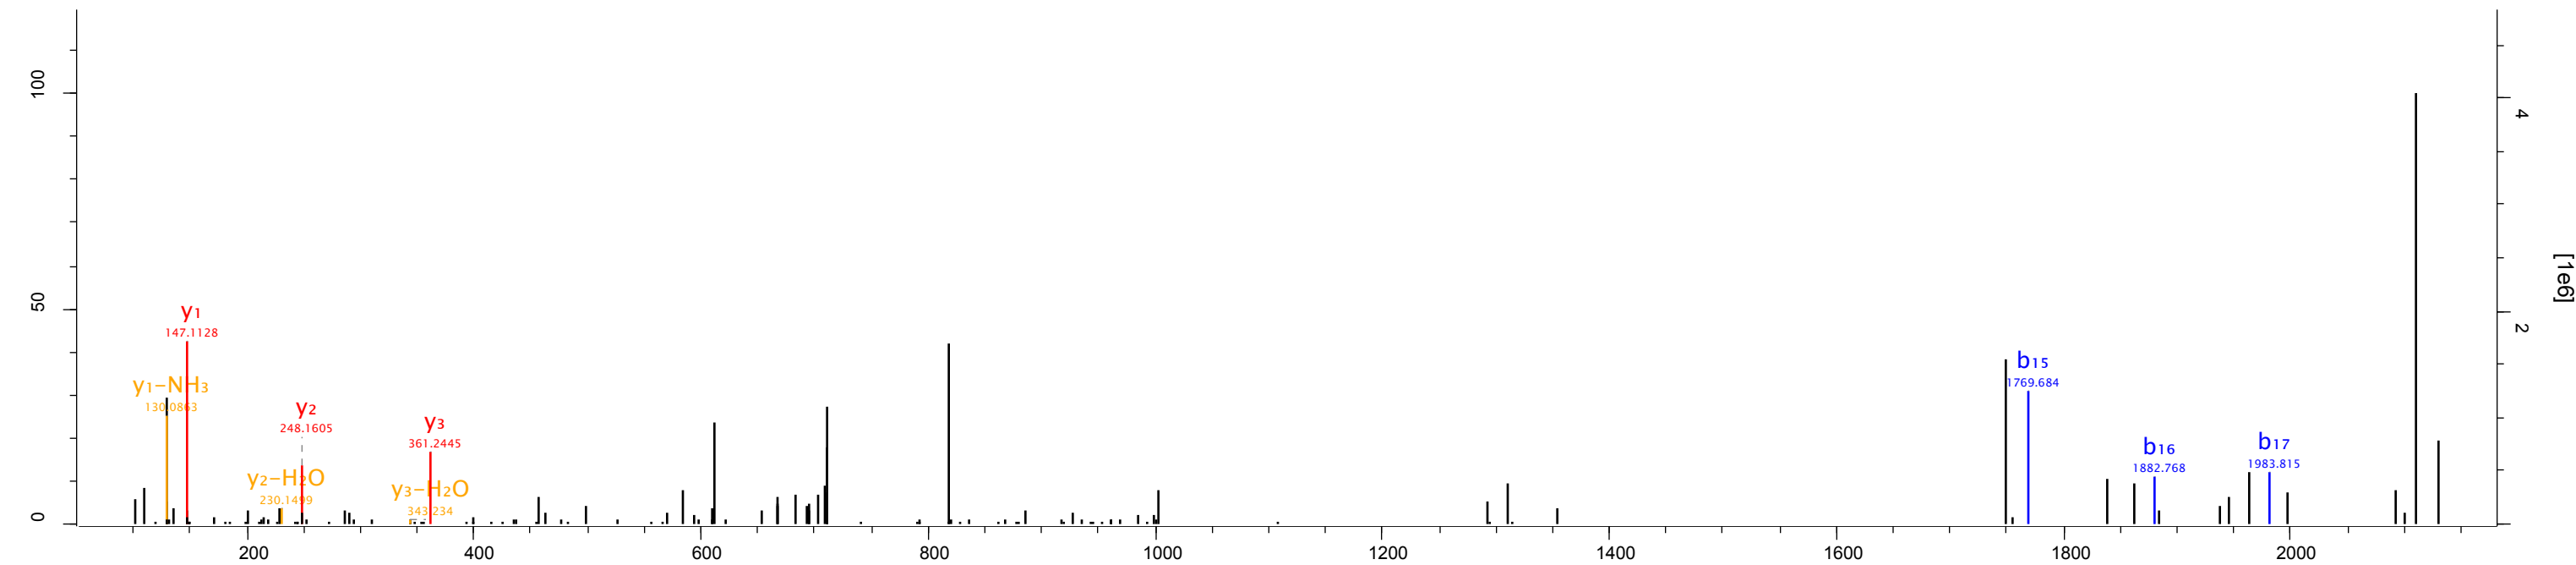

ac - L Y Q L P A A D ph S A ph T A S V V I T K -

b15
y3
I
T
y2
K
y1

Raw file 20180707\_MaS\_A375SR\_ML\_proteome\_2\_11 Scan 19910 Method FTMS; HCD Score 93.84 m/z 427.92 Gene names CT83

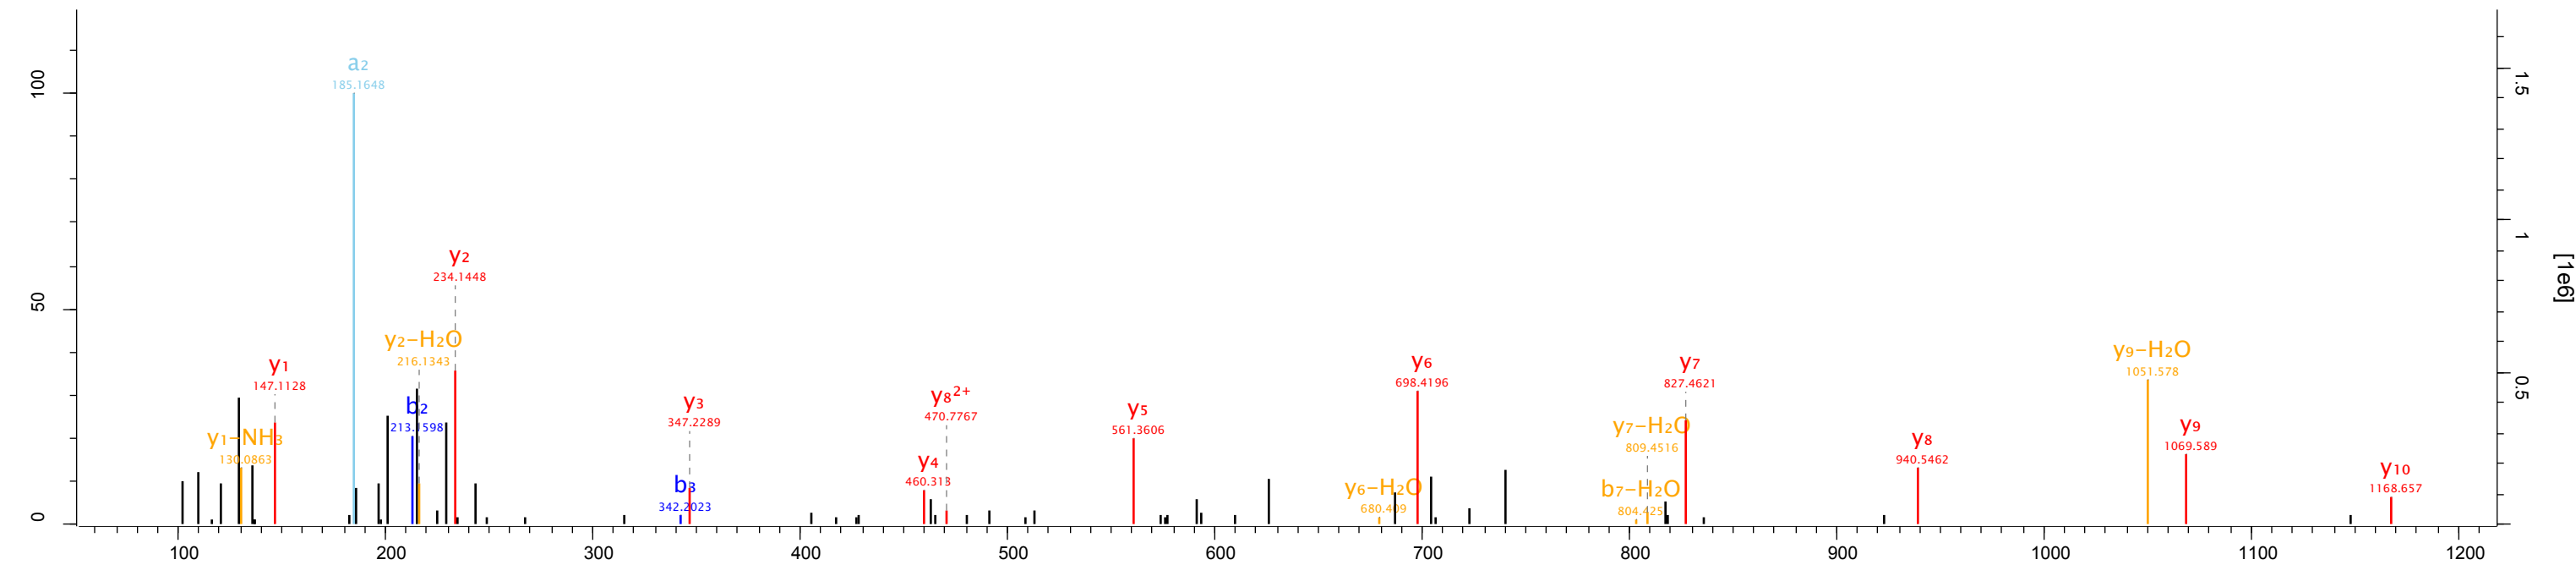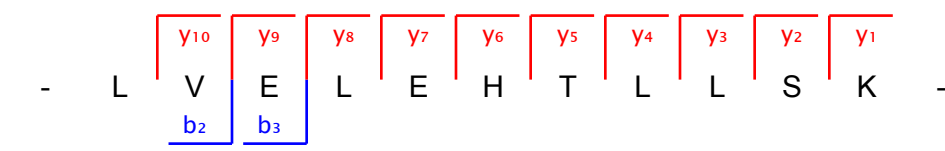

Raw file  
20180707\_MaS\_A375SR\_ML\_proteome\_2\_11

Scan 22250 Method FTMS; HCD Score 78.93 m/z 600.82 Gene names MEF2BNB

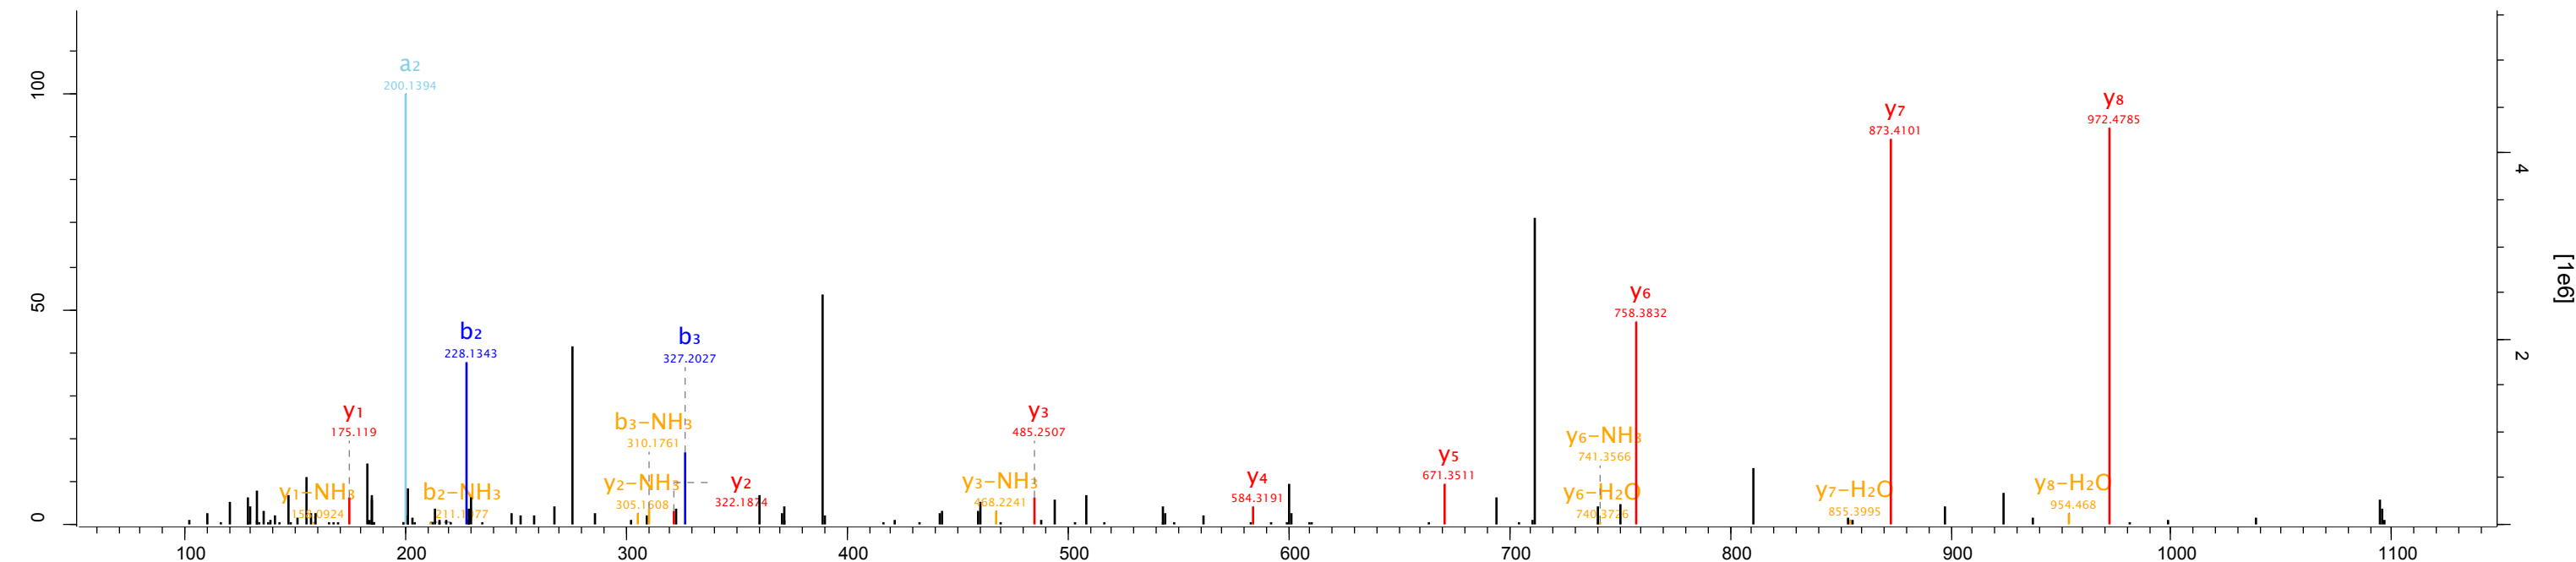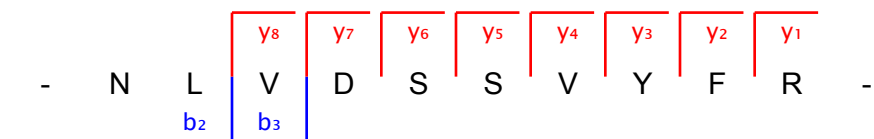

Raw file 20180707\_MaS\_A375SR\_ML\_proteome\_2\_11 Scan 3800 Method FTMS; HCD Score 42.78 m/z 559.94

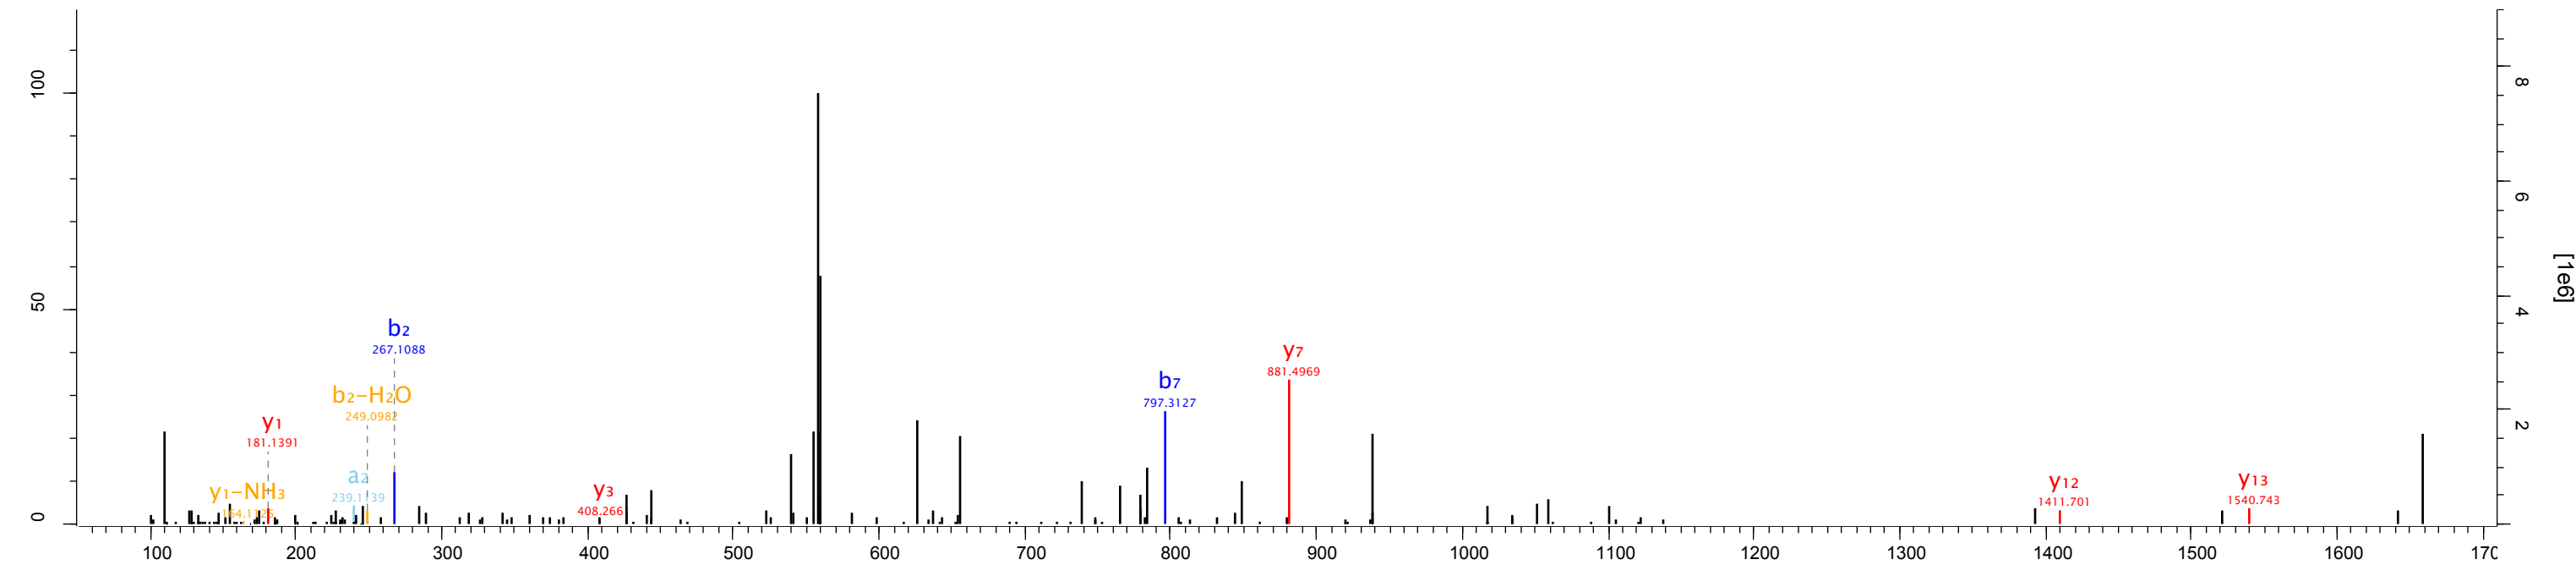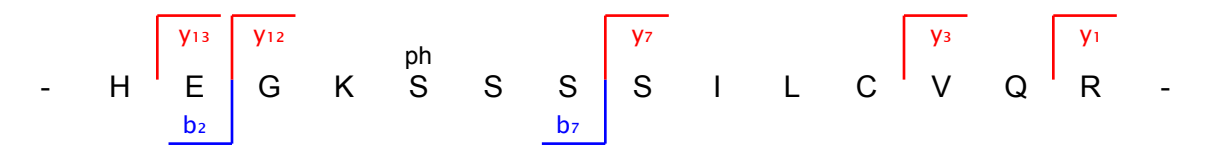

Raw file 20180707\_MaS\_A375SR\_ML\_proteome\_2\_12 Scan 11040 Method FTMS; HCD Score 60.29 m/z 398.17

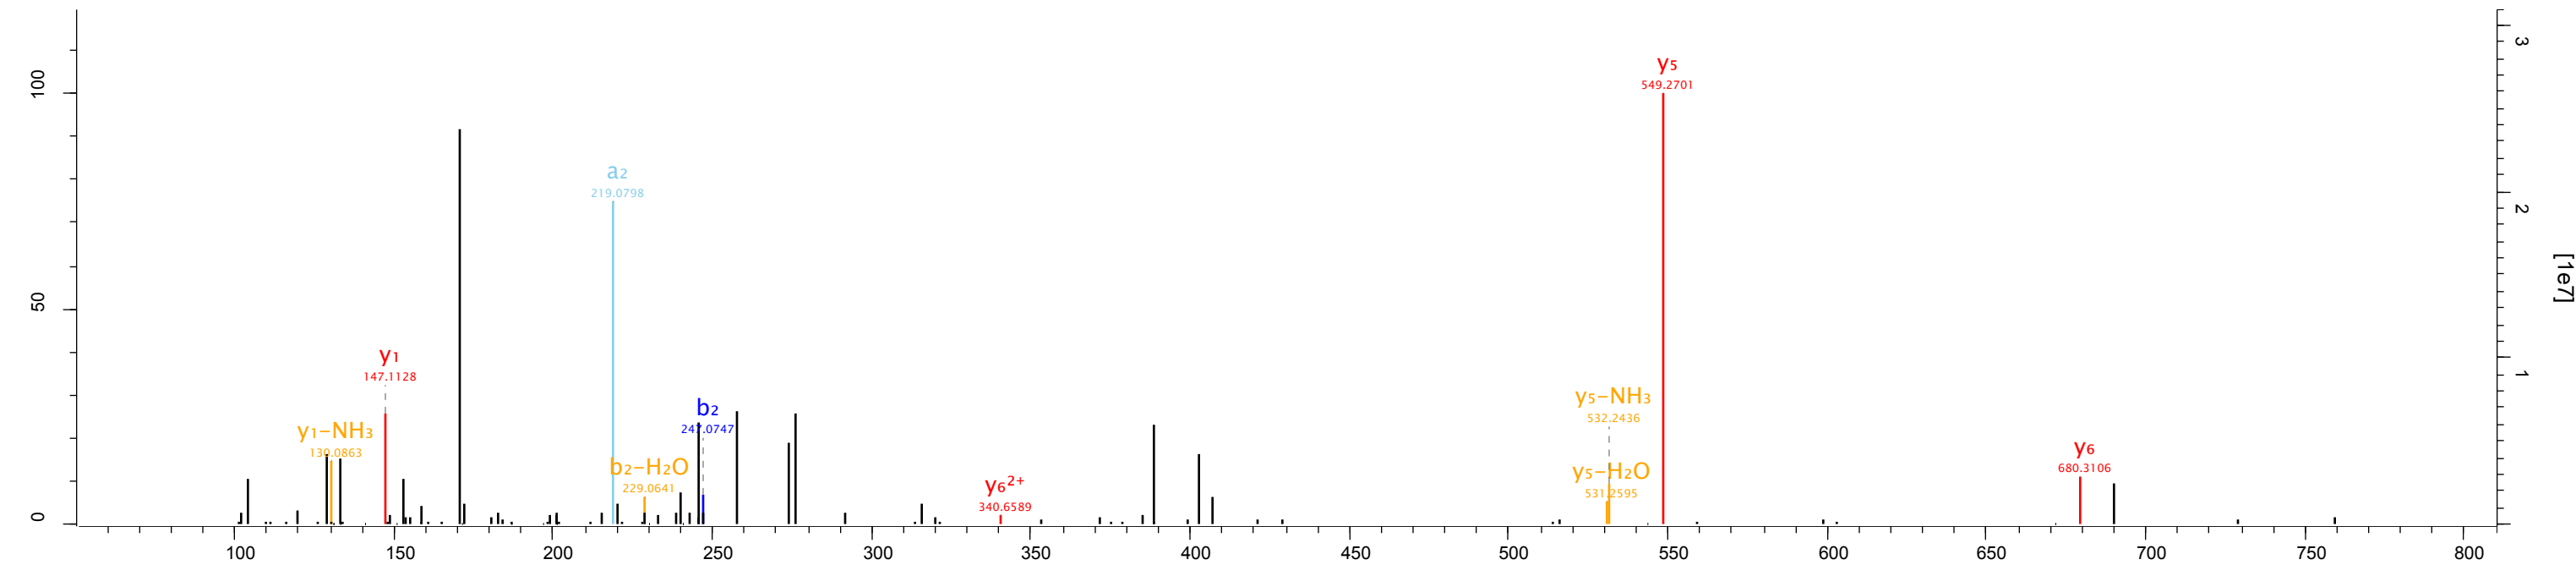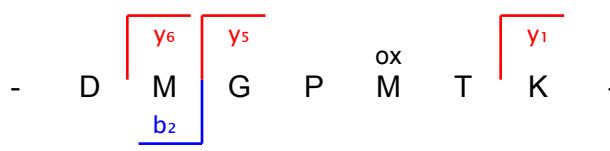

Raw file 20180707\_MaS\_A375SR\_ML\_proteome\_2\_12 Scan 15560 Method FTMS; HCD Score 96.95 m/z 606.78

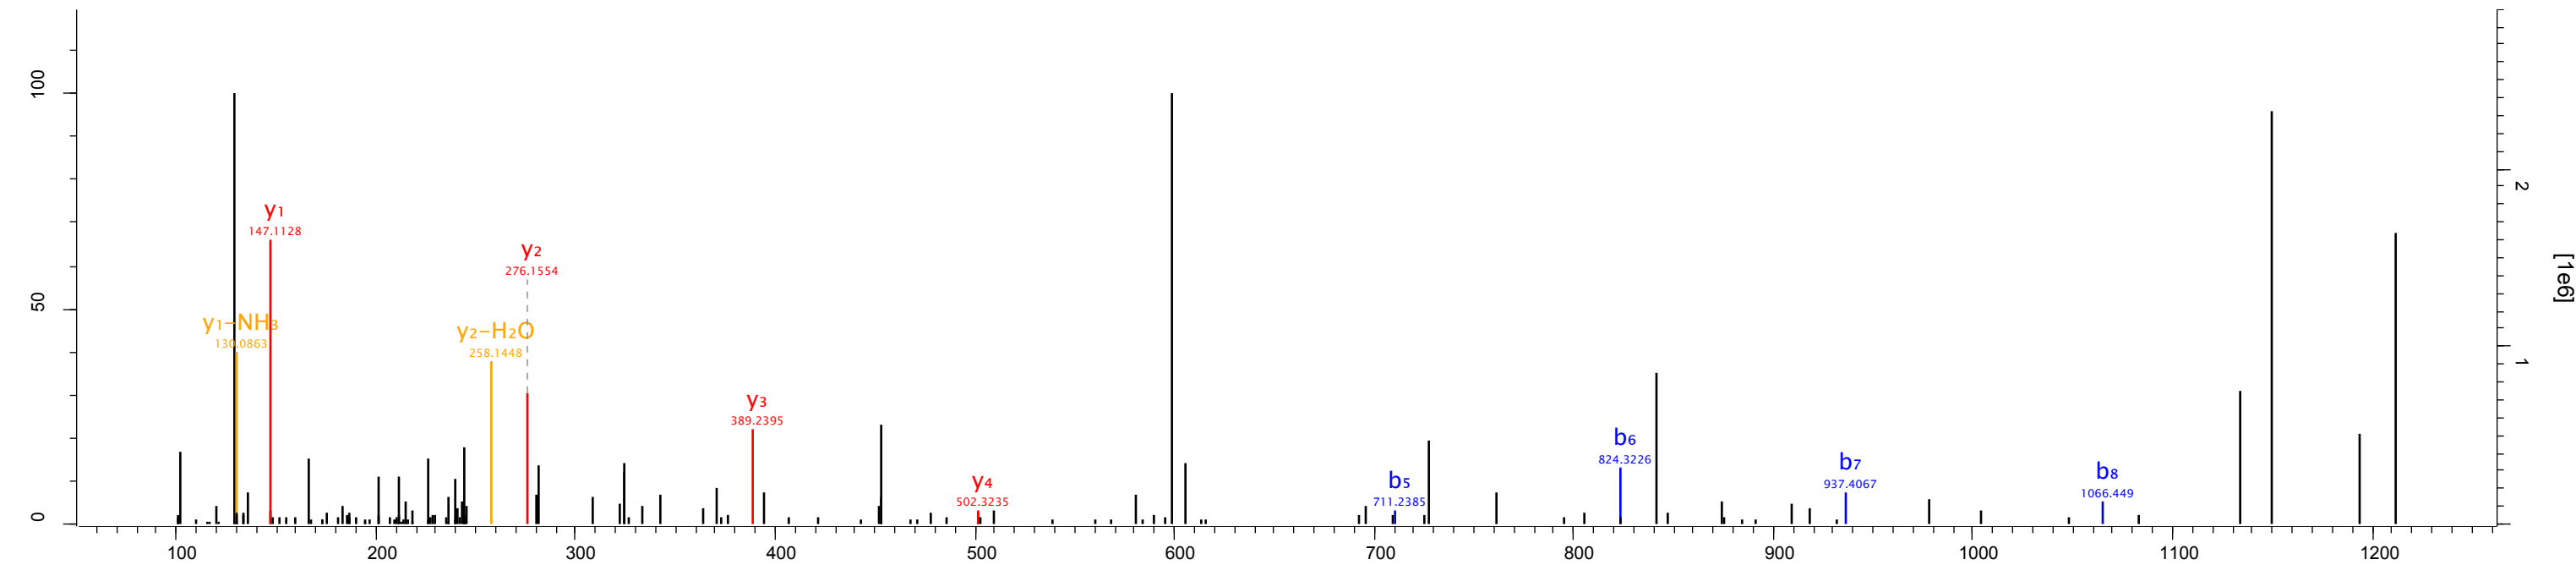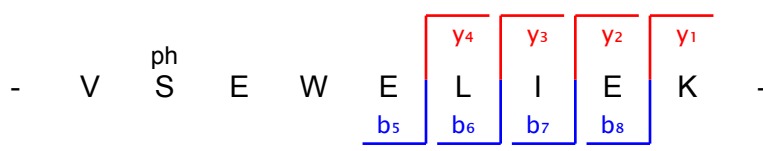



Raw file  
20180707\_MaS\_A375SR\_ML\_proteome\_2\_12

Scan 25850 Method FTMS; HCD Score 129.43 m/z 961.96 Gene names CDC42SE2

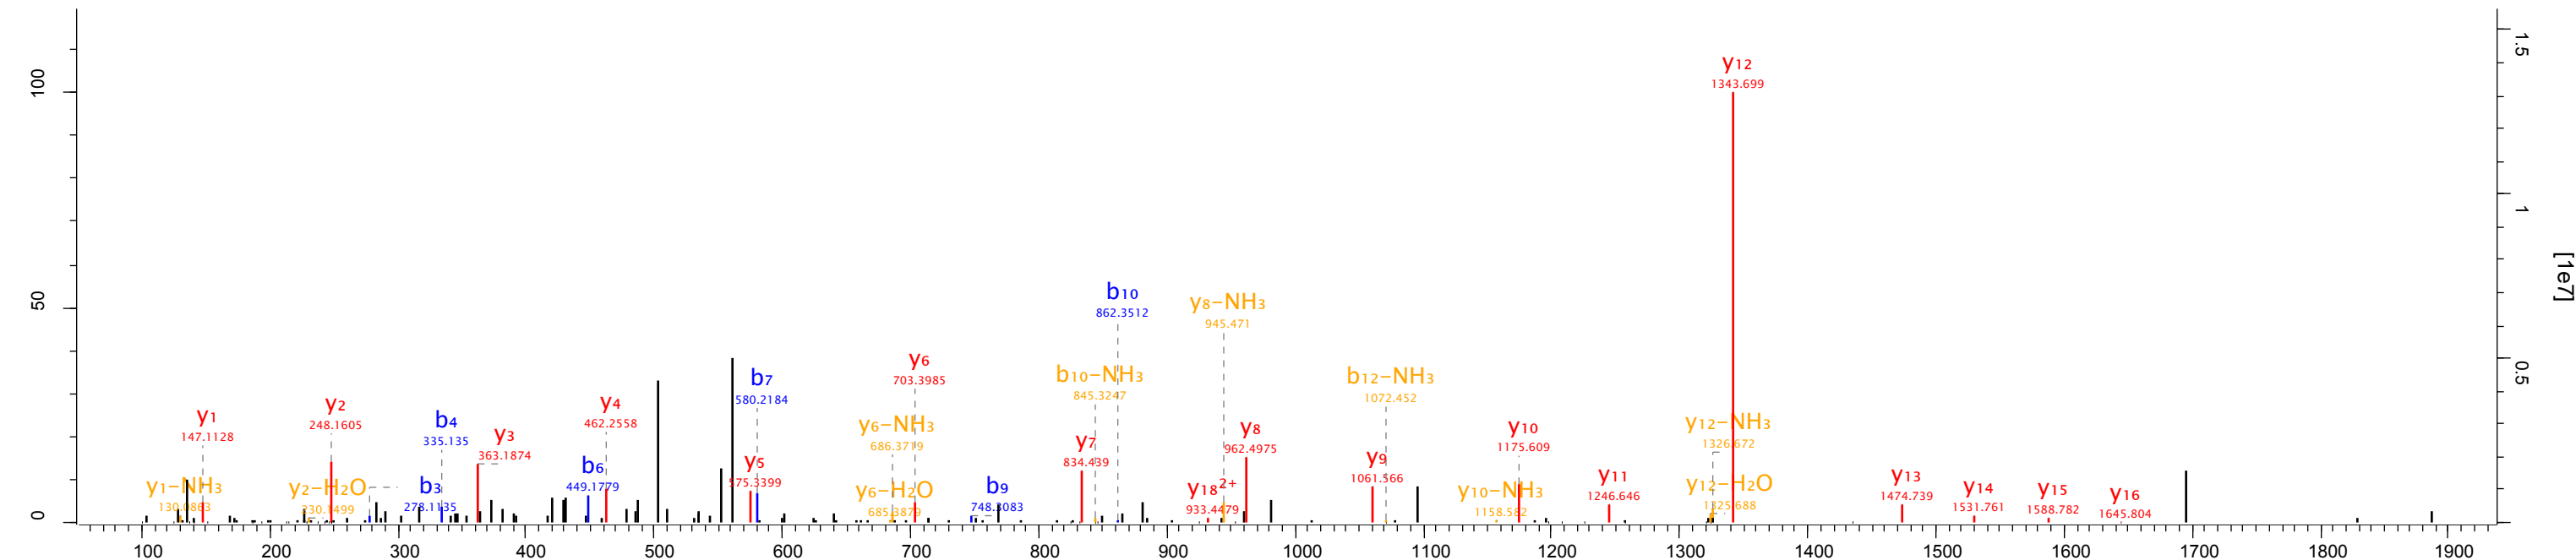

- G G Y G G G M P A N V Q M Q L V D T K -

Fragmentation mapping:

- Red boxes (y ions): y<sub>18</sub><sup>2+</sup> (G), y<sub>16</sub> (G), y<sub>15</sub> (G), y<sub>14</sub> (G), y<sub>13</sub> (M), y<sub>12</sub> (P), y<sub>11</sub> (A), y<sub>10</sub> (N), y<sub>9</sub> (V), y<sub>8</sub> (Q), y<sub>7</sub> (M), y<sub>6</sub> (Q), y<sub>5</sub> (L), y<sub>4</sub> (V), y<sub>3</sub> (D), y<sub>2</sub> (T), y<sub>1</sub> (K).
- Blue boxes (b ions): b<sub>3</sub> (Y), b<sub>4</sub> (G), b<sub>6</sub> (G), b<sub>7</sub> (M), b<sub>9</sub> (A), b<sub>10</sub> (N).

Raw file  
20180707\_MaS\_A375SR\_ML\_proteome\_2\_13

Scan Method Score m/z Gene names  
10150 FTMS; HCD 92.19 361.19 ART4

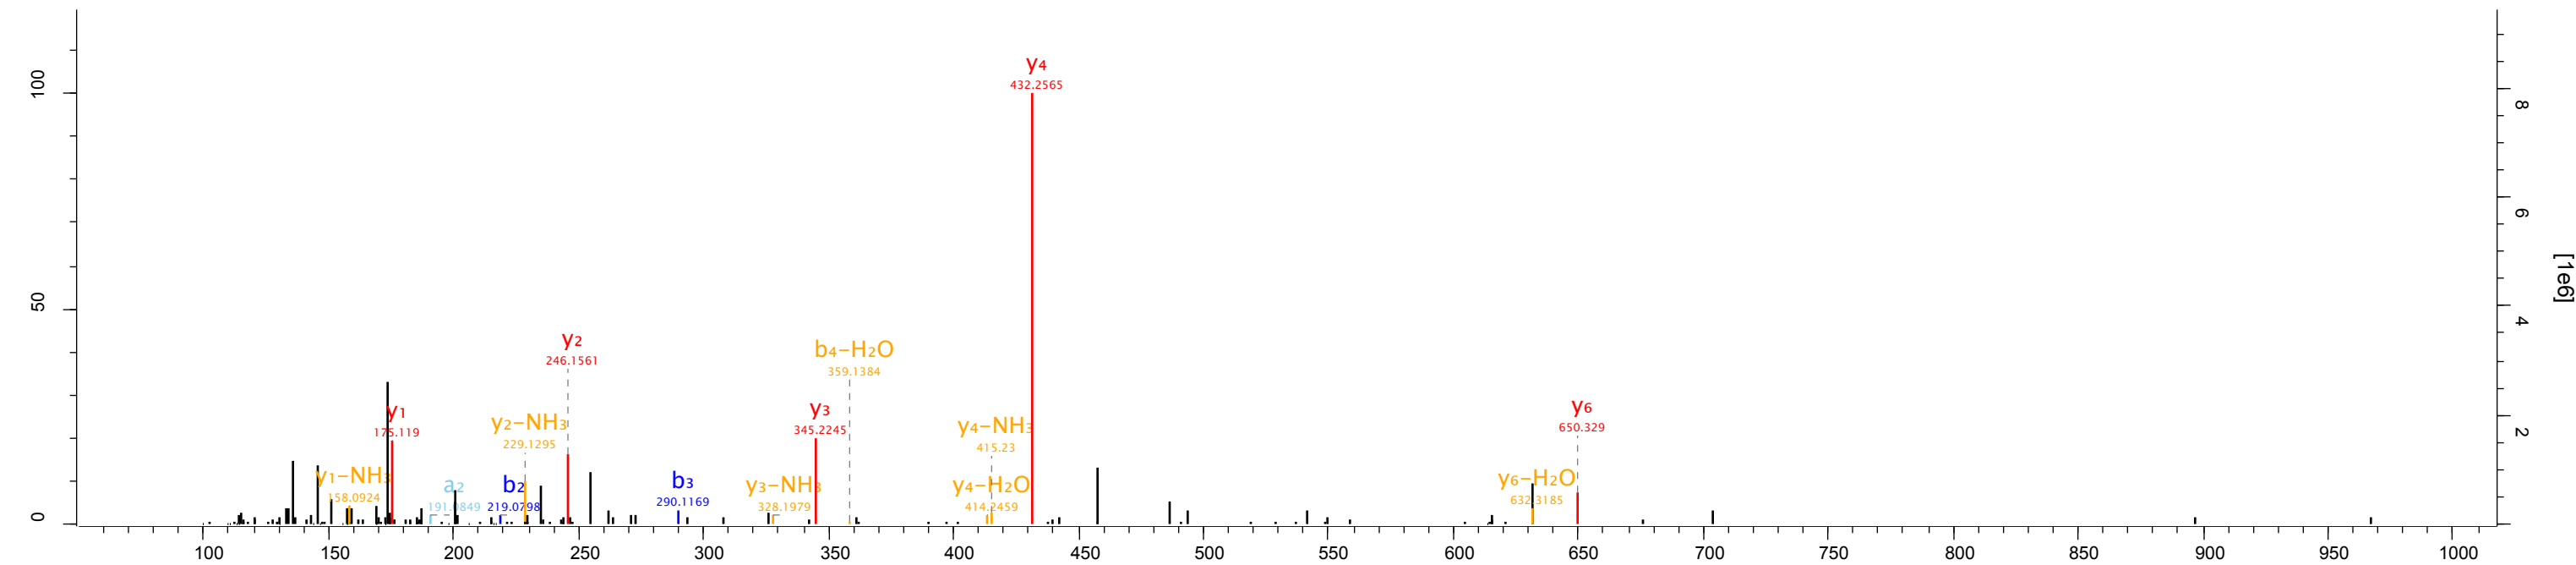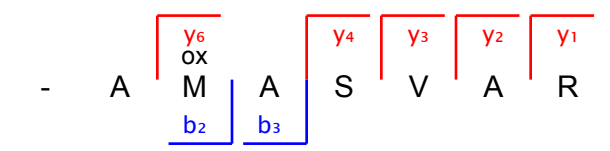

Raw file 20180707\_MaS\_A375SR\_ML\_proteome\_2\_13 Scan 10590 Method FTMS; HCD Score 60.3 m/z 625.77 Gene names ANAPC16

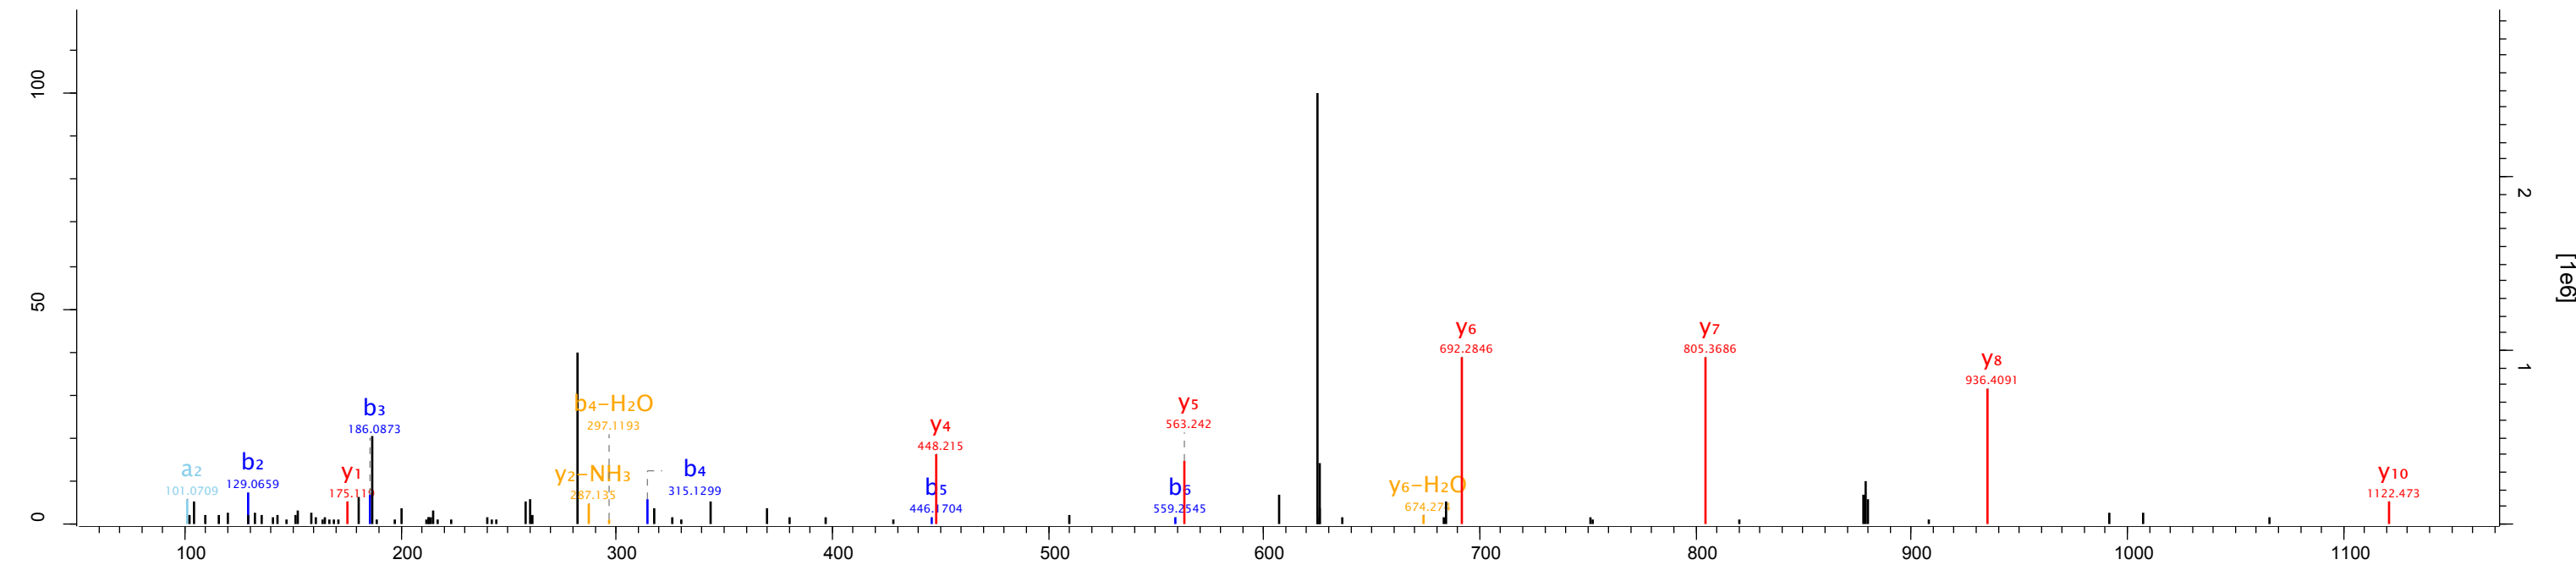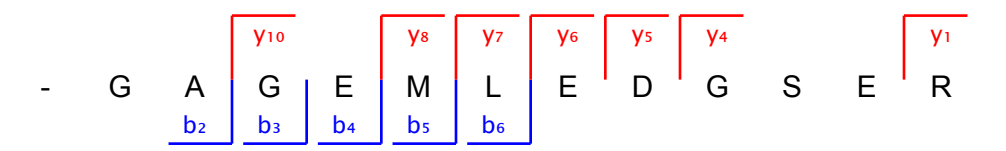

Raw file: 20180707\_MaS\_A375SR\_ML\_proteome\_2\_13  
 Scan: 21520 Method: FTMS; HCD Score: 76.82 m/z: 822.9 Gene names: UBXN2A

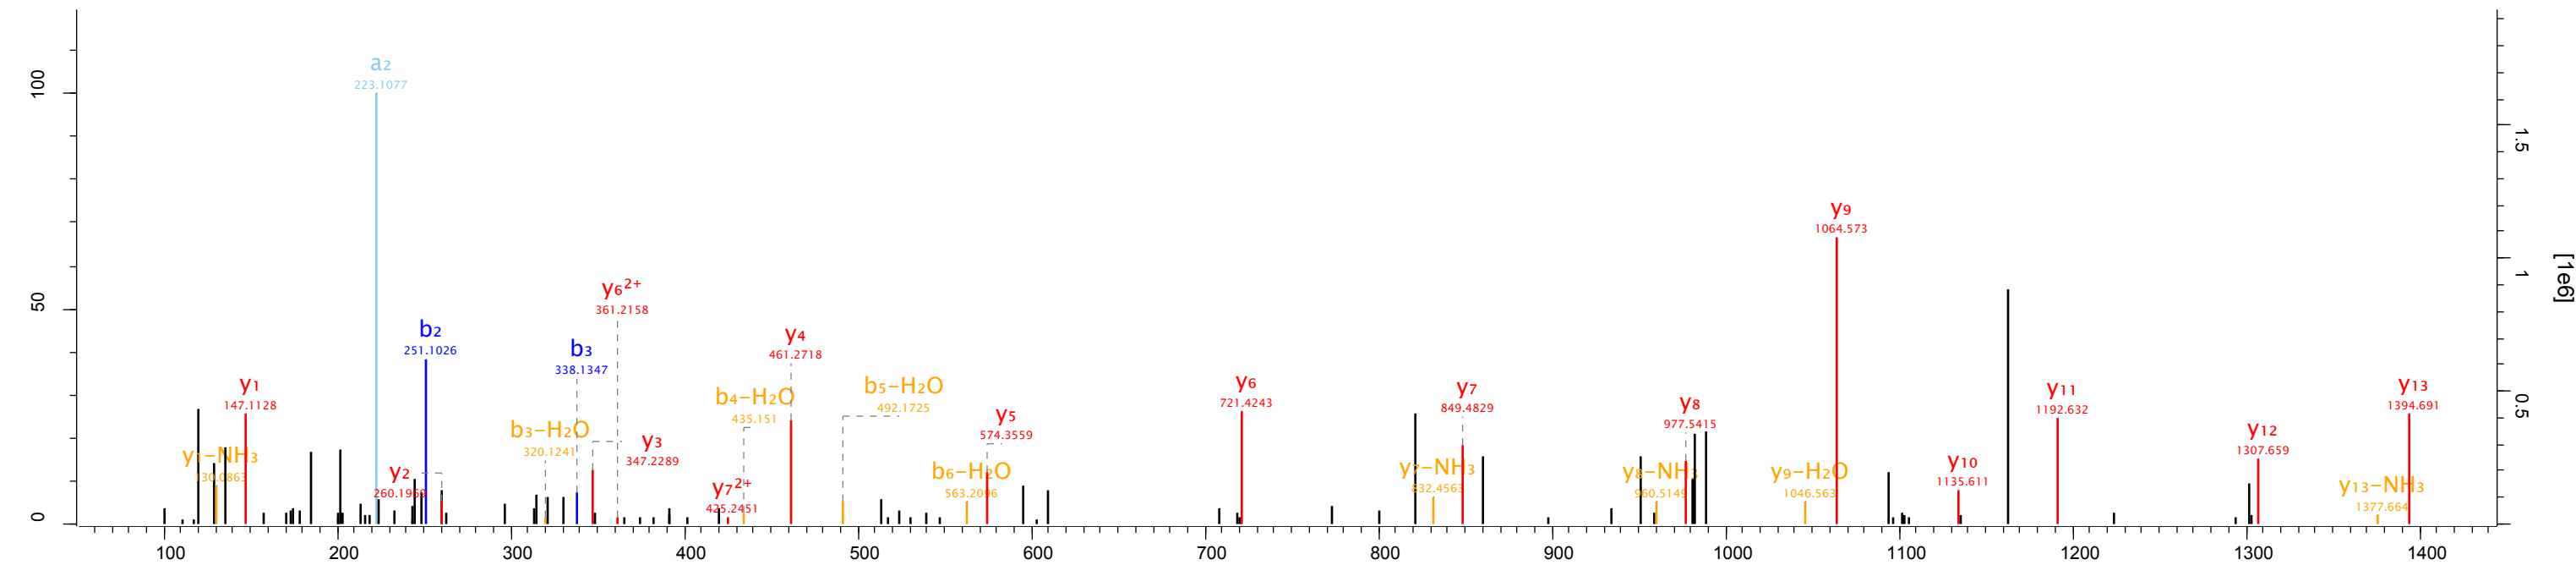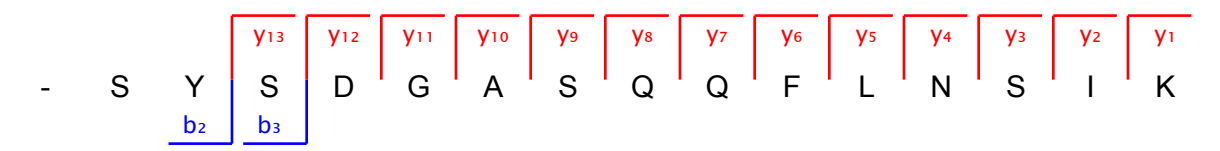

Raw file: 20180707\_MaS\_A375SR\_ML\_proteome\_2\_13  
 Scan: 4890 Method: FTMS; HCD Score: 90.05 m/z: 560.27 Gene names: SFT2D2

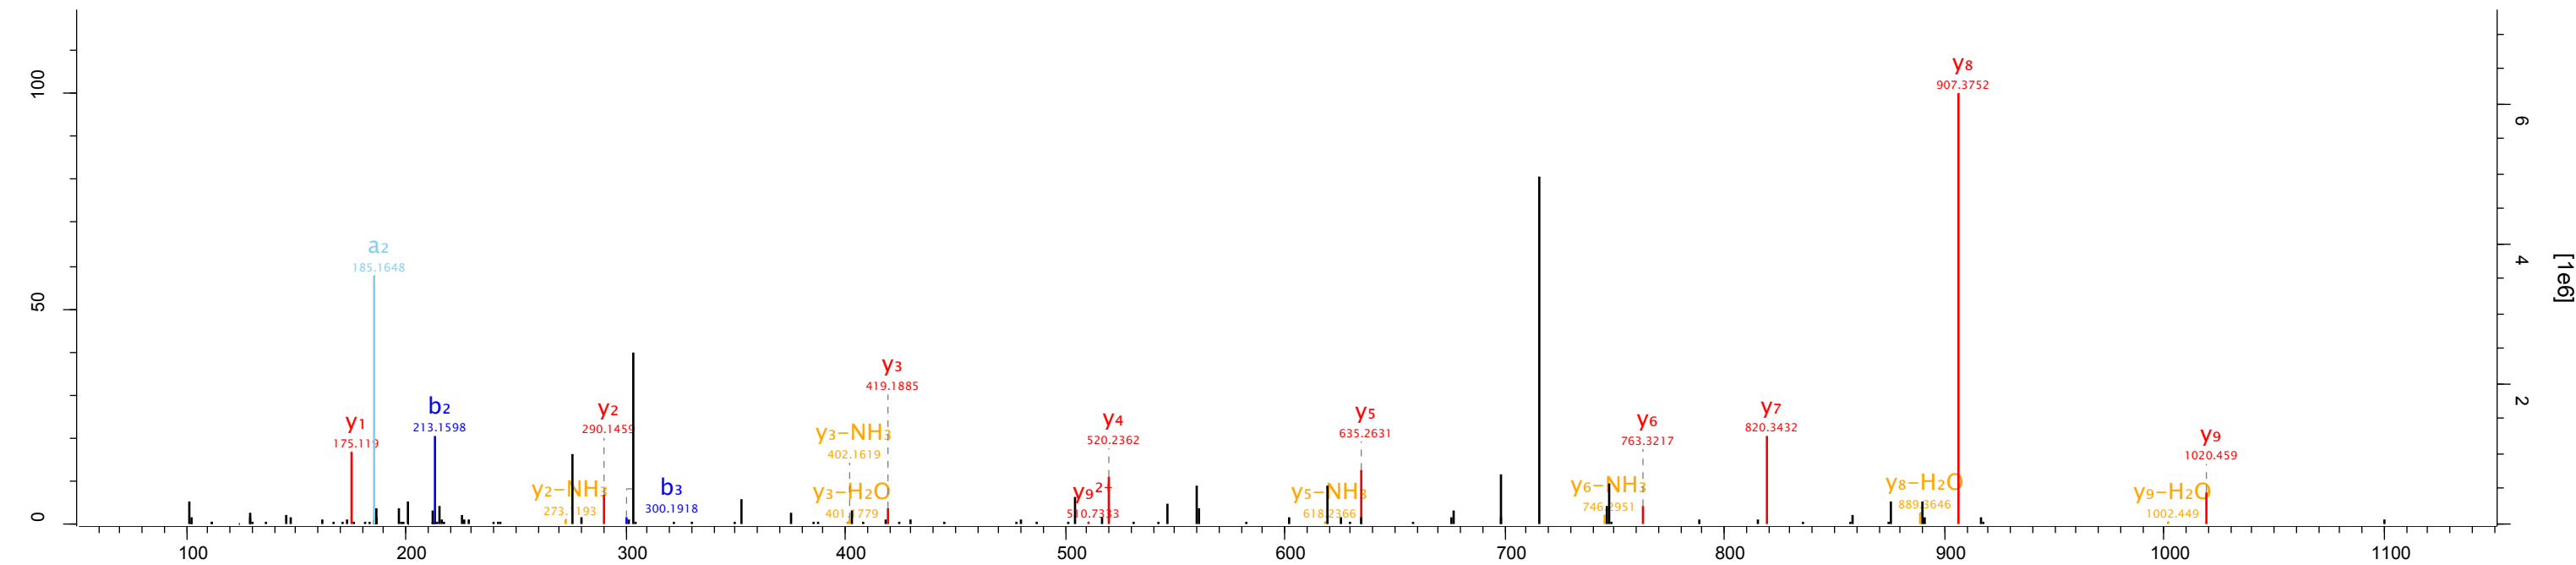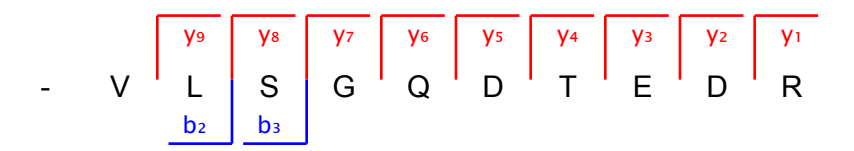

Raw file 20180707\_MaS\_A375SR\_ML\_proteome\_2\_14 Scan 25800 Method FTMS; HCD Score 24.96 m/z 431.23 Gene names IGFALS

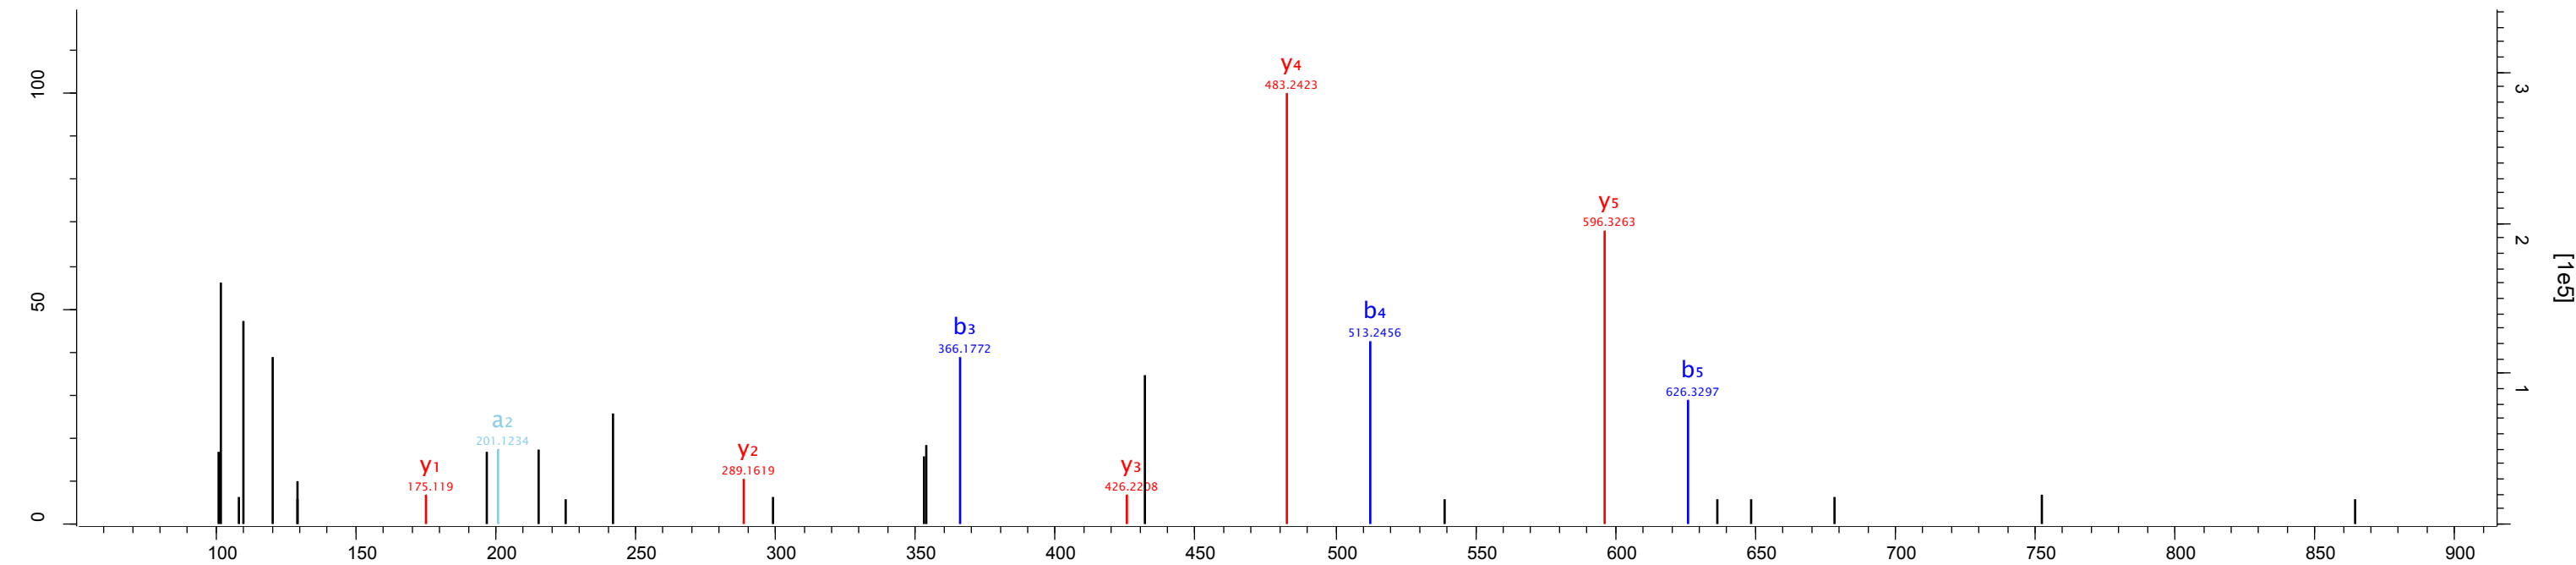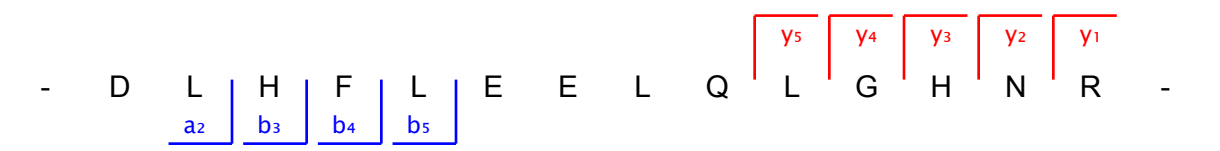

Raw file: 20180707\_MaS\_A375SR\_ML\_proteome\_2\_15  
 Scan: 22990 Method: FTMS; HCD Score: 118.31 m/z: 613.63 Gene names: RBM48

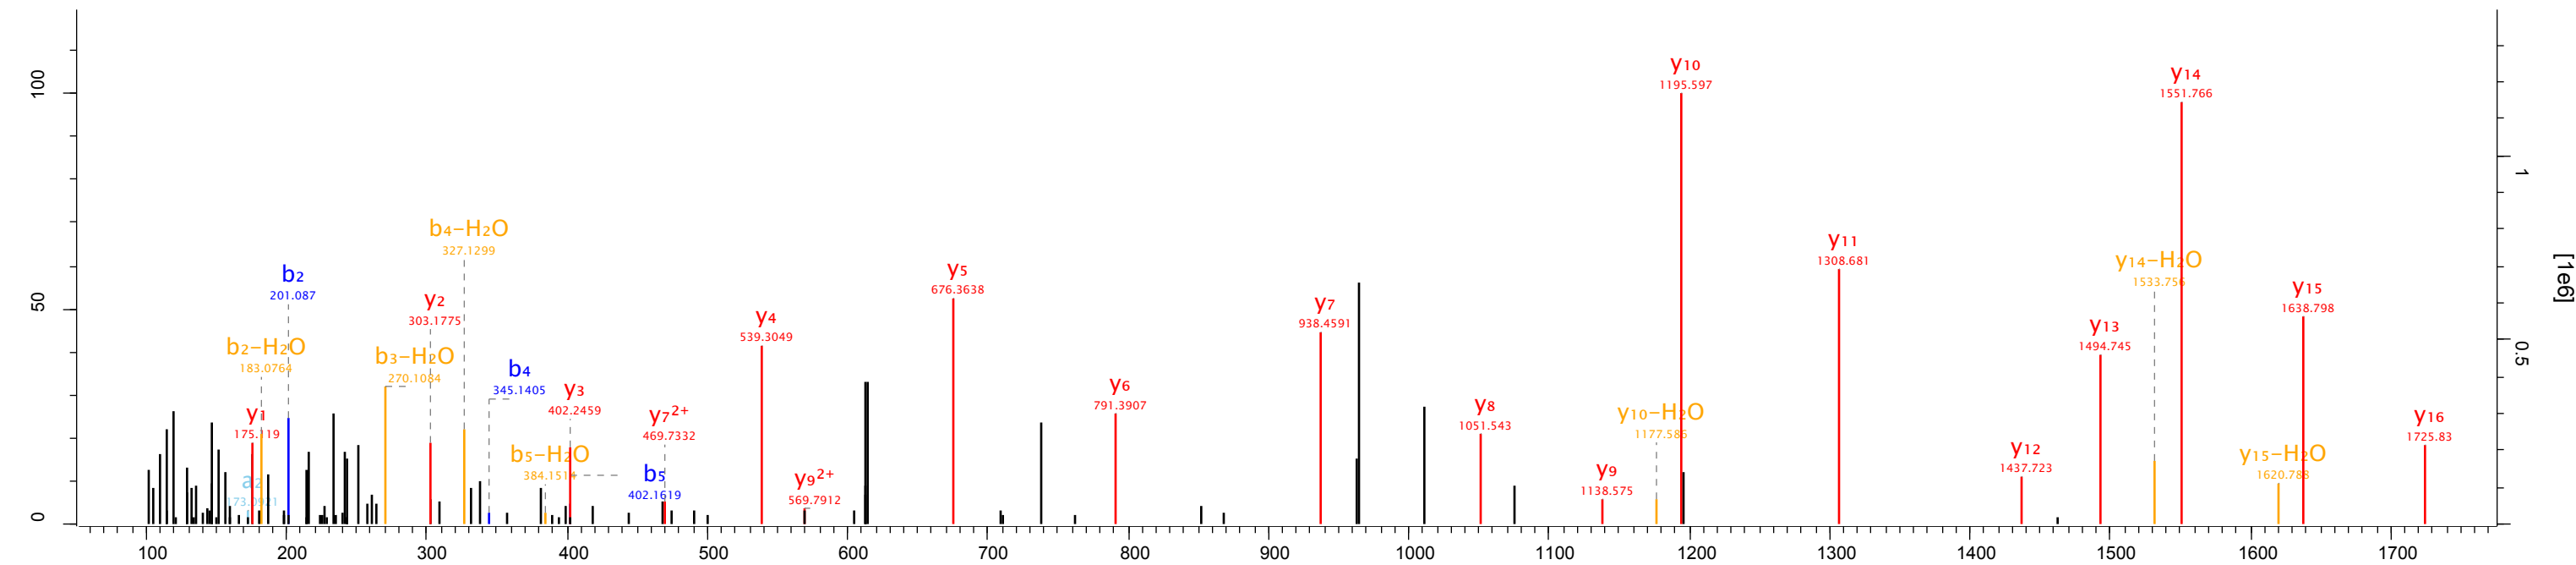

ac - A S S G G E L G S L F D H H V Q R -

Fragmentation mapping:  
 - b2 (under S)  
 - b4 (under G)  
 - b5 (under G)

Raw file  
20180707\_MaS\_A375SR\_ML\_proteome\_2\_16

Scan 14700 Method FTMS; HCD Score 251.68 m/z 858.93 Gene names APOC3

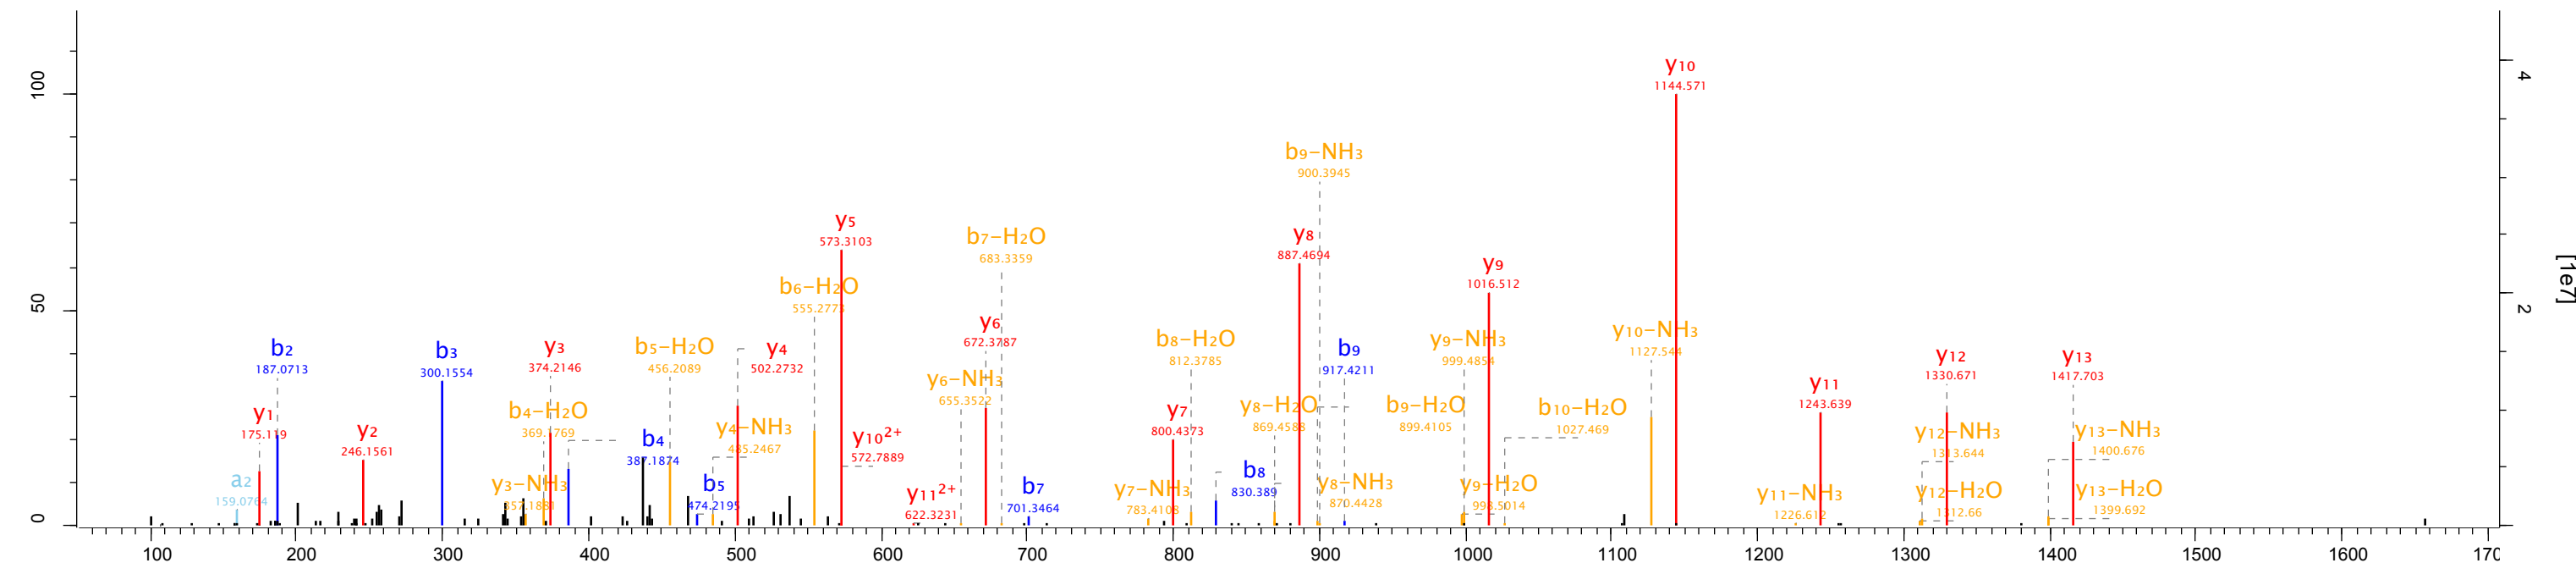

- D A L S S V Q E S Q V A Q Q A R -  
b2 b3 b4 b5 b7 b8 b9



Raw file 20180707\_MaS\_A375SR\_ML\_proteome\_2\_16 Scan 17820 Method FTMS; HCD Score 100.02 m/z 485.27

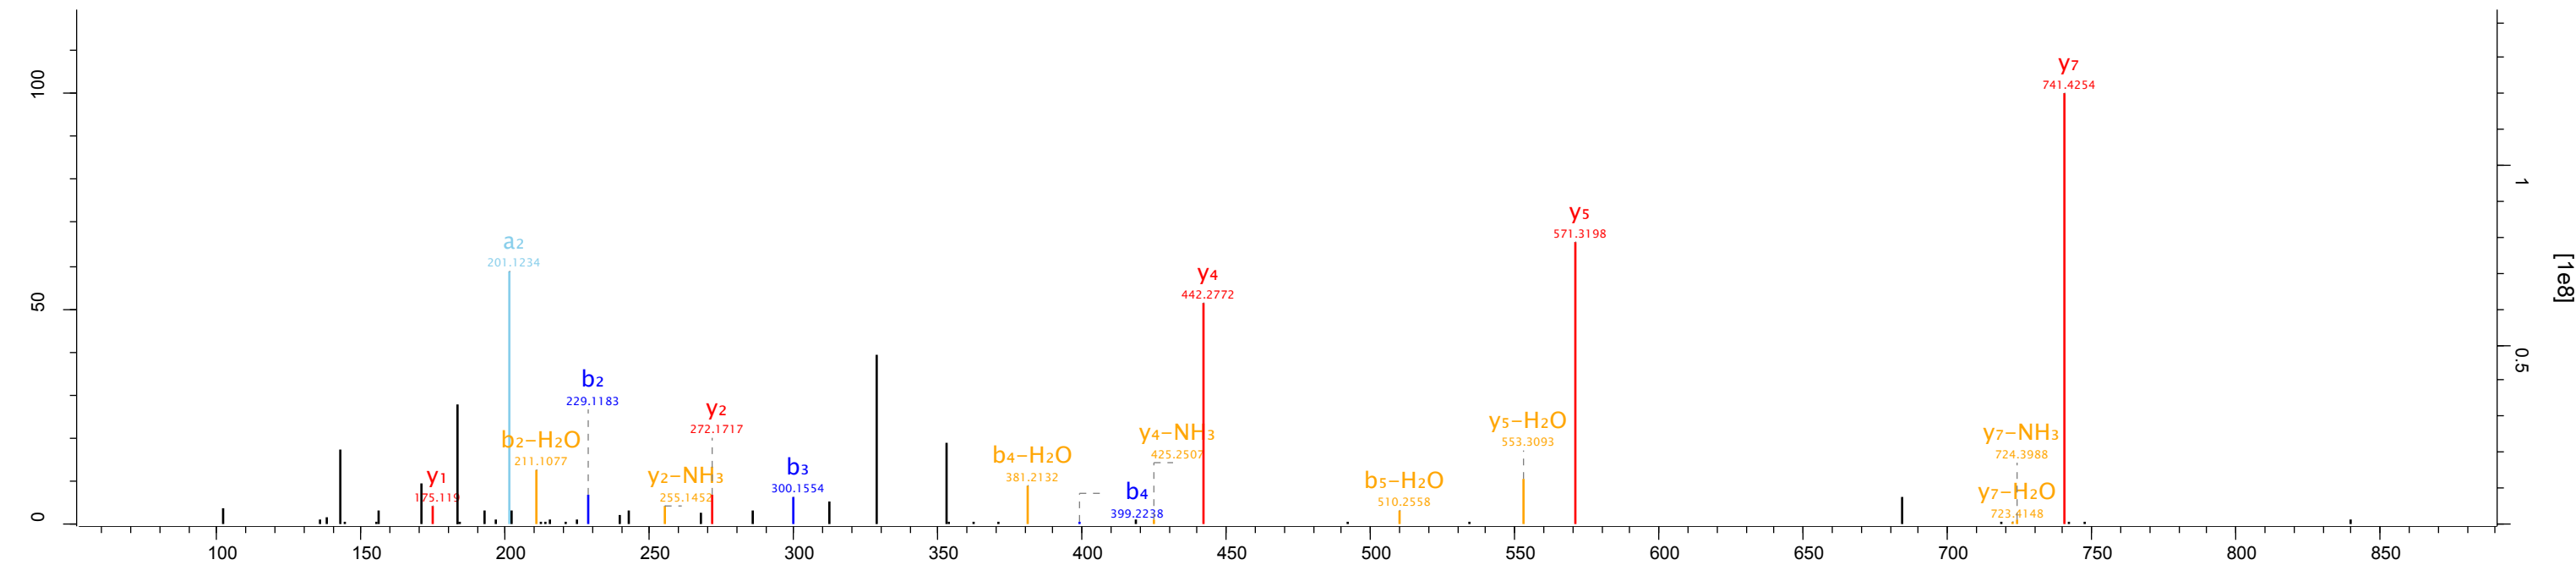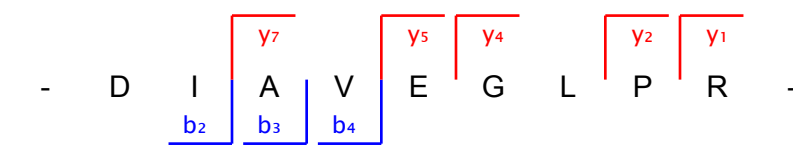

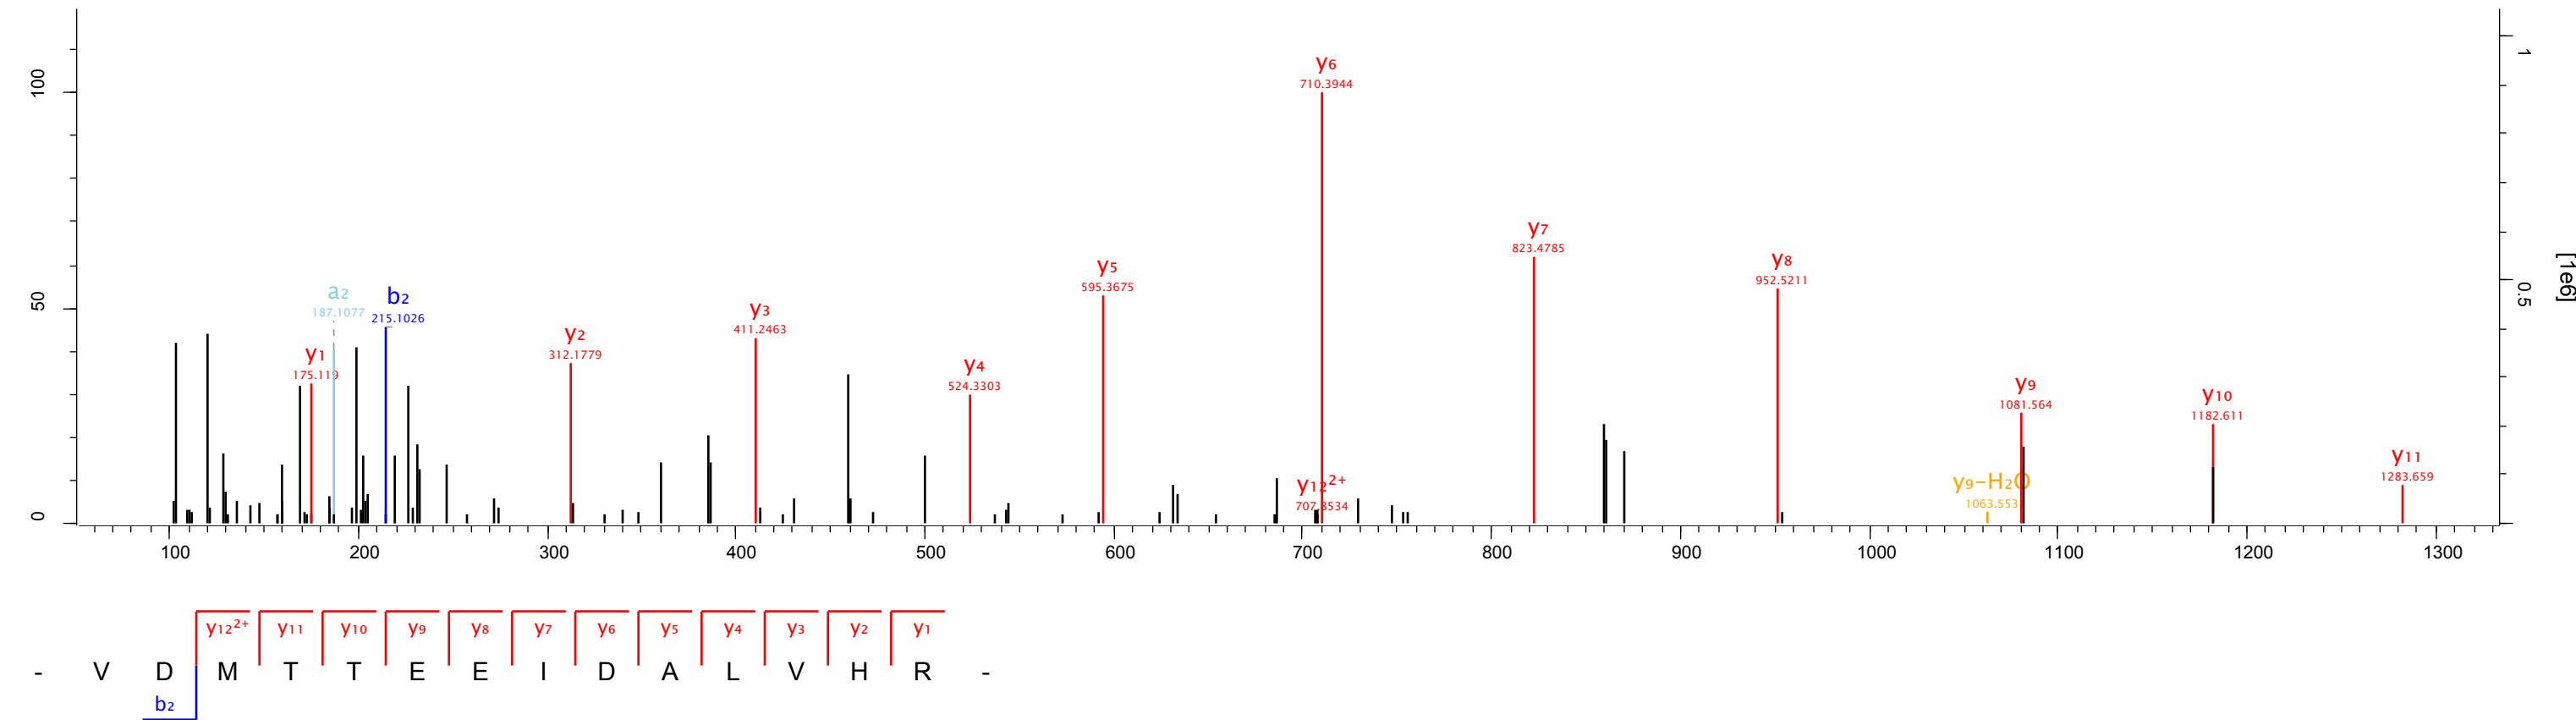

Raw file  
20180707\_MaS\_A375SR\_ML\_proteome\_2\_16

Scan 2870 Method FTMS; HCD Score 71.56 m/z 644.83 Gene names FAM89B

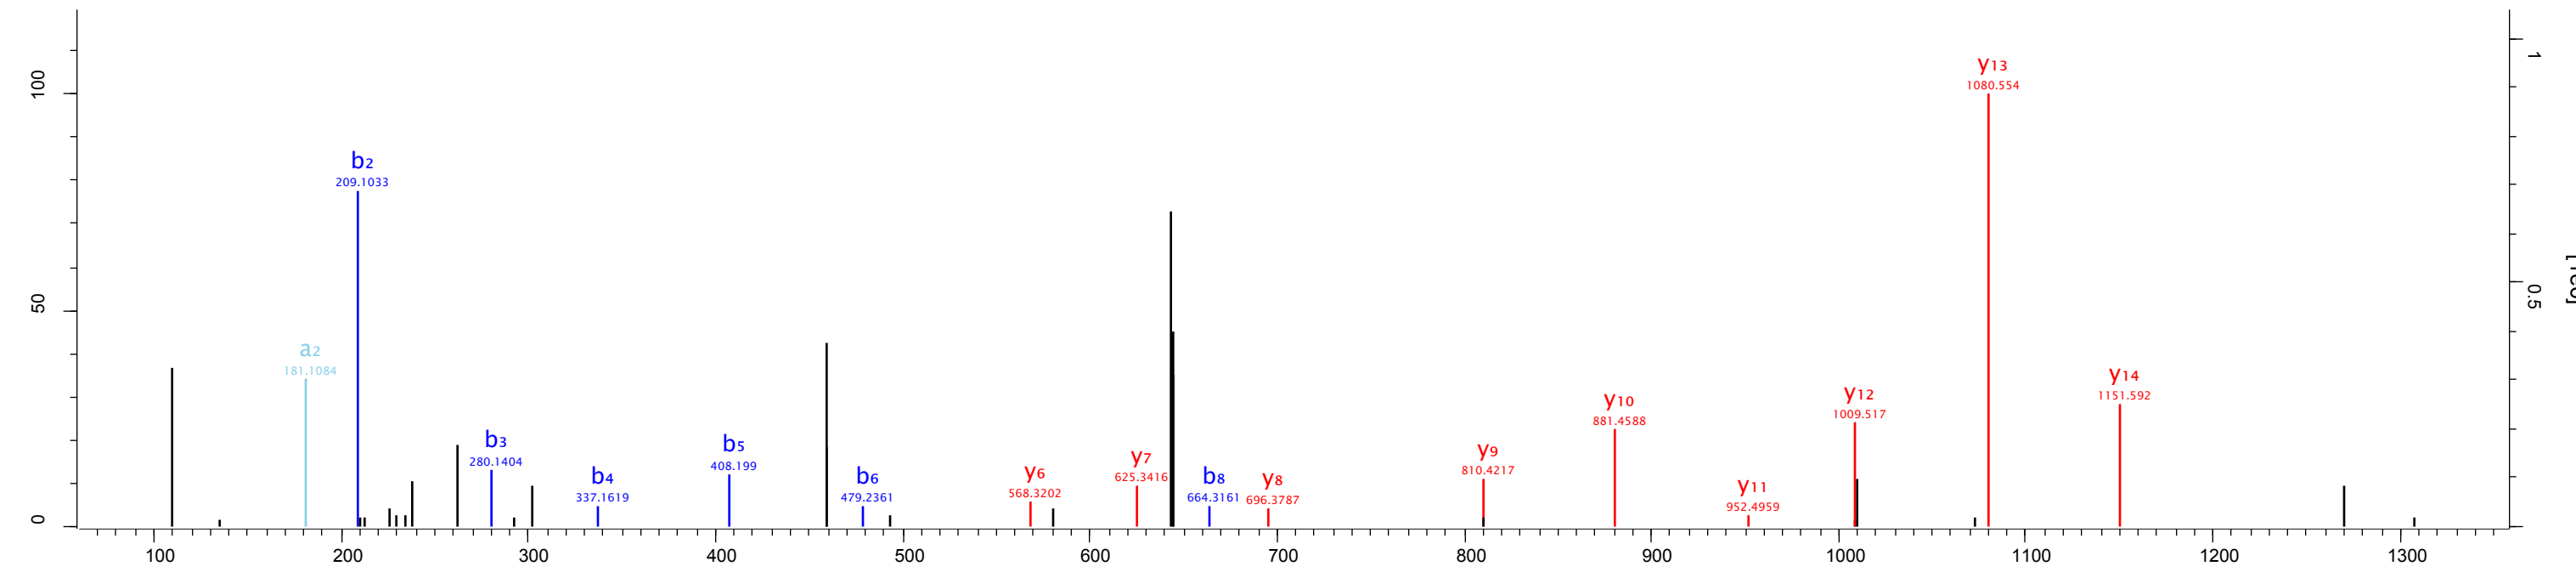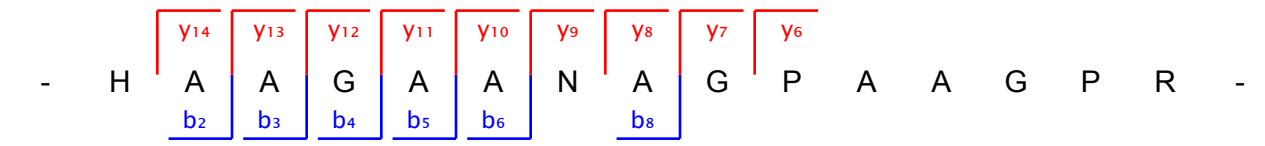

Raw file 20180707\_MaS\_A375SR\_ML\_proteome\_2\_16 Scan 28870 Method FTMS; HCD Score 60.16 m/z 671.92 Gene names THEMIS2

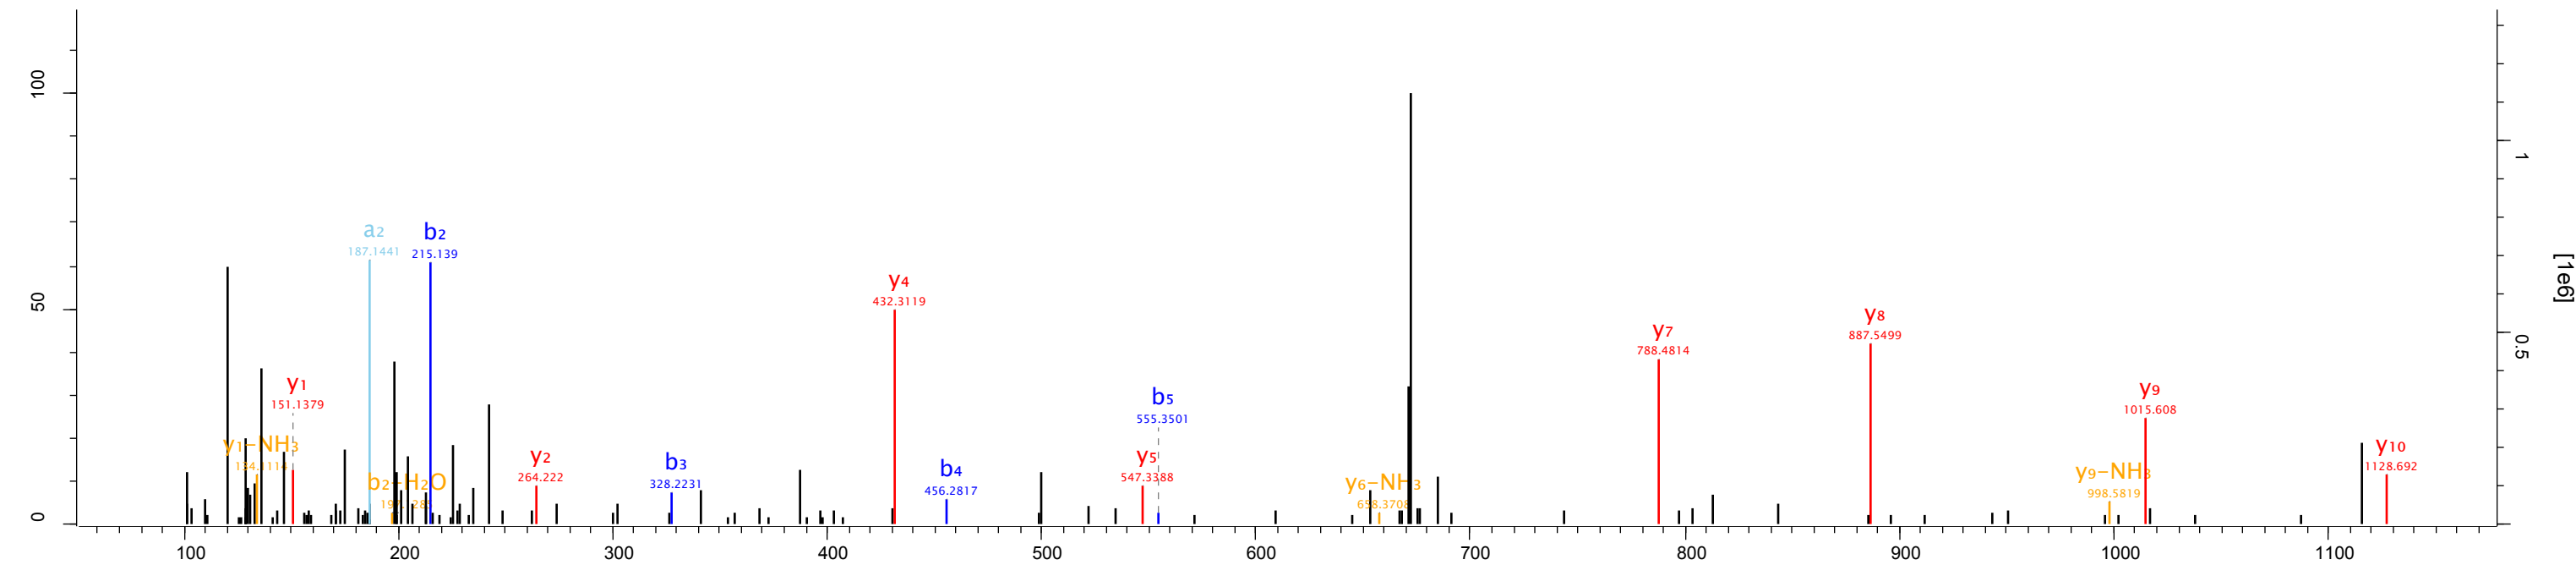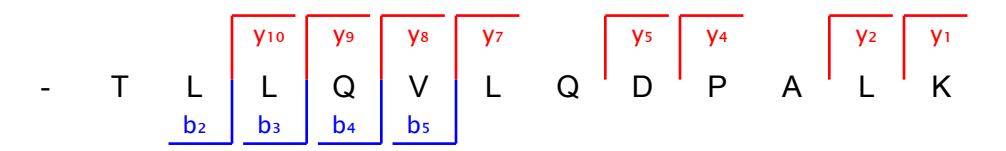

Raw file 20180707\_MaS\_A375SR\_ML\_proteome\_2\_17 Scan 5370 Method FTMS; HCD Score 95.36 m/z 370.55

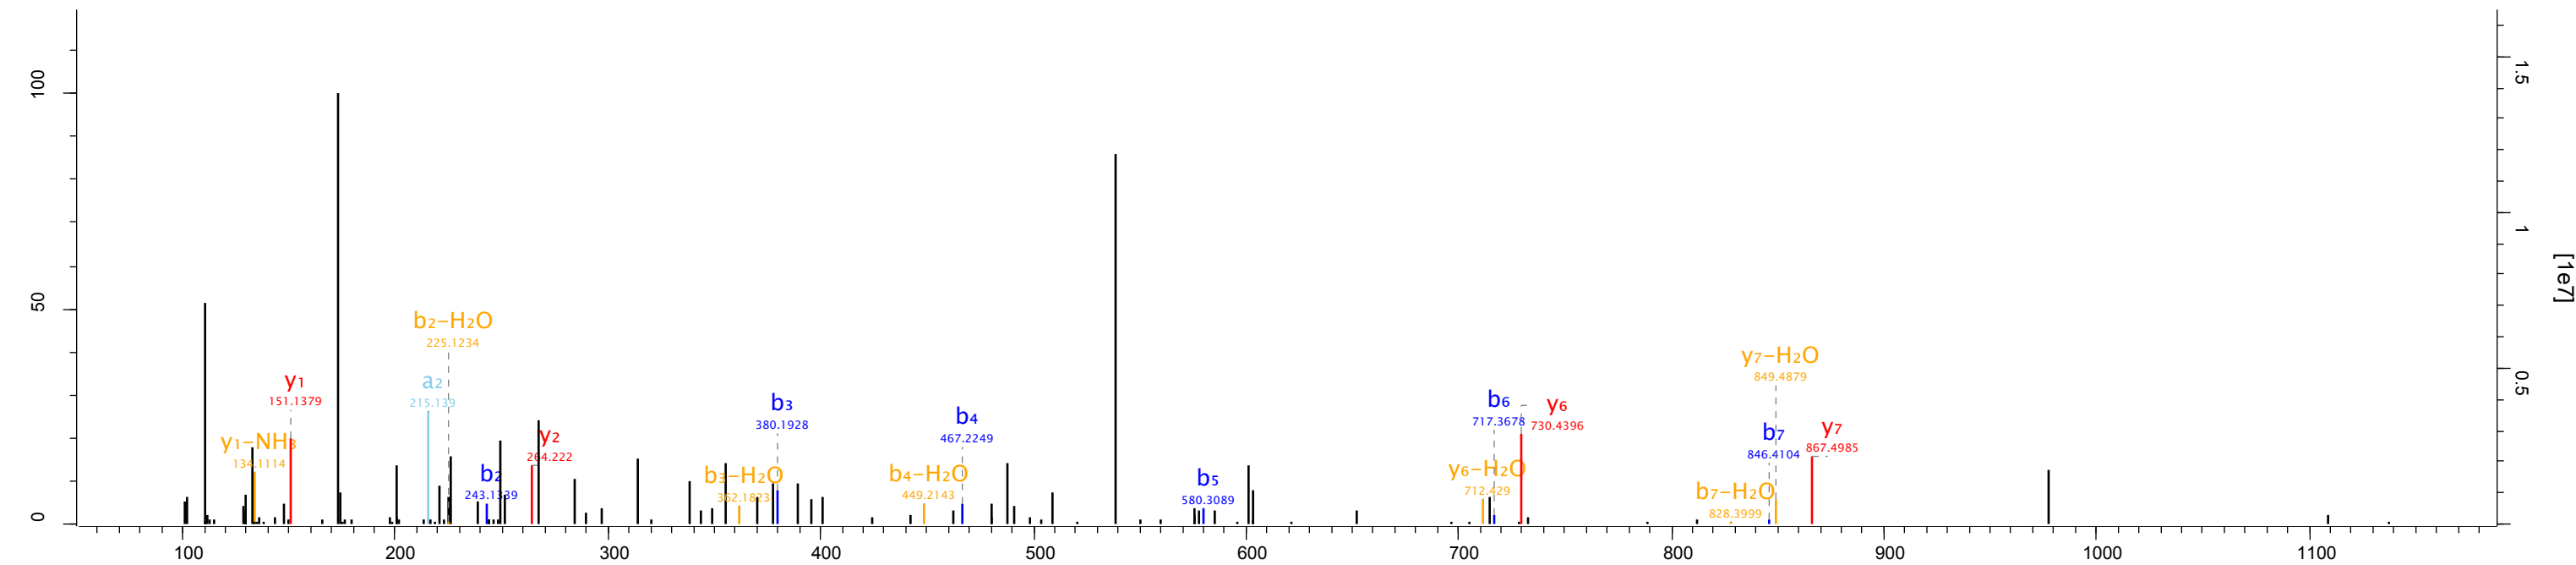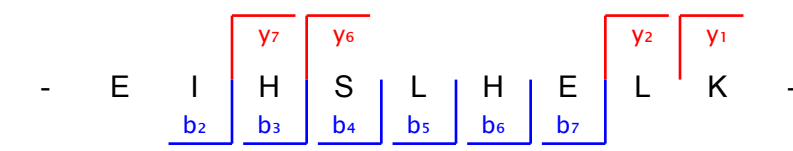

Raw file 20180707\_MaS\_A375SR\_ML\_proteome\_2\_18  
 Scan 19490 Method FTMS; HCD Score 77.8 m/z 962.48 Gene names ATP6V0C

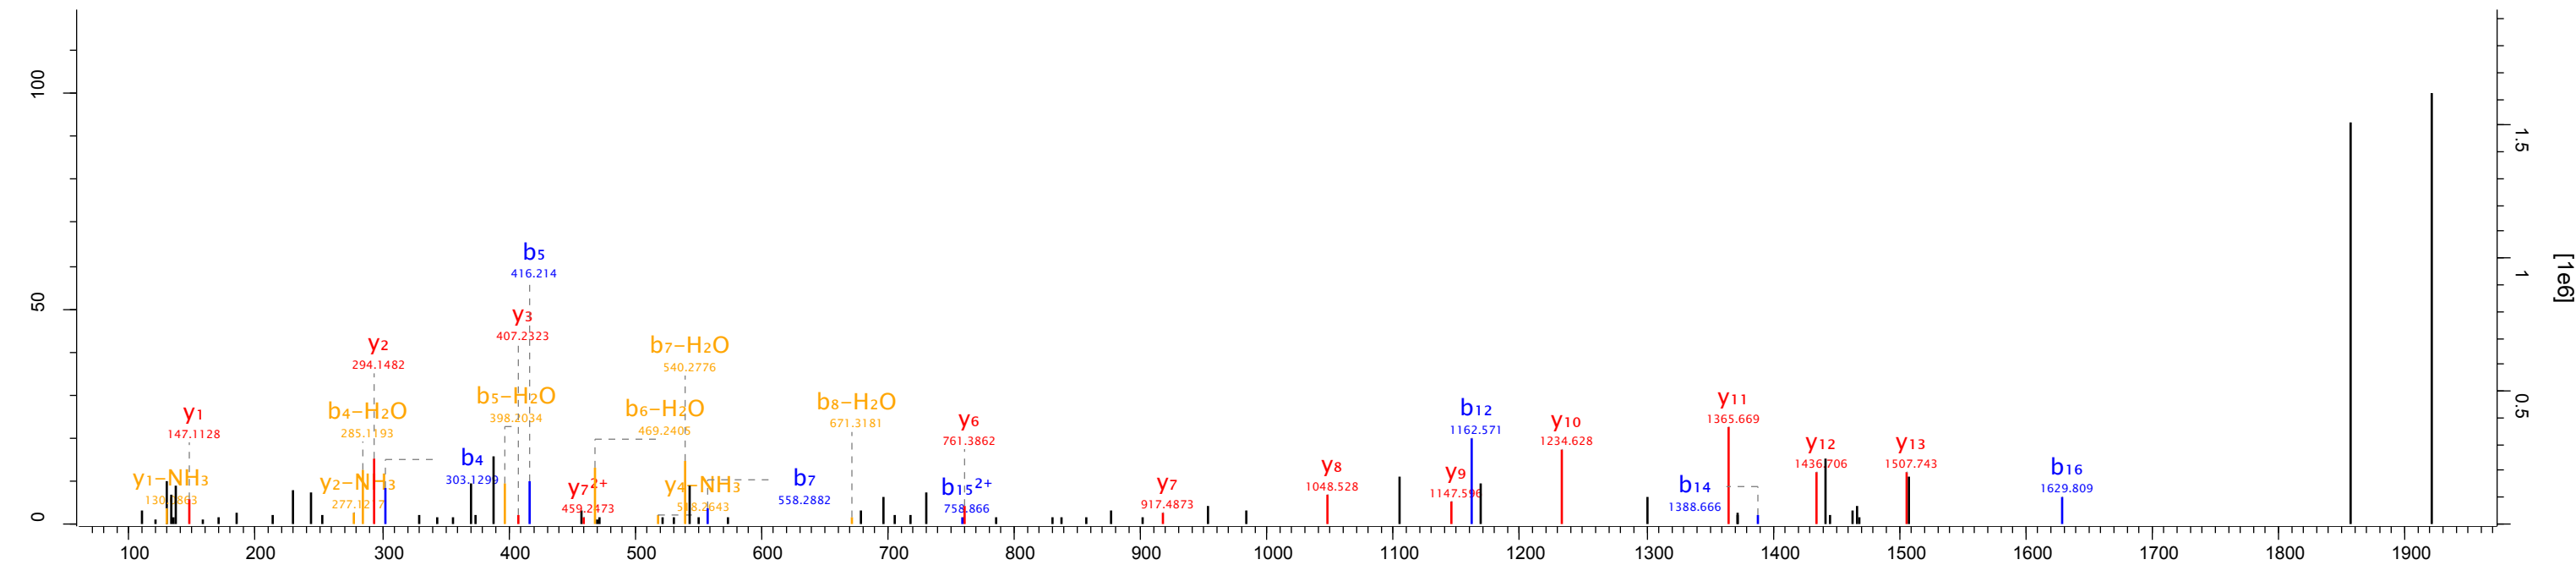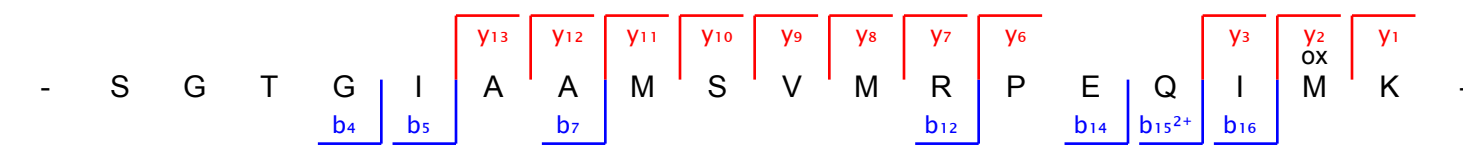

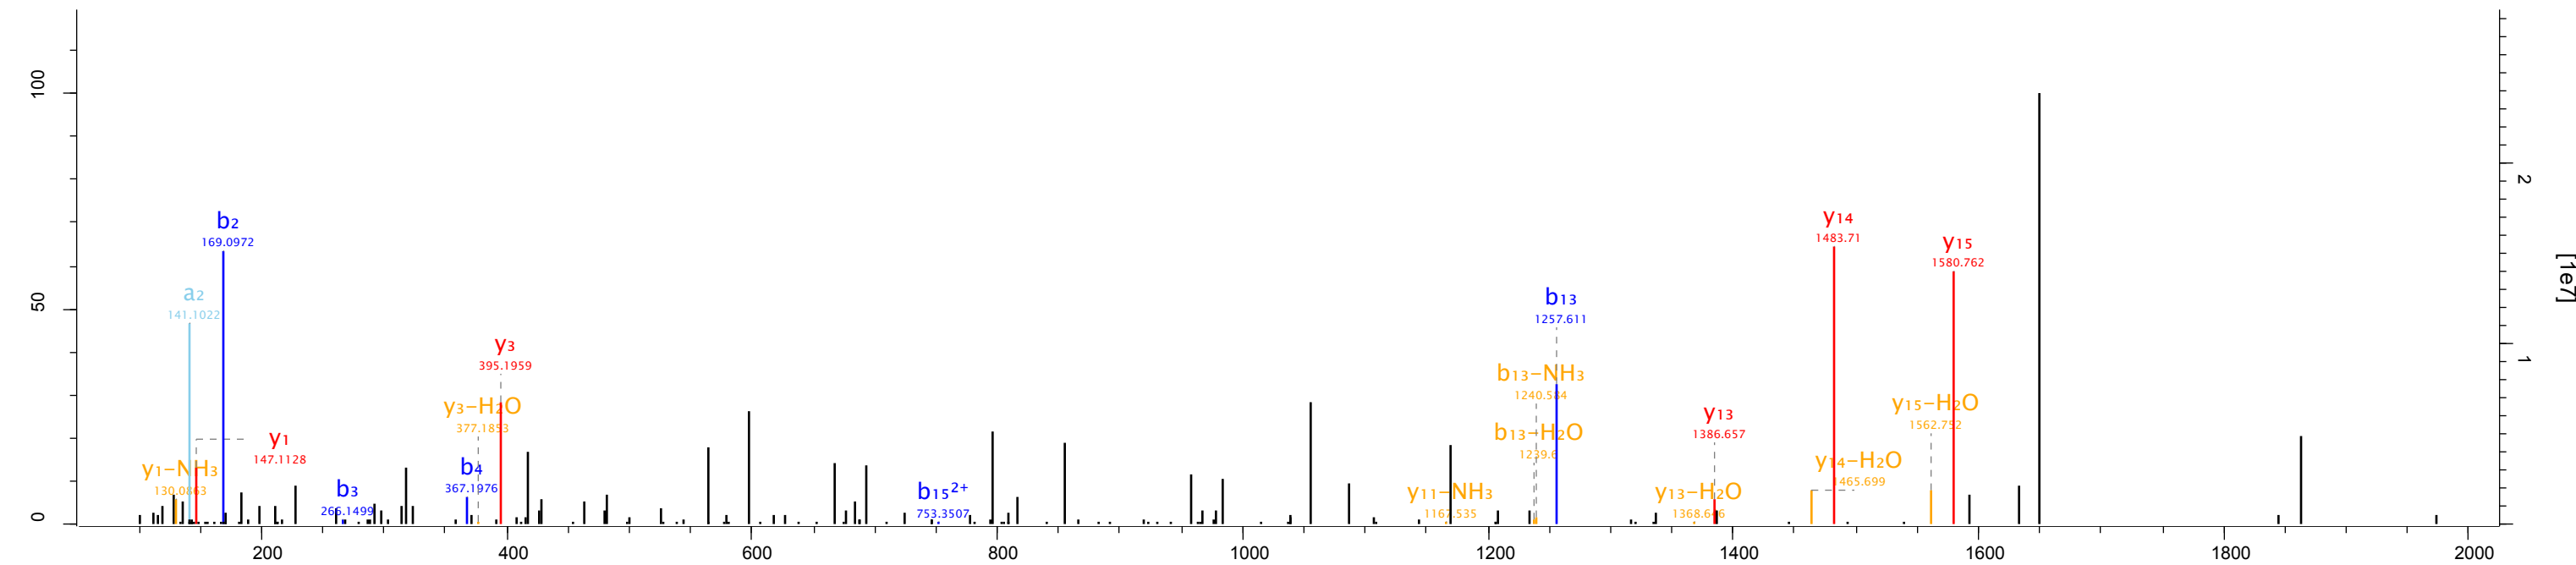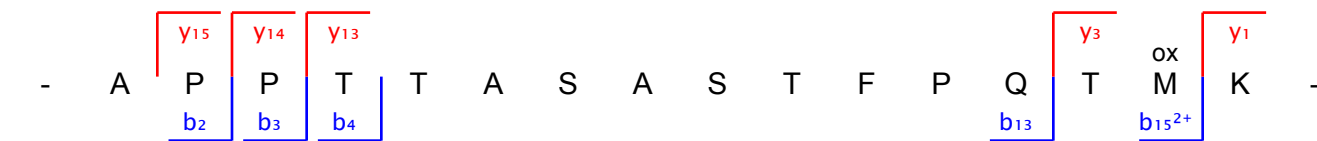

Raw file 20180707\_MaS\_A375SR\_ML\_proteome\_2\_18 Scan 23230 Method FTMS; HCD Score 44.54 m/z 668.88

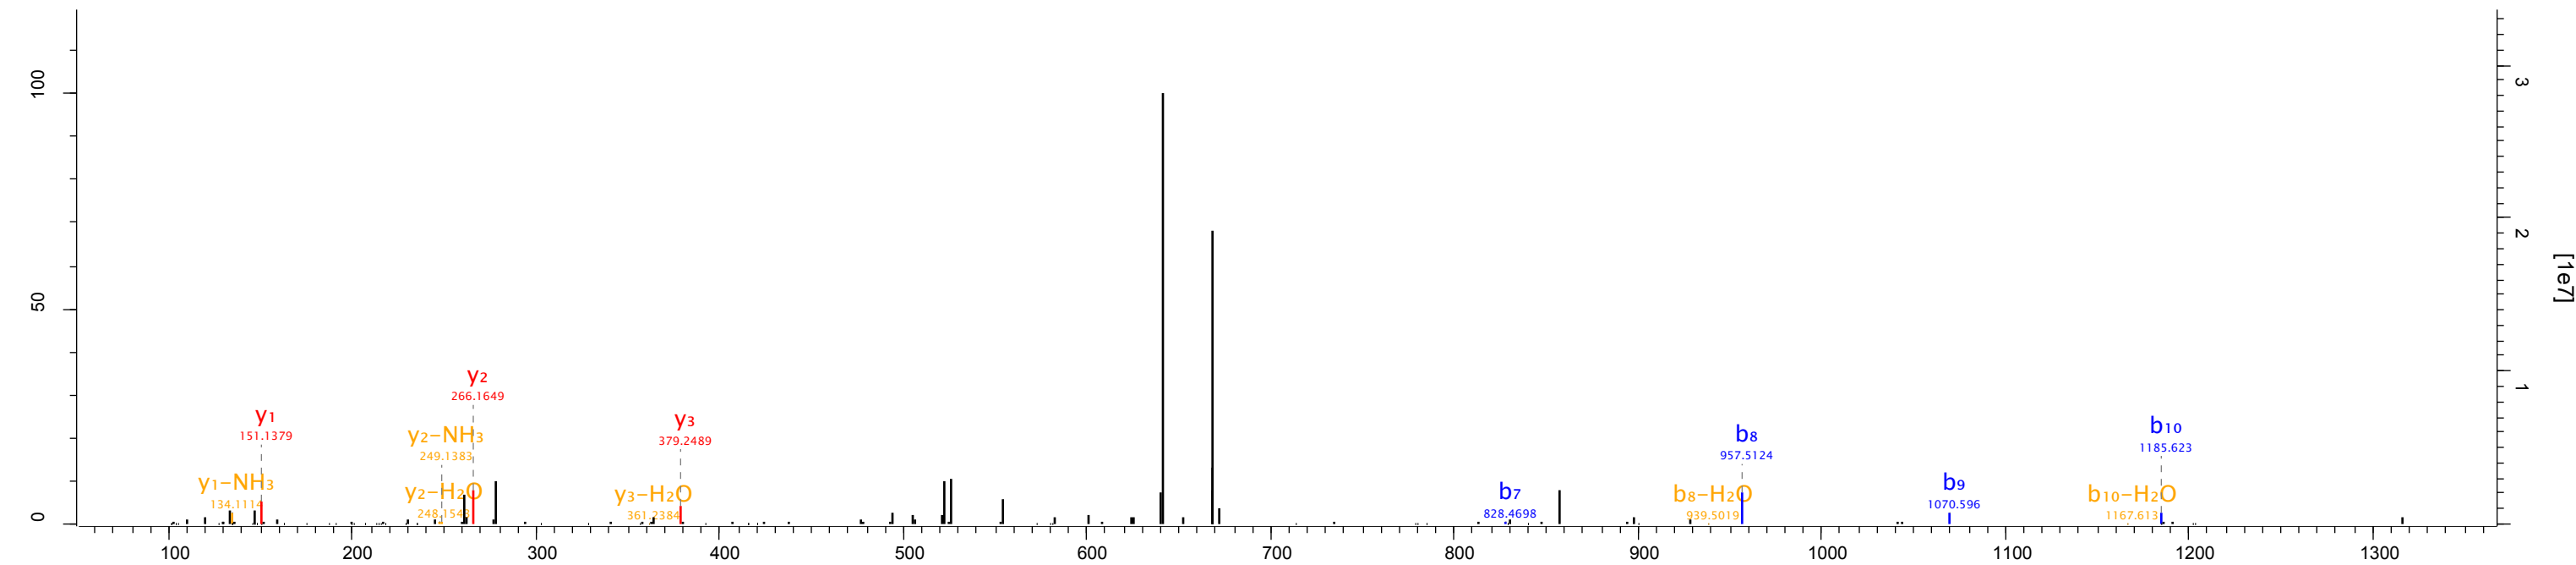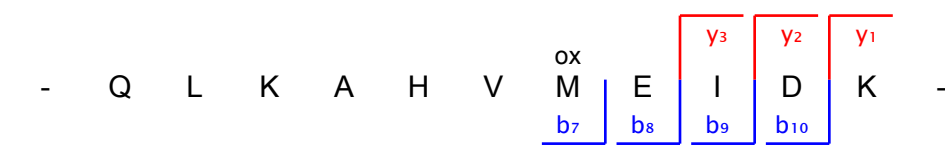



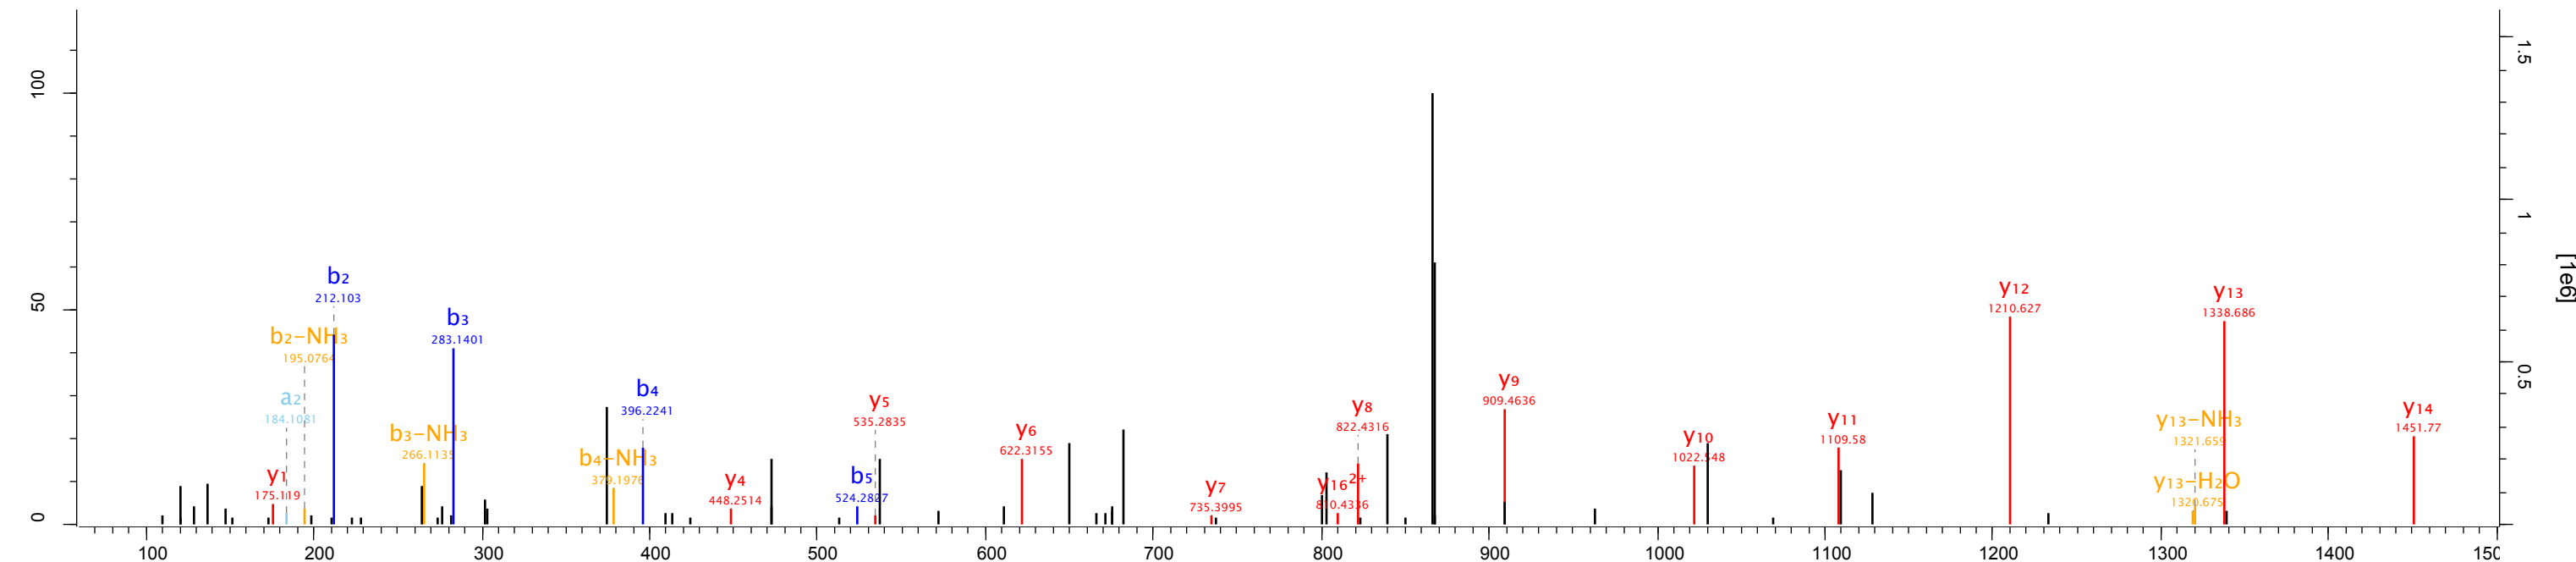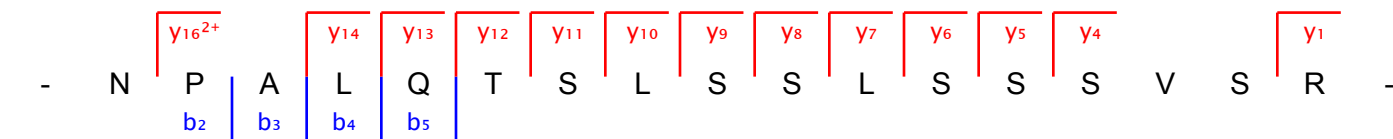

Raw file 20180707\_MaS\_A375SR\_ML\_proteome\_2\_20 Scan 21860 Method FTMS; HCD Score 64.7 m/z 636.66 Gene names ATP6V0C

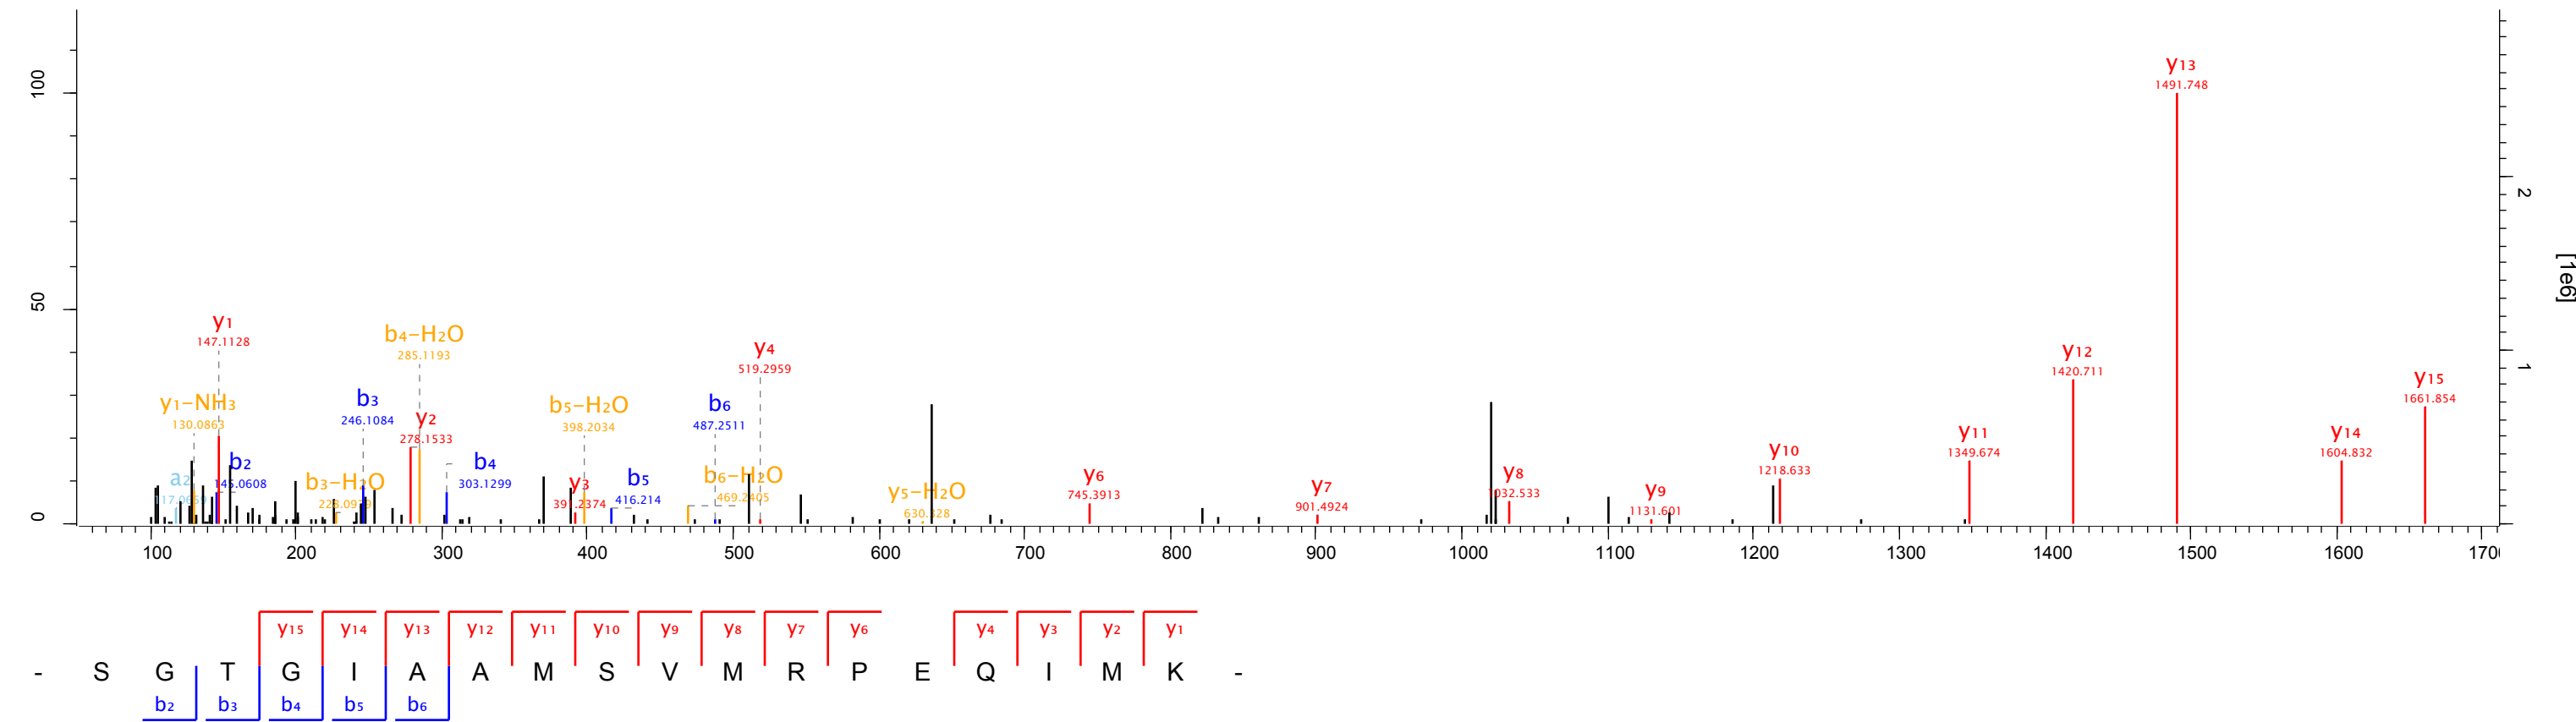

Raw file 20180707\_MaS\_A375SR\_ML\_proteome\_2\_21 Scan 24080 Method FTMS; HCD Score 57.94 m/z 959.51 Gene names ATP6V0C

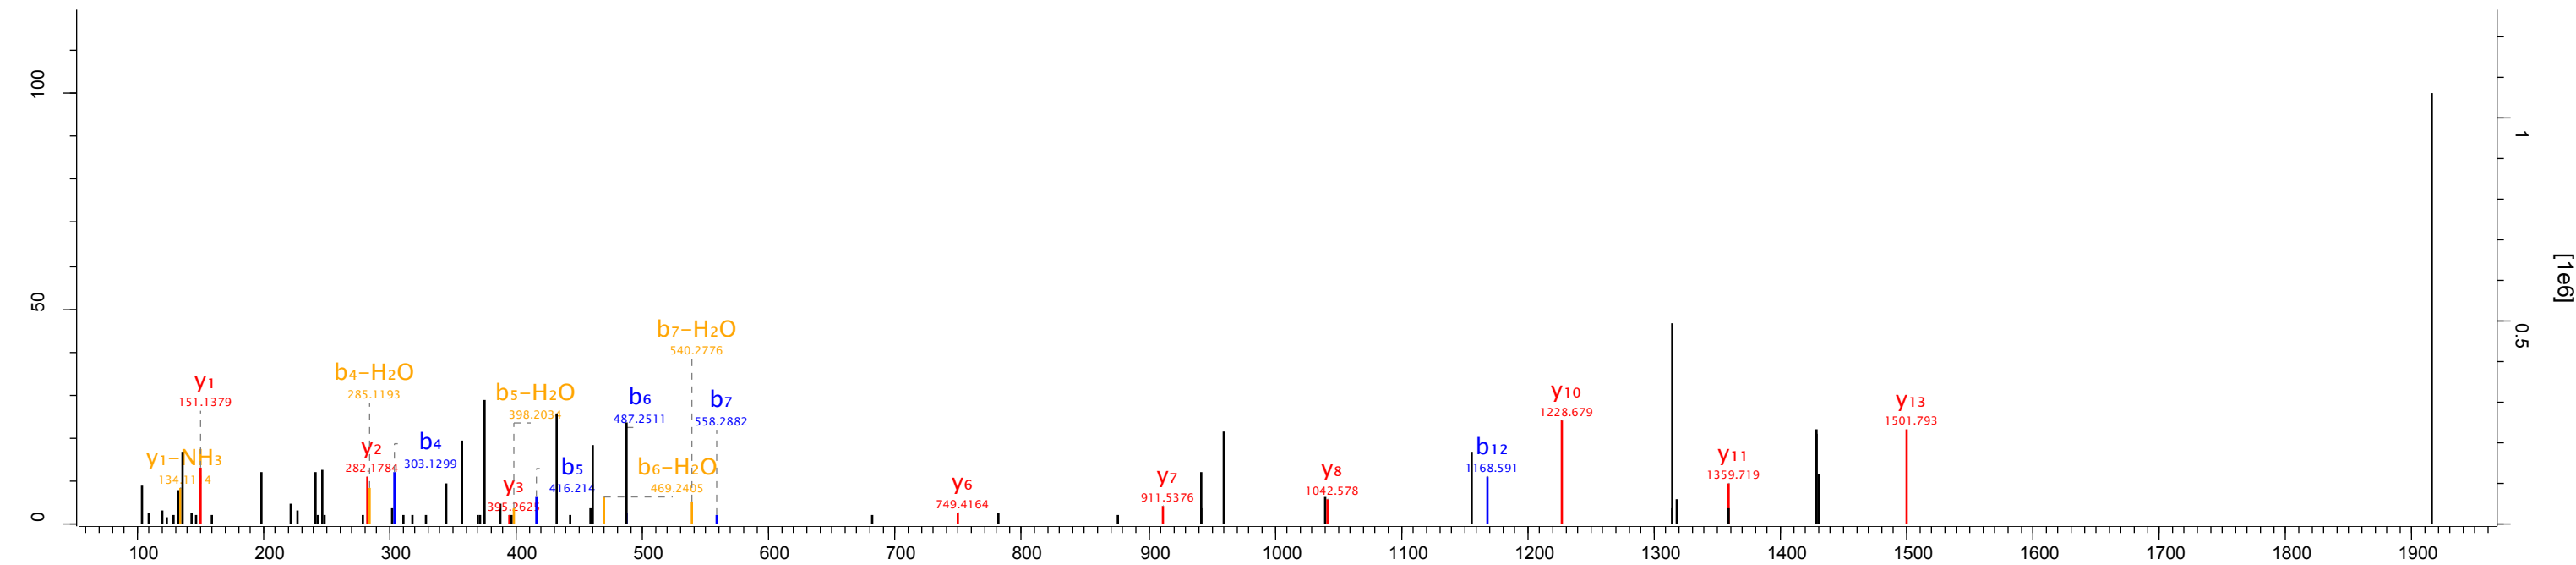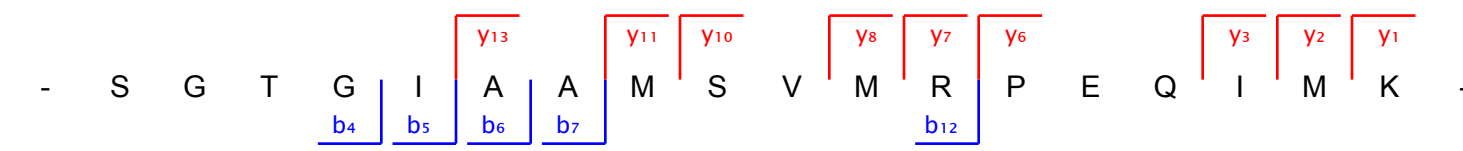

Raw file: 20180707\_MaS\_A375SR\_ML\_proteome\_2\_22  
 Scan: 10000 Method: FTMS; HCD Score: 61.78 m/z: 377.88 Gene names: C1orf21

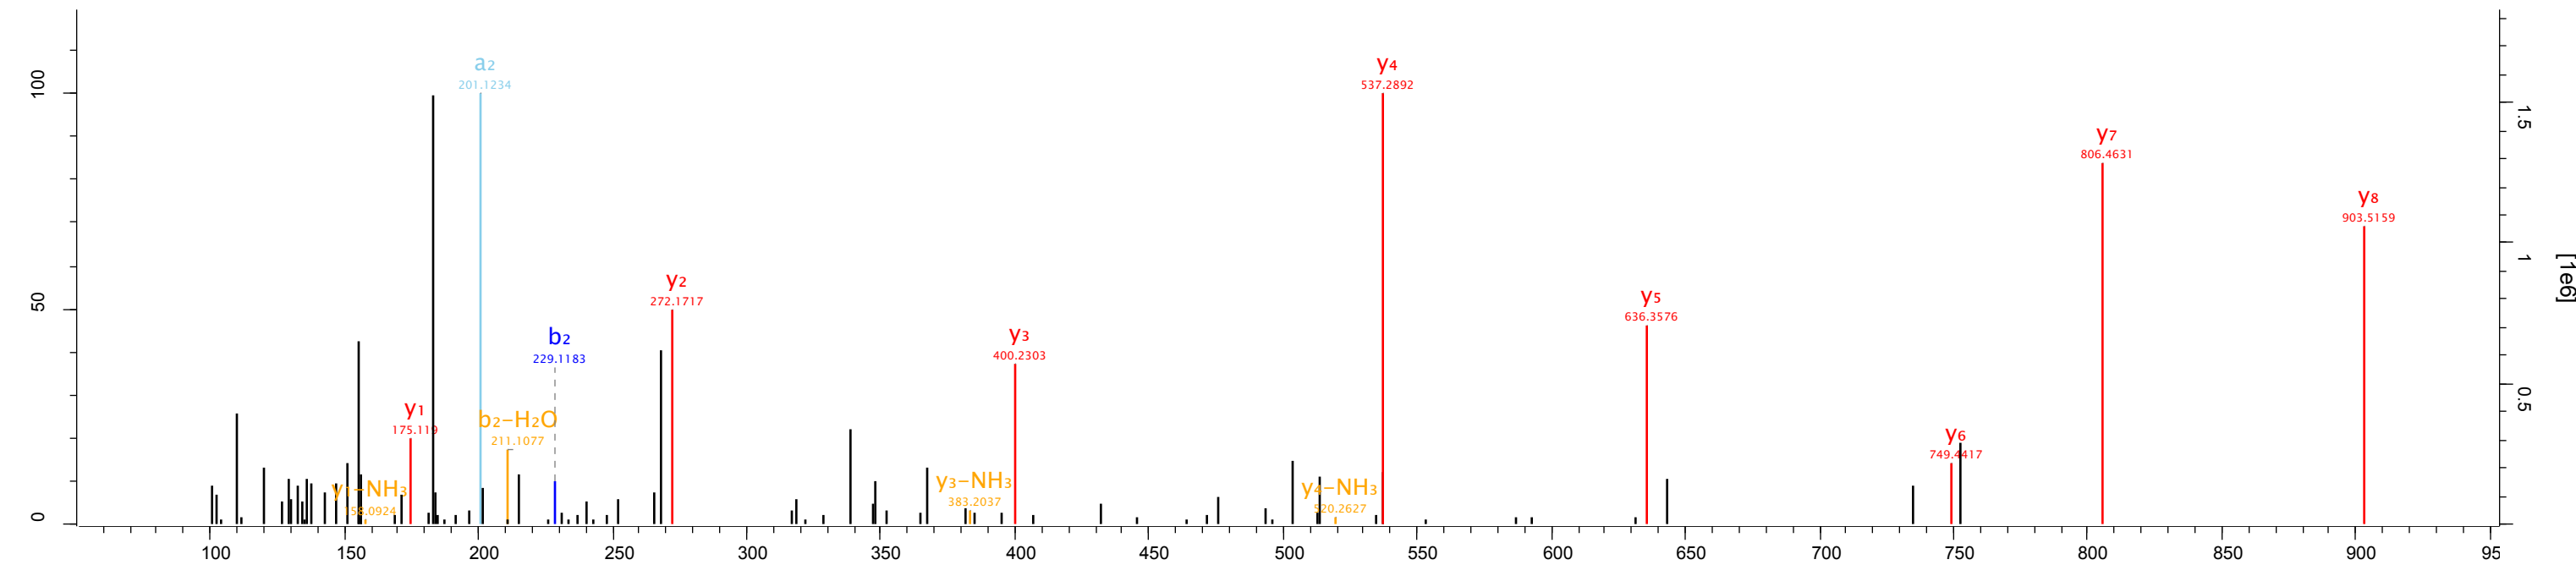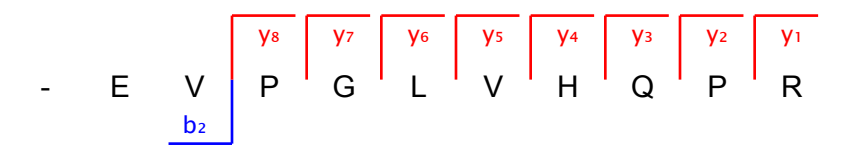

Raw file

20180707\_MaS\_A375SR\_ML\_proteome\_2\_22

| Scan | Method    | Score  | m/z    | Gene names |
|------|-----------|--------|--------|------------|
| 7910 | FTMS; HCD | 133.81 | 656.31 | RNASE4     |

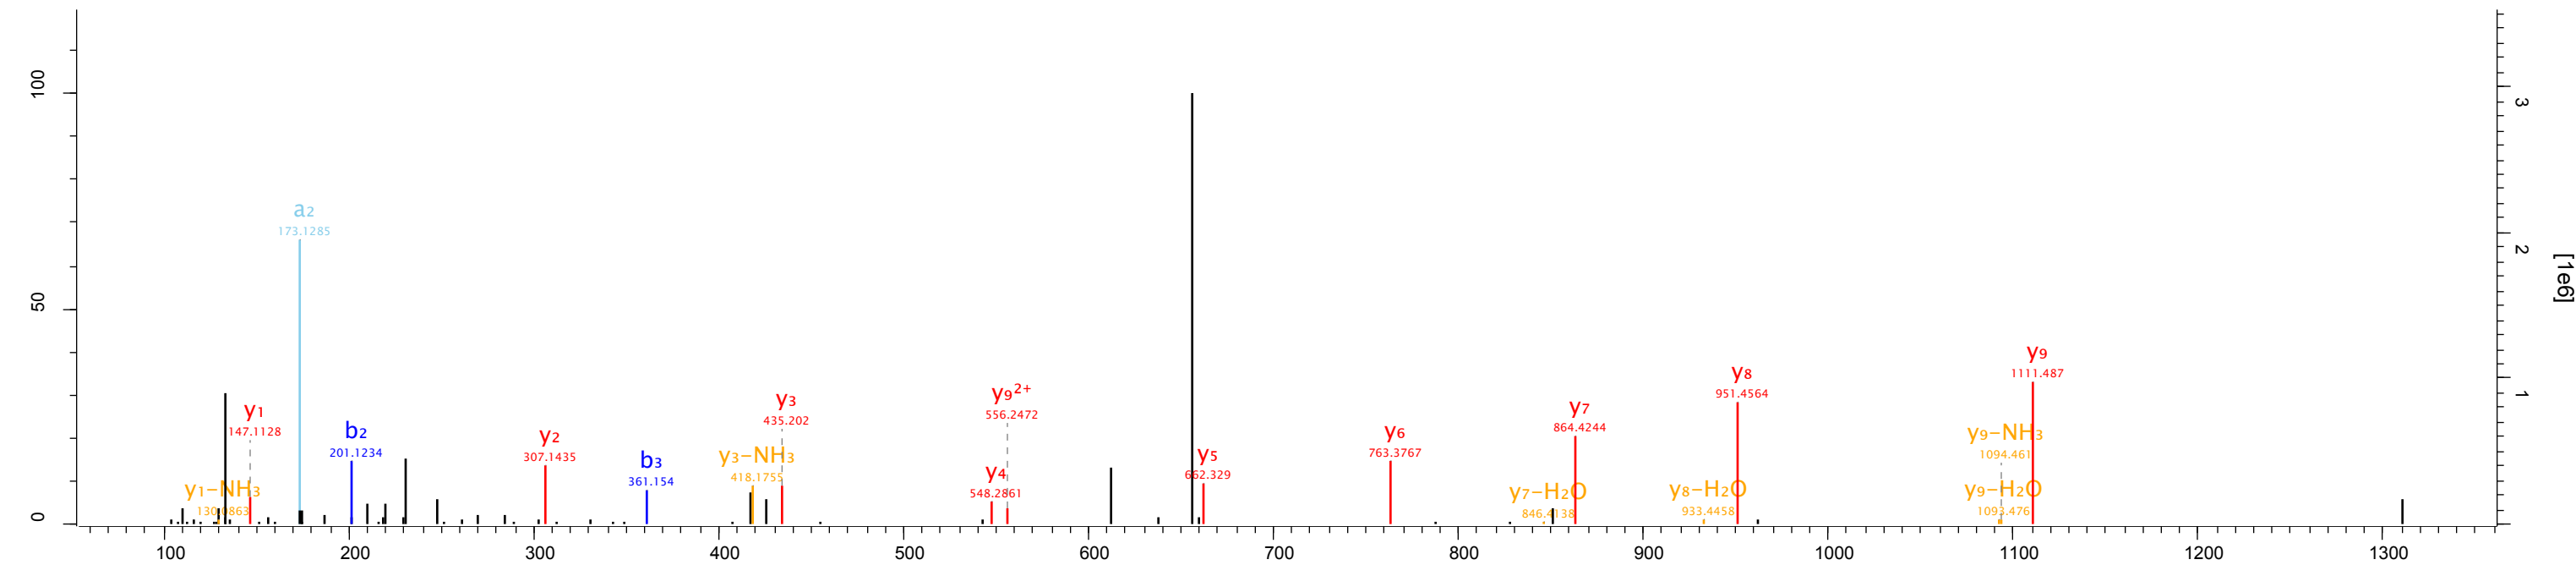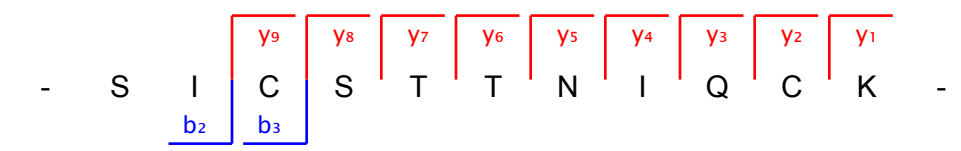

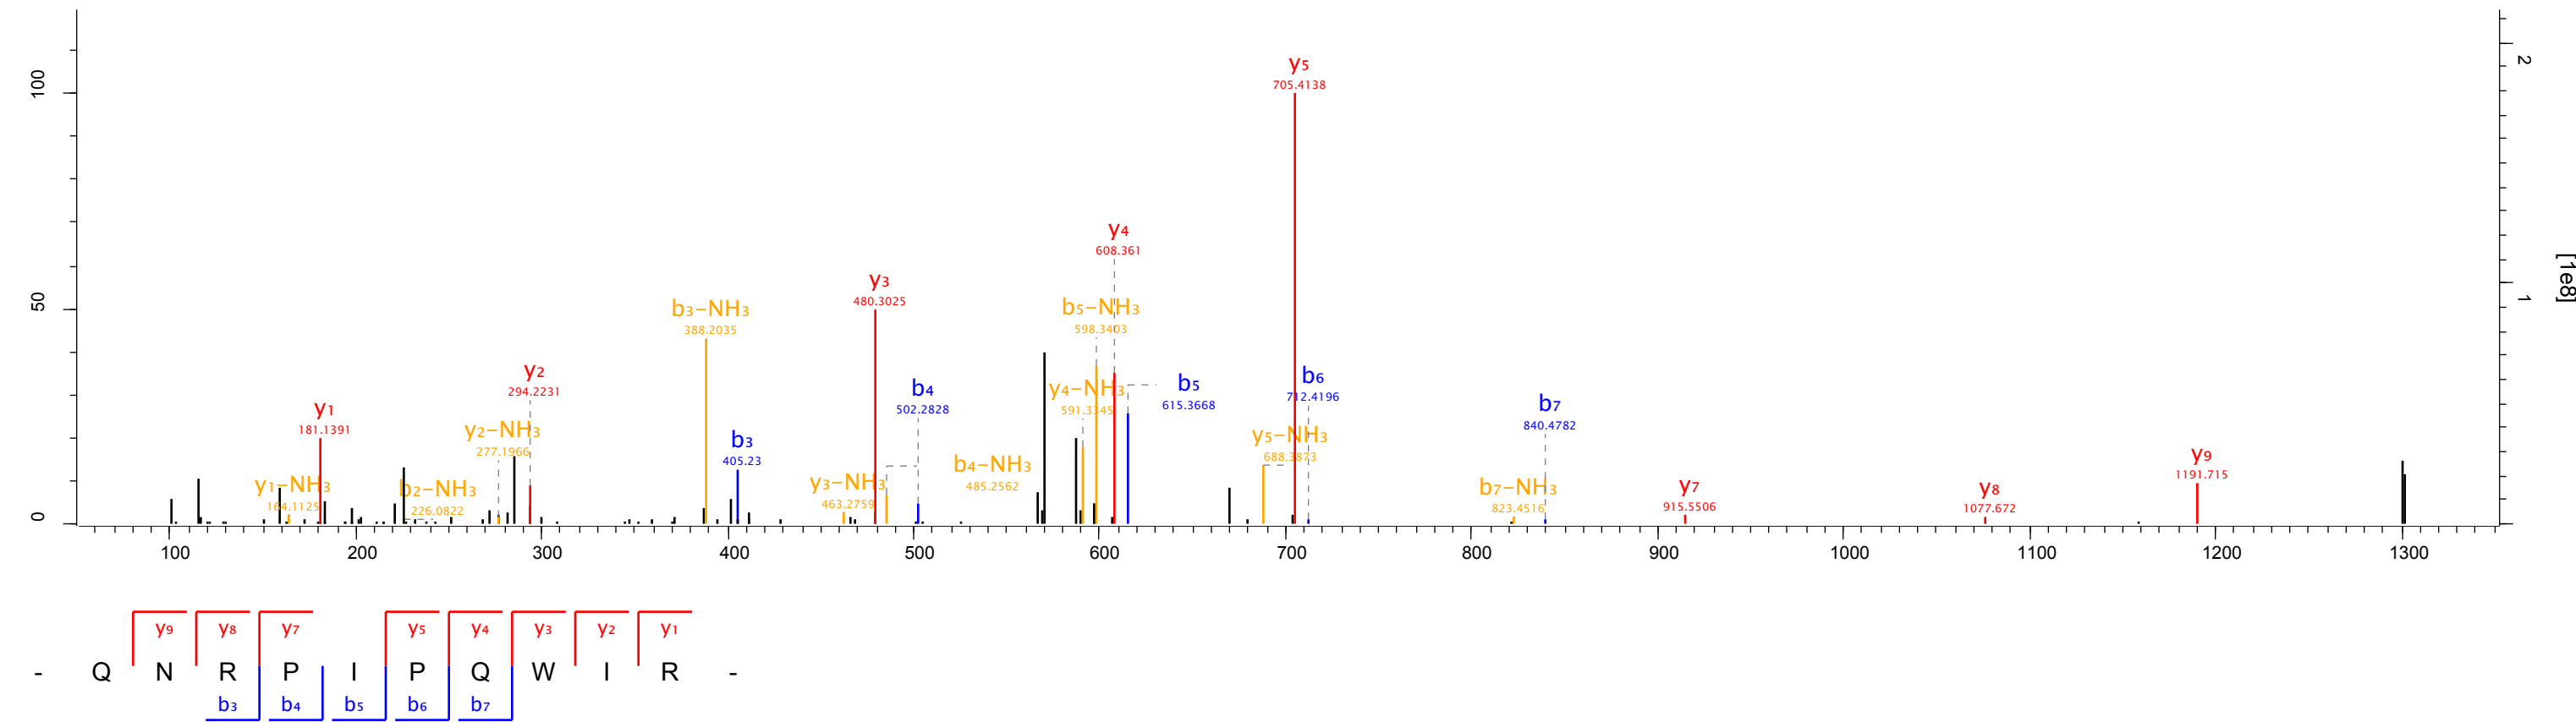

Raw file: 20180707\_MaS\_A375SR\_ML\_proteome\_2\_24  
 Scan: 23160 Method: FTMS; HCD Score: 78.08 m/z: 868 Gene names: KRTCAP2

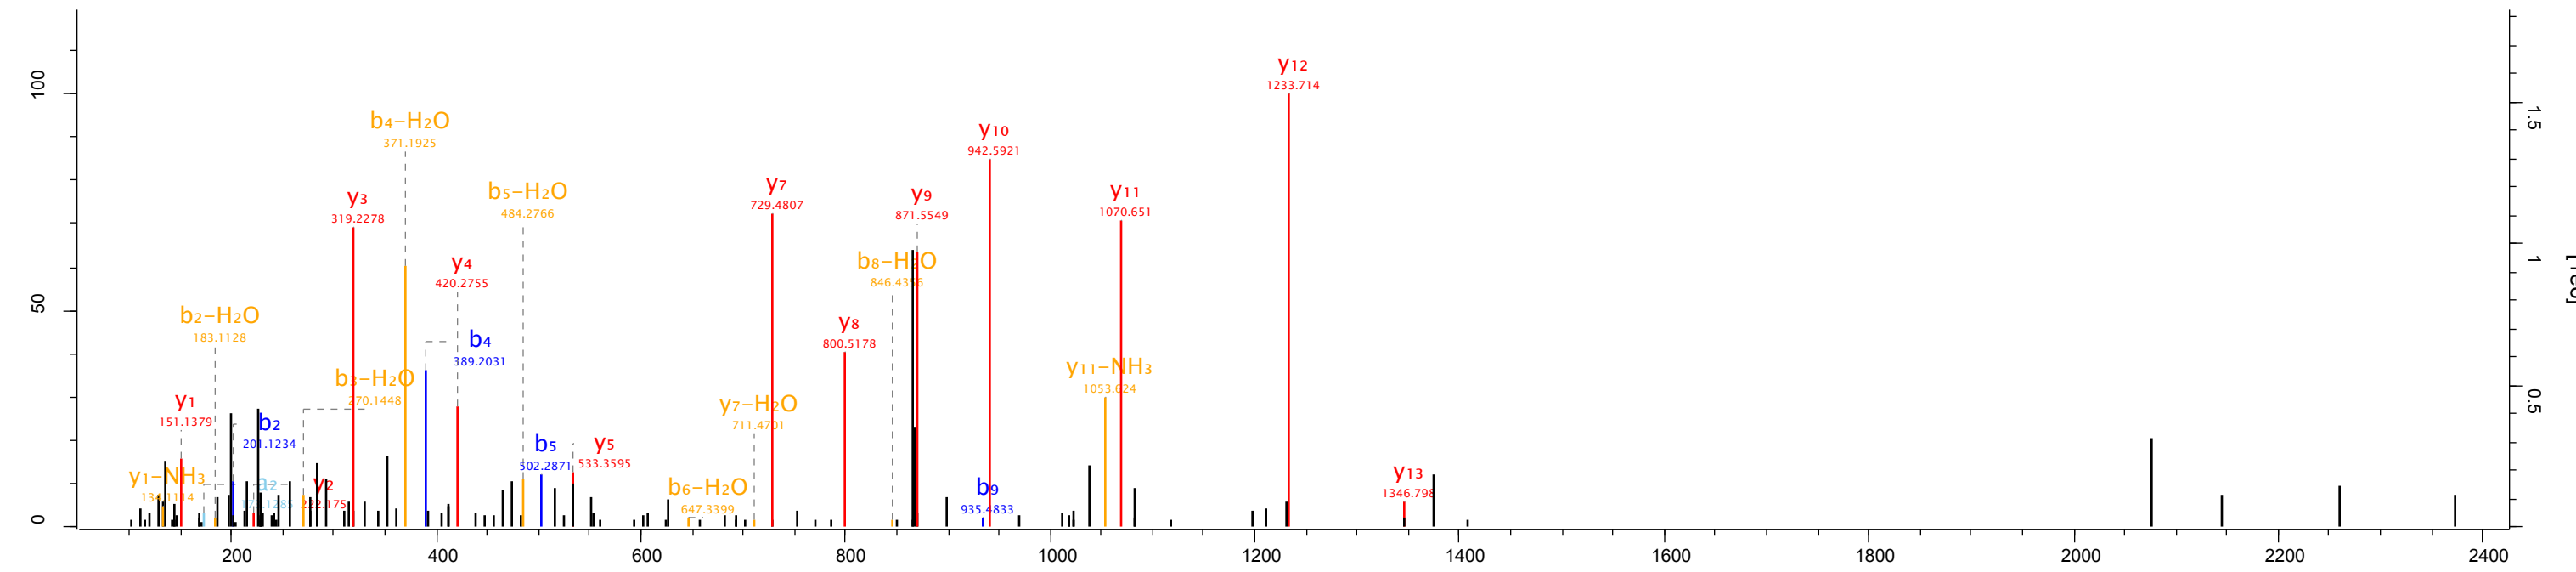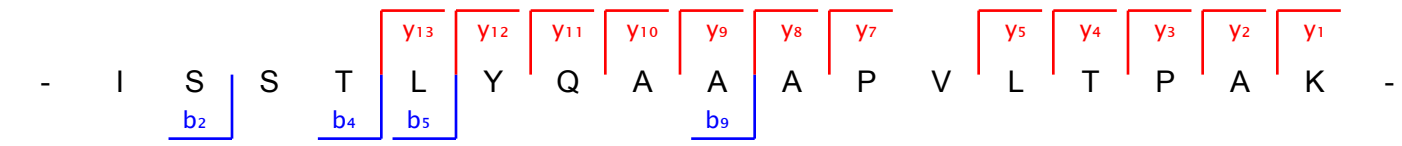

Raw file

20180707\_MaS\_A375SR\_ML\_proteome\_2\_25

| Scan  | Method    | Score  | m/z   | Gene names    |
|-------|-----------|--------|-------|---------------|
| 16210 | FTMS; HCD | 140.83 | 440.6 | RPL39P5;RPL39 |

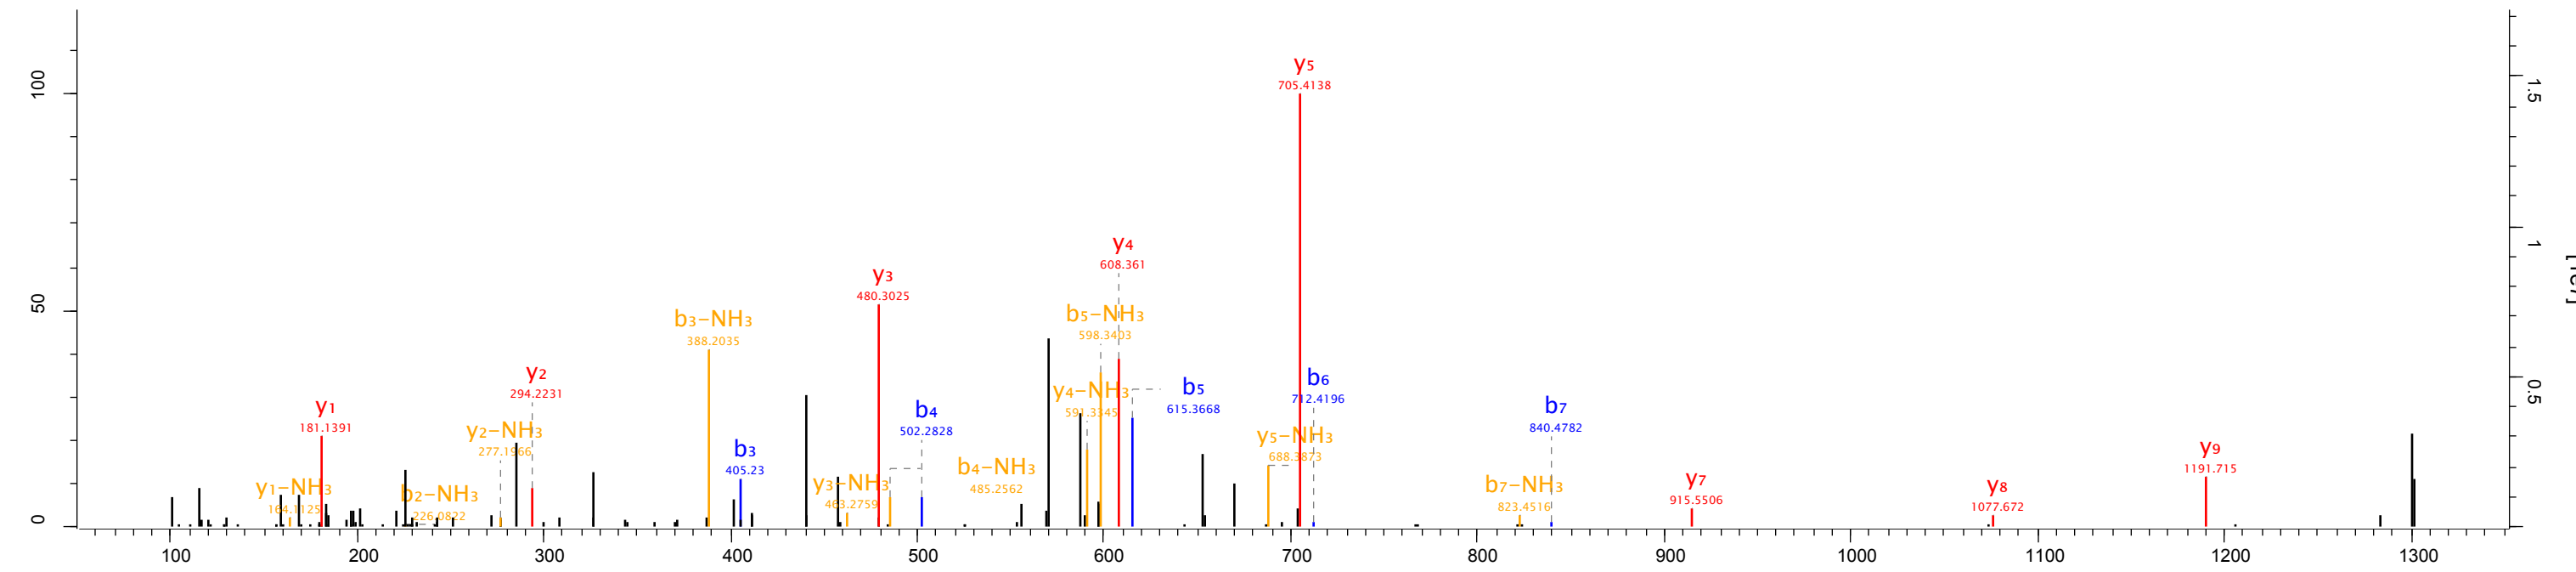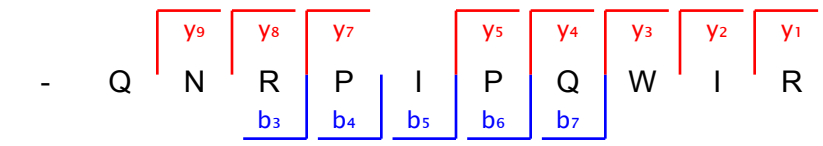



Raw file  
20180707\_MaS\_A375SR\_ML\_proteome\_2\_25

Scan 8940 Method FTMS; HCD Score 46.43 m/z 499.22 Gene names IL1F10

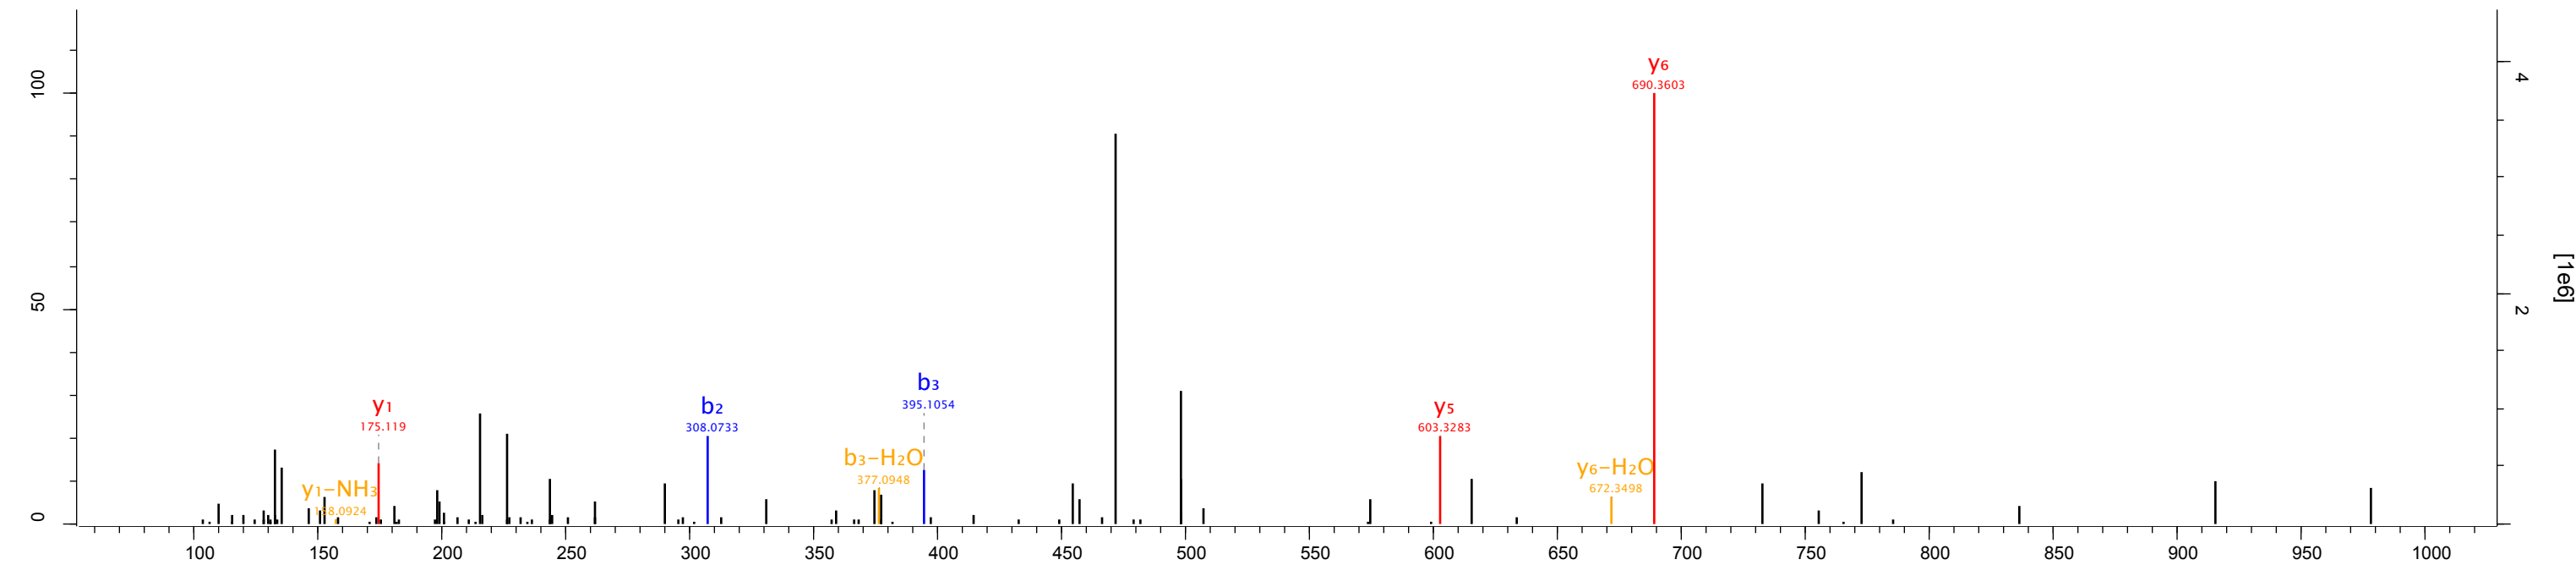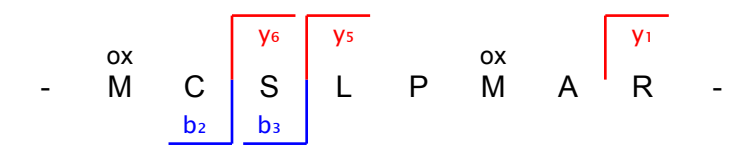

Raw file 20180707\_MaS\_A375SR\_ML\_proteome\_2\_26 Scan 19750 Method FTMS; HCD Score 42.03 m/z 690.84

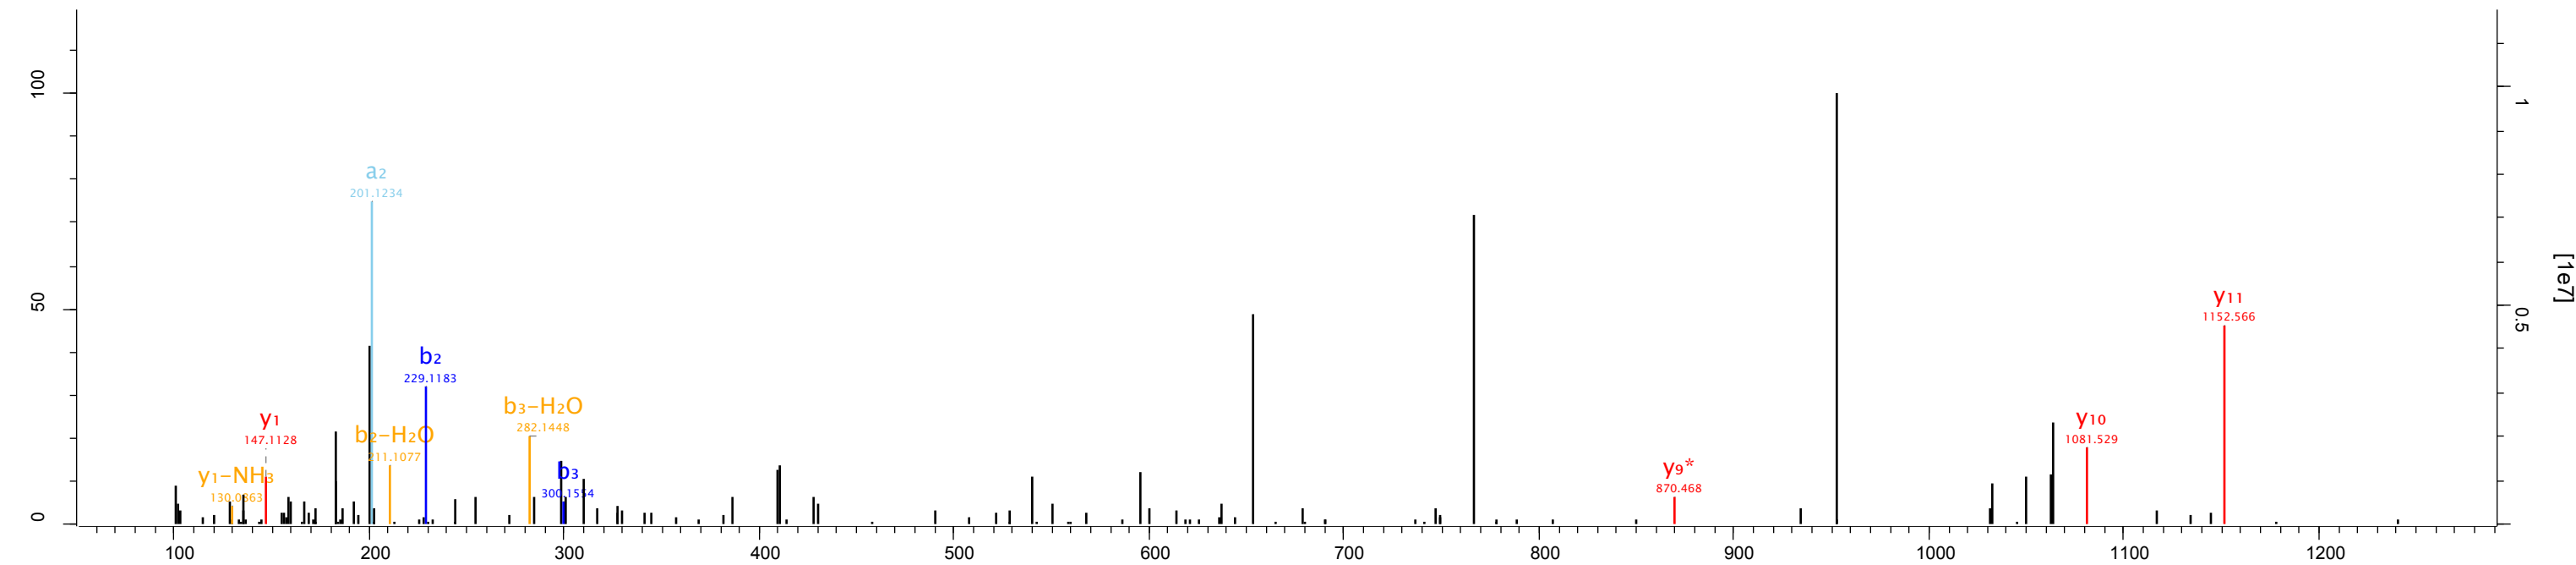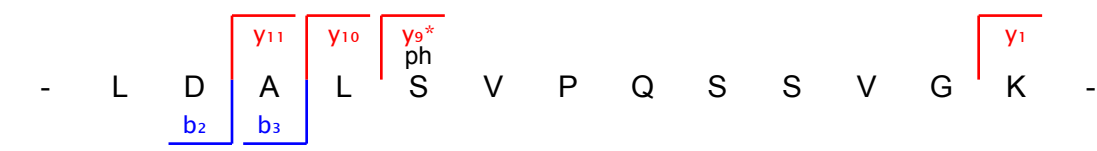

Raw file  
20180707\_MaS\_A375SR\_ML\_proteome\_2\_27

Scan 17330 Method FTMS; HCD Score 125.72 m/z 688.81 Gene names F9

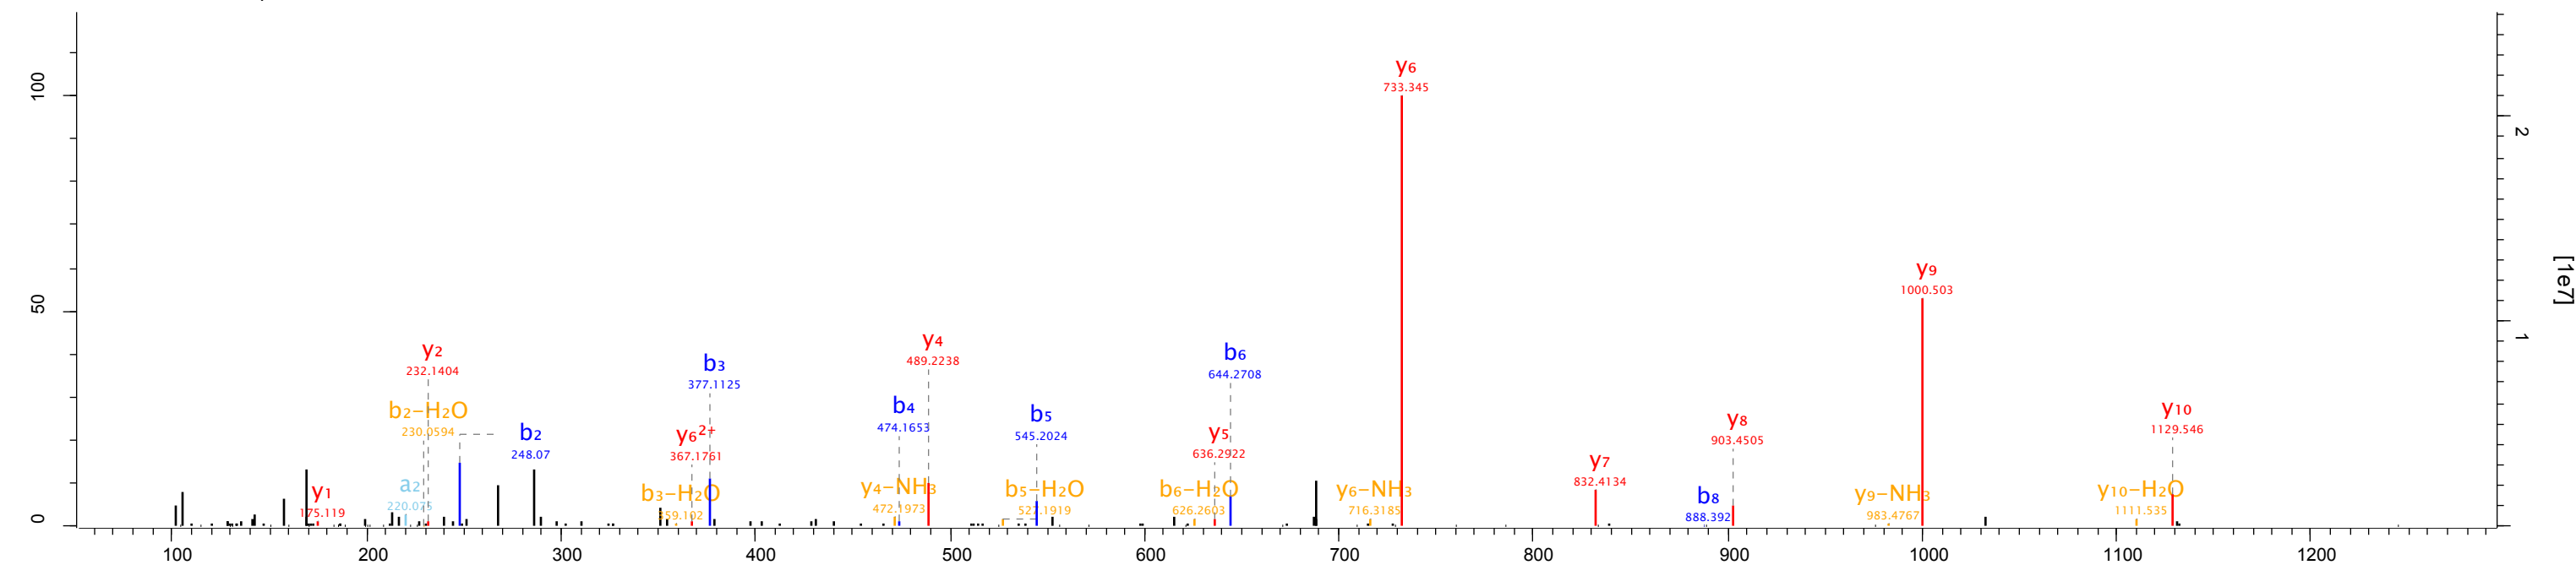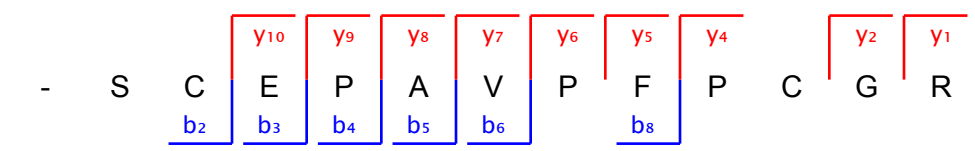

Raw file 20180707\_MaS\_A375SR\_ML\_proteome\_2\_27 Scan 23720 Method FTMS; HCD Score 48.62 m/z 880.45 Gene names SERTAD4

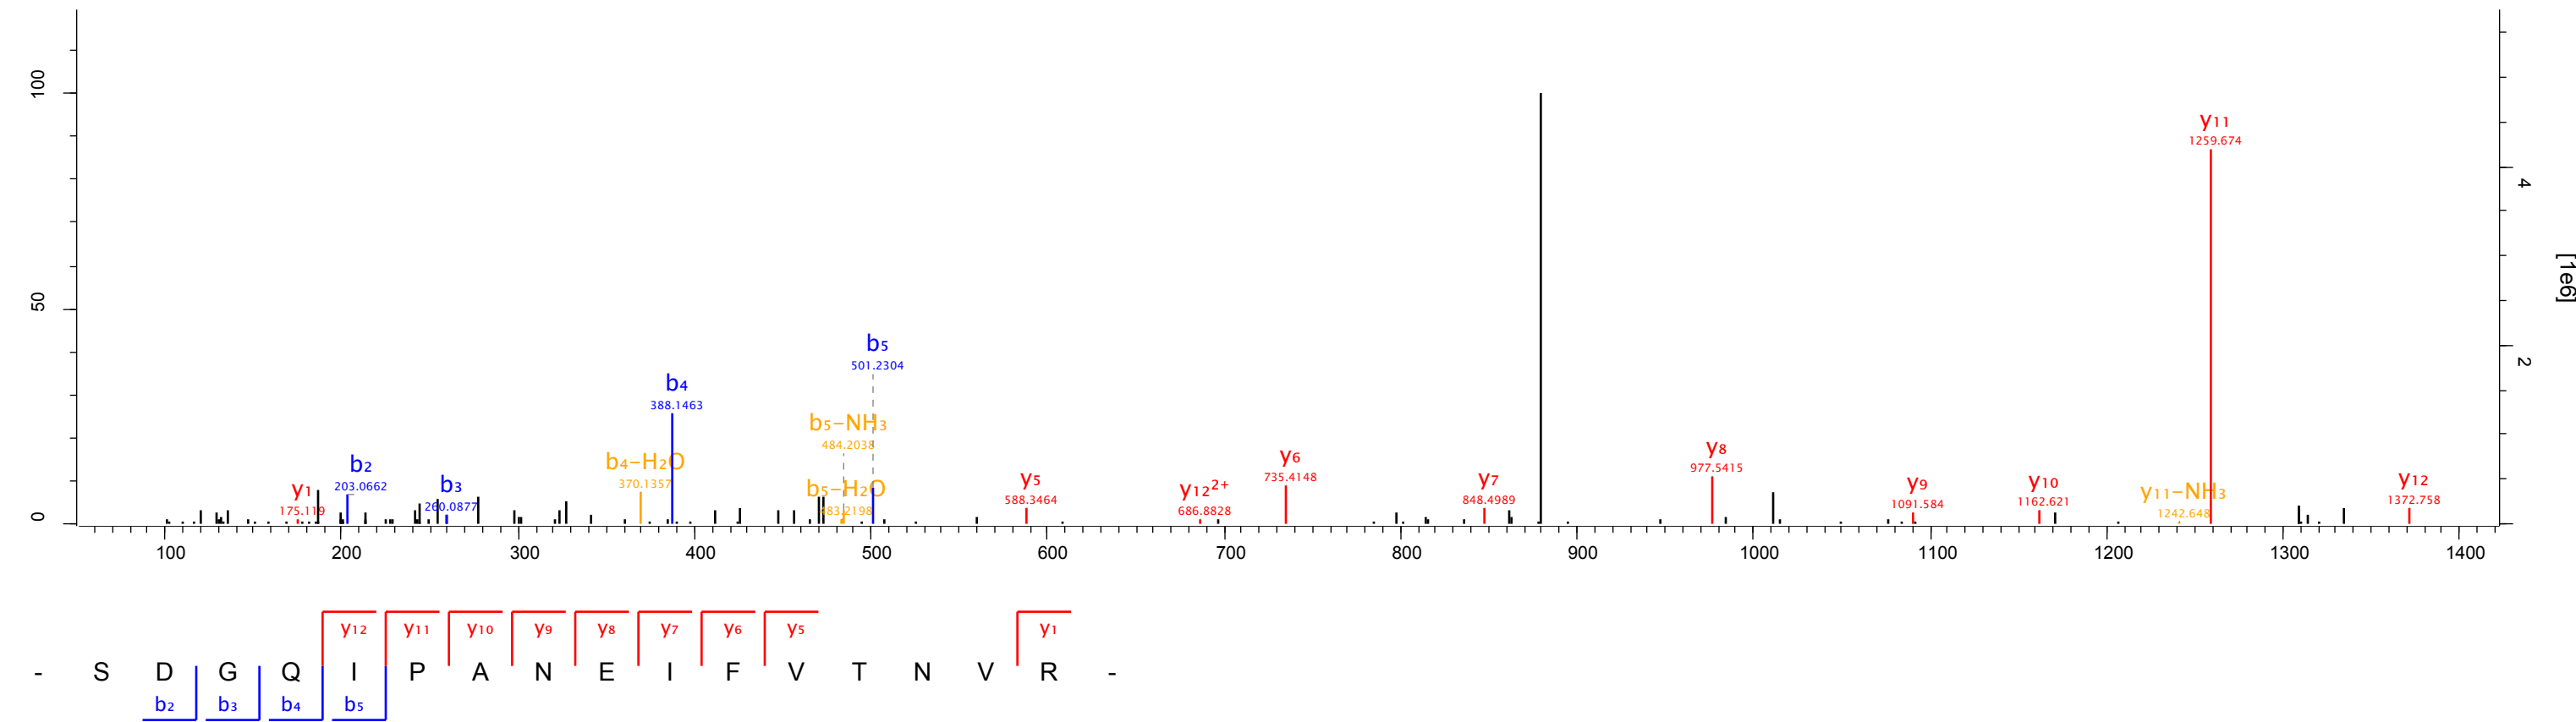

Raw file 20180707\_MaS\_A375SR\_ML\_proteome\_2\_27 Scan 23790 Method FTMS; HCD Score 95.53 m/z 492.75

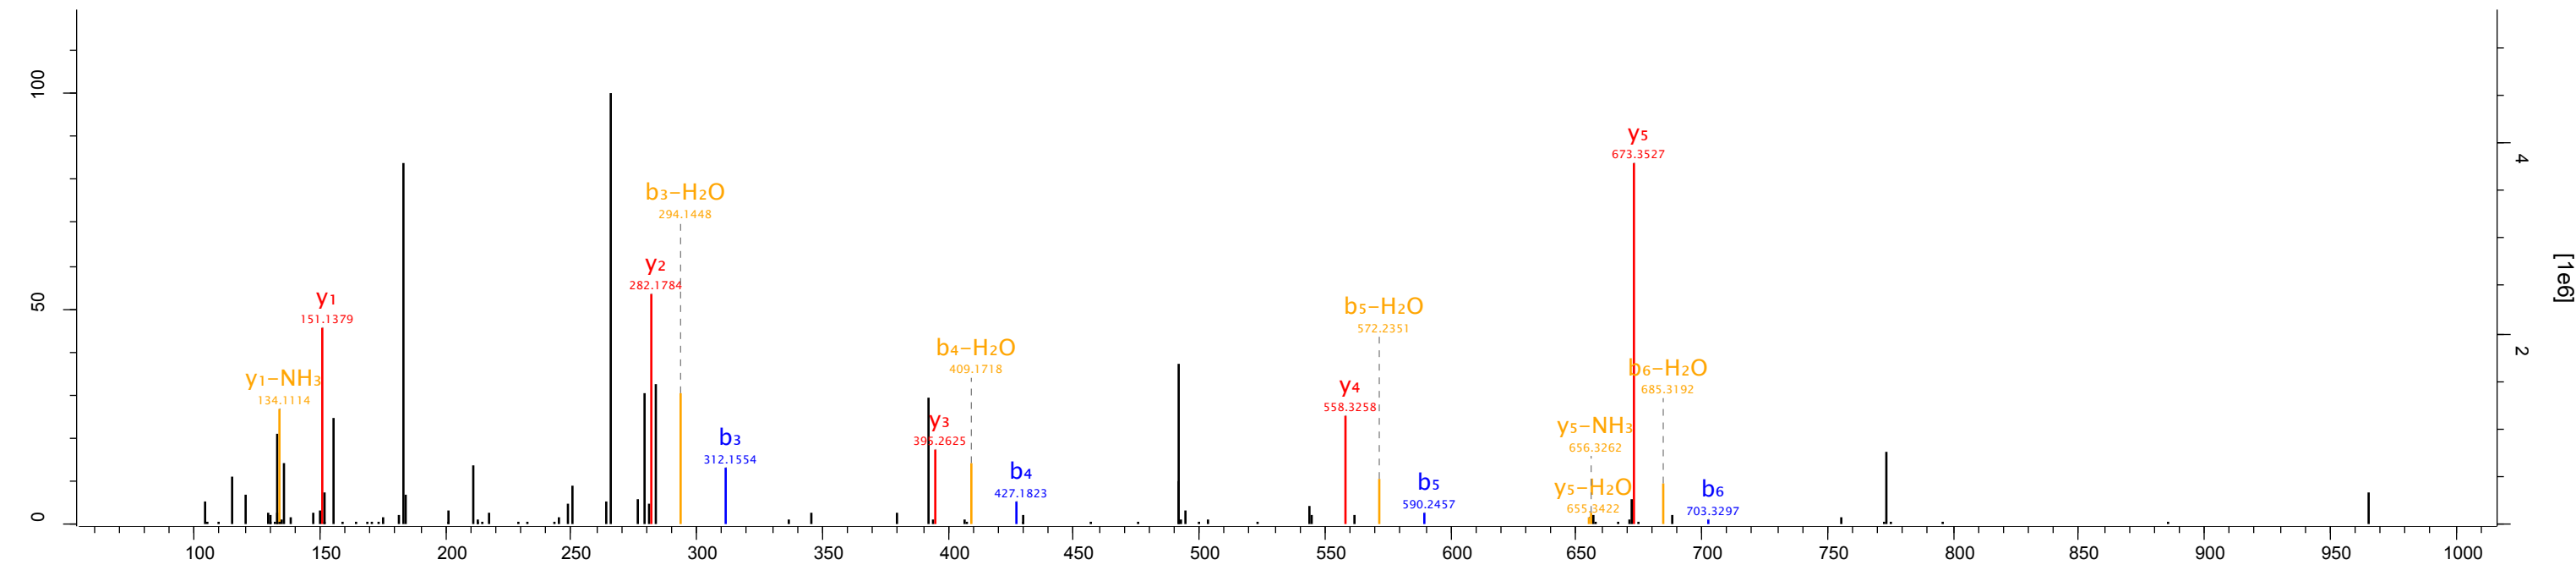

Raw file  
20180707\_MaS\_A375SR\_ML\_proteome\_2\_27

Scan: 4460  
Method: FTMS; HCD  
Score: 53.49  
m/z: 520.26  
Gene names: MTA3

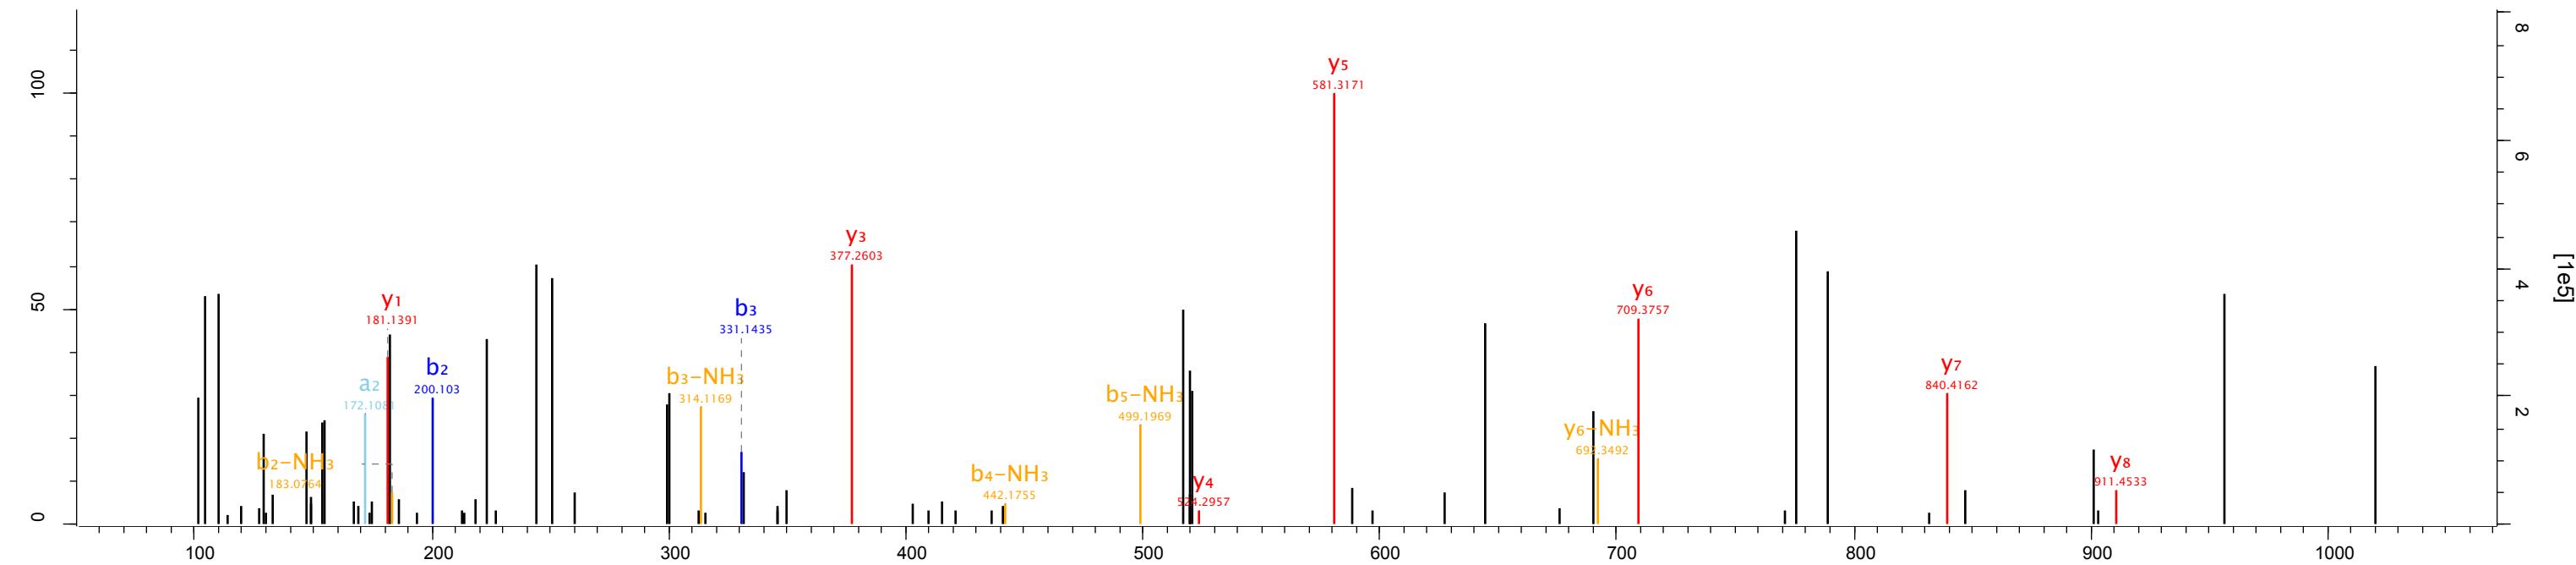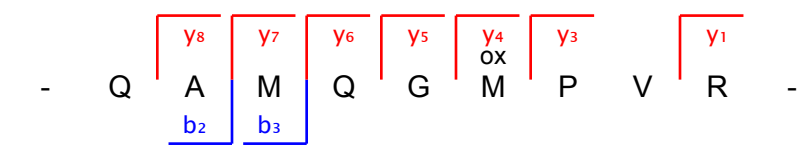

Raw file 20180707\_MaS\_A375SR\_ML\_proteome\_2\_28 Scan 13160 Method FTMS; HCD Score 66.69 m/z 562.26

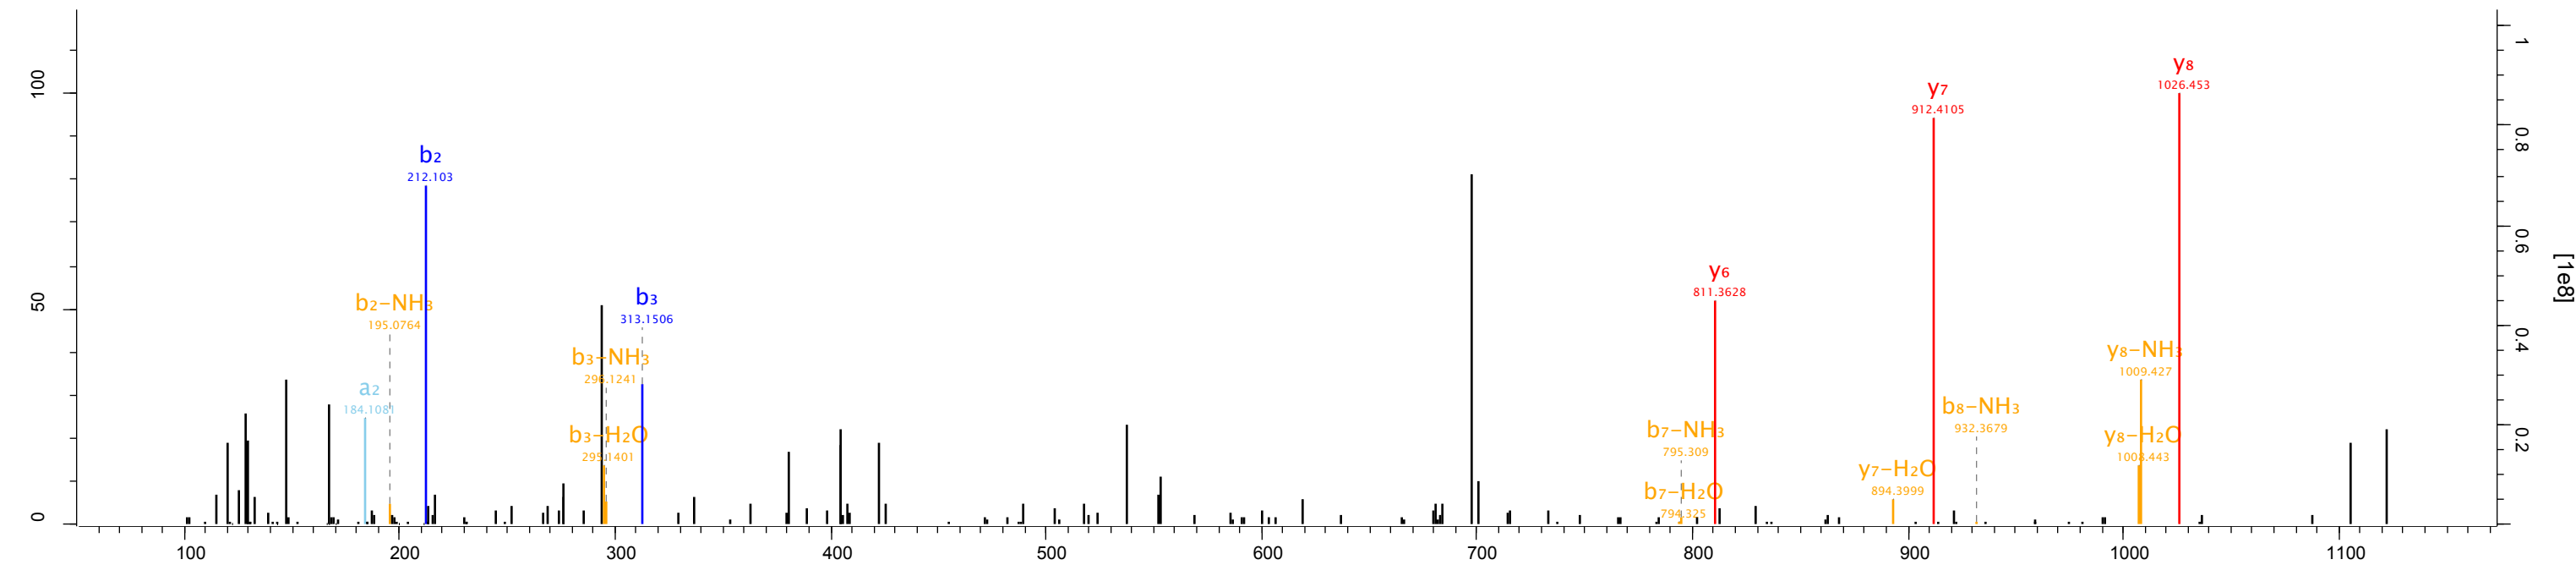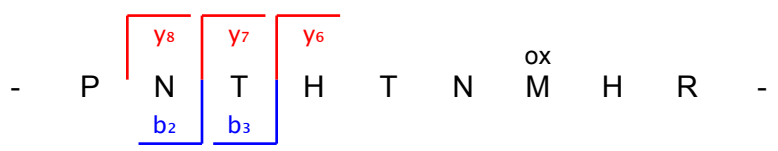

Raw file 20180707\_MaS\_A375SR\_ML\_proteome\_2\_28 Scan 6410 Method FTMS; HCD Score 52.6 m/z 480.77 Gene names EPM2A

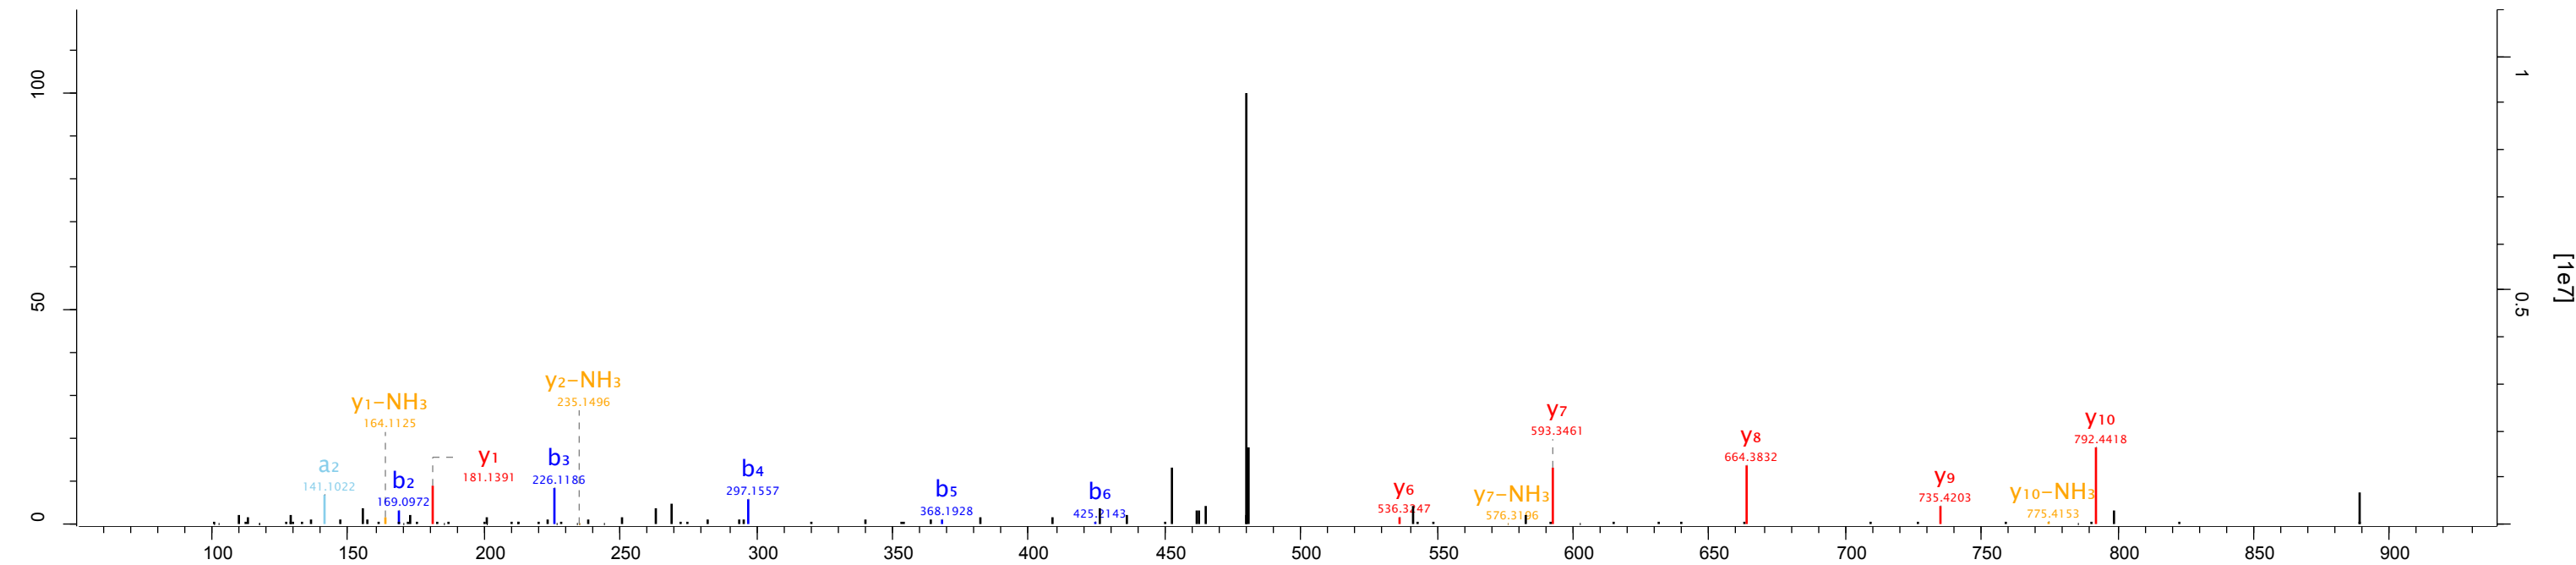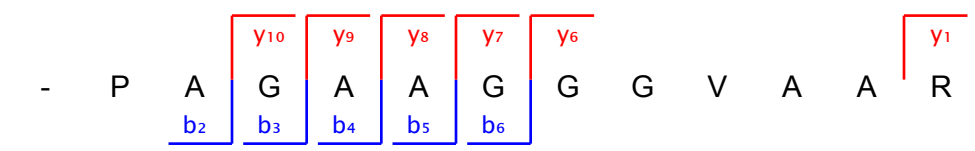



Raw file  
20180707\_MaS\_A375SR\_ML\_proteome\_2\_29

Scan 19970 Method FTMS; HCD Score 119.87 m/z 800.44 Gene names ZCCHC10

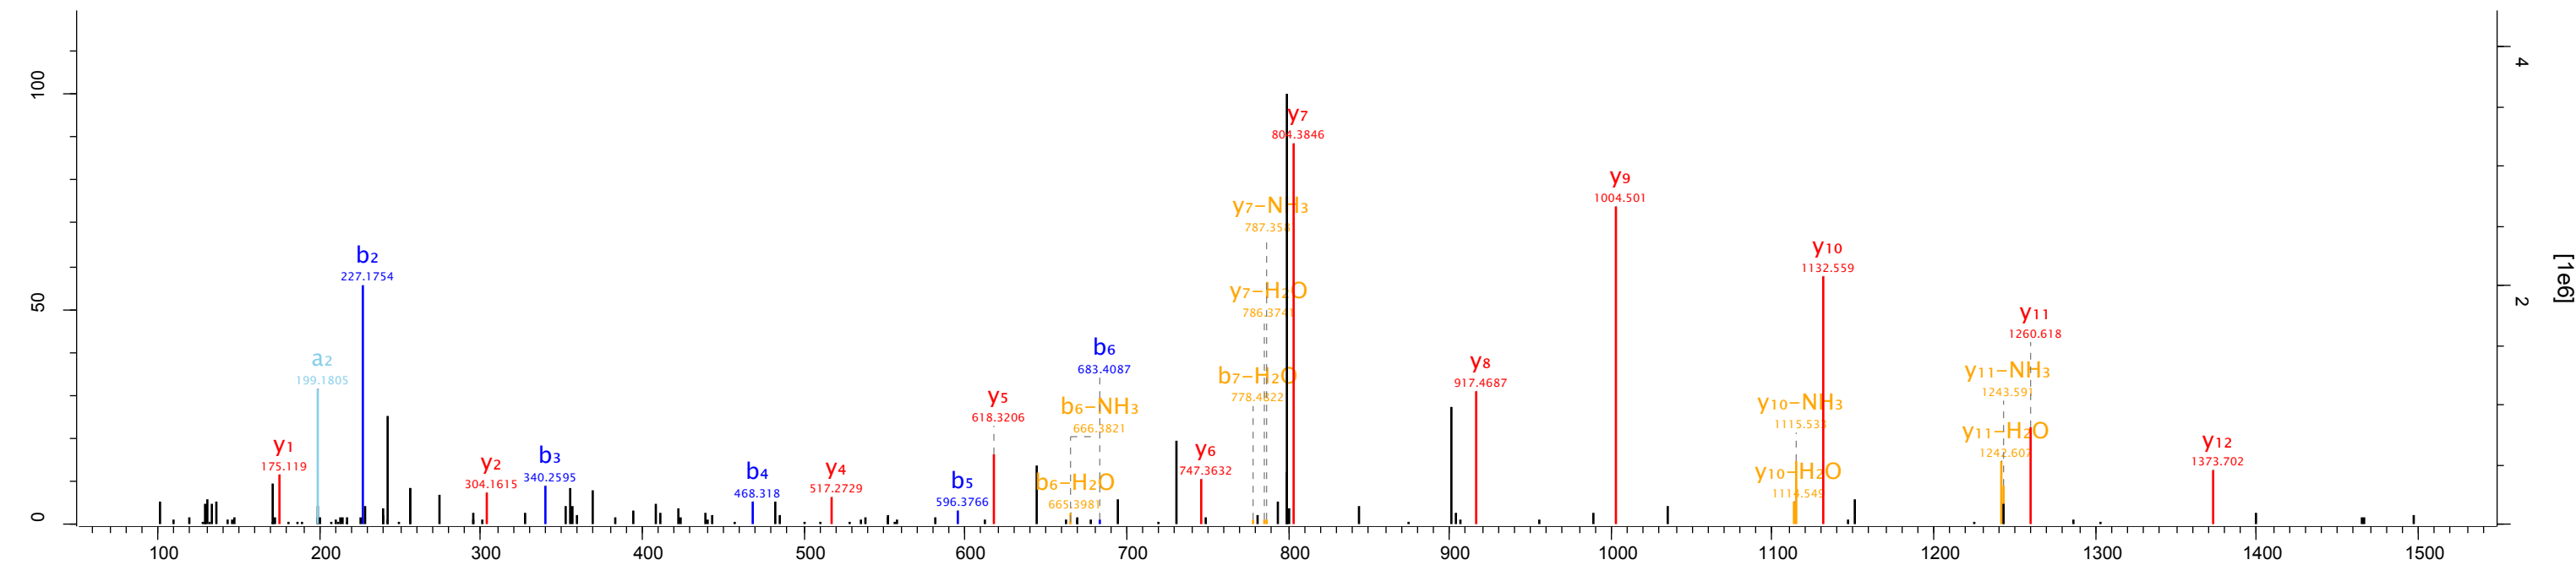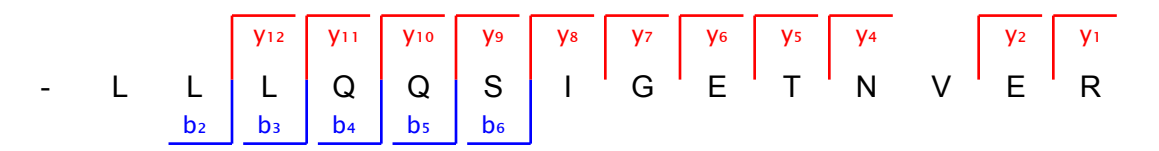

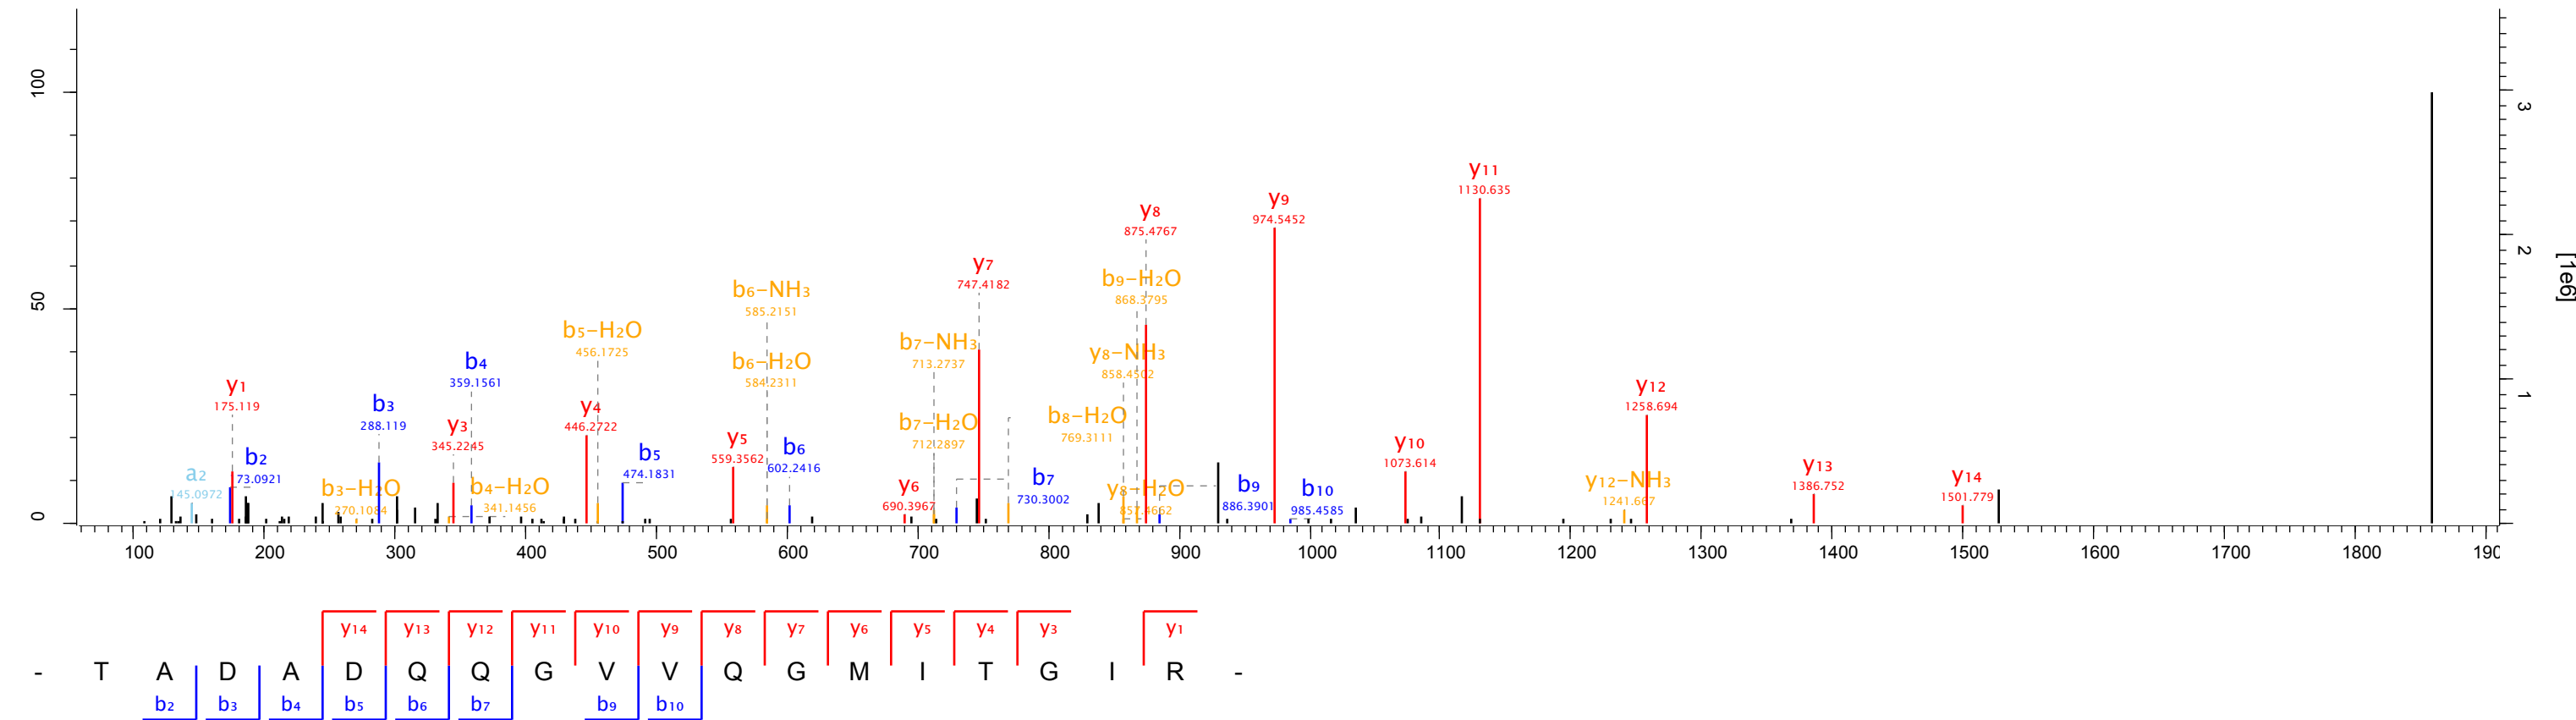

Raw file  
 20180707\_MaS\_A375SR\_ML\_proteome\_2\_30  
 Scan 23130 Method FTMS; HCD Score 74.99 m/z 694.9 Gene names CHRM3

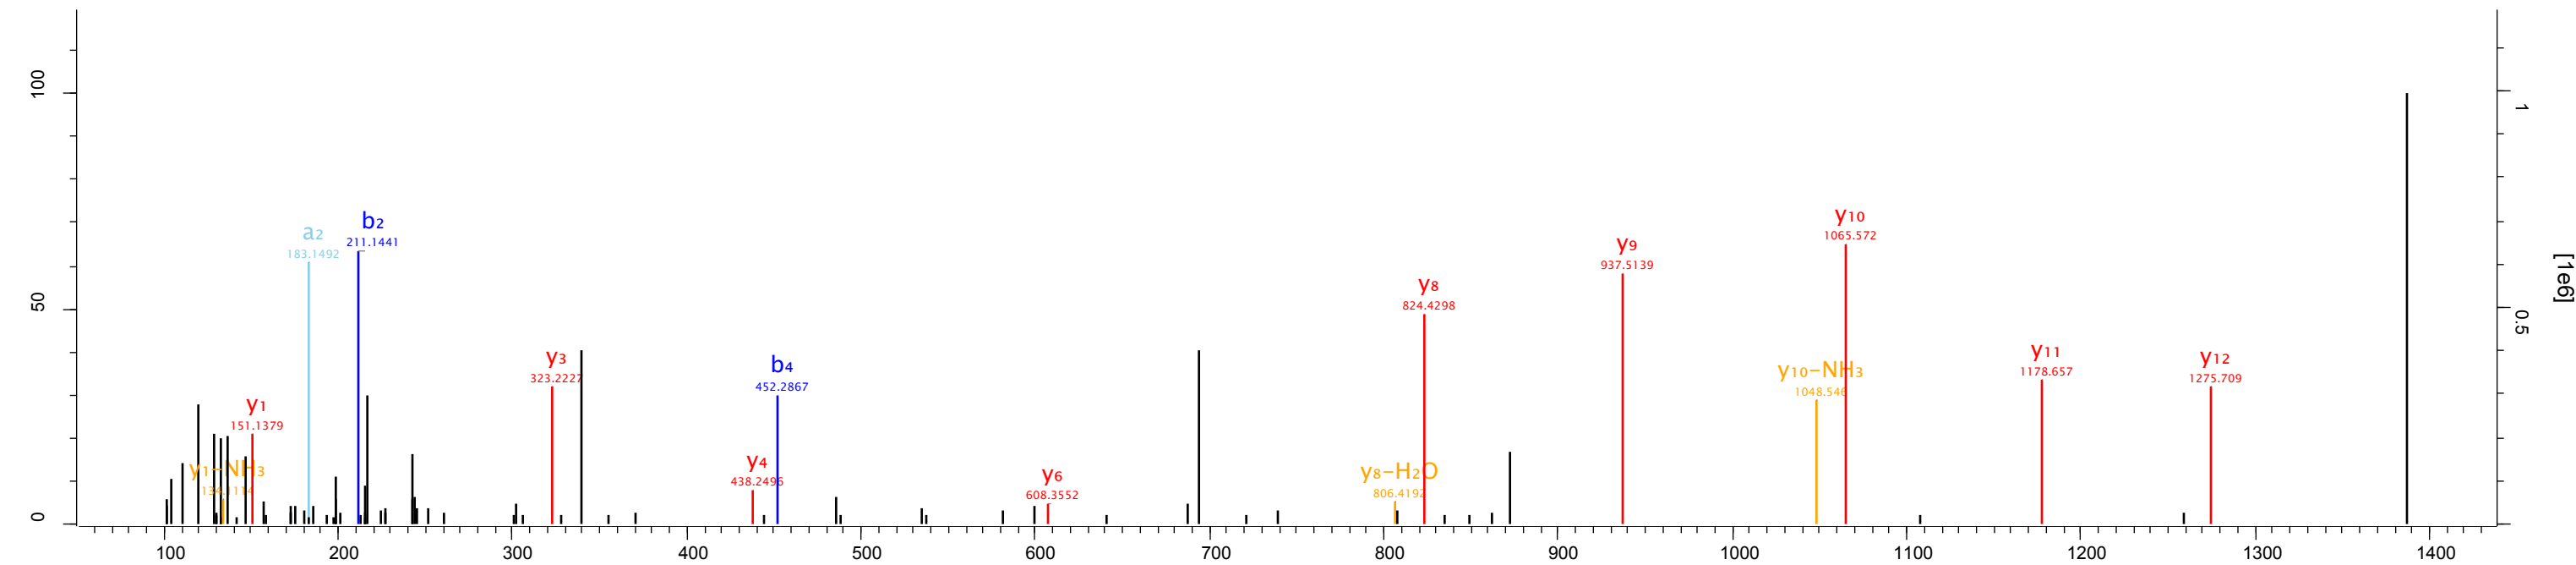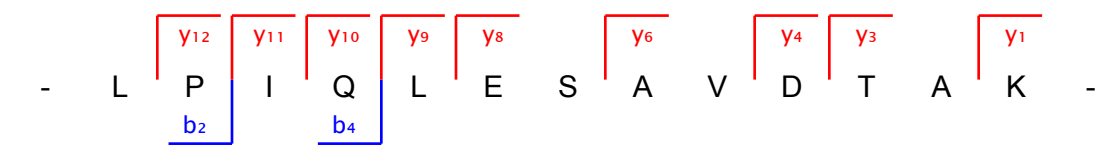

Raw file  
20180707\_MaS\_A375SR\_ML\_proteome\_2\_30

Scan 25530 Method FTMS; HCD Score 167.84 m/z 705.87 Gene names SPP2

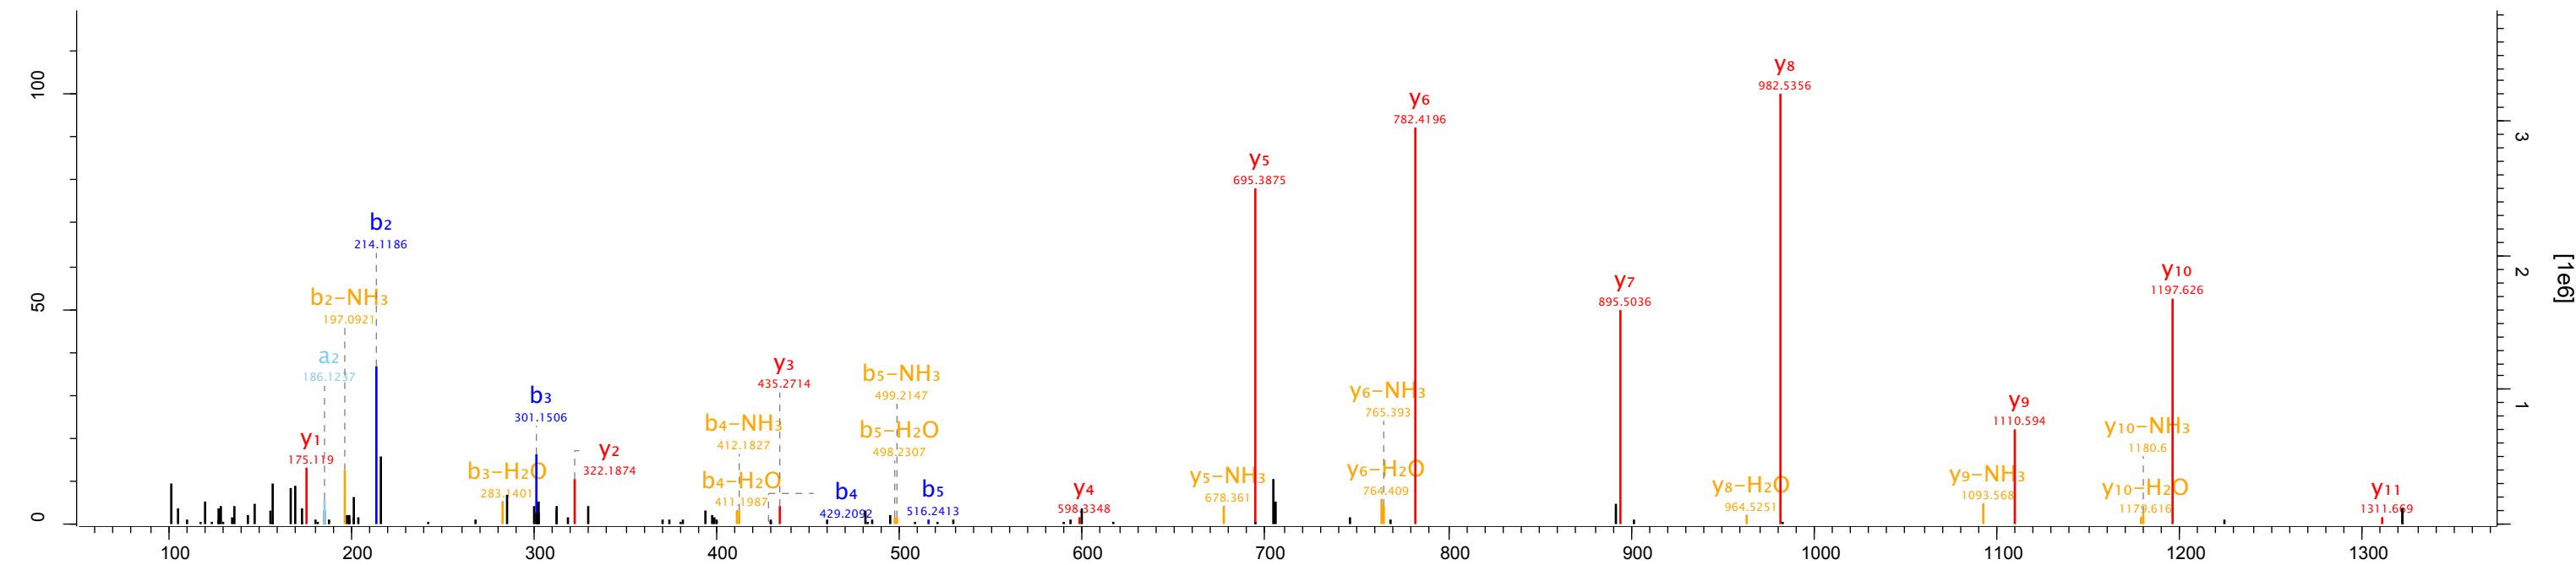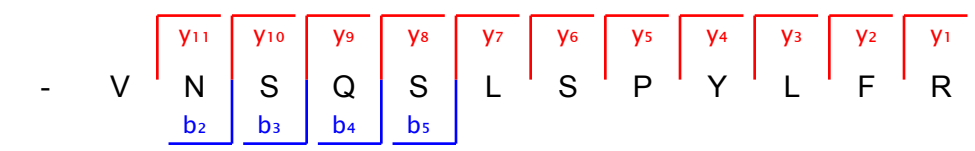

Raw file: 20180707\_MaS\_A375SR\_ML\_proteome\_20  
 Scan: 22200 Method: FTMS; HCD Score: 79.49 m/z: 586.84 Gene names: KATNAL2

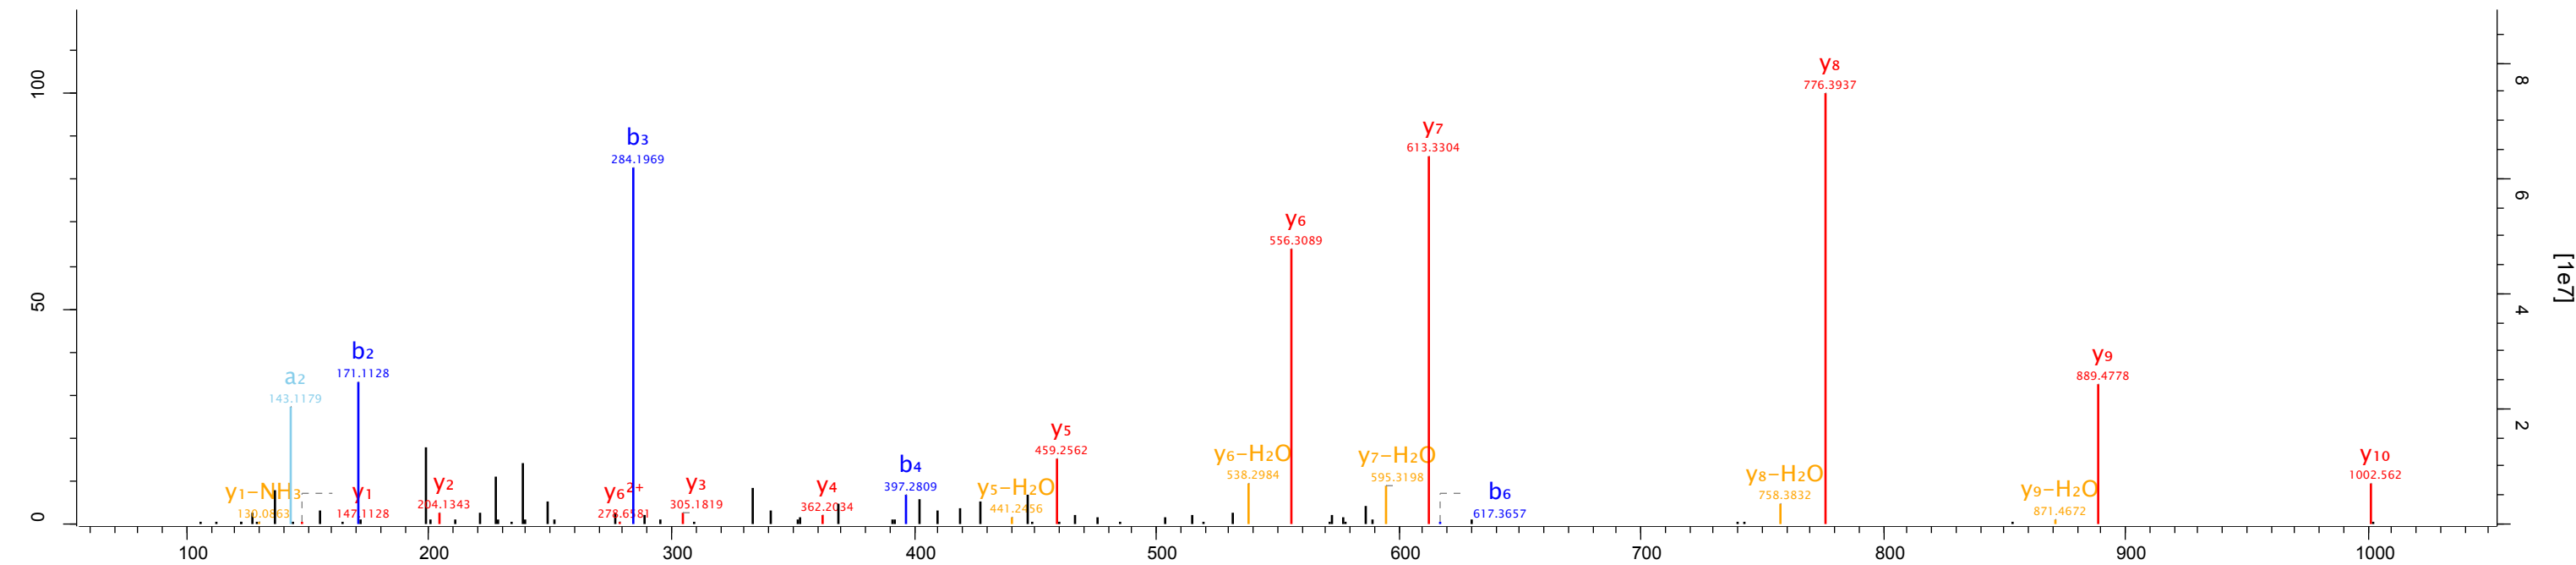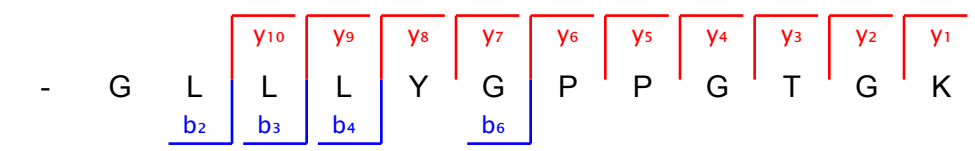

Raw file 20180707\_MaS\_A375SR\_ML\_proteome\_20 Scan 23330 Method FTMS; HCD Score 44.54 m/z 668.38

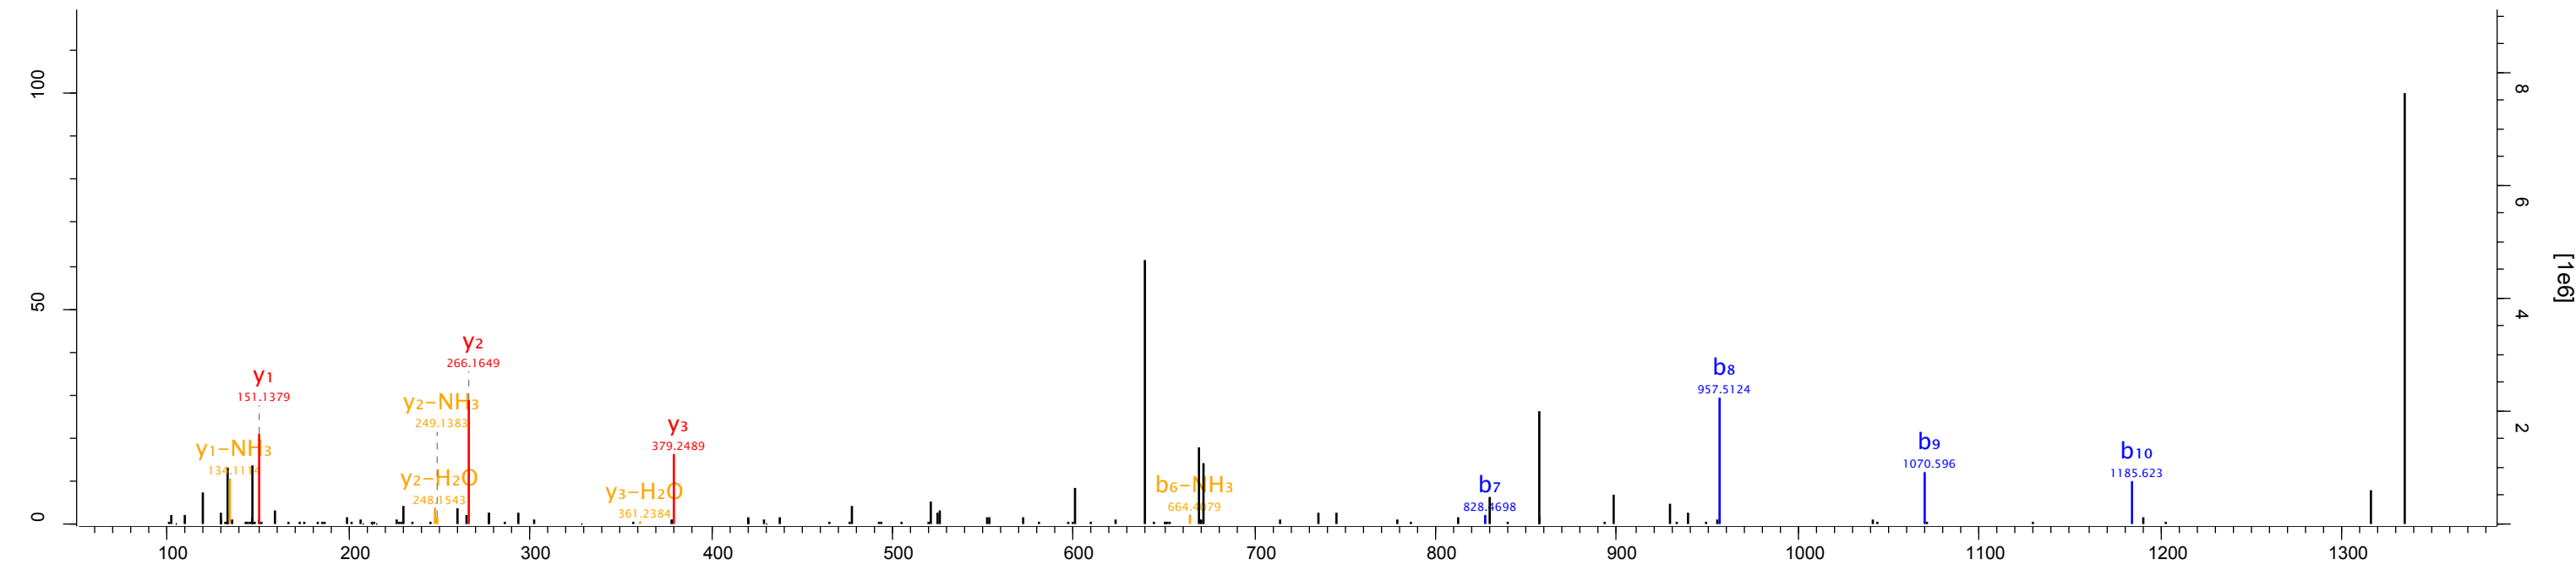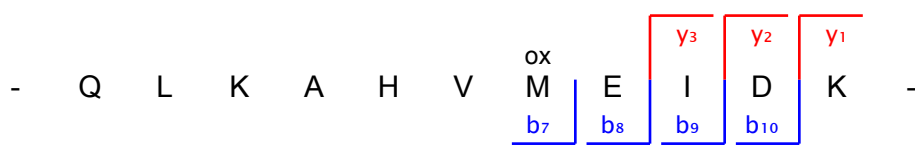

Raw file 20180707\_MaS\_A375SR\_ML\_proteome\_20 Scan 23780 Method FTMS; HCD Score 54.29 m/z 960.51 Gene names ATP6V0C

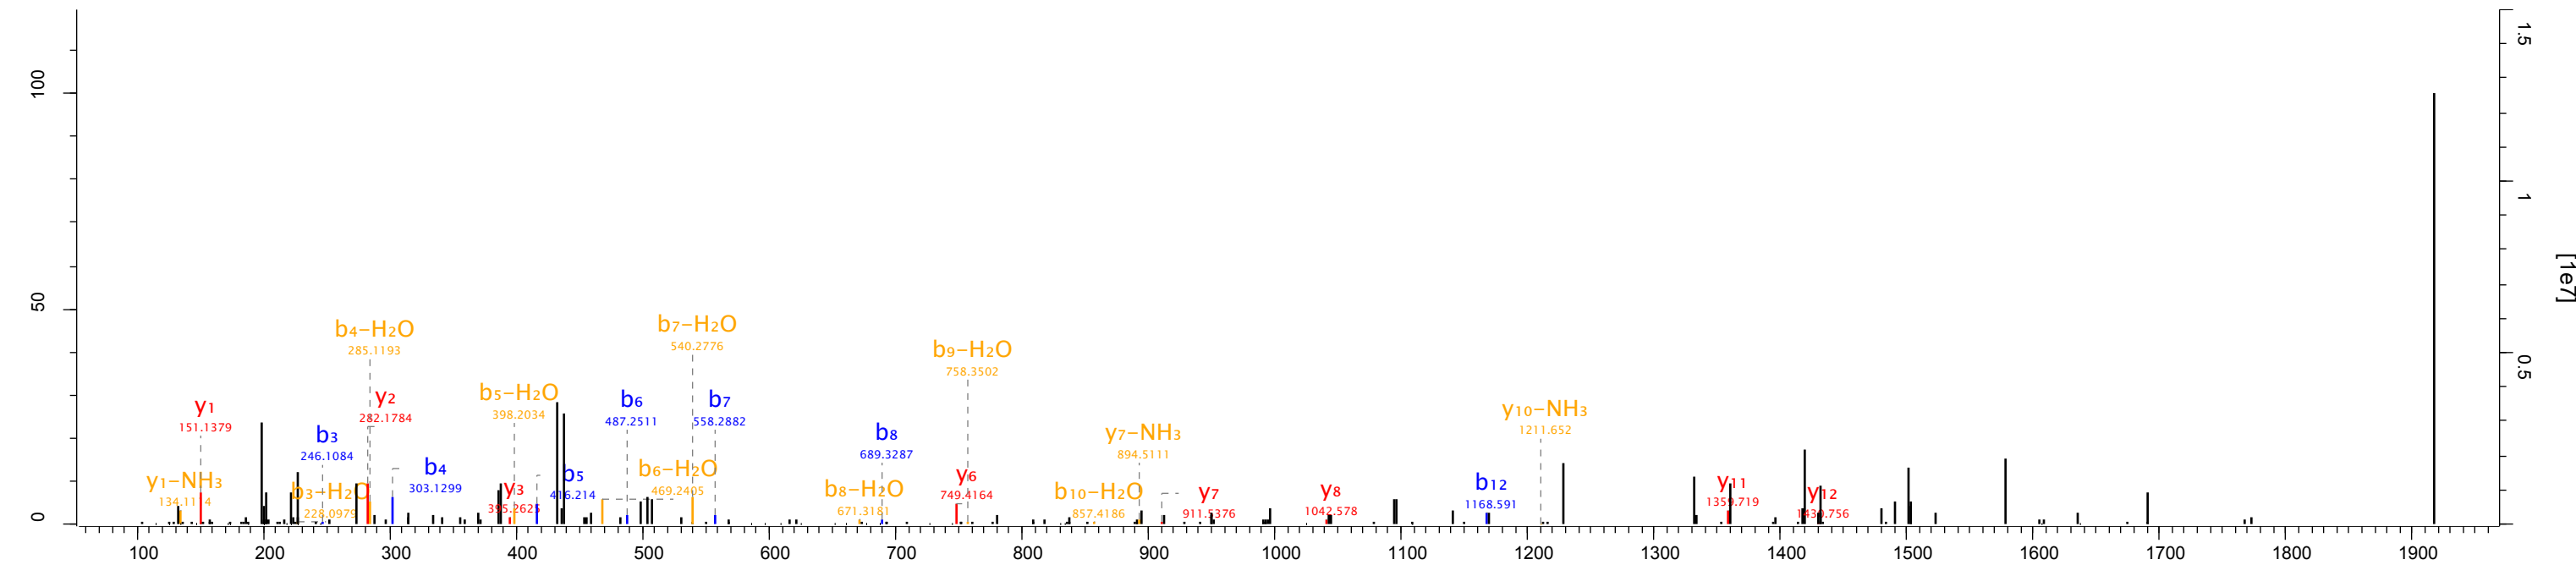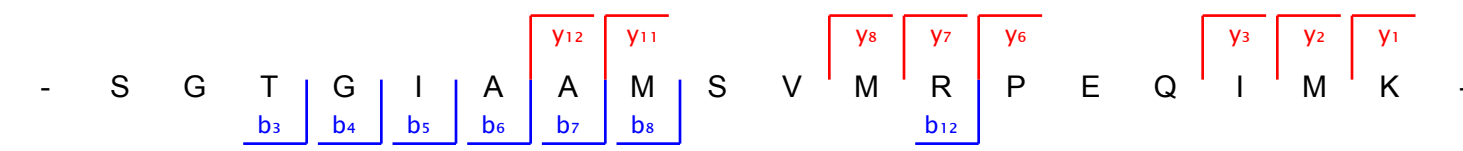

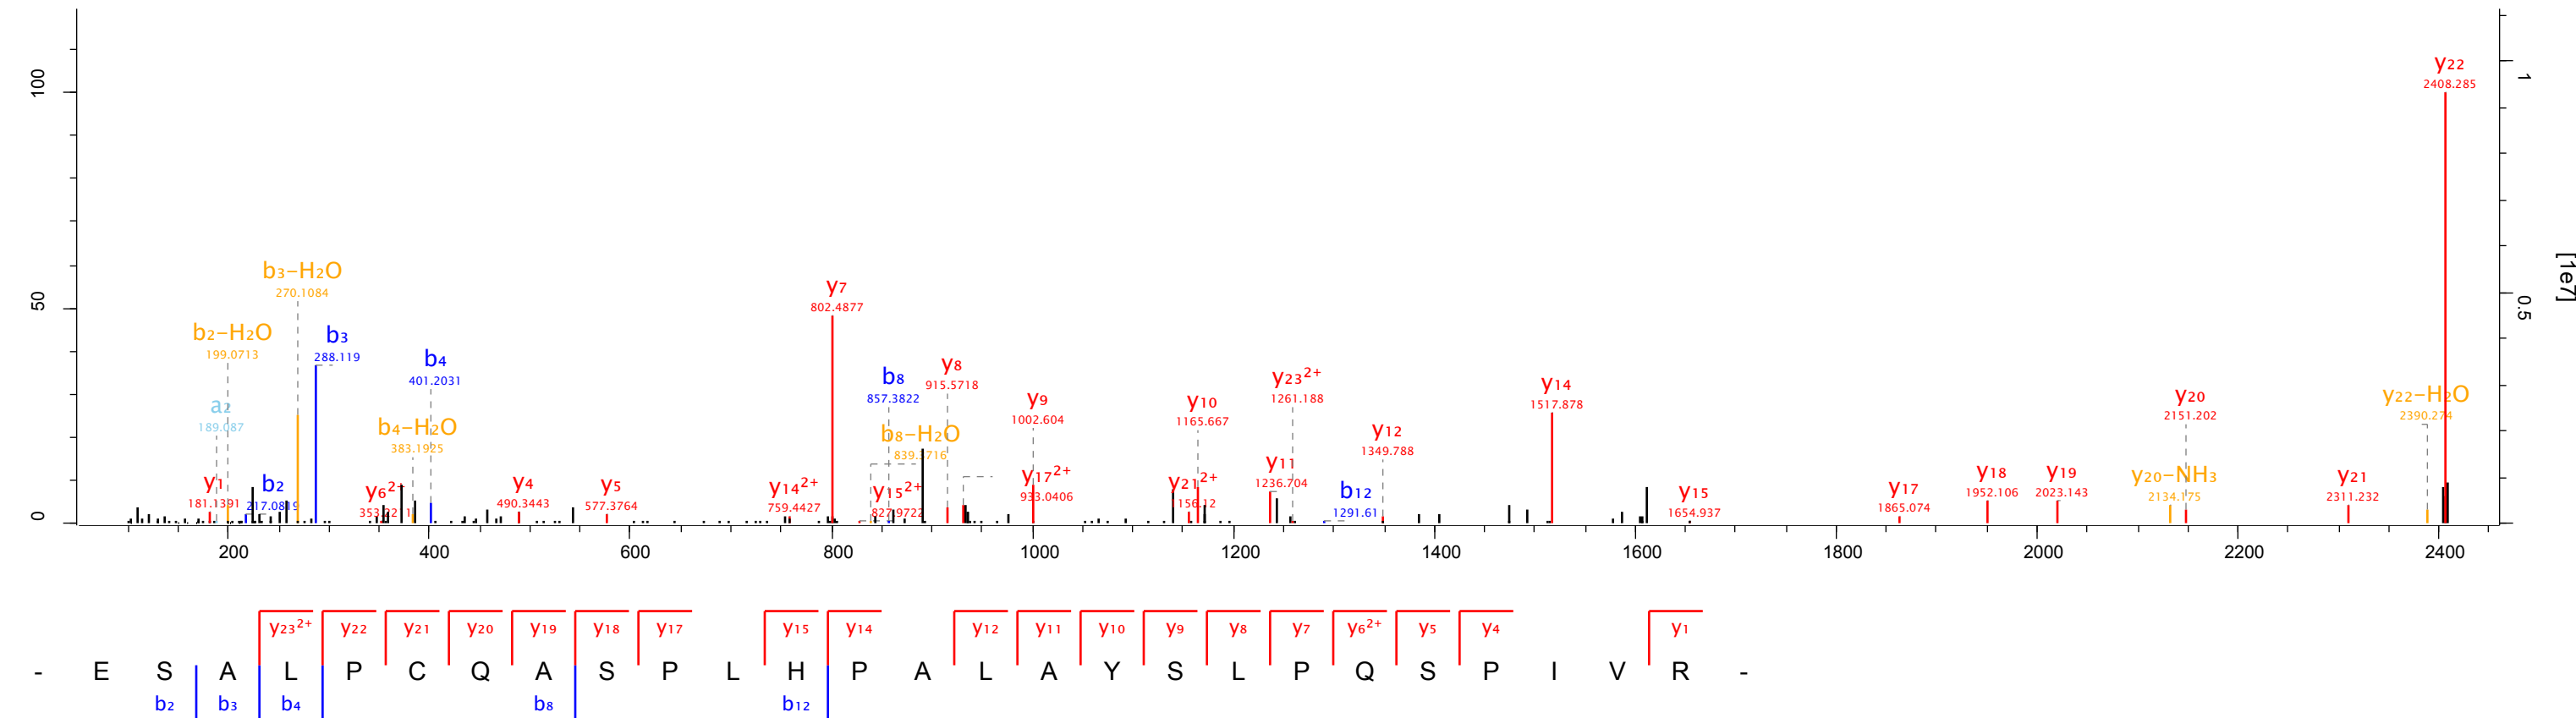



Raw file  
20180707\_MaS\_A375SR\_ML\_proteome\_21

| Scan  | Method    | Score | m/z    |
|-------|-----------|-------|--------|
| 16240 | FTMS; HCD | 69.39 | 389.21 |

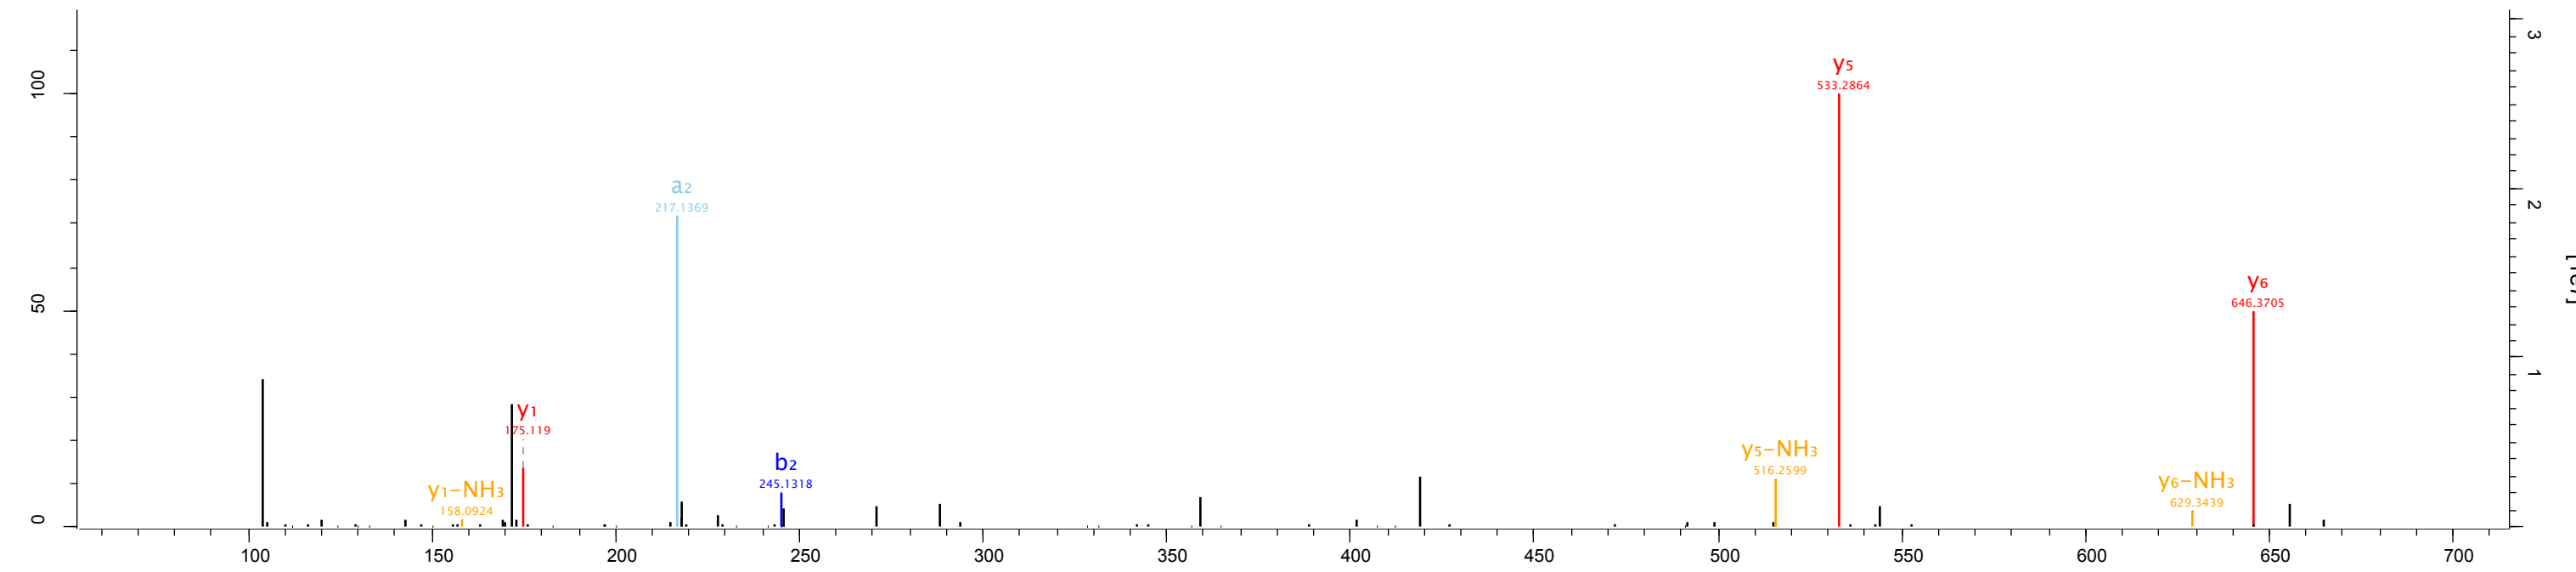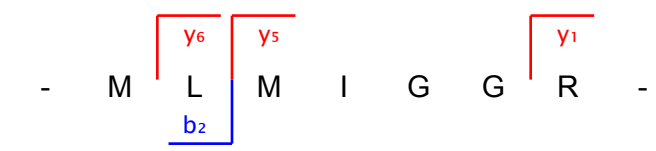

Raw file 20180707\_MaS\_A375SR\_ML\_proteome\_22 Scan 23170 Method FTMS; HCD Score 153.54 m/z 705.87 Gene names SPP2

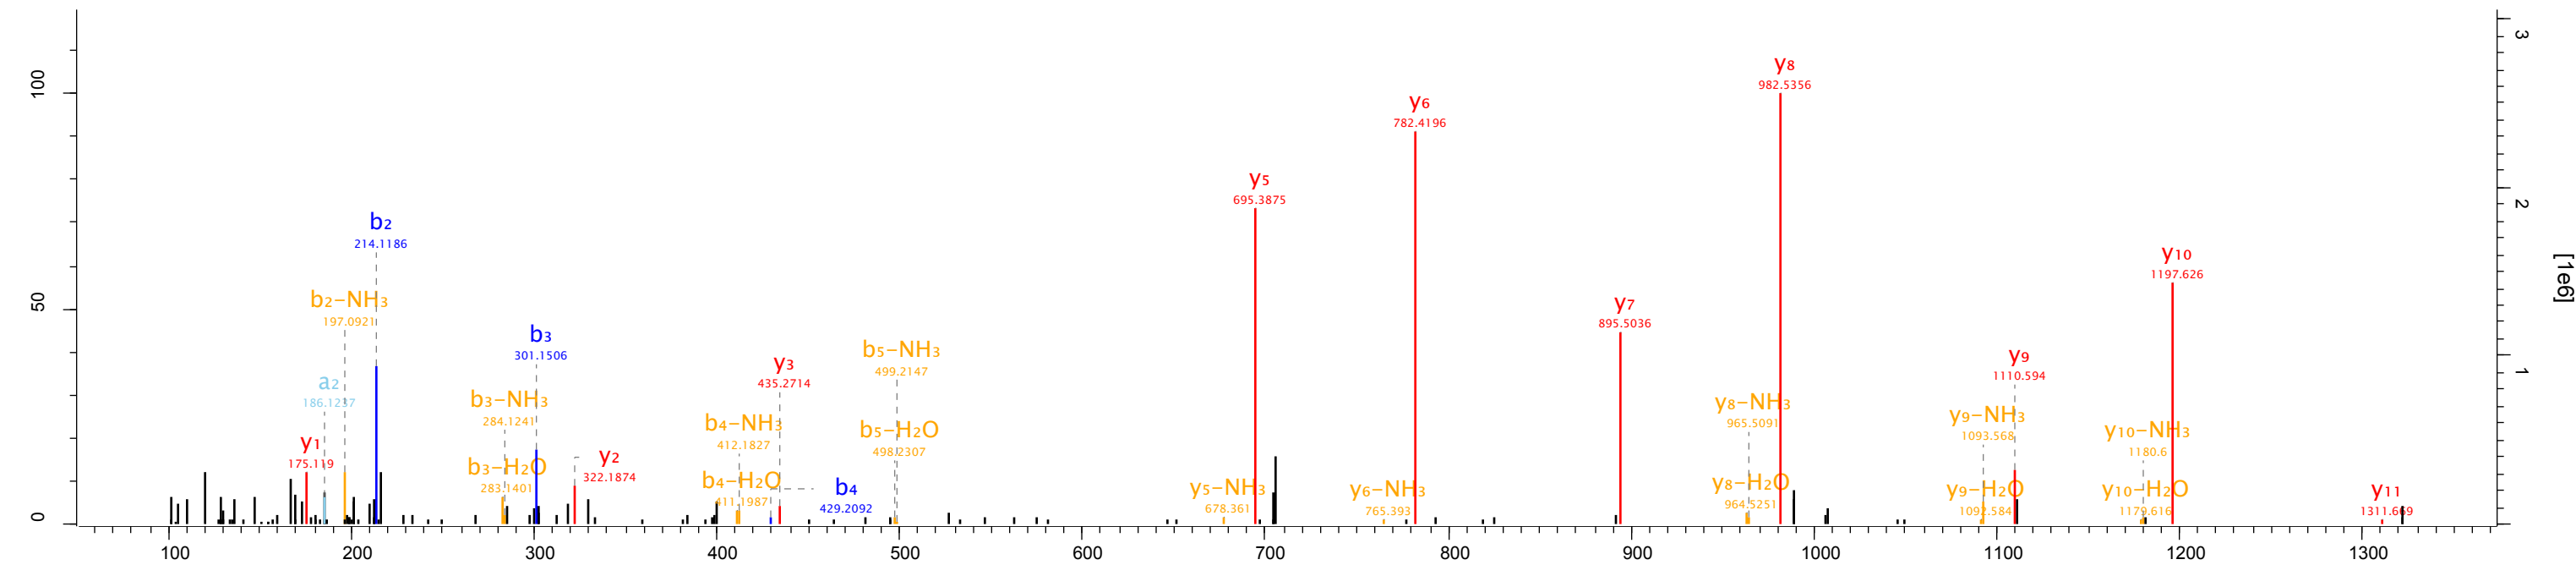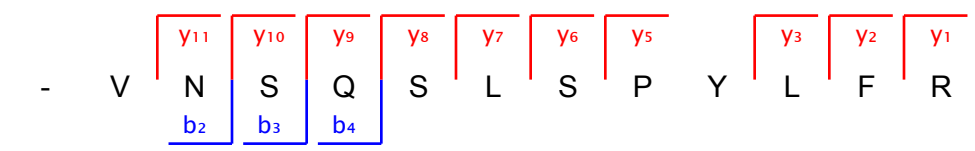

Raw file 20180707\_MaS\_A375SR\_ML\_proteome\_22 Scan 25200 Method FTMS; HCD Score 51.8 m/z 930.45 Gene names MAPK1IP1L

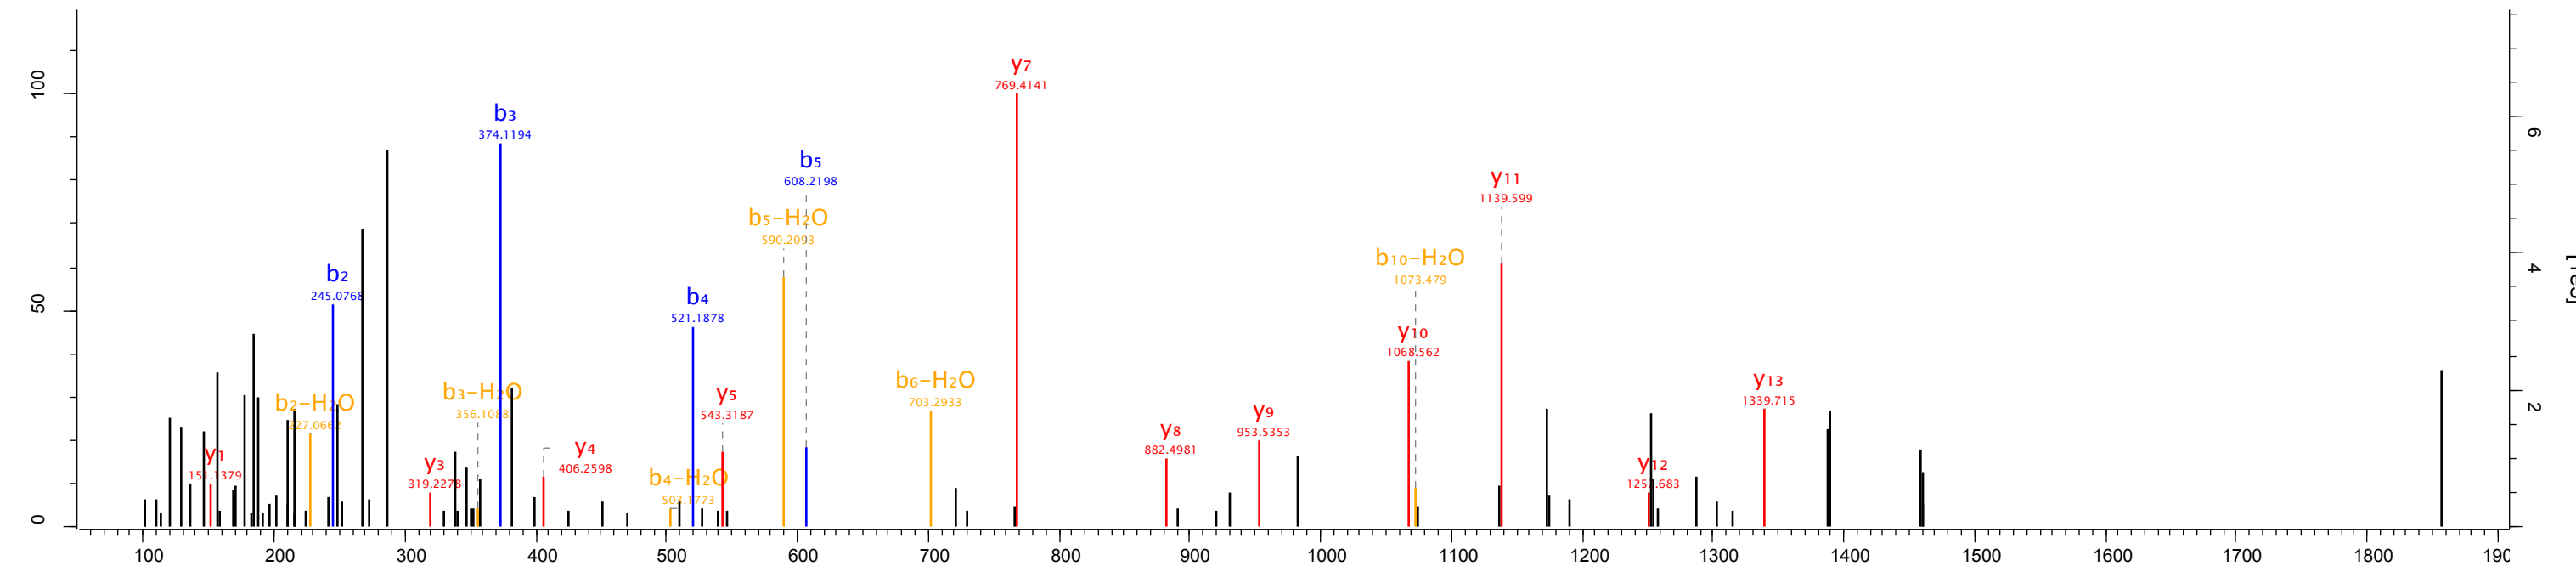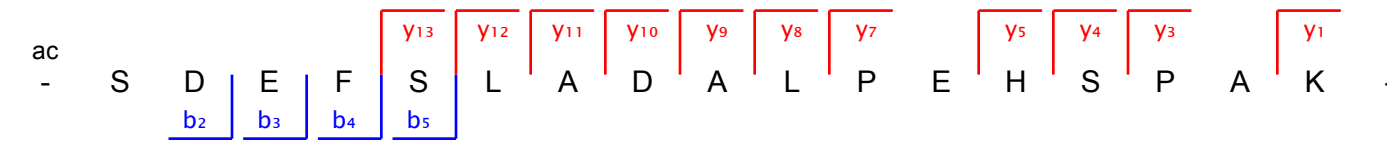

Raw file  
20180707\_MaS\_A375SR\_ML\_proteome\_22

Scan 26280 Method FTMS; HCD Score 62.62 m/z 750.72 Gene names FGRL1

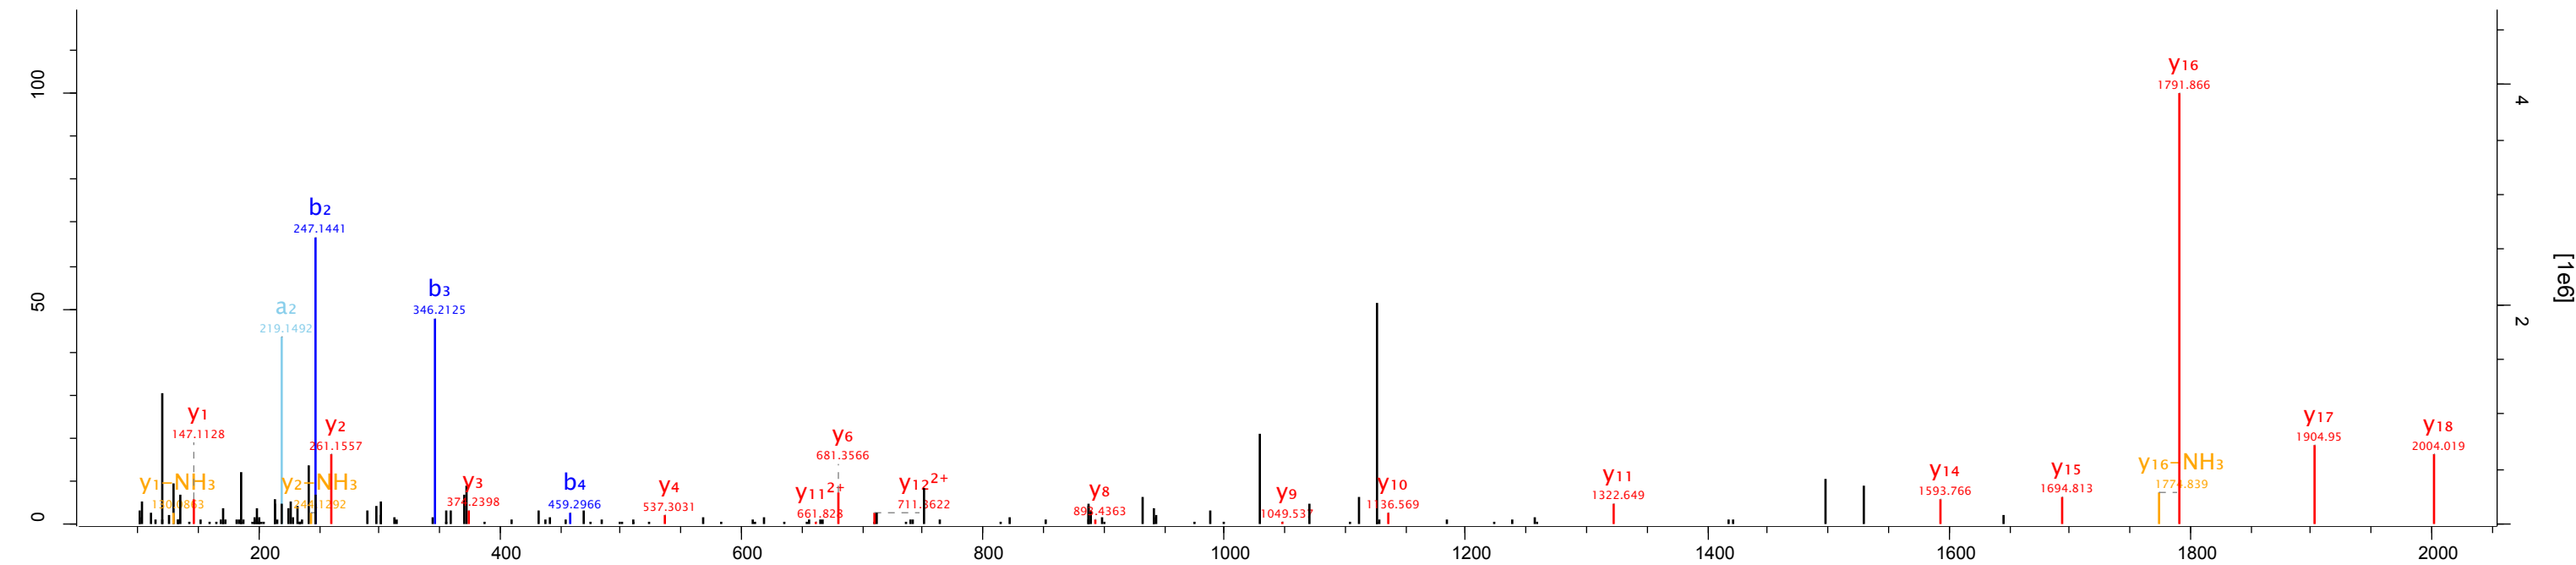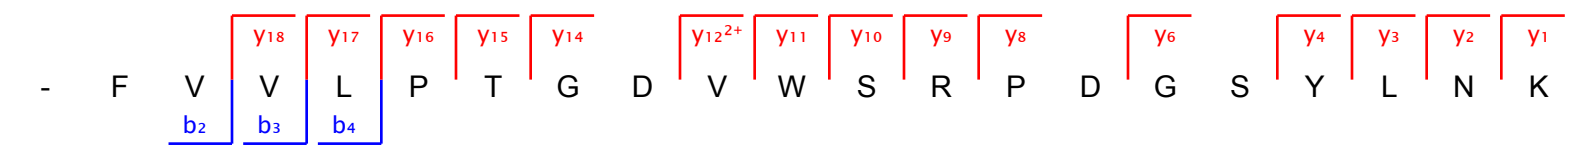

Raw file 20180707\_MaS\_A375SR\_ML\_proteome\_24 Scan 17740 Method FTMS; HCD Score 48.28 m/z 717.36

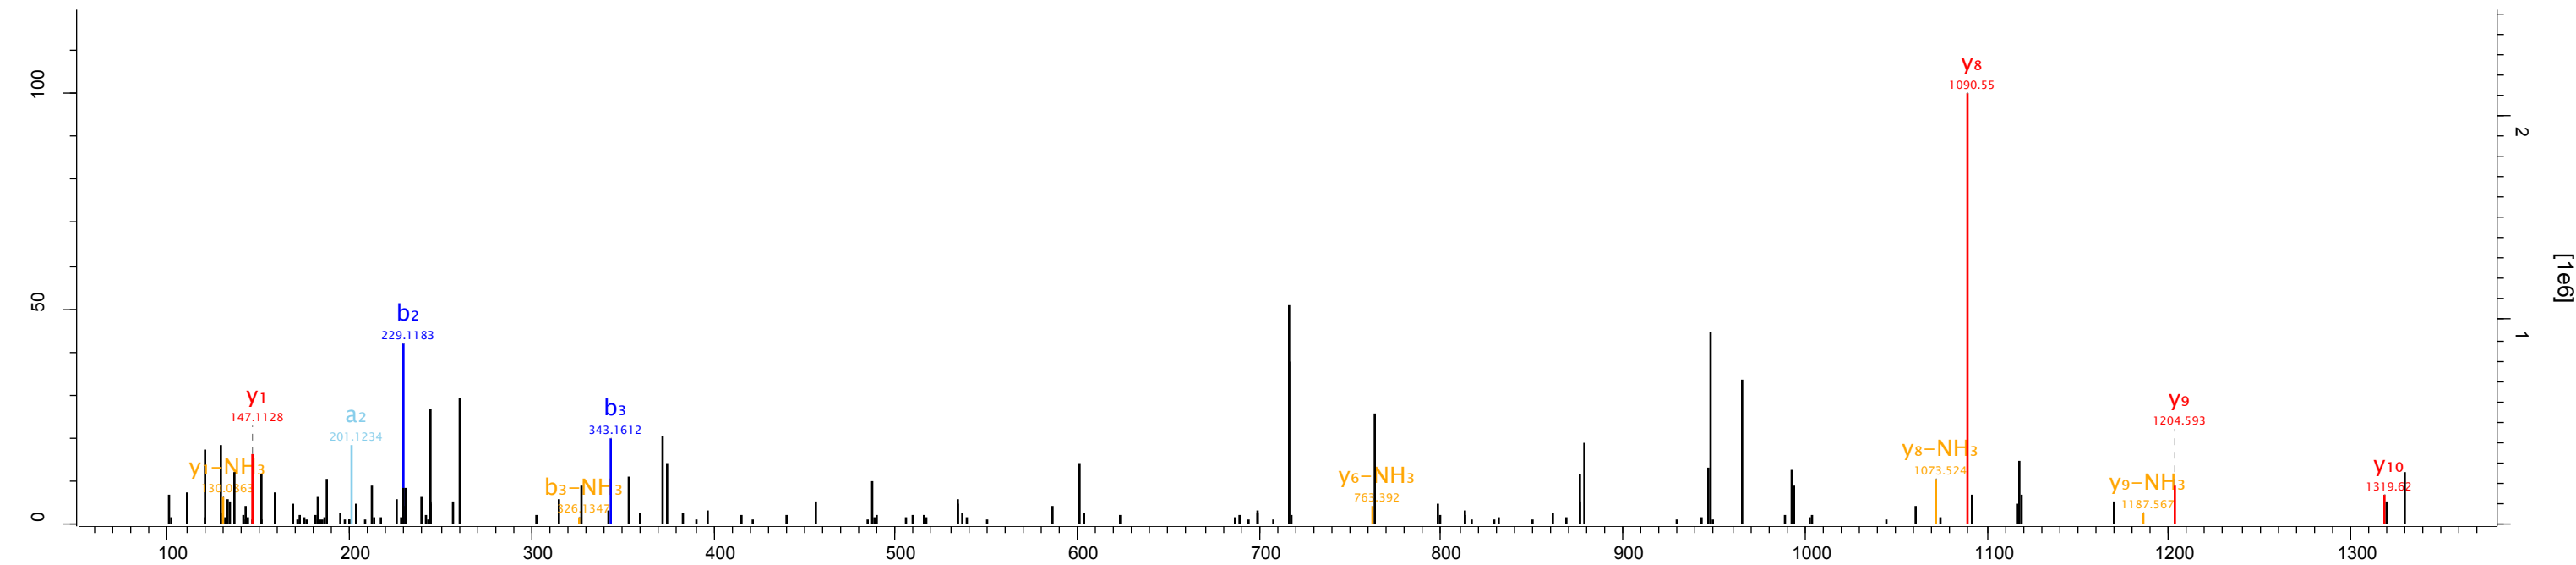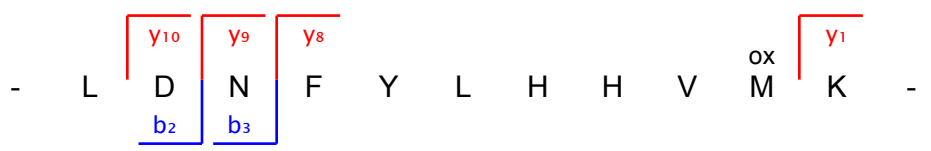

Raw file: 20180707\_MaS\_A375SR\_ML\_proteome\_25  
 Scan: 29480 Method: FTMS; HCD Score: 82.45 m/z: 622.8 Gene names: TOR2A

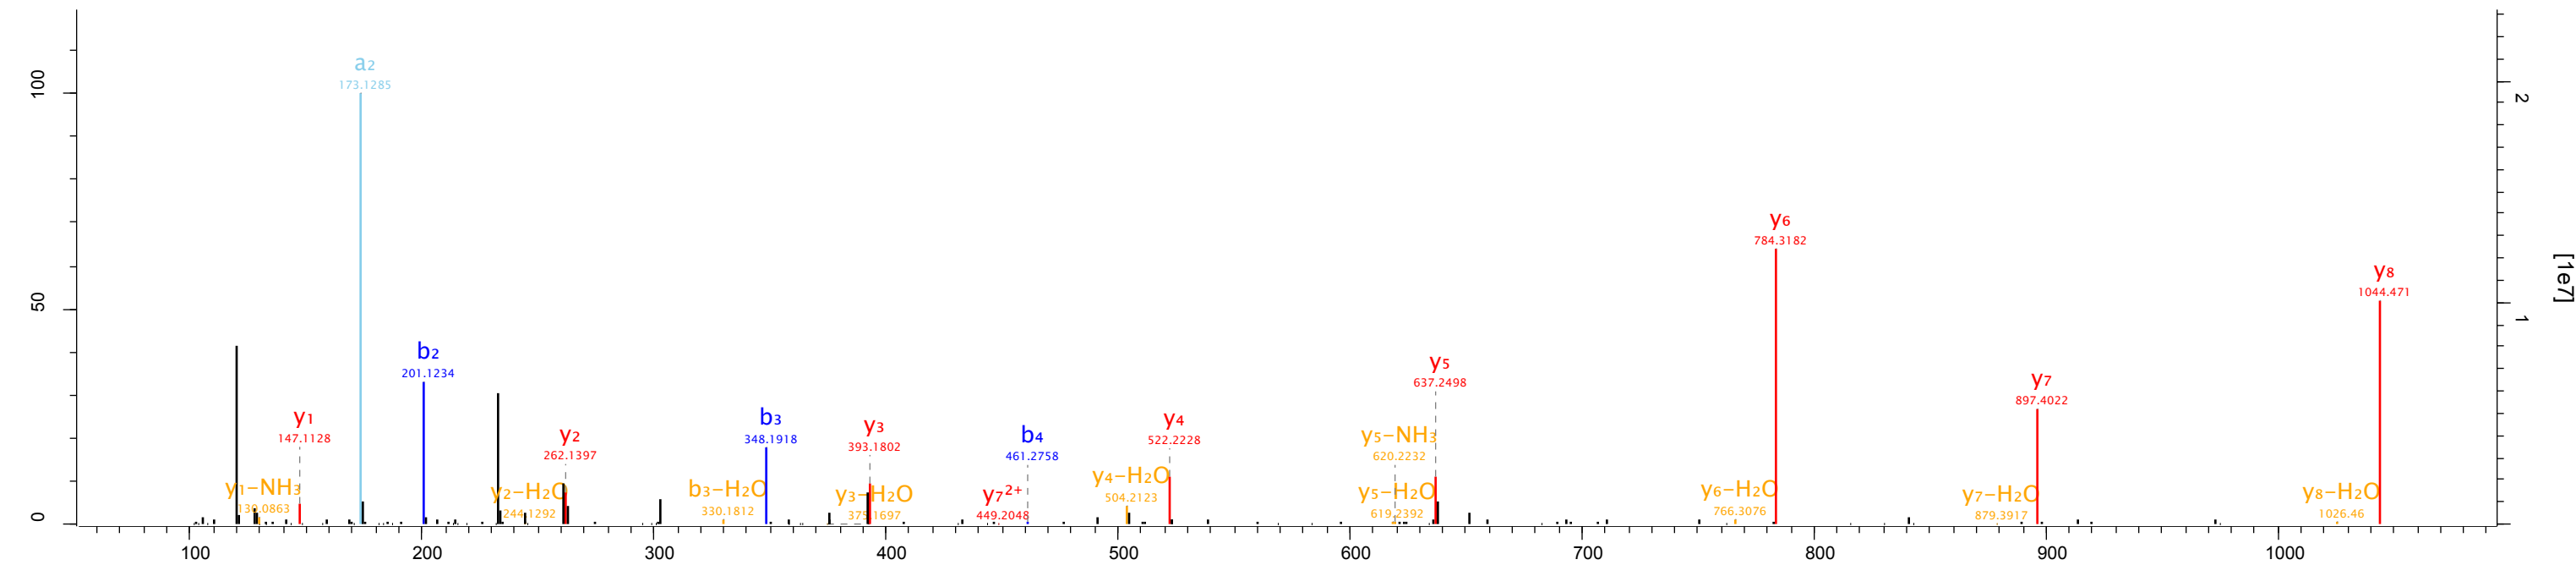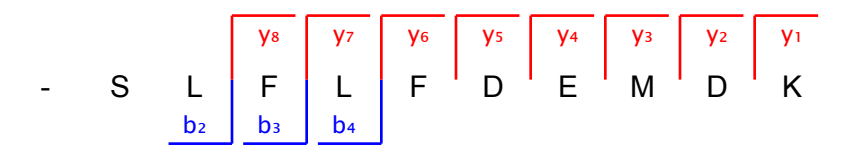

20180707\_MaS\_A375SR\_ML\_proteome\_25

29850 FTMS; HCD 134.13 715.91 UQCR11

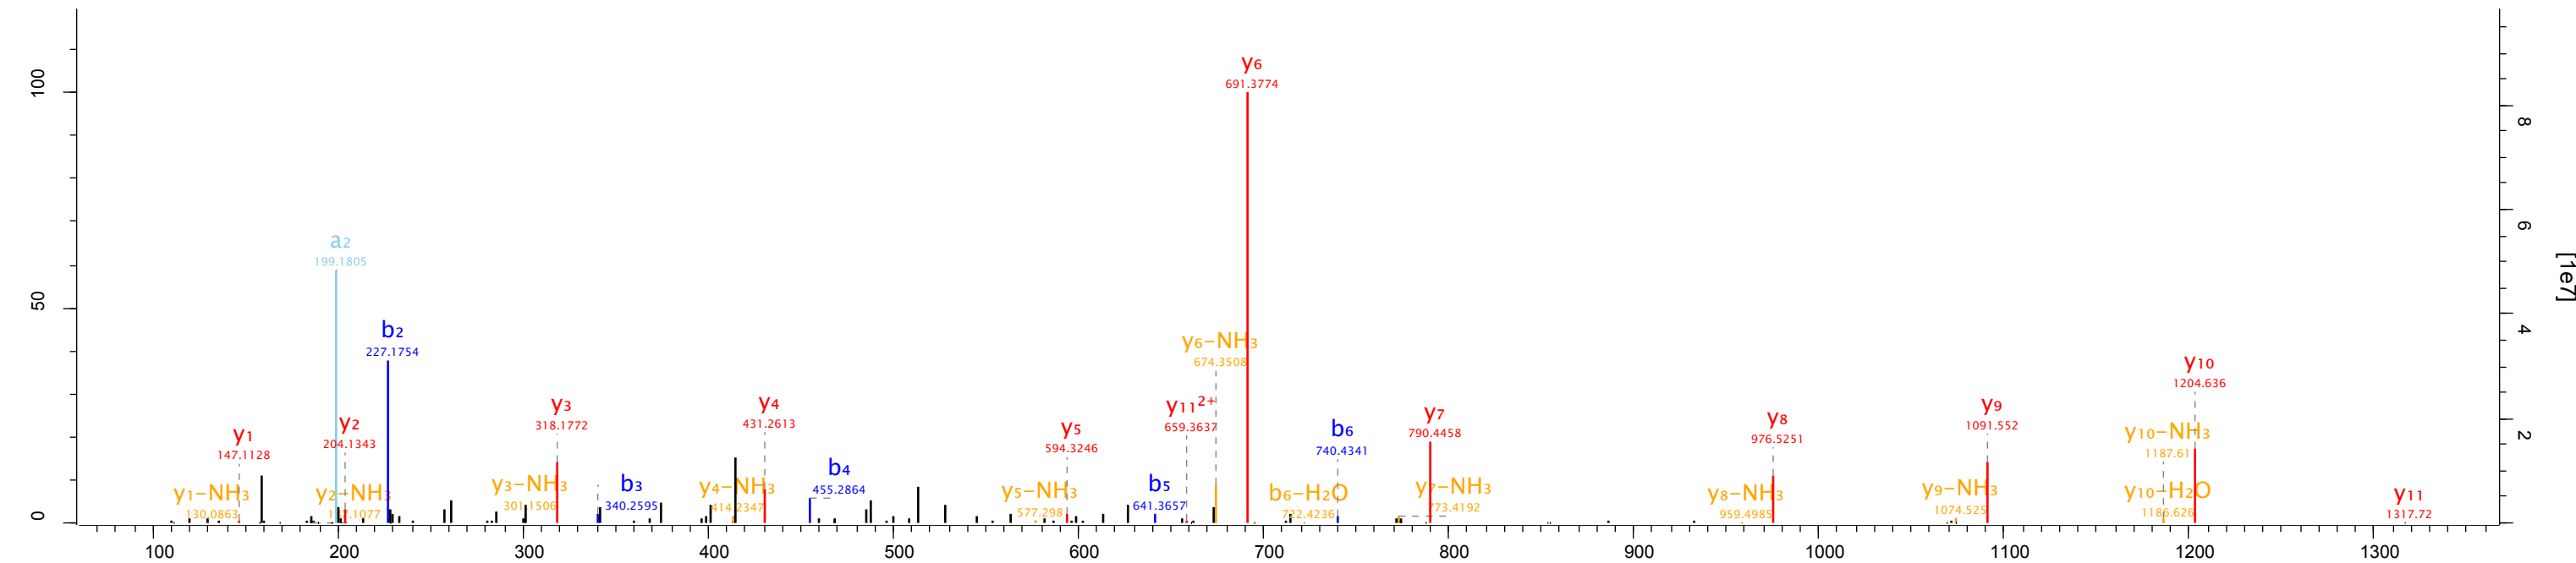

- L I L D W V P Y I N G K -

b<sub>2</sub> b<sub>3</sub> b<sub>4</sub> b<sub>5</sub> b<sub>6</sub>

y<sub>1</sub> y<sub>2</sub> y<sub>3</sub> y<sub>4</sub> y<sub>5</sub> y<sub>6</sub> y<sub>7</sub> y<sub>8</sub> y<sub>9</sub> y<sub>10</sub> y<sub>11</sub>

Raw file: 20180707\_MaS\_A375SR\_ML\_proteome\_27  
 Scan: 15820 Method: FTMS; HCD Score: 88.34 m/z: 458.91 Gene names: CRYAB

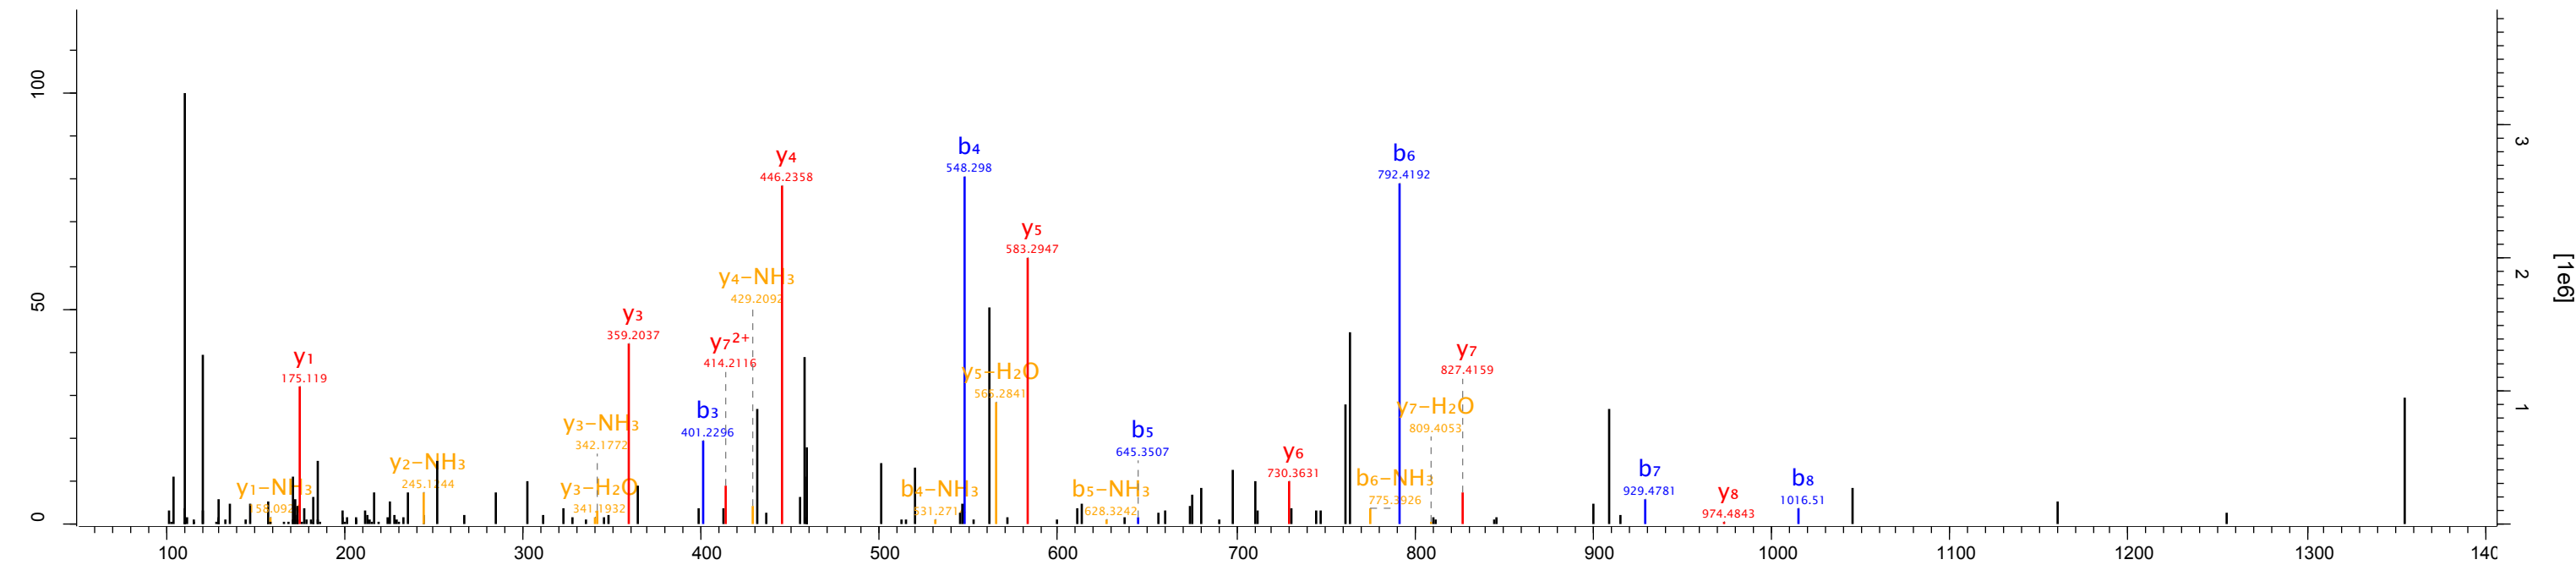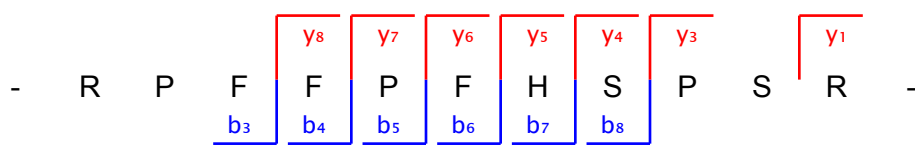



Raw file  
20180707\_MaS\_A375SR\_ML\_proteome\_27

Scan 16060 Method FTMS; HCD Score 118.67 m/z 440.93 Gene names RPL39P5;RPL39

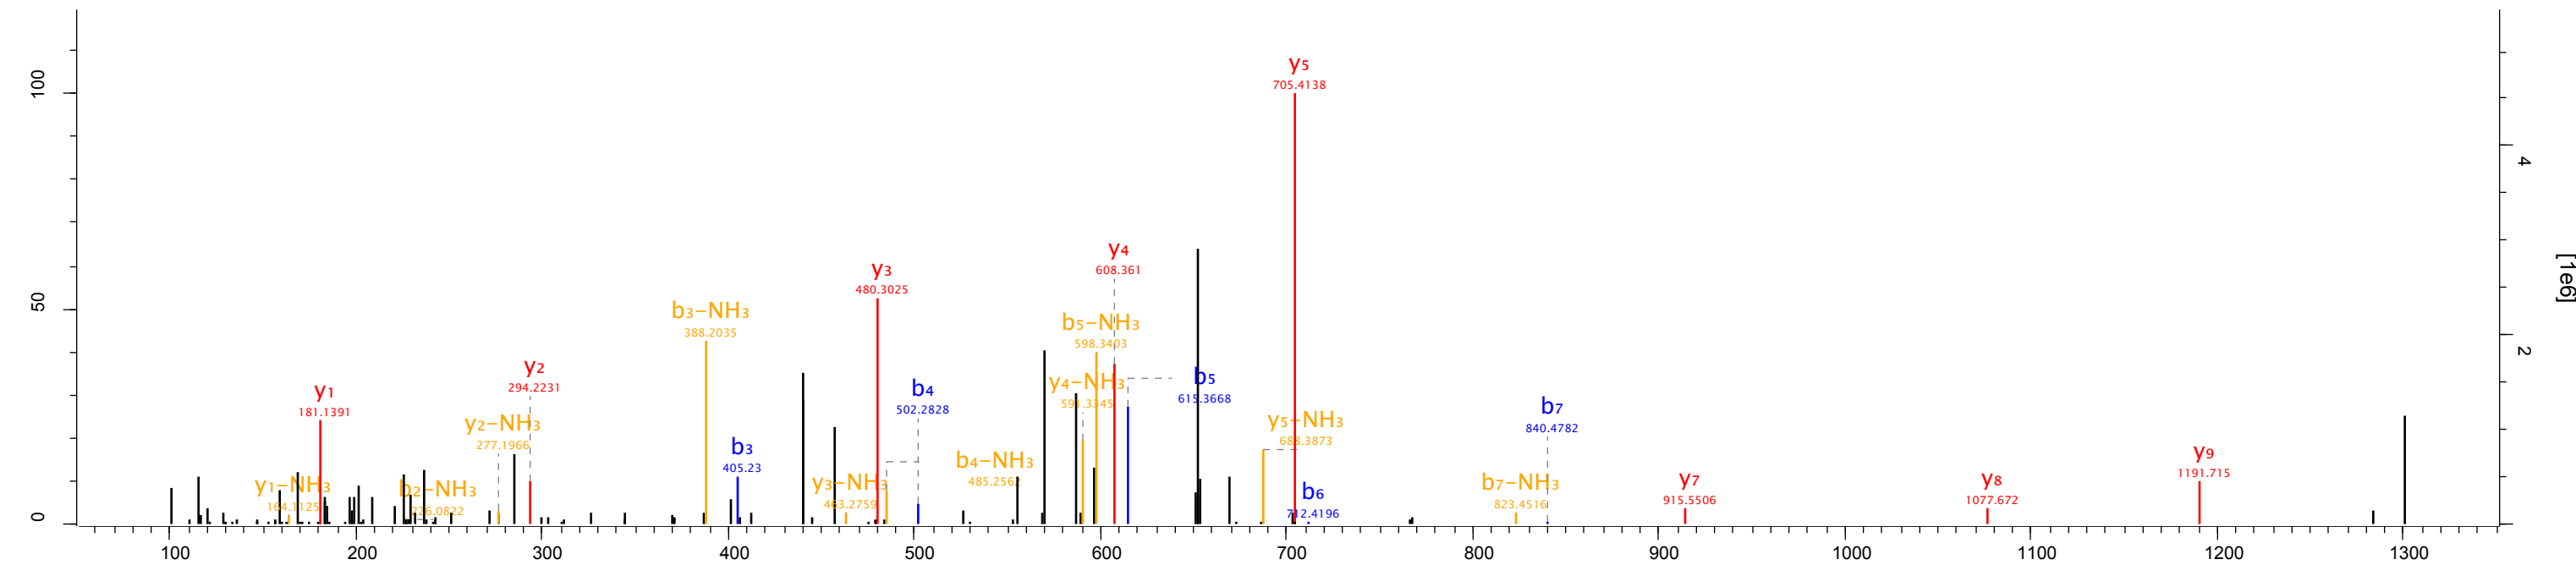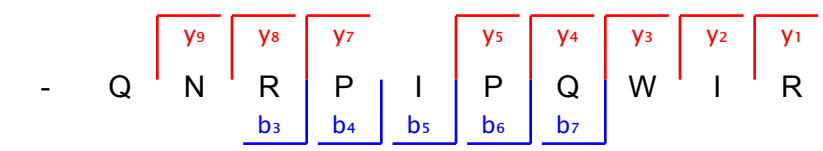

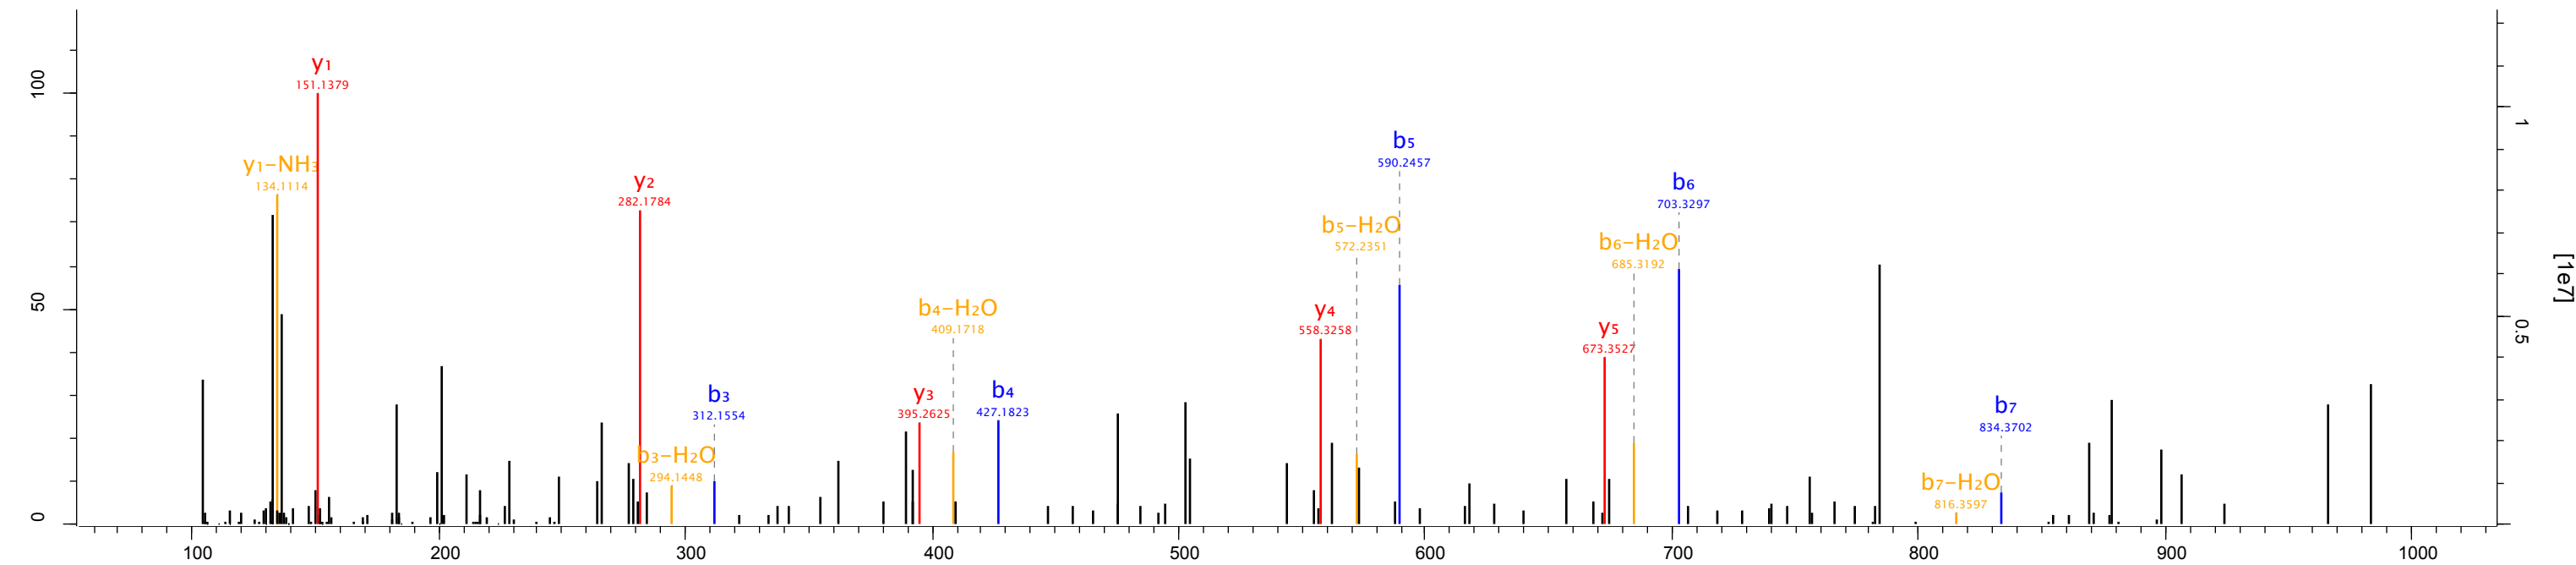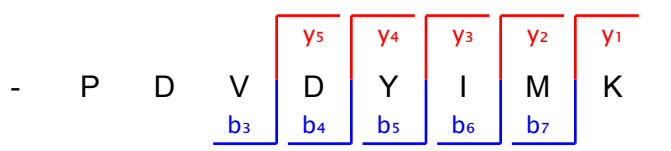

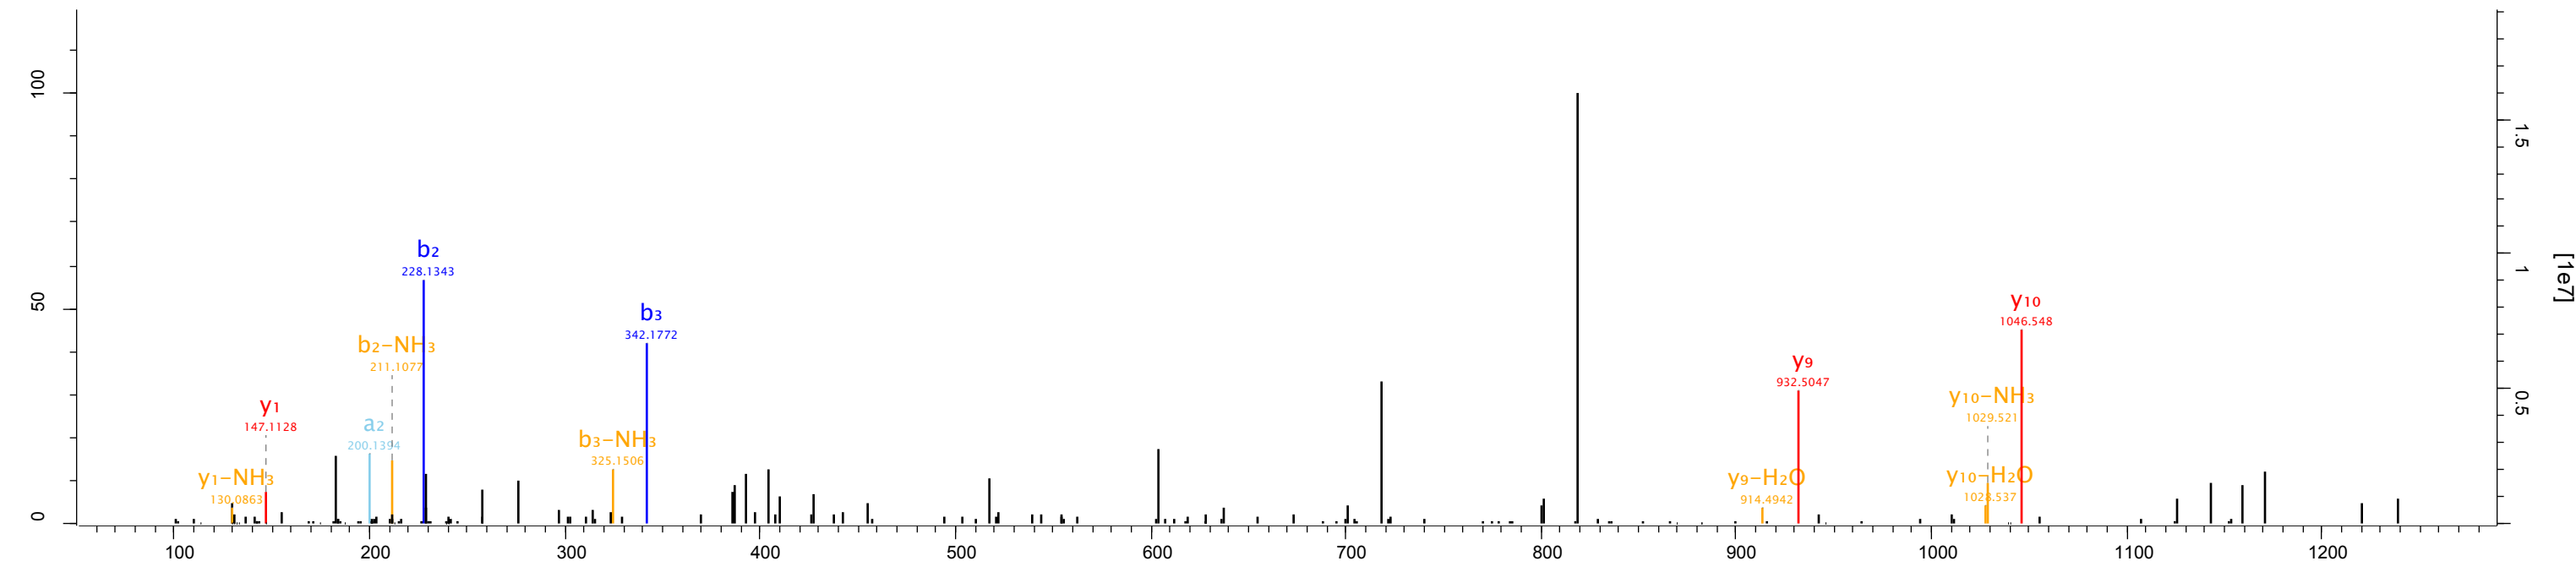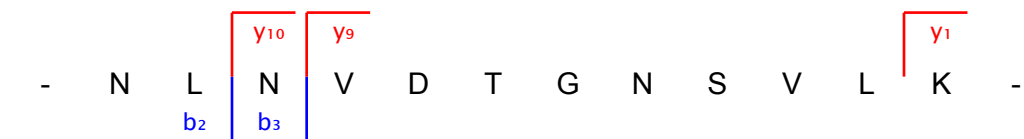

Raw file: 20180707\_MaS\_A375SR\_ML\_proteome\_29  
 Scan: 27520 Method: FTMS; HCD Score: 93.18 m/z: 598.38 Gene names: SLITRK1

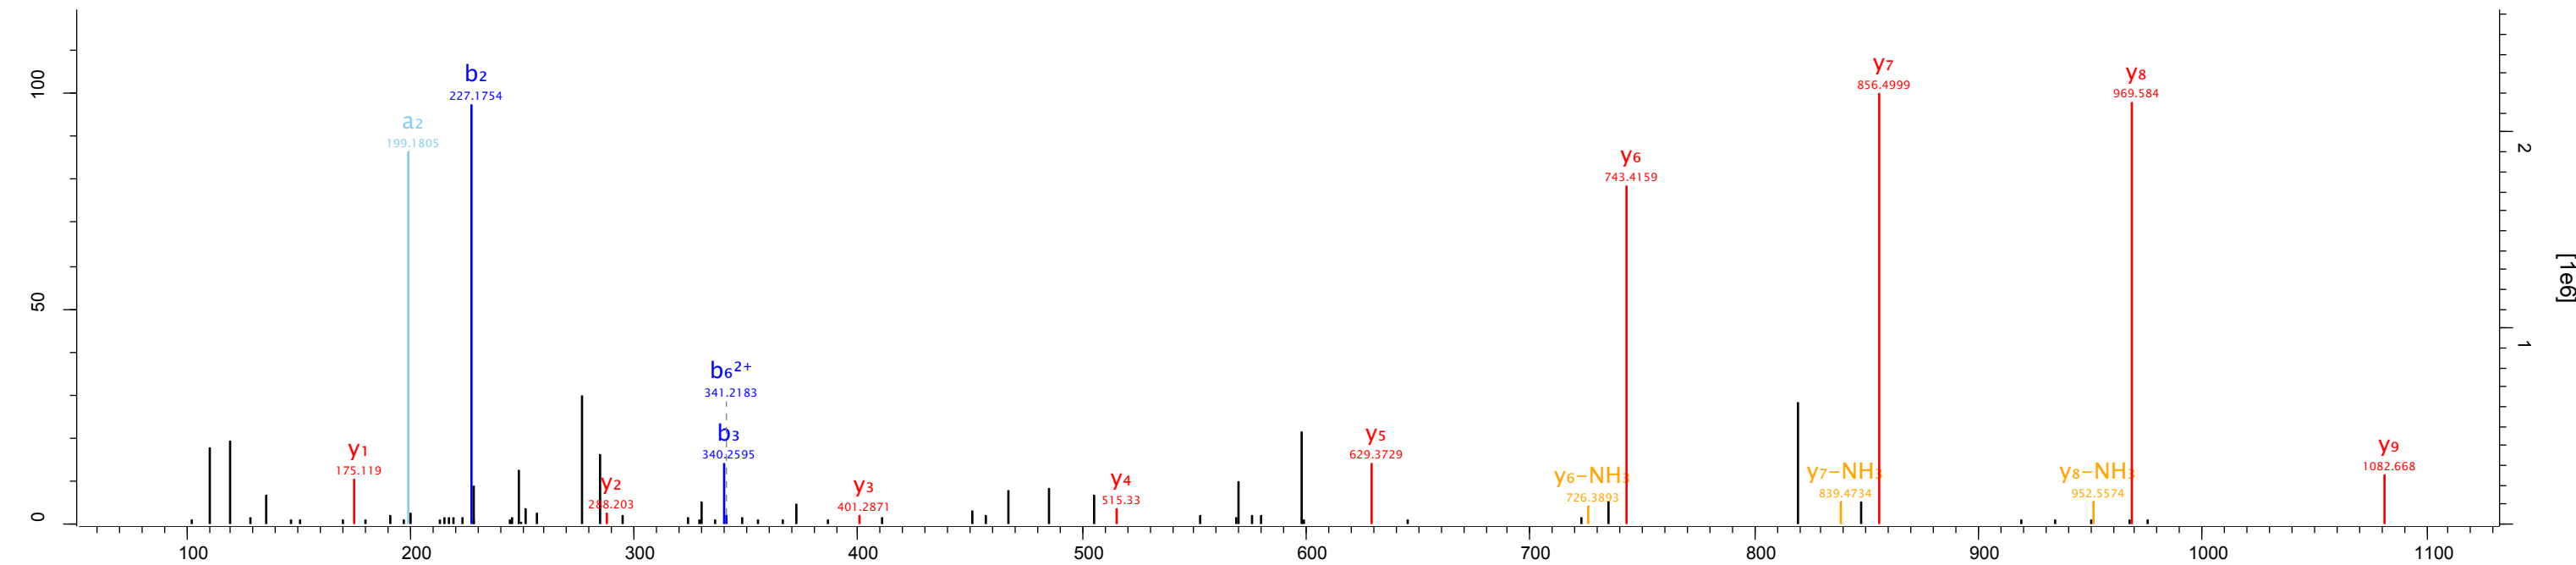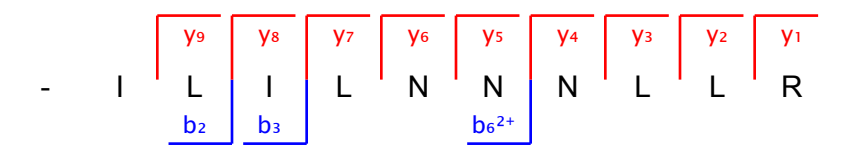

Raw file  
20180707\_MaS\_A375SR\_ML\_proteome\_30

| Scan | Method    | Score | m/z    |
|------|-----------|-------|--------|
| 2900 | FTMS; HCD | 62.71 | 361.19 |

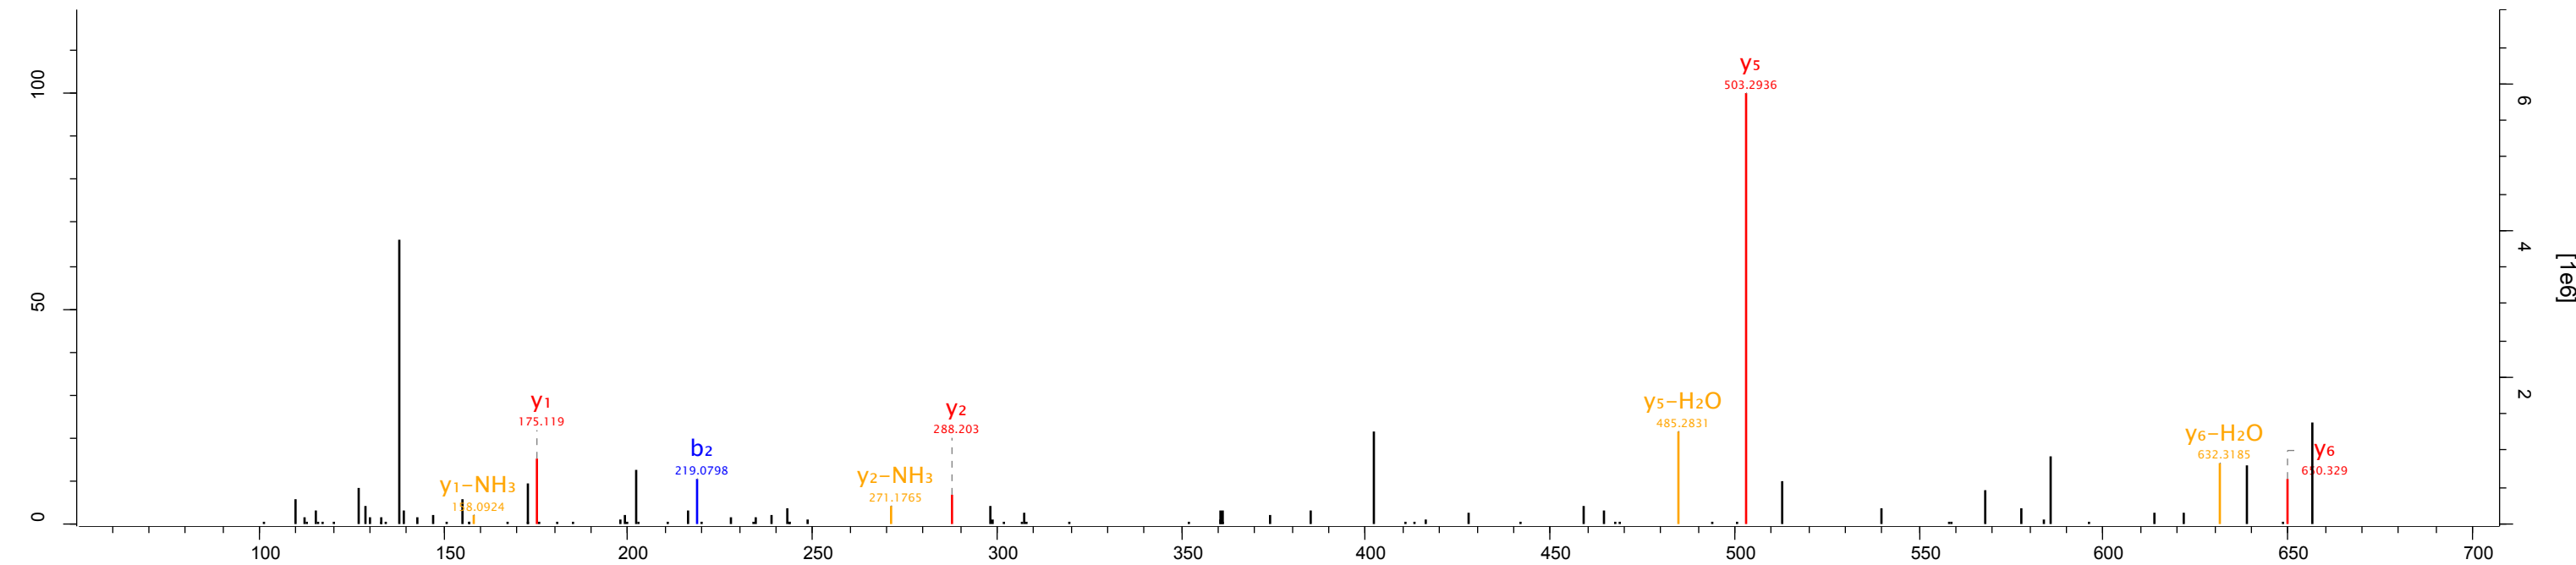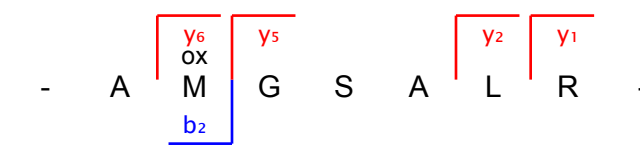

Raw file  
20180707\_MaS\_A375SR\_ML\_proteome\_30

Scan 3420 Method FTMS; HCD Score 66.19 m/z 568.24 Gene names MAP3K19

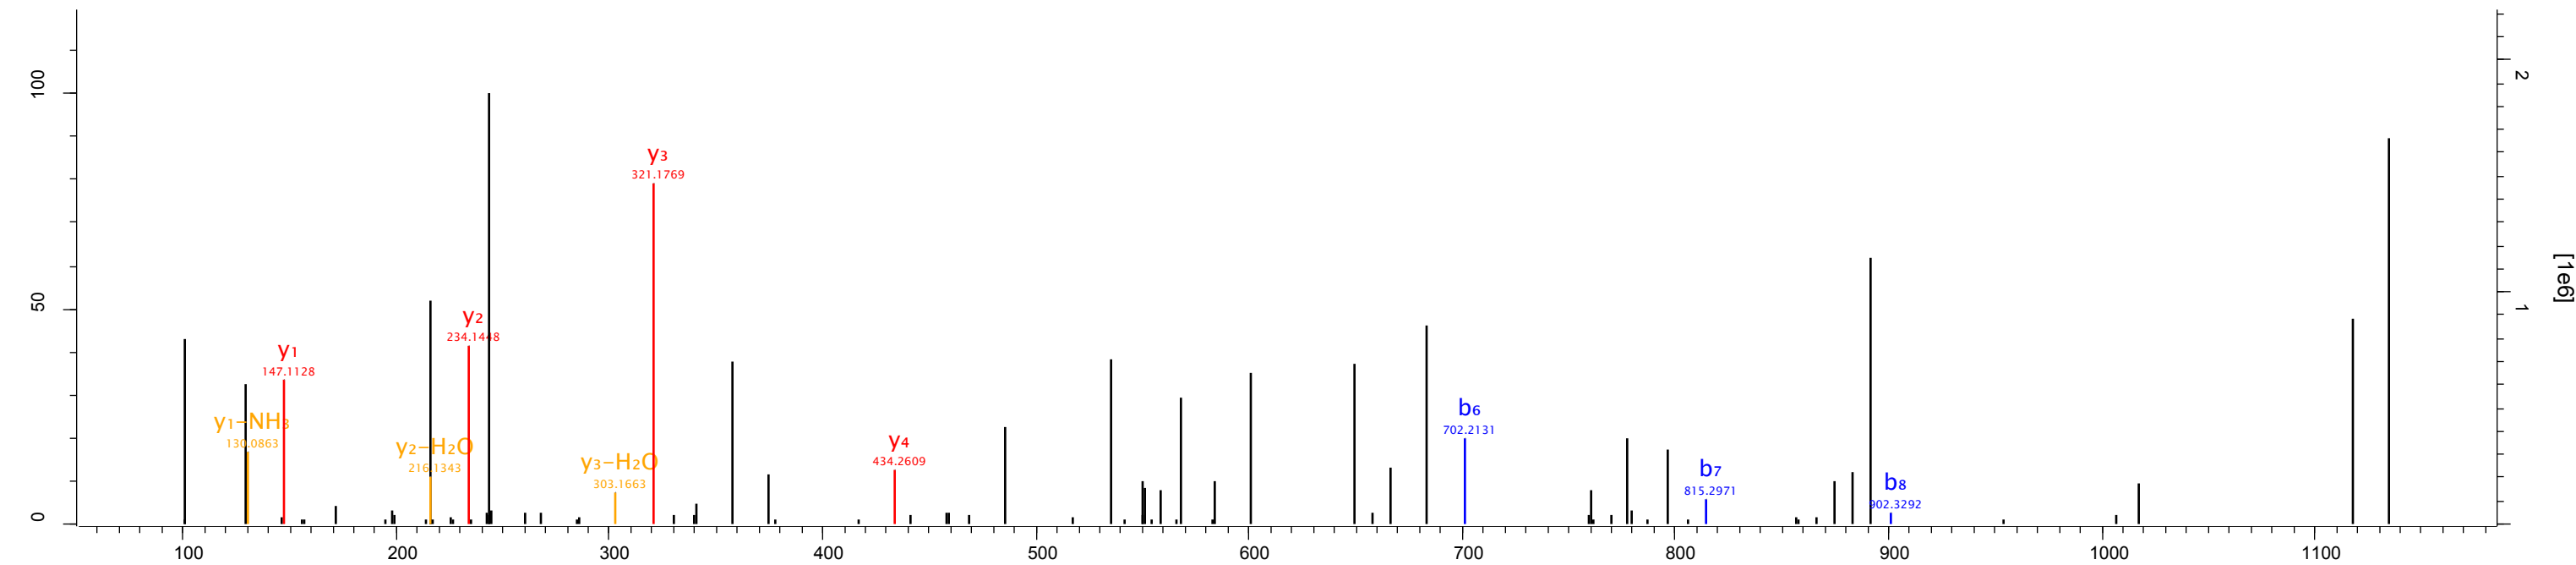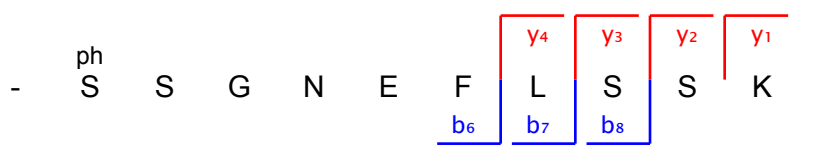

Raw file Scan Method Score m/z Gene names  
 20150812\_A375SR\_Phospho\_BR1\_02 24311 FTMS; HCD 172.77 970.44 MAPK11P1L

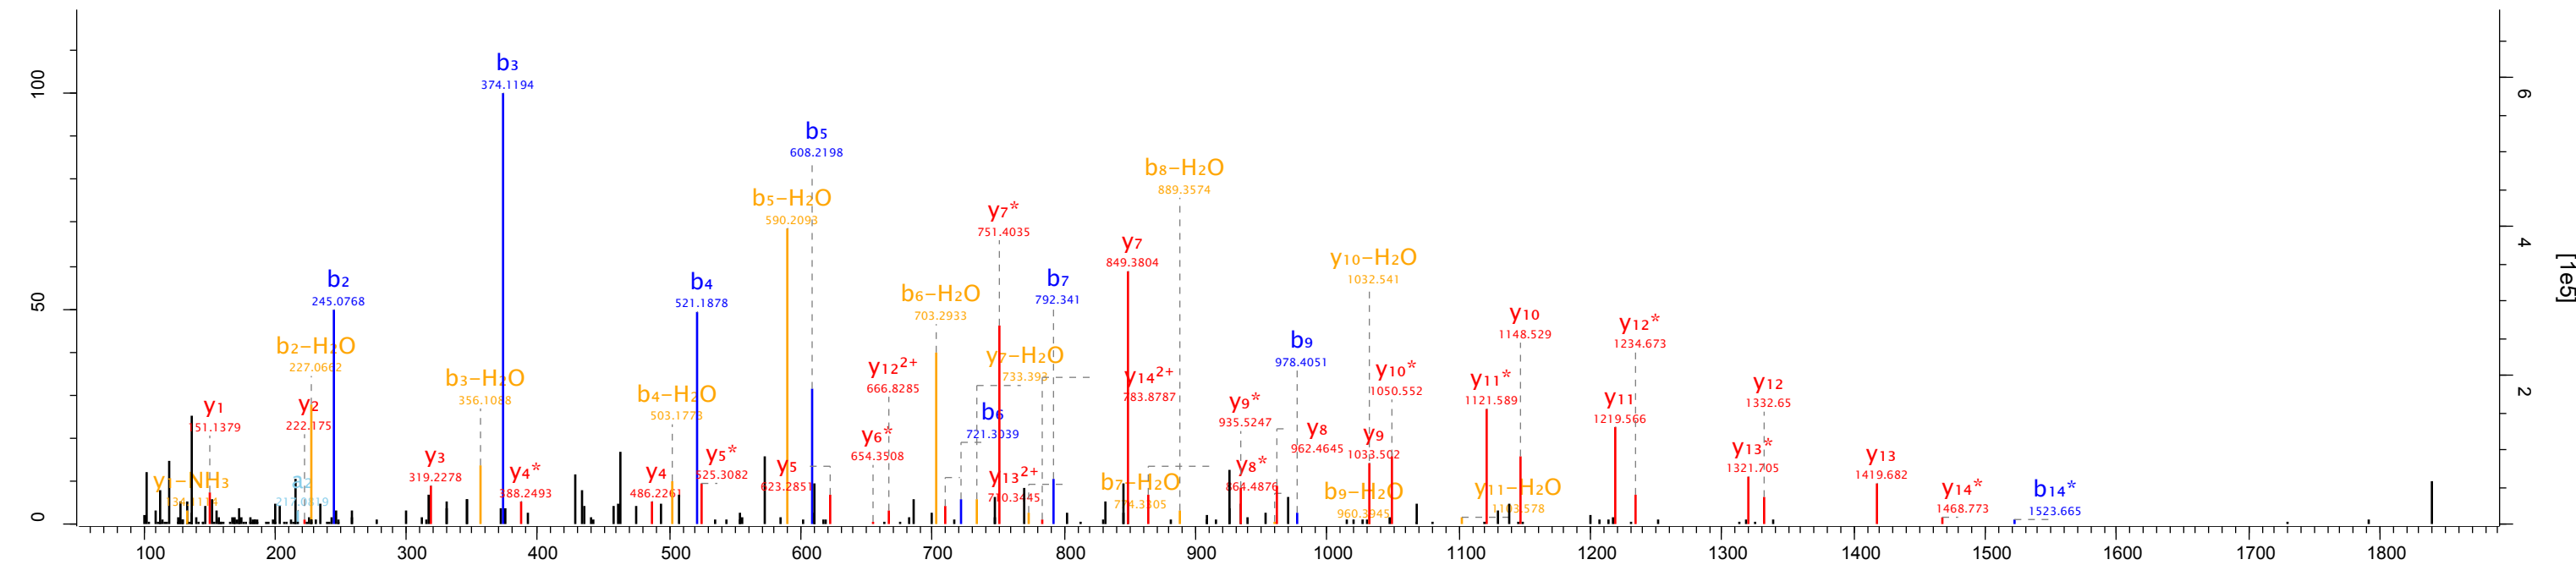

ac  
 - S D E F S L A D A L P E H S P A K -  
 b2 b3 b4 b5 b6 b7 b9 b14\*

Raw file 20150812\_A375SR\_Phospho\_BR1\_03 Scan 22141 Method FTMS; HCD Score 46.42 m/z 1177.43 Gene names PIH1D3

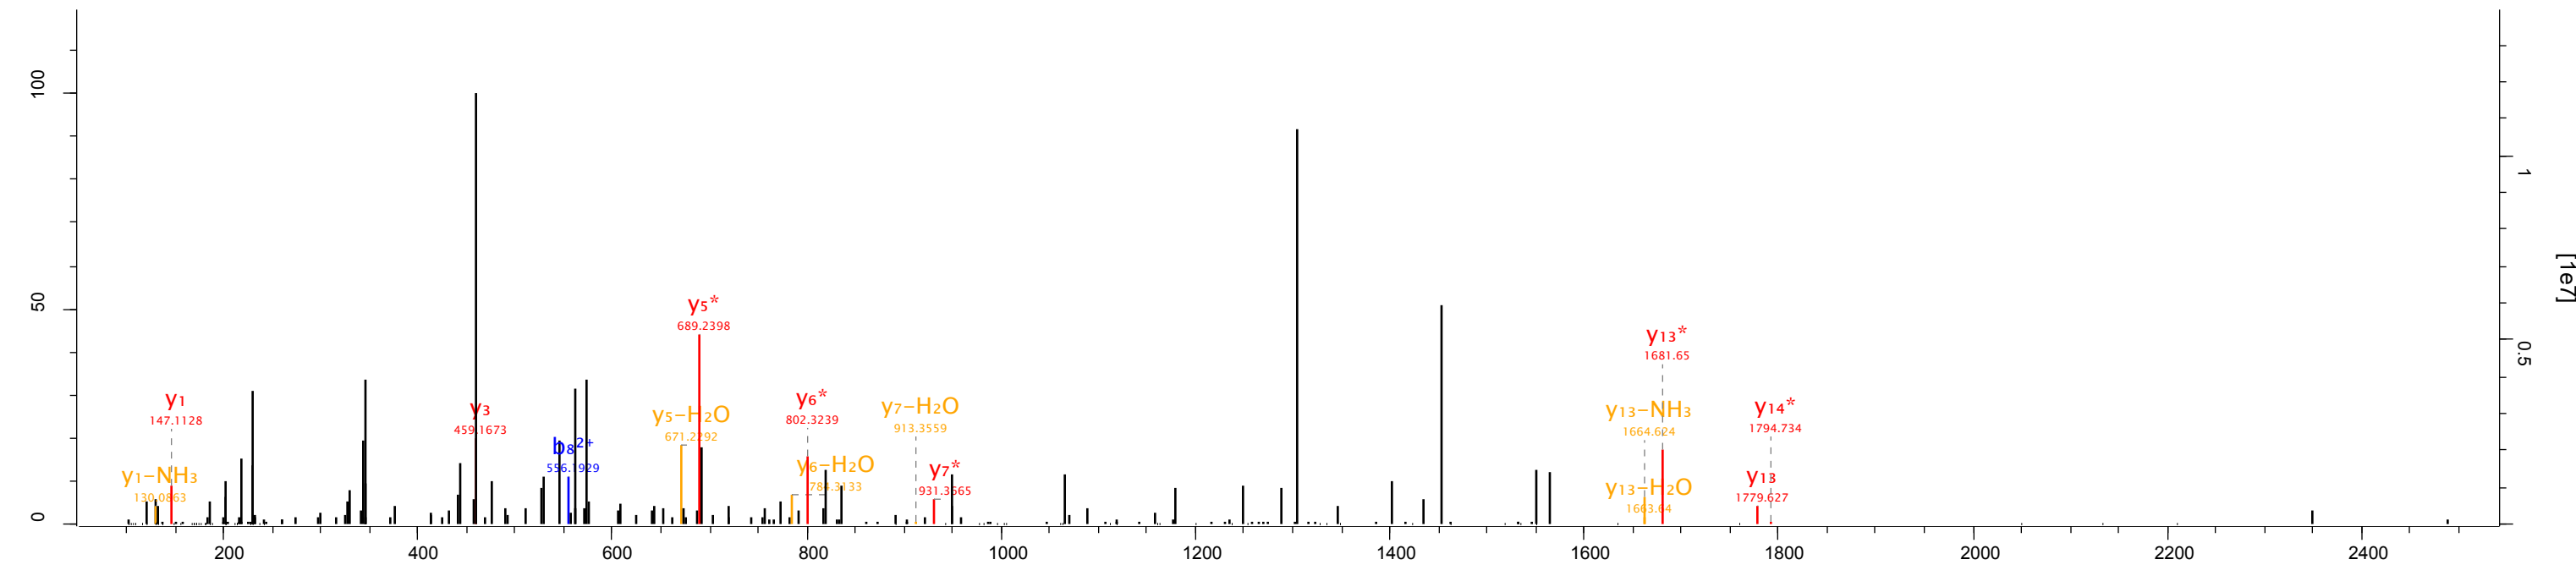

- A F Y ph I P E T E T L E I T M T M K -

Fragmentation diagram showing peptide sequence and fragmentation sites:

- ph (phosphorylation) on Y
- y14\* and y13 (backbone fragmentation) on I and P
- b8<sup>2+</sup> (charge state) on E
- y7\*, y6\*, y5\* (backbone fragmentation) on E, I, and T
- ph (phosphorylation) on T
- ox (oxidation) on M
- y3 (backbone fragmentation) on T
- y1 (backbone fragmentation) on K



Raw file 20150812\_A375SR\_Phospho\_BR1\_03 Scan 22841 Method FTMS; HCD Score 162.81 m/z 660.33 Gene names PDZD2

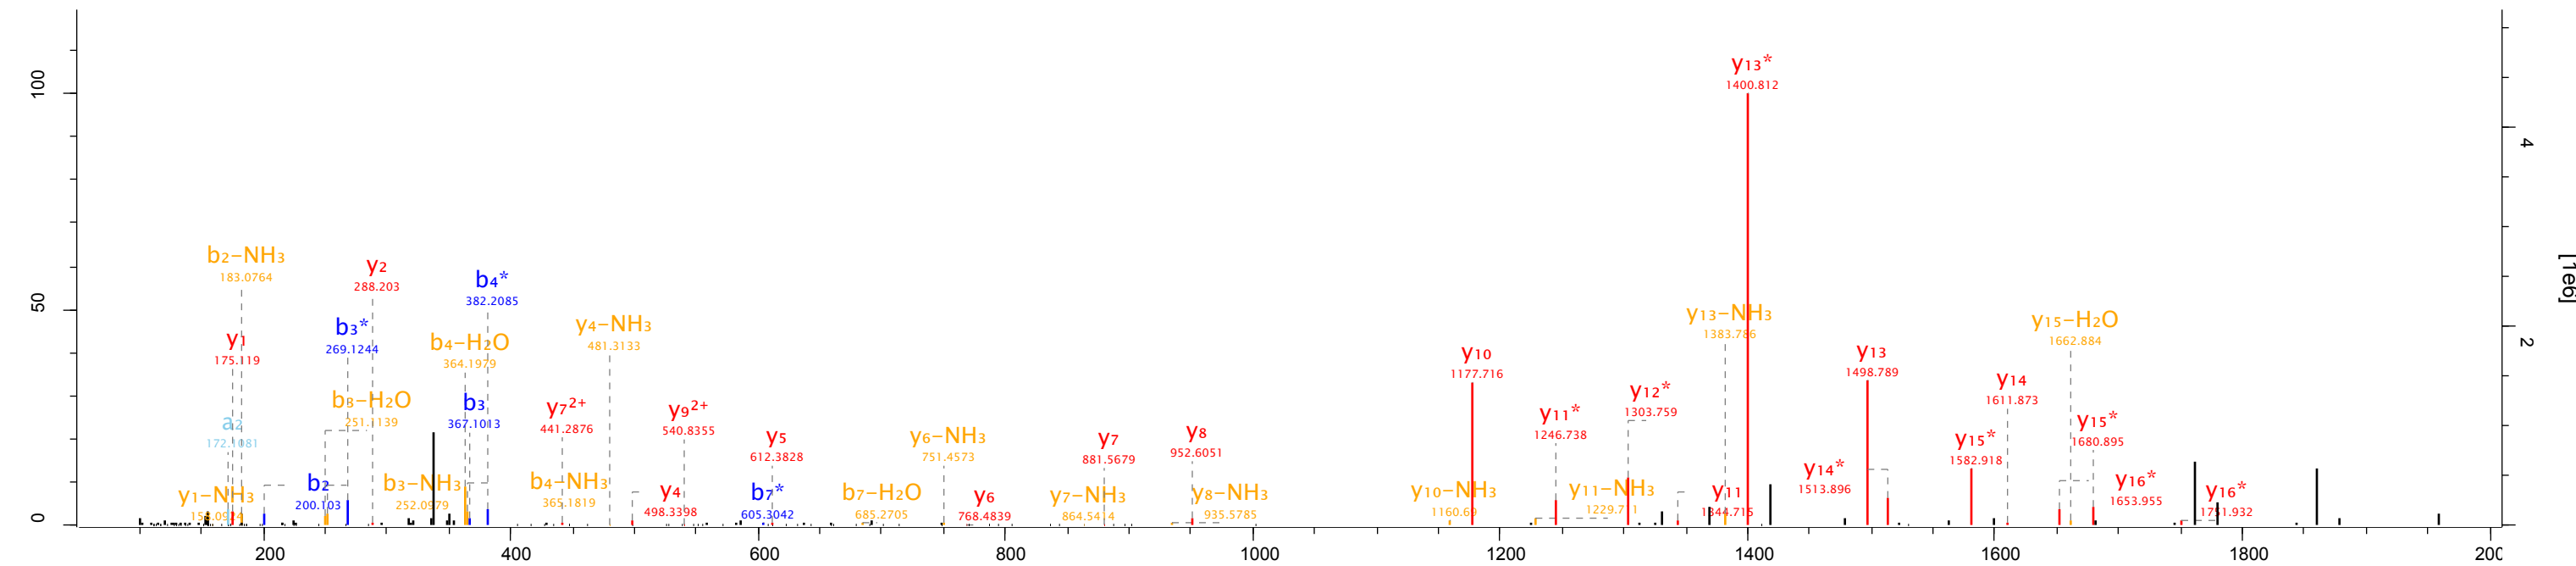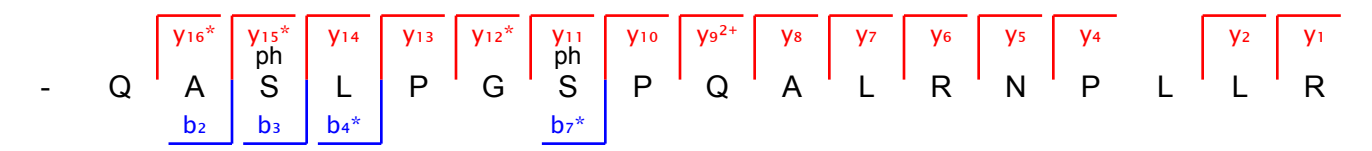

Raw file: 20150812\_A375SR\_Phospho\_BR1\_03  
 Scan: 7941 Method: FTMS; HCD Score: 111.81 m/z: 722.31 Gene names: CEP112

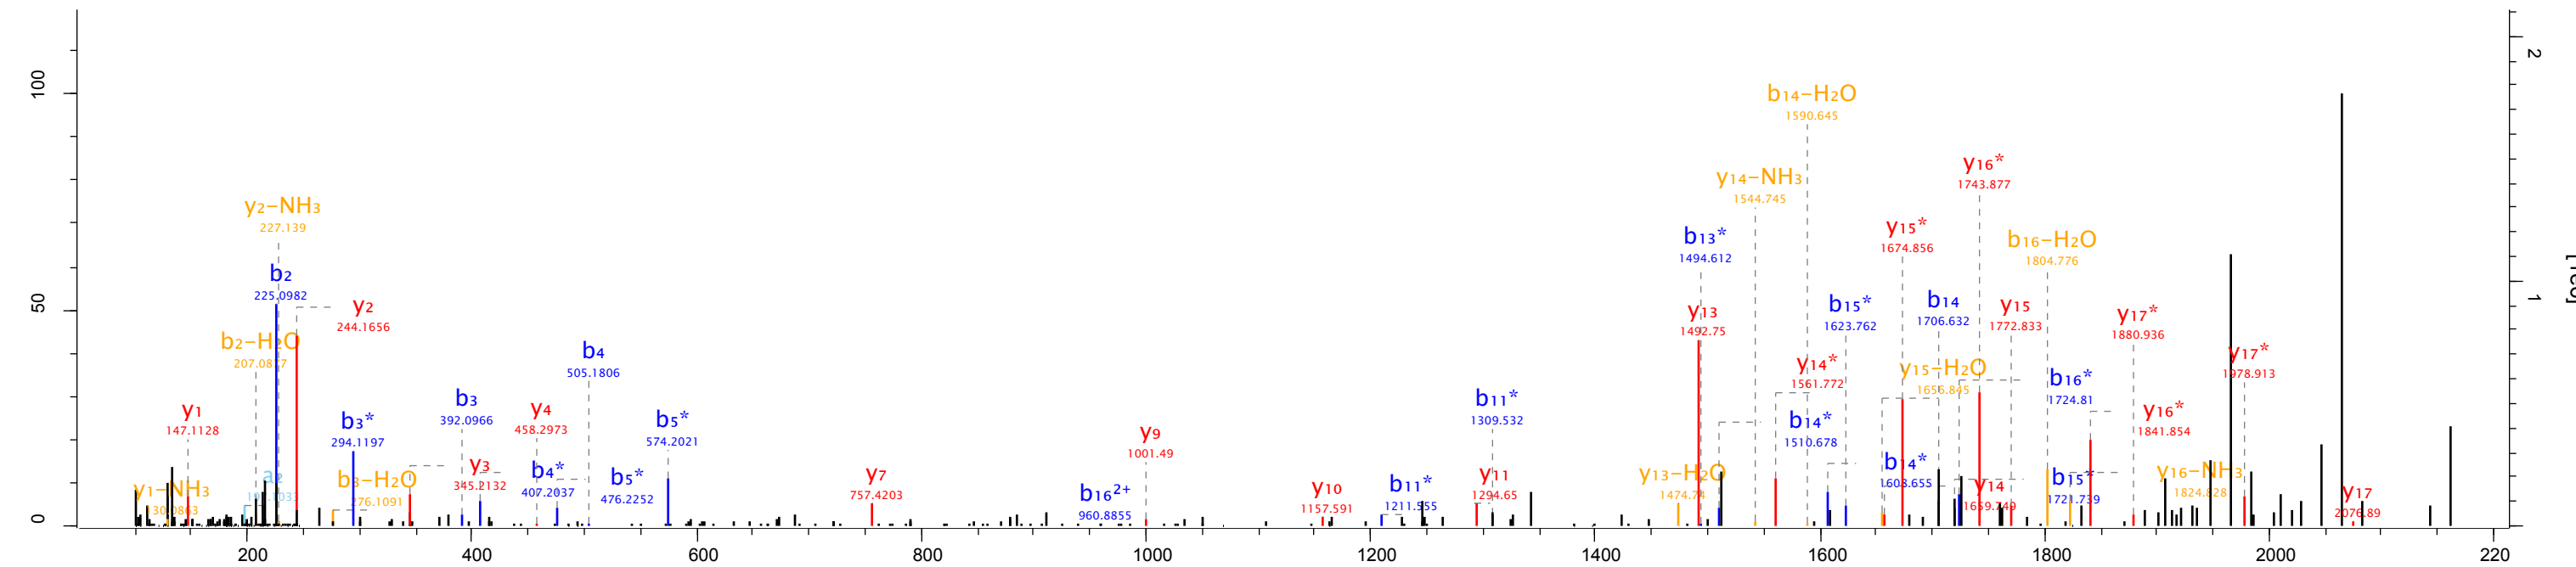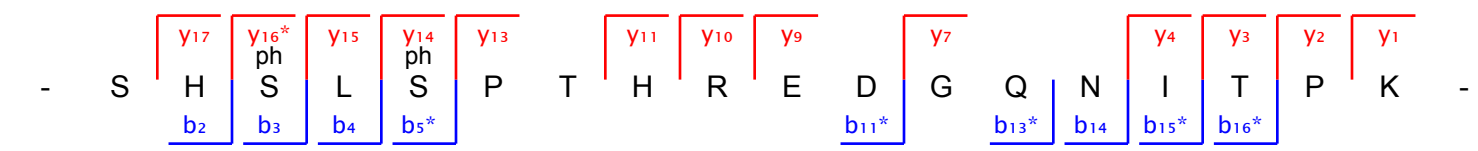

Raw file: 20150812\_A375SR\_Phospho\_BR1\_04  
 Scan: 11321 Method: FTMS; HCD Score: 105.53 m/z: 693.35 Gene names: ELK3

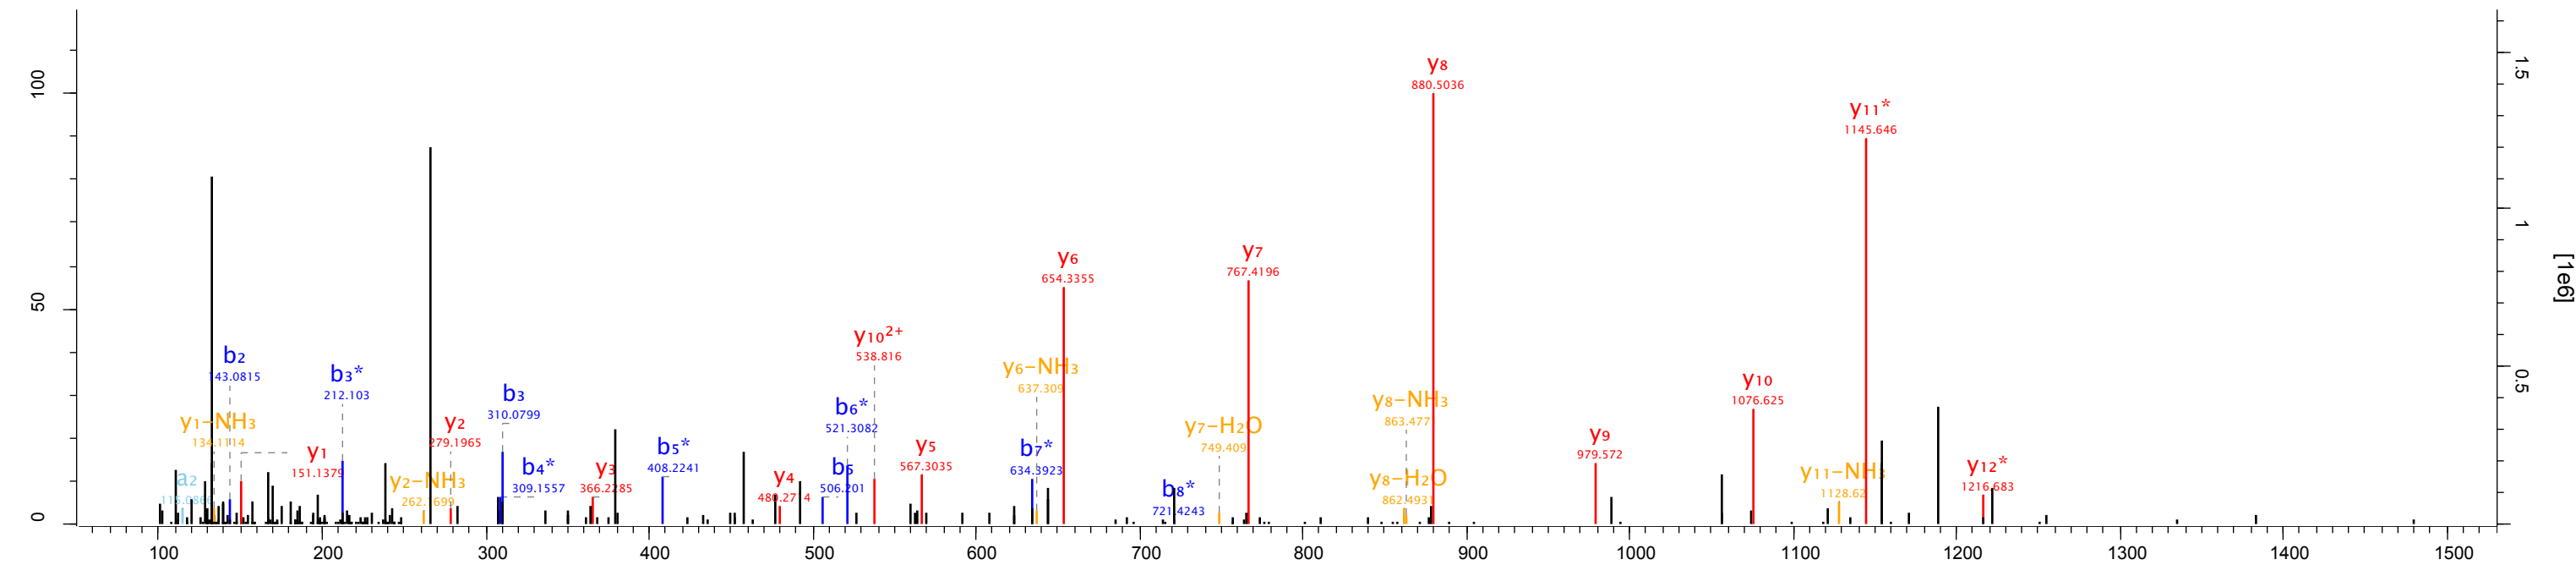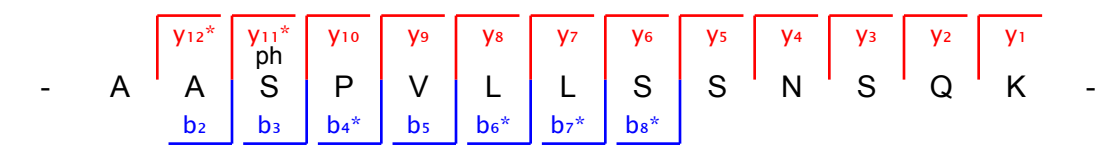

Raw file 20150812\_A375SR\_Phospho\_BR1\_04 Scan 14041 Method FTMS; HCD Score 185.3 m/z 782.84 Gene names PWWP2A

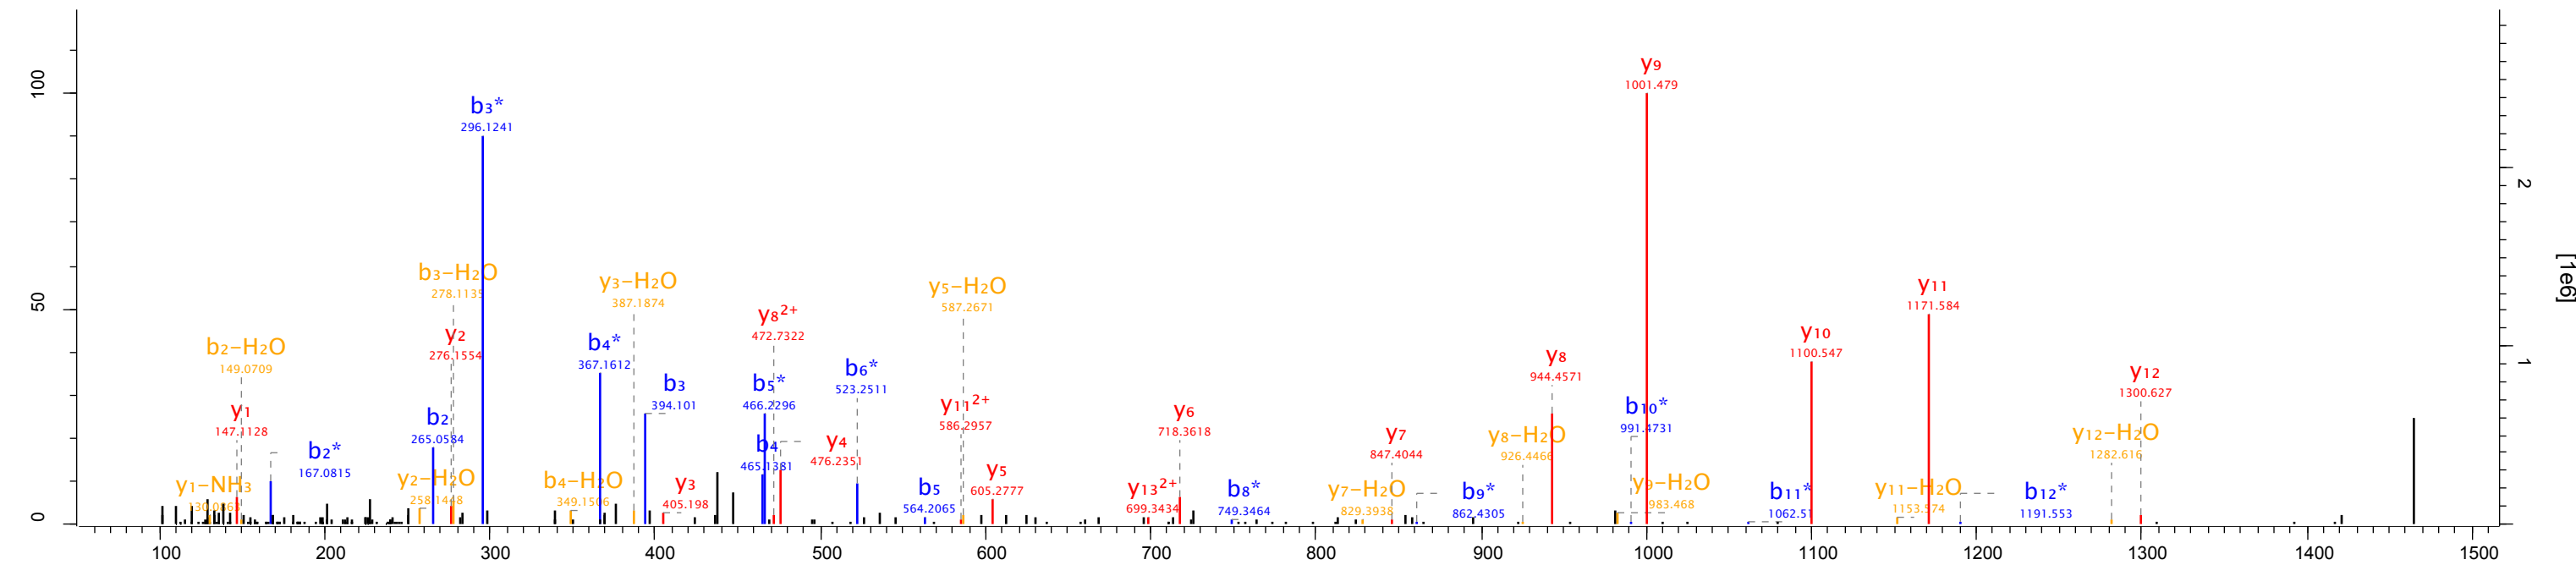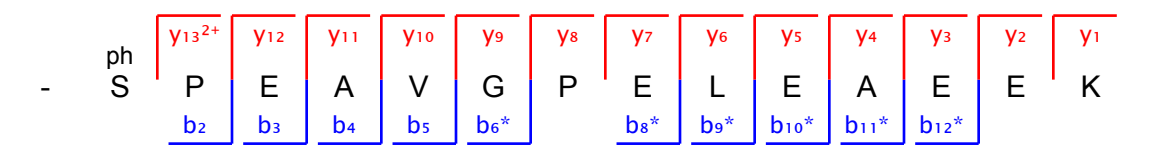

Raw file: 20150812\_A375SR\_Phospho\_BR1\_04  
 Scan: 6121 Method: FTMS; HCD Score: 105.95 m/z: 844.36 Gene names: YAF2

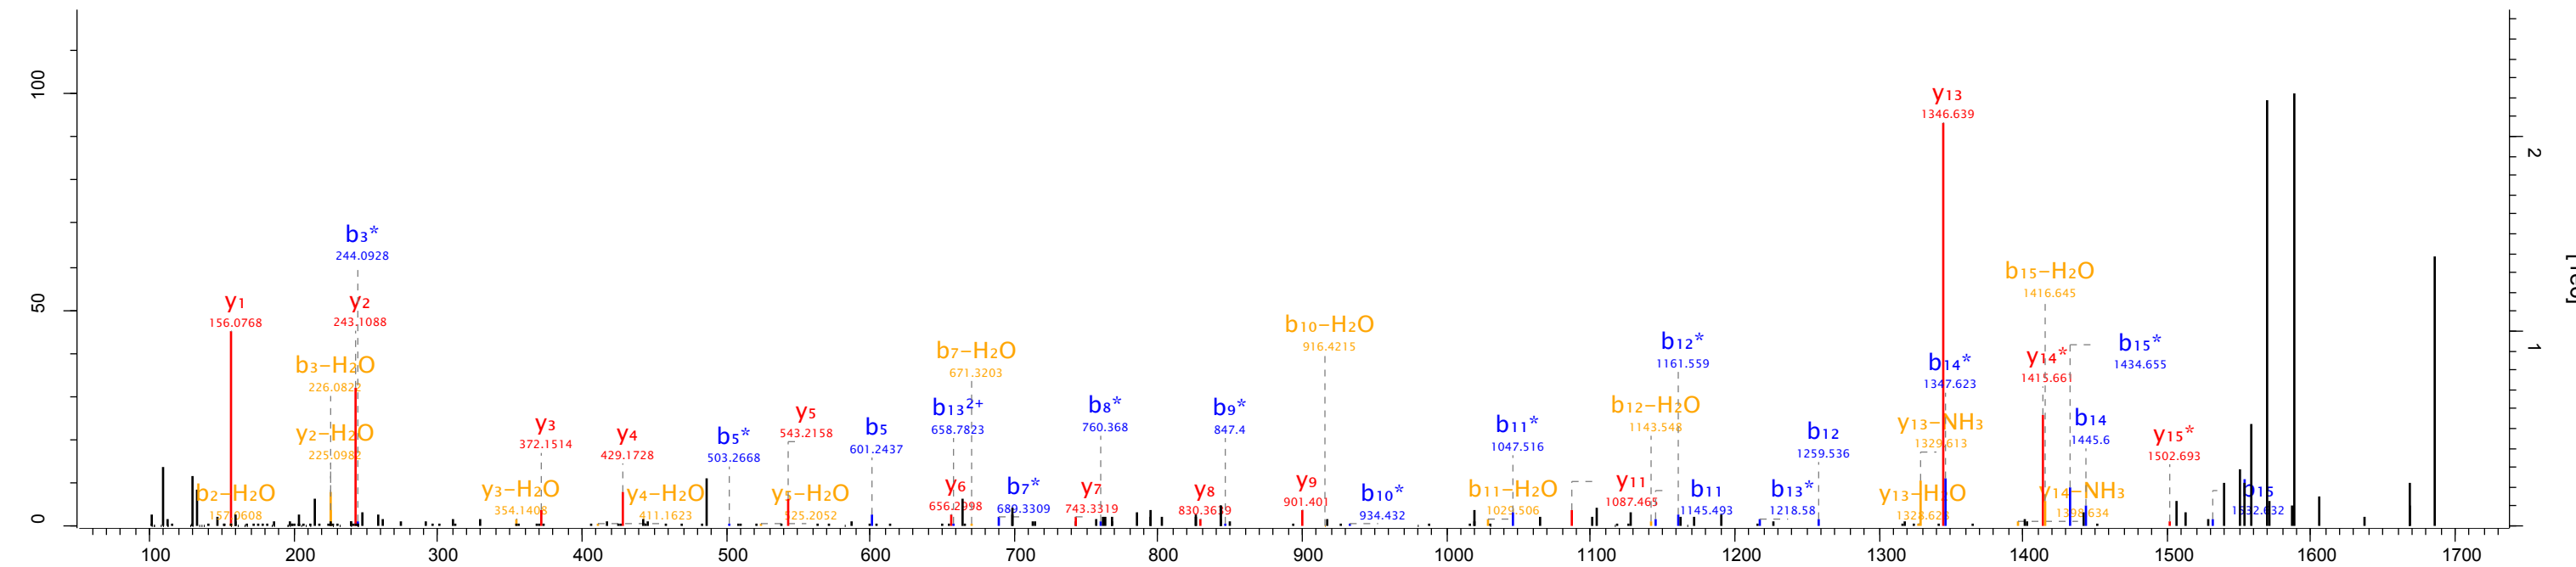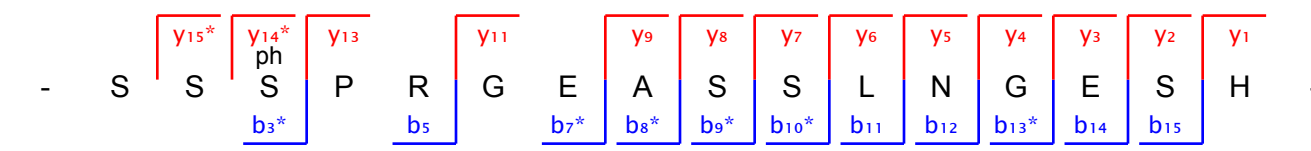

Raw file 20150812\_A375SR\_Phospho\_BR1\_05 Scan 13891 Method FTMS; HCD Score 75.01 m/z 784.86 Gene names PWWP2A

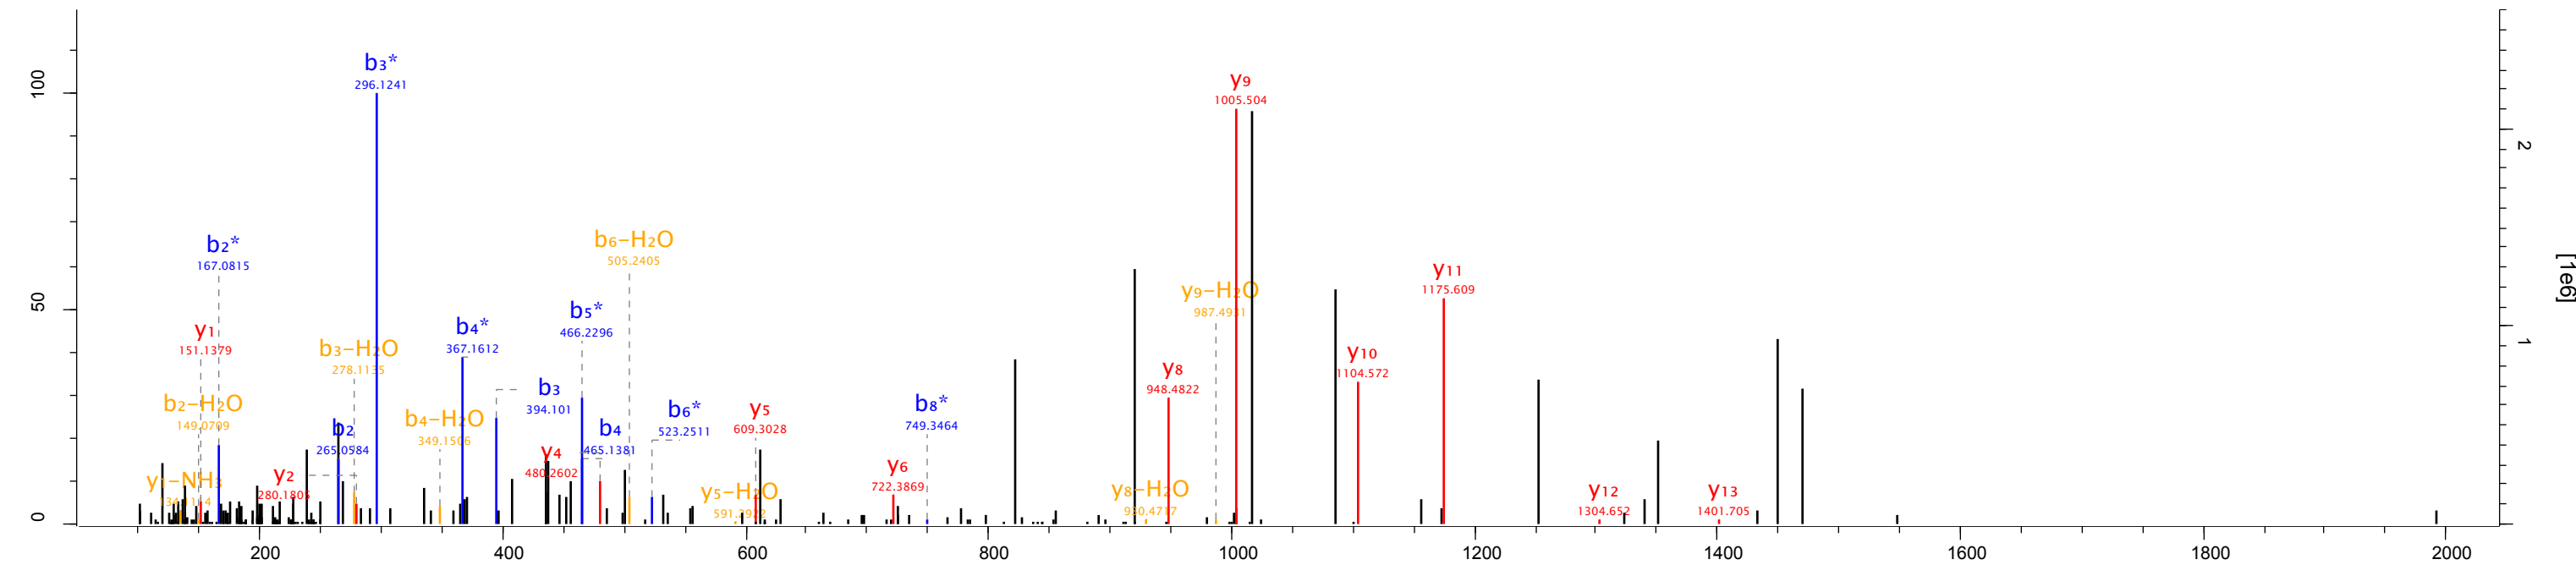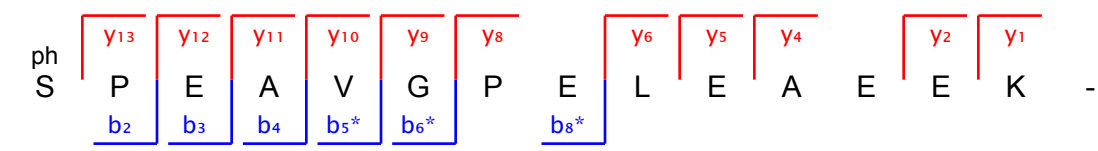

Raw file 20150812\_A375SR\_Phospho\_BR1\_05 Scan 14291 Method FTMS; HCD Score 149.27 m/z 440.93 Gene names RPL39P5;RPL39

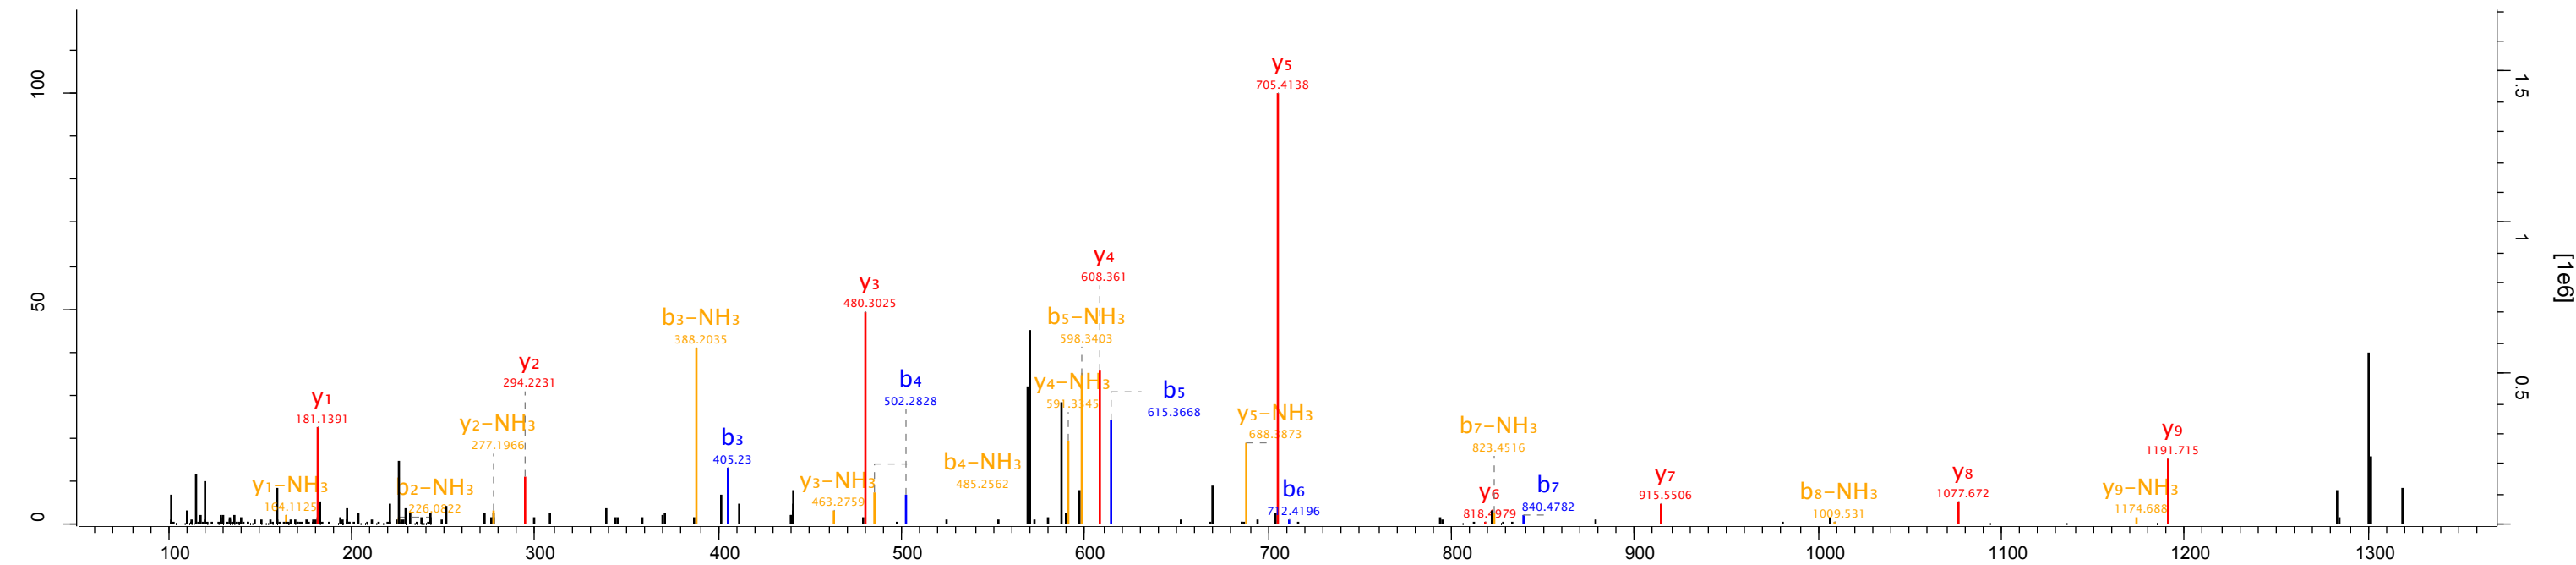

Raw file  
 20150812\_A375SR\_Phospho\_BR1\_05  
 Scan 24341 Method FTMS; HCD Score 229.68 m/z 968.93 Gene names MAPK11P1L

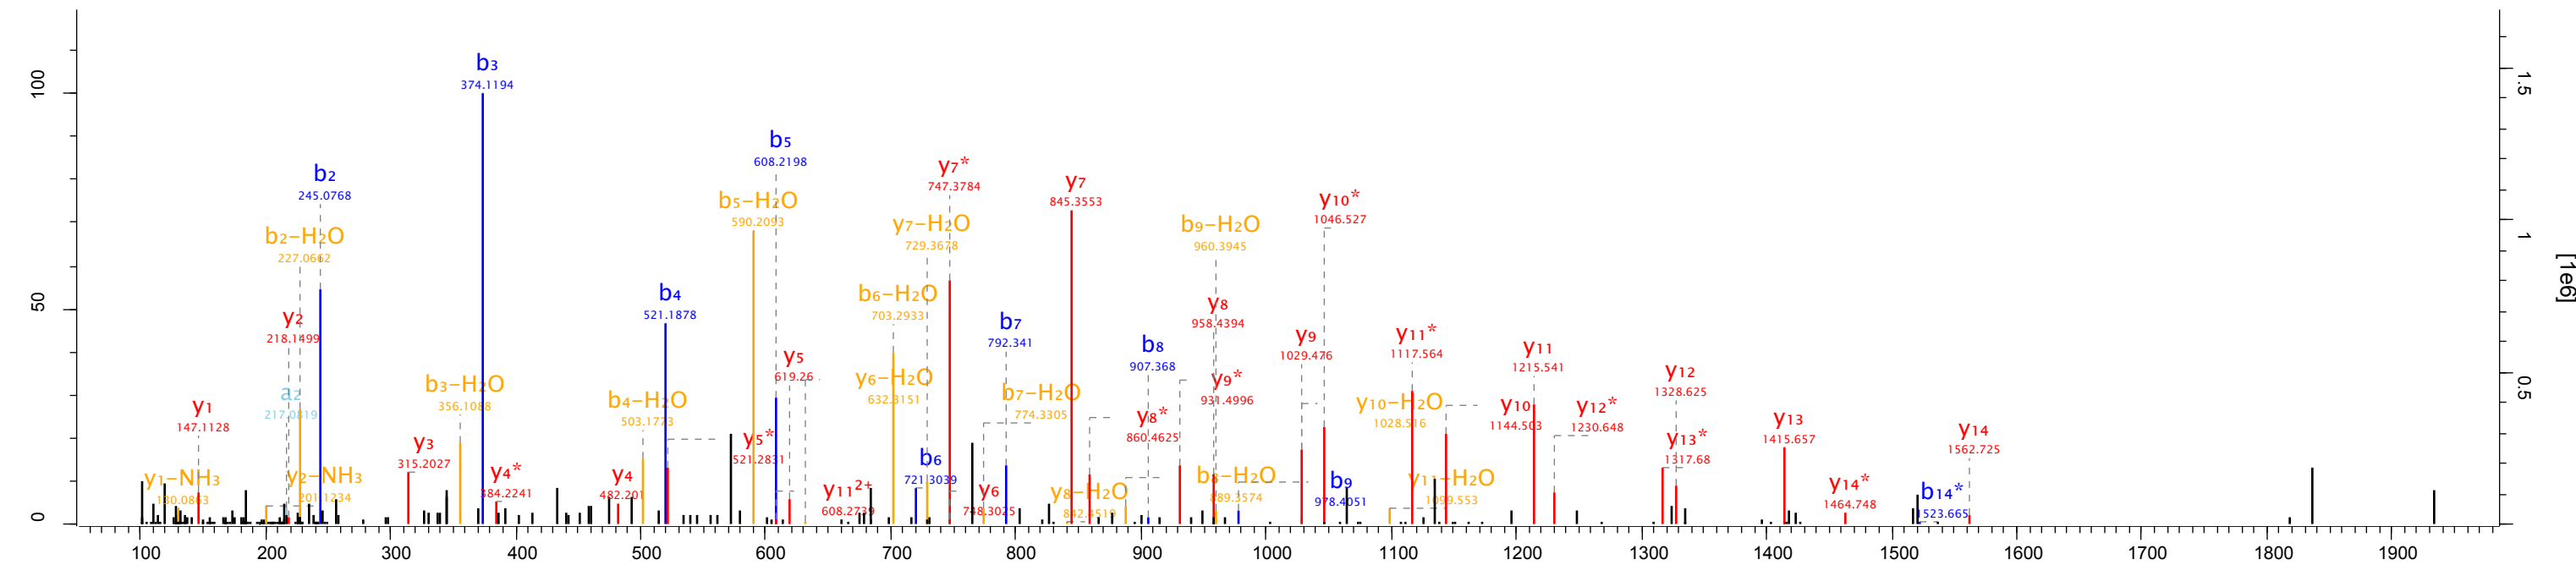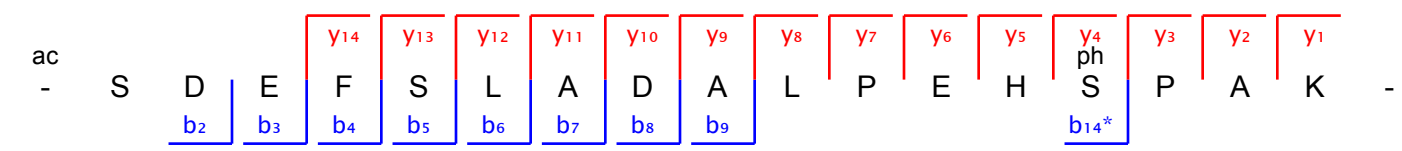



Raw file: 20150812\_A375SR\_Phospho\_BR1\_05  
 Scan: 5151 Method: FTMS; HCD Score: 64.22 m/z: 530.24

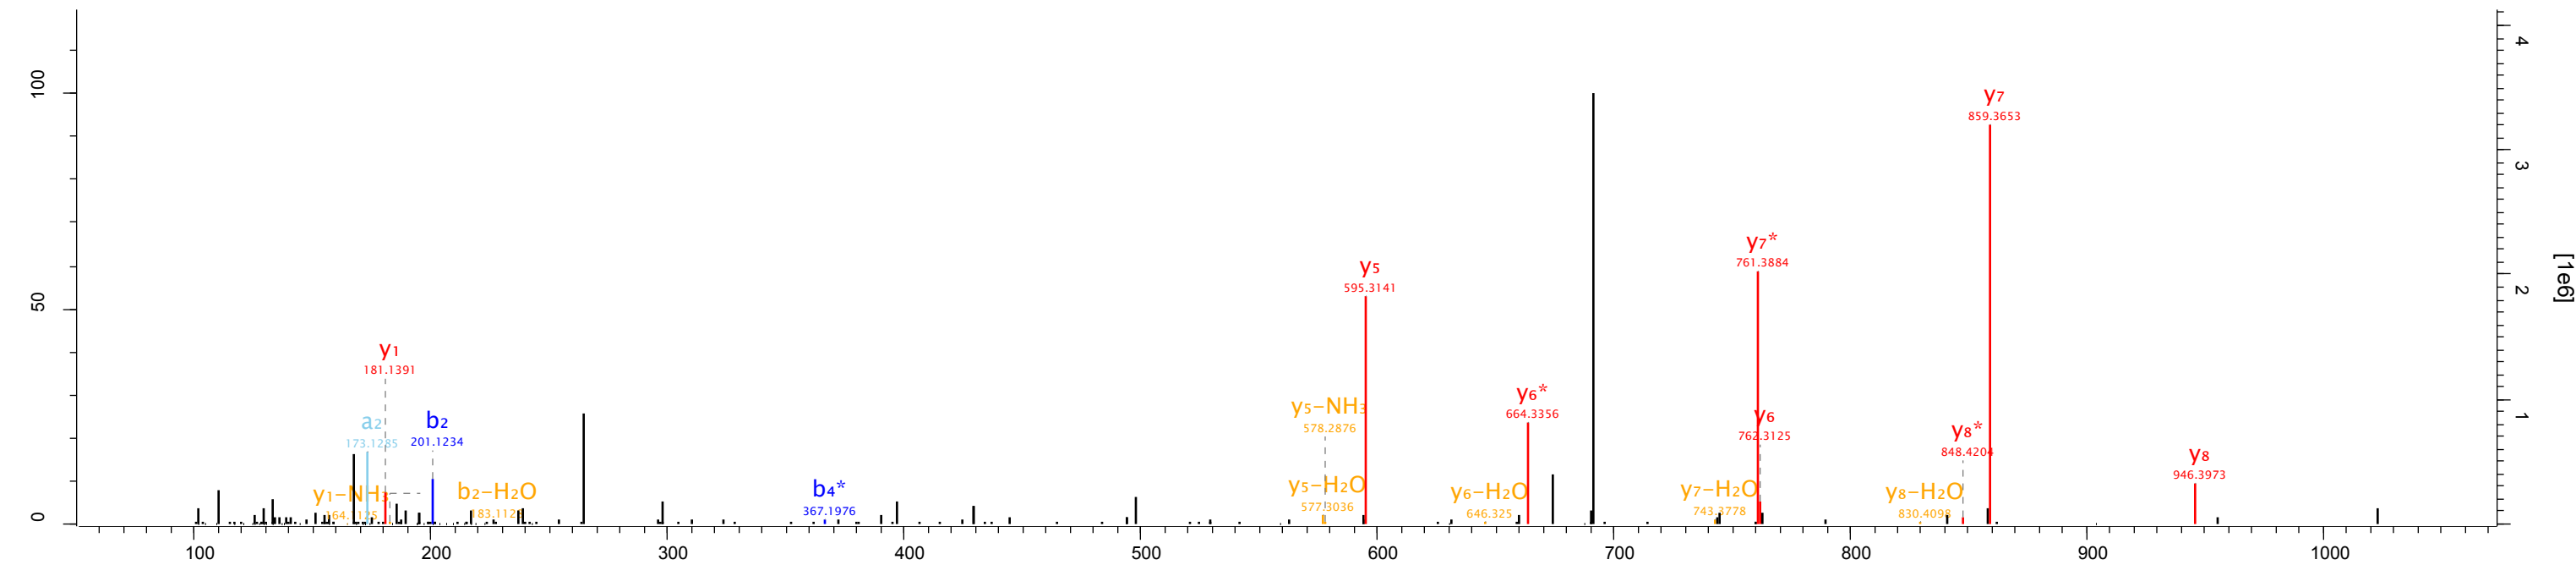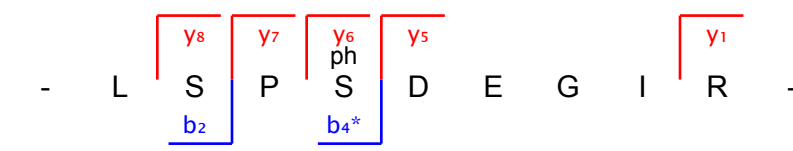

Raw file 20150812\_A375SR\_Phospho\_BR1\_05 Scan 6221 Method FTMS; HCD Score 70.03 m/z 426.73

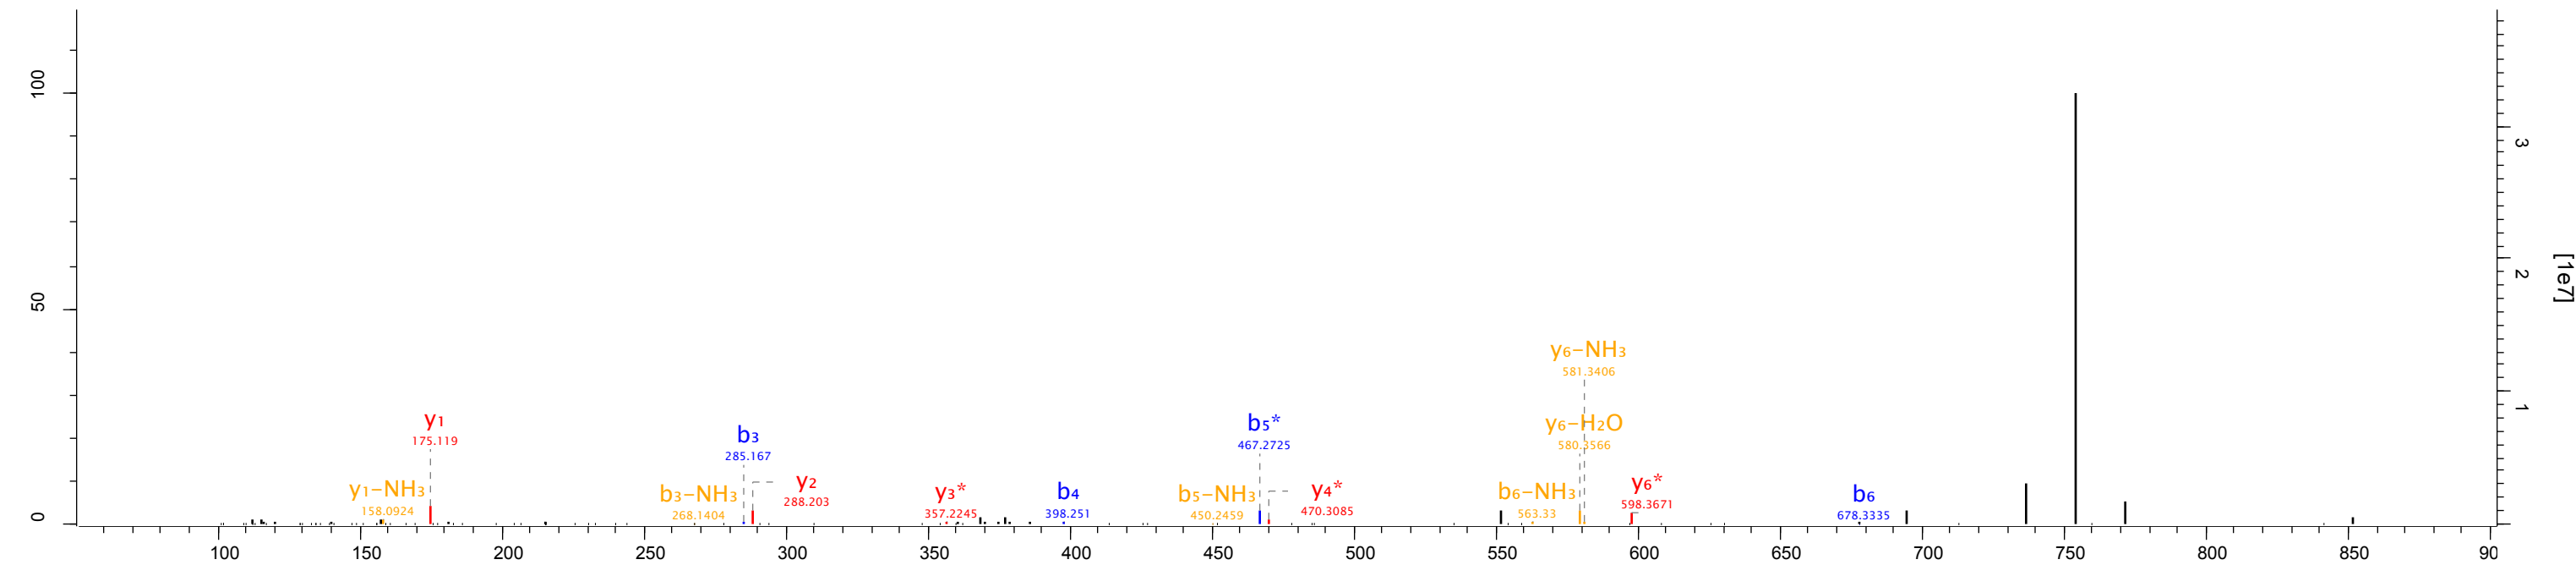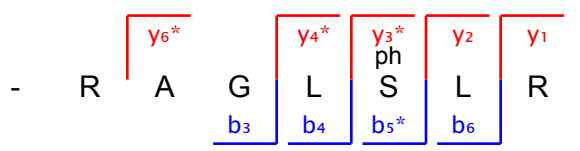

Raw file: 20150812\_A375SR\_Phospho\_BR1\_06  
 Scan: 24571 Method: FTMS; HCD Score: 275.76 m/z: 968.42 Gene names: MAPK11P1L

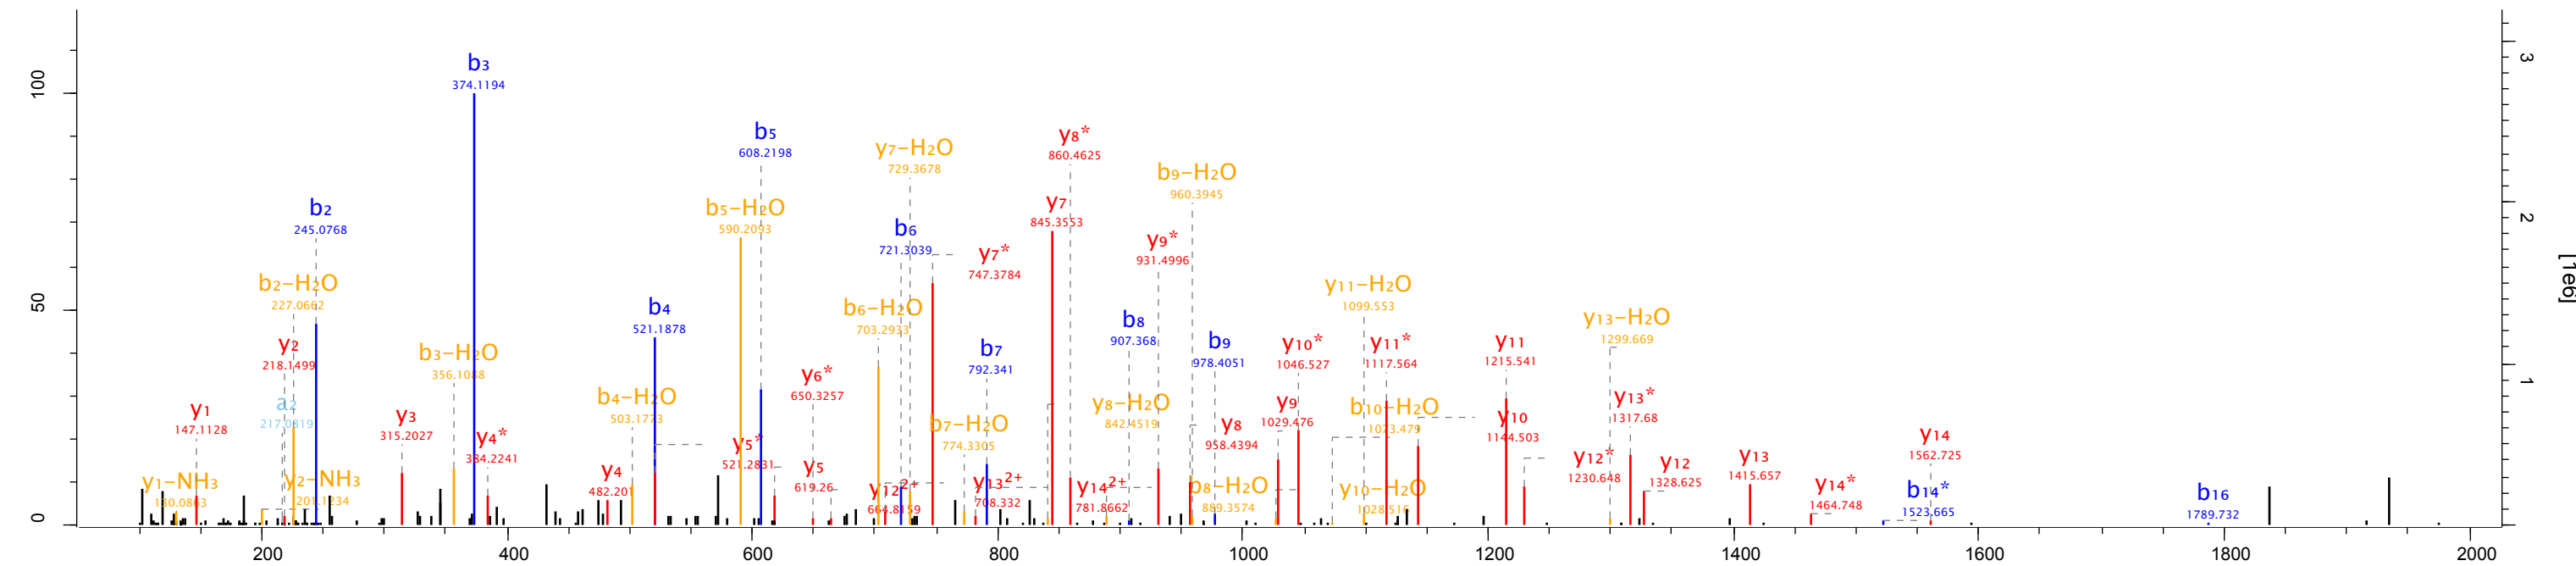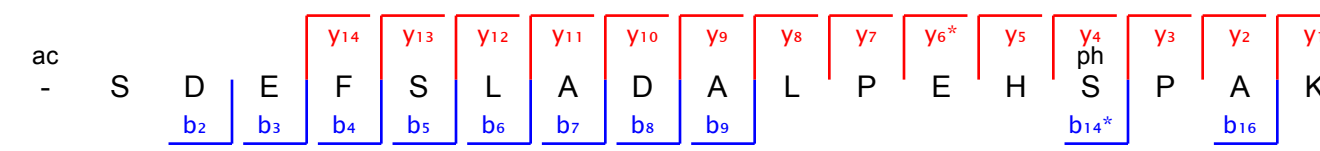

Raw file 20150812\_A375SR\_Phospho\_BR1\_06 Scan 6671 Method FTMS; HCD Score 72.93 m/z 426.73

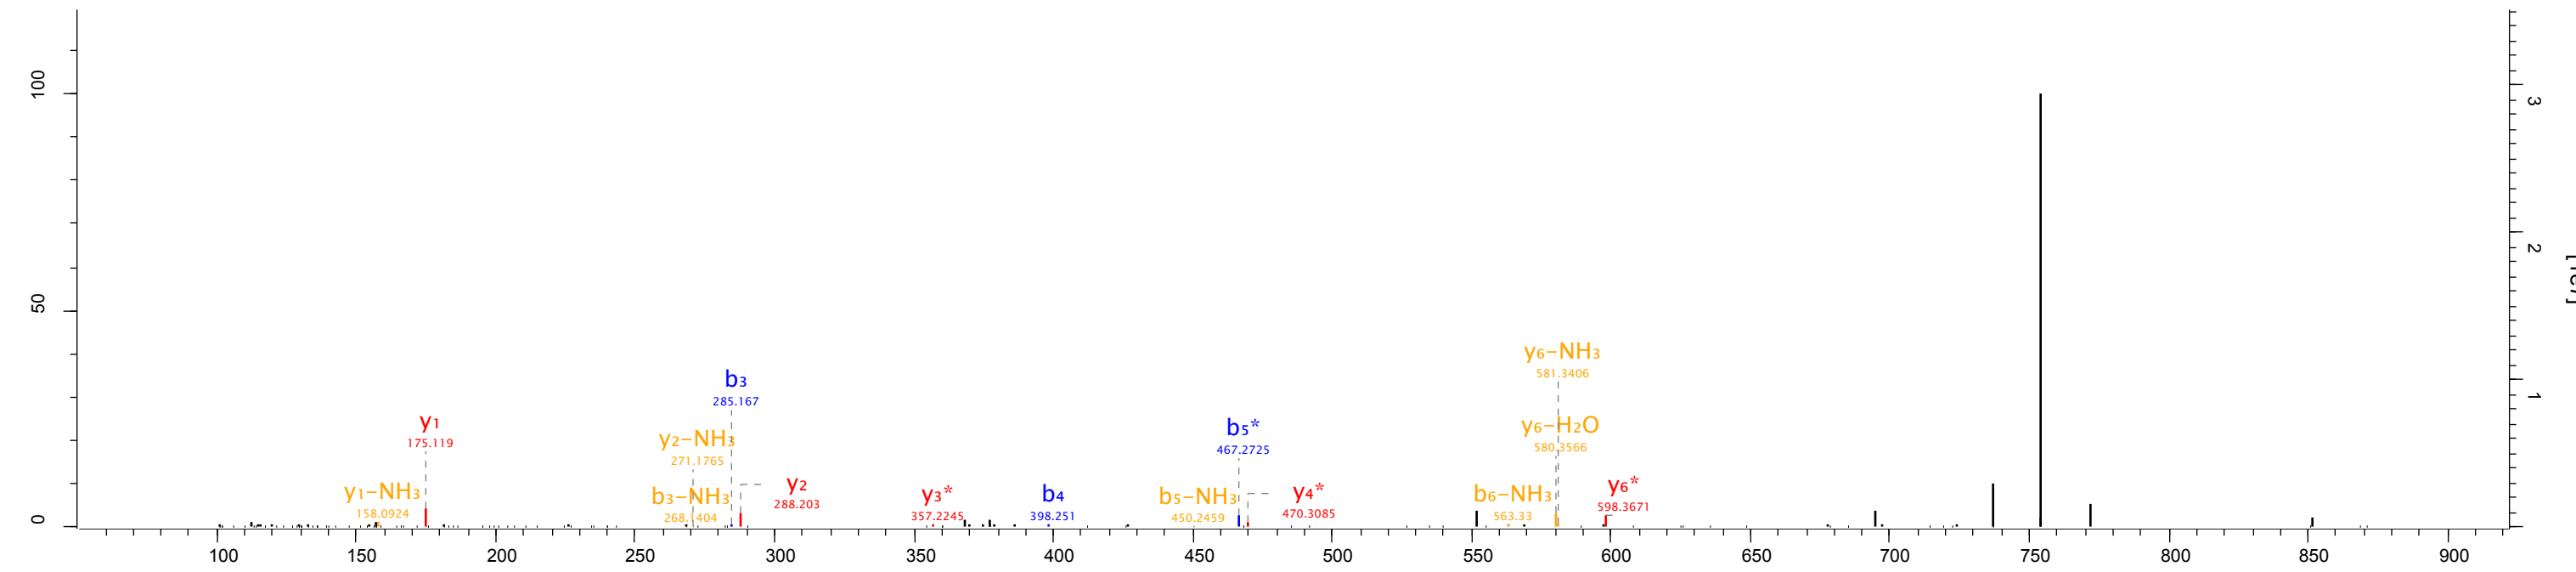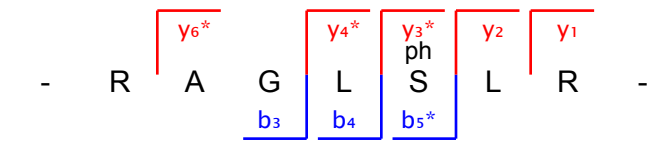

Raw file 20150812\_A375SR\_Phospho\_BR1\_07 Scan 18371 Method FTMS; HCD Score 57.29 m/z 861.38

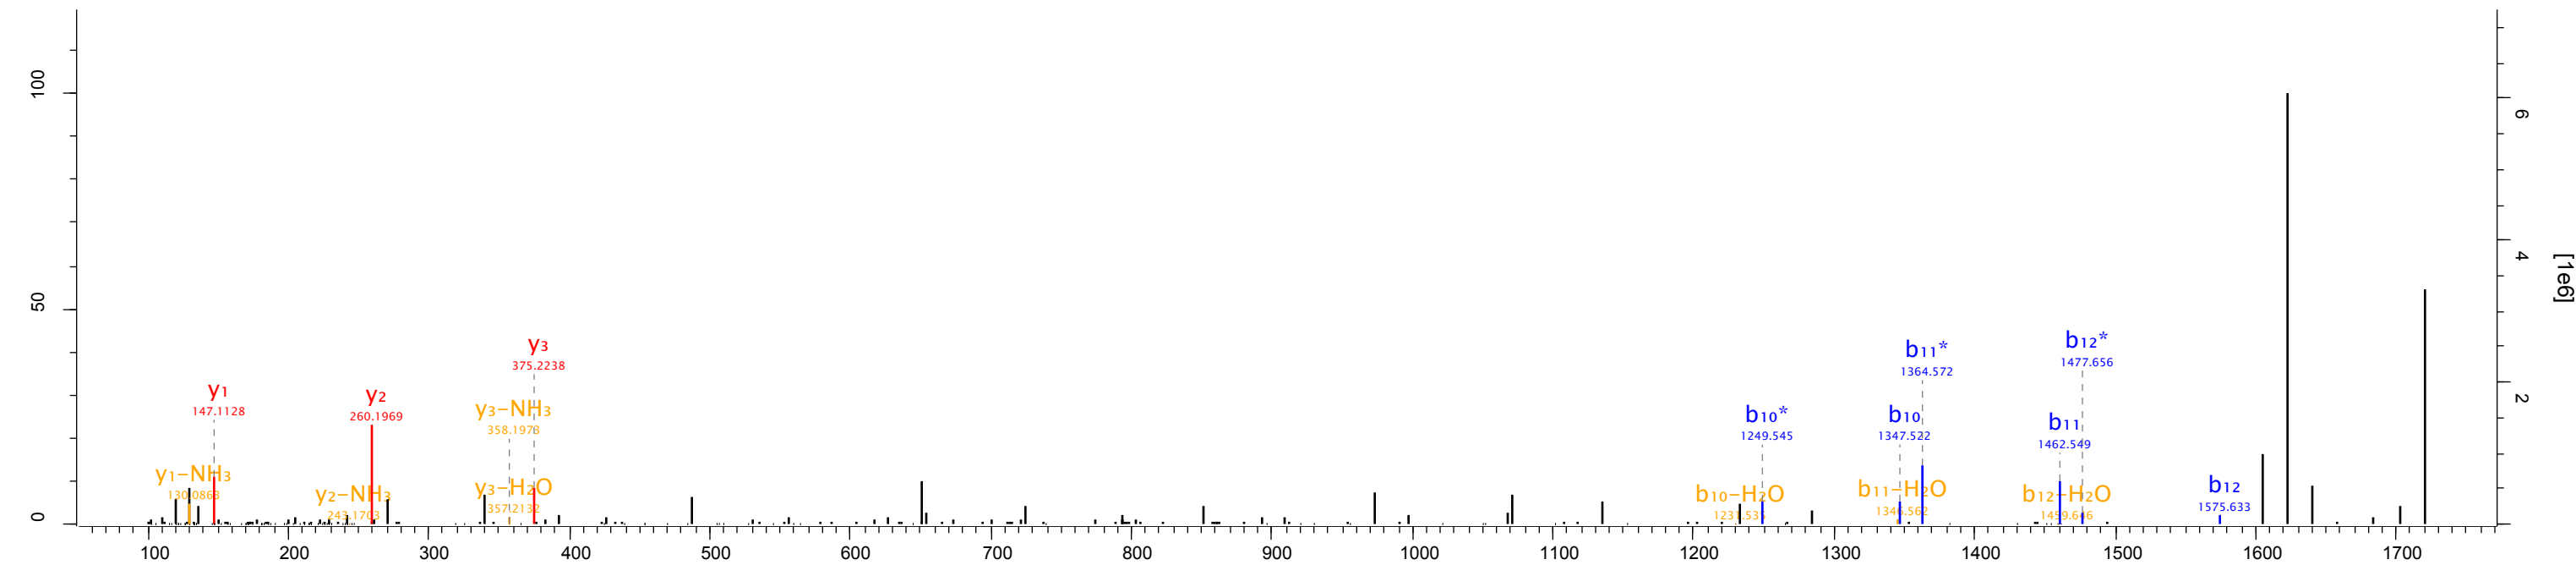

Raw file 20150812\_A375SR\_Phospho\_BR1\_08 Scan 21121 Method FTMS; HCD Score 49.08 m/z 782.75 Gene names ZNF579

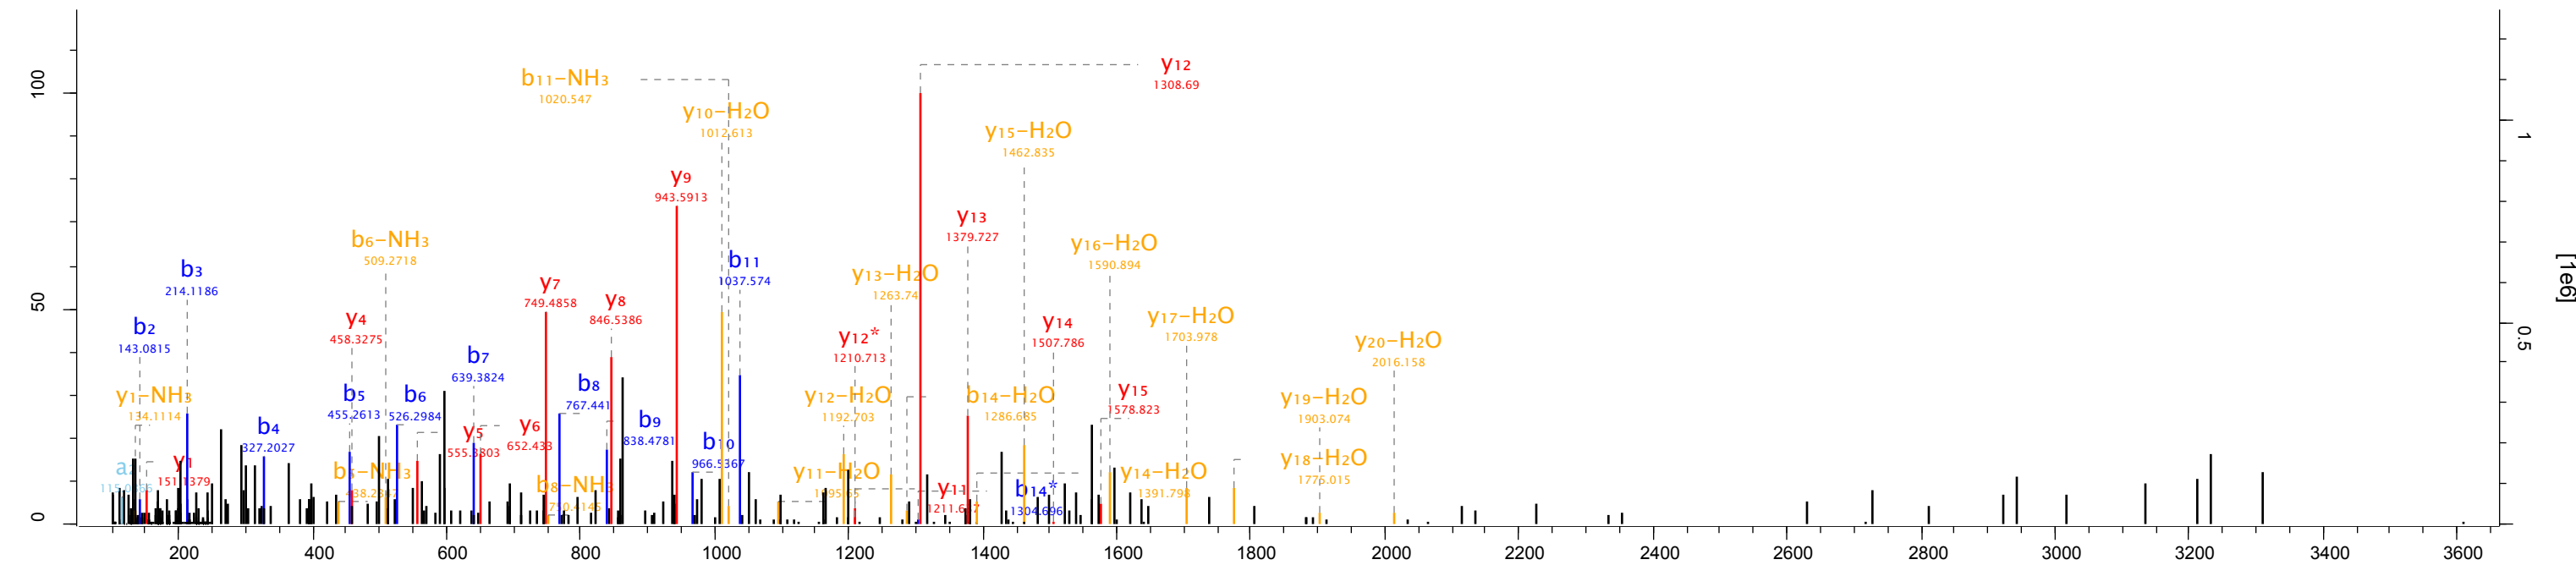

- A A A L Q A L Q A Q A P T S P P P P P P P L K -

b<sub>2</sub>
b<sub>3</sub>
b<sub>4</sub>
b<sub>5</sub>
b<sub>6</sub>
b<sub>7</sub>
b<sub>8</sub>
b<sub>9</sub>
b<sub>10</sub>
b<sub>11</sub>
b<sub>14</sub>\*
y<sub>15</sub>
y<sub>14</sub>
y<sub>13</sub>
y<sub>12</sub>
y<sub>11</sub>  
ph
y<sub>9</sub>
y<sub>8</sub>
y<sub>7</sub>
y<sub>6</sub>
y<sub>5</sub>
y<sub>4</sub>
y<sub>1</sub>

Raw file: 20150812\_A375SR\_Phospho\_BR1\_08  
 Scan: 7721 Method: FTMS; HCD Score: 58.82 m/z: 730.33 Gene names: CDON

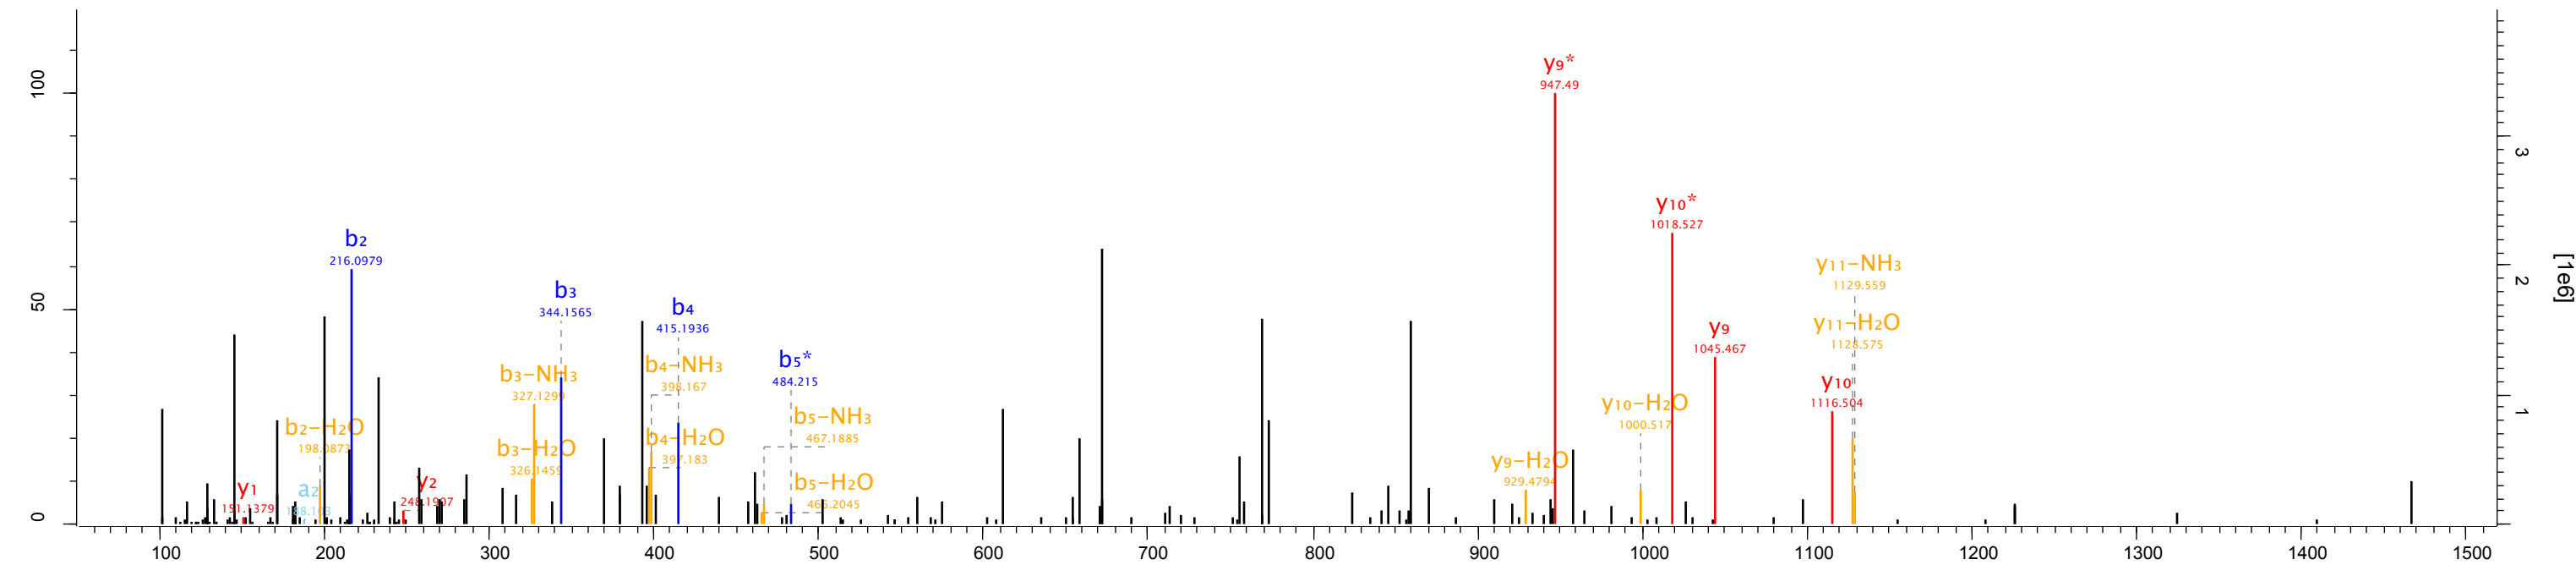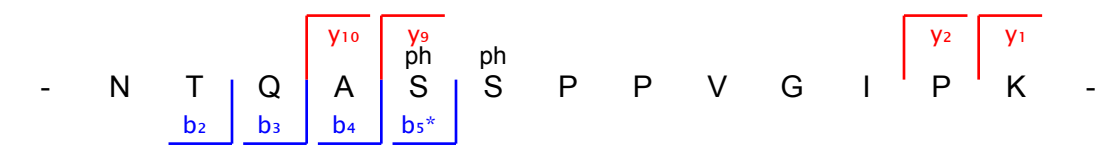

Raw file: 20150812\_A375SR\_Phospho\_BR1\_09  
 Scan: 13511 Method: FTMS; HCD Score: 98.05 m/z: 654.87 Gene names: RPL39P5;RPL39

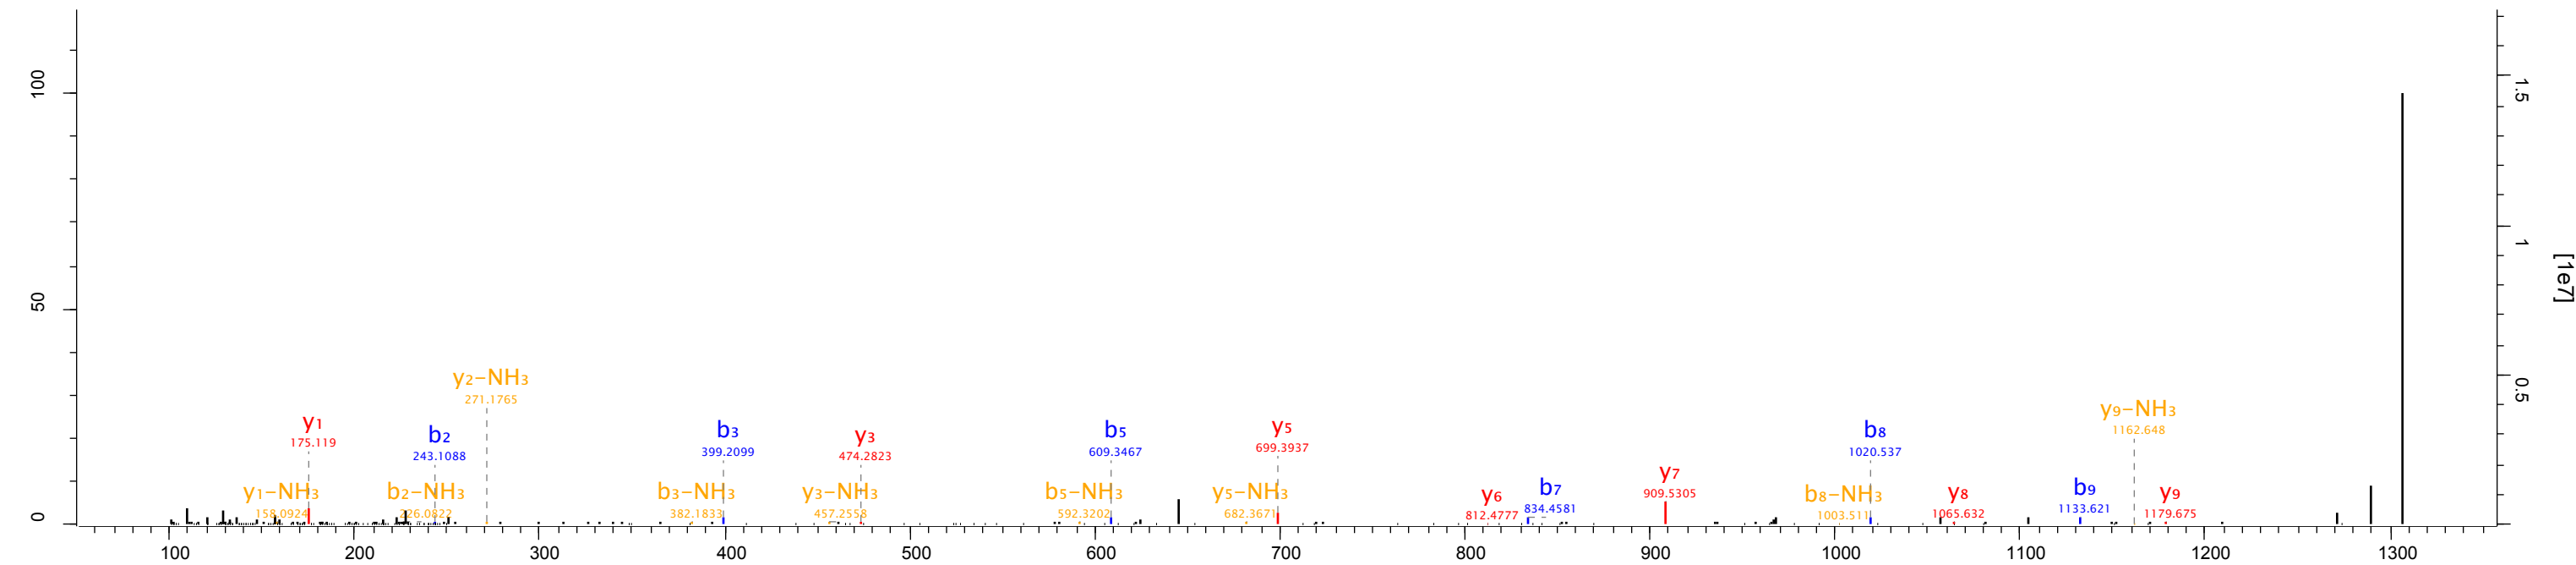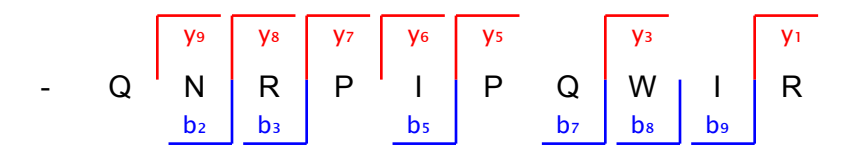



Raw file  
20150812\_A375SR\_Phospho\_BR1\_10

Scan 22201 Method FTMS; HCD Score 135.55 m/z 928.94 Gene names MAPK11P1L

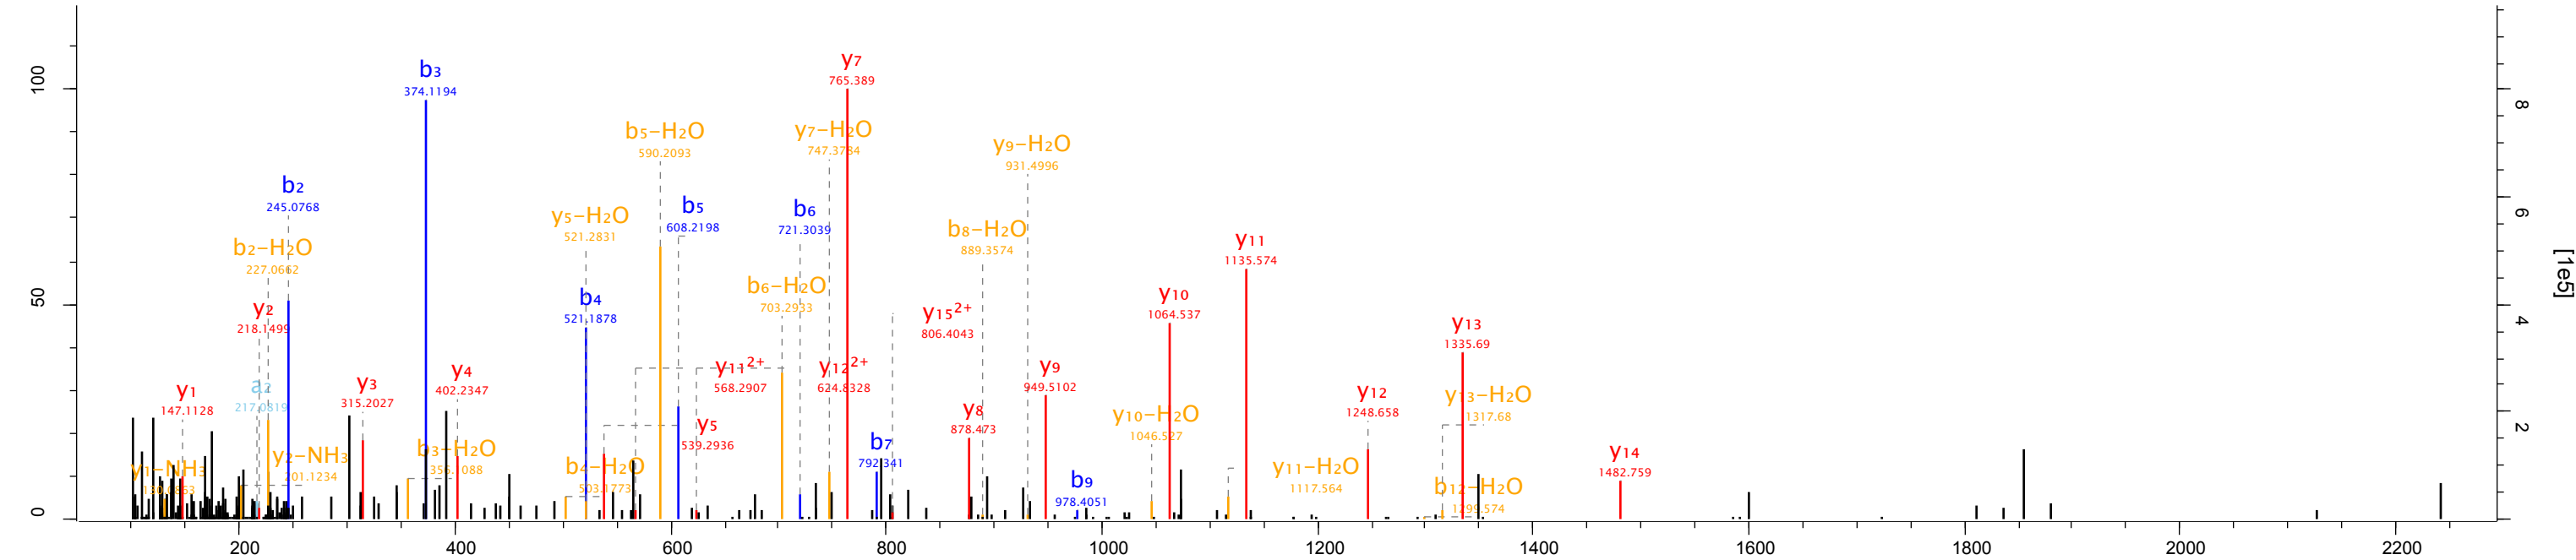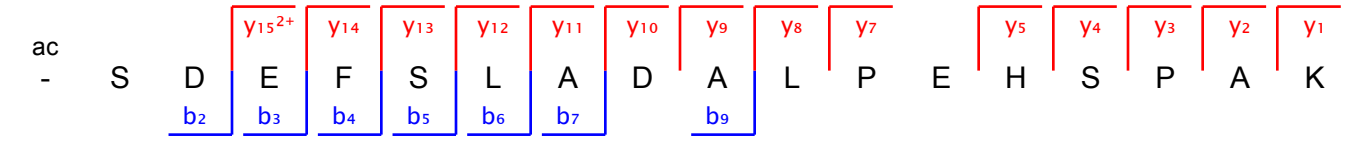

Raw file: 20150814\_A375SR\_Phospho\_BR2\_02  
 Scan: 23461 Method: FTMS; HCD Score: 151.89 m/z: 970.44 Gene names: MAPK11P1L

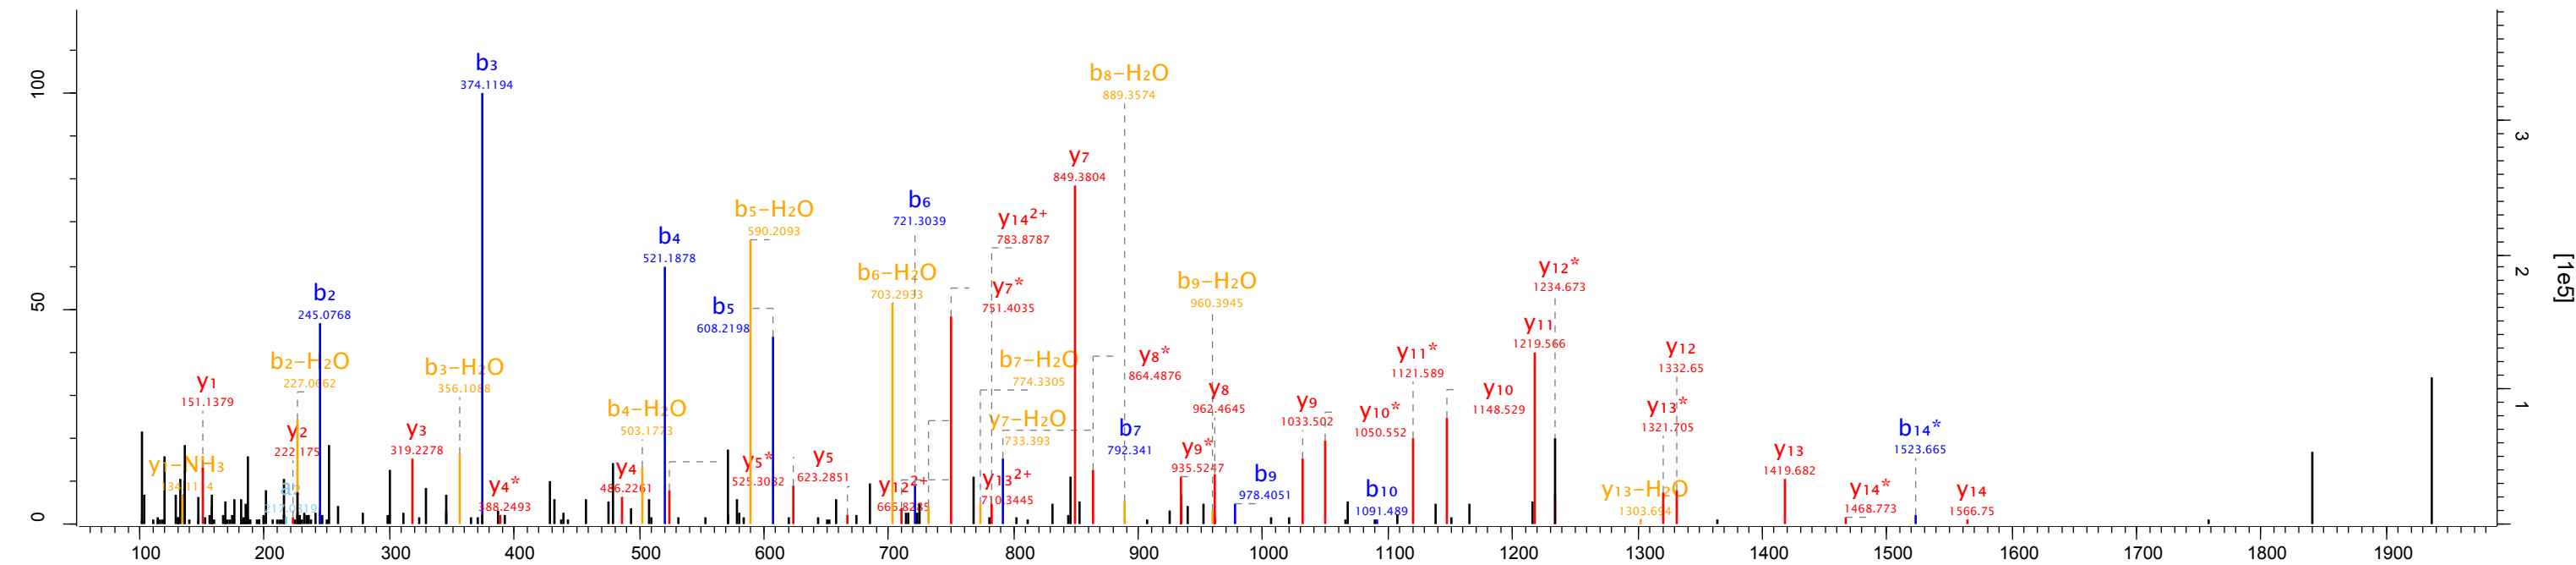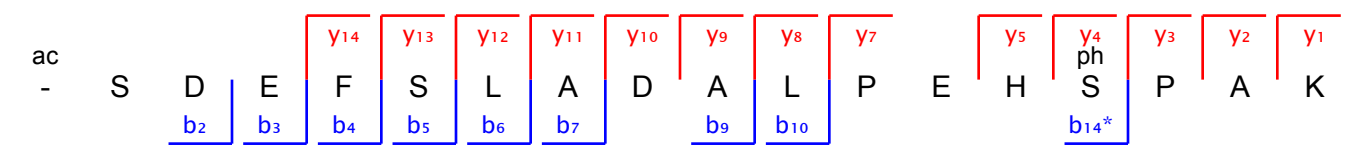

Raw file 20150814\_A375SR\_Phospho\_BR2\_03 Scan 11701 Method FTMS; HCD Score 328.29 m/z 1031.92

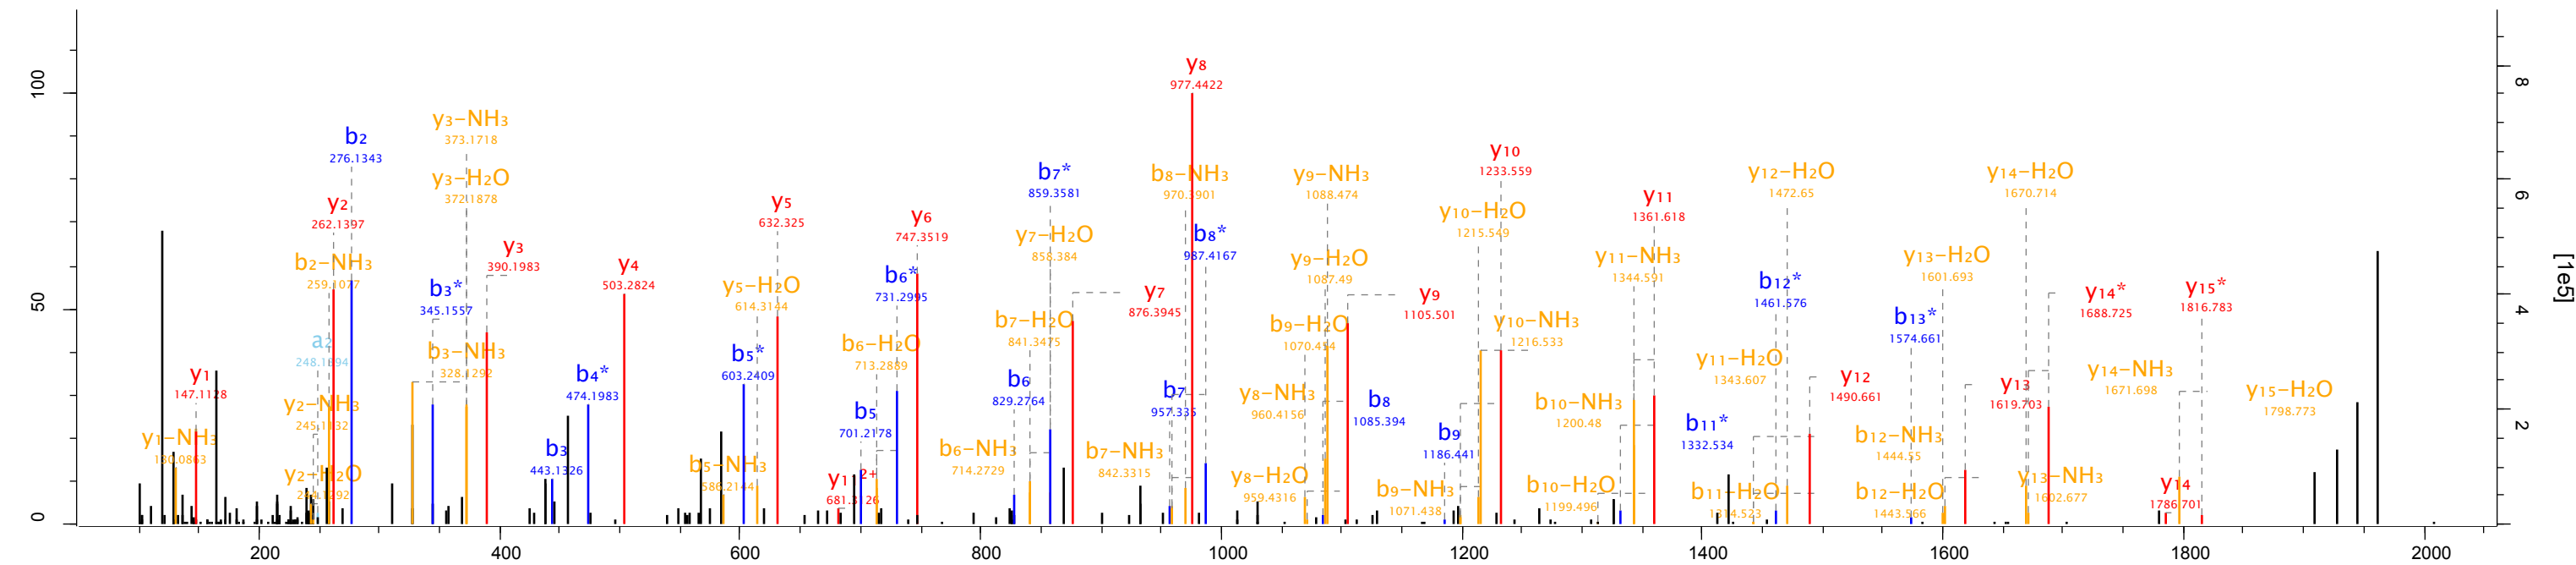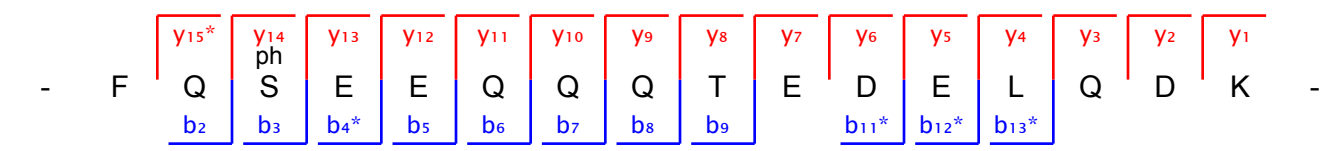

Raw file 20150814\_A375SR\_Phospho\_BR2\_03 Scan 12291 Method FTMS; HCD Score 64.12 m/z 556.27

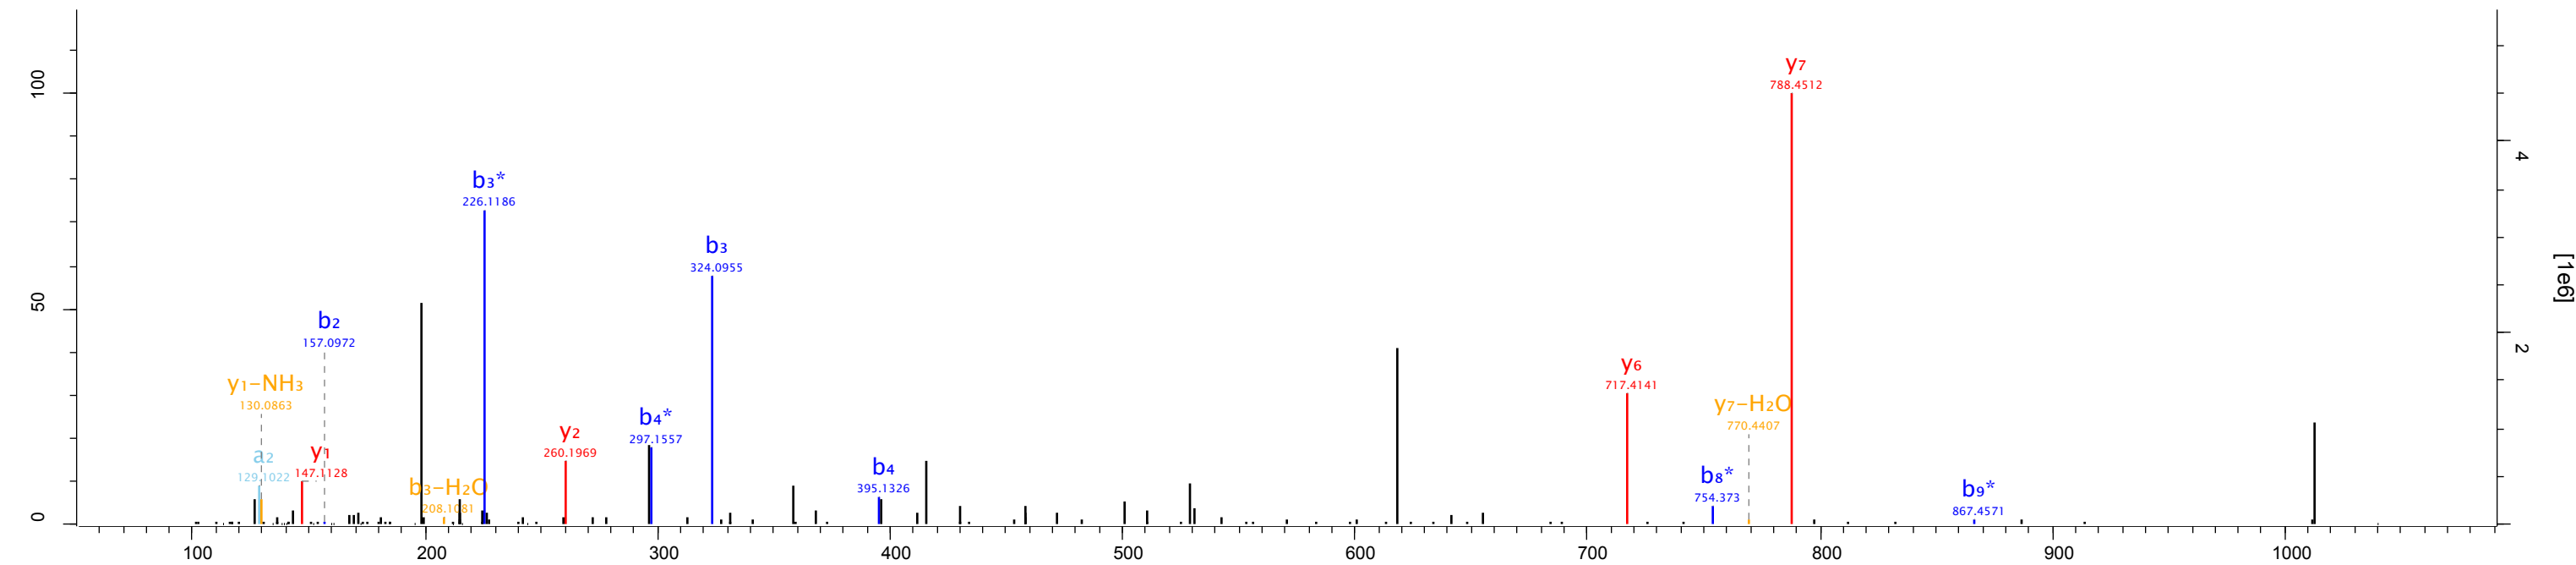

Raw file: 20150814\_A375SR\_Phospho\_BR2\_03  
 Scan: 21541 Method: FTMS; HCD Score: 137.64 m/z: 659.99 Gene names: PDZD2

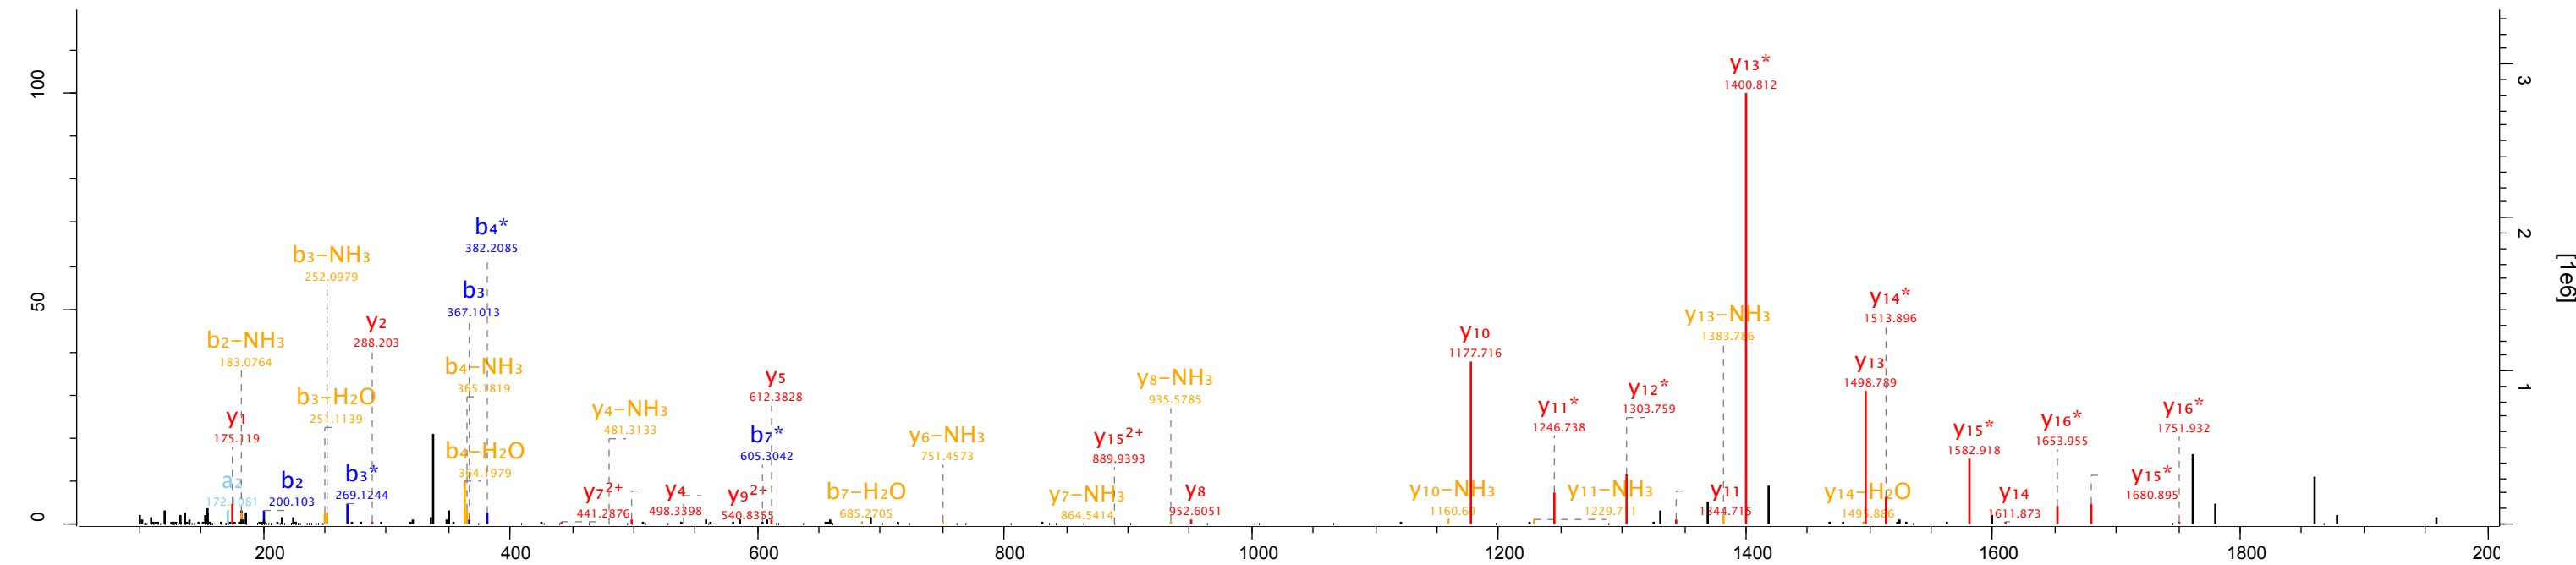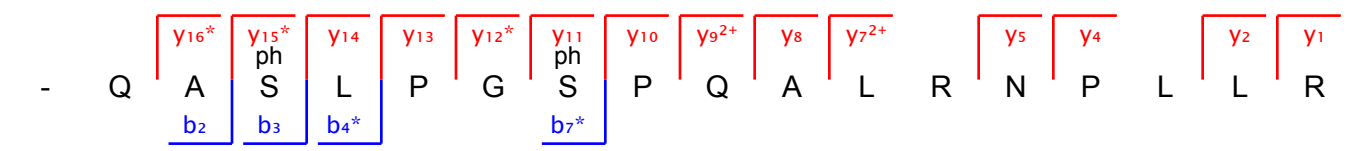

Raw file  
20150814\_A375SR\_Phospho\_BR2\_03

Scan 23741 Method FTMS; HCD m/z 211.35 968.42 Gene names MAPK11P1L

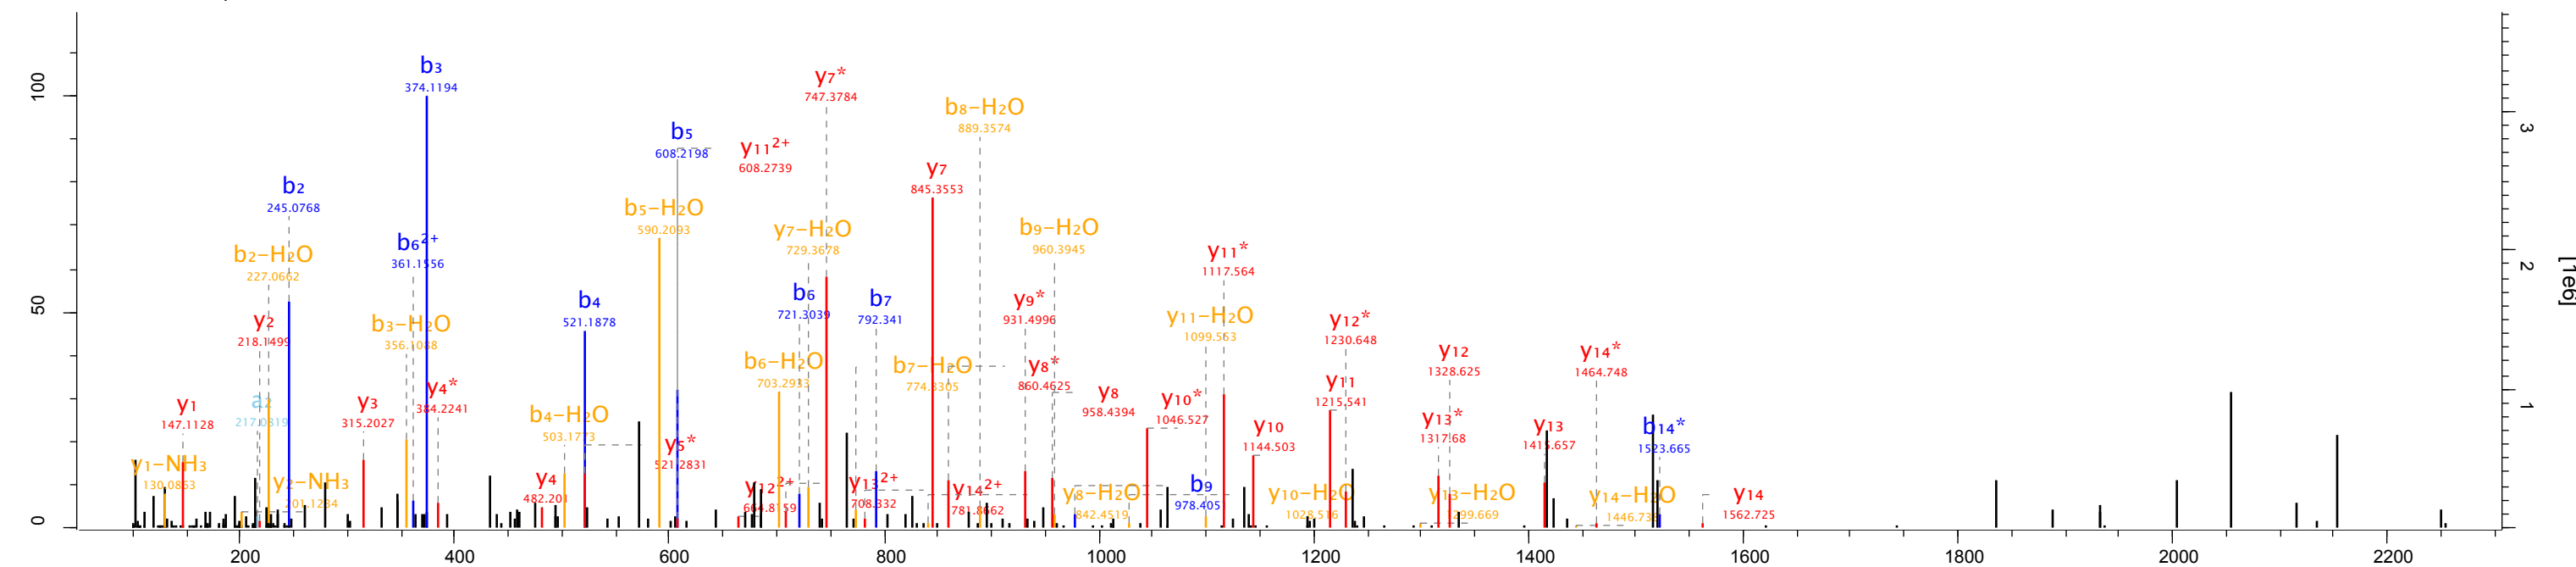

ac  
- S D E F S L A D A L P E H S P A K -  
b2 b3 b4 b5 b6 b7 b9 b14\*

Raw file: 20150814\_A375SR\_Phospho\_BR2\_03  
 Scan: 5641 Method: FTMS; HCD Score: 171.9 m/z: 841.35 Gene names: YAF2

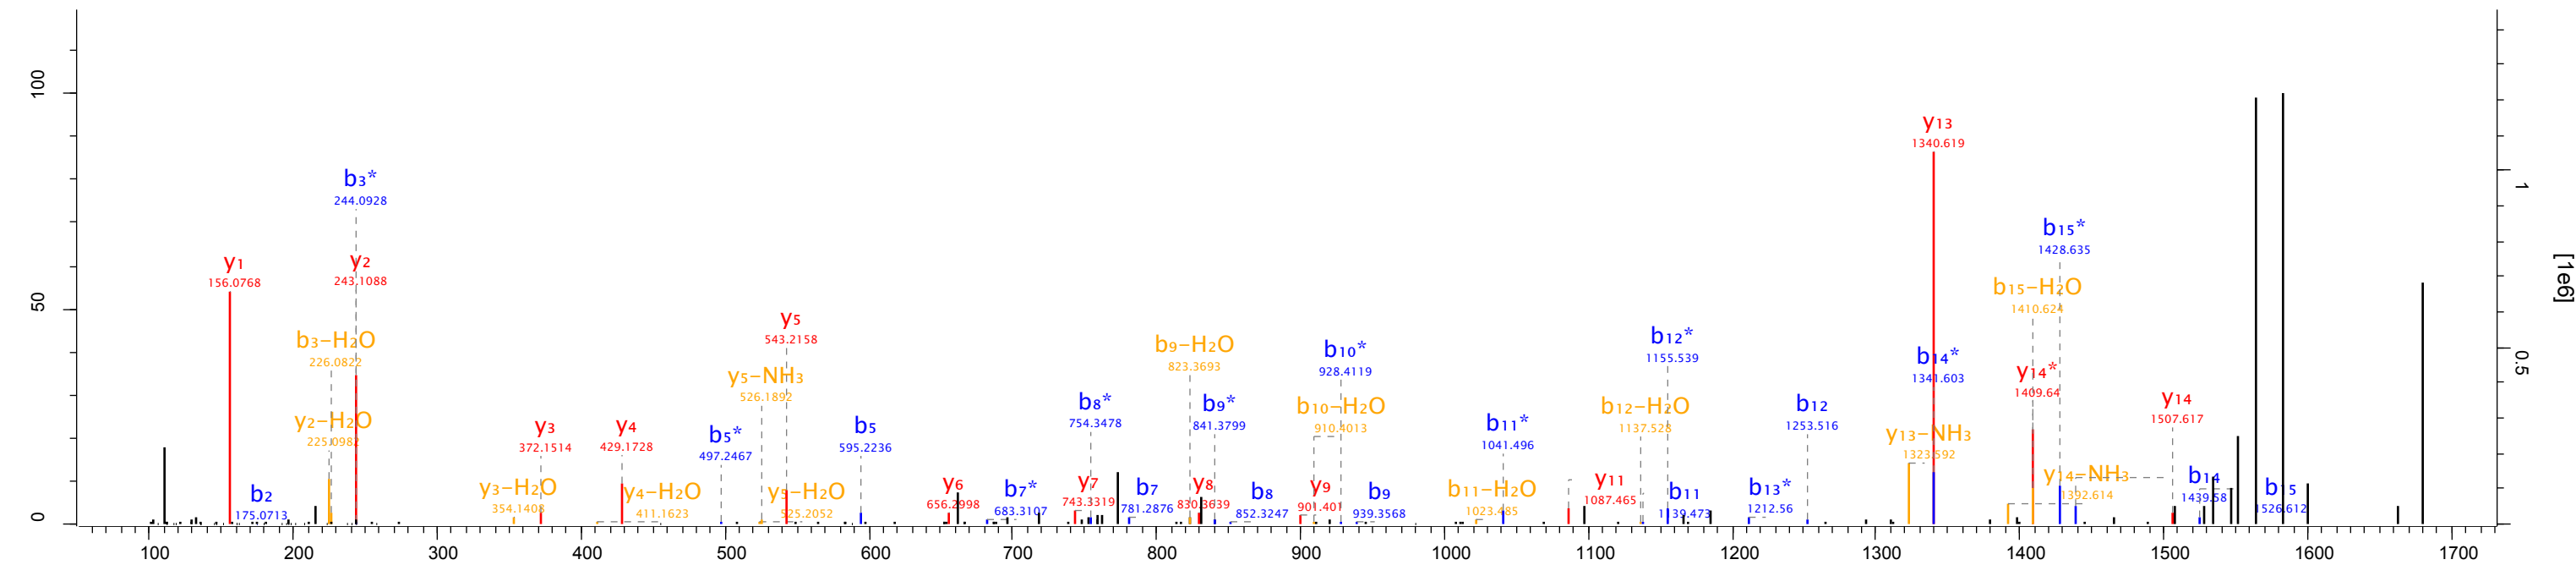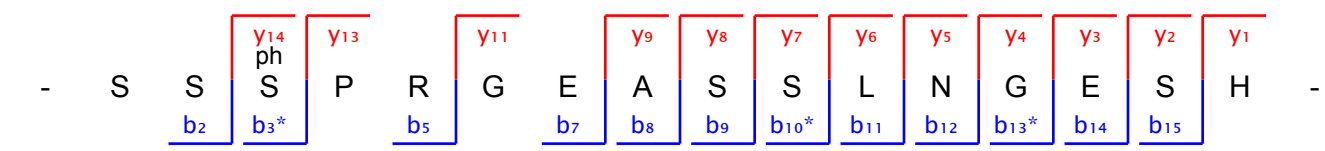

Raw file: 20150814\_A375SR\_Phospho\_BR2\_04  
 Scan: 10621 Method: FTMS; HCD Score: 124.2 m/z: 691.34 Gene names: ELK3

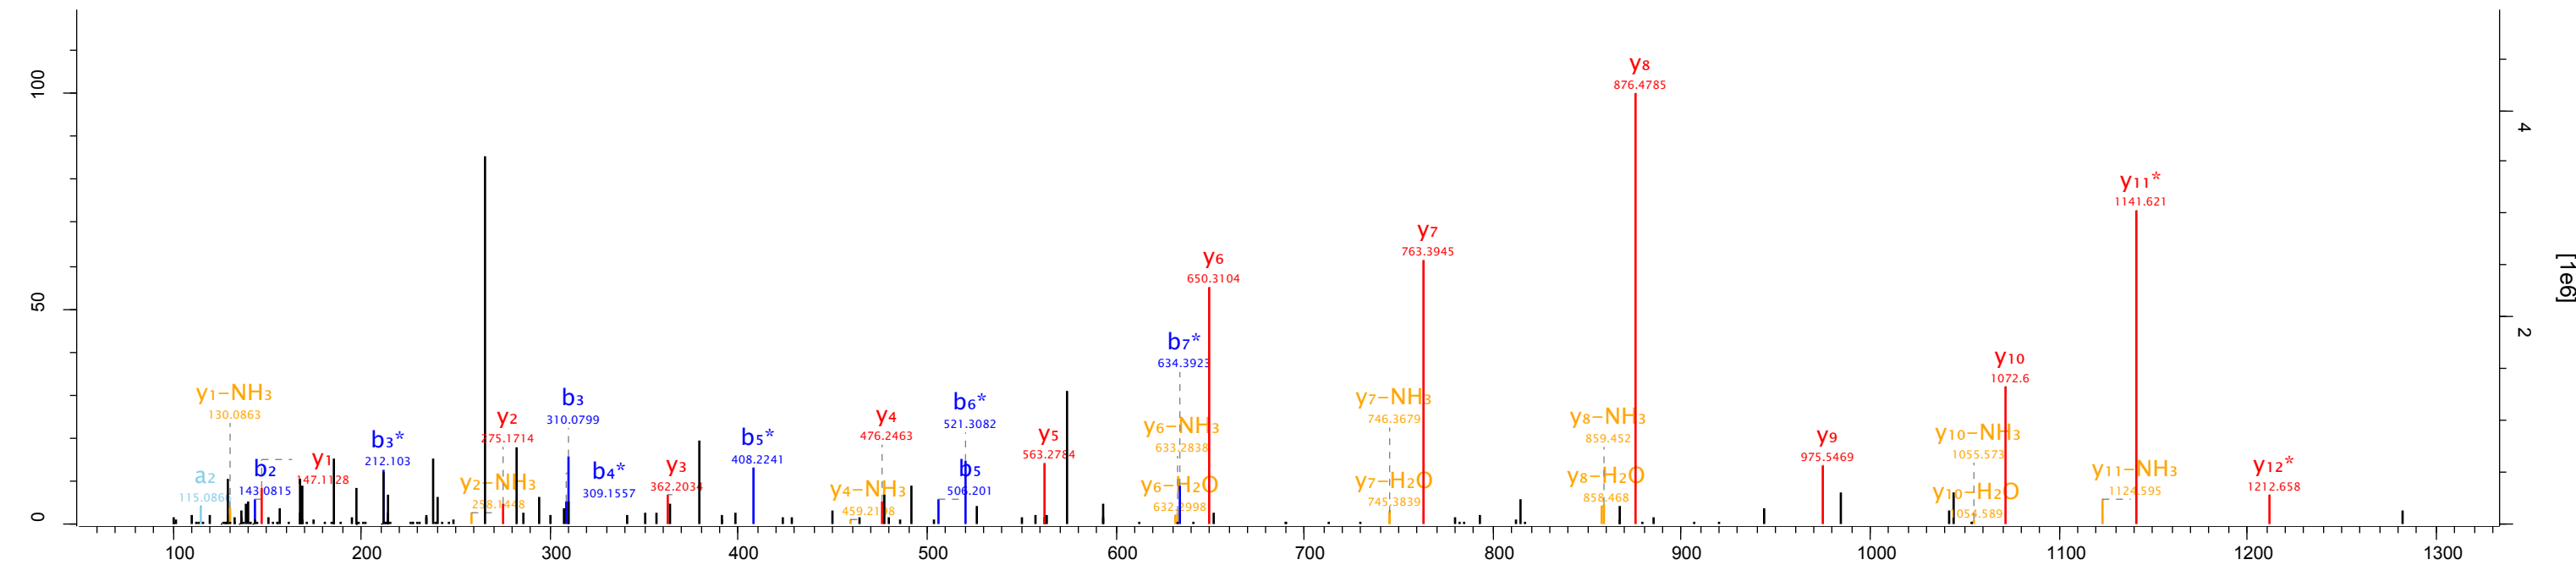



Raw file 20150814\_A375SR\_Phospho\_BR2\_04 Scan 15671 Method FTMS; HCD Score 116.9 m/z 675.84 Gene names TBXA2R

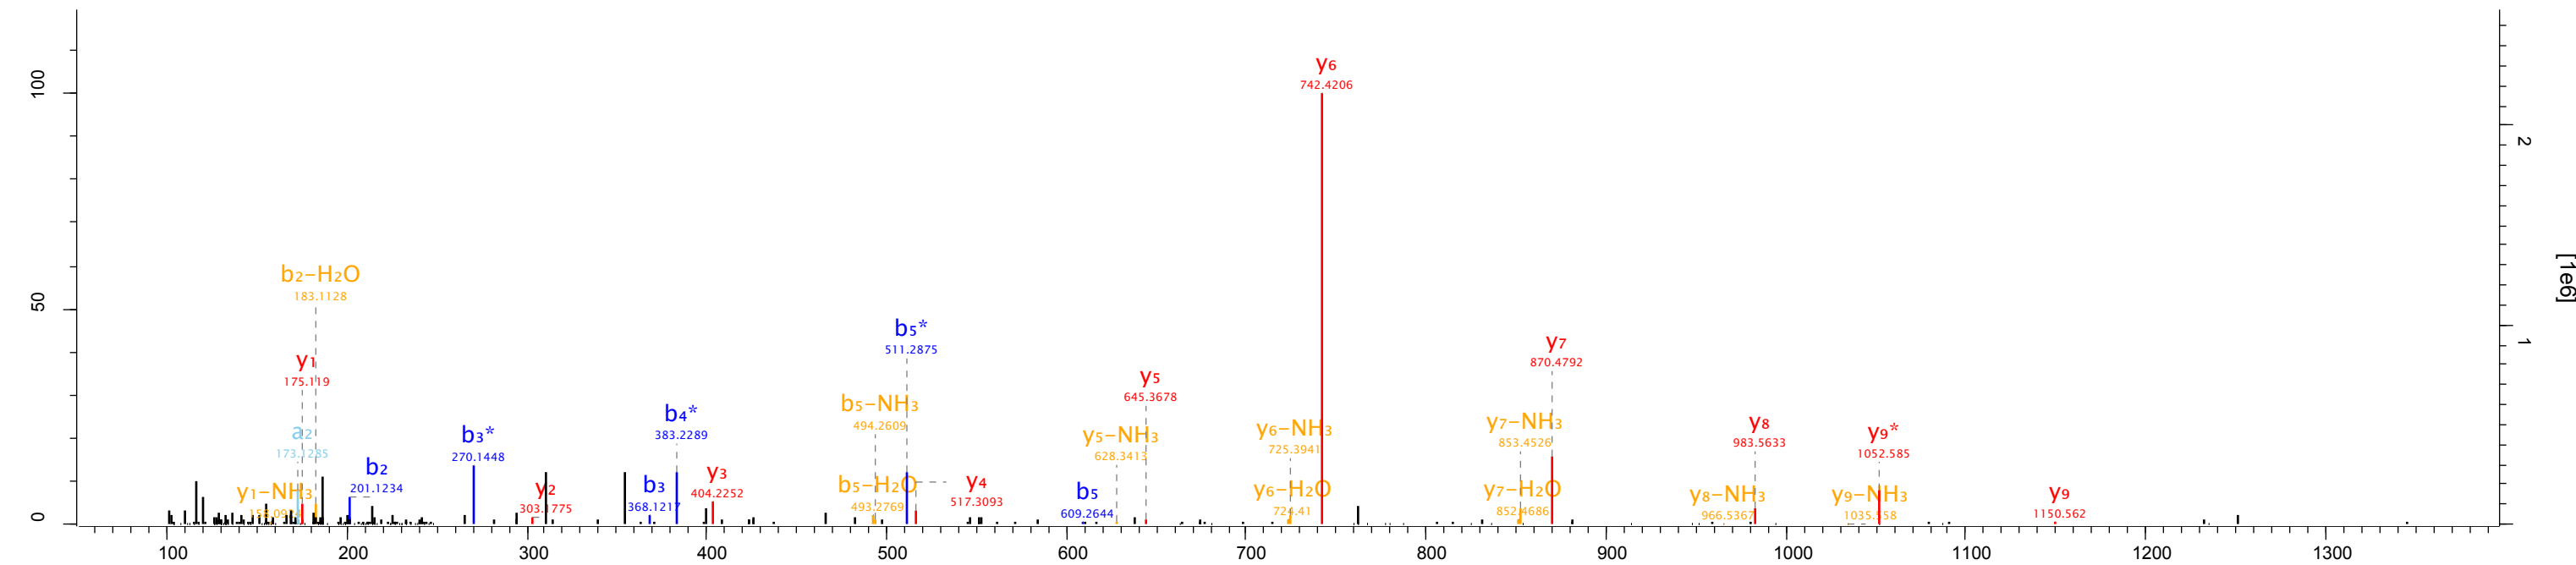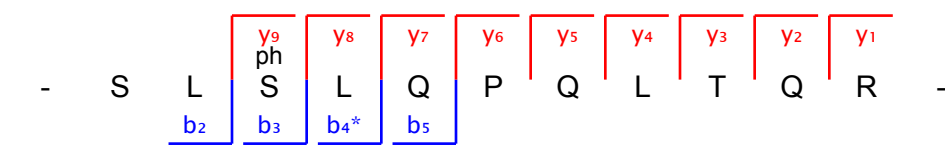

Raw file: 20150814\_A375SR\_Phospho\_BR2\_04  
 Scan: 19381 Method: FTMS; HCD Score: 86.01 m/z: 569.76 Gene names: CCDC125

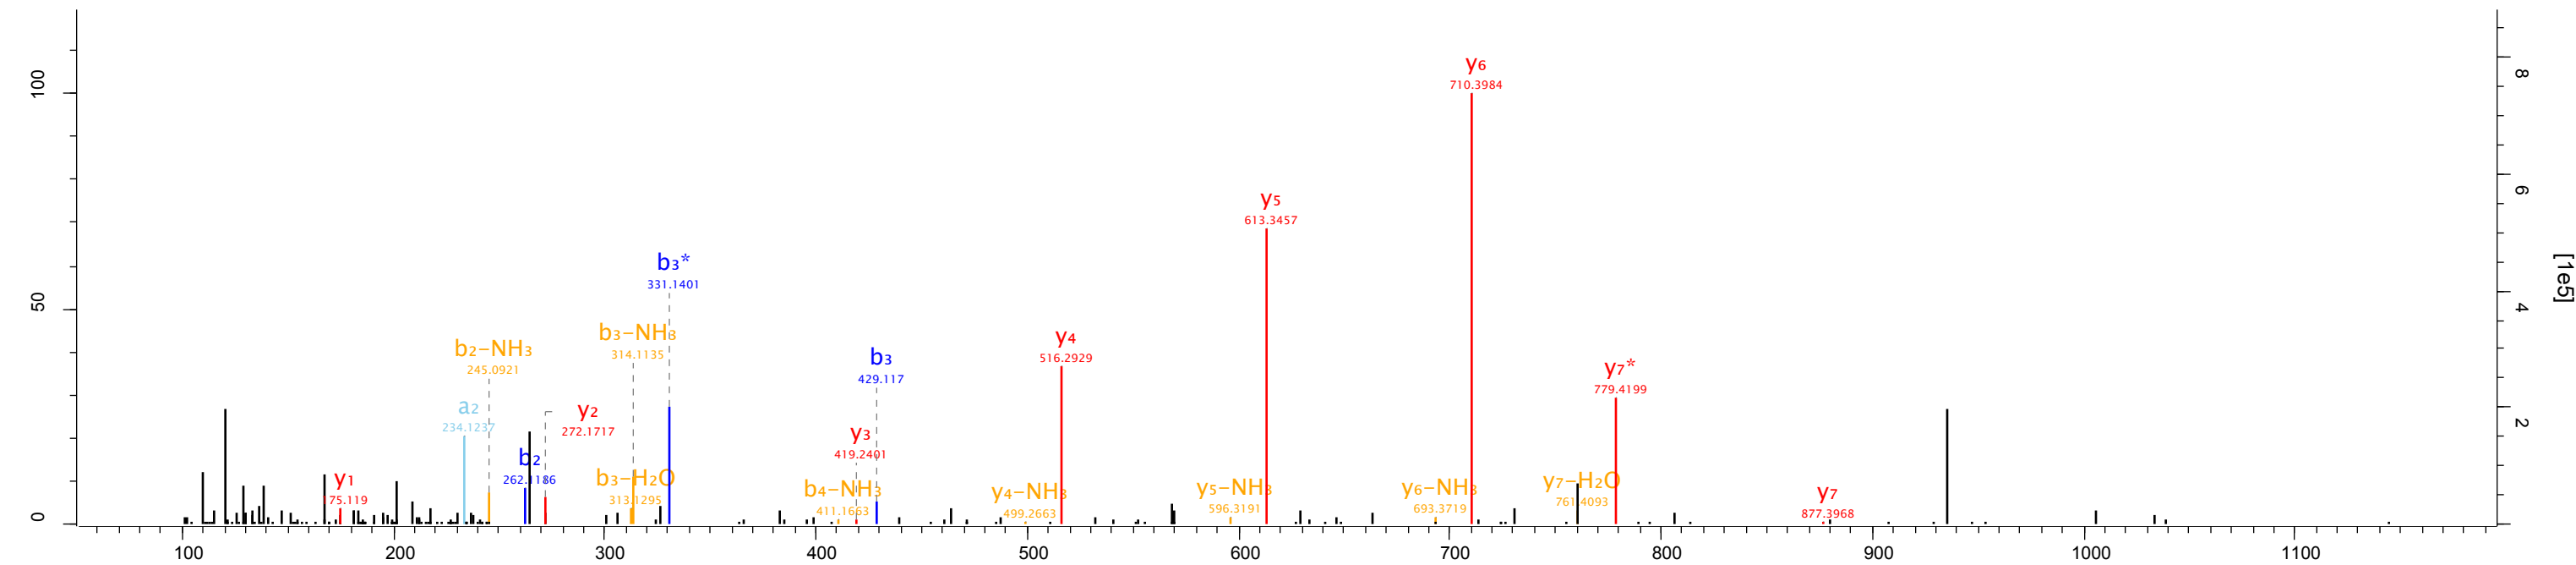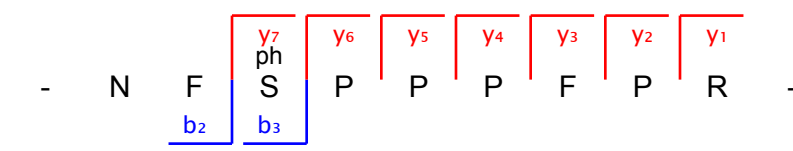

Raw file: 20150814\_A375SR\_Phospho\_BR2\_04  
 Scan: 9111 Method: FTMS; HCD Score: 40.61 m/z: 785.38 Gene names: CRYBB1

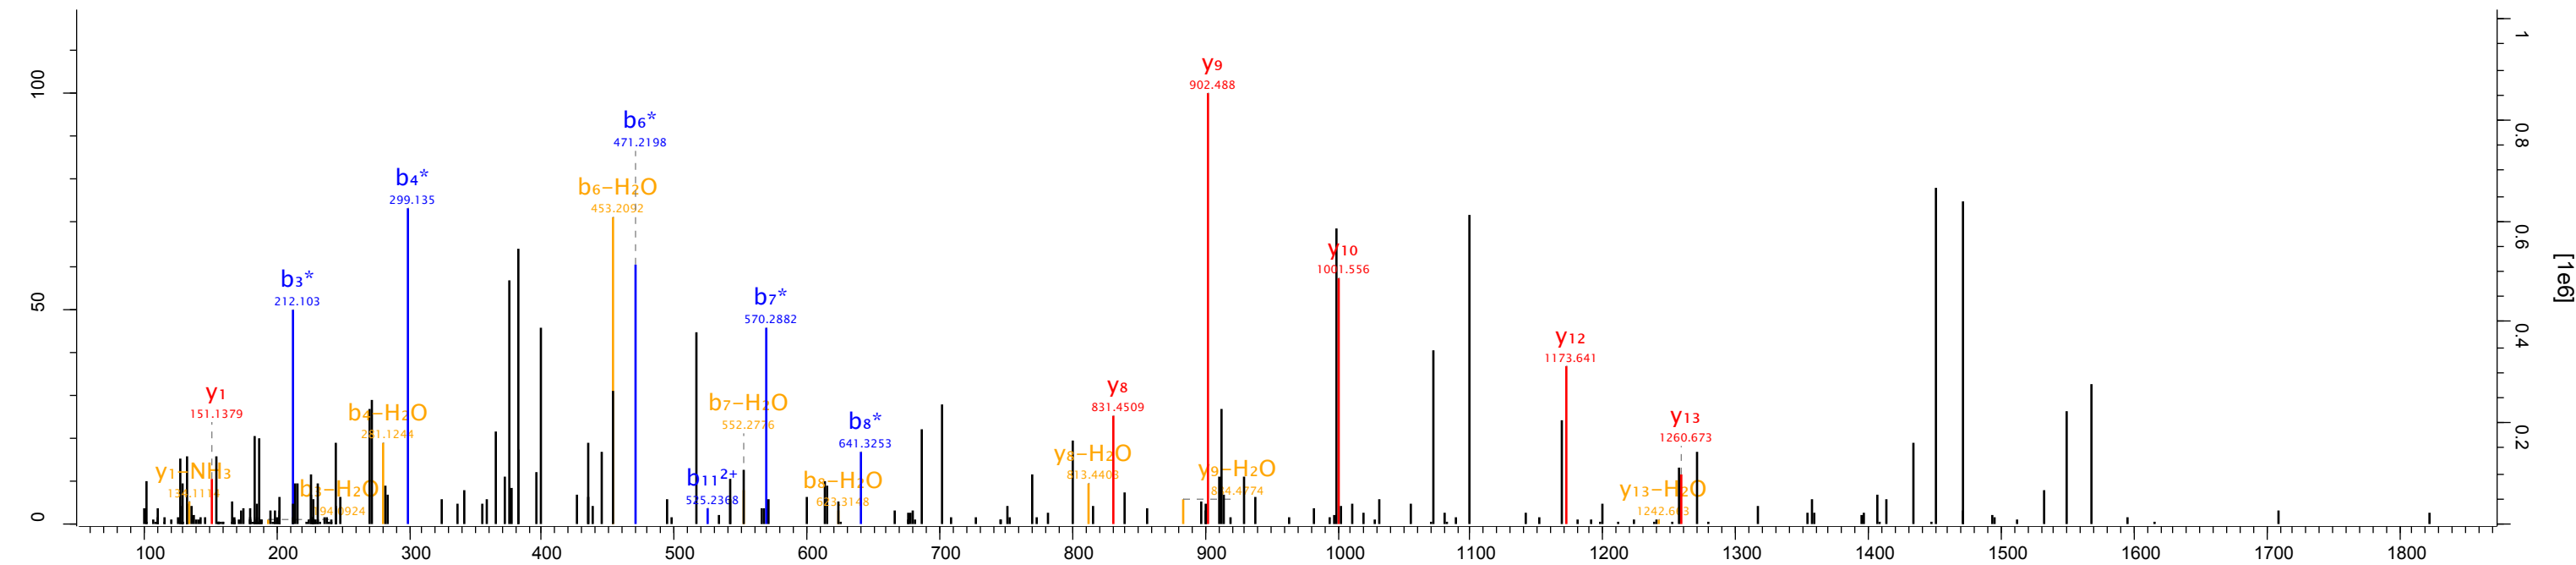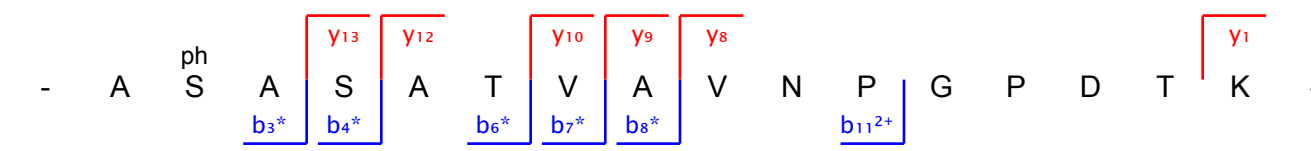

Raw file 20150814\_A375SR\_Phospho\_BR2\_05 Scan 13041 Method FTMS; HCD Score 137.98 m/z 843.46 Gene names MLLT3

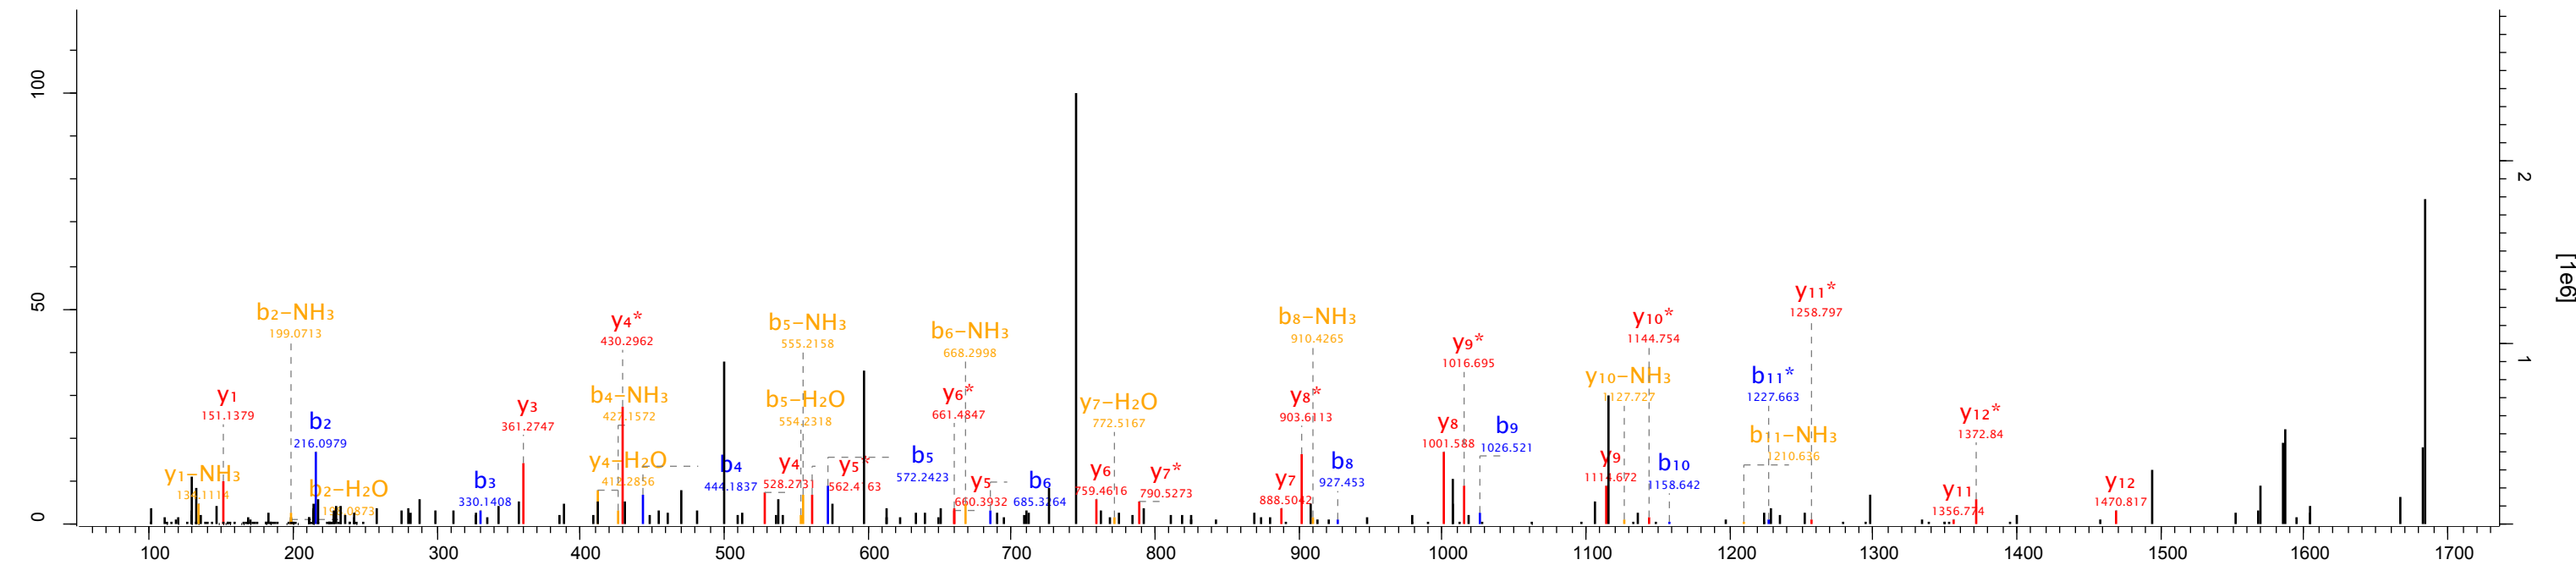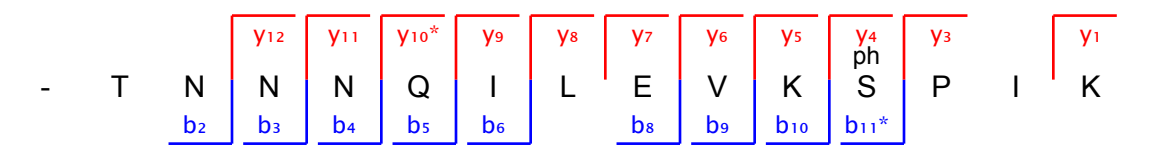

Raw file  
 20150814\_A375SR\_Phospho\_BR2\_05  
 Scan 21181 Method FTMS; HCD Score 137.72 m/z 983.44 Gene names FAM168B

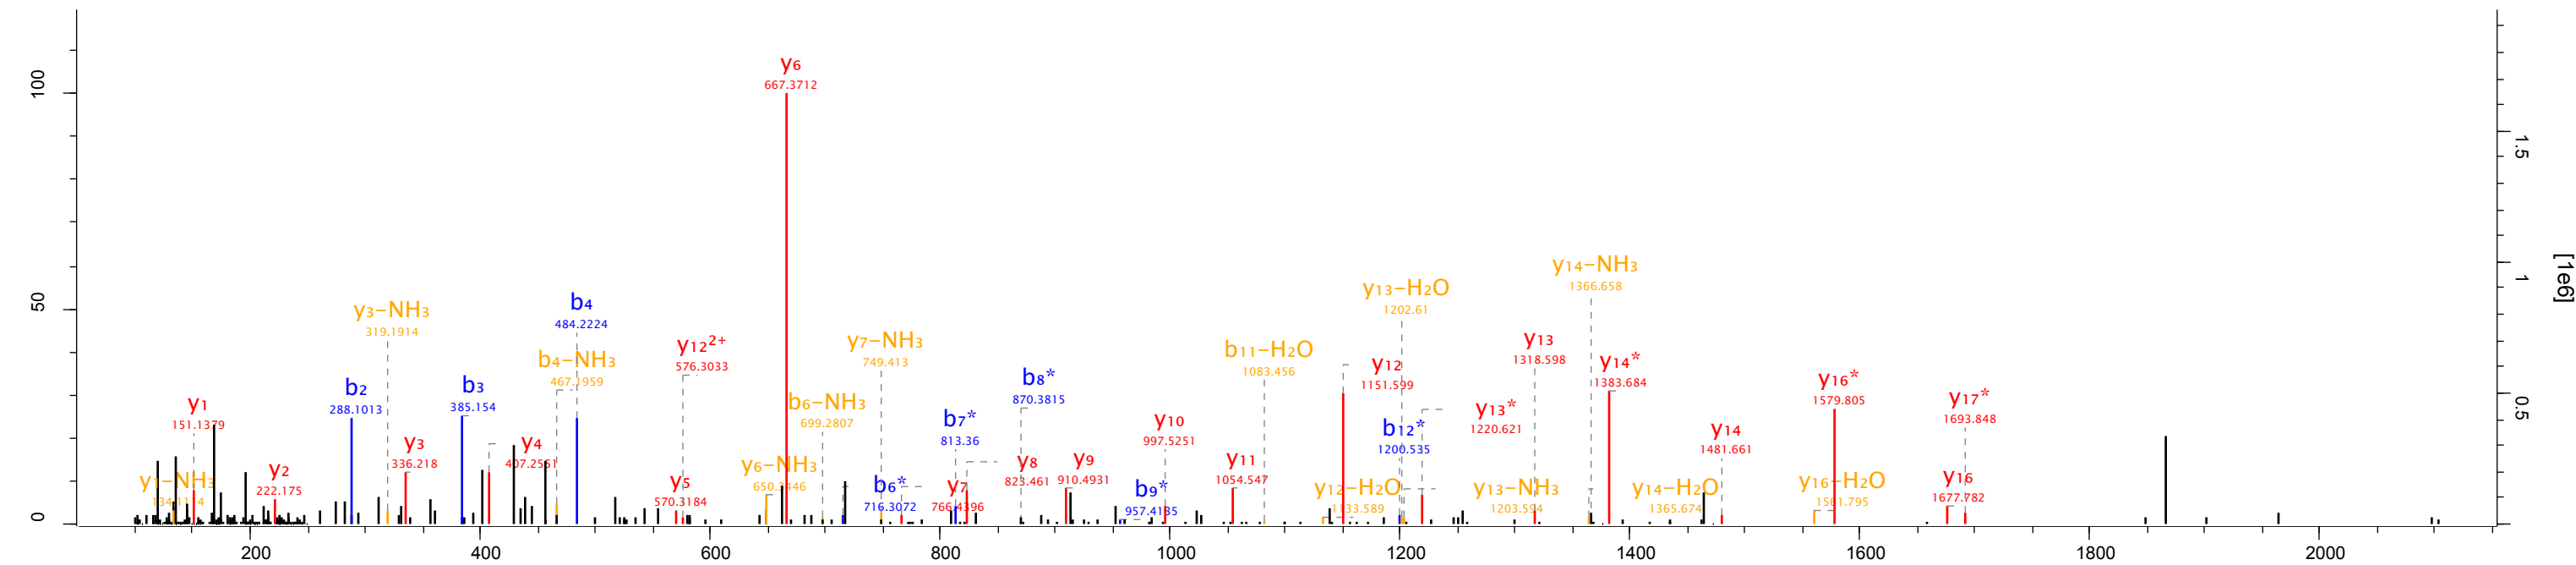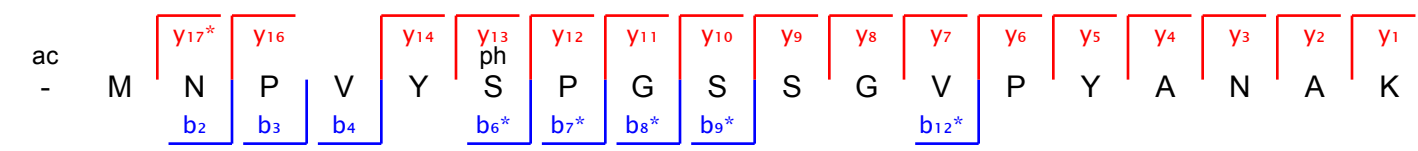

Raw file: 20150814\_A375SR\_Phospho\_BR2\_05  
 Scan: 27091 Method: FTMS; HCD Score: 192.46 m/z: 900.41 Gene names: ARHGAP31

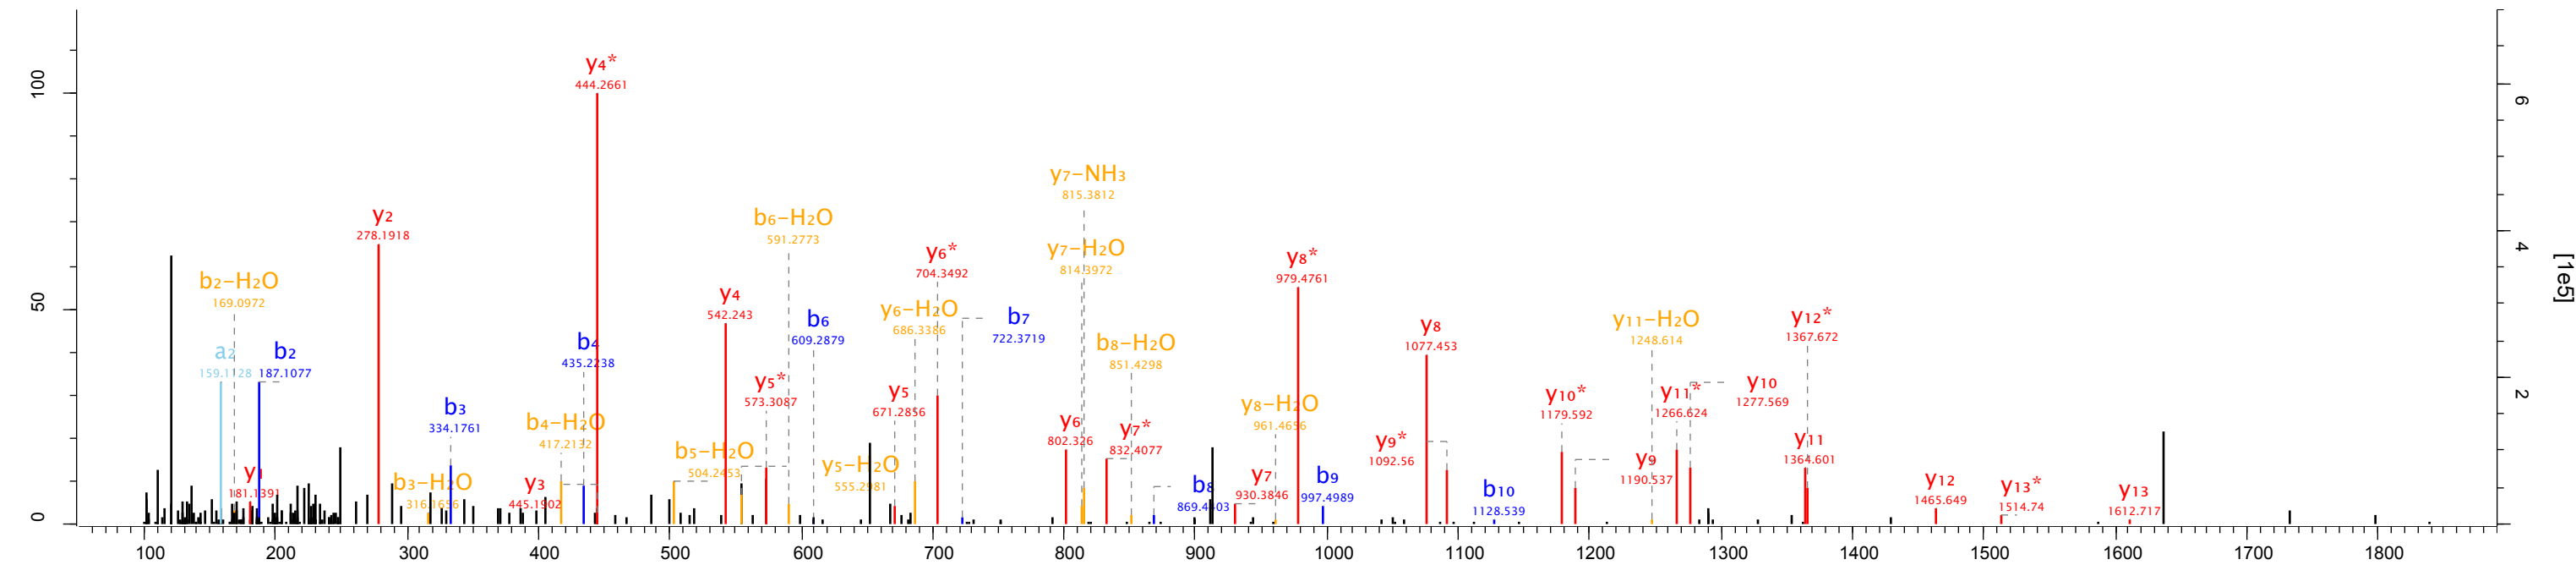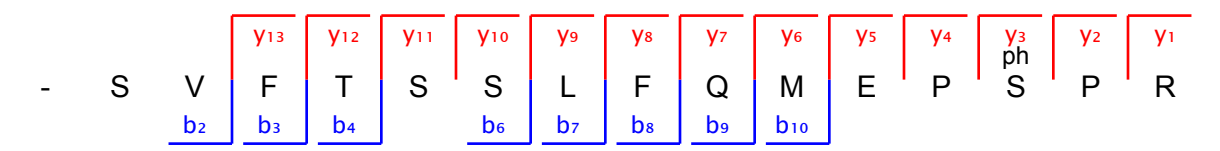

Raw file: 20150814\_A375SR\_Phospho\_BR2\_05  
 Scan: 8711 Method: FTMS; HCD Score: 168.25 m/z: 730.31 Gene names: STX1A

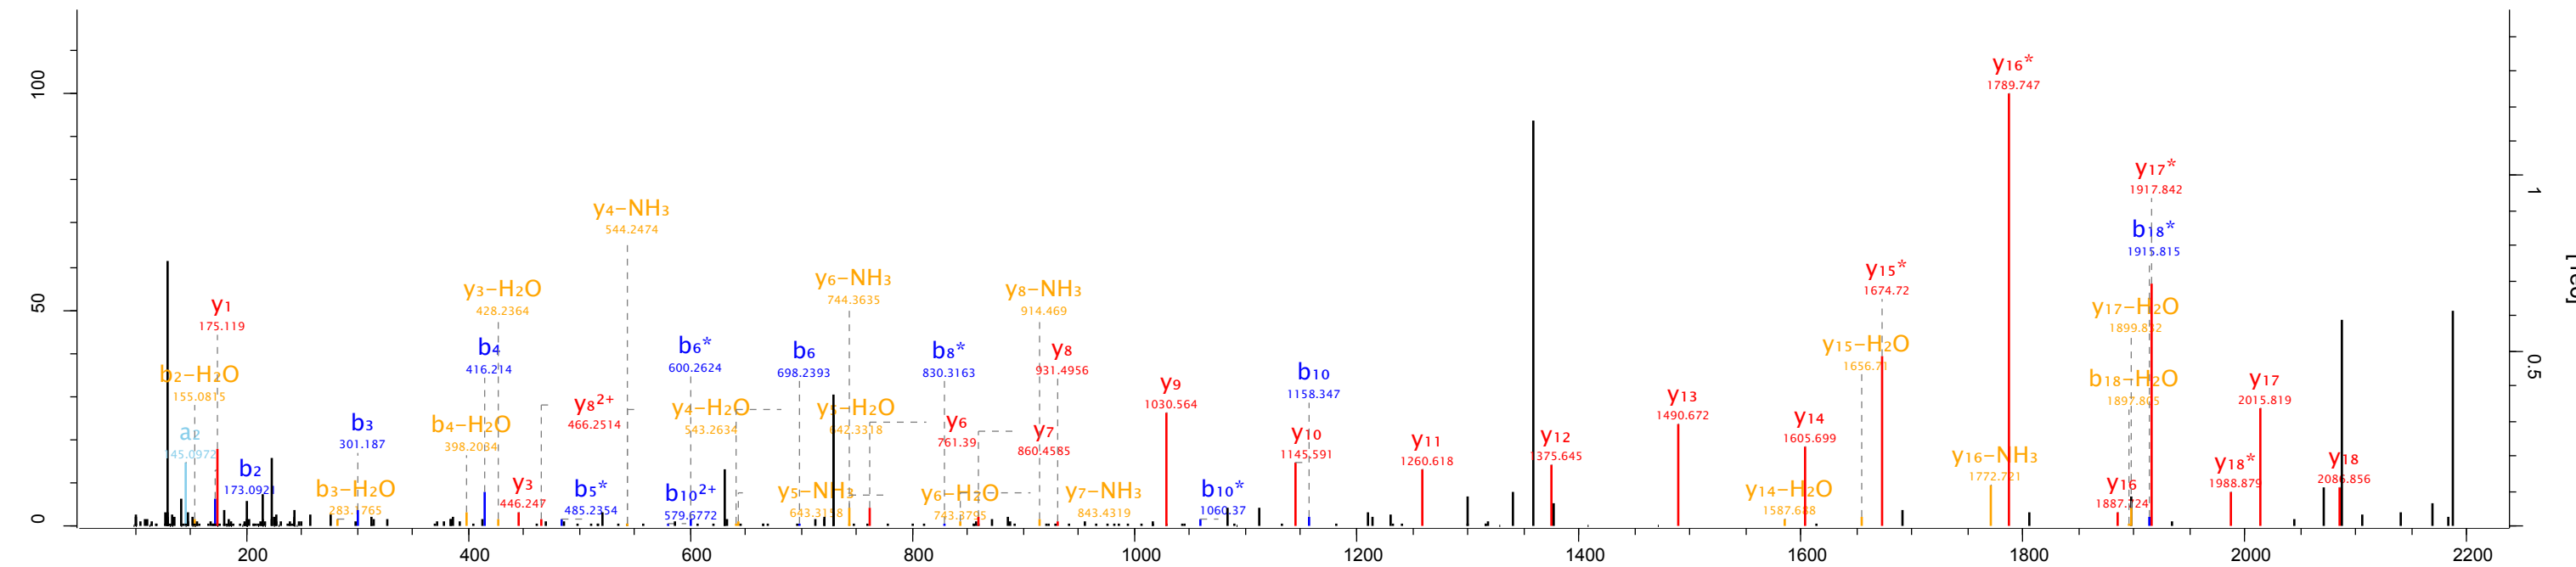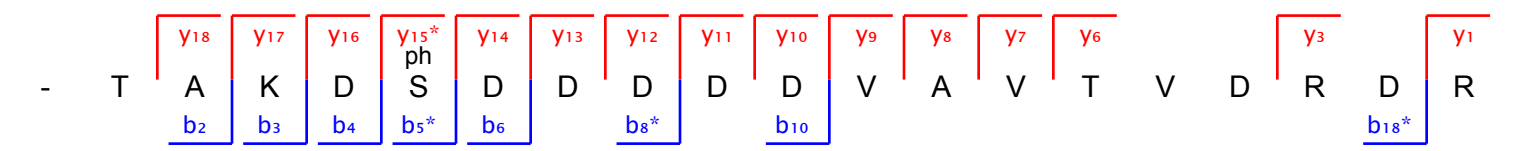

Raw file: 20150814\_A375SR\_Phospho\_BR2\_06  
 Scan: 11821 Method: FTMS; HCD Score: 135.55 m/z: 655.82 Gene names: PHACTR2

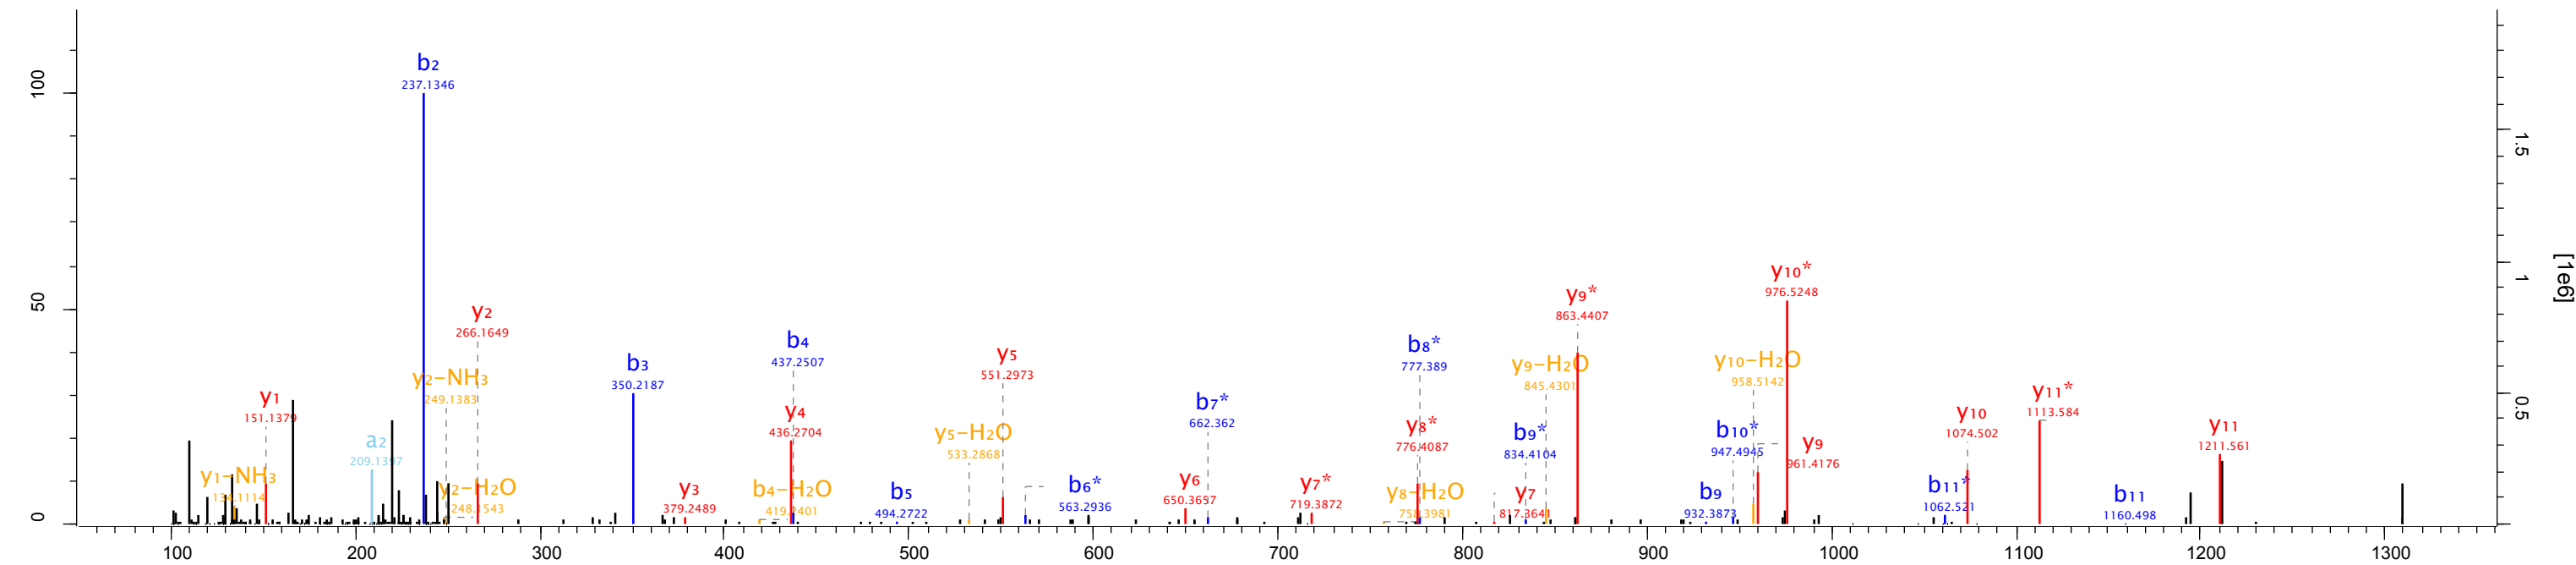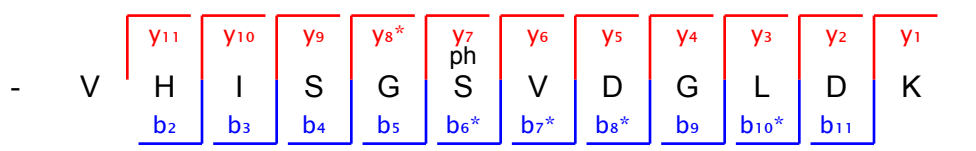



Raw file 20150814\_A375SR\_Phospho\_BR2\_06 Scan 19811 Method FTMS; HCD Score 57.89 m/z 569.76 Gene names CCDC125

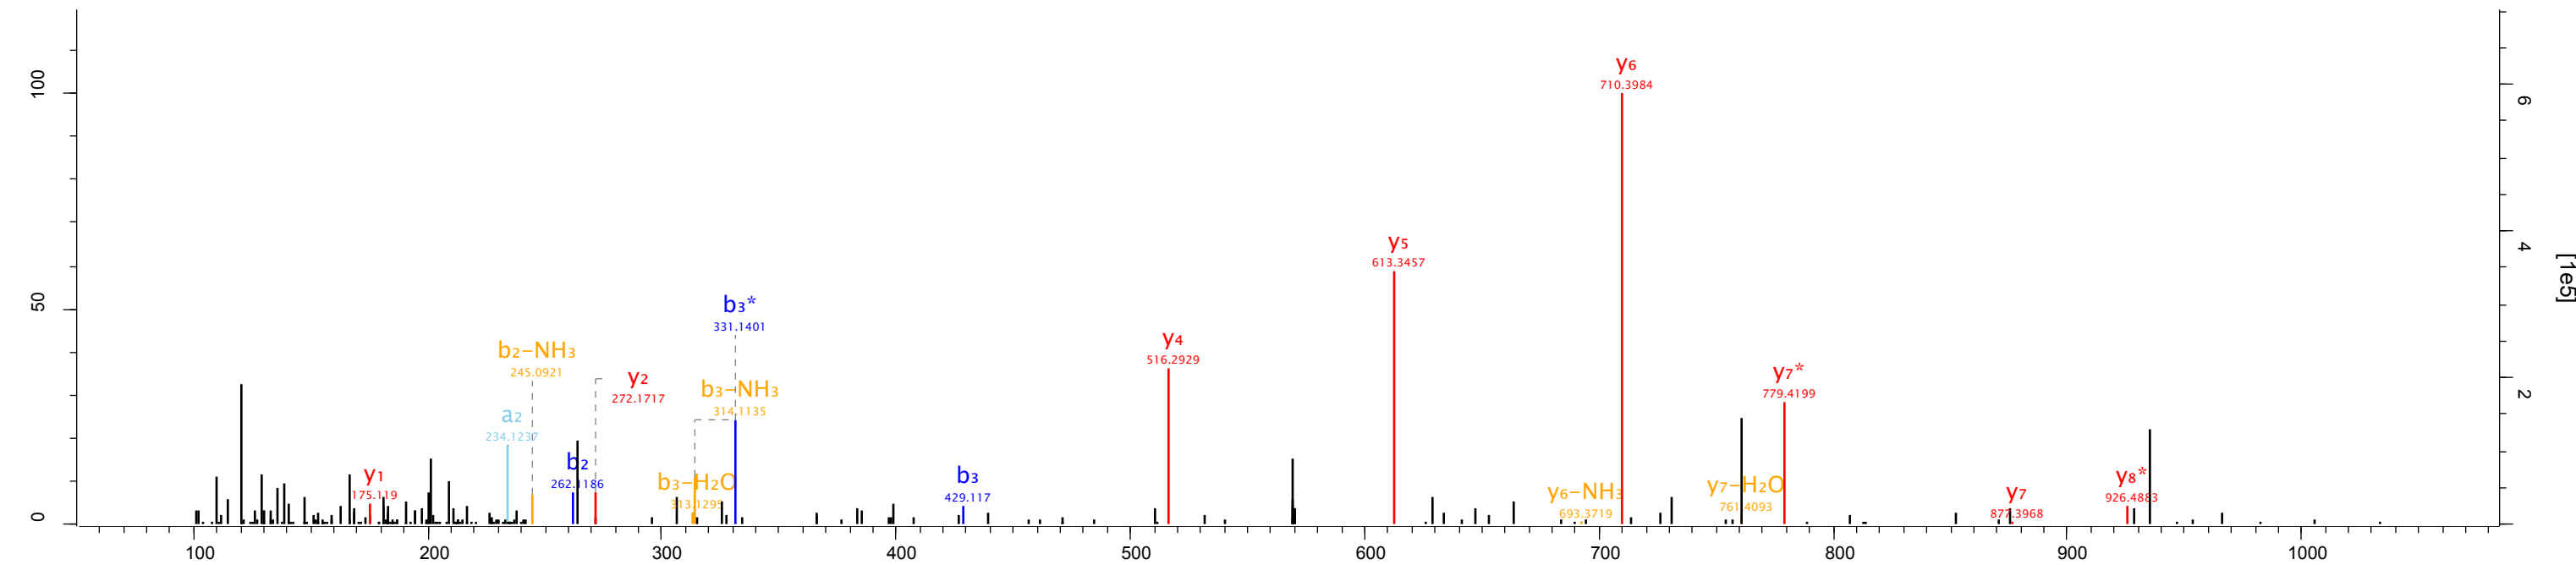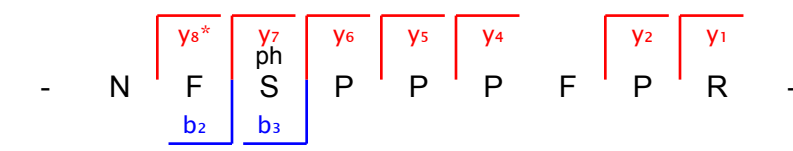

Raw file: 20150814\_A375SR\_Phospho\_BR2\_06  
 Scan: 2241 Method: FTMS; HCD Score: 59.71 m/z: 401.54 Gene names: TBC1D14

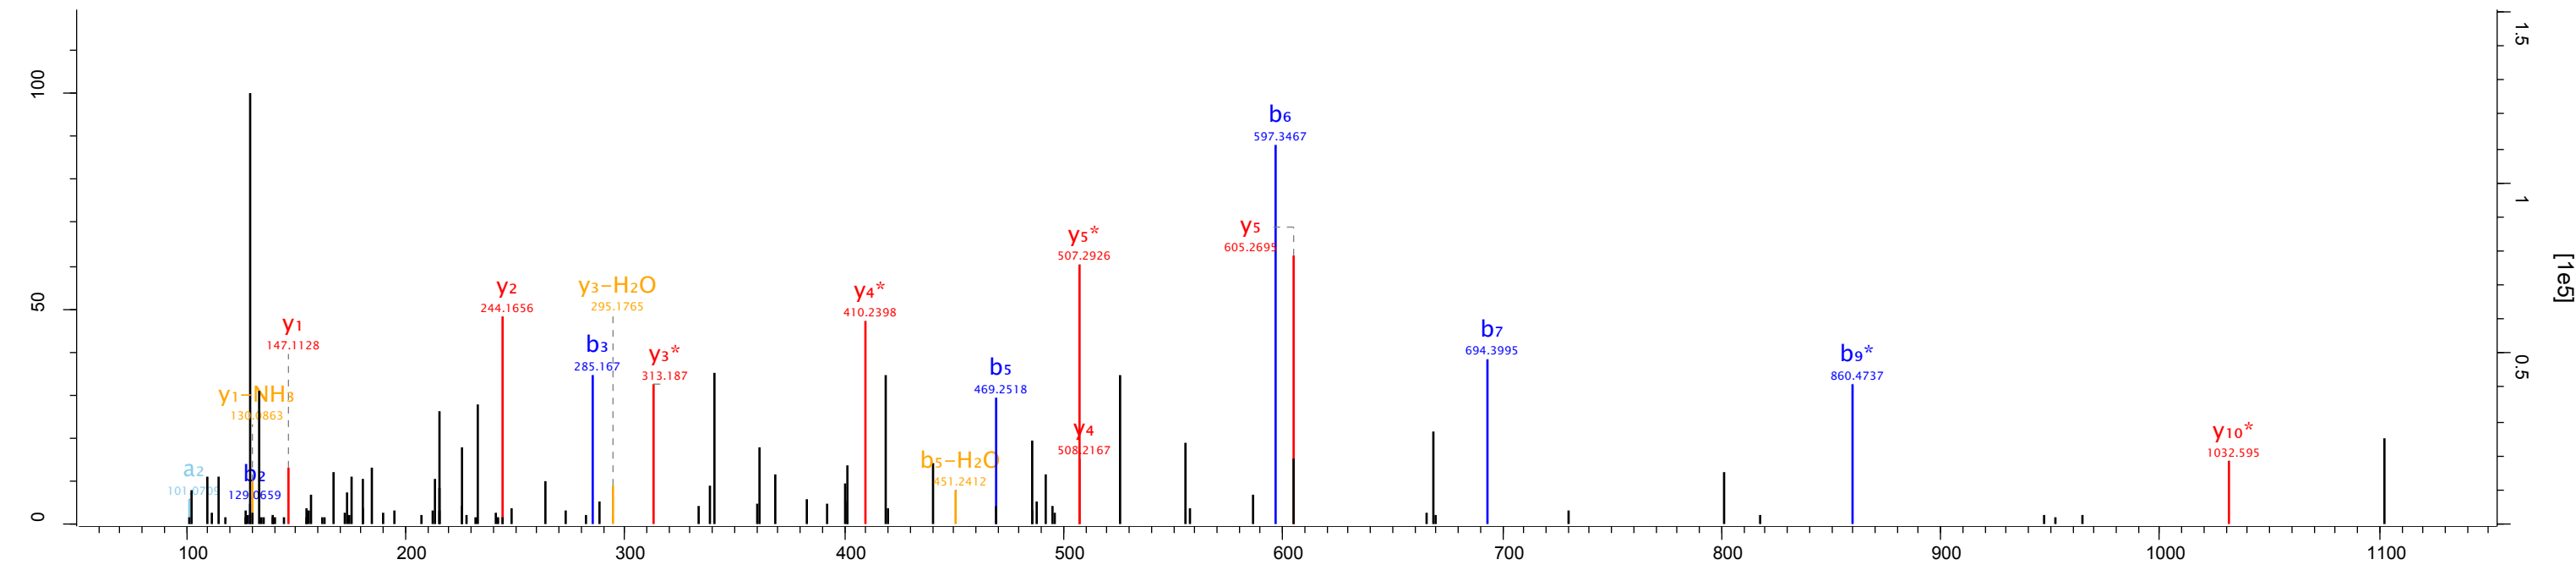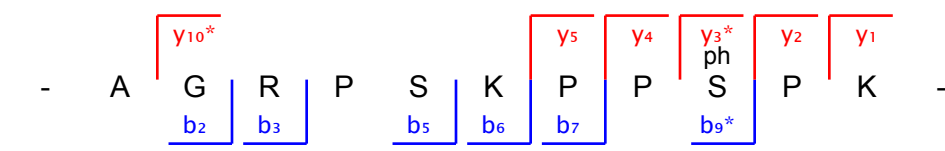

Raw file: 20150814\_A375SR\_Phospho\_BR2\_08  
 Scan: 11551 Method: FTMS; HCD Score: 131.4 m/z: 691.34 Gene names: ELK3

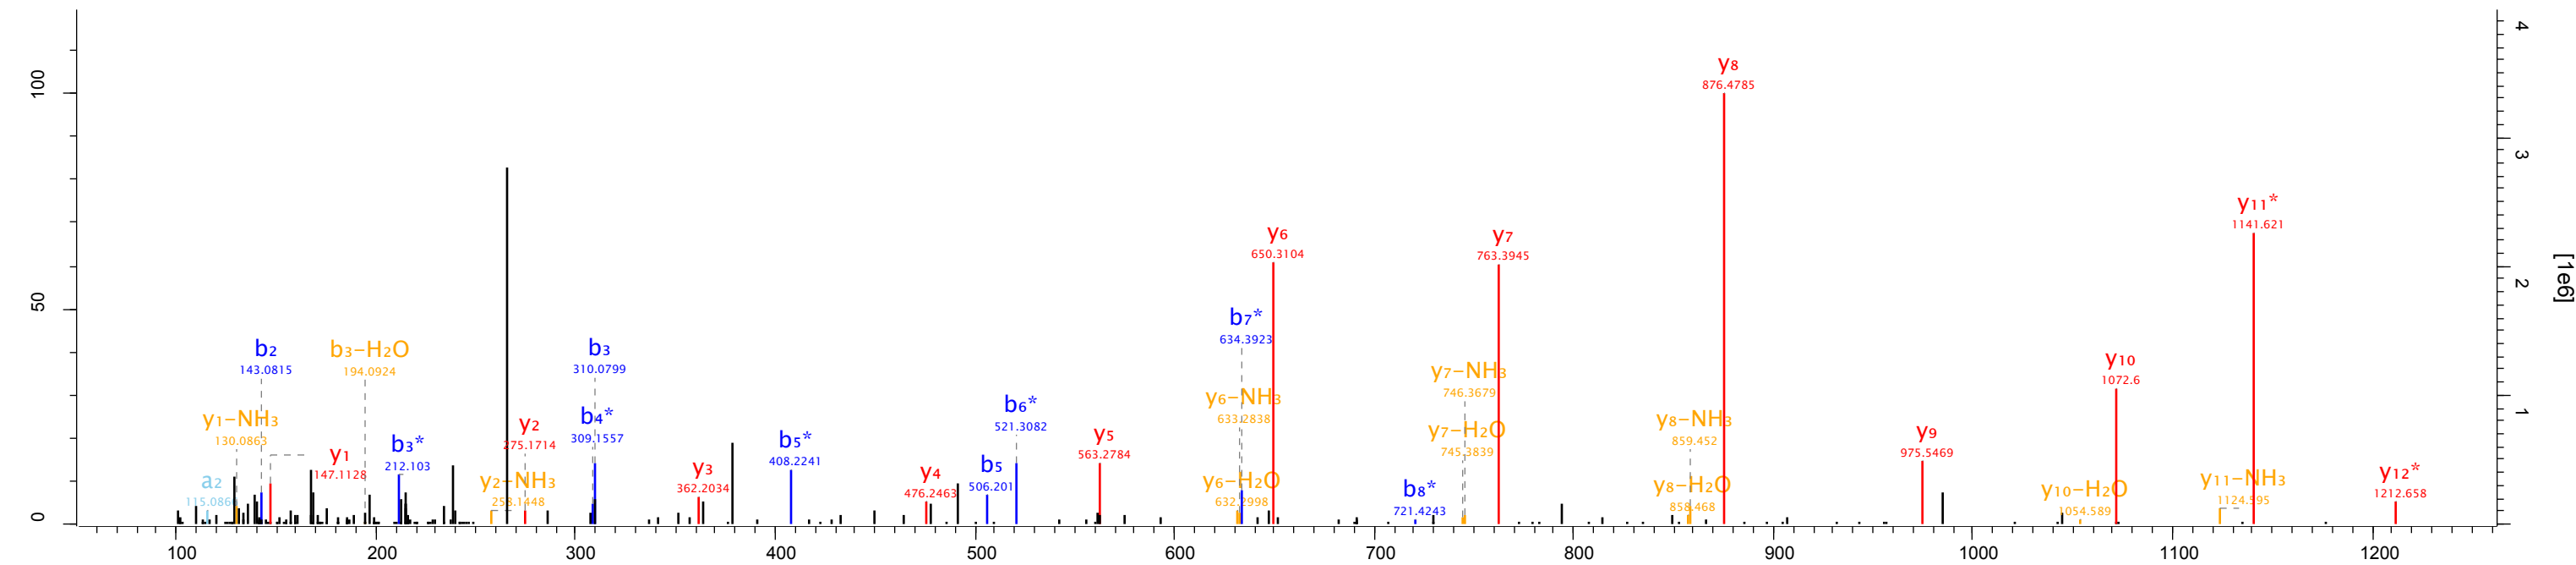

Raw file: 20150814\_A375SR\_Phospho\_BR2\_08  
 Scan: 14241 Method: FTMS; HCD Score: 61.87 m/z: 784.86 Gene names: PWWP2A

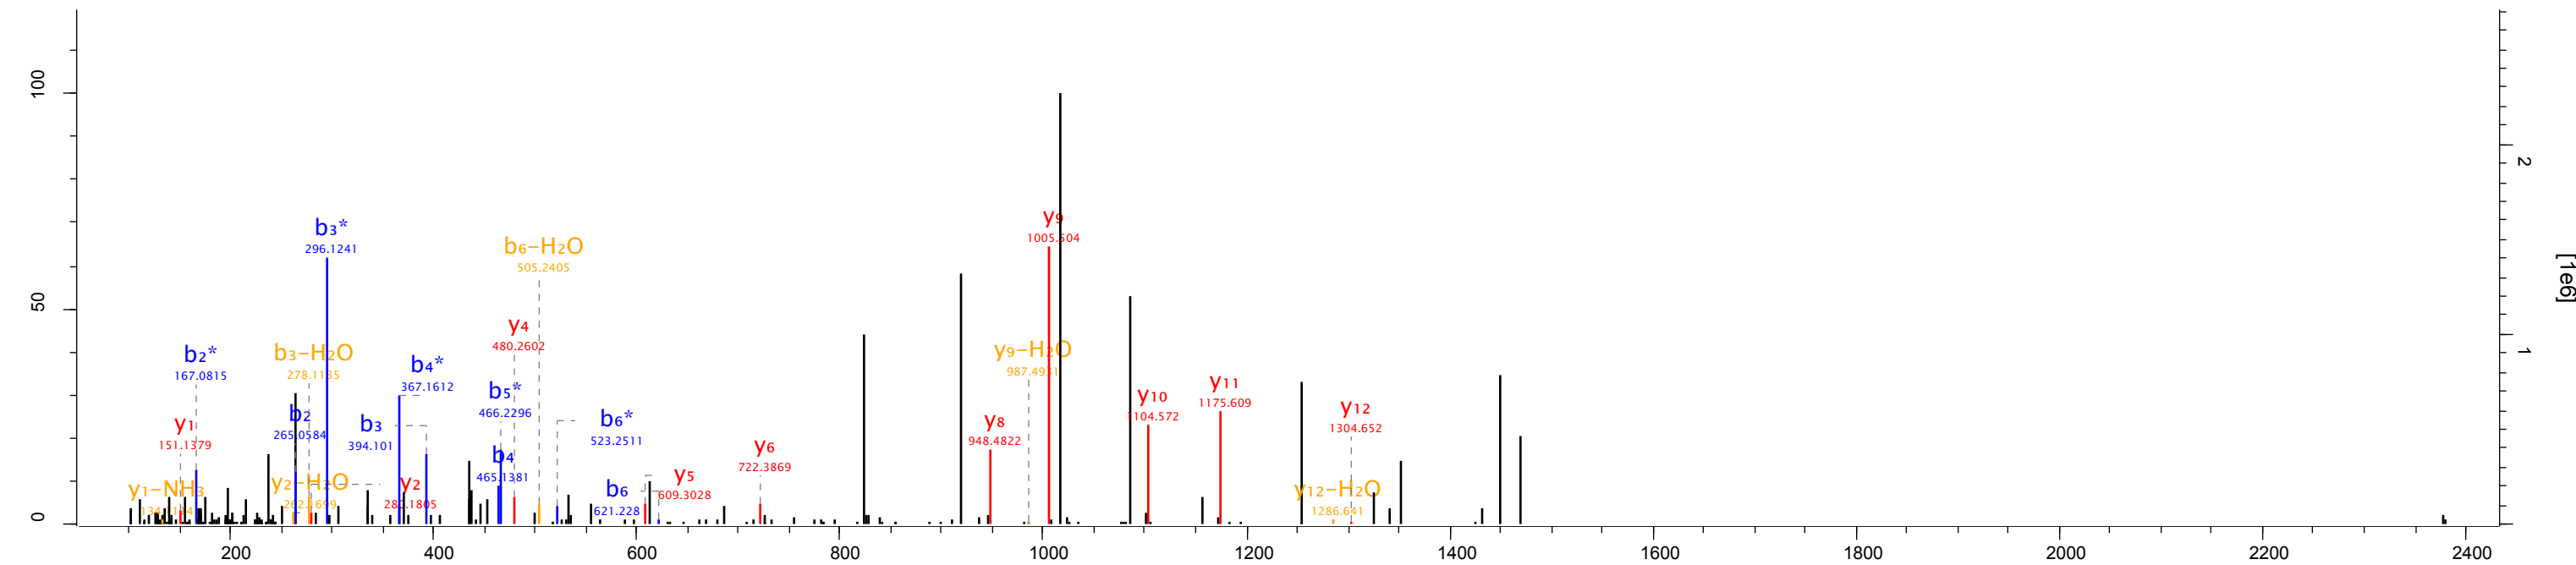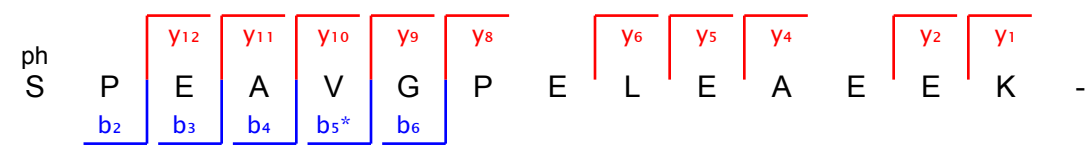

Raw file 20150814\_A375SR\_Phospho\_BR2\_08 Scan 24171 Method FTMS; HCD Score 217.73 m/z 968.42 Gene names MAPK11P1L

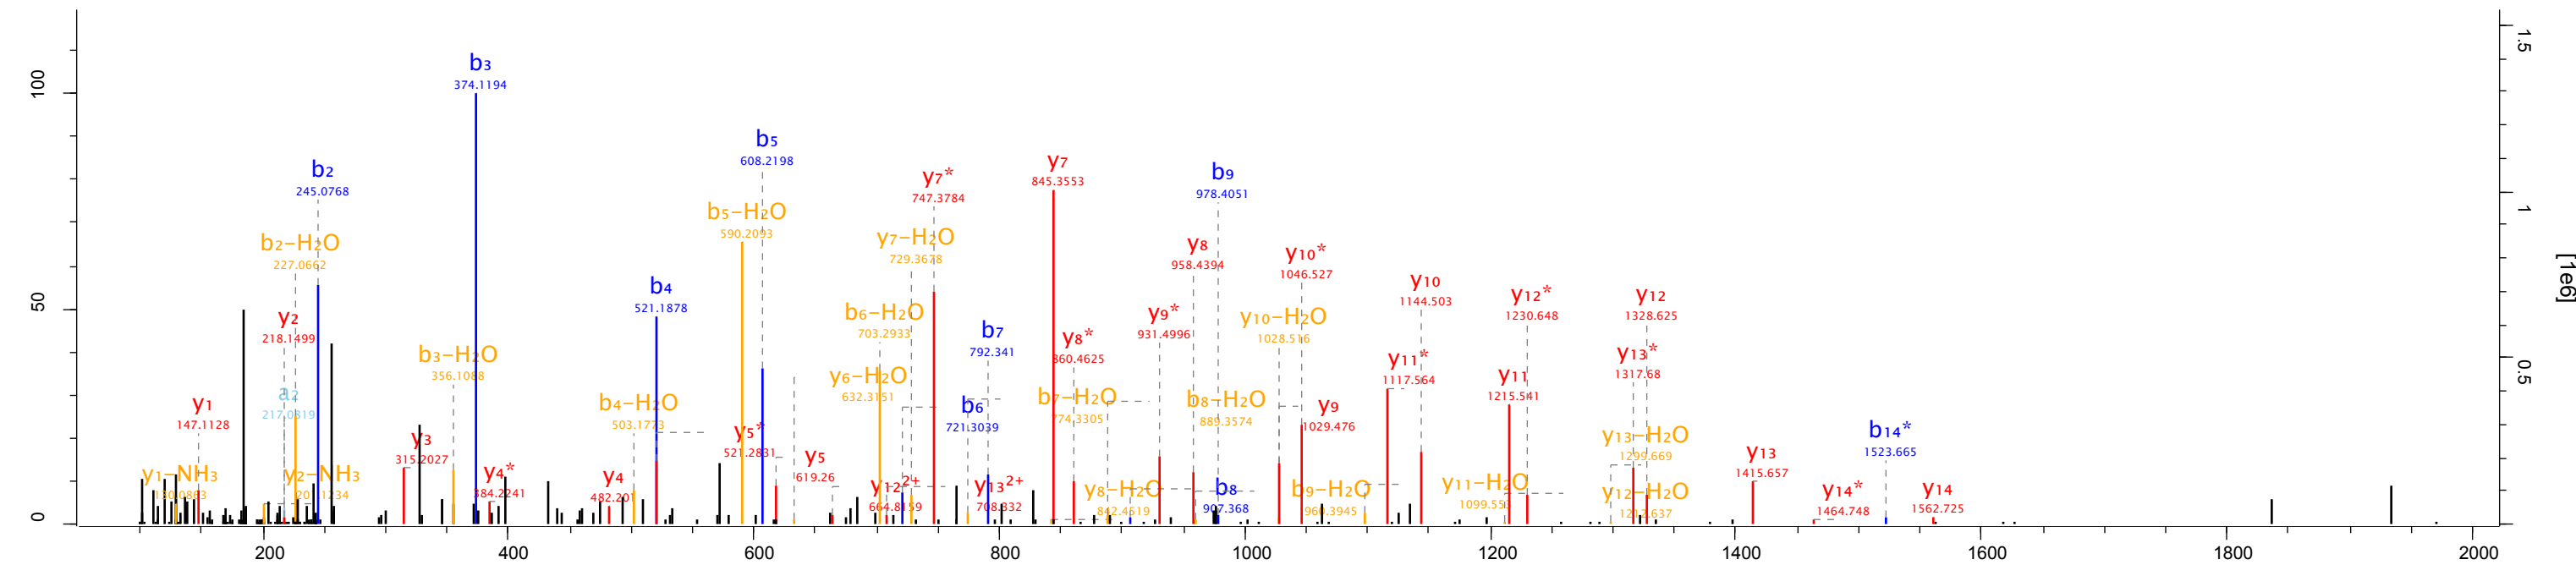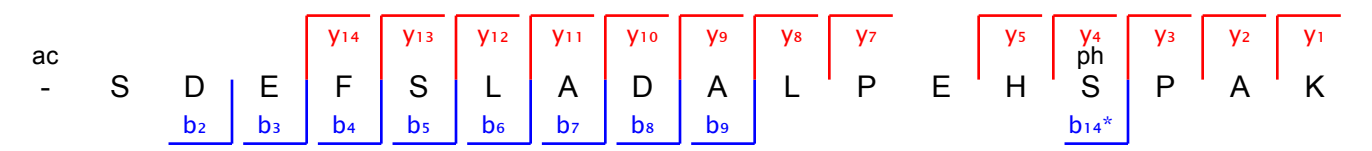

Raw file 20150814\_A375SR\_Phospho\_BR2\_08 Scan 5471 Method FTMS; HCD Score 48.51 m/z 527.23

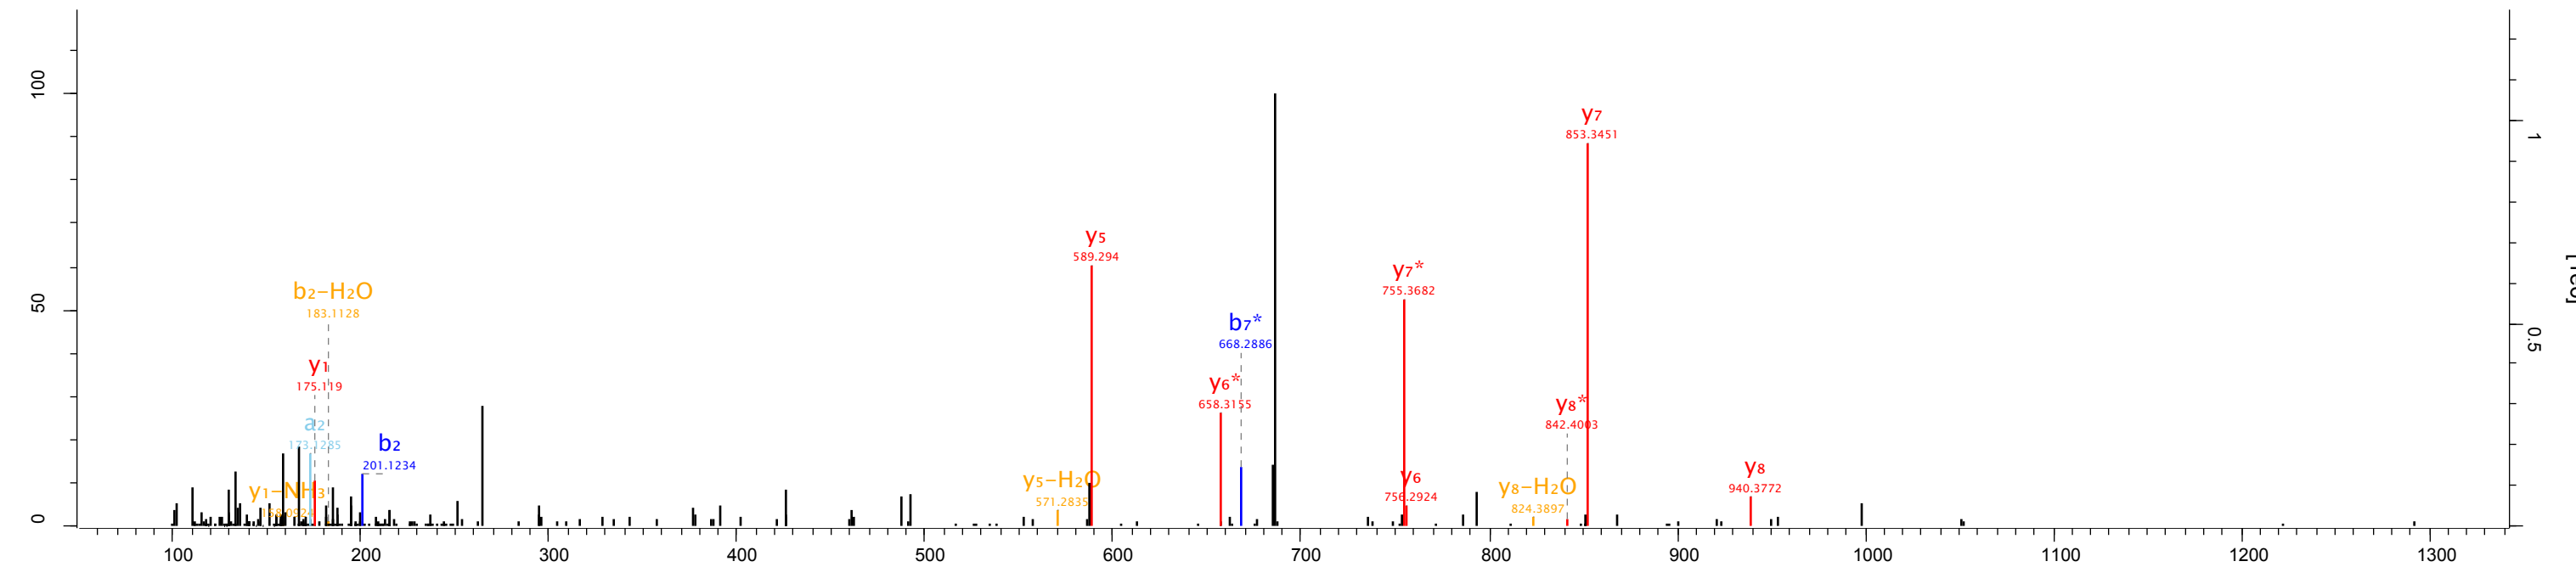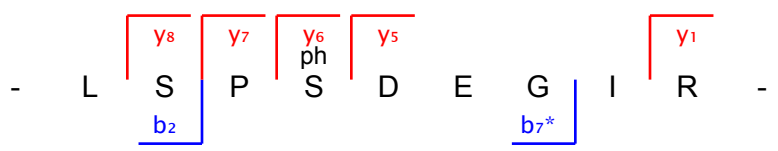

Raw file 20150814\_A375SR\_Phospho\_BR2\_08 Scan 6431 Method FTMS; HCD Score 60.4 m/z 426.73

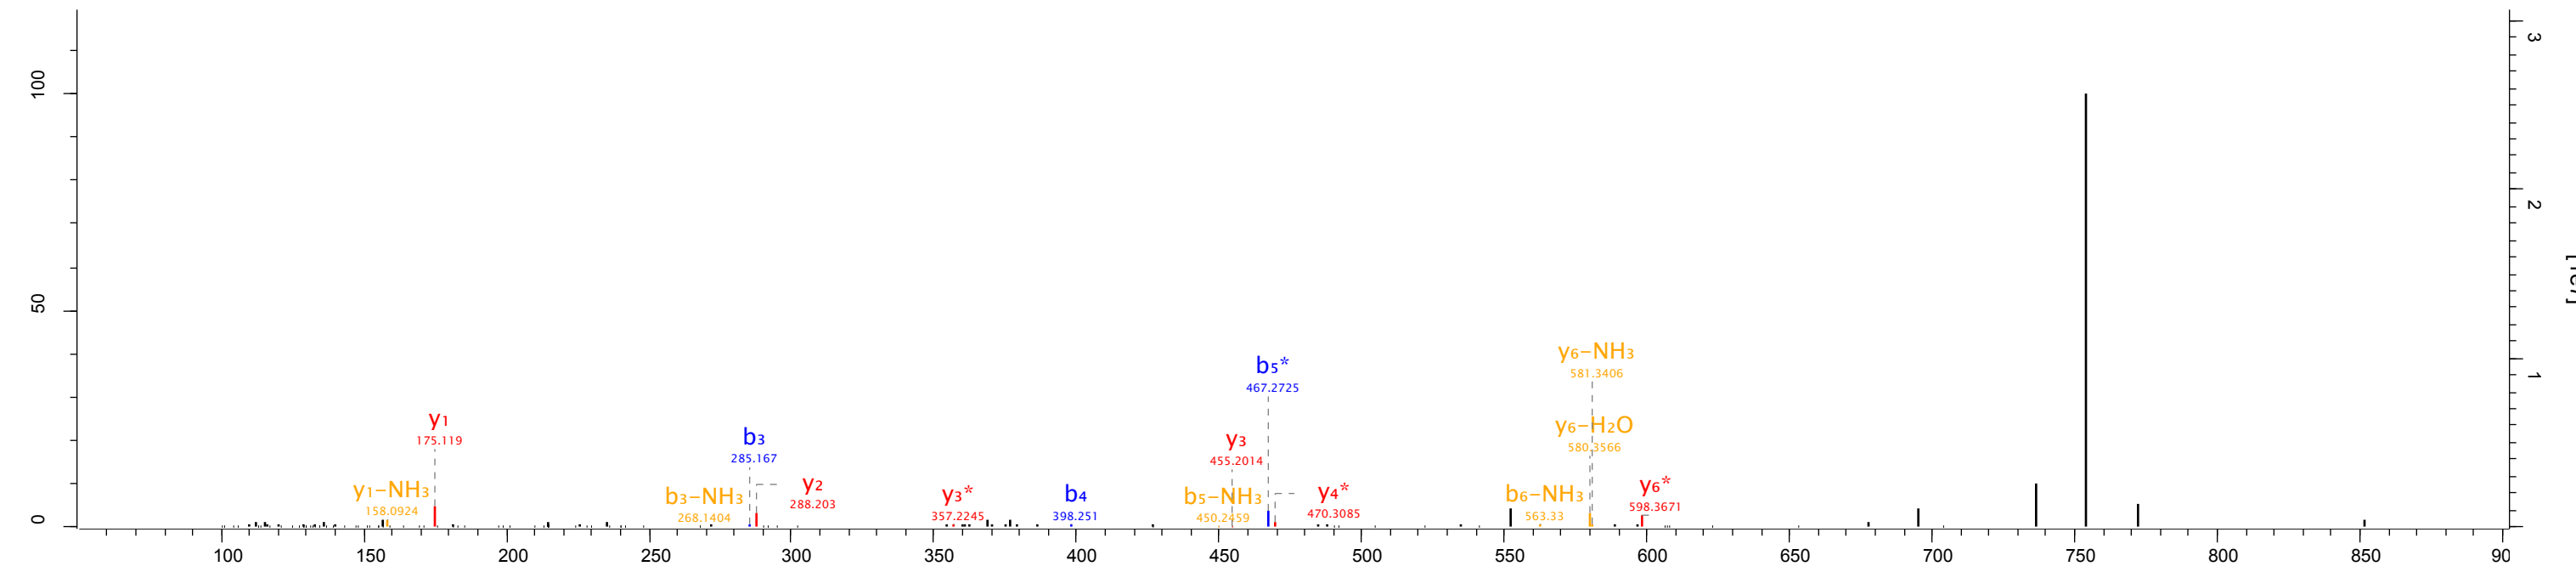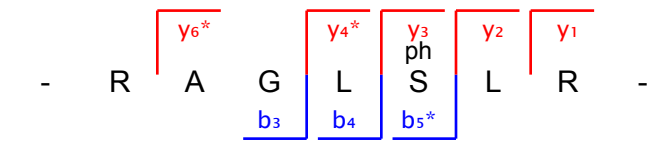

Raw file 20150814\_A375SR\_Phospho\_BR2\_10 Scan 10541 Method FTMS; HCD Score 124.5 m/z 693.35 Gene names ELK3

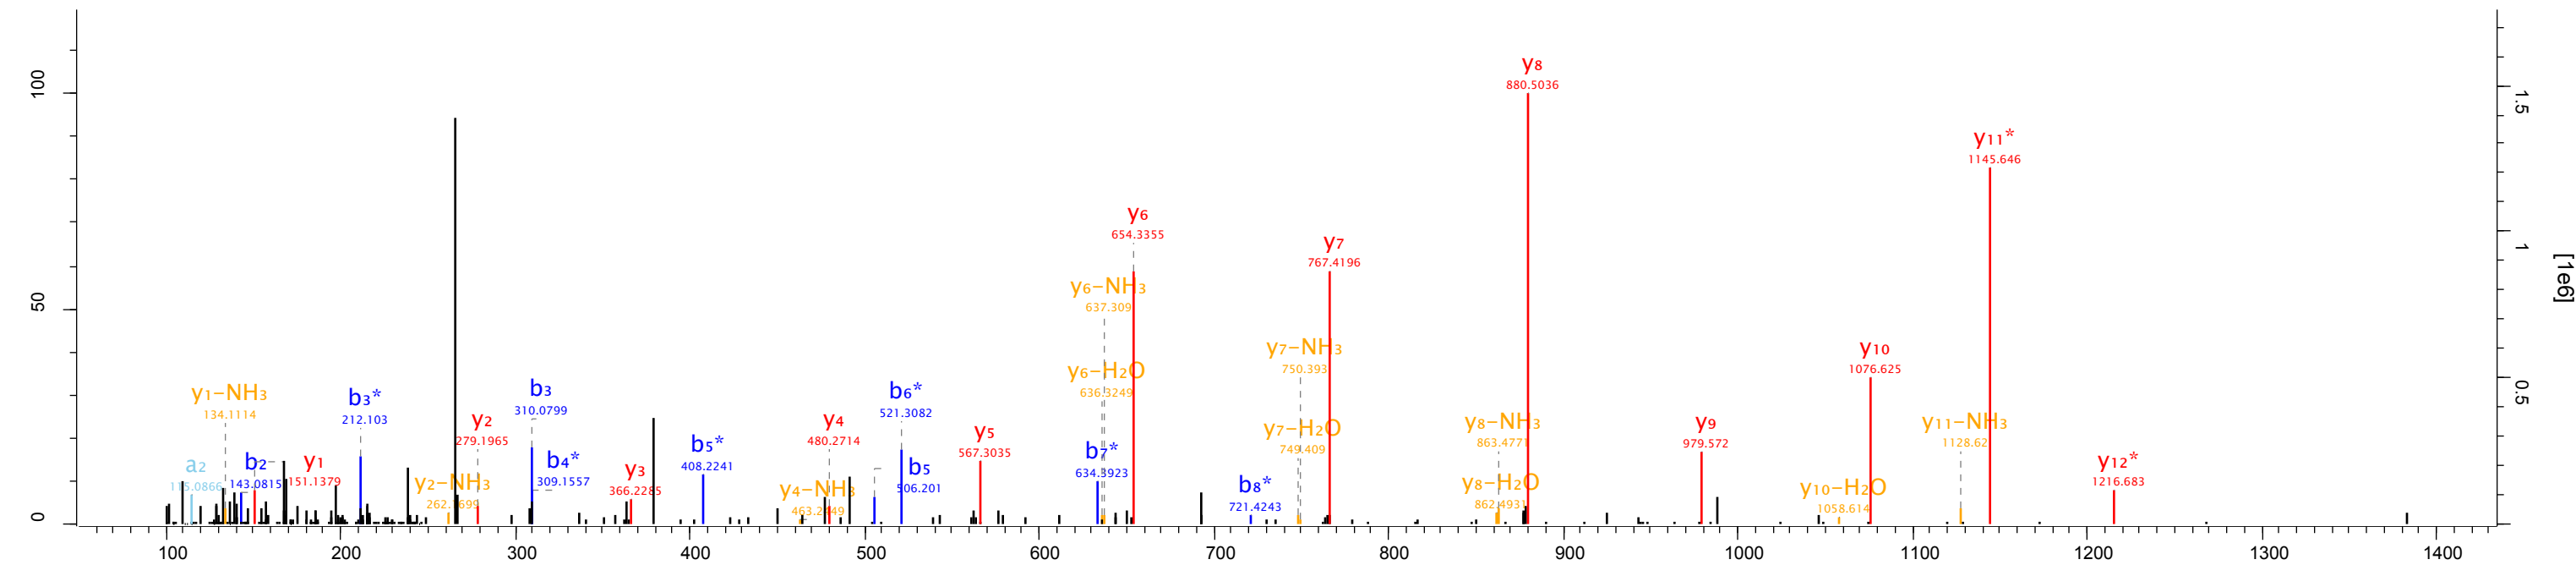



Raw file: 20150814\_A375SR\_Phospho\_BR2\_10  
 Scan: 10551 Method: FTMS; HCD Score: 84.86 m/z: 691.34 Gene names: ELK3

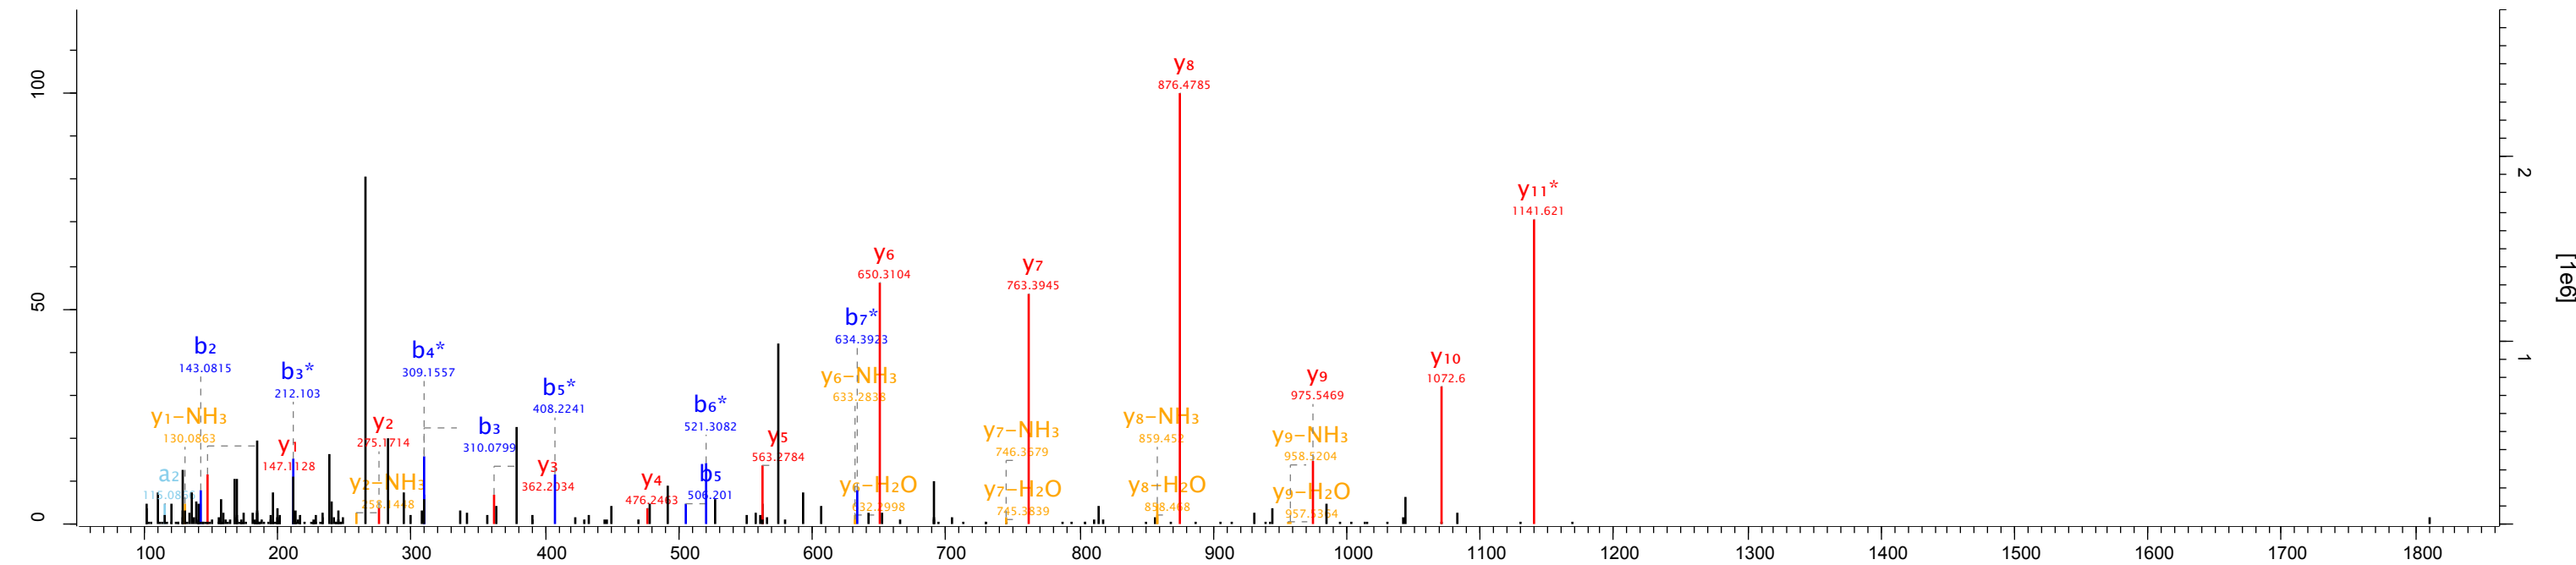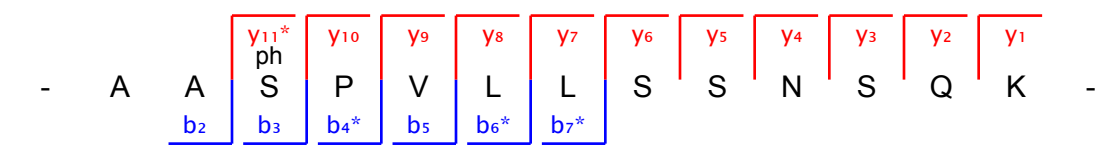

Raw file 20150818\_A375SR-Proteome\_BR1 Scan 38611 Method FTMS; HCD Score 39.62 m/z 488.28

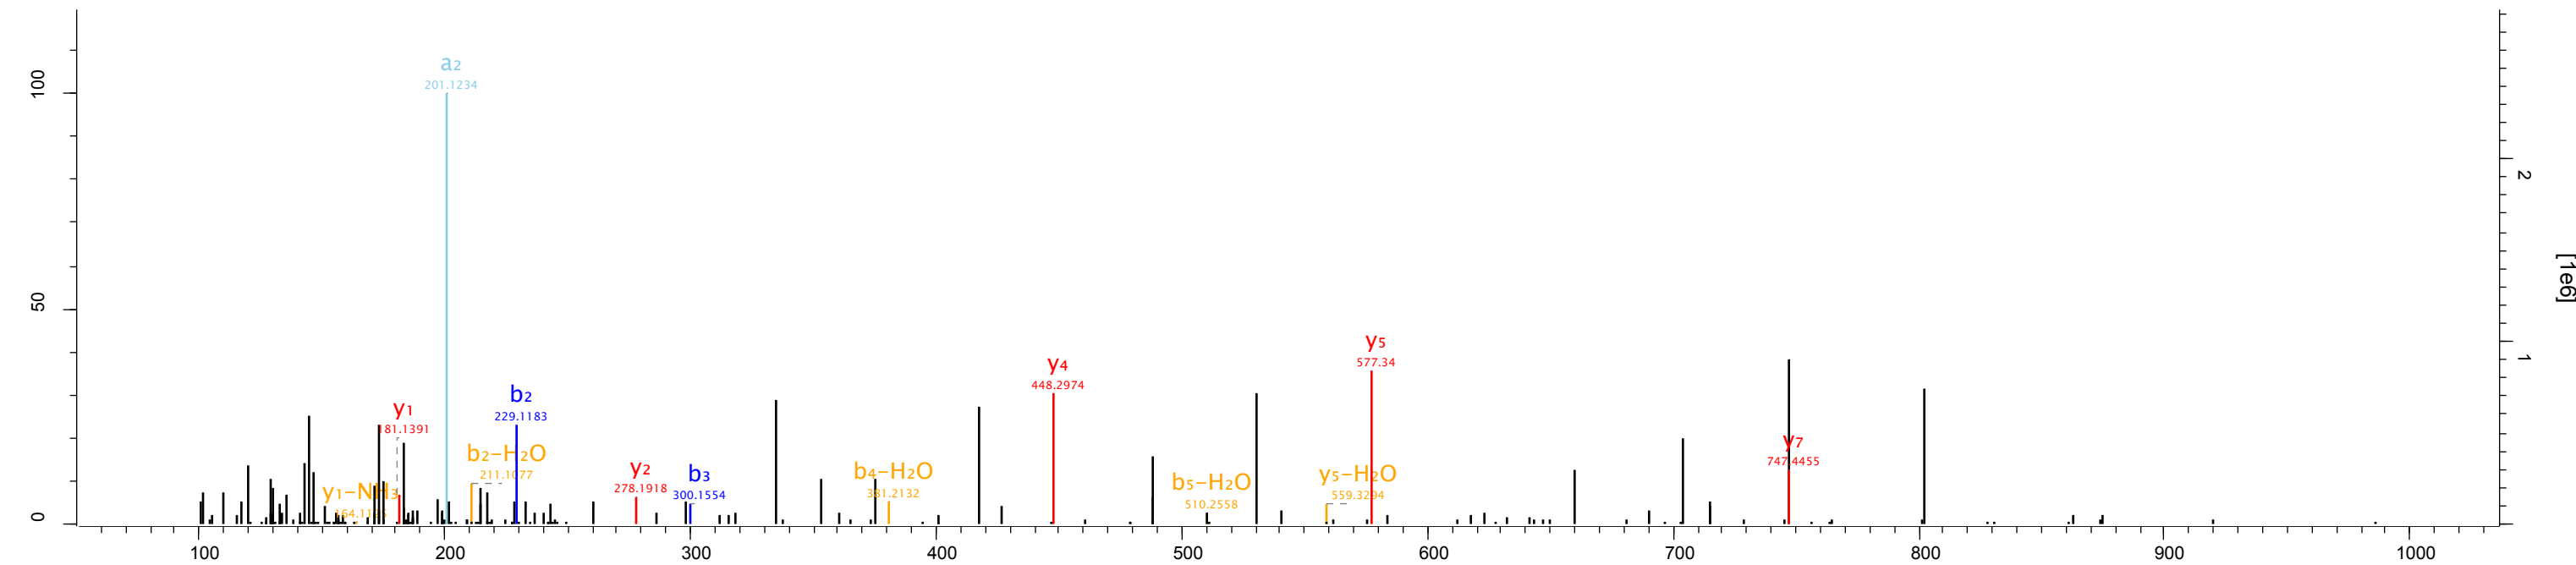

Raw file: 20150818\_A375SR-Proteome\_BR1  
 Scan: 4881 Method: FTMS; HCD Score: 37.18 m/z: 352.52 Gene names: TYMP

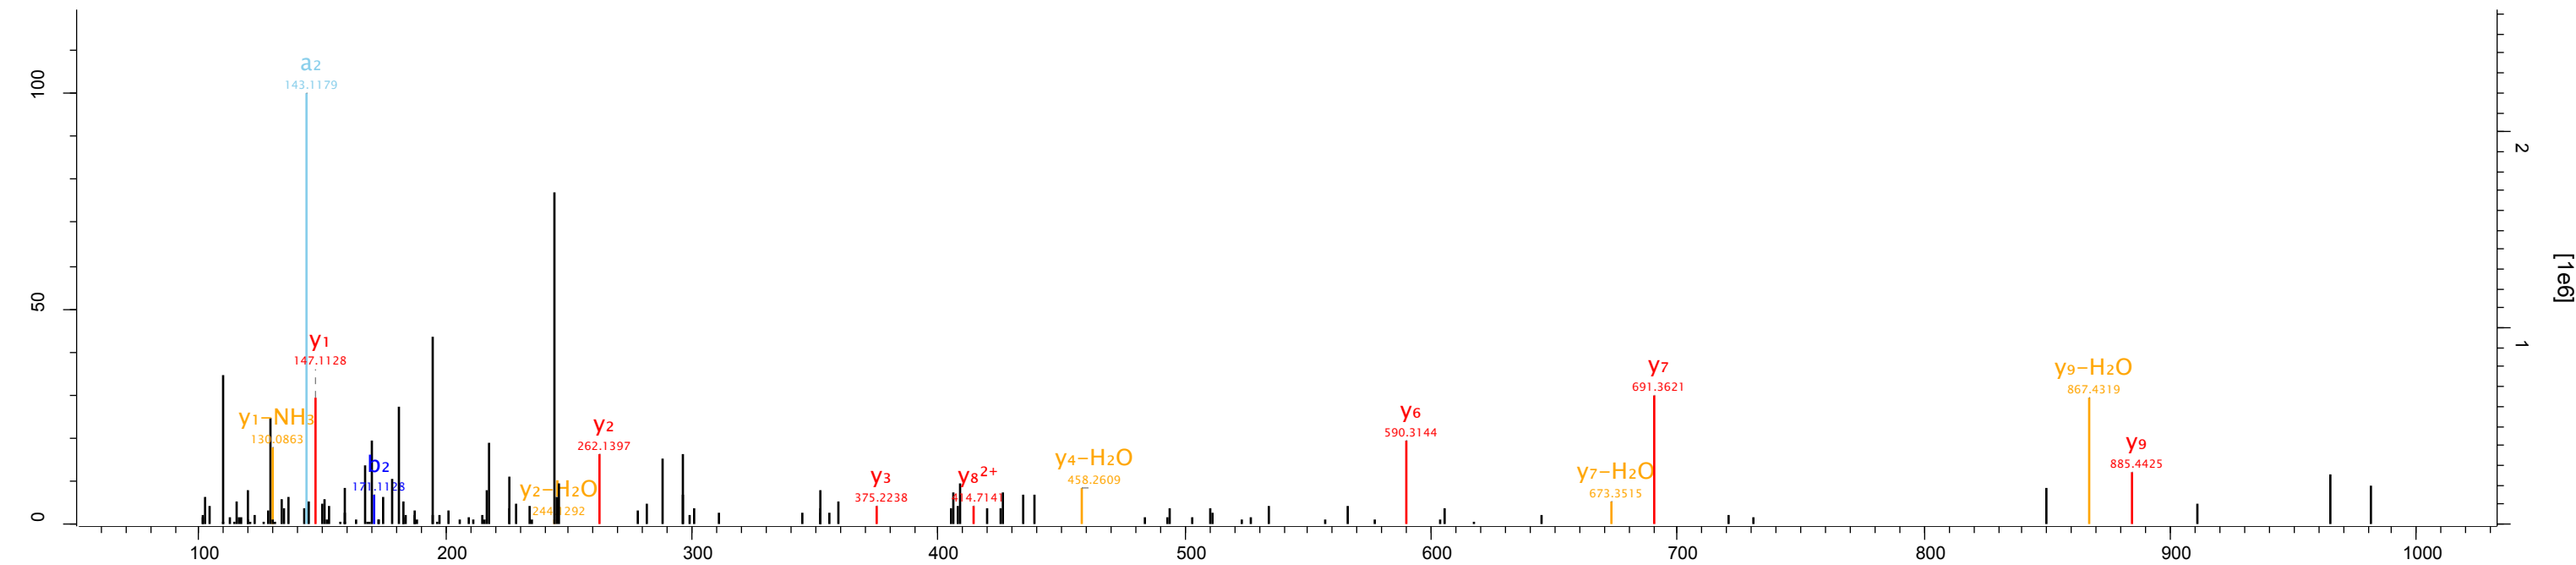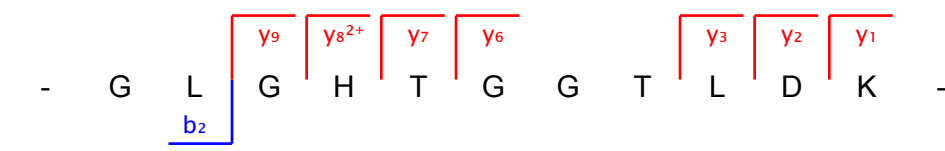

Raw file 20150818\_A375SR-Proteome\_BR1 Scan 53991 Method FTMS; HCD Score 77.12 m/z 588.85 Gene names KATNAL2

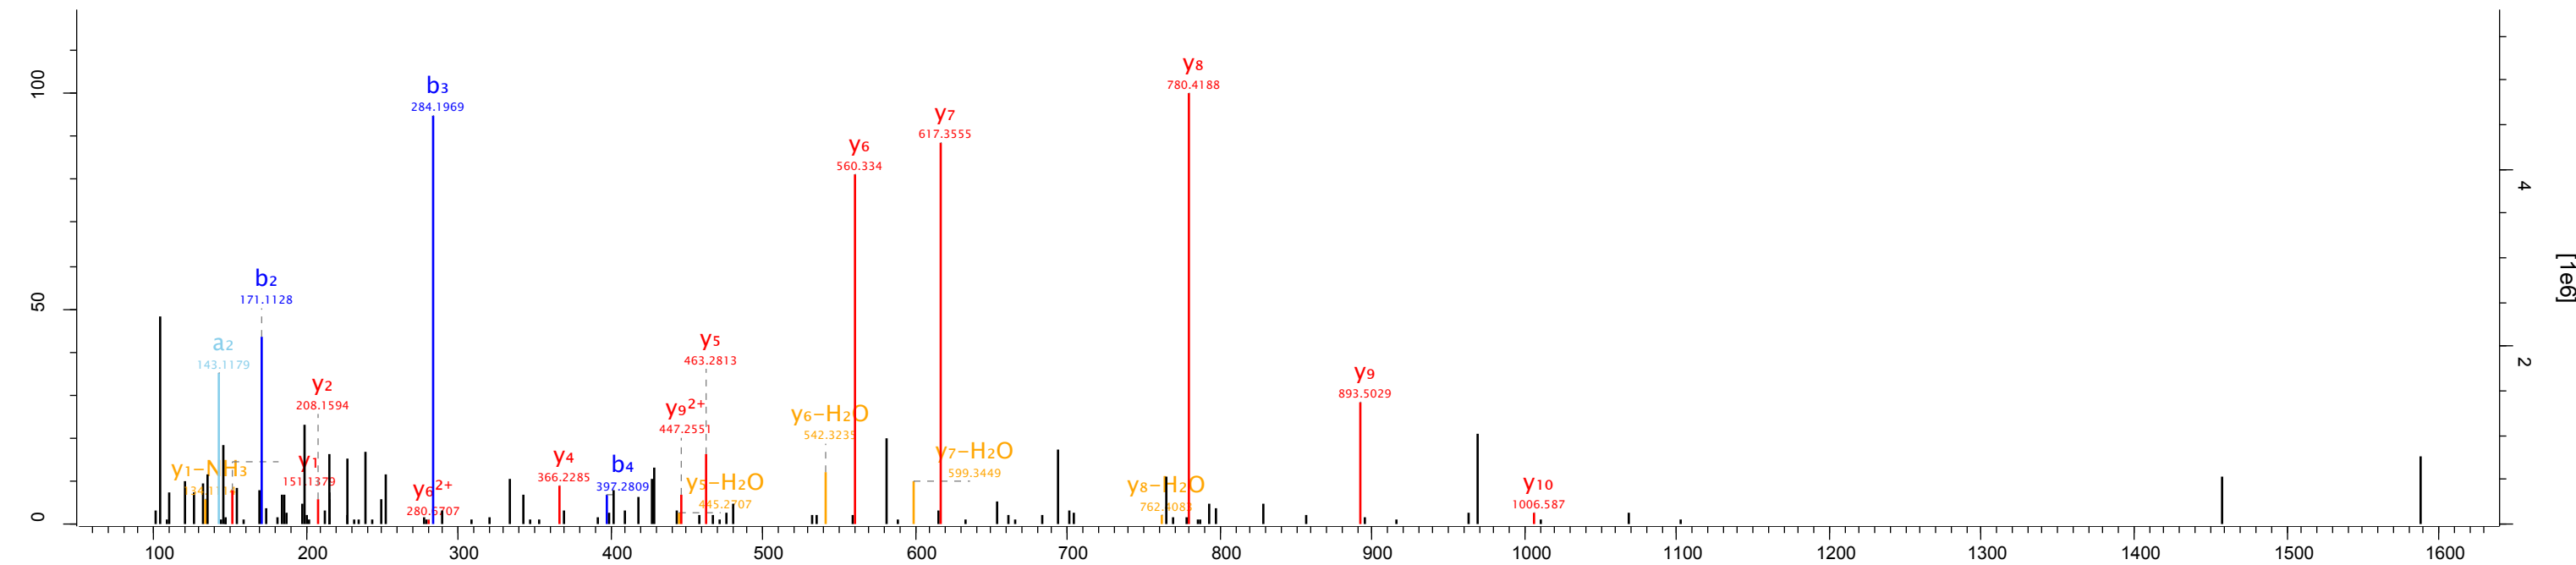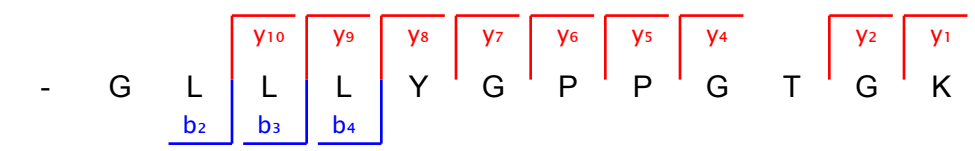

Raw file: 20150818\_A375SR-Proteome\_BR1  
 Scan: 63551 Method: FTMS; HCD Score: 33.14 m/z: 696.01 Gene names: SLC31A1

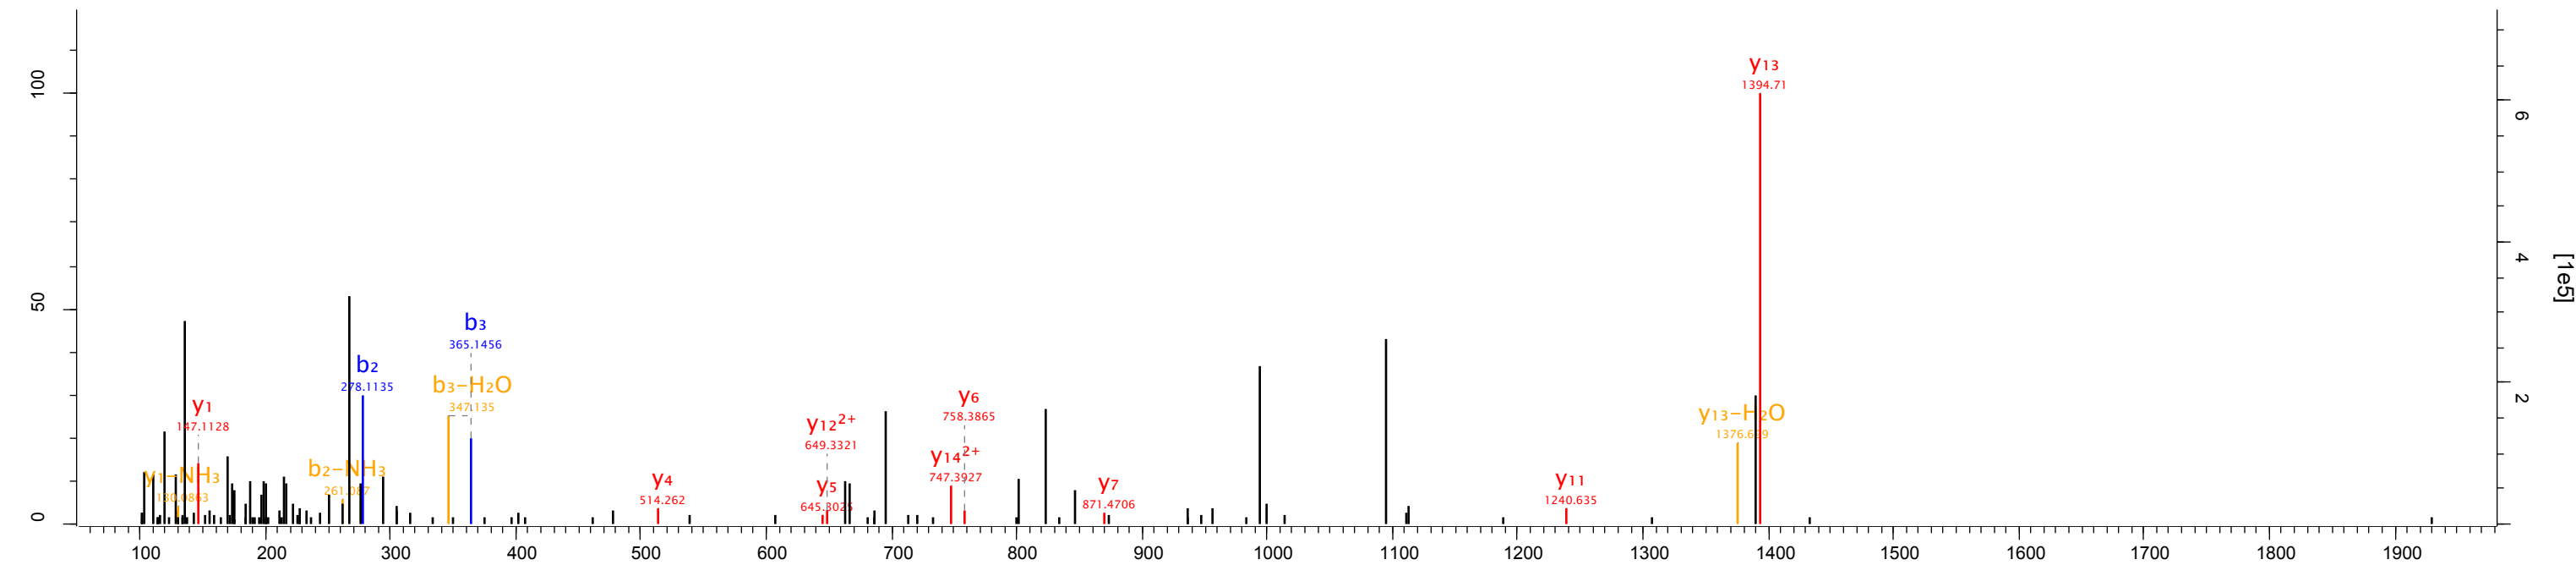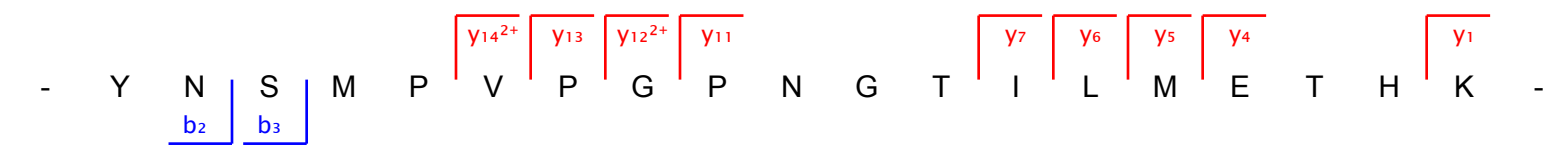

Raw file: 20150818\_A375SR-Proteome\_BR1  
 Scan: 72931 Method: FTMS; HCD Score: 28.53 m/z: 545.28 Gene names: SPPL2A

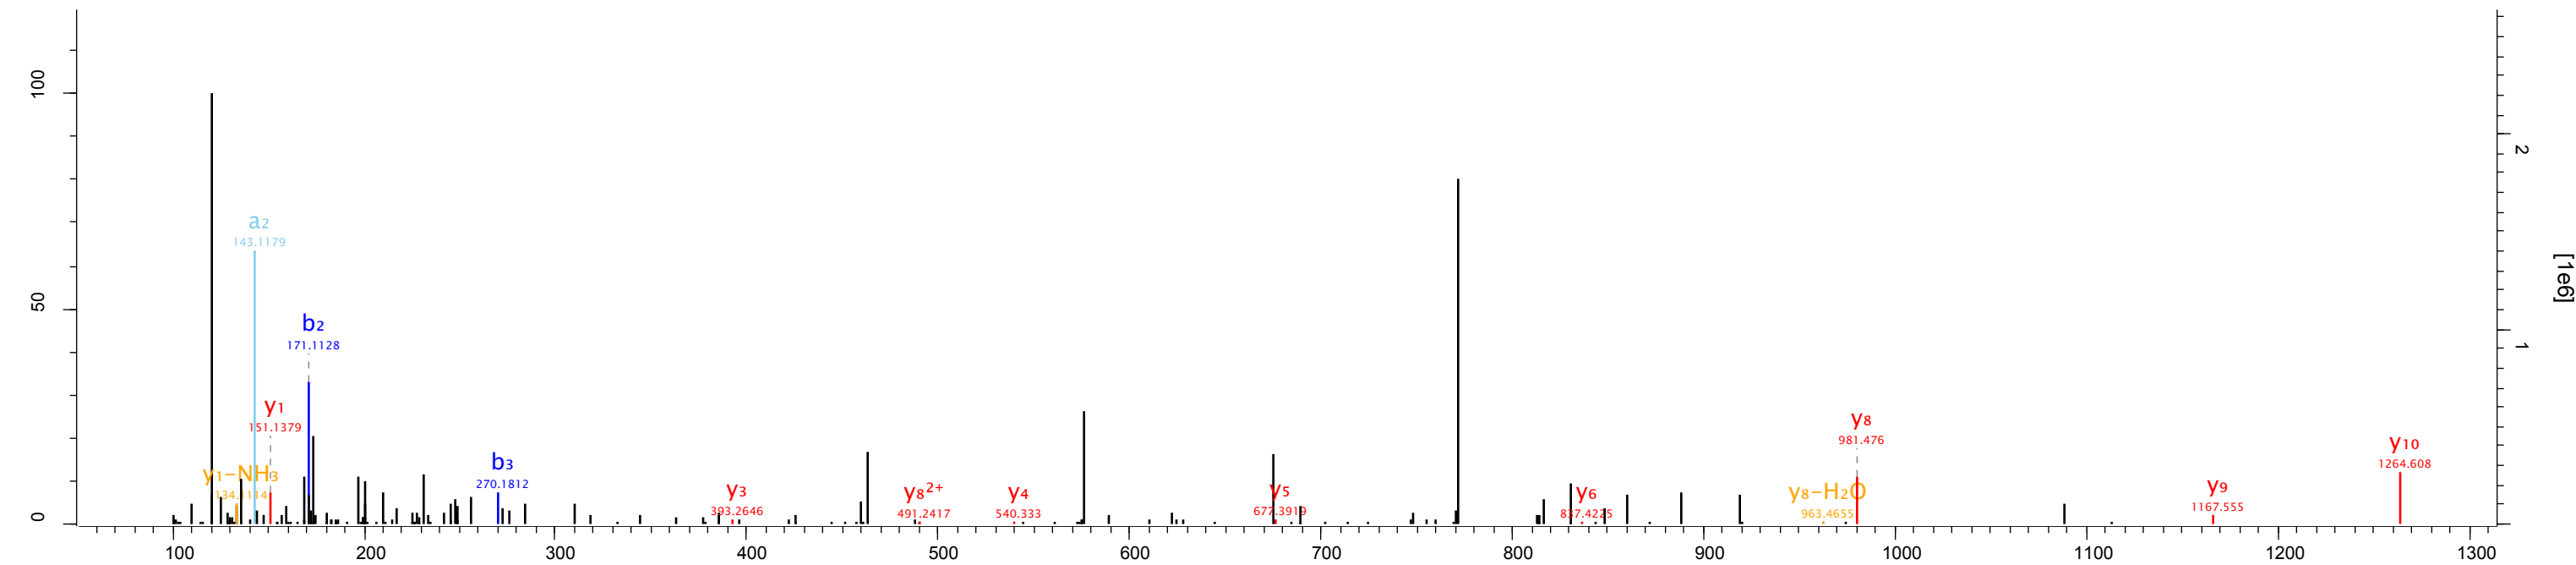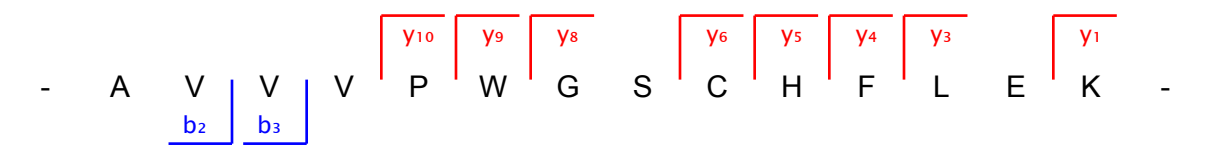

Raw file: 20150818\_A375SR-Proteome\_BR2  
 Scan: 54871 Method: FTMS; HCD Score: 57.79 m/z: 374.92 Gene names: BPI

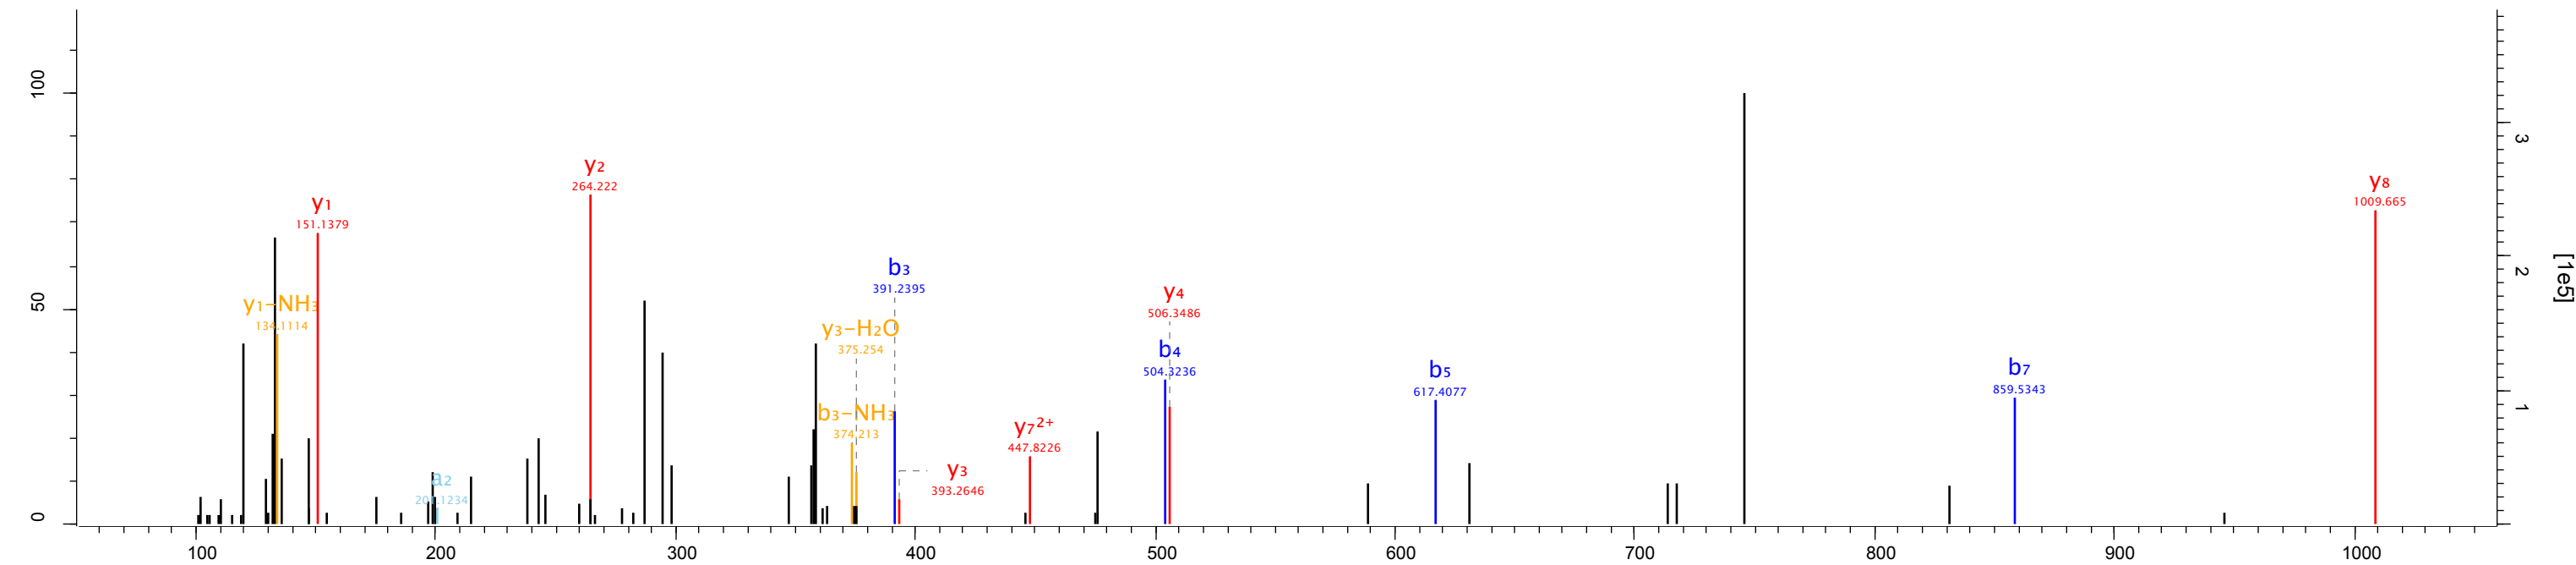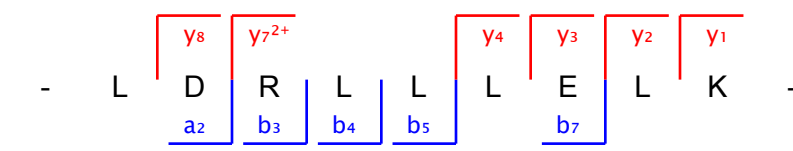

Raw file: 20150818\_A375SR-Proteome\_BR2  
 Scan: 63531 Method: FTMS; HCD Score: 25.82 m/z: 805.11 Gene names: ZNF511

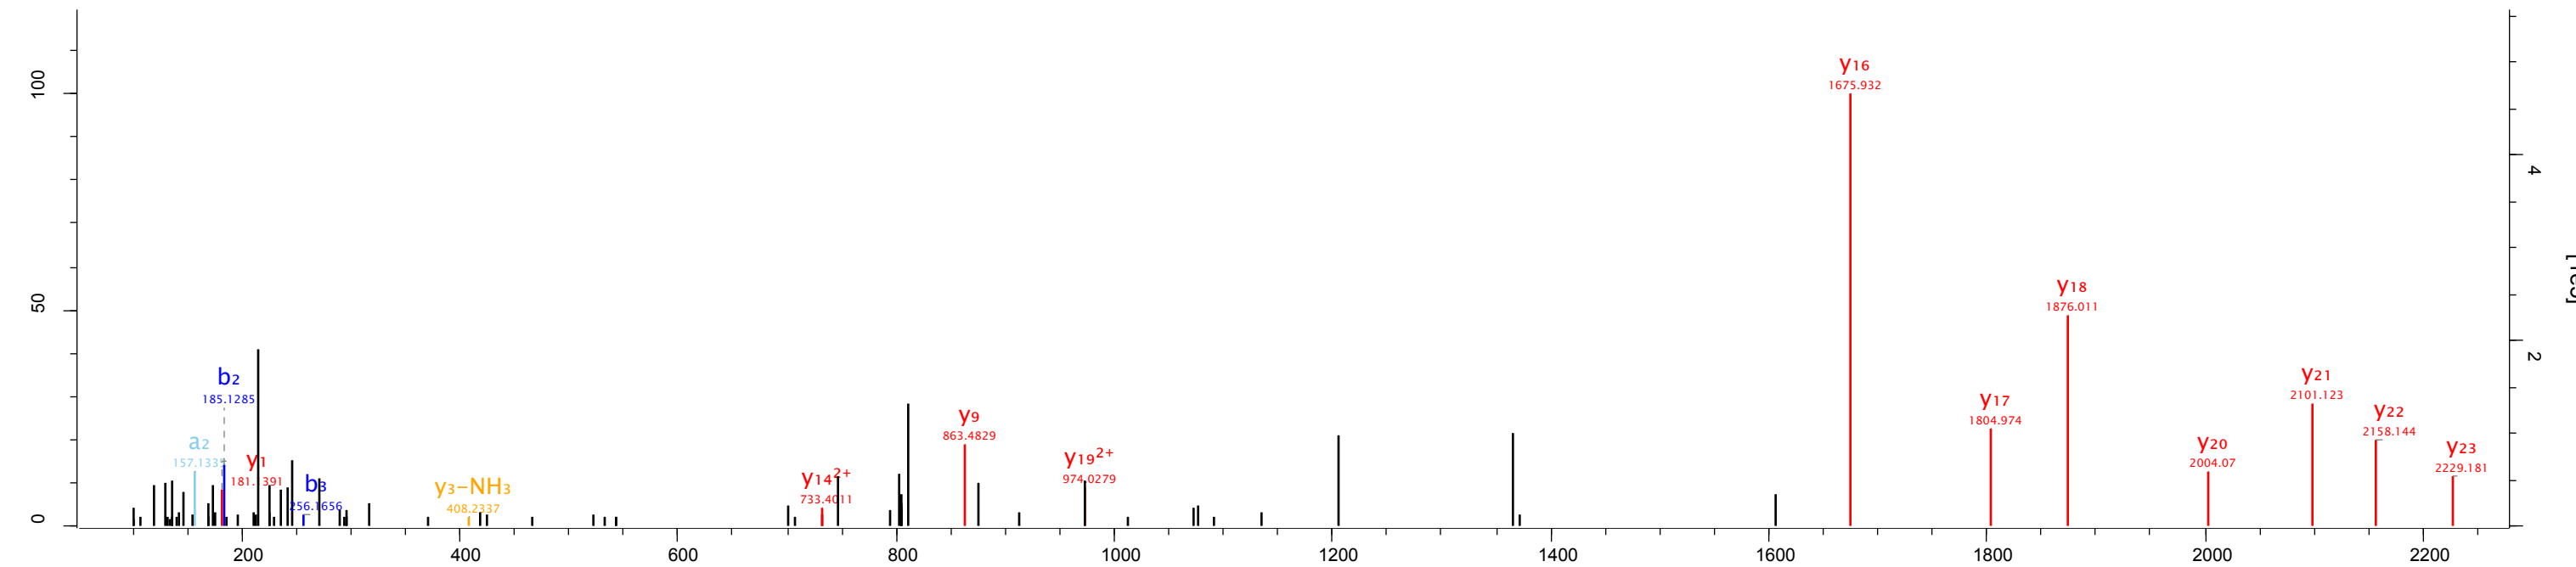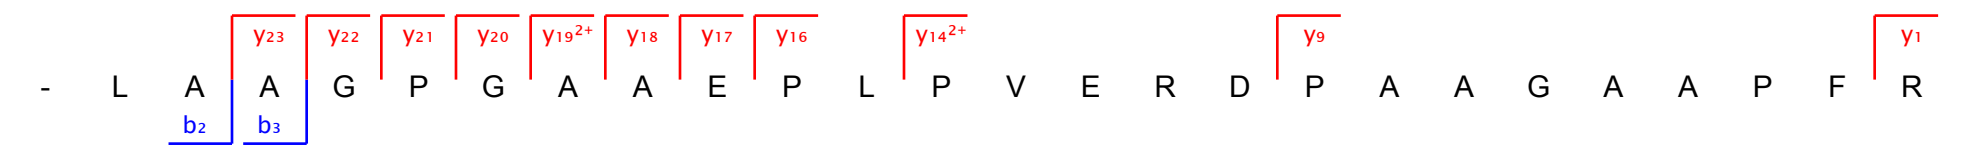



Raw file: 20150818\_A375SR-Proteome\_BR2  
 Scan: 65781  
 Method: FTMS; HCD  
 Score: 62.86  
 m/z: 744.03  
 Gene names: MED21

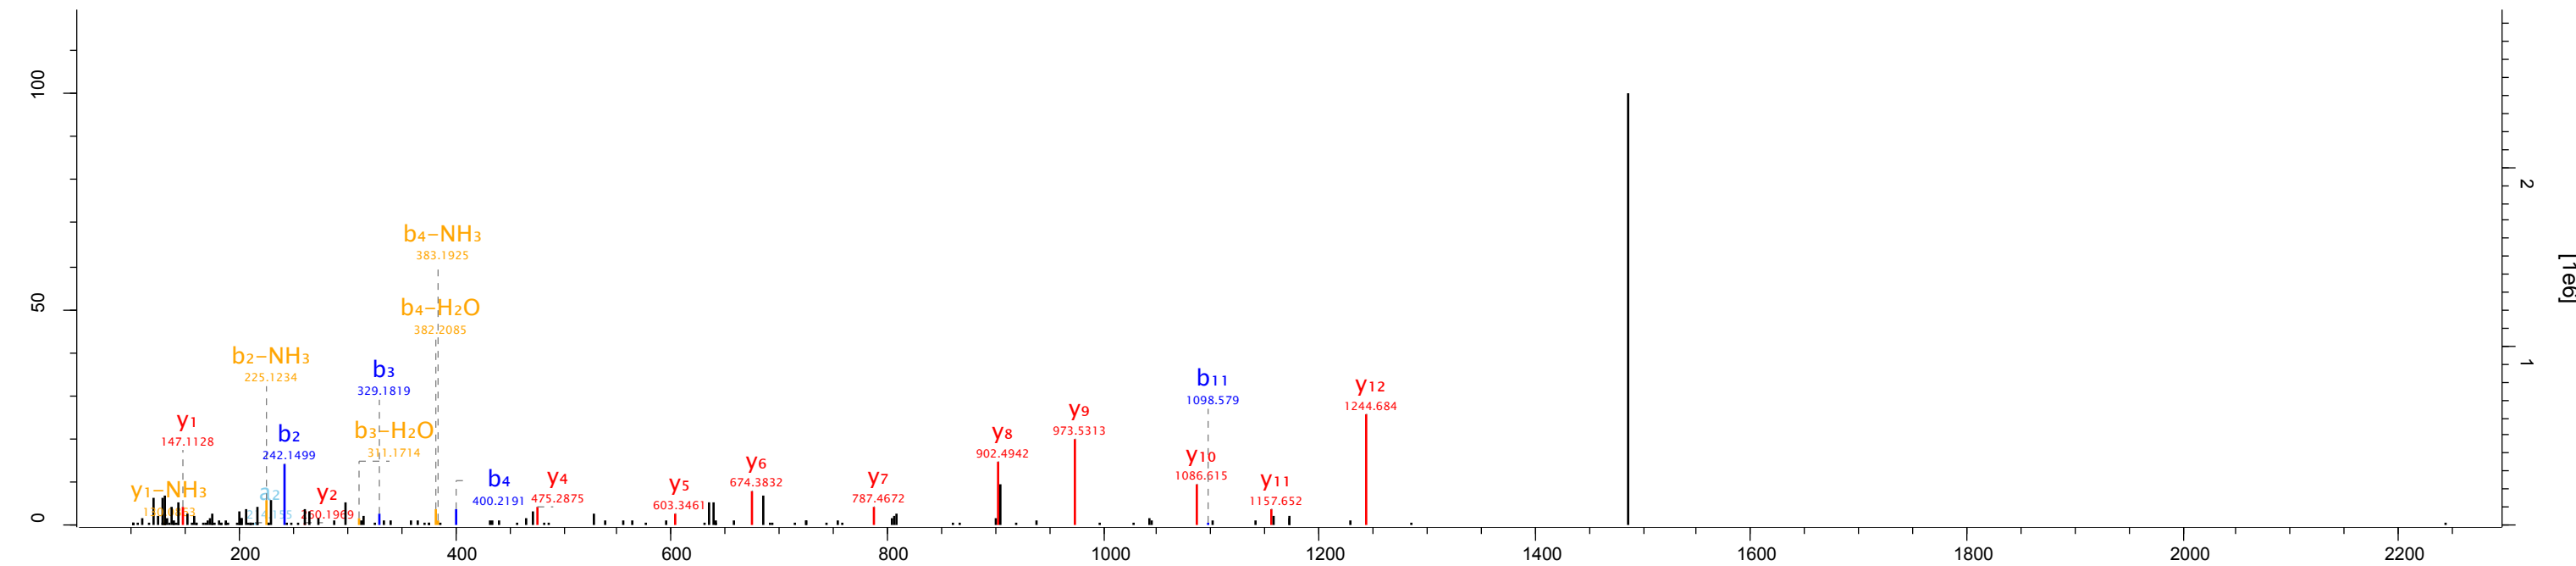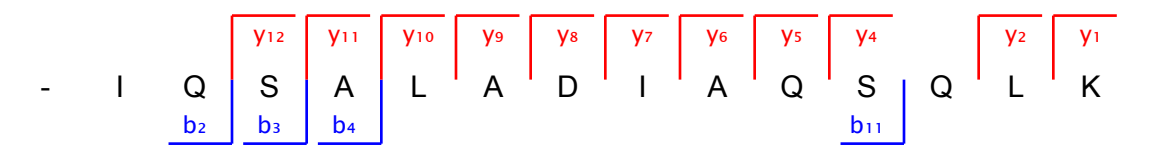

Raw file: 20150818\_A375SR-Proteome\_BR2  
 Scan: 9171 Method: FTMS; HCD Score: 66.07 m/z: 480.75 Gene names: ROR2

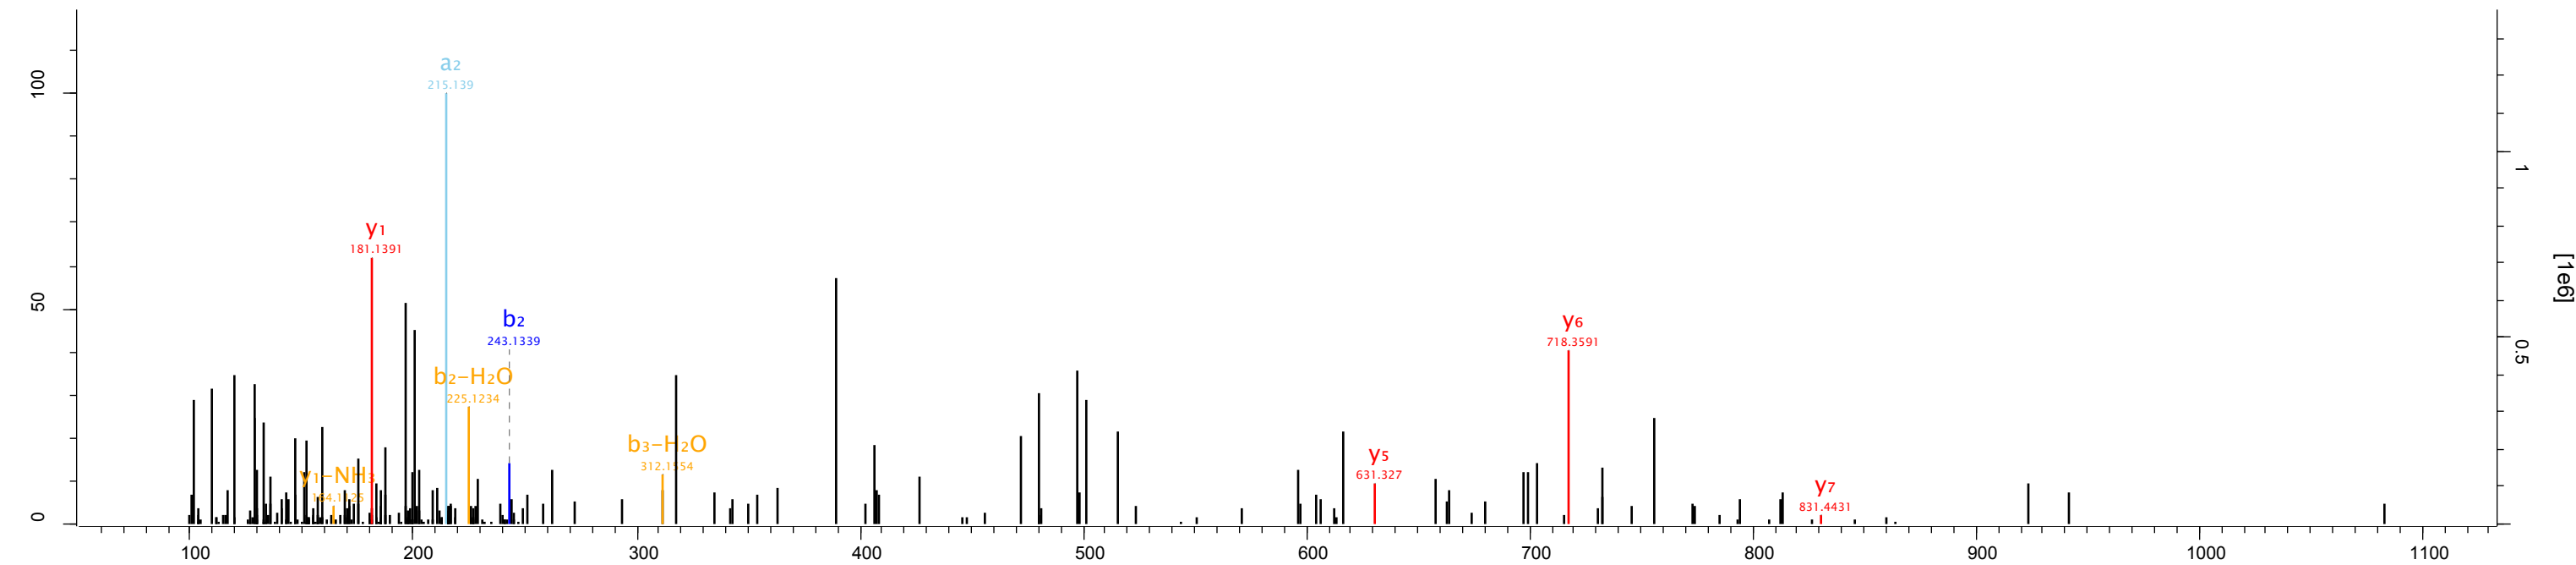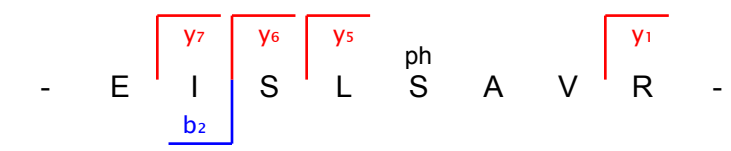

Raw file 20150822\_A375SR\_Phospho\_BR3\_02 Scan 11051 Method FTMS; HCD Score 41.68 m/z 754.87

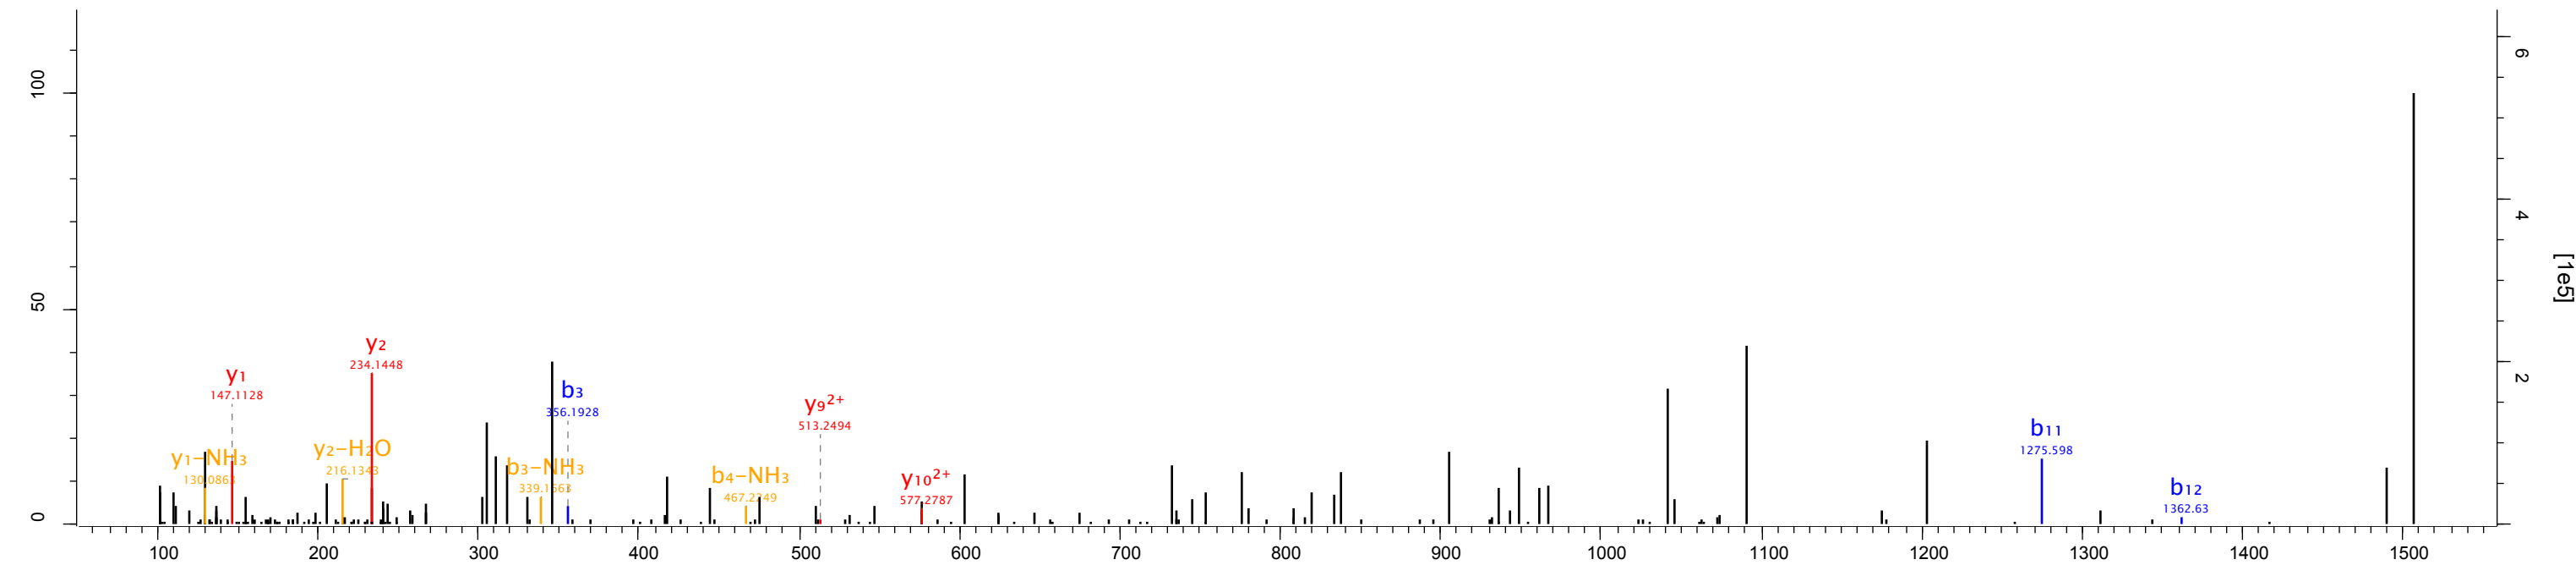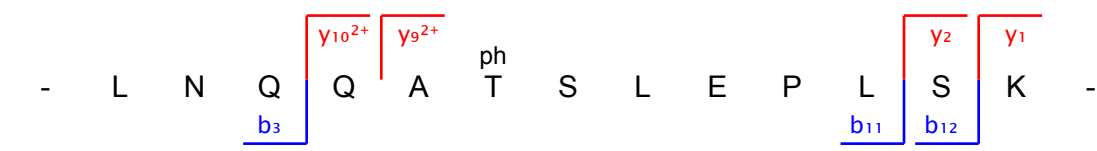

Raw file: 20150822\_A375SR\_Phospho\_BR3\_04  
 Scan: 6901 Method: FTMS; HCD Score: 52.17 m/z: 576.29

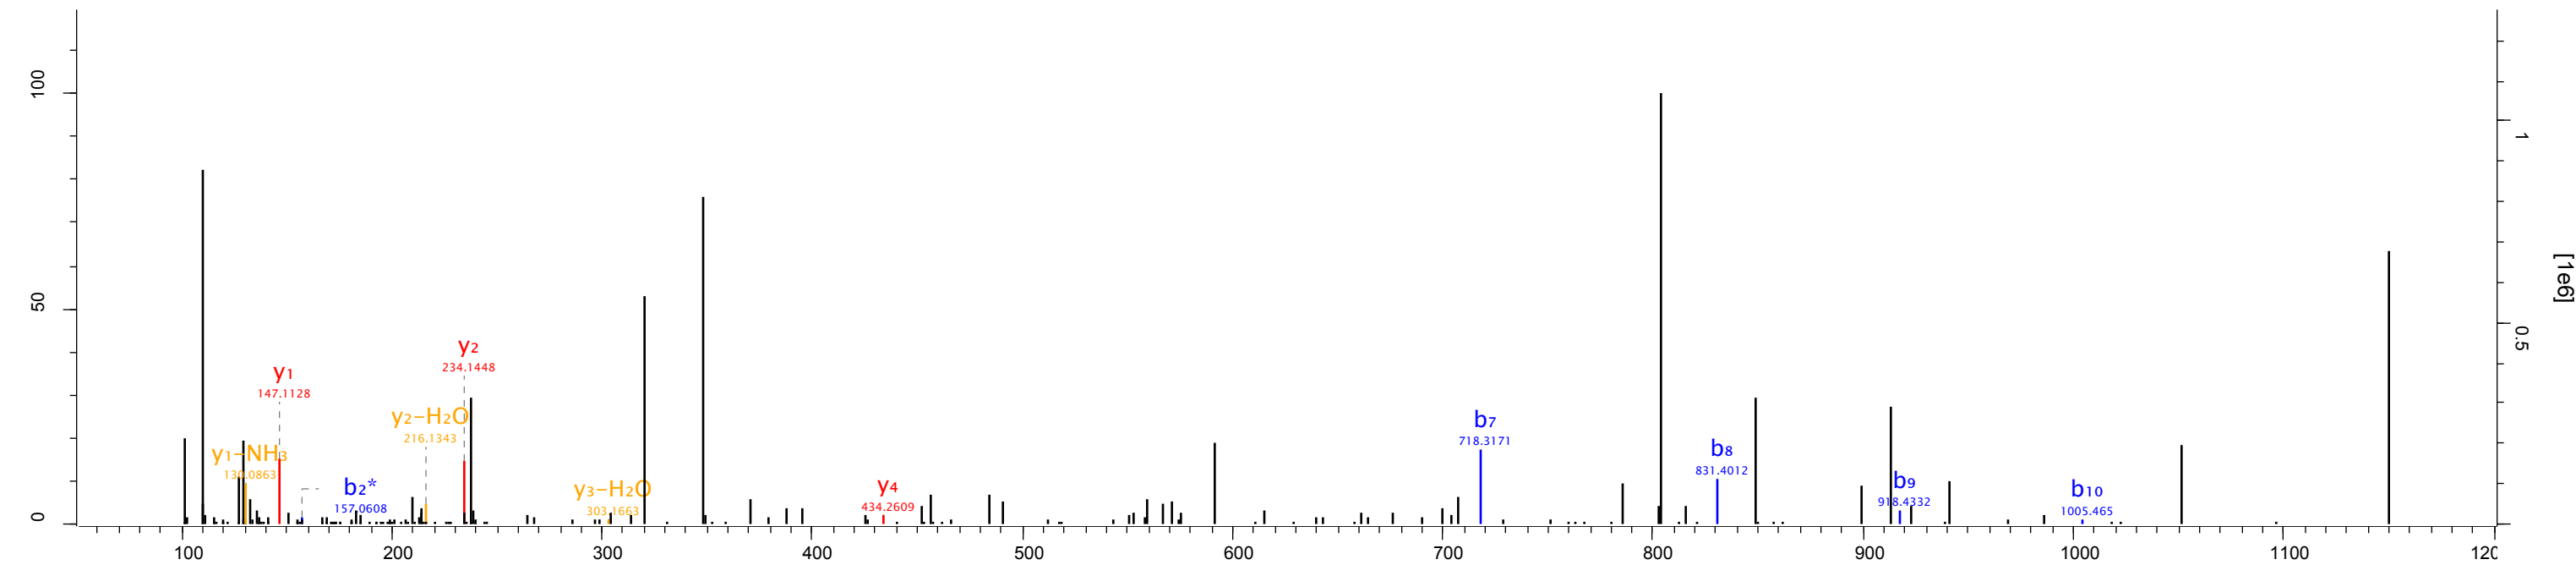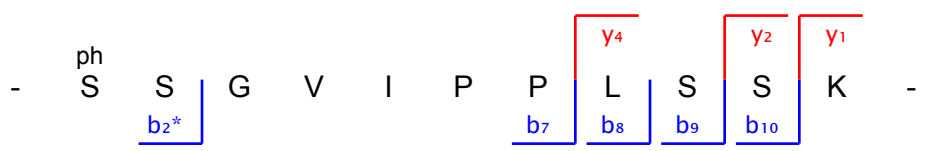

Raw file 20150822\_A375SR\_Phospho\_BR3\_05 Scan 10081 Method FTMS; HCD Score 72.79 m/z 477.23 Gene names GPR64

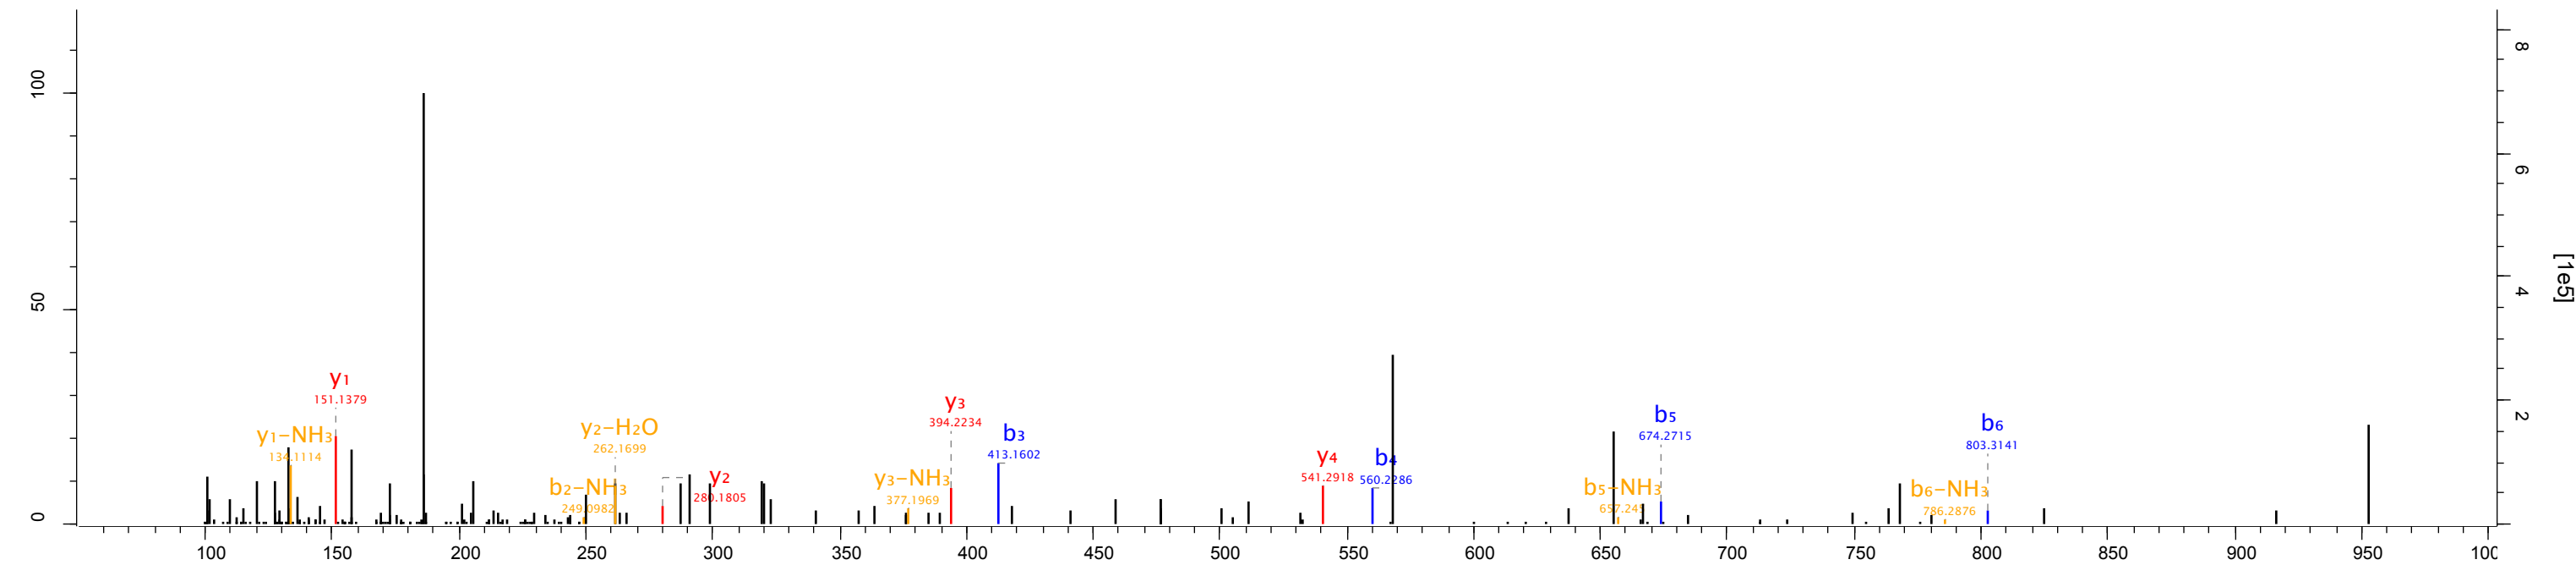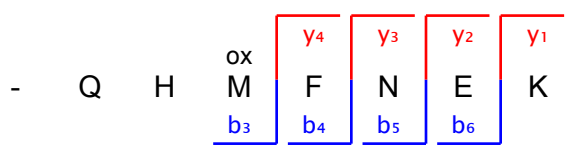

Raw file 20150822\_A375SR\_Phospho\_BR3\_05 Scan 13931 Method FTMS; HCD Score 48.62 m/z 838.84 Gene names MME

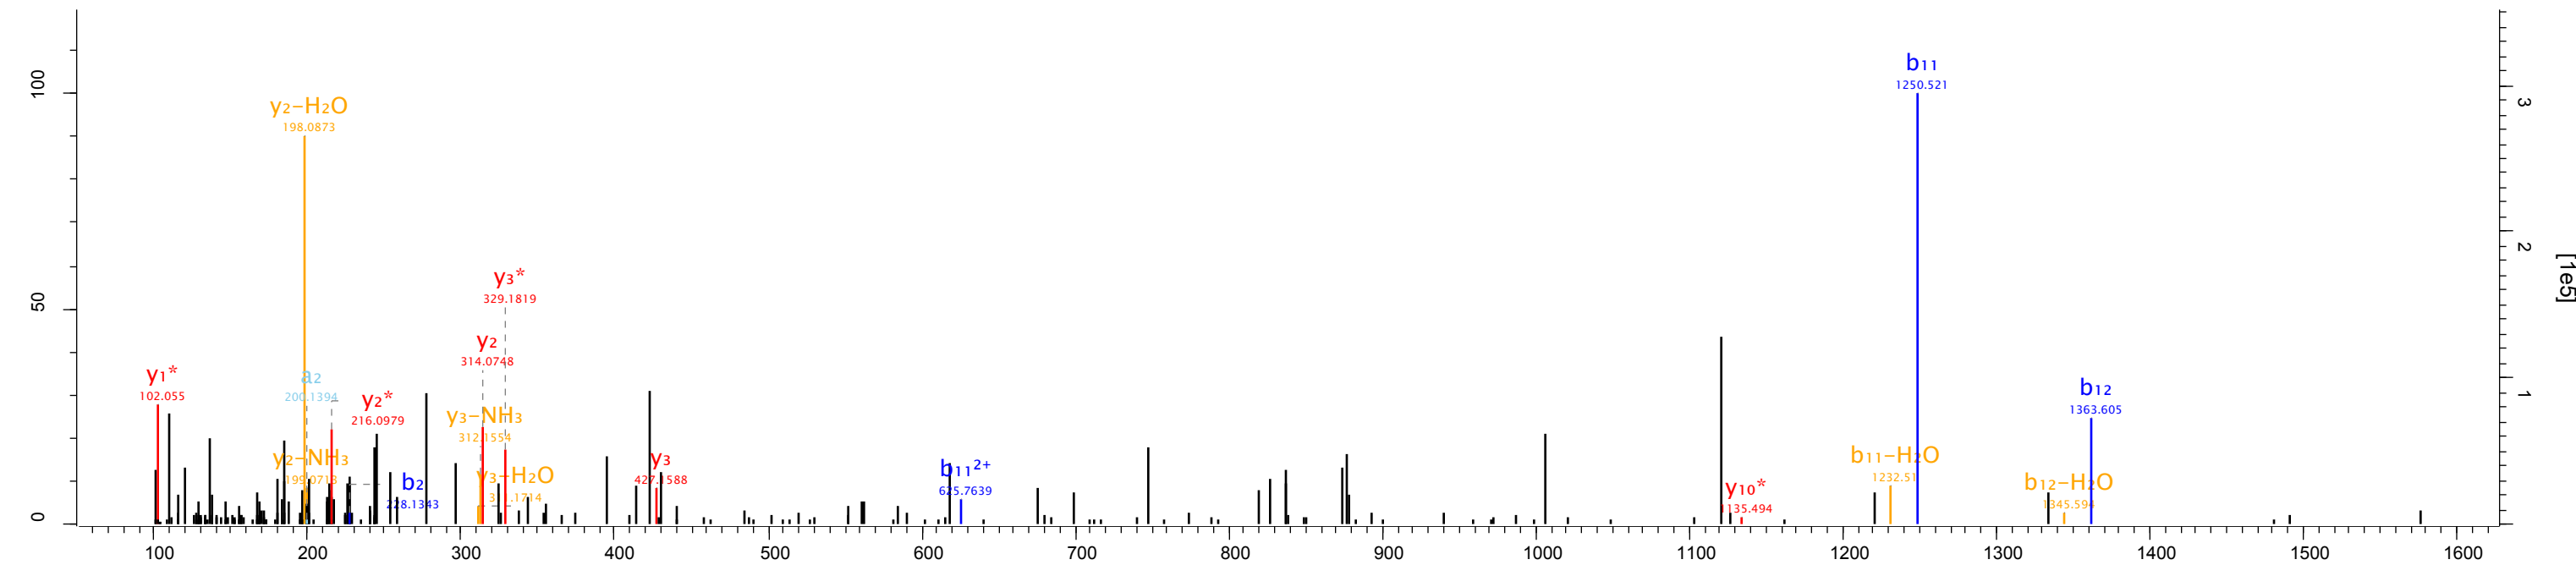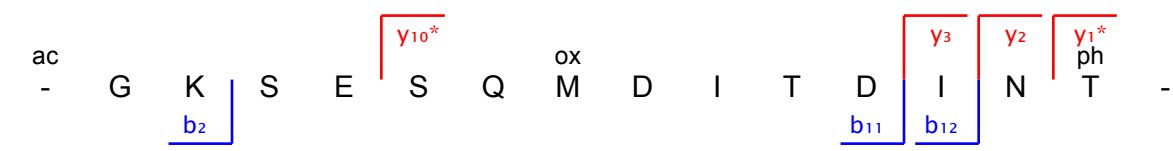

Raw file 20150822\_A375SR\_Phospho\_BR3\_06 Scan 10011 Method FTMS; HCD Score 82.67 m/z 477.23 Gene names GPR64

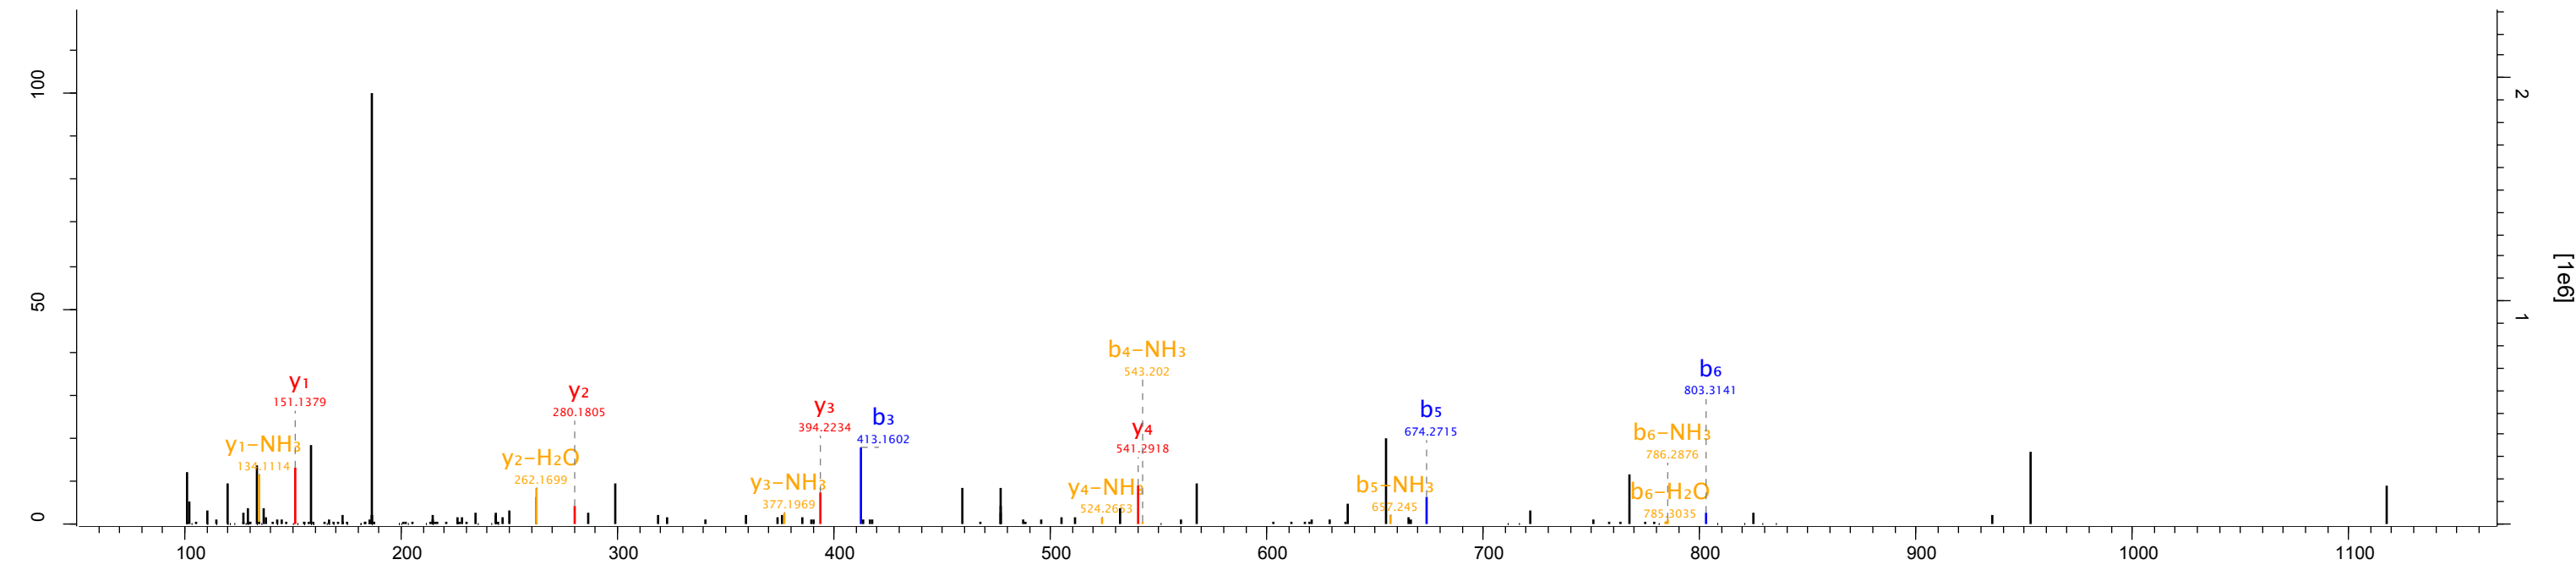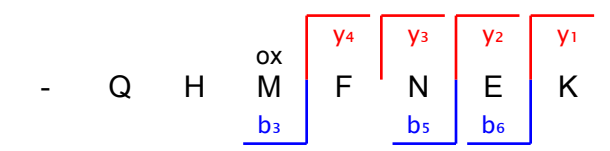

Raw file 20150822\_A375SR\_Phospho\_BR3\_06 Scan 6401 Method FTMS; HCD Score 66.27 m/z 426.73

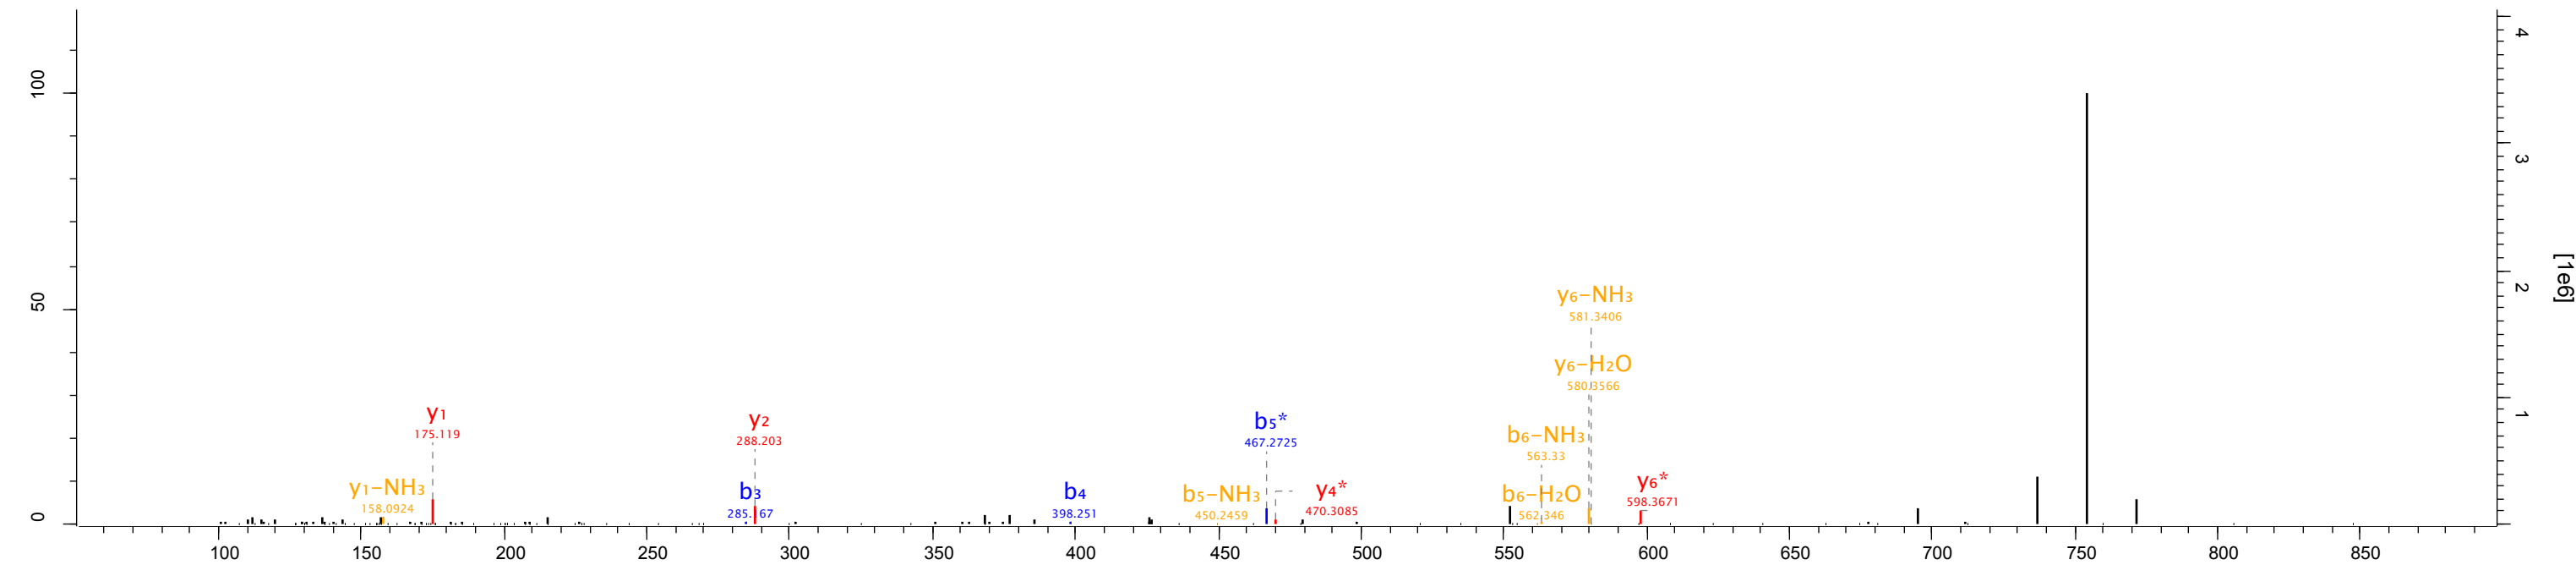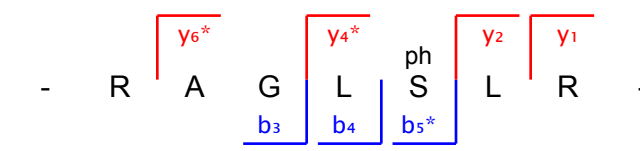



Raw file 20150822\_A375SR\_Phospho\_BR3\_08 Scan 22841 Method FTMS; HCD Score 41.65 m/z 1100.17 Gene names CEBPG

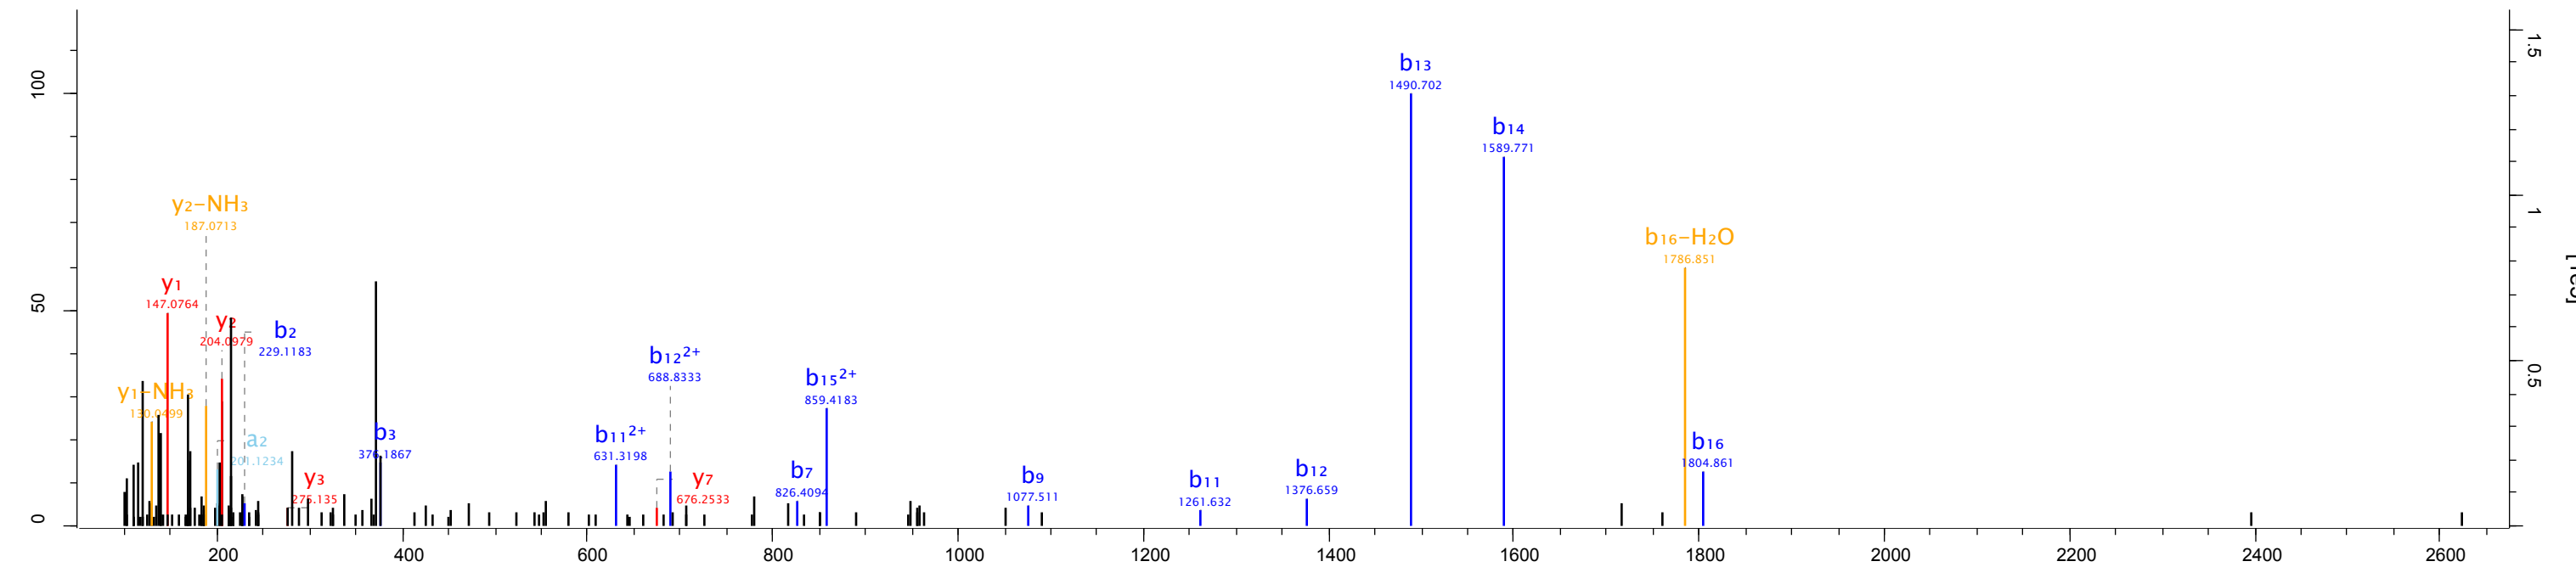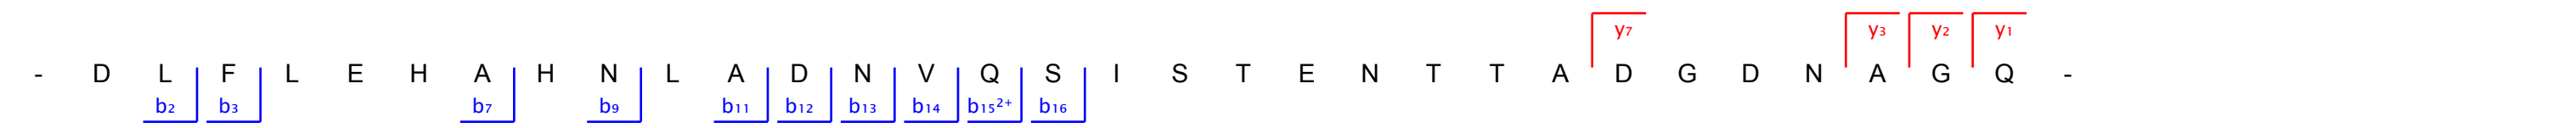

Raw file: 20150822\_A375SR\_Phospho\_BR3\_08  
 Scan: 22851 Method: FTMS; HCD Score: 51.32 m/z: 1100.84 Gene names: CEBPG

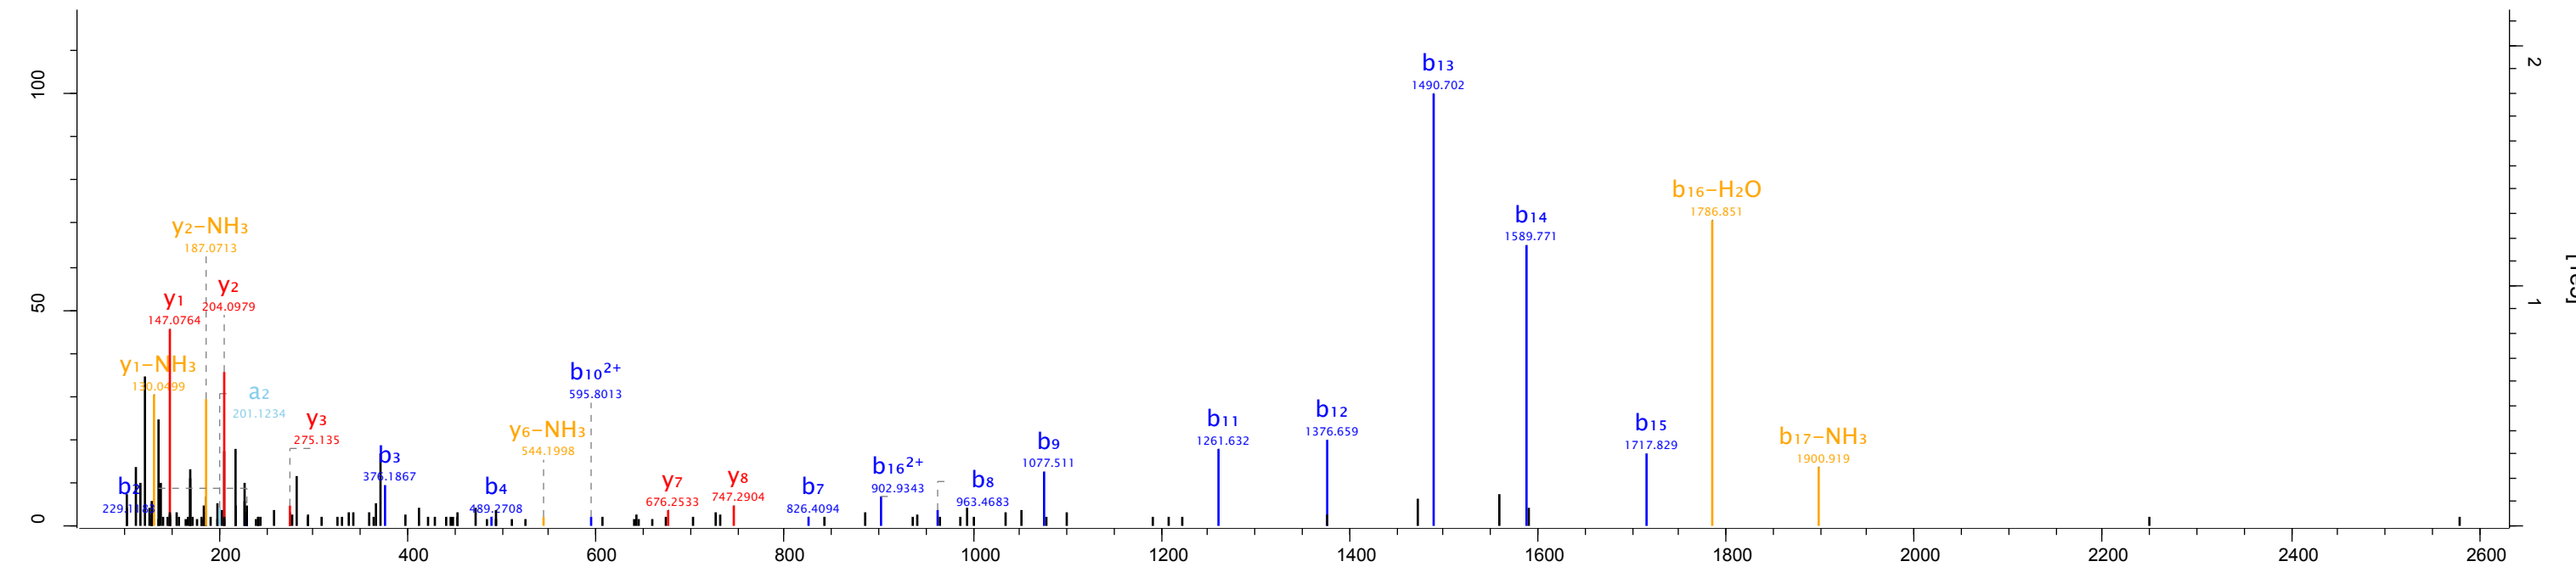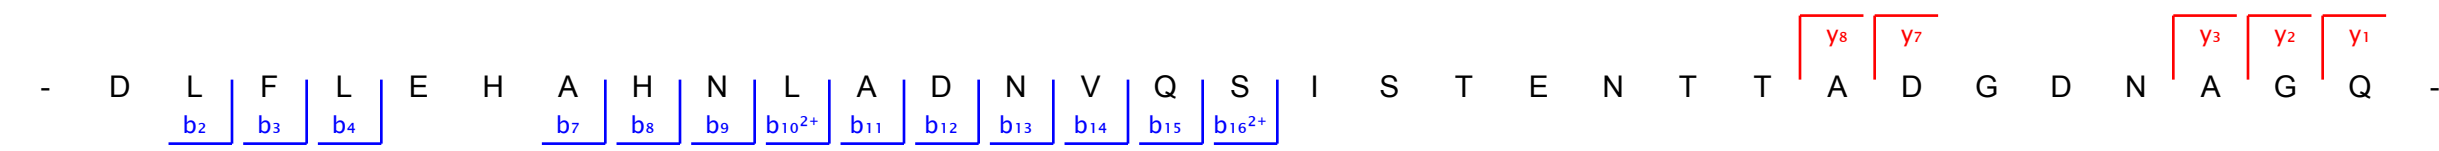

Raw file: 20150822\_A375SR\_Phospho\_BR3\_09  
 Scan: 22651 Method: FTMS; HCD Score: 78.91 m/z: 1100.5 Gene names: CEBPG

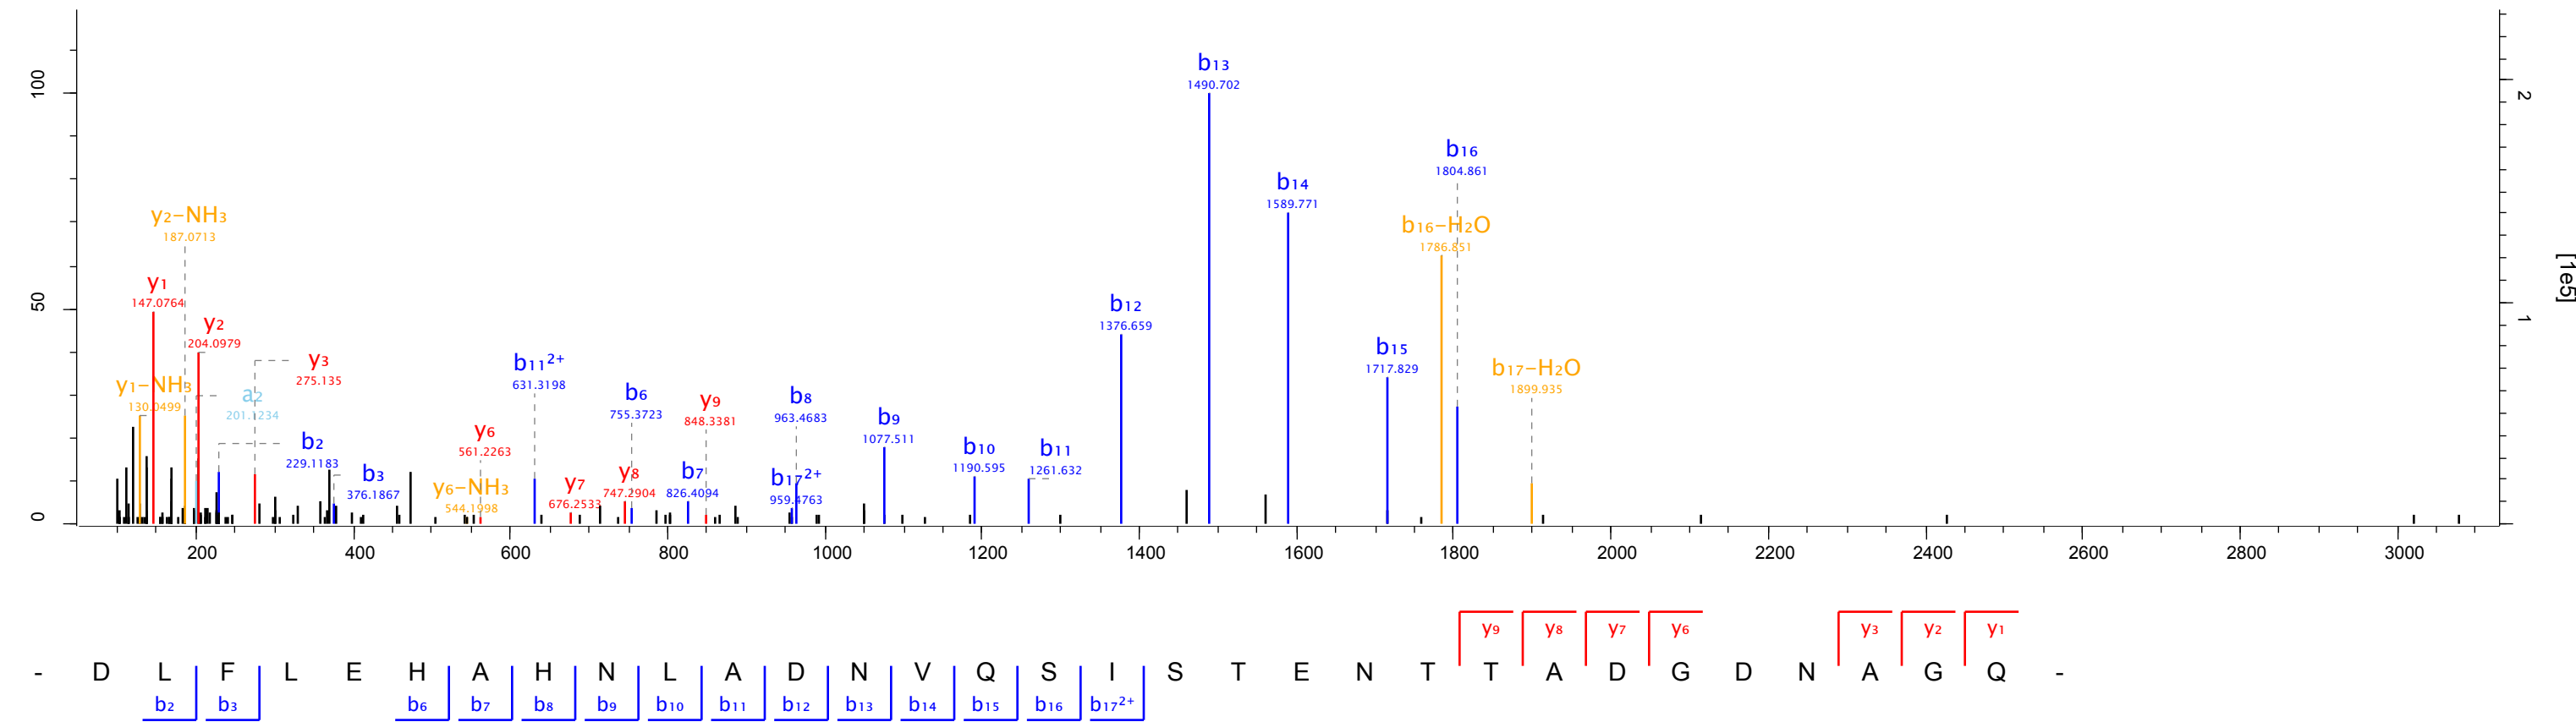

Raw file: 20150822\_A375SR-Proteome\_BR3  
 Scan: 120631  
 Method: FTMS; HCD  
 Score: 50.36  
 m/z: 715.75  
 Gene names: AIMP2

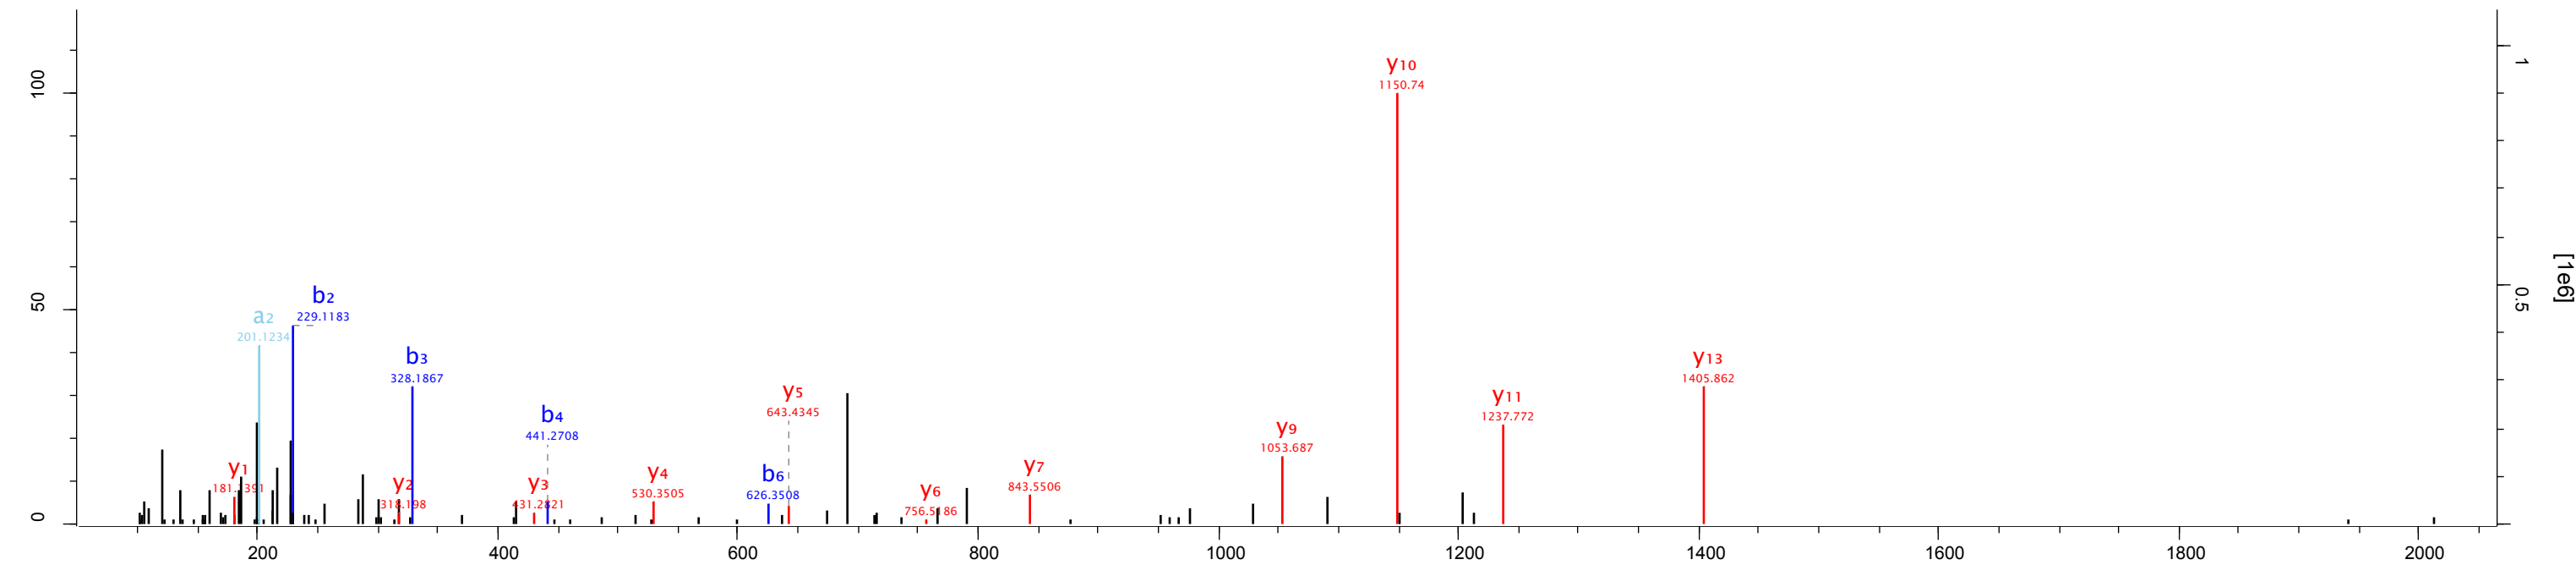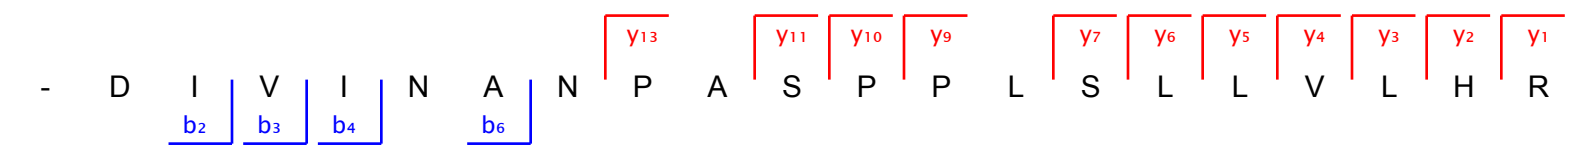

Raw file: 20150822\_A375SR-Proteome\_BR3  
 Scan: 26671 Method: FTMS; HCD Score: 51.57 m/z: 442.23 Gene names: C1orf234

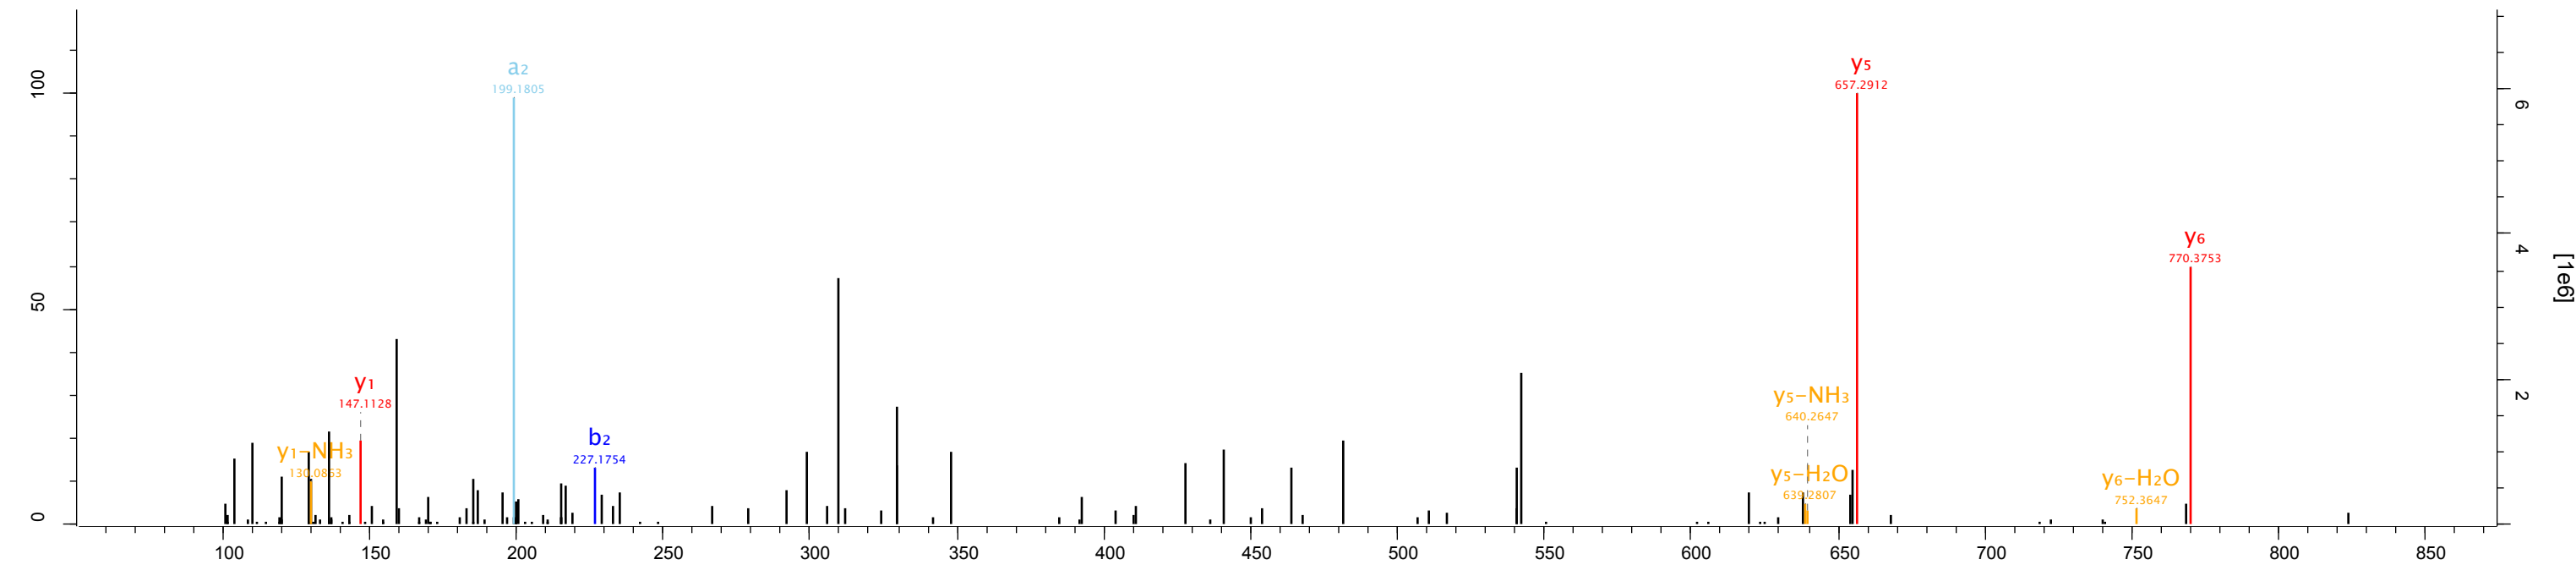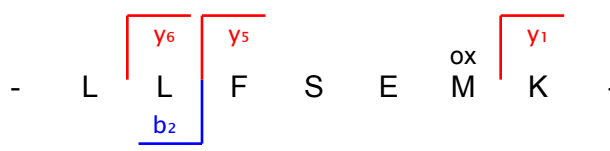

Raw file: 20150822\_A375SR-Proteome\_BR3  
 Scan: 44691 Method: FTMS; HCD Score: 119.75 m/z: 436.58 Gene names: RPL39P5;RPL39

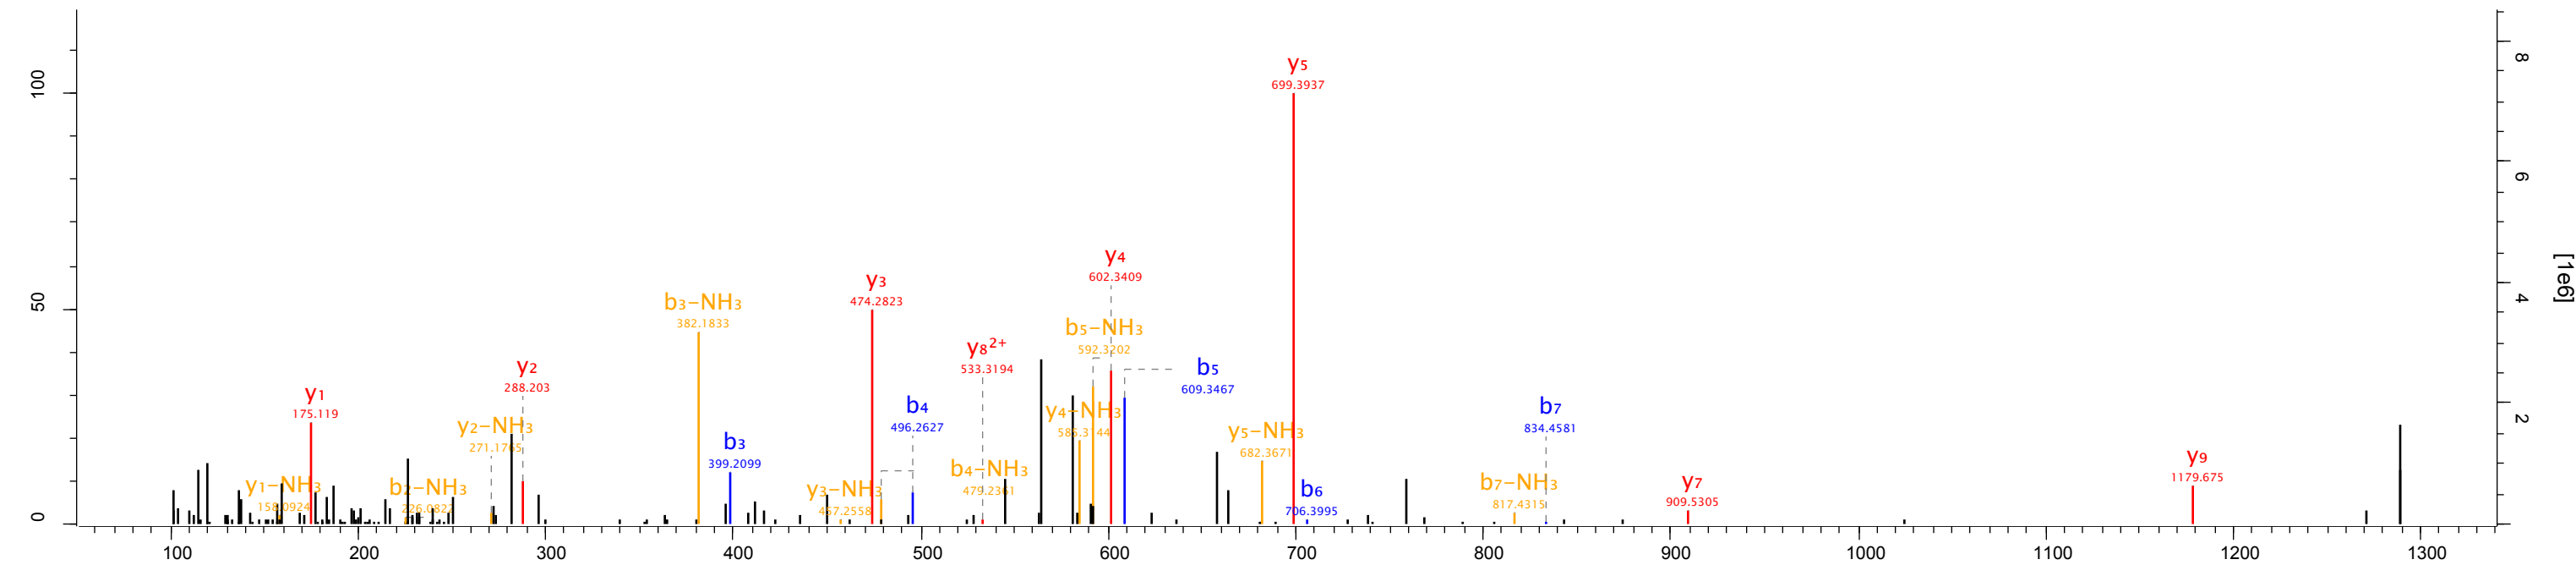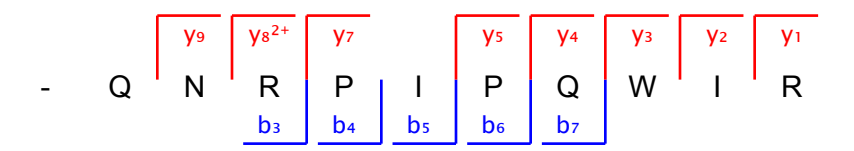

Raw file Scan Method Score m/z  
20150822\_A375SR-Proteome\_BR3 72411 FTMS; HCD 93.37 490.73

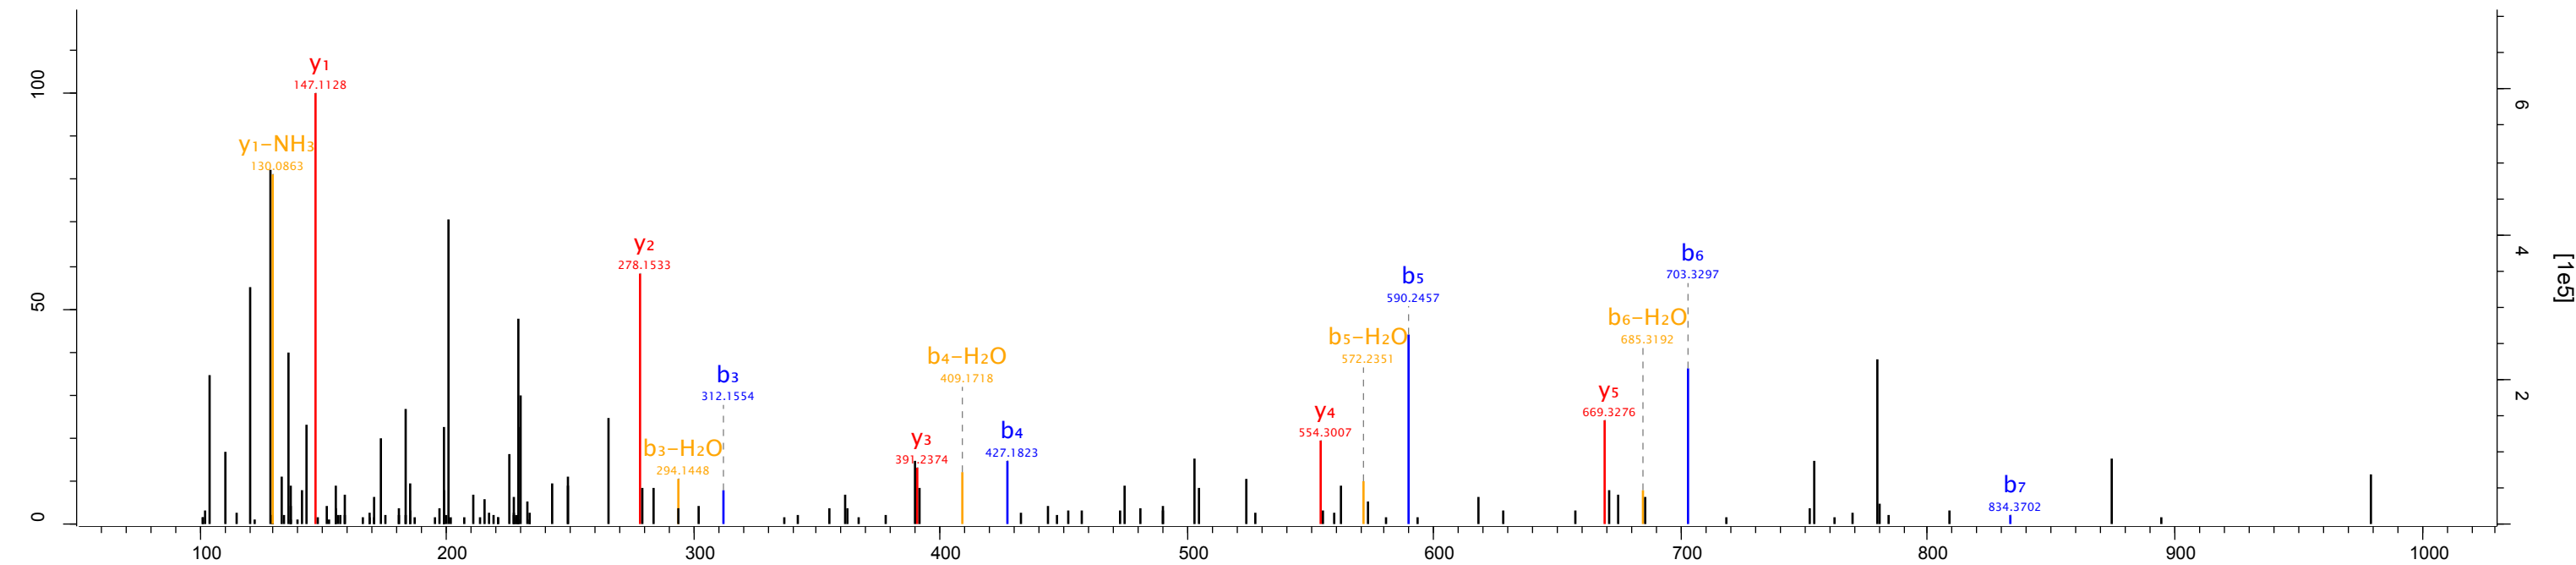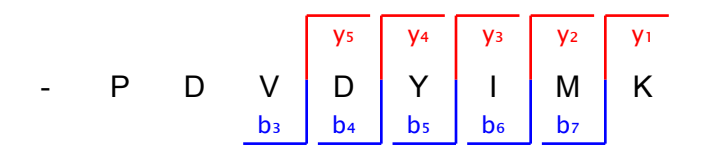

Raw file: 20150822\_A375SR-Proteome\_BR3  
 Scan: 94111 Method: FTMS; HCD Score: 6.04 m/z: 935.16 Gene names: C1orf85

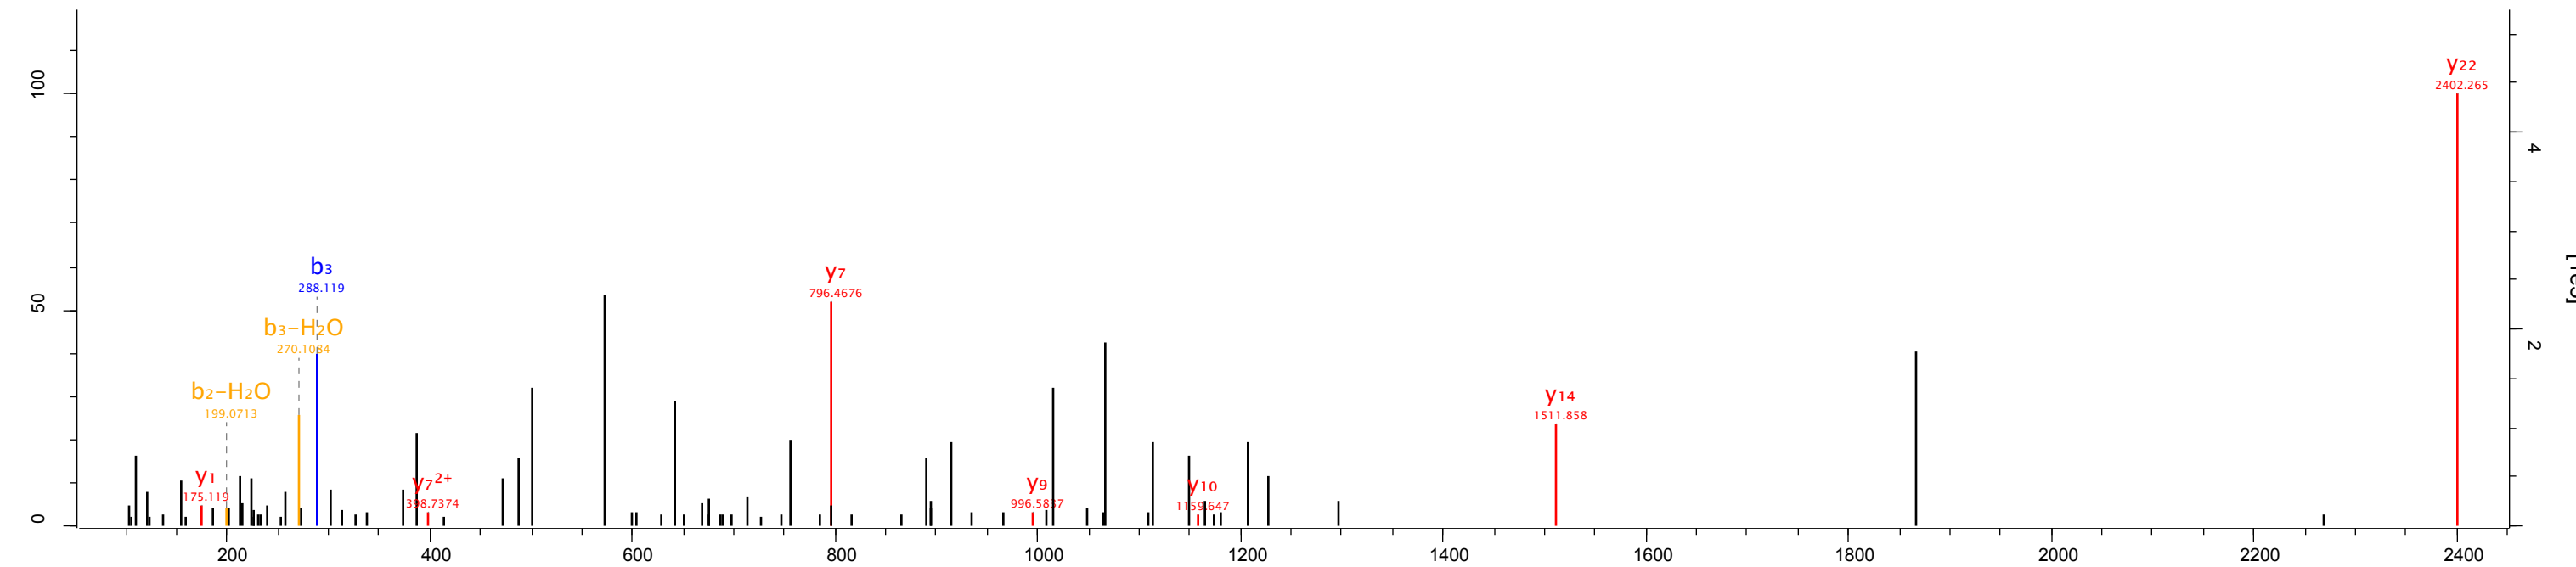

- E S A L P C Q A S P L H P A L A Y S L P Q S P I V R -

Fragmentation mapping (red brackets):

- $y_{22}$  covers residues L, P, C, Q, A, S, P, L, H, P, A, L, A, Y, S, L, P, Q, S, P, I, V, R.
- $y_{14}$  covers residues P, A, L, A, Y, S, L, P, Q, S, P, I, V, R.
- $y_{10}$  covers residues Y, S, L, P, Q, S, P, I, V, R.
- $y_9$  covers residues S, L, P, Q, S, P, I, V, R.
- $y_7$  covers residues L, P, Q, S, P, I, V, R.
- $y_1$  covers residues R.

Fragmentation mapping (blue bracket):

- $b_3$  covers residues A, L, P, C, Q, A, S, P, L, H, P, A, L, A, Y, S, L, P, Q, S, P, I, V, R.



Raw file: 20180707\_MaS\_A375SR\_LM\_proteome\_05  
 Scan: 2931 Method: FTMS; HCD Score: 58.43 m/z: 493.27 Gene names: TIMM17A

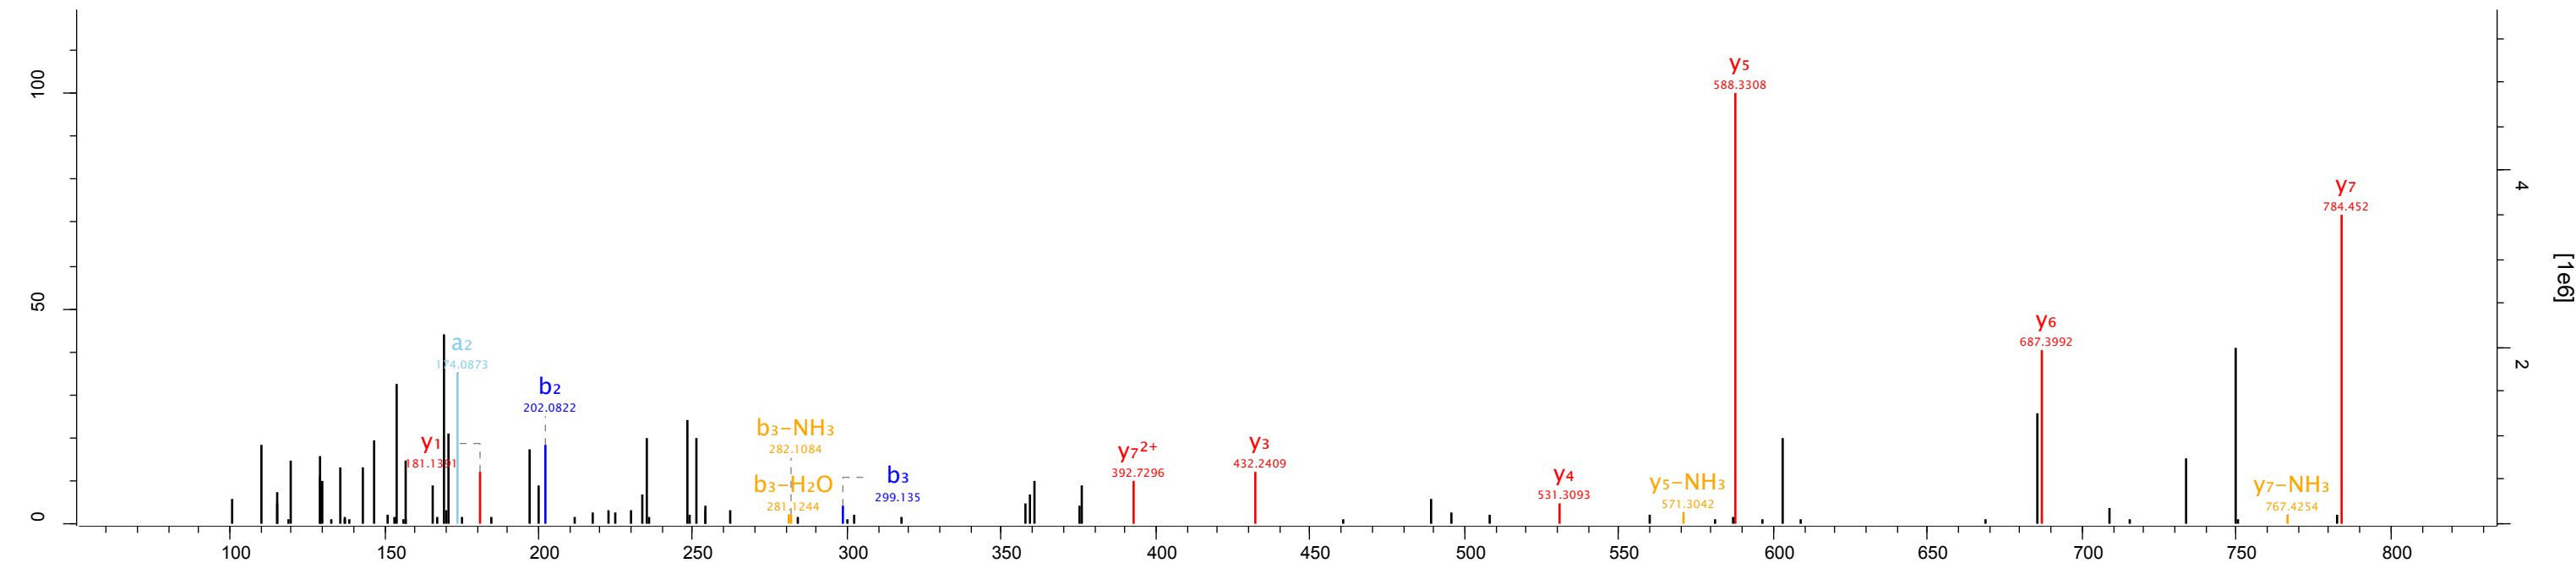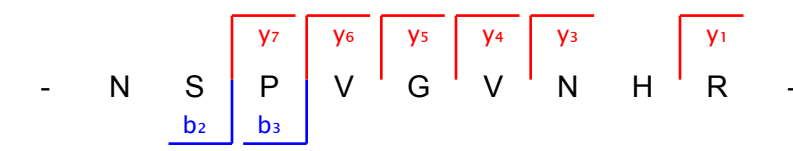

Raw file 20180707\_MaS\_A375SR\_LM\_proteome\_05 Scan 2951 Method FTMS; HCD Score 76.06 m/z 490.26 Gene names TIMM17A

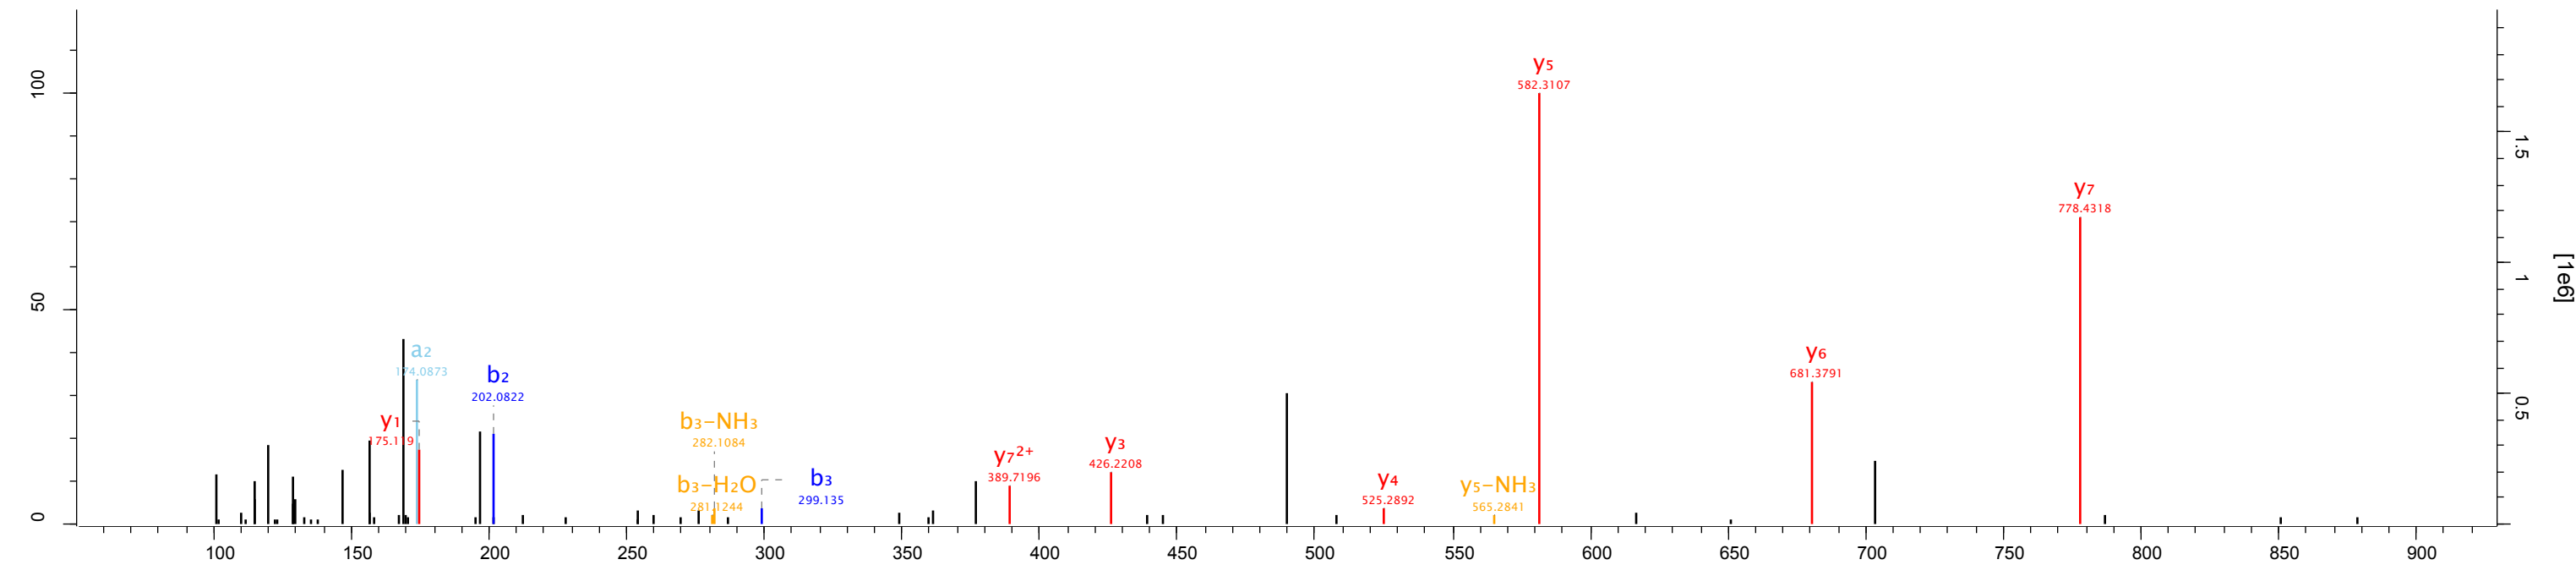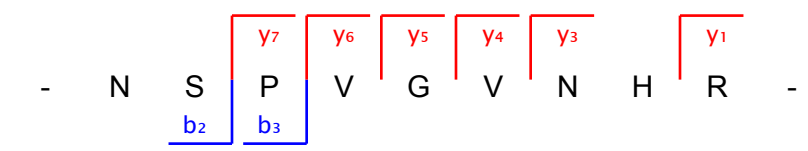

Raw file 20180707\_MaS\_A375SR\_LM\_proteome\_06 Scan 24361 Method FTMS; HCD Score 18.82 m/z 543.61 Gene names SPPL2A

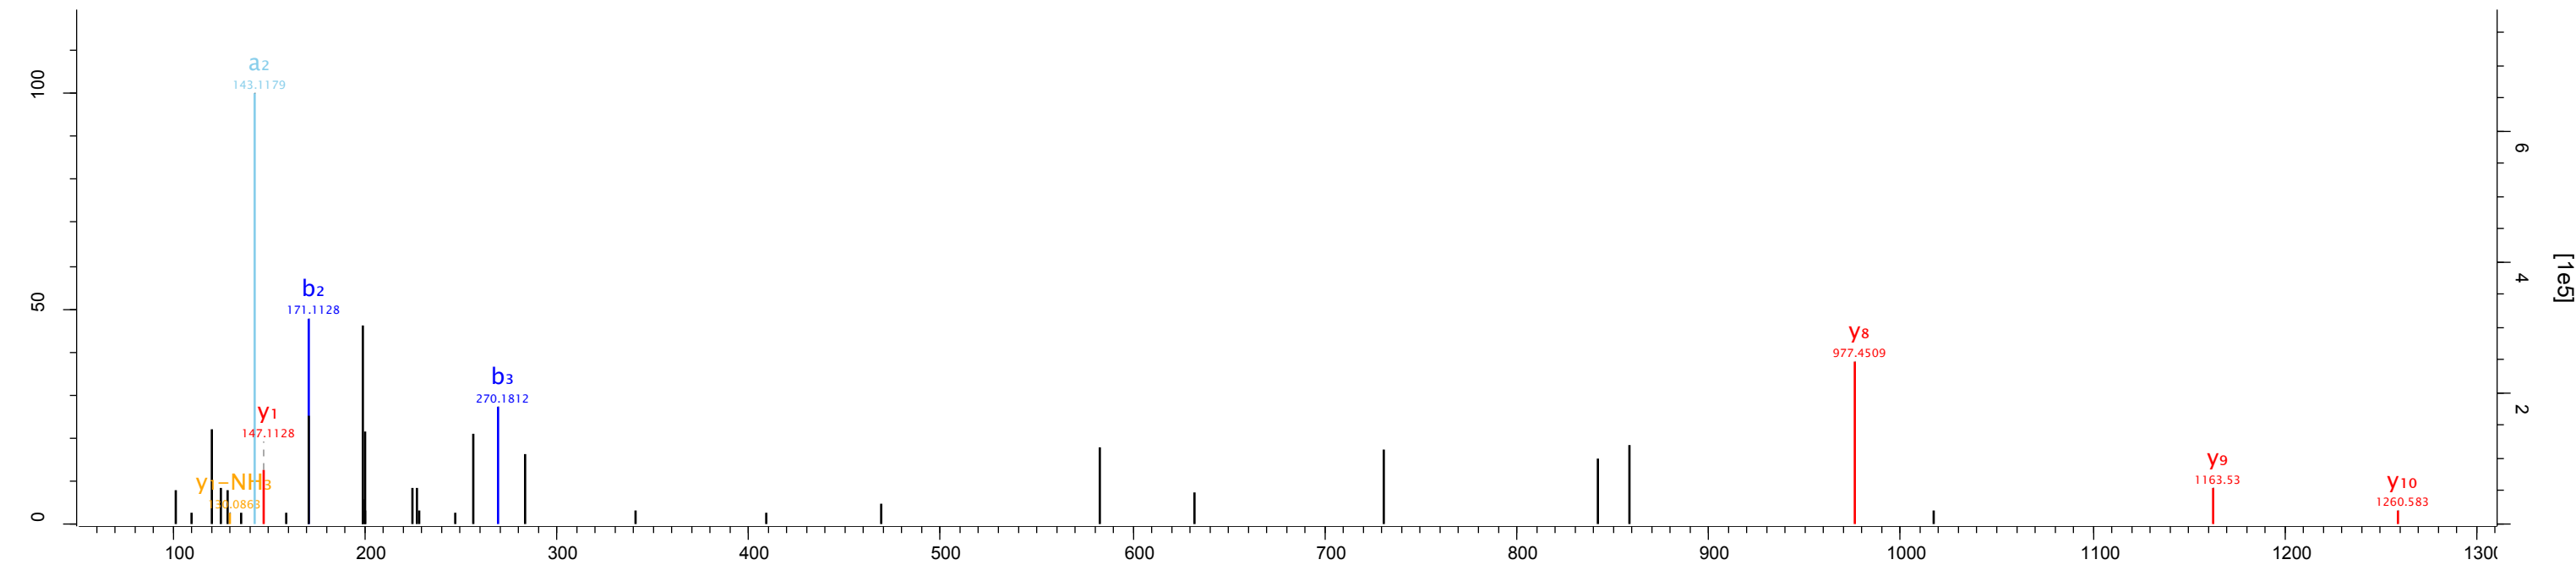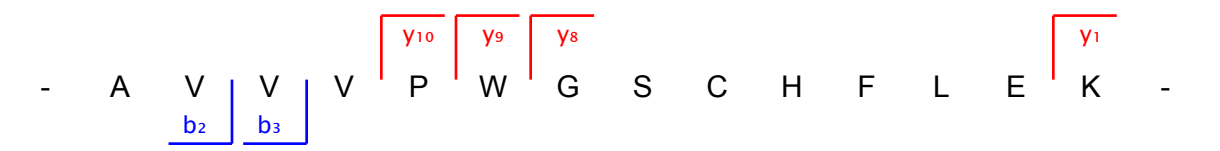

Raw file

20180707\_MaS\_A375SR\_LM\_proteome\_07

| Scan  | Method    | Score | m/z    | Gene names |
|-------|-----------|-------|--------|------------|
| 24301 | FTMS; HCD | 14.08 | 545.29 | SPPL2A     |

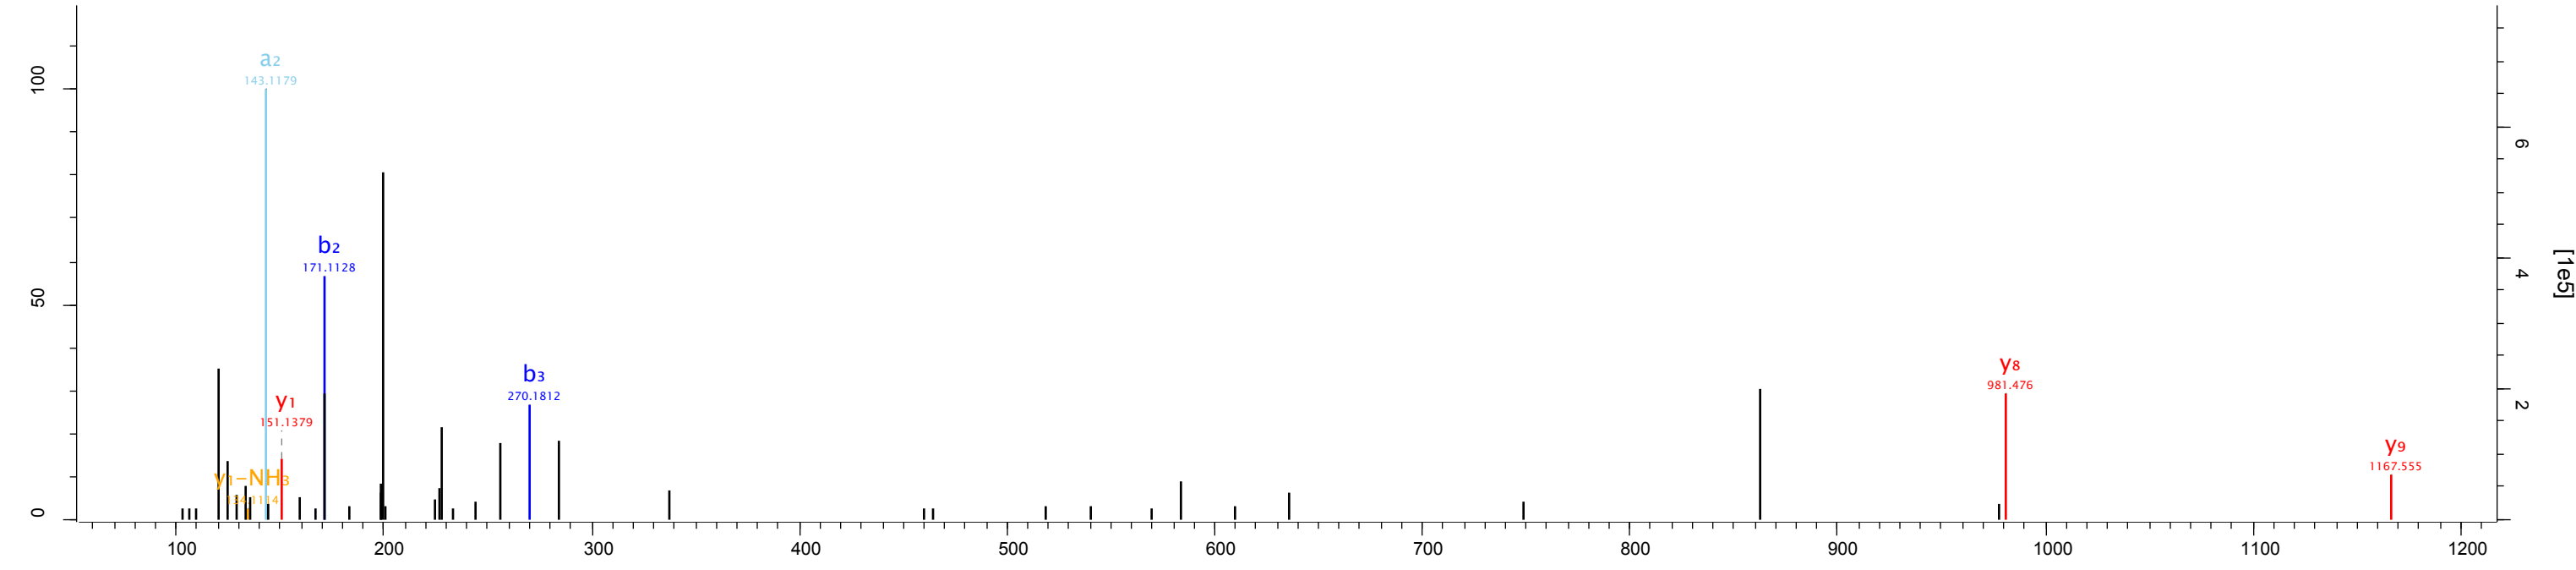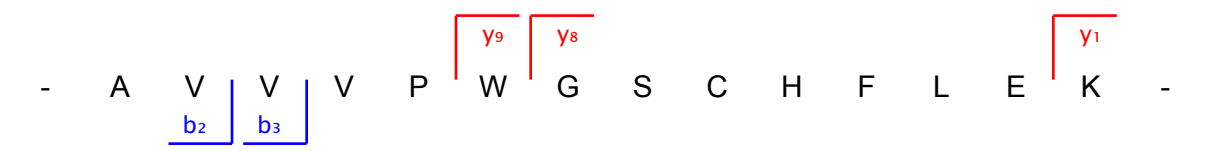

Raw file 20180707\_MaS\_A375SR\_LM\_proteome\_08 Scan 8371 Method FTMS; HCD Score 72.43 m/z 591.3

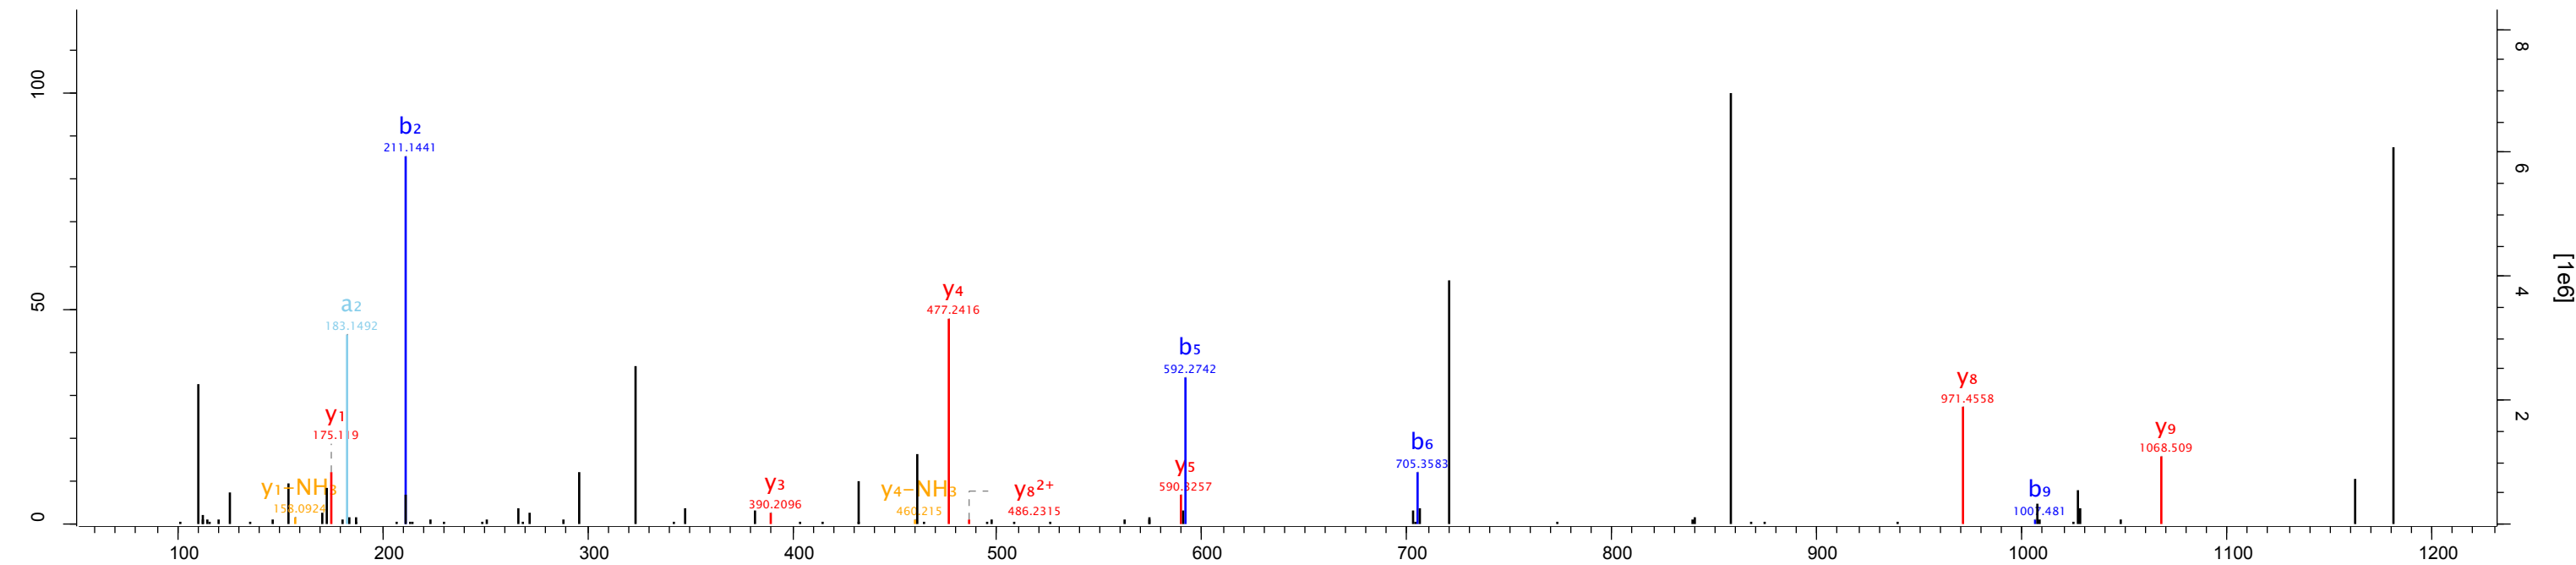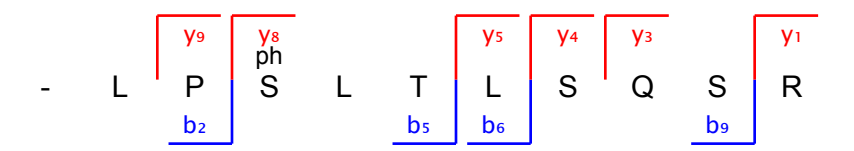

Raw file 20180707\_MaS\_A375SR\_LM\_proteome\_10 Scan 3791 Method FTMS; HCD Score 46.37 m/z 415.7

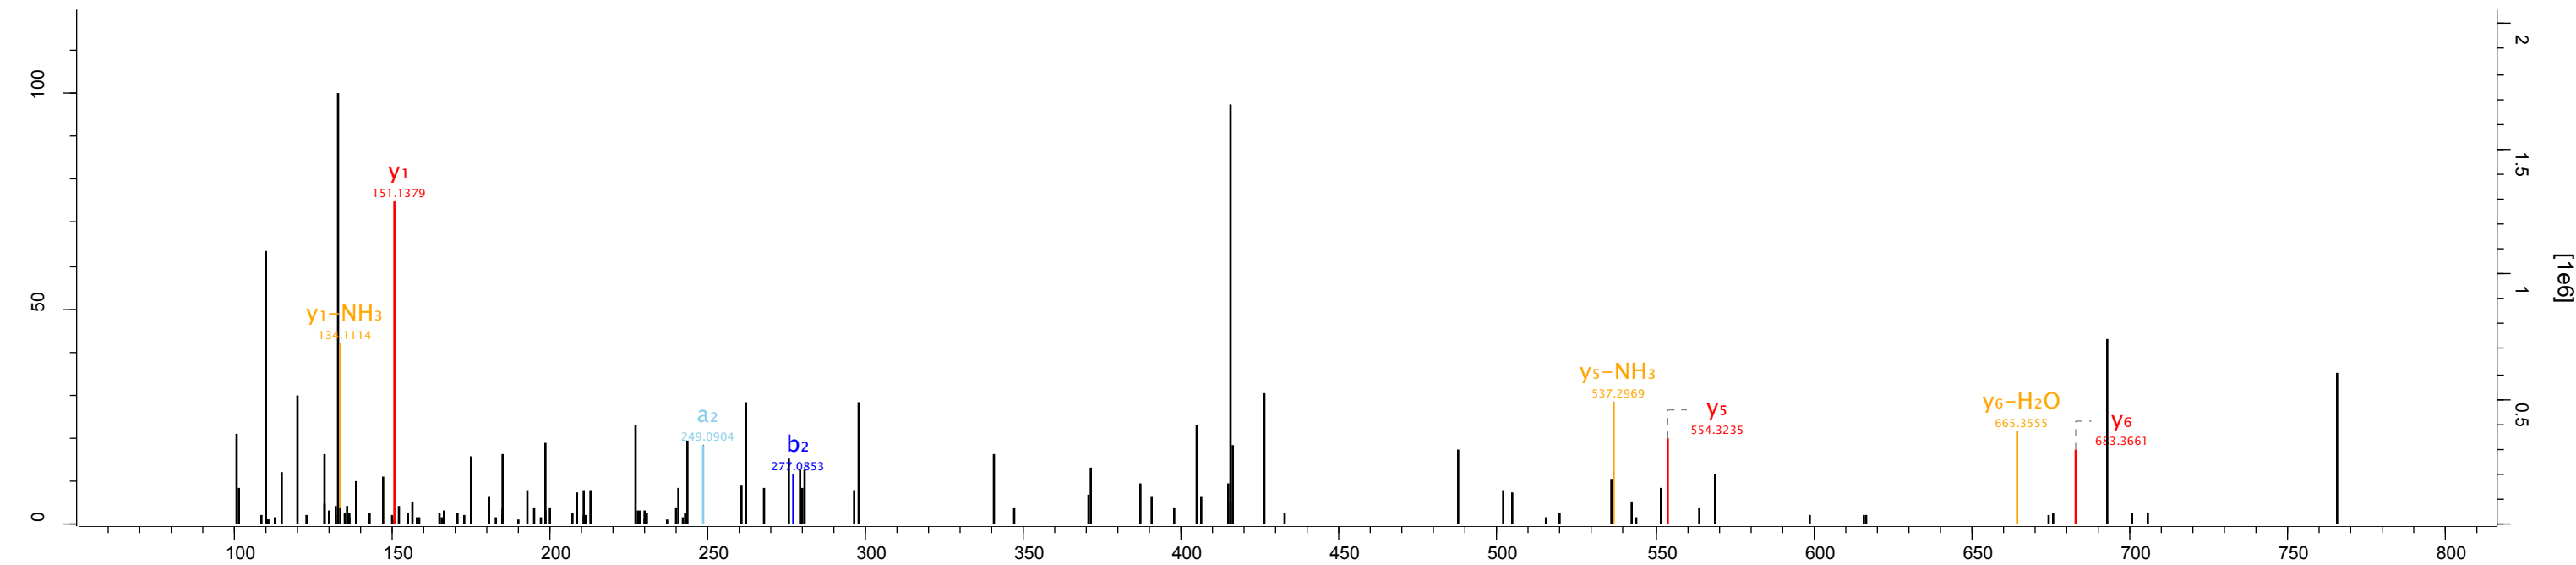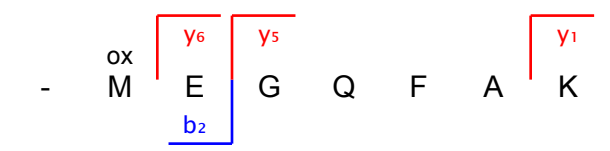

Raw file  
20180707\_MaS\_A375SR\_LM\_proteome\_21

Scan 27251 Method FTMS; HCD Score 55.66 m/z 854.41 Gene names SSR3

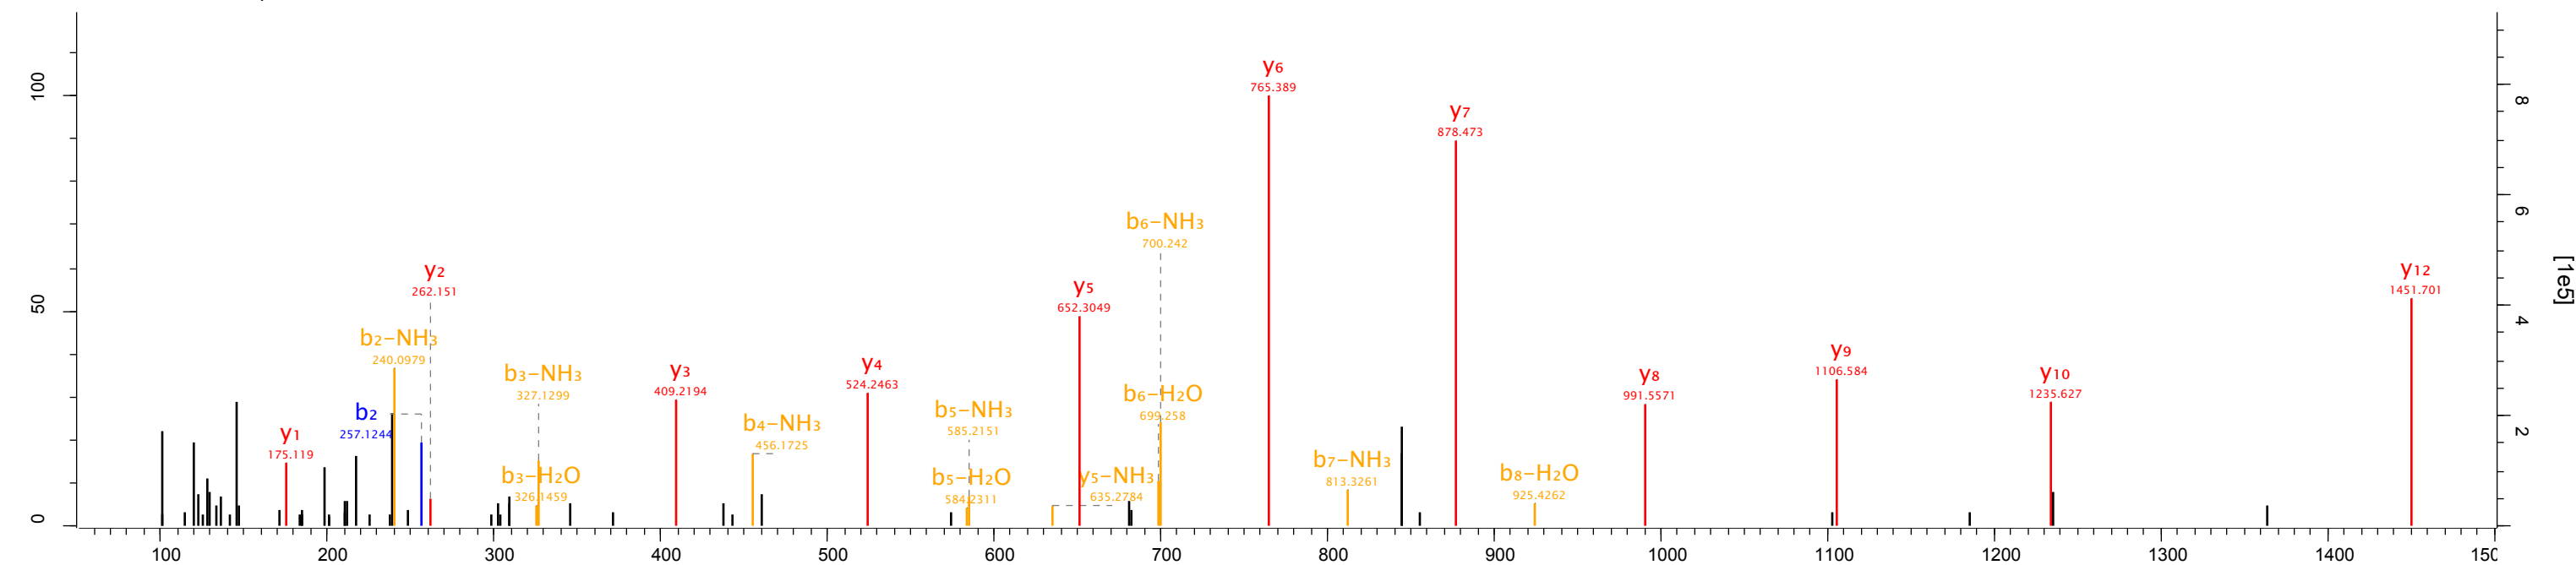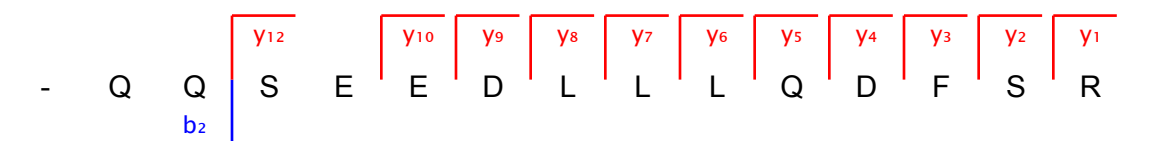

Raw file  
20180707\_MaS\_A375SR\_LM\_proteome\_21

Scan 27261 Method FTMS; HCD Score 83.63 m/z 857.42 Gene names SSR3

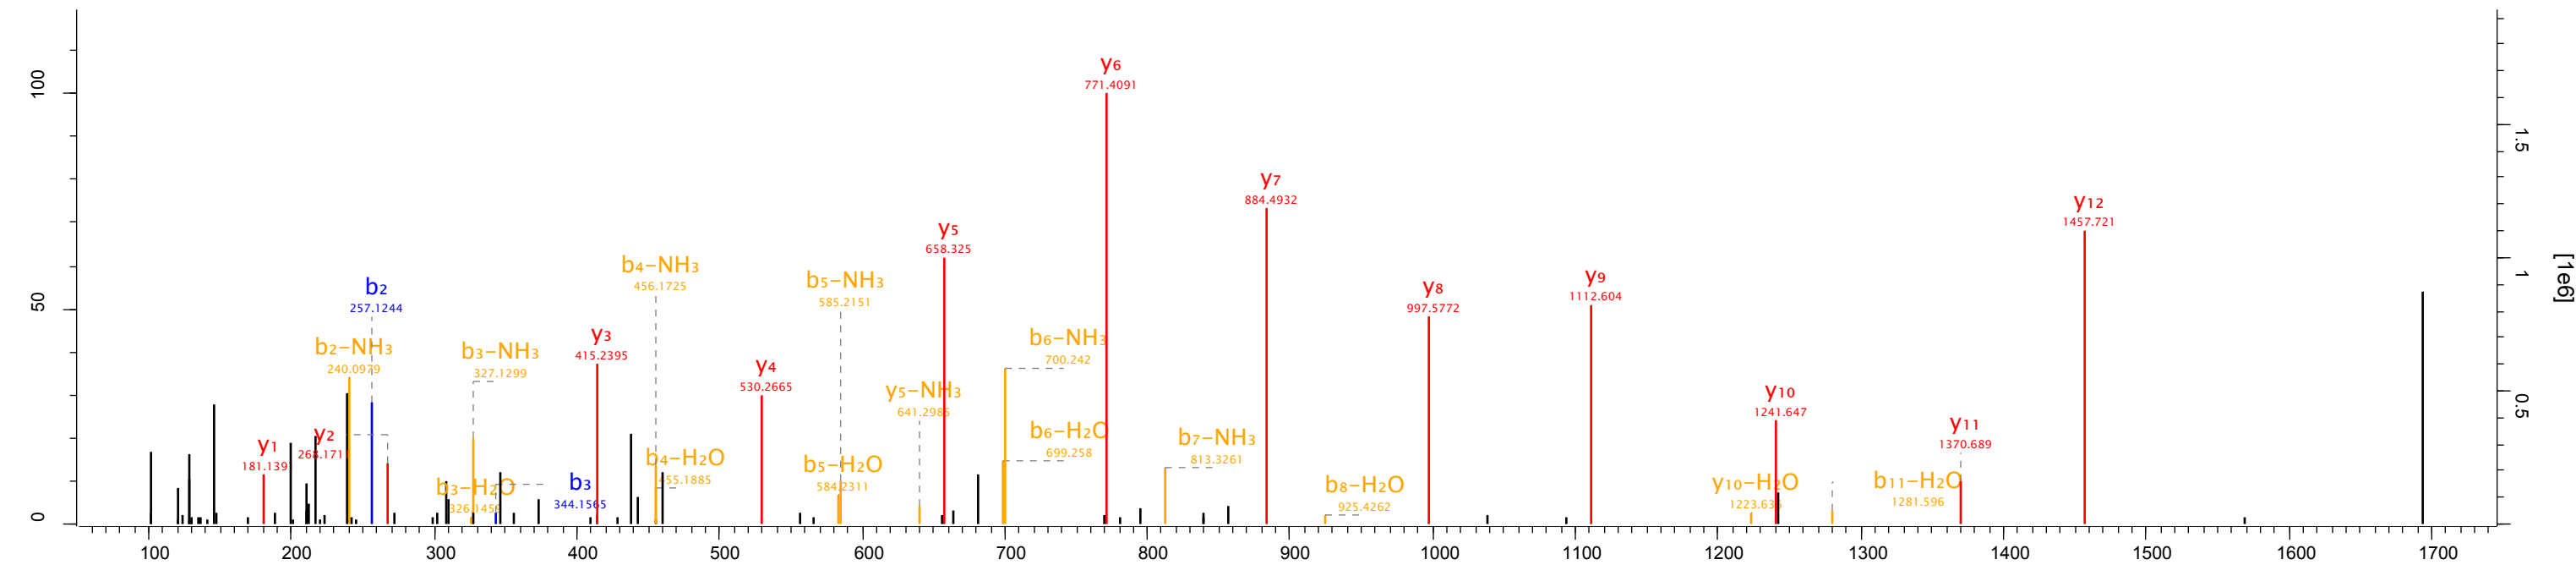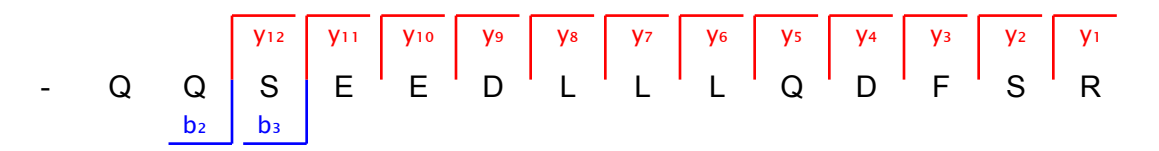



Raw file

20180707\_MaS\_A375SR\_LM\_proteome\_22

Scan 8711 Method FTMS; HCD Score 46.13 m/z 485.74 Gene names OR56B4

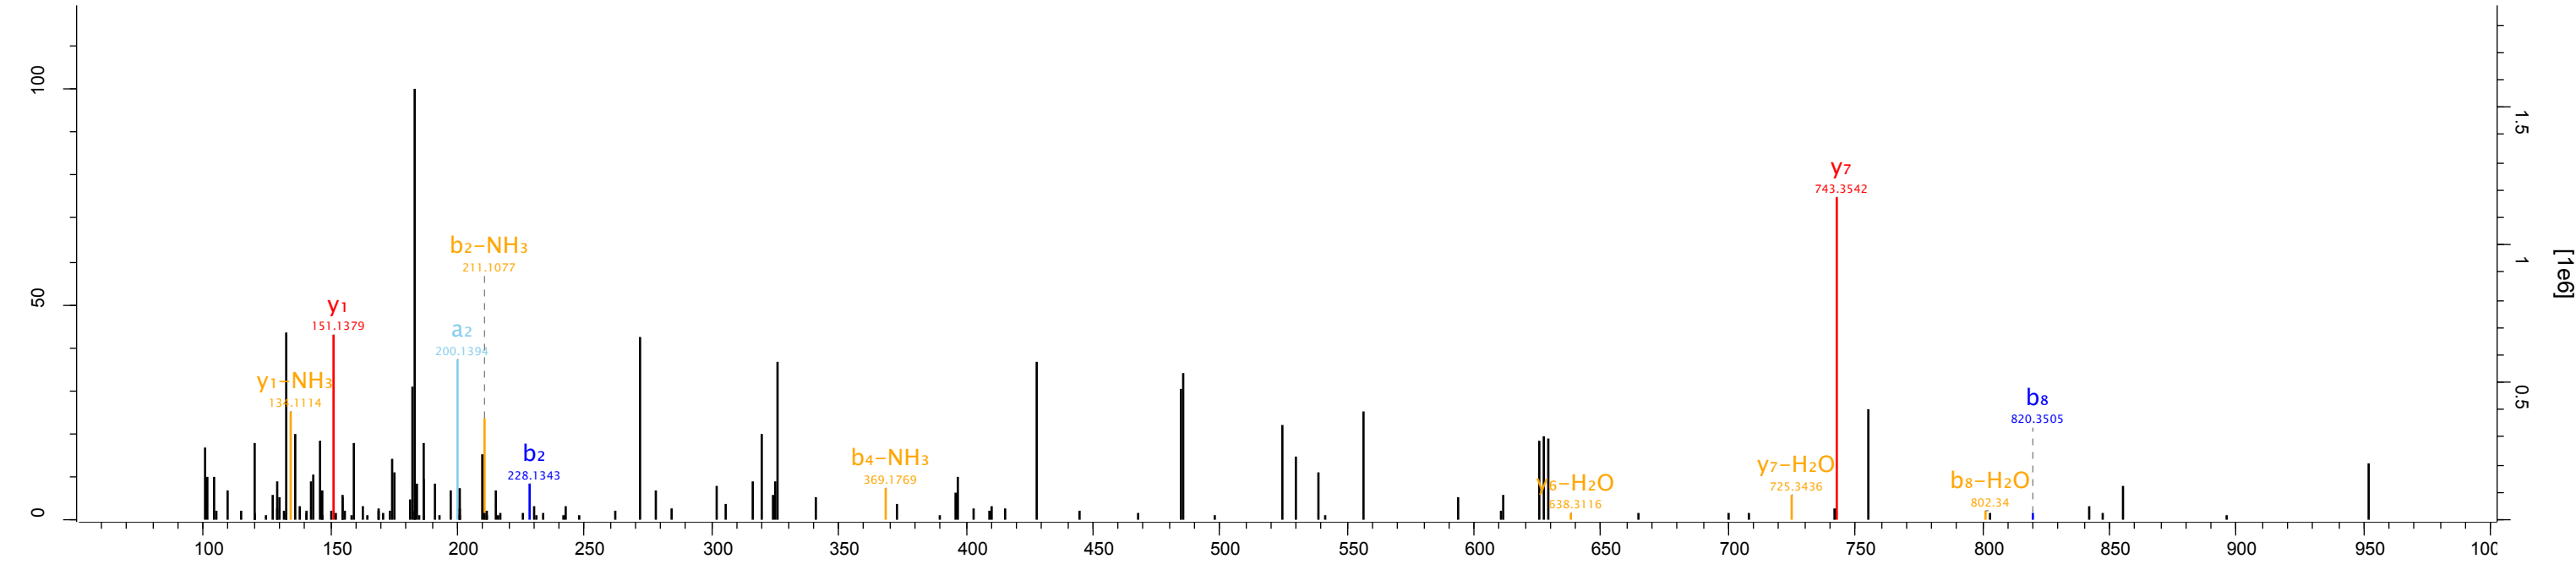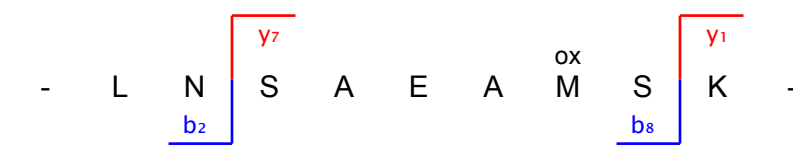

Raw file 20180707\_MaS\_A375SR\_LM\_proteome\_24 Scan 23371 Method FTMS; HCD Score 64.45 m/z 866.49 Gene names KRTCAP2

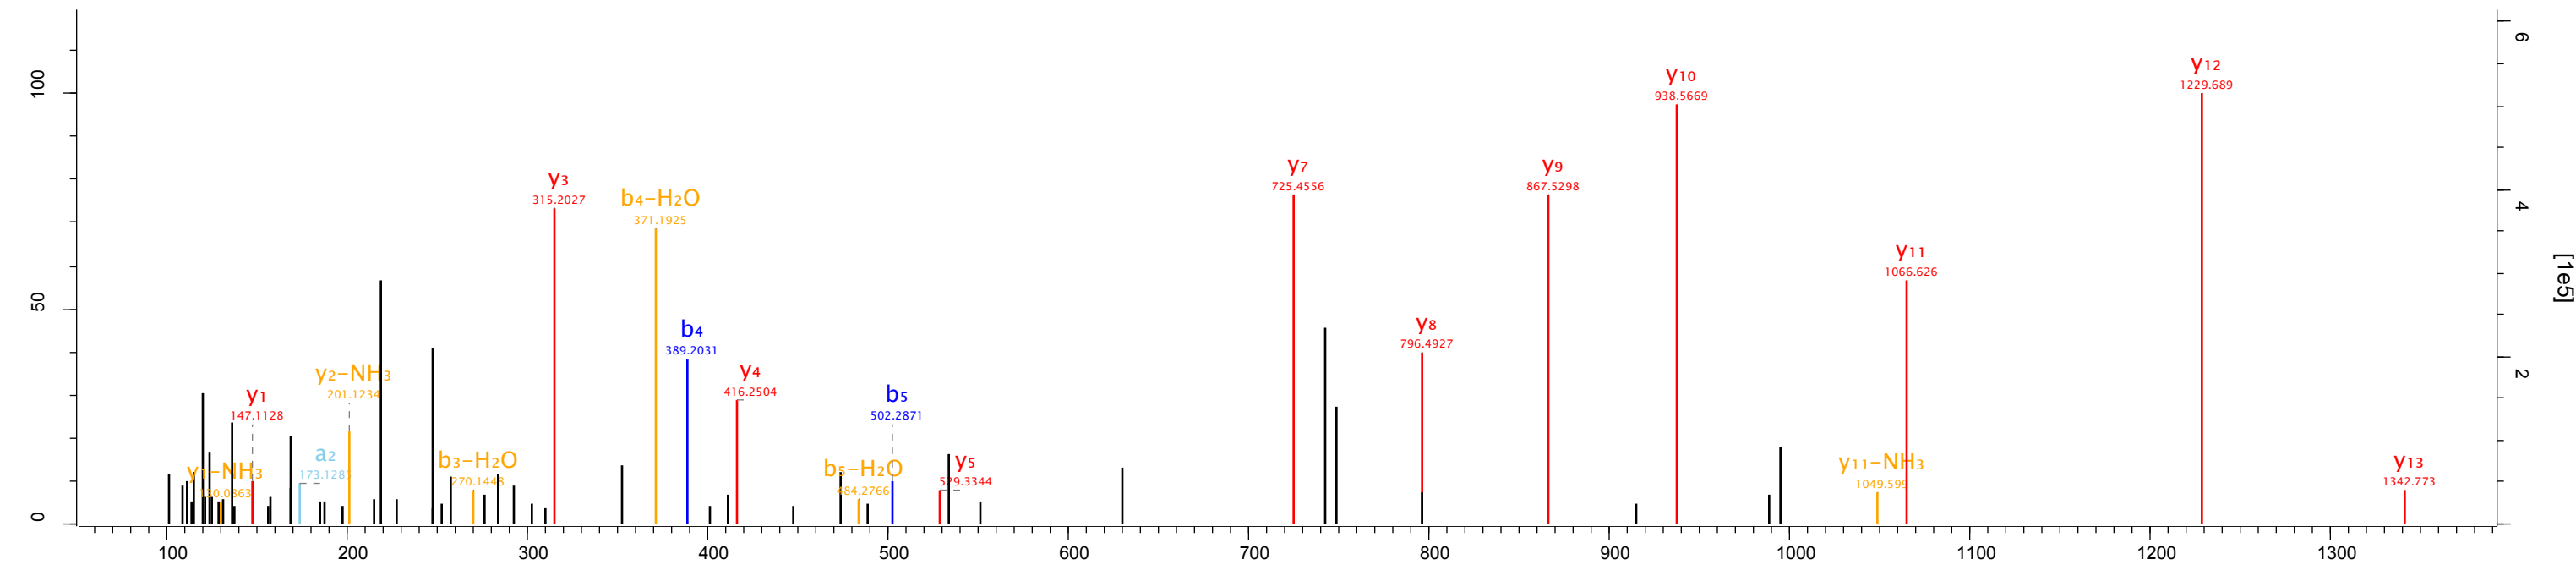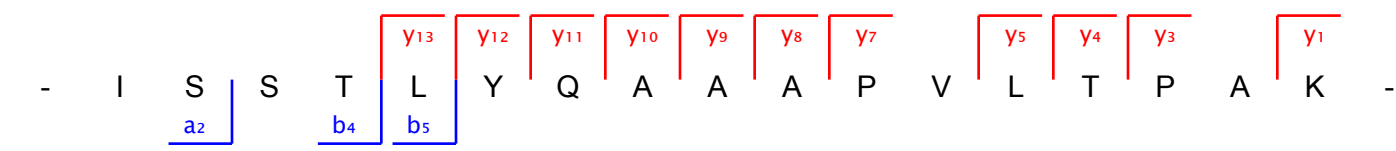

Raw file: 20180707\_MaS\_A375SR\_LM\_proteome\_27  
 Scan: 4821 Method: FTMS; HCD Score: 66.3 m/z: 502.73 Gene names: TMEM258

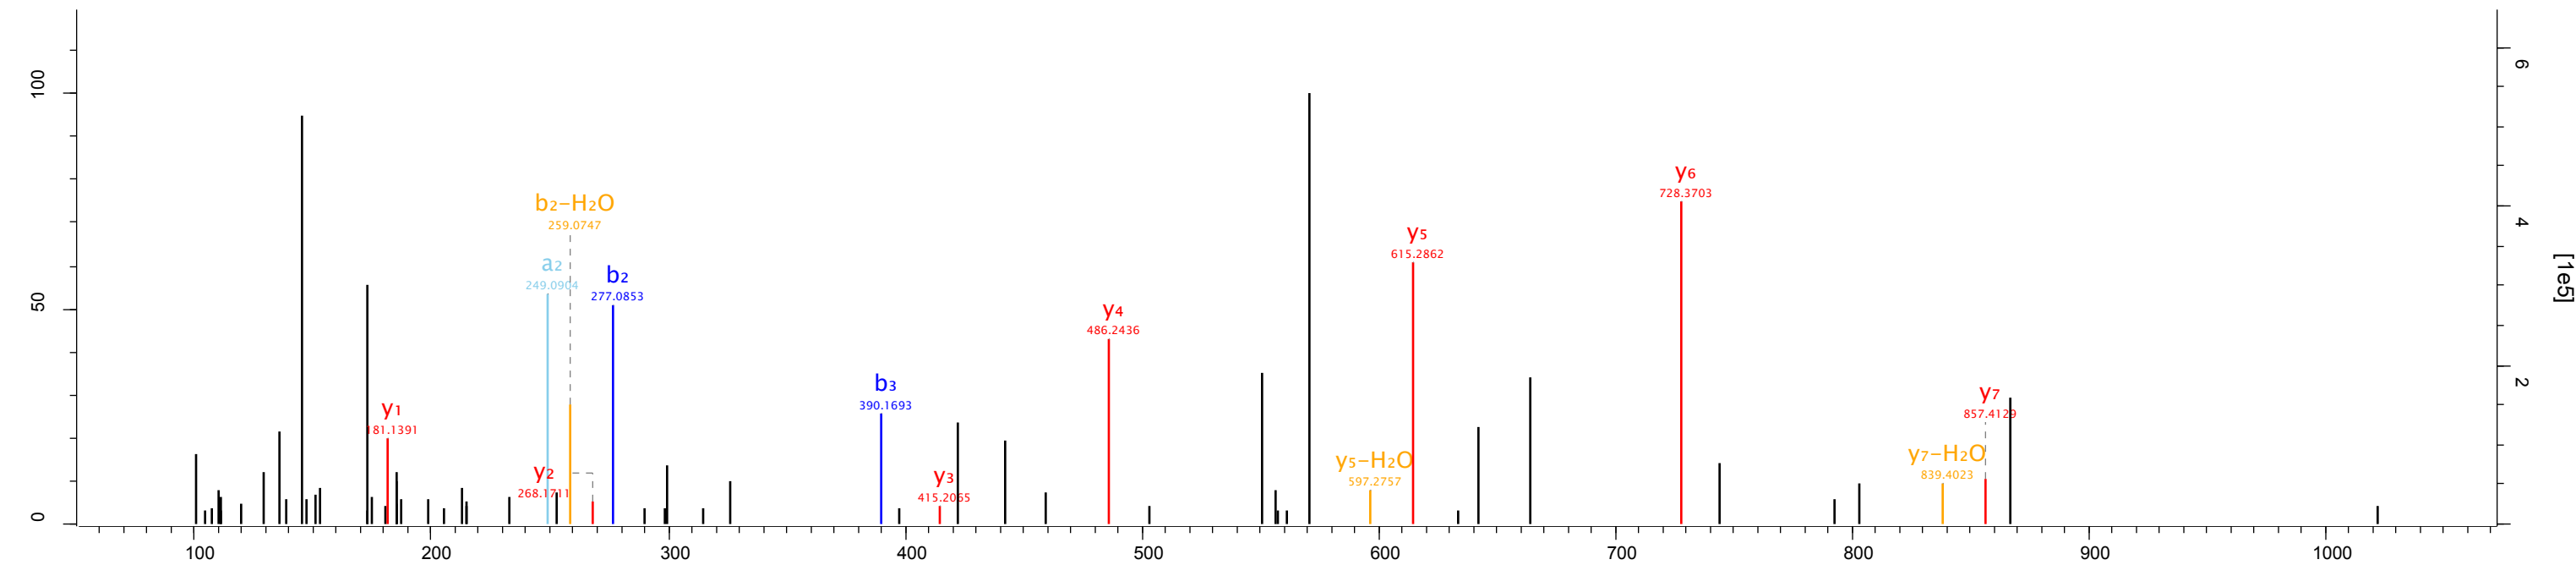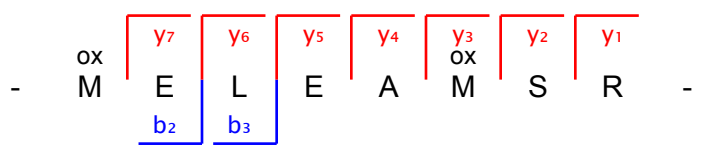

Raw file: 20180707\_MaS\_A375SR\_LM\_proteome\_28  
 Scan: 8911 Method: FTMS; HCD Score: 47.08 m/z: 481.77 Gene names: CAPN6

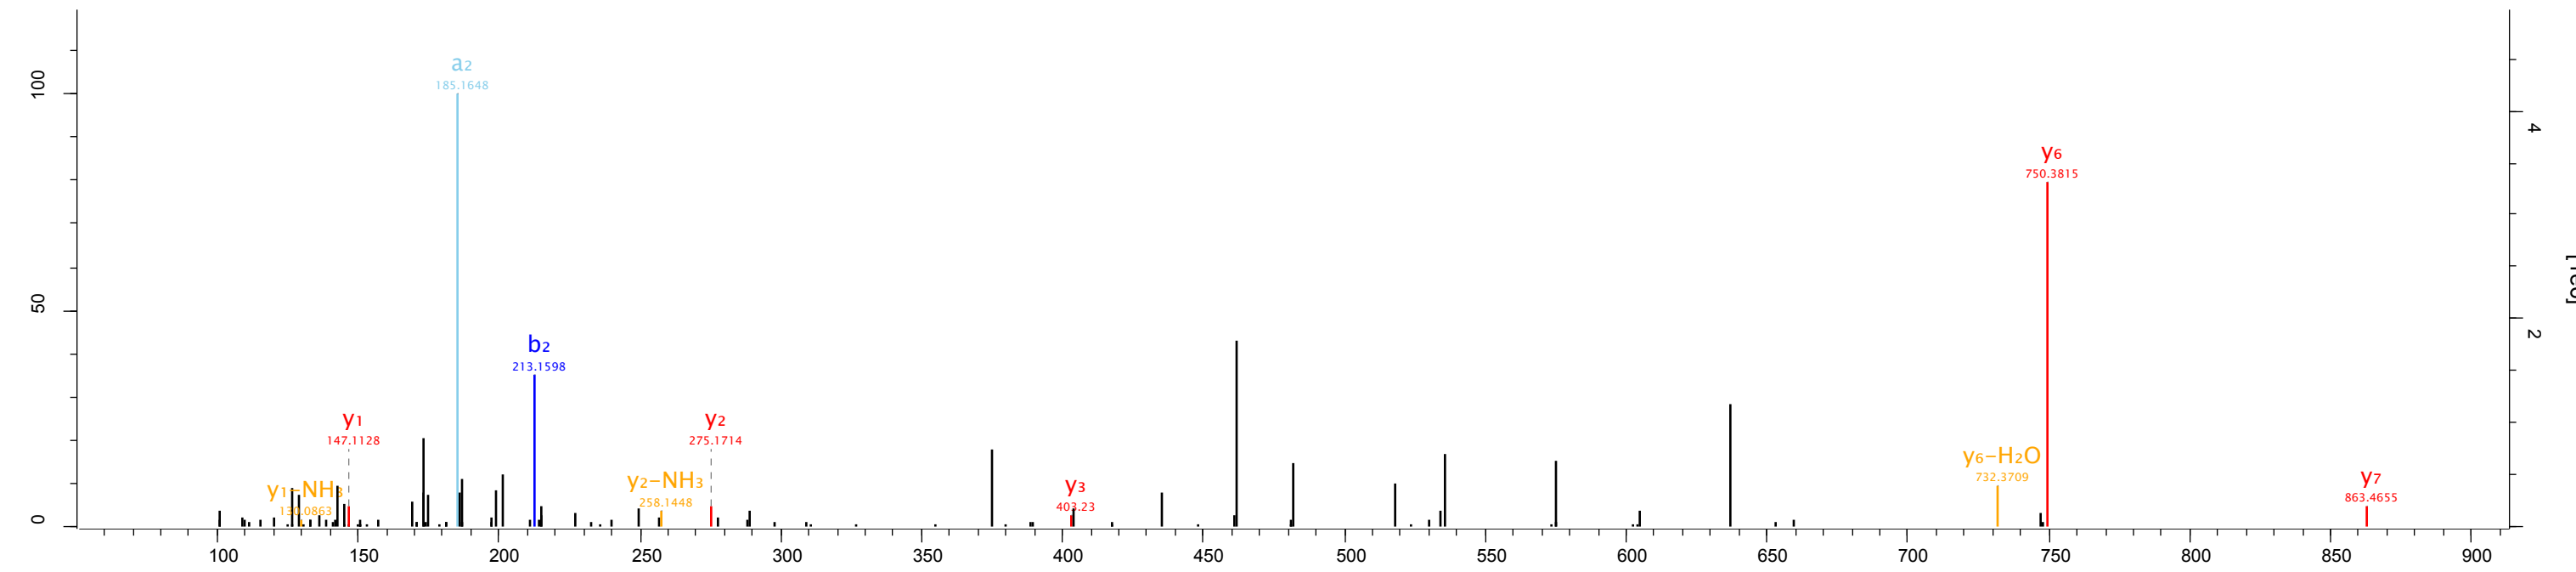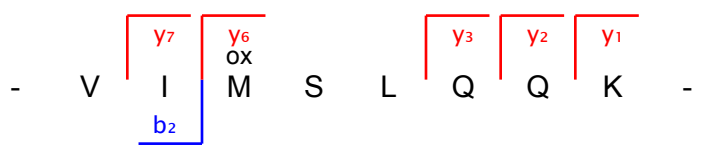

Raw file  
 20180707\_MaS\_A375SR\_ML\_proteome\_03  
 Scan 13561 Method FTMS; HCD Score 47.6 m/z 528.77

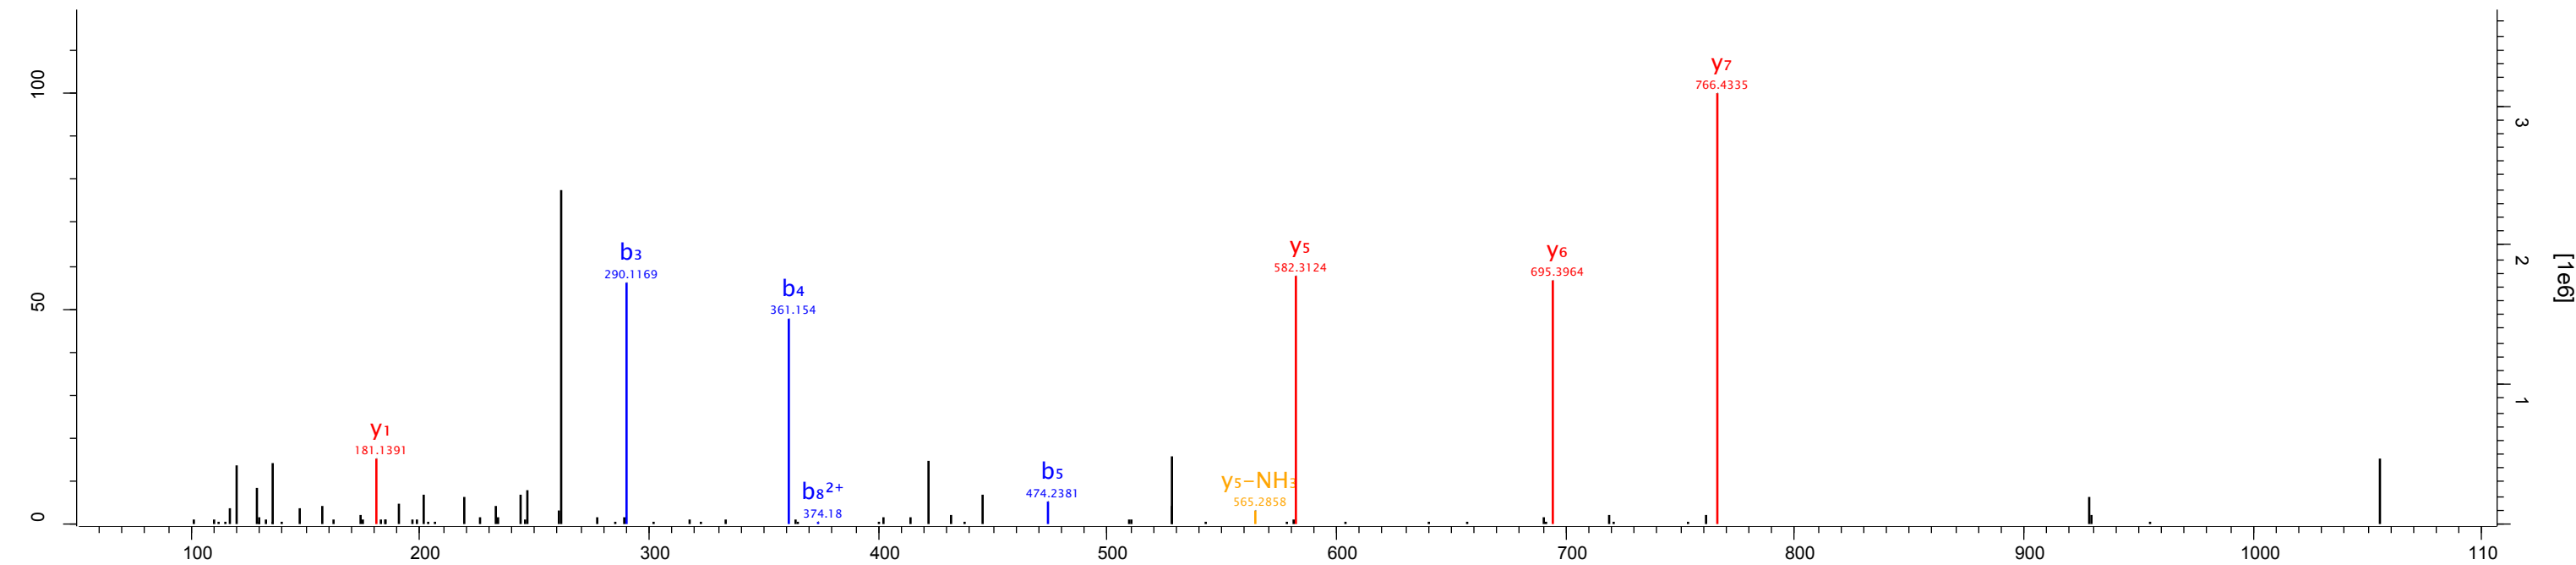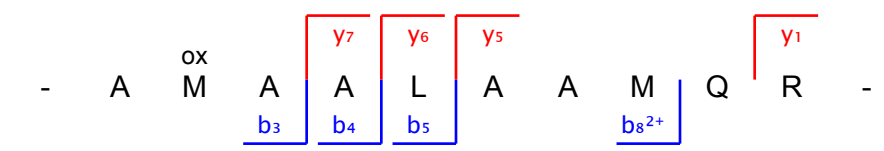

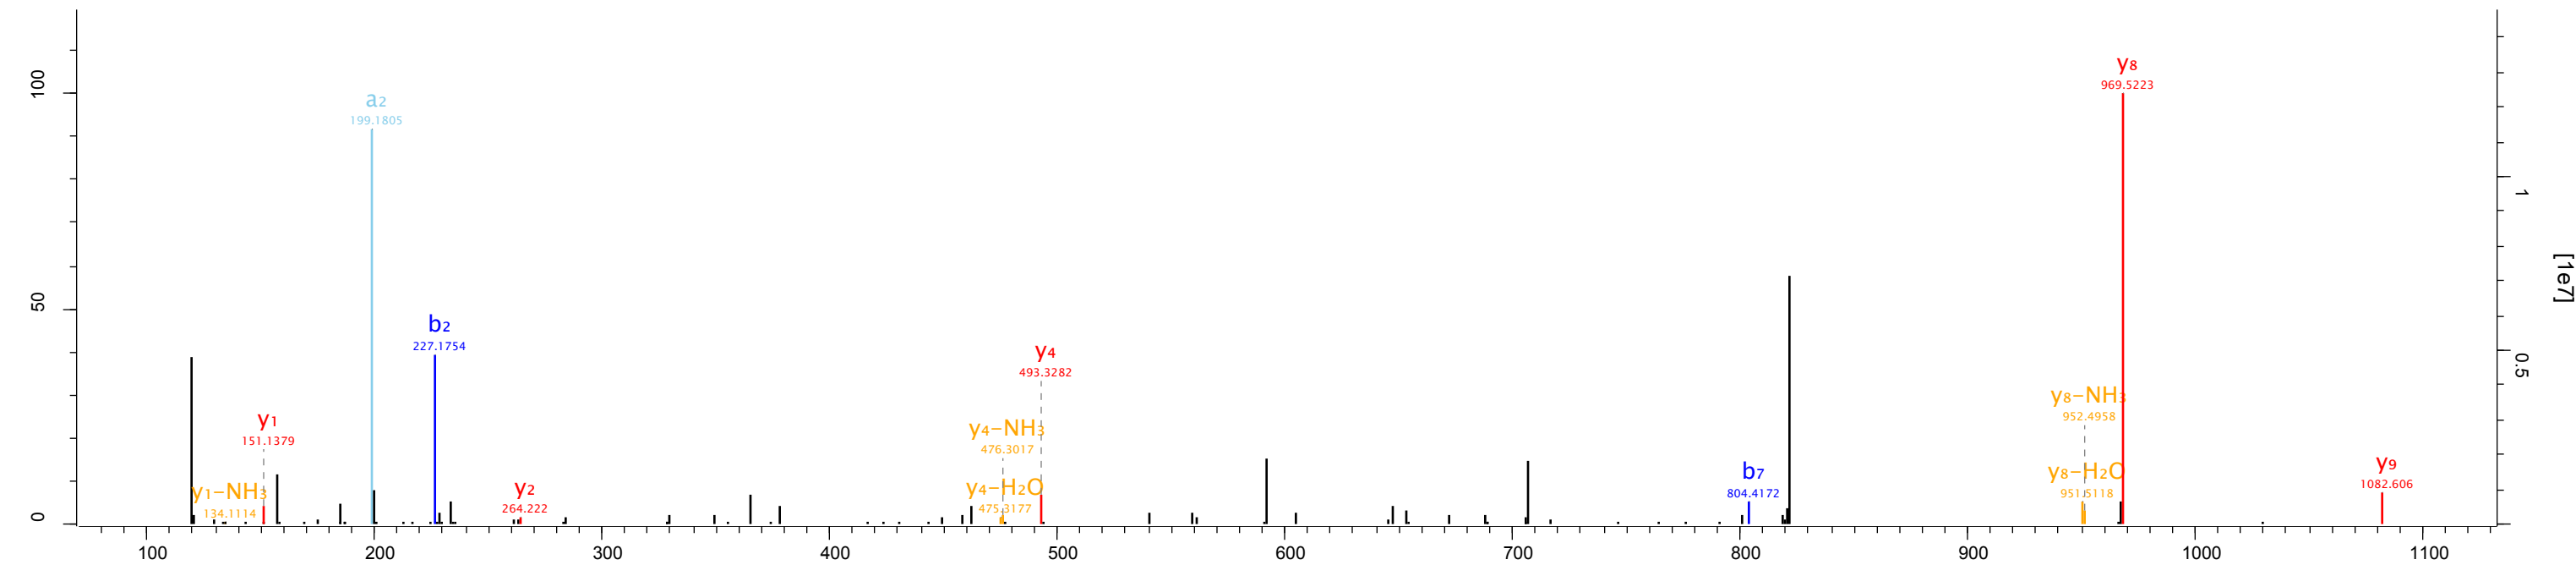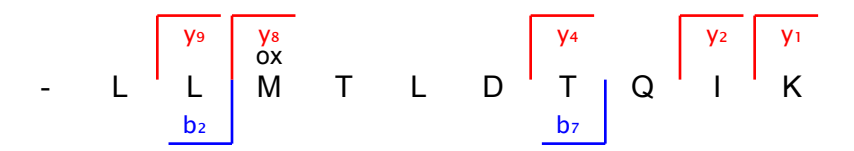

Raw file: 20180707\_MaS\_A375SR\_ML\_proteome\_04  
 Scan: 18241 Method: FTMS; HCD Score: 45.08 m/z: 527.76 Gene names: BDKRB2

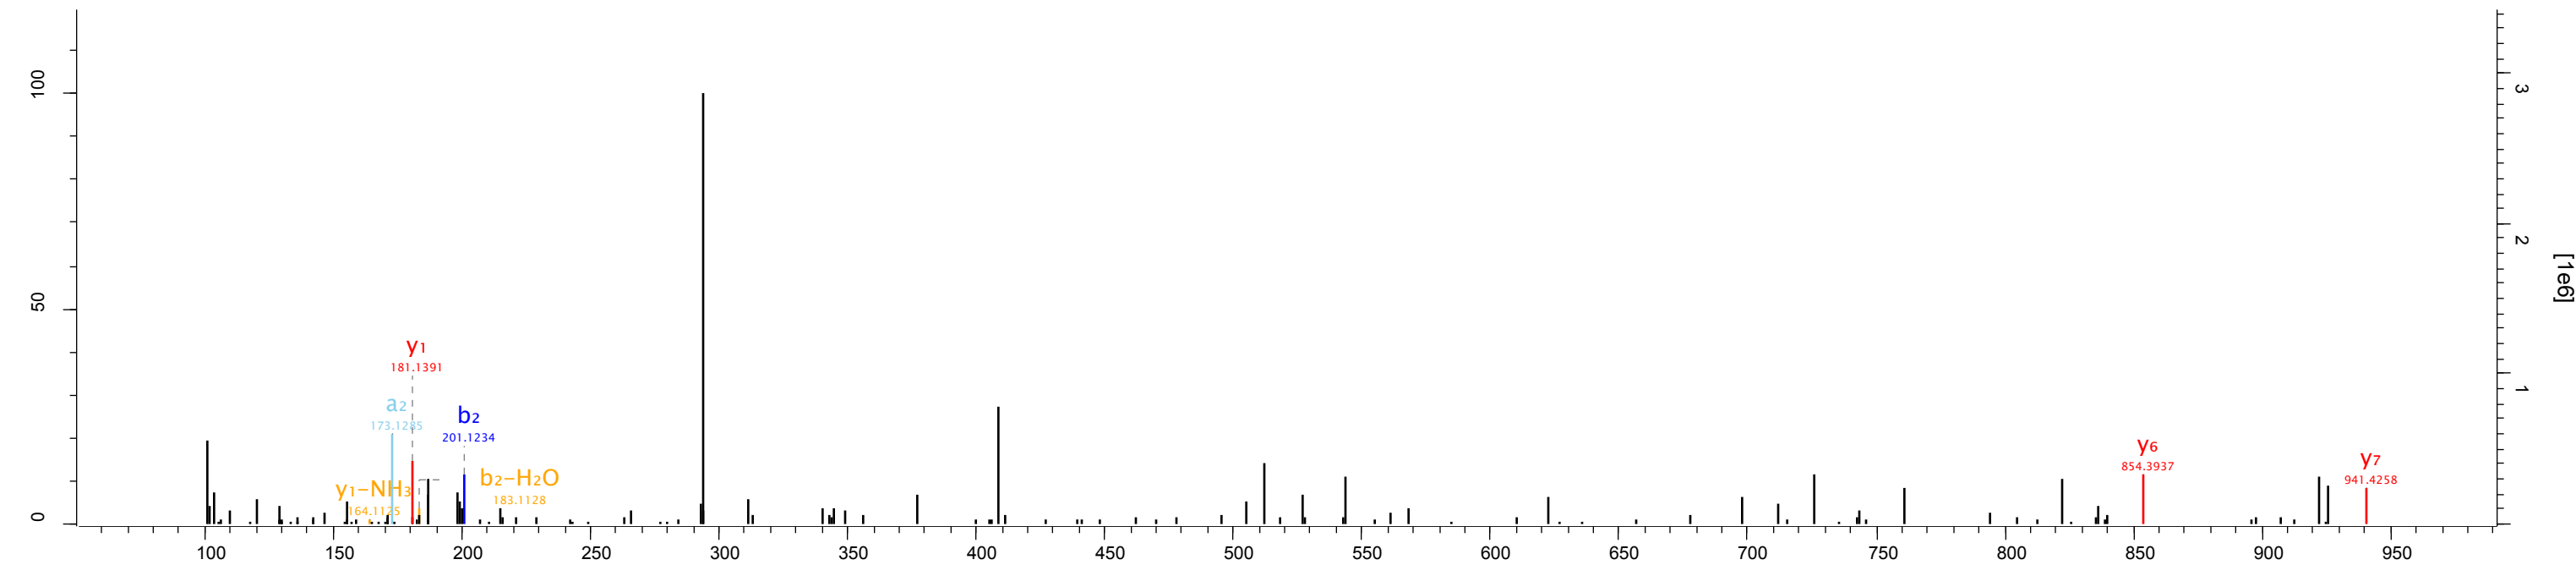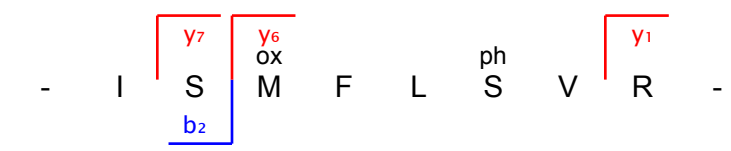

Raw file  
20180707\_MaS\_A375SR\_ML\_proteome\_04

Scan Method Score m/z Gene names  
24791 FTMS; HCD 83.76 916.92 MIEF2

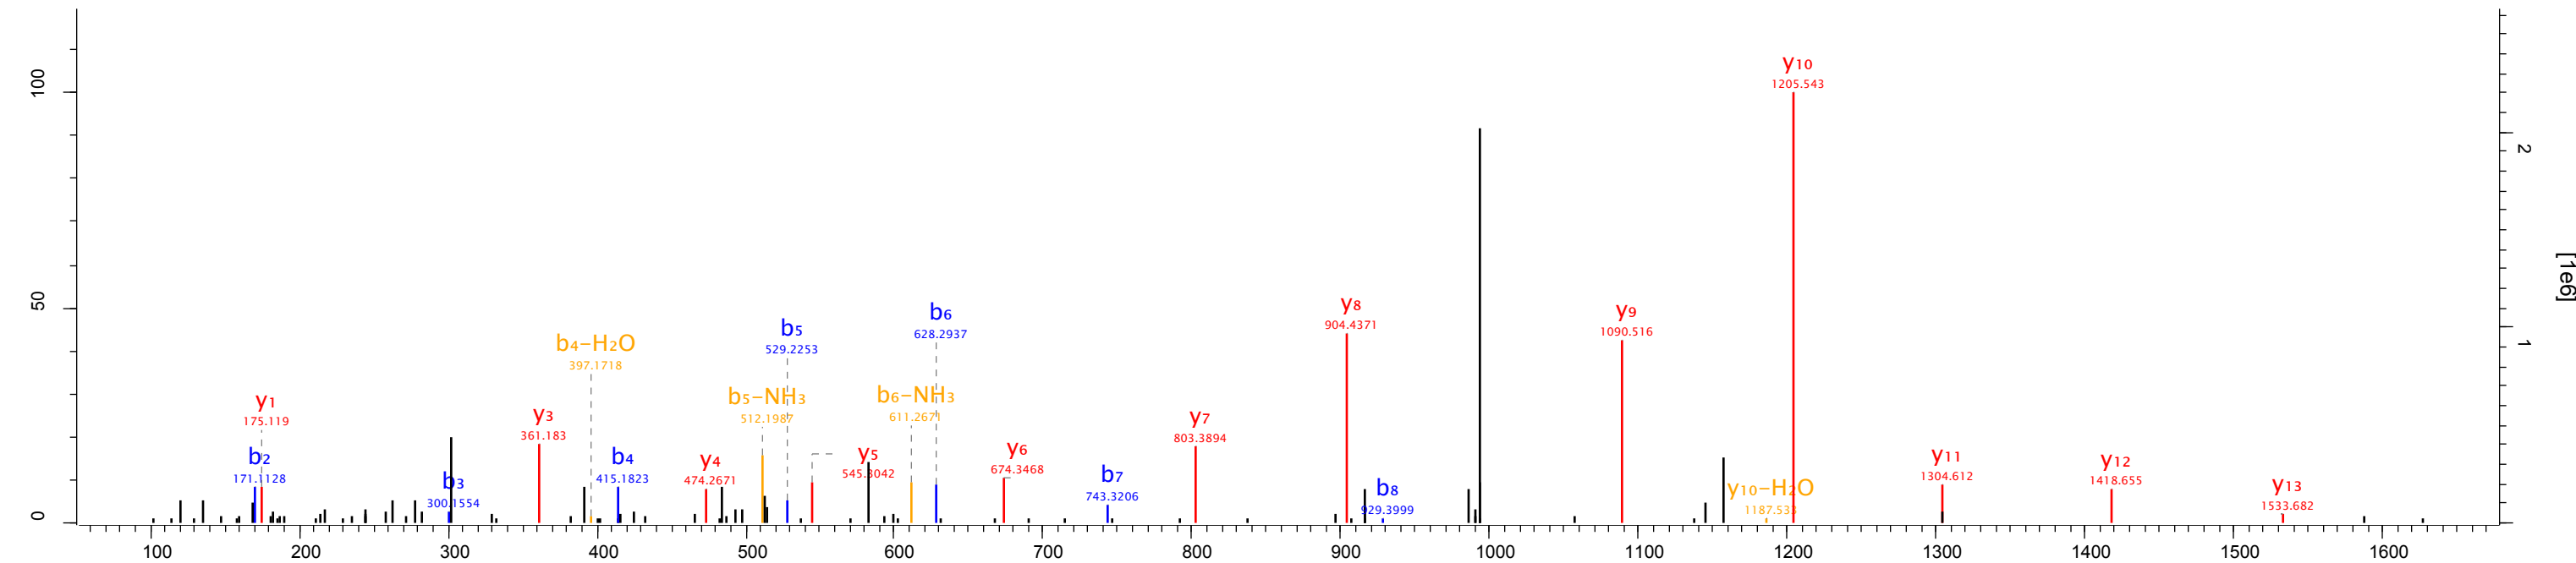

- L G E D N V D W T E E A L G E R -

b<sub>2</sub> b<sub>3</sub> b<sub>4</sub> b<sub>5</sub> b<sub>6</sub> b<sub>7</sub> b<sub>8</sub> y<sub>13</sub> y<sub>12</sub> y<sub>11</sub> y<sub>10</sub> y<sub>9</sub> y<sub>8</sub> y<sub>7</sub> y<sub>6</sub> y<sub>5</sub> y<sub>4</sub> y<sub>3</sub> y<sub>1</sub>



Raw file

20180707\_MaS\_A375SR\_ML\_proteome\_04

| Scan  | Method    | Score | m/z    | Gene names |
|-------|-----------|-------|--------|------------|
| 24801 | FTMS; HCD | 34.39 | 919.93 | MIEF2      |

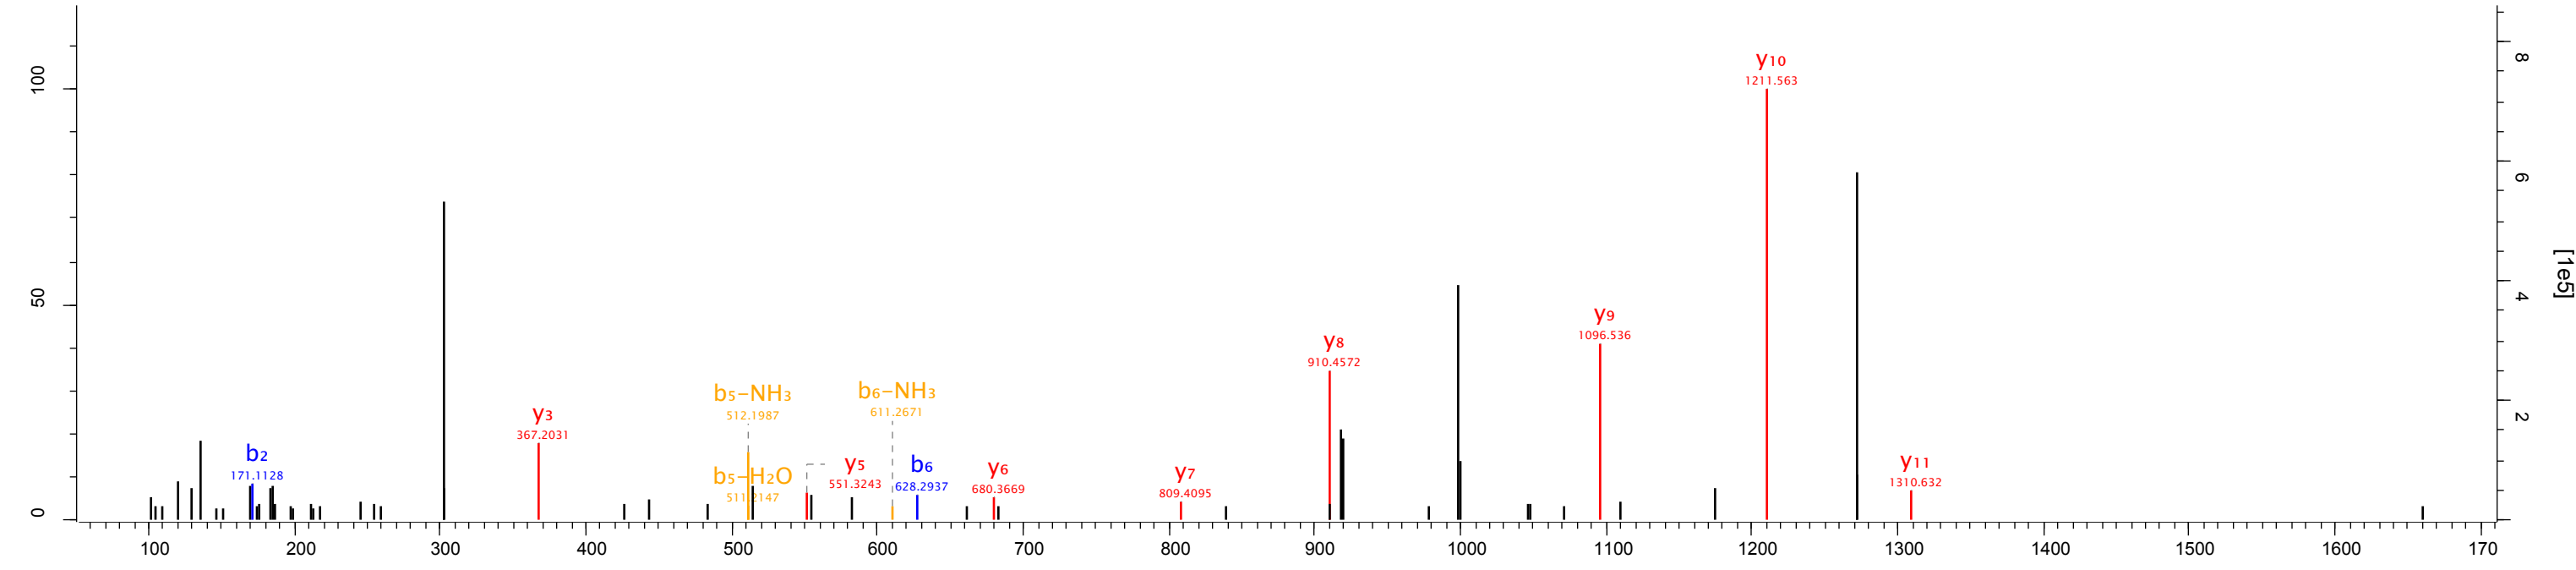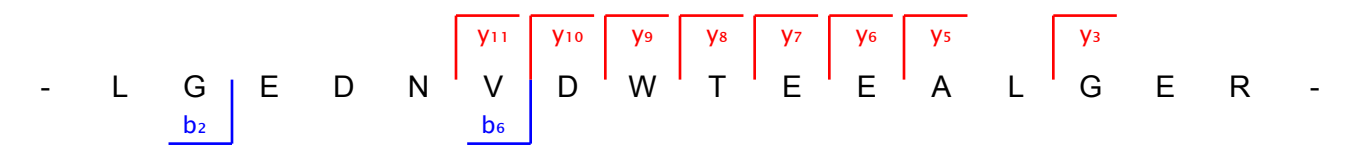

Raw file 20180707\_MaS\_A375SR\_ML\_proteome\_04 Scan 27731 Method FTMS; HCD Score 69.65 m/z 731.36

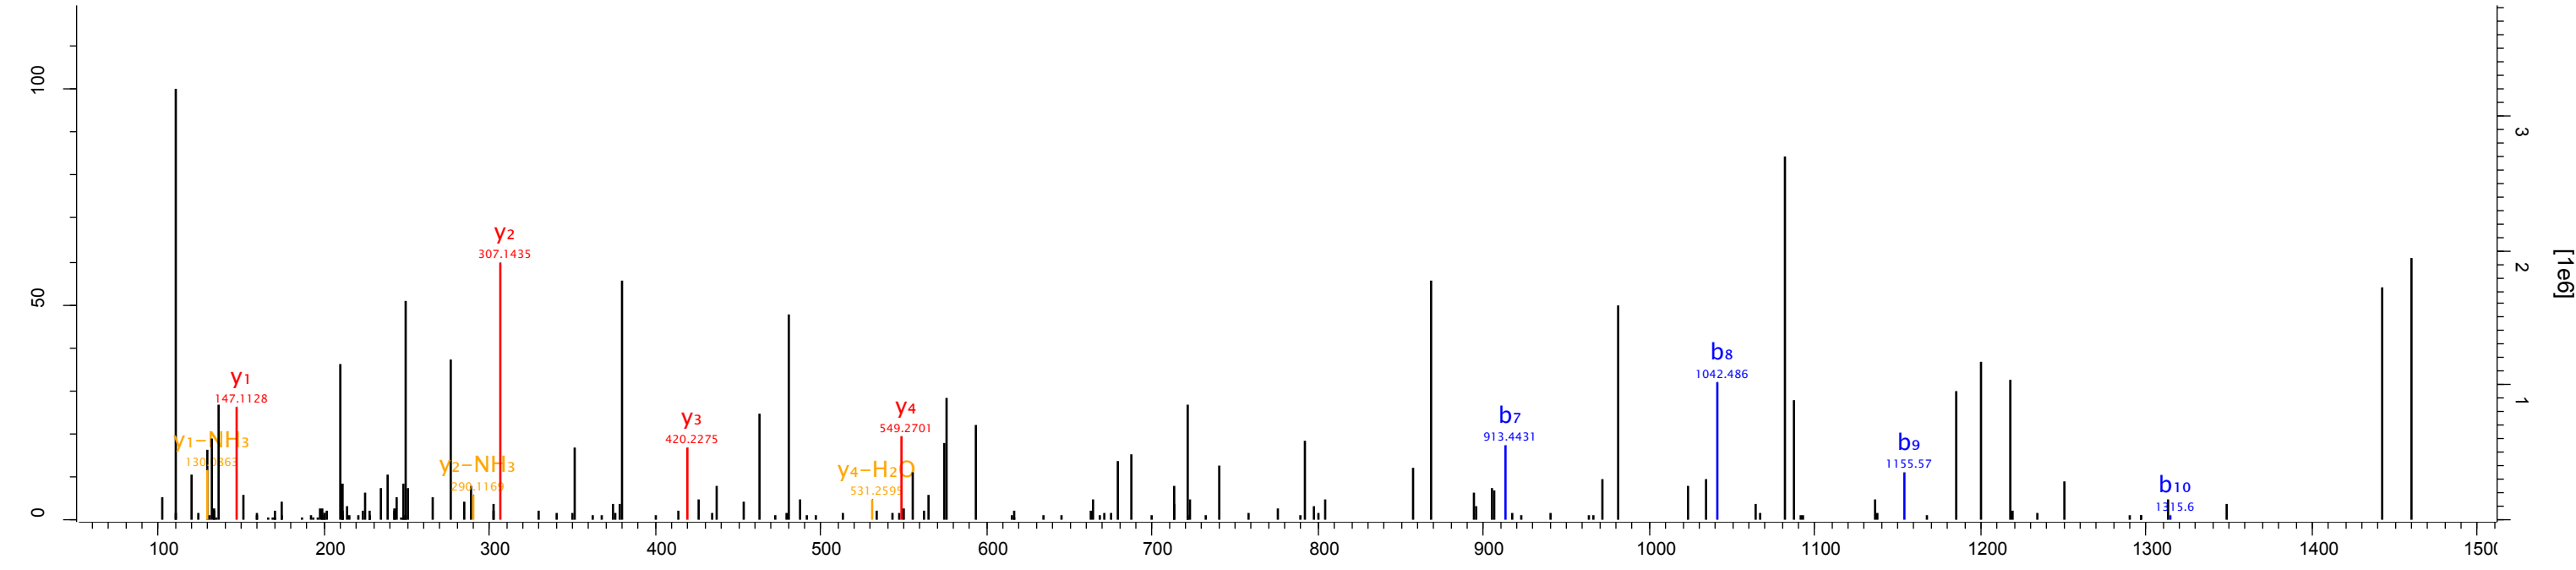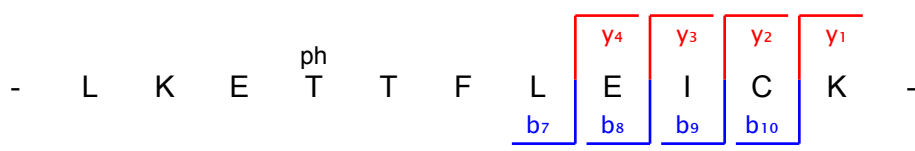

Raw file 20180707\_MaS\_A375SR\_ML\_proteome\_05 Scan 11151 Method FTMS; HCD Score 89.19 m/z 625.77 Gene names ANAPC16

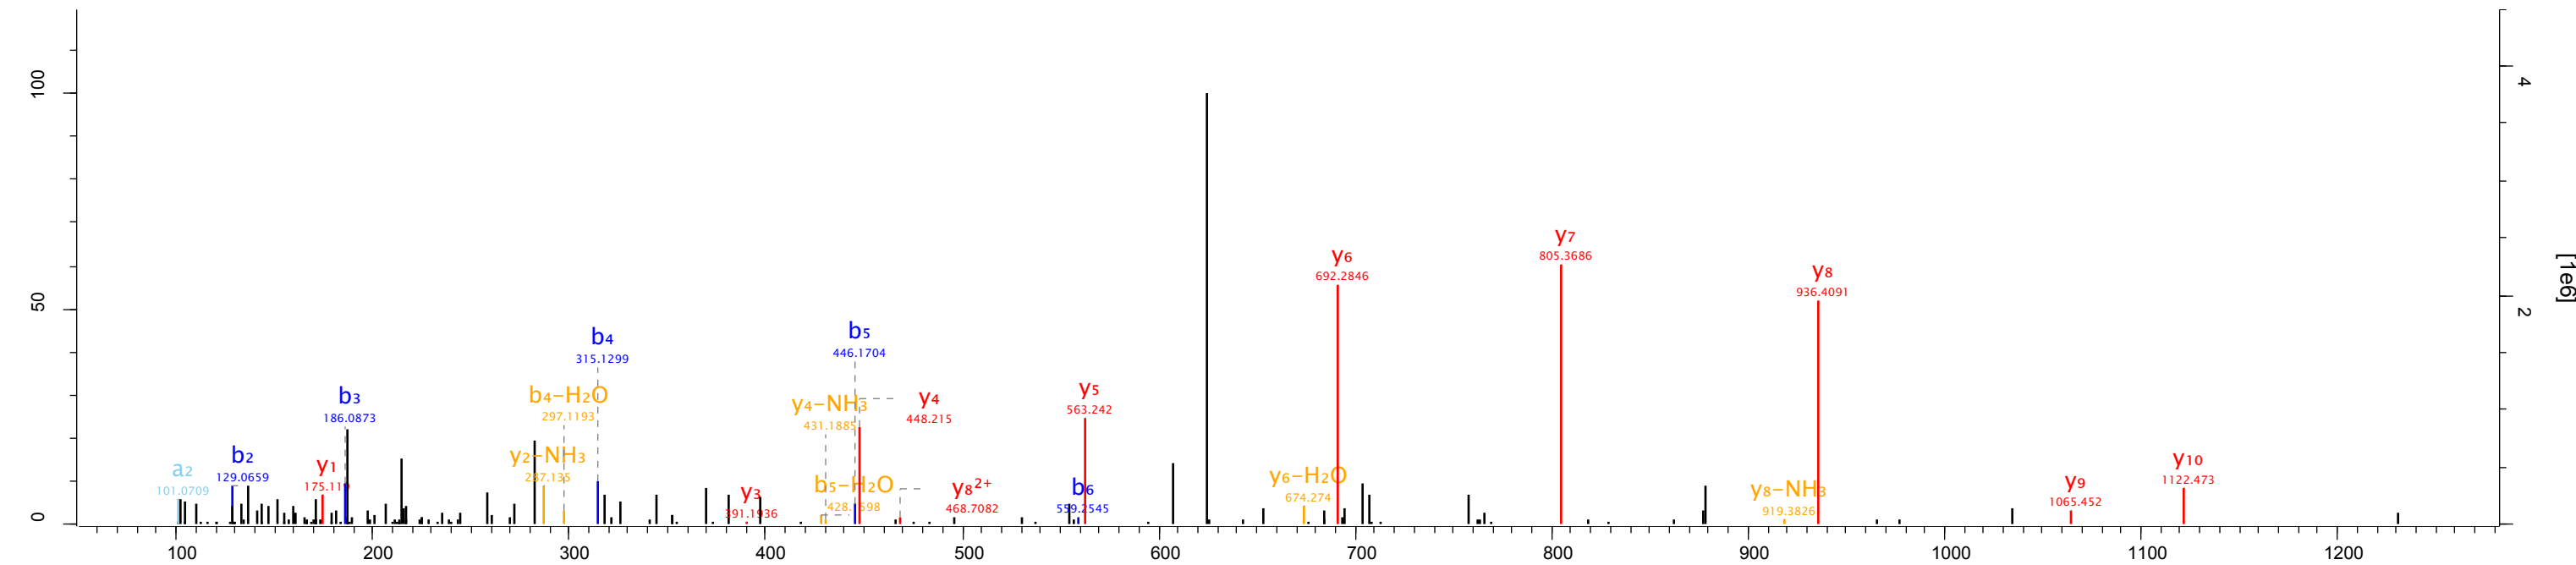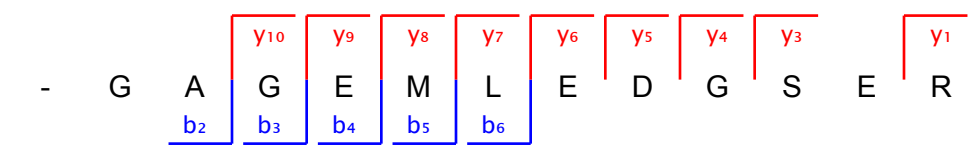

Raw file  
20180707\_MaS\_A375SR\_ML\_proteome\_05

Scan Method Score m/z Gene names  
24781 FTMS; HCD 214.45 840.92 GTF2H5

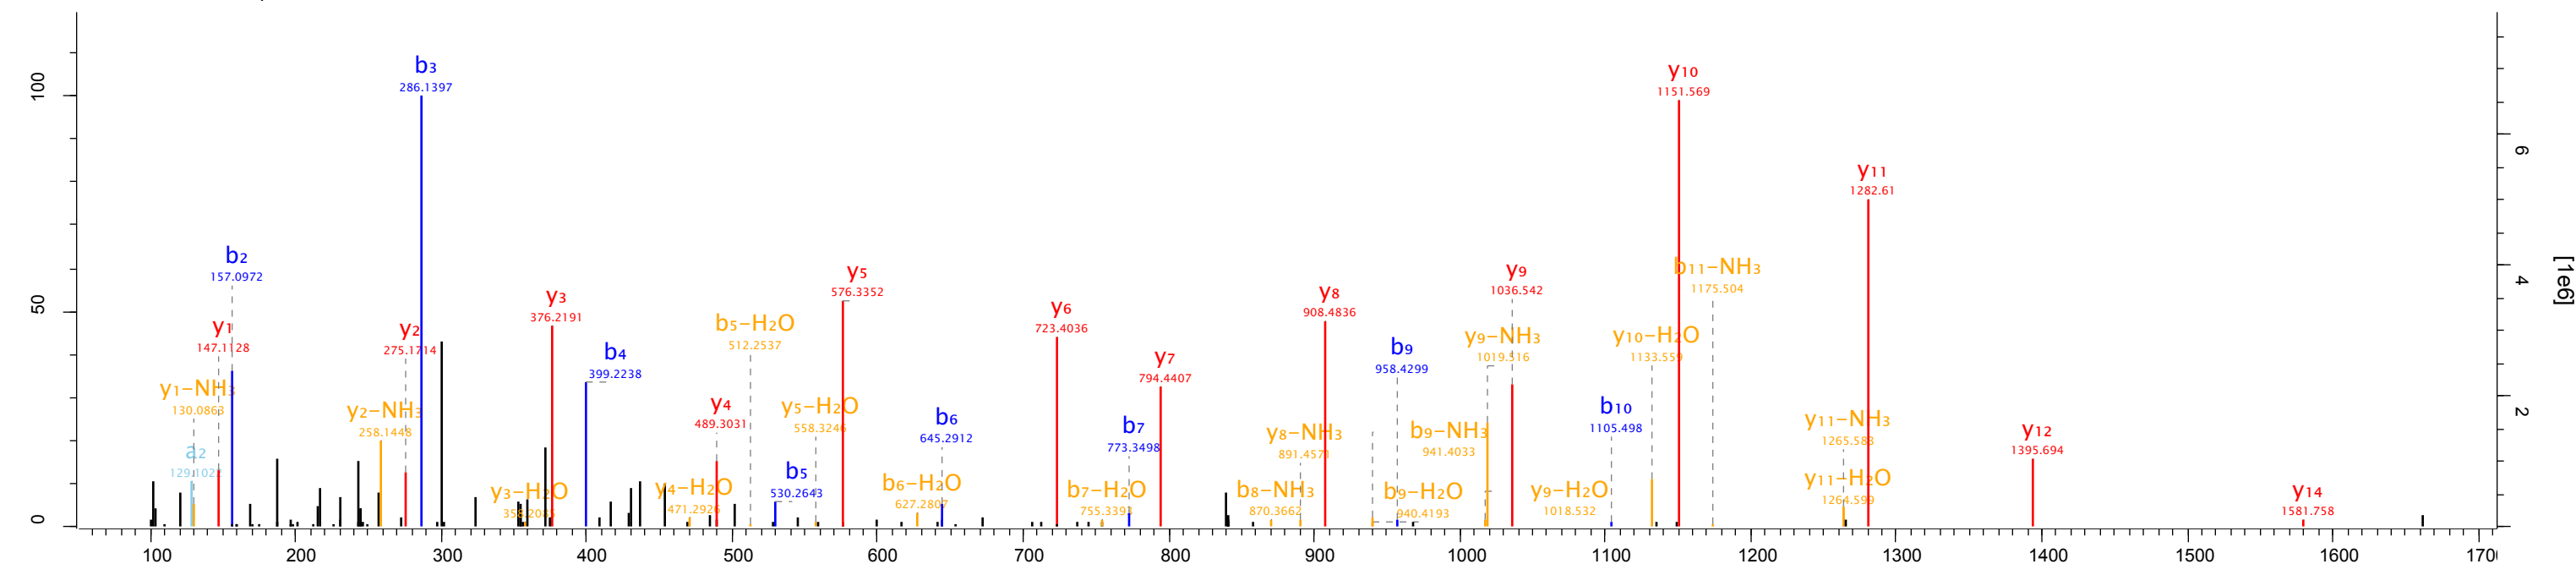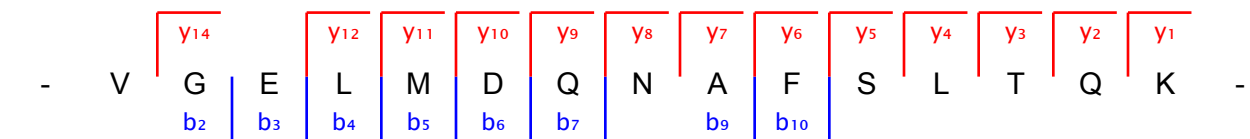

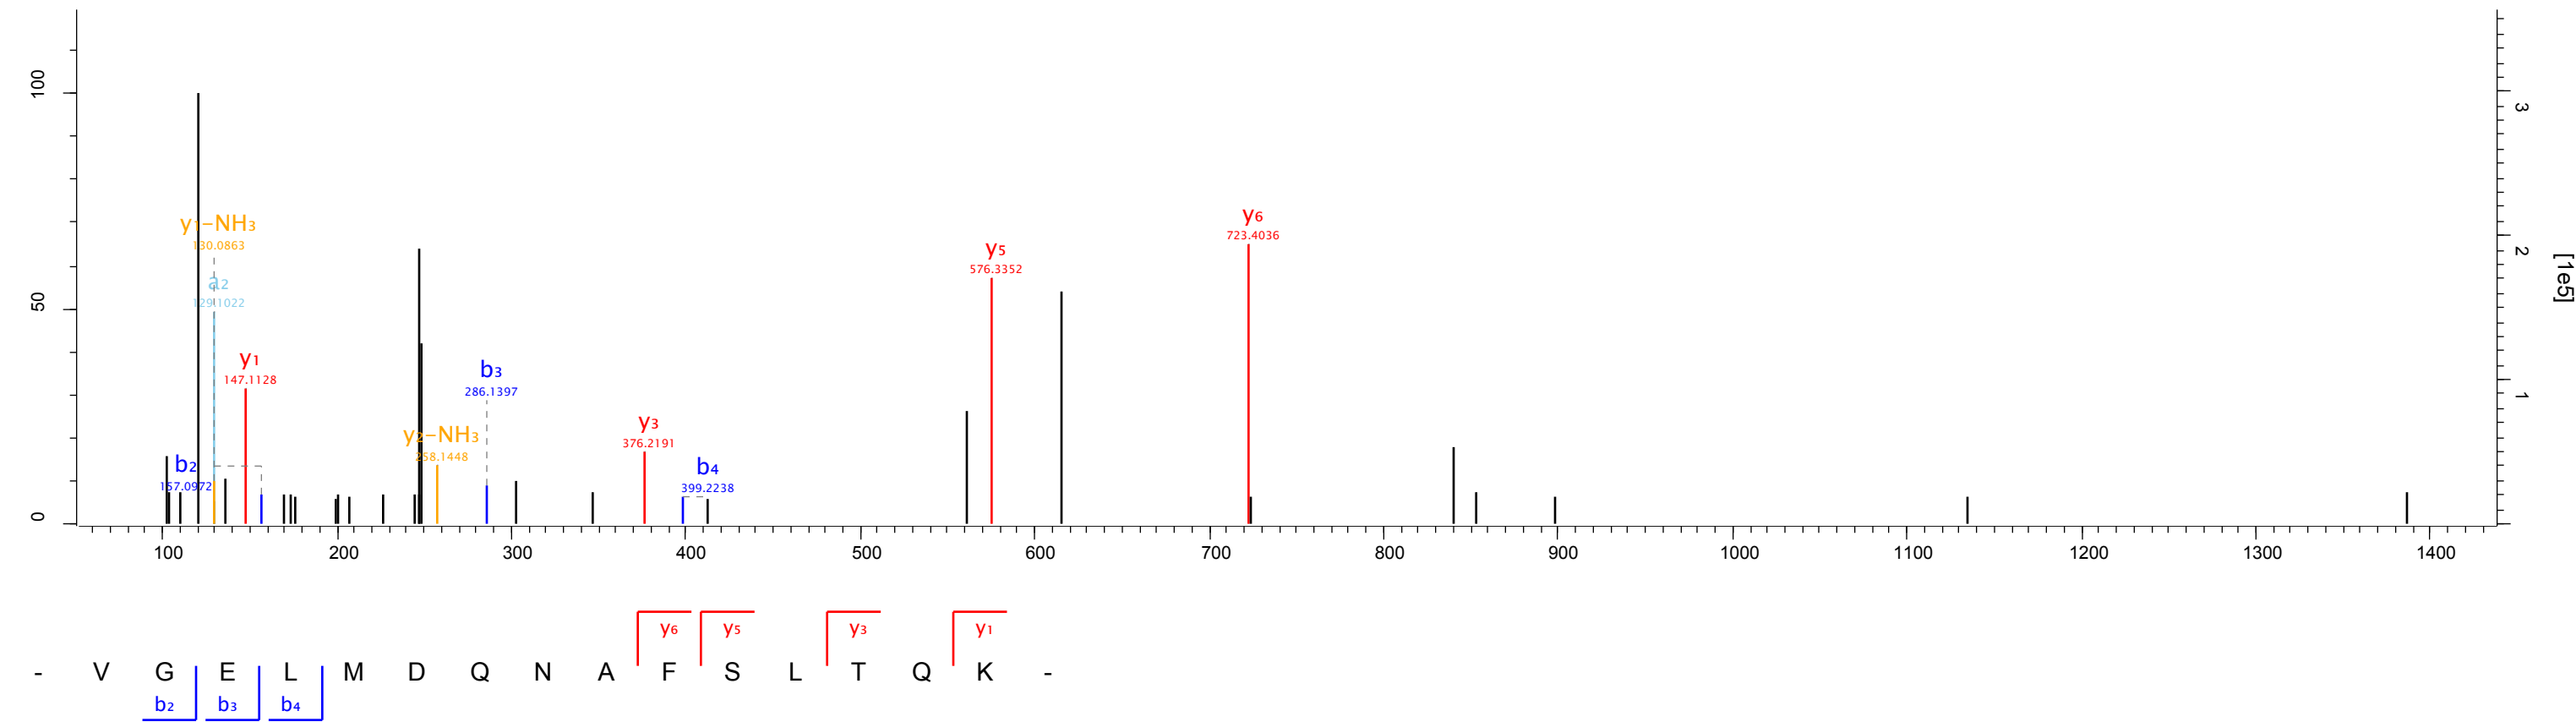

Raw file 20180707\_MaS\_A375SR\_ML\_proteome\_06 Scan 27421 Method FTMS; HCD Score 50.35 m/z 804.91 Gene names IQCK

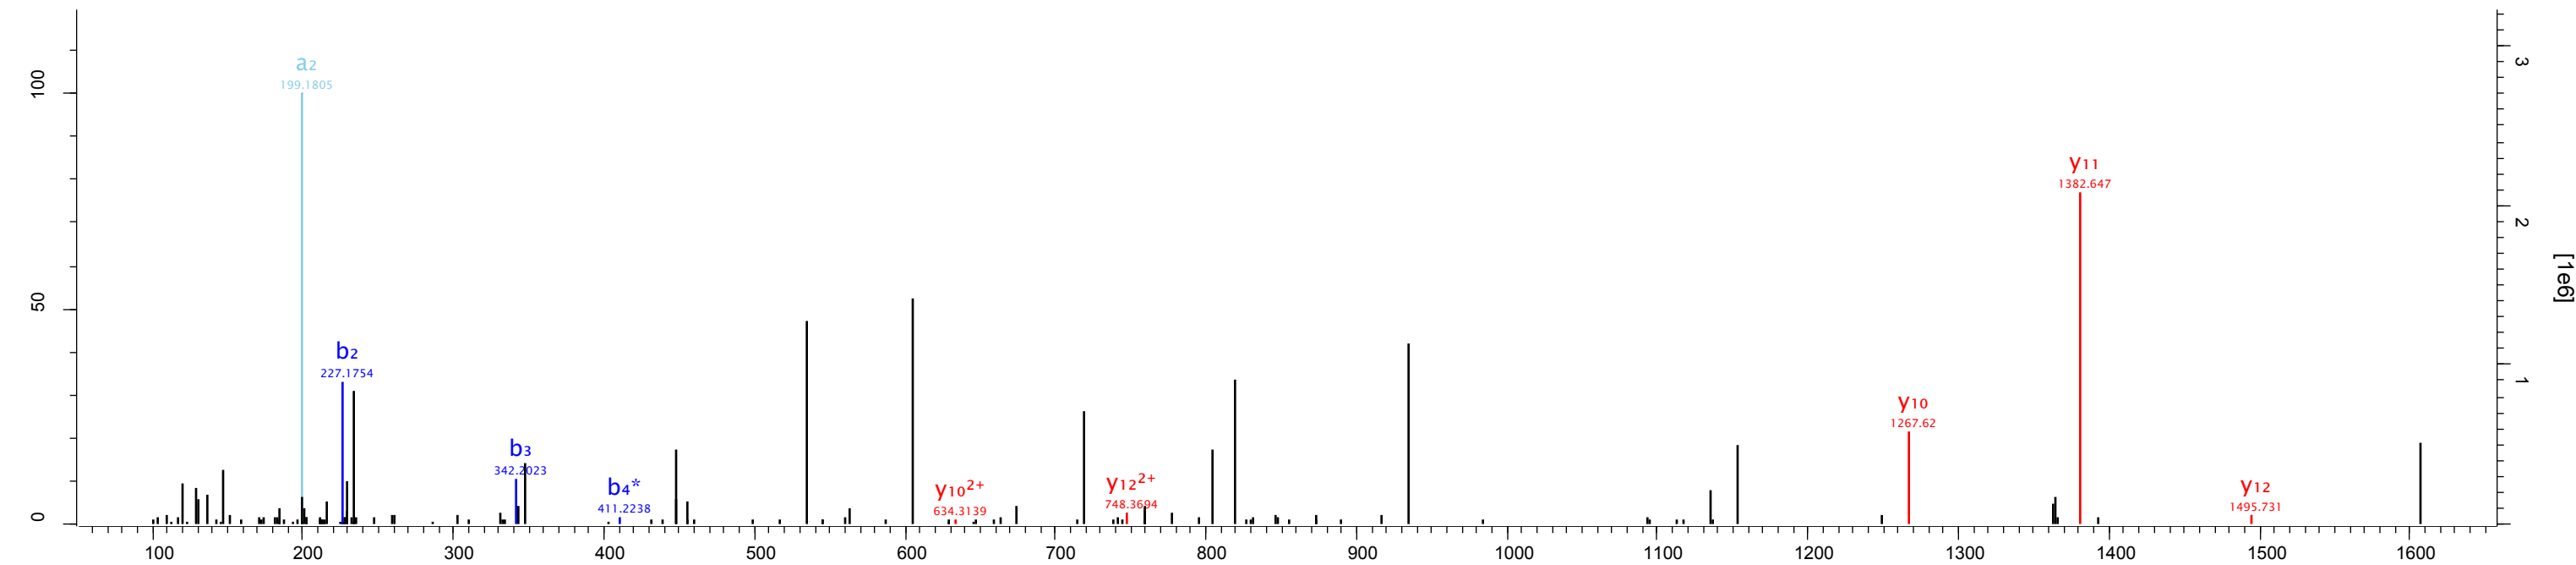

- L L D S L S L V H S R K A -

L
D
S
L
D
S
L
S
L
V
H
S
R
K
A

b<sub>2</sub>
b<sub>3</sub>
b<sub>4</sub>\*
y<sub>12</sub>
y<sub>11</sub>
y<sub>10</sub>

Raw file: 20180707\_MaS\_A375SR\_ML\_proteome\_08  
 Scan: 27101 Method: FTMS; HCD Score: 85.55 m/z: 632.82 Gene names: CCNF

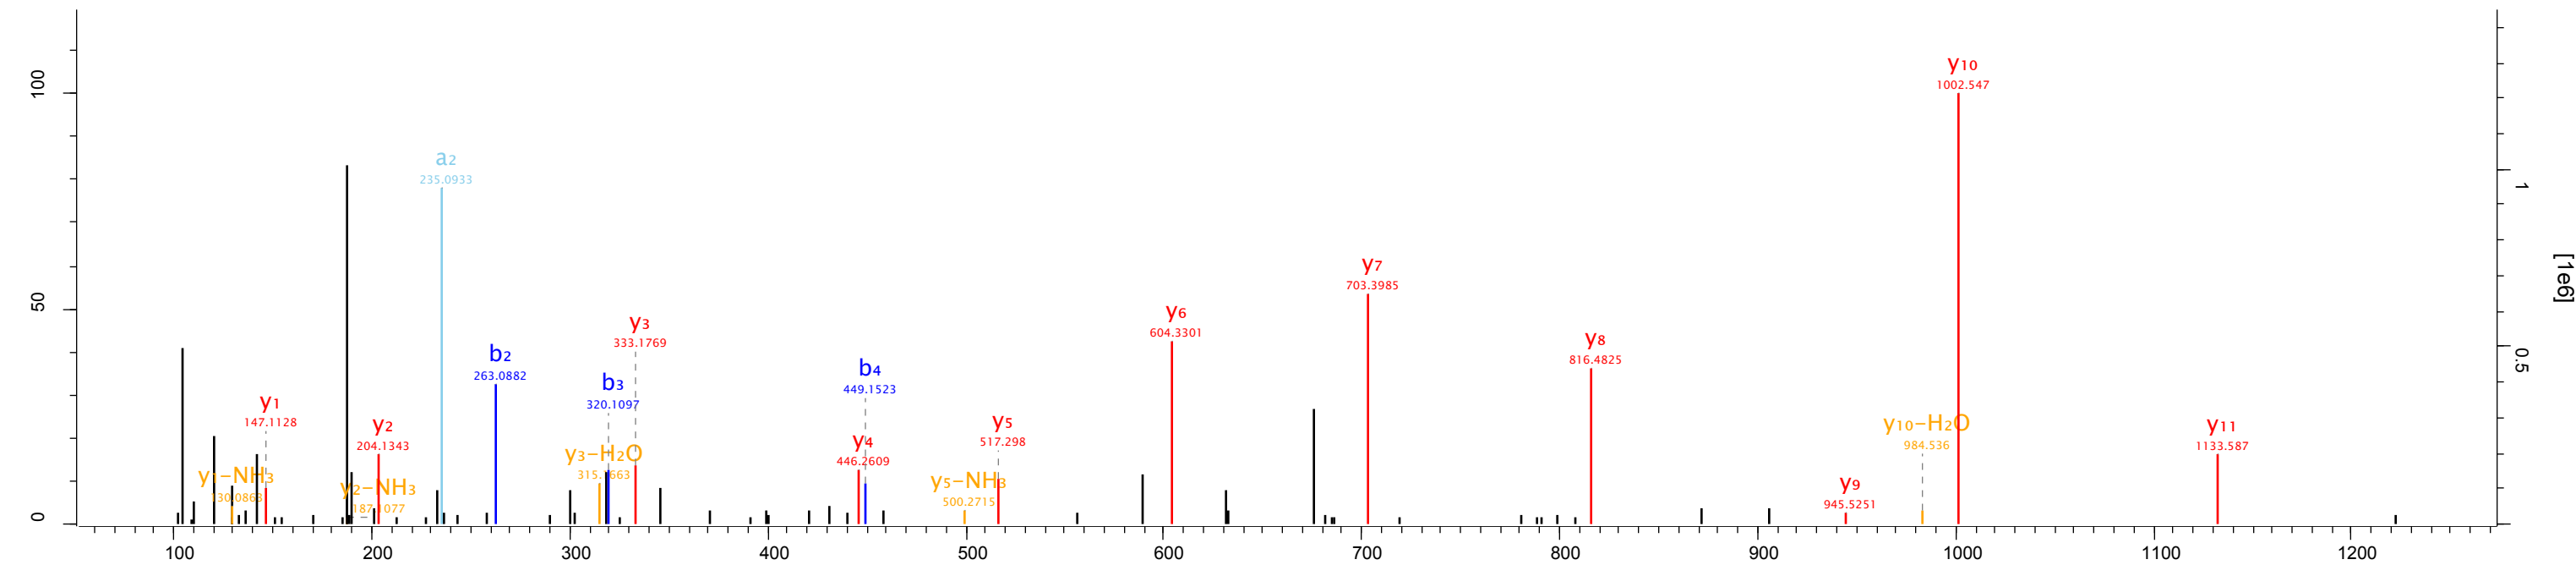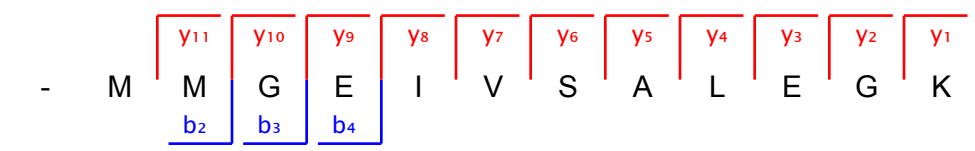

Raw file: 20180707\_MaS\_A375SR\_ML\_proteome\_08  
 Scan: 8491 Method: FTMS; HCD Score: 134.26 m/z: 613.81 Gene names: SGCE

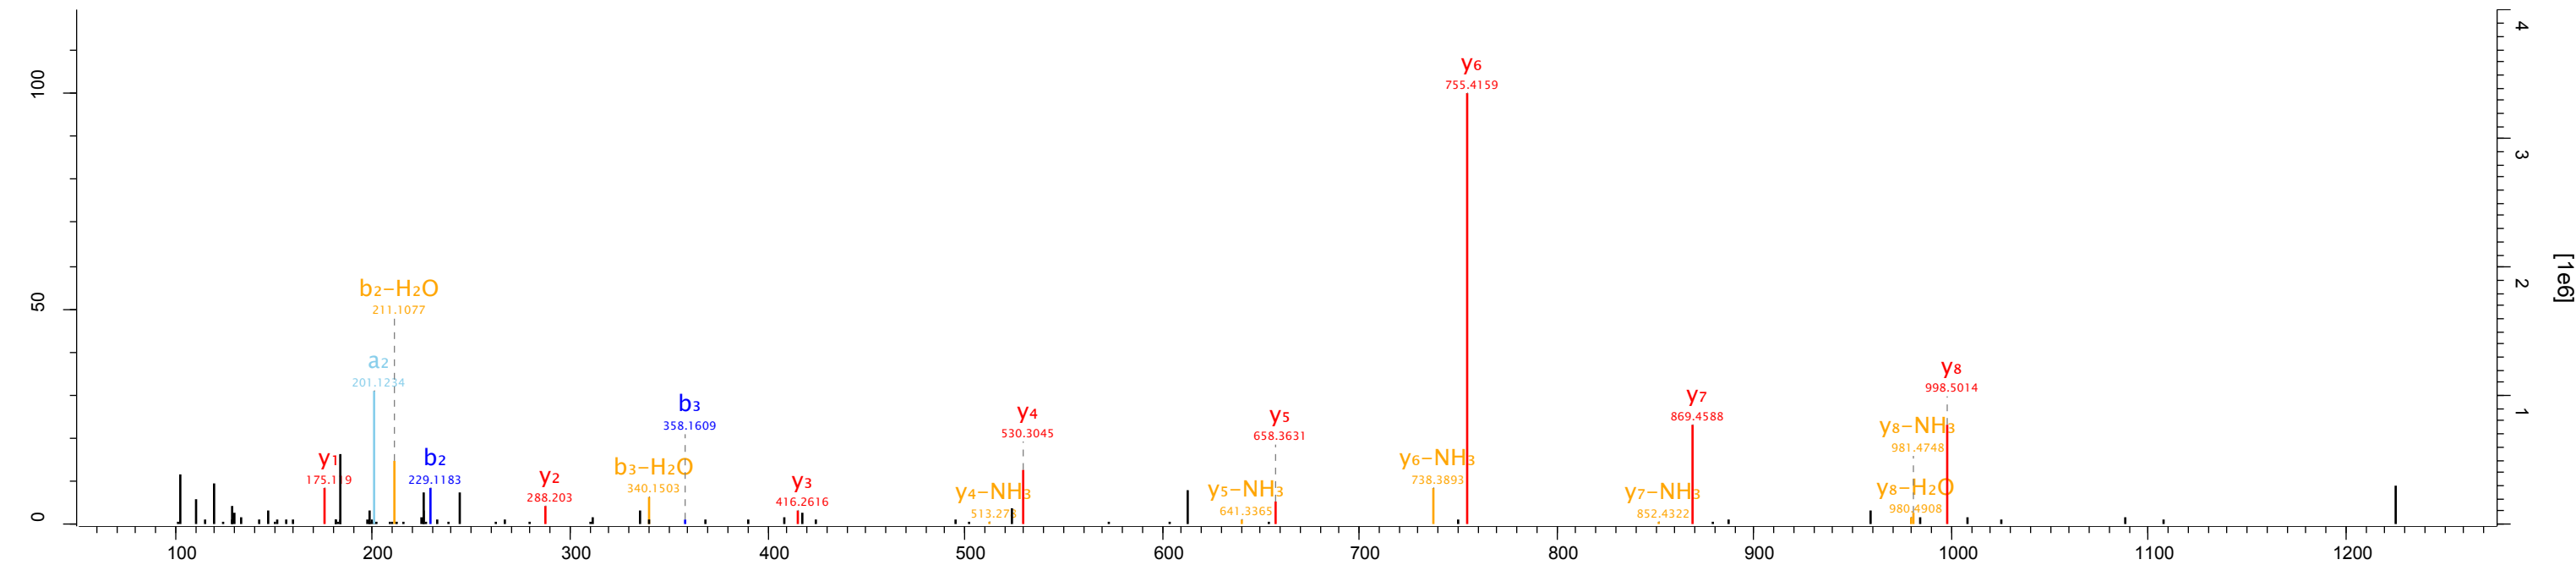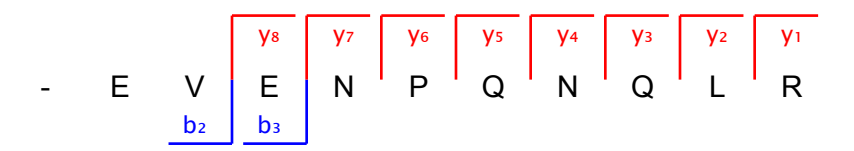



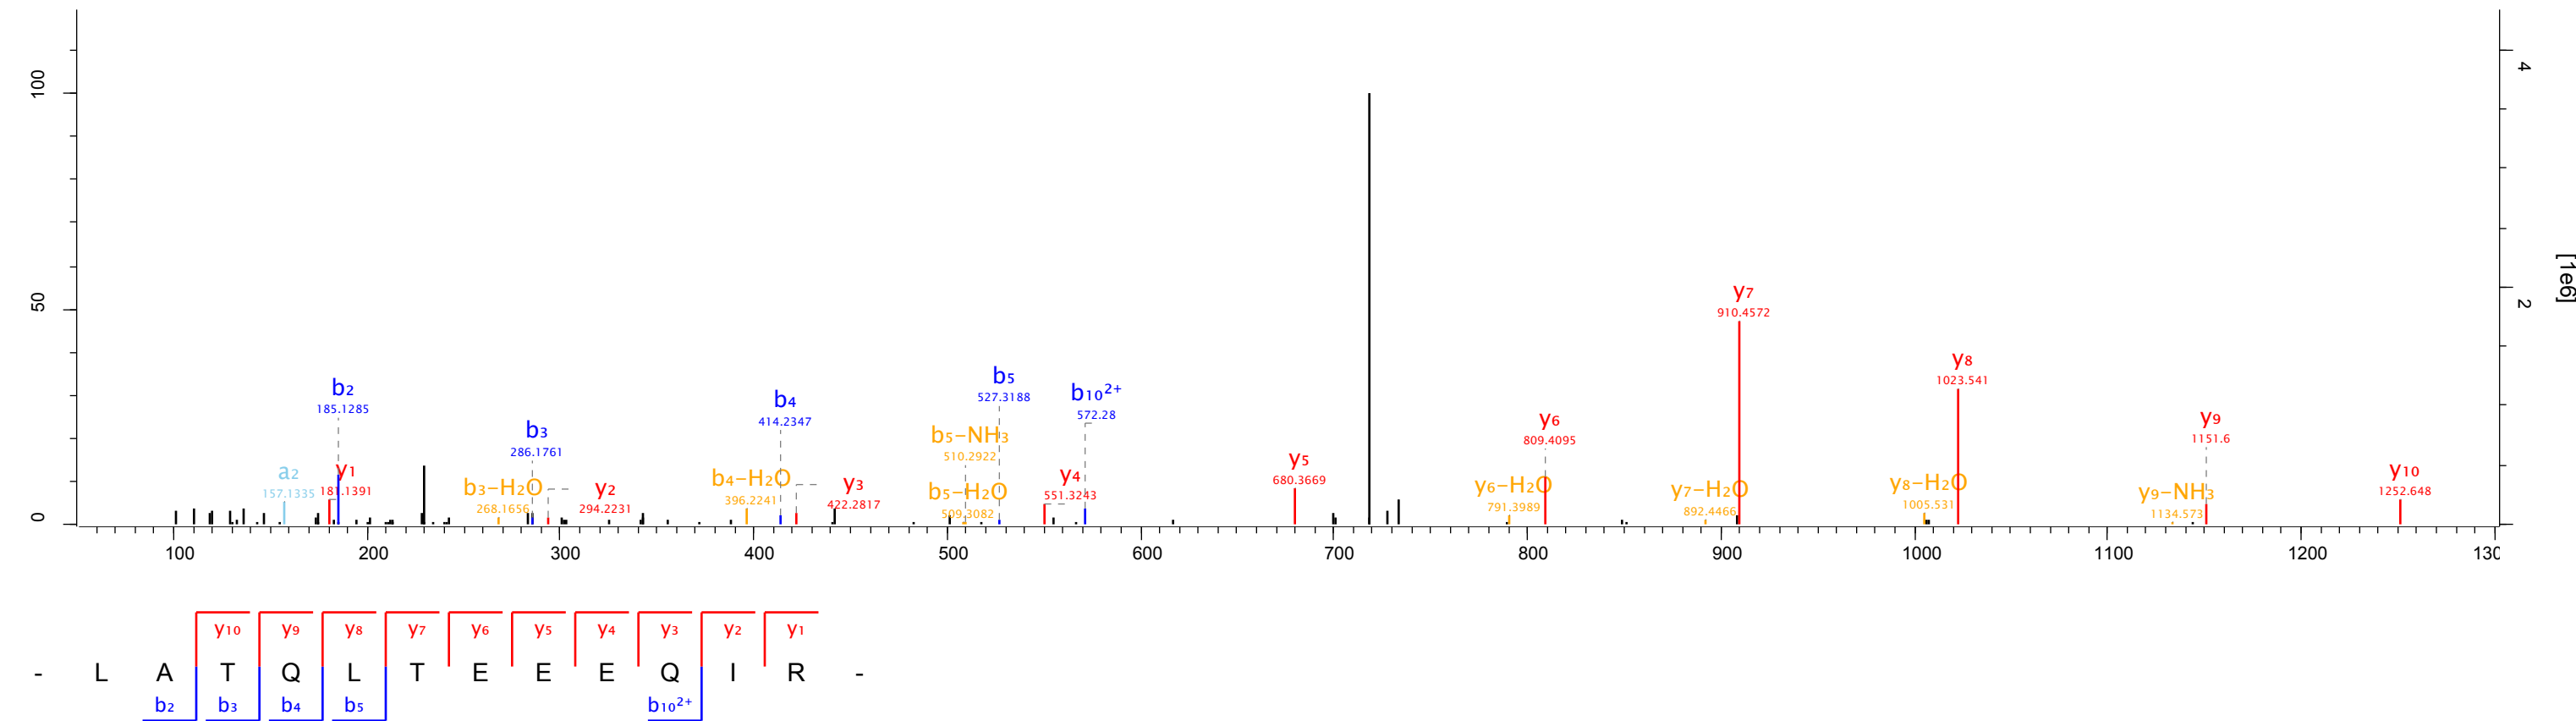

Raw file  
20180707\_MaS\_A375SR\_ML\_proteome\_09

Scan: 24121  
Method: FTMS; HCD  
Score: 69.23  
m/z: 711.4  
Gene names: NFE2L1

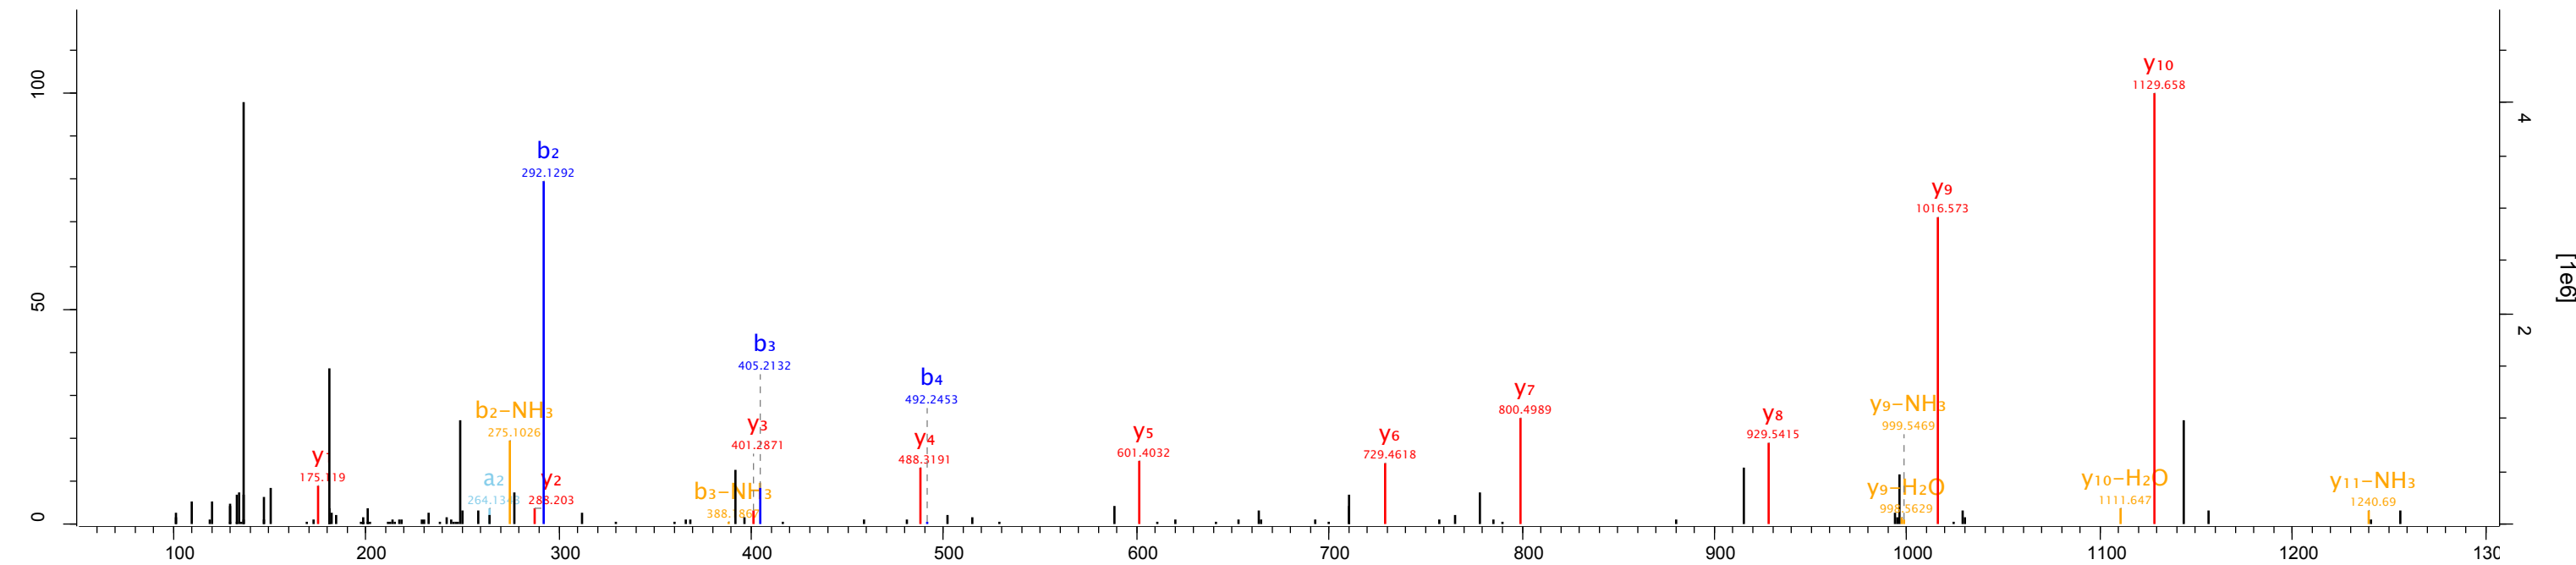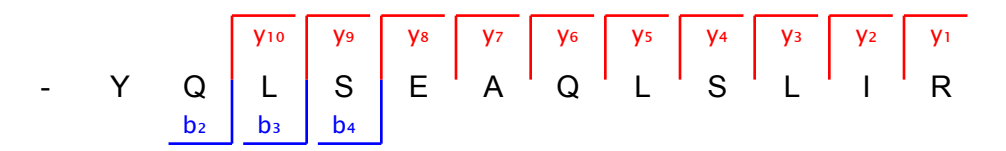

Raw file: 20180707\_MaS\_A375SR\_ML\_proteome\_09  
 Scan: 25421 Method: FTMS; HCD Score: 108.47 m/z: 704.83 Gene names: OAF

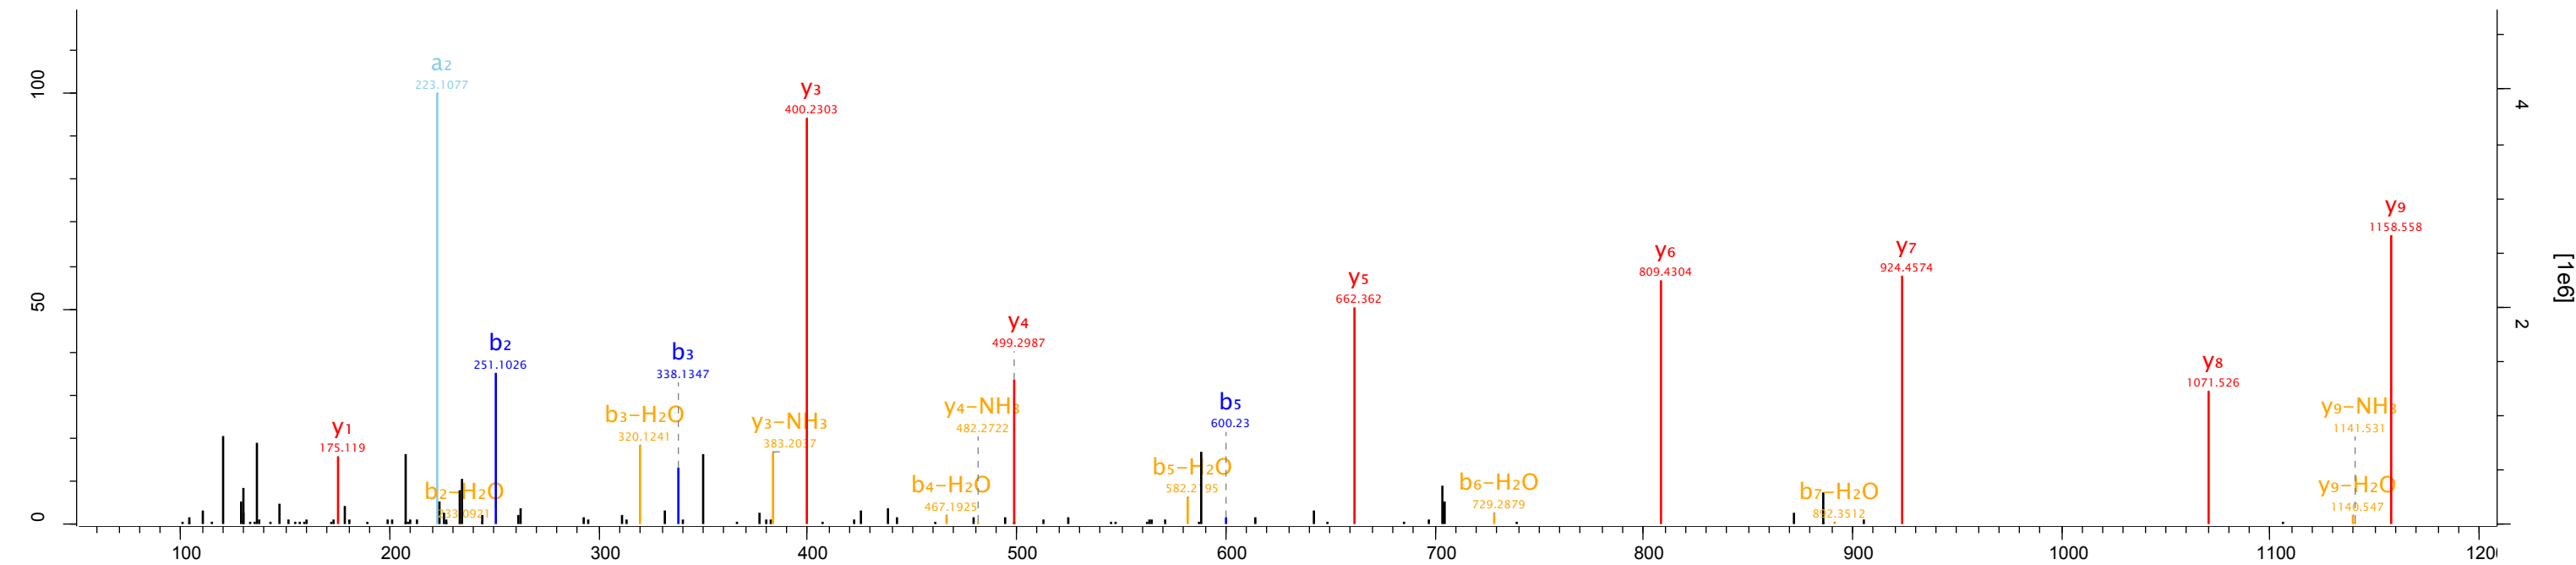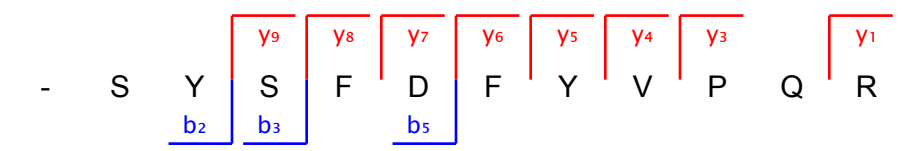

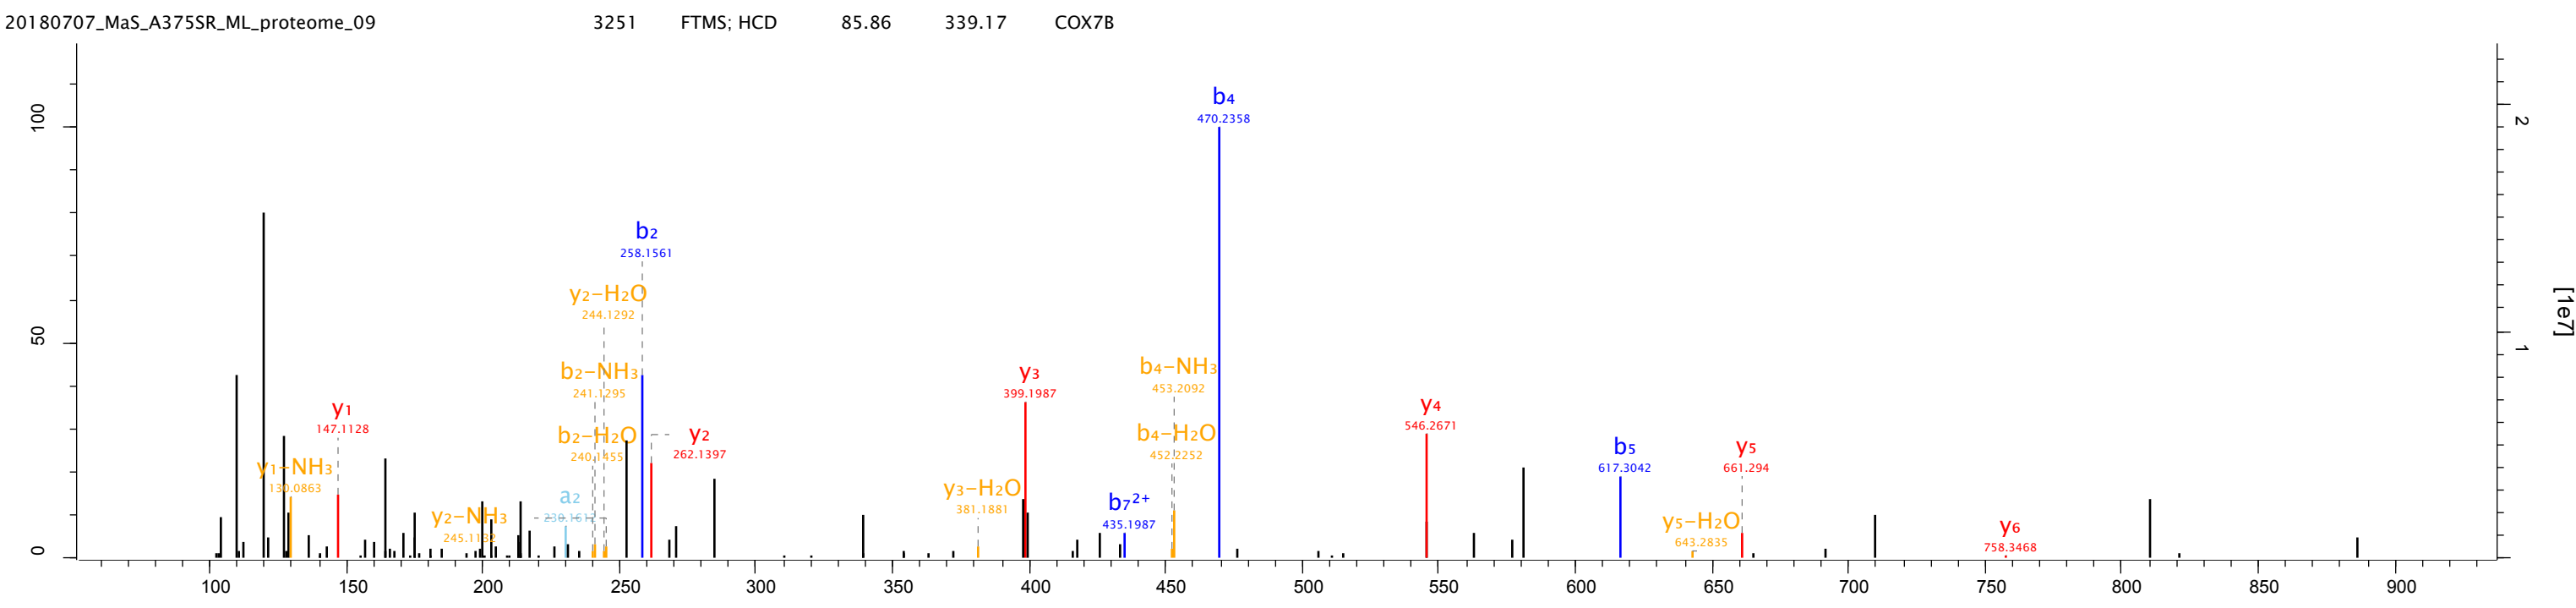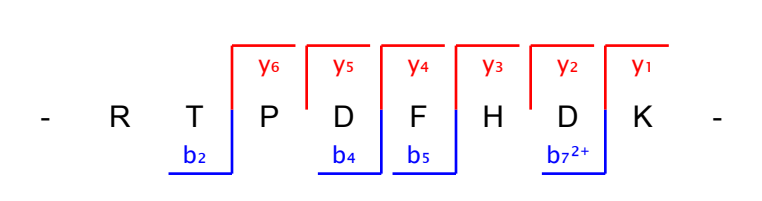

Raw file  
20180707\_MaS\_A375SR\_ML\_proteome\_09

Scan 5301 Method FTMS; HCD Score 50.47 m/z 572.74

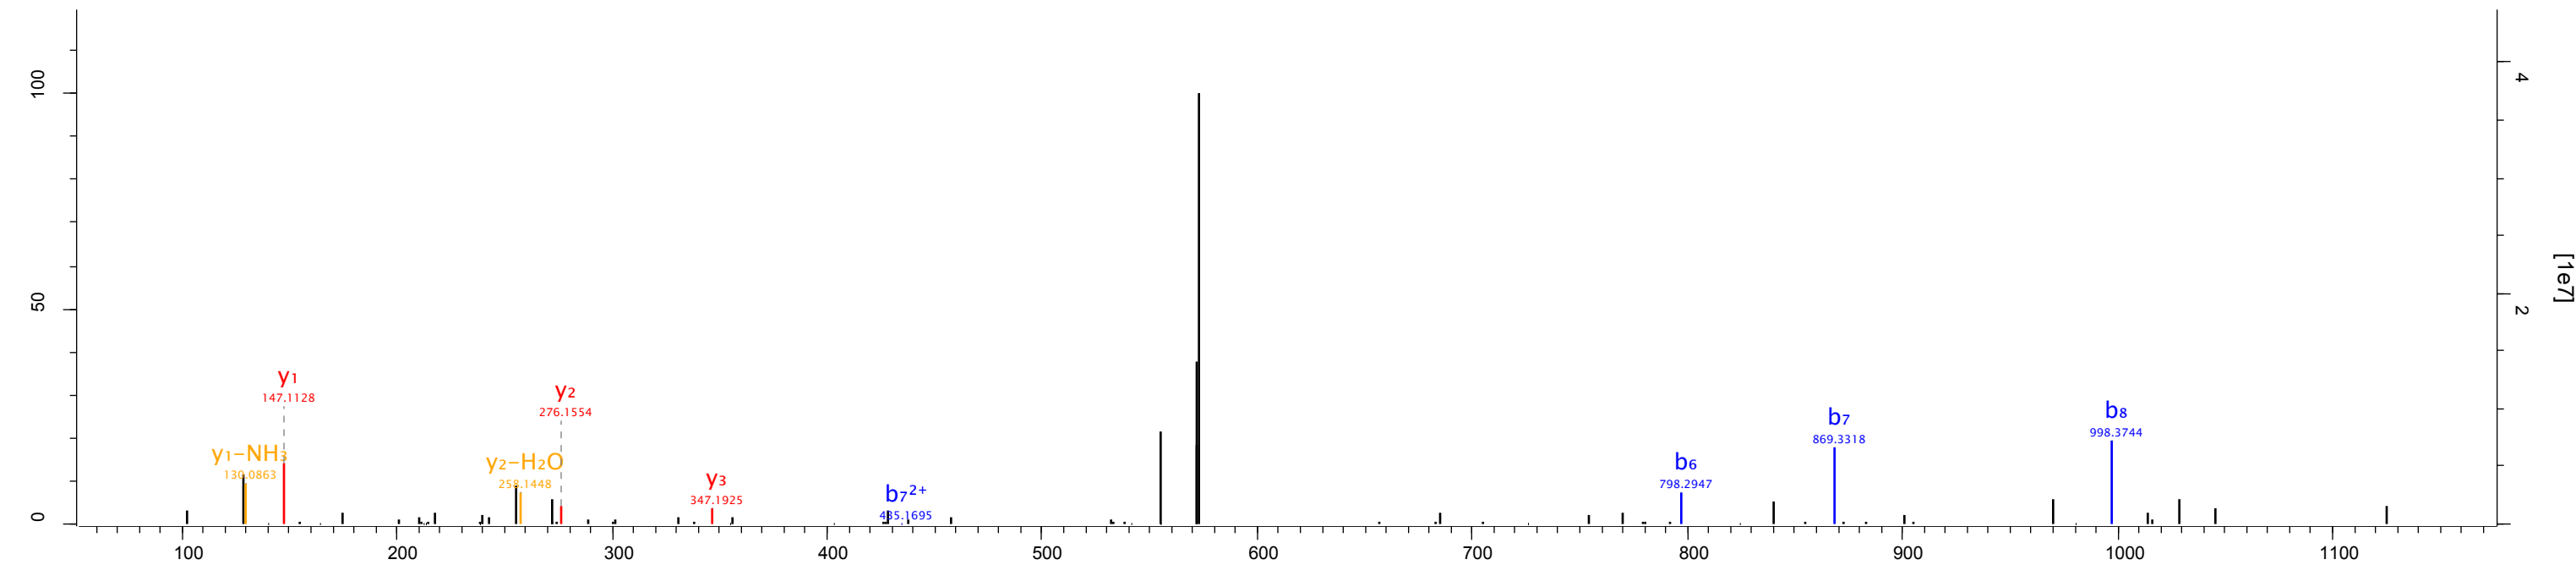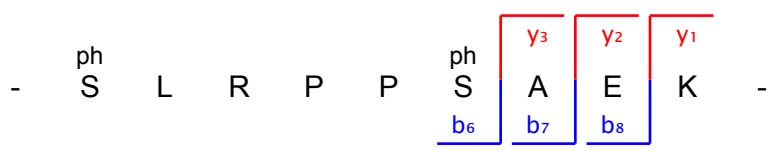

[1e7]

Raw file  
20180707\_MaS\_A375SR\_ML\_proteome\_10

Scan 17451 Method FTMS; HCD Score 110.92 m/z 702.84 Gene names HPX

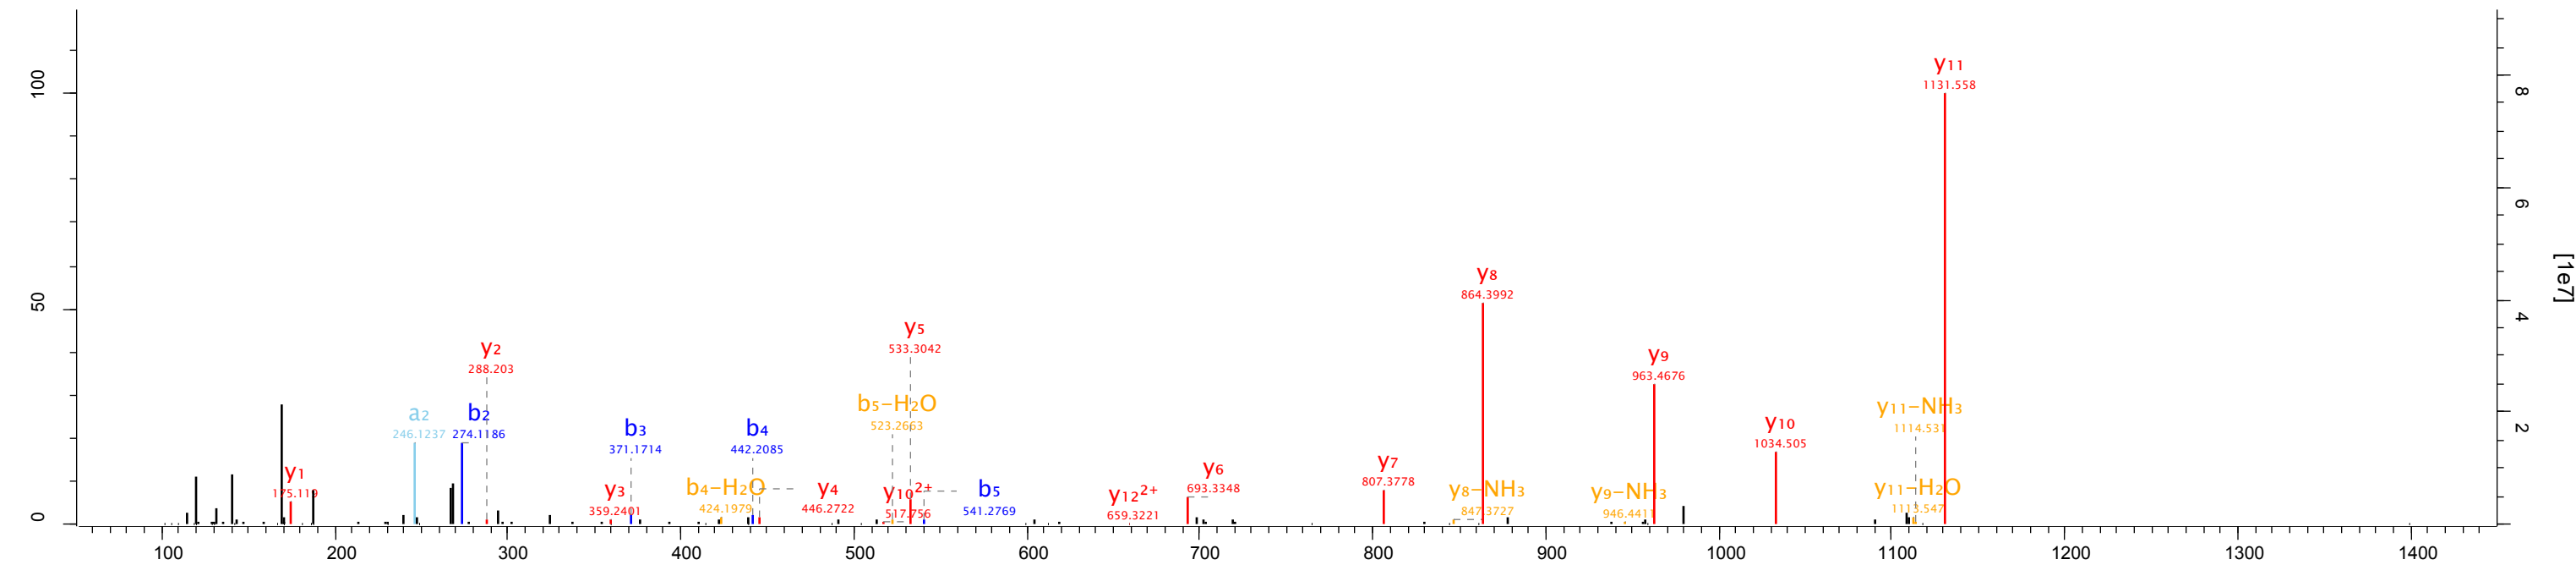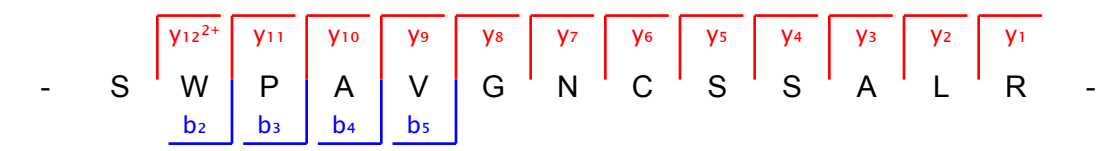

Raw file  
20180707\_MaS\_A375SR\_ML\_proteome\_10

Scan Method Score m/z Gene names  
21461 FTMS; HCD 63.68 715.63 PDE6B;PDE6A

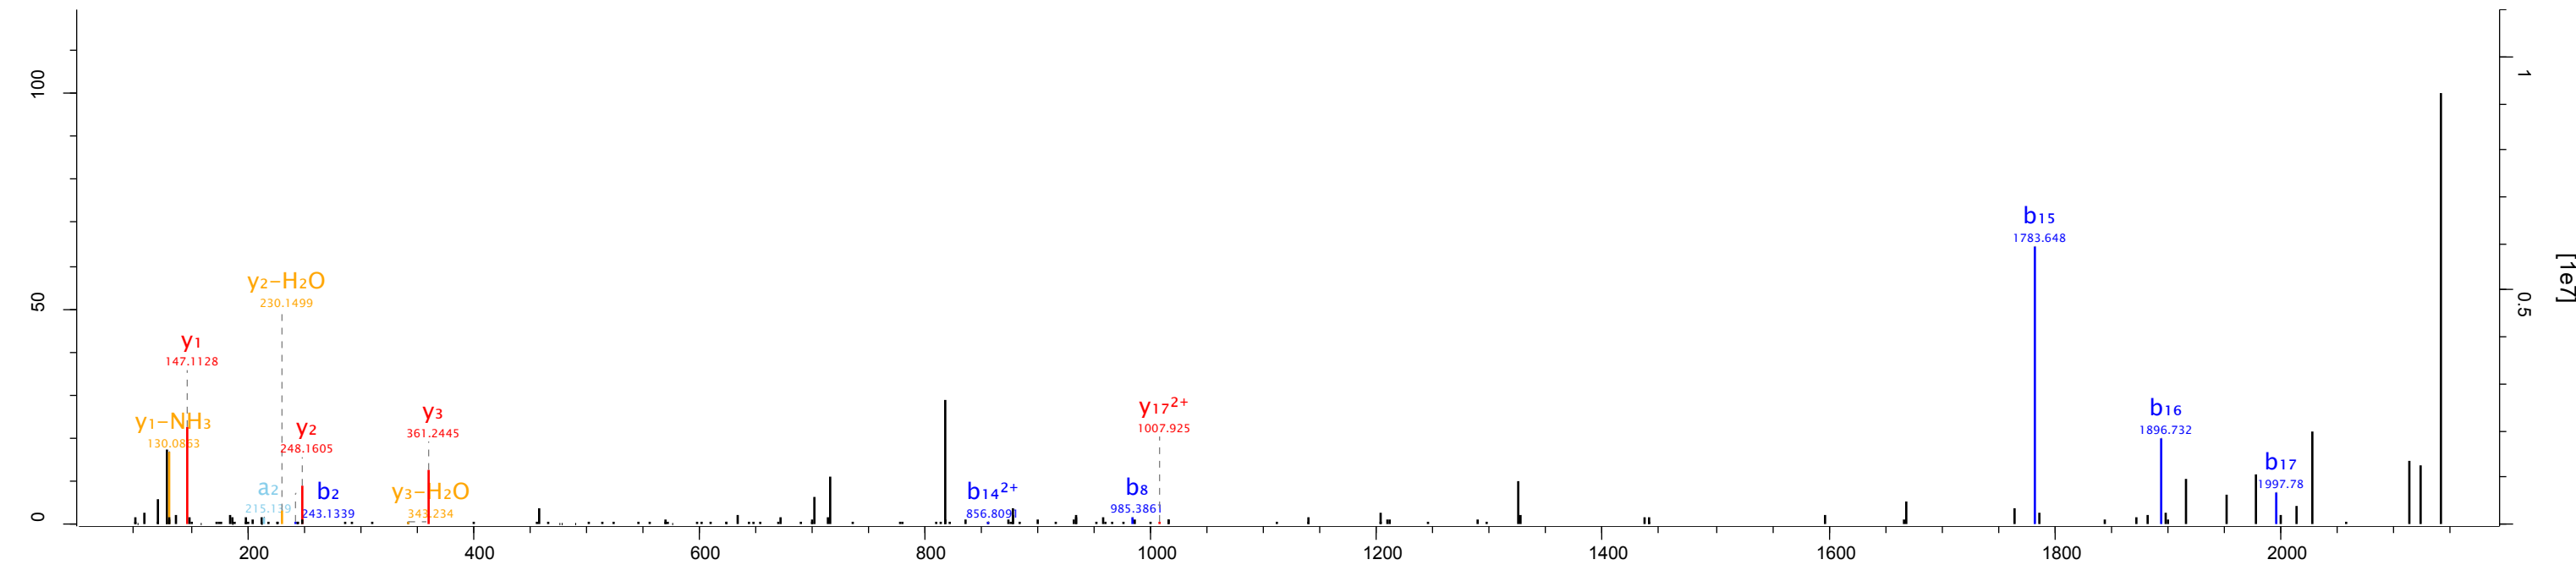

- E I V ox M A ox M M M ph T A C D L S A I T K -  
b<sub>2</sub> b<sub>8</sub> b<sub>14</sub><sup>2+</sup> b<sub>15</sub> b<sub>16</sub> b<sub>17</sub> y<sub>17</sub><sup>2+</sup> y<sub>3</sub> y<sub>2</sub> y<sub>1</sub>

Raw file 20180707\_MaS\_A375SR\_ML\_proteome\_11 Scan 22481 Method FTMS; HCD Score 64.82 m/z 371.57 Gene names BPI

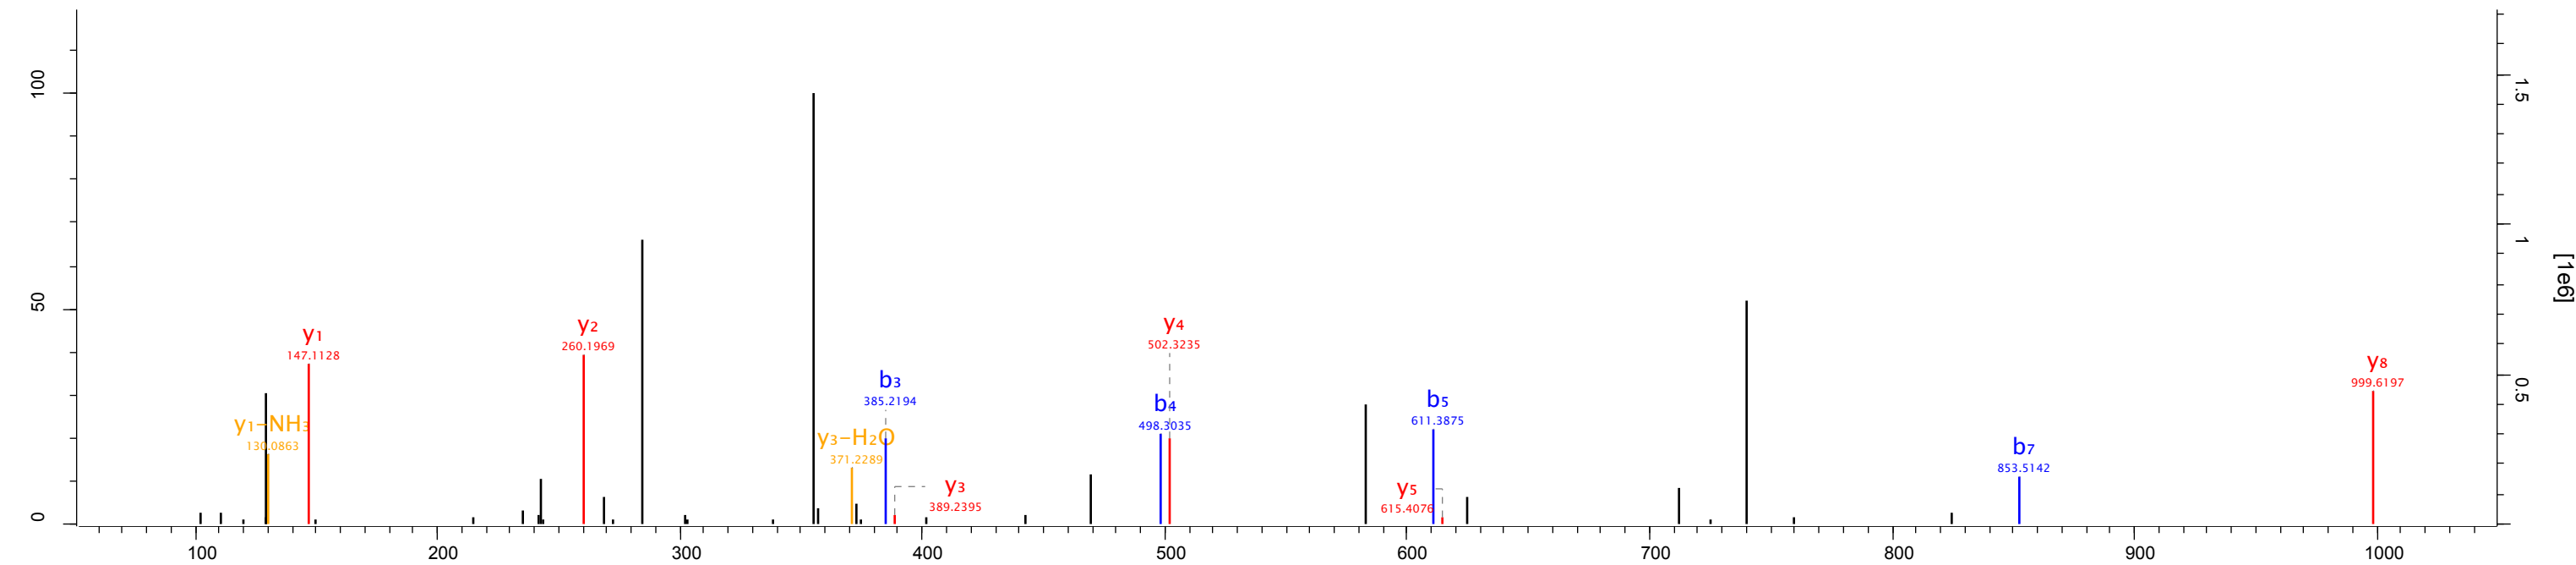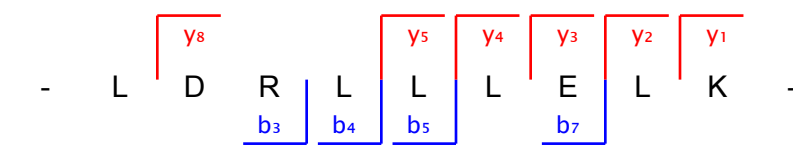



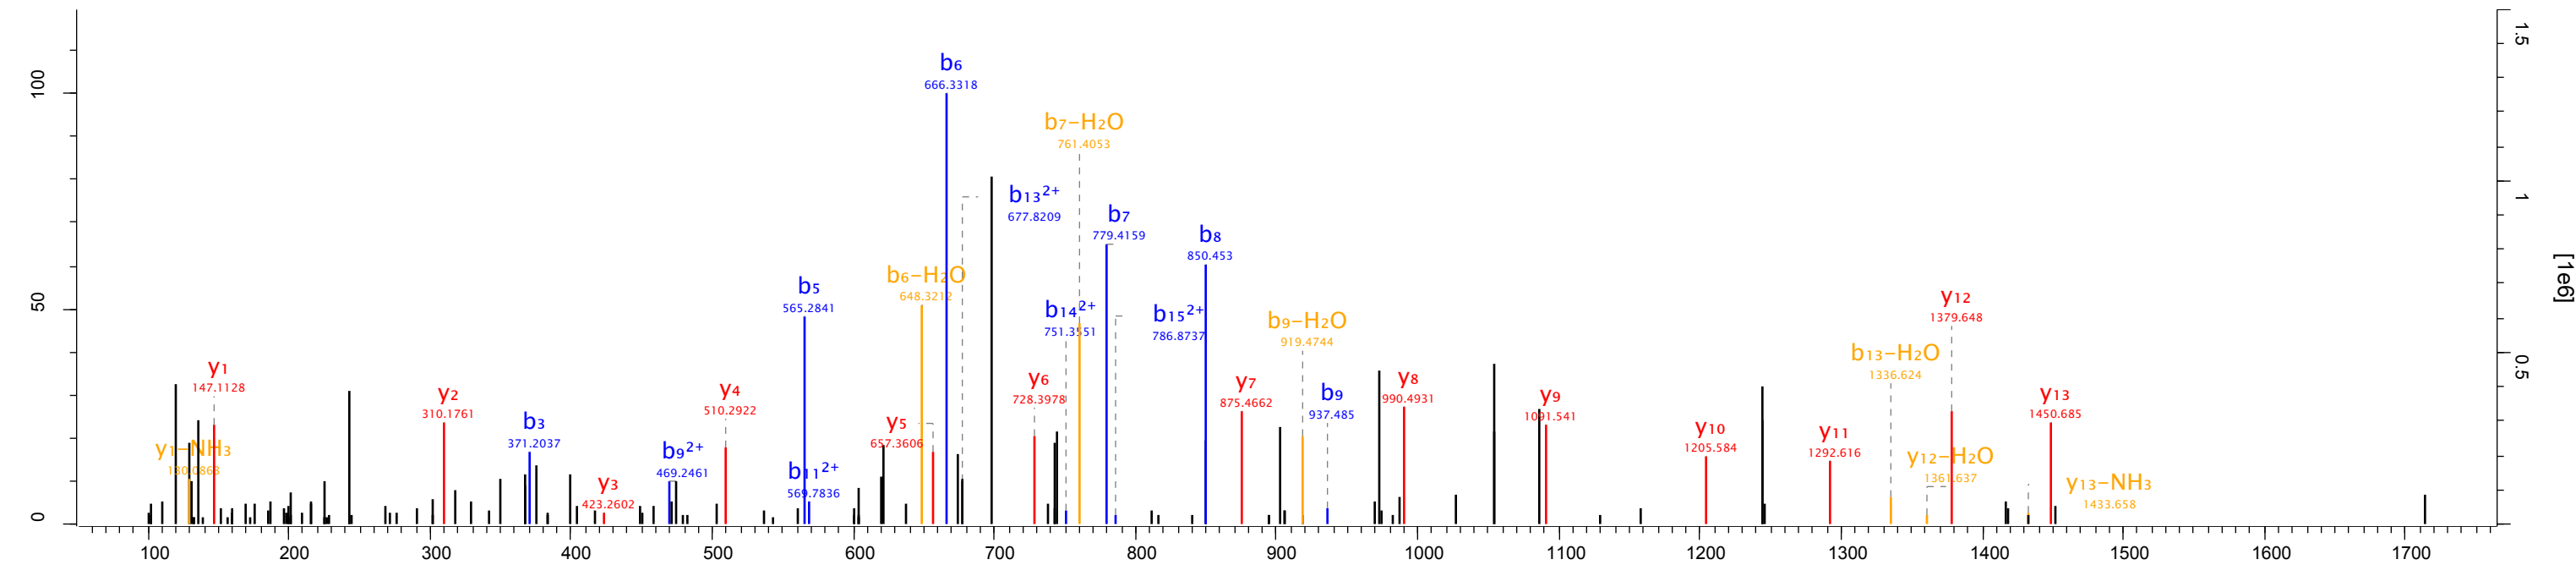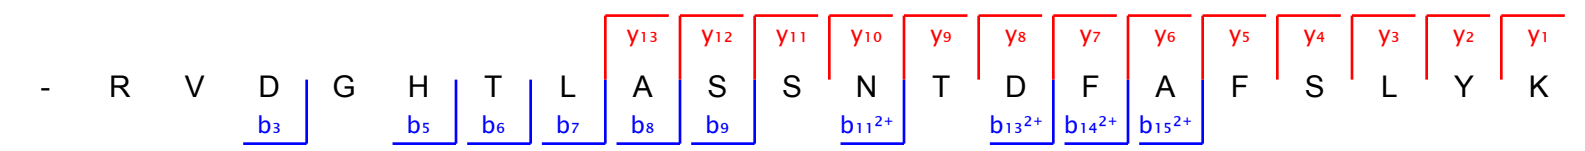

Raw file  
20180707\_MaS\_A375SR\_ML\_proteome\_11

Scan 26141 Method FTMS; HCD Score 110.38 m/z 770.38 Gene names R3HDM4

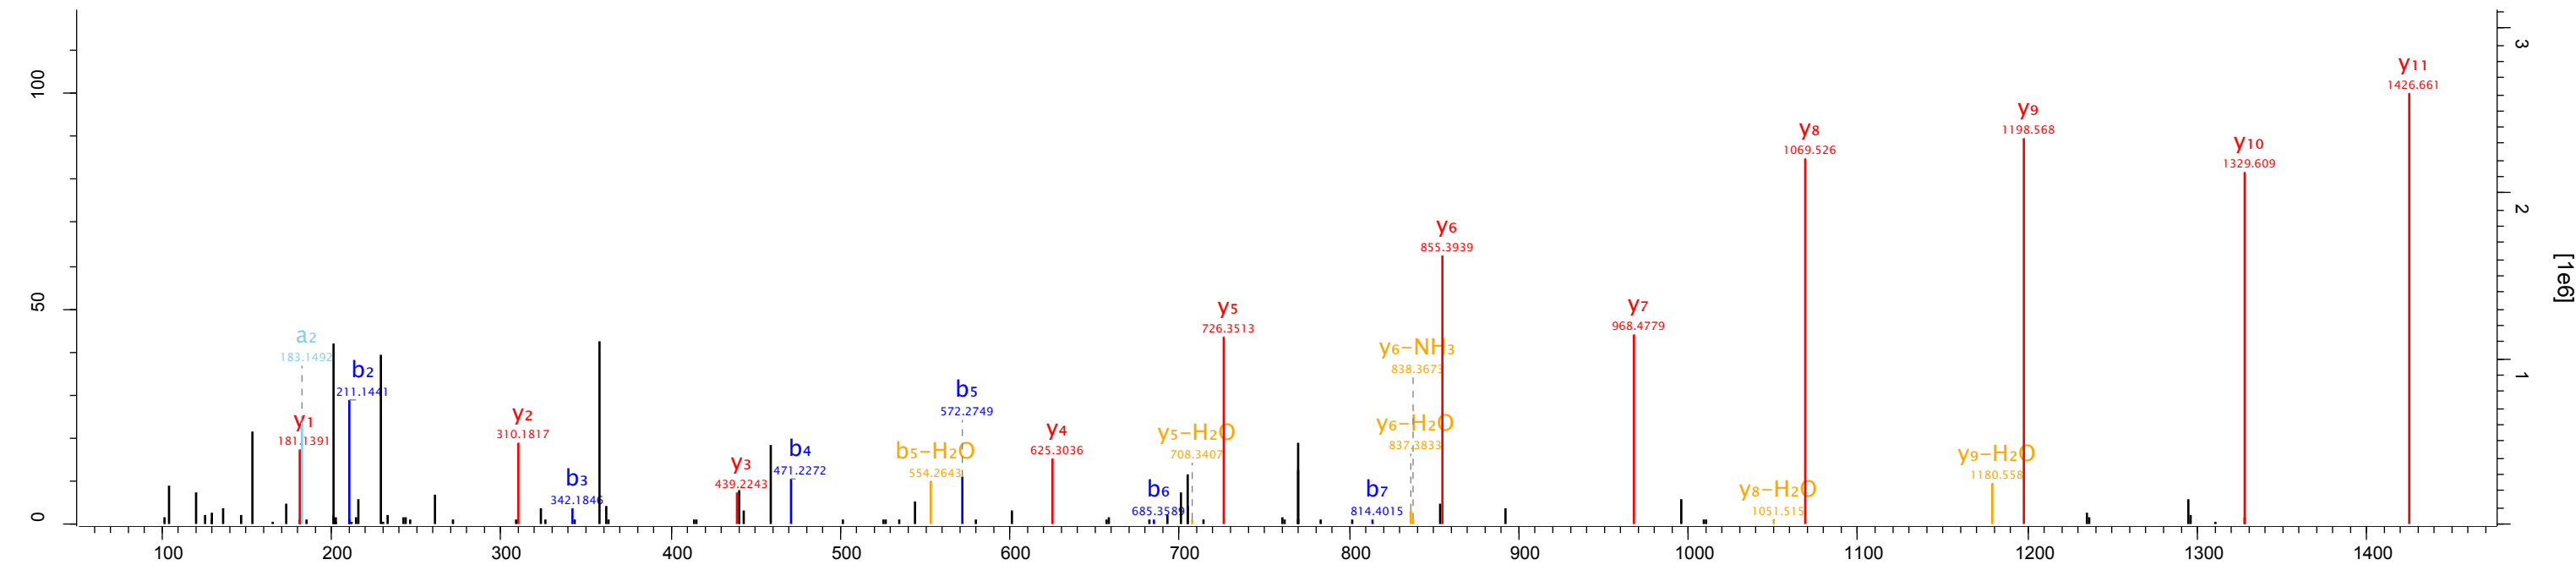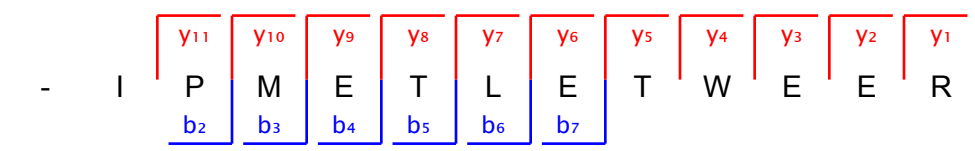

Raw file 20180707\_MaS\_A375SR\_ML\_proteome\_11 Scan 2751 Method FTMS; HCD Score 44.97 m/z 327.18

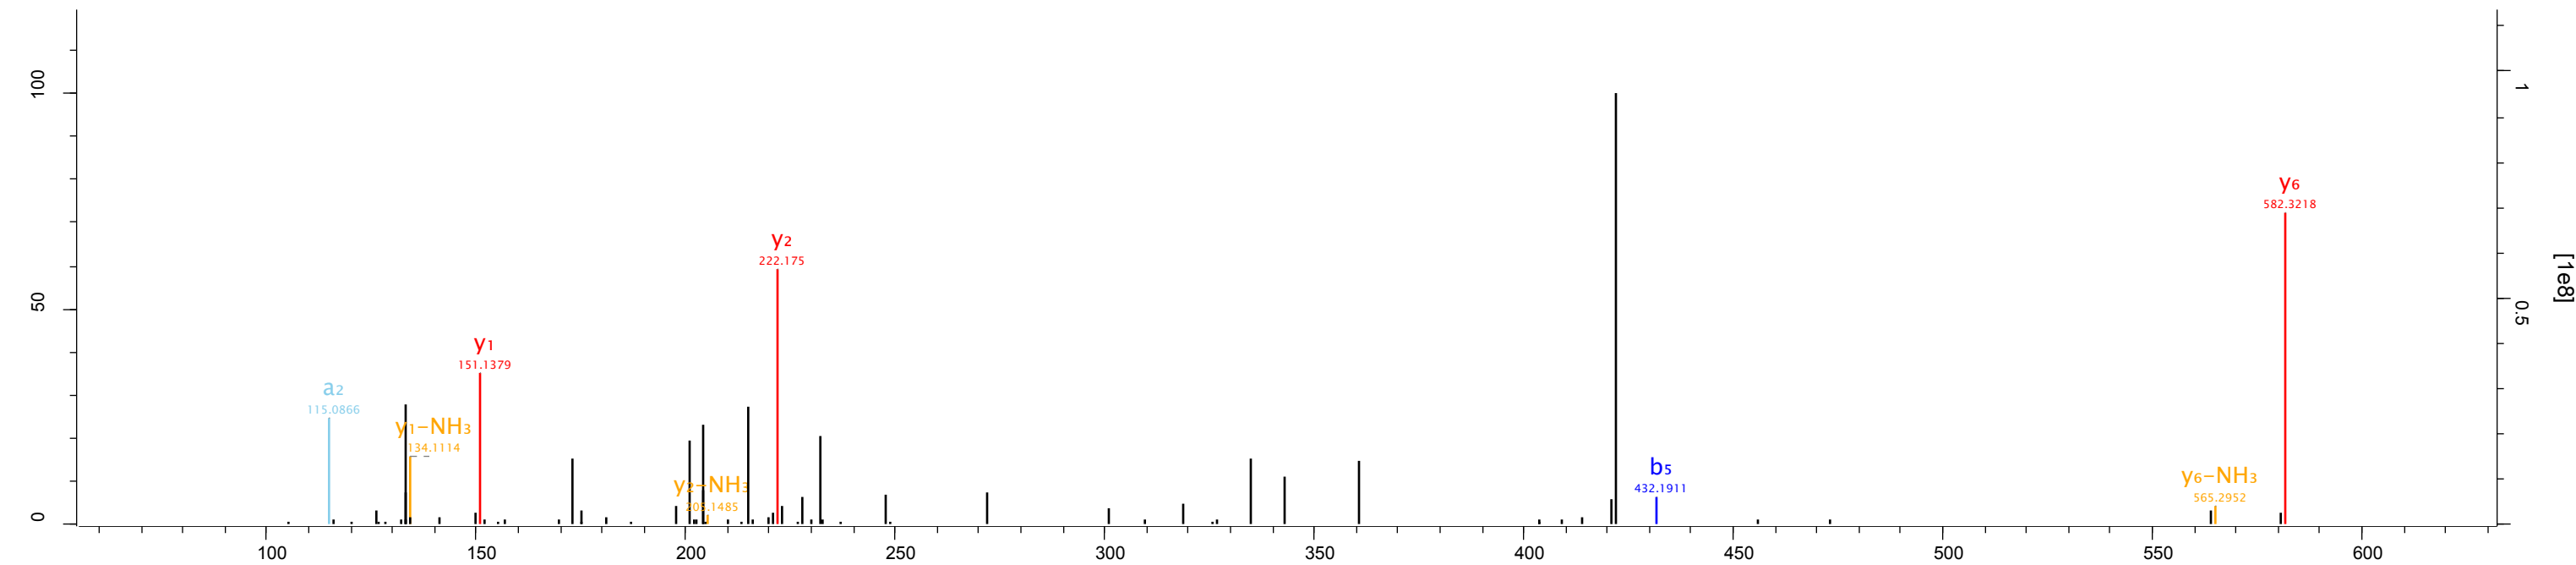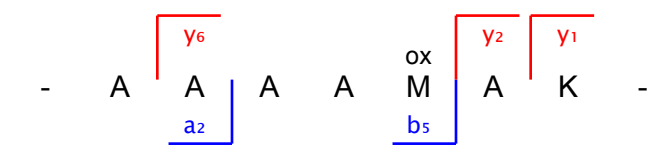

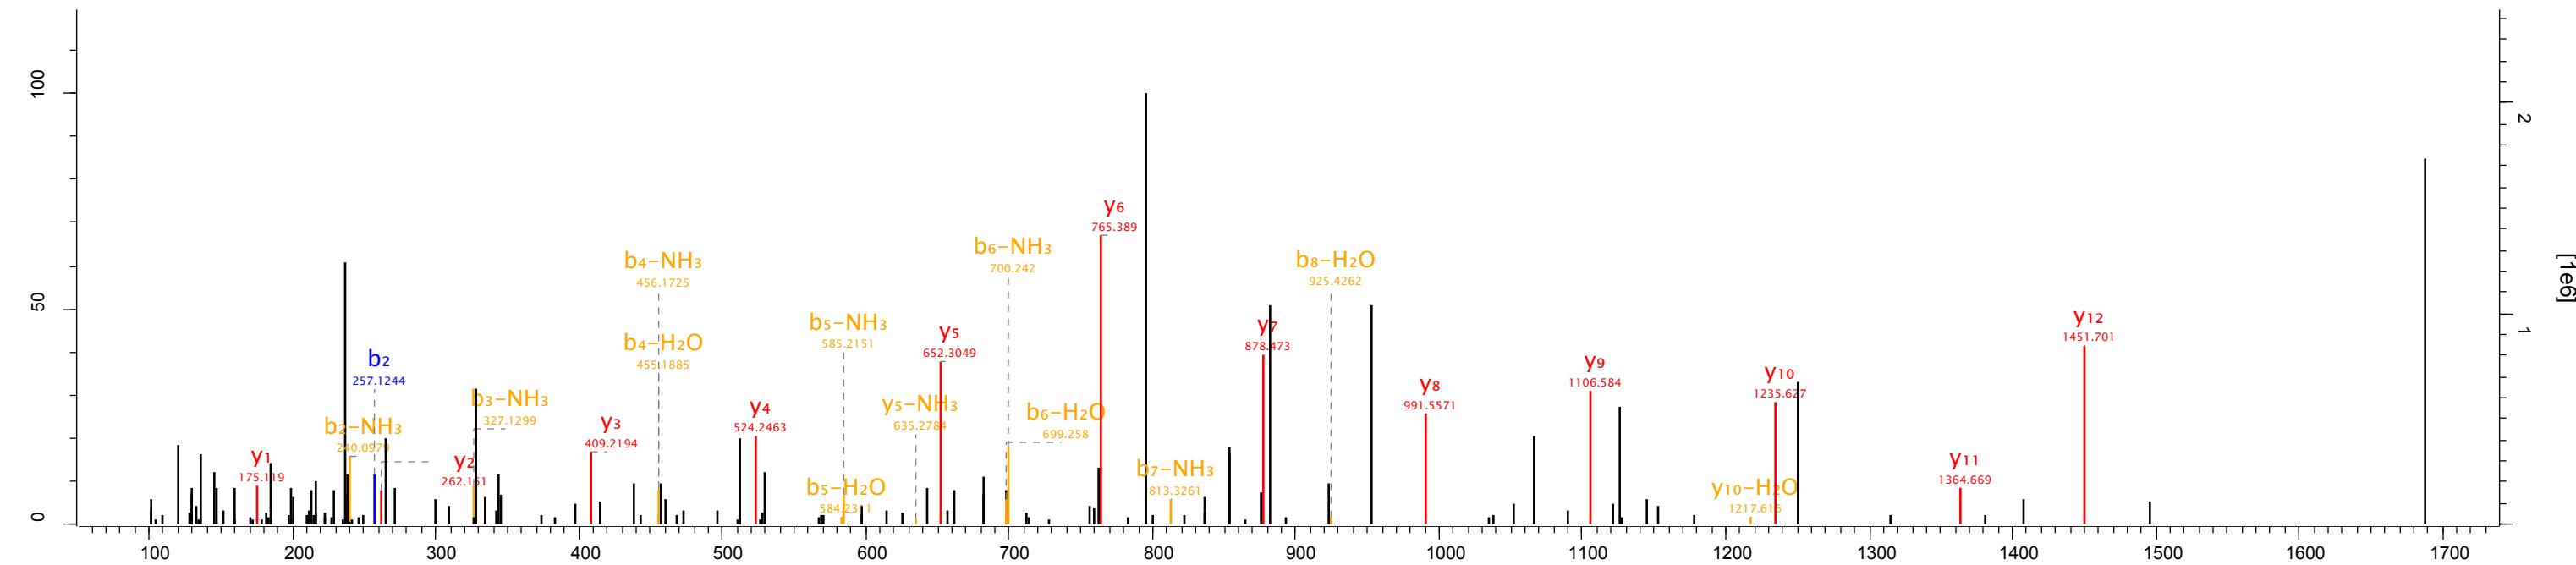

- Q Q S E E D L L L Q D F S R -

b<sub>2</sub> is indicated by a blue bracket under the second Q.

Fragmentation scheme showing b and y ions for the peptide sequence: - Q Q S E E D L L L Q D F S R -

Red brackets above the sequence indicate y ions (y<sub>1</sub> to y<sub>12</sub>) and blue brackets below indicate b ions (b<sub>2</sub>).

Raw file 20180707\_MaS\_A375SR\_ML\_proteome\_11 Scan 3011 Method FTMS; HCD Score 61.16 m/z 353.21

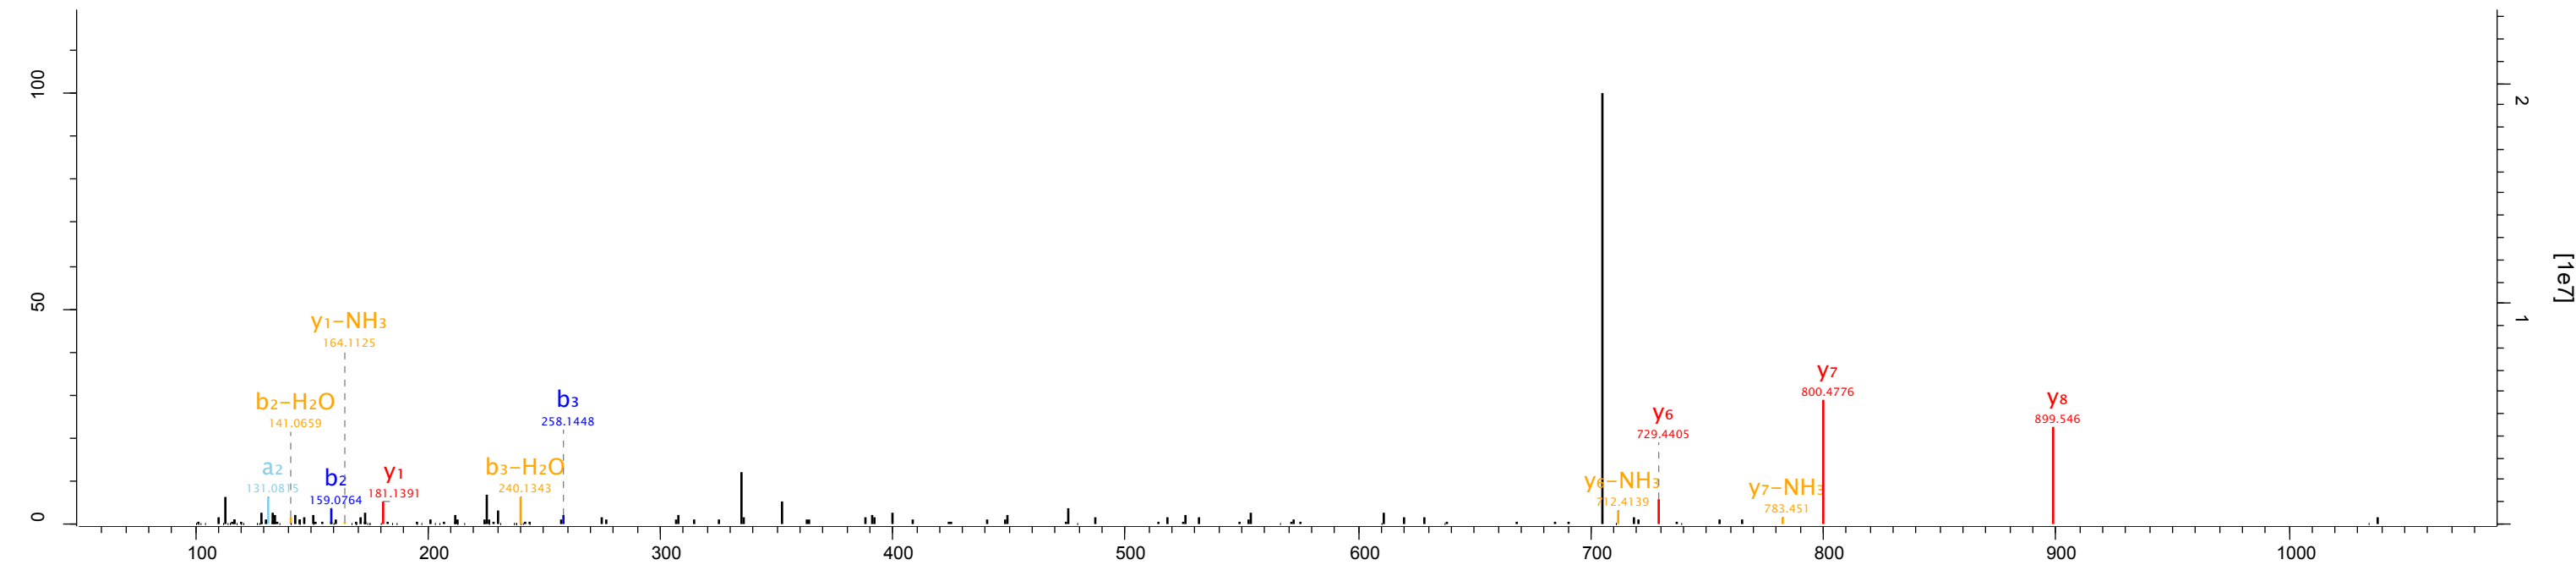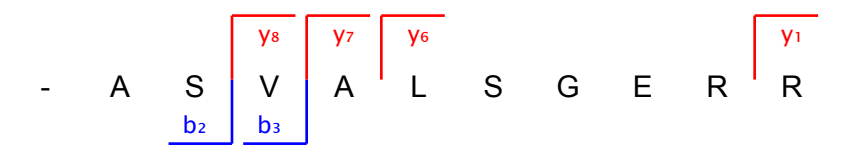

Raw file 20180707\_MaS\_A375SR\_ML\_proteome\_12 Scan 23831 Method FTMS; HCD Score 72.61 m/z 502.27 Gene names PGM5

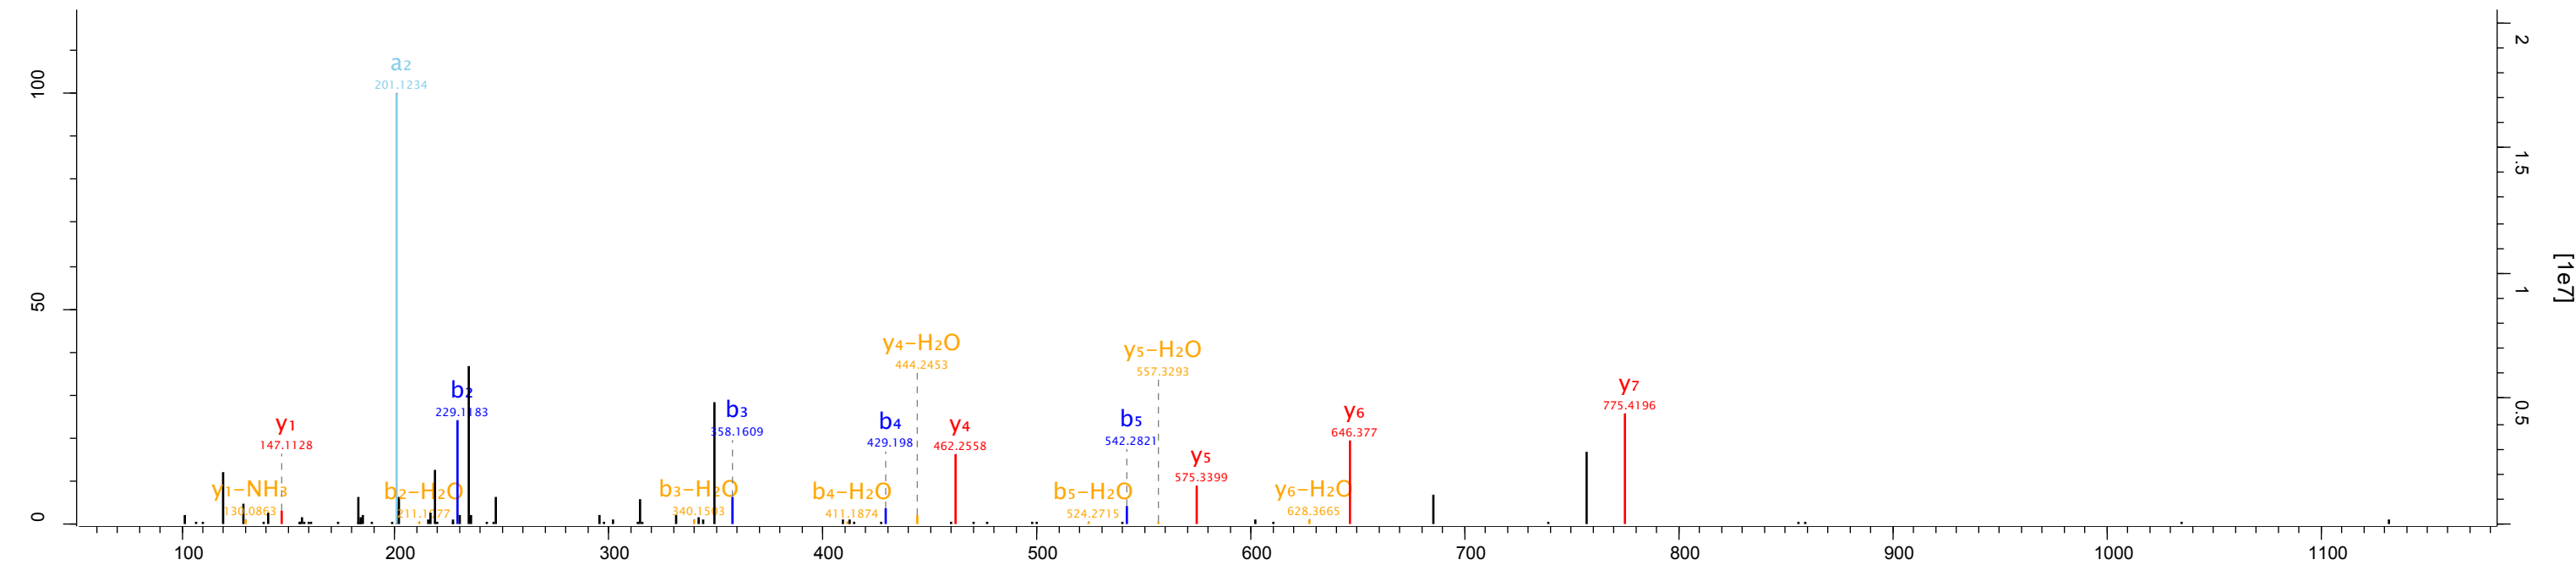

Raw file  
20180707\_MaS\_A375SR\_ML\_proteome\_12

Scan 27461 Method FTMS; HCD Score 101.65 m/z 531.3 Gene names CYB561

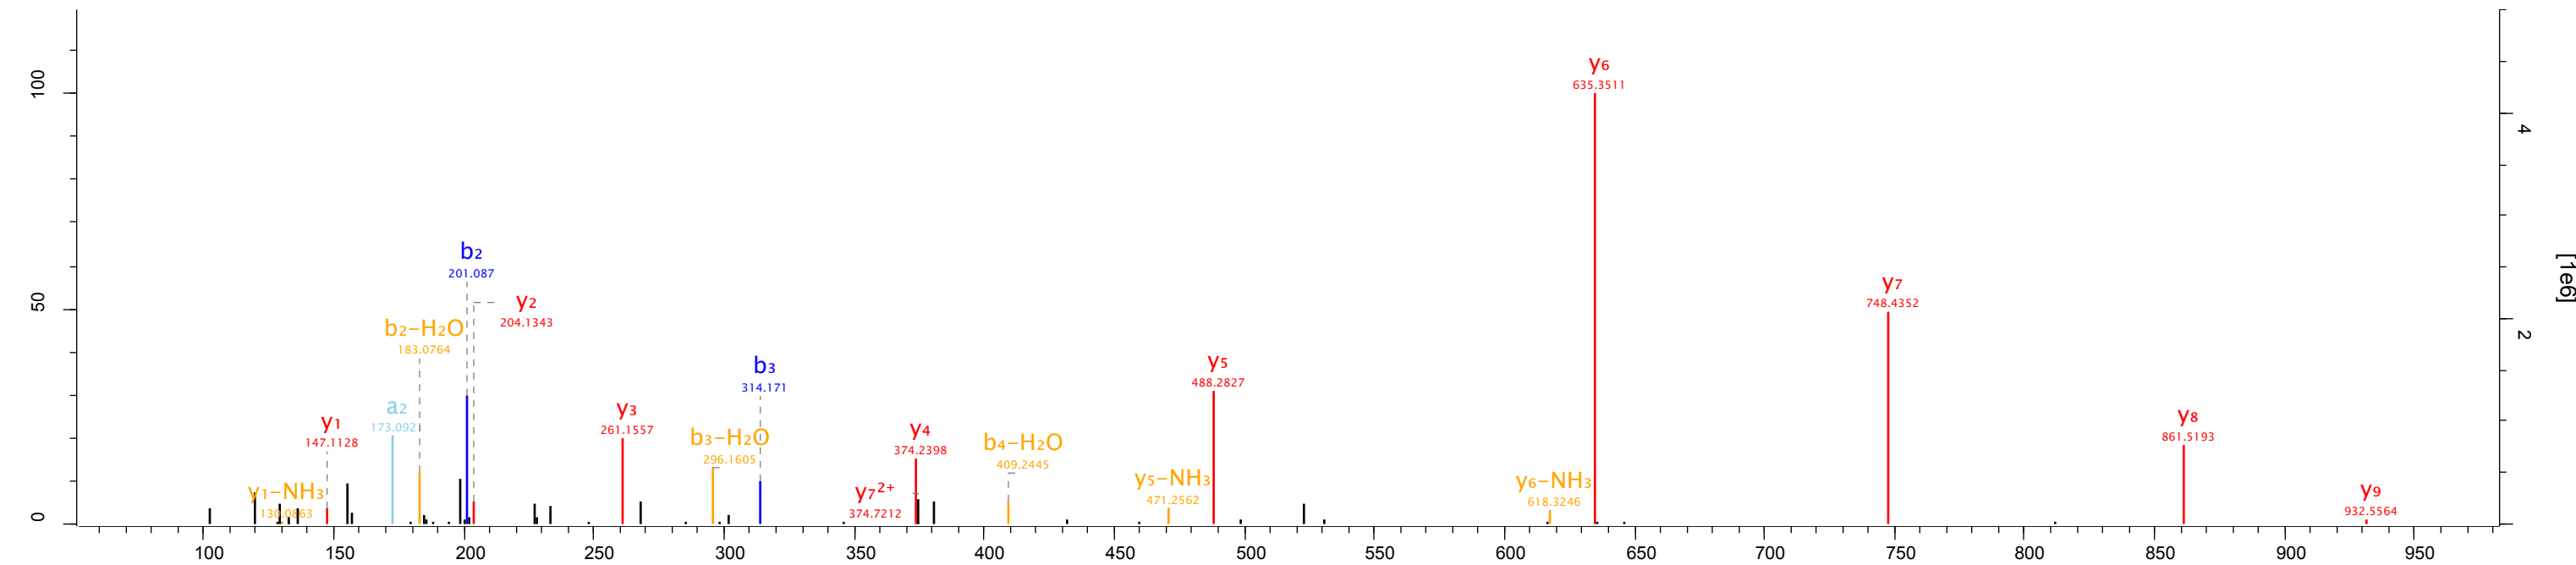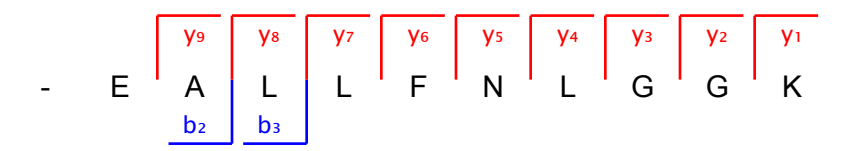

Raw file  
20180707\_MaS\_A375SR\_ML\_proteome\_12

Scan 3041 Method FTMS; HCD Score 123.75 m/z 538.76 Gene names TM4SF1

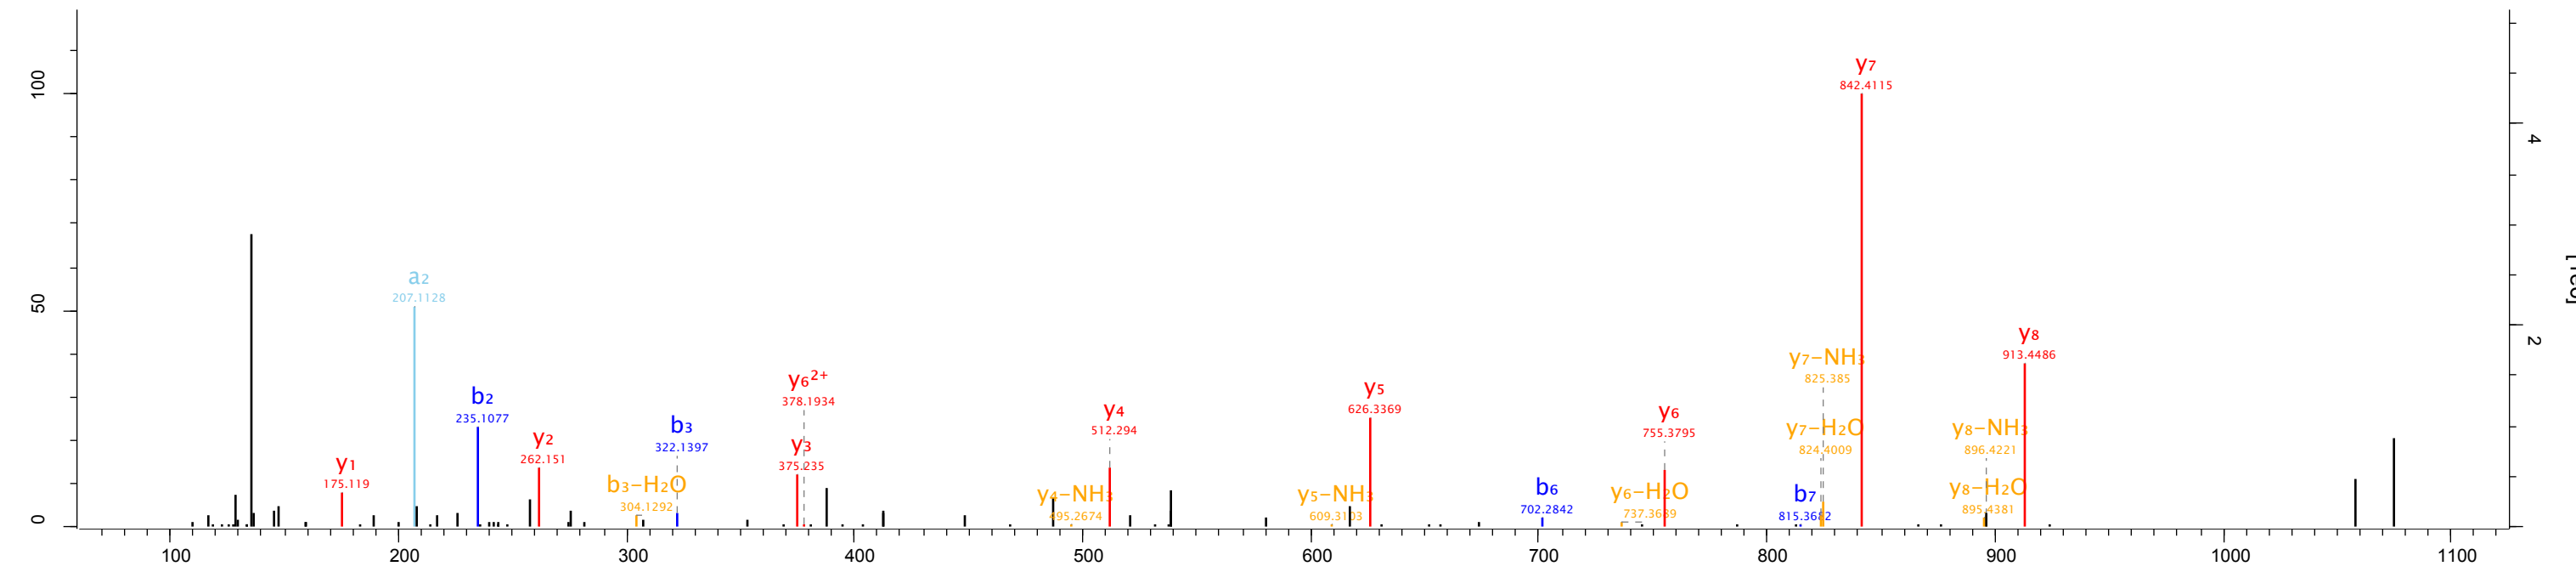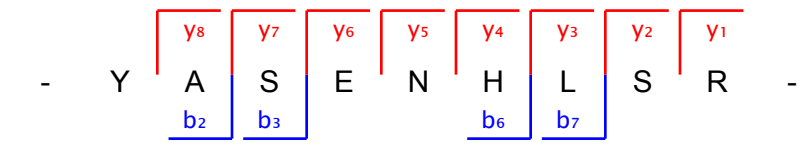



Raw file  
20180707\_MaS\_A375SR\_ML\_proteome\_12

Scan 4171 Method FTMS; HCD Score 58.59 m/z 576.29

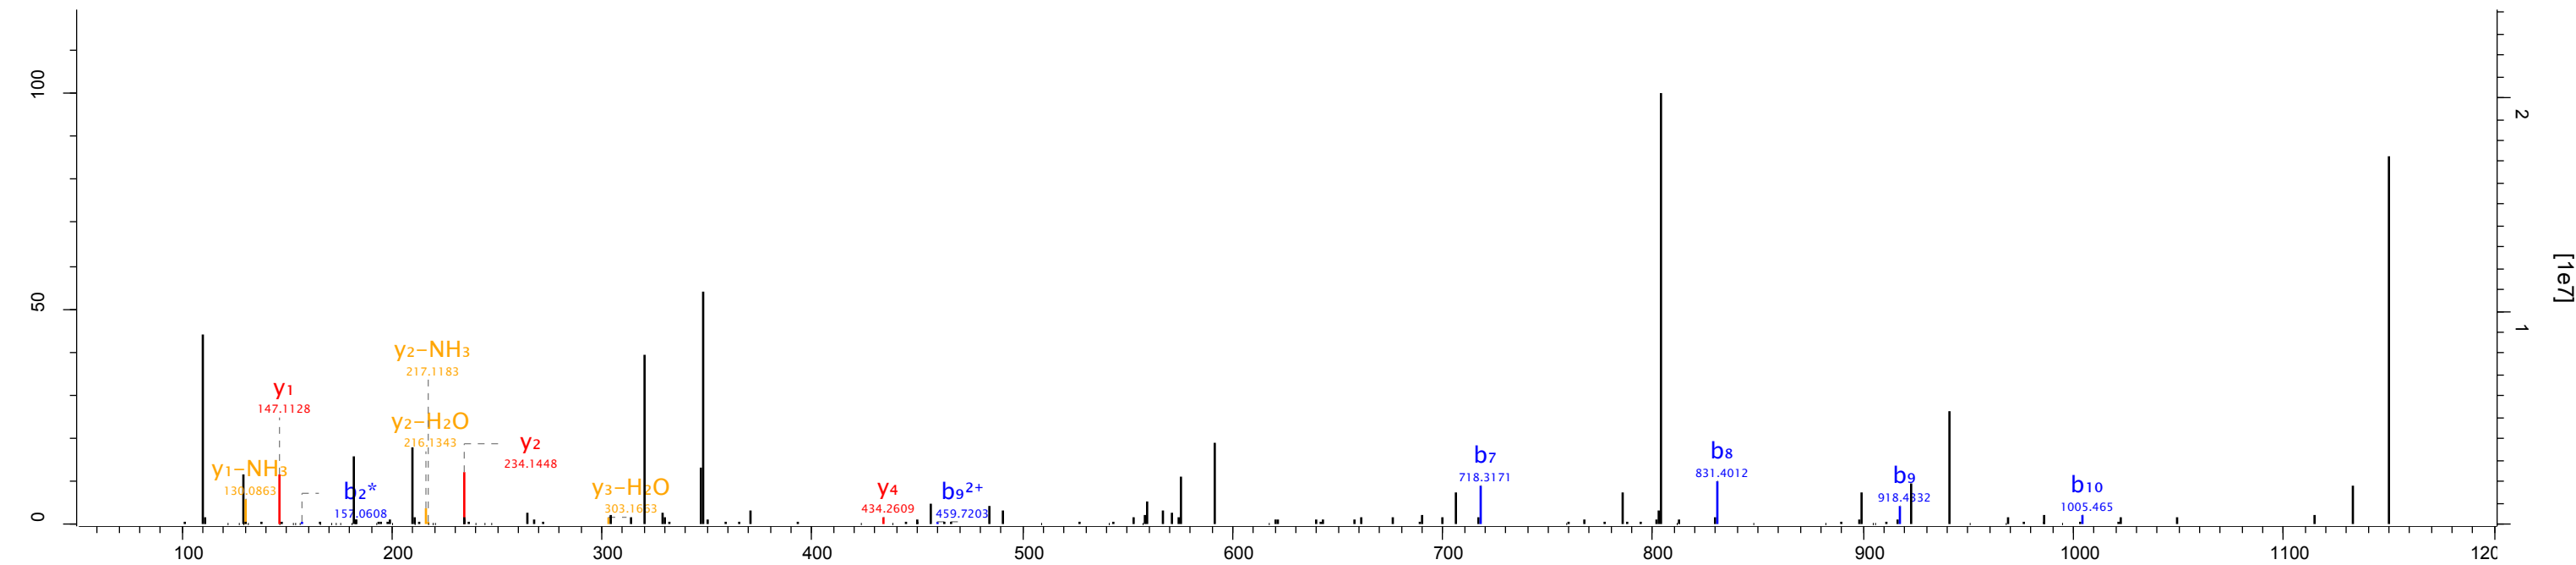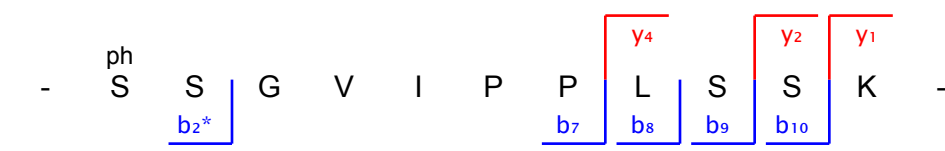

Raw file  
20180707\_MaS\_A375SR\_ML\_proteome\_13

Scan 23731 Method FTMS; HCD Score 75.21 m/z 765.36 Gene names CNIH4

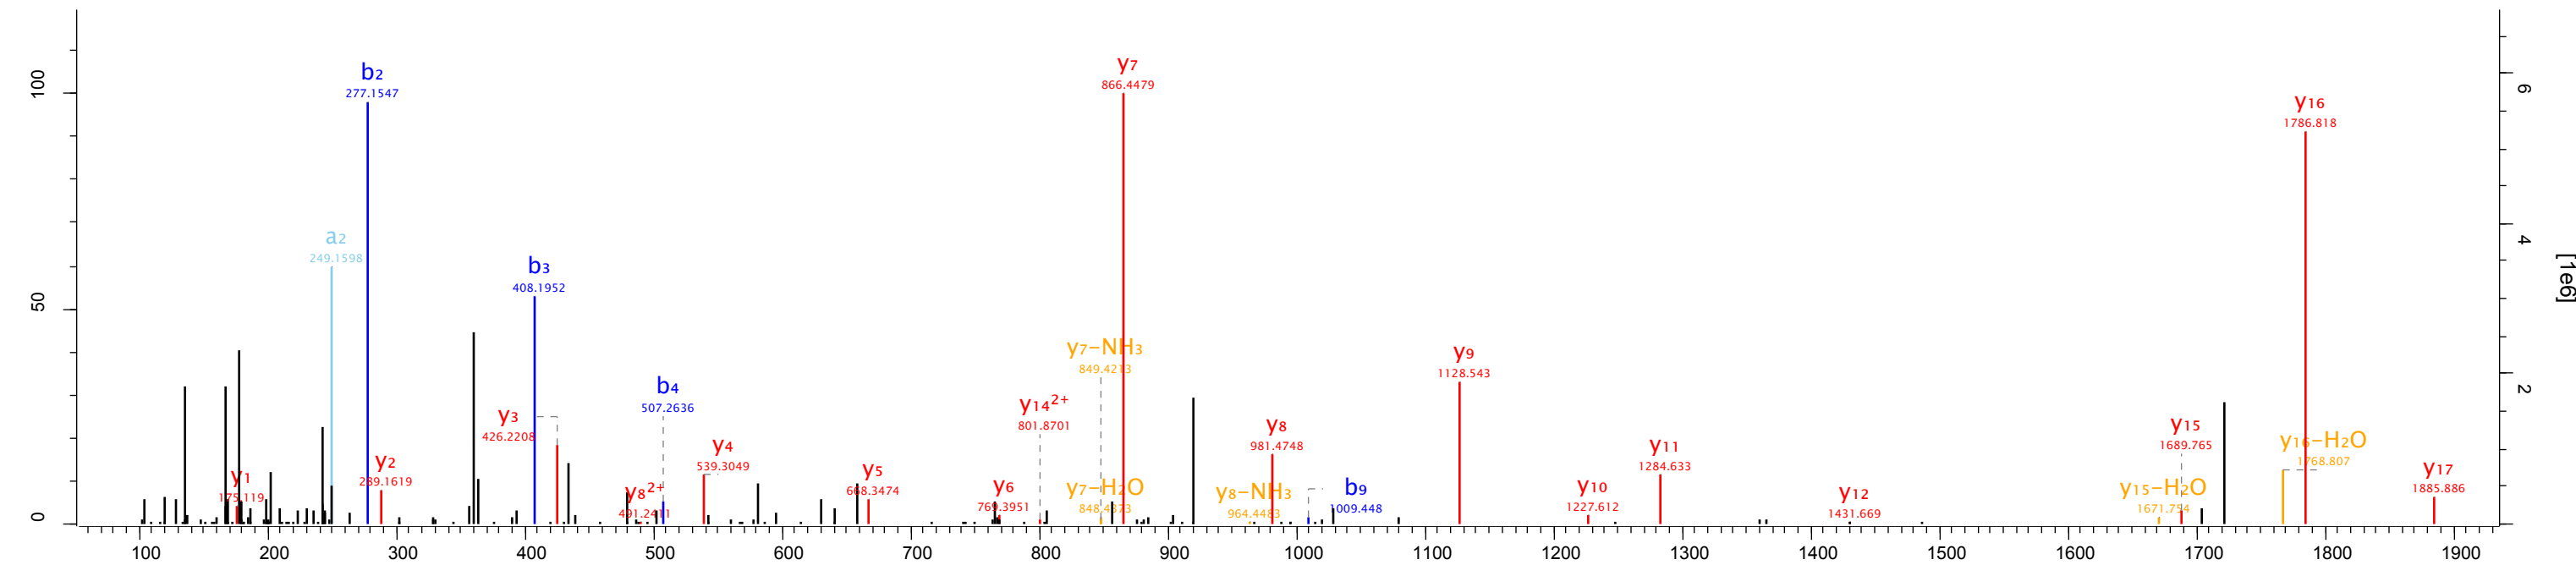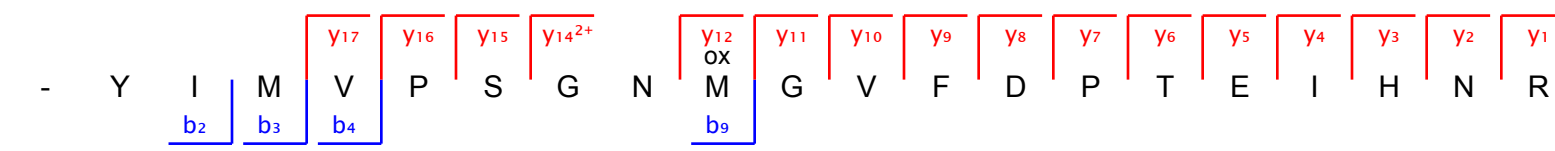

Raw file  
20180707\_MaS\_A375SR\_ML\_proteome\_13

Scan 25331 Method FTMS; HCD Score 76.3 m/z 767.04 Gene names CNIH4

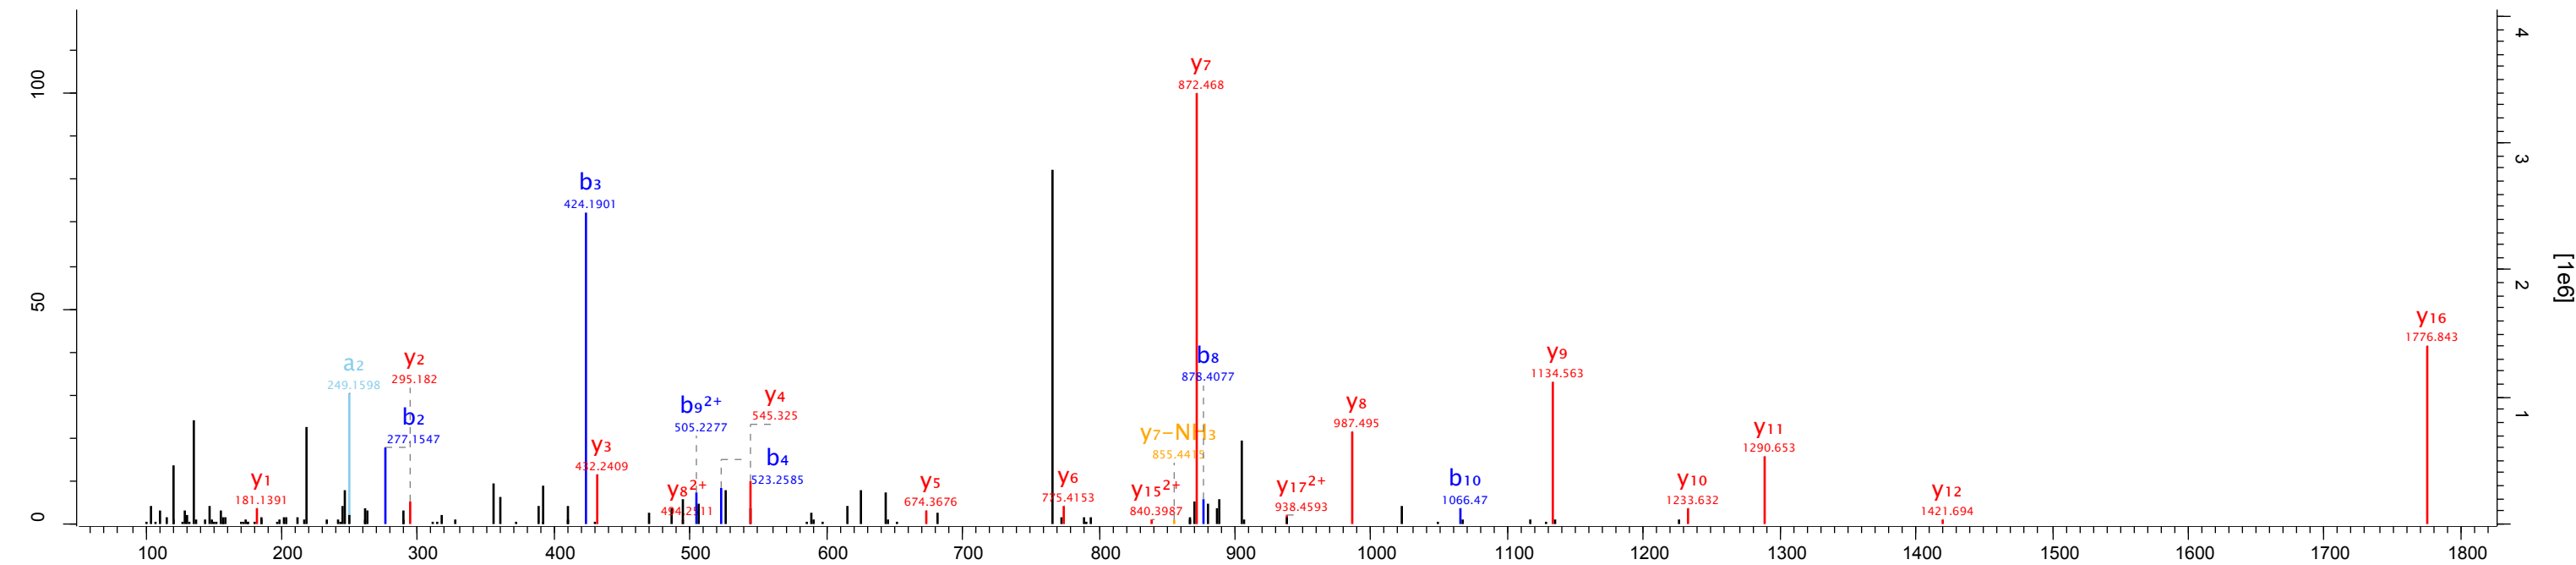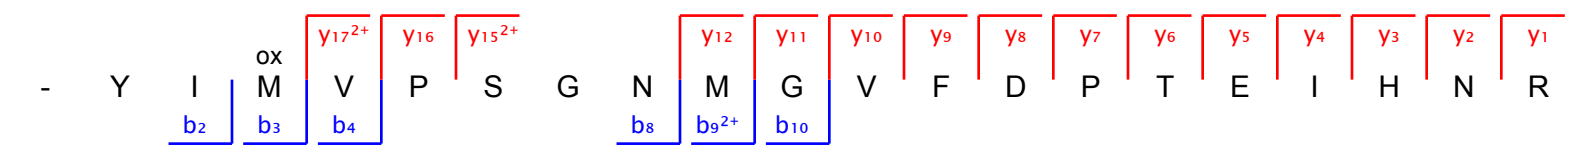

Raw file 20180707\_MaS\_A375SR\_ML\_proteome\_13 Scan 3411 Method FTMS; HCD Score 76.23 m/z 568.24 Gene names MAP3K19

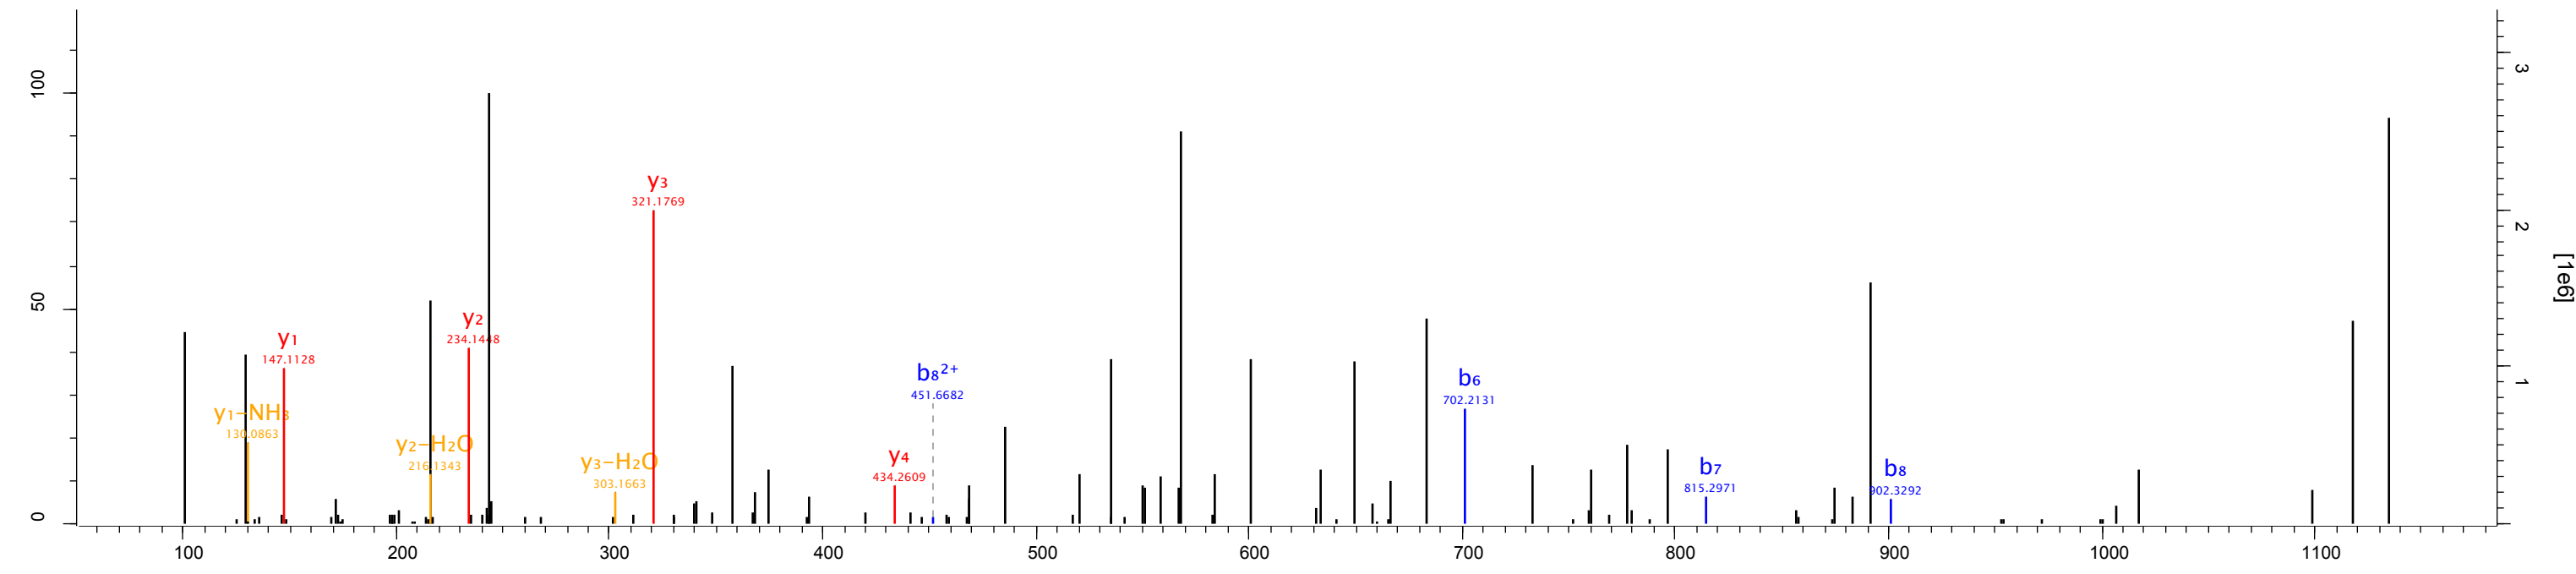

Raw file 20180707\_MaS\_A375SR\_ML\_proteome\_14 Scan 14751 Method FTMS; HCD Score 64.78 m/z 1121.47

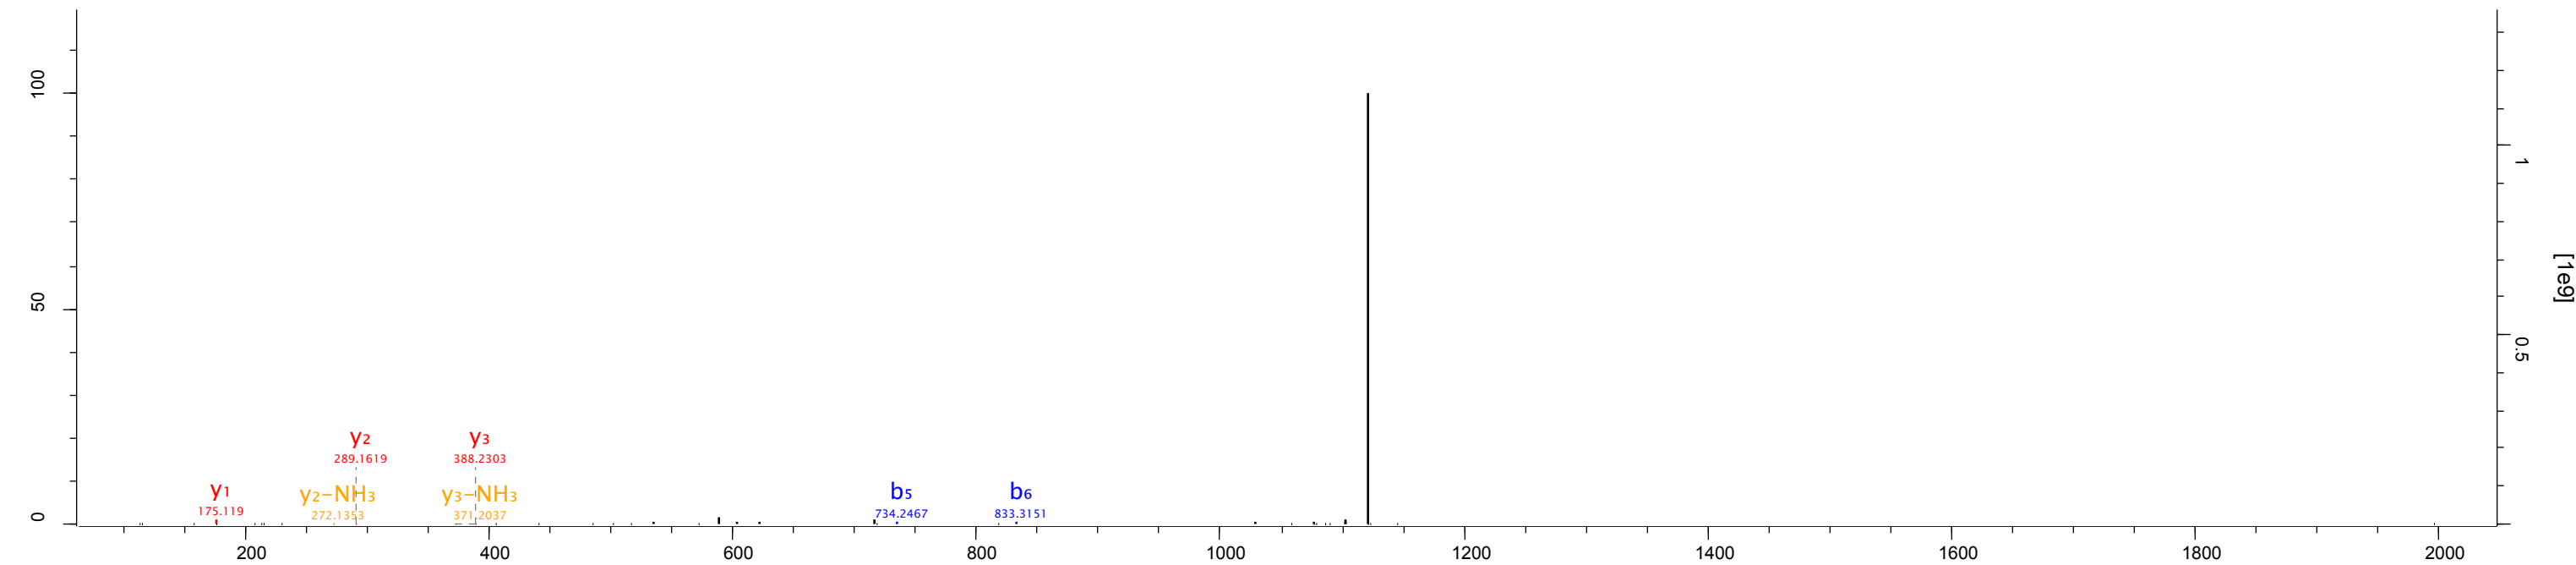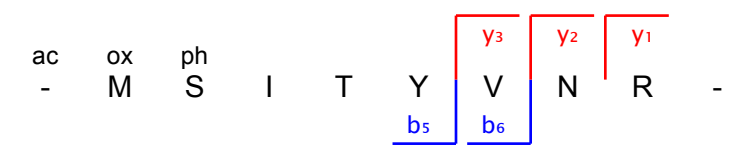

Raw file  
20180707\_MaS\_A375SR\_ML\_proteome\_14

Scan Method Score m/z Gene names  
16821 FTMS; HCD 282.94 709.85 CYB561D2

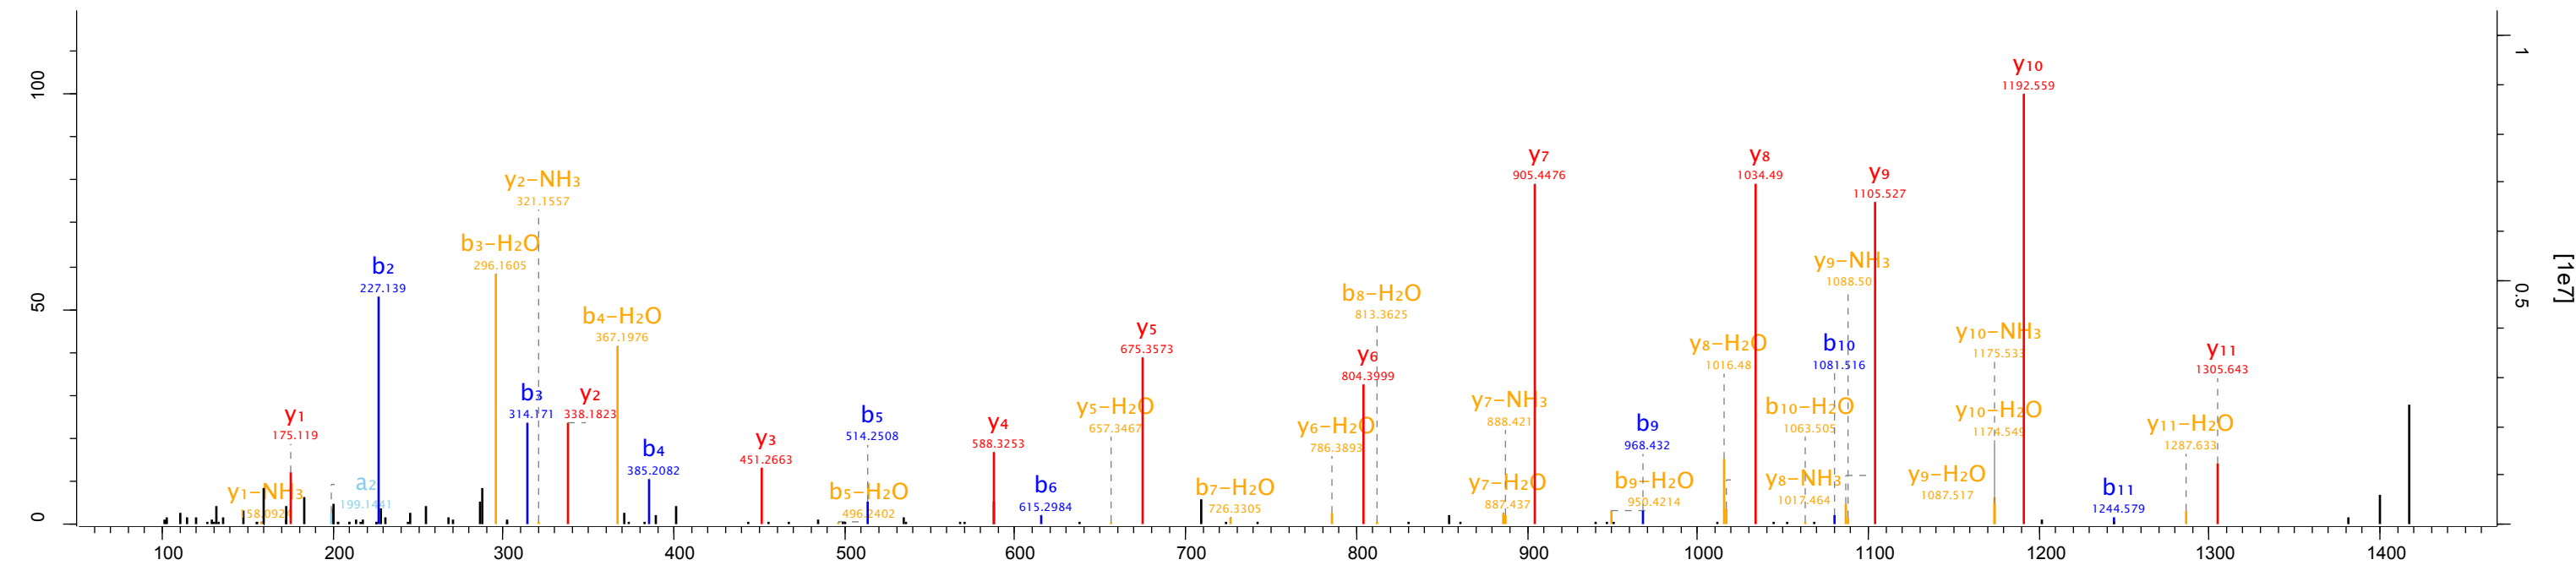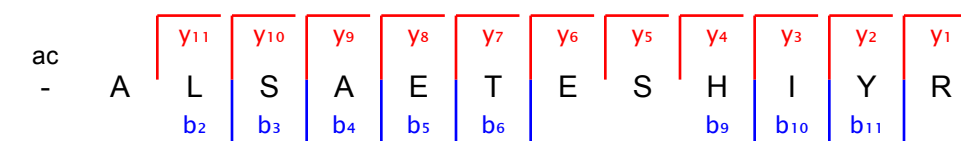

Raw file  
20180707\_MaS\_A375SR\_ML\_proteome\_14

Scan 8031 Method FTMS; HCD Score 42.21 m/z 653.35

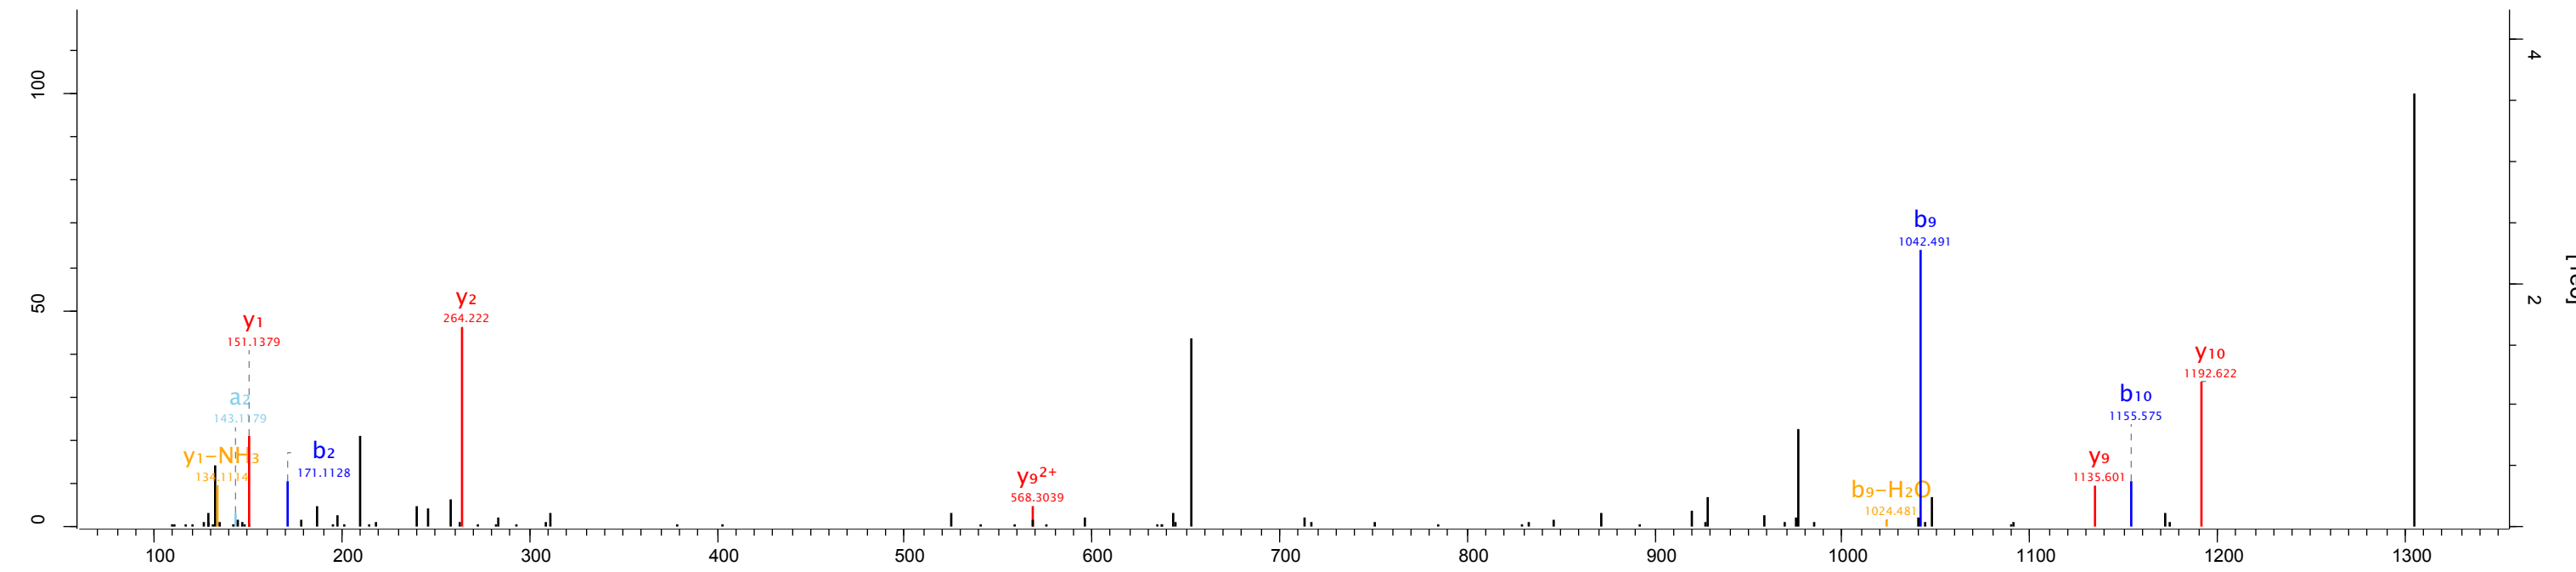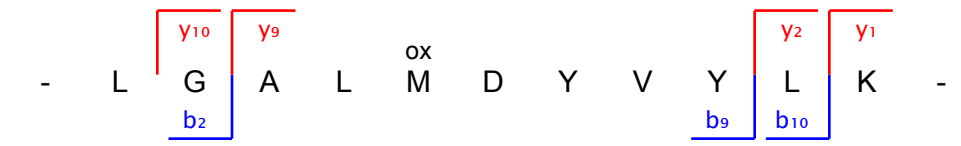

Raw file  
20180707\_MaS\_A375SR\_ML\_proteome\_15

Scan 22141 Method FTMS; HCD Score 72.82 m/z 710.36 Gene names TMEM184C

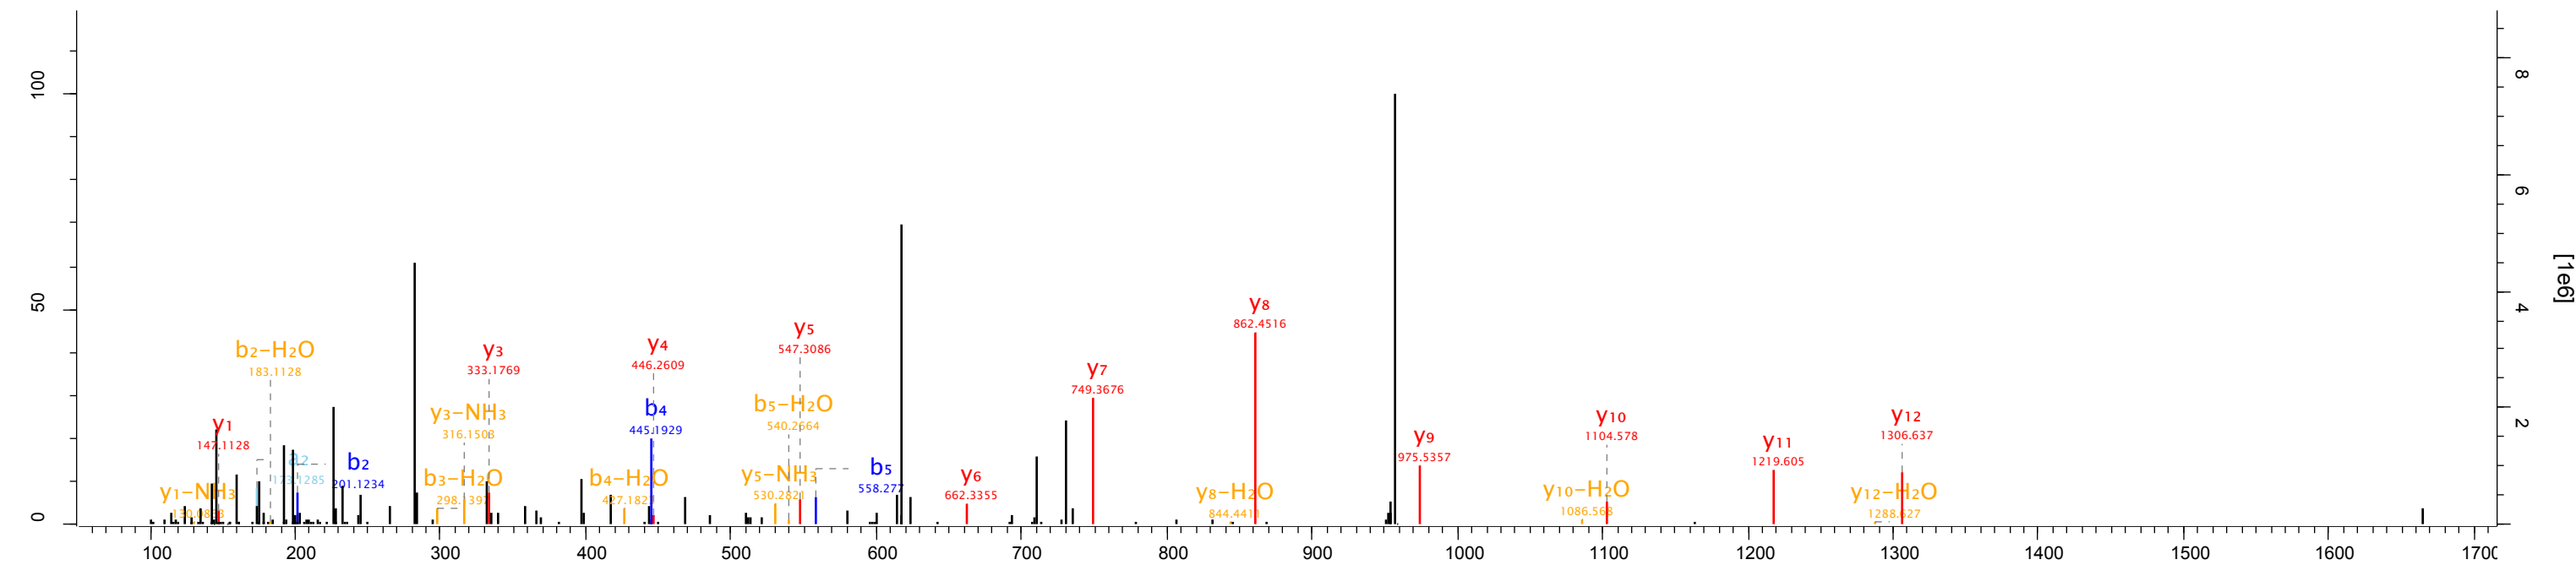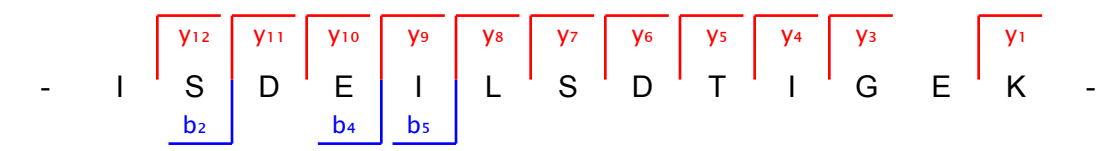



Raw file  
20180707\_MaS\_A375SR\_ML\_proteome\_15

Scan 25401 Method FTMS; HCD Score 77.87 m/z 765.36 Gene names CNIH4

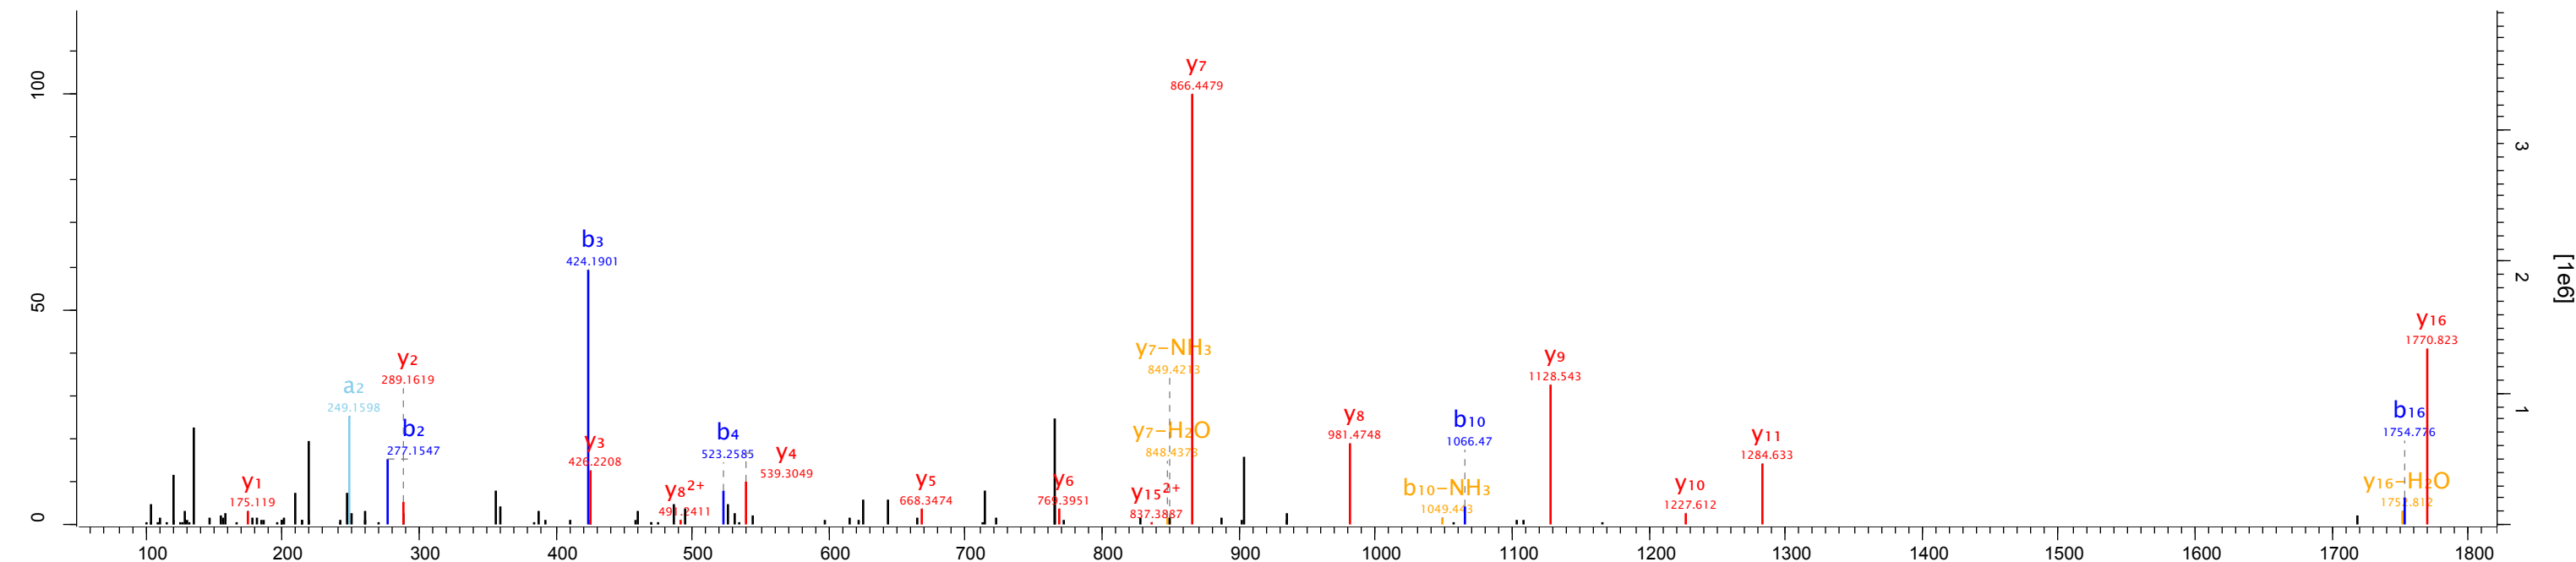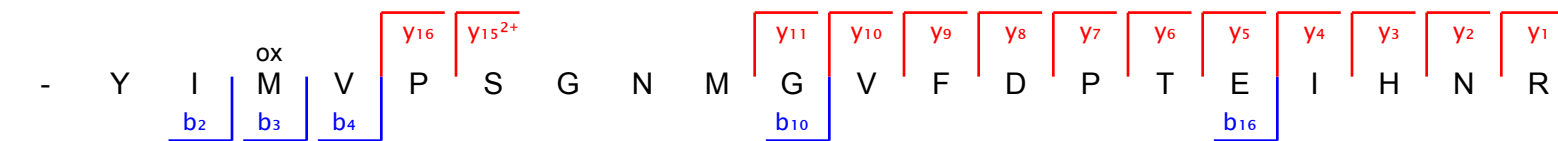

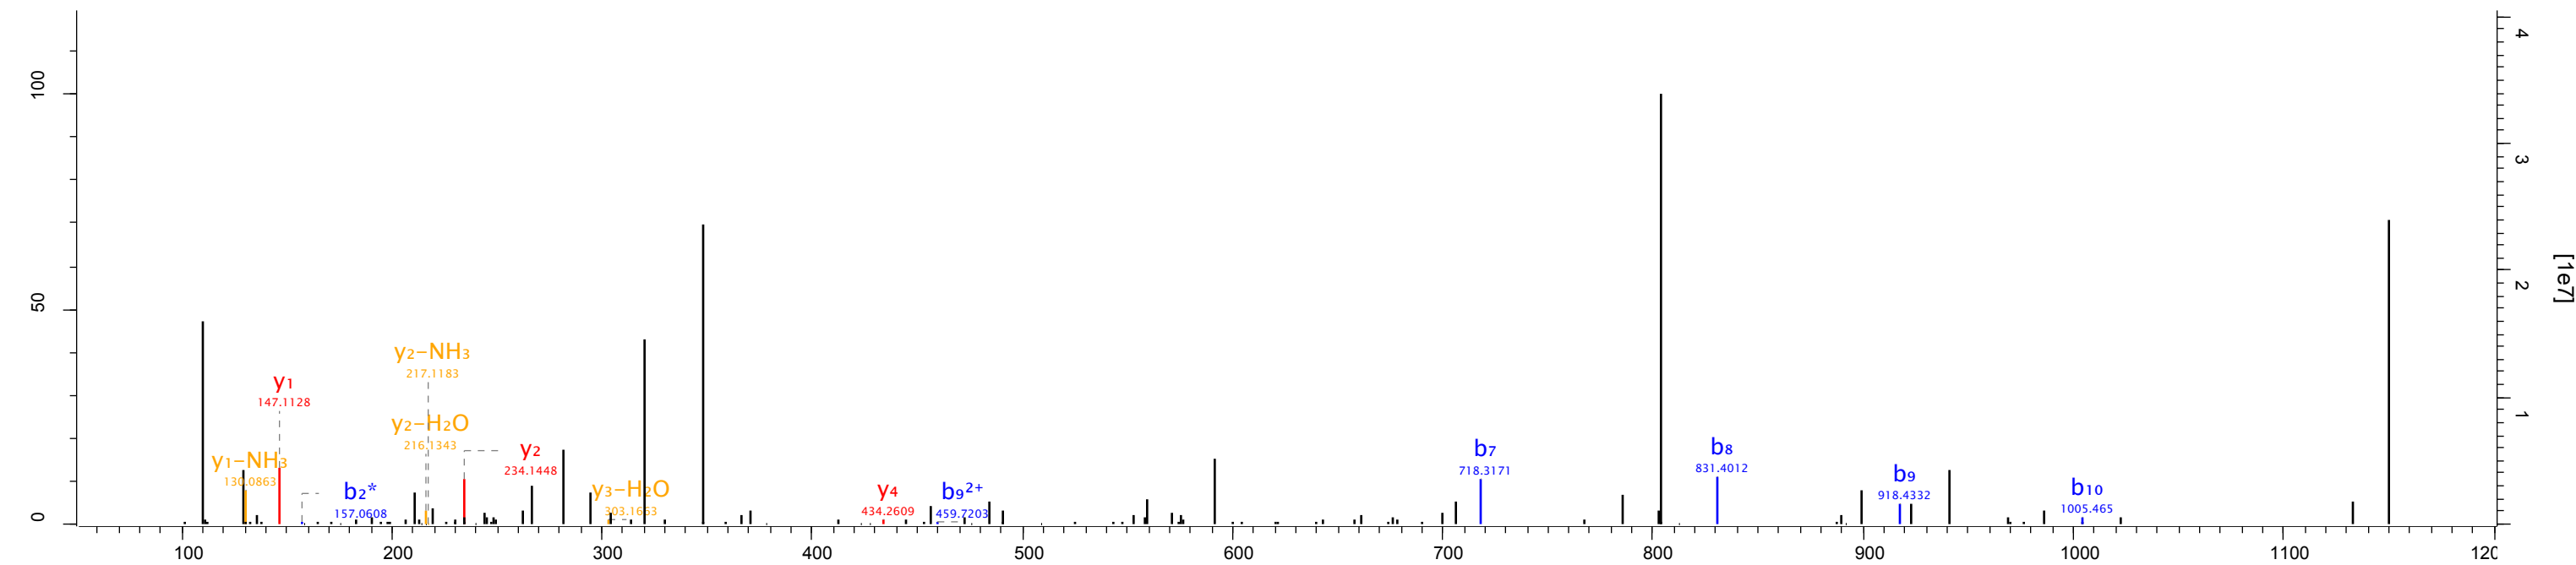

Raw file 20180707\_MaS\_A375SR\_ML\_proteome\_16 Scan 11541 Method FTMS; HCD Score 89.08 m/z 337.88 Gene names RBP1

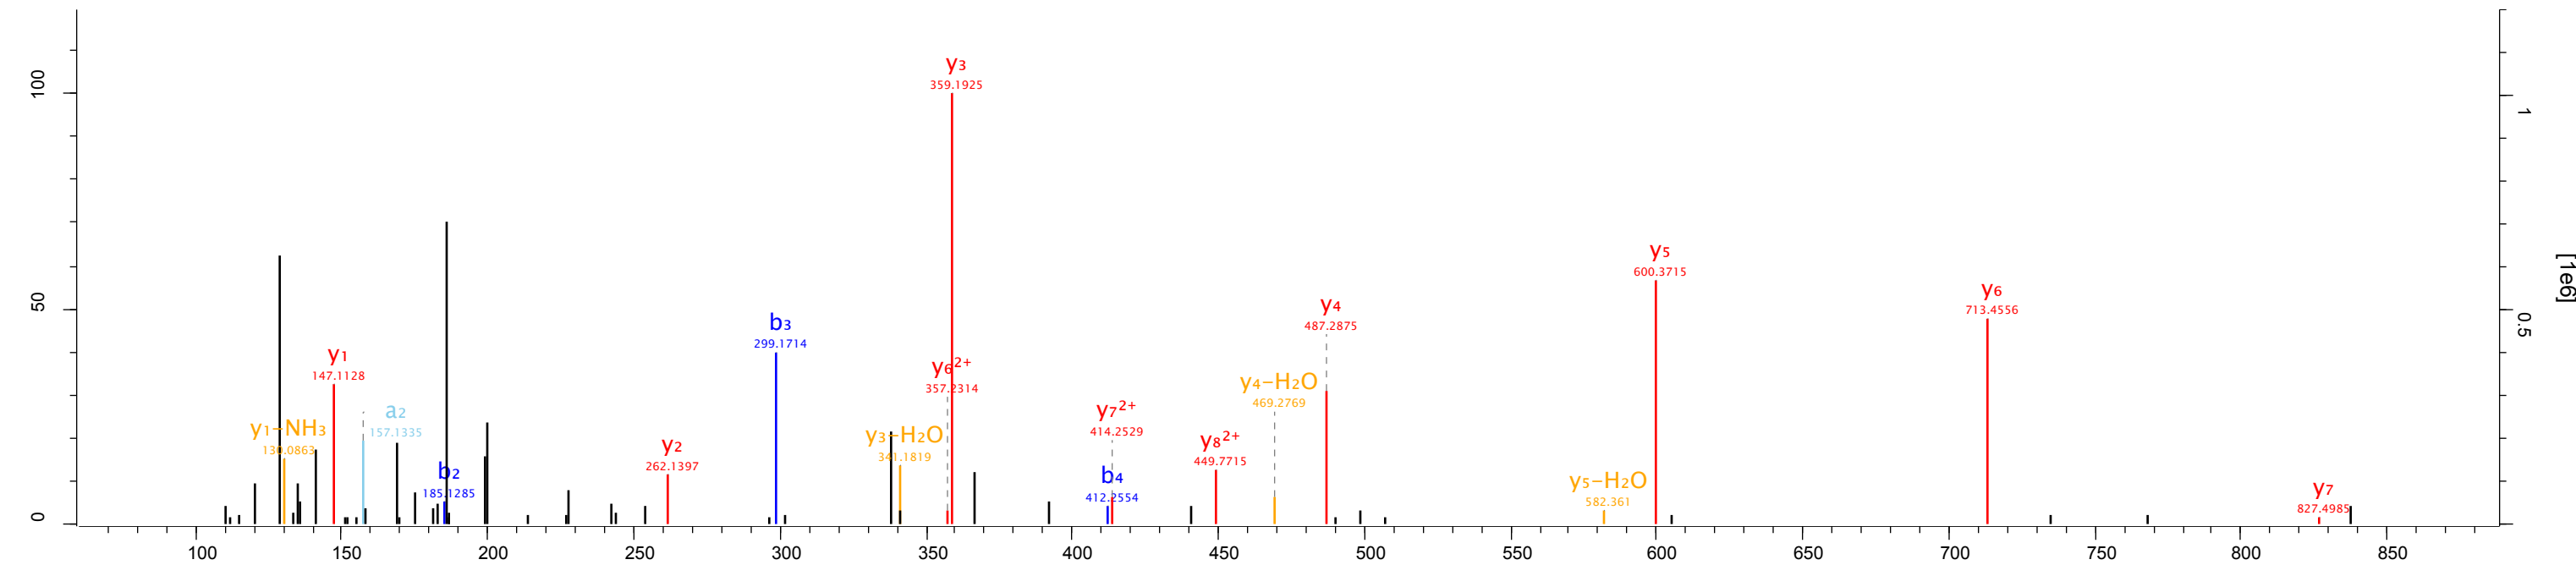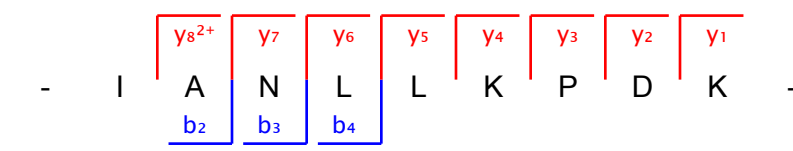

Raw file 20180707\_MaS\_A375SR\_ML\_proteome\_16 Scan 22471 Method FTMS; HCD Score 109.1 m/z 751.87 Gene names MT-ND6

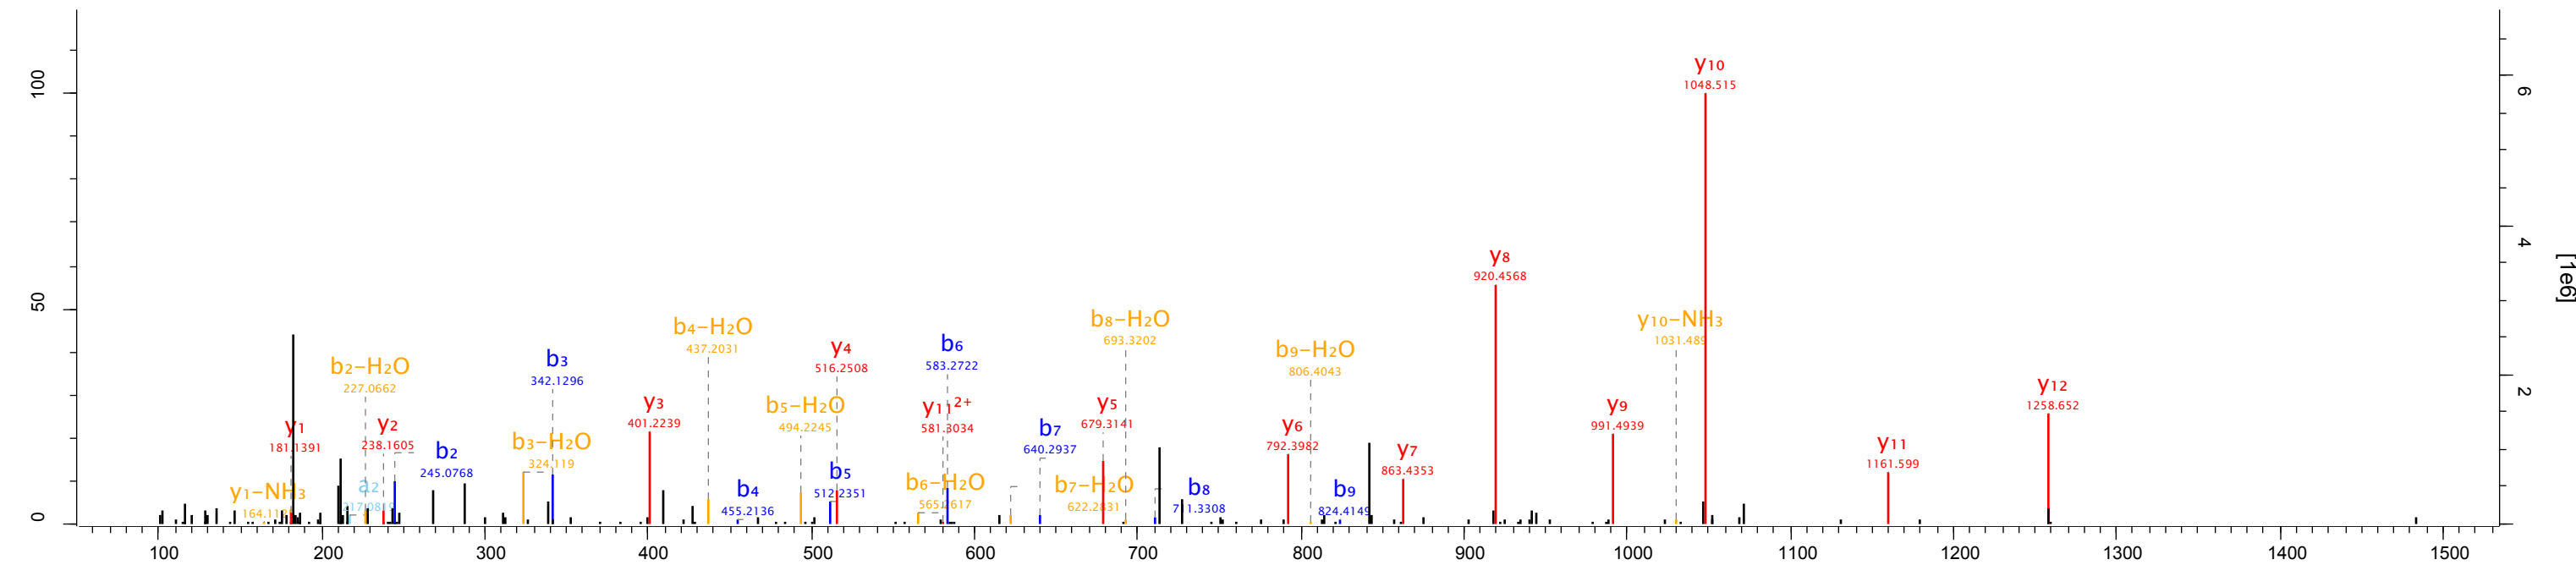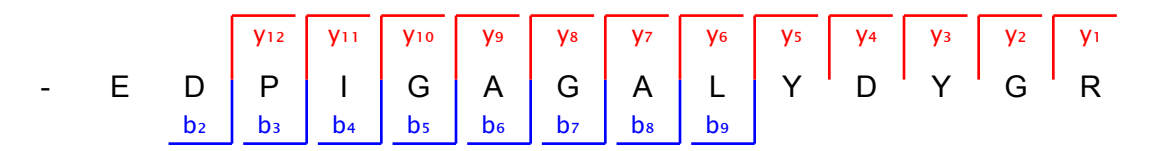

Raw file: 20180707\_MaS\_A375SR\_ML\_proteome\_18  
 Scan: 24141 Method: FTMS; HCD Score: 68.68 m/z: 582.83 Gene names: GADD45A

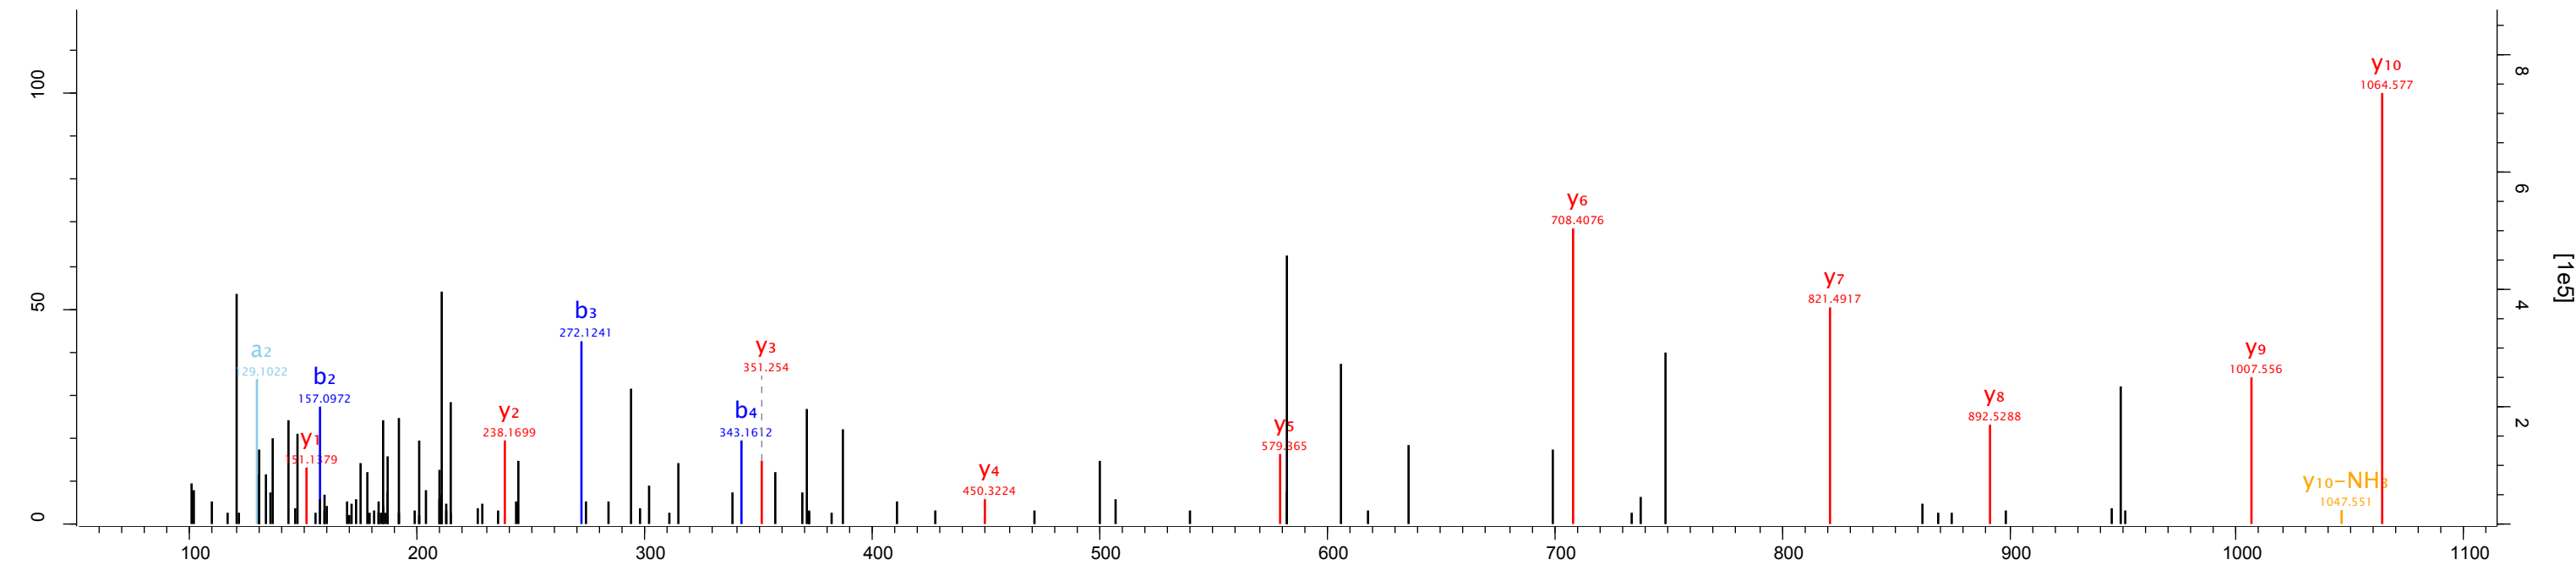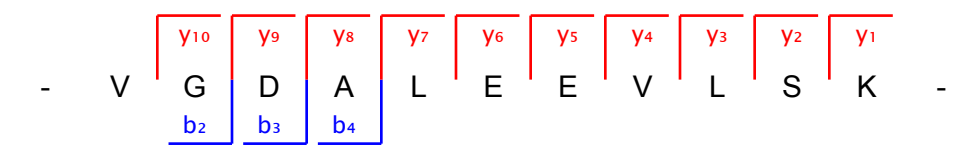

Raw file  
20180707\_MaS\_A375SR\_ML\_proteome\_18

Scan 8031 Method FTMS; HCD Score 57.35 m/z 576.29

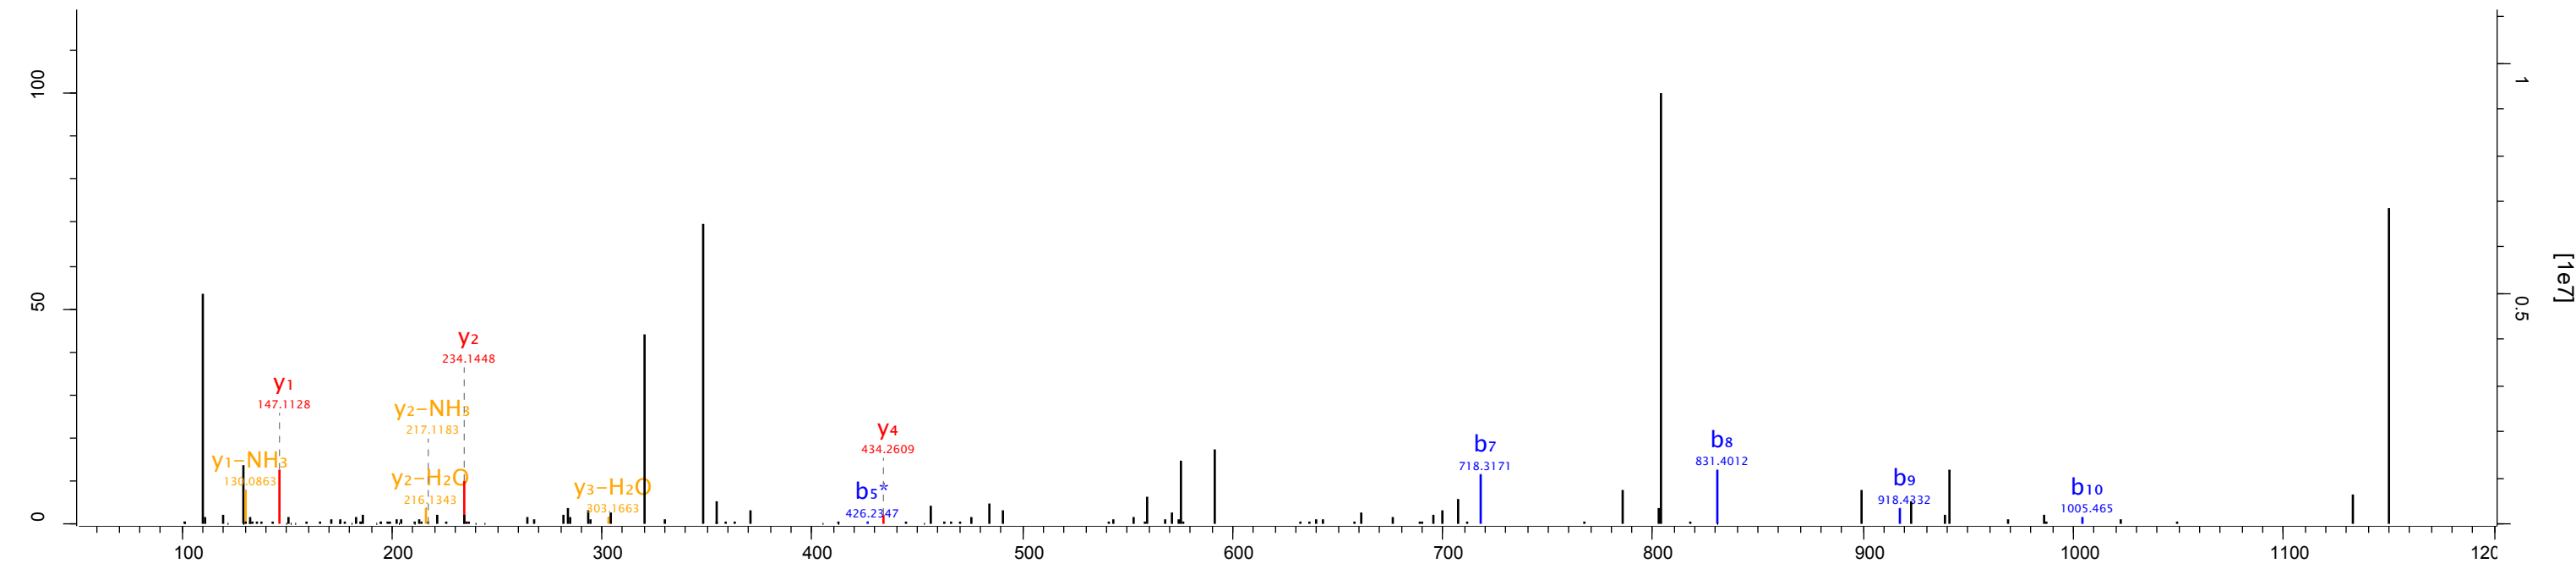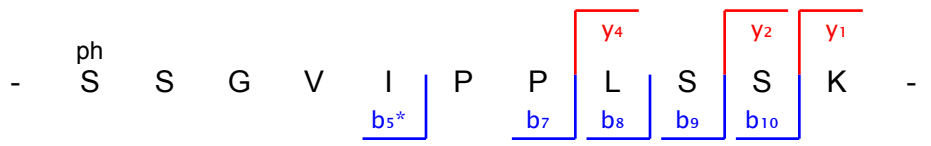

Raw file  
20180707\_MaS\_A375SR\_ML\_proteome\_2\_01

Scan 24511 Method FTMS; HCD Score 109.48 m/z 507.74 Gene names TMEM258

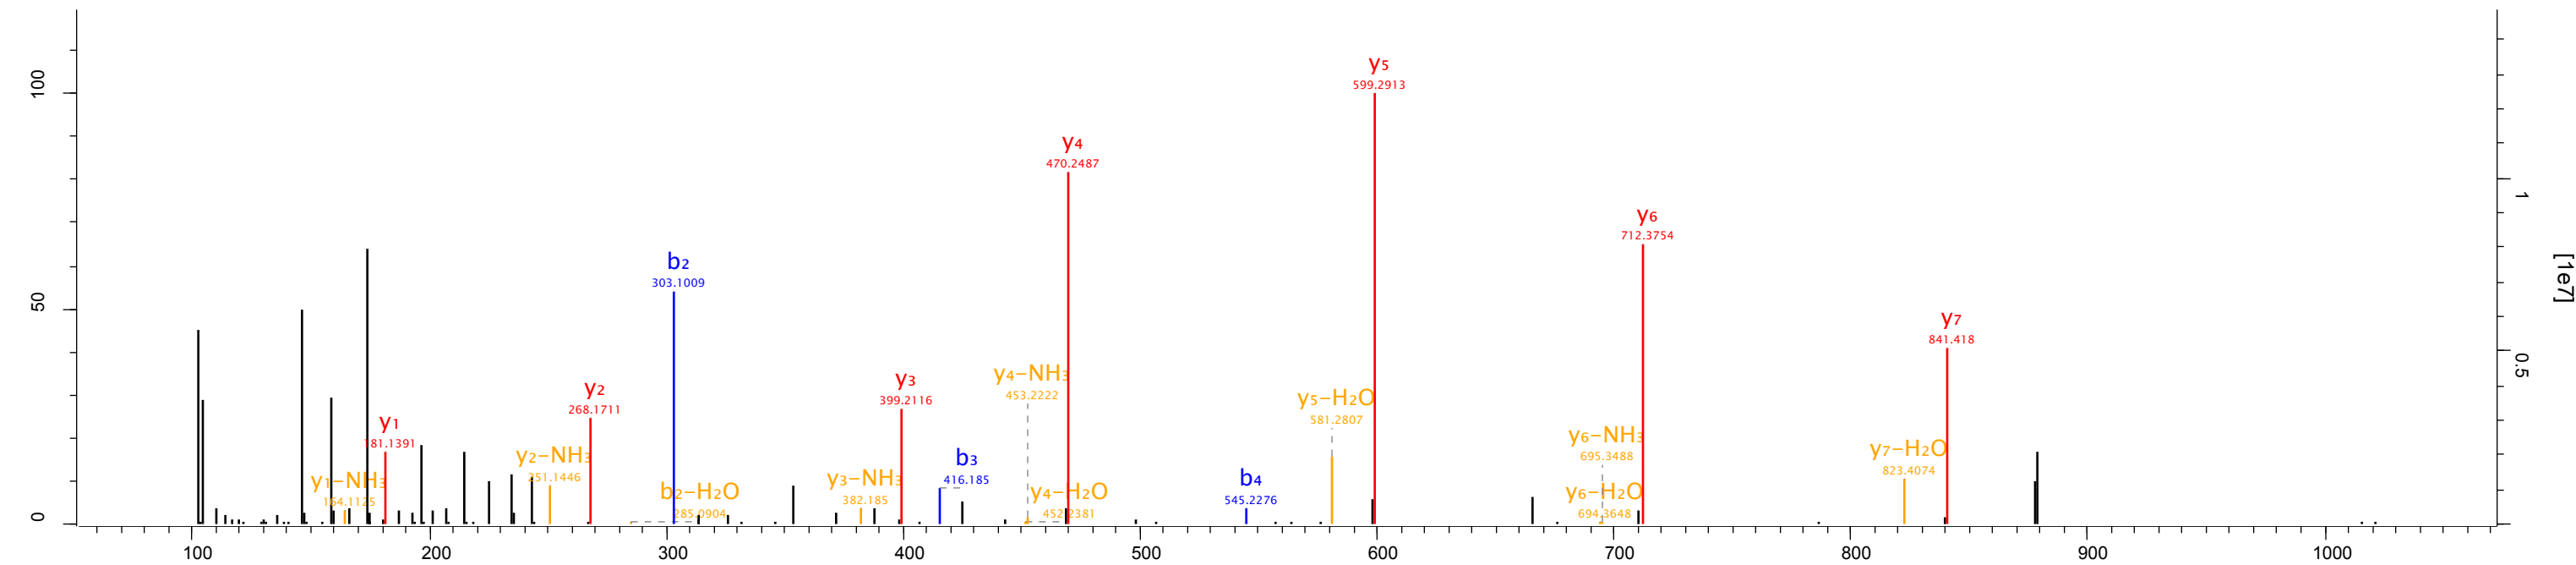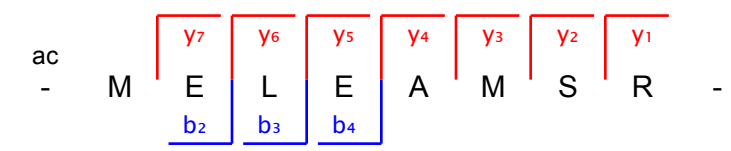

Raw file 20180707\_MaS\_A375SR\_ML\_proteome\_2\_01 Scan 2771 Method FTMS; HCD Score 56.51 m/z 325.17

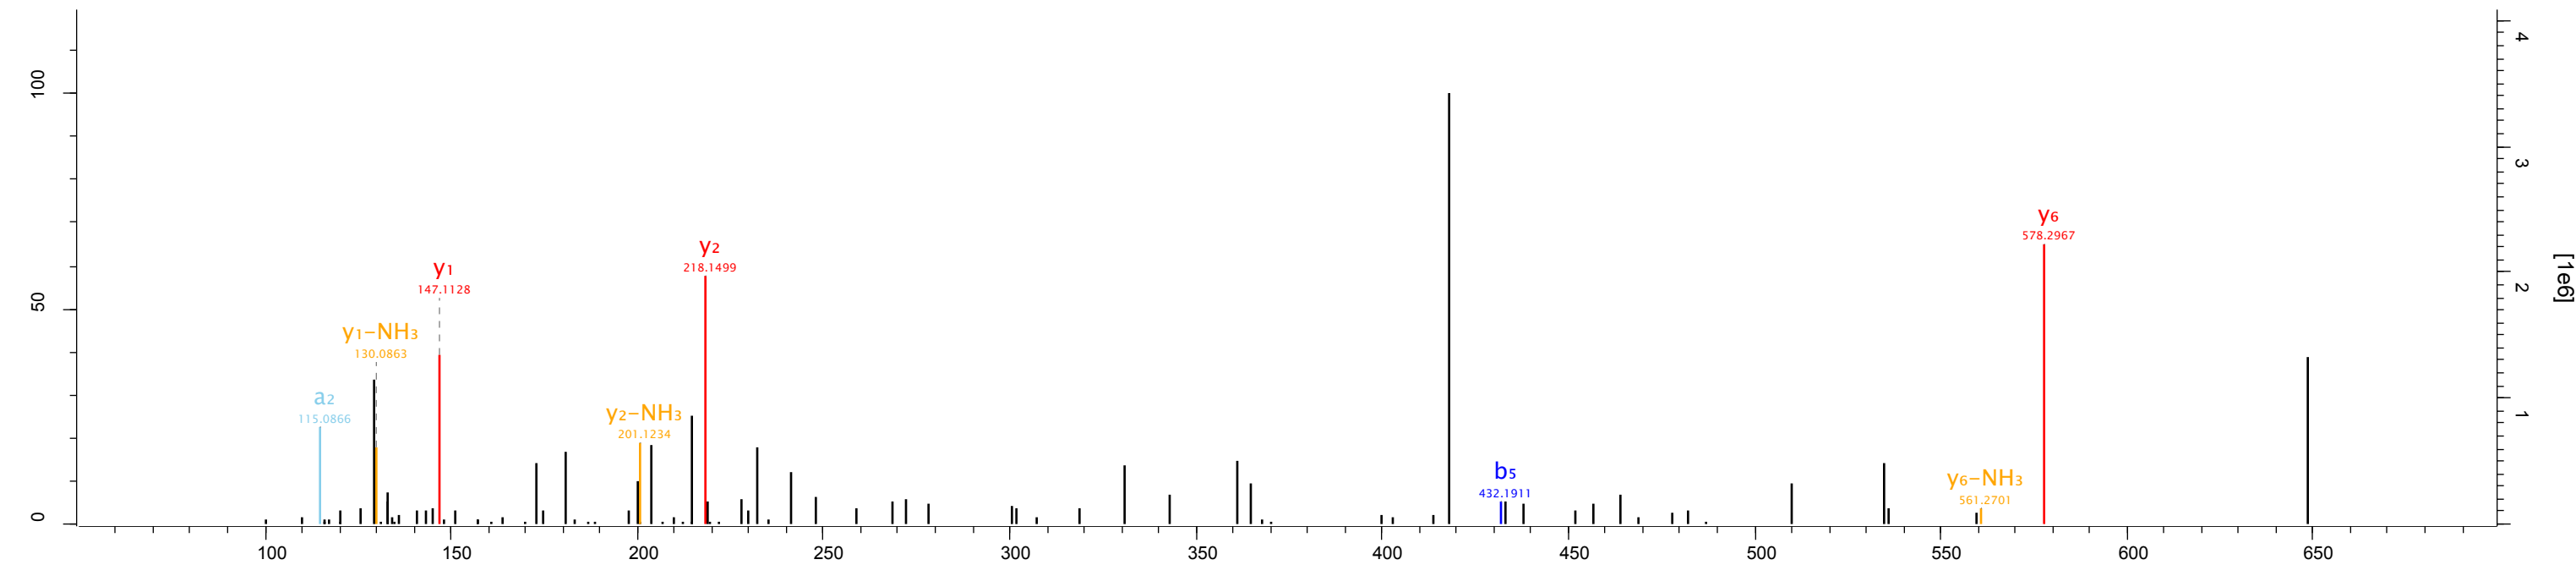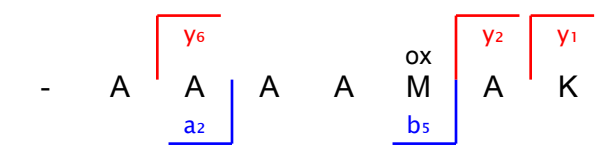



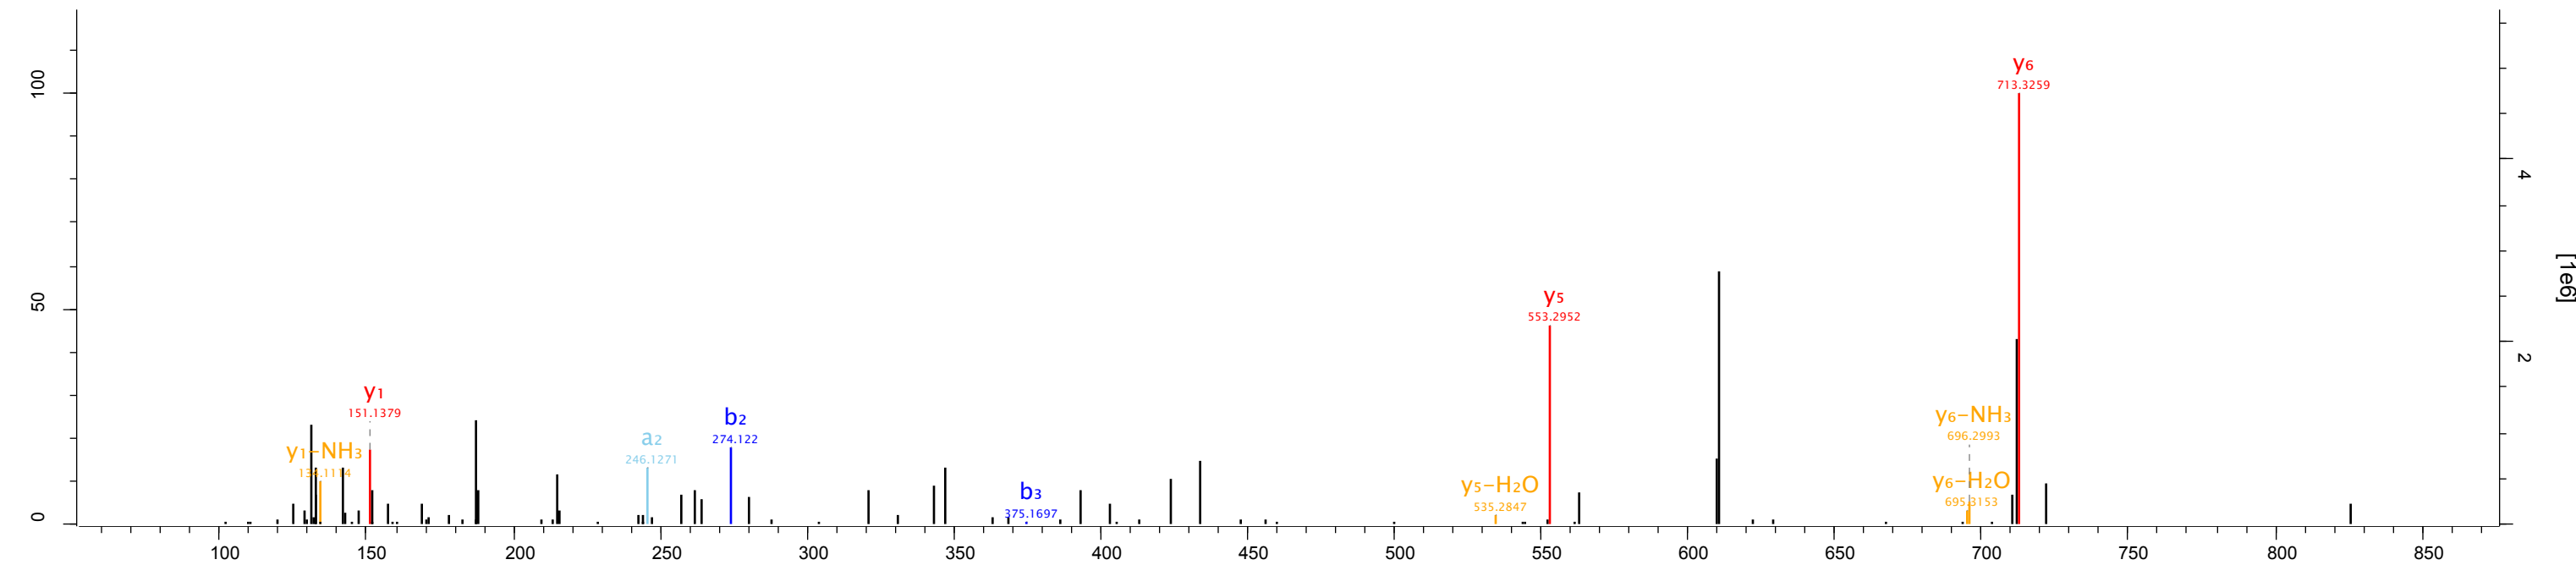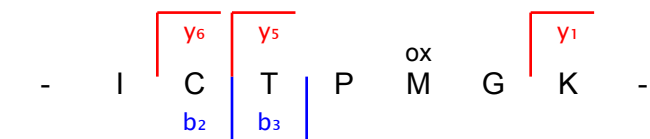

20180707\_MaS\_A375SR\_ML\_proteome\_2\_02

23611 FTMS; HCD 87.65 765.36 CNIH4

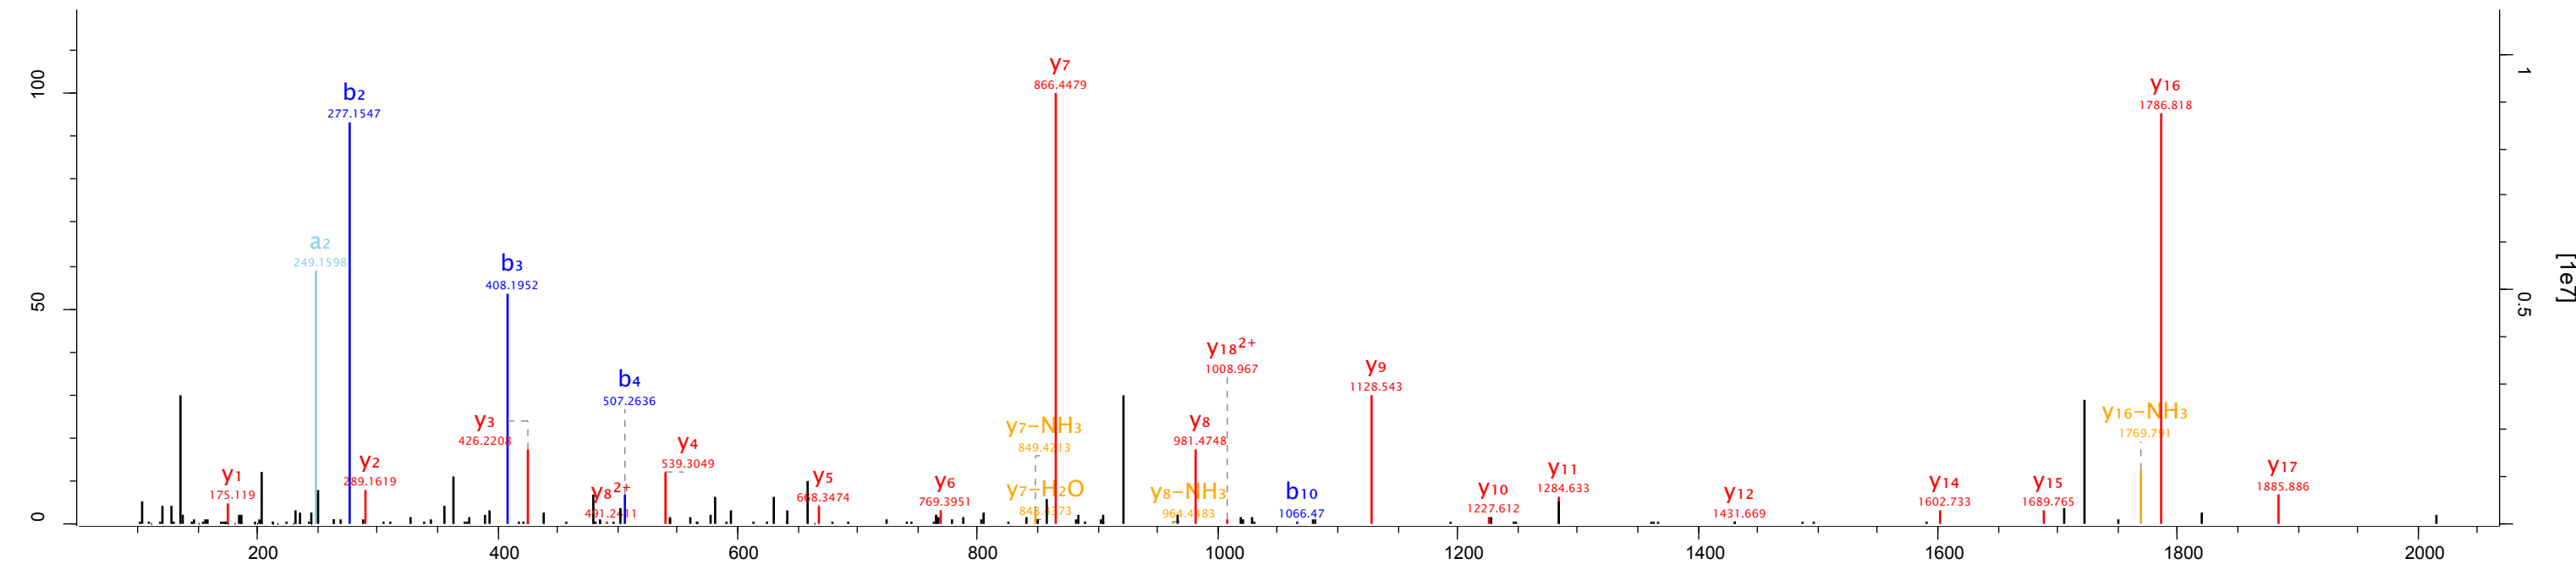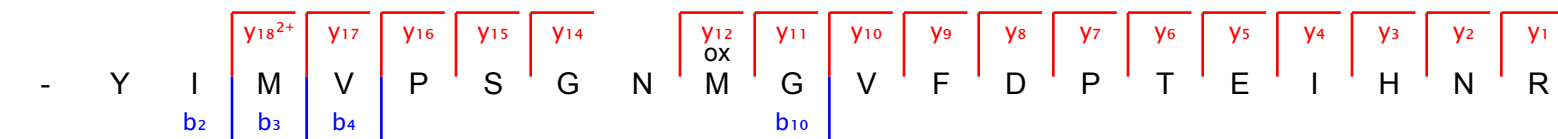

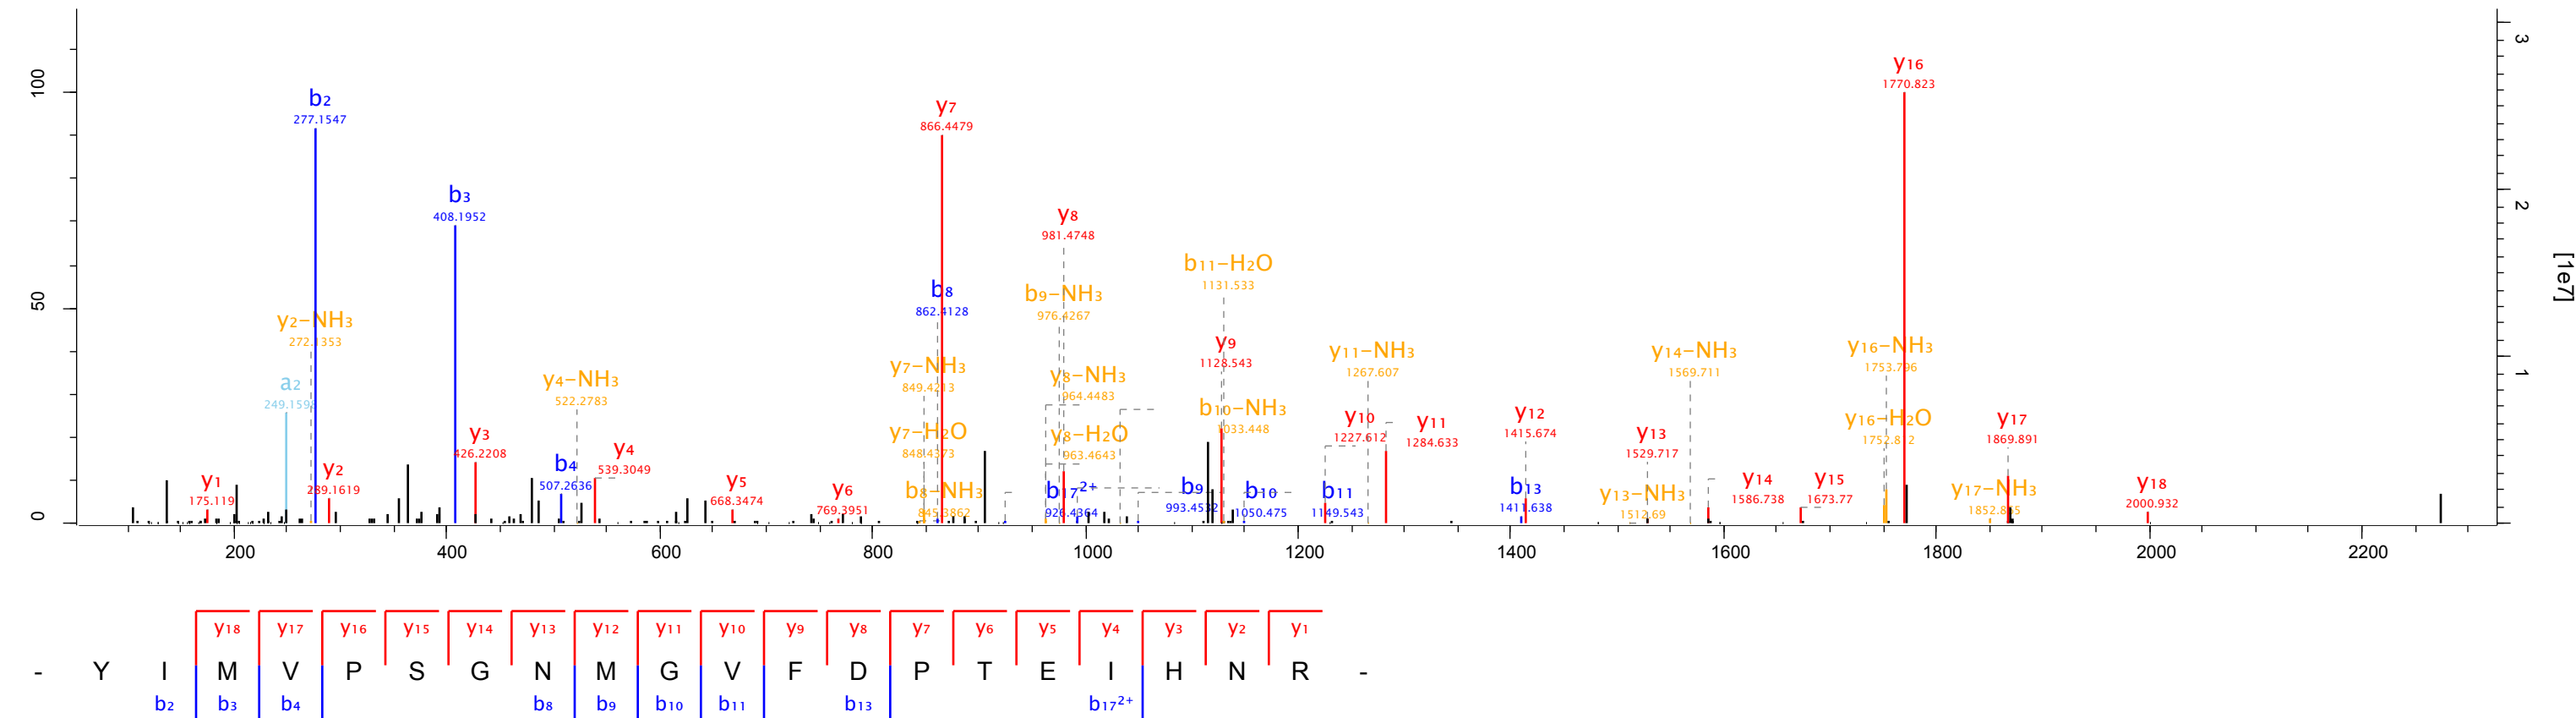

Raw file  
20180707\_MaS\_A375SR\_ML\_proteome\_2\_03

Scan 22071 Method FTMS; HCD Score 66.19 m/z 556.86 Gene names BPI

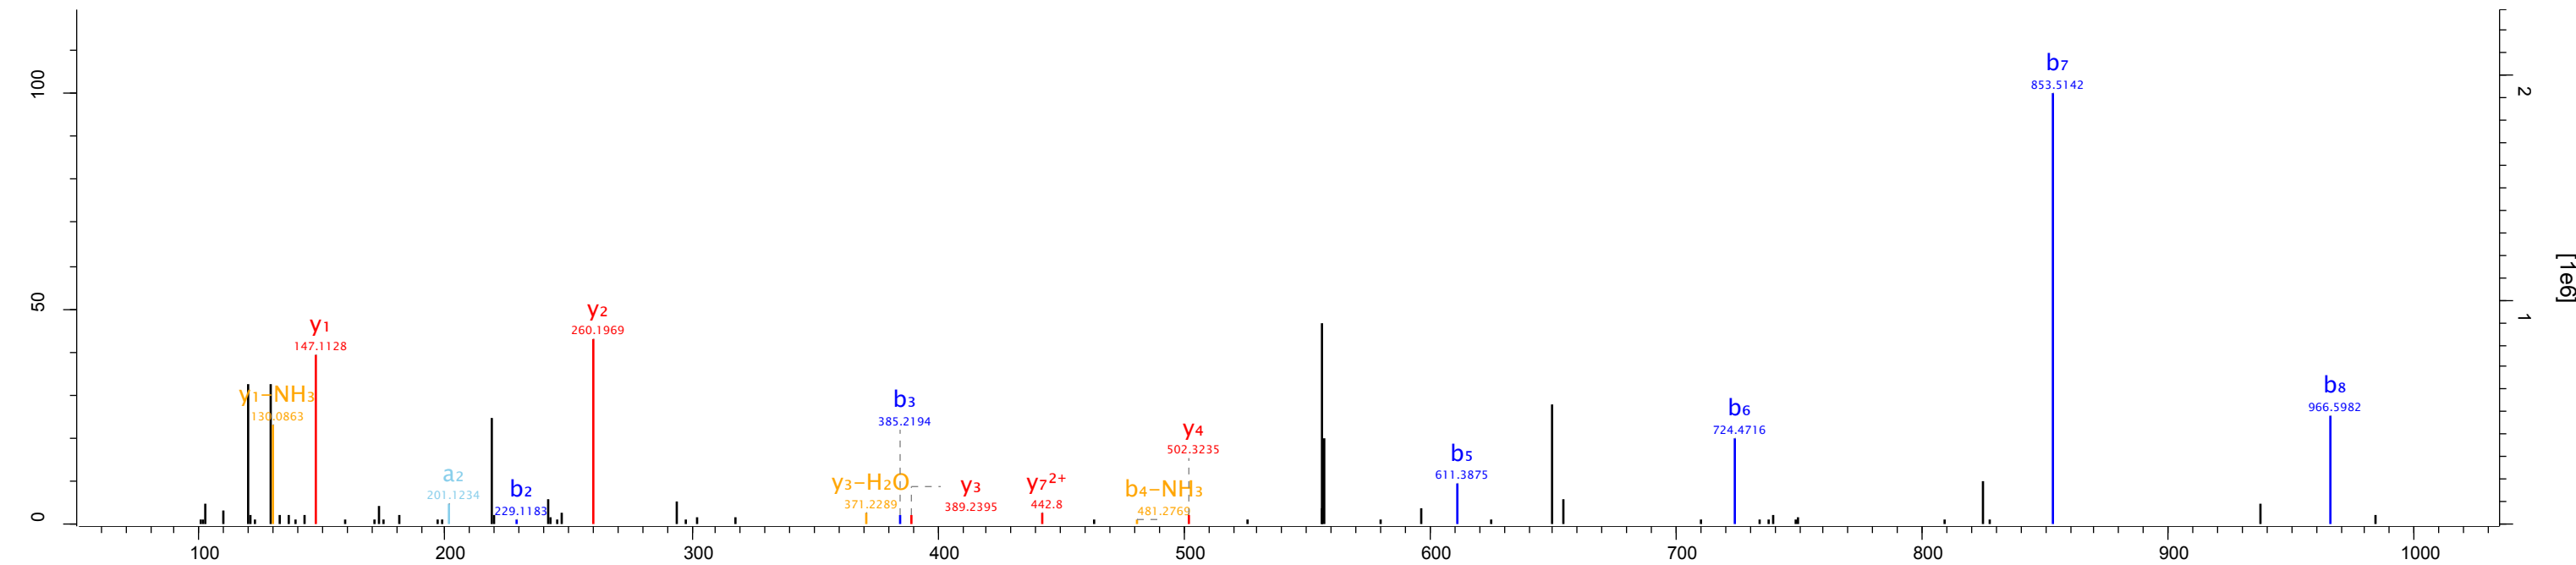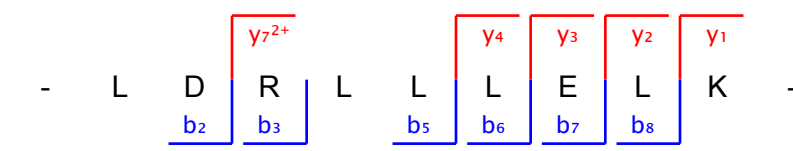

Raw file

20180707\_MaS\_A375SR\_ML\_proteome\_2\_03

| Scan  | Method    | Score | m/z    | Gene names |
|-------|-----------|-------|--------|------------|
| 24001 | FTMS; HCD | 73.92 | 765.36 | CNIH4      |

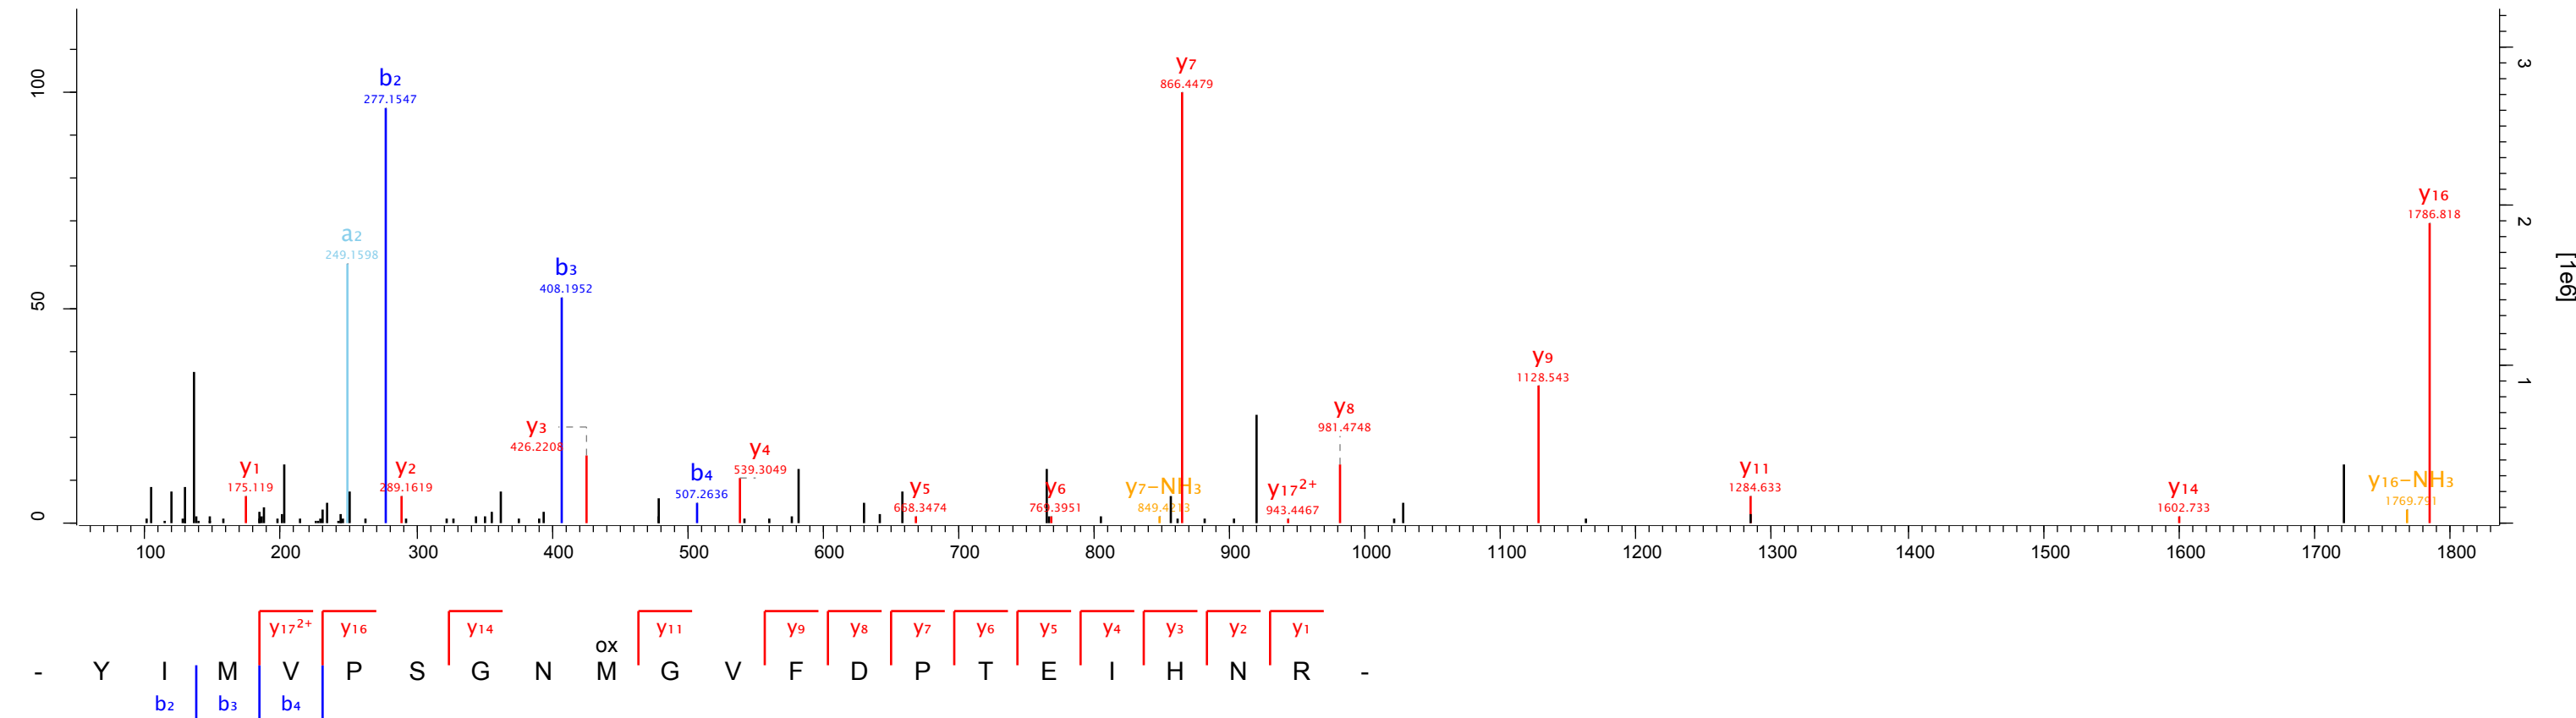

Raw file  
20180707\_MaS\_A375SR\_ML\_proteome\_2\_04

Scan 12251 Method FTMS; HCD Score 52.72 m/z 612.81 Gene names SLC1A3

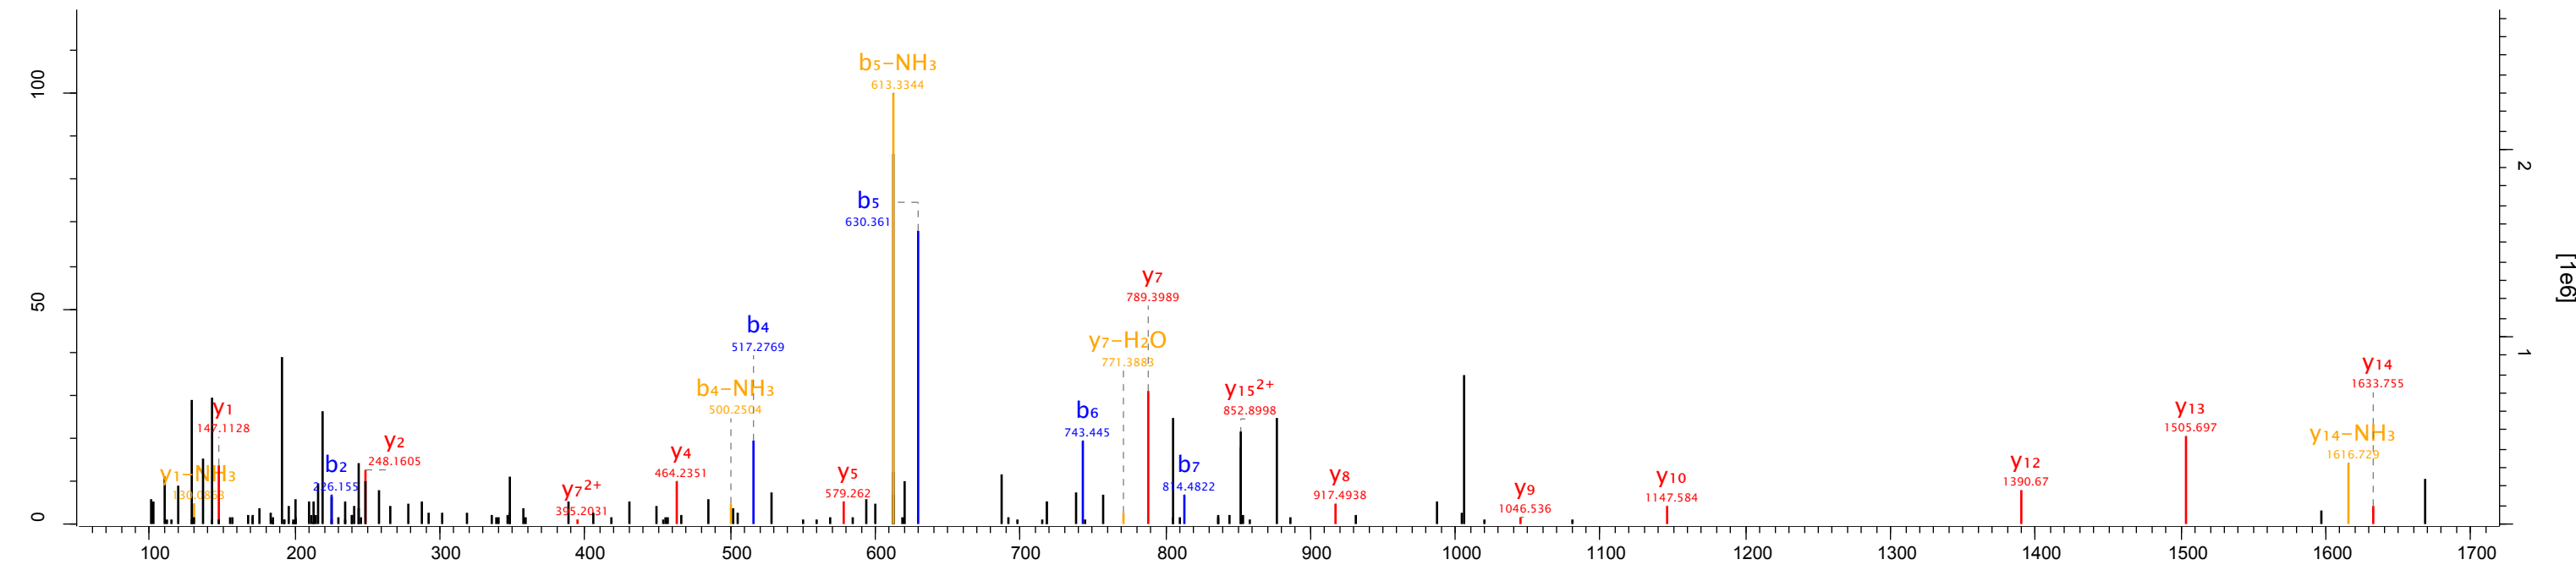

- K P Y Q L I A Q D N E T E K P I D S E T K -  
b2 b4 b5 b6 b7 y15 2+ y14 y13 y12 y10 y9 y8 y7 y5 y4 y2 y1

Raw file  
20180707\_MaS\_A375SR\_ML\_proteome\_2\_05

Scan 13241 Method FTMS; HCD Score 59.2 m/z 724.36 Gene names TRIM60

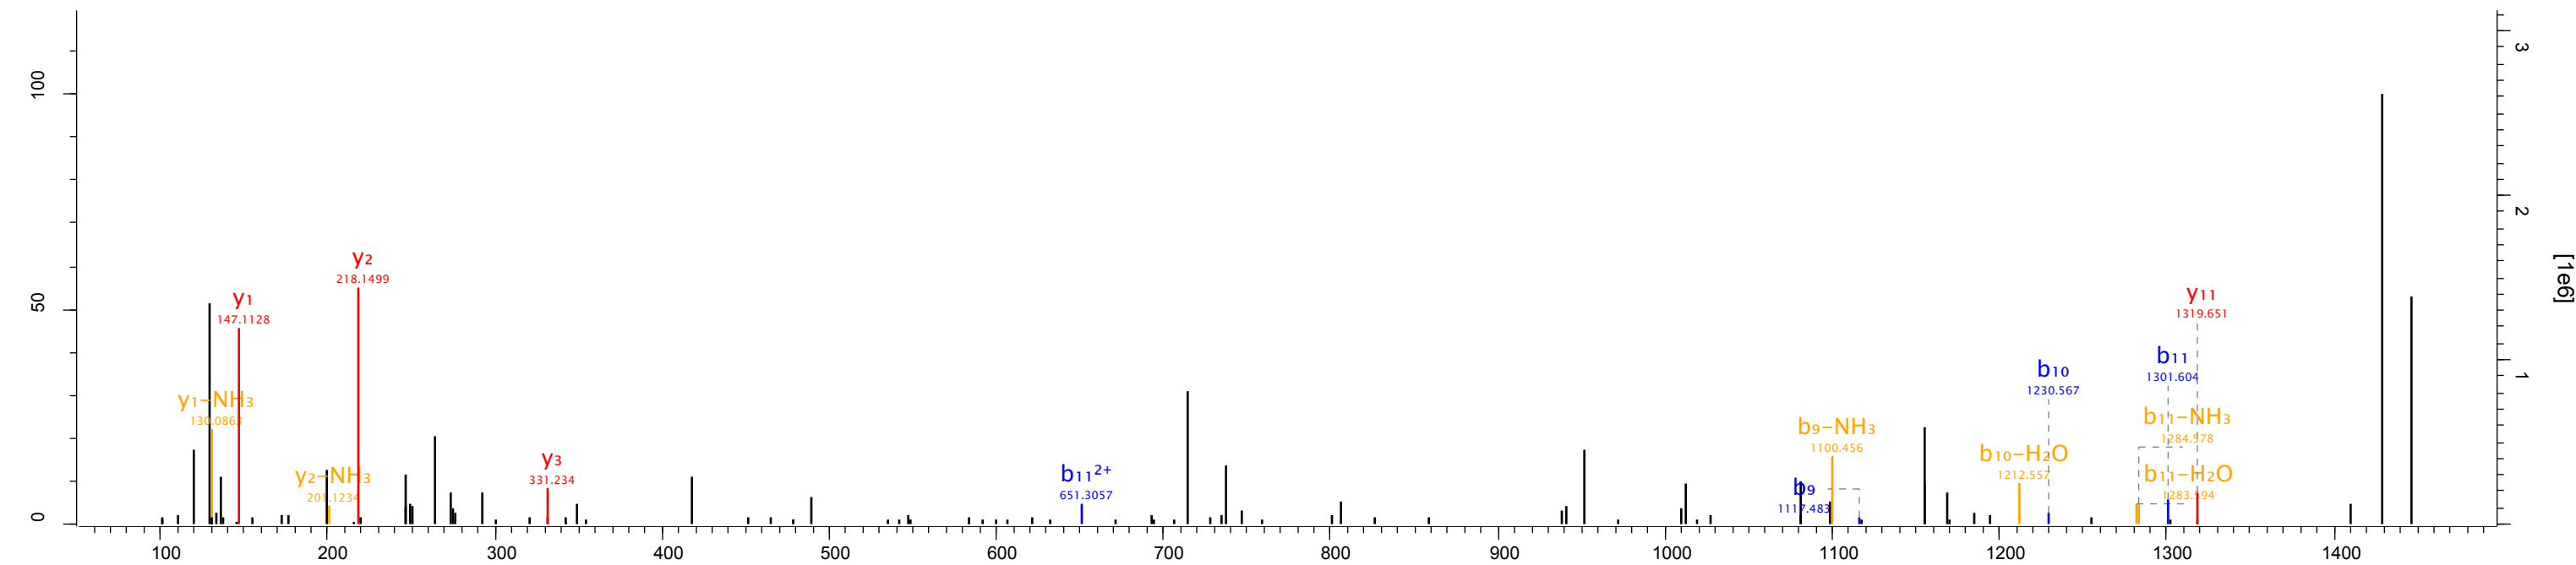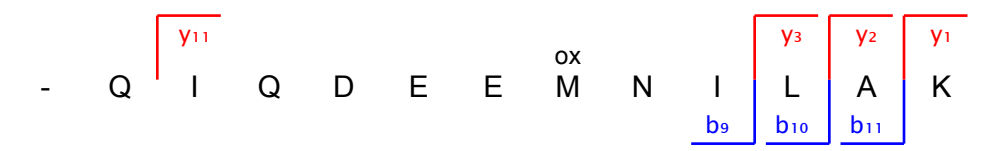

Raw file  
20180707\_MaS\_A375SR\_ML\_proteome\_2\_05

Scan 22111 Method FTMS; HCD Score 103.83 m/z 712.38 Gene names TMEM184C

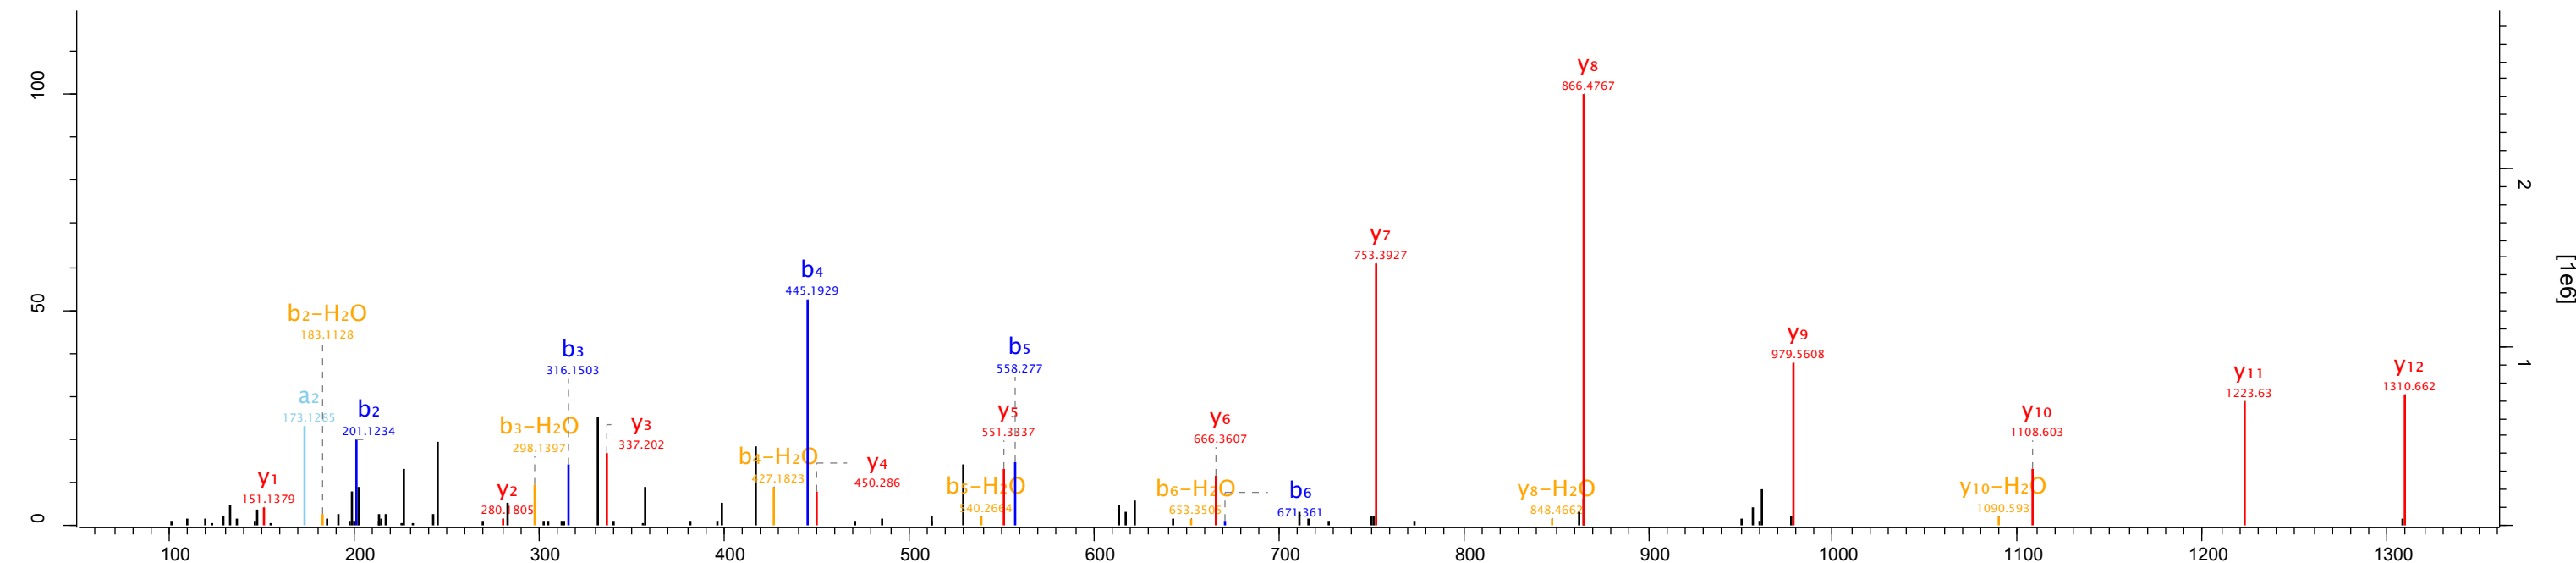

- I S D E I L S D T I G E K -  
b<sub>2</sub> b<sub>3</sub> b<sub>4</sub> b<sub>5</sub> b<sub>6</sub> y<sub>12</sub> y<sub>11</sub> y<sub>10</sub> y<sub>9</sub> y<sub>8</sub> y<sub>7</sub> y<sub>6</sub> y<sub>5</sub> y<sub>4</sub> y<sub>3</sub> y<sub>2</sub> y<sub>1</sub>



Raw file  
20180707\_MaS\_A375SR\_ML\_proteome\_2\_05

Scan      Method      Score      m/z      Gene names  
24911      FTMS; HCD      40.62      1059.55      TMEM261

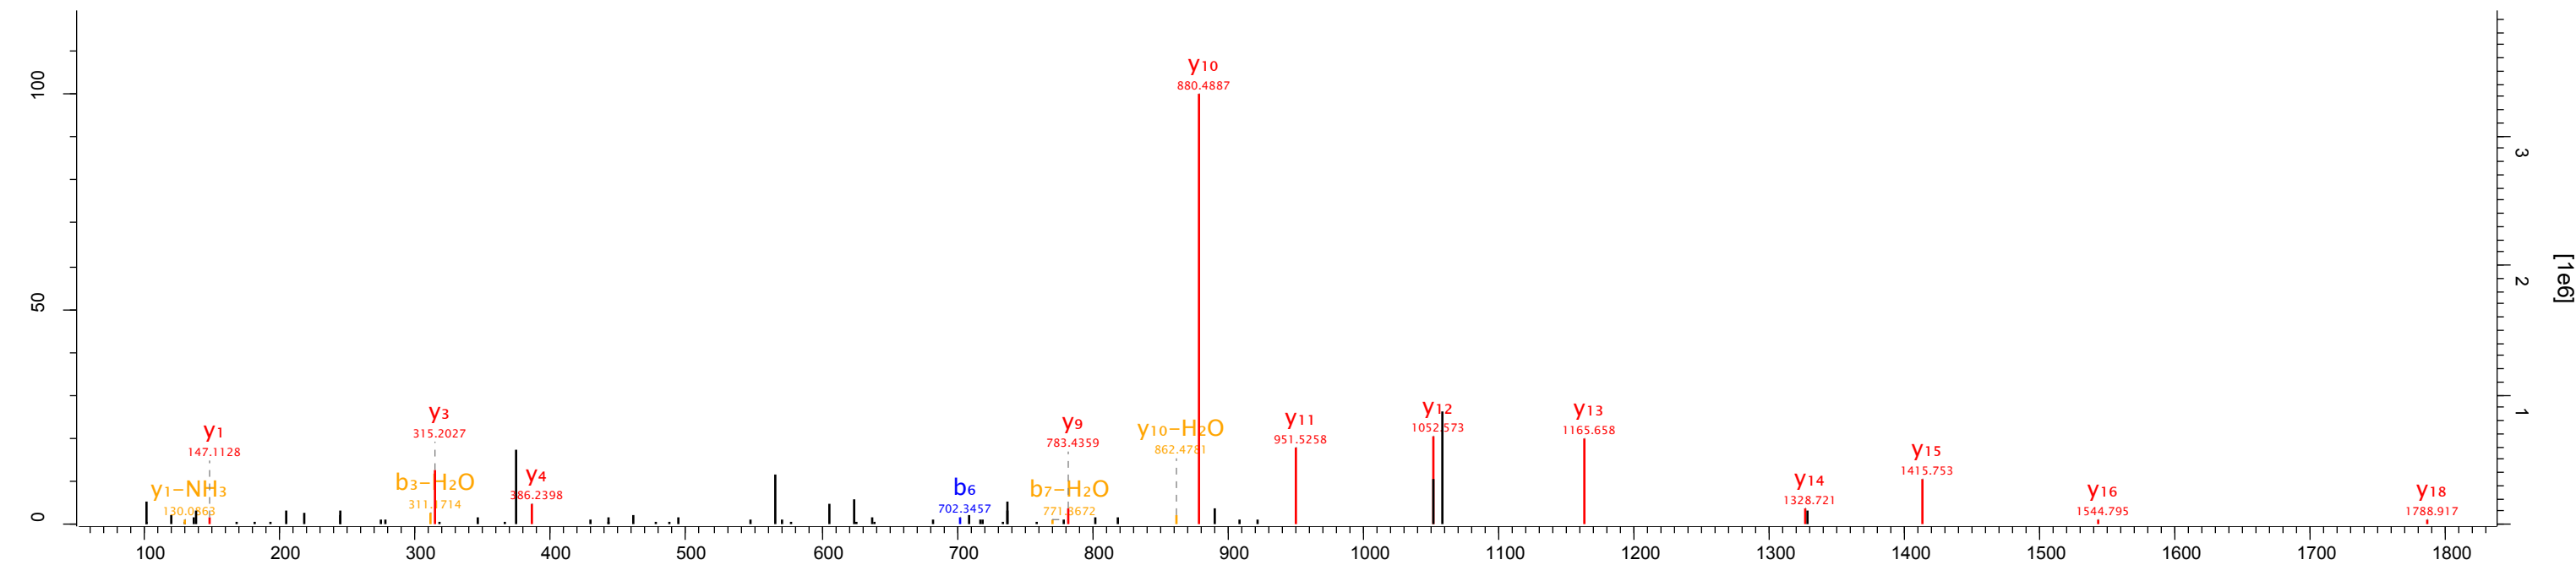

- L S Q P F E S Y I T A P P G T A A A P A K -

Fragmentation mapping (red brackets):

- y18: P
- y16: E
- y15: ES
- y14: SY
- y13: IY
- y12: IT
- y11: IA
- y10: AP
- y9: PP
- y4: AA
- y3: AP
- y1: AK

Fragmentation mapping (blue bracket):

- b6: E

Raw file 20180707\_MaS\_A375SR\_ML\_proteome\_2\_05 Scan 26181 Method FTMS; HCD Score 97.97 m/z 492.81 Gene names STON2

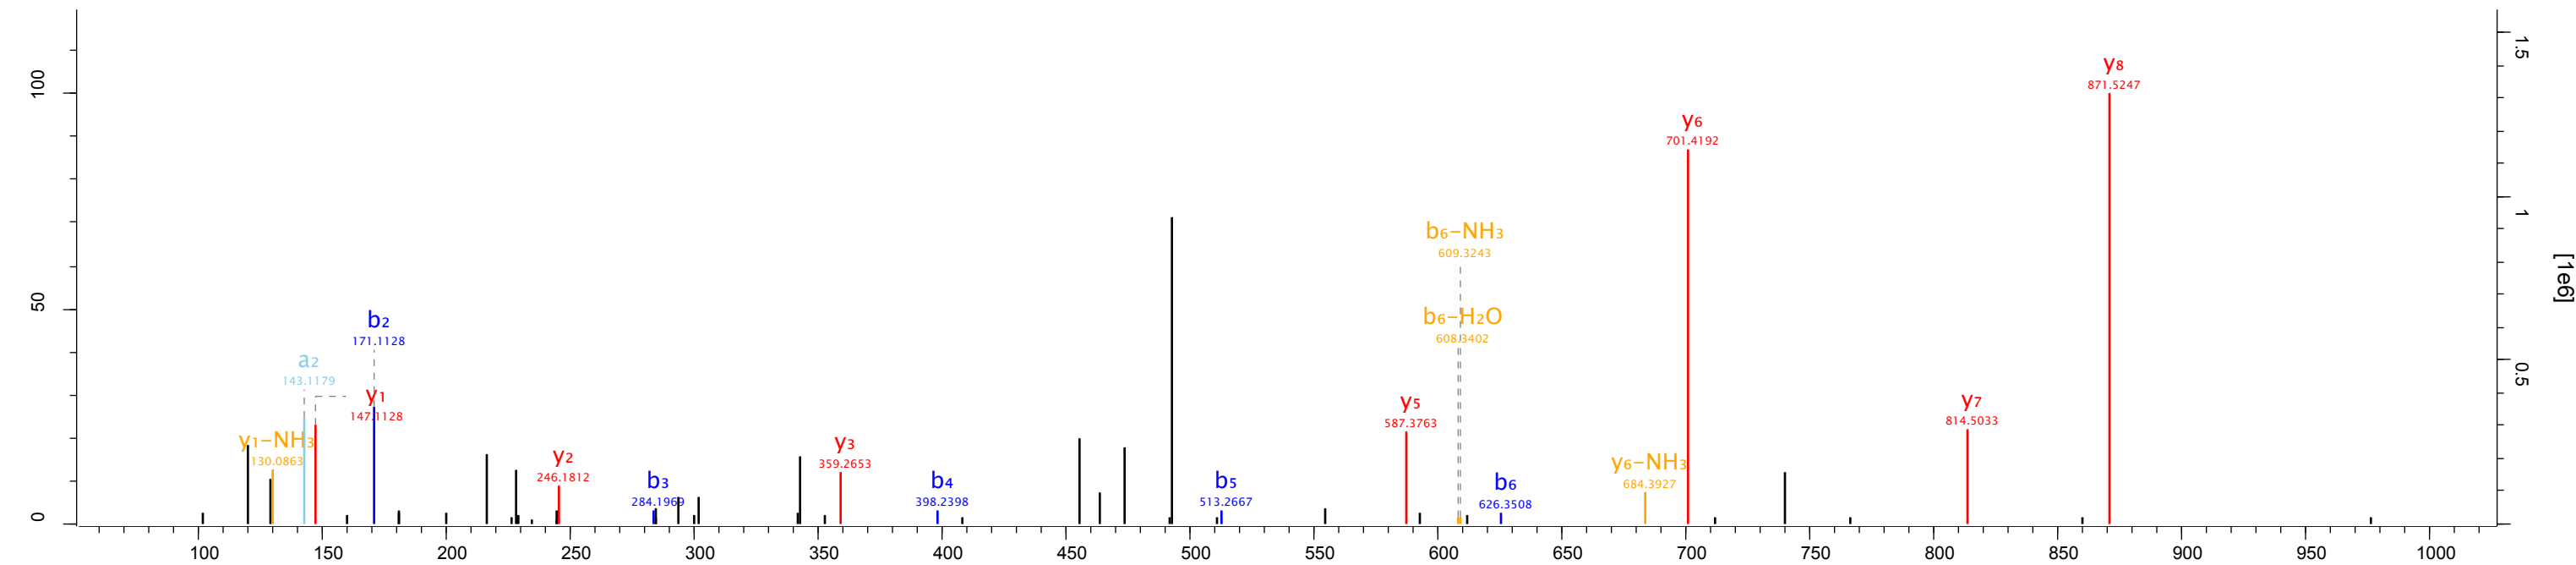

Raw file  
20180707\_MaS\_A375SR\_ML\_proteome\_2\_05

Scan 8201 Method FTMS; HCD Score 50.45 m/z 576.29

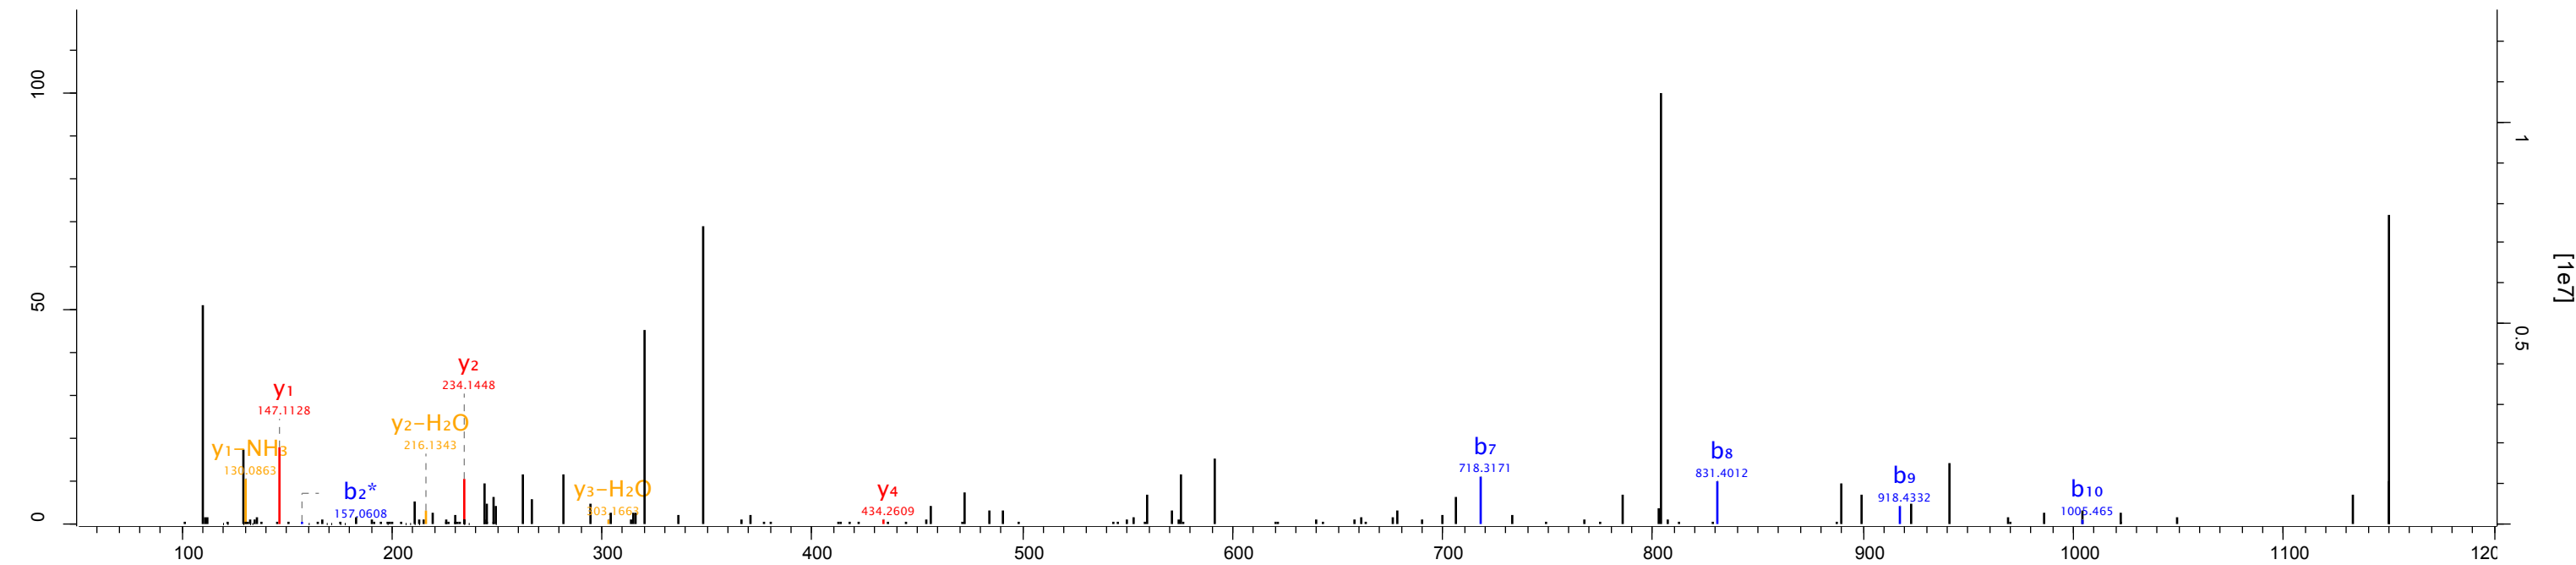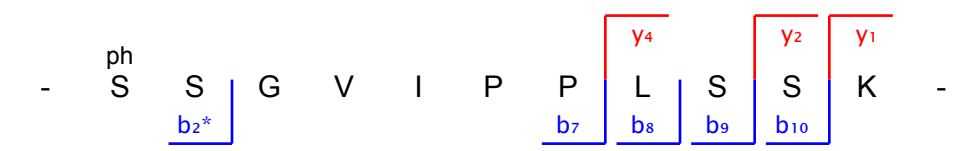

Raw file 20180707\_MaS\_A375SR\_ML\_proteome\_2\_06 Scan 2721 Method FTMS; HCD Score 44.97 m/z 327.18

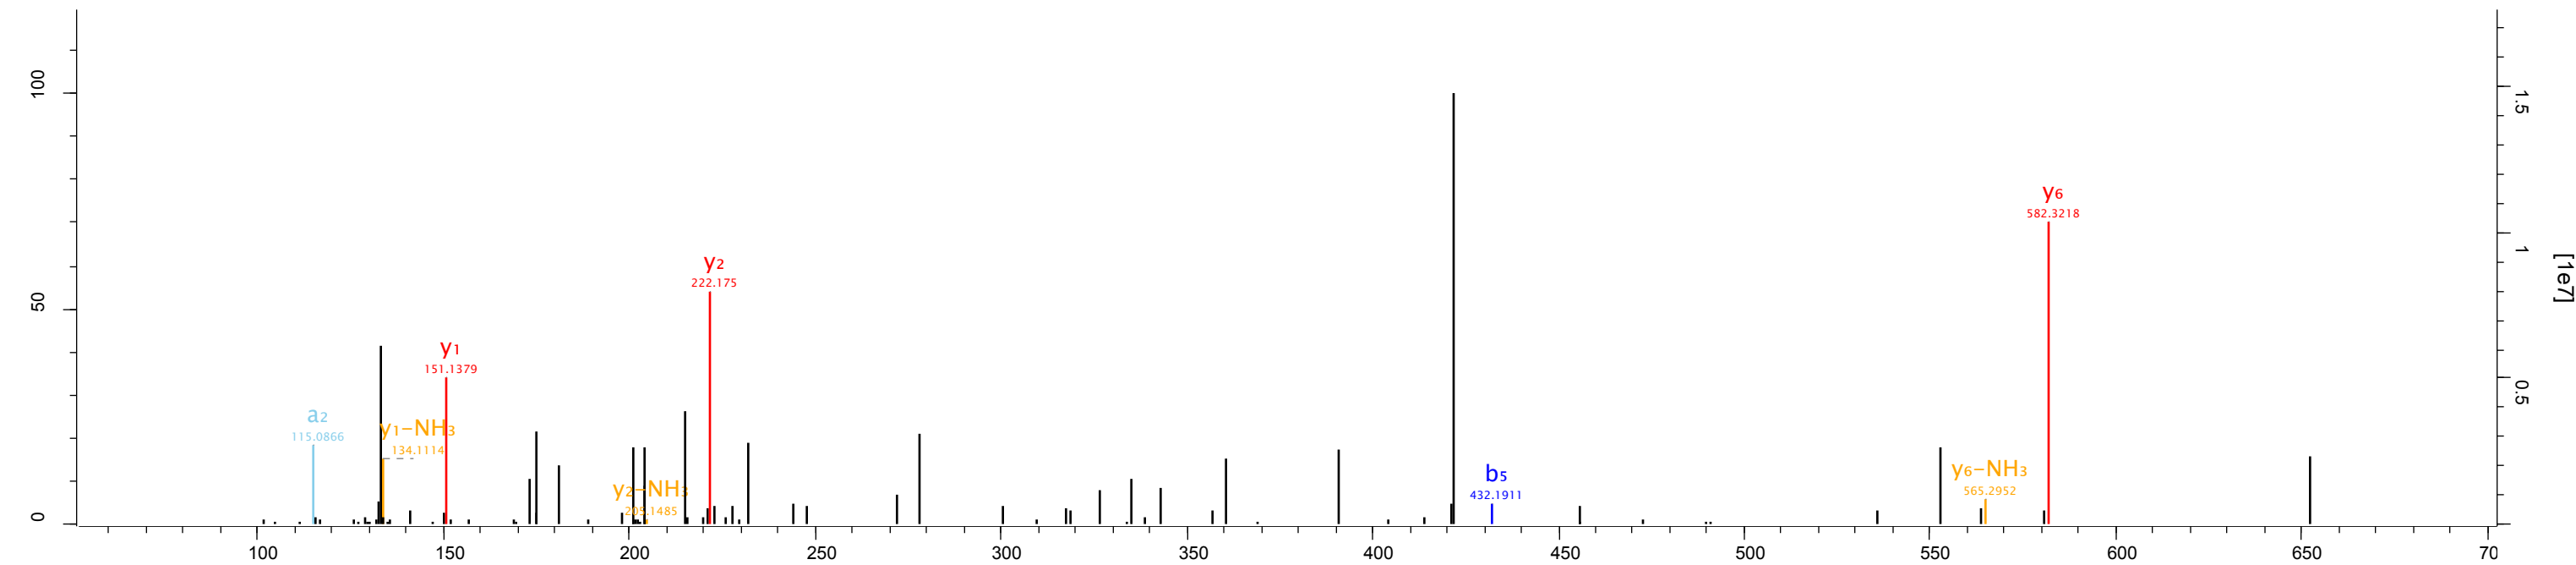

Raw file  
20180707\_MaS\_A375SR\_ML\_proteome\_2\_07

Scan 20811 Method FTMS; HCD Score 91.59 m/z 697.35 Gene names SLC31A1

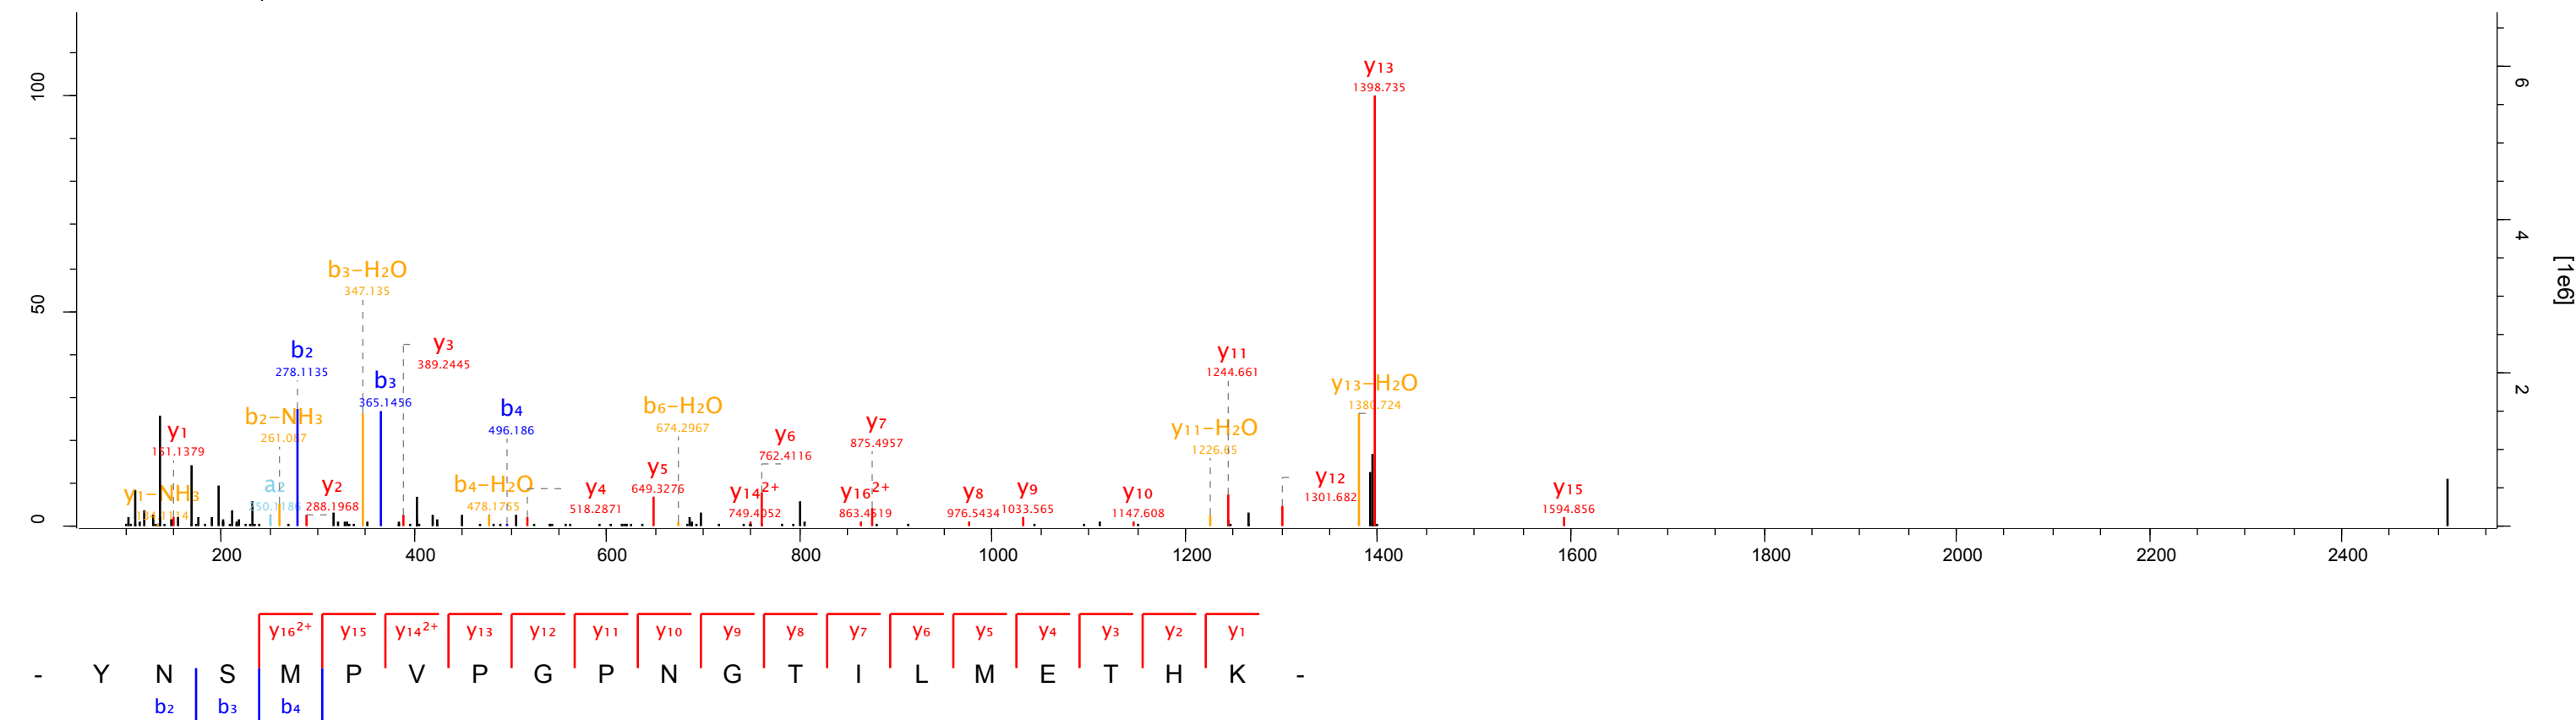

Raw file  
20180707\_MaS\_A375SR\_ML\_proteome\_2\_07

Scan 28201 Method FTMS; HCD Score 47.64 m/z 985.99 Gene names FAM35A

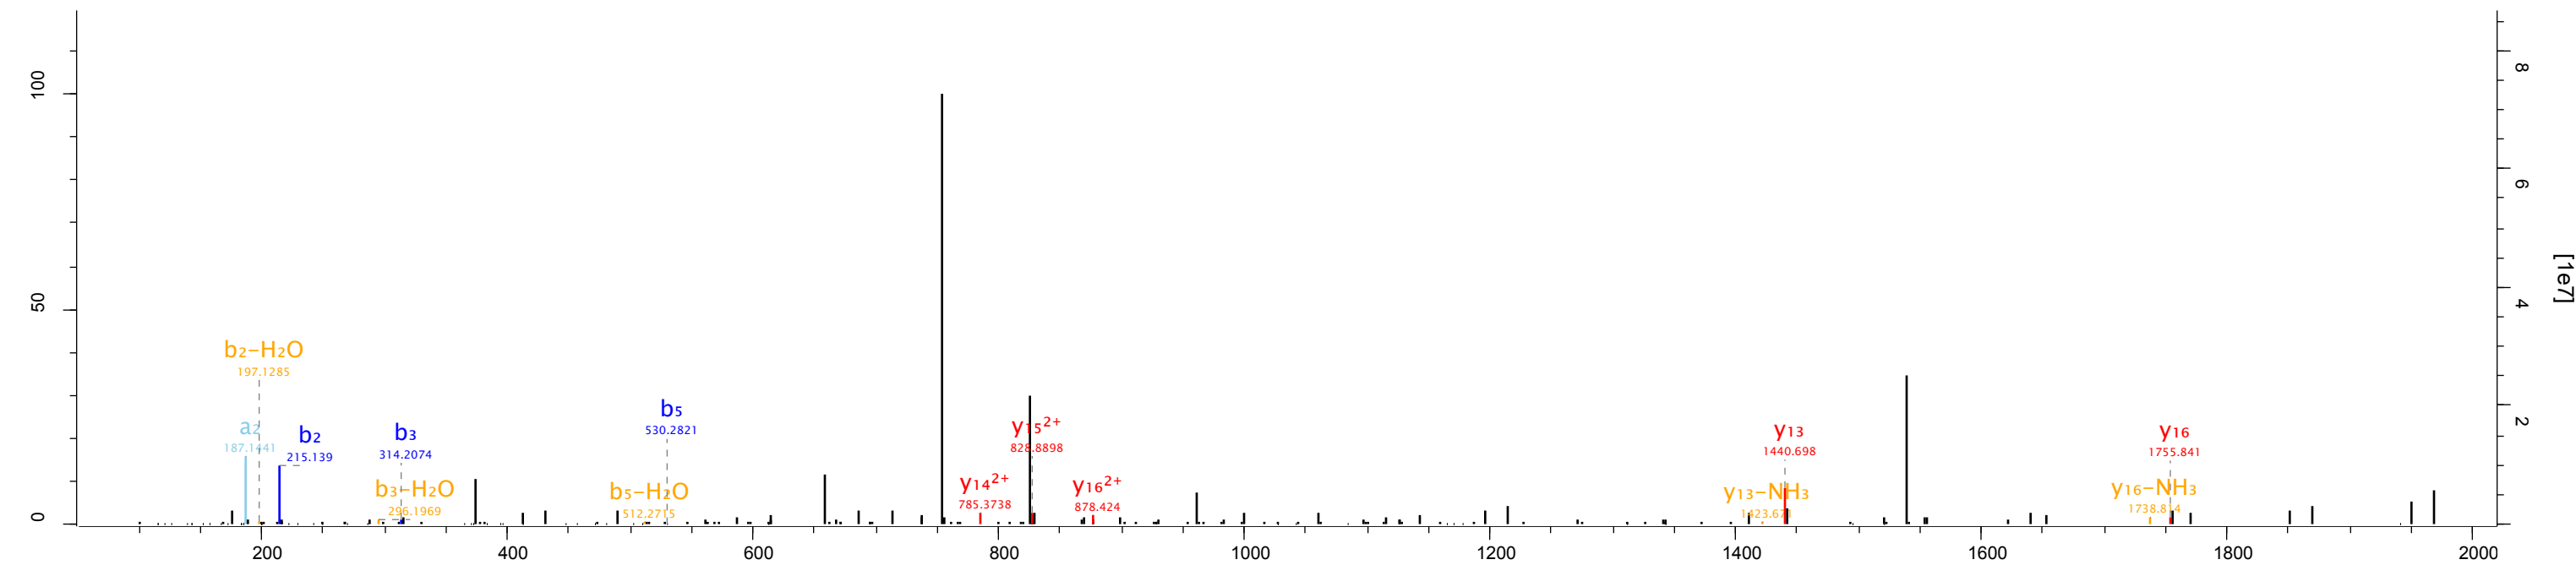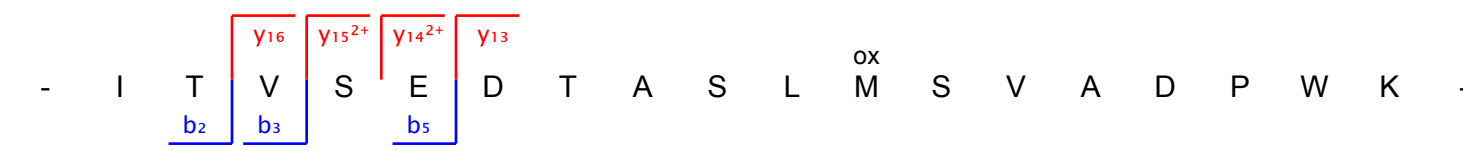

Raw file  
20180707\_MaS\_A375SR\_ML\_proteome\_2\_07

Scan 3271 Method FTMS; HCD Score 50.11 m/z 508.25 Gene names COX7B

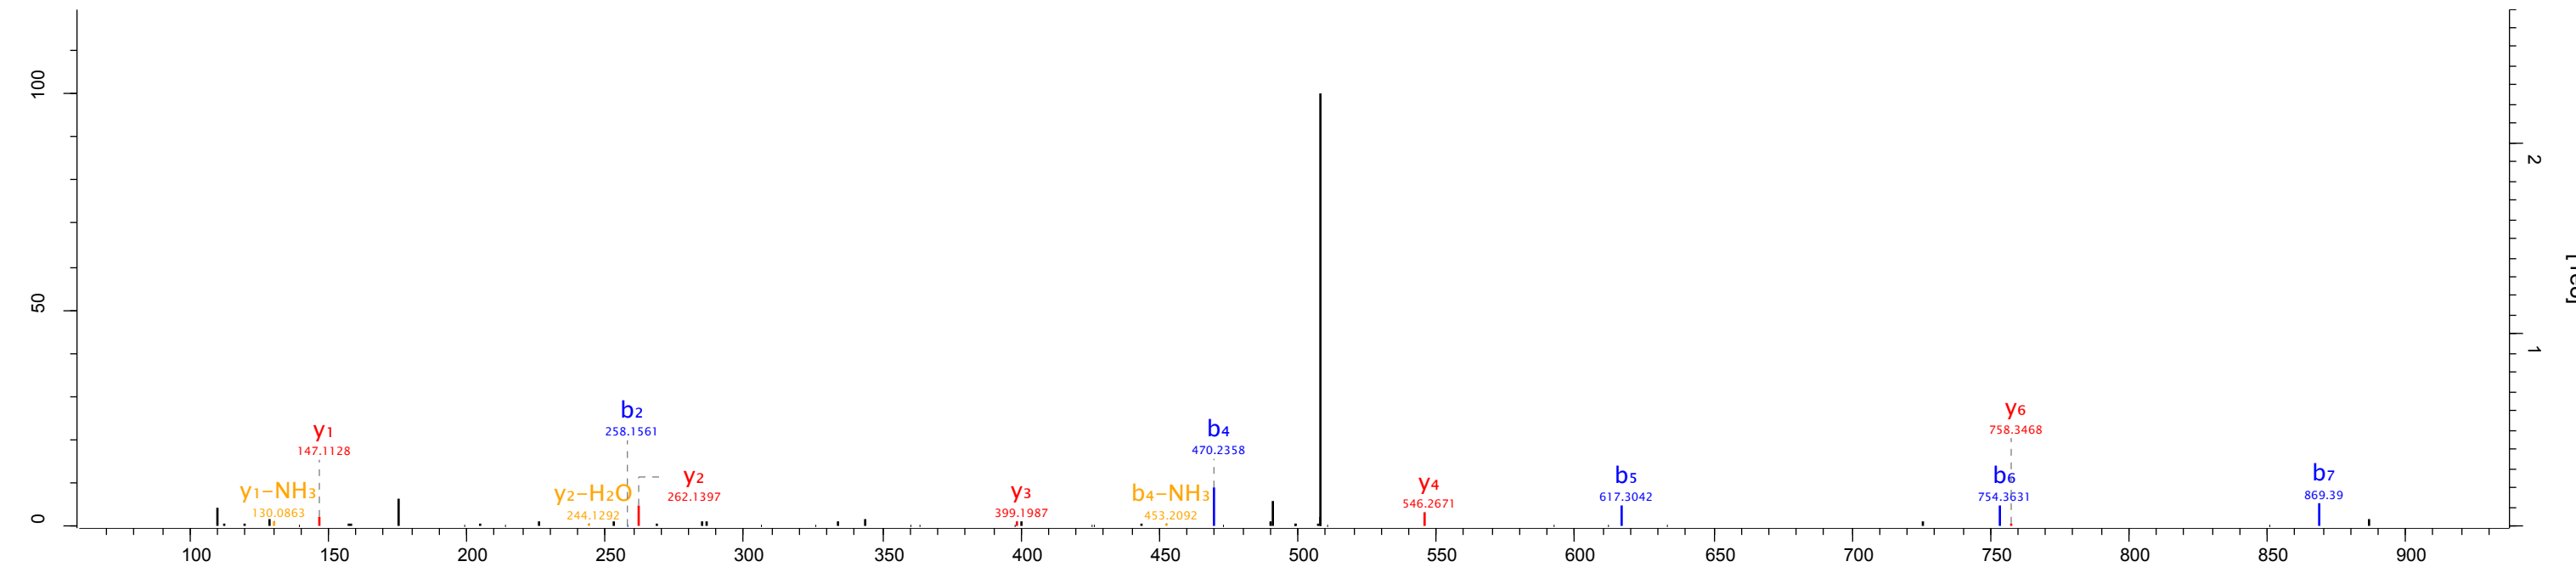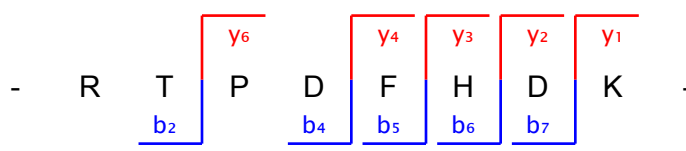

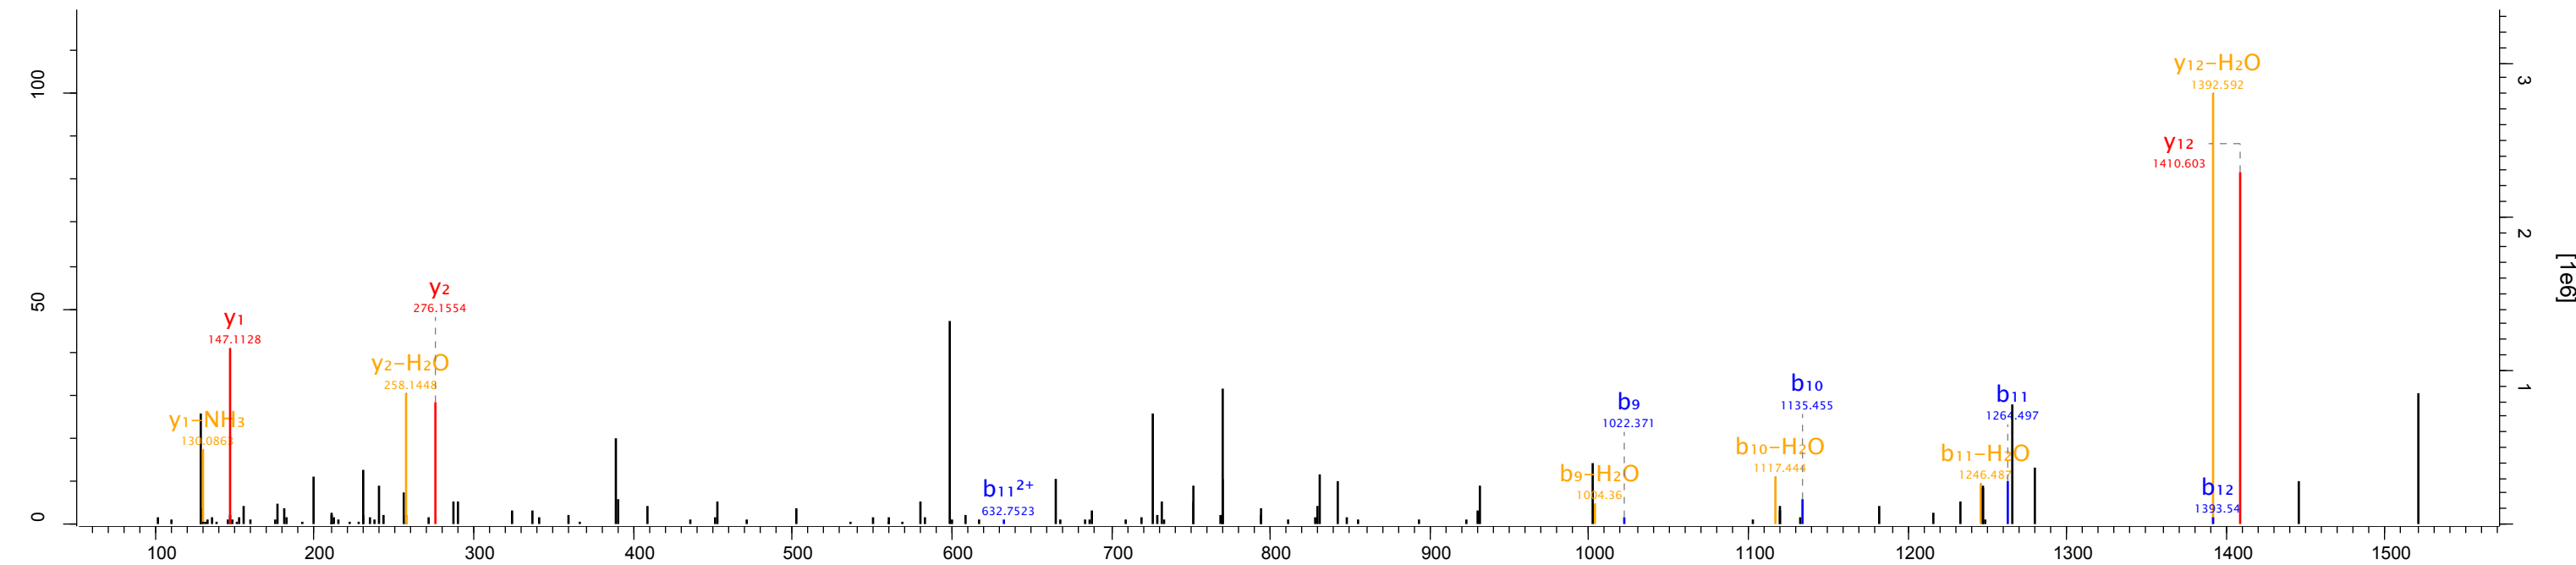

- E A M S G F M D H L E E K -

ox

b<sub>9</sub> b<sub>10</sub> b<sub>11</sub> b<sub>12</sub> y<sub>12</sub> y<sub>2</sub> y<sub>1</sub>



Raw file  
20180707\_MaS\_A375SR\_ML\_proteome\_2\_10

Scan Method Score m/z Gene names  
17741 FTMS; HCD 96.49 594.33 SLC35A3

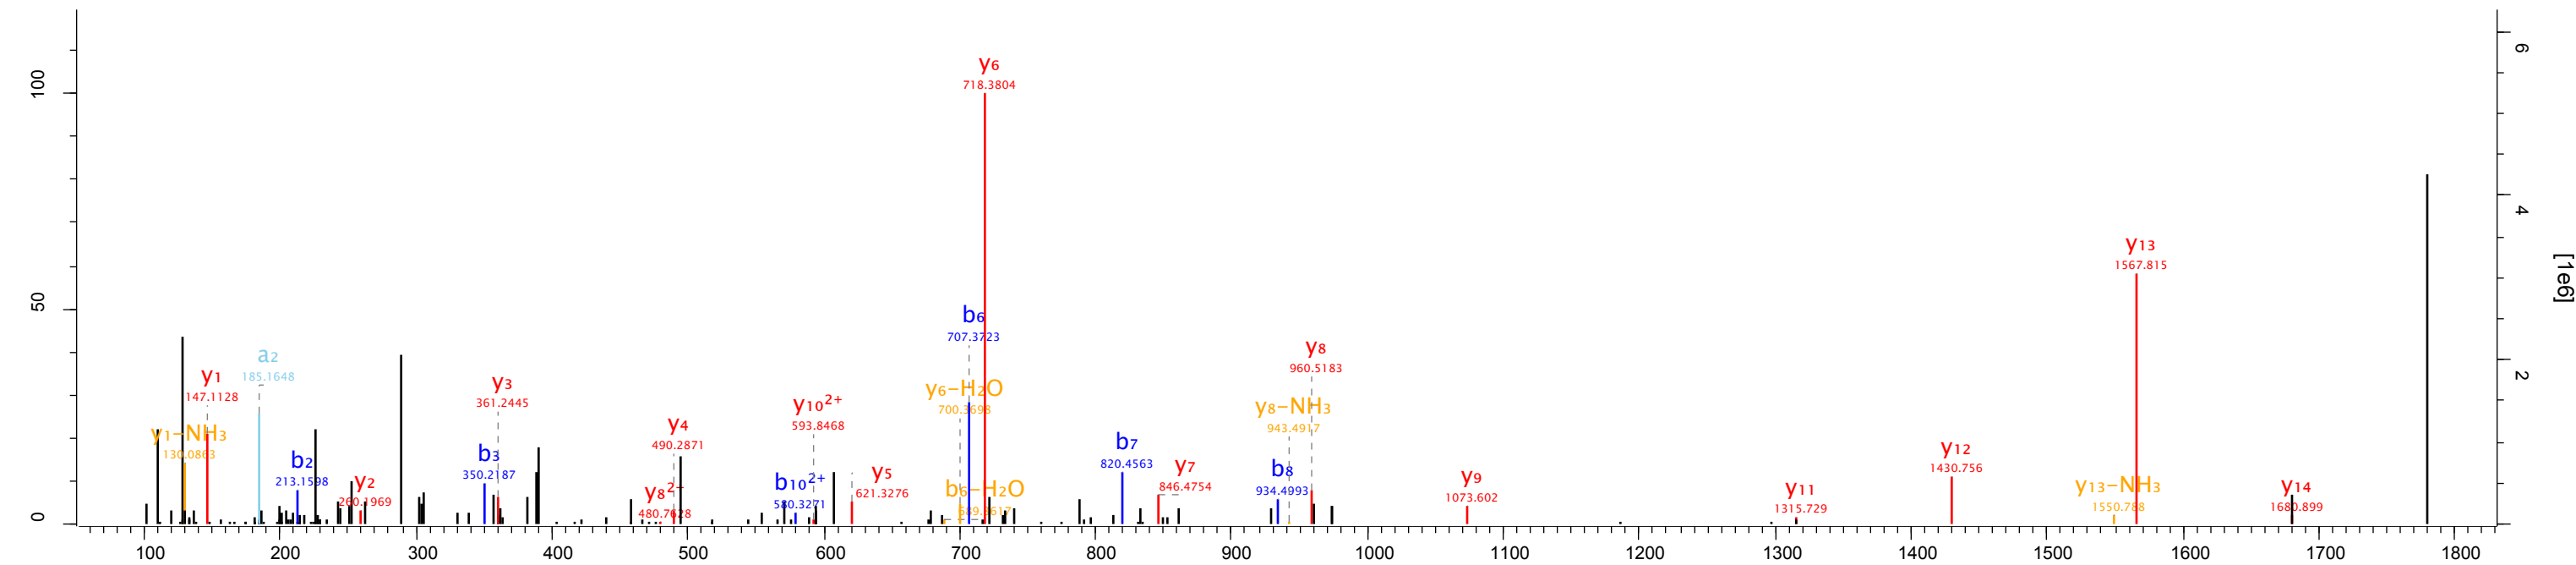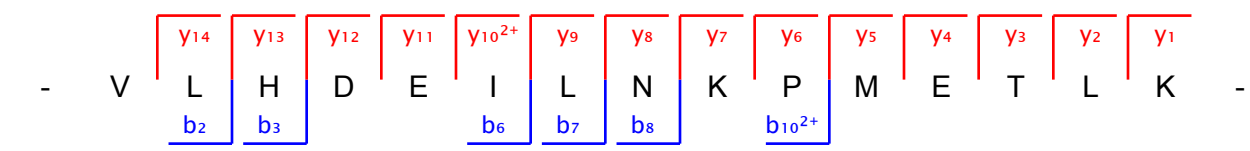

Raw file 20180707\_MaS\_A375SR\_ML\_proteome\_2\_10 Scan 20161 Method FTMS; HCD Score 47.71 m/z 692.86 Gene names TRPC7

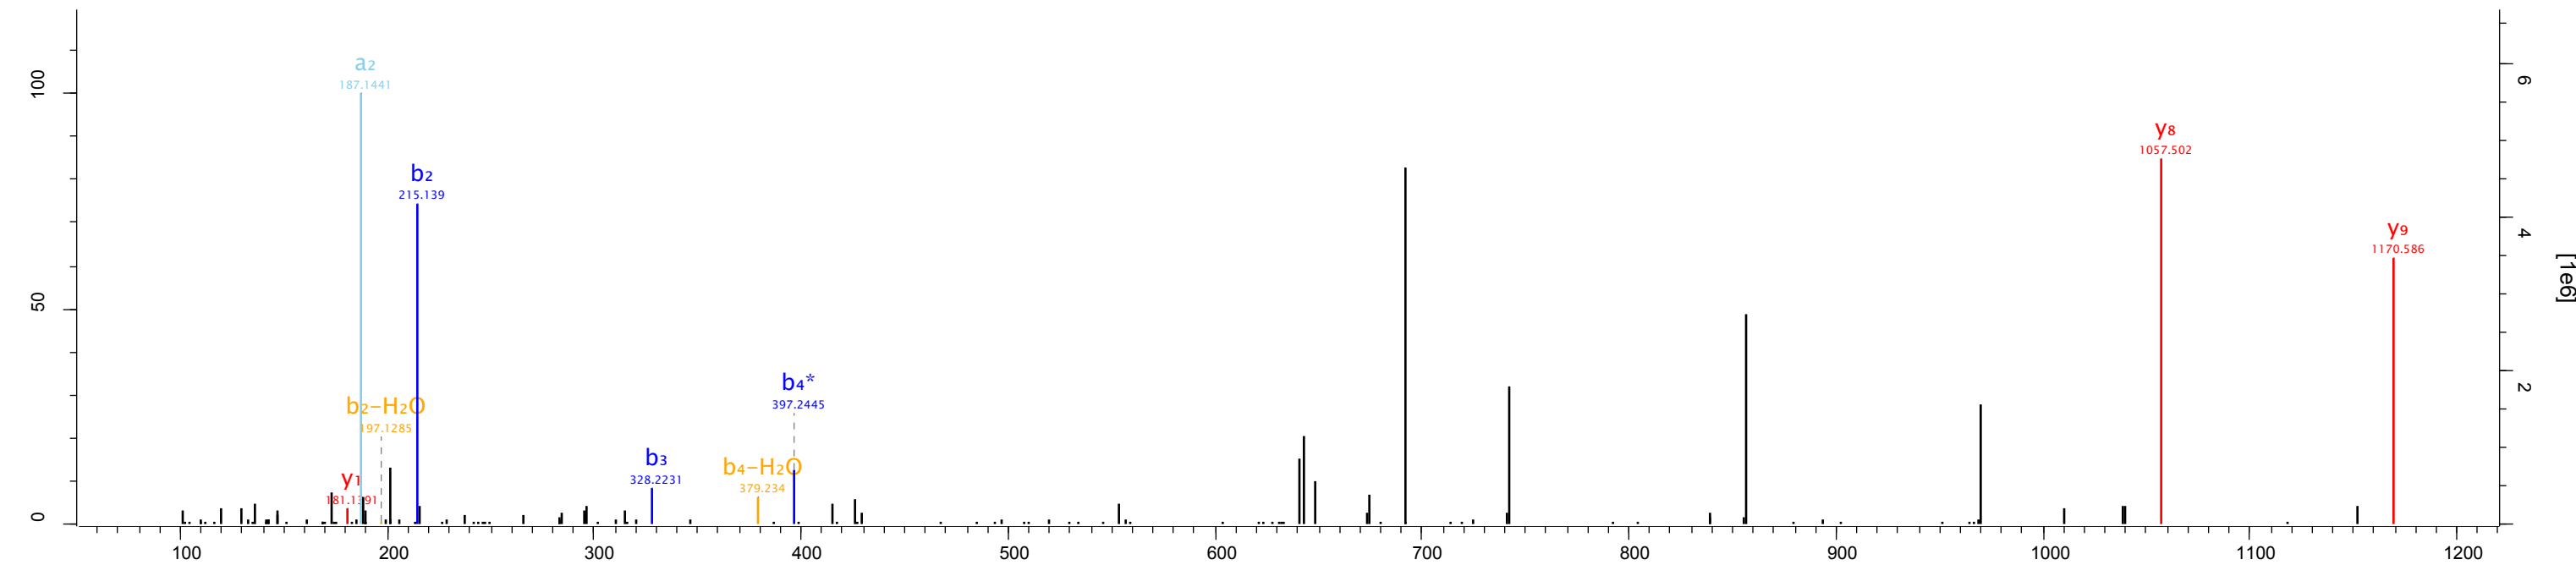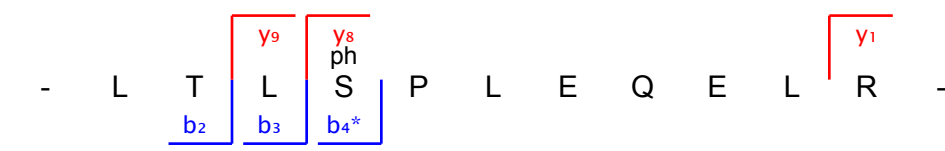

Raw file 20180707\_MaS\_A375SR\_ML\_proteome\_2\_10 Scan 21681 Method FTMS; HCD Score 36.5 m/z 737.34 Gene names ELOF1

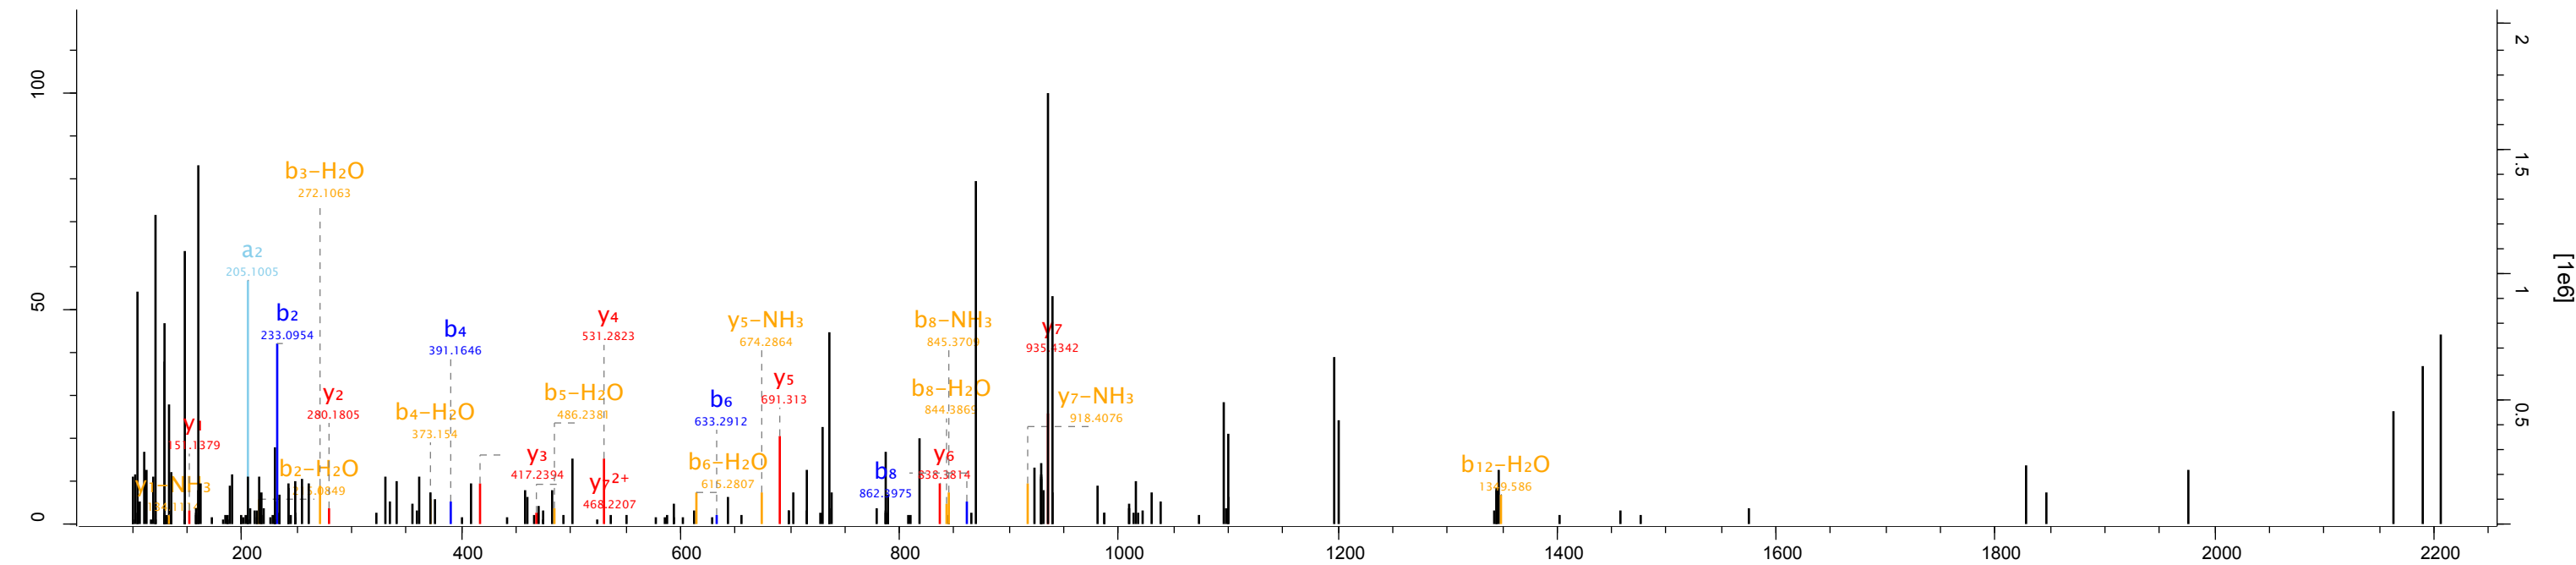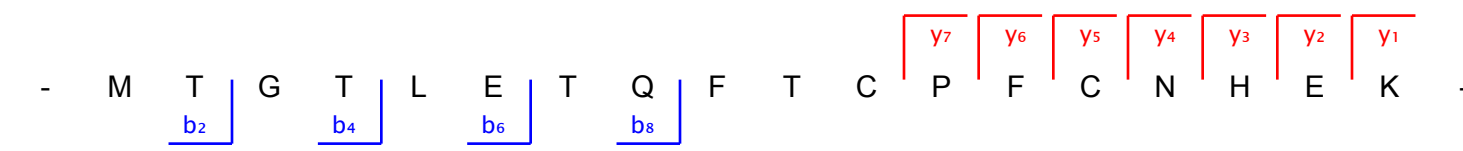

Raw file 20180707\_MaS\_A375SR\_ML\_proteome\_2\_11 Scan 3541 Method FTMS; HCD Score 53.55 m/z 361.18

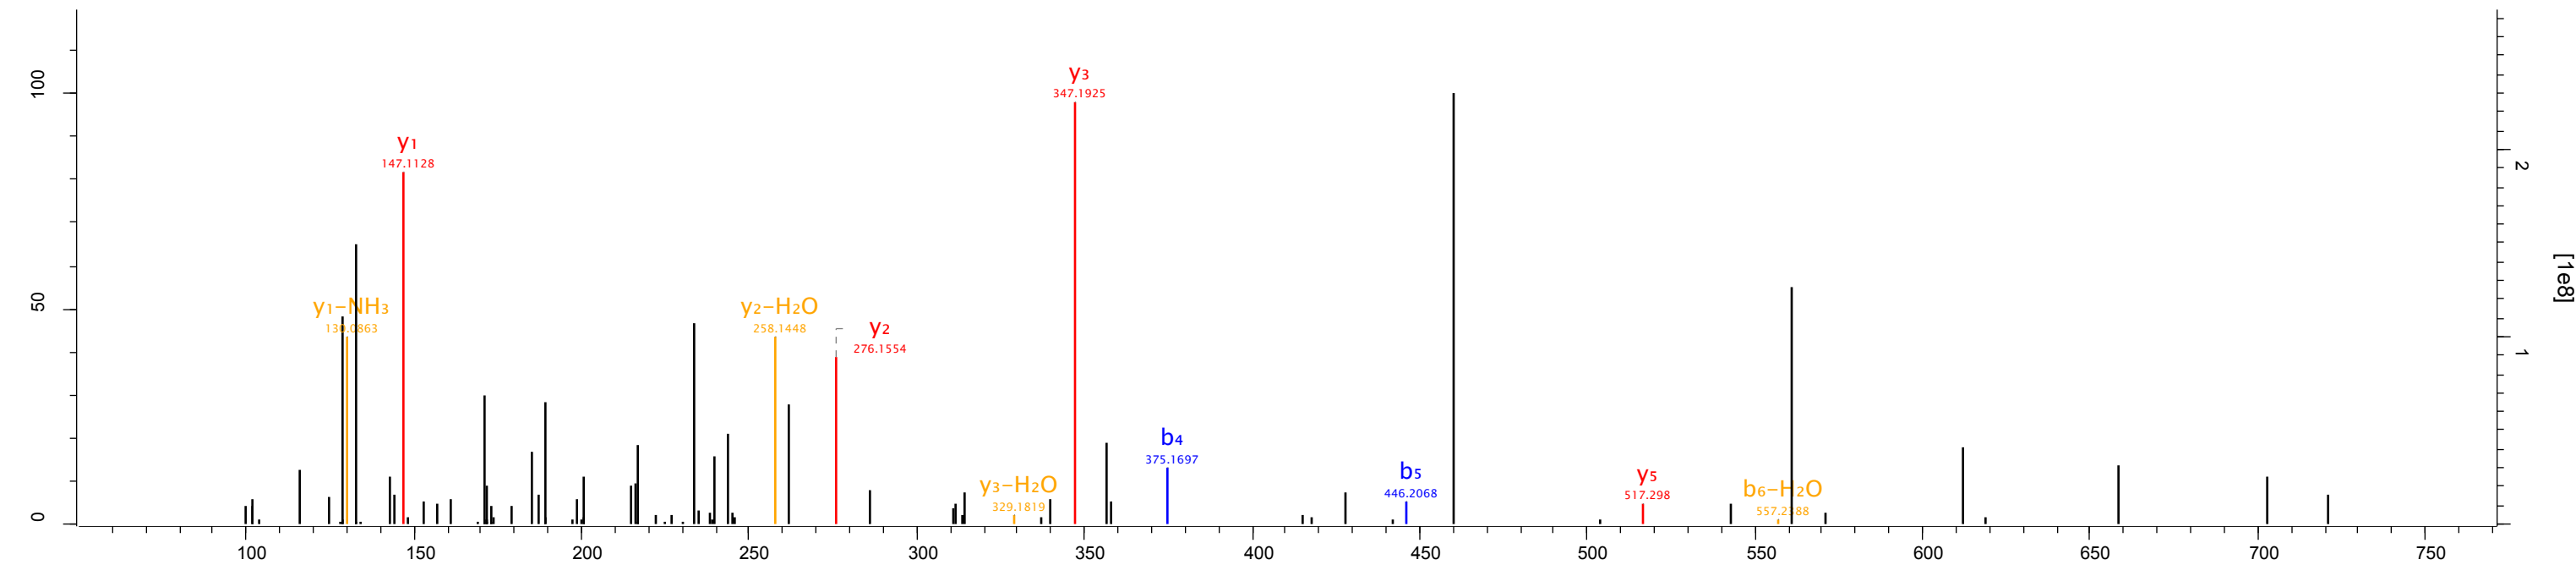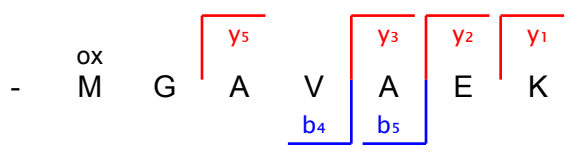

Raw file 20180707\_MaS\_A375SR\_ML\_proteome\_2\_12 Scan 11021 Method FTMS; HCD Score 54.79 m/z 400.19

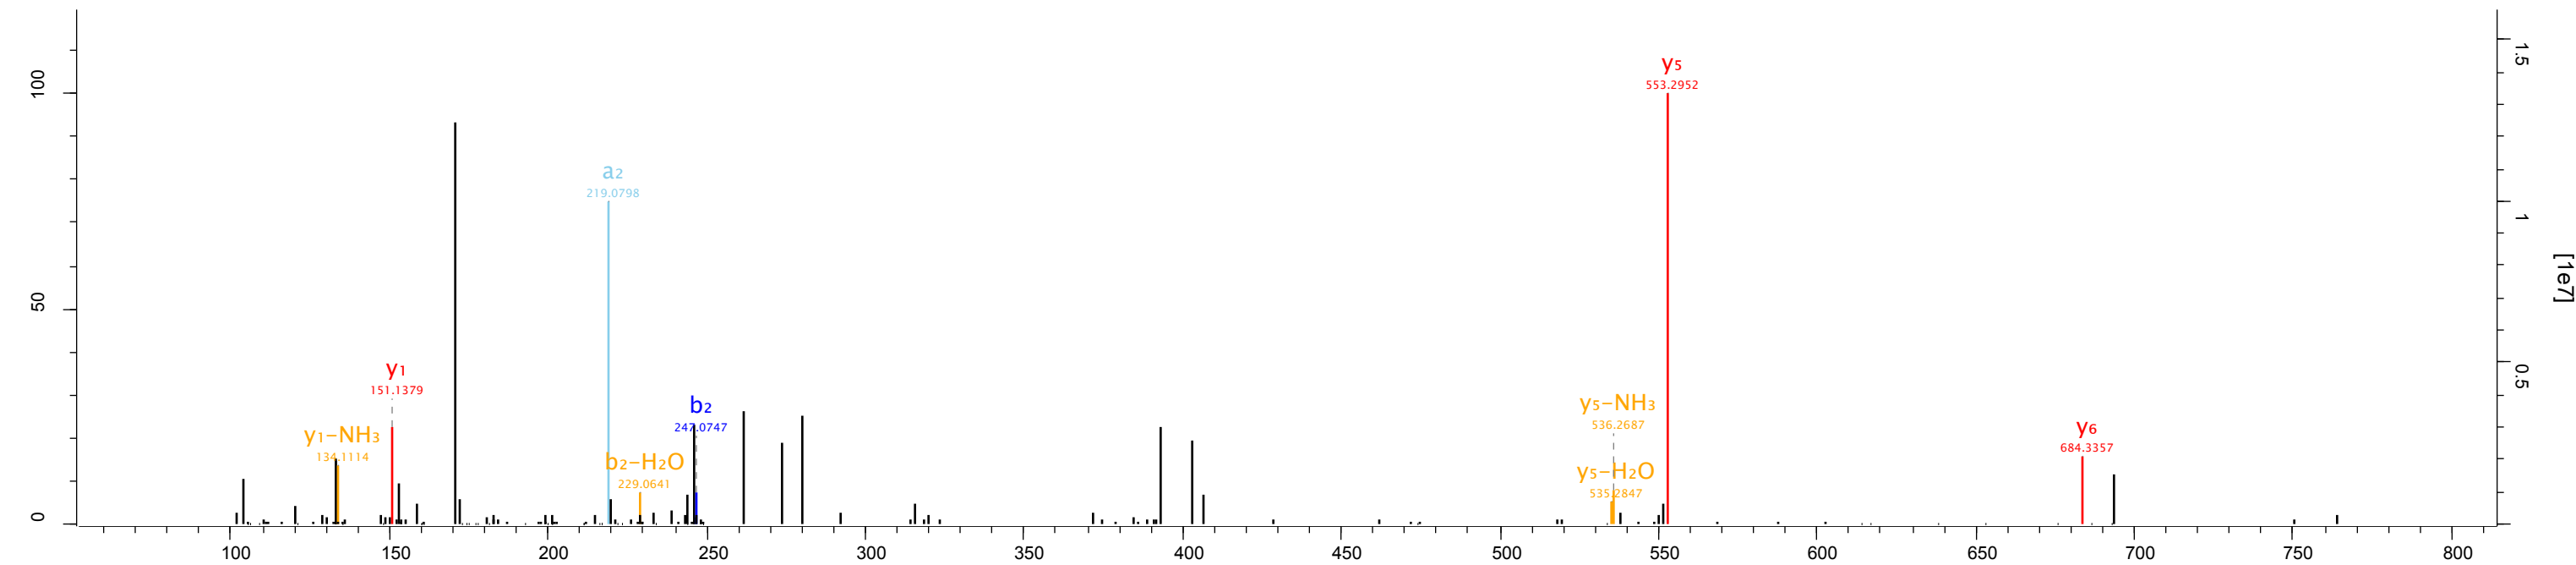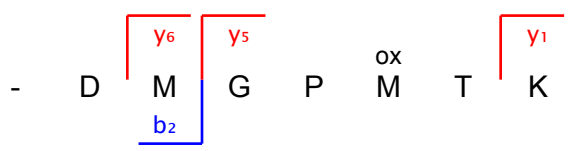

Raw file: 20180707\_MaS\_A375SR\_ML\_proteome\_2\_12  
 Scan: 12871 Method: FTMS; HCD Score: 99.59 m/z: 625.77 Gene names: ANAPC16

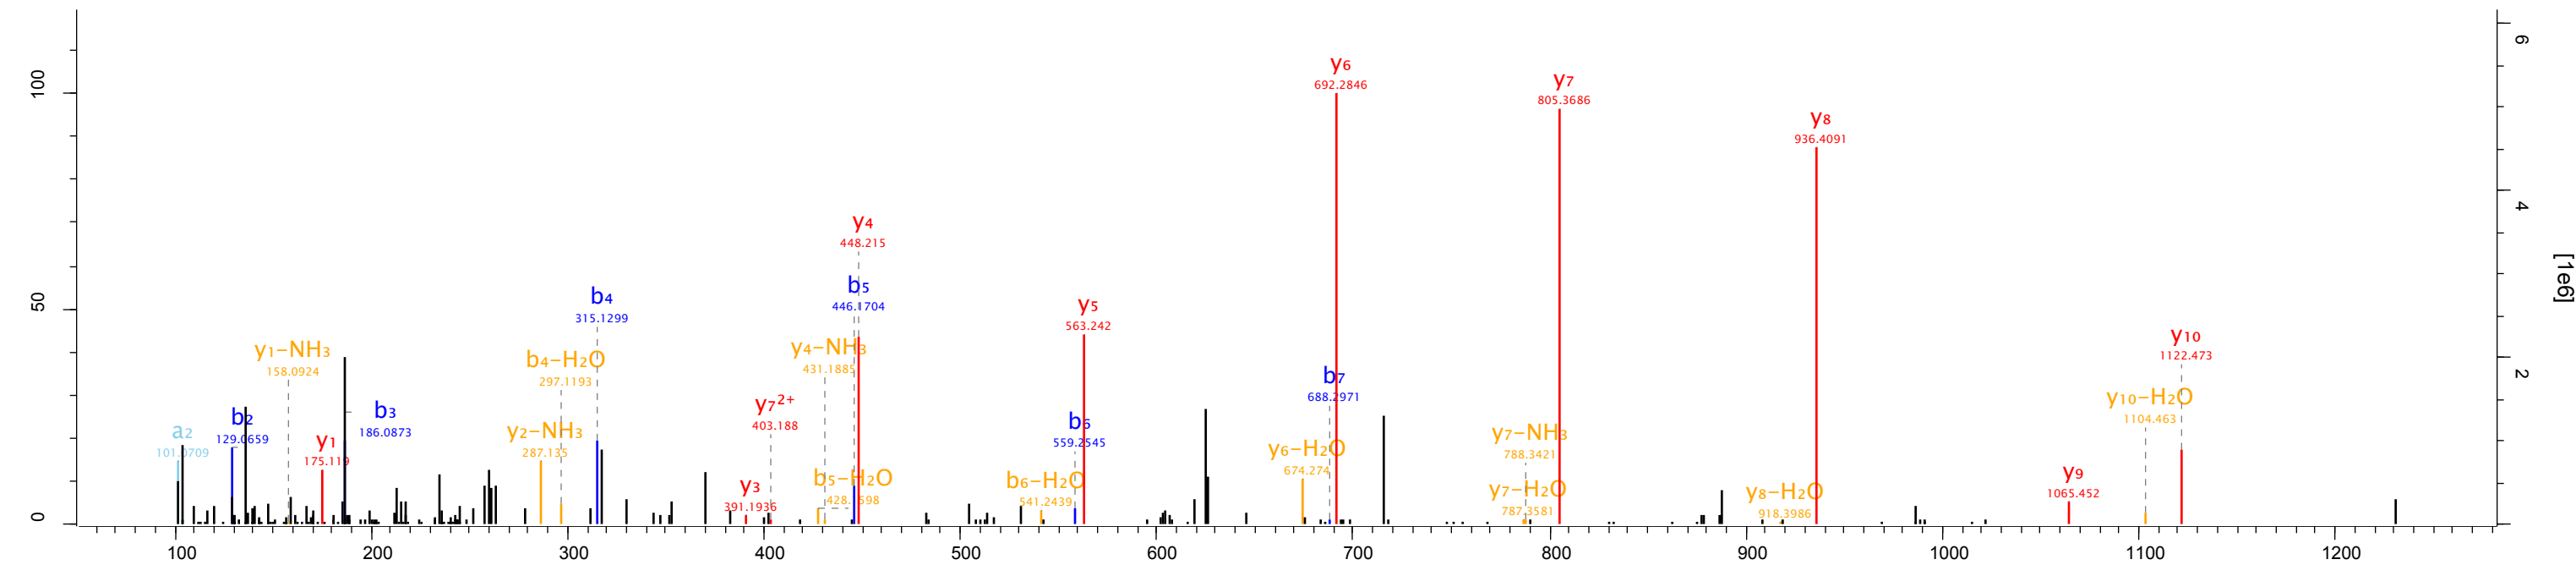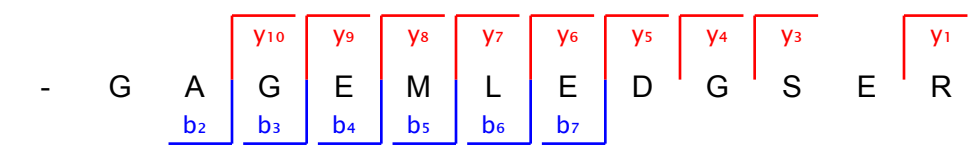

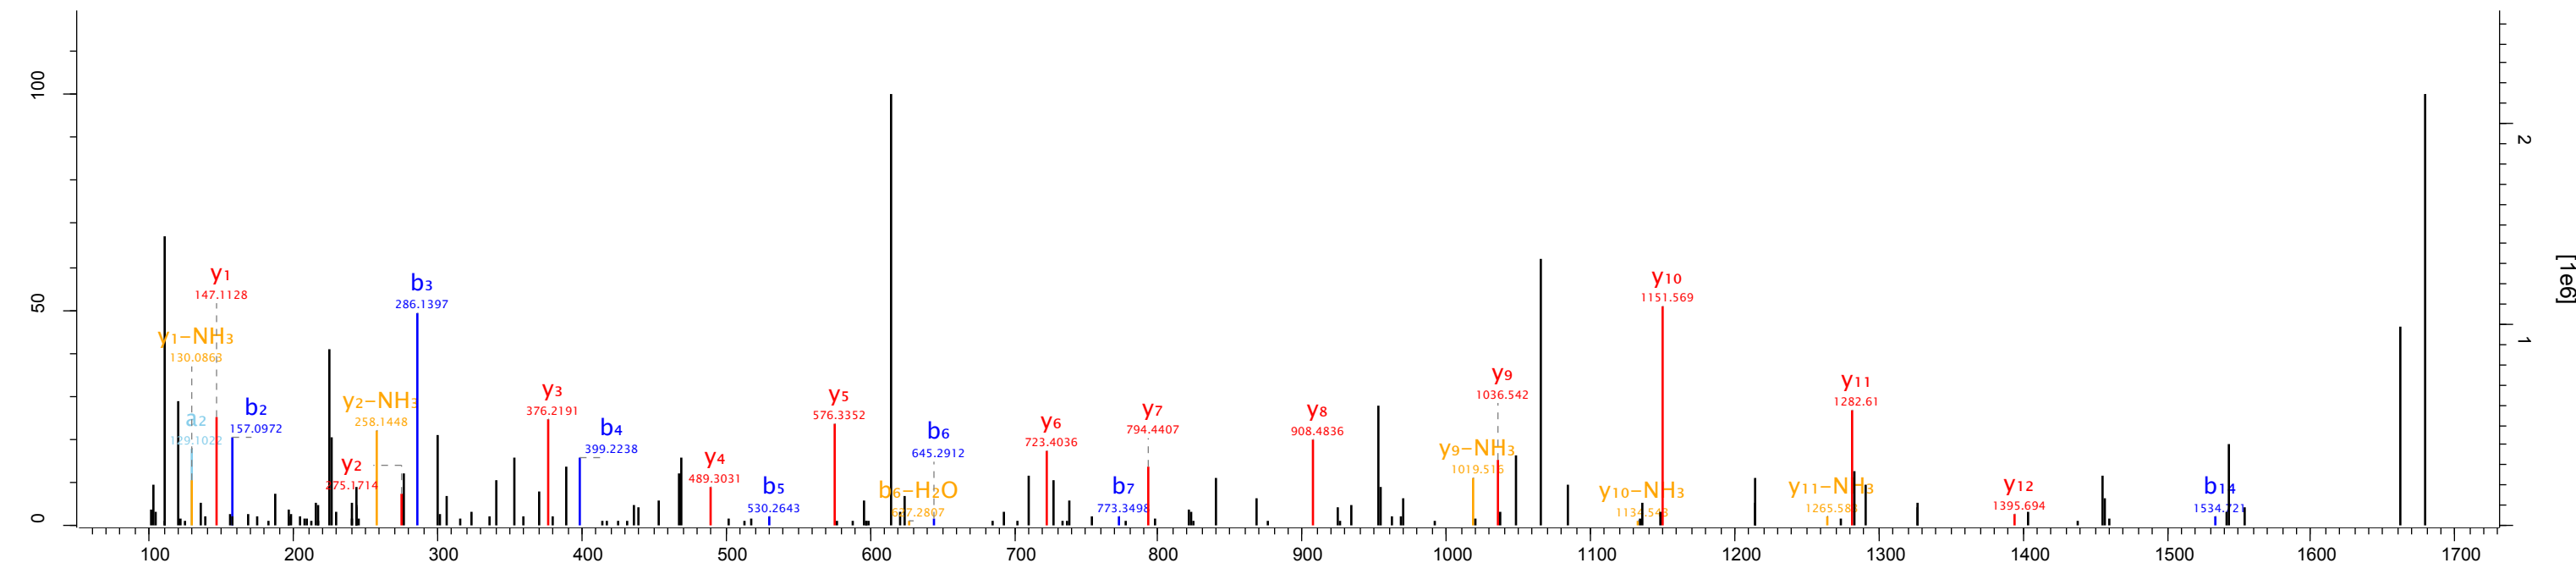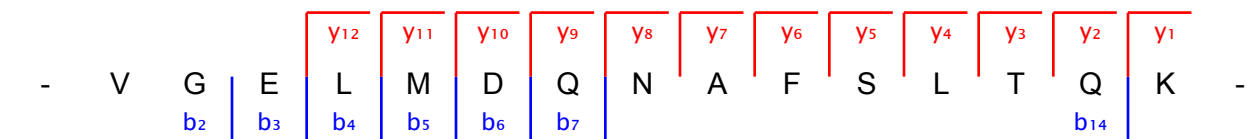

Raw file  
20180707\_MaS\_A375SR\_ML\_proteome\_2\_12

Scan: 9201  
Method: FTMS; HCD  
Score: 154.84  
m/z: 582.8  
Gene names: DDIT3

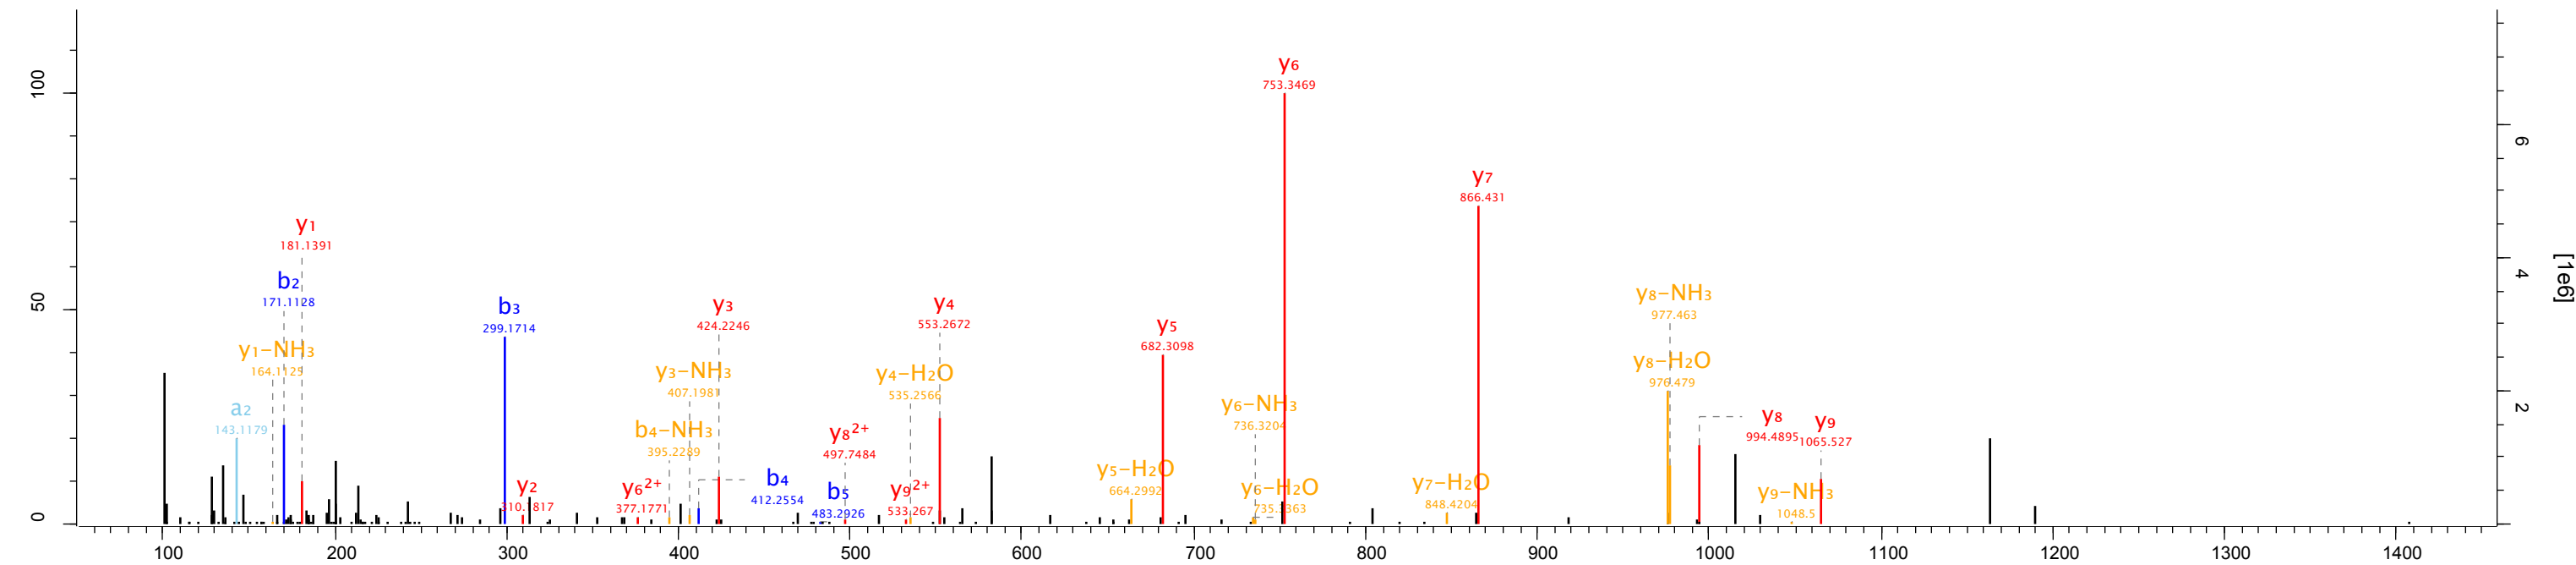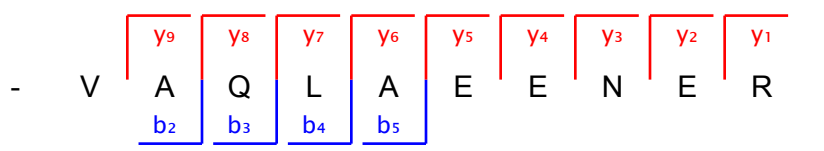



Raw file: 20180707\_MaS\_A375SR\_ML\_proteome\_2\_13  
 Scan: 13411 Method: FTMS; HCD Score: 103.08 m/z: 650.84 Gene names: MEIS2;MEIS3;MEIS1;MEIS3P1

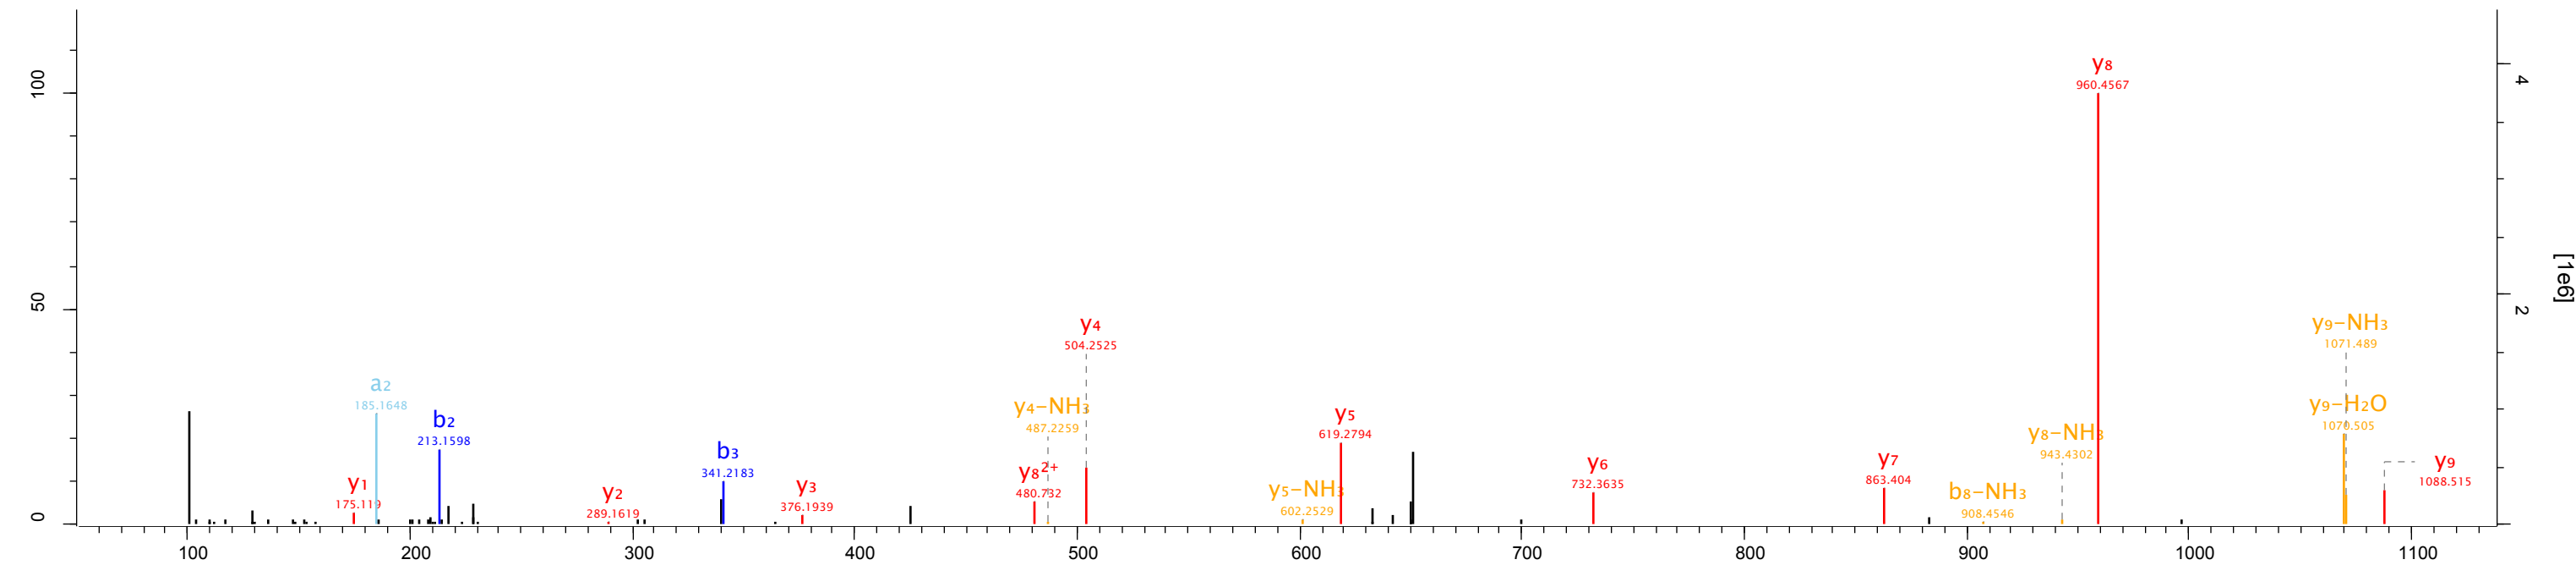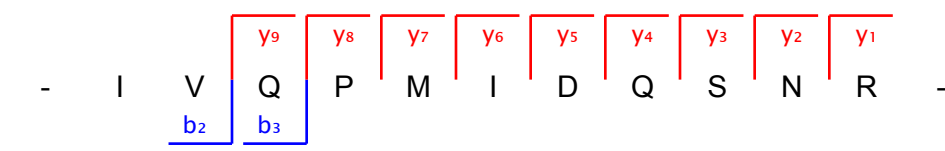

Raw file: 20180707\_MaS\_A375SR\_ML\_proteome\_2\_13  
 Scan: 4911 Method: FTMS; HCD Score: 116.13 m/z: 563.28 Gene names: SFT2D2

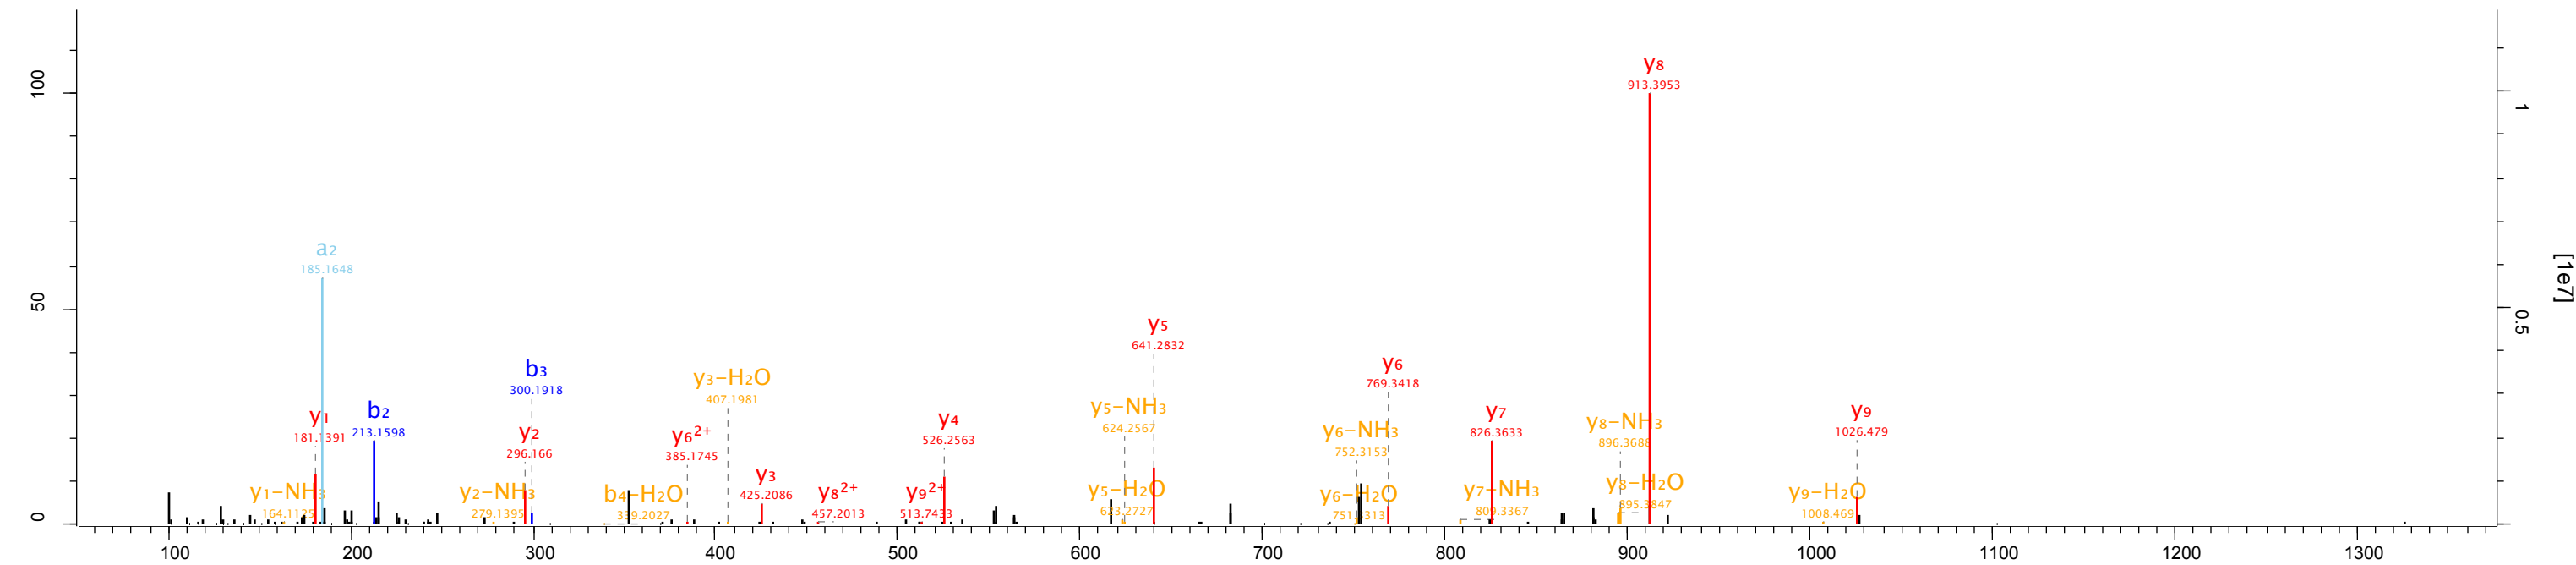

Raw file  
 20180707\_MaS\_A375SR\_ML\_proteome\_2\_13  
 Scan 7921 Method FTMS; HCD Score 50.04 m/z 553.24

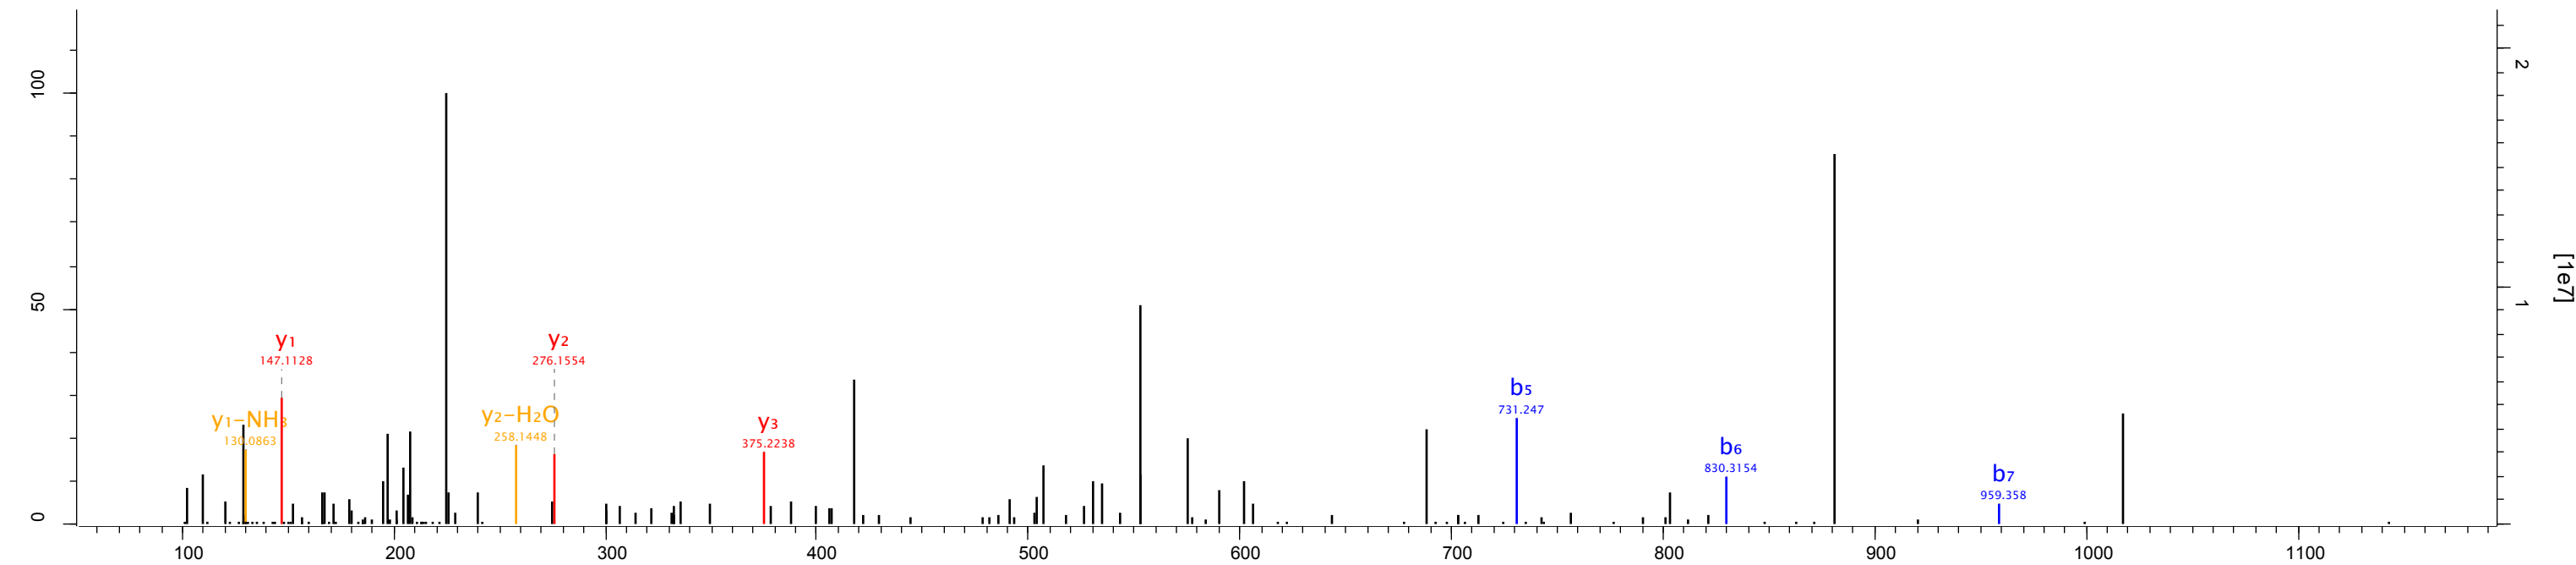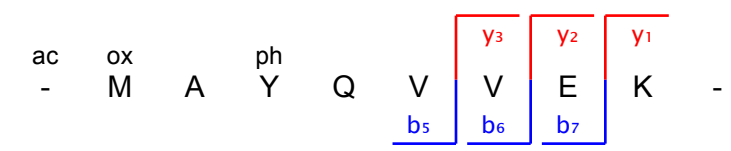

Raw file 20180707\_MaS\_A375SR\_ML\_proteome\_2\_14 Scan 10191 Method FTMS; HCD Score 80.69 m/z 565.83 Gene names FBXO6

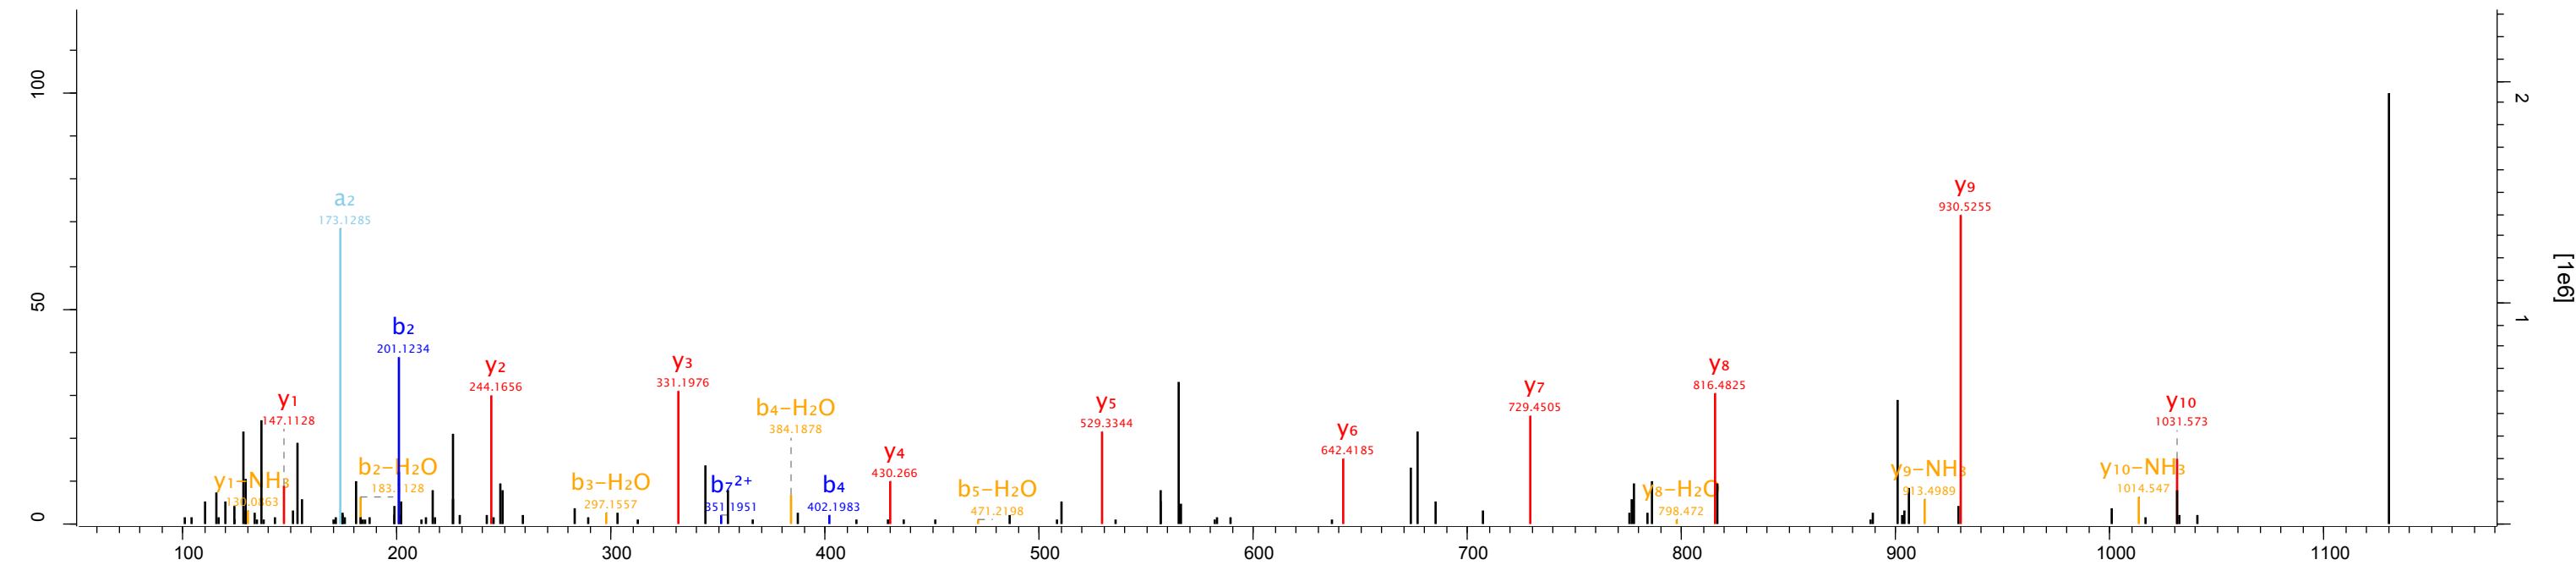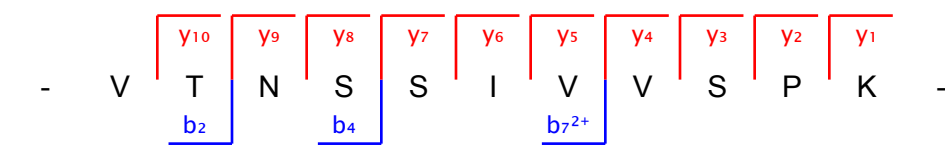

Raw file  
20180707\_MaS\_A375SR\_ML\_proteome\_2\_14

Scan 17711 Method FTMS; HCD Score 45.56 m/z 672 Gene names TMEM243

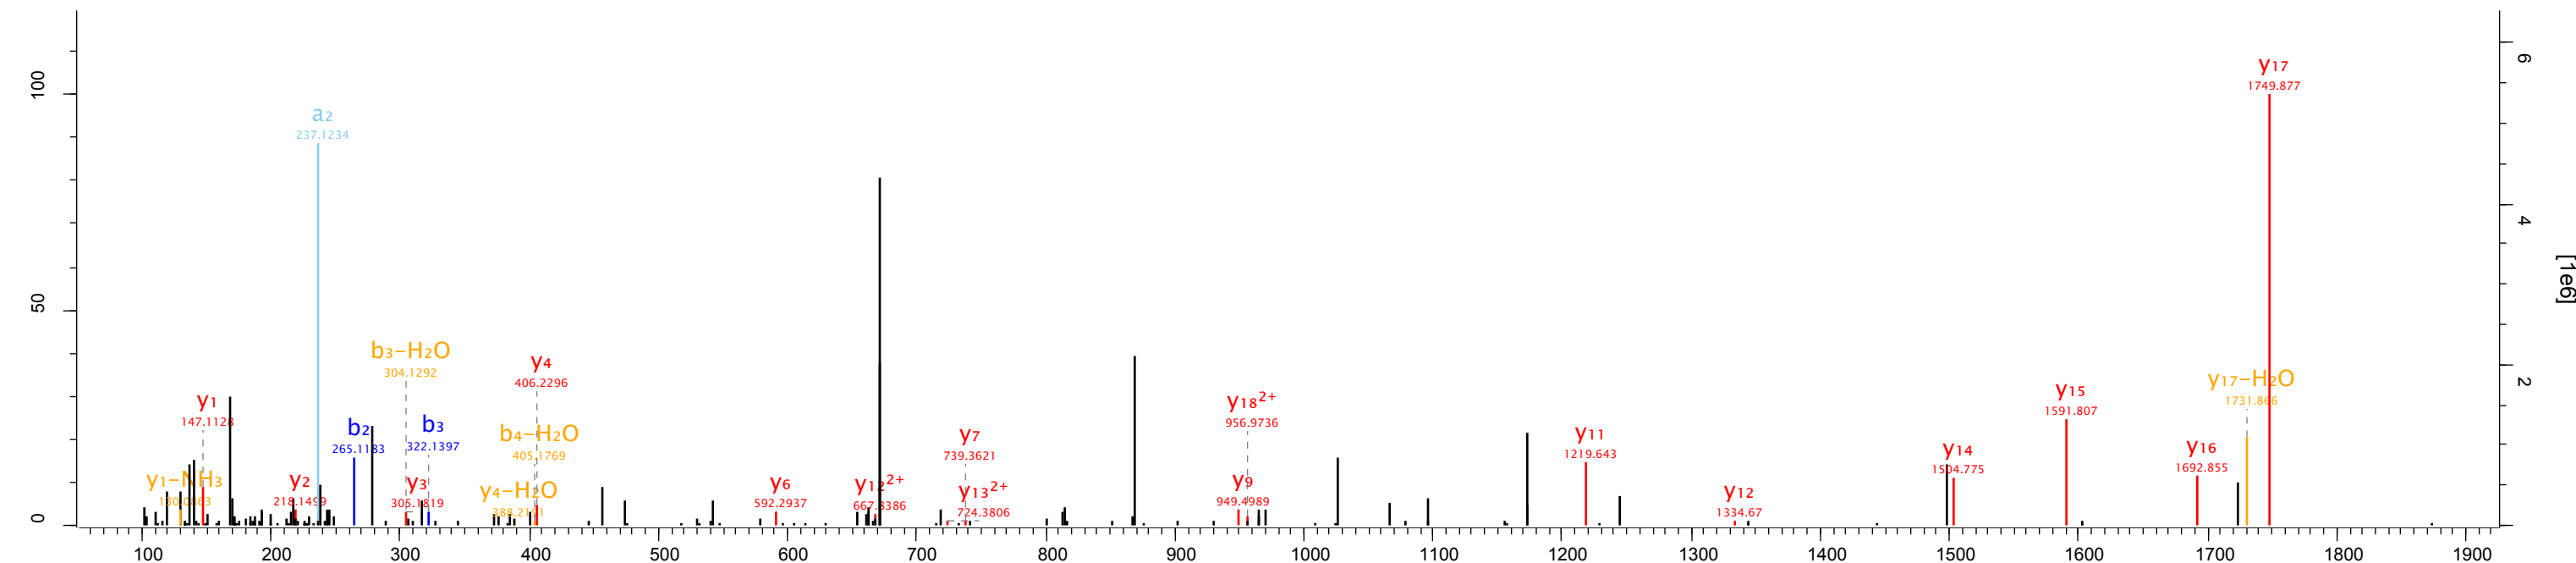

- T Y G T S G L D N R P L F G E T S A K -  
b2 b3

Raw file  
20180707\_MaS\_A375SR\_ML\_proteome\_2\_15

Scan 12481 Method FTMS; HCD Score 68.41 m/z 791.37 Gene names MTSS1L

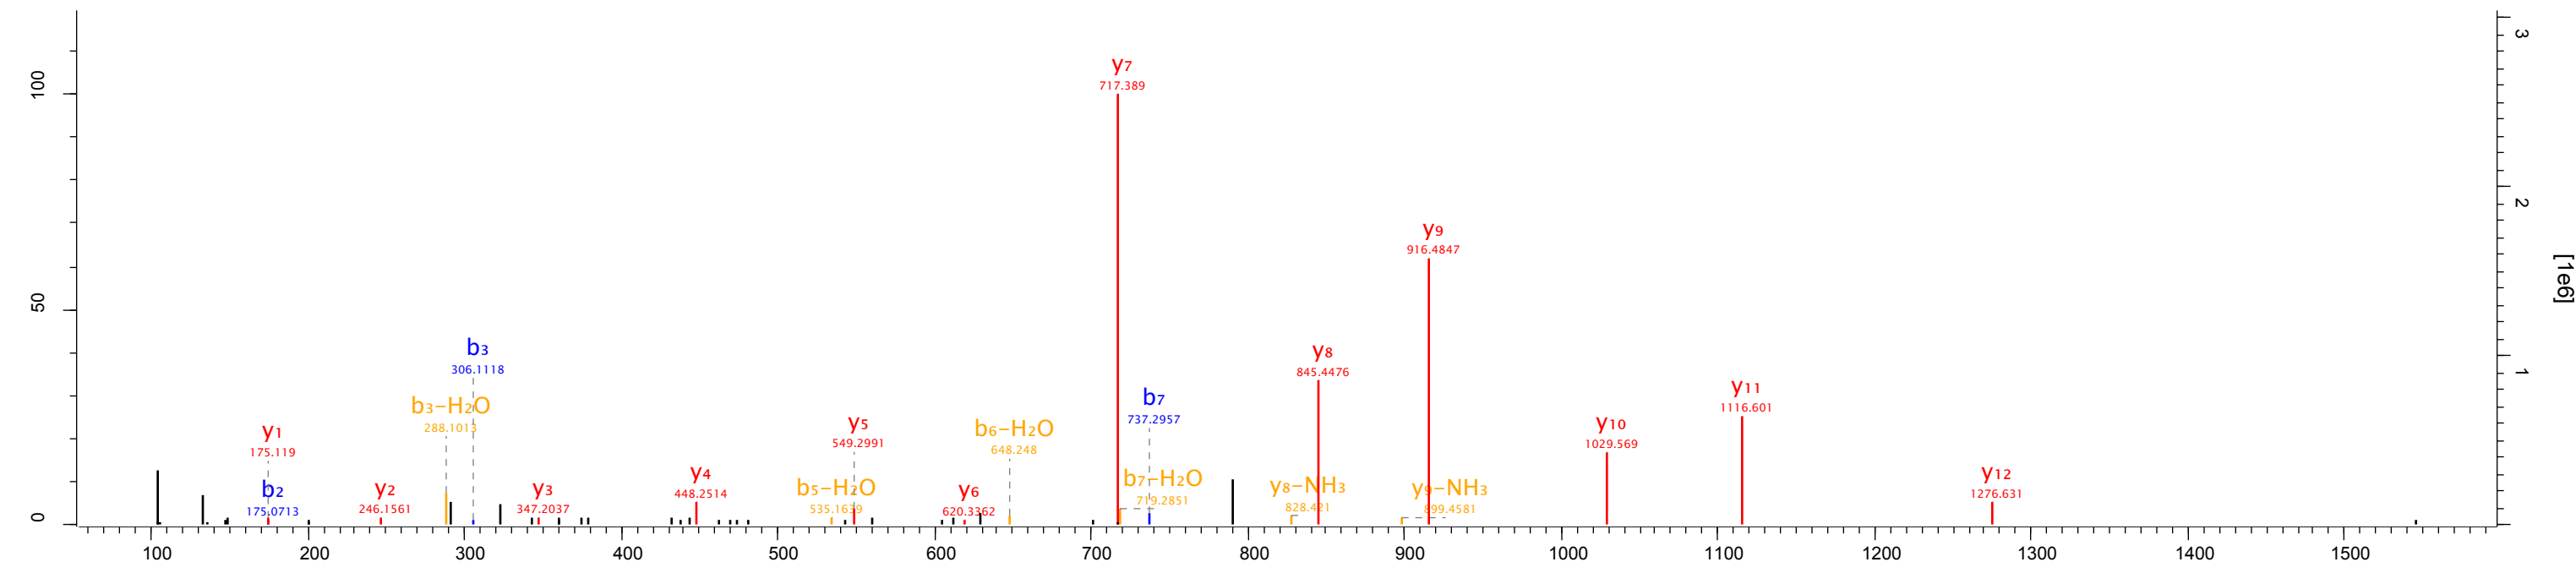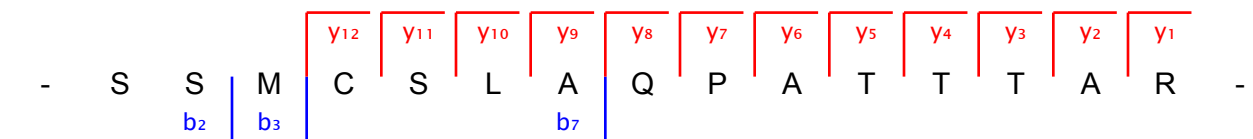

Raw file  
20180707\_MaS\_A375SR\_ML\_proteome\_2\_15

Scan 25391 Method FTMS; HCD Score 56.72 m/z 936.46 Gene names SIRT7

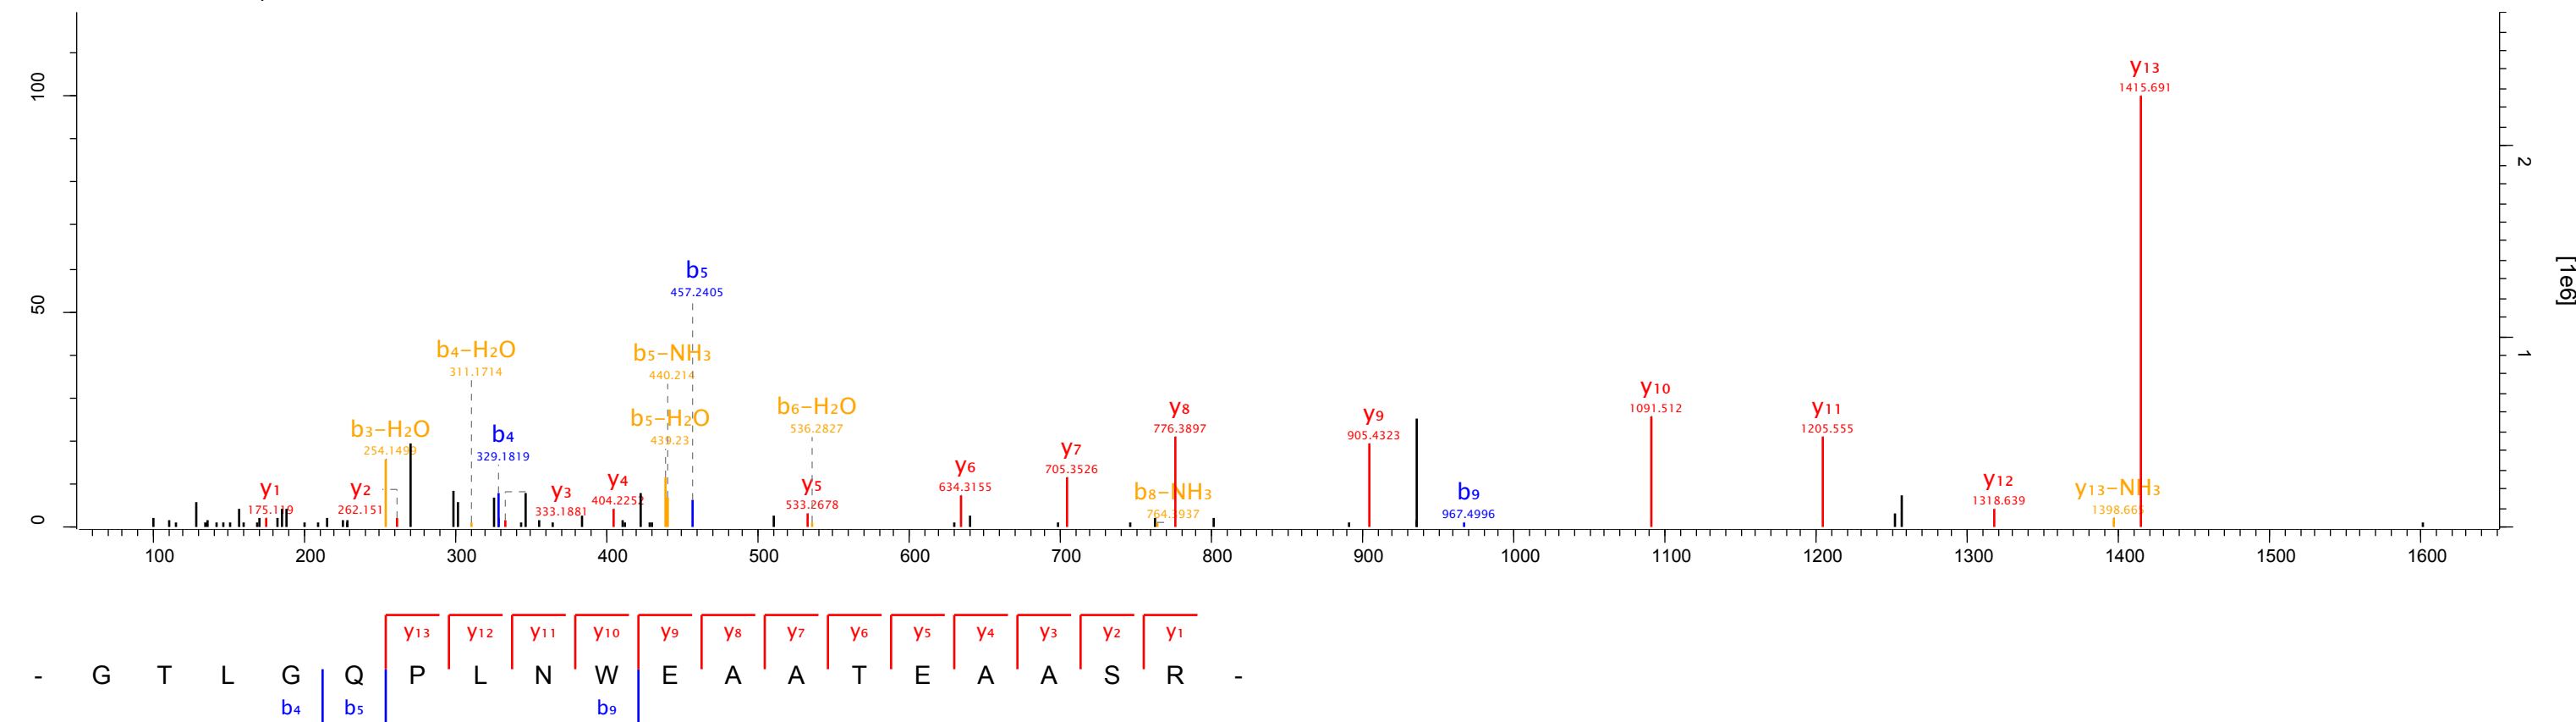

Raw file: 20180707\_MaS\_A375SR\_ML\_proteome\_2\_16  
 Scan: 25681 Method: FTMS; HCD Score: 109.48 m/z: 504.73 Gene names: TMEM258

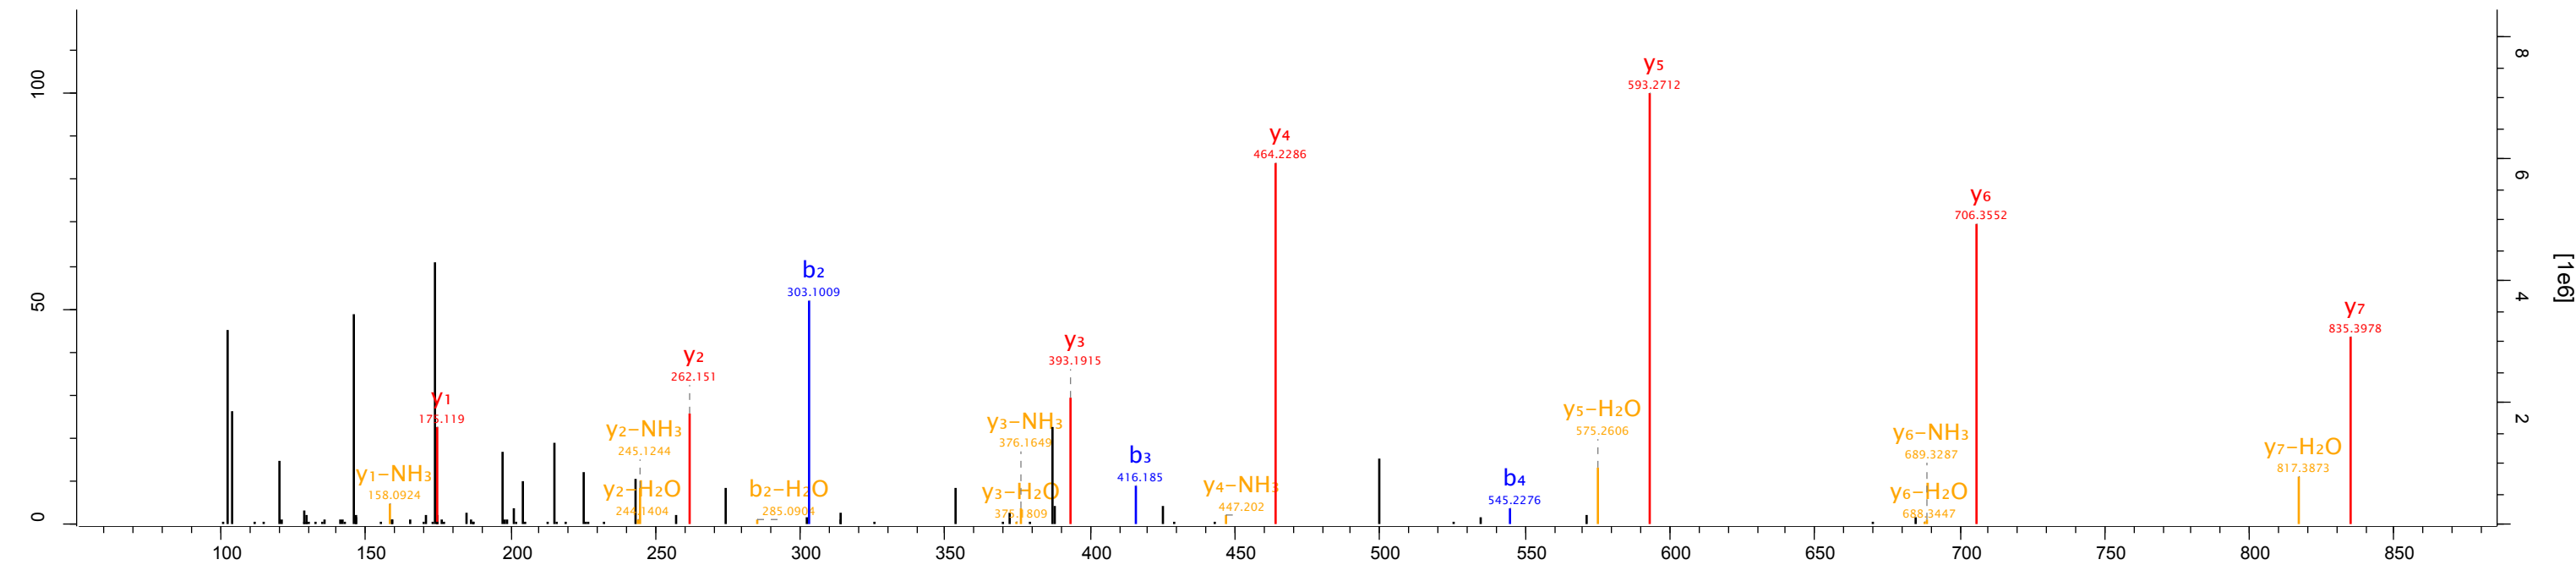



Raw file: 20180707\_MaS\_A375SR\_ML\_proteome\_2\_16  
 Scan: 7711 Method: FTMS; HCD Score: 47.87 m/z: 534.78 Gene names: HOOK2

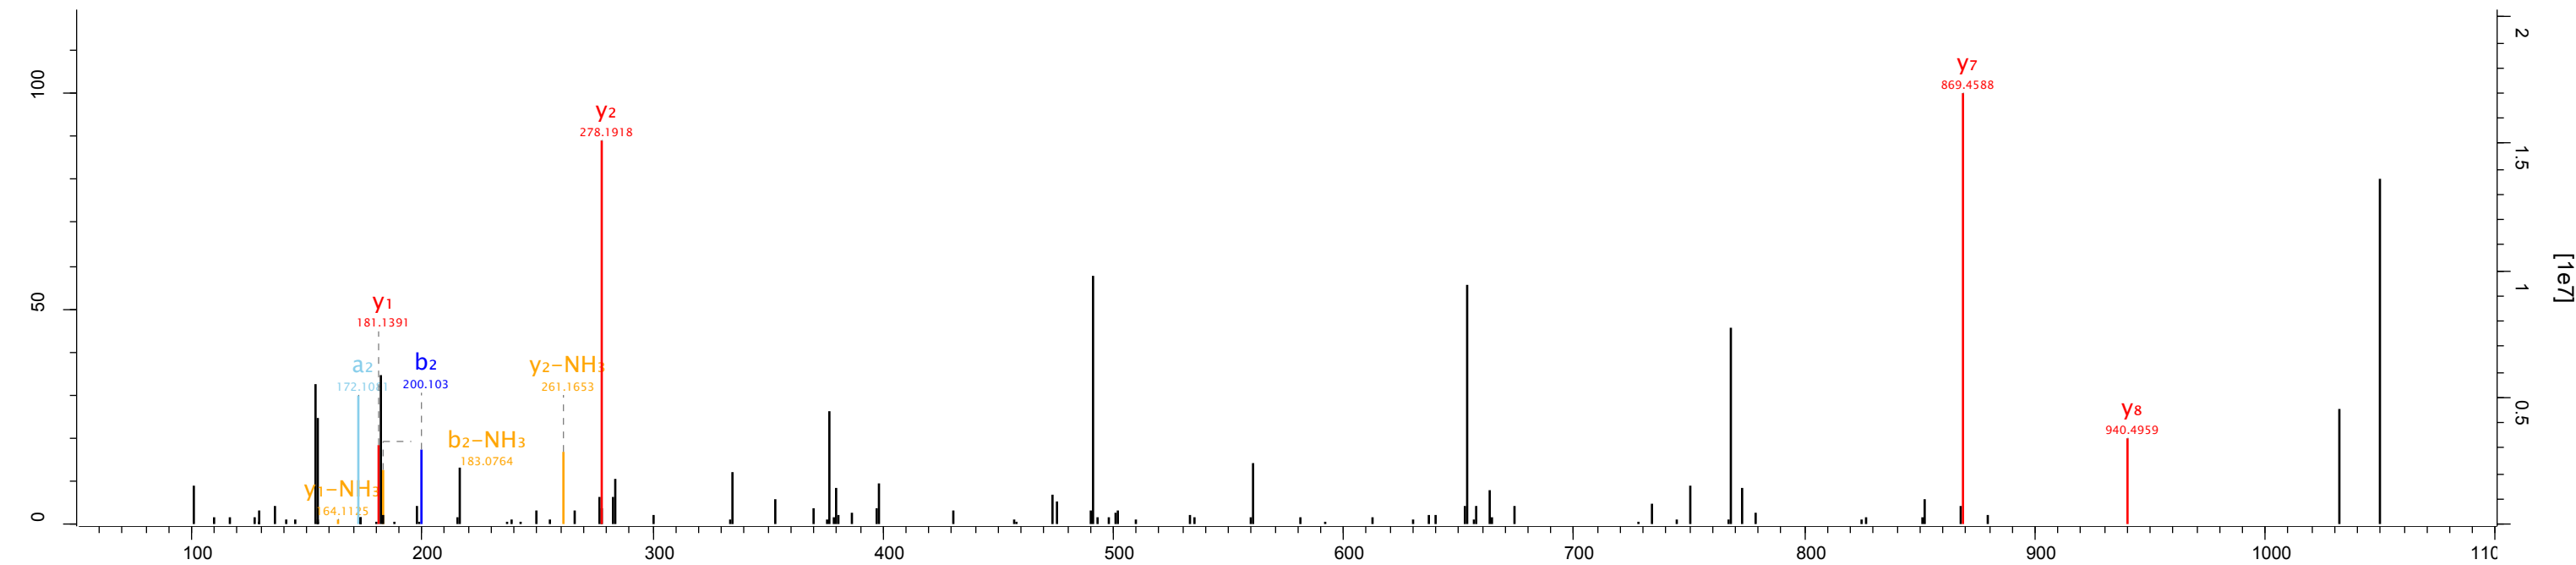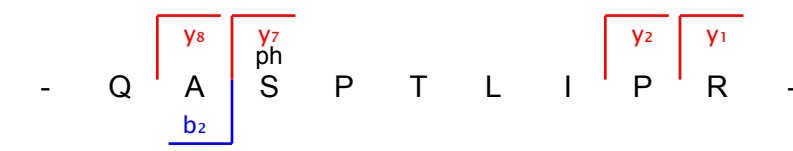

Raw file  
20180707\_MaS\_A375SR\_ML\_proteome\_2\_17

Scan 15531 Method FTMS; HCD Score 77.75 m/z 1121.47

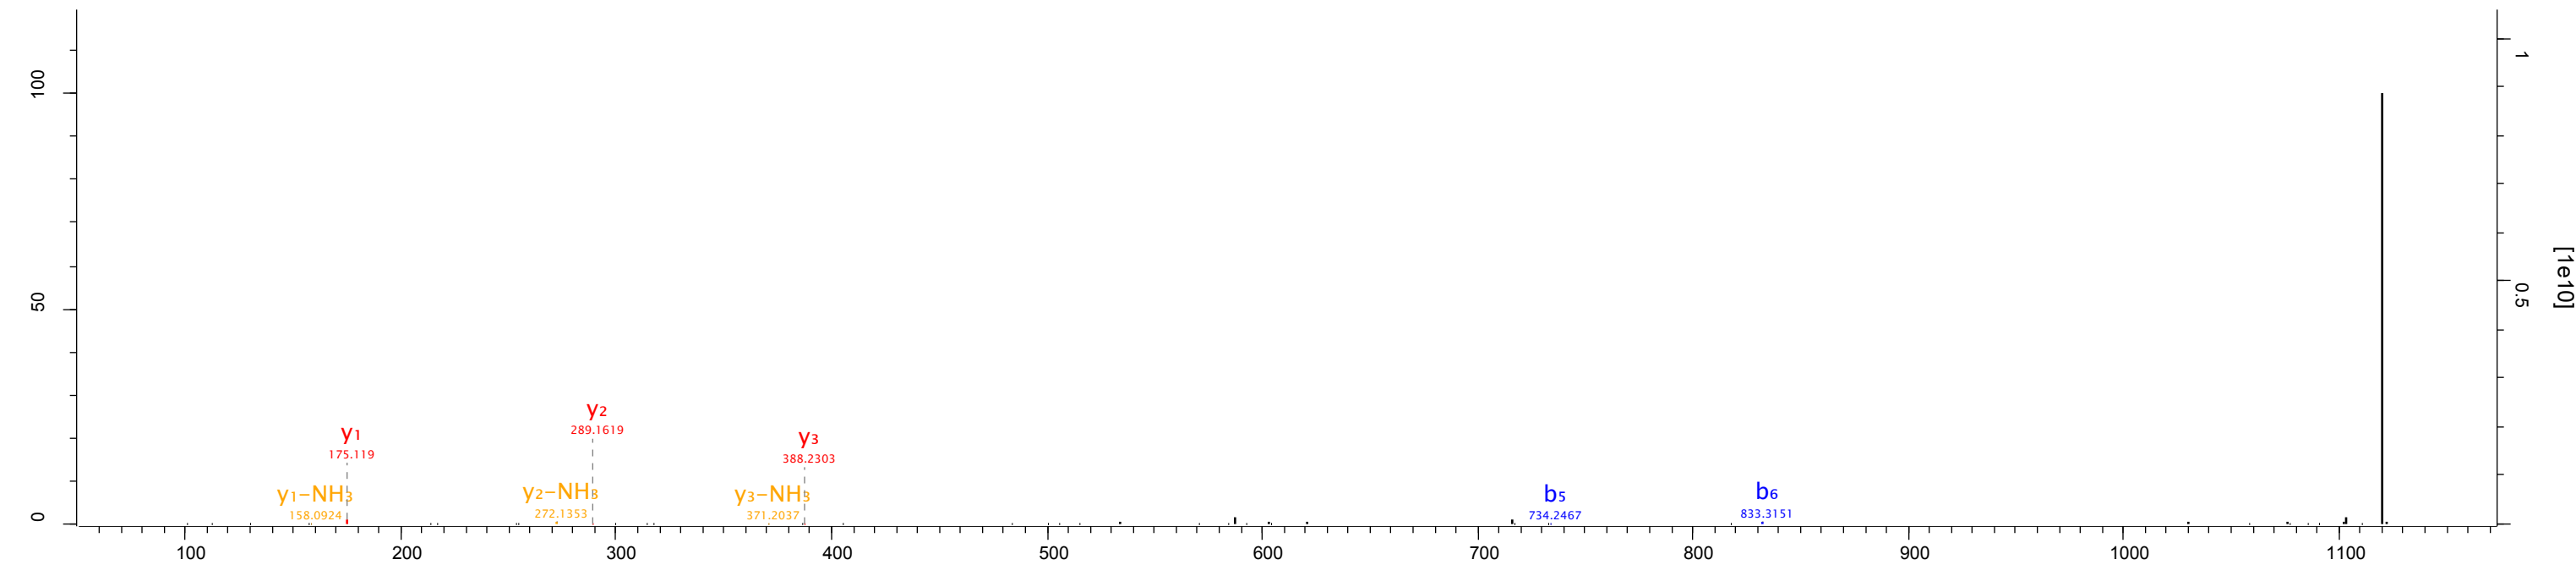

Raw file  
20180707\_MaS\_A375SR\_ML\_proteome\_2\_17

| Scan | Method    | Score | m/z    | Gene names |
|------|-----------|-------|--------|------------|
| 8301 | FTMS; HCD | 78.62 | 353.19 | ART4       |

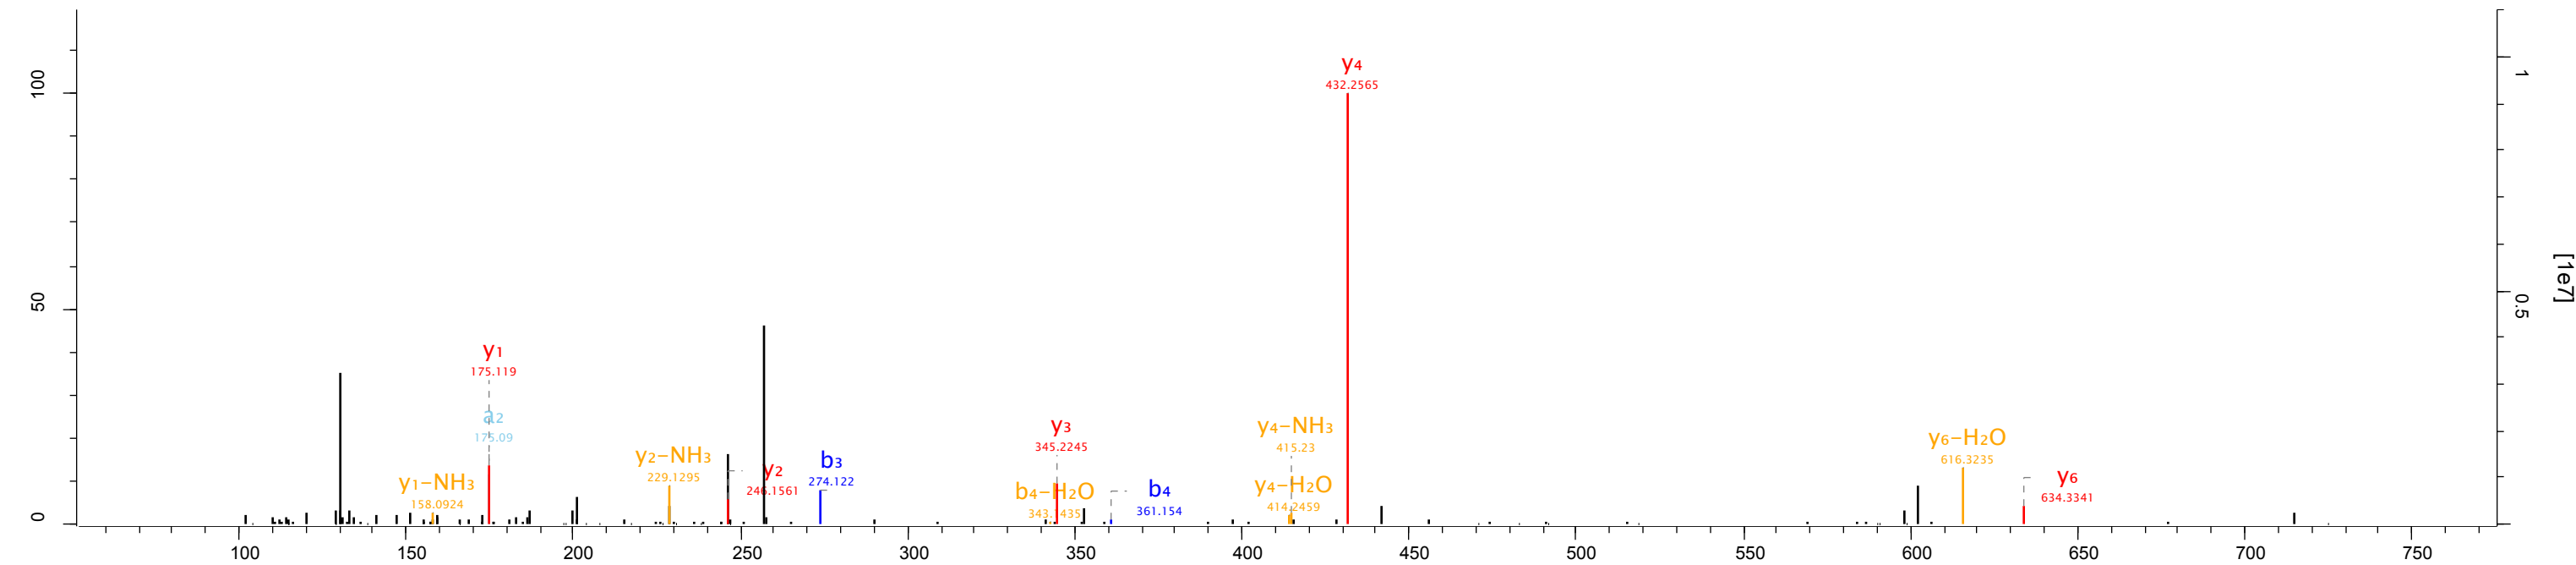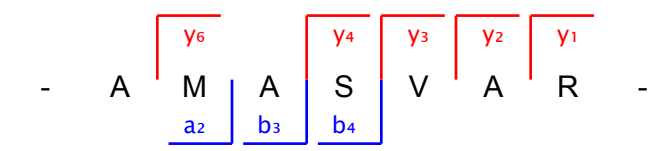

Raw file: 20180707\_MaS\_A375SR\_ML\_proteome\_2\_18  
 Scan: 14921 Method: FTMS; HCD Score: 188.39 m/z: 858.93 Gene names: APOC3

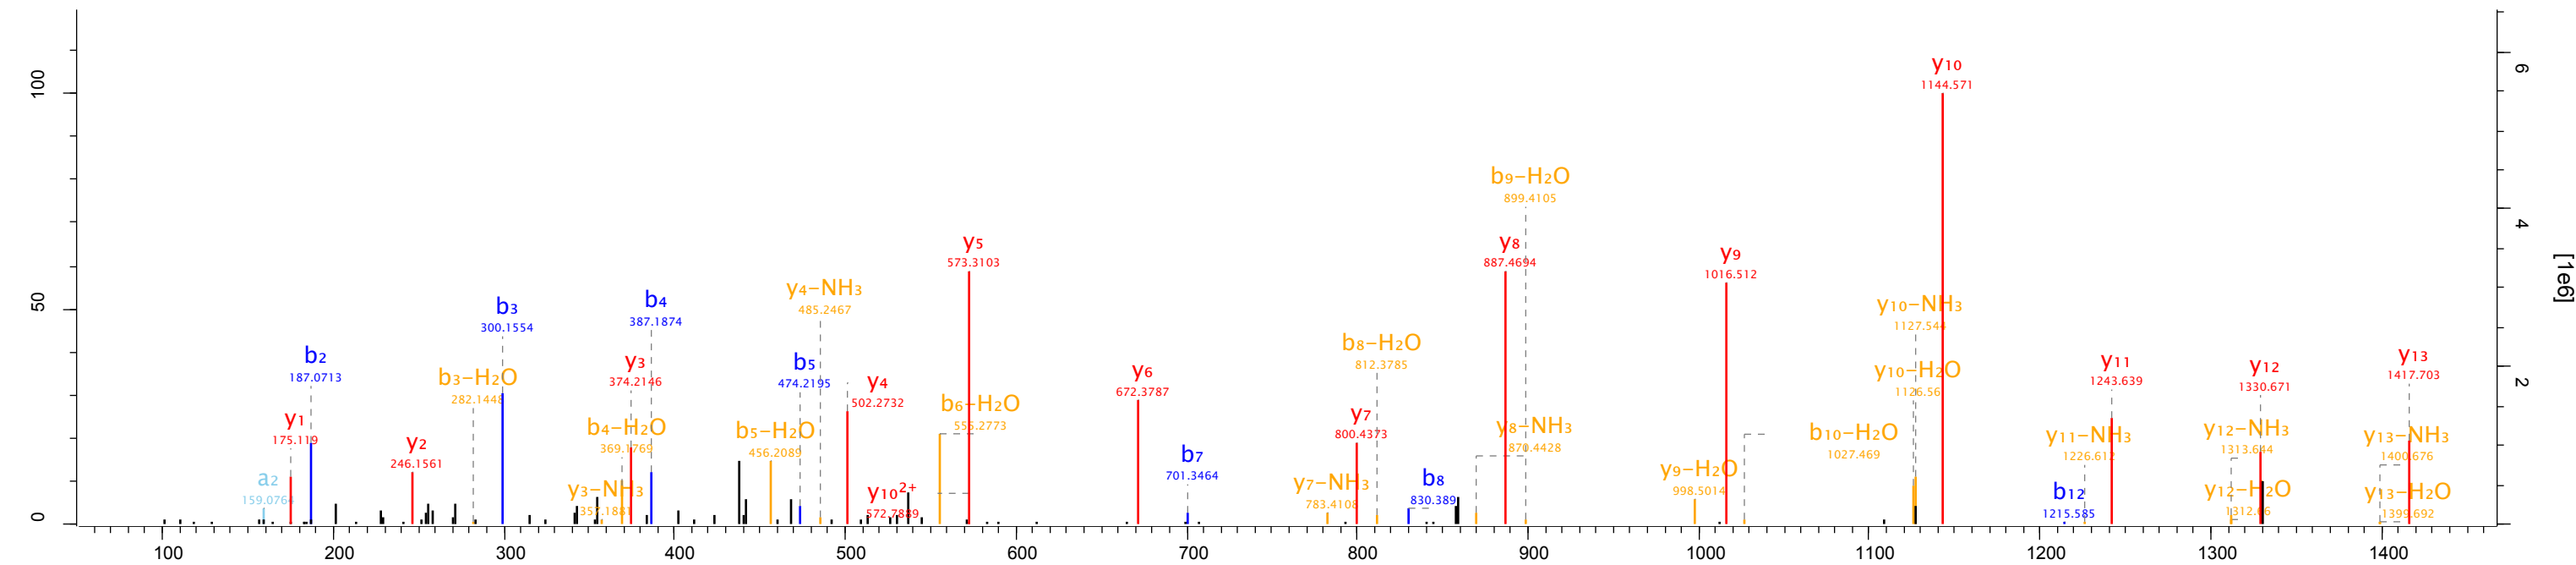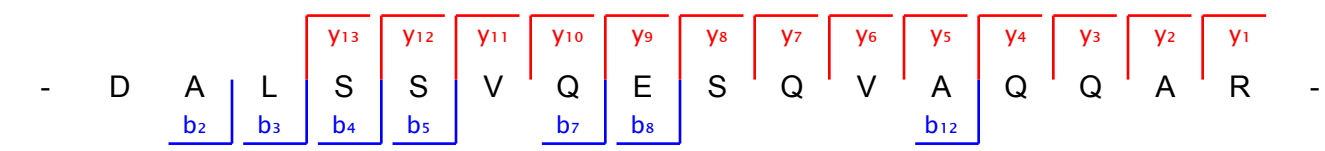

Raw file  
20180707\_MaS\_A375SR\_ML\_proteome\_2\_18

Scan 18581 Method FTMS; HCD Score 131.45 m/z 967 Gene names ATP6V0C

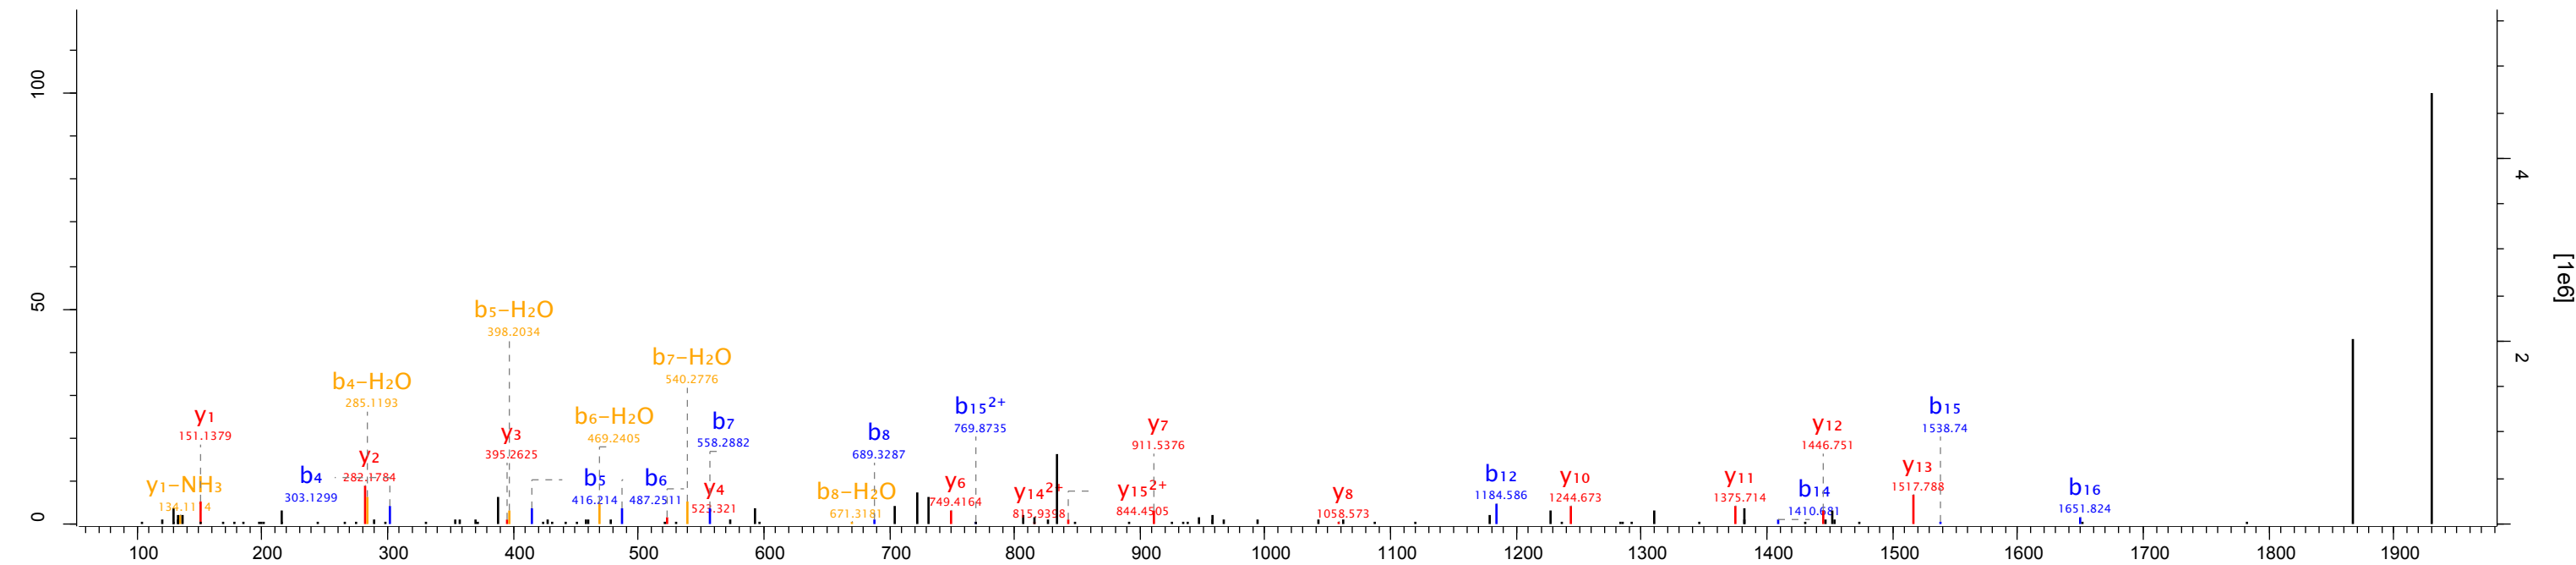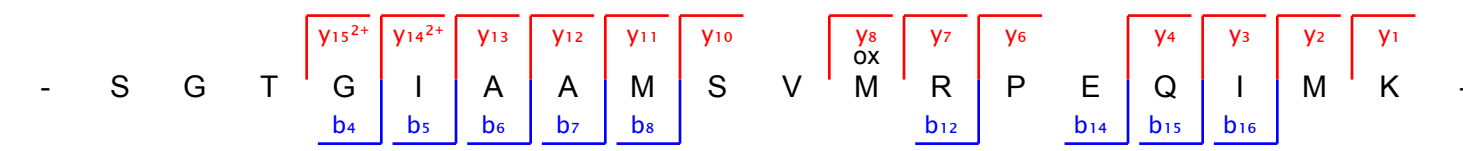

Raw file 20180707\_MaS\_A375SR\_ML\_proteome\_2\_20  
 Scan 19431 Method FTMS; HCD Score 61.17 m/z 858.37 Gene names MT-ND3

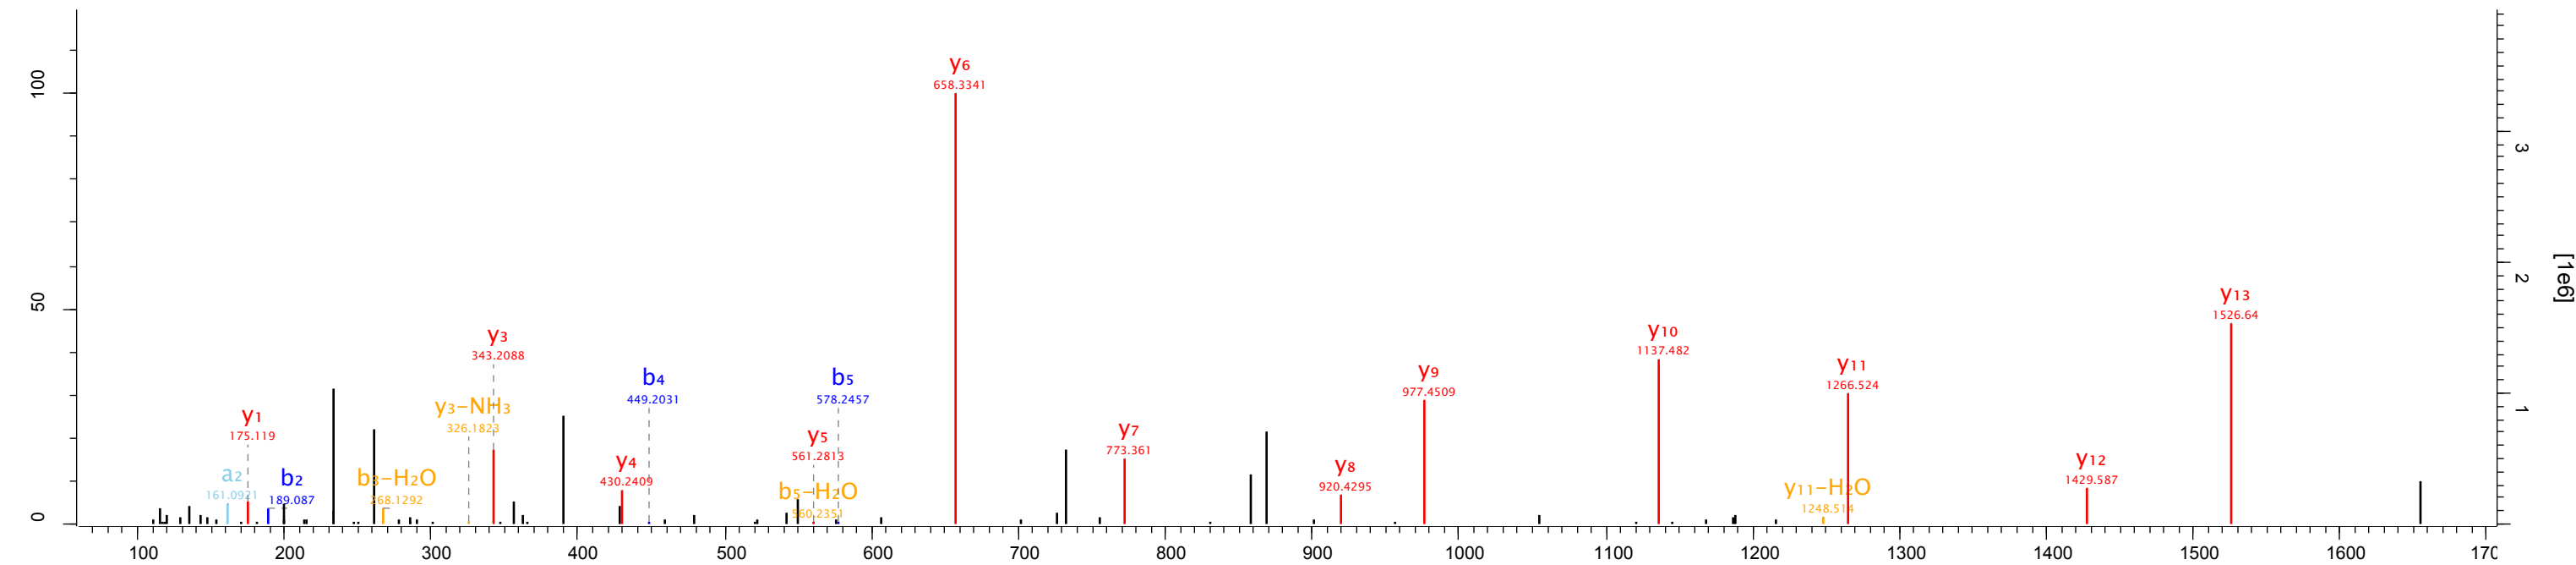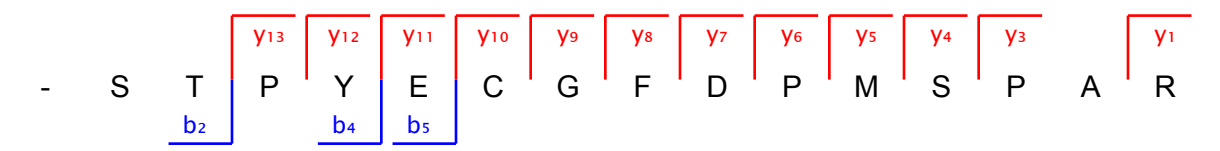

Raw file 20180707\_MaS\_A375SR\_ML\_proteome\_2\_21 Scan 9721 Method FTMS; HCD Score 51.04 m/z 397.21

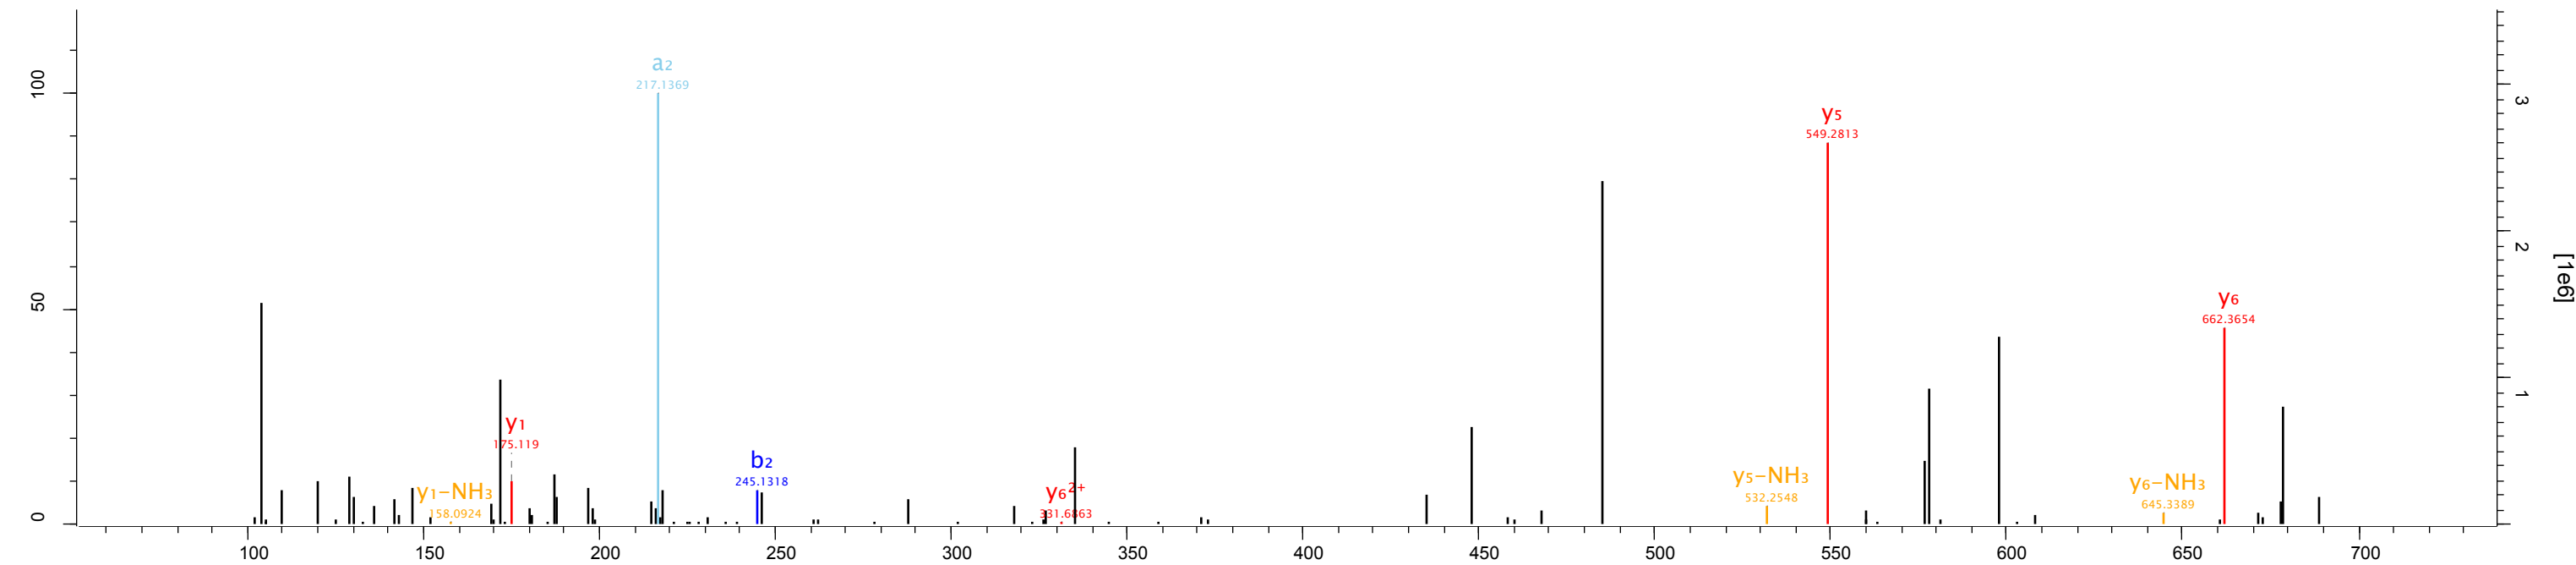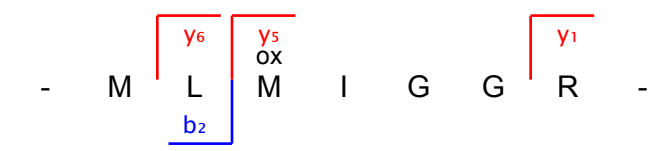

Raw file 20180707\_MaS\_A375SR\_ML\_proteome\_2\_22  
 Scan 24501 Method FTMS; HCD Score 54.34 m/z 705.87 Gene names SPP2

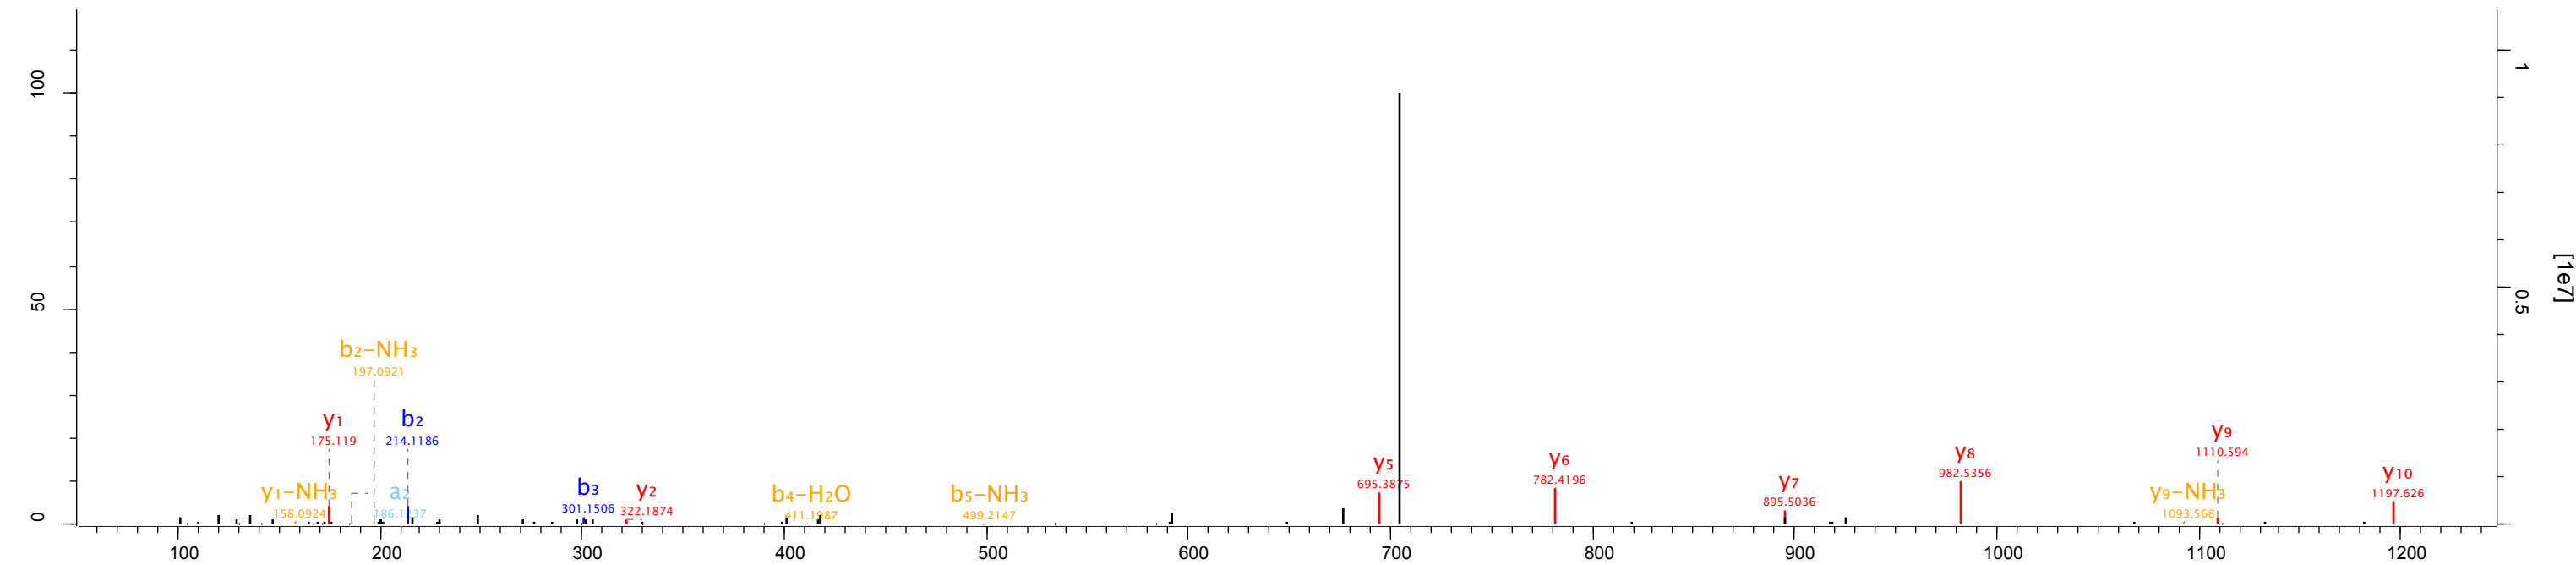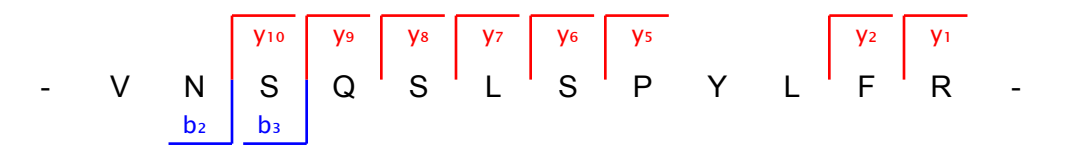



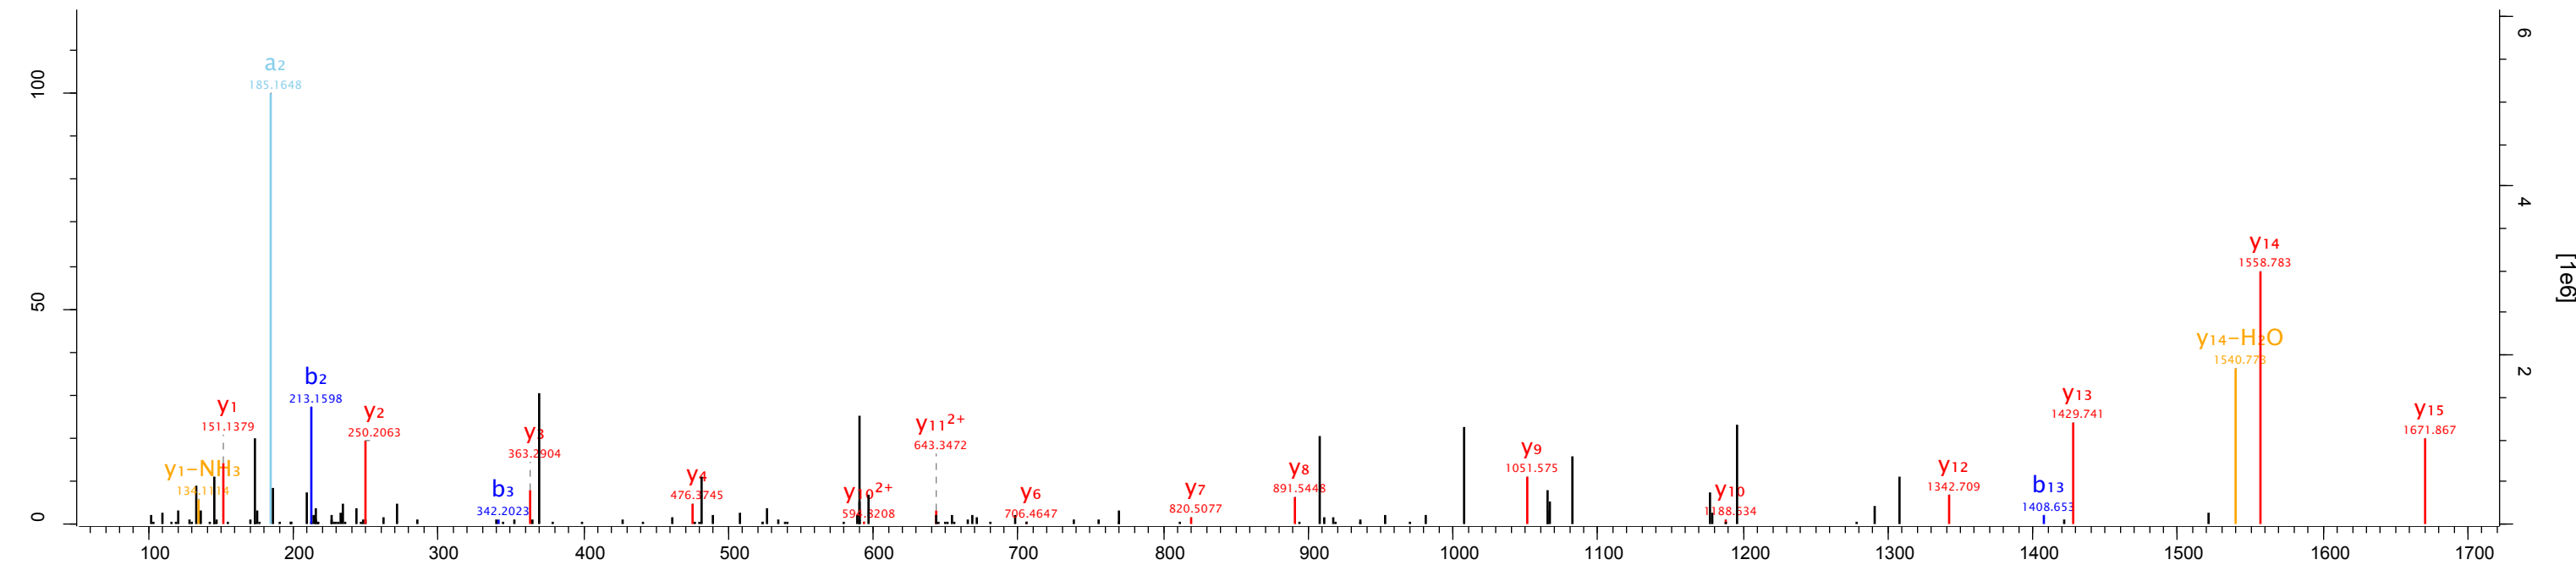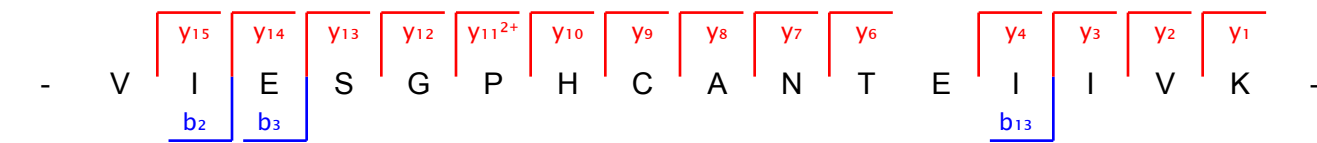

Raw file 20180707\_MaS\_A375SR\_ML\_proteome\_2\_23 Scan 17151 Method FTMS; HCD Score 45.37 m/z 583.3

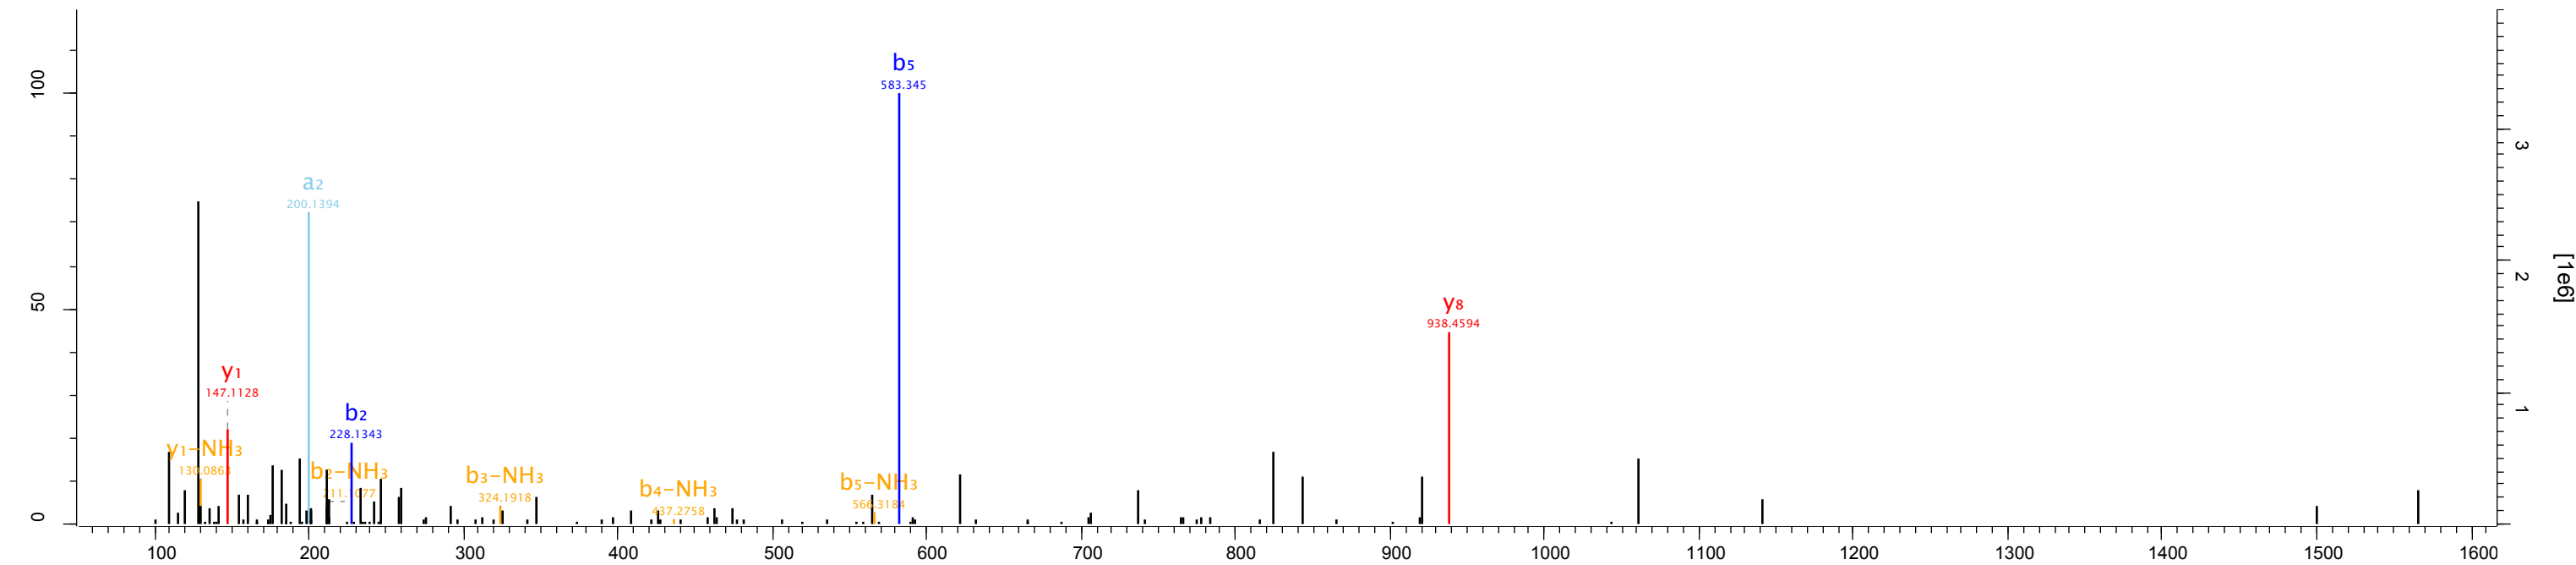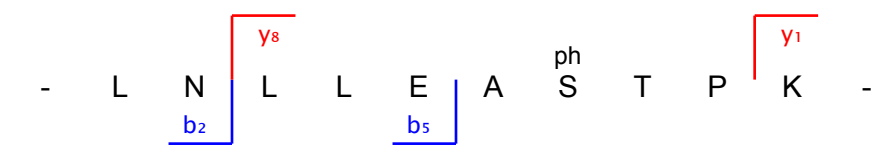

Raw file

20180707\_MaS\_A375SR\_ML\_proteome\_2\_23

Scan 23251 Method FTMS; HCD Score 32.86 m/z 601.05 Gene names BCDIN3D

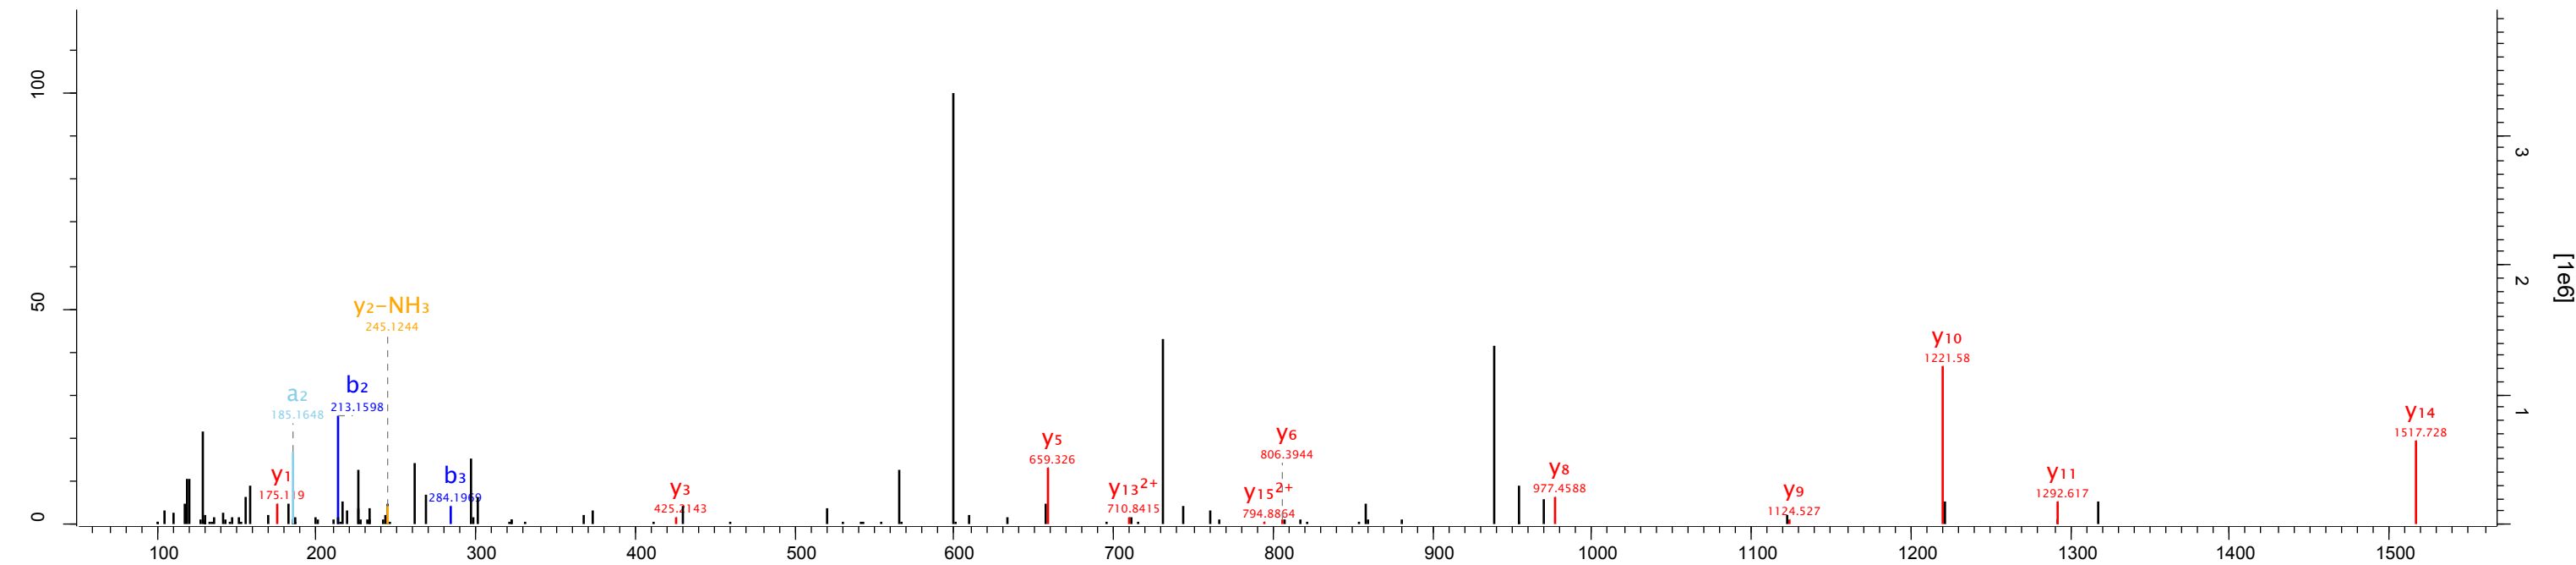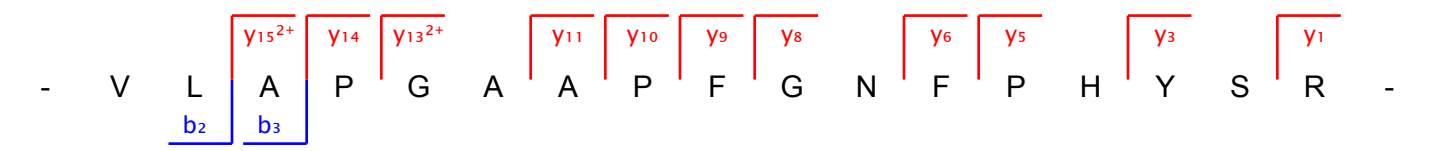

Raw file  
20180707\_MaS\_A375SR\_ML\_proteome\_2\_23

Scan 9371 Method FTMS; HCD Score 46.43 m/z 566.72 Gene names PSPHP1

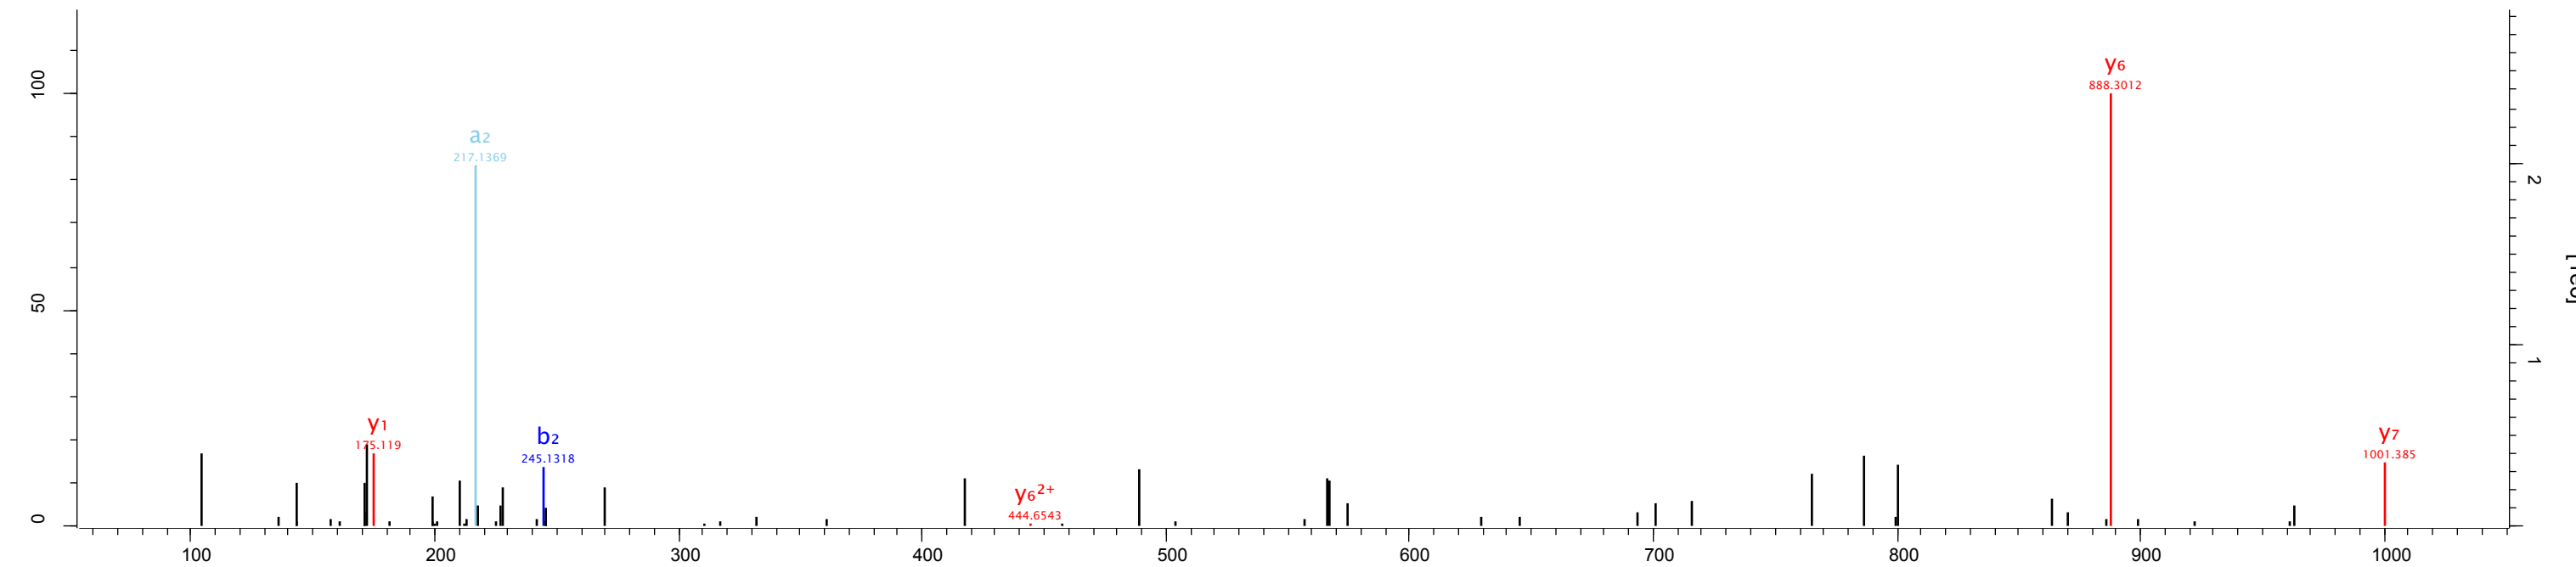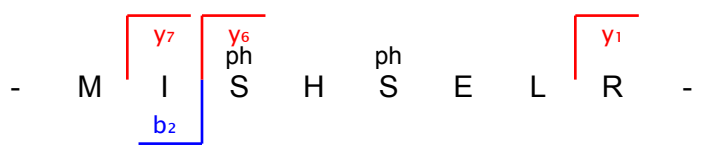

Raw file: 20180707\_MaS\_A375SR\_ML\_proteome\_2\_24  
 Scan: 17921 Method: FTMS; HCD Score: 128.85 m/z: 710.85 Gene names: SPATA22

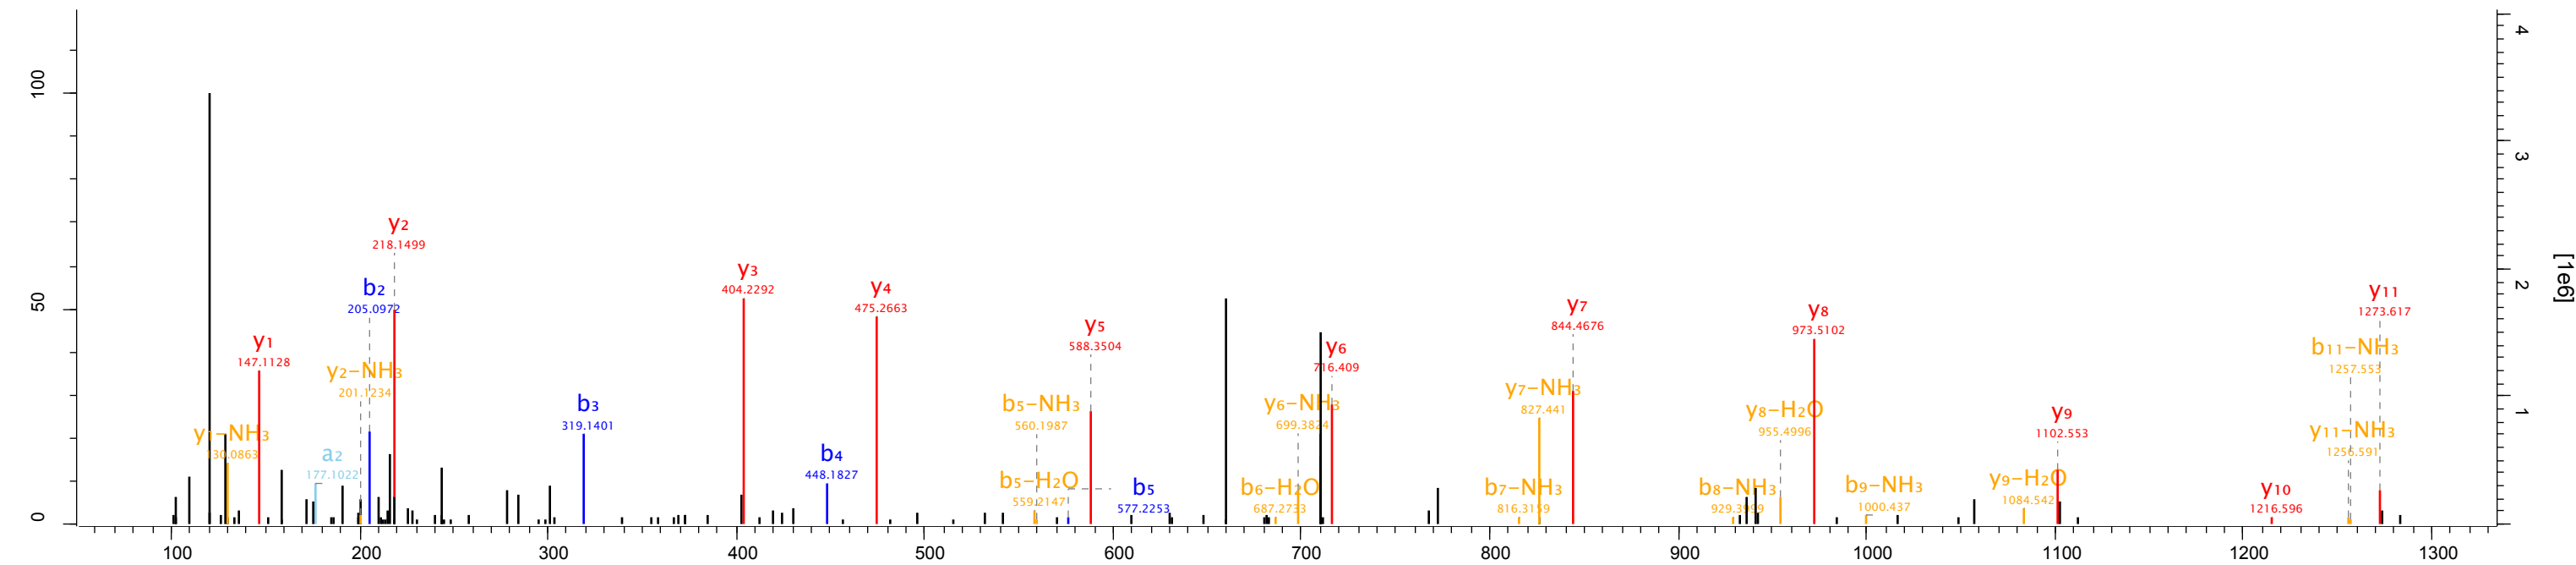

Peptide sequence: F G N E E Q Q L A W A K

Fragmentation sites (b and y ions):

- b<sub>2</sub> (G)
- b<sub>3</sub> (GN)
- b<sub>4</sub> (GNE)
- b<sub>5</sub> (GNEE)

Raw file  
20180707\_MaS\_A375SR\_ML\_proteome\_2\_24

Scan Method Score m/z Gene names  
24271 FTMS; HCD 60.54 604.83 ZFPM1

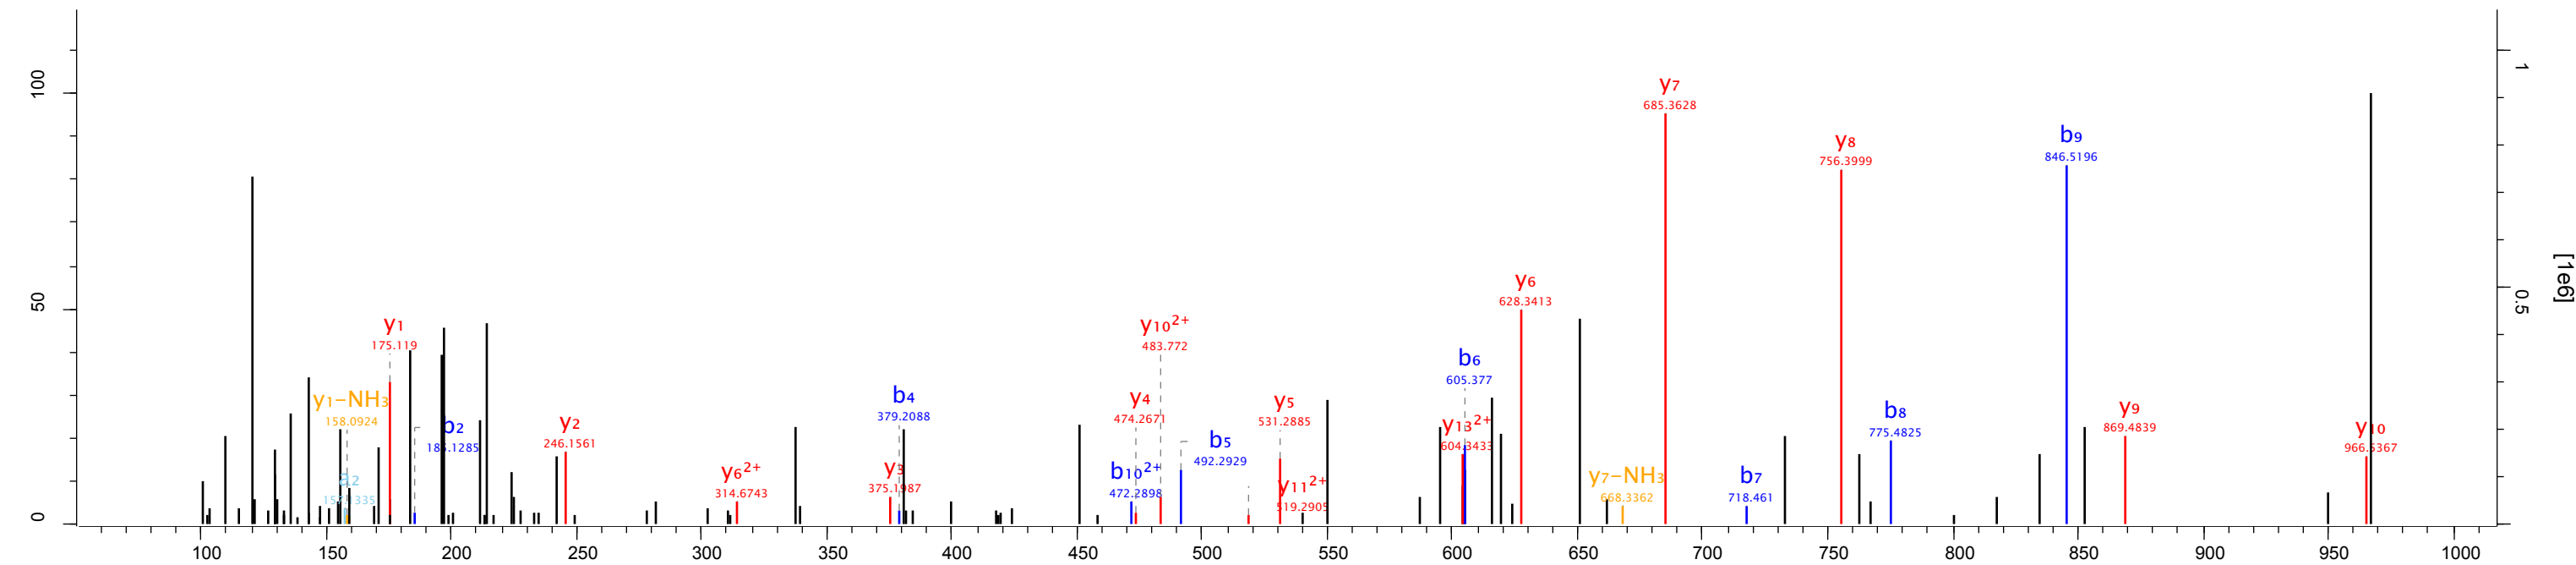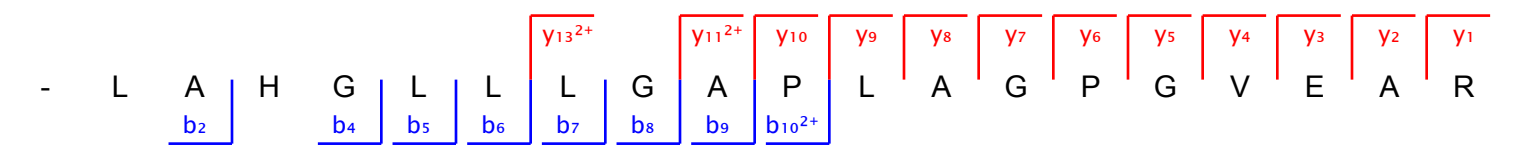

Raw file  
20180707\_MaS\_A375SR\_ML\_proteome\_2\_25

Scan 27551 Method FTMS; HCD Score 77.78 m/z 717.91 Gene names RFXAP

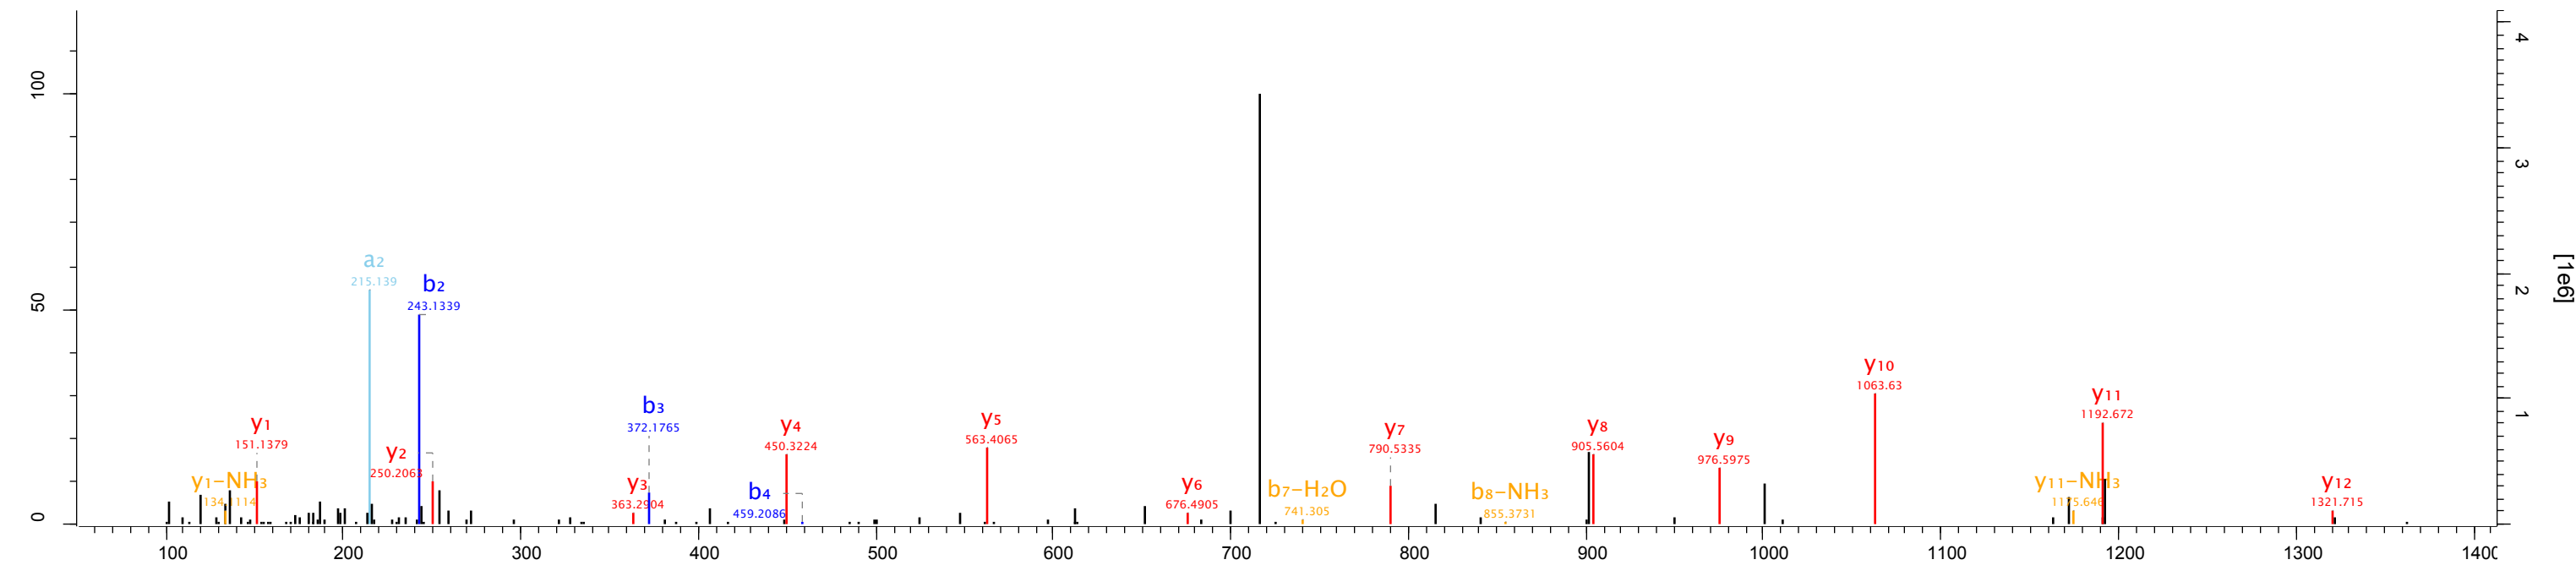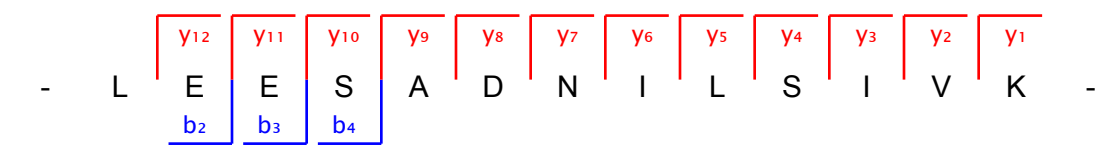

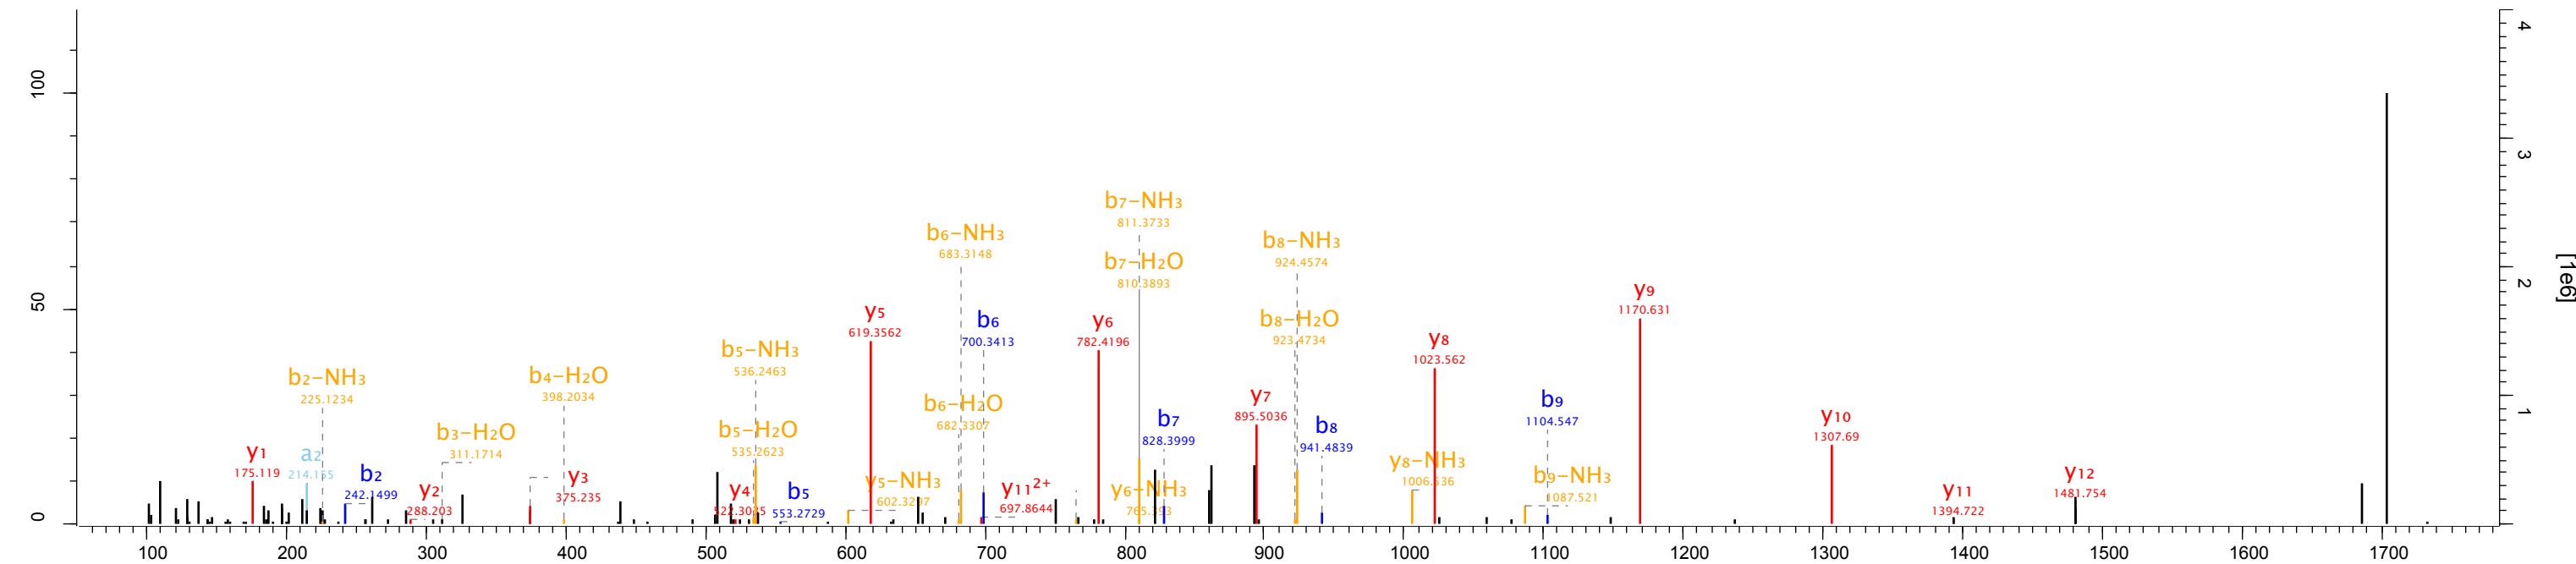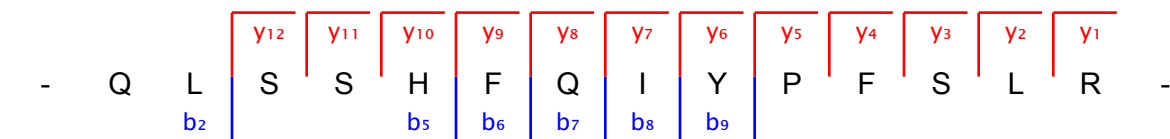



Raw file  
20180707\_MaS\_A375SR\_ML\_proteome\_2\_26

Scan 13041 Method FTMS; HCD Score 12.13 m/z 641.03 Gene names FABP7

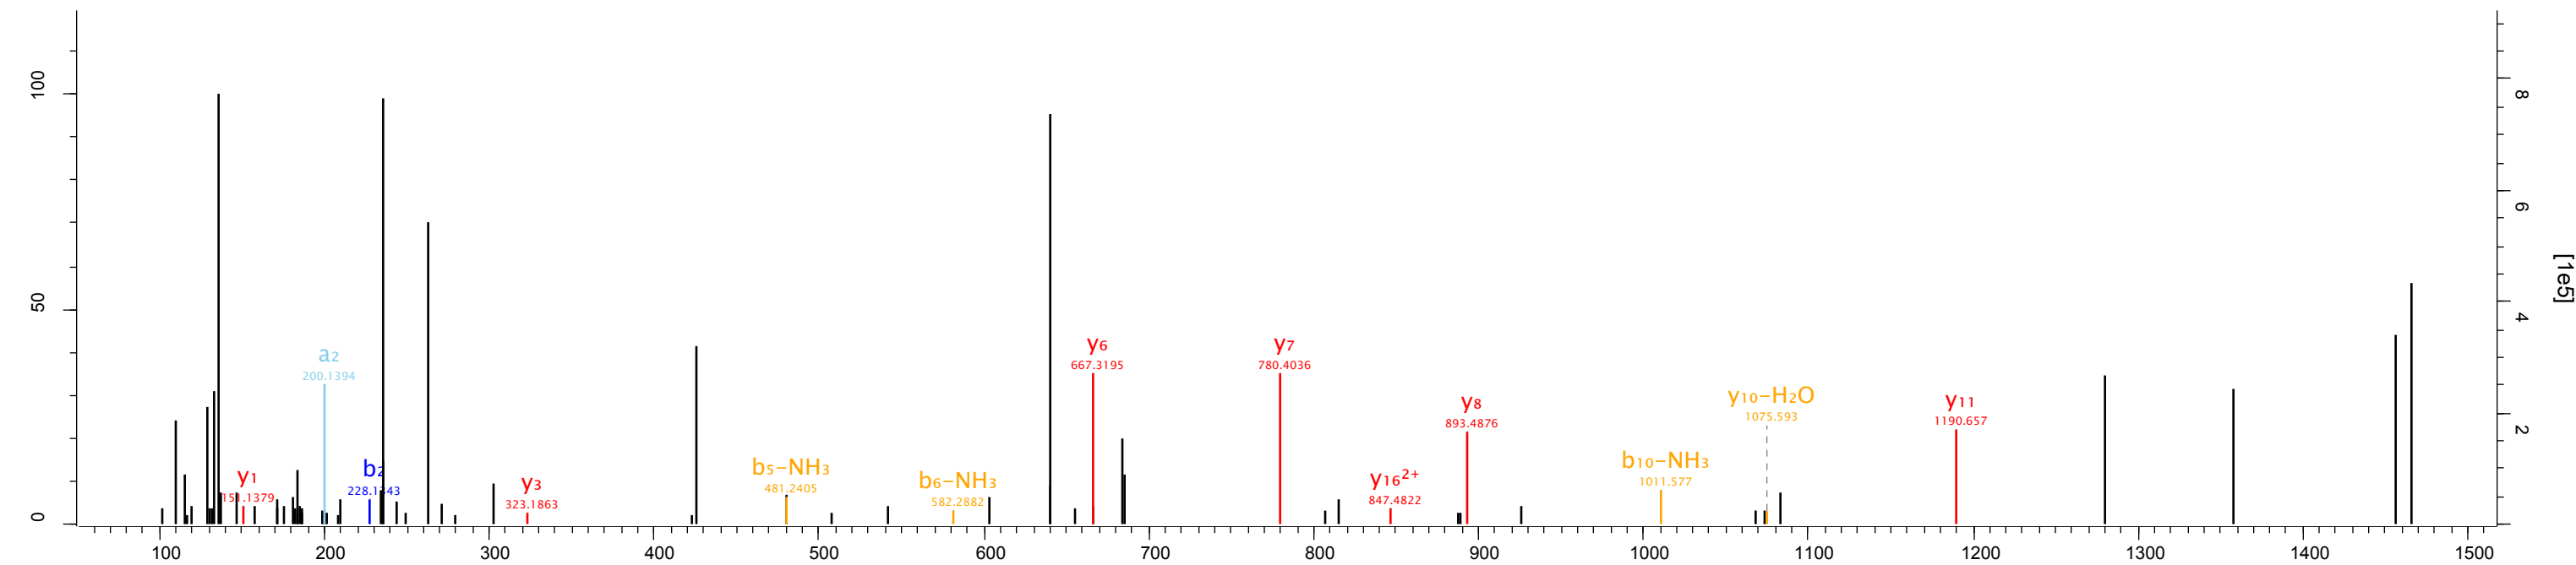

- Q V G N V T K P T V I I S Q E G D K -

Fragmentation labels: b<sub>2</sub> (under V), y<sub>16</sub><sup>2+</sup> (over G), y<sub>11</sub> (over P), y<sub>8</sub> (over I), y<sub>7</sub> (over I), y<sub>6</sub> (over S), y<sub>3</sub> (over G), y<sub>1</sub> (over K).

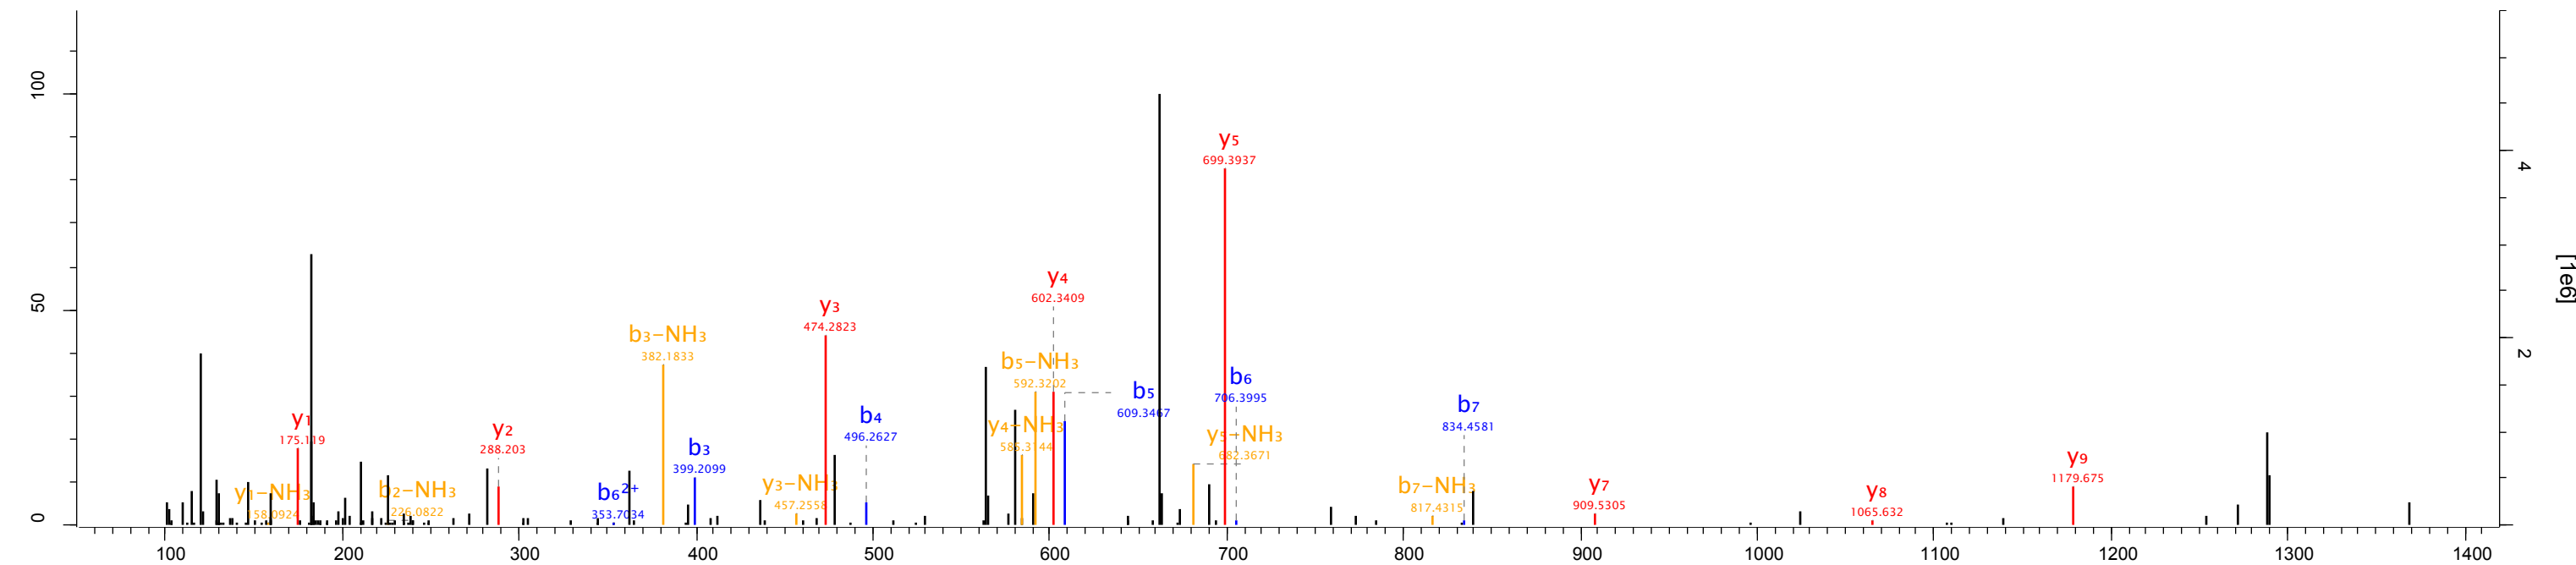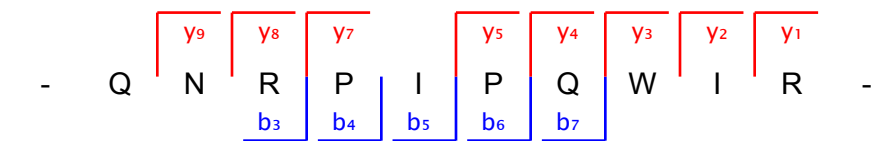

Raw file 20180707\_MaS\_A375SR\_ML\_proteome\_2\_27 Scan 12751 Method FTMS; HCD Score 54.78 m/z 637.34

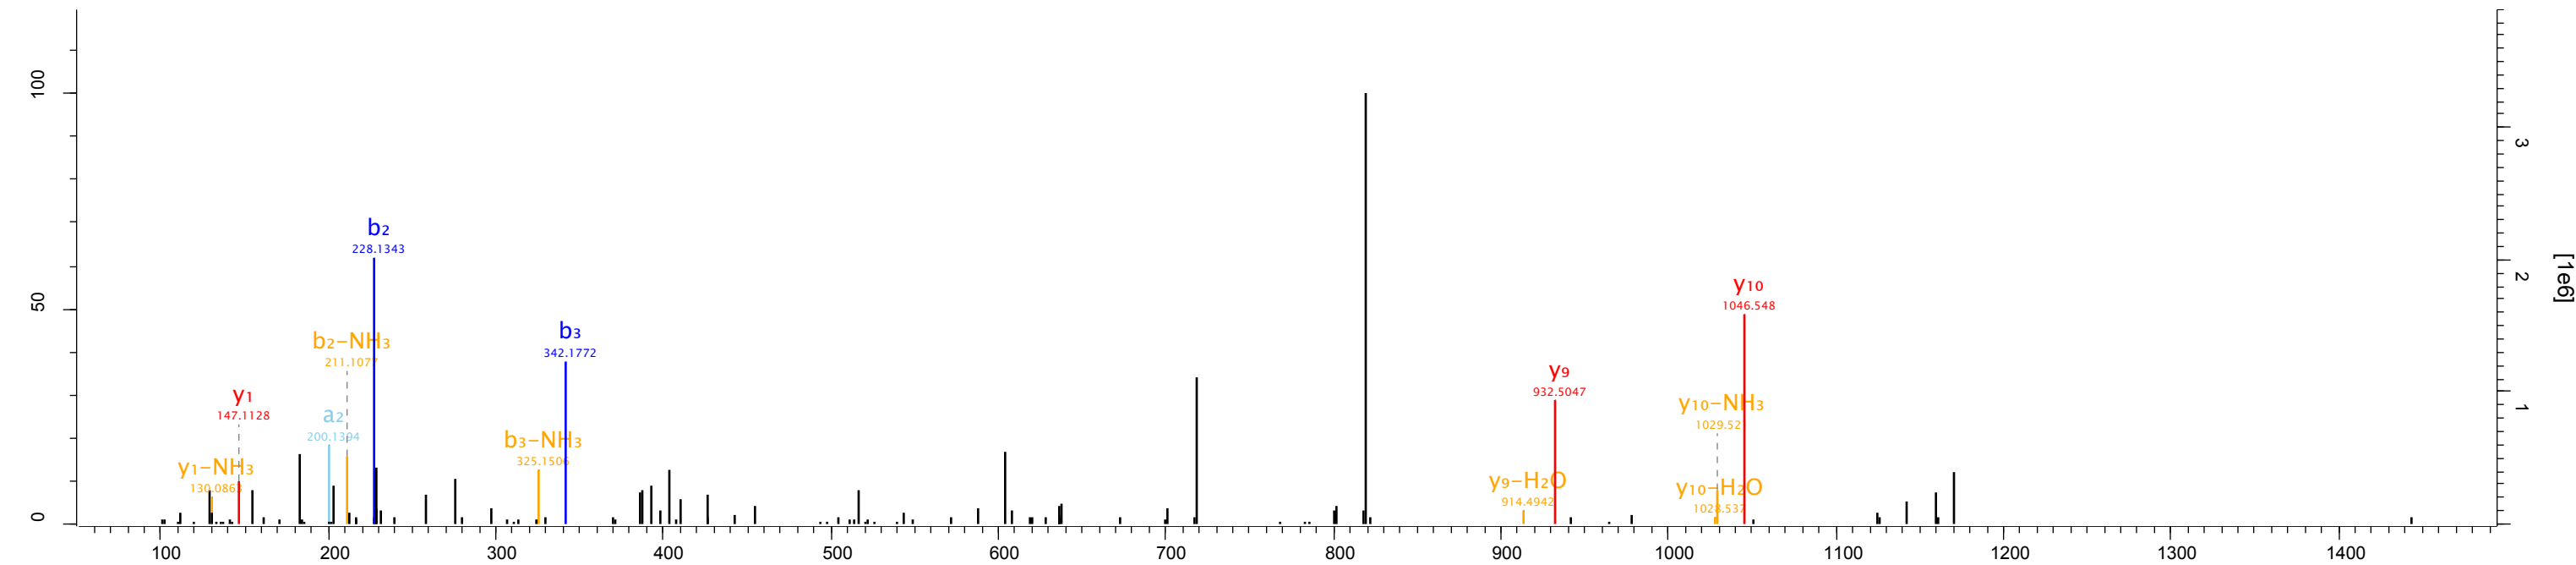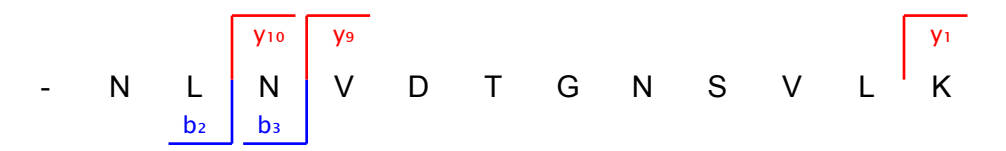

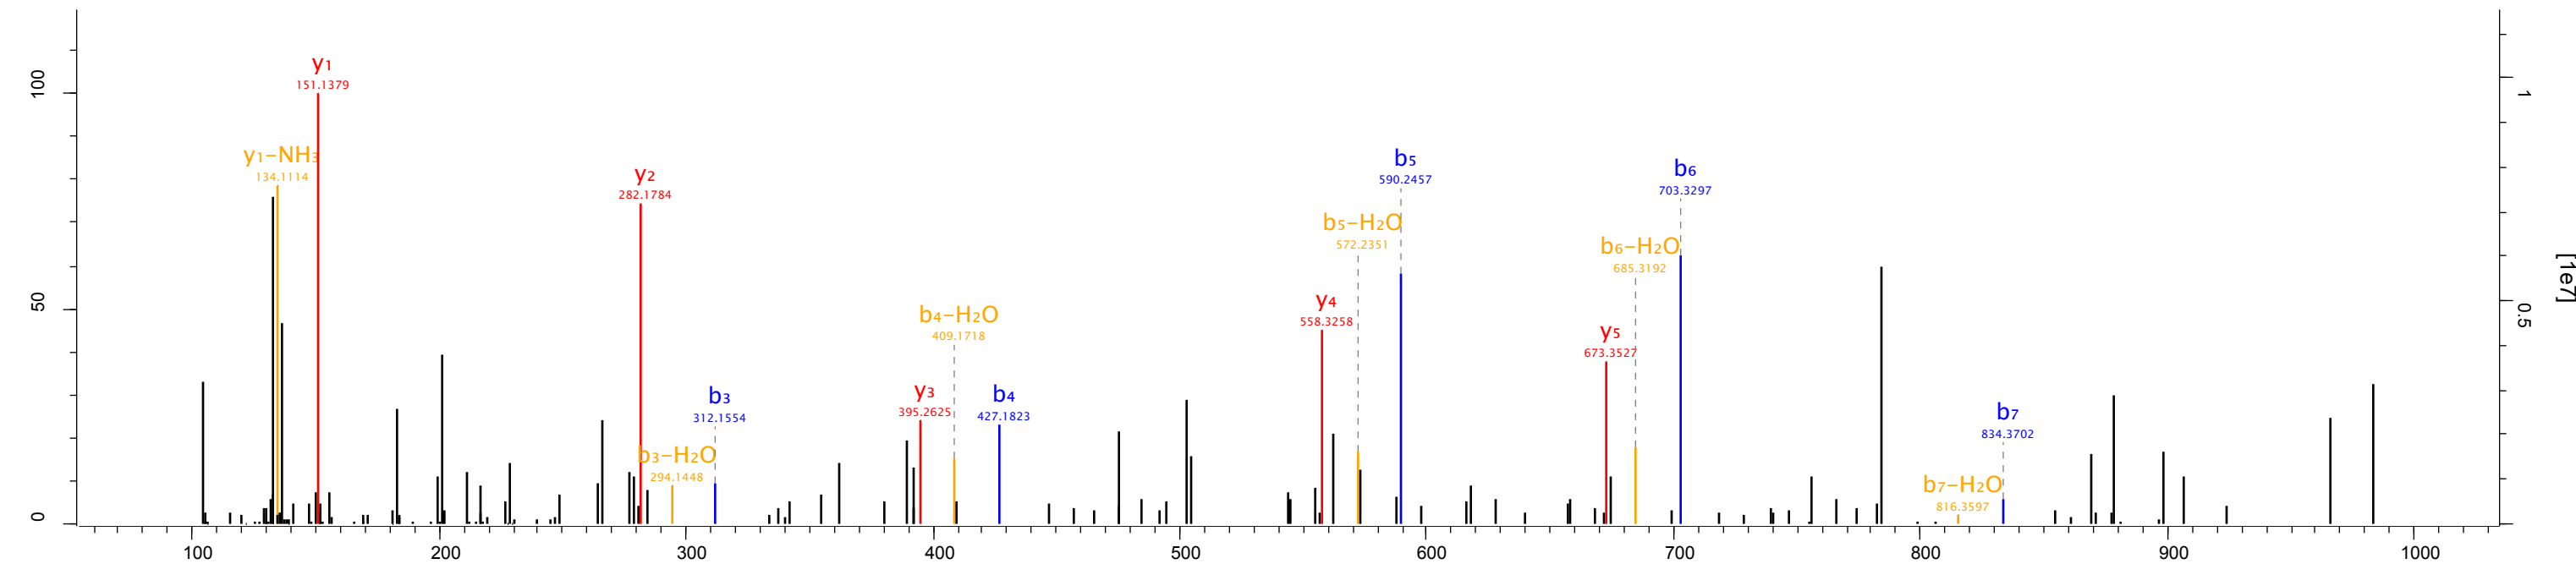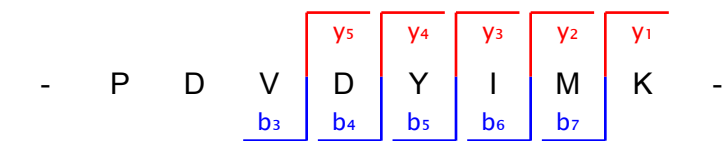

Raw file 20180707\_MaS\_A375SR\_ML\_proteome\_2\_27 Scan 26401 Method FTMS; HCD Score 59.2 m/z 576.83

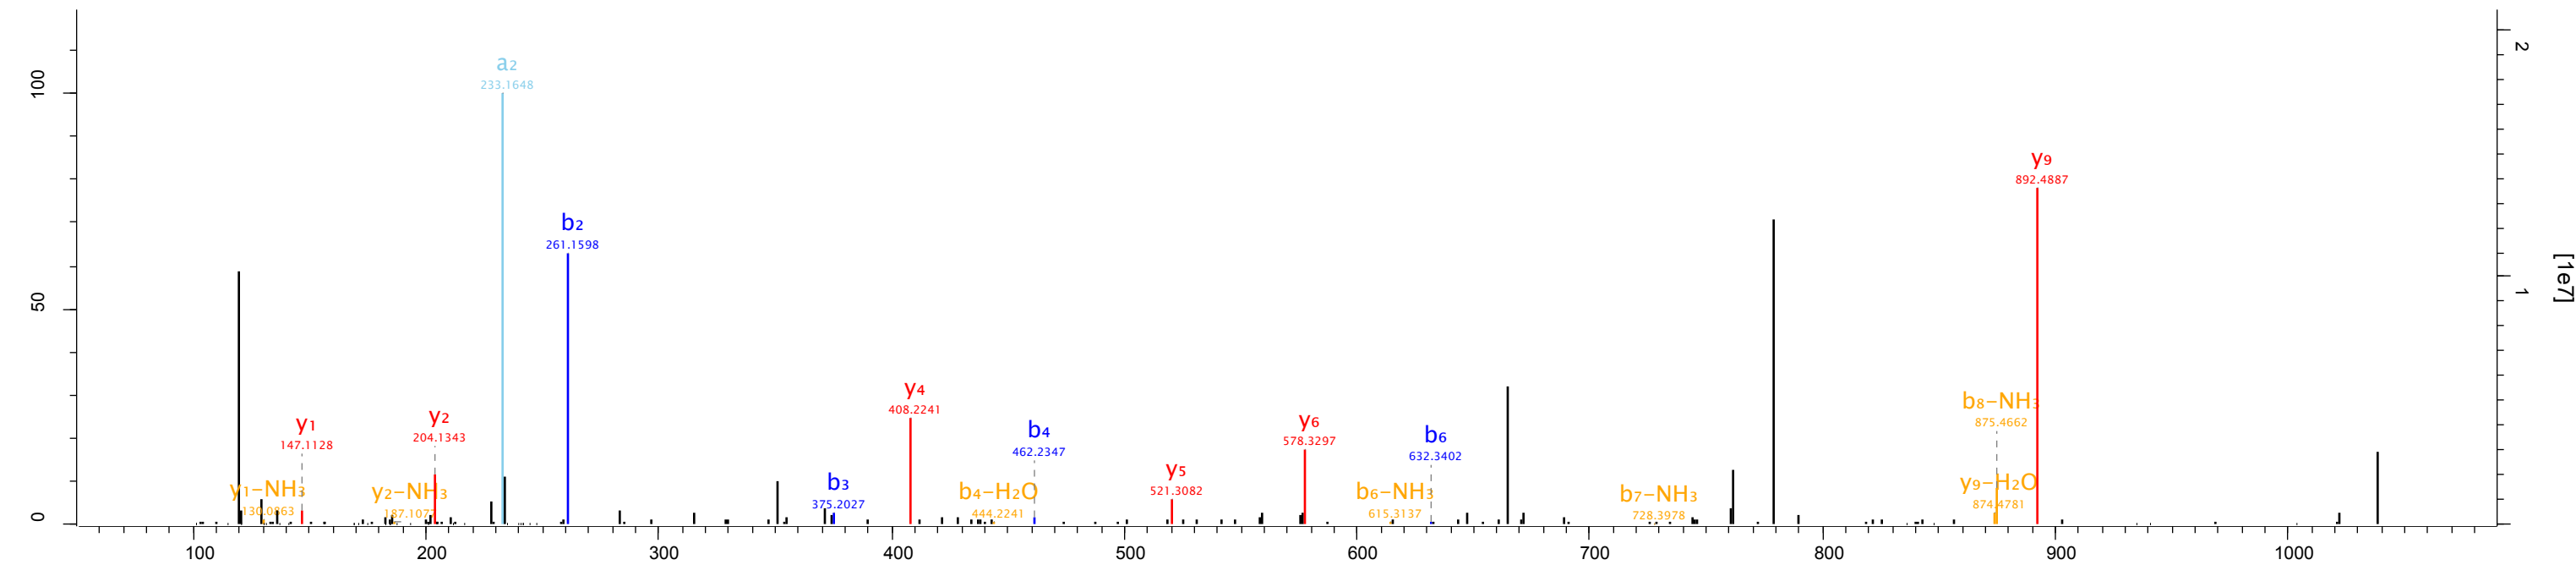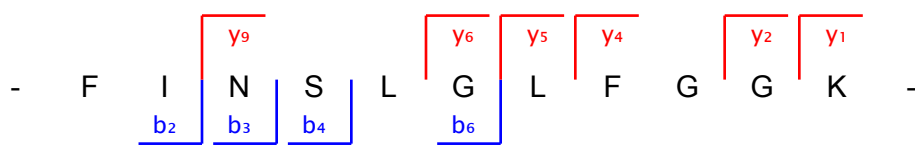

Raw file: 20180707\_MaS\_A375SR\_ML\_proteome\_2\_27  
 Scan: 3041 Method: FTMS; HCD Score: 75.39 m/z: 568.24 Gene names: MAP3K19

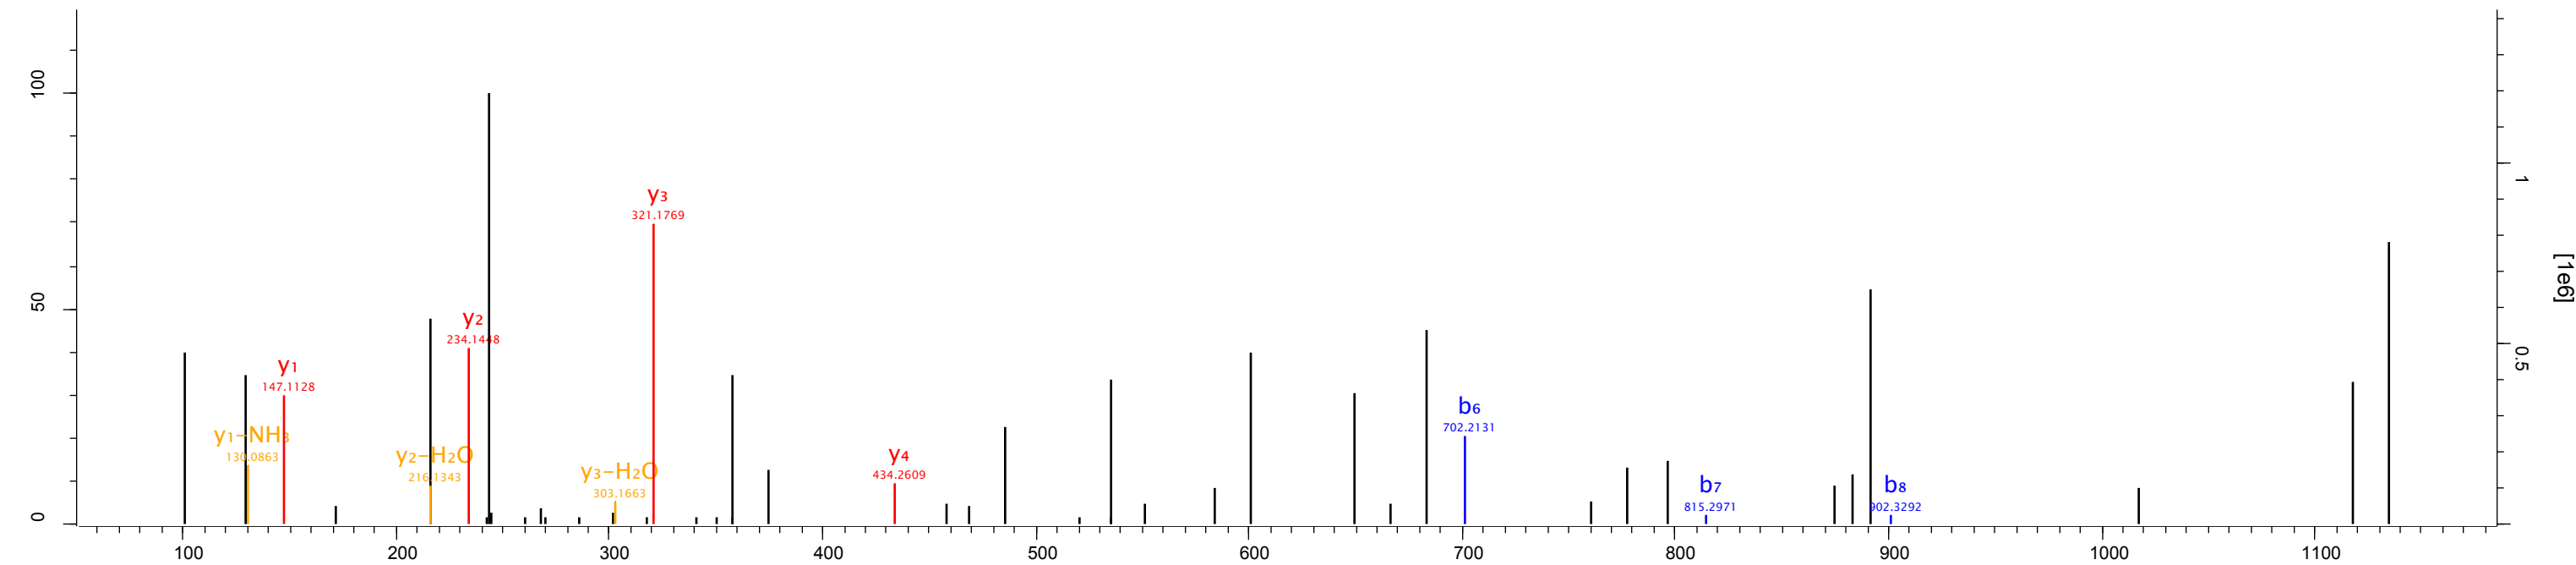

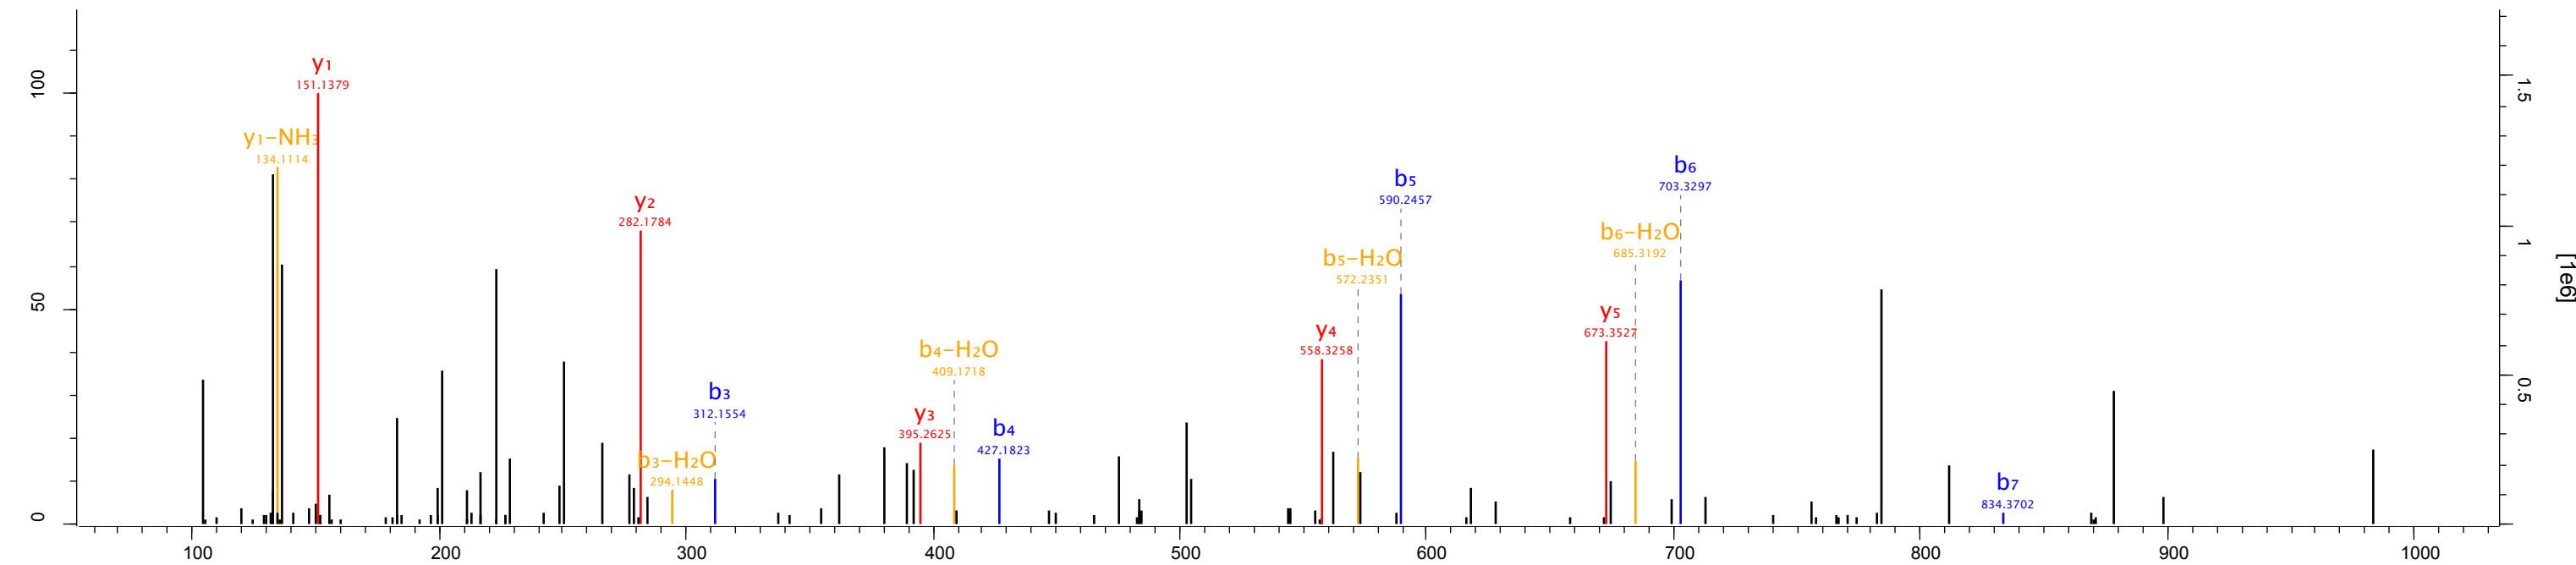

Raw file: 20180707\_MaS\_A375SR\_ML\_proteome\_2\_29  
 Scan: 23641 Method: FTMS; HCD Score: 62.2 m/z: 865.99 Gene names: KRTCAP2

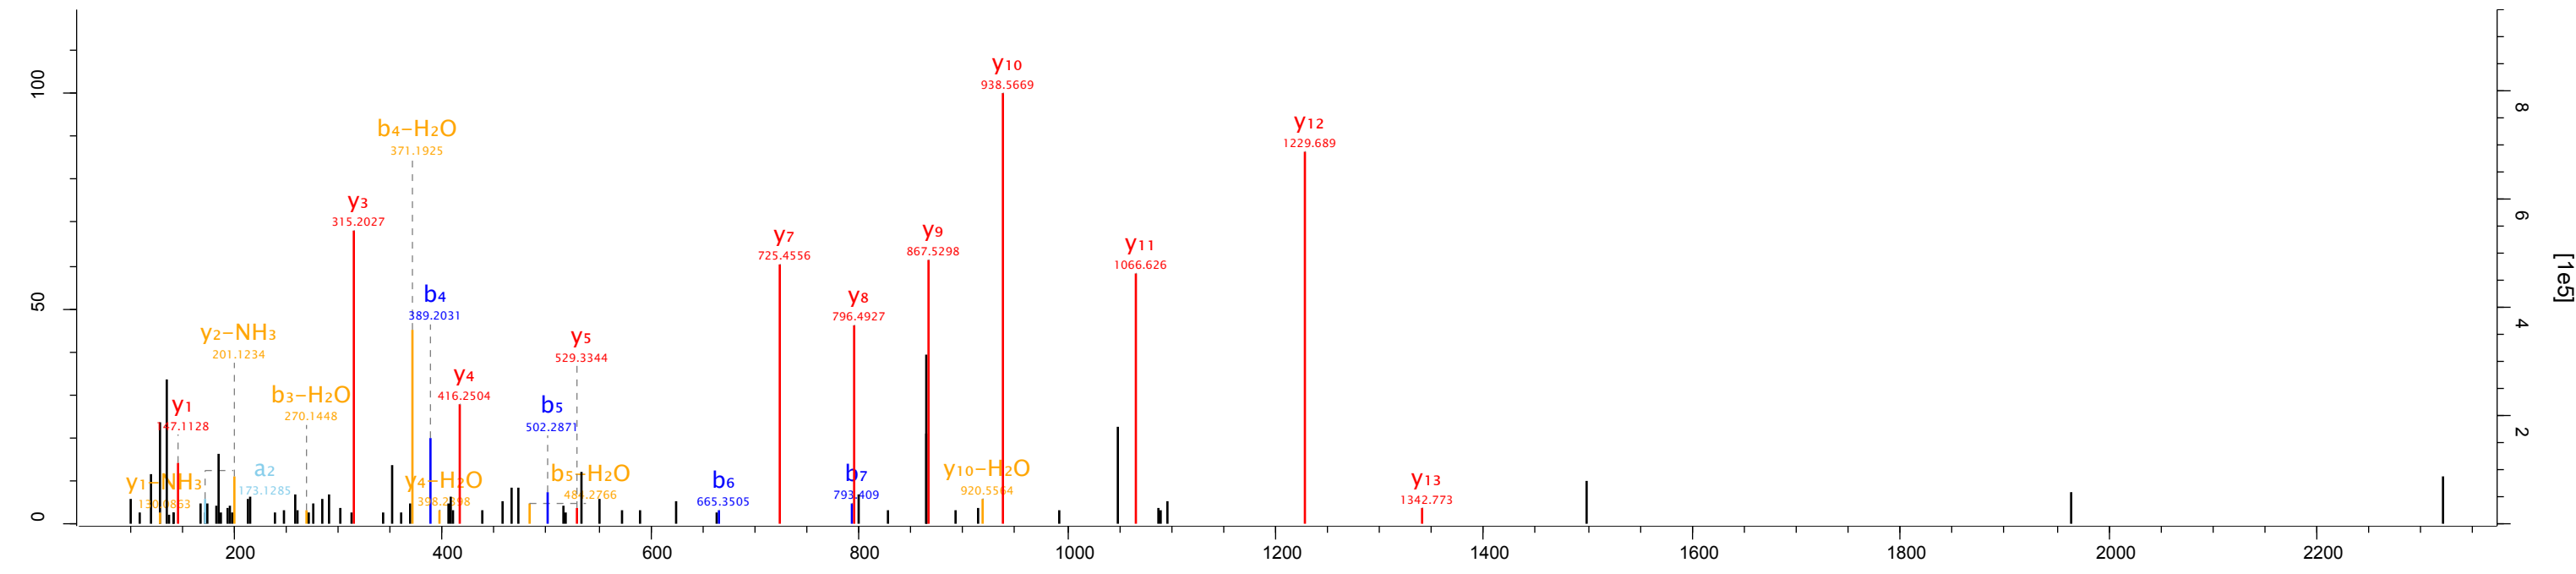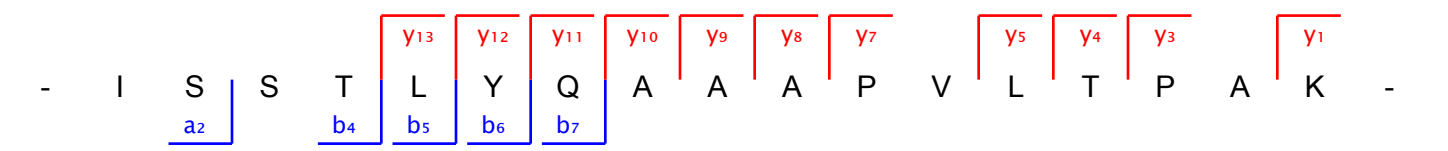



20180707\_MaS\_A375SR\_ML\_proteome\_20 9001 FTMS; HCD 33.13 653.34 LAGE3

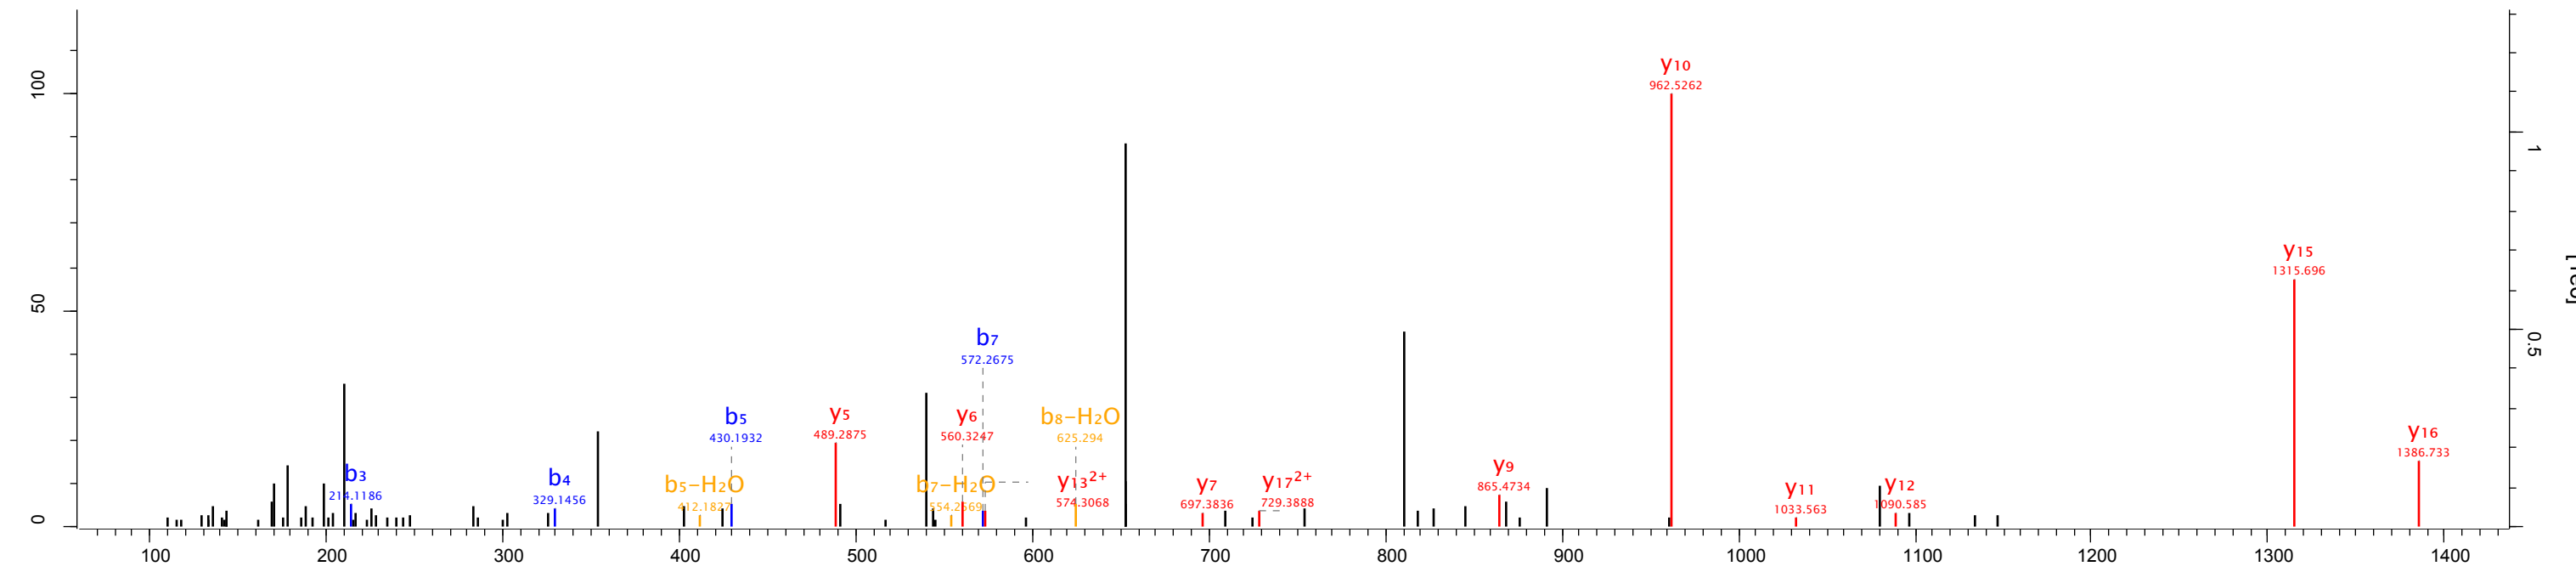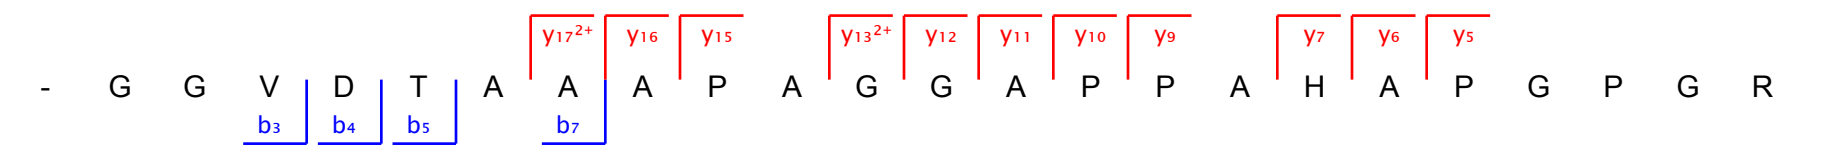

Raw file  
20180707\_MaS\_A375SR\_ML\_proteome\_22

Scan 19251 Method FTMS; HCD Score 88.56 m/z 857.87 Gene names MT-ND3

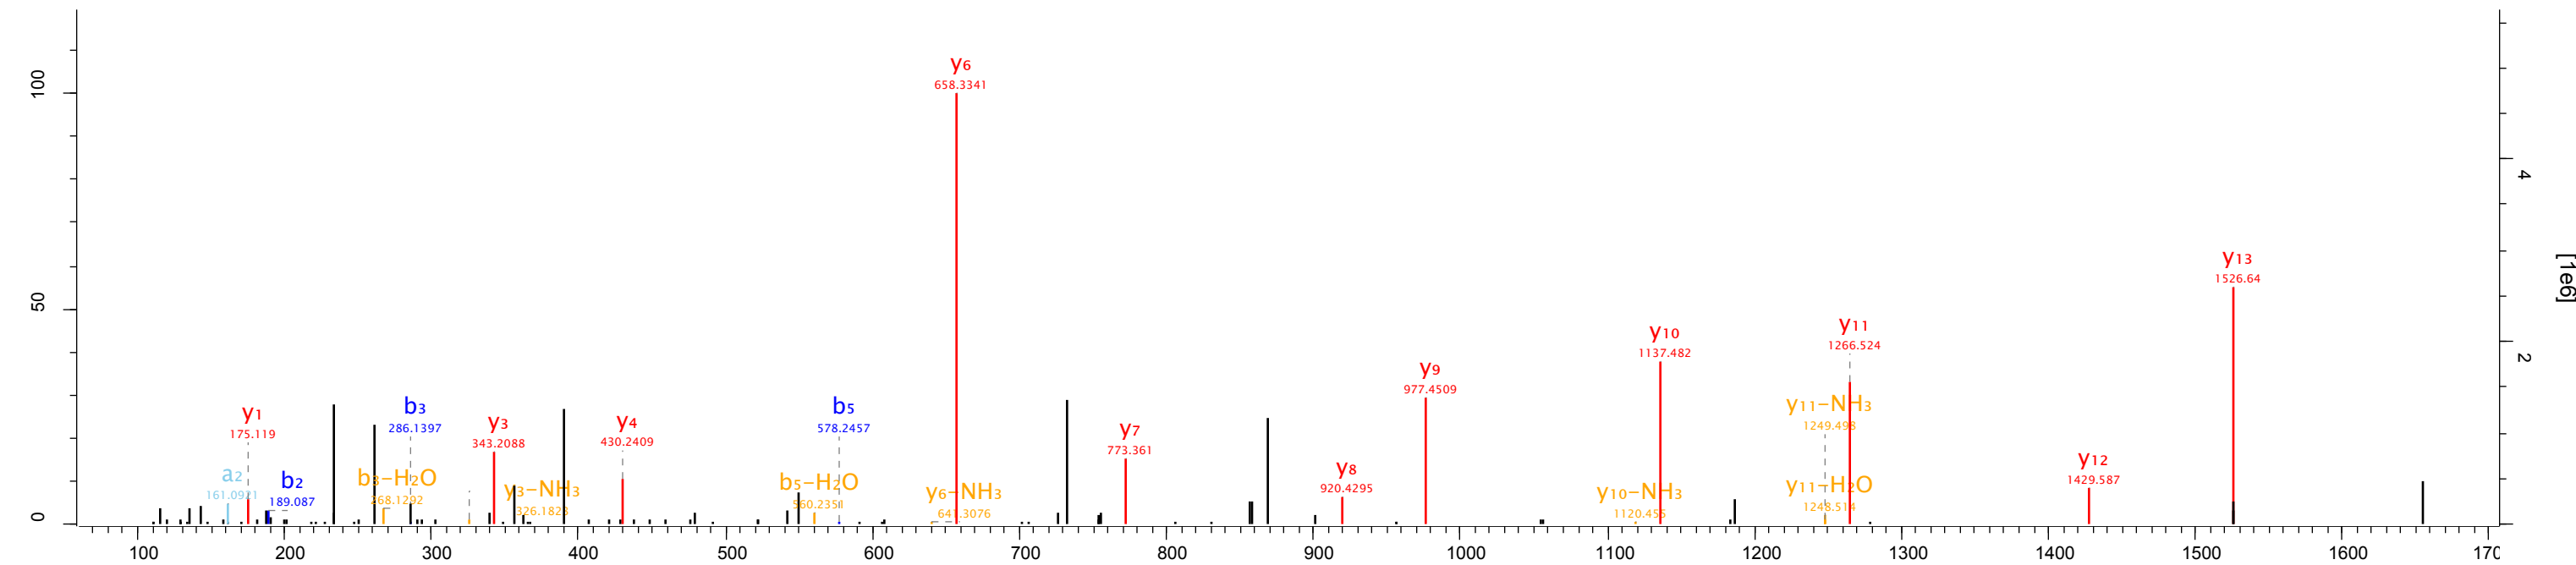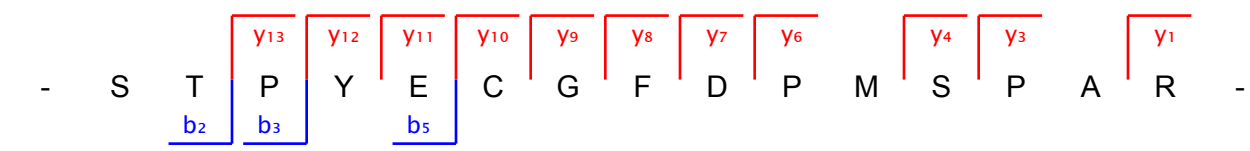

Raw file 20180707\_MaS\_A375SR\_ML\_proteome\_22 Scan 25351 Method FTMS; HCD Score 76.85 m/z 841.5

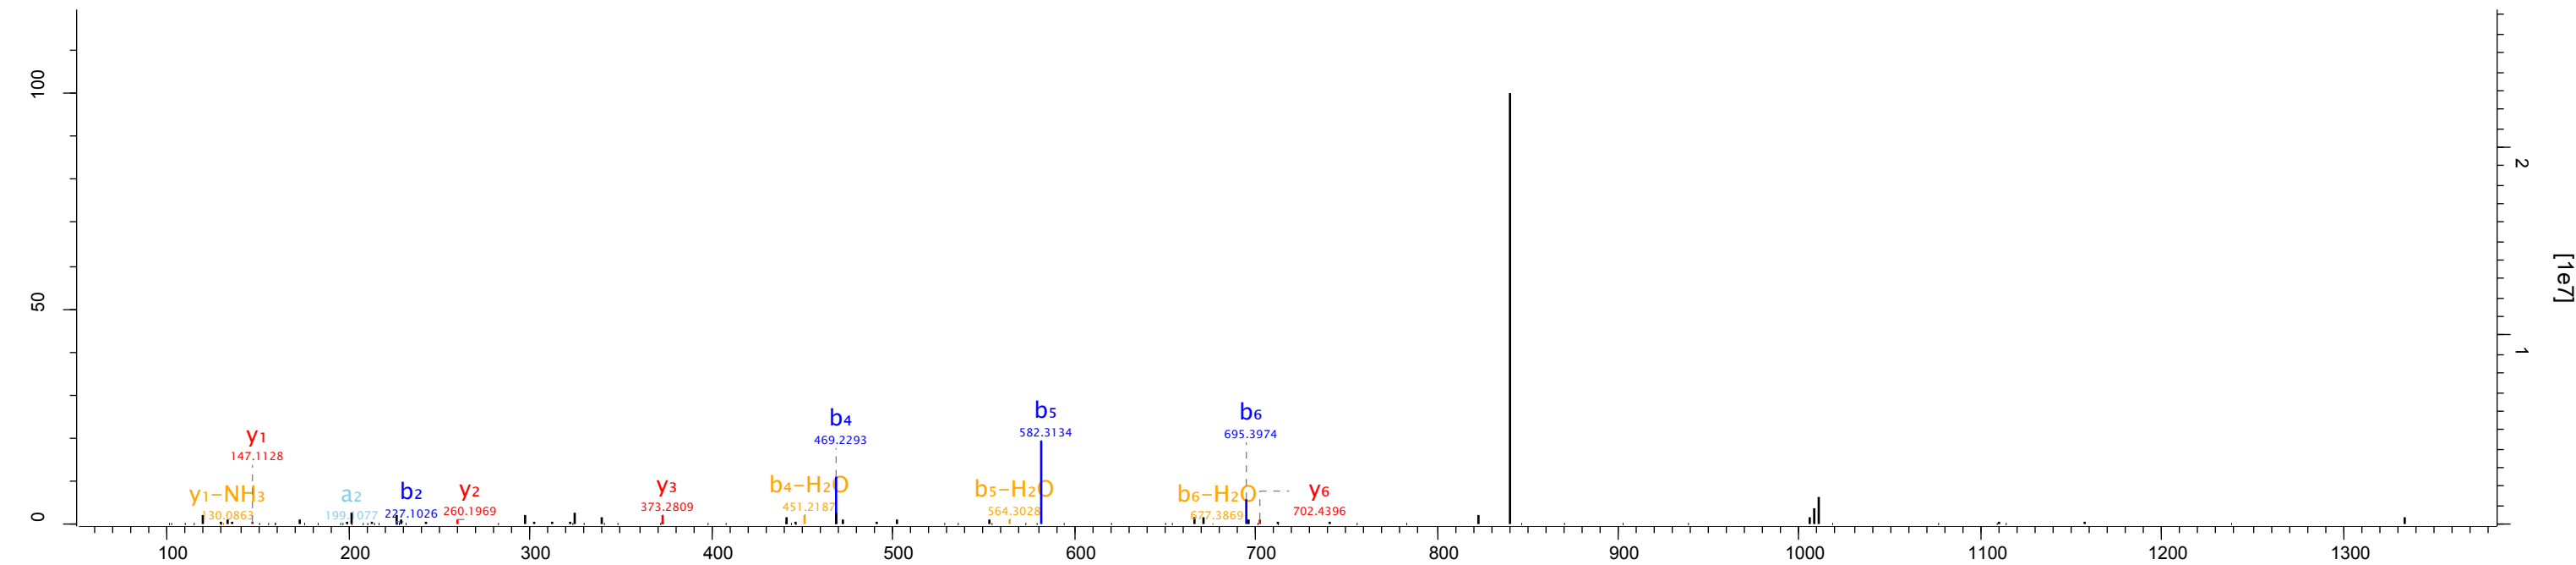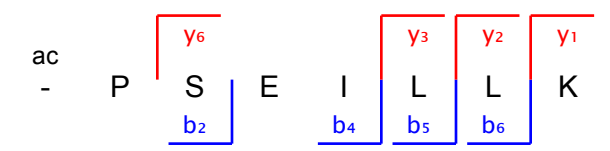

Raw file: 20180707\_MaS\_A375SR\_ML\_proteome\_22  
 Scan: 6221 Method: FTMS; HCD Score: 78.19 m/z: 477.25 Gene names: EEF1G

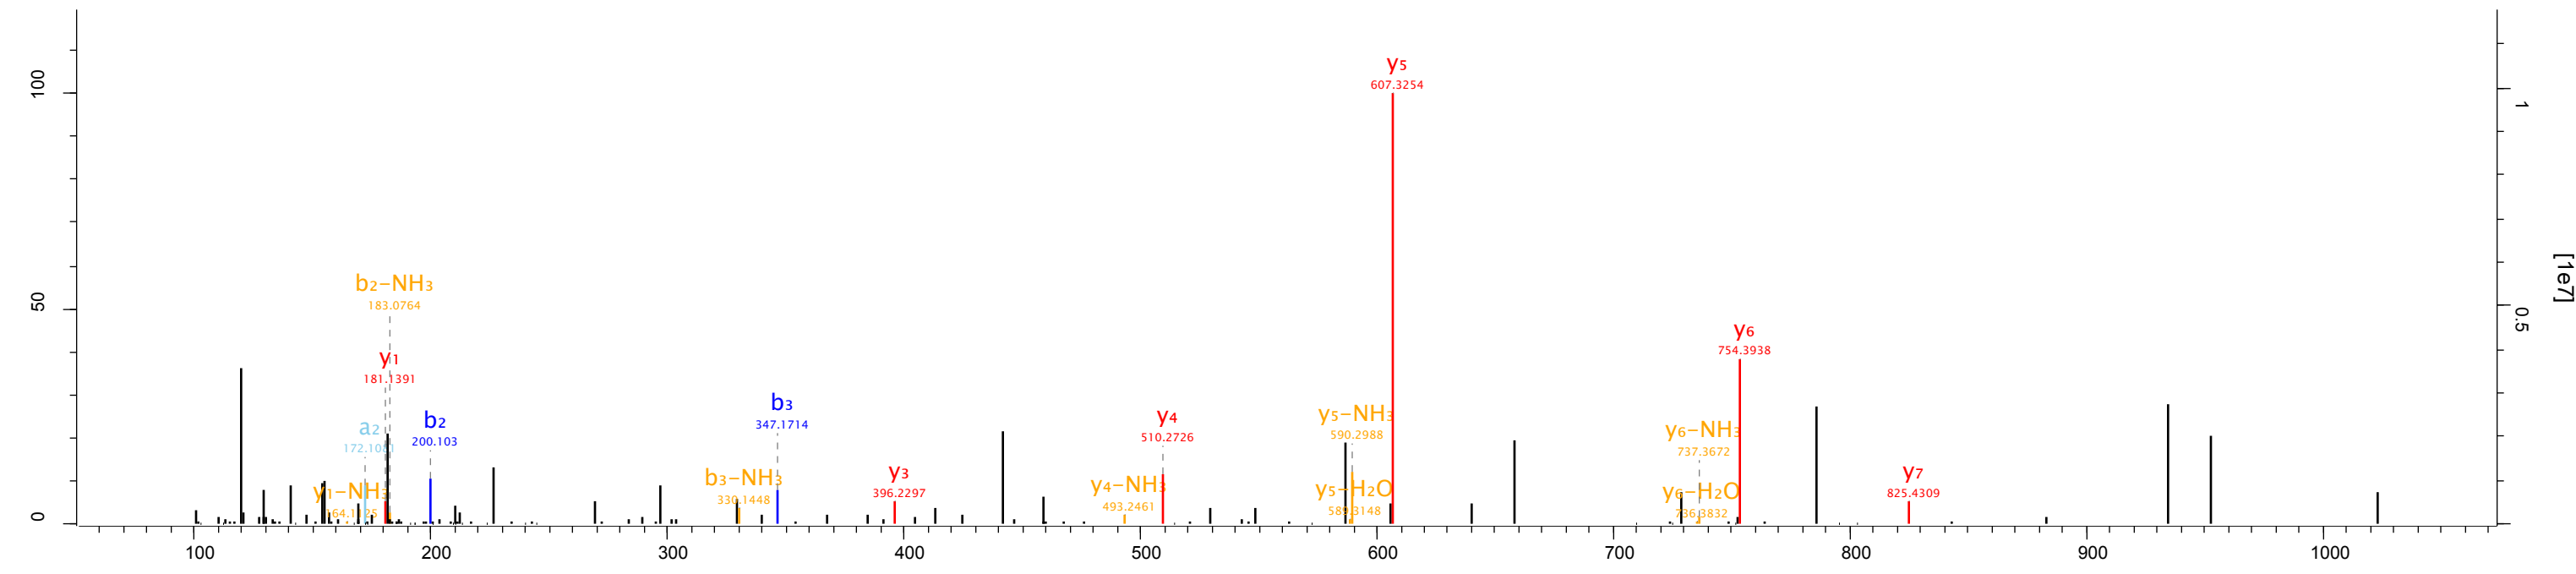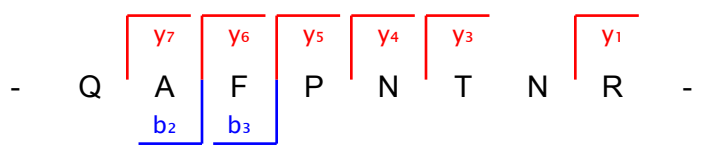



Raw file  
20180707\_MaS\_A375SR\_ML\_proteome\_24

Scan 27041 Method FTMS; HCD Score 68.54 m/z 722.9

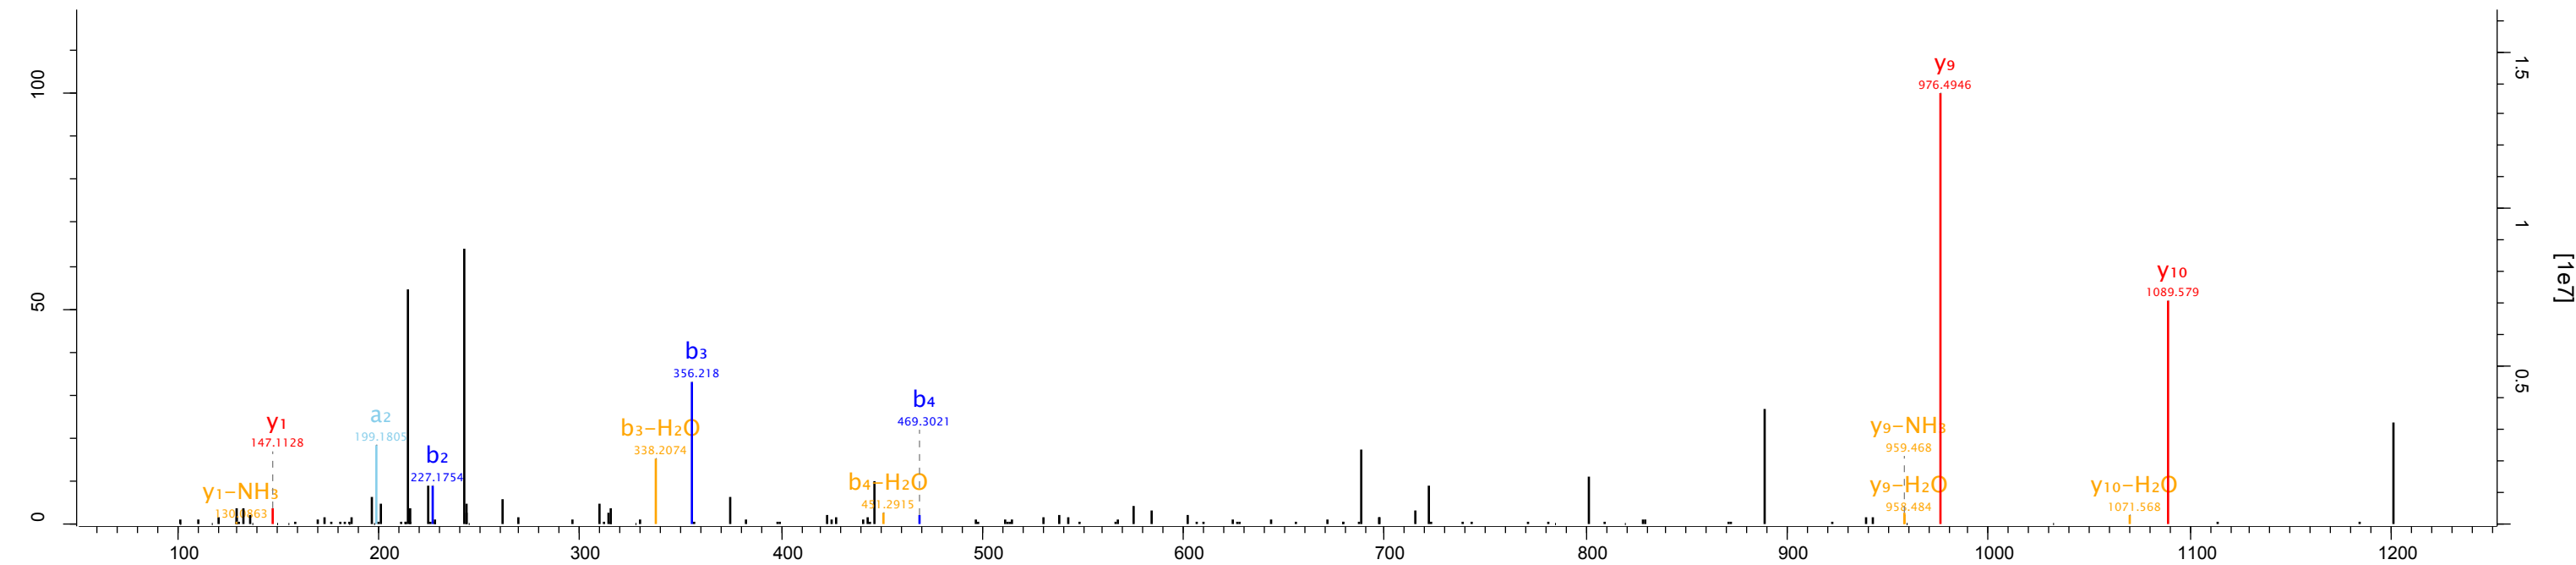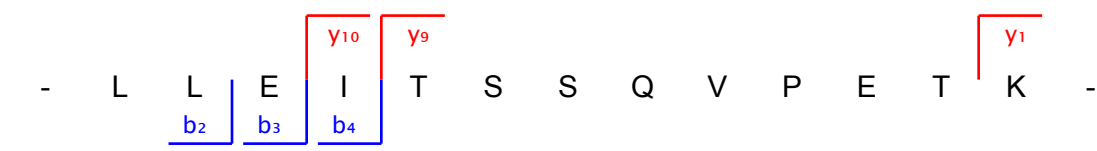

Raw file: 20180707\_MaS\_A375SR\_ML\_proteome\_24  
 Scan: 9691 Method: FTMS; HCD Score: 42.34 m/z: 566.82 Gene names: C1orf21

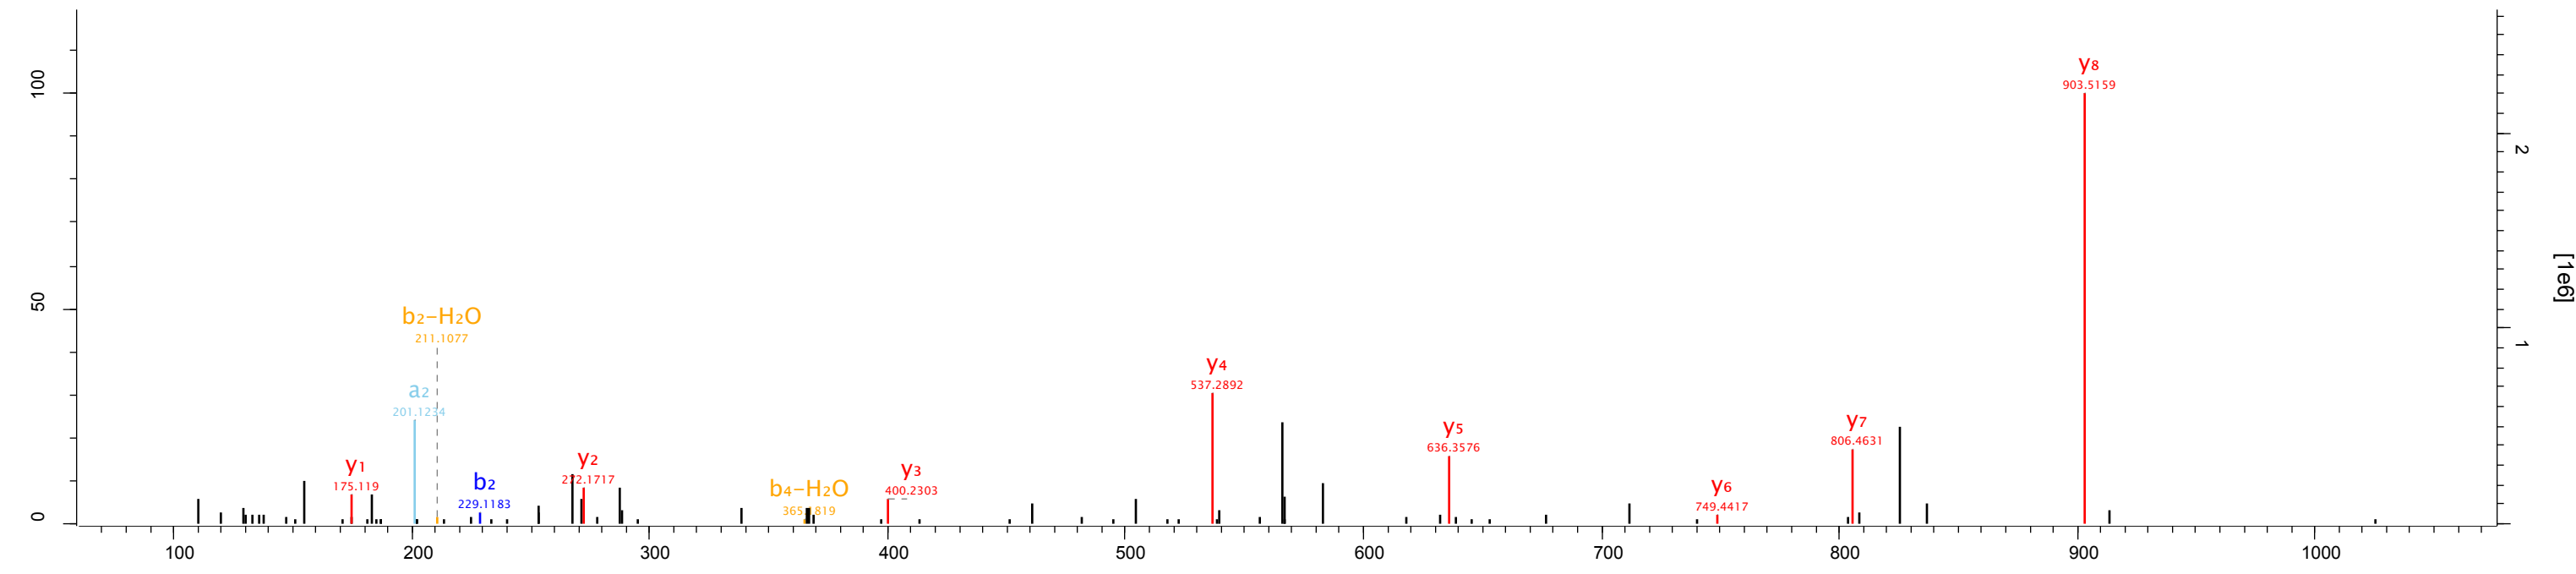

Raw file  
20180707\_MaS\_A375SR\_ML\_proteome\_25

Scan: 29481  
Method: FTMS; HCD  
Score: 87.57  
m/z: 624.81  
Gene names: TOR2A

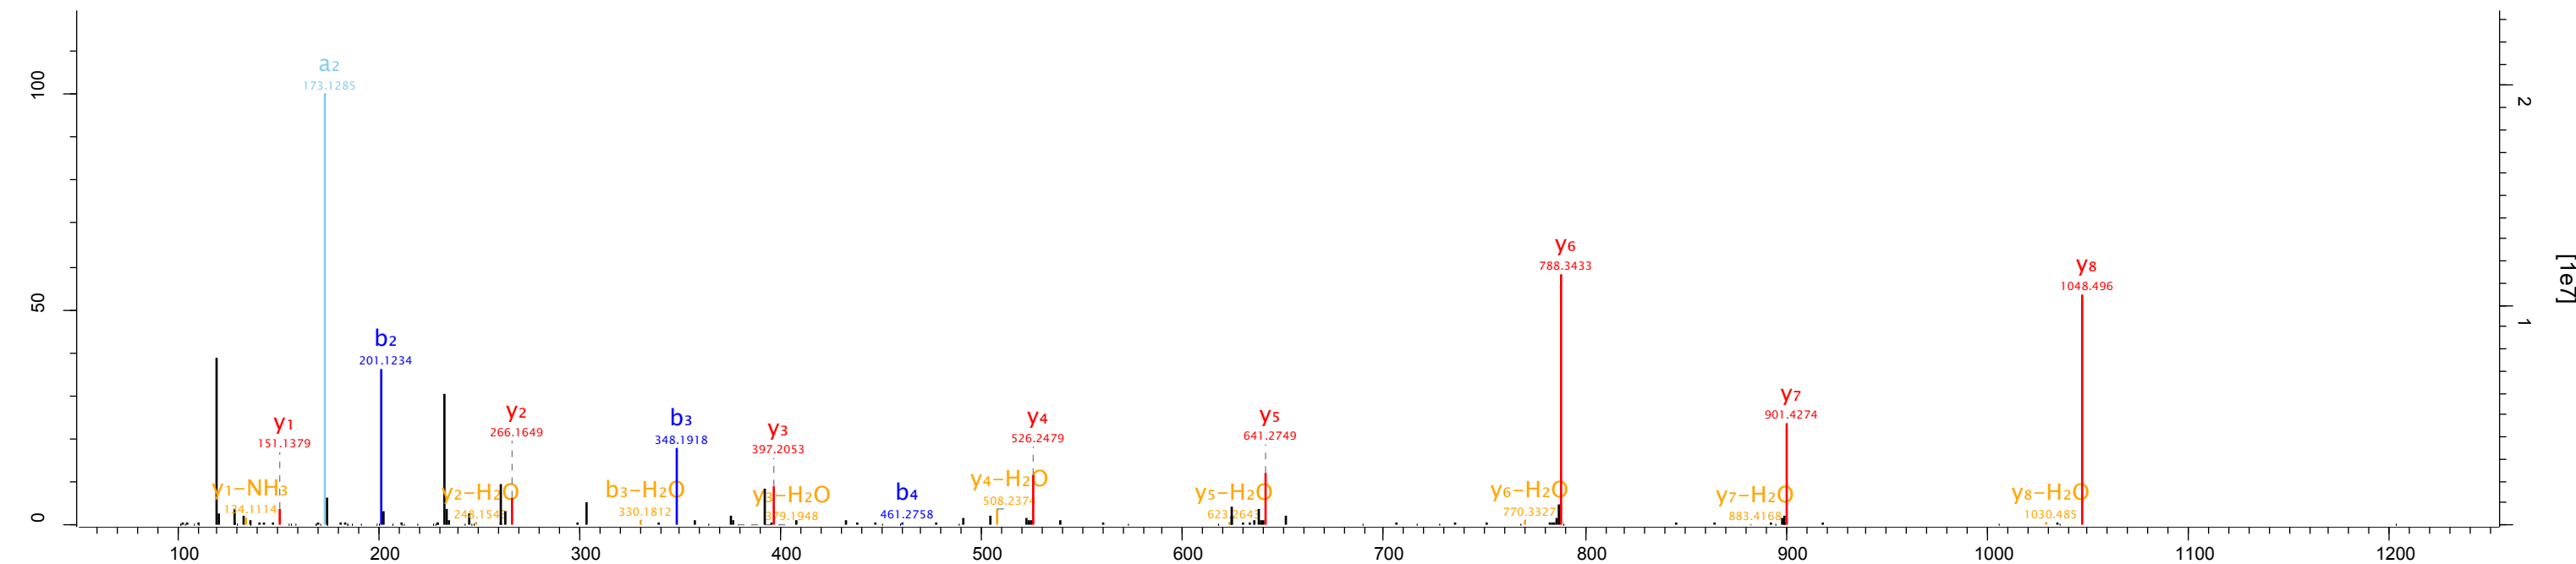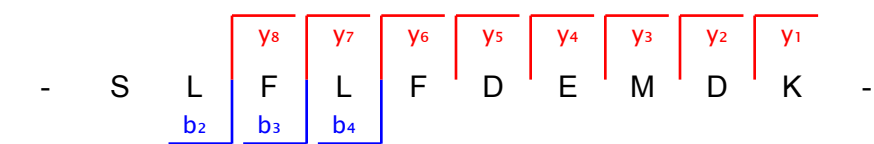



Raw file 20180707\_MaS\_A375SR\_ML\_proteome\_26 Scan 15931 Method FTMS; HCD Score 143.03 m/z 436.58 Gene names RPL39P5;RPL39

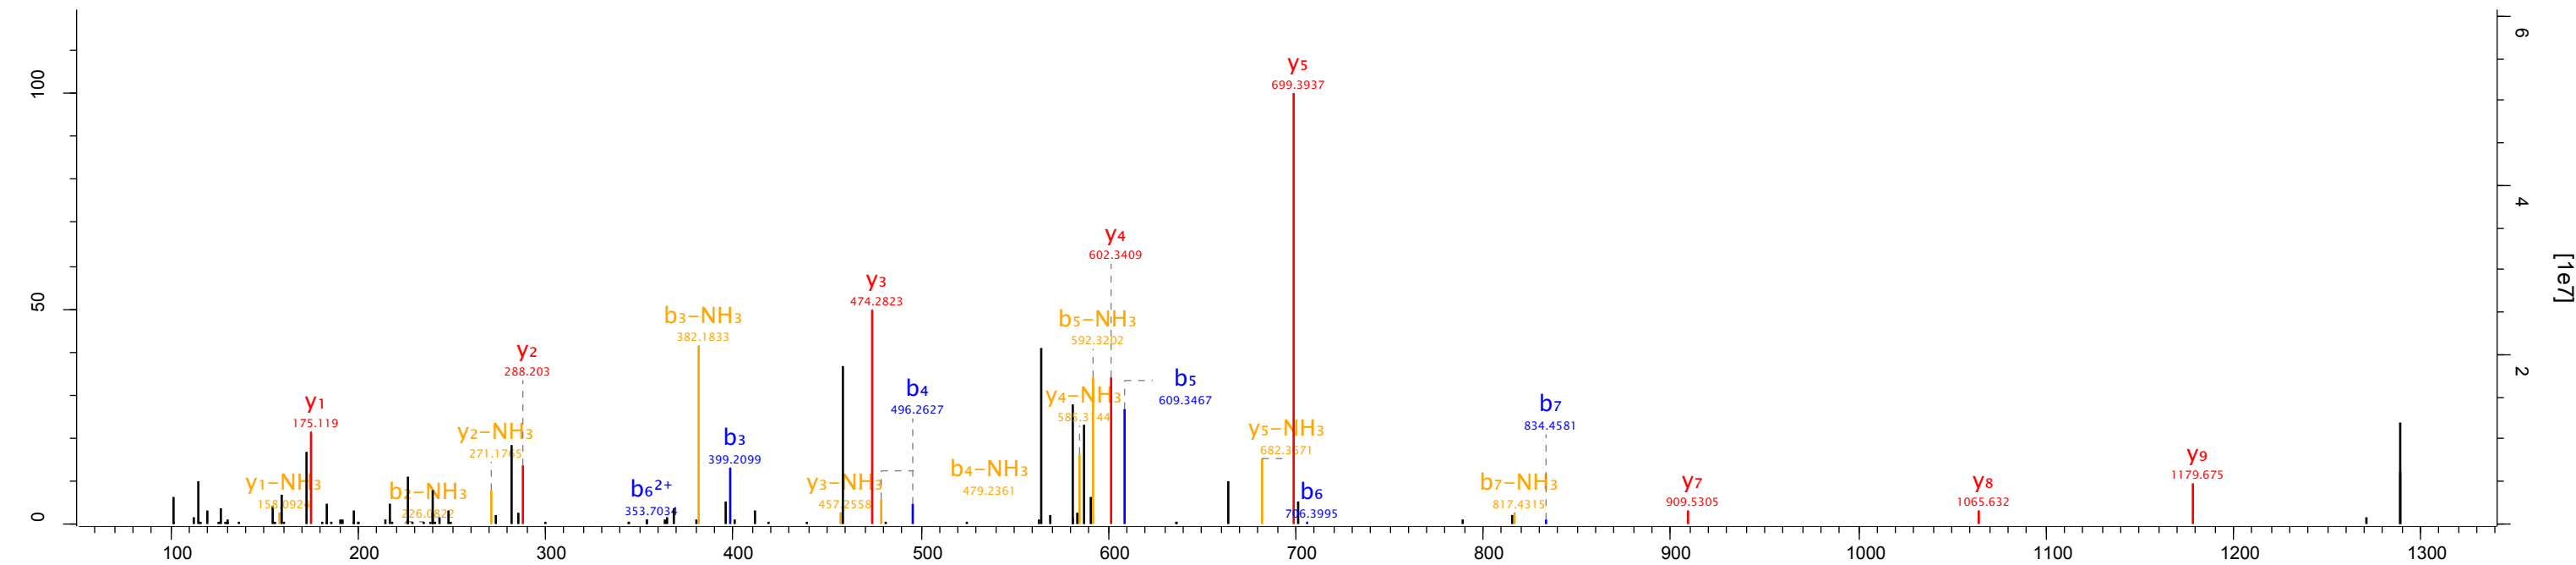

Raw file 20180707\_MaS\_A375SR\_ML\_proteome\_26 Scan 15951 Method FTMS; HCD Score 120.31 m/z 654.87 Gene names RPL39P5;RPL39

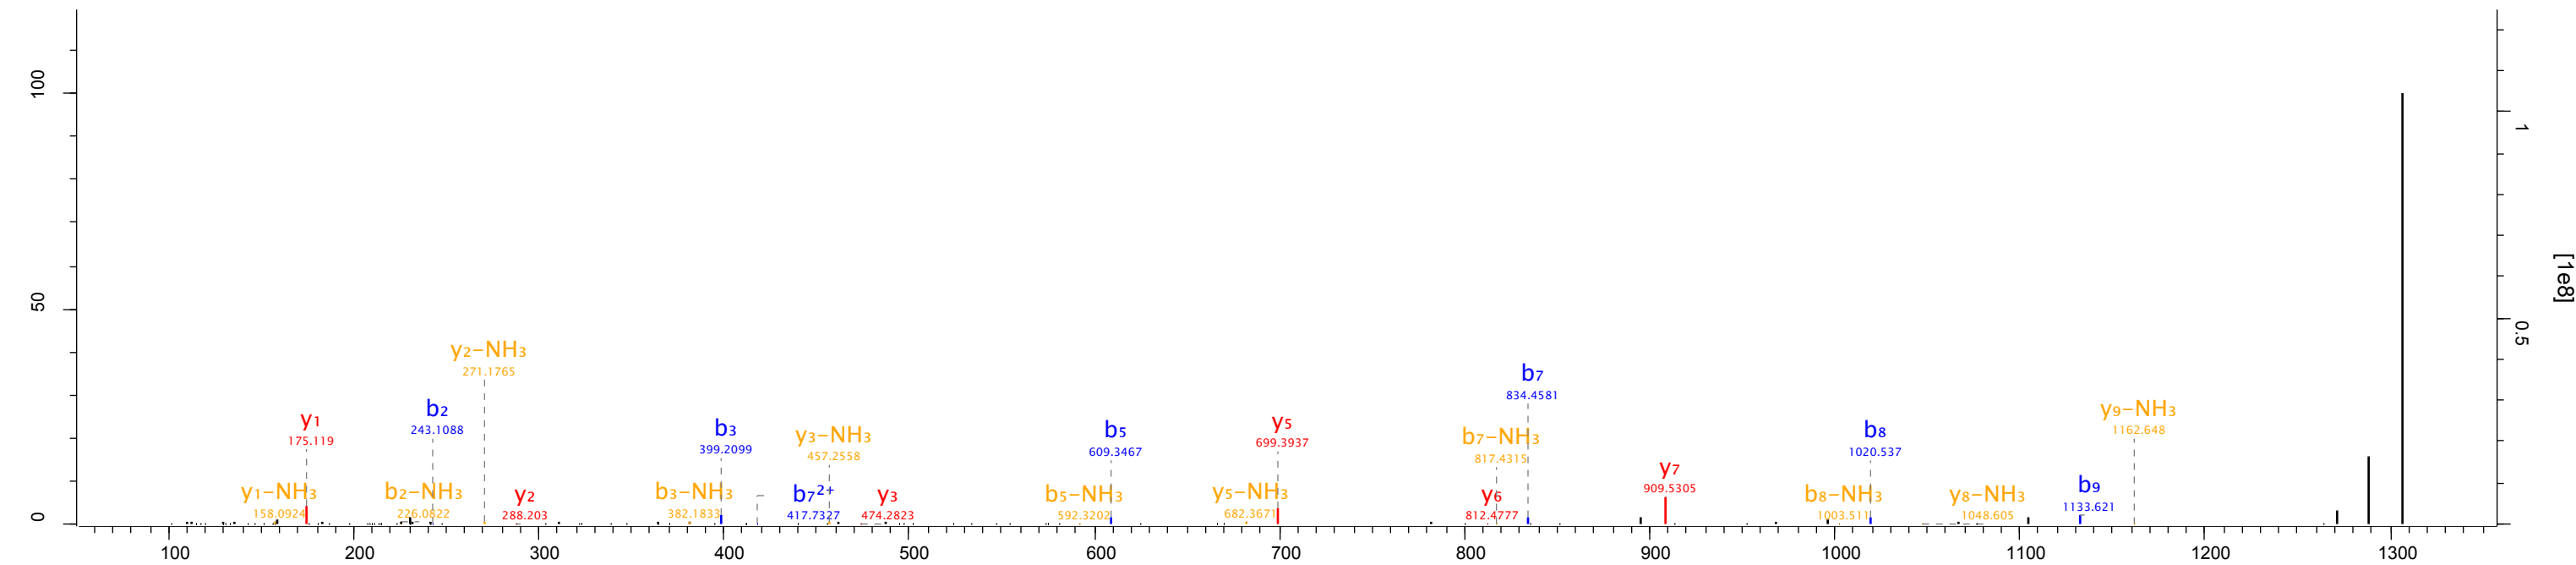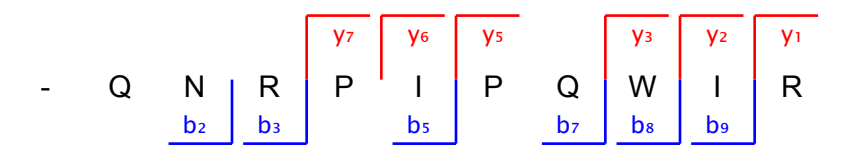

[1e8]

Raw file  
20180707\_MaS\_A375SR\_ML\_proteome\_26

Scan: 24791  
Method: FTMS; HCD  
Score: 106.14  
m/z: 522.3  
Gene names: NEIL2

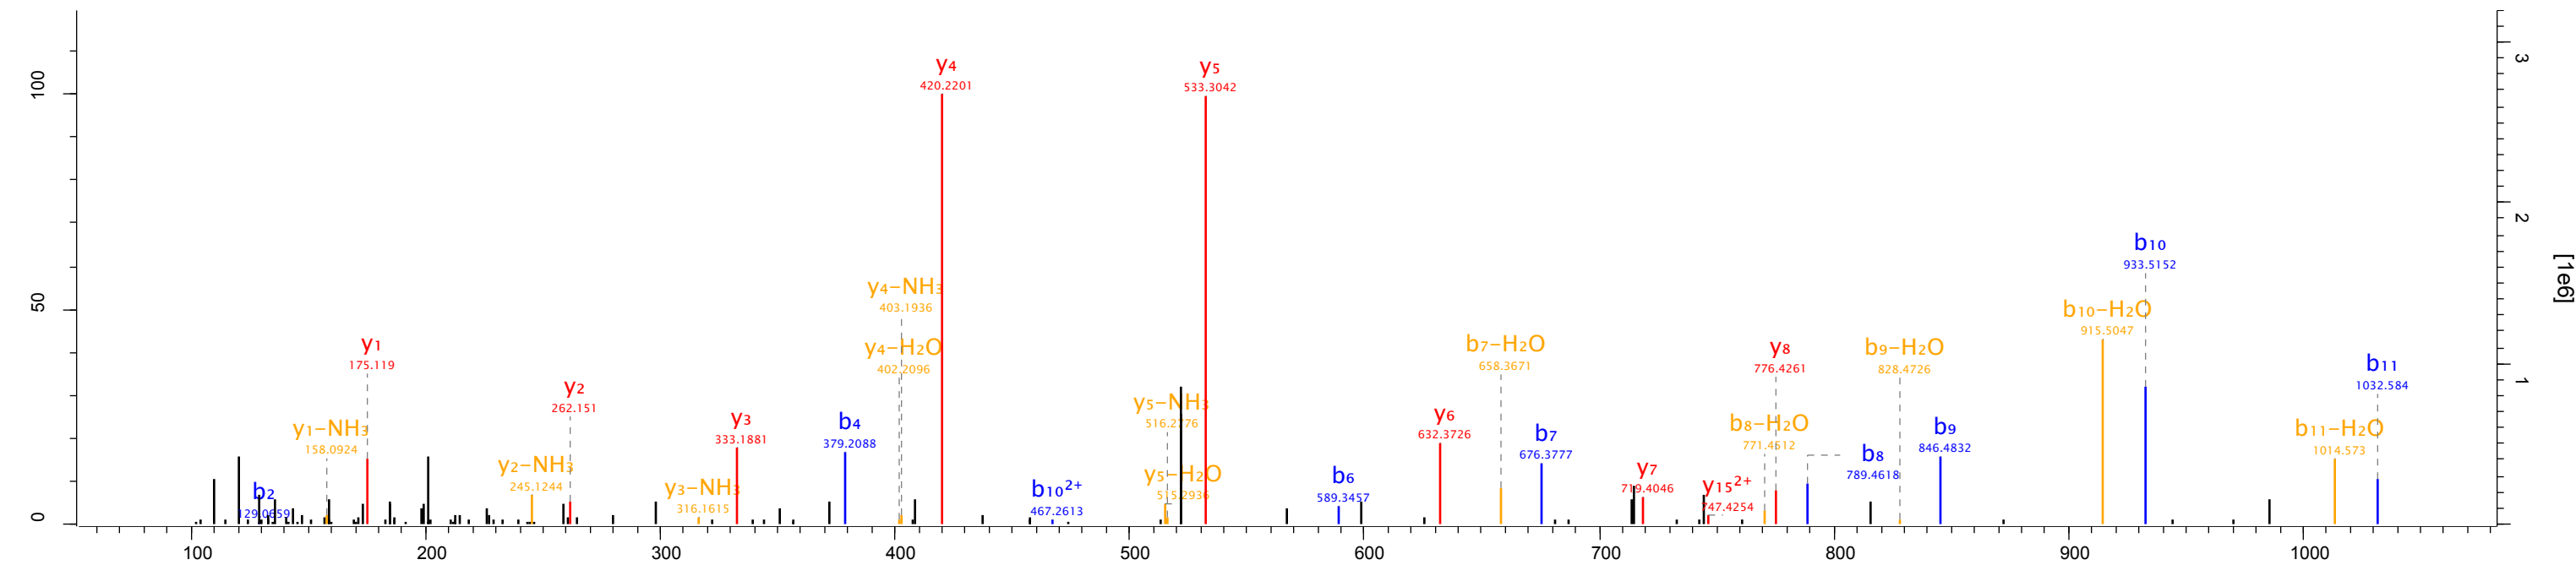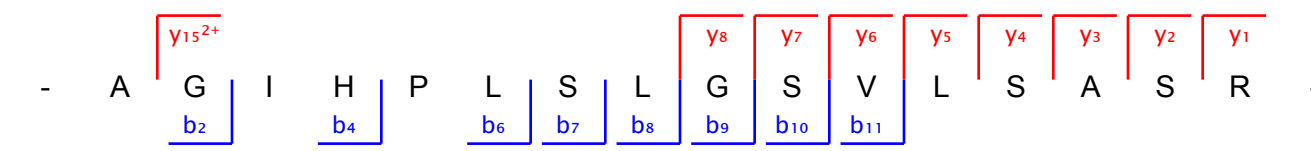

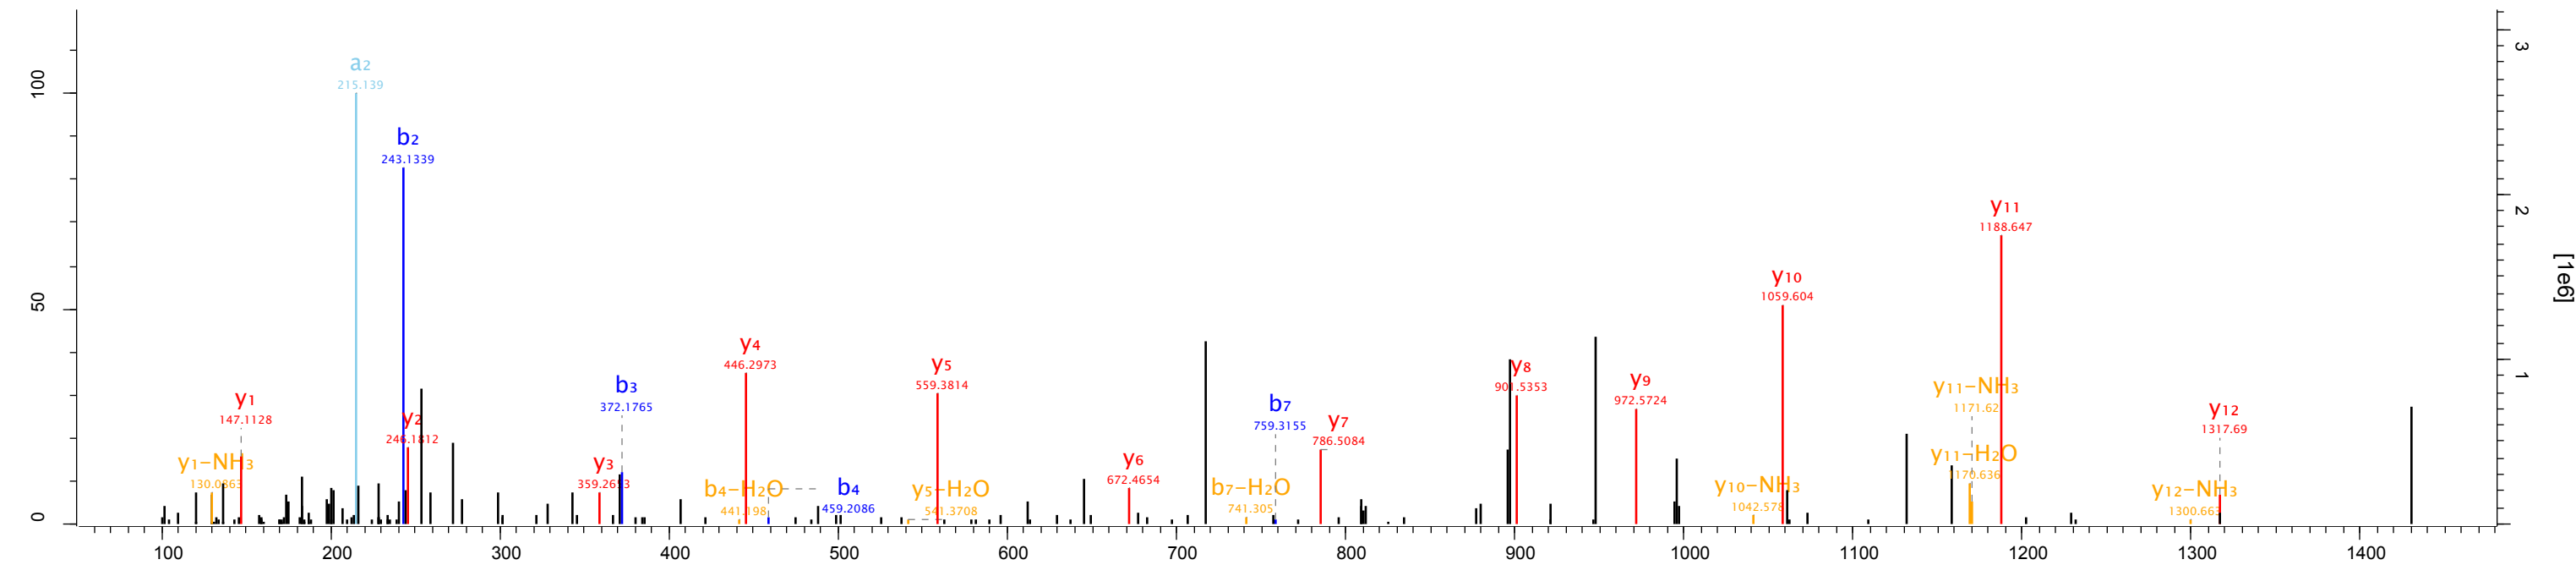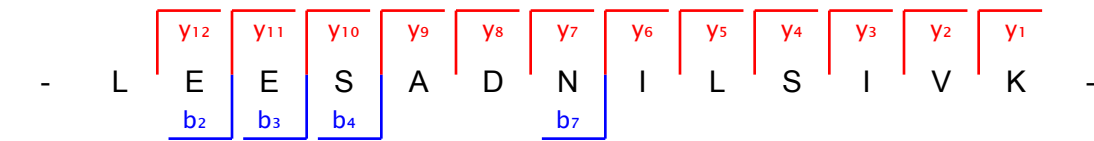

Raw file: 20180707\_MaS\_A375SR\_ML\_proteome\_26  
 Scan: 27201 Method: FTMS; HCD Score: 88.08 m/z: 717.9 Gene names: RFXAP

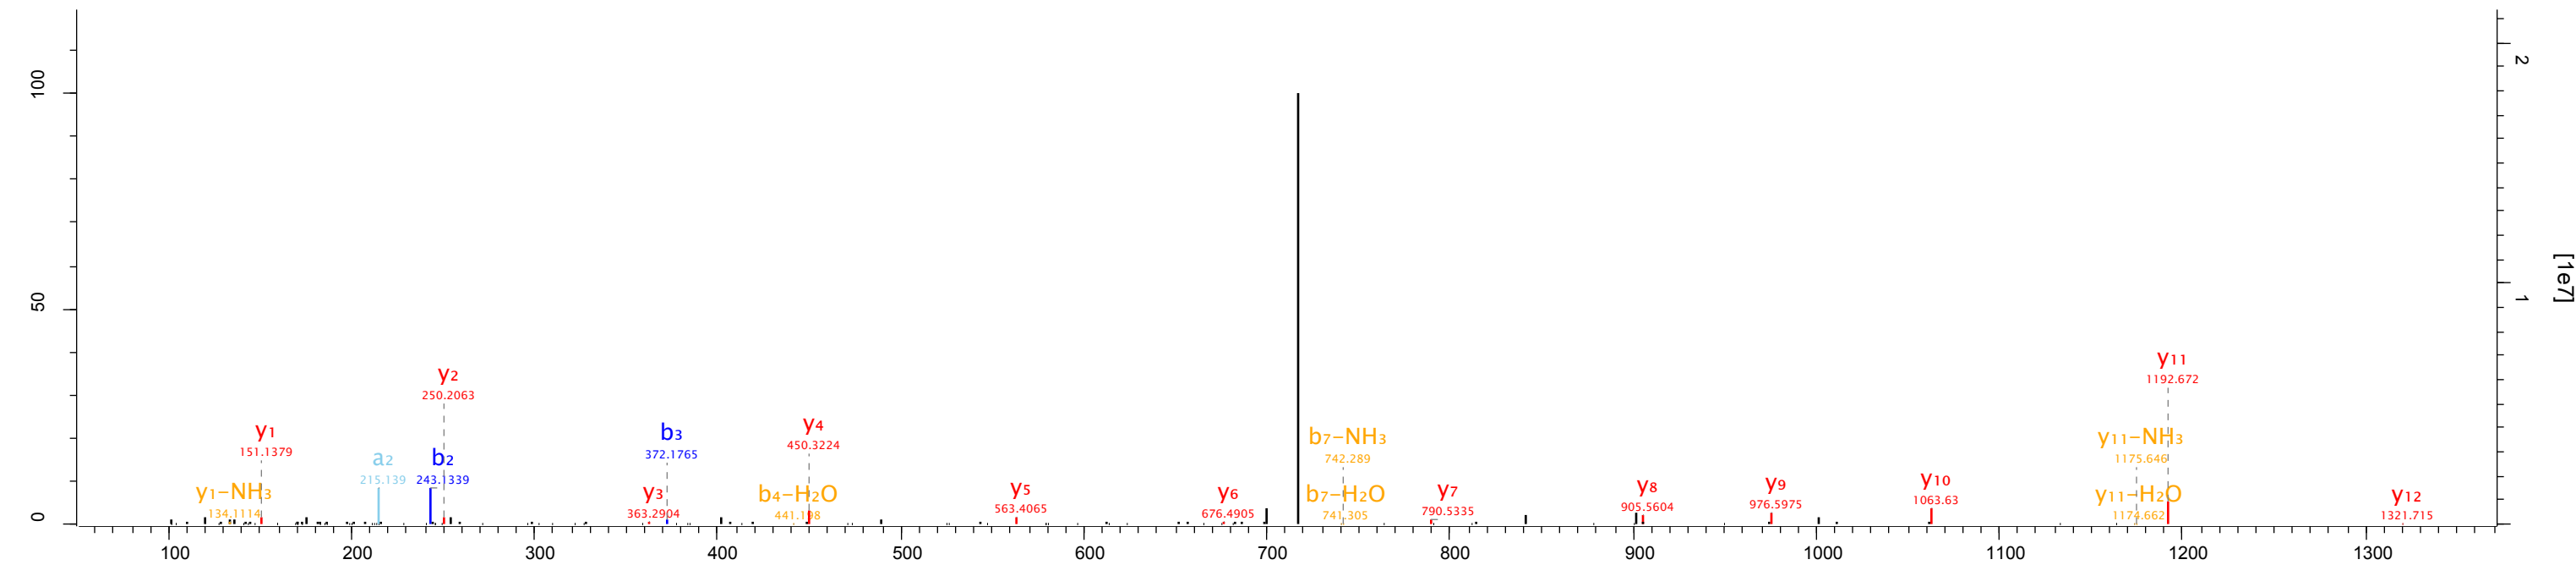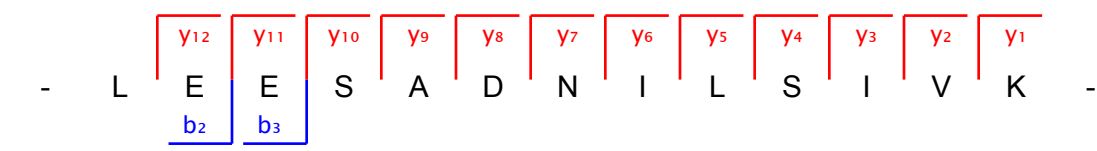

Raw file 20180707\_MaS\_A375SR\_ML\_proteome\_27  
 Scan 16141 Method FTMS; HCD Score 81.95 m/z 654.37 Gene names RPL39P5;RPL39

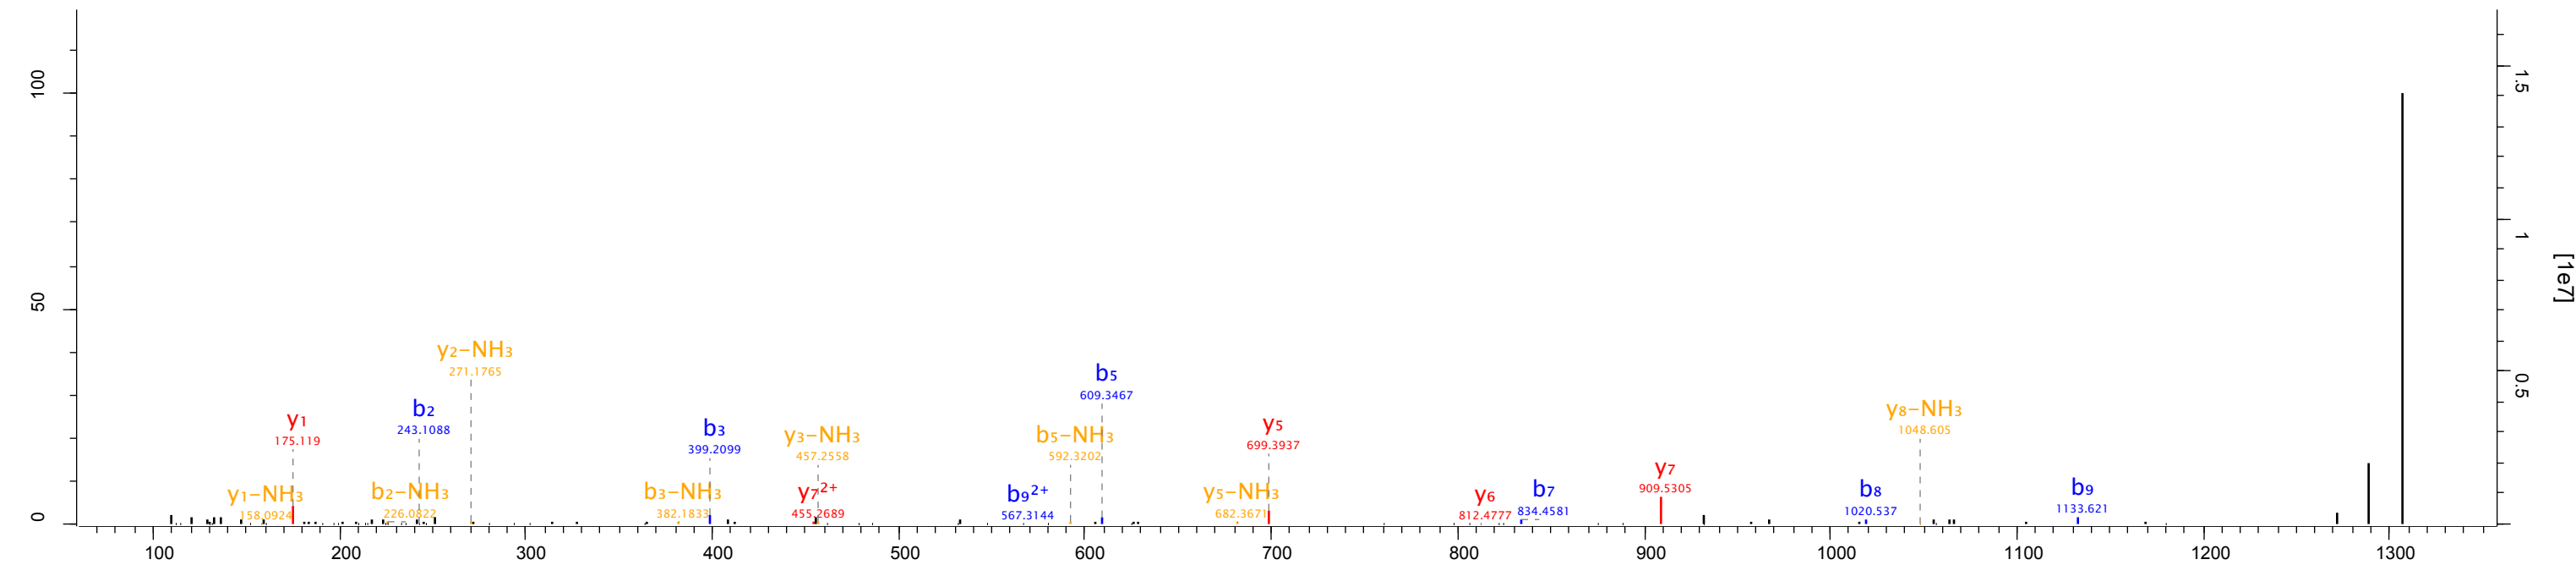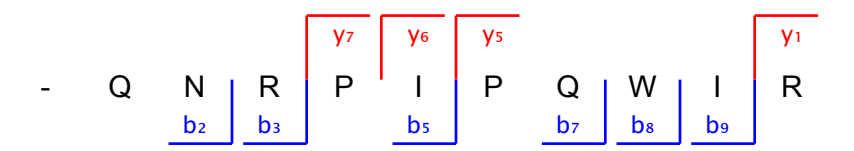

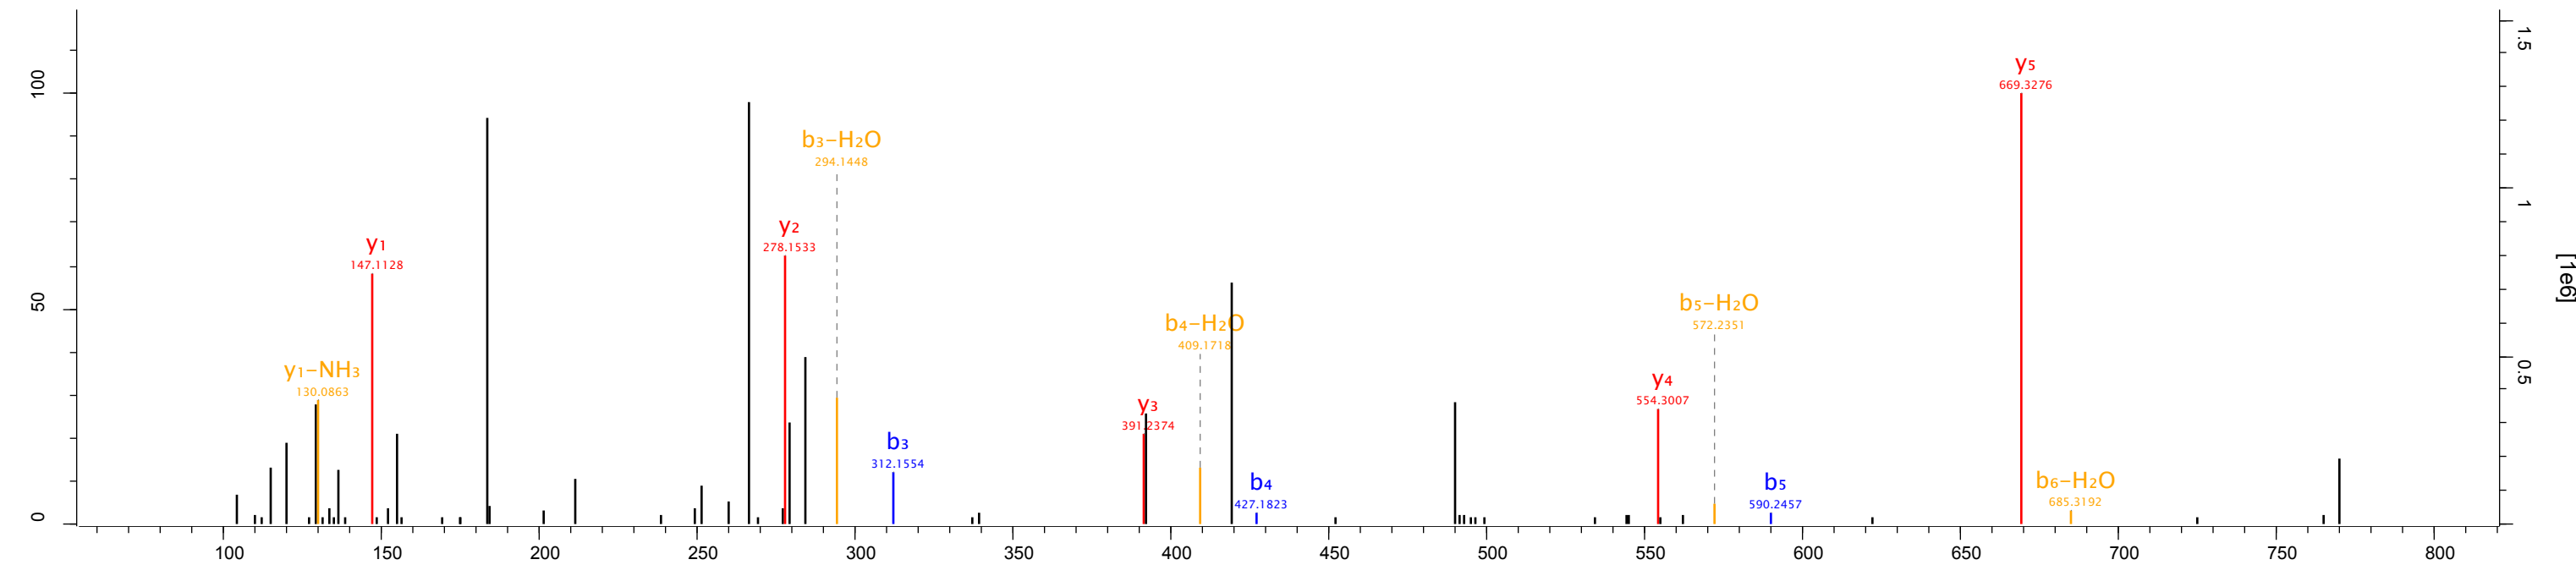

- P D V D Y I M K -

b3 b4 b5 y5 y4 y3 y2 y1

Raw file  
20180707\_MaS\_A375SR\_ML\_proteome\_27

| Scan | Method    | Score | m/z    |
|------|-----------|-------|--------|
| 2681 | FTMS; HCD | 65.67 | 361.19 |

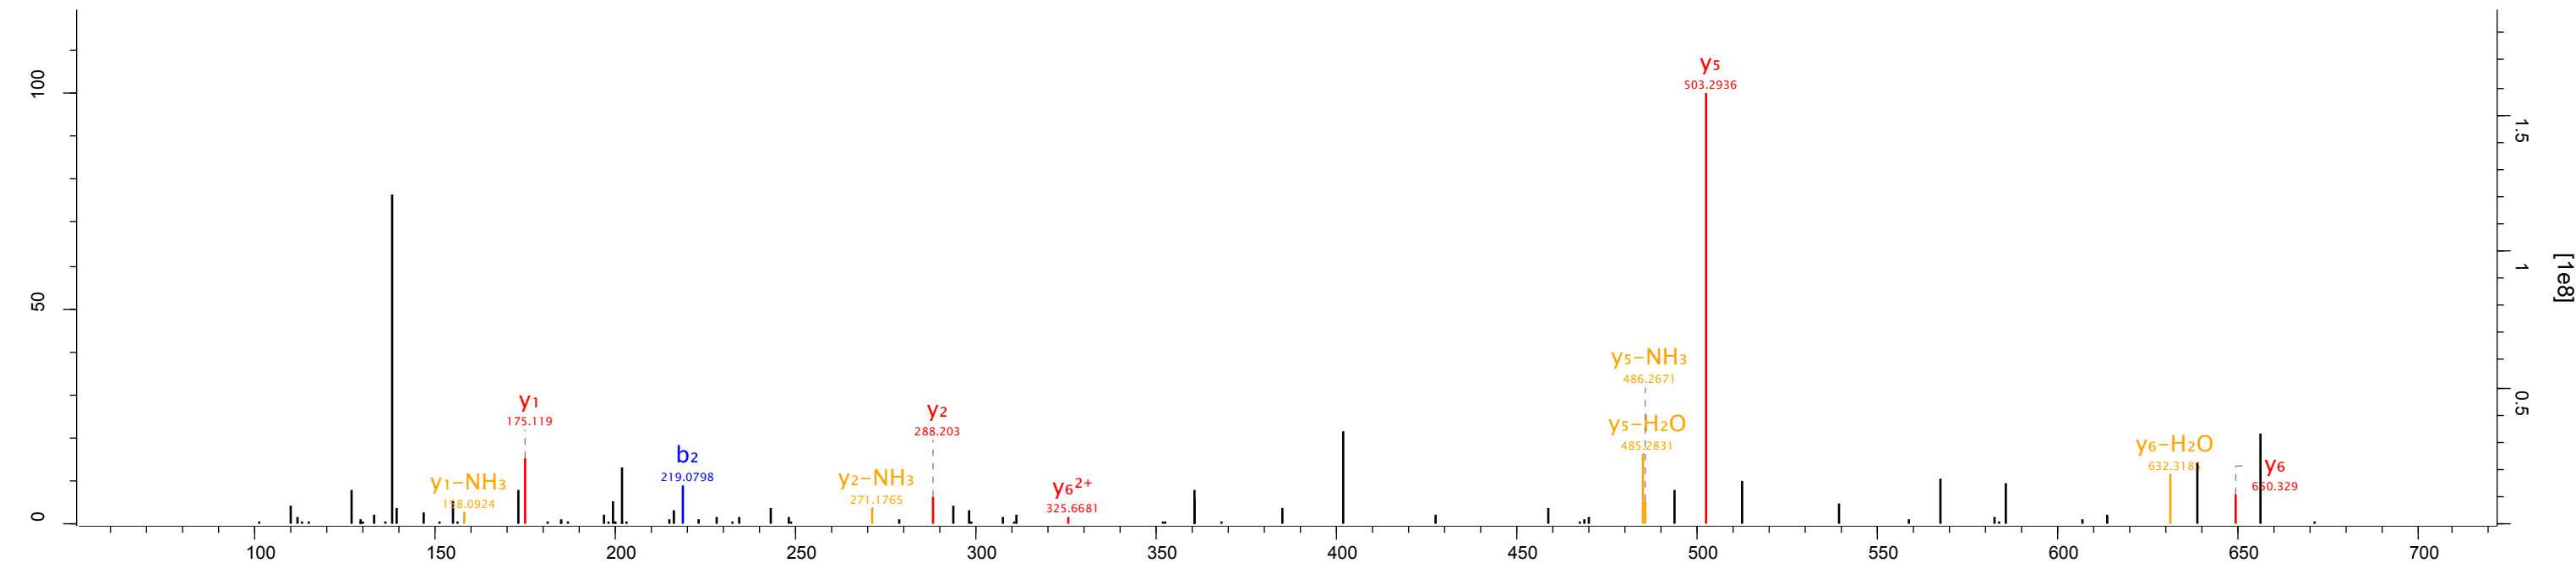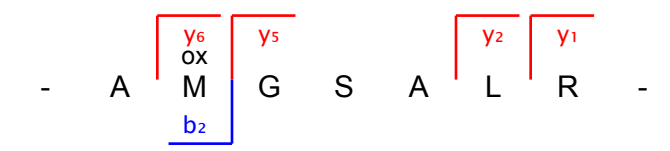



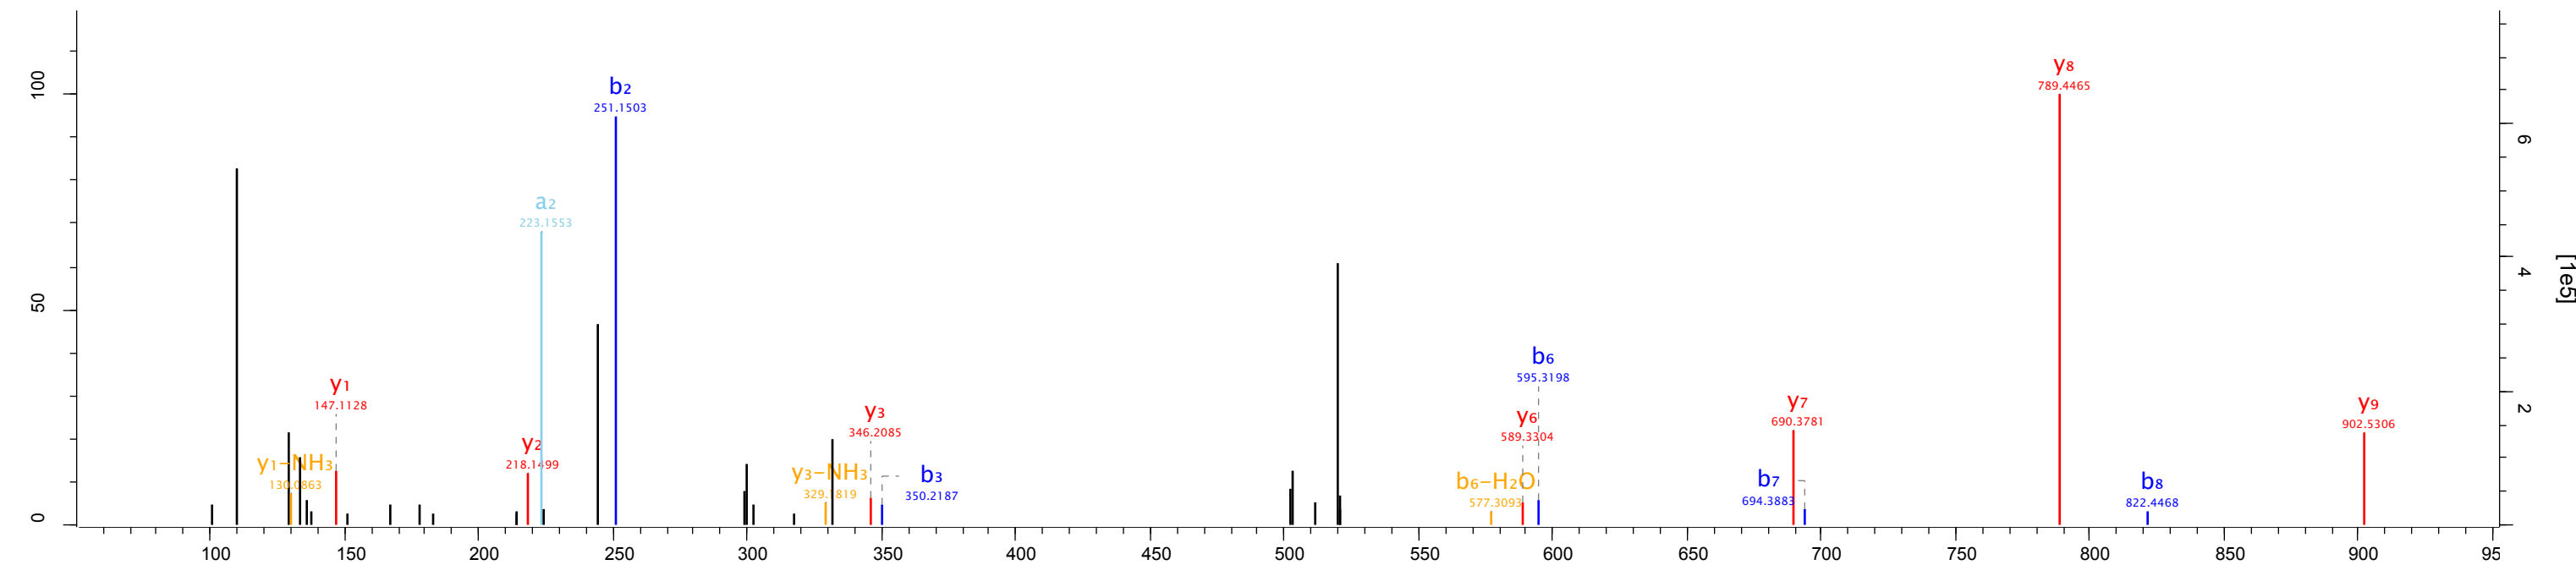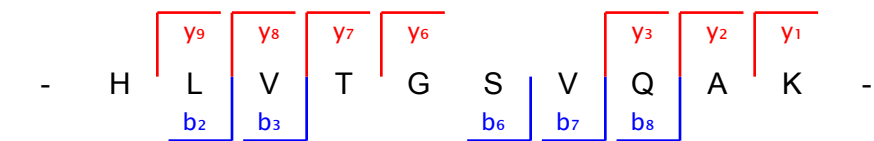

Raw file  
20180707\_MaS\_A375SR\_ML\_proteome\_29

Scan 3941 Method FTMS; HCD Score 49.47 m/z 537.82

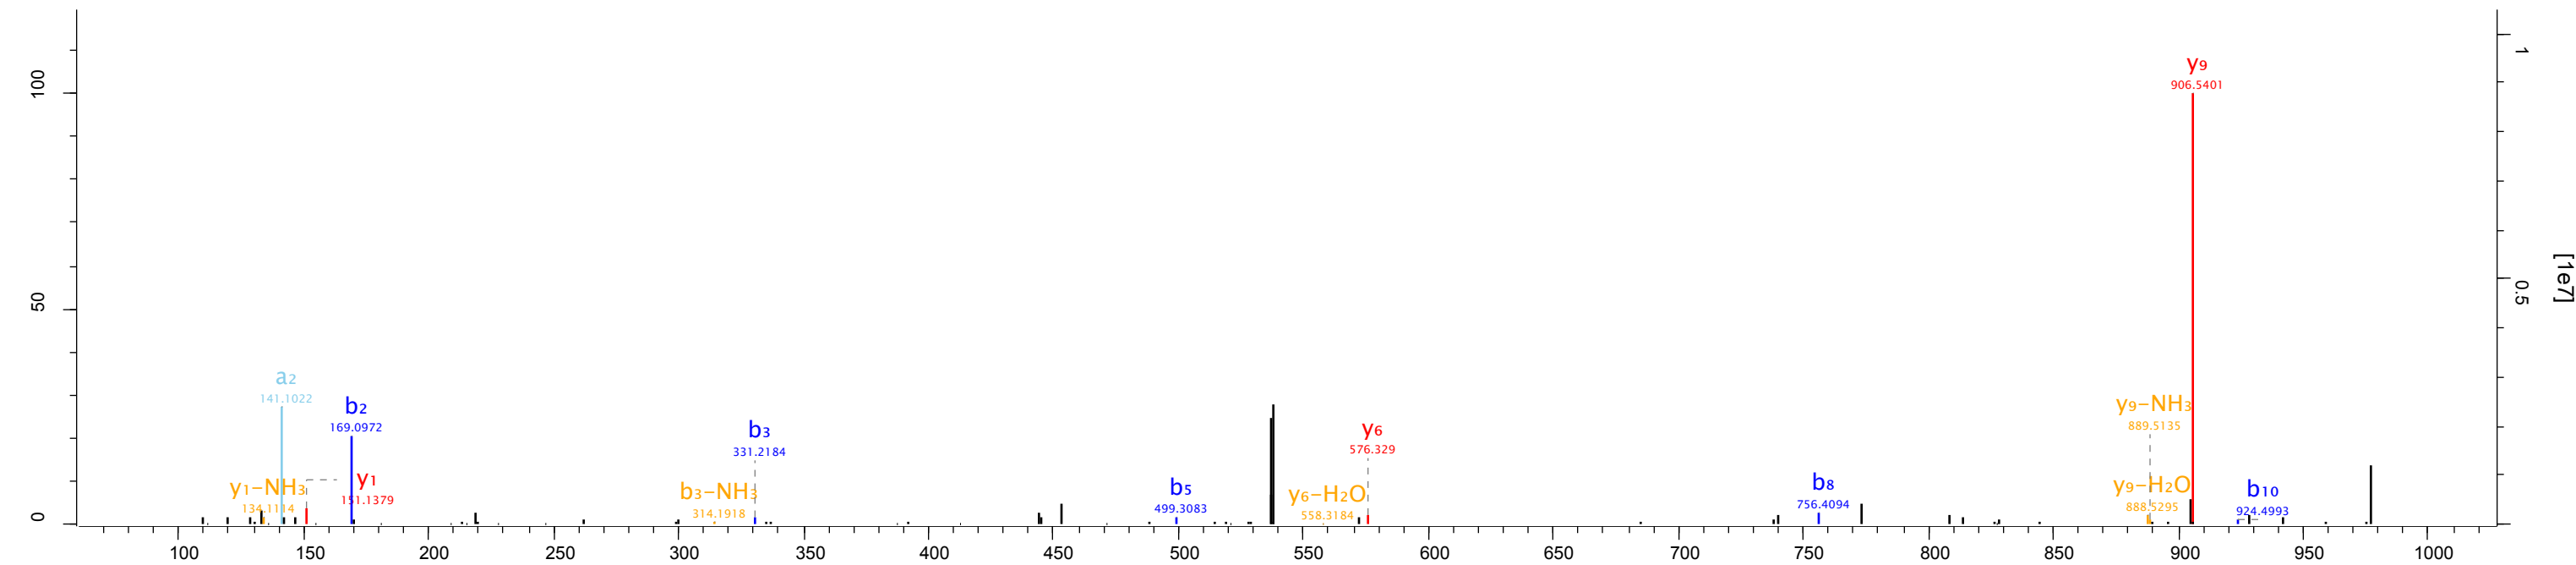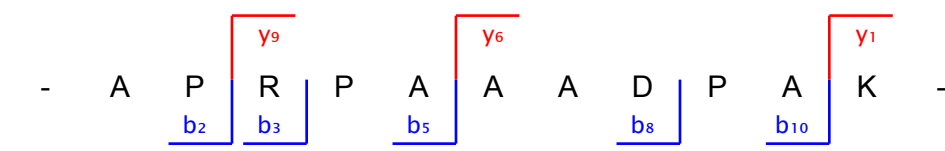

Raw file 20180707\_MaS\_A375SR\_ML\_proteome\_30 Scan 11491 Method FTMS; HCD Score 73.44 m/z 558.83

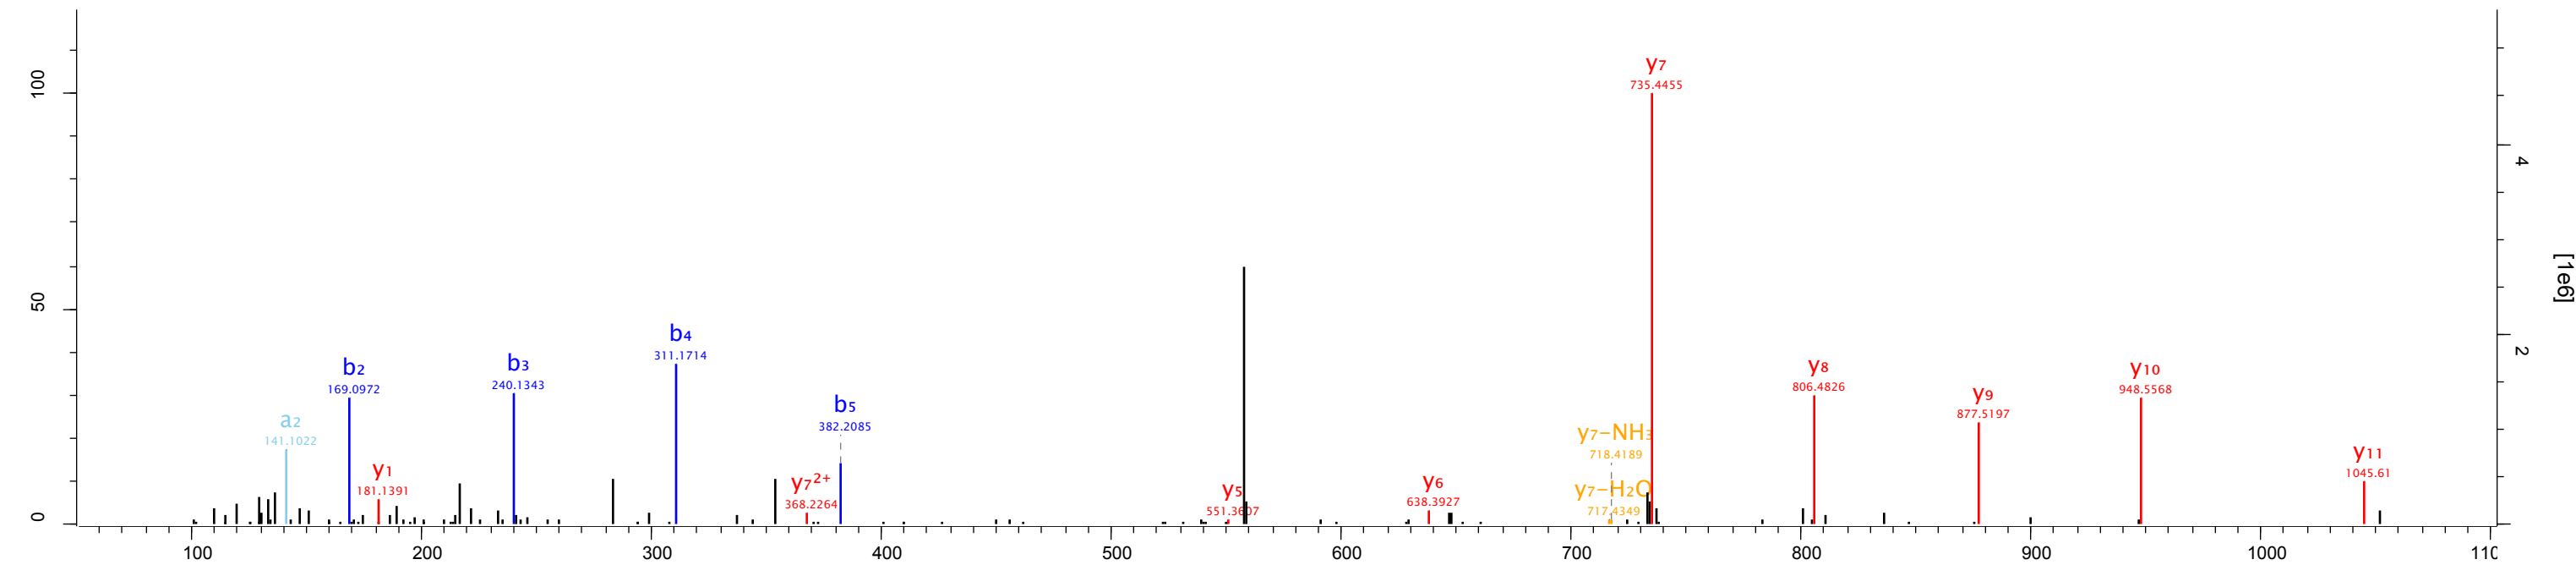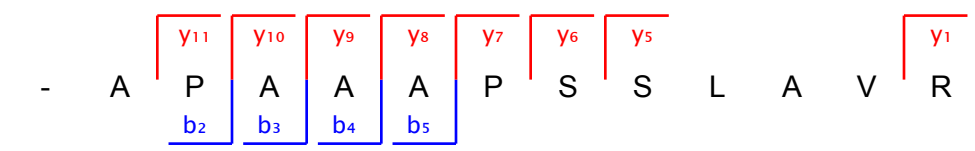

Raw file 20180707\_MaS\_A375SR\_ML\_proteome\_30  
 Scan 13101 Method FTMS; HCD Score 69.19 m/z 858.93 Gene names ZBED3

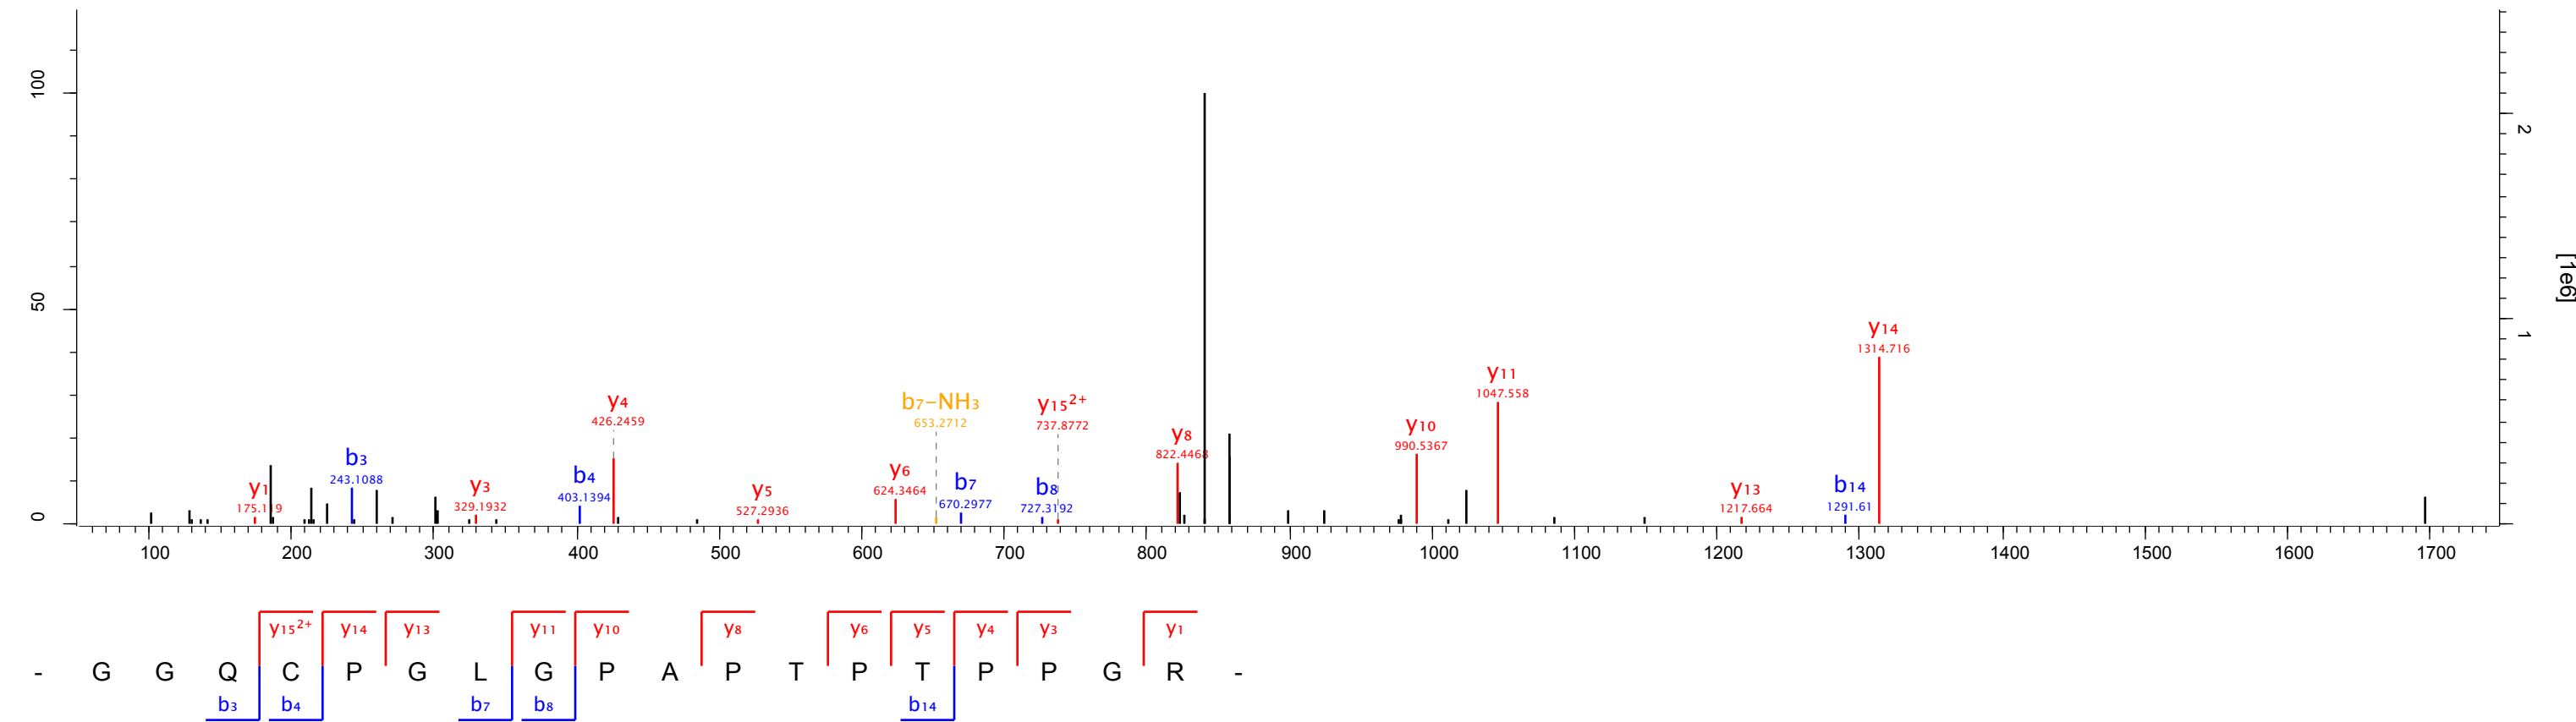

Raw file 20180707\_MaS\_A375SR\_ML\_proteome\_30 Scan 16831 Method FTMS; HCD Score 111.64 m/z 770.4 Gene names PLXNB3

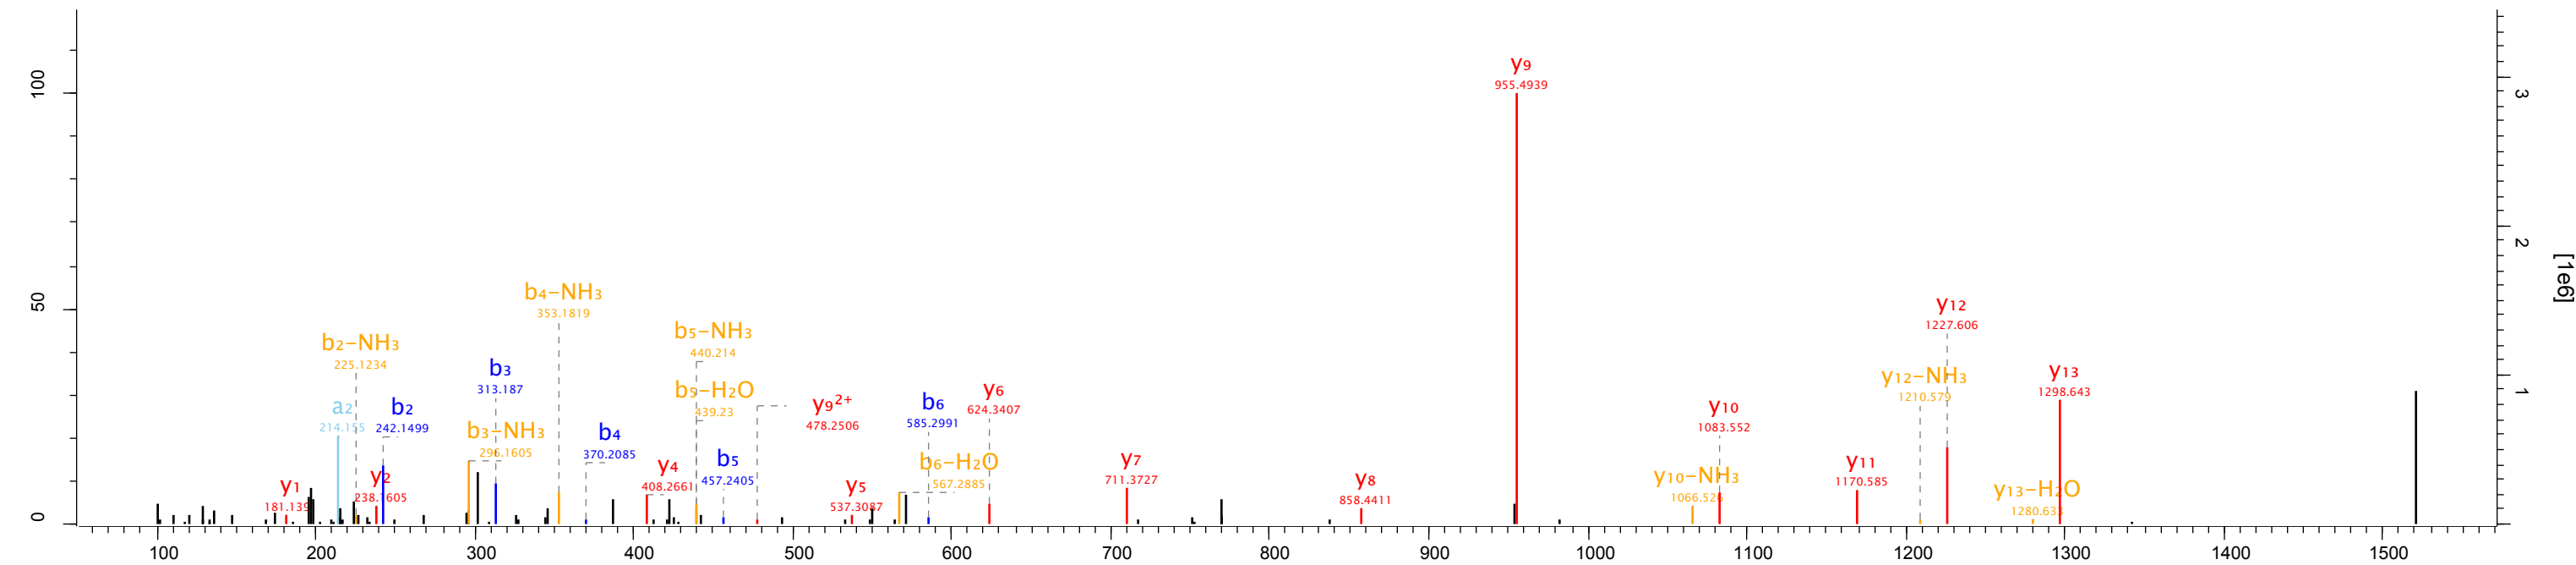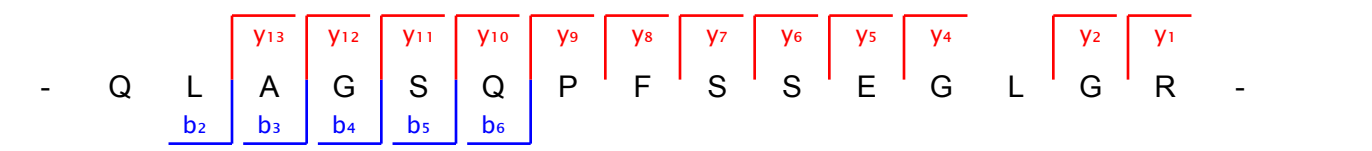

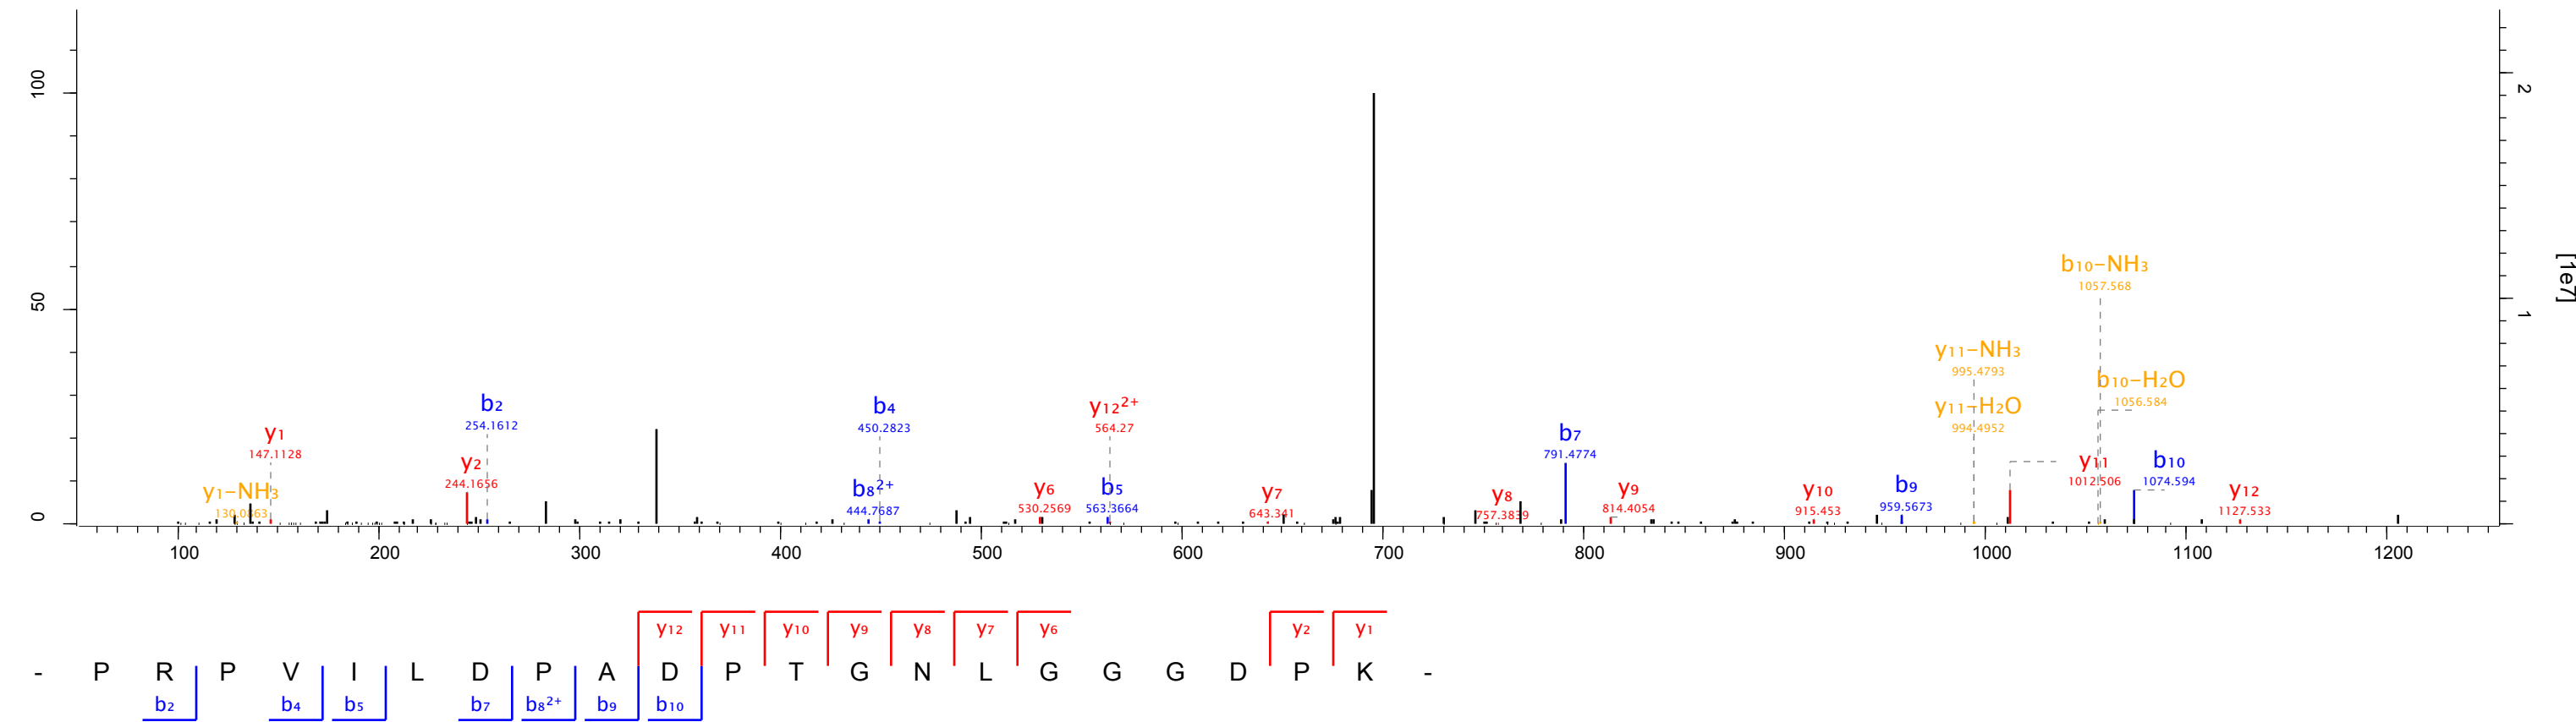

Raw file: 20150812\_A375SR\_Phospho\_BR1\_01  
 Scan: 5752 Method: FTMS; HCD Score: 46.27 m/z: 907.32 Gene names: FBRSL1

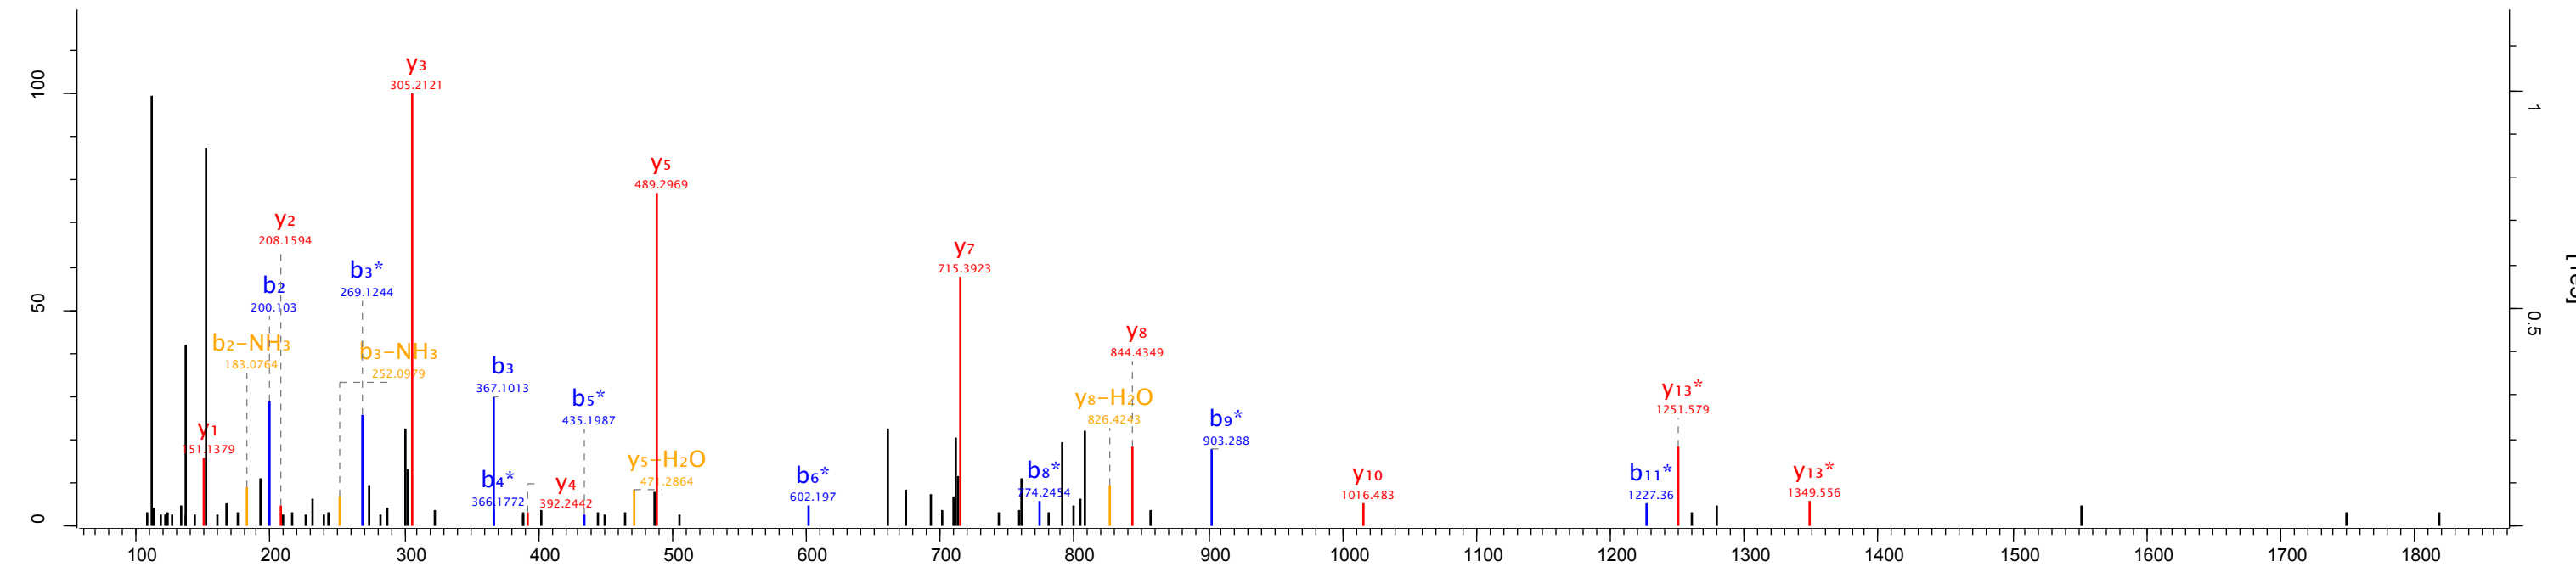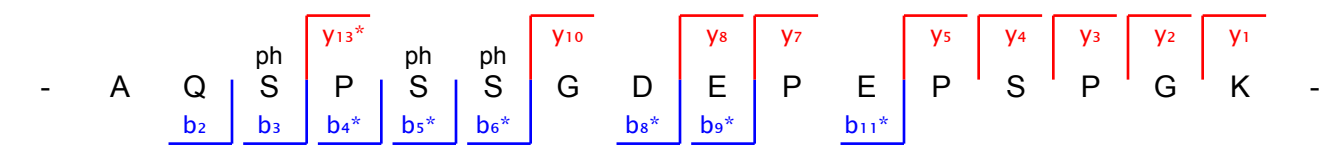

Raw file 20150812\_A375SR\_Phospho\_BR1\_02 Scan 13792 Method FTMS; HCD Score 45.61 m/z 668.68 Gene names BHLHE22

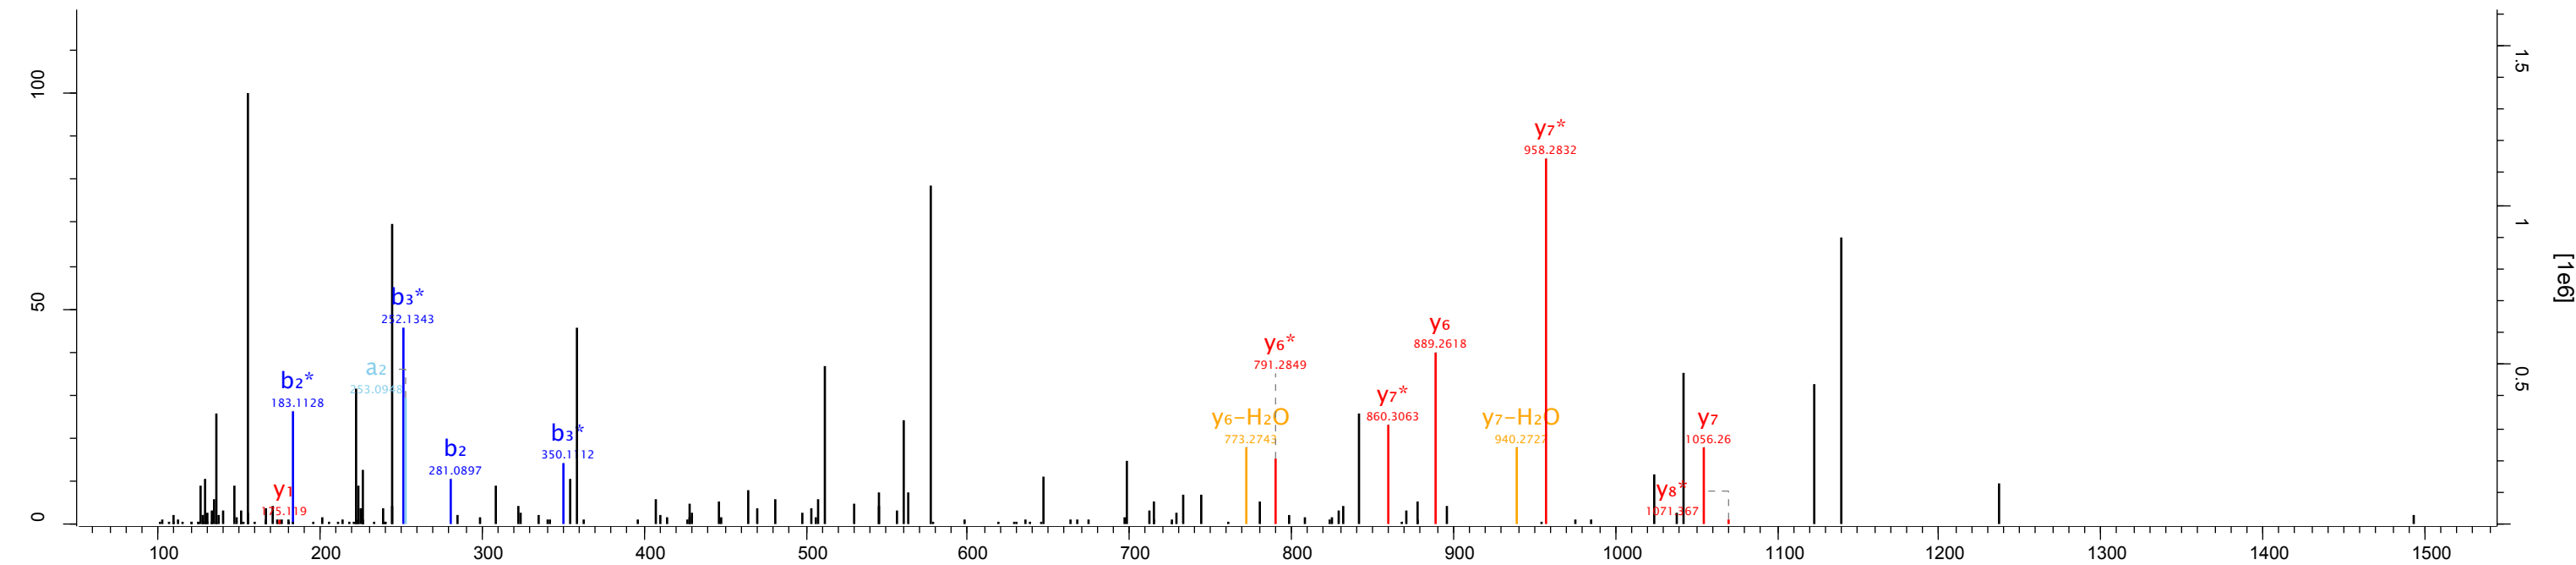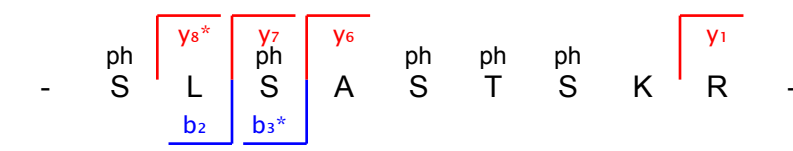



Raw file 20150812\_A375SR\_Phospho\_BR1\_02 Scan 14512 Method FTMS; HCD Score 64.83 m/z 732.74 Gene names SGMS2

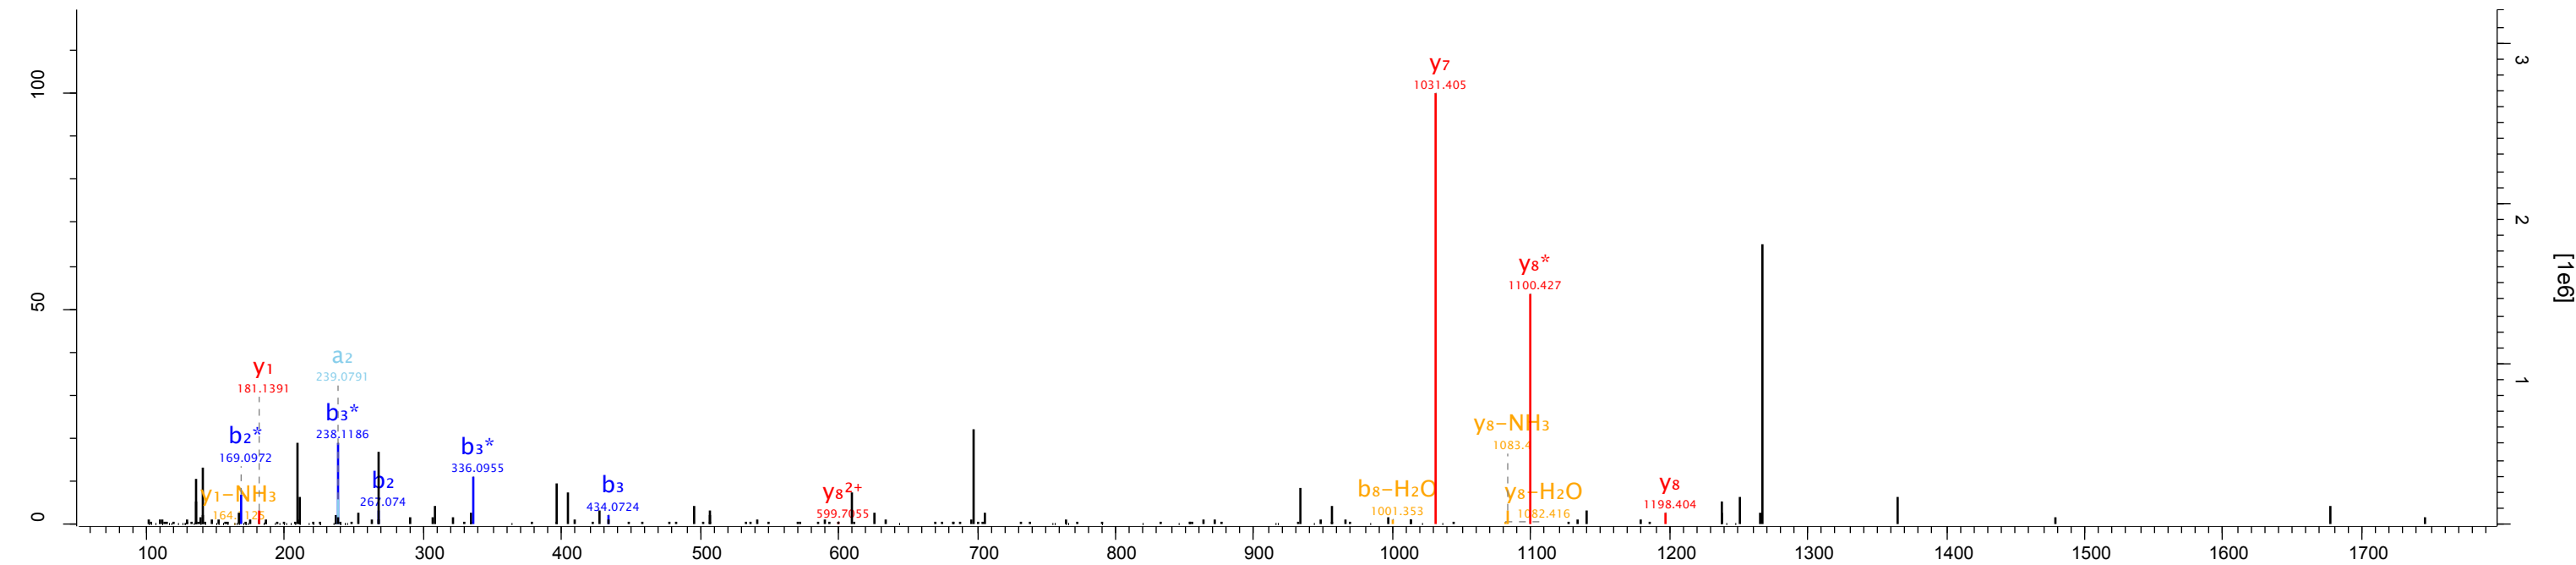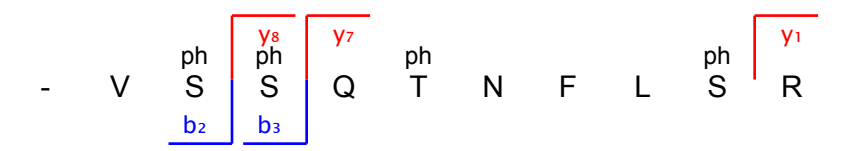

Raw file: 20150812\_A375SR\_Phospho\_BR1\_03  
 Scan: 17922 Method: FTMS; HCD Score: 106.28 m/z: 1093.97 Gene names: FAM214B

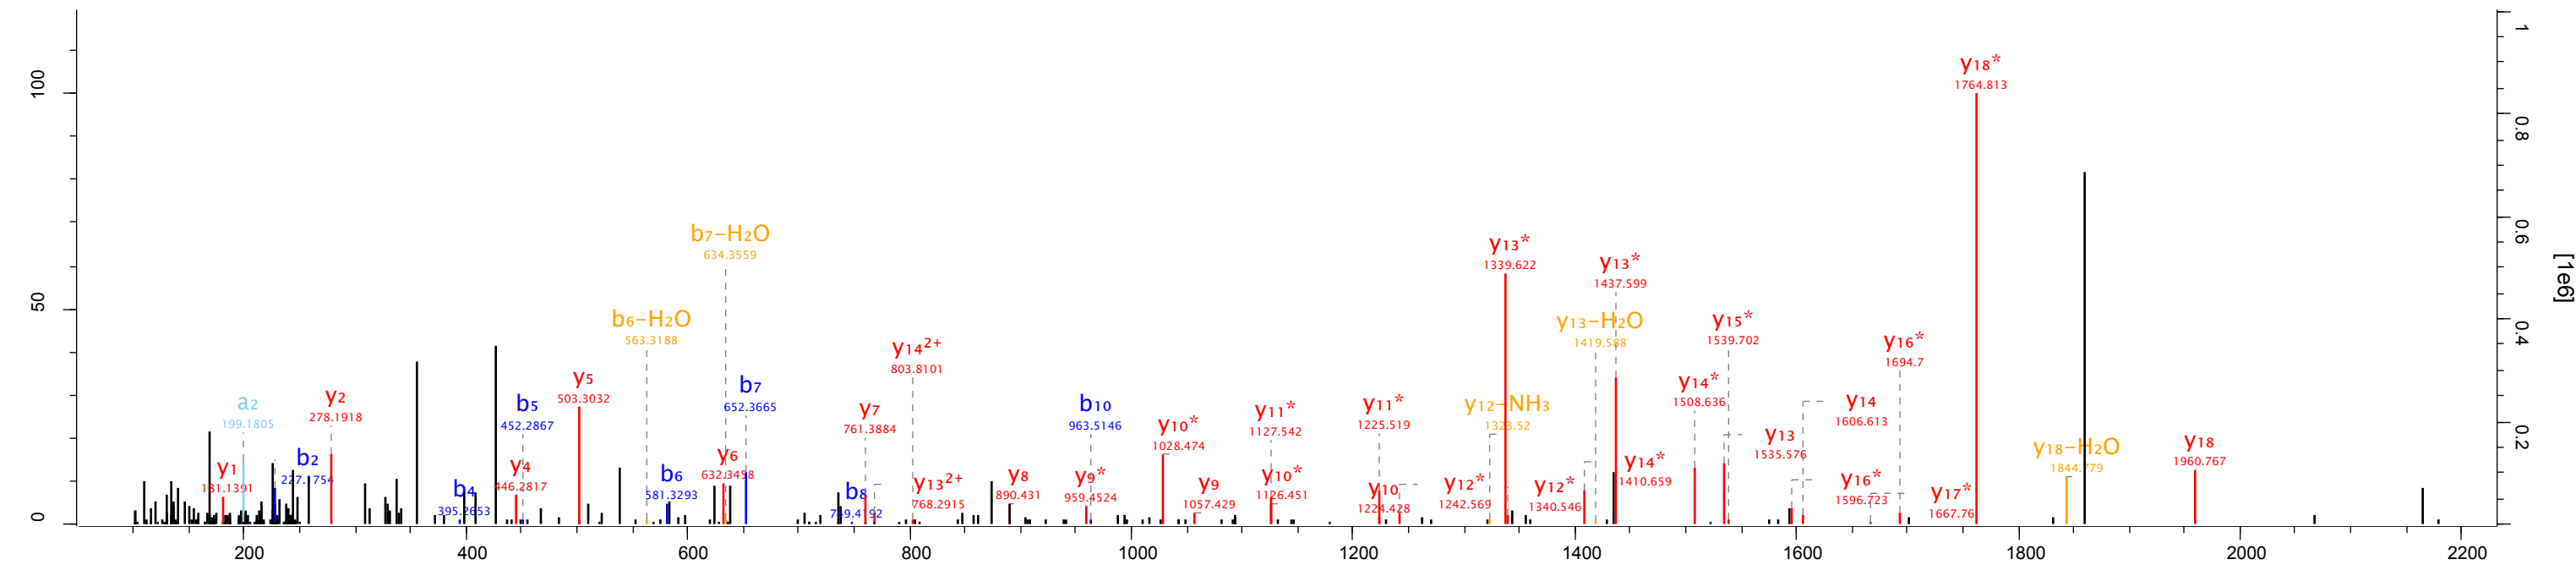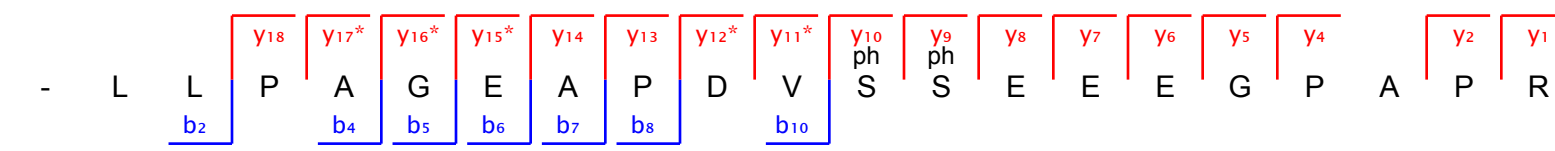

Raw file 20150812\_A375SR\_Phospho\_BR1\_03 Scan 7242 Method FTMS; HCD Score 124.1 m/z 844.36 Gene names YAF2

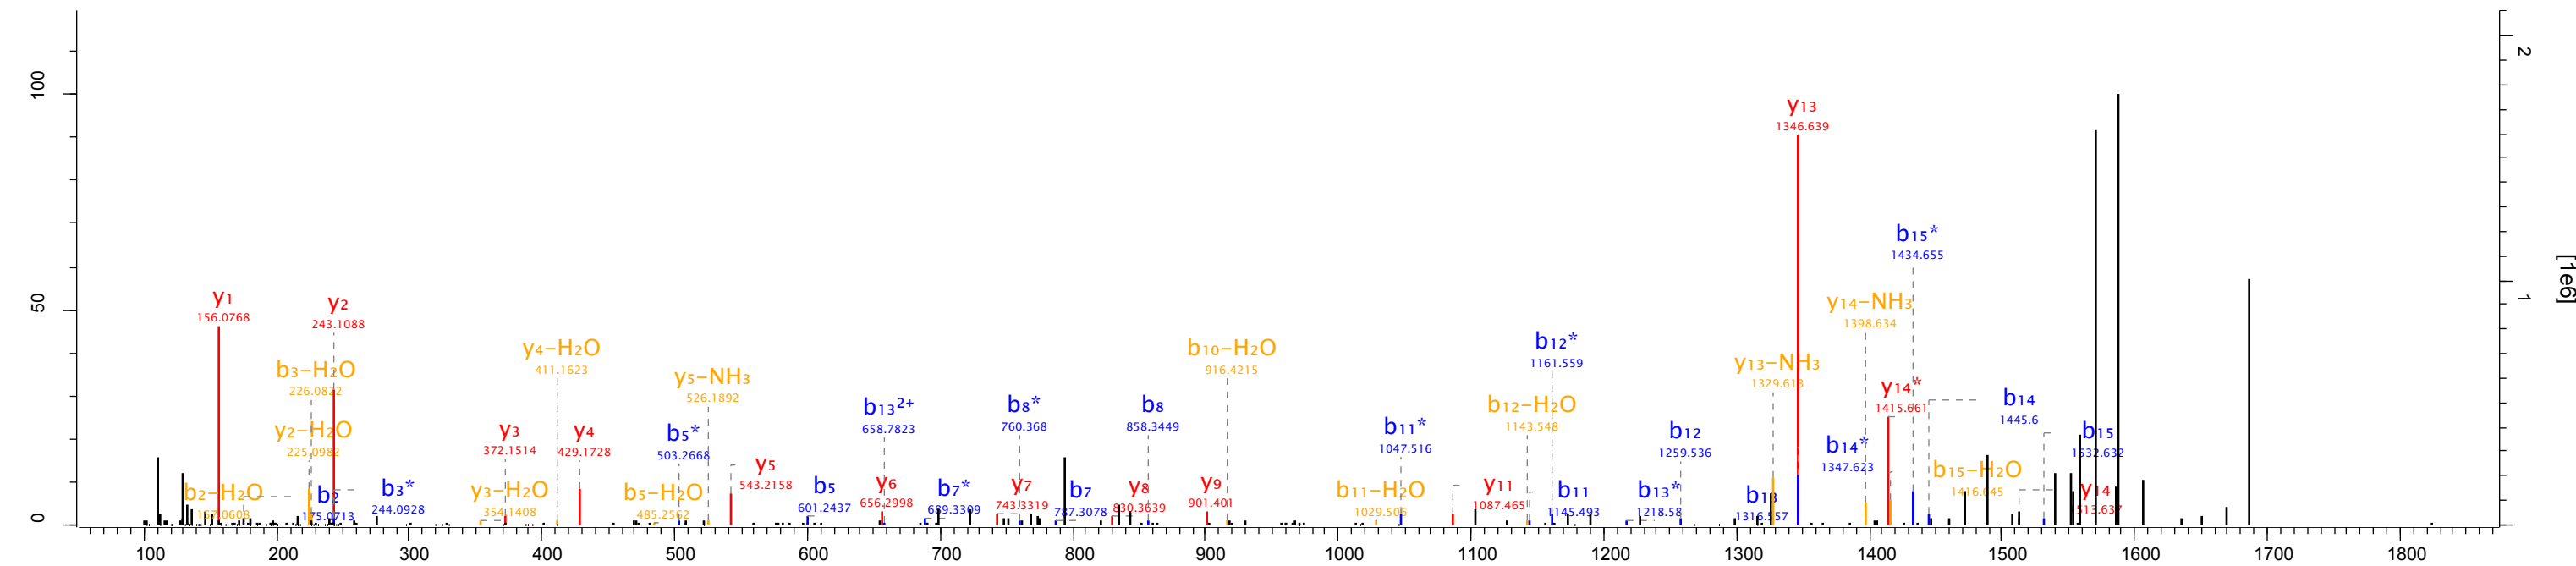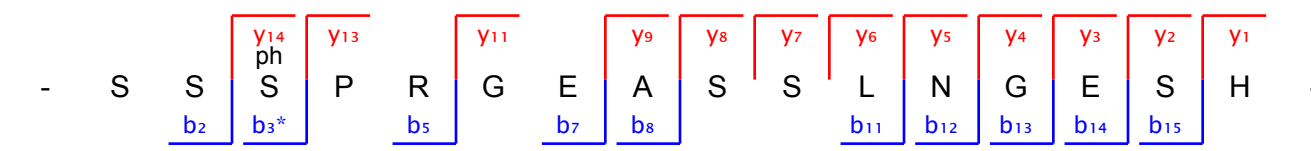

Raw file: 20150812\_A375SR\_Phospho\_BR1\_03  
 Scan: 7642 Method: FTMS; HCD Score: 46.49 m/z: 663.78 Gene names: GPSM3

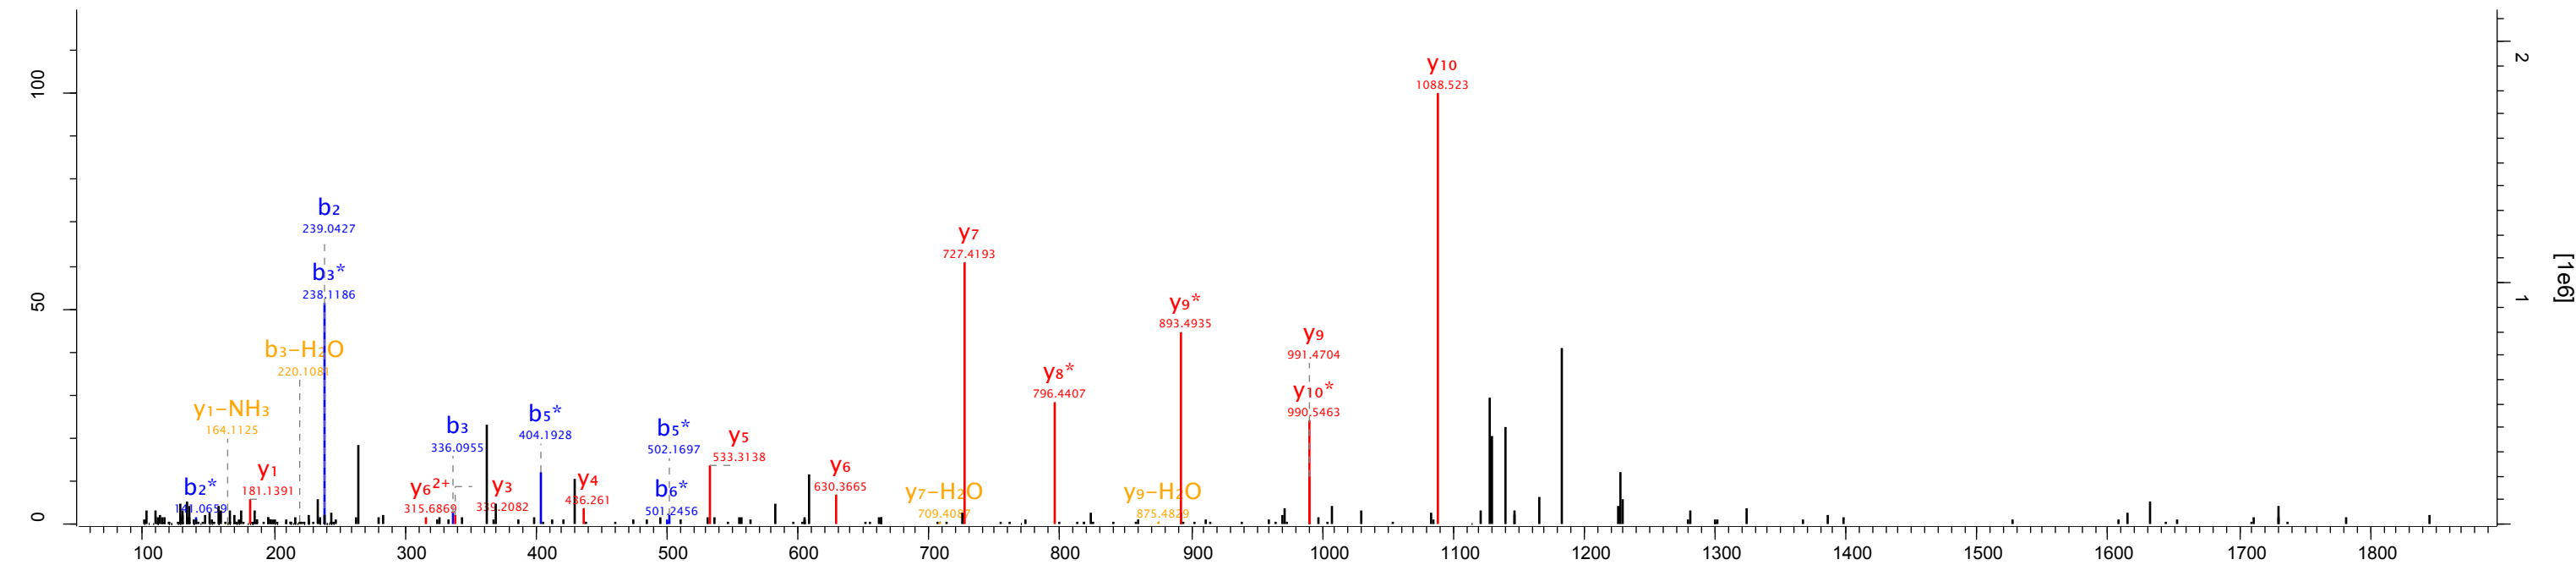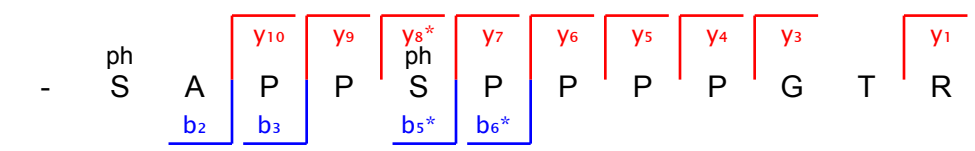

Raw file  
20150812\_A375SR\_Phospho\_BR1\_04

Scan 12212 Method FTMS; HCD Score 319.18 m/z 1031.92

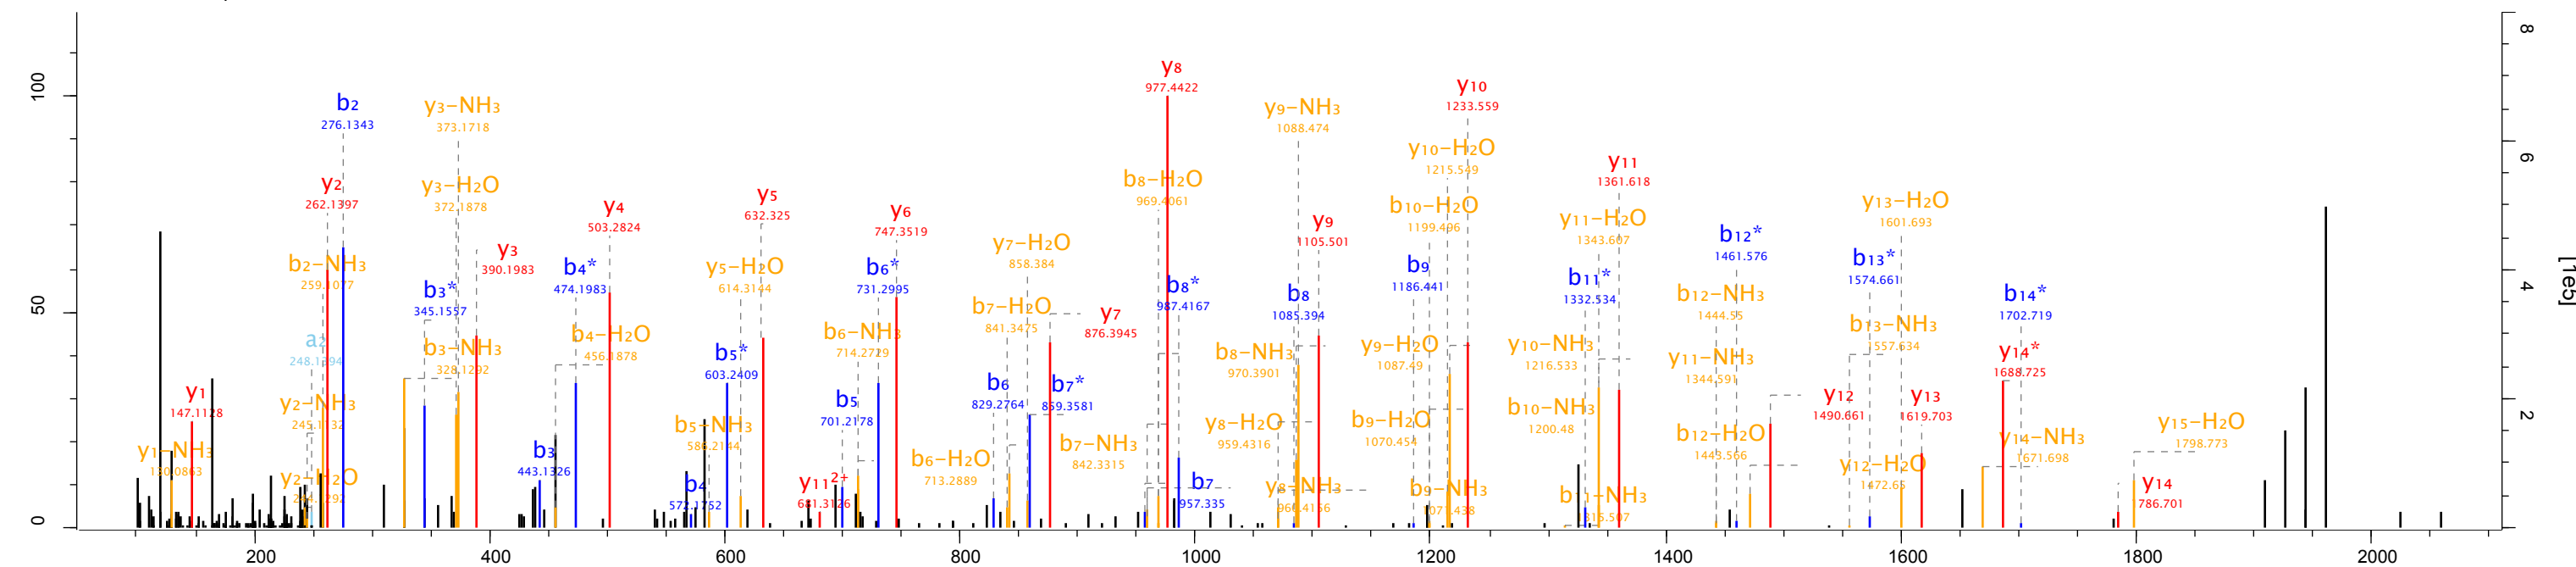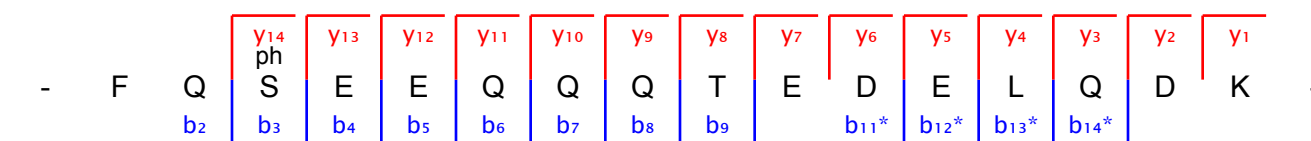

Raw file: 20150812\_A375SR\_Phospho\_BR1\_04  
 Scan: 5242 Method: FTMS; HCD Score: 48.57 m/z: 530.24

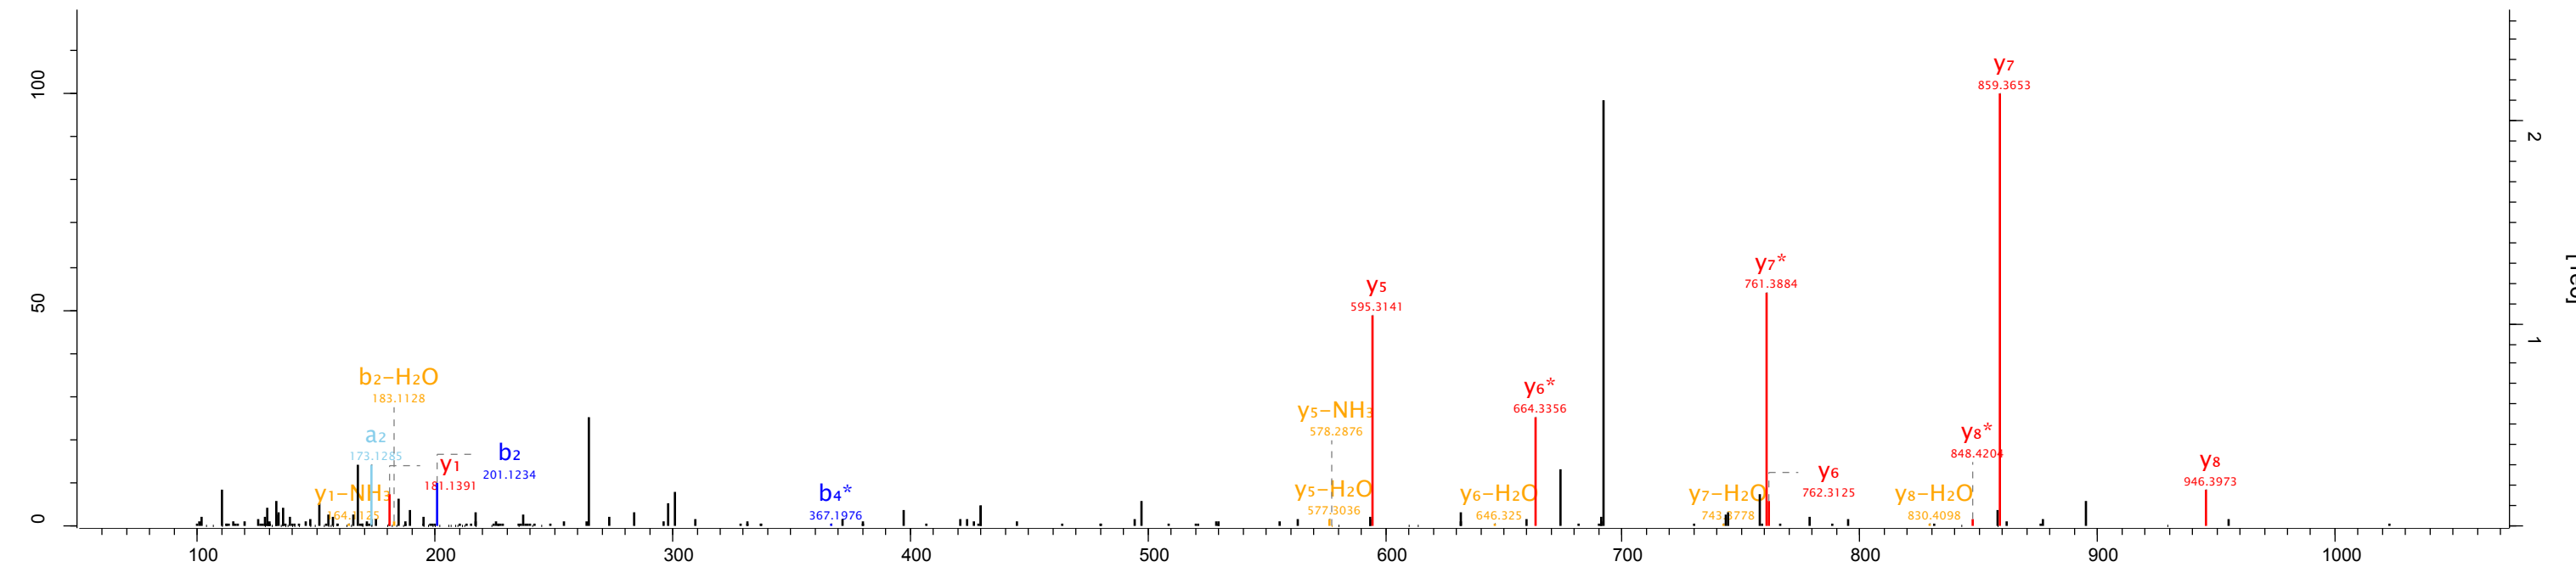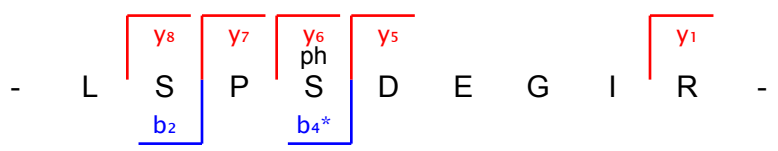

Raw file: 20150812\_A375SR\_Phospho\_BR1\_05  
 Scan: 15862 Method: FTMS; HCD Score: 55.75 m/z: 711.64 Gene names: LINC00614

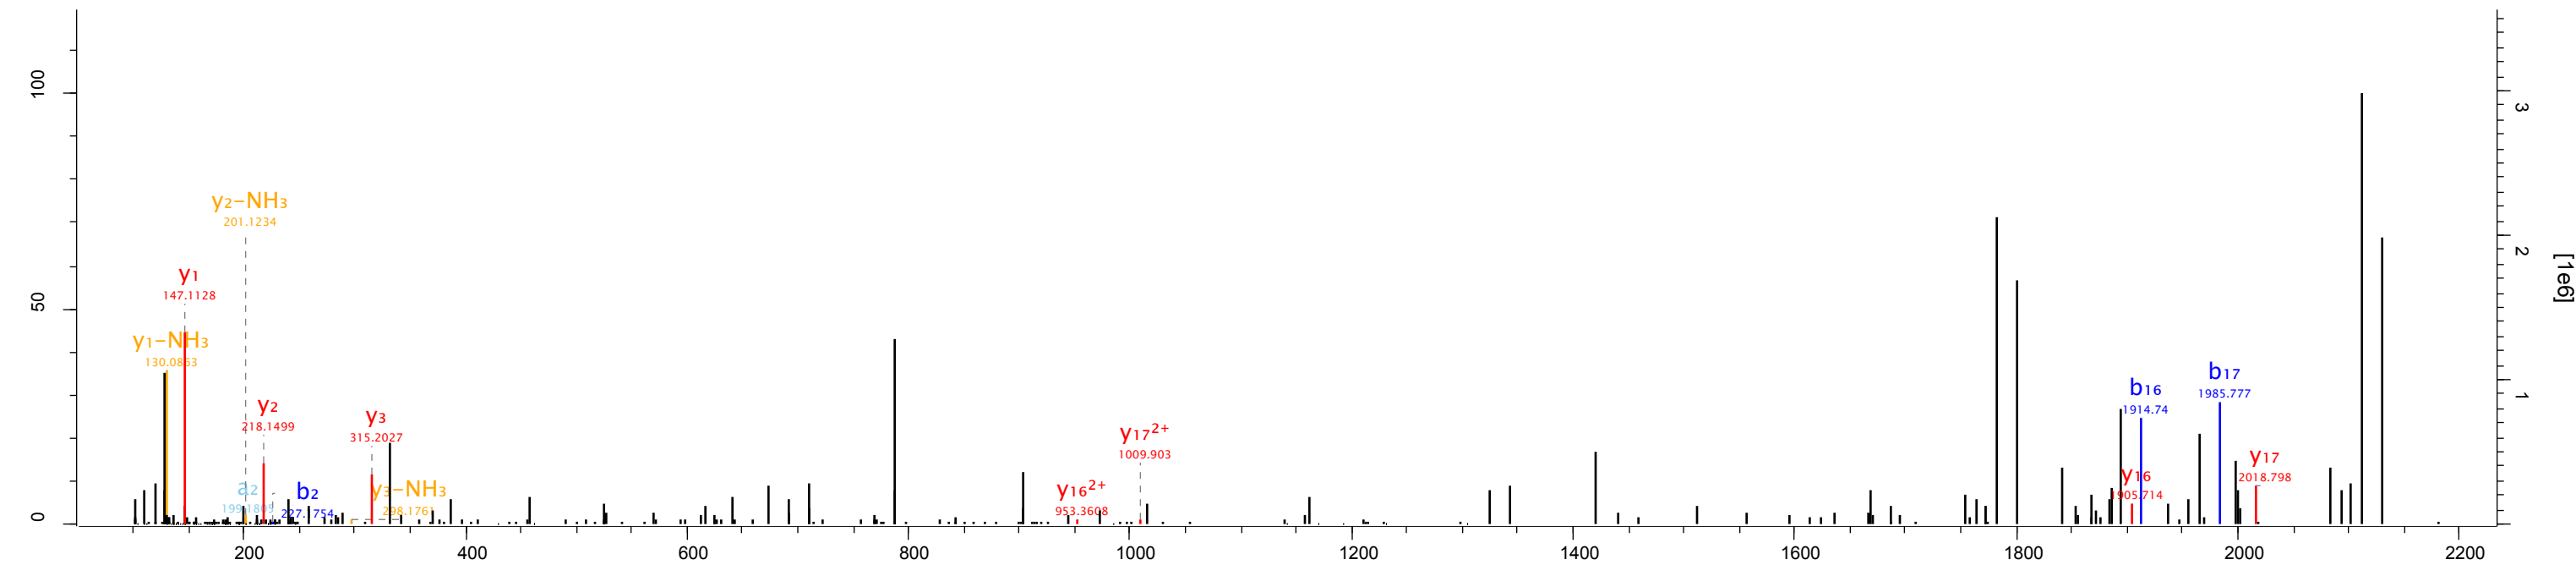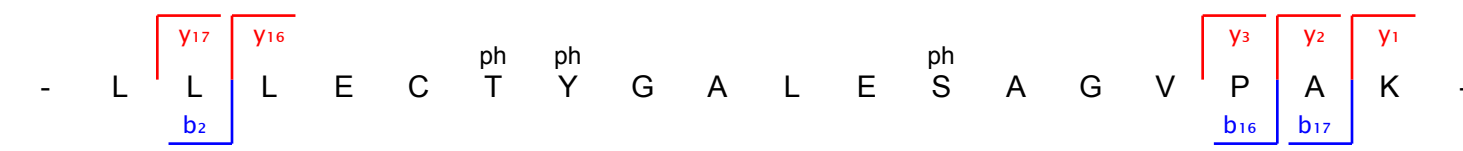

Raw file 20150812\_A375SR\_Phospho\_BR1\_05 Scan 17812 Method FTMS; HCD Score 53.98 m/z 861.38

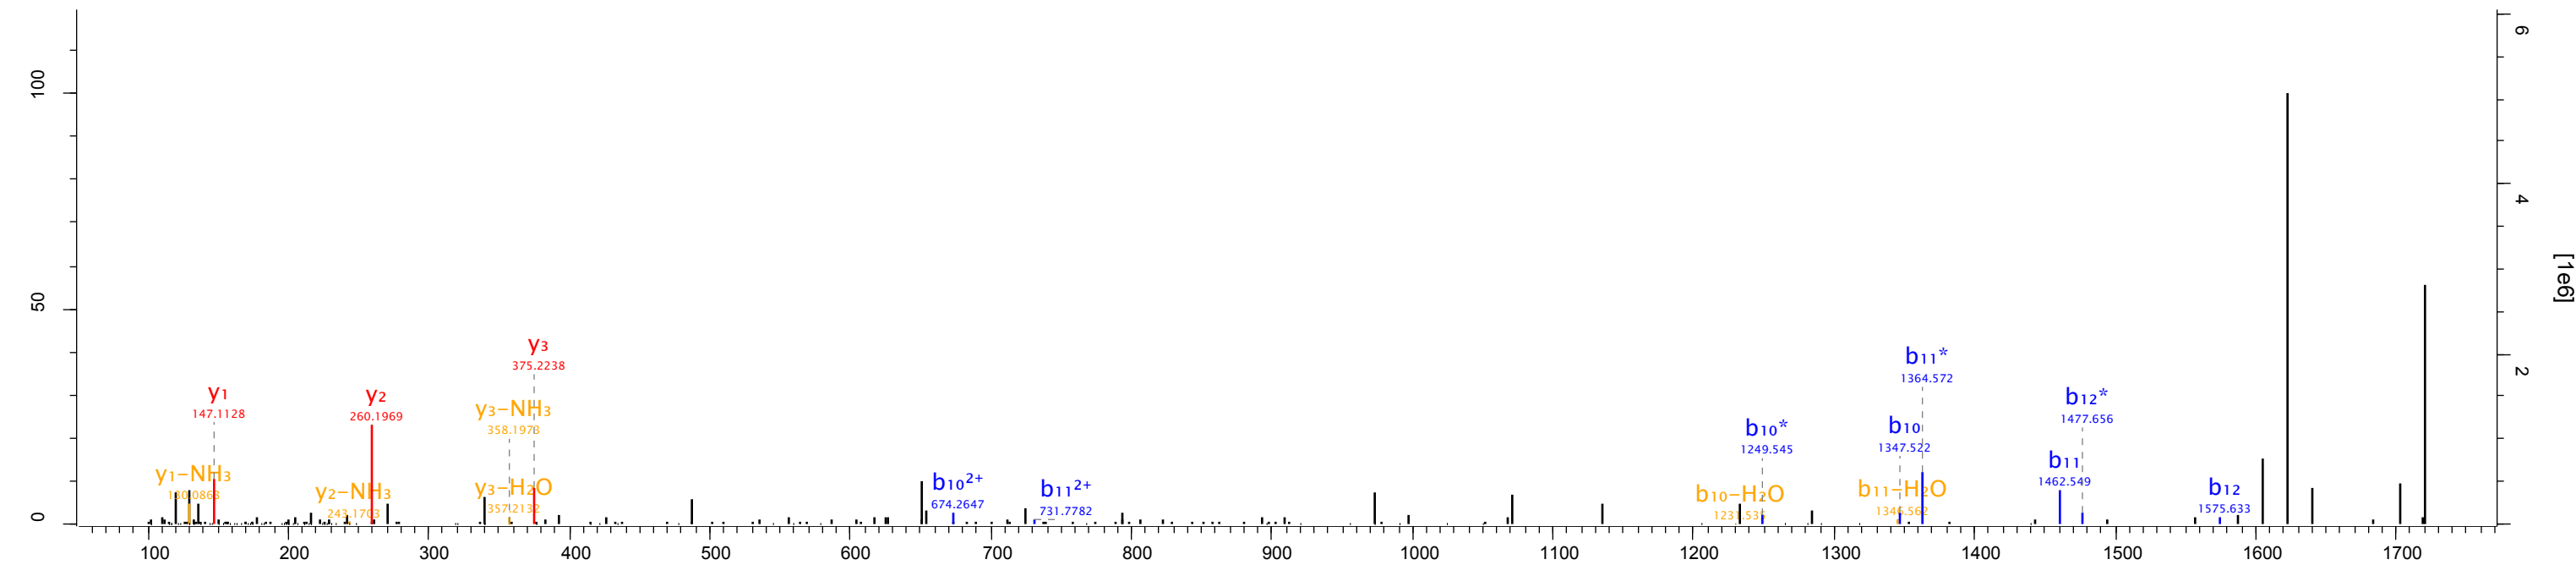



Raw file 20150812\_A375SR\_Phospho\_BR1\_06 Scan 14002 Method FTMS; HCD Score 127.59 m/z 562.98 Gene names MLLT3

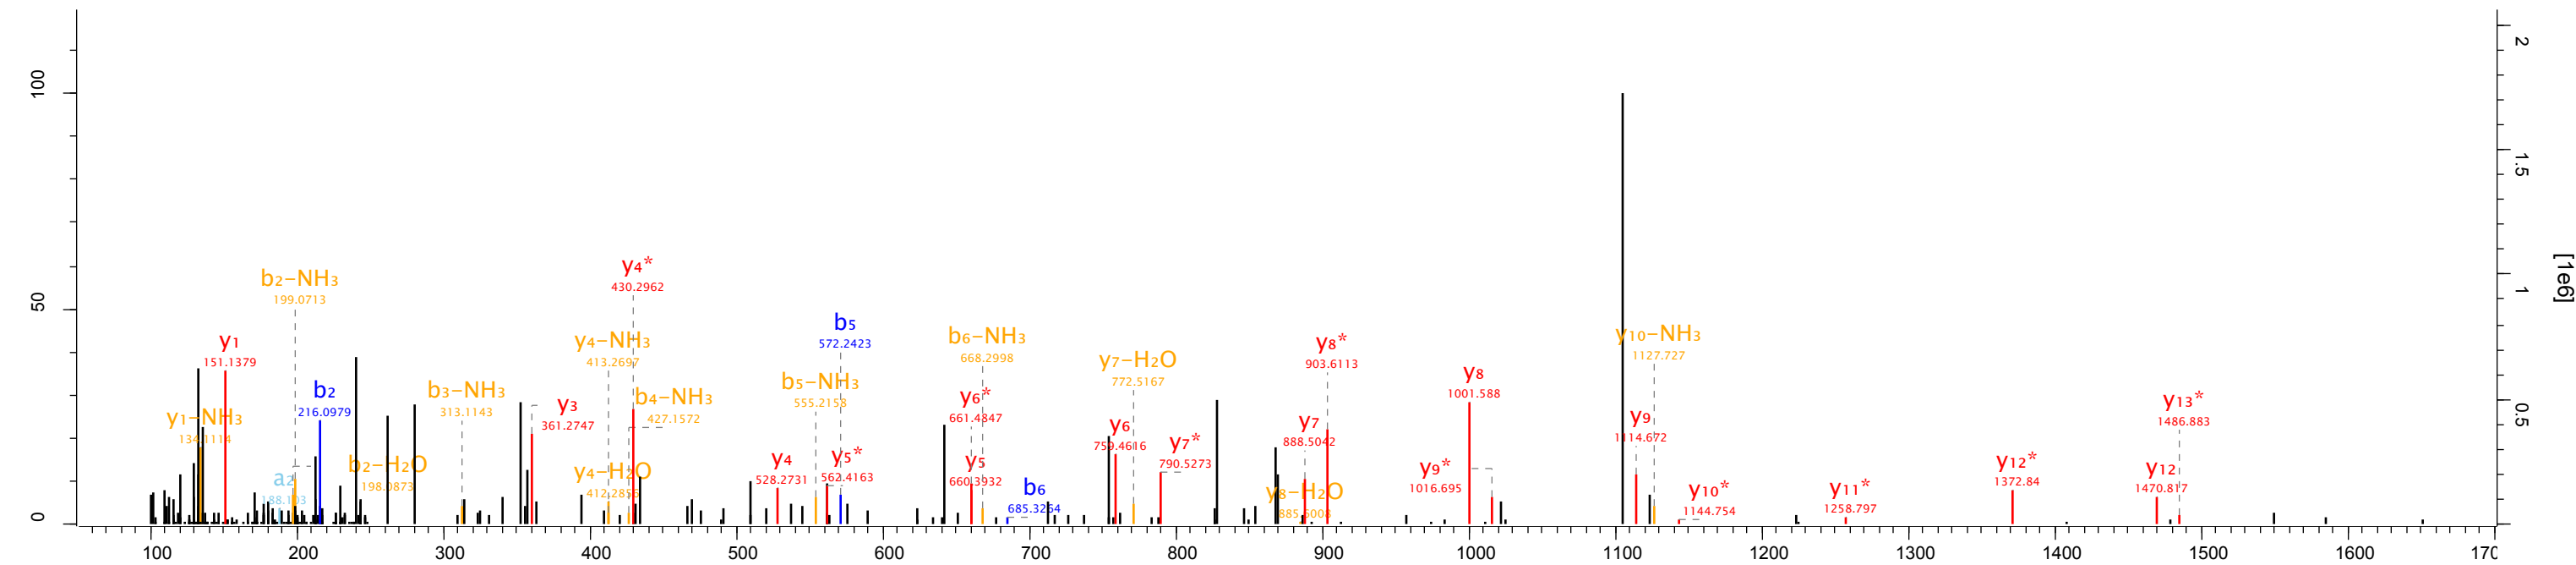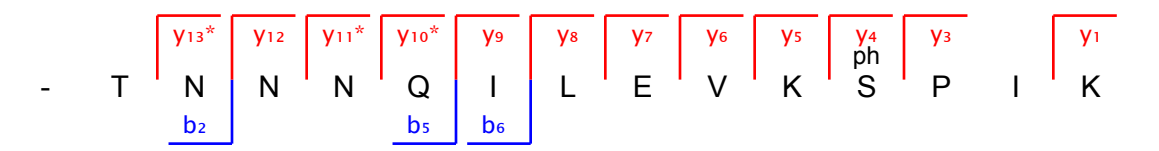

Raw file 20150812\_A375SR\_Phospho\_BR1\_06 Scan 18142 Method FTMS; HCD Score 61.44 m/z 861.37

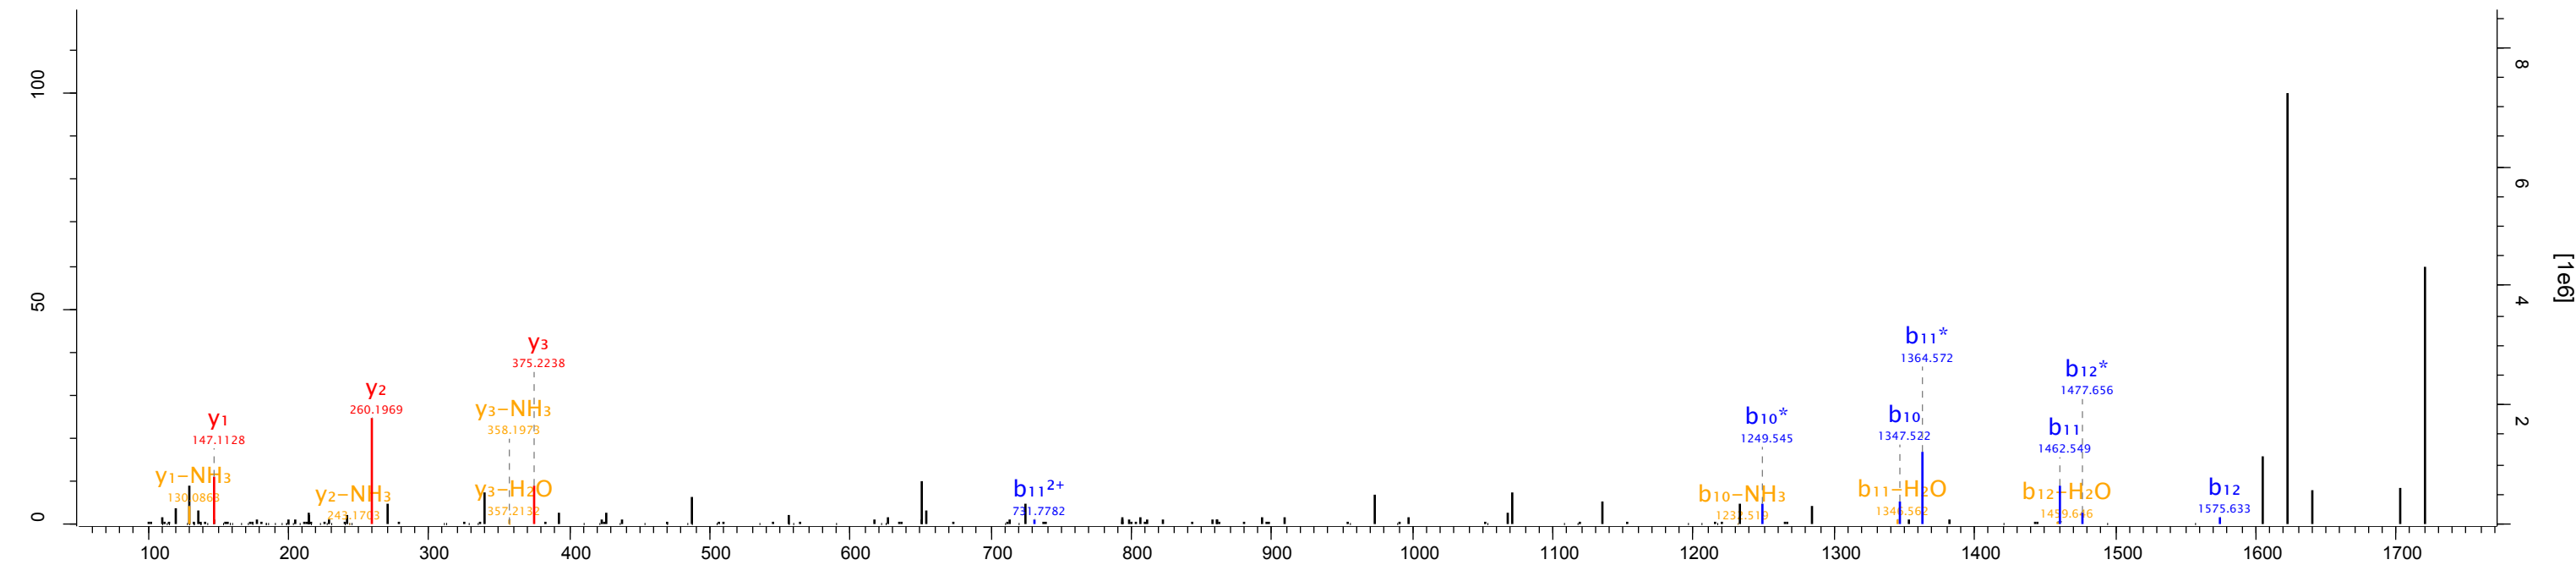

Raw file Scan Method Score m/z  
 20150812\_A375SR\_Phospho\_BR1\_06 5642 FTMS; HCD 43.5 530.24

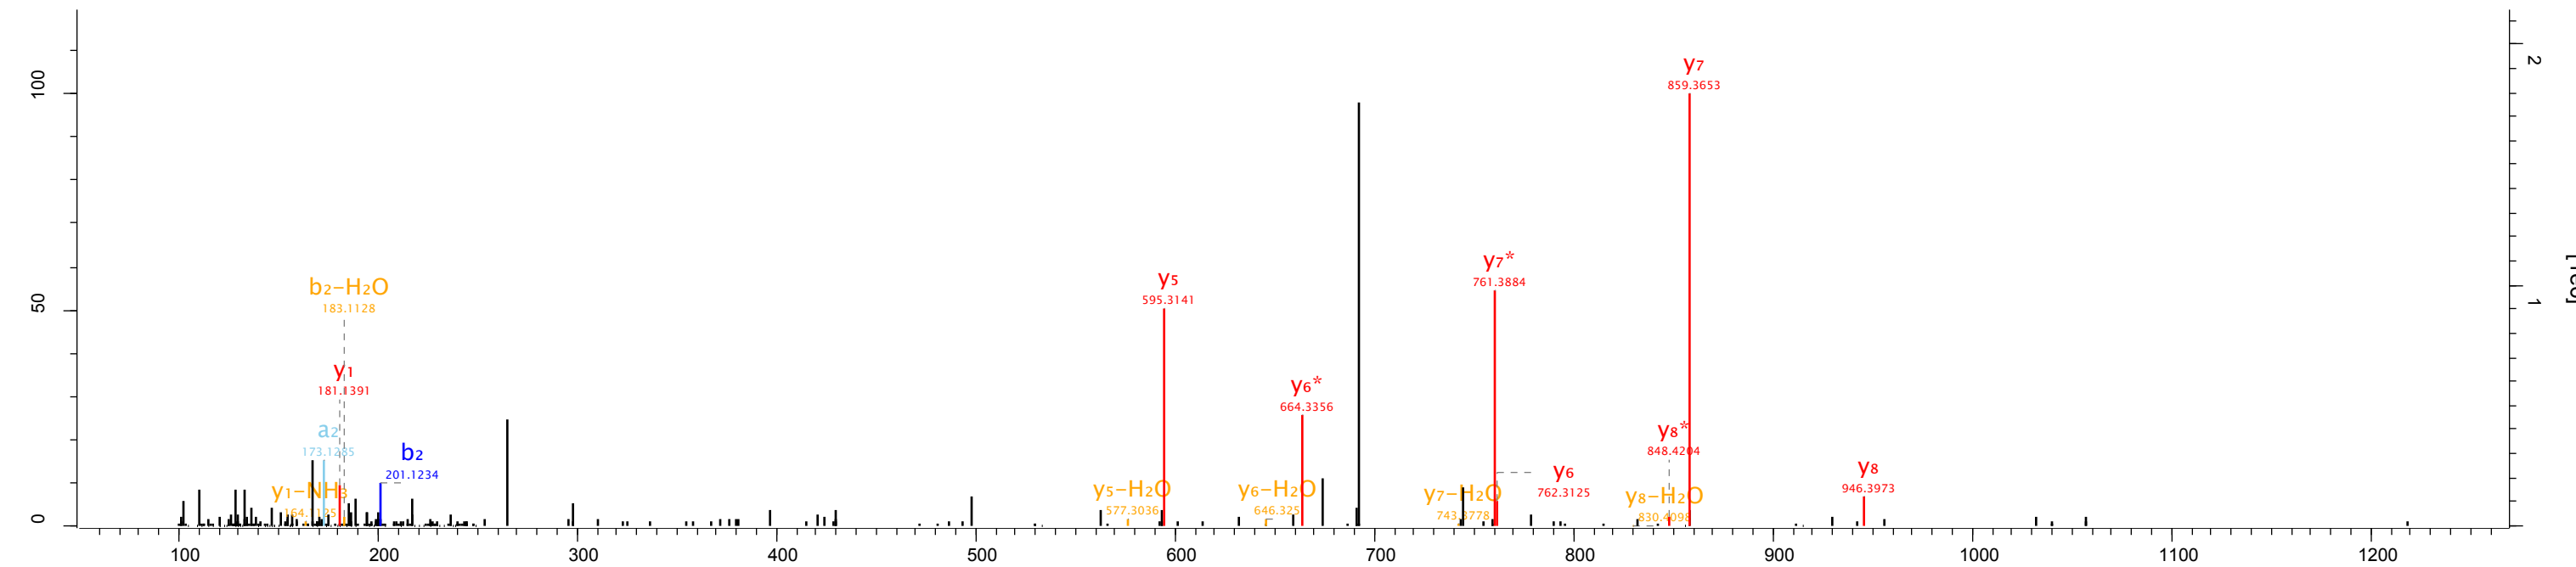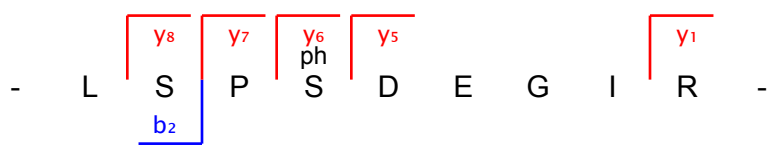

Raw file: 20150812\_A375SR\_Phospho\_BR1\_07  
 Scan: 12112 Method: FTMS; HCD Score: 131.4 m/z: 693.35 Gene names: ELK3

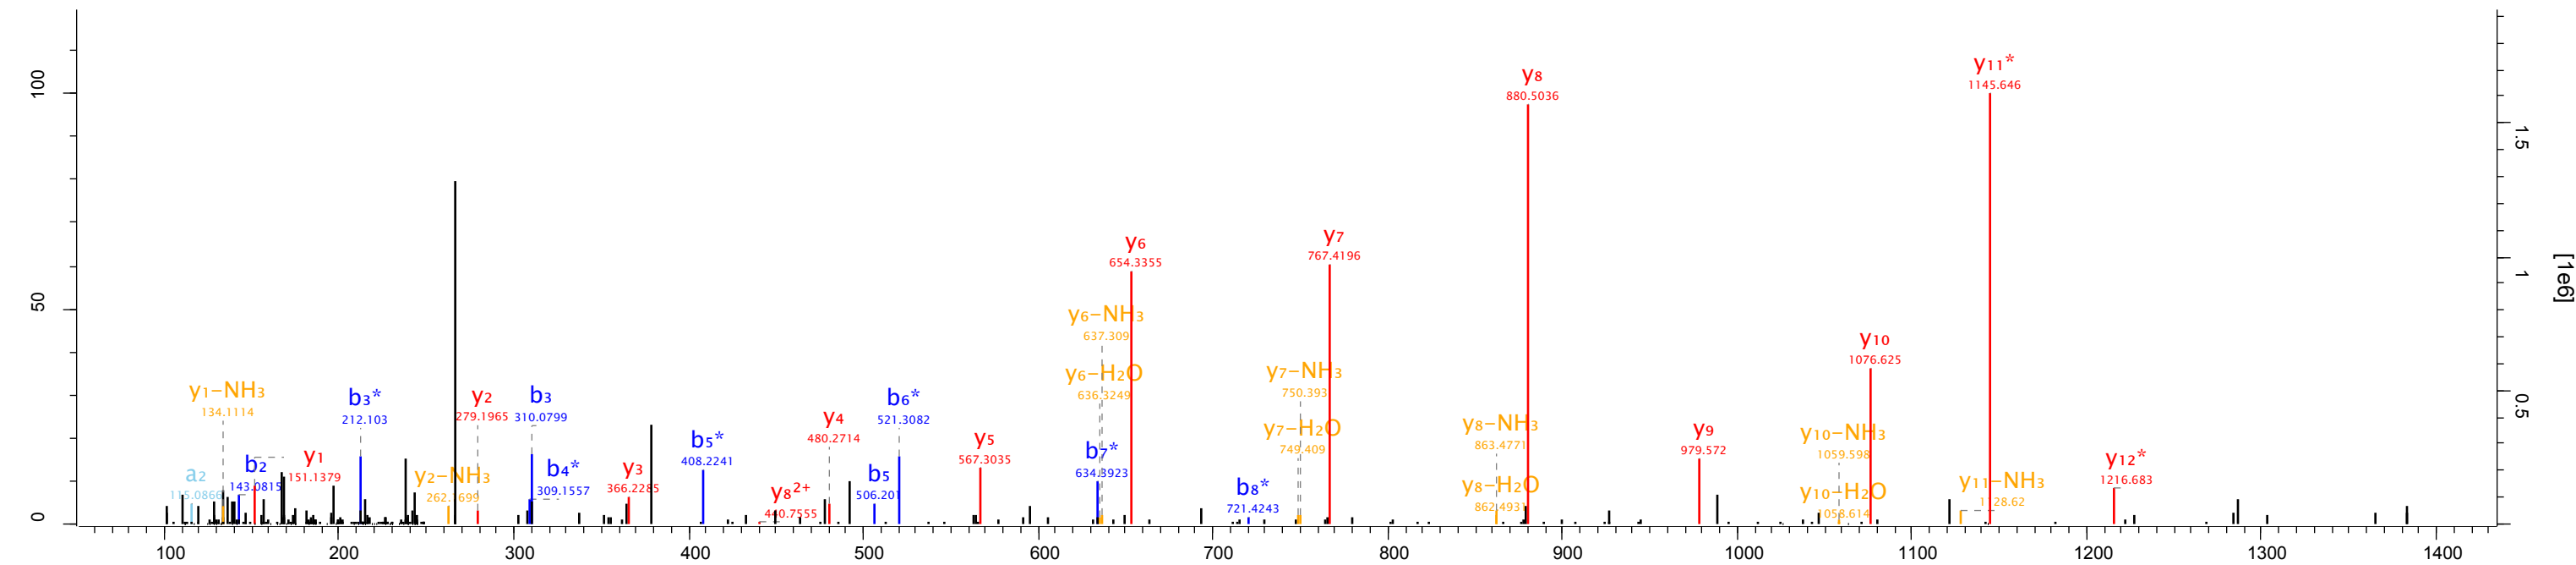

Raw file: 20150812\_A375SR\_Phospho\_BR1\_07  
 Scan: 1502 Method: FTMS; HCD Score: 69.72 m/z: 487.92

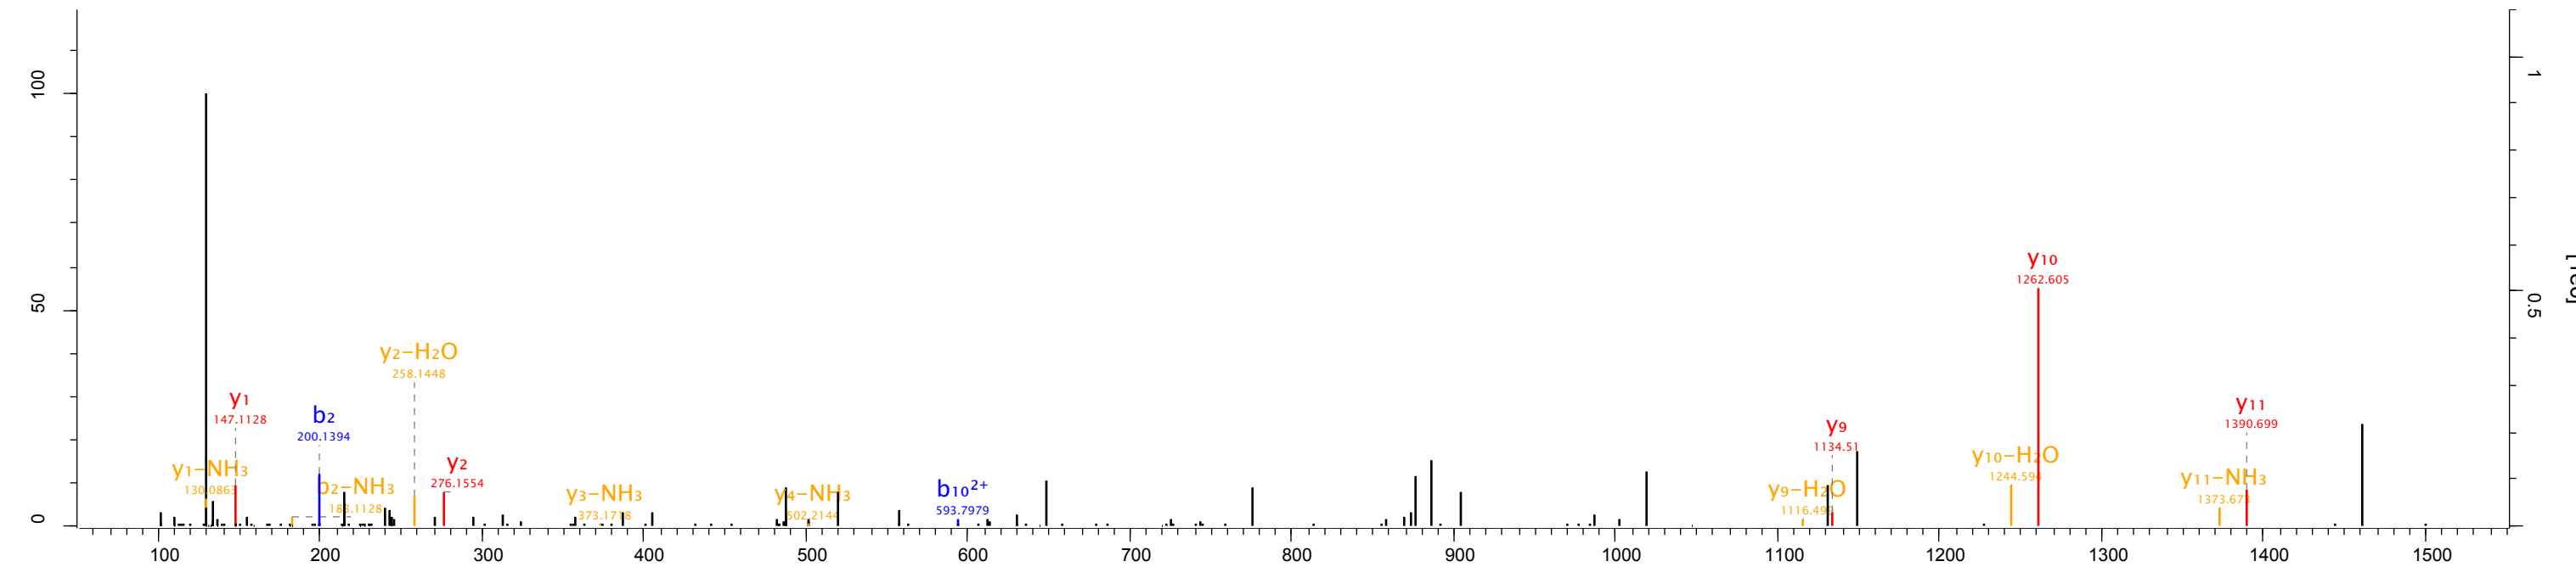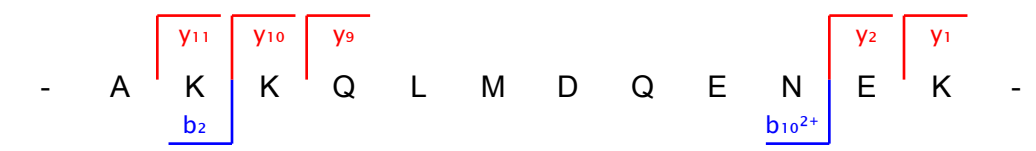

Raw file  
20150812\_A375SR\_Phospho\_BR1\_07

Scan Method Score m/z Gene names  
24572 FTMS; HCD 254.71 970.94 MAPK11P1L

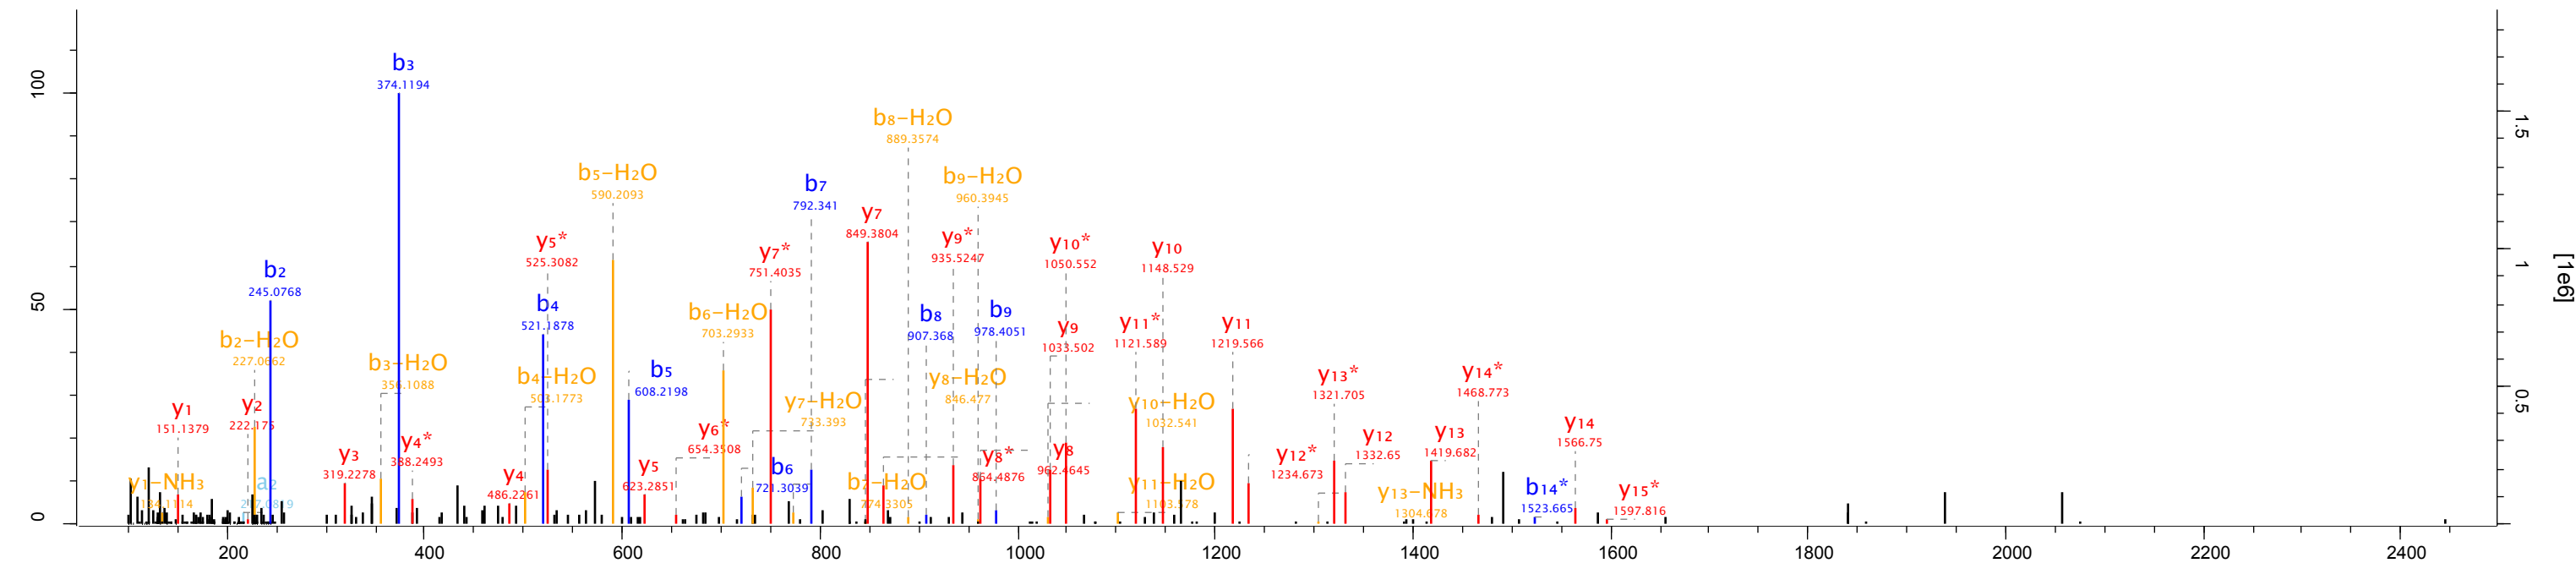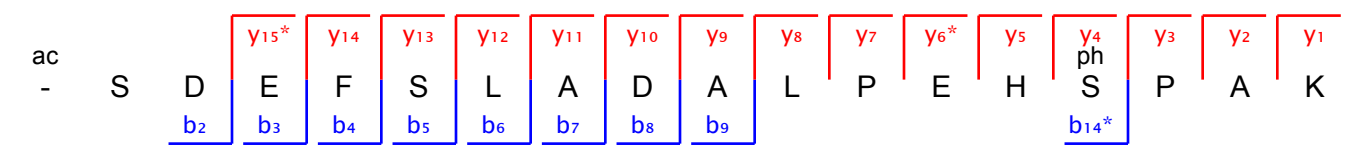

Raw file 20150812\_A375SR\_Phospho\_BR1\_07 Scan 5942 Method FTMS; HCD Score 42.47 m/z 530.25

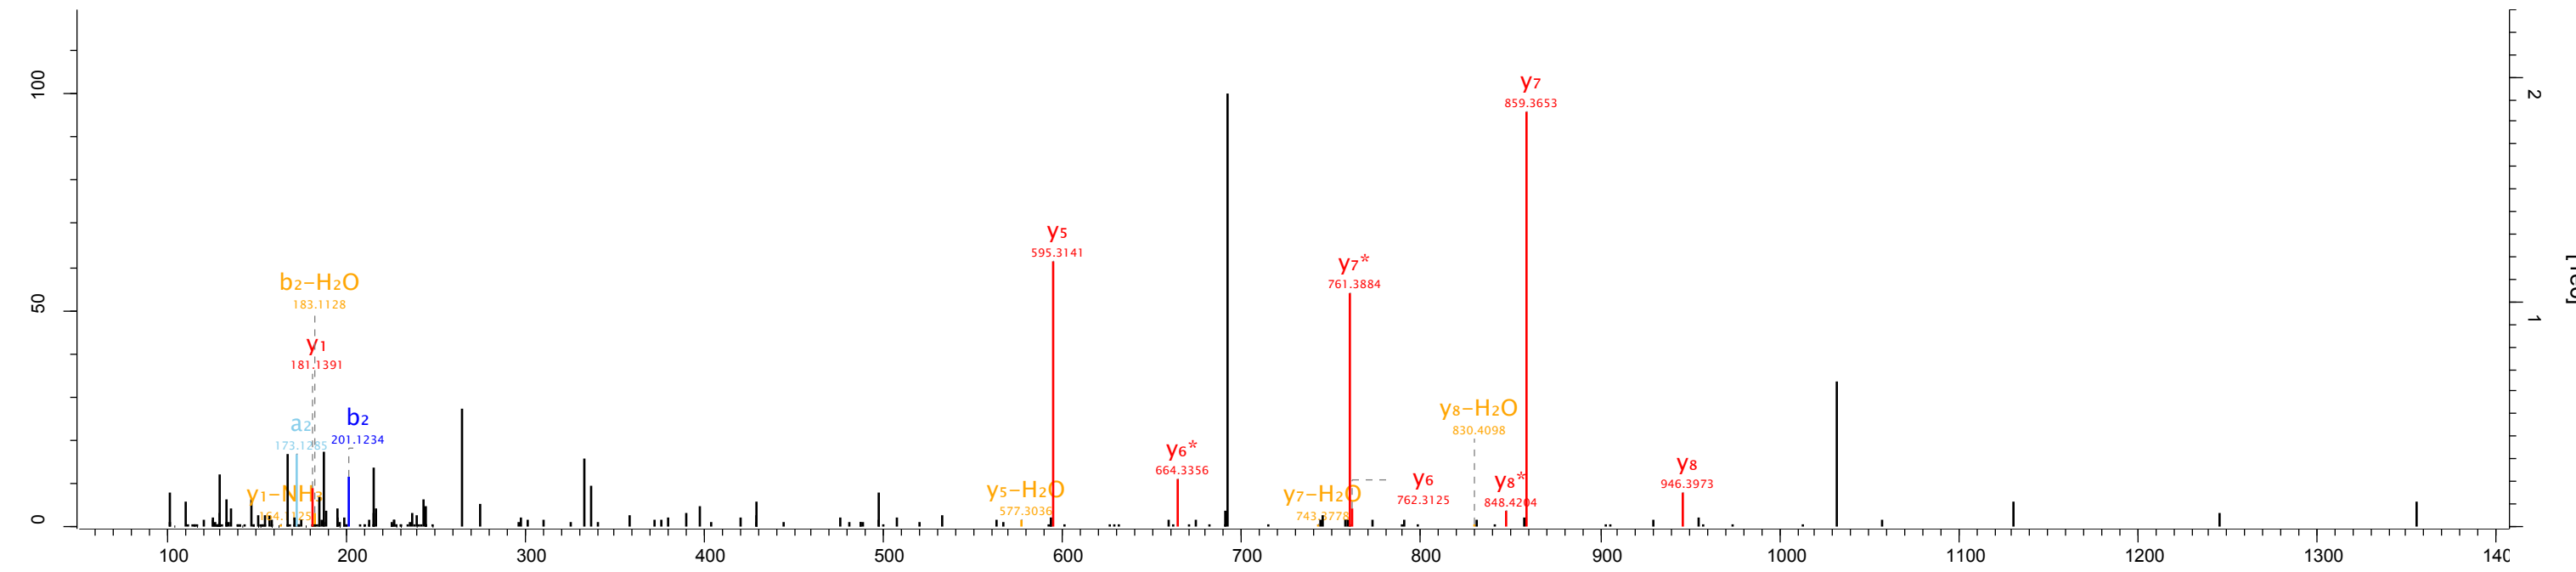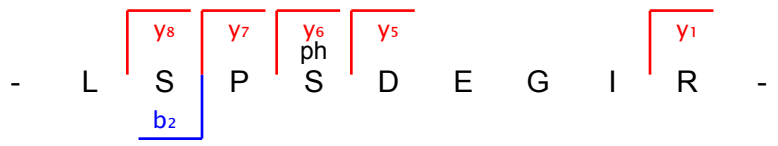

Raw file 20150812\_A375SR\_Phospho\_BR1\_08 Scan 14302 Method FTMS; HCD Score 45.44 m/z 861.37

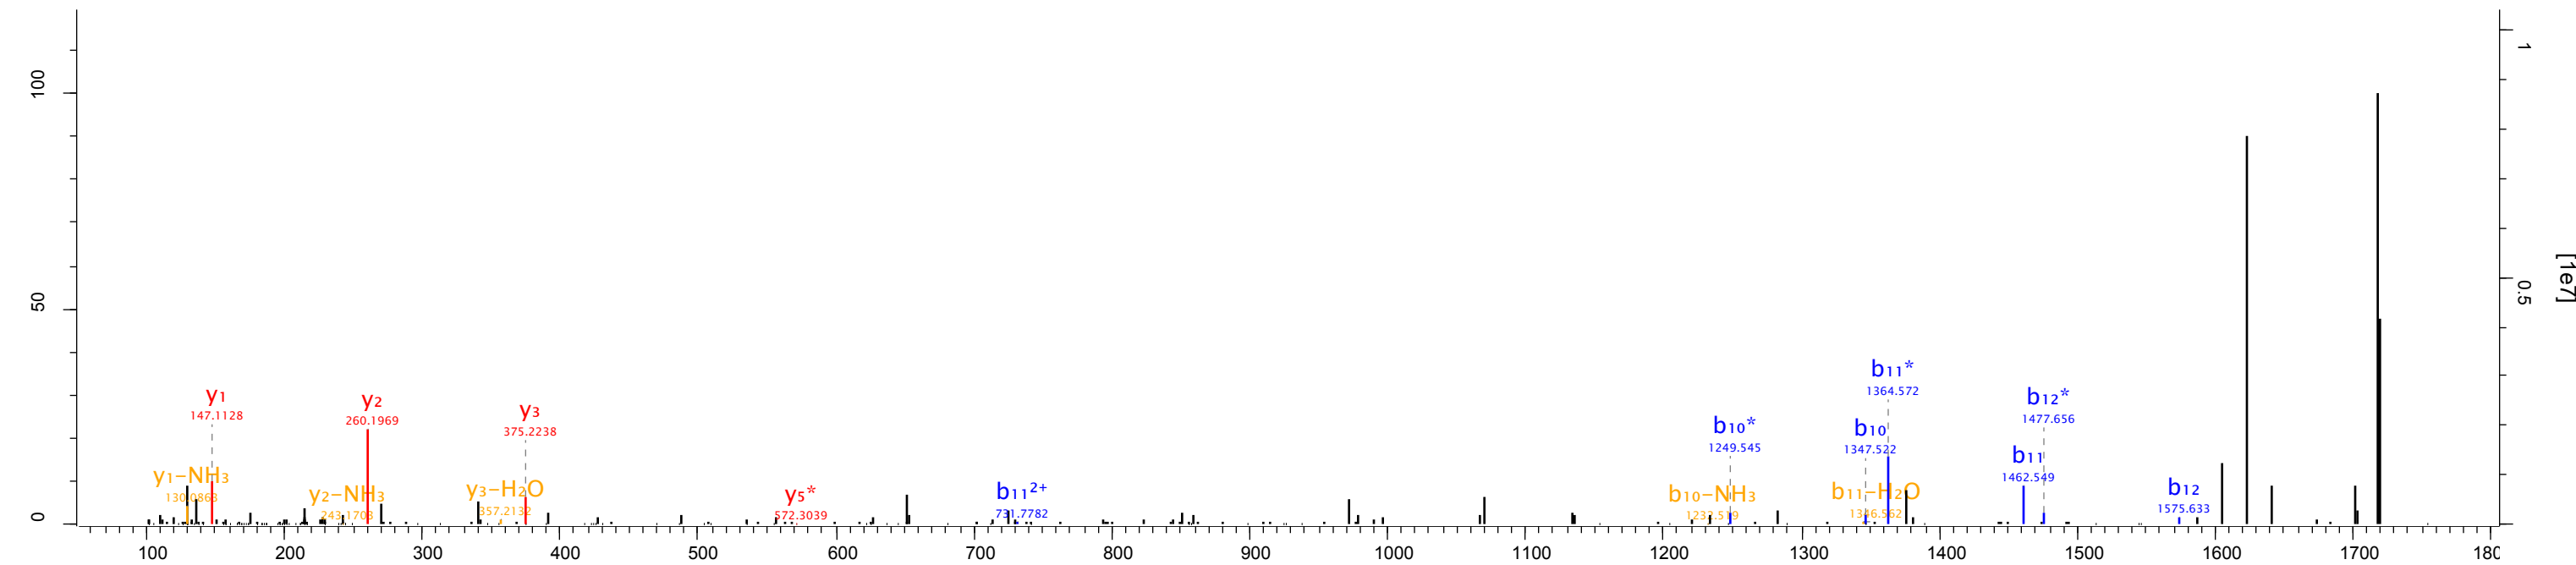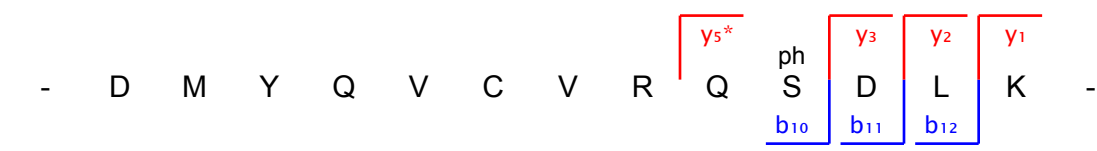



Raw file 20150812\_A375SR\_Phospho\_BR1\_08 Scan 17592 Method FTMS; HCD Score 58.72 m/z 861.37

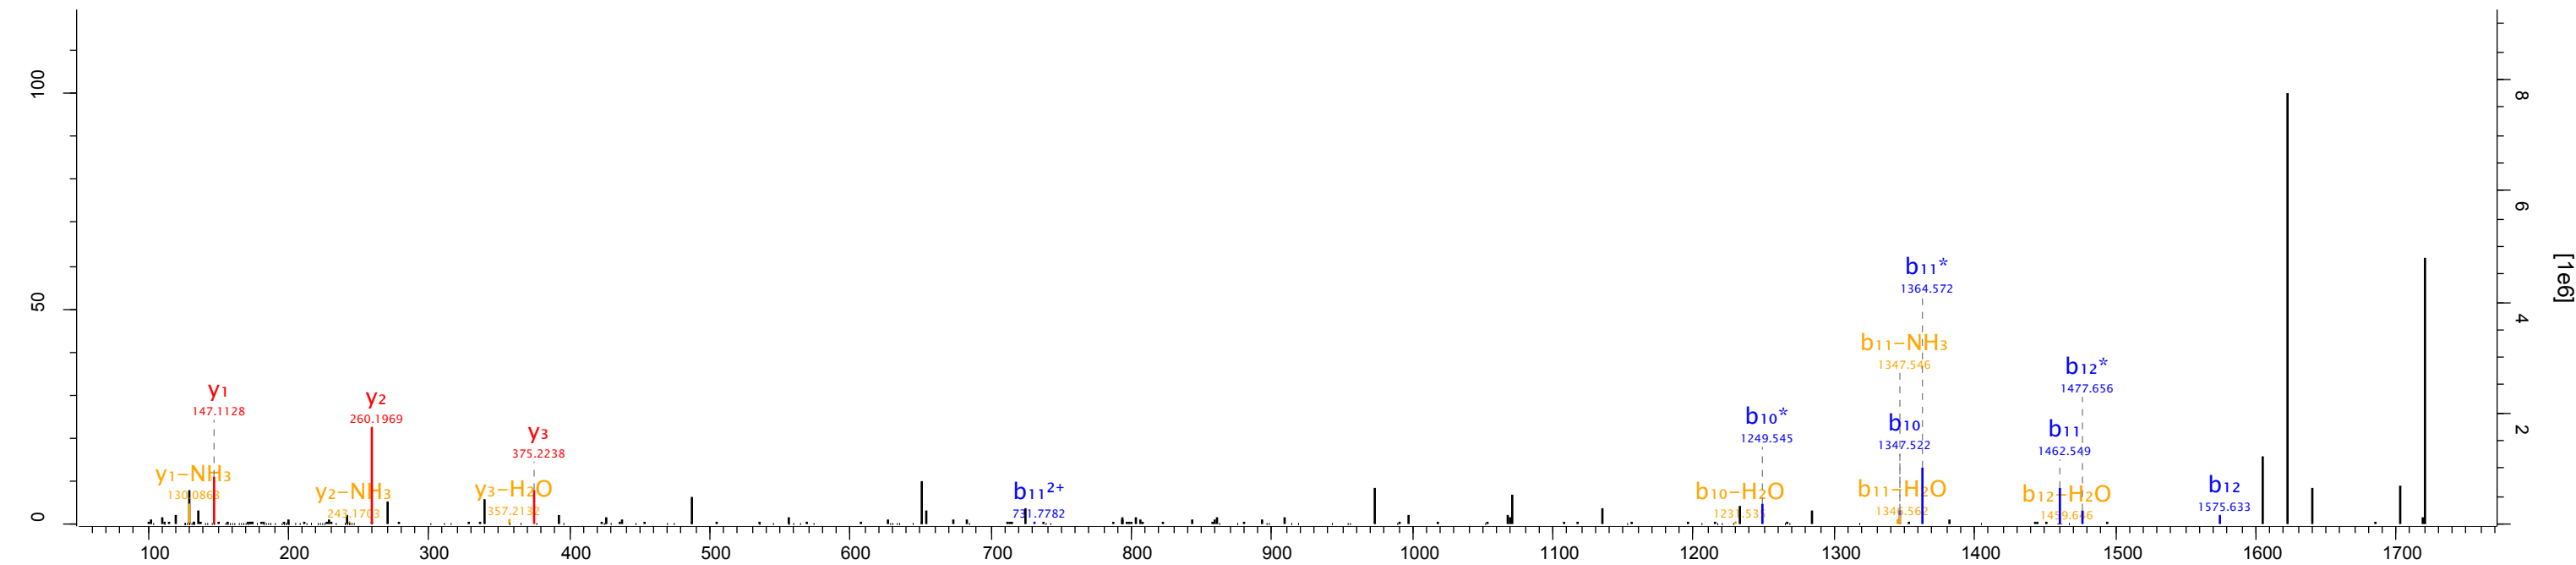

Raw file 20150812\_A375SR\_Phospho\_BR1\_08 Scan 24222 Method FTMS; HCD Score 286.97 m/z 968.42 Gene names MAPK11P1L

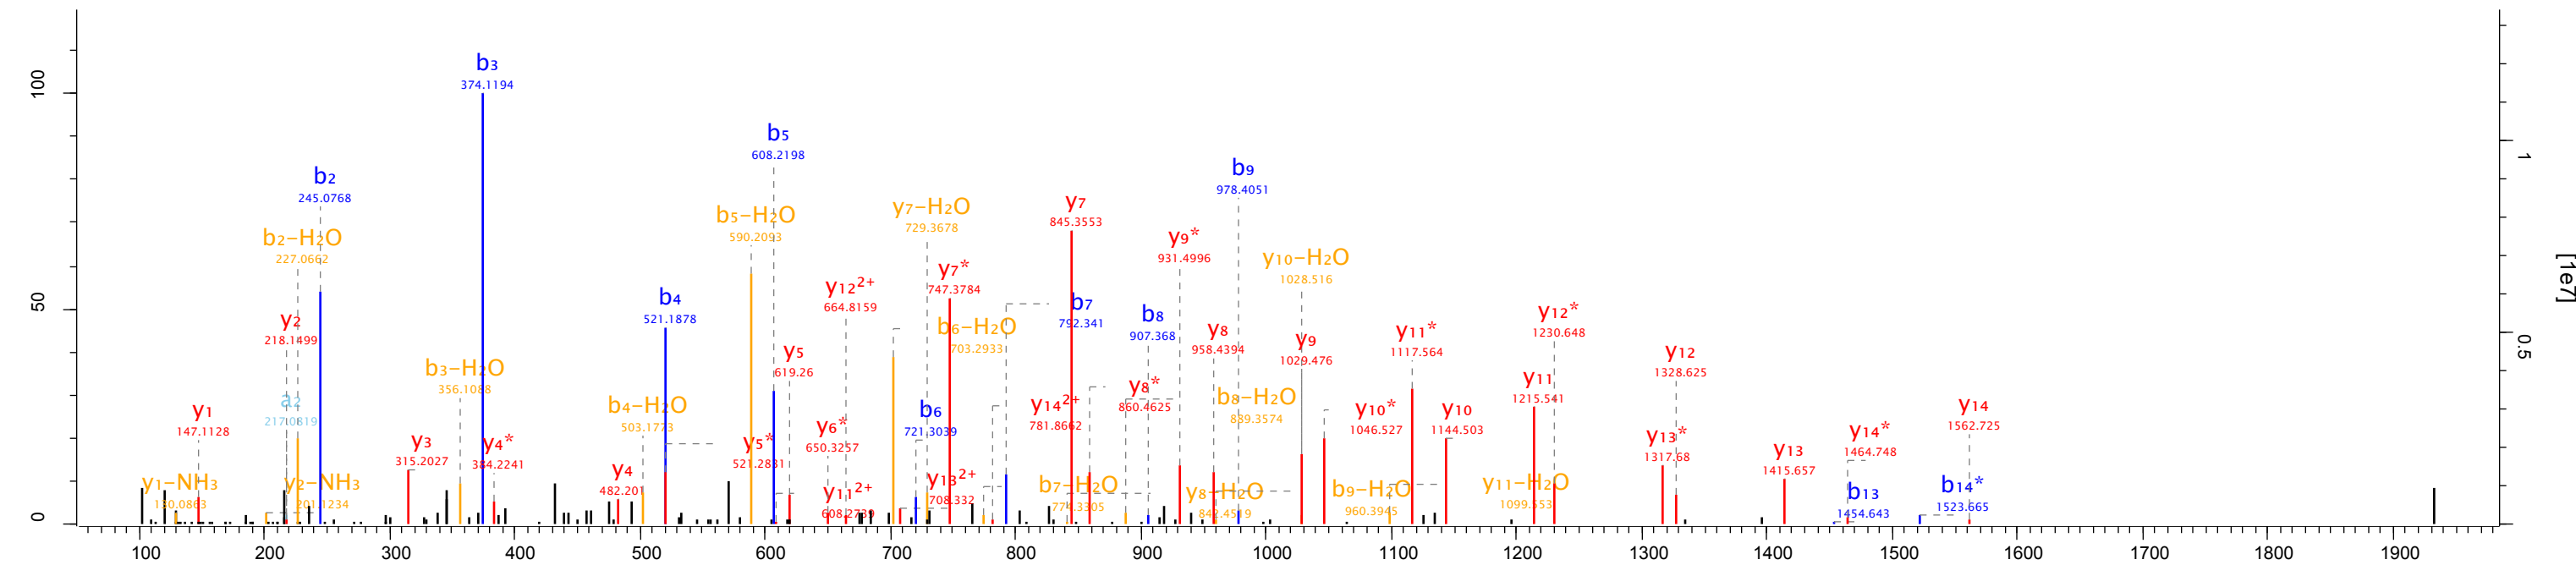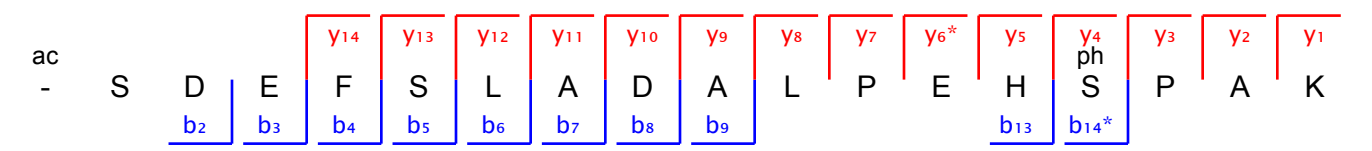

Raw file  
 20150812\_A375SR\_Phospho\_BR1\_08  
 Scan 5112 Method FTMS; HCD Score 48.51 m/z 527.24

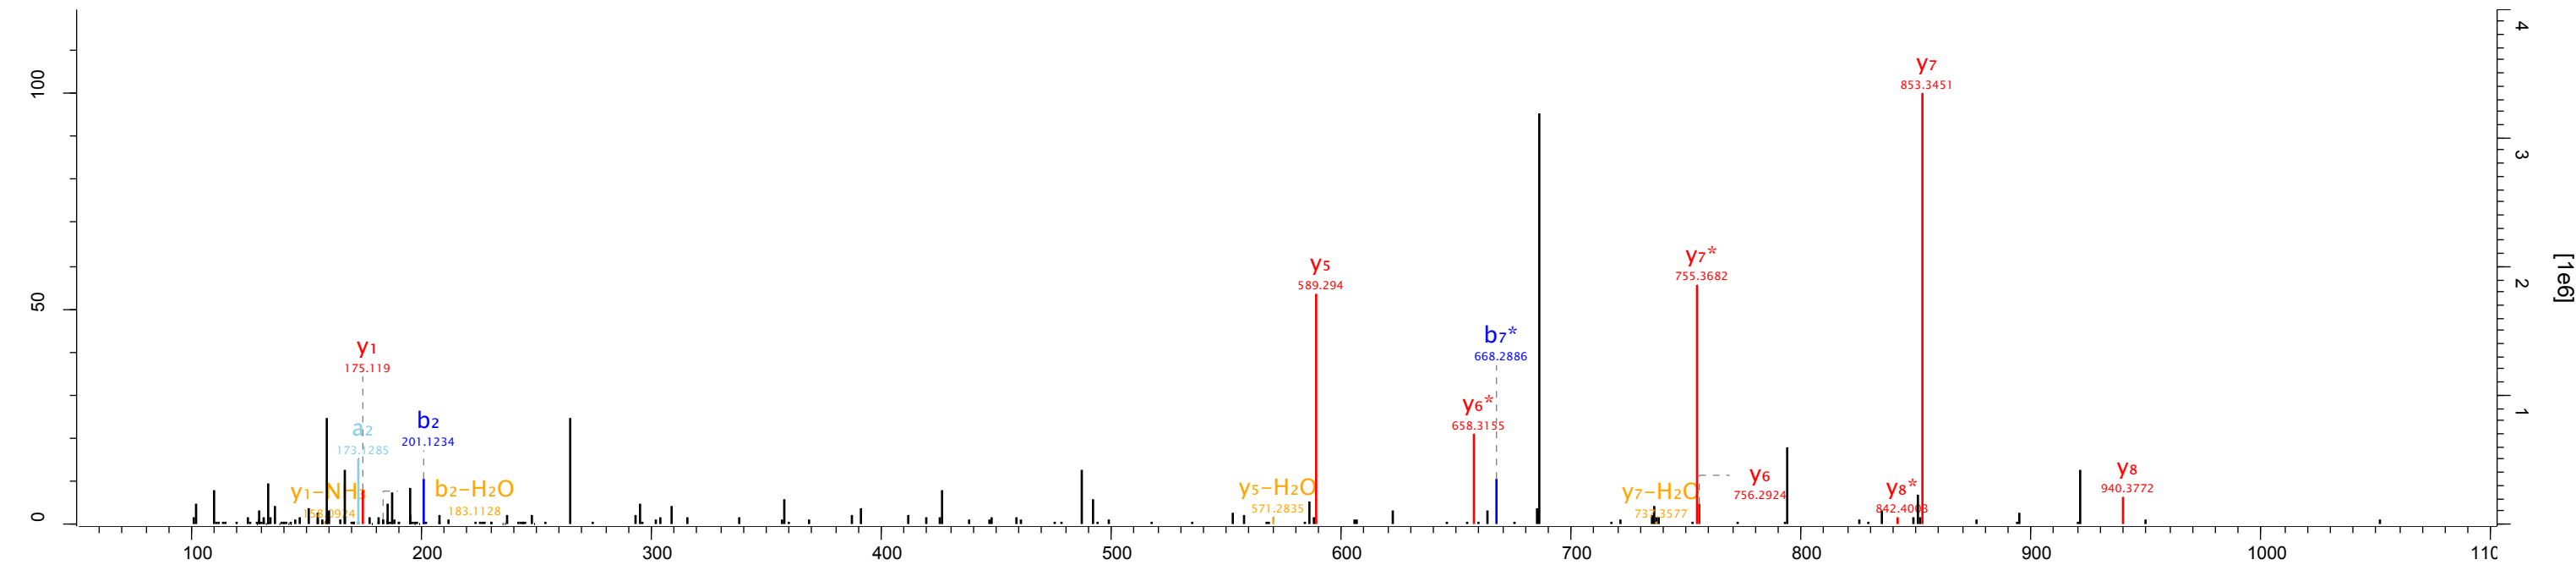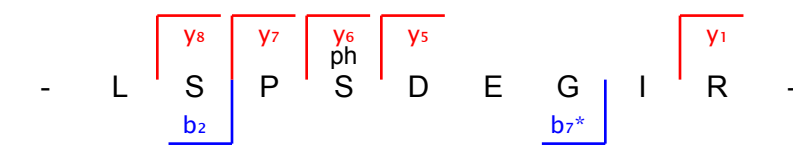

Raw file: 20150812\_A375SR\_Phospho\_BR1\_09  
 Scan: 13482 Method: FTMS; HCD Score: 185.81 m/z: 440.6 Gene names: RPL39P5;RPL39

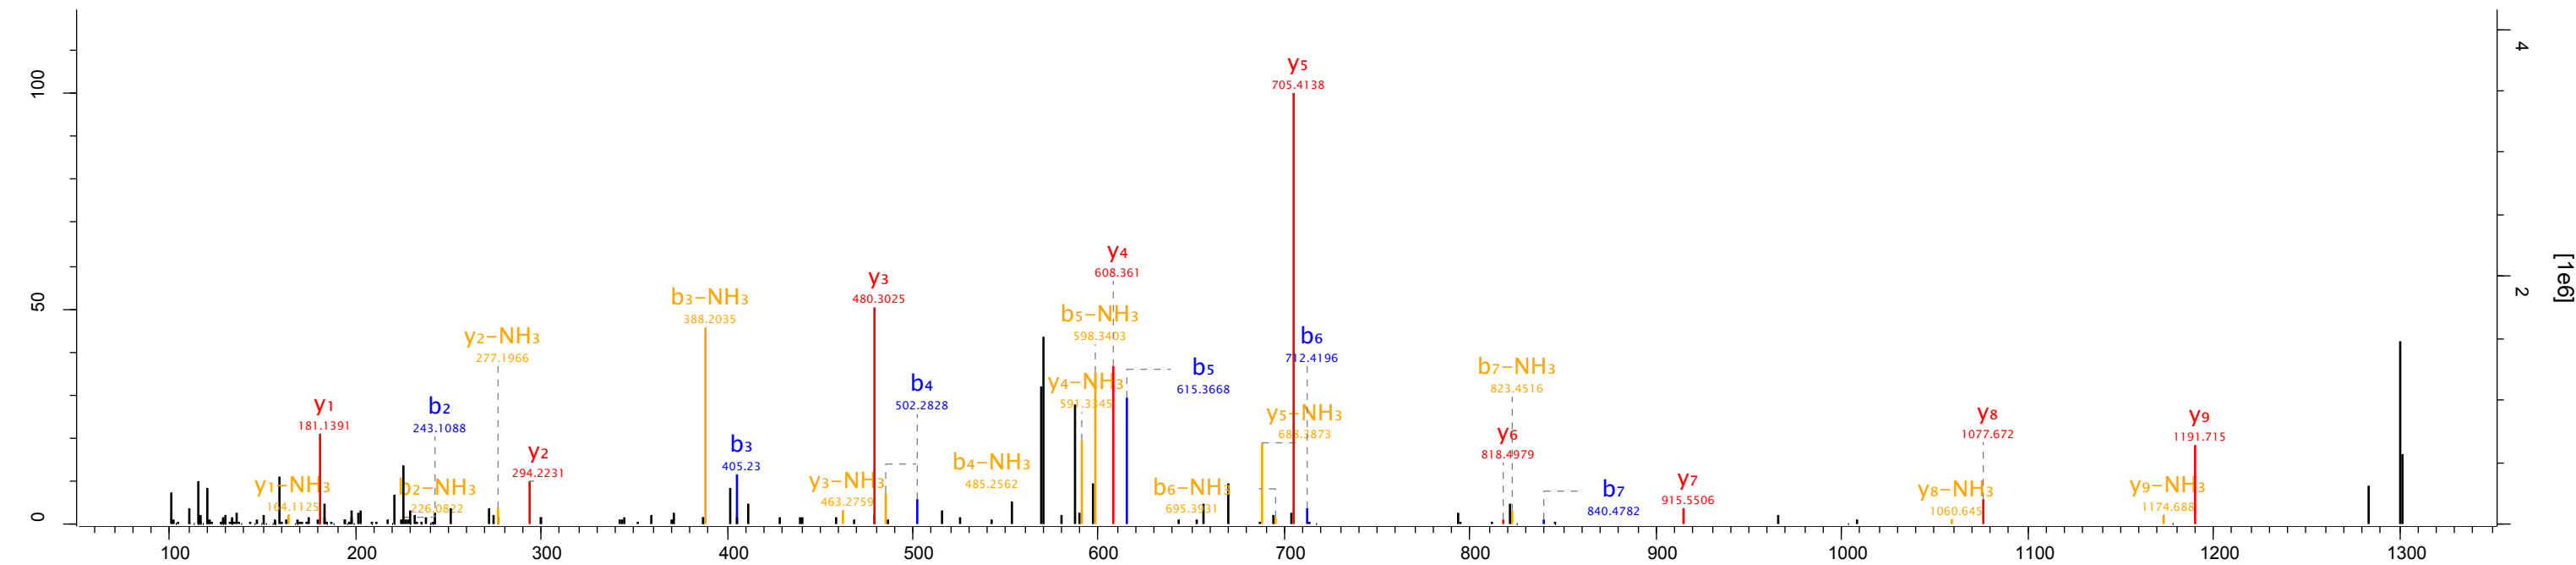

Raw file Scan Method Score m/z Gene names  
 20150812\_A375SR\_Phospho\_BR1\_10 17292 FTMS; HCD 41.38 587.33 KATNAL2

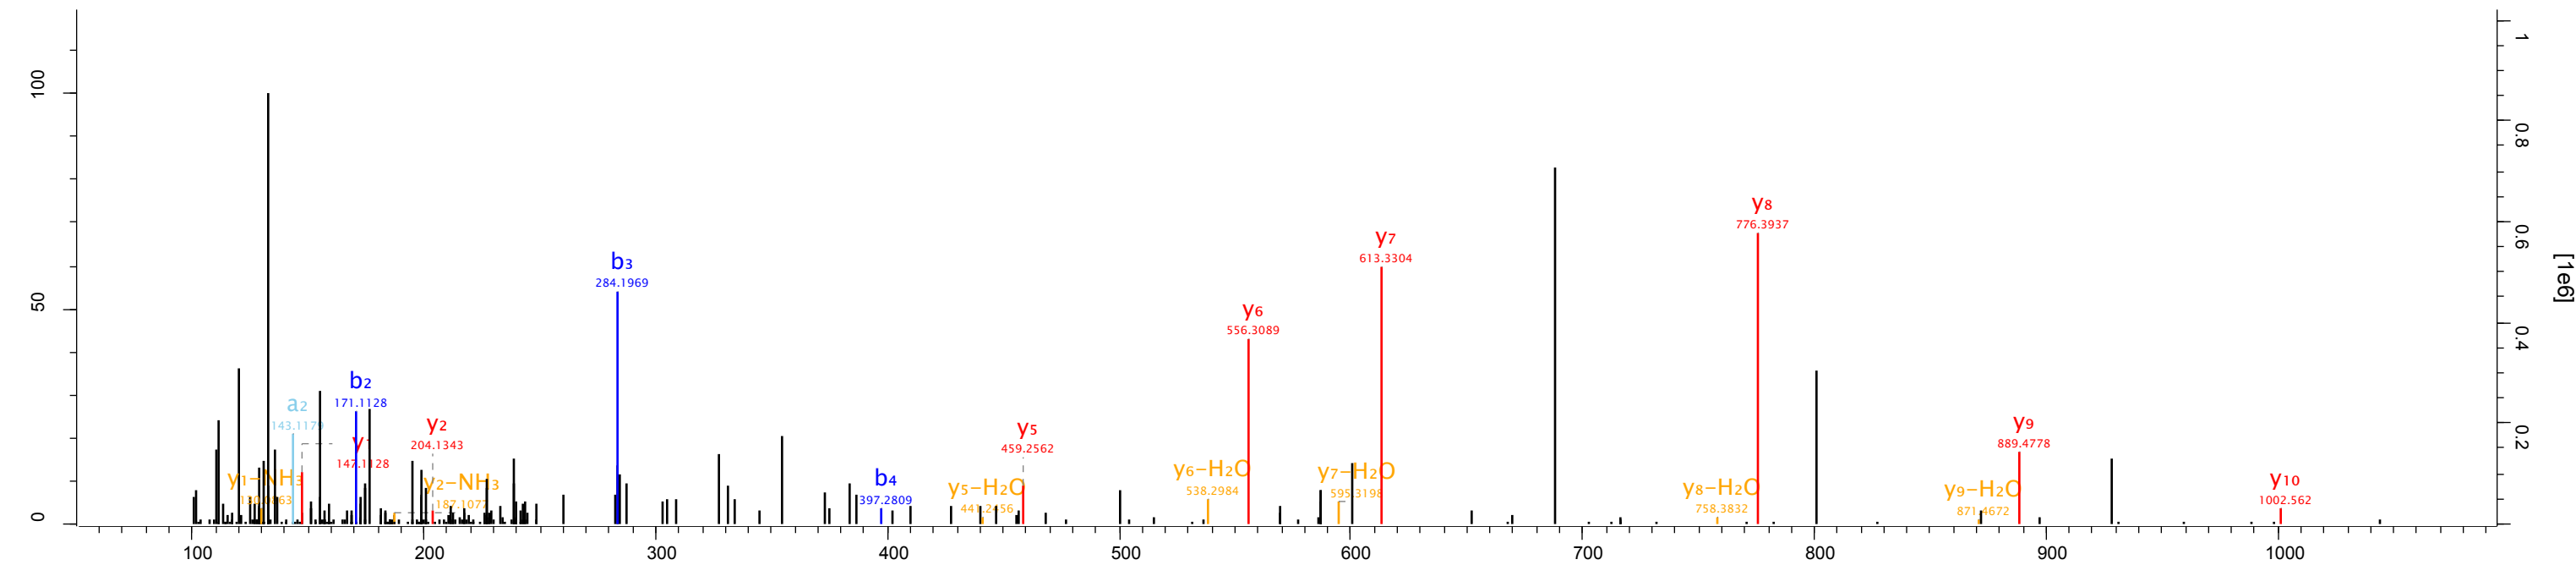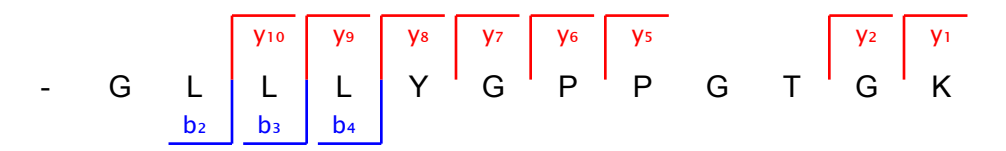

Raw file 20150814\_A375SR\_Phospho\_BR2\_01 Scan 17602 Method FTMS; HCD Score 135.91 m/z 970.94 Gene names MAPK11P1L

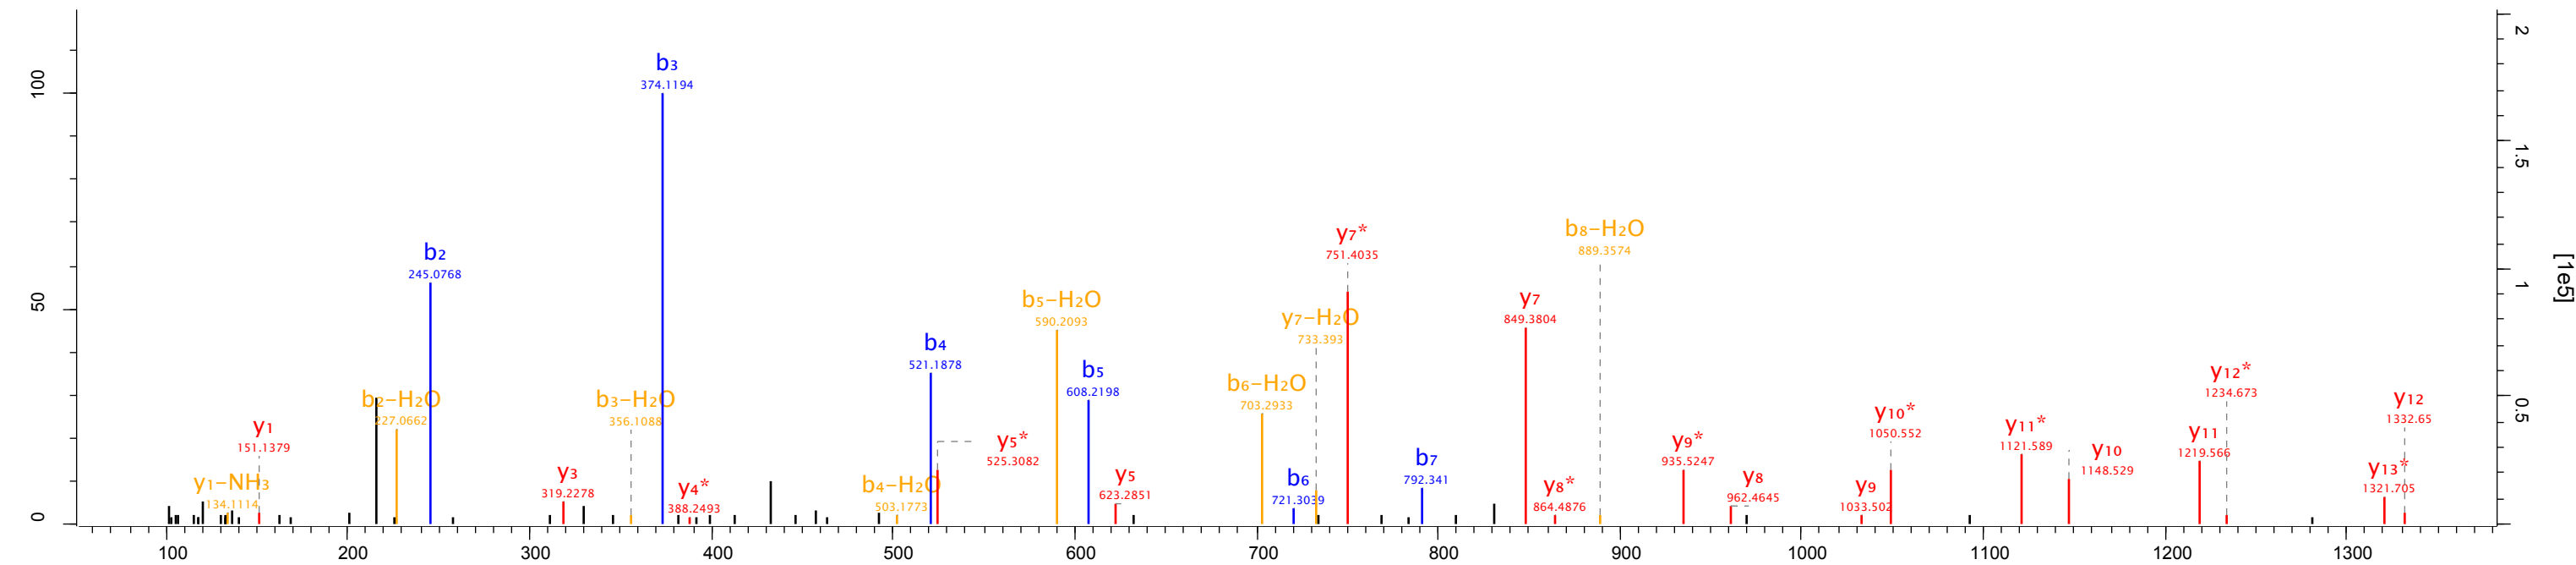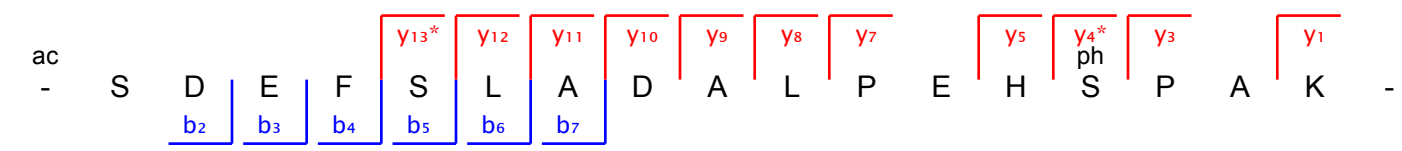

Raw file: 20150814\_A375SR\_Phospho\_BR2\_02  
 Scan: 8082 Method: FTMS; HCD Score: 92.11 m/z: 522.22 Gene names: RHBDF2

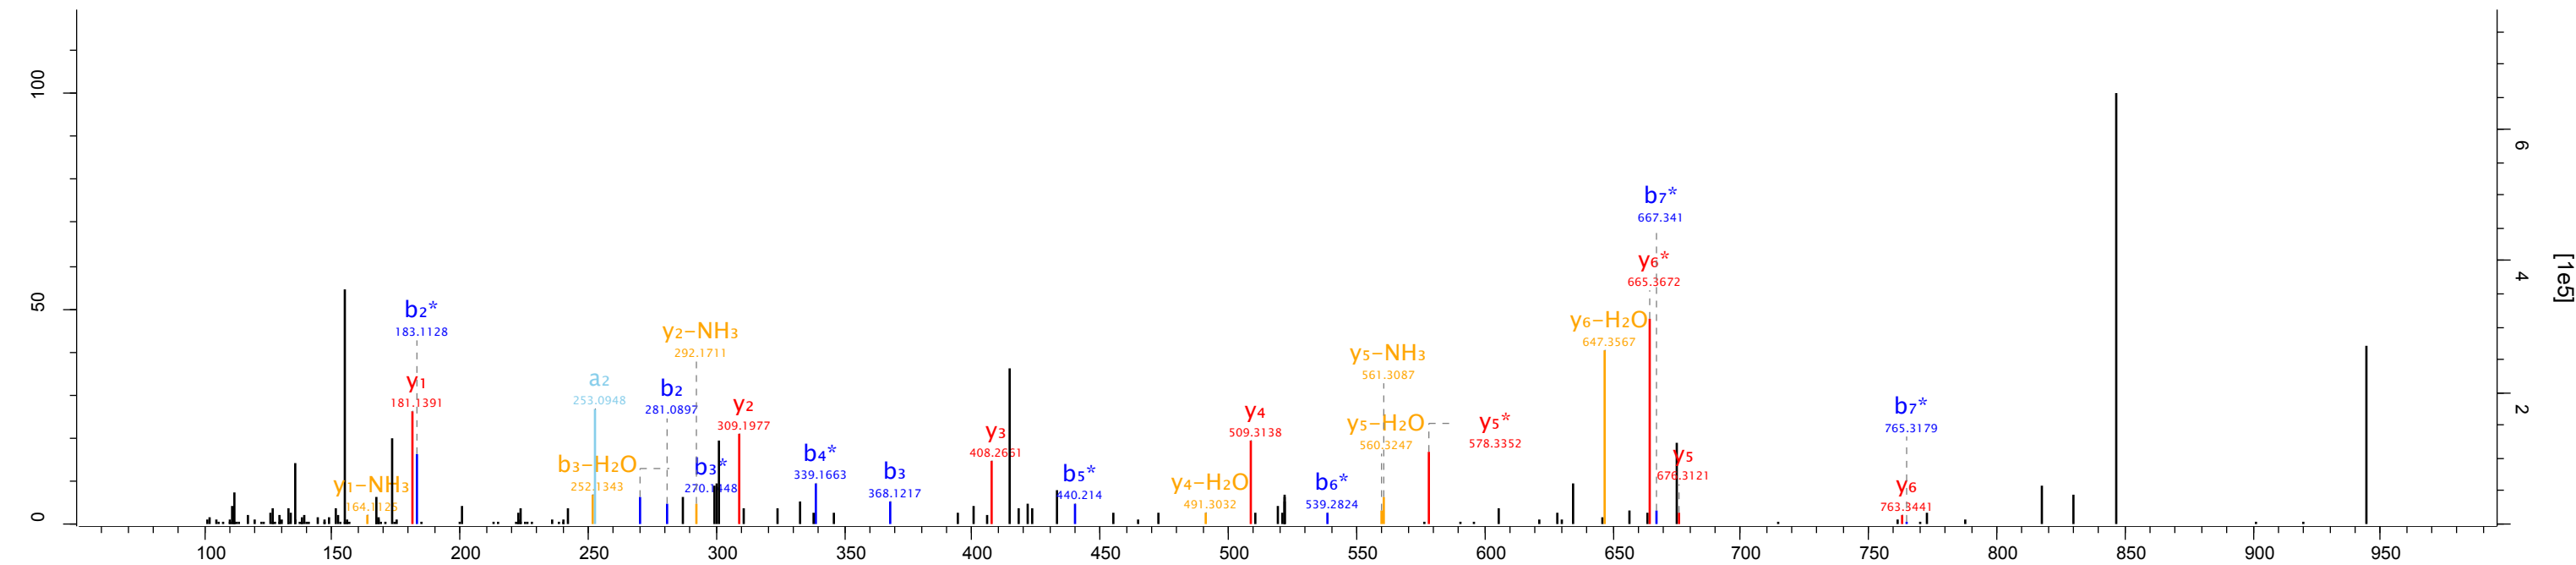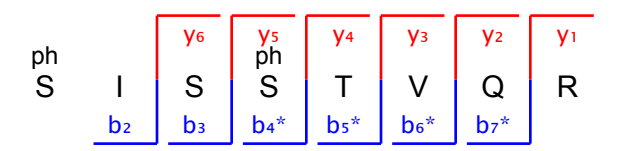

Raw file: 20150814\_A375SR\_Phospho\_BR2\_03  
 Scan: 17762 Method: FTMS; HCD Score: 85.51 m/z: 658.3 Gene names: ZFP36

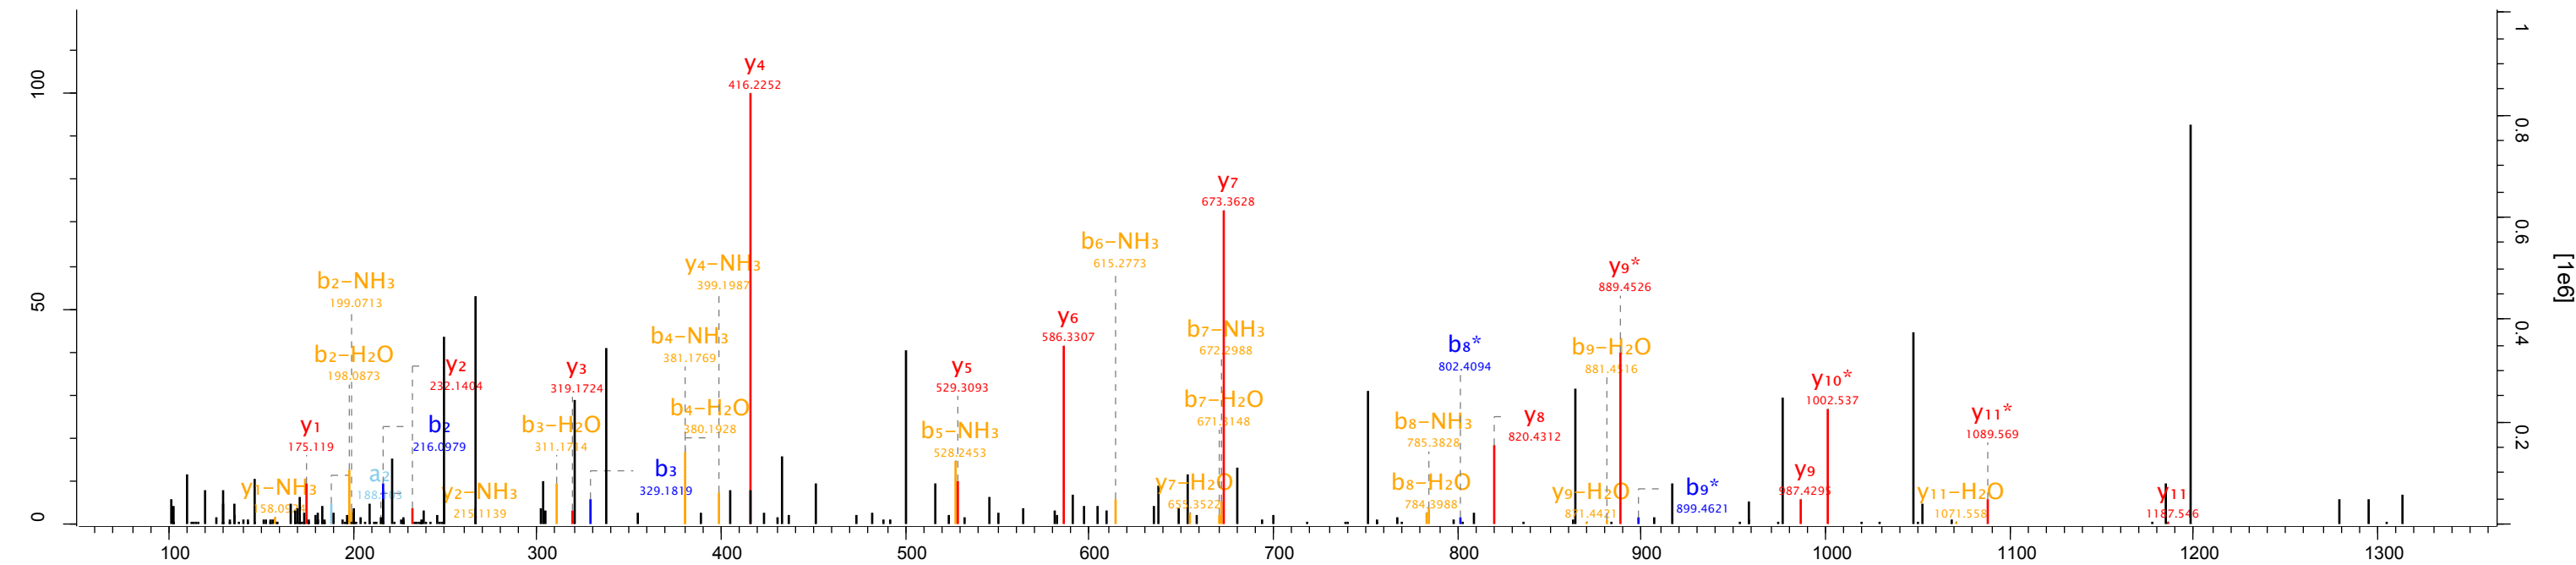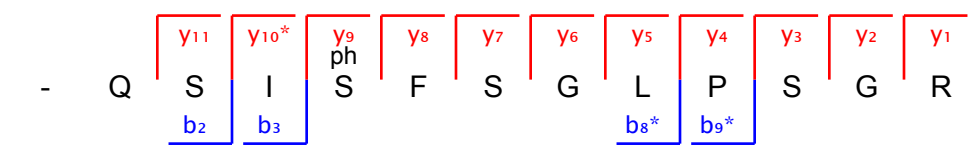



Raw file: 20150814\_A375SR\_Phospho\_BR2\_03  
 Scan: 23642 Method: FTMS; HCD Score: 170.13 m/z: 970.44 Gene names: MAPK11P1L

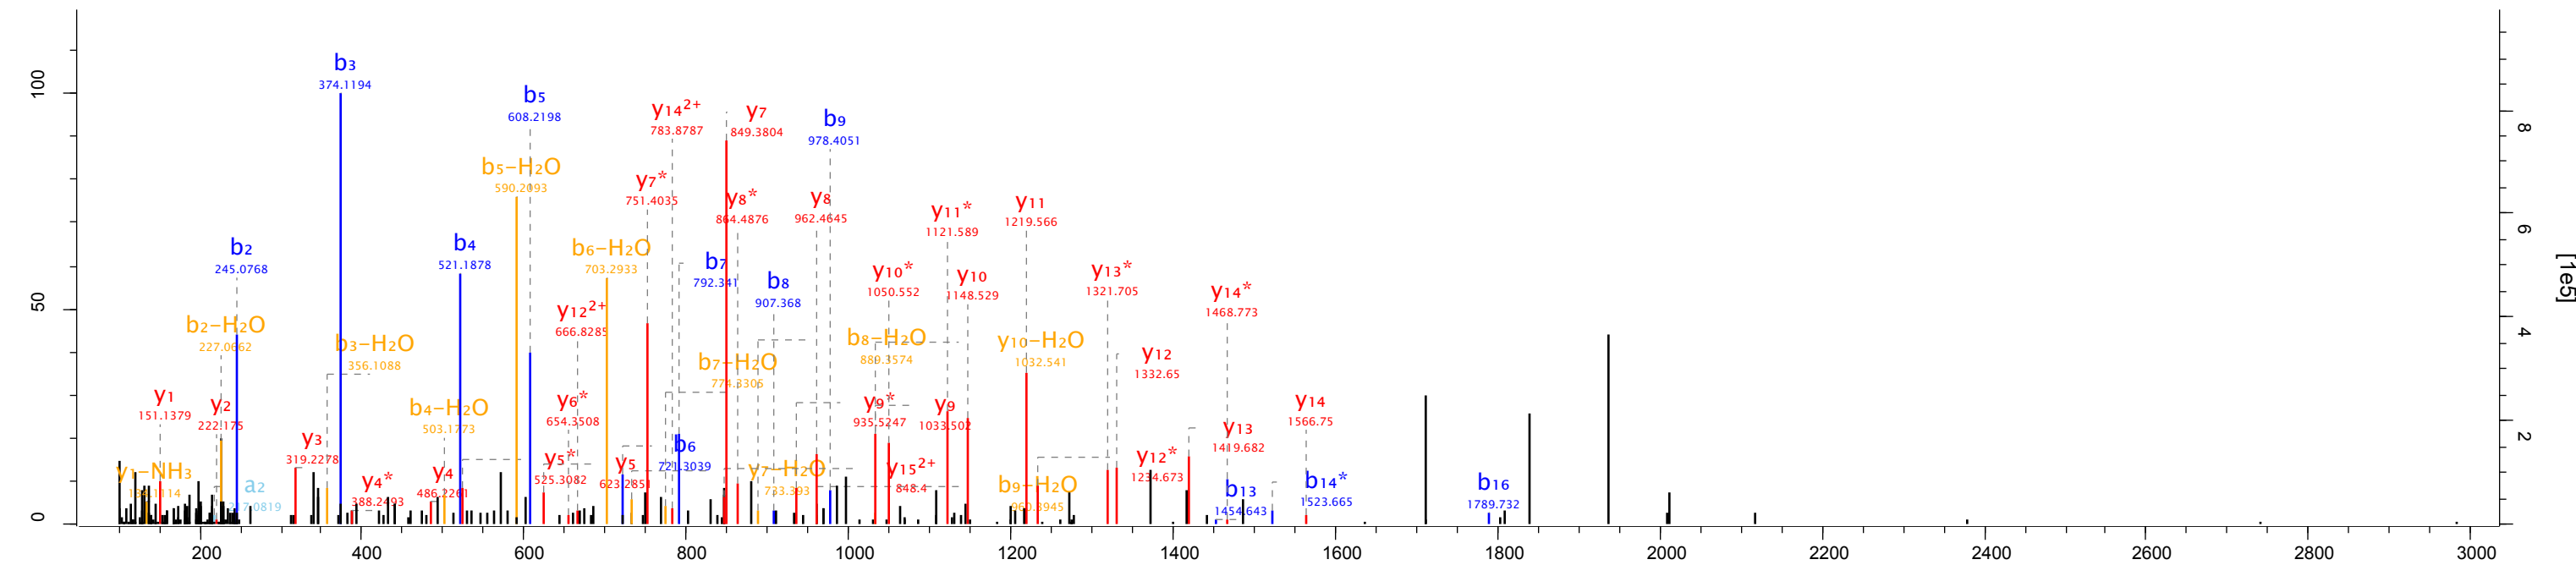

ac - S D E F S L A D A L P E H S P A K -  
 b2 b3 b4 b5 b6 b7 b8 b9 b13 b14\* b16

Raw file 20150814\_A375SR\_Phospho\_BR2\_03 Scan 23702 Method FTMS; HCD Score 271.66 m/z 970.94 Gene names MAPK11P1L

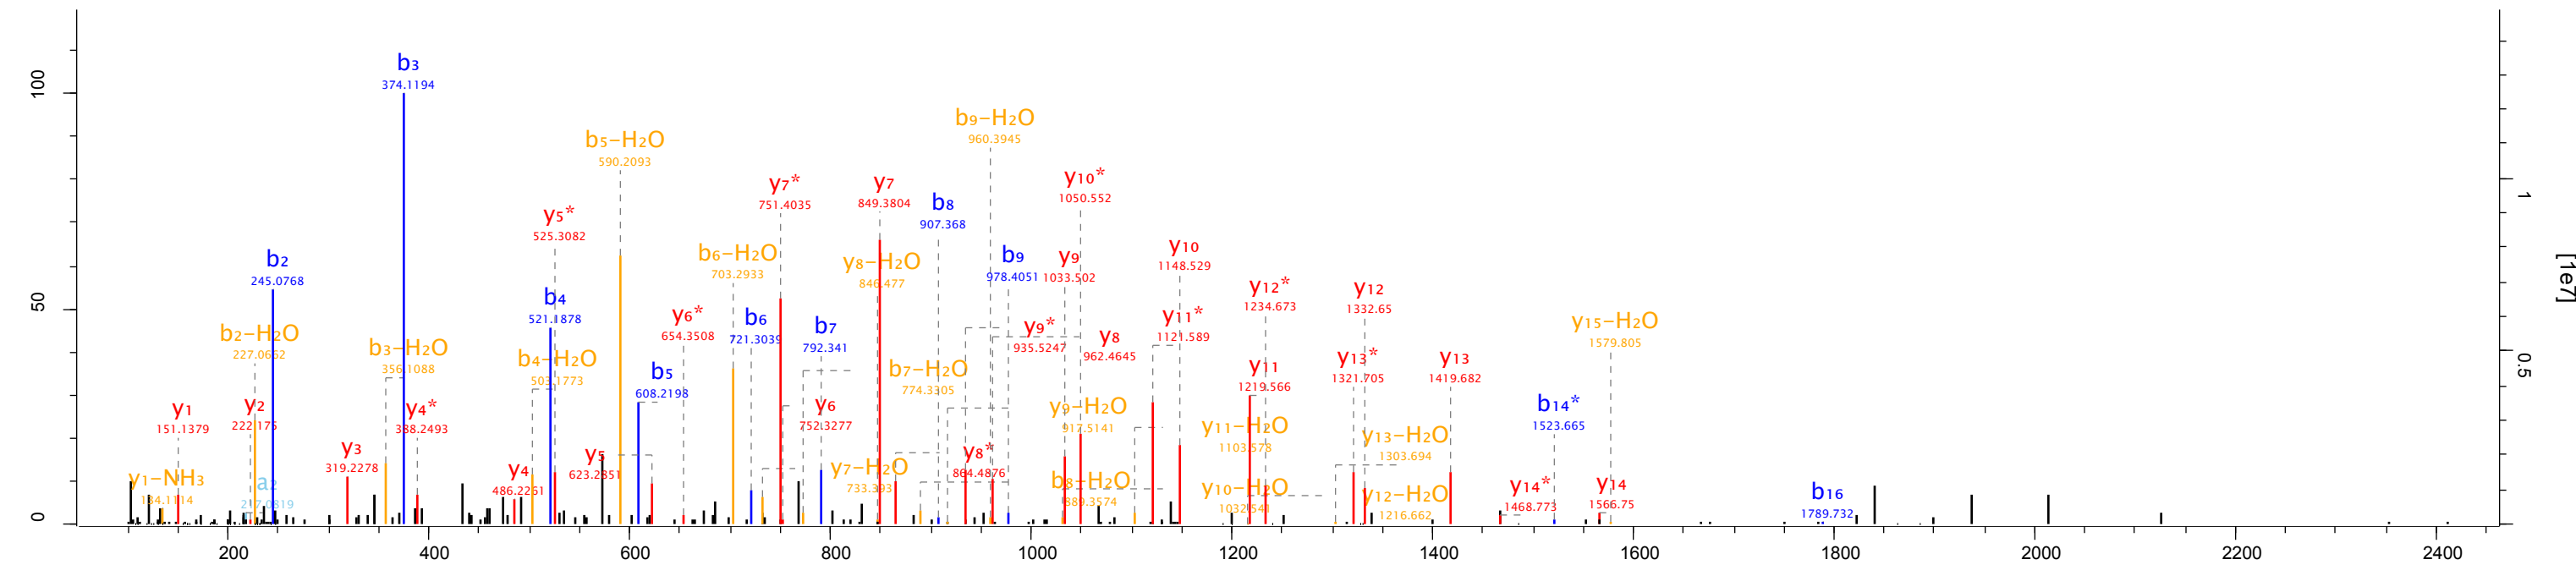

ac  
 - S D E F S L A D A L P E H S P A K -  
 b<sub>2</sub> b<sub>3</sub> b<sub>4</sub> b<sub>5</sub> b<sub>6</sub> b<sub>7</sub> b<sub>8</sub> b<sub>9</sub> b<sub>14</sub>\* b<sub>16</sub>

Raw file: 20150814\_A375SR\_Phospho\_BR2\_04  
 Scan: 8432 Method: FTMS; HCD Score: 72.58 m/z: 840.89 Gene names: IL1RAPL2

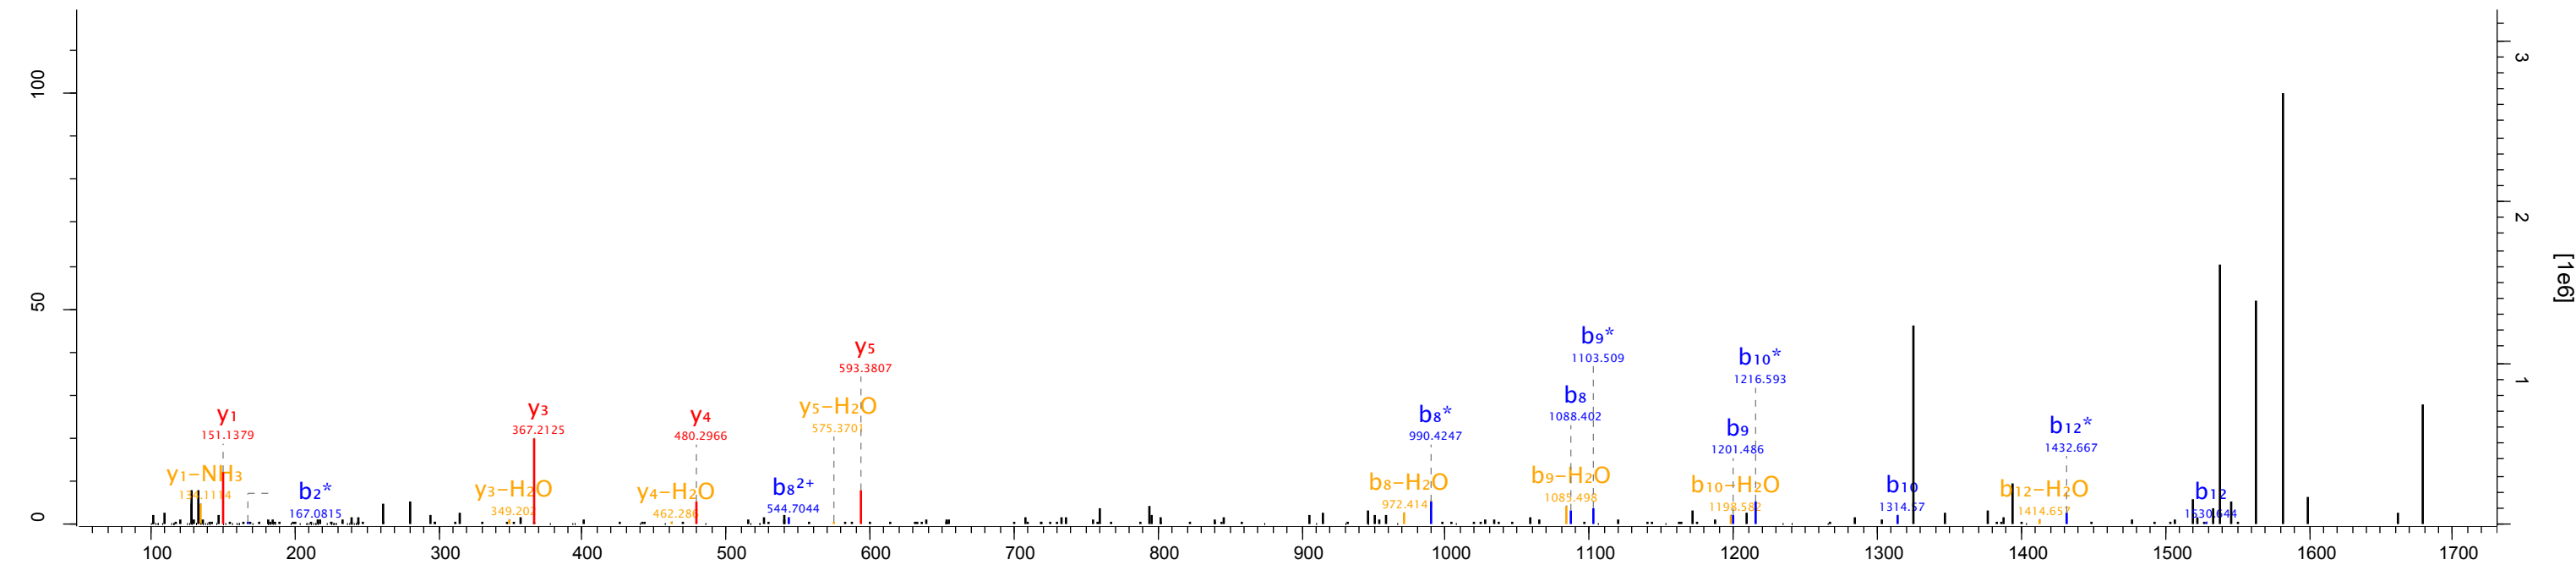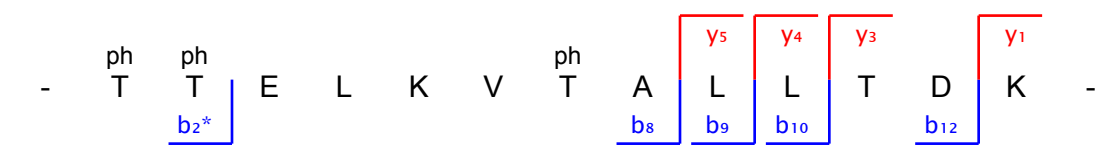

Raw file: 20150814\_A375SR\_Phospho\_BR2\_05  
 Scan: 13672 Method: FTMS; HCD Score: 178.02 m/z: 782.84 Gene names: PWWP2A

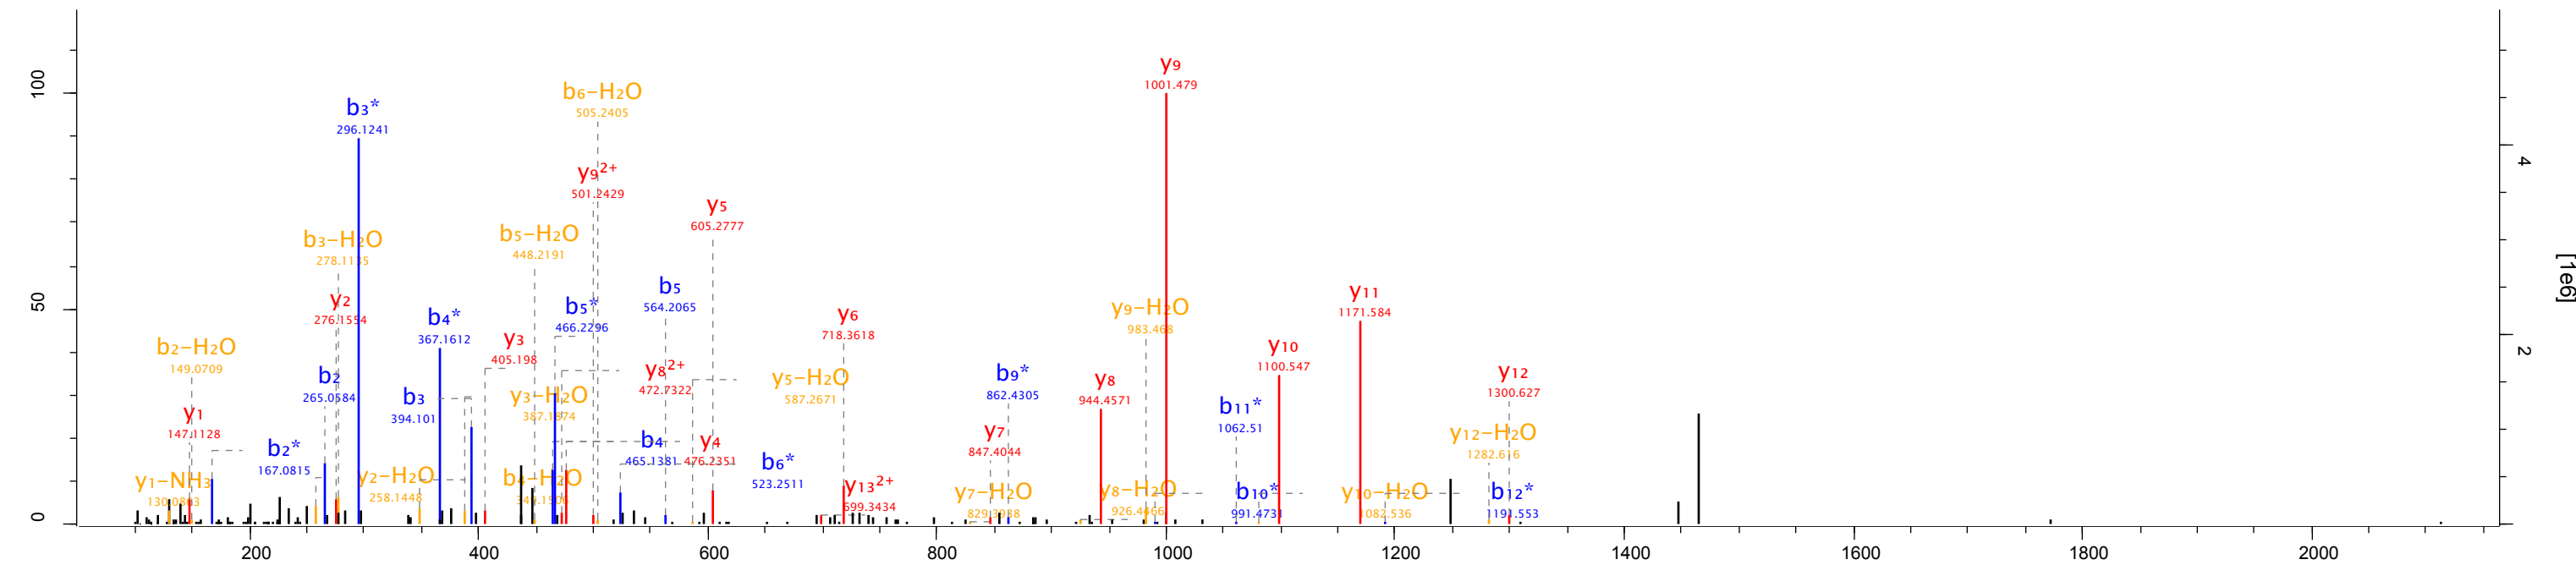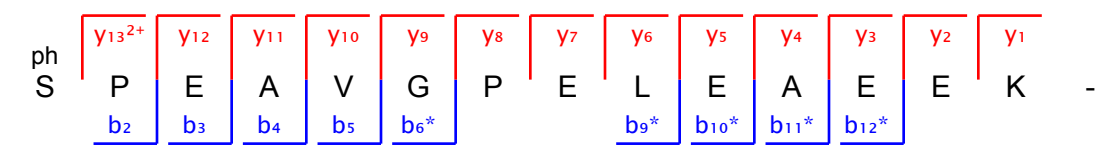

Raw file  
20150814\_A375SR\_Phospho\_BR2\_05  
Scan 4732 Method FTMS; HCD Score 53.76 m/z 630.79

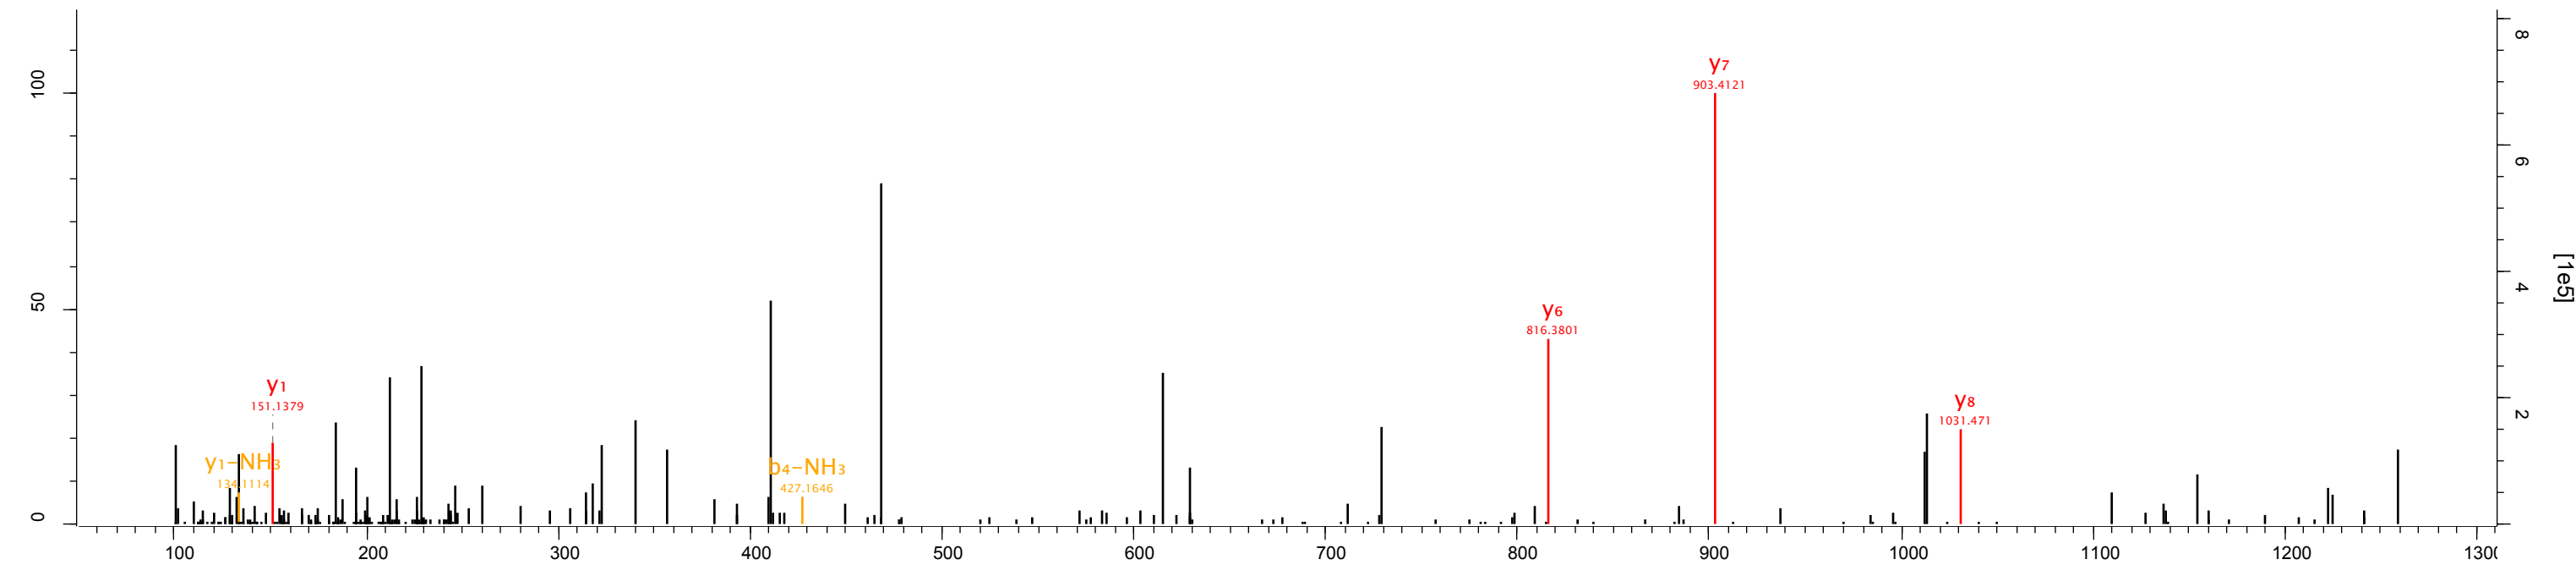

- P M Q S Q L E S Q K -

Annotations above the sequence: y8 (above Q), y7 (above S), y6 (above Q), ph (above S), y1 (above K)

Raw file 20150814\_A375SR\_Phospho\_BR2\_06 Scan 12552 Method FTMS; HCD Score 44.43 m/z 756.88

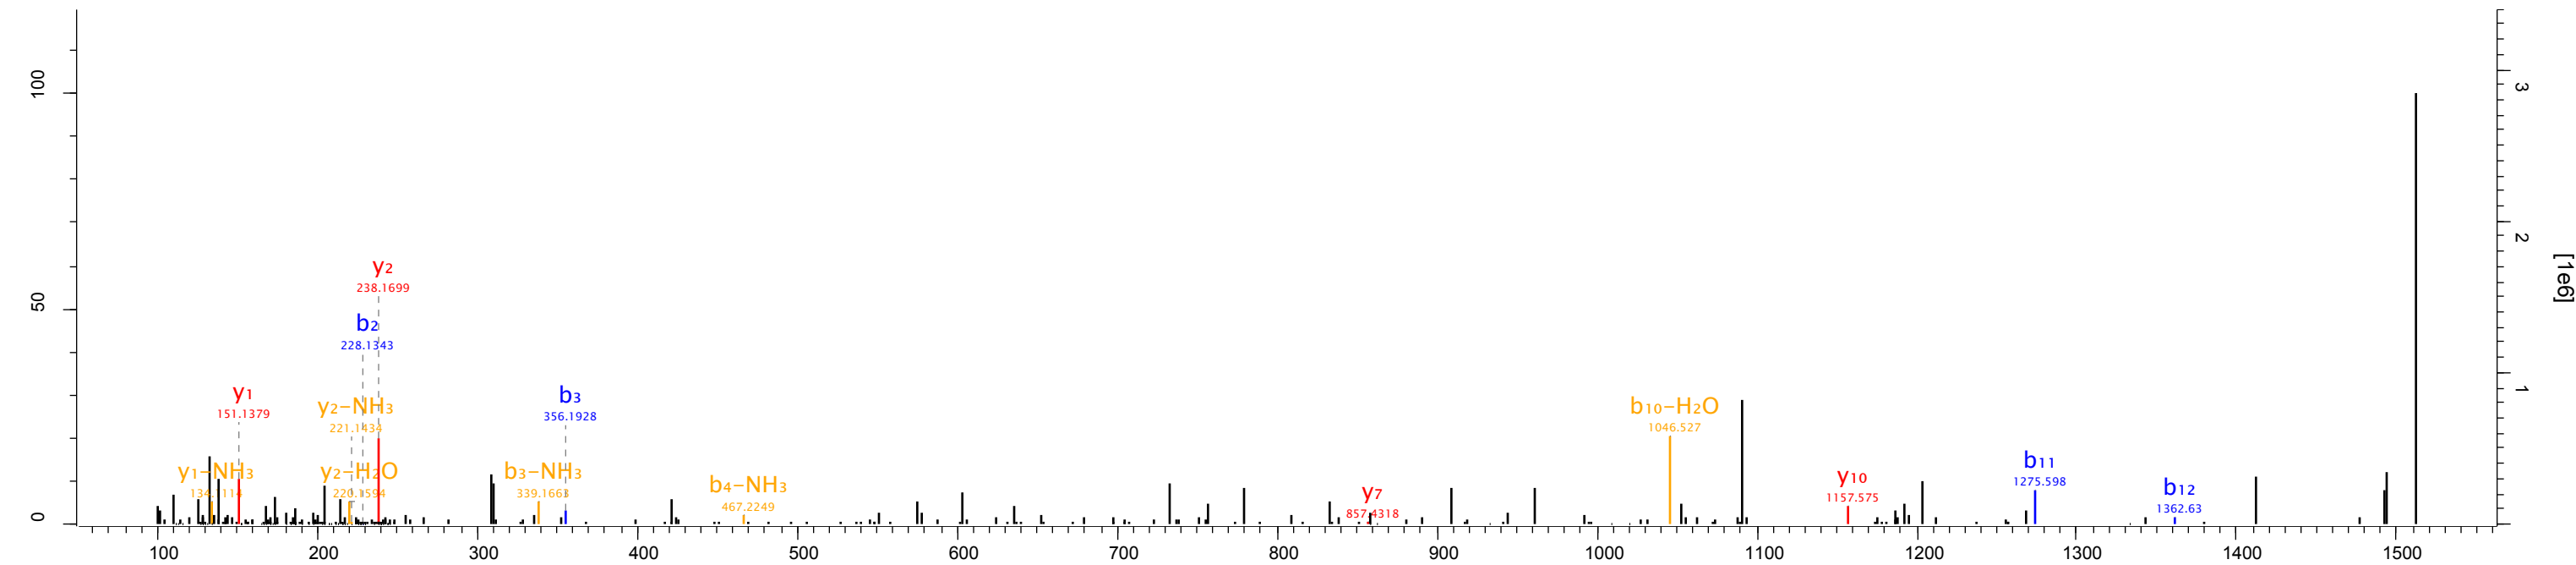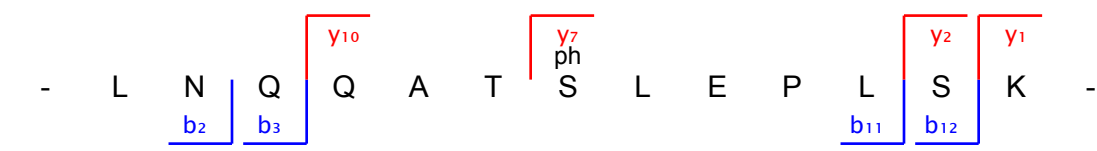

Raw file: 20150814\_A375SR\_Phospho\_BR2\_07  
 Scan: 12752 Method: FTMS; HCD Score: 92 m/z: 843.46 Gene names: MLLT3

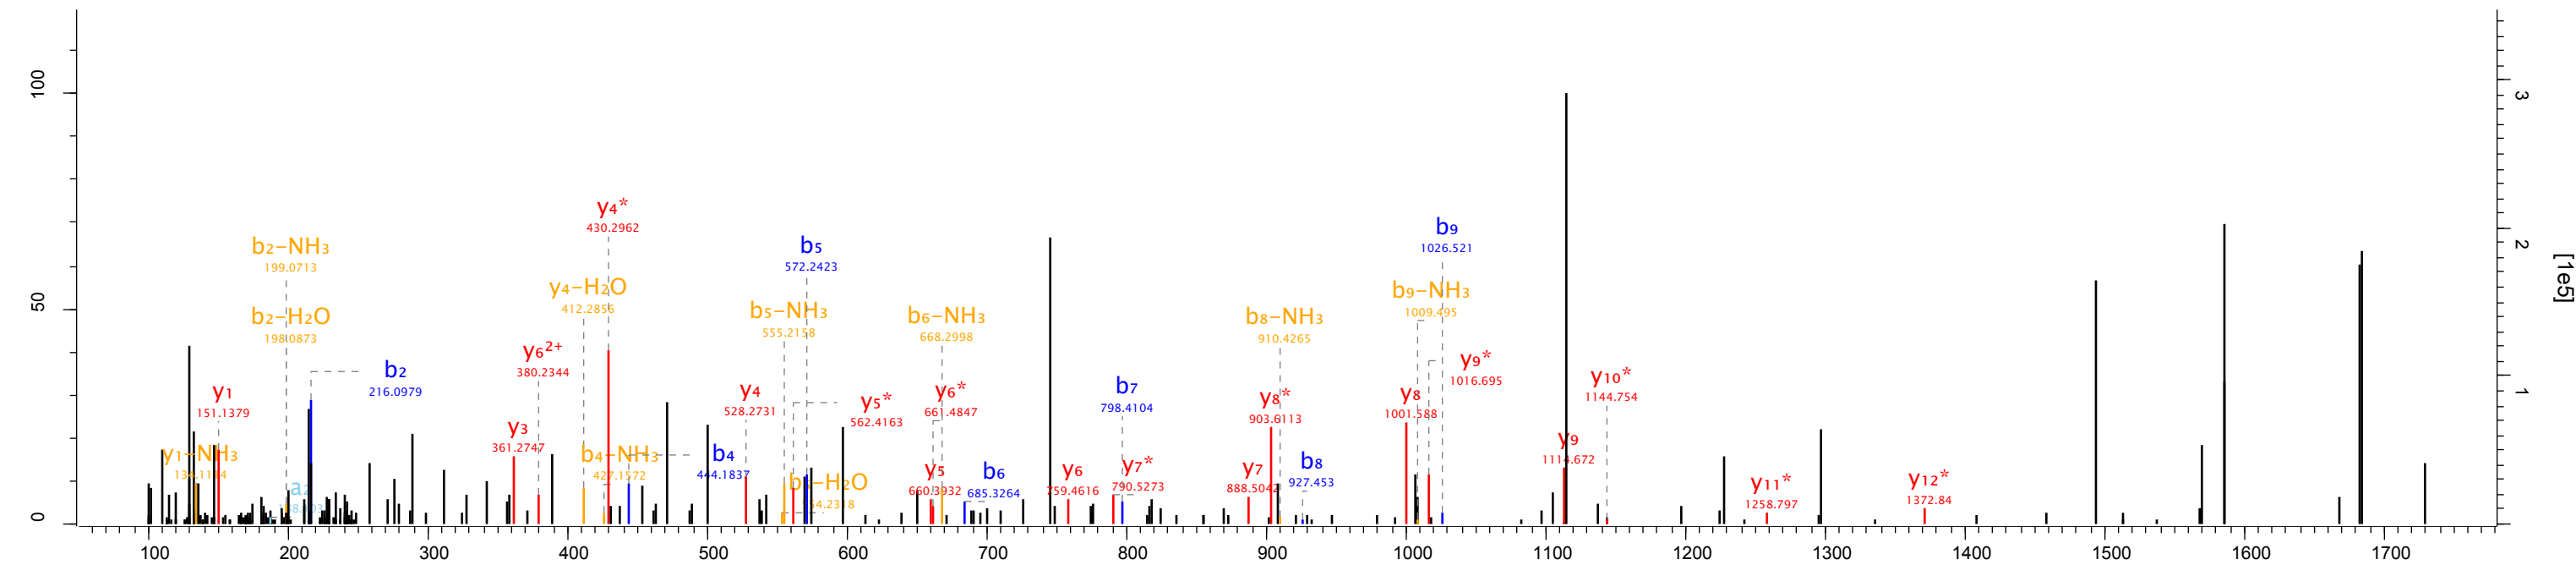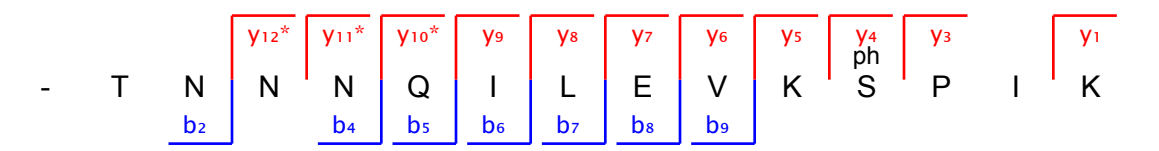

Raw file 20150814\_A375SR\_Phospho\_BR2\_07 Scan 17662 Method FTMS; HCD Score 61.19 m/z 658.31 Gene names ZFP36

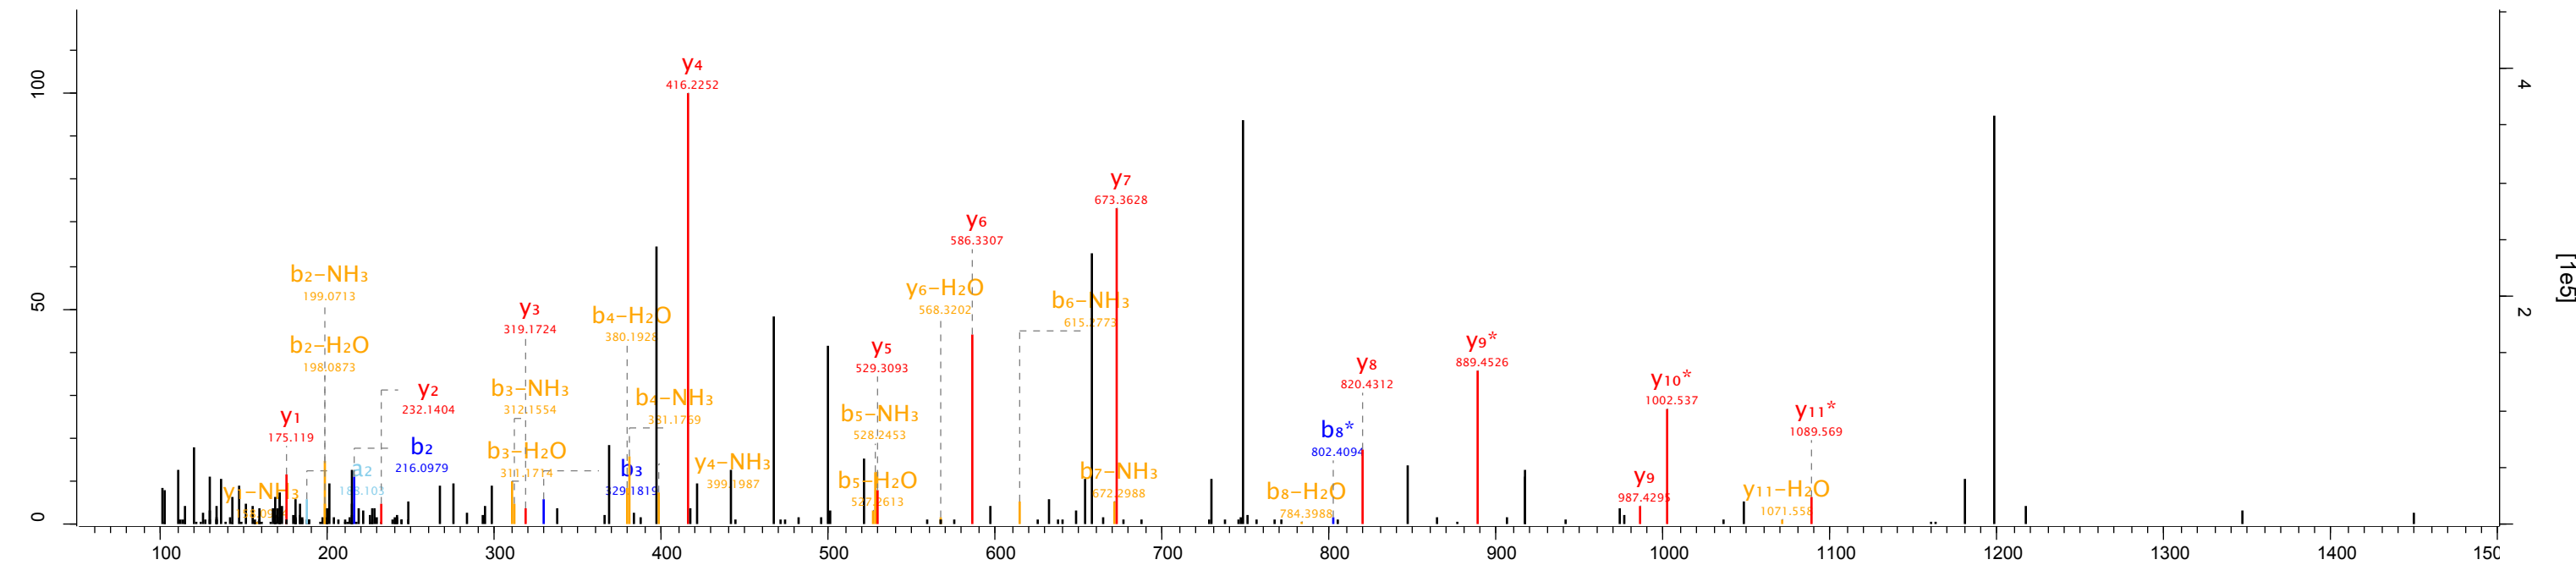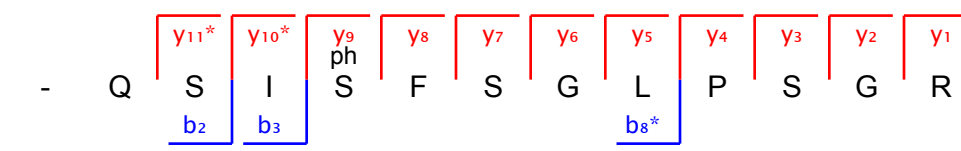



Raw file 20150814\_A375SR\_Phospho\_BR2\_07 Scan 9642 Method FTMS; HCD Score 40.14 m/z 1140.98 Gene names ATP8A1

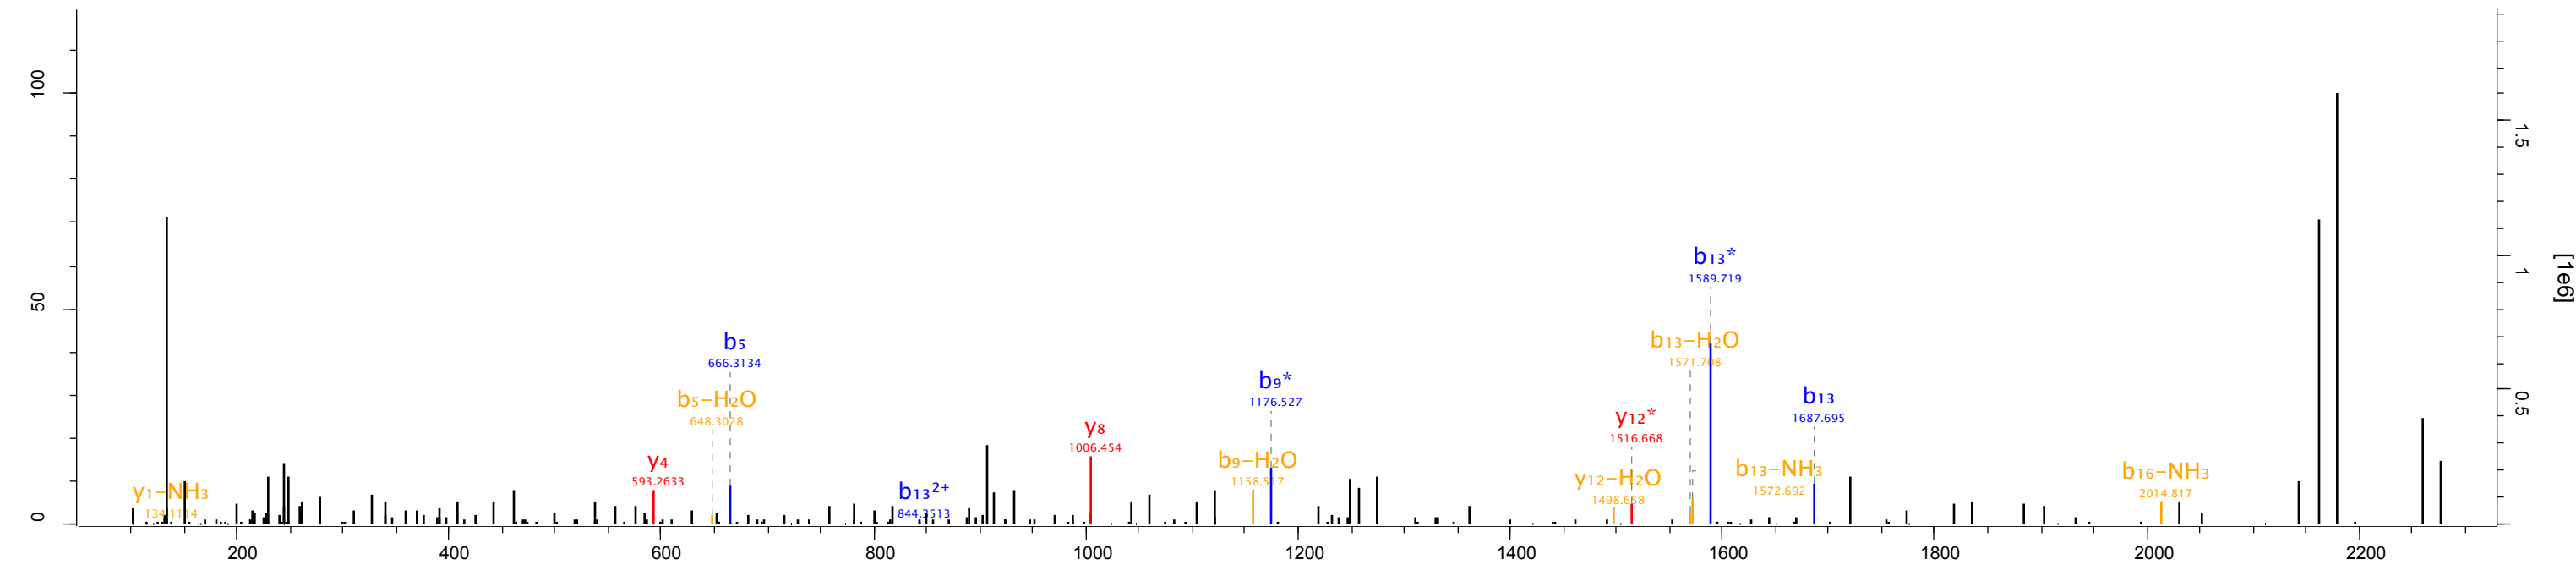

- Y P E L Y K T S Q N A L D F N T K -

Fragmentation mapping:  
 - b<sub>5</sub> (blue line) connects Y and K.  
 - y<sub>12</sub>\* (red line) connects K and N.  
 - b<sub>9</sub>\* (blue line) connects Q and N.  
 - y<sub>8</sub> (red line) connects N and A.  
 - b<sub>13</sub> (blue line) connects D and F.  
 - y<sub>4</sub> (red line) connects F and N.

Raw file 20150814\_A375SR\_Phospho\_BR2\_08 Scan 13142 Method FTMS; HCD Score 63.05 m/z 1111.54

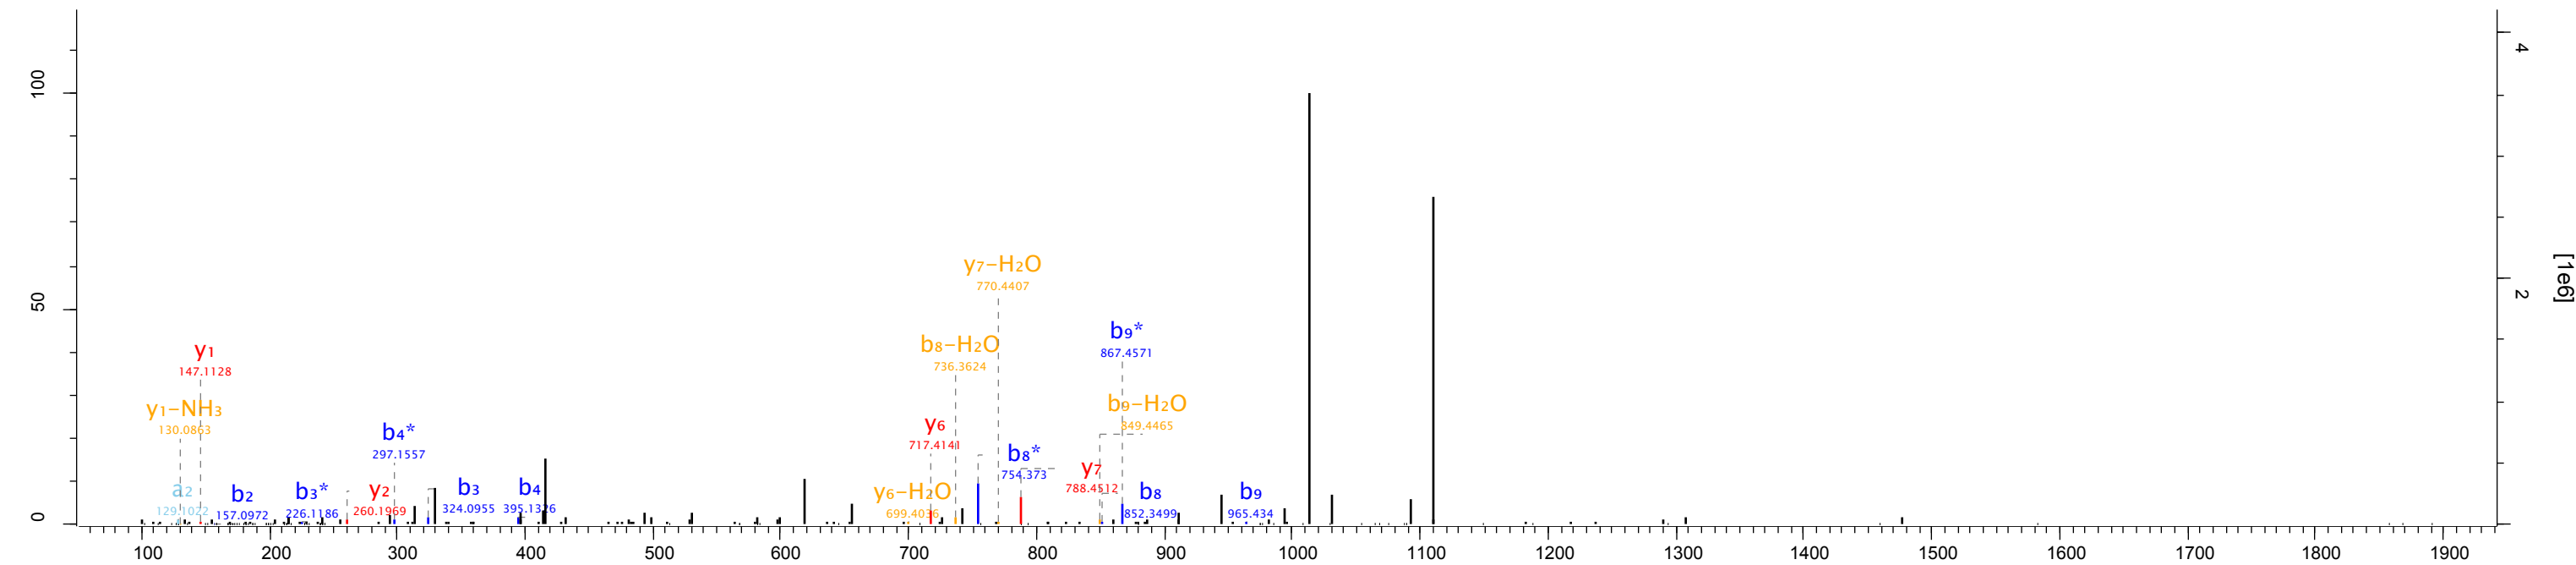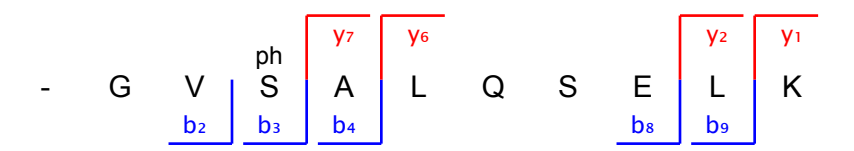

Raw file: 20150814\_A375SR\_Phospho\_BR2\_09  
 Scan: 22362  
 Method: FTMS; HCD  
 Score: 104.09  
 m/z: 1100.17  
 Gene names: CEBPG

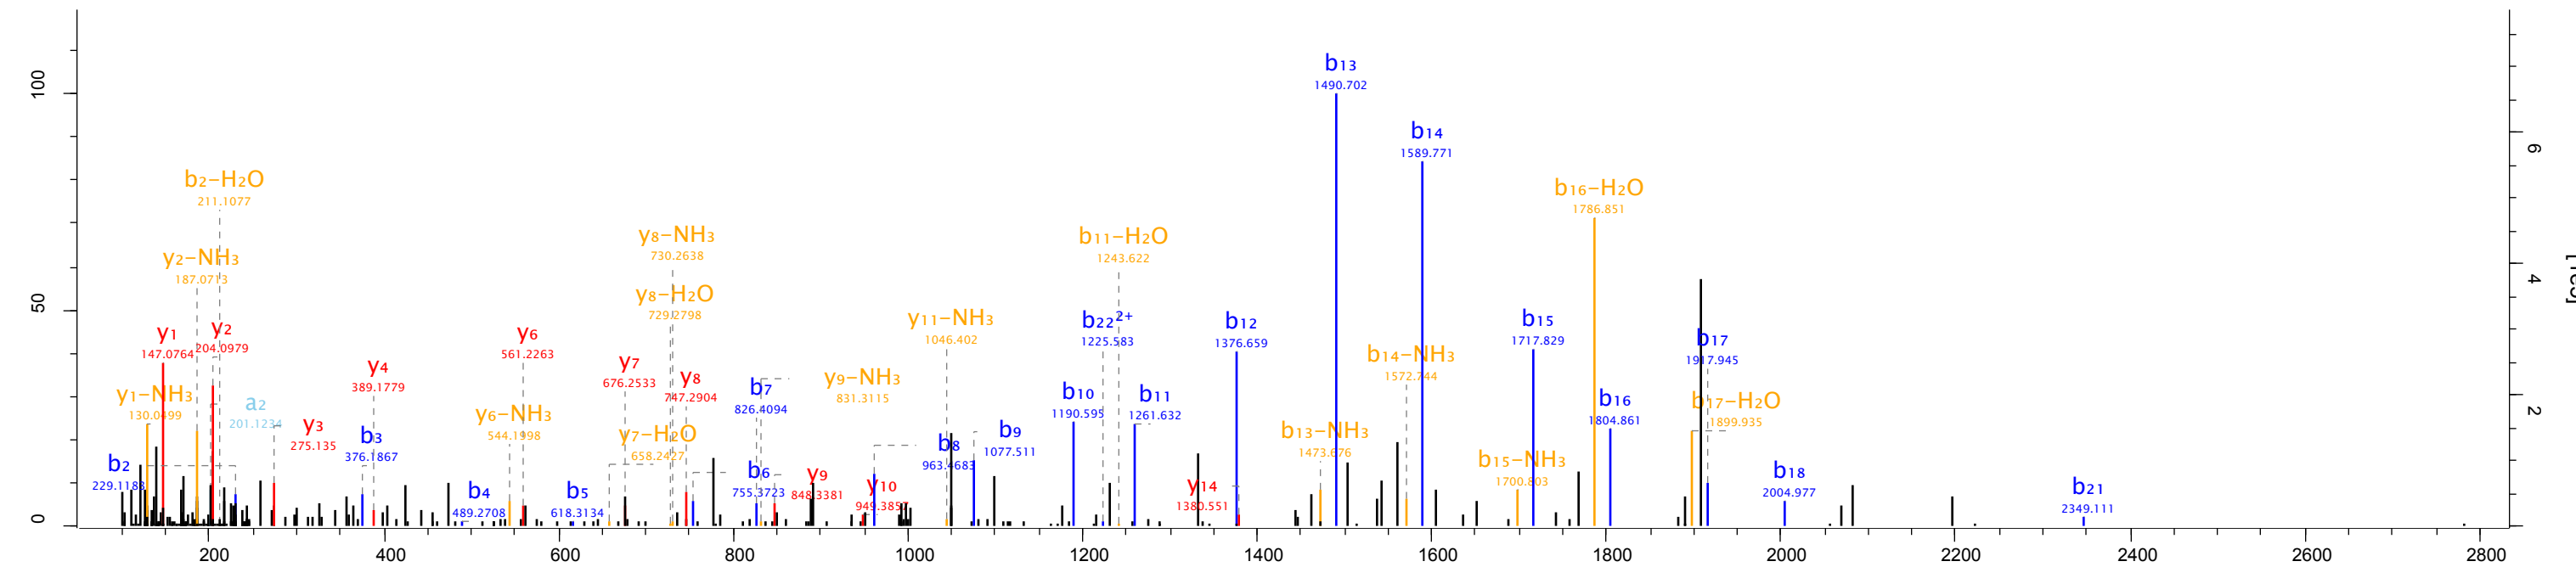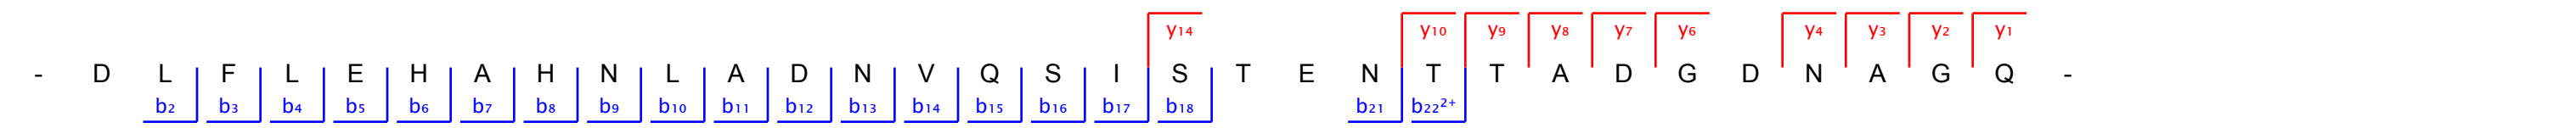

Raw file: 20150814\_A375SR\_Phospho\_BR2\_09  
 Scan: 24222 Method: FTMS; HCD Score: 239.1 m/z: 968.42 Gene names: MAPK11P1L

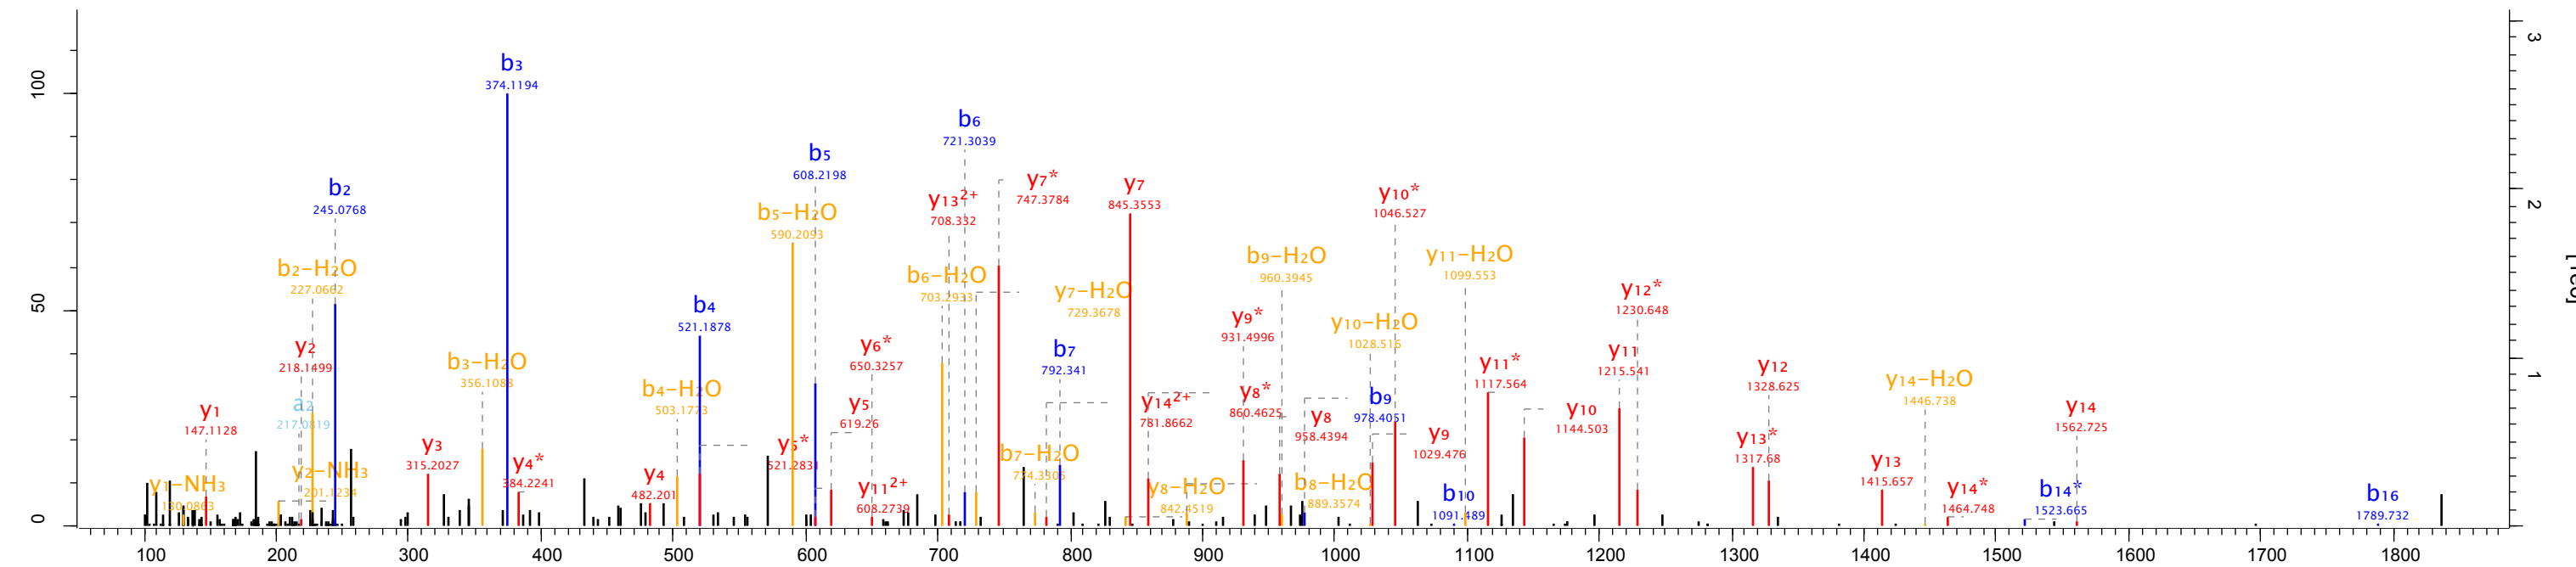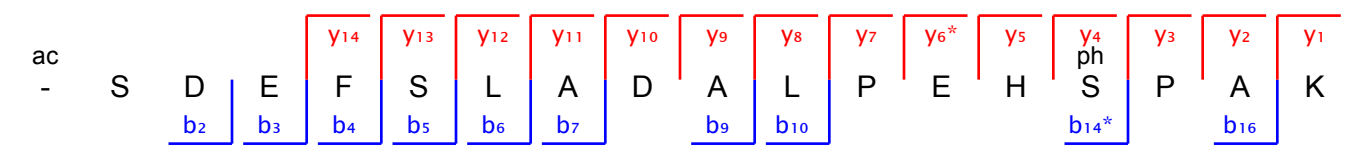

Raw file 20150814\_A375SR\_Phospho\_BR2\_09 Scan 5332 Method FTMS; HCD Score 44.85 m/z 530.24

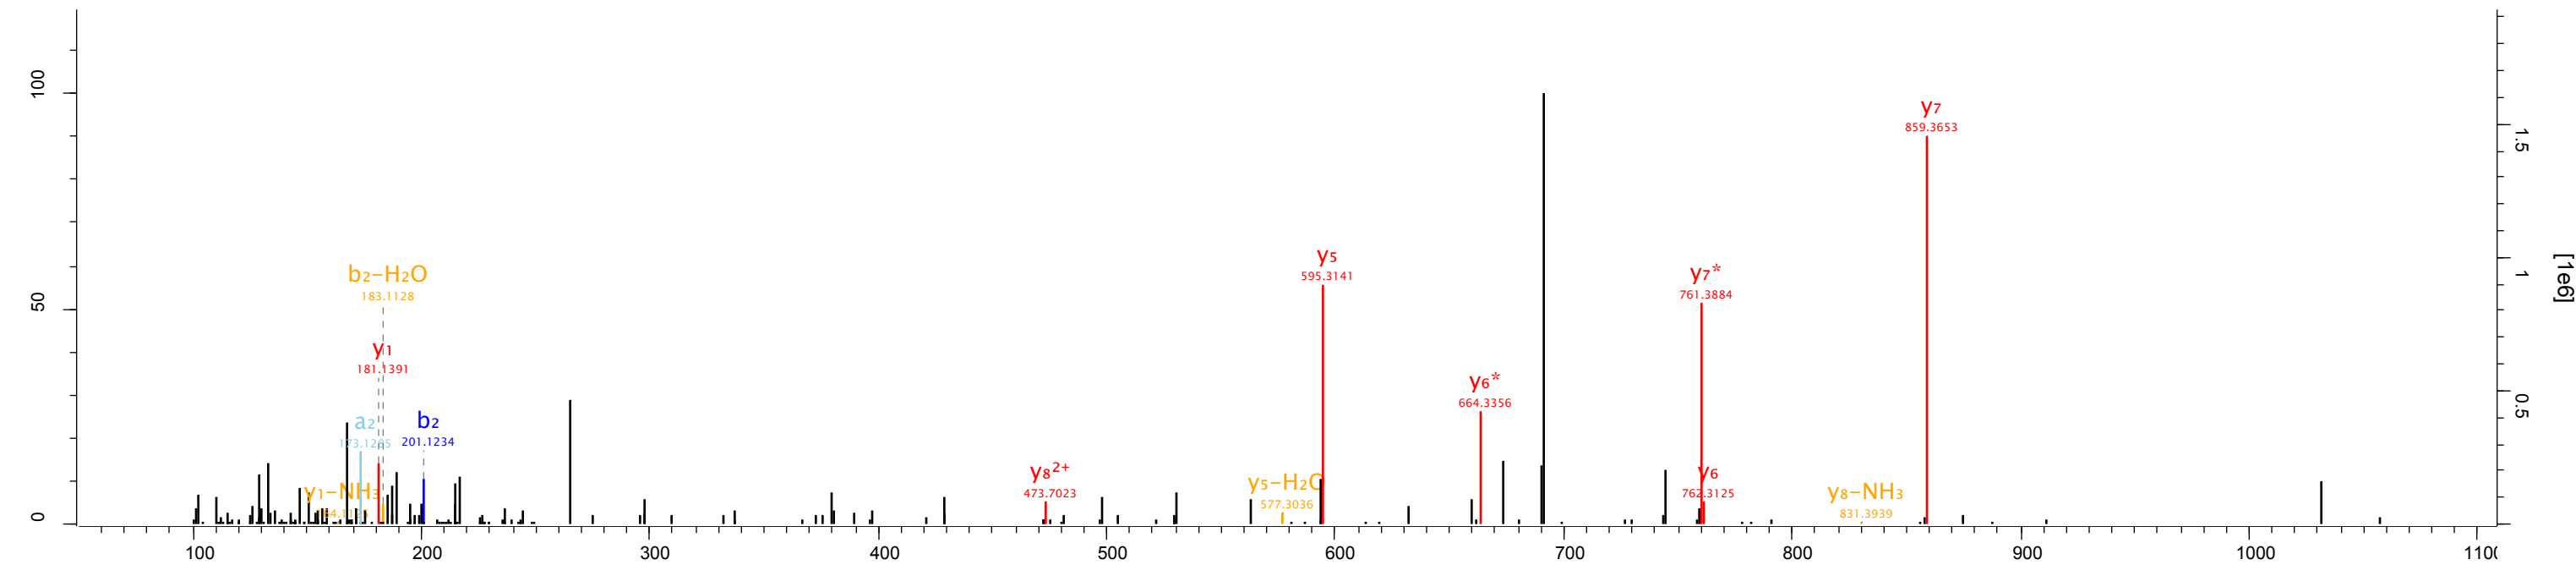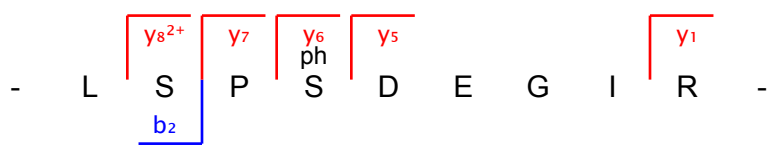

Raw file: 20150814\_A375SR\_Phospho\_BR2\_10  
 Scan: 10992 Method: FTMS; HCD Score: 110.56 m/z: 655.82 Gene names: PHACTR2

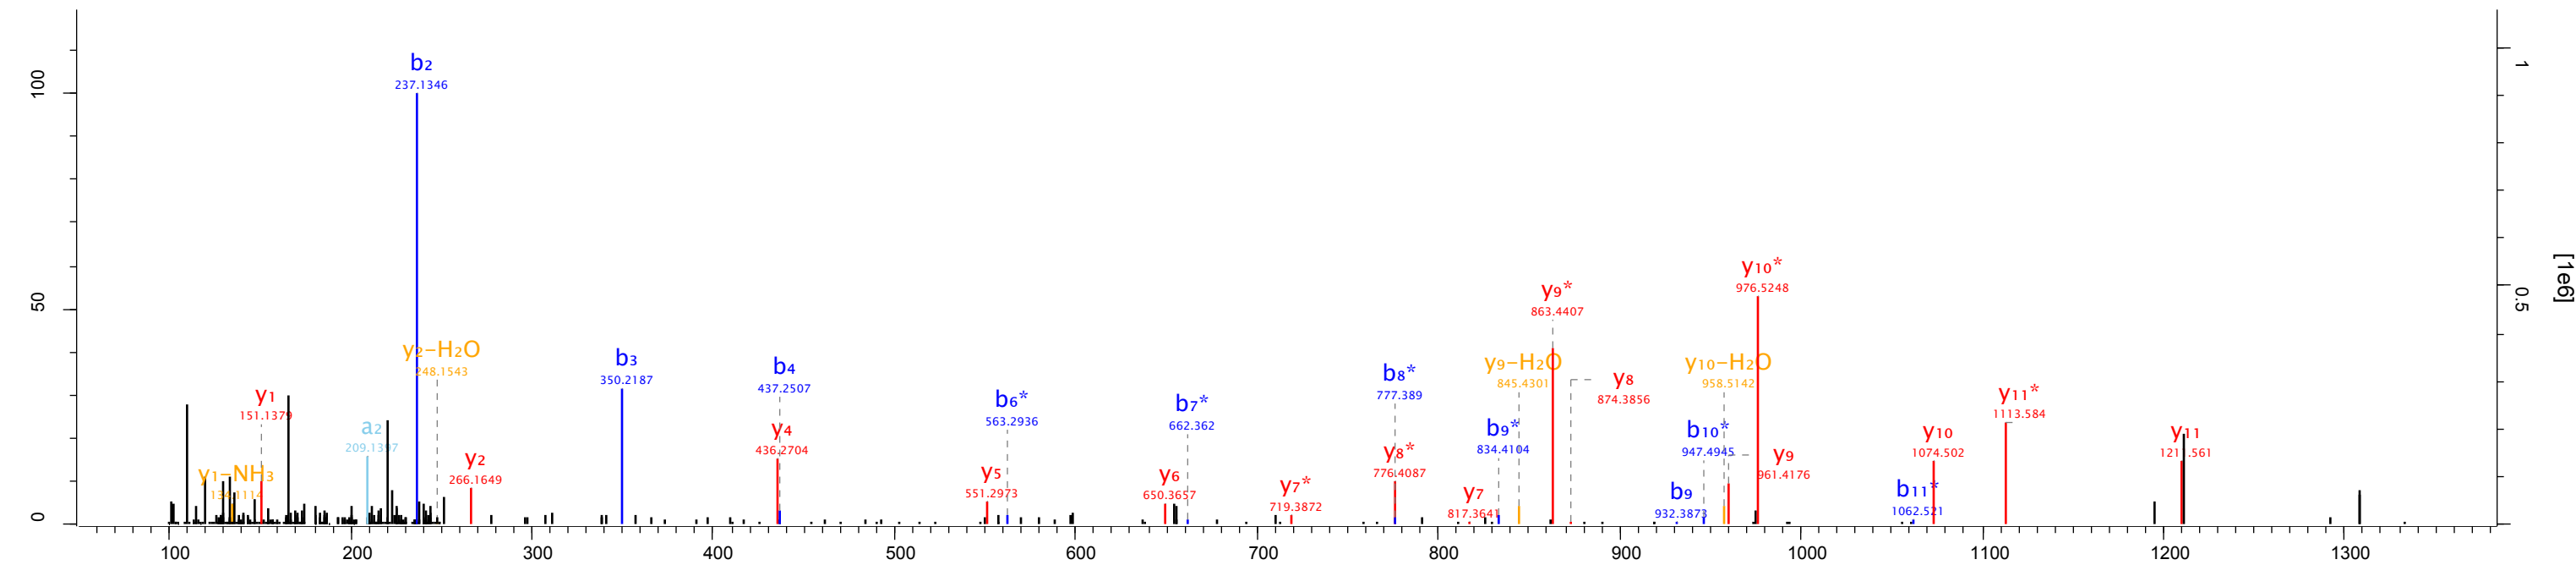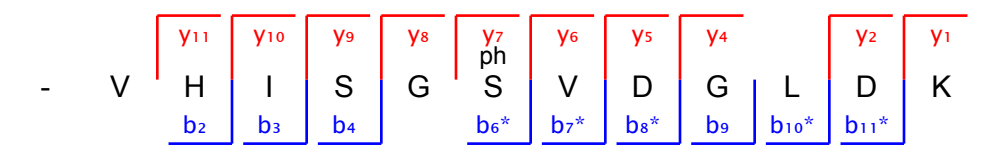

Raw file Scan Method Score m/z Gene names  
 20150814\_A375SR\_Phospho\_BR2\_10 13352 FTMS; HCD 125.71 436.58 RPL39P5;RPL39

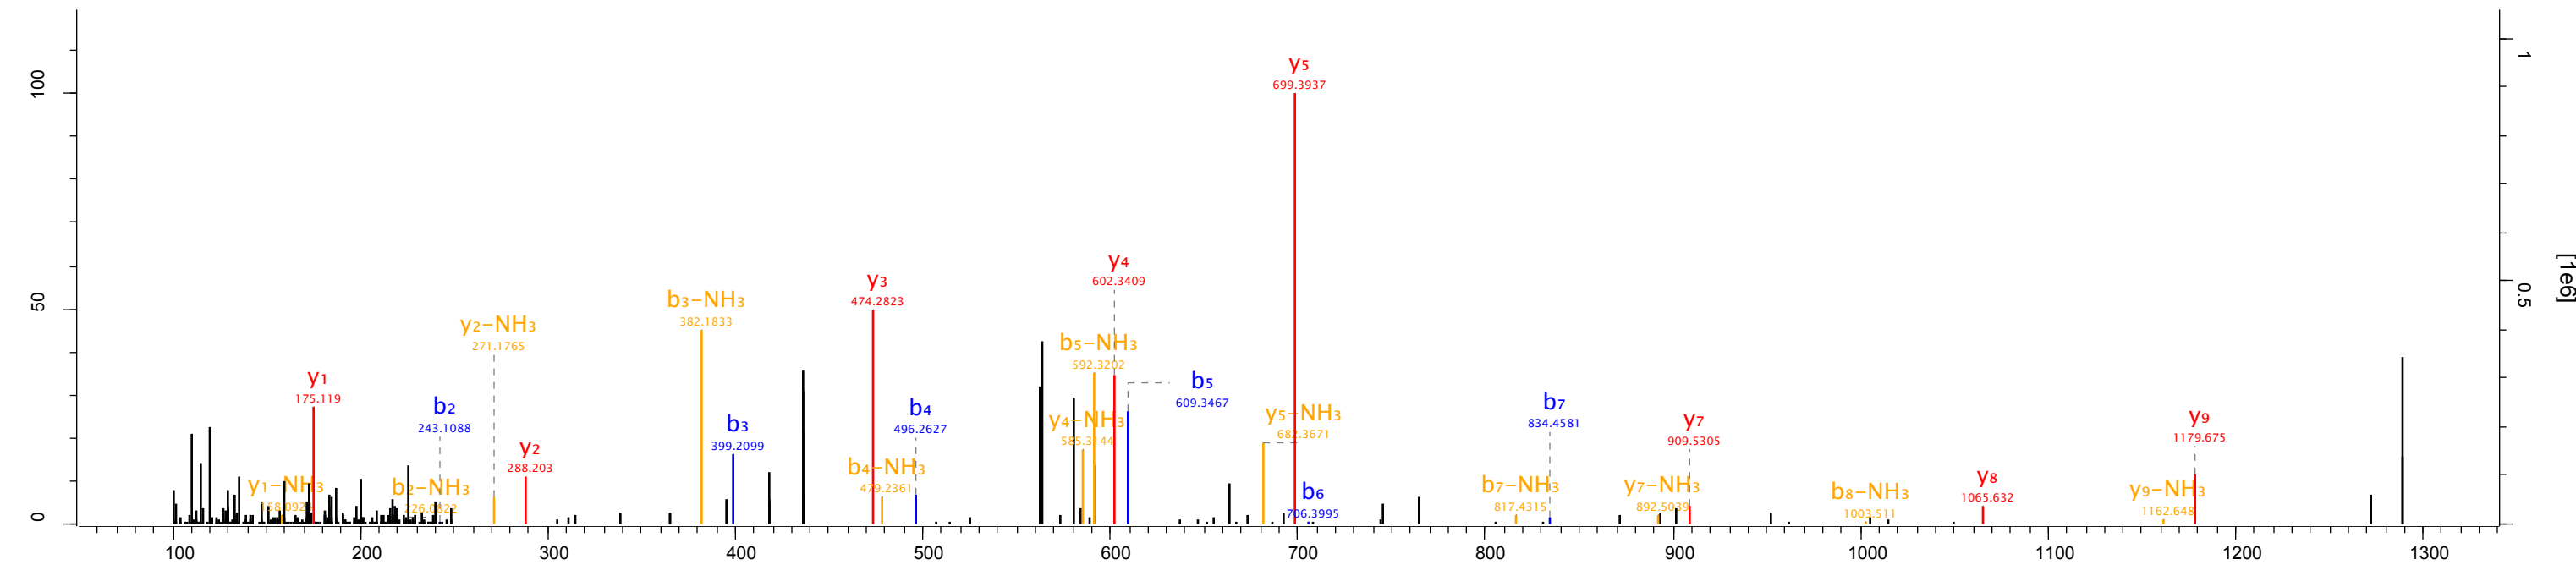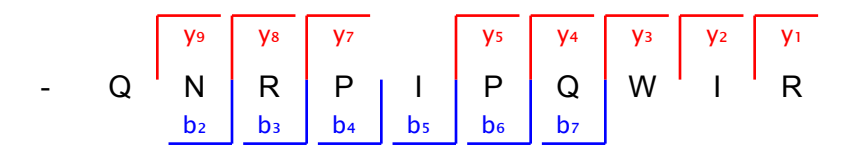

Raw file 20150814\_A375SR\_Phospho\_BR2\_10 Scan 17022 Method FTMS; HCD Score 46.89 m/z 861.87

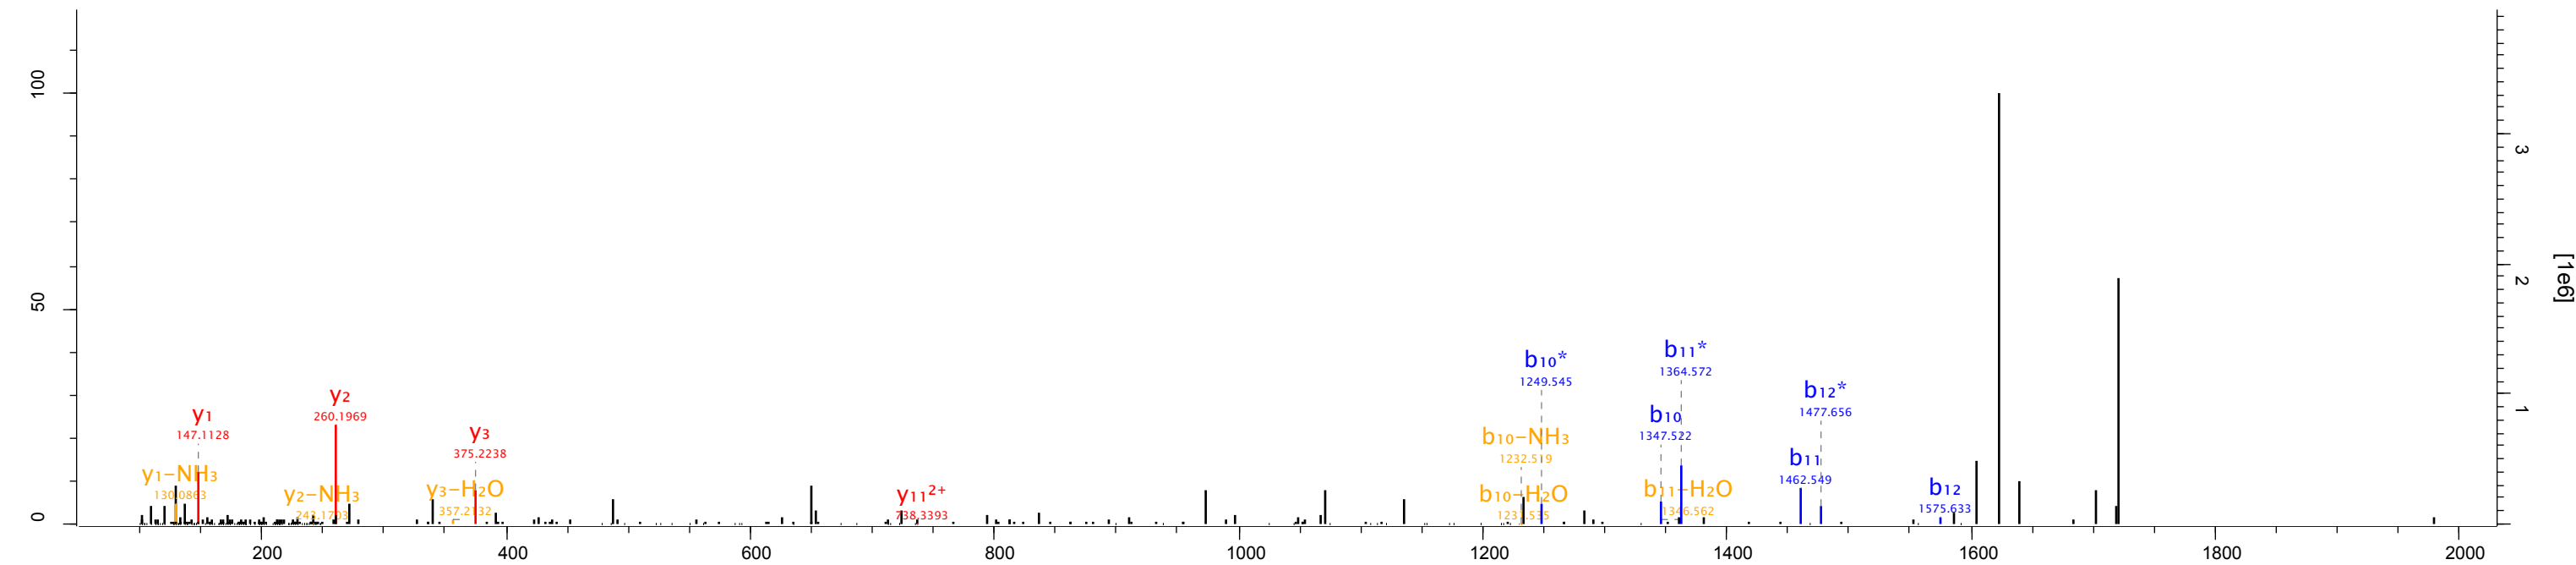

- D M Y<sup>y11<sup>2+</sup></sup> Q V C V R Q S<sup>b10</sup> D<sup>y3</sup> L<sup>y2</sup> K<sup>y1</sup> -



Raw file  
 20150814\_A375SR\_Phospho\_BR2\_10  
 Scan 23672 Method FTMS; HCD Score 197.68 m/z 970.44 Gene names MAPK11P1L

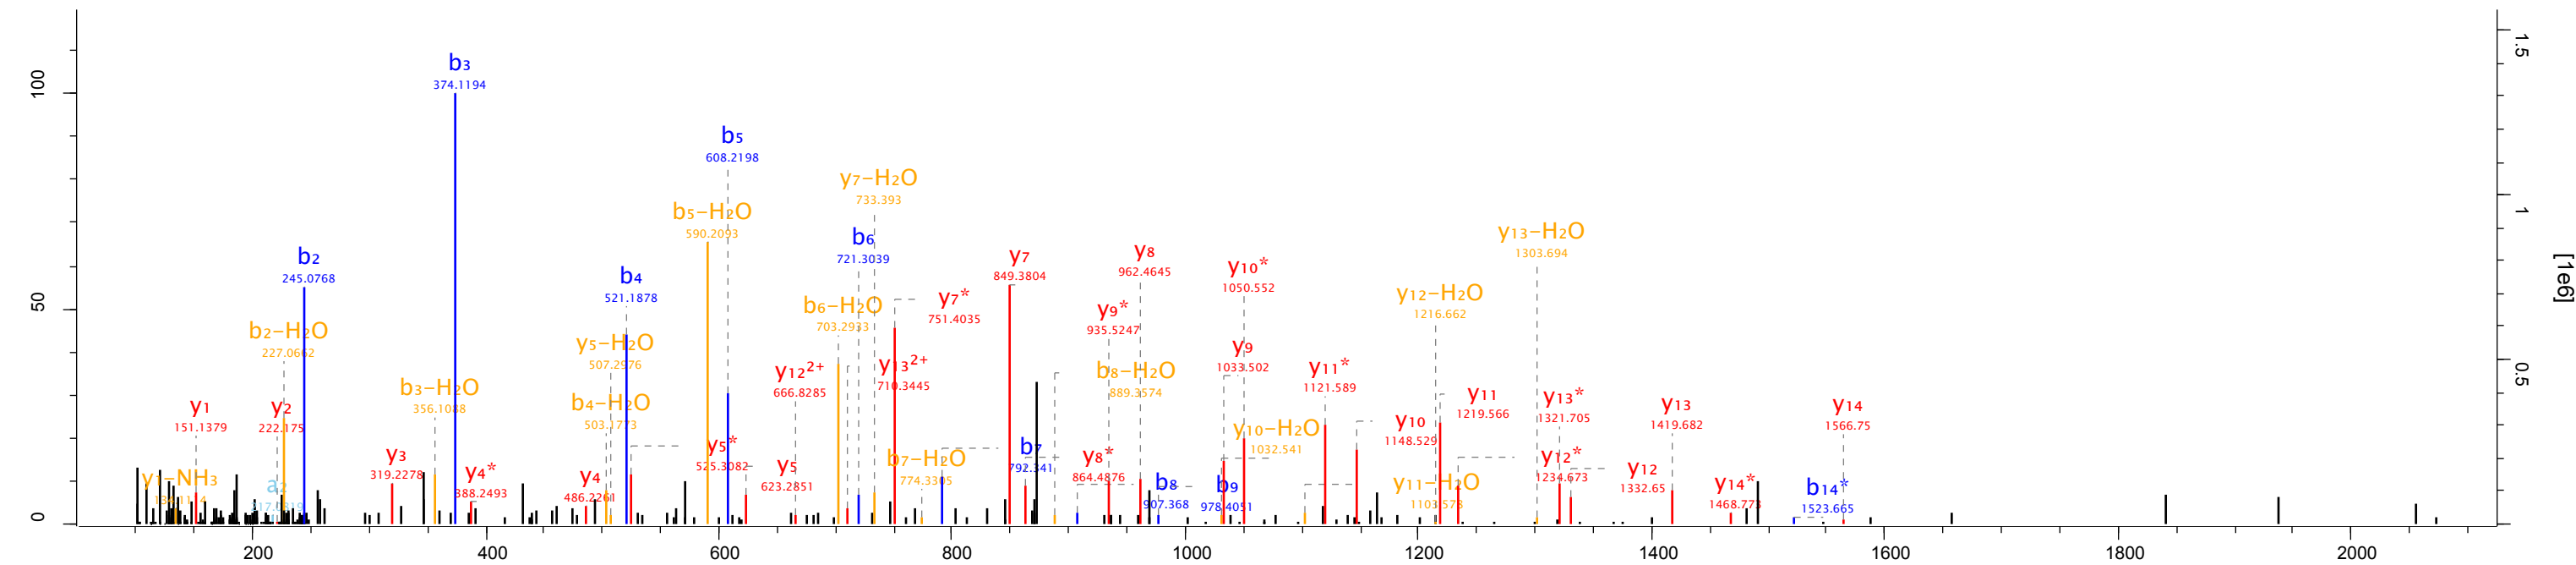

Raw file: 20150818\_A375SR-Proteome\_BR1  
 Scan: 116162    Method: FTMS; HCD    Score: 42.42    m/z: 715.91    Gene names: UQCRI1

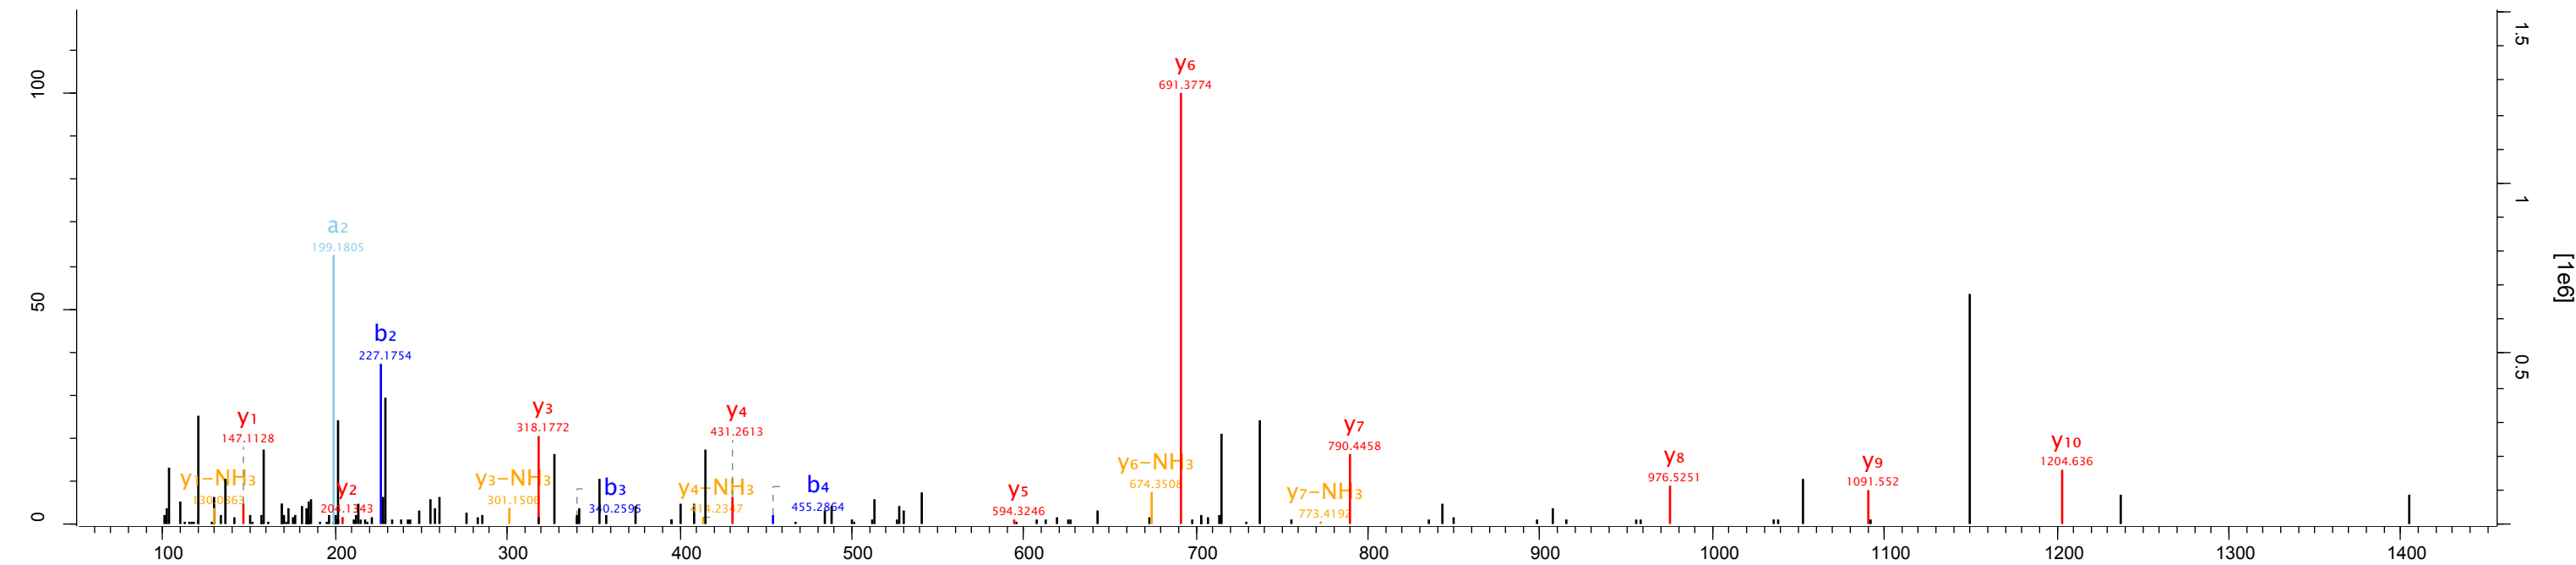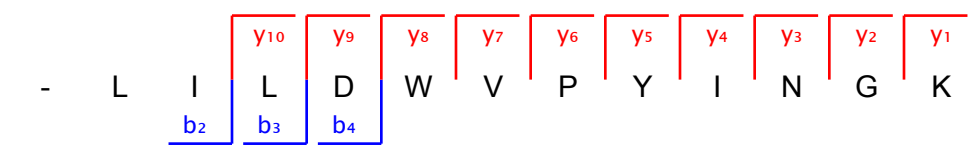

Raw file: 20150818\_A375SR-Proteome\_BR1  
 Scan: 38632 Method: FTMS; HCD Score: 67.65 m/z: 858.93 Gene names: APOC3

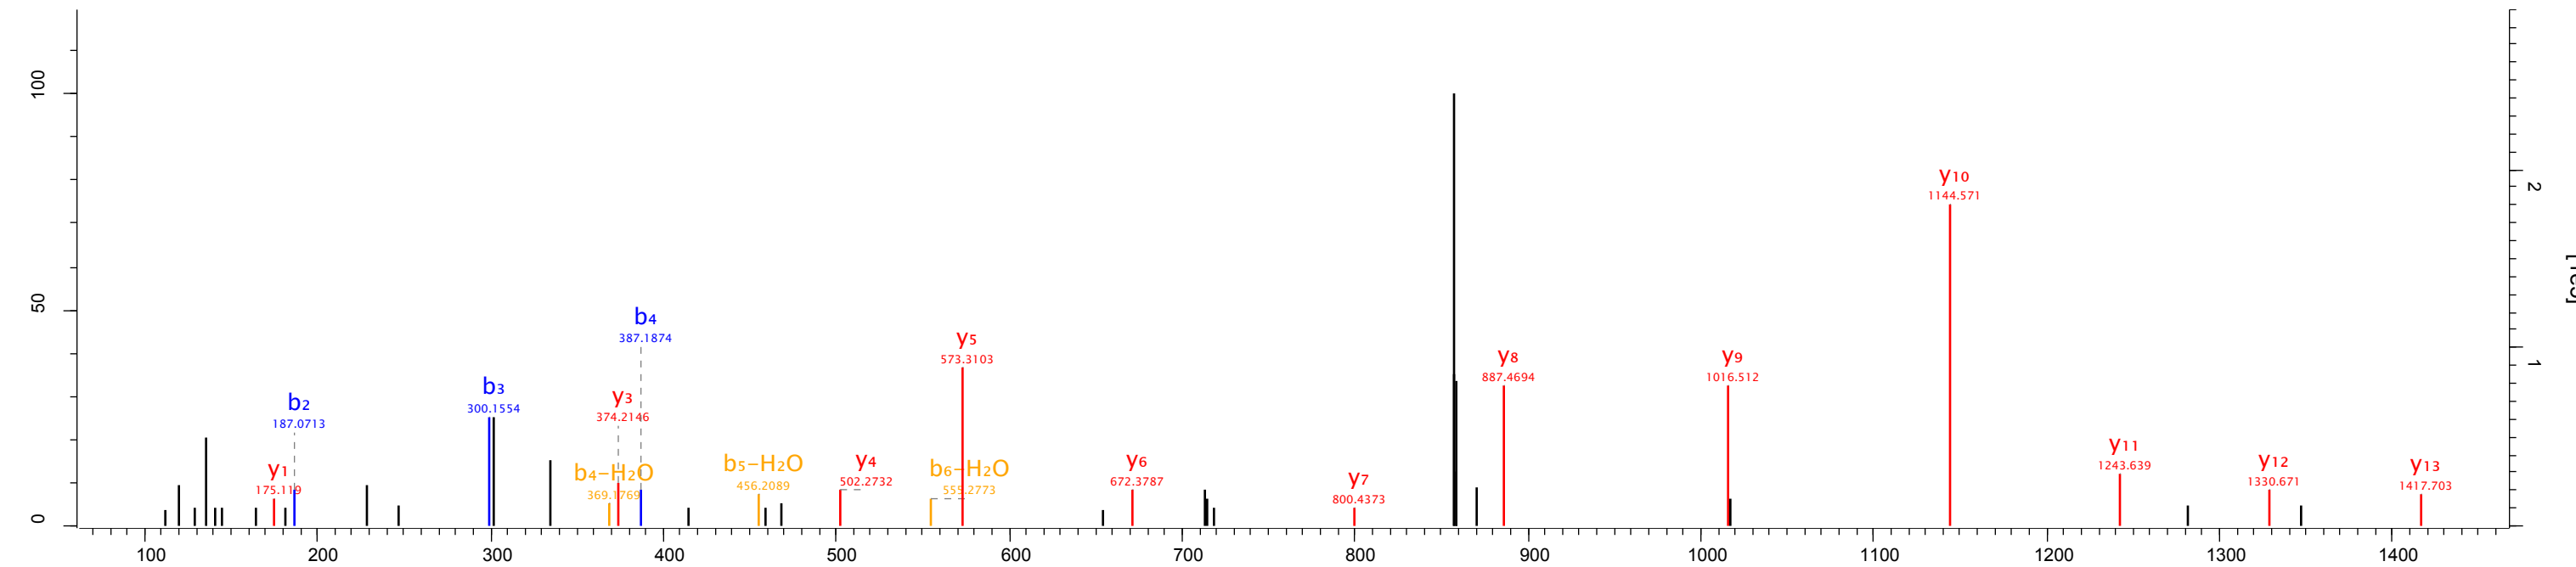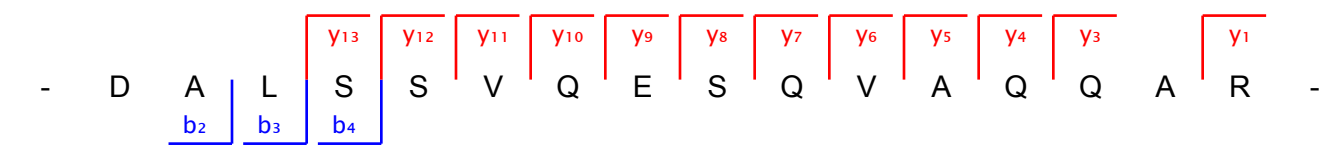

Raw file Scan Method Score m/z Gene names  
 20150818\_A375SR-Proteome\_BR1 54192 FTMS; HCD 61.11 586.84 KATNAL2

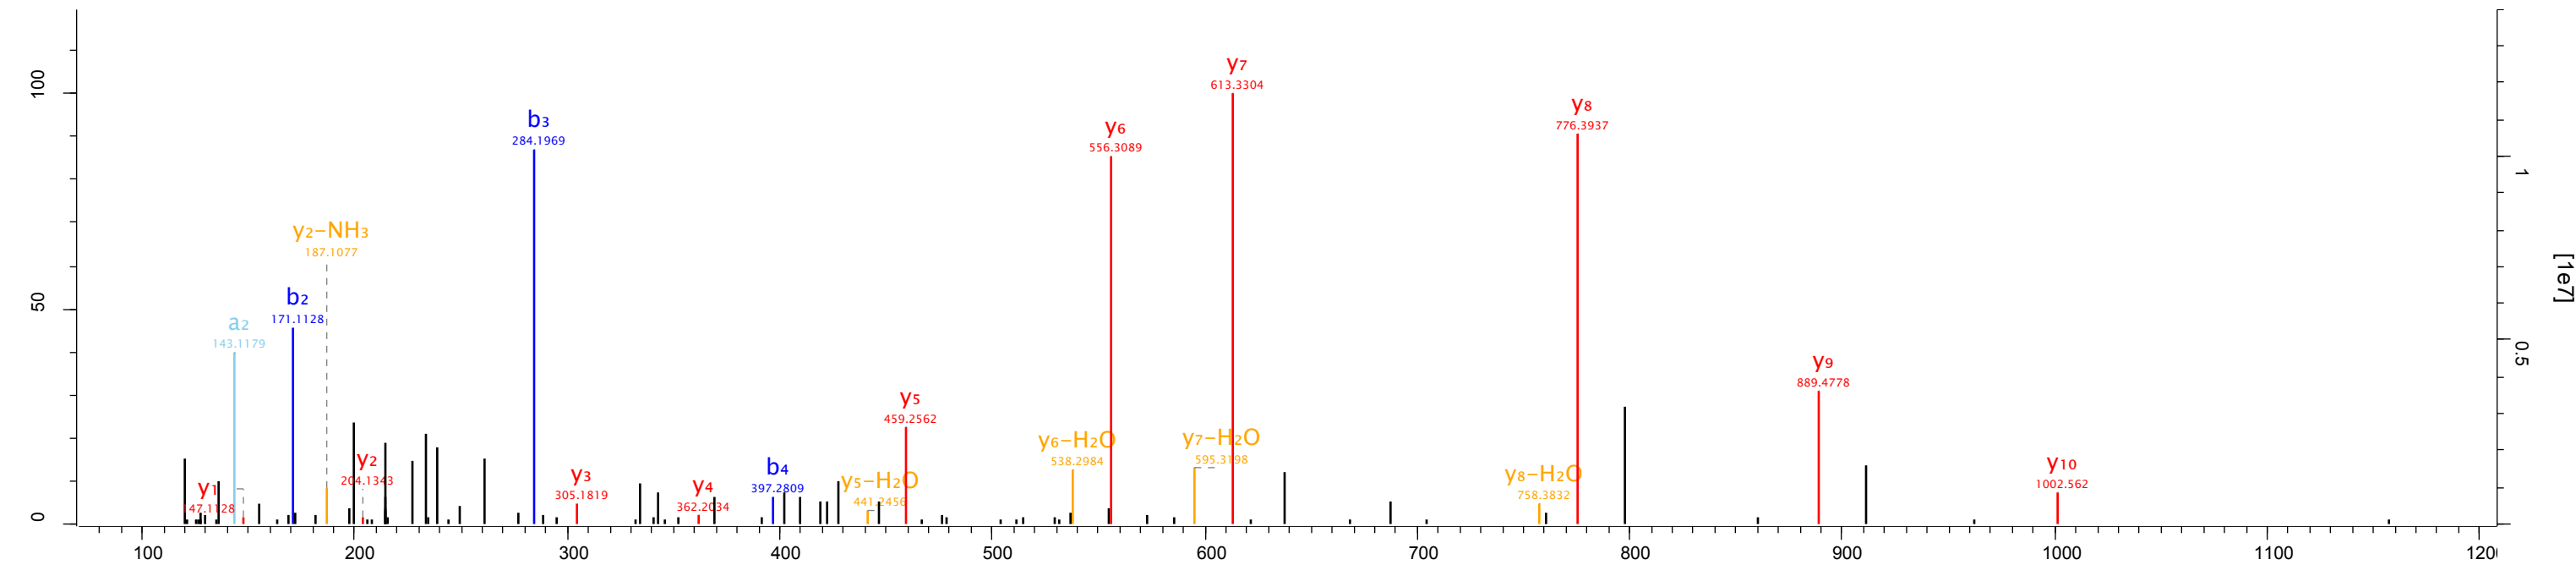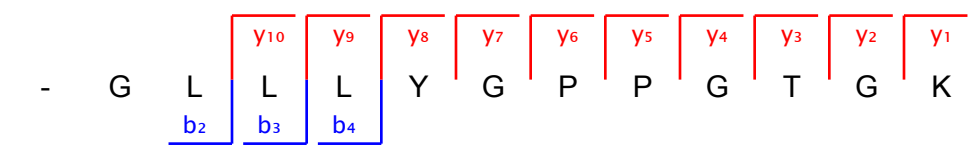

Raw file: 20150818\_A375SR-Proteome\_BR2  
 Scan: 14272 Method: FTMS; HCD Score: 47.89 m/z: 555.8 Gene names: POLR2F

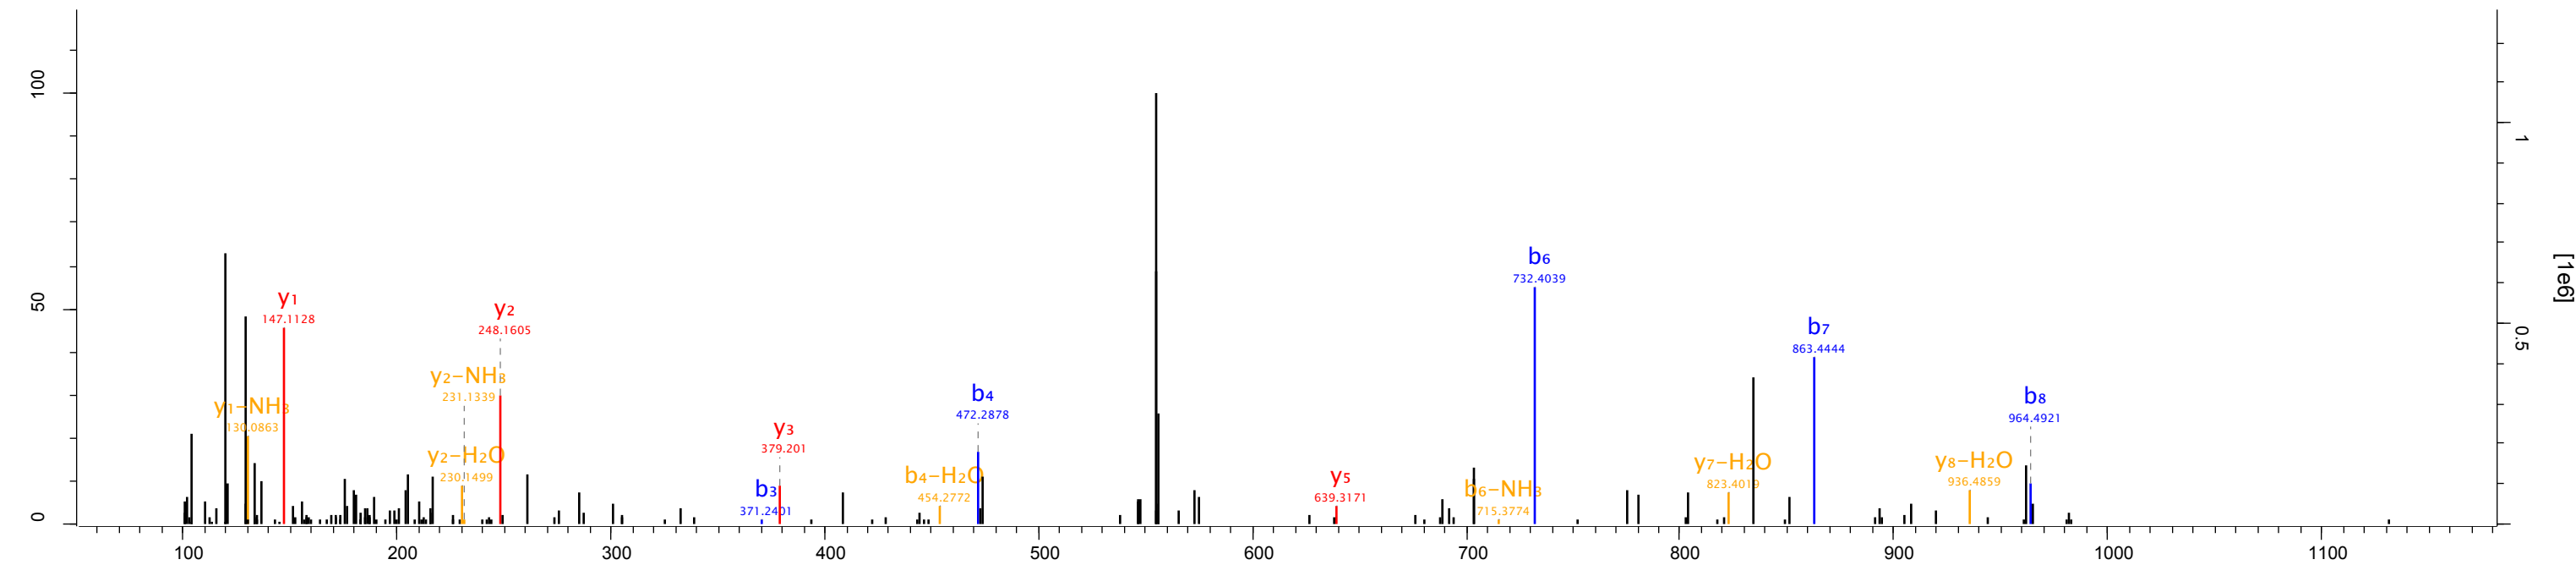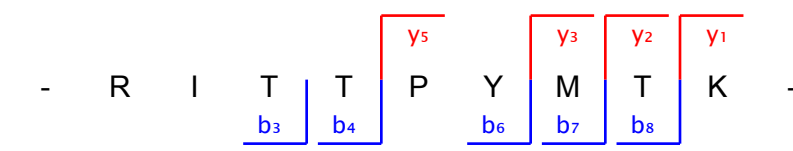

Raw file: 20150818\_A375SR-Proteome\_BR2  
 Scan: 52492 Method: FTMS; HCD Score: 89.3 m/z: 588.85 Gene names: KATNAL2

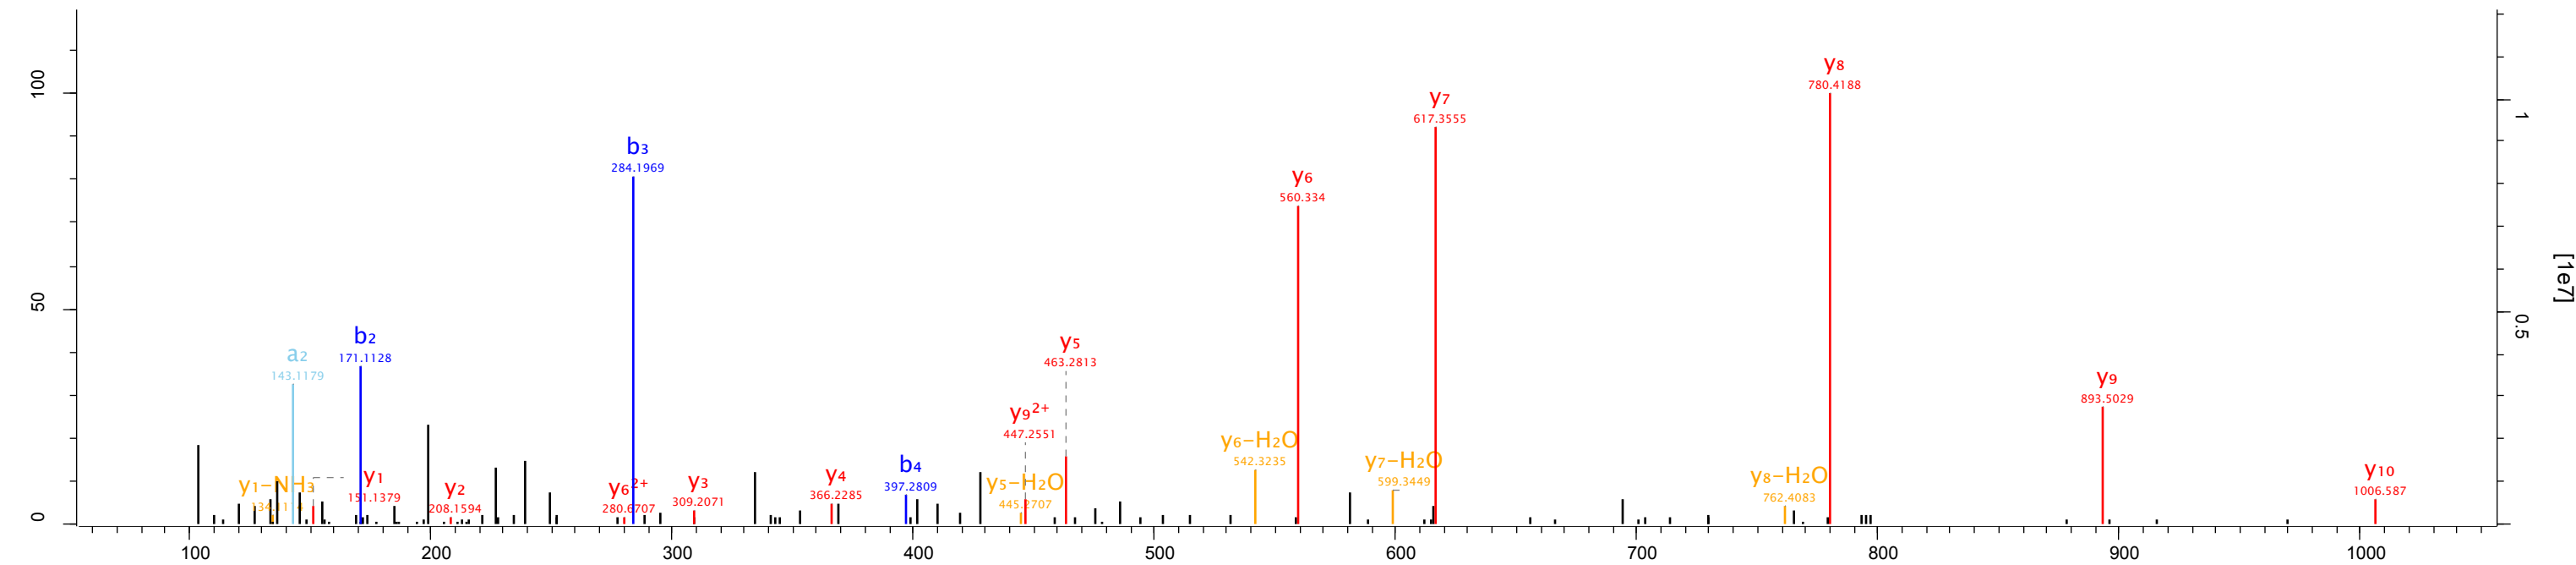

Raw file: 20150818\_A375SR-Proteome\_BR2  
 Scan: 70432 Method: FTMS; HCD Score: 67.33 m/z: 492.81 Gene names: STON2

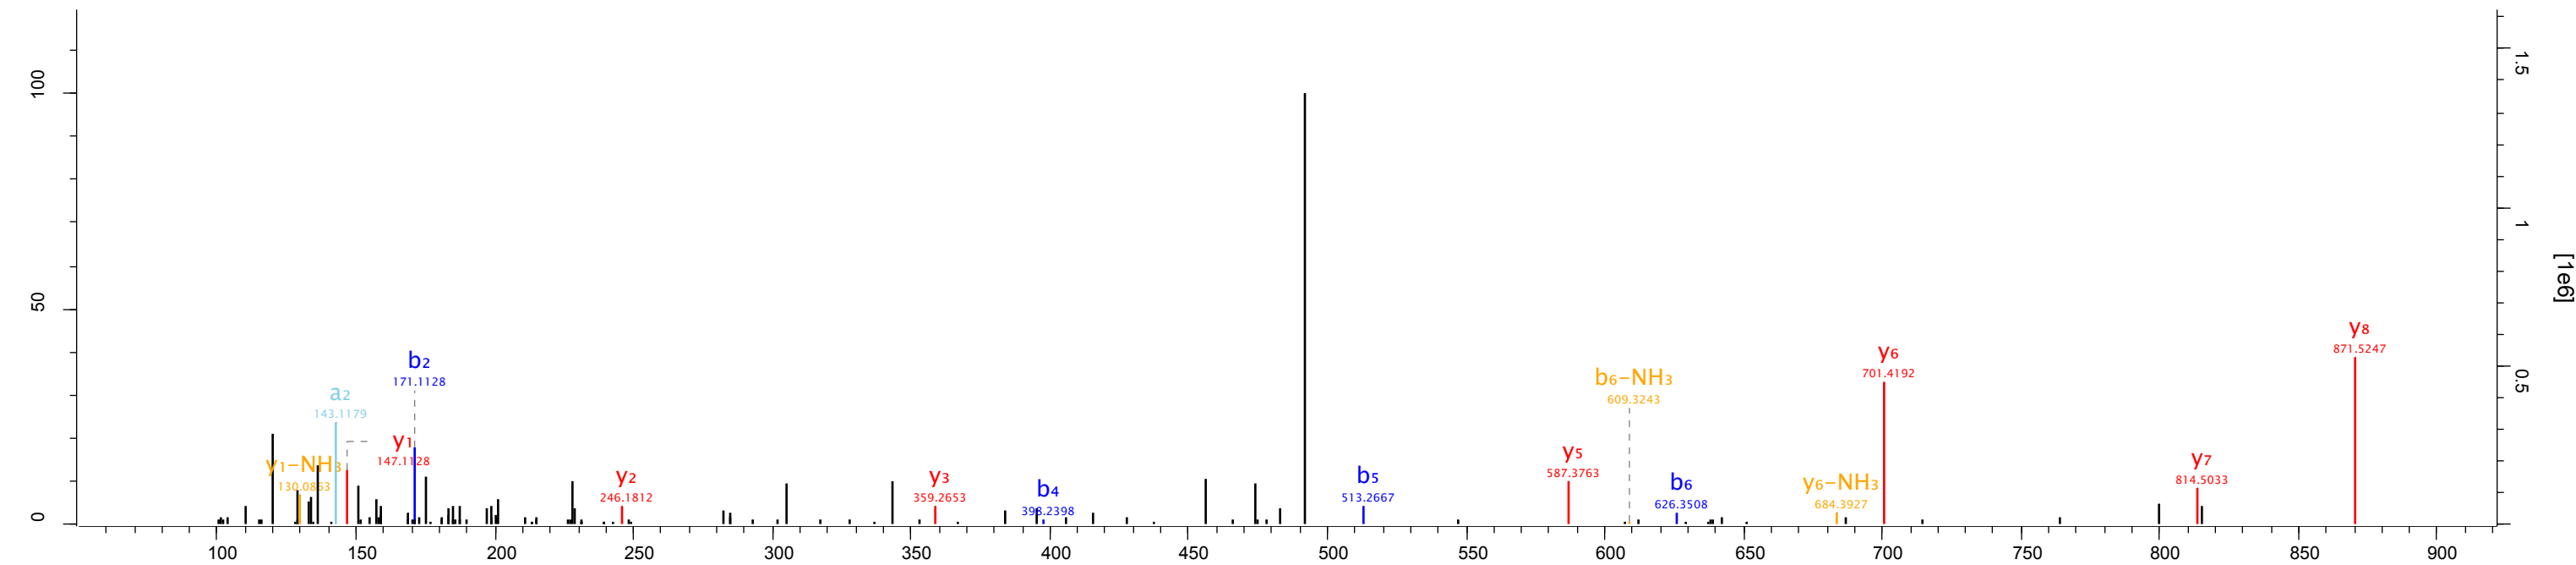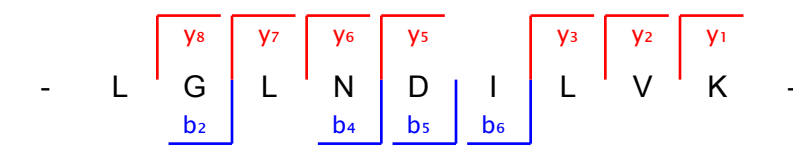

Raw file: 20150818\_A375SR-Proteome\_BR2  
 Scan: 78362 Method: FTMS; HCD Score: 138.91 m/z: 928.44 Gene names: MAPK11P1L

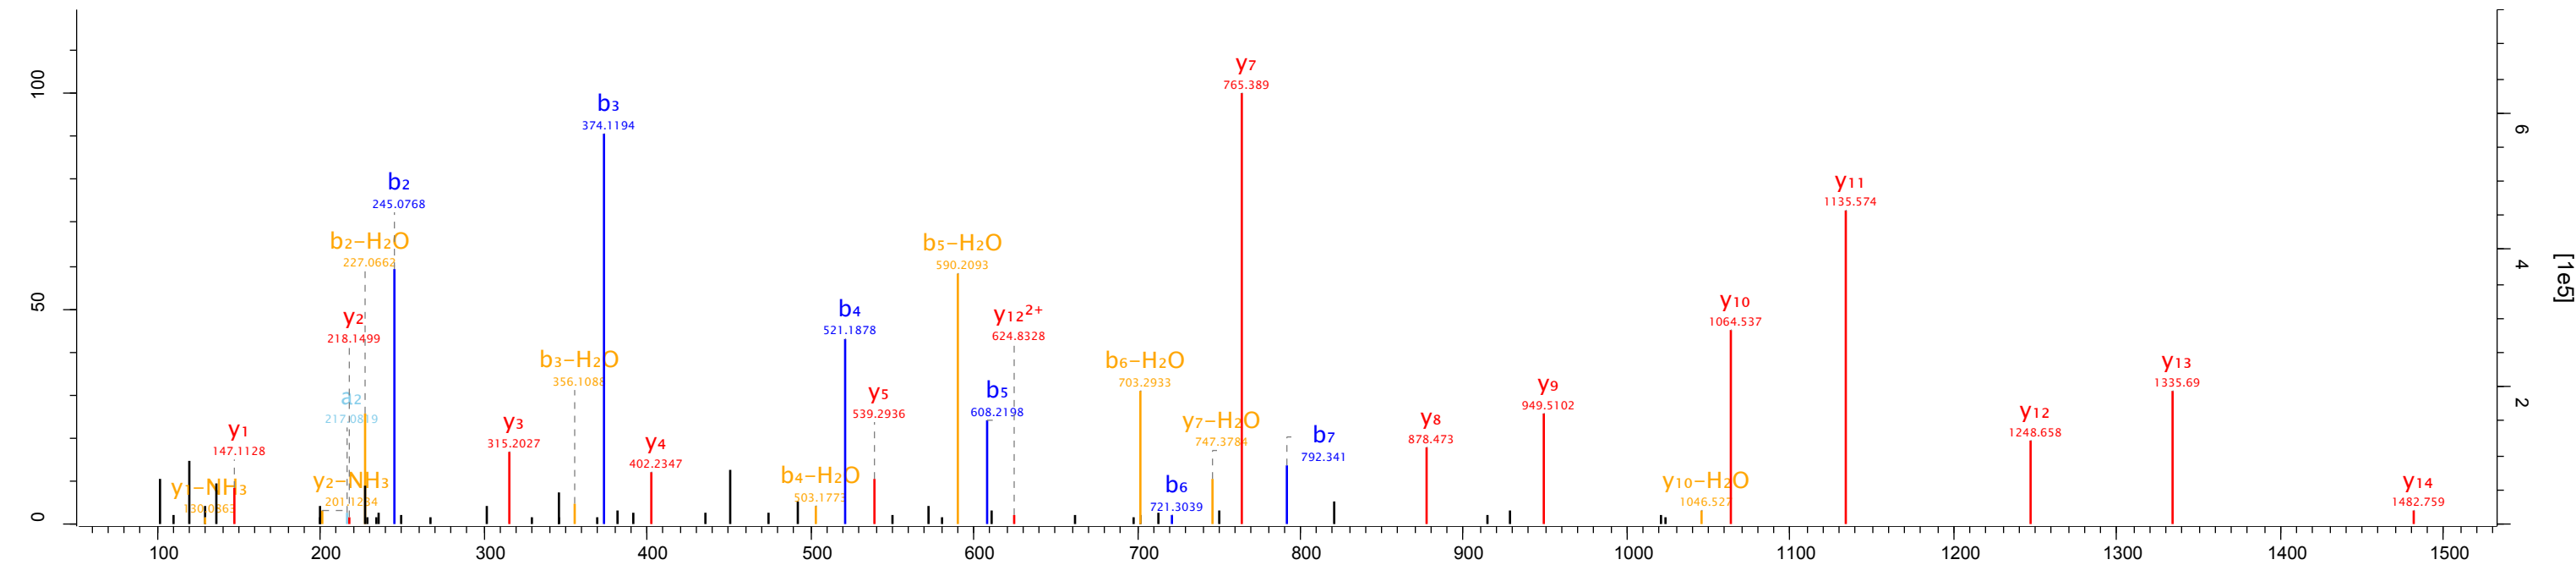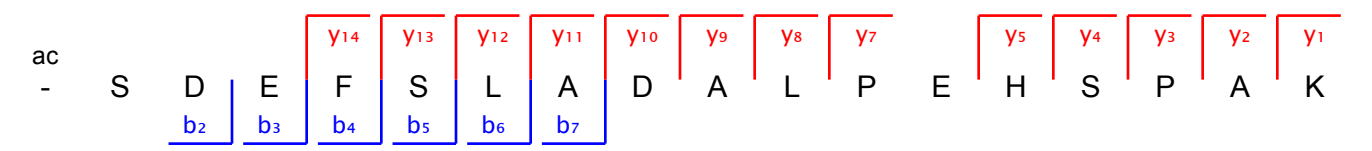



Raw file: 20150822\_A375SR\_Phospho\_BR3\_02  
 Scan: 5442 Method: FTMS; HCD Score: 44.39 m/z: 660.77 Gene names: GPSM3

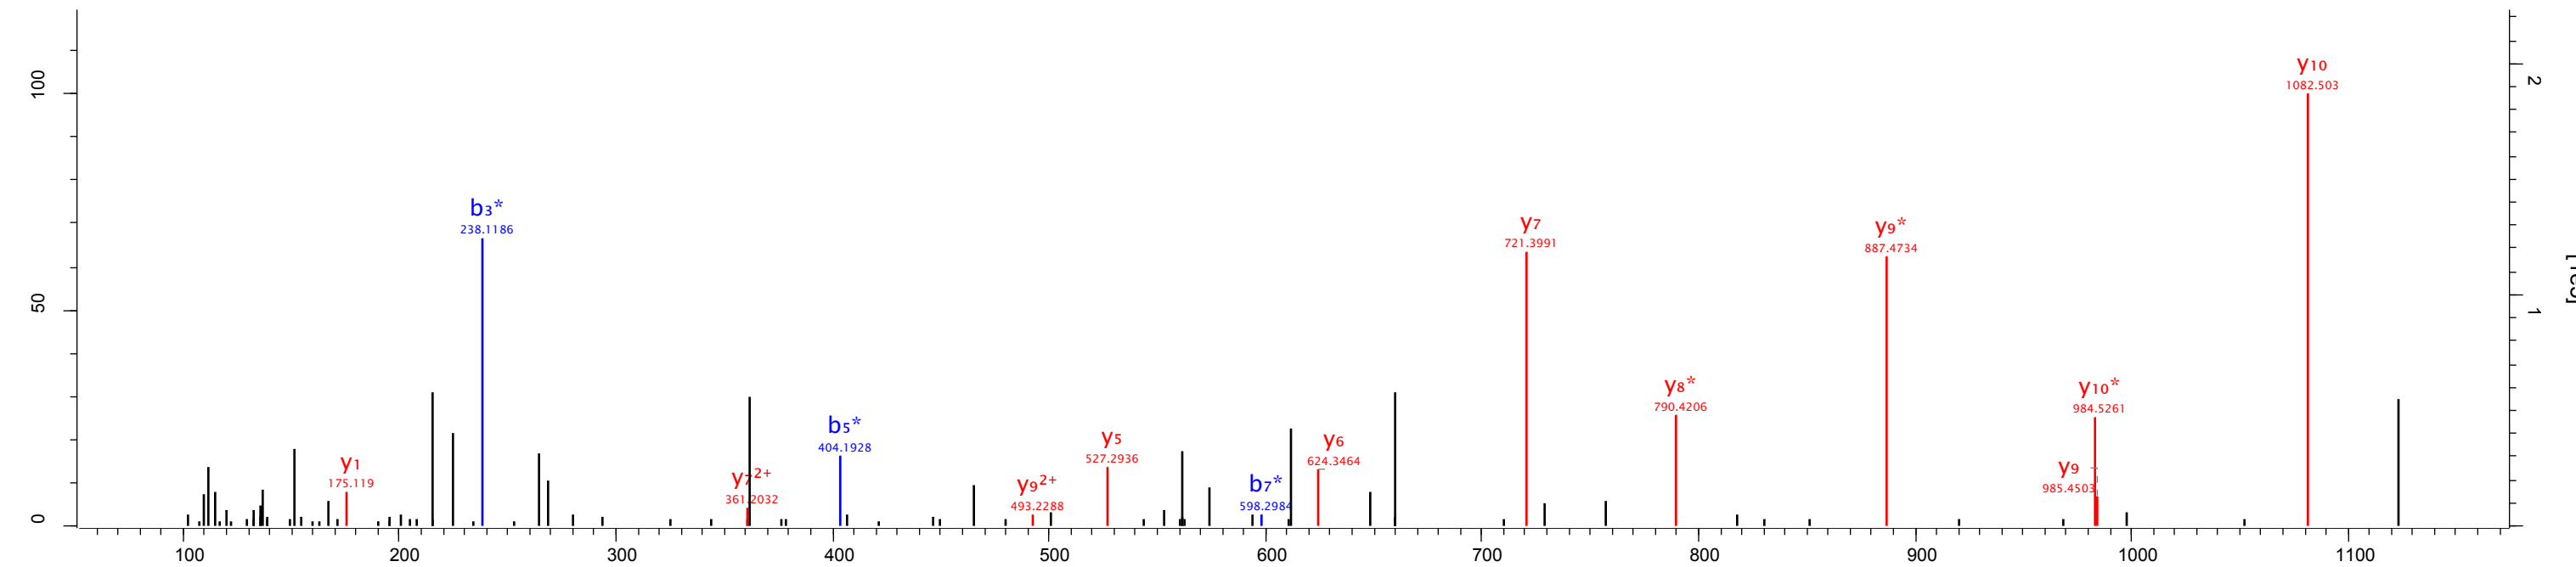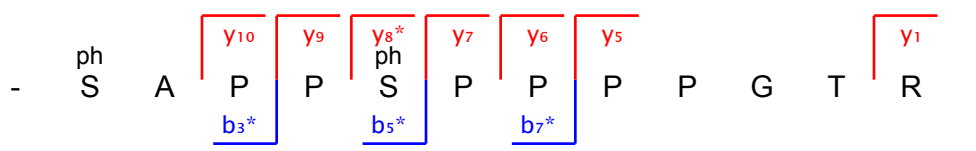

Raw file: 20150822\_A375SR\_Phospho\_BR3\_03  
 Scan: 8992 Method: FTMS; HCD Score: 77.28 m/z: 475.21 Gene names: GPR64

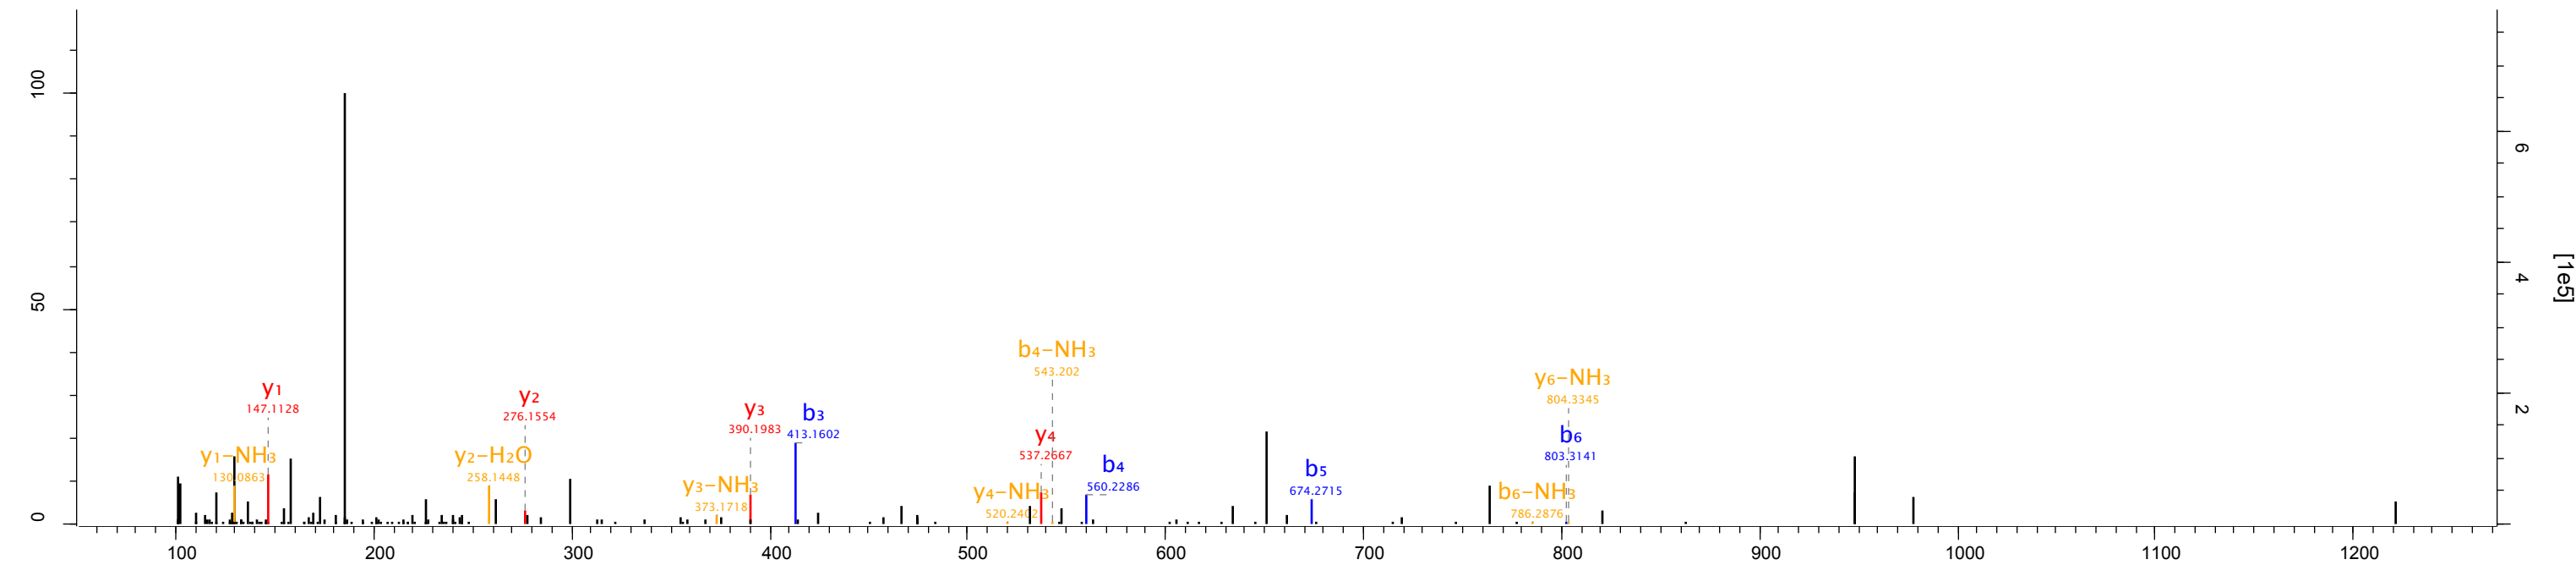

Raw file  
20150822\_A375SR\_Phospho\_BR3\_04

Scan 23872 Method FTMS; HCD Score 127.58 m/z 968.42 Gene names MAPK11P1L

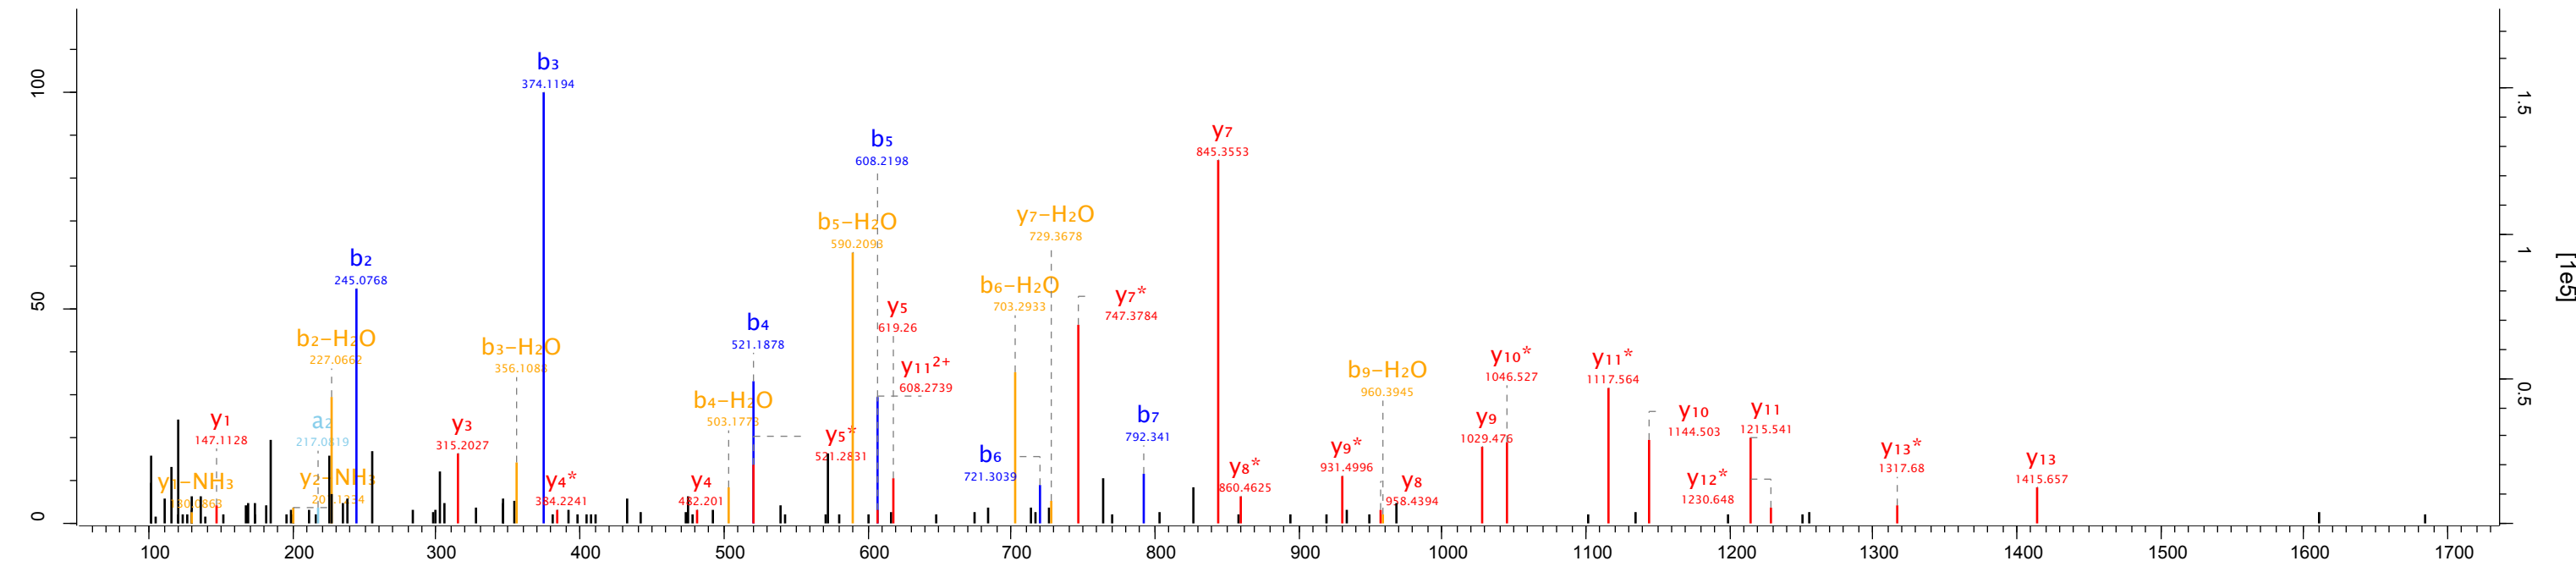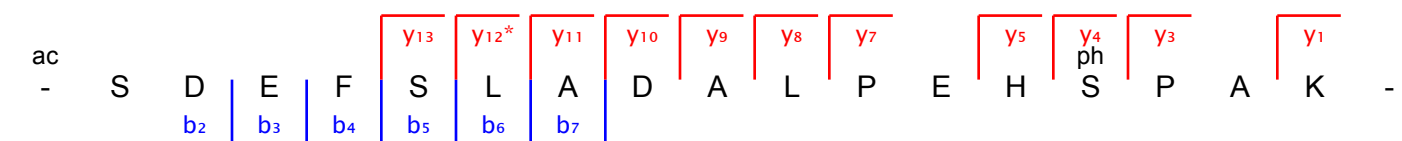

Raw file: 20150822\_A375SR\_Phospho\_BR3\_05  
 Scan: 23952 Method: FTMS; HCD Score: 164.94 m/z: 970.94 Gene names: MAPK11P1L

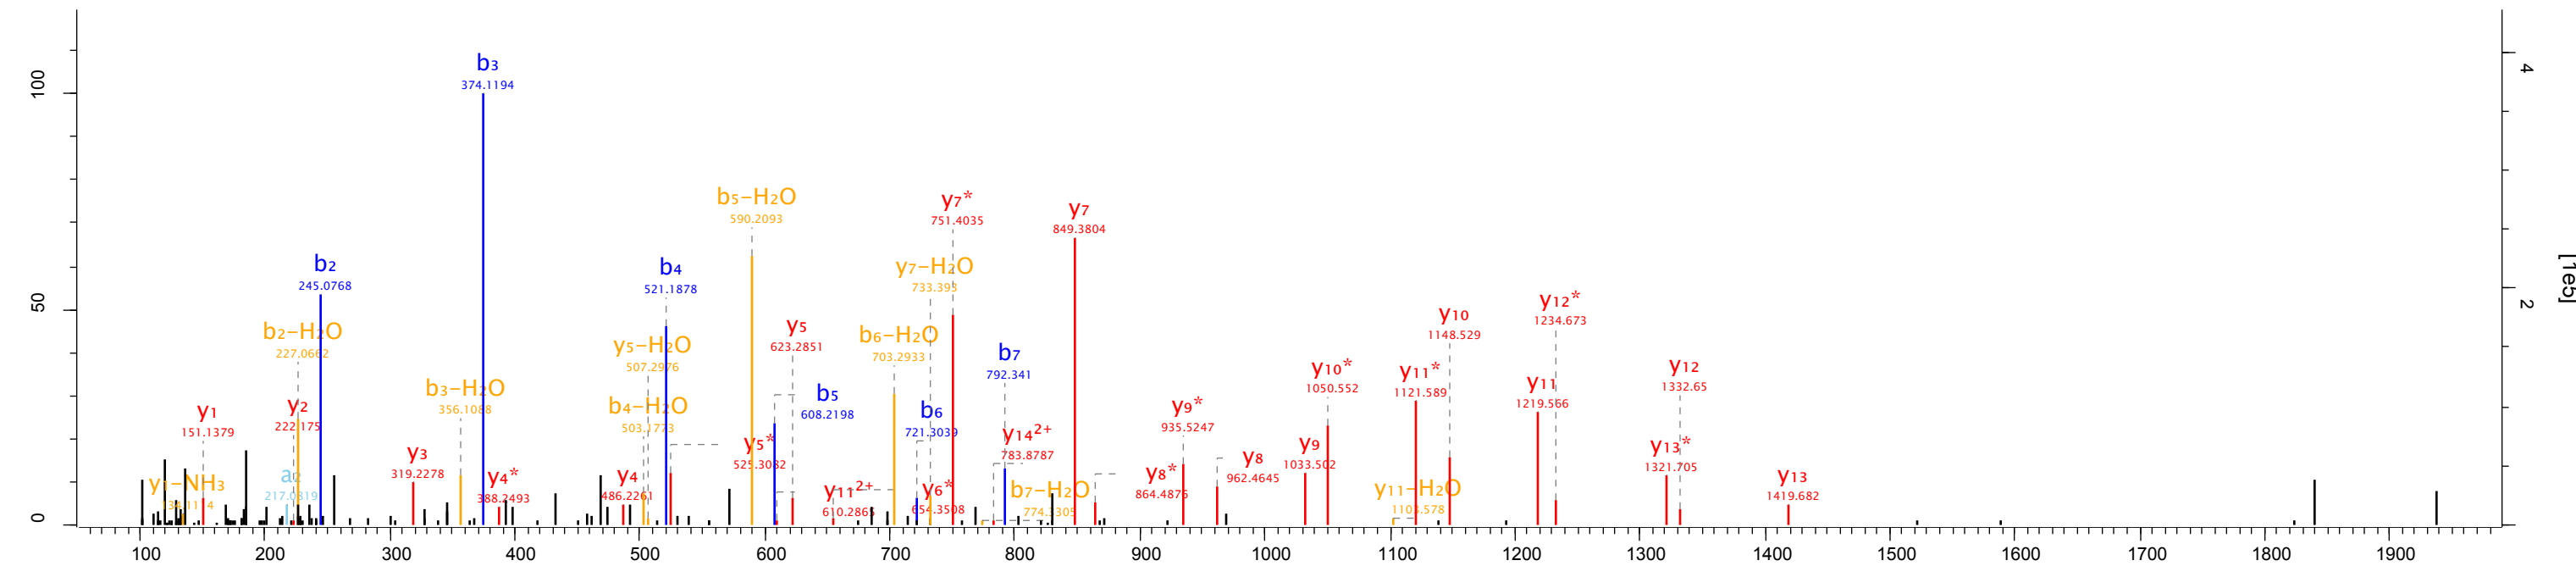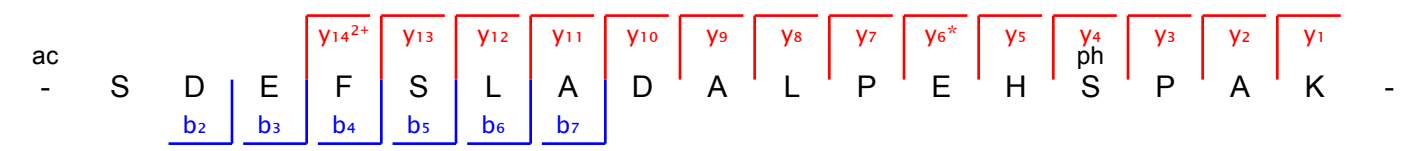

Raw file: 20150822\_A375SR\_Phospho\_BR3\_07  
 Scan: 10152 Method: FTMS; HCD Score: 83.75 m/z: 477.23 Gene names: GPR64

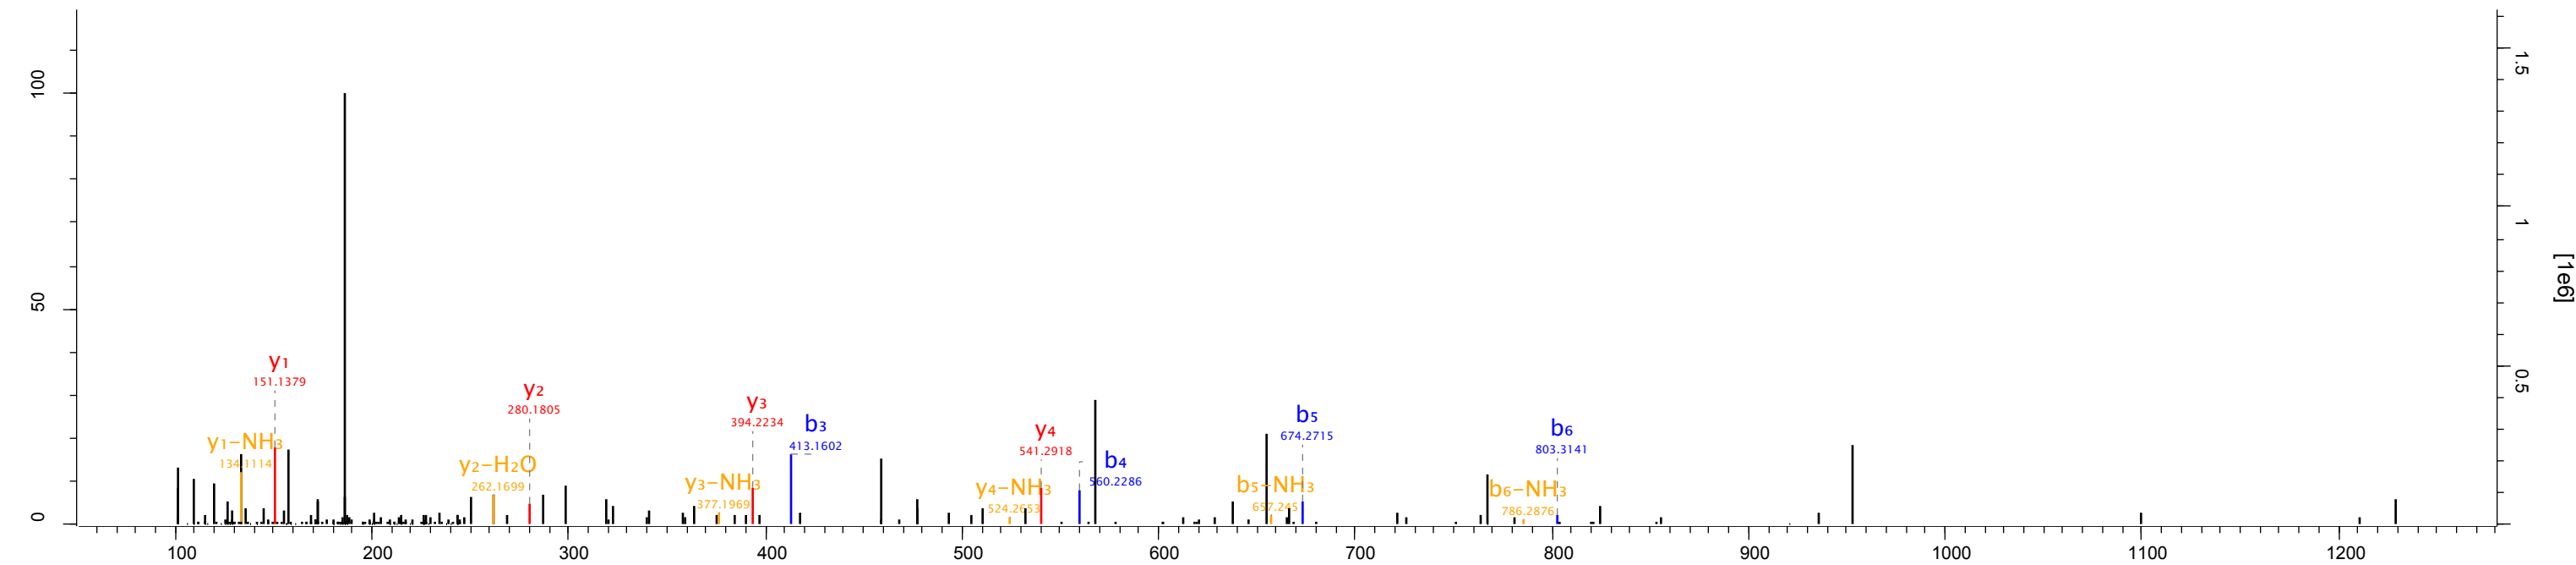

Raw file 20150822\_A375SR\_Phospho\_BR3\_07 Scan 11352 Method FTMS; HCD Score 56.75 m/z 691.34 Gene names ELK3

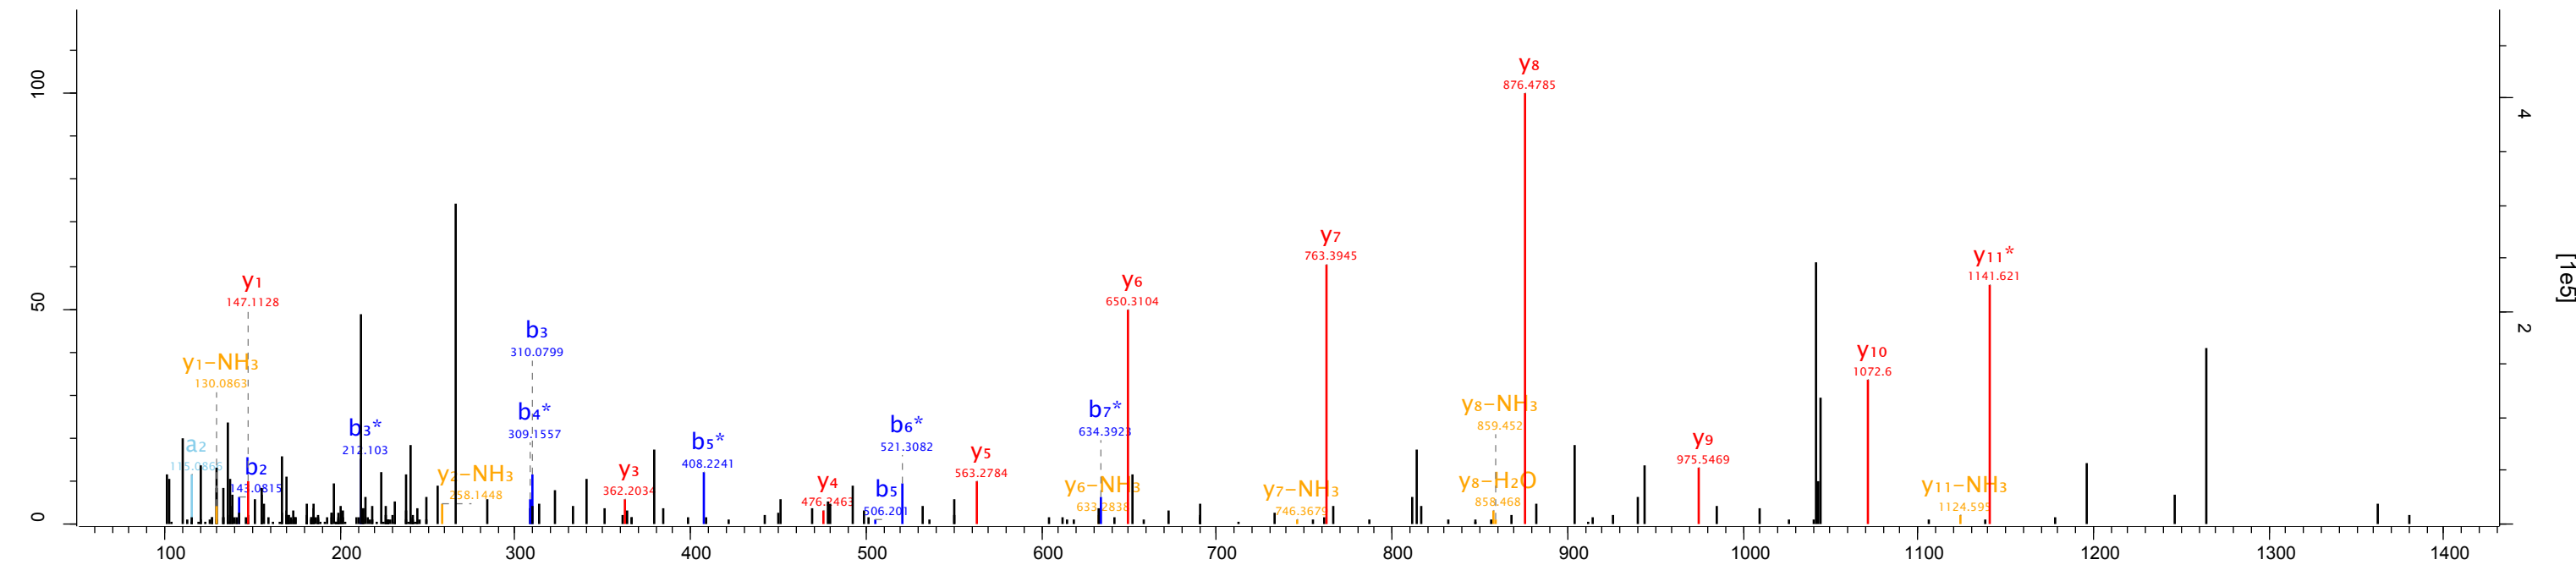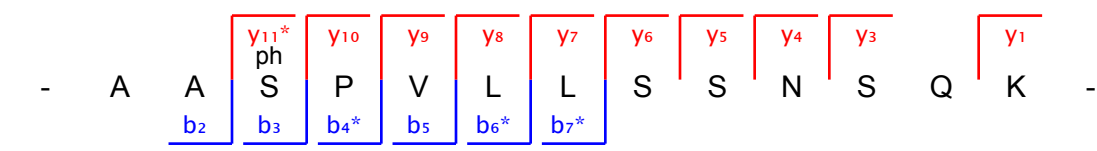

Raw file: 20150822\_A375SR\_Phospho\_BR3\_07  
 Scan: 24212 Method: FTMS; HCD Score: 102.45 m/z: 970.44 Gene names: MAPK11P1L

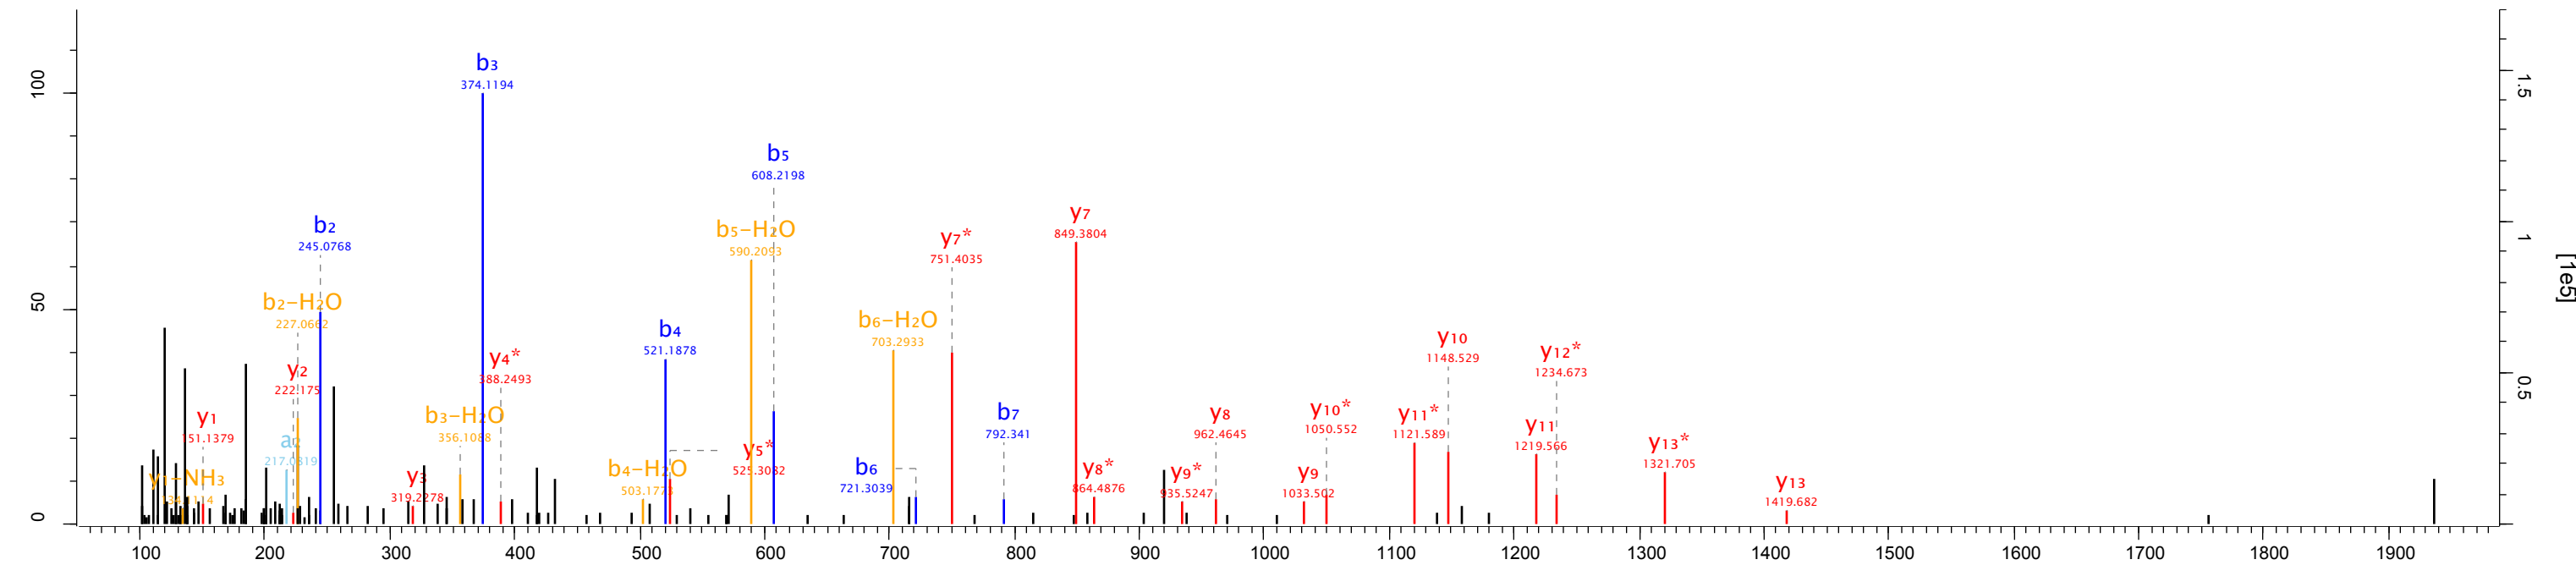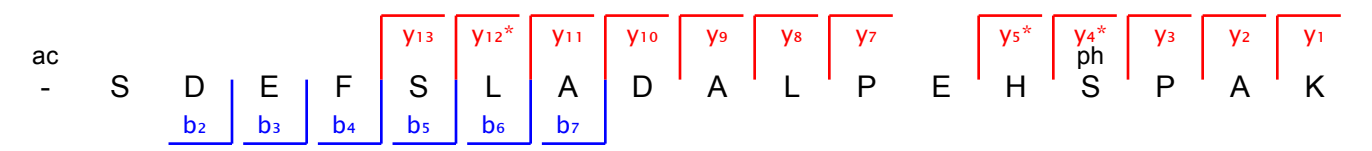

Raw file Scan Method Score m/z Gene names  
 20150822\_A375SR\_Phospho\_BR3\_08 10572 FTMS; HCD 107.59 477.23 GPR64

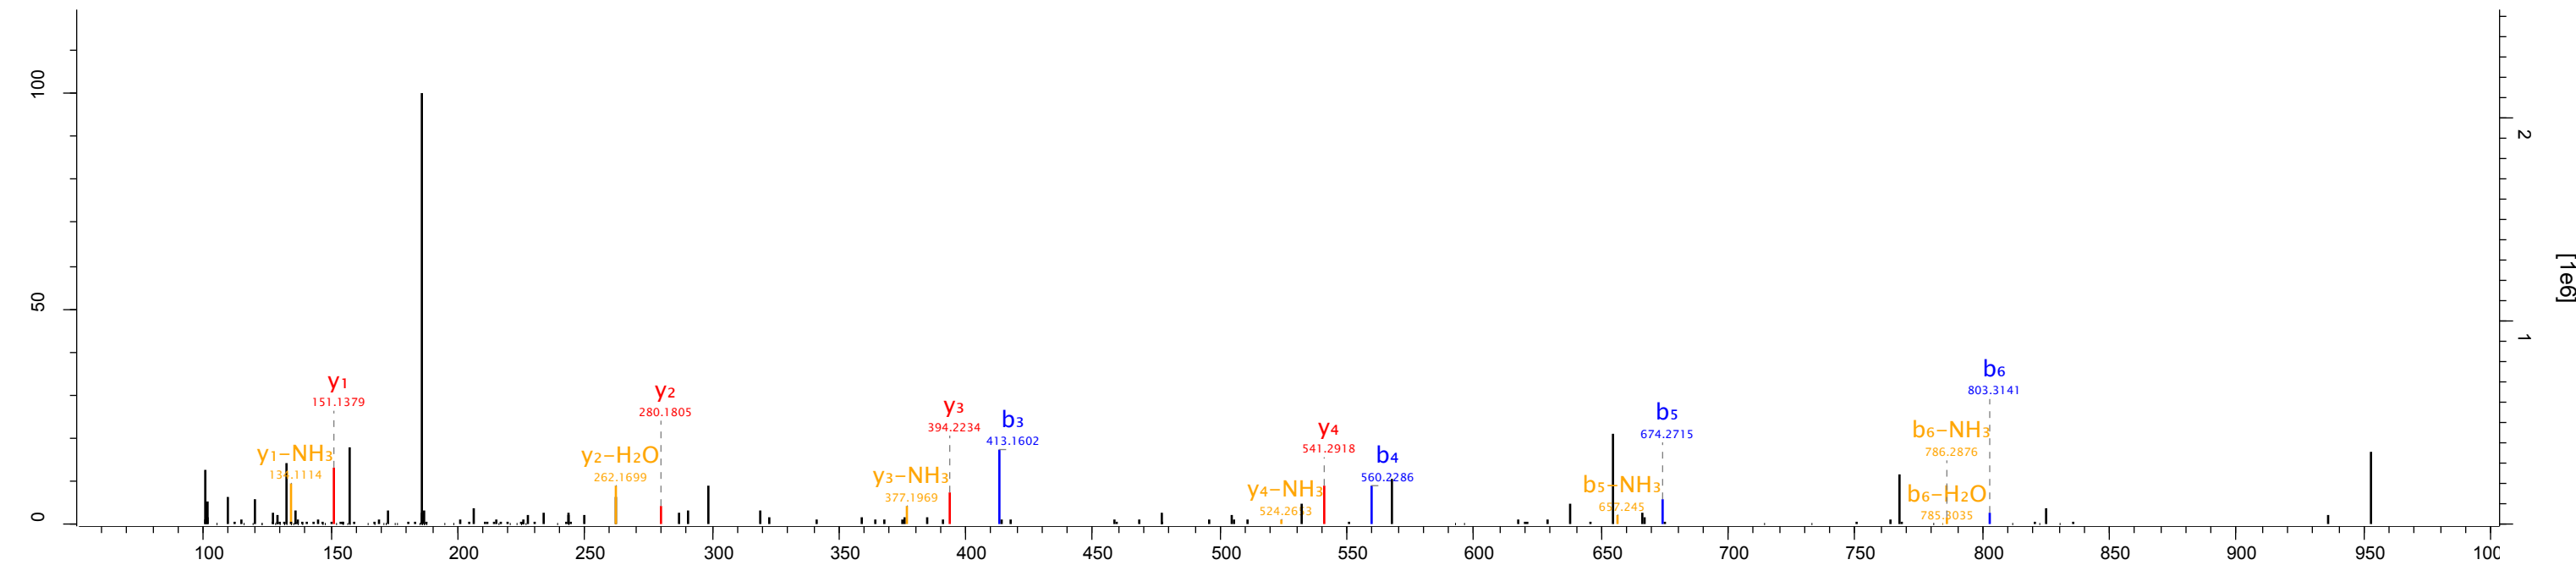



Raw file 20150822\_A375SR\_Phospho\_BR3\_08 Scan 18262 Method FTMS; HCD Score 45.08 m/z 861.37

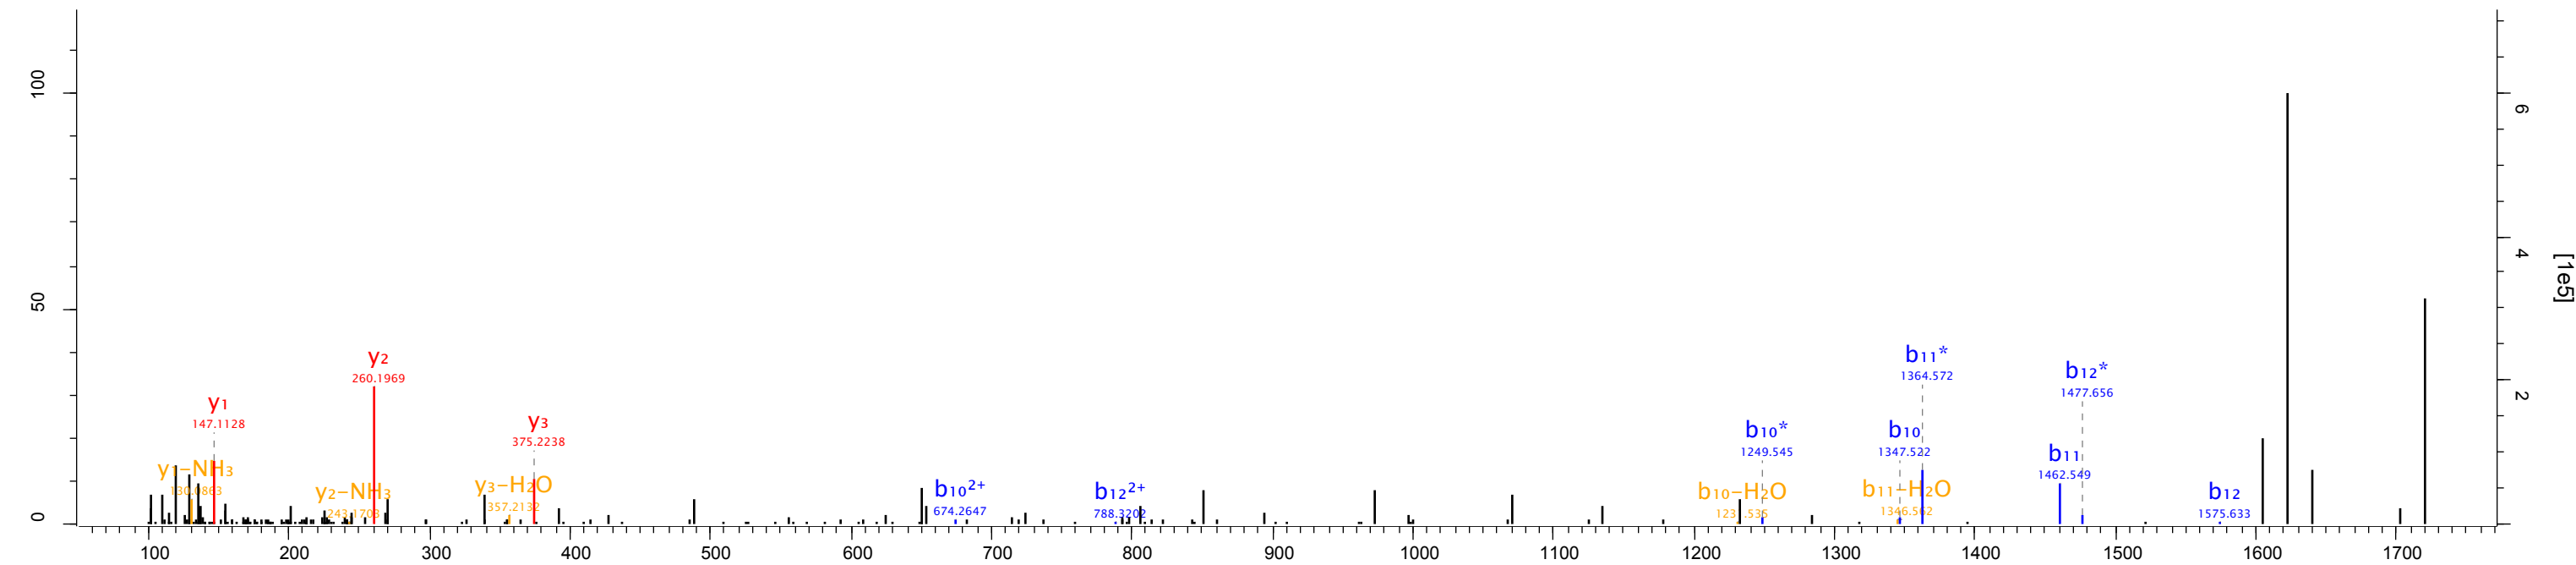

Raw file 20150822\_A375SR\_Phospho\_BR3\_09 Scan 21402 Method FTMS; HCD Score 48.05 m/z 781.08 Gene names ZNF579

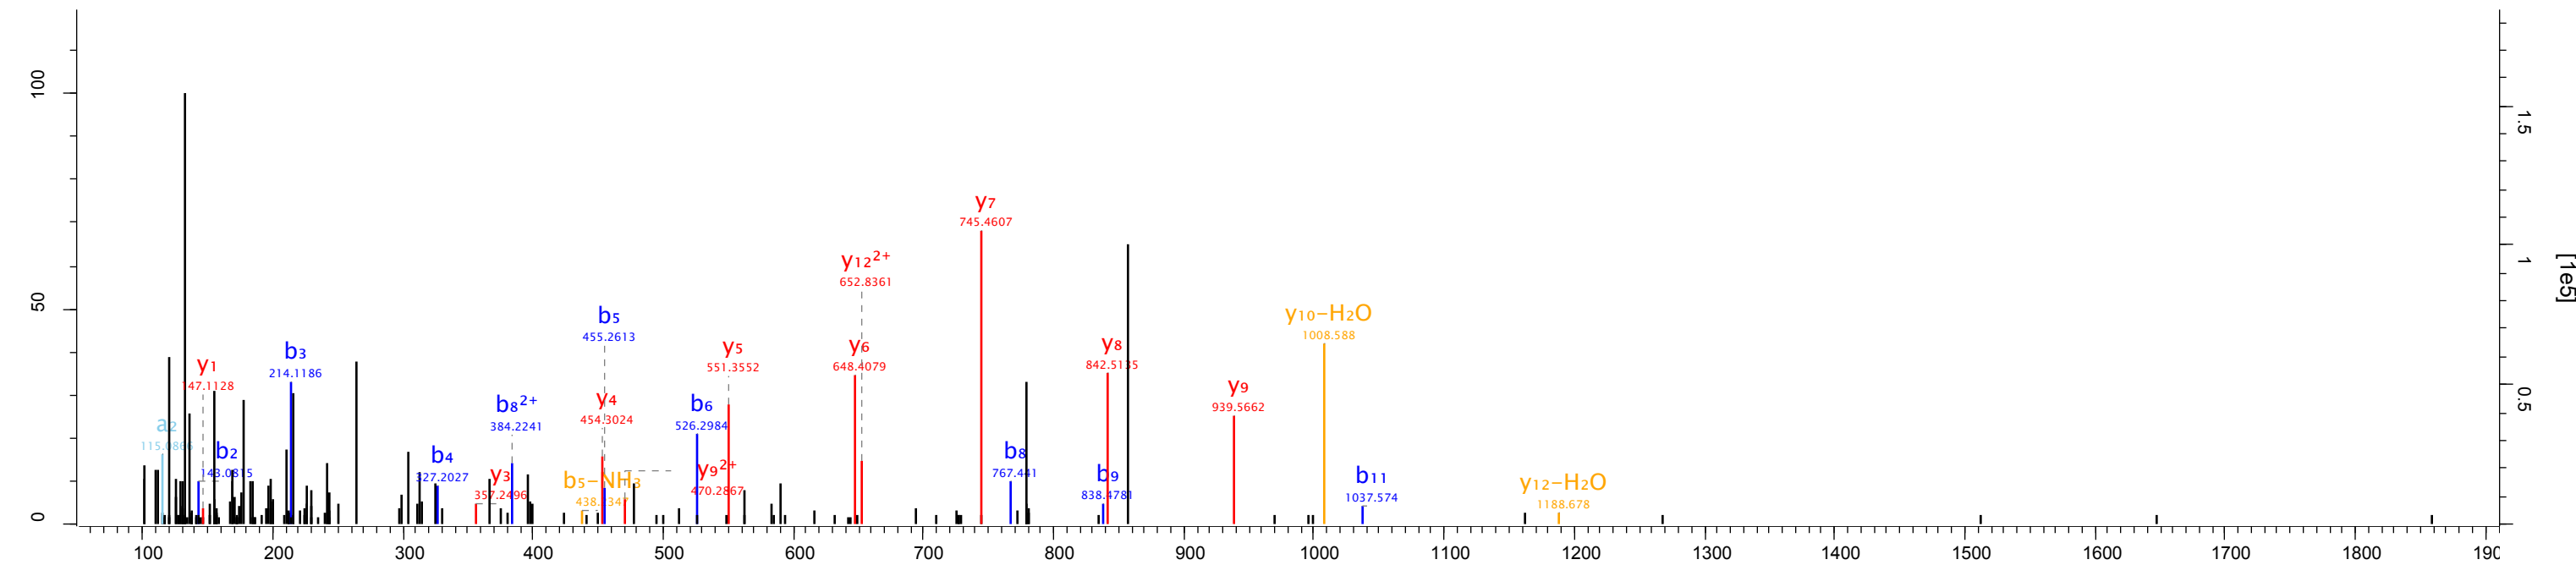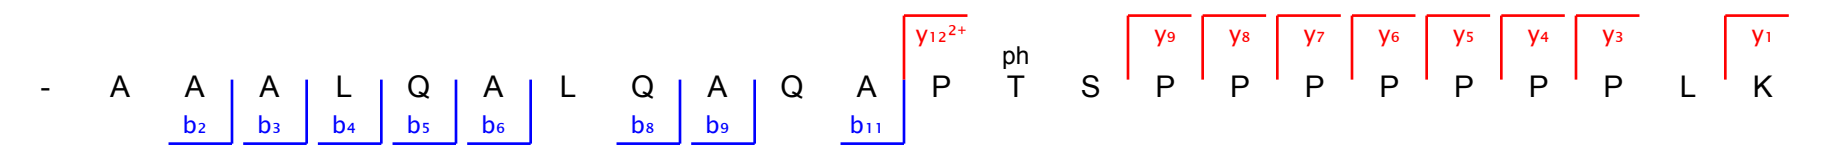

Raw file: 20150822\_A375SR\_Phospho\_BR3\_10  
 Scan: 24172 Method: FTMS; HCD Score: 63.61 m/z: 970.48 Gene names: MAPK11P1L

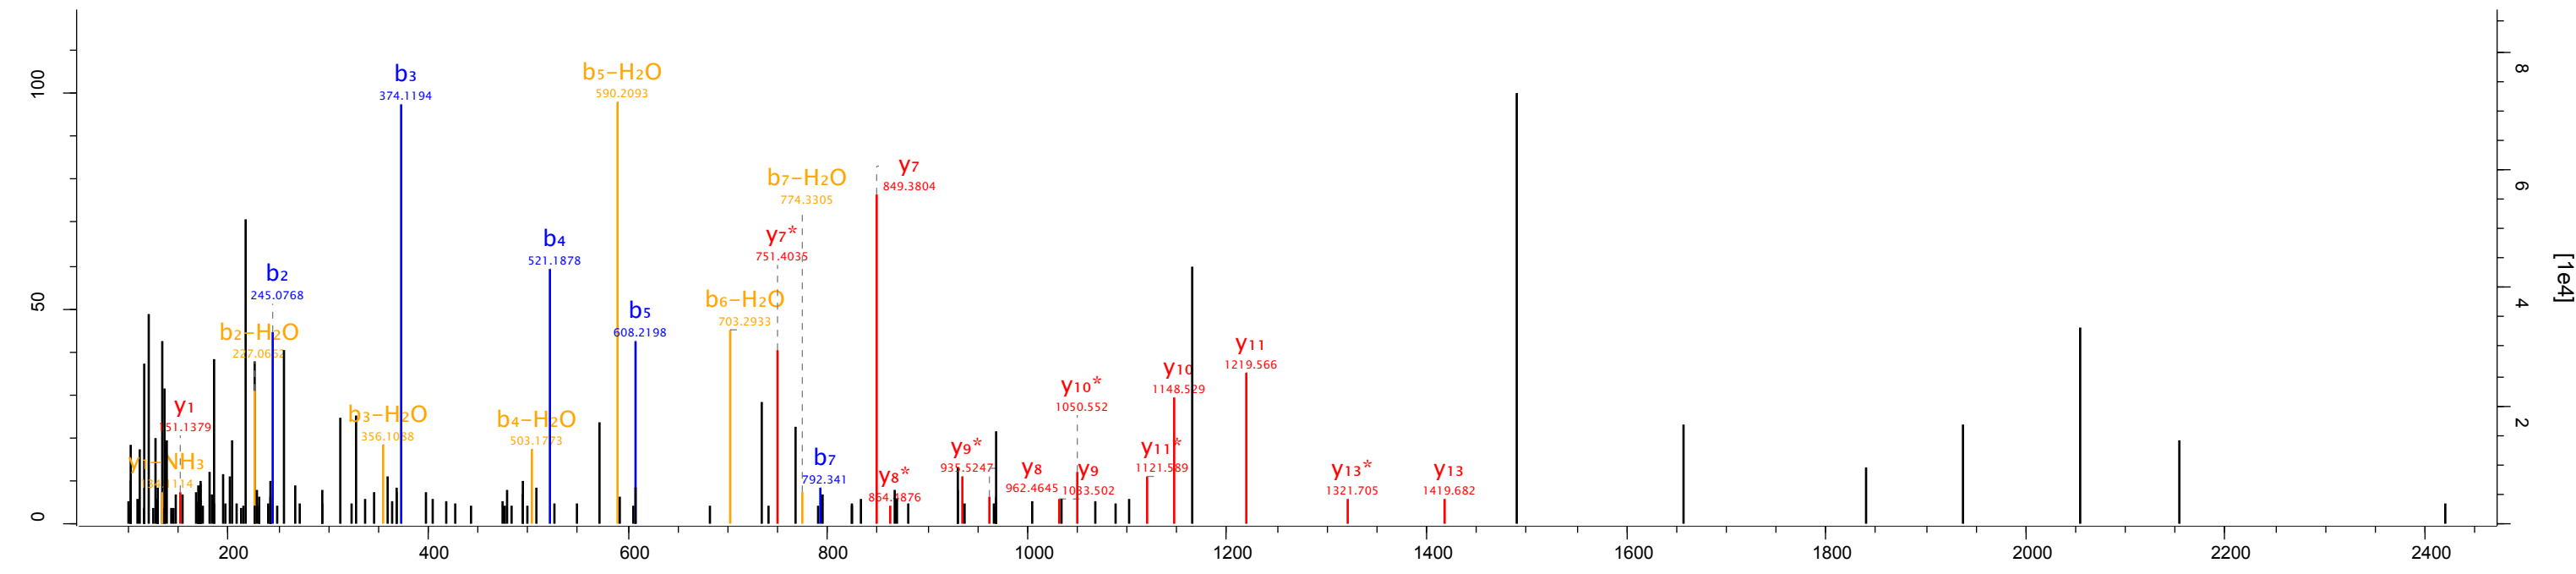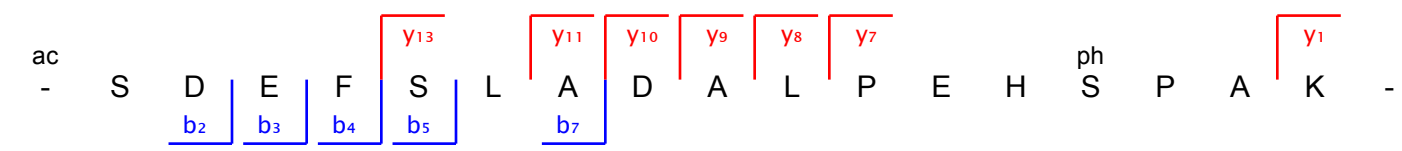

Raw file: 20150822\_A375SR-Proteome\_BR3  
 Scan: 71612 Method: FTMS; HCD Score: 14.11 m/z: 639.67 Gene names: ATP6V0C

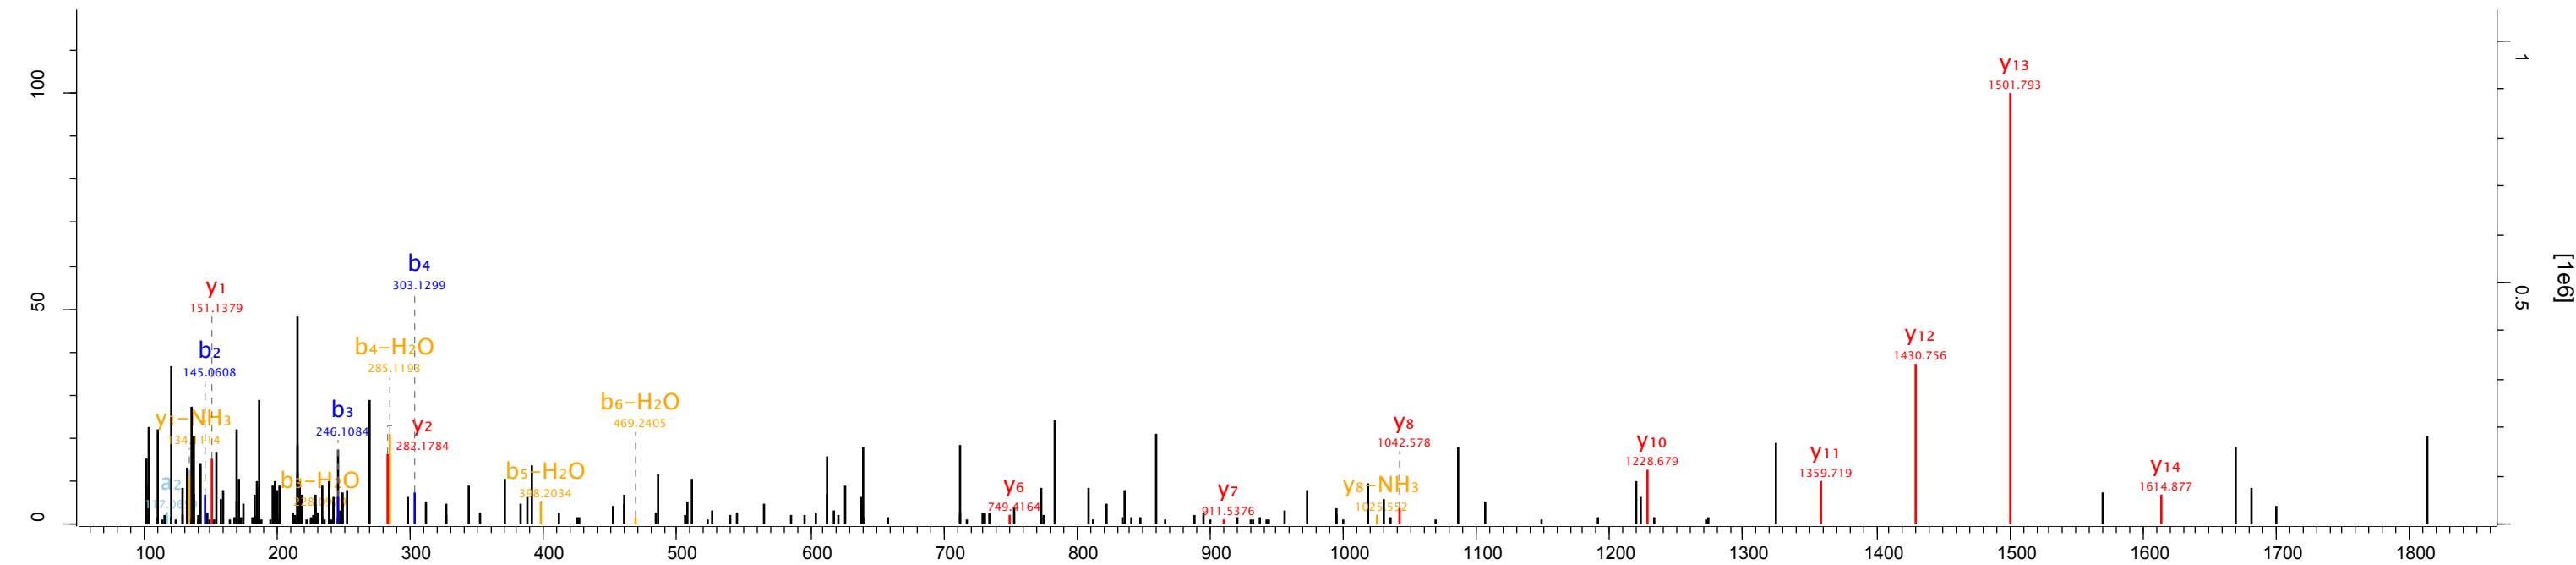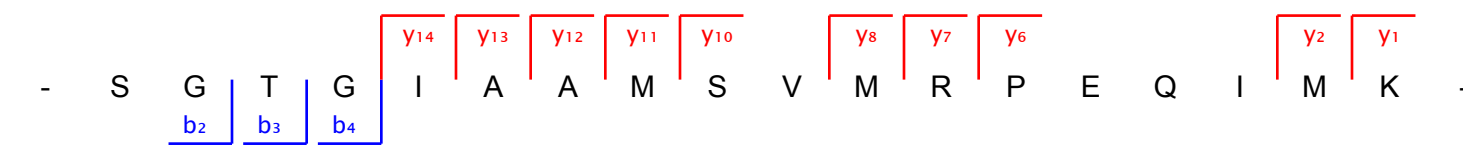

Raw file: 20150822\_A375SR-Proteome\_BR3  
 Scan: 75552 Method: FTMS; HCD Score: 77.66 m/z: 492.81 Gene names: STON2

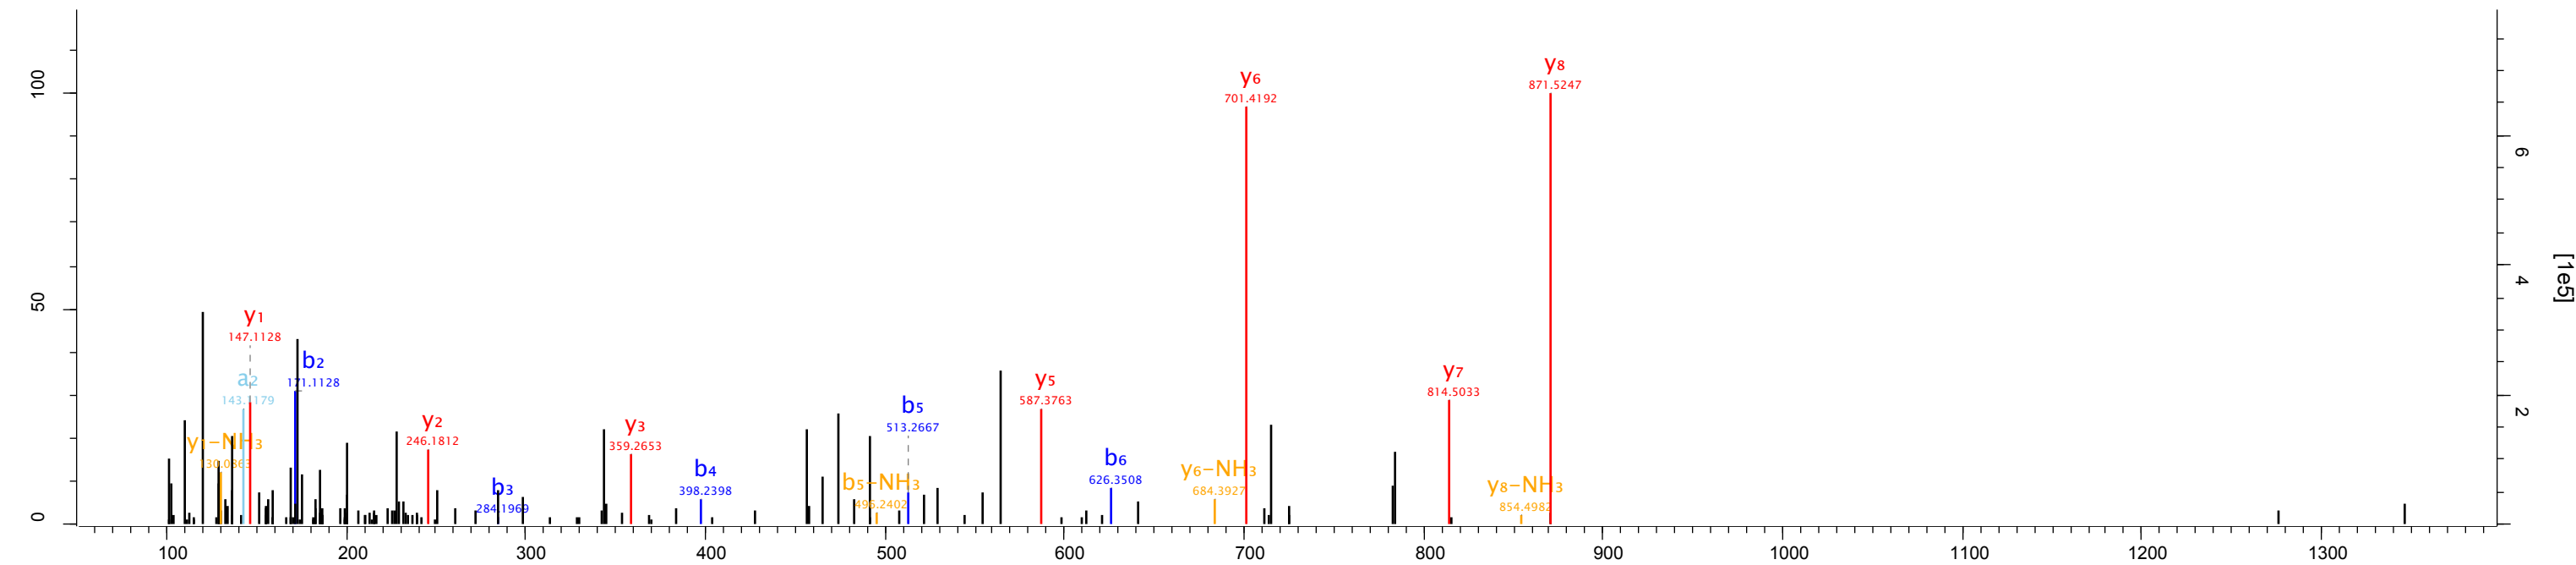

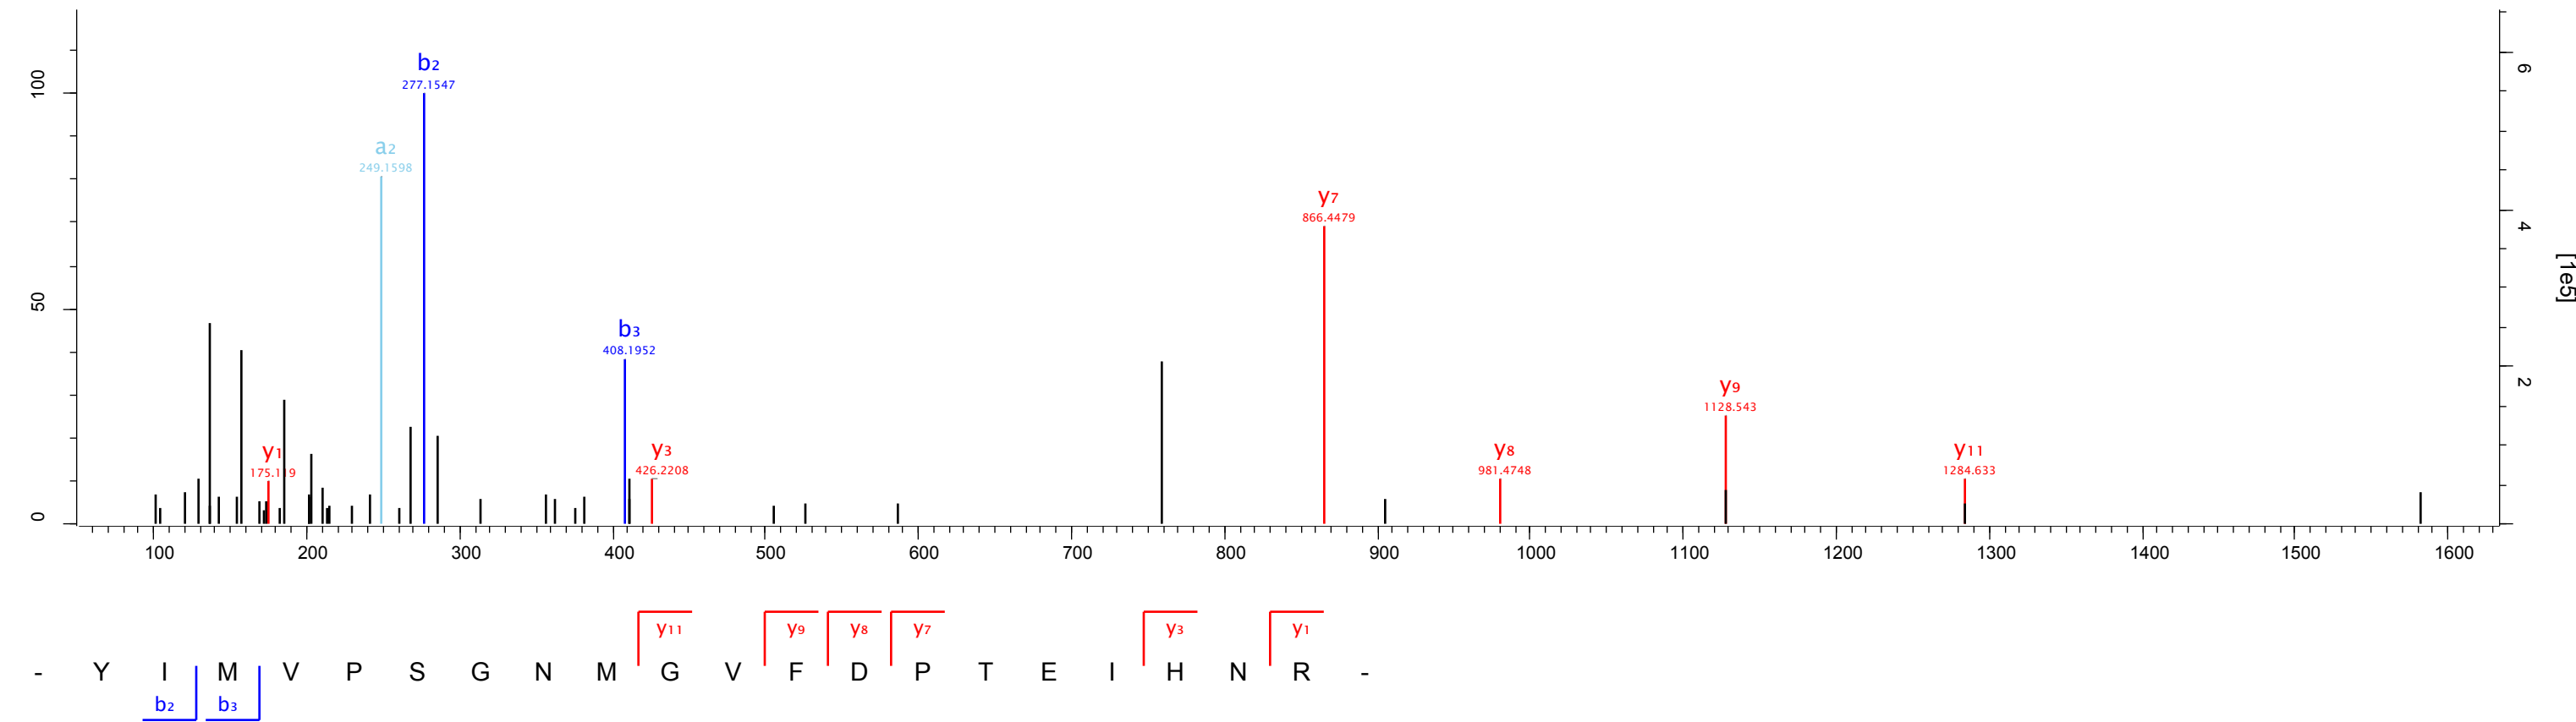

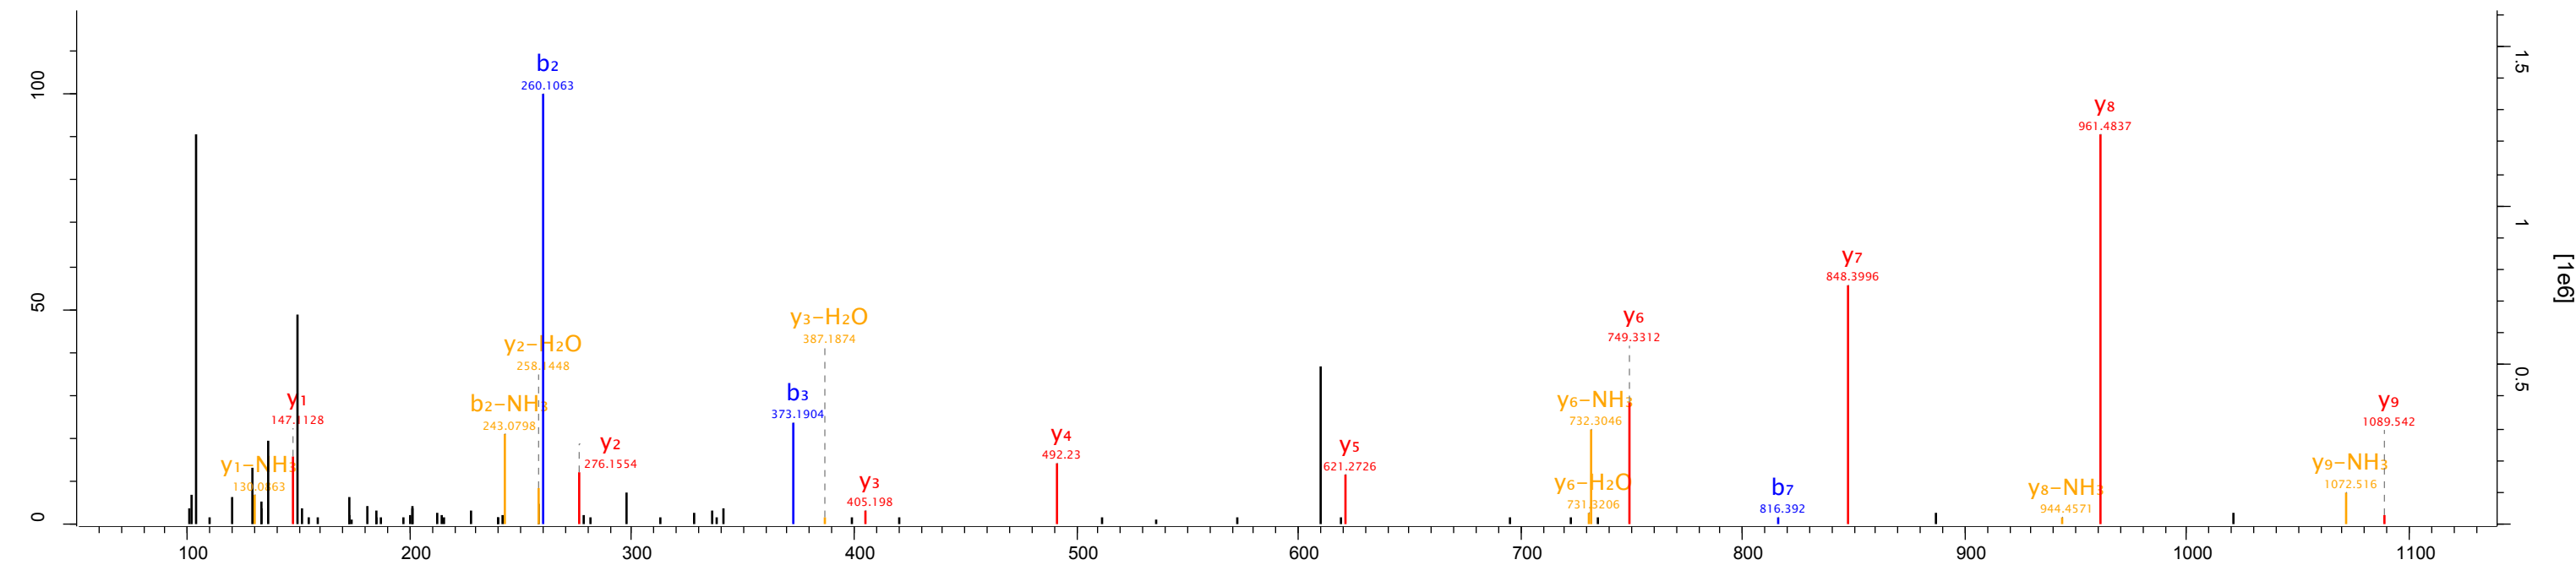

- M Q L V Q E S E E K -

b2 b3 b7

Raw file  
20180707\_MaS\_A375SR\_LM\_proteome\_06

Scan 26402 Method FTMS; HCD Score 12.22 m/z 935.5 Gene names C1orf85

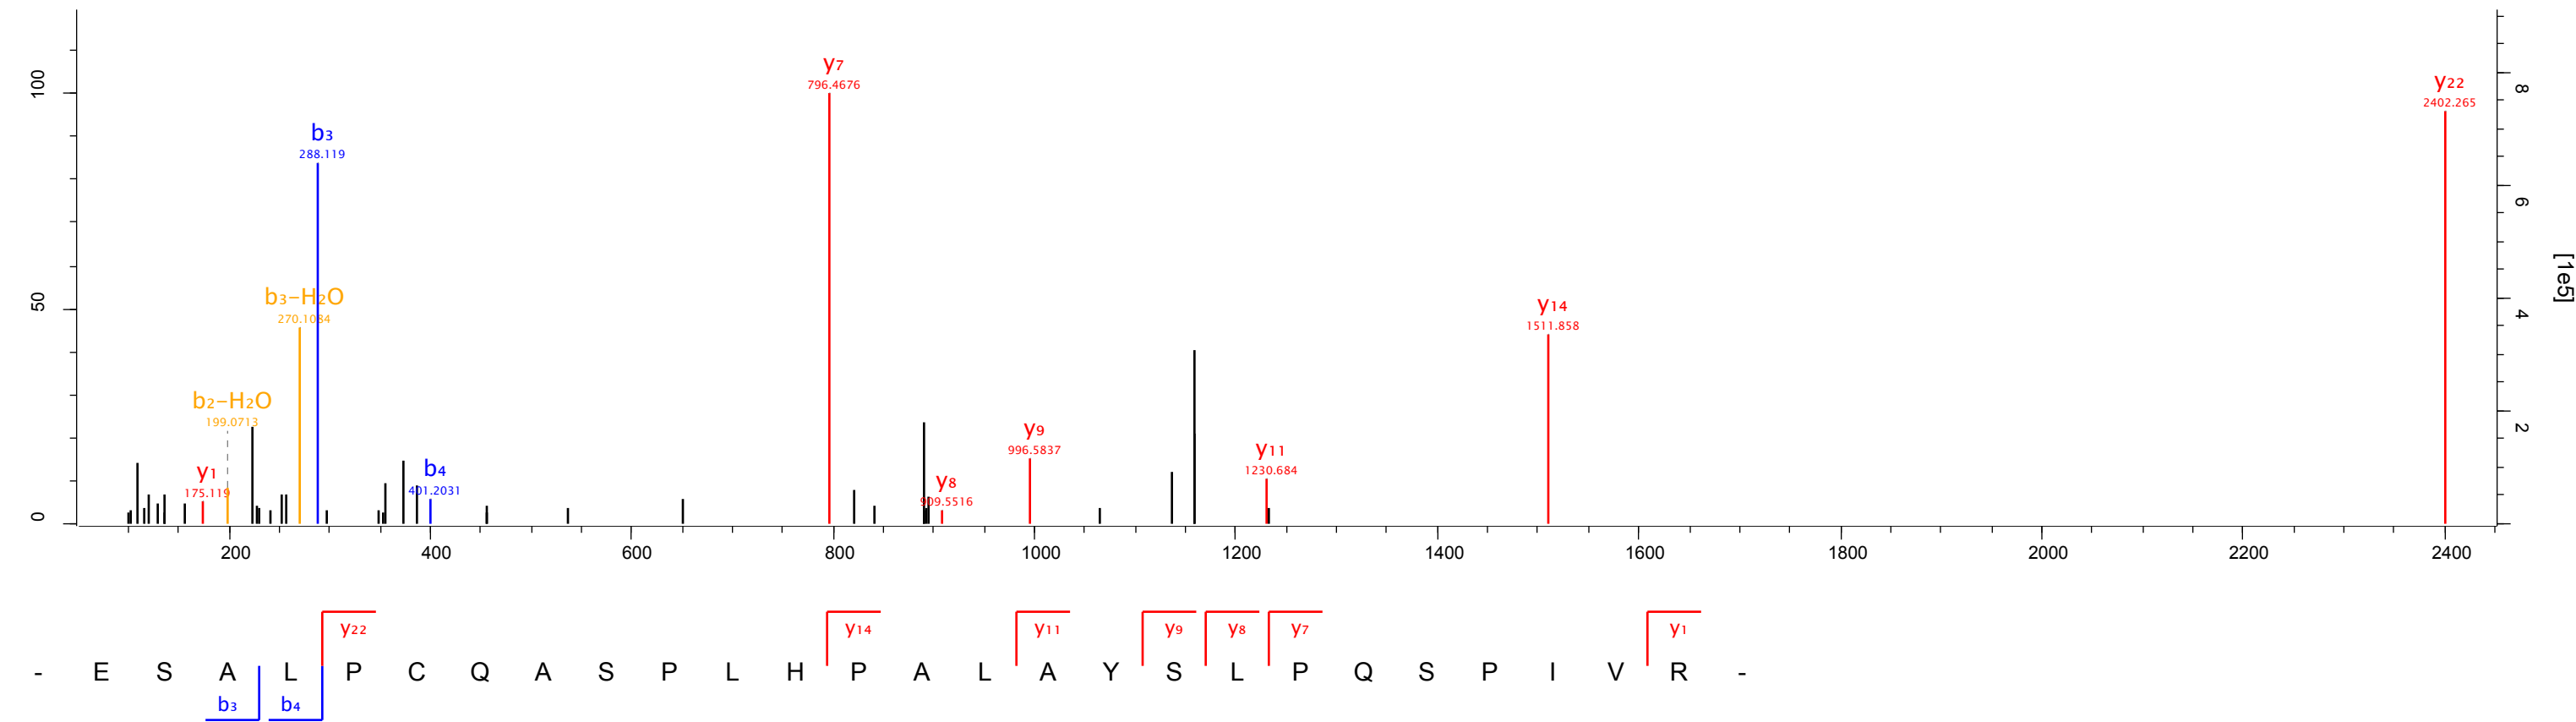



Raw file 20180707\_MaS\_A375SR\_LM\_proteome\_06 Scan 6822 Method FTMS; HCD Score 42.32 m/z 716.8 Gene names LEPROT

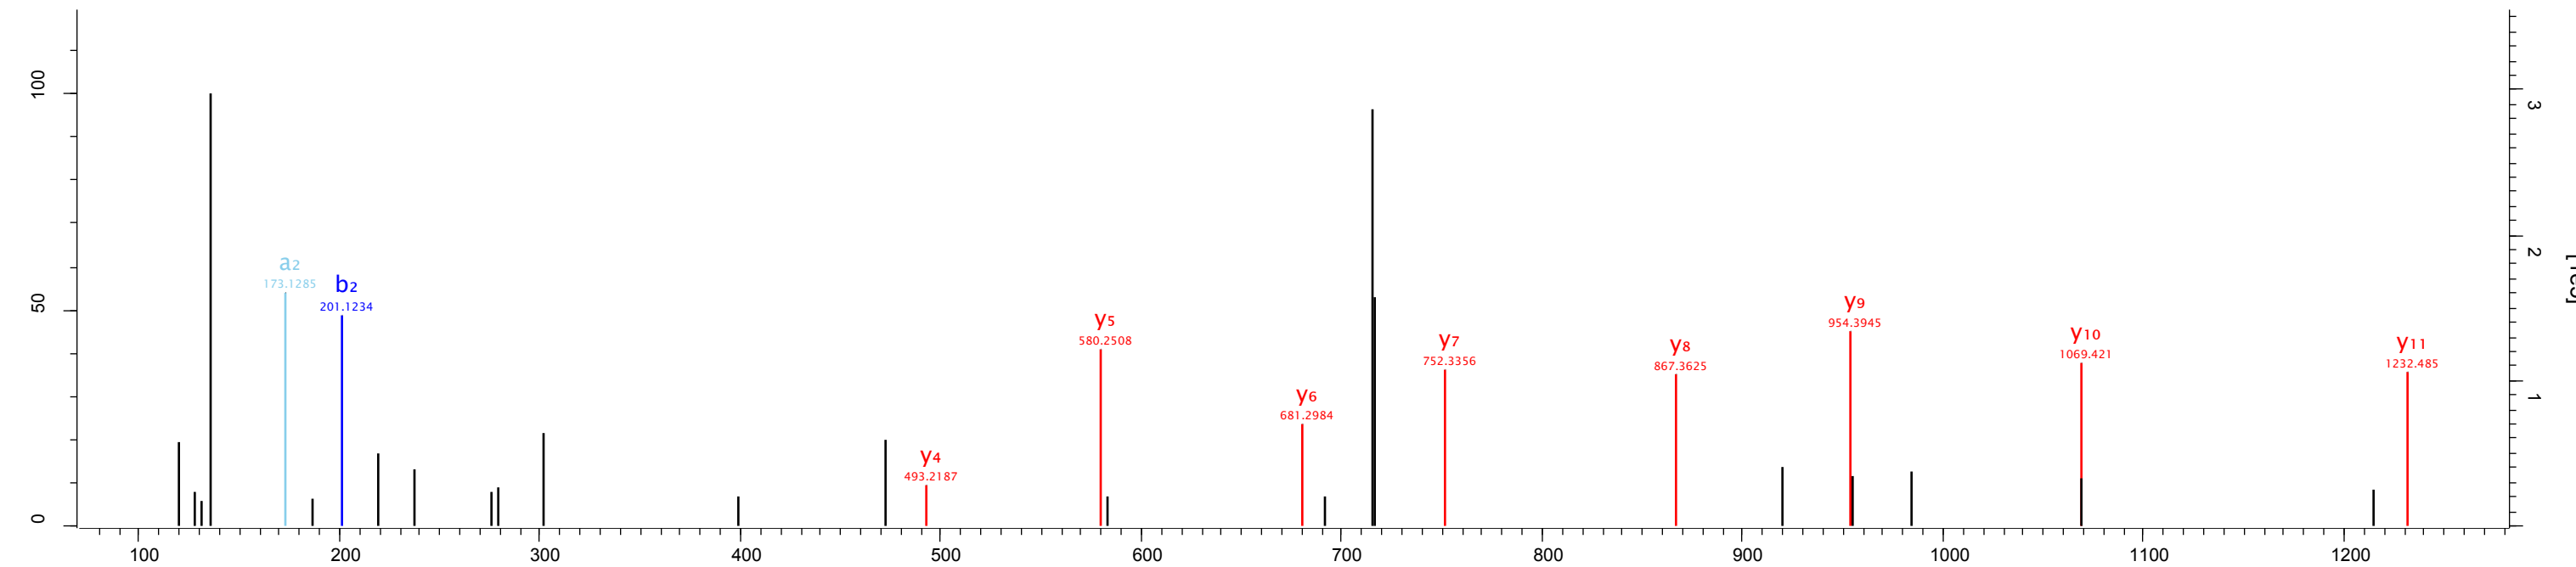

- V T Y D S D A T S S A C R -

Fragmentation diagram showing b<sub>2</sub> (blue) and y<sub>4</sub>-y<sub>11</sub> (red) ions. The b<sub>2</sub> ion is formed from the first two residues (V, T). The y<sub>4</sub>-y<sub>11</sub> ions are formed from the last eight residues (Y, D, S, D, A, T, S, S).

Raw file  
20180707\_MaS\_A375SR\_LM\_proteome\_07

Scan Method Score m/z Gene names  
26382 FTMS; HCD 28.09 935.16 C1orf85

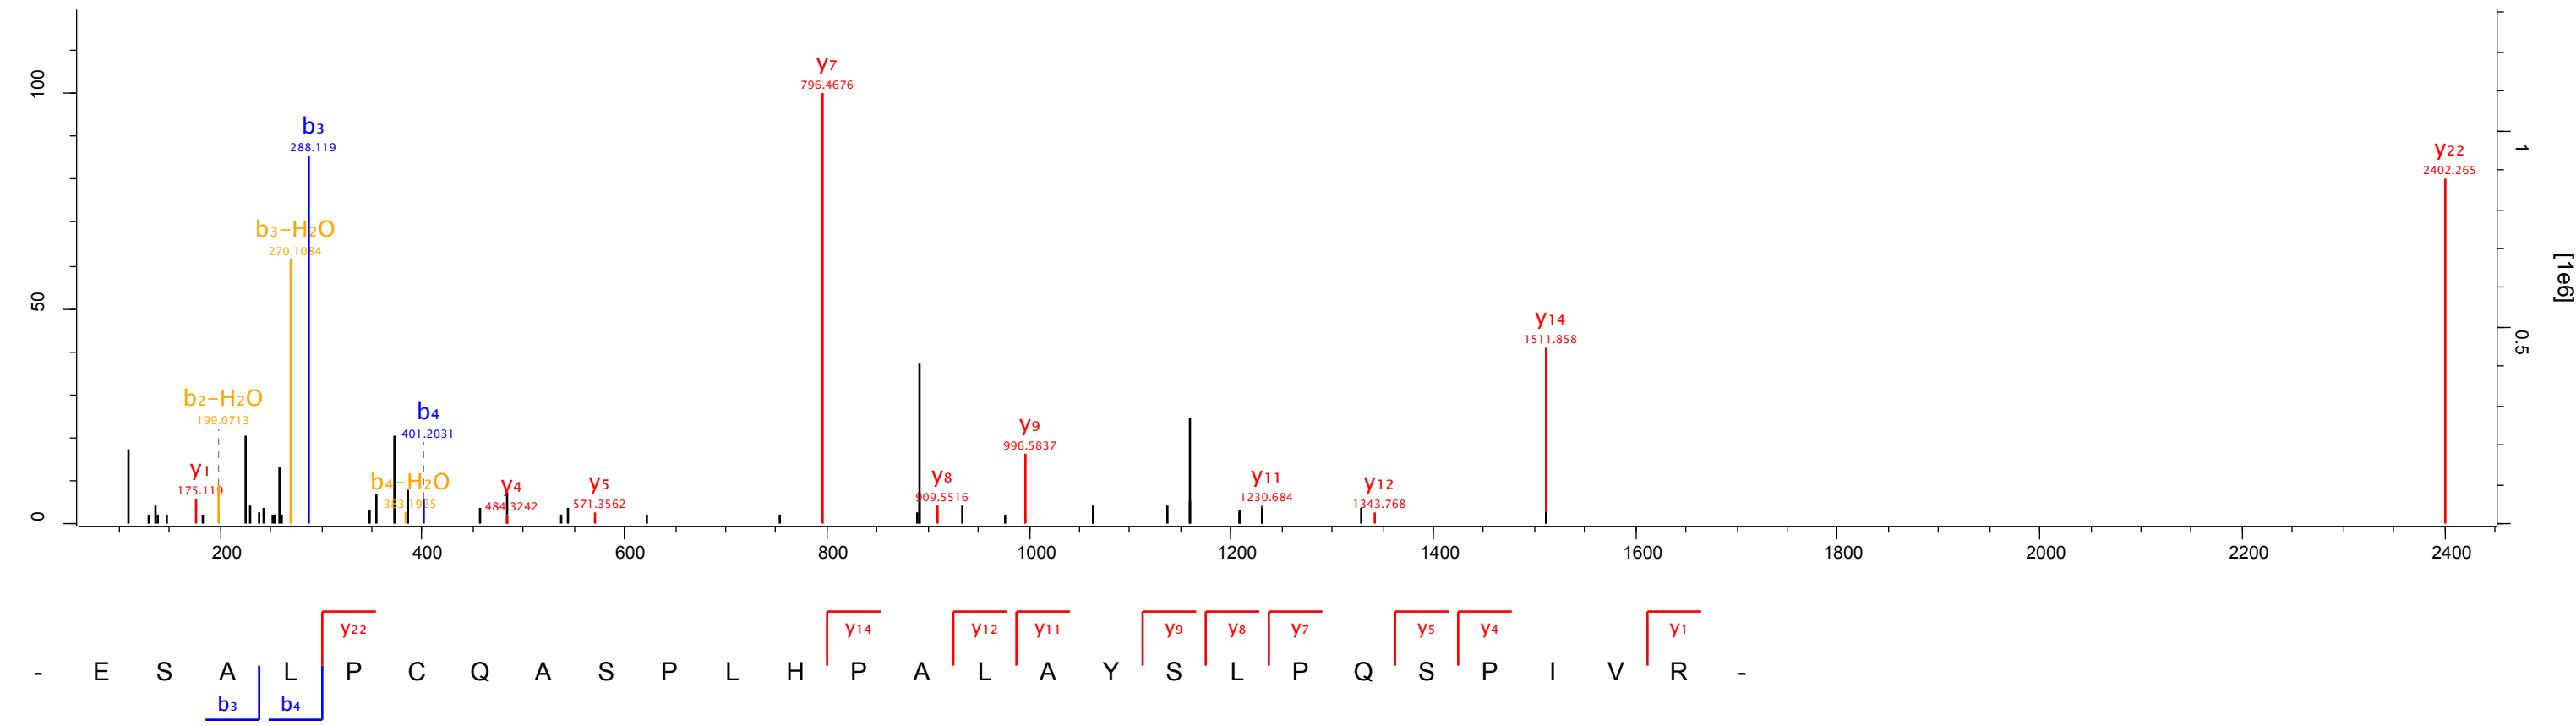

Raw file  
20180707\_MaS\_A375SR\_LM\_proteome\_16

Scan Method Score m/z Gene names  
5072 FTMS; HCD 59.64 409.7 KCNN2

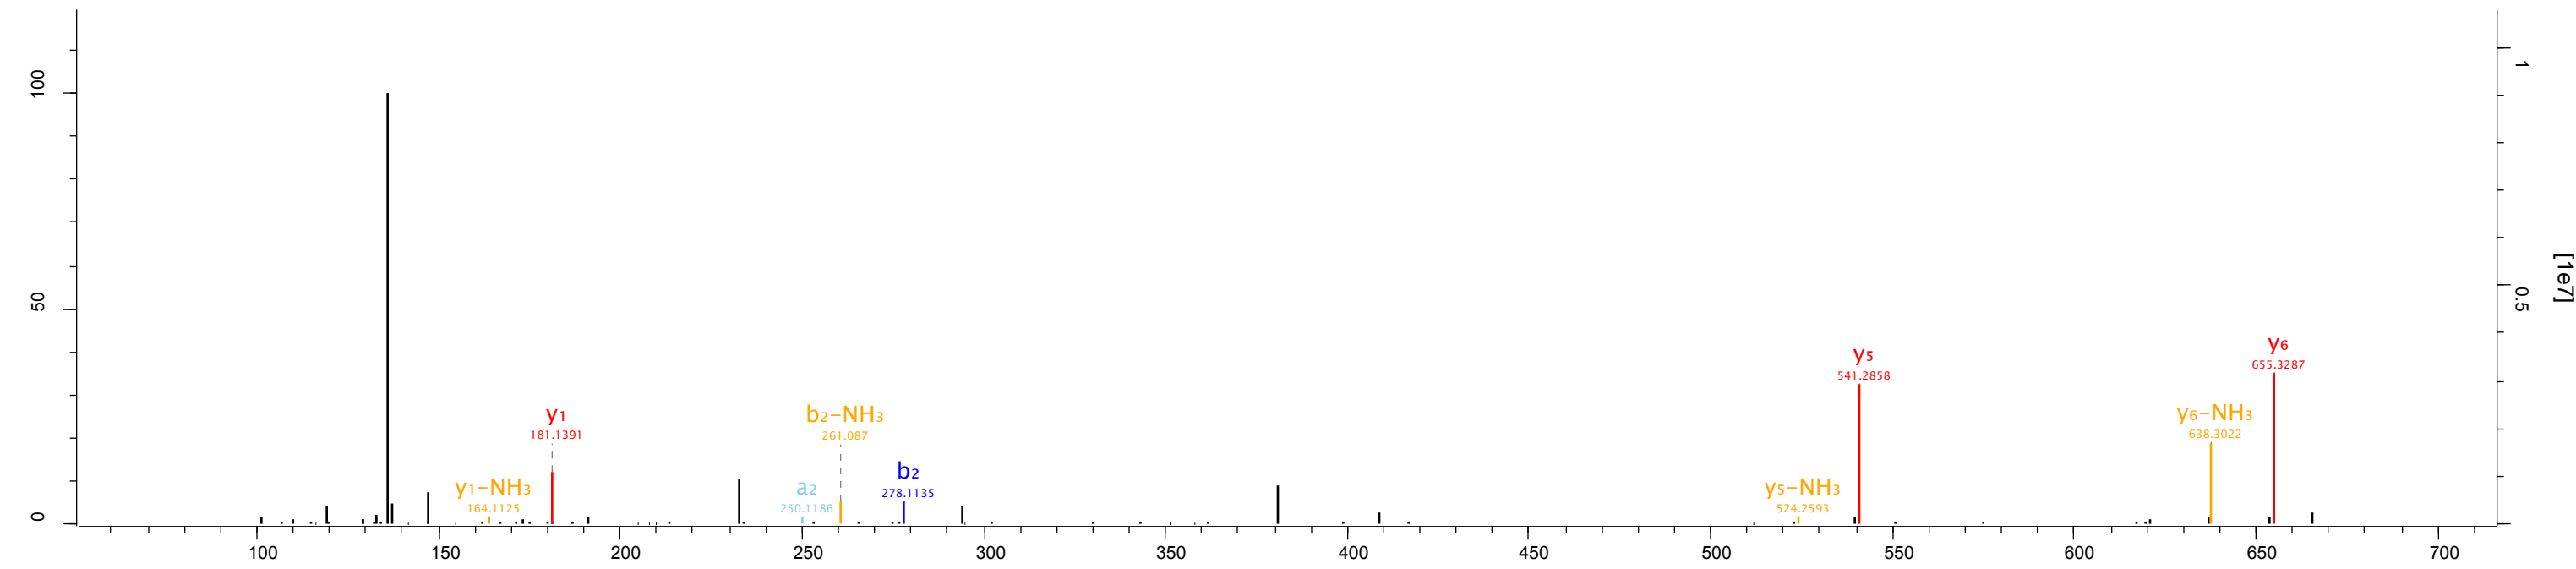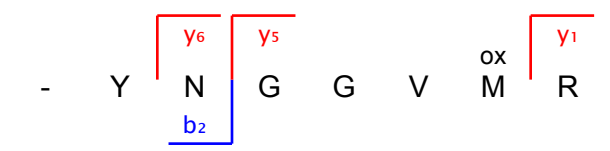

Raw file 20180707\_MaS\_A375SR\_LM\_proteome\_19 Scan 23392 Method FTMS; HCD Score 50.3 m/z 842.93 Gene names GTF2H5

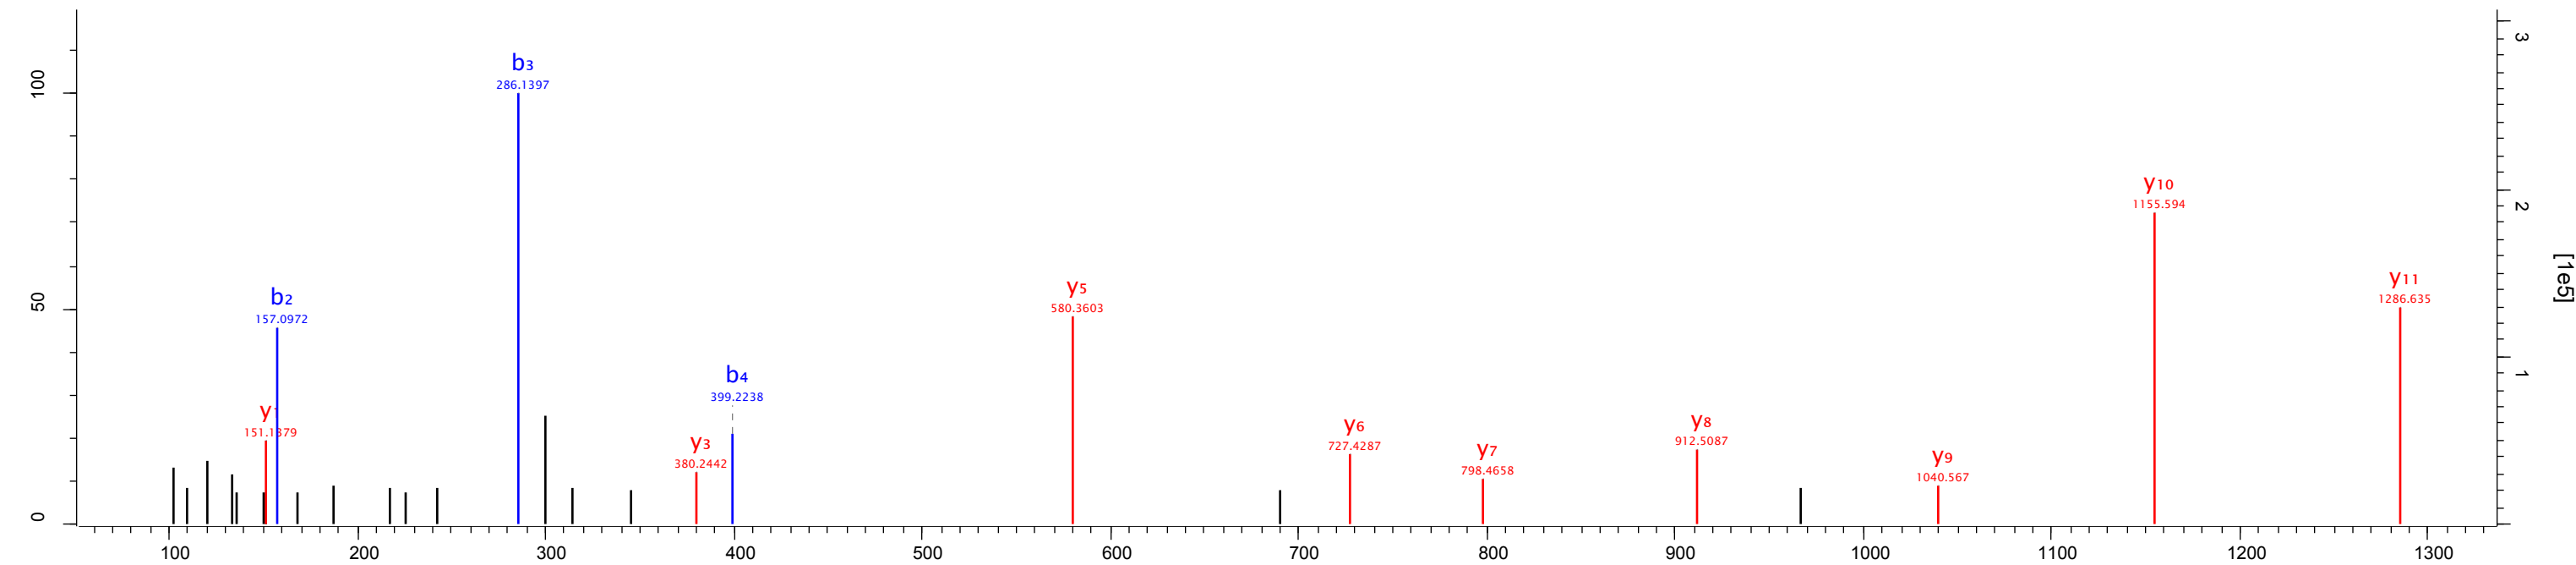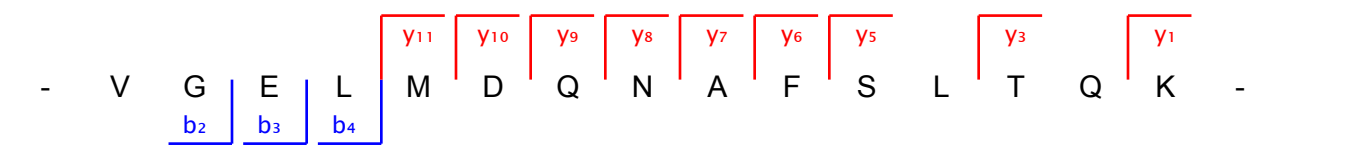

Raw file

20180707\_MaS\_A375SR\_LM\_proteome\_19

| Scan  | Method    | Score | m/z    | Gene names |
|-------|-----------|-------|--------|------------|
| 23512 | FTMS; HCD | 38.38 | 840.92 | GTF2H5     |

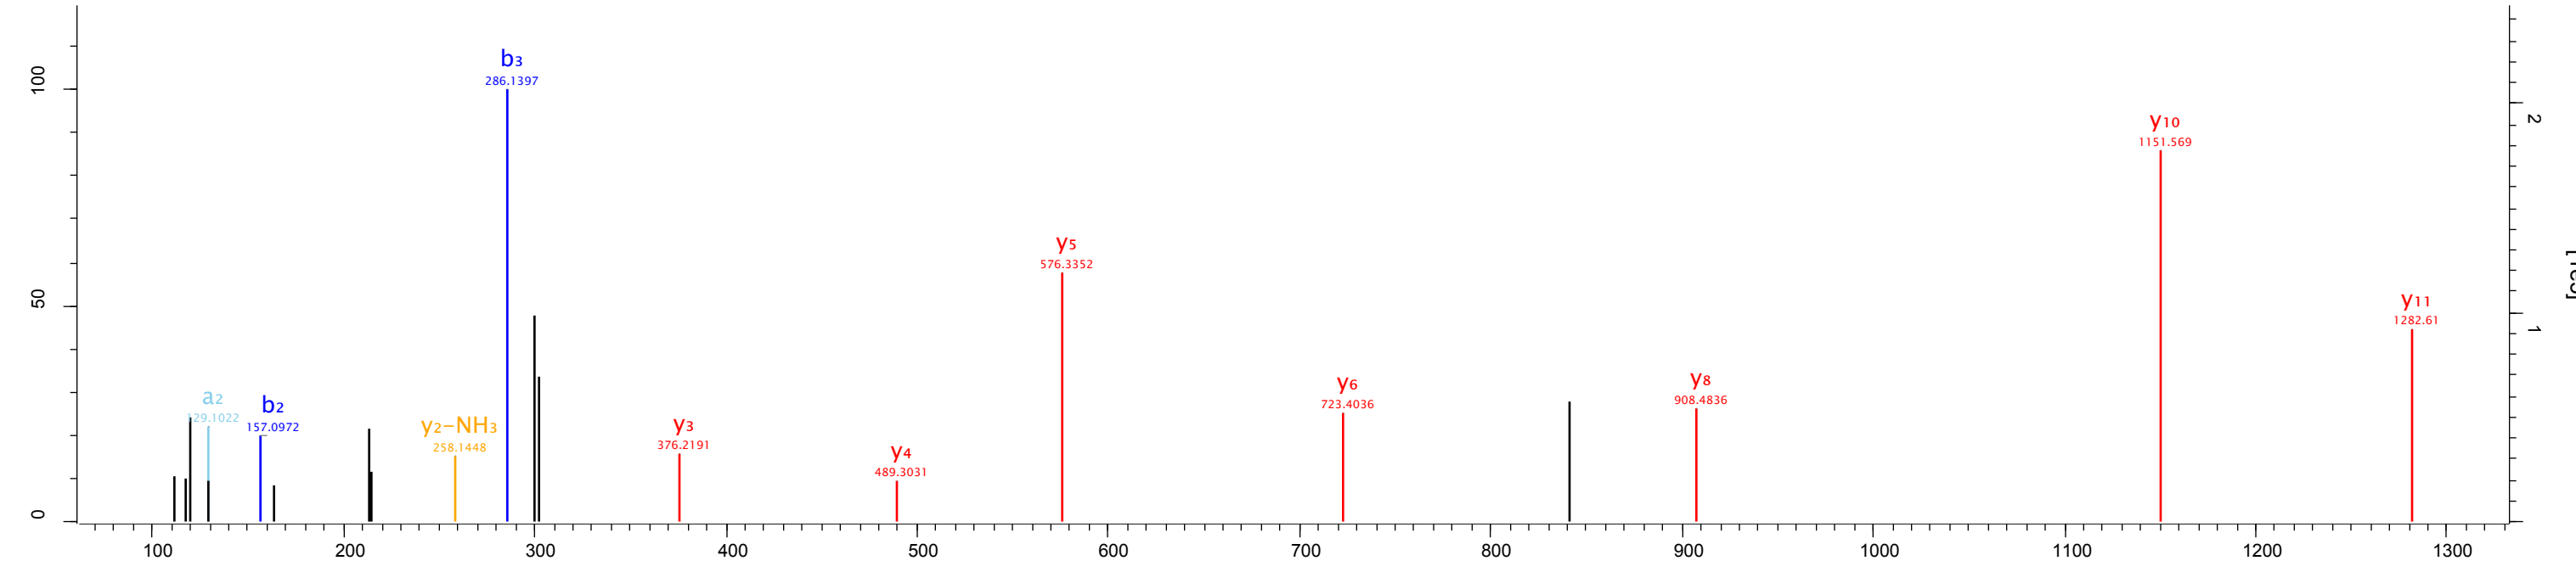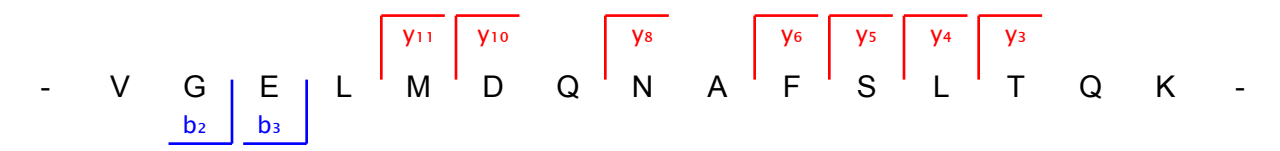

Raw file: 20180707\_MaS\_A375SR\_LM\_proteome\_20  
 Scan: 3002 Method: FTMS; HCD Score: 50.47 m/z: 493.27 Gene names: TIMM17A

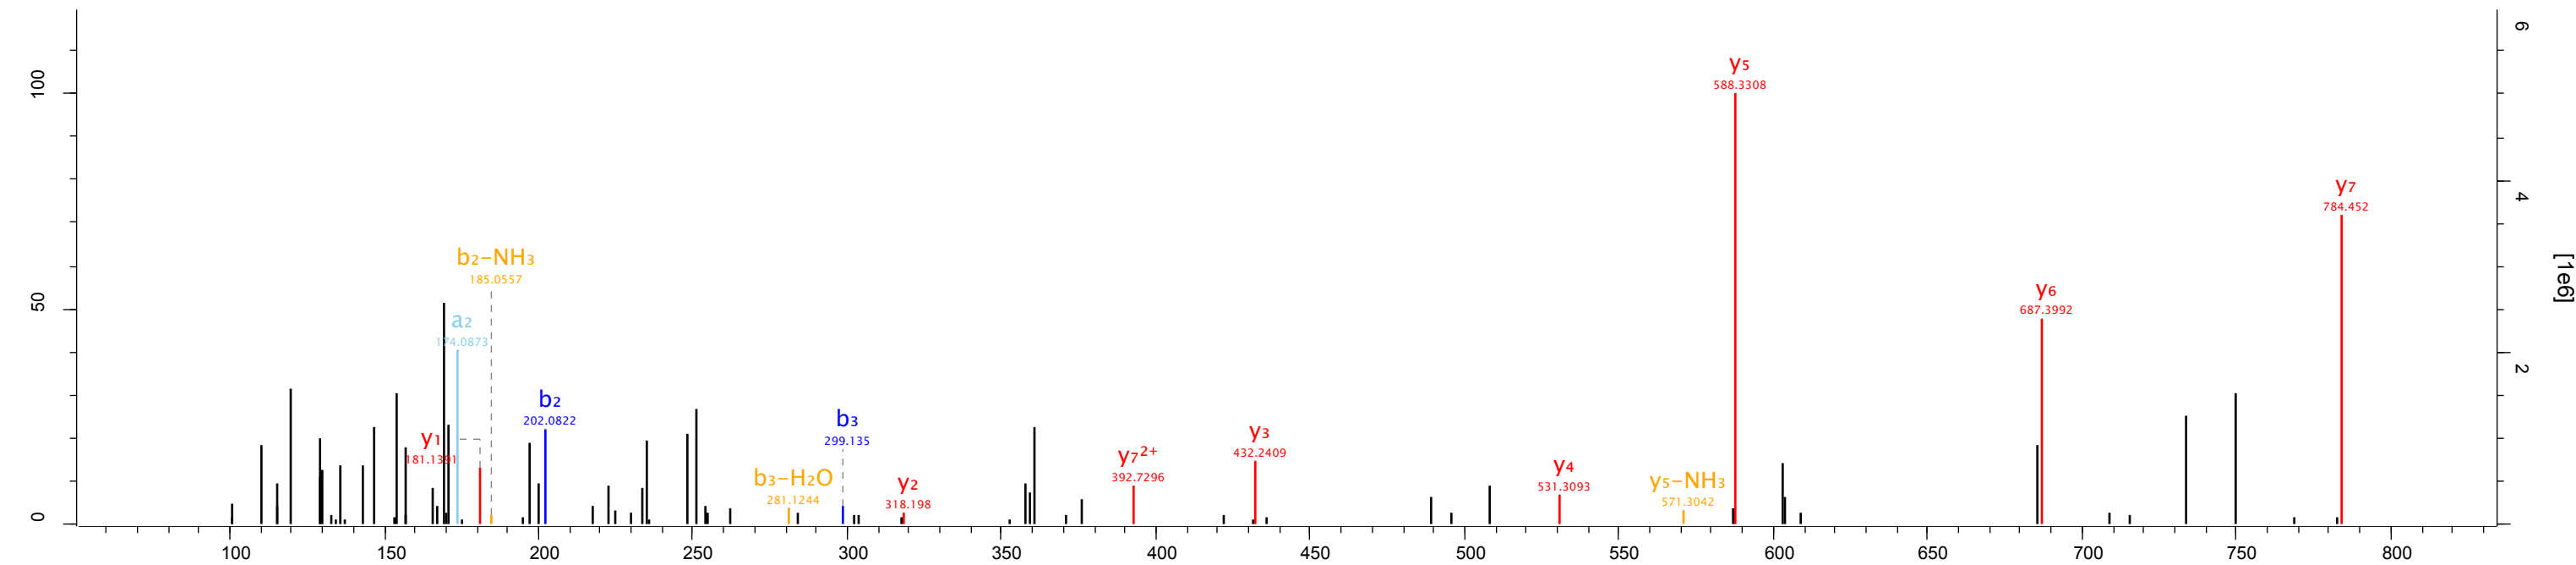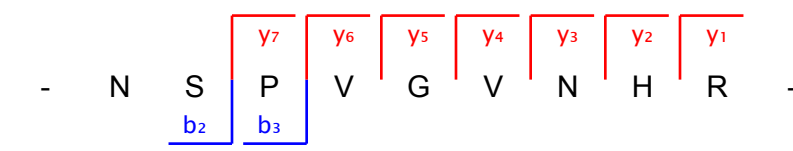

Raw file 20180707\_MaS\_A375SR\_LM\_proteome\_23 Scan 3442 Method FTMS; HCD Score 73.57 m/z 342.52 Gene names COX7B

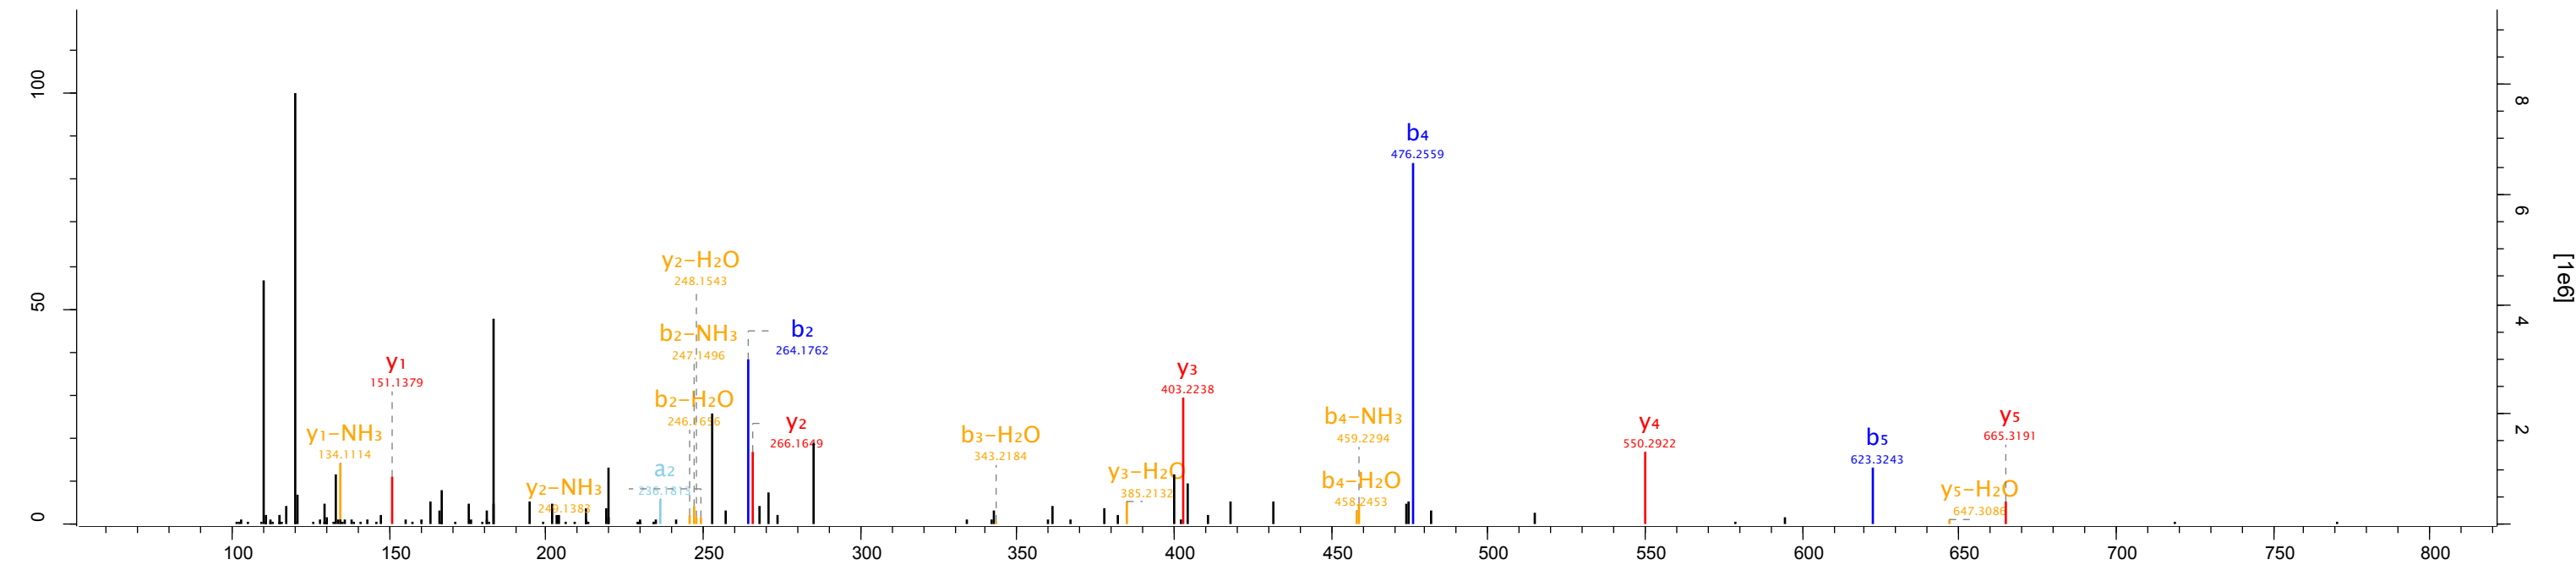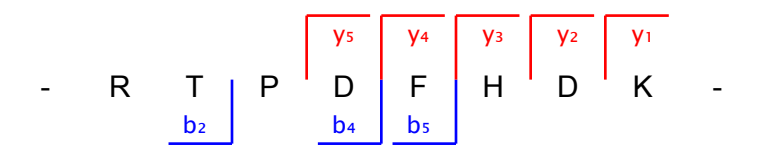

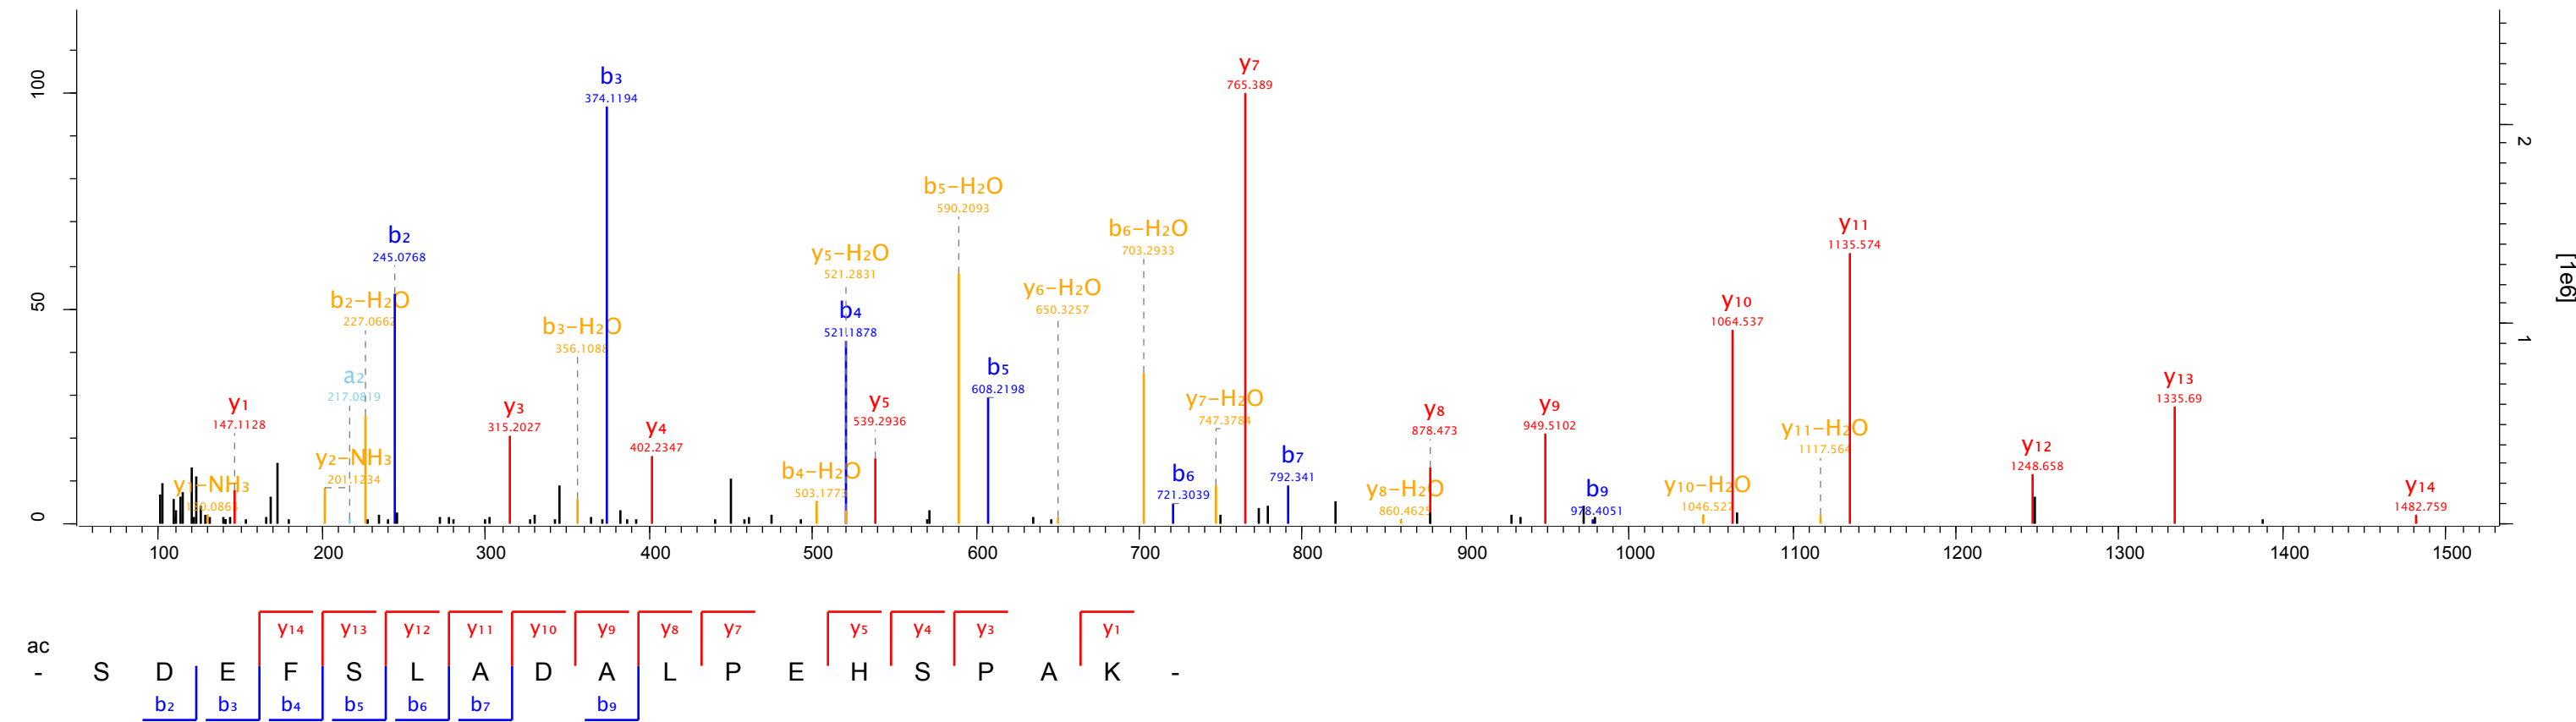



Raw file  
20180707\_MaS\_A375SR\_ML\_proteome\_01

Scan 16542 Method FTMS; HCD Score 27.92 m/z 675.69 Gene names TMEM243

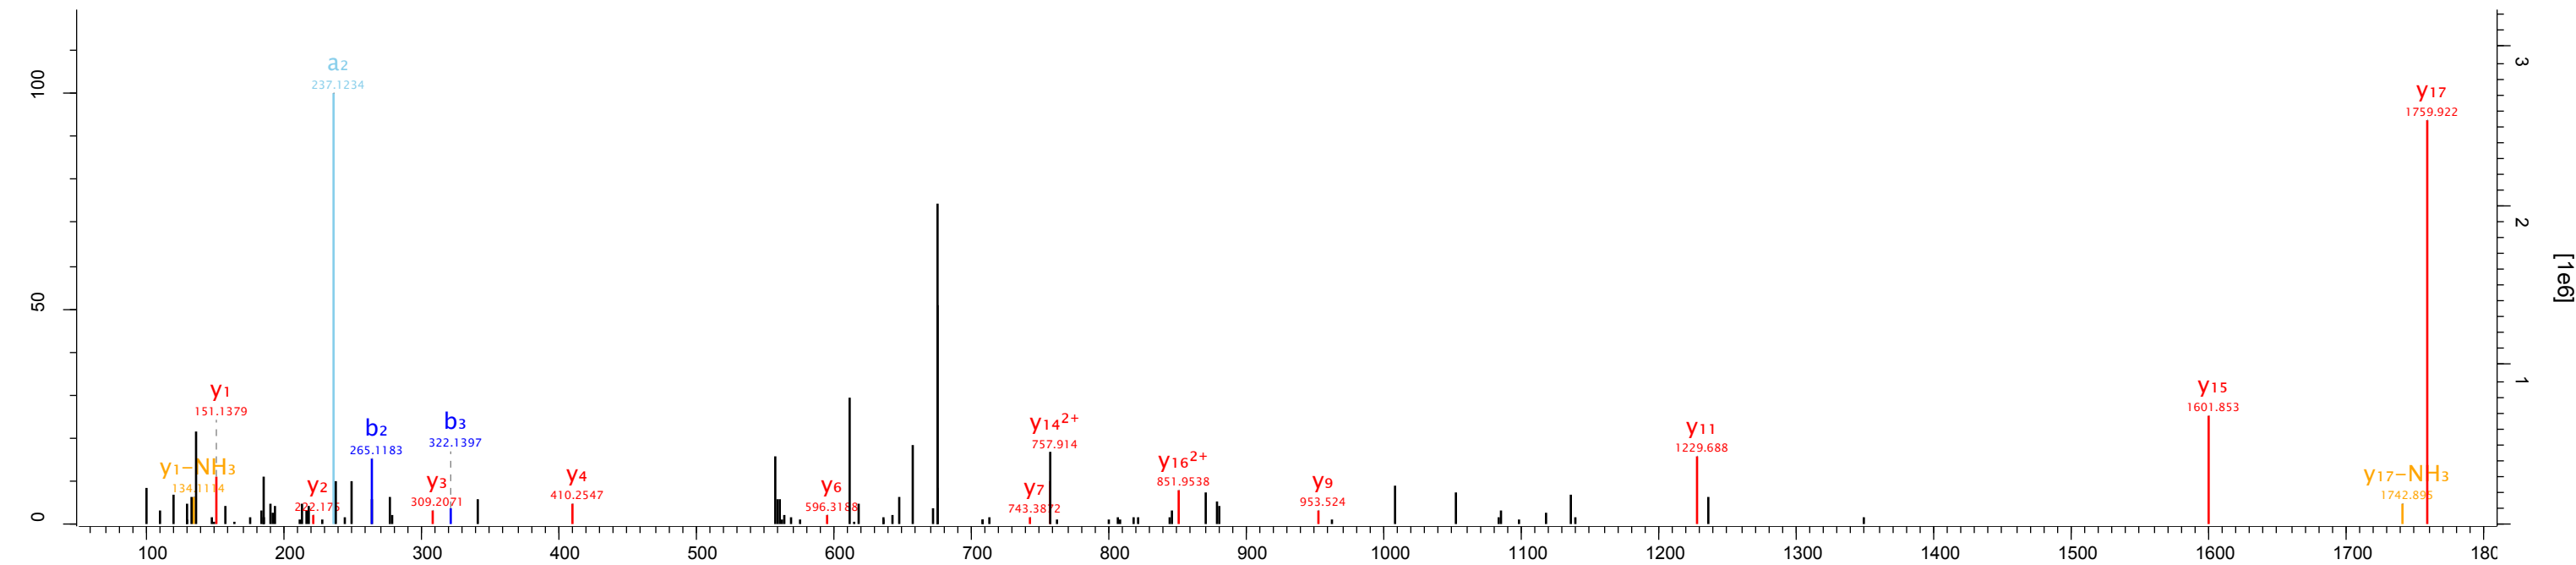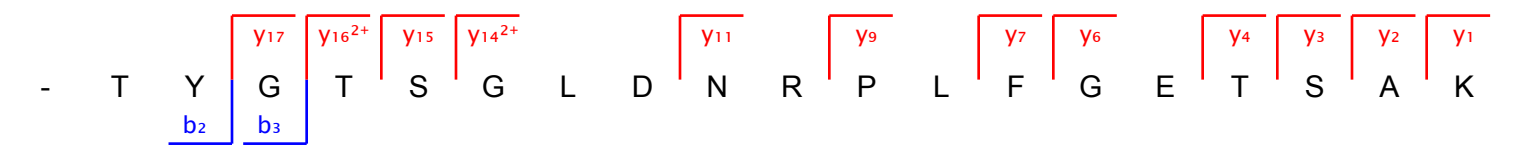

Raw file 20180707\_MaS\_A375SR\_ML\_proteome\_01 Scan 23142 Method FTMS; HCD Score 57.97 m/z 861.43 Gene names PIK3C2B

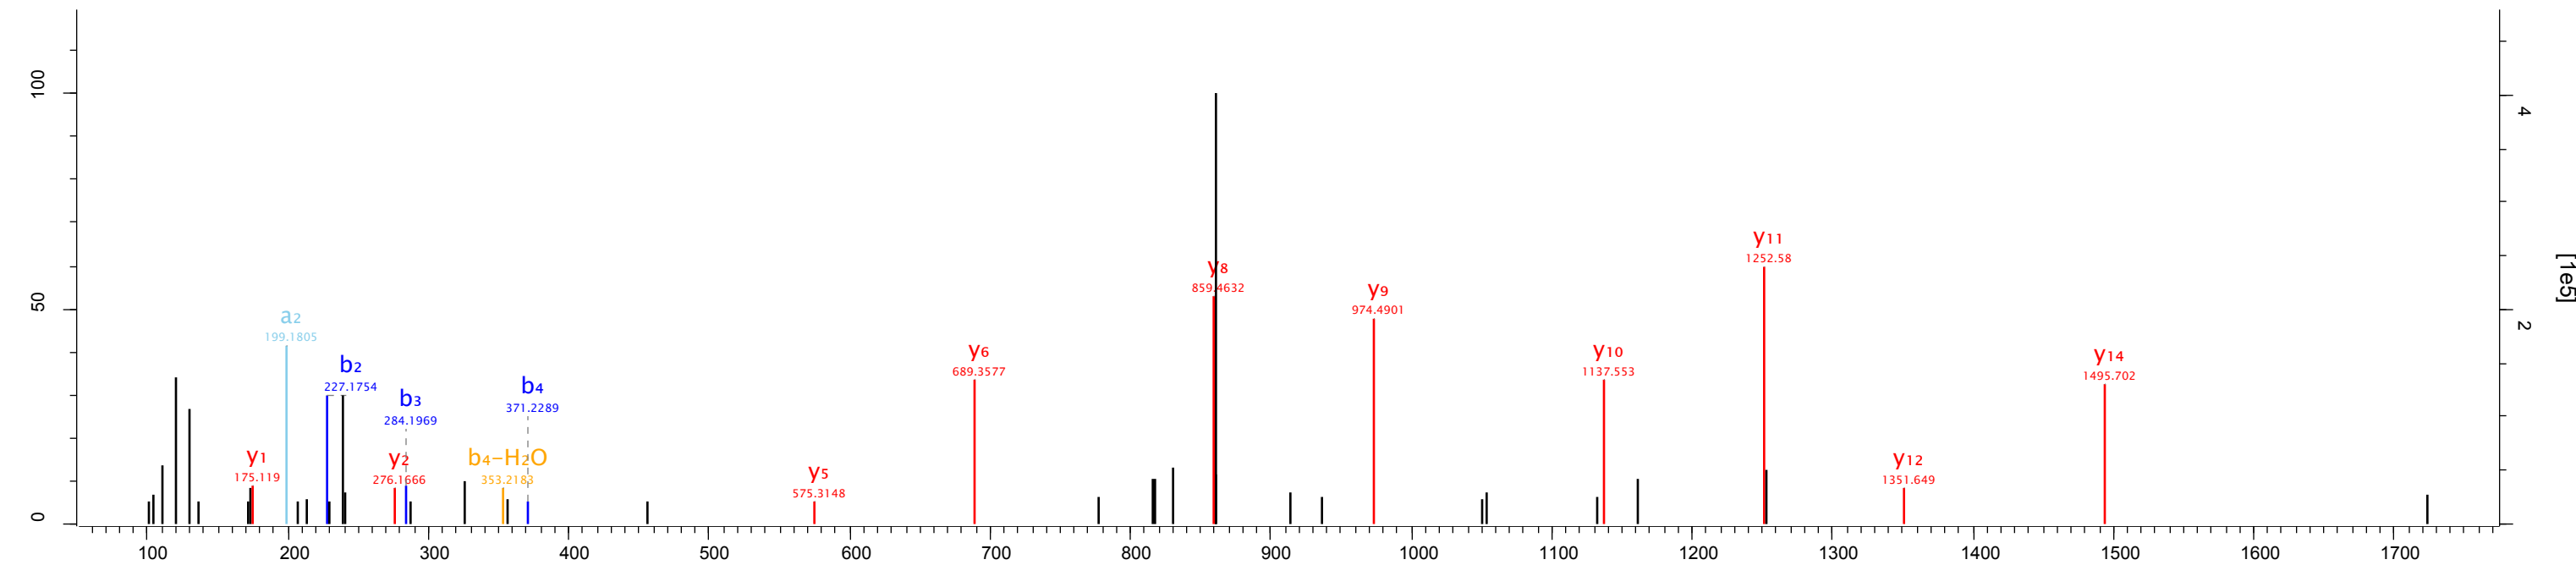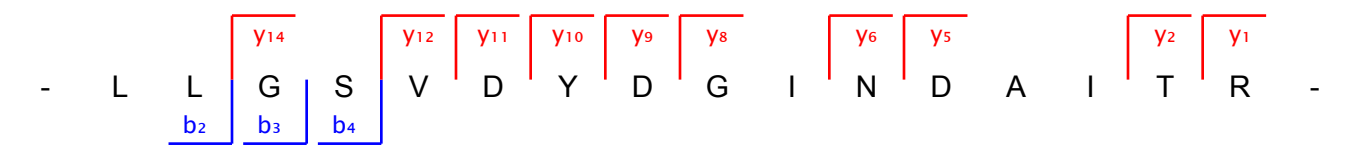

Raw file  
20180707\_MaS\_A375SR\_ML\_proteome\_02

Scan Method Score m/z Gene names  
4812 FTMS; HCD 54.53 406.69 KCNN2

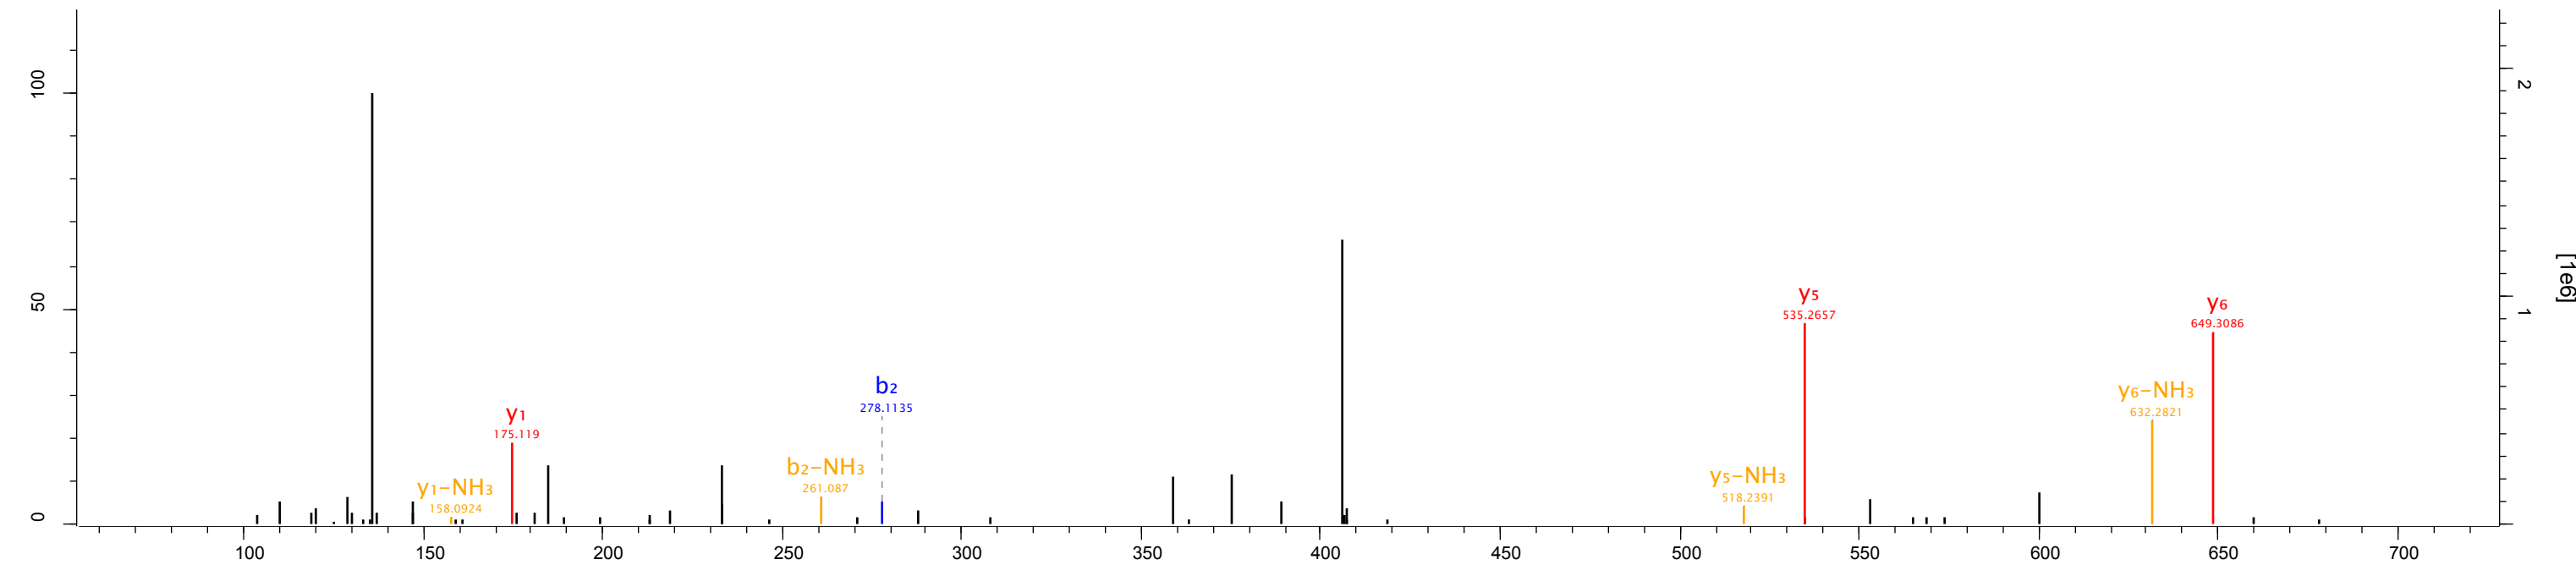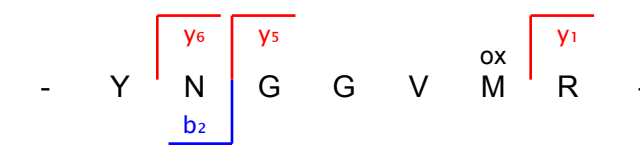

Raw file  
20180707\_MaS\_A375SR\_ML\_proteome\_04

Scan: 27192  
Method: FTMS; HCD  
Score: 62.2  
m/z: 902.97  
Gene names: LNX2

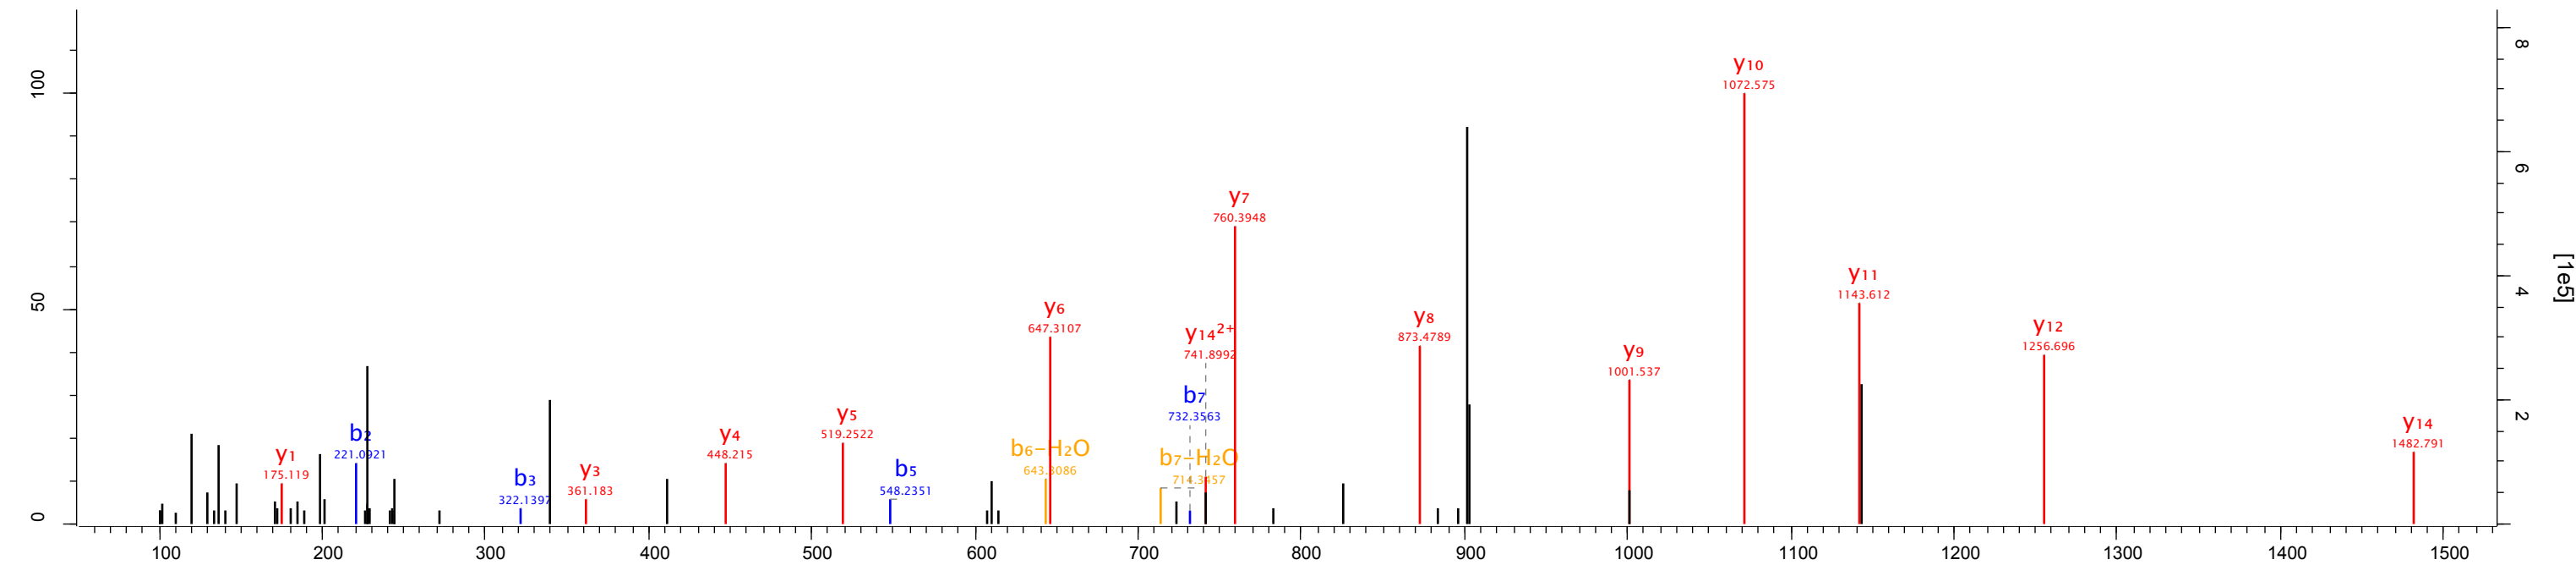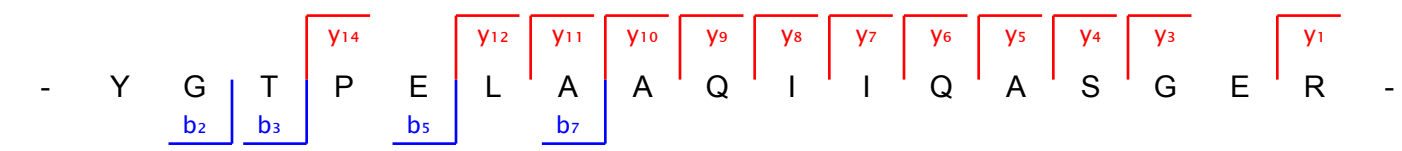

Raw file 20180707\_MaS\_A375SR\_ML\_proteome\_05 Scan 13202 Method FTMS; HCD Score 42.47 m/z 442.23 Gene names C1orf234

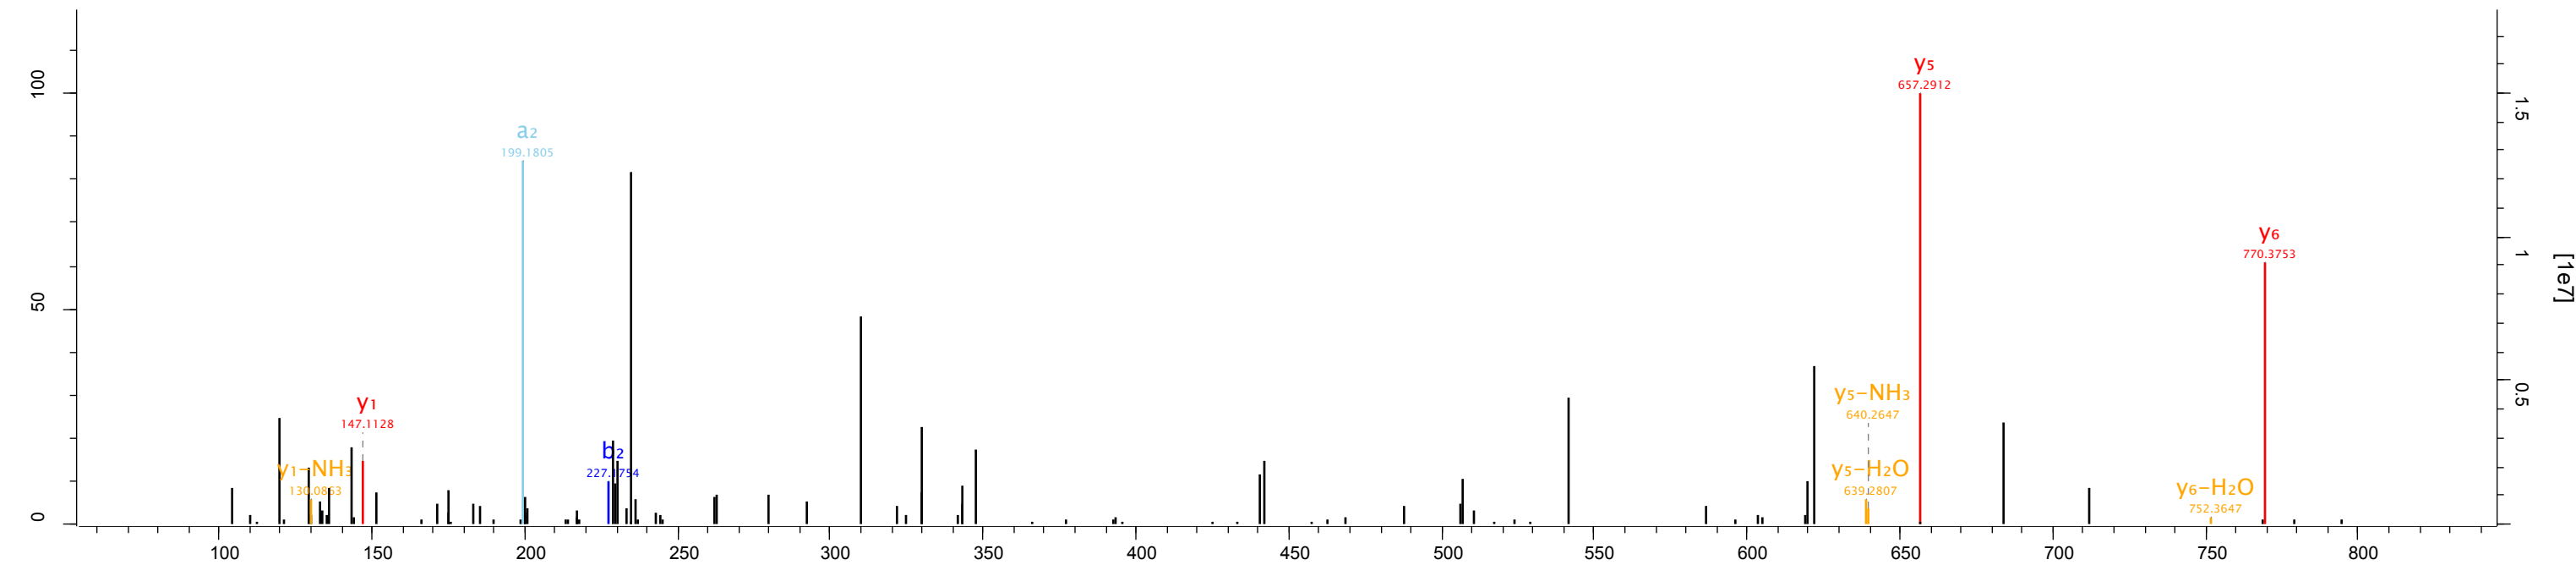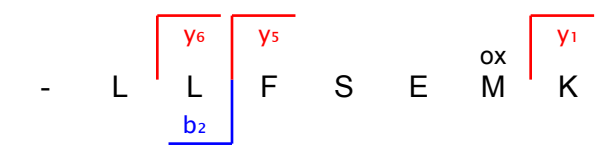

Raw file: 20180707\_MaS\_A375SR\_ML\_proteome\_06  
 Scan: 23252 Method: FTMS; HCD Score: 128.82 m/z: 940.94 Gene names: FAM168B

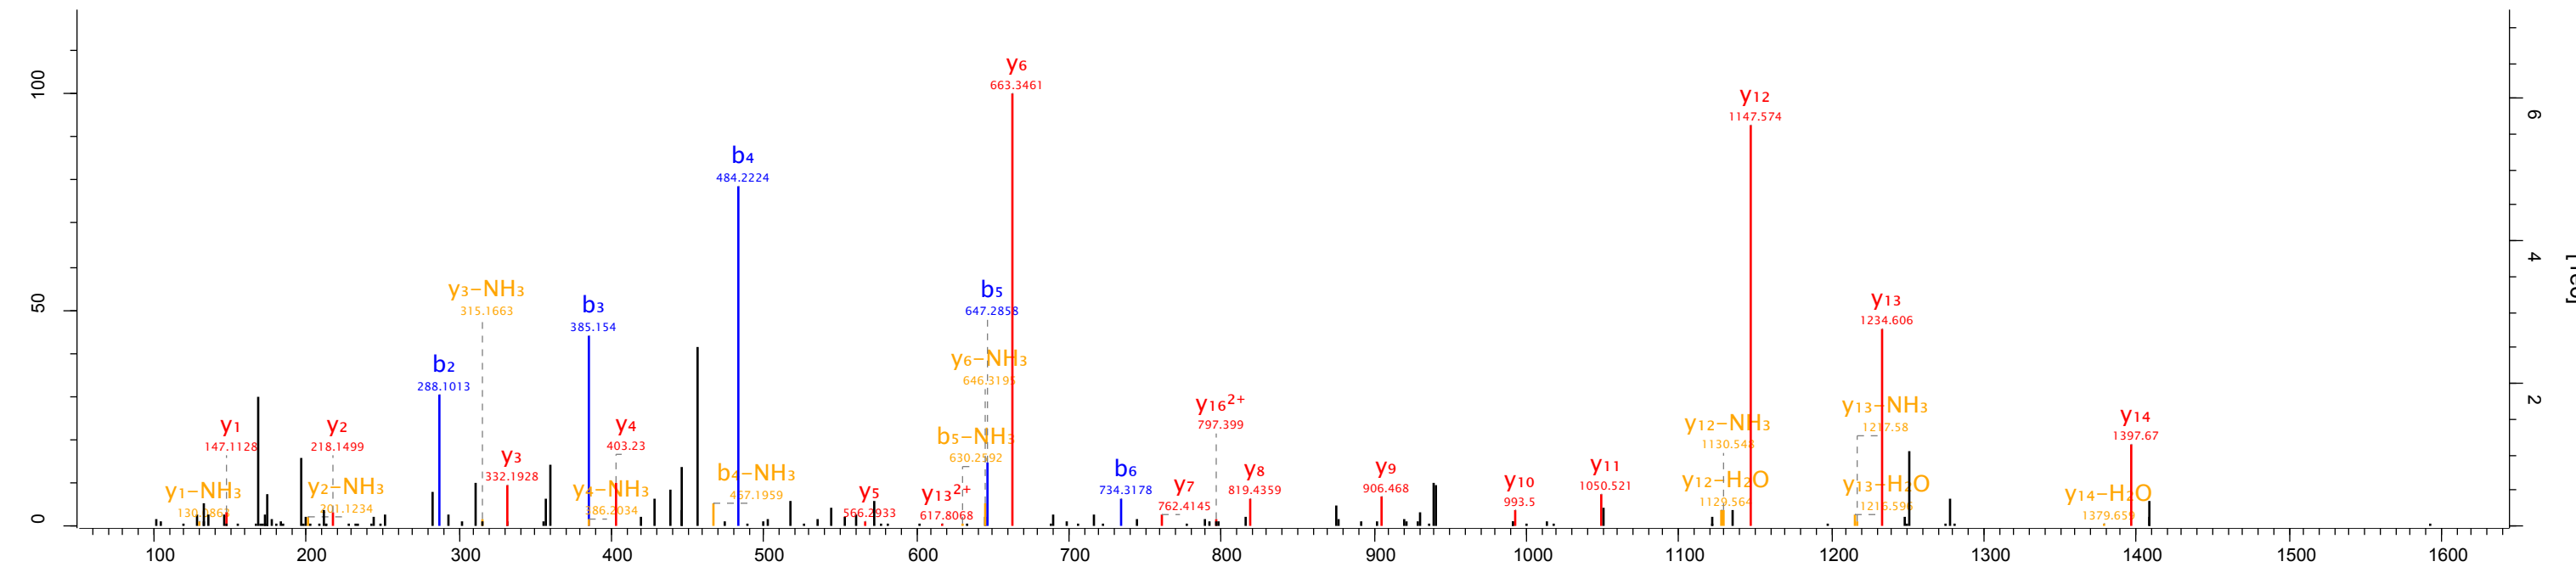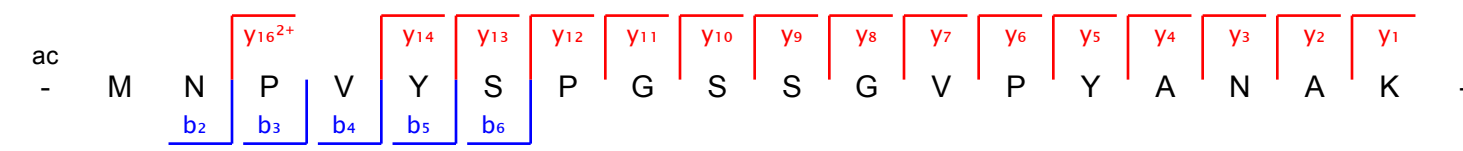

Raw file 20180707\_MaS\_A375SR\_ML\_proteome\_06 Scan 23282 Method FTMS; HCD Score 63.46 m/z 943.46 Gene names FAM168B

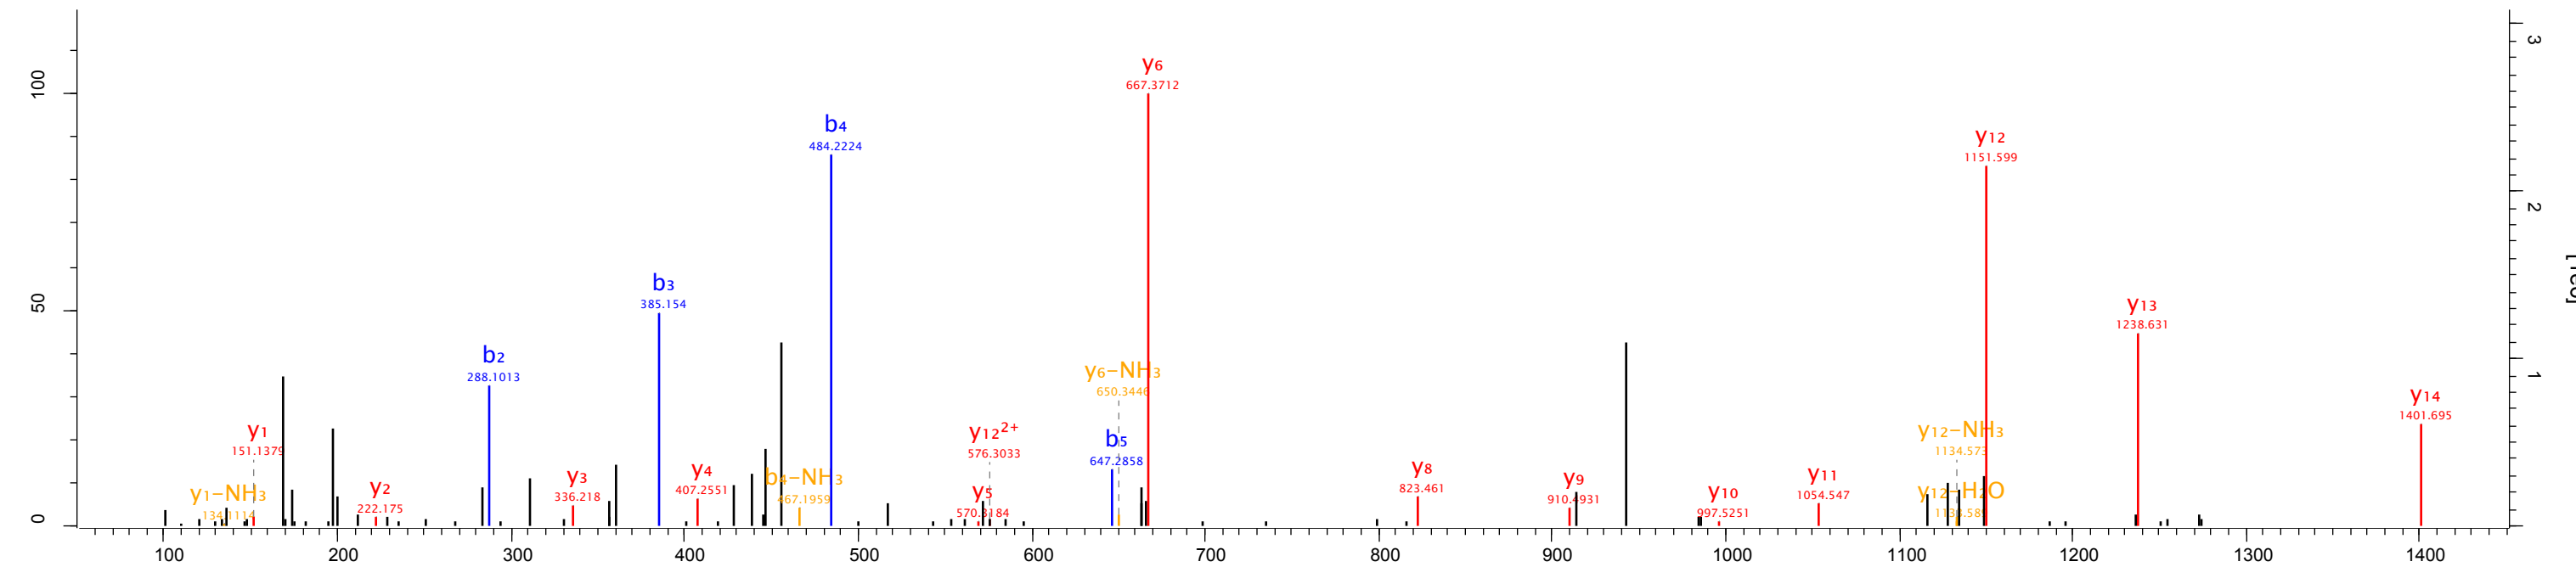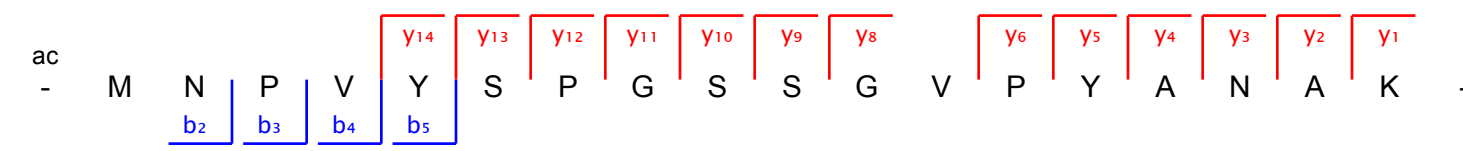

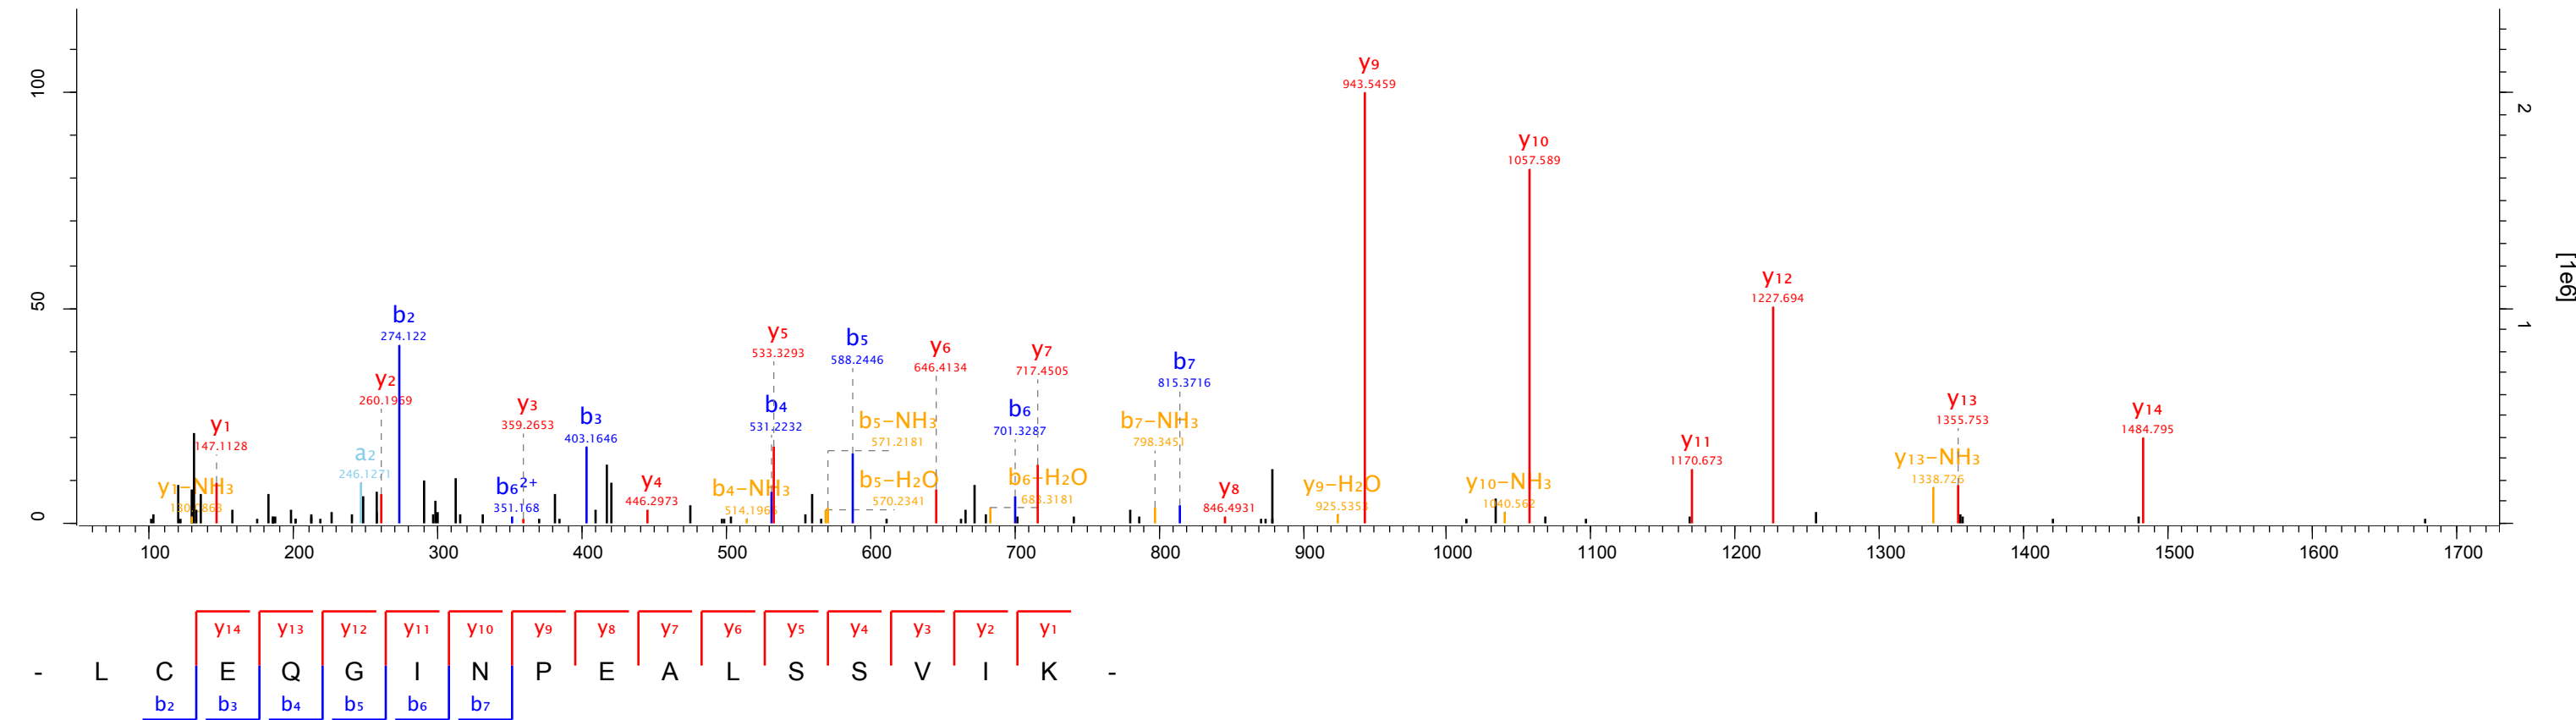



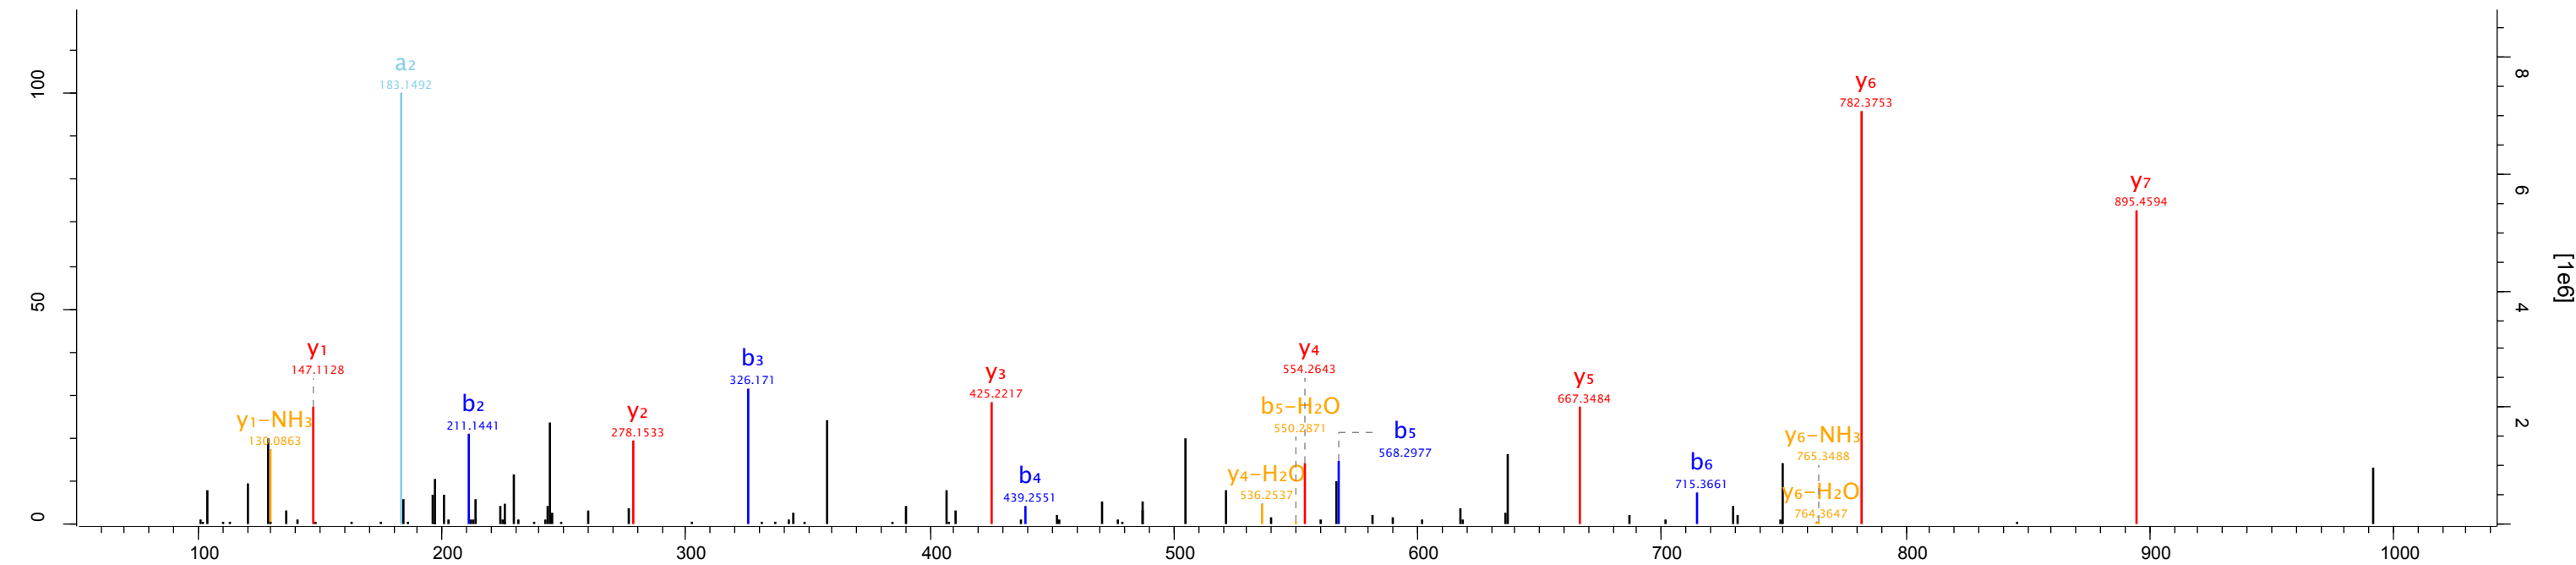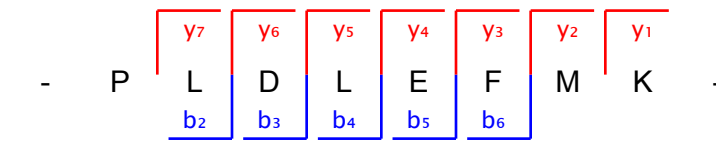

Raw file 20180707\_MaS\_A375SR\_ML\_proteome\_08 Scan 14982 Method FTMS; HCD Score 68.91 m/z 494.23 Gene names IL1F10

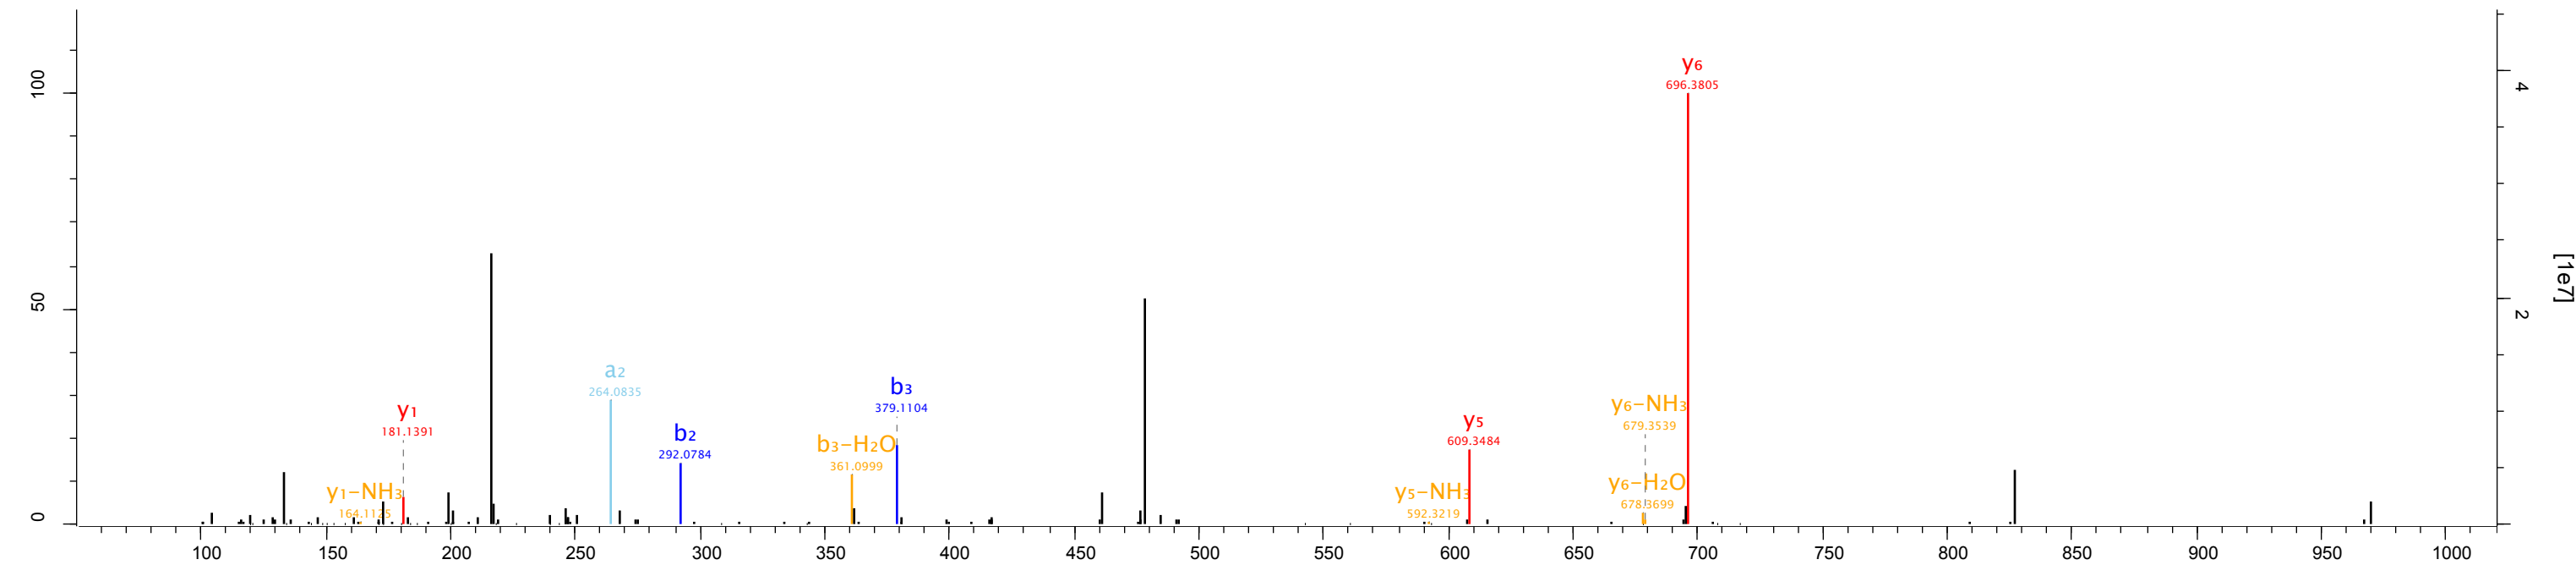

Raw file  
20180707\_MaS\_A375SR\_ML\_proteome\_08

Scan Method Score m/z Gene names  
15002 FTMS; HCD 57.28 491.22 IL1F10

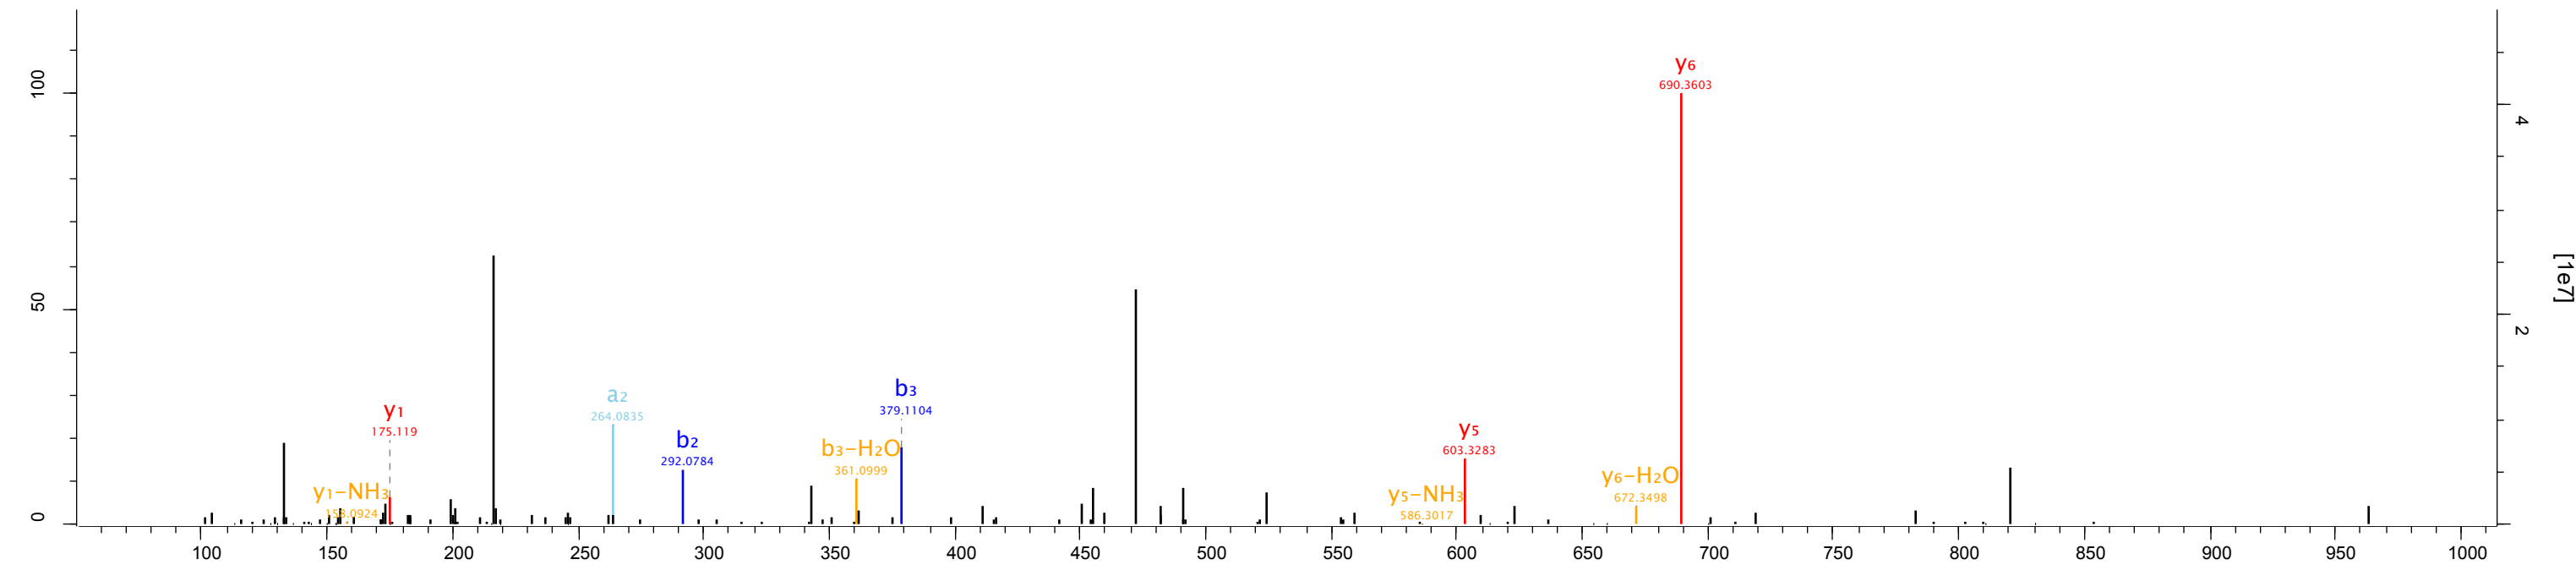

Raw file  
20180707\_MaS\_A375SR\_ML\_proteome\_08

Scan Method Score m/z Gene names  
22032 FTMS; HCD 44.39 626.38 BTBD19

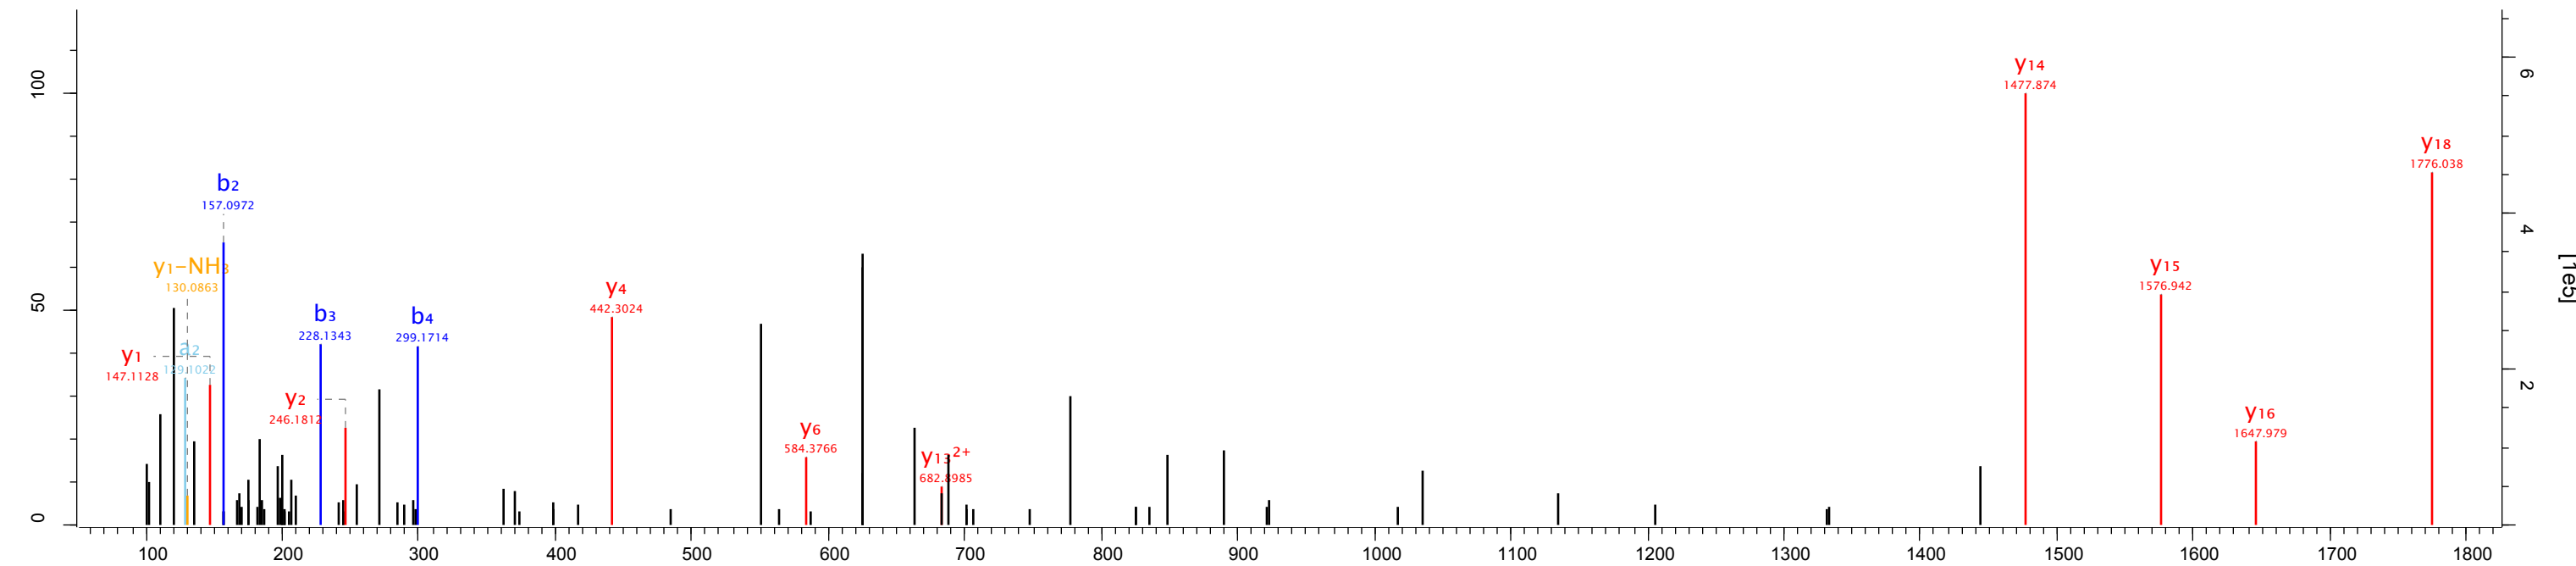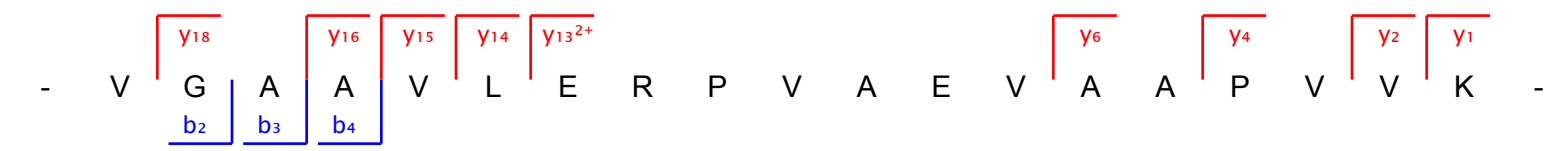

Raw file 20180707\_MaS\_A375SR\_ML\_proteome\_09 Scan 14592 Method FTMS; HCD Score 82.07 m/z 715.88 Gene names RNF11

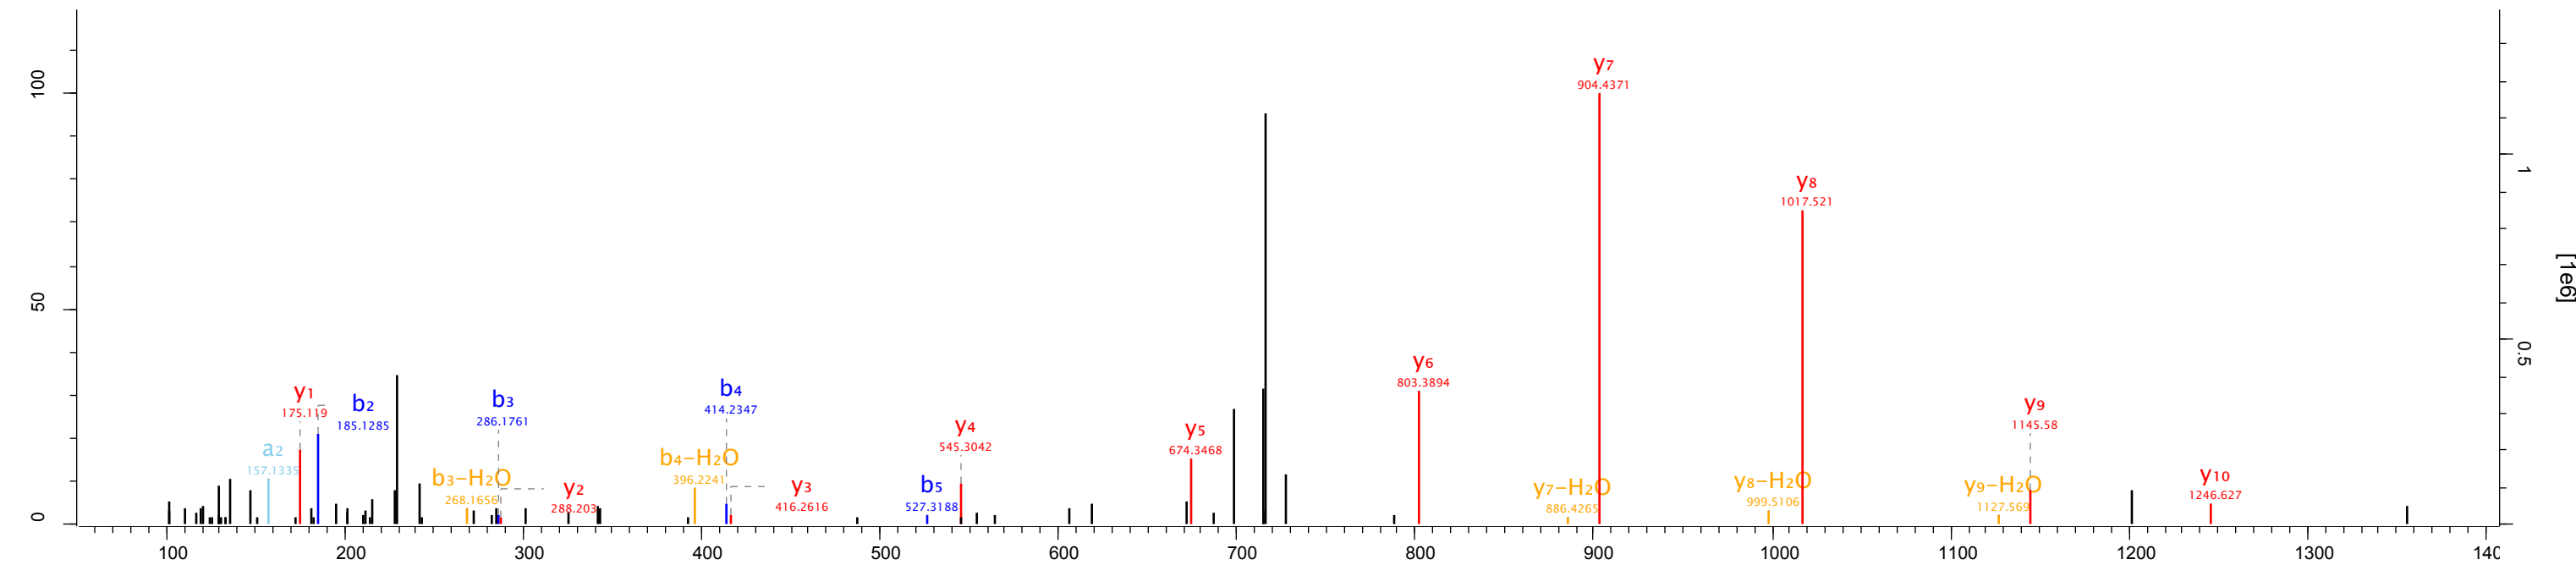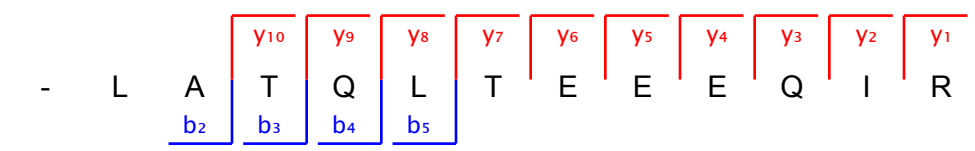

Raw file 20180707\_MaS\_A375SR\_ML\_proteome\_09 Scan 17352 Method FTMS; HCD Score 111.61 m/z 517.8 Gene names DPF3

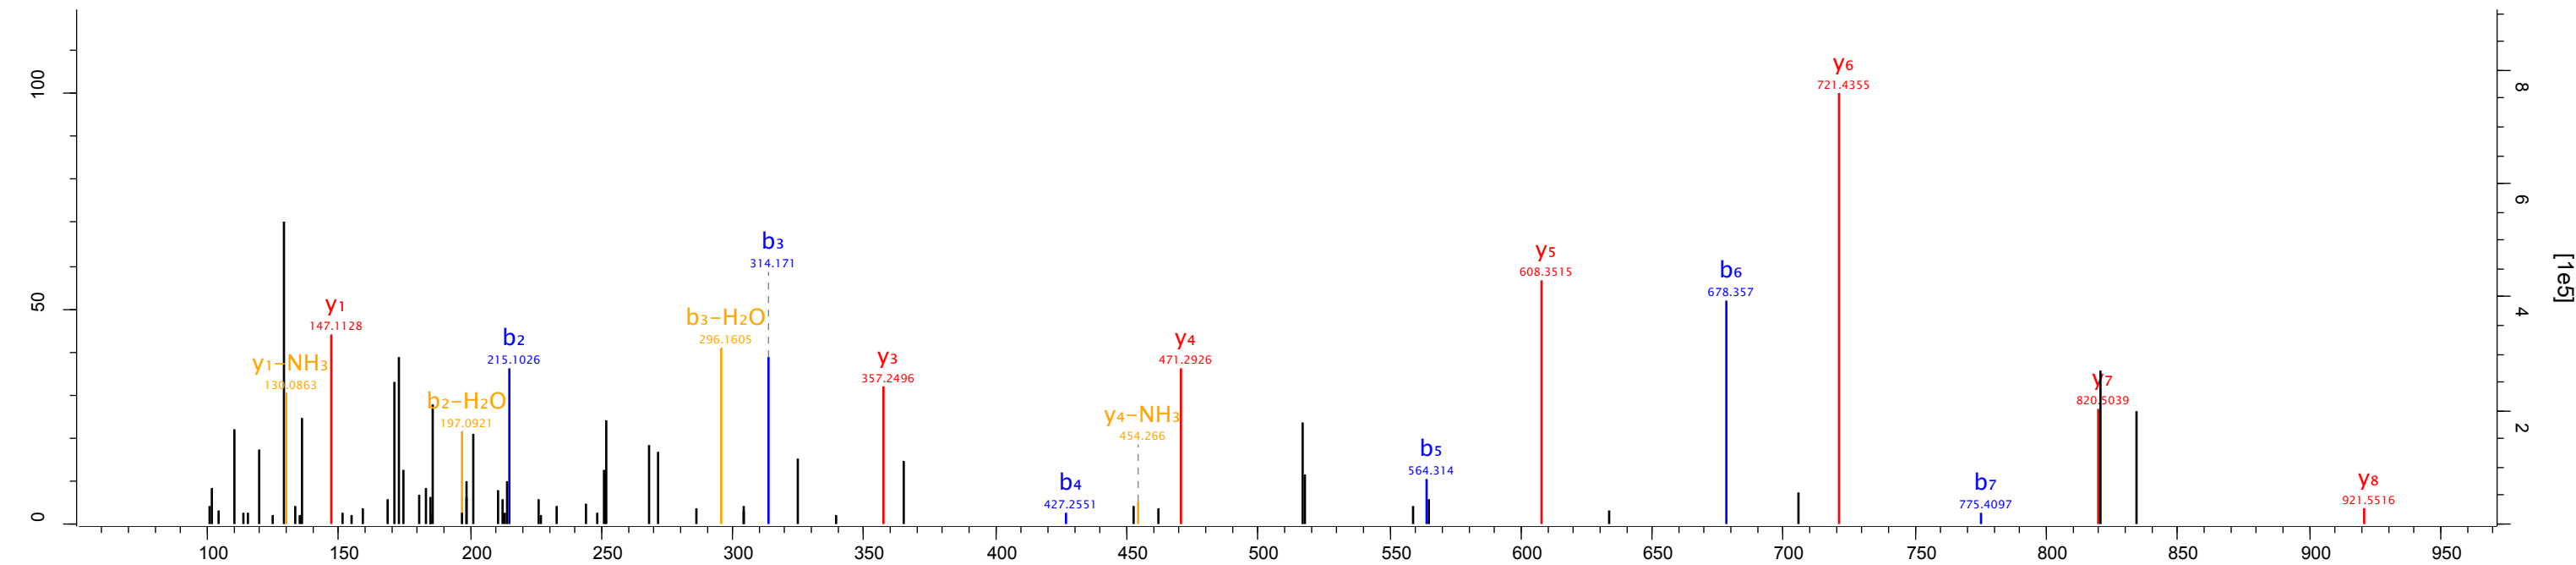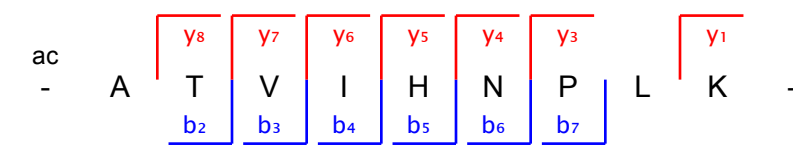

Raw file 20180707\_MaS\_A375SR\_ML\_proteome\_10 Scan 10462 Method FTMS; HCD Score 83.61 m/z 442.2

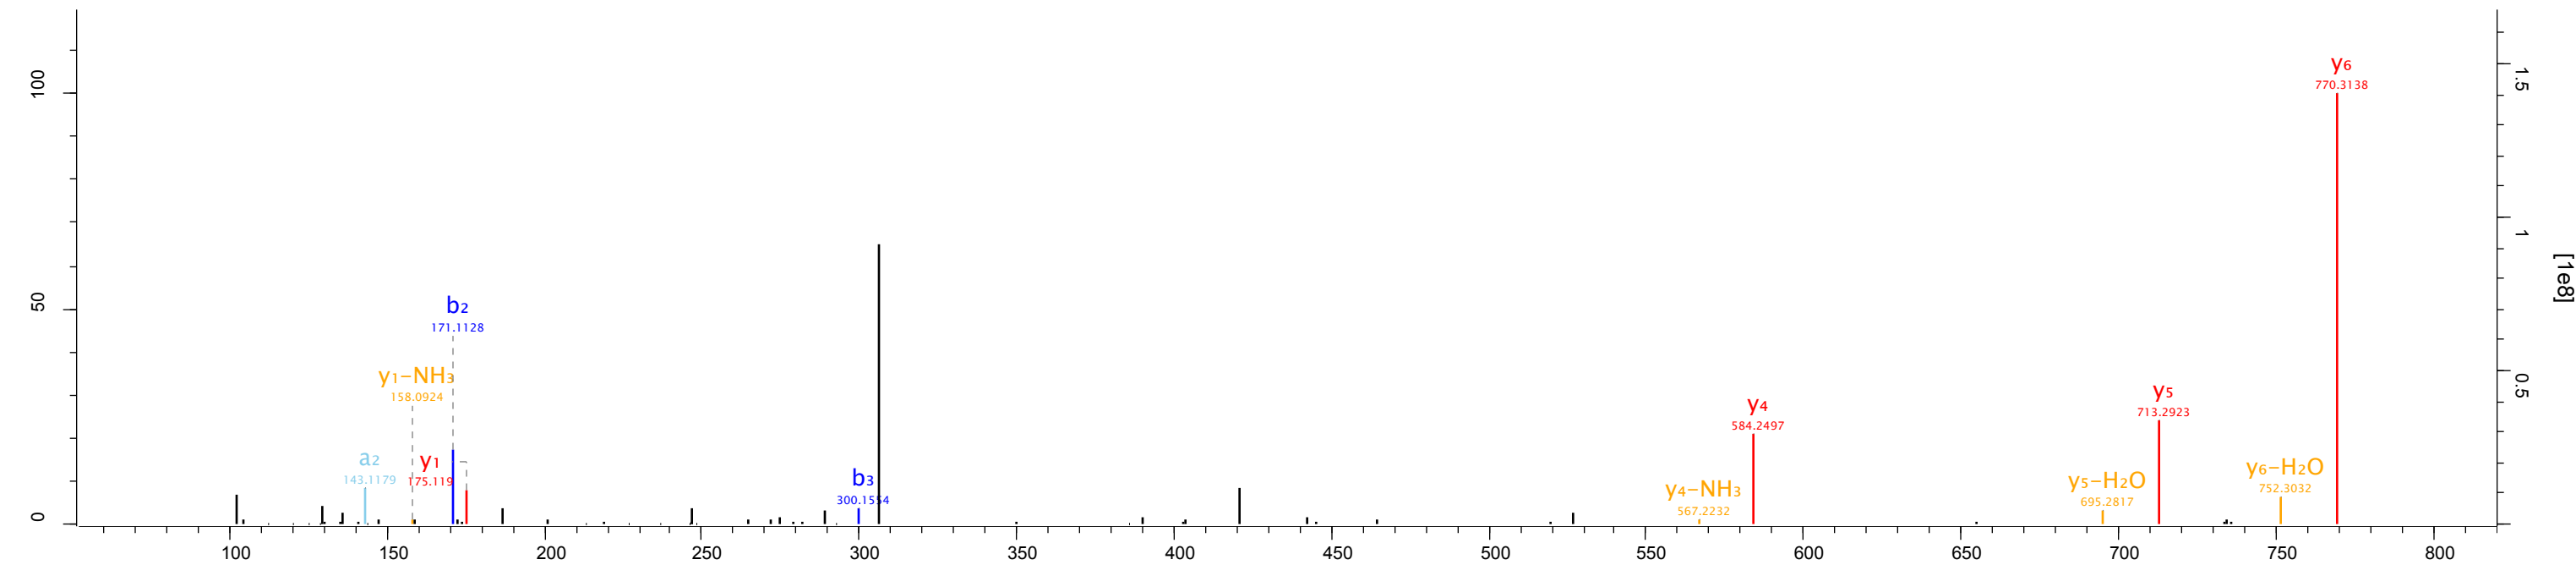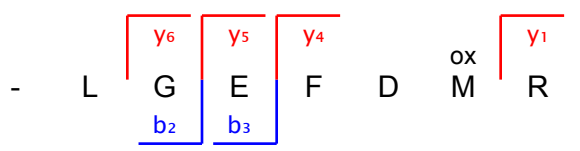

Raw file  
20180707\_MaS\_A375SR\_ML\_proteome\_10

Scan 5202 Method FTMS; HCD Score 46 m/z 577.77

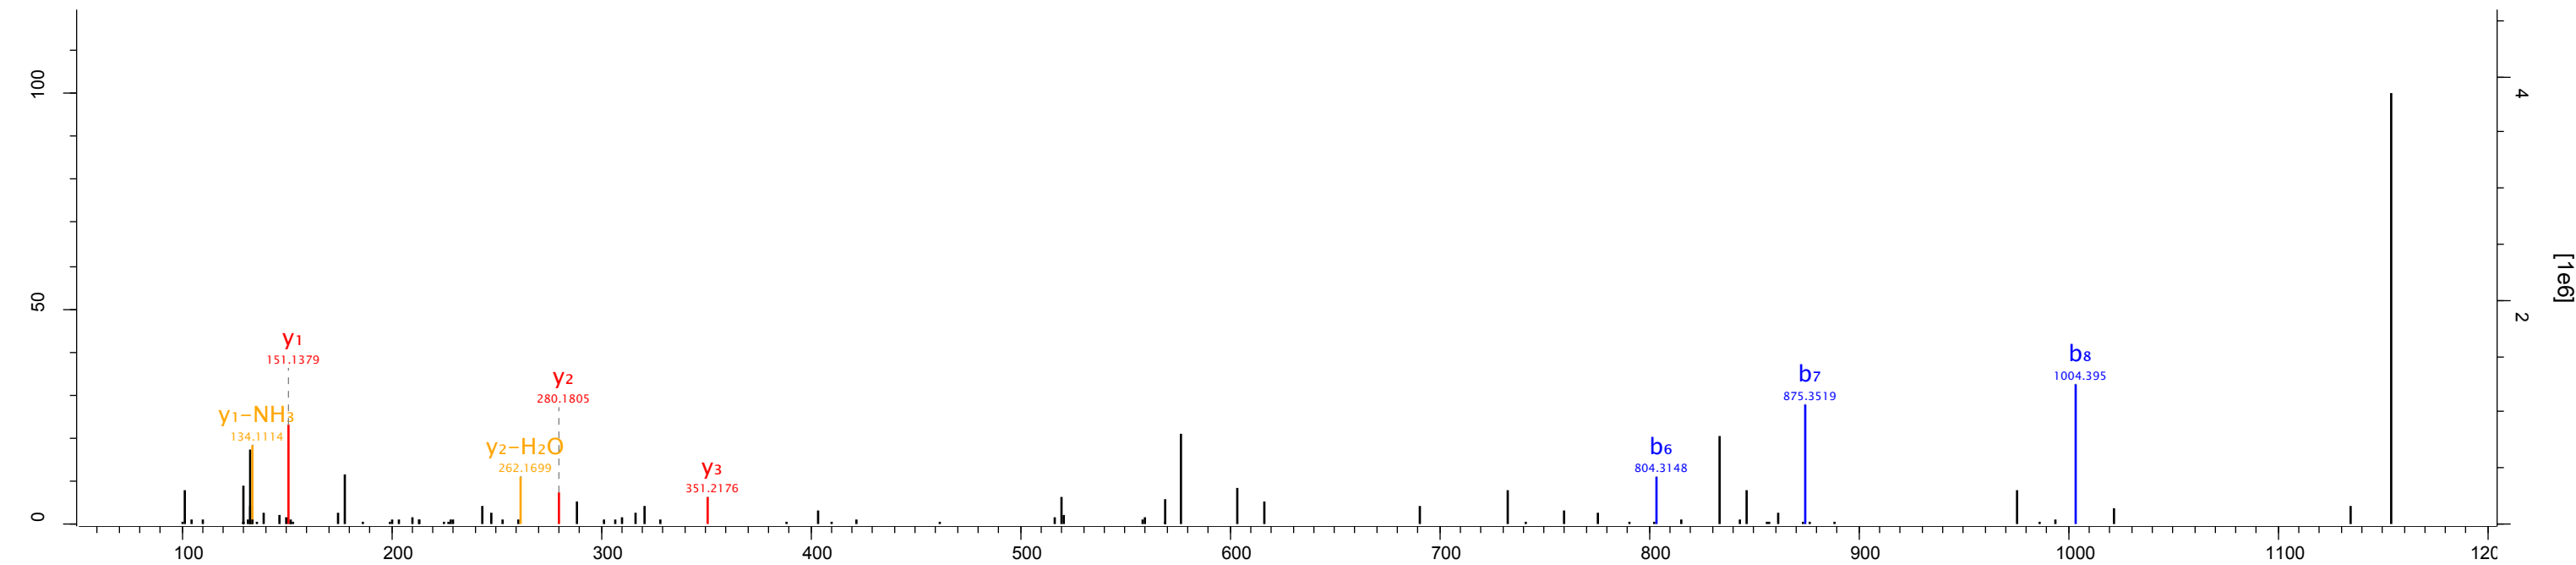



Raw file  
20180707\_MaS\_A375SR\_ML\_proteome\_10

Scan Method Score m/z Gene names  
9432 FTMS; HCD 127.83 555.8 POLR2F

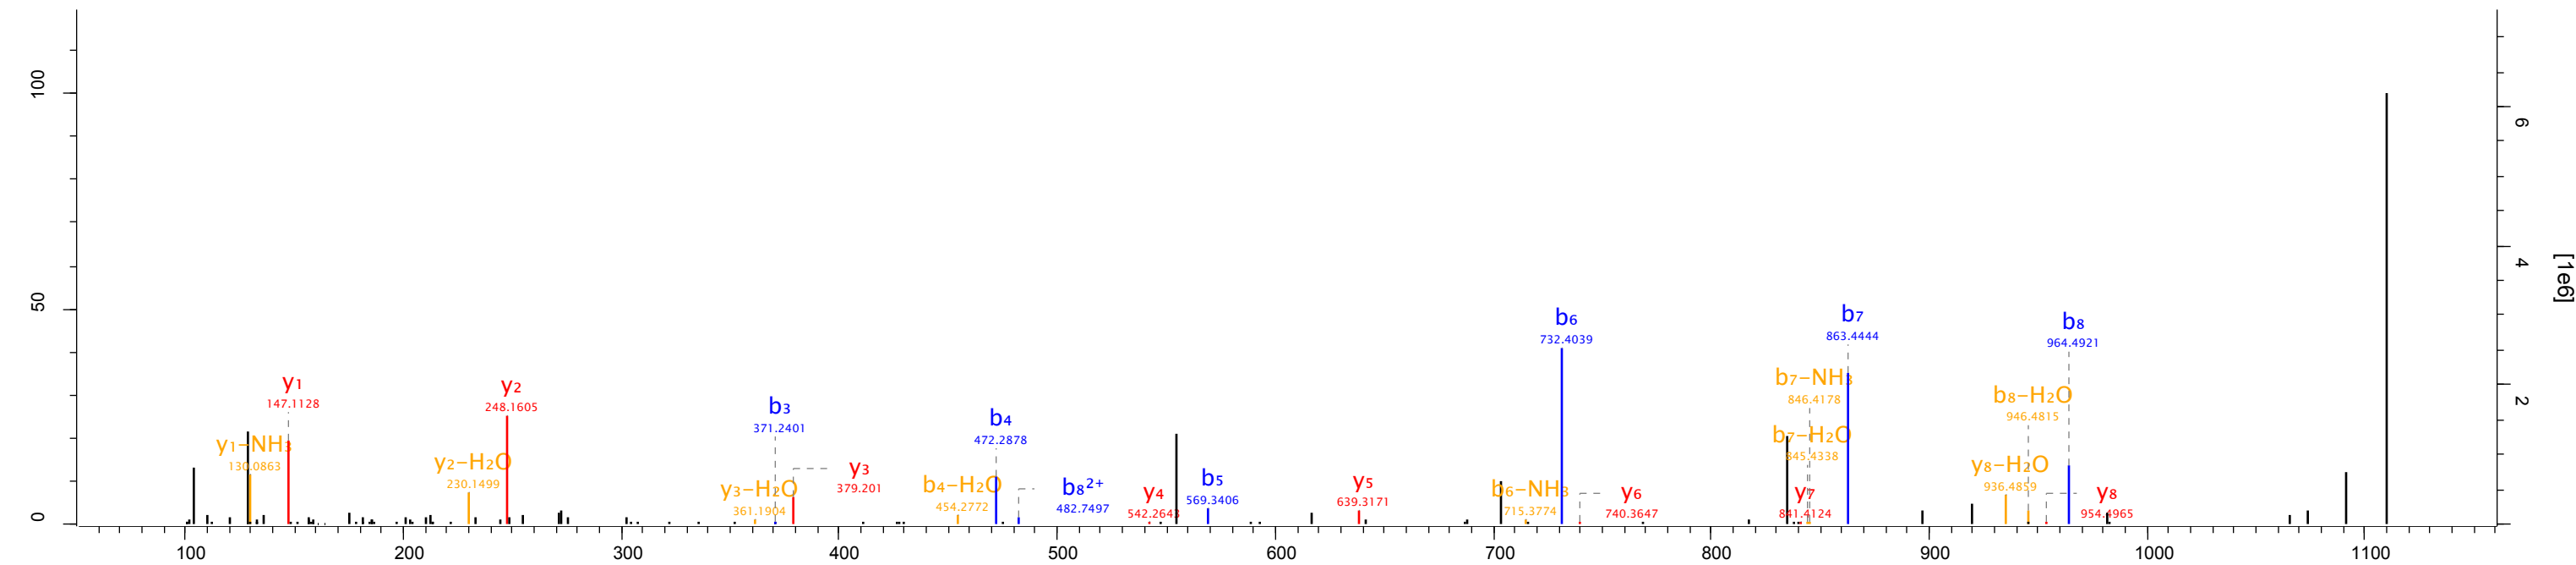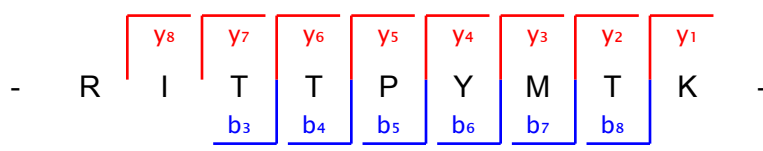

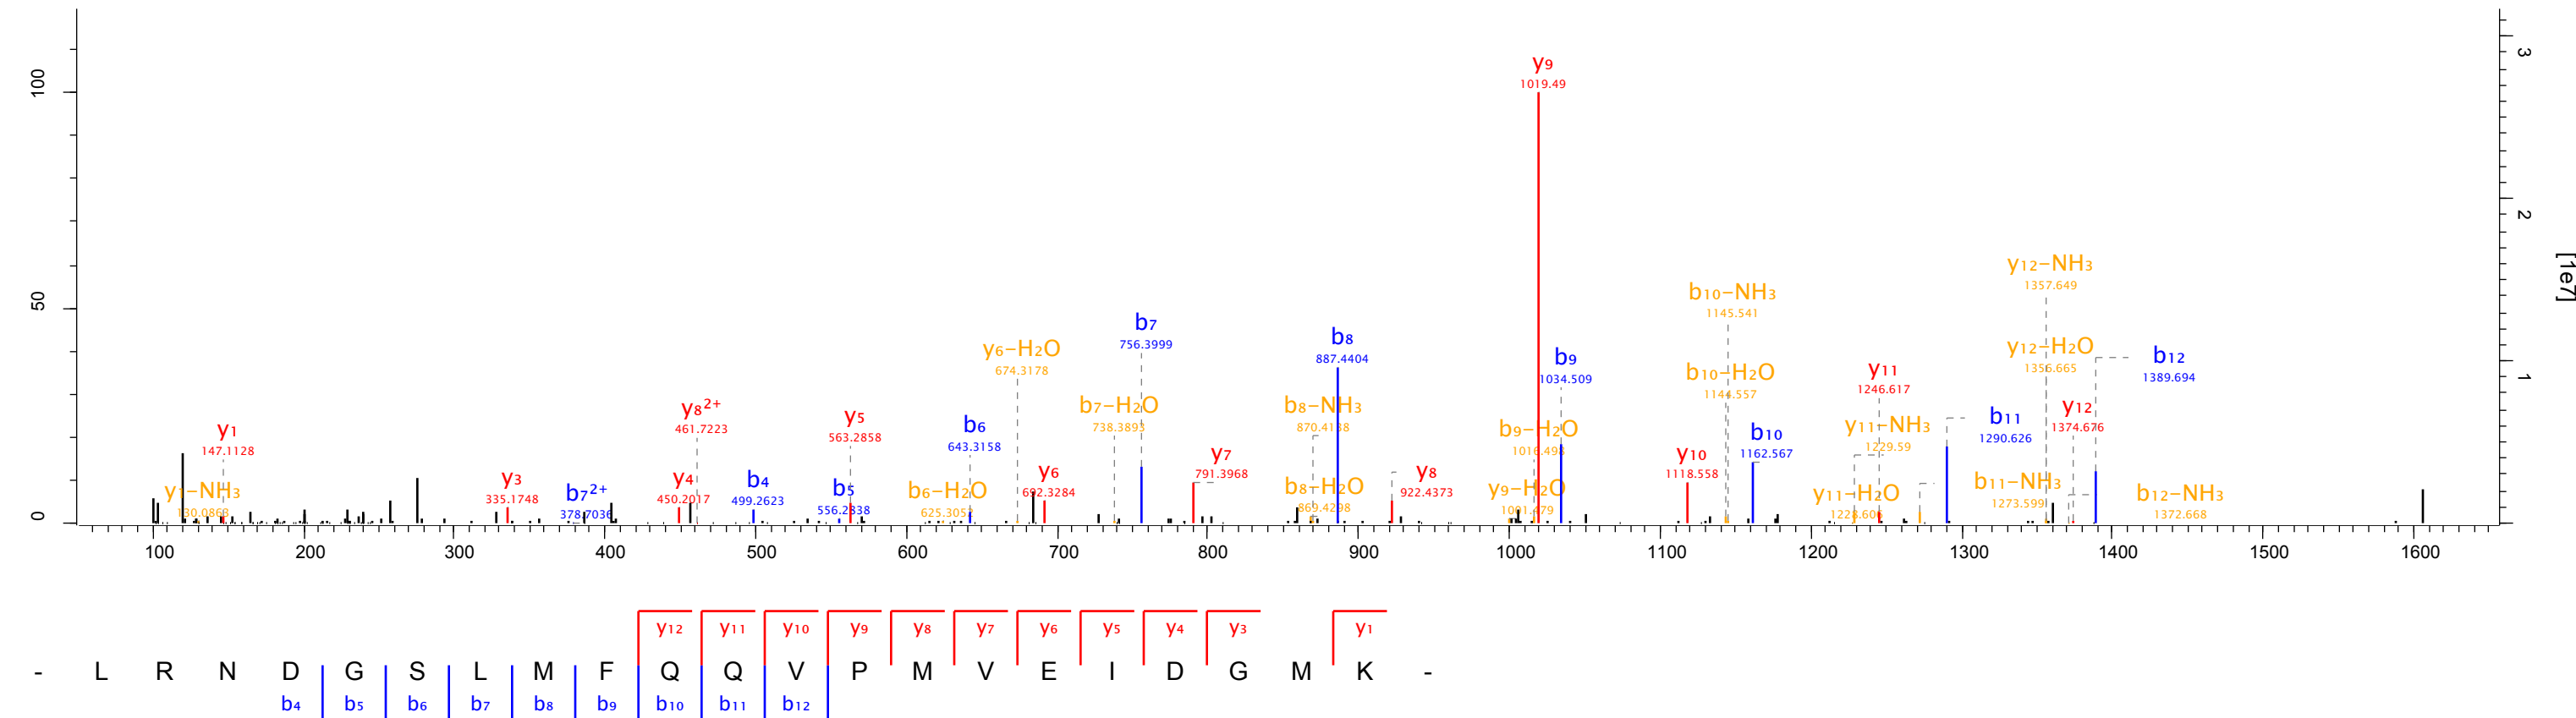

Raw file: 20180707\_MaS\_A375SR\_ML\_proteome\_12  
 Scan: 10352 Method: FTMS; HCD Score: 57.11 m/z: 770.37 Gene names: NAP1L6

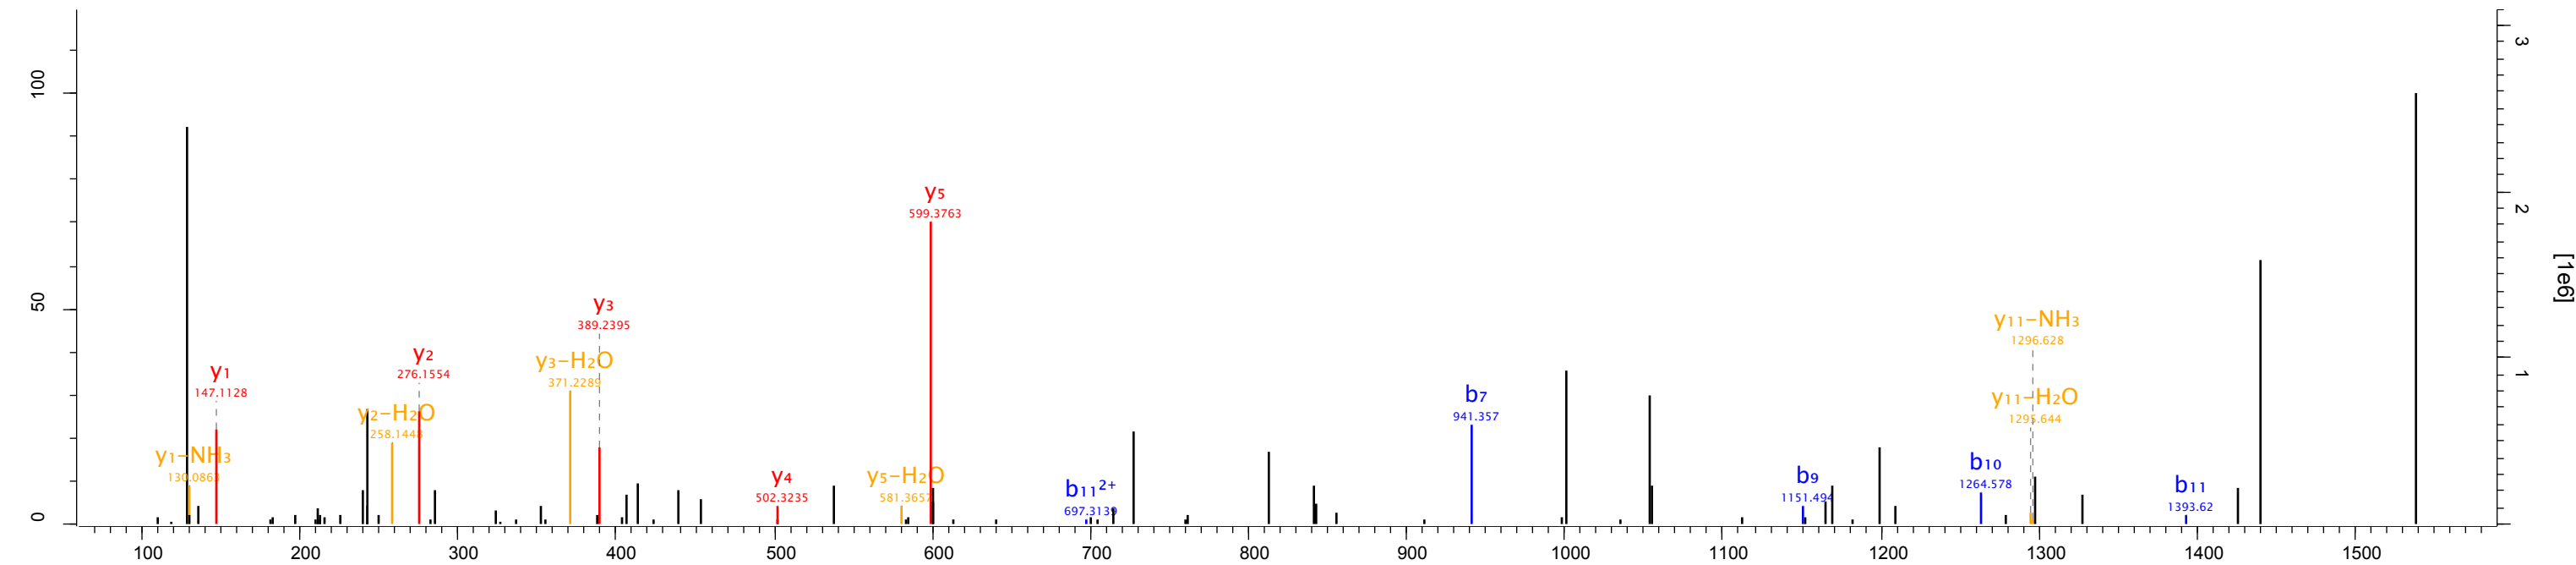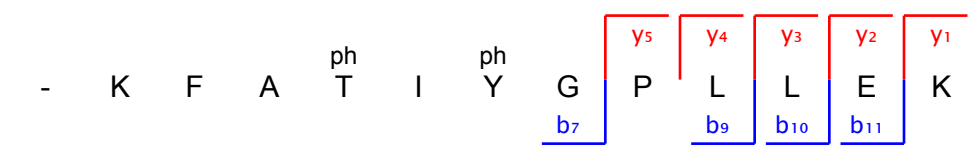

Raw file  
20180707\_MaS\_A375SR\_ML\_proteome\_12

Scan 10732 Method FTMS; HCD Score 97.07 m/z 442.2

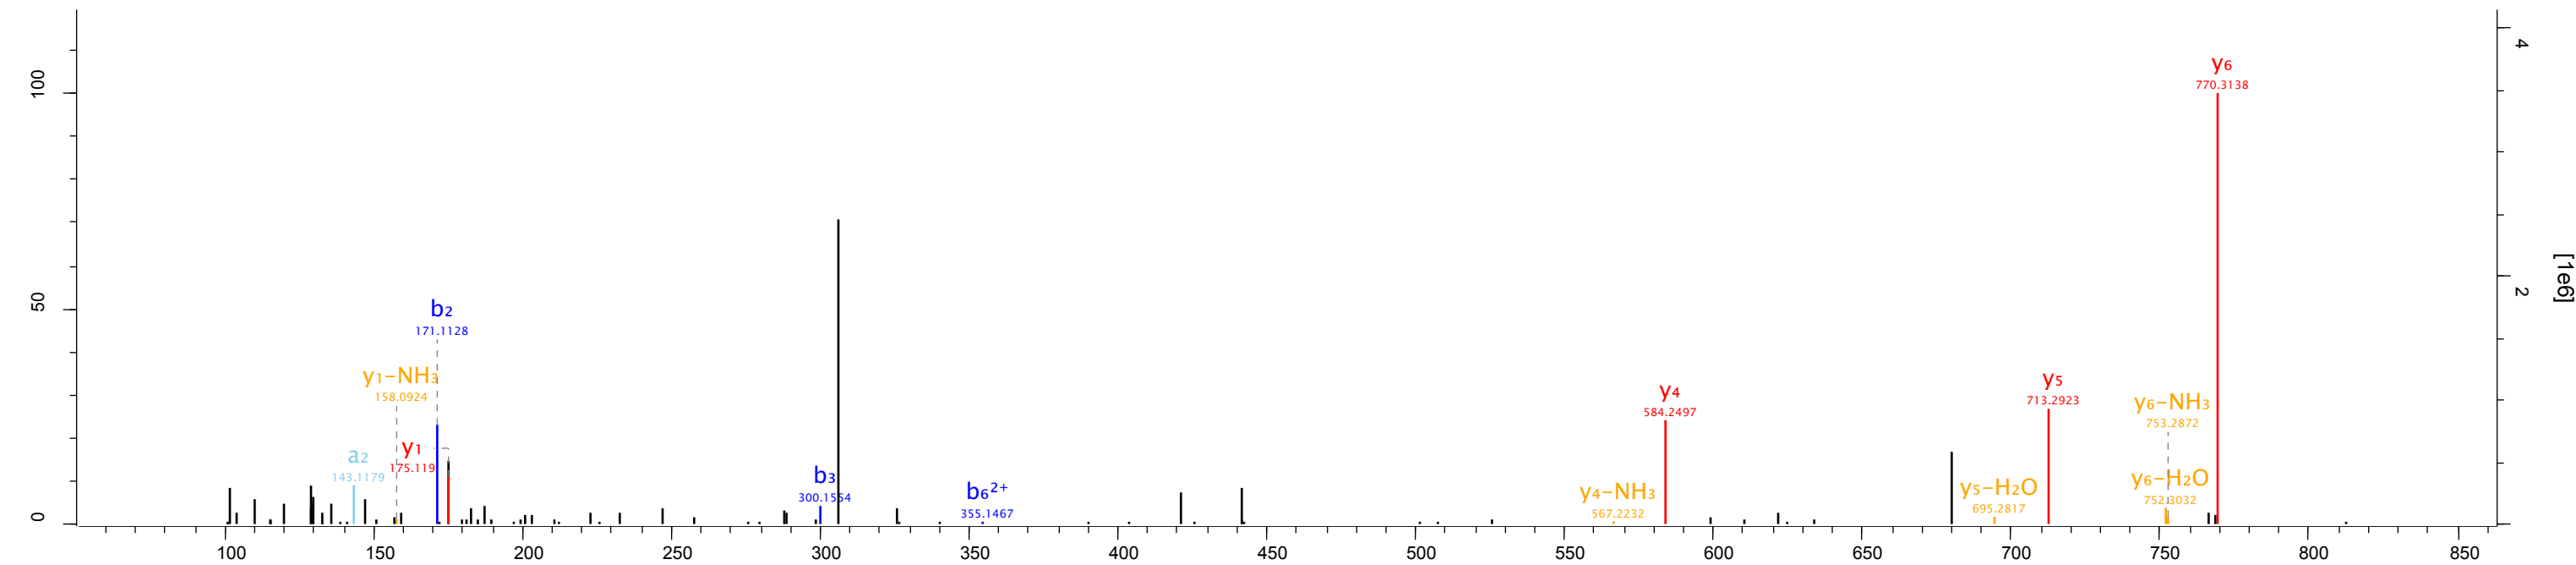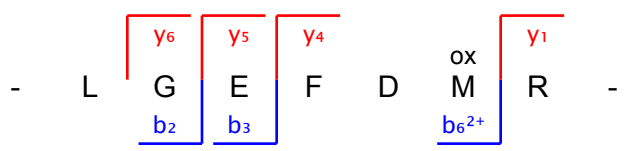

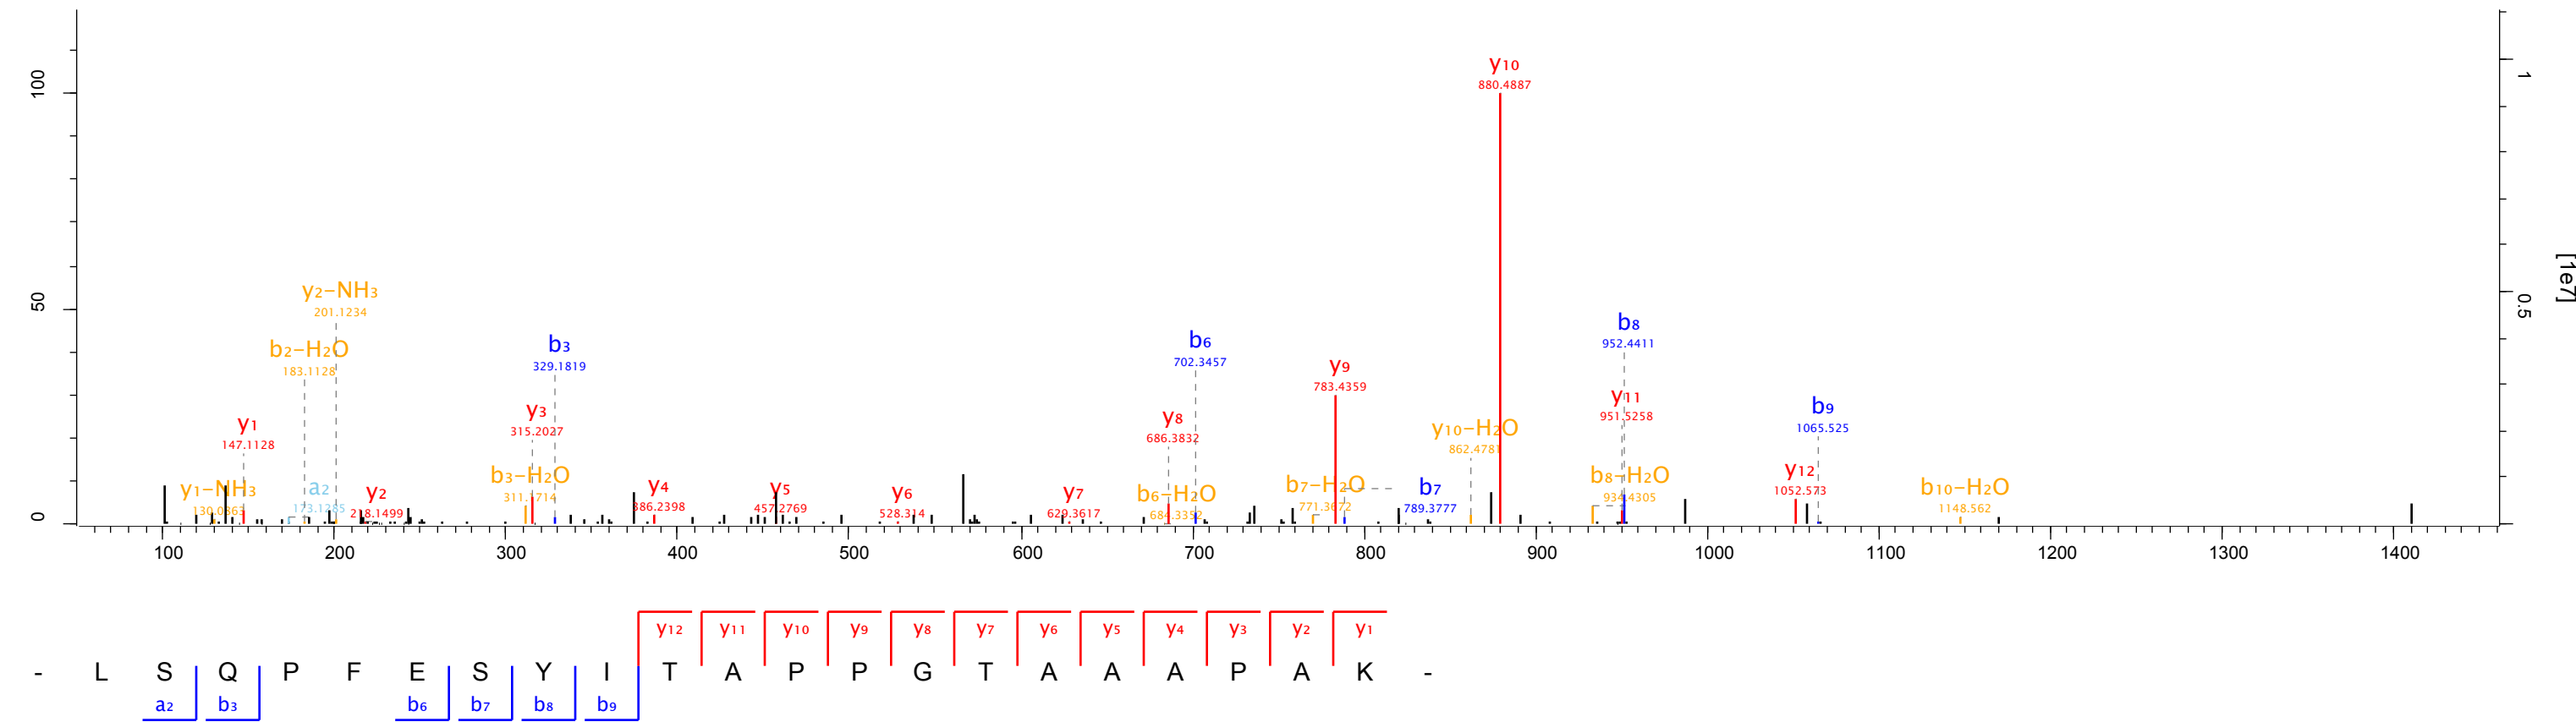

Raw file  
20180707\_MaS\_A375SR\_ML\_proteome\_13

Scan 14102 Method FTMS; HCD Score 133.58 m/z 486.73 Gene names TMEM258

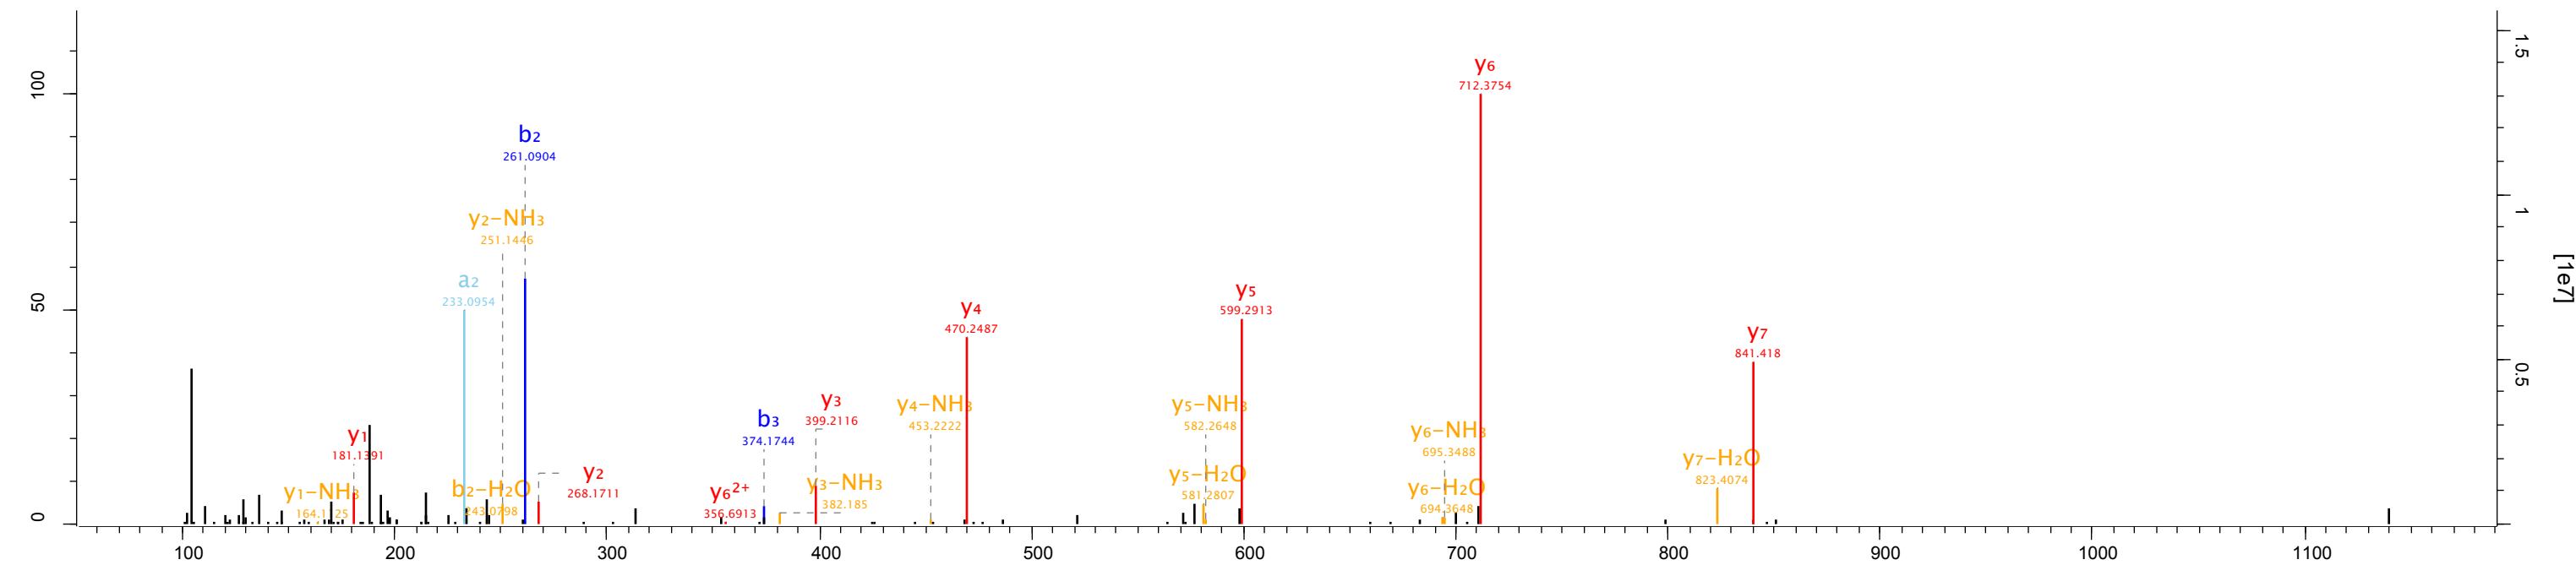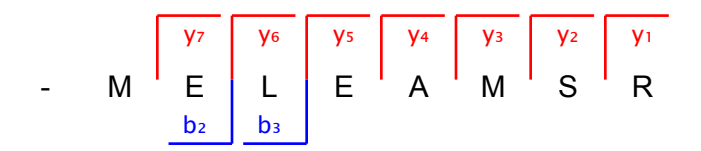

Raw file 20180707\_MaS\_A375SR\_ML\_proteome\_13 Scan 26102 Method FTMS; HCD Score 66.27 m/z 504.28 Gene names PGM5

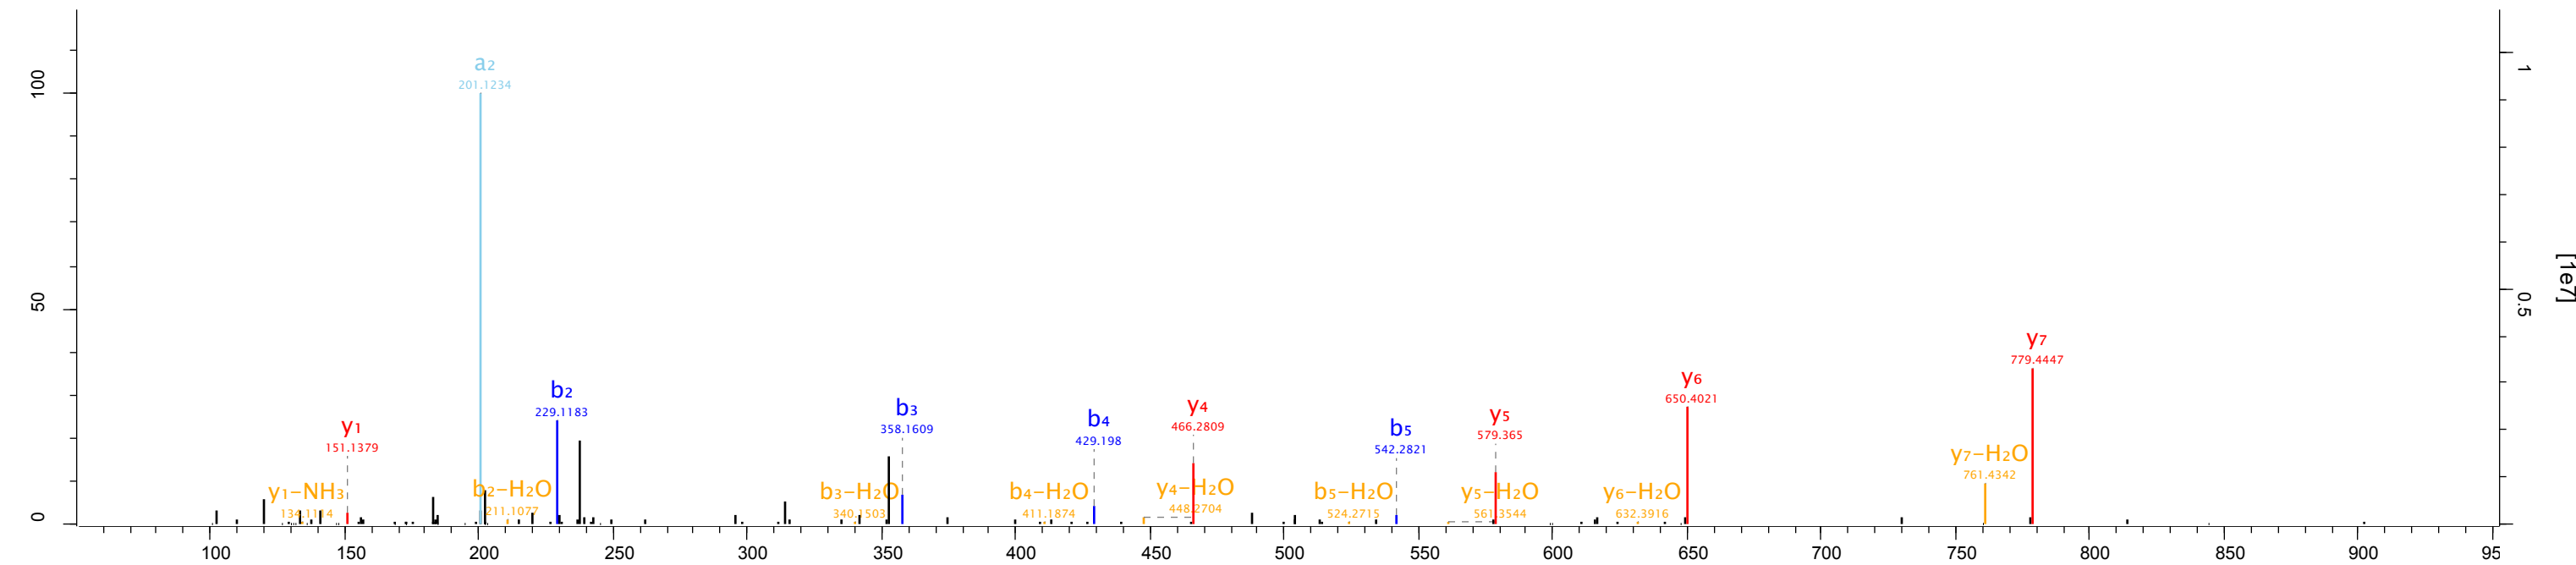

Raw file  
20180707\_MaS\_A375SR\_ML\_proteome\_13

Scan 27212 Method FTMS; HCD Score 98.54 m/z 1142.05 Gene names CNIH4

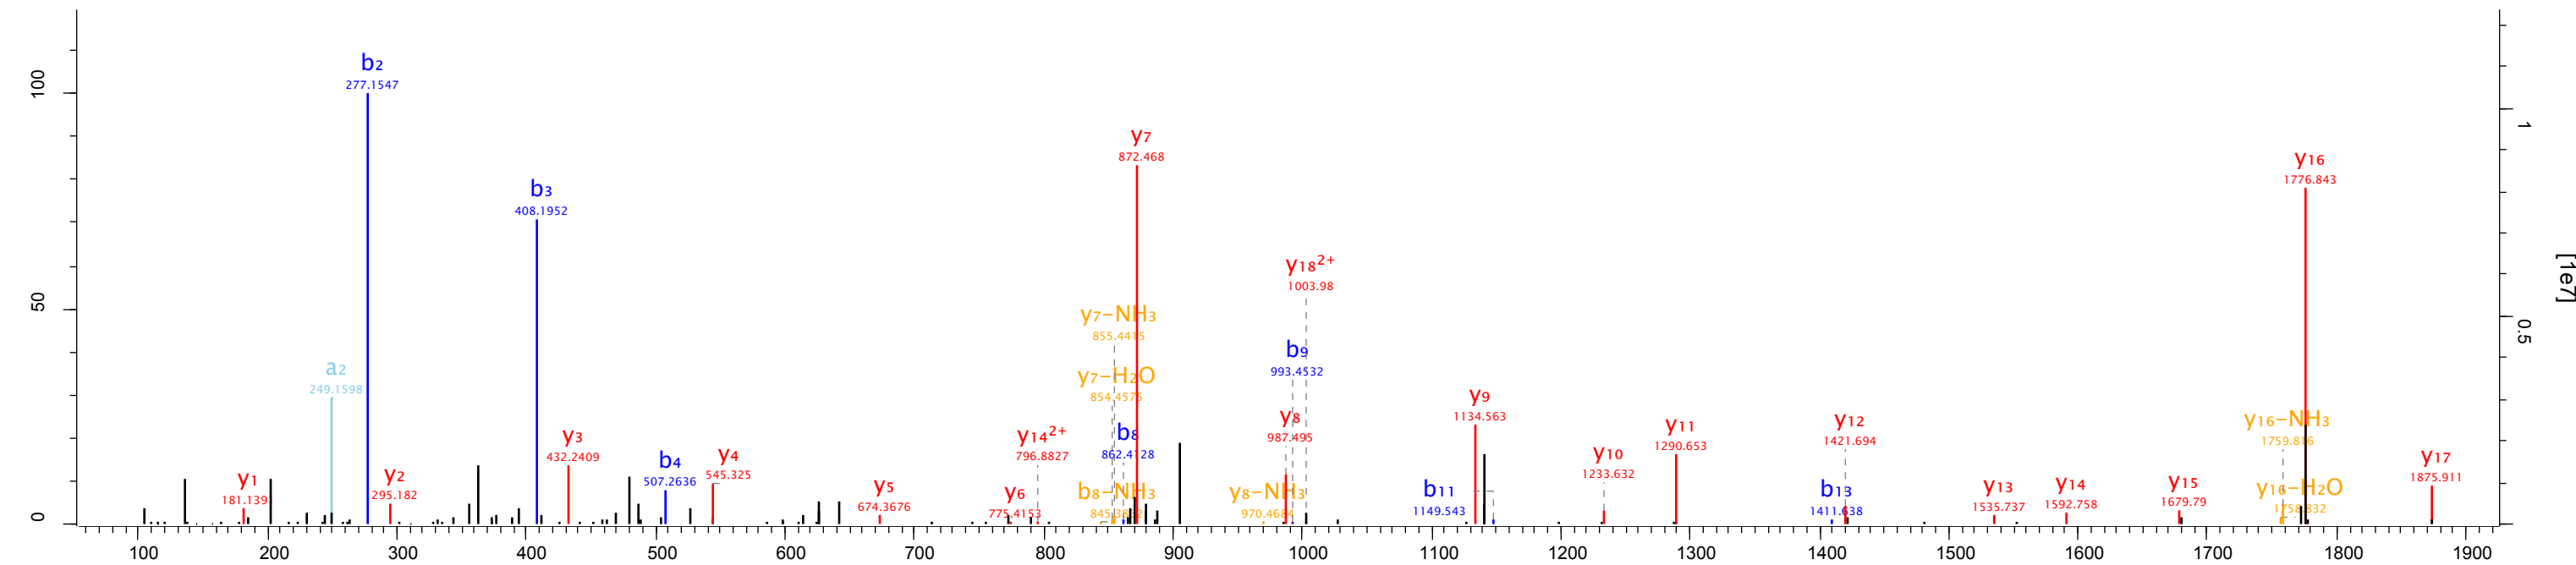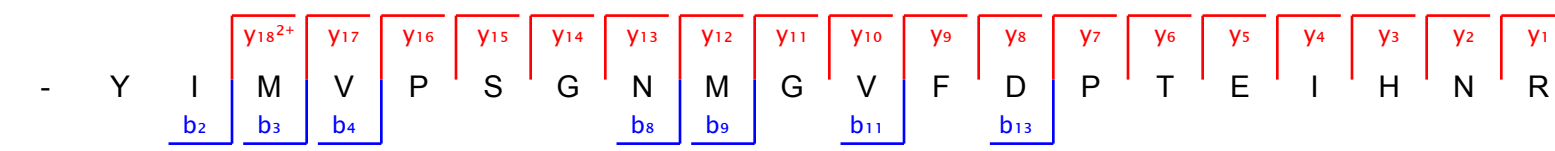



Raw file: 20180707\_MaS\_A375SR\_ML\_proteome\_13  
 Scan: 3282 Method: FTMS; HCD Score: 50.11 m/z: 538.76 Gene names: TM4SF1

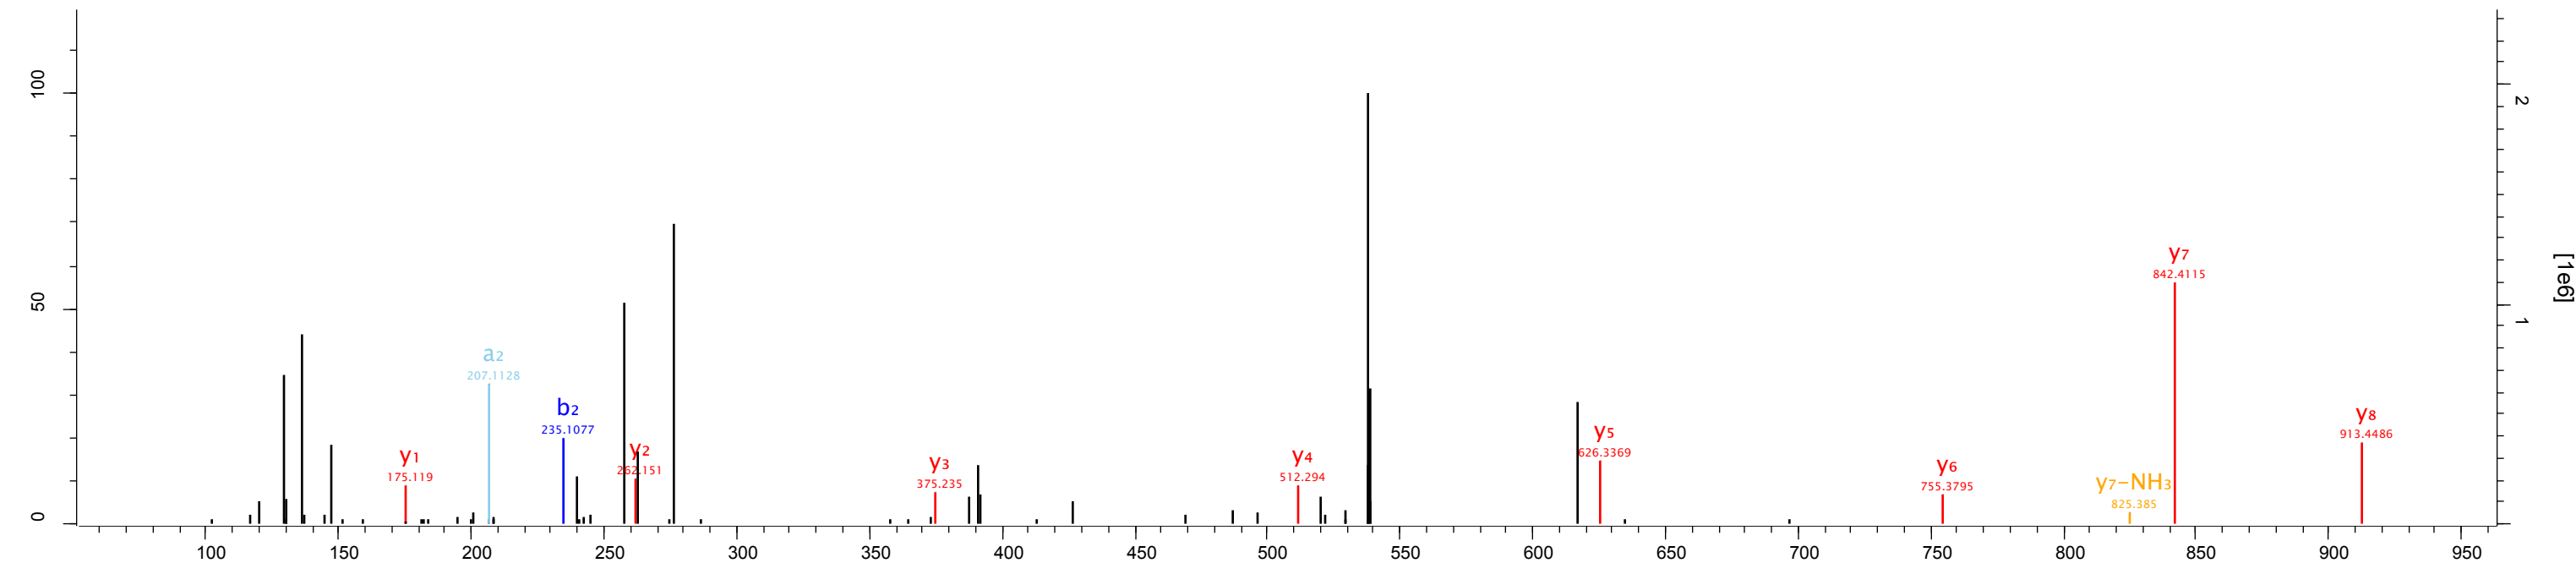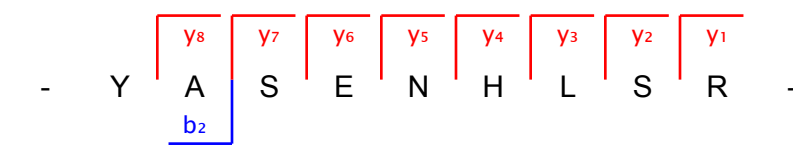

Raw file 20180707\_MaS\_A375SR\_ML\_proteome\_14 Scan 13882 Method FTMS; HCD Score 112.42 m/z 690.33 Gene names ZNF324

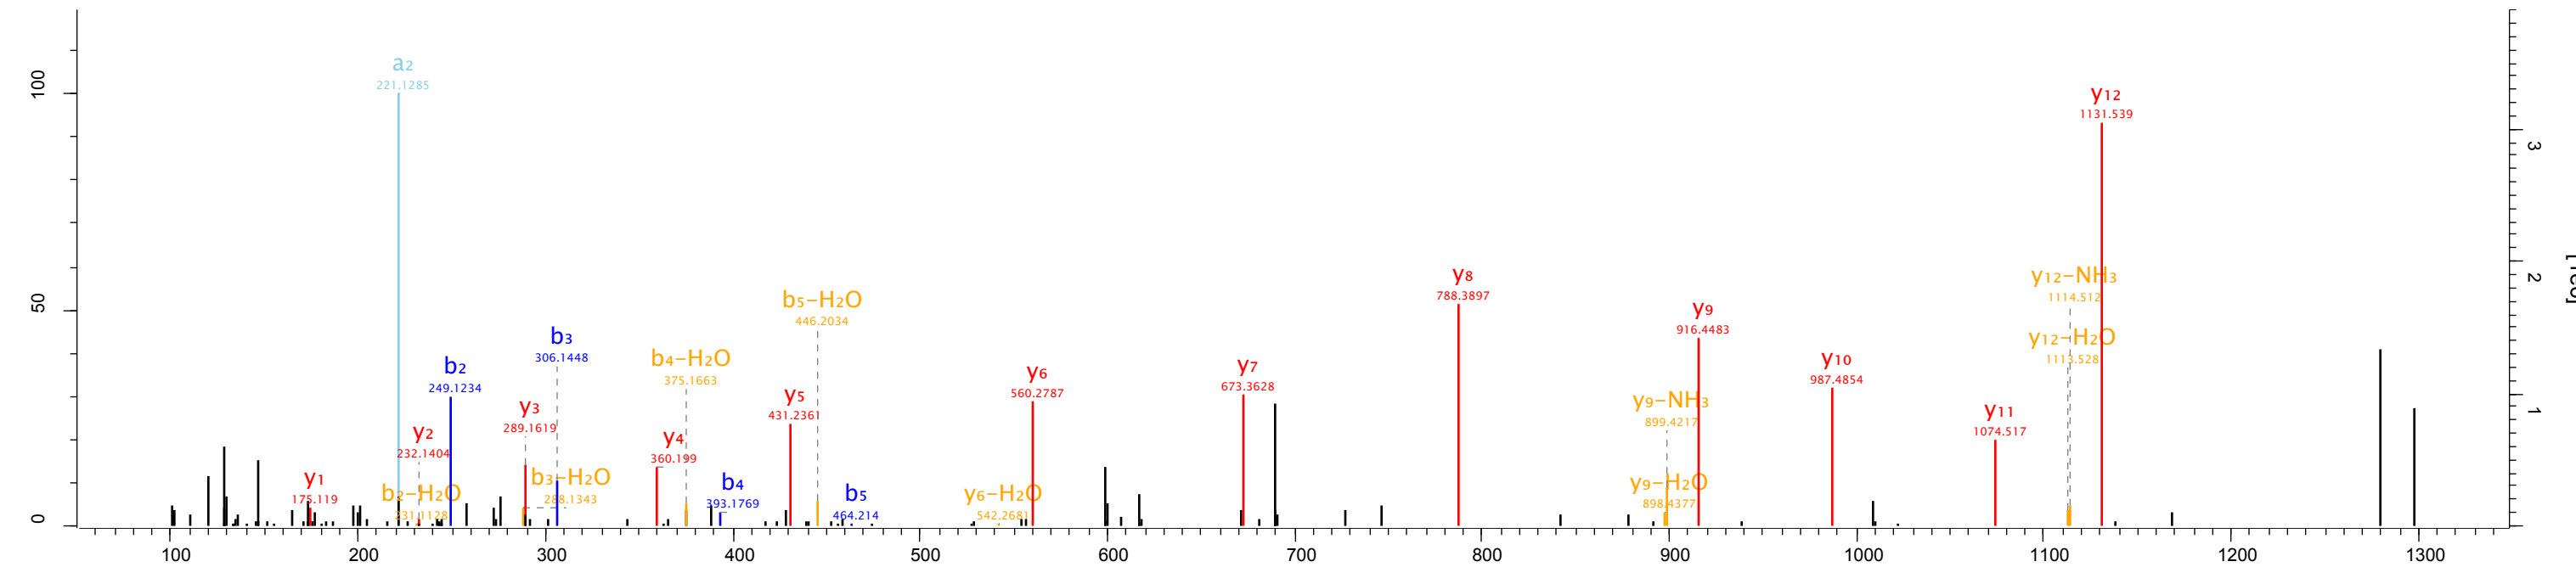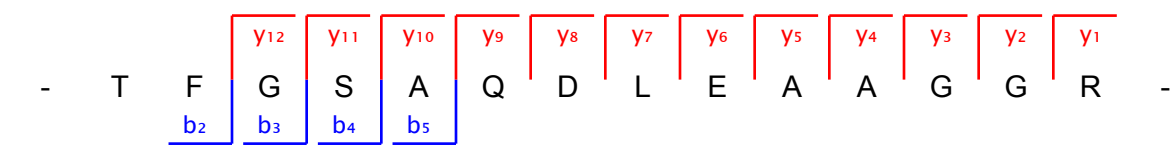

Raw file: 20180707\_MaS\_A375SR\_ML\_proteome\_14  
 Scan: 17112 Method: FTMS; HCD Score: 90.71 m/z: 485.27

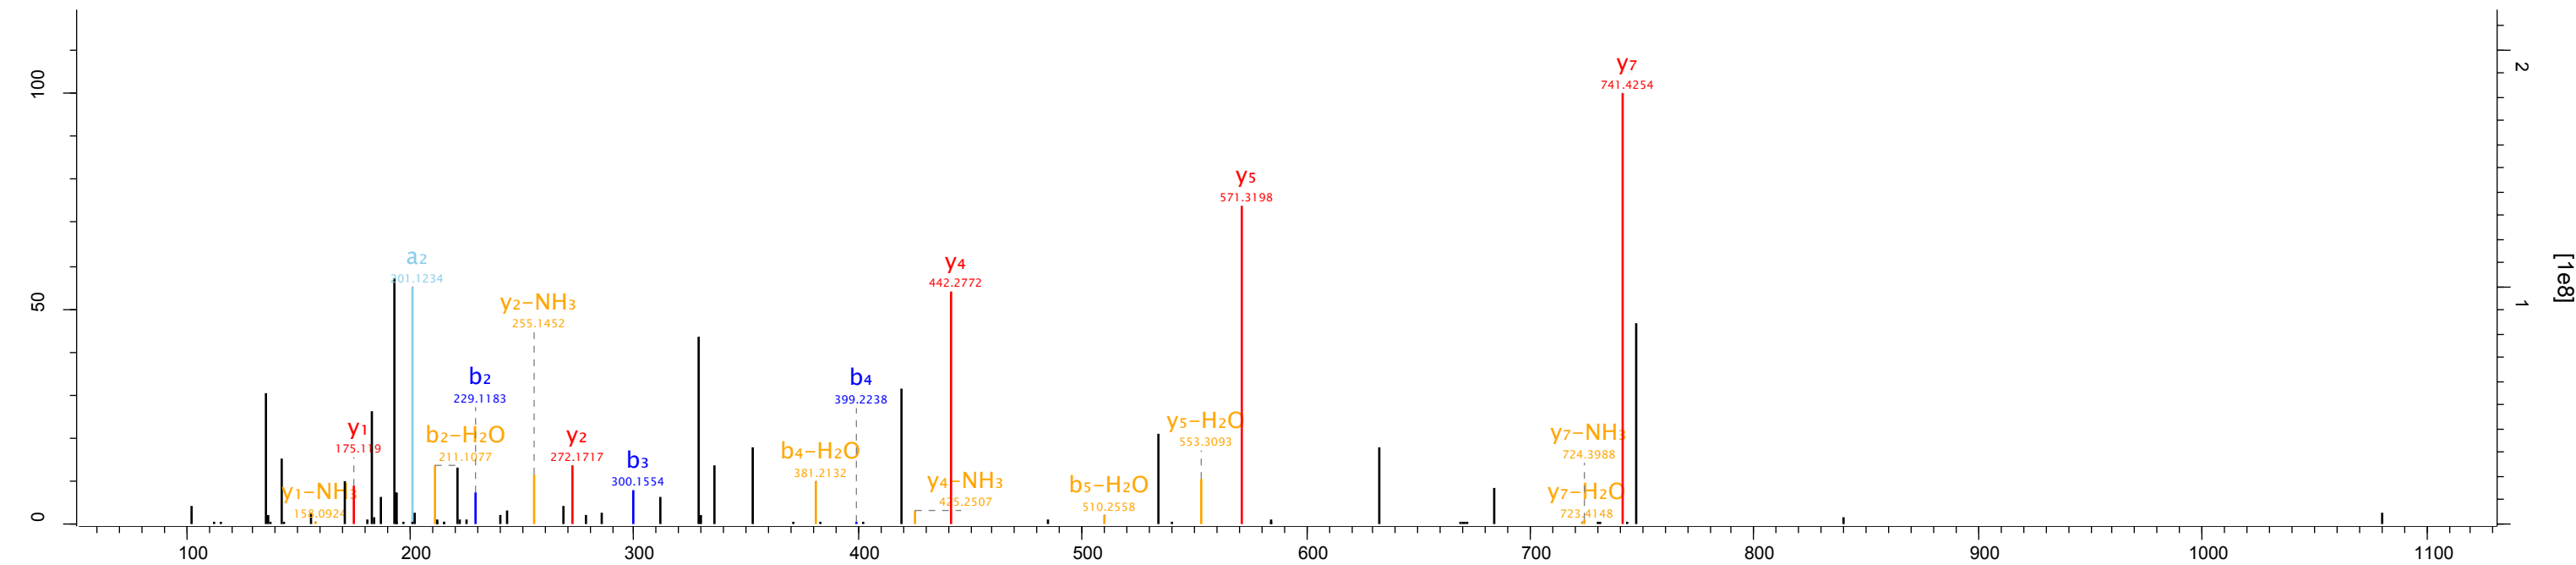

Raw file  
20180707\_MaS\_A375SR\_ML\_proteome\_14

Scan 20462 Method FTMS; HCD Score 40.49 m/z 578.31 Gene names MBLAC1

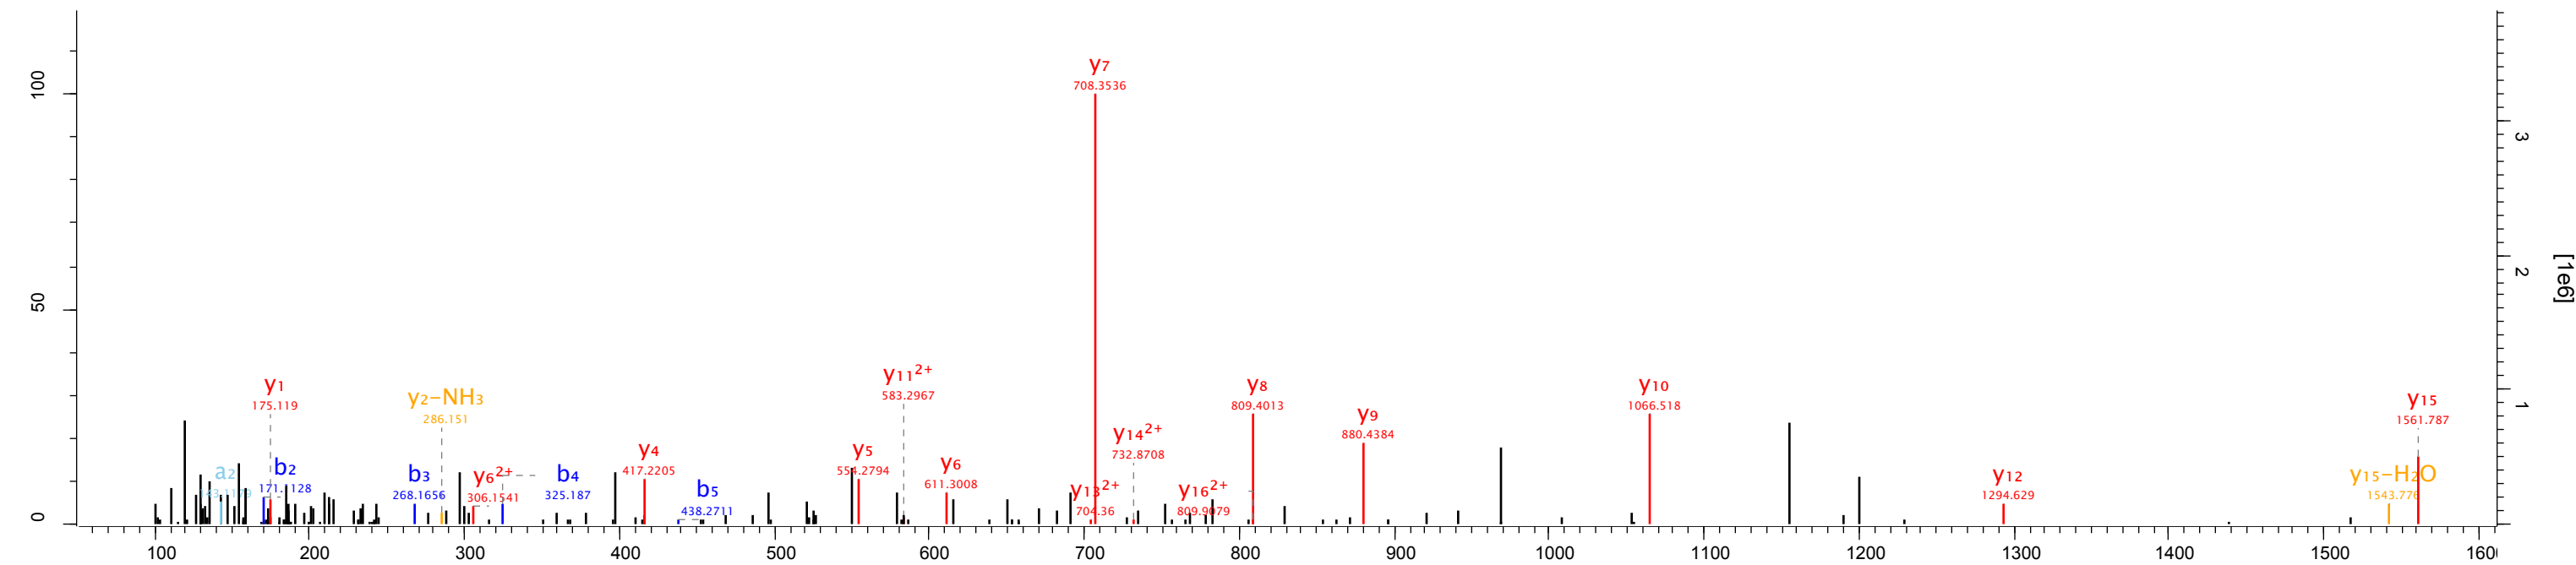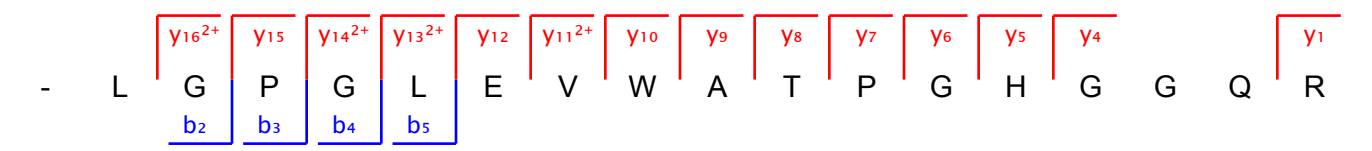

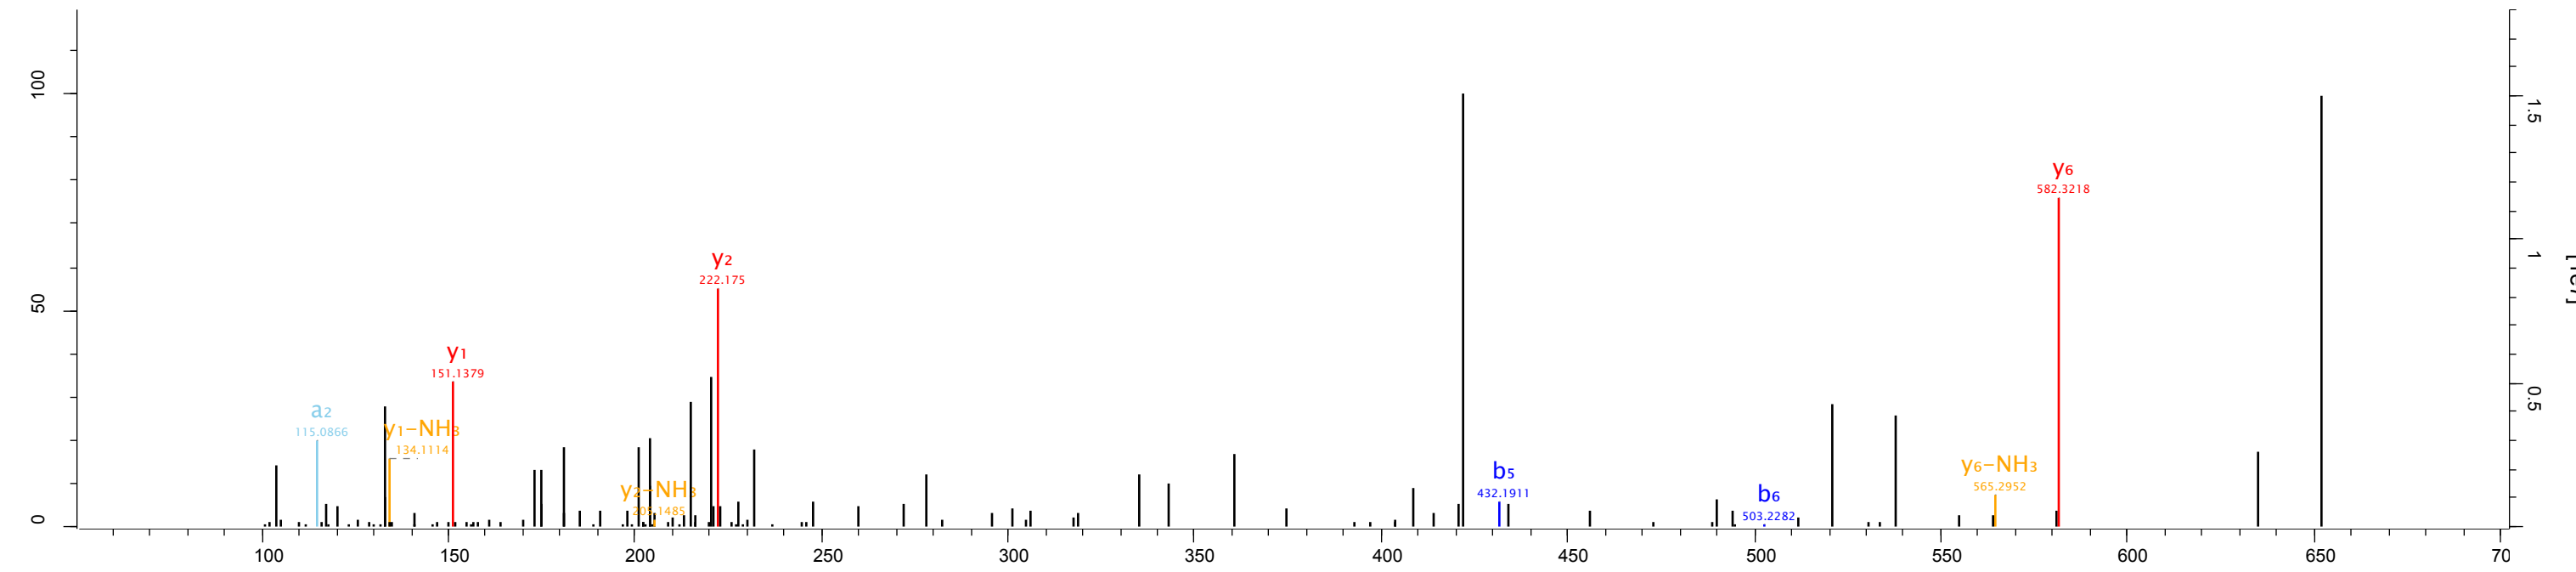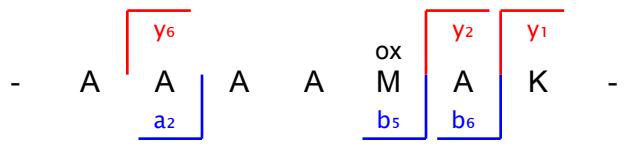

Raw file

20180707\_MaS\_A375SR\_ML\_proteome\_16

| Scan  | Method    | Score | m/z    | Gene names |
|-------|-----------|-------|--------|------------|
| 24272 | FTMS; HCD | 56.2  | 727.35 | FBP1       |

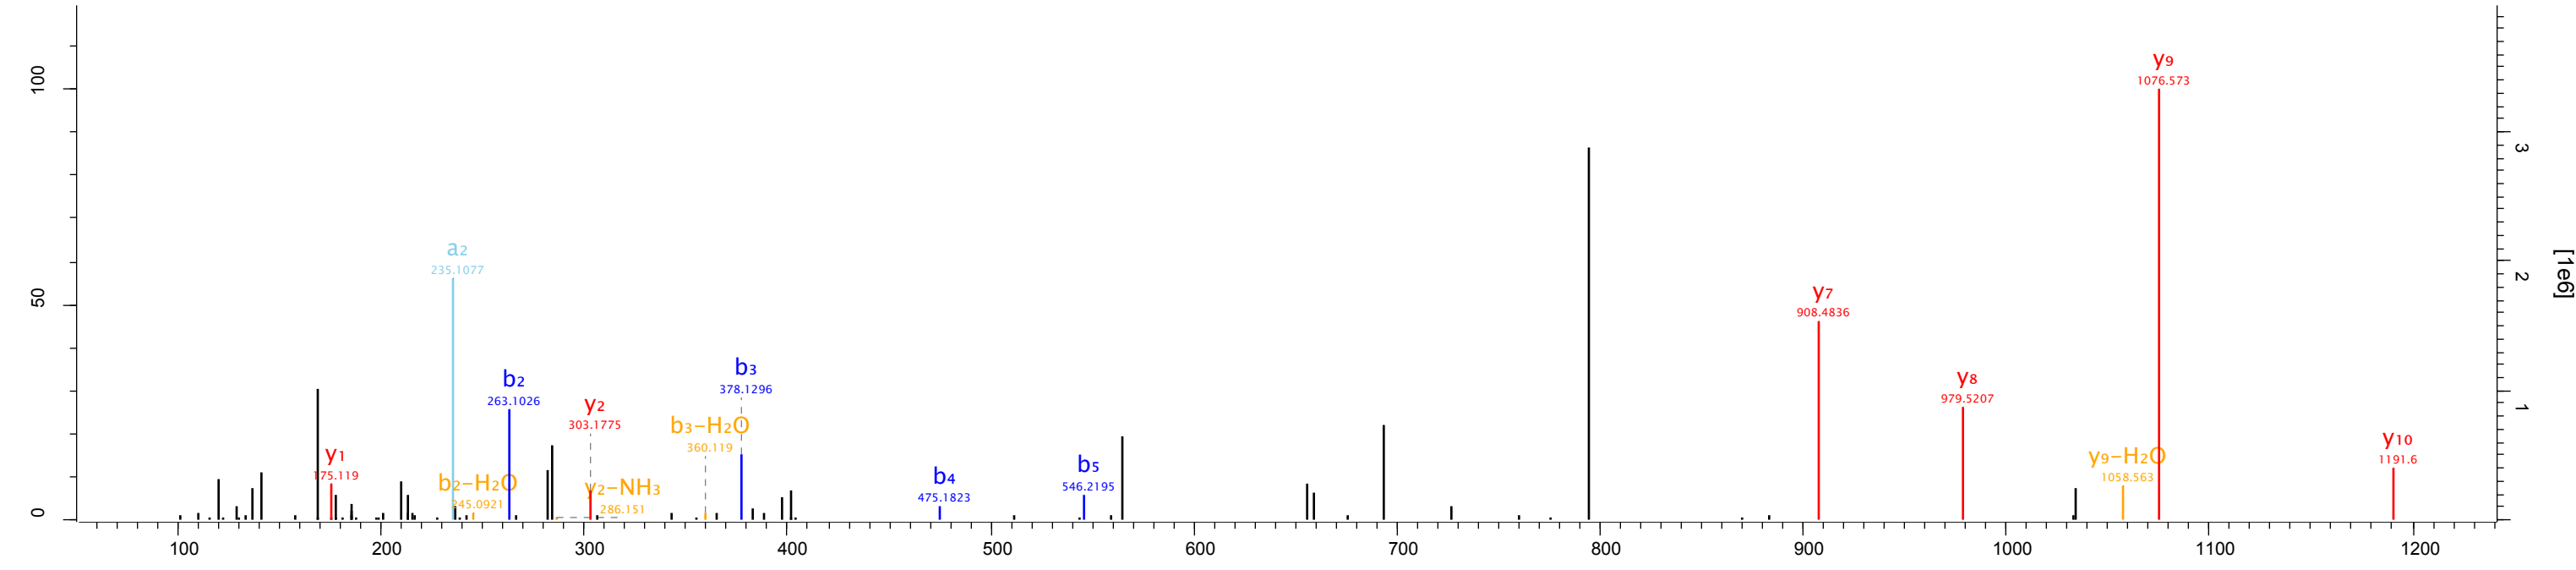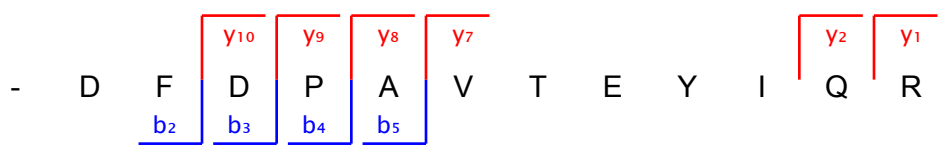

Raw file: 20180707\_MaS\_A375SR\_ML\_proteome\_17  
 Scan: 5912 Method: FTMS; HCD Score: 66.49 m/z: 741.26 Gene names: MTIL

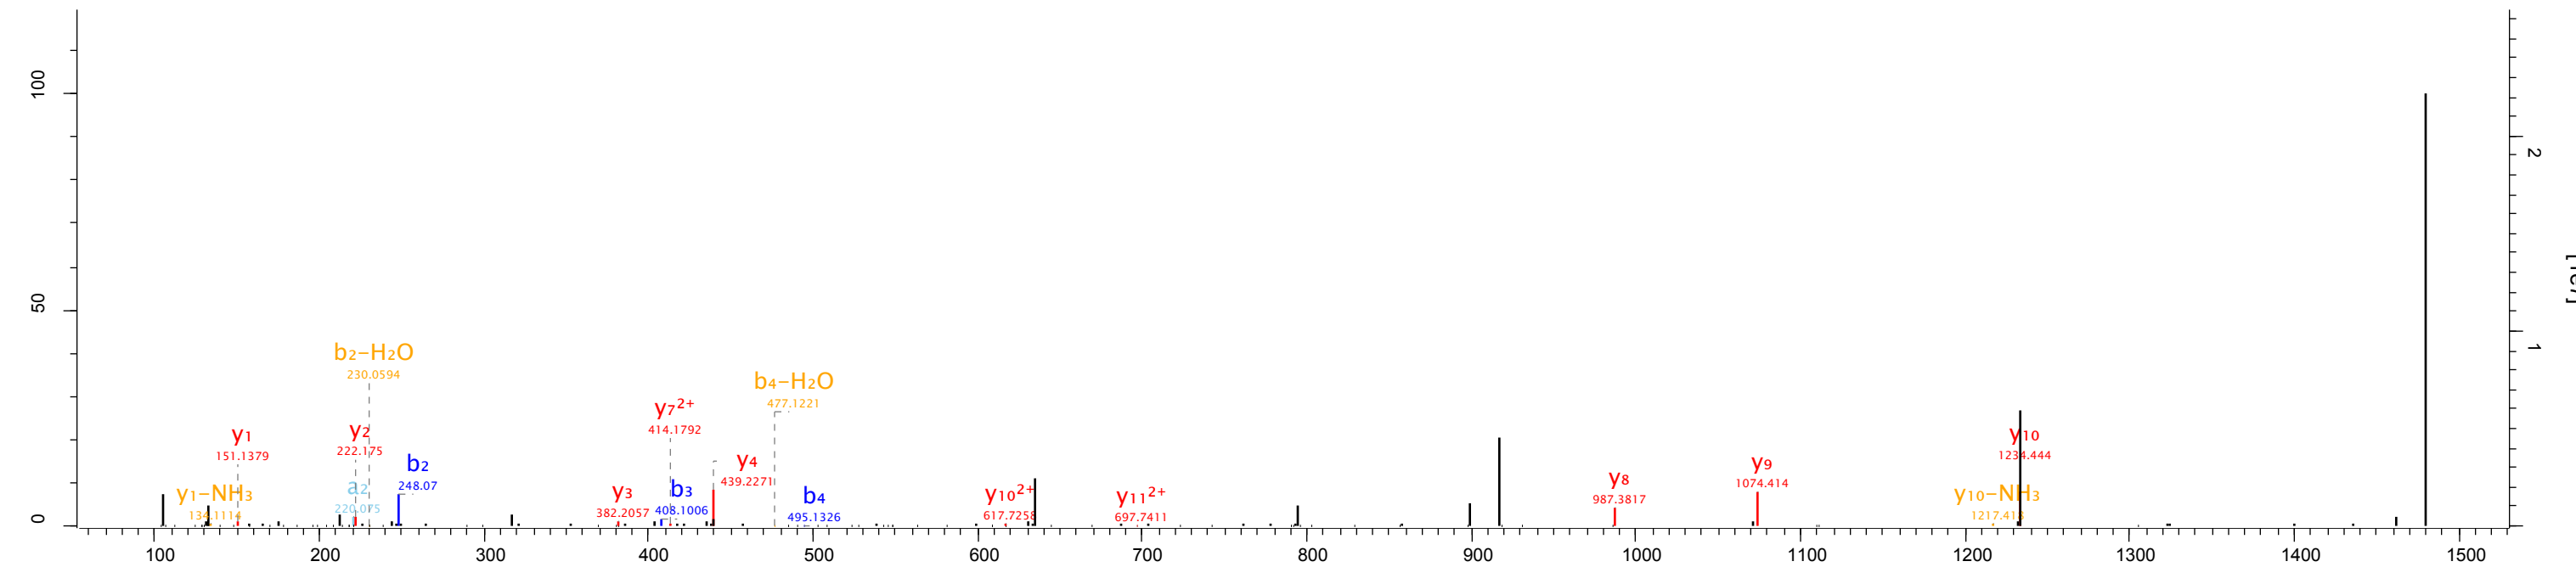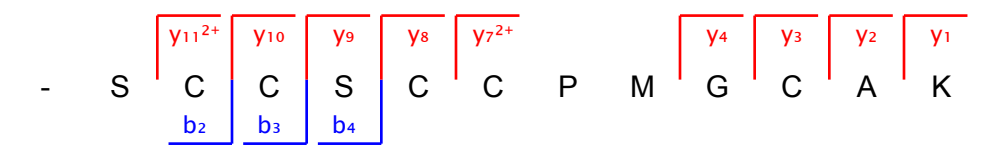

Raw file  
20180707\_MaS\_A375SR\_ML\_proteome\_18

Scan 15292 Method FTMS; HCD Score 69.43 m/z 1121.47

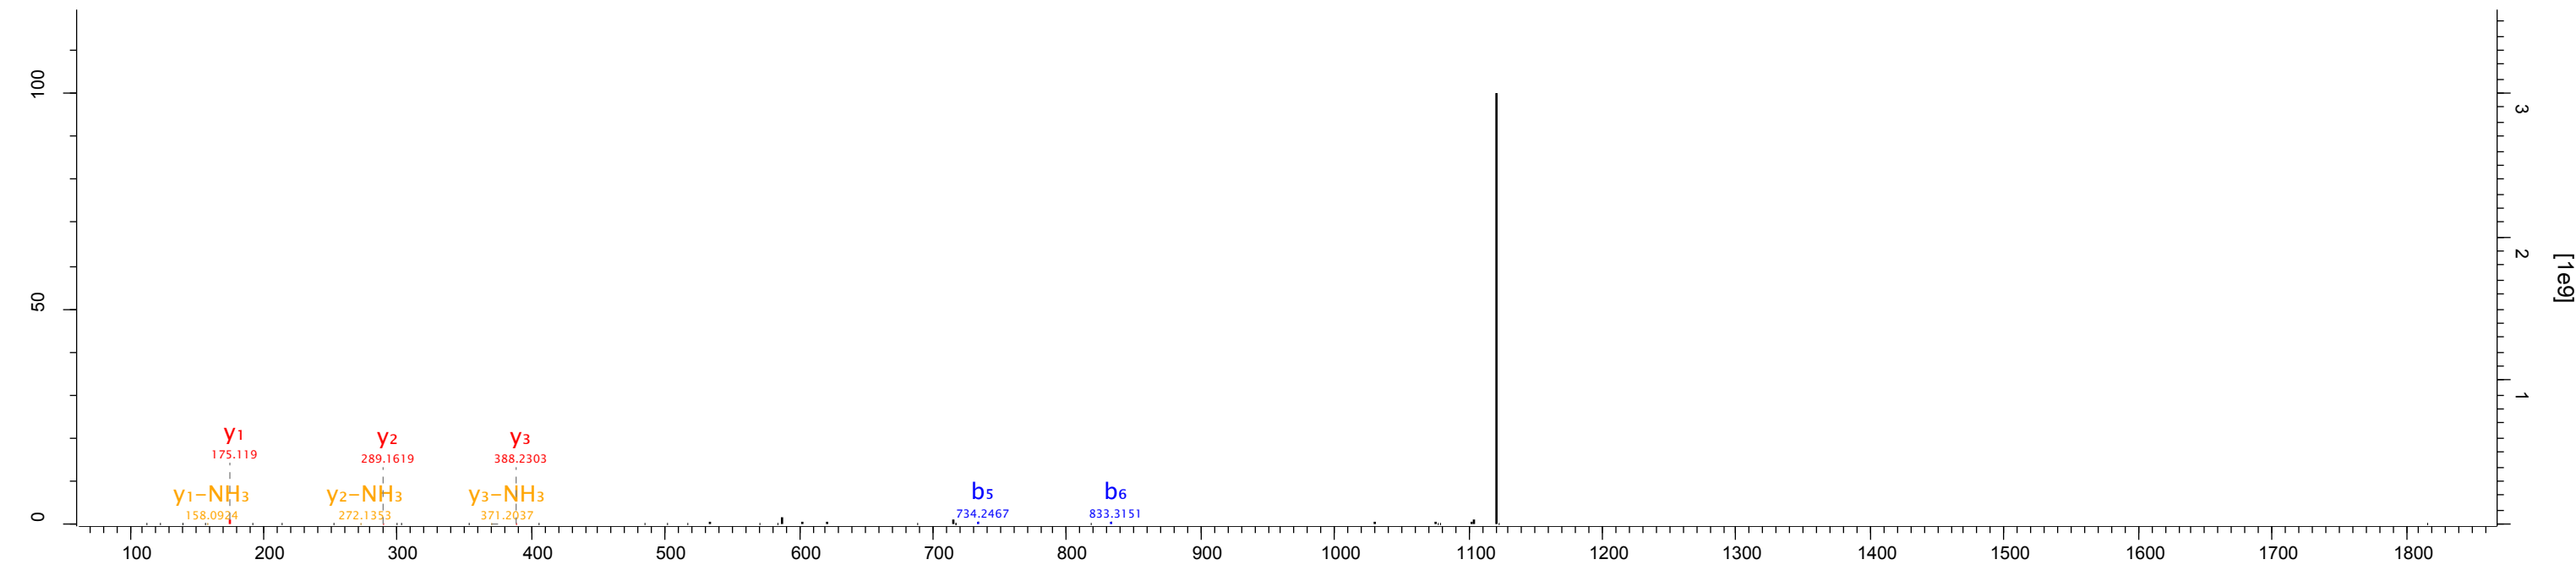



Raw file

20180707\_MaS\_A375SR\_ML\_proteome\_18

| Scan  | Method    | Score | m/z    | Gene names |
|-------|-----------|-------|--------|------------|
| 25862 | FTMS; HCD | 44.32 | 618.78 | ZNF442     |

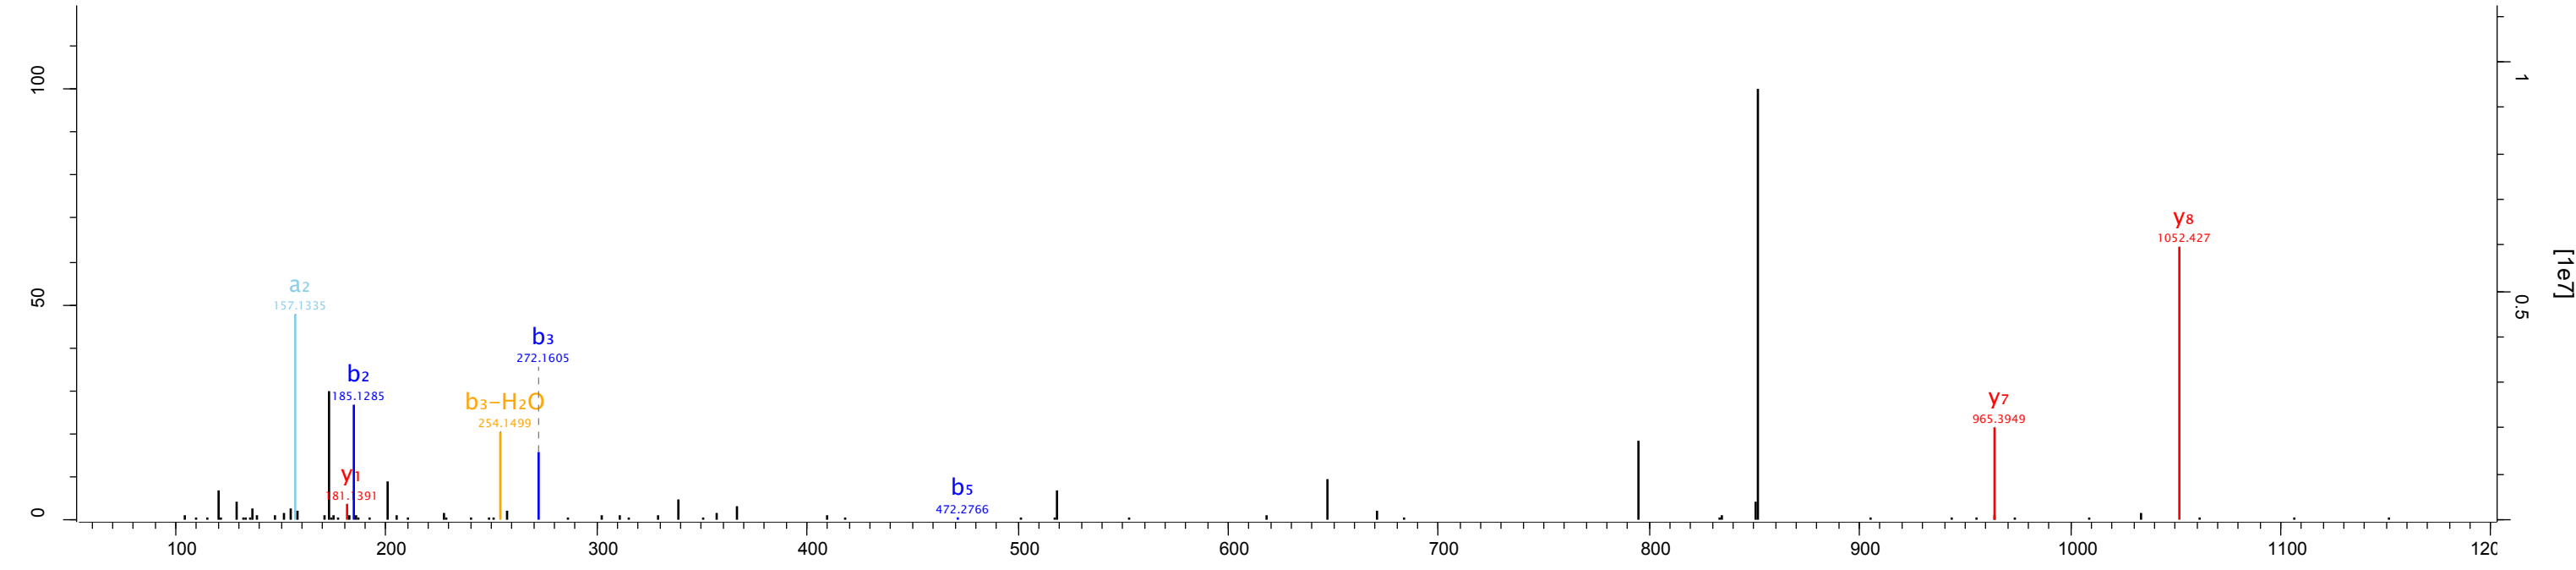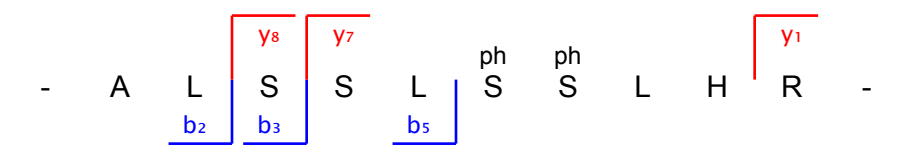

Raw file: 20180707\_MaS\_A375SR\_ML\_proteome\_18  
 Scan: 28522 Method: FTMS; HCD Score: 105.65 m/z: 669.9 Gene names: THEMIS2

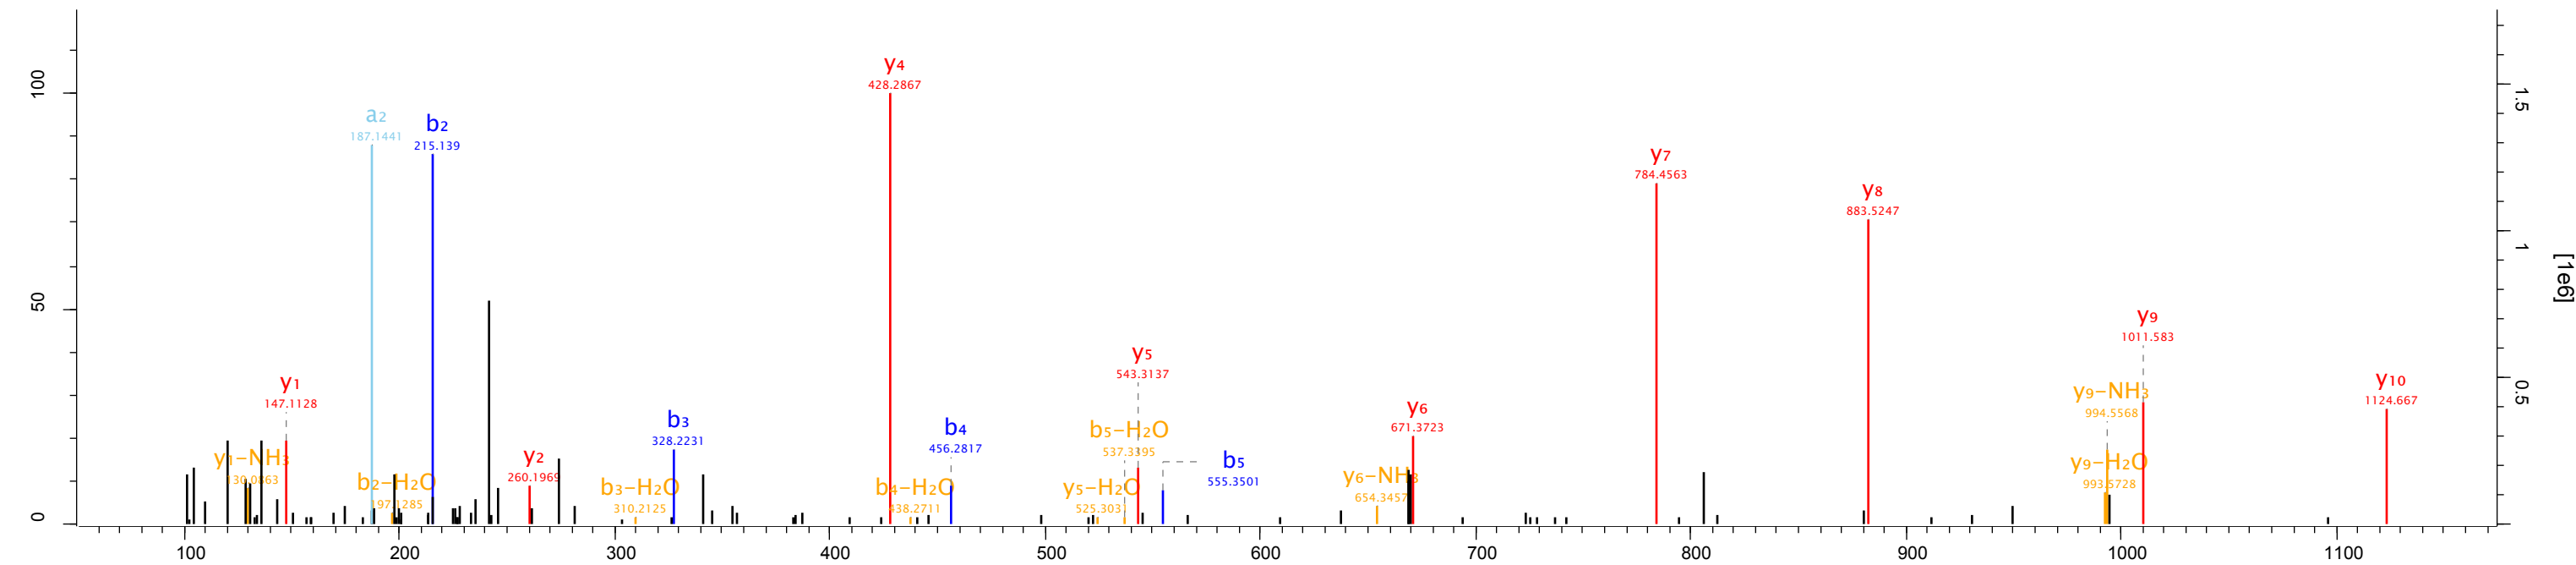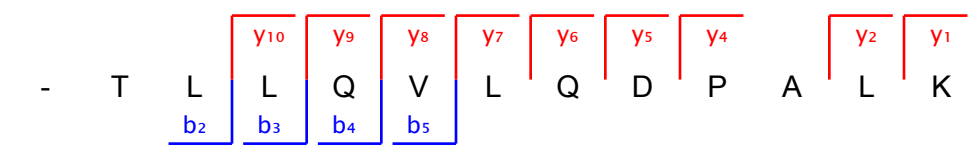

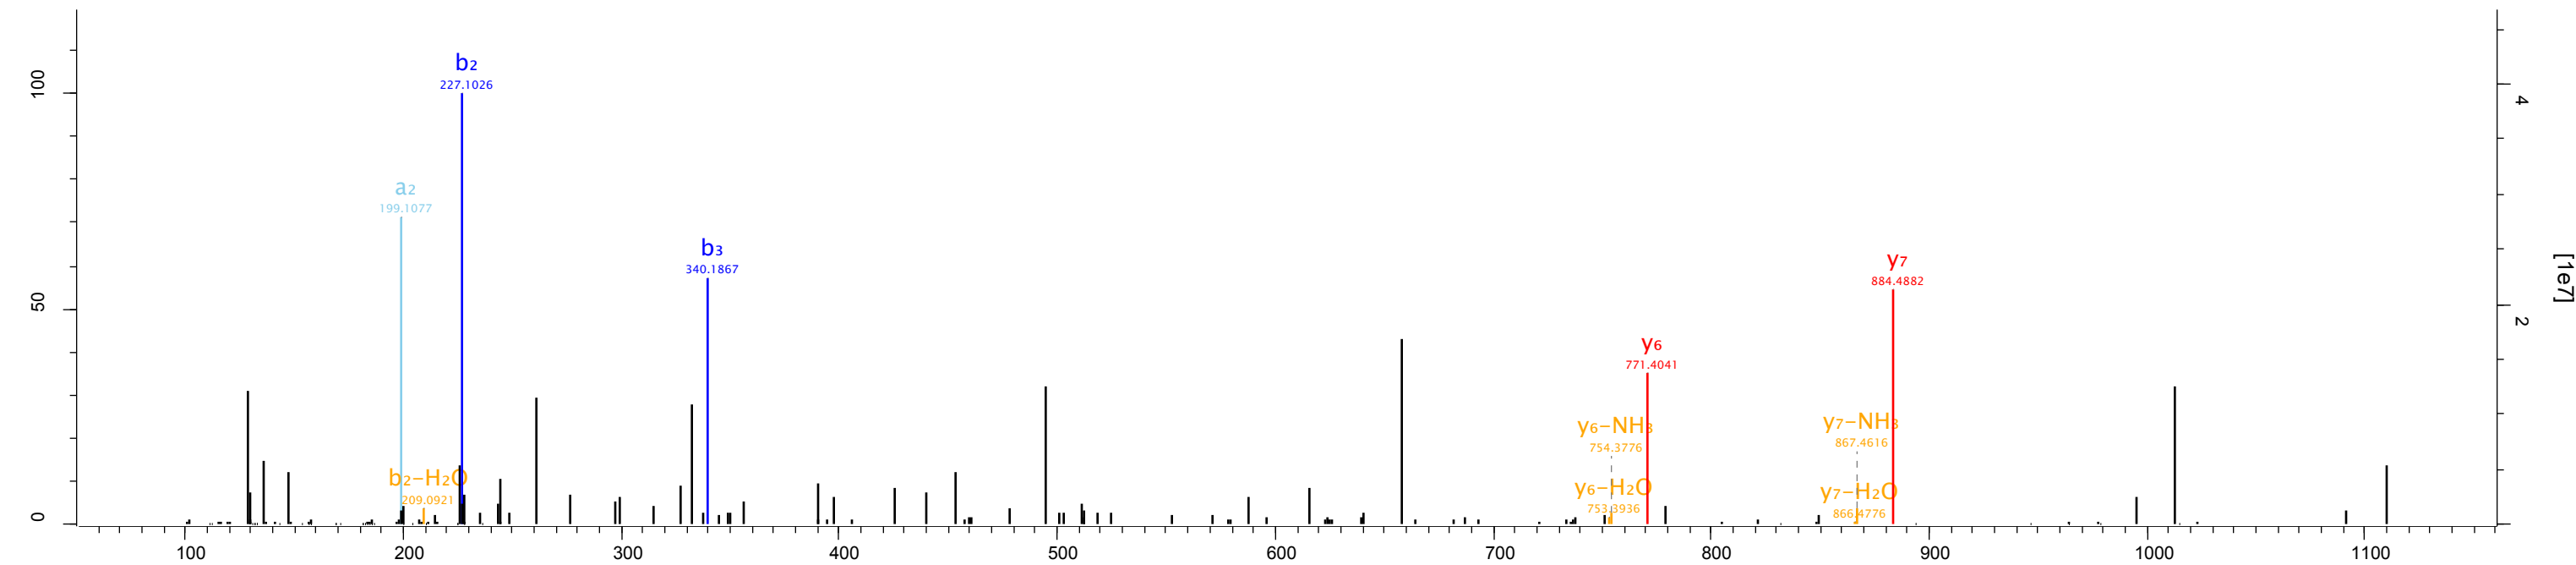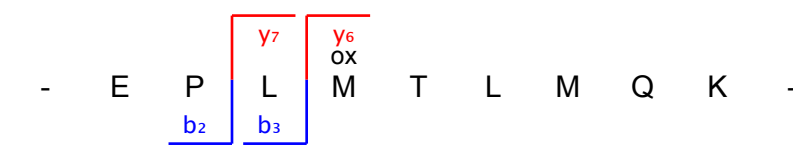

Raw file 20180707\_MaS\_A375SR\_ML\_proteome\_2\_01  
 Scan 17112 Method FTMS; HCD Score 43.59 m/z 448.57 Gene names B9D1

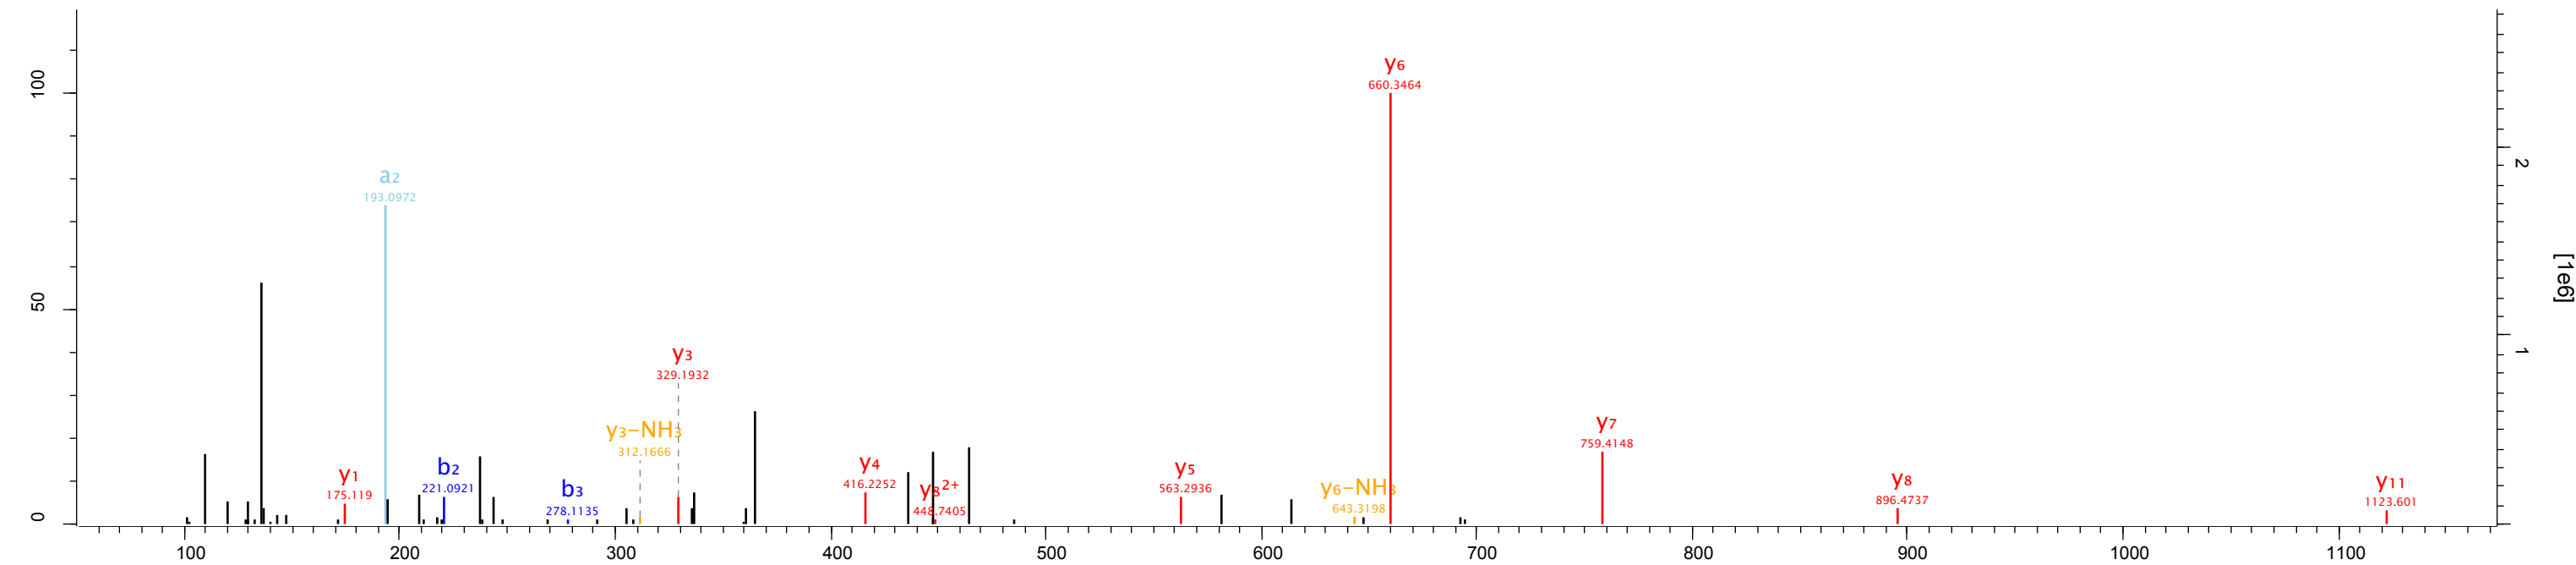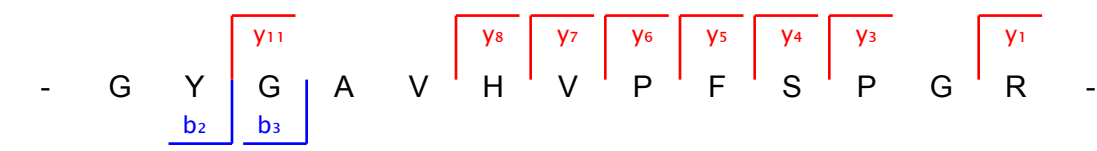

Raw file  
20180707\_MaS\_A375SR\_ML\_proteome\_2\_01

Scan 24532 Method FTMS; HCD Score 107.69 m/z 504.73 Gene names TMEM258

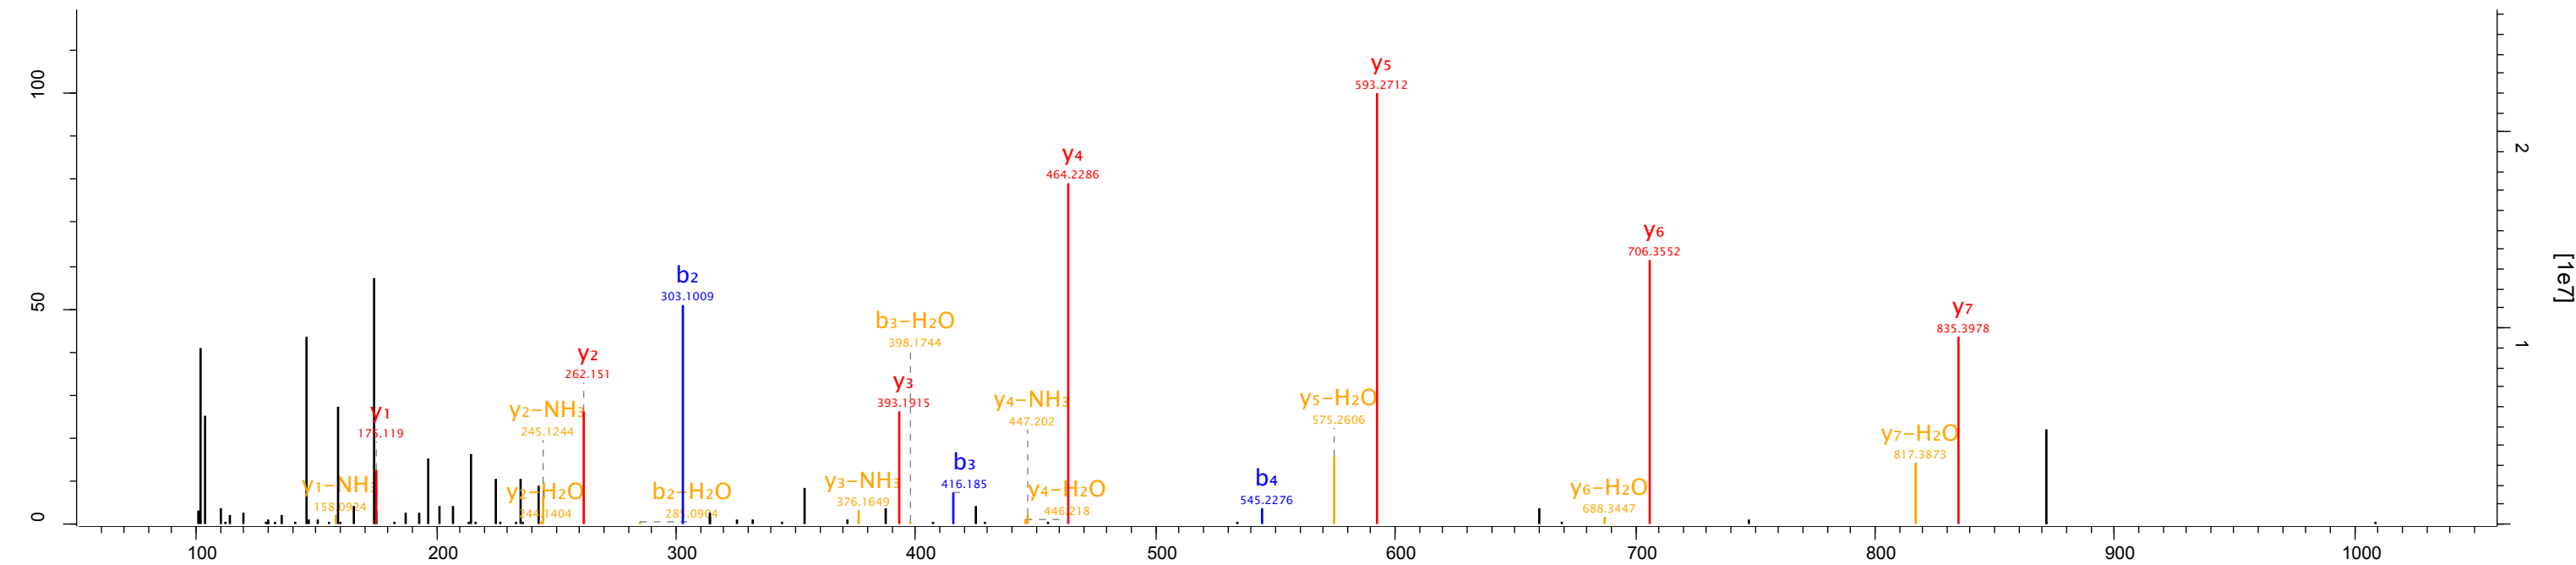

Raw file  
20180707\_MaS\_A375SR\_ML\_proteome\_2\_01

Scan 4542 Method FTMS; HCD Score 45.43 m/z 352.52 Gene names TYMP

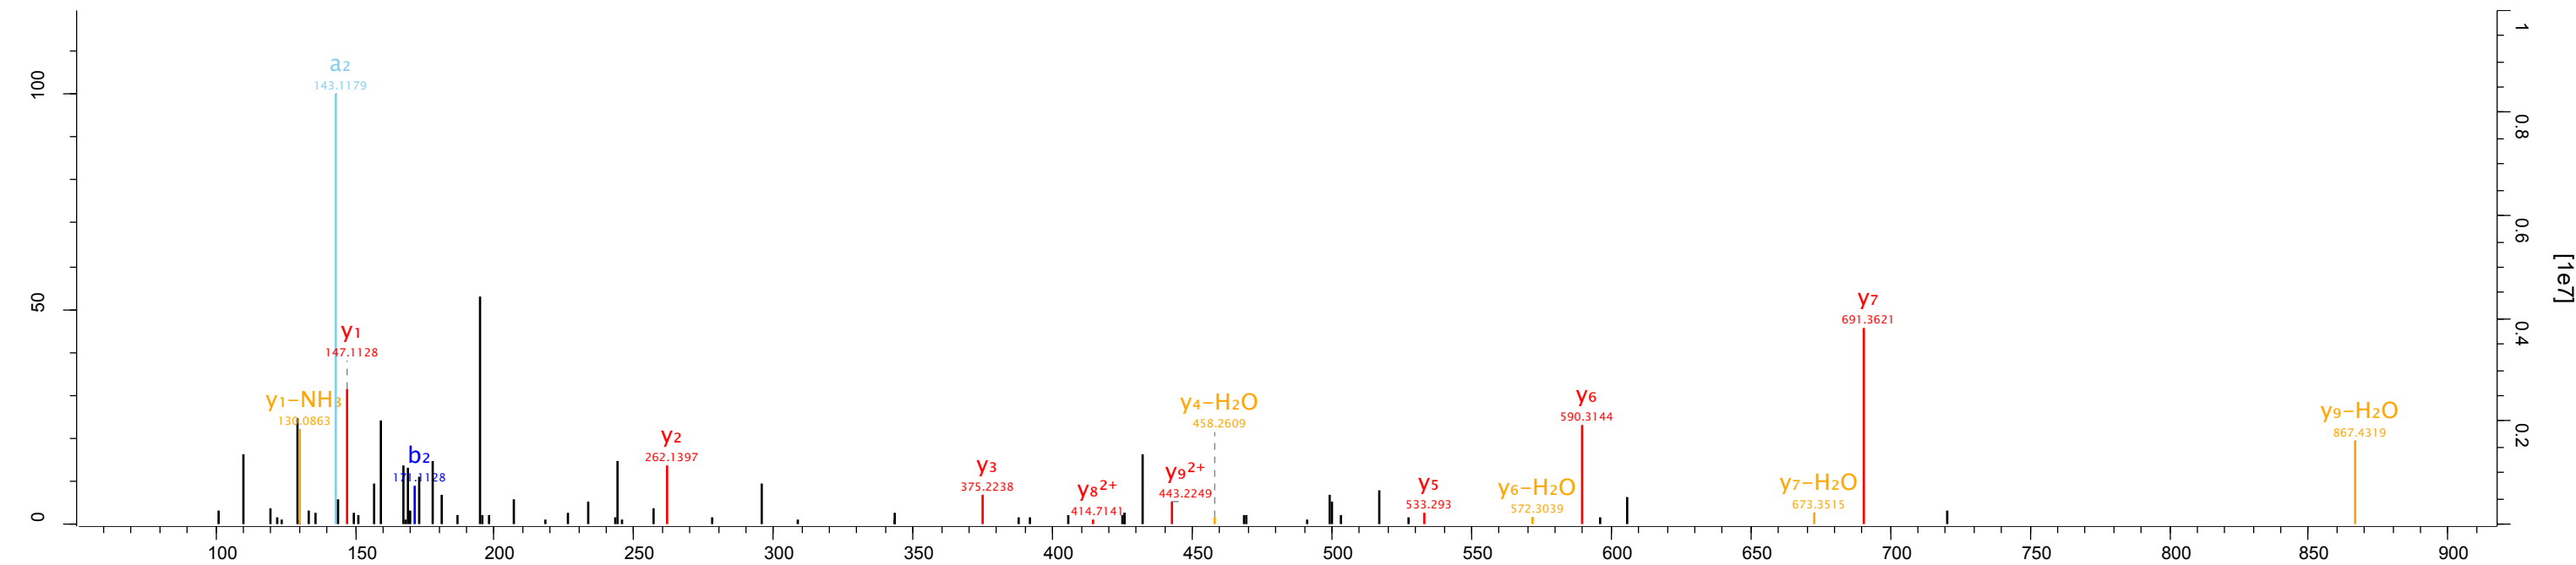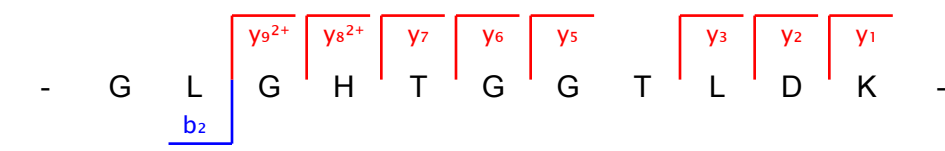

Raw file 20180707\_MaS\_A375SR\_ML\_proteome\_2\_02 Scan 3352 Method FTMS; HCD Score 75.39 m/z 568.24 Gene names MAP3K19

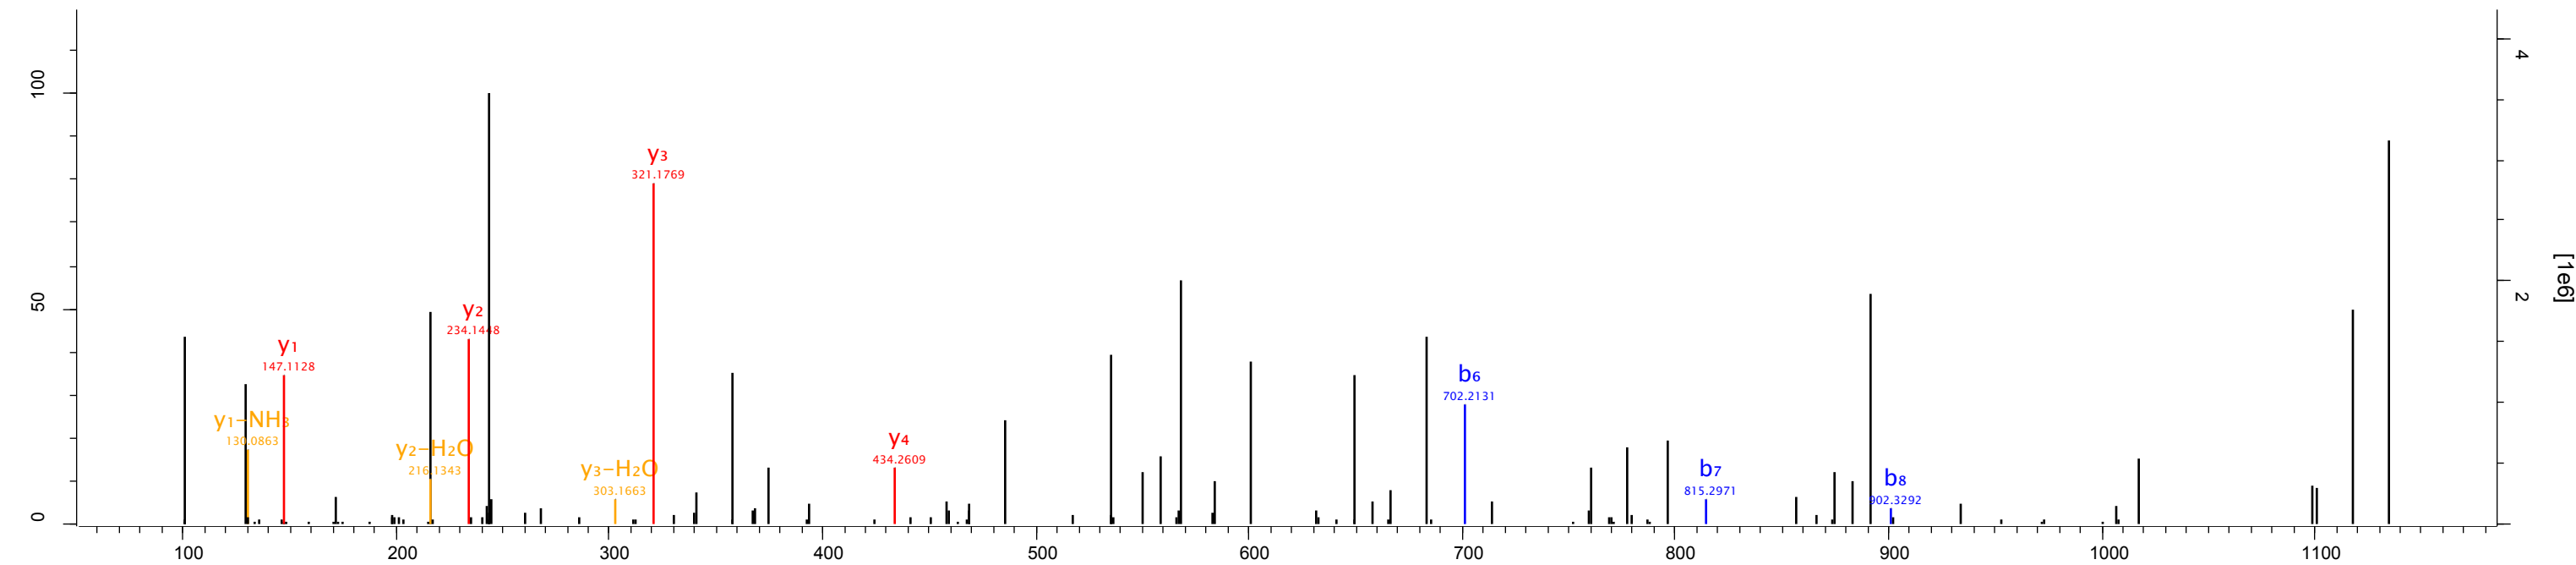

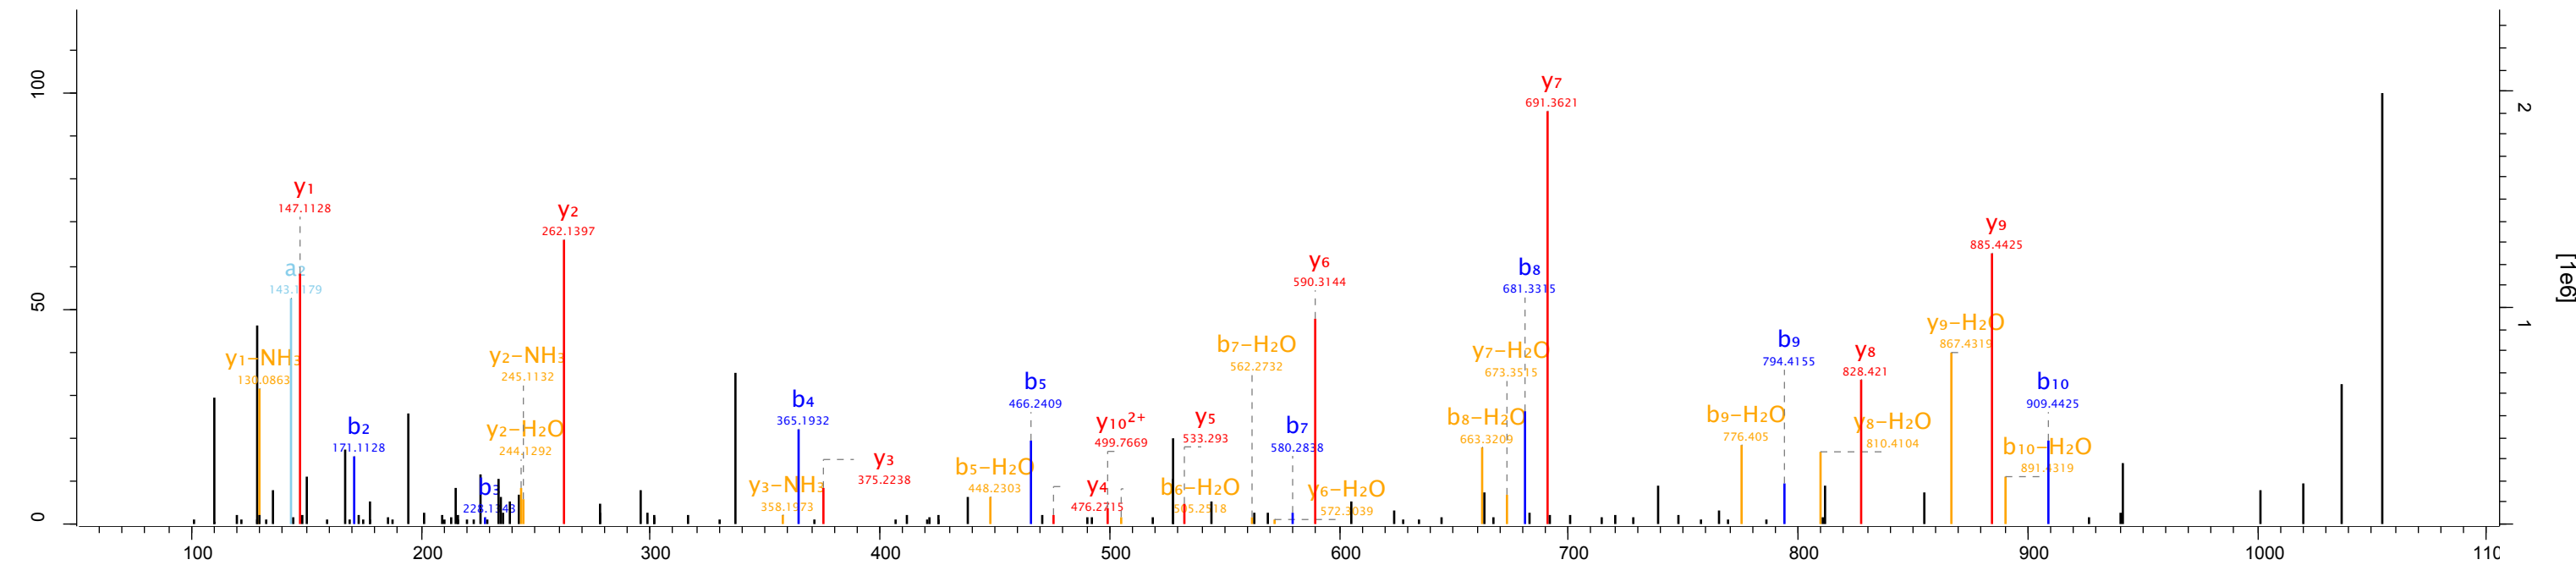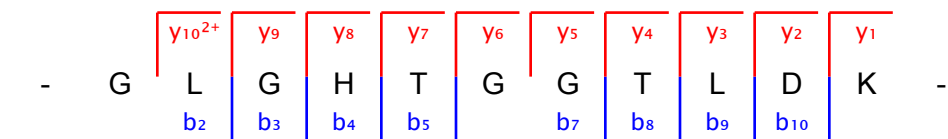



Raw file 20180707\_MaS\_A375SR\_ML\_proteome\_2\_03 Scan 22002 Method FTMS; HCD Score 51.28 m/z 375.26 Gene names BPI

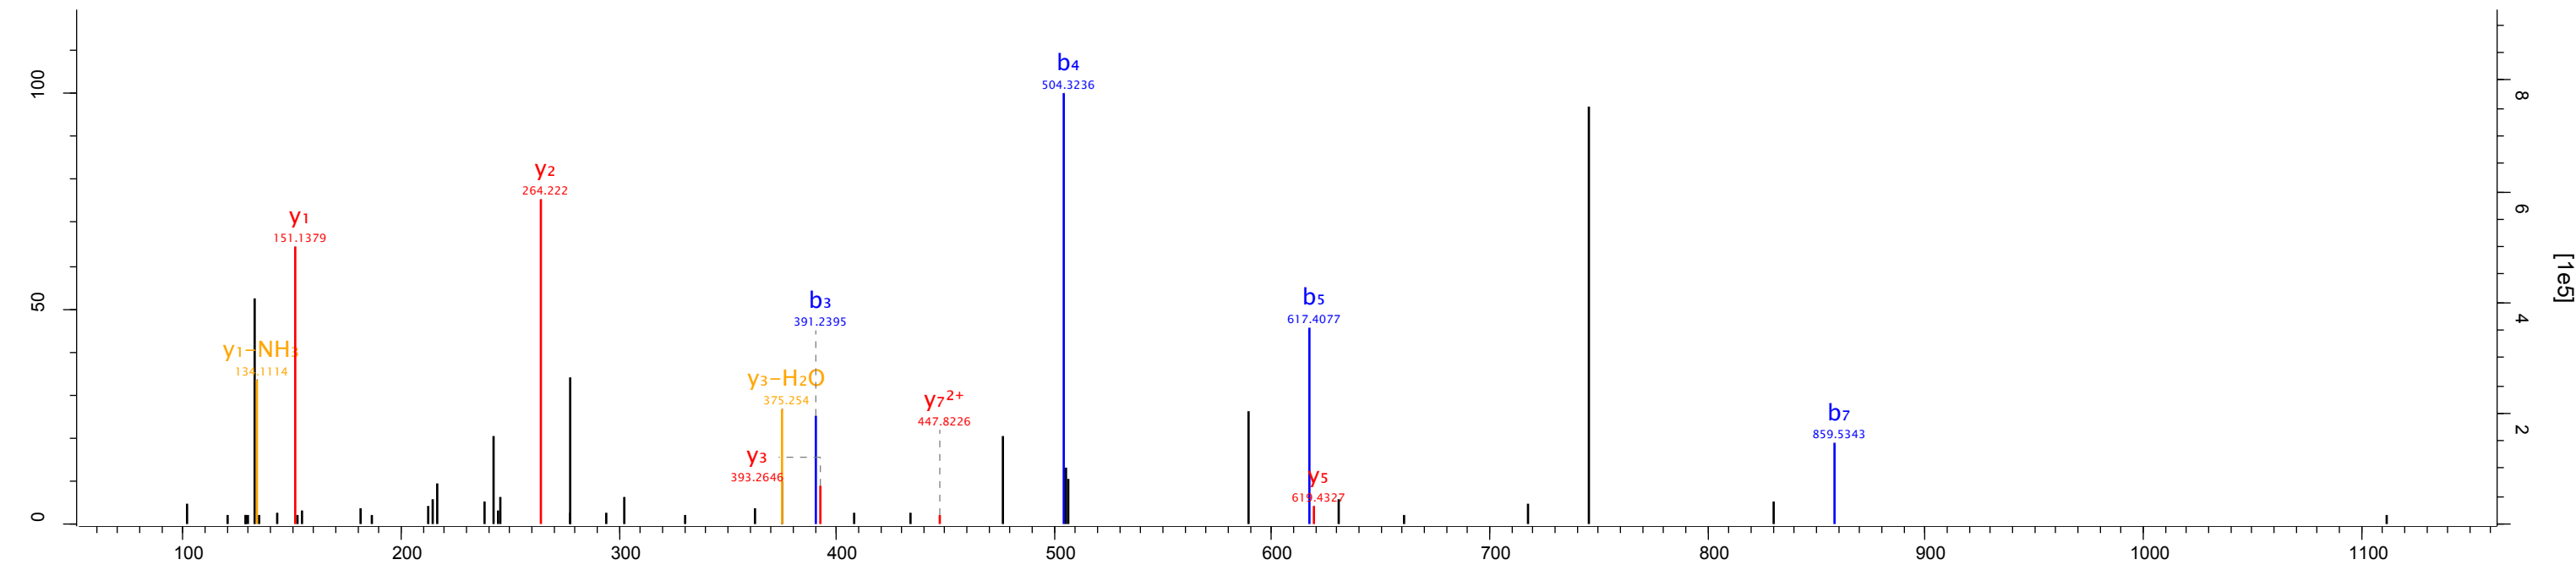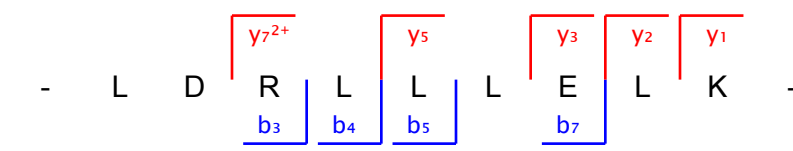

Raw file 20180707\_MaS\_A375SR\_ML\_proteome\_2\_03 Scan 23992 Method FTMS; HCD Score 75.91 m/z 745.93 Gene names MED21

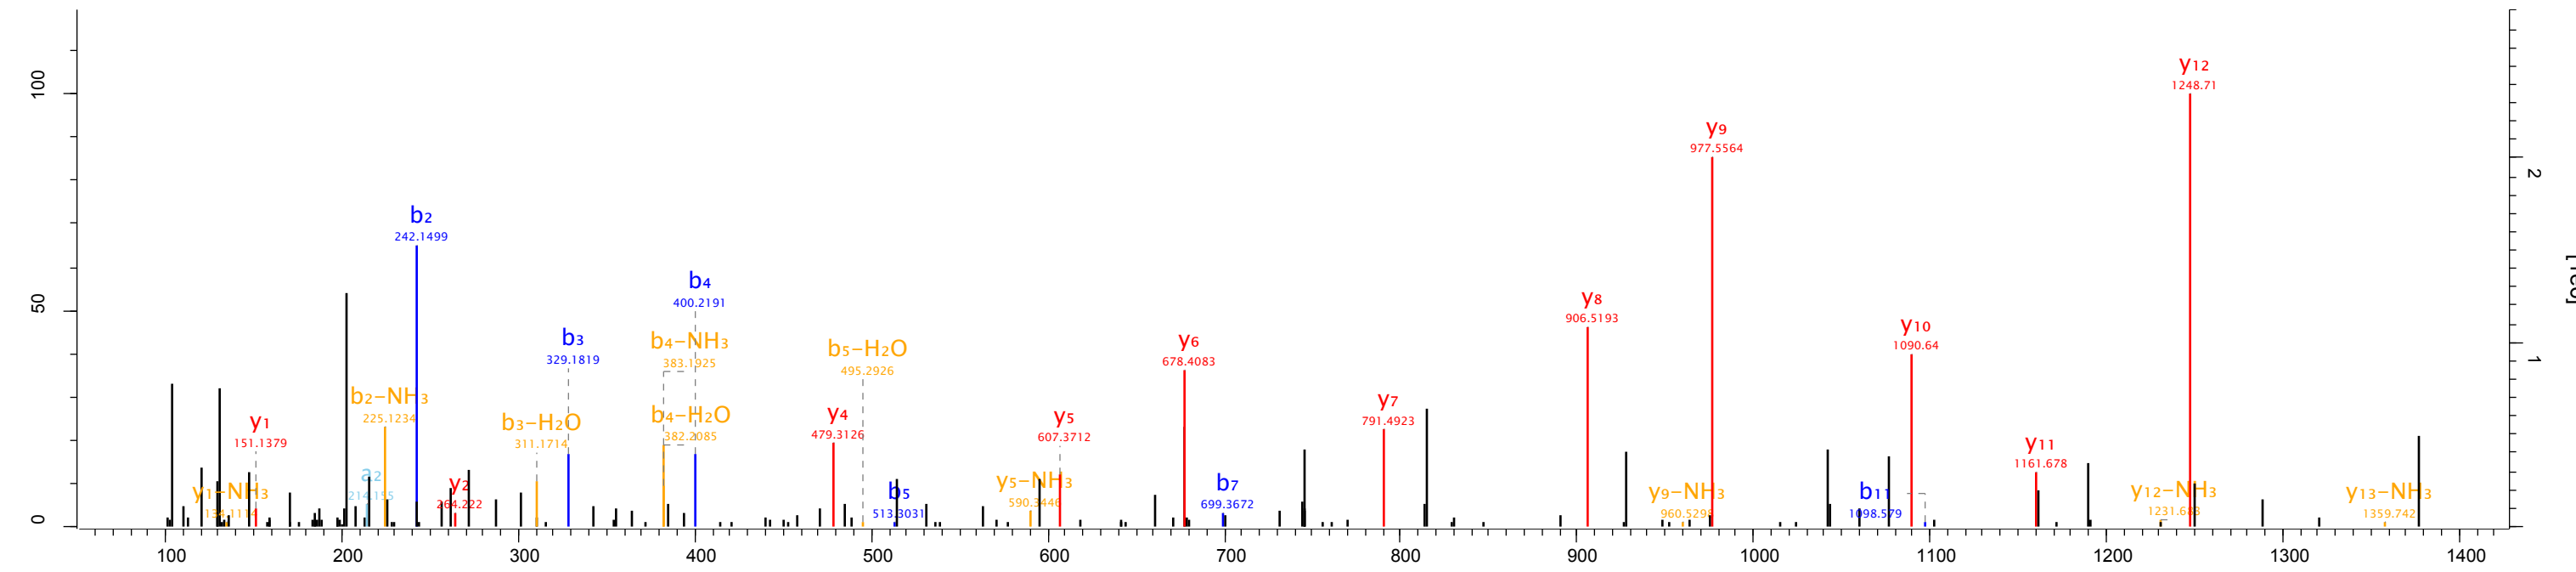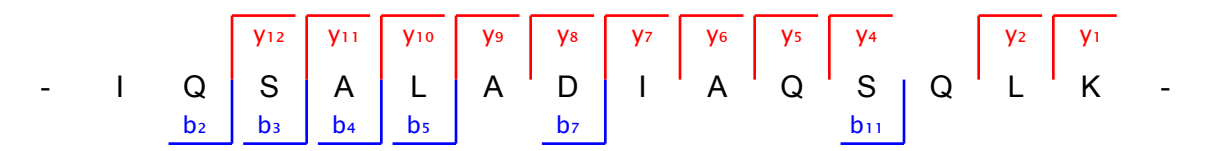

20180707\_MaS\_A375SR\_ML\_proteome\_2\_03

29172 FTMS; HCD 50.19 803.73 GSTA3

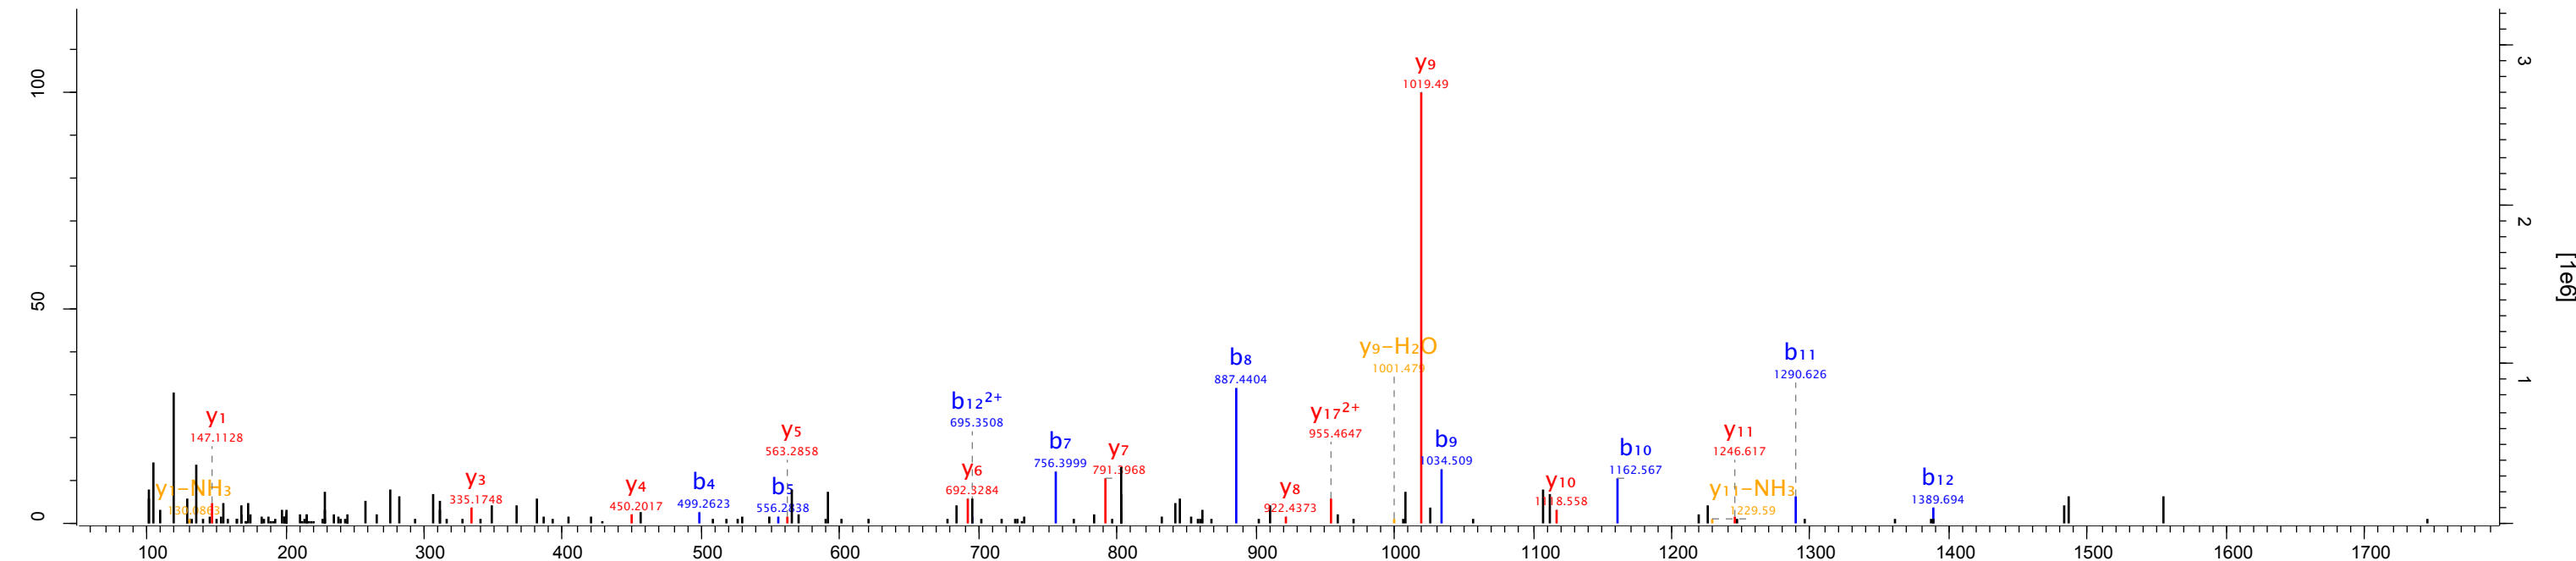

- L R N D G S L M F Q Q V P M V E I D G M K -

b<sub>4</sub> b<sub>5</sub> b<sub>7</sub> b<sub>8</sub> b<sub>9</sub> b<sub>10</sub> b<sub>11</sub> b<sub>12</sub> y<sub>17</sub><sup>2+</sup> y<sub>11</sub> y<sub>10</sub> y<sub>9</sub> y<sub>8</sub> y<sub>7</sub> y<sub>6</sub> y<sub>5</sub> y<sub>4</sub> y<sub>3</sub> y<sub>1</sub>

Raw file 20180707\_MaS\_A375SR\_ML\_proteome\_2\_03 Scan 2982 Method FTMS; HCD Score 53.75 m/z 349.53

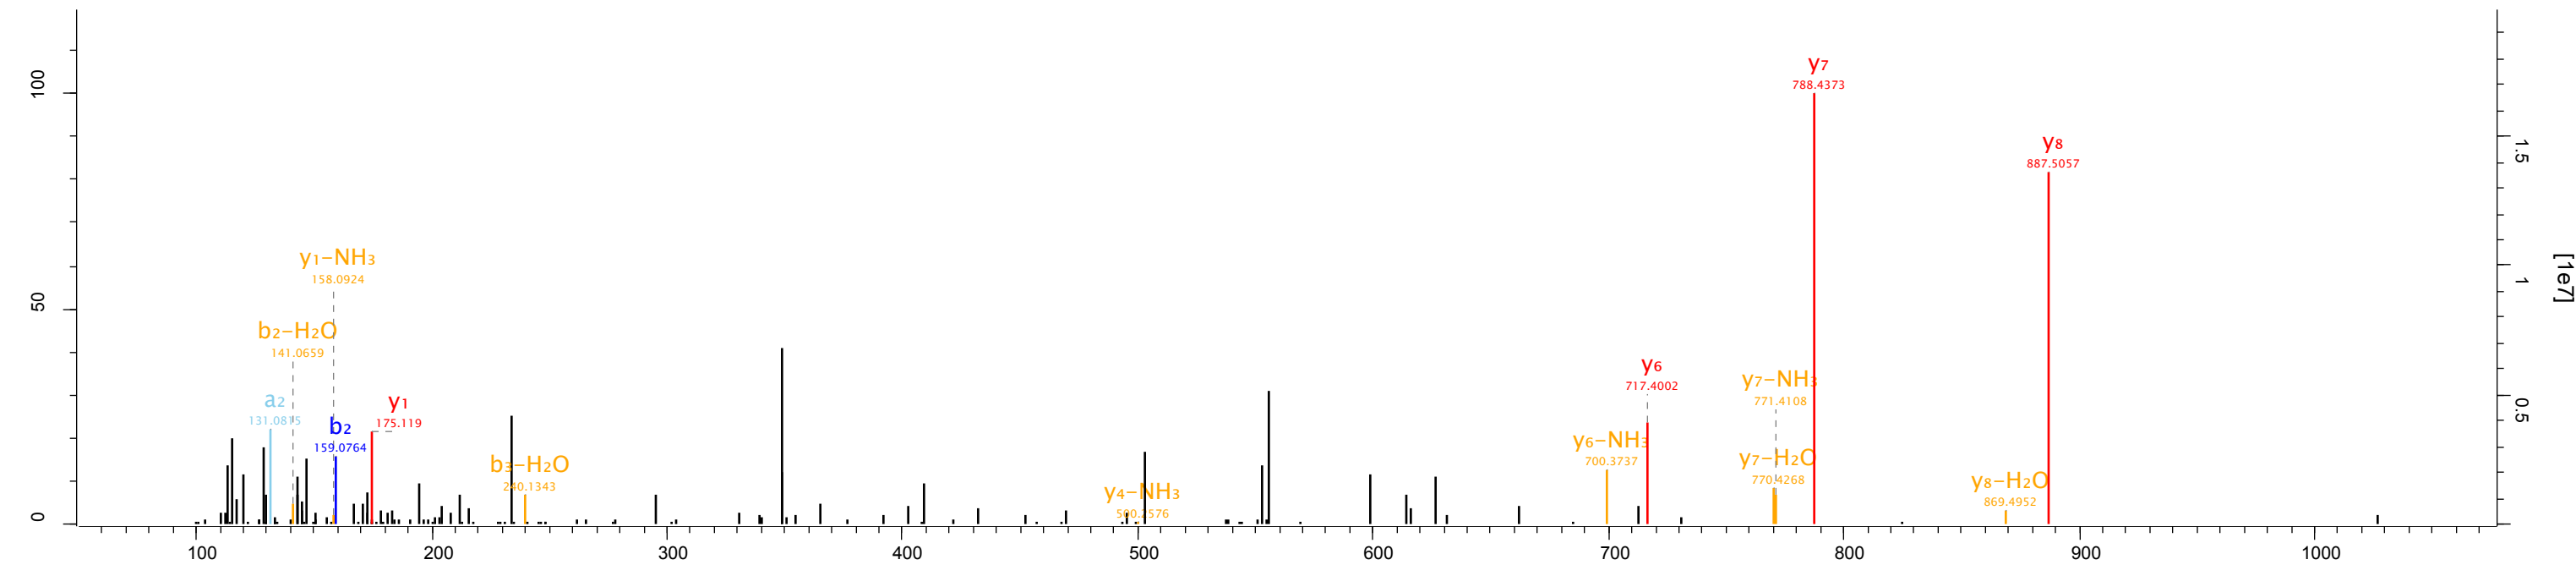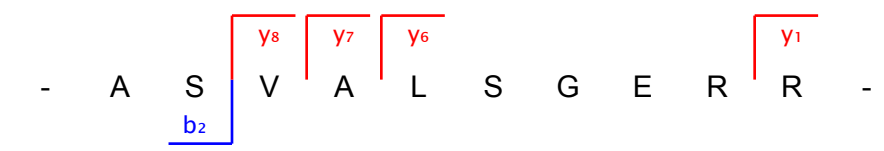

Raw file 20180707\_MaS\_A375SR\_ML\_proteome\_2\_03 Scan 4472 Method FTMS; HCD Score 57.35 m/z 576.29

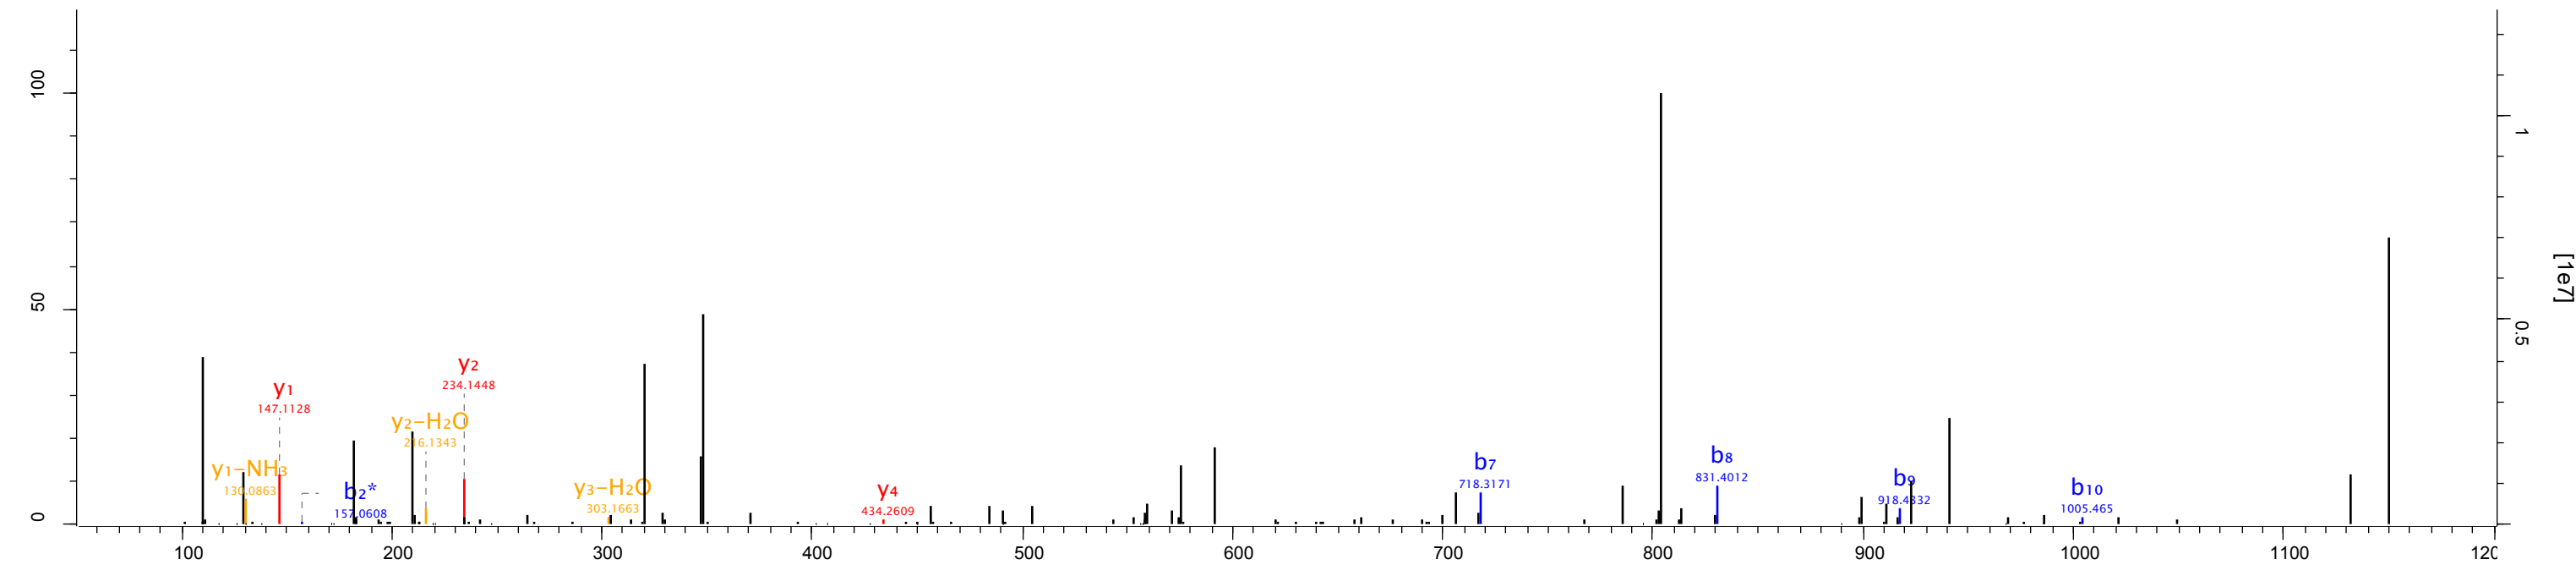

Raw file  
20180707\_MaS\_A375SR\_ML\_proteome\_2\_04

Scan 2892 Method FTMS; HCD Score 144.65 m/z 541.77 Gene names TM4SF1

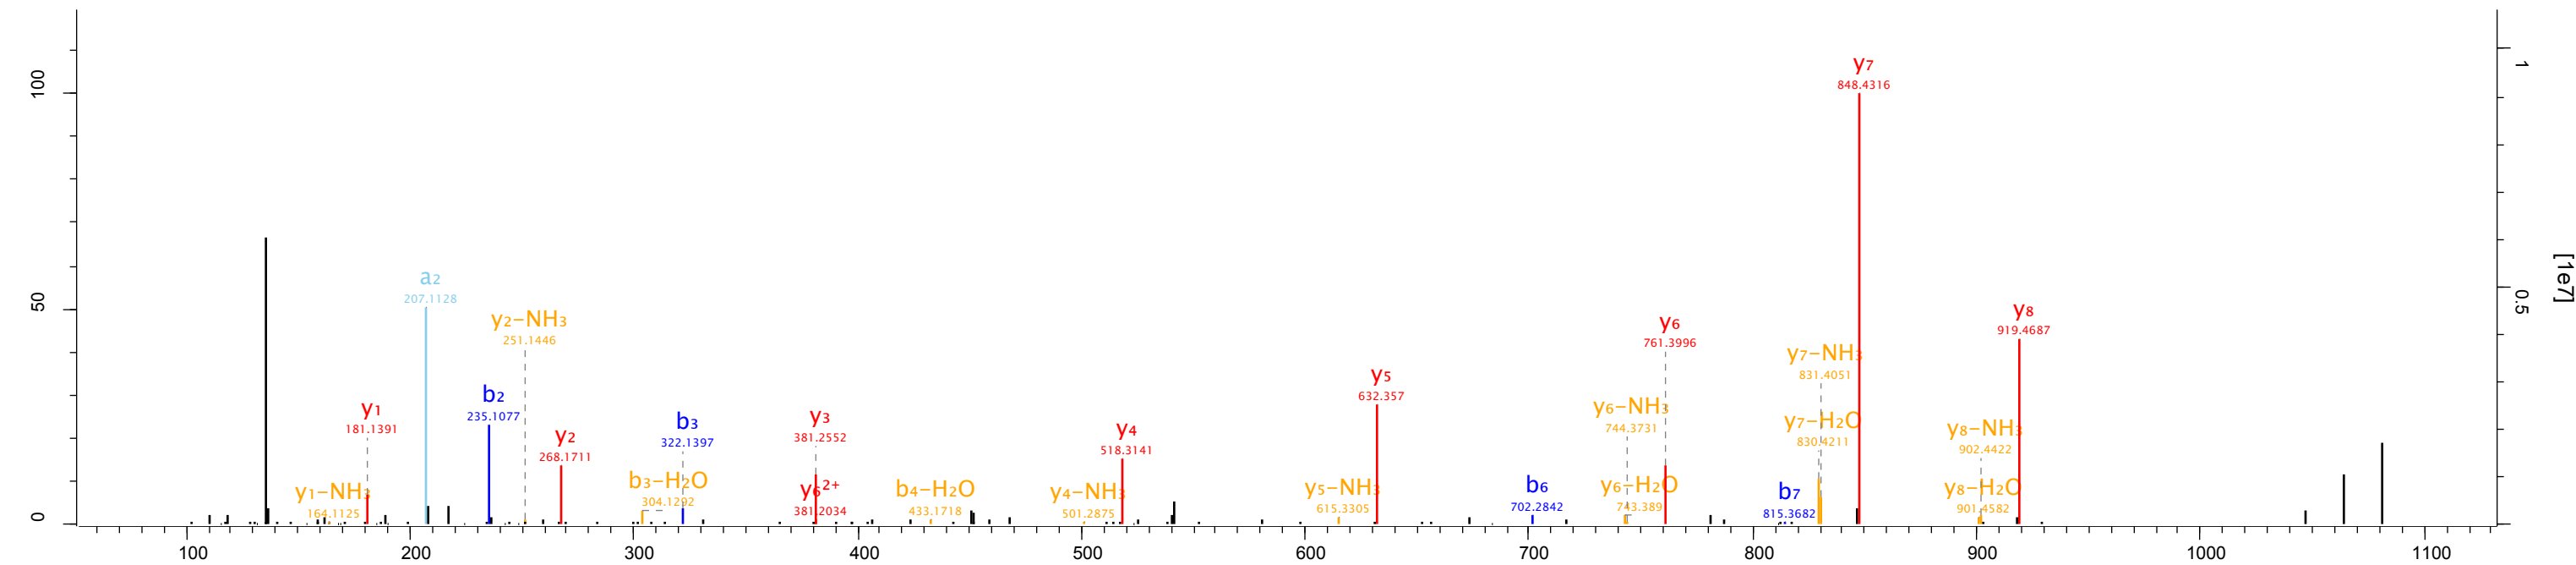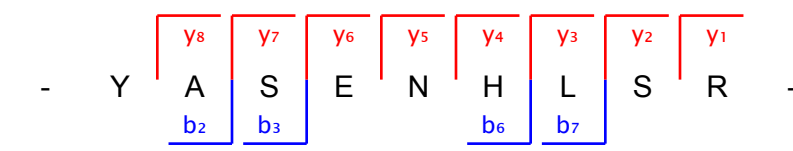

Raw file  
20180707\_MaS\_A375SR\_ML\_proteome\_2\_04

Scan 3012 Method FTMS; HCD Score 90.76 m/z 536.93 Gene names MT-CO3

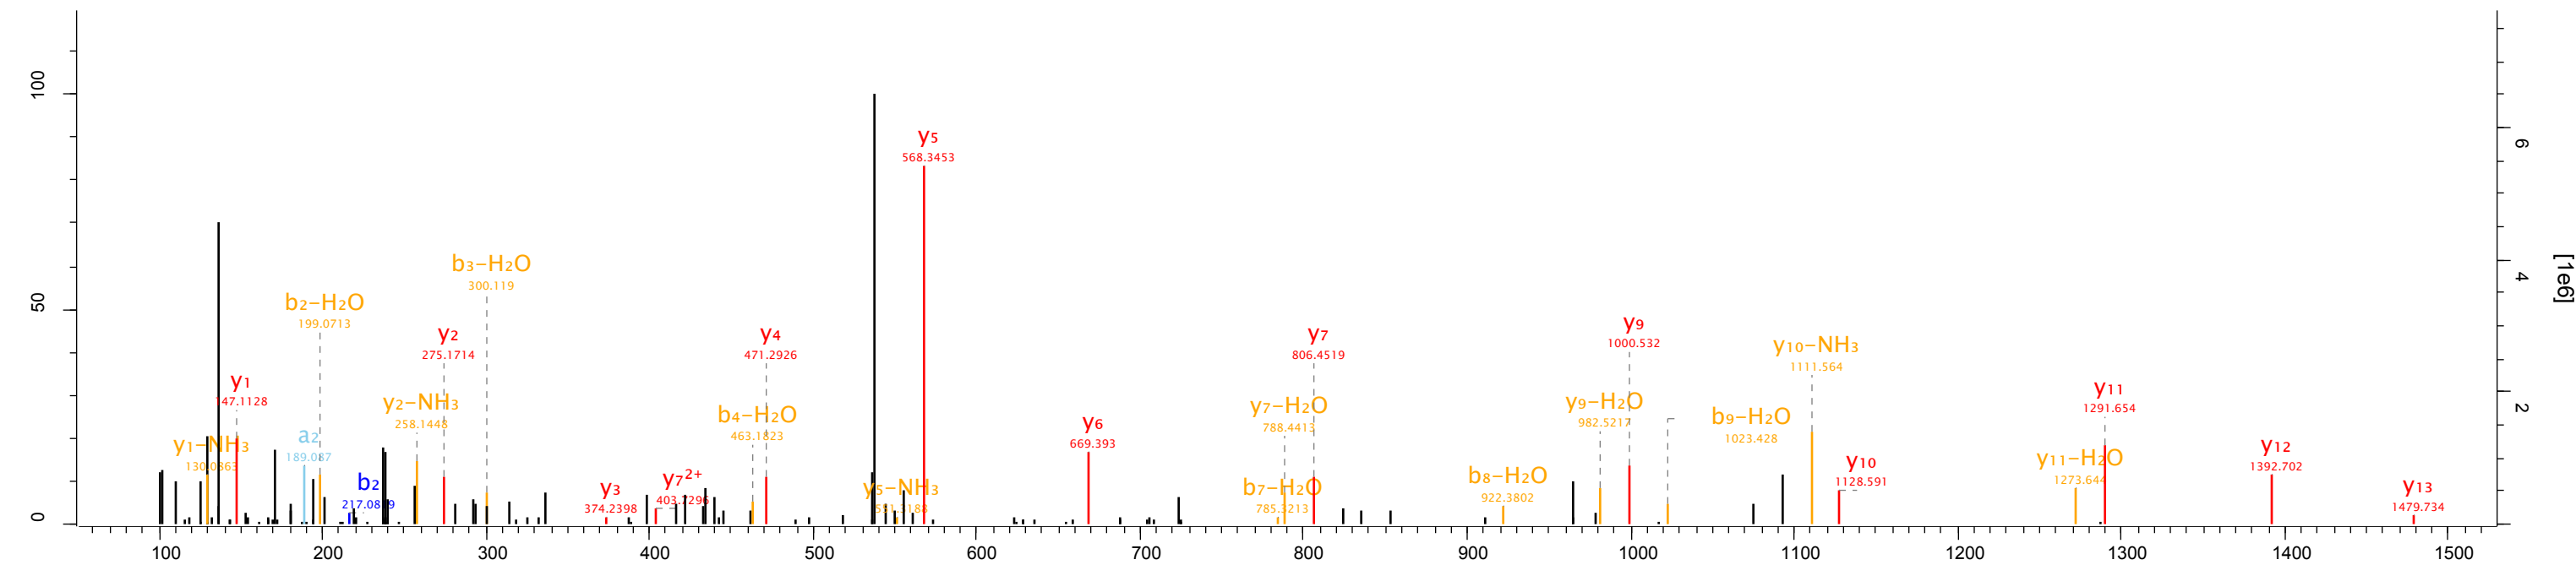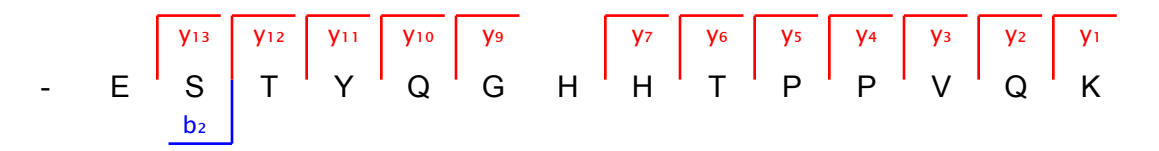

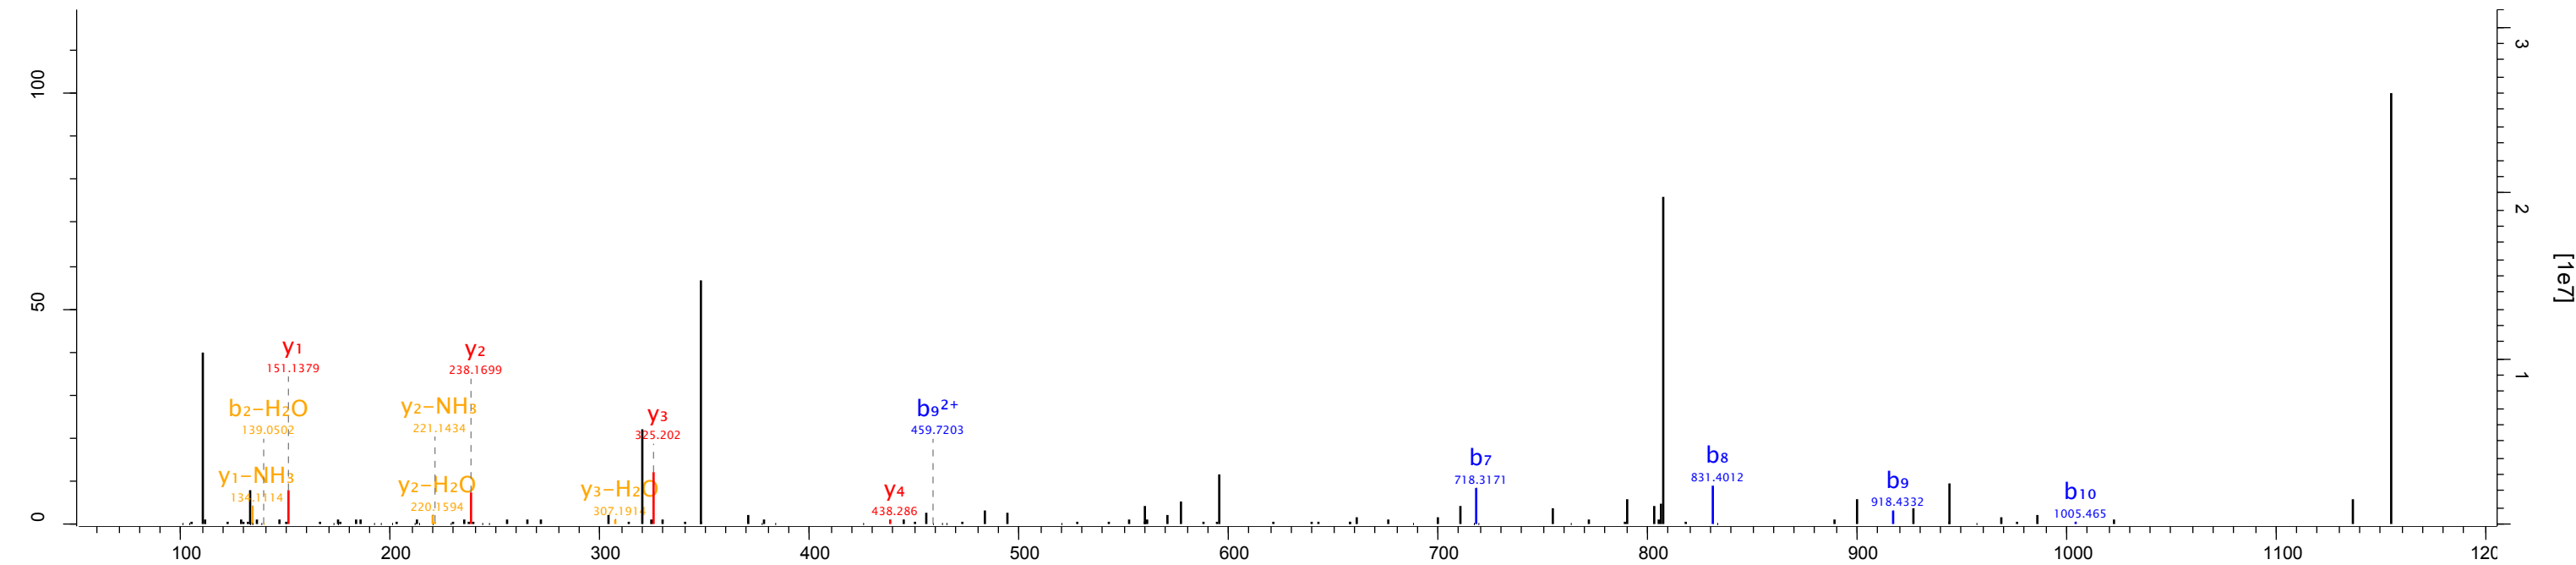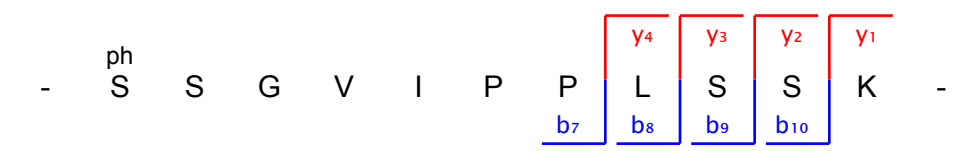



Raw file: 20180707\_MaS\_A375SR\_ML\_proteome\_2\_05  
 Scan: 12792 Method: FTMS; HCD Score: 107.99 m/z: 729.38 Gene names: LETM2

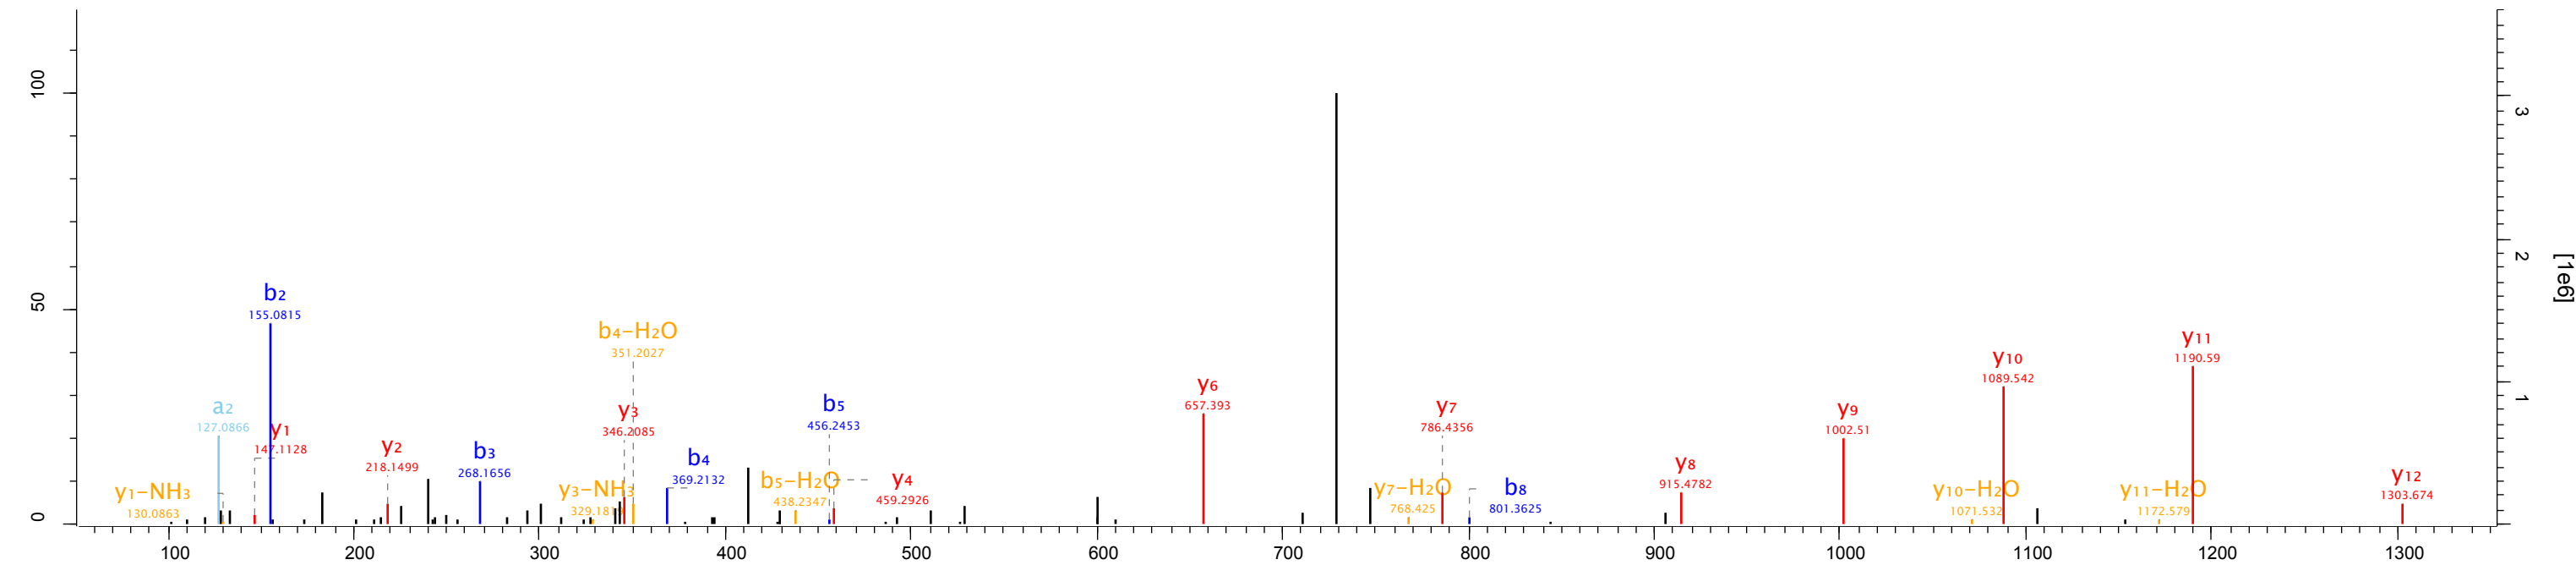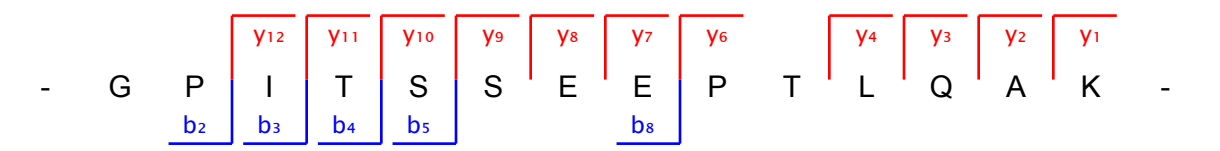

Raw file  
 20180707\_MaS\_A375SR\_ML\_proteome\_2\_05  
 Scan 16962 Method FTMS; HCD Score 73.63 m/z 483.94 Gene names ECE2

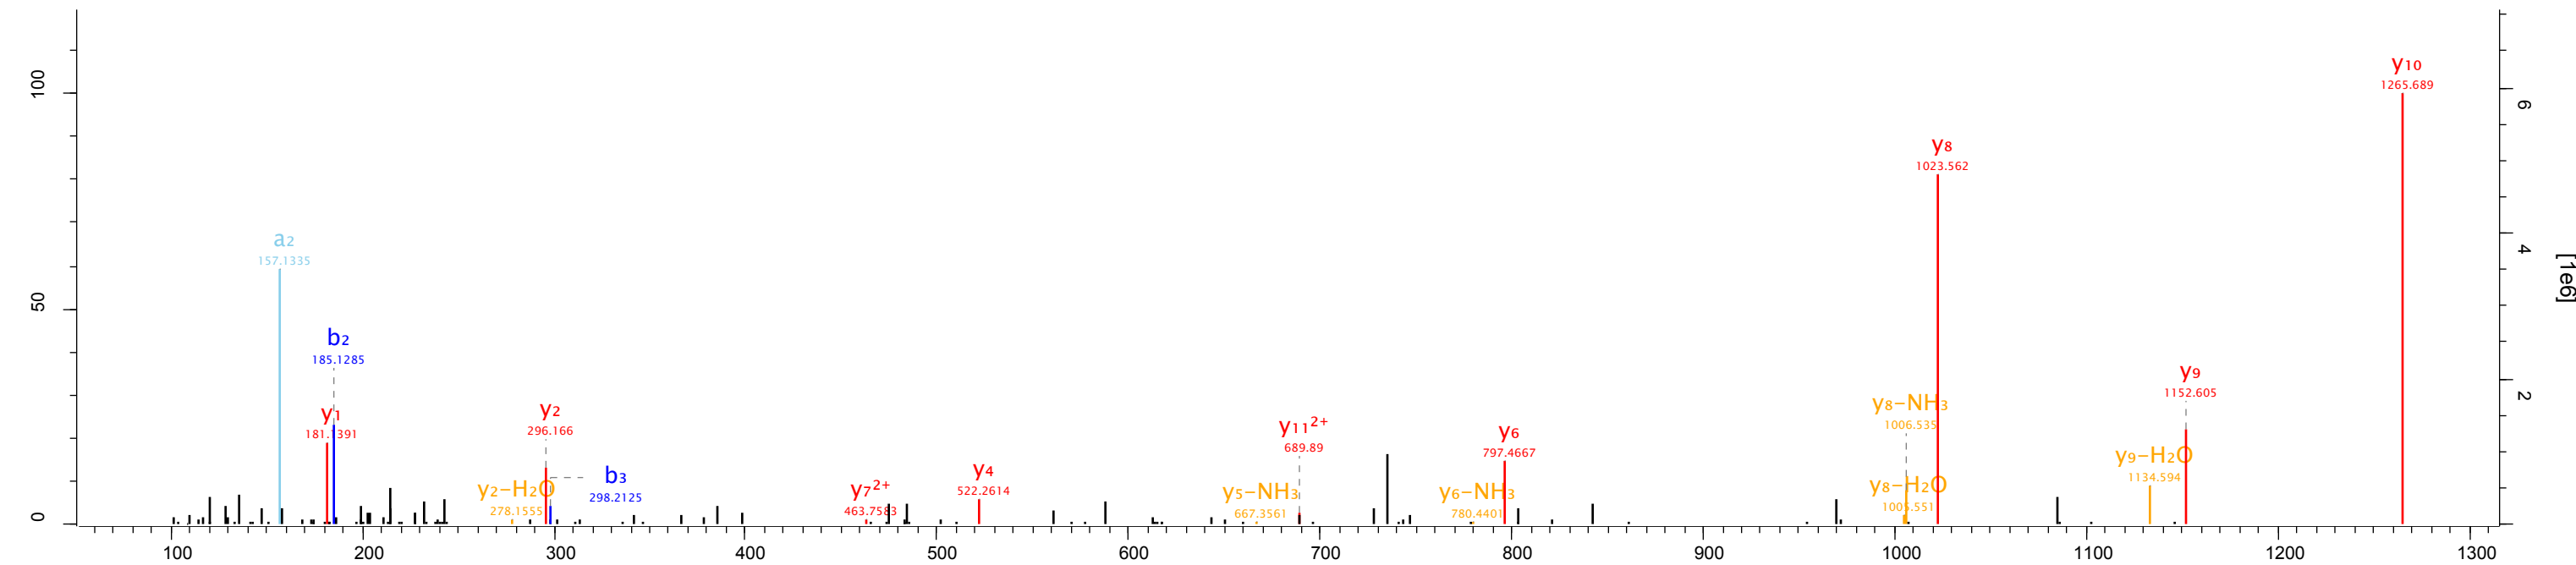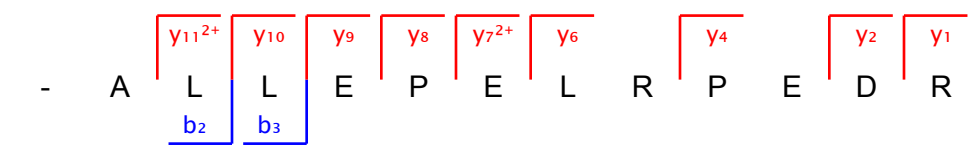

Raw file  
20180707\_MaS\_A375SR\_ML\_proteome\_2\_05

Scan 20622 Method FTMS; HCD Score 35.63 m/z 820.73 Gene names TPRA1

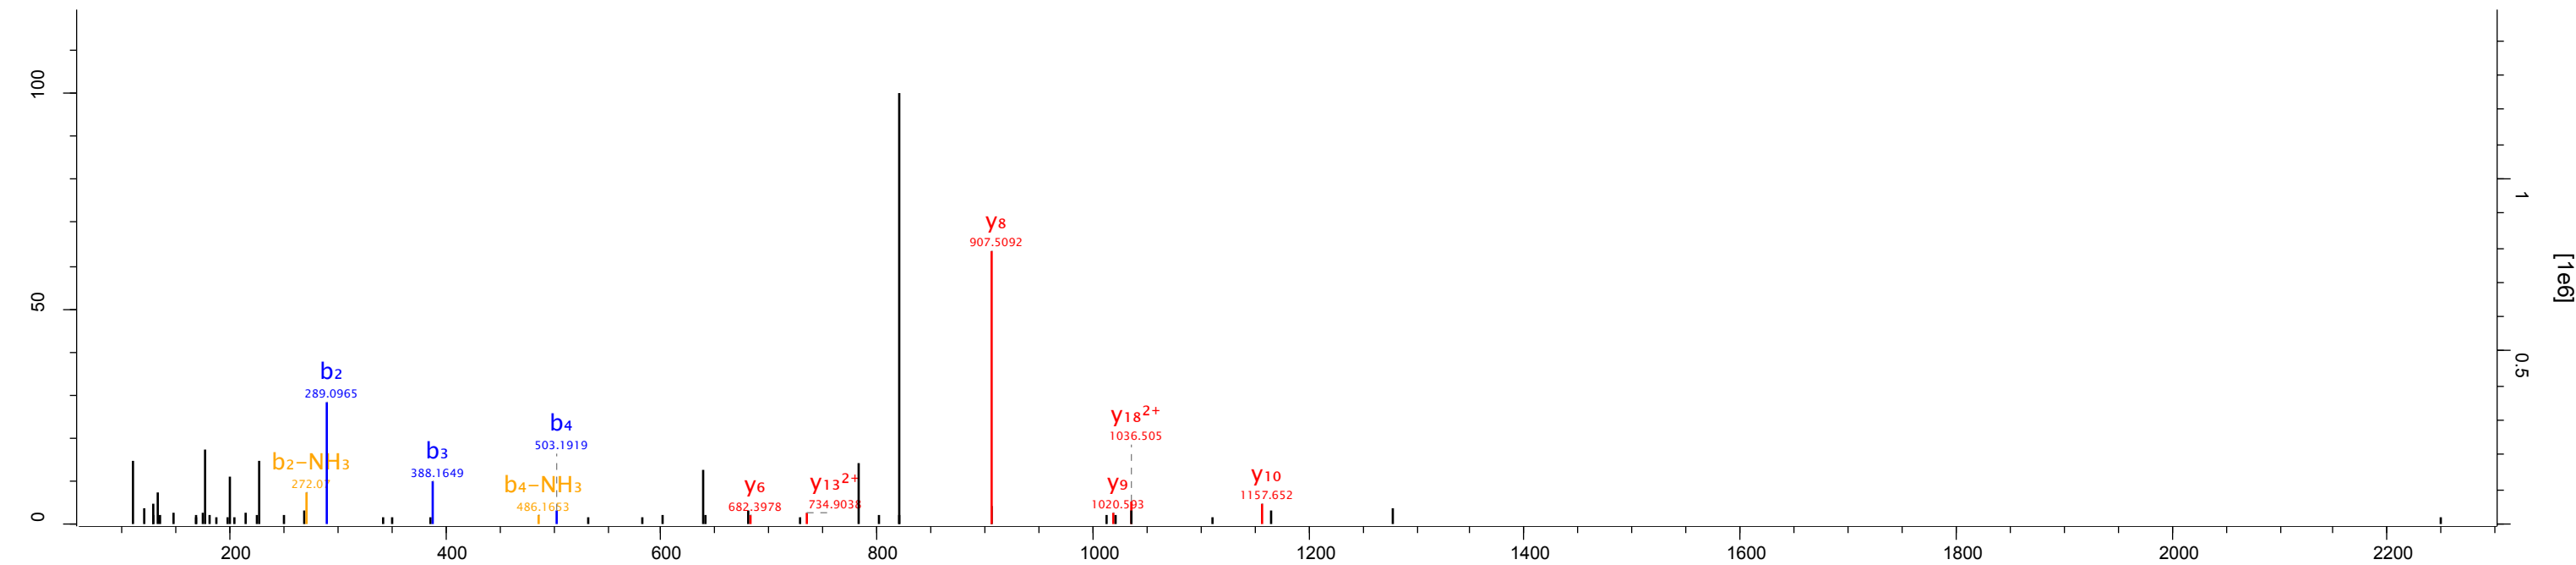

- C Q V D E T E P D V H L P Q P Y A V A R -

Fragmentation mapping:  
b<sub>2</sub> (C-Q), b<sub>3</sub> (Q-V), b<sub>4</sub> (V-D)  
y<sub>18</sub><sup>2+</sup> (V-D), y<sub>13</sub><sup>2+</sup> (E-P), y<sub>10</sub> (H-L), y<sub>9</sub> (L-P), y<sub>8</sub> (P-Q), y<sub>6</sub> (Q-P)

Raw file 20180707\_MaS\_A375SR\_ML\_proteome\_2\_05 Scan 3362 Method FTMS; HCD Score 96.34 m/z 541.77 Gene names TM4SF1

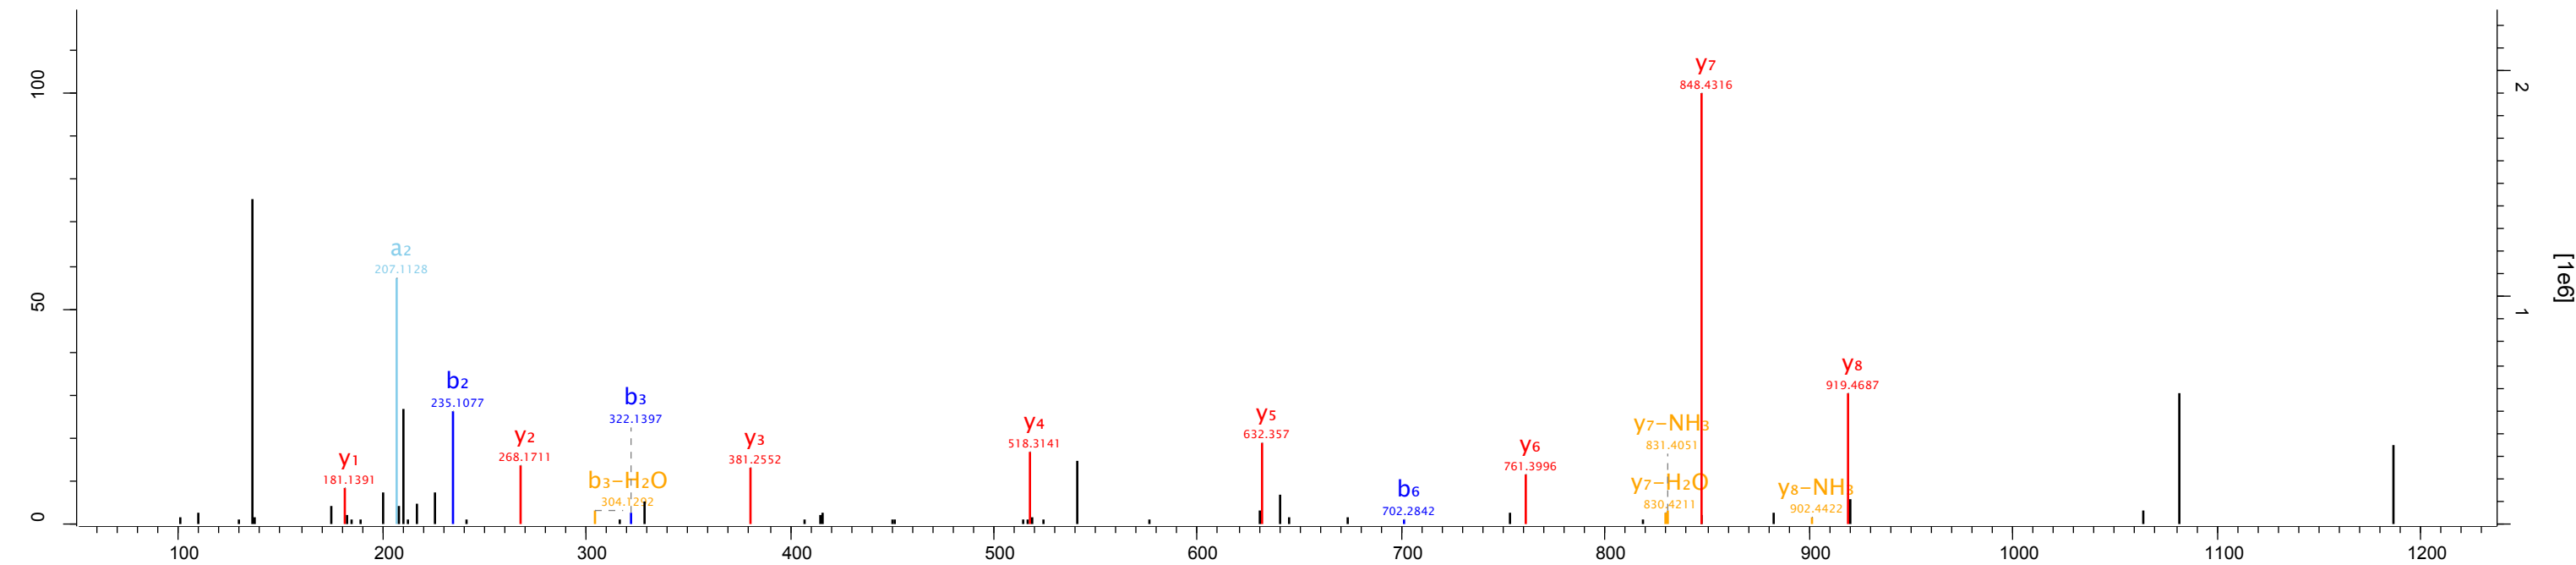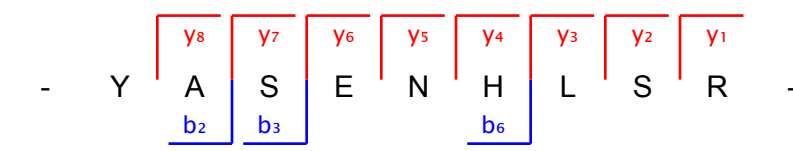

Raw file  
20180707\_MaS\_A375SR\_ML\_proteome\_2\_05

Scan 8072 Method FTMS; HCD Score 61.59 m/z 709.27 Gene names ZNF704

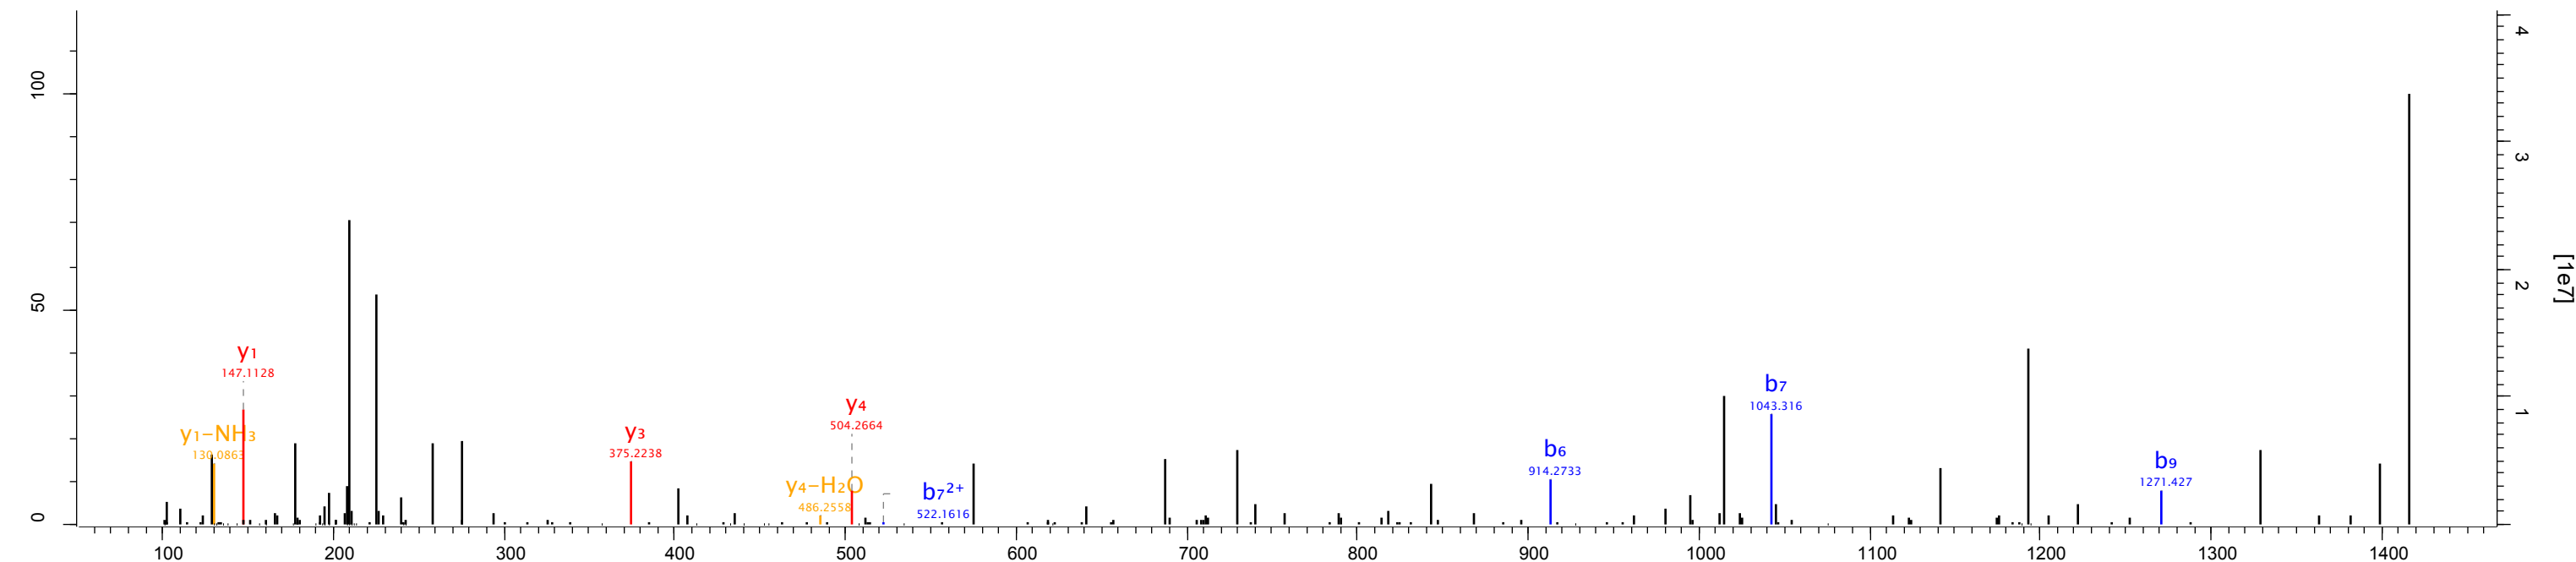

ac  
- T F ph T F Q ph S E D L K -  
b6 b7 b9 y4 y3 y1

Raw file 20180707\_MaS\_A375SR\_ML\_proteome\_2\_06 Scan 10352 Method FTMS; HCD Score 86.88 m/z 550.29 Gene names ESCO1

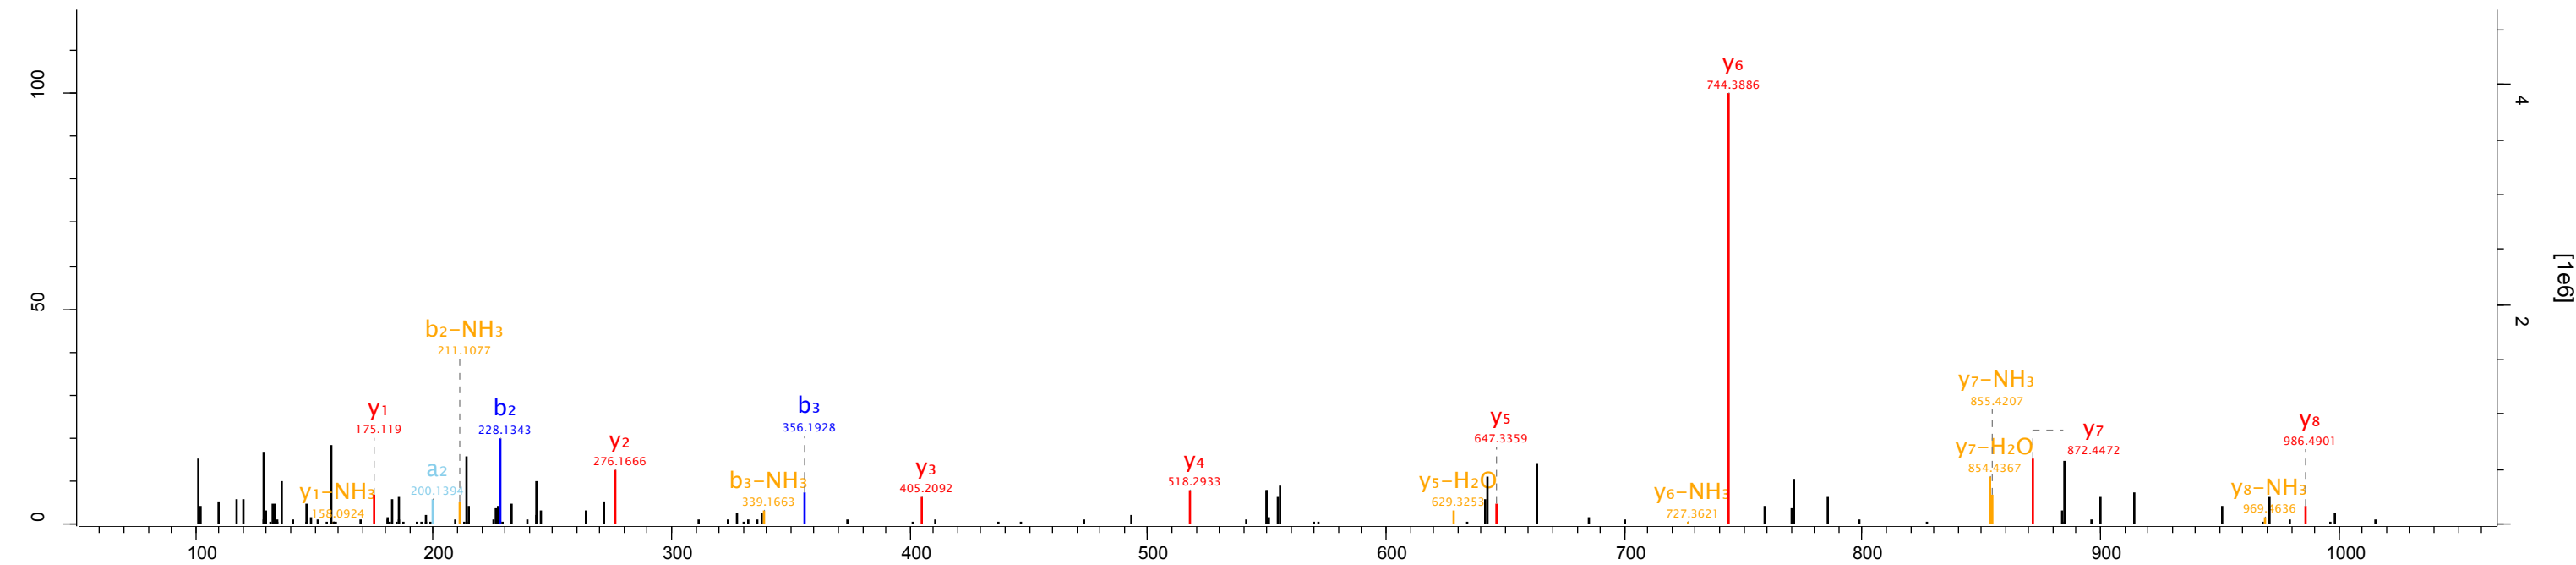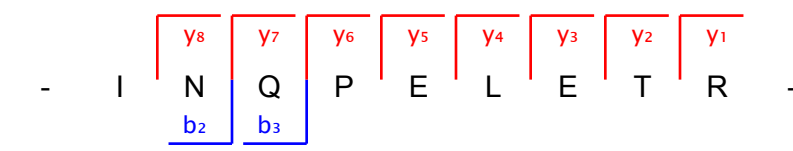

Raw file  
20180707\_MaS\_A375SR\_ML\_proteome\_2\_06  
Scan 2782 Method FTMS; HCD Score 68.03 m/z 325.17

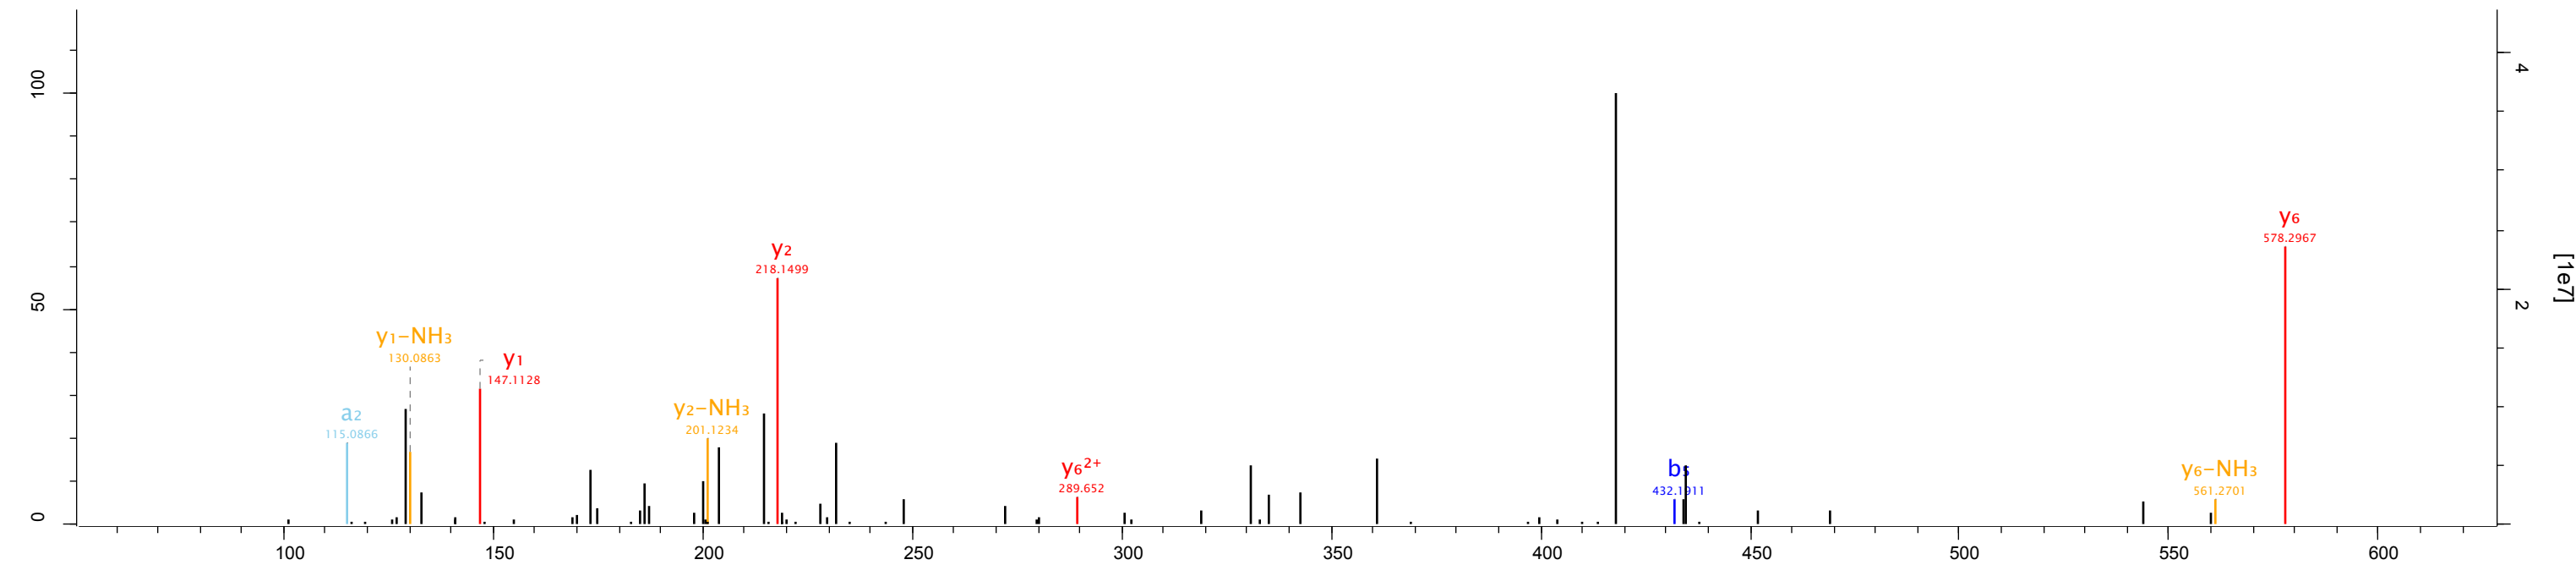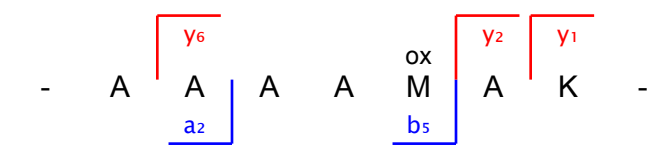

Raw file 20180707\_MaS\_A375SR\_ML\_proteome\_2\_06 Scan 7852 Method FTMS; HCD Score 54.54 m/z 394.53

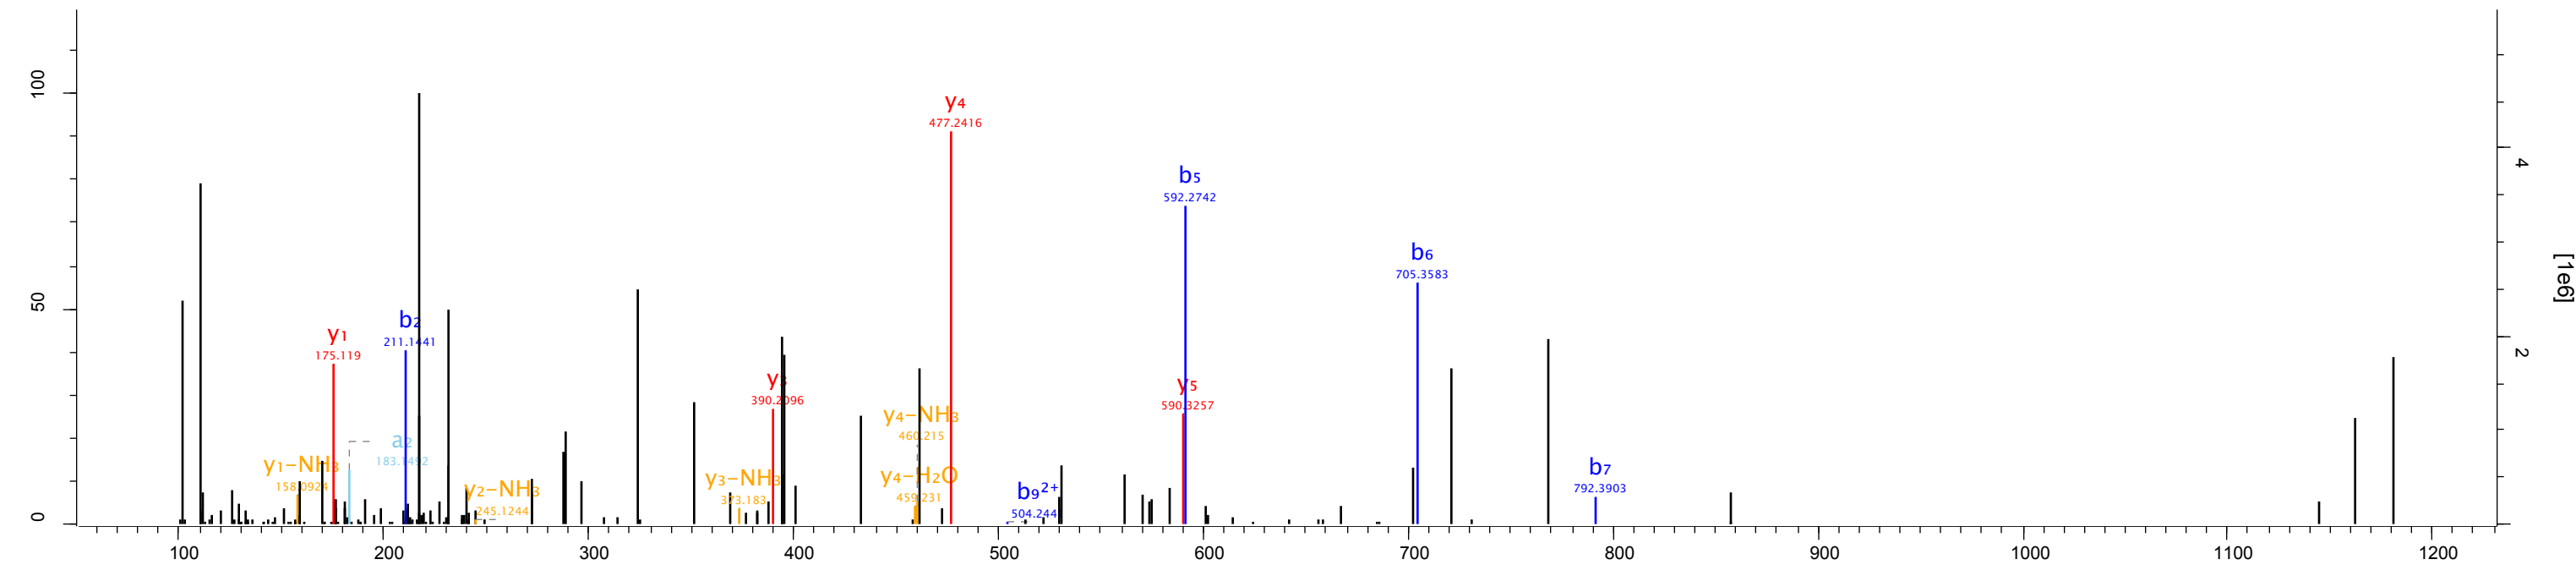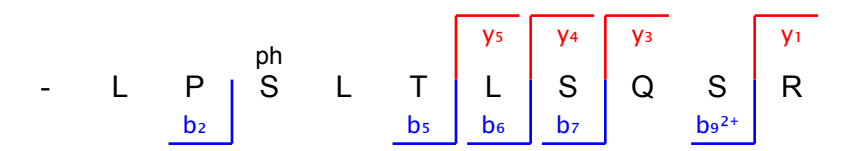



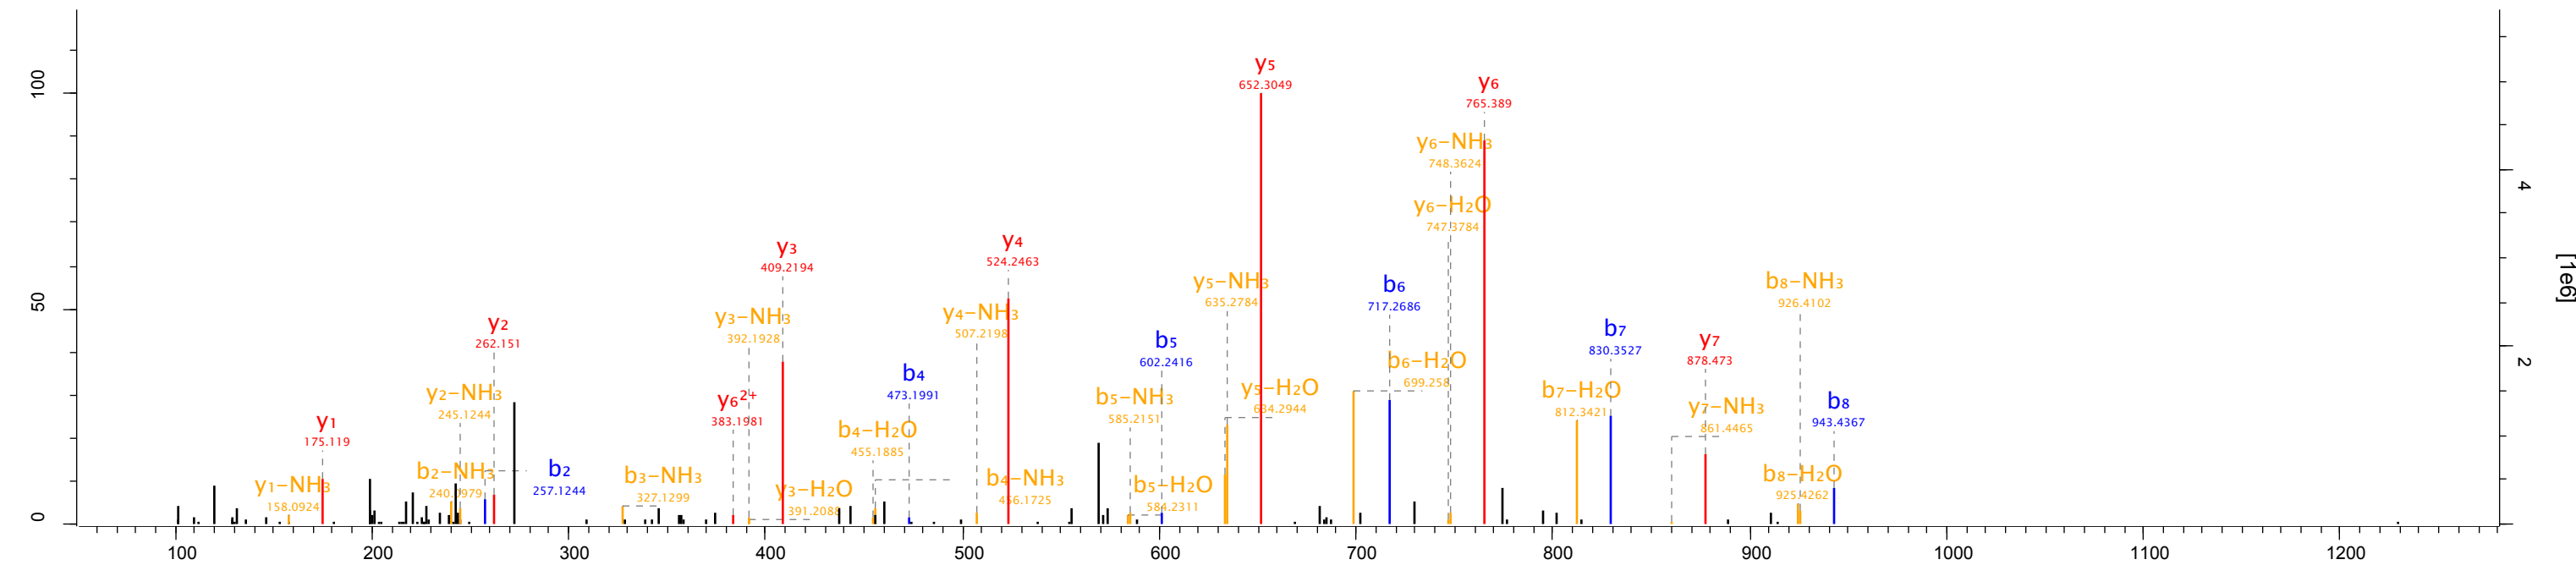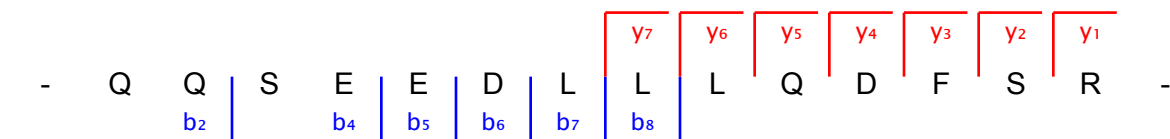

Raw file 20180707\_MaS\_A375SR\_ML\_proteome\_2\_09 Scan 13222 Method FTMS; HCD Score 92.94 m/z 732.88 Gene names TCTN3

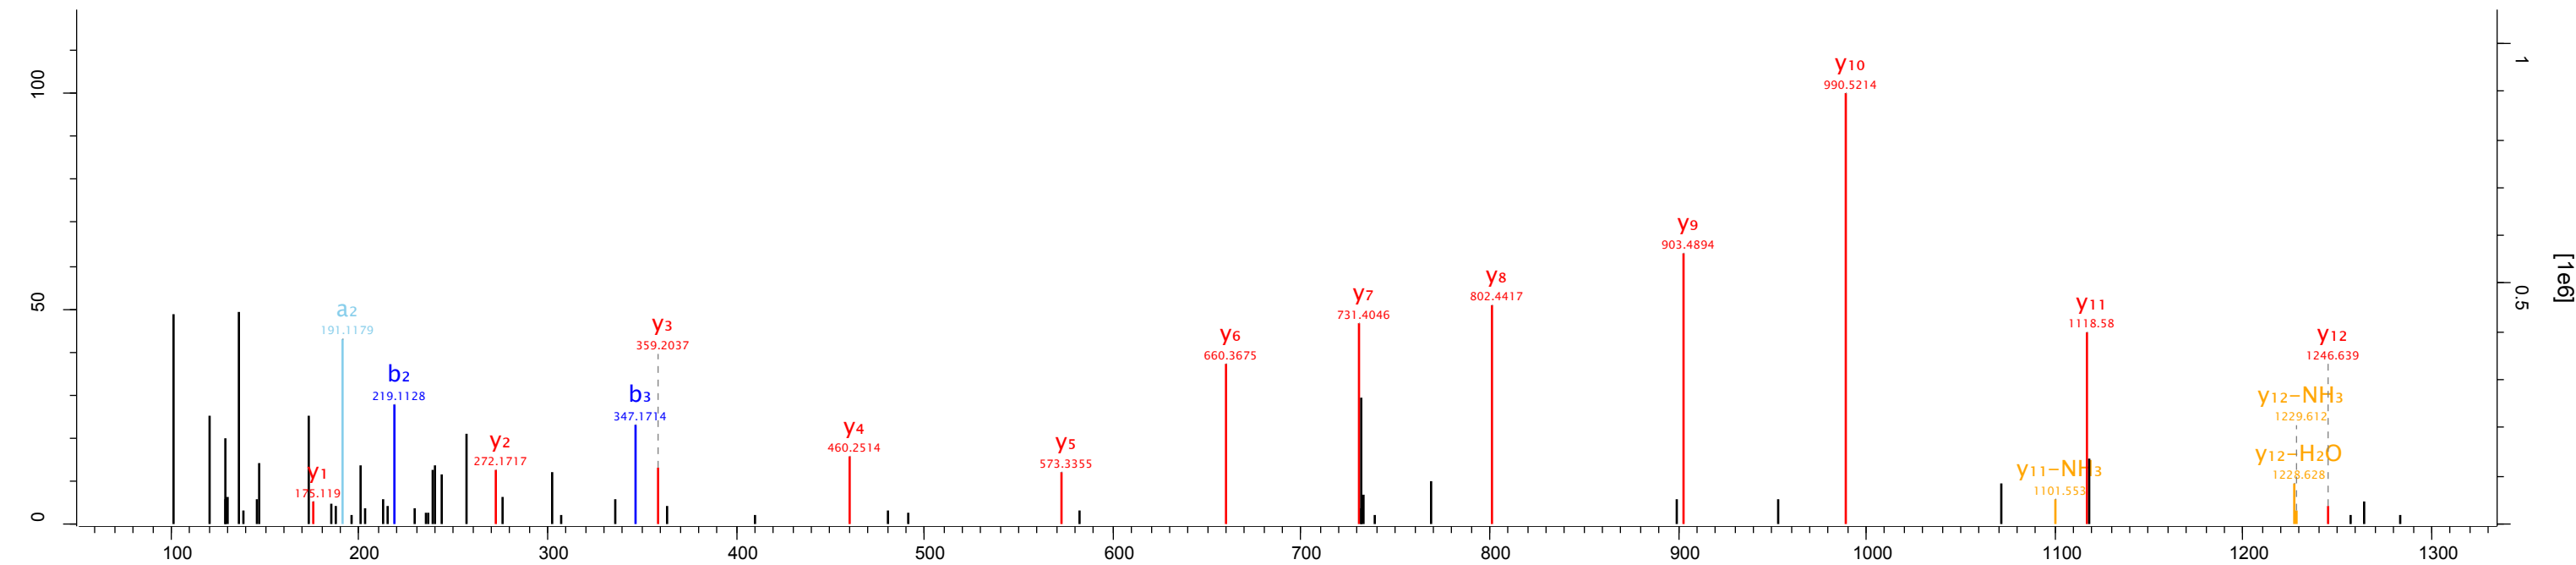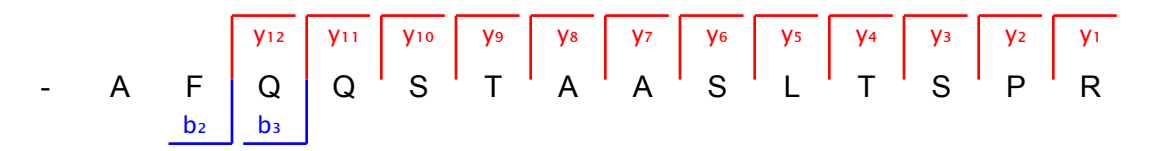

Raw file 20180707\_MaS\_A375SR\_ML\_proteome\_2\_09 Scan 24622 Method FTMS; HCD Score 64.27 m/z 496.76 Gene names SEPT3

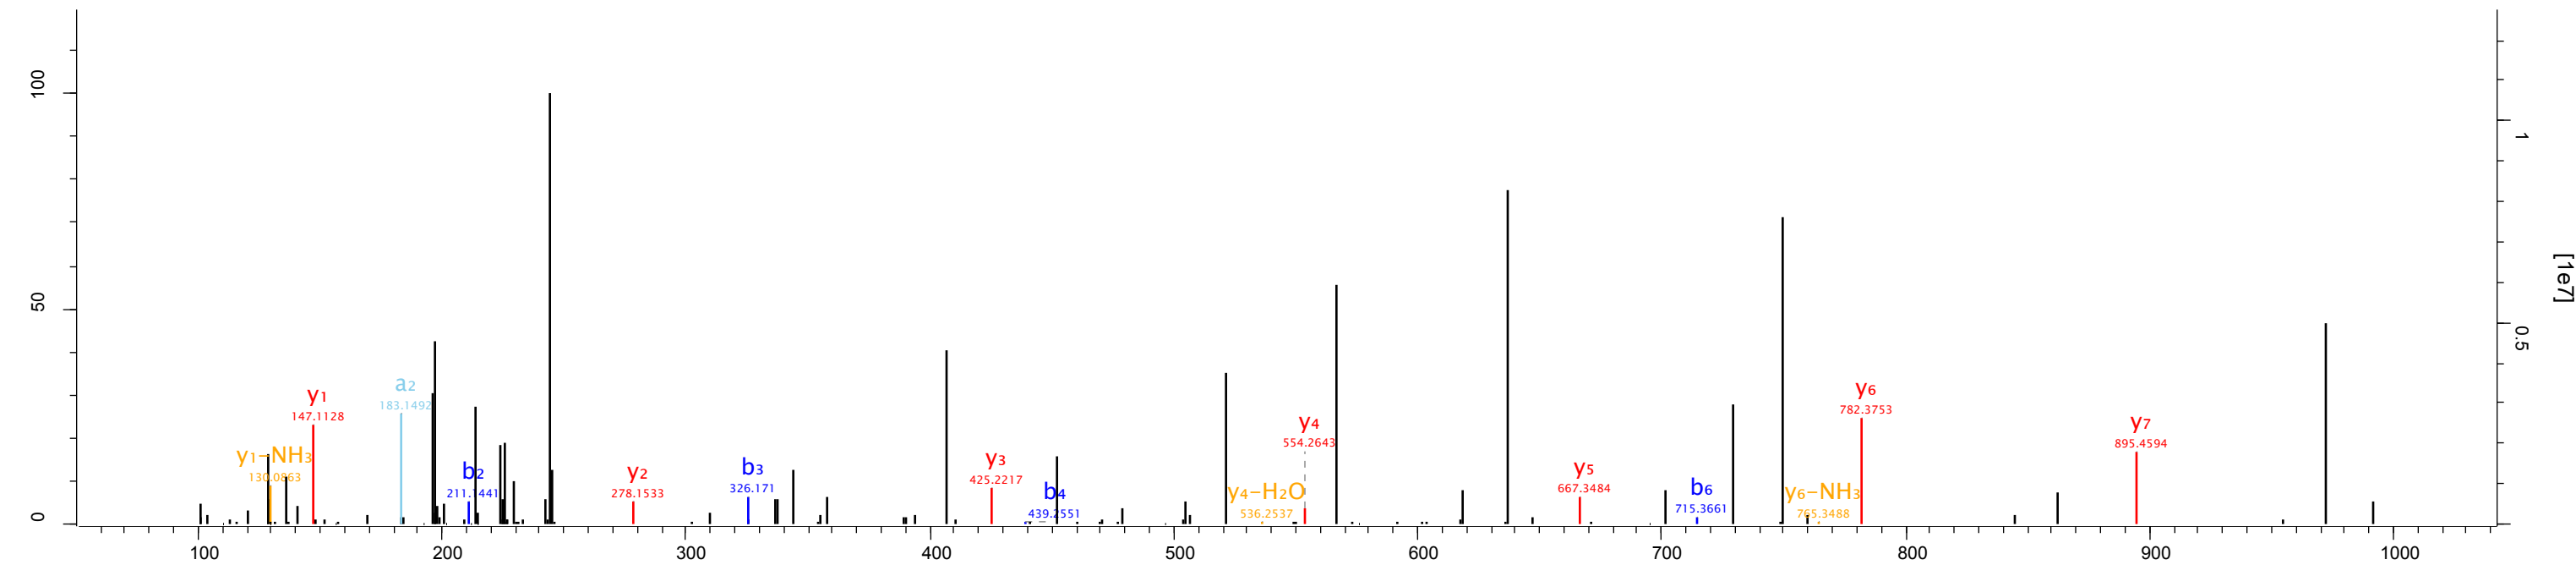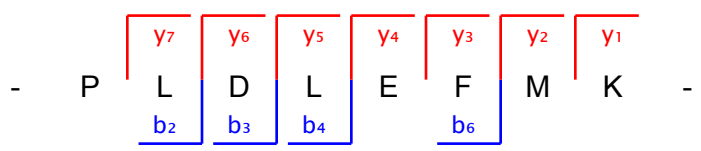

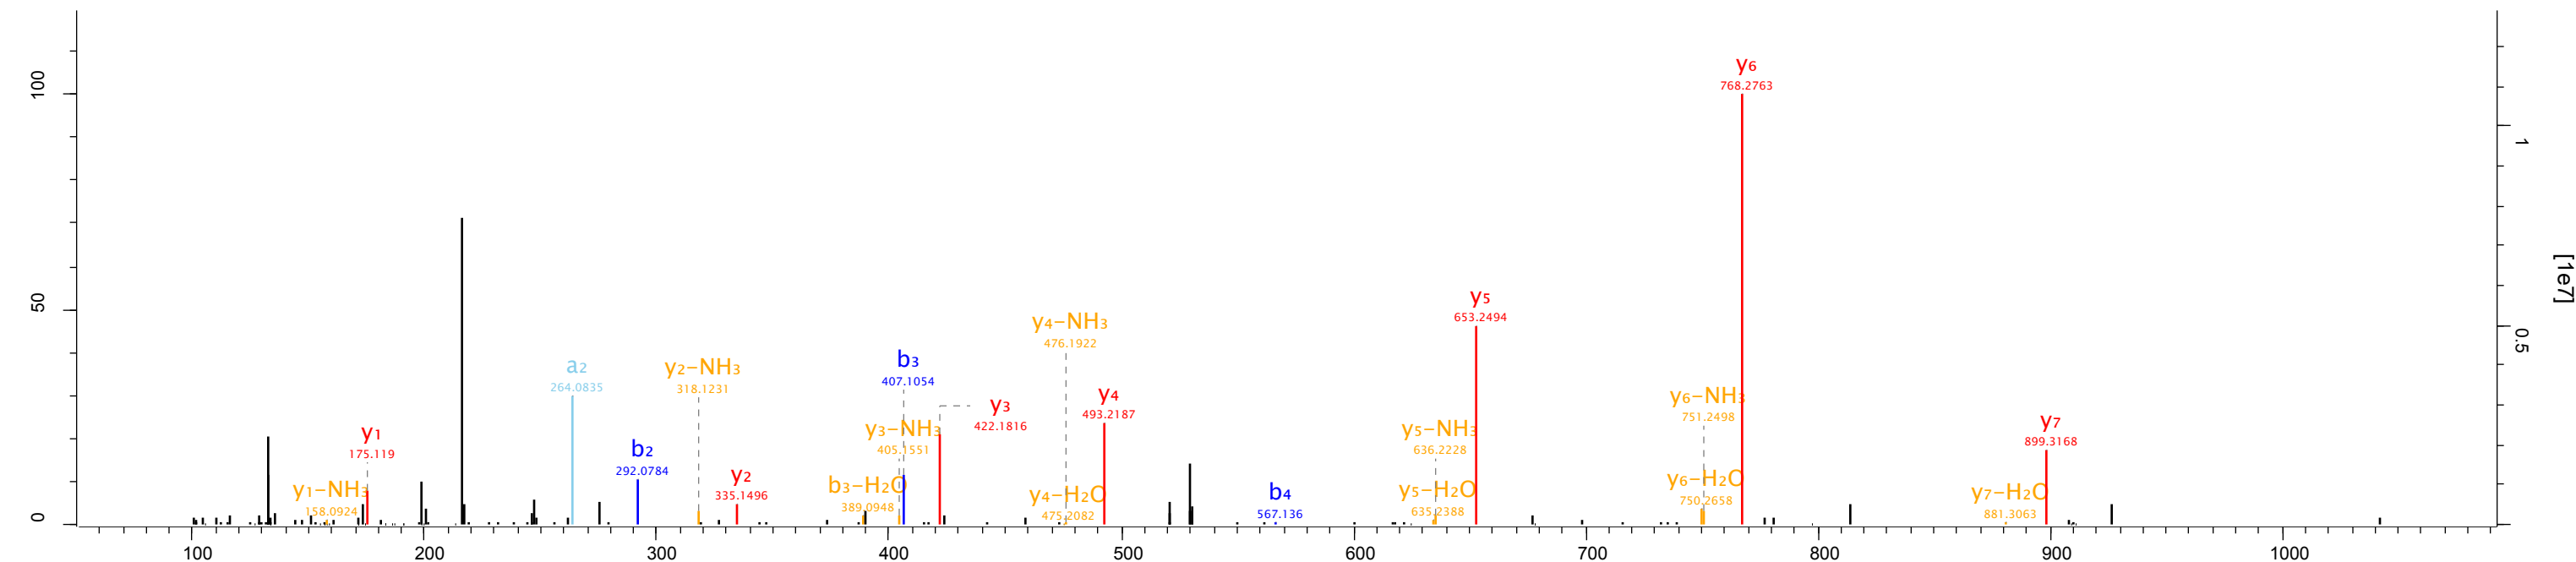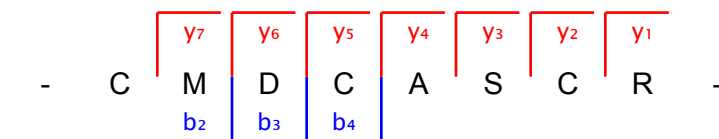

Raw file 20180707\_MaS\_A375SR\_ML\_proteome\_2\_10 Scan 16812 Method FTMS; HCD Score 40.49 m/z 710.65

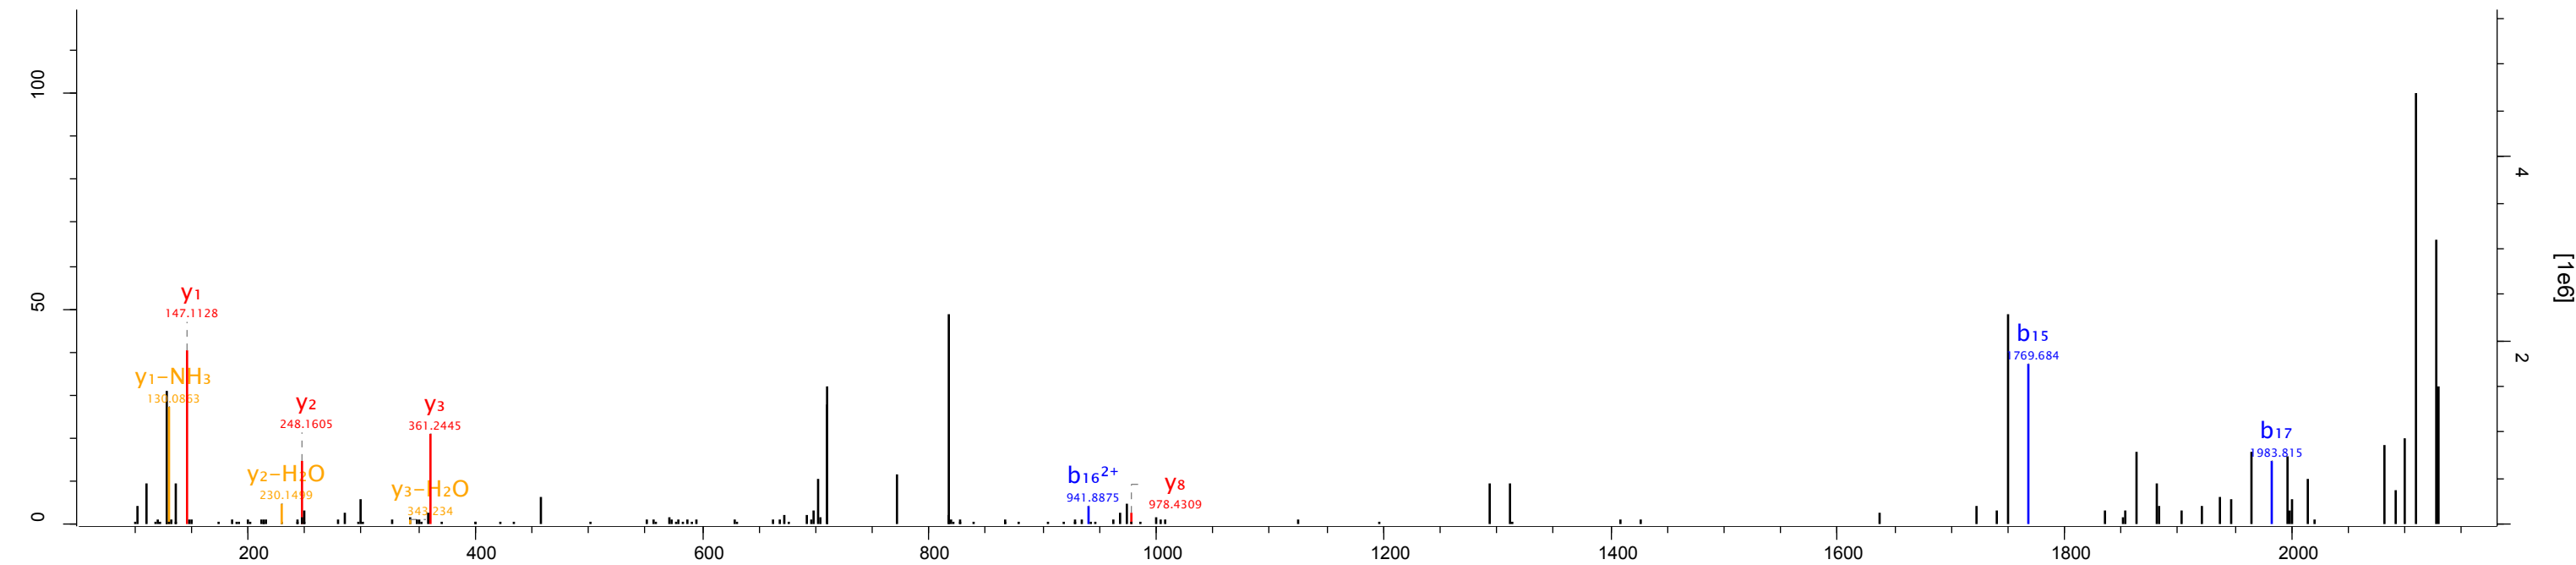

ac - L Y Q L P A A D S ph A <sup>y8</sup> T A S V b15 b16<sup>2+</sup> b17 <sup>y3</sup> I <sup>y2</sup> T <sup>y1</sup> K -

Raw file  
20180707\_MaS\_A375SR\_ML\_proteome\_2\_10

Scan 9242 Method FTMS; HCD Score 103.91 m/z 662.79 Gene names NRG1

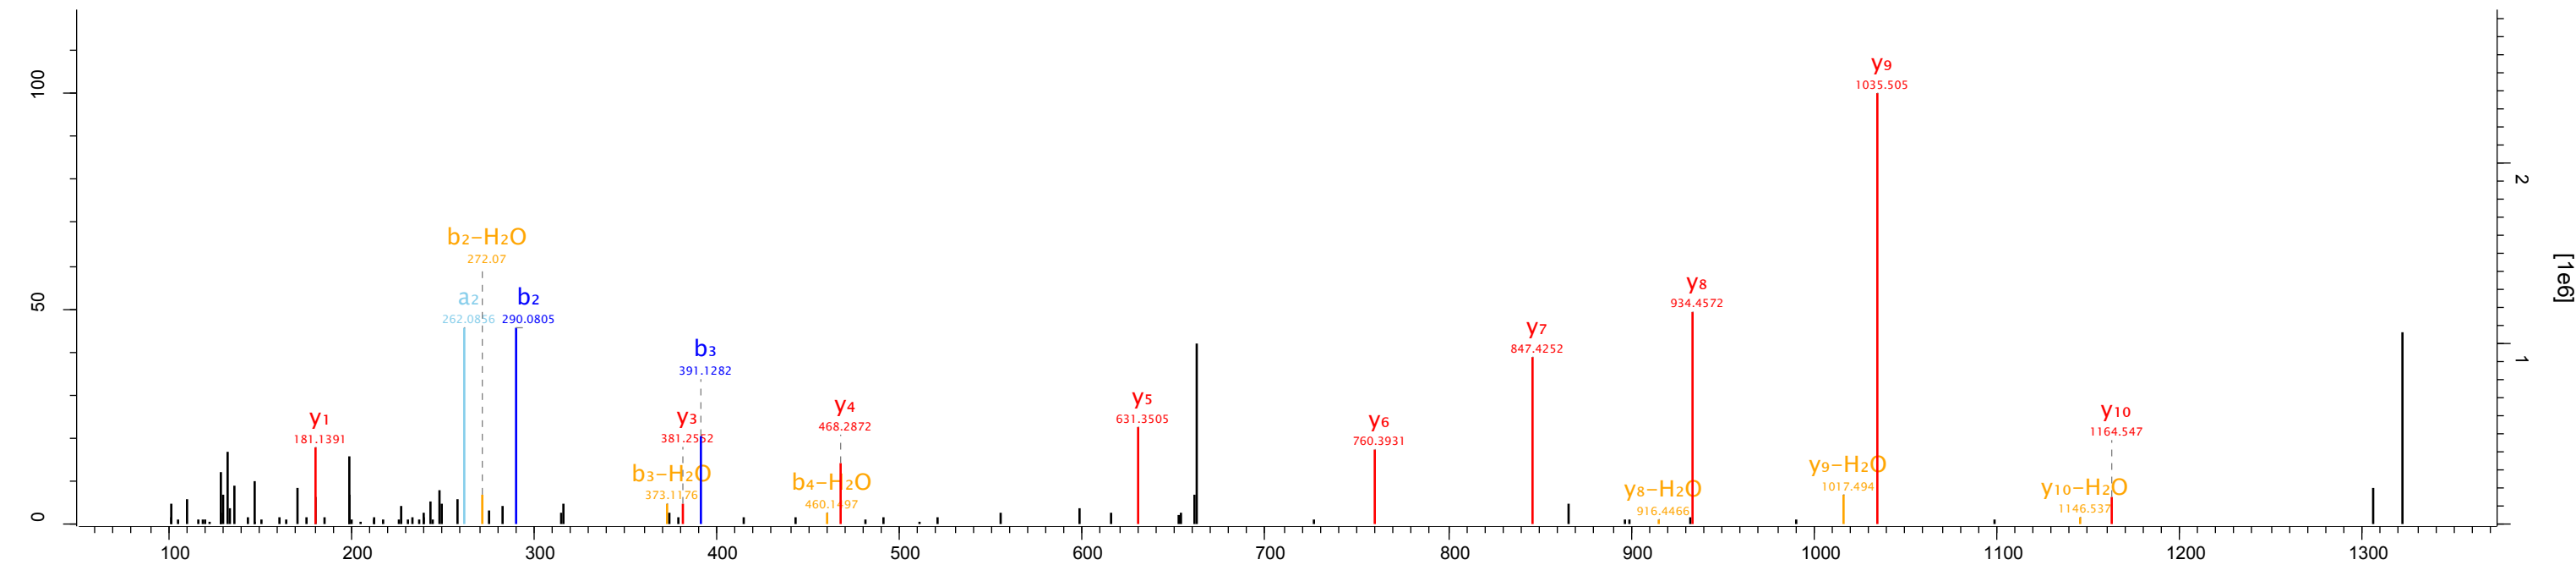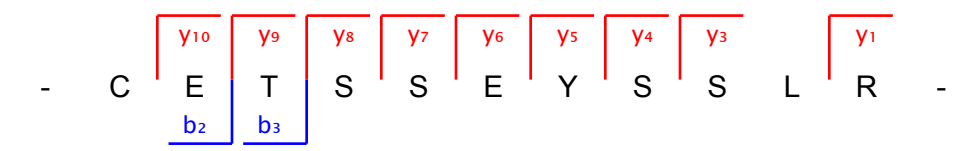

Raw file 20180707\_MaS\_A375SR\_ML\_proteome\_2\_11  
 Scan 25182 Method FTMS; HCD Score 94.2 m/z 916.91 Gene names MIEF2

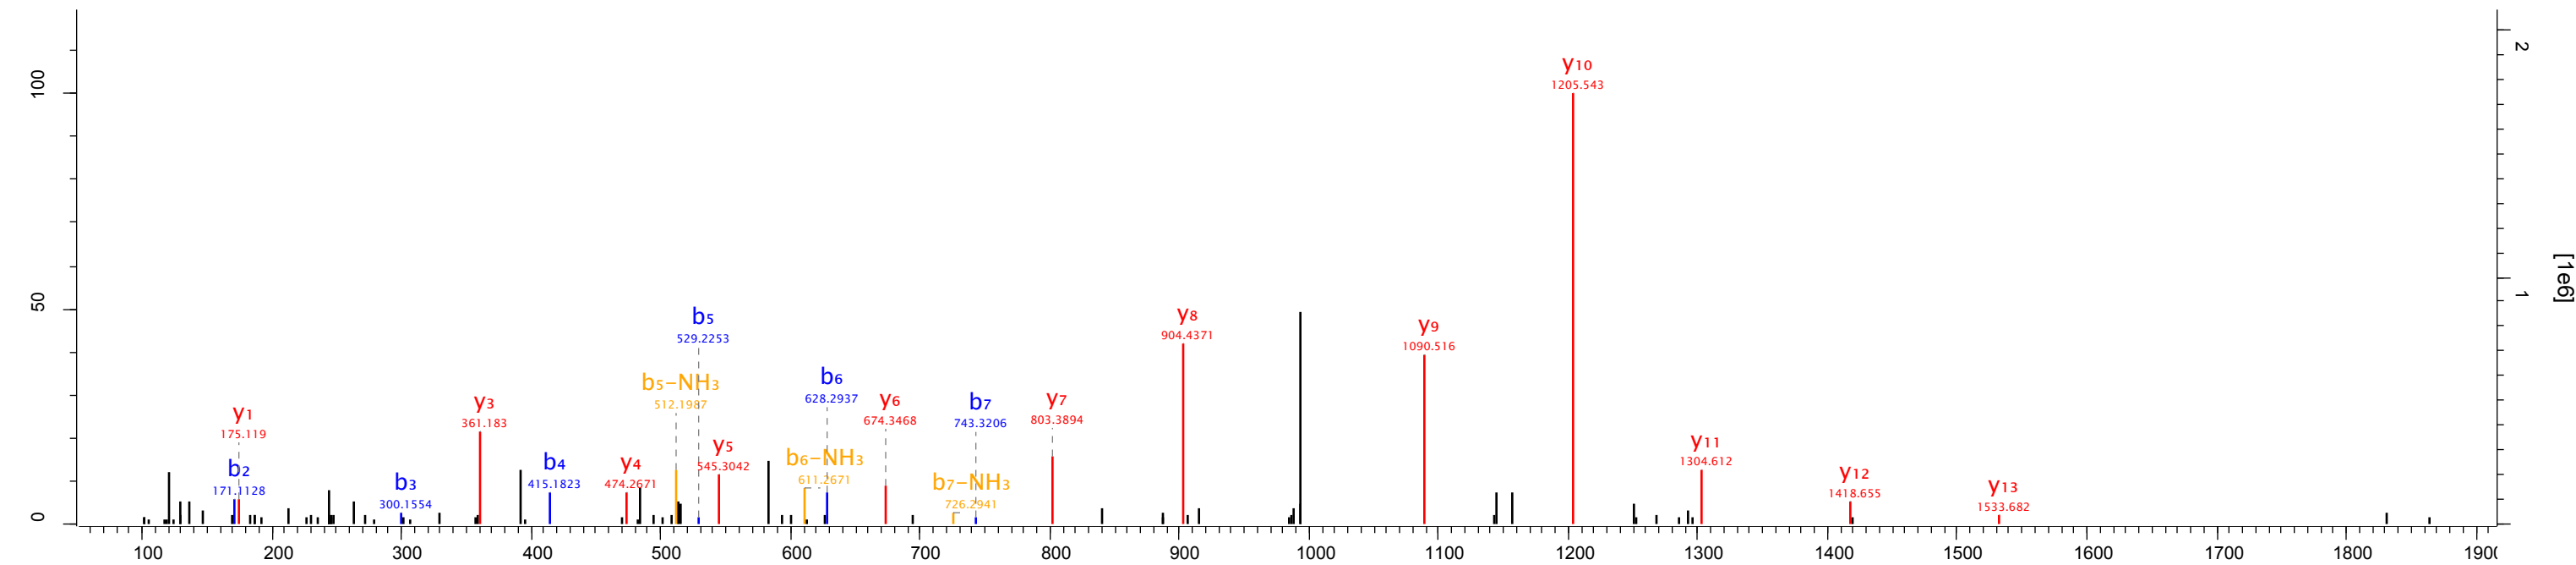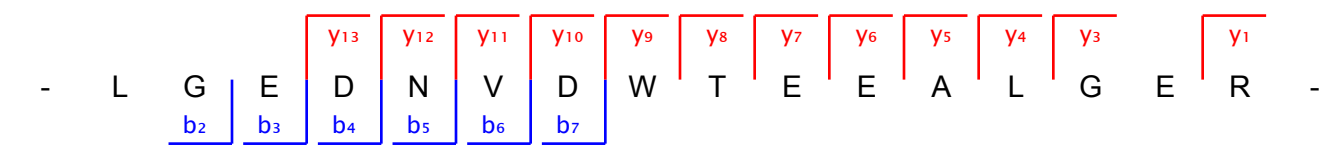

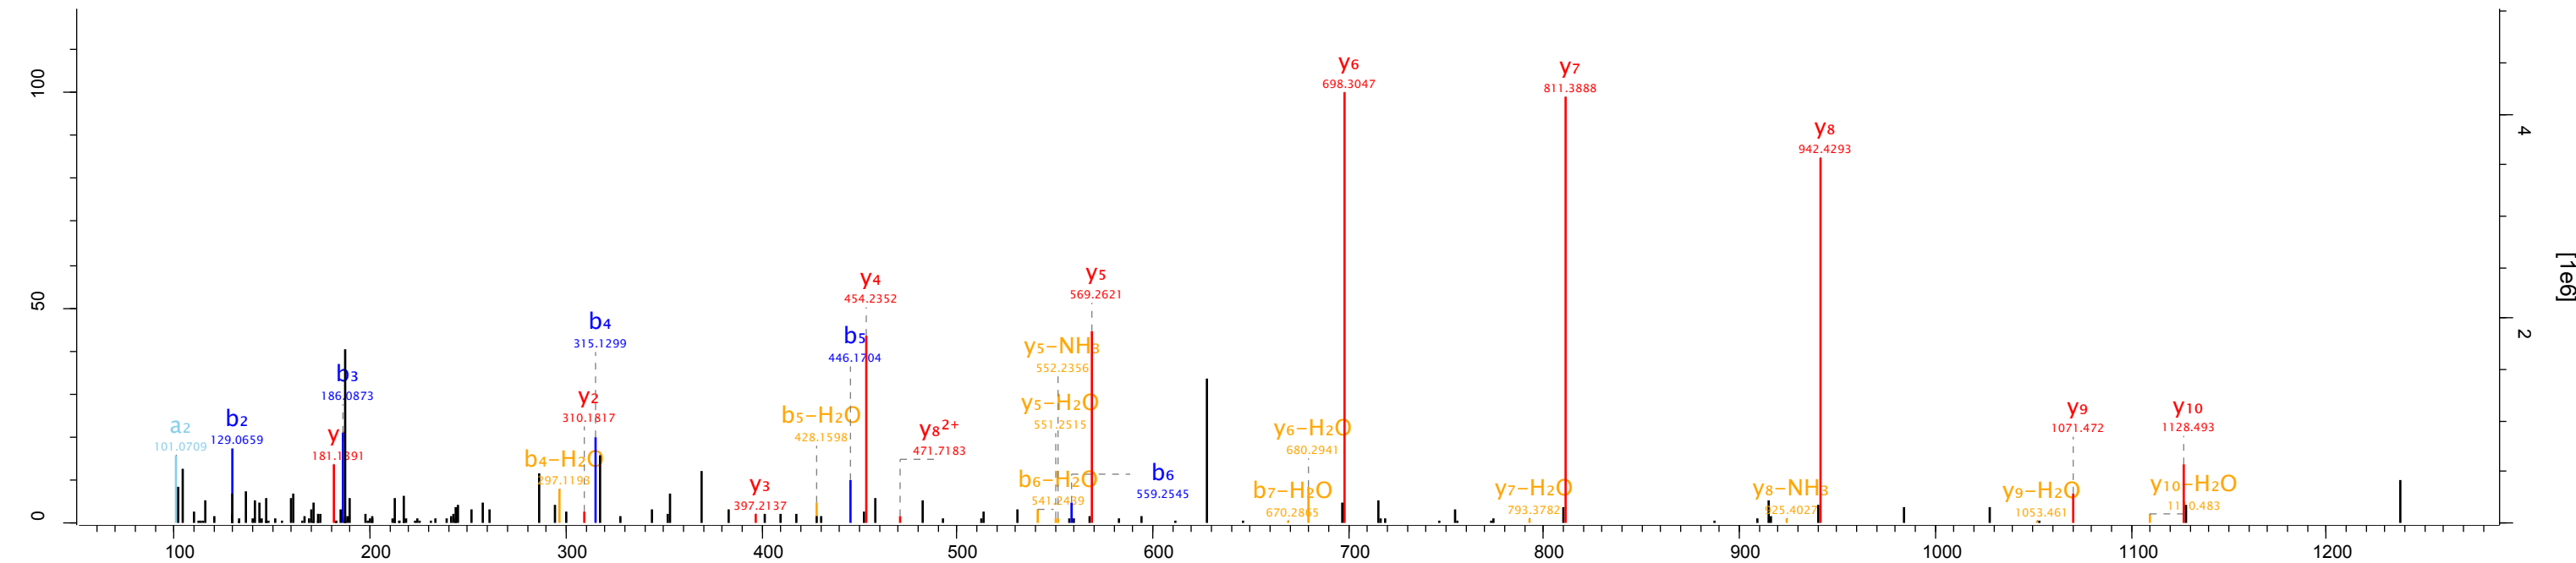

- G A G E M L E D G S E R -

b<sub>2</sub>
b<sub>3</sub>
b<sub>4</sub>
b<sub>5</sub>
b<sub>6</sub>
y<sub>10</sub>
y<sub>9</sub>
y<sub>8</sub>
y<sub>7</sub>
y<sub>6</sub>
y<sub>5</sub>
y<sub>4</sub>
y<sub>3</sub>
y<sub>2</sub>
y<sub>1</sub>



Raw file  
20180707\_MaS\_A375SR\_ML\_proteome\_2\_12

Scan 17902 Method FTMS; HCD Score 58.86 m/z 986.8 Gene names GAP43

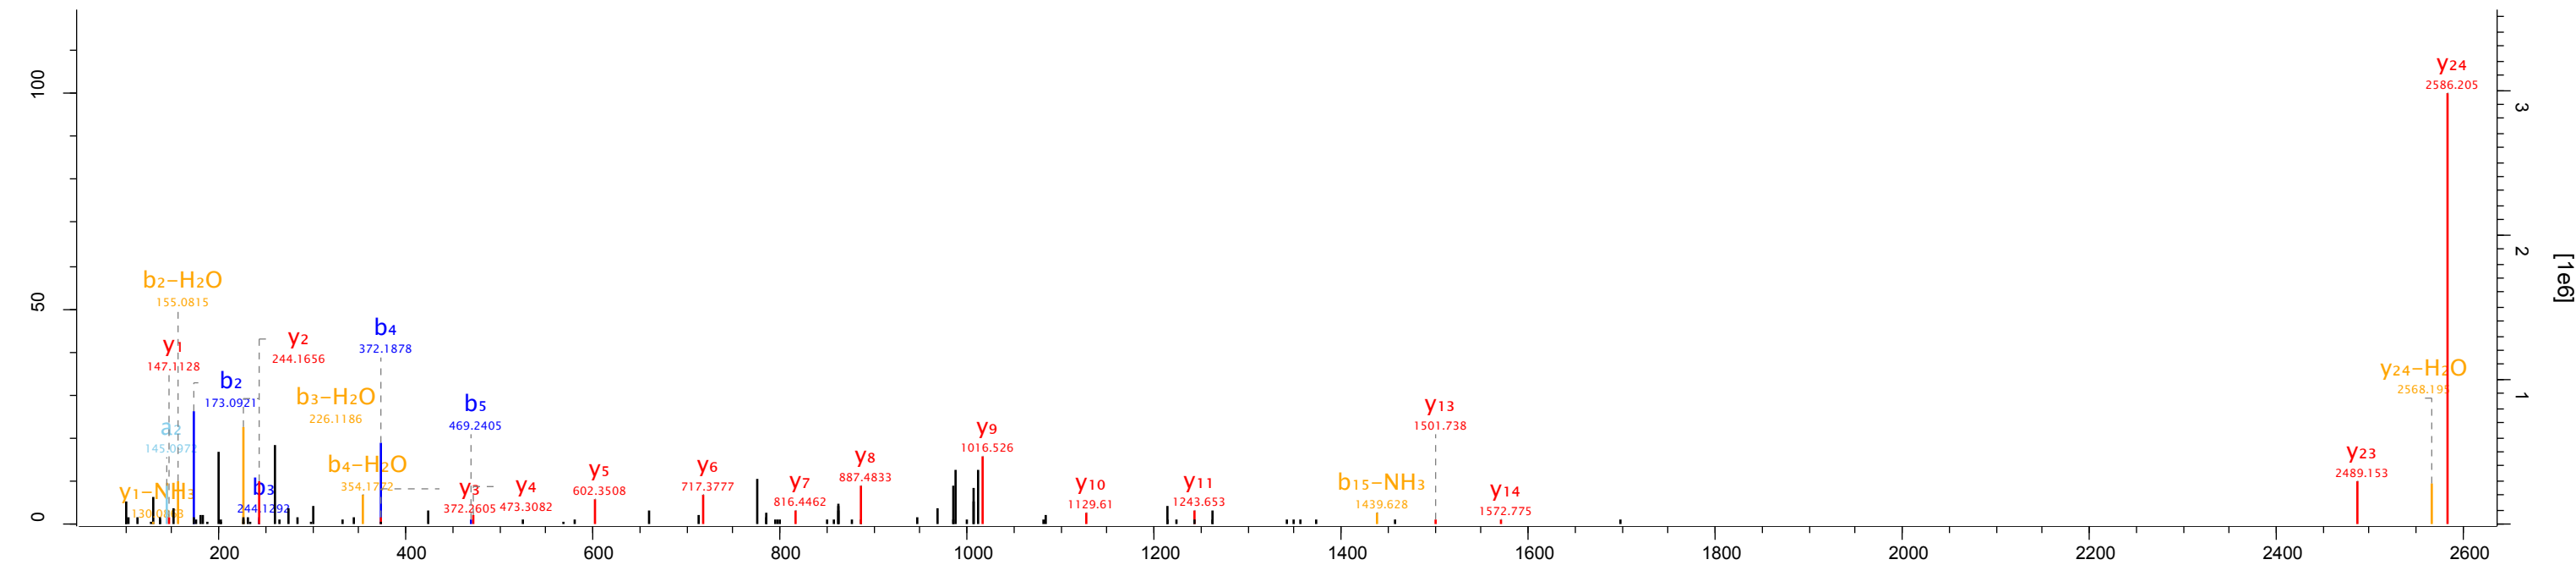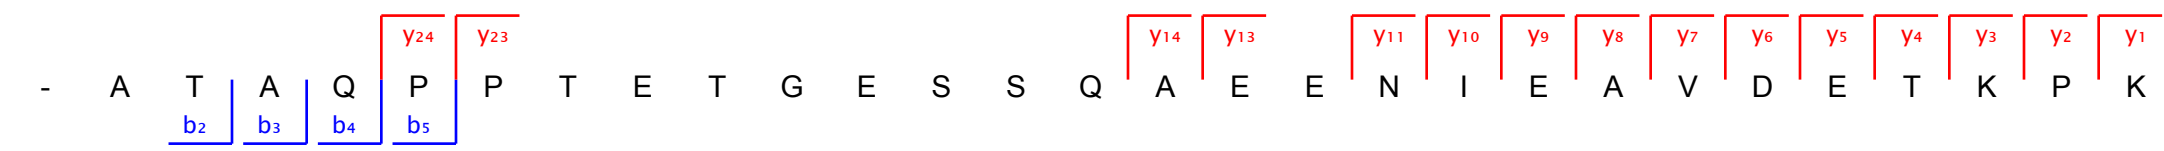

Raw file 20180707\_MaS\_A375SR\_ML\_proteome\_2\_12 Scan 19342 Method FTMS; HCD Score 51.76 m/z 703.34

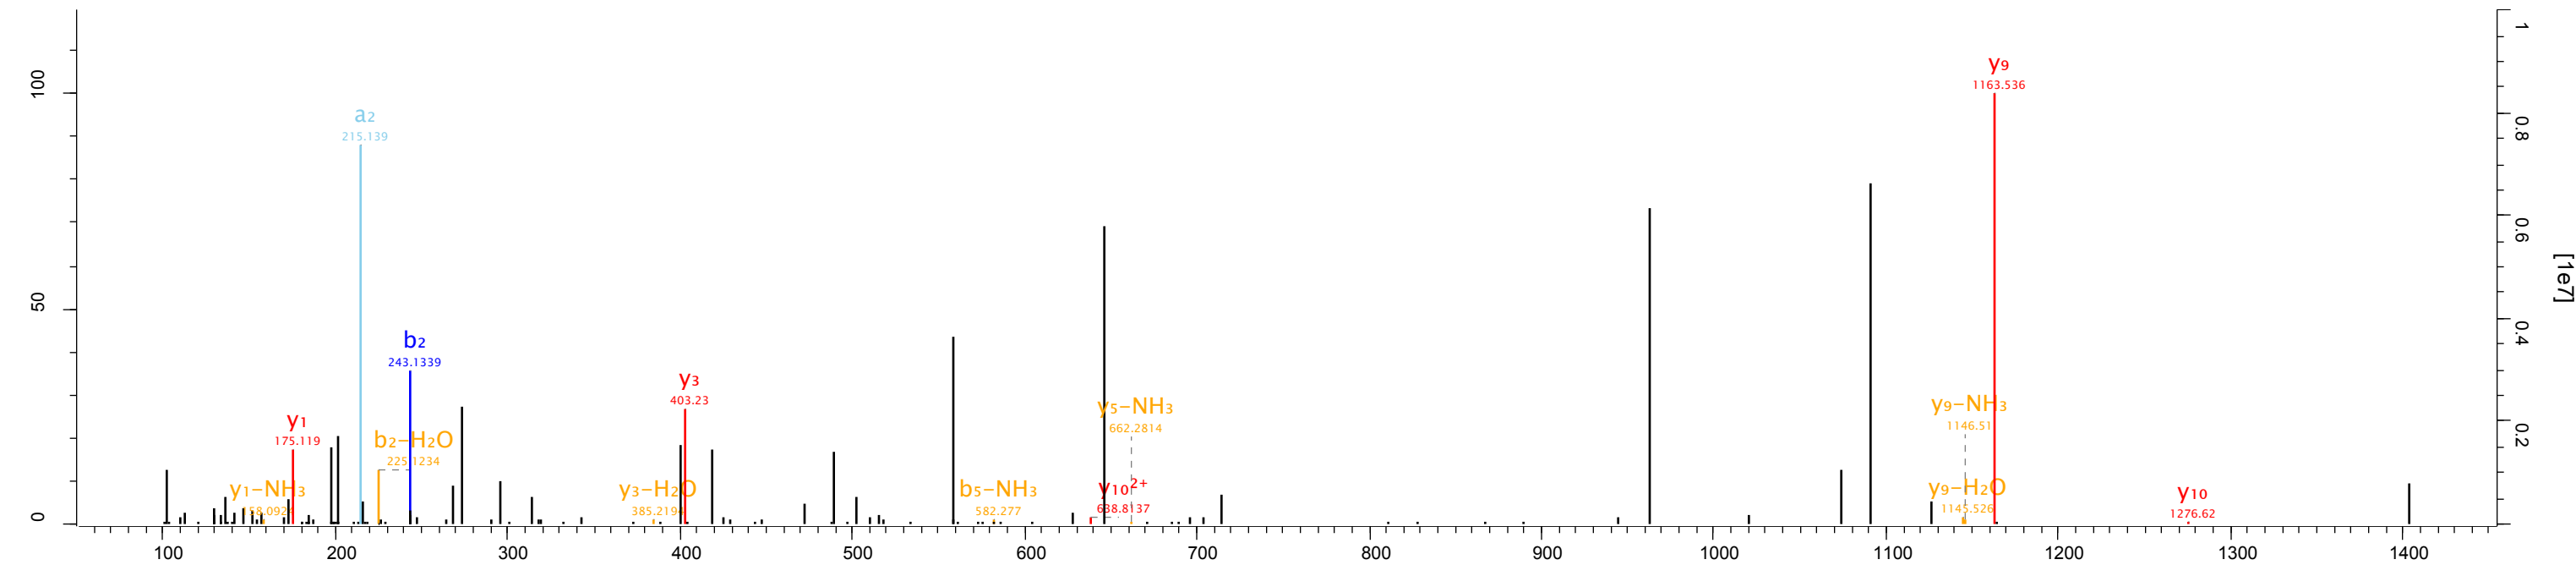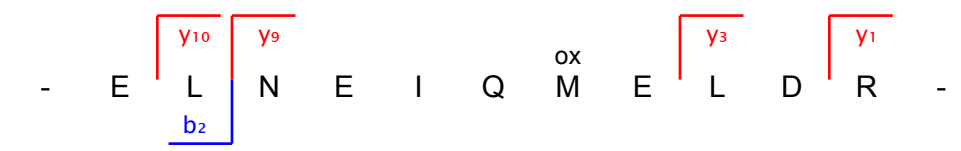

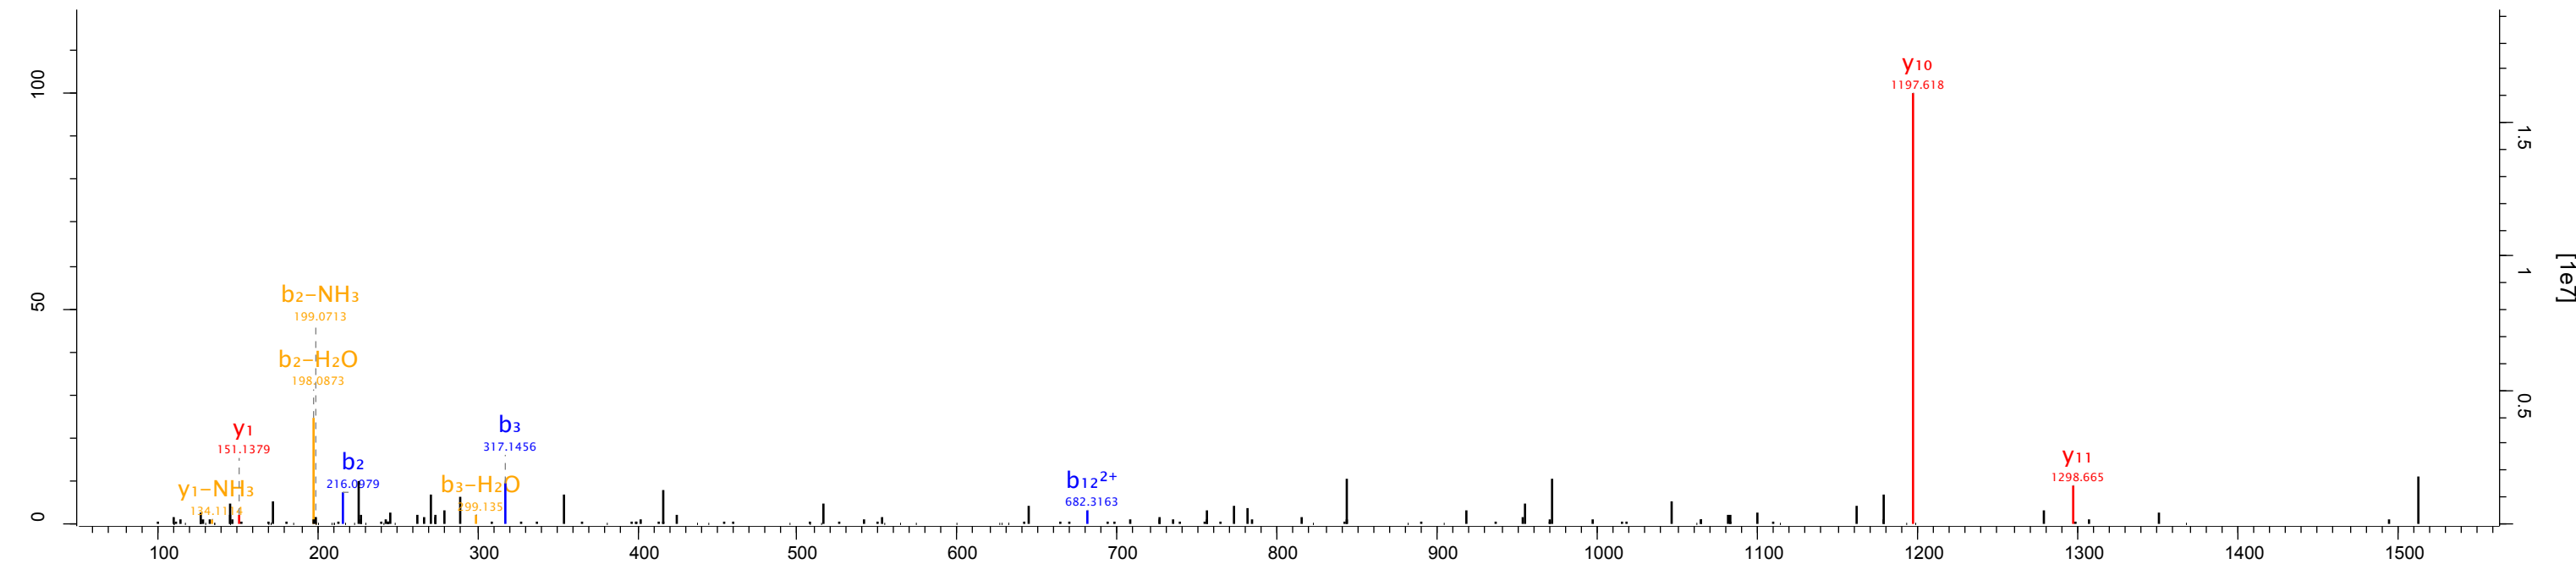

- Q S T V I Q S N Q S P I K -

Fragmentation labels: b<sub>2</sub>, b<sub>3</sub>, y<sub>11</sub>, y<sub>10</sub>, b<sub>12<sup>2+</sup></sub>, y<sub>1</sub>

Raw file 20180707\_MaS\_A375SR\_ML\_proteome\_2\_15 Scan 16492 Method FTMS; HCD Score 97.97 m/z 559.78

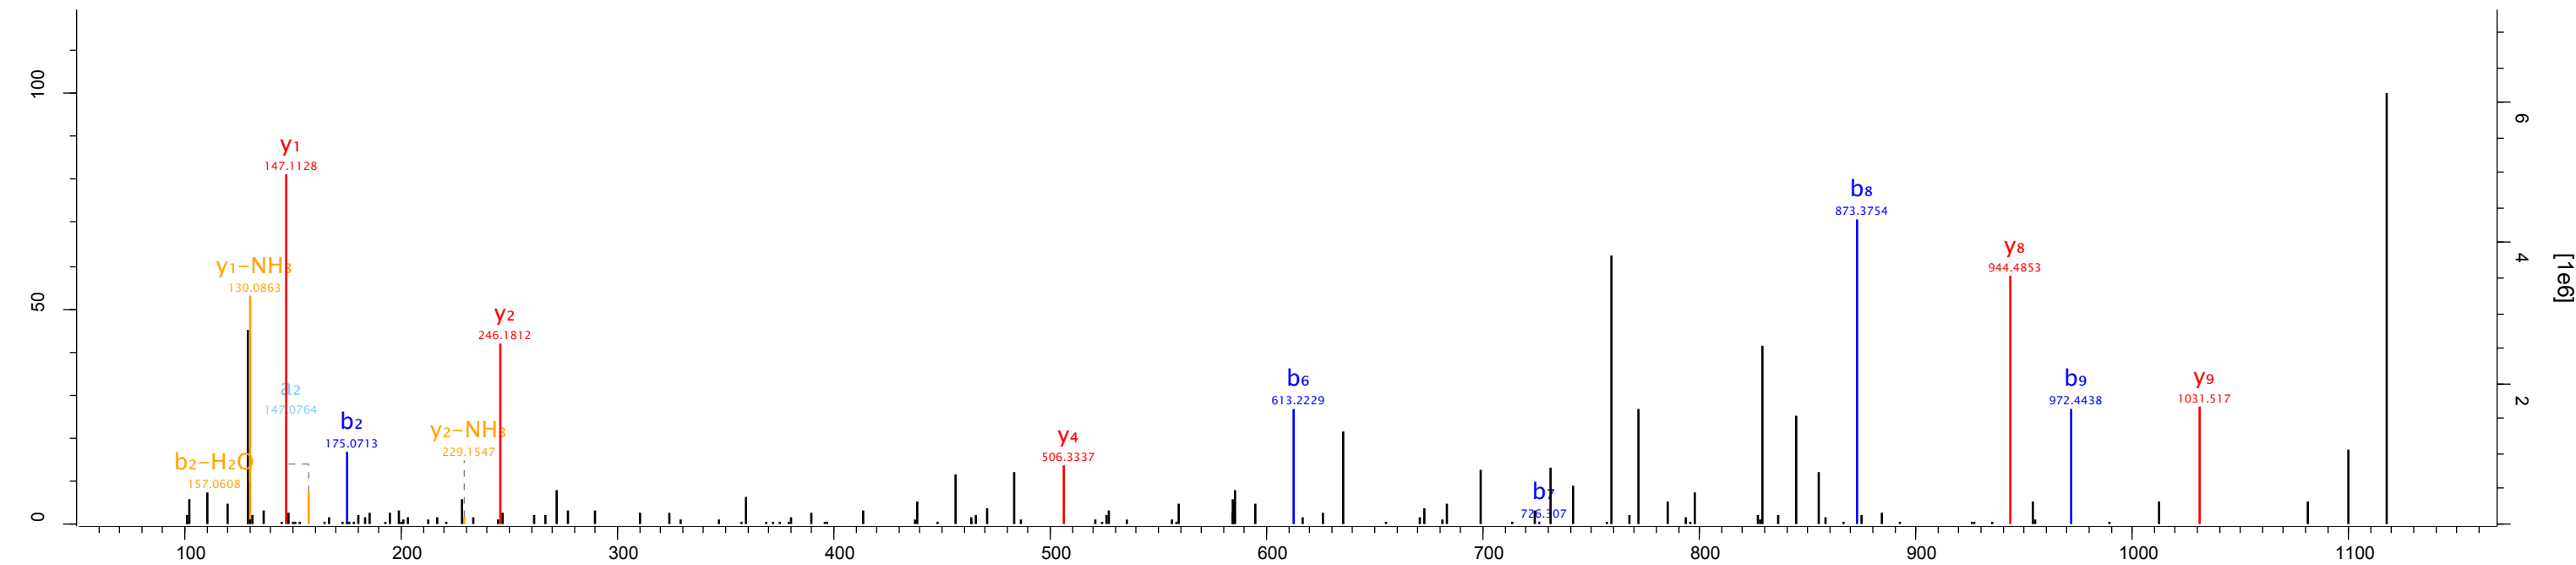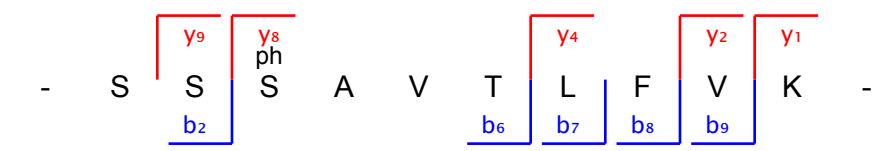

Raw file  
20180707\_MaS\_A375SR\_ML\_proteome\_2\_15

Scan: 27912  
Method: FTMS; HCD  
Score: 85.49  
m/z: 928.5  
Gene names: CLIC3

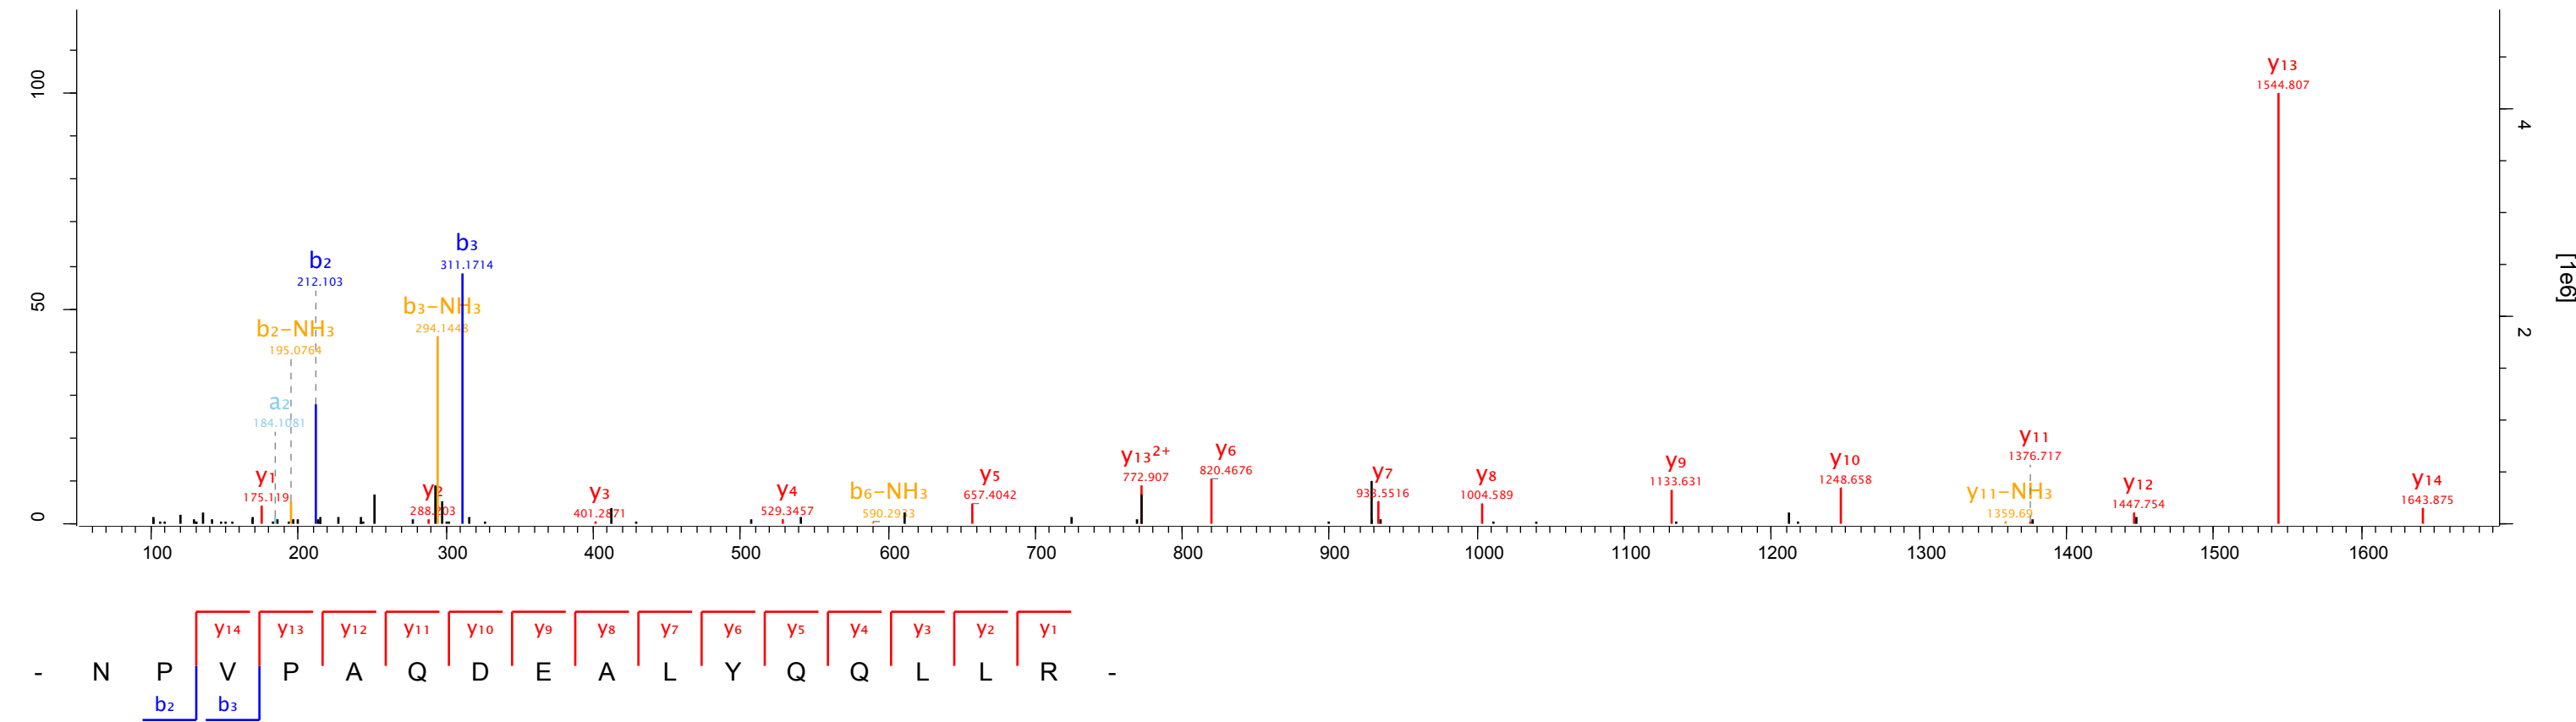

Raw file  
20180707\_MaS\_A375SR\_ML\_proteome\_2\_15

Scan 4772 Method FTMS; HCD Score 47.3 m/z 563.28 Gene names SFT2D2

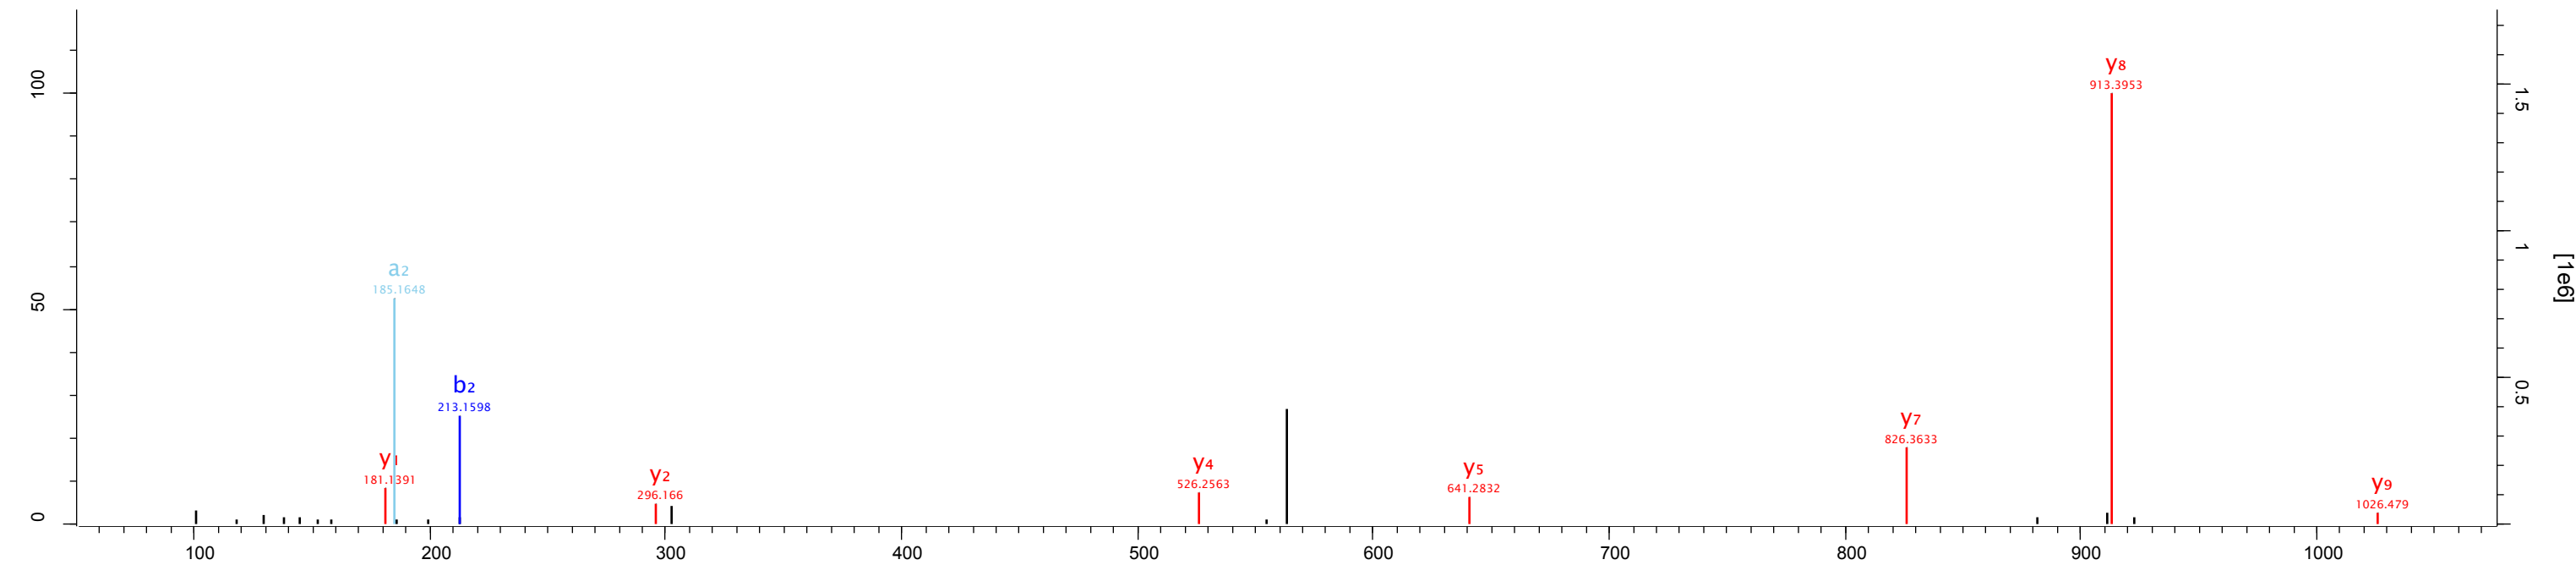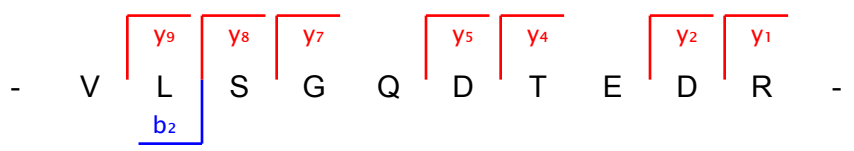

Raw file  
20180707\_MaS\_A375SR\_ML\_proteome\_2\_15

Scan 6612 Method FTMS; HCD Score 96.51 m/z 353.19 Gene names ART4

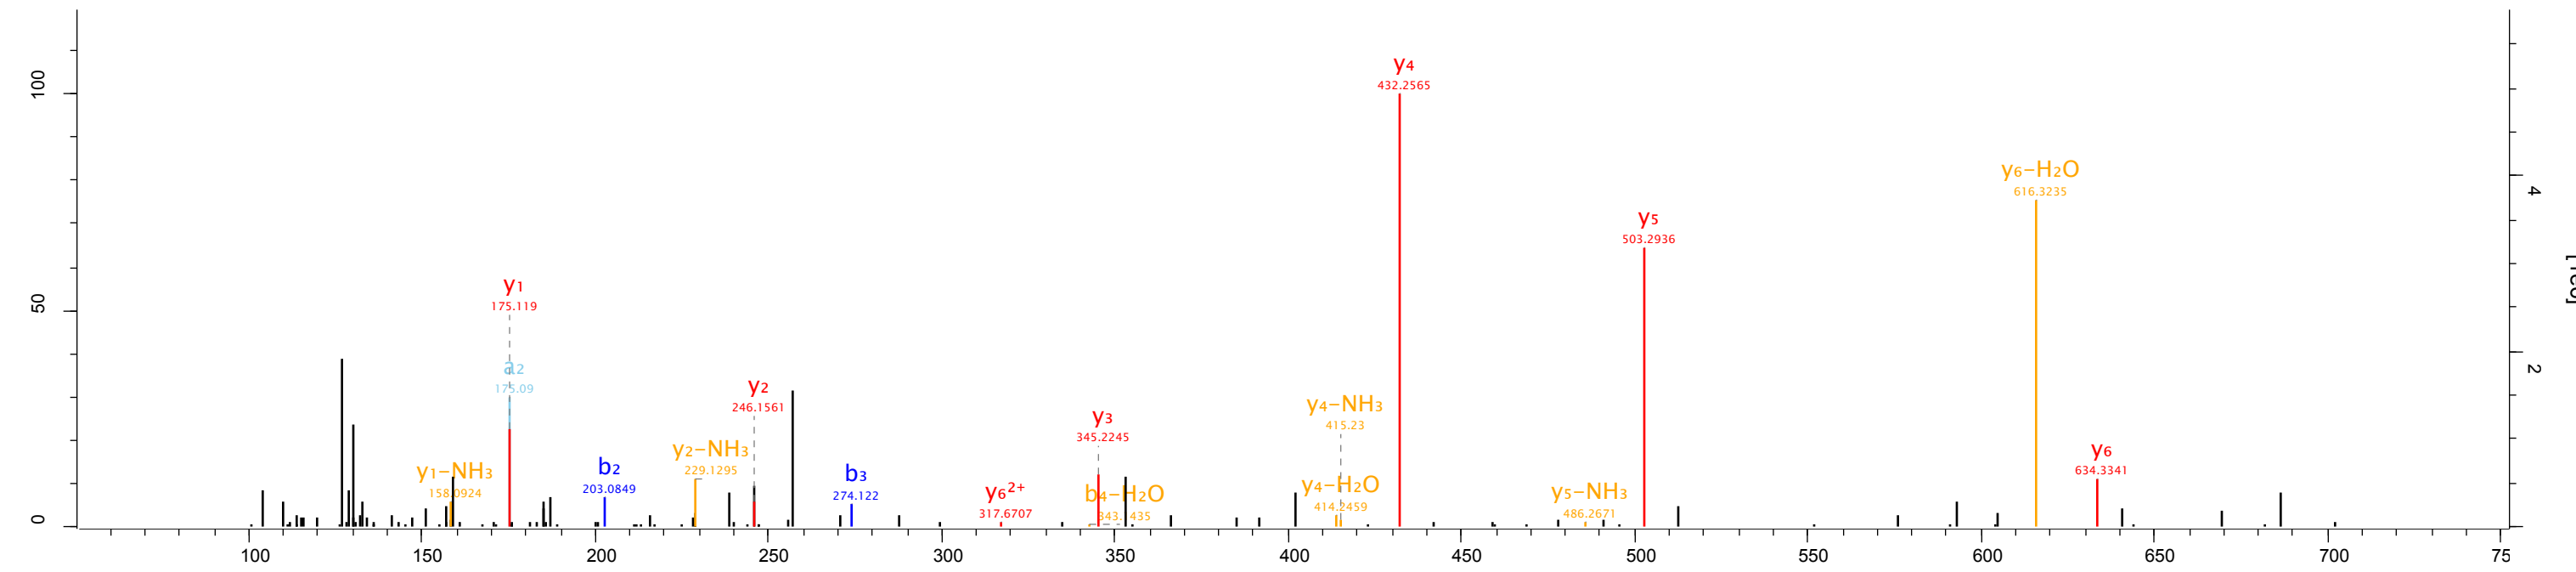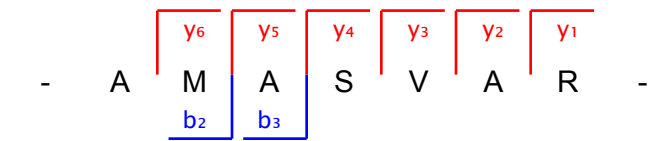

Raw file  
20180707\_MaS\_A375SR\_ML\_proteome\_2\_16

Scan 26442 Method FTMS; HCD Score 100.04 m/z 930.45 Gene names MAPK1IP1L

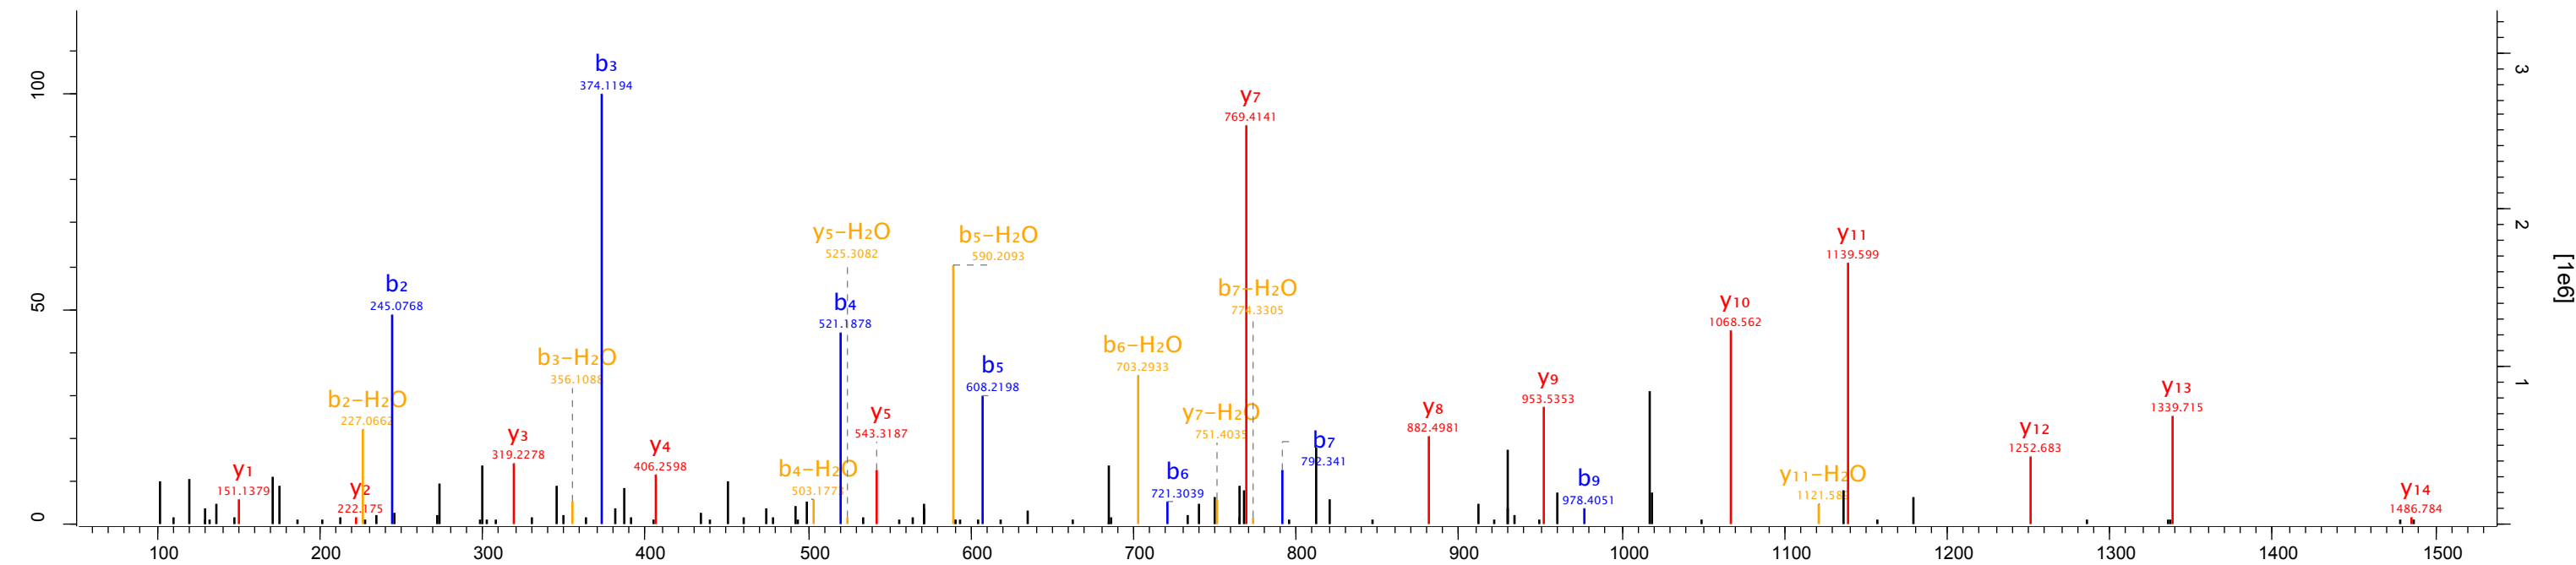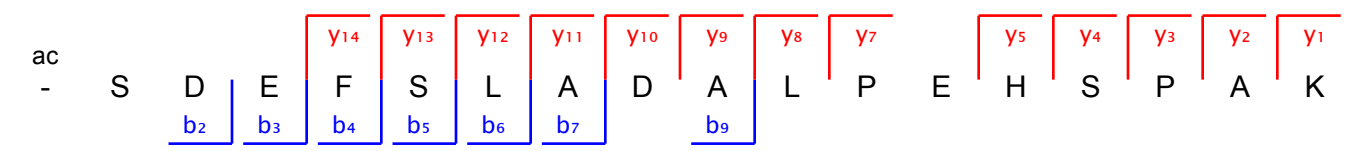



Raw file 20180707\_MaS\_A375SR\_ML\_proteome\_2\_17  
 Scan 19082 Method FTMS; HCD Score 8.32 m/z 954.45 Gene names C6orf120

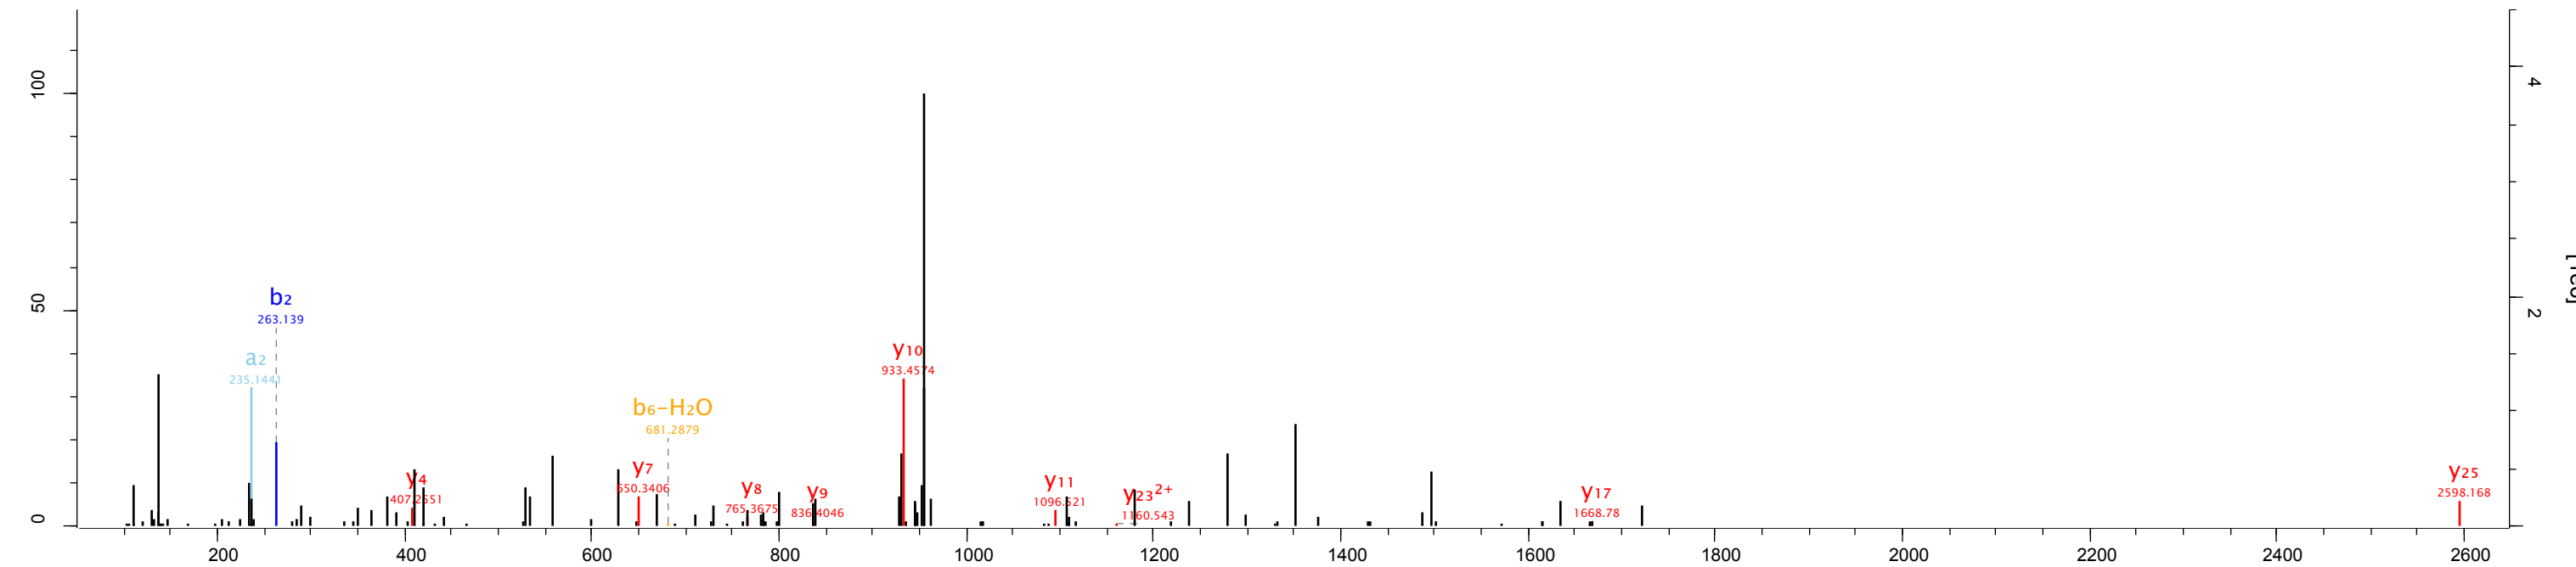

- V Y Y D G T V E Q H P F G E A A Y P A D G A D A G Q K -

Fragmentation sites are indicated by brackets above the sequence:

- b<sub>2</sub>** (blue bracket) under Y (position 3)
- y<sub>25</sub>** (red bracket) above Y (position 3)
- y<sub>23</sub><sup>2+</sup>** (red bracket) above G (position 5)
- y<sub>17</sub>** (red bracket) above H (position 9)
- y<sub>11</sub>** (red bracket) above Y (position 14)
- y<sub>10</sub>** (red bracket) above P (position 15)
- y<sub>9</sub>** (red bracket) above A (position 16)
- y<sub>8</sub>** (red bracket) above D (position 17)
- y<sub>7</sub>** (red bracket) above G (position 18)
- y<sub>4</sub>** (red bracket) above A (position 21)

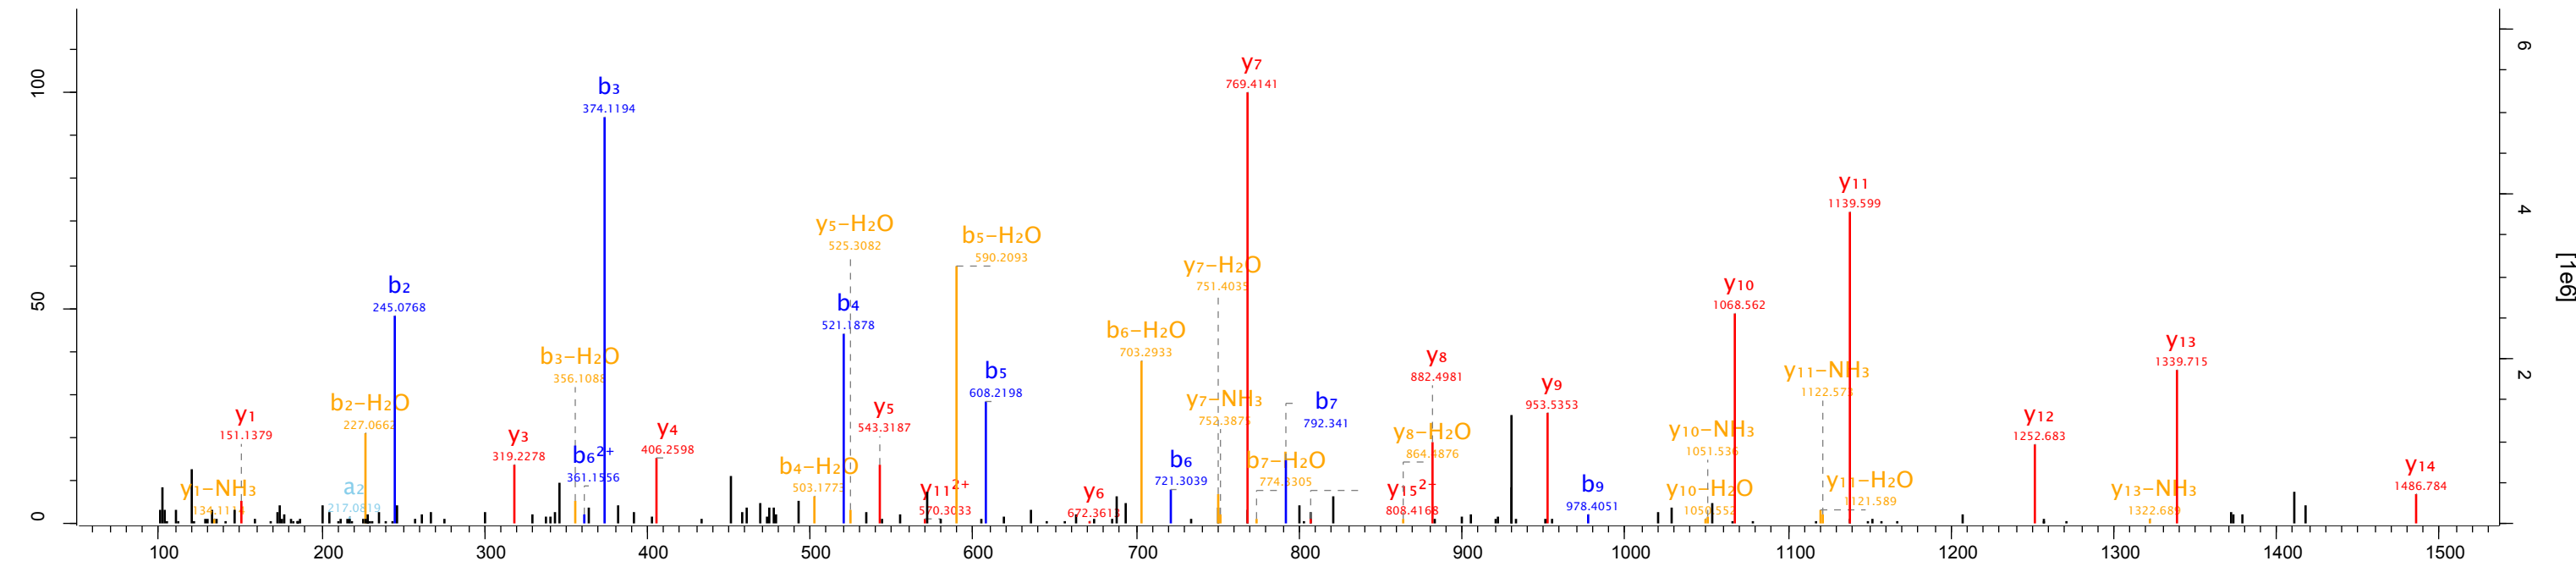

ac

- S D E F S L A D A L P E H S P A K -

b<sub>2</sub> b<sub>3</sub> b<sub>4</sub> b<sub>5</sub> b<sub>6</sub> b<sub>7</sub> b<sub>9</sub>

y<sub>15</sub><sup>2+</sup> y<sub>14</sub> y<sub>13</sub> y<sub>12</sub> y<sub>11</sub> y<sub>10</sub> y<sub>9</sub> y<sub>8</sub> y<sub>7</sub> y<sub>6</sub> y<sub>5</sub> y<sub>4</sub> y<sub>3</sub> y<sub>1</sub>

Raw file  
20180707\_MaS\_A375SR\_ML\_proteome\_2\_18

Scan 15192 Method FTMS; HCD Score 54.98 m/z 562.26

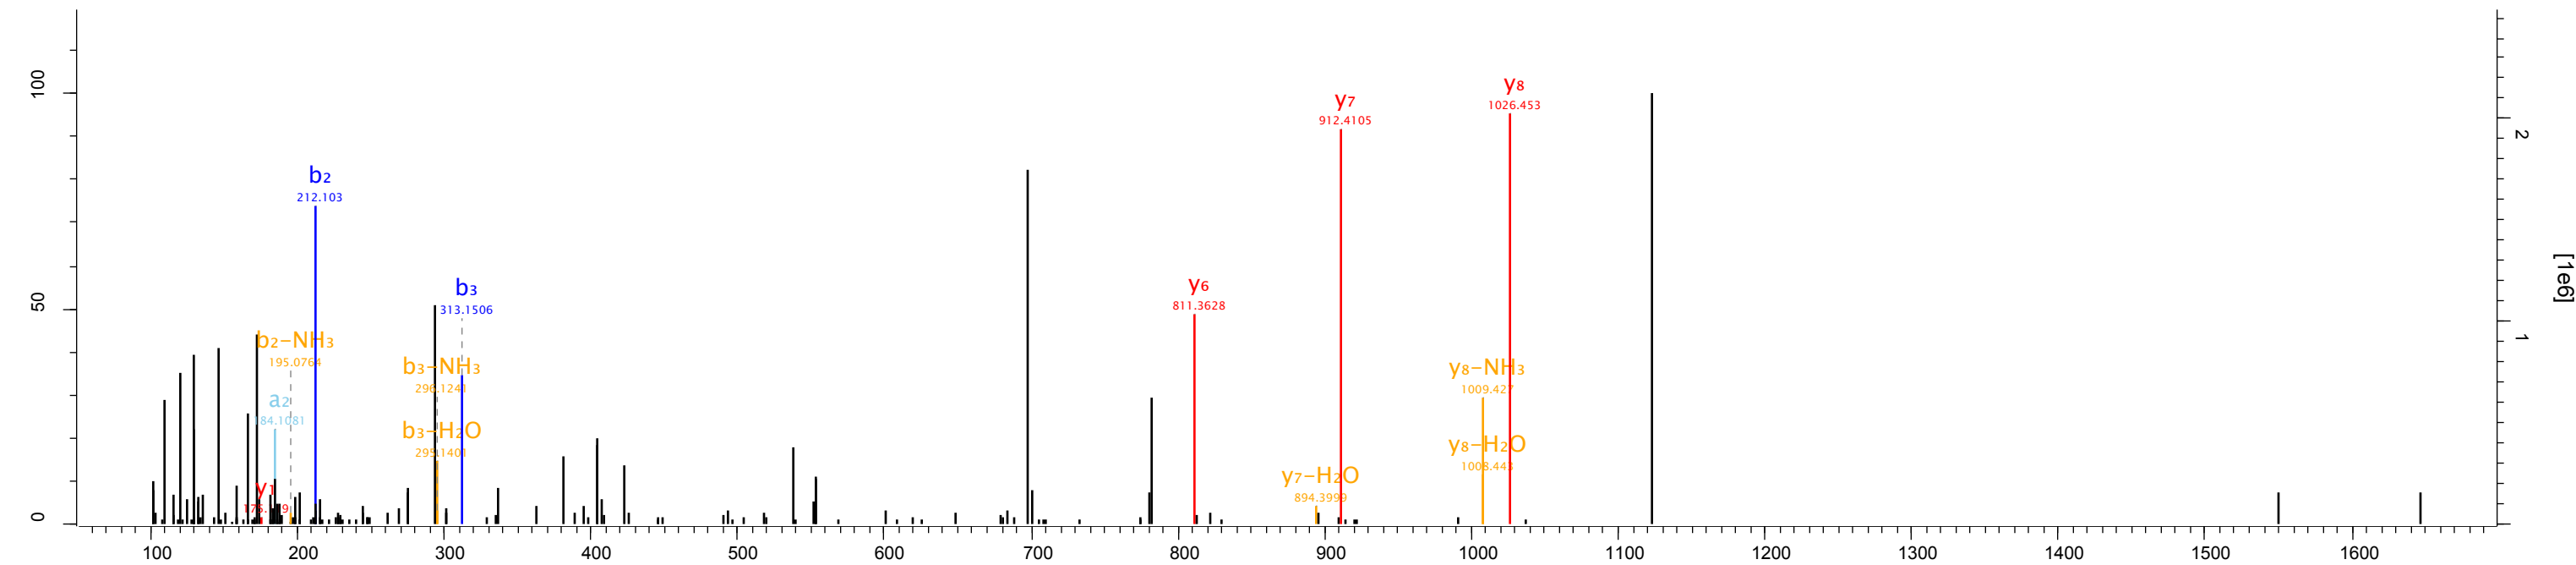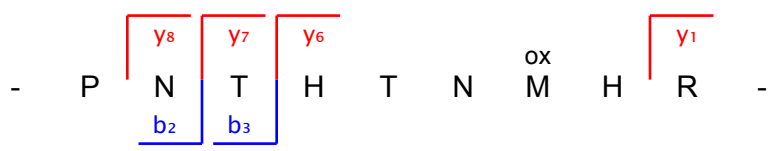

Raw file 20180707\_MaS\_A375SR\_ML\_proteome\_2\_18 Scan 18722 Method FTMS; HCD Score 44.93 m/z 1026.47

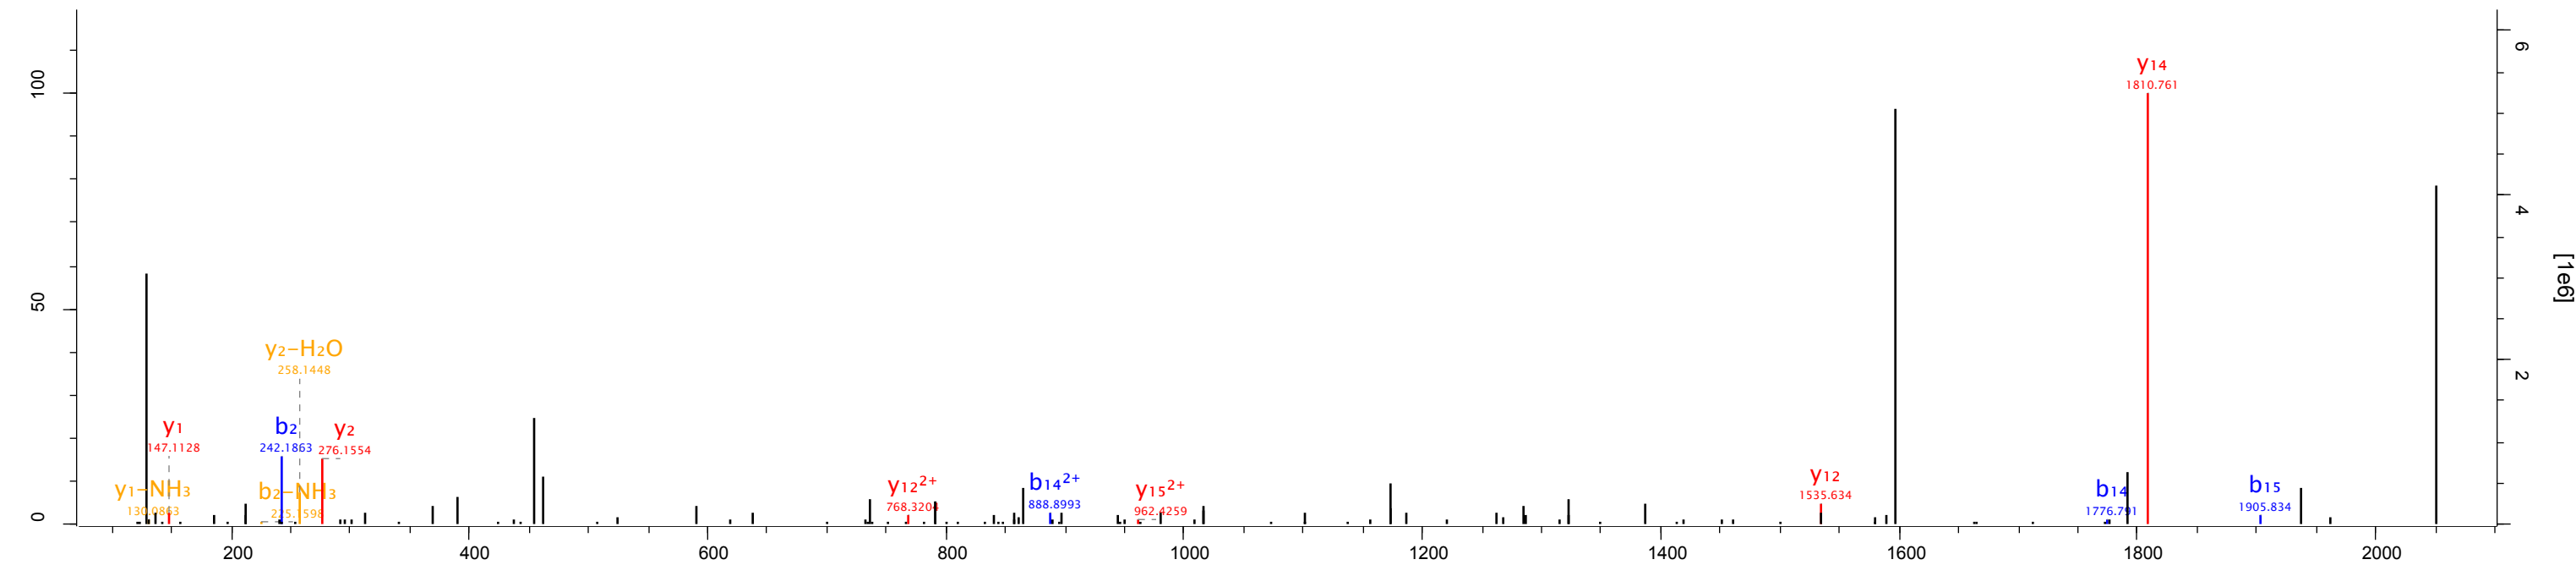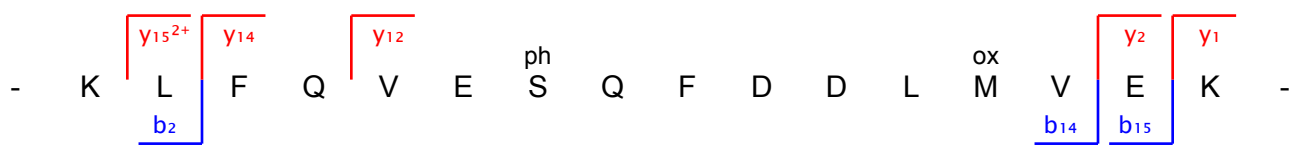

Raw file  
 20180707\_MaS\_A375SR\_ML\_proteome\_2\_18  
 Scan: 19472 Method: FTMS; HCD Score: 73.93 m/z: 645 Gene names: ATP6V0C

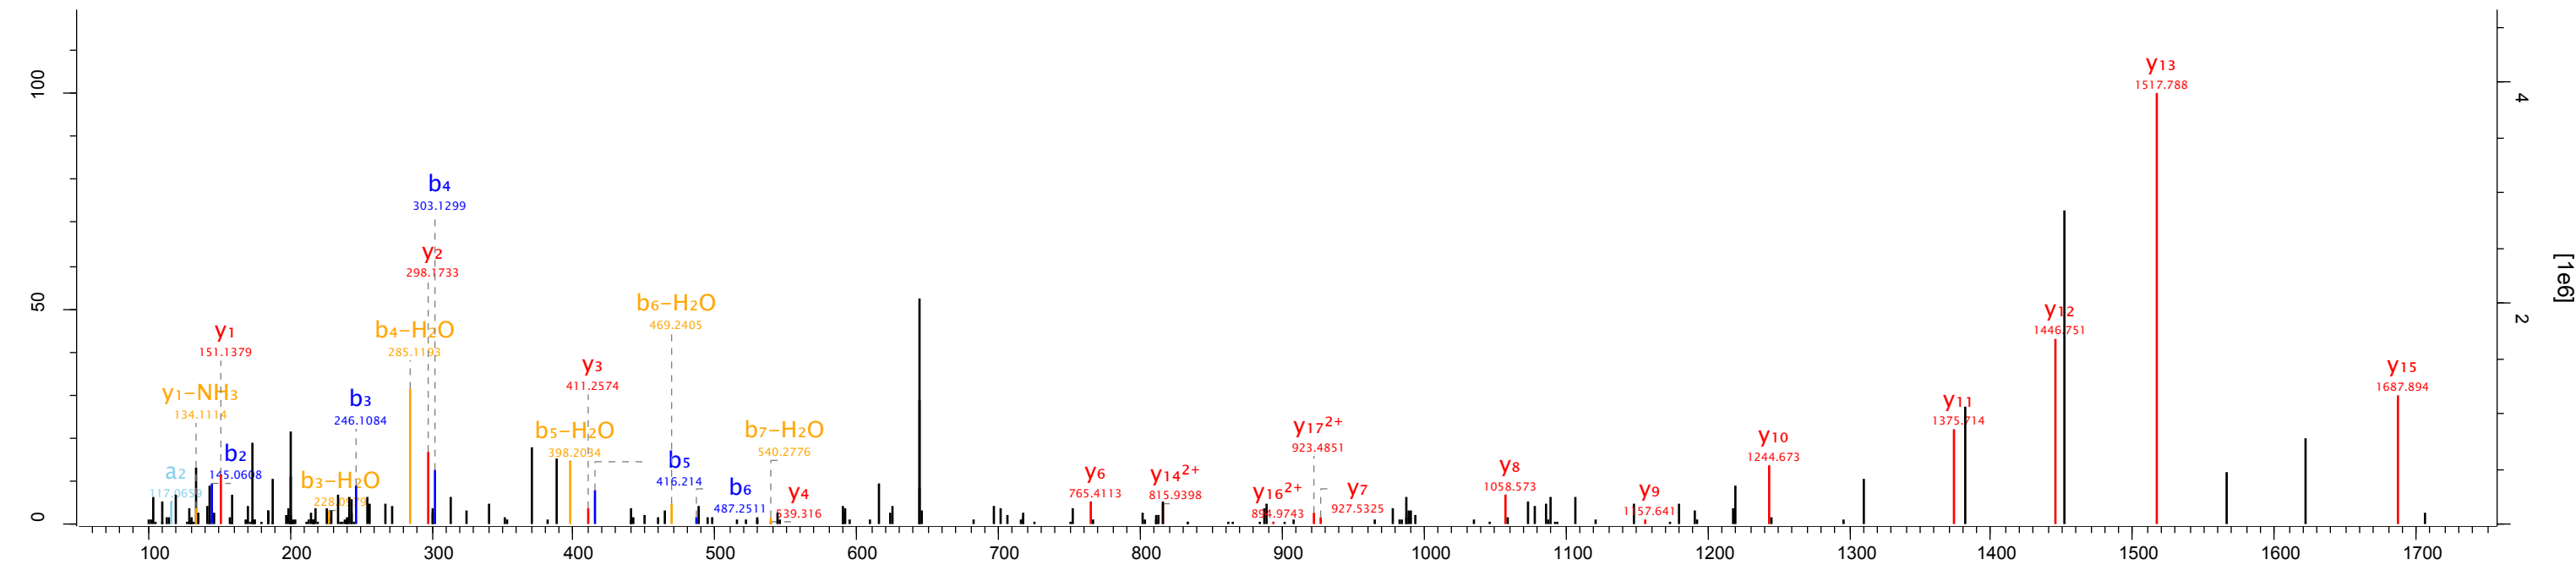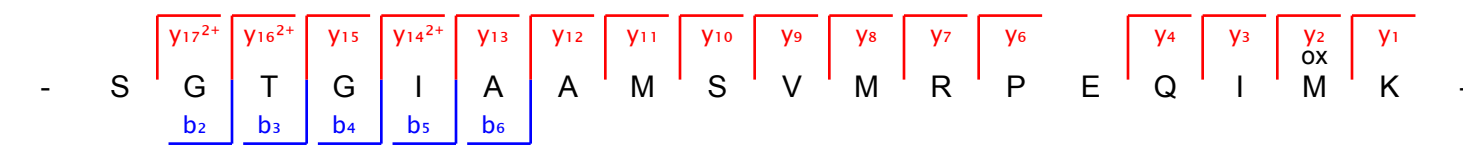

Raw file  
20180707\_MaS\_A375SR\_ML\_proteome\_2\_19

Scan 11692 Method FTMS; HCD Score 93.18 m/z 337.88 Gene names RBP1

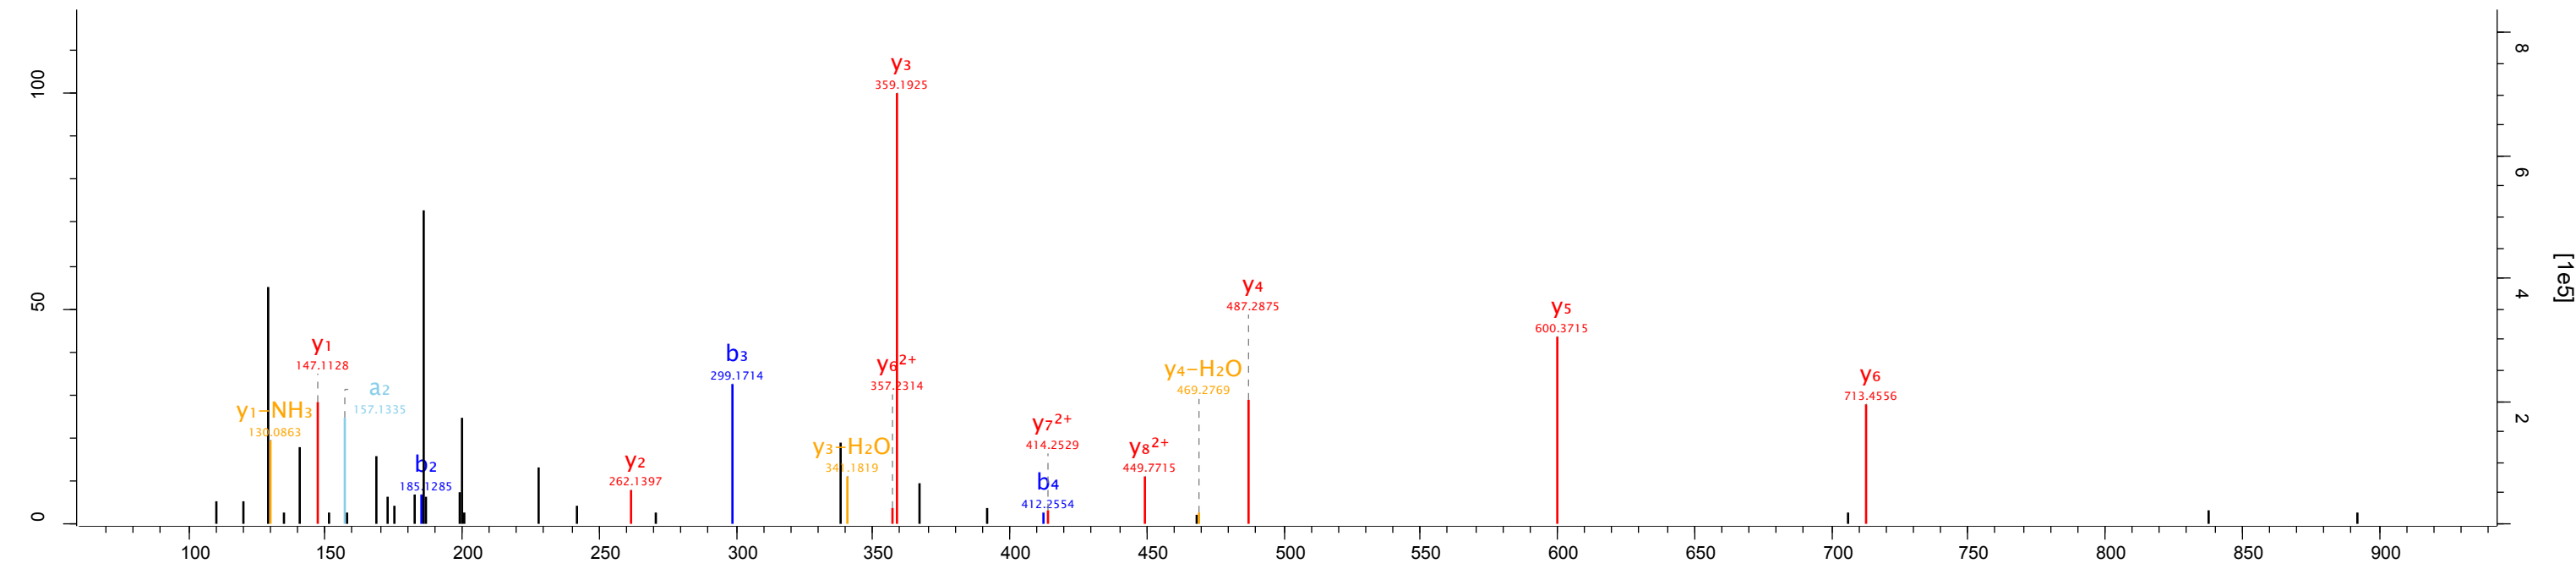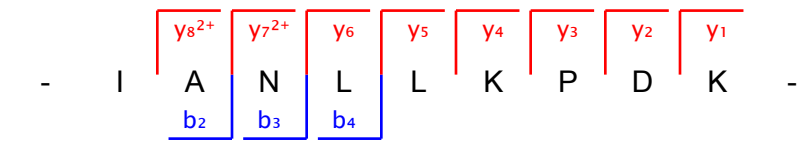

Raw file 20180707\_MaS\_A375SR\_ML\_proteome\_2\_19 Scan 14762 Method FTMS; HCD Score 117 m/z 858.93 Gene names APOC3

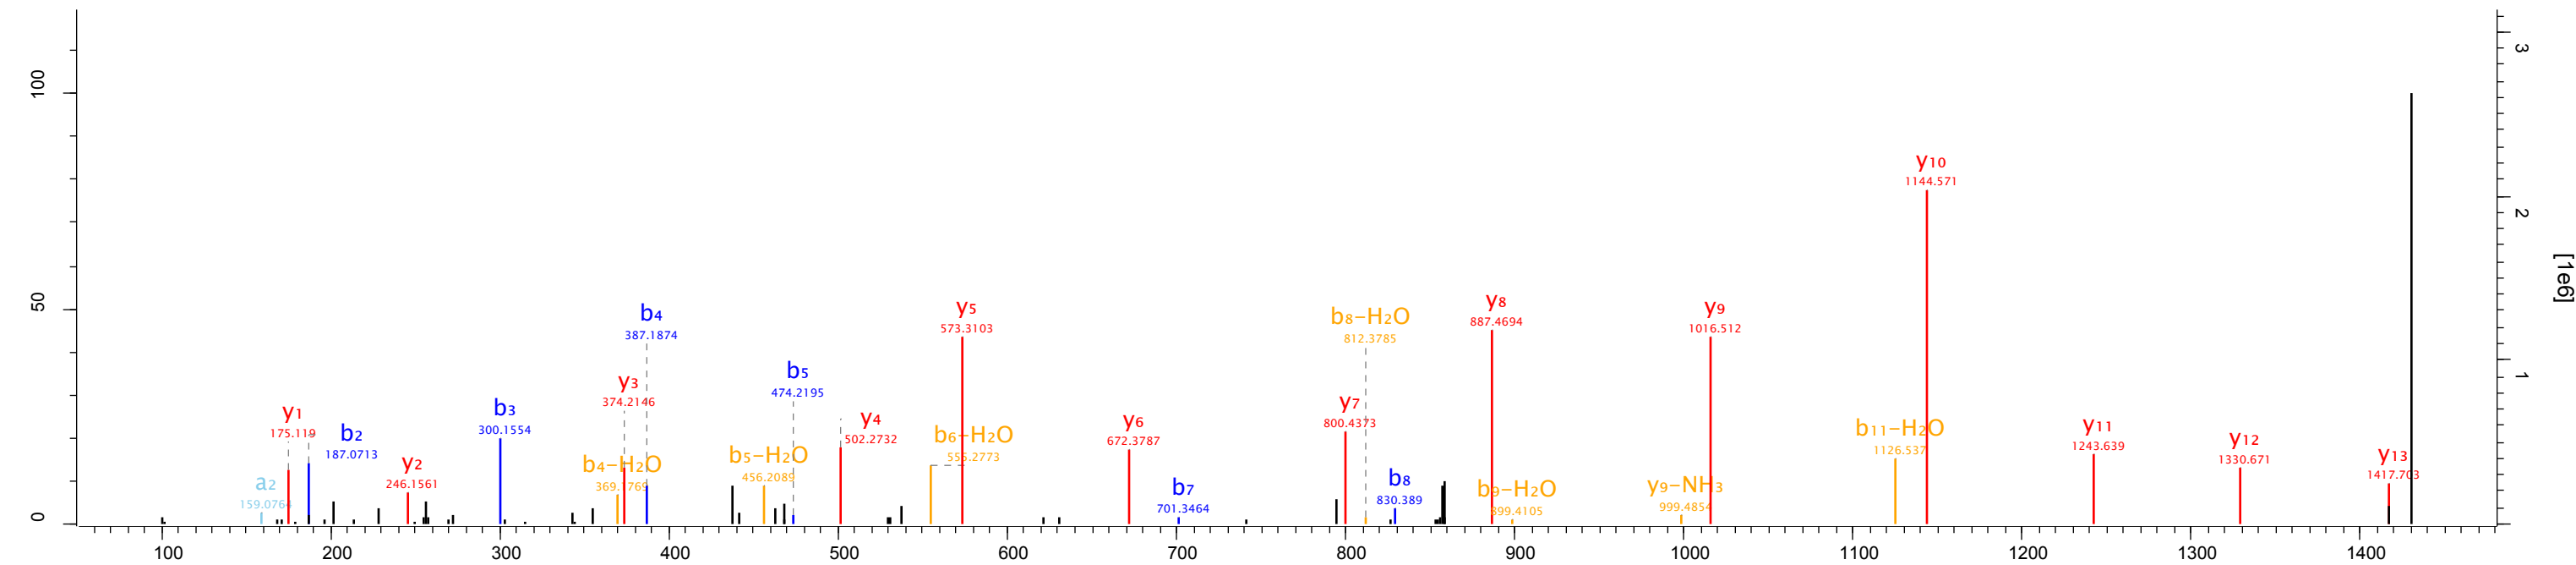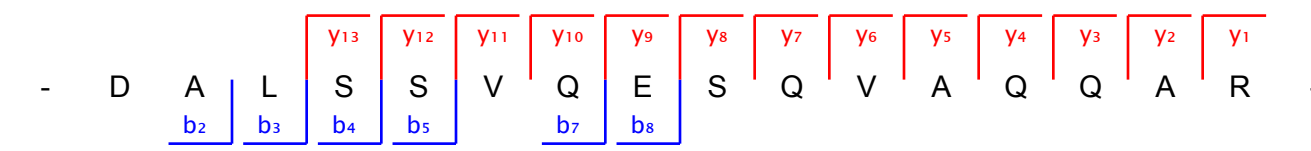

Raw file 20180707\_MaS\_A375SR\_ML\_proteome\_2\_20 Scan 19452 Method FTMS; HCD Score 70.2 m/z 860.87 Gene names MT-ND3

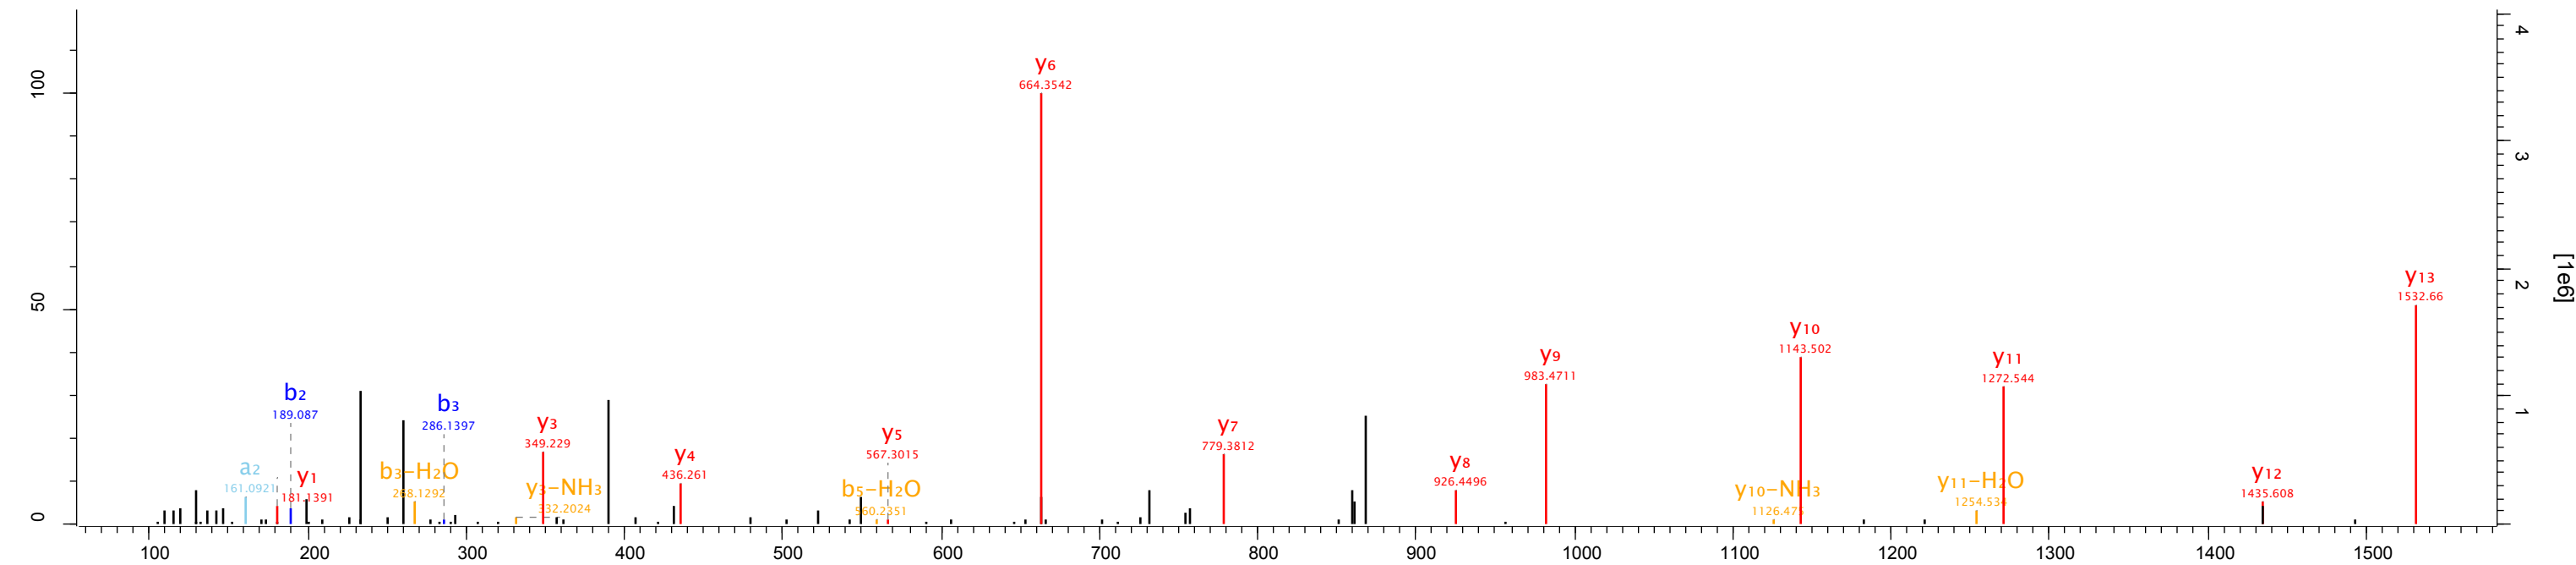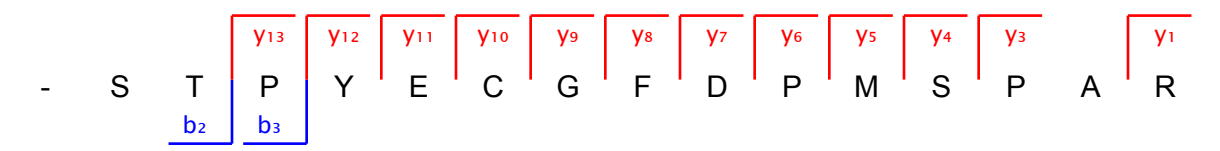



Raw file  
20180707\_MaS\_A375SR\_ML\_proteome\_2\_20

Scan 6472 Method FTMS; HCD Score 64.82 m/z 480.77 Gene names EPM2A

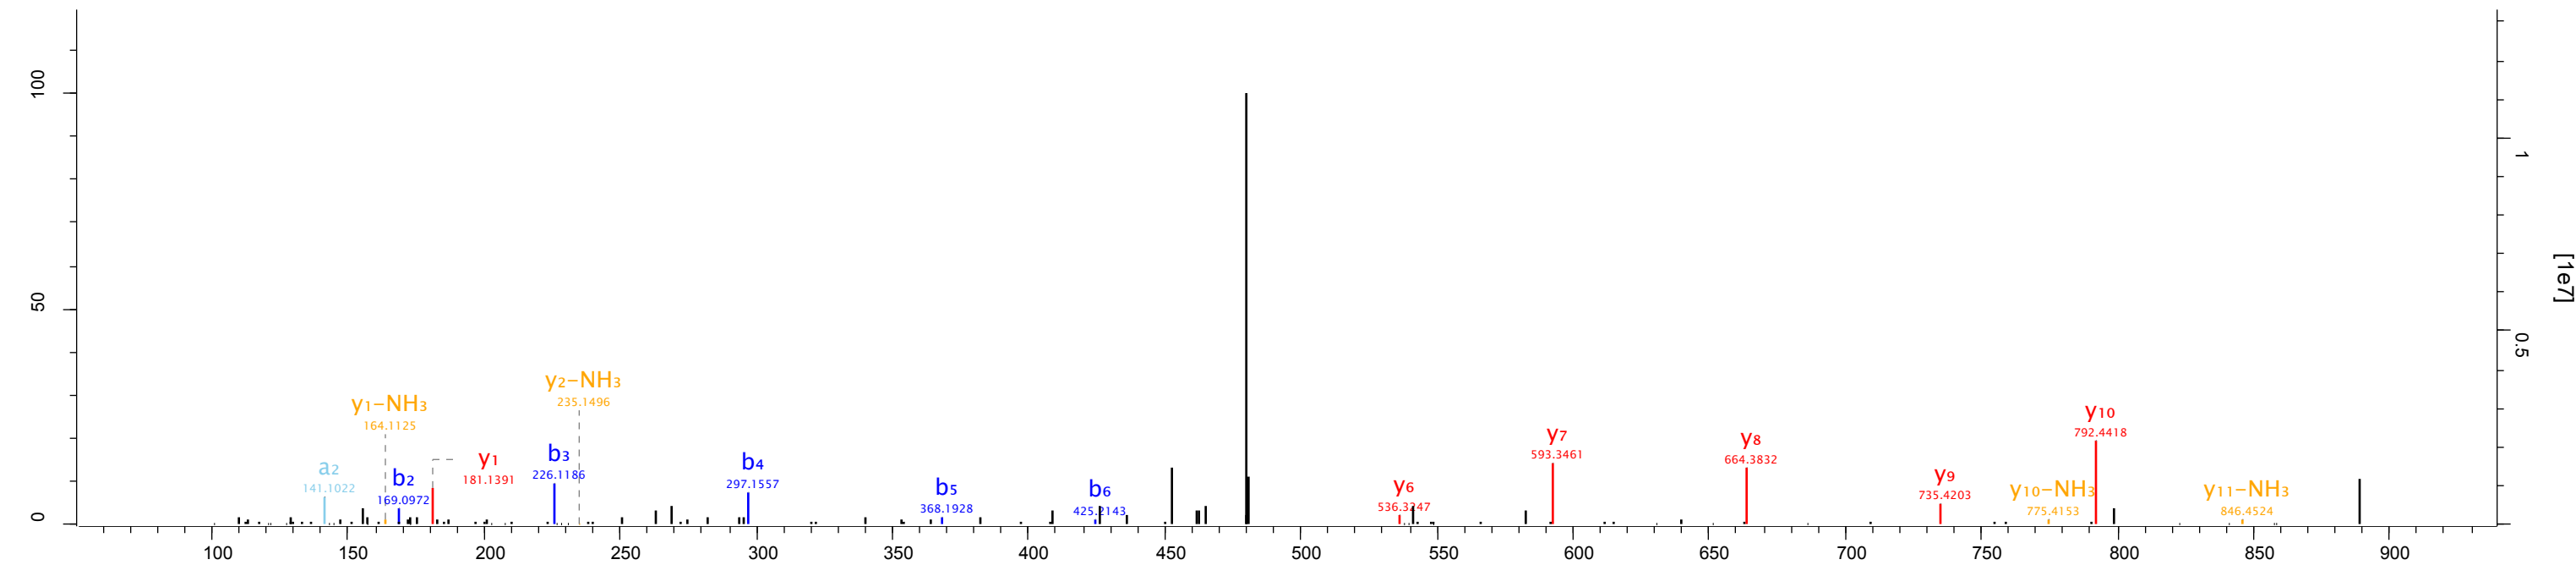

Raw file  
20180707\_MaS\_A375SR\_ML\_proteome\_2\_21

Scan 11502 Method FTMS; HCD Score 53.98 m/z 543.95 Gene names C1QTNF5

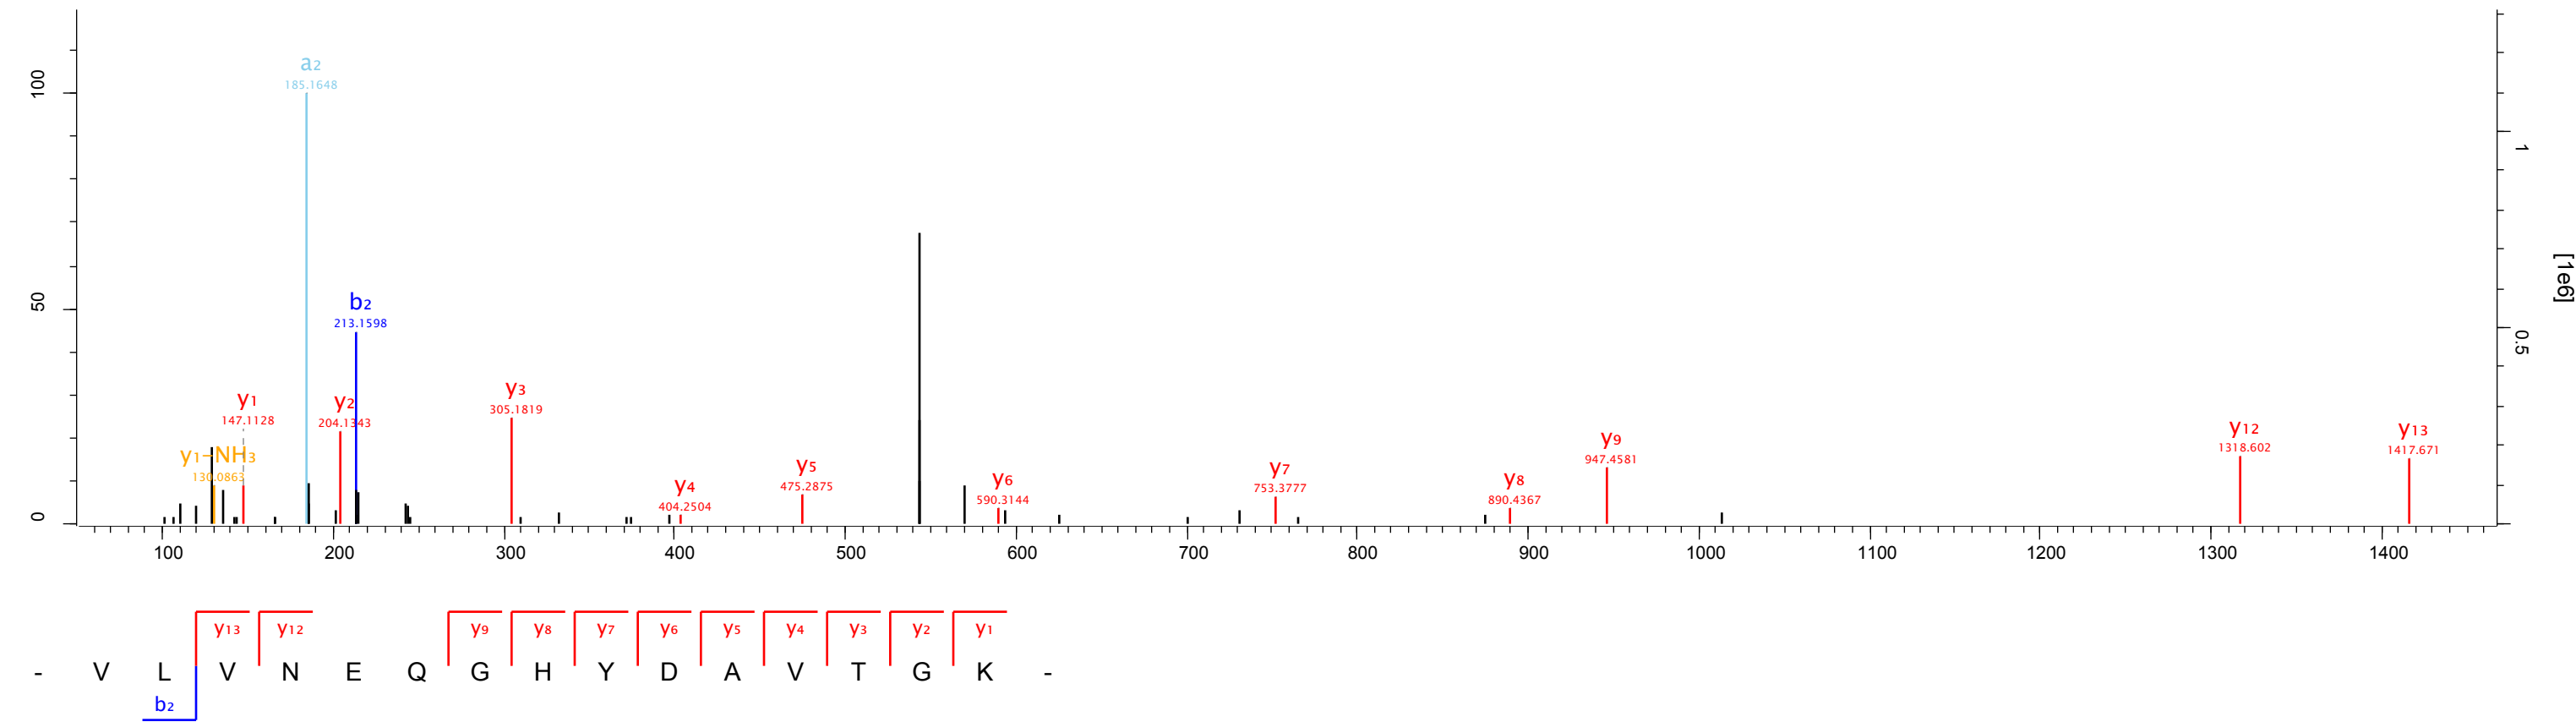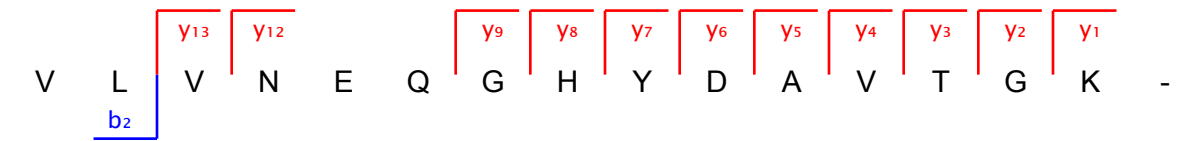

Raw file  
20180707\_MaS\_A375SR\_ML\_proteome\_2\_21

Scan 28652 Method FTMS; HCD Score 54.76 m/z 723.75 Gene names C17orf53

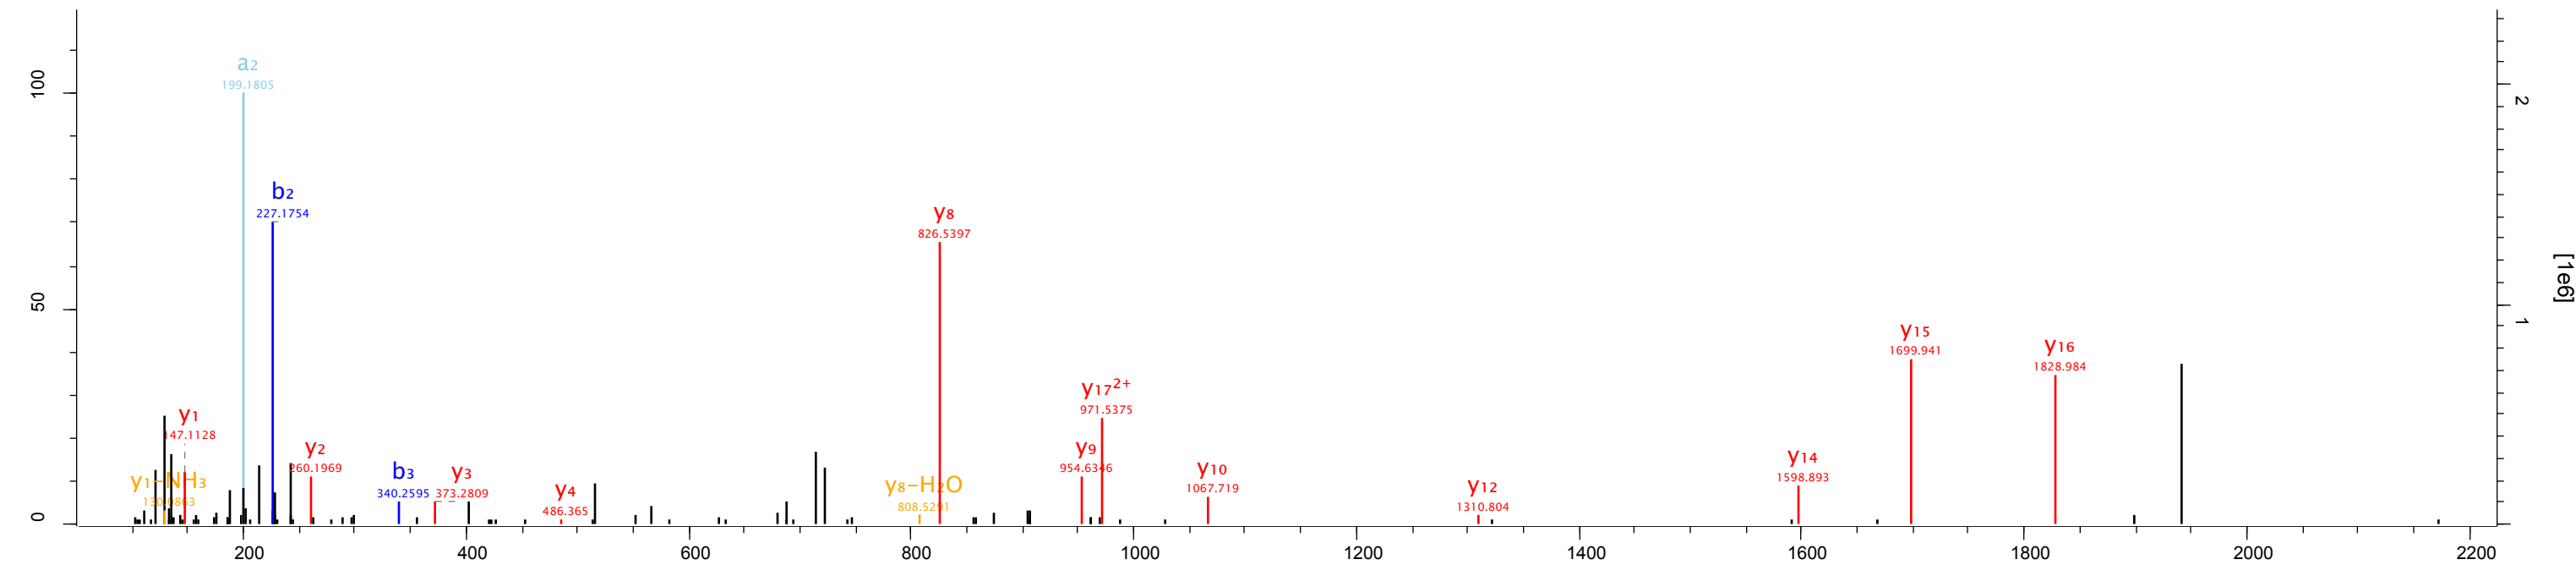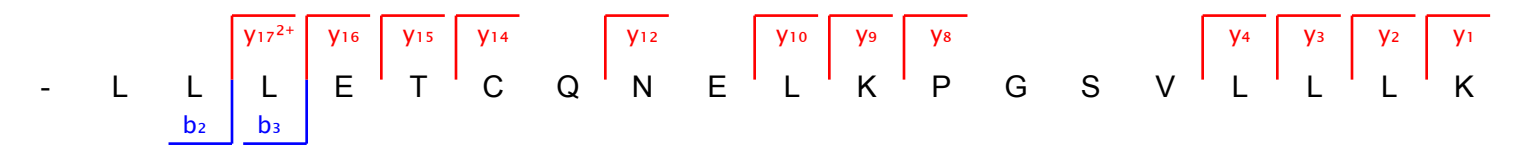

Raw file 20180707\_MaS\_A375SR\_ML\_proteome\_2\_21  
 Scan 6952 Method FTMS; HCD Score 64.82 m/z 477.76 Gene names EPM2A

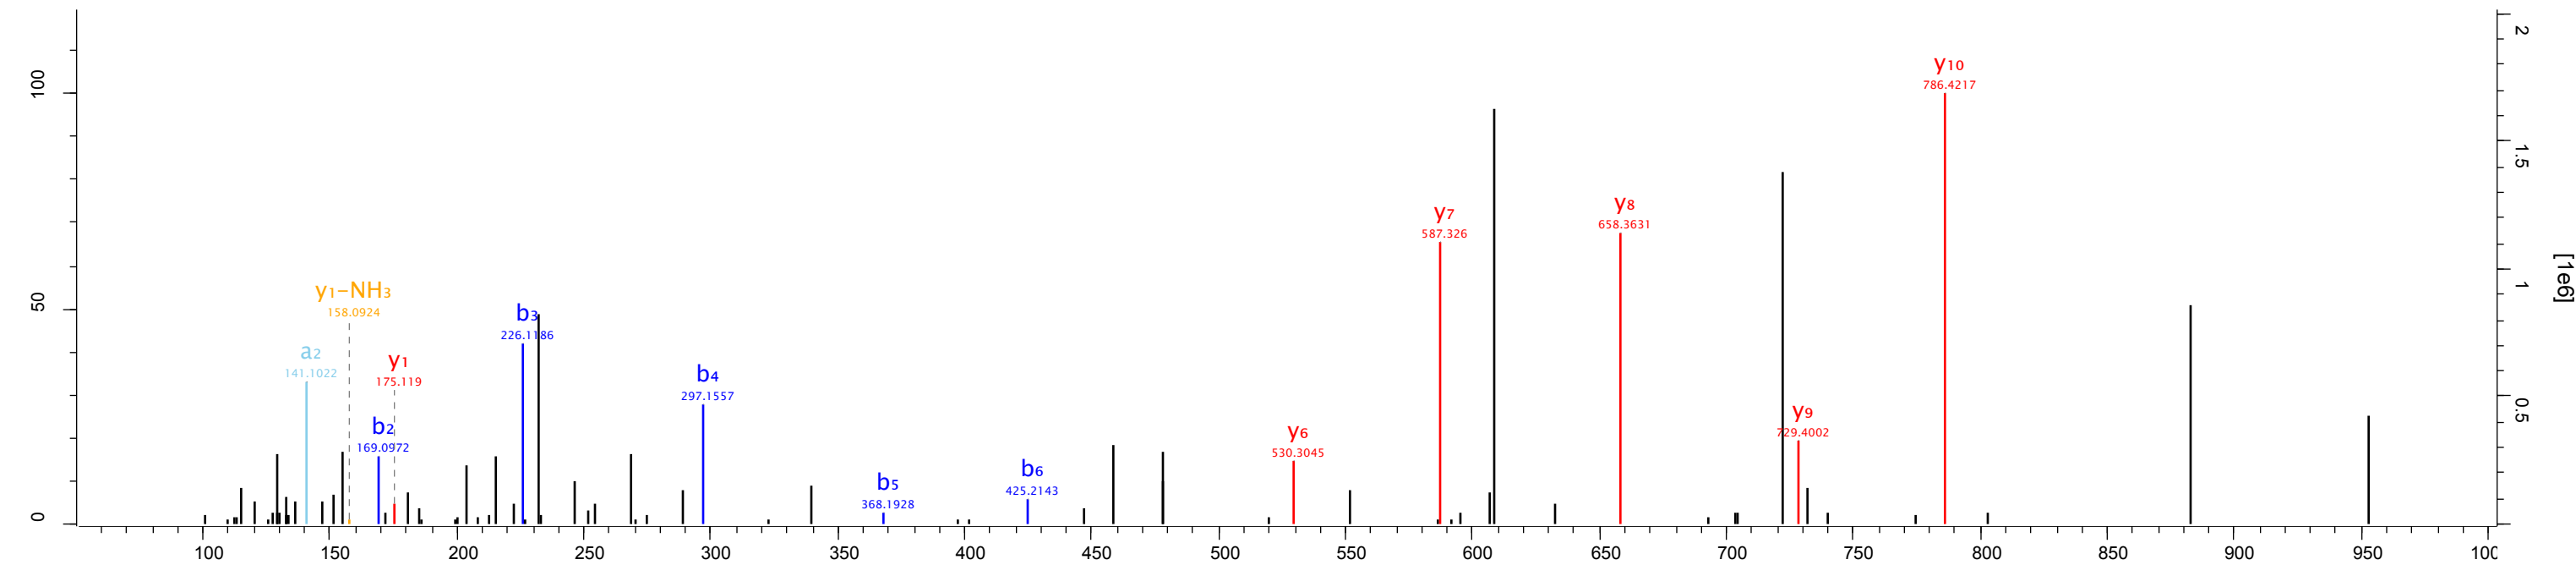

Raw file: 20180707\_MaS\_A375SR\_ML\_proteome\_2\_22  
 Scan: 10002 Method: FTMS; HCD Score: 63.08 m/z: 379.89 Gene names: C1orf21

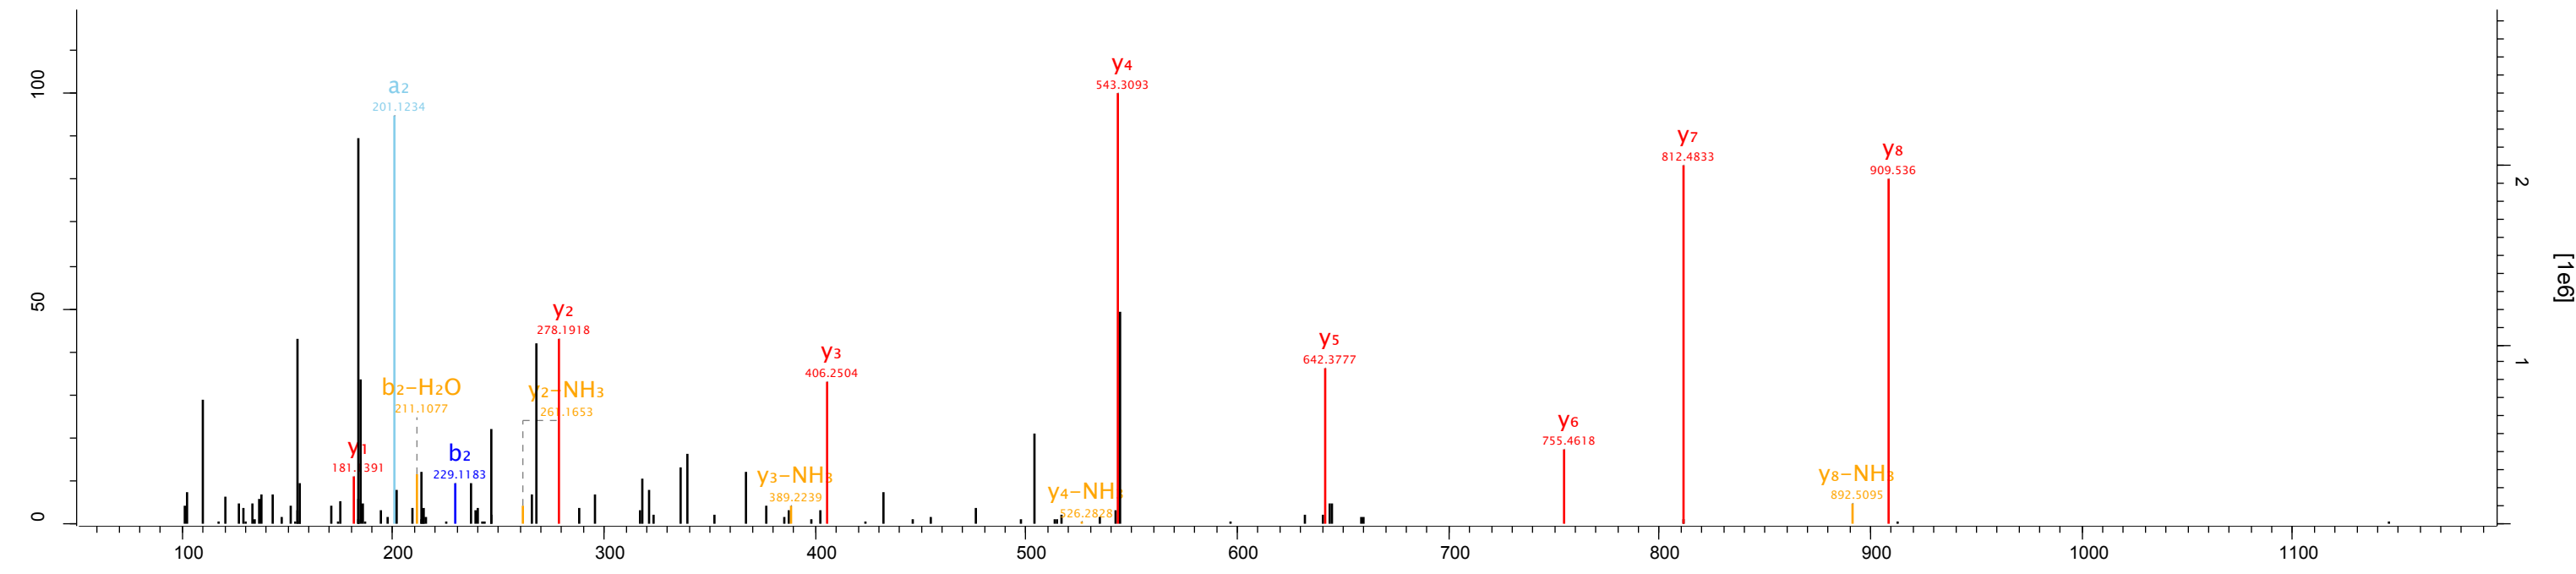

Raw file 20180707\_MaS\_A375SR\_ML\_proteome\_2\_22 Scan 16932 Method FTMS; HCD Score 66.96 m/z 440.93 Gene names RPL39P5;RPL39

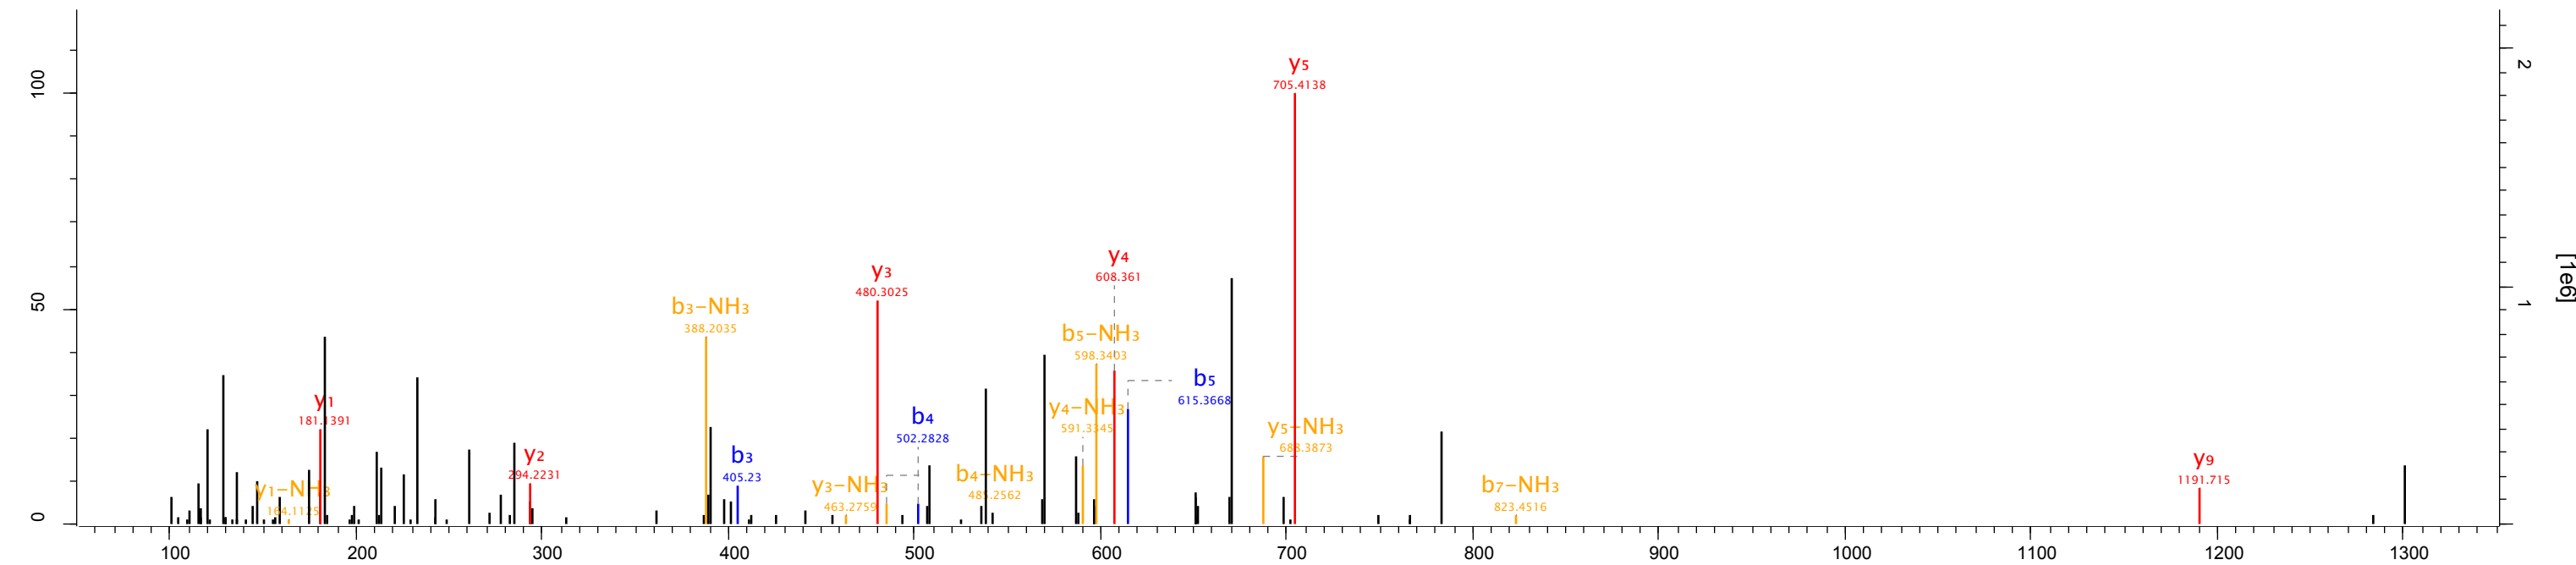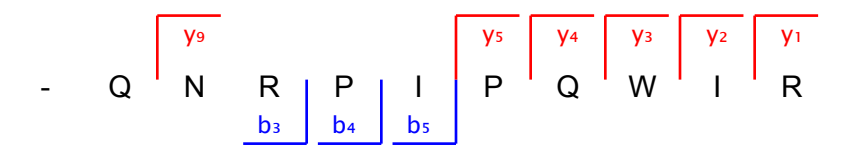

Raw file 20180707\_MaS\_A375SR\_ML\_proteome\_2\_22 Scan 2852 Method FTMS; HCD Score 67.03 m/z 361.19

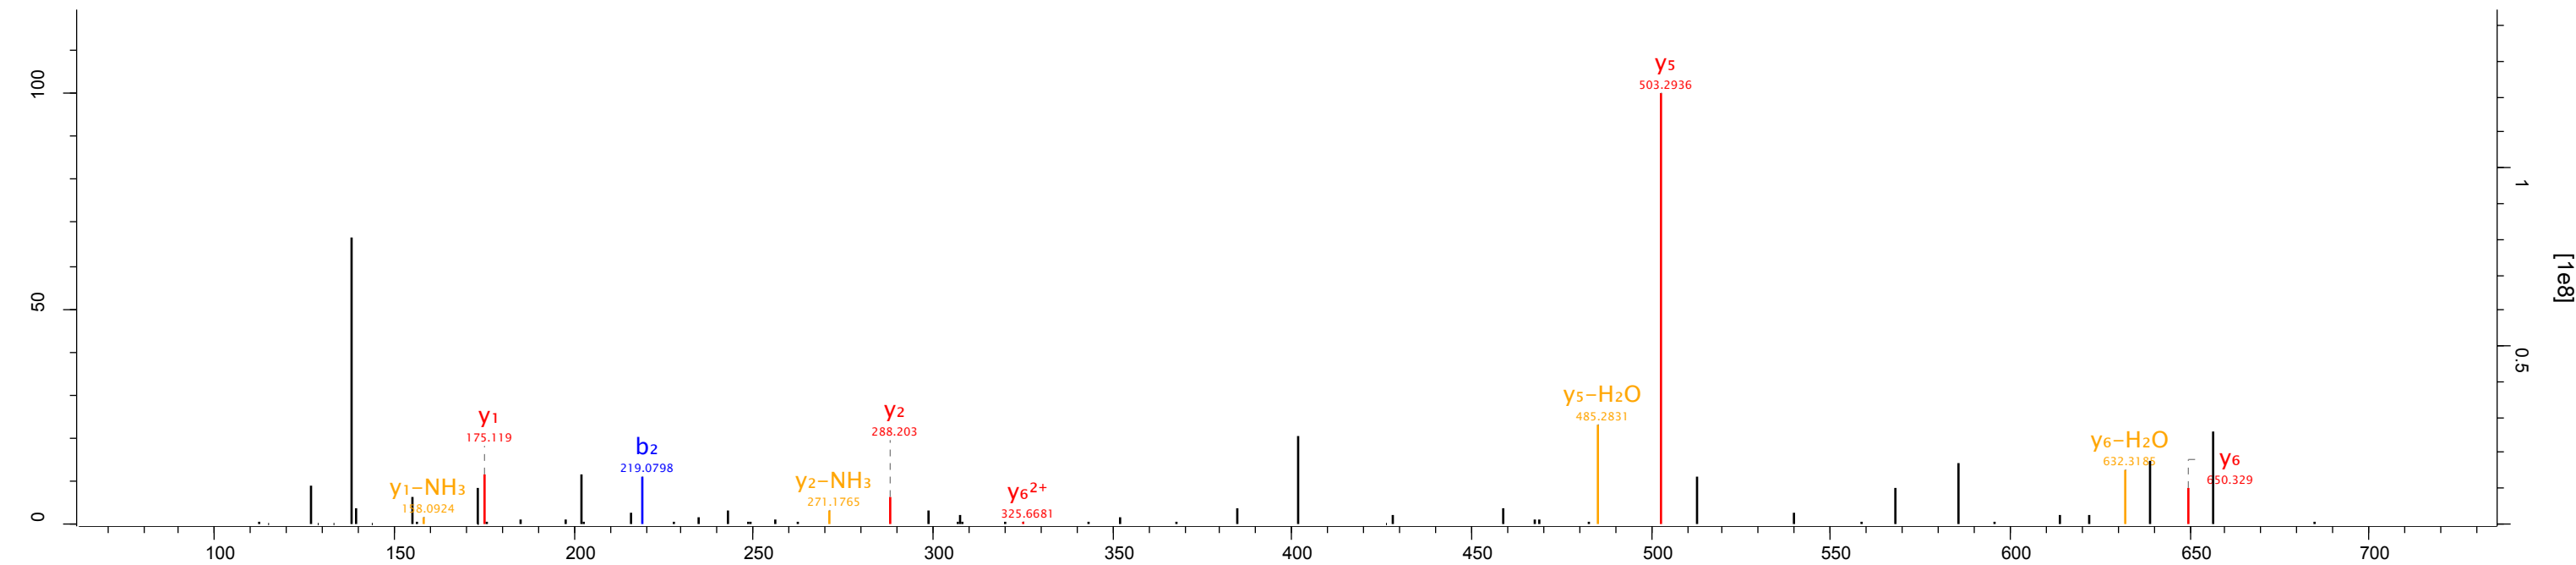

Raw file 20180707\_MaS\_A375SR\_ML\_proteome\_2\_22 Scan 6392 Method FTMS; HCD Score 79.45 m/z 353.19

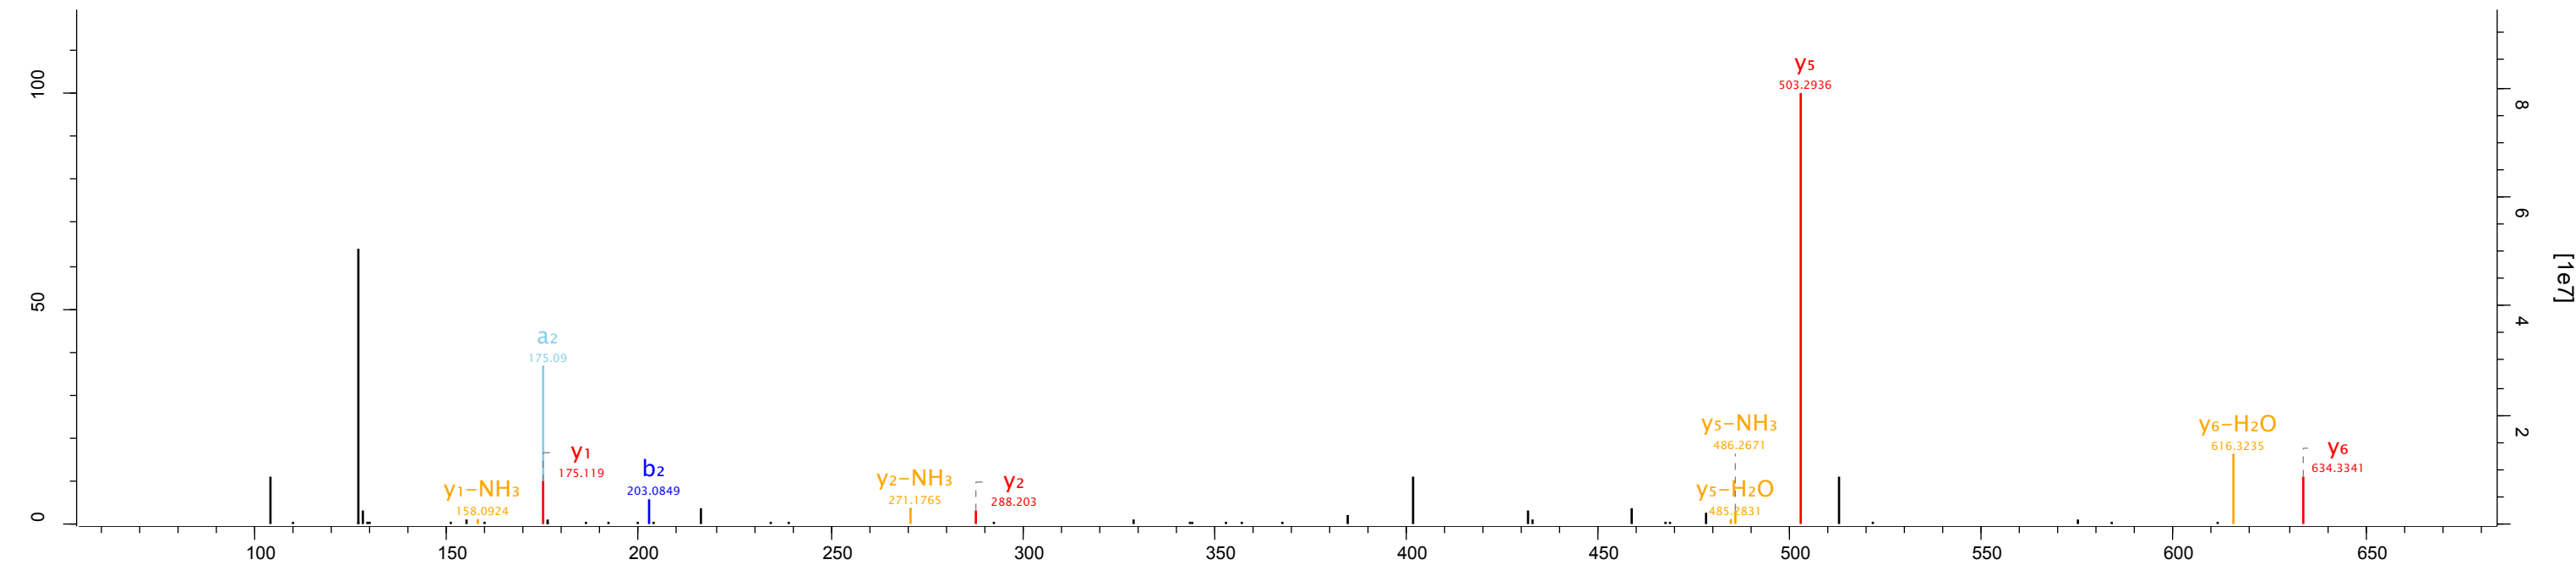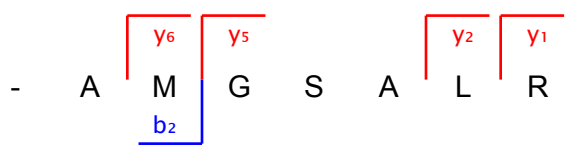



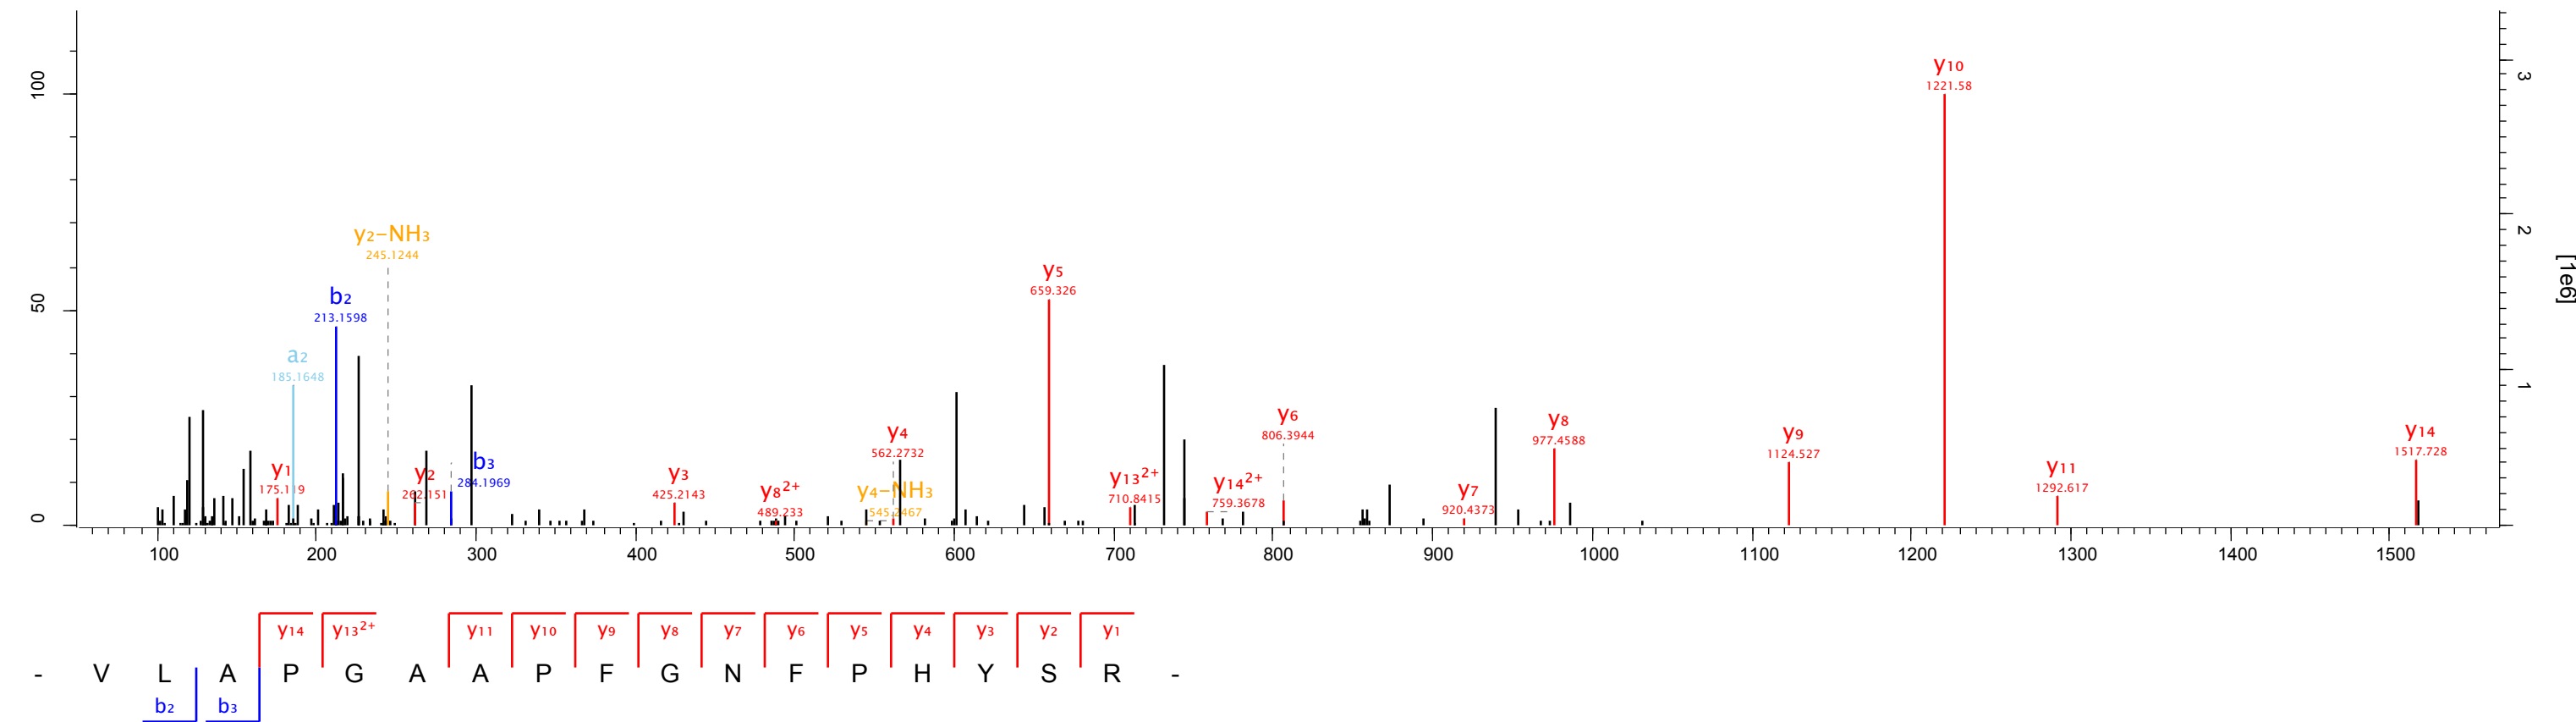

Raw file

20180707\_MaS\_A375SR\_ML\_proteome\_2\_24

| Scan  | Method    | Score  | m/z    | Gene names    |
|-------|-----------|--------|--------|---------------|
| 15612 | FTMS; HCD | 122.44 | 436.58 | RPL39P5;RPL39 |

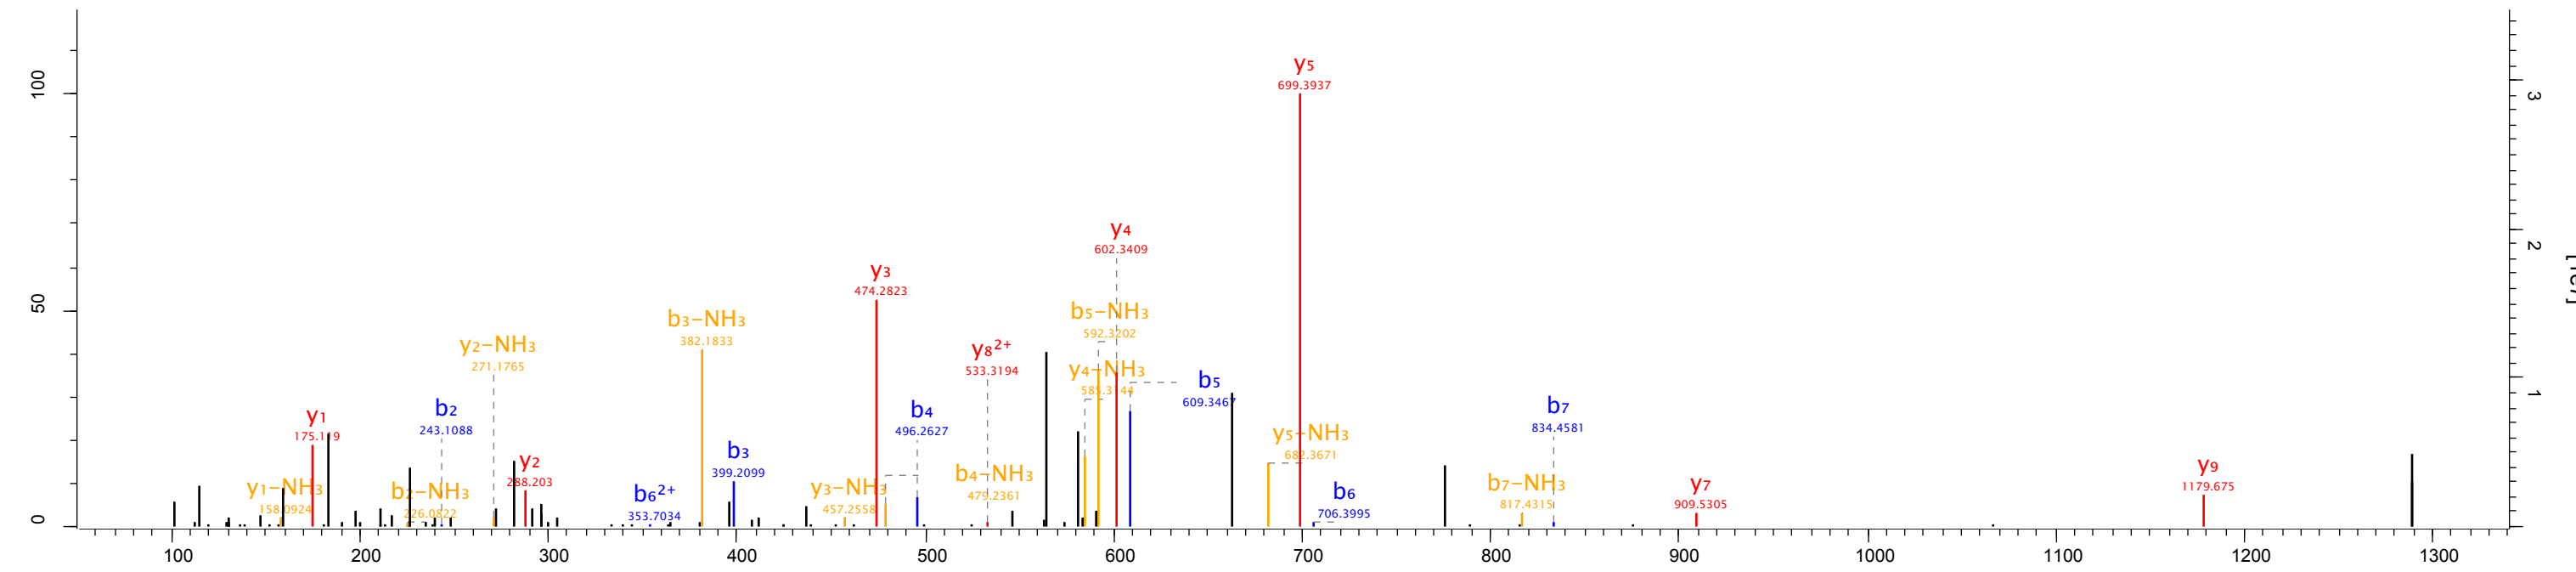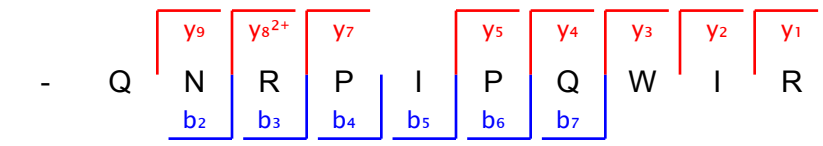

Raw file  
20180707\_MaS\_A375SR\_ML\_proteome\_2\_24

Scan 19842 Method FTMS; HCD Score 110.39 m/z 632.84 Gene names CKLF

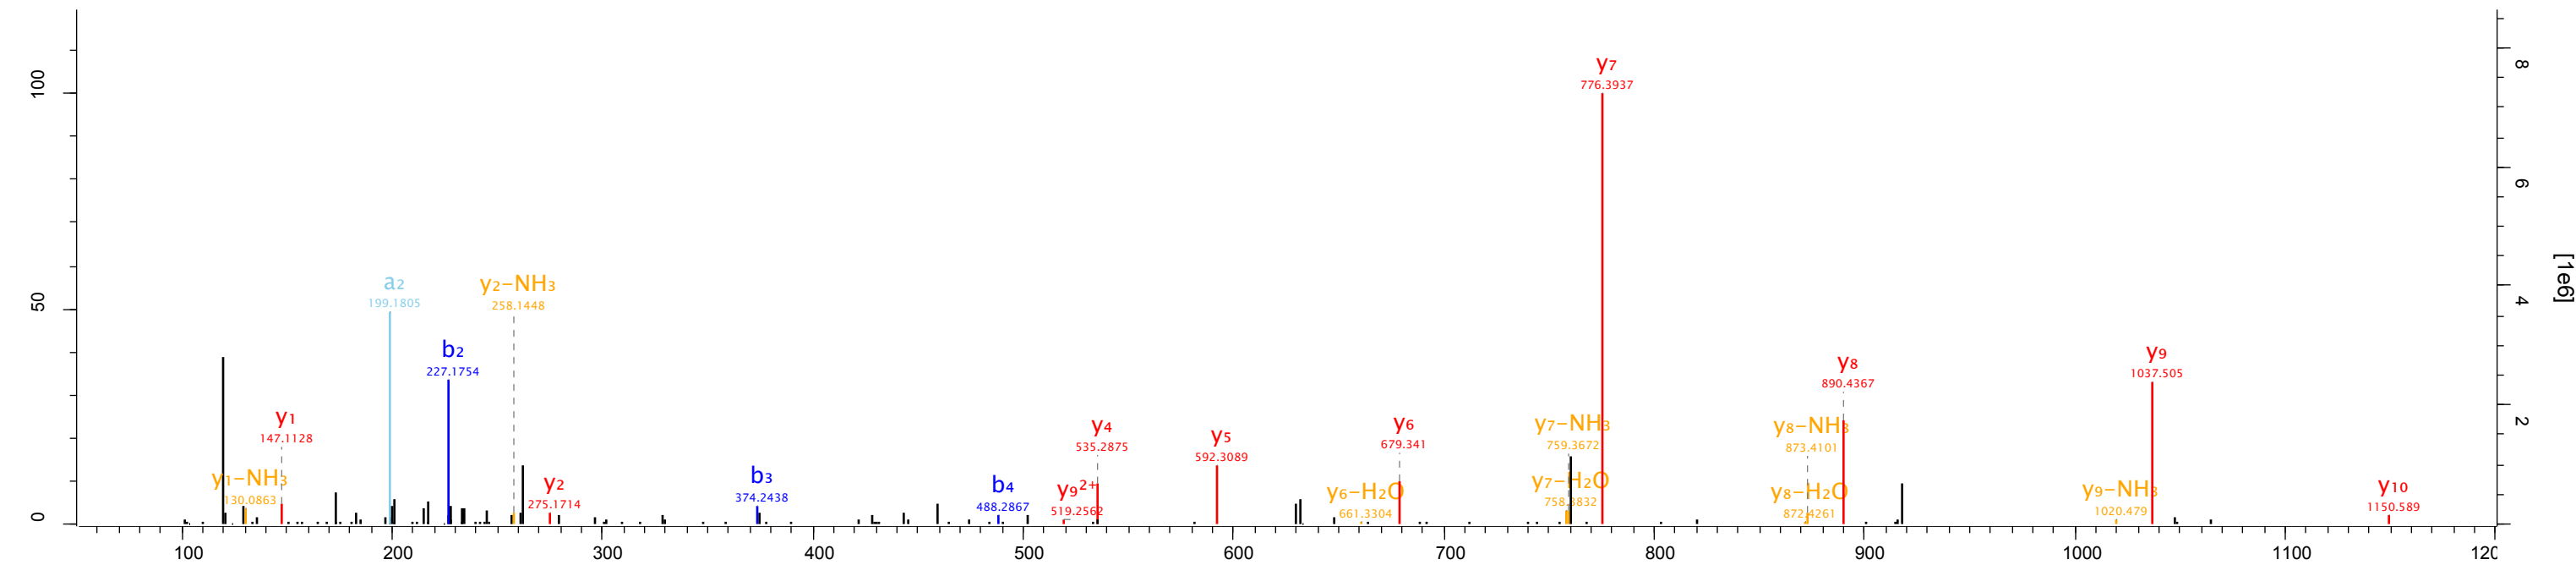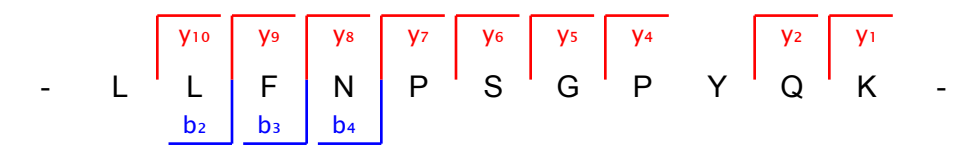

Raw file 20180707\_MaS\_A375SR\_ML\_proteome\_2\_24 Scan 28242 Method FTMS; HCD Score 42.84 m/z 803.85

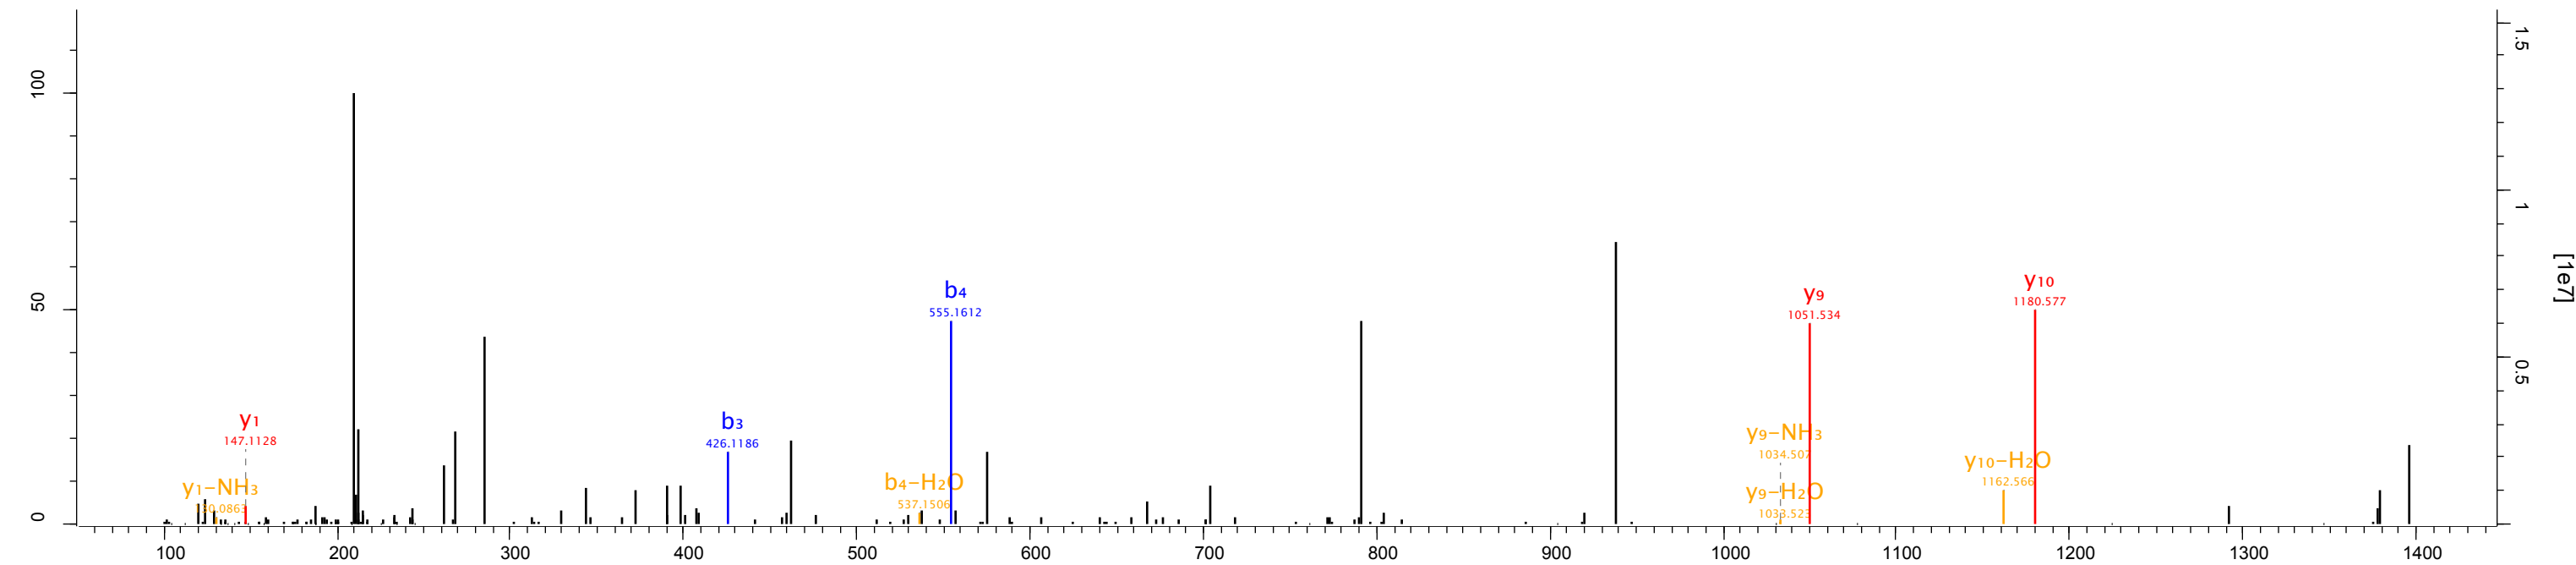

- OX M OX M M E M E S I L D S L K -

Fragmentation mapping:

- b3: M
- b4: M E
- y9: M
- y10: E M
- y1: K

Raw file  
20180707\_MaS\_A375SR\_ML\_proteome\_2\_25

Scan 16232 Method FTMS; HCD Score 152.06 m/z 654.37 Gene names RPL39P5;RPL39

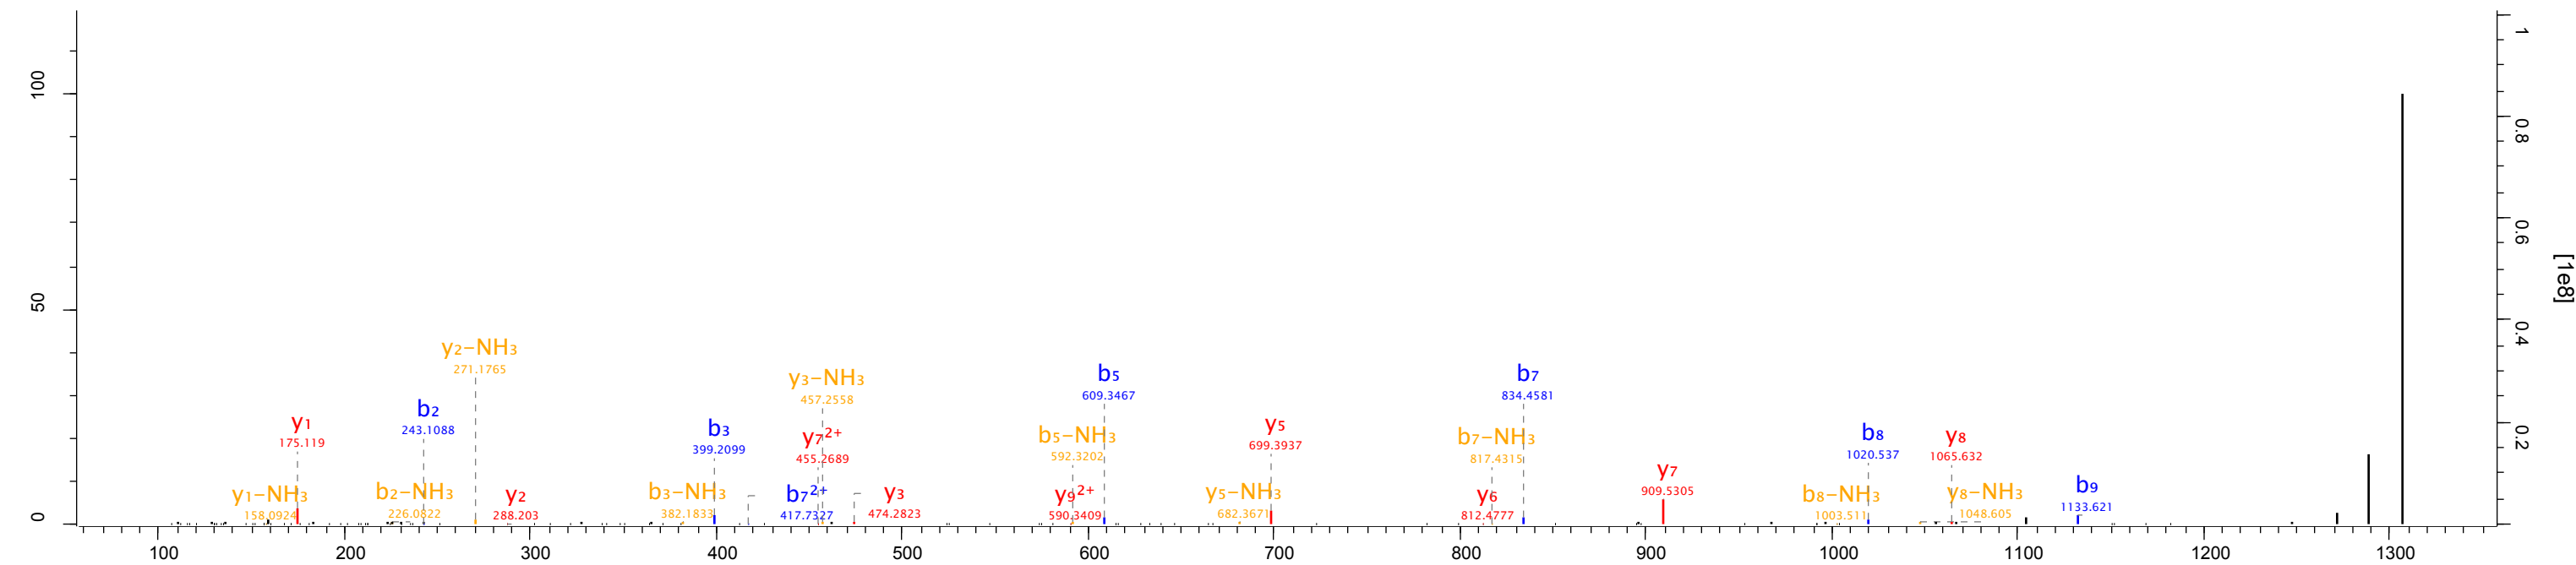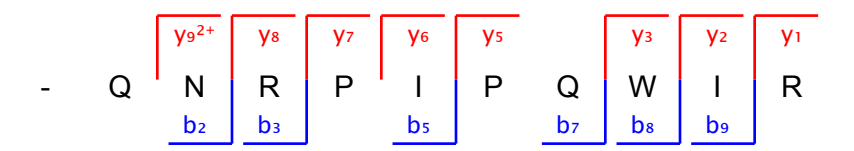

Raw file 20180707\_MaS\_A375SR\_ML\_proteome\_2\_25 Scan 17492 Method FTMS; HCD Score 78.55 m/z 688.81 Gene names F9

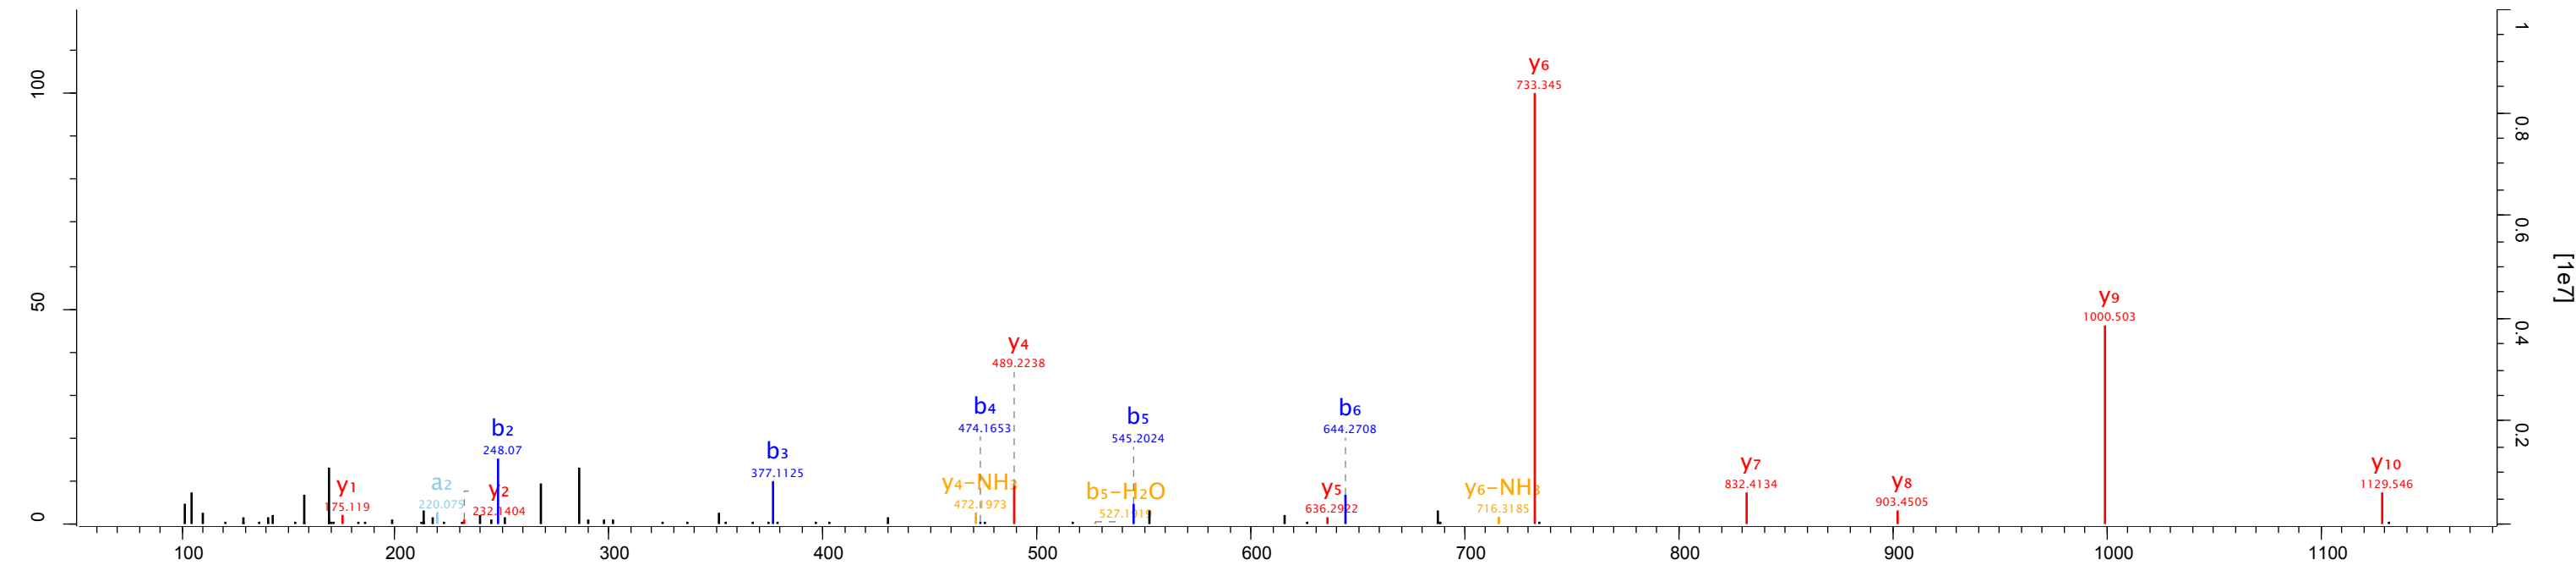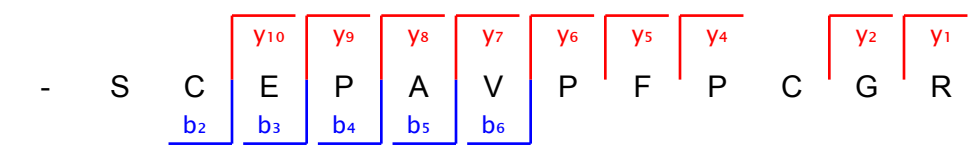

Raw file  
20180707\_MaS\_A375SR\_ML\_proteome\_2\_25

Scan 9032 Method FTMS; HCD Score 46.43 m/z 502.23 Gene names IL1F10

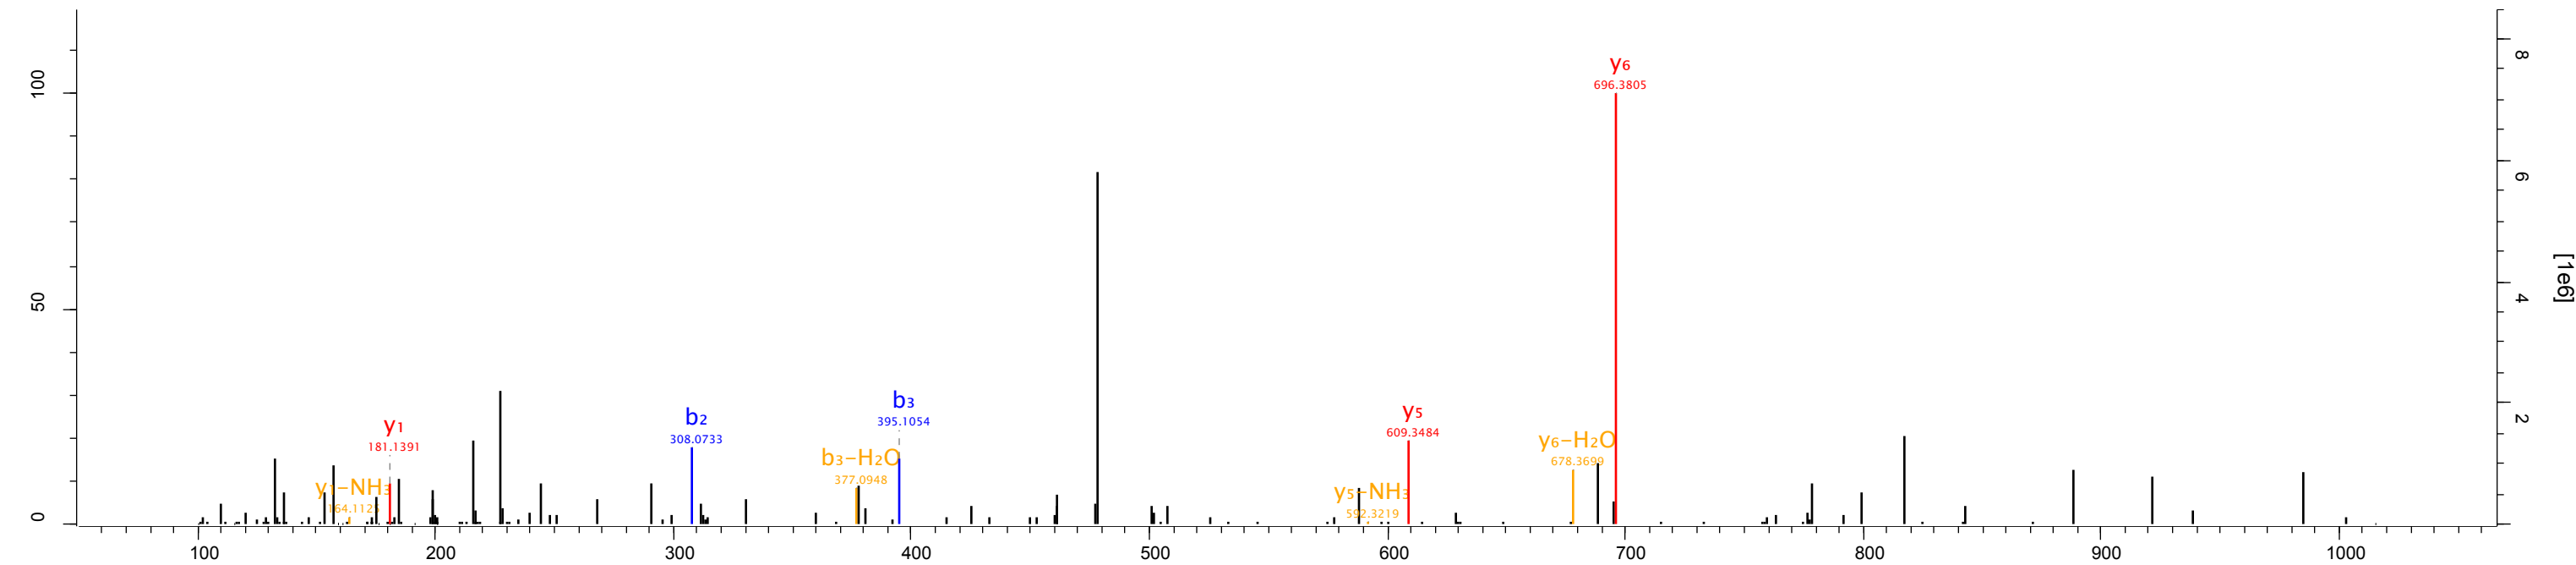

Raw file  
20180707\_MaS\_A375SR\_ML\_proteome\_2\_26

Scan: 21452  
Method: FTMS; HCD  
Score: 50.89  
m/z: 1048.22  
Gene names: PKNOX2

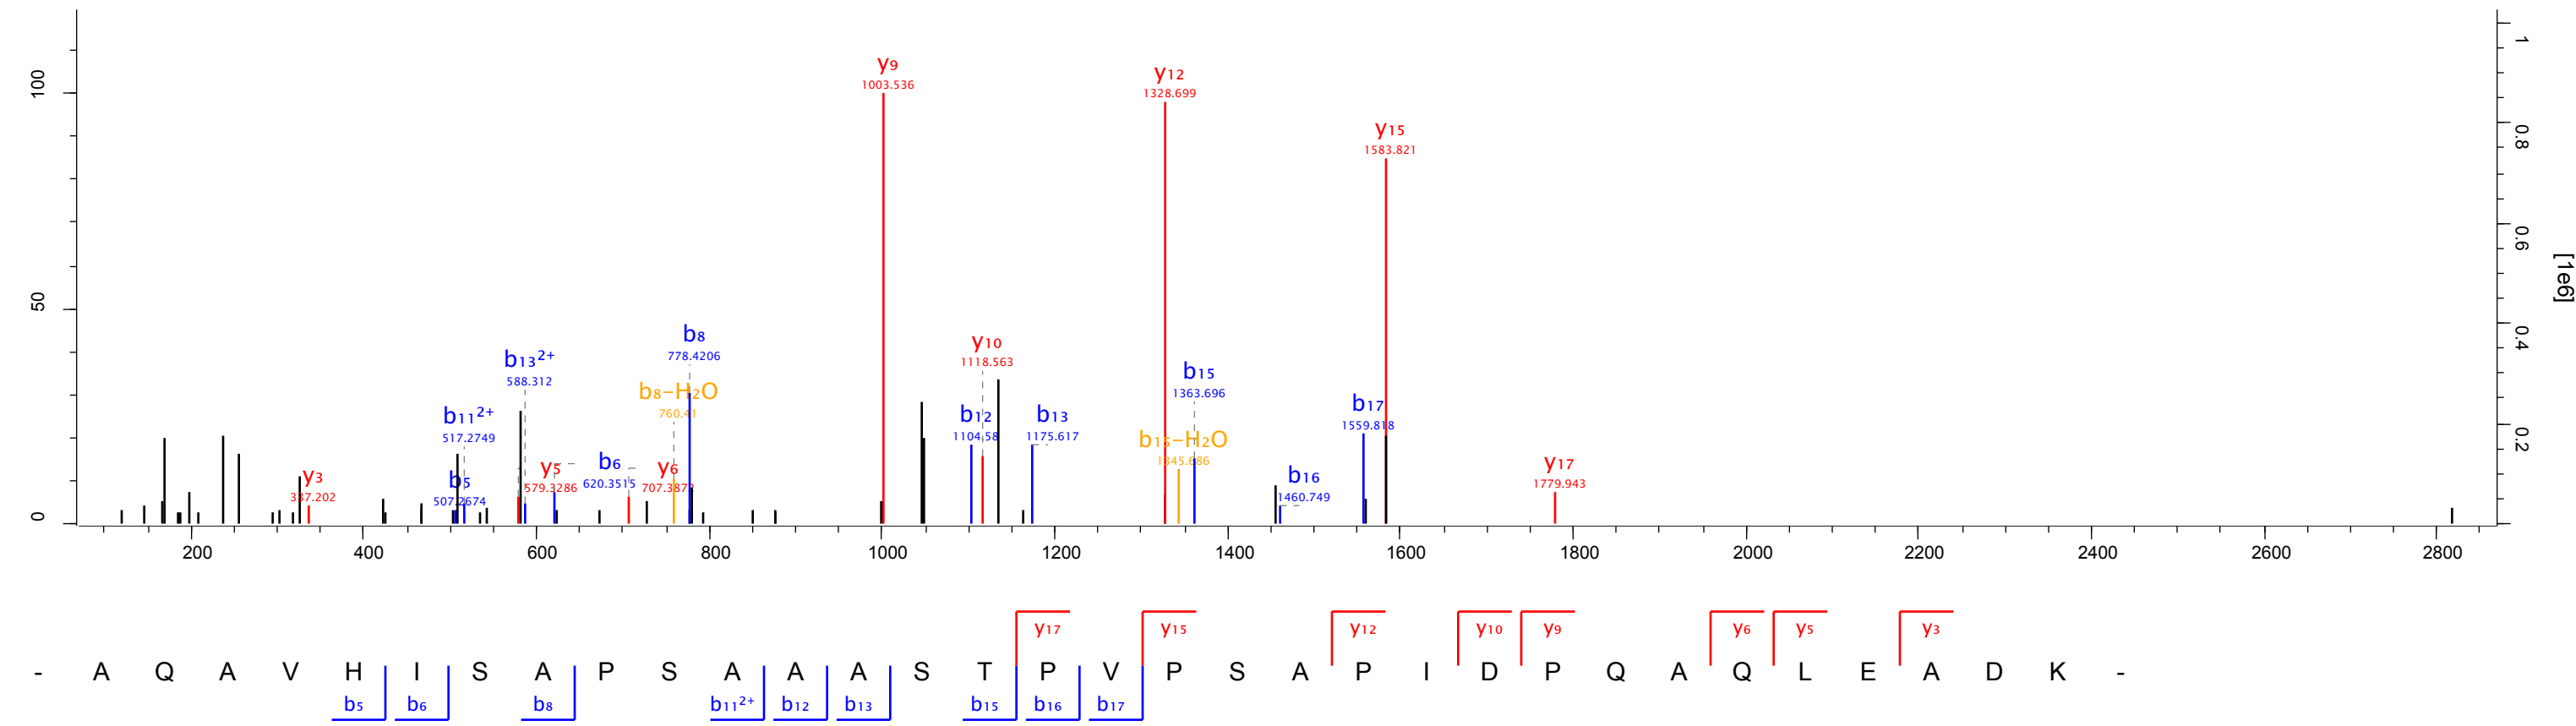



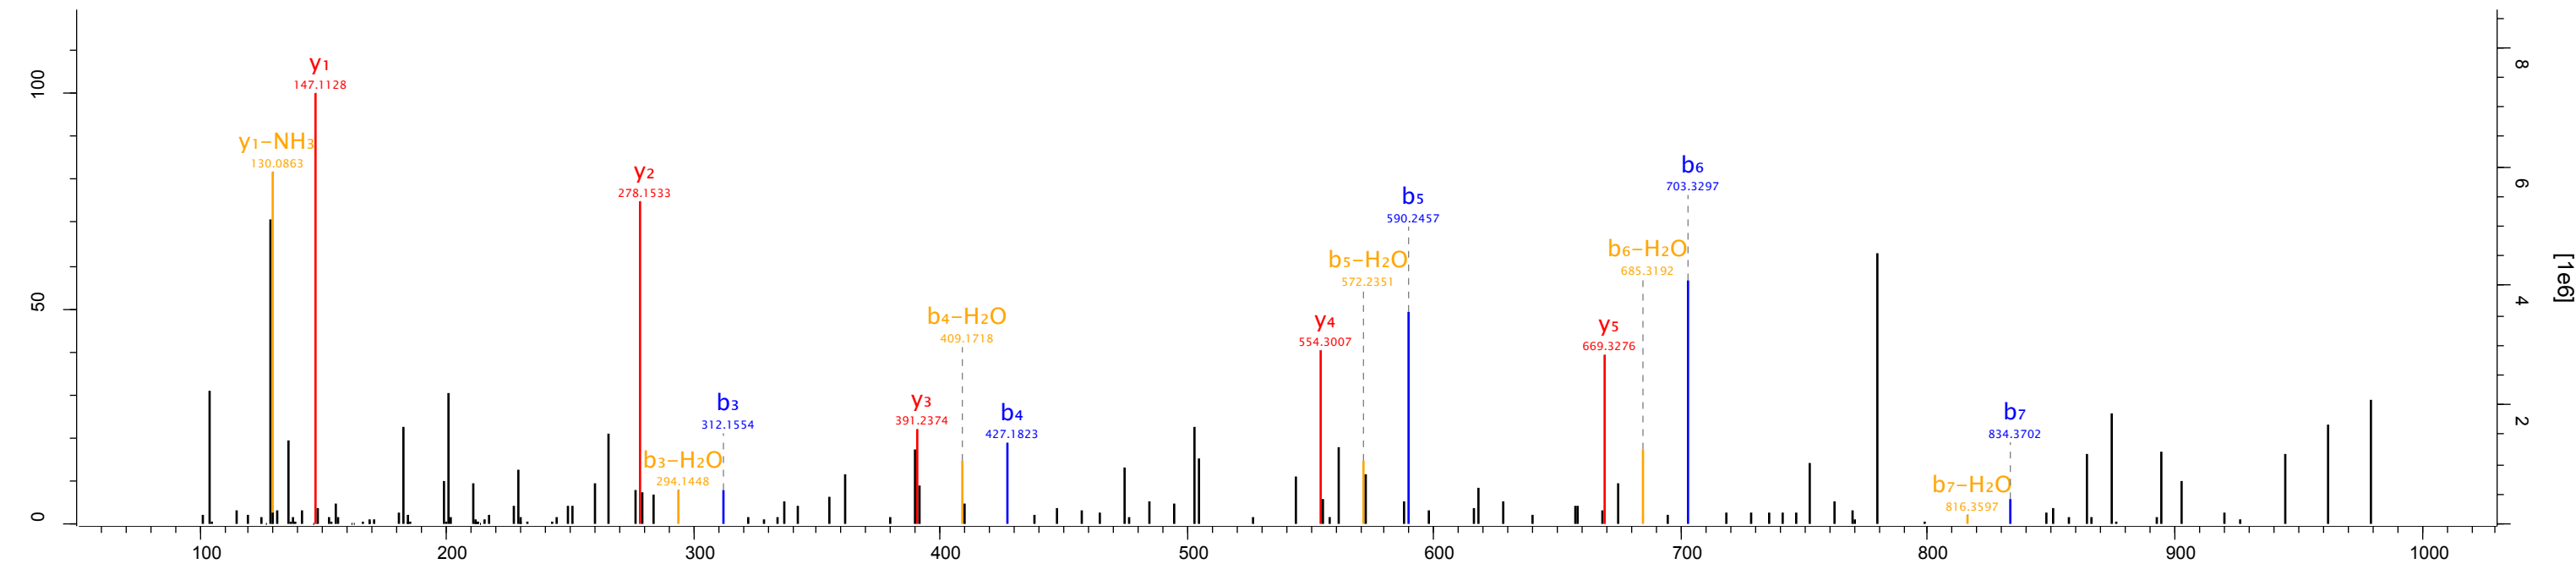

Raw file  
20180707\_MaS\_A375SR\_ML\_proteome\_2\_27

Scan 27442 Method FTMS; HCD Score 102.4 m/z 452.28 Gene names LBP

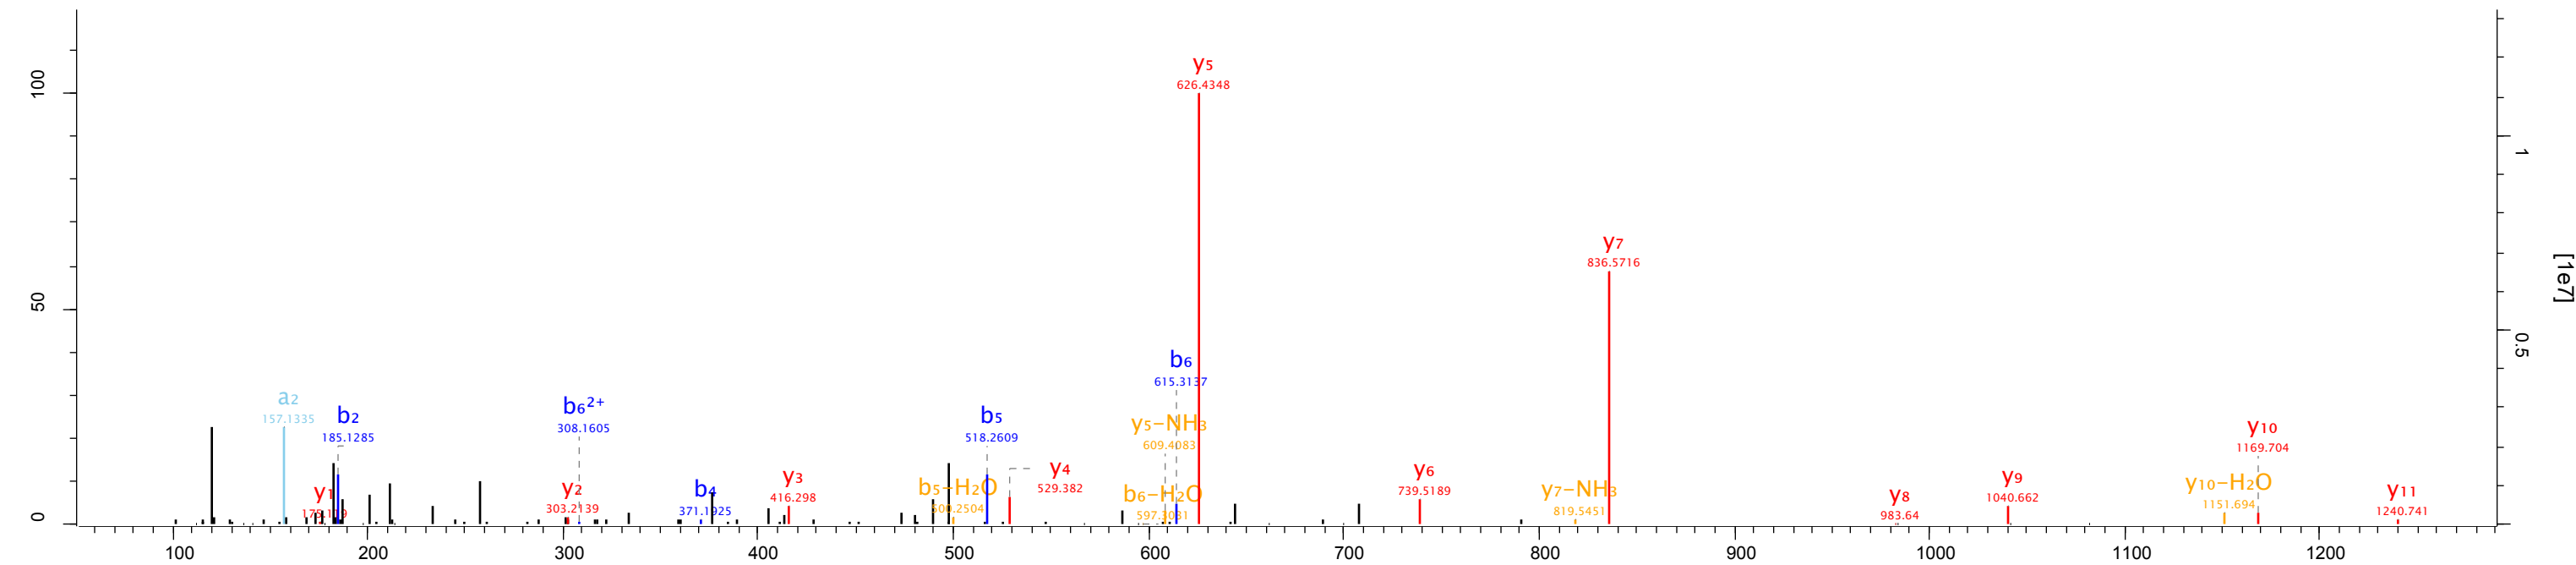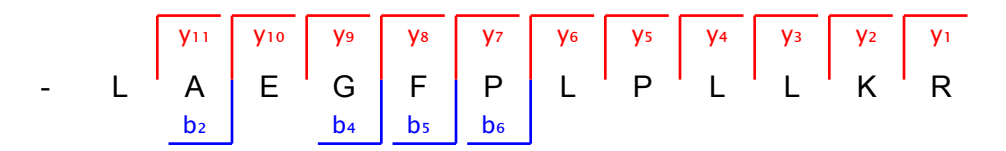

Raw file  
20180707\_MaS\_A375SR\_ML\_proteome\_2\_28

Scan 19552 Method FTMS; HCD Score 80.63 m/z 857.86 Gene names MT-ND3

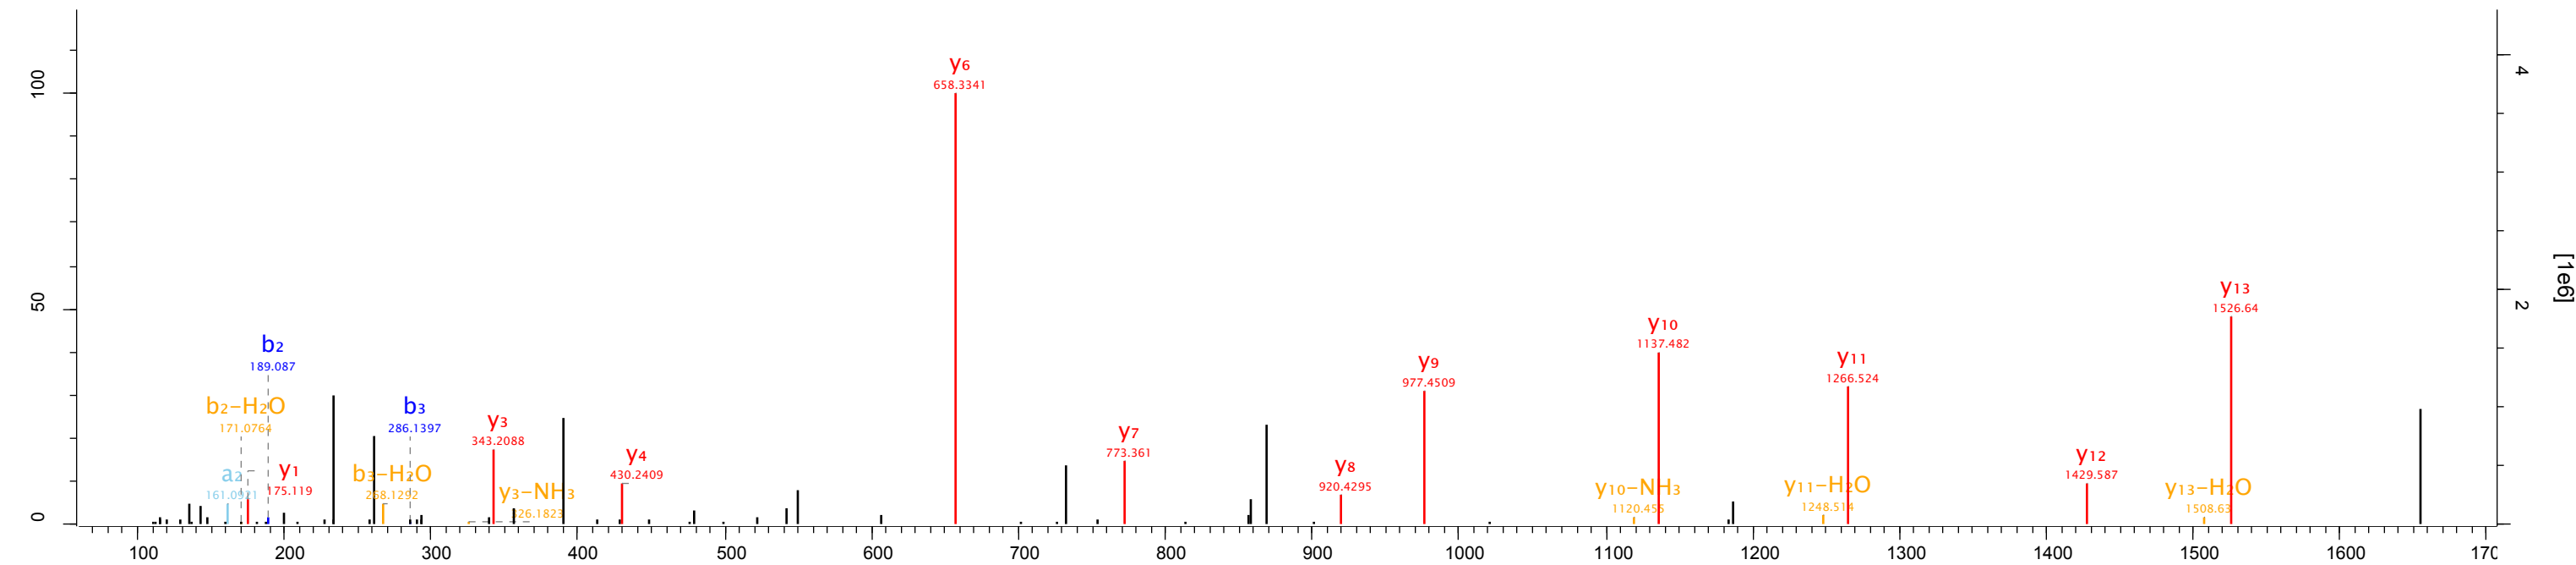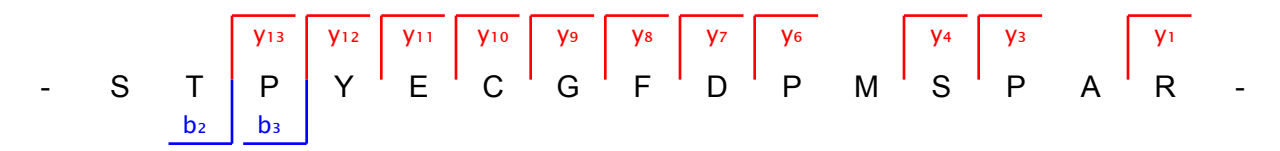

Raw file

20180707\_MaS\_A375SR\_ML\_proteome\_2\_28

| Scan | Method    | Score | m/z    | Gene names |
|------|-----------|-------|--------|------------|
| 6412 | FTMS; HCD | 47.84 | 477.76 | EPM2A      |

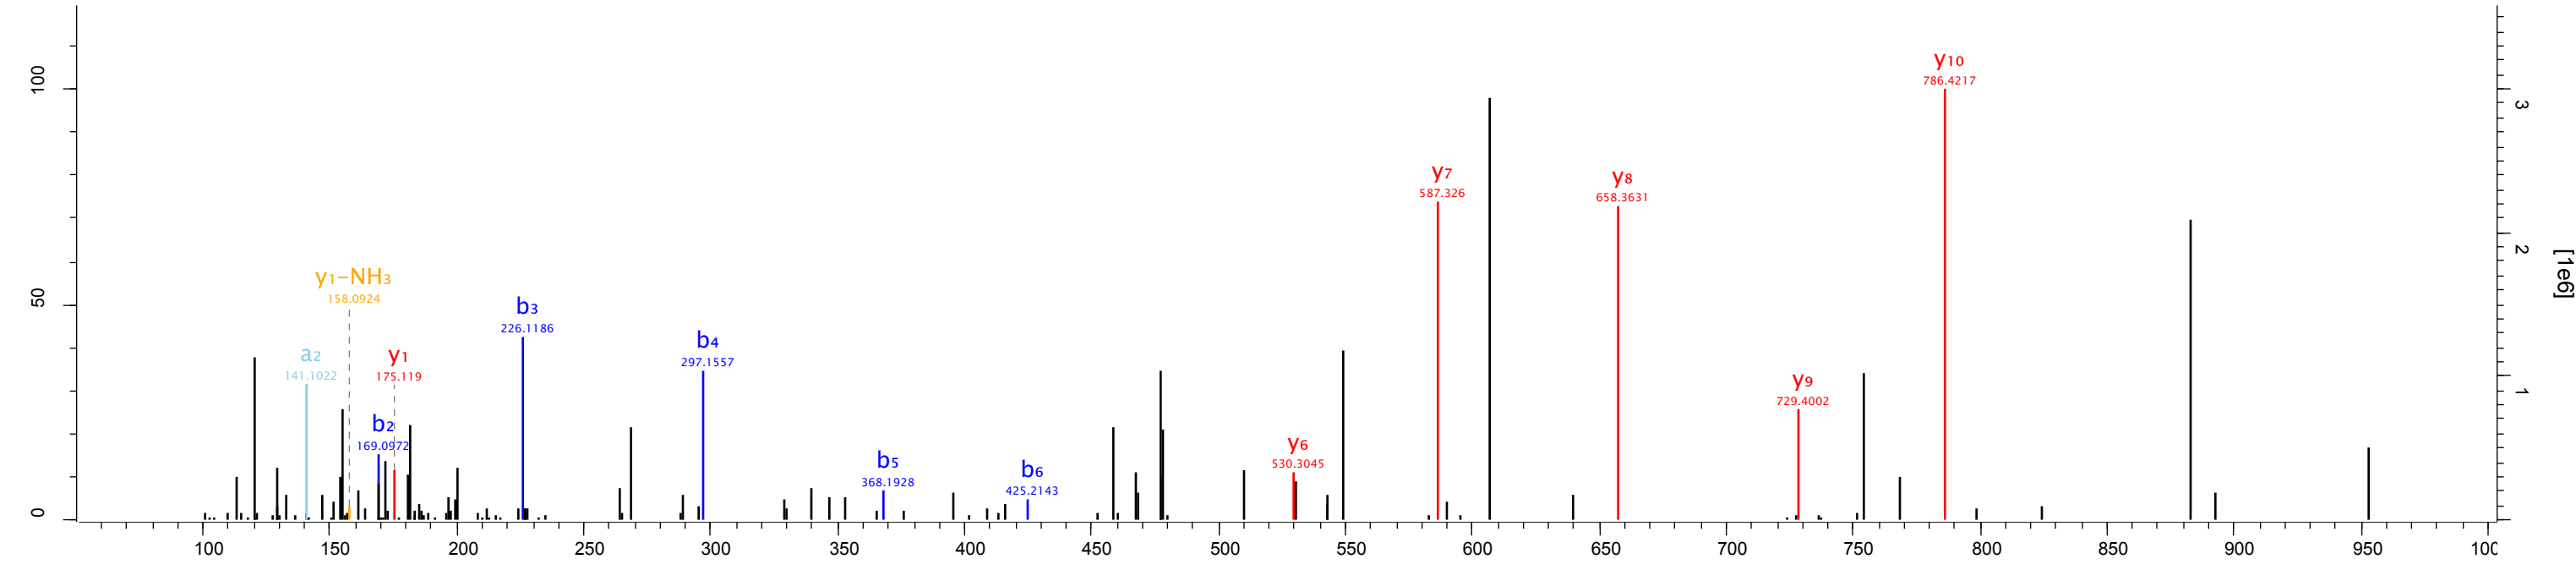

Raw file  
20180707\_MaS\_A375SR\_ML\_proteome\_2\_29

Scan 17092 Method FTMS; HCD Score 97.77 m/z 770.9 Gene names PLXNB3

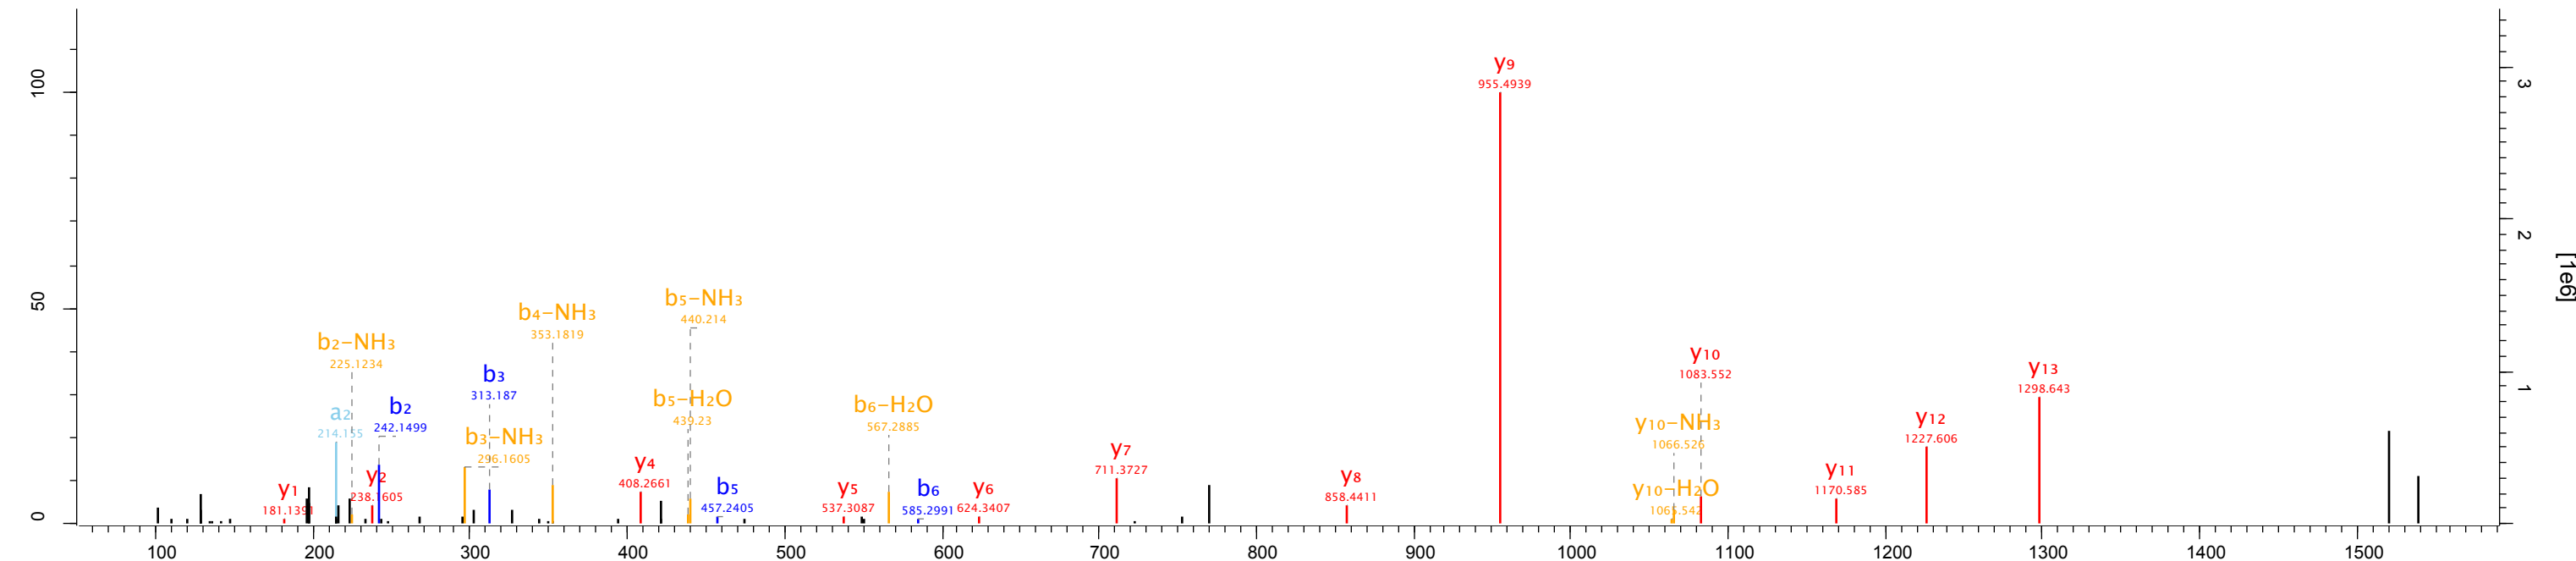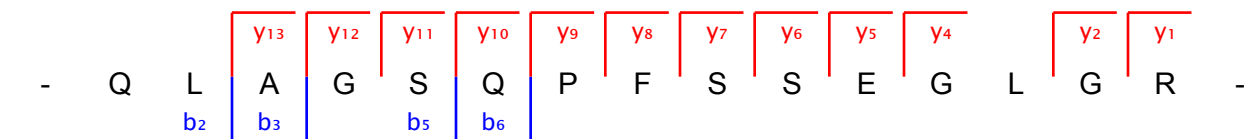

Raw file 20180707\_MaS\_A375SR\_ML\_proteome\_2\_29 Scan 23562 Method FTMS; HCD Score 48.91 m/z 868 Gene names KRTCAP2

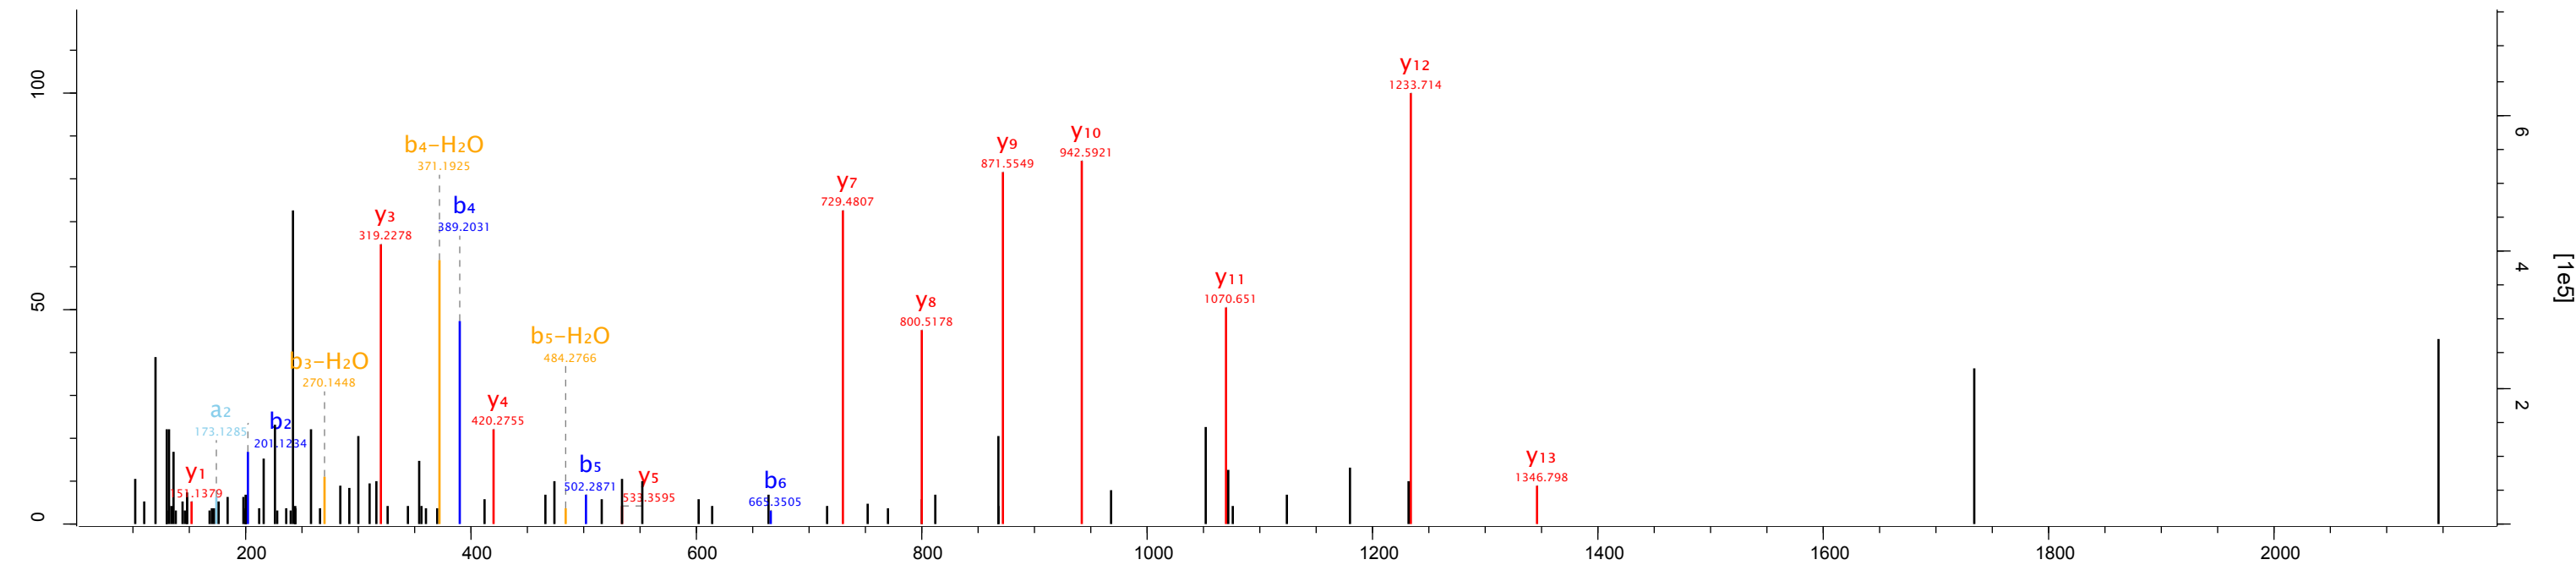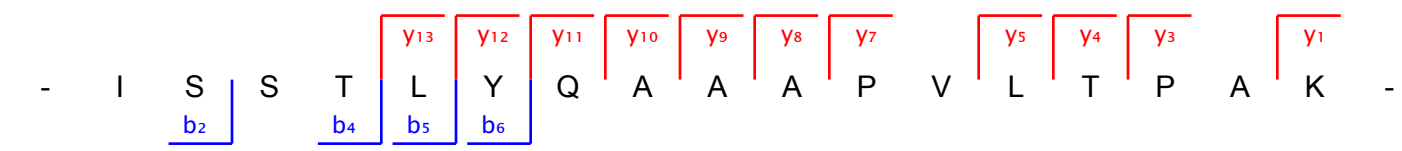

Raw file 20180707\_MaS\_A375SR\_ML\_proteome\_2\_30  
 Scan 28622 Method FTMS; HCD Score 72.61 m/z 598.38 Gene names SLITRK1

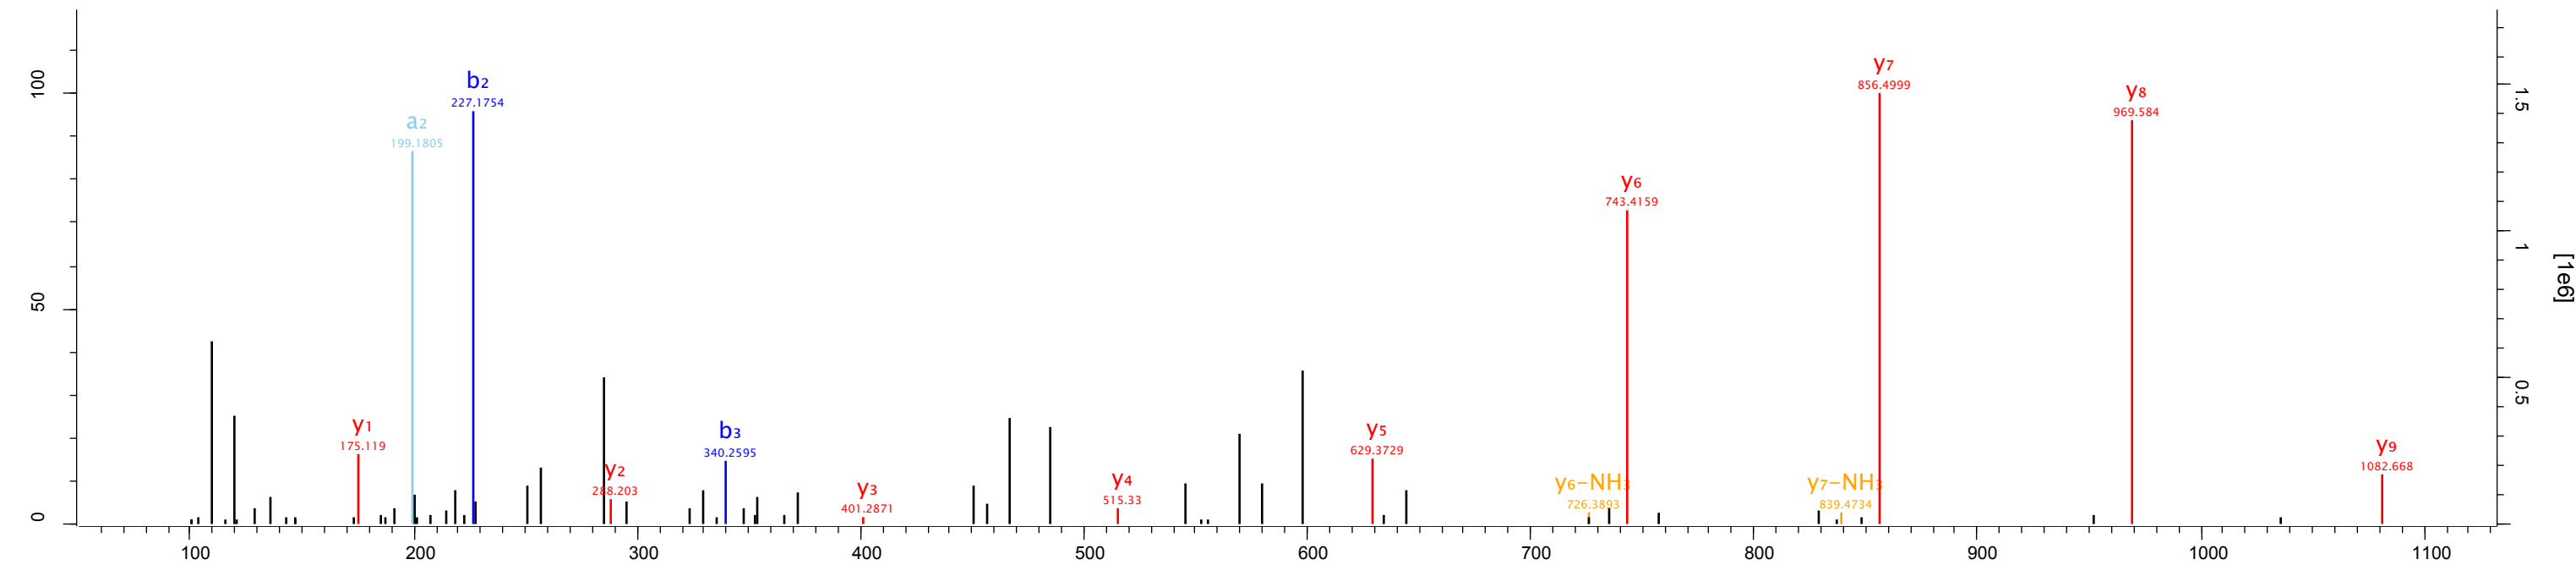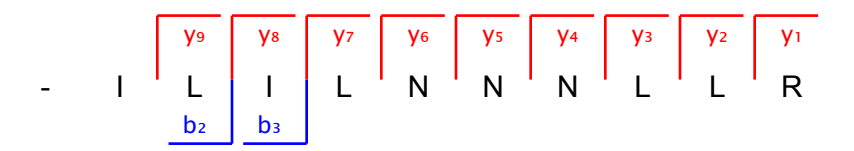

Raw file 20180707\_MaS\_A375SR\_ML\_proteome\_2\_30  
 Scan 8362 Method FTMS; HCD Score 99.75 m/z 592.82

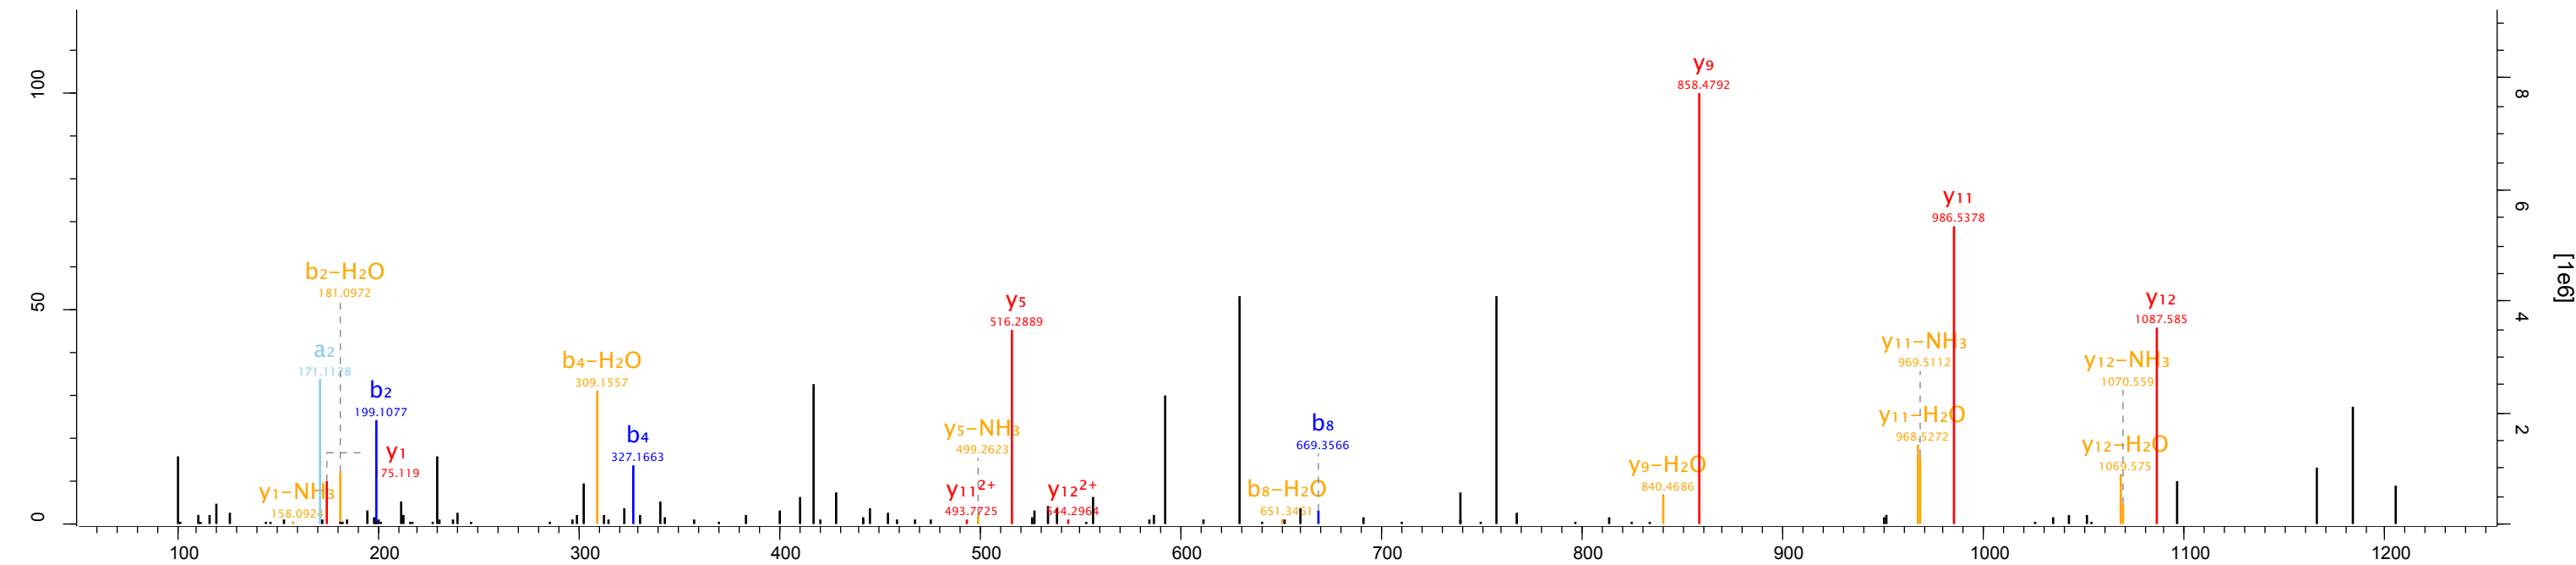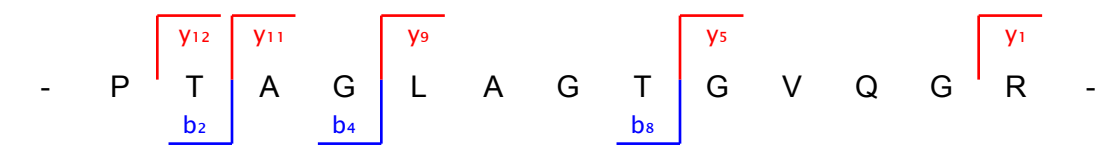



Raw file: 20180707\_MaS\_A375SR\_ML\_proteome\_20  
 Scan: 10802 Method: FTMS; HCD Score: 98.94 m/z: 695.81 Gene names: KIAA1549L

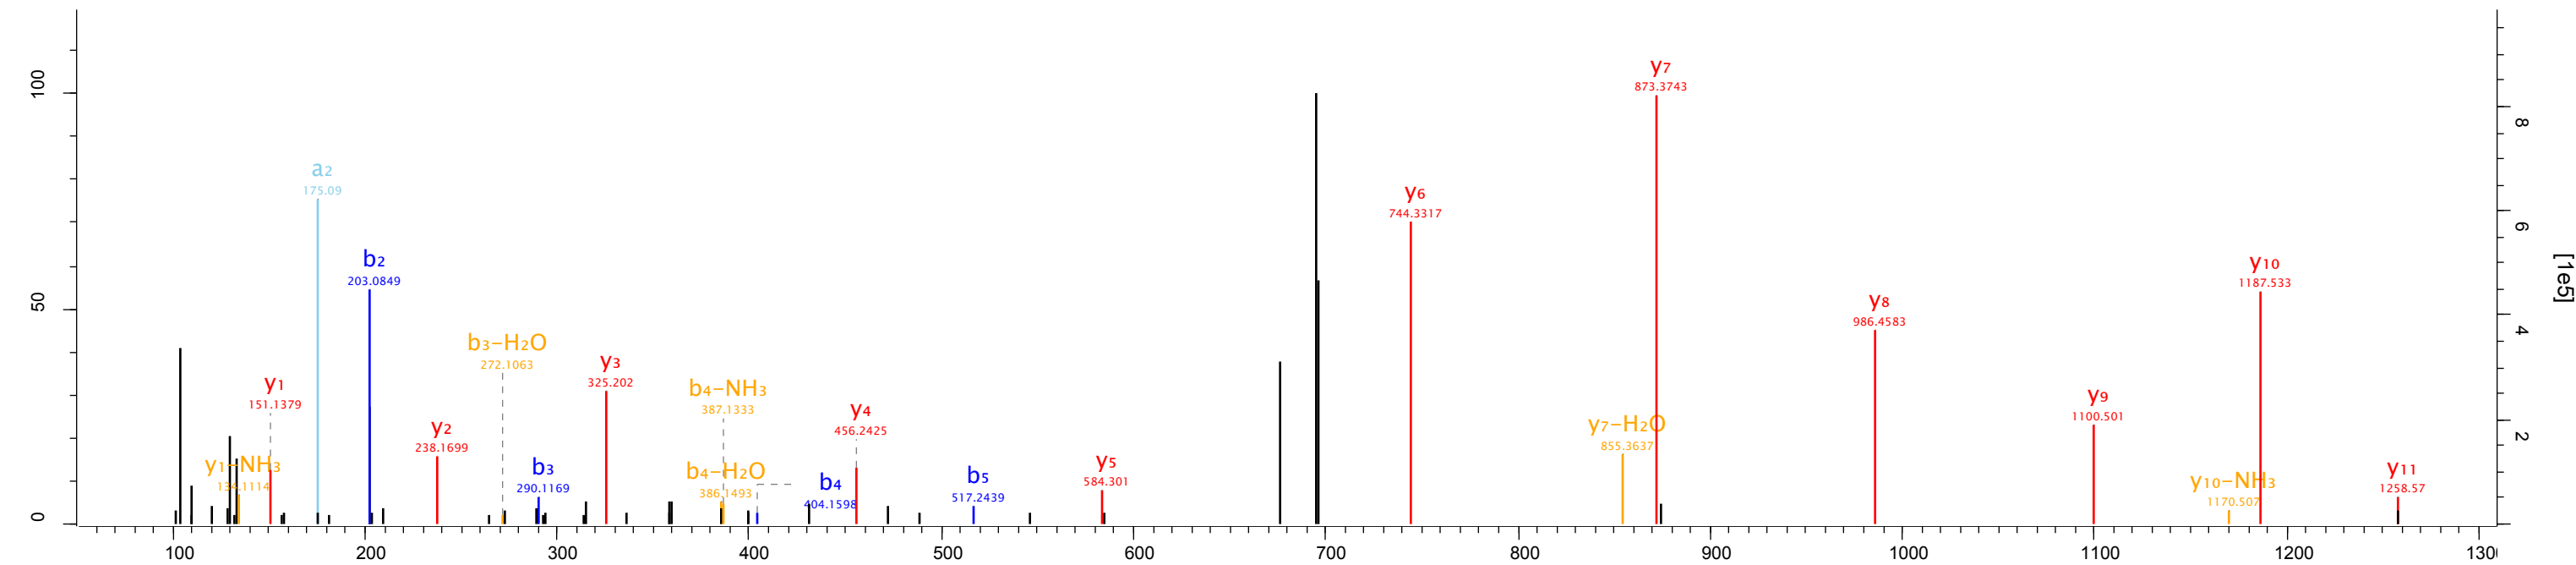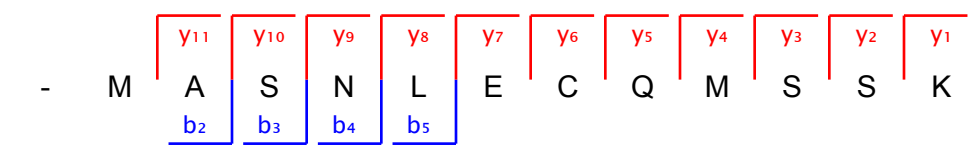

Raw file: 20180707\_MaS\_A375SR\_ML\_proteome\_20  
 Scan: 10822 Method: FTMS; HCD Score: 111.79 m/z: 693.3 Gene names: KIAA1549L

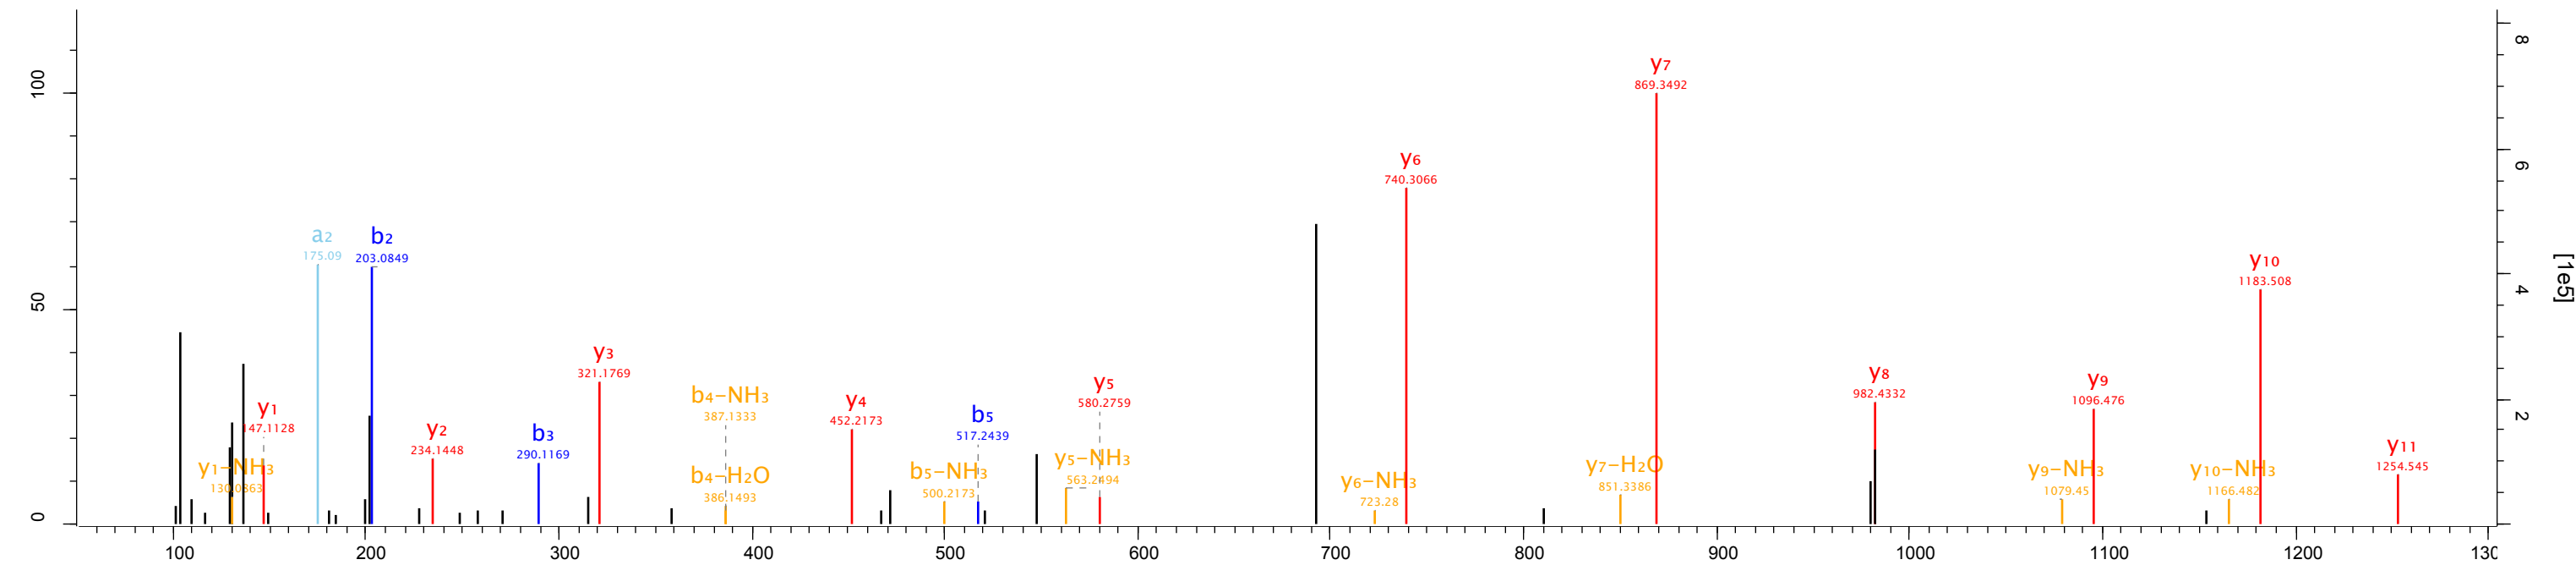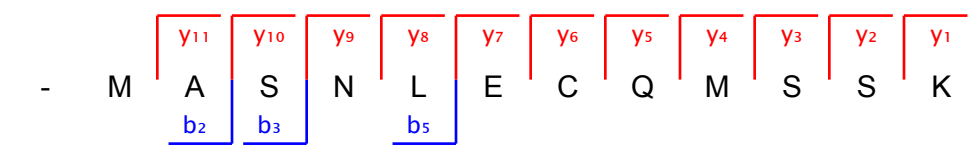

Raw file  
20180707\_MaS\_A375SR\_ML\_proteome\_20

Scan: 14342  
Method: FTMS; HCD  
Score: 103.55  
m/z: 599.29  
Gene names: SEMA4D

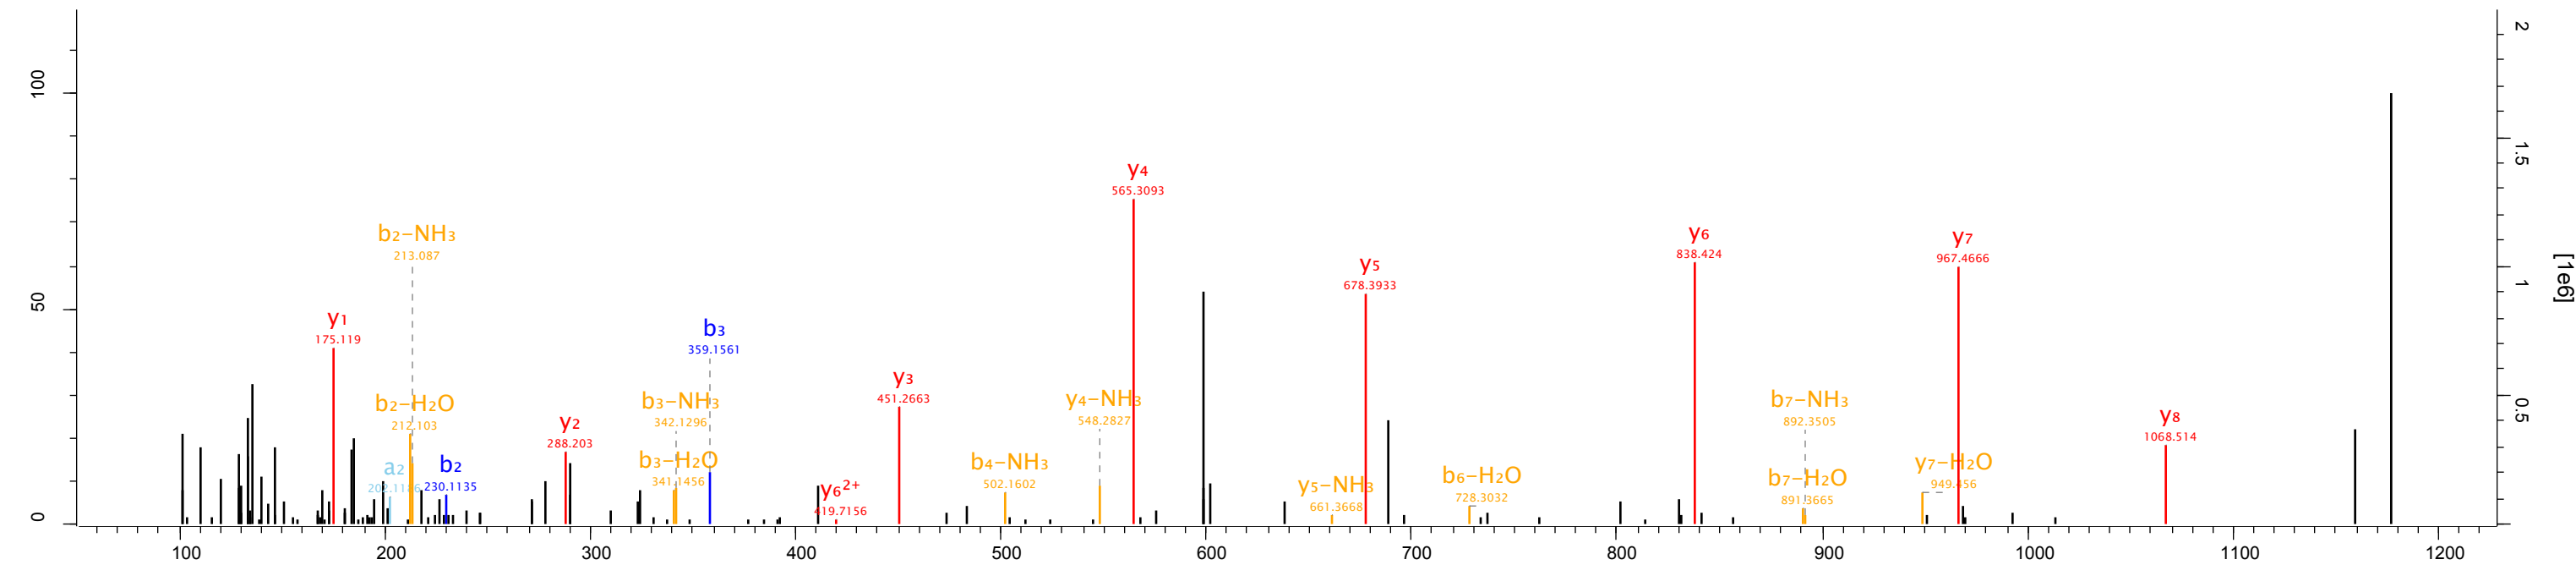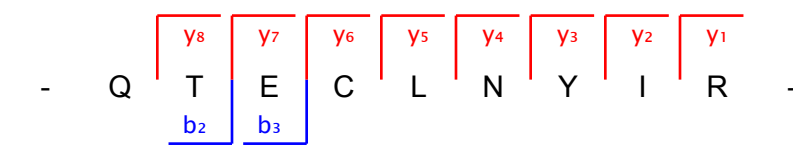

Raw file 20180707\_MaS\_A375SR\_ML\_proteome\_20 Scan 16812 Method FTMS; HCD Score 60.66 m/z 743.88 Gene names MGST2

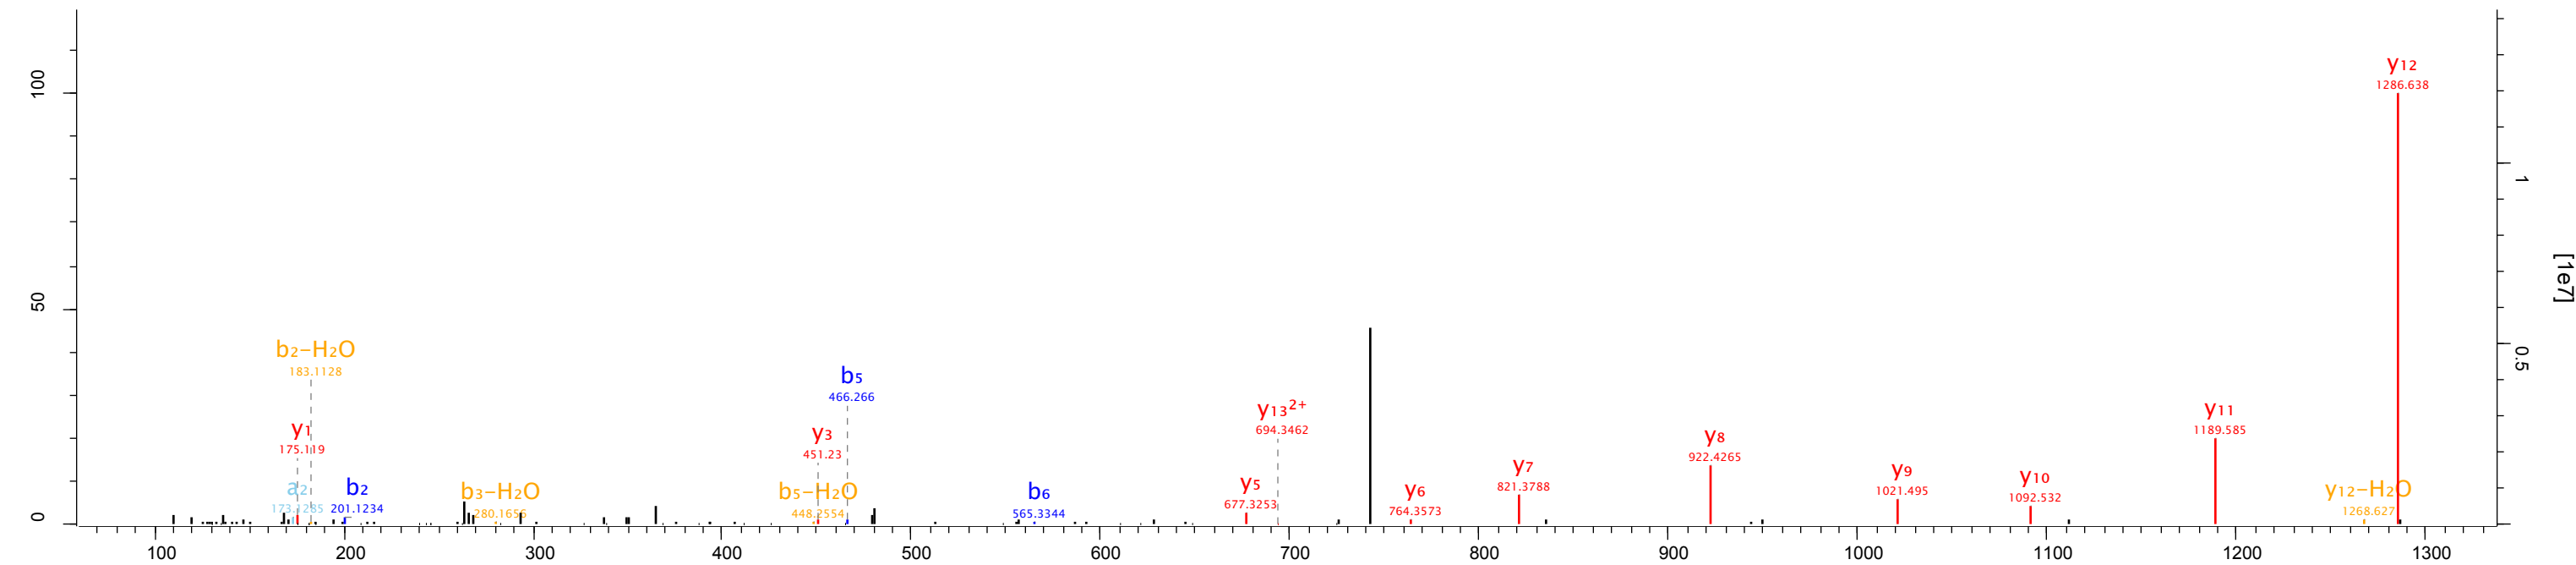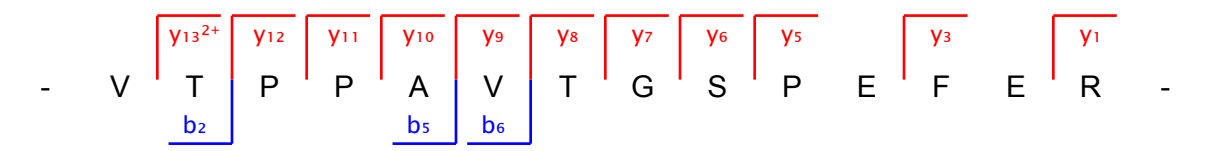

Raw file 20180707\_MaS\_A375SR\_ML\_proteome\_20  
 Scan 19832 Method FTMS; HCD Score 54 m/z 1062.15

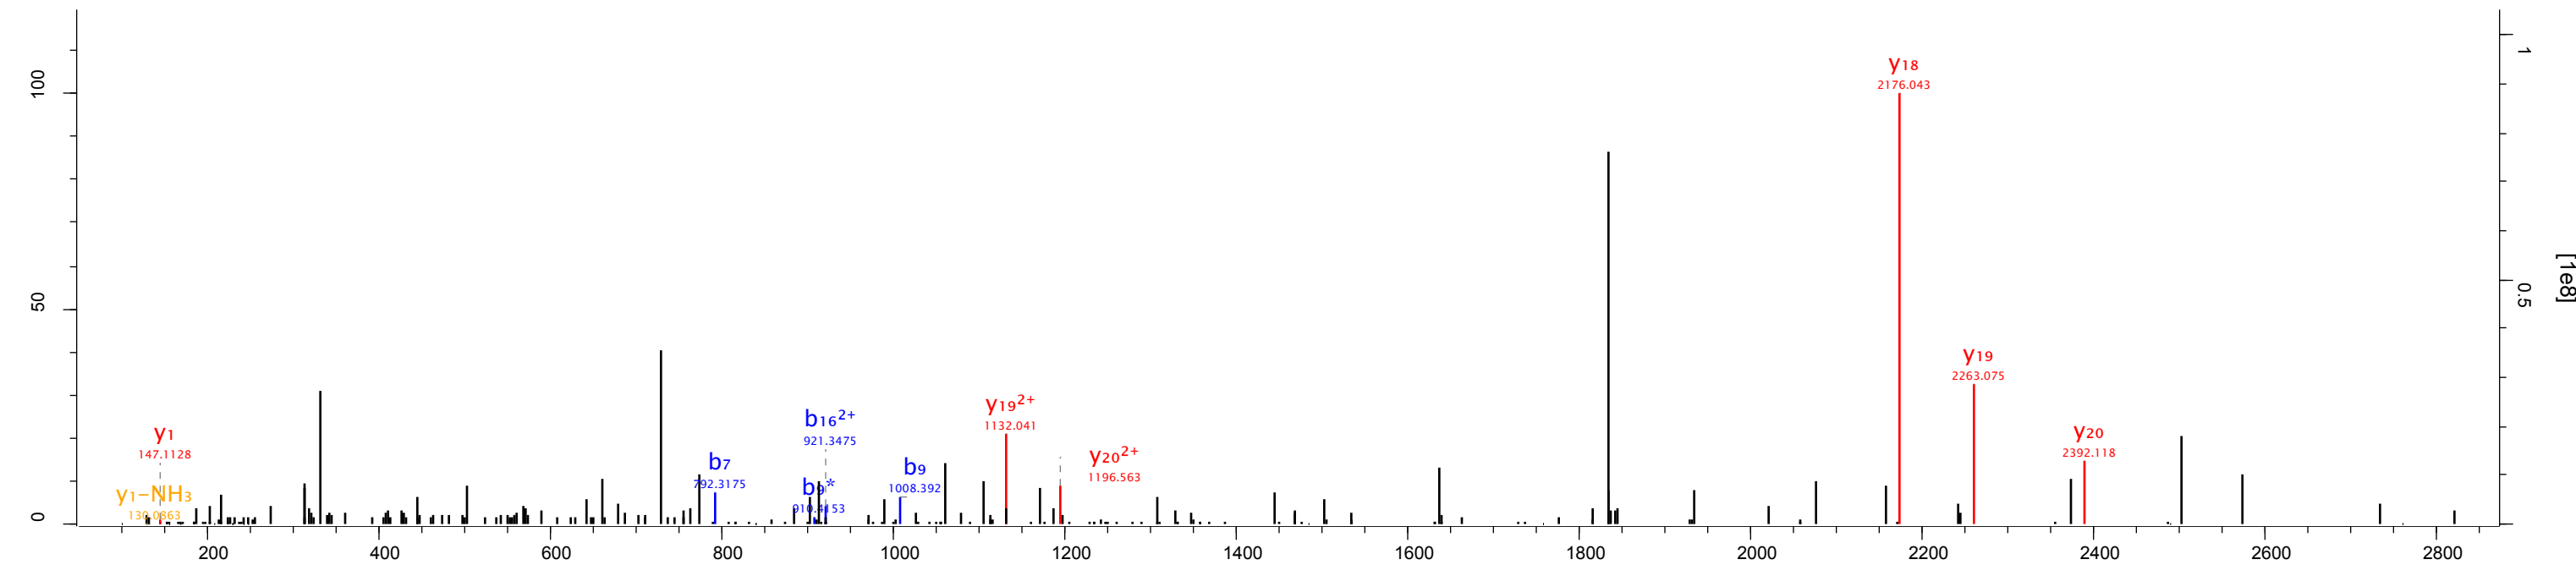

- L P P S S T E E S E S S H A L F D H K L Q V L T N K -

Fragmentation mapping (red boxes):

- y20: E (residues 18-19)
- y19: S (residue 20)
- y18: E (residue 21)
- y1: K (residue 26)

Fragmentation mapping (blue boxes):

- b7: E (residues 18-19)
- b9: S (residues 20-21)
- b16<sup>2+</sup>: L (residue 23)

Raw file  
20180707\_MaS\_A375SR\_ML\_proteome\_20

Scan Method Score m/z Gene names  
23672 FTMS; HCD 81.51 640.34 ATP6V0C

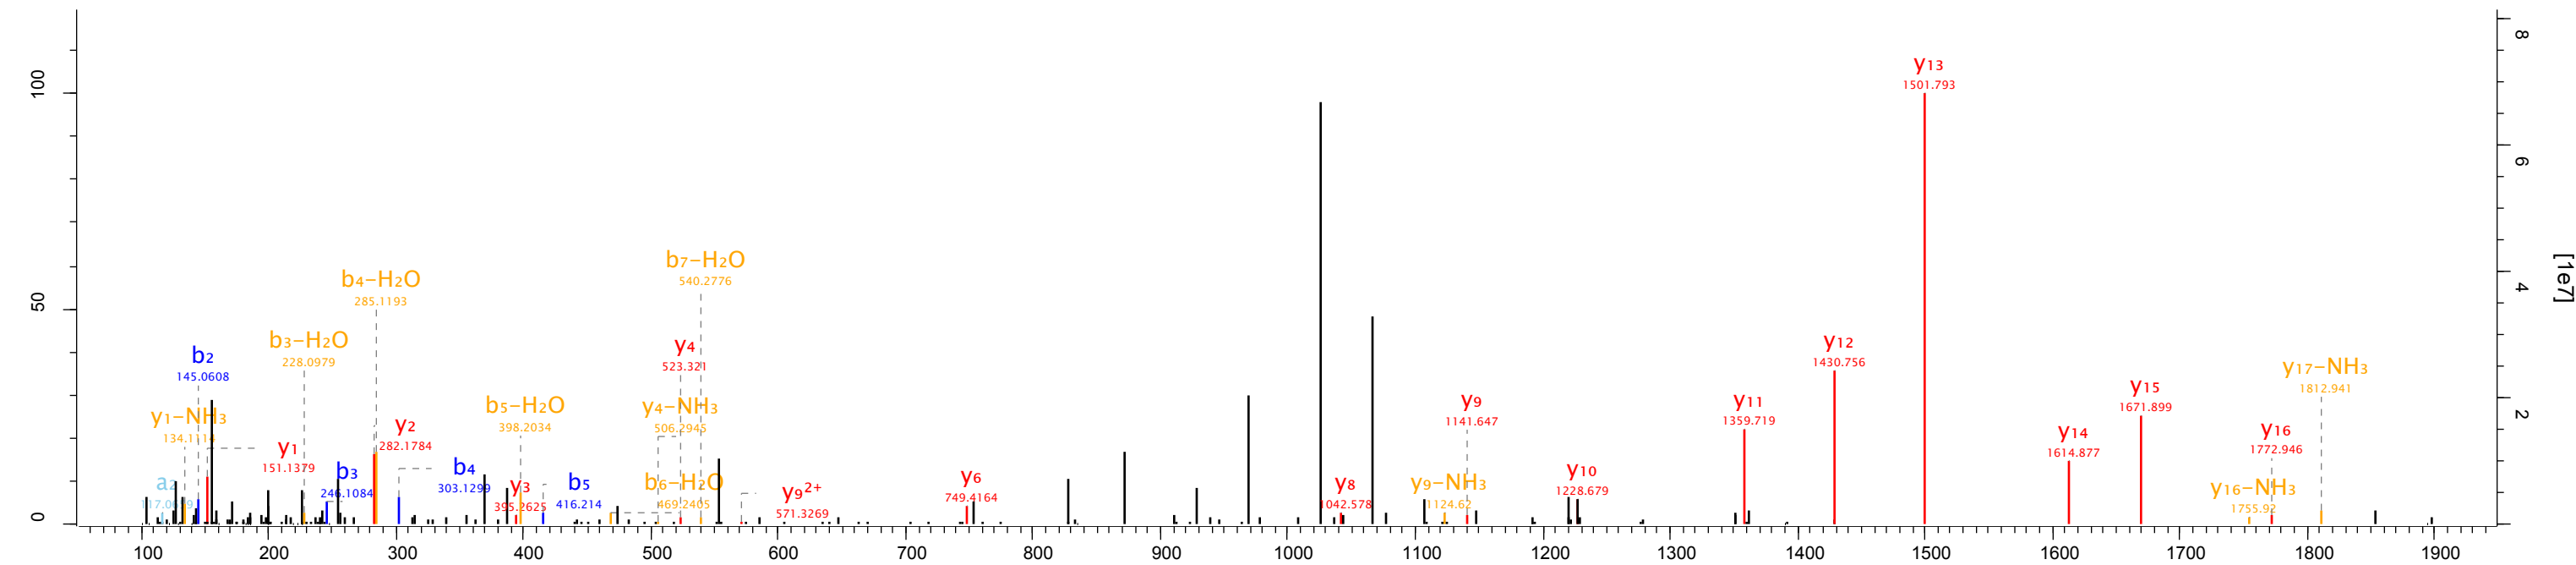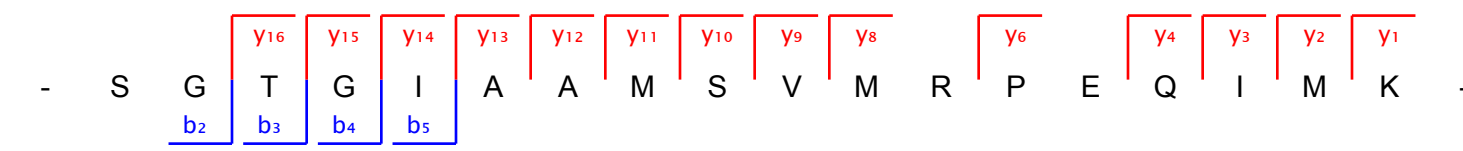

20180707\_MaS\_A375SR\_ML\_proteome\_20

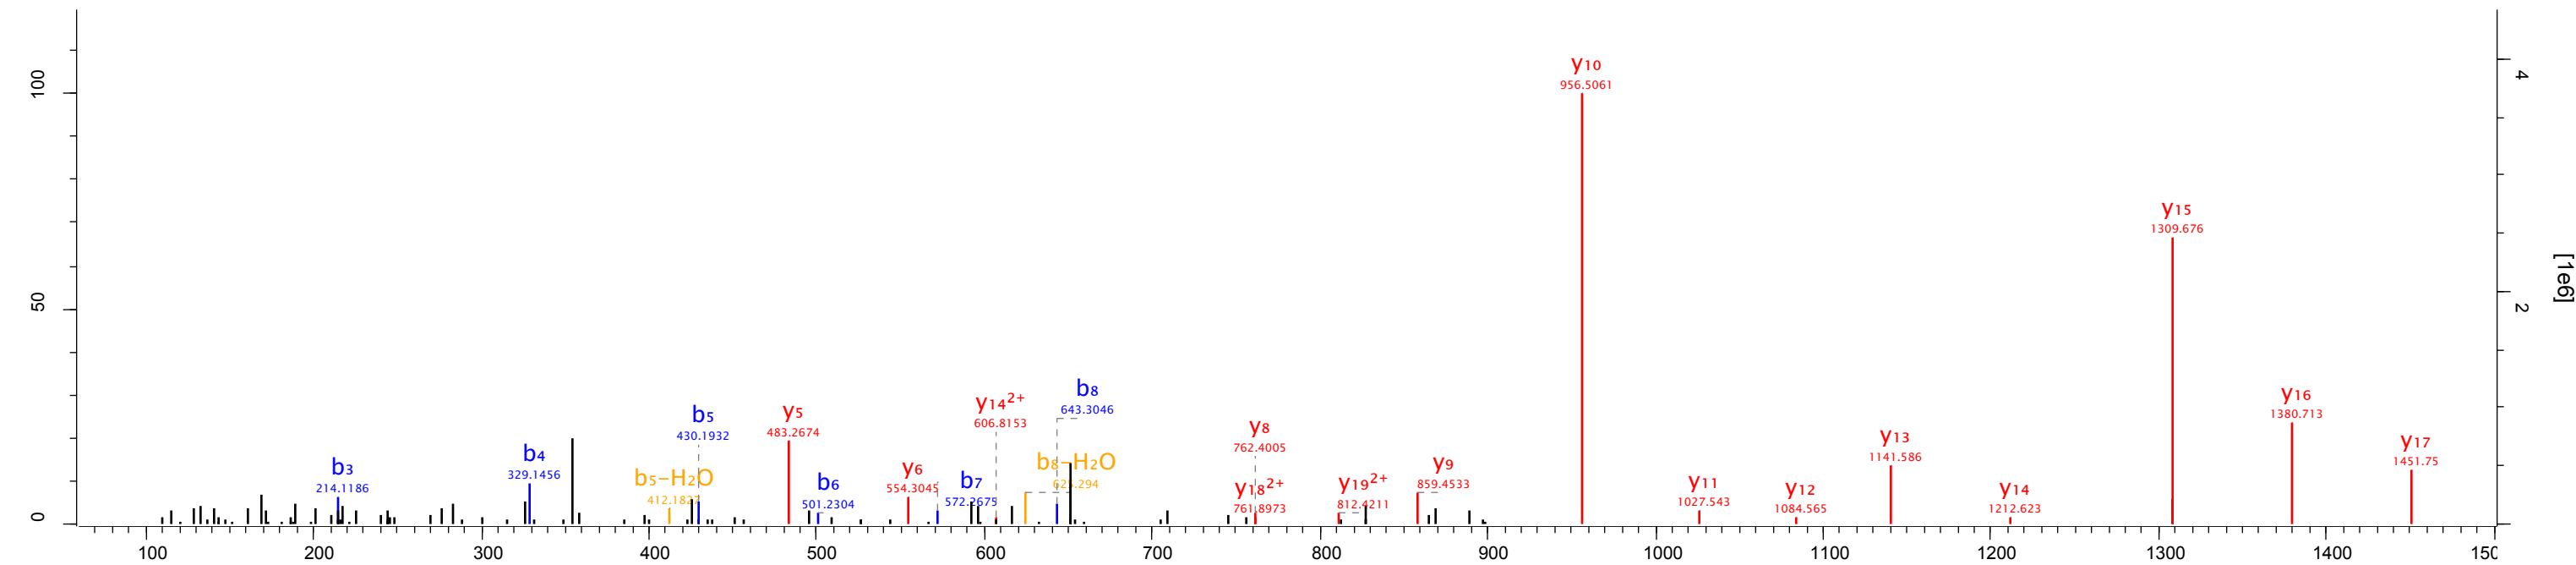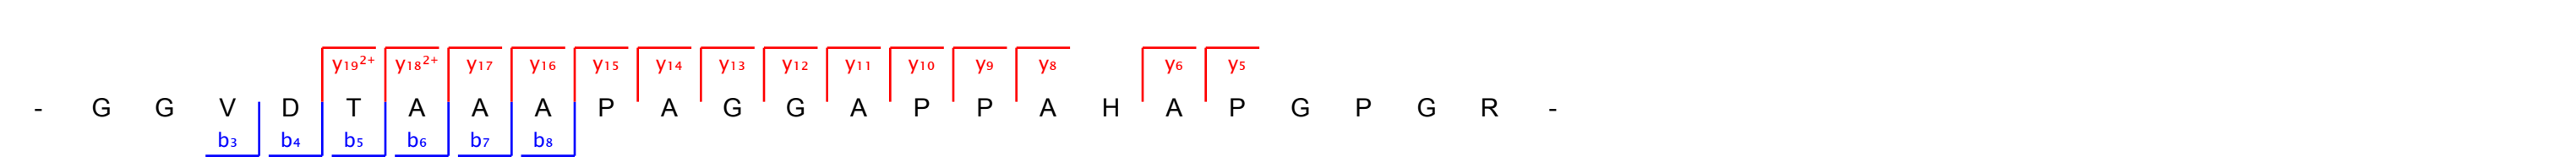

Raw file

20180707\_MaS\_A375SR\_ML\_proteome\_21

| Scan  | Method    | Score | m/z    | Gene names |
|-------|-----------|-------|--------|------------|
| 17212 | FTMS; HCD | 34.18 | 746.89 | MGST2      |

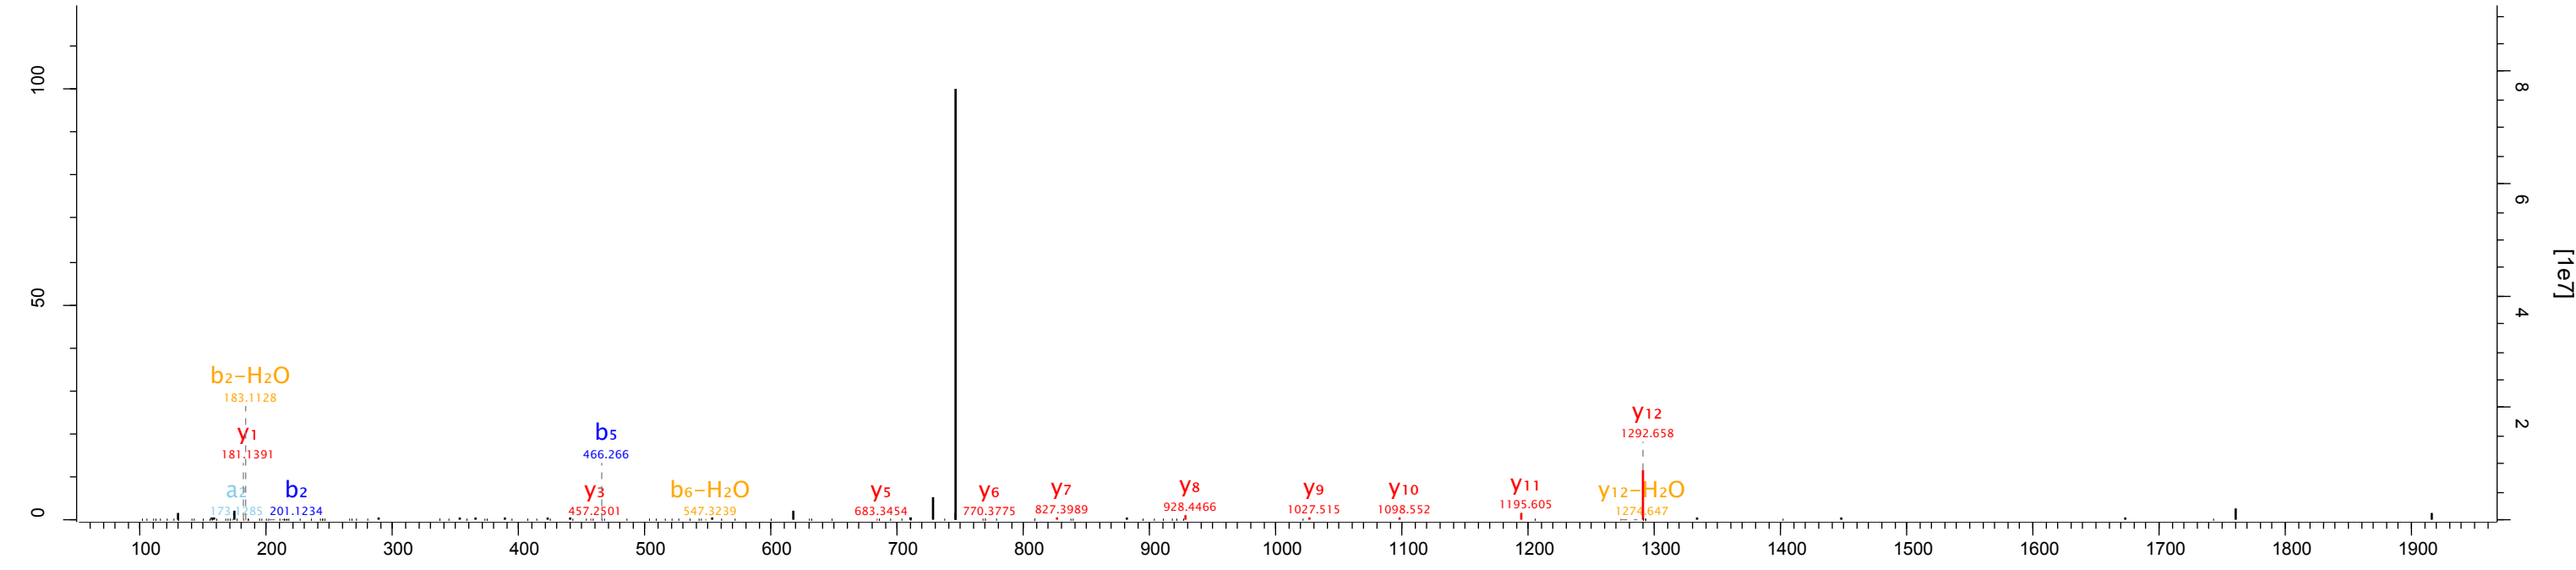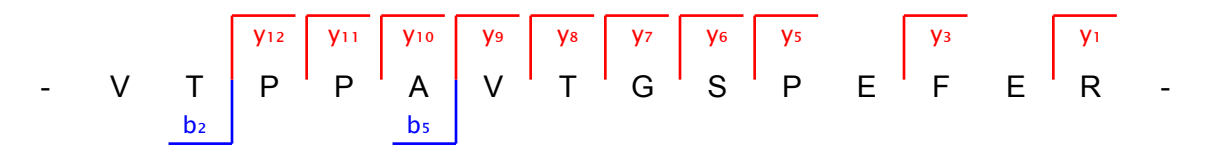



Raw file 20180707\_MaS\_A375SR\_ML\_proteome\_21 Scan 23922 Method FTMS; HCD Score 98.06 m/z 636.32 Gene names ATP6V0C

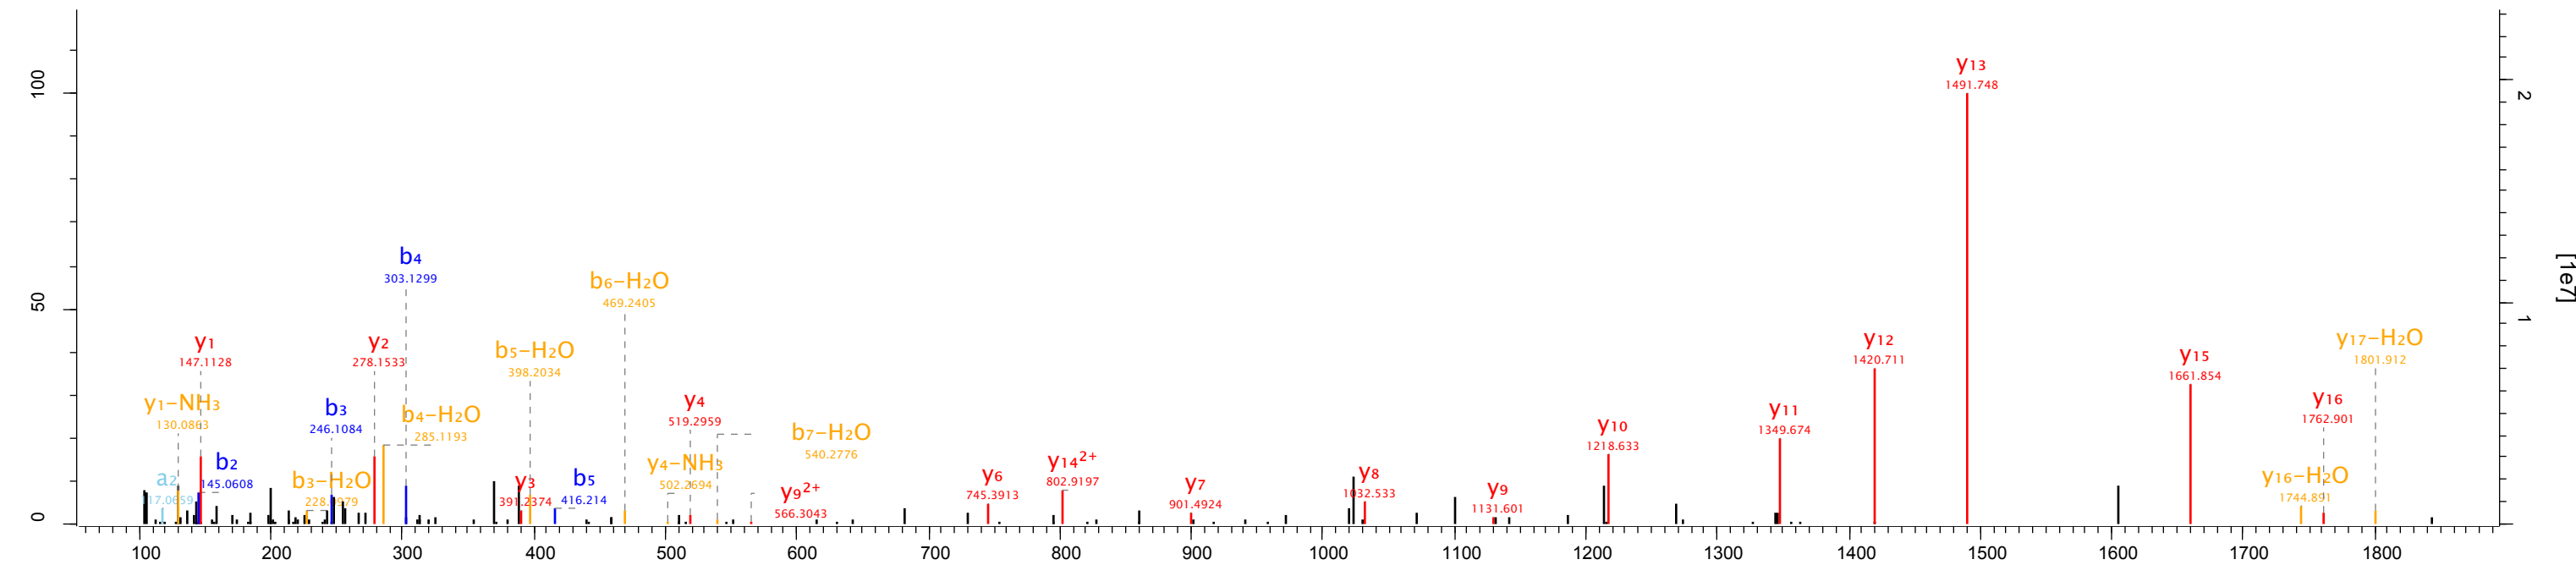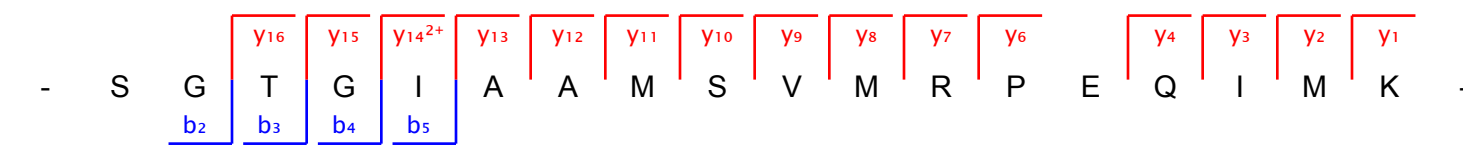

Raw file  
20180707\_MaS\_A375SR\_ML\_proteome\_21

Scan: 23952  
Method: FTMS; HCD  
Score: 164.53  
m/z: 959  
Gene names: ATP6V0C

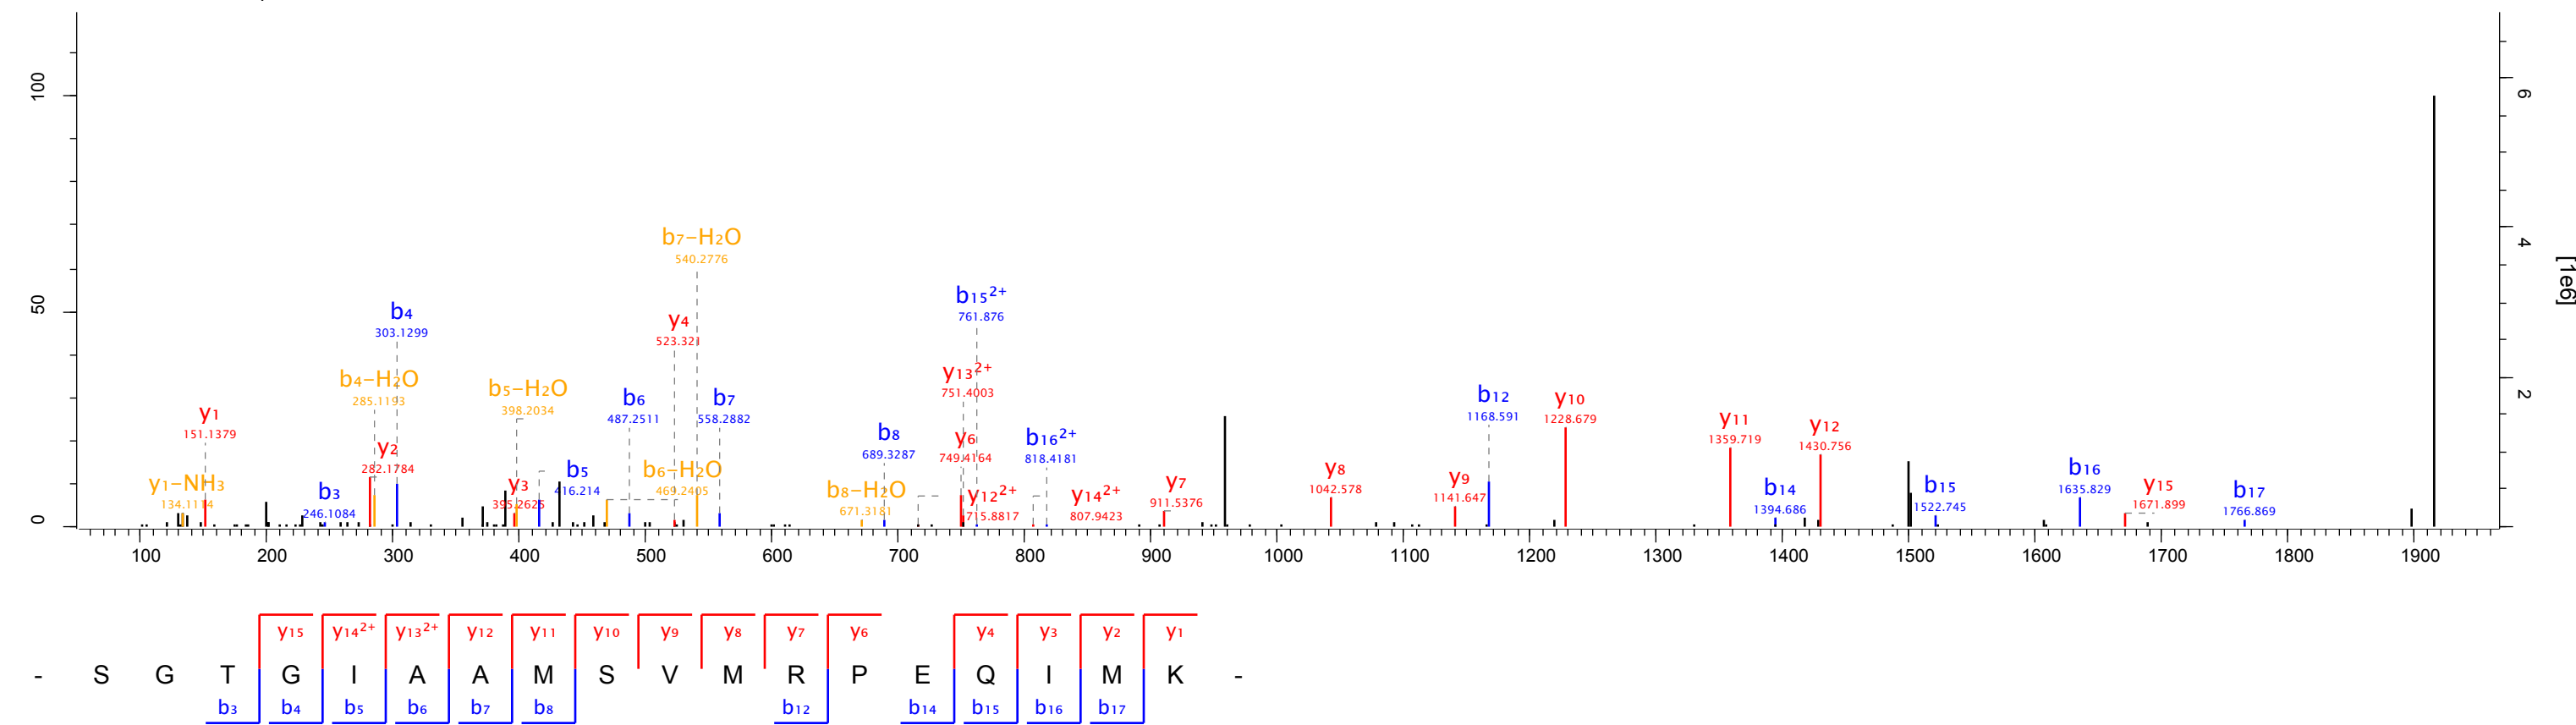

Raw file 20180707\_MaS\_A375SR\_ML\_proteome\_21 Scan 9522 Method FTMS; HCD Score 54.2 m/z 566.72 Gene names PSPHP1

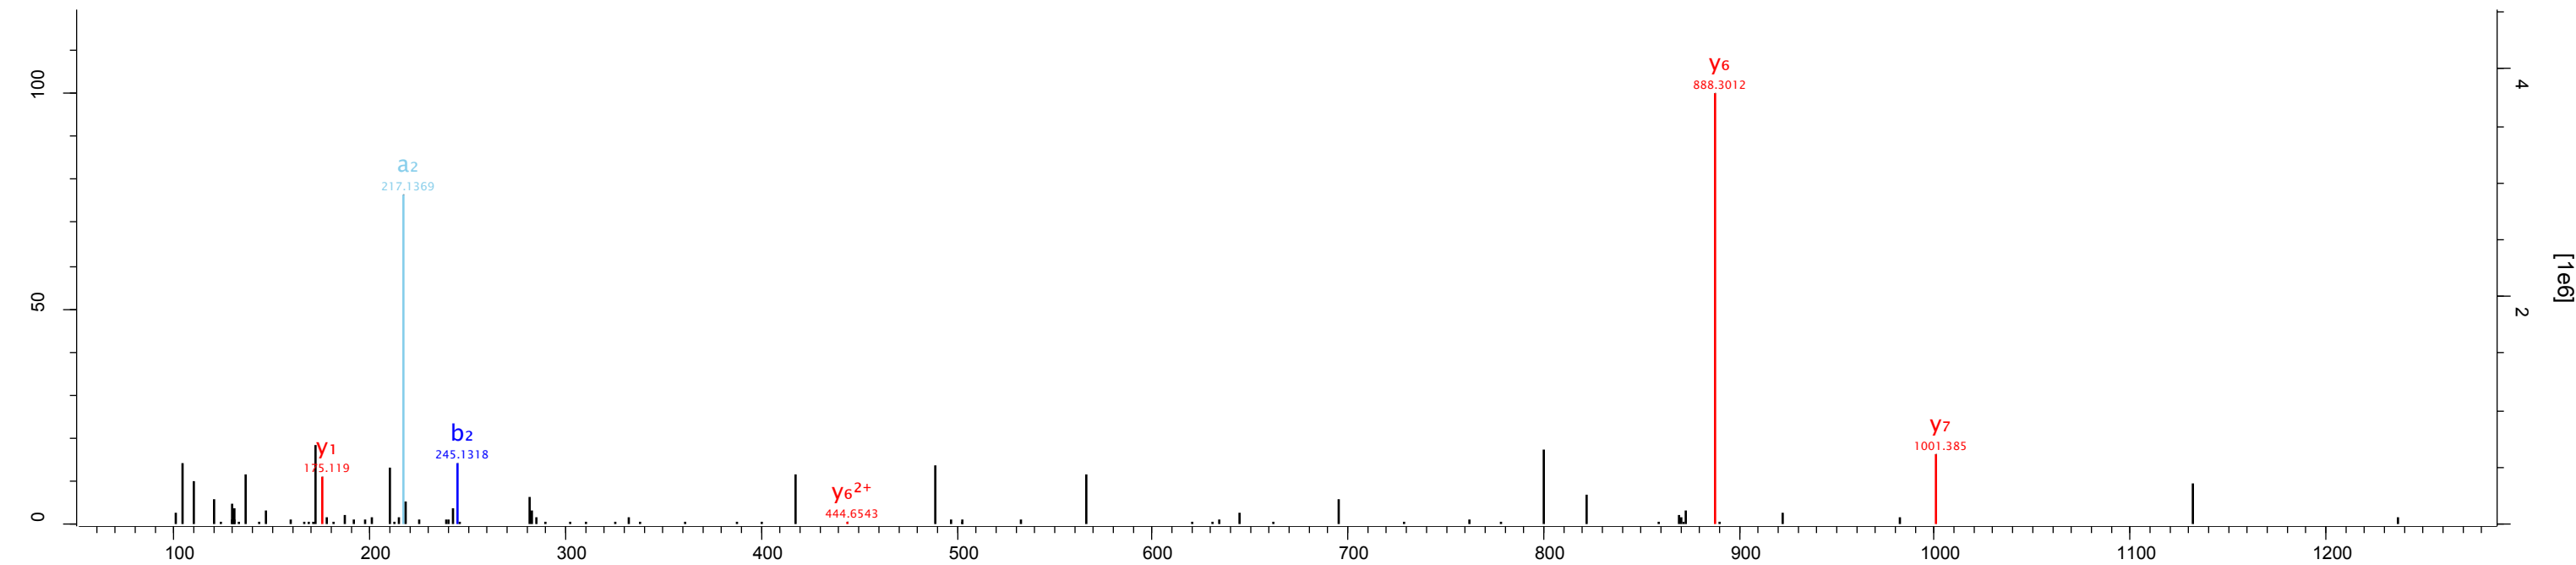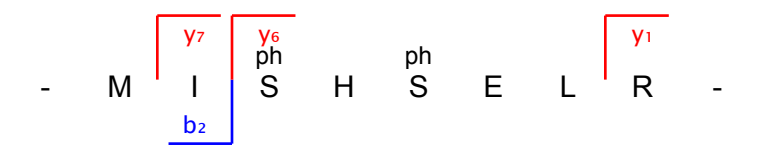

Raw file

20180707\_MaS\_A375SR\_ML\_proteome\_21

Scan: 9542  
Method: FTMS; HCD  
Score: 60.76  
m/z: 569.73  
Gene names: PSPHP1

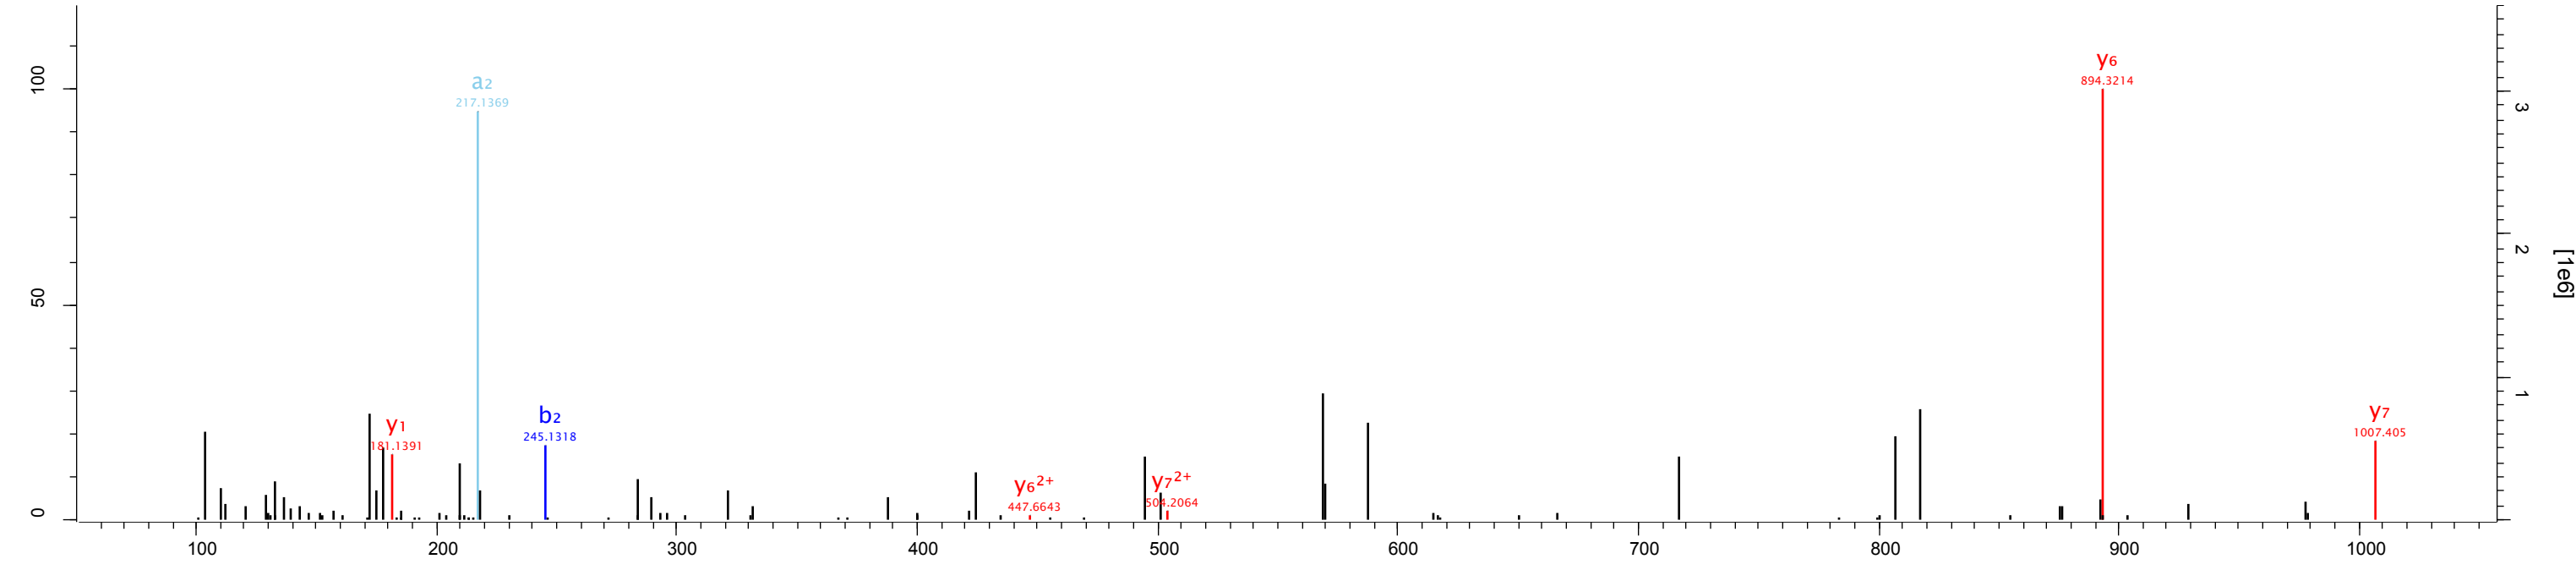

Raw file: 20180707\_MaS\_A375SR\_ML\_proteome\_22  
 Scan: 17312 Method: FTMS; HCD Score: 225.79 m/z: 712.86 Gene names: SPATA22

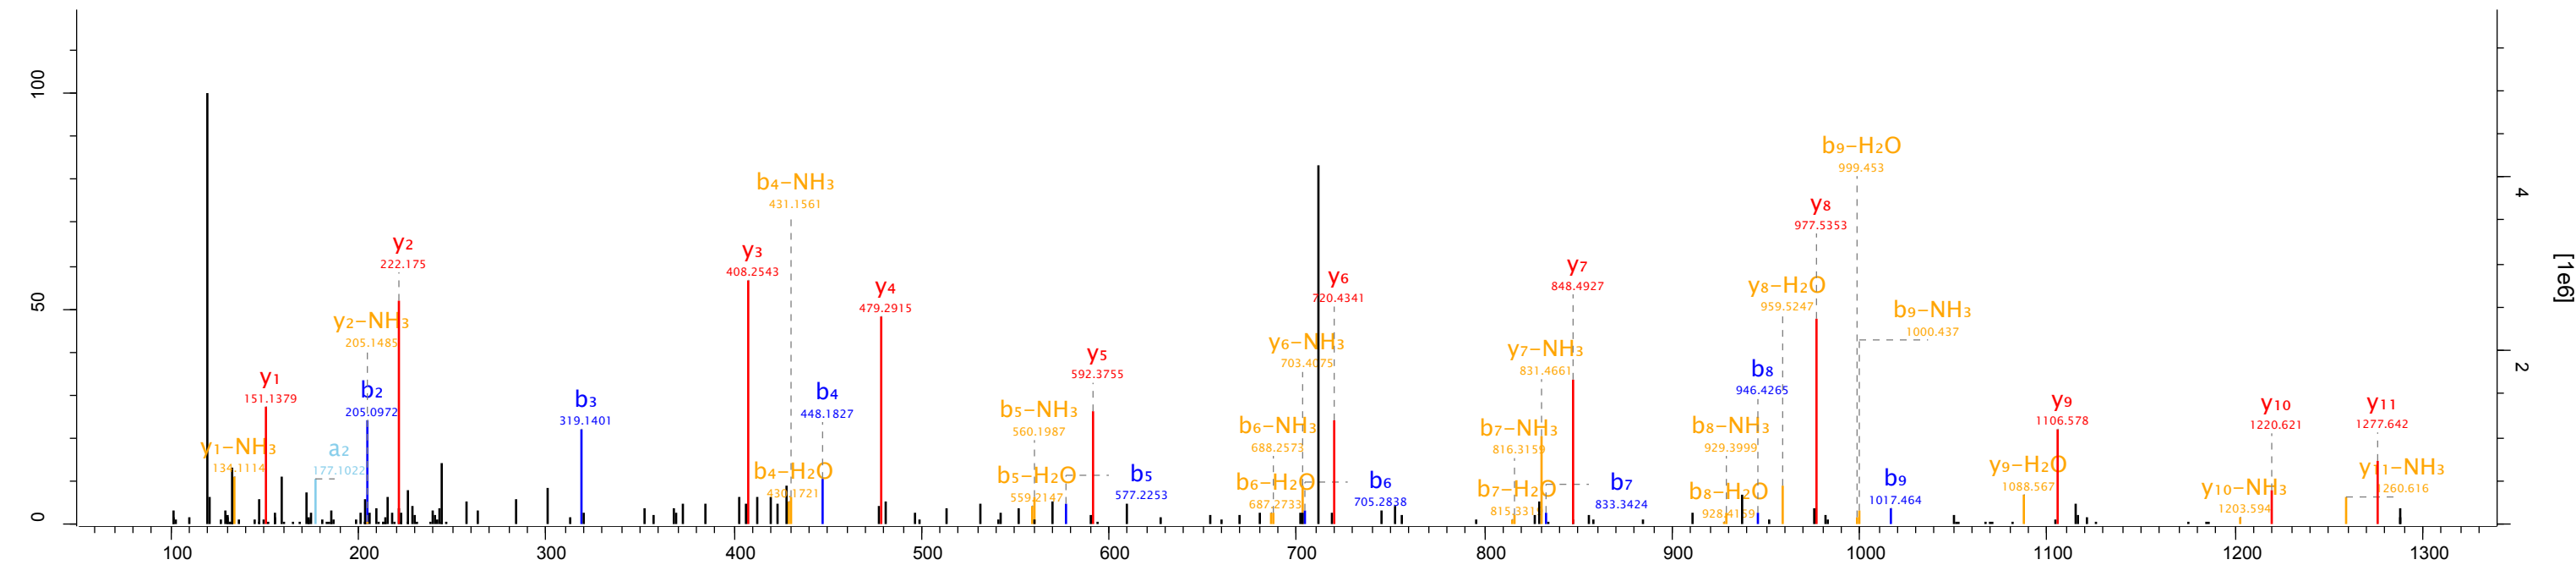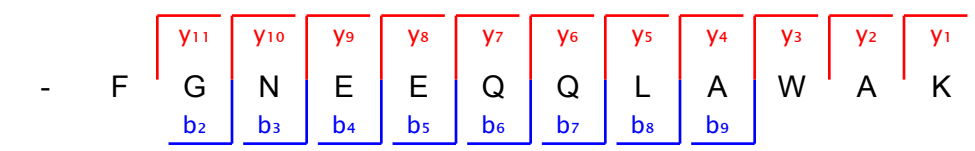

Raw file  
20180707\_MaS\_A375SR\_ML\_proteome\_22

Scan 21652 Method FTMS; HCD Score 40.48 m/z 595

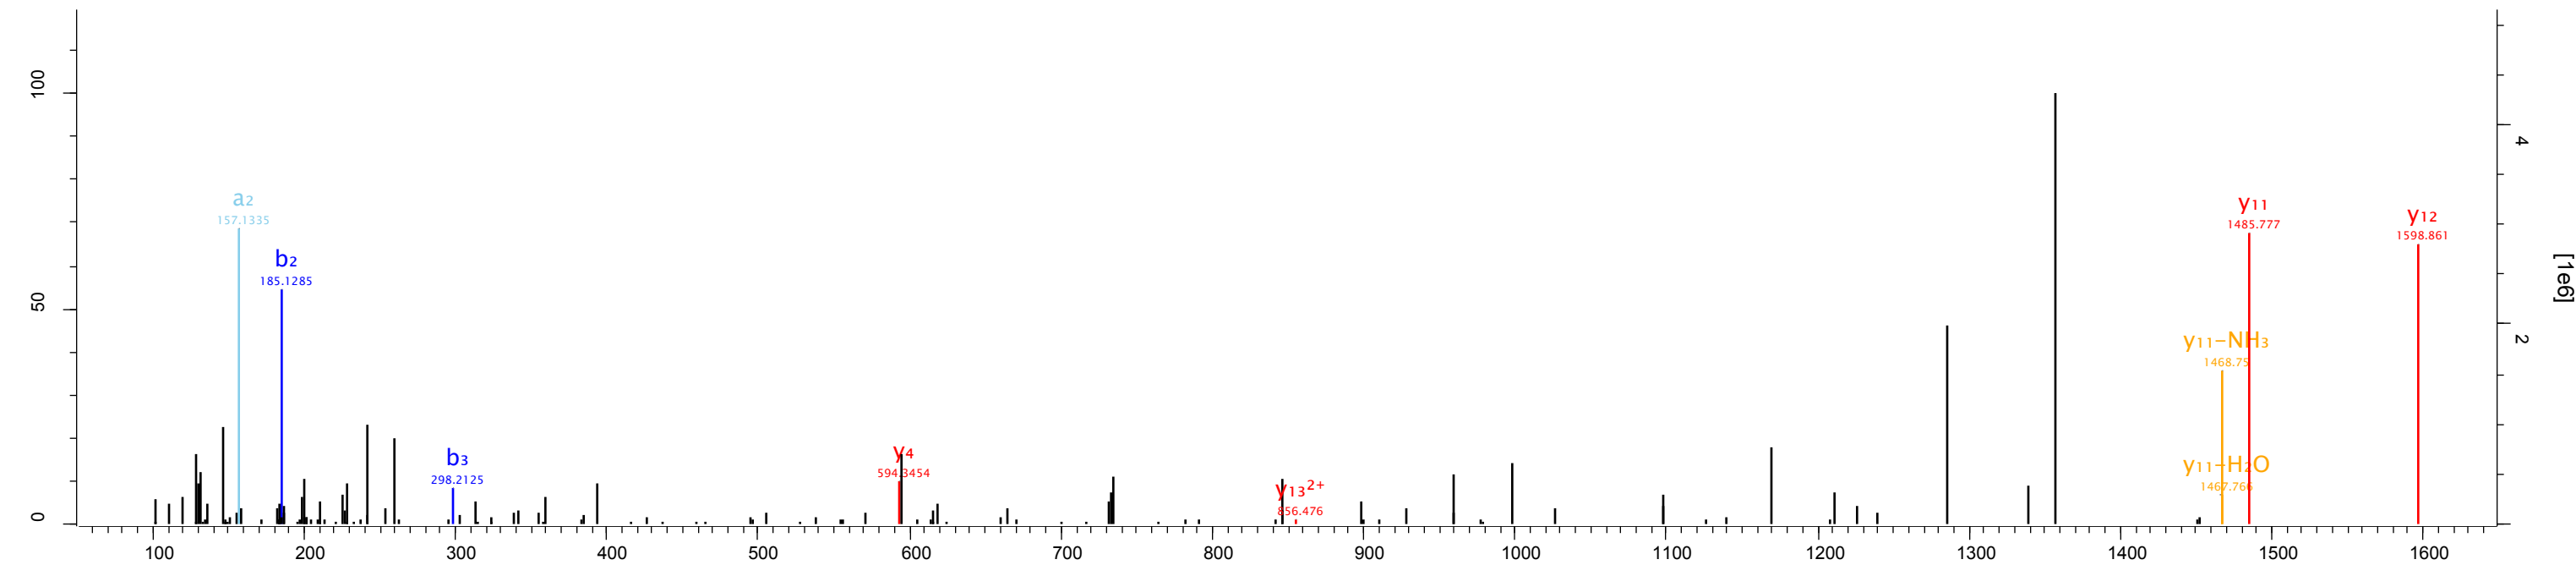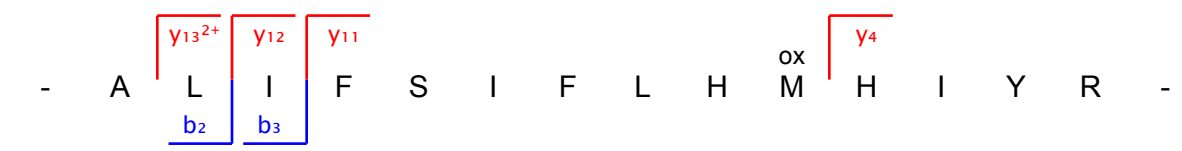

Raw file 20180707\_MaS\_A375SR\_ML\_proteome\_23 Scan 11042 Method FTMS; HCD Score 52.58 m/z 518.3

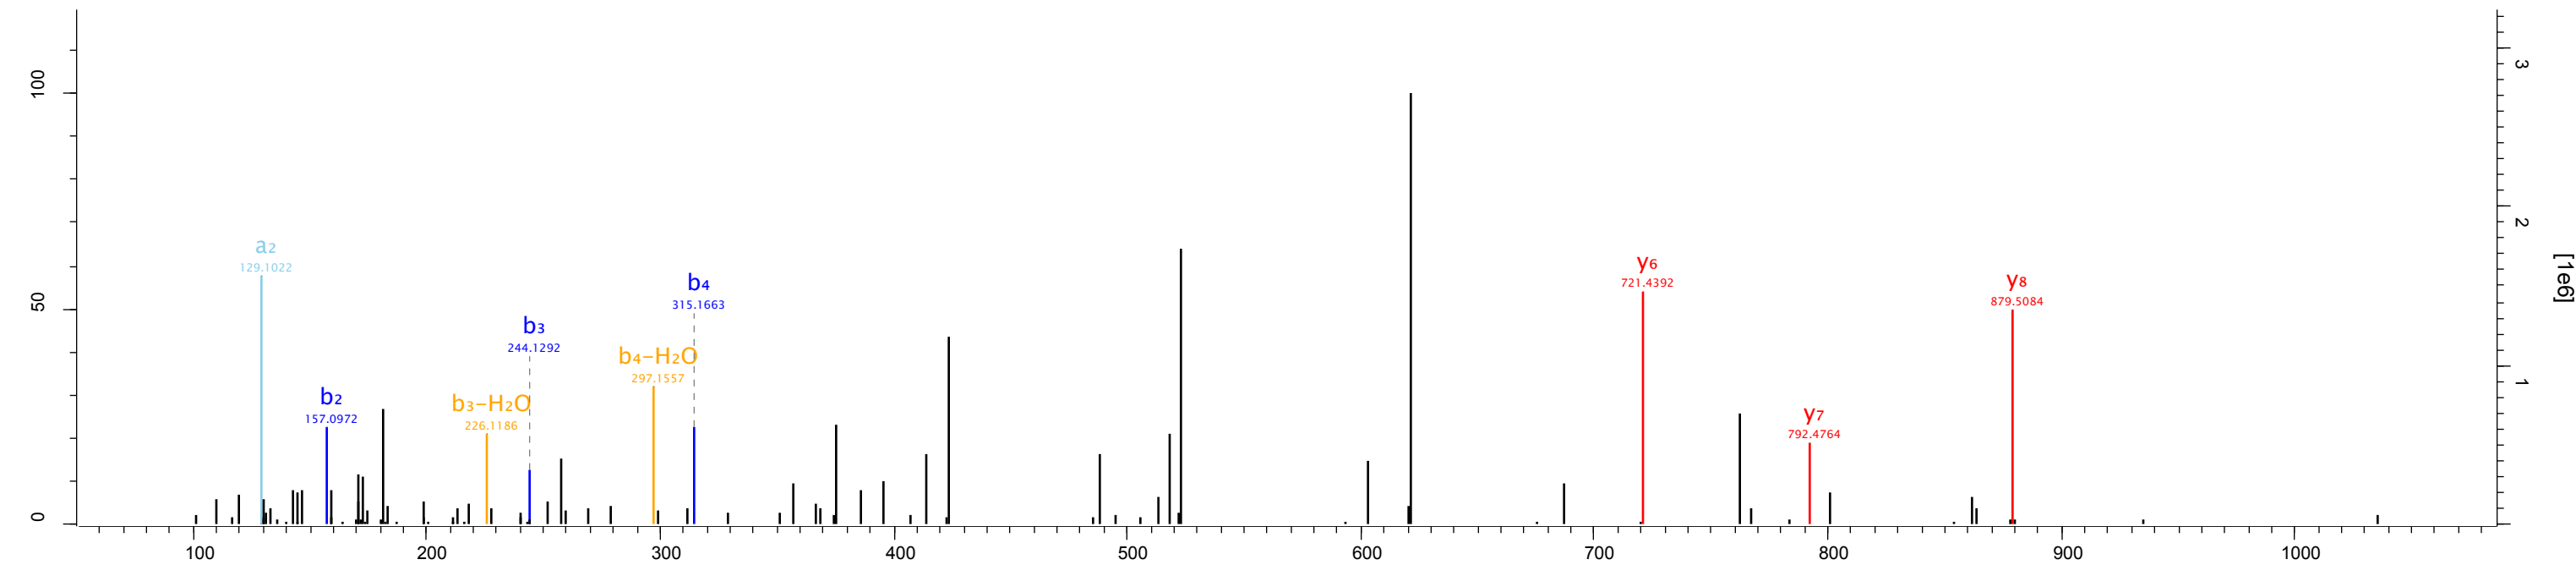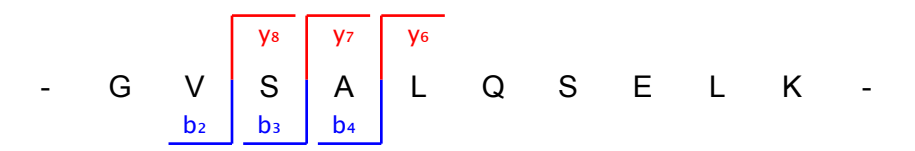

Raw file  
 20180707\_MaS\_A375SR\_ML\_proteome\_23  
 Scan: 19662 Method: FTMS; HCD Score: 100.82 m/z: 632.34 Gene names: CKLF

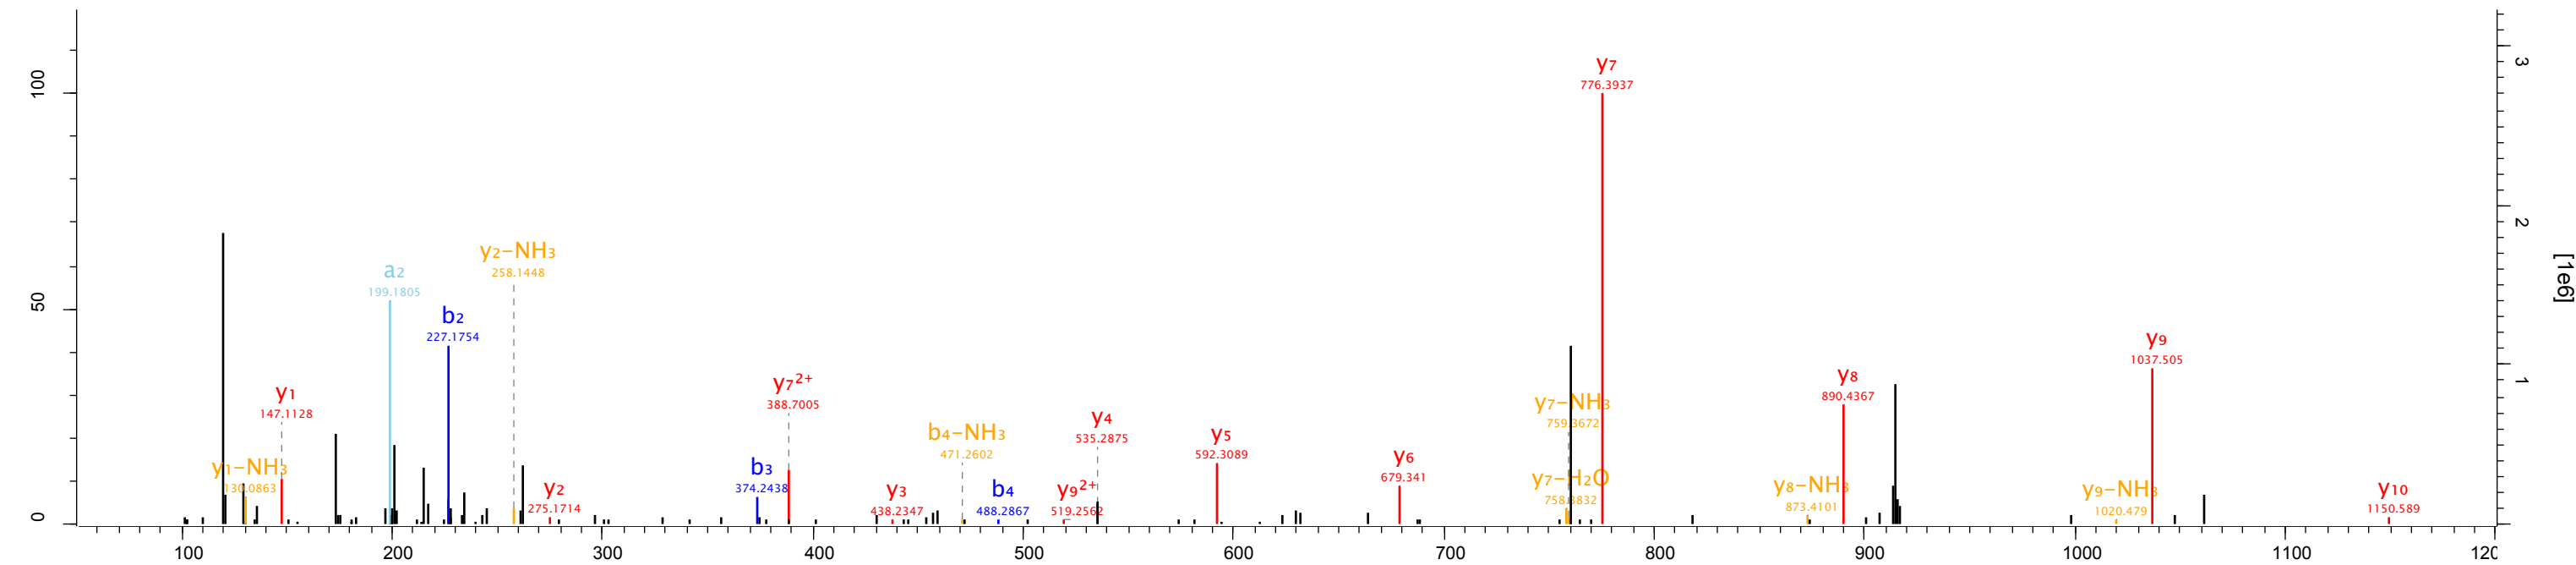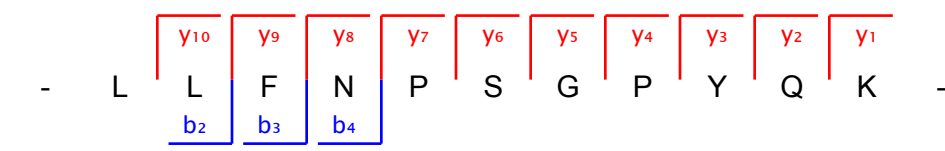



Raw file  
20180707\_MaS\_A375SR\_ML\_proteome\_24

Scan: 12412  
Method: FTMS; HCD  
Score: 88.56  
m/z: 700.33  
Gene names: ODC1

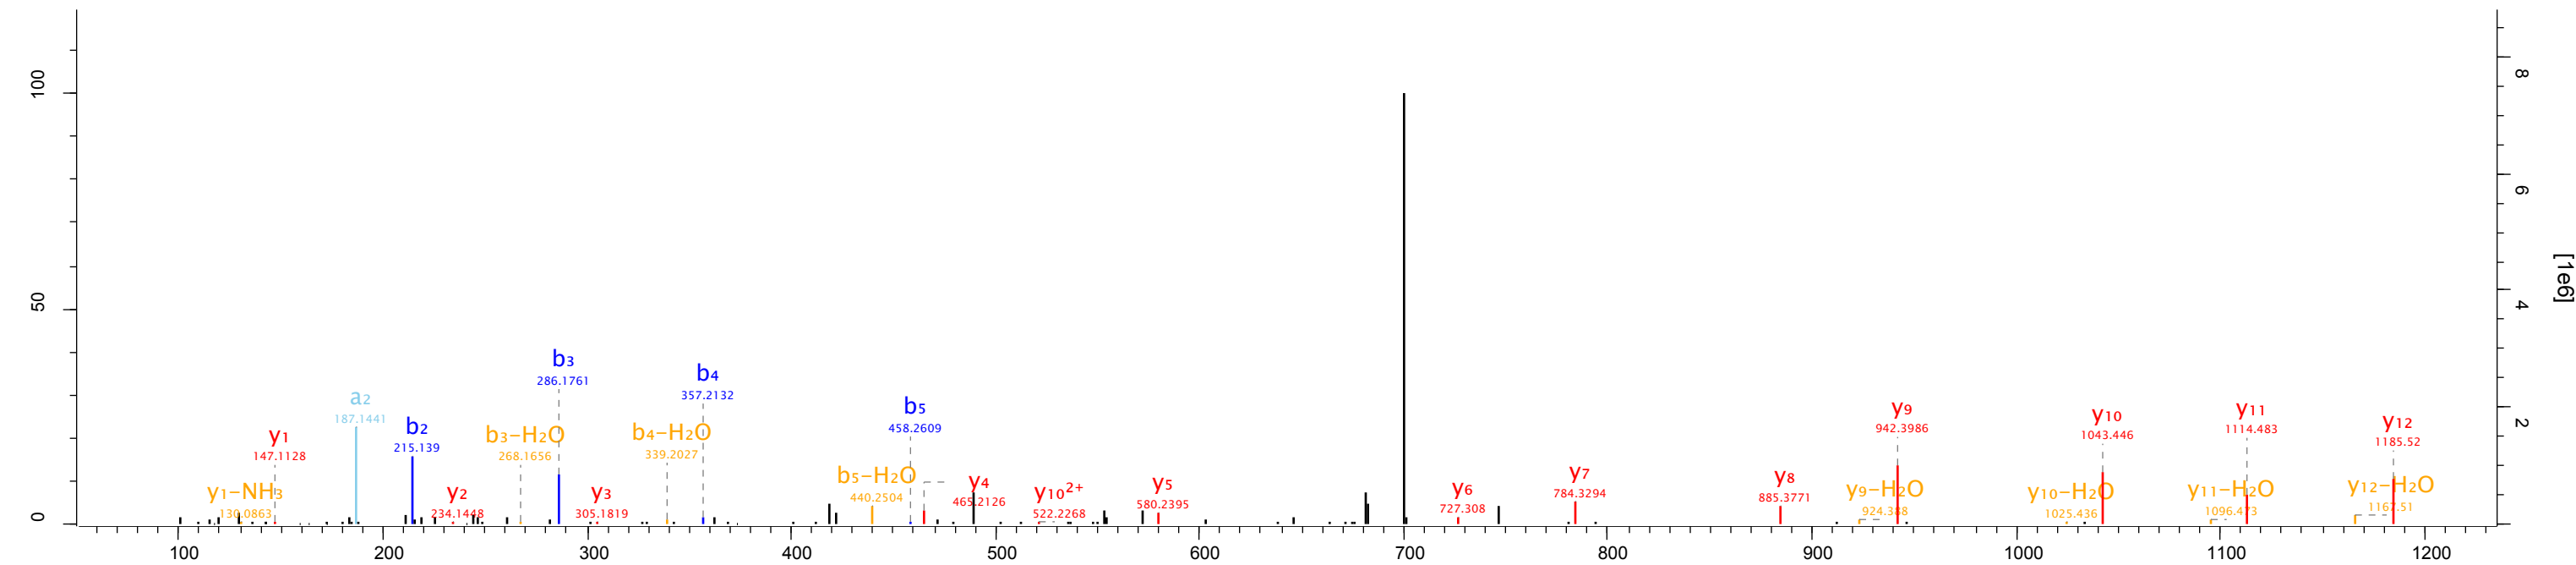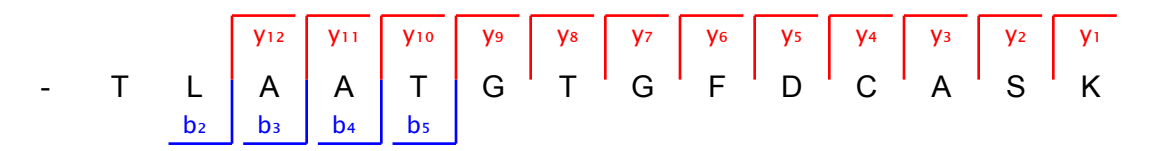

Raw file: 20180707\_MaS\_A375SR\_ML\_proteome\_24  
 Scan: 22752 Method: FTMS; HCD Score: 17.56 m/z: 639.67 Gene names: ATP6V0C

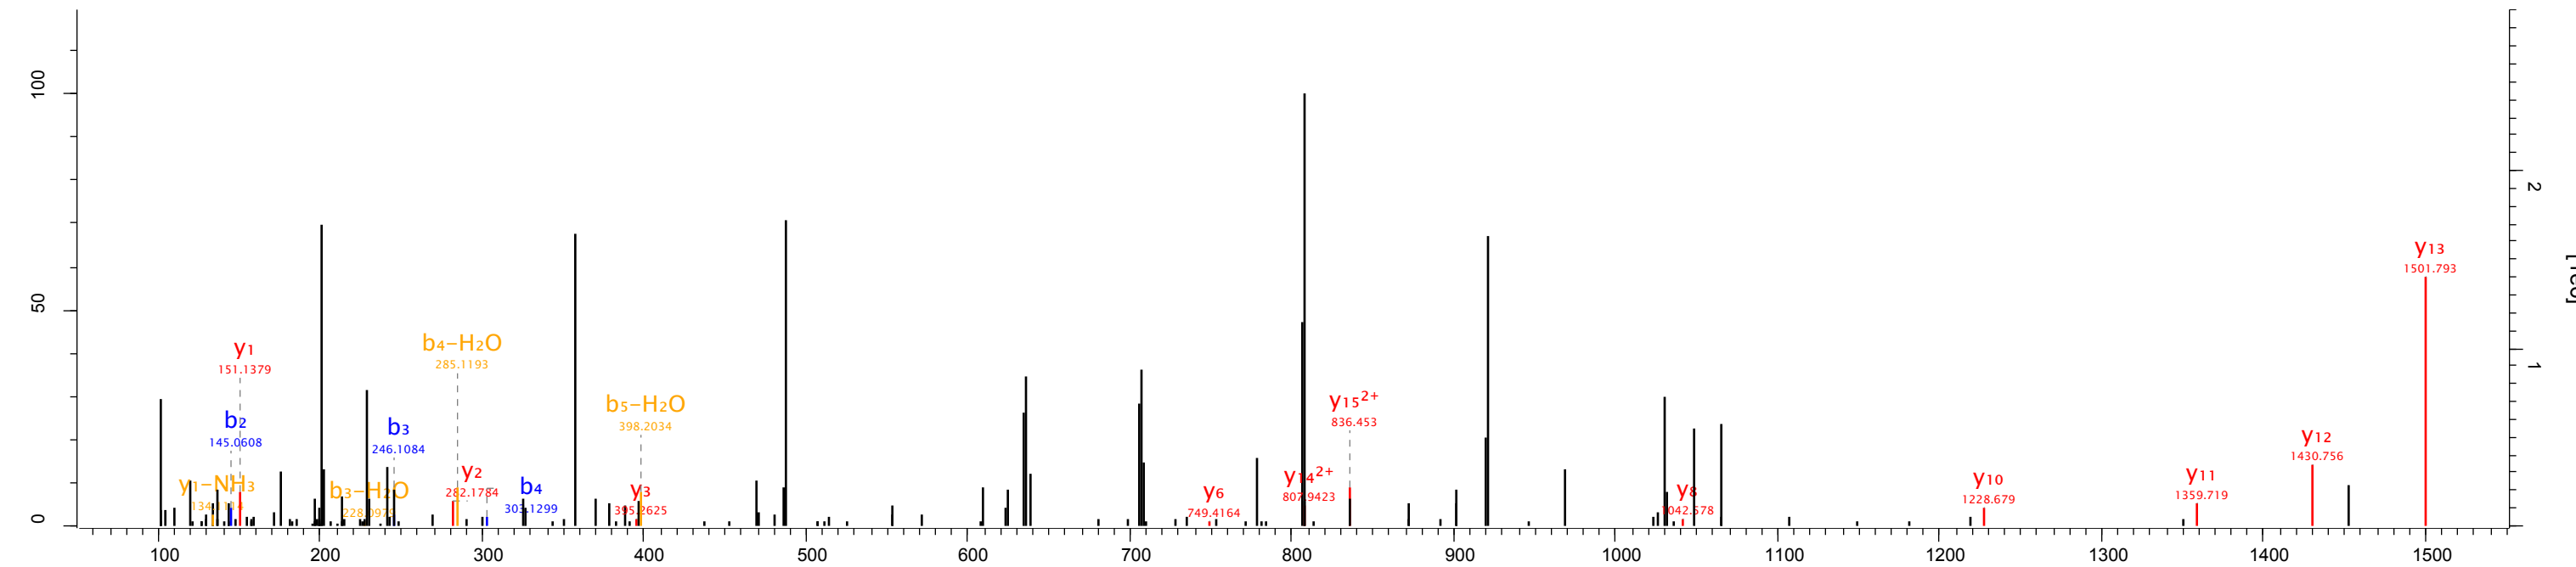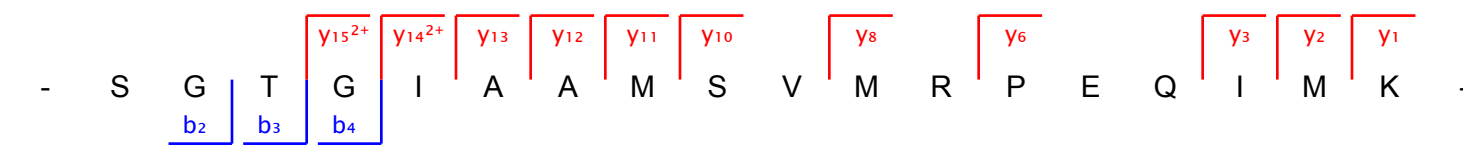

Raw file: 20180707\_MaS\_A375SR\_ML\_proteome\_24  
 Scan: 29272 Method: FTMS; HCD Score: 118.37 m/z: 753.43 Gene names: GEMIN7

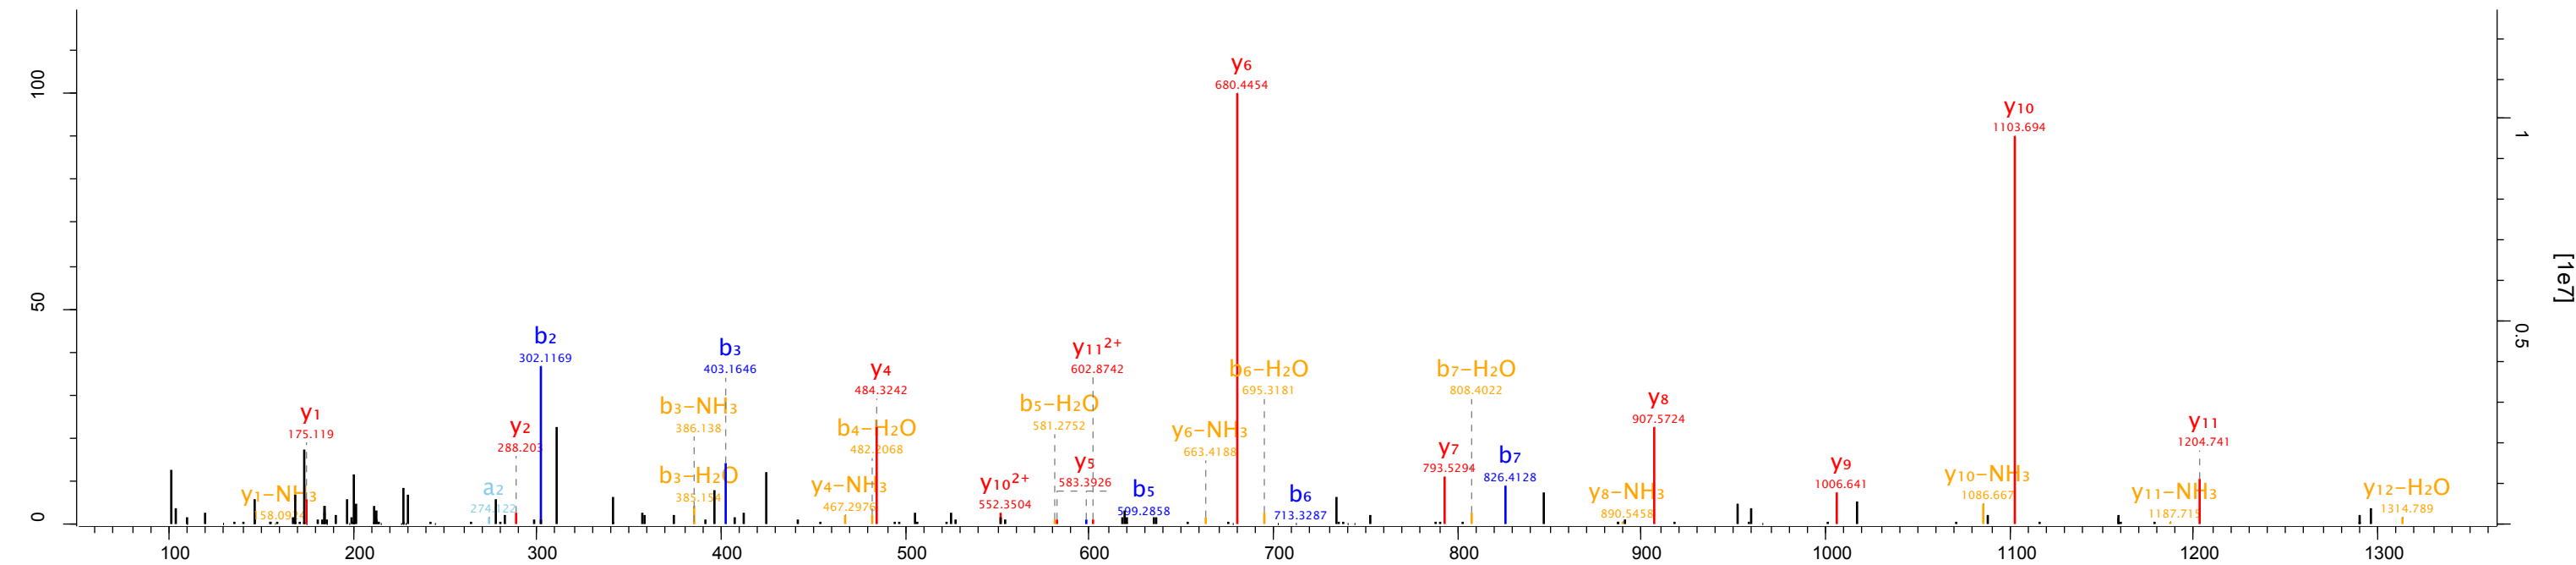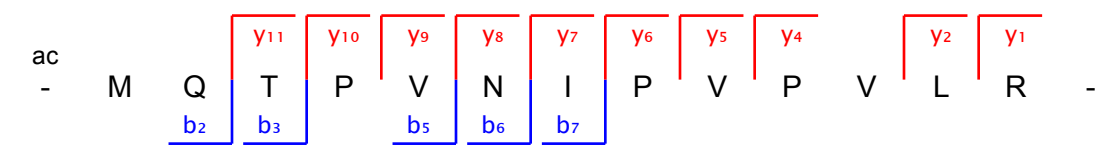

Raw file 20180707\_MaS\_A375SR\_ML\_proteome\_24 Scan 7632 Method FTMS; HCD Score 110.39 m/z 656.3 Gene names RNASE4

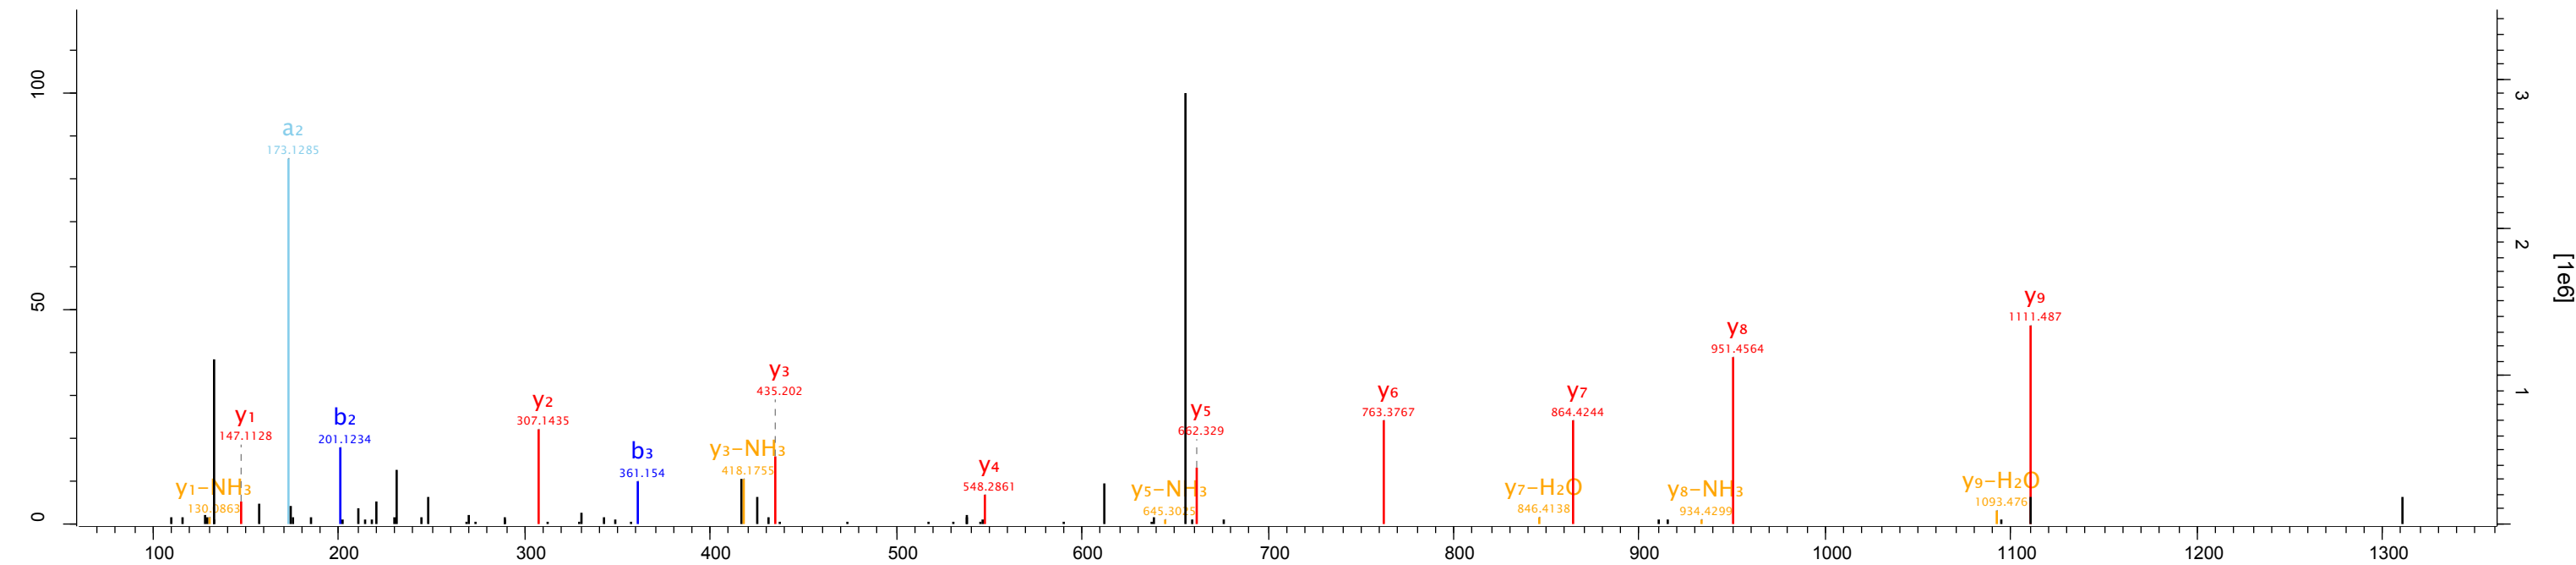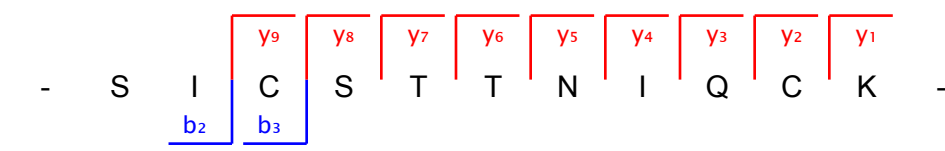

Raw file: 20180707\_MaS\_A375SR\_ML\_proteome\_25  
 Scan: 6052 Method: FTMS; HCD Score: 79.45 m/z: 353.19

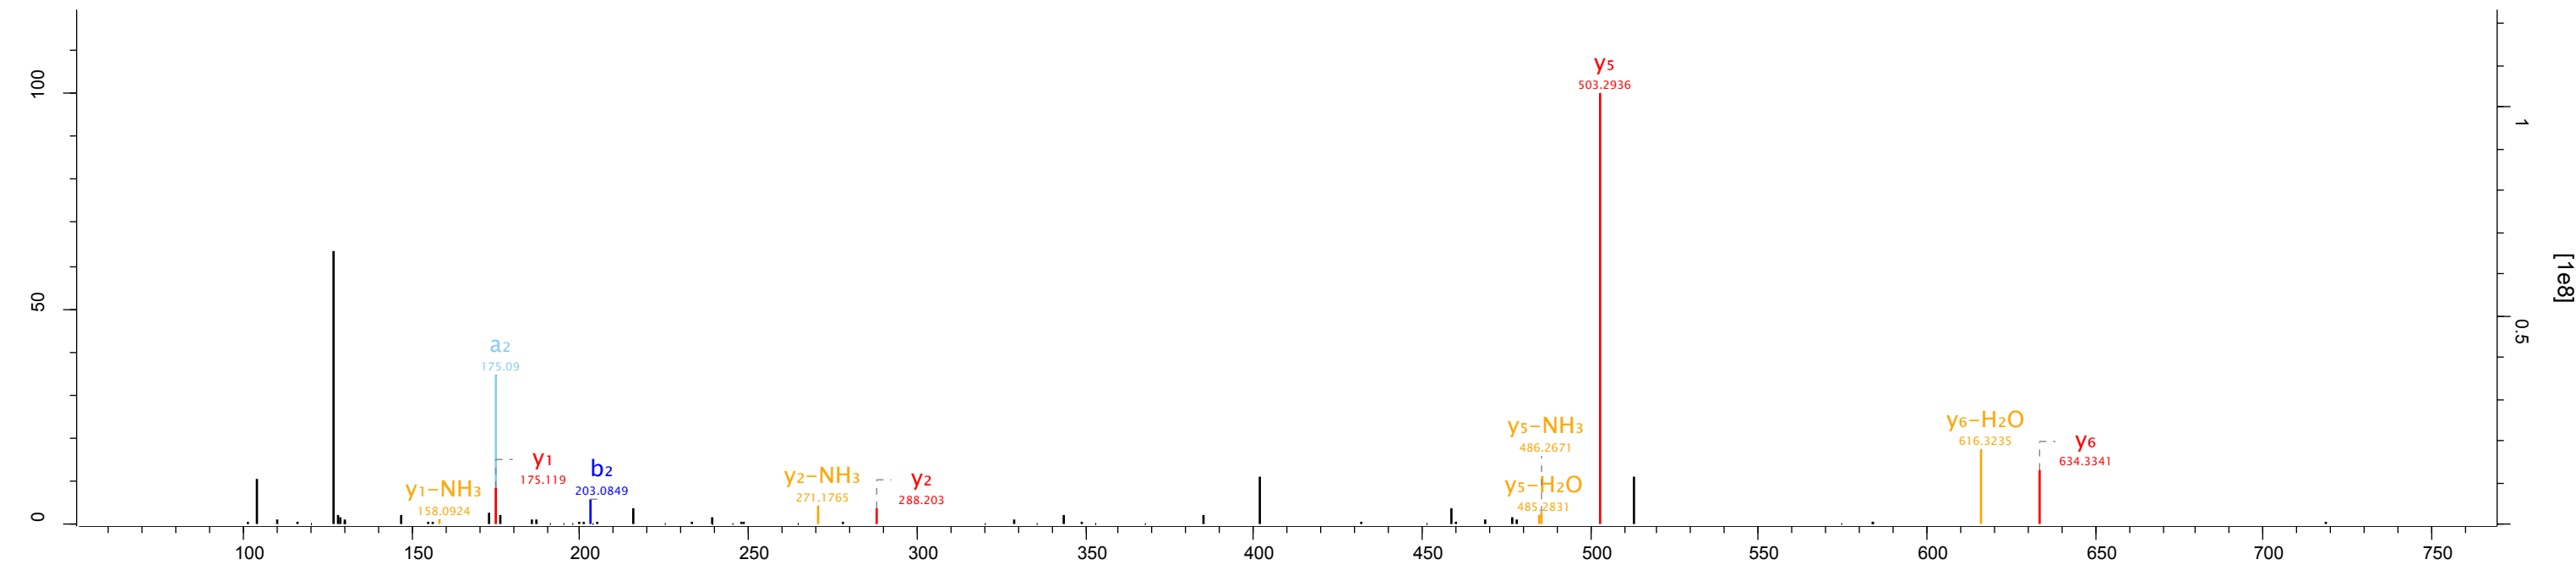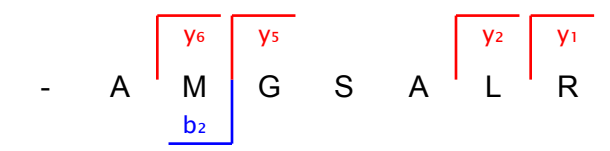

Raw file: 20180707\_MaS\_A375SR\_ML\_proteome\_25  
 Scan: 9122 Method: FTMS; HCD Score: 50.13 m/z: 566.72 Gene names: PSPHP1

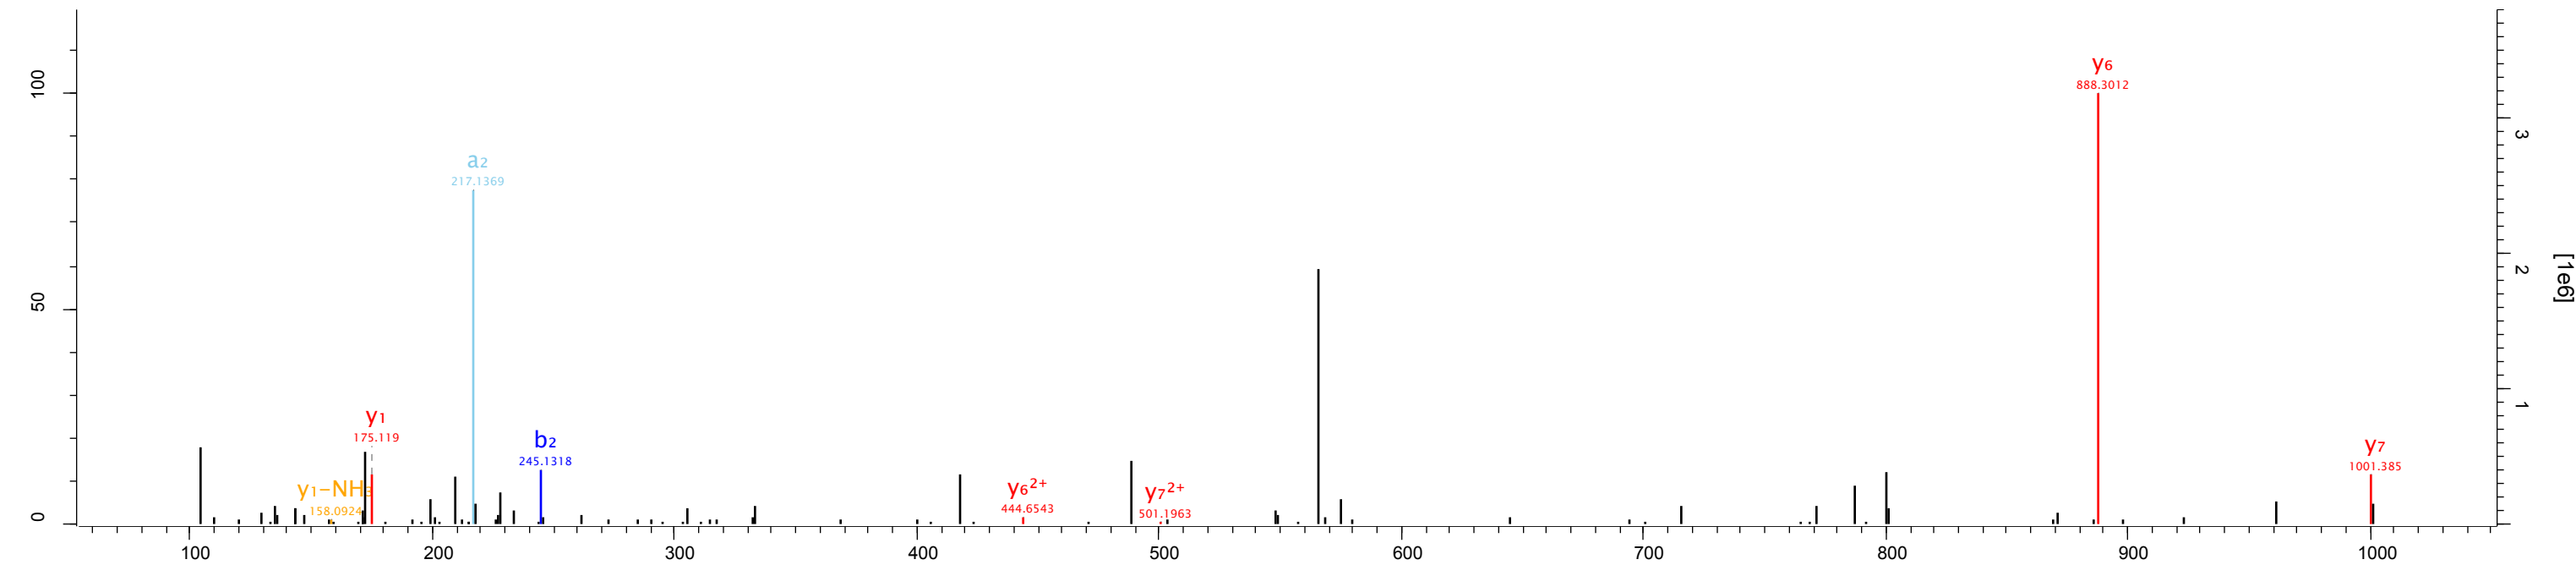

Raw file: 20180707\_MaS\_A375SR\_ML\_proteome\_26  
 Scan: 15932 Method: FTMS; HCD Score: 131.11 m/z: 440.6 Gene names: RPL39P5;RPL39

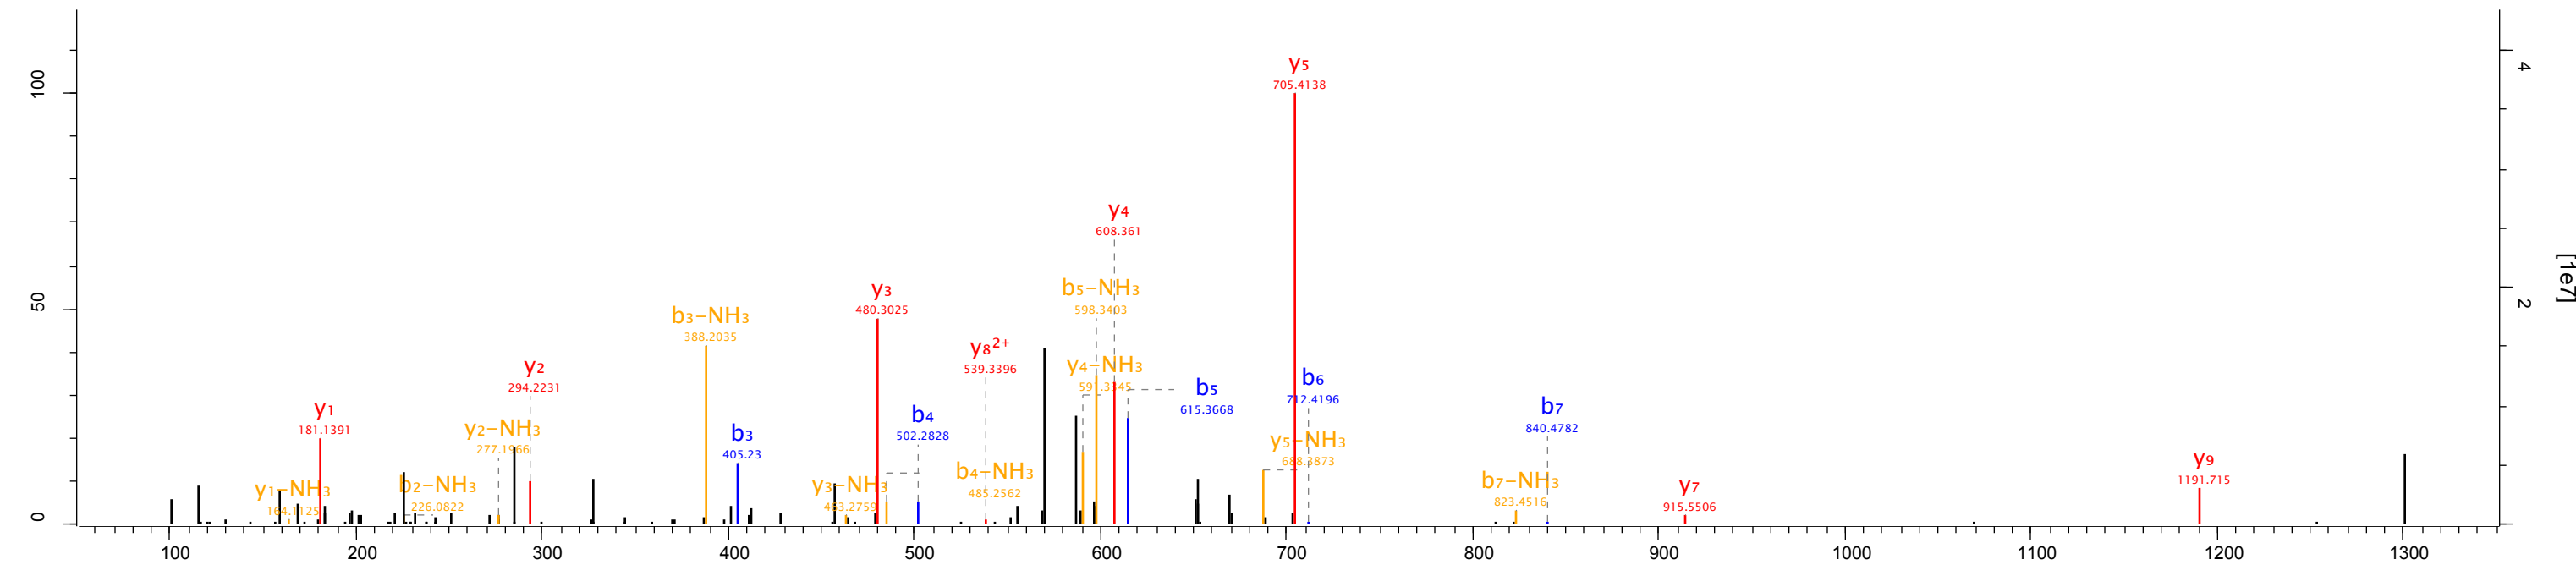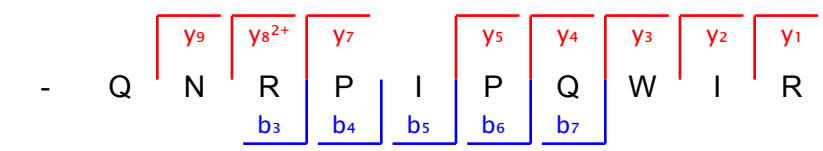

Raw file  
20180707\_MaS\_A375SR\_ML\_proteome\_26

Scan 27162 Method FTMS; HCD Score 97.27 m/z 574.97 Gene names EPT1

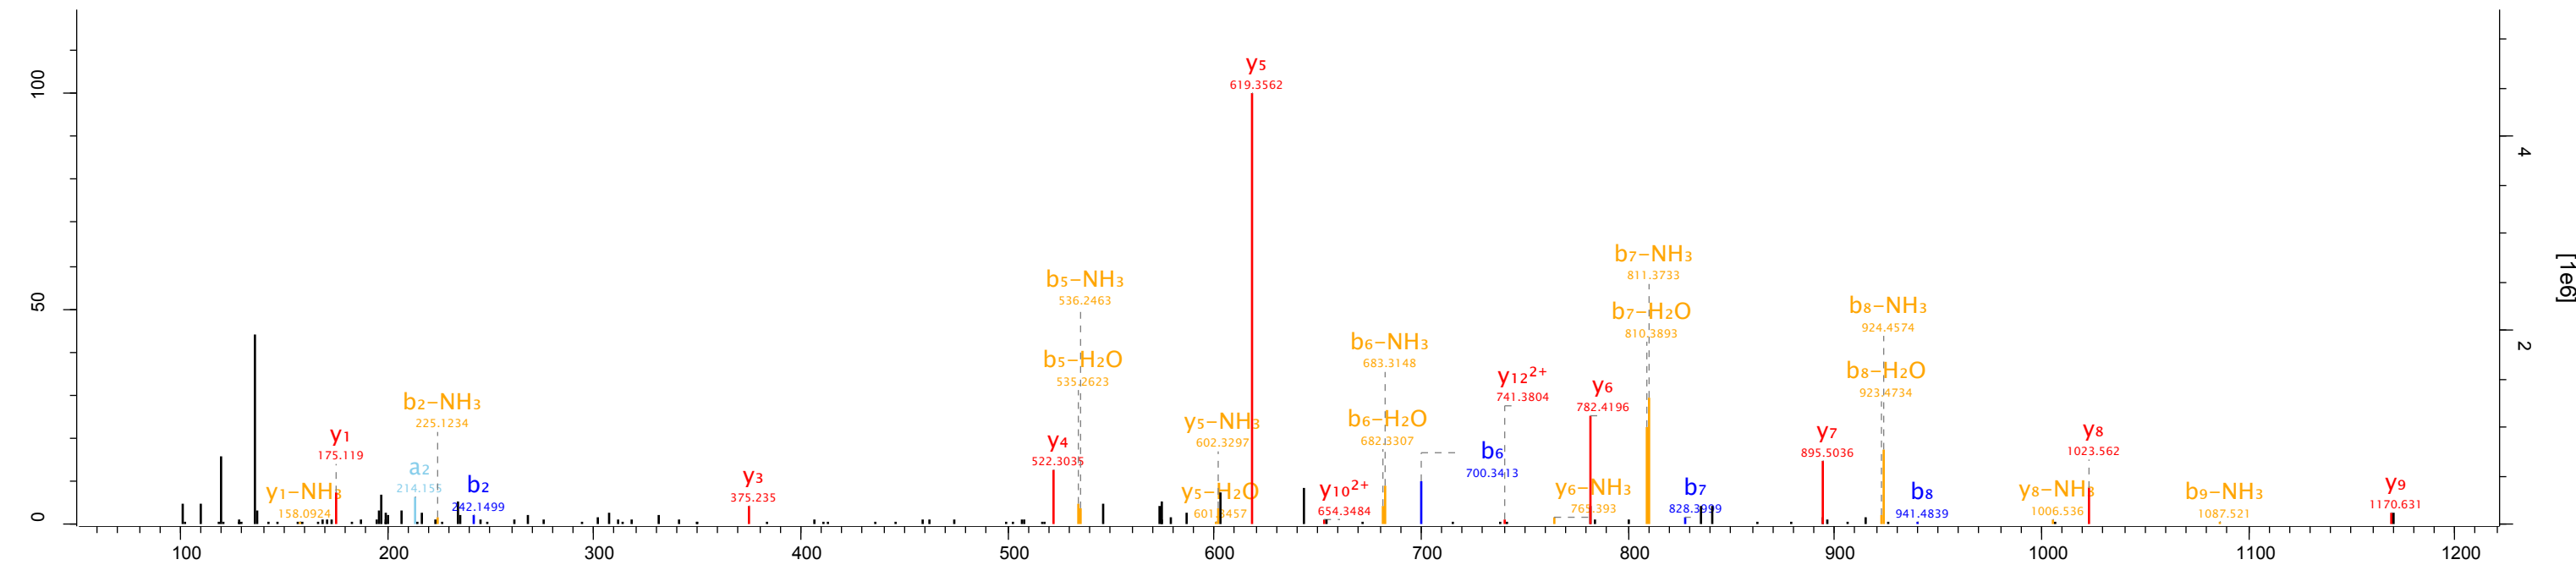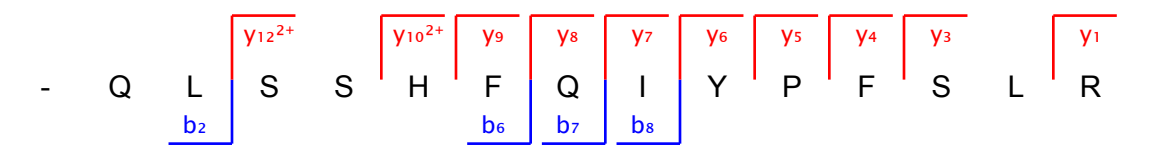



Raw file: 20180707\_MaS\_A375SR\_ML\_proteome\_27  
 Scan: 14462 Method: FTMS; HCD Score: 161.48 m/z: 675.85 Gene names: SELK

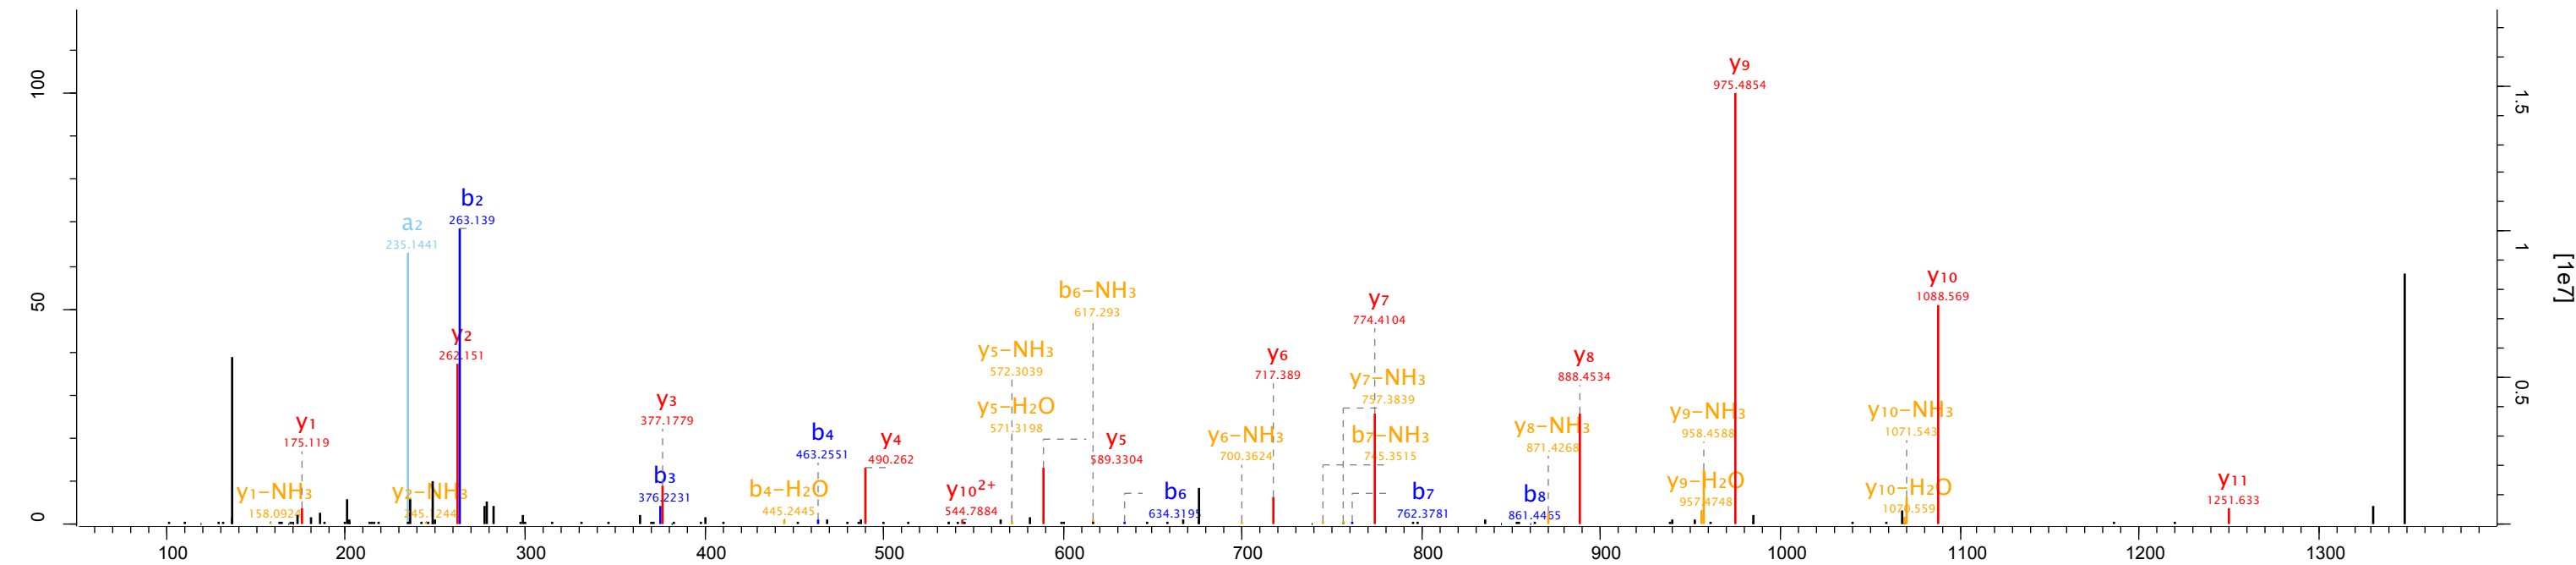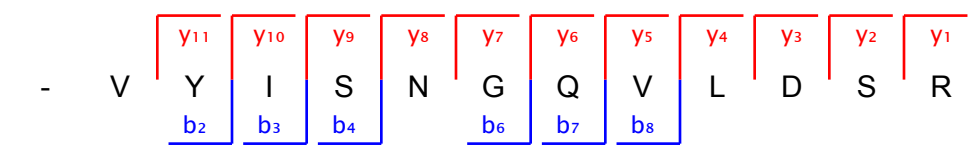

Raw file: 20180707\_MaS\_A375SR\_ML\_proteome\_29  
 Scan: 13602 Method: FTMS; HCD Score: 91.07 m/z: 510.3 Gene names: TBC1D30

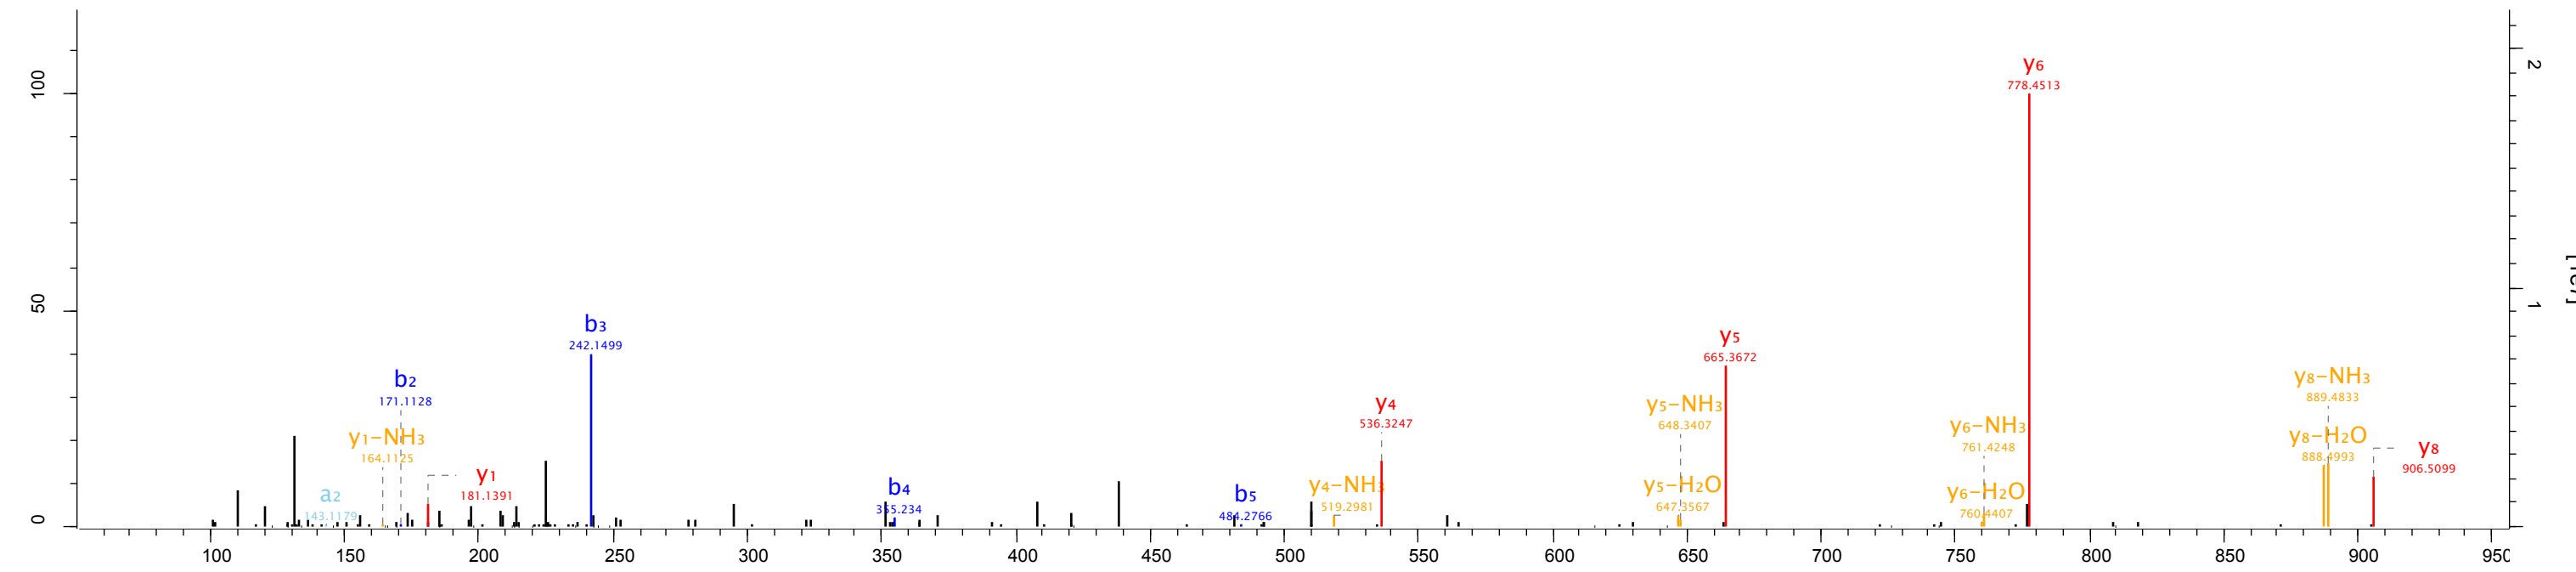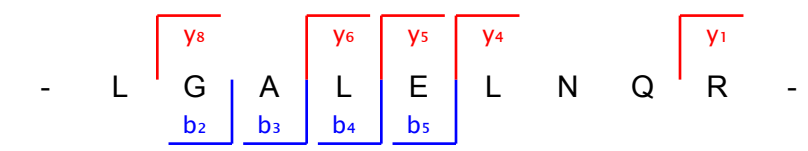

Raw file  
20180707\_MaS\_A375SR\_ML\_proteome\_29

Scan 27542 Method FTMS; HCD Score 56.43 m/z 601.39 Gene names SLITRK1

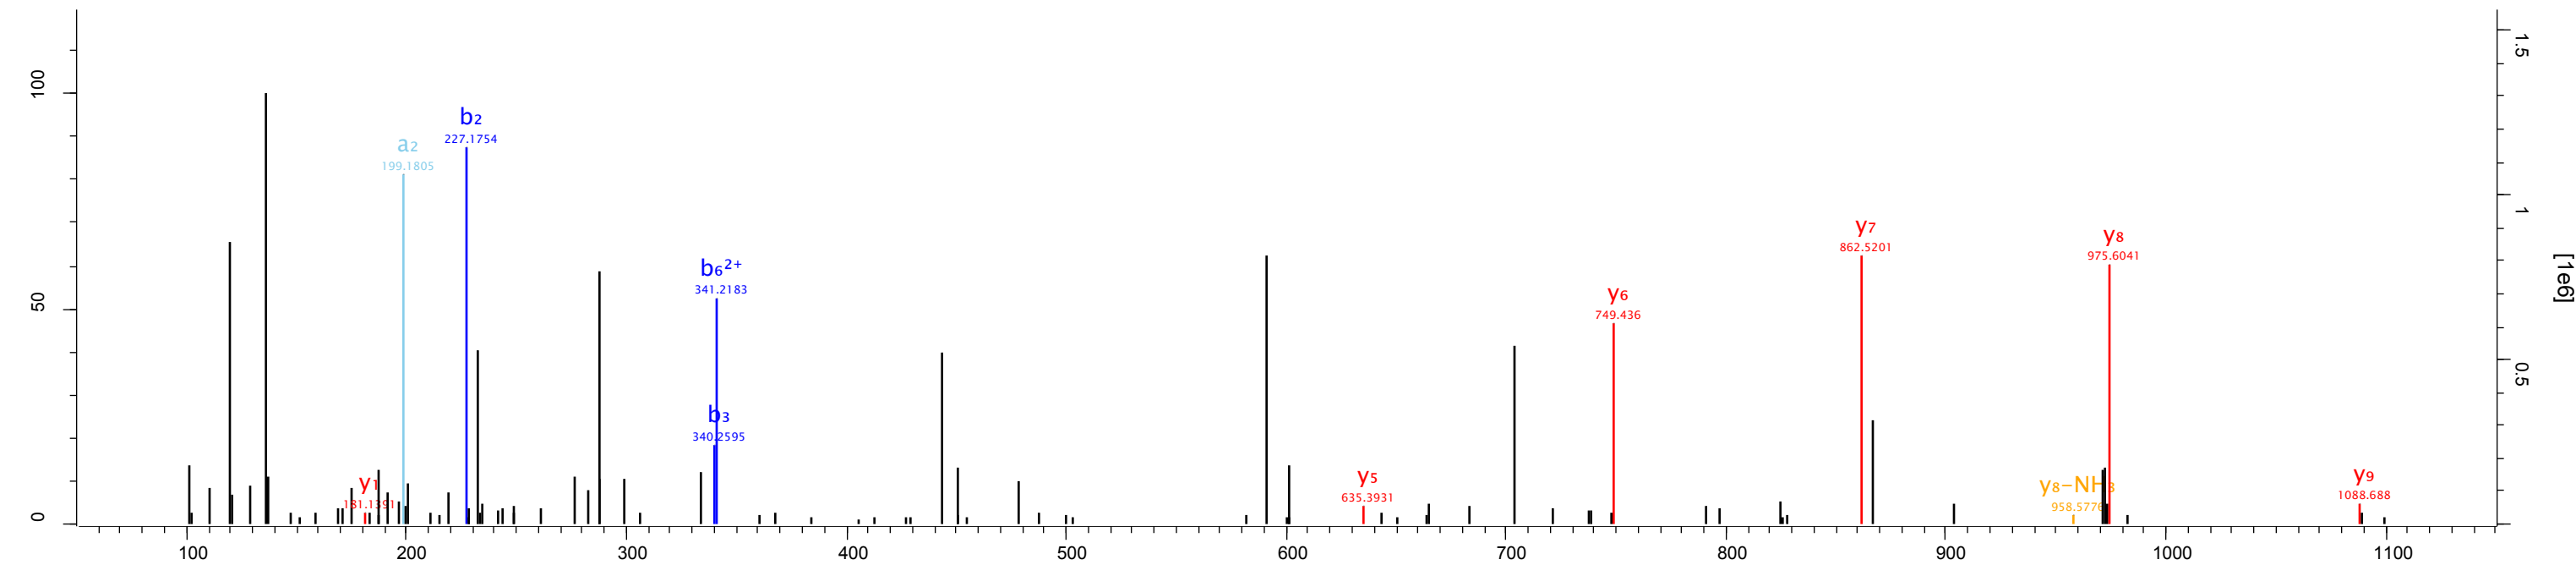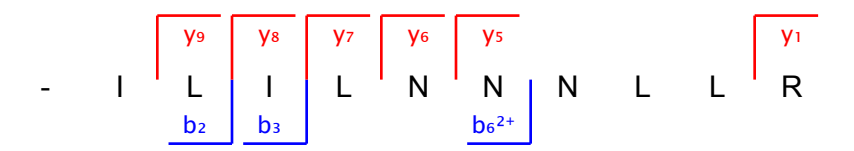

Raw file: 20180707\_MaS\_A375SR\_ML\_proteome\_29  
 Scan: 6882 Method: FTMS; HCD Score: 52.49 m/z: 466.79 Gene names: FAM11A;TMEM185A;TMEM185B

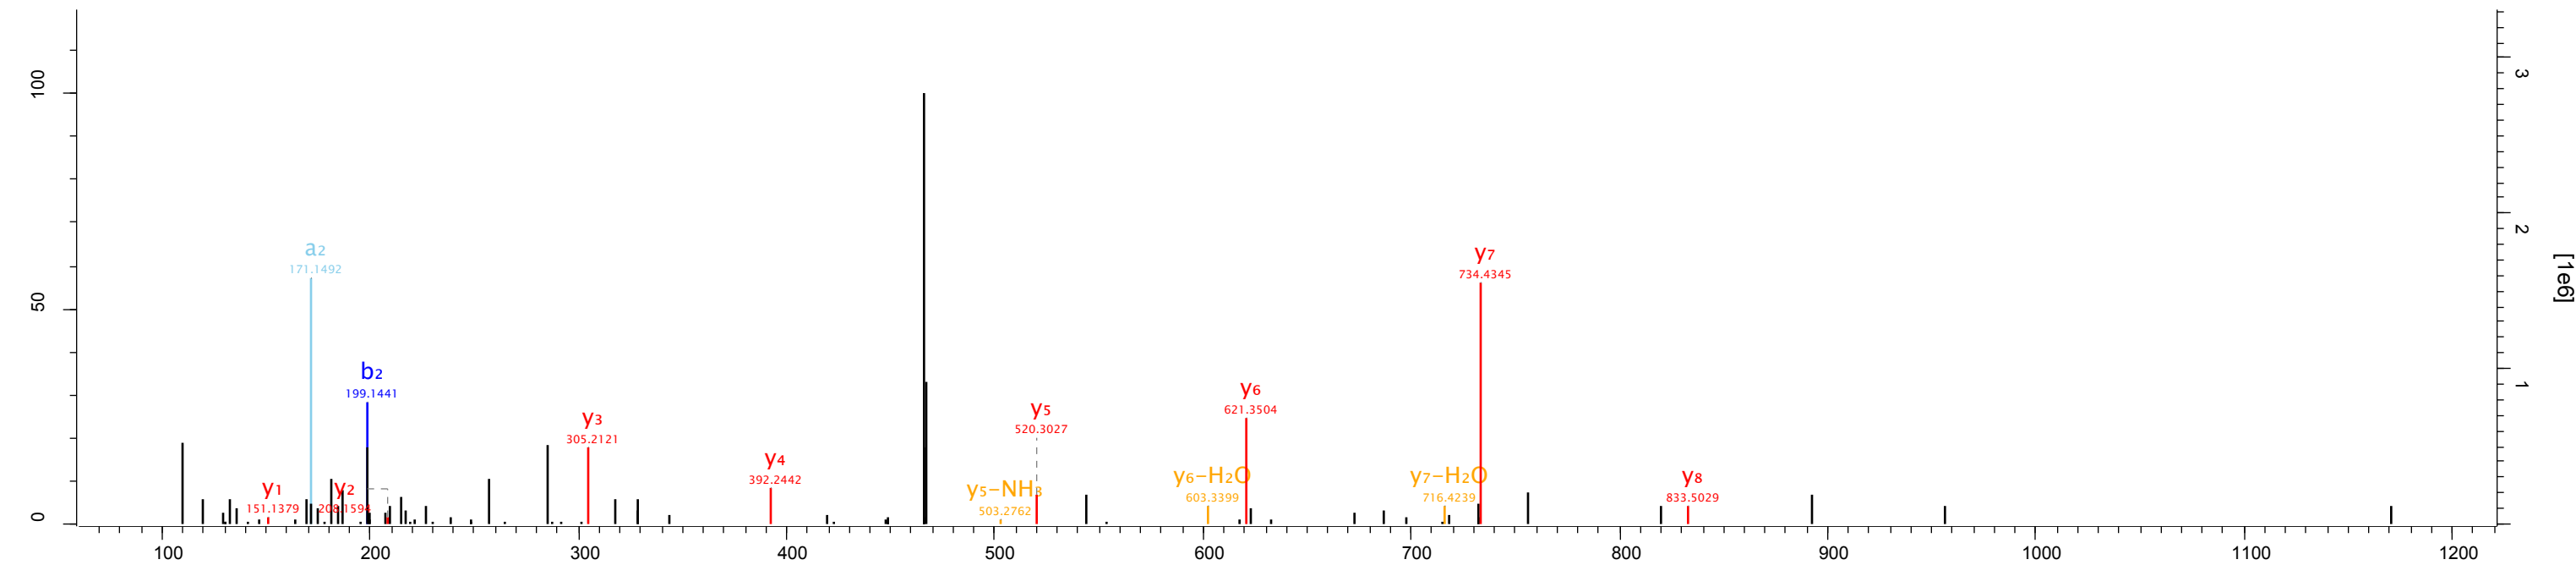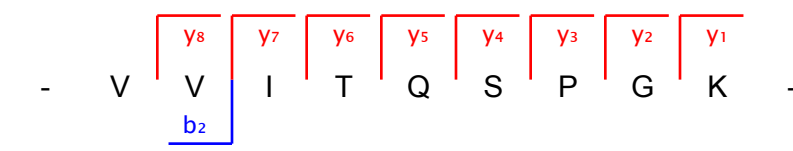

Raw file Scan Method Score m/z Gene names  
 20150812\_A375SR\_Phospho\_BR1\_02 25863 FTMS; HCD 65.5 929.06 HECA

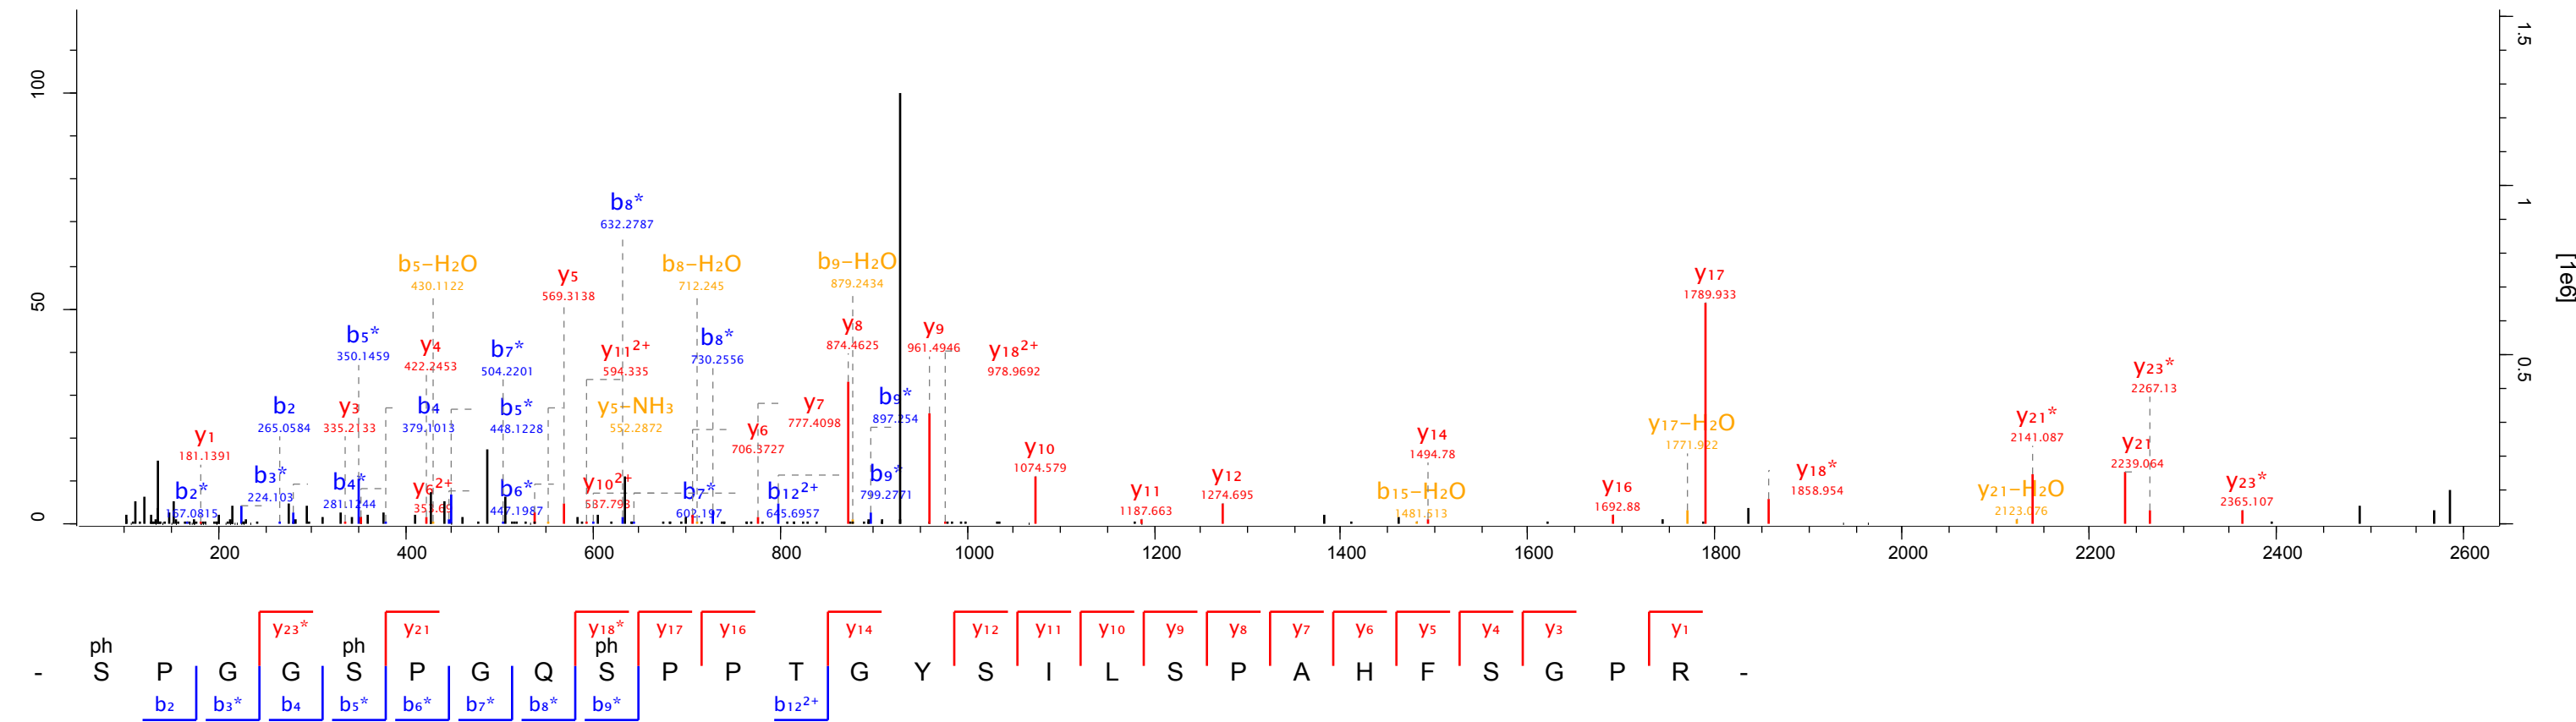

Raw file: 20150812\_A375SR\_Phospho\_BR1\_02  
 Scan: 8433 Method: FTMS; HCD Score: 109.39 m/z: 522.22 Gene names: RHBDF2

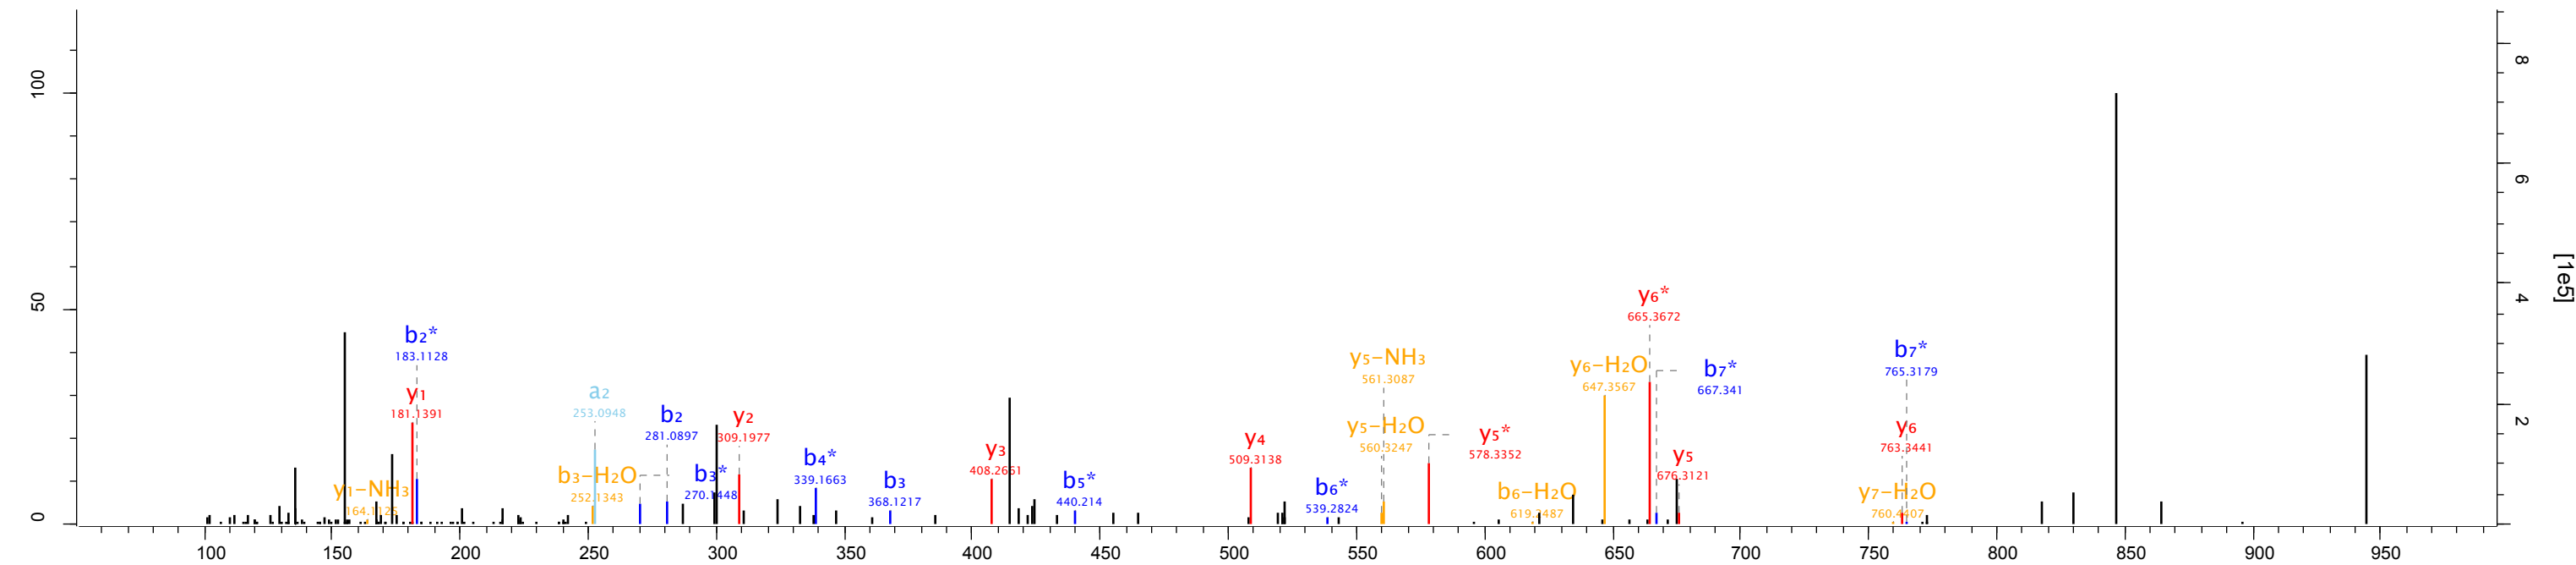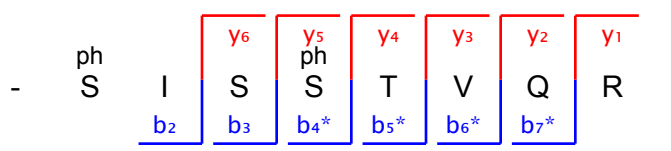

Raw file: 20150812\_A375SR\_Phospho\_BR1\_03  
 Scan: 19853 Method: FTMS; HCD Score: 82.41 m/z: 832.71 Gene names: SPEG

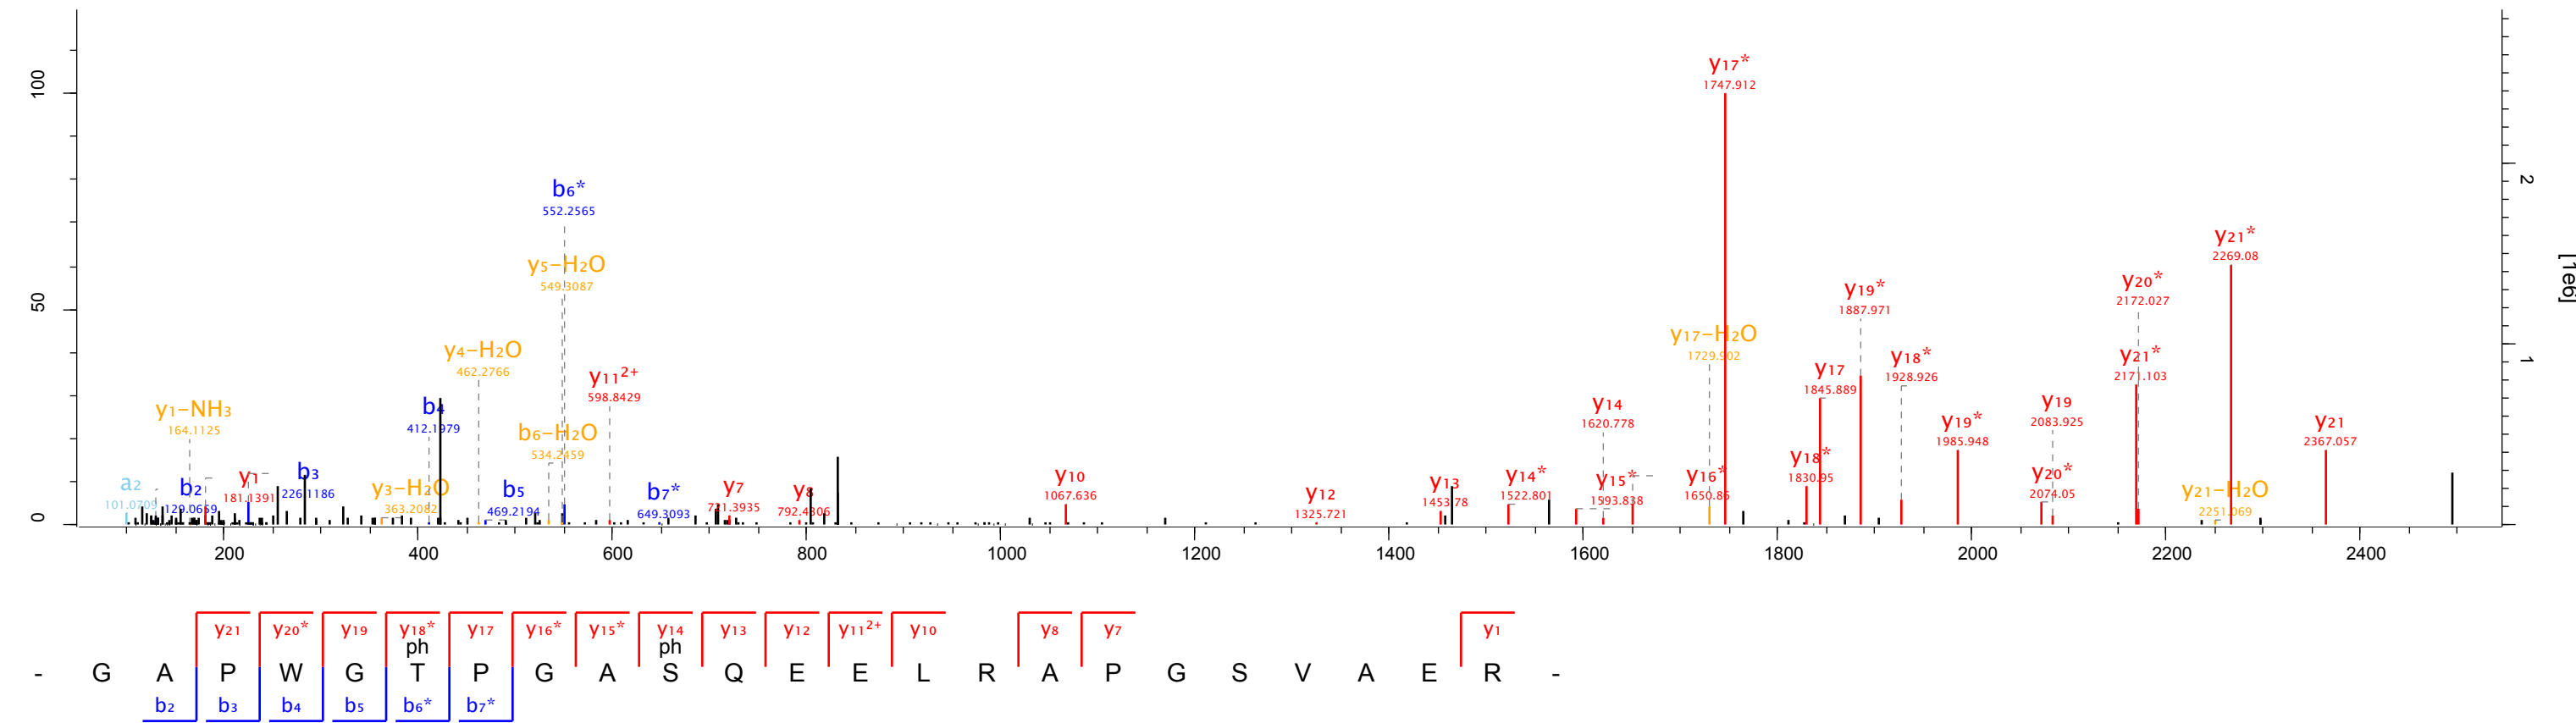

Raw file 20150812\_A375SR\_Phospho\_BR1\_04 Scan 13613 Method FTMS; HCD Score 190.67 m/z 843.46 Gene names MLLT3

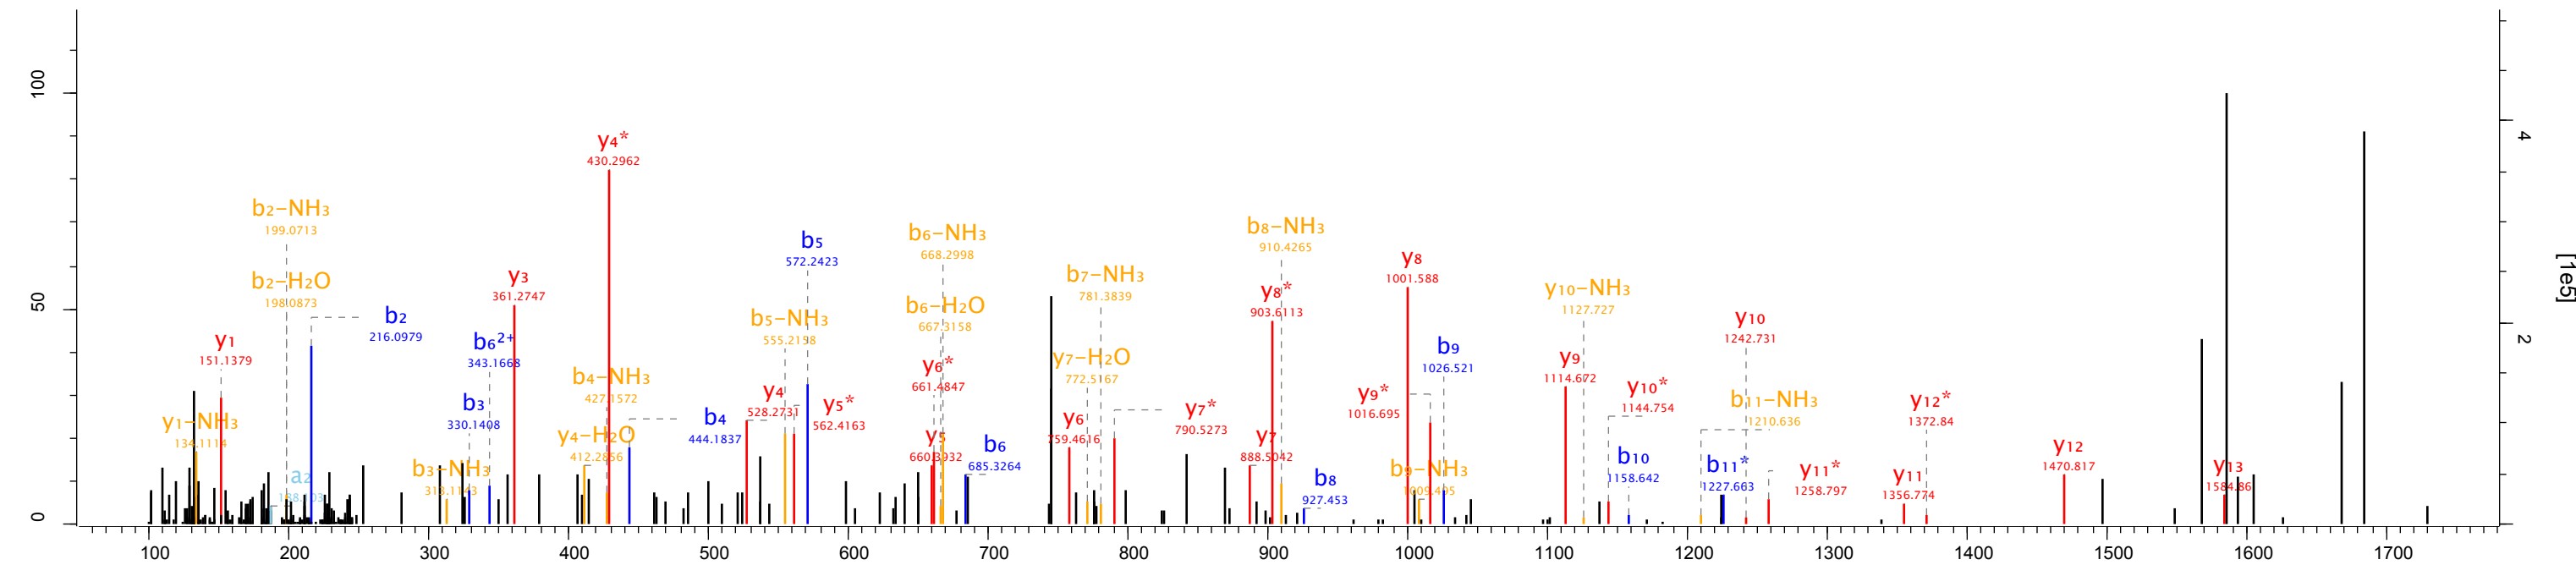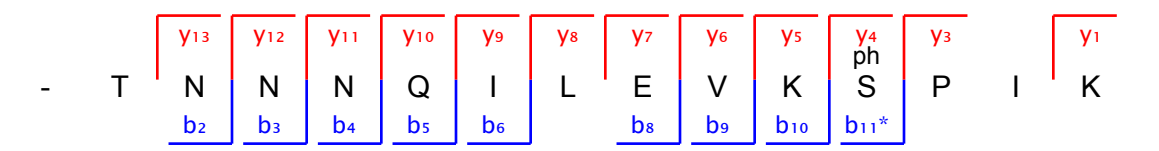



Raw file: 20150812\_A375SR\_Phospho\_BR1\_04  
 Scan: 24353 Method: FTMS; HCD Score: 283.64 m/z: 968.93 Gene names: MAPK11P1L

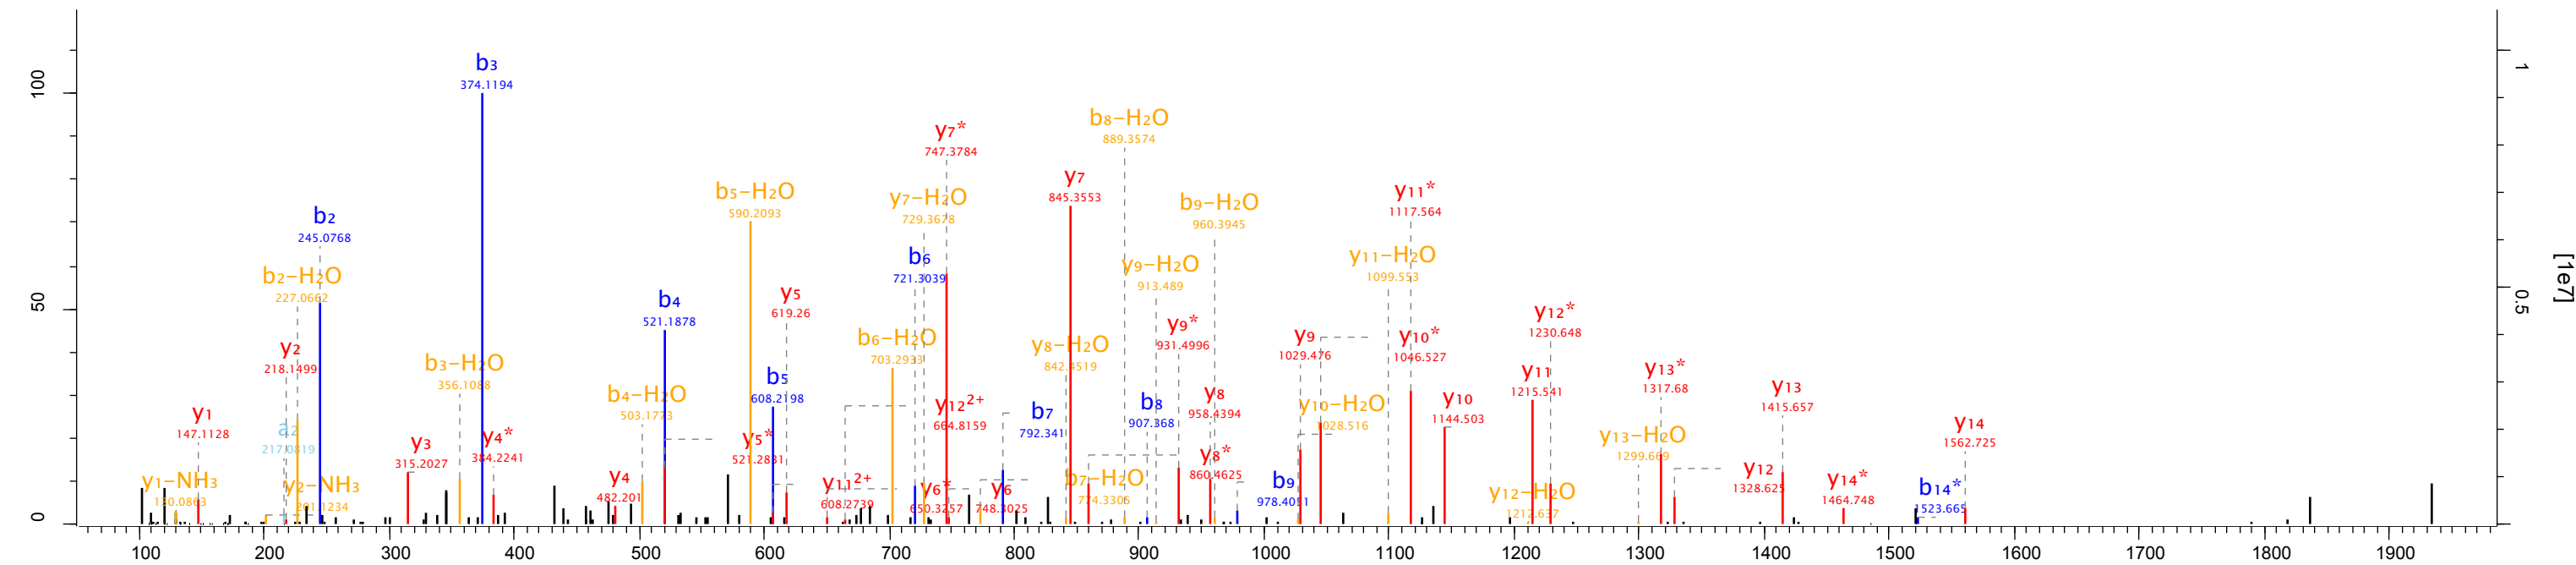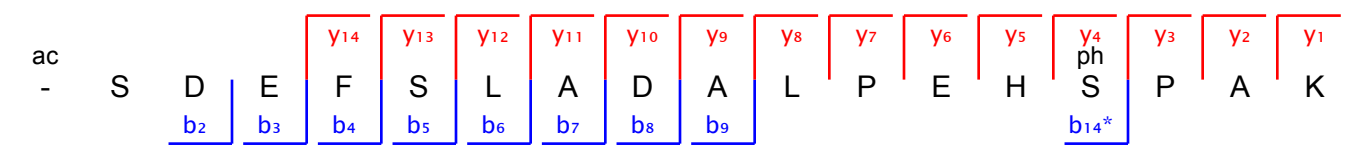

Raw file 20150812\_A375SR\_Phospho\_BR1\_05 Scan 13533 Method FTMS; HCD Score 277.02 m/z 843.96 Gene names MLLT3

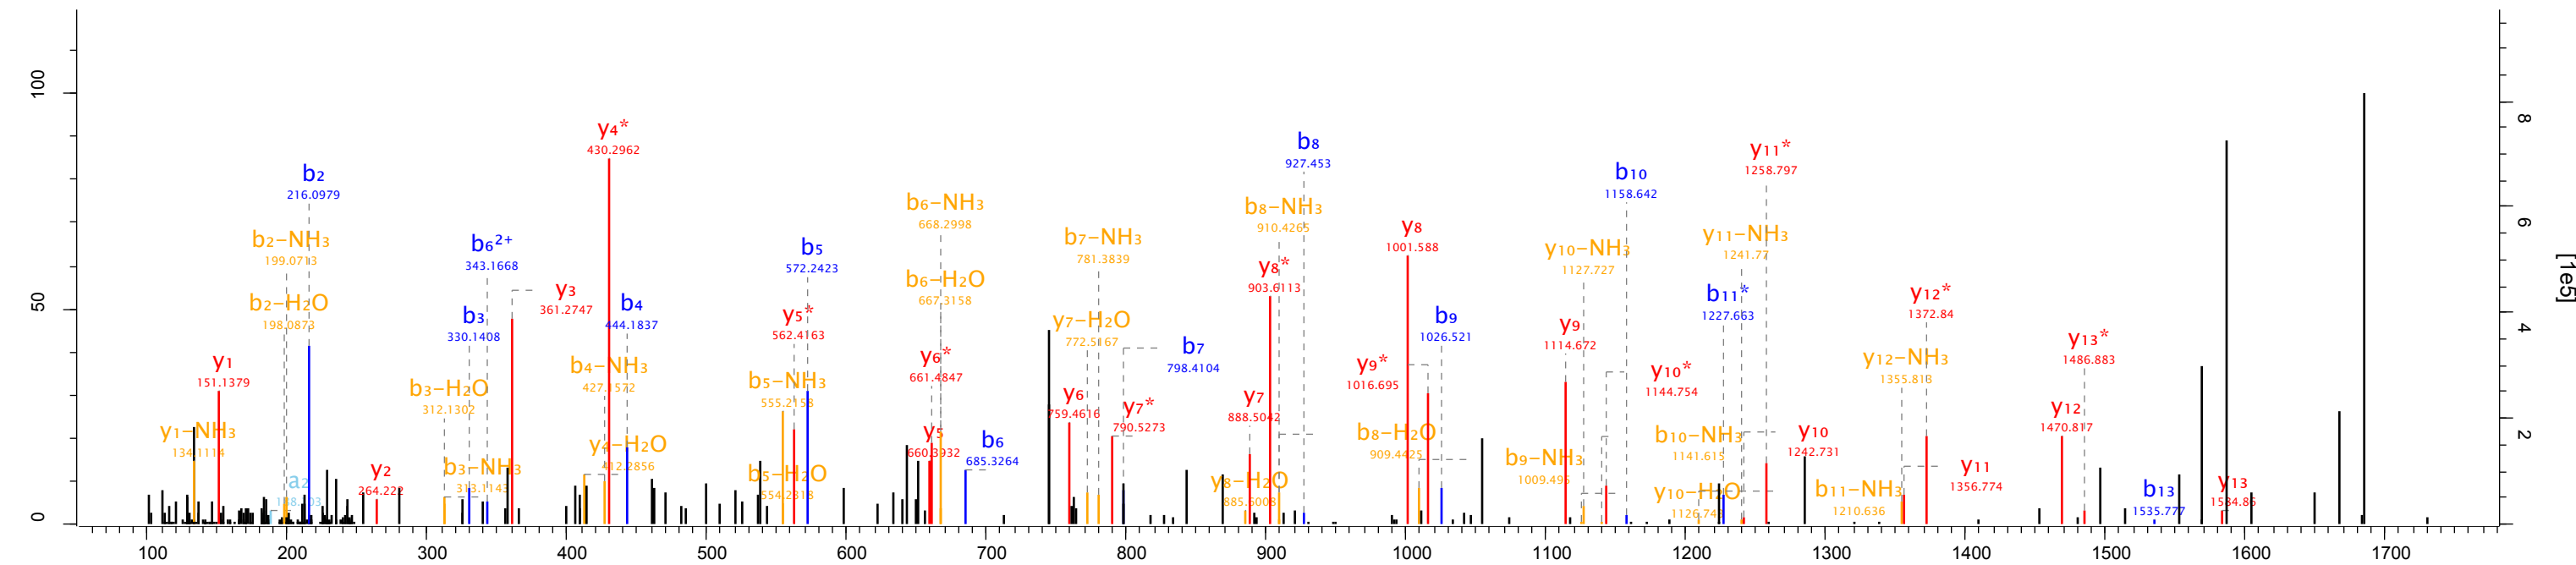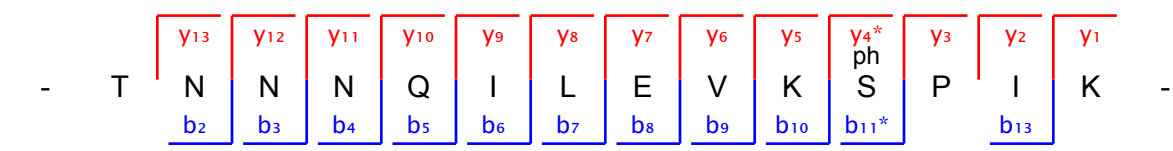

Raw file 20150812\_A375SR\_Phospho\_BR1\_05 Scan 13623 Method FTMS; HCD Score 43.04 m/z 861.37

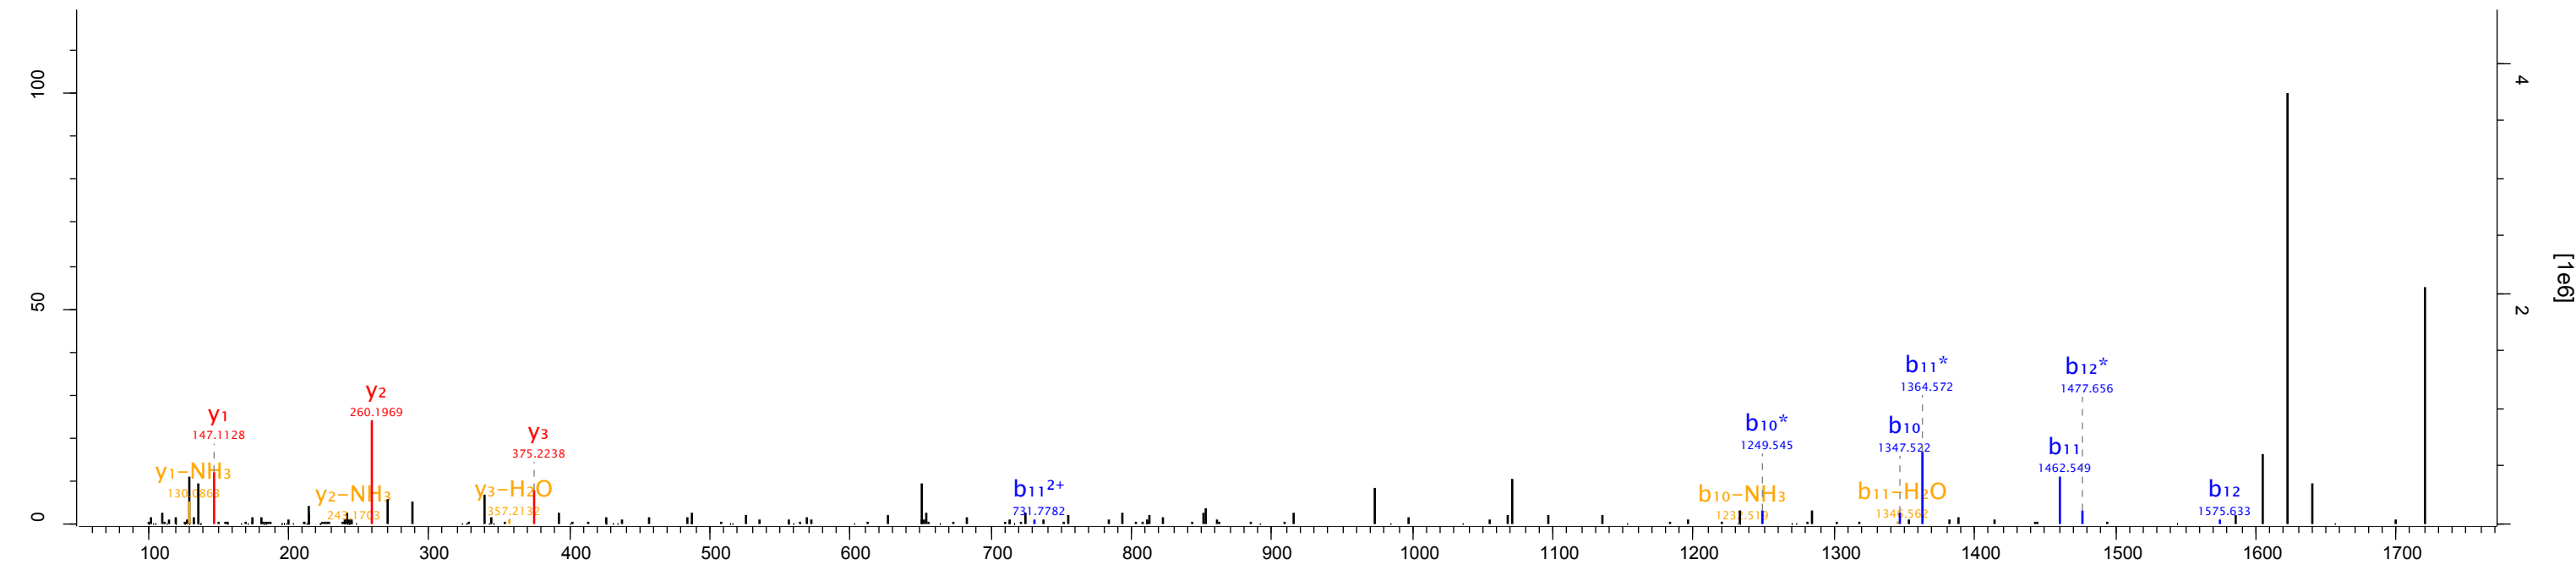

Raw file Scan Method Score m/z Gene names  
 20150812\_A375SR\_Phospho\_BR1\_05 18073 FTMS; HCD 48.33 991.08 FAM168B

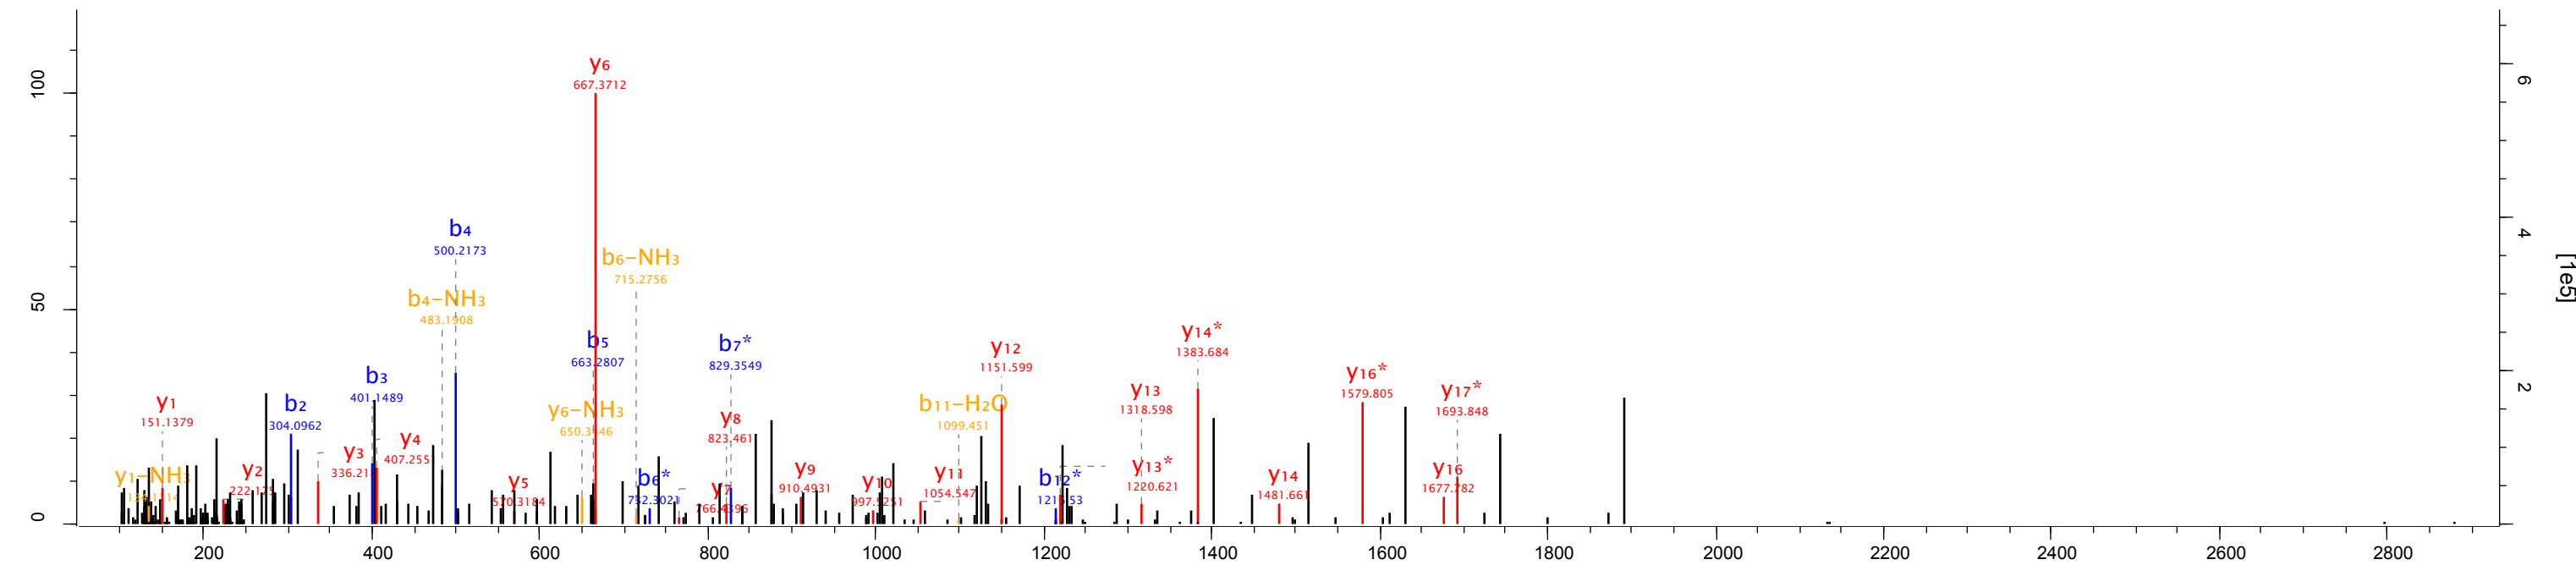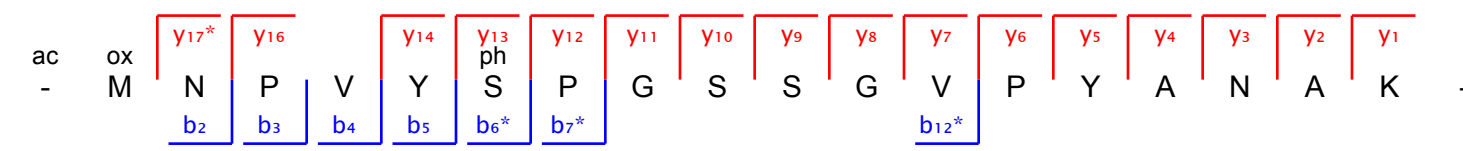

Raw file Scan Method Score m/z Gene names  
 20150812\_A375SR\_Phospho\_BR1\_05 21393 FTMS; HCD 85.06 983.45 FAM168B

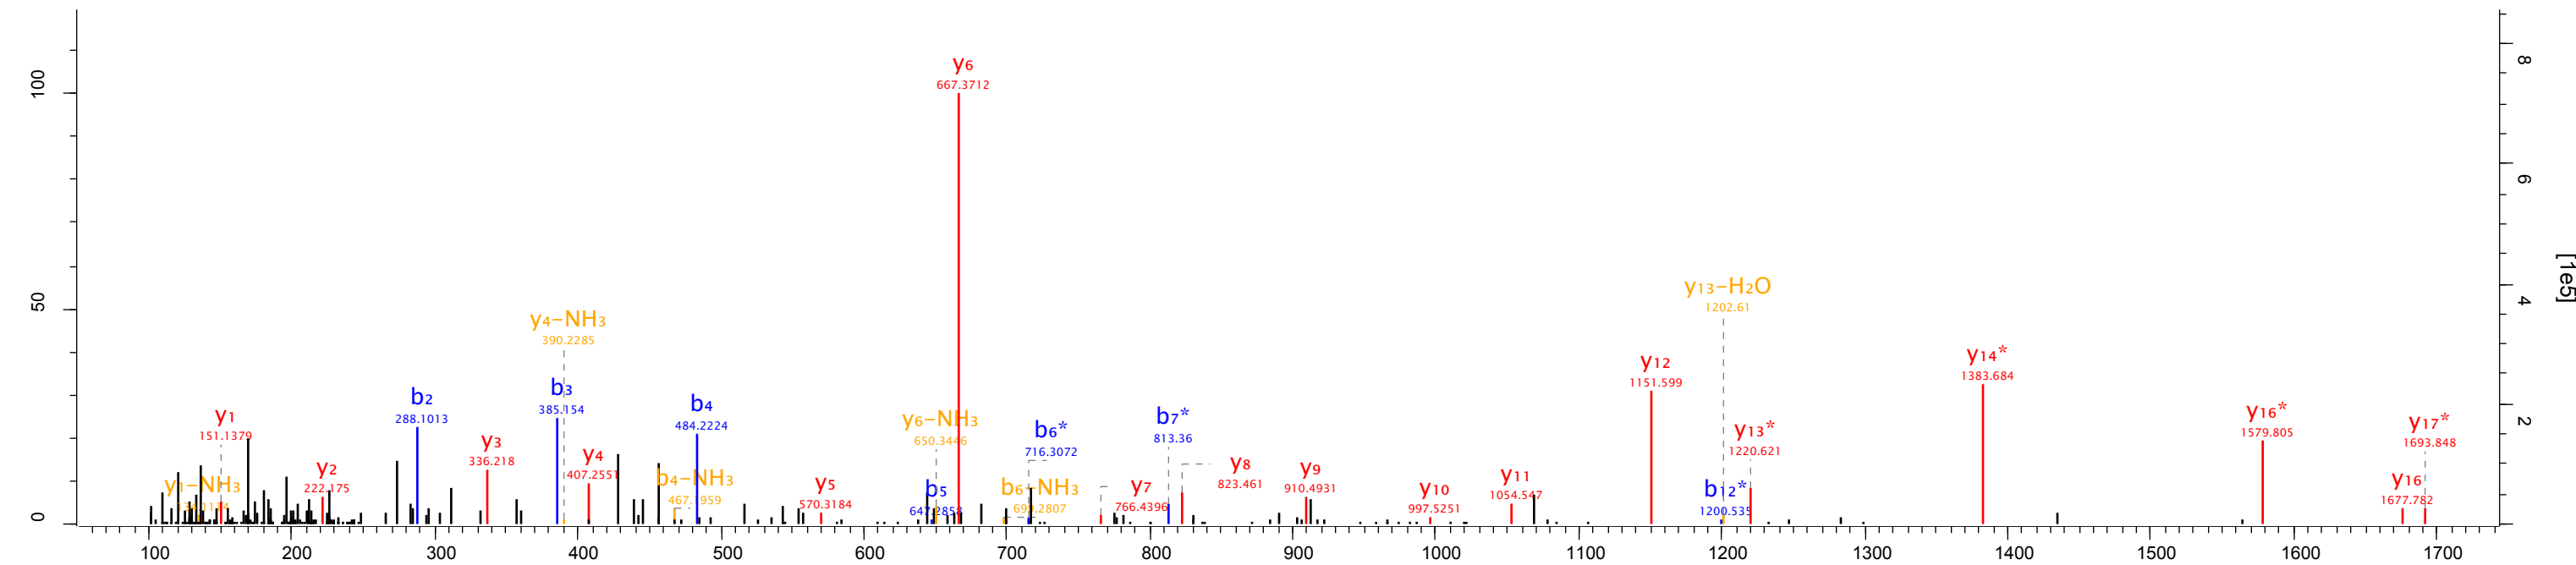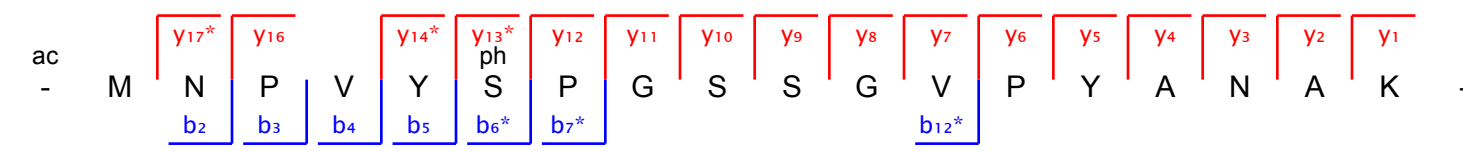

Raw file 20150812\_A375SR\_Phospho\_BR1\_06 Scan 13353 Method FTMS; HCD Score 93.43 m/z 693.33 Gene names CBY1

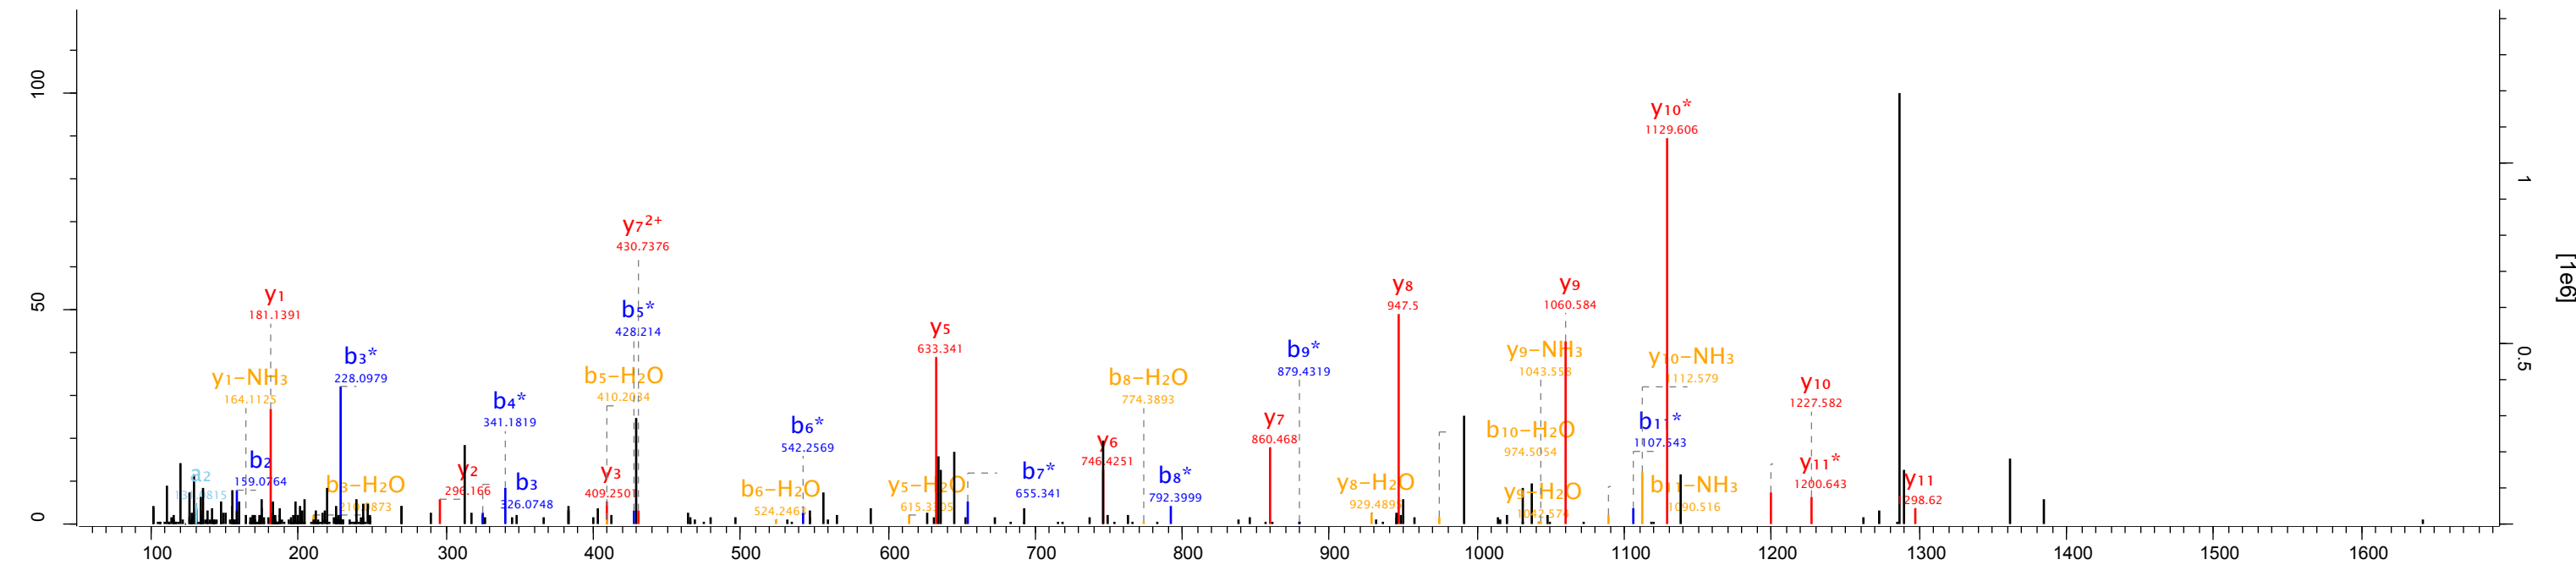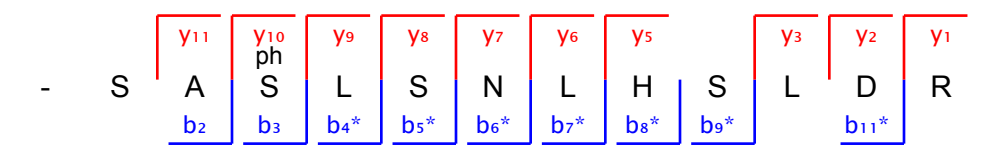

Raw file 20150812\_A375SR\_Phospho\_BR1\_06 Scan 14953 Method FTMS; HCD Score 42.31 m/z 861.37

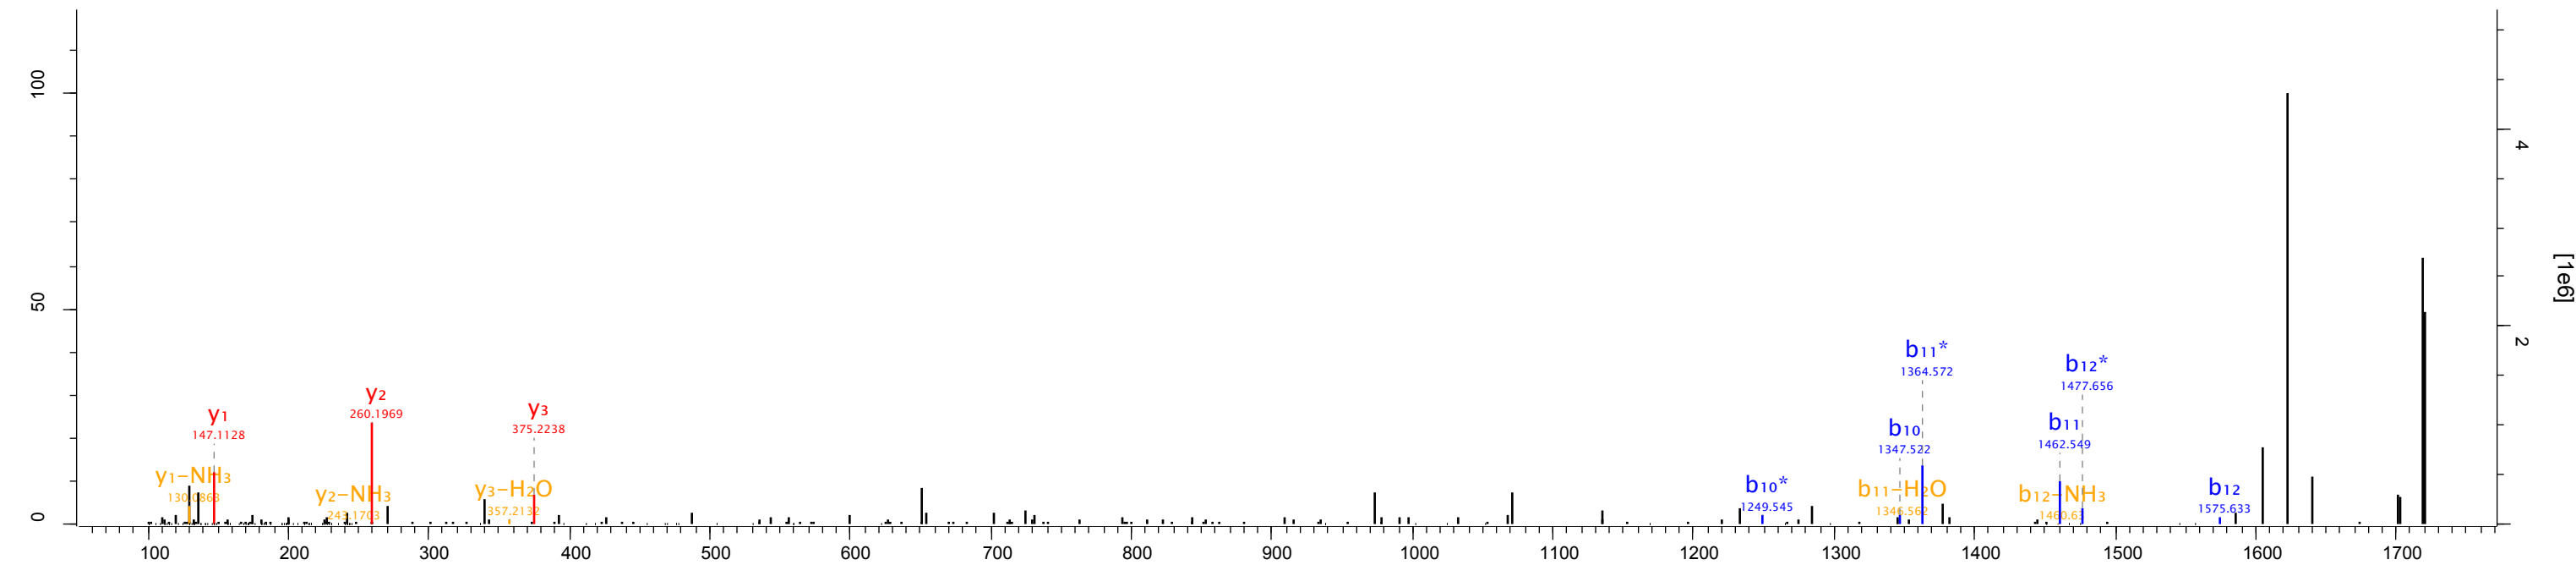

Raw file 20150812\_A375SR\_Phospho\_BR1\_06 Scan 4833 Method FTMS; HCD Score 71.35 m/z 879.34 Gene names PTPN5

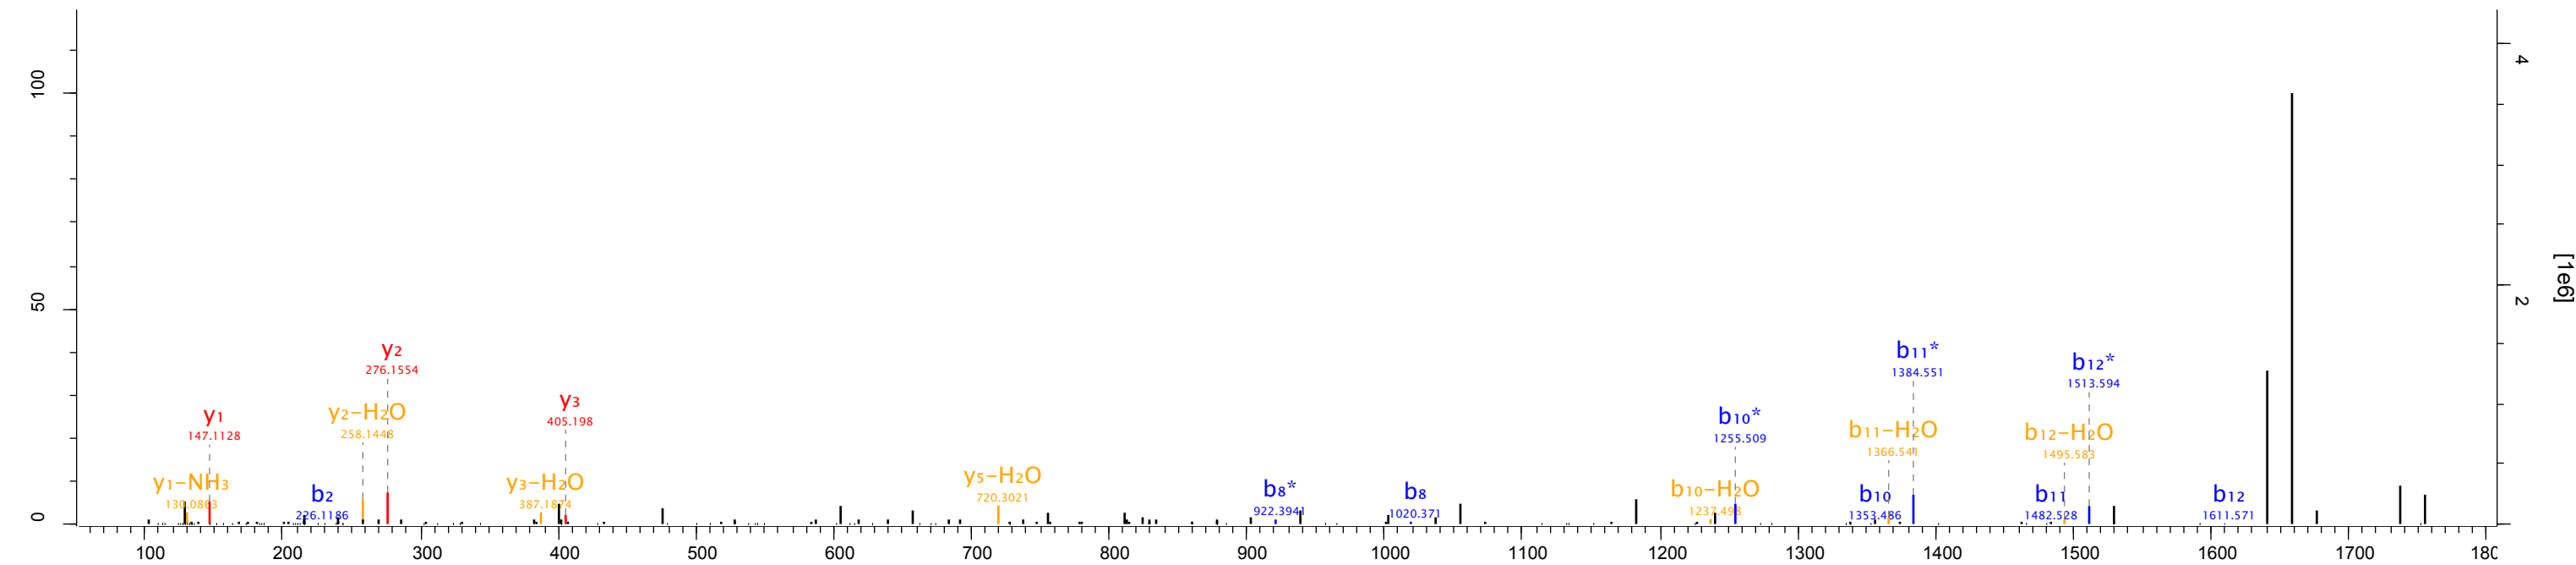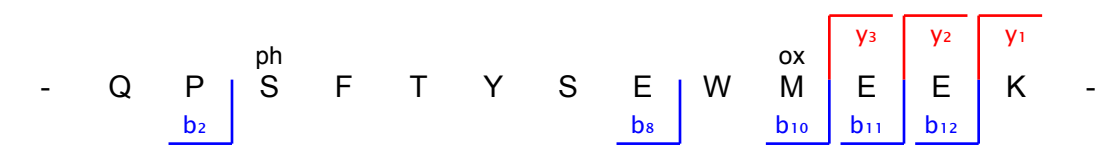



Raw file: 20150812\_A375SR\_Phospho\_BR1\_07  
 Scan: 12603 Method: FTMS; HCD Score: 101.8 m/z: 655.82 Gene names: PHACTR2

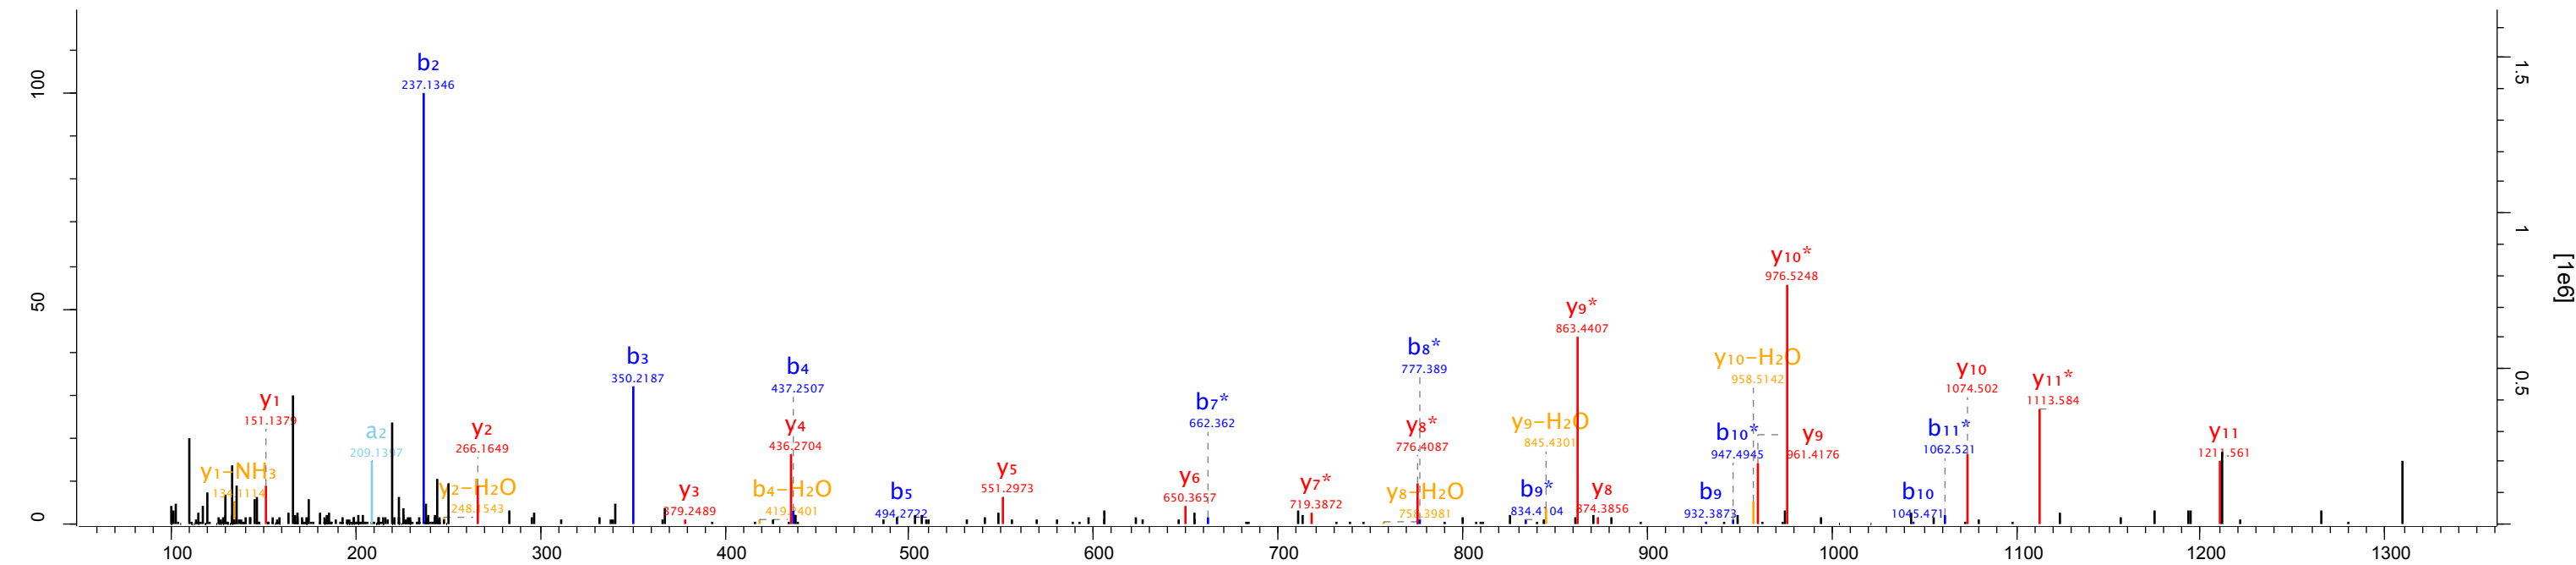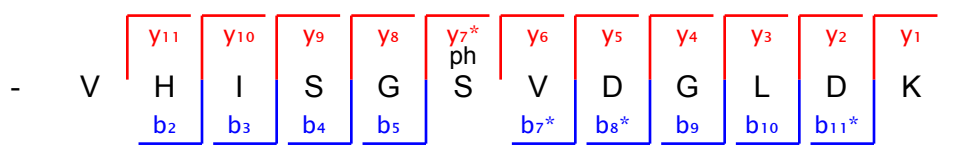

Raw file 20150812\_A375SR\_Phospho\_BR1\_07 Scan 16303 Method FTMS; HCD Score 46.84 m/z 582.26 Gene names LCT

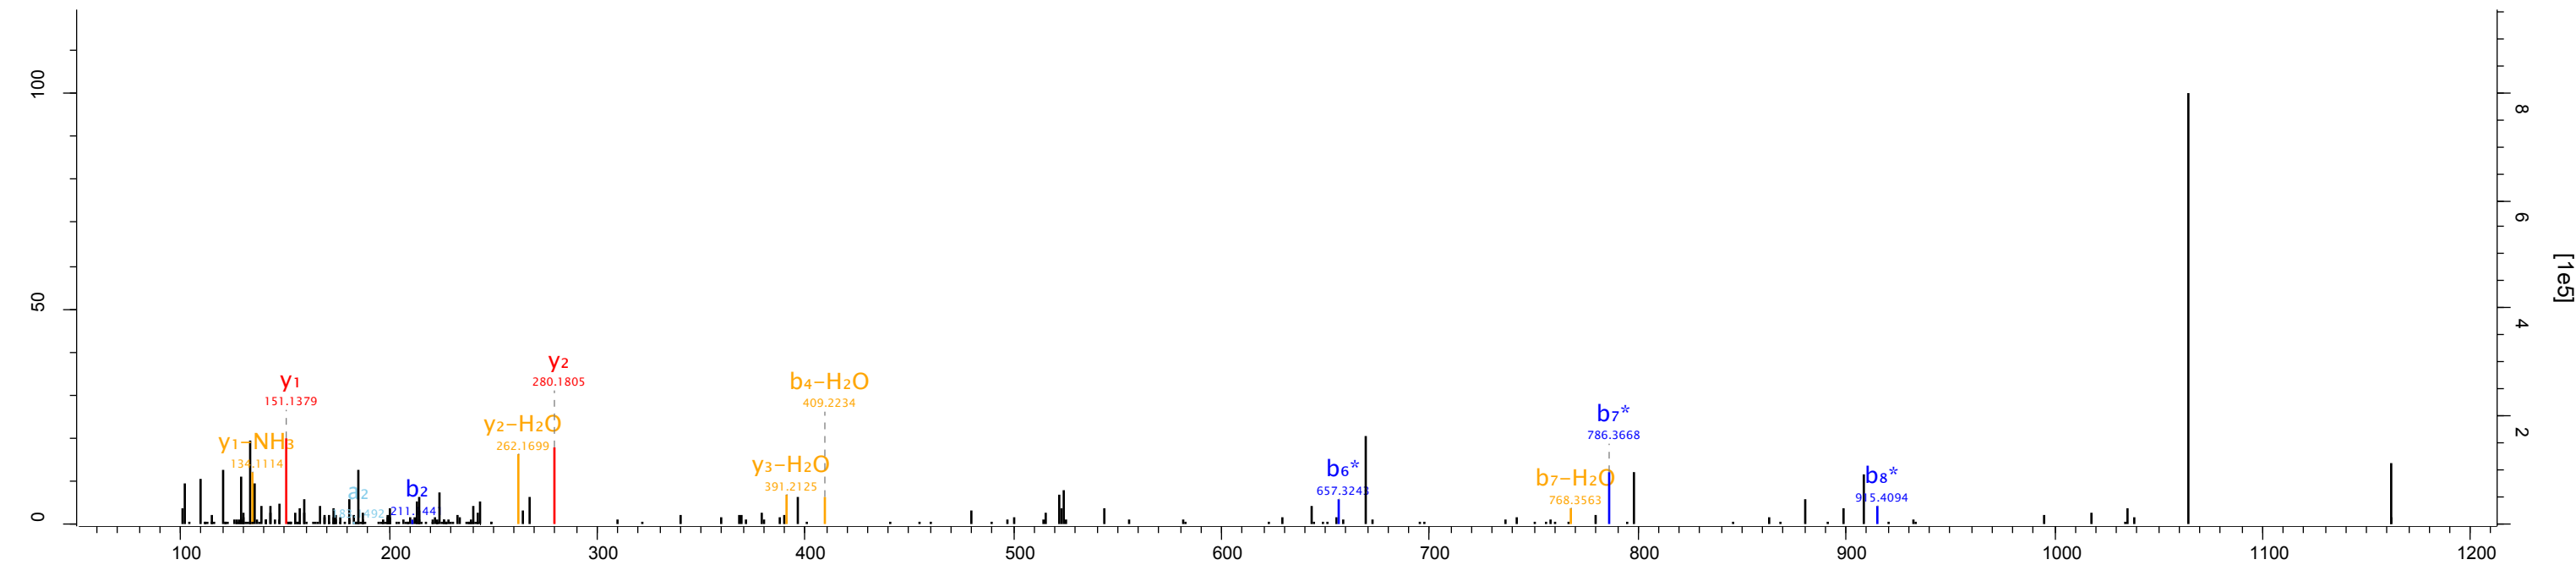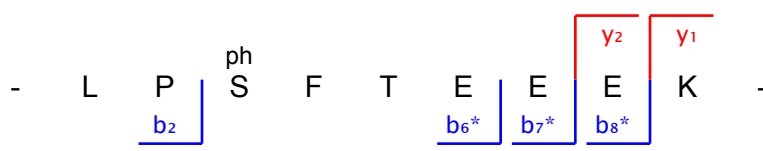

Raw file: 20150812\_A375SR\_Phospho\_BR1\_08  
 Scan: 11103 Method: FTMS; HCD Score: 98.51 m/z: 693.35 Gene names: ELK3

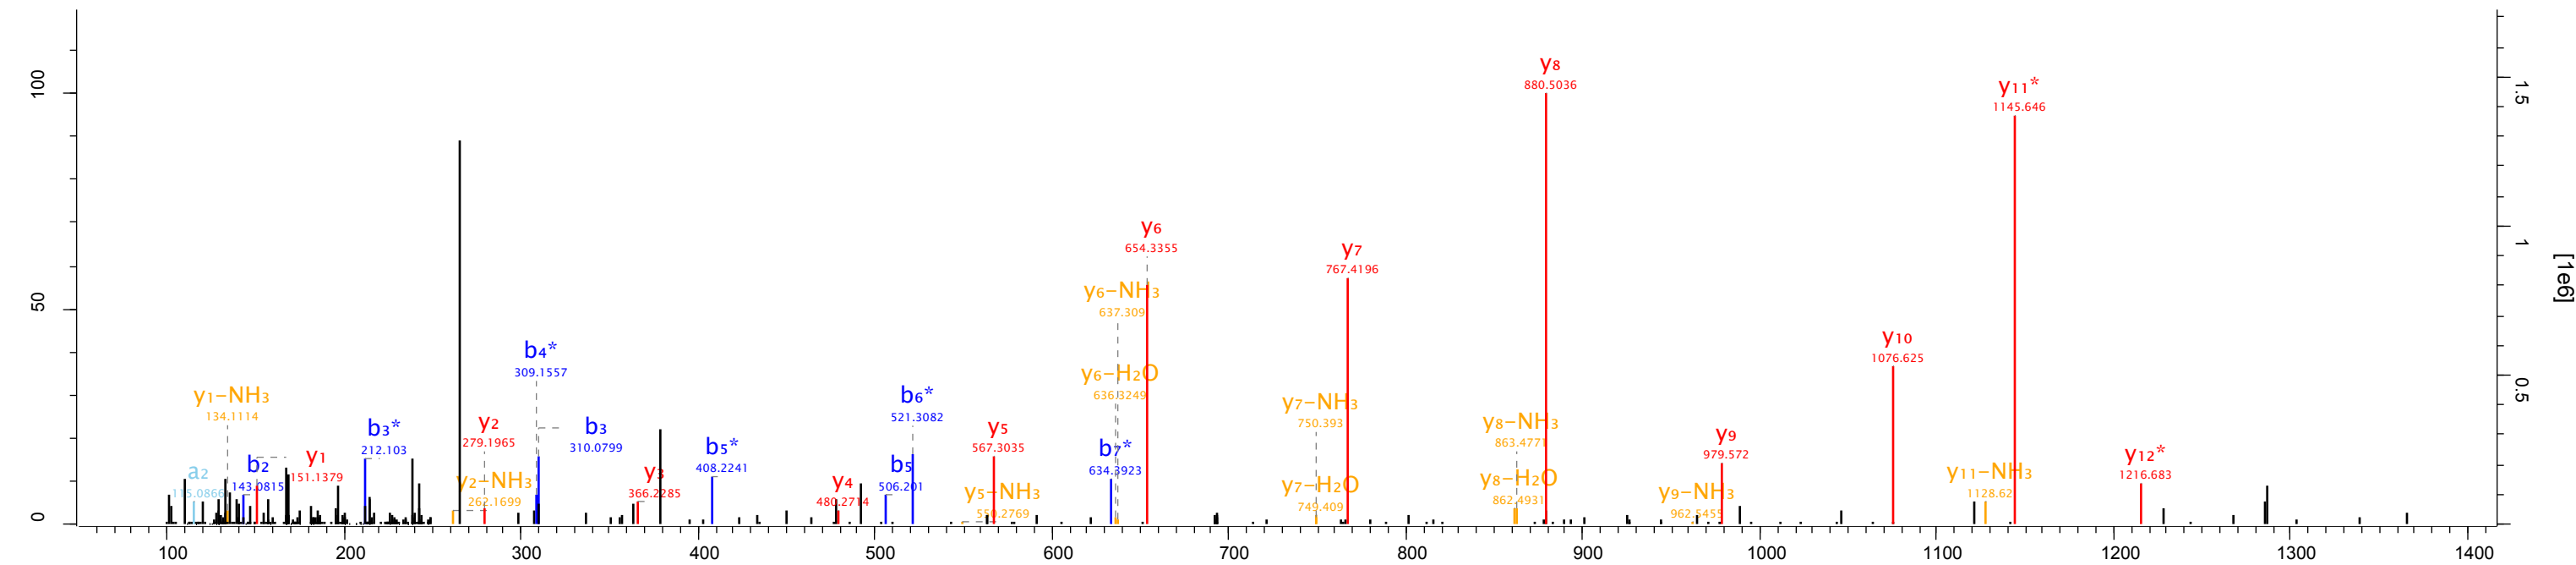

Raw file: 20150812\_A375SR\_Phospho\_BR1\_08  
 Scan: 5403 Method: FTMS; HCD Score: 47.04 m/z: 683.65

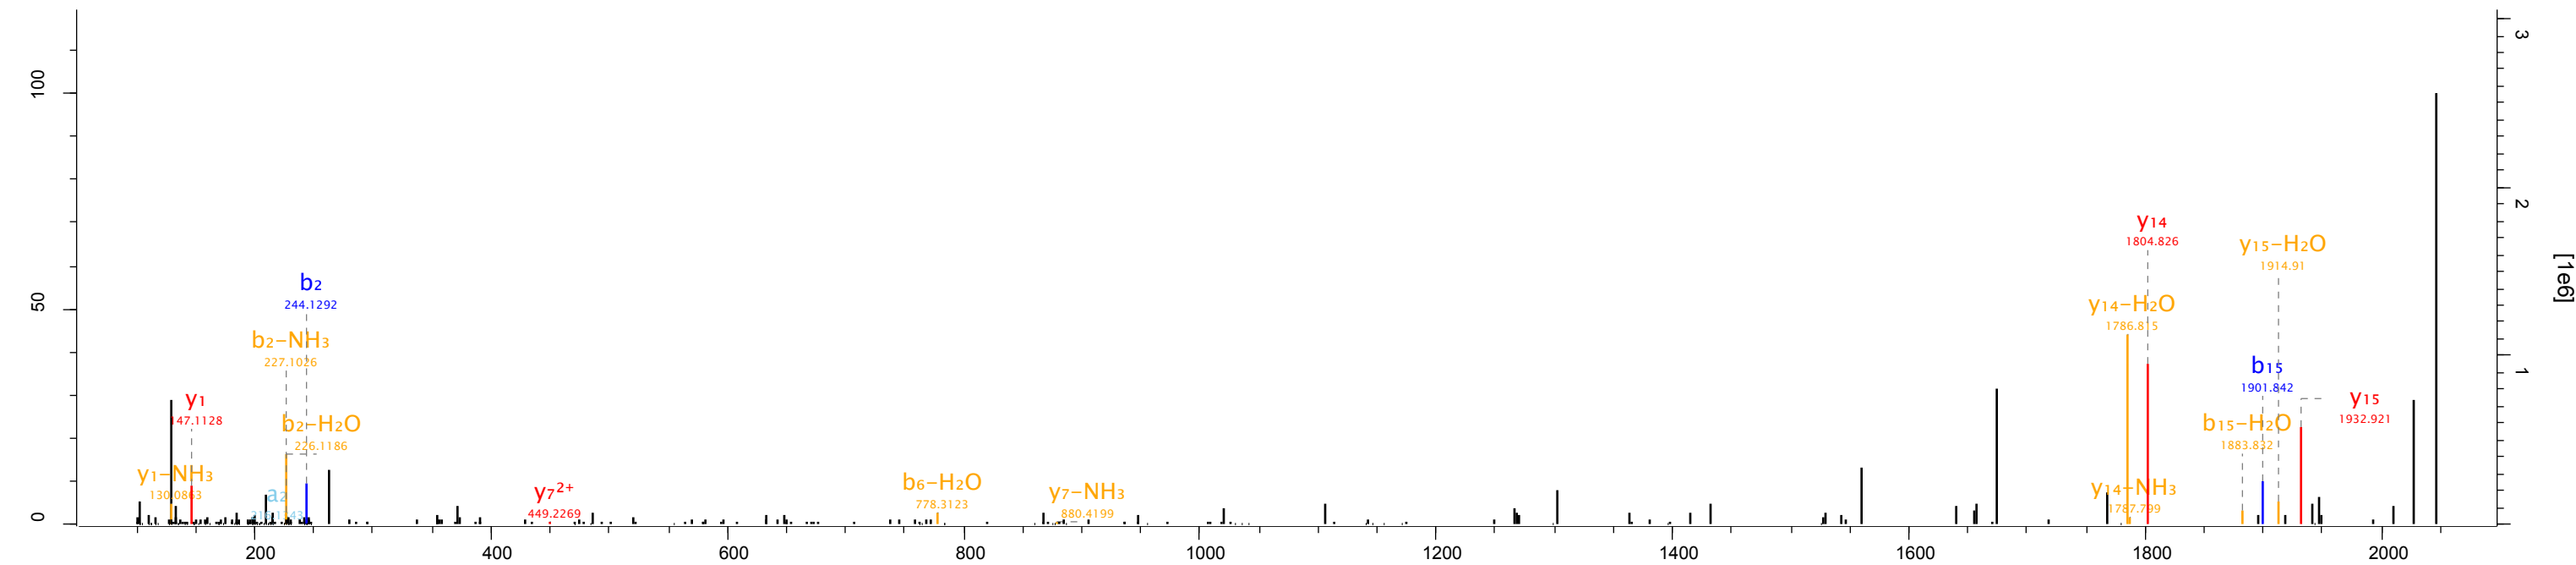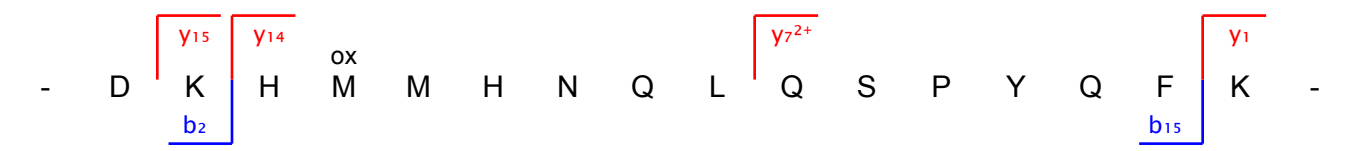

Raw file 20150812\_A375SR\_Phospho\_BR1\_09 Scan 20553 Method FTMS; HCD Score 44.51 m/z 634.99 Gene names C1orf61

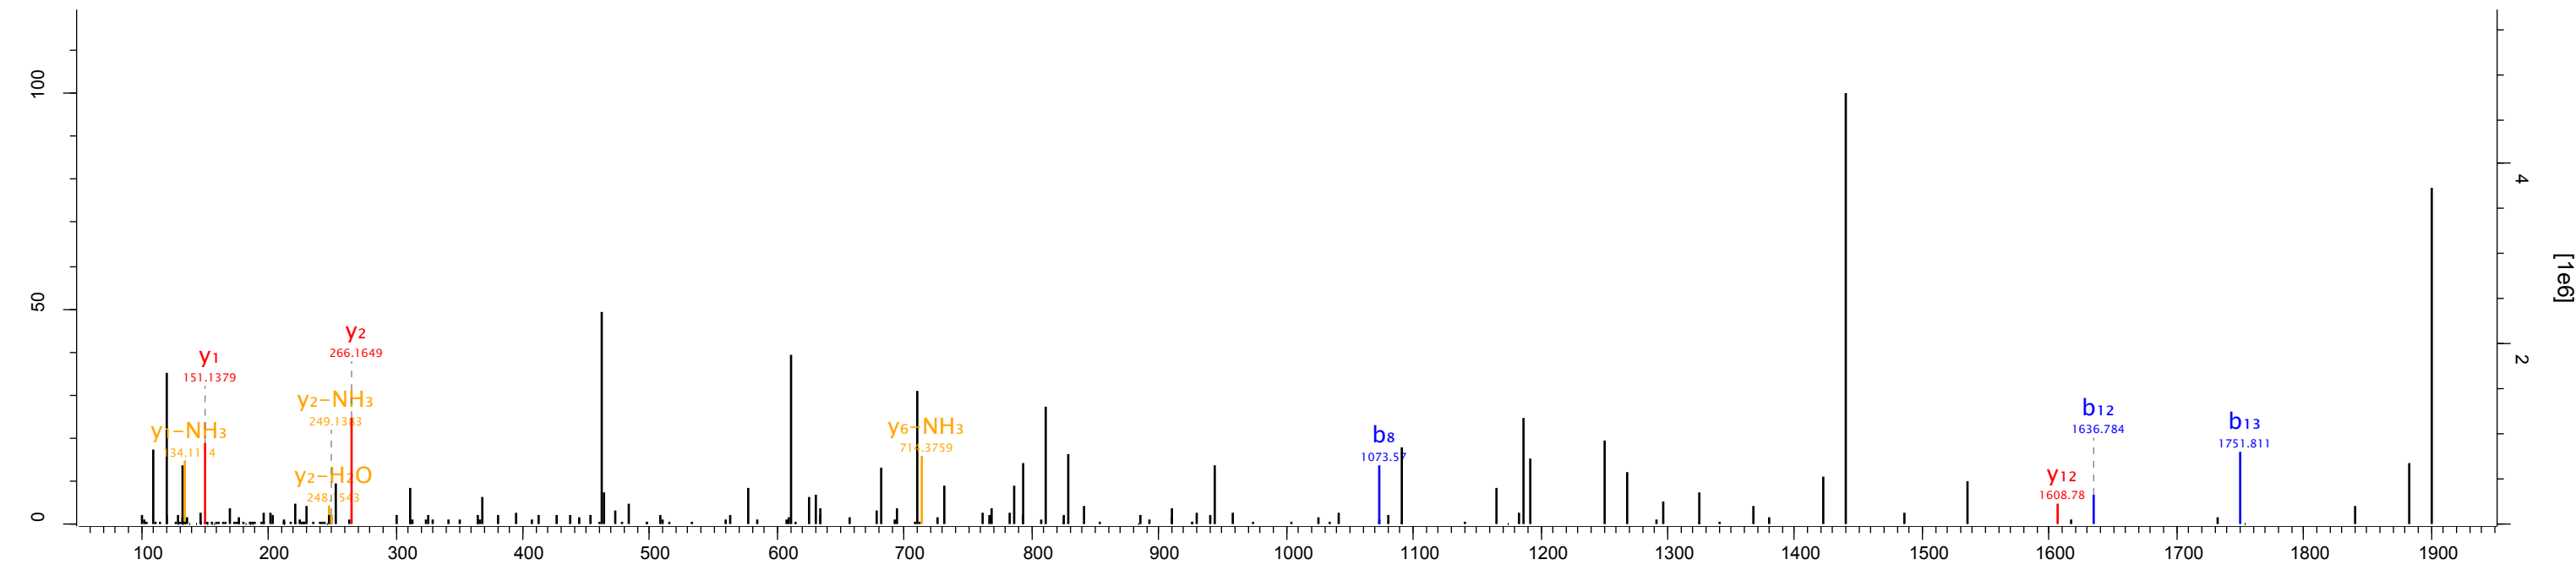

- R M Y F I W L G W I P S D K -

Fragmentation labels: y12 (above Y), b8 (below G), b12 (below S), b13 (below D), y2 (above D), y1 (above K).

Raw file 20150812\_A375SR\_Phospho\_BR1\_10 Scan 15393 Method FTMS; HCD Score 41.7 m/z 711.63 Gene names LINC00614

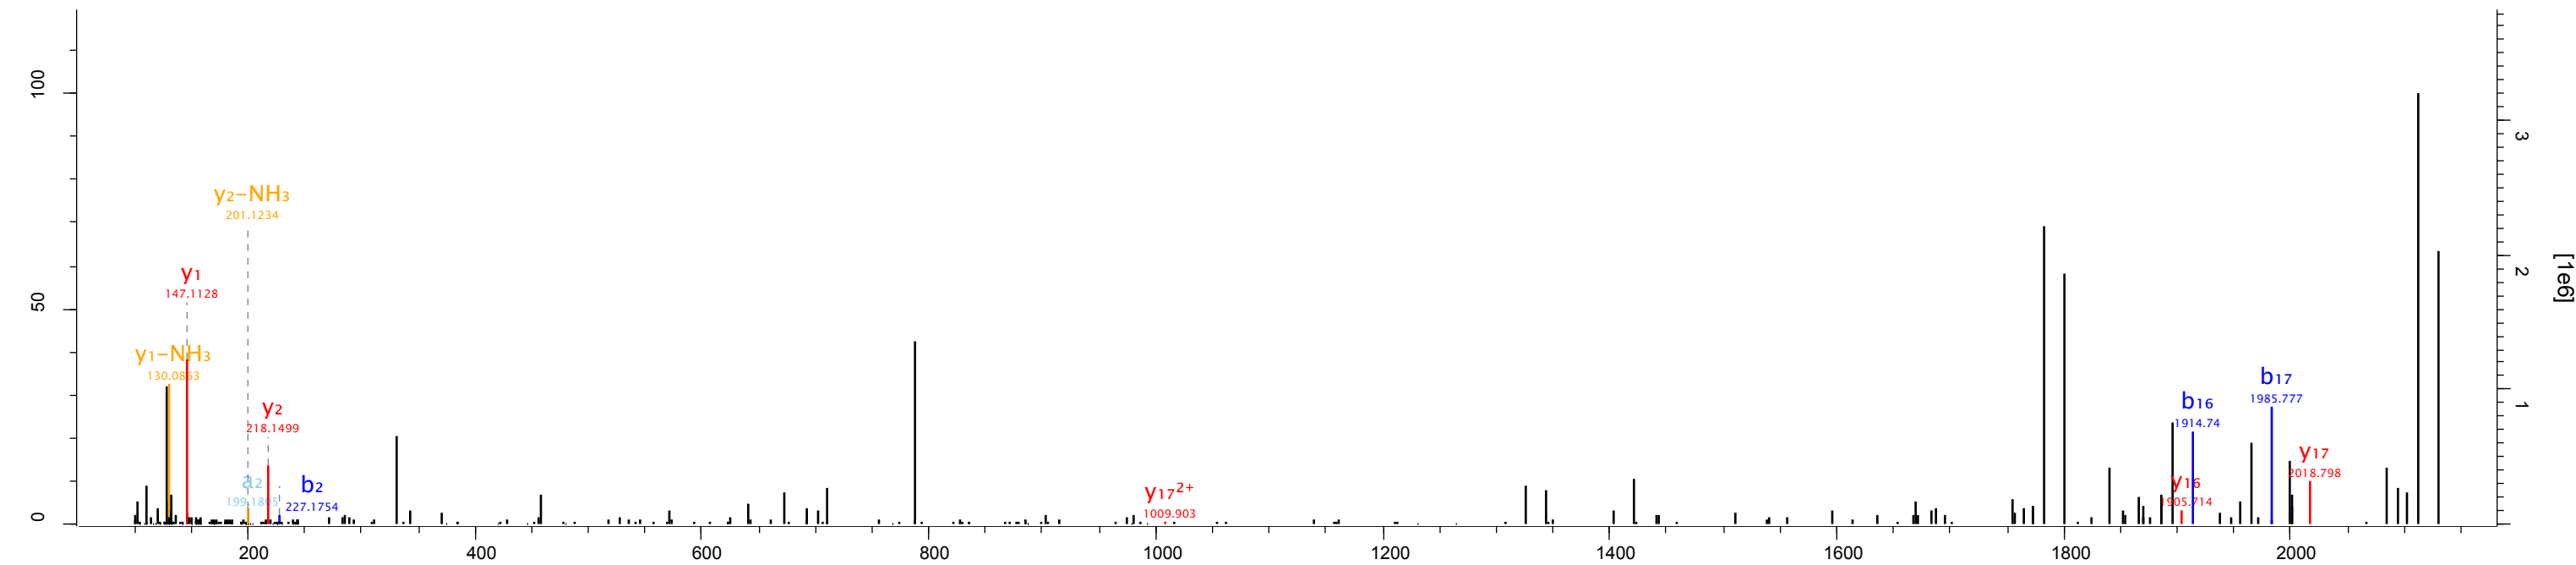

- L L L E C T Y G A L E S A G V P A K -

Fragmentation labels: b<sub>2</sub> (under the first L), y<sub>17</sub> (over the first L), y<sub>16</sub> (over the second L), b<sub>16</sub> (under P), y<sub>2</sub> (over A), b<sub>17</sub> (under A), y<sub>1</sub> (over K).

Raw file 20150812\_A375SR\_Phospho\_BR1\_10 Scan 1693 Method FTMS; HCD Score 41.62 m/z 425.54 Gene names KEAP1

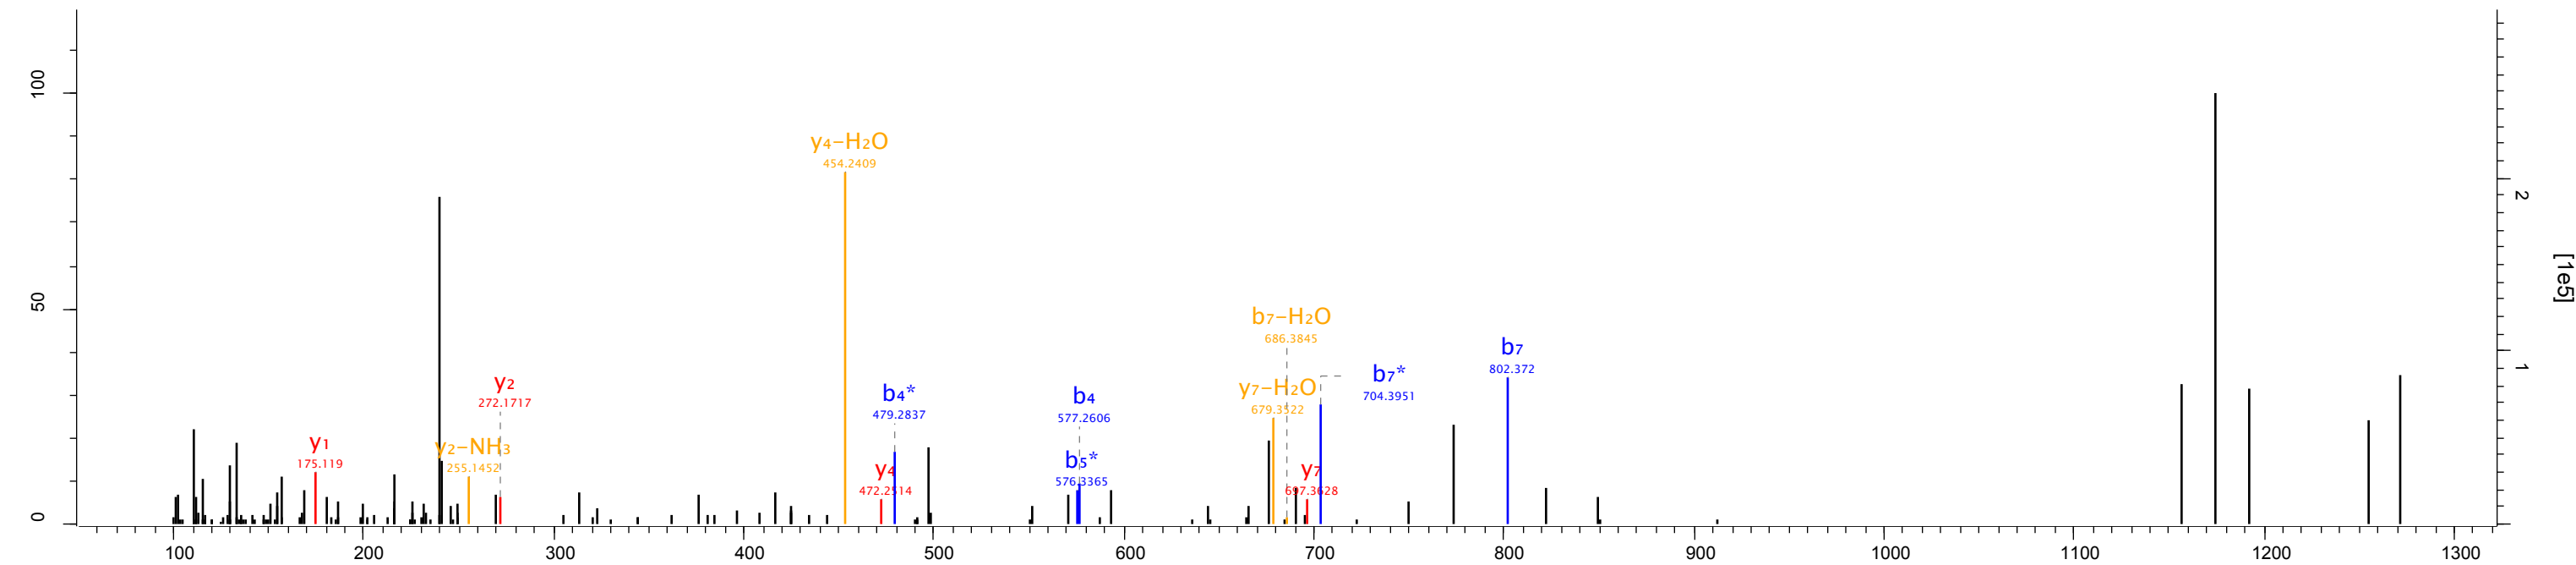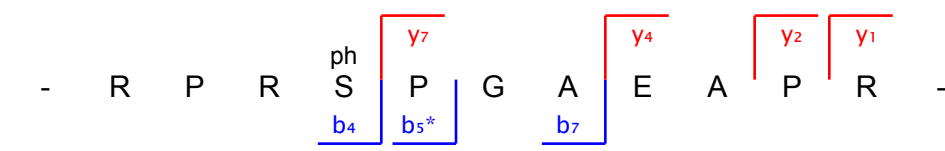

Raw file: 20150814\_A375SR\_Phospho\_BR2\_02  
 Scan: 8073 Method: FTMS; HCD Score: 91.69 m/z: 519.21 Gene names: RHBD2

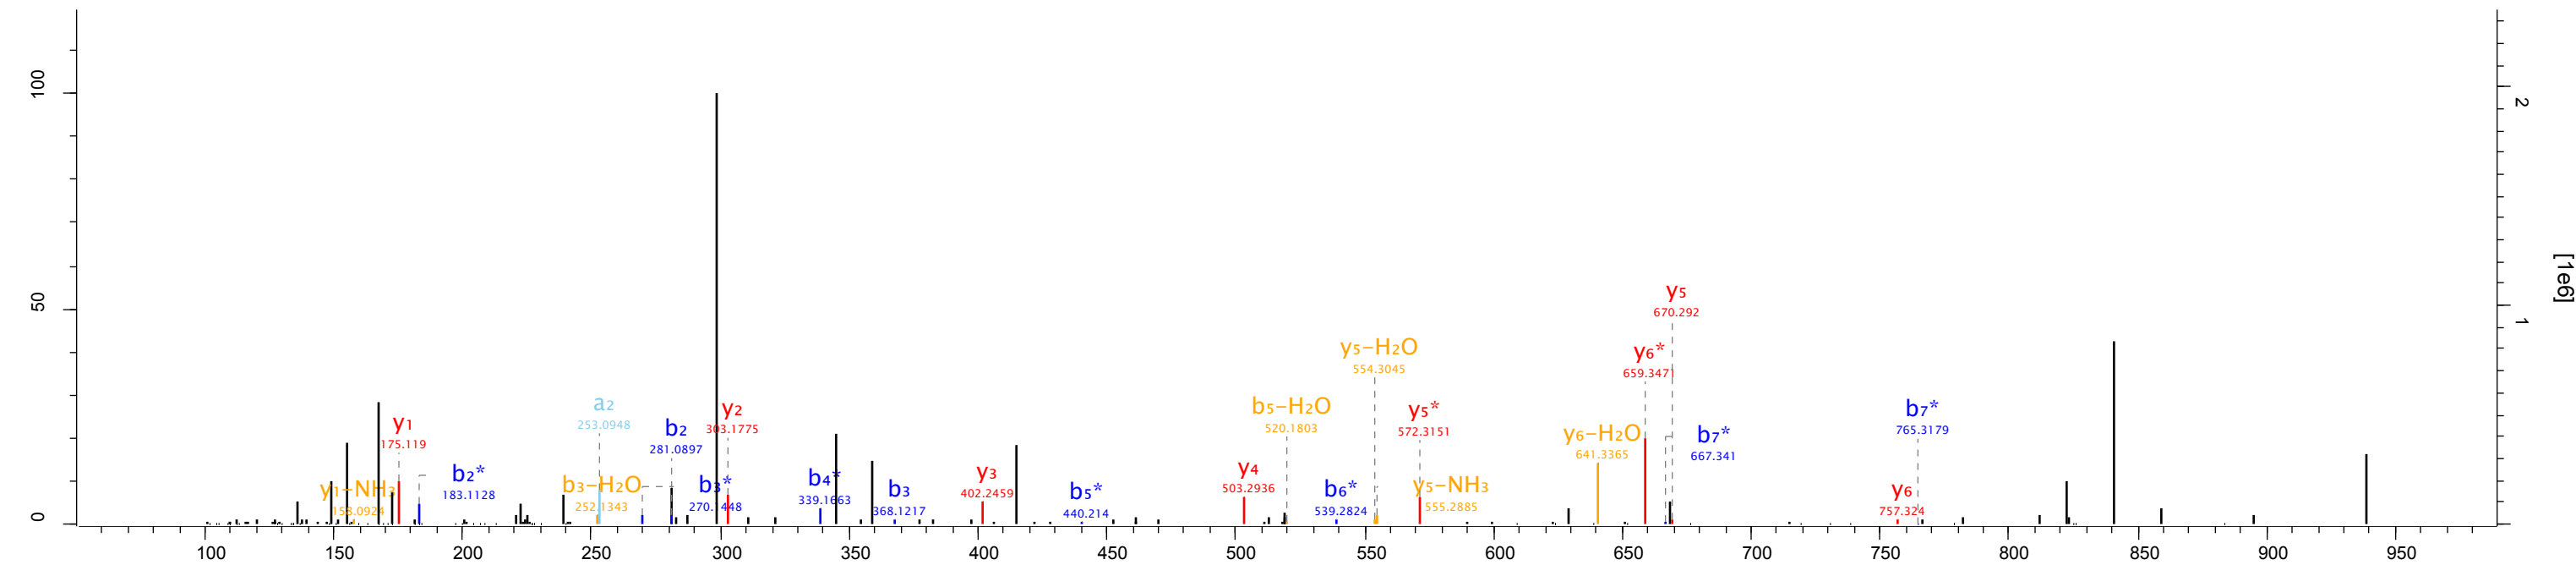



Raw file  
 20150814\_A375SR\_Phospho\_BR2\_03  
 Scan 10623 Method FTMS; HCD Score 63.55 m/z 693.35 Gene names ELK3

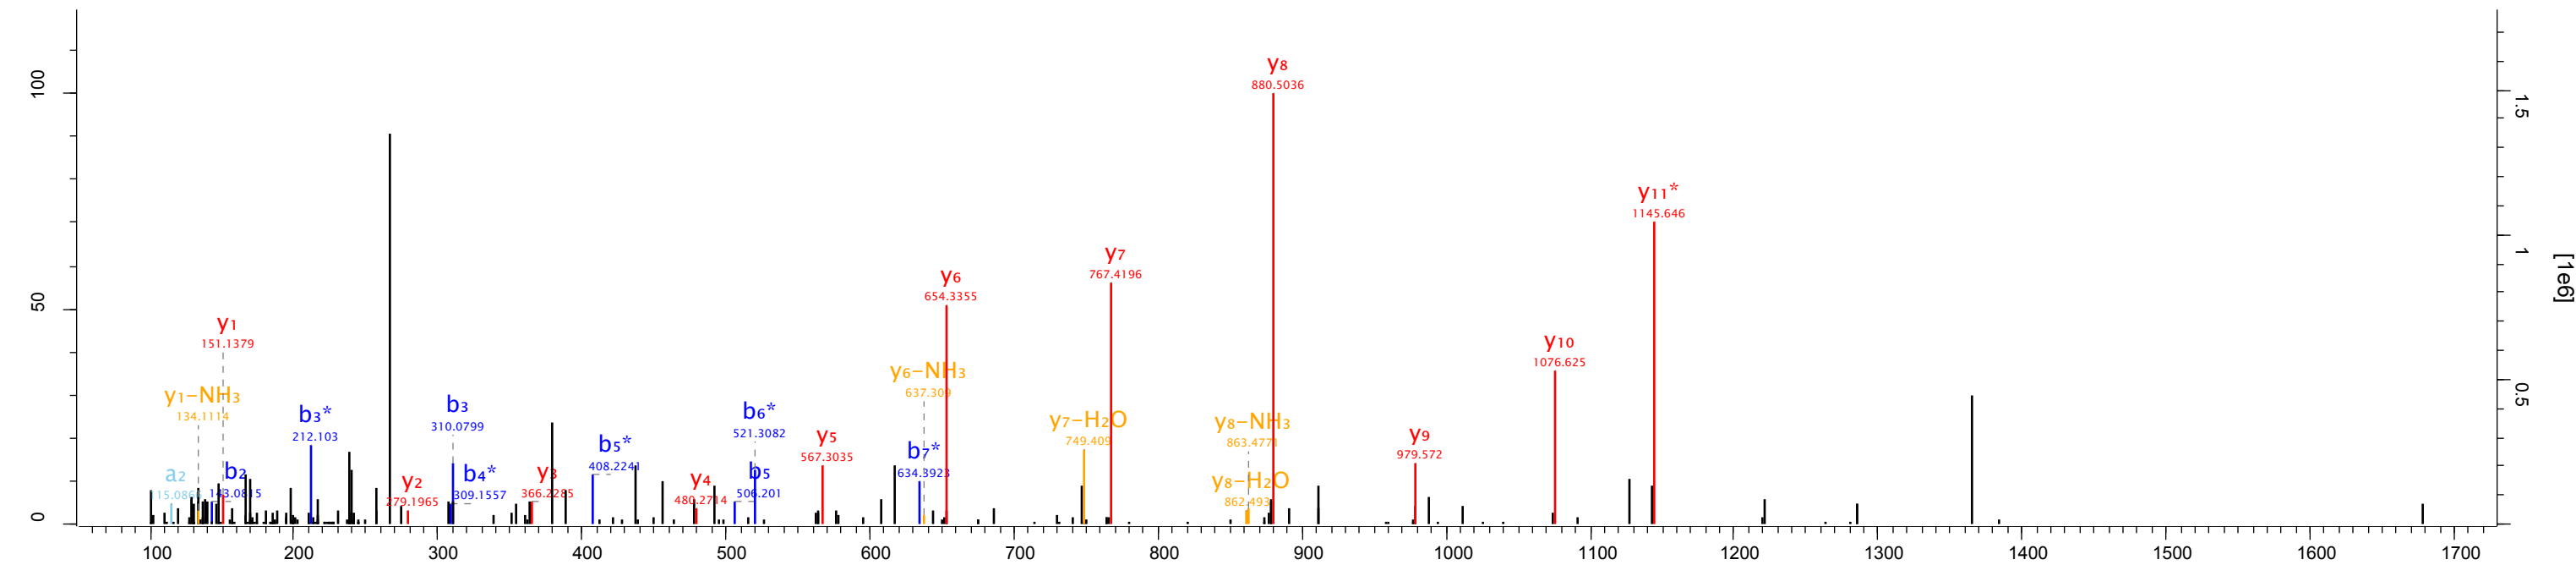

Raw file 20150814\_A375SR\_Phospho\_BR2\_03 Scan 11713 Method FTMS; HCD Score 131.98 m/z 687.95

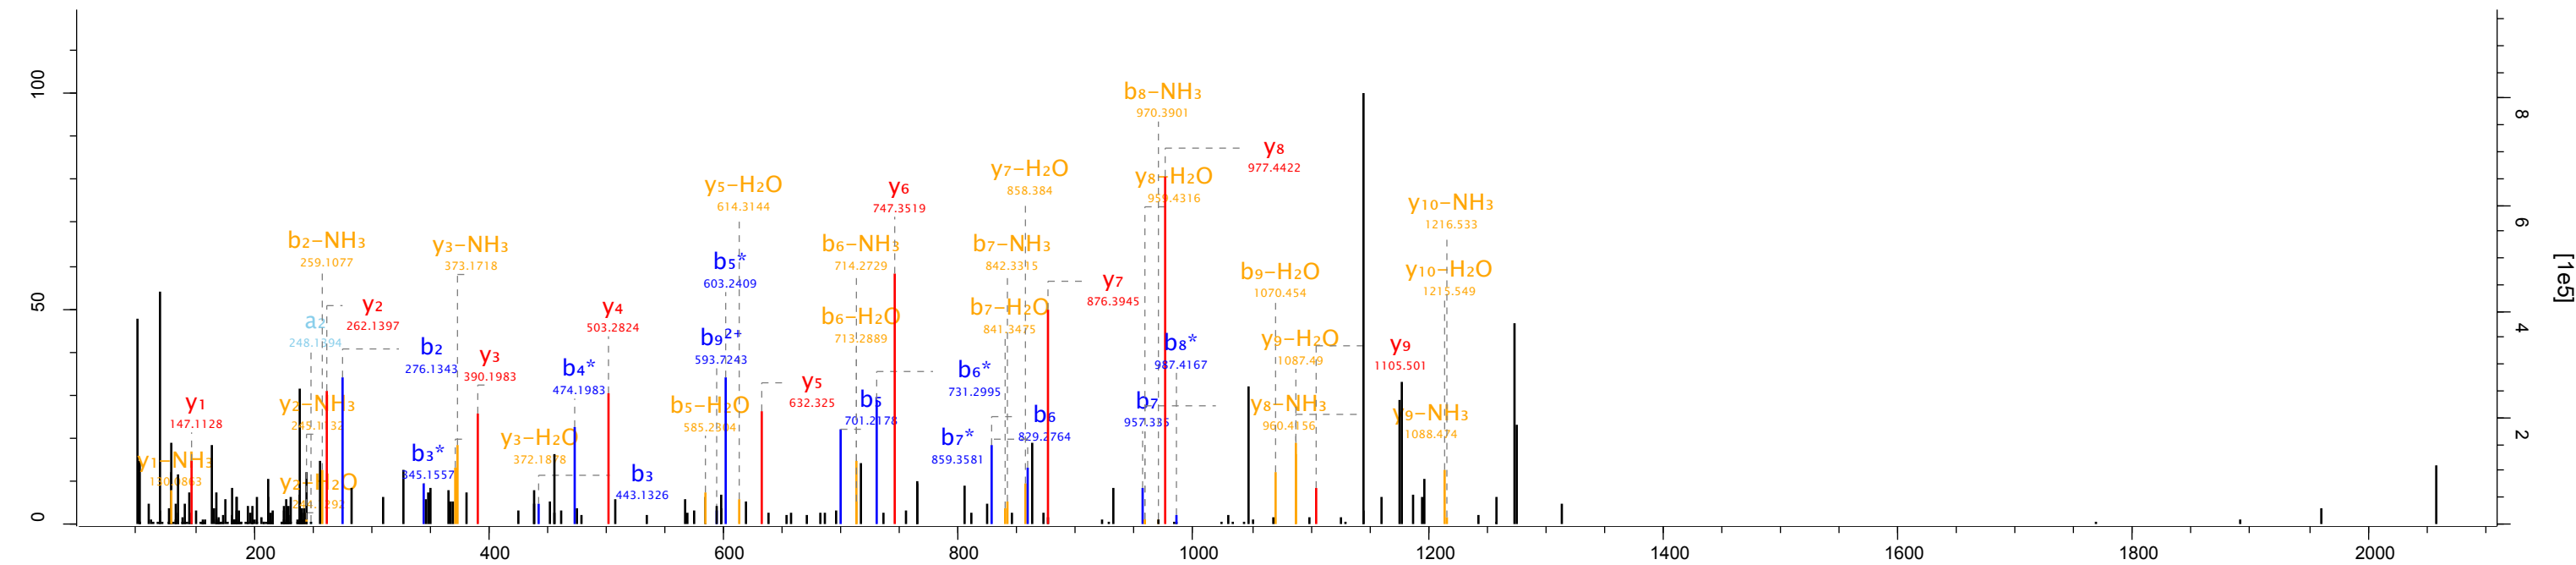

- F Q S E E Q Q Q T E D E L Q D K -  
 (Labels below the sequence: b2, b3, b4\*, b5, b6, b7, b8\*, b9<sup>2+</sup> are under the first 8 residues; y9, y8, y7, y6, y5, y4, y3, y2, y1 are under the last 9 residues)

Raw file Scan Method Score m/z Gene names  
 20150814\_A375SR\_Phospho\_BR2\_03 12063 FTMS; HCD 78.32 579.26 PAG1

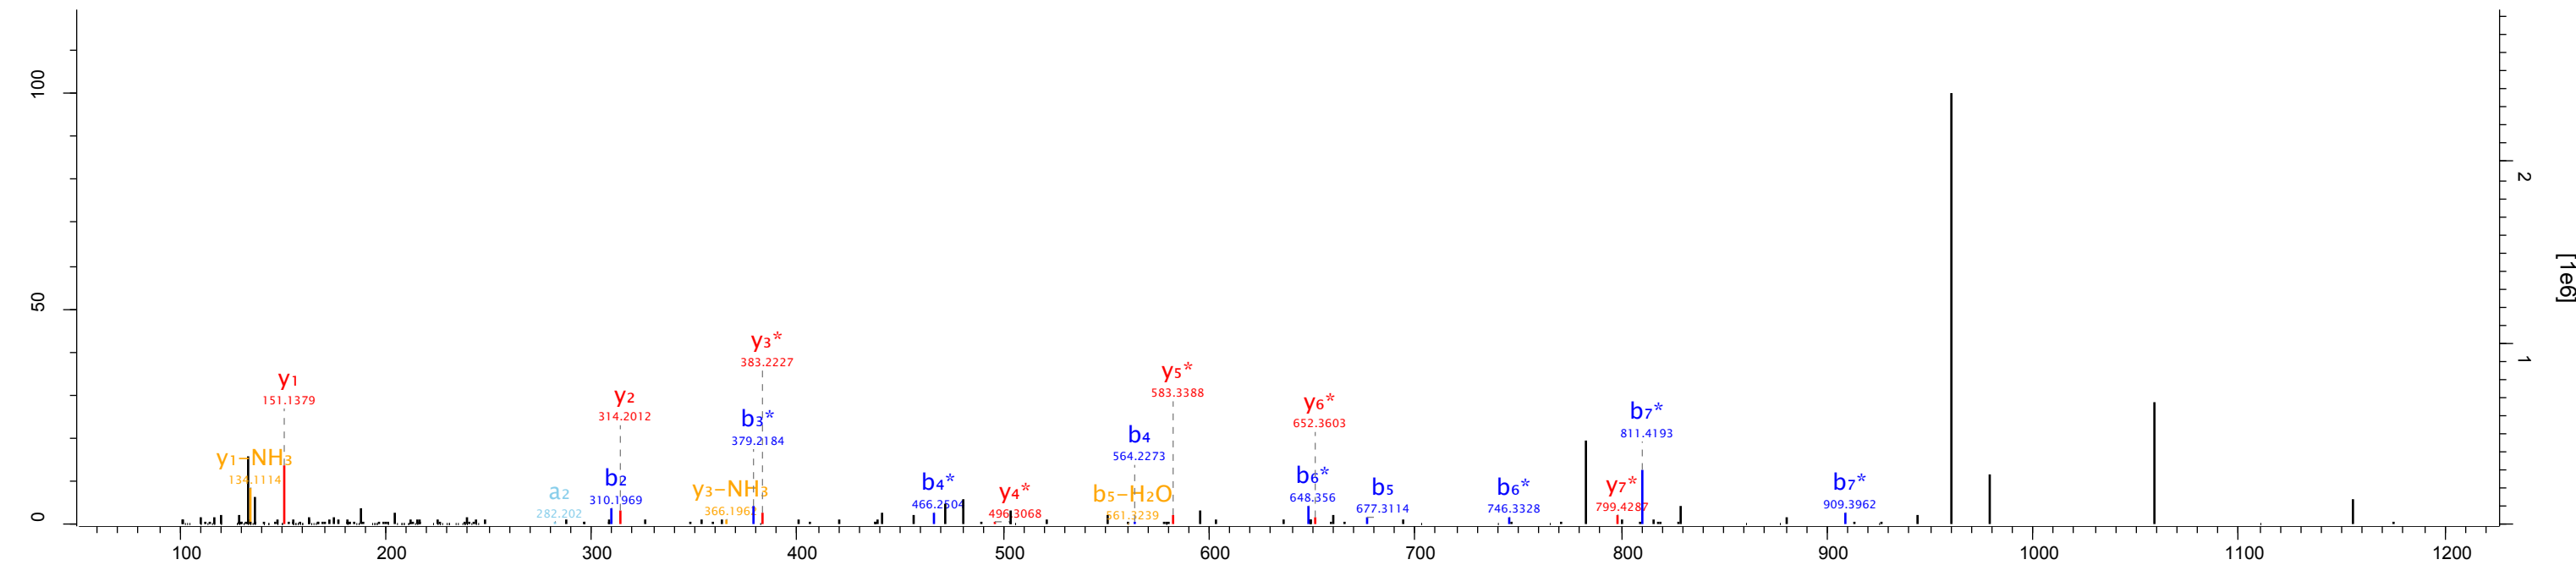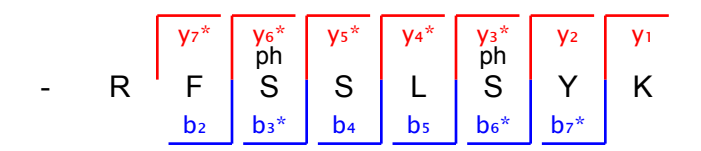

Raw file: 20150814\_A375SR\_Phospho\_BR2\_03  
 Scan: 13383 Method: FTMS; HCD Score: 164.48 m/z: 782.84 Gene names: PWWP2A

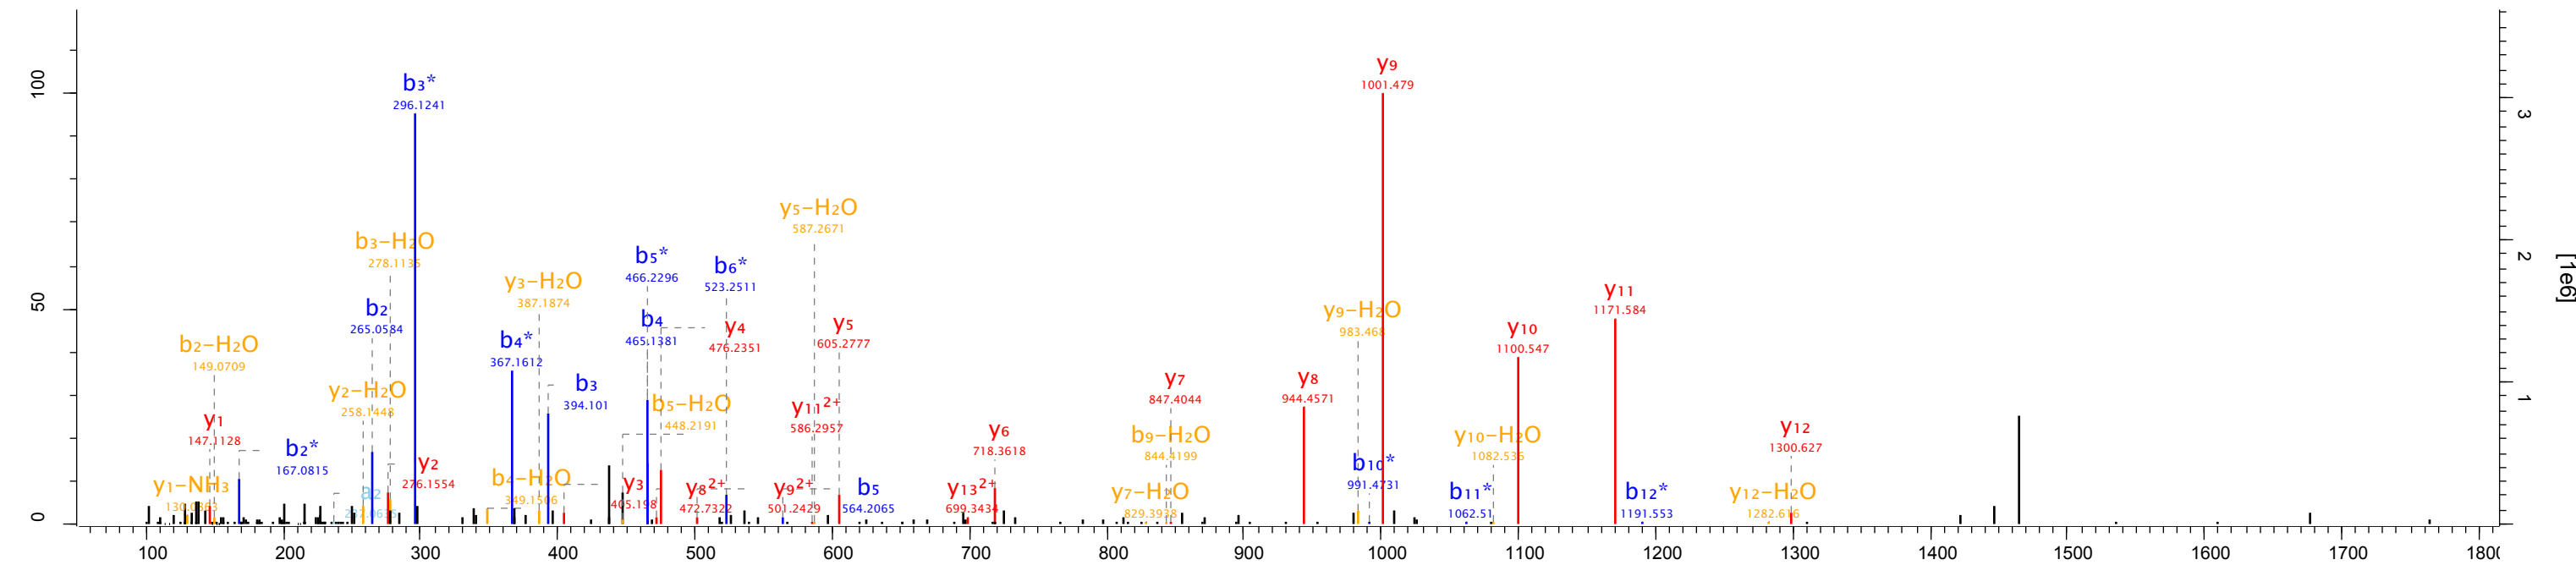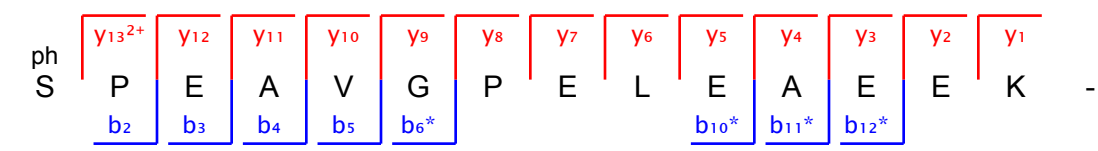

Raw file: 20150814\_A375SR\_Phospho\_BR2\_03  
 Scan: 16243 Method: FTMS; HCD Score: 132.25 m/z: 851.4 Gene names: ZNF395

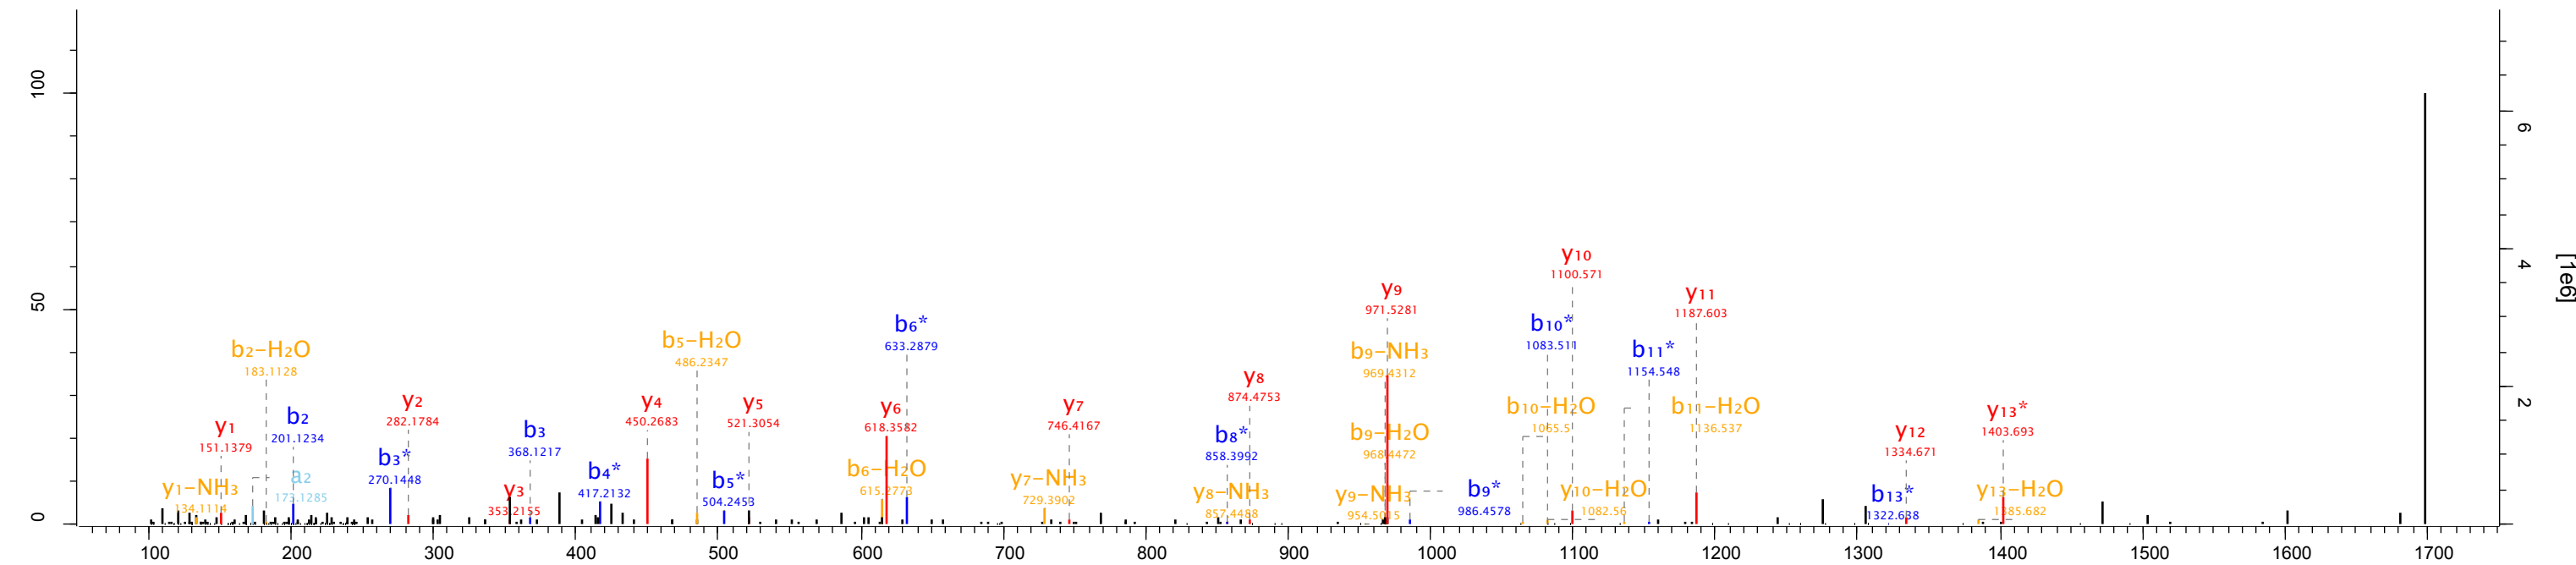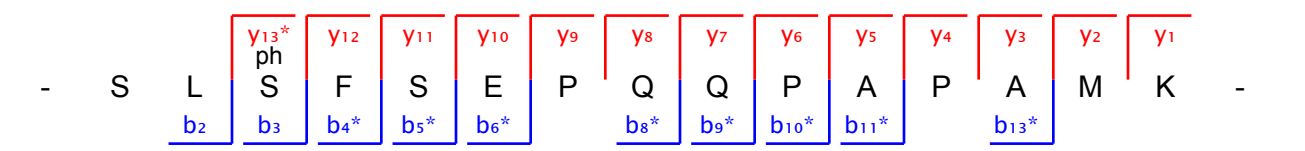

Raw file 20150814\_A375SR\_Phospho\_BR2\_03 Scan 17253 Method FTMS; HCD Score 66.02 m/z 596.27 Gene names SCARF2

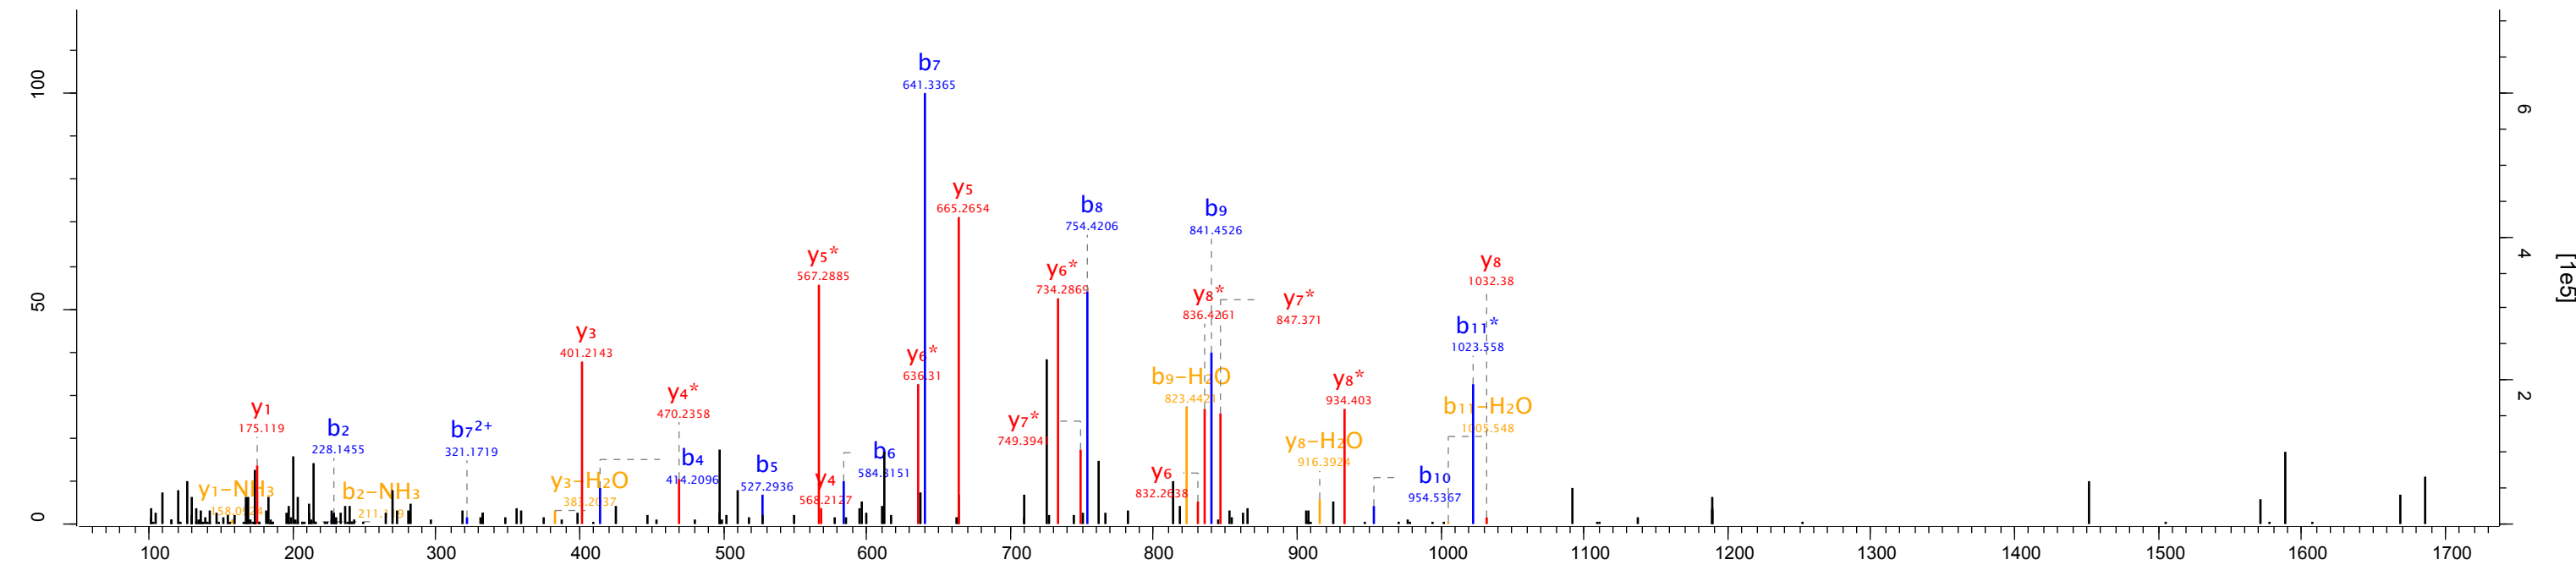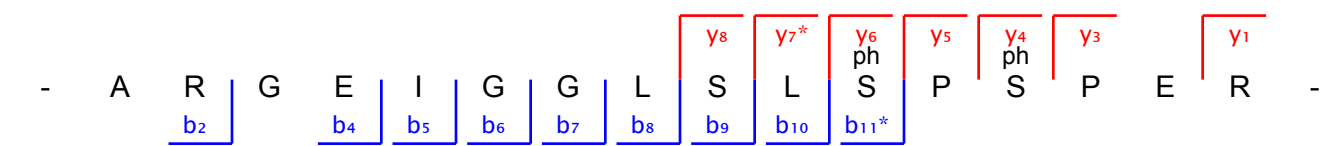

Raw file 20150814\_A375SR\_Phospho\_BR2\_03 Scan 17263 Method FTMS; HCD Score 110.93 m/z 570.76 Gene names GPATCH2L

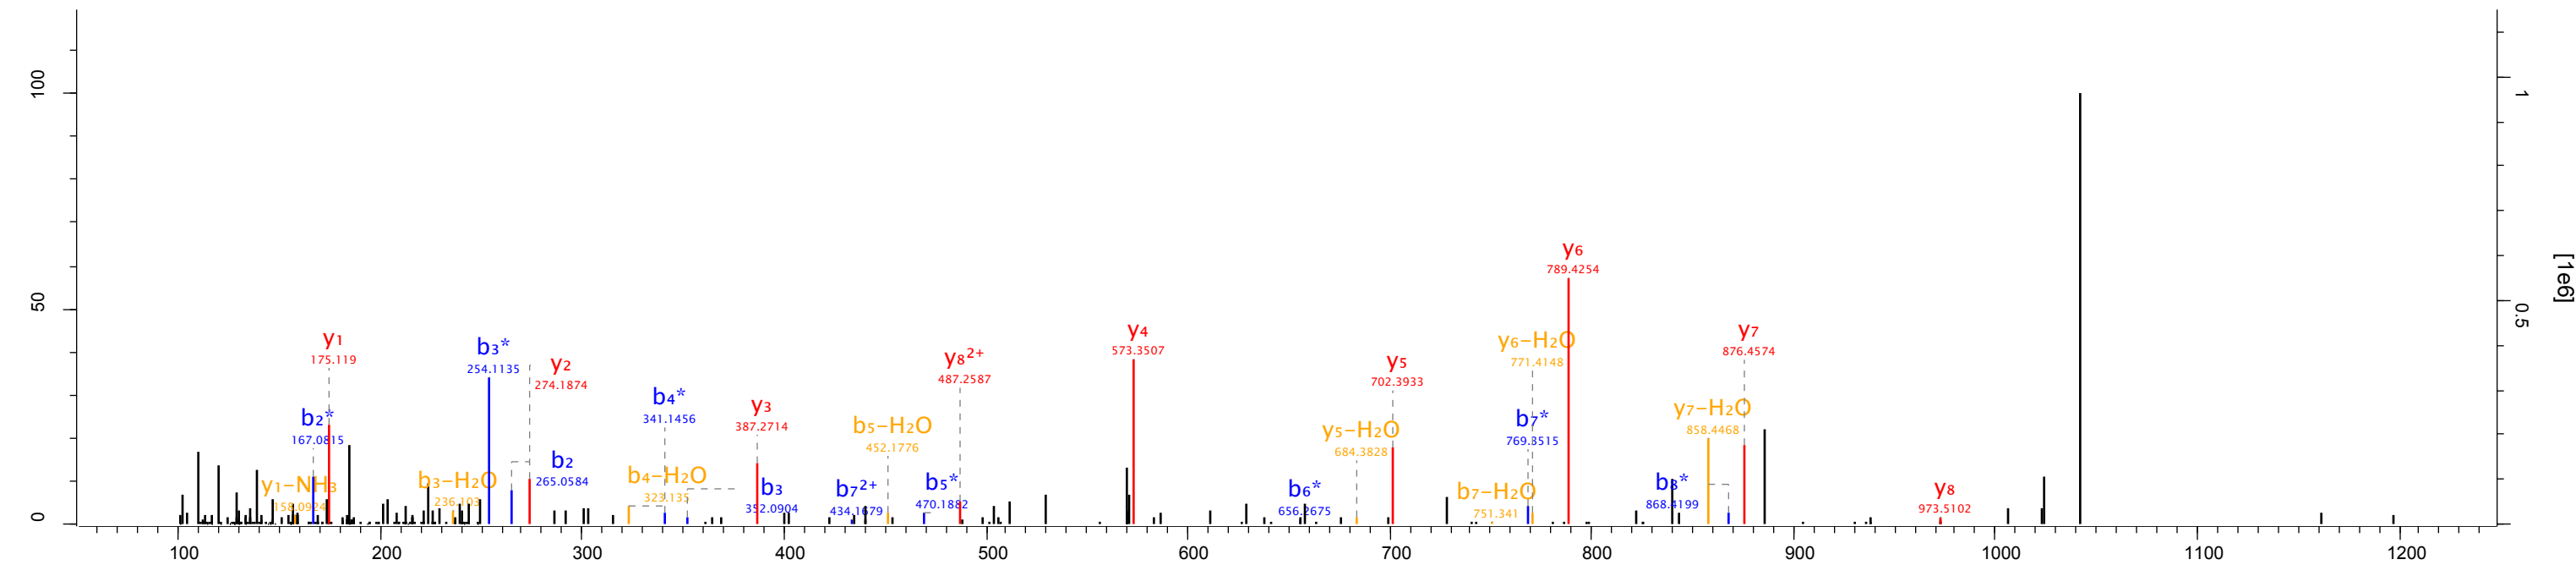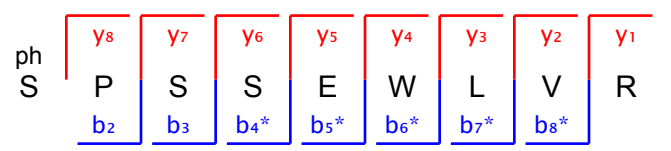

Raw file: 20150814\_A375SR\_Phospho\_BR2\_03  
 Scan: 19373 Method: FTMS; HCD Score: 46.52 m/z: 572.77 Gene names: CCDC125

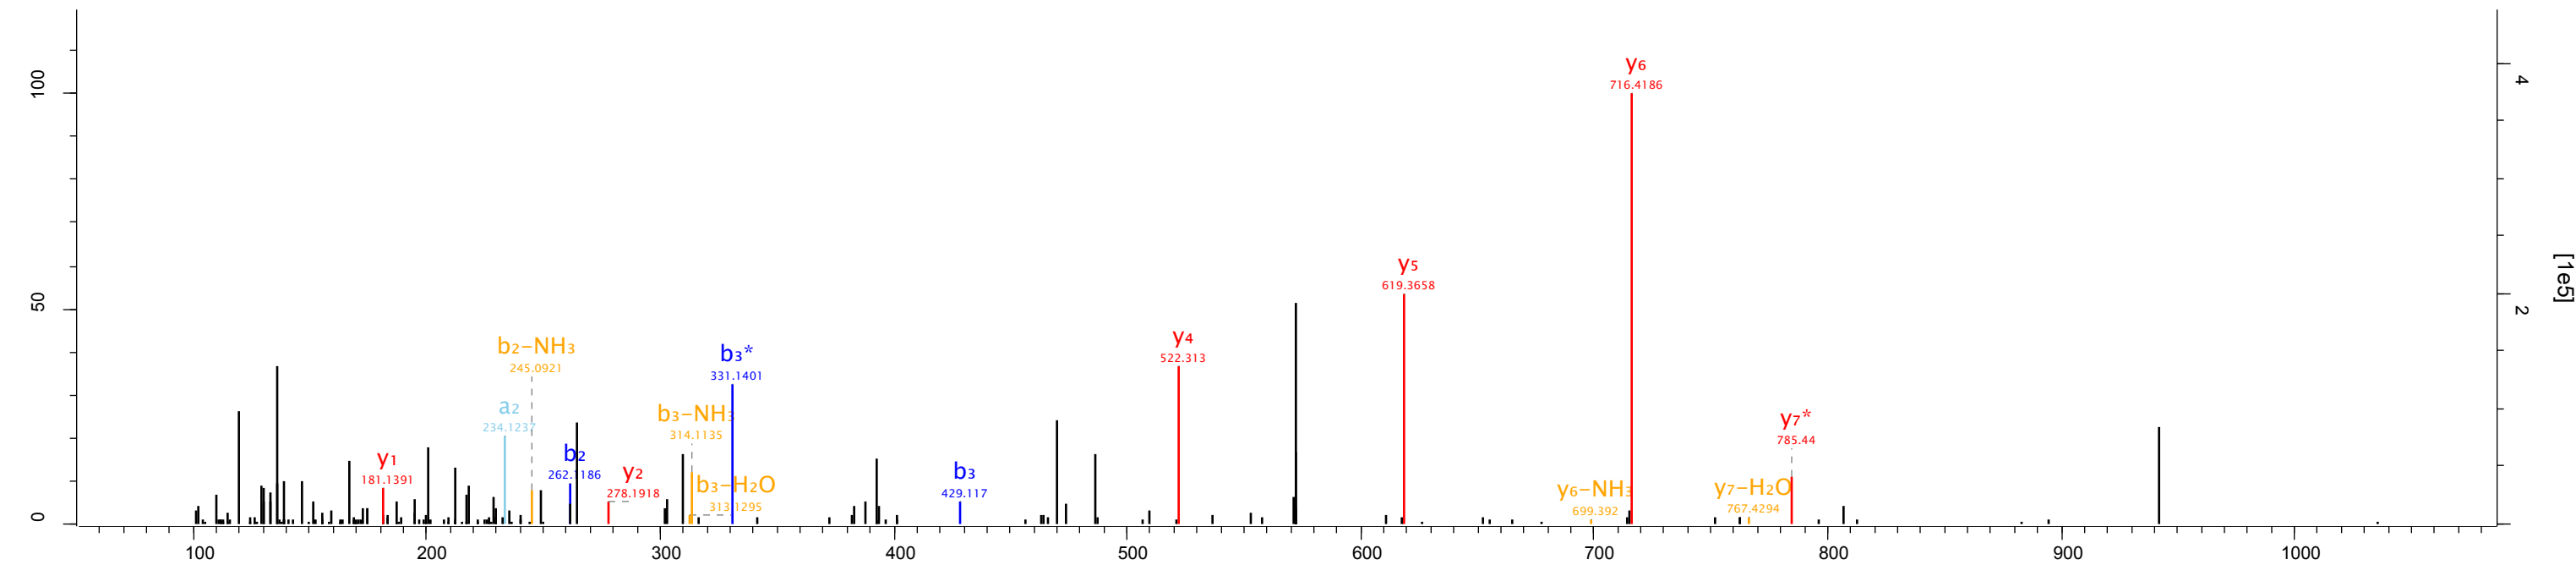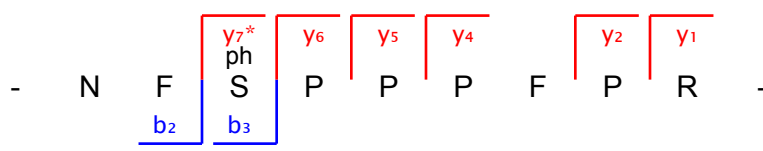



Raw file 20150814\_A375SR\_Phospho\_BR2\_03 Scan 6523 Method FTMS; HCD Score 47.89 m/z 576.29

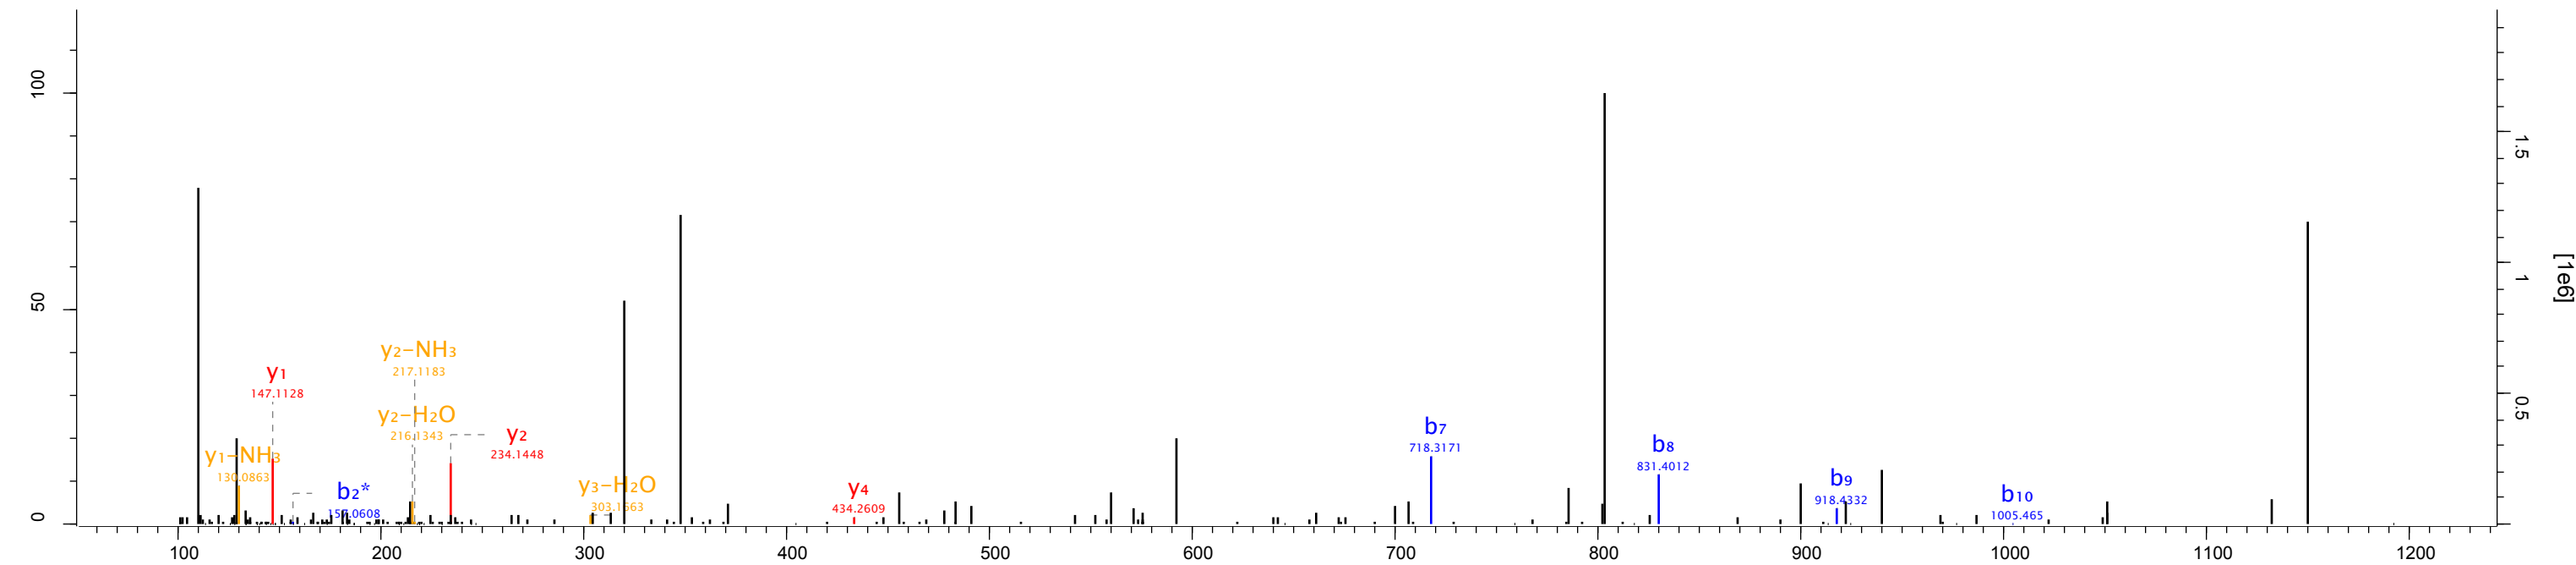

Raw file  
20150814\_A375SR\_Phospho\_BR2\_04

Scan 11703 Method FTMS; HCD Score 323.57 m/z 1031.42

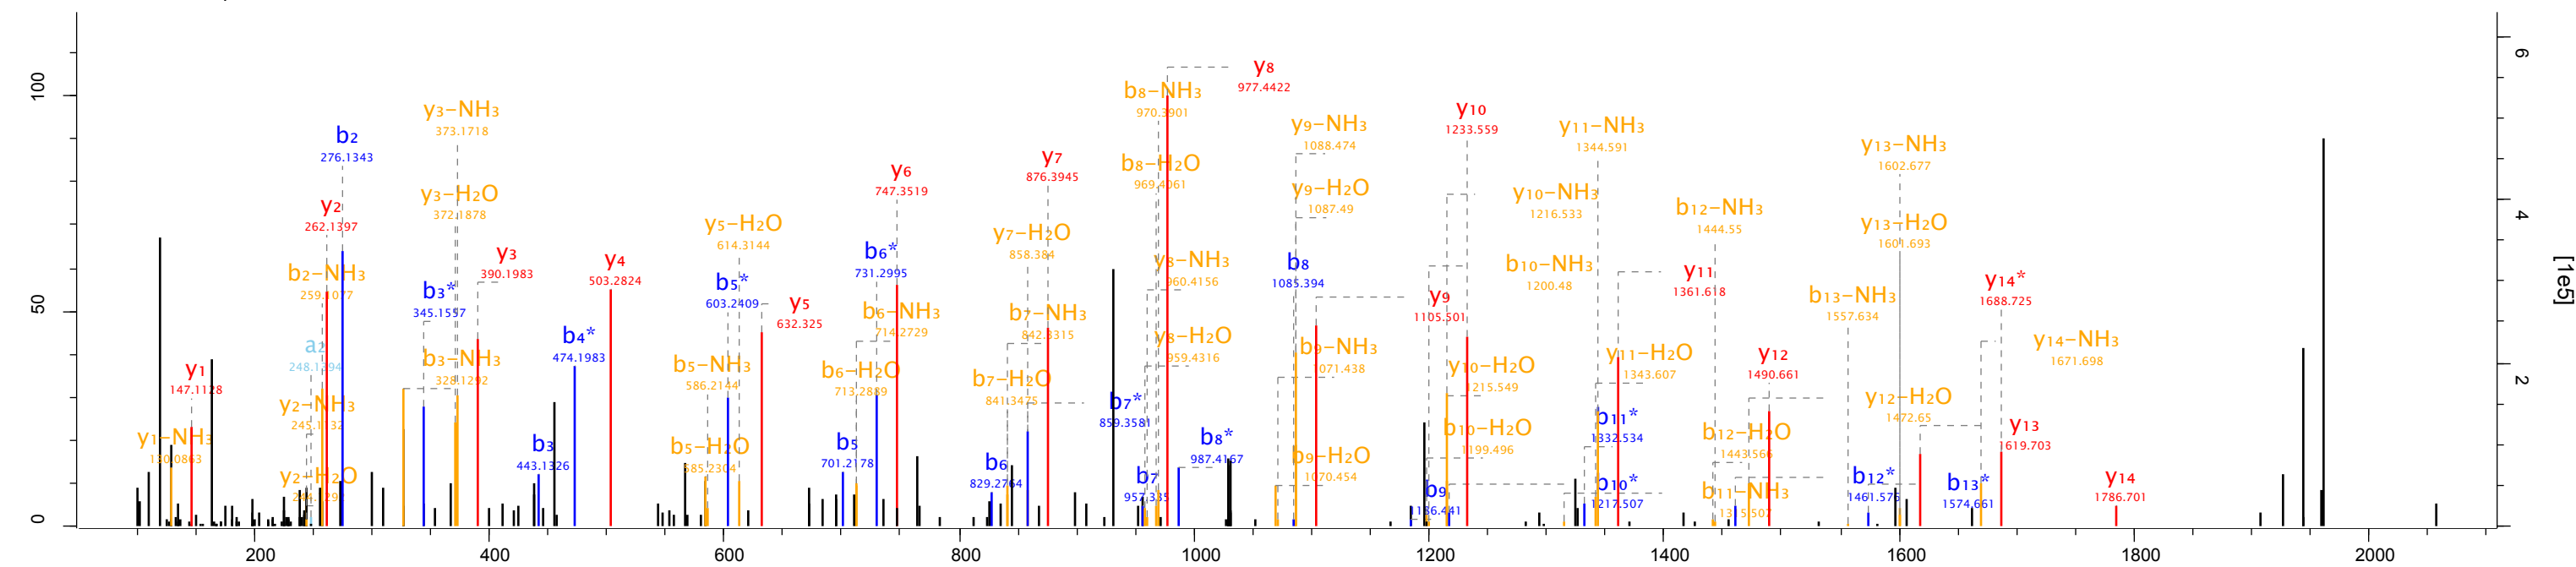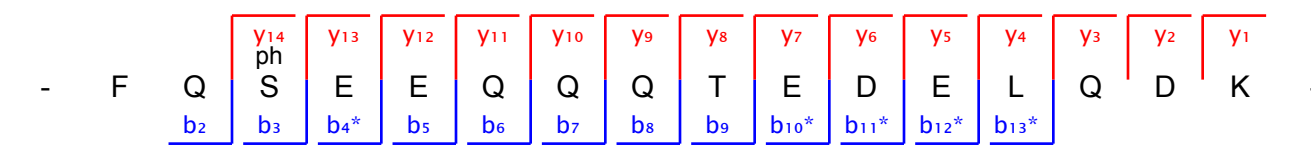

Raw file: 20150814\_A375SR\_Phospho\_BR2\_04  
 Scan: 14643 Method: FTMS; HCD Score: 75.25 m/z: 777.87 Gene names: PRICKLE1

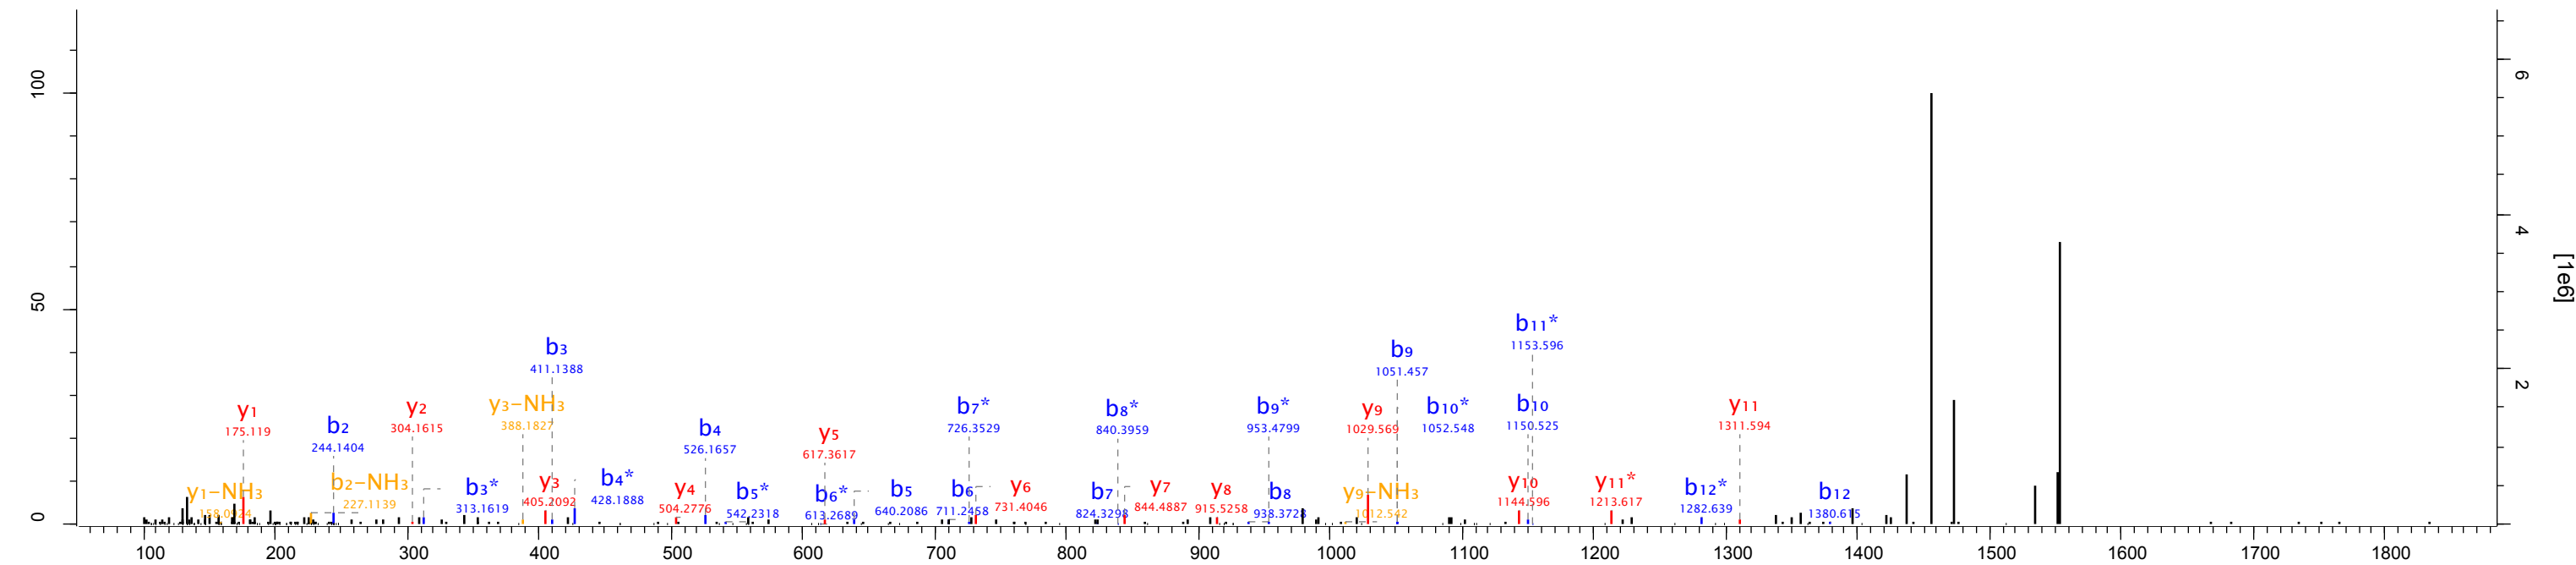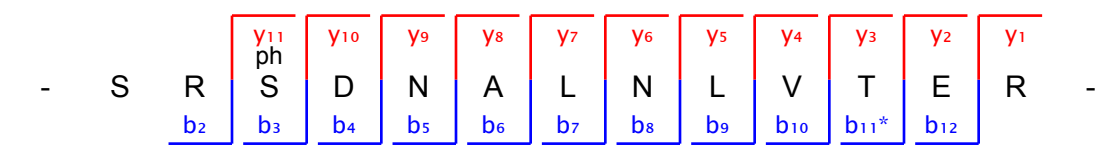

Raw file 20150814\_A375SR\_Phospho\_BR2\_04 Scan 28803 Method FTMS; HCD Score 42.35 m/z 950.96

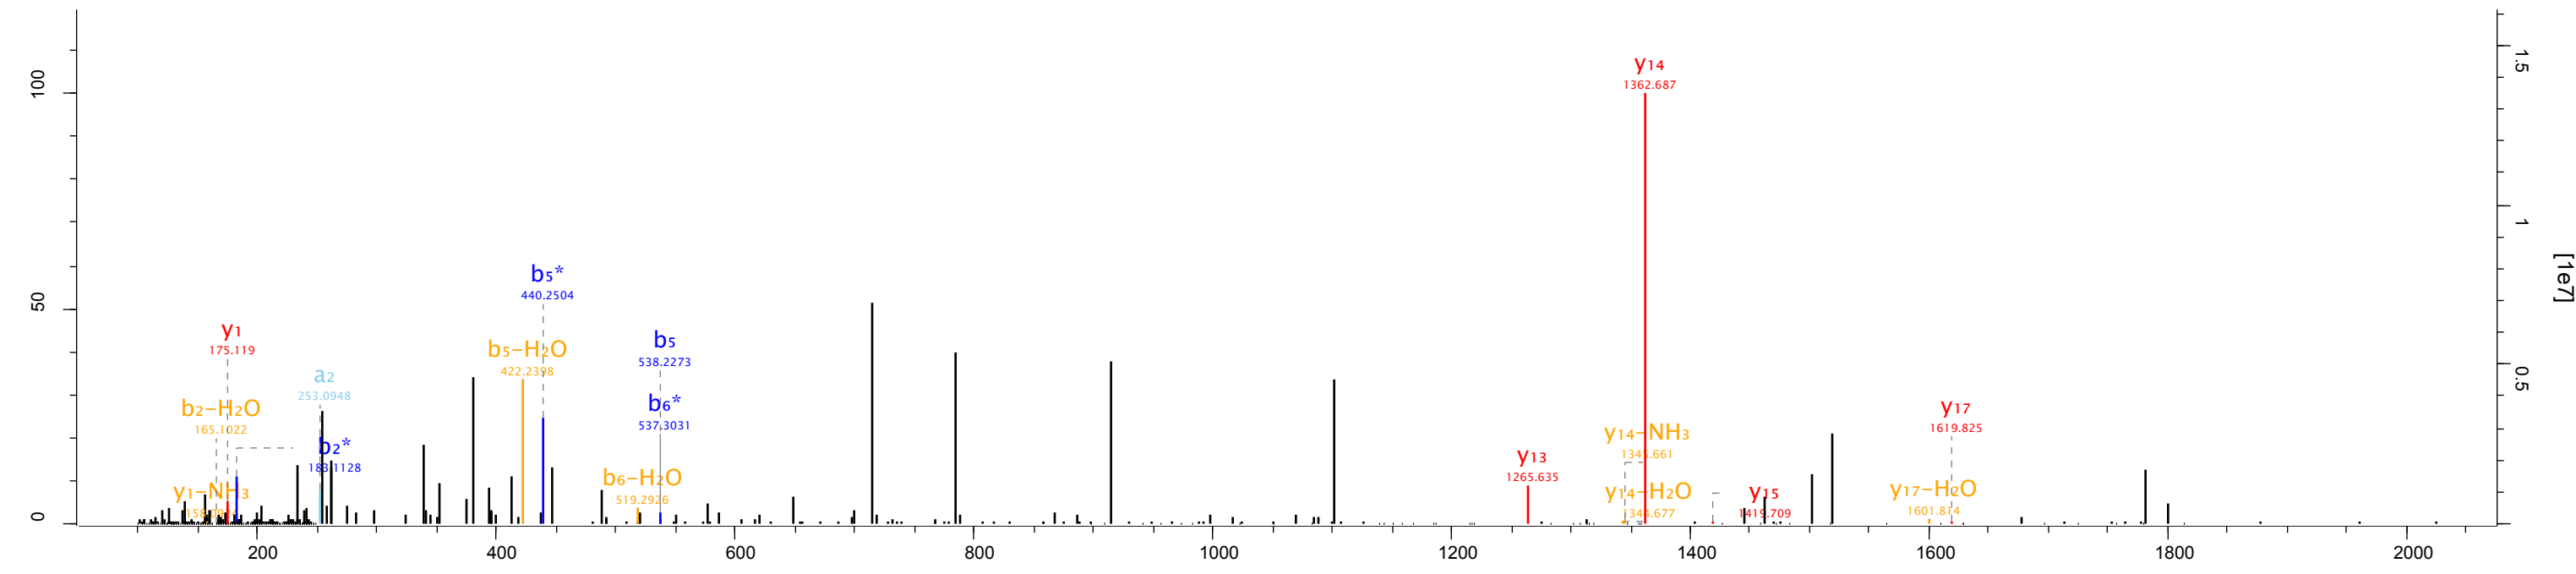

- ph S L S L G P S Q E P A P G G G R G P R -

Fragmentation mapping (b and y ions):

- b<sub>2</sub>\*: L S
- y<sub>17</sub>: S
- b<sub>5</sub>: G
- y<sub>15</sub>: G
- b<sub>6</sub>\*: P
- y<sub>14</sub>: P
- y<sub>13</sub>: S
- y<sub>1</sub>: R

Raw file: 20150814\_A375SR\_Phospho\_BR2\_04  
 Scan: 5583 Method: FTMS; HCD Score: 195.36 m/z: 841.34 Gene names: YAF2

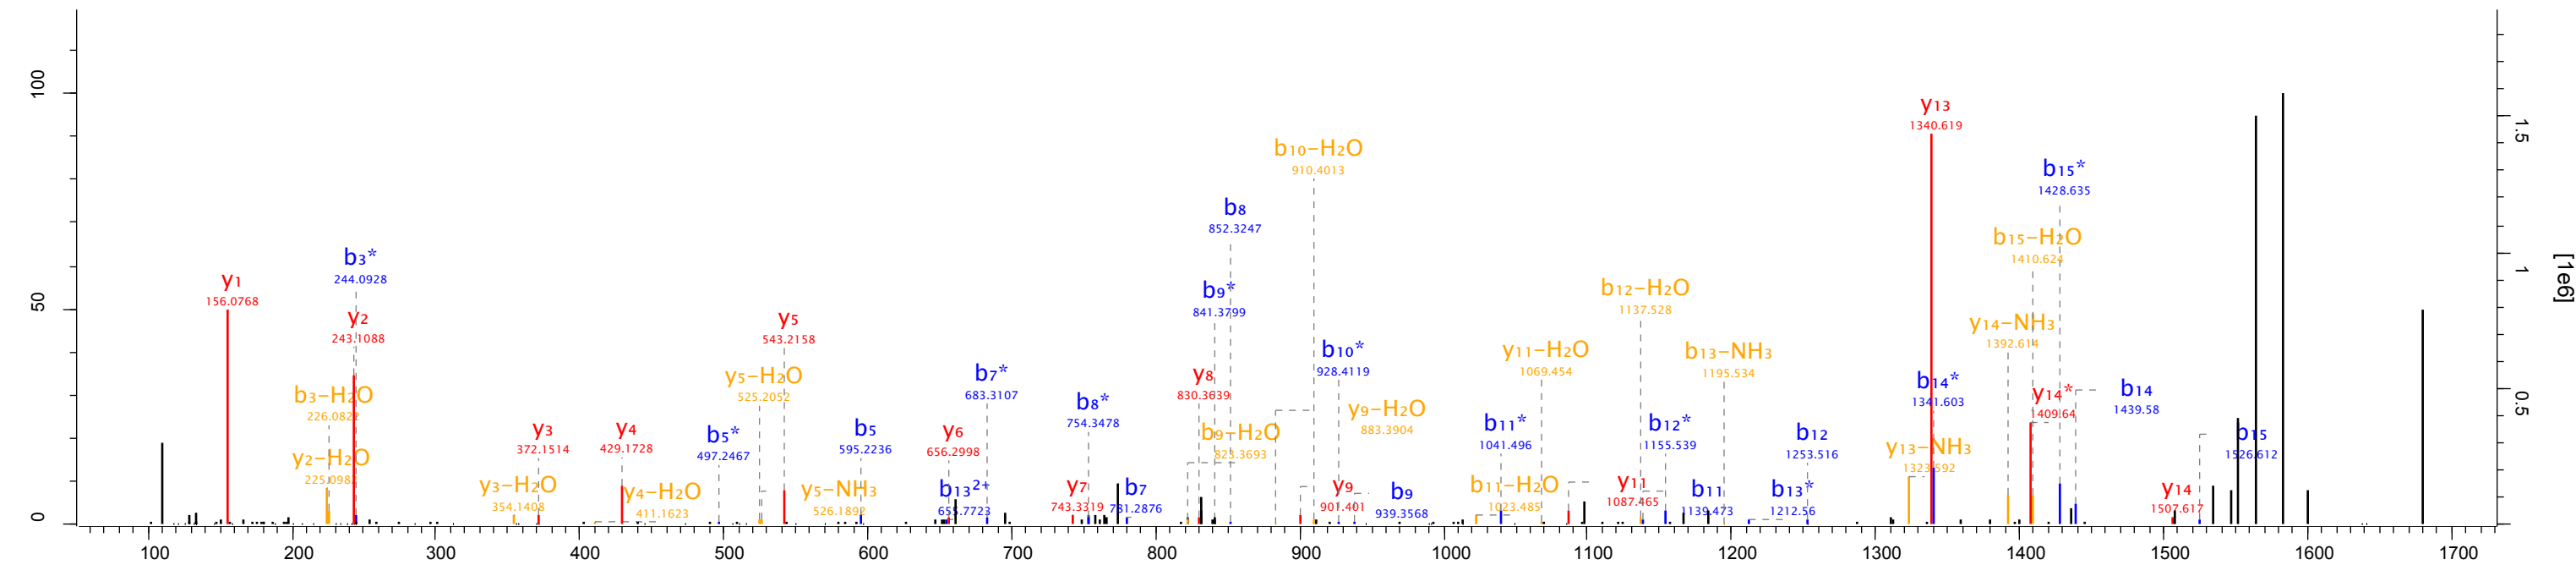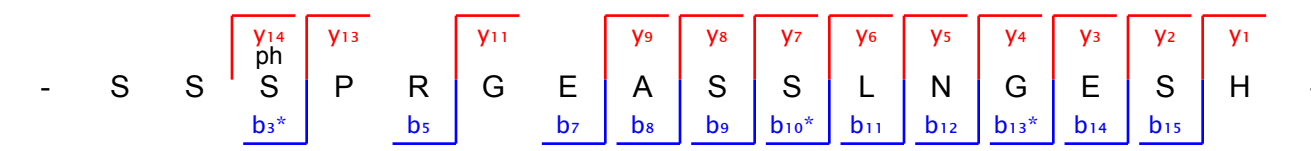

Raw file 20150814\_A375SR\_Phospho\_BR2\_04 Scan 5653 Method FTMS; HCD Score 70.06 m/z 426.73

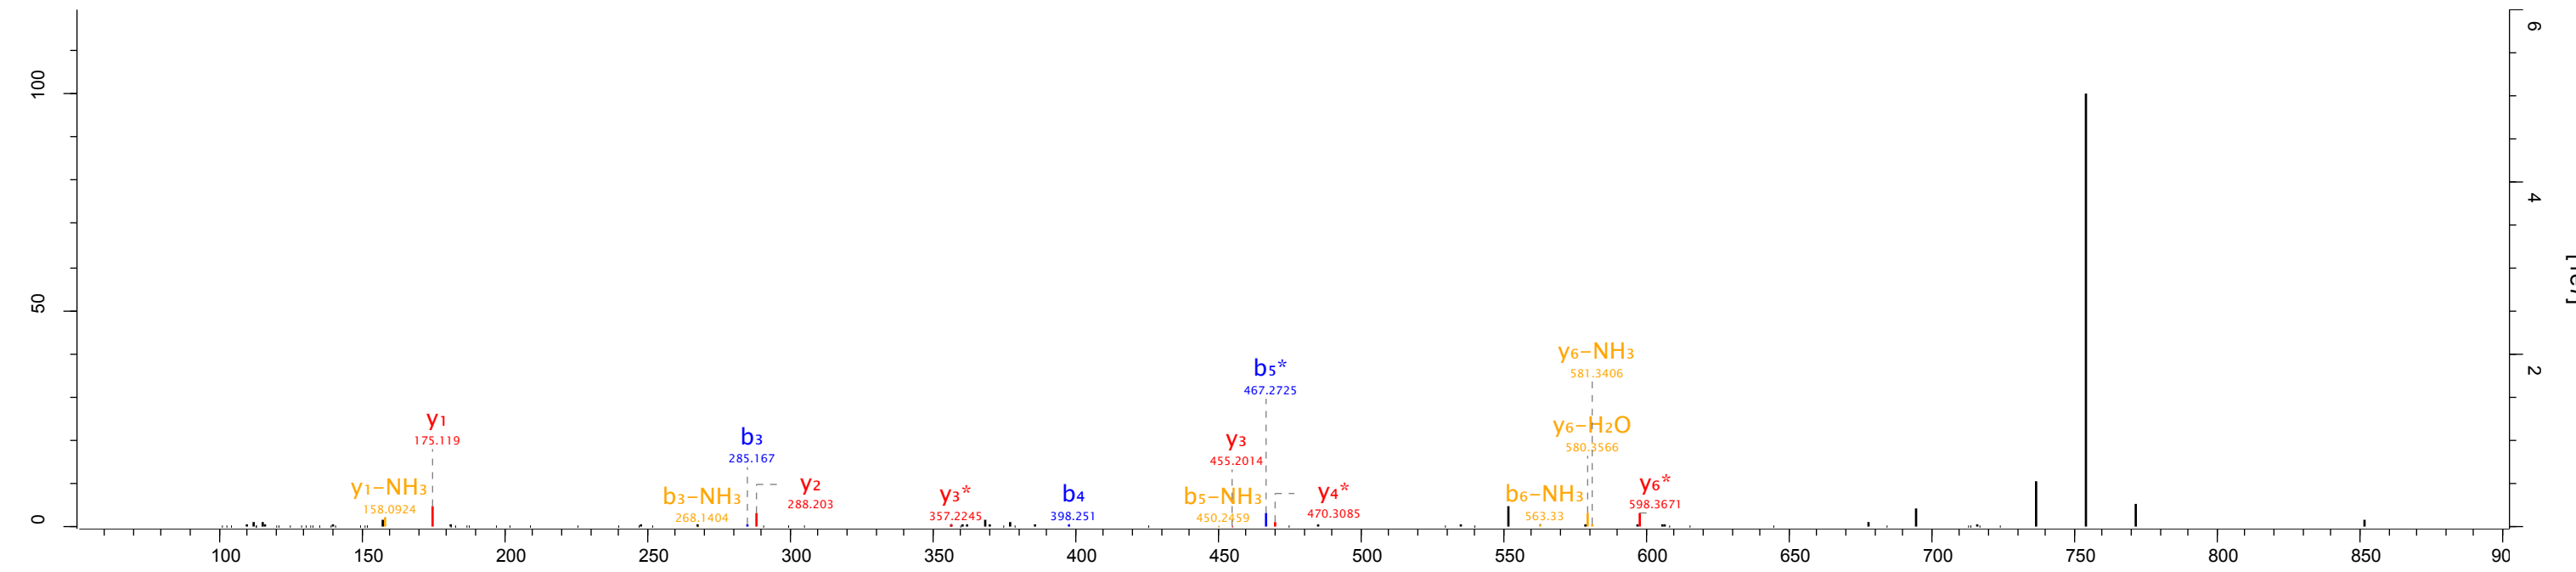

Raw file: 20150814\_A375SR\_Phospho\_BR2\_05  
 Scan: 13673 Method: FTMS; HCD Score: 66.55 m/z: 784.86 Gene names: PWWP2A

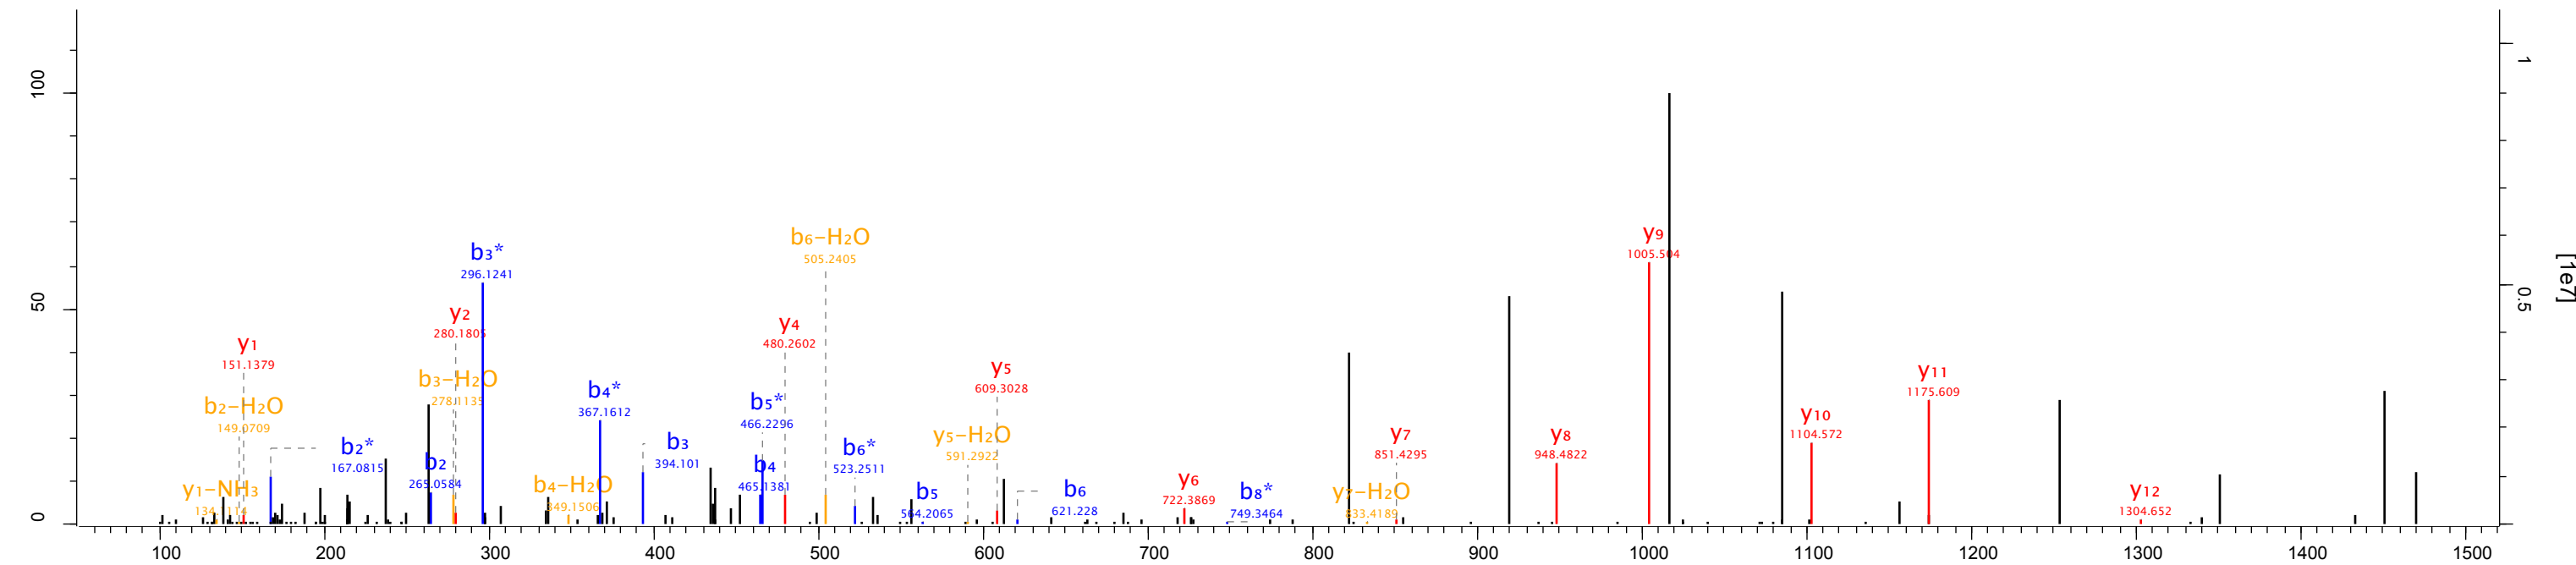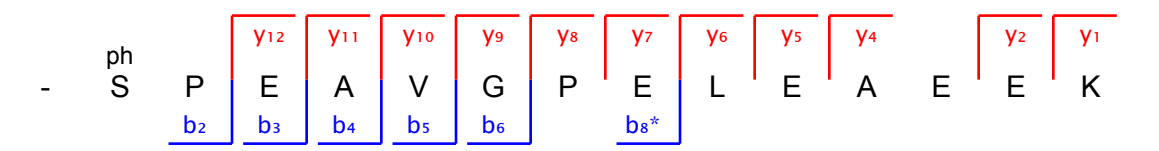

Raw file: 20150814\_A375SR\_Phospho\_BR2\_05  
 Scan: 28843 Method: FTMS; HCD Score: 119.08 m/z: 682.02 Gene names: TKT

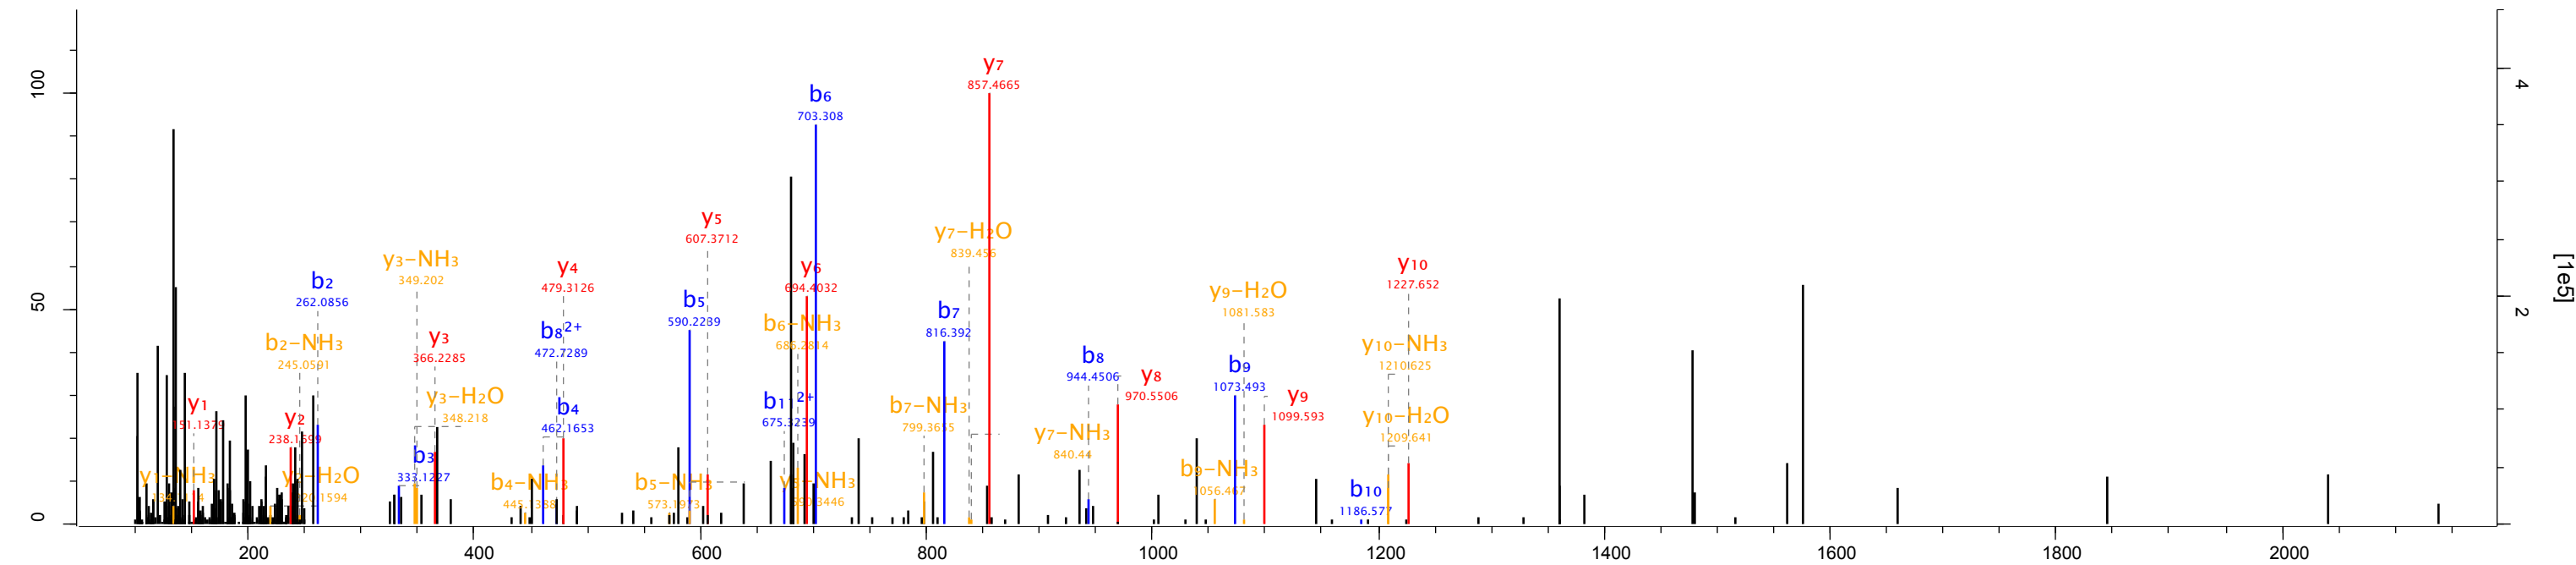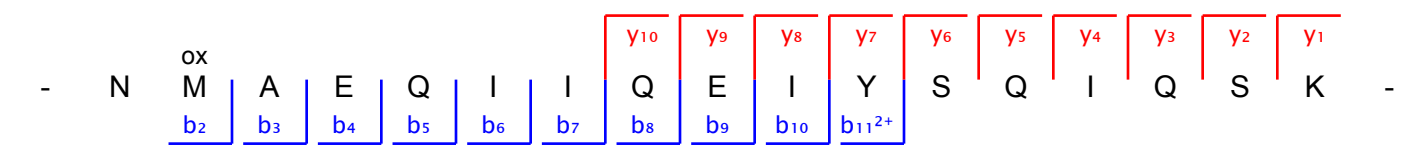



Raw file: 20150814\_A375SR\_Phospho\_BR2\_05  
 Scan: 6003 Method: FTMS; HCD Score: 142.54 m/z: 841.34 Gene names: YAF2

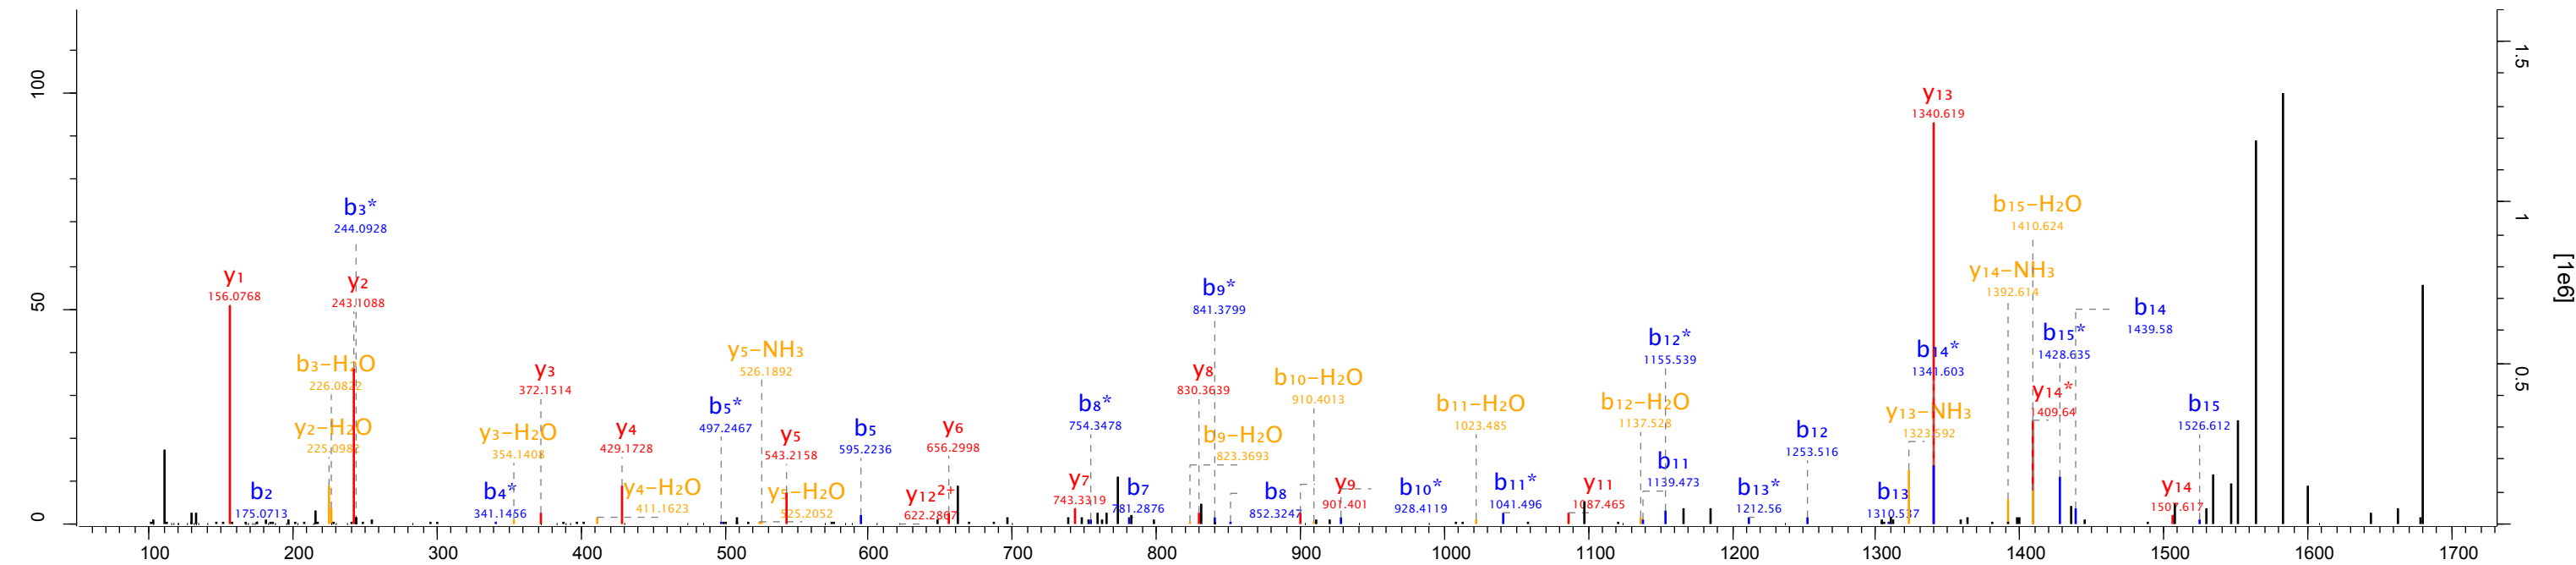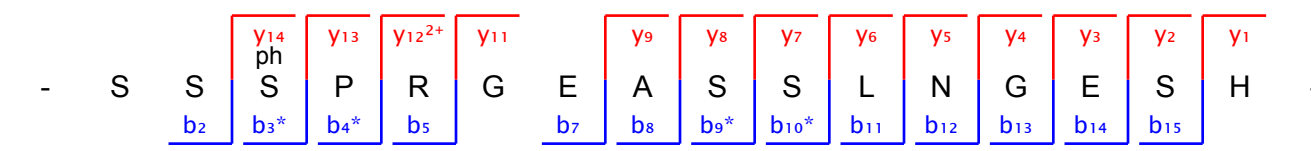

Raw file 20150814\_A375SR\_Phospho\_BR2\_06 Scan 21253 Method FTMS; HCD Score 89.3 m/z 782.76 Gene names ZNF579

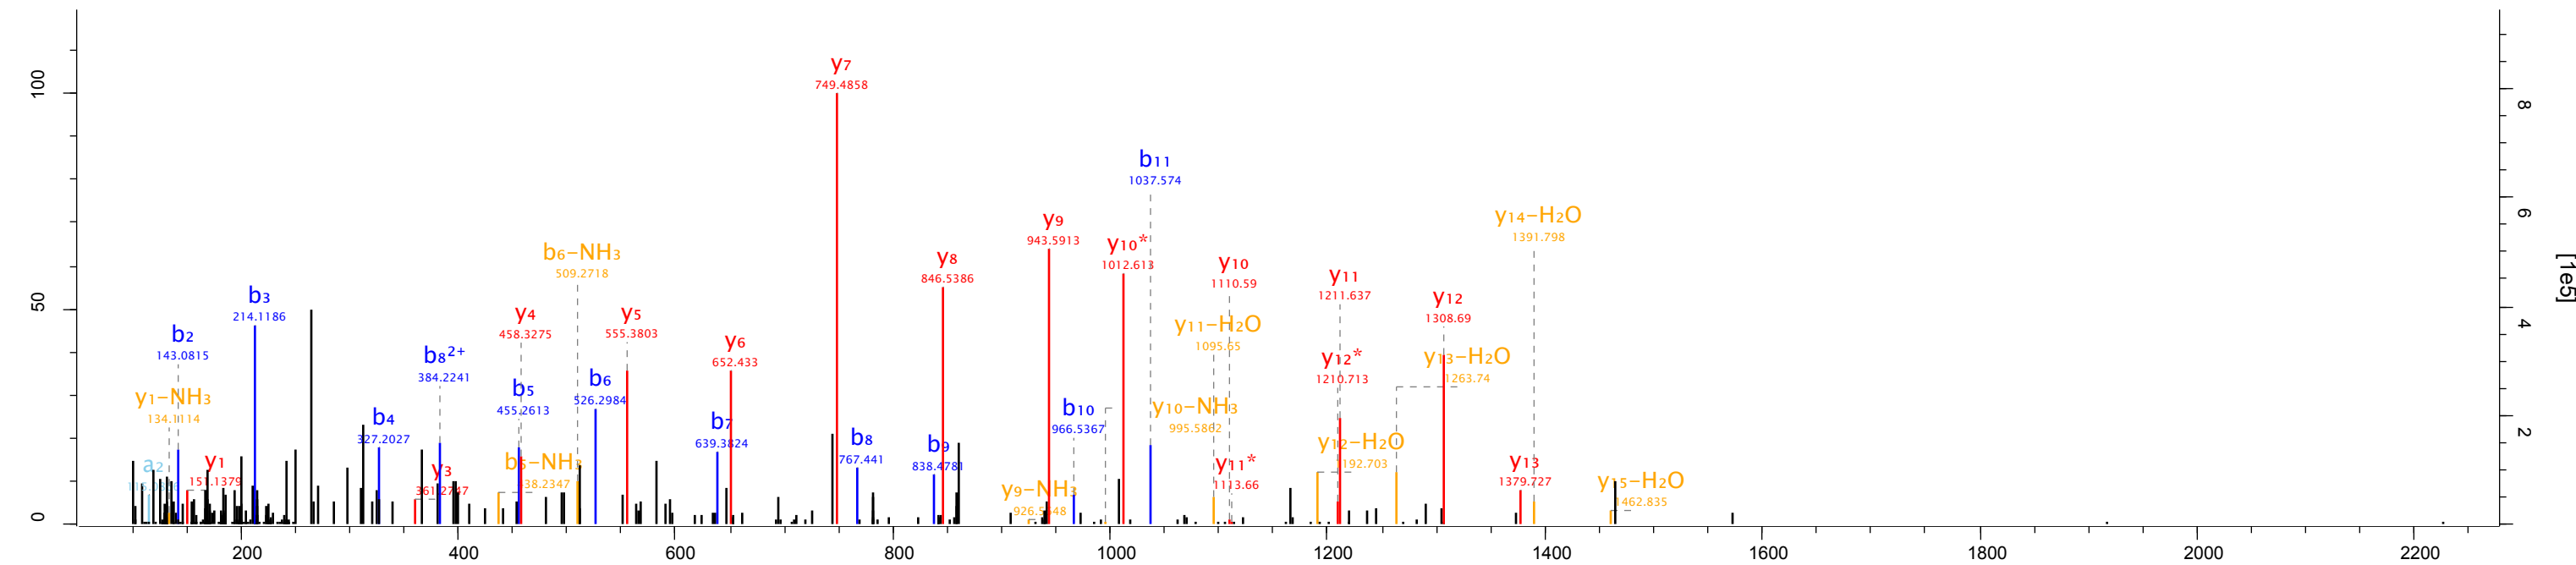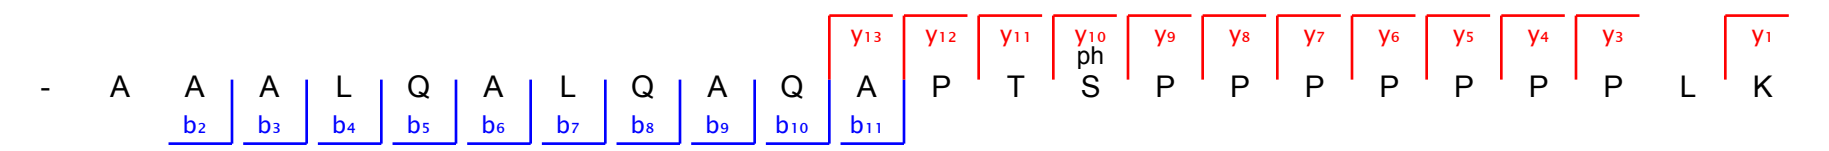

Raw file  
20150814\_A375SR\_Phospho\_BR2\_06

Scan 24083 Method FTMS; HCD Score 107.83 m/z 646.29 Gene names MAPK11P1L

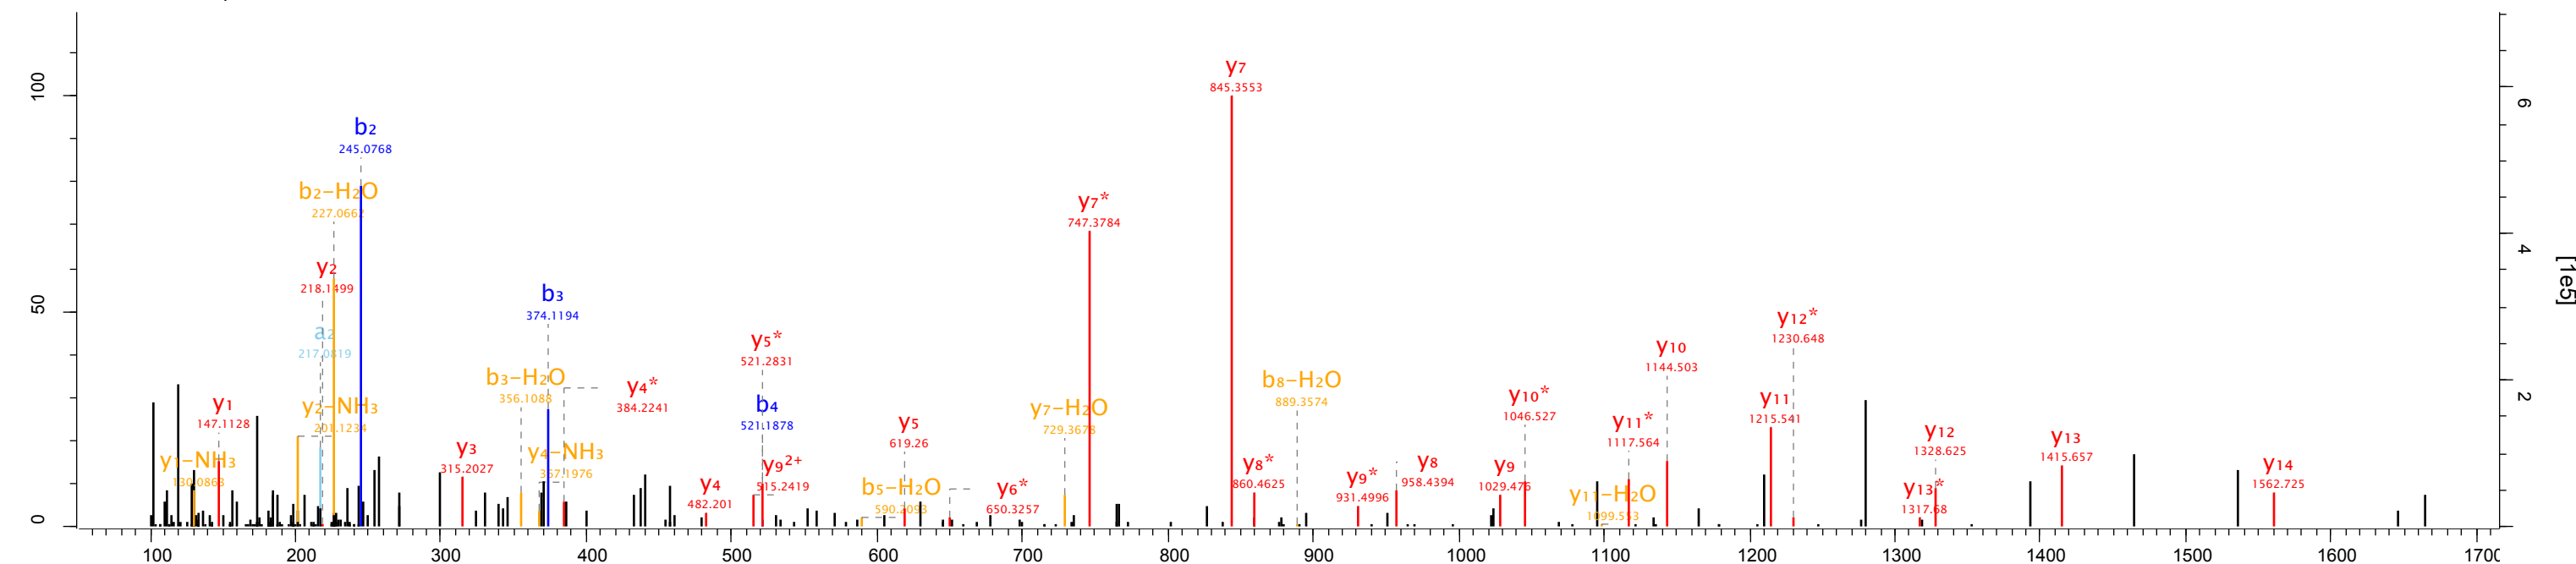

ac  
- S D E F S L A D A L P E H S P A K -  
b2 b3 b4

Raw file: 20150814\_A375SR\_Phospho\_BR2\_07  
 Scan: 23553 Method: FTMS; HCD Score: 105.51 m/z: 647.63 Gene names: MAPK11P1L

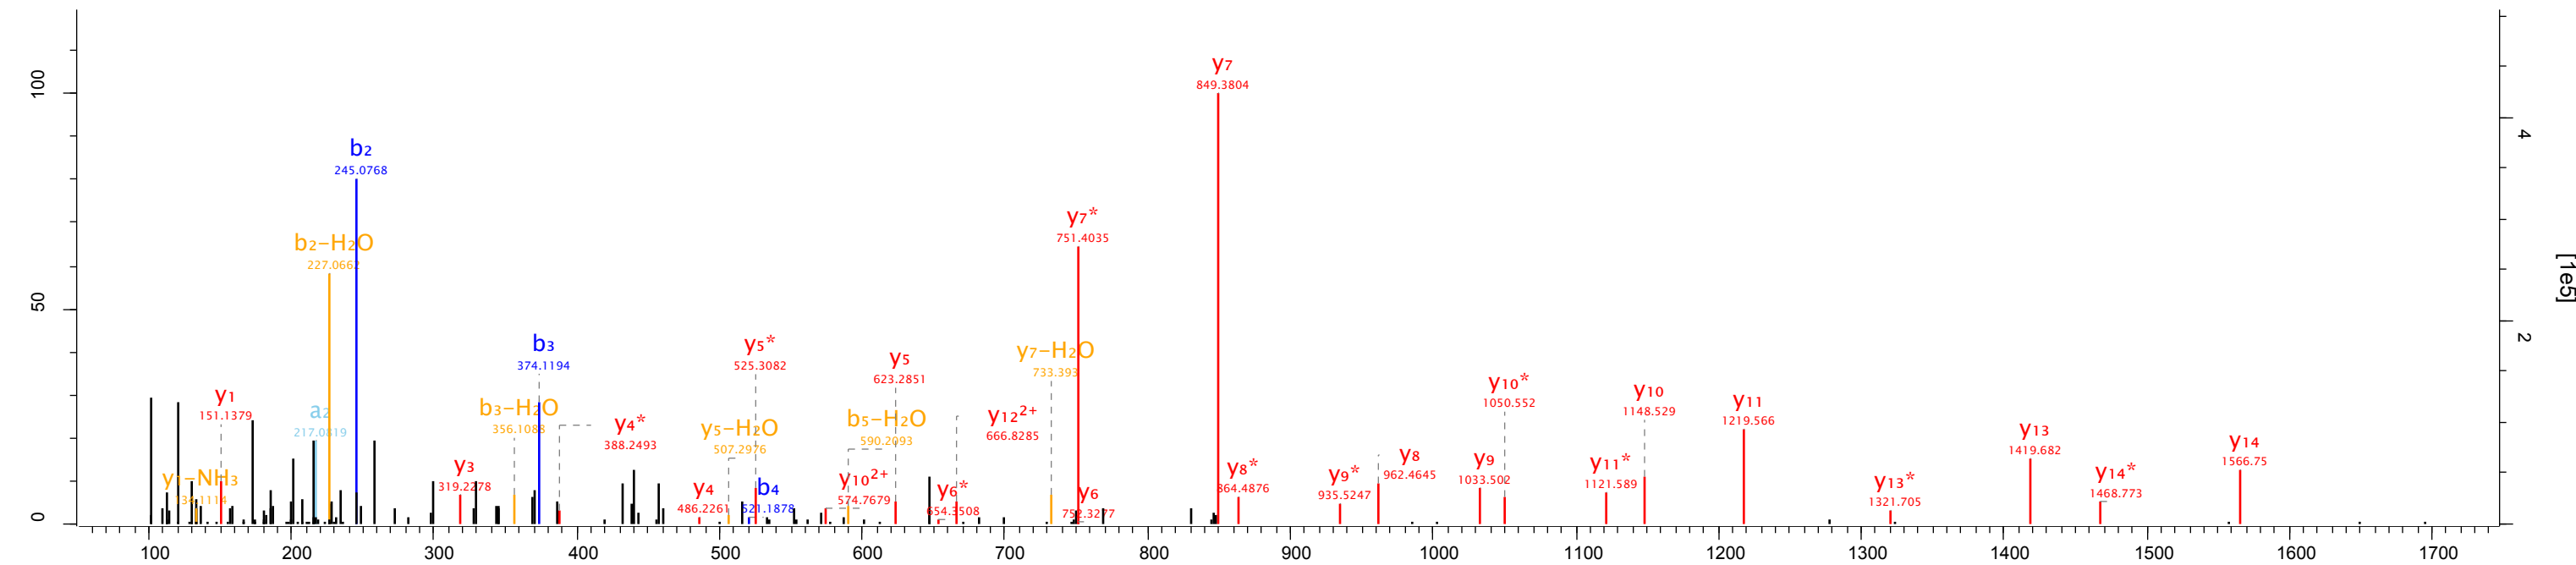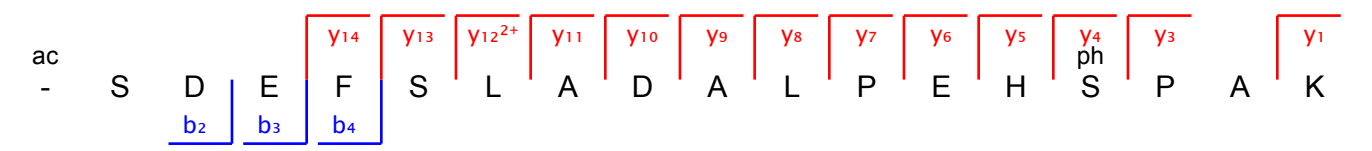

Raw file 20150814\_A375SR\_Phospho\_BR2\_08 Scan 9683 Method FTMS; HCD Score 42.19 m/z 556.77

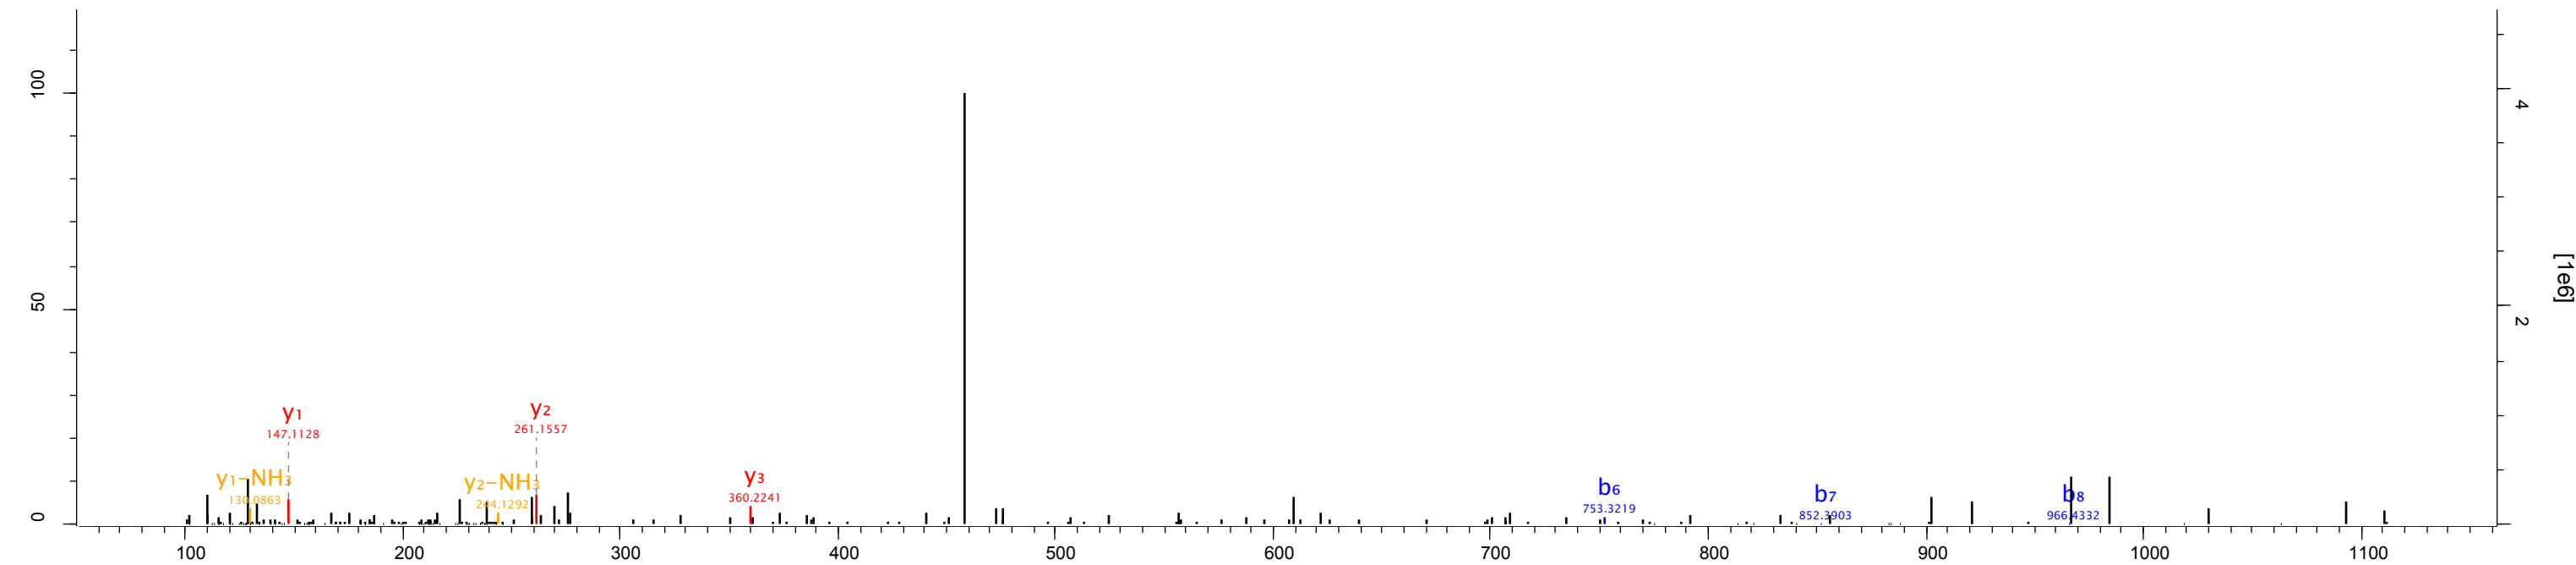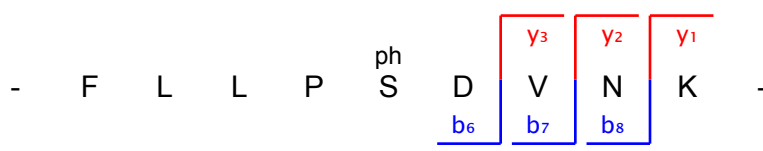

Raw file 20150814\_A375SR\_Phospho\_BR2\_09 Scan 24073 Method FTMS; HCD Score 188.26 m/z 970.44 Gene names MAPK11P1L

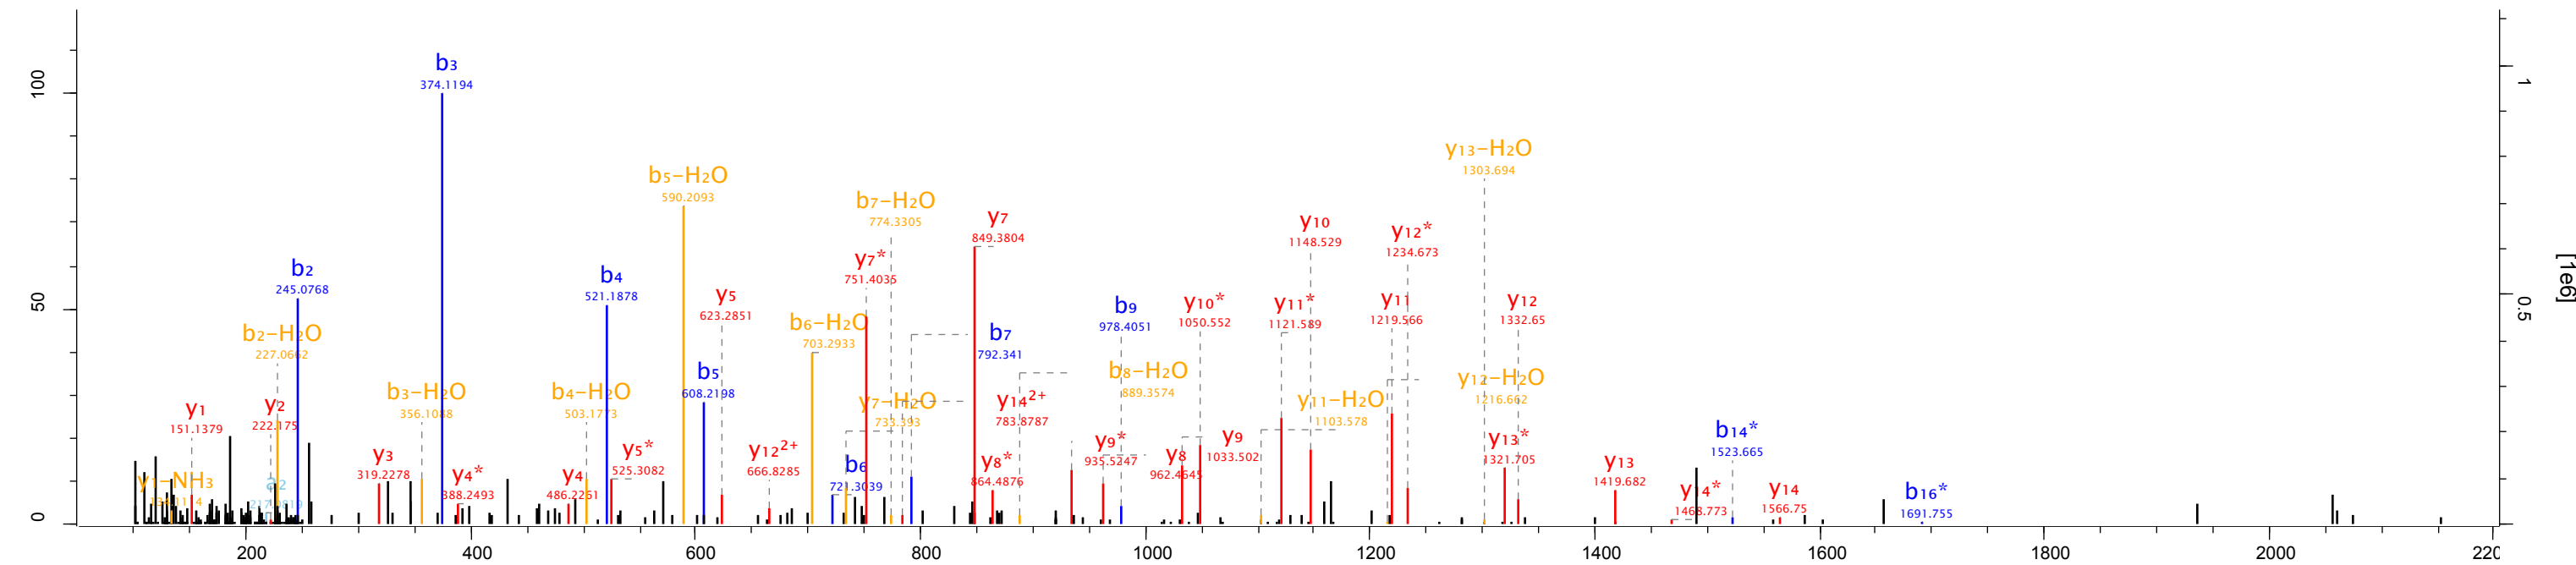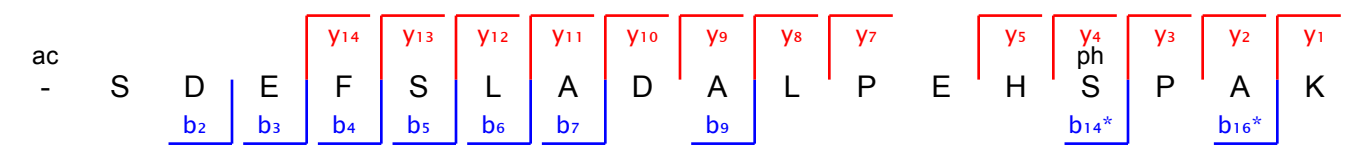

Raw file 20150814\_A375SR\_Phospho\_BR2\_10 Scan 21983 Method FTMS; HCD Score 157.82 m/z 1100.51 Gene names CEBPG

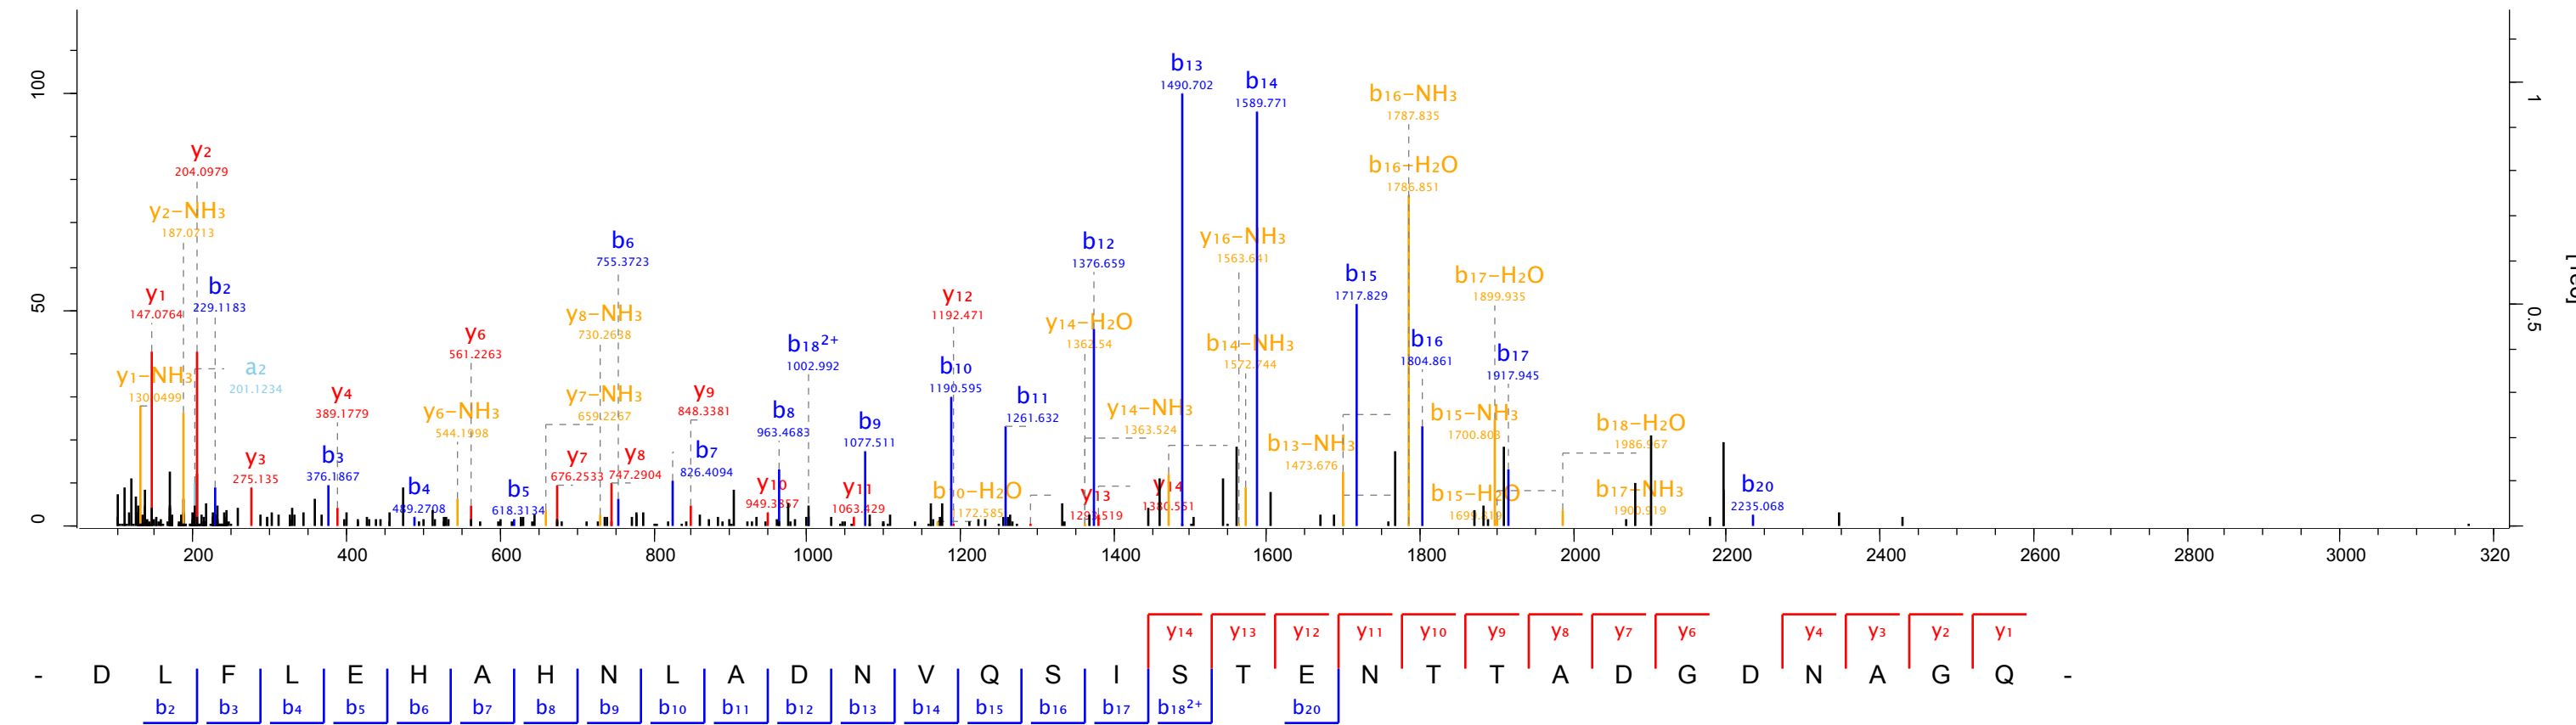

Raw file: 20150818\_A375SR-Proteome\_BR1  
 Scan: 15653 Method: FTMS; HCD Score: 62 m/z: 560.83 Gene names: POLR2F

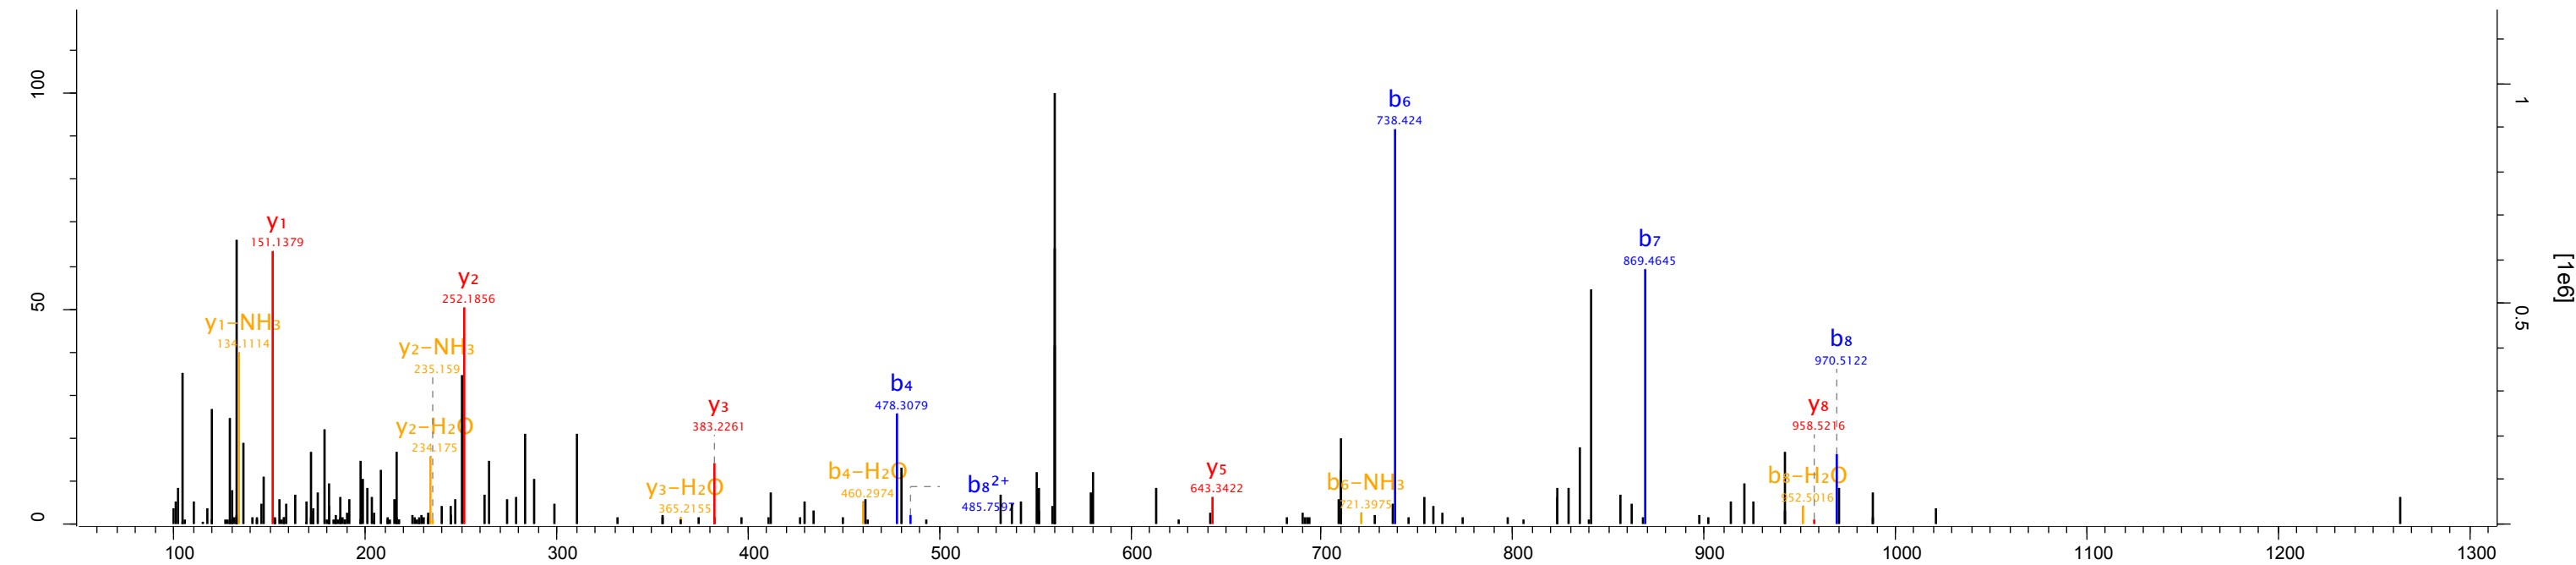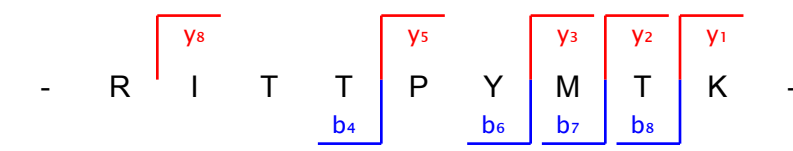



Raw file: 20150818\_A375SR-Proteome\_BR1  
 Scan: 22193 Method: FTMS; HCD Score: 52.68 m/z: 442.23 Gene names: C1orf234

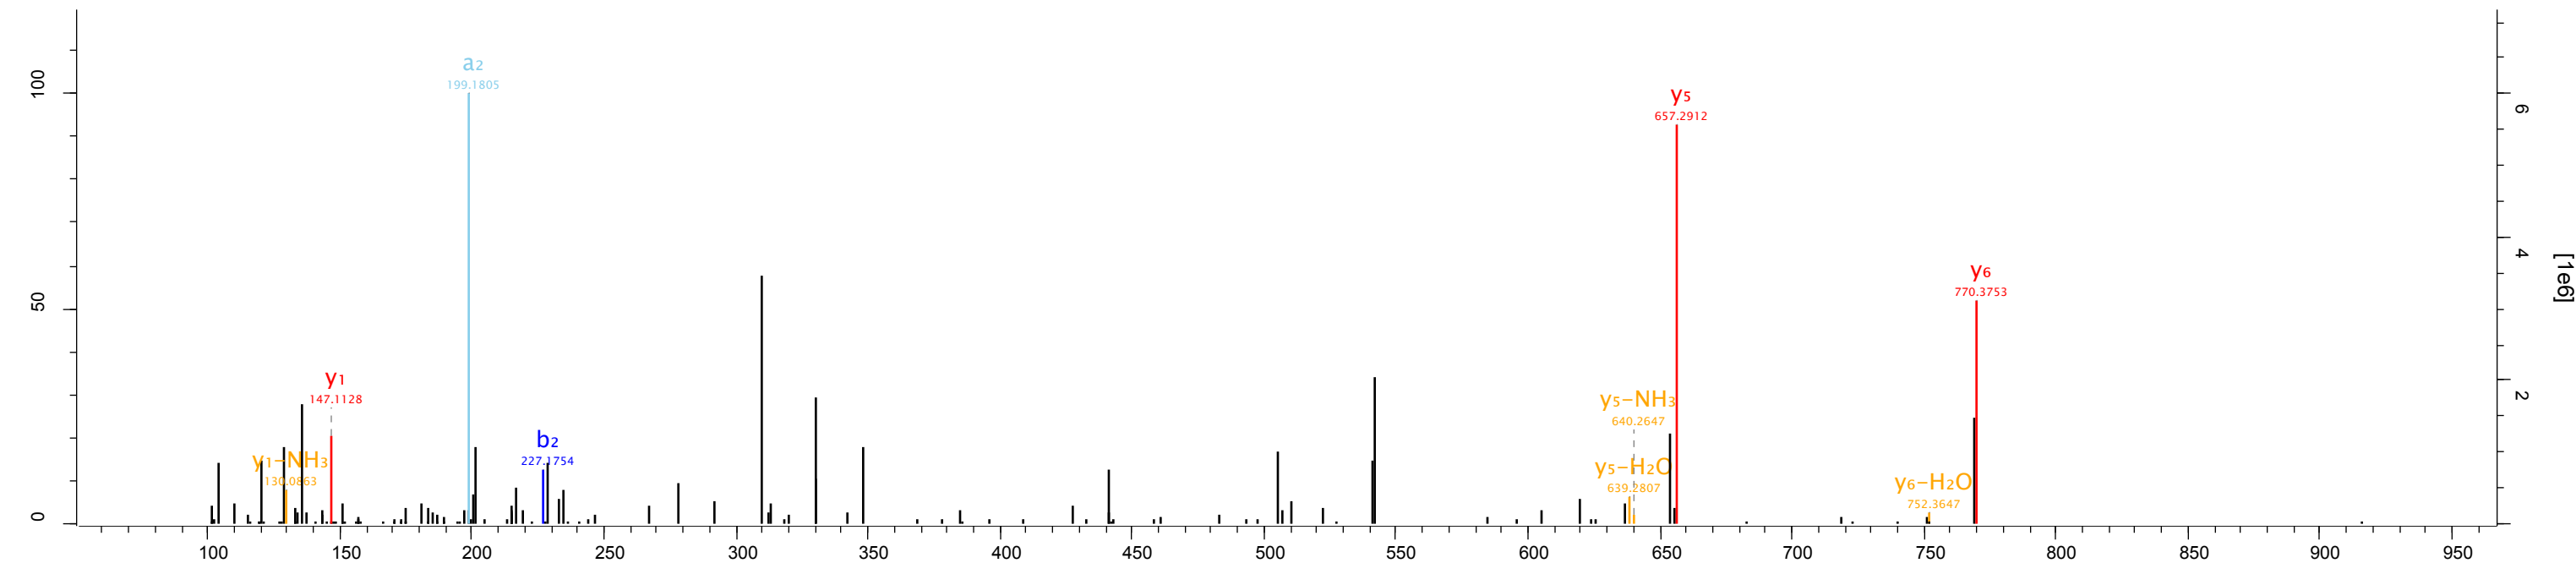

Raw file: 20150818\_A375SR-Proteome\_BR1  
 Scan: 38593 Method: FTMS; HCD Score: 89.03 m/z: 436.58 Gene names: RPL39P5;RPL39

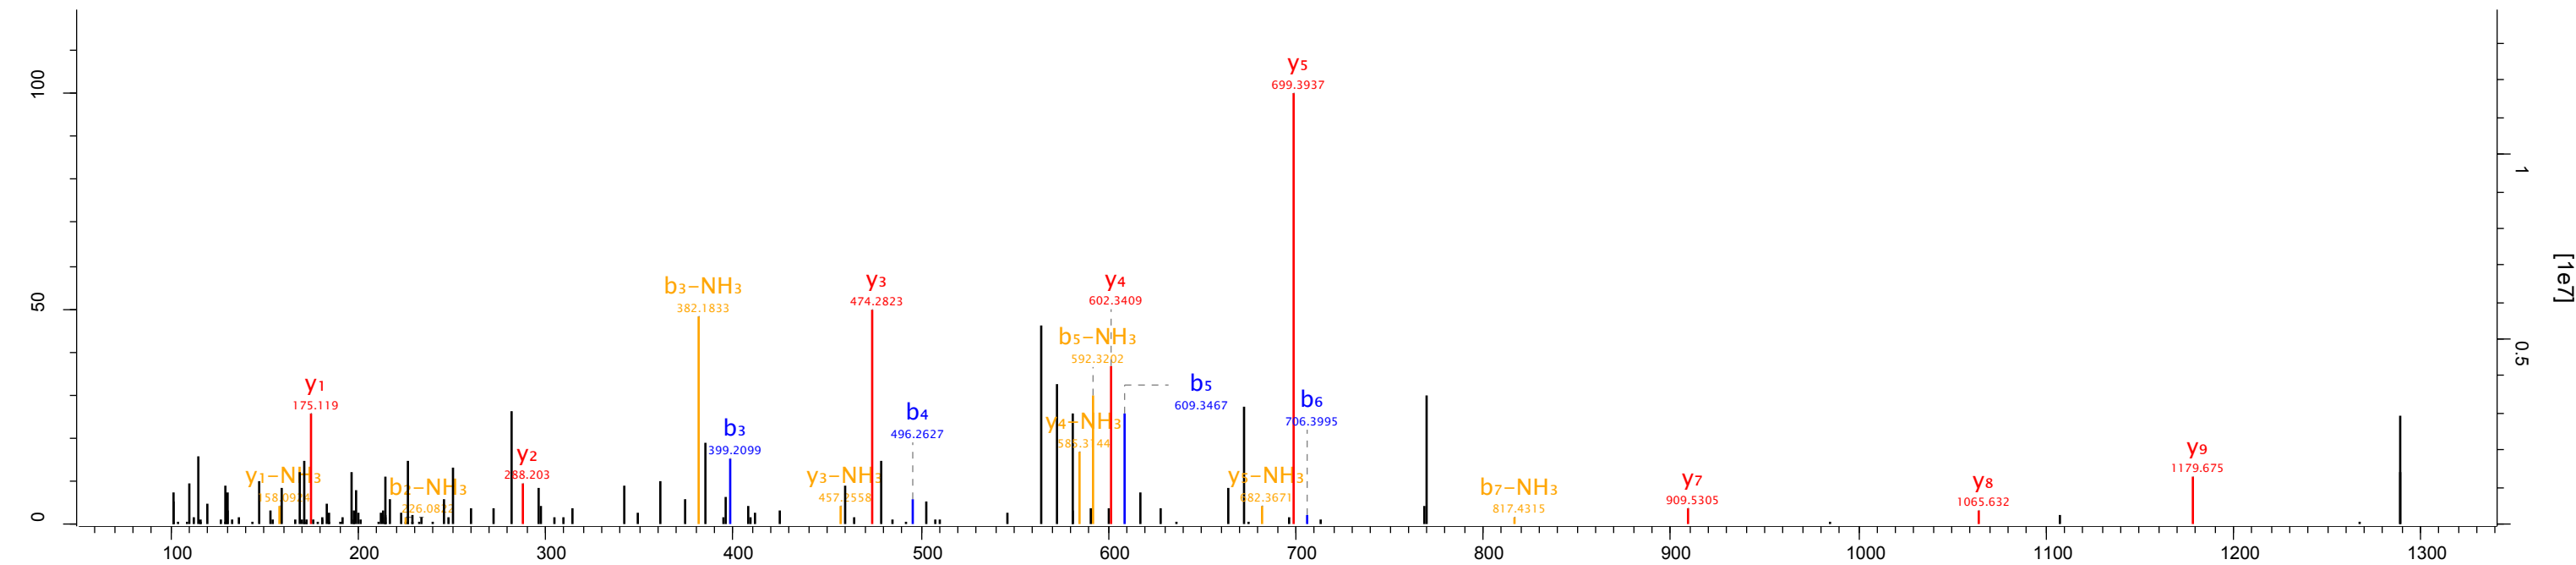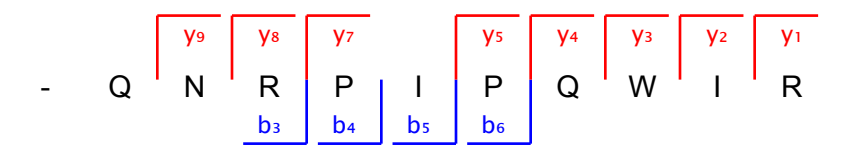

Raw file: 20150818\_A375SR-Proteome\_BR1  
 Scan: 79933 Method: FTMS; HCD Score: 125.98 m/z: 928.44 Gene names: MAPK11P1L

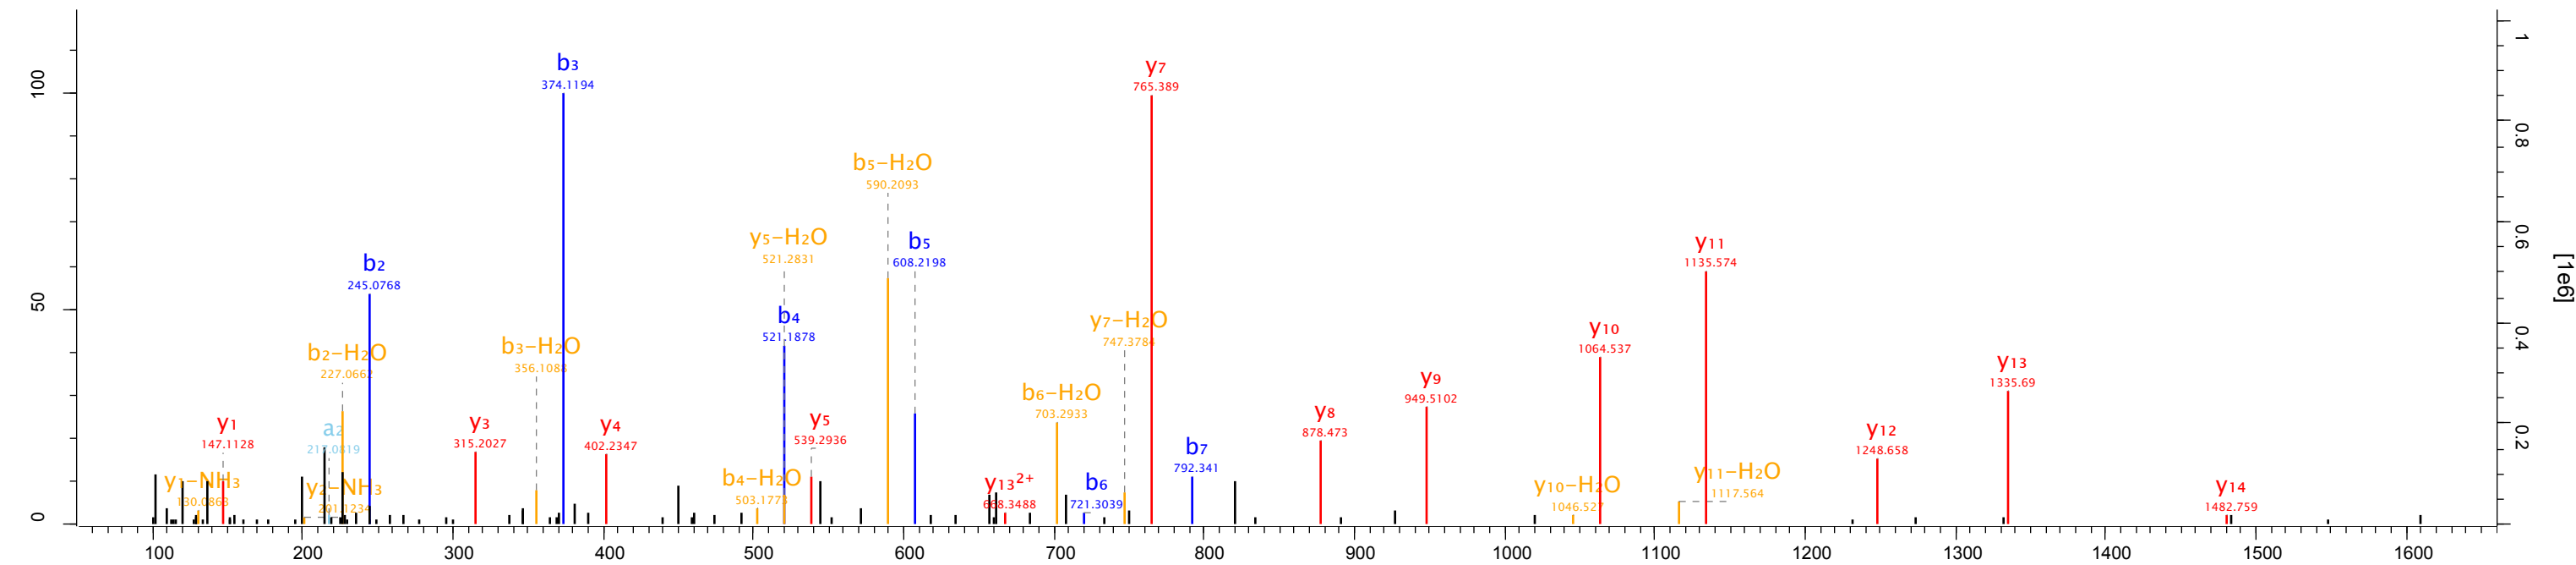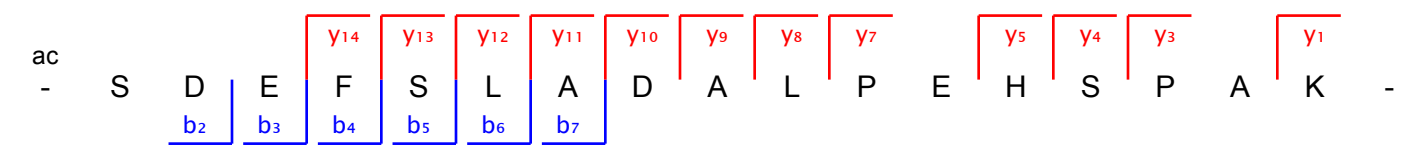

Raw file: 20150818\_A375SR-Proteome\_BR1  
 Scan: 80243  
 Method: FTMS; HCD  
 Score: 162.29  
 m/z: 930.95  
 Gene names: MAPK11P1L

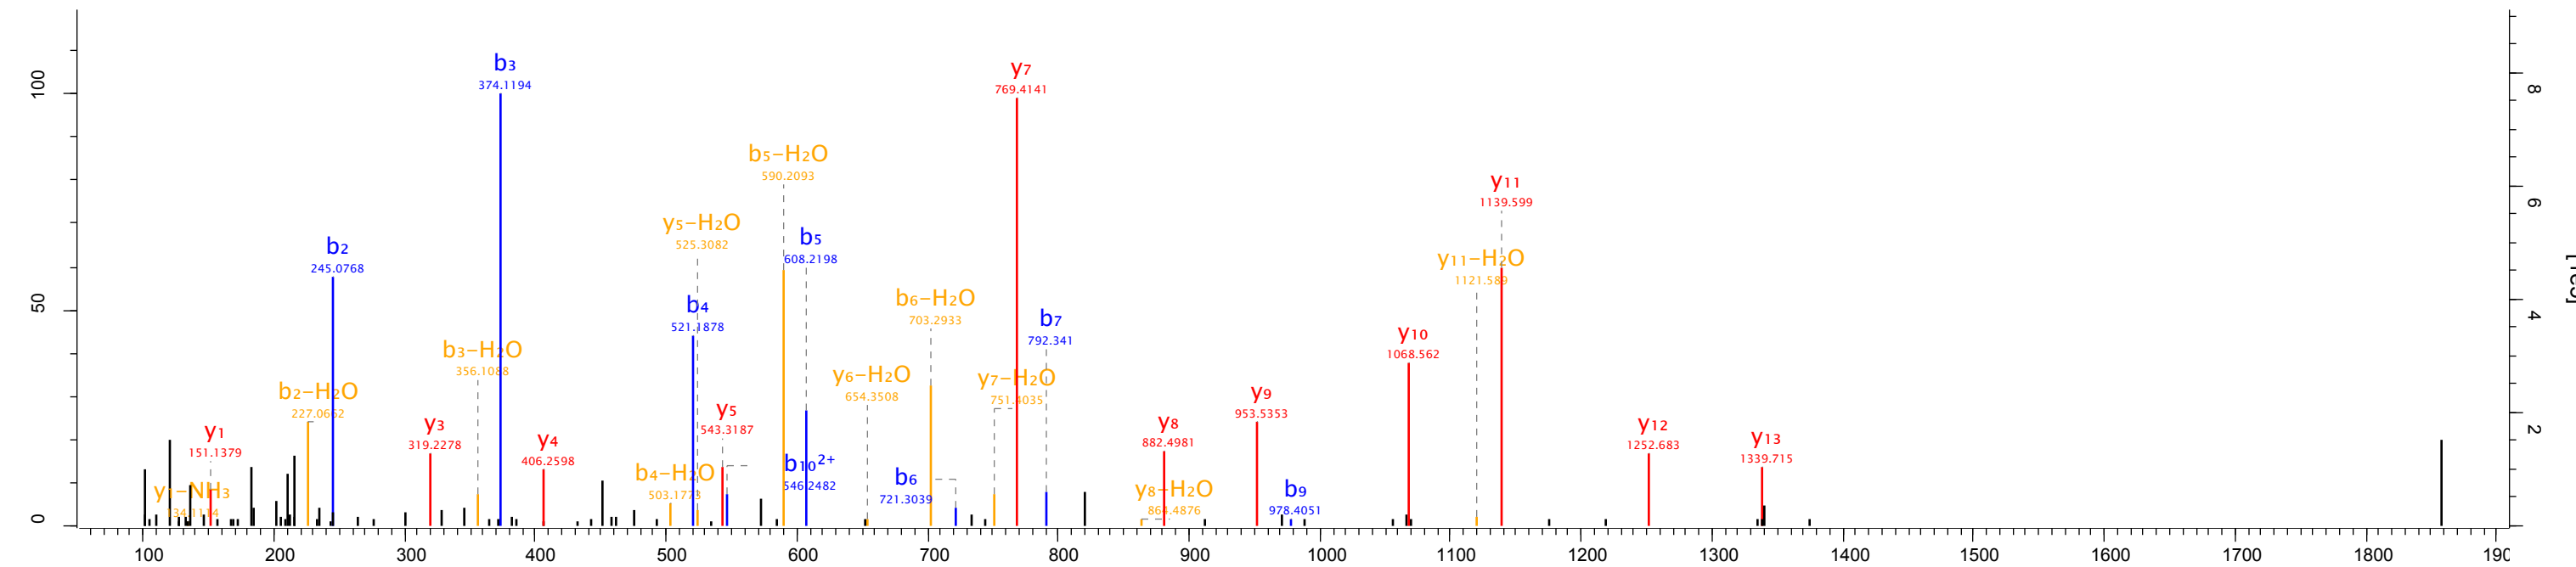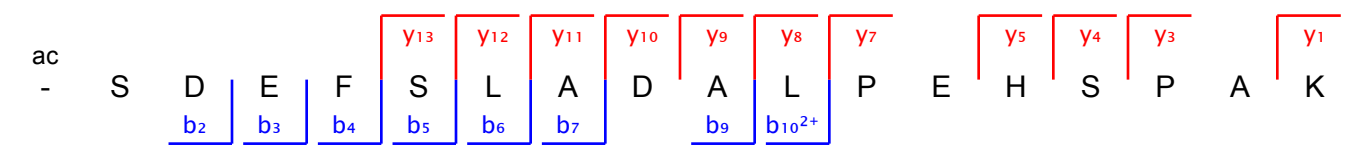

Raw file: 20150818\_A375SR-Proteome\_BR1  
 Scan: 92213 Method: FTMS; HCD Score: 44.61 m/z: 624.81 Gene names: TOR2A

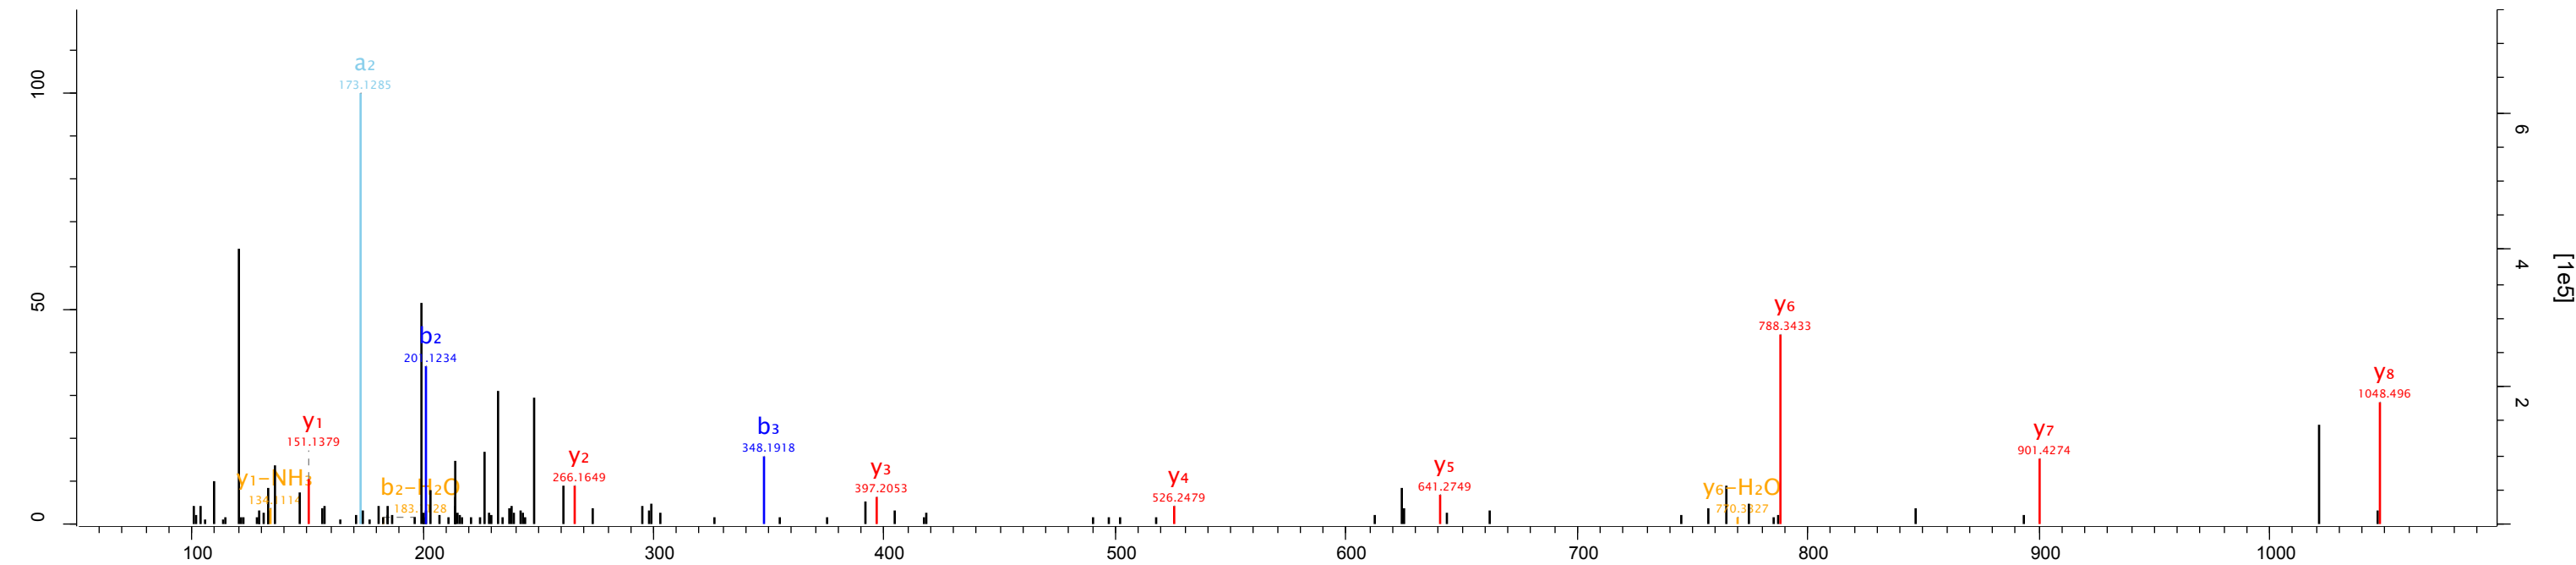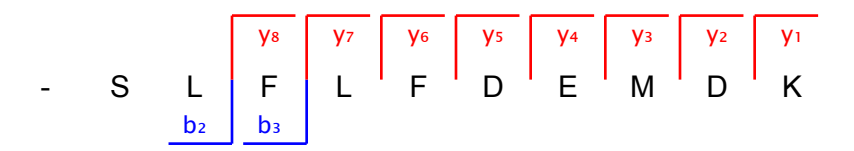

Raw file: 20150818\_A375SR-Proteome\_BR2  
 Scan: 37273 Method: FTMS; HCD Score: 89.89 m/z: 440.6 Gene names: RPL39P5;RPL39

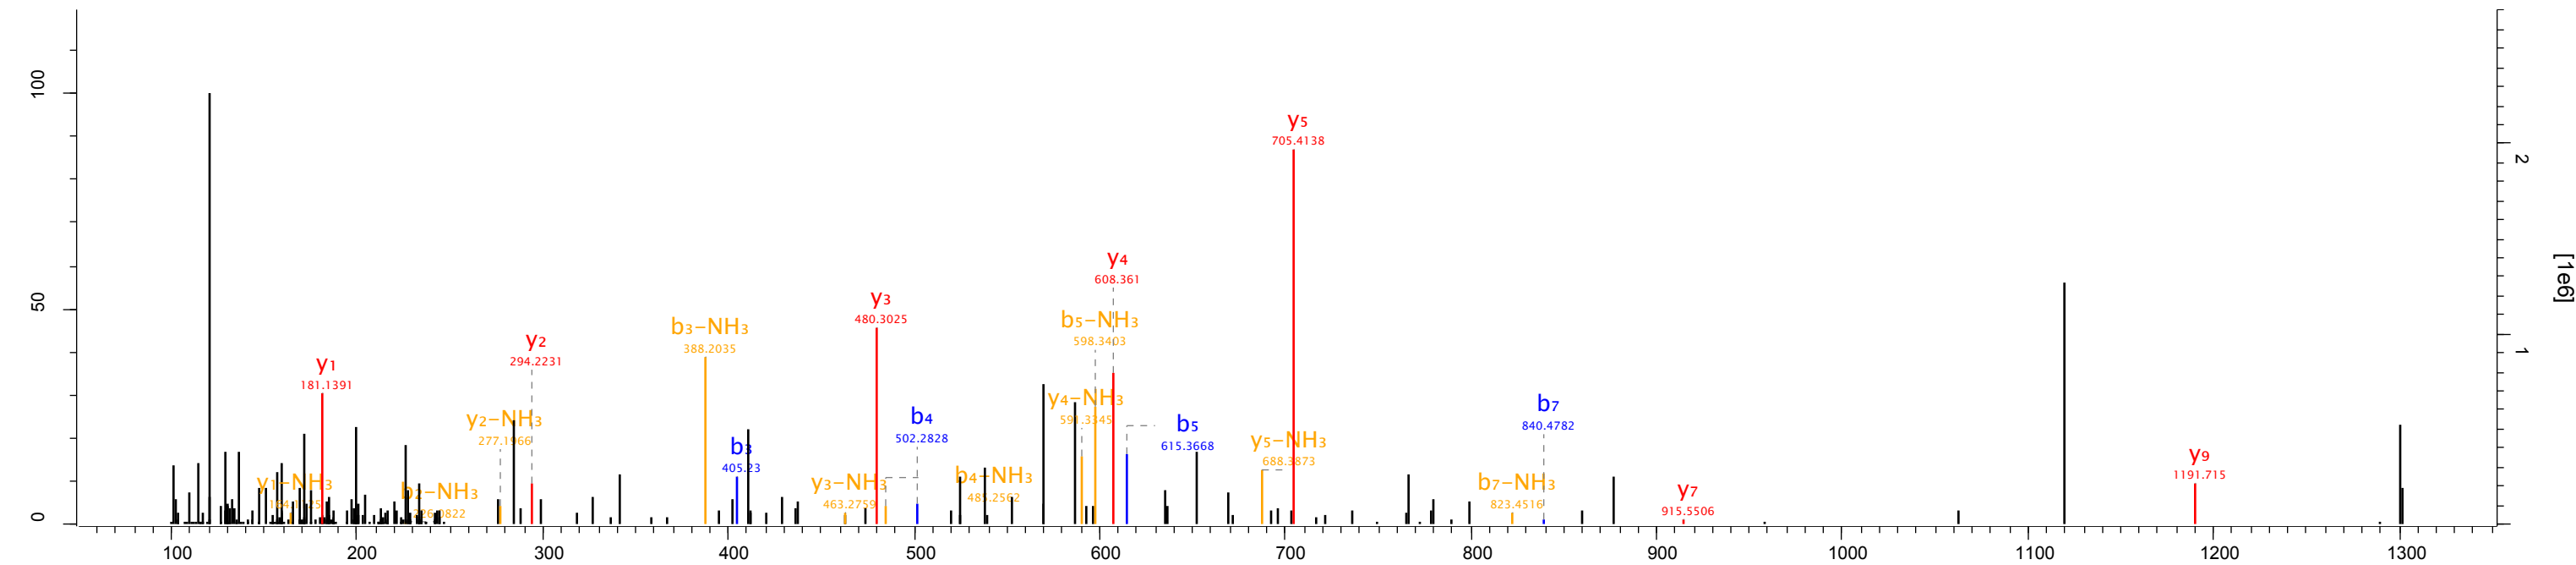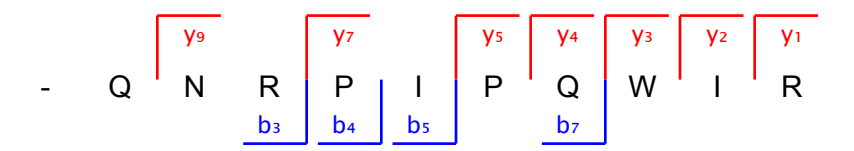

Raw file: 20150818\_A375SR-Proteome\_BR2  
 Scan: 4483 Method: FTMS; HCD Score: 60.64 m/z: 560.27 Gene names: SFT2D2

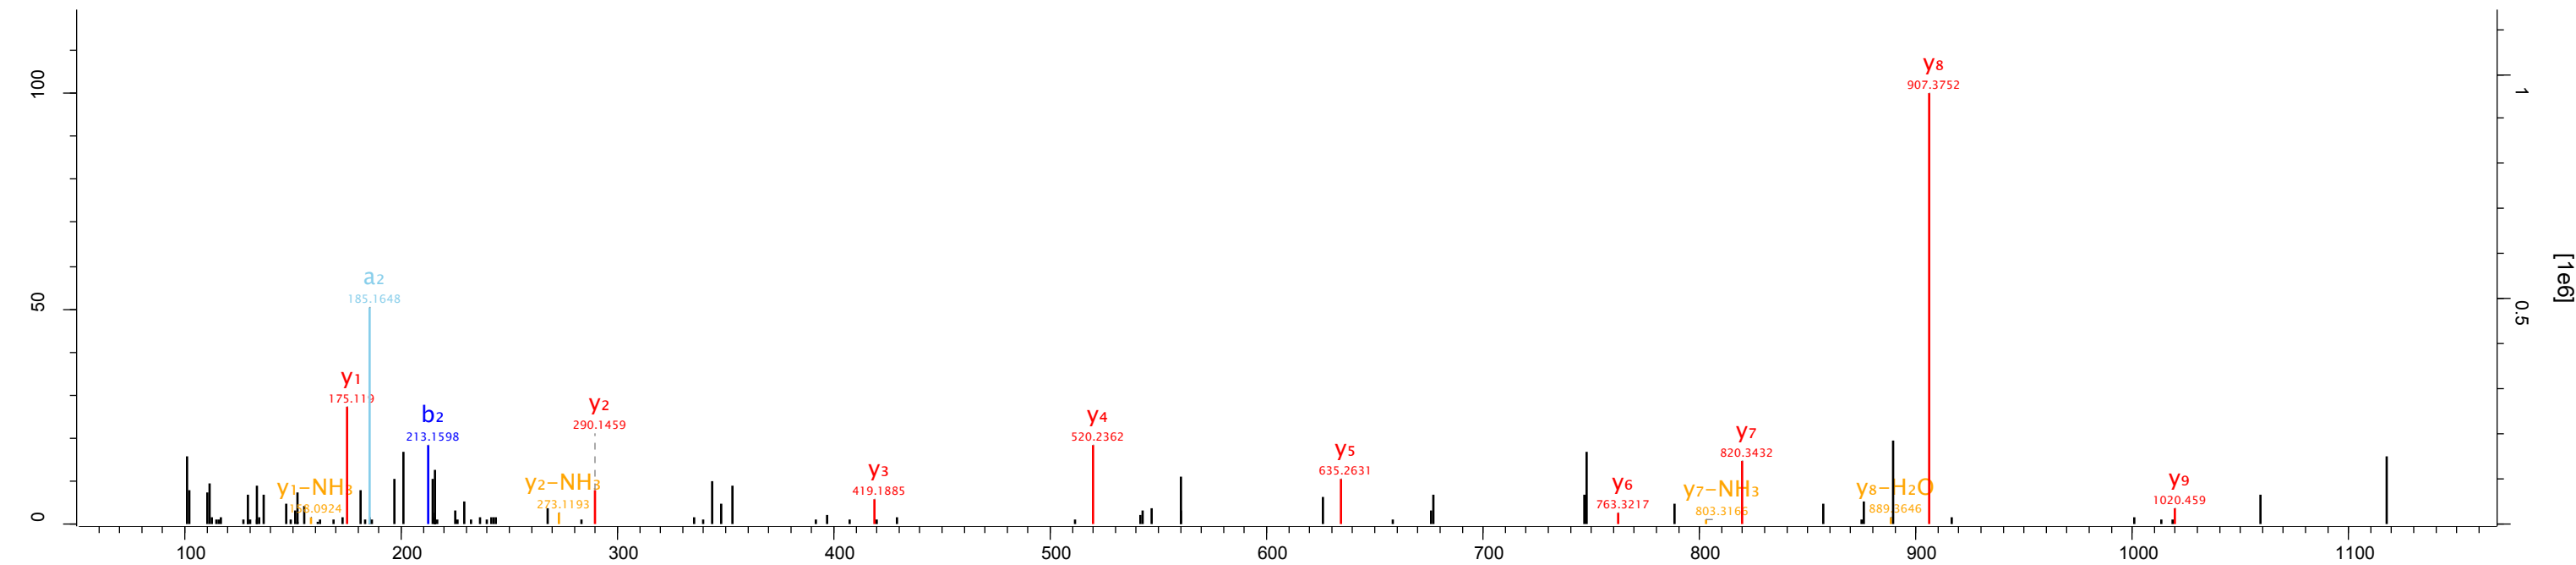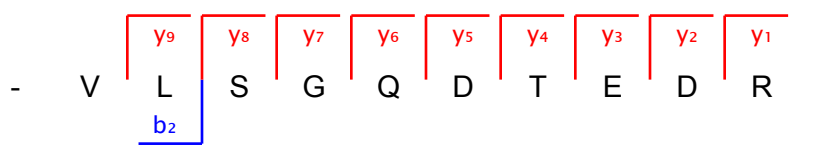

Raw file: 20150818\_A375SR-Proteome\_BR2  
 Scan: 66733 Method: FTMS; HCD Score: 56.43 m/z: 498.77 Gene names: SEPT3

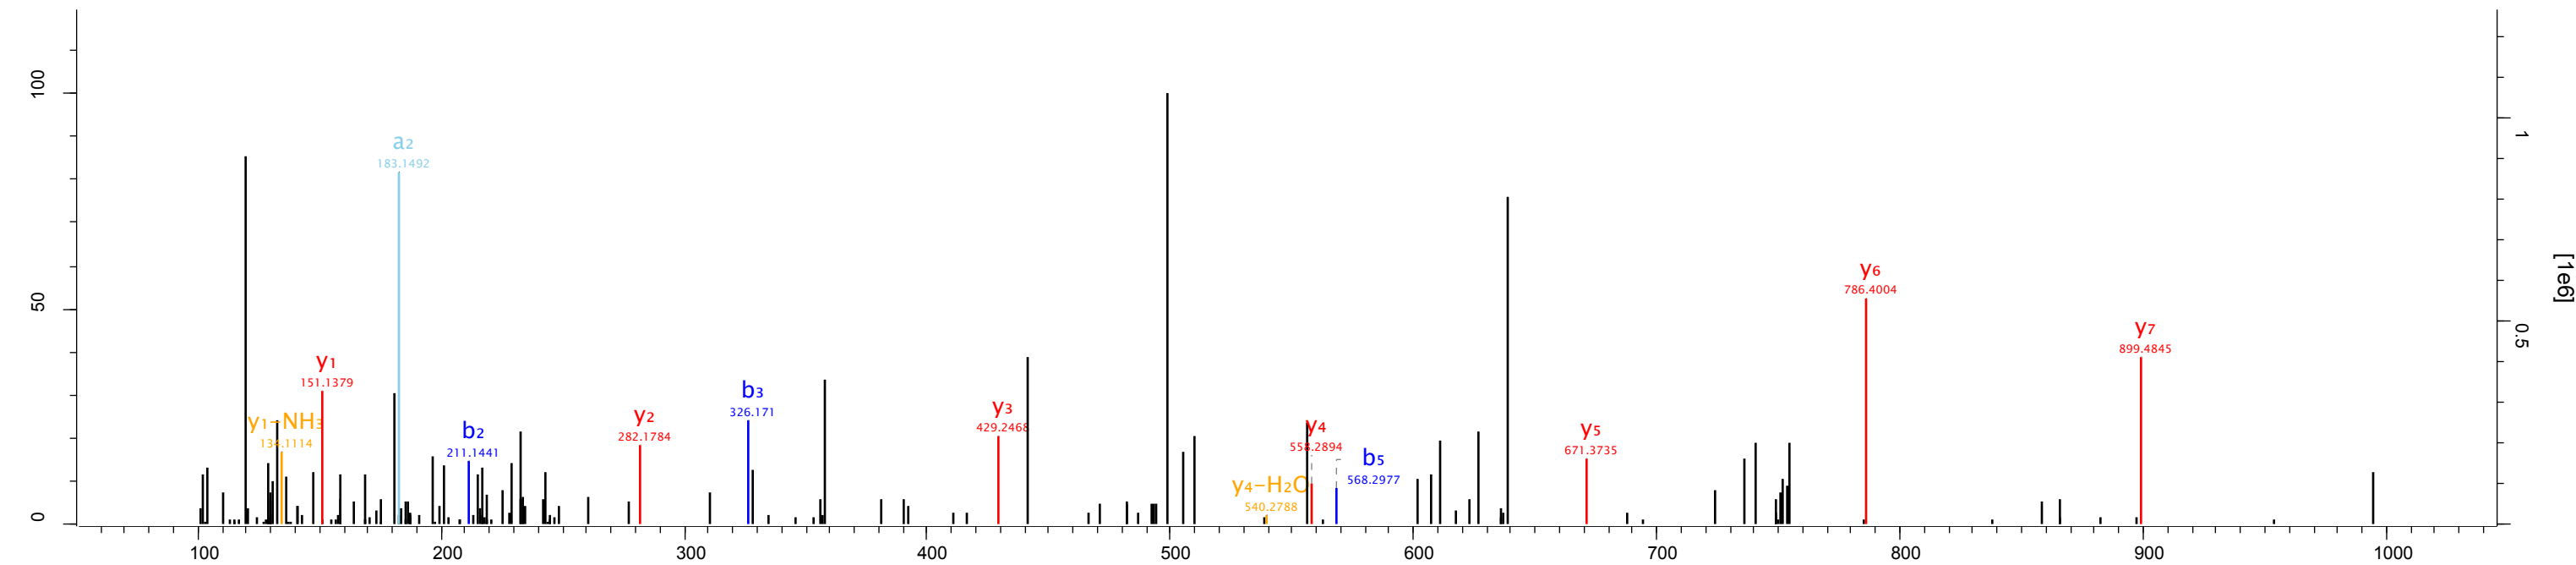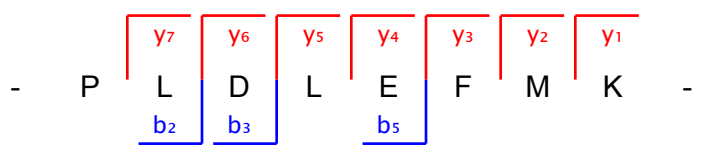



Raw file: 20150822\_A375SR\_Phospho\_BR3\_02  
 Scan: 6093 Method: FTMS; HCD Score: 40.28 m/z: 589.26 Gene names: E2F8

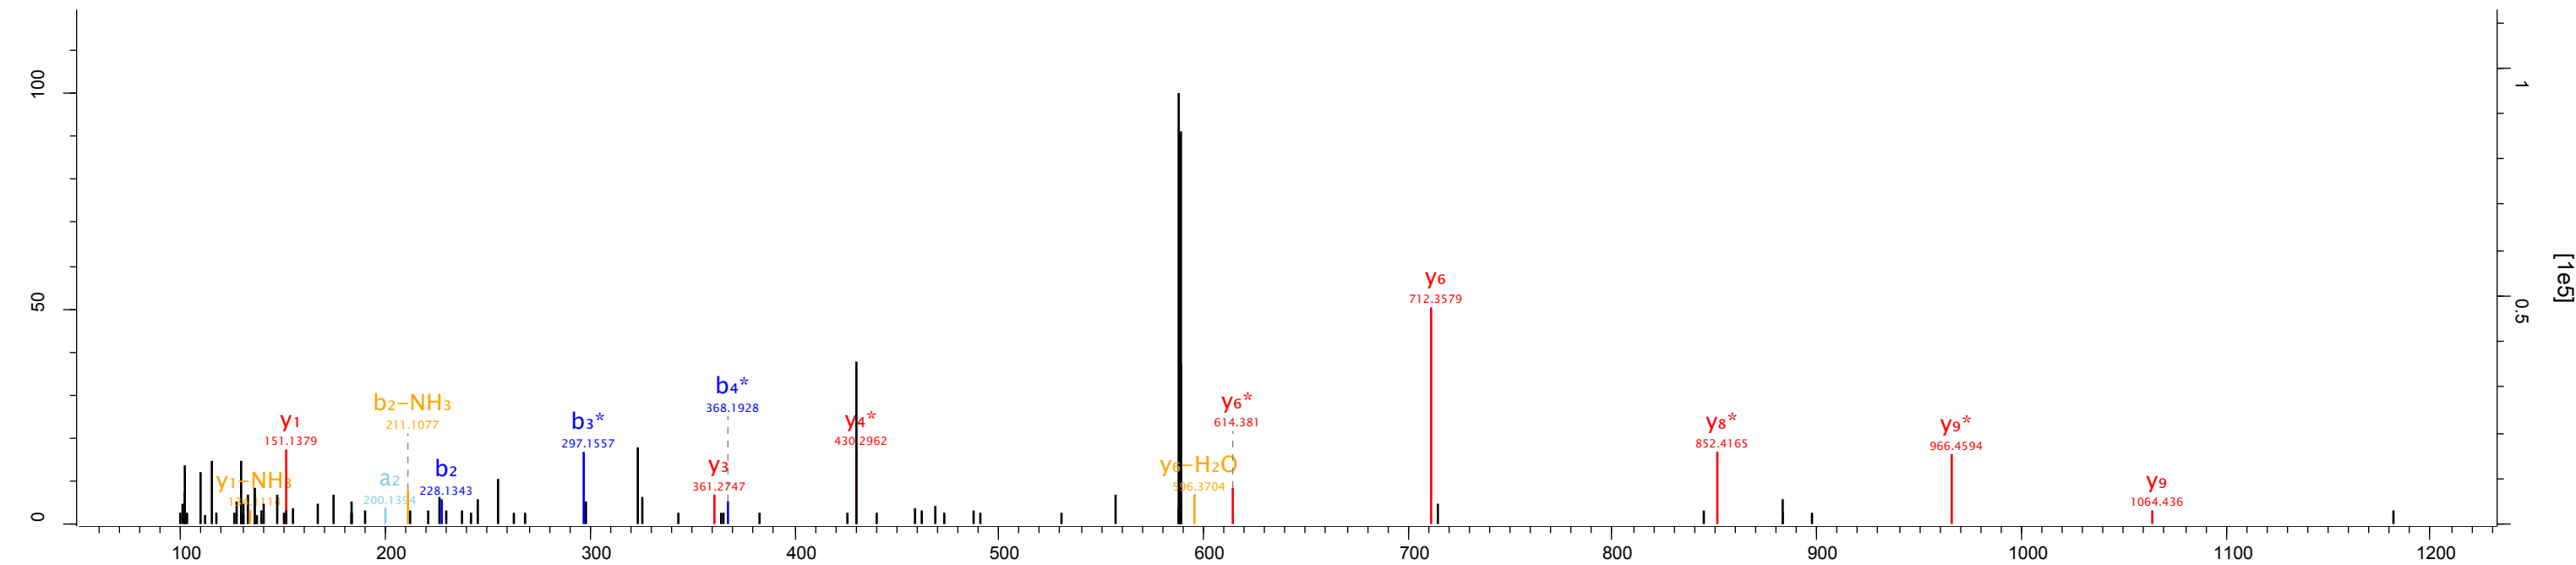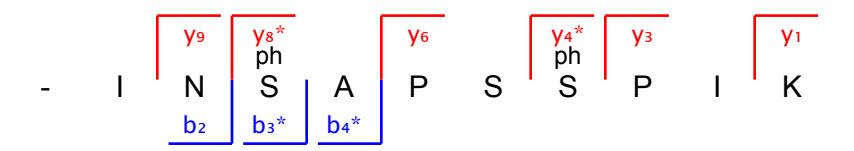

Raw file: 20150822\_A375SR\_Phospho\_BR3\_04  
 Scan: 6053 Method: FTMS; HCD Score: 84.97 m/z: 841.35 Gene names: YAF2

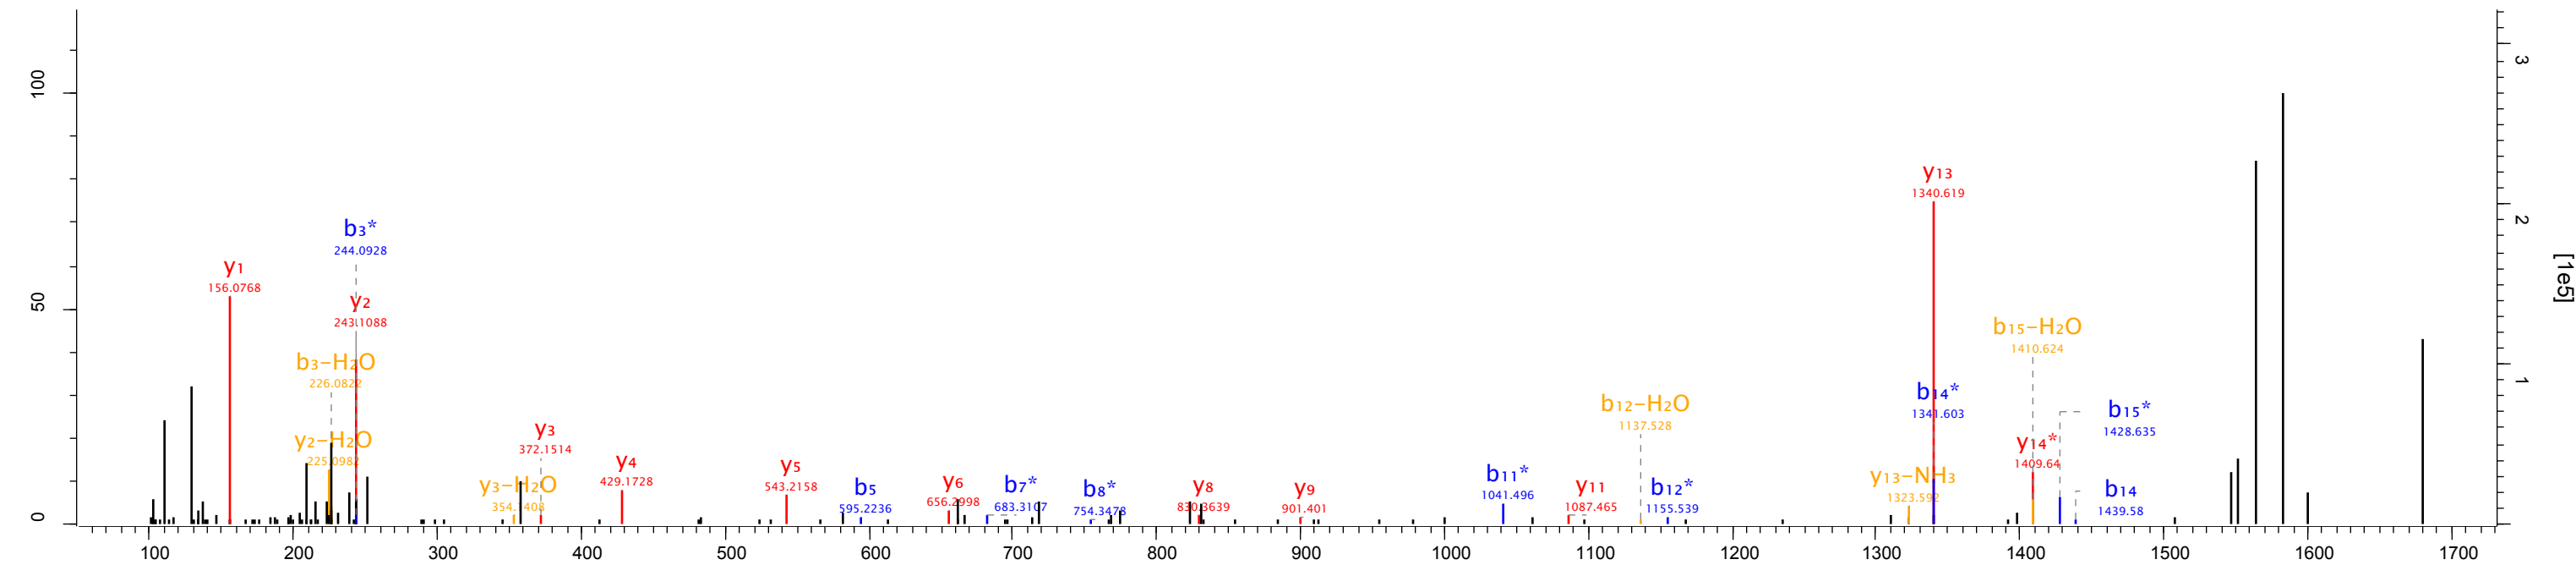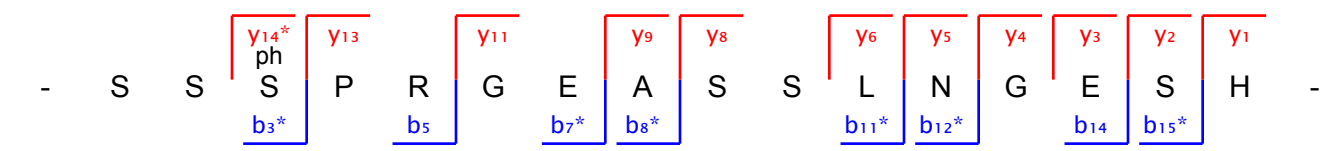

Raw file 20150822\_A375SR\_Phospho\_BR3\_04 Scan 6103 Method FTMS; HCD Score 43.63 m/z 426.73

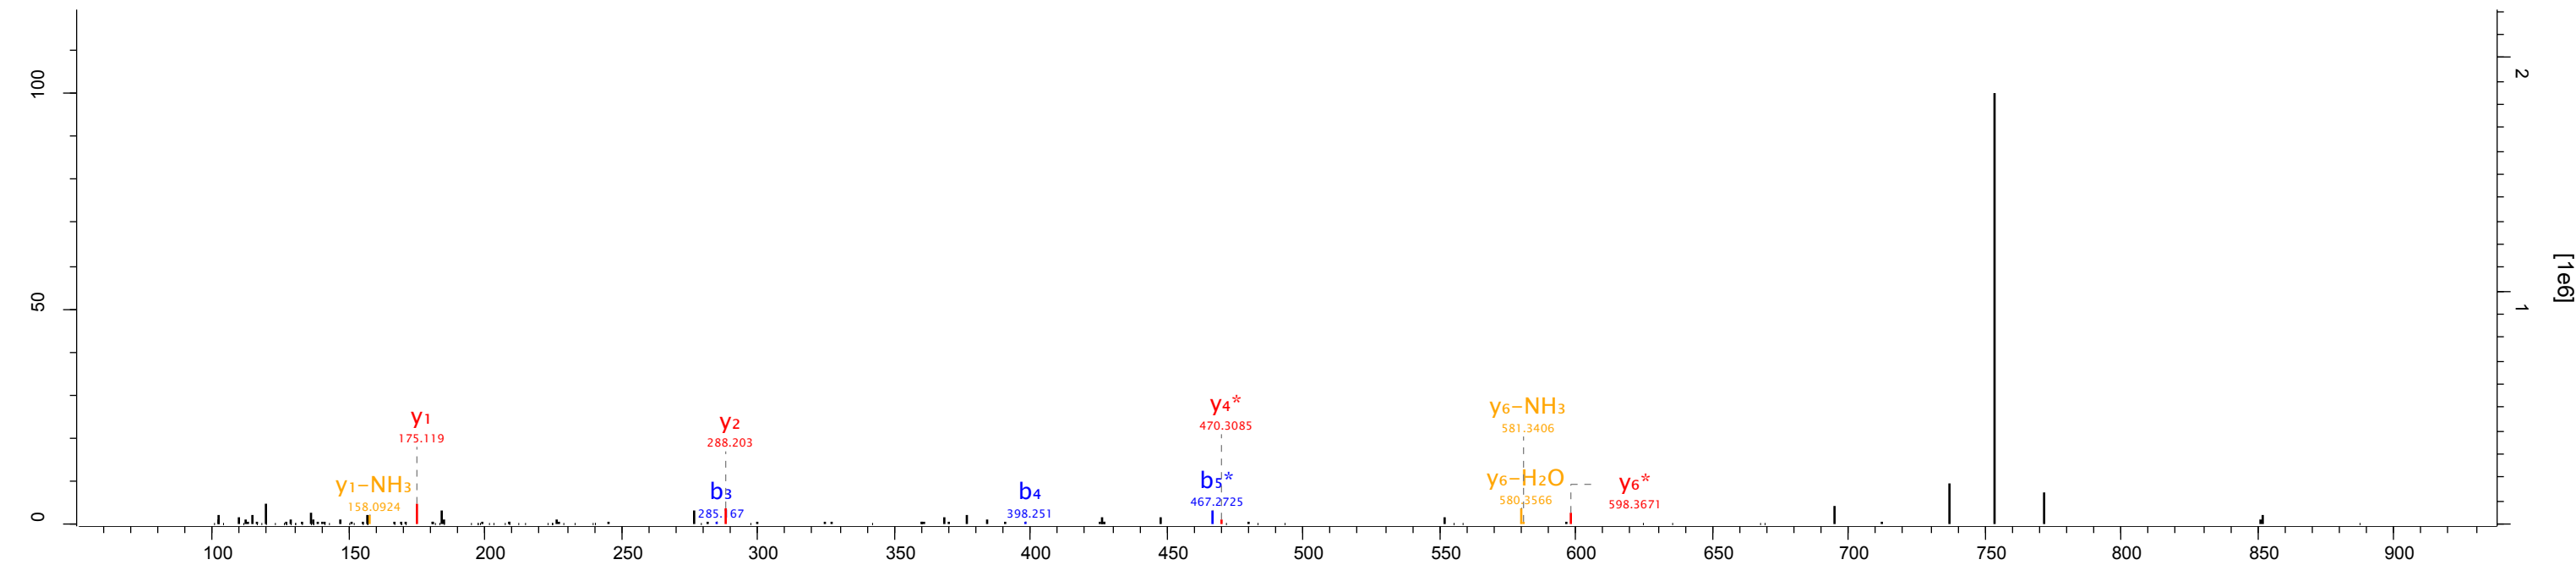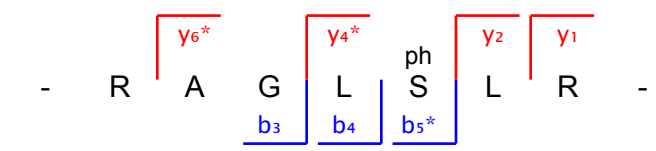

Raw file: 20150822\_A375SR\_Phospho\_BR3\_05  
 Scan: 11393 Method: FTMS; HCD Score: 74.14 m/z: 693.35 Gene names: ELK3

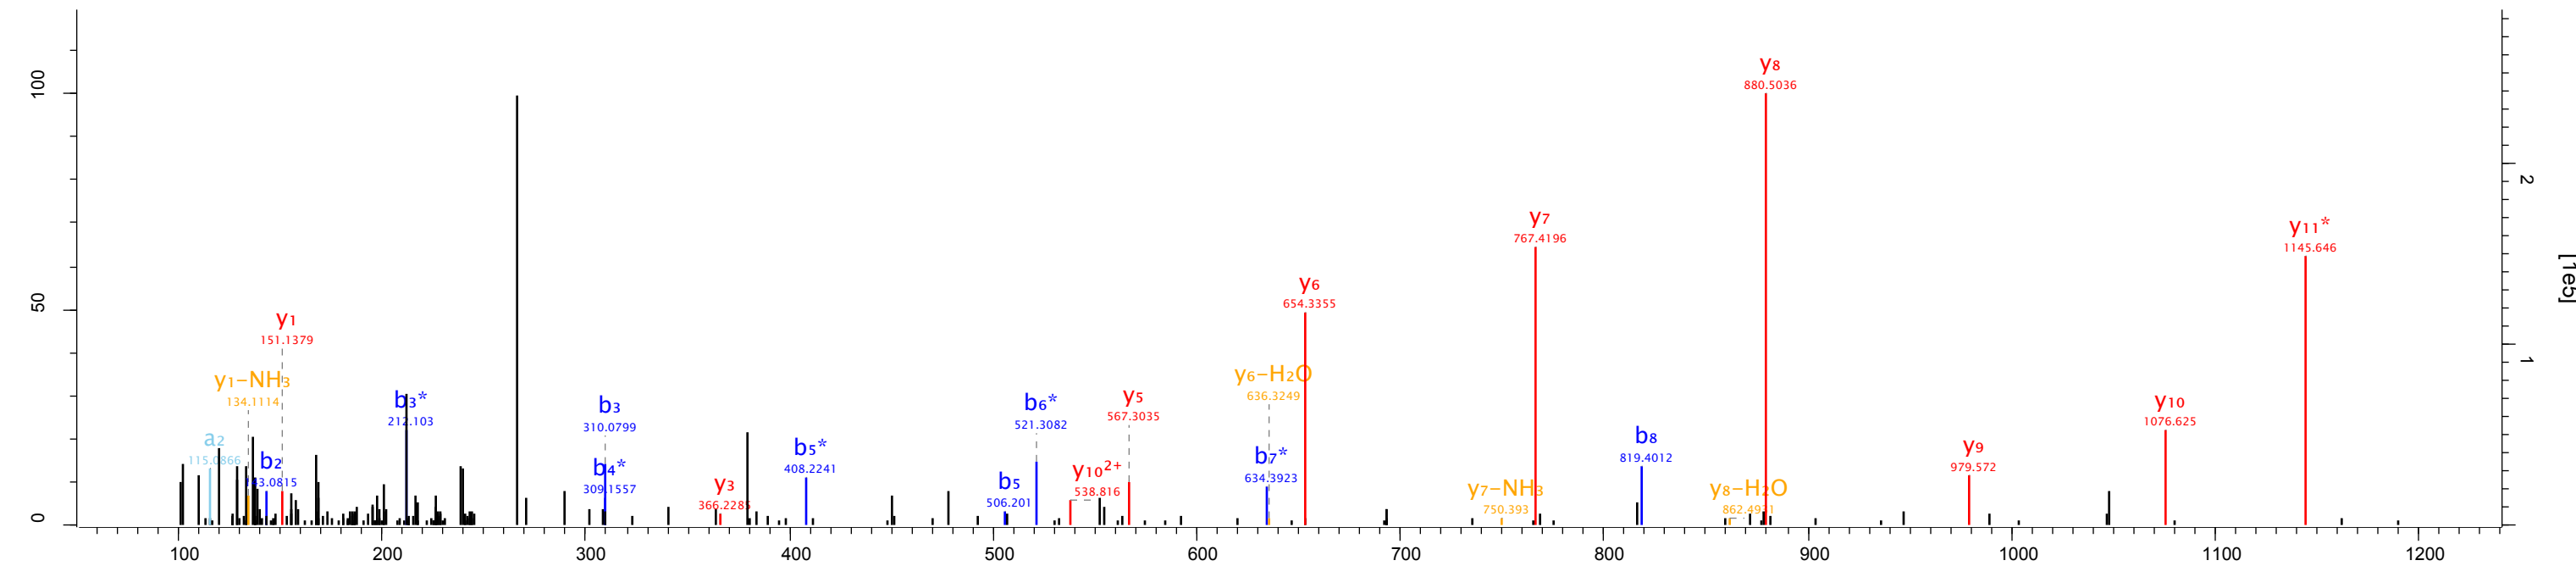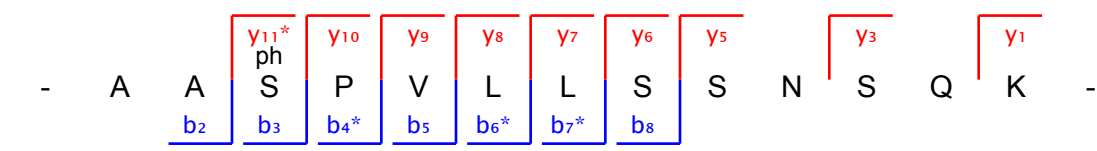

Raw file 20150822\_A375SR\_Phospho\_BR3\_07 Scan 13873 Method FTMS; HCD Score 47.22 m/z 839.34 Gene names MME

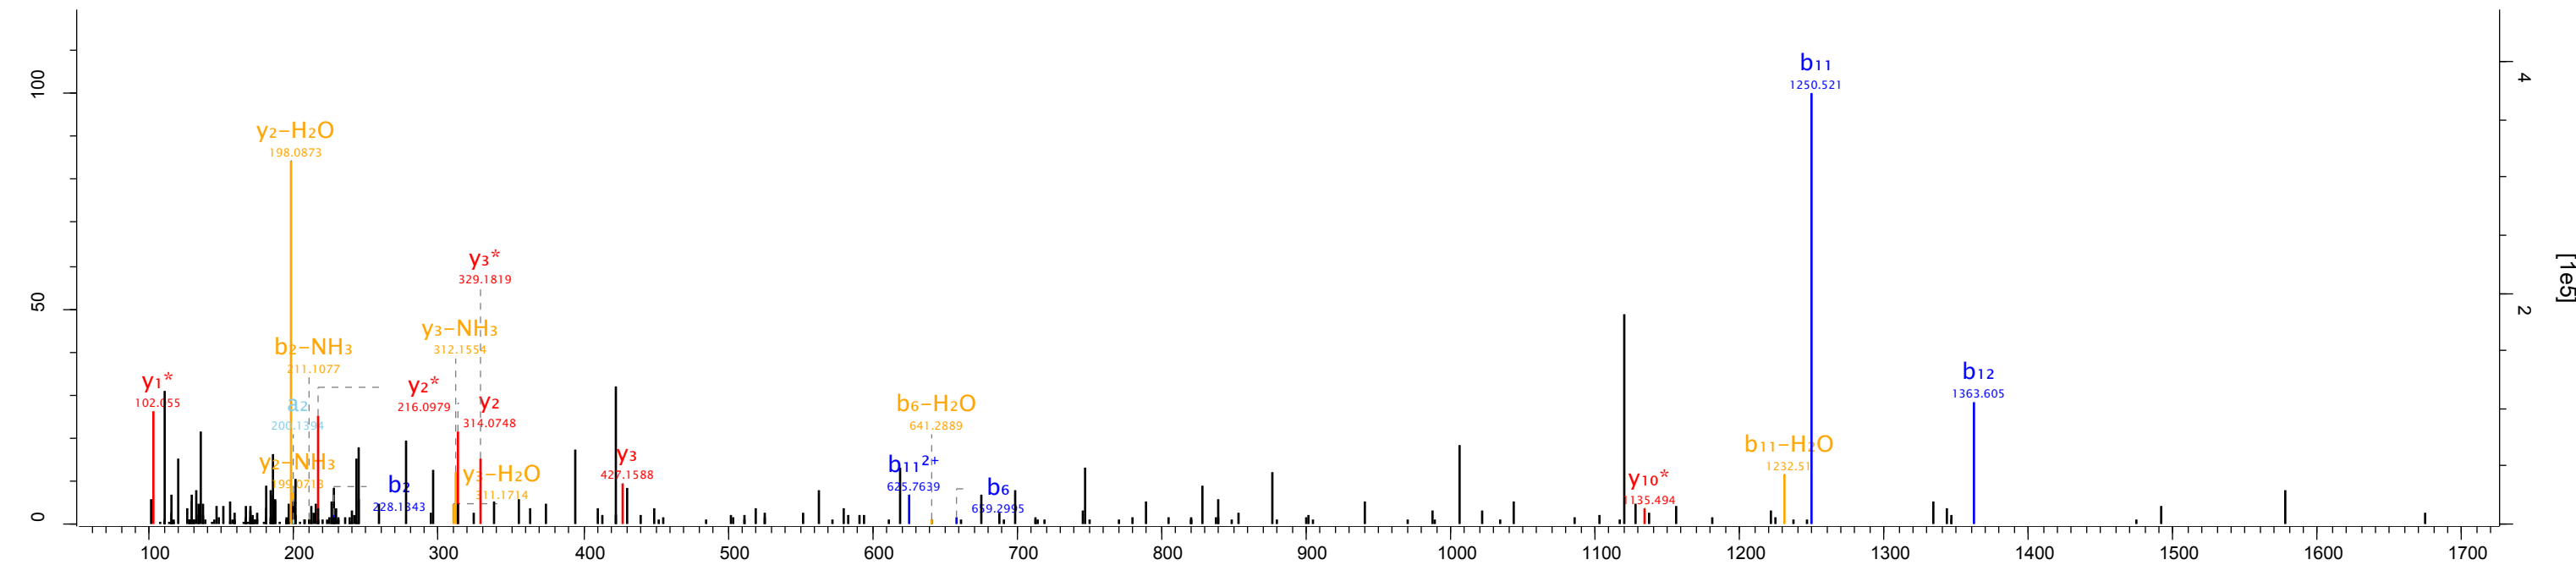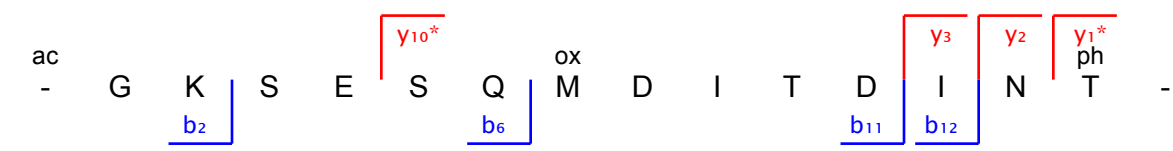

Raw file 20150822\_A375SR\_Phospho\_BR3\_08 Scan 13323 Method FTMS; HCD Score 62.34 m/z 556.27

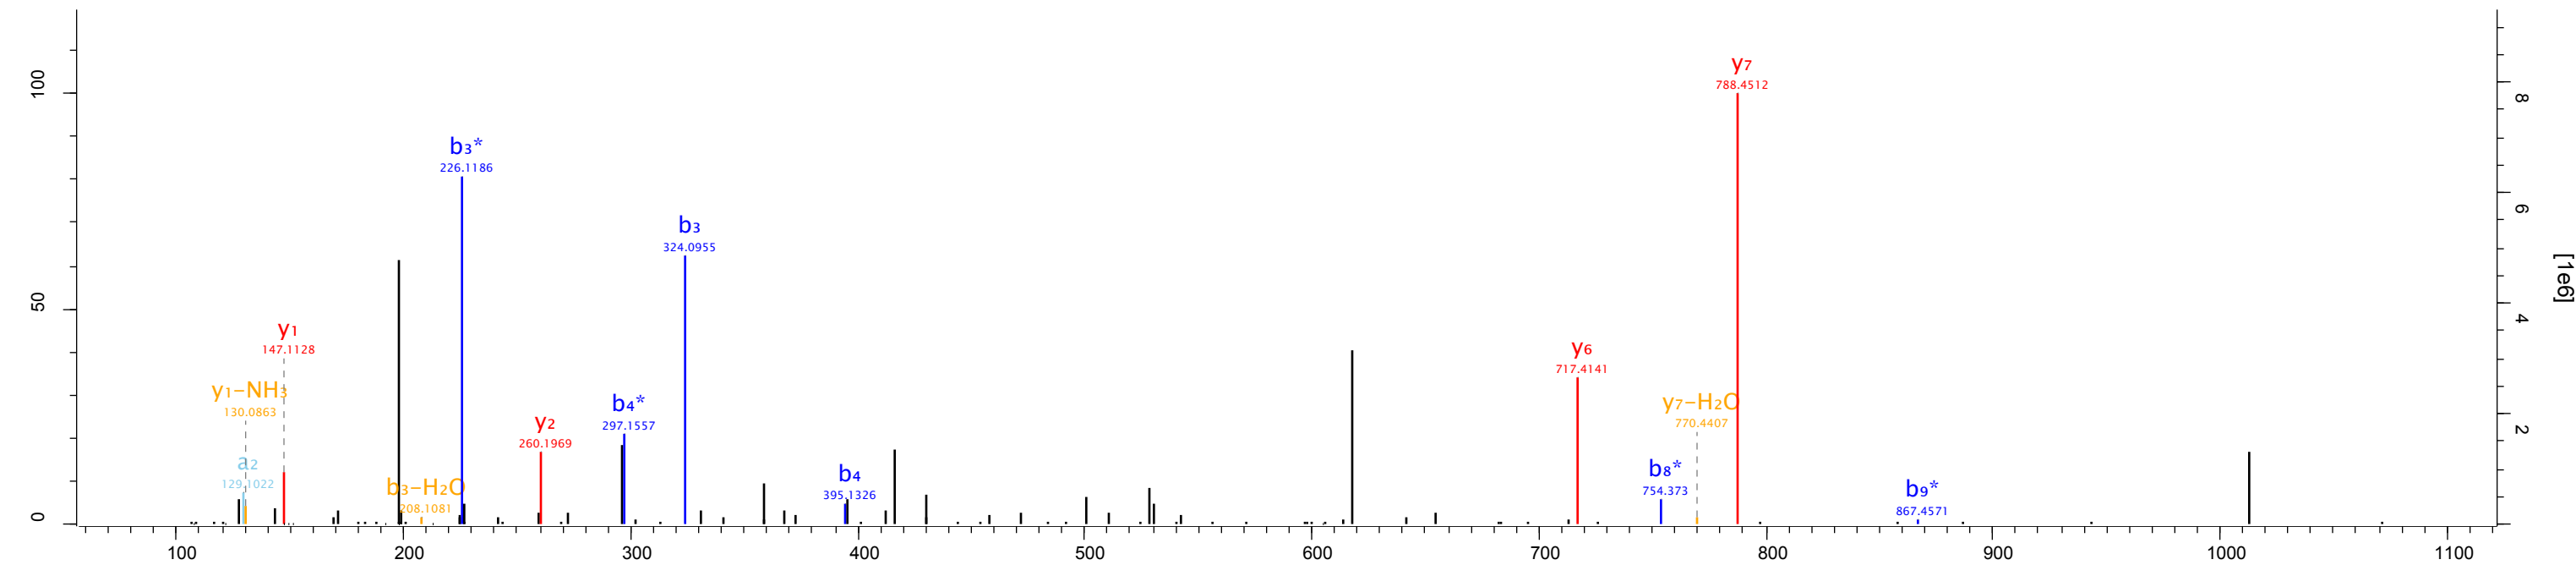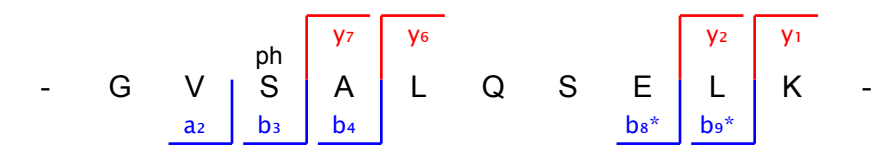

Raw file 20150822\_A375SR\_Phospho\_BR3\_09 Scan 12943 Method FTMS; HCD Score 60.36 m/z 558.29

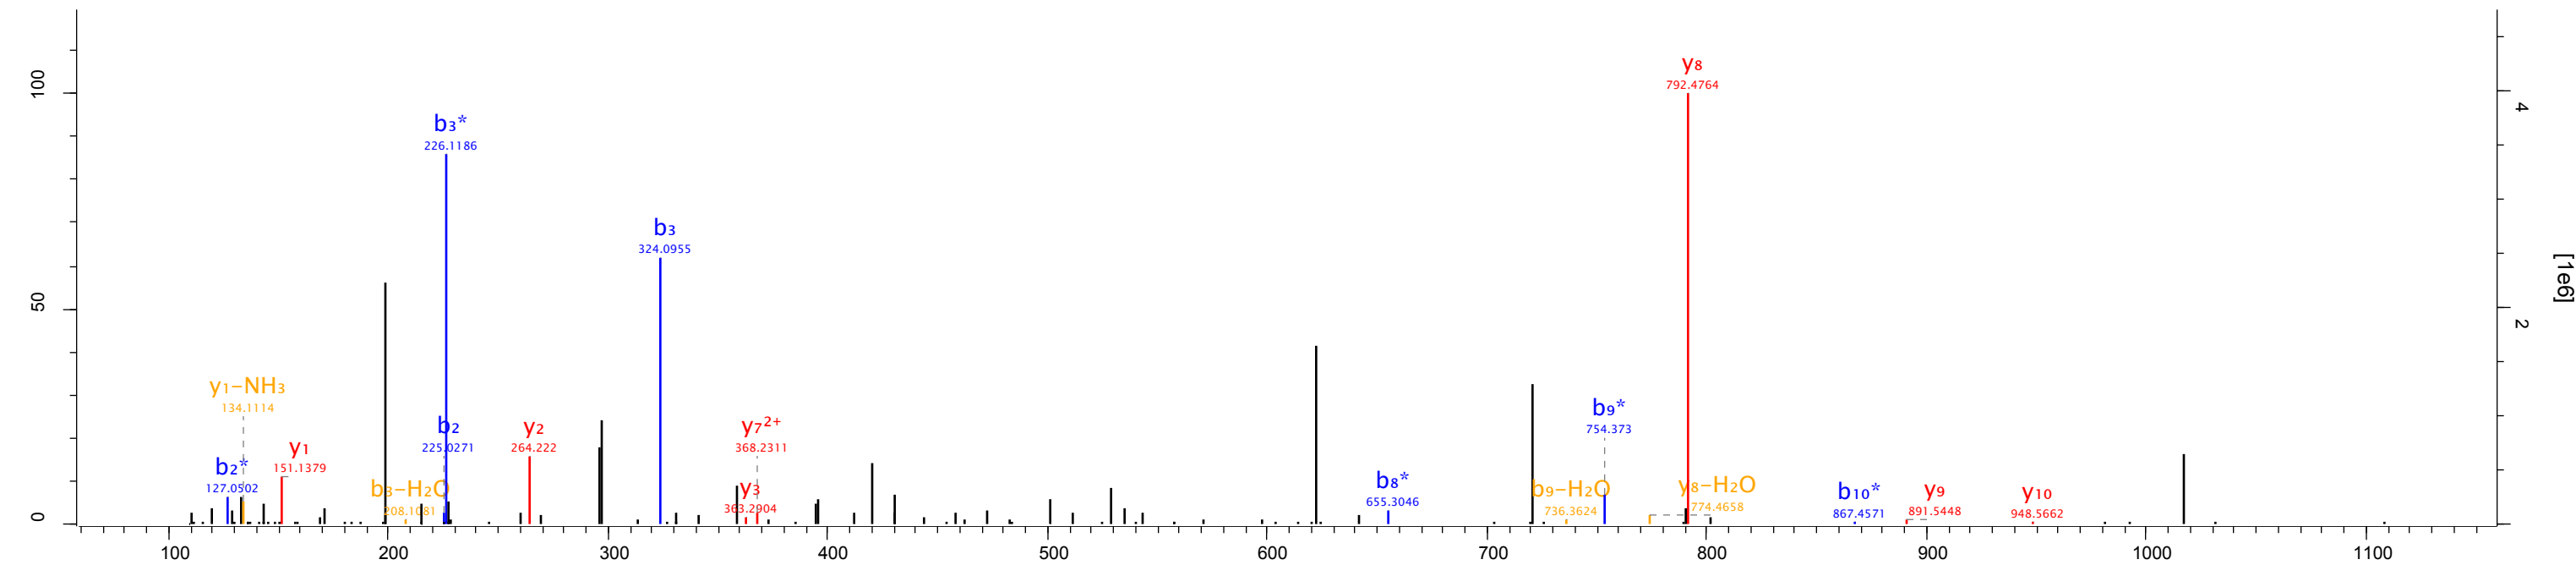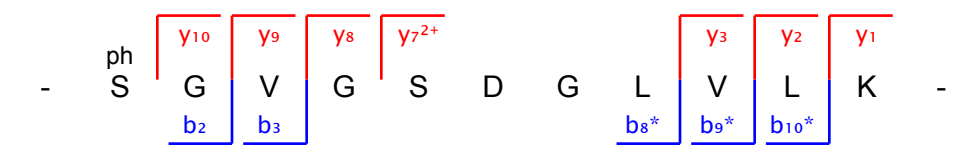

Raw file Scan Method Score m/z Gene names  
 20150822\_A375SR-Proteome\_BR3 45023 FTMS; HCD 78.94 436.58 RPL39P5;RPL39

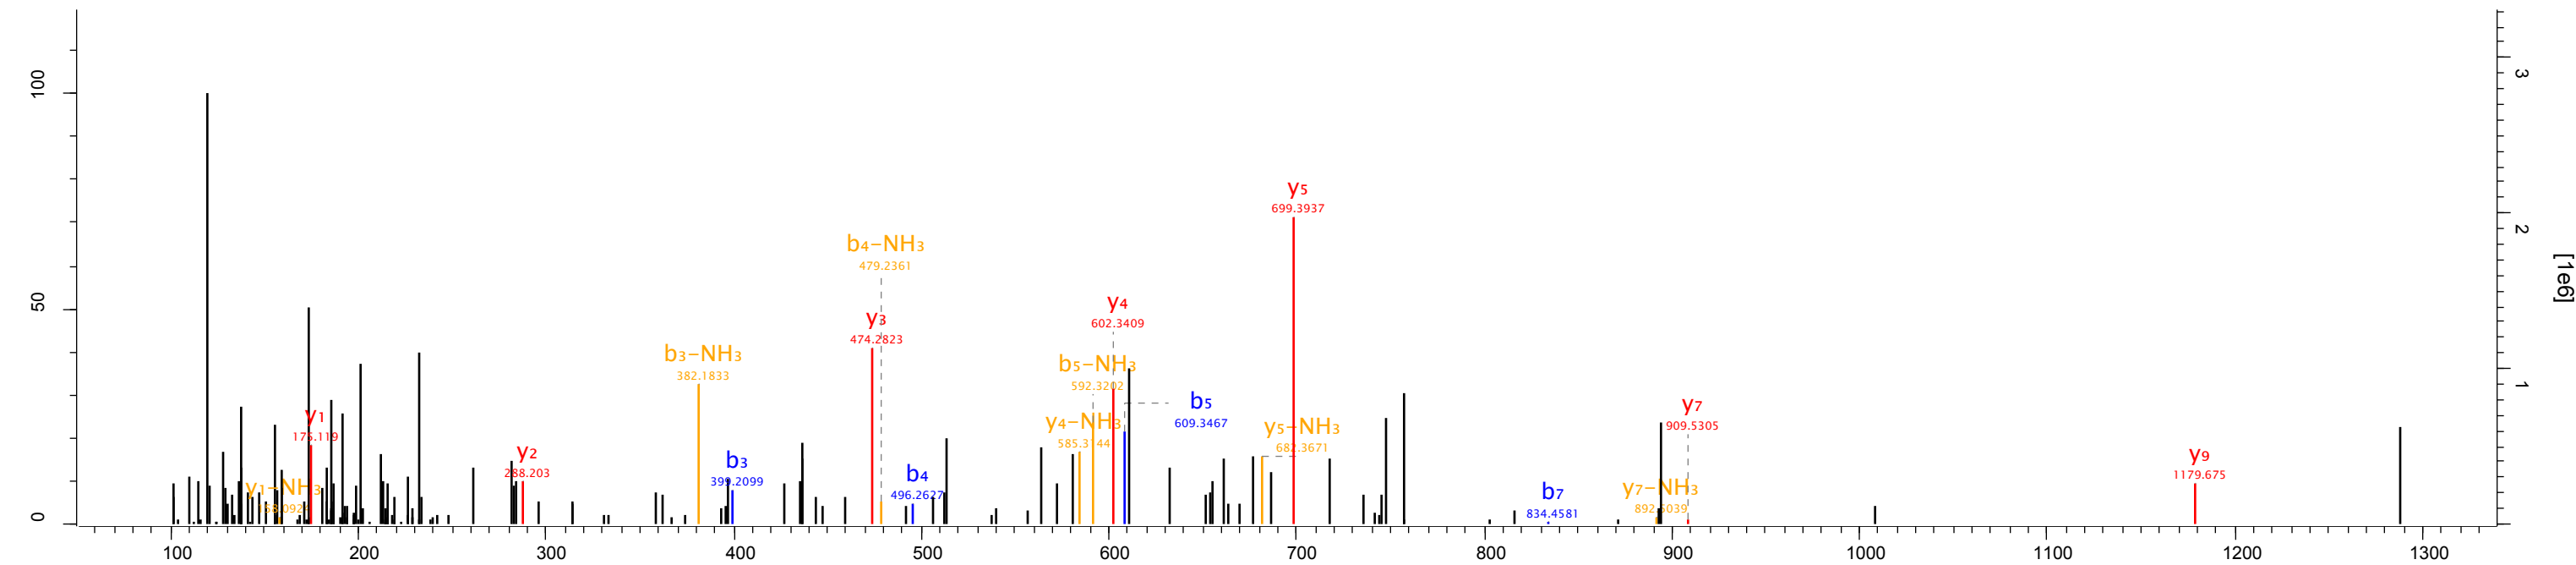



Raw file  
20180707\_MaS\_A375SR\_LM\_proteome\_01

Scan 12923 Method FTMS; HCD Score 34.39 m/z 572.96 Gene names APOC3

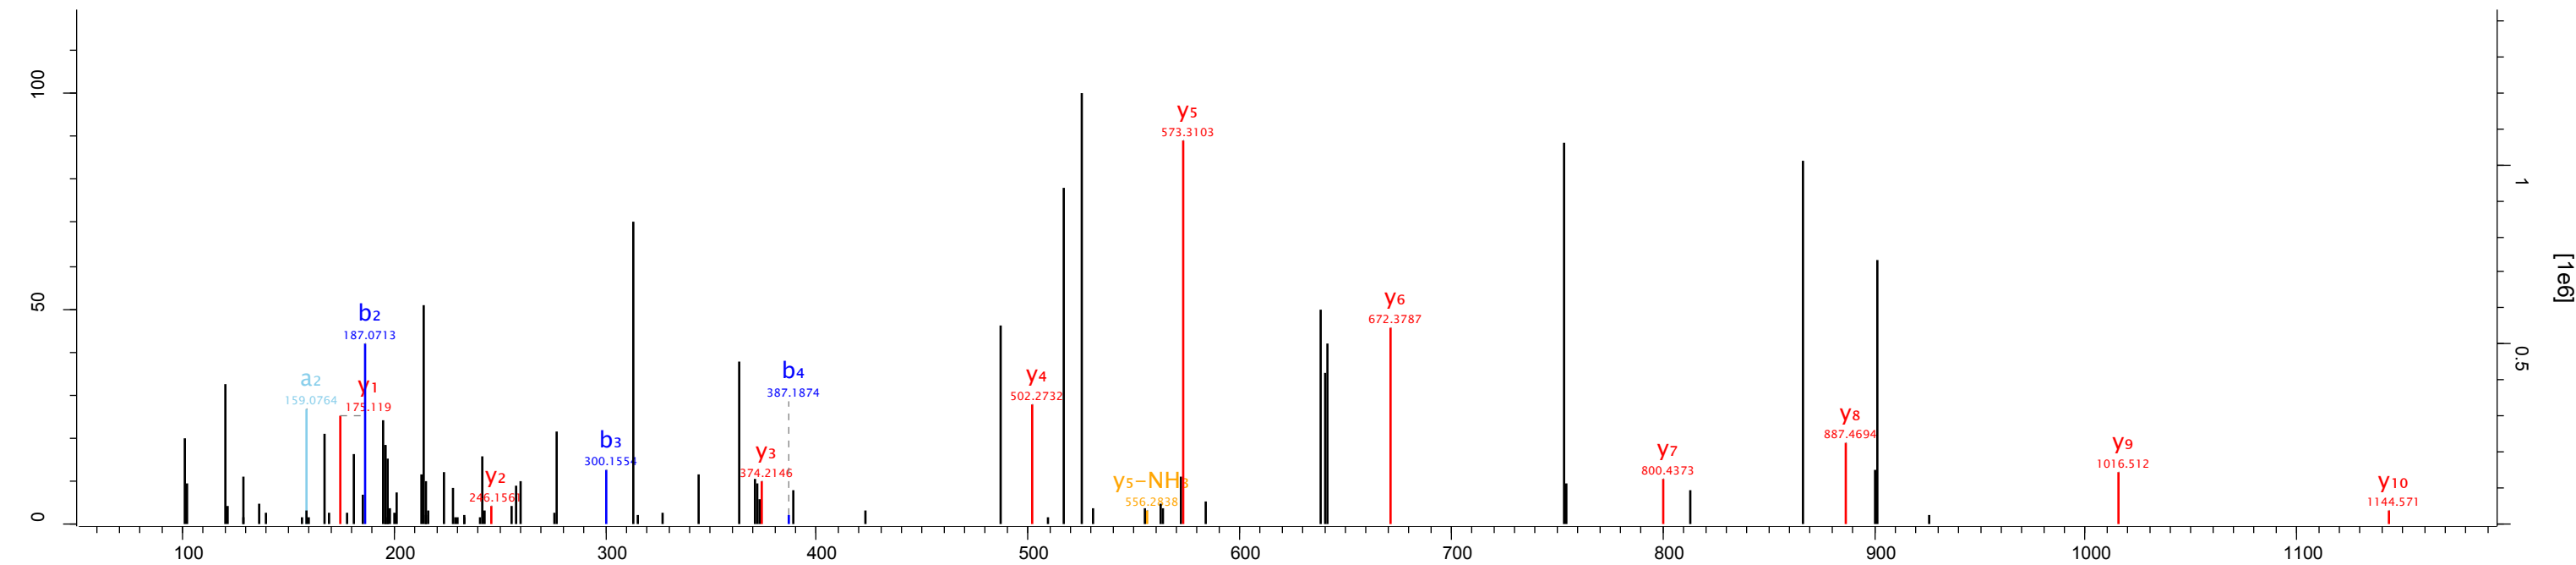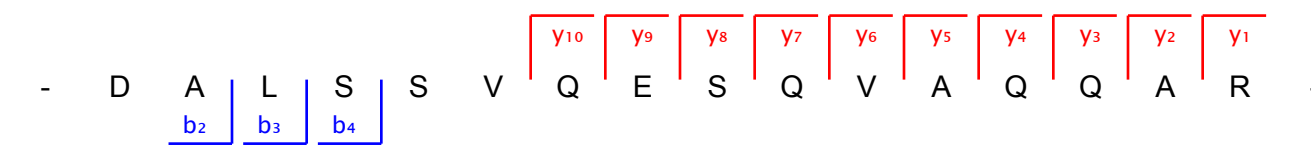

Raw file  
20180707\_MaS\_A375SR\_LM\_proteome\_01

Scan: 20823  
Method: FTMS; HCD  
Score: 52.53  
m/z: 745.93  
Gene names: MED21

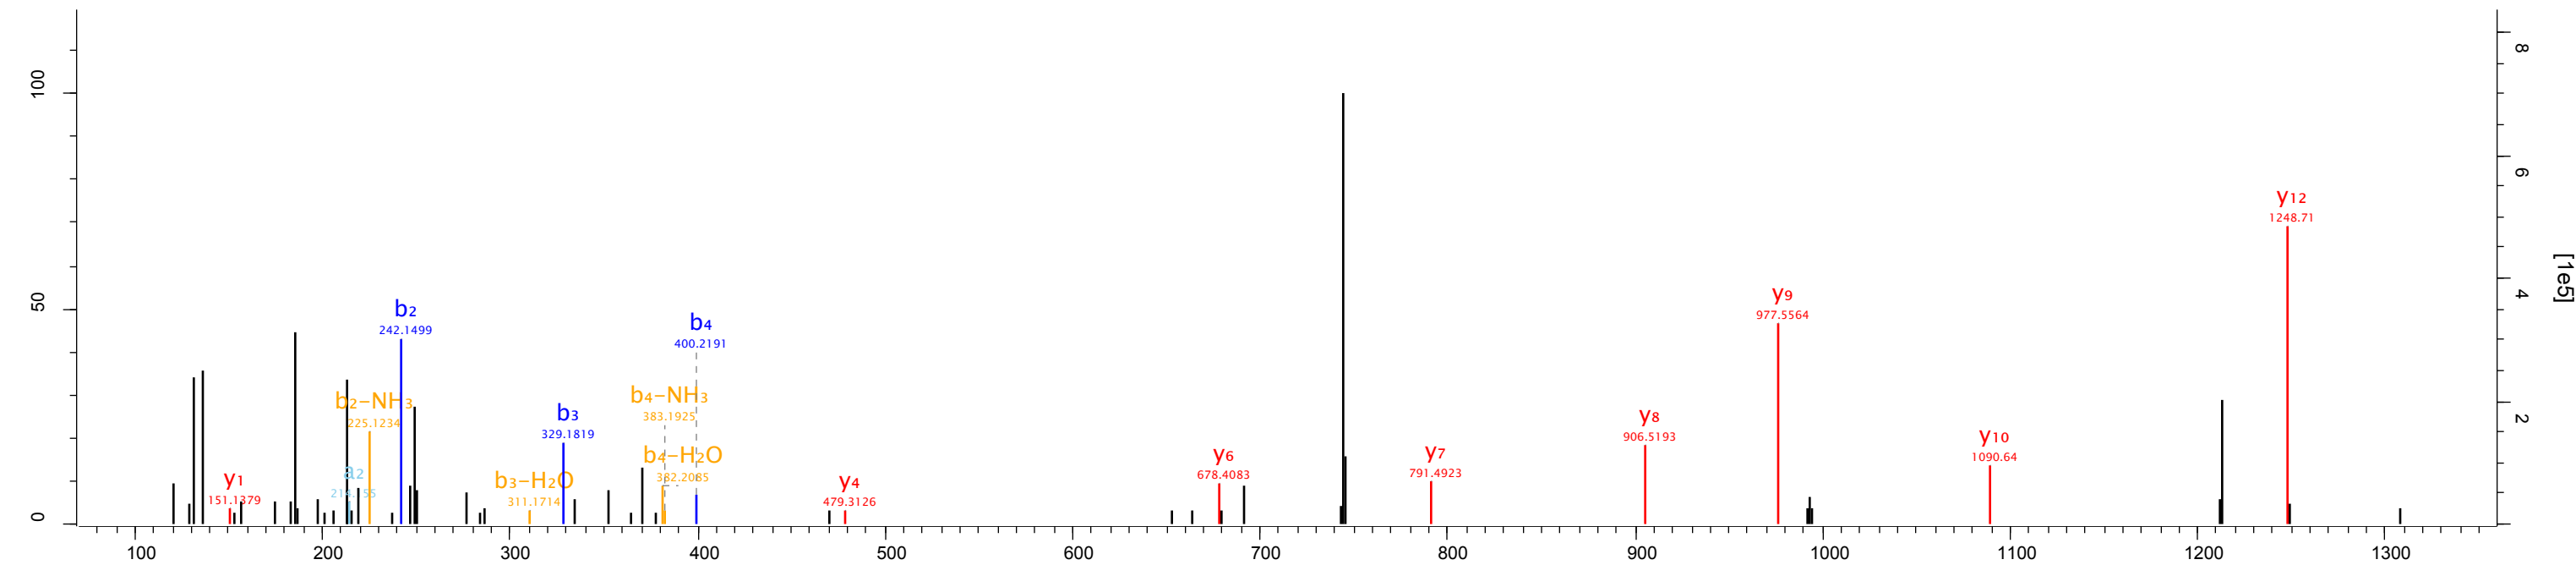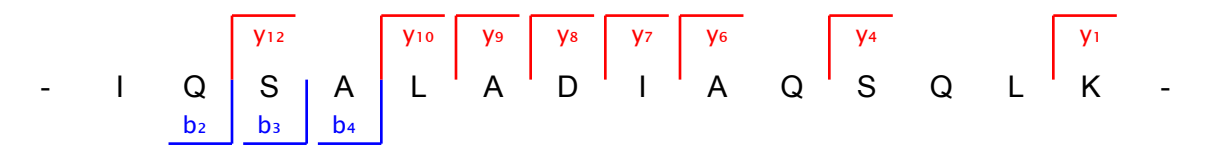

Raw file  
20180707\_MaS\_A375SR\_LM\_proteome\_01

| Scan | Method    | Score | m/z   | Gene names |
|------|-----------|-------|-------|------------|
| 5033 | FTMS; HCD | 59.64 | 409.7 | KCNN2      |

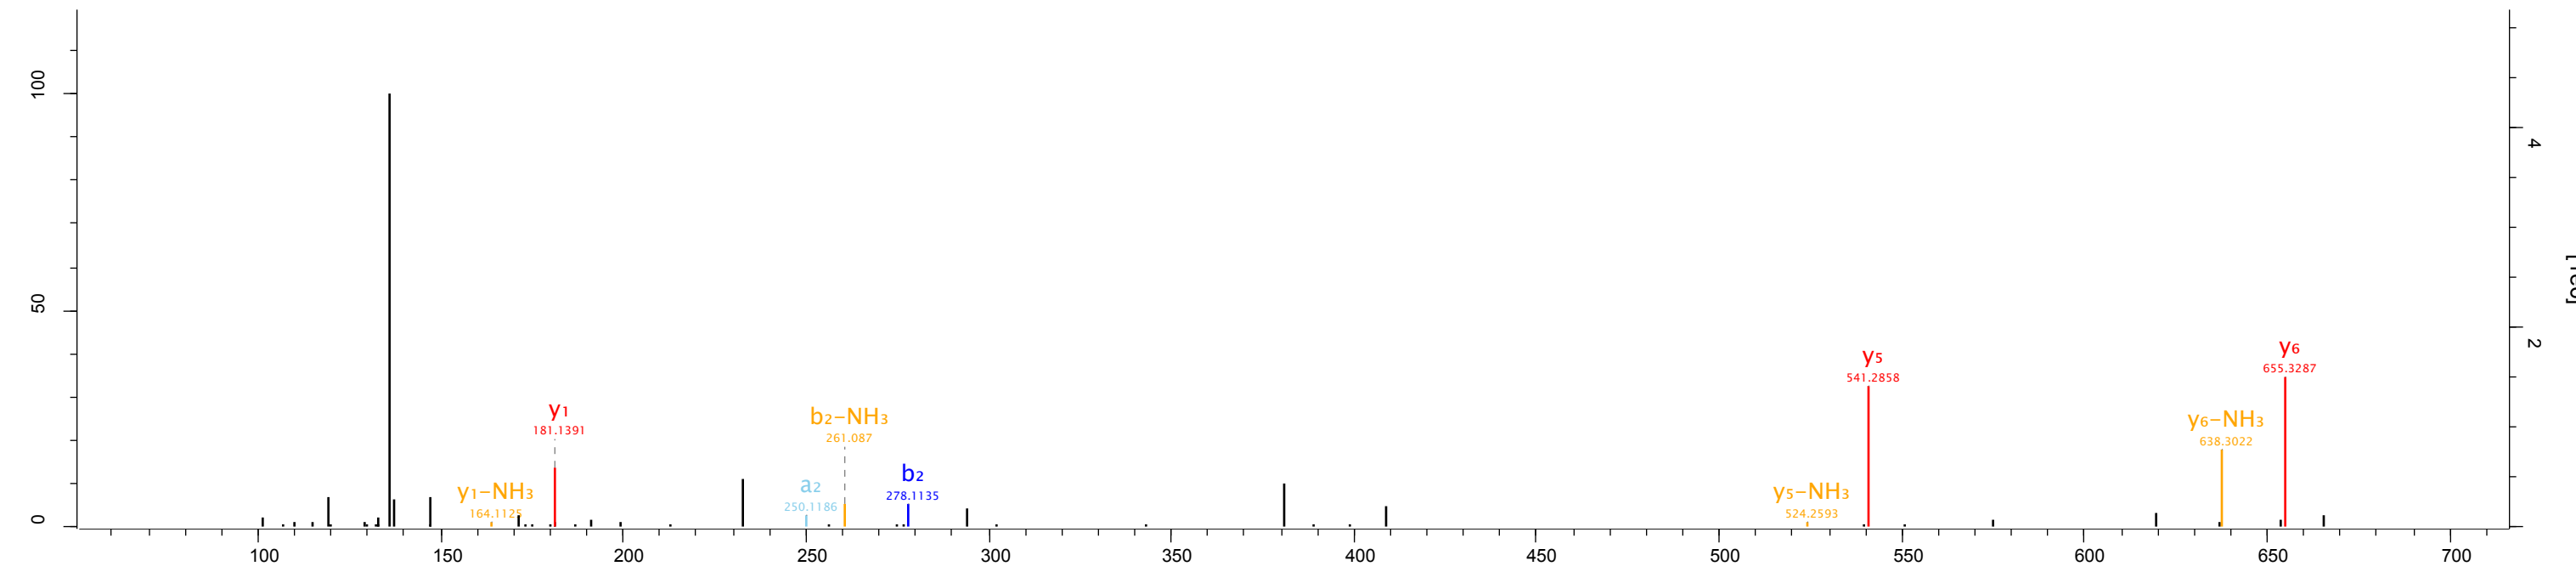

Raw file

20180707\_MaS\_A375SR\_LM\_proteome\_06

| Scan | Method    | Score | m/z    | Gene names |
|------|-----------|-------|--------|------------|
| 6813 | FTMS; HCD | 42.32 | 719.81 | LEPROT     |

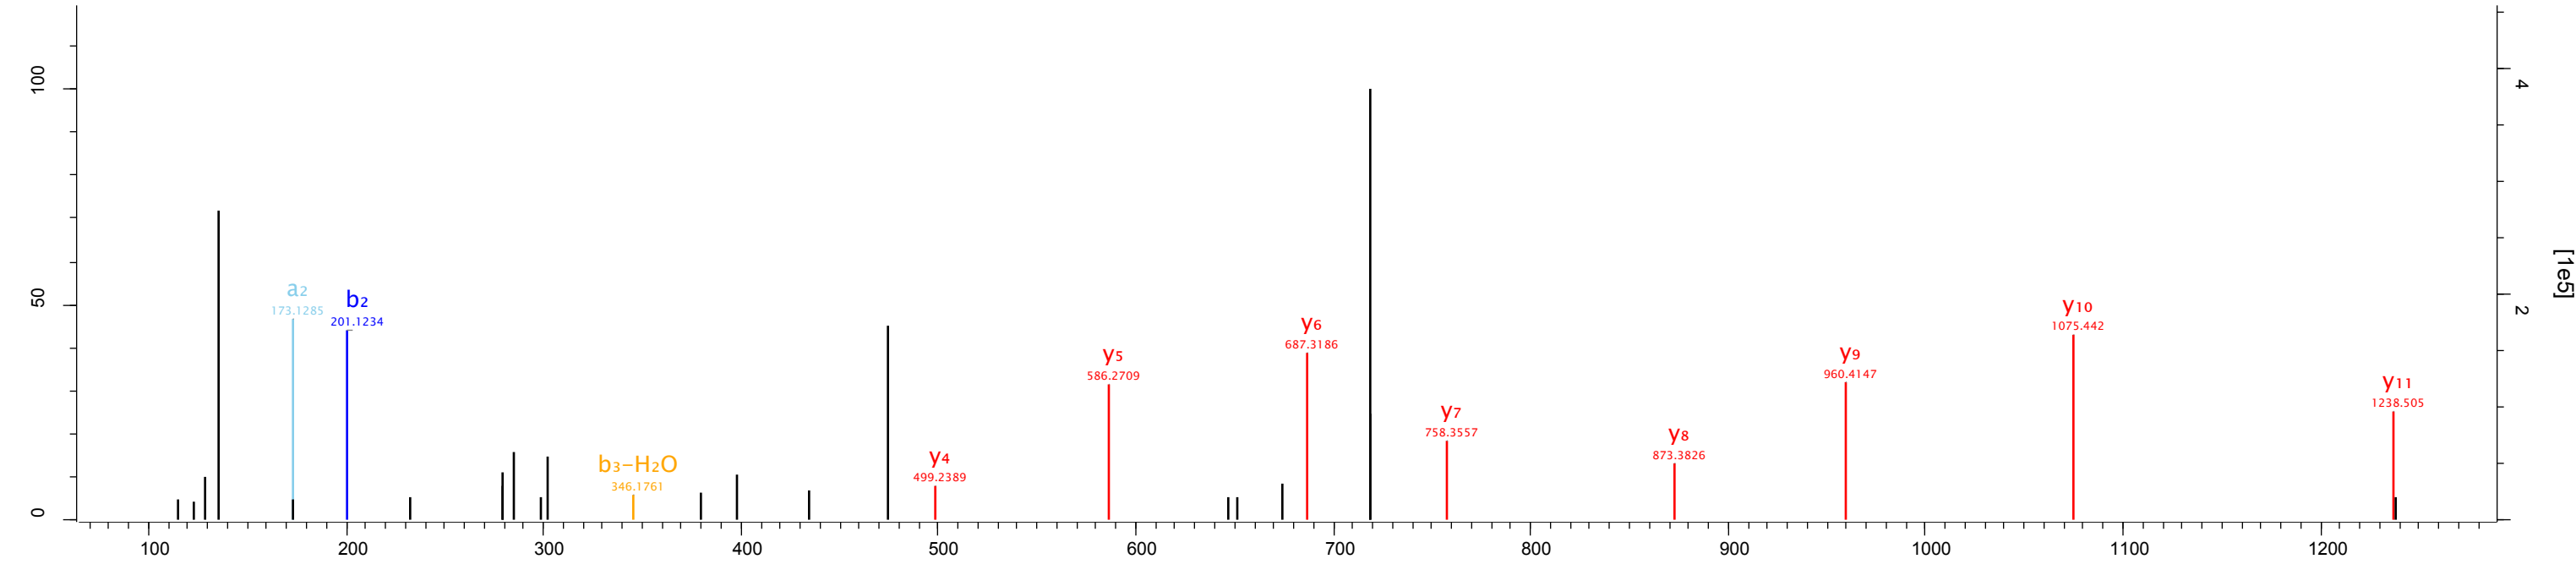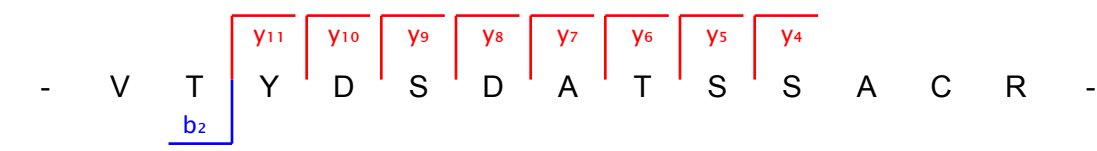

Raw file

20180707\_MaS\_A375SR\_LM\_proteome\_07

| Scan  | Method    | Score | m/z    | Gene names |
|-------|-----------|-------|--------|------------|
| 24313 | FTMS; HCD | 17.25 | 543.61 | SPPL2A     |

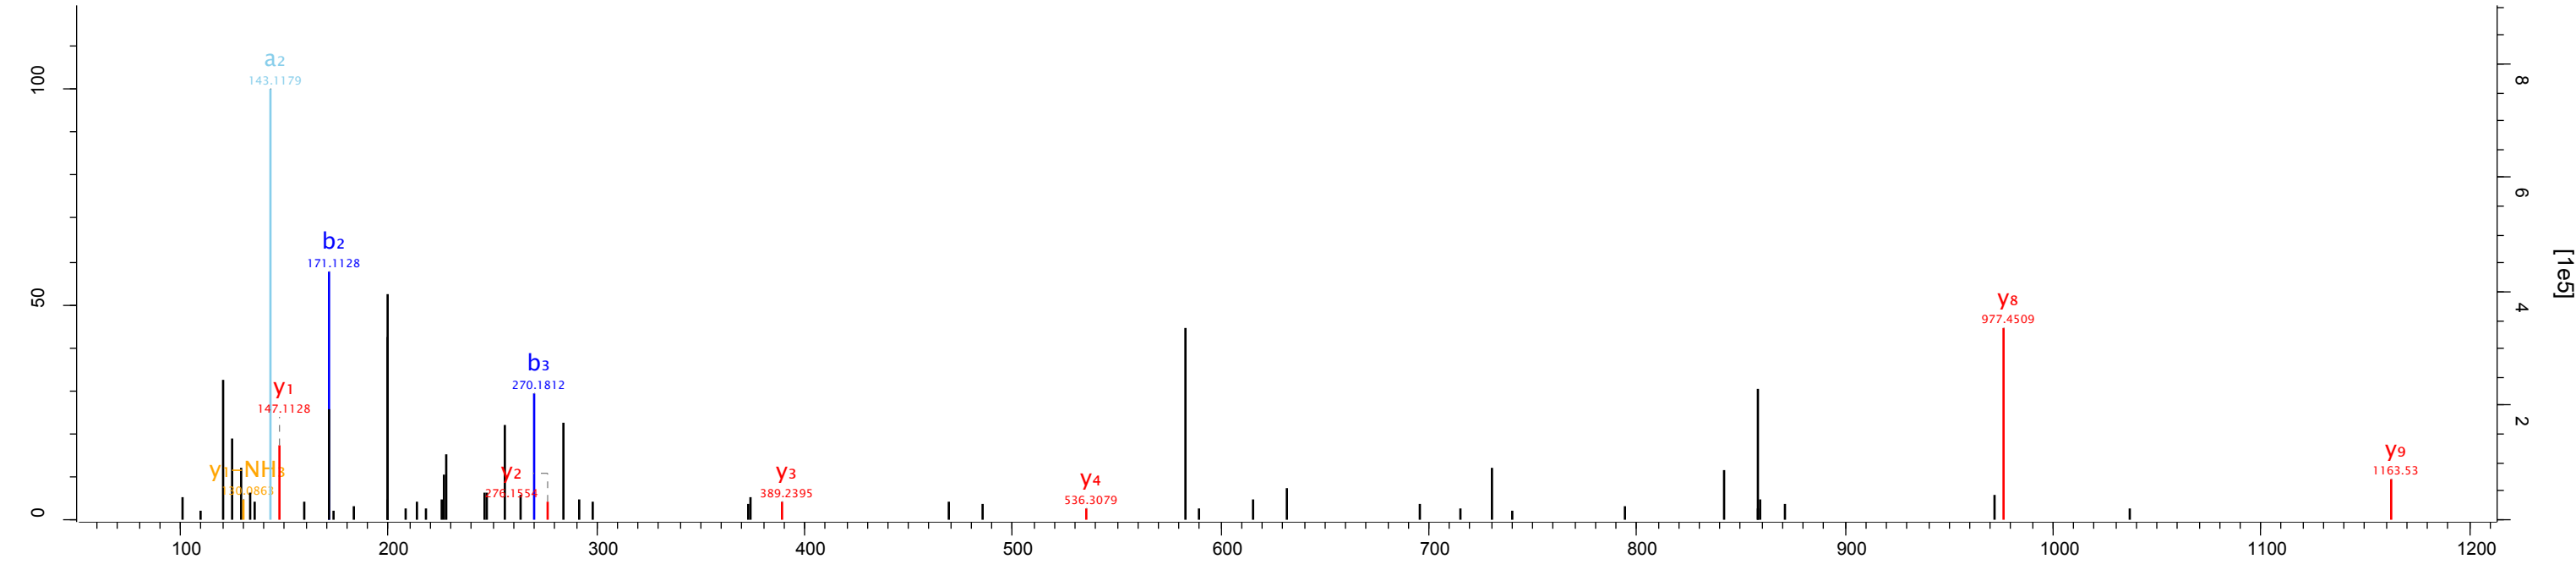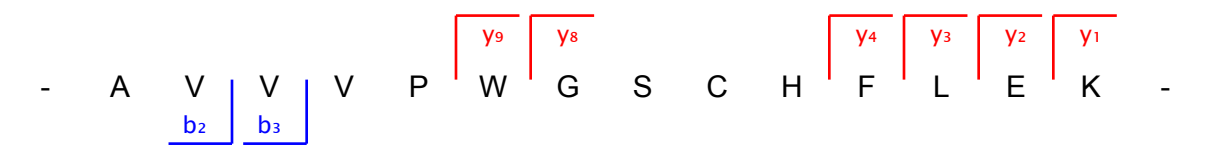

Raw file  
20180707\_MaS\_A375SR\_LM\_proteome\_07

Scan 26923 Method FTMS; HCD Score 75.32 m/z 857.42 Gene names SSR3

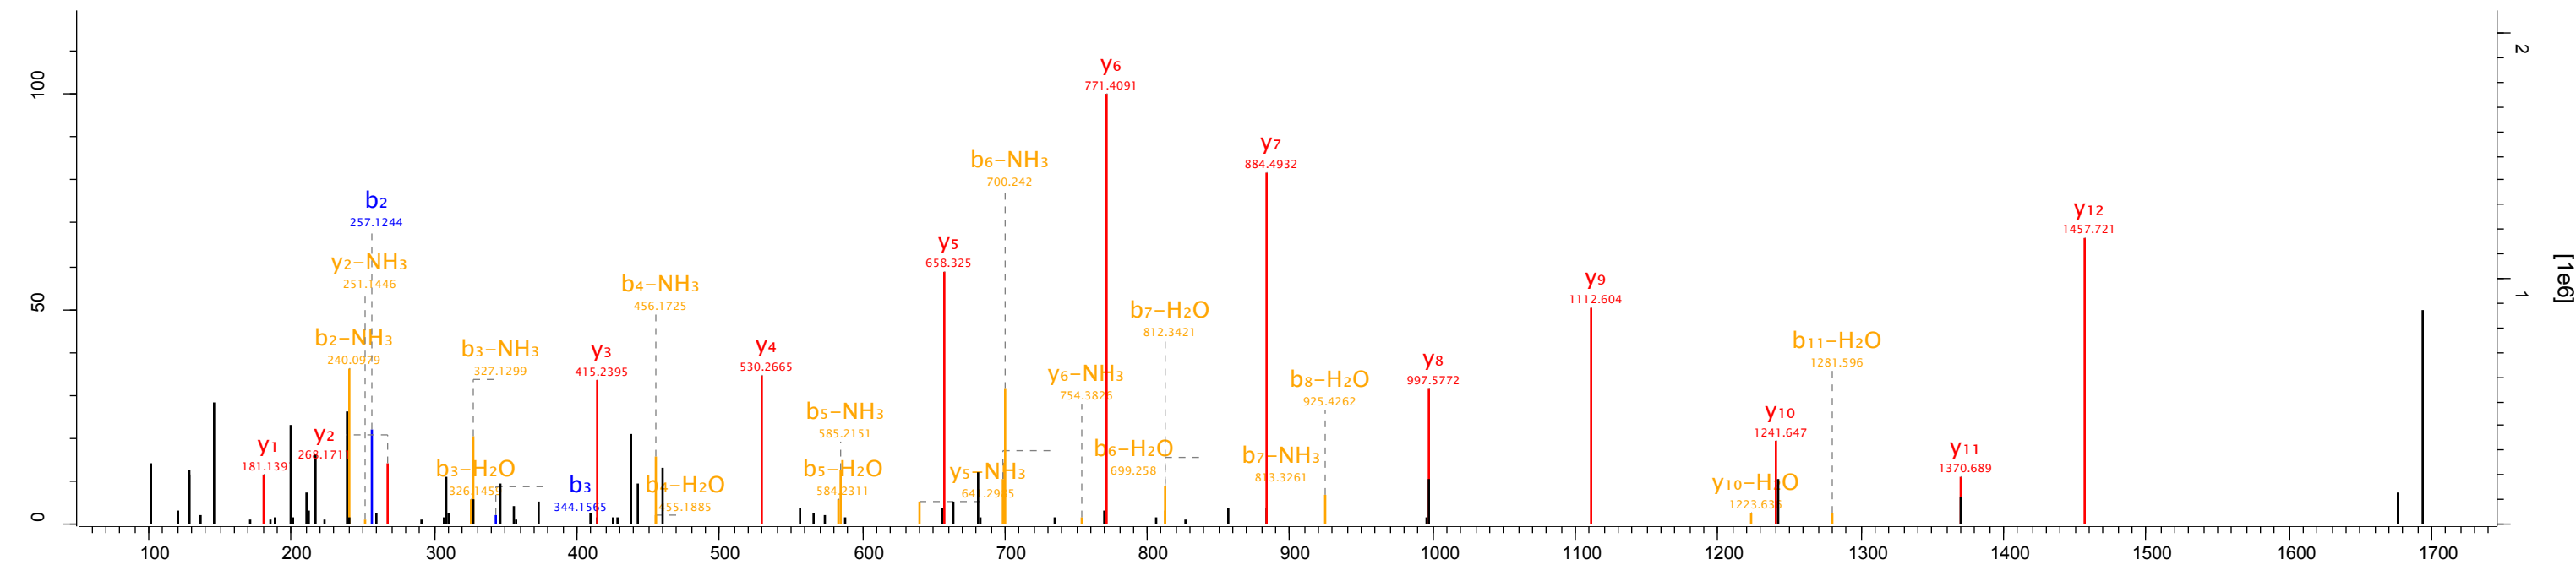

Raw file 20180707\_MaS\_A375SR\_LM\_proteome\_07 Scan 6713 Method FTMS; HCD Score 36.29 m/z 716.8 Gene names LEPROT

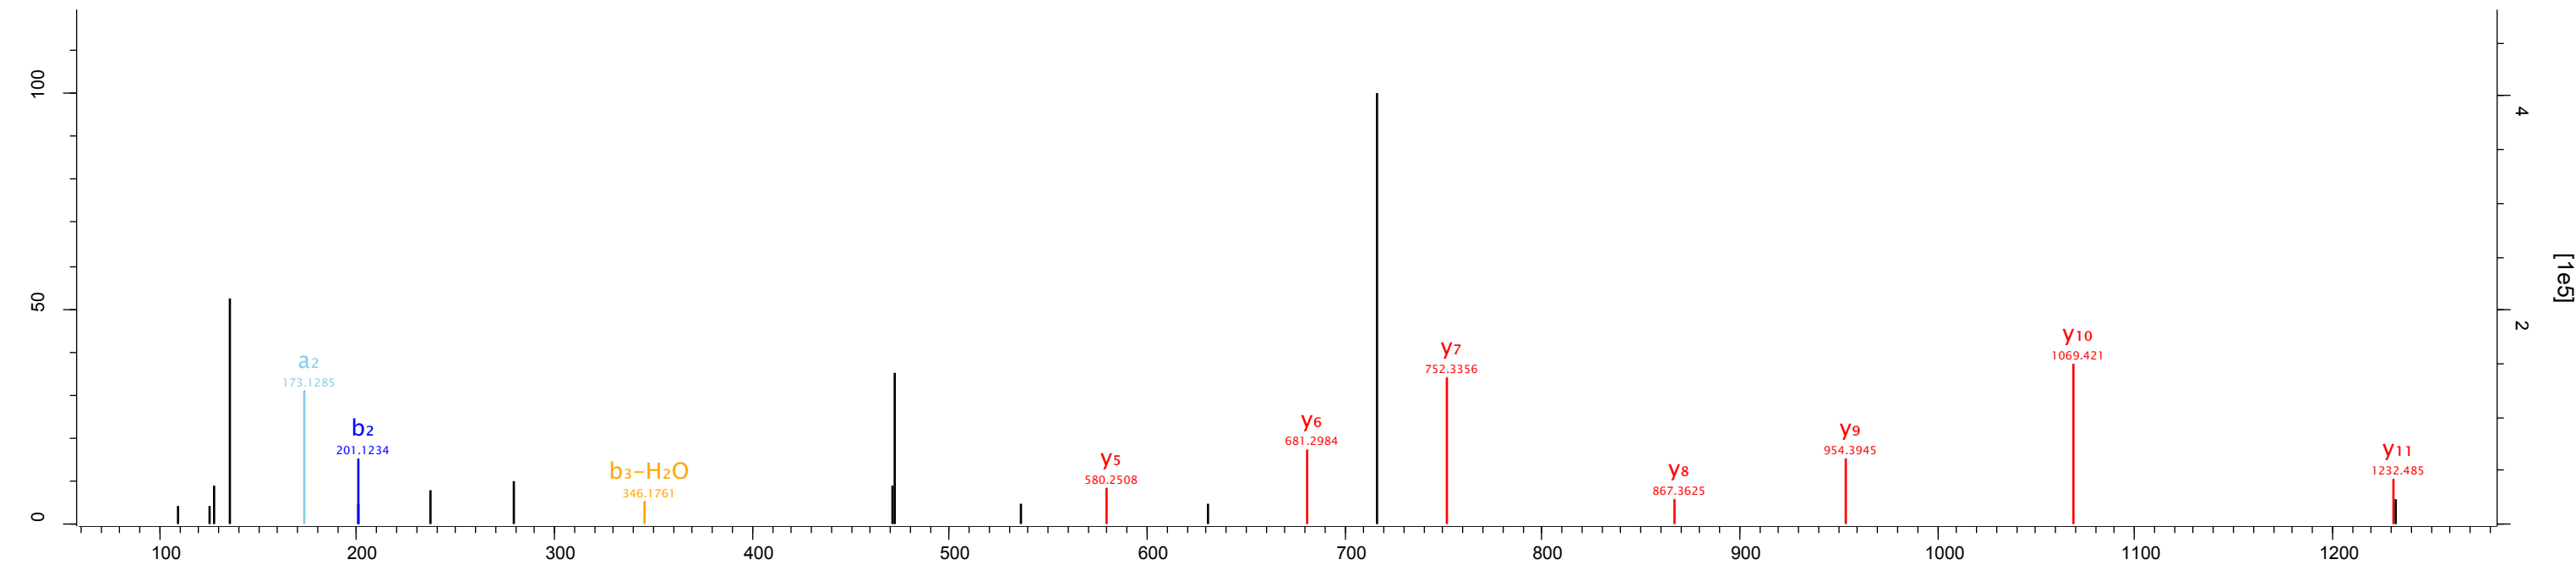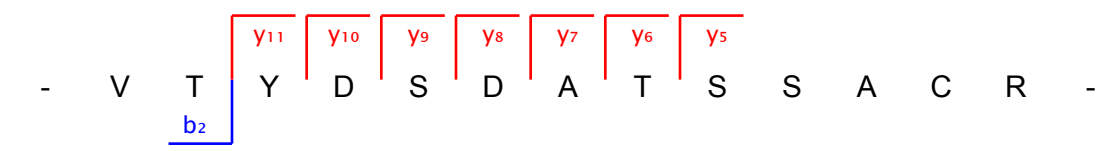

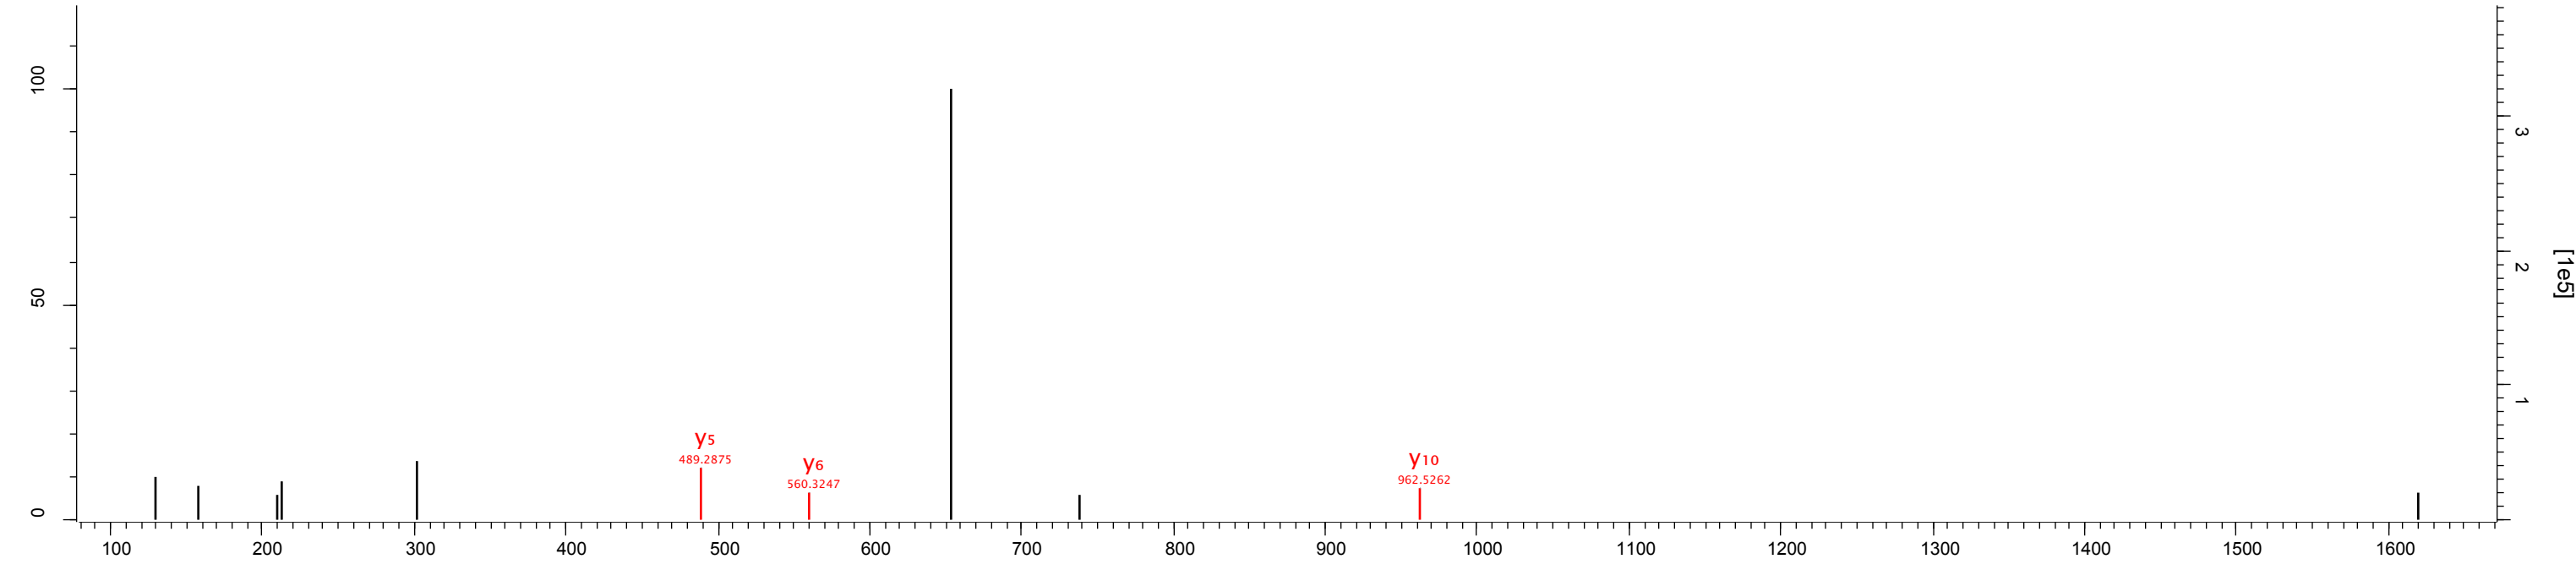

- G G V D T A A A P A G G A P P A H A P G P G R -

y10

y6

y5



Raw file 20180707\_MaS\_A375SR\_LM\_proteome\_16 Scan 12883 Method FTMS; HCD Score 55.01 m/z 859.43 Gene names APOC3

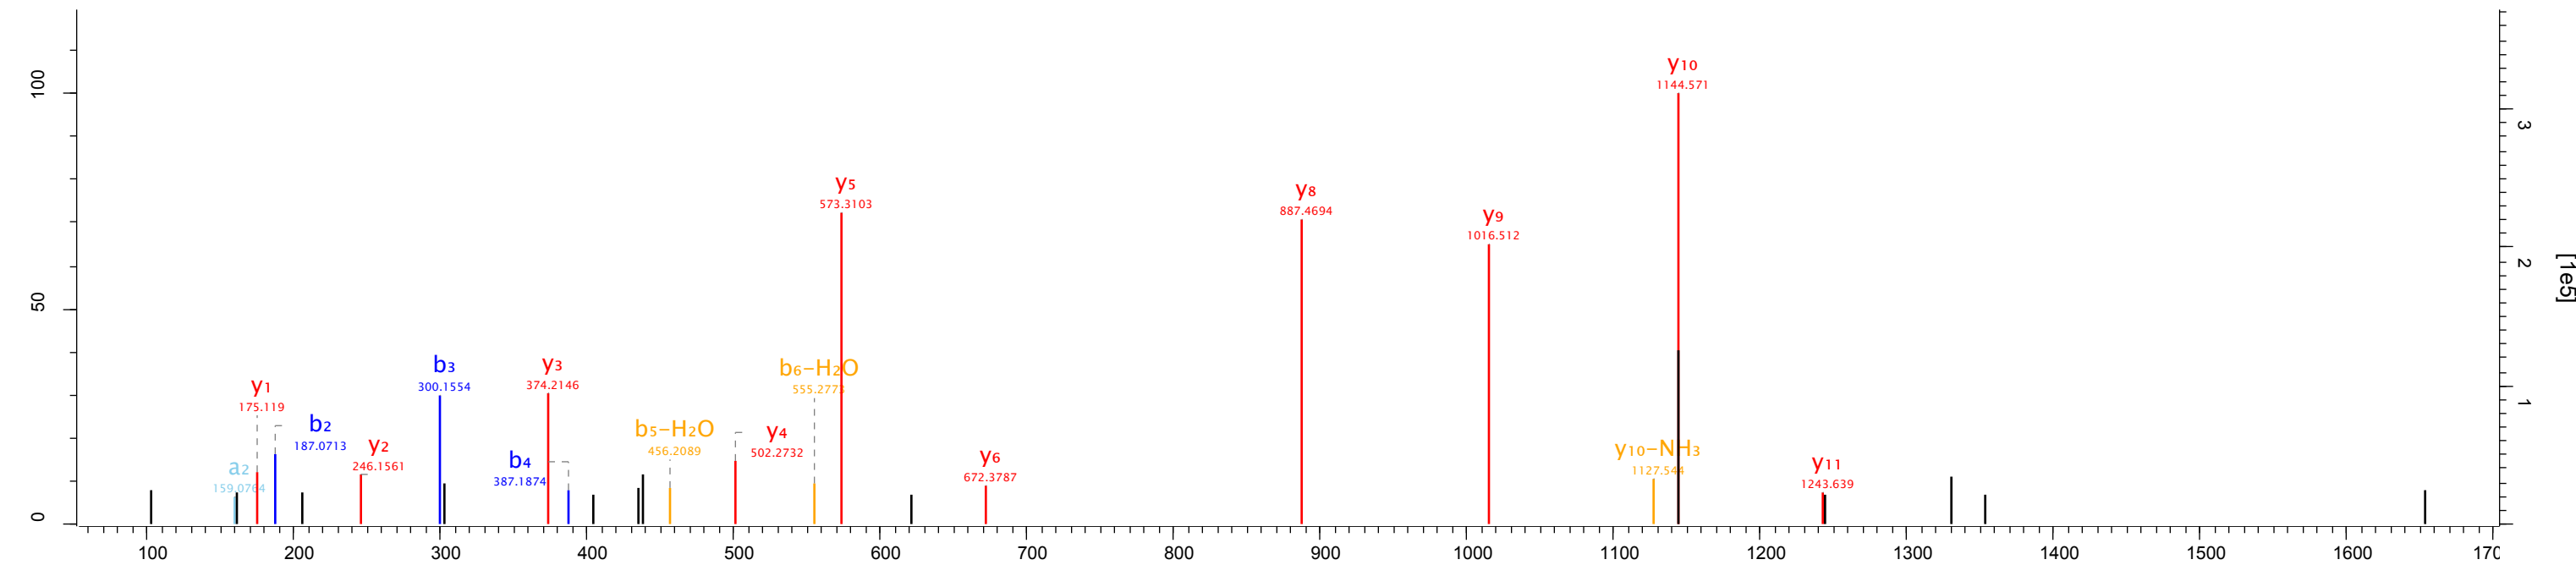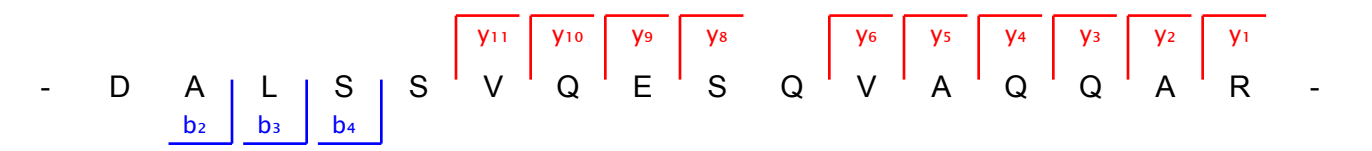

Raw file 20180707\_MaS\_A375SR\_LM\_proteome\_17 Scan 16183 Method FTMS; HCD Score 64.78 m/z 1121.47

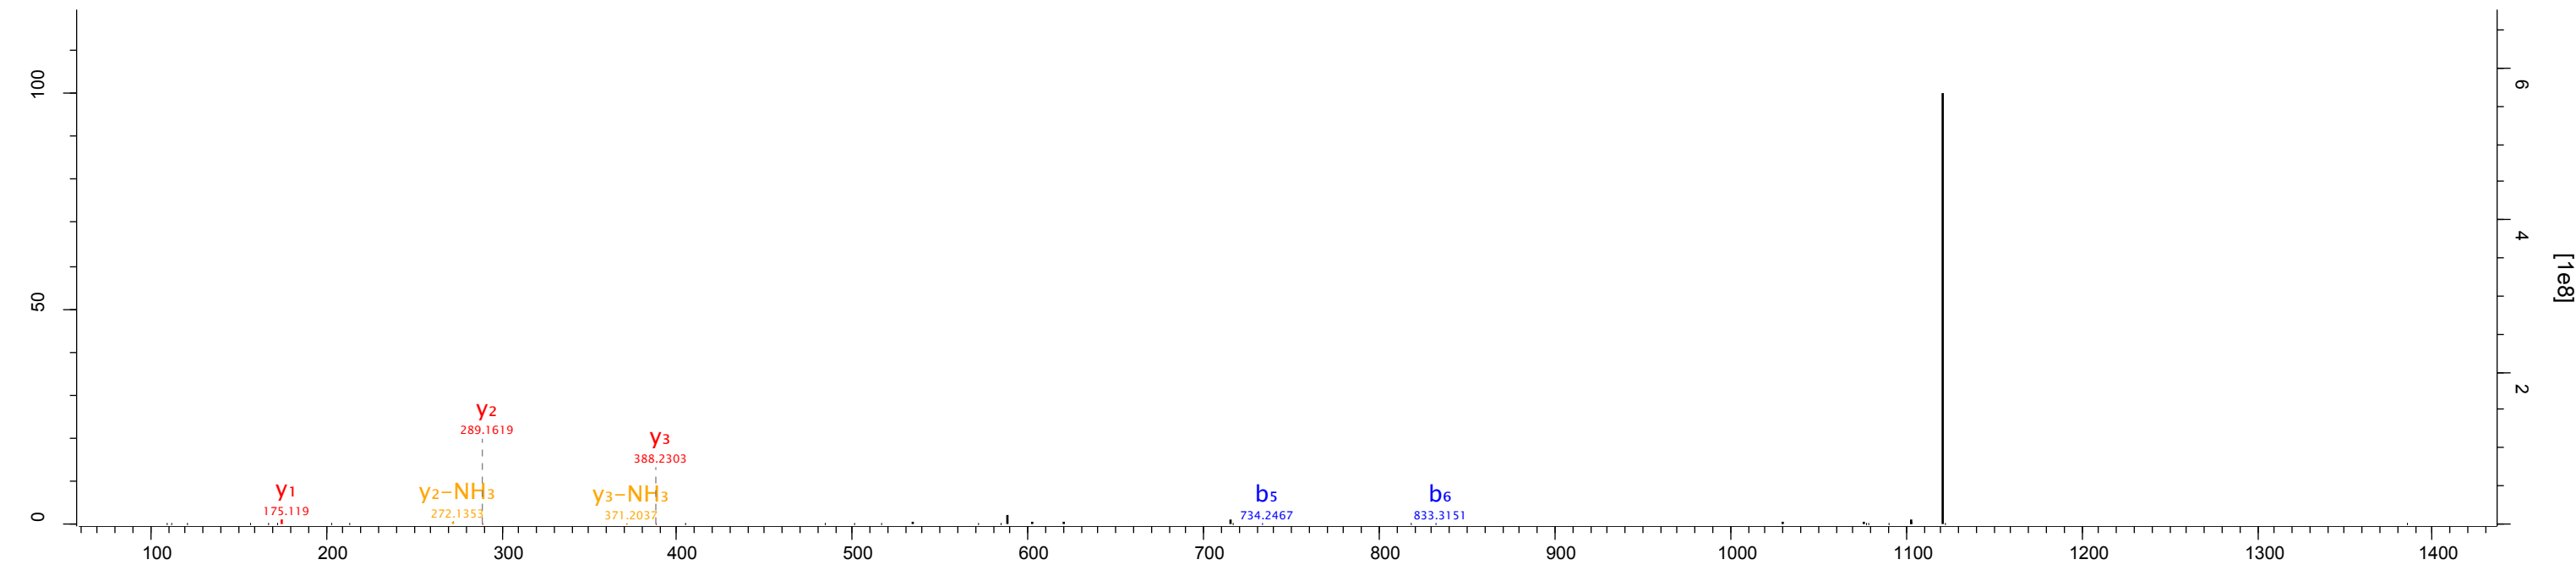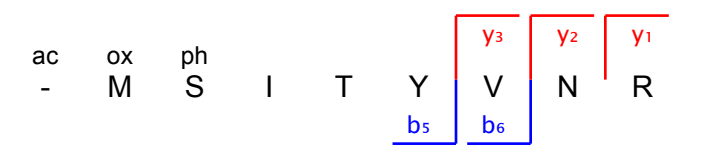

Raw file  
20180707\_MaS\_A375SR\_LM\_proteome\_19

| Scan  | Method    | Score | m/z    | Gene names |
|-------|-----------|-------|--------|------------|
| 24333 | FTMS; HCD | 11.58 | 486.29 | IL1R1      |

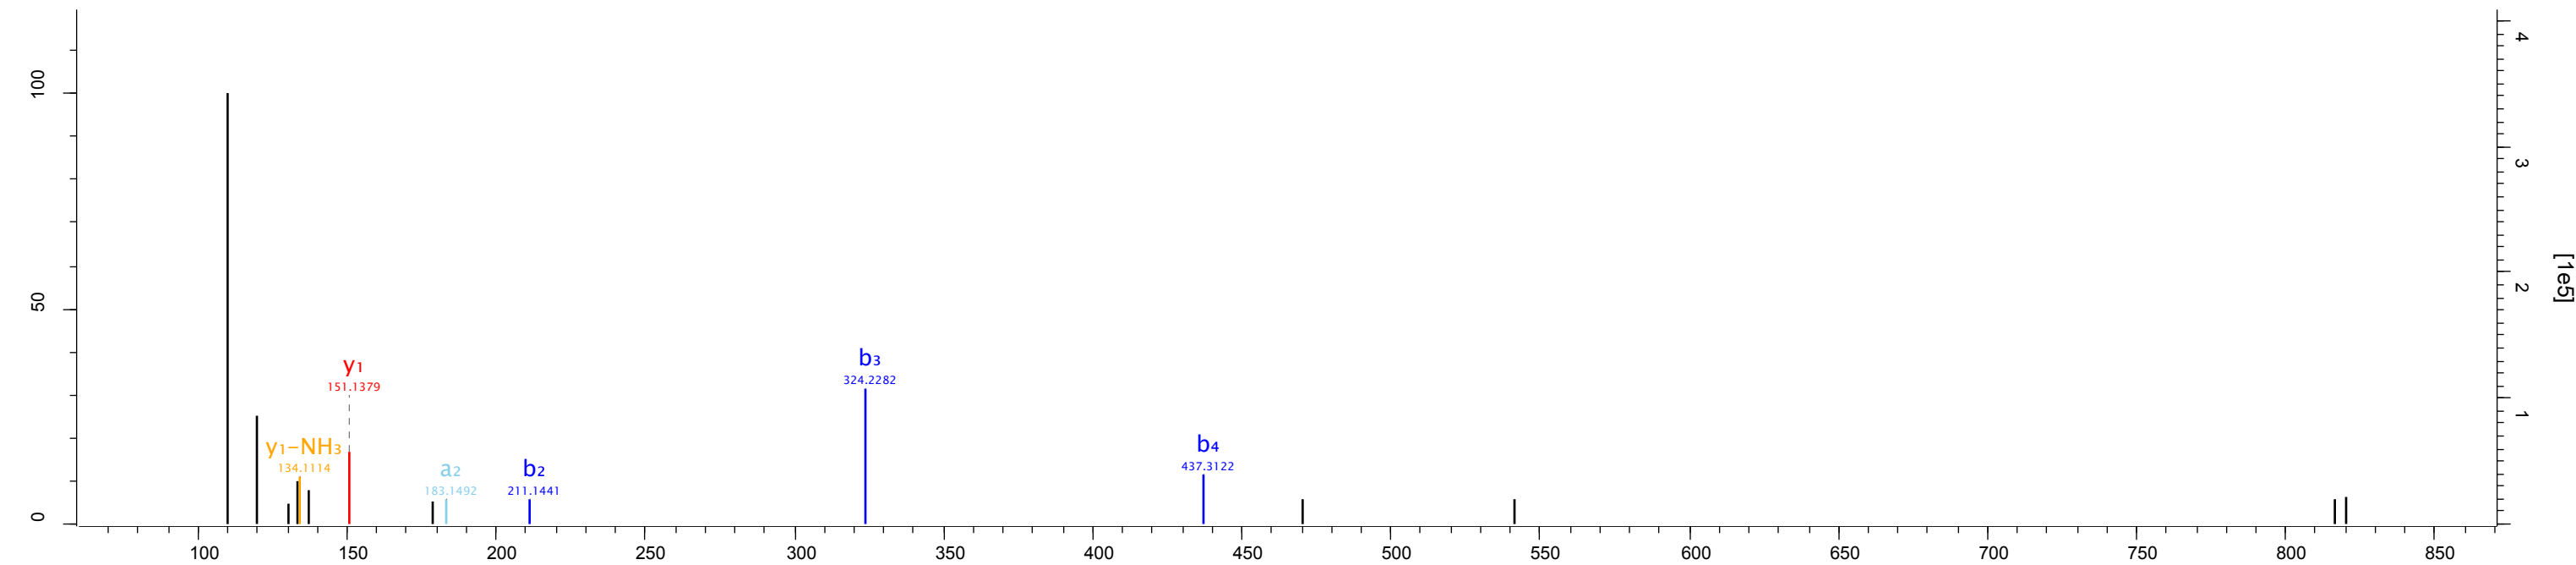

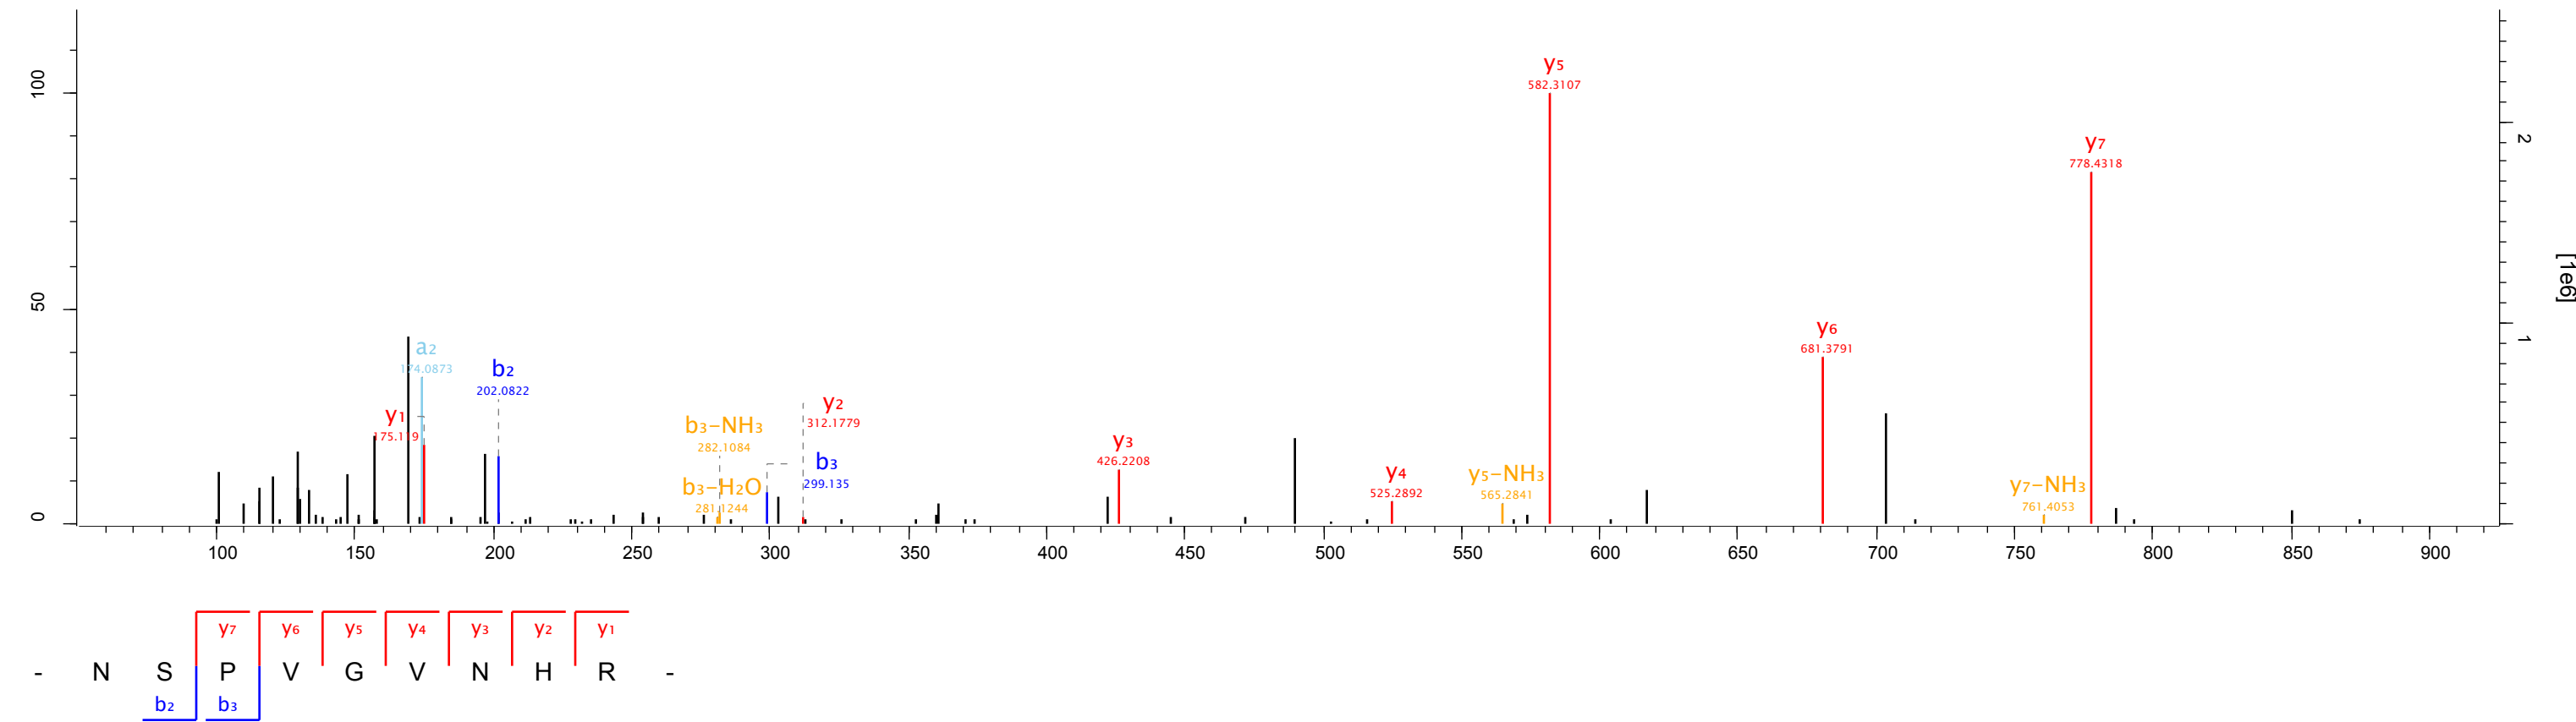

Raw file  
20180707\_MaS\_A375SR\_LM\_proteome\_21

Scan: 26743  
Method: FTMS; HCD  
Score: 15.52  
m/z: 935.16  
Gene names: C1orf85

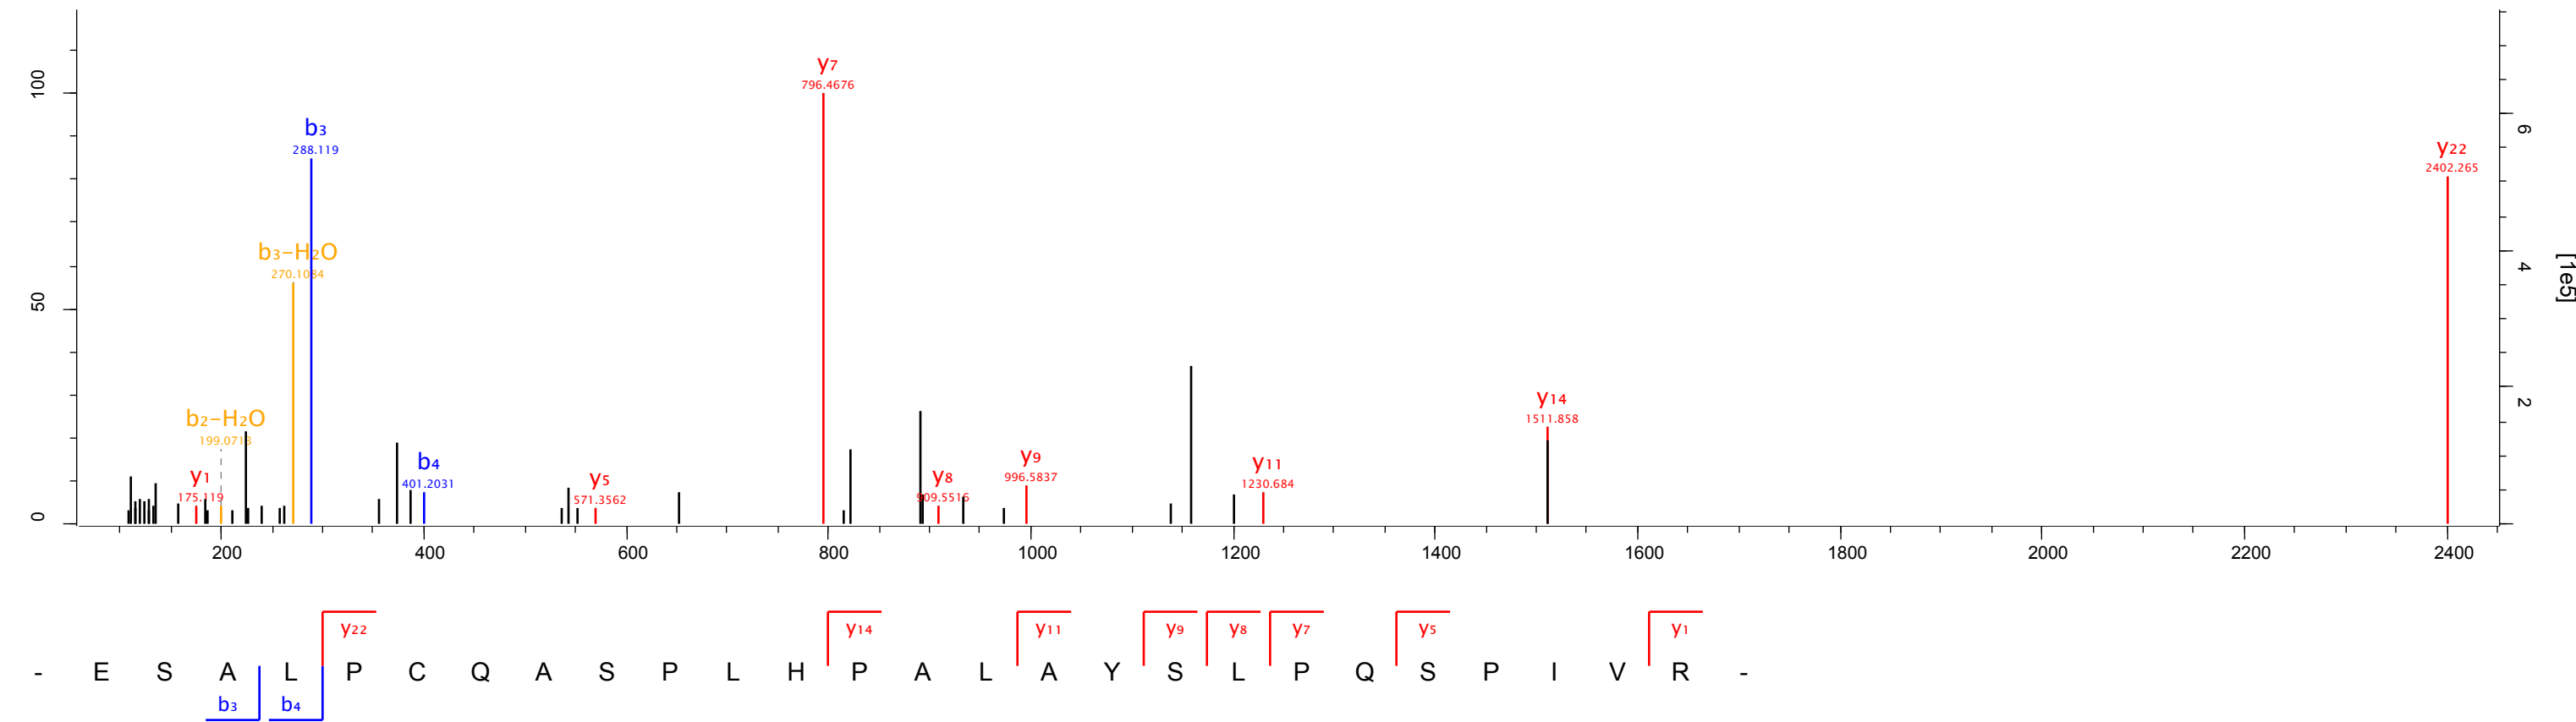

Raw file  
20180707\_MaS\_A375SR\_LM\_proteome\_22

Scan Method Score m/z Gene names  
6863 FTMS; HCD 36.29 716.8 LEPROT

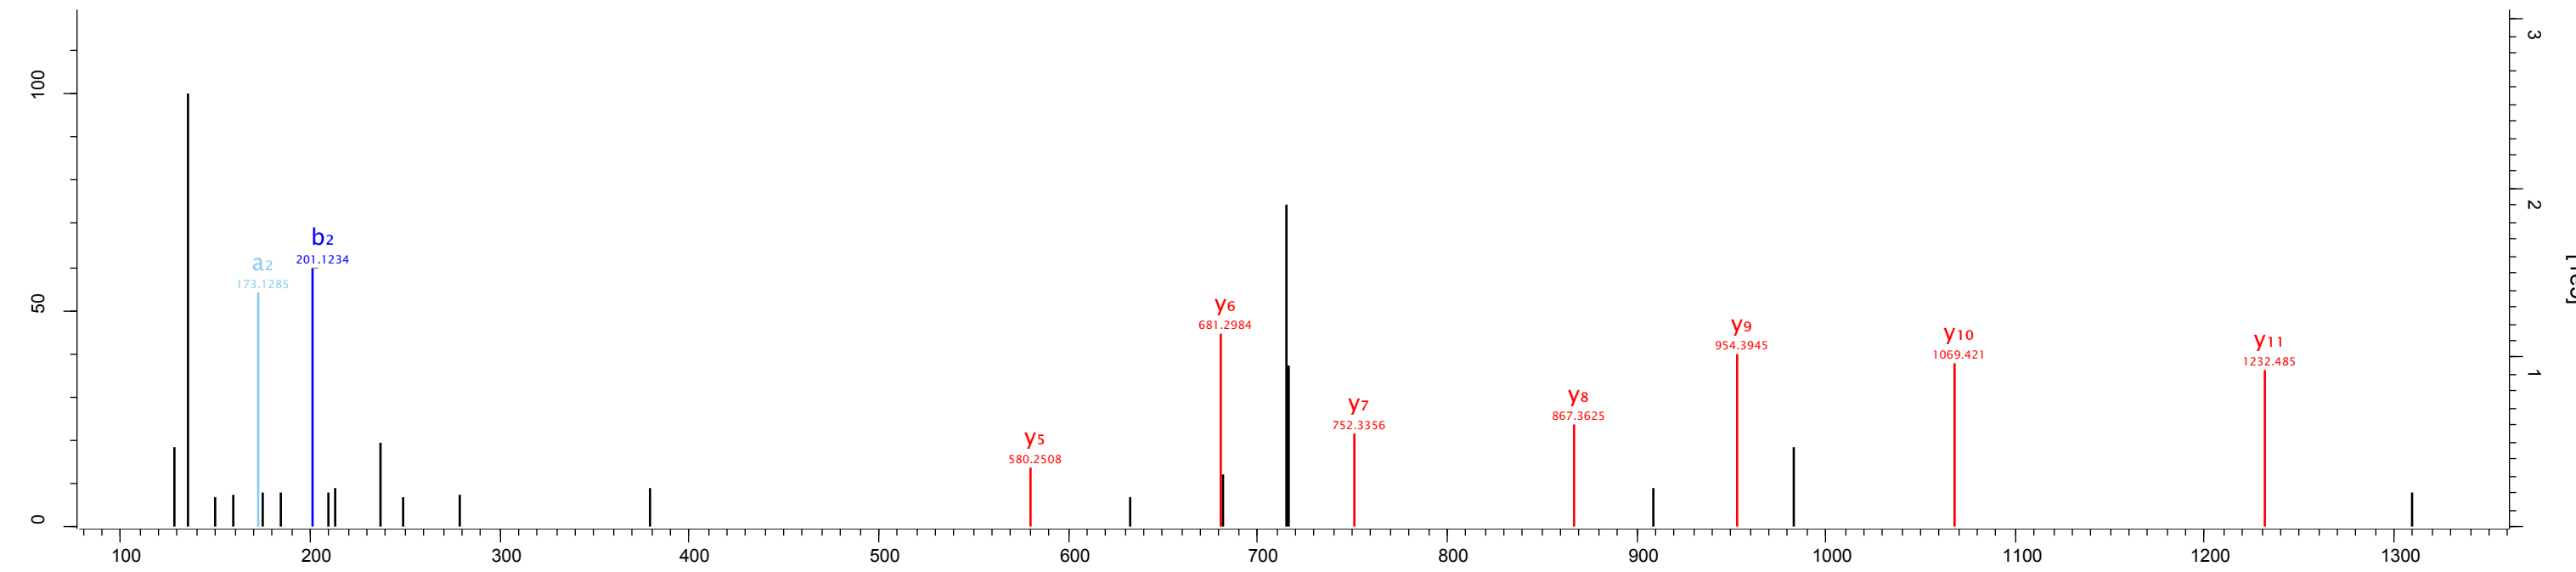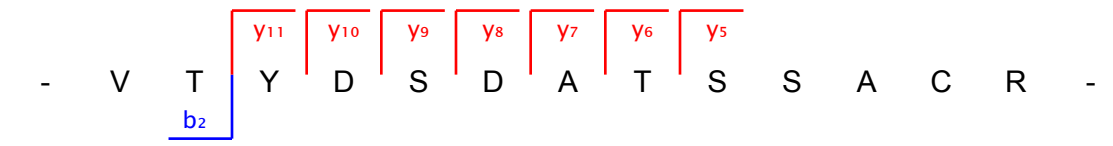

Raw file  
20180707\_MaS\_A375SR\_LM\_proteome\_22

| Scan | Method    | Score | m/z    | Gene names |
|------|-----------|-------|--------|------------|
| 9183 | FTMS; HCD | 2.04  | 651.33 | LAGE3      |

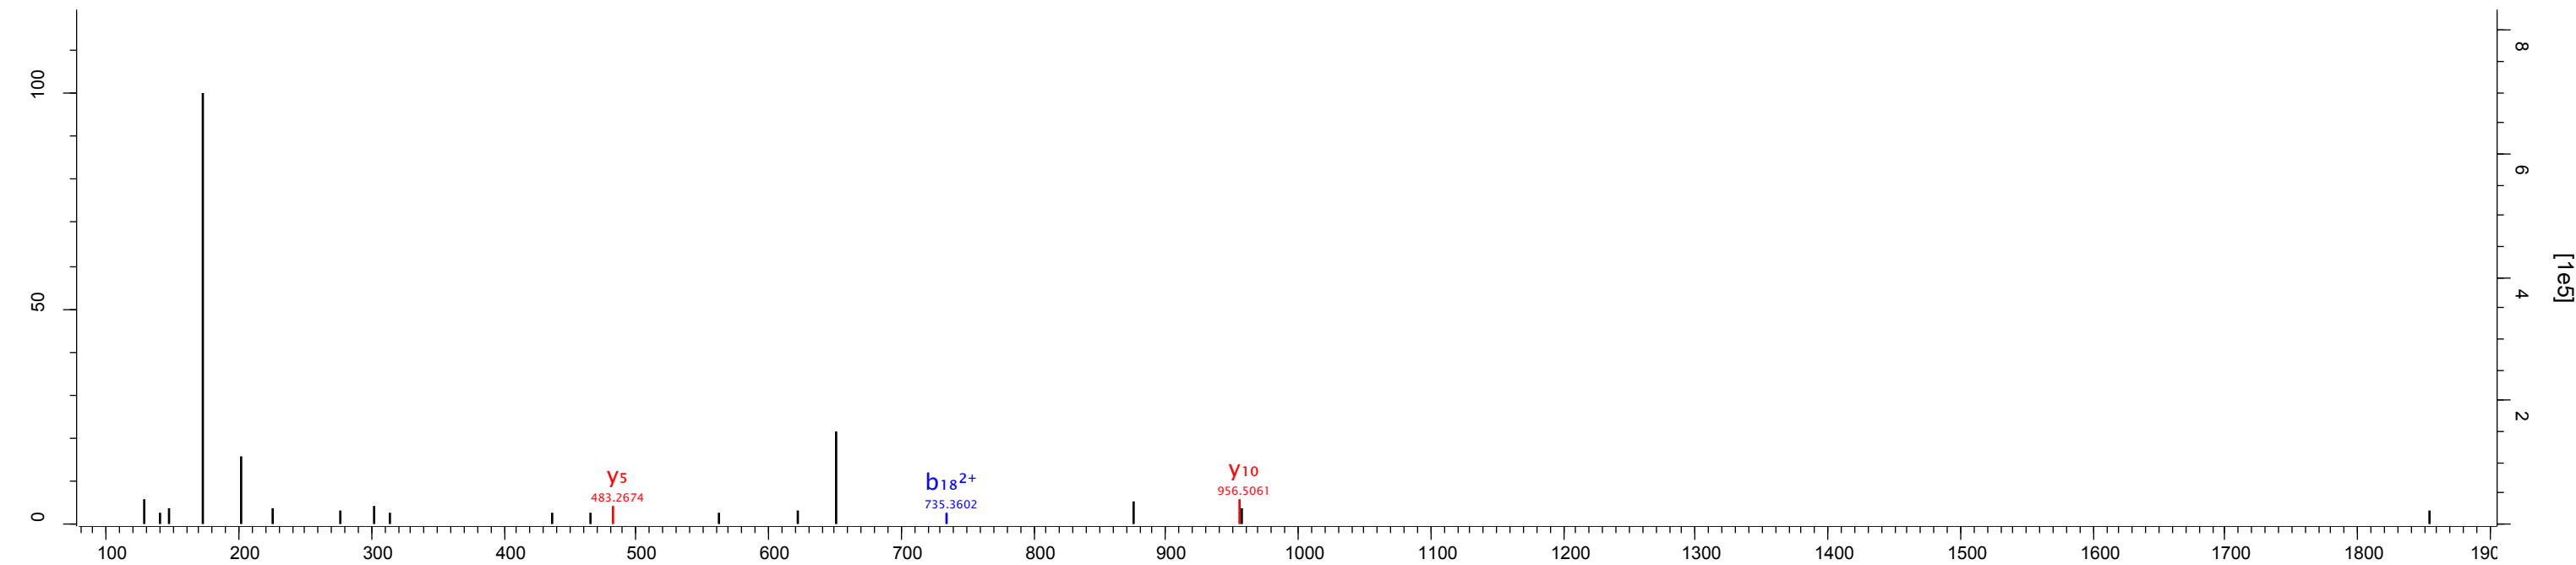

- G G V D T A A A P A G G A P P A H A P G P G R -

Annotations on the peptide sequence:  
- y10 (red bracket) spans from the 13th residue (A) to the 18th residue (P).  
- b18<sup>2+</sup> (blue bracket) spans from the 13th residue (A) to the 18th residue (P).  
- y5 (red bracket) spans from the 18th residue (P) to the 21st residue (G).

Raw file

20180707\_MaS\_A375SR\_LM\_proteome\_29

| Scan  | Method    | Score | m/z    | Gene names |
|-------|-----------|-------|--------|------------|
| 23813 | FTMS; HCD | 73.28 | 930.45 | MAPK1IP1L  |

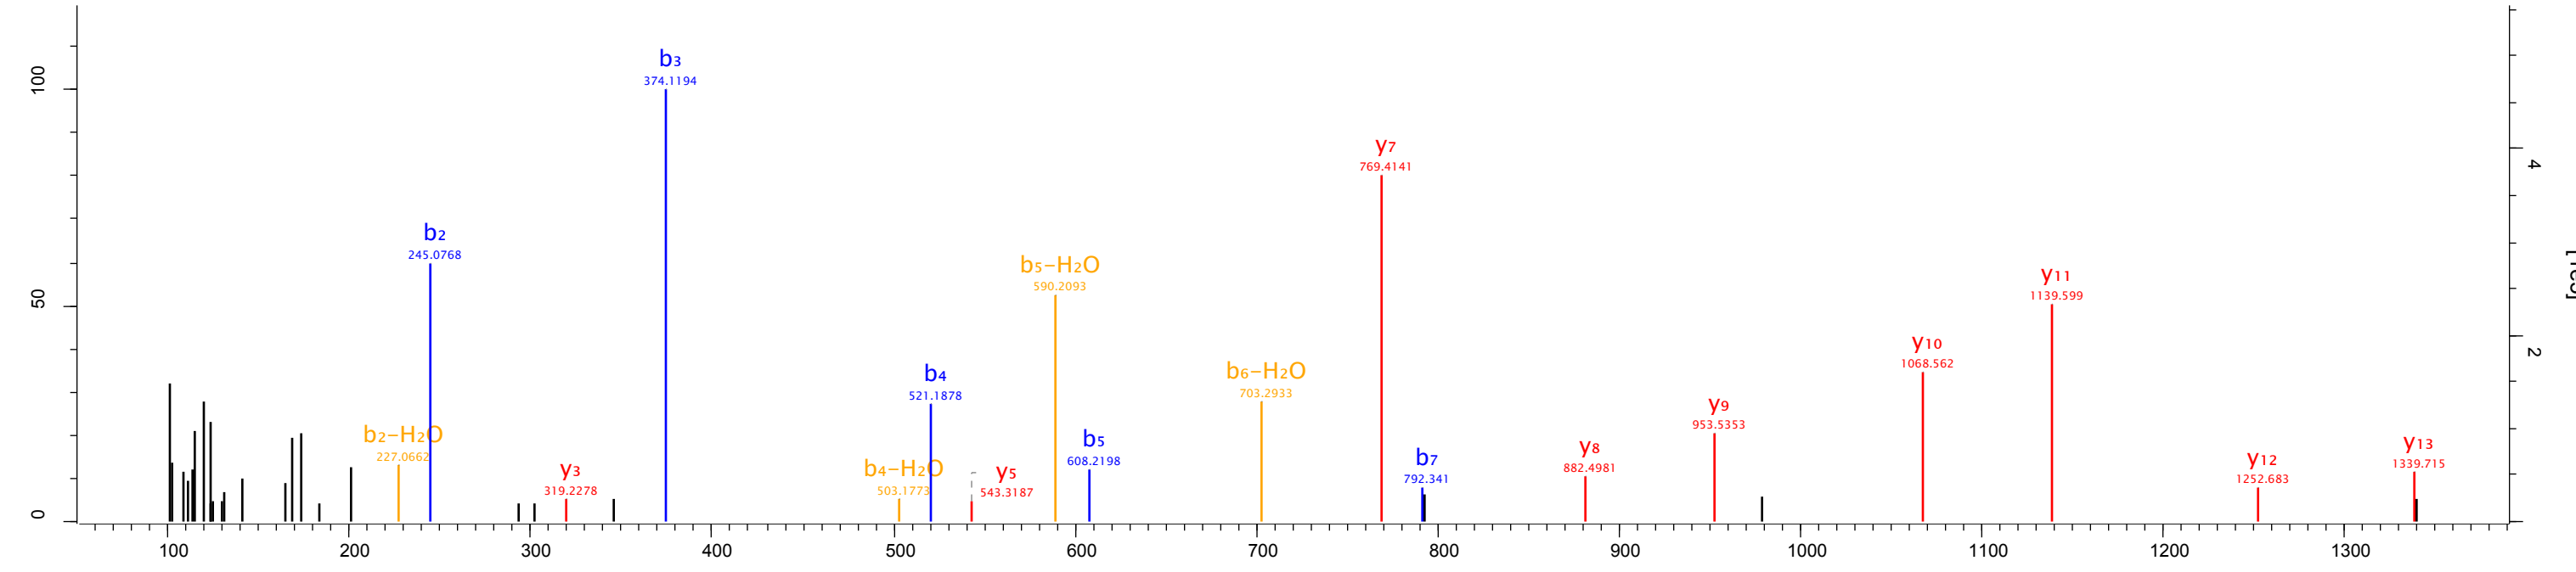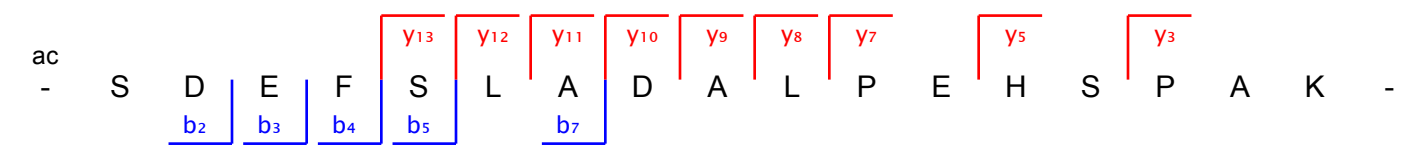



Raw file: 20180707\_MaS\_A375SR\_ML\_proteome\_01  
 Scan: 23163 Method: FTMS; HCD Score: 66.83 m/z: 861.94 Gene names: PIK3C2B

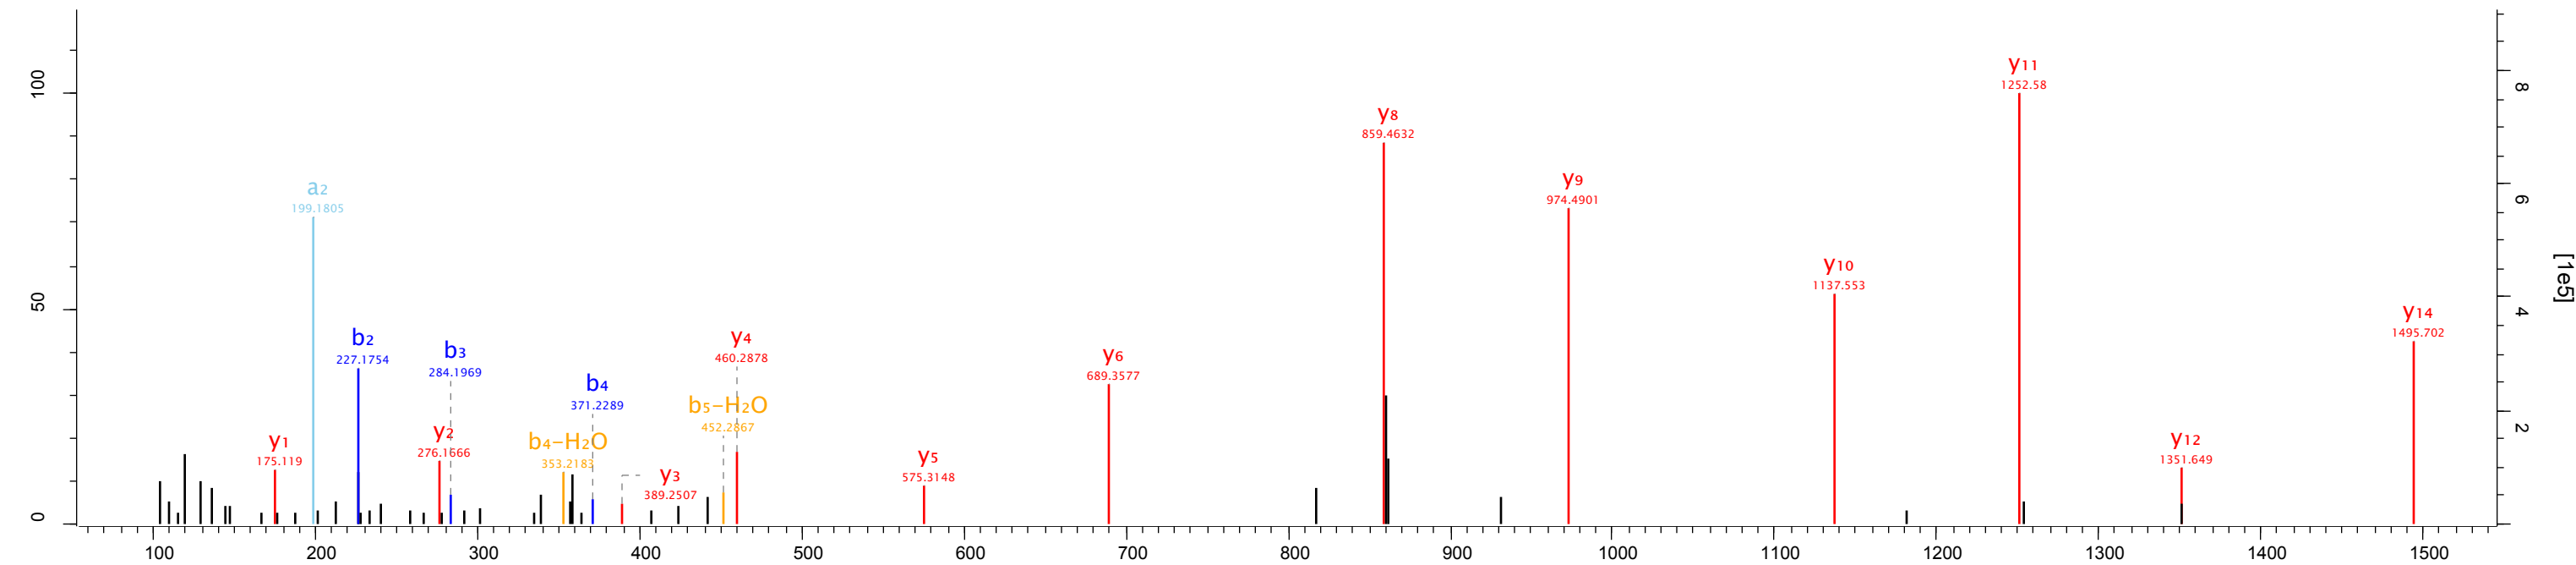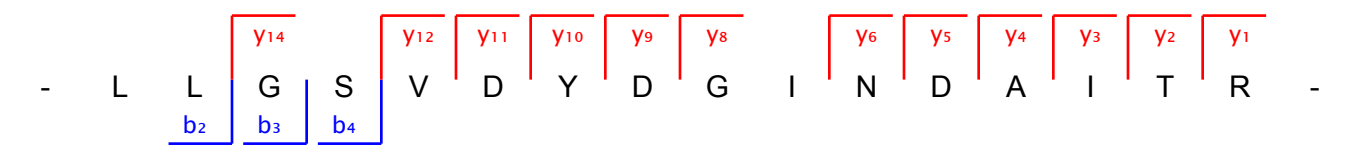

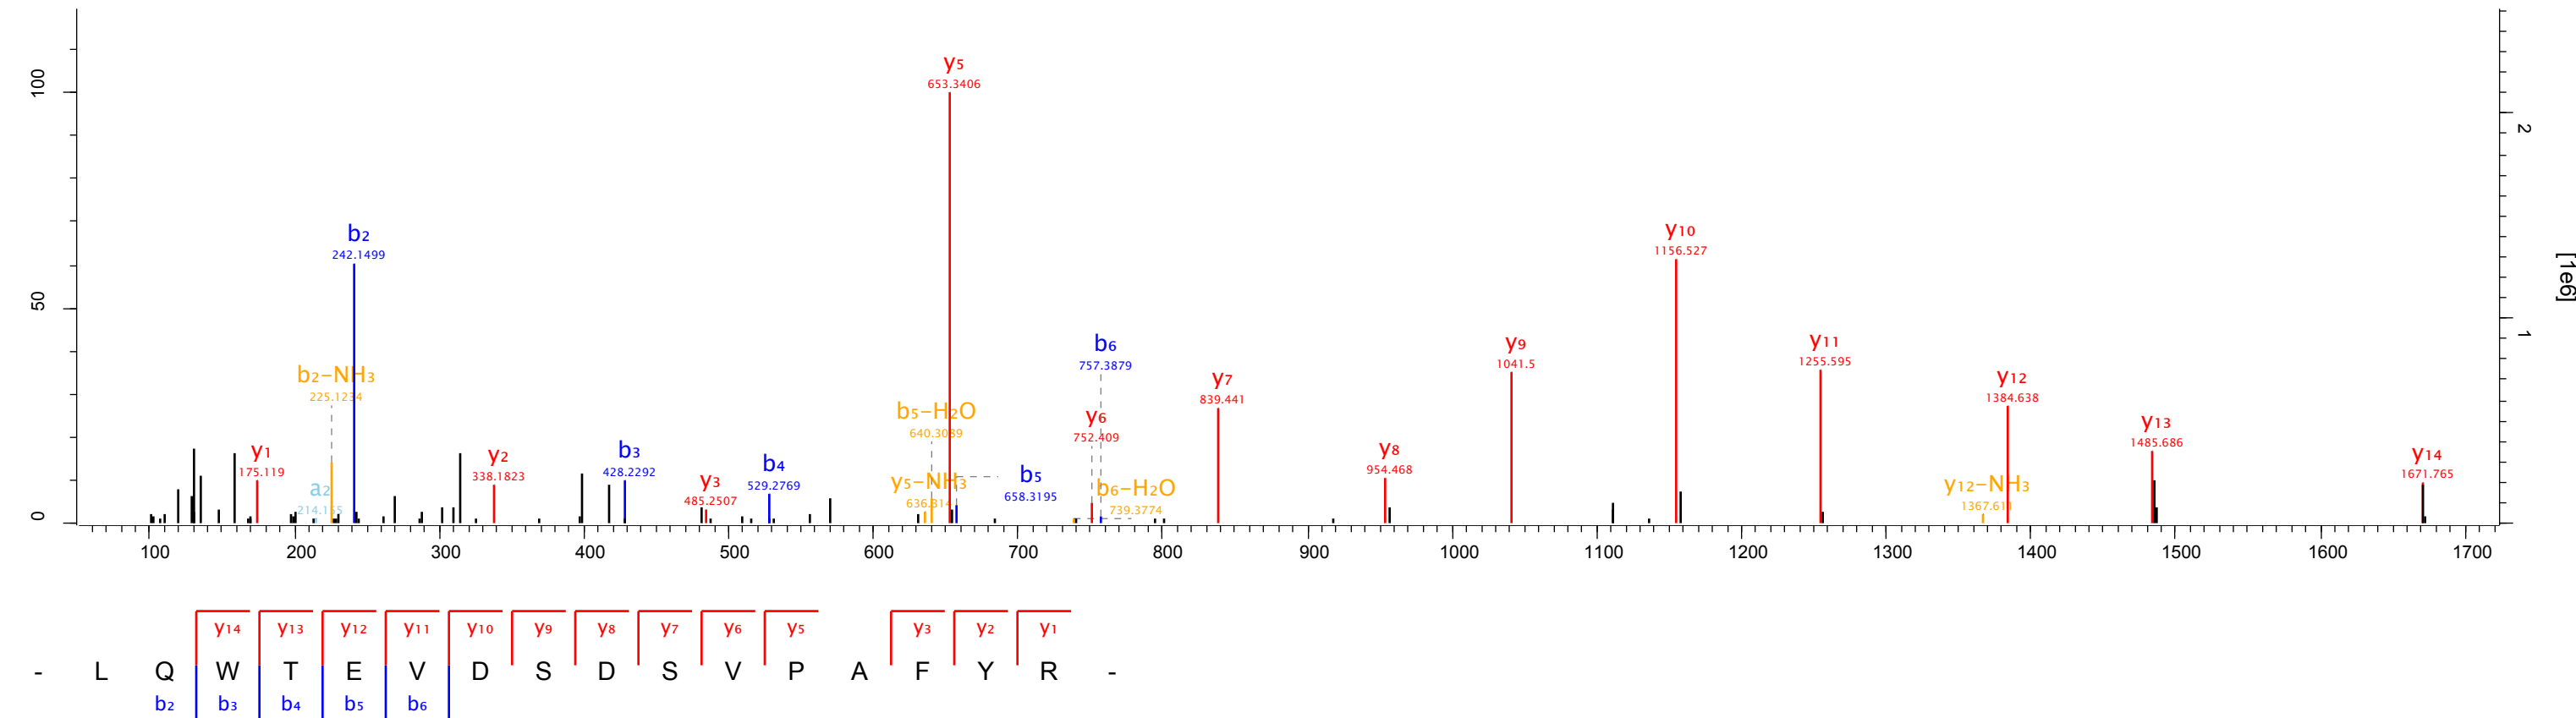

Raw file 20180707\_MaS\_A375SR\_ML\_proteome\_02 Scan 15083 Method FTMS; HCD Score 86.76 m/z 705.86 Gene names TMEM69

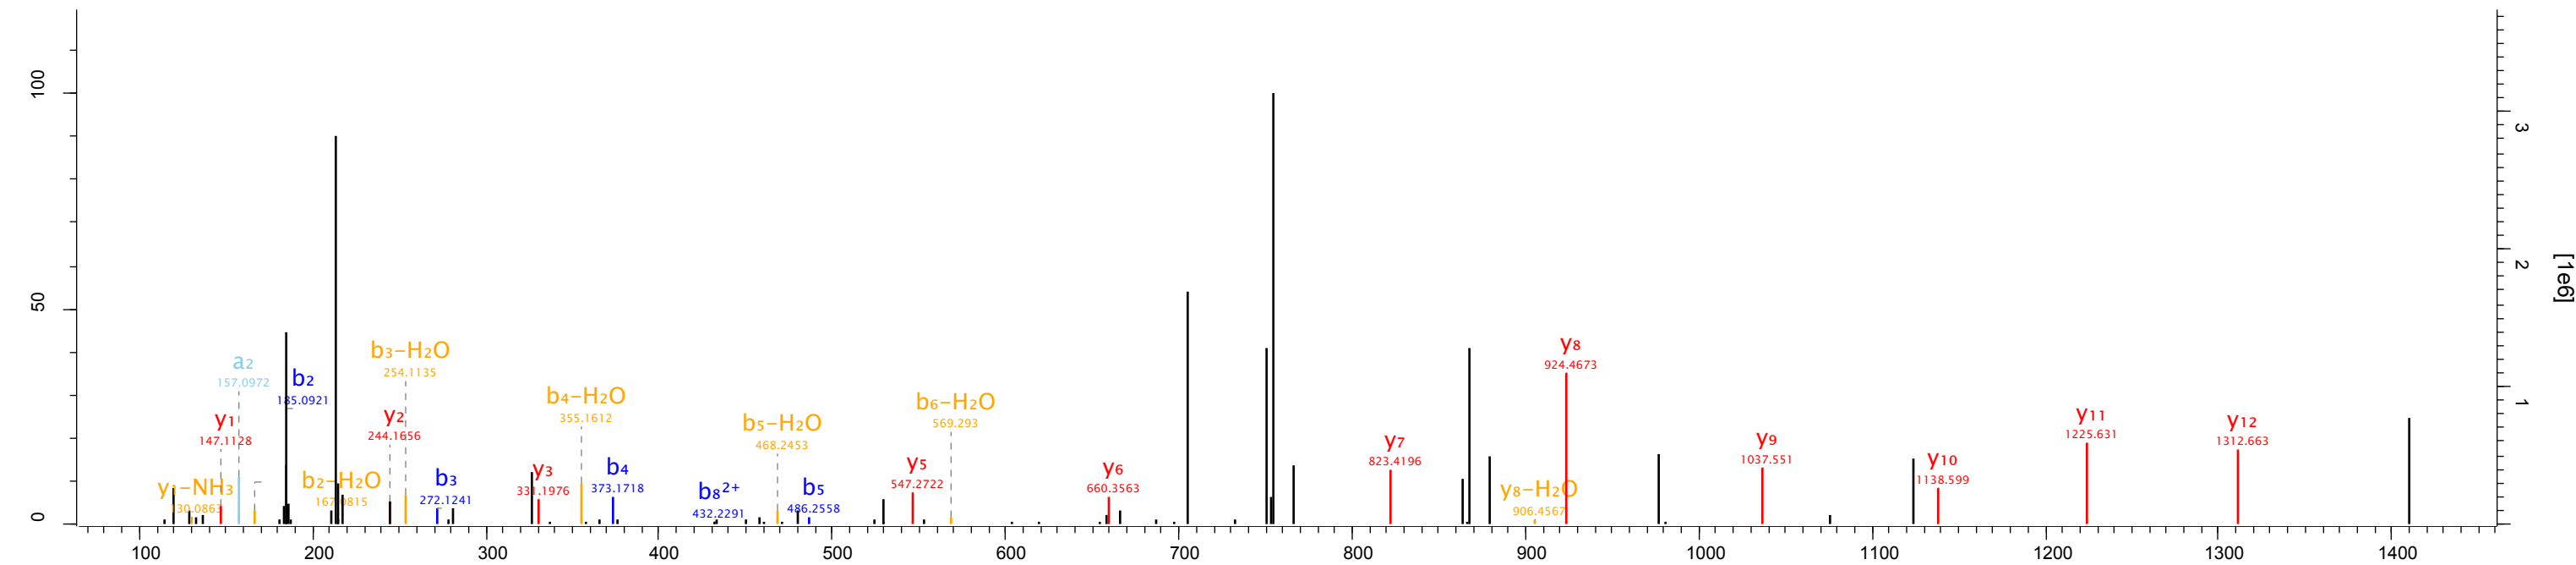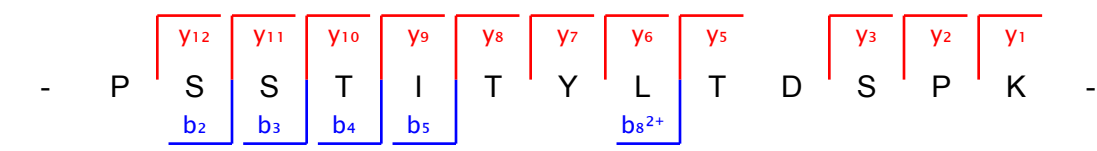

Raw file: 20180707\_MaS\_A375SR\_ML\_proteome\_03  
 Scan: 10303 Method: FTMS; HCD Score: 85.81 m/z: 650.84 Gene names: MEIS2;MEIS3;MEIS1;MEIS3P1

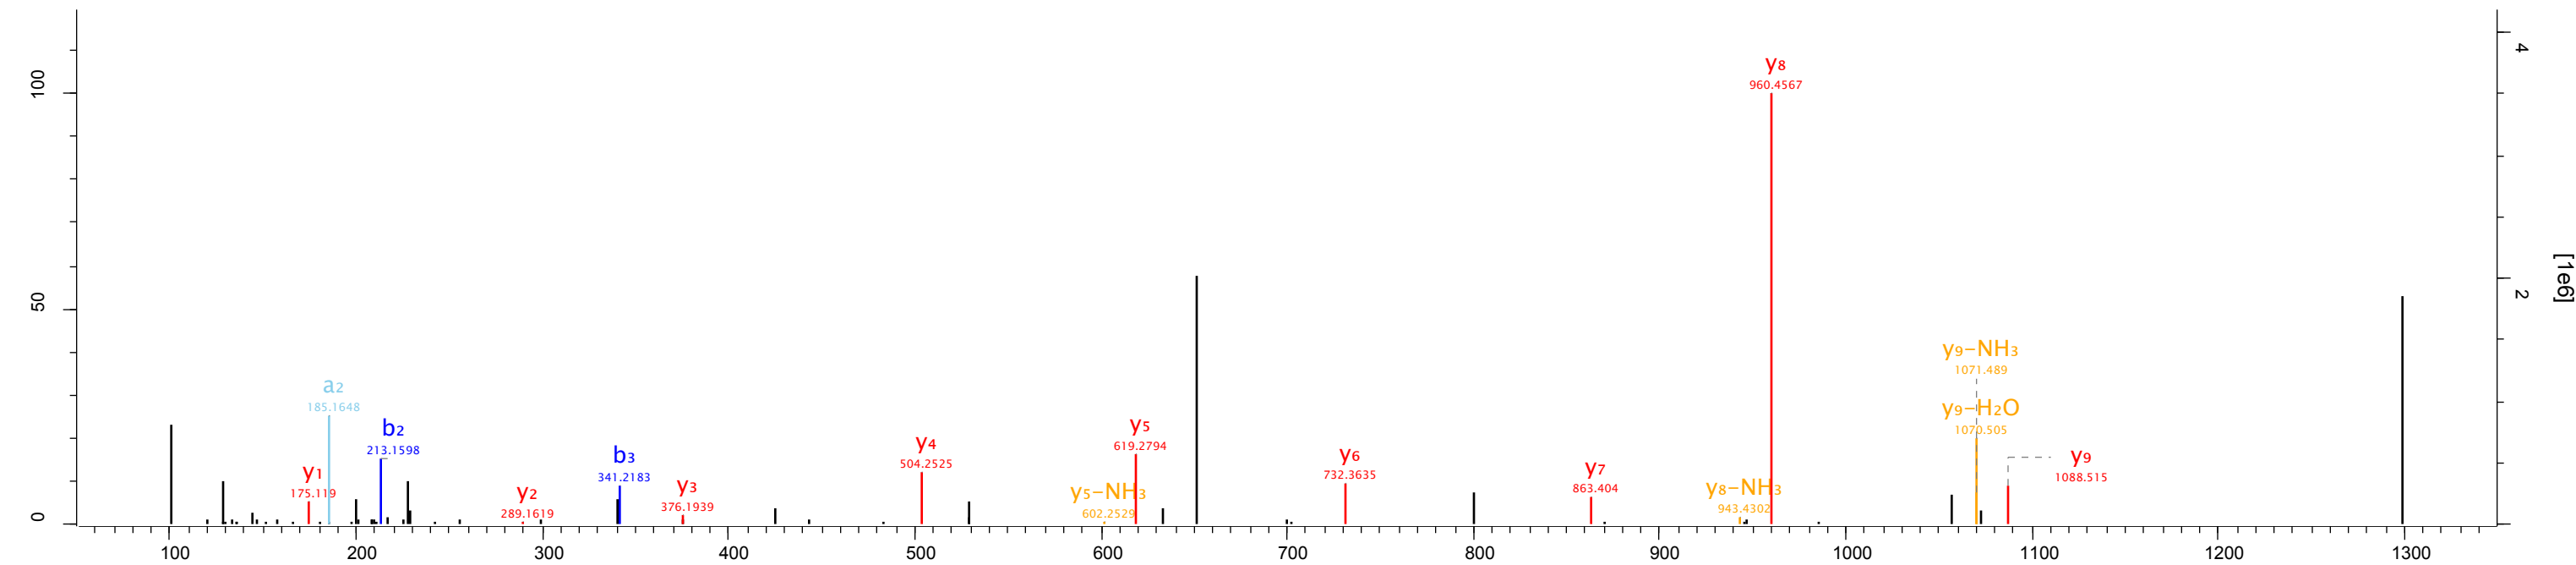

Raw file 20180707\_MaS\_A375SR\_ML\_proteome\_04 Scan 12263 Method FTMS; HCD Score 64.78 m/z 442.23 Gene names C1orf234

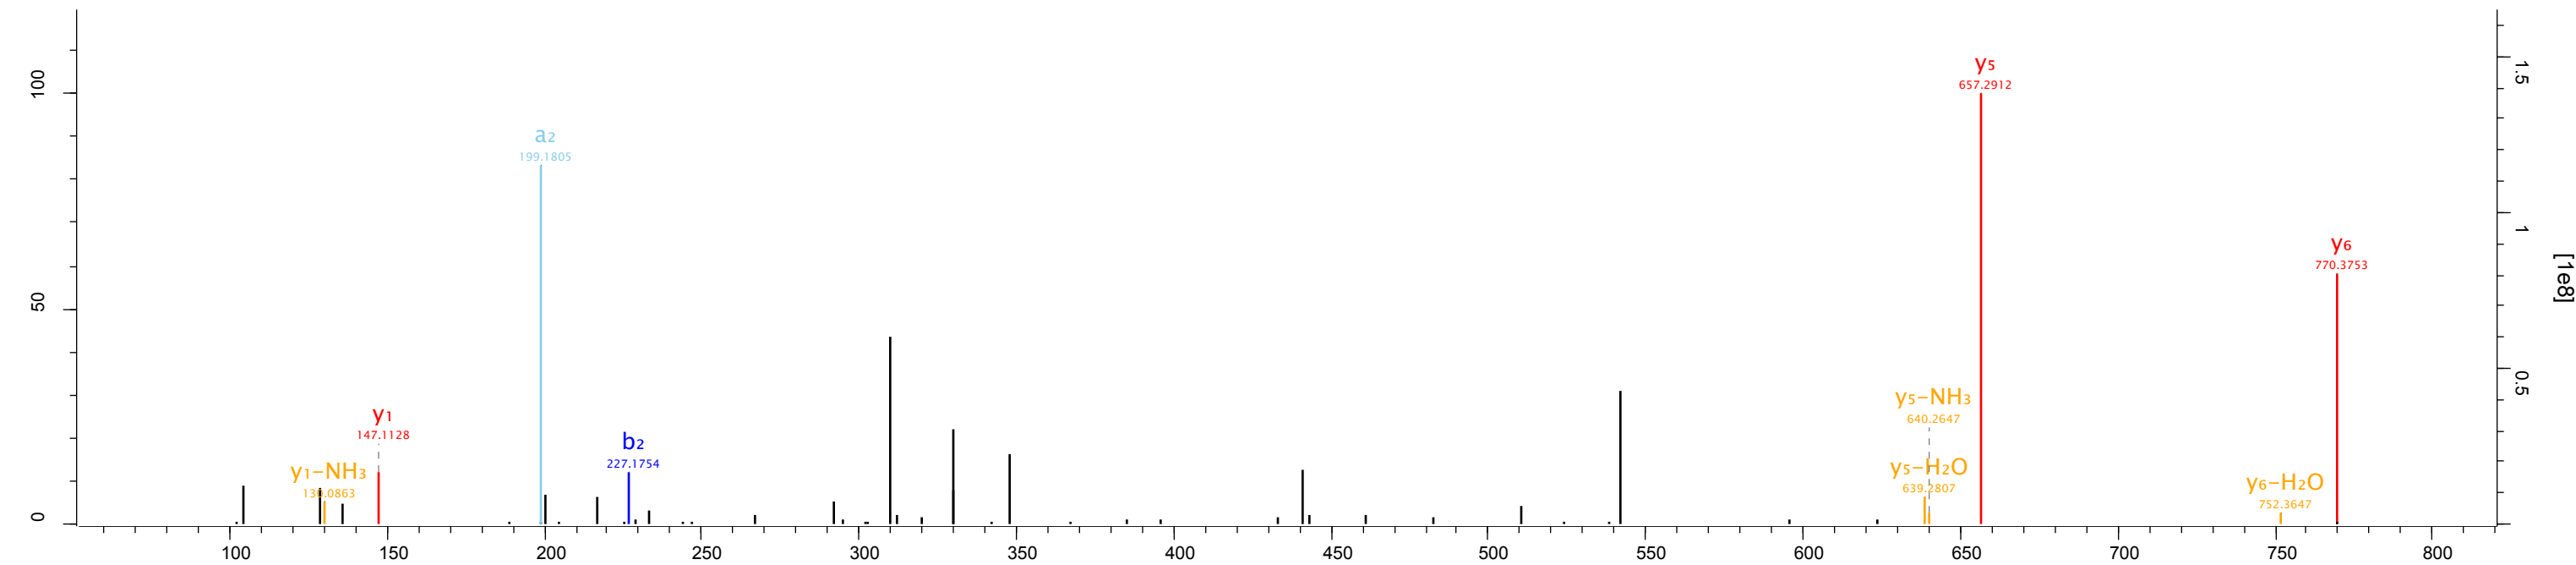

Raw file  
20180707\_MaS\_A375SR\_ML\_proteome\_04

Scan 21473 Method FTMS; HCD Score 47.08 m/z 1100.98 Gene names ELOF1

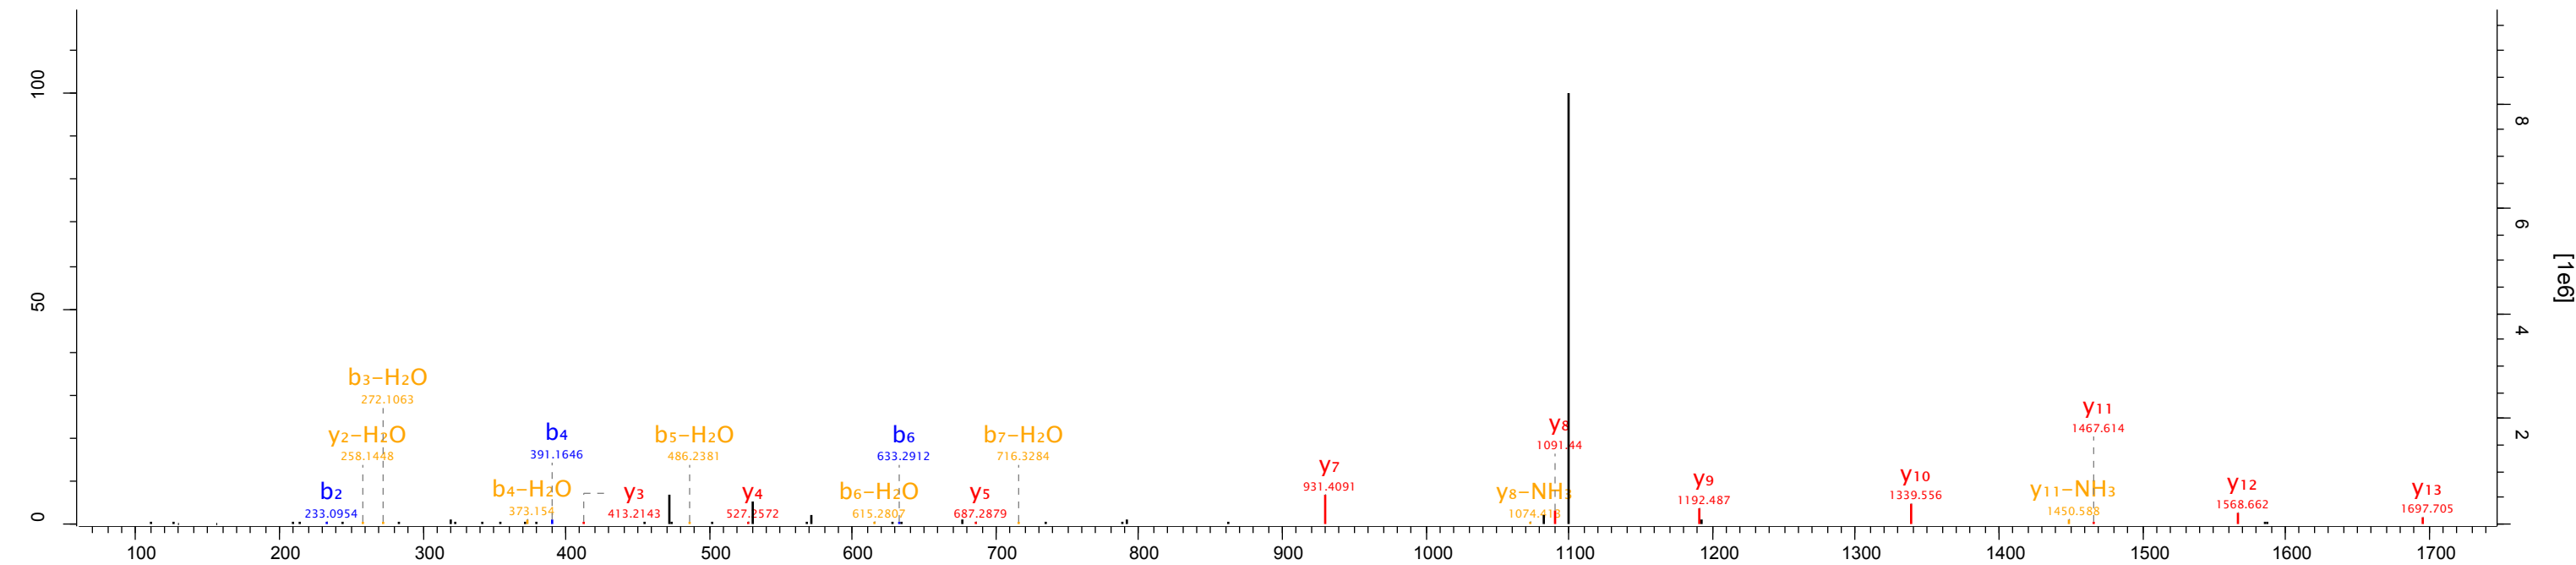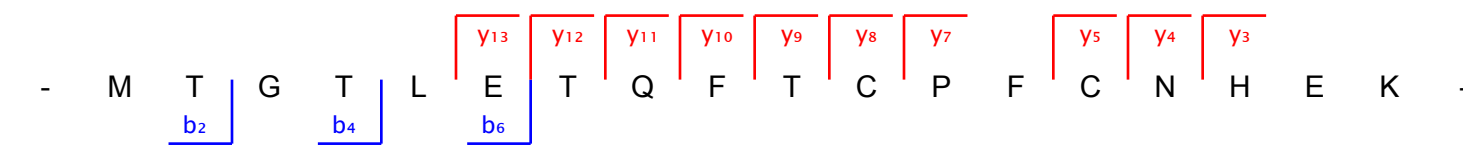

20180707\_MaS\_A375SR\_ML\_proteome\_04

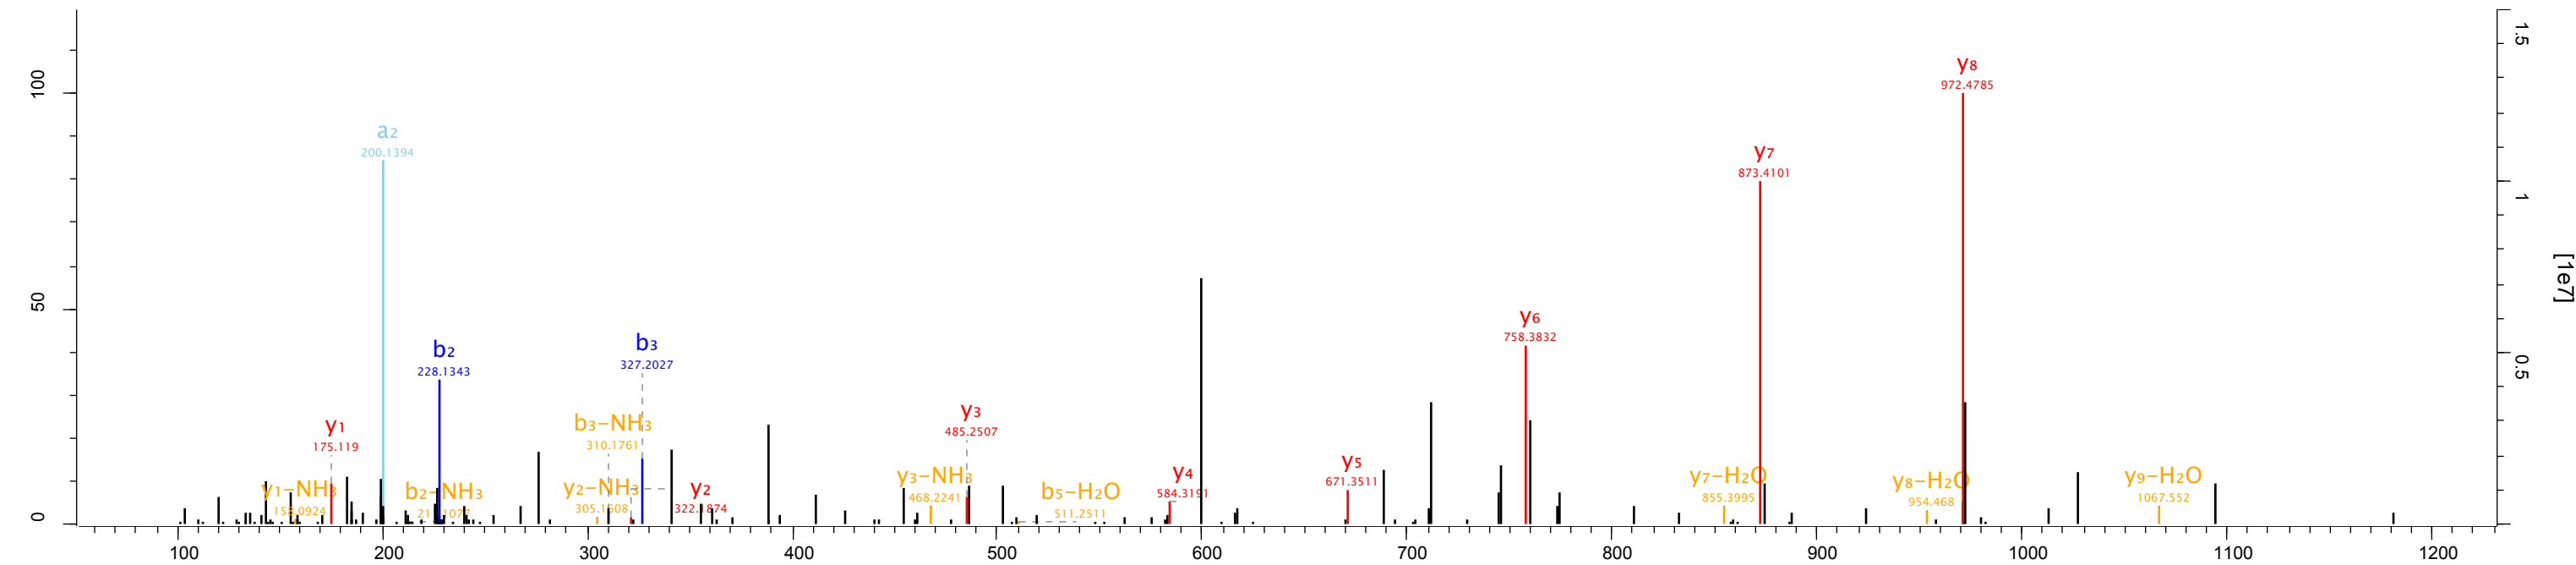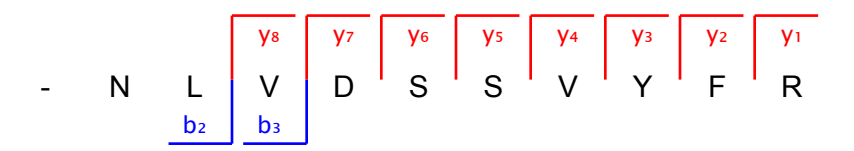

Raw file: 20180707\_MaS\_A375SR\_ML\_proteome\_04  
 Scan: 3133 Method: FTMS; HCD Score: 84.2 m/z: 569.26 Gene names: ZEB2

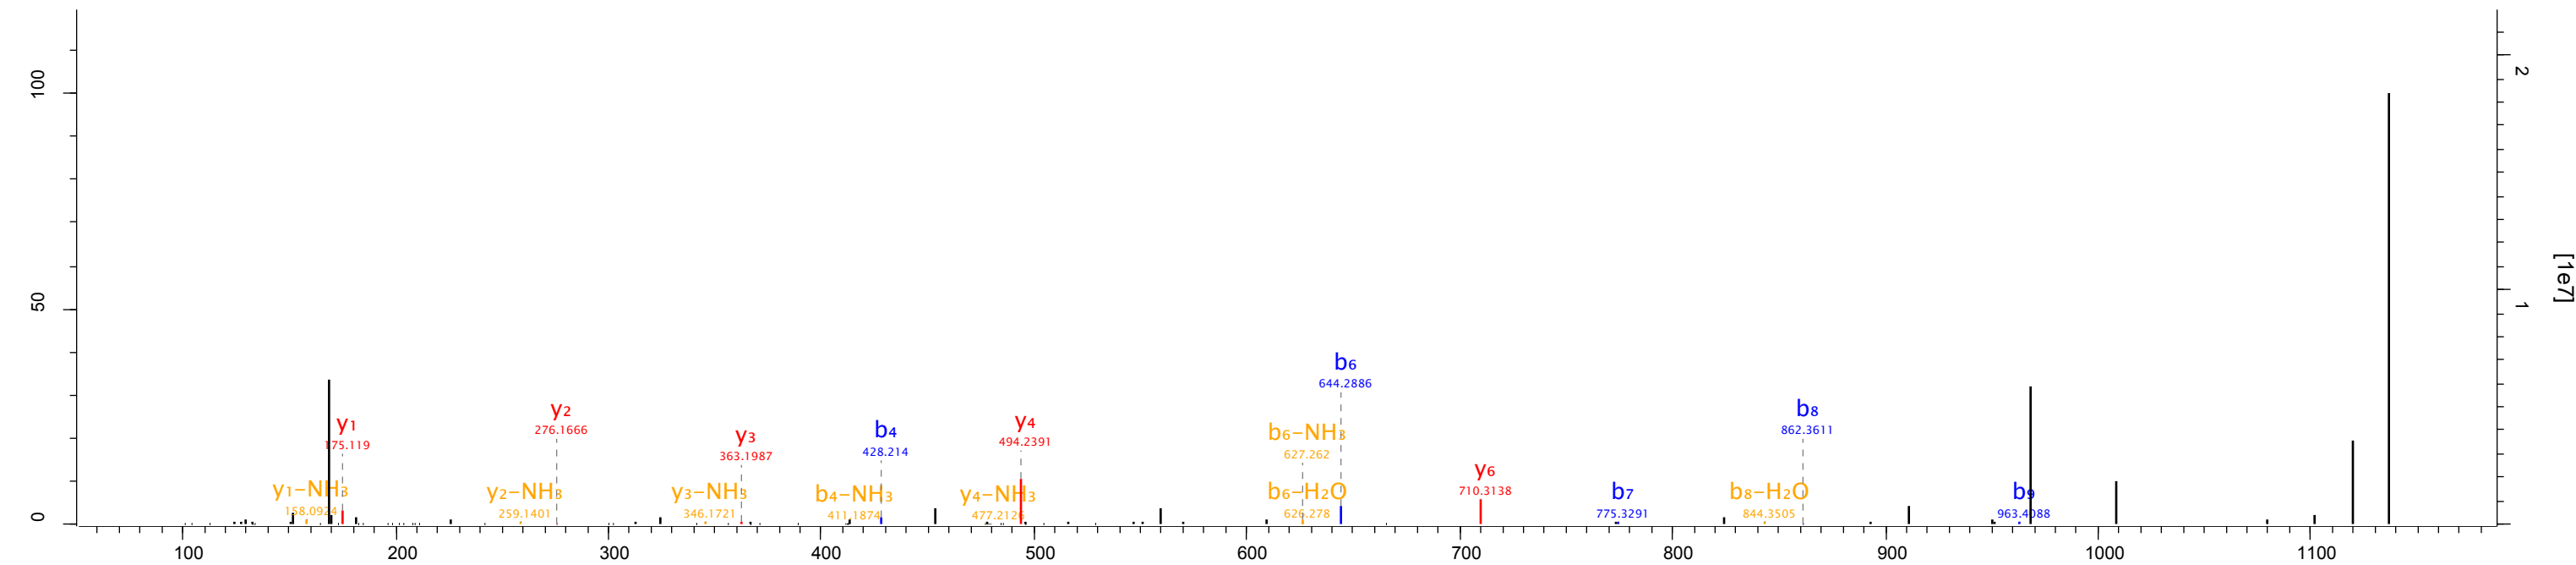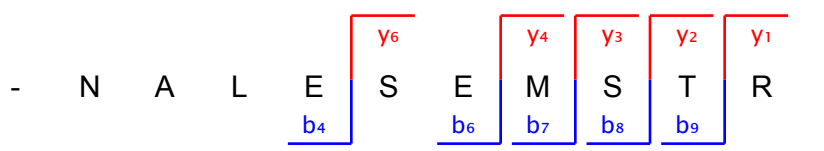



Raw file  
20180707\_MaS\_A375SR\_ML\_proteome\_05

Scan 23023 Method FTMS; HCD Score 95.41 m/z 962.46 Gene names CDC42SE2

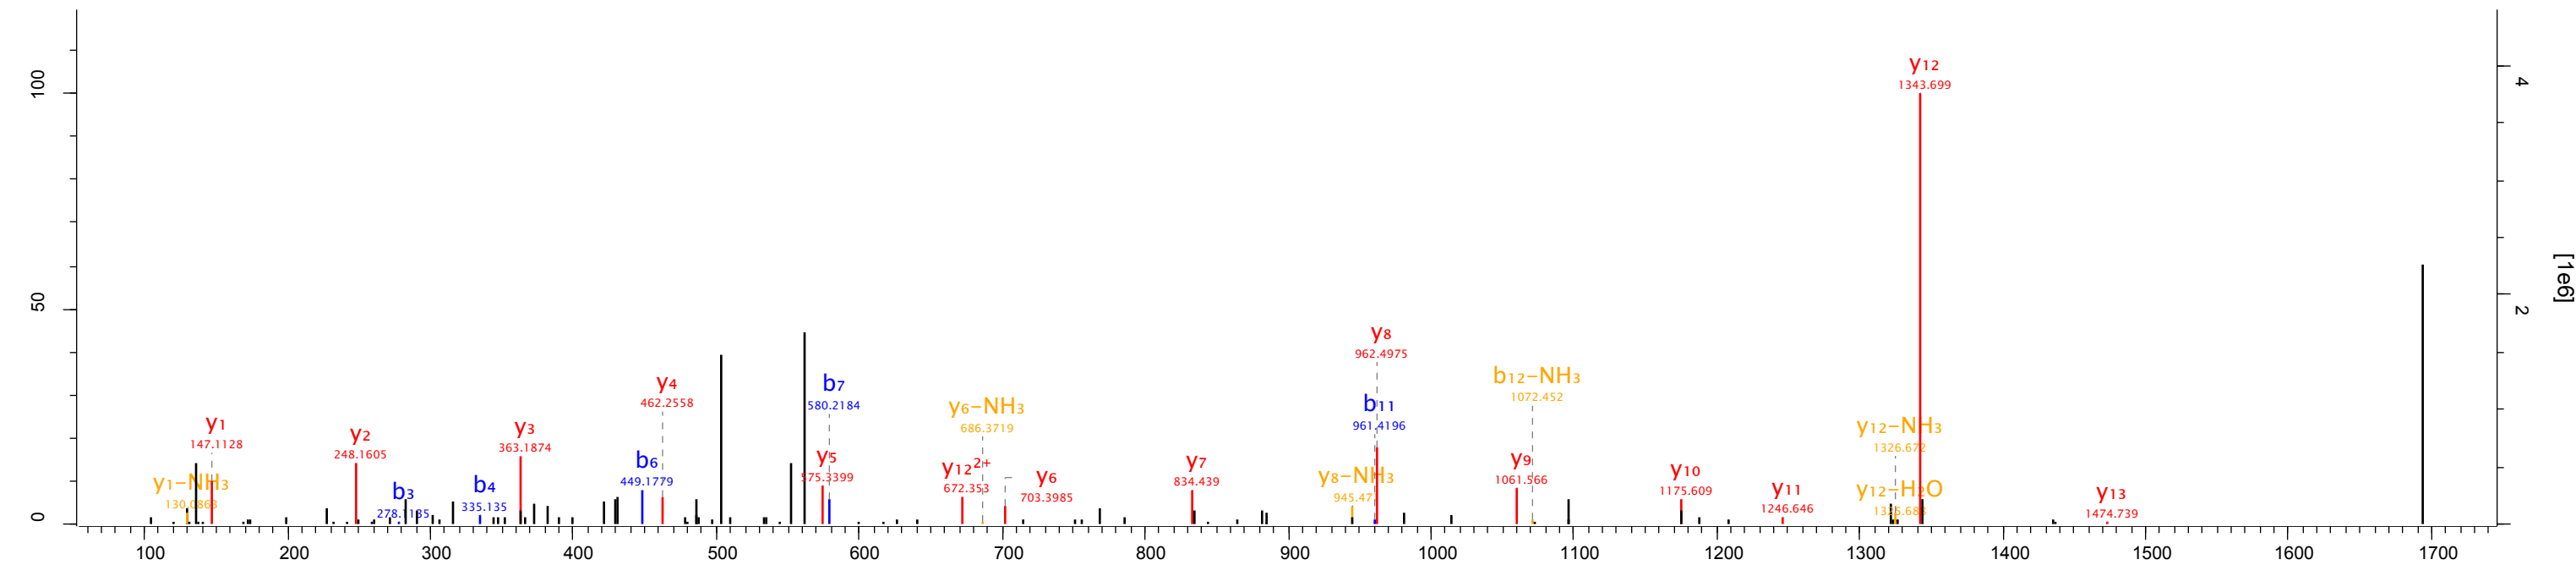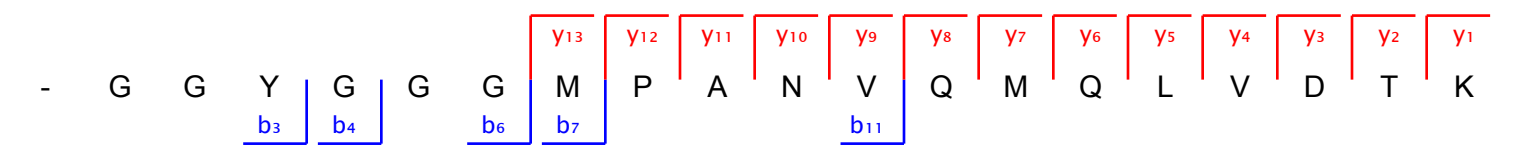

Raw file 20180707\_MaS\_A375SR\_ML\_proteome\_05 Scan 9513 Method FTMS; HCD Score 65.67 m/z 398.17

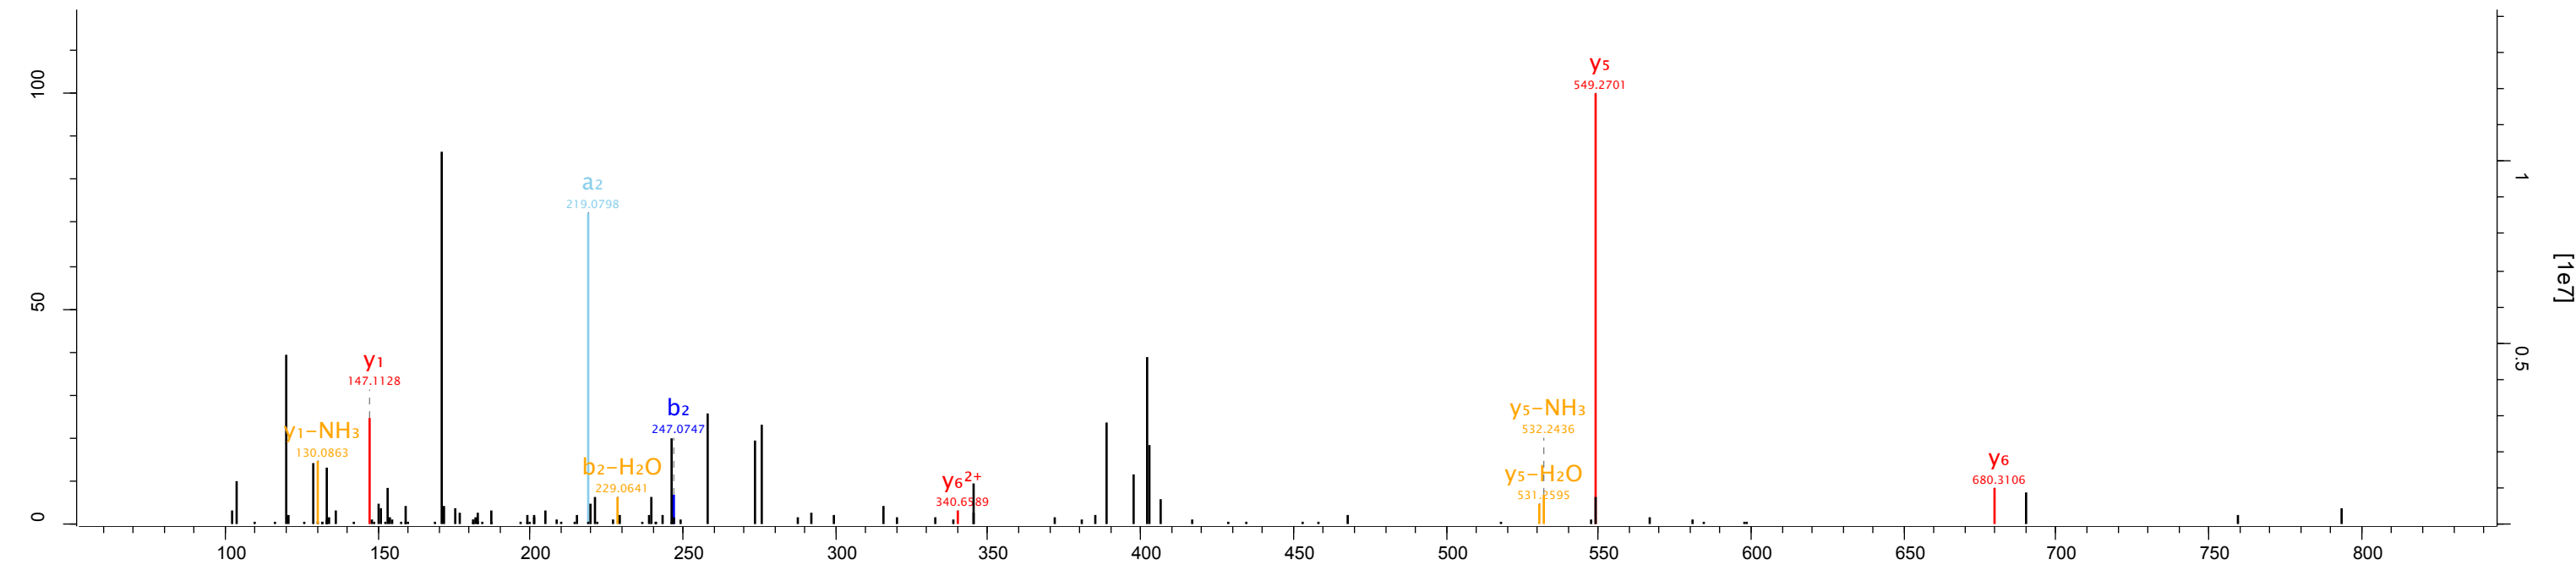

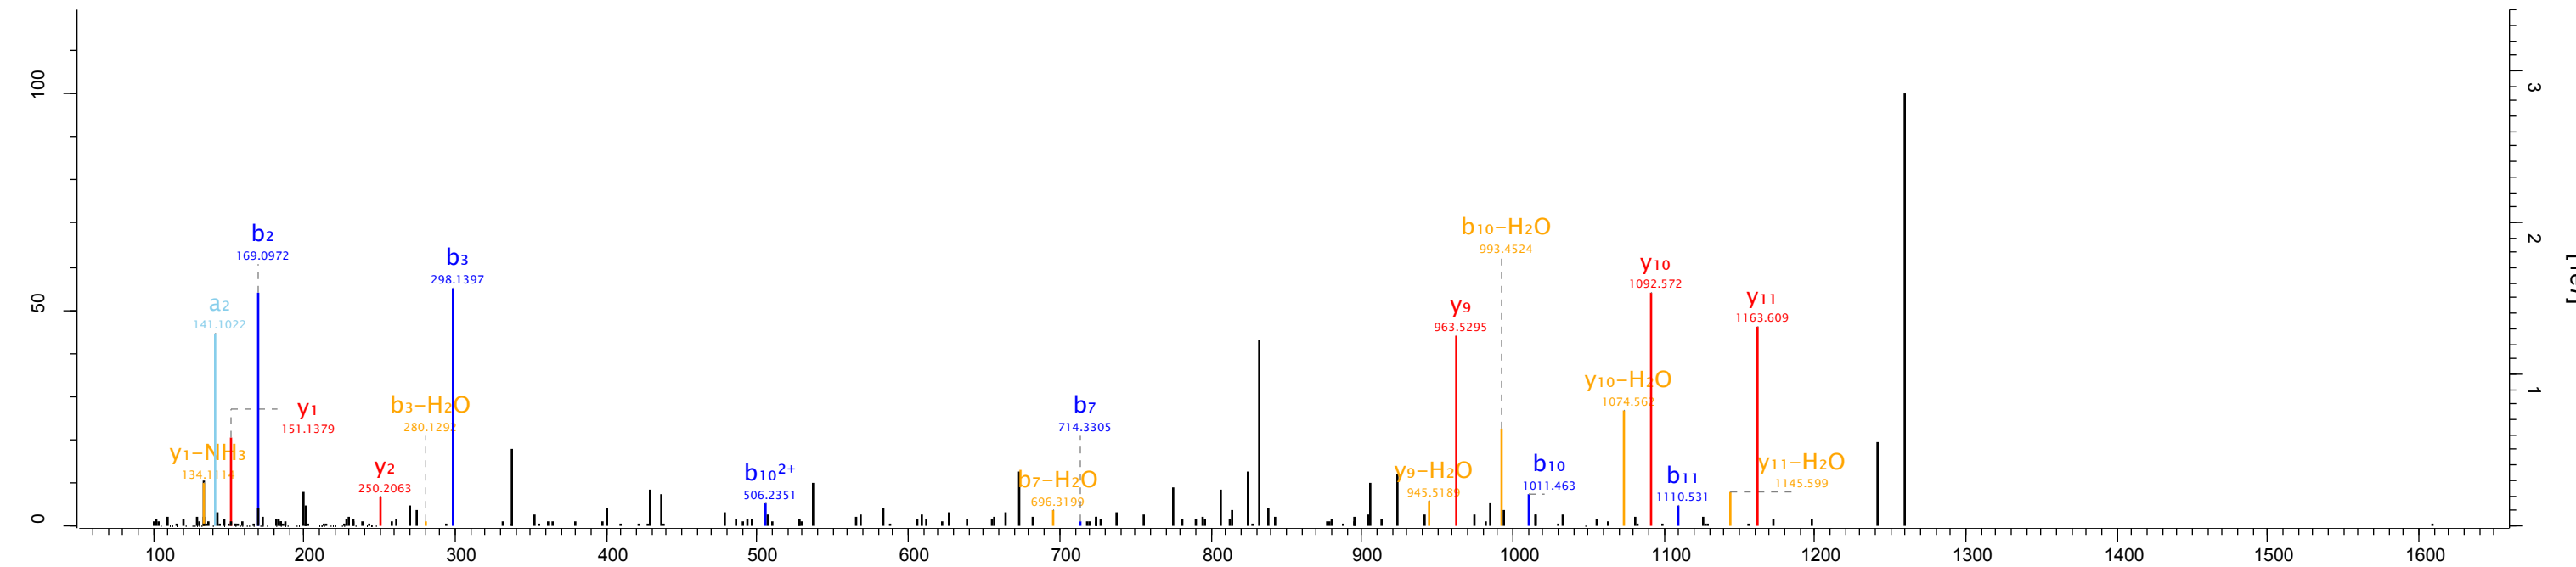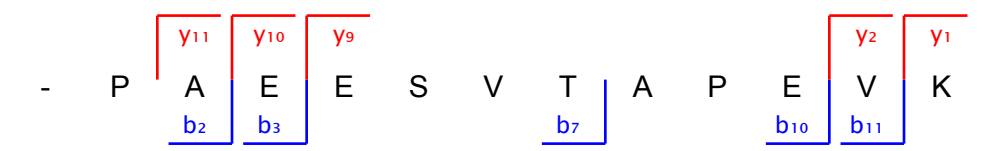

Raw file 20180707\_MaS\_A375SR\_ML\_proteome\_07 Scan 24023 Method FTMS; HCD Score 121.05 m/z 498.77 Gene names SEPT3

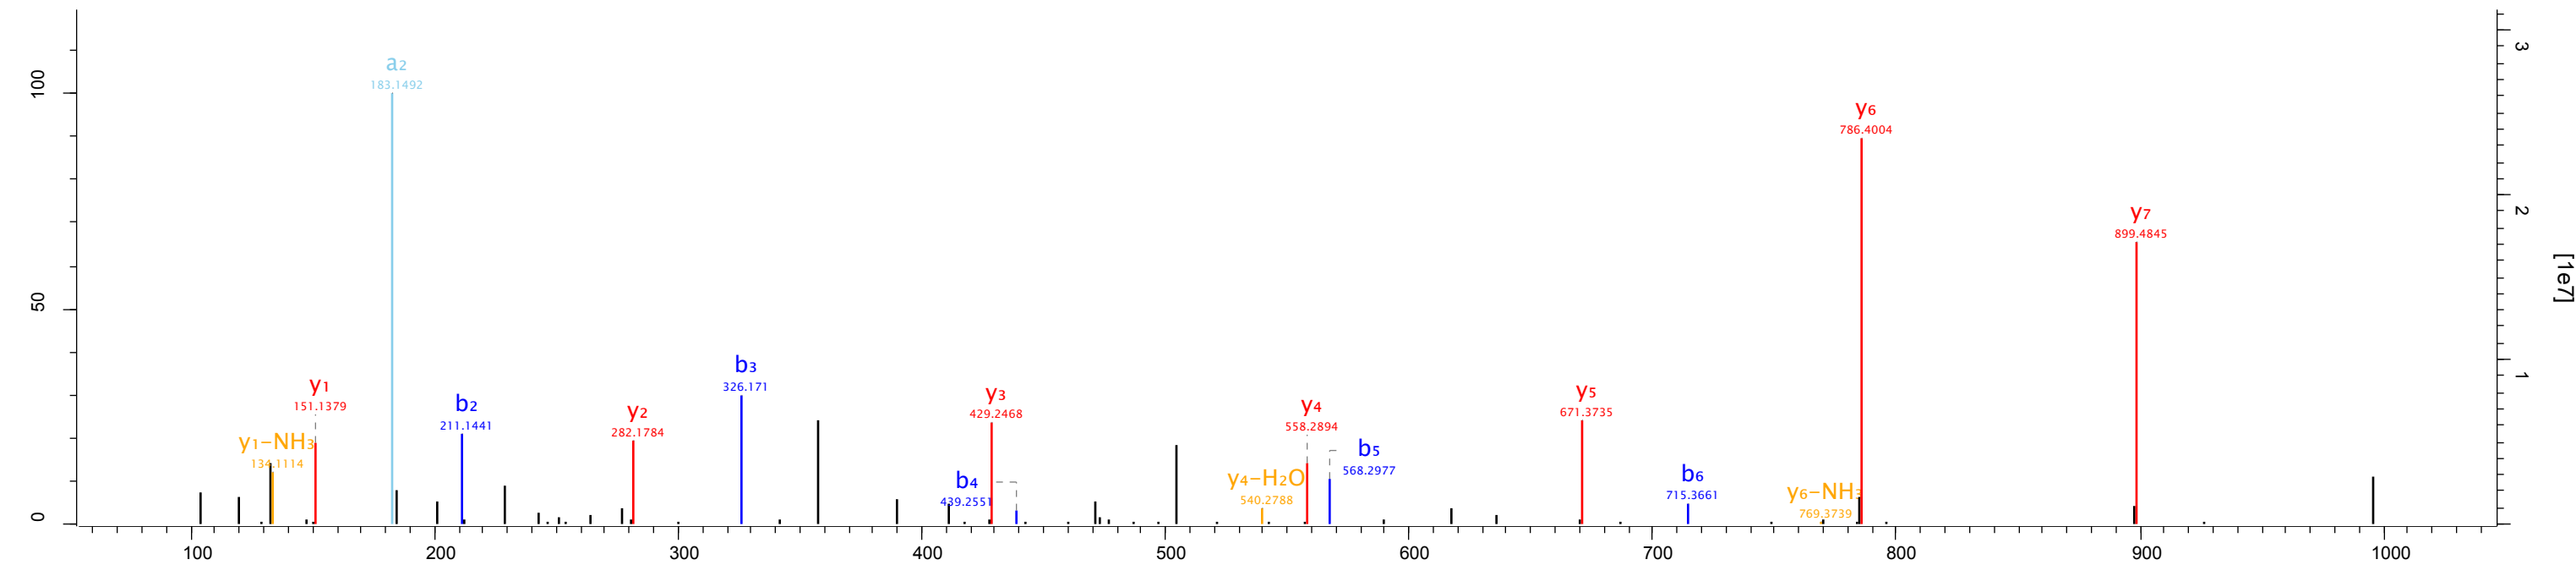

Raw file  
20180707\_MaS\_A375SR\_ML\_proteome\_08

Scan: 15483  
Method: FTMS; HCD  
Score: 51.28  
m/z: 445.58  
Gene names: GREB1L

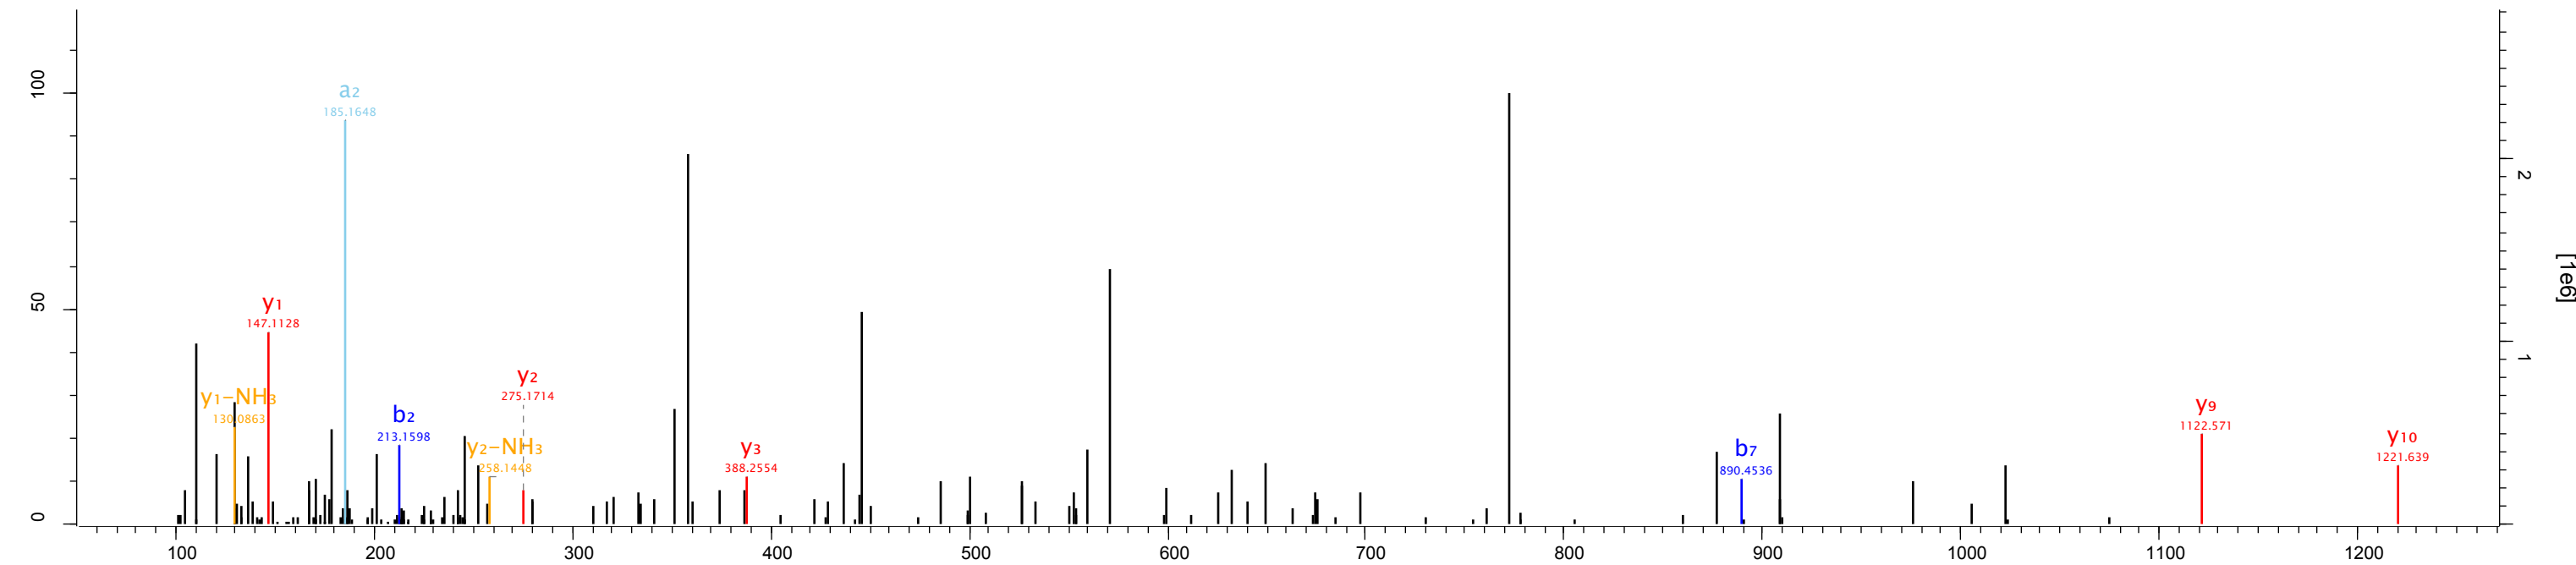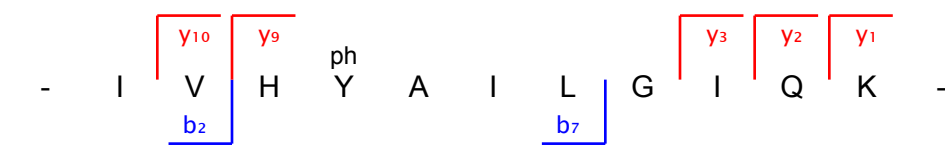

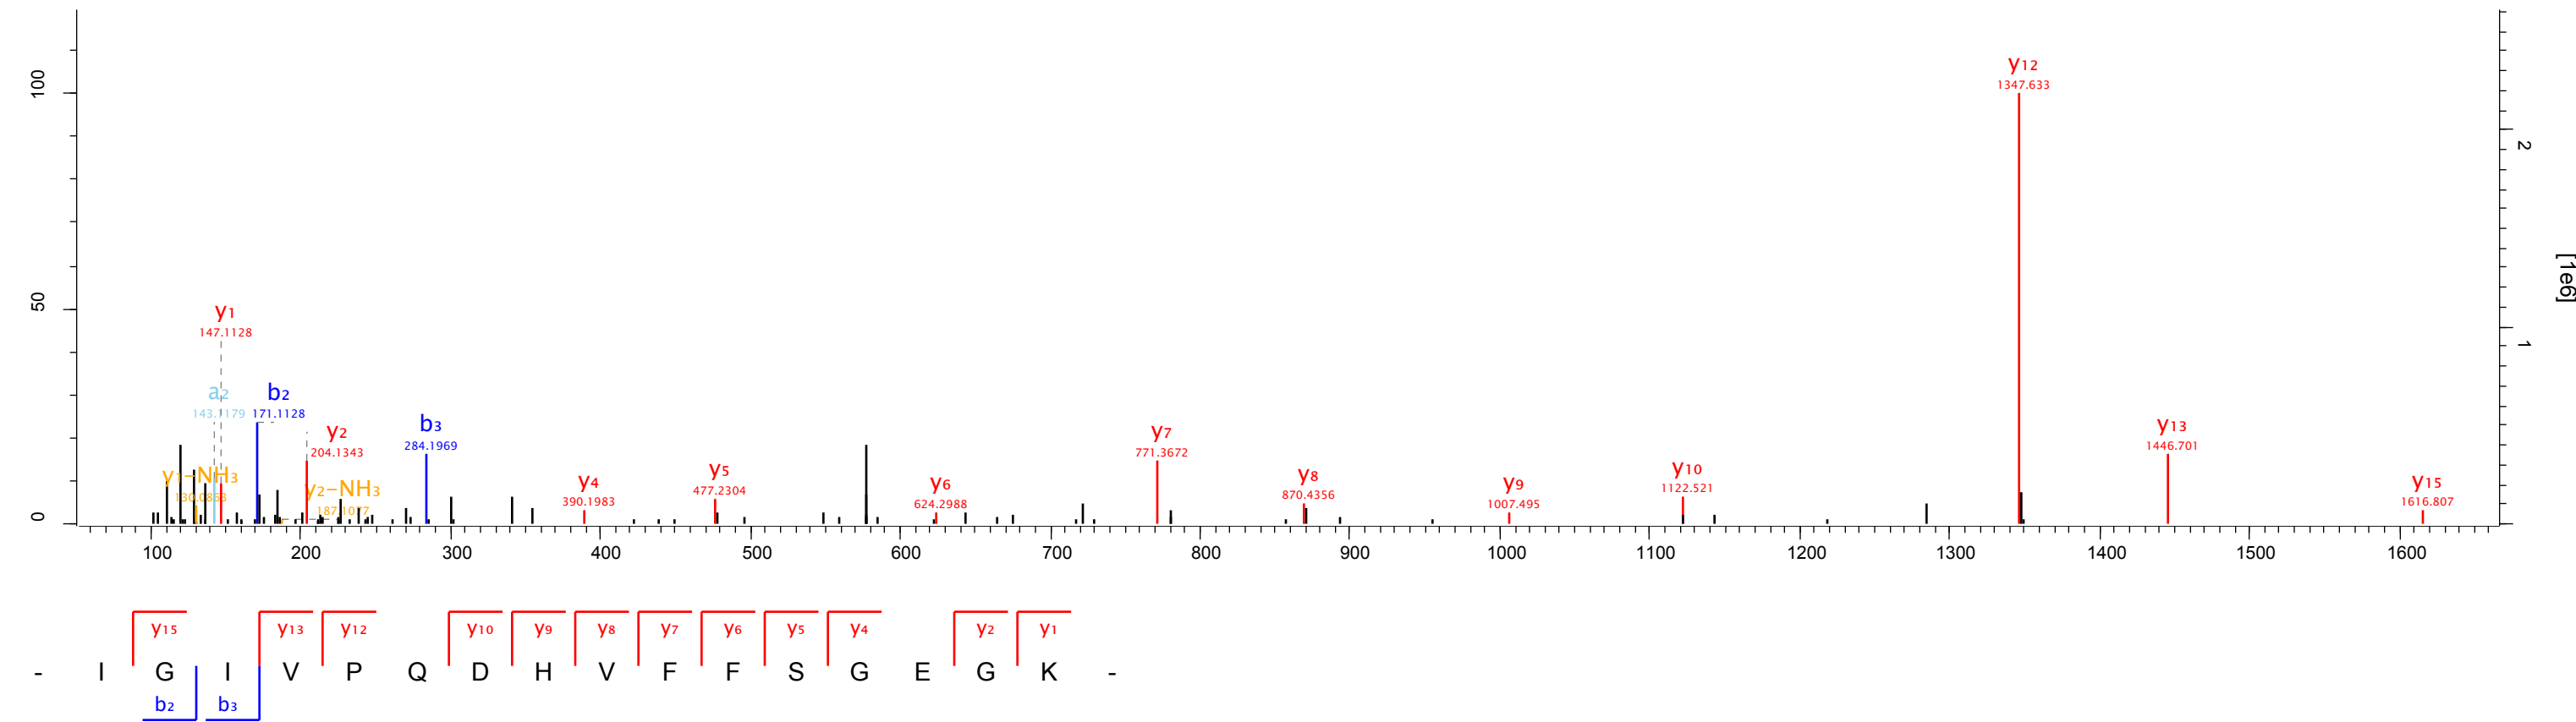

Raw file  
20180707\_MaS\_A375SR\_ML\_proteome\_08

Scan: 25293  
Method: FTMS; HCD  
Score: 97.43  
m/z: 498.77  
Gene names: SEPT3

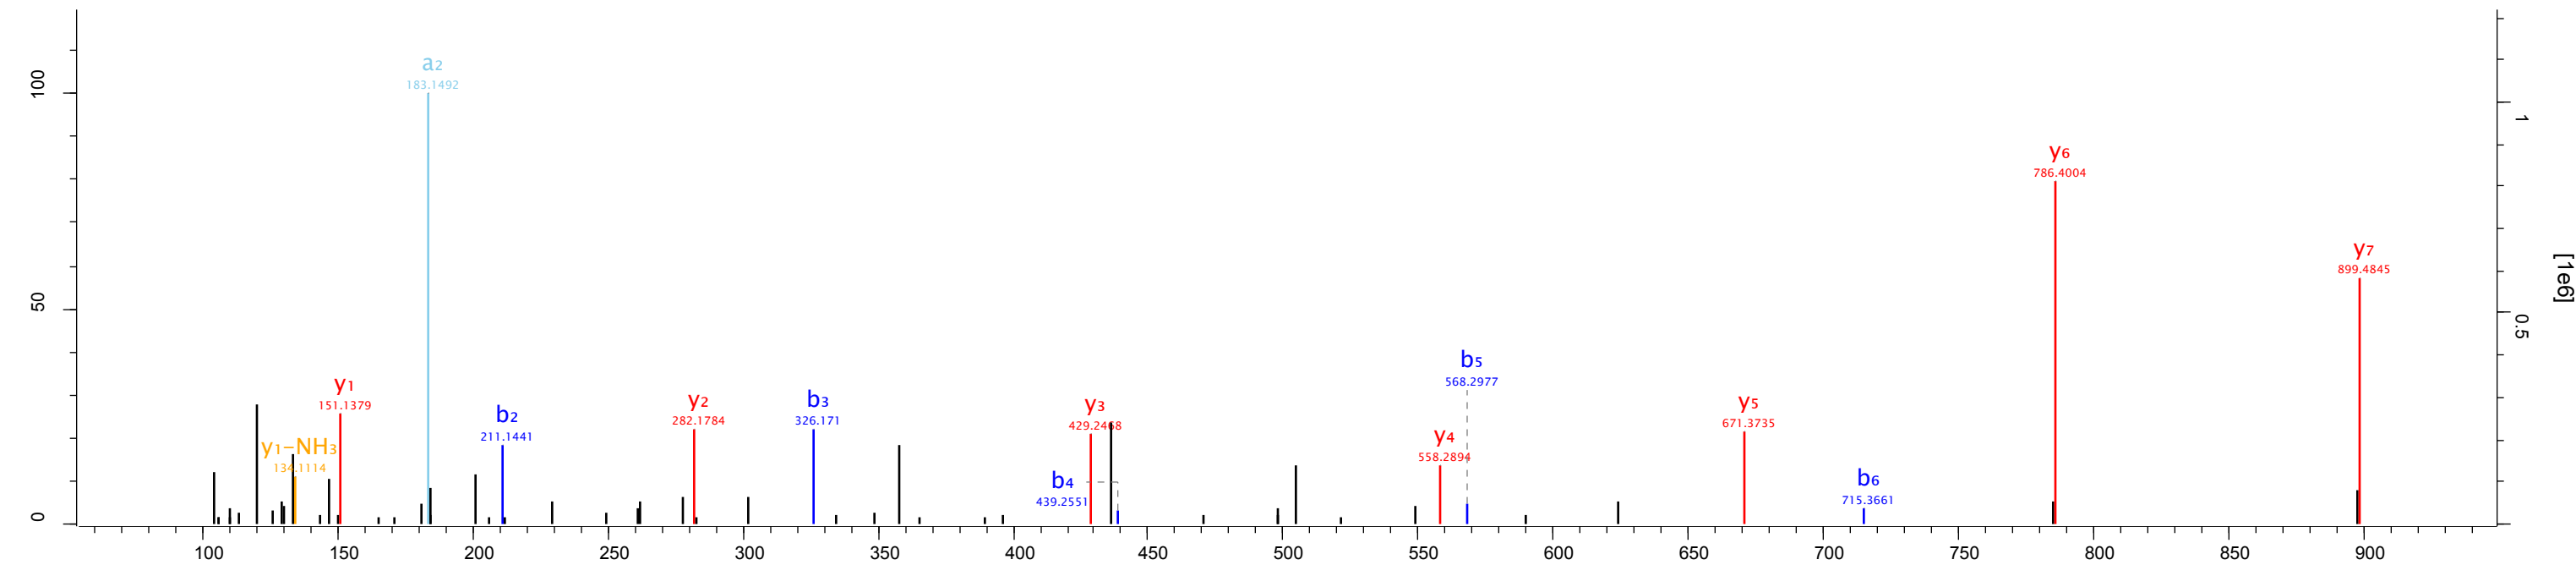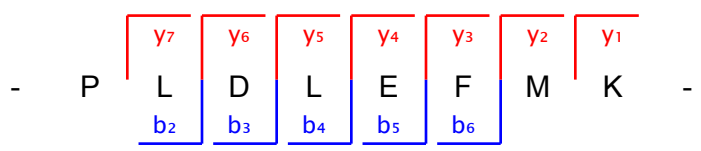

Raw file 20180707\_MaS\_A375SR\_ML\_proteome\_08 Scan 6763 Method FTMS; HCD Score 105.95 m/z 716.8 Gene names LEPROT

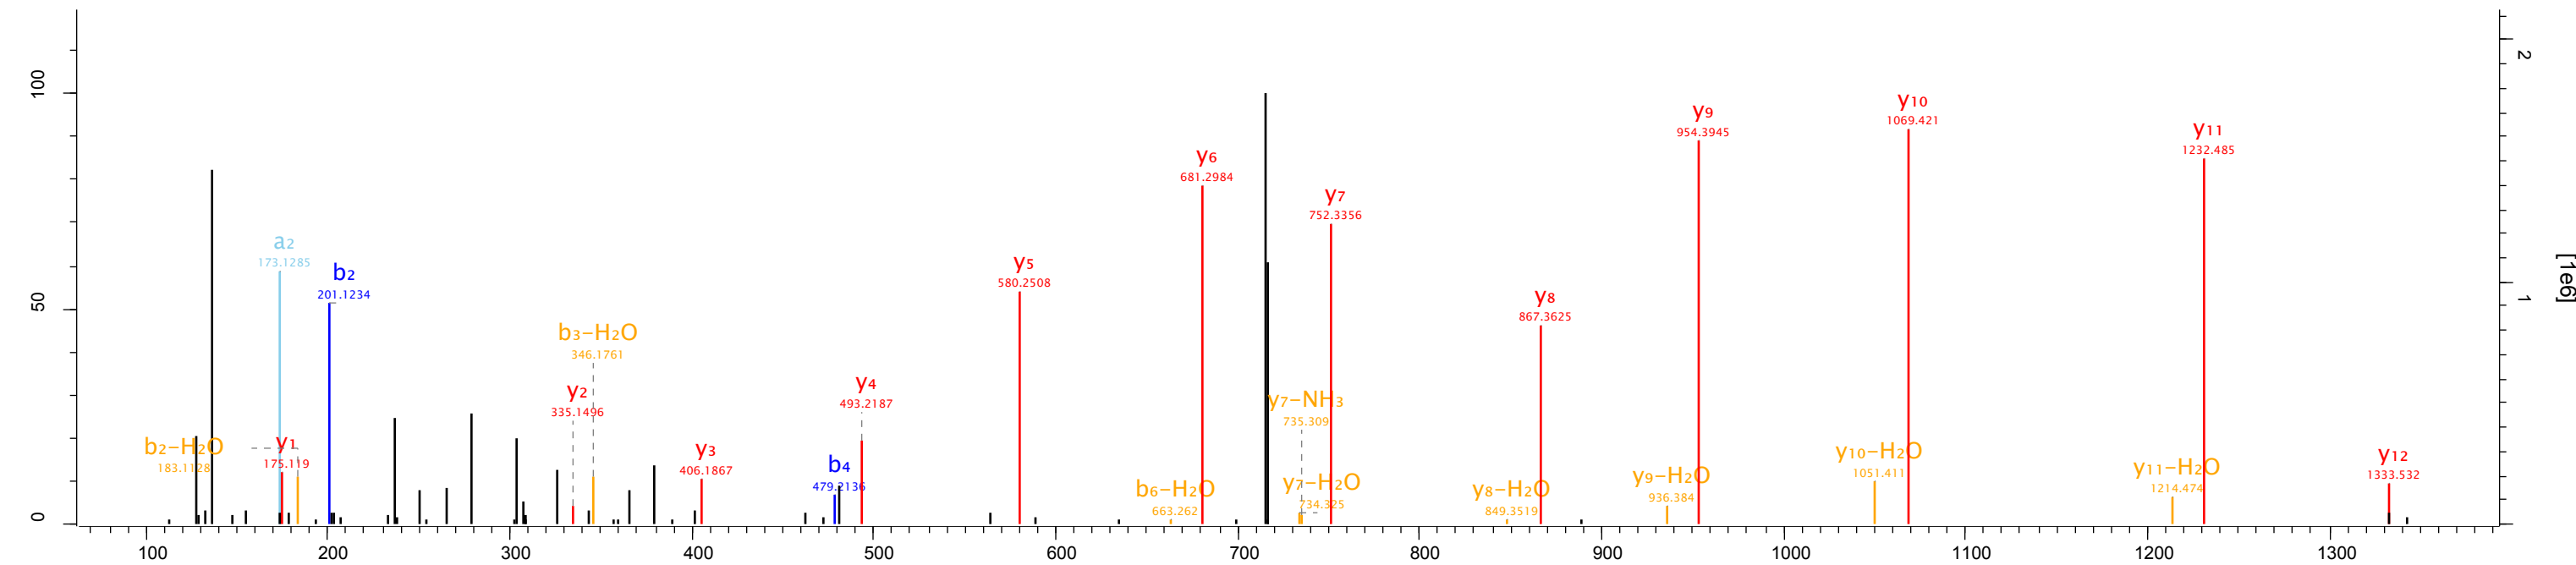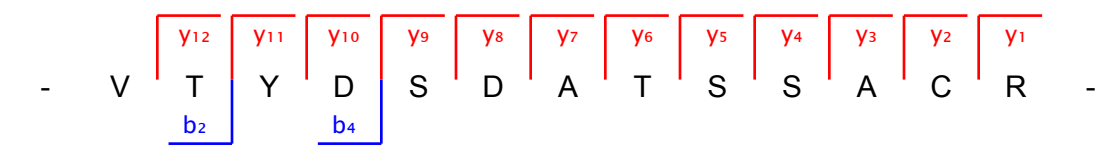



Raw file 20180707\_MaS\_A375SR\_ML\_proteome\_09 Scan 7983 Method FTMS; HCD Score 48.56 m/z 483.78 Gene names CAPN6

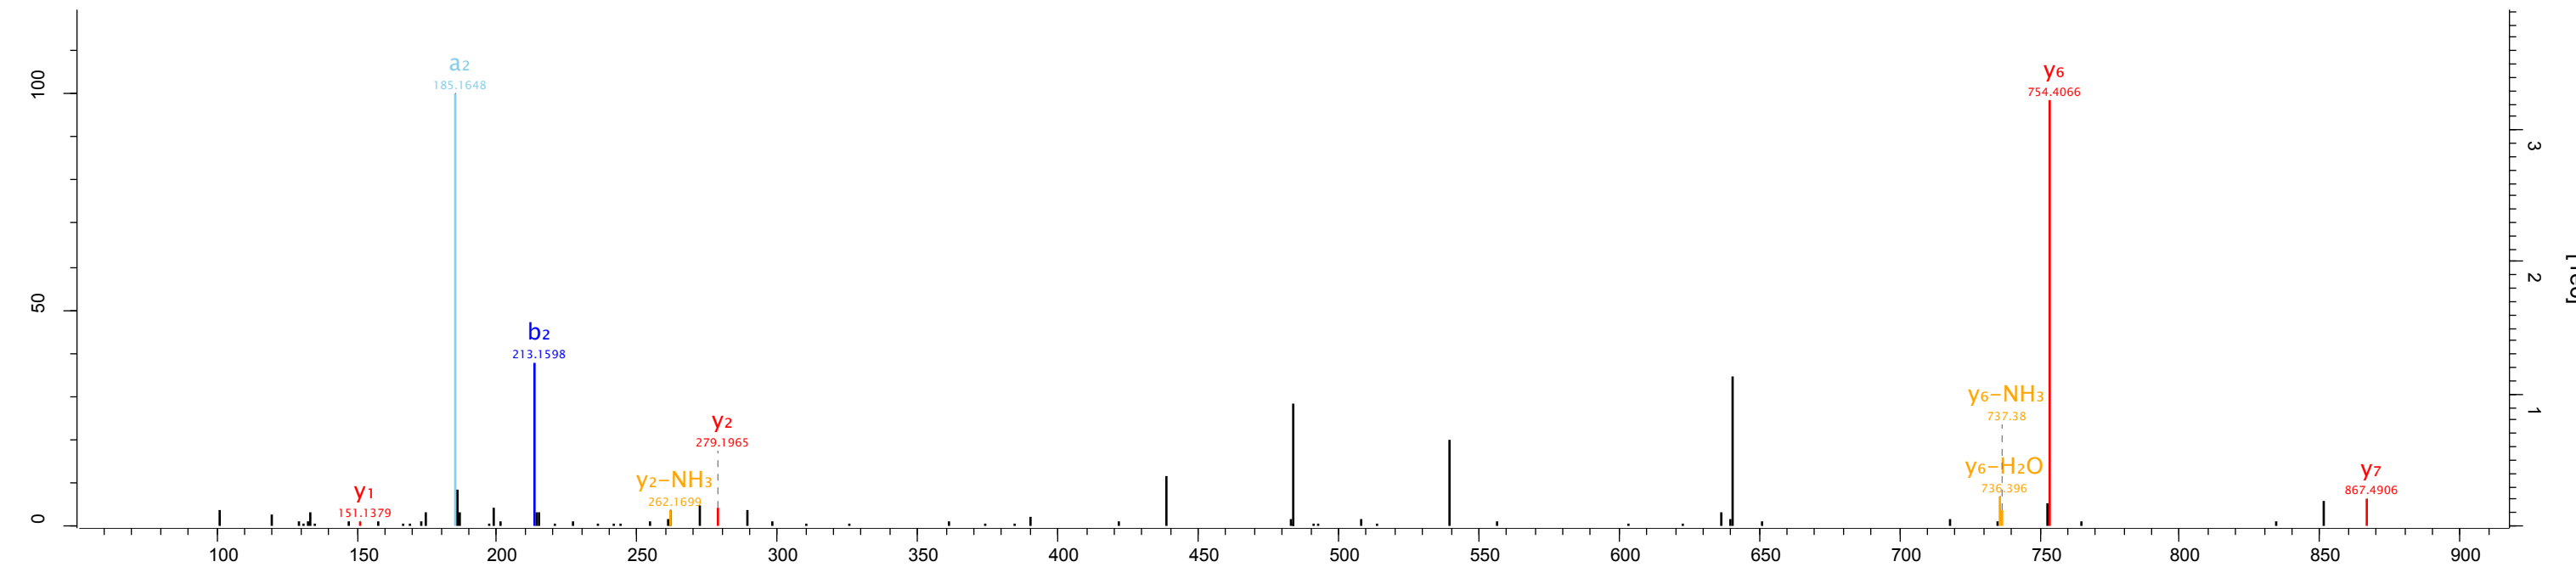

Raw file  
20180707\_MaS\_A375SR\_ML\_proteome\_09

Scan Method Score m/z Gene names  
8793 FTMS; HCD 94.41 619.8 SLC17A9

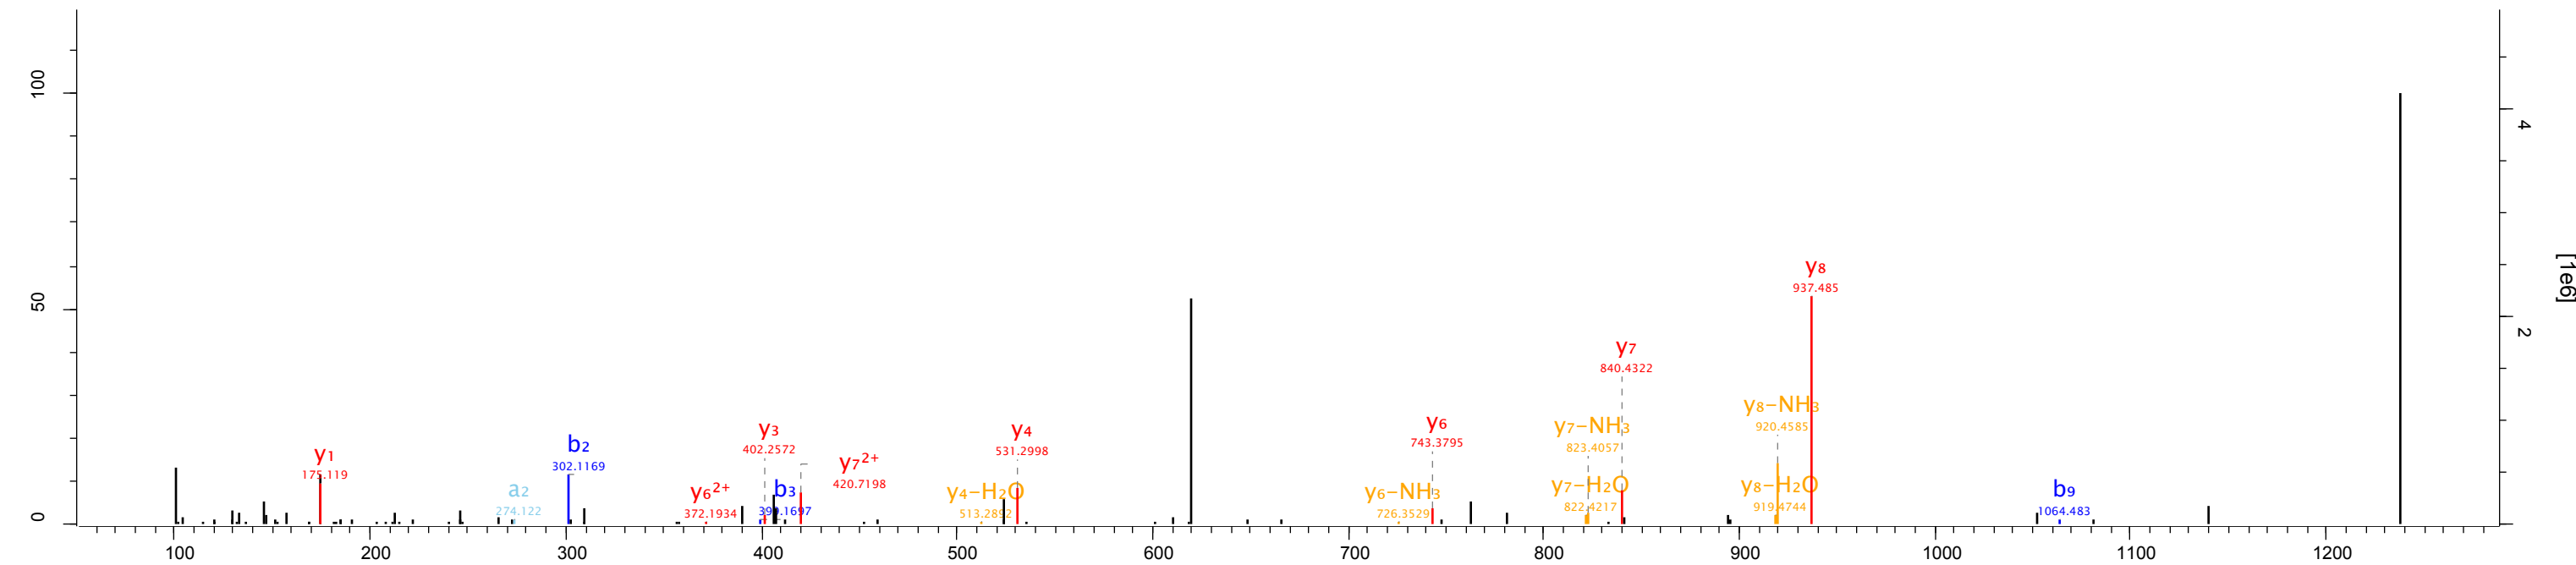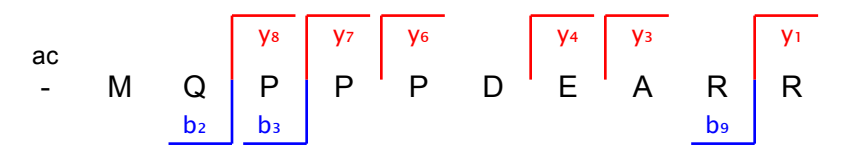

Raw file 20180707\_MaS\_A375SR\_ML\_proteome\_10 Scan 25703 Method FTMS; HCD Score 102.97 m/z 717.43 Gene names EMC9

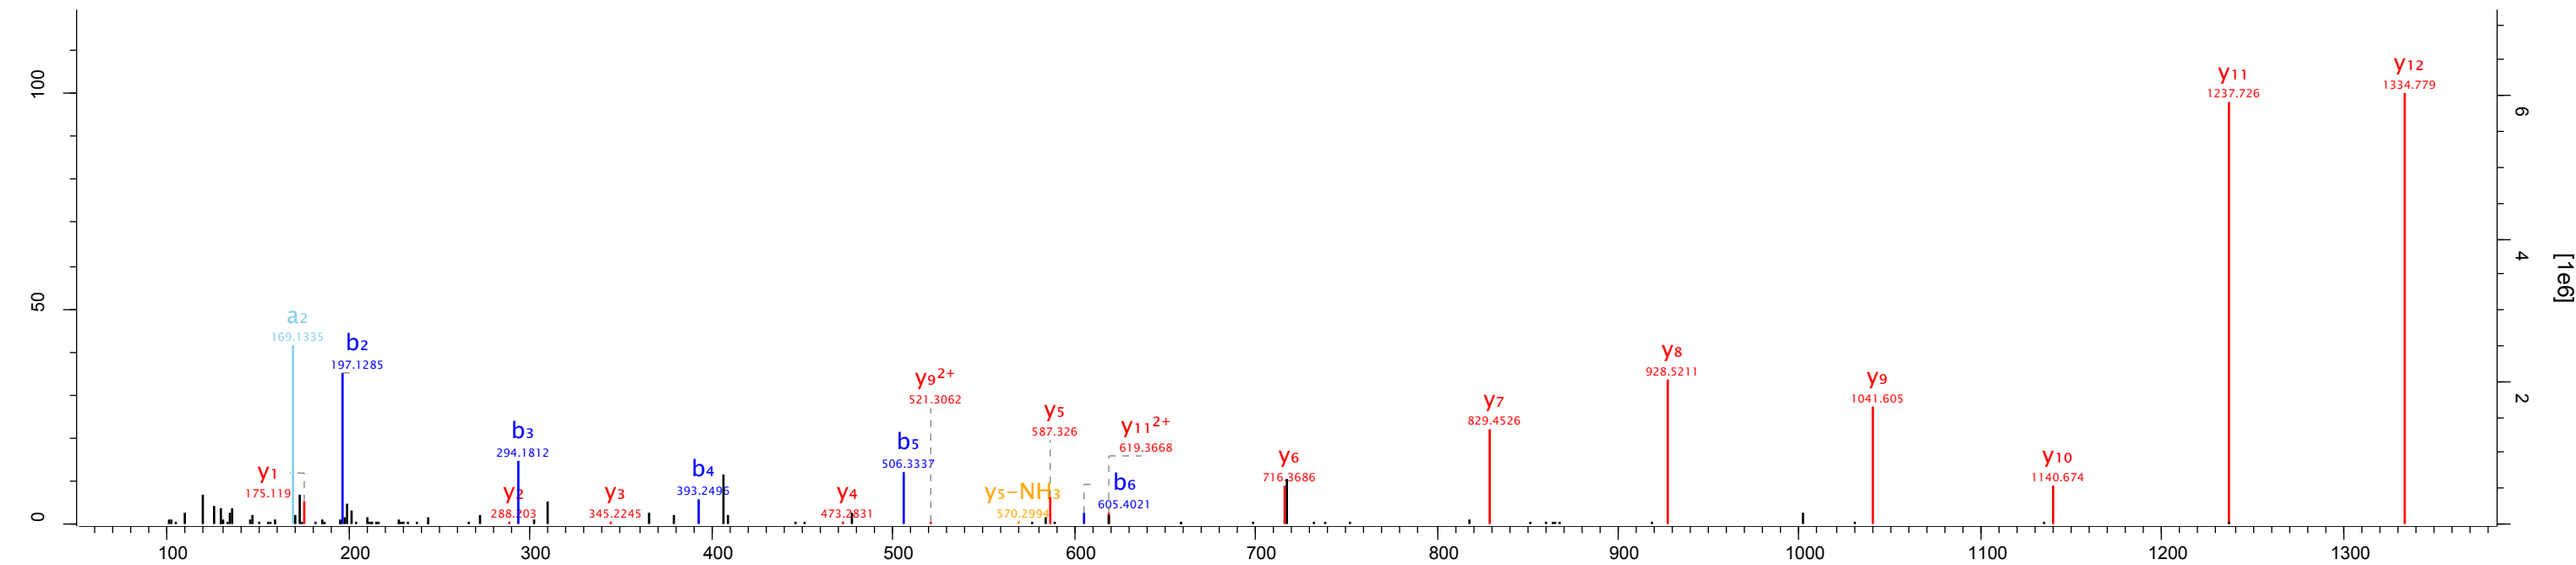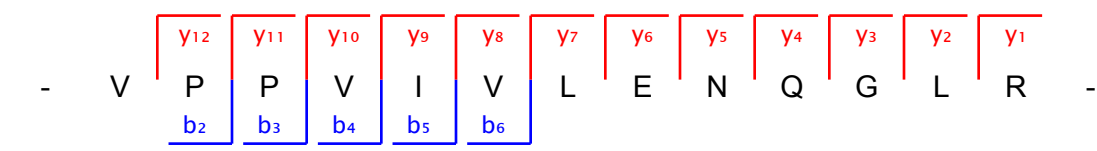

Raw file 20180707\_MaS\_A375SR\_ML\_proteome\_11 Scan 22453 Method FTMS; HCD Score 74.84 m/z 374.92 Gene names BPI

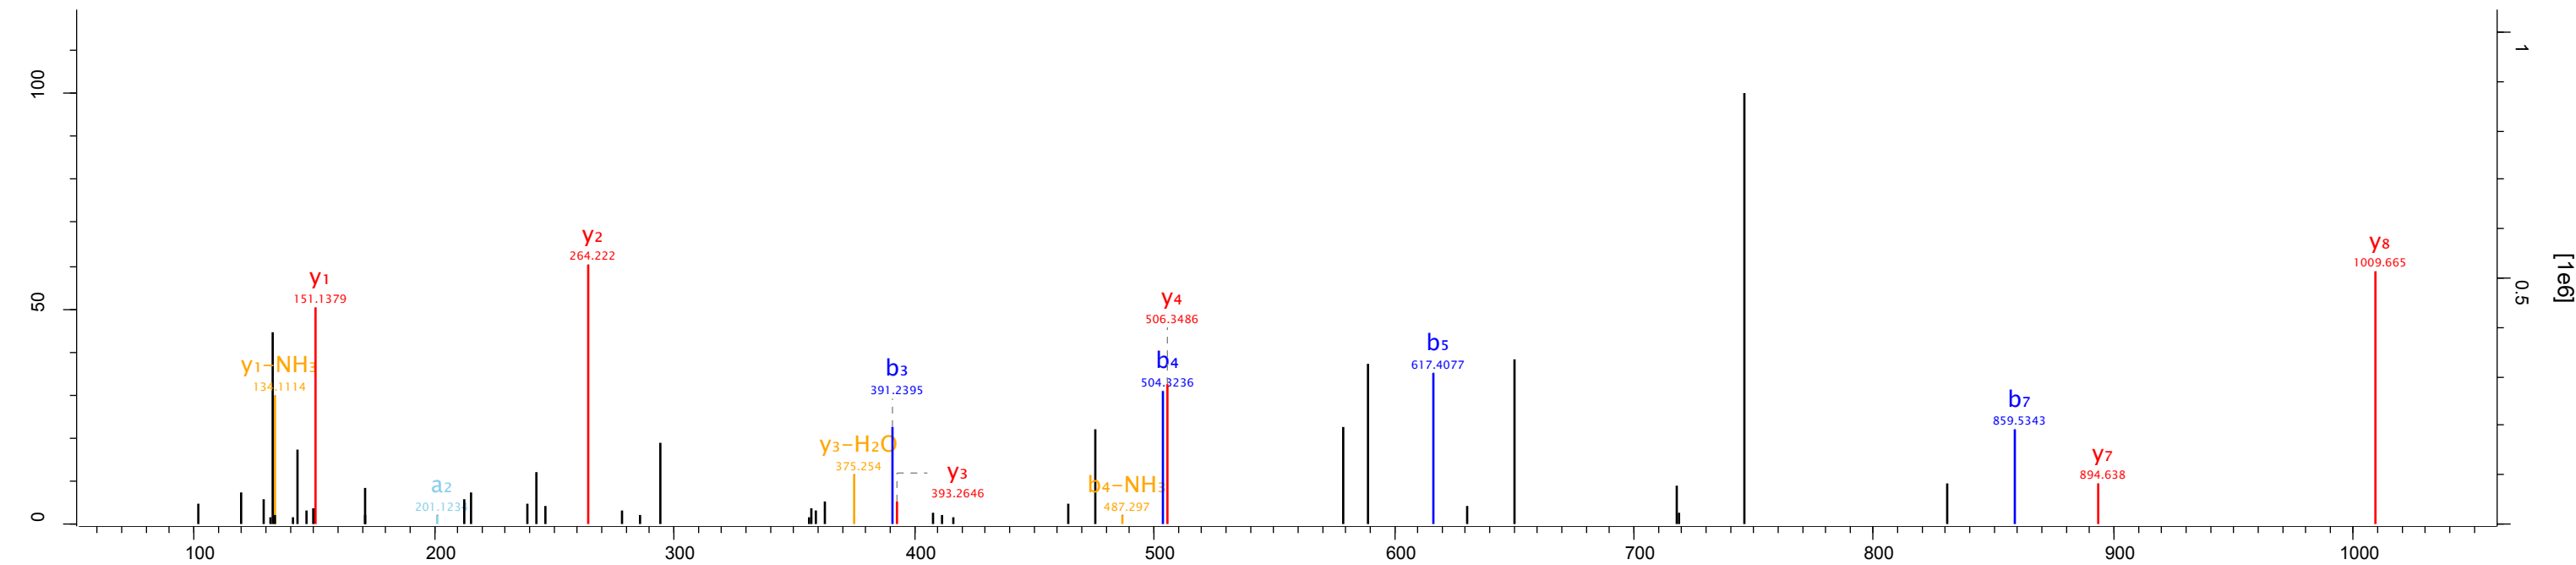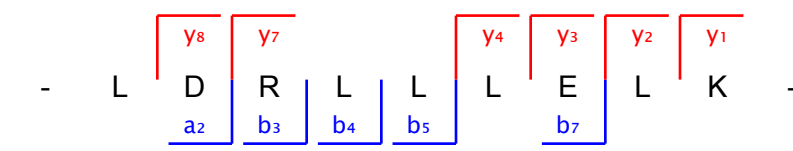

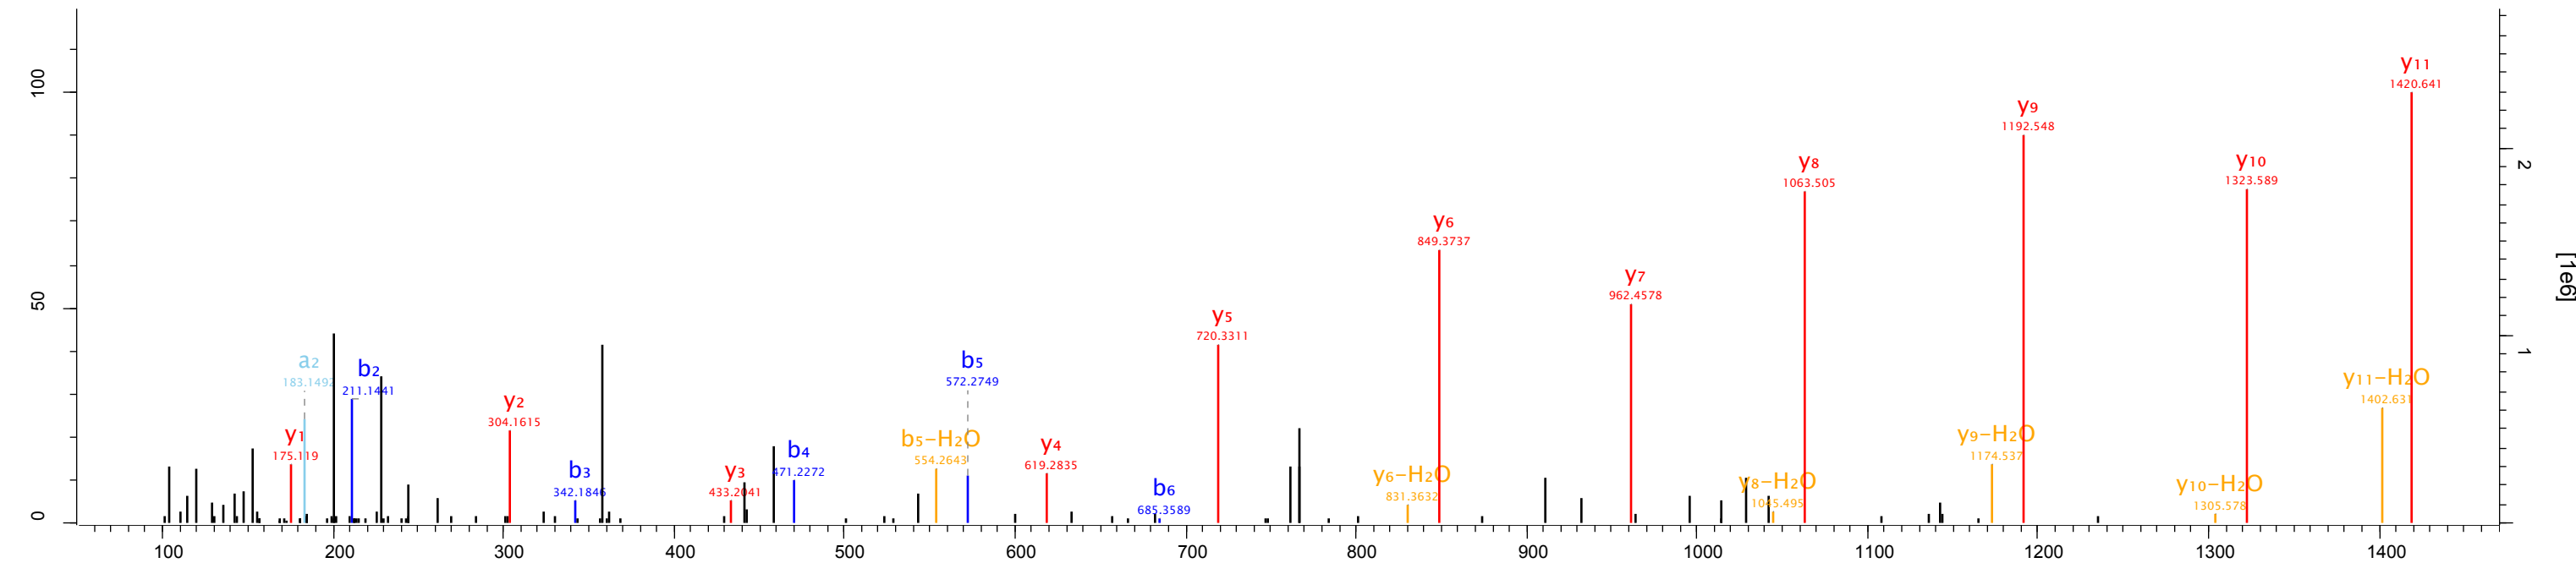

- I y<sub>11</sub> y<sub>10</sub> y<sub>9</sub> y<sub>8</sub> y<sub>7</sub> y<sub>6</sub> y<sub>5</sub> y<sub>4</sub> y<sub>3</sub> y<sub>2</sub> y<sub>1</sub> -  
P M E T L E T W E E R -  
b<sub>2</sub> b<sub>3</sub> b<sub>4</sub> b<sub>5</sub> b<sub>6</sub>

Raw file  
20180707\_MaS\_A375SR\_ML\_proteome\_11

Scan Method Score m/z Gene names  
26903 FTMS; HCD 136.57 492.81 STON2

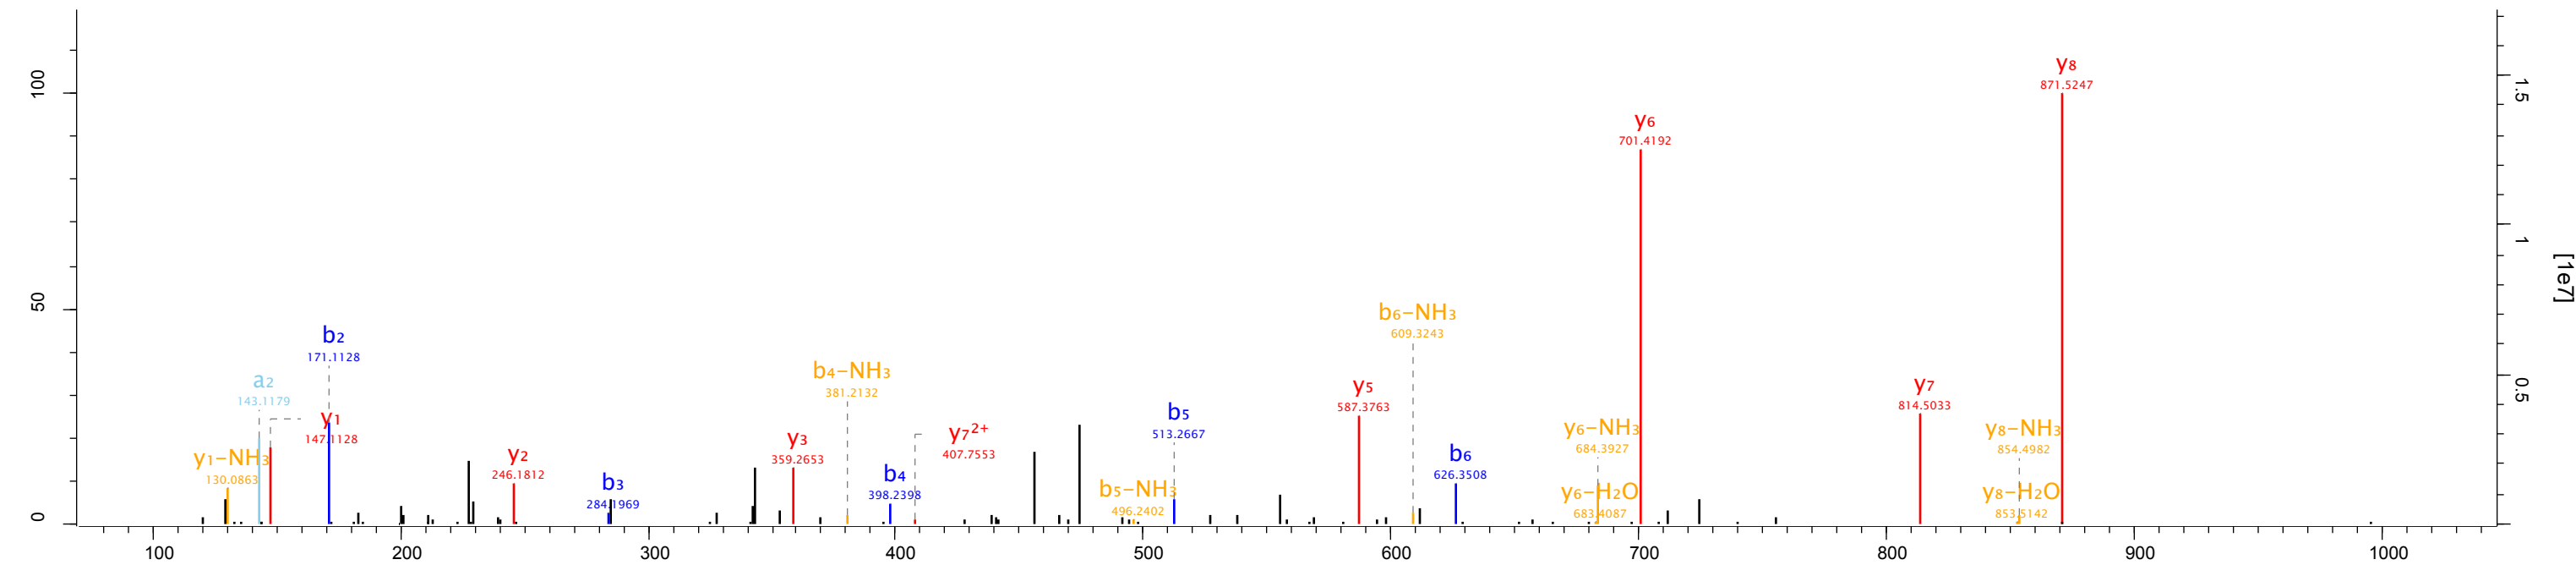

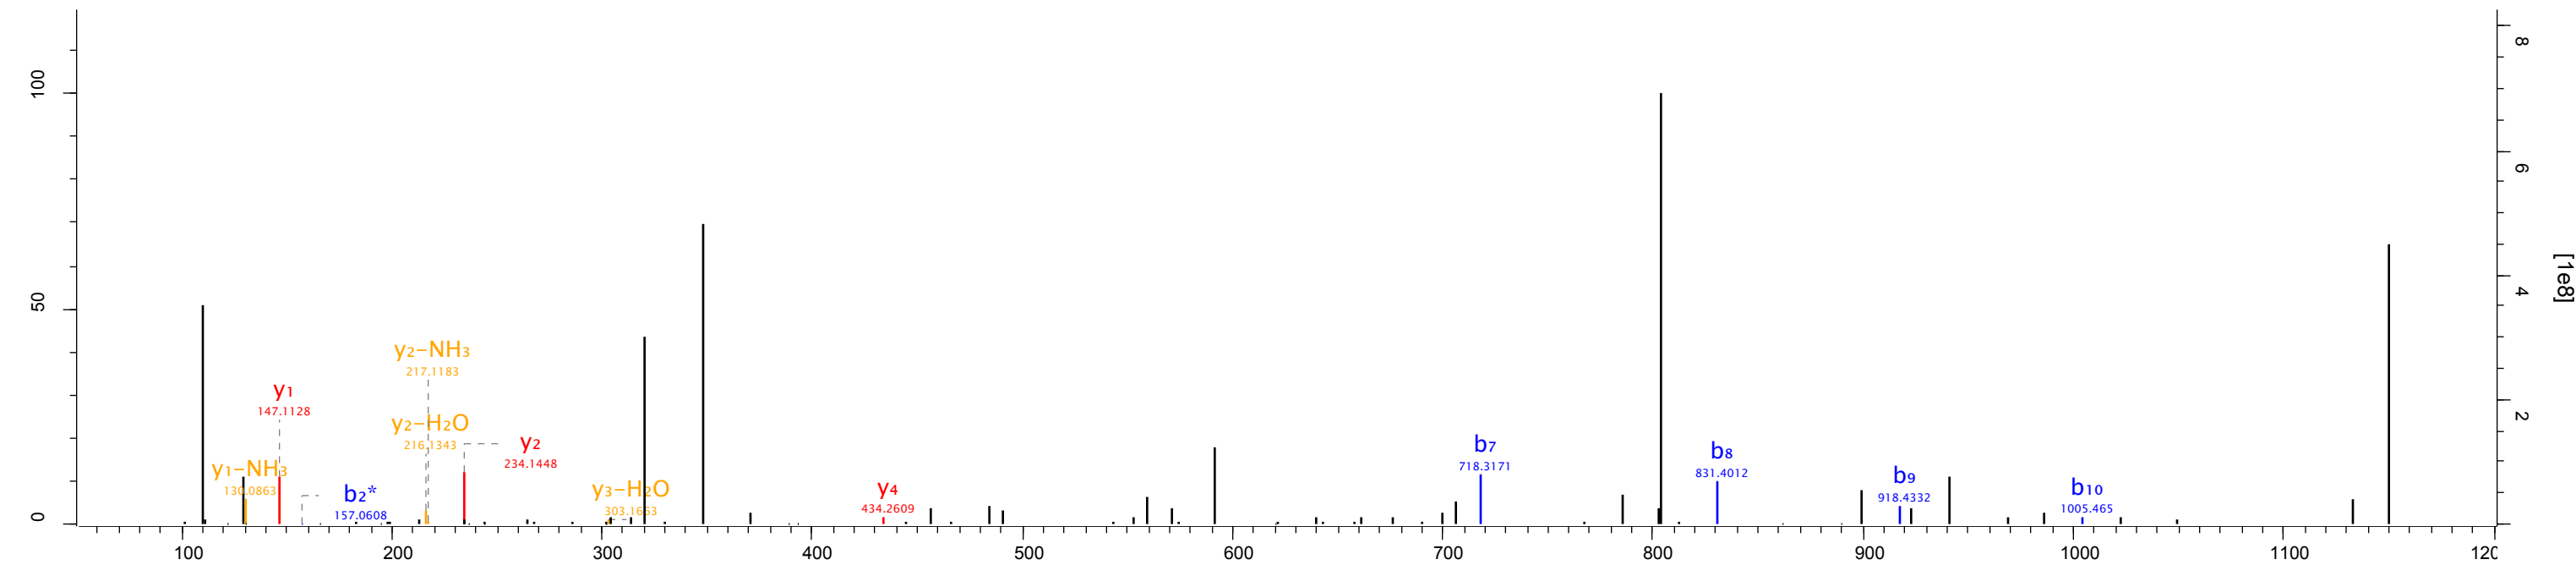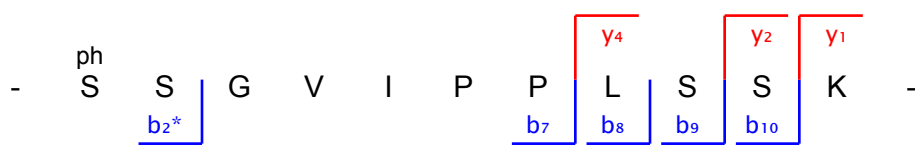

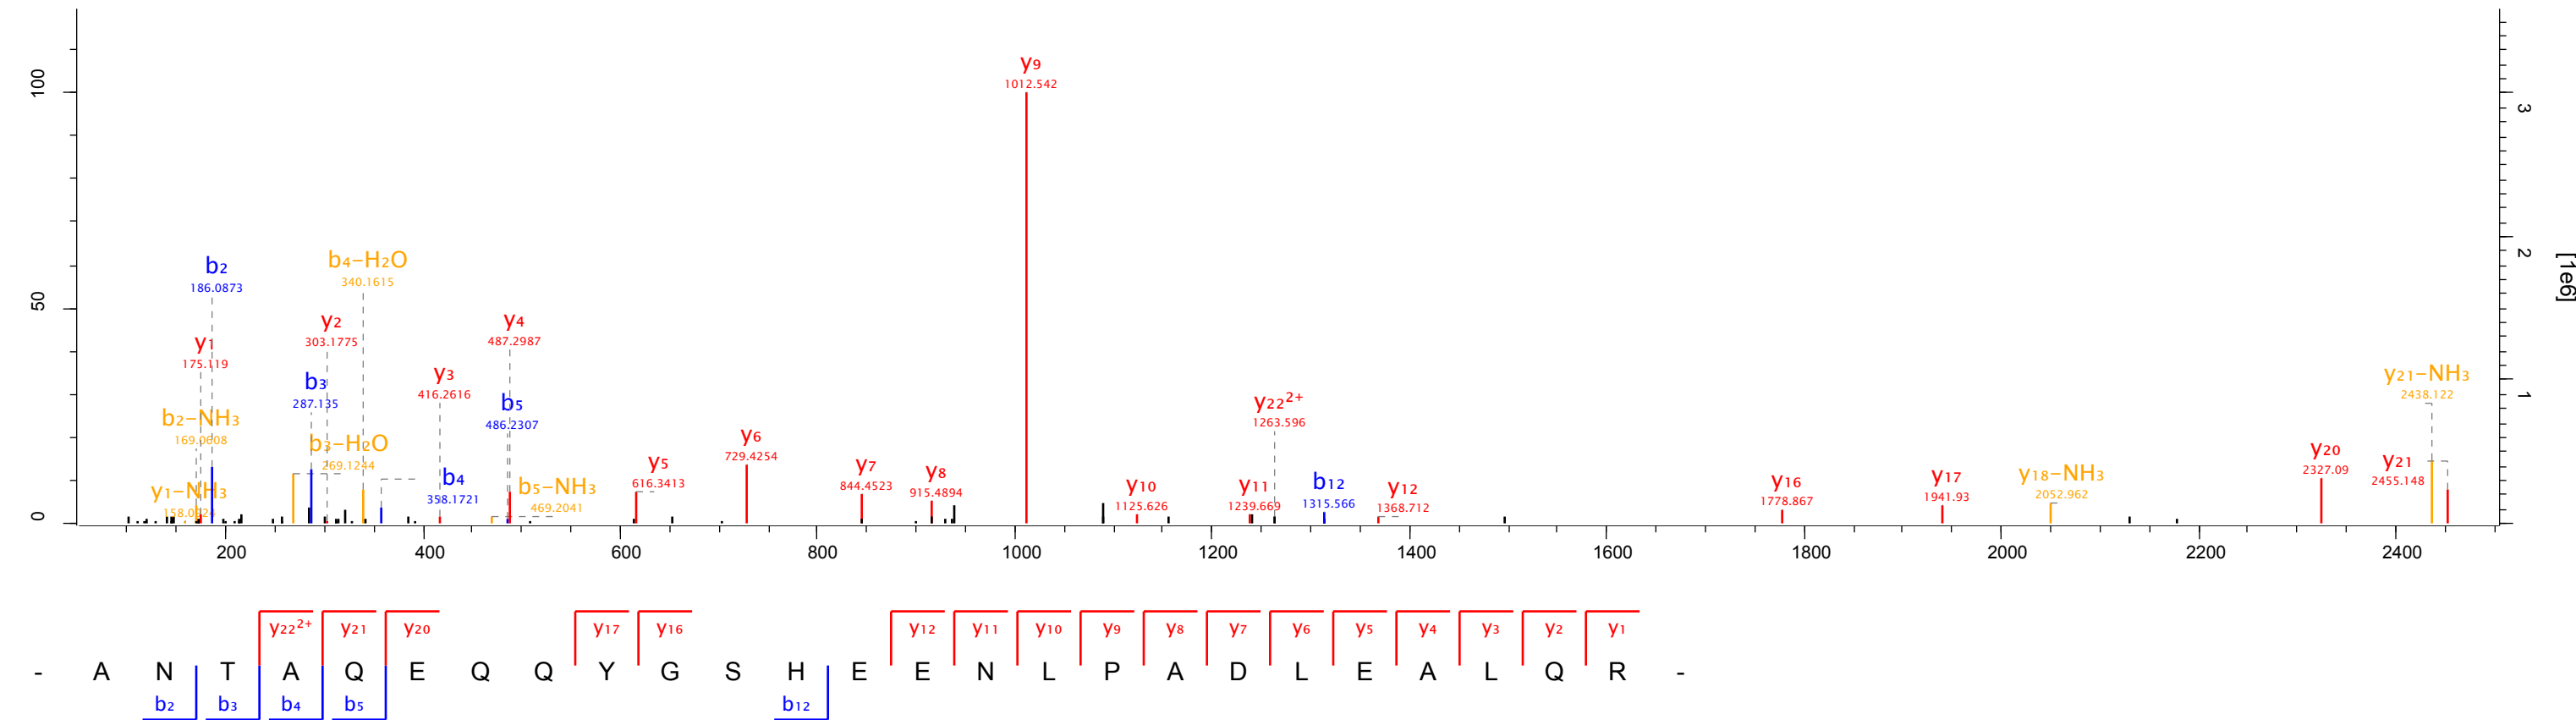



Raw file  
20180707\_MaS\_A375SR\_ML\_proteome\_12

Scan Method Score m/z Gene names  
2503 FTMS; HCD 123.69 414.75 AZIN2

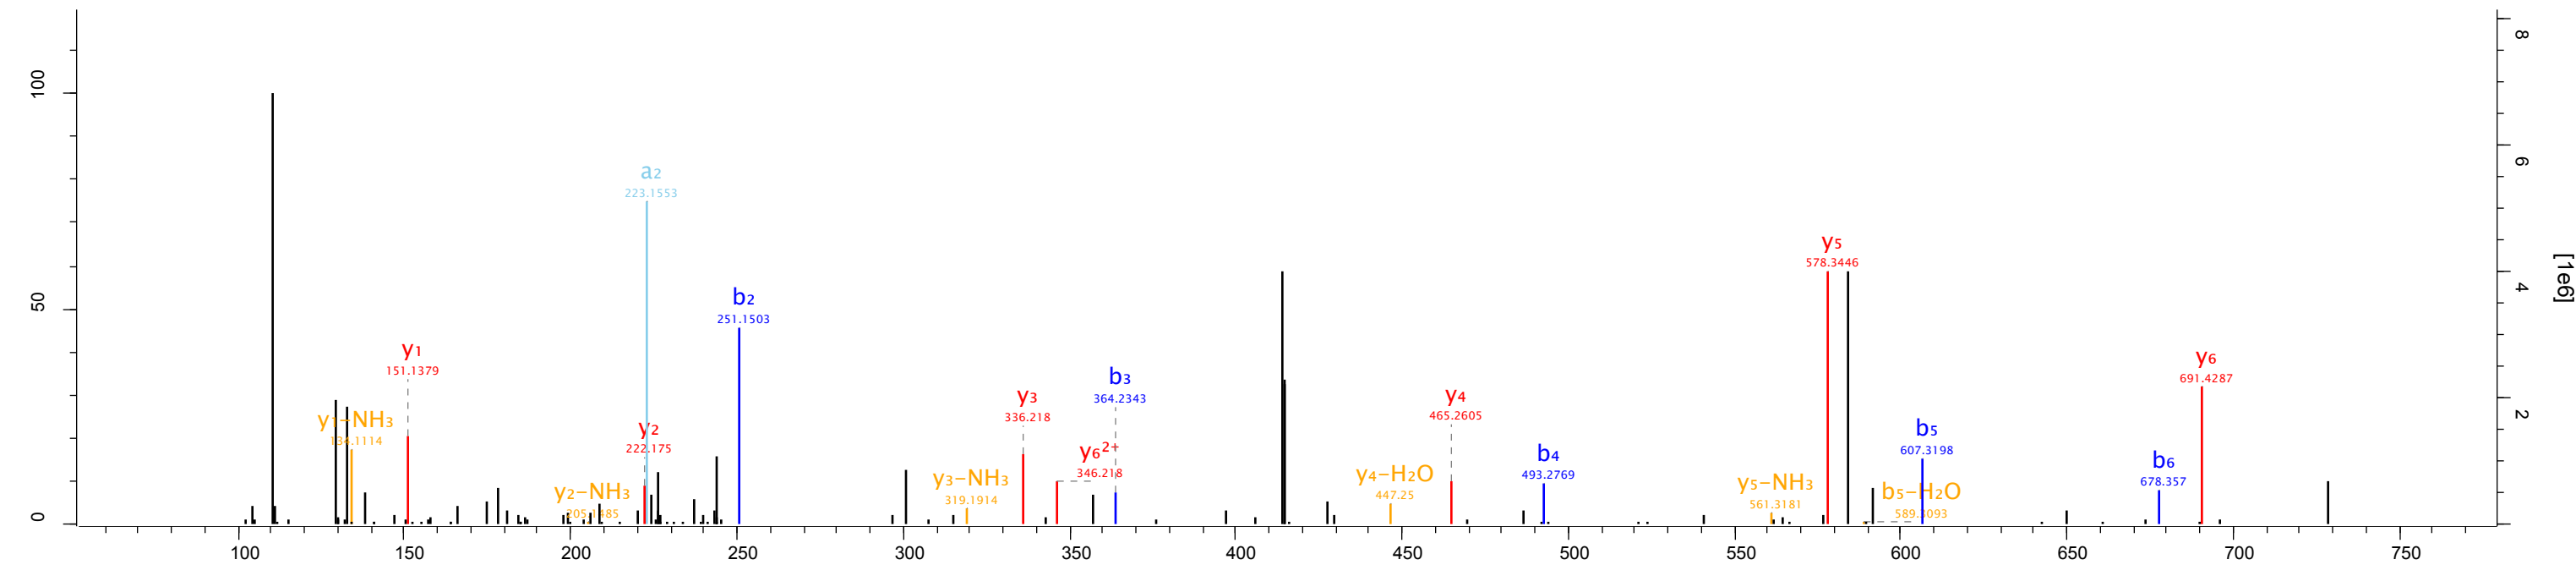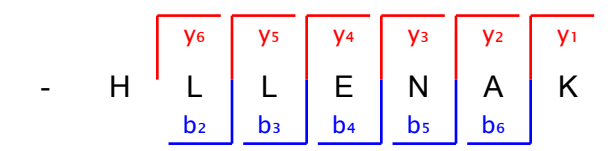

Raw file

Scan Method Score m/z Gene names

20180707\_MaS\_A375SR\_ML\_proteome\_12 3033 FTMS; HCD 89.05 361.51 TM4SF1

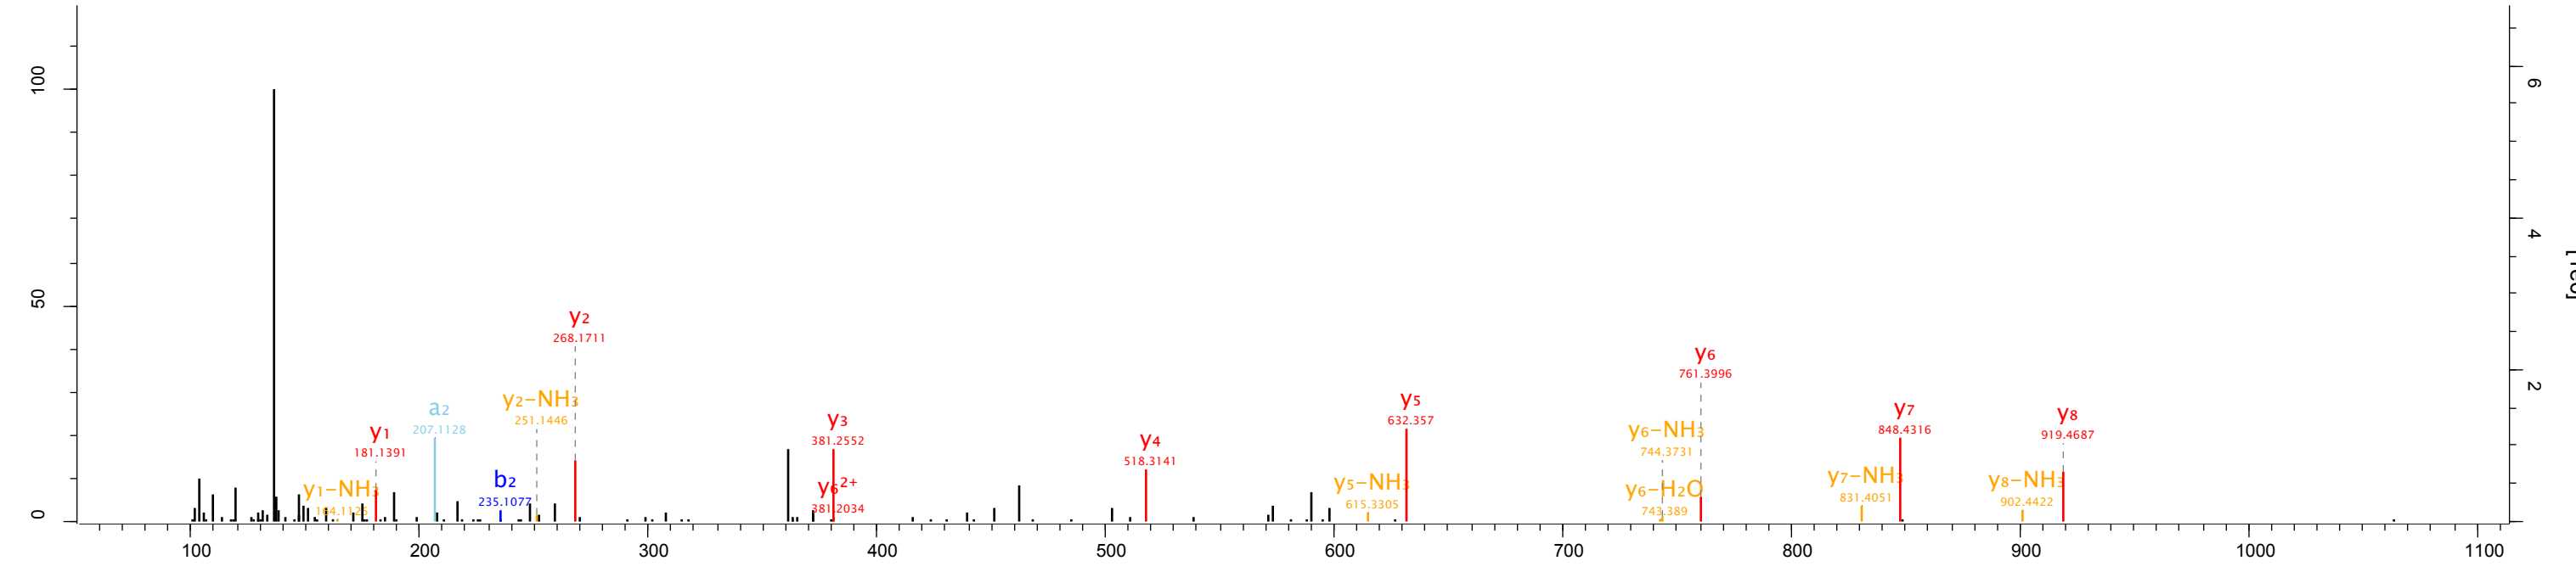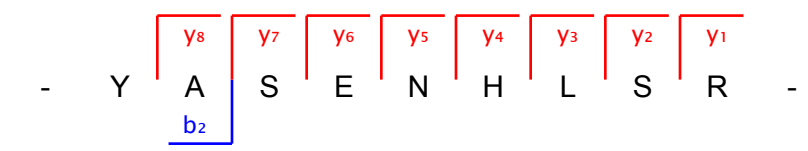

Raw file

20180707\_MaS\_A375SR\_ML\_proteome\_12

| Scan | Method    | Score | m/z    | Gene names |
|------|-----------|-------|--------|------------|
| 3173 | FTMS; HCD | 88.09 | 538.27 | MT-CO3     |

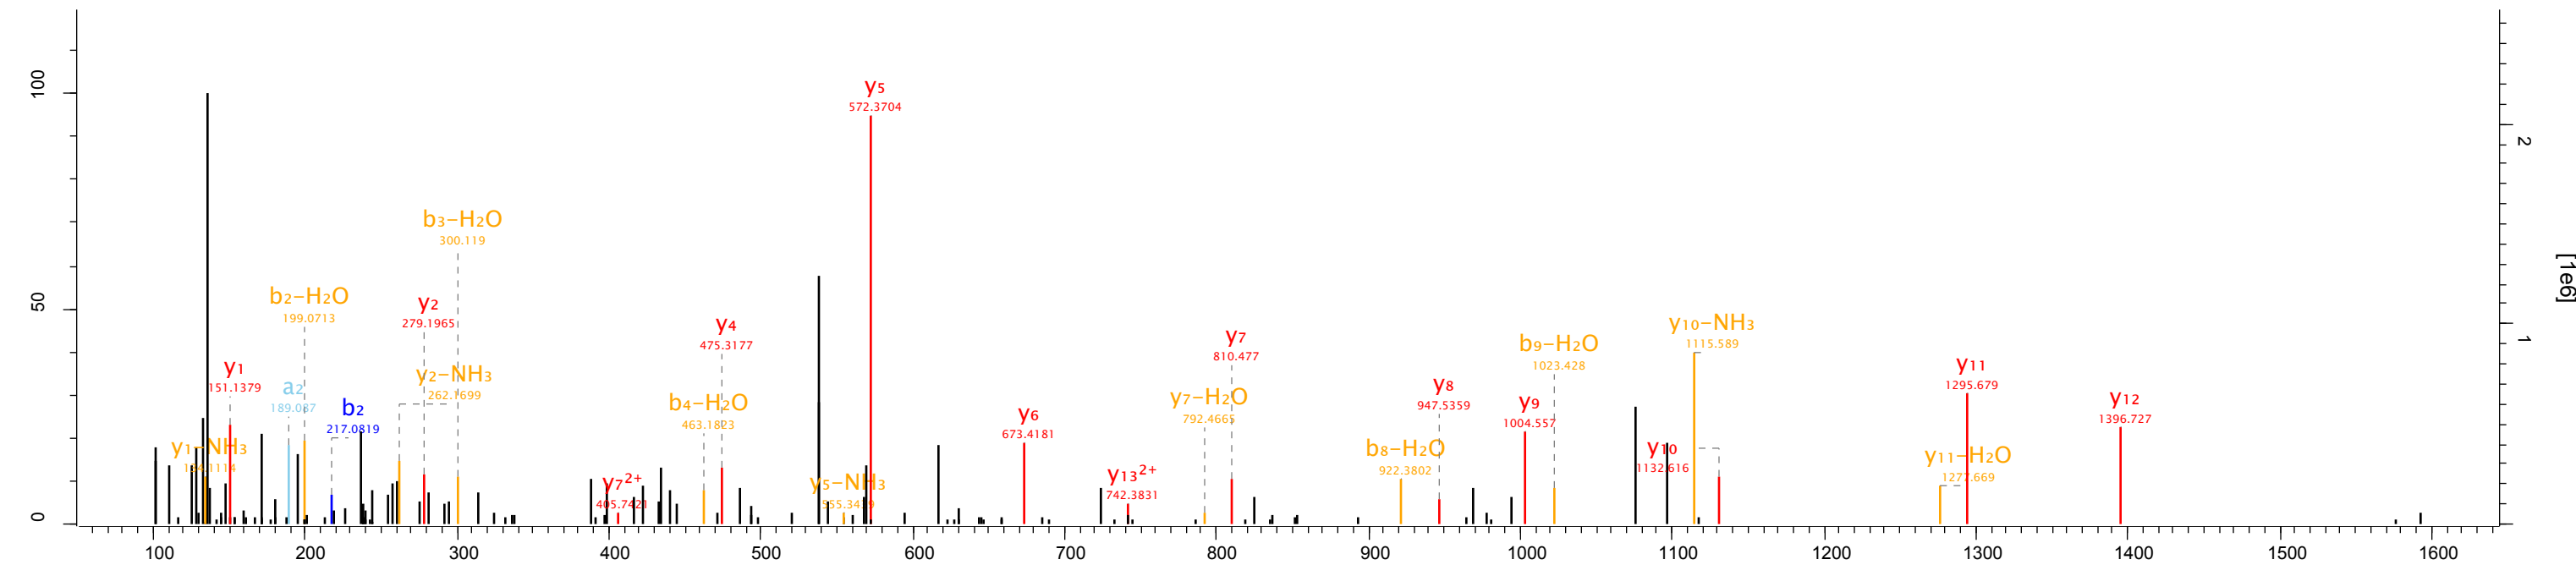

- E y<sub>13</sub><sup>2+</sup> y<sub>12</sub> y<sub>11</sub> y<sub>10</sub> y<sub>9</sub> y<sub>8</sub> y<sub>7</sub> y<sub>6</sub> y<sub>5</sub> y<sub>4</sub> V y<sub>2</sub> y<sub>1</sub> -

b<sub>2</sub>

S T Y Q G H H T P P V Q K

Raw file 20180707\_MaS\_A375SR\_ML\_proteome\_13 Scan 15703 Method FTMS; HCD Score 66.99 m/z 374.22

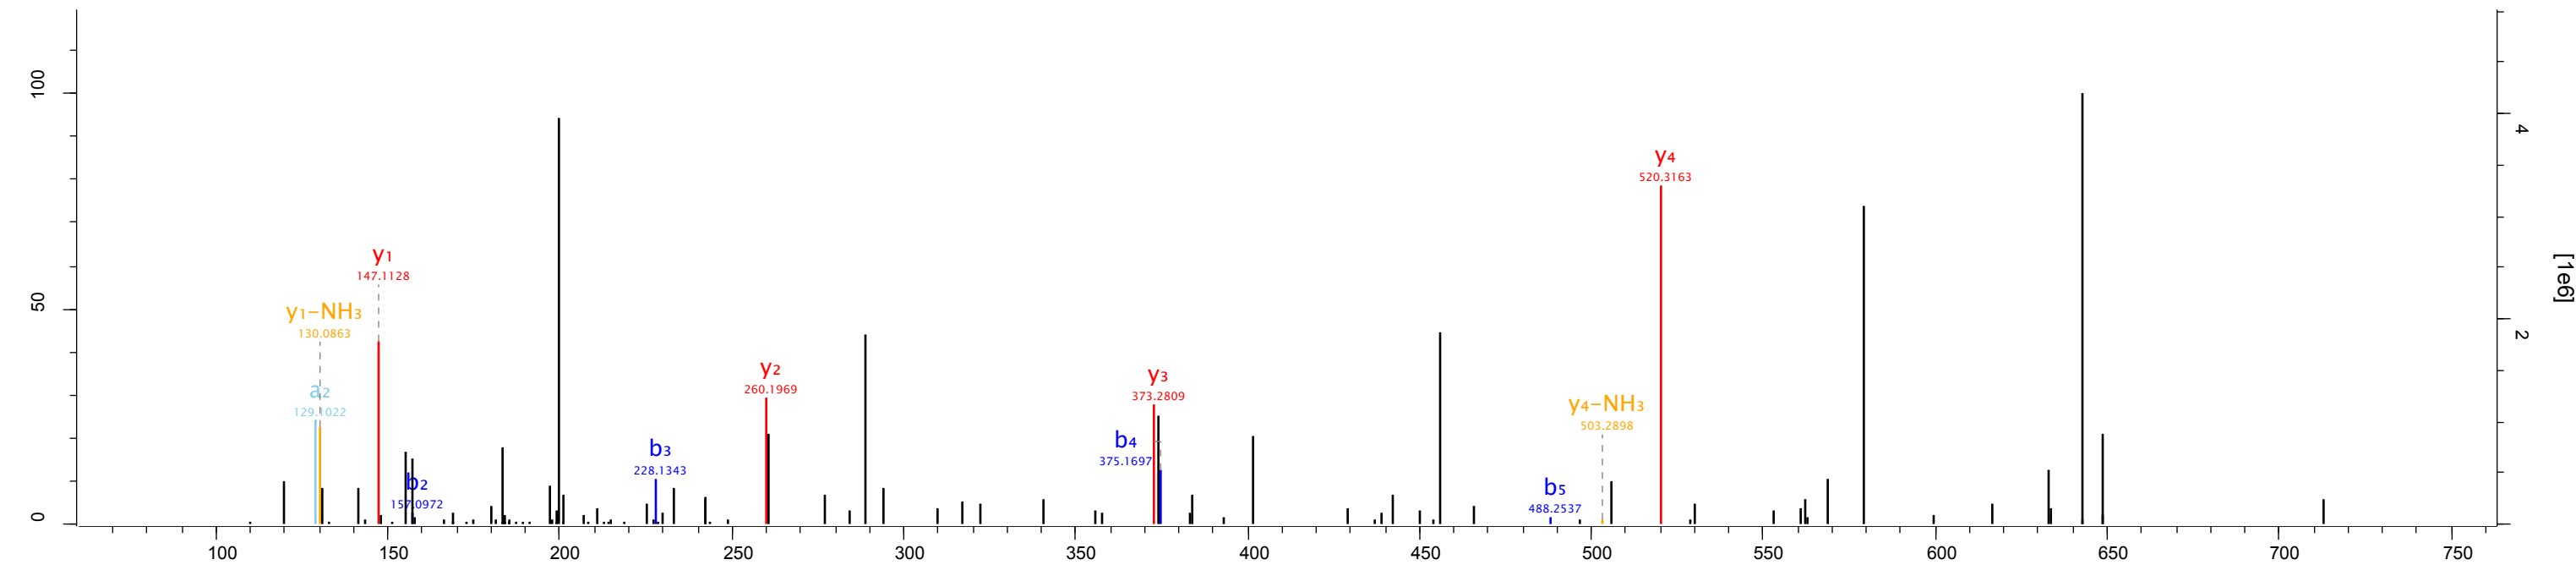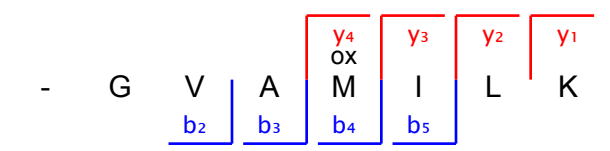

Raw file 20180707\_MaS\_A375SR\_ML\_proteome\_13 Scan 19173 Method FTMS; HCD Score 46.46 m/z 542.78

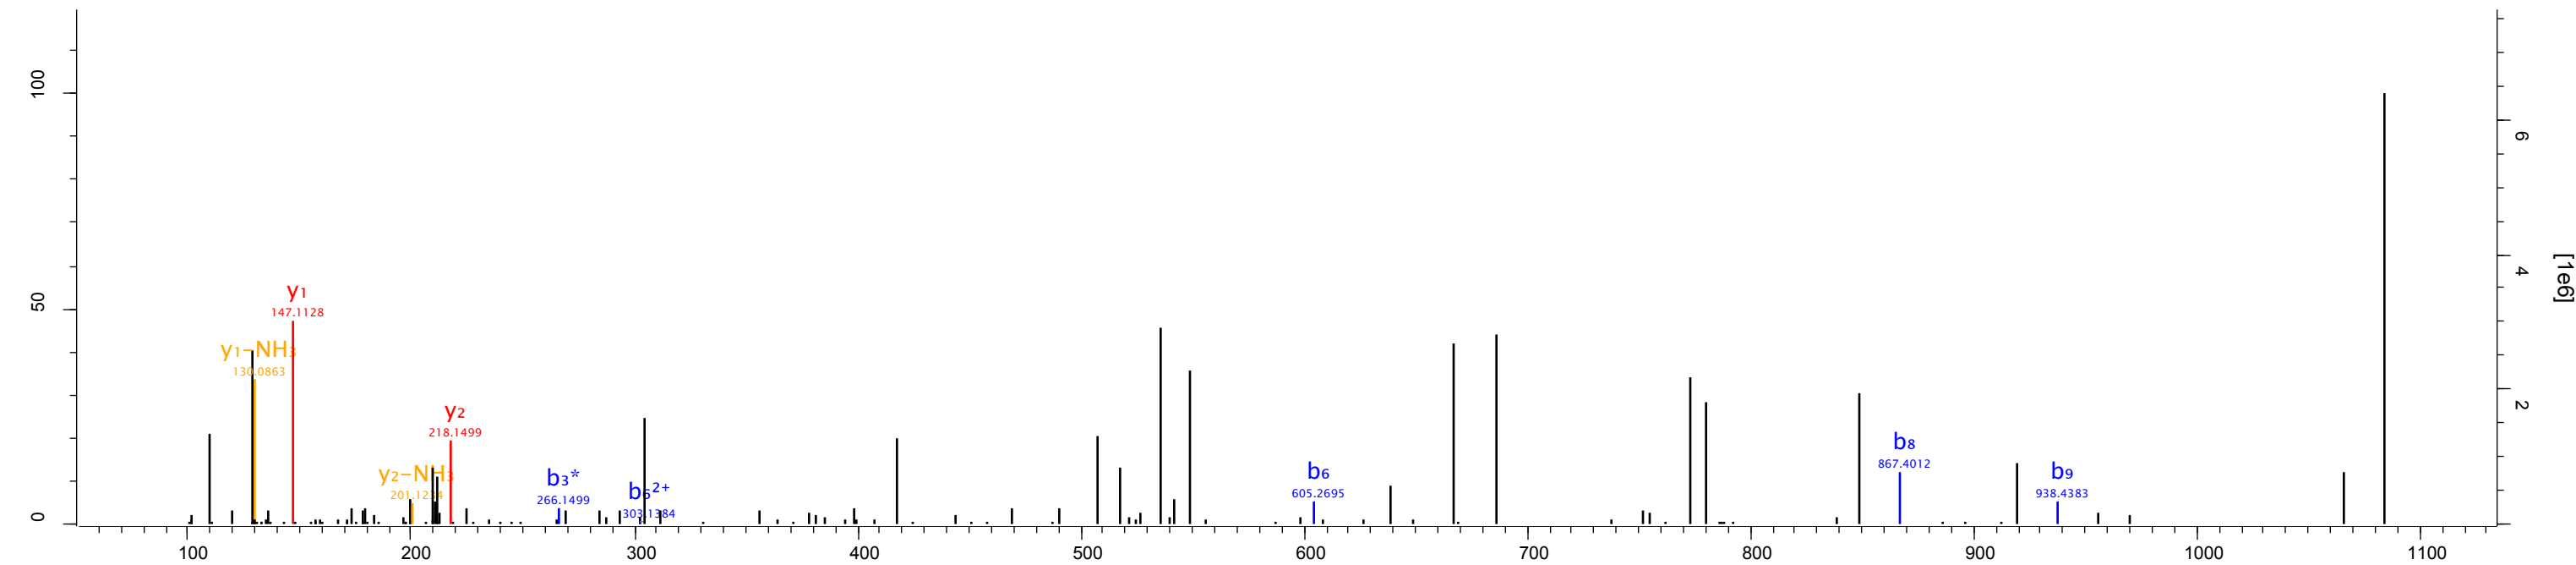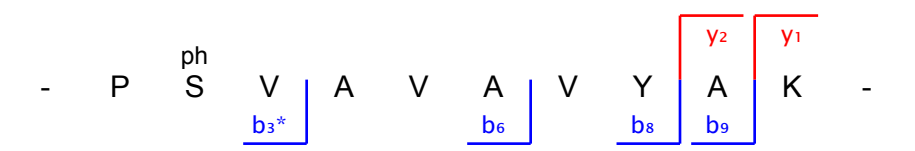

Raw file 20180707\_MaS\_A375SR\_ML\_proteome\_13 Scan 19513 Method FTMS; HCD Score 77.22 m/z 645 Gene names ATP6V0C

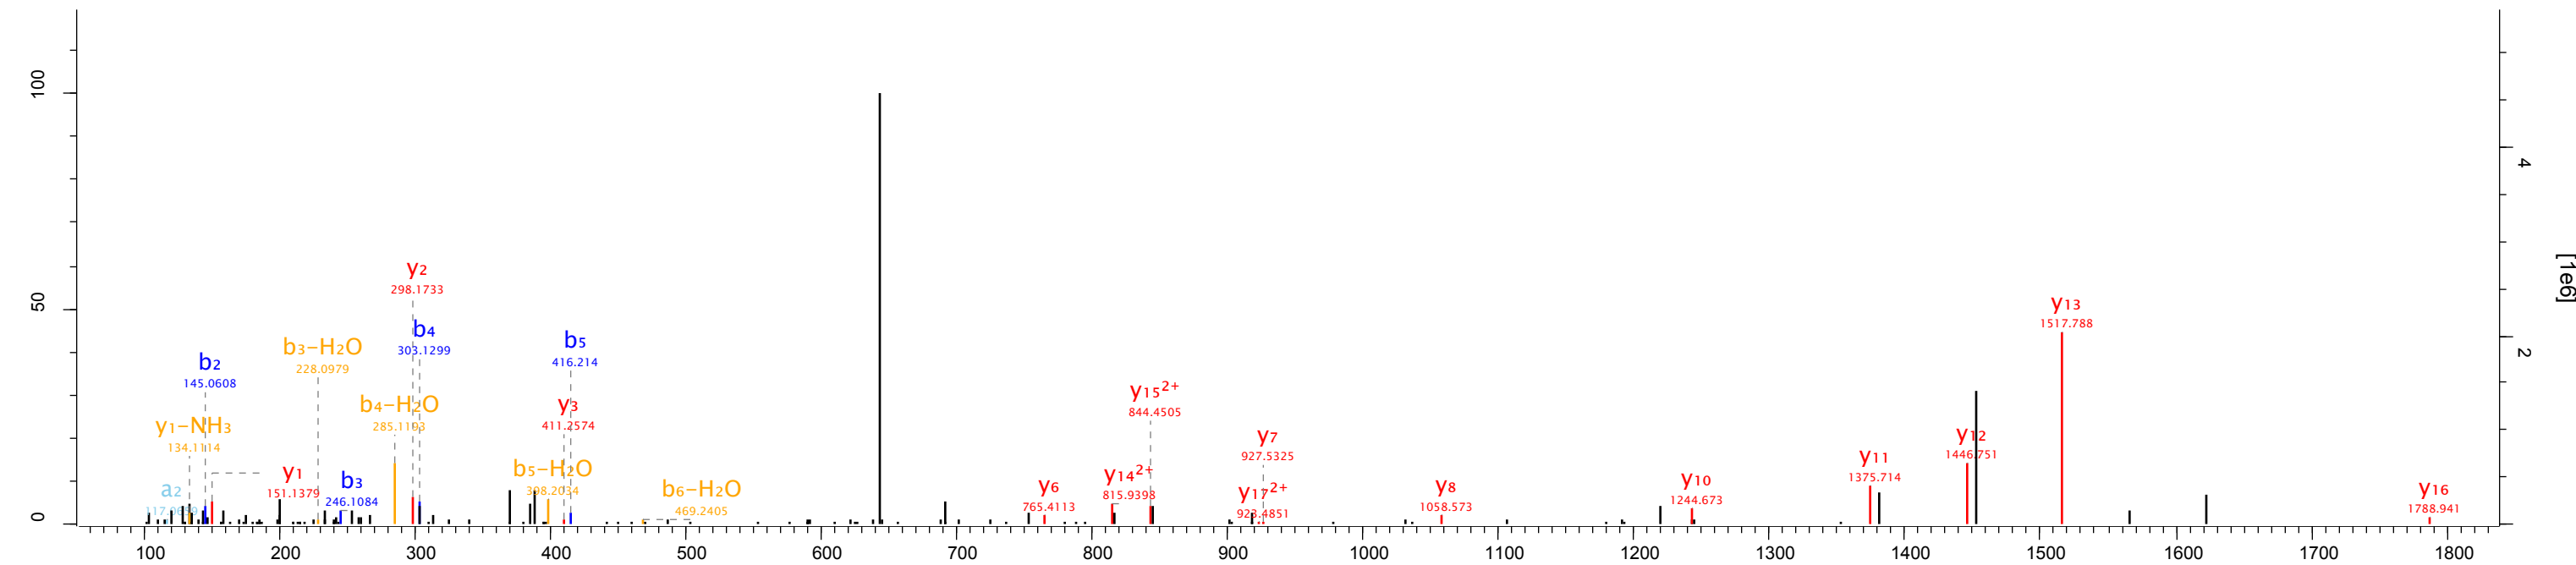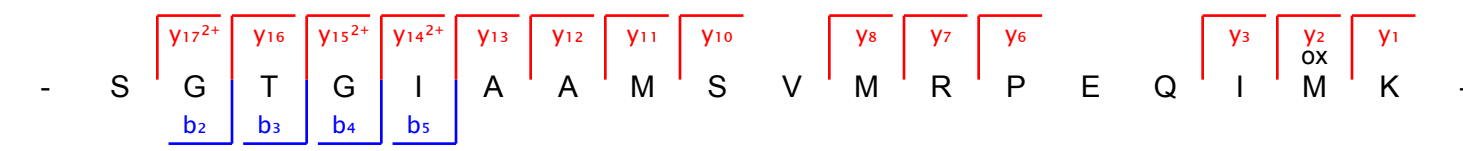

Raw file  
20180707\_MaS\_A375SR\_ML\_proteome\_13

Scan Method Score m/z Gene names  
27253 FTMS; HCD 18.94 570.03 CNIH4

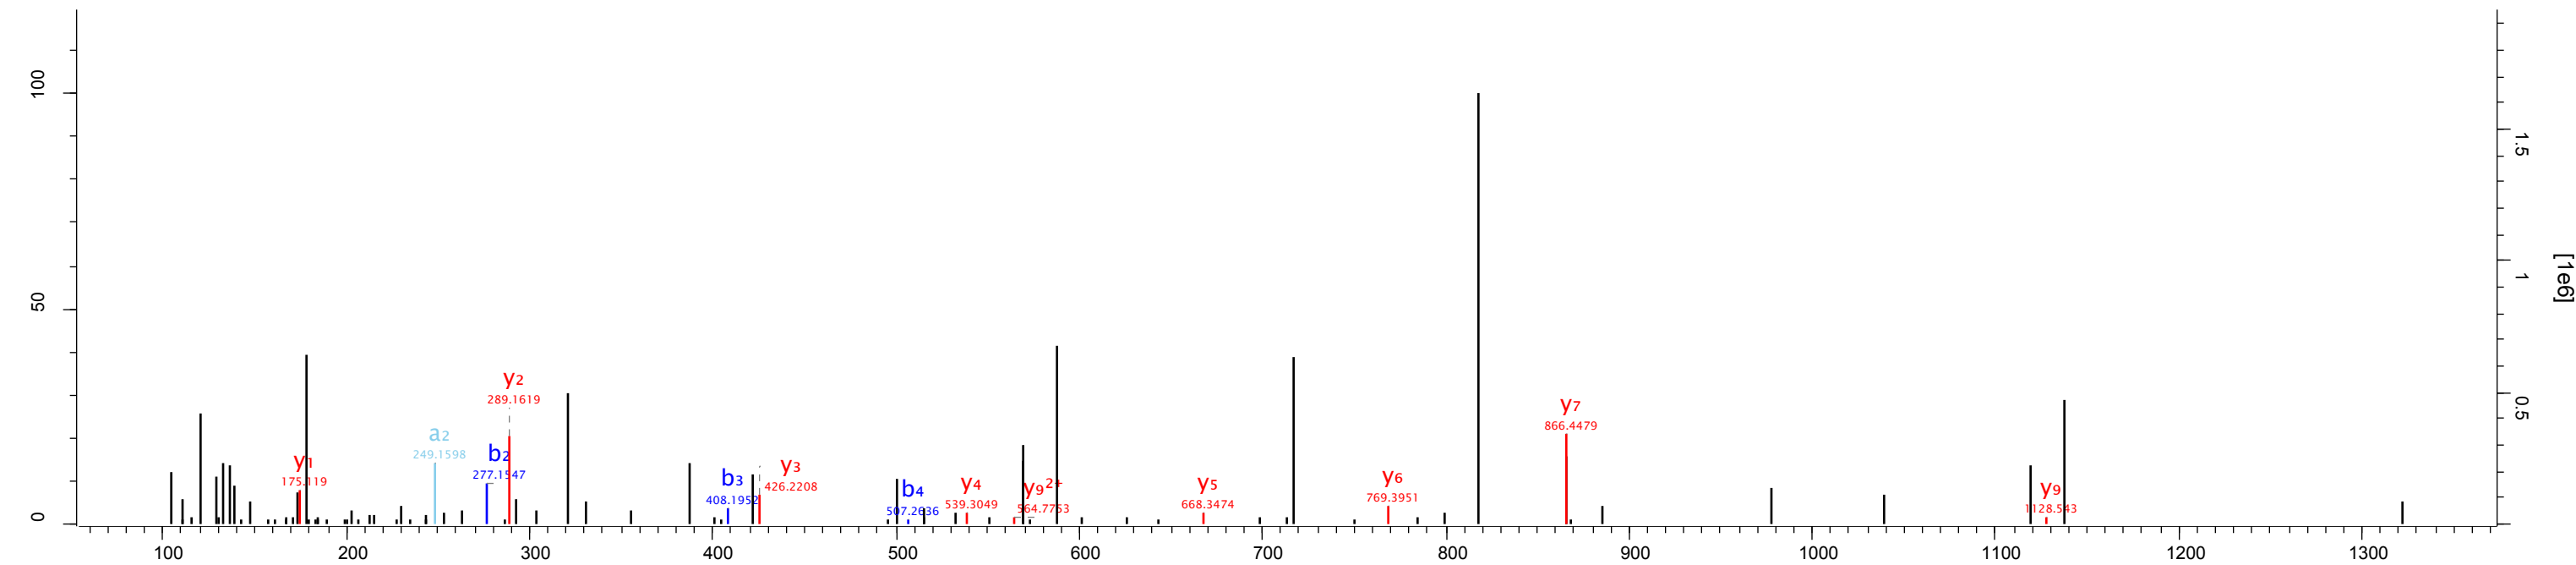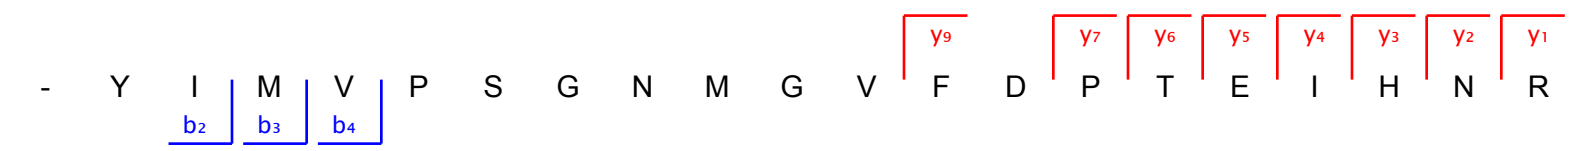

Raw file 20180707\_MaS\_A375SR\_ML\_proteome\_13 Scan 2763 Method FTMS; HCD Score 44.97 m/z 327.18

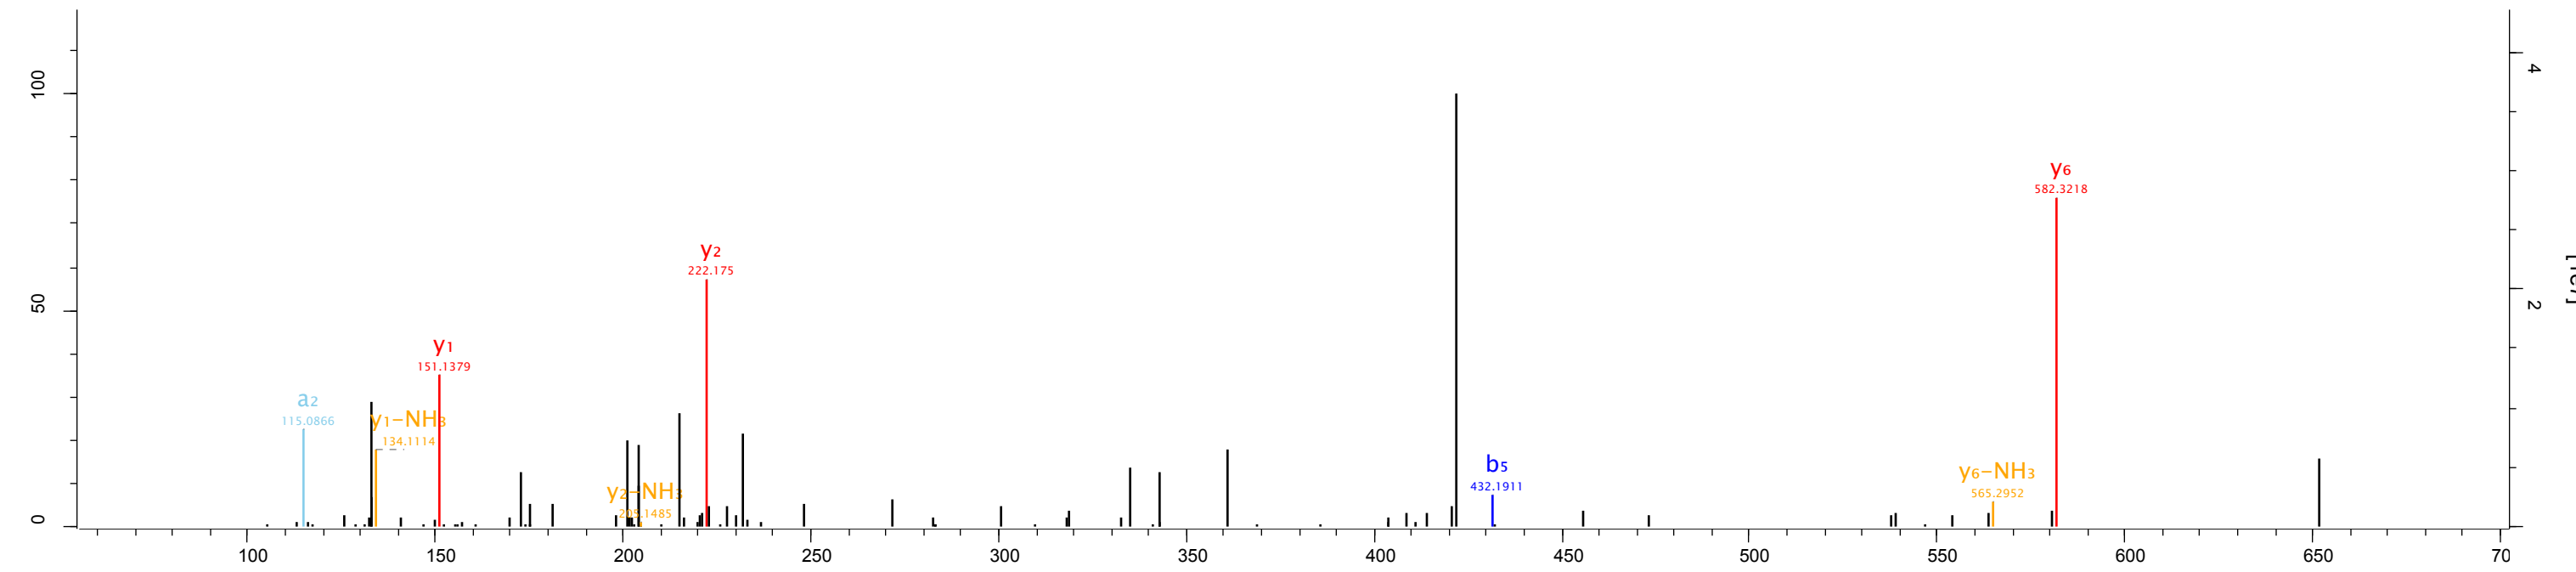



Raw file  
20180707\_MaS\_A375SR\_ML\_proteome\_14

Scan: 23793  
Method: FTMS; HCD  
Score: 62.59  
m/z: 1020.49  
Gene names: RNFT2

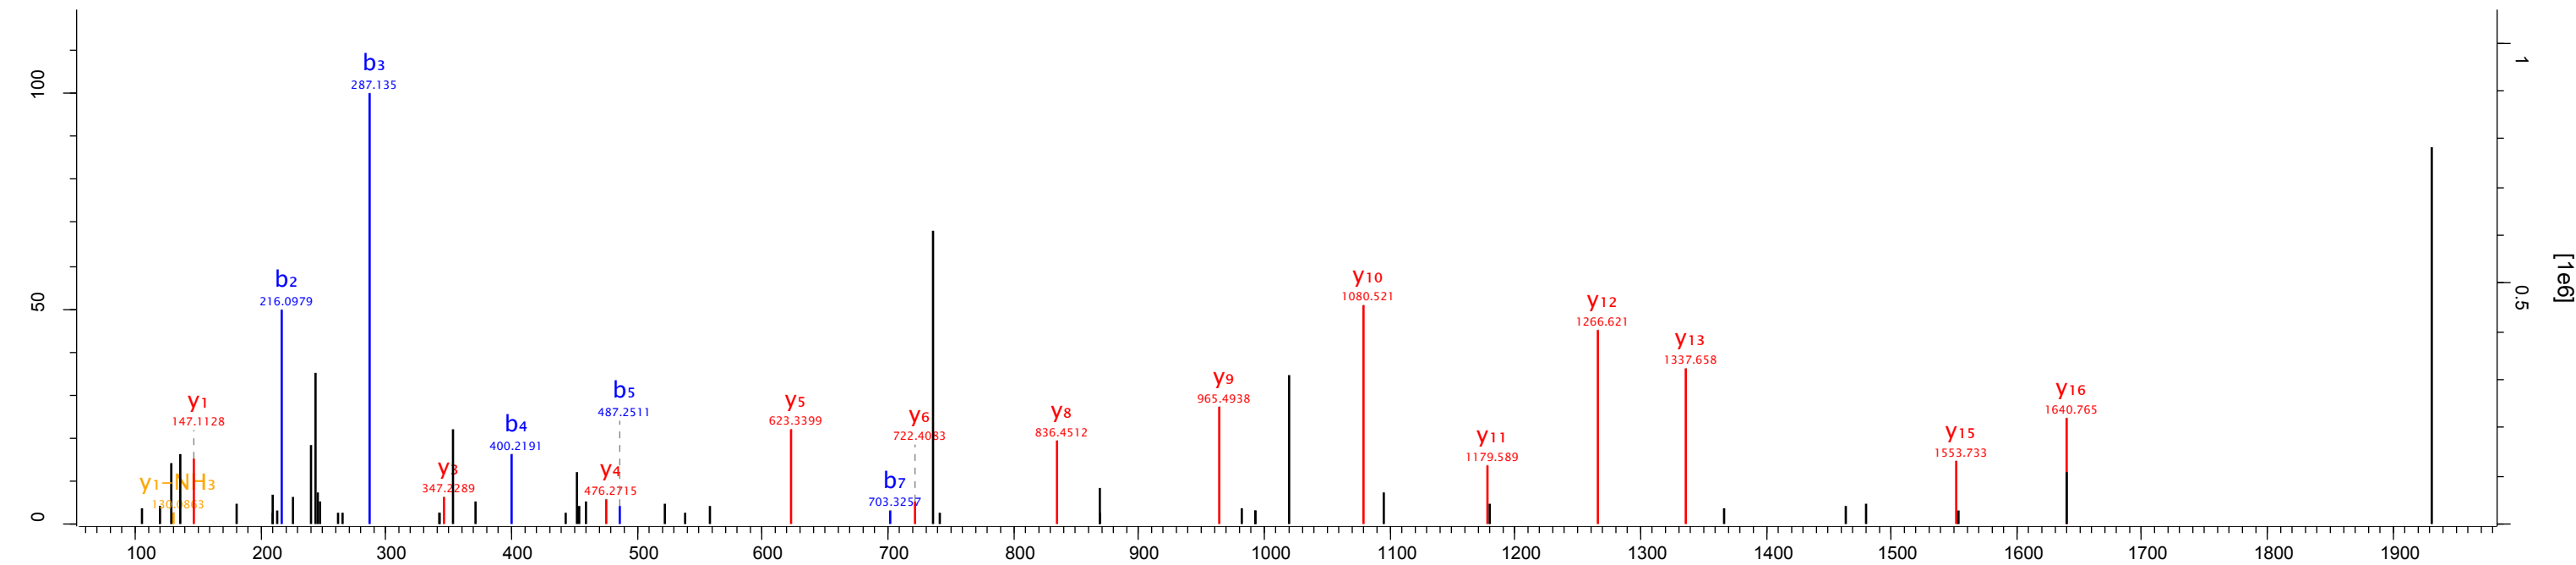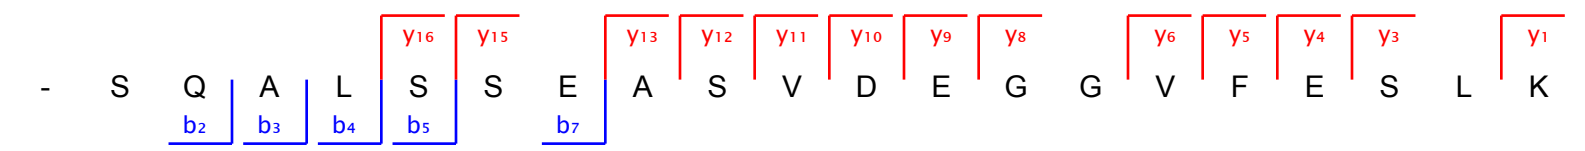

Raw file: 20180707\_MaS\_A375SR\_ML\_proteome\_14  
 Scan: 25363 Method: FTMS; HCD Score: 47.51 m/z: 1001.44 Gene names: ANKRD36BP1

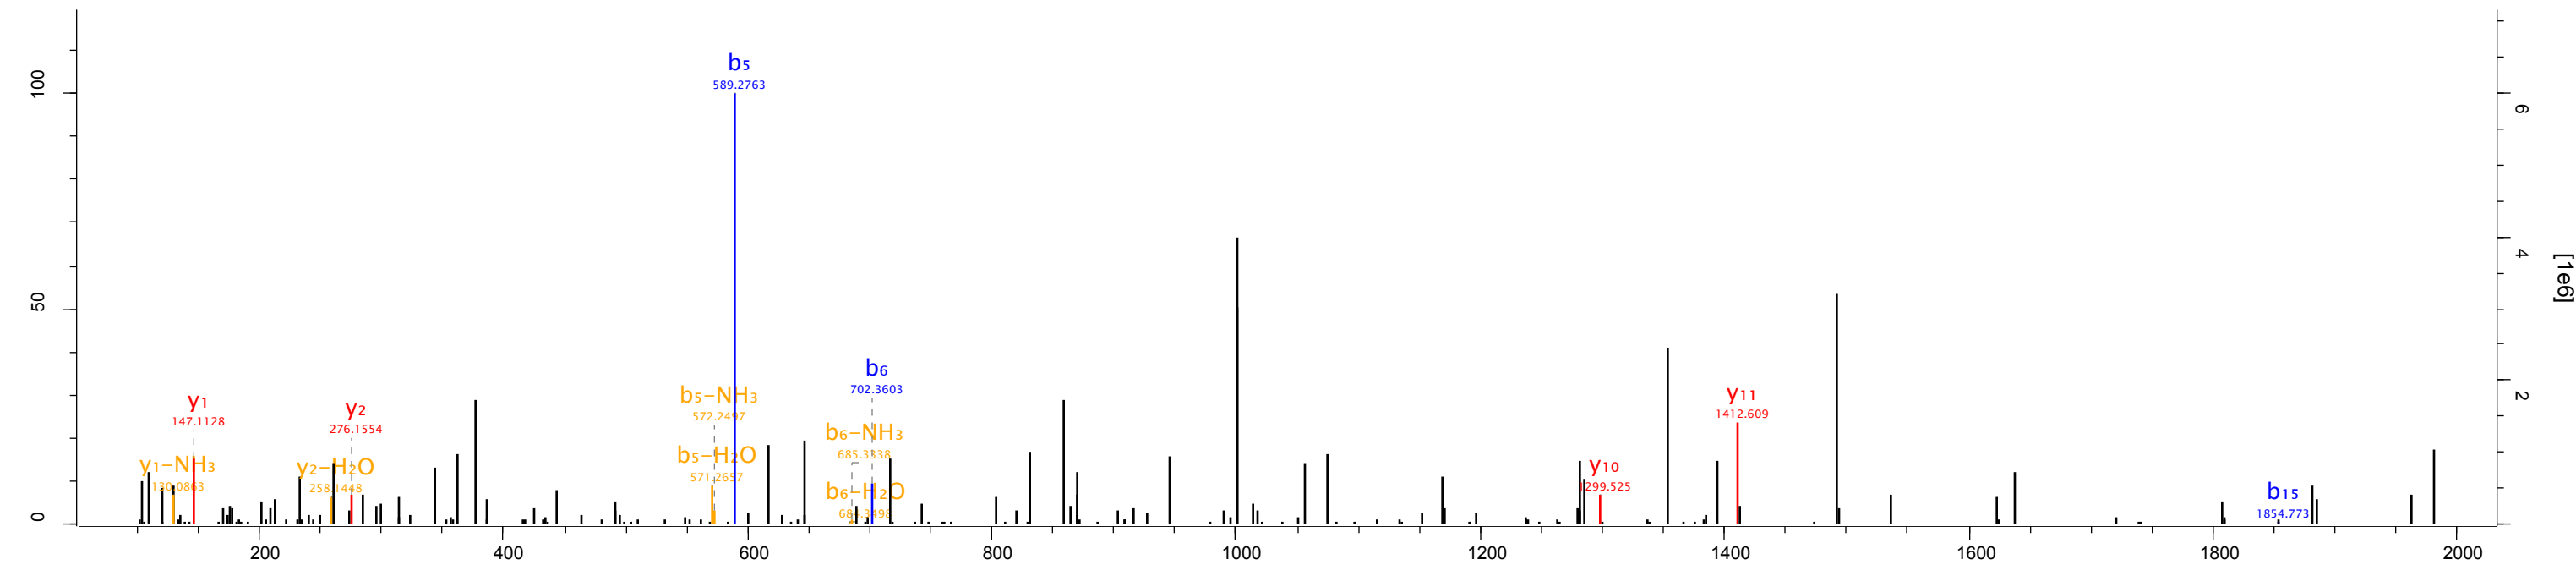

ac - M G T R T L Q F E I S D S H E K -

Fragmentation sites are indicated by brackets below the sequence:

- Red brackets: y<sub>11</sub> (L), y<sub>10</sub> (LQ), y<sub>2</sub> (E), y<sub>1</sub> (EK)
- Blue brackets: b<sub>5</sub> (TR), b<sub>6</sub> (TL), b<sub>15</sub> (E)



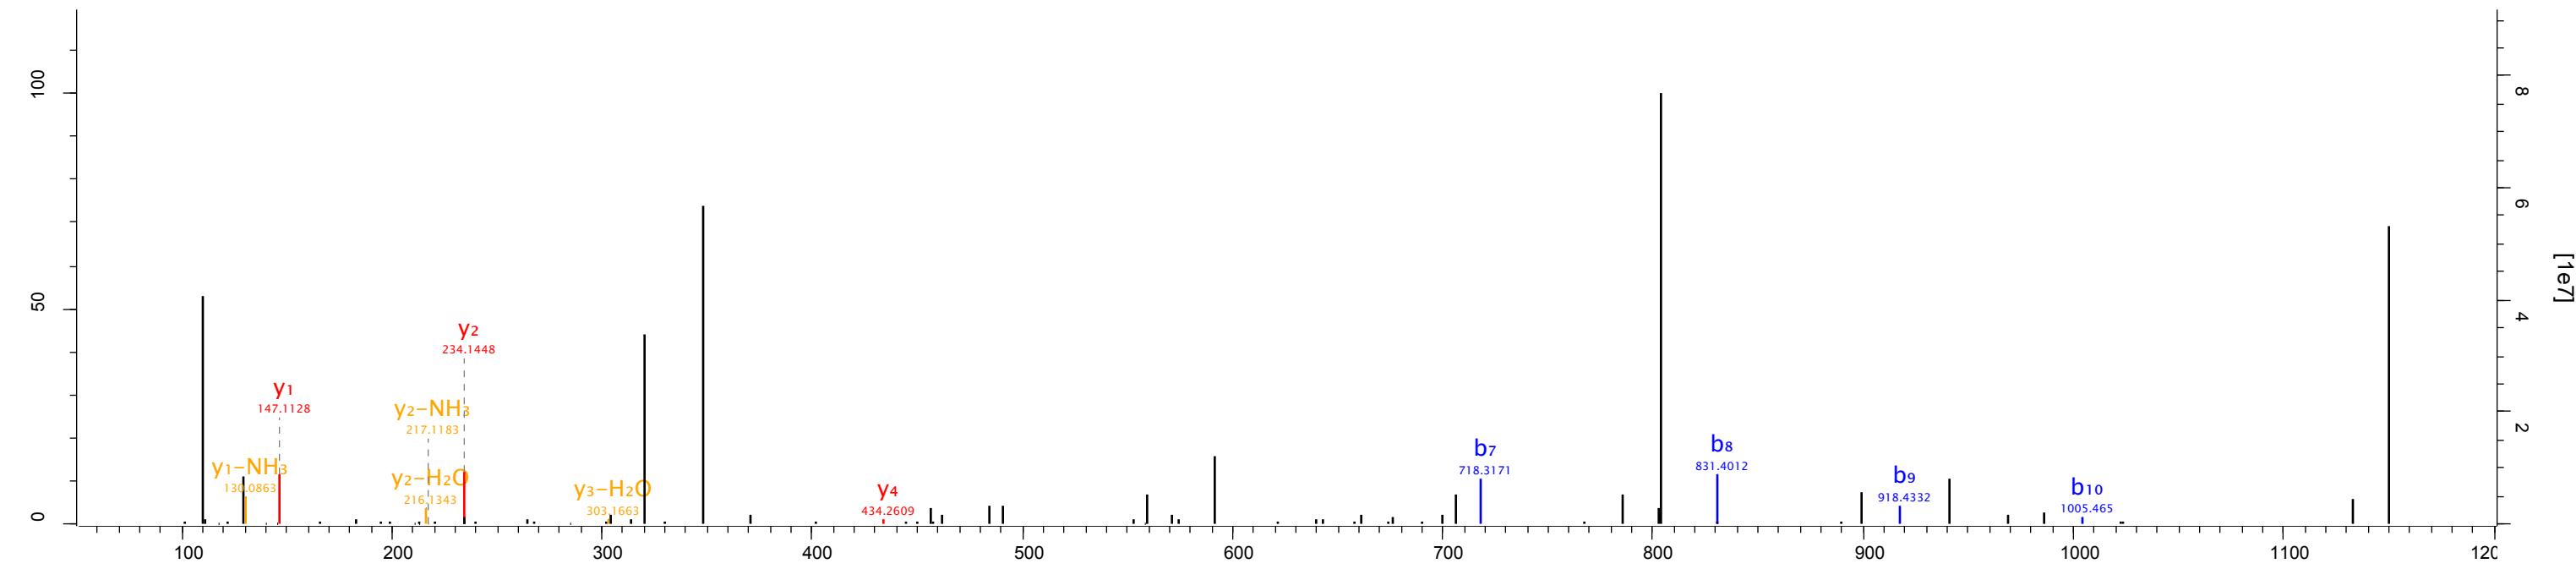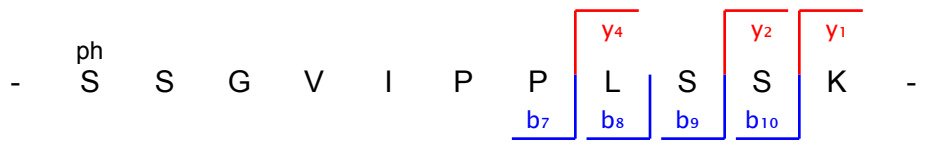

Raw file  
20180707\_MaS\_A375SR\_ML\_proteome\_15

Scan 21753 Method FTMS; HCD Score 58.78 m/z 468.75

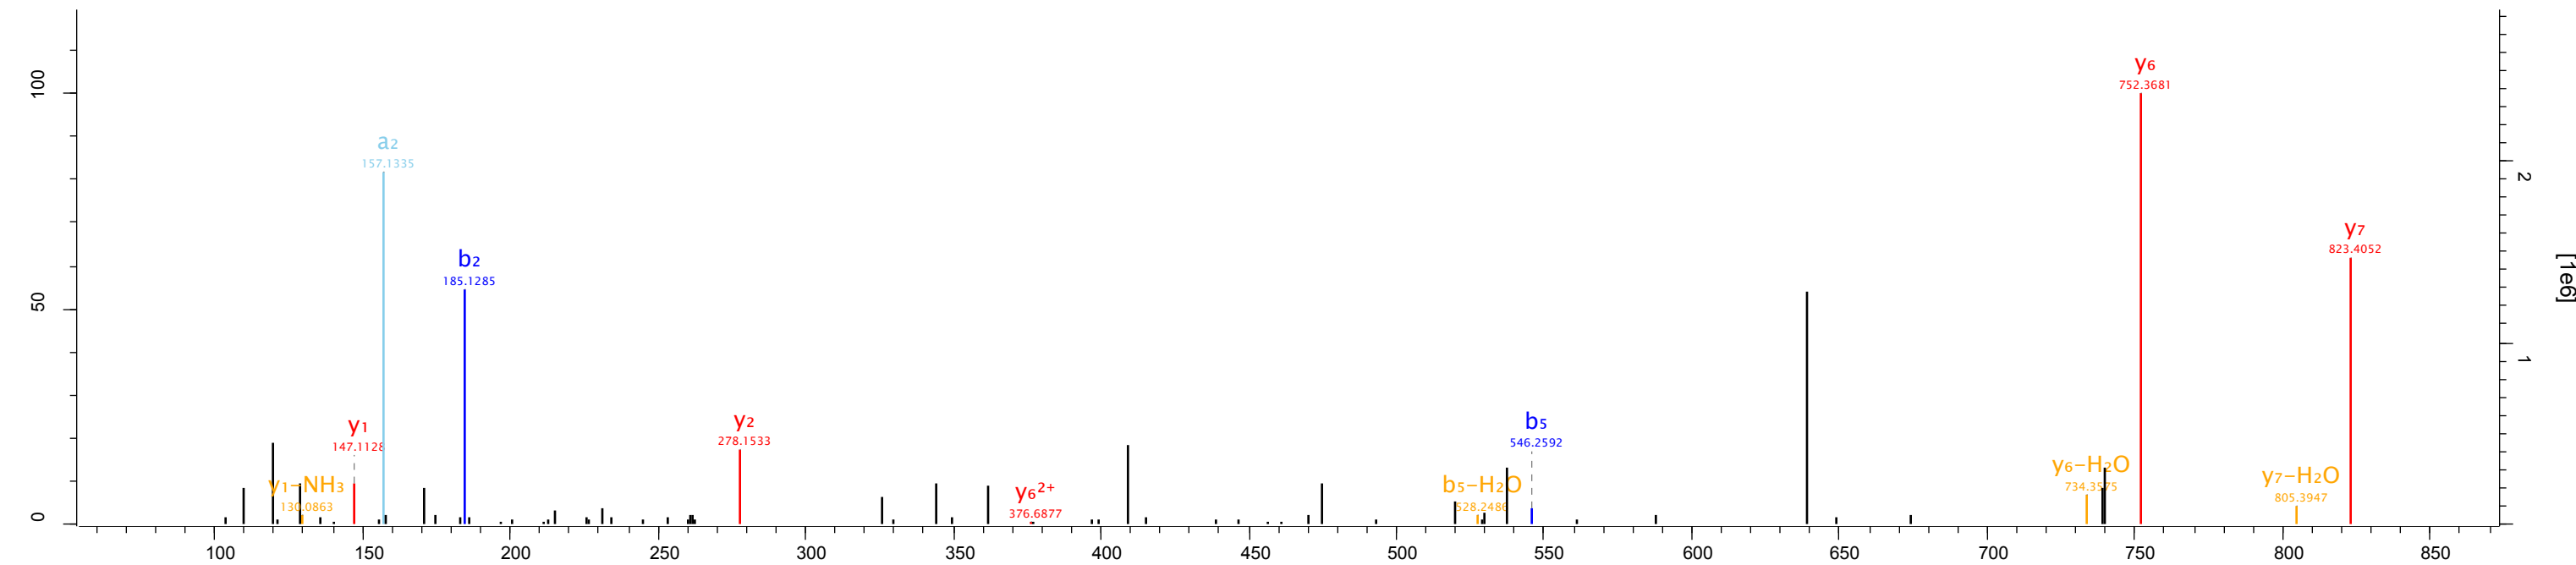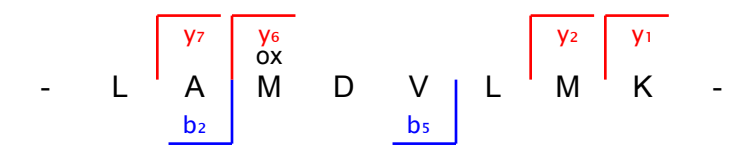

Raw file: 20180707\_MaS\_A375SR\_ML\_proteome\_15  
 Scan: 22133 Method: FTMS; HCD Score: 113.25 m/z: 712.38 Gene names: TMEM184C

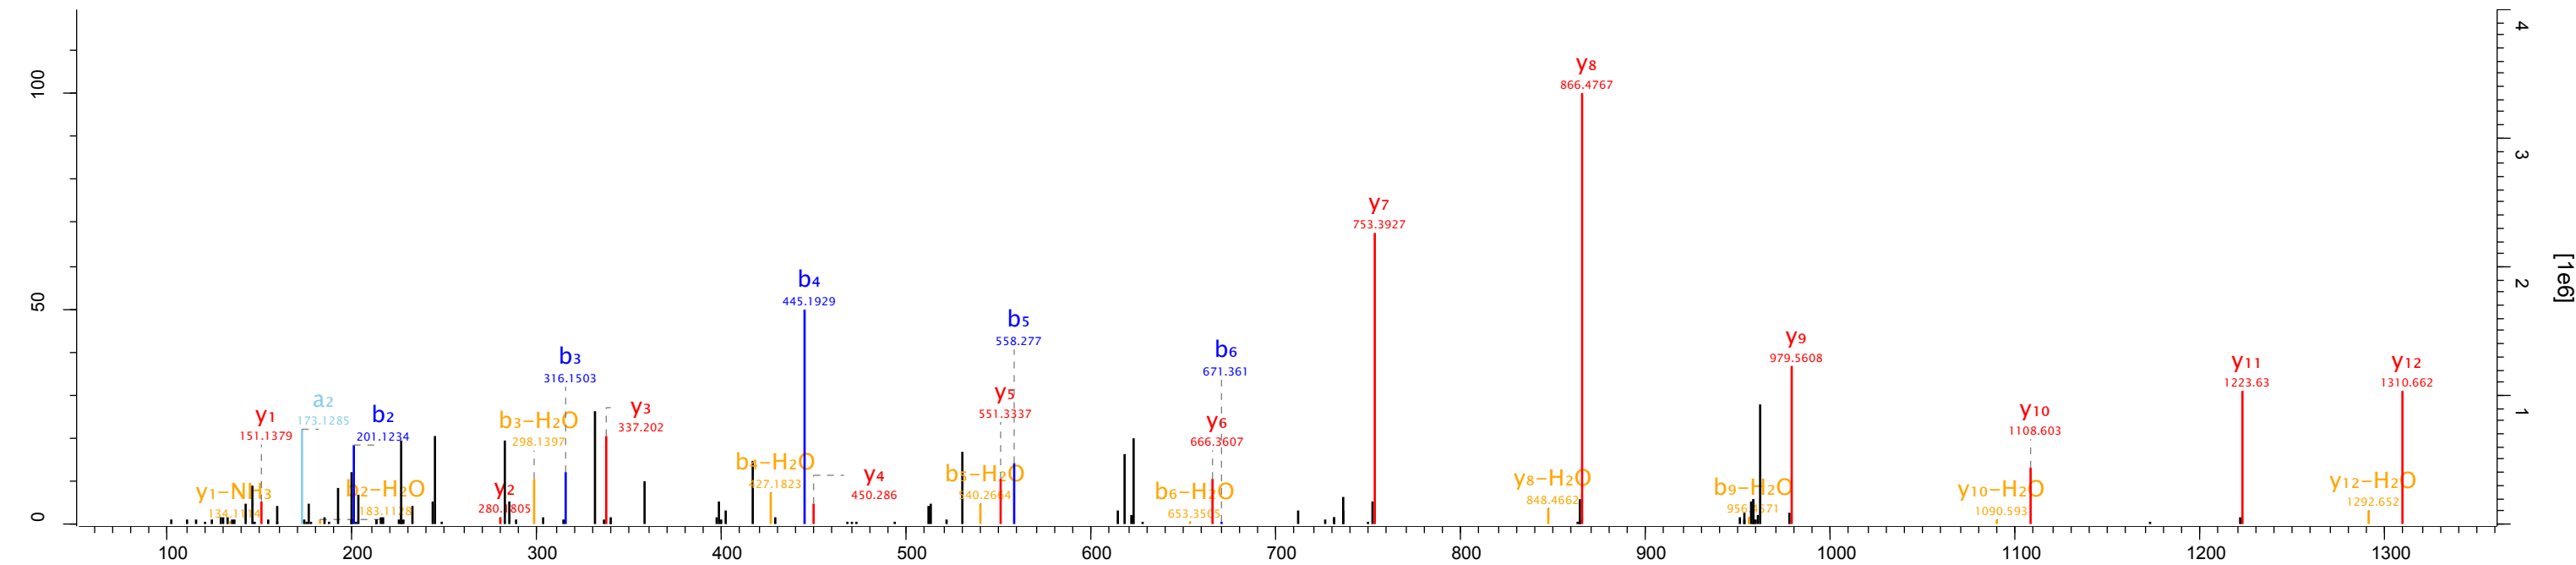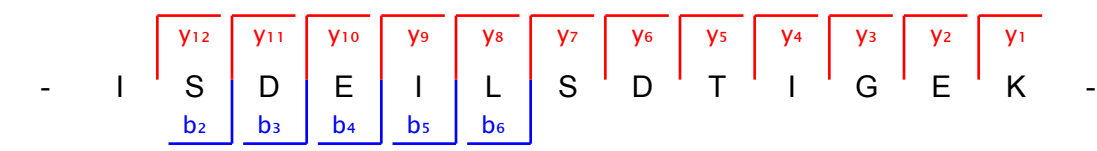

Raw file  
20180707\_MaS\_A375SR\_ML\_proteome\_16

Scan 25533 Method FTMS; HCD Score 74.46 m/z 507.74 Gene names TMEM258

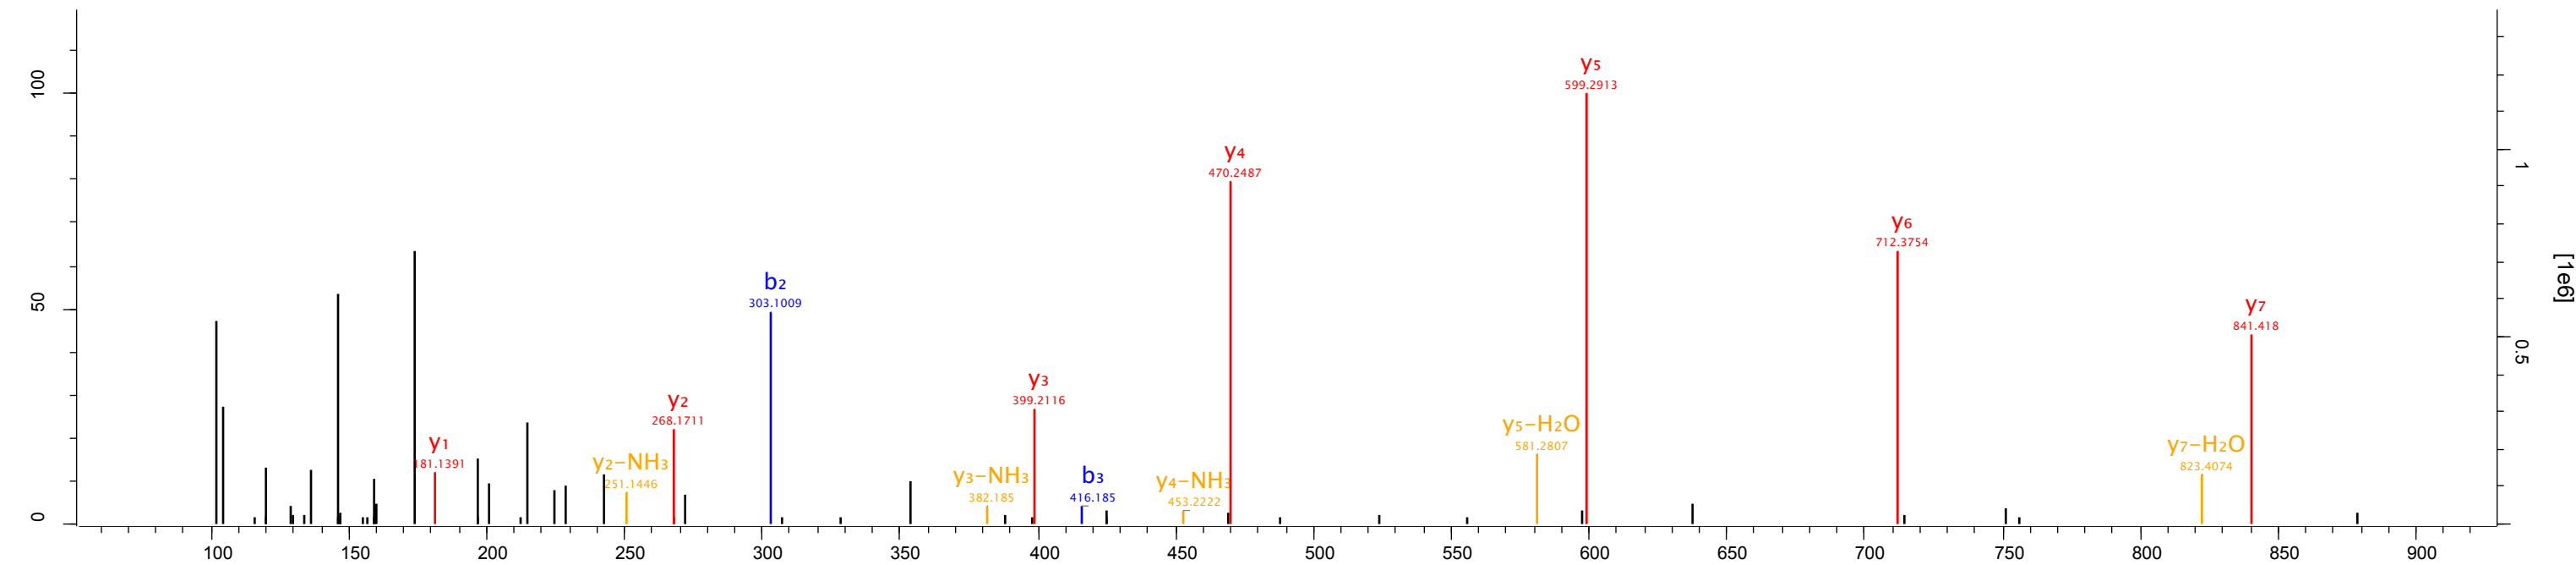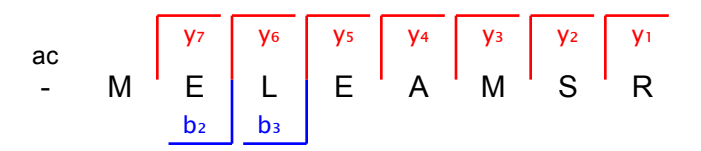

Raw file 20180707\_MaS\_A375SR\_ML\_proteome\_16 Scan 25833 Method FTMS; HCD Score 60.2 m/z 808.91 Gene names MRC1

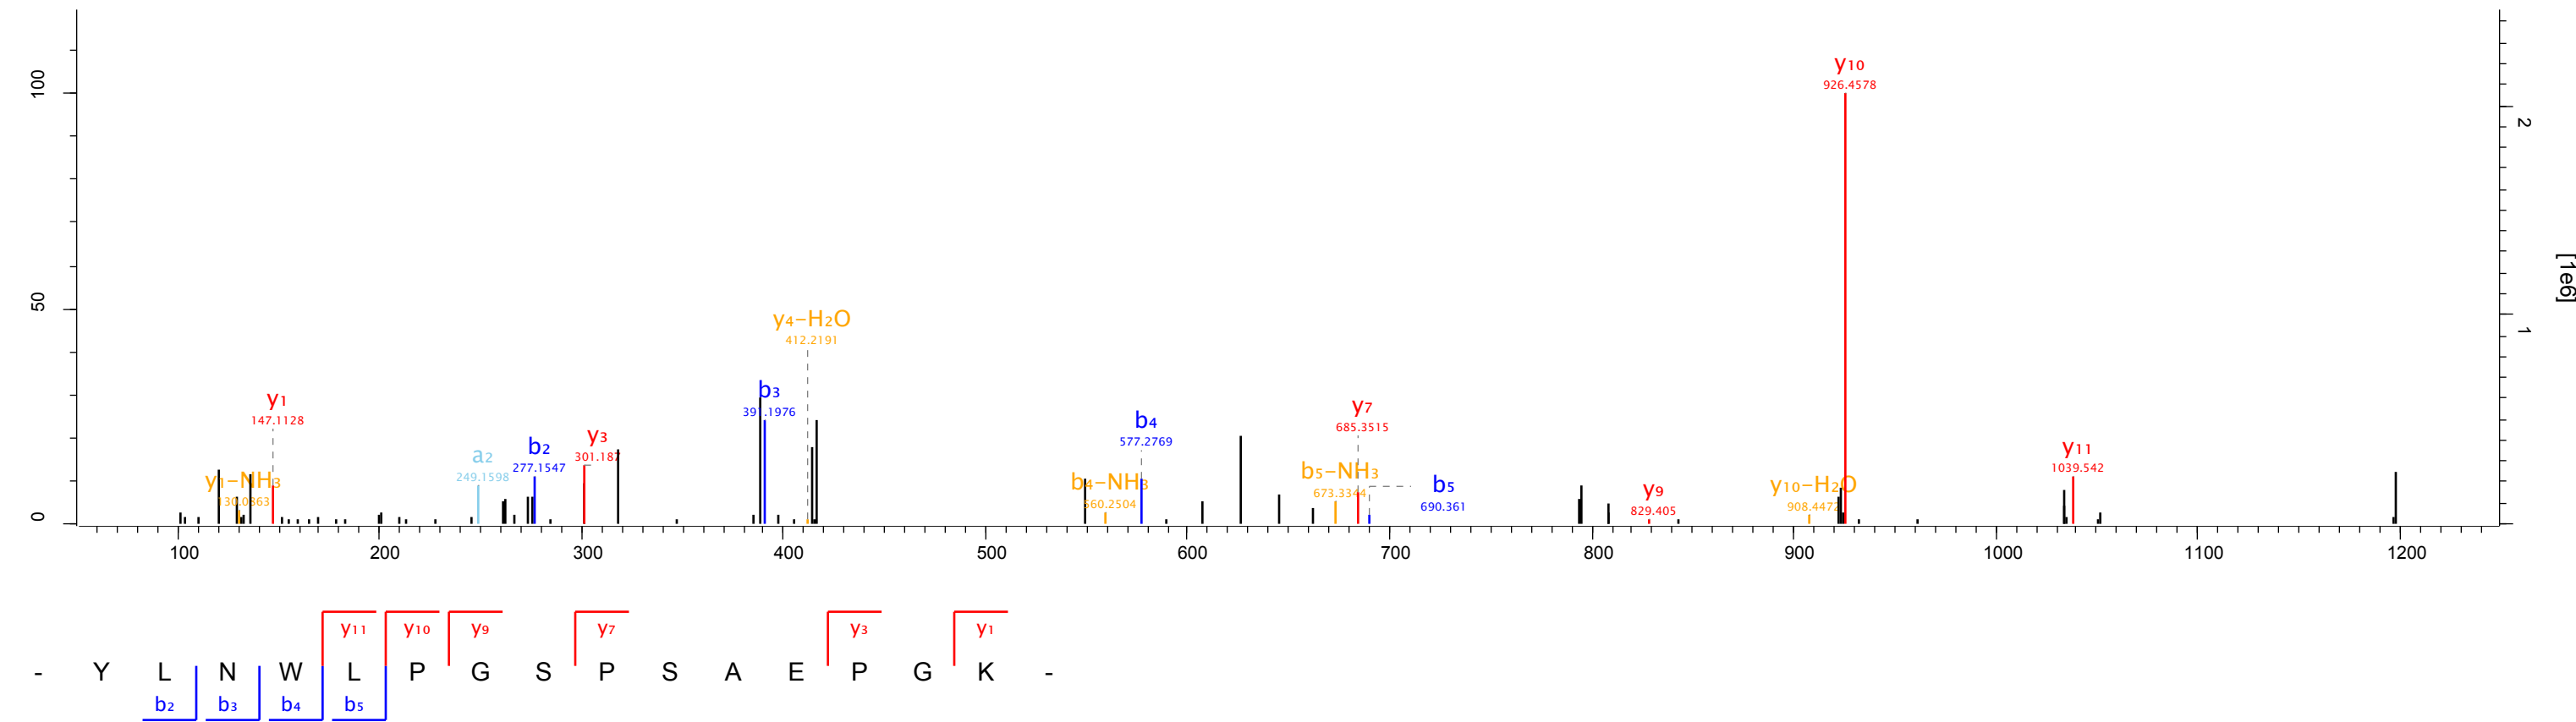



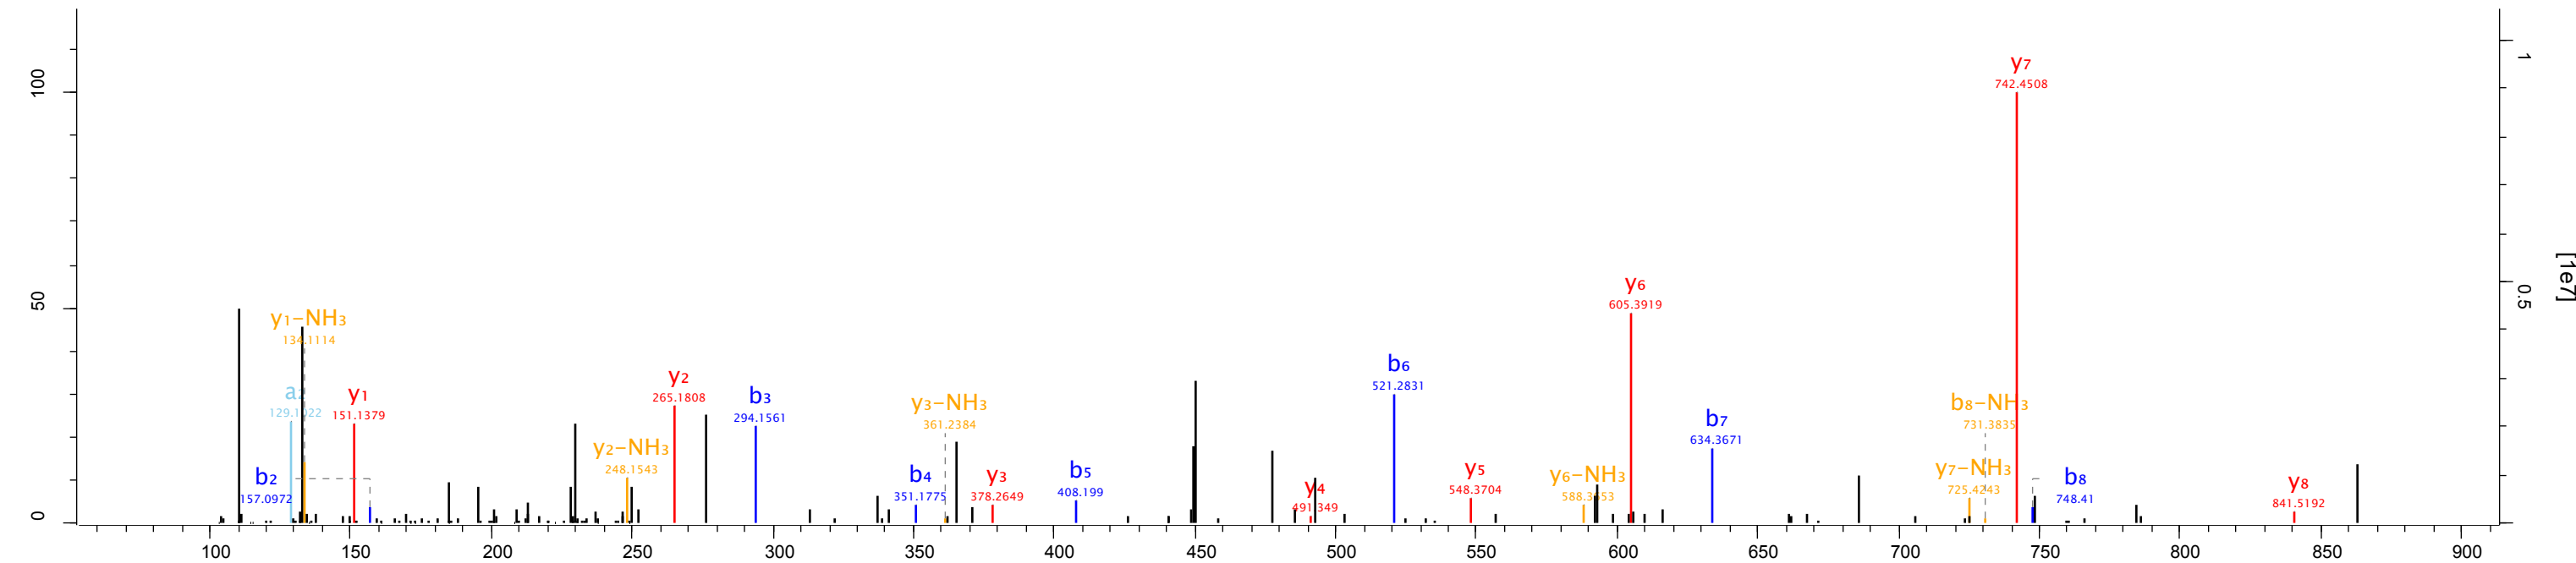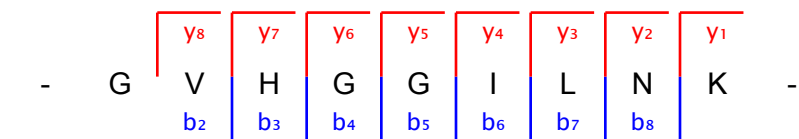

Raw file 20180707\_MaS\_A375SR\_ML\_proteome\_17 Scan 10003 Method FTMS; HCD Score 71.98 m/z 552.29 Gene names LSM10

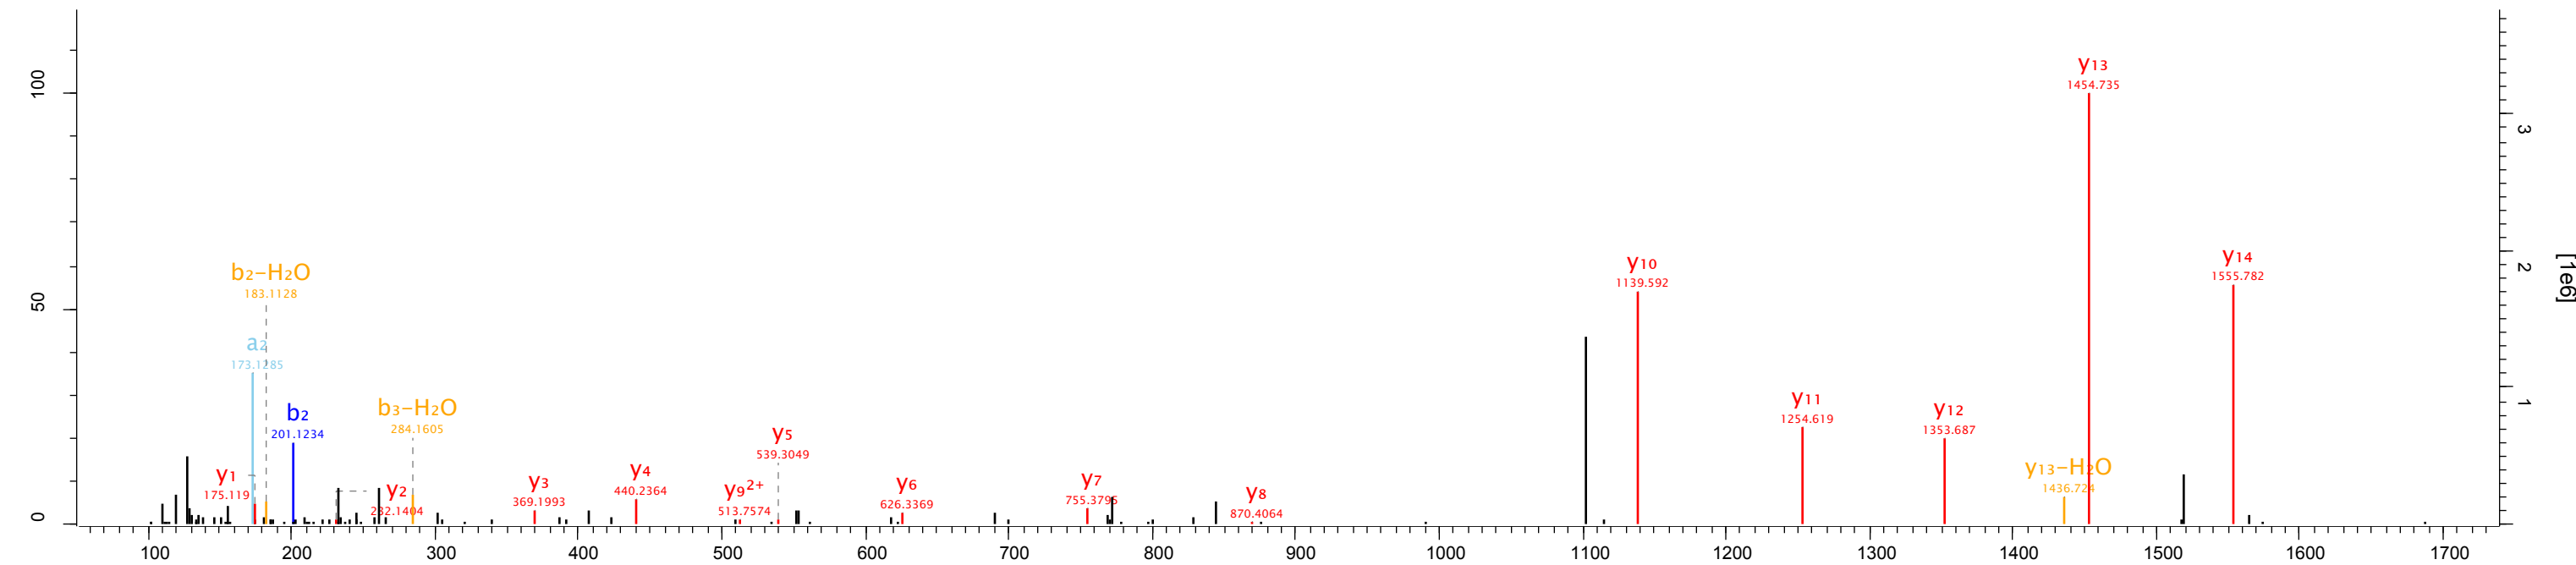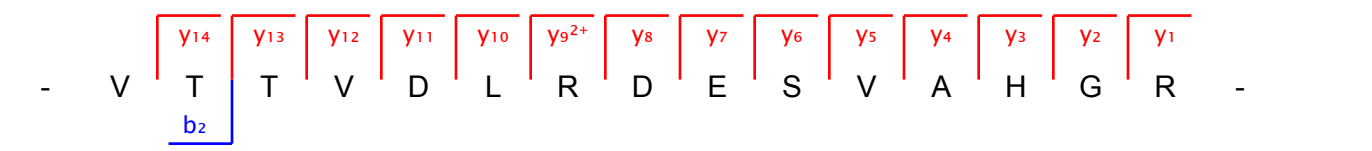

Raw file 20180707\_MaS\_A375SR\_ML\_proteome\_17 Scan 25853 Method FTMS; HCD Score 42.08 m/z 726.91 Gene names IL1R1

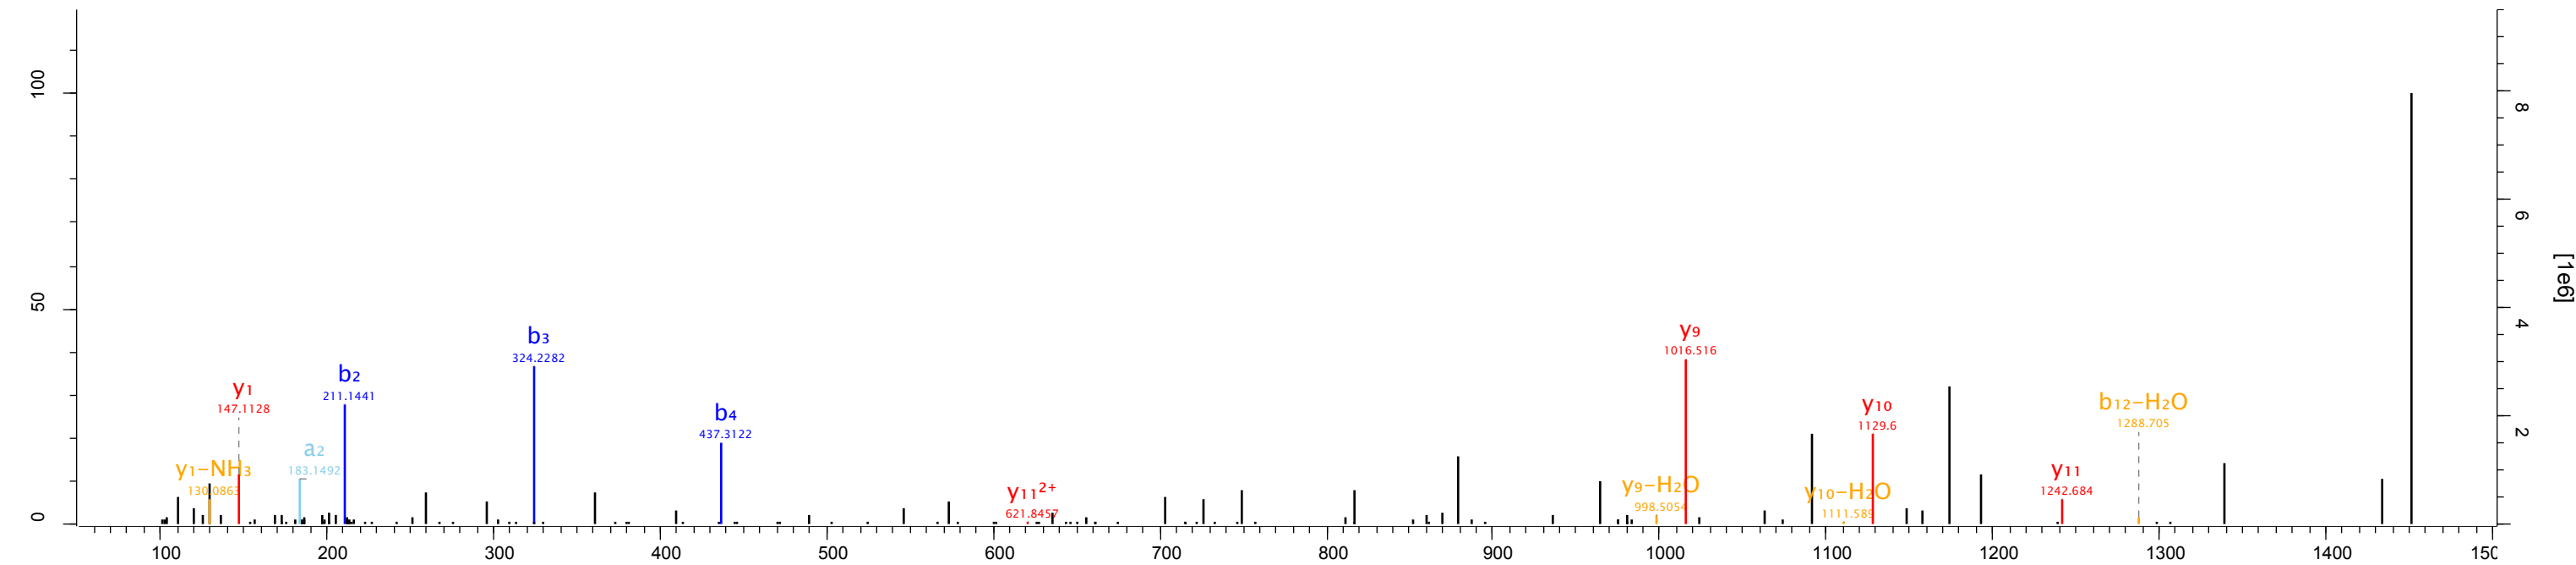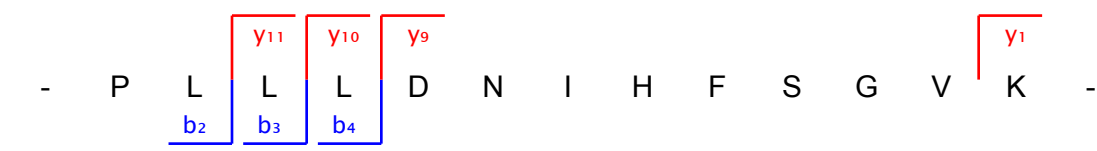

Raw file  
20180707\_MaS\_A375SR\_ML\_proteome\_18

Scan Method Score m/z Gene names  
14453 FTMS; HCD 247.17 858.93 APOC3

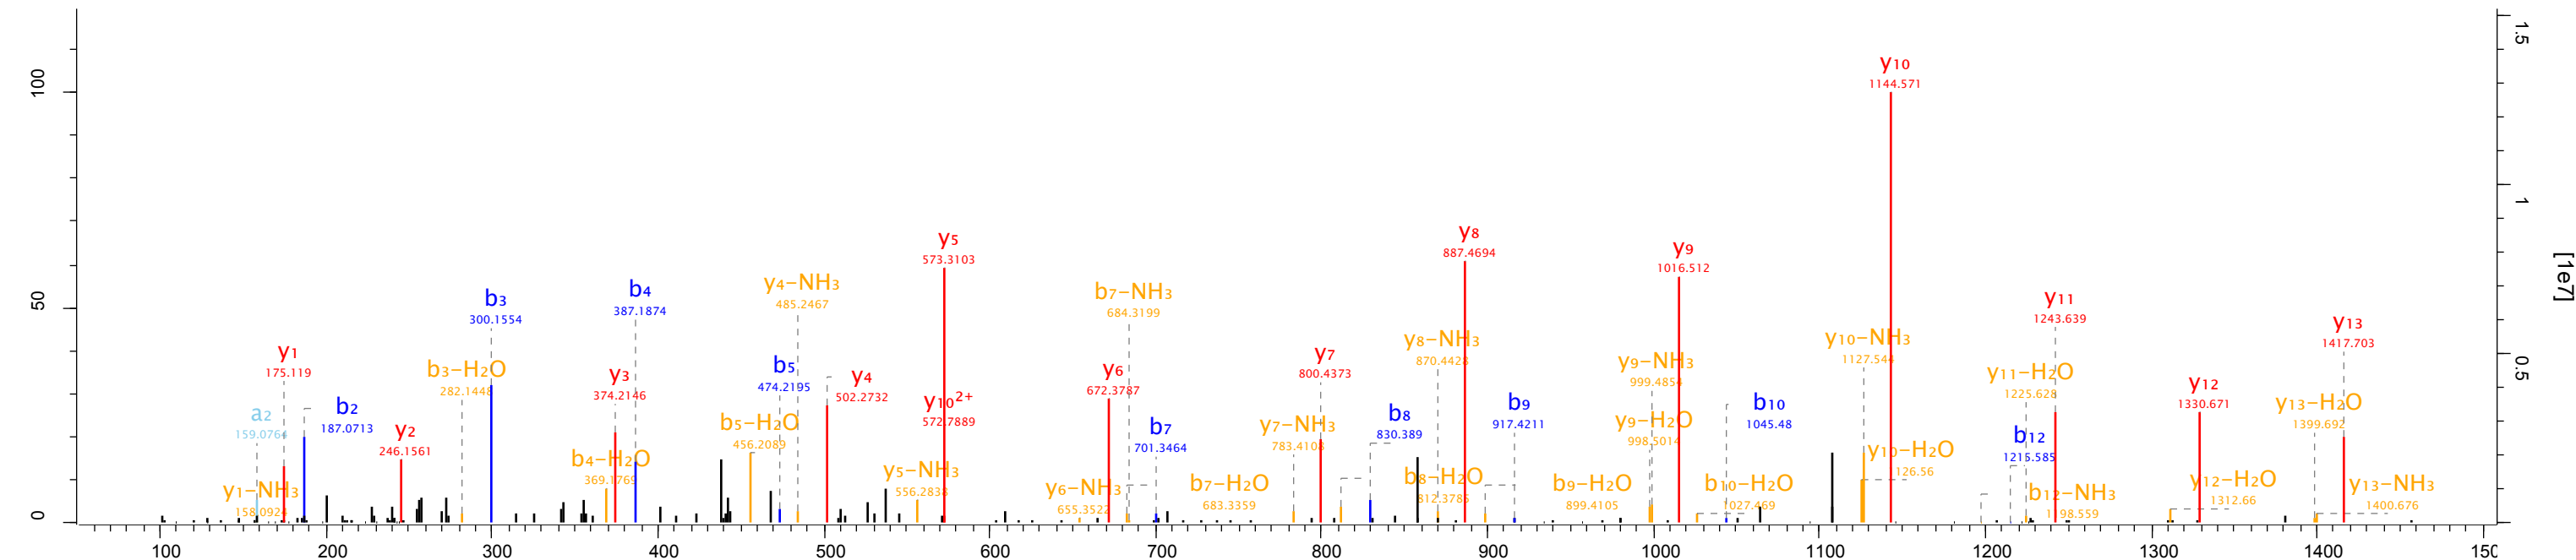

- D A L S S V Q E S Q V A Q Q A R -  
b2 b3 b4 b5 b7 b8 b9 b10 b12

Raw file  
20180707\_MaS\_A375SR\_ML\_proteome\_18

Scan 14513 Method FTMS; HCD Score 87.52 m/z 572.96 Gene names APOC3

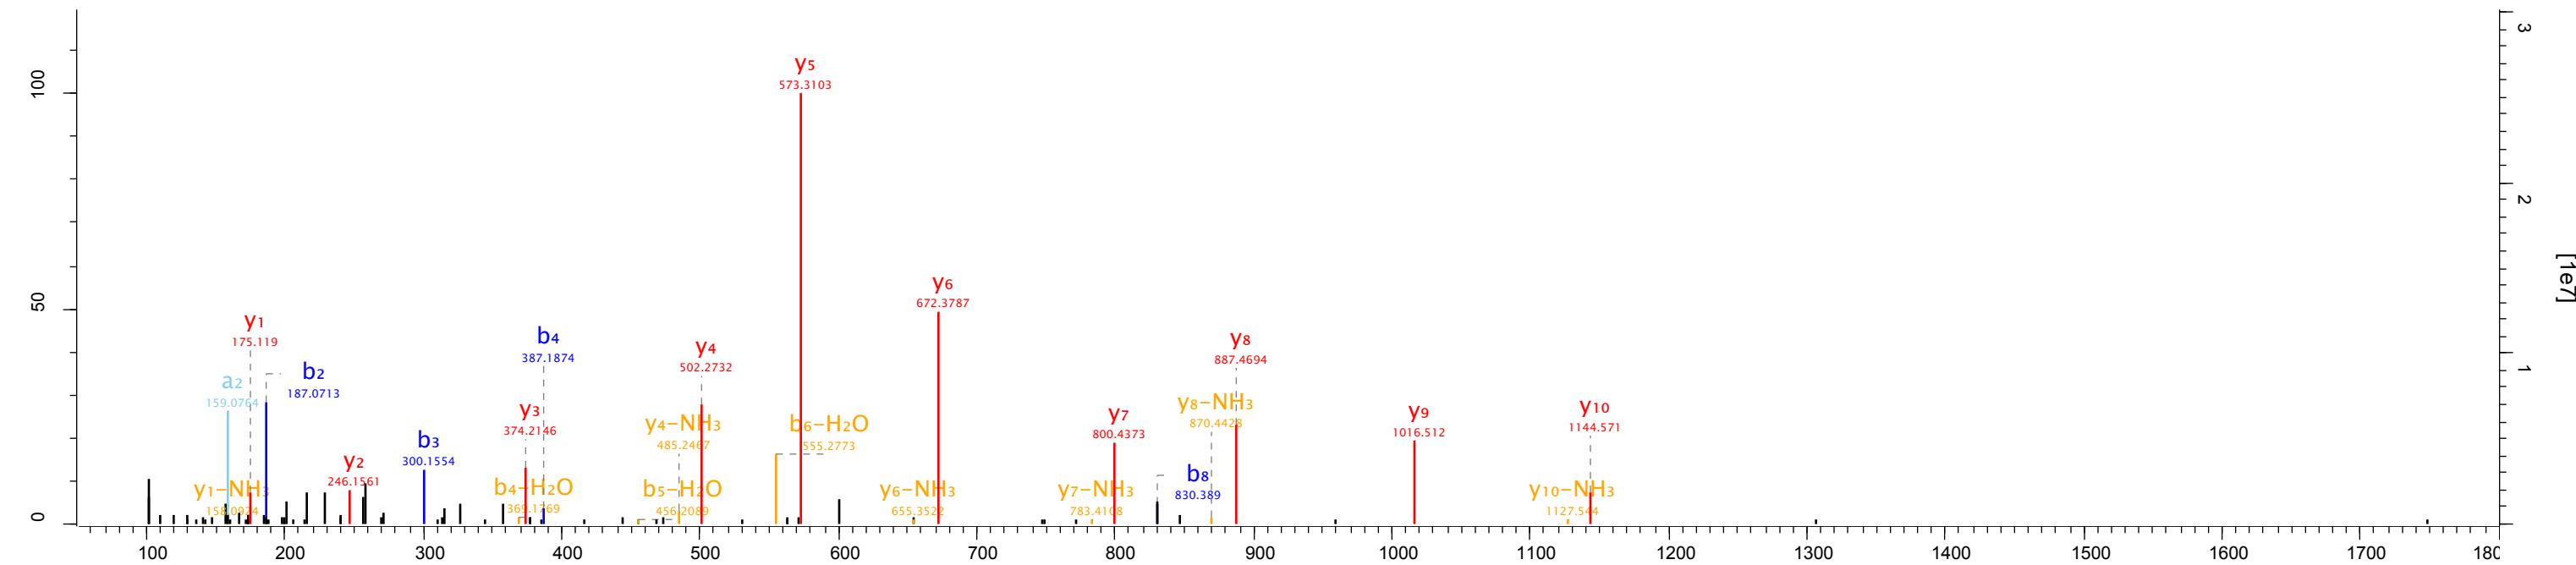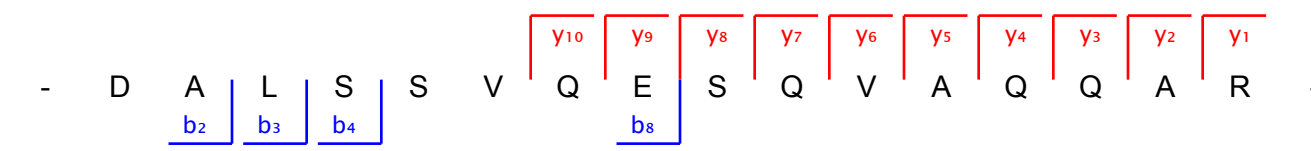

Raw file  
20180707\_MaS\_A375SR\_ML\_proteome\_18

Scan Method Score m/z Gene names  
14843 FTMS; HCD 46.07 490.56 PIGX

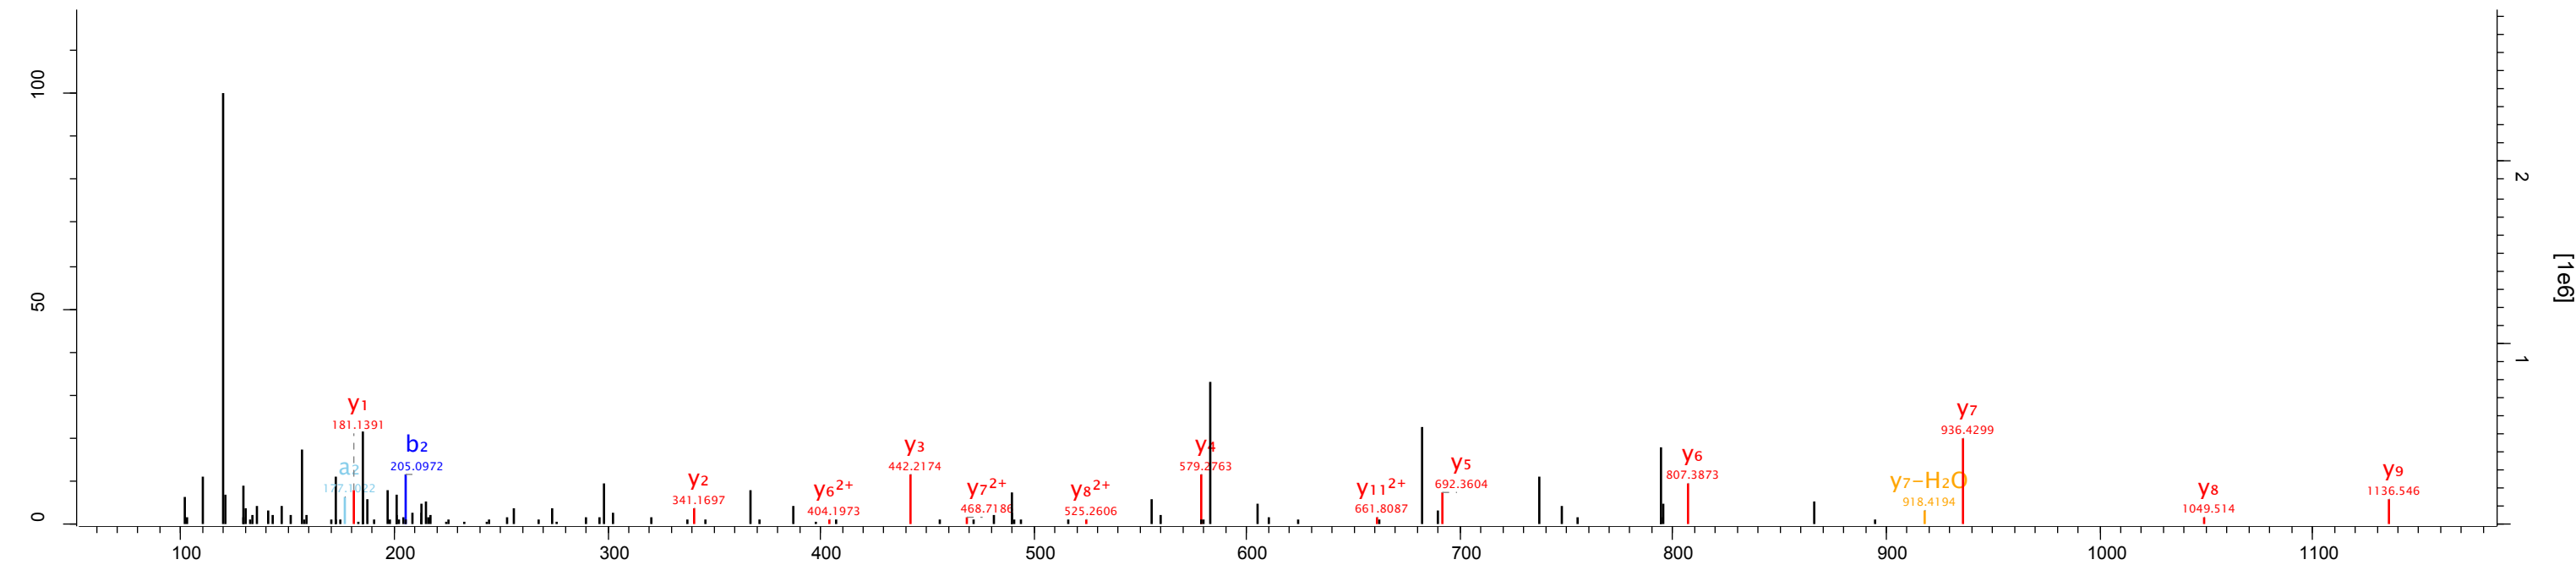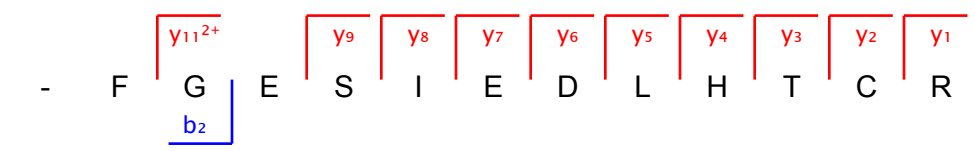

Raw file  
20180707\_MaS\_A375SR\_ML\_proteome\_18

Scan 22793 Method FTMS; HCD Score 107.98 m/z 893.46 Gene names BICC1

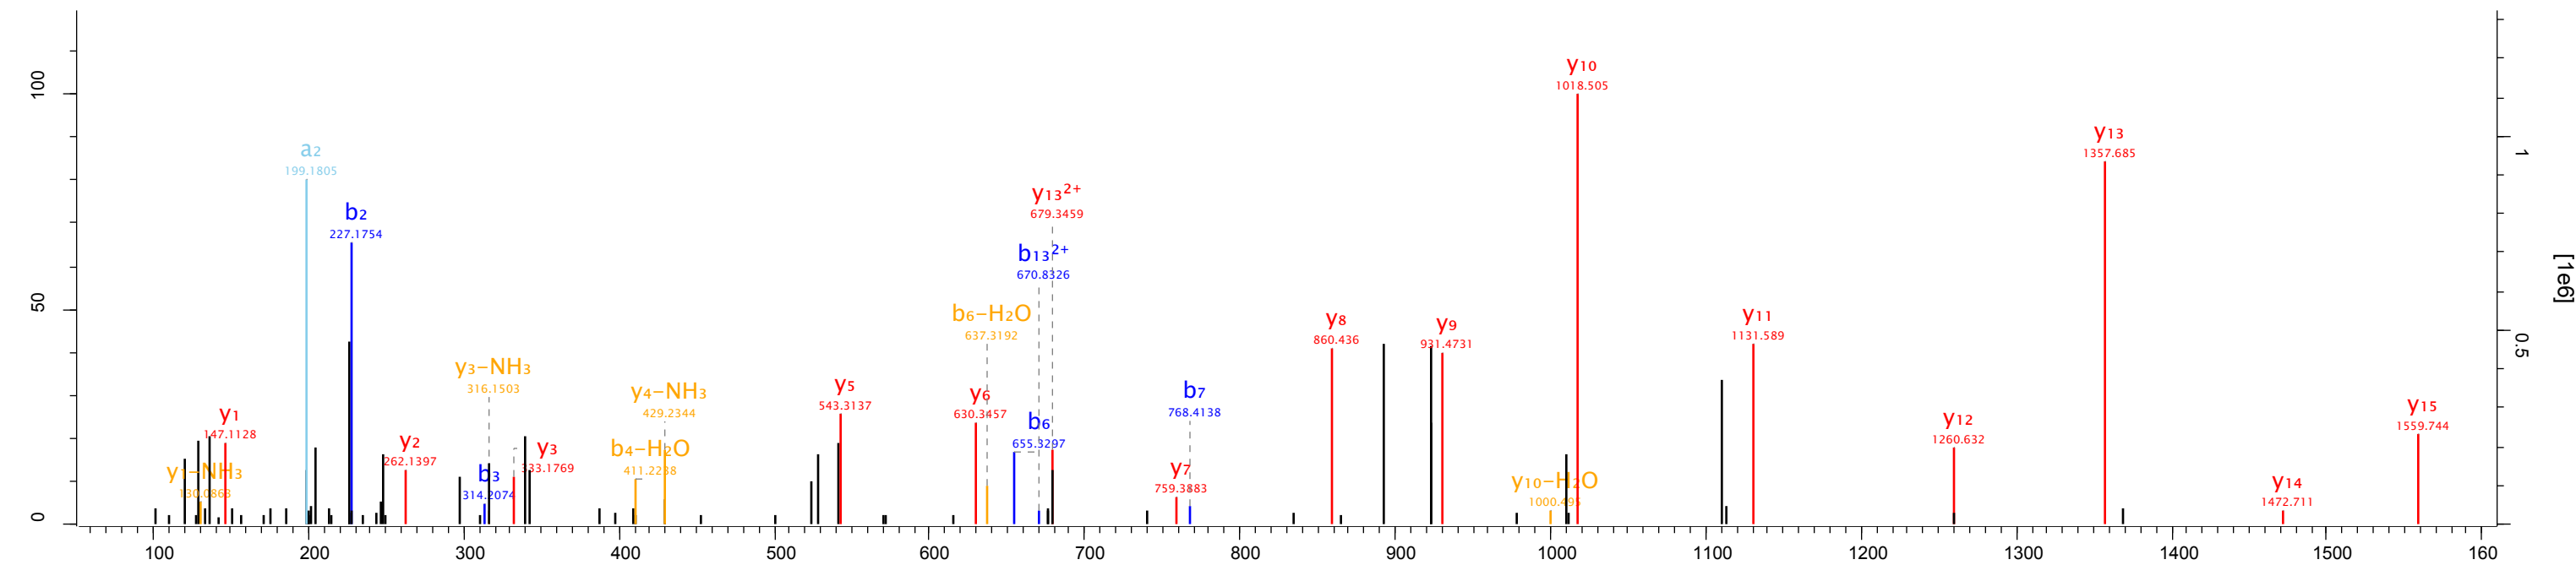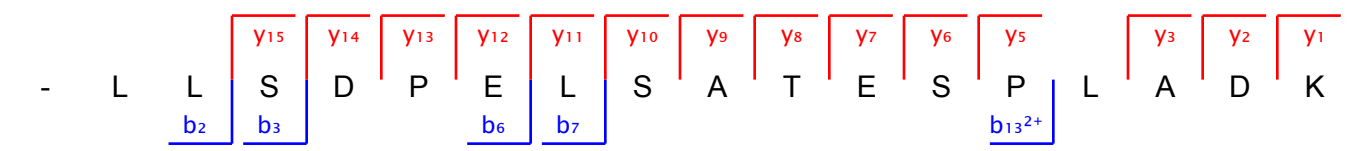

Raw file  
20180707\_MaS\_A375SR\_ML\_proteome\_18

Scan 23093 Method FTMS; HCD Score 40.28 m/z 546.96 Gene names PVRL1

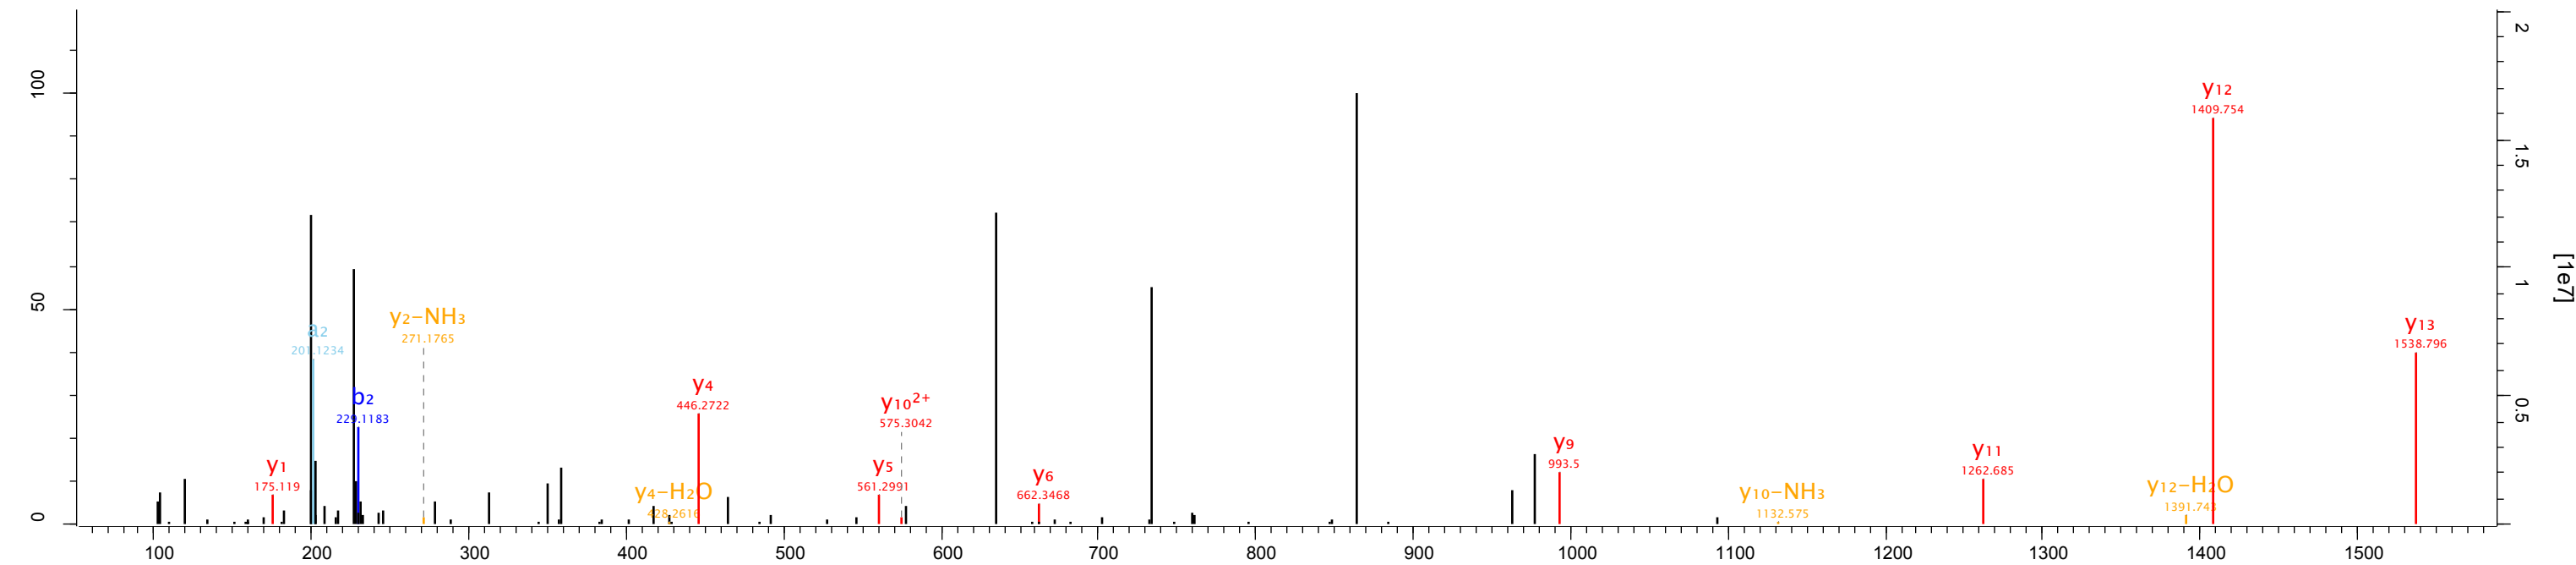

- V E F L R P S F T D G T I R -  
b2



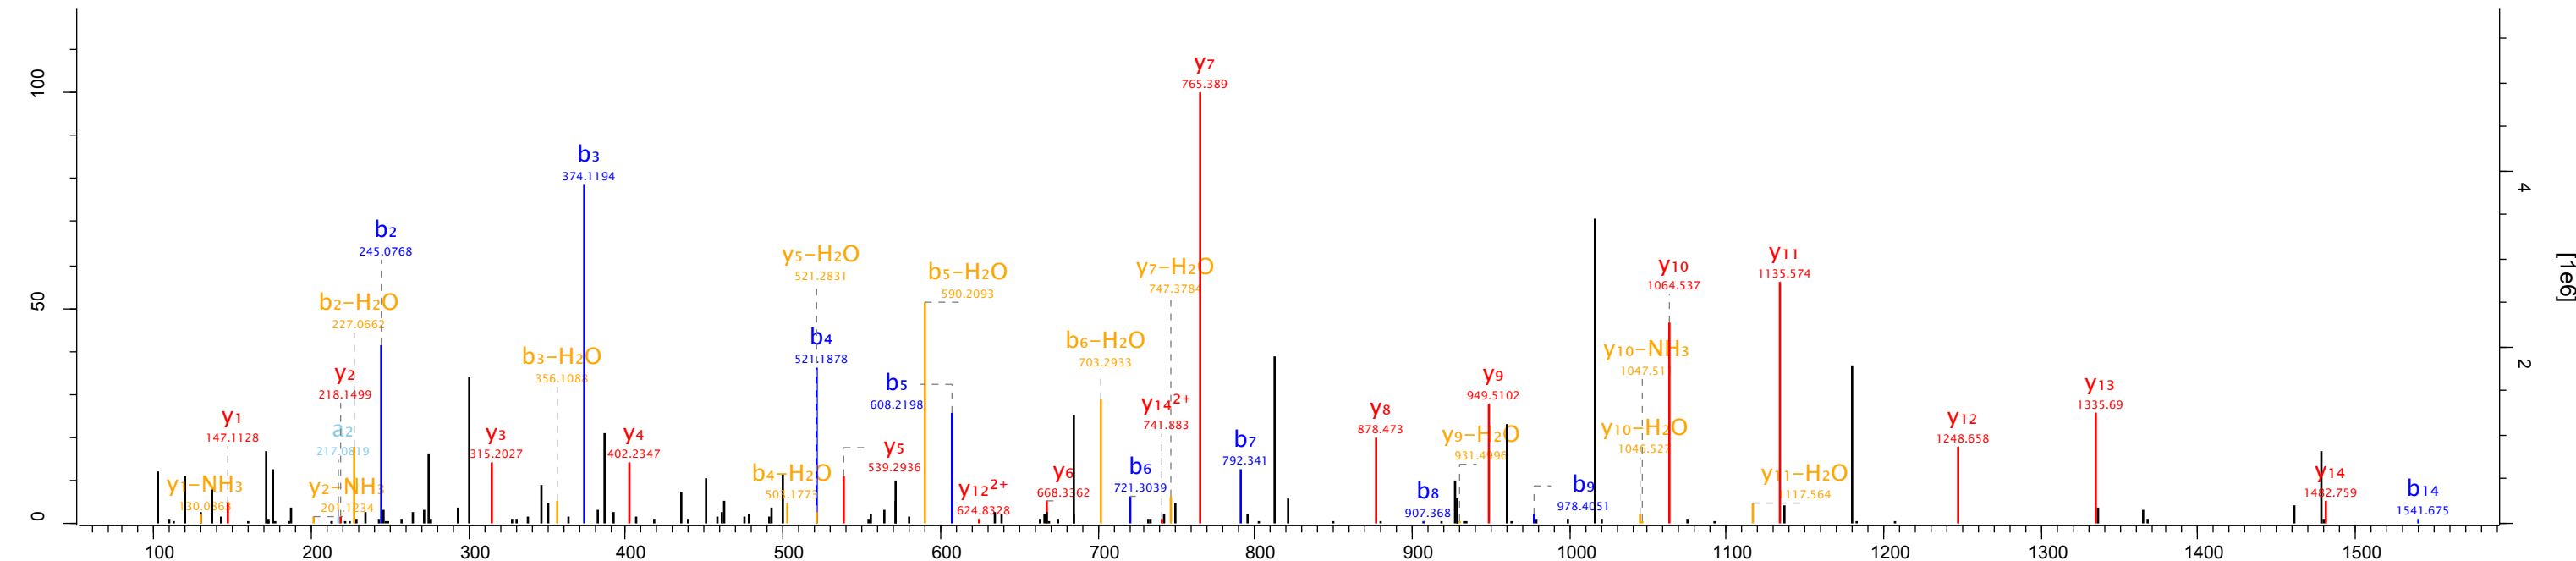

ac

- S D E F S L A D A L P E H S P A K -

b<sub>2</sub> b<sub>3</sub> b<sub>4</sub> b<sub>5</sub> b<sub>6</sub> b<sub>7</sub> b<sub>8</sub> b<sub>9</sub> b<sub>14</sub>

y<sub>14</sub> y<sub>13</sub> y<sub>12</sub> y<sub>11</sub> y<sub>10</sub> y<sub>9</sub> y<sub>8</sub> y<sub>7</sub> y<sub>6</sub> y<sub>5</sub> y<sub>4</sub> y<sub>3</sub> y<sub>2</sub> y<sub>1</sub>

Raw file  
20180707\_MaS\_A375SR\_ML\_proteome\_18

Scan 2683 Method FTMS; HCD Score 69.39 m/z 325.17

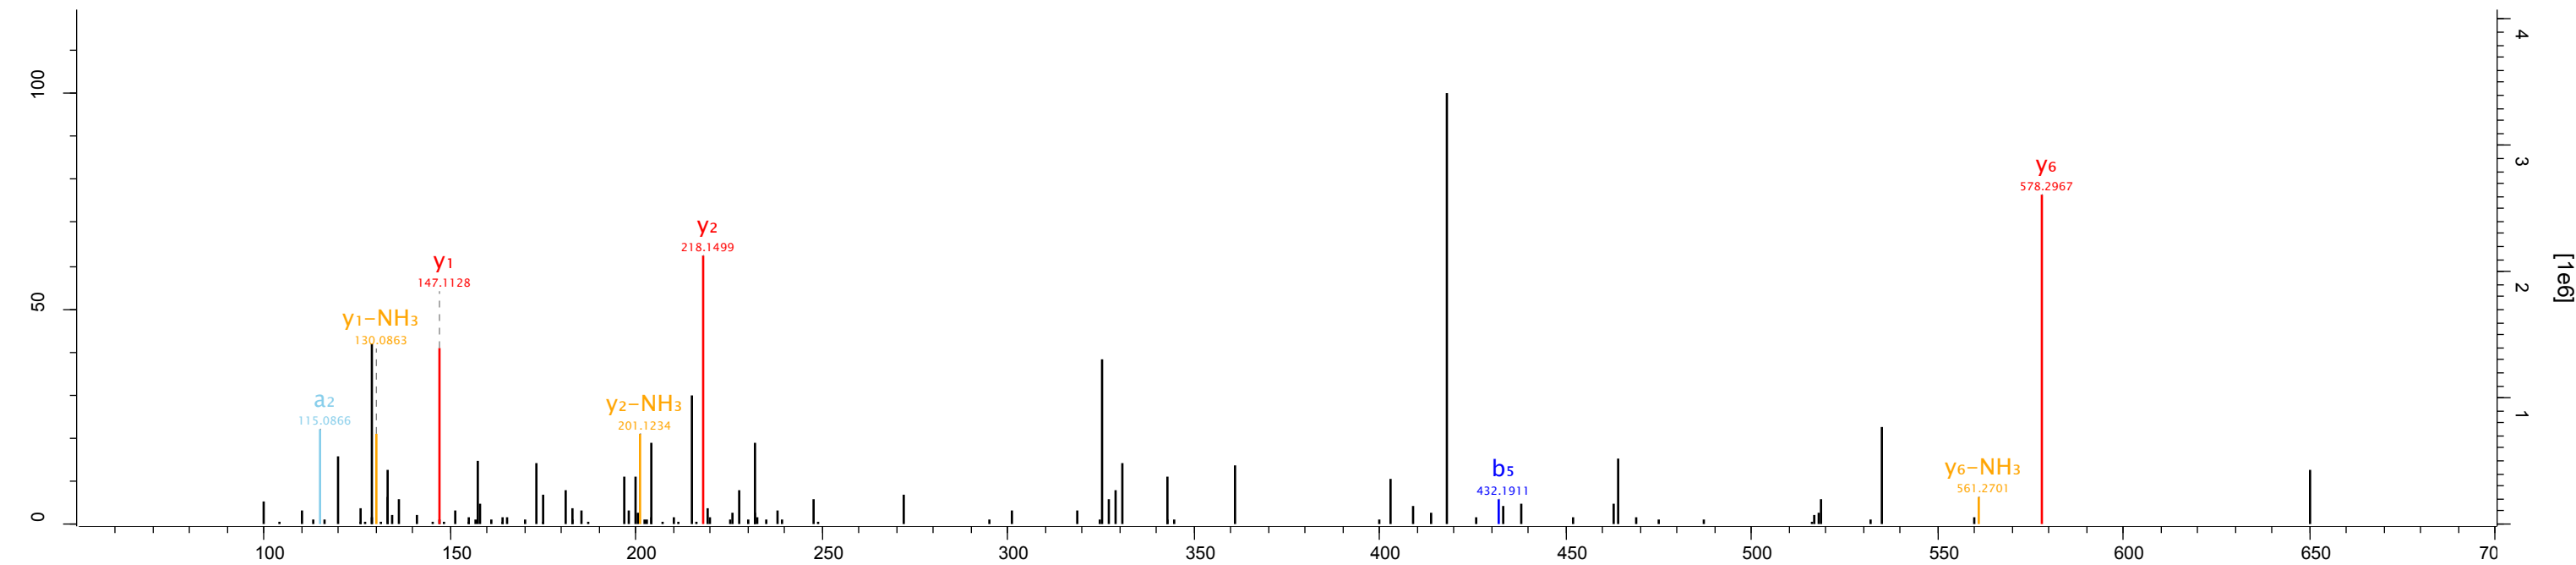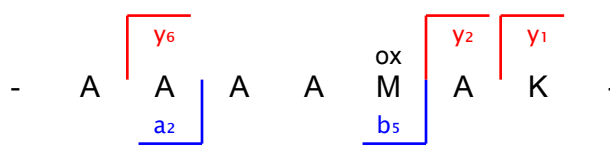

Raw file 20180707\_MaS\_A375SR\_ML\_proteome\_19 Scan 12813 Method FTMS; HCD Score 41.88 m/z 559.27

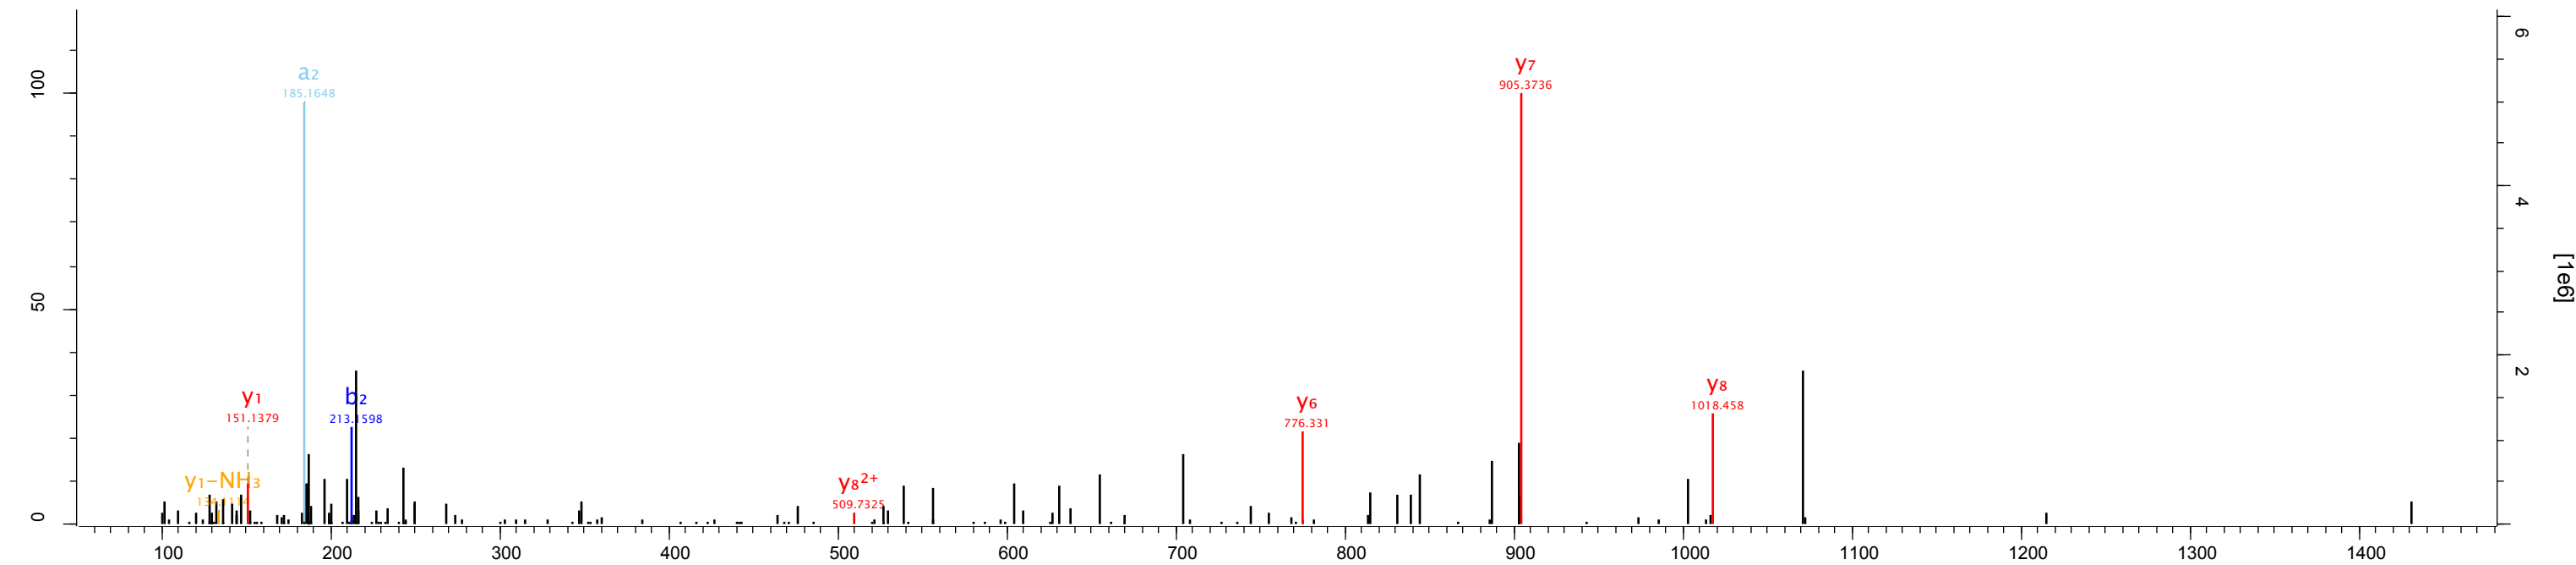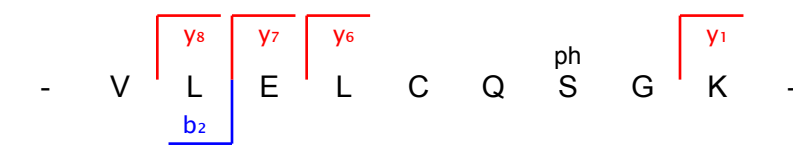

Raw file: 20180707\_MaS\_A375SR\_ML\_proteome\_19  
 Scan: 21313 Method: FTMS; HCD Score: 79.49 m/z: 588.85 Gene names: KATNAL2

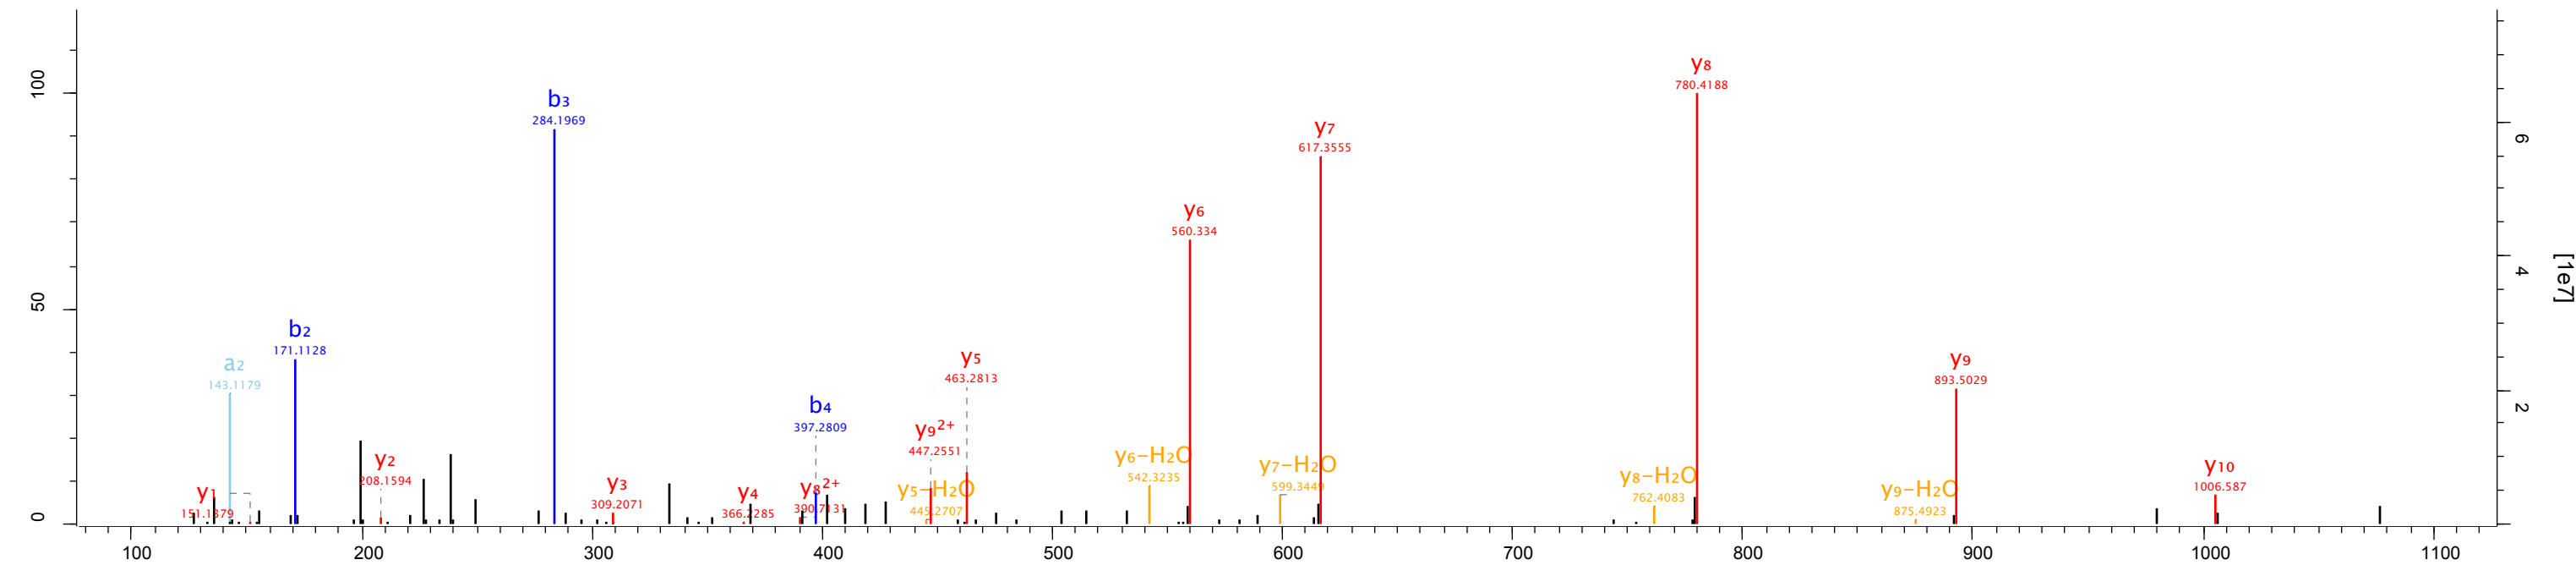

Raw file  
20180707\_MaS\_A375SR\_ML\_proteome\_19

Scan 26333 Method FTMS; HCD Score 166.92 m/z 928.94 Gene names MAPK11P1L

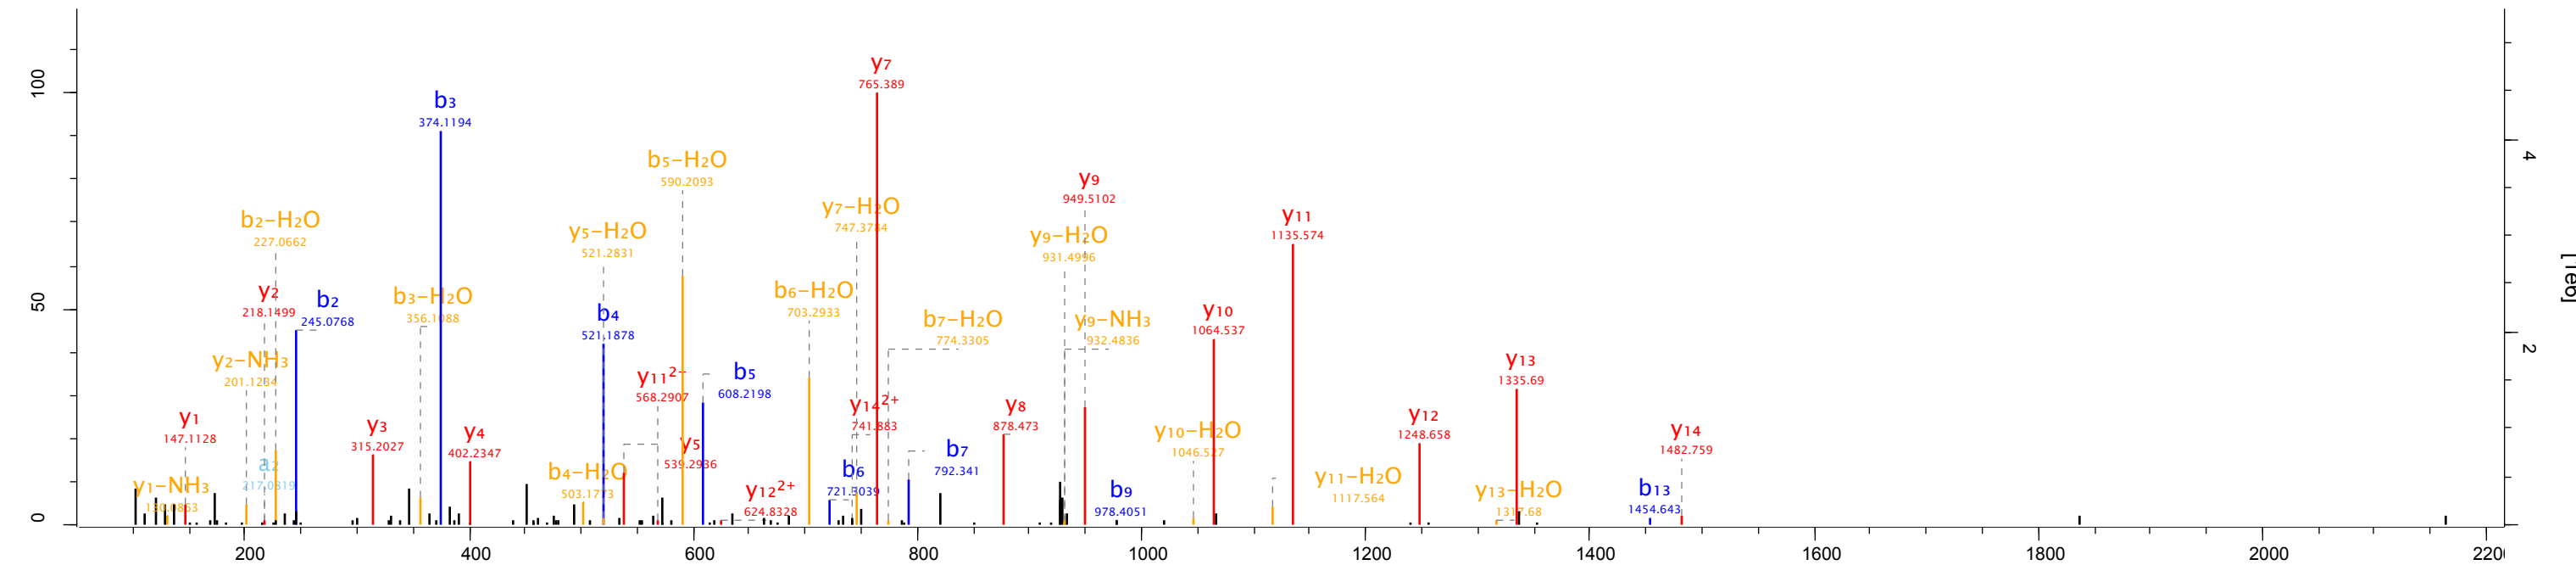

ac  
- S D E F S L A D A L P E H S P A K -  
b2 b3 b4 b5 b6 b7 b9 b13

Raw file 20180707\_MaS\_A375SR\_ML\_proteome\_2\_01 Scan 13783 Method FTMS; HCD Score 51.45 m/z 661.34

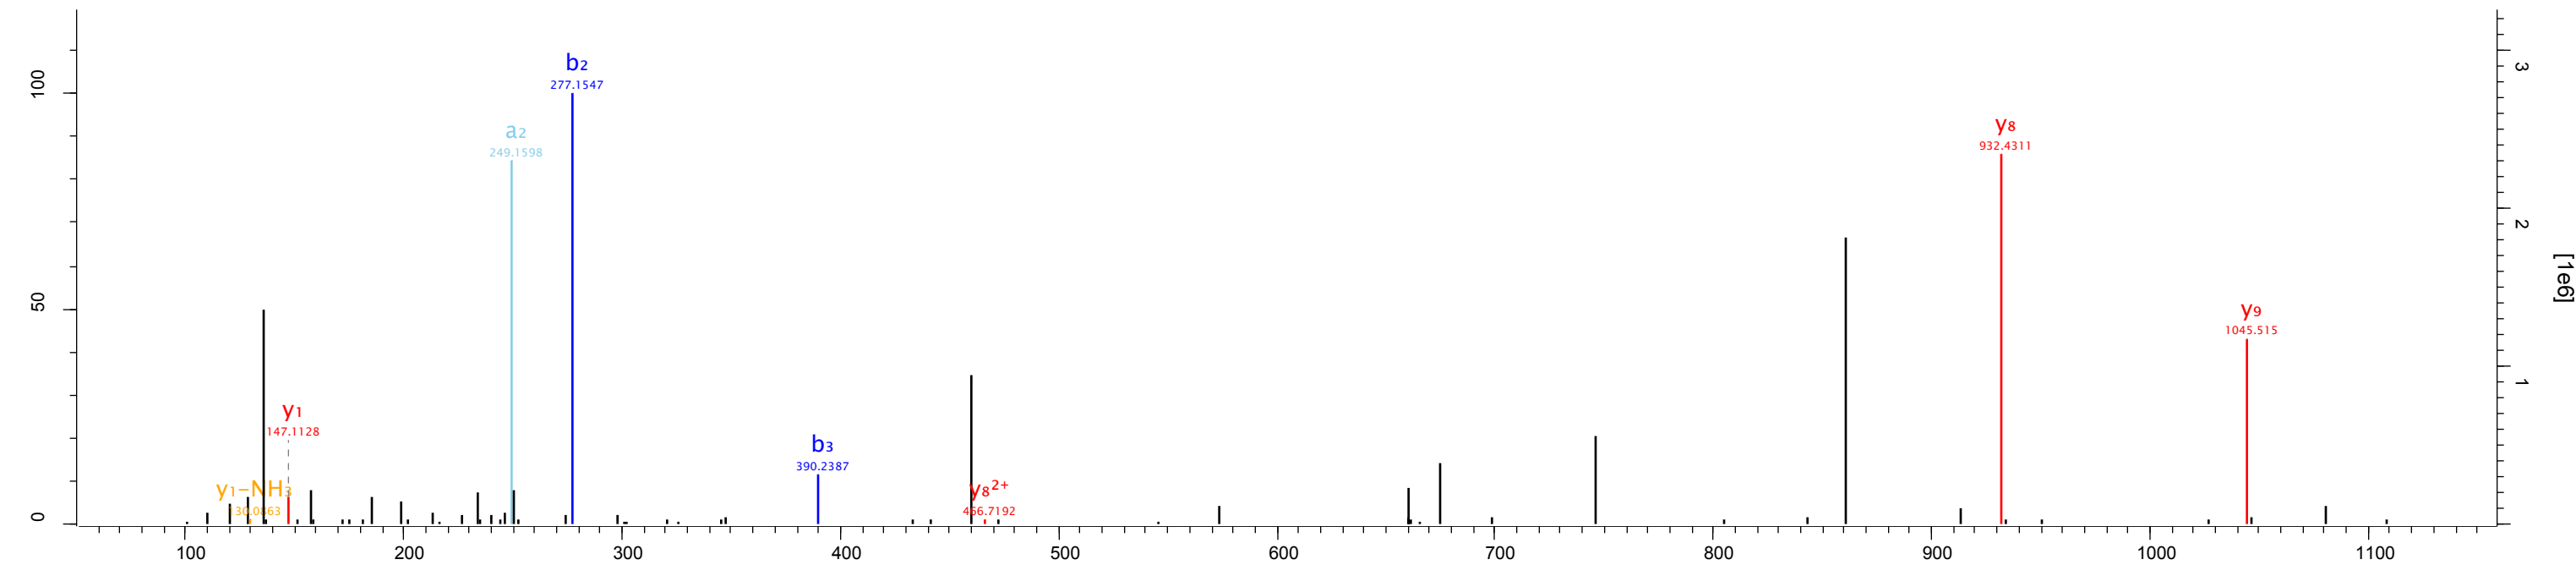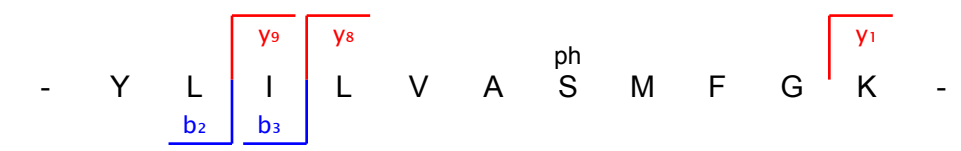

Raw file  
20180707\_MaS\_A375SR\_ML\_proteome\_2\_02

Scan 27003 Method FTMS; HCD Score 121.77 m/z 761.7 Gene names CNIH4

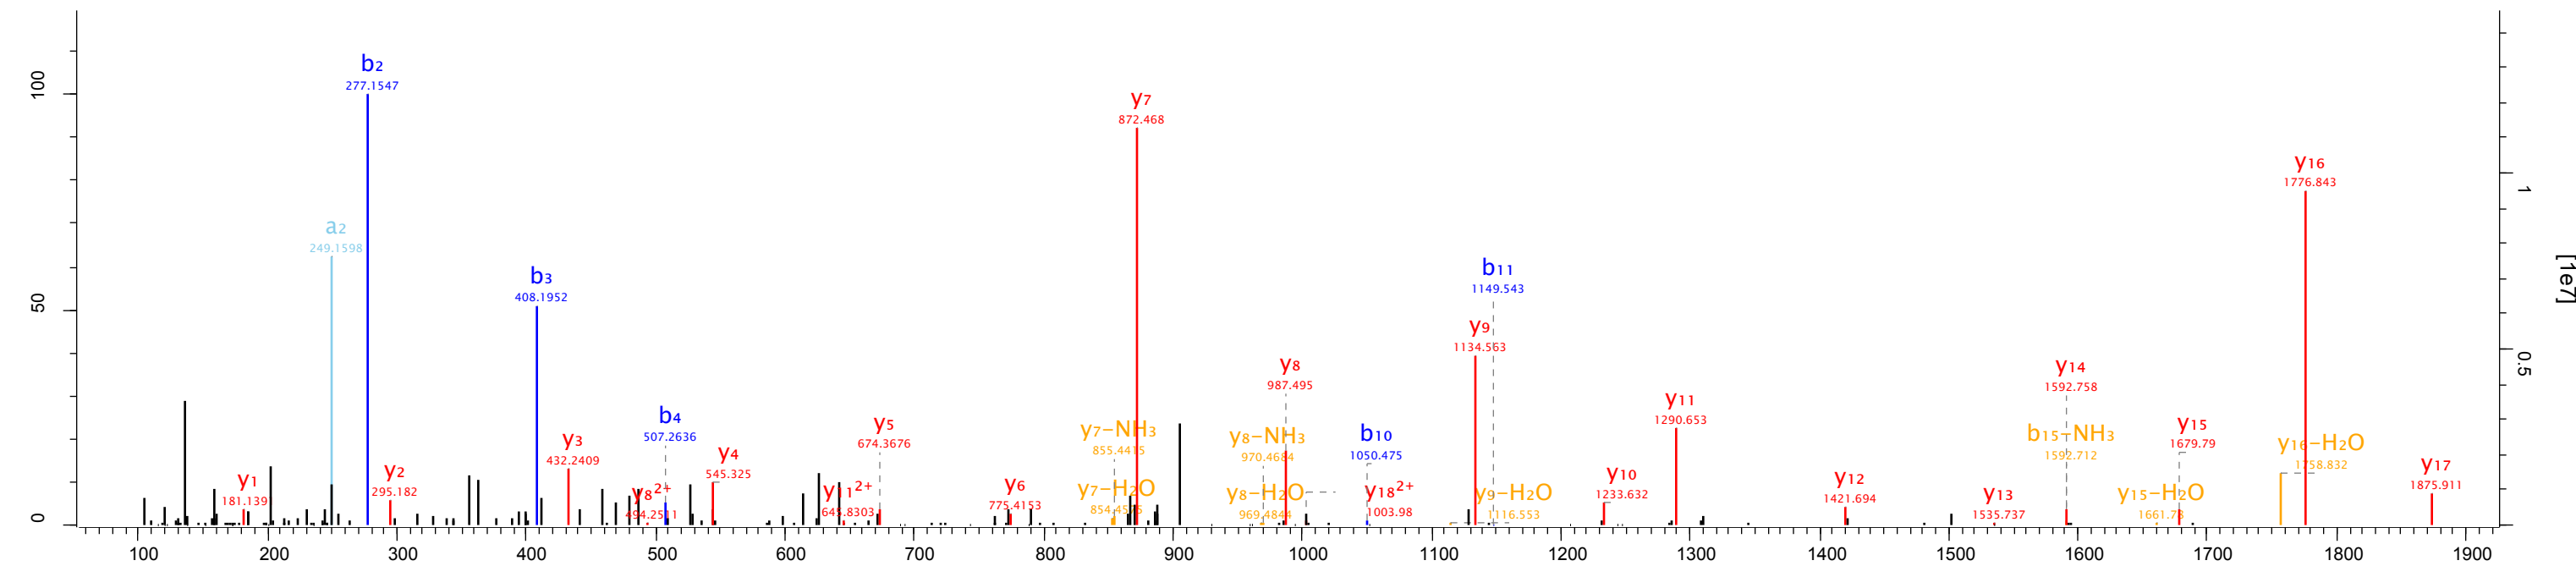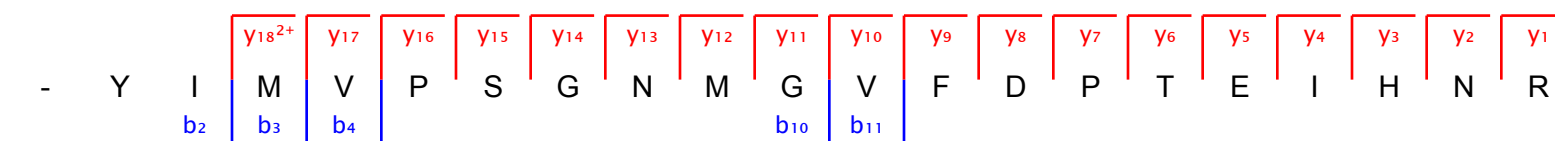

Raw file: 20180707\_MaS\_A375SR\_ML\_proteome\_2\_03  
 Scan: 24953    Method: FTMS; HCD    Score: 76.36    m/z: 720.35    Gene names: ZBTB45;ZBTB20

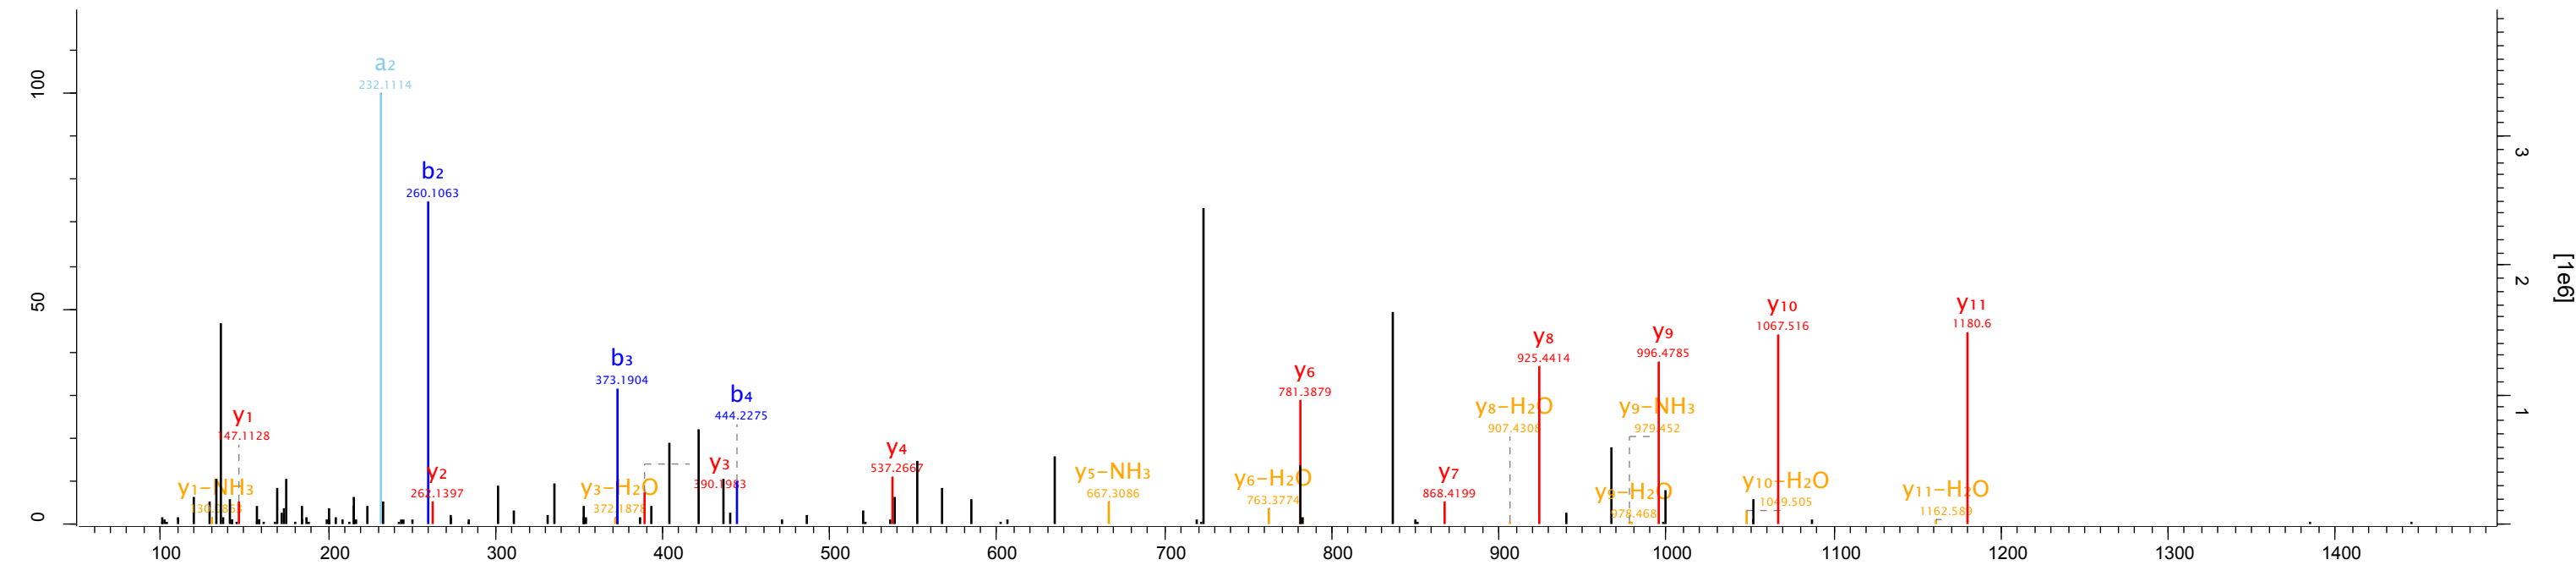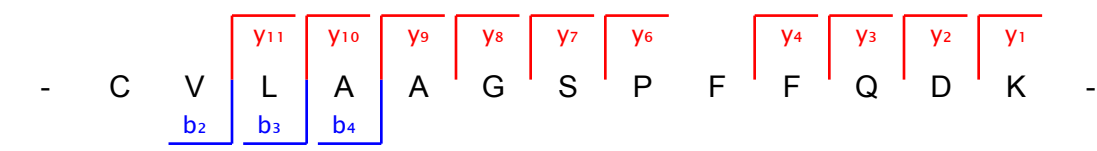



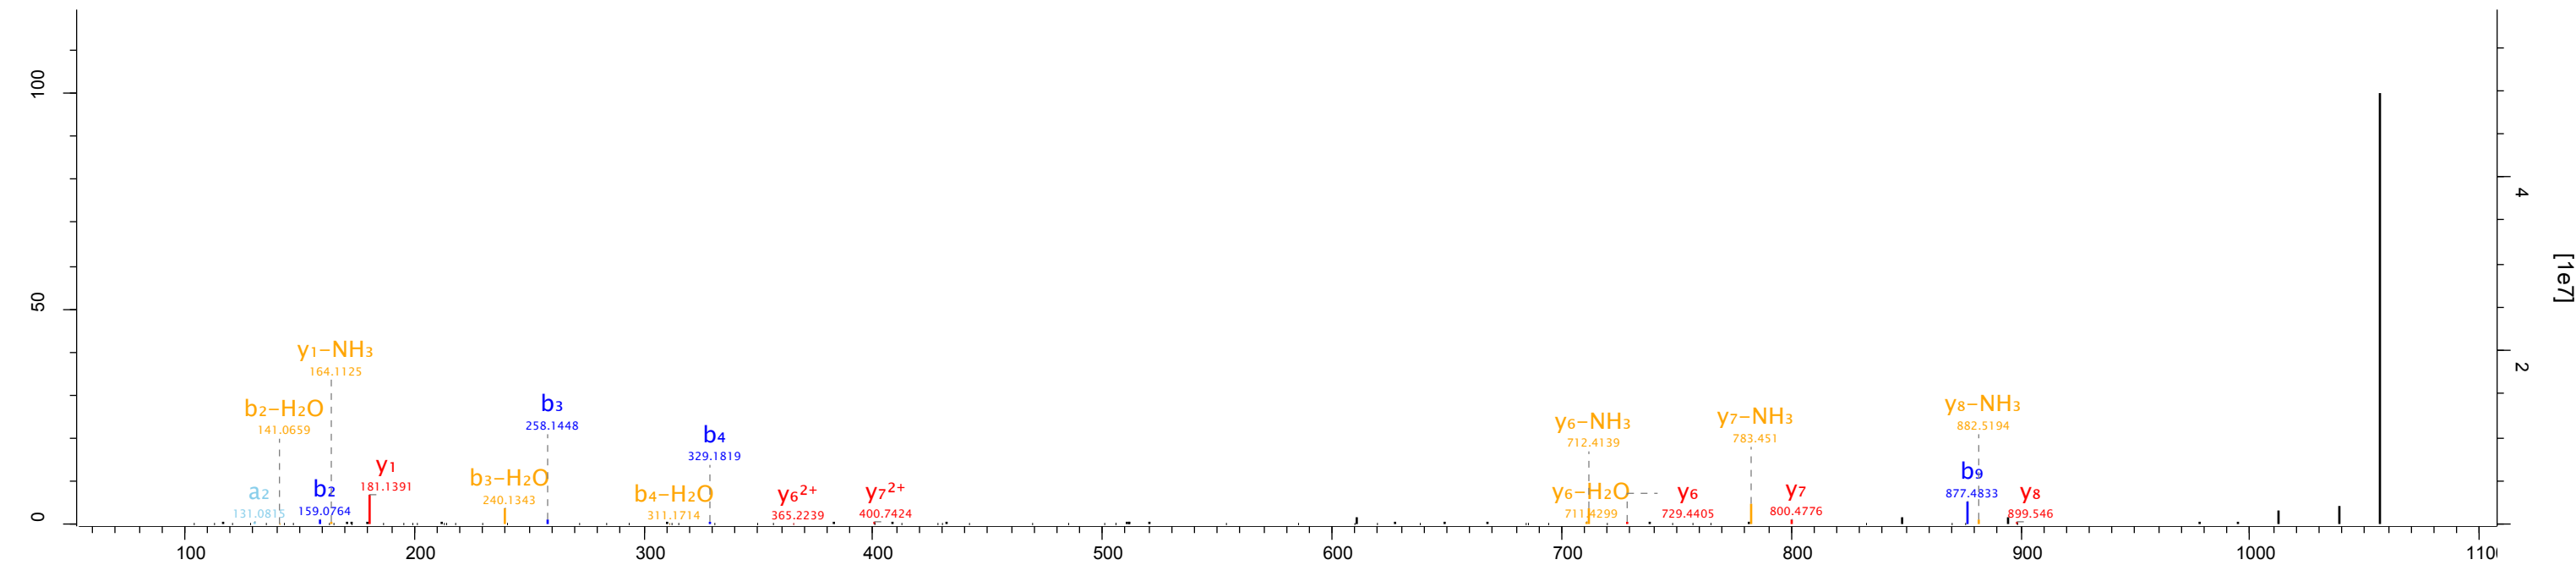

- A S V A L S G E R R -

Fragmentation sites are indicated by boxes and labels:

- Red boxes above the sequence: y<sub>8</sub> (V), y<sub>7</sub> (A), y<sub>6</sub> (L), y<sub>1</sub> (R).
- Blue boxes below the sequence: b<sub>2</sub> (S), b<sub>3</sub> (V), b<sub>4</sub> (A), b<sub>9</sub> (R).

Raw file: 20180707\_MaS\_A375SR\_ML\_proteome\_2\_03  
 Scan: 3363 Method: FTMS; HCD Score: 75.39 m/z: 568.24 Gene names: MAP3K19

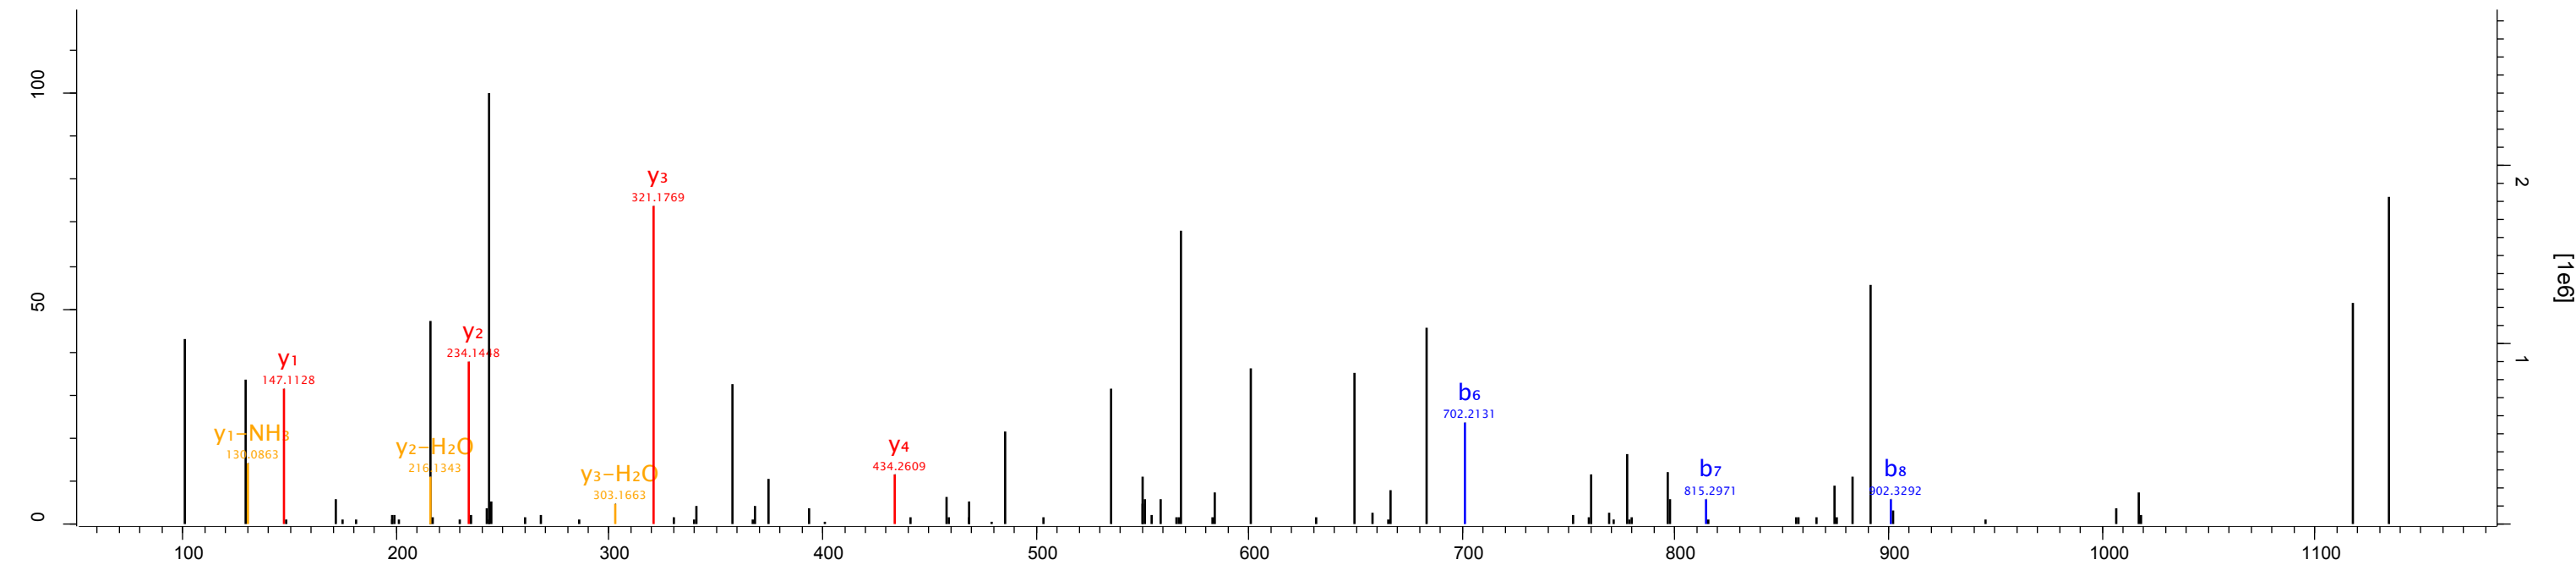

Raw file 20180707\_MaS\_A375SR\_ML\_proteome\_2\_04 Scan 27283 Method FTMS; HCD Score 115.71 m/z 531.3 Gene names CYB561

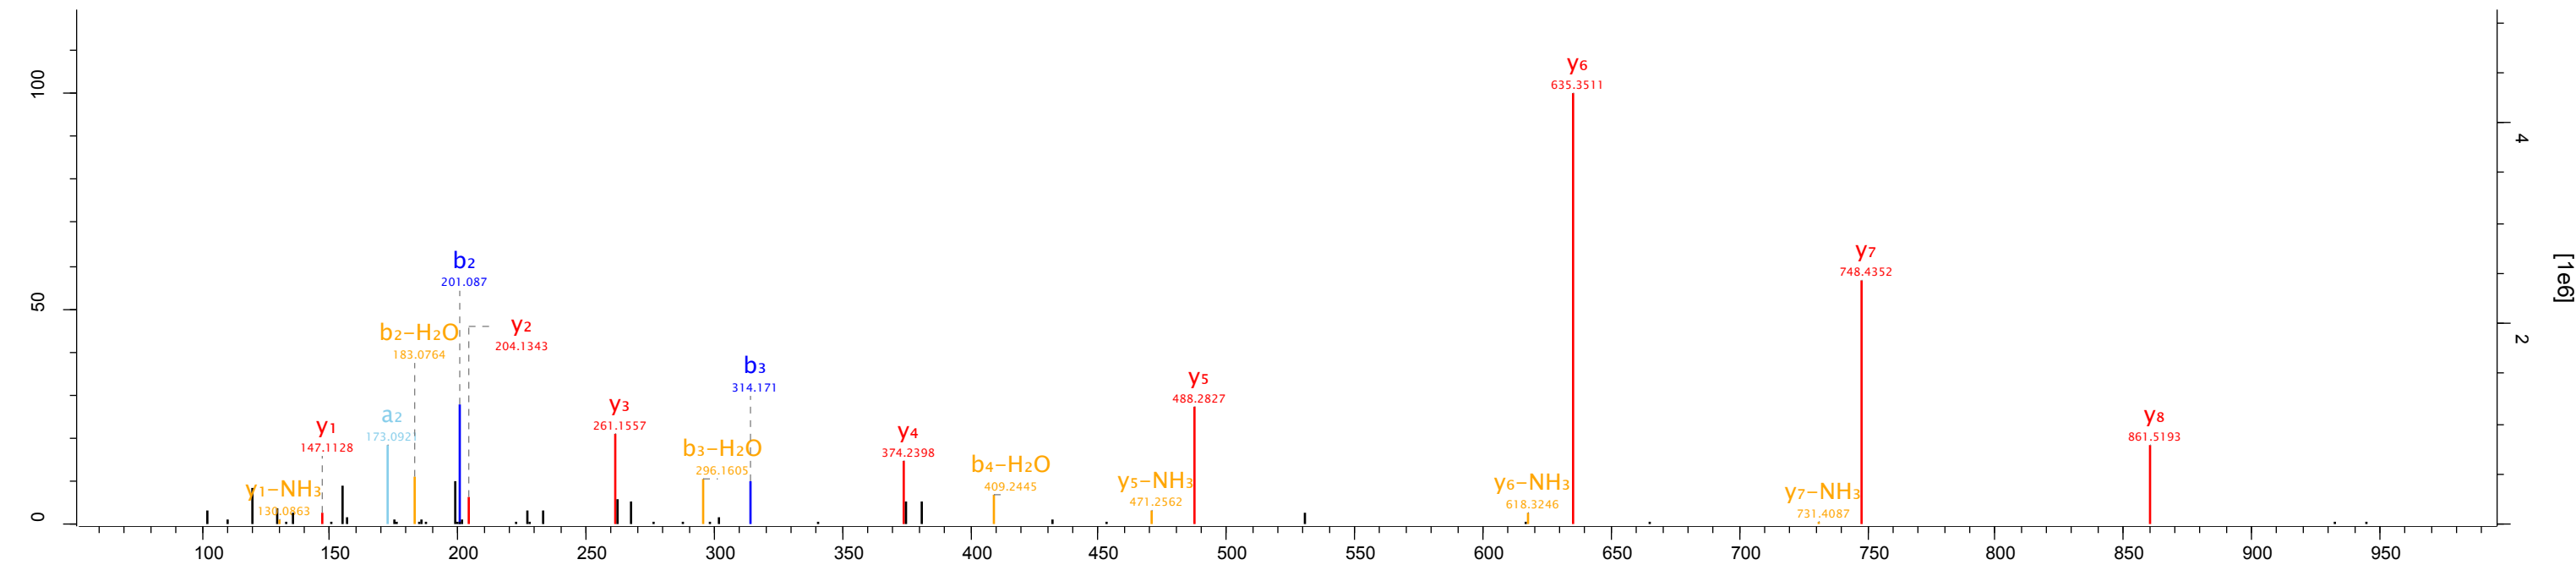

Raw file: 20180707\_MaS\_A375SR\_ML\_proteome\_2\_05  
 Scan: 18073 Method: FTMS; HCD Score: 78.85 m/z: 641.65 Gene names: ATP6V0C

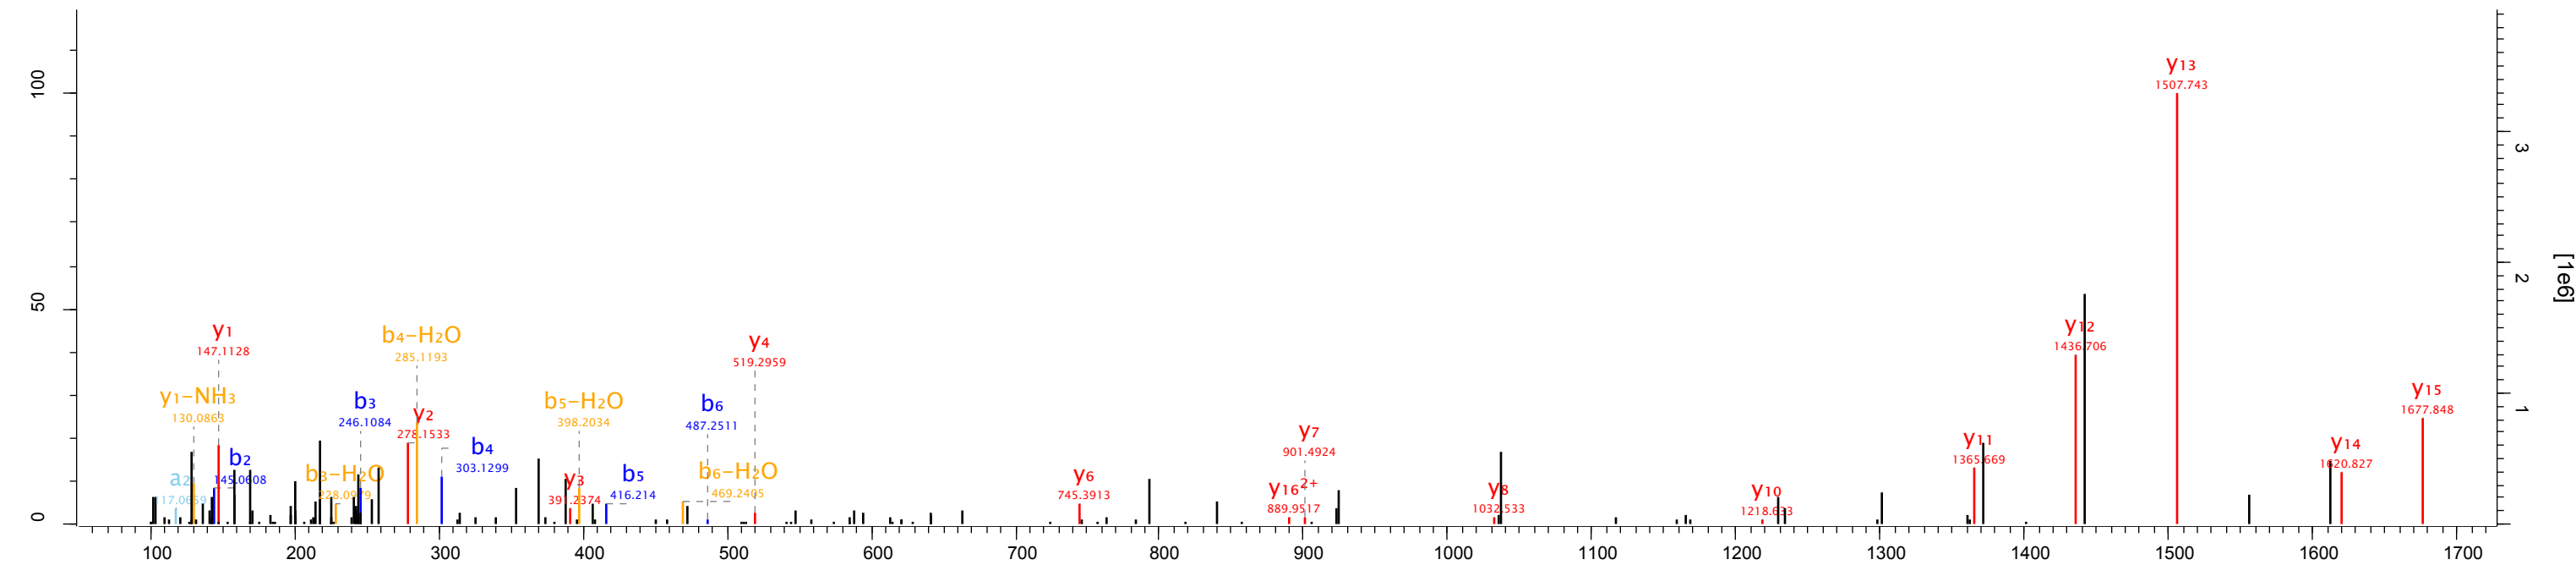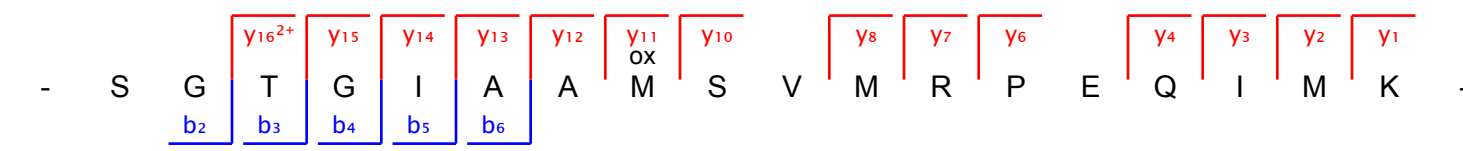

Raw file  
20180707\_MaS\_A375SR\_ML\_proteome\_2\_05

Scan 20643 Method FTMS; HCD Score 42.64 m/z 818.72 Gene names TPRA1

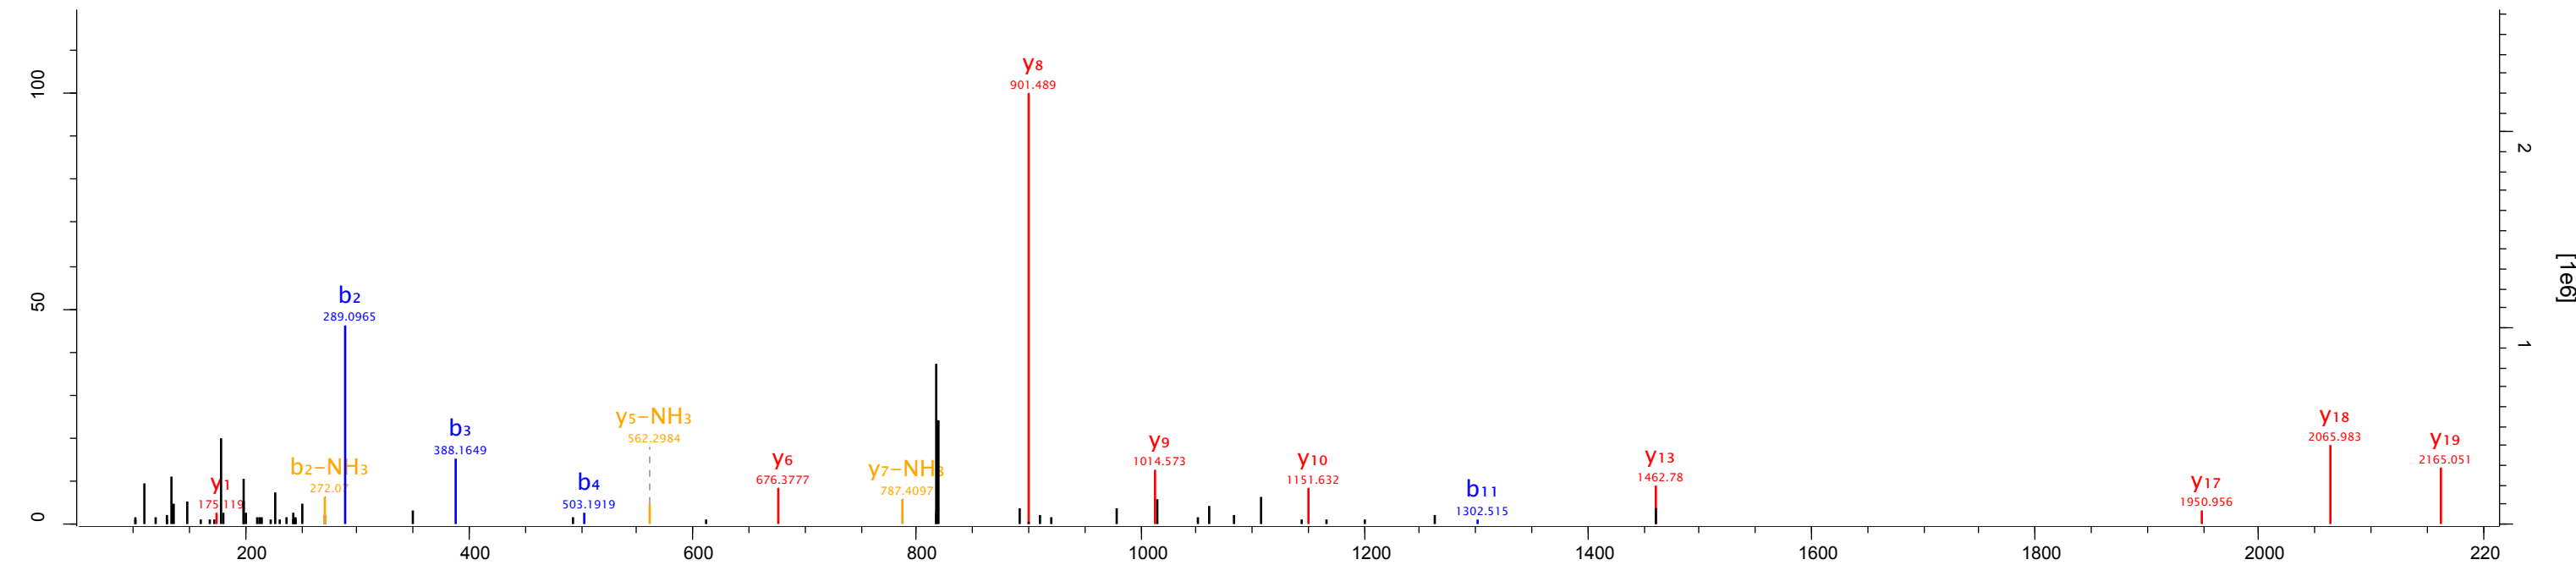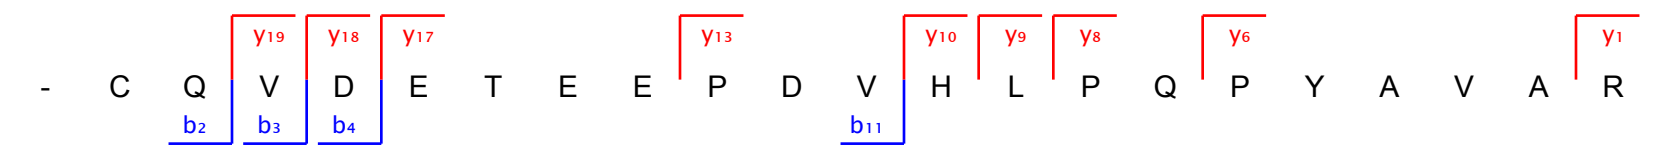

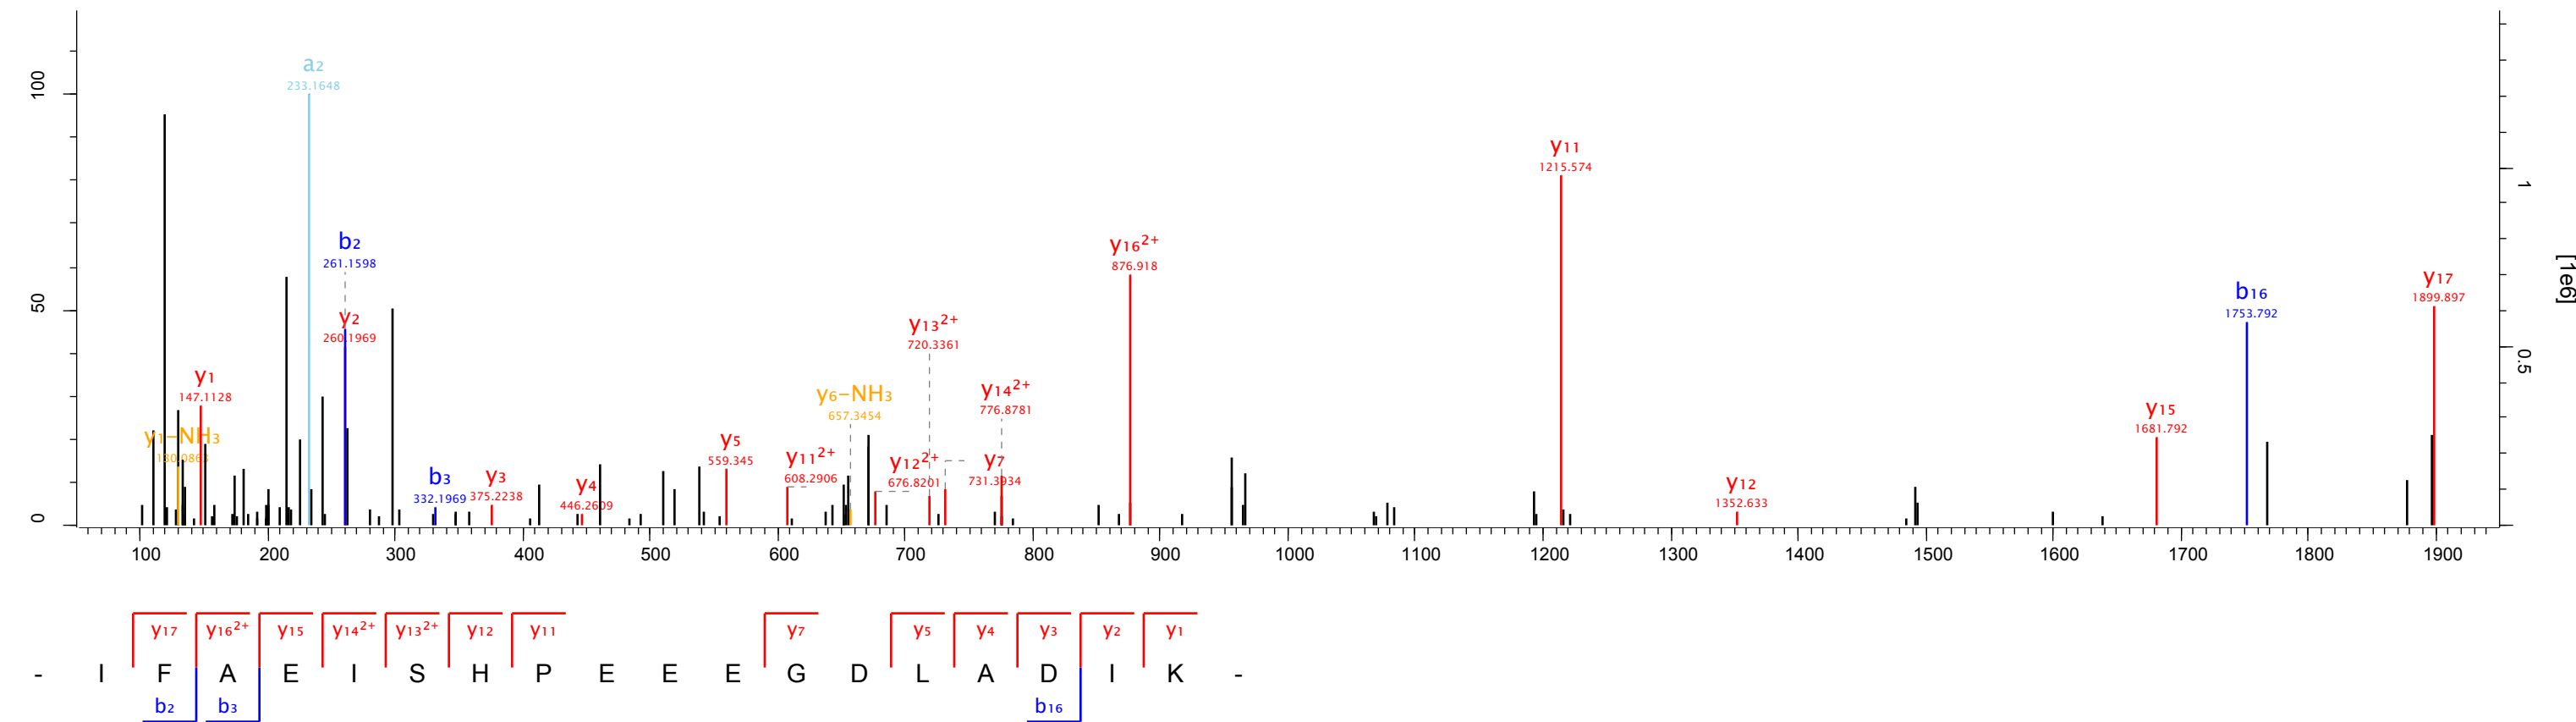

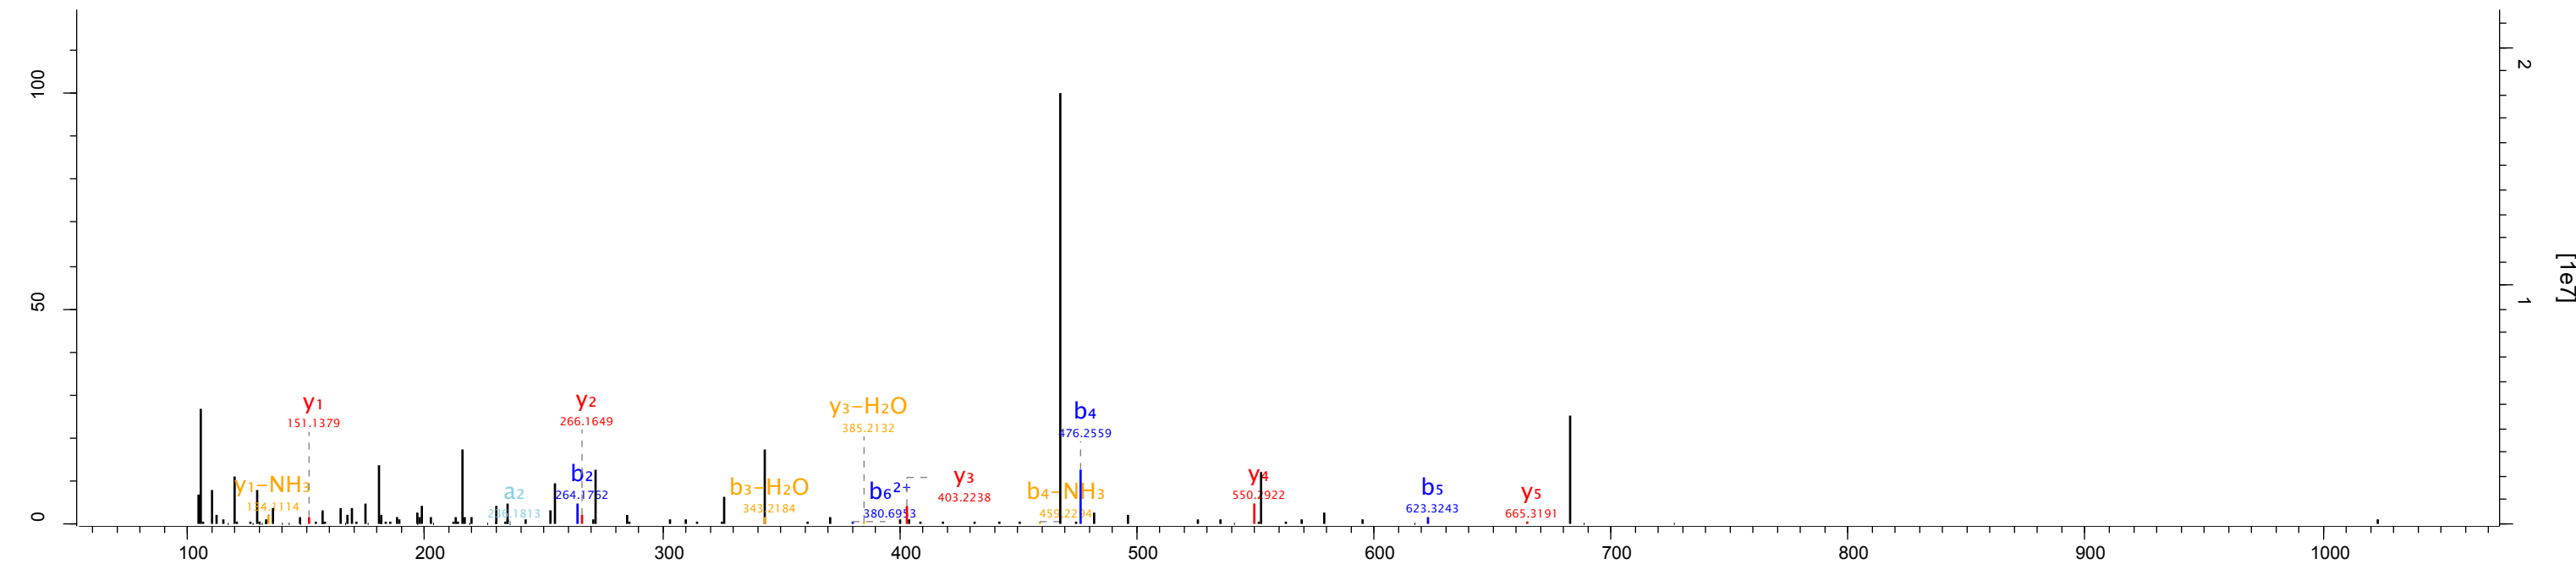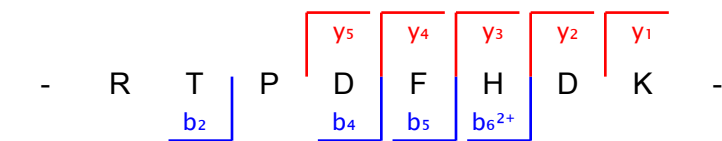

Raw file  
20180707\_MaS\_A375SR\_ML\_proteome\_2\_07

Scan 27083 Method FTMS; HCD Score 179.27 m/z 854.41 Gene names SSR3

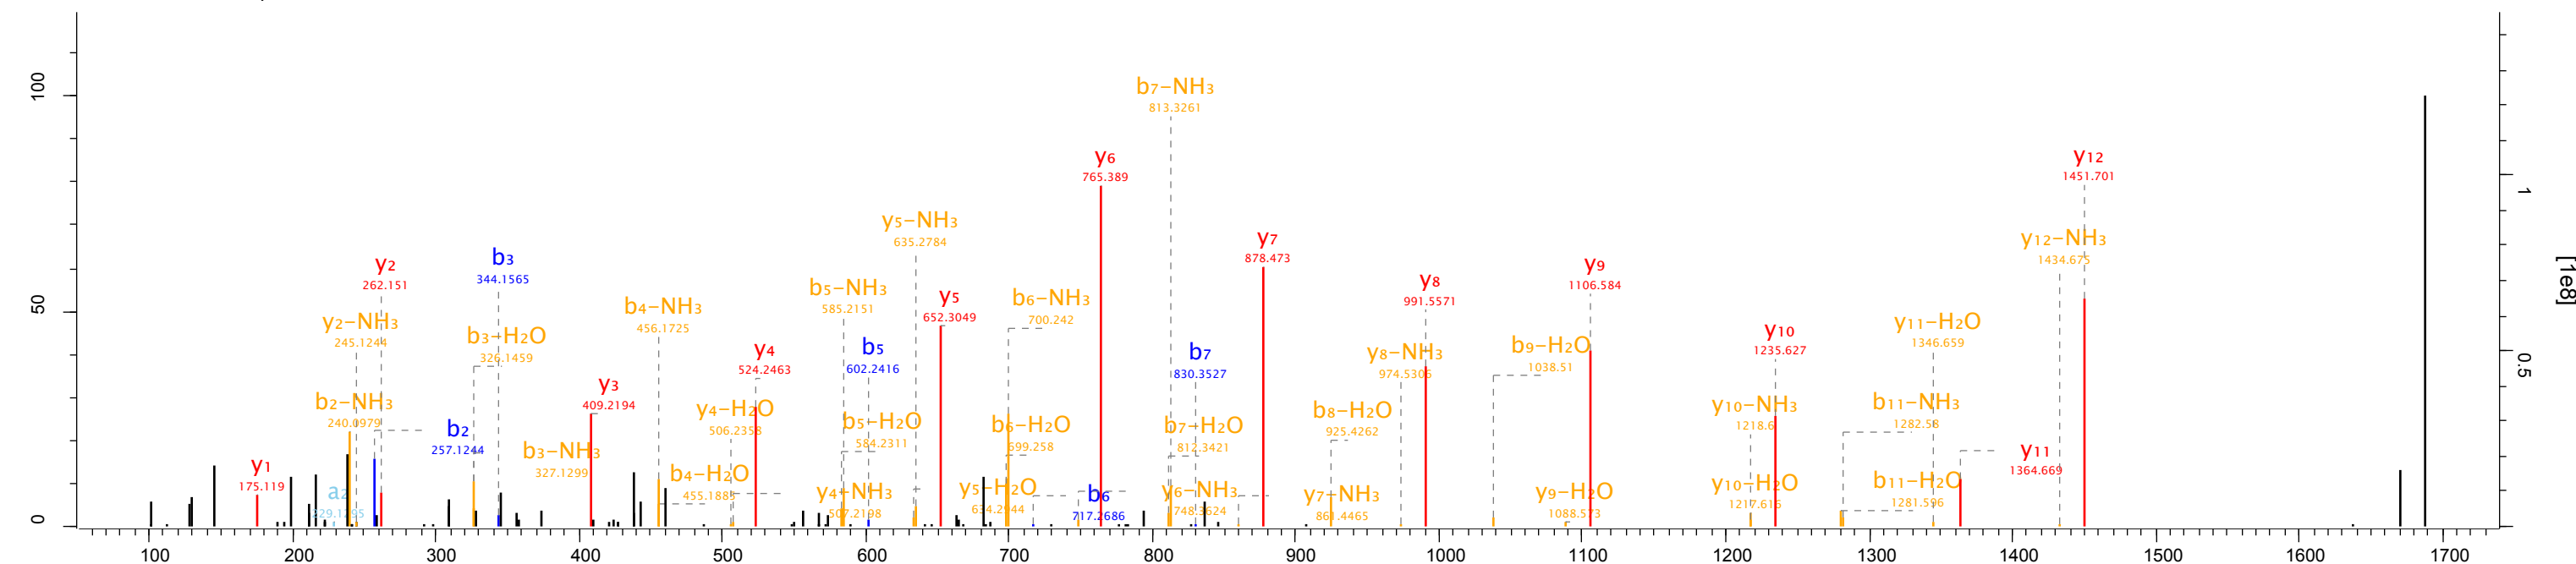

- Q Q S E E D L L L Q D F S R -

Peptide sequence: Q Q S E E D L L L Q D F S R

Fragmentation sites (b and y ions) are indicated by brackets below the sequence:

- b2: Q Q
- b3: Q S
- b5: E E
- b6: E D
- b7: E D L



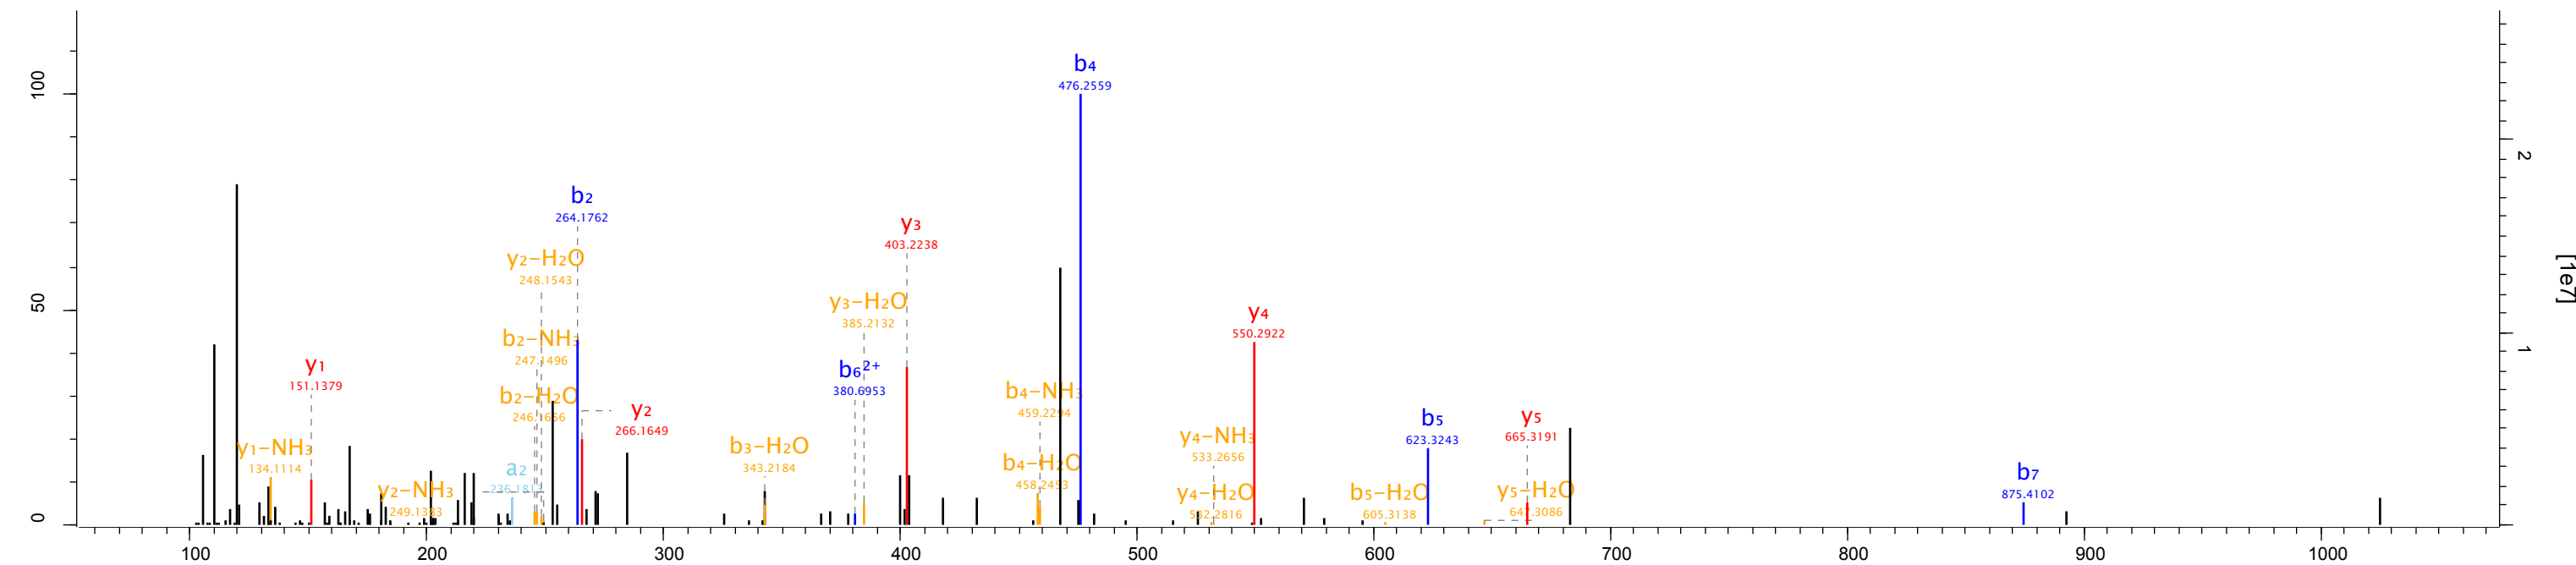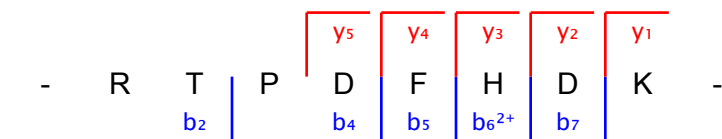

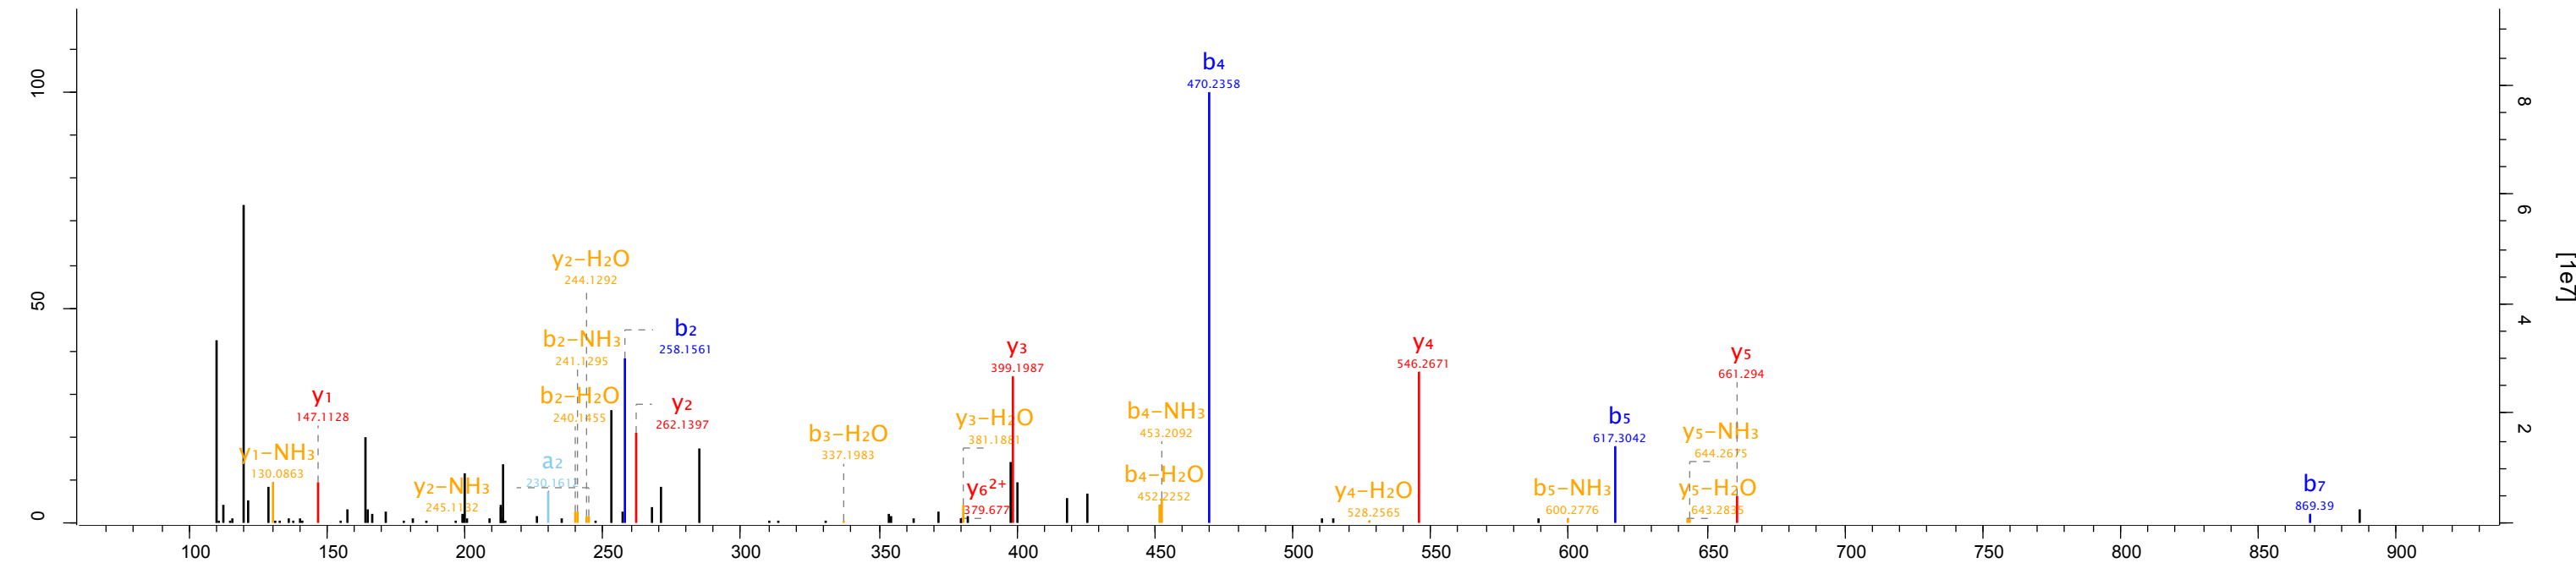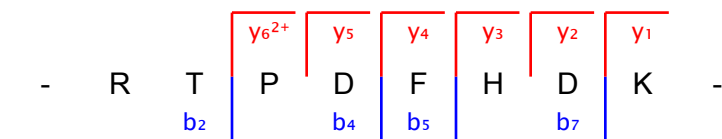

Raw file 20180707\_MaS\_A375SR\_ML\_proteome\_2\_08 Scan 18253 Method FTMS; HCD Score 48.35 m/z 703.02 Gene names SLC31A1

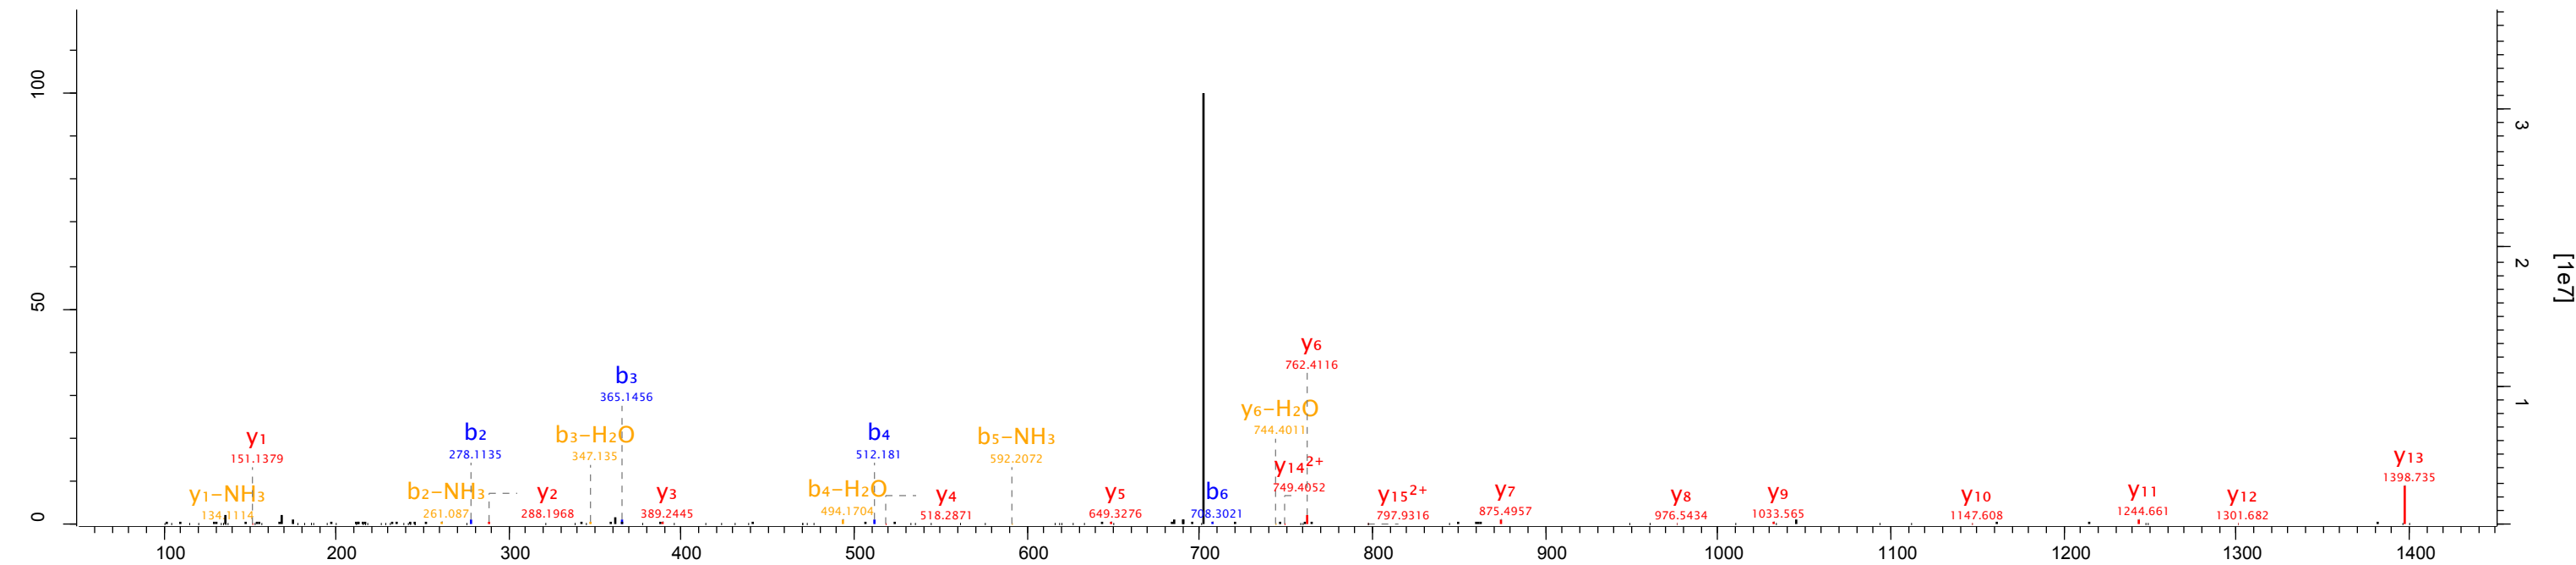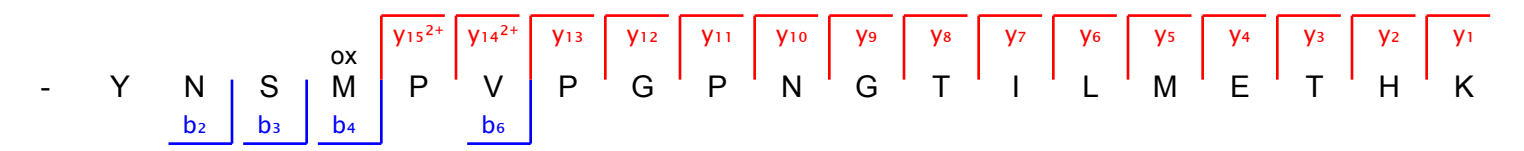

Raw file 20180707\_MaS\_A375SR\_ML\_proteome\_2\_08 Scan 18273 Method FTMS; HCD Score 98.18 m/z 701.68 Gene names SLC31A1

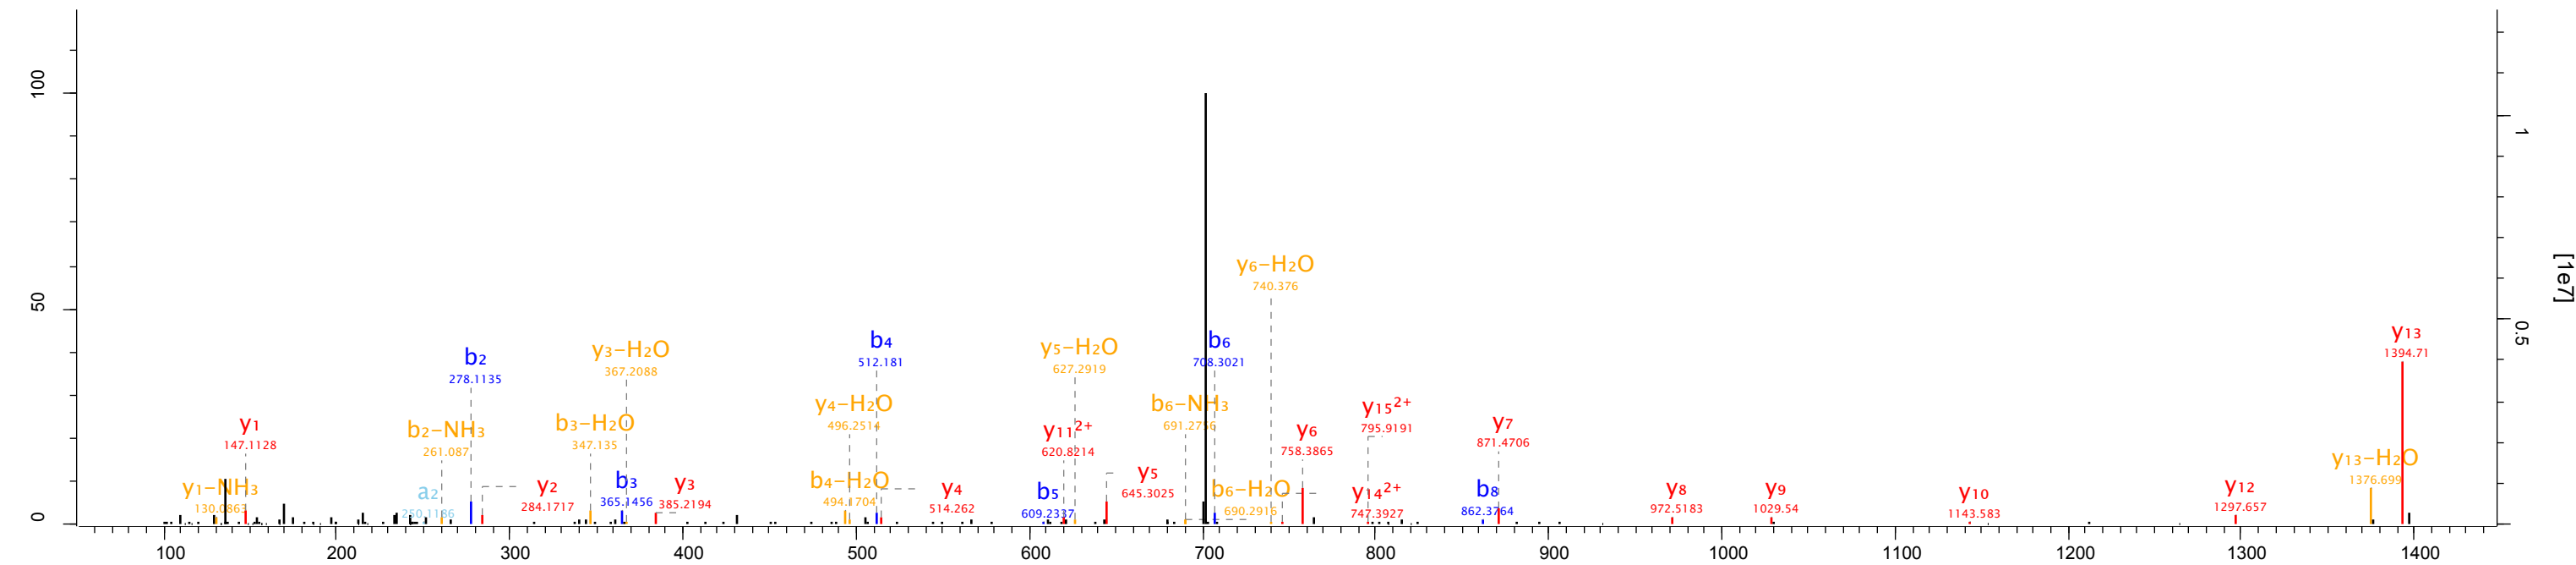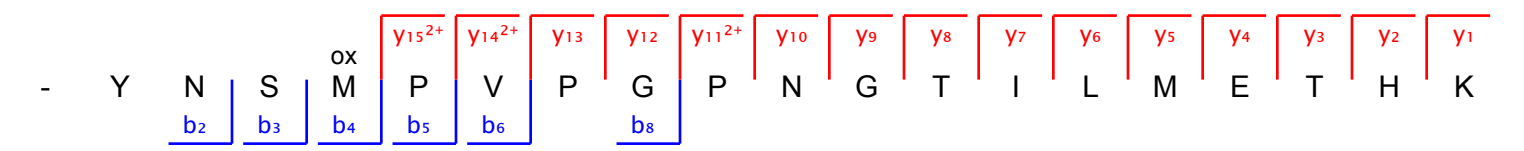

Raw file 20180707\_MaS\_A375SR\_ML\_proteome\_2\_08 Scan 27523 Method FTMS; HCD Score 89.88 m/z 874.79 Gene names ALDH8A1

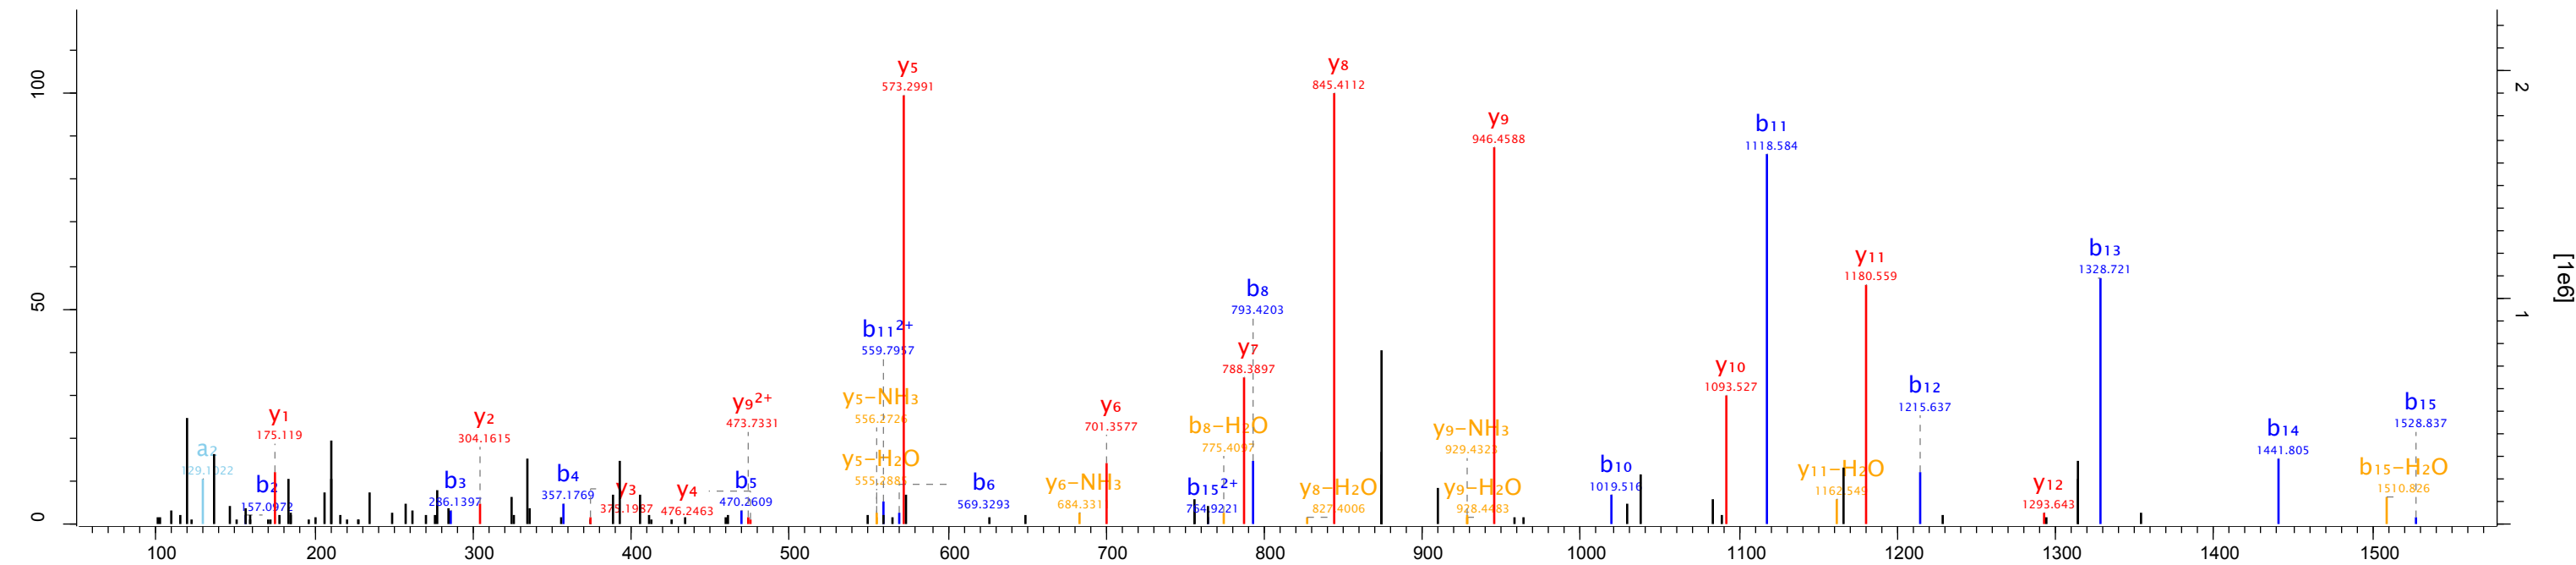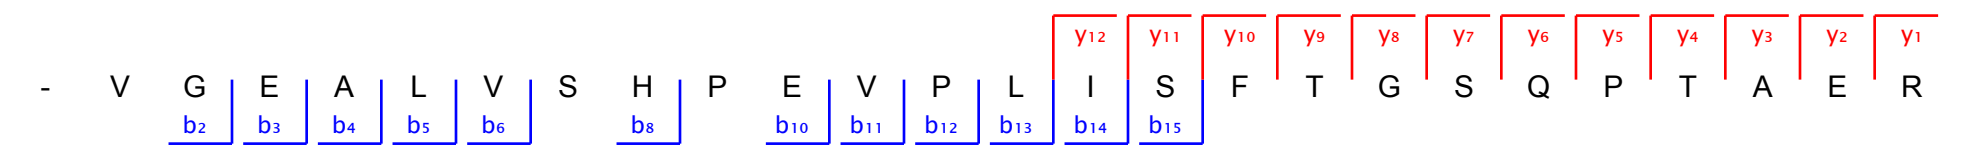

Raw file: 20180707\_MaS\_A375SR\_ML\_proteome\_2\_08  
 Scan: 6723 Method: FTMS; HCD Score: 77.78 m/z: 719.81 Gene names: LEPROT

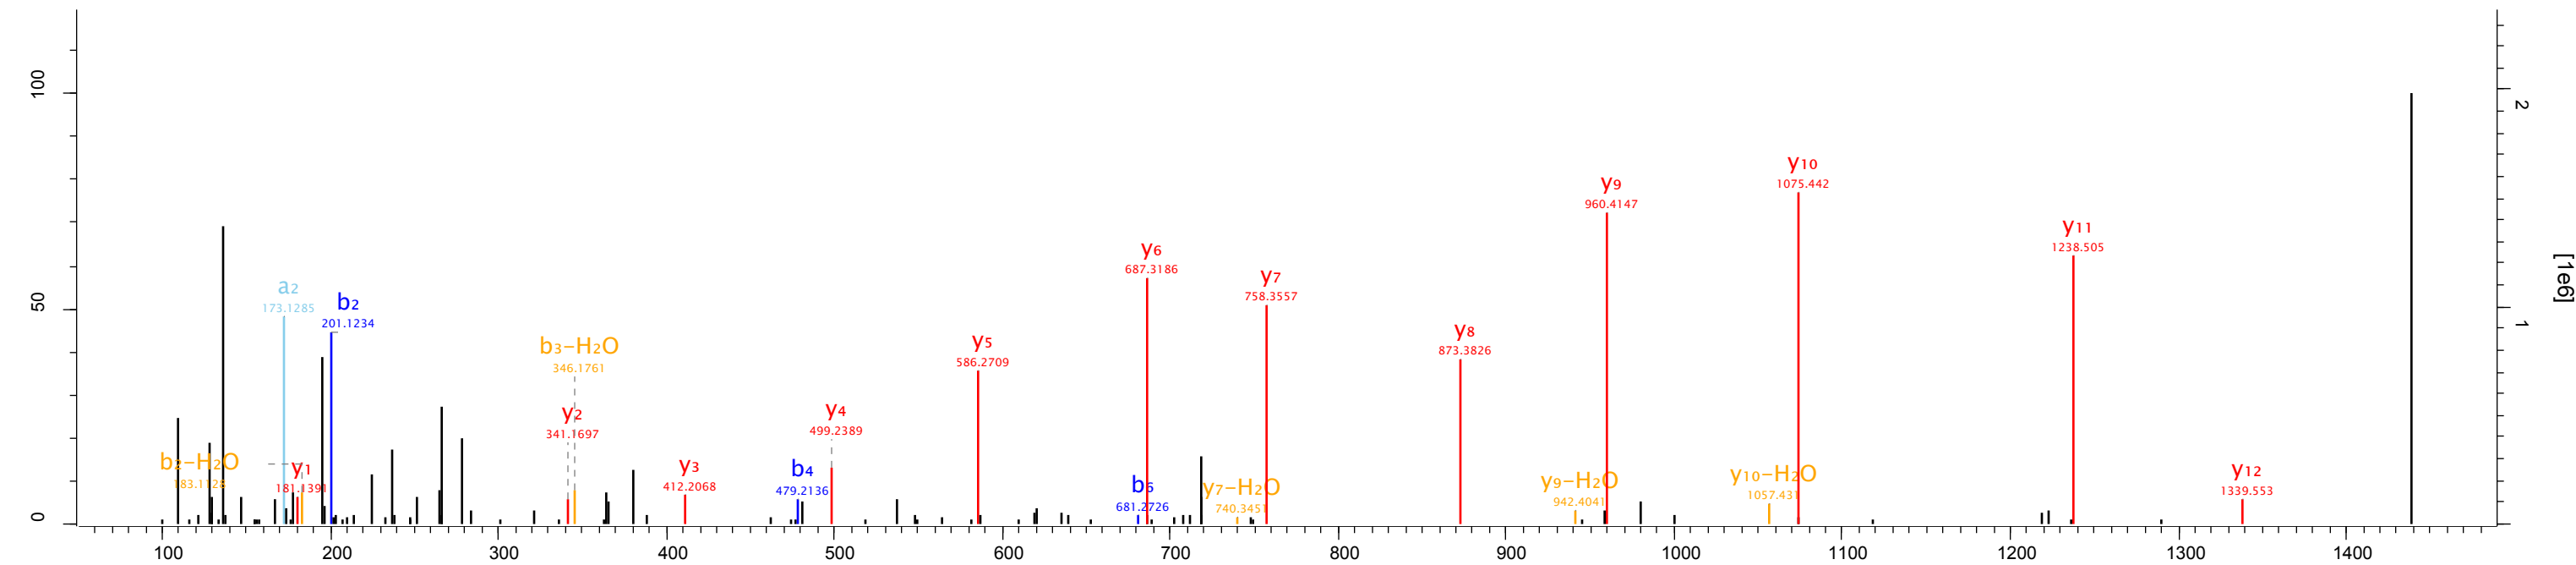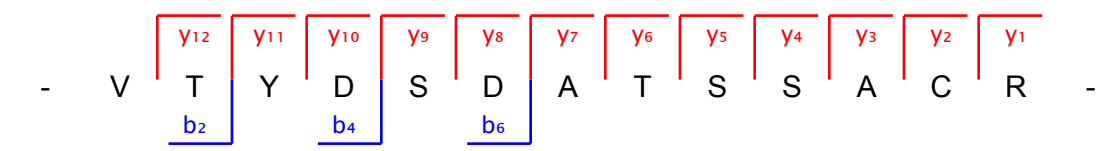

Raw file 20180707\_MaS\_A375SR\_ML\_proteome\_2\_09 Scan 2643 Method FTMS; HCD Score 67.51 m/z 603.77 Gene names NLRP2

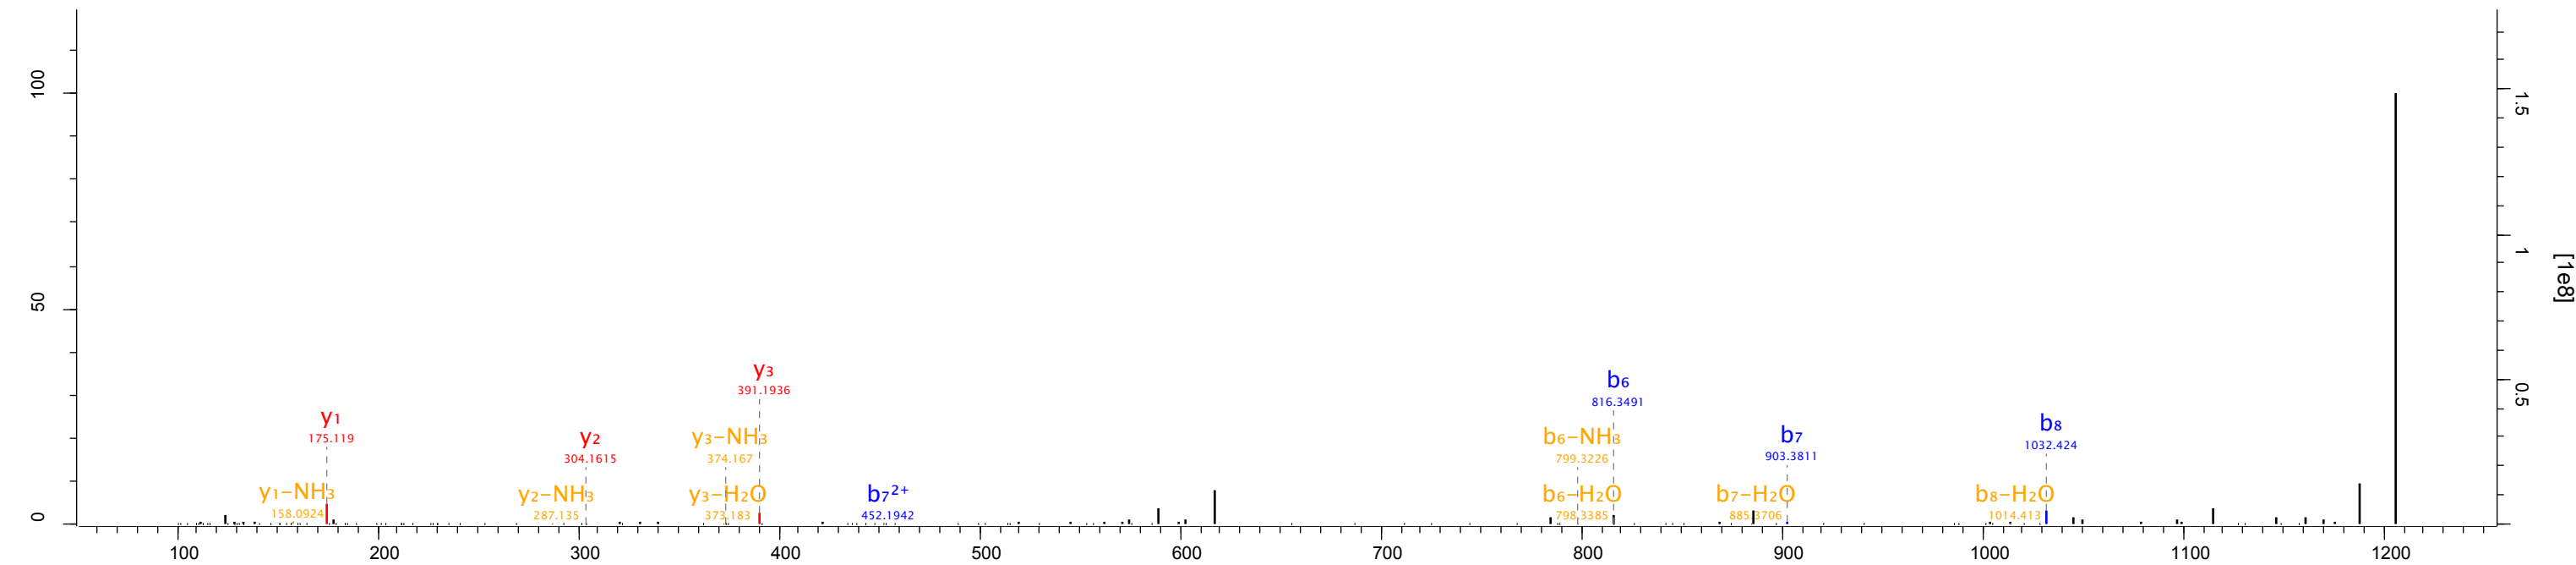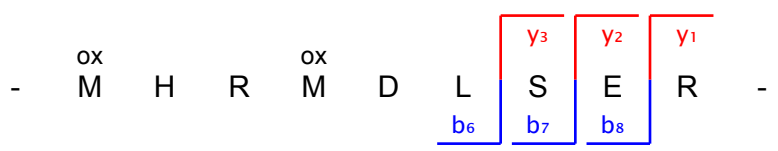

Raw file 20180707\_MaS\_A375SR\_ML\_proteome\_2\_10 Scan 25593 Method FTMS; HCD Score 97.64 m/z 496.76 Gene names SEPT3

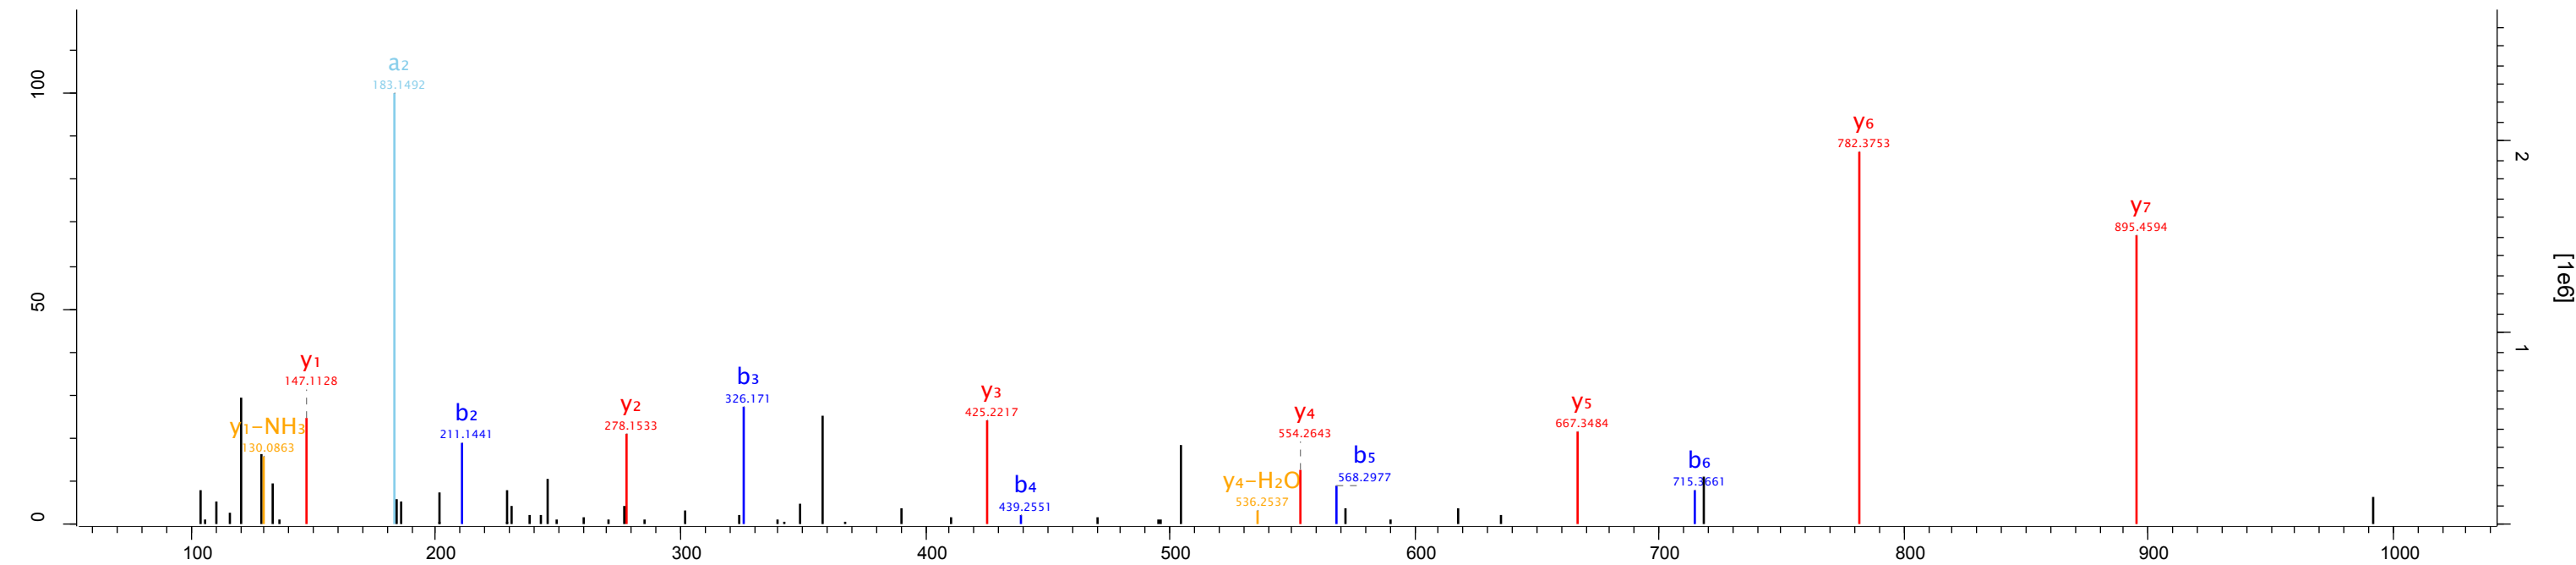



Raw file  
20180707\_MaS\_A375SR\_ML\_proteome\_2\_10

Scan 28133 Method FTMS; HCD Score 98.94 m/z 753.88 Gene names STK11

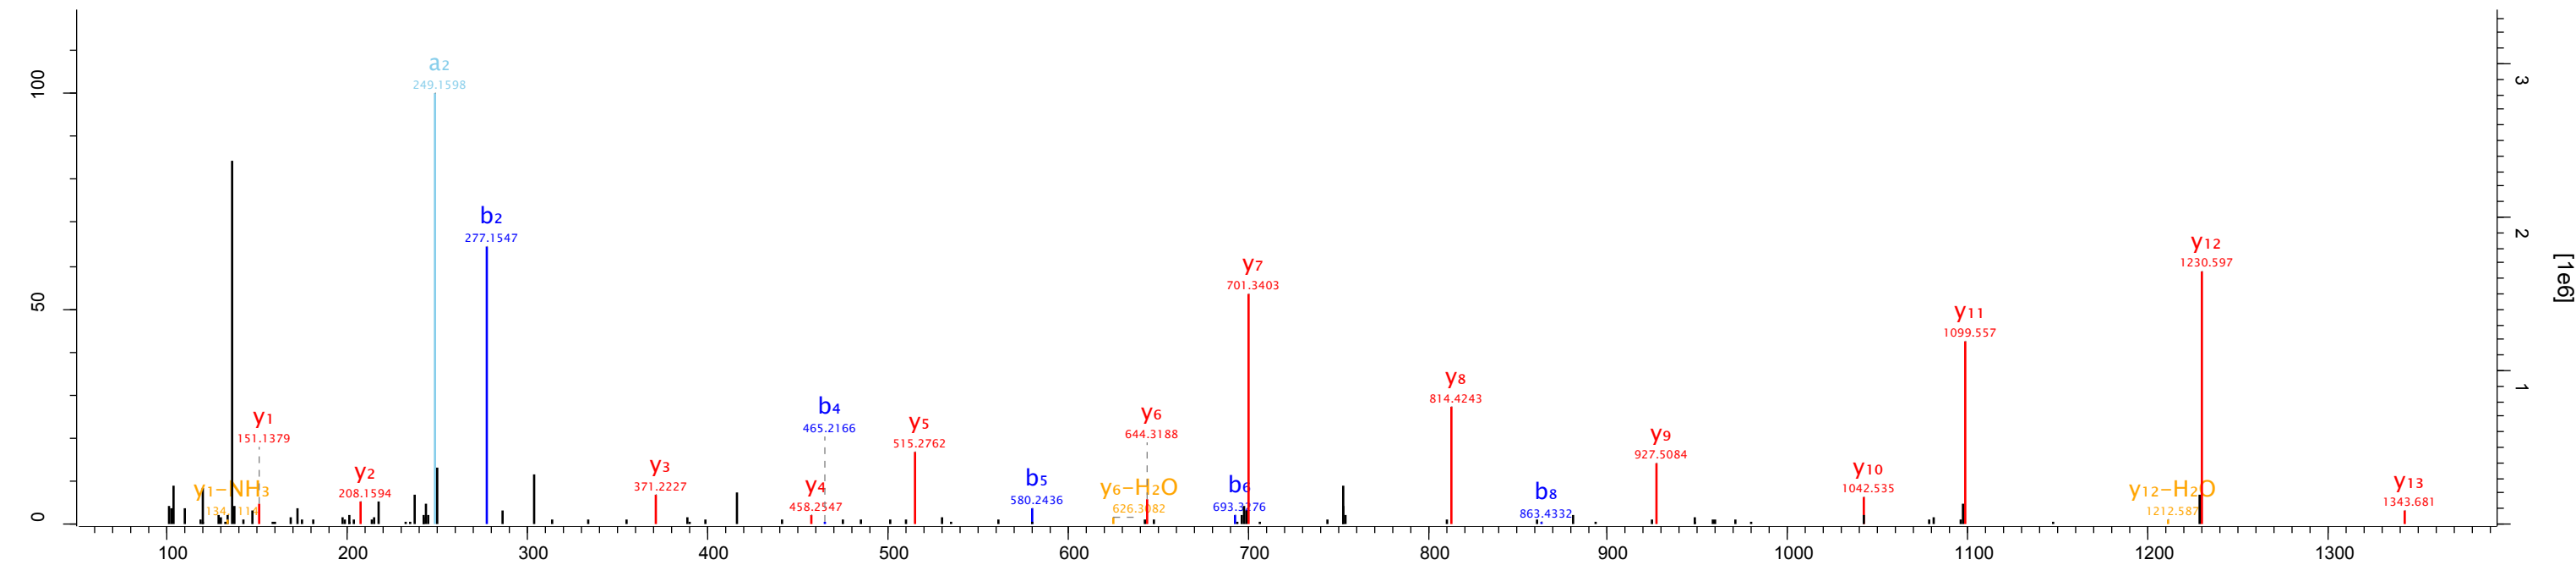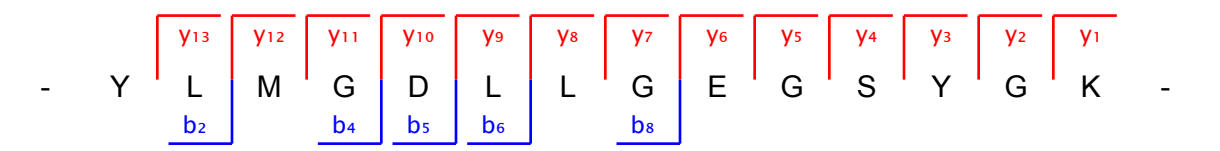

20180707\_MaS\_A375SR\_ML\_proteome\_2\_11 17343 FTMS; HCD 35.09 681 UFSP1

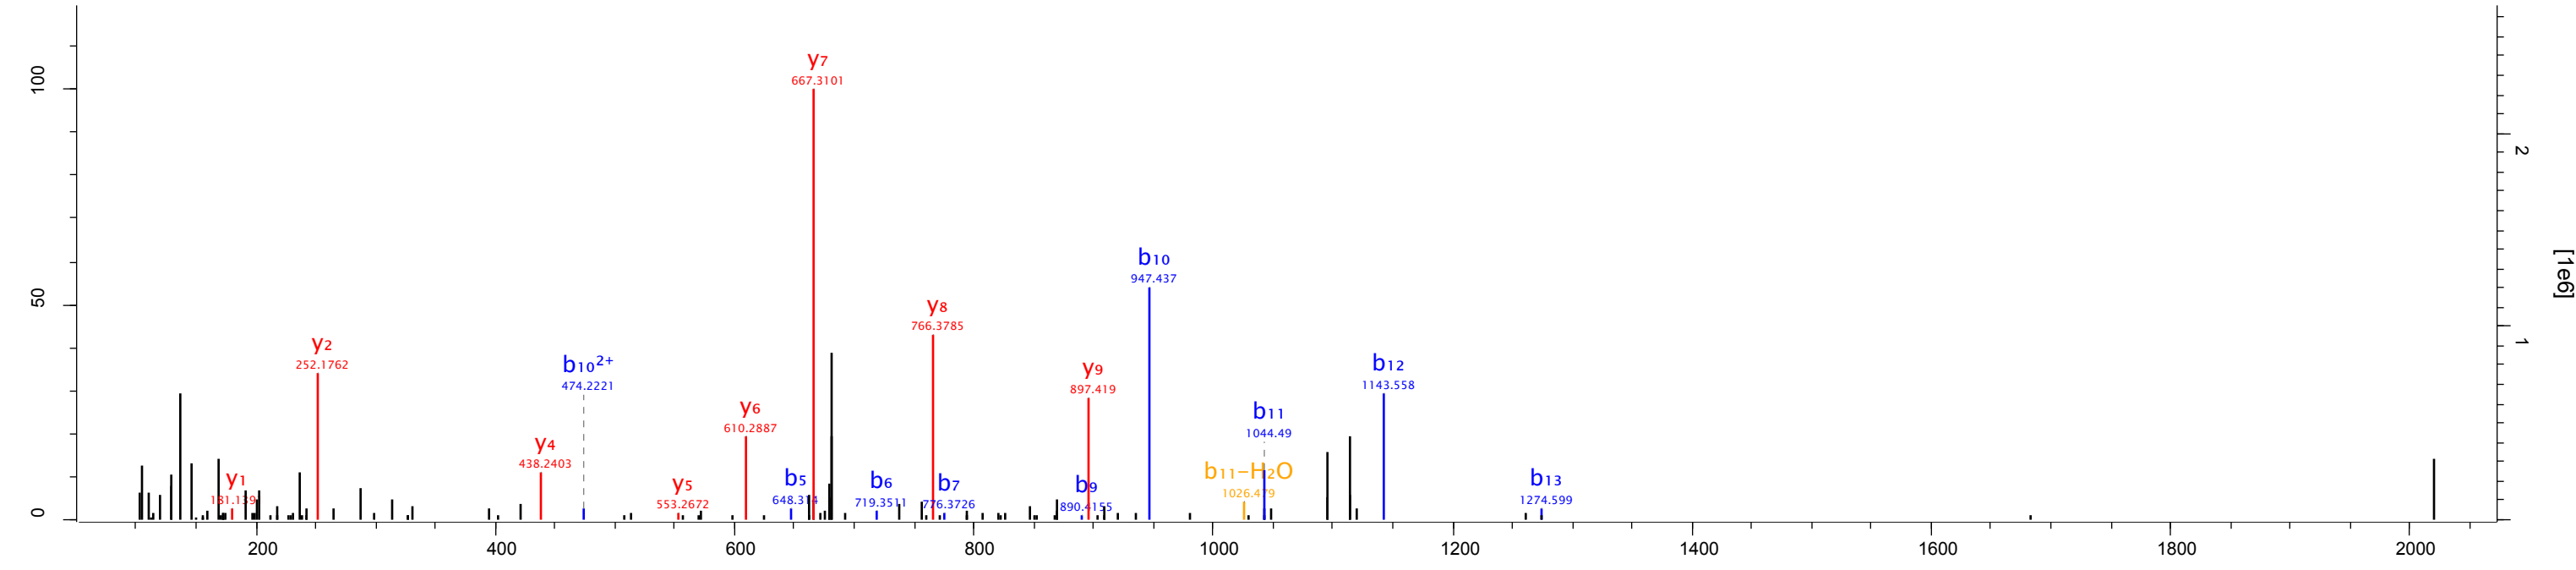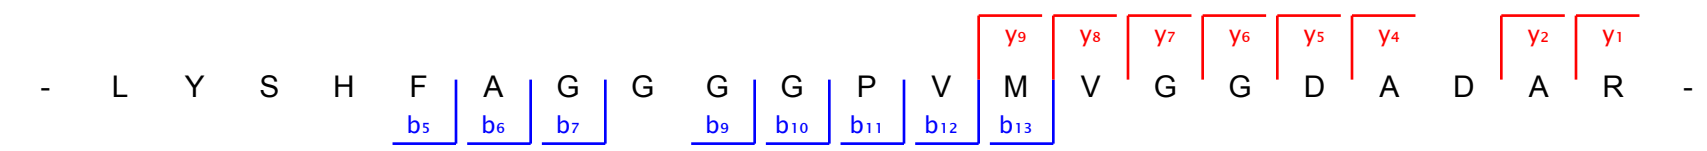

Raw file  
20180707\_MaS\_A375SR\_ML\_proteome\_2\_11

Scan 21663 Method FTMS; HCD Score 124.29 m/z 734.66 Gene names ELOF1

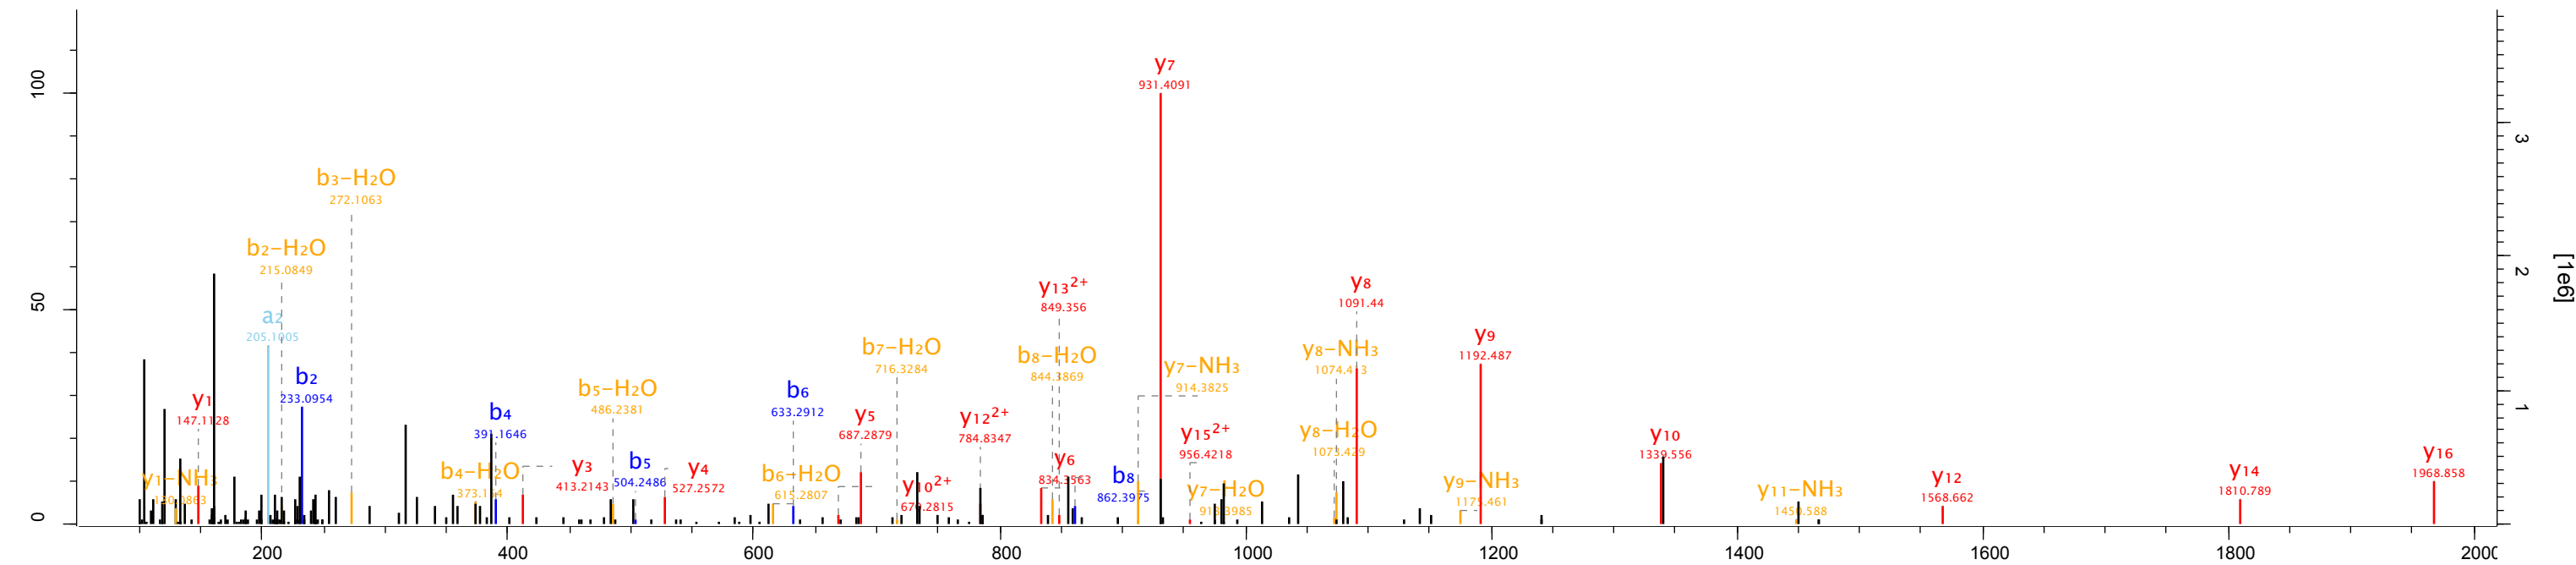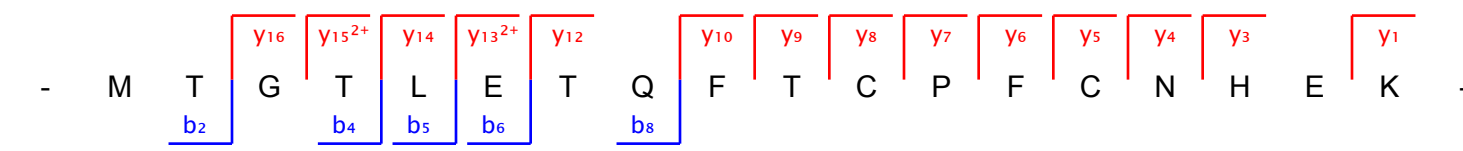

Raw file: 20180707\_MaS\_A375SR\_ML\_proteome\_2\_11  
 Scan: 22263 Method: FTMS; HCD Score: 121.9 m/z: 603.32 Gene names: MEF2BNB

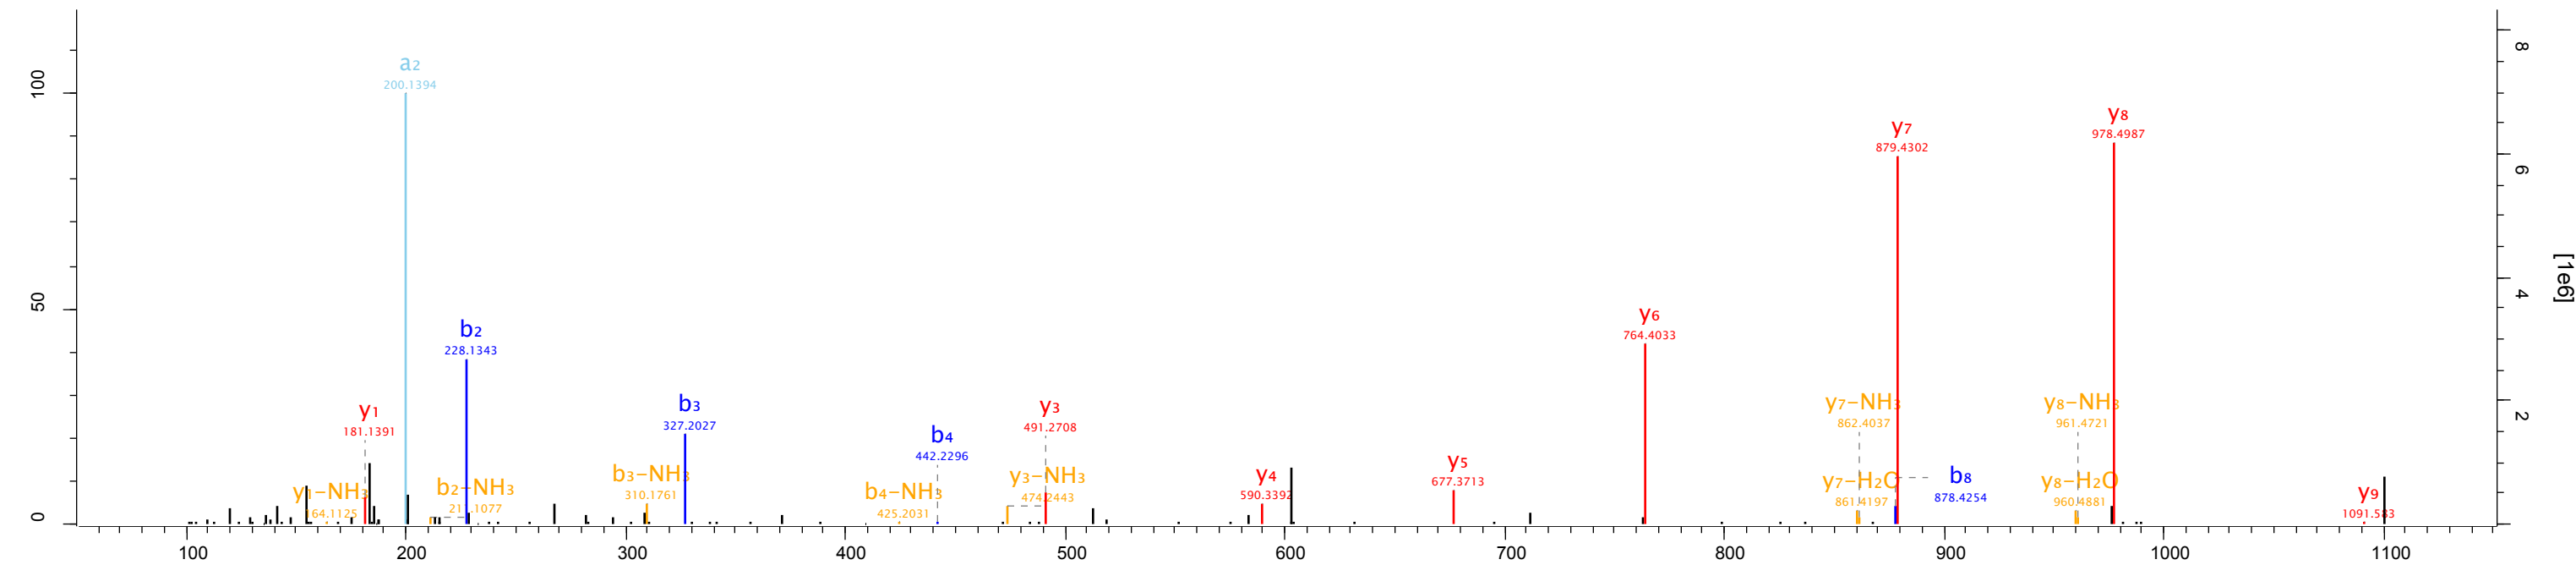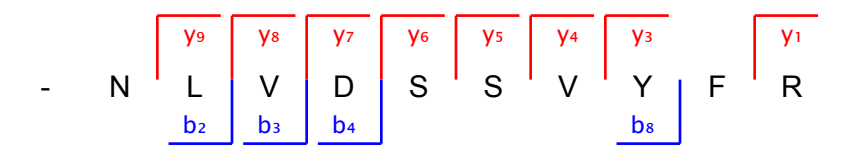

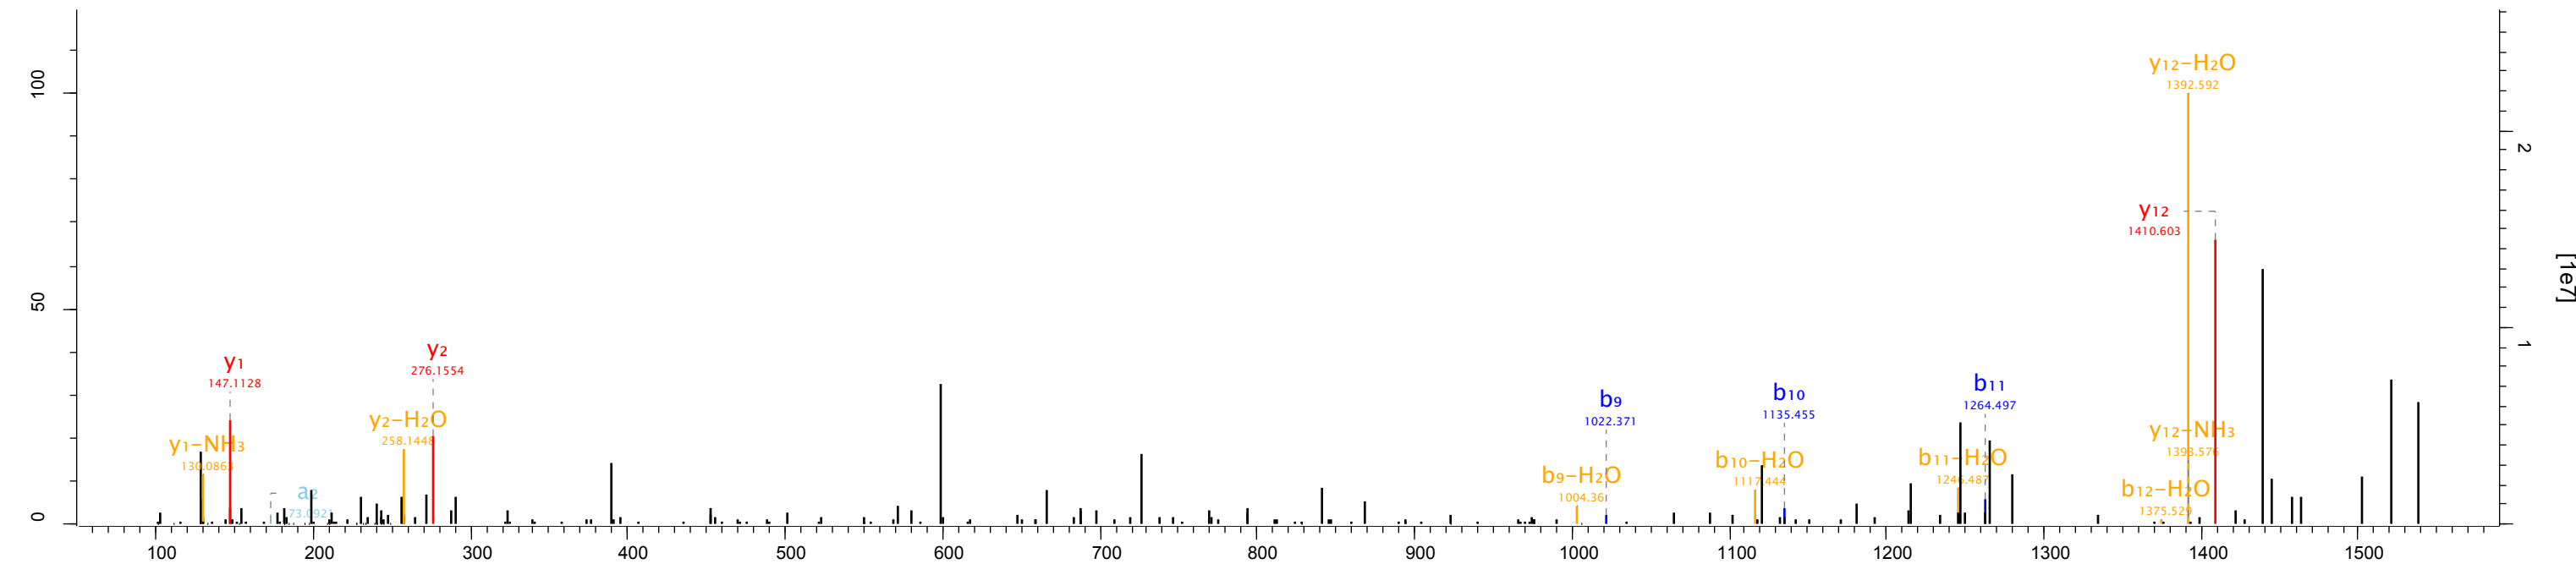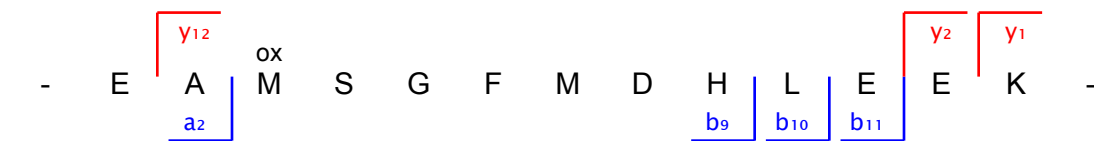

Raw file 20180707\_MaS\_A375SR\_ML\_proteome\_2\_13 Scan 11233 Method FTMS; HCD Score 40.27 m/z 433.76 Gene names ABCA12

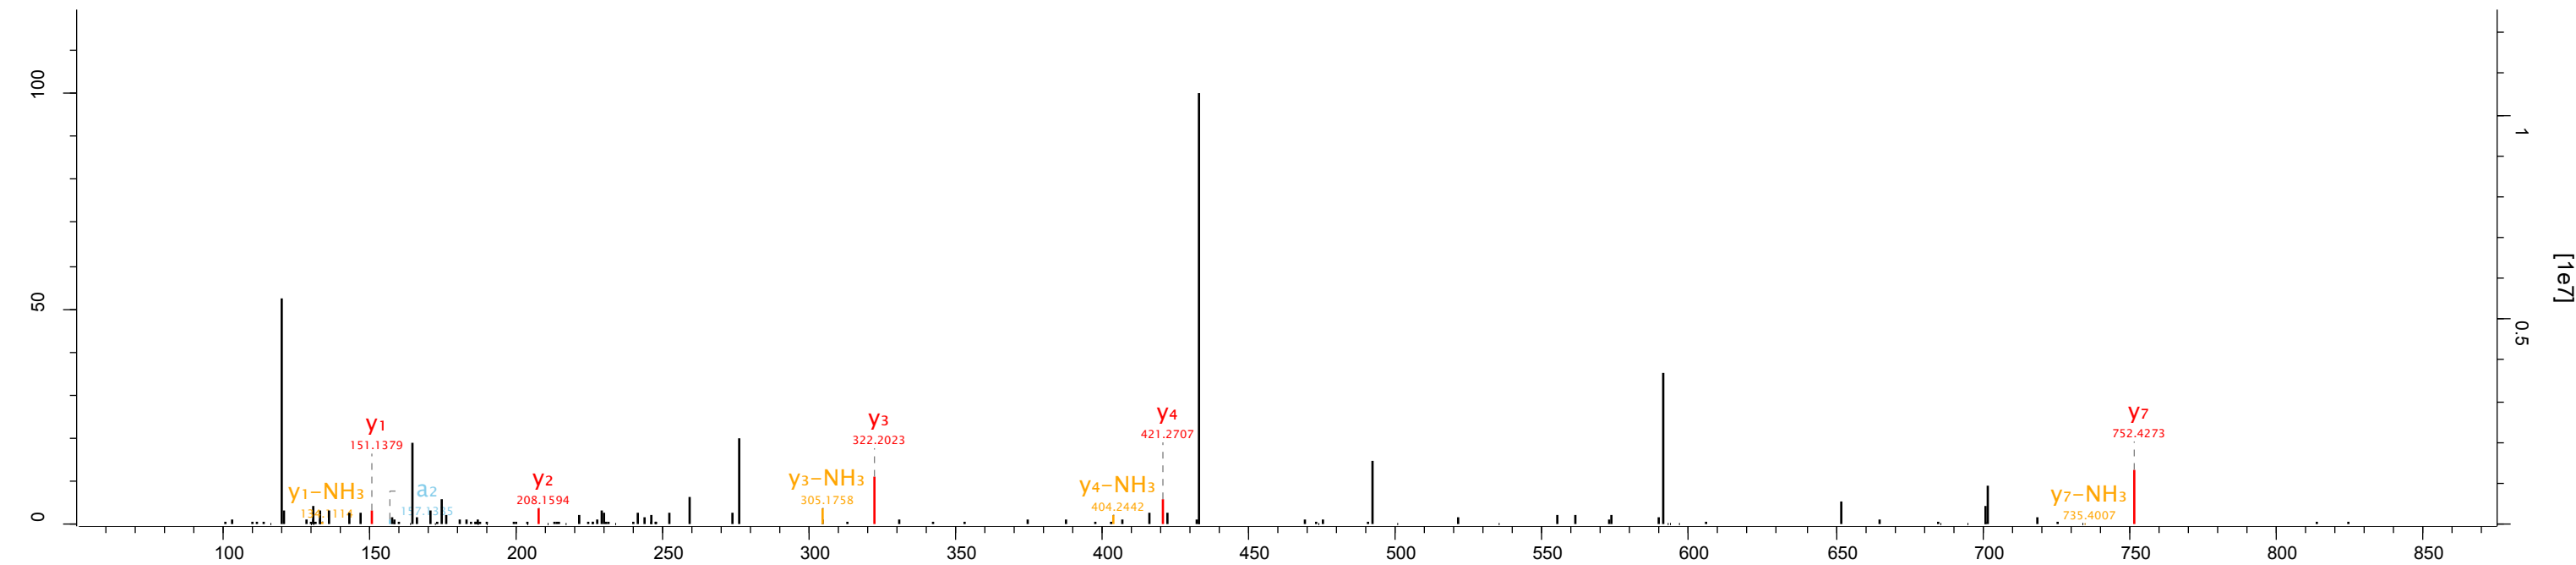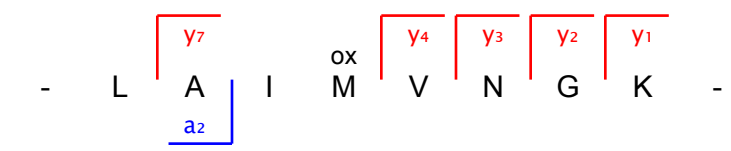

Raw file  
20180707\_MaS\_A375SR\_ML\_proteome\_2\_13

Scan 14723 Method FTMS; HCD Score 92.19 m/z 361.19 Gene names ART4

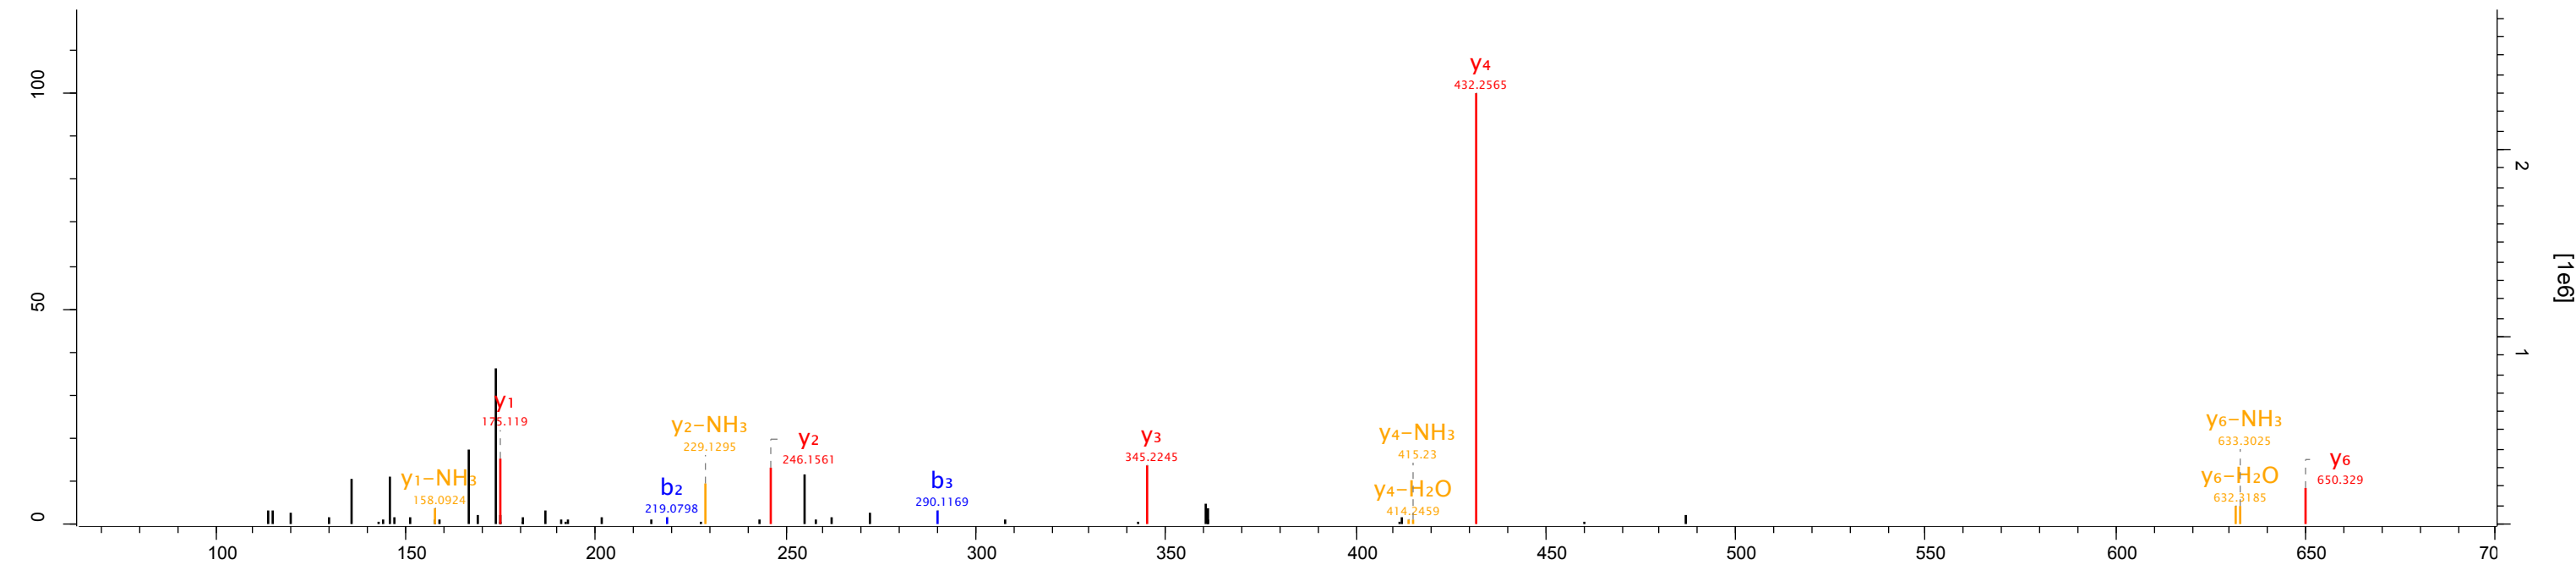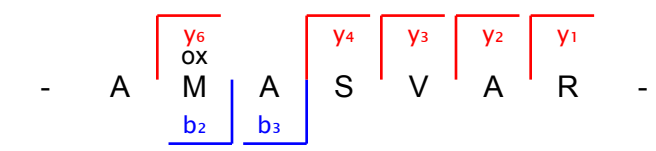

Raw file  
20180707\_MaS\_A375SR\_ML\_proteome\_2\_14

Scan 14823 Method FTMS; HCD Score 68.37 m/z 382.54 Gene names MREG

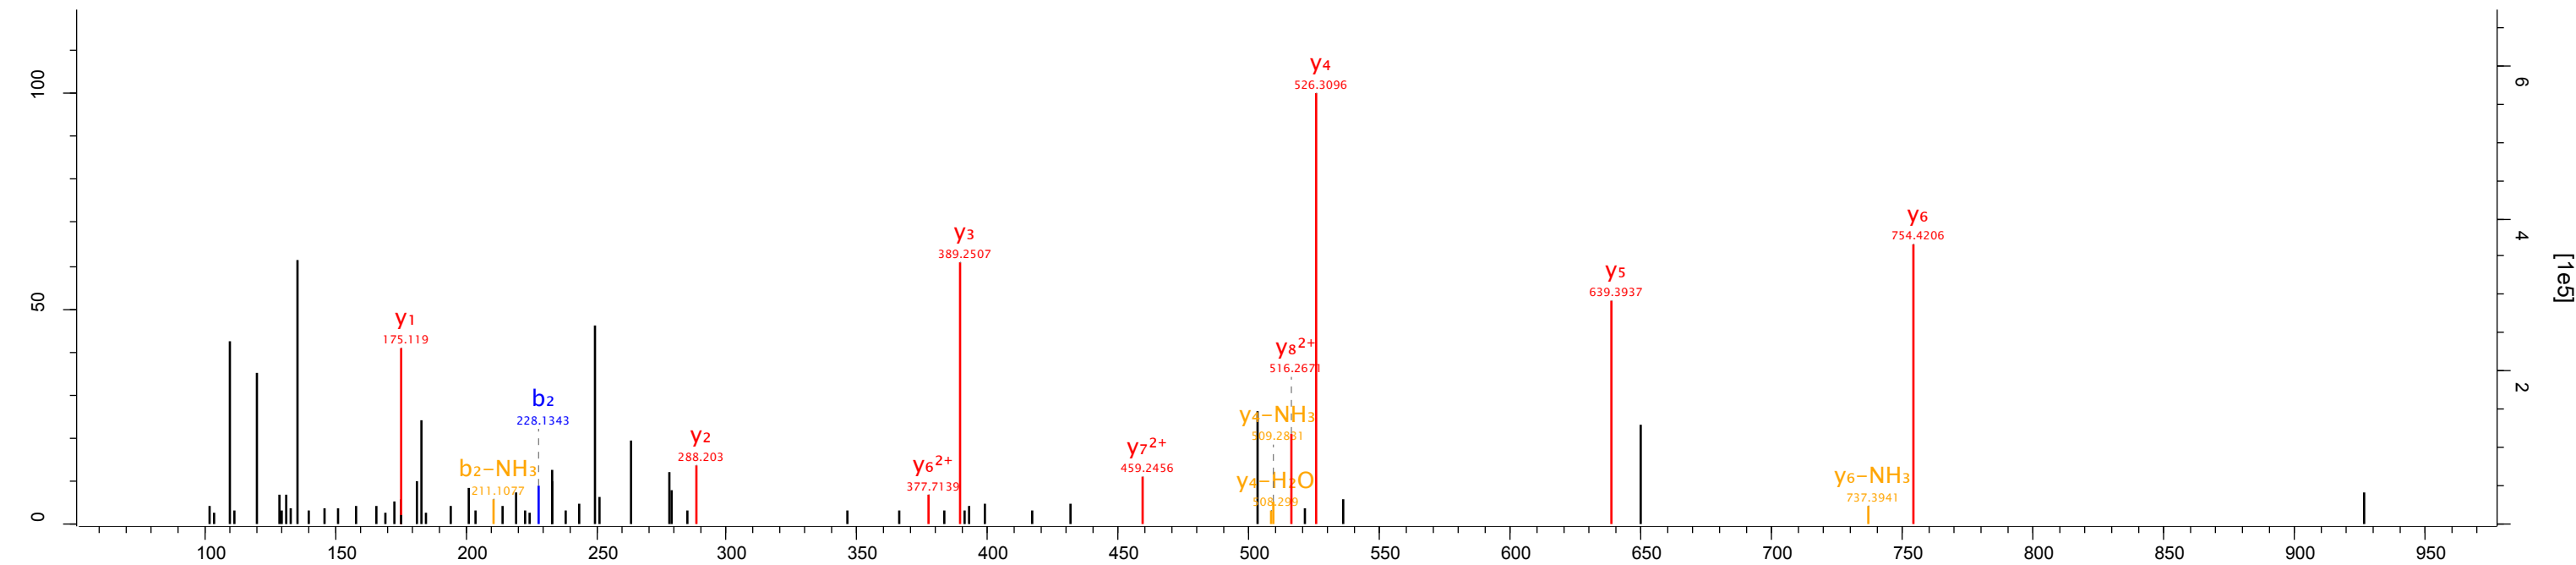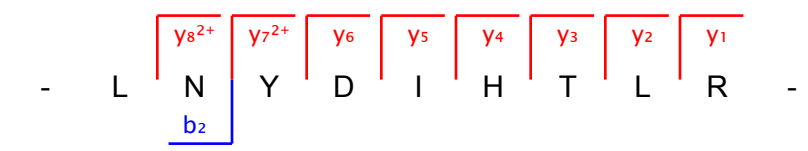



Raw file  
20180707\_MaS\_A375SR\_ML\_proteome\_2\_14

Scan Method Score m/z Gene names  
4843 FTMS; HCD 60.26 563.28 SFT2D2

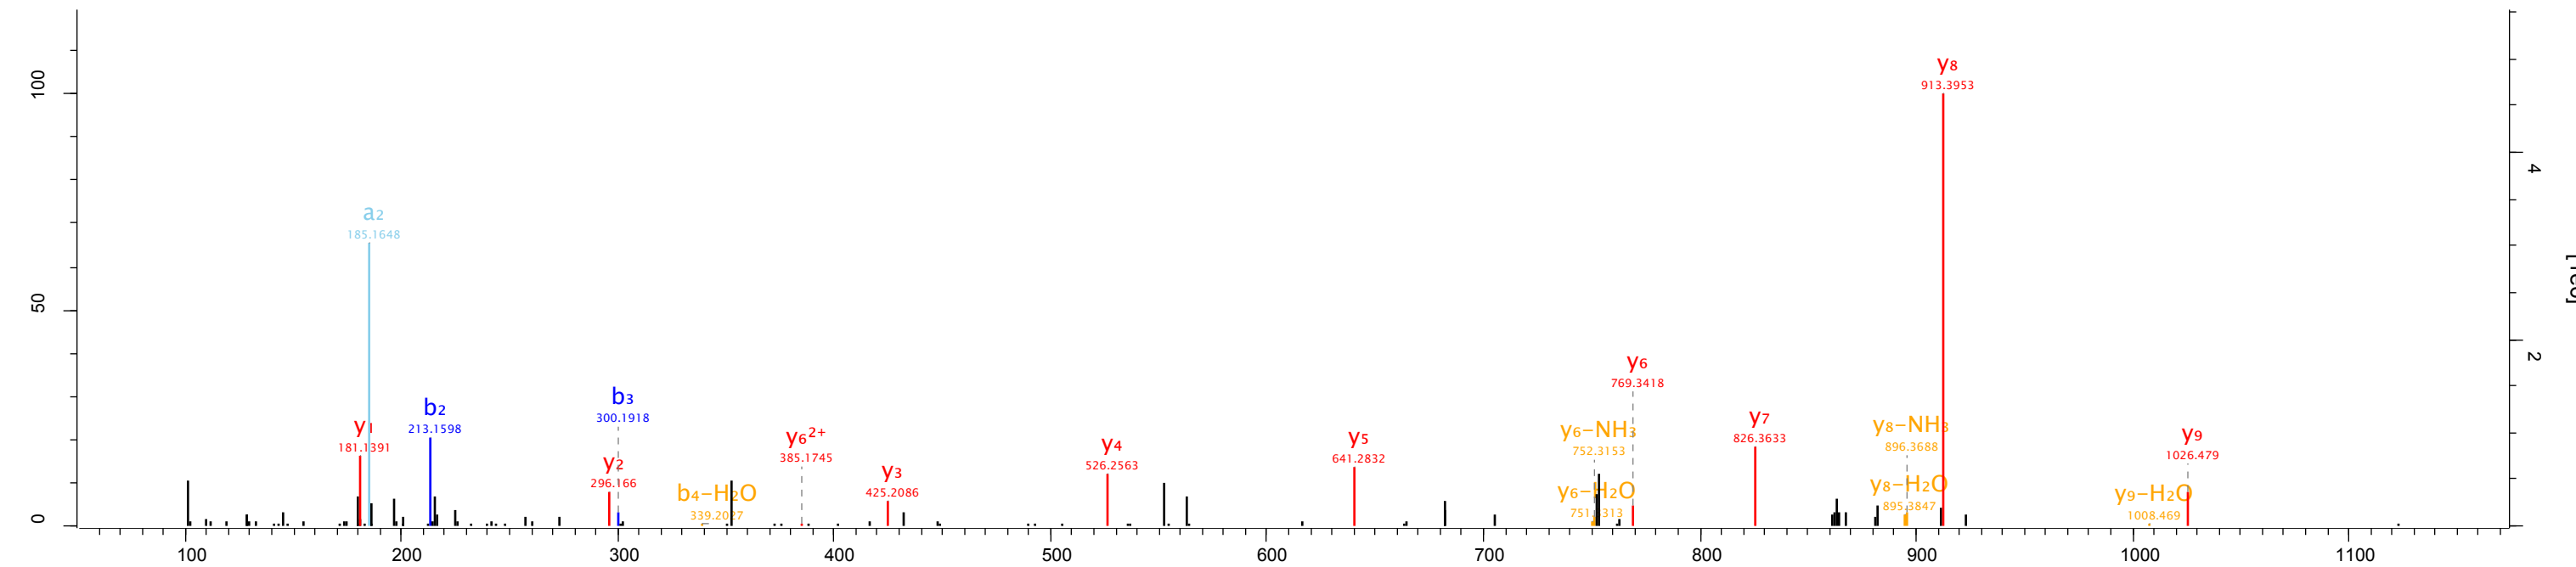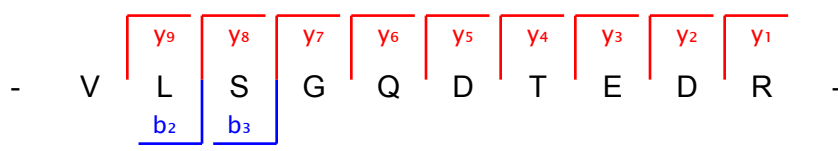

Raw file  
20180707\_MaS\_A375SR\_ML\_proteome\_2\_14

Scan 7753 Method FTMS; HCD Score 69.98 m/z 429.21 Gene names PTGDS

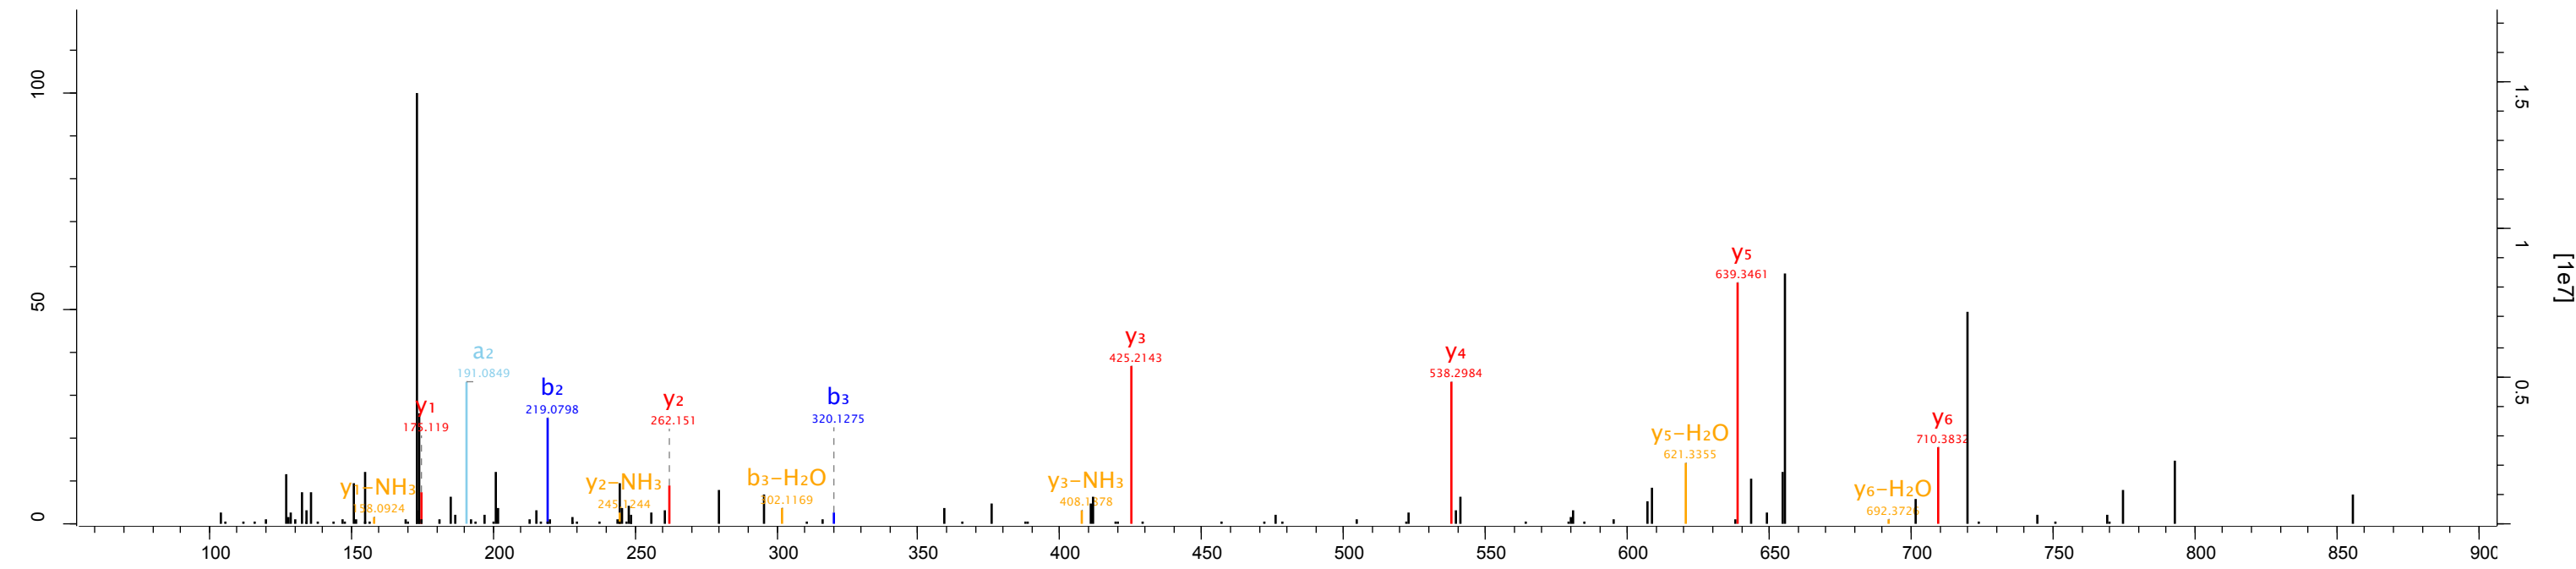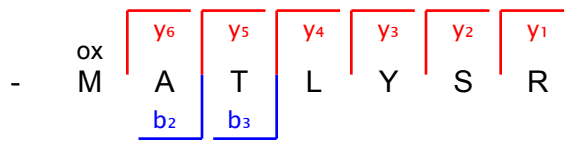

Raw file 20180707\_MaS\_A375SR\_ML\_proteome\_2\_15 Scan 12313 Method FTMS; HCD Score 111.28 m/z 431.23

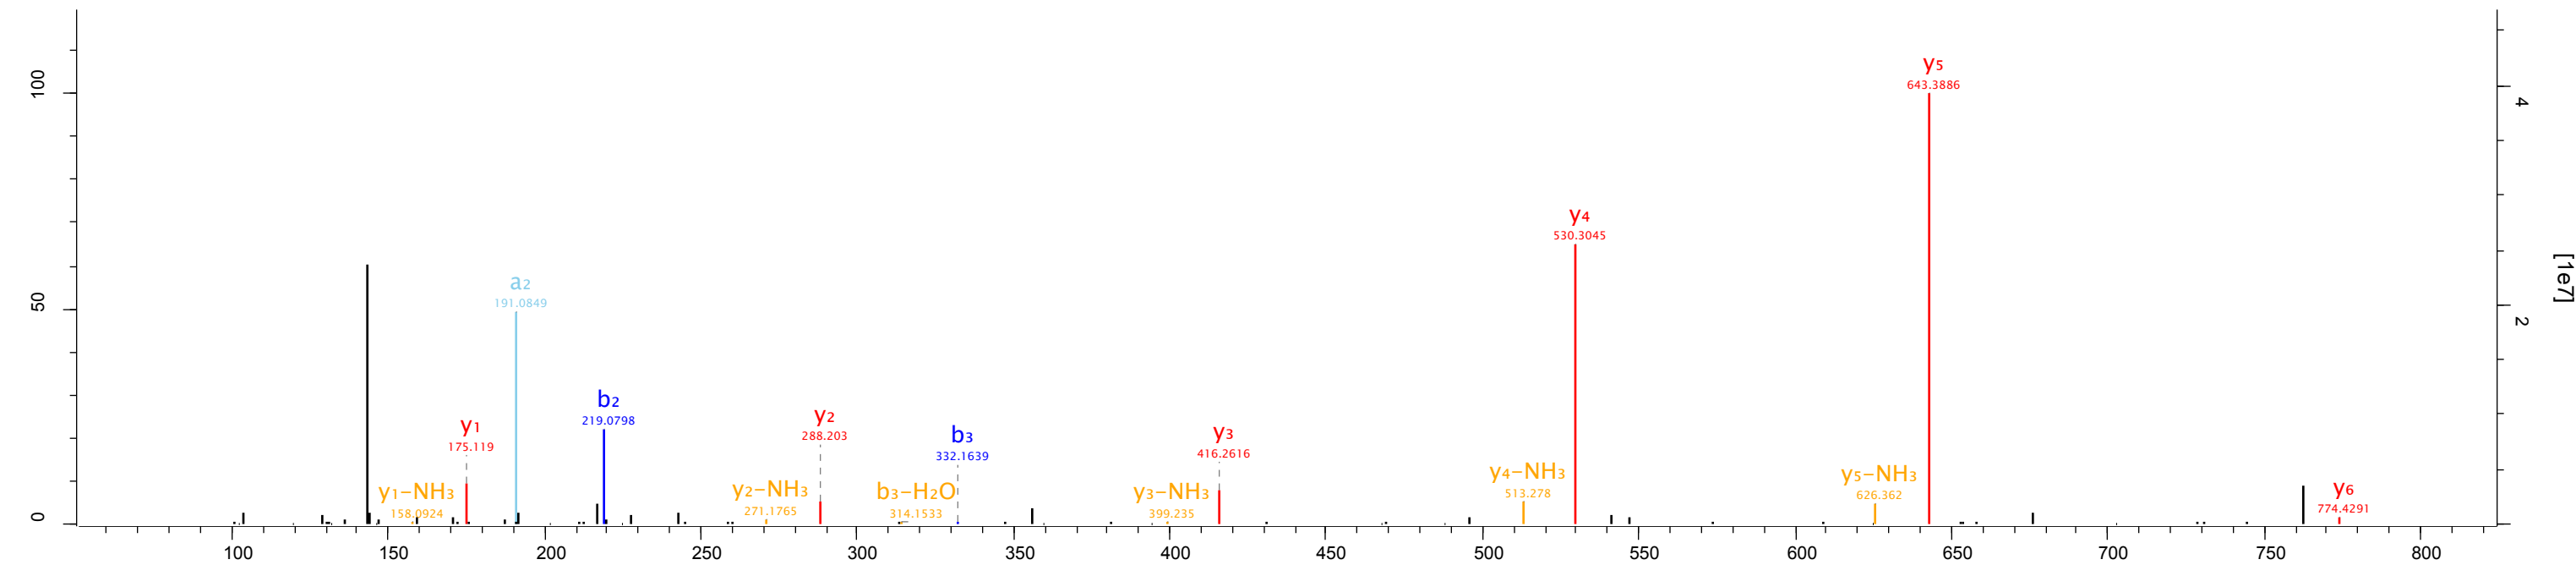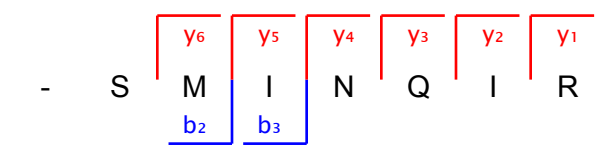

Raw file  
20180707\_MaS\_A375SR\_ML\_proteome\_2\_15

Scan 16713 Method FTMS; HCD Score 31.42 m/z 376.56 Gene names PNKD

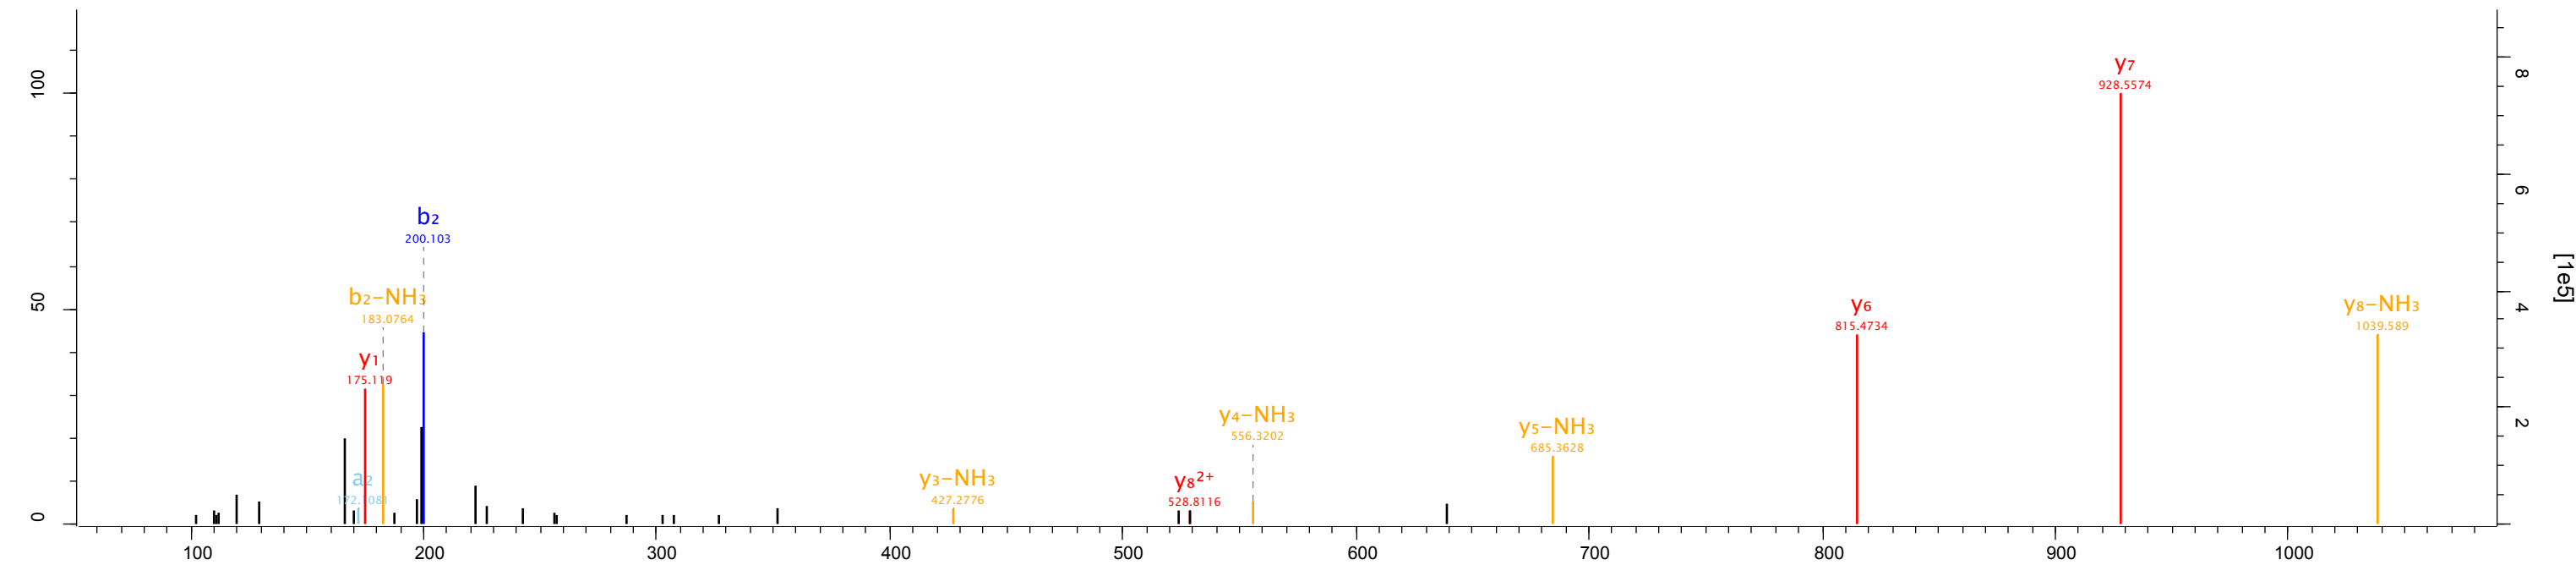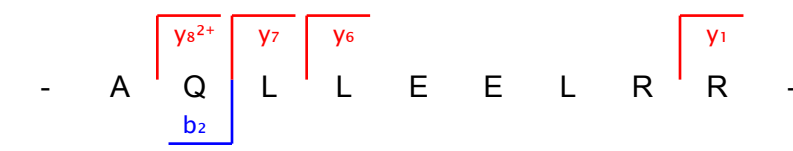

Raw file  
20180707\_MaS\_A375SR\_ML\_proteome\_2\_15

Scan 29433 Method FTMS; HCD Score 230.86 m/z 846.45 Gene names S100A1

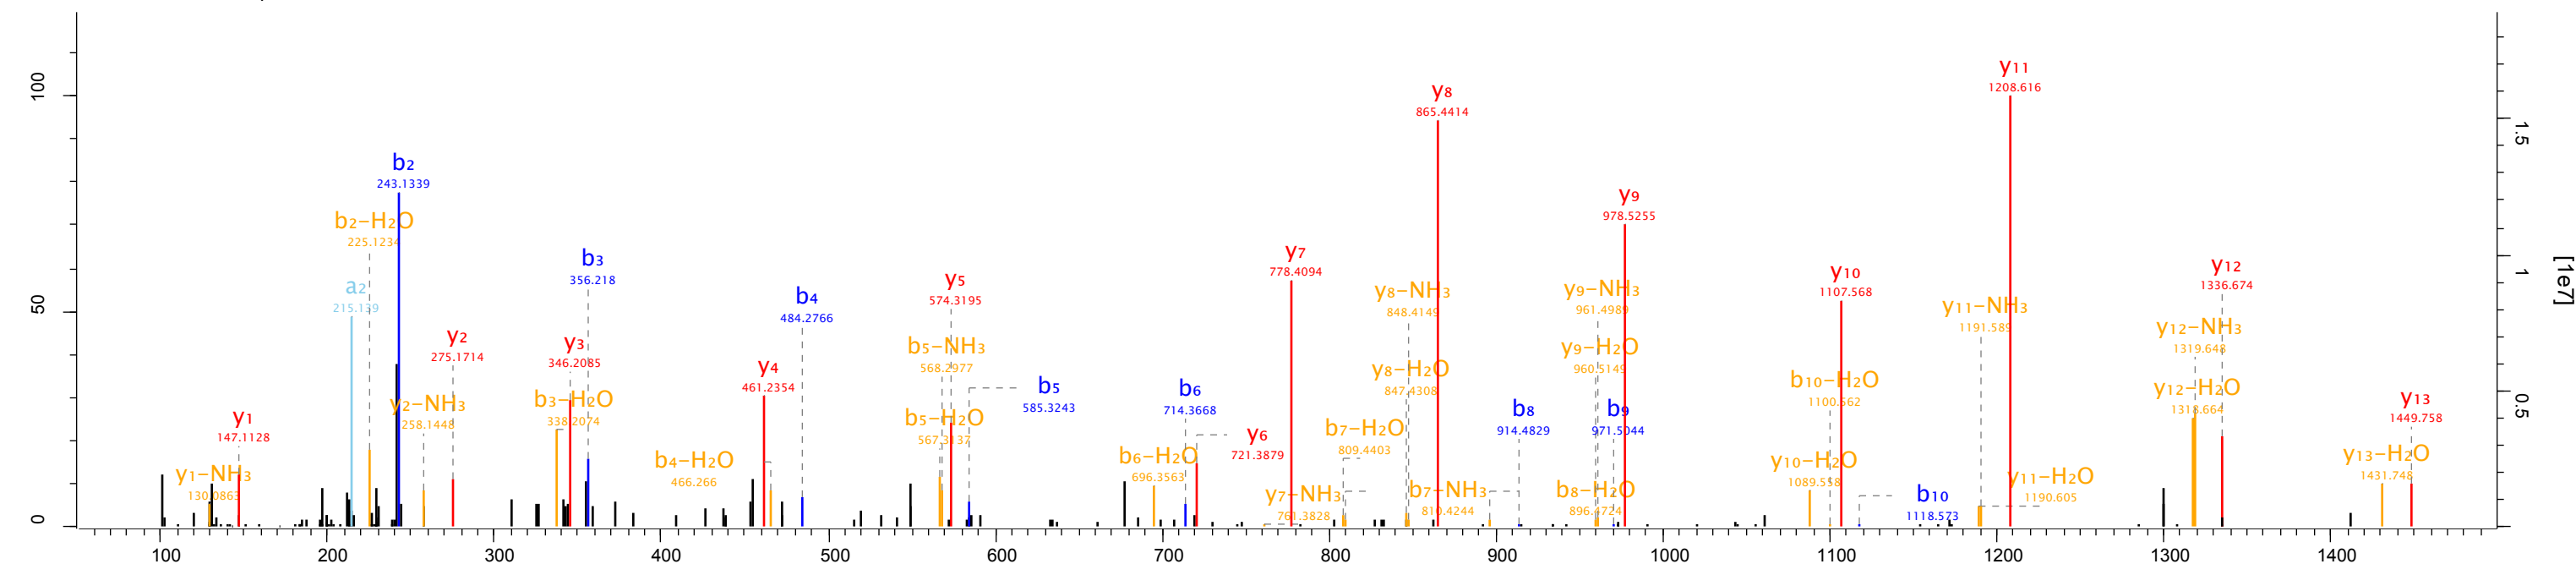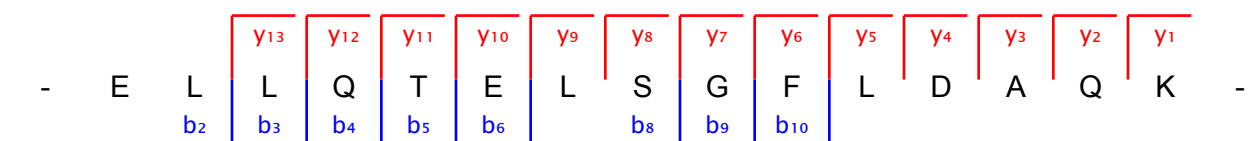

Raw file: 20180707\_MaS\_A375SR\_ML\_proteome\_2\_15  
 Scan: 4773 Method: FTMS; HCD Score: 50.95 m/z: 560.27 Gene names: SFT2D2

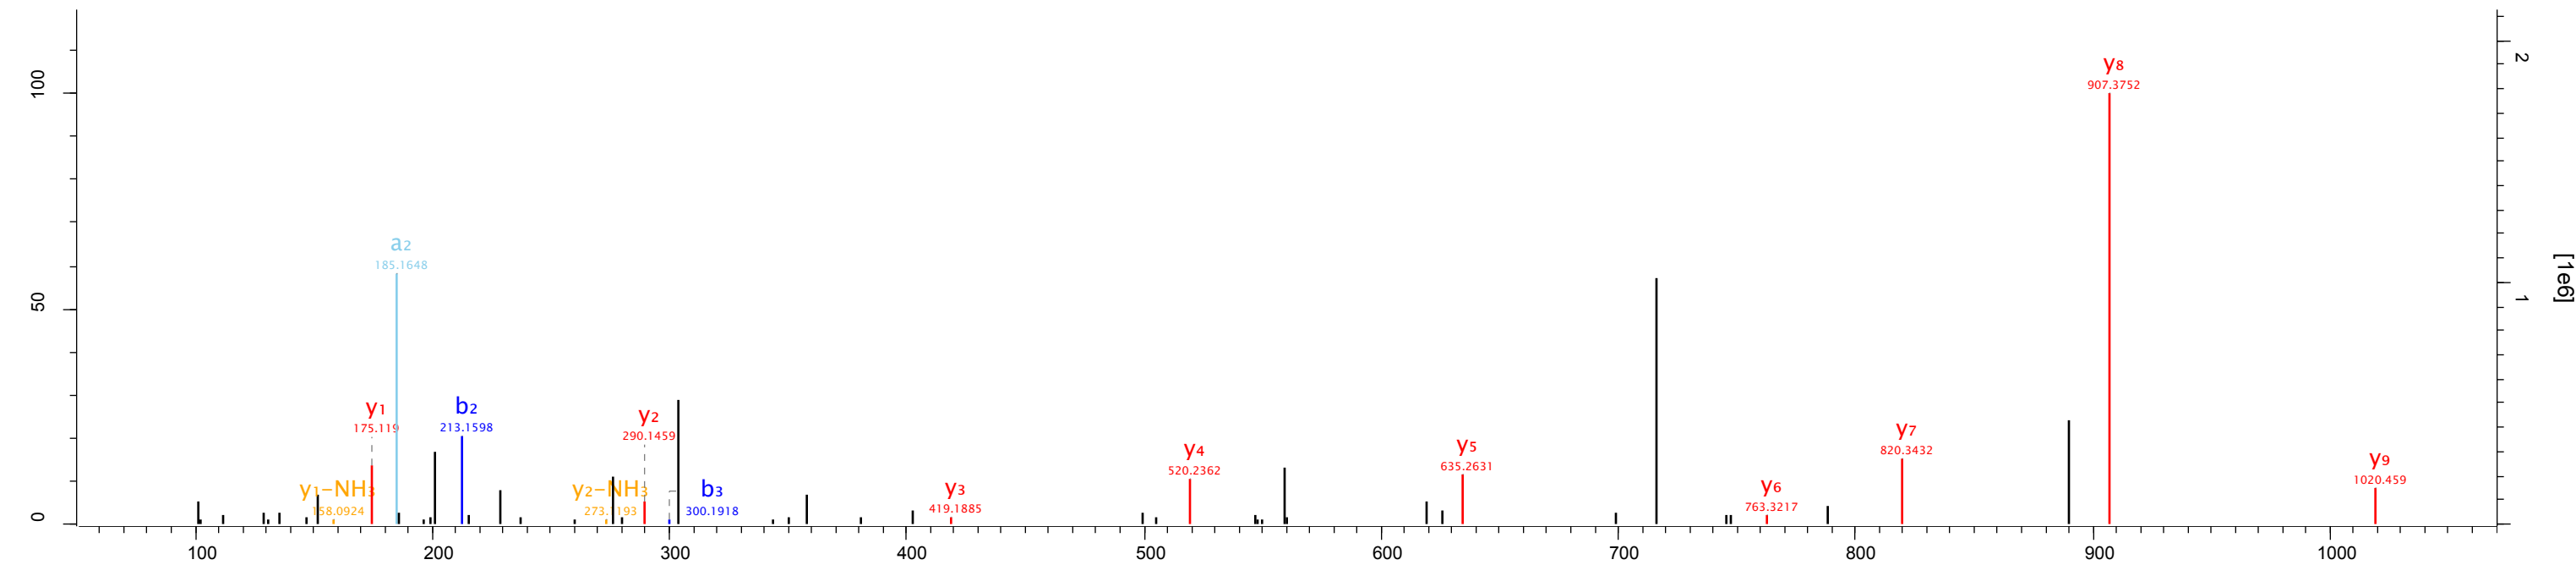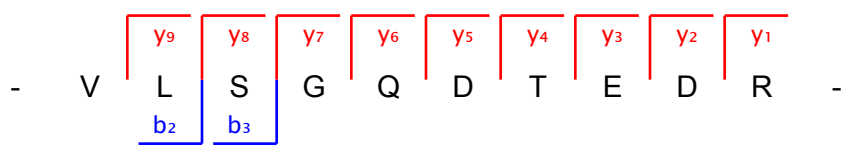

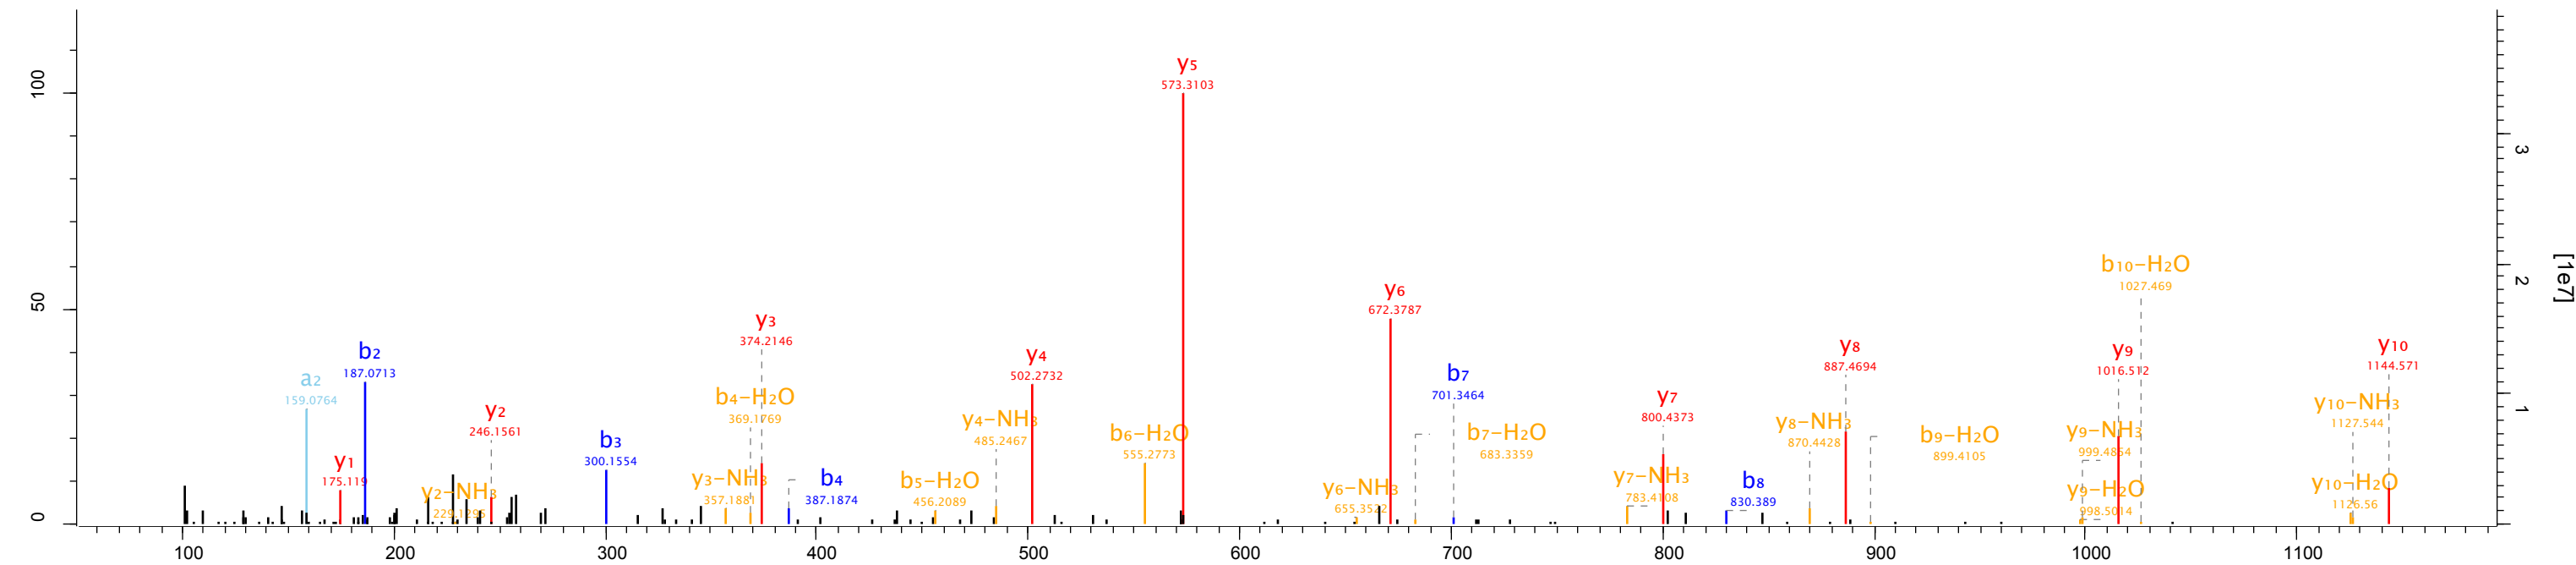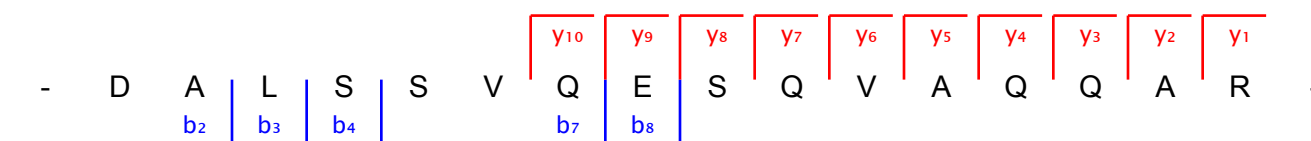

Raw file  
20180707\_MaS\_A375SR\_ML\_proteome\_2\_16

Scan: 25663  
Method: FTMS; HCD  
Score: 119.21  
m/z: 507.74  
Gene names: TMEM258

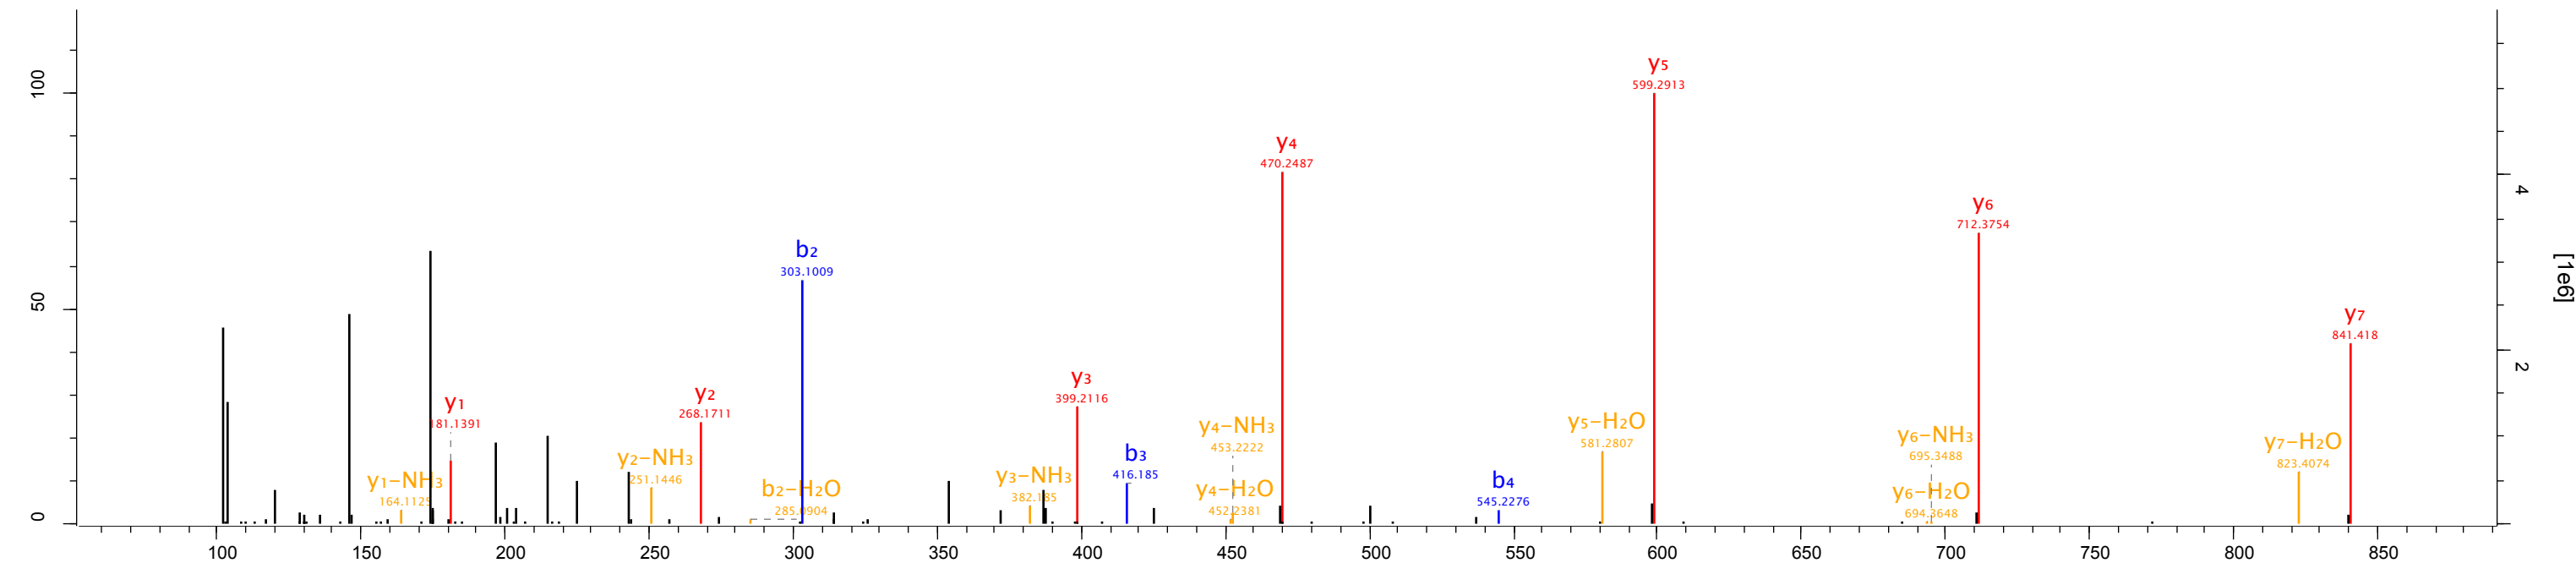



Raw file  
20180707\_MaS\_A375SR\_ML\_proteome\_2\_16

Scan 27613 Method FTMS; HCD Score 100.23 m/z 958.48 Gene names TMEM128

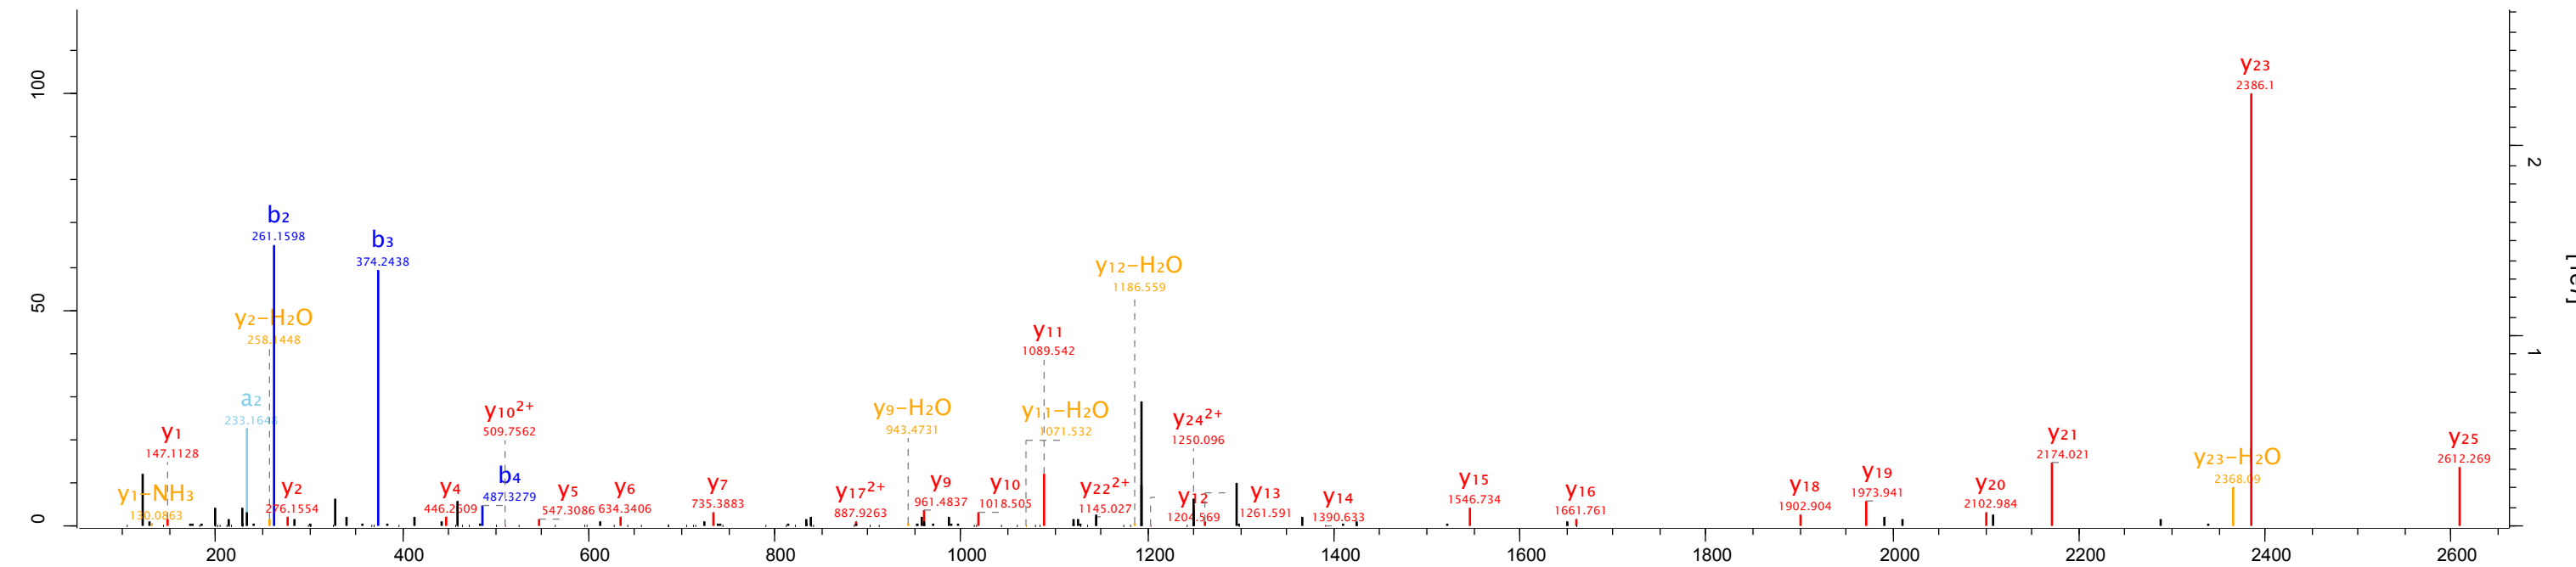

- F L L L P D A E A Q L D R E G D A G P E T S T A V E K -  
          b2 b3 b4

Raw file 20180707\_MaS\_A375SR\_ML\_proteome\_2\_17 Scan 13543 Method FTMS; HCD Score 98.23 m/z 516.25 Gene names ECT2L

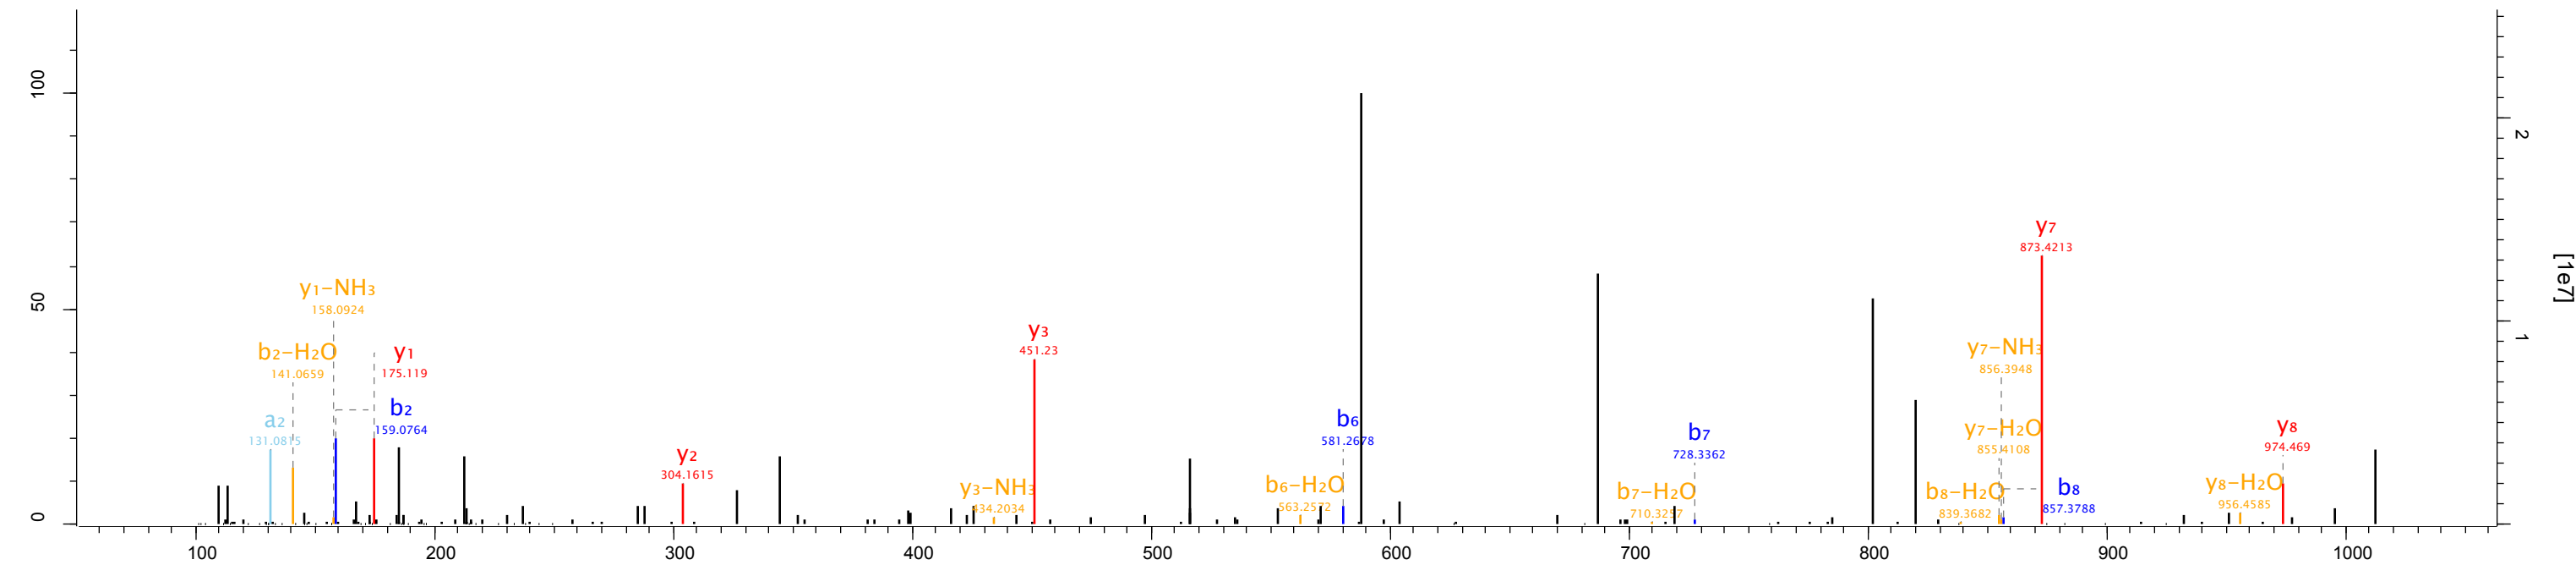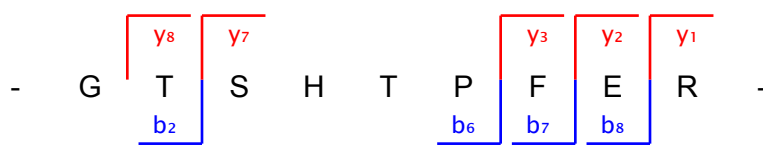

Raw file  
20180707\_MaS\_A375SR\_ML\_proteome\_2\_18

Scan 15733 Method FTMS; HCD Score 77.75 m/z 1121.47

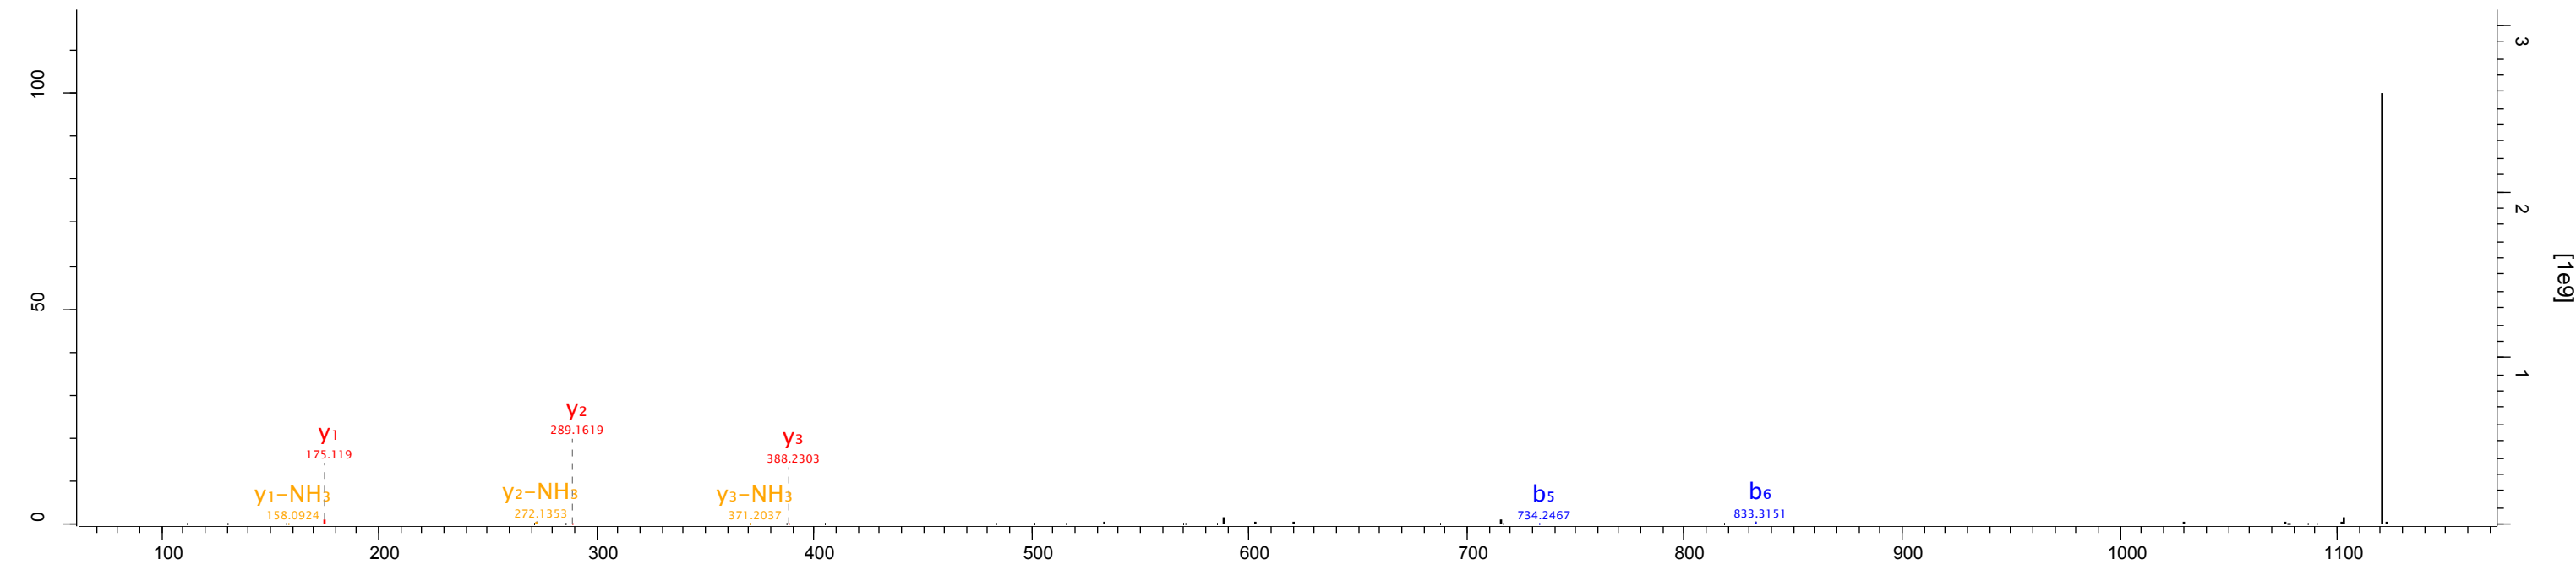

Raw file 20180707\_MaS\_A375SR\_ML\_proteome\_2\_18 Scan 18553 Method FTMS; HCD Score 47.08 m/z 962.48 Gene names ATP6V0C

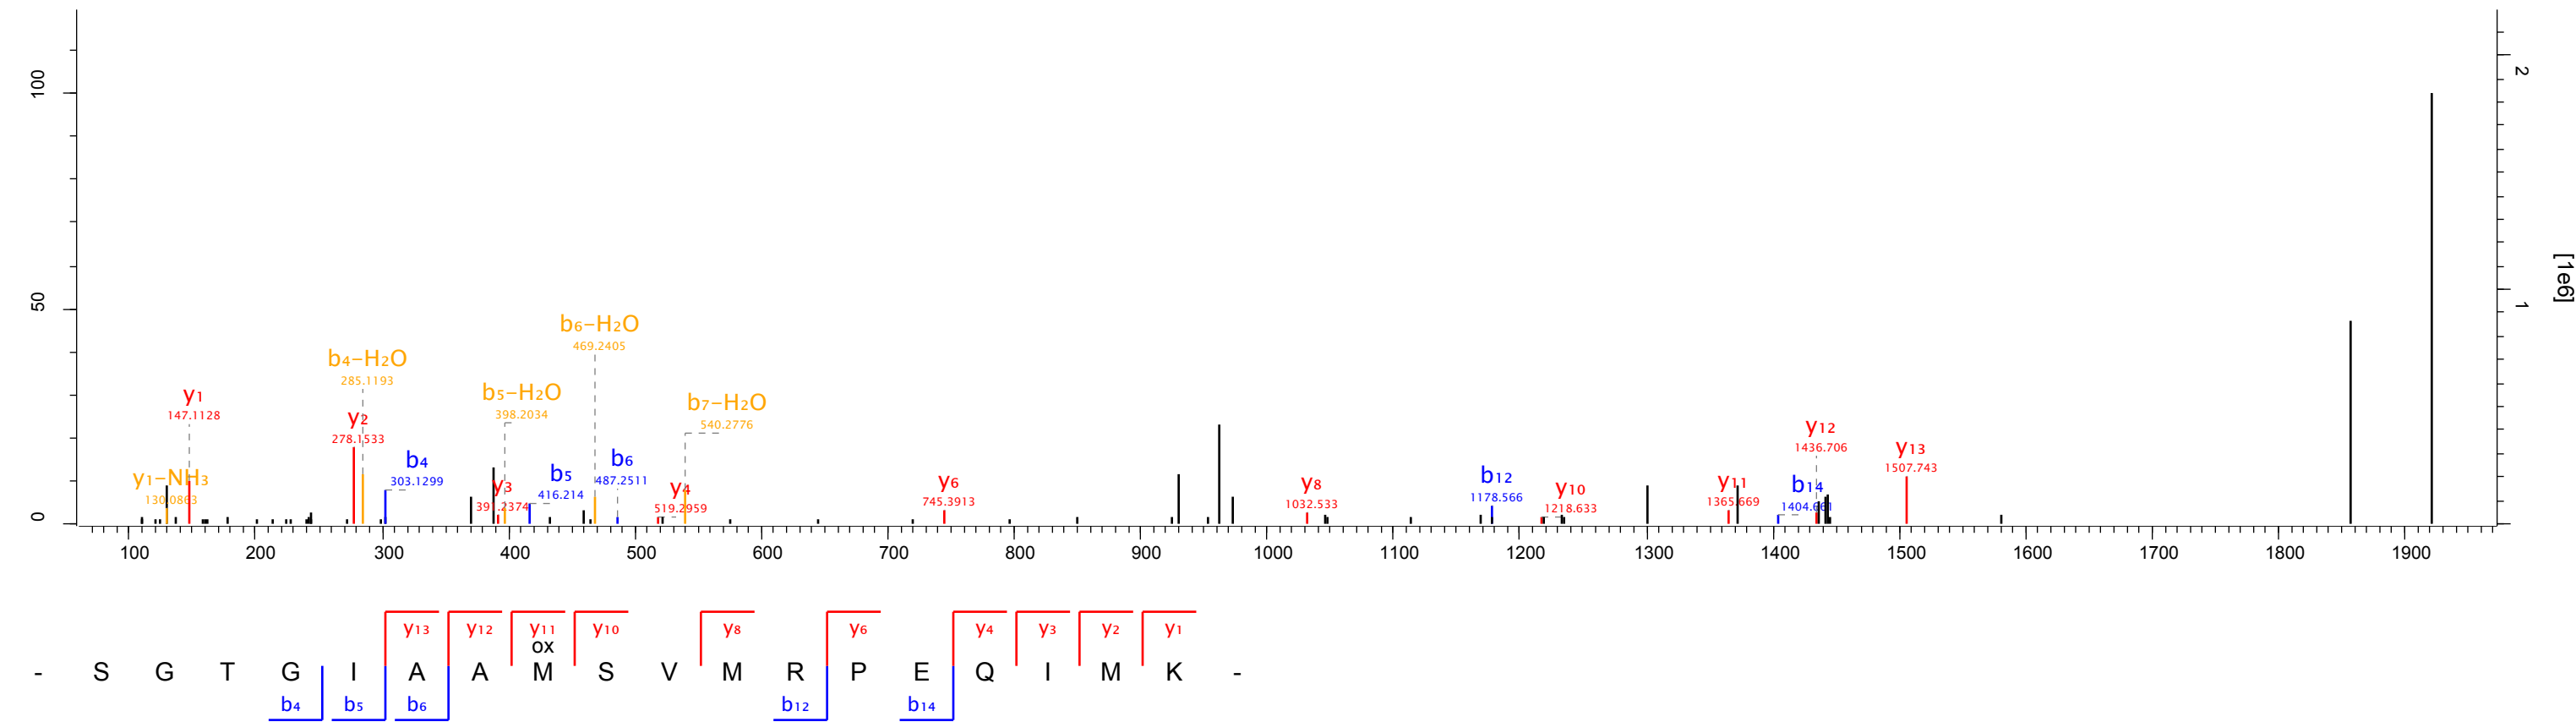

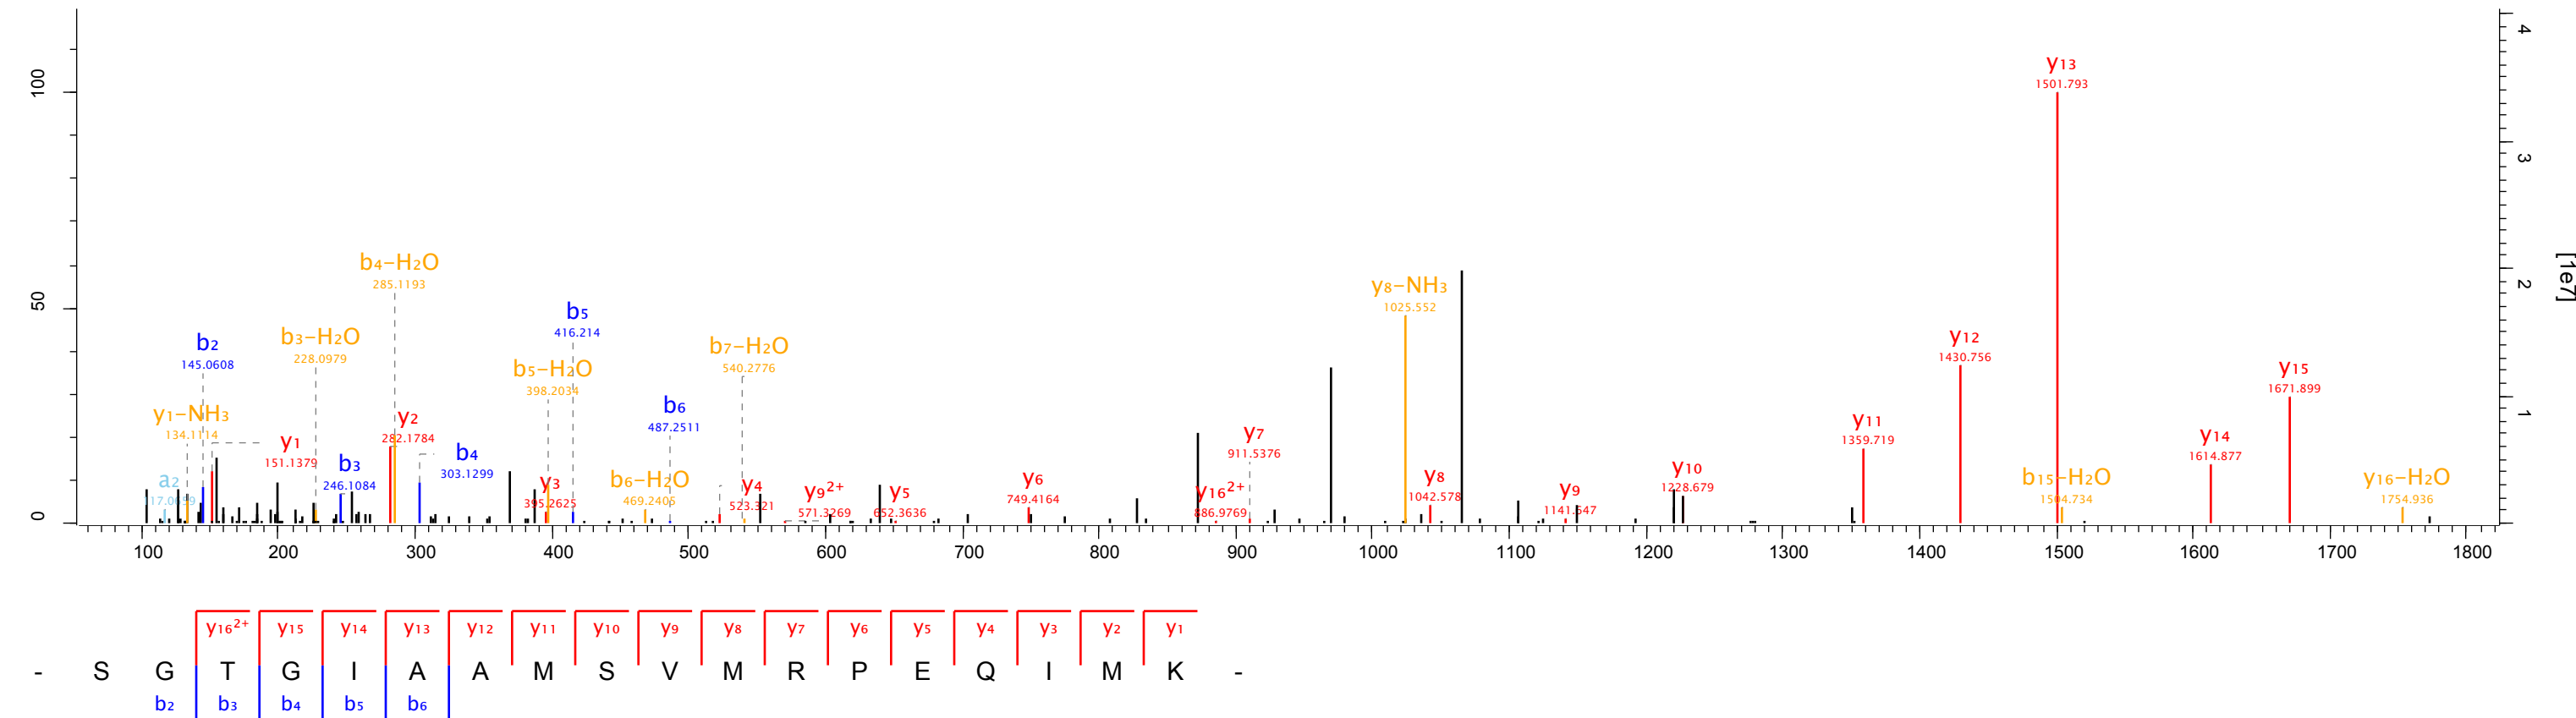

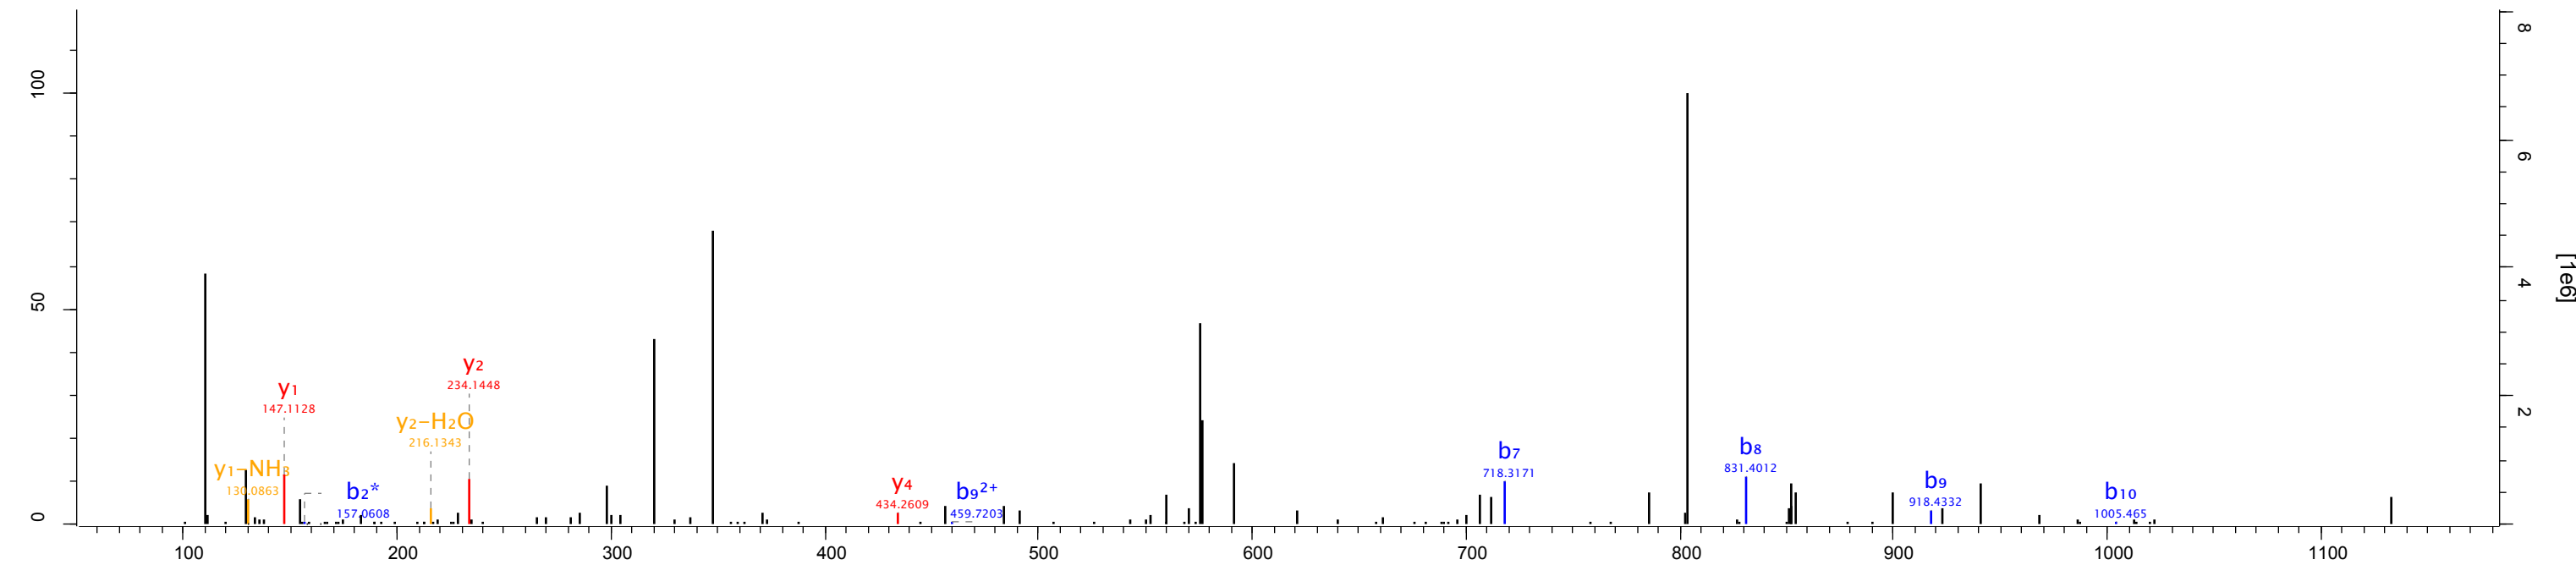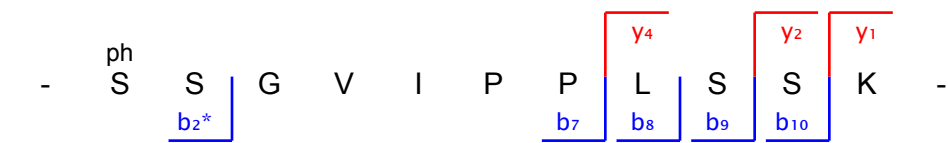

Raw file 20180707\_MaS\_A375SR\_ML\_proteome\_2\_19 Scan 11623 Method FTMS; HCD Score 58.25 m/z 825.92 Gene names MKRN1

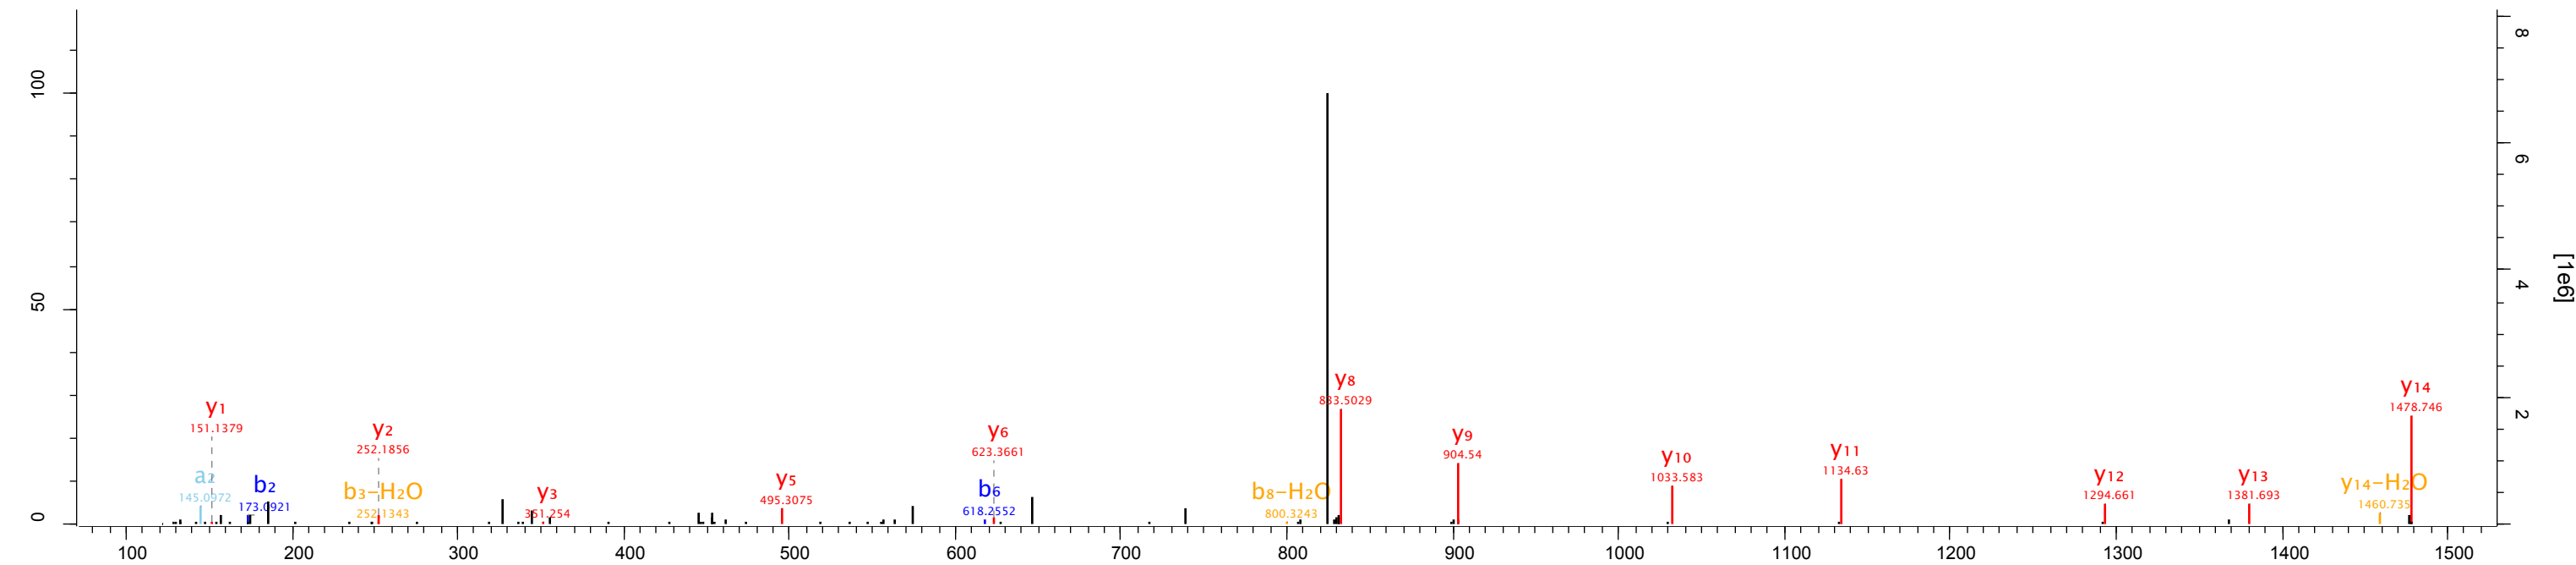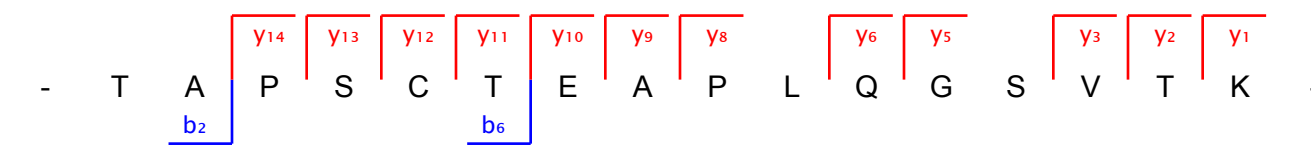

Raw file 20180707\_MaS\_A375SR\_ML\_proteome\_2\_21 Scan 17293 Method FTMS; HCD Score 45.61 m/z 743.88 Gene names MGST2

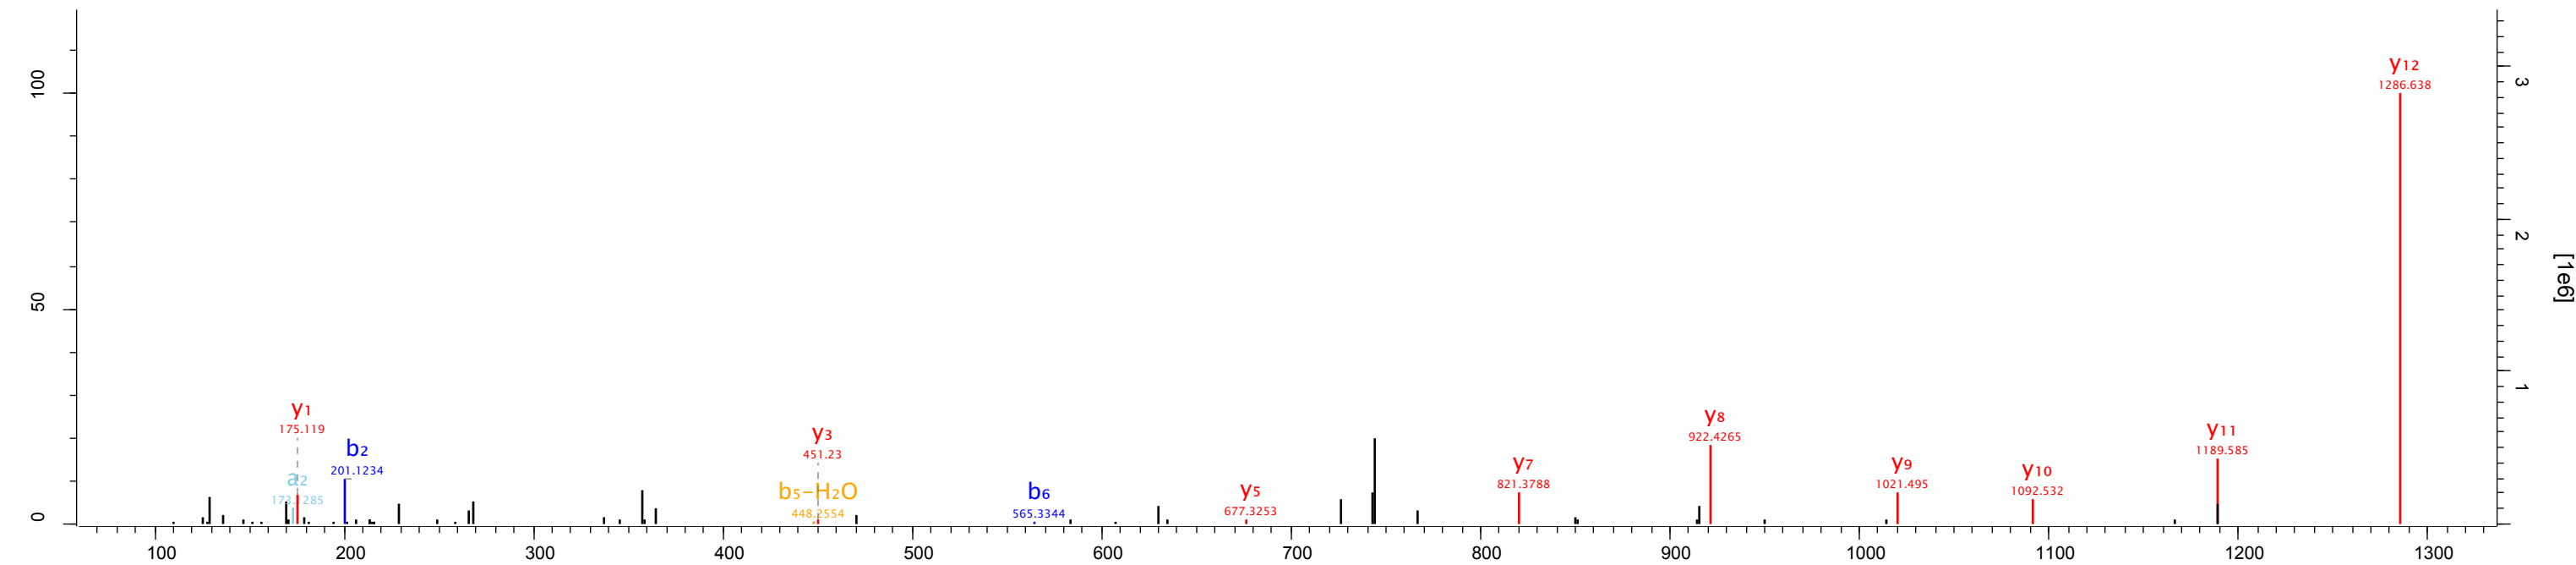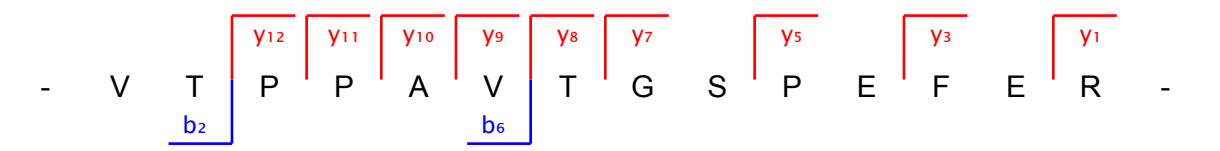



Raw file 20180707\_MaS\_A375SR\_ML\_proteome\_2\_22 Scan 19383 Method FTMS; HCD Score 85.54 m/z 716.37 Gene names ZFAND3

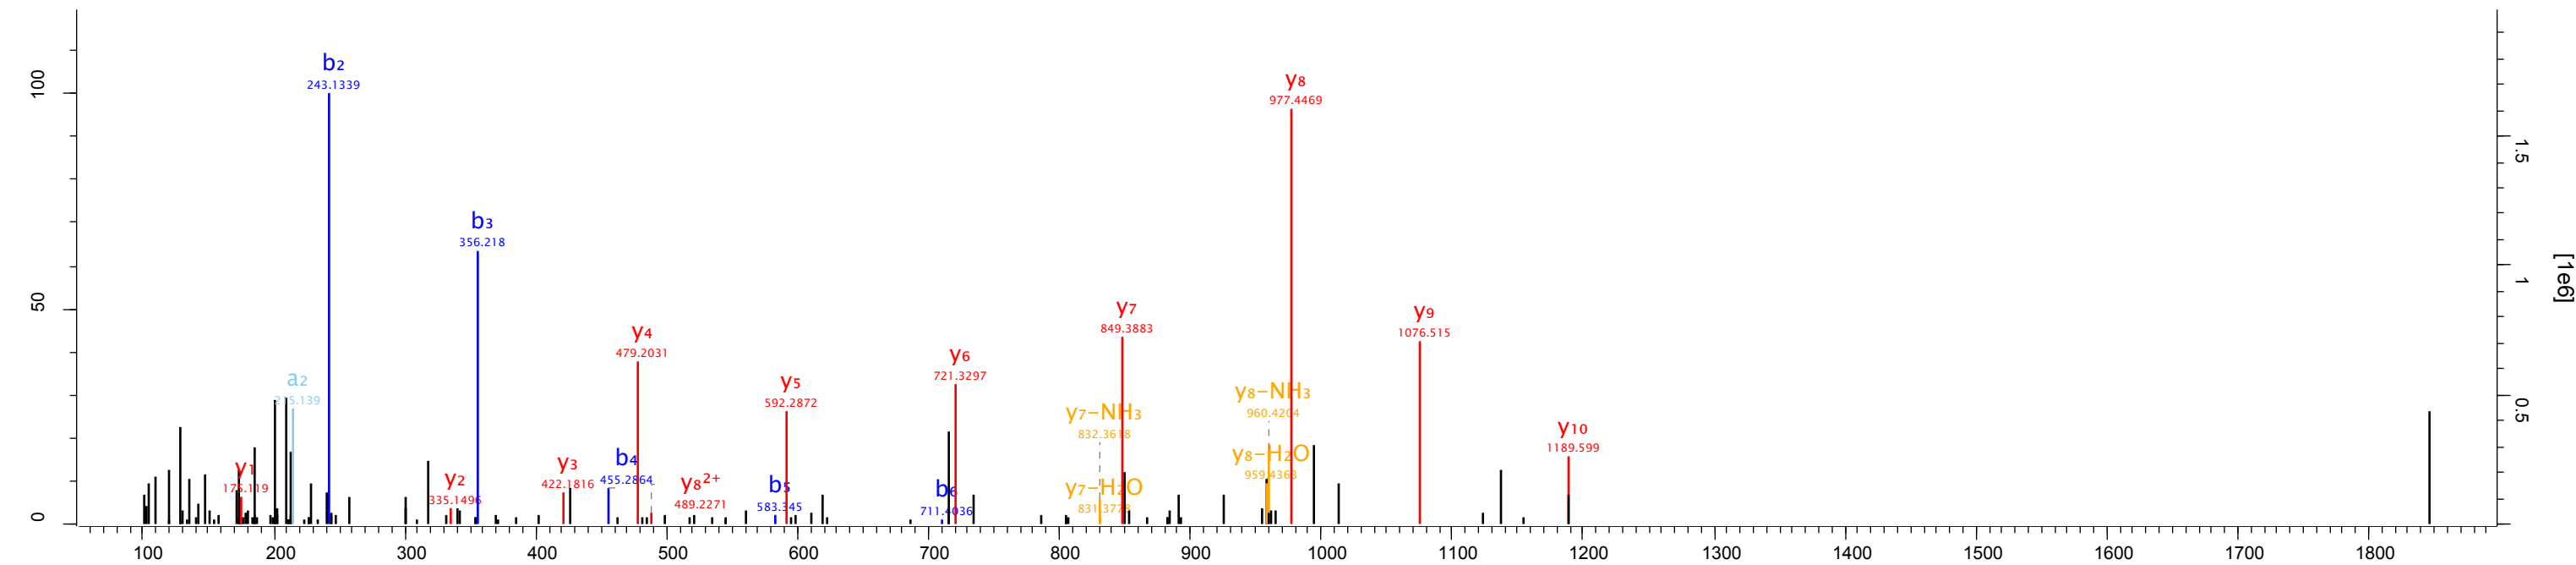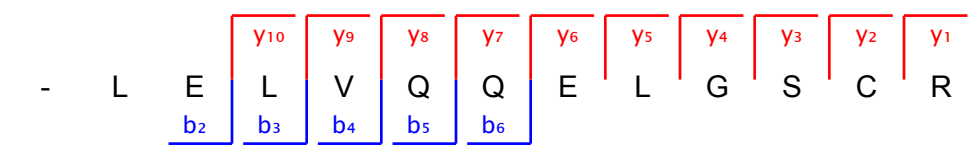

Raw file 20180707\_MaS\_A375SR\_ML\_proteome\_2\_22 Scan 23653 Method FTMS; HCD Score 107.69 m/z 518.31

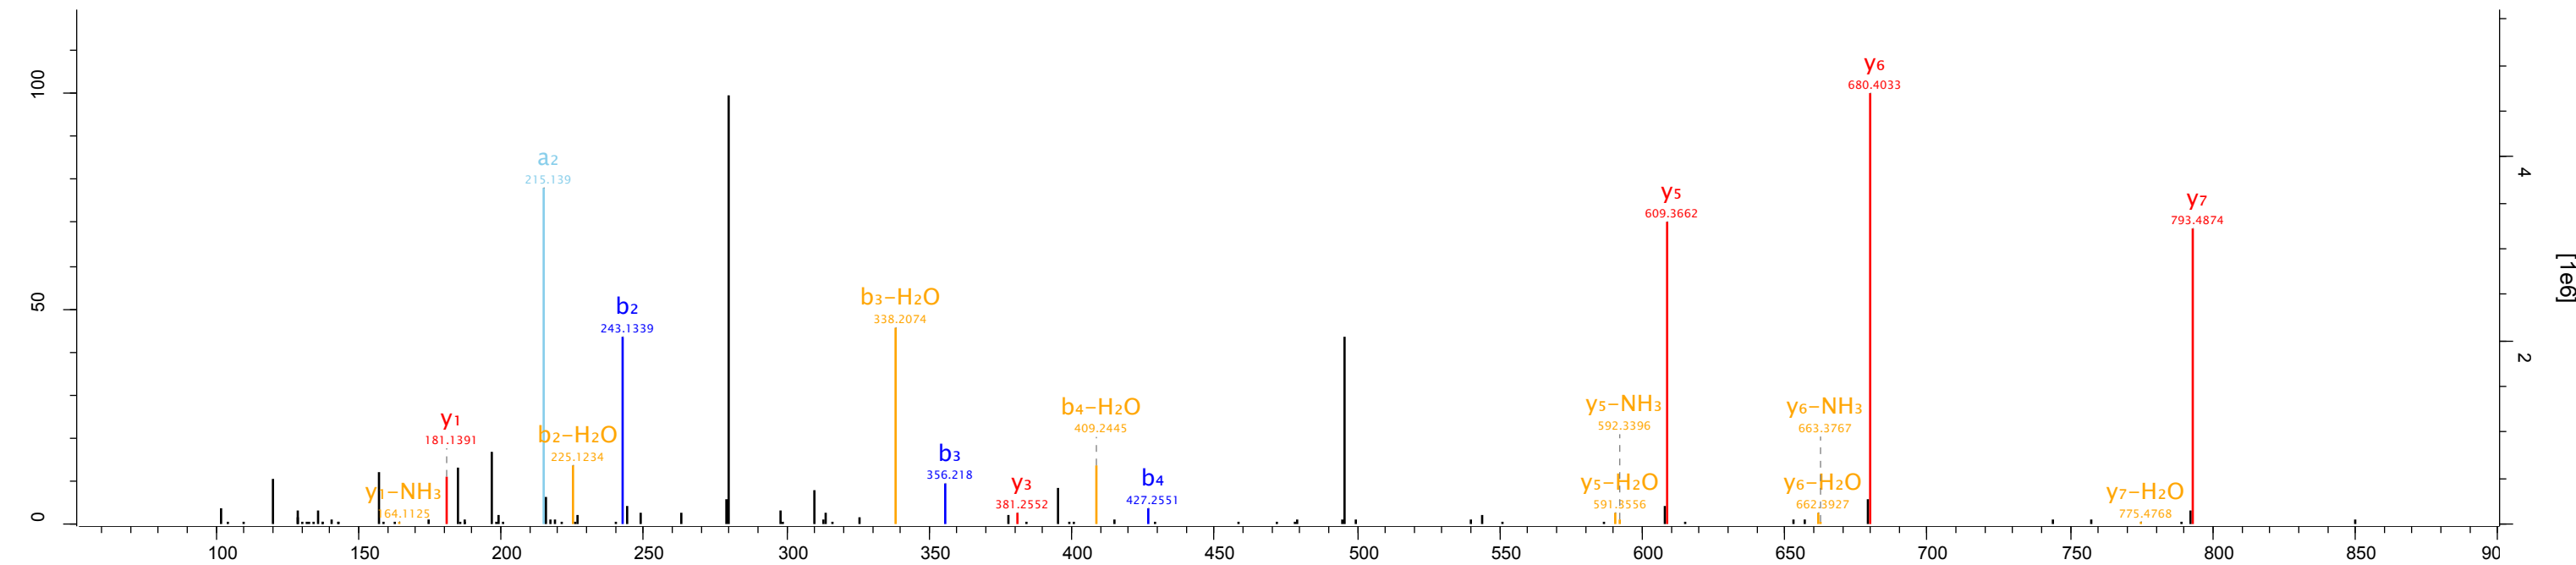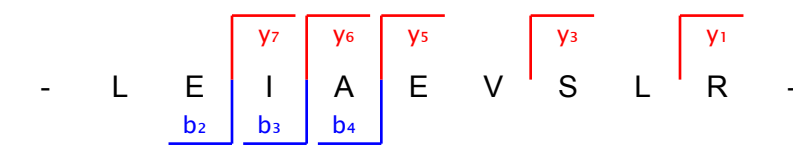

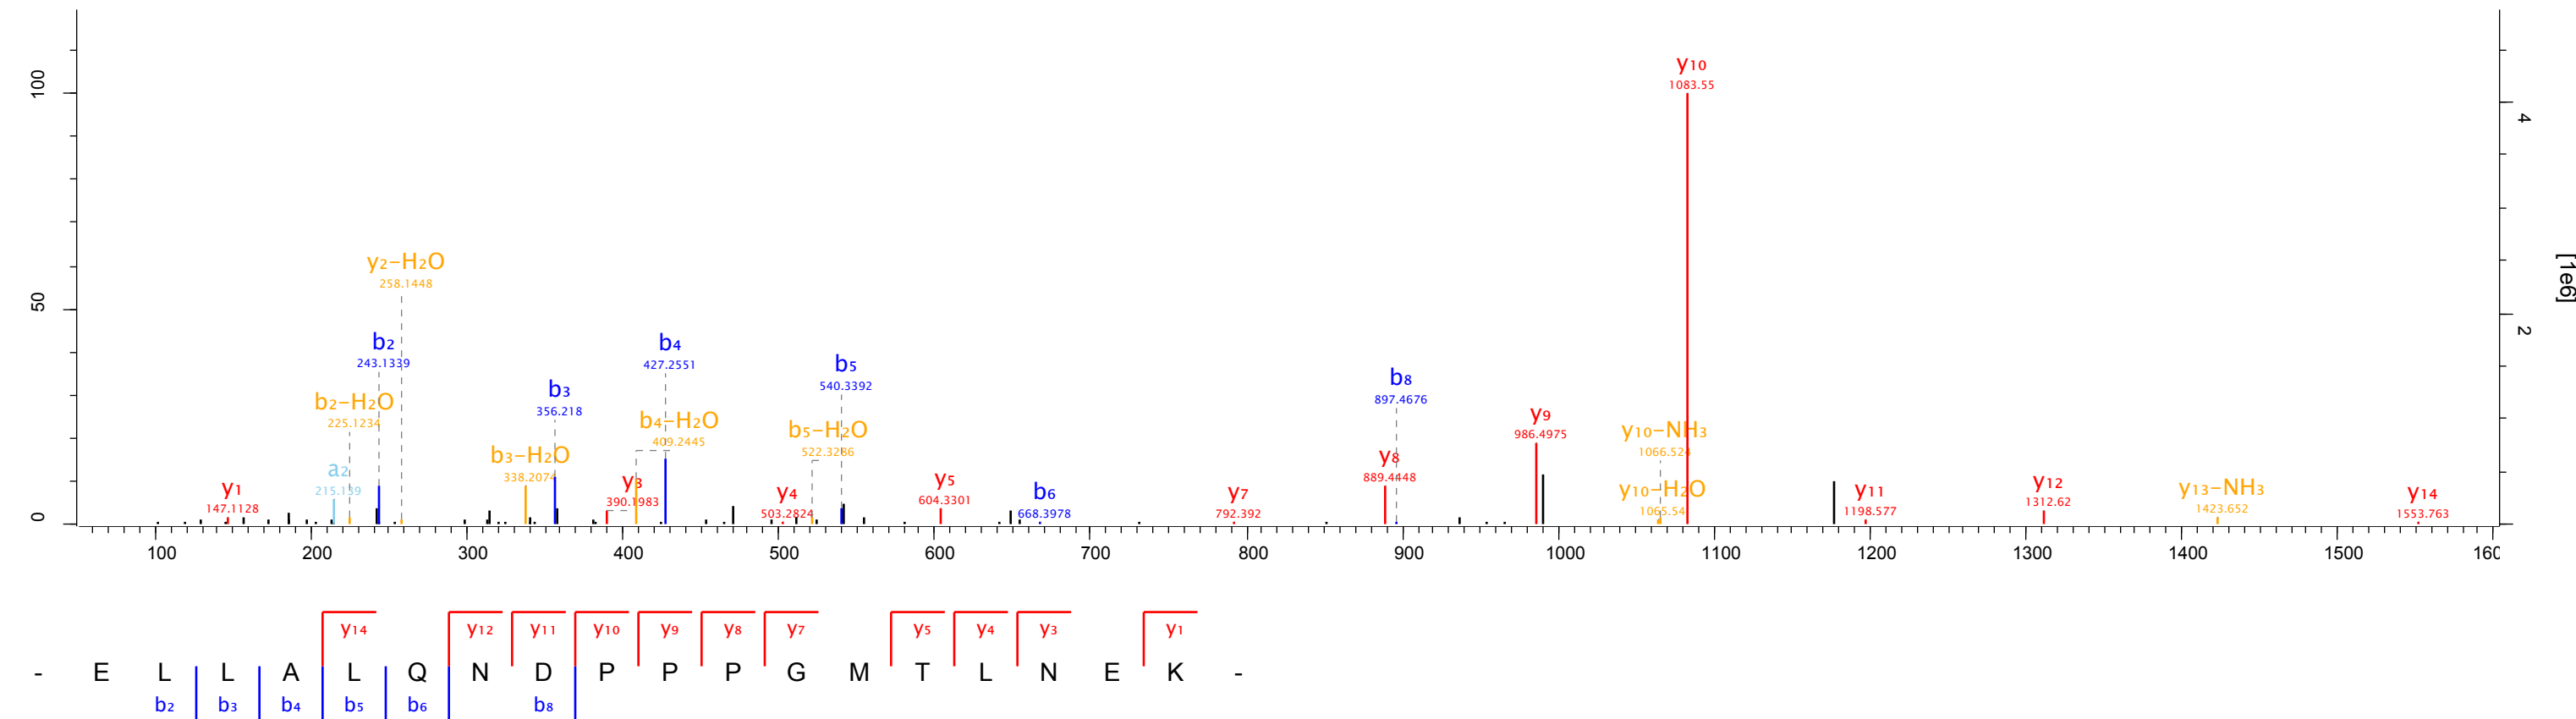

Raw file  
20180707\_MaS\_A375SR\_ML\_proteome\_2\_22

Scan 25583 Method FTMS; HCD Score 65.37 m/z 832.44 Gene names UROC1

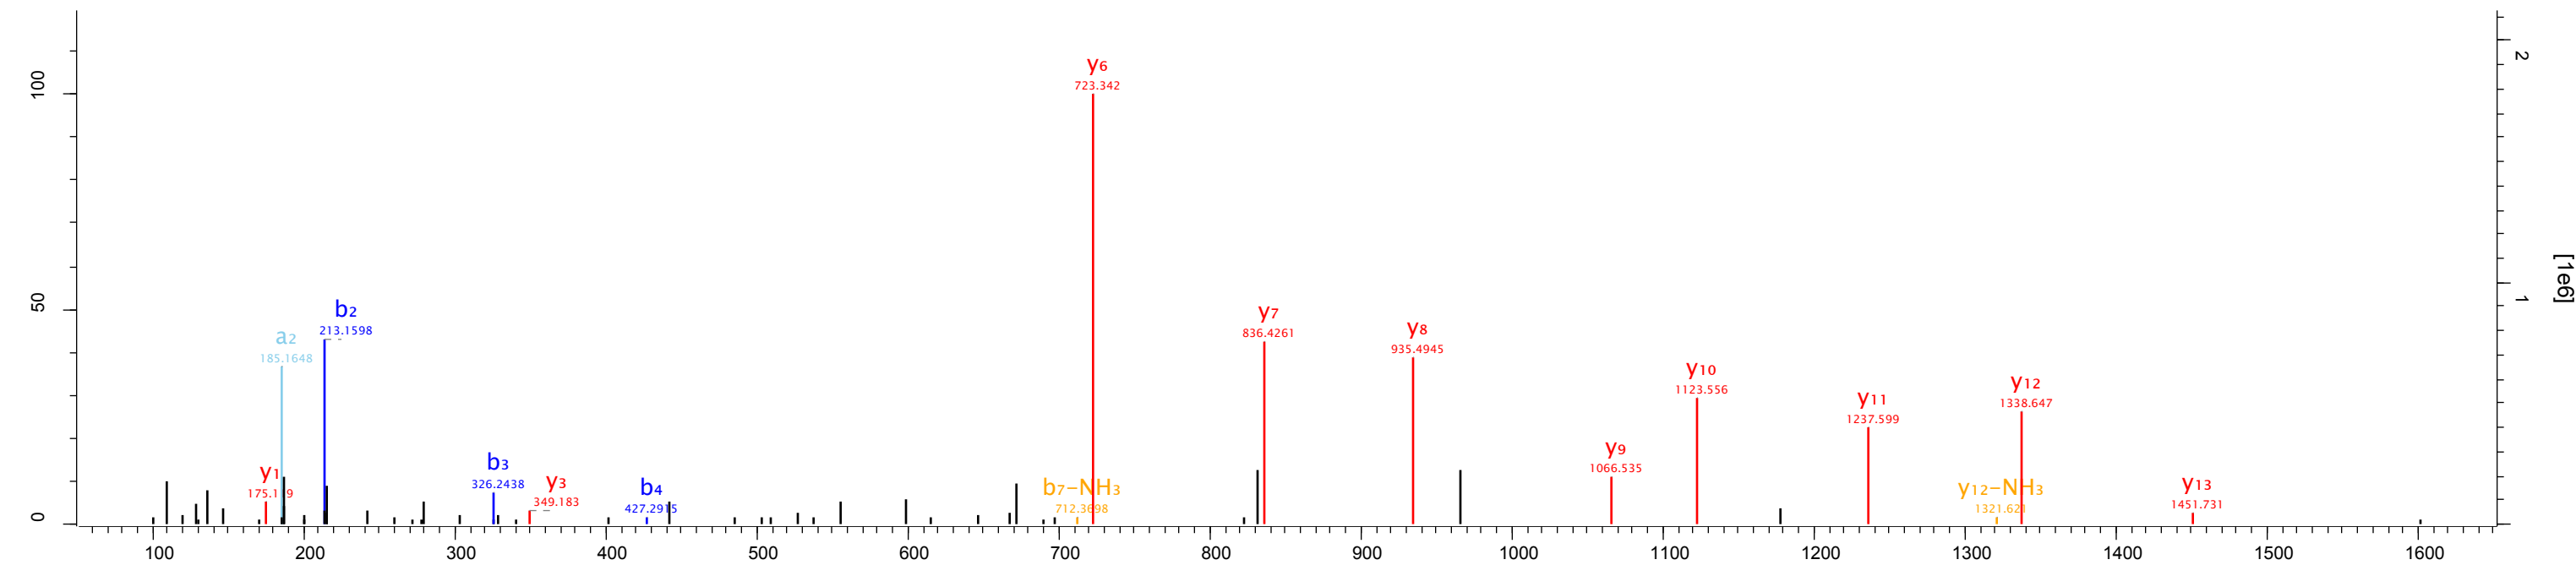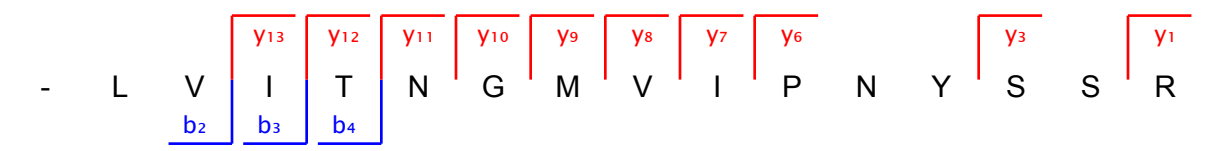

Raw file  
20180707\_MaS\_A375SR\_ML\_proteome\_2\_23

| Scan | Method    | Score | m/z    | Gene names |
|------|-----------|-------|--------|------------|
| 9953 | FTMS; HCD | 29.58 | 592.66 | C20orf24   |

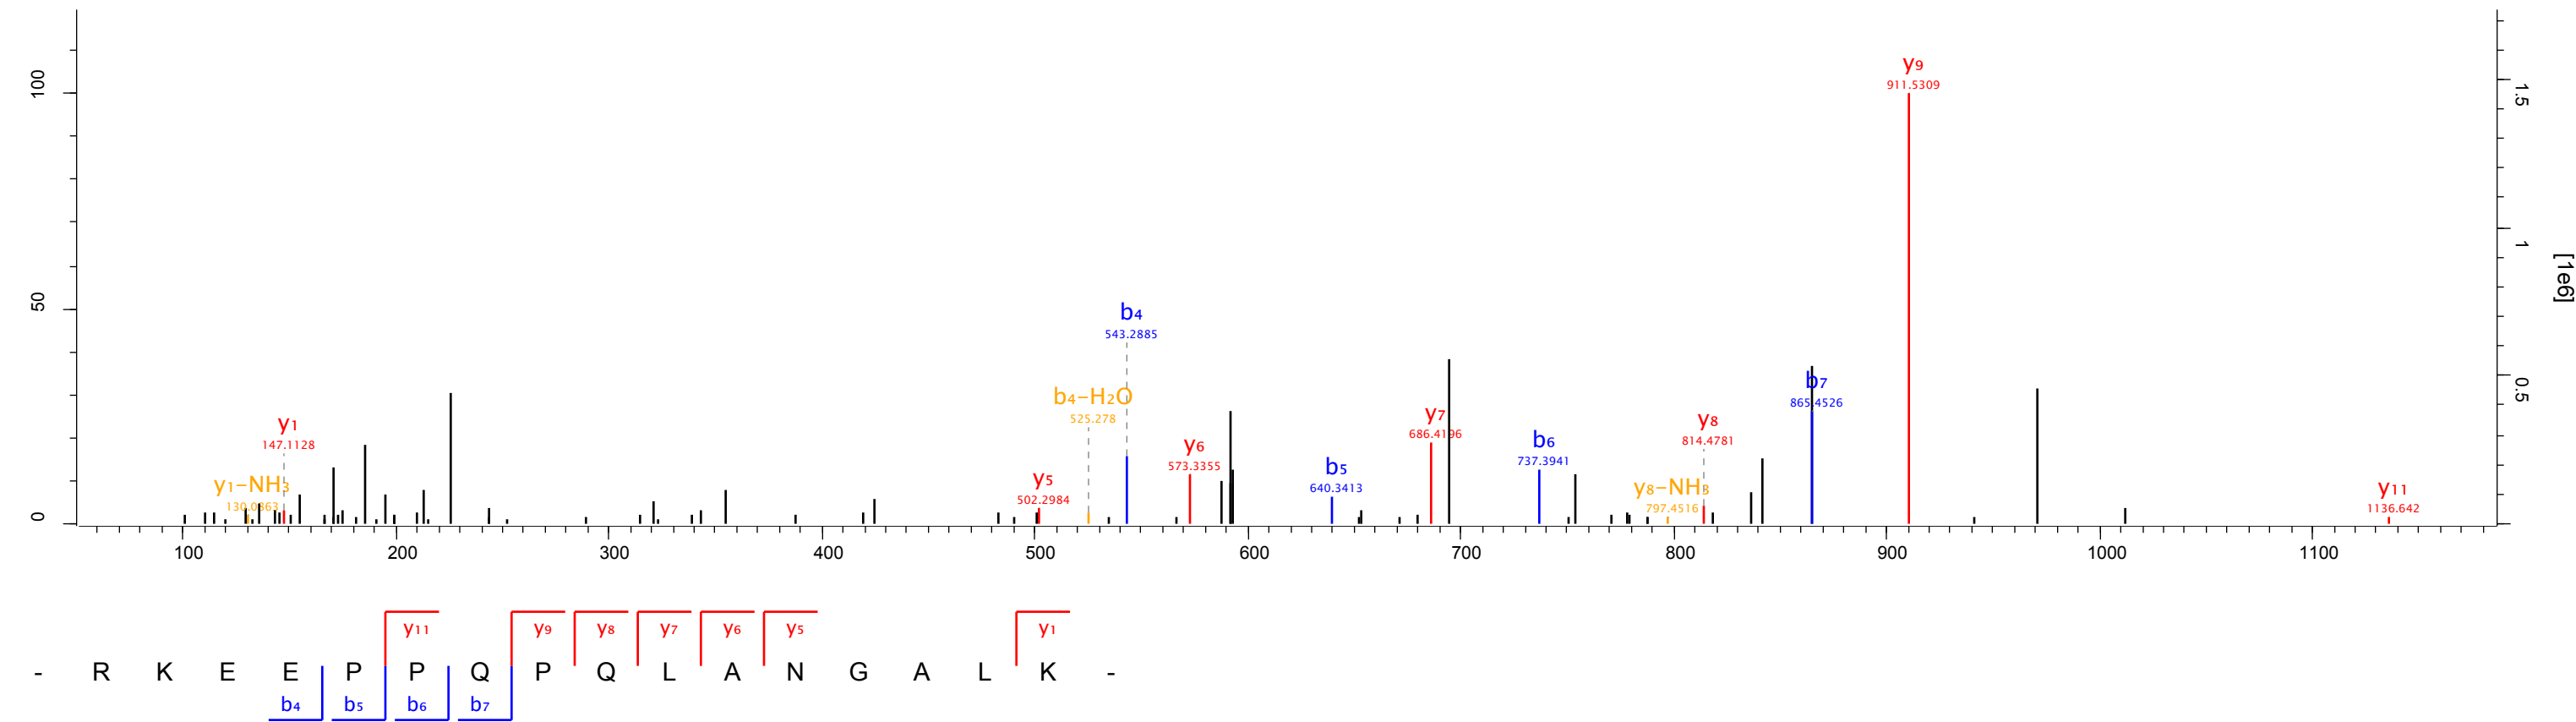

Raw file  
20180707\_MaS\_A375SR\_ML\_proteome\_2\_24

Scan 15613 Method FTMS; HCD Score 143.7 m/z 440.6 Gene names RPL39P5;RPL39

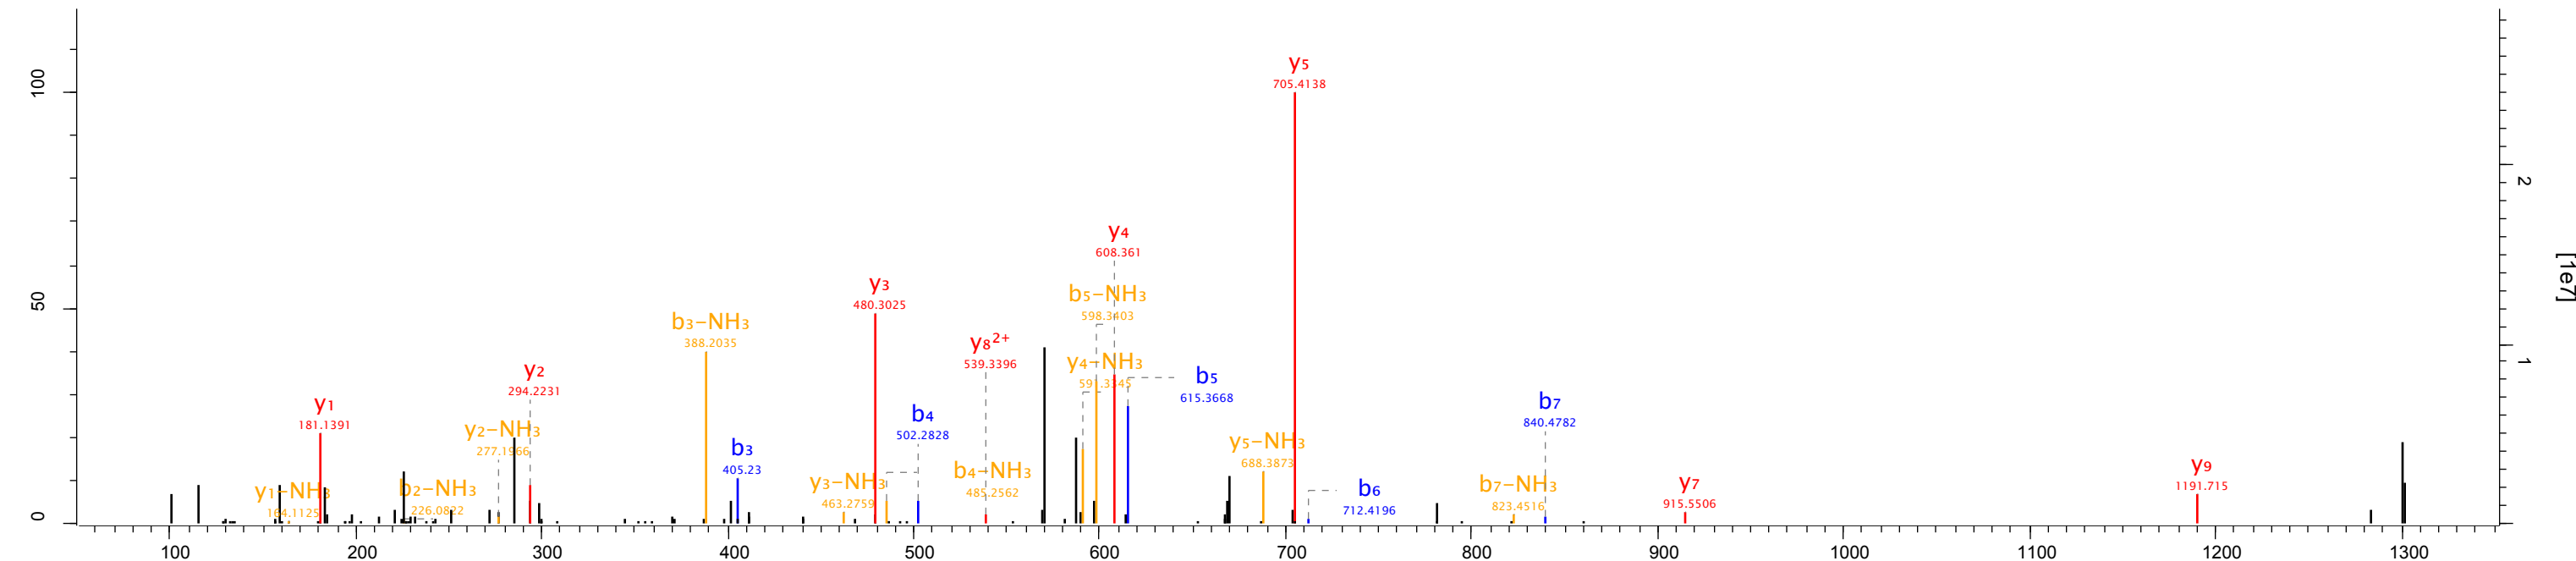

- Q N R P I P Q W I R -  
          b3 b4 b5 b6 b7

Raw file: 20180707\_MaS\_A375SR\_ML\_proteome\_2\_25  
 Scan: 27523 Method: FTMS; HCD Score: 66.22 m/z: 715.89 Gene names: RFXAP

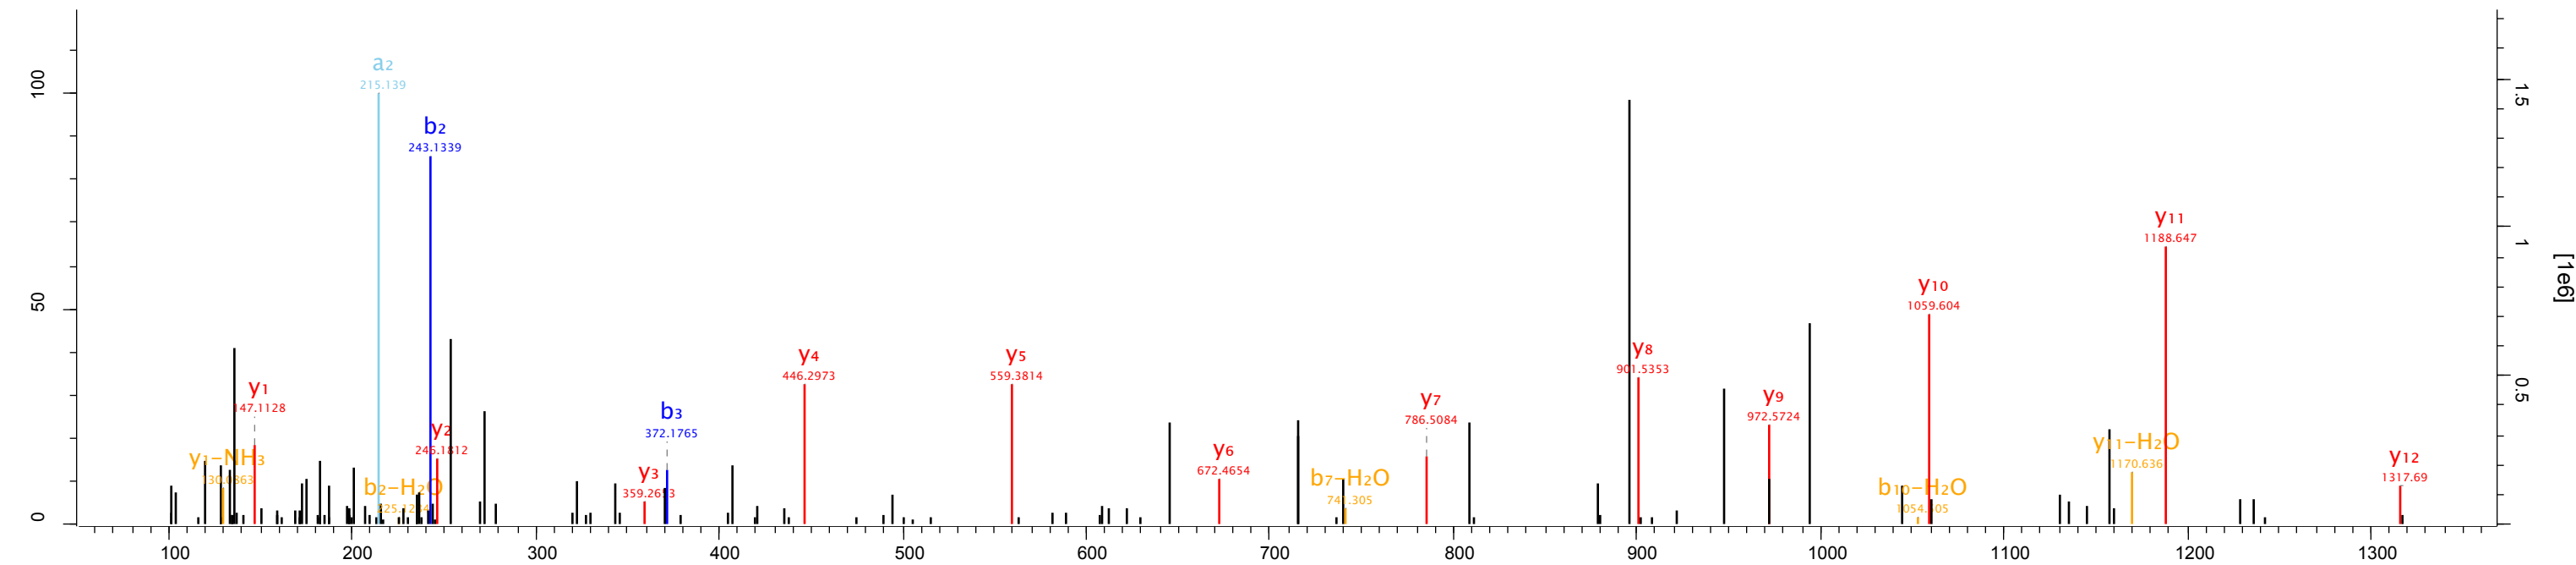

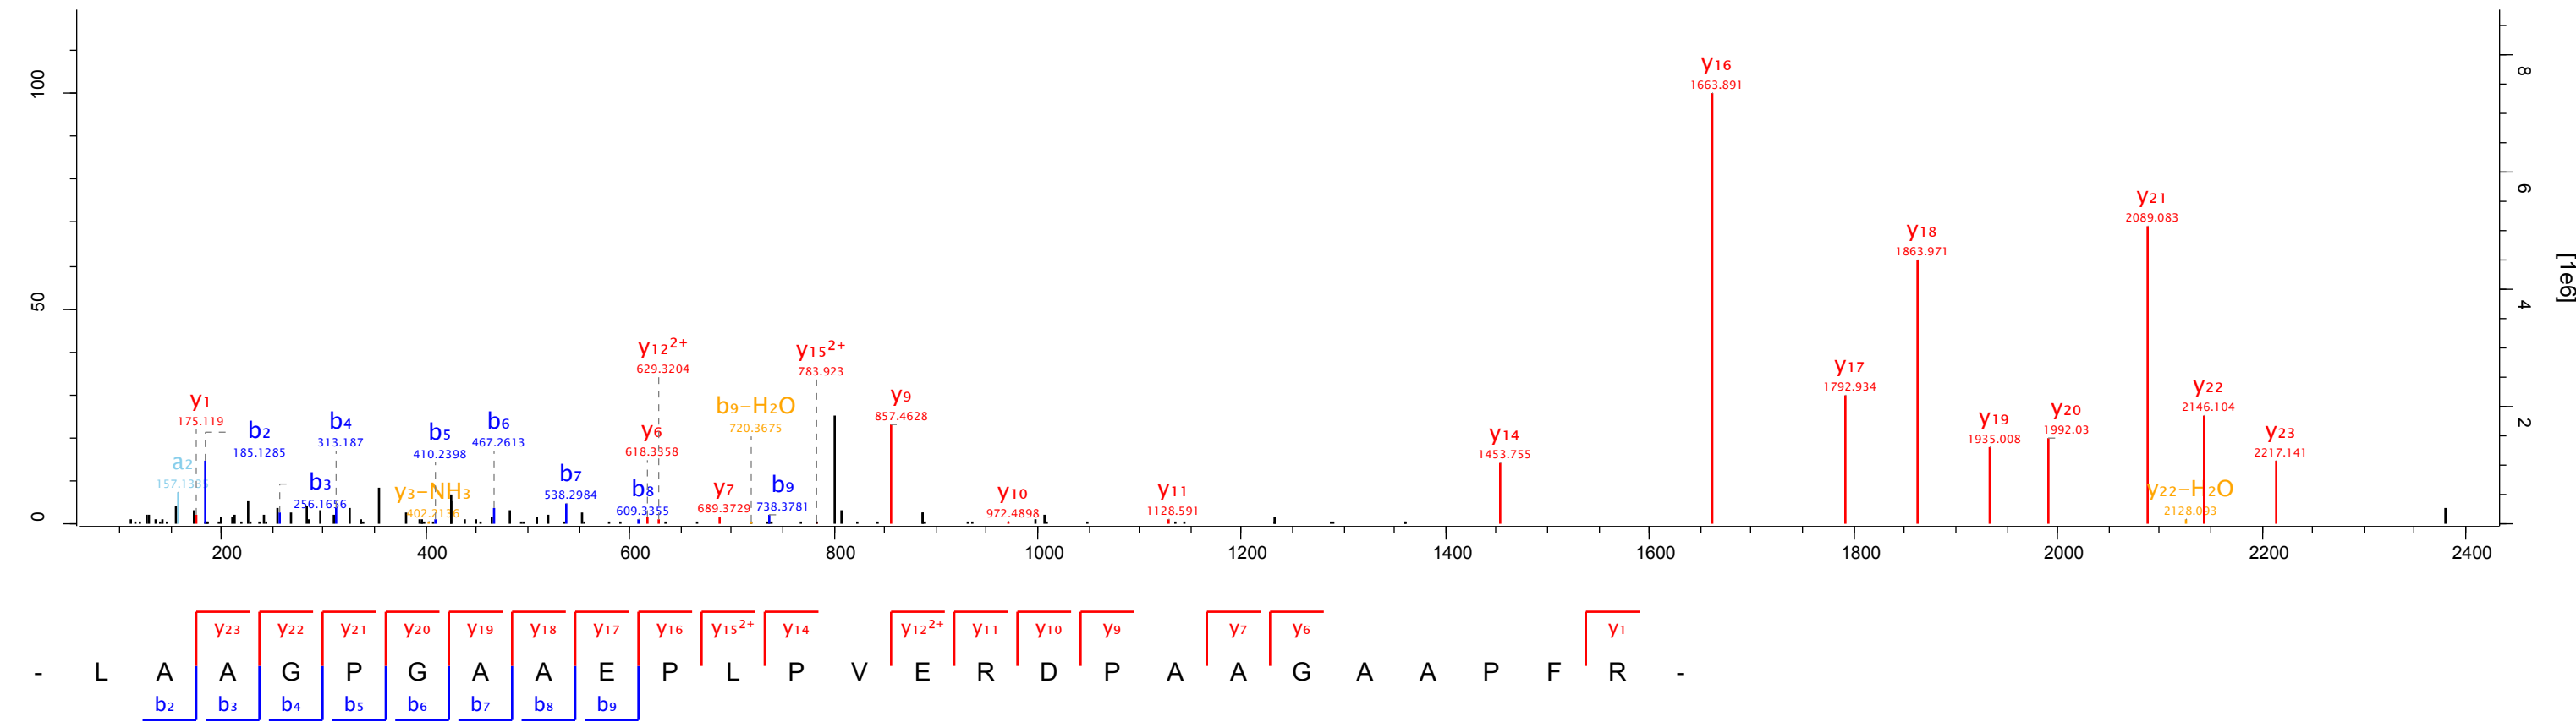



Raw file  
20180707\_MaS\_A375SR\_ML\_proteome\_2\_27

Scan 9293 Method FTMS; HCD Score 40.27 m/z 431.73

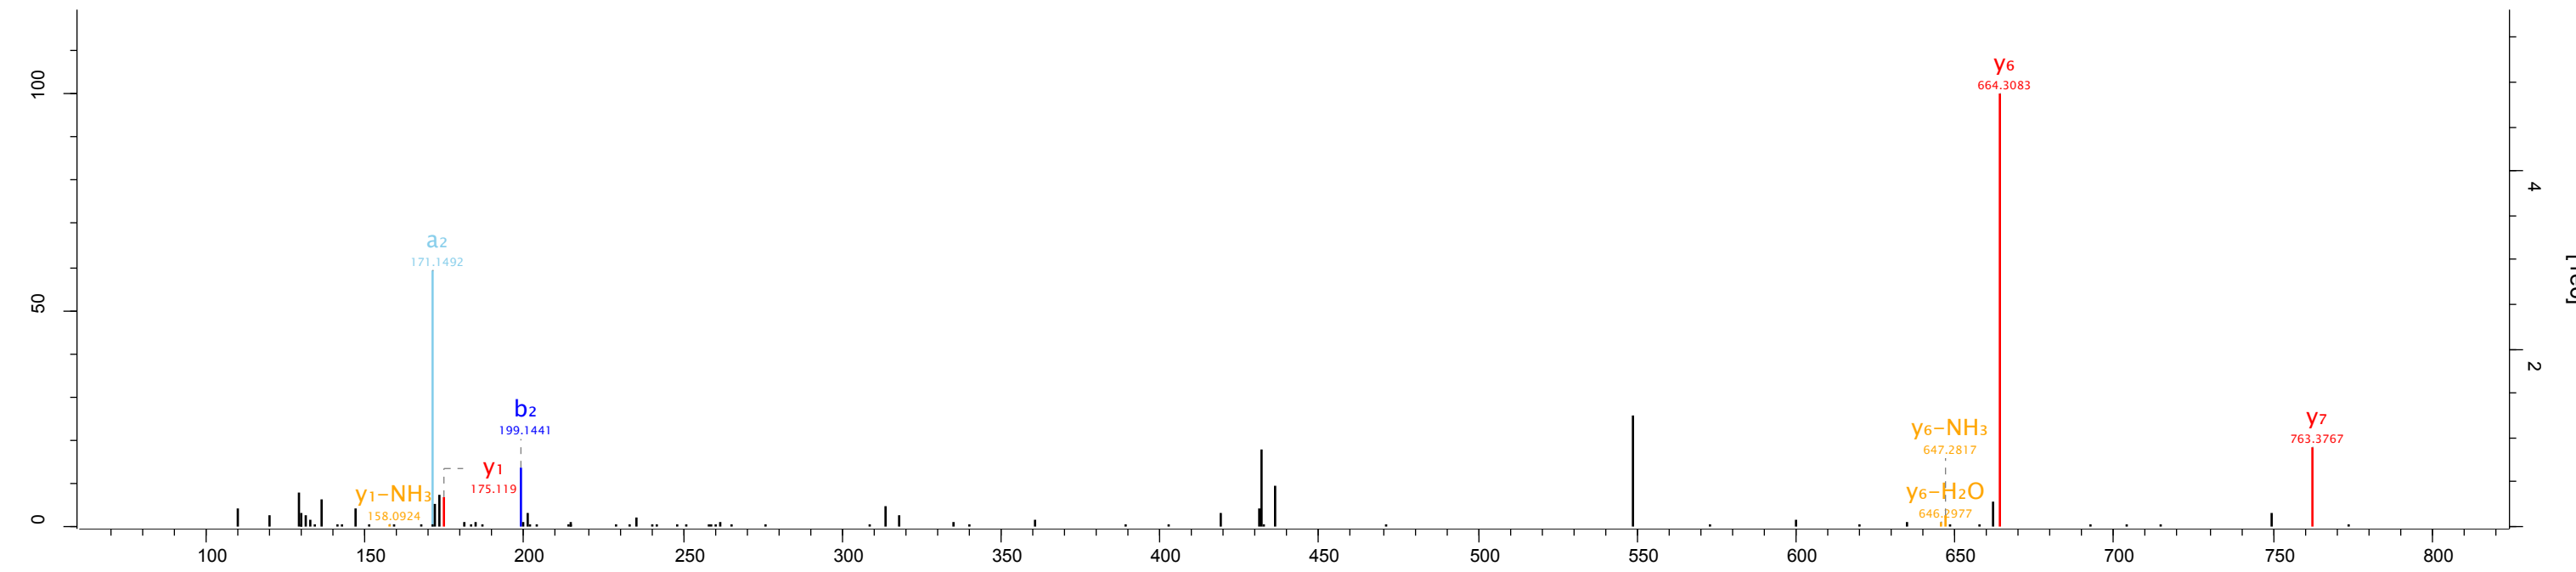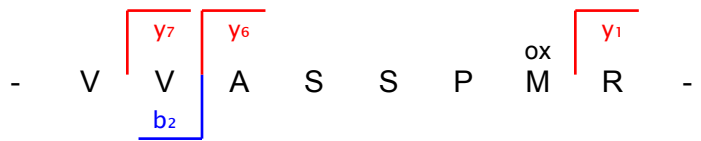

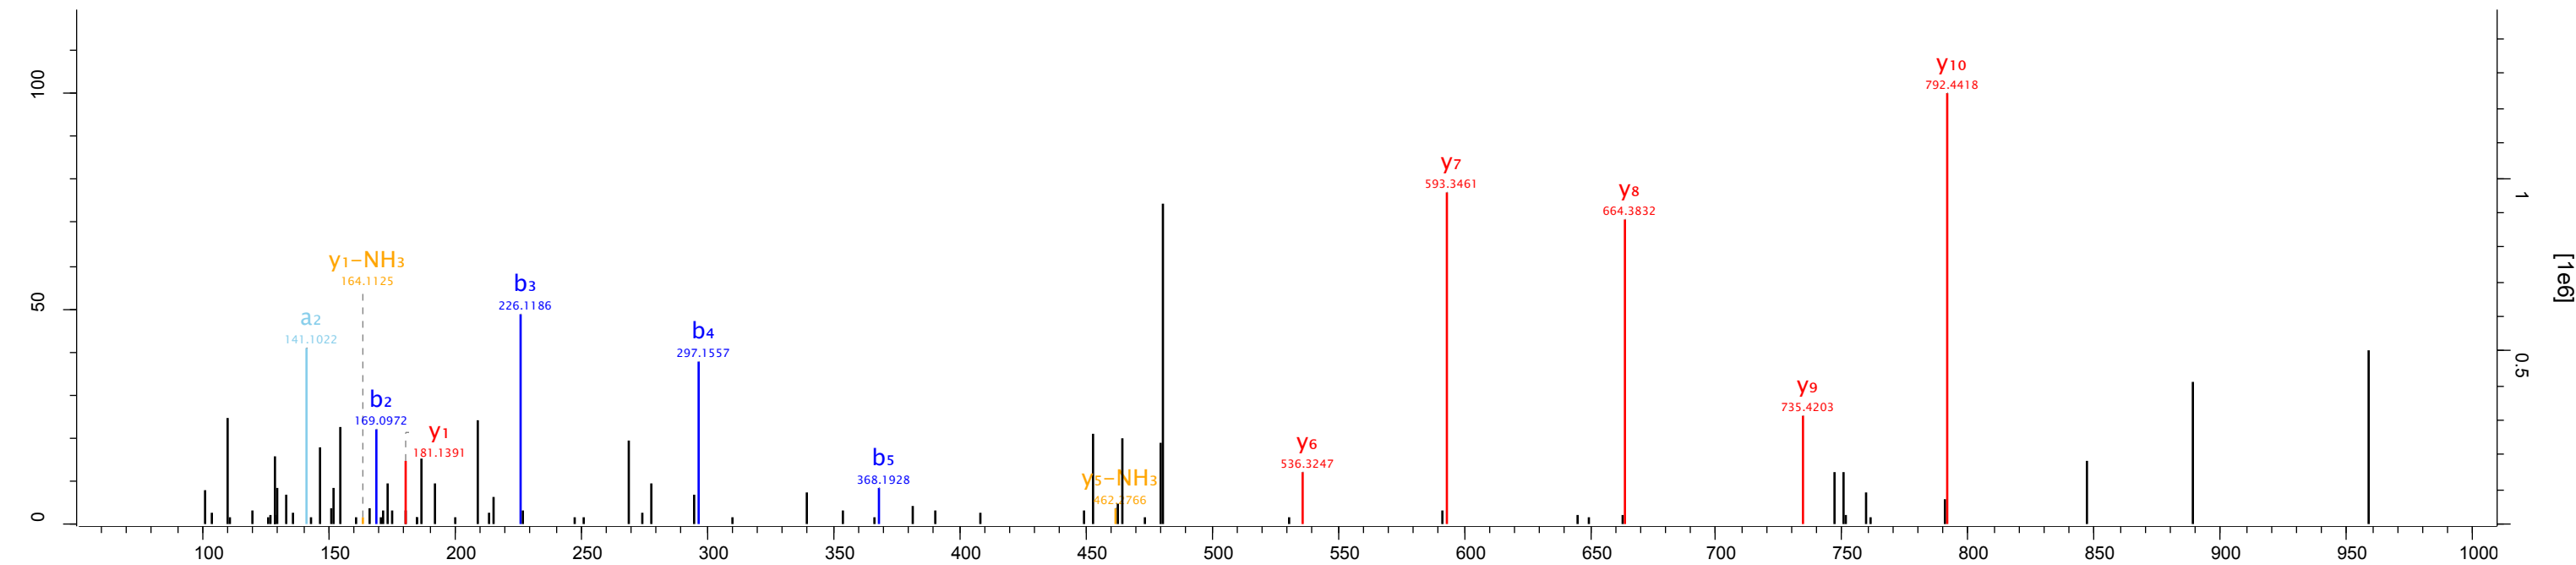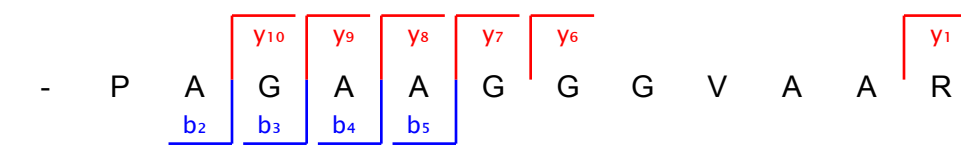

Raw file 20180707\_MaS\_A375SR\_ML\_proteome\_2\_30 Scan 10193 Method FTMS; HCD Score 48.09 m/z 346.19

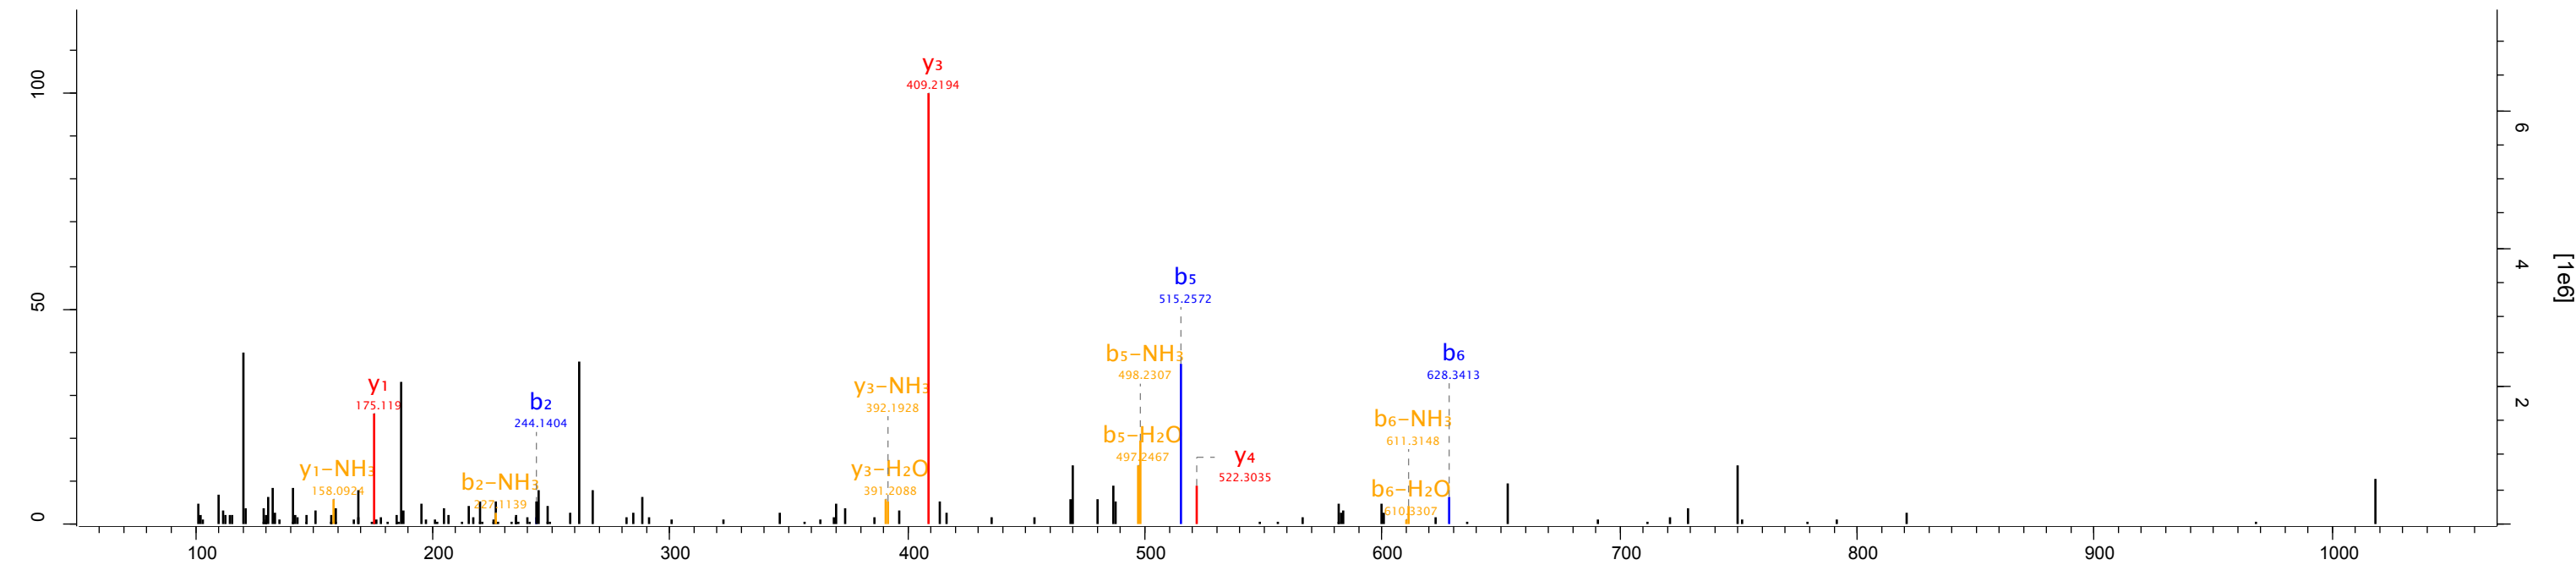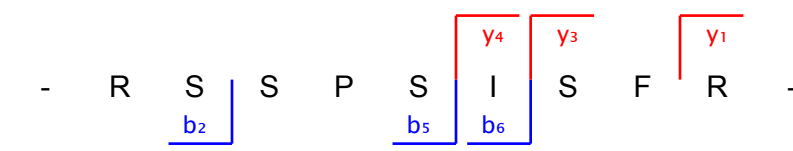

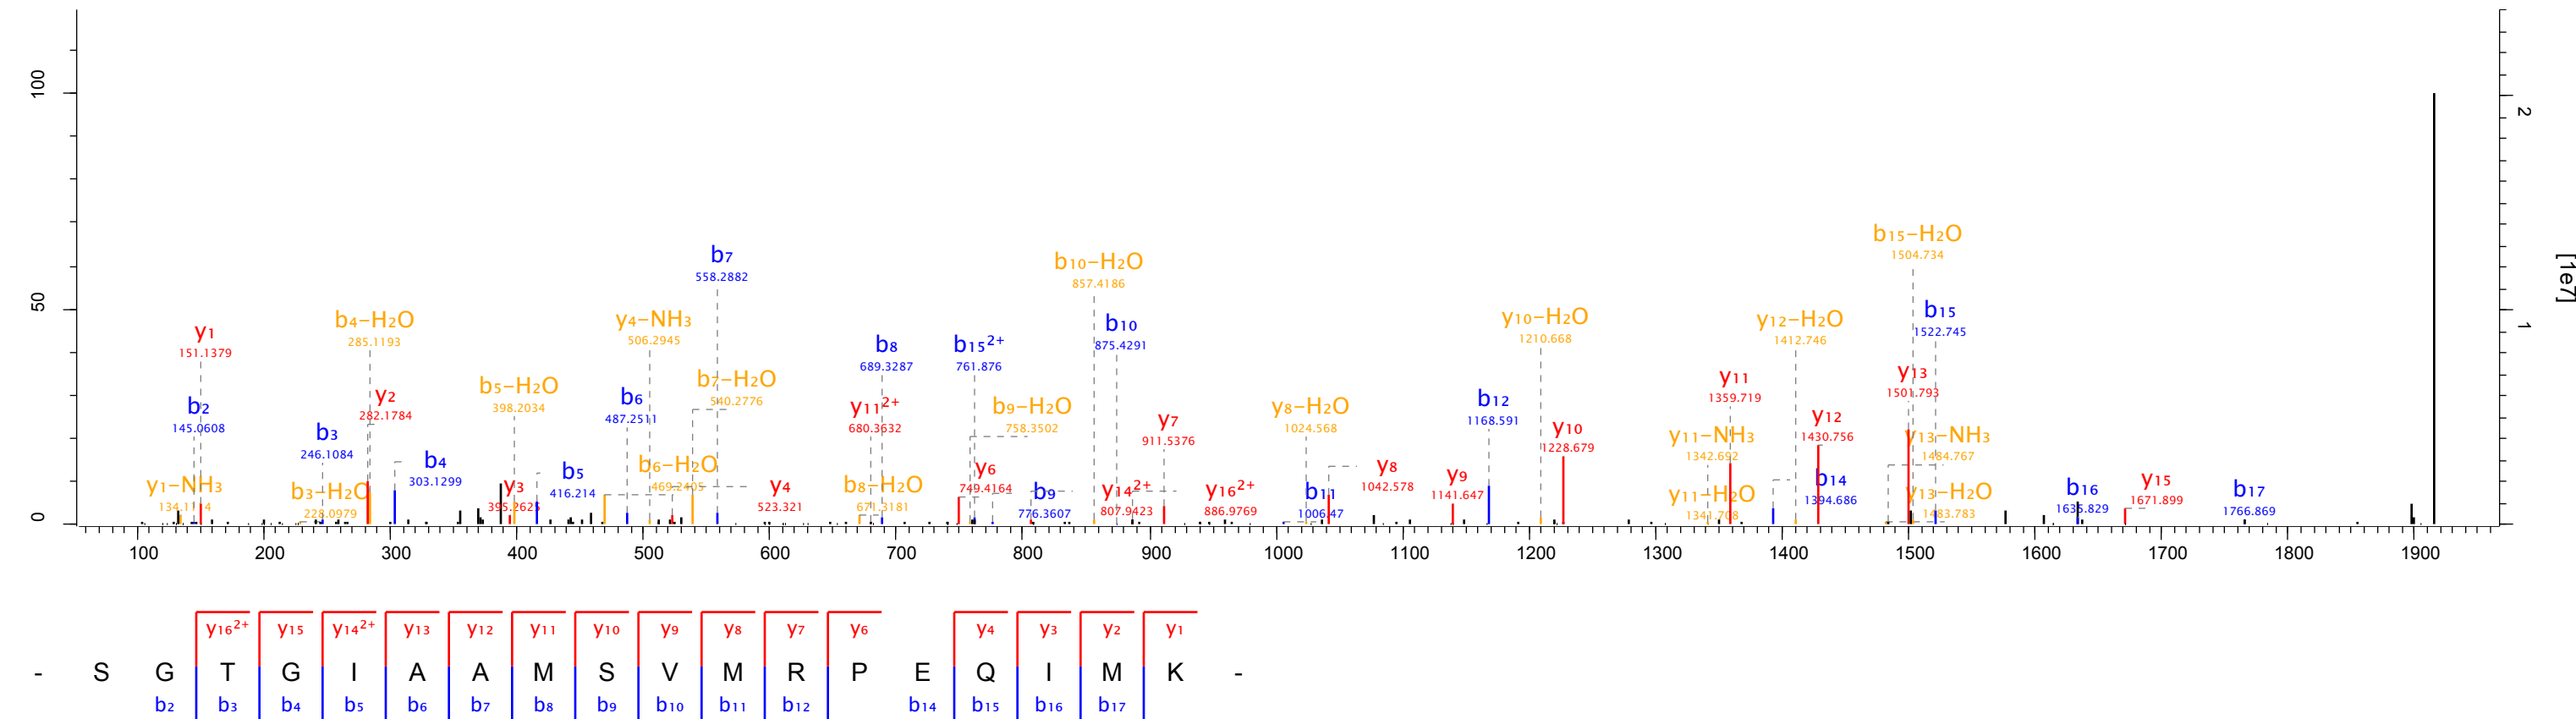

Raw file: 20180707\_MaS\_A375SR\_ML\_proteome\_20  
 Scan: 23703 Method: FTMS; HCD Score: 92.63 m/z: 636.66 Gene names: ATP6V0C

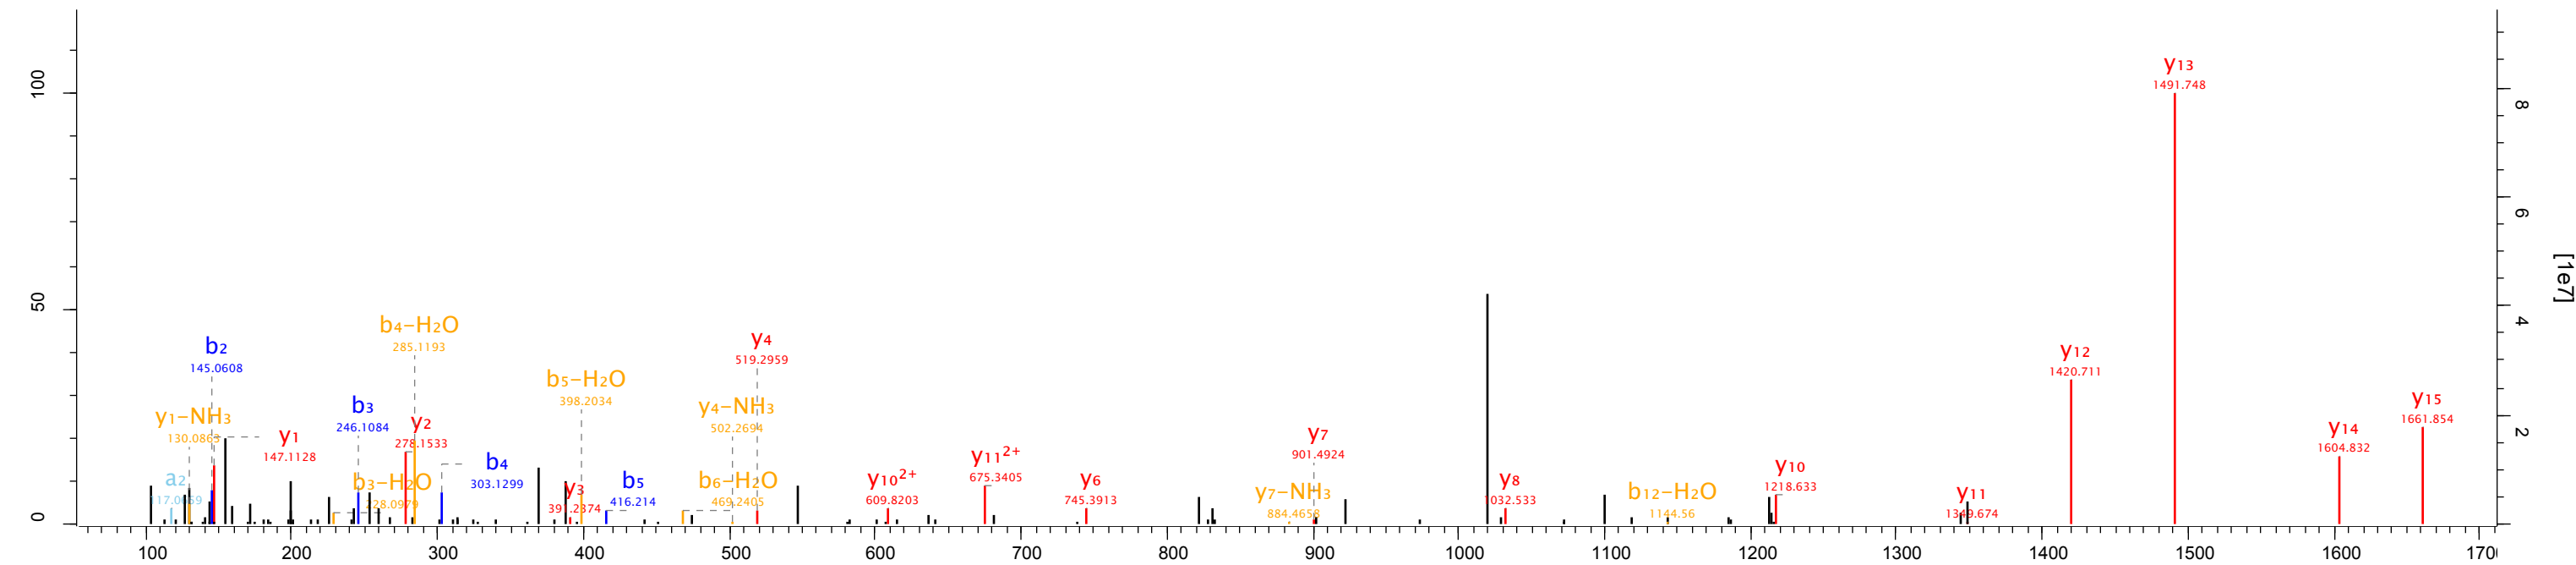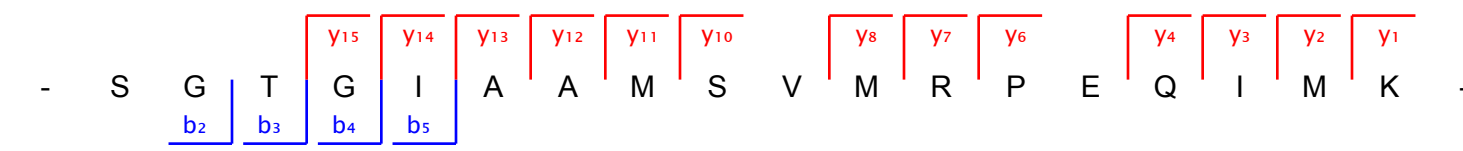

Raw file  
20180707\_MaS\_A375SR\_ML\_proteome\_21

Scan 11213 Method FTMS; HCD Score 70.2 m/z 543.95 Gene names C1QTNF5

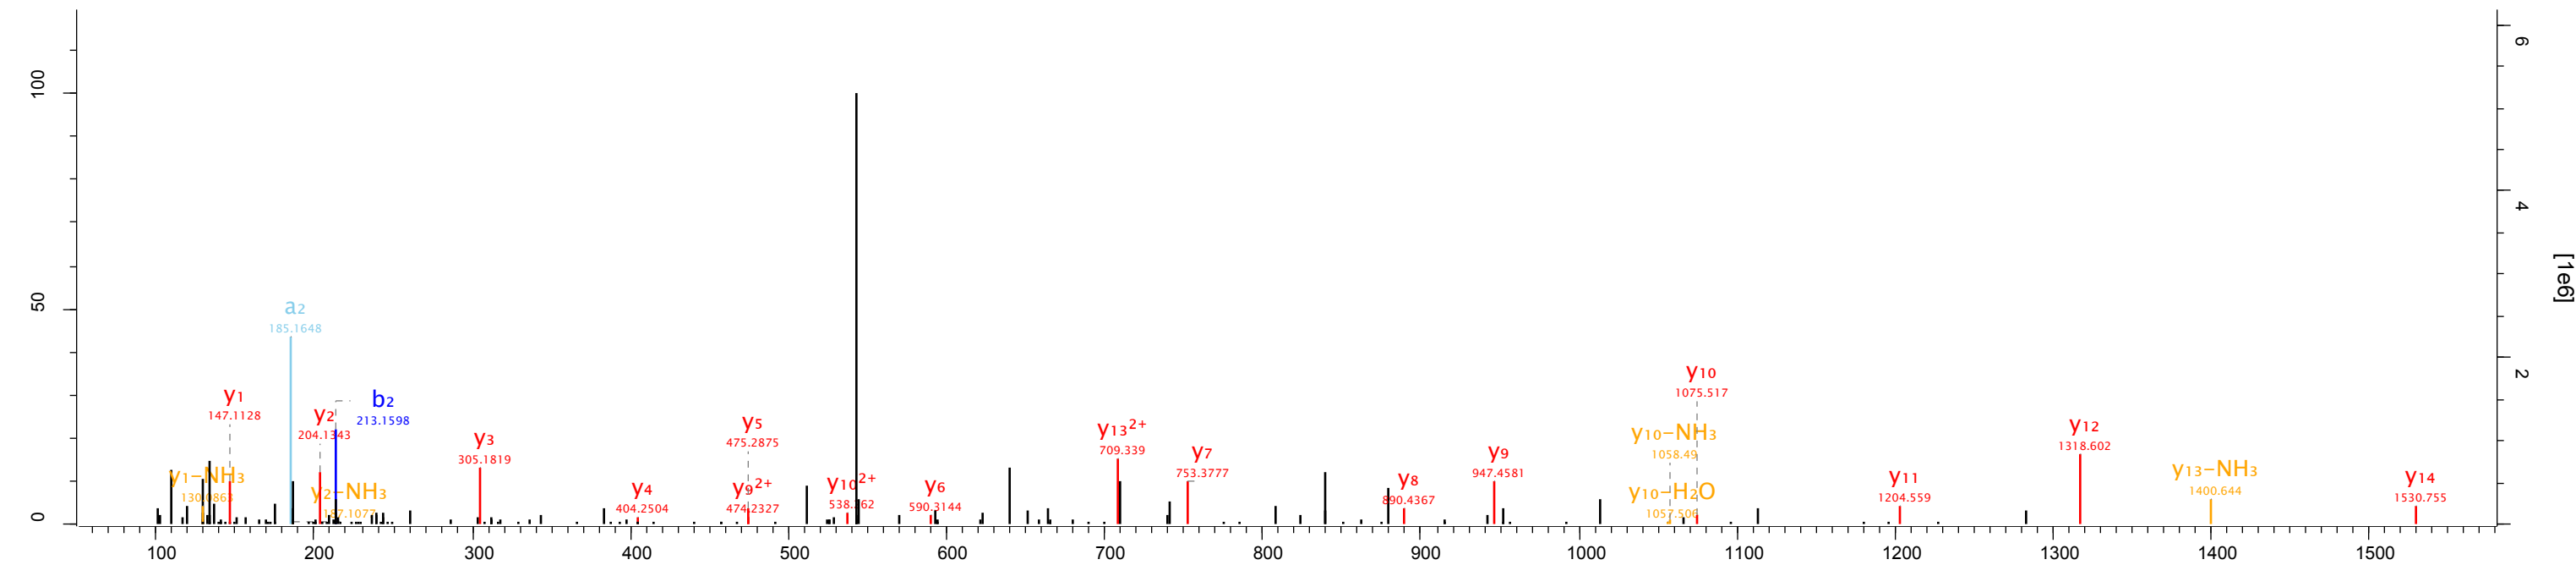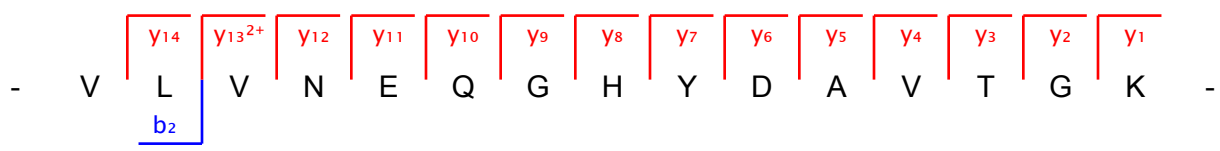

Raw file: 20180707\_MaS\_A375SR\_ML\_proteome\_21  
 Scan: 23913 Method: FTMS; HCD Score: 80.86 m/z: 640.01 Gene names: ATP6V0C

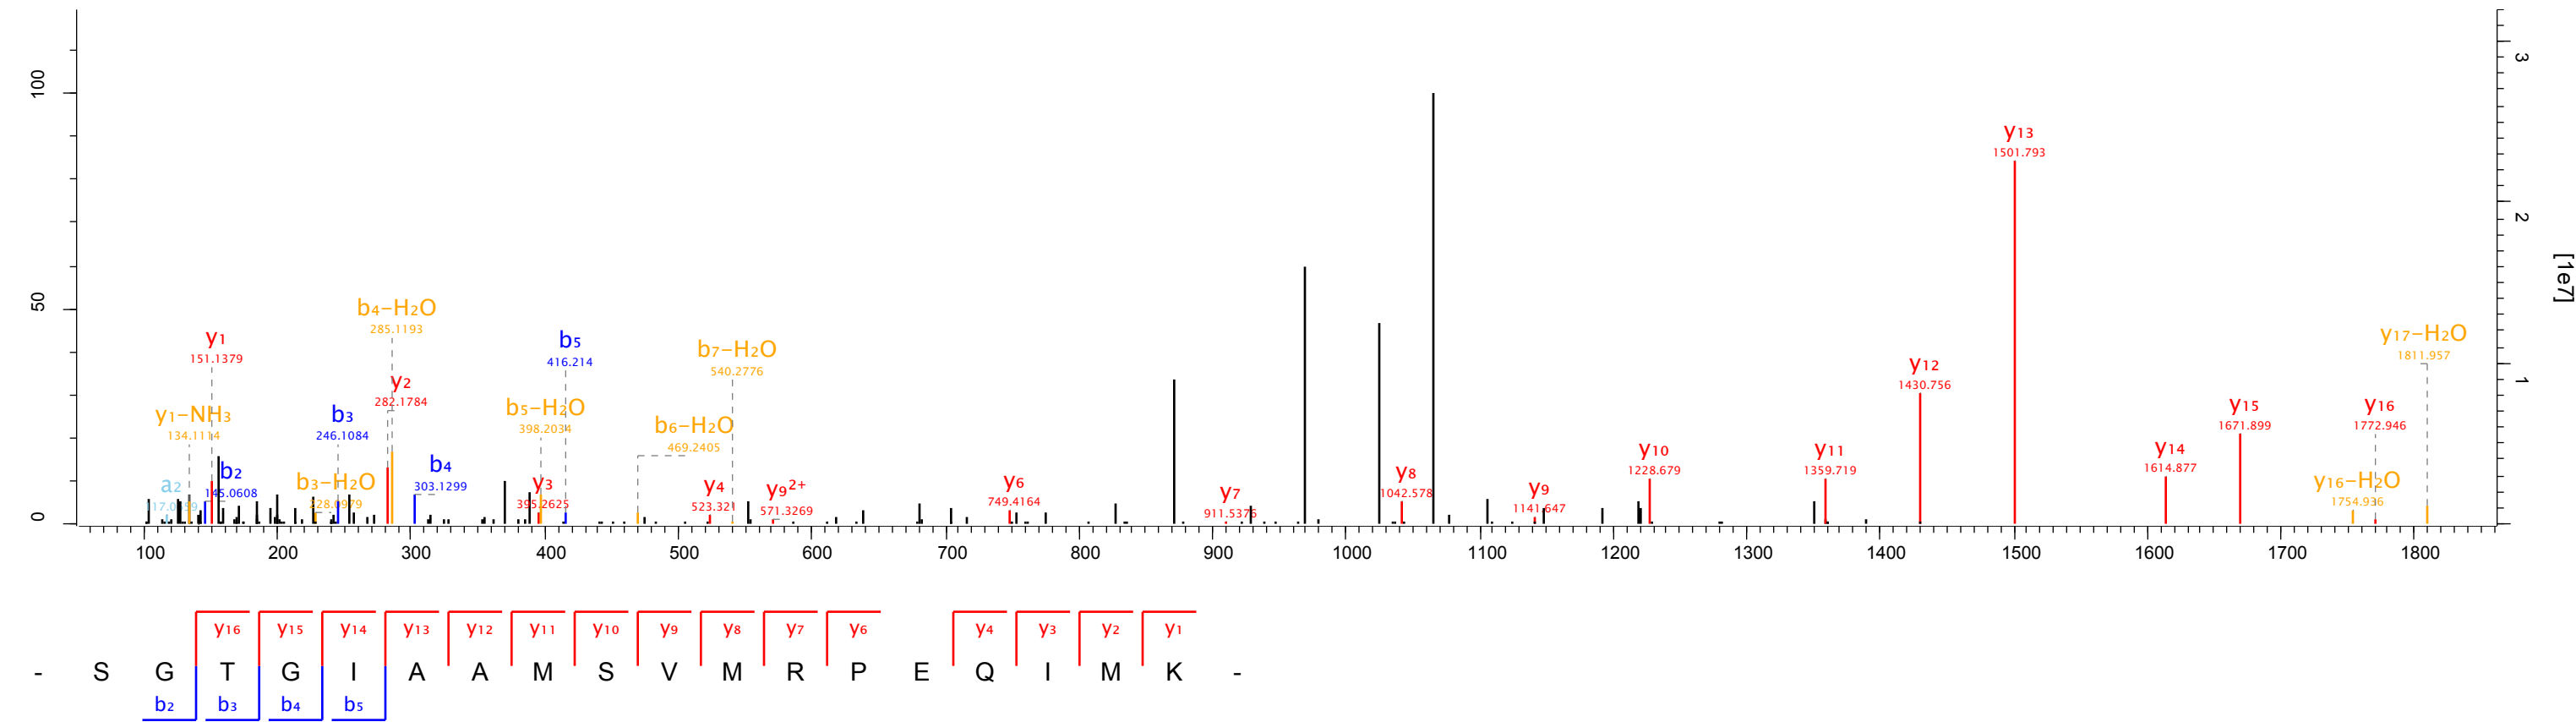

Raw file 20180707\_MaS\_A375SR\_ML\_proteome\_21 Scan 23953 Method FTMS; HCD Score 188.27 m/z 954.48 Gene names ATP6V0C

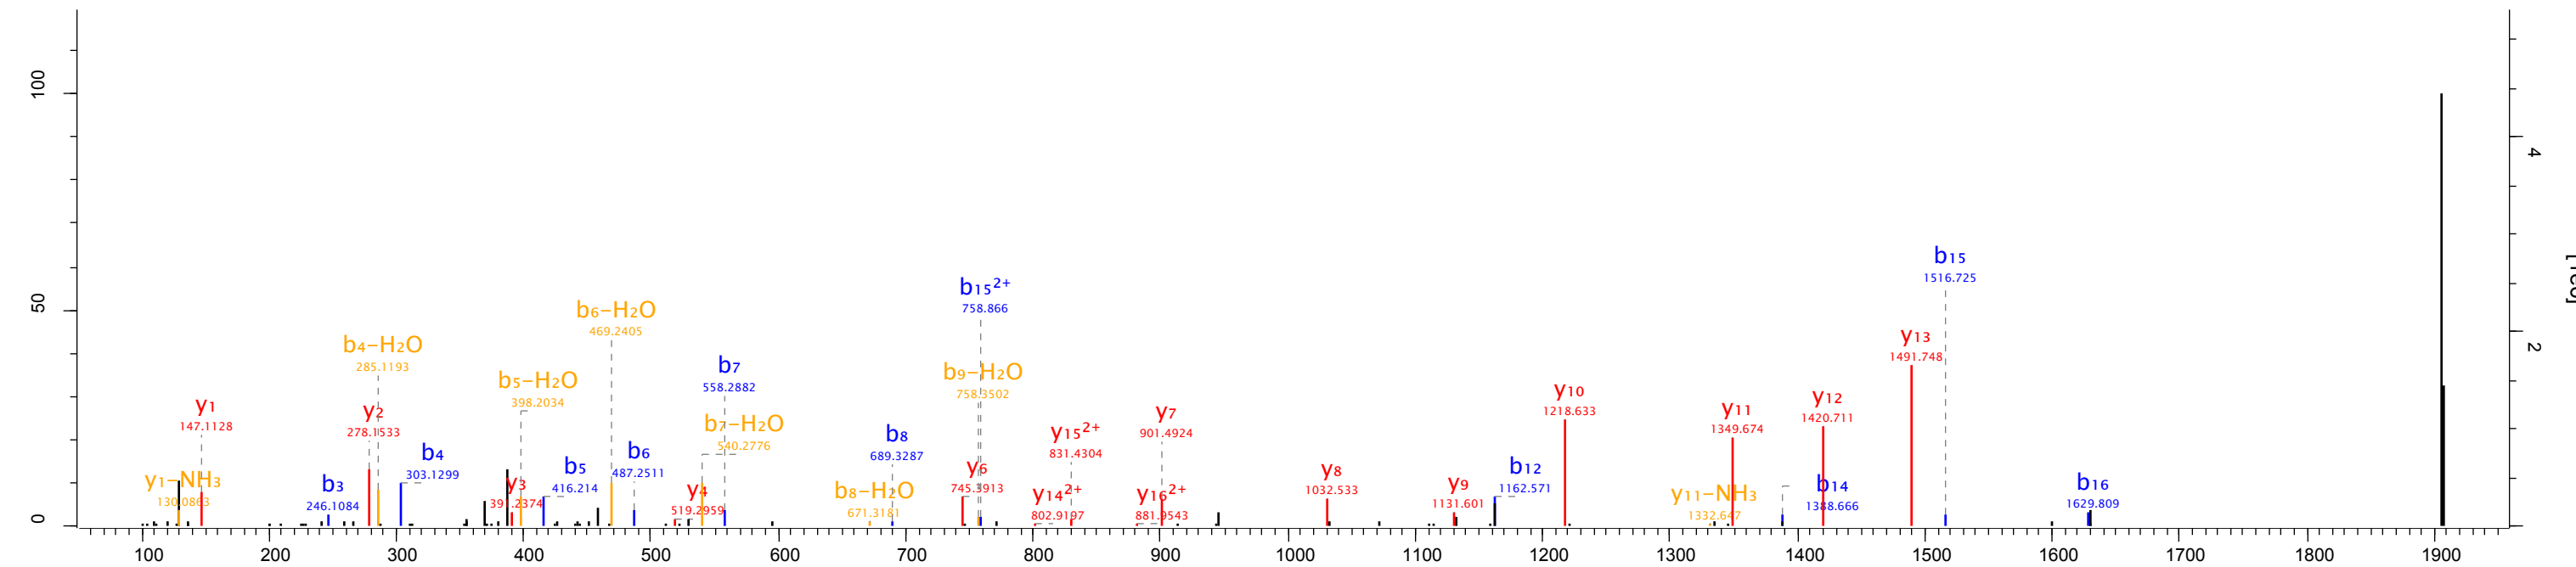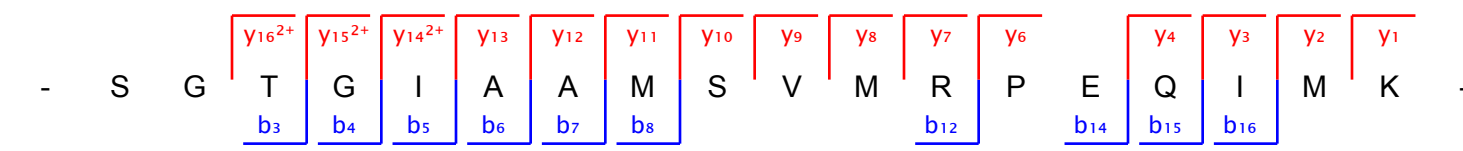



Raw file  
20180707\_MaS\_A375SR\_ML\_proteome\_22

Scan 18963 Method FTMS; HCD Score 105.65 m/z 724.33 Gene names FABP4;PMP2

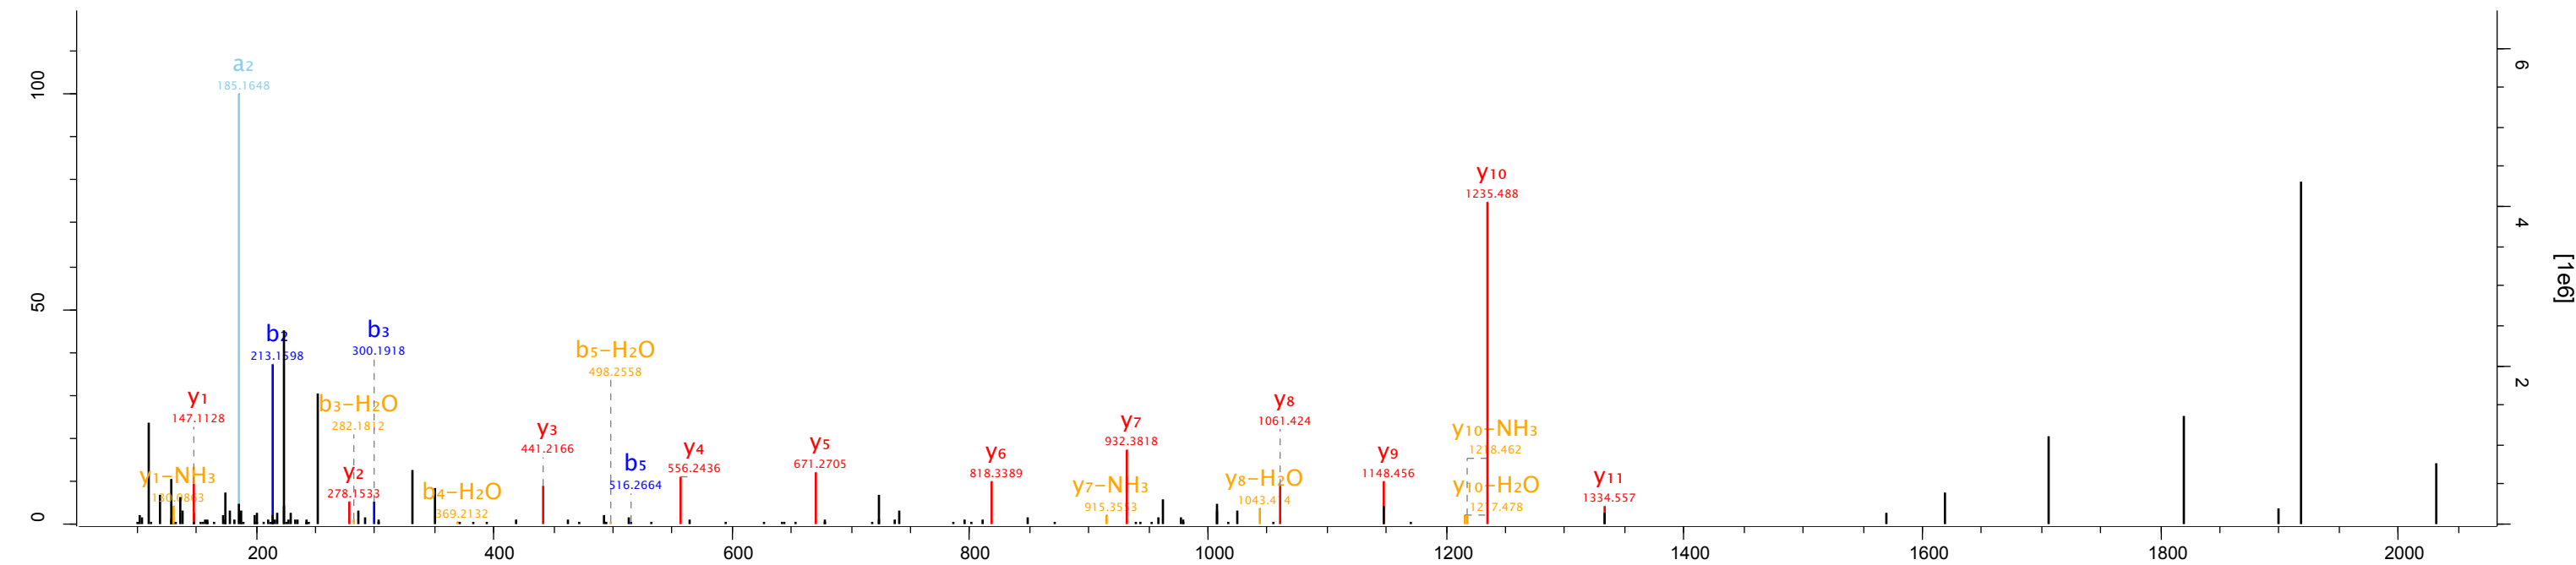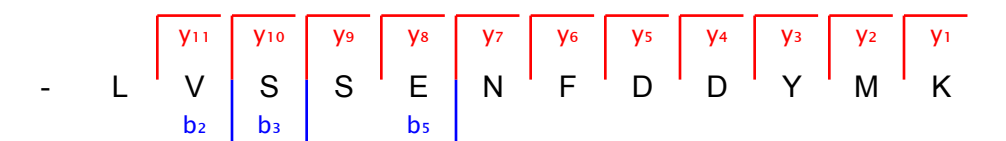

Raw file: 20180707\_MaS\_A375SR\_ML\_proteome\_22  
 Scan: 21633 Method: FTMS; HCD Score: 55.19 m/z: 636.66 Gene names: ATP6V0C

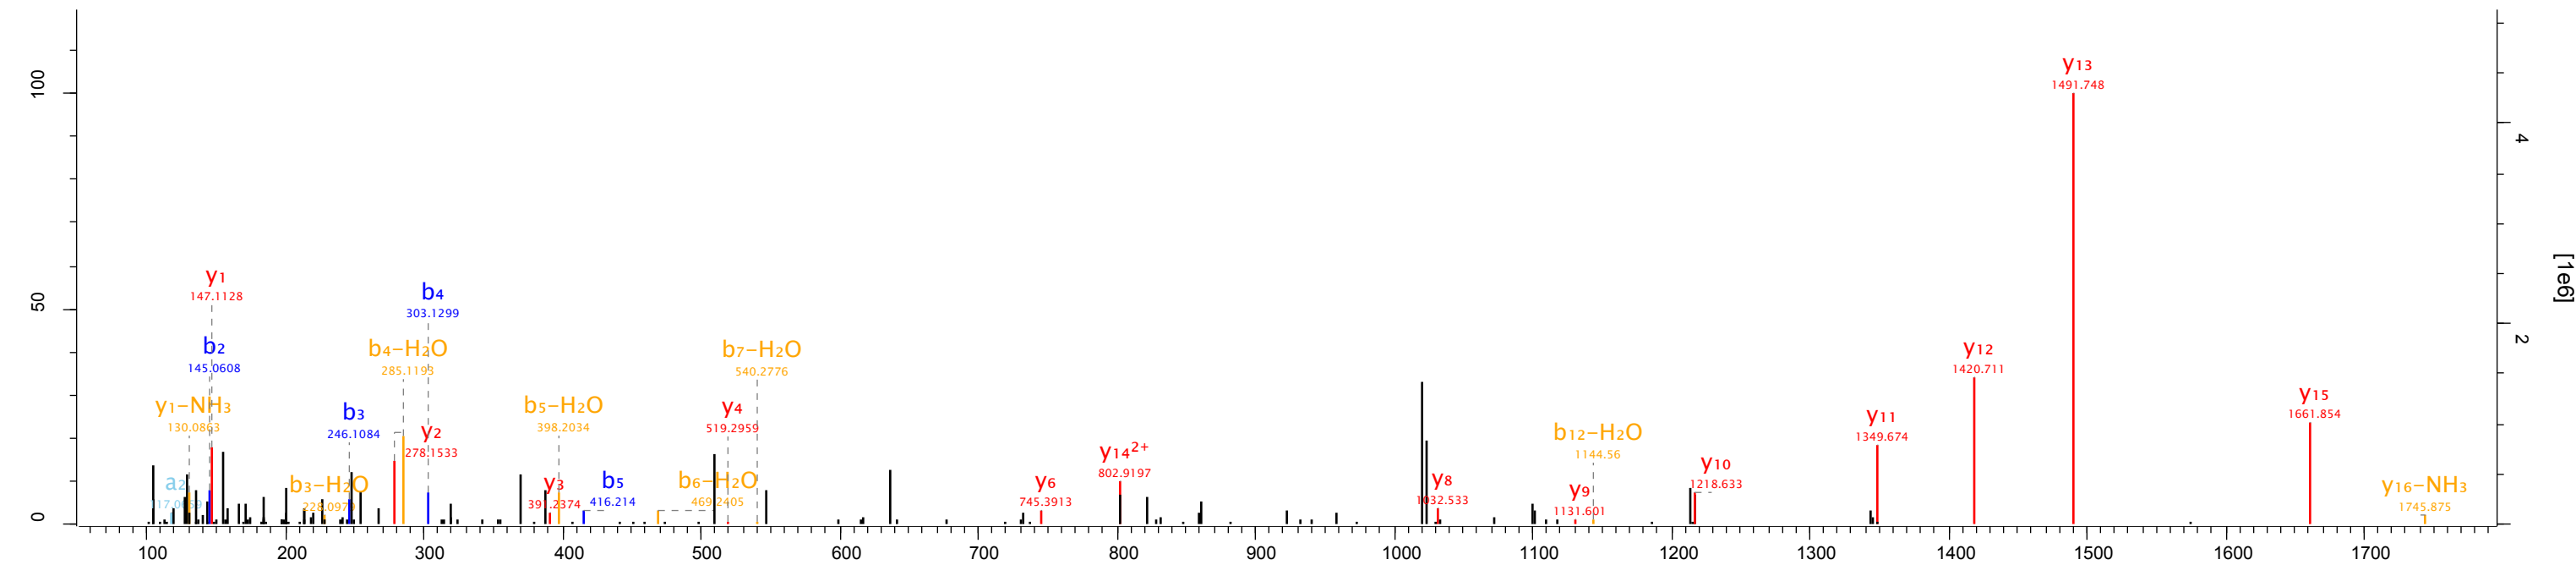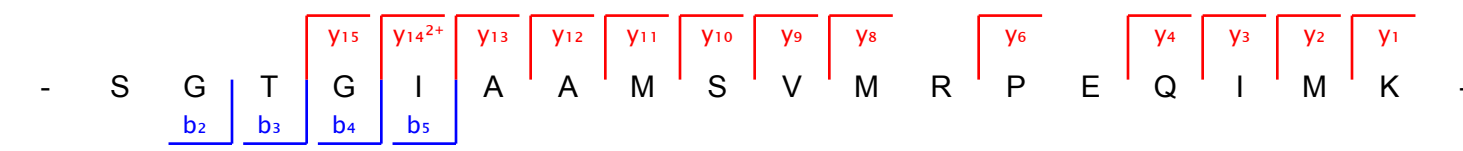

Raw file  
20180707\_MaS\_A375SR\_ML\_proteome\_25

Scan 16553 Method FTMS; HCD Score 210.6 m/z 660.39 Gene names RPL39P5;RPL39

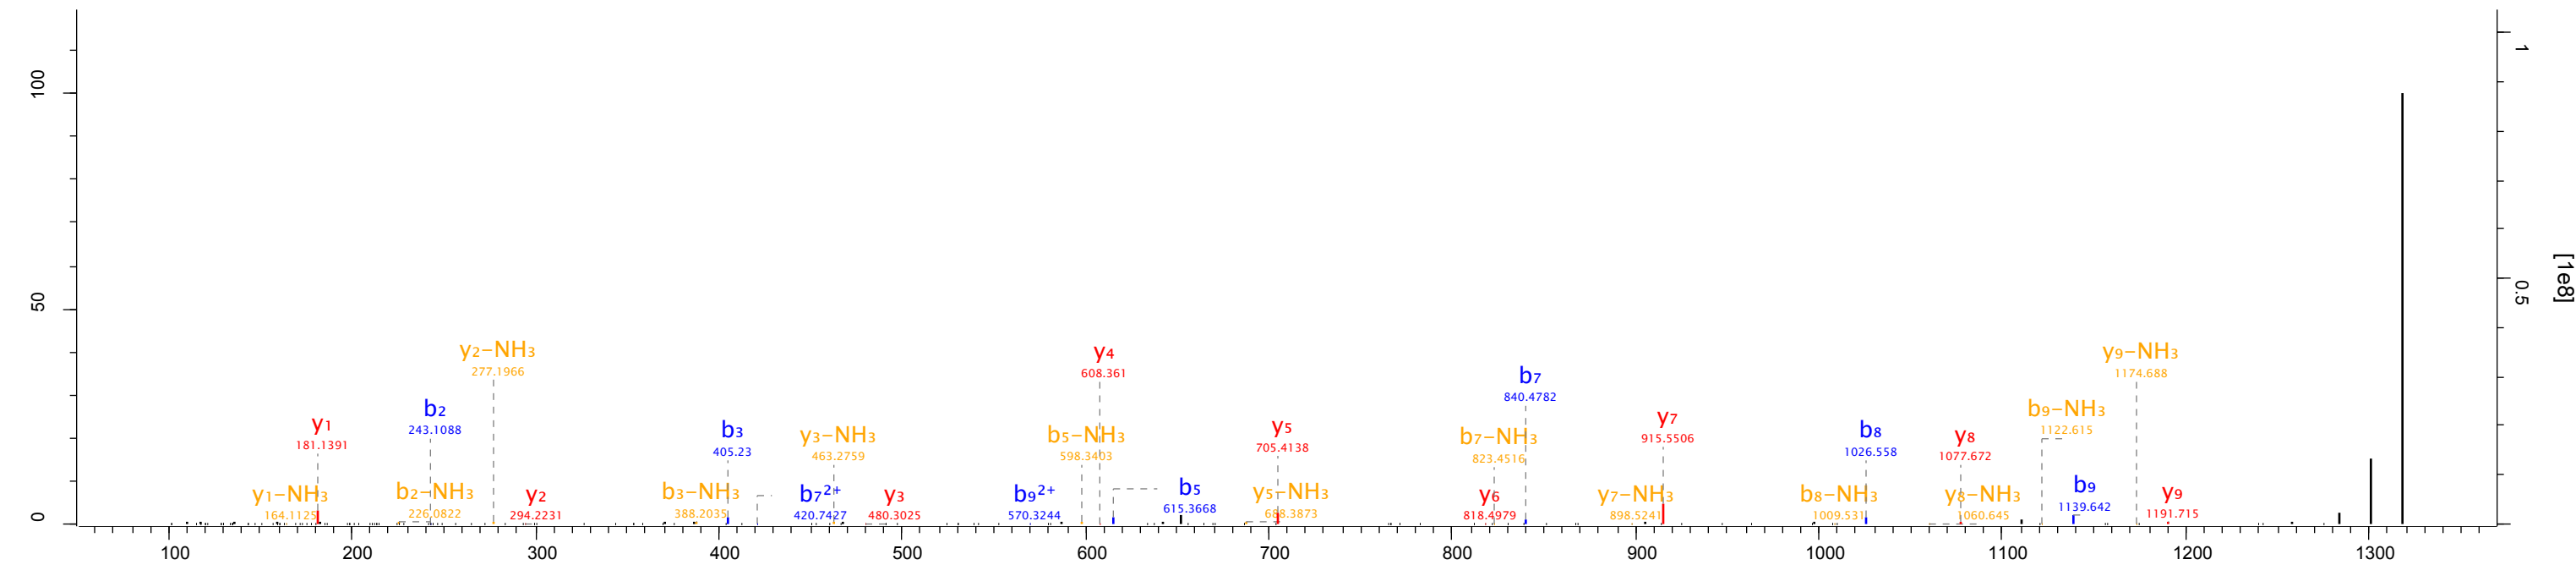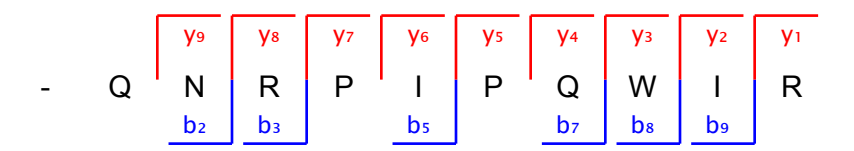

Raw file 20180707\_MaS\_A375SR\_ML\_proteome\_25 Scan 9573 Method FTMS; HCD Score 72.37 m/z 491.27

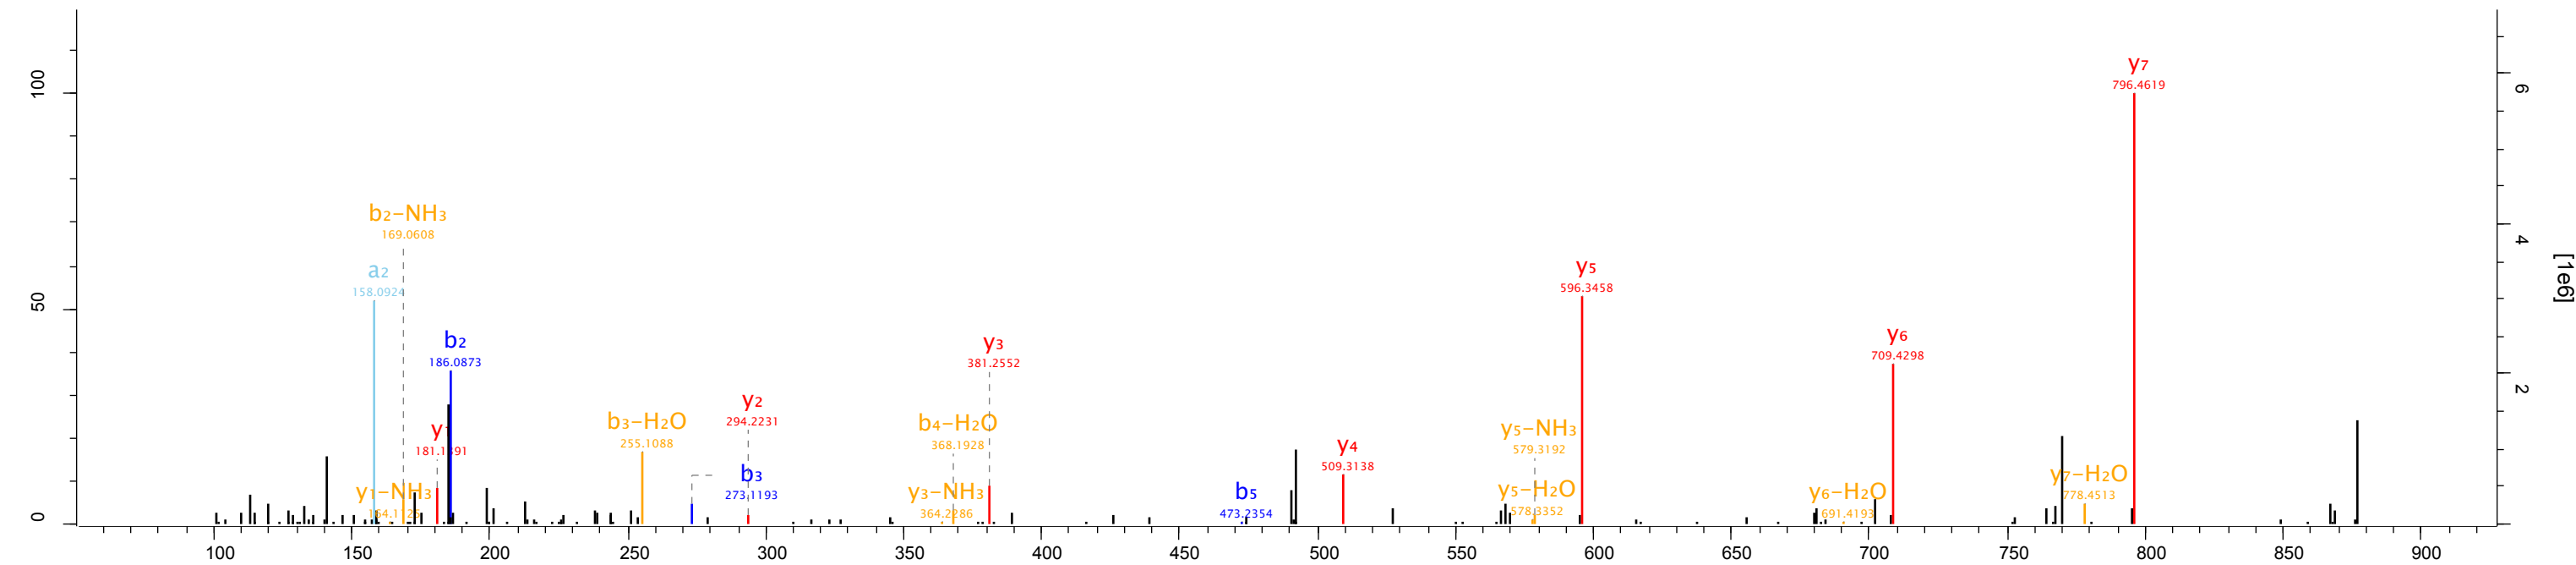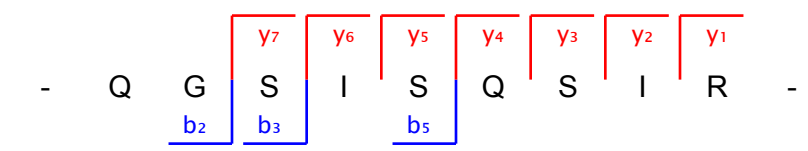

Raw file 20180707\_MaS\_A375SR\_ML\_proteome\_26 Scan 15533 Method FTMS; HCD Score 92.11 m/z 719.33 Gene names ZRSR1;ZRSR2

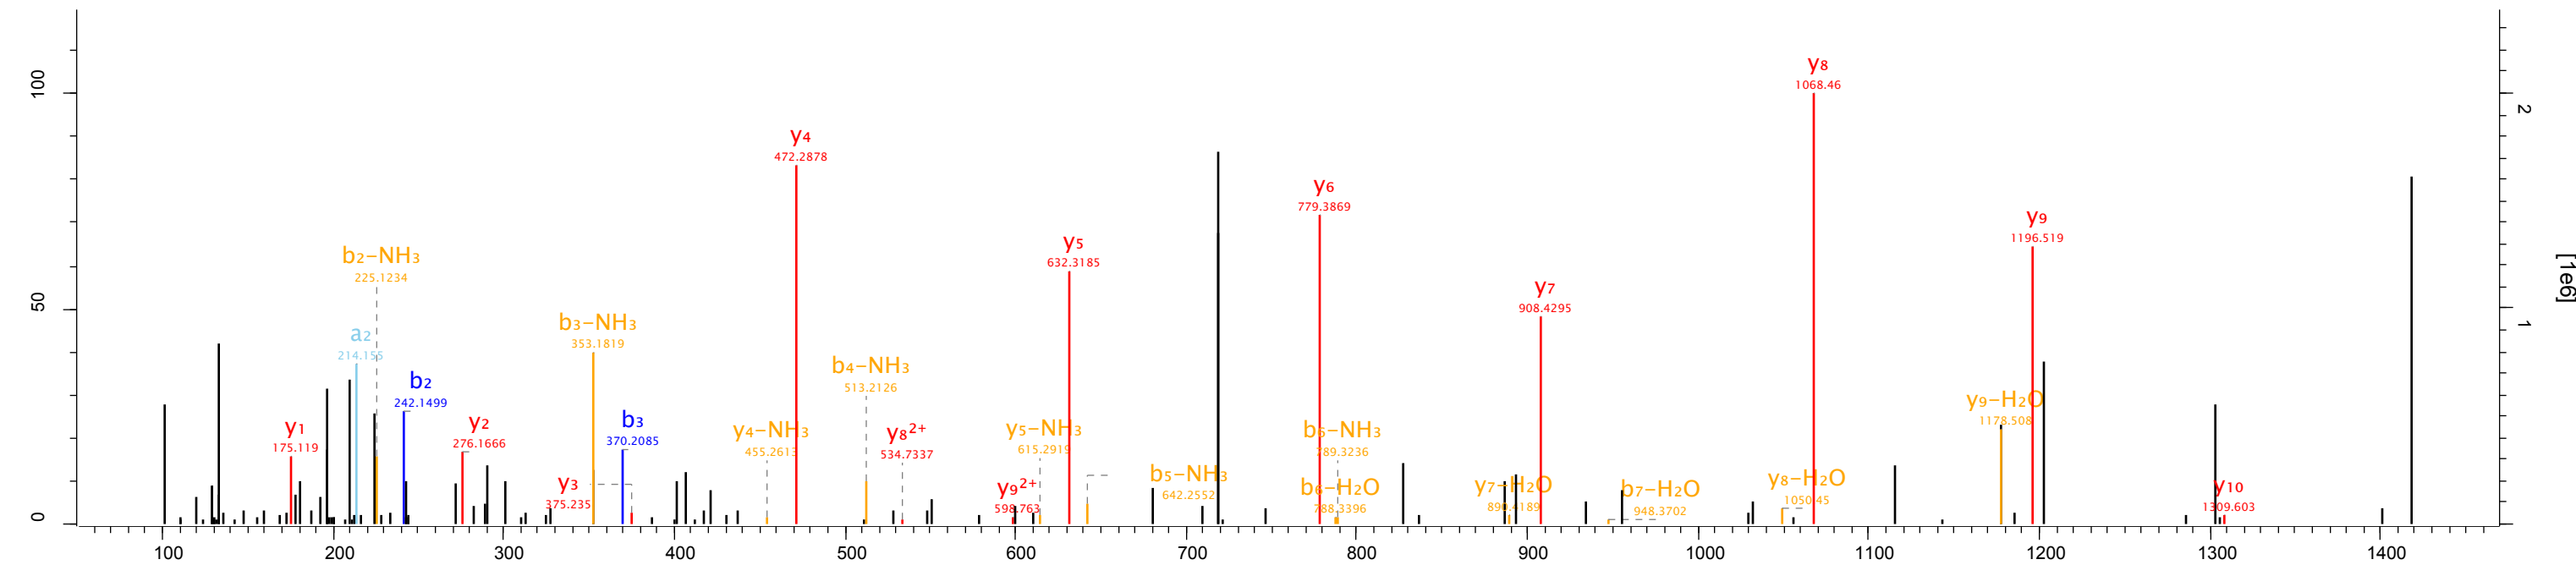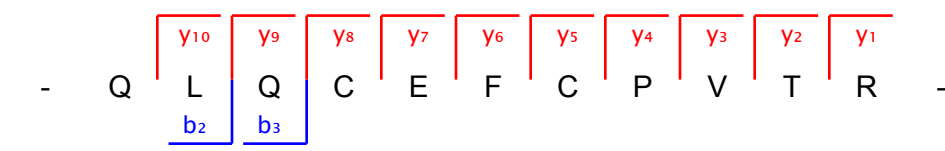

Raw file  
20180707\_MaS\_A375SR\_ML\_proteome\_26

Scan 21273 Method FTMS; HCD Score 110.56 m/z 928.98 Gene names HIATL1

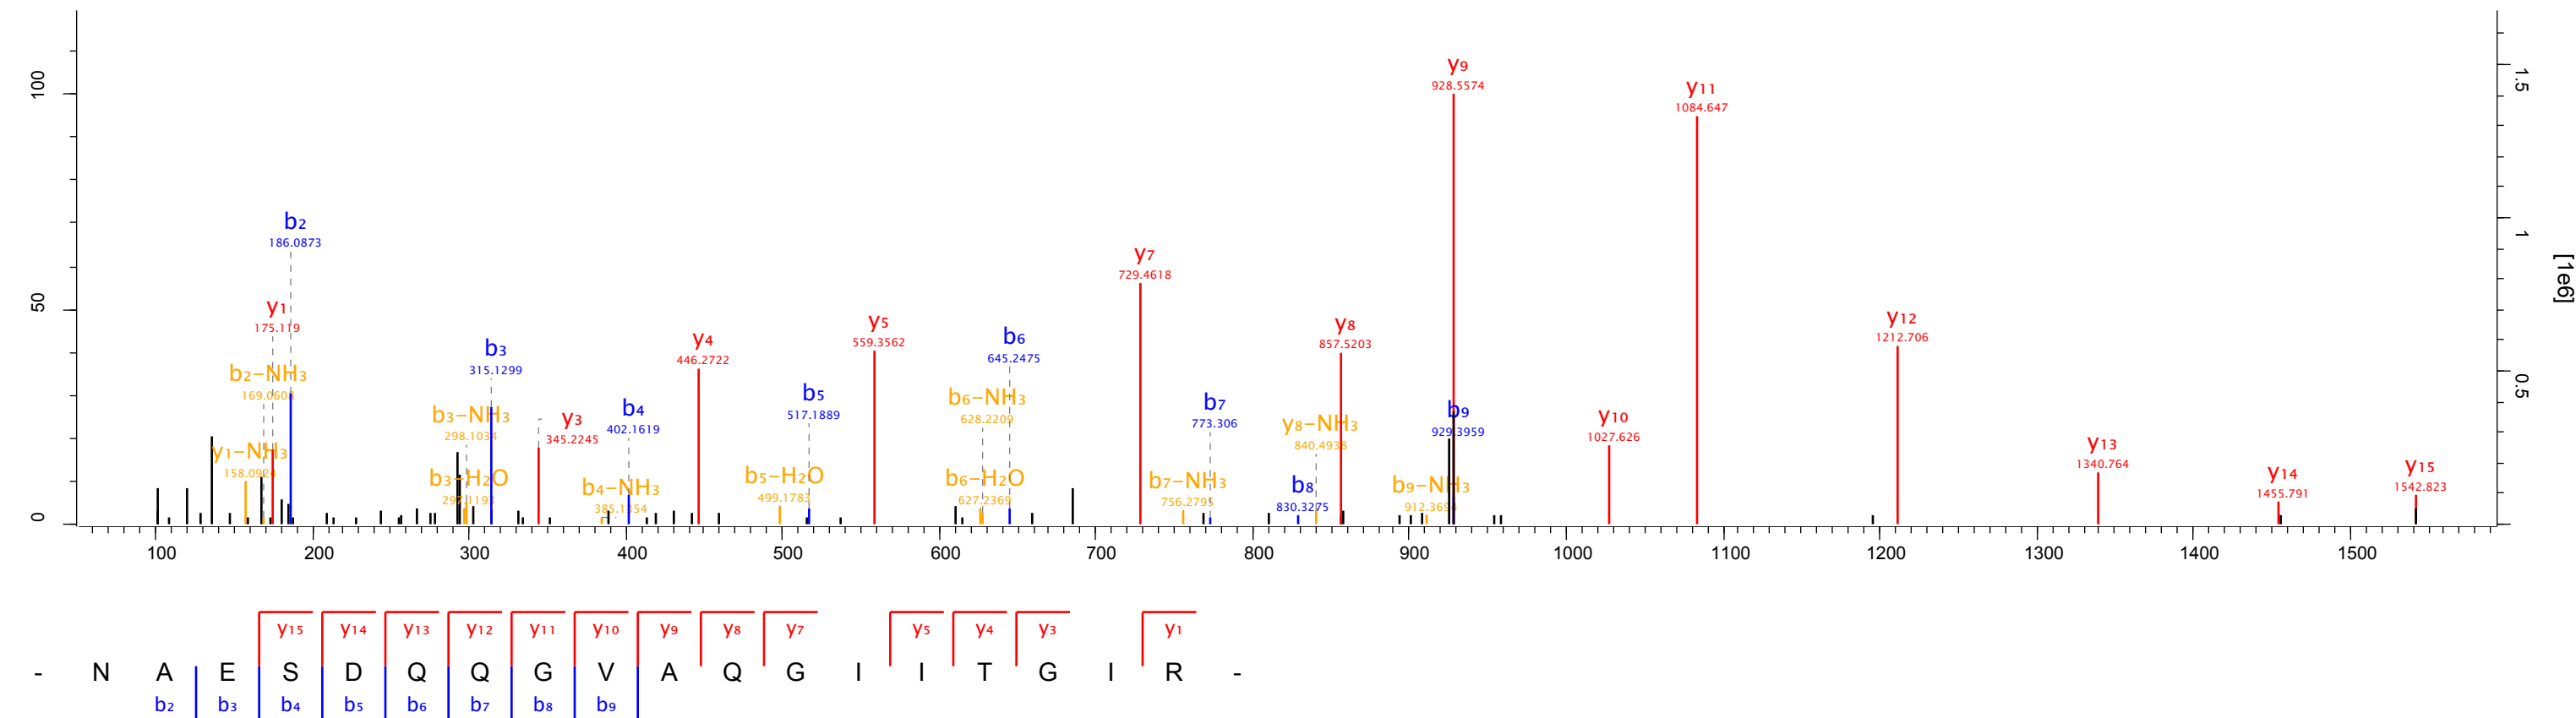

Raw file: 20180707\_MaS\_A375SR\_ML\_proteome\_26  
 Scan: 27163 Method: FTMS; HCD Score: 78.51 m/z: 715.89 Gene names: RFXAP

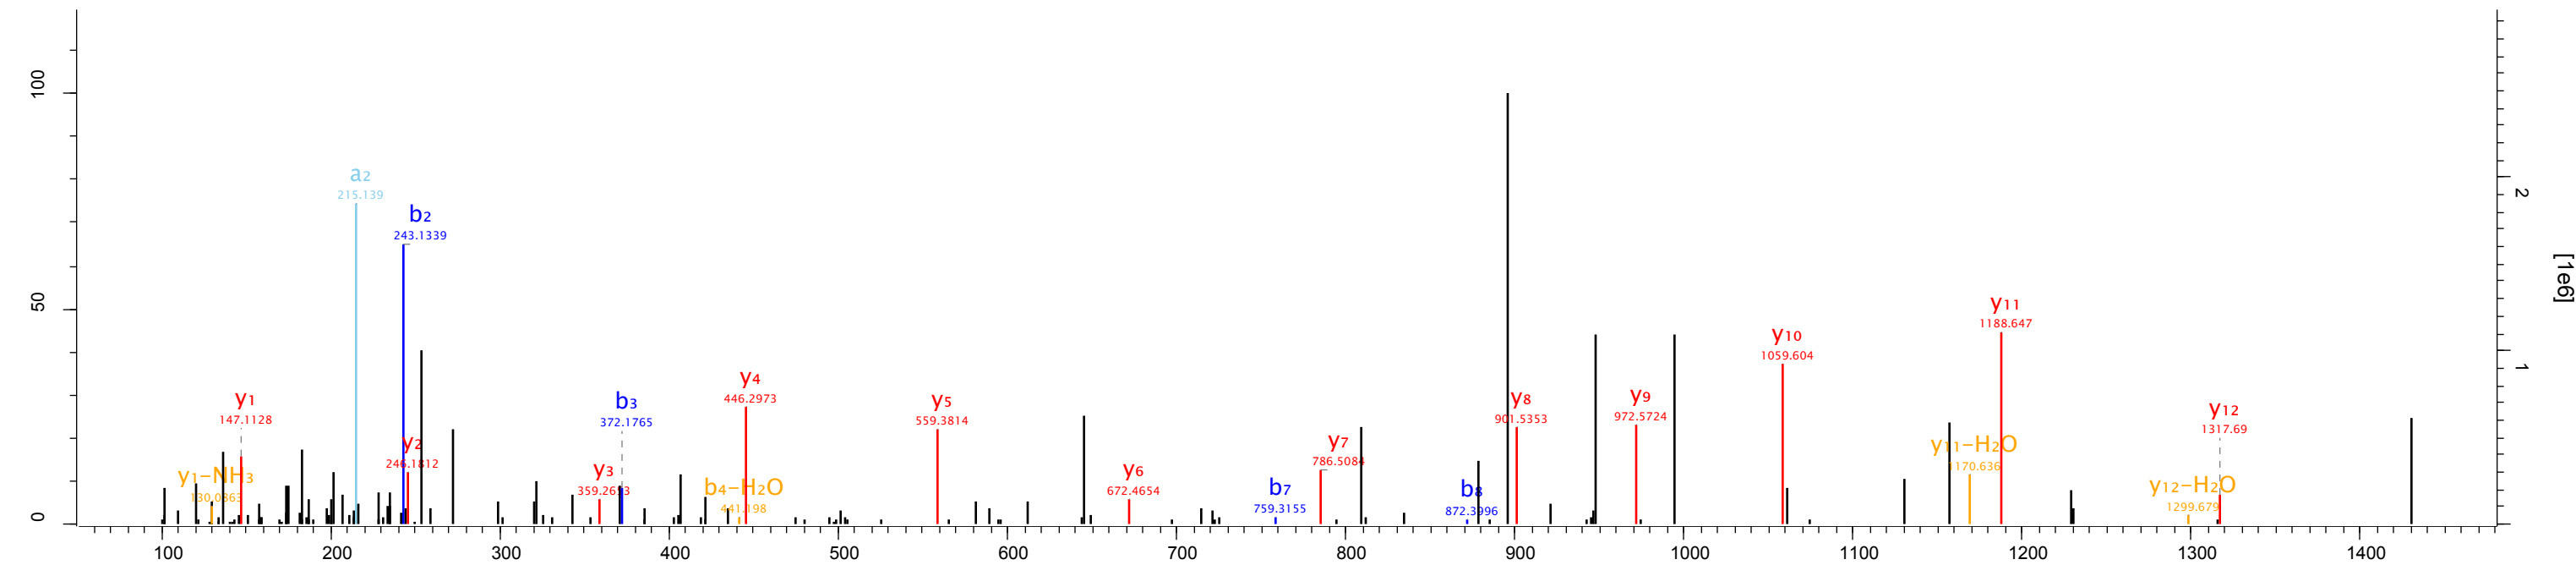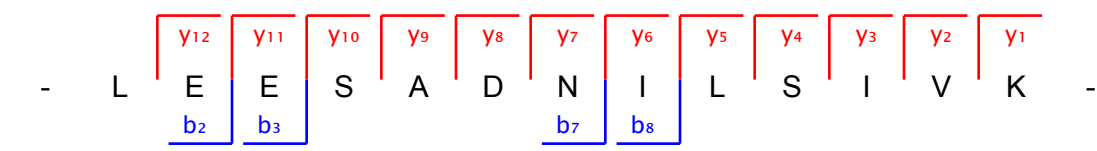

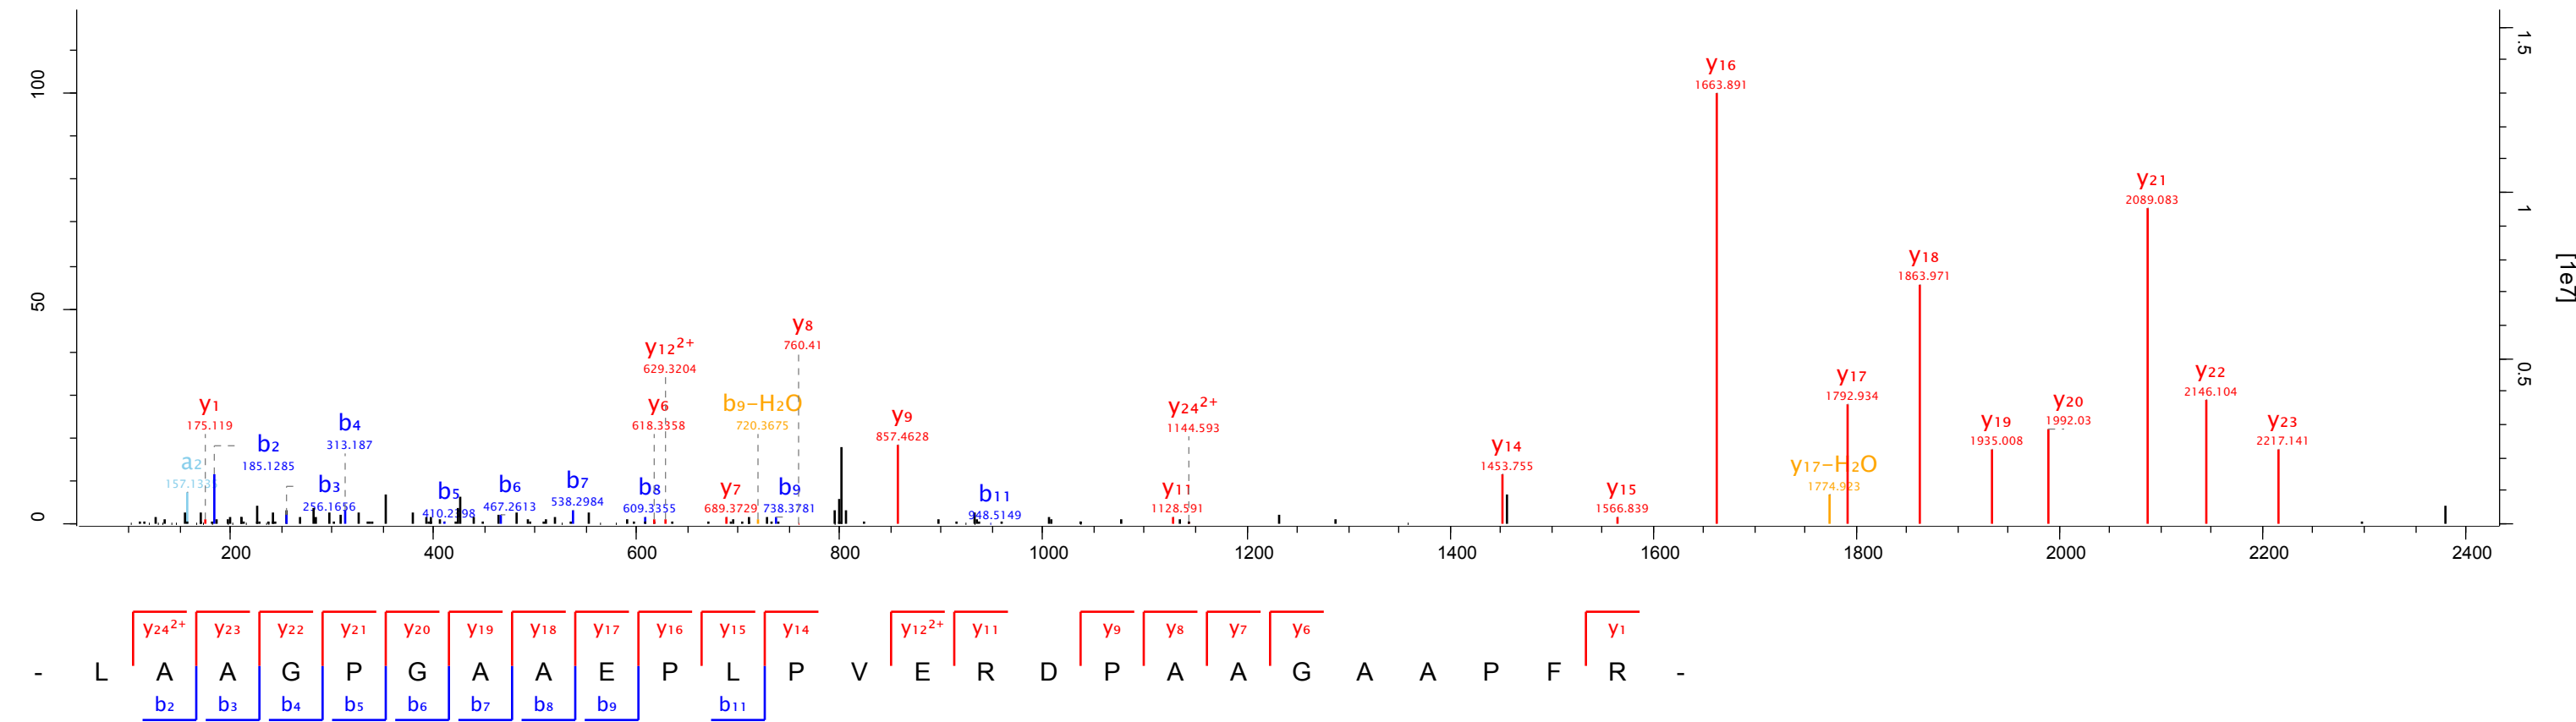



Raw file: 20180707\_MaS\_A375SR\_ML\_proteome\_29  
 Scan: 9453 Method: FTMS; HCD Score: 64.71 m/z: 346.19

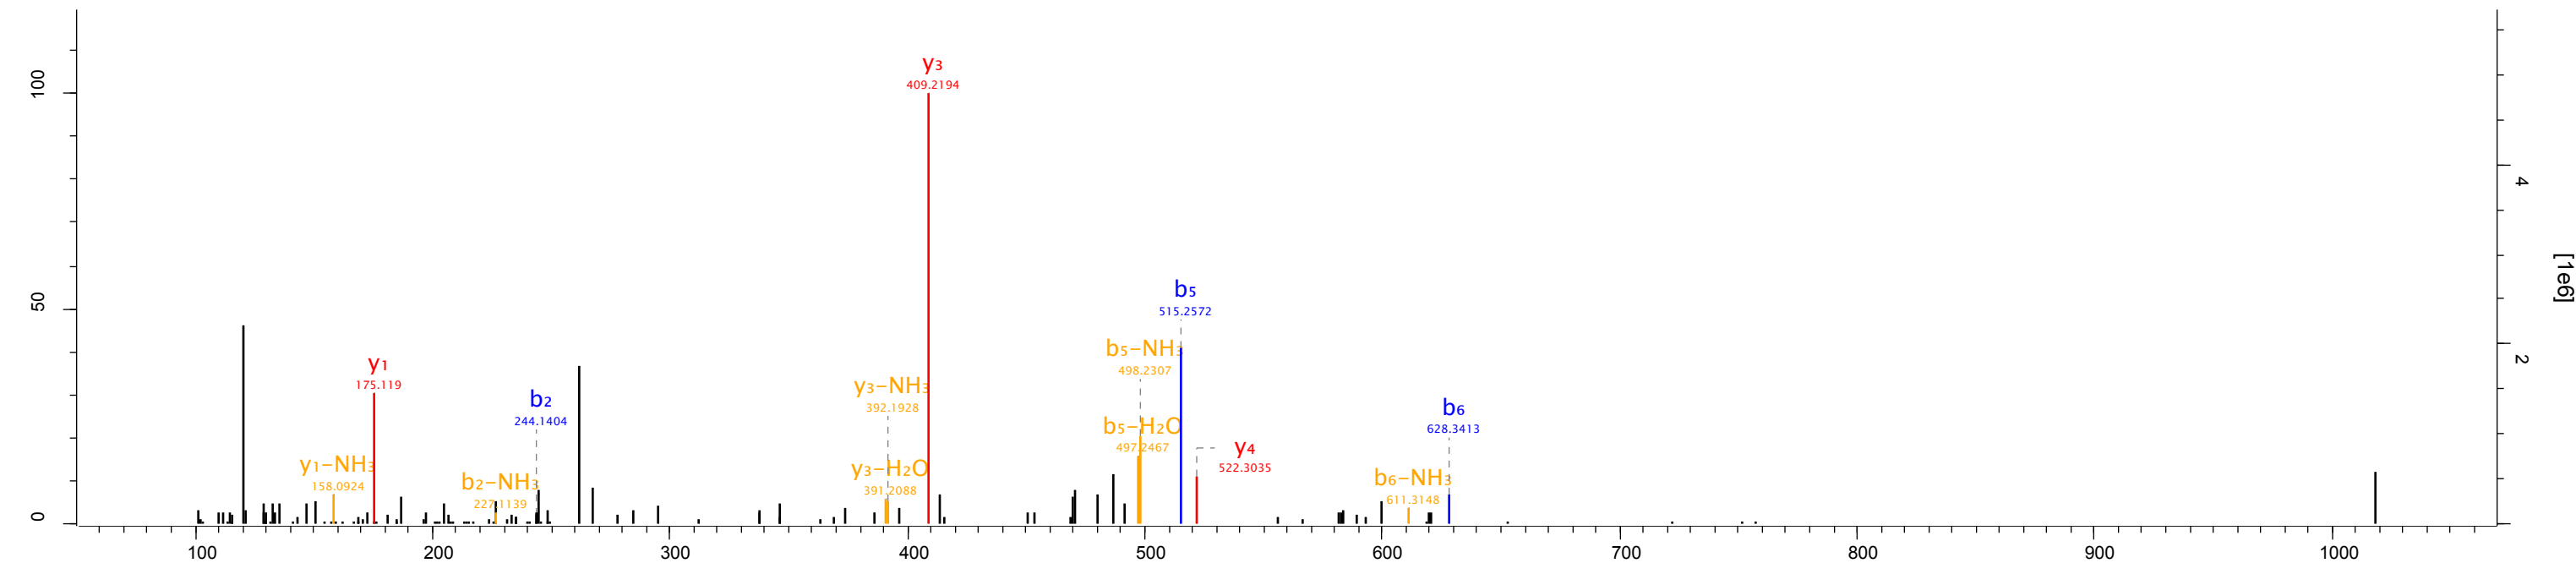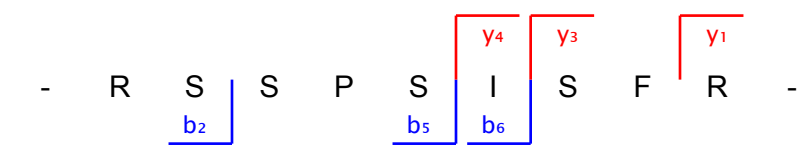

Raw file 20180707\_MaS\_A375SR\_ML\_proteome\_29 Scan 9483 Method FTMS; HCD Score 60.02 m/z 350.2

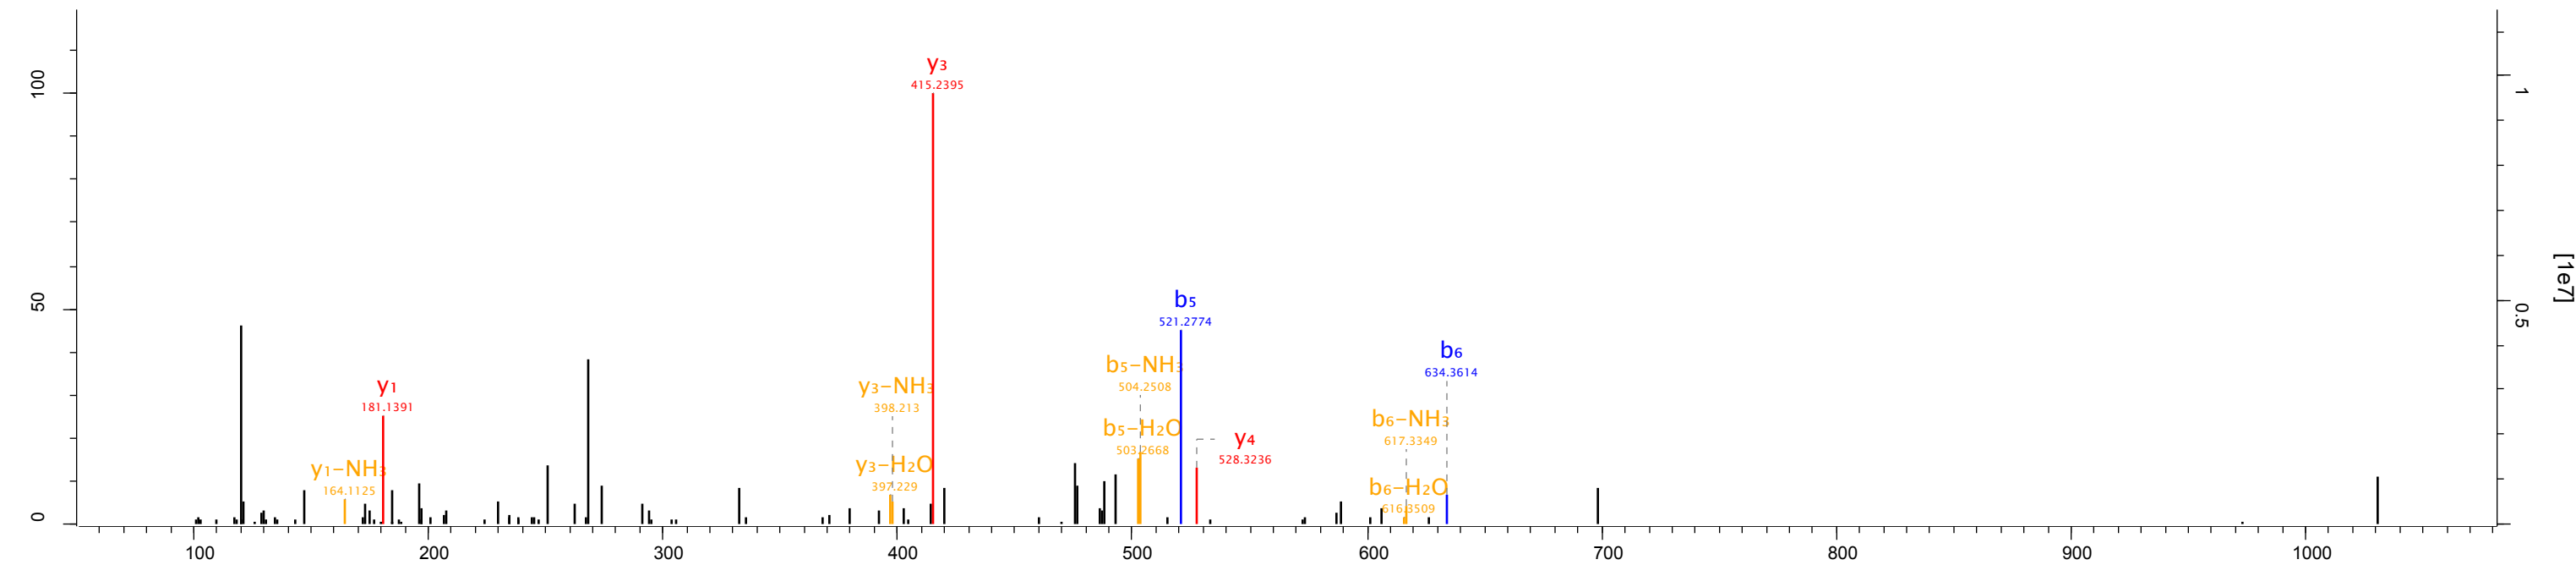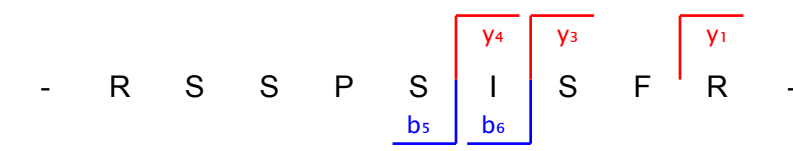

Raw file  
20180707\_MaS\_A375SR\_ML\_proteome\_30

Scan 23323 Method FTMS; HCD Score 167.14 m/z 930.97 Gene names HIAT1

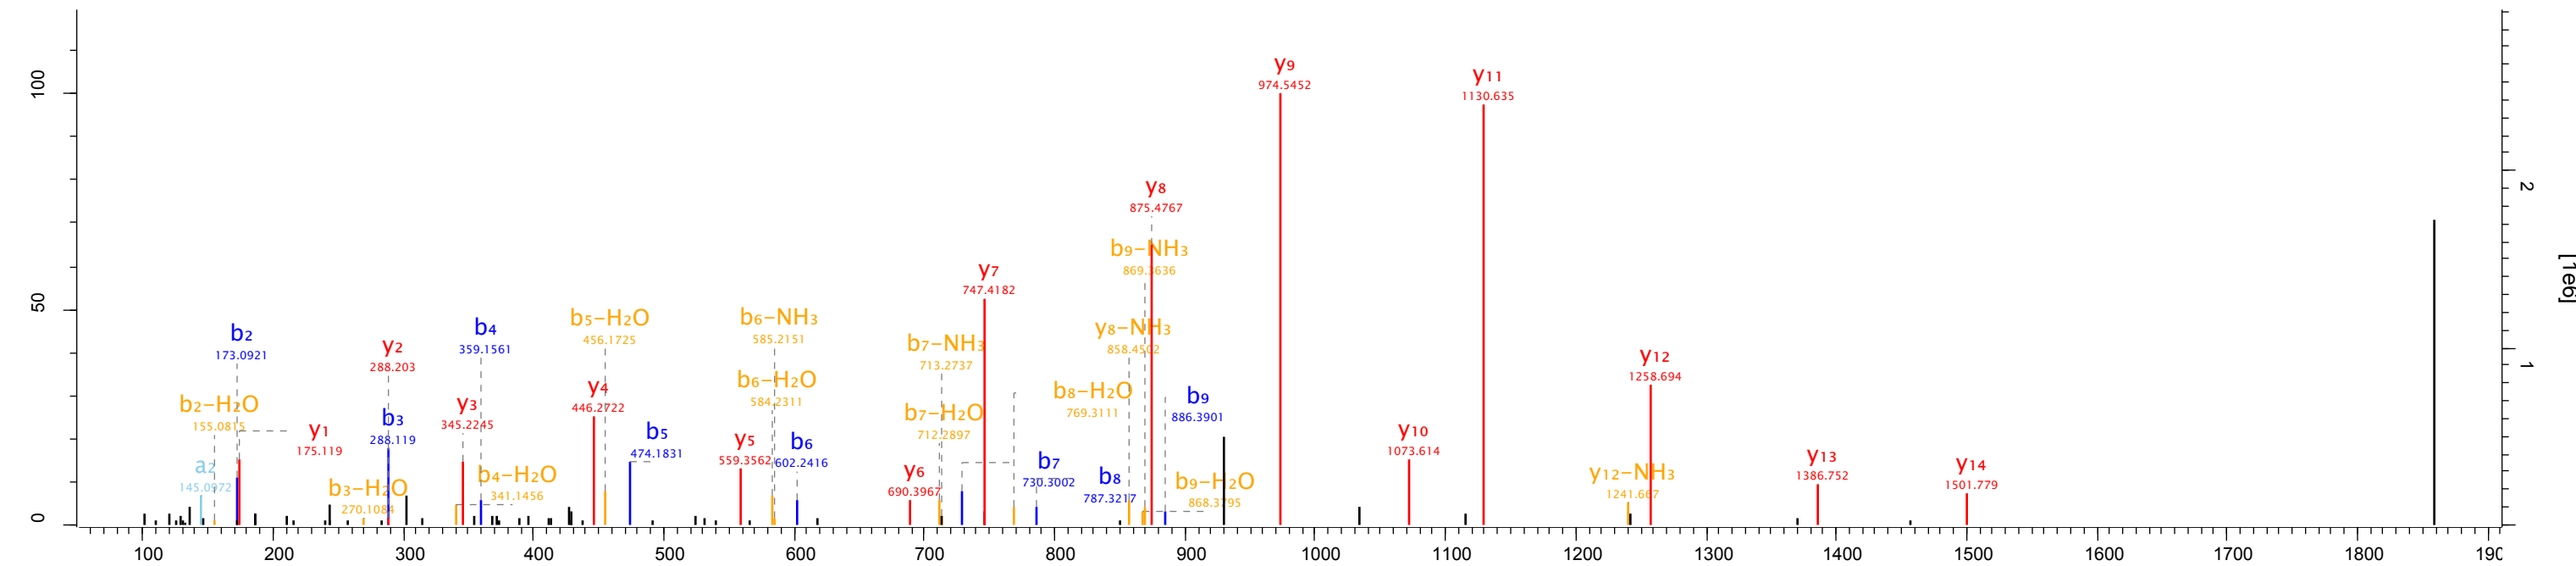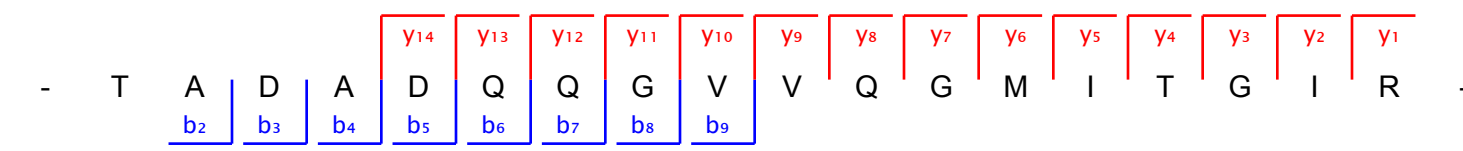

Raw file: 20180707\_MaS\_A375SR\_ML\_proteome\_30  
 Scan: 6813 Method: FTMS; HCD Score: 116.05 m/z: 466.79 Gene names: FAM111A;TMEM185A;TMEM185B

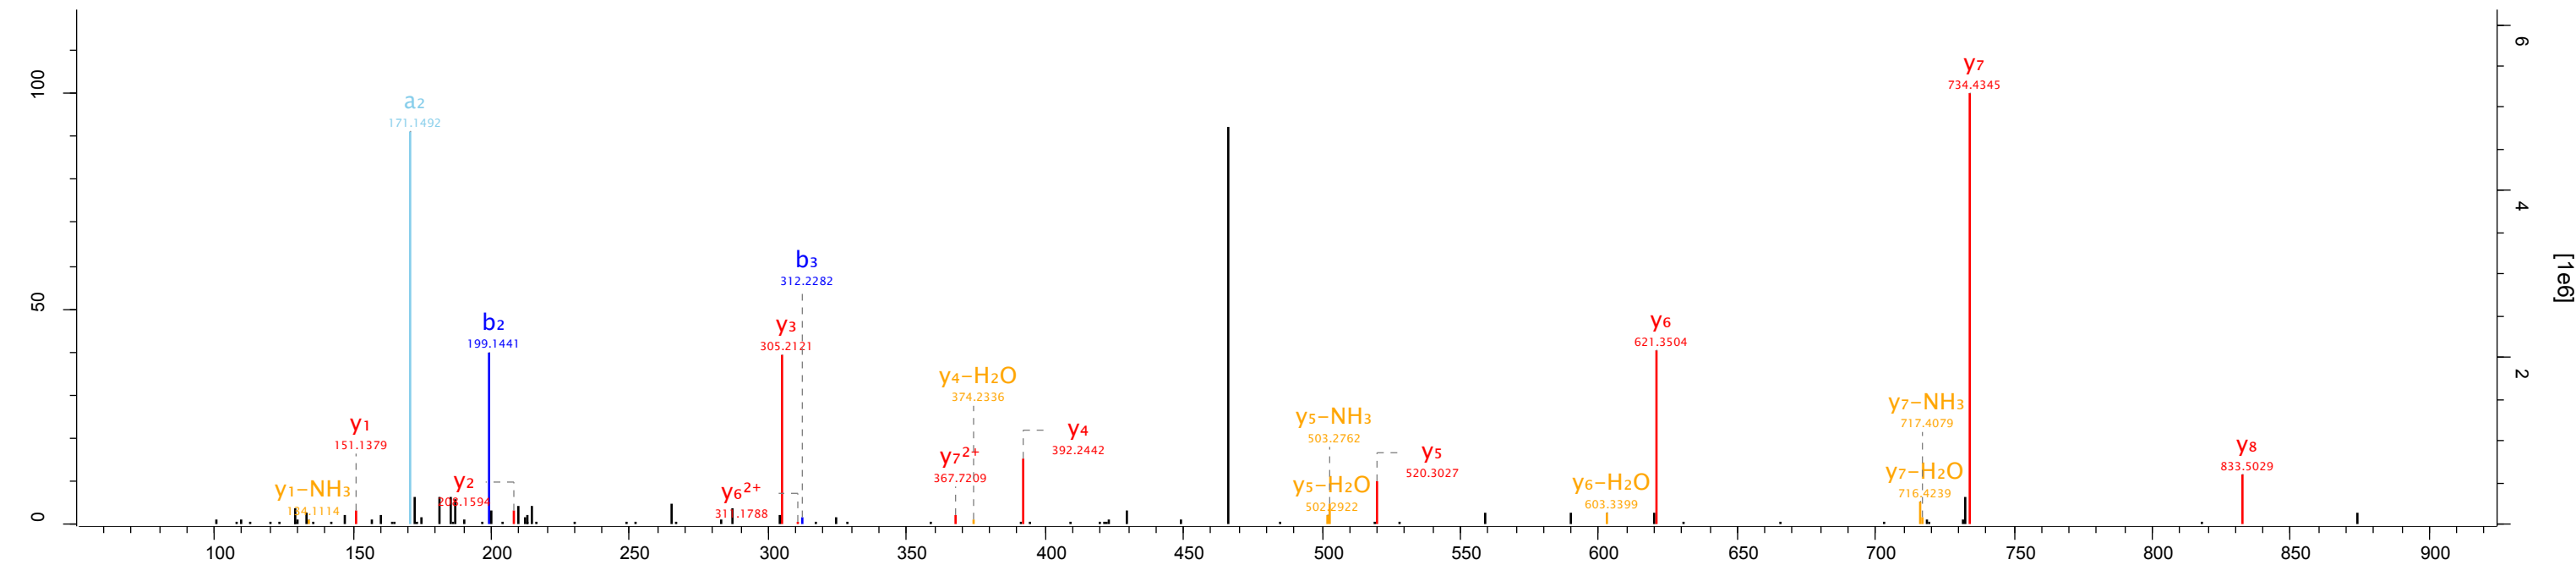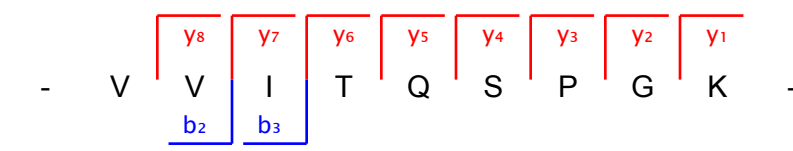

Raw file: 20150812\_A375SR\_Phospho\_BR1\_02  
 Scan: 6624 Method: FTMS; HCD Score: 49.77 m/z: 663.78 Gene names: GPSM3

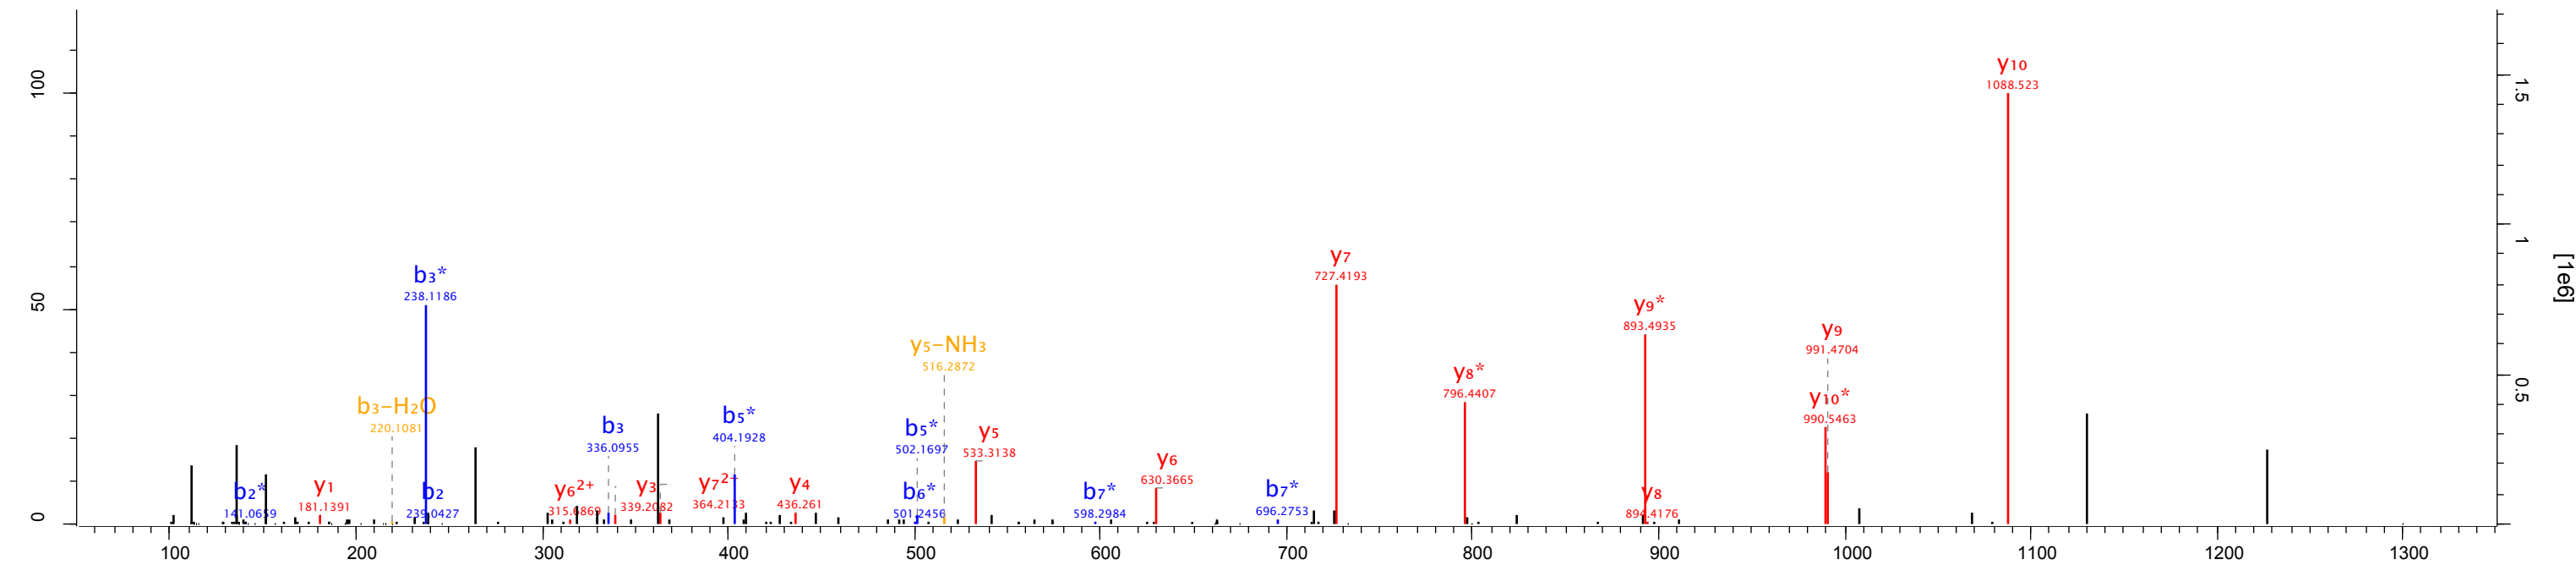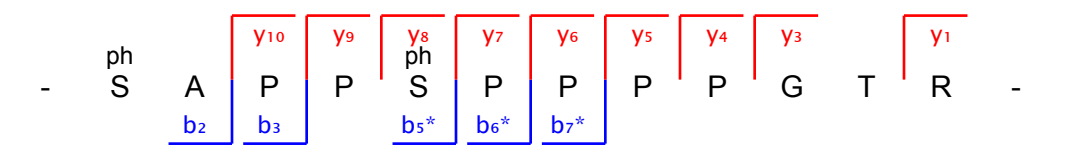

Raw file 20150812\_A375SR\_Phospho\_BR1\_04 Scan 13014 Method FTMS; HCD Score 71.08 m/z 556.27

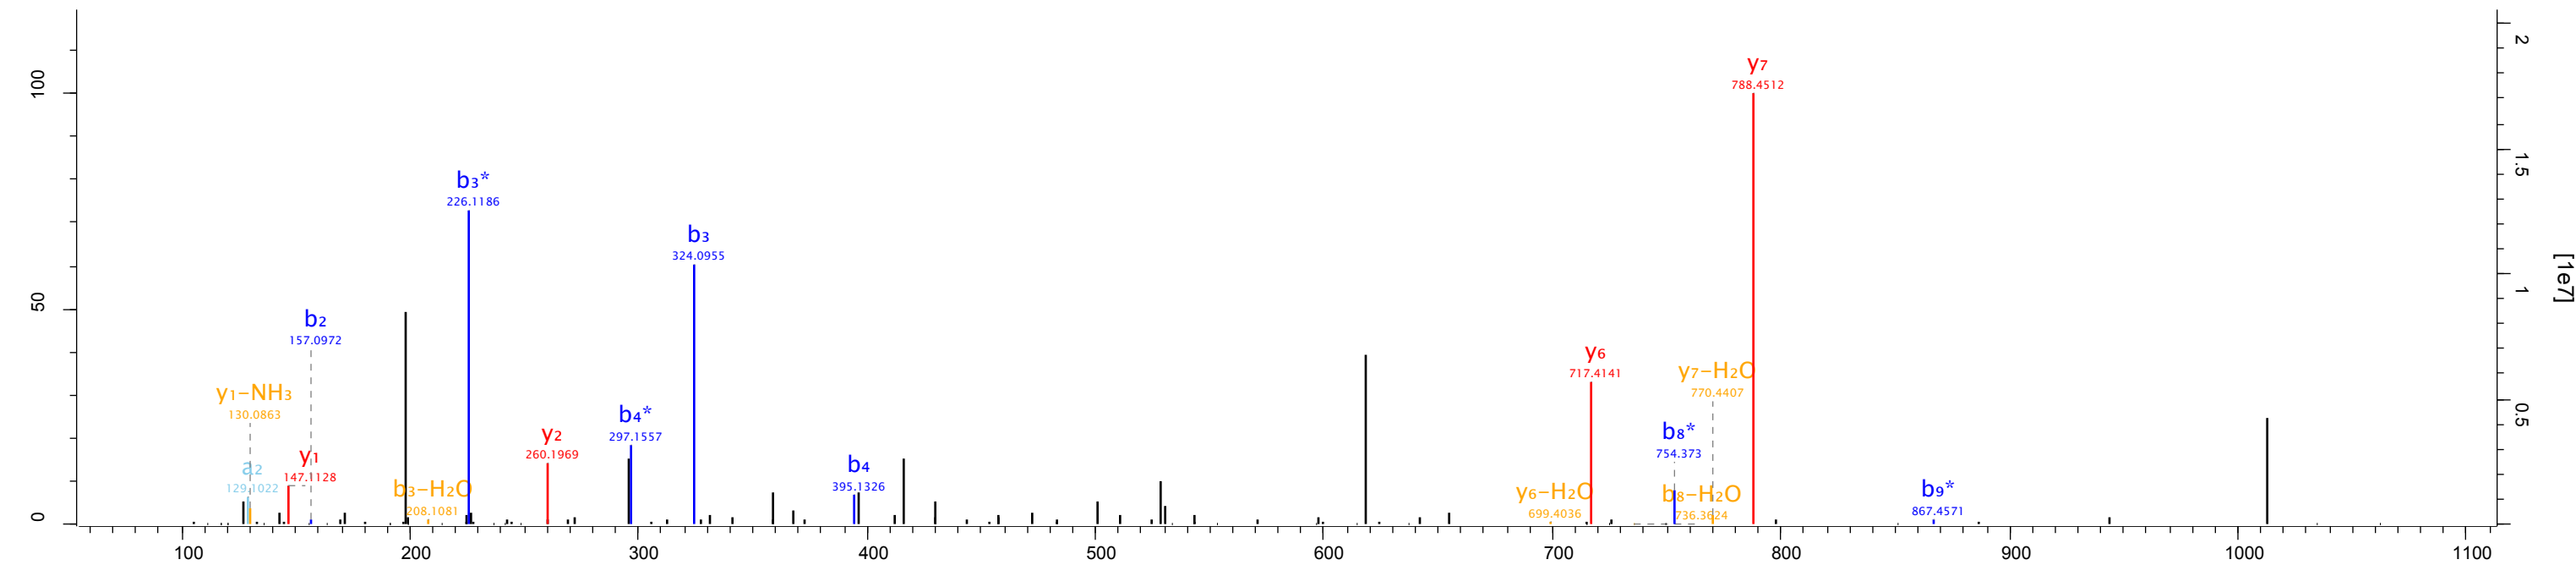

Raw file 20150812\_A375SR\_Phospho\_BR1\_04 Scan 24284 Method FTMS; HCD Score 217.39 m/z 970.94 Gene names MAPK1IP1L

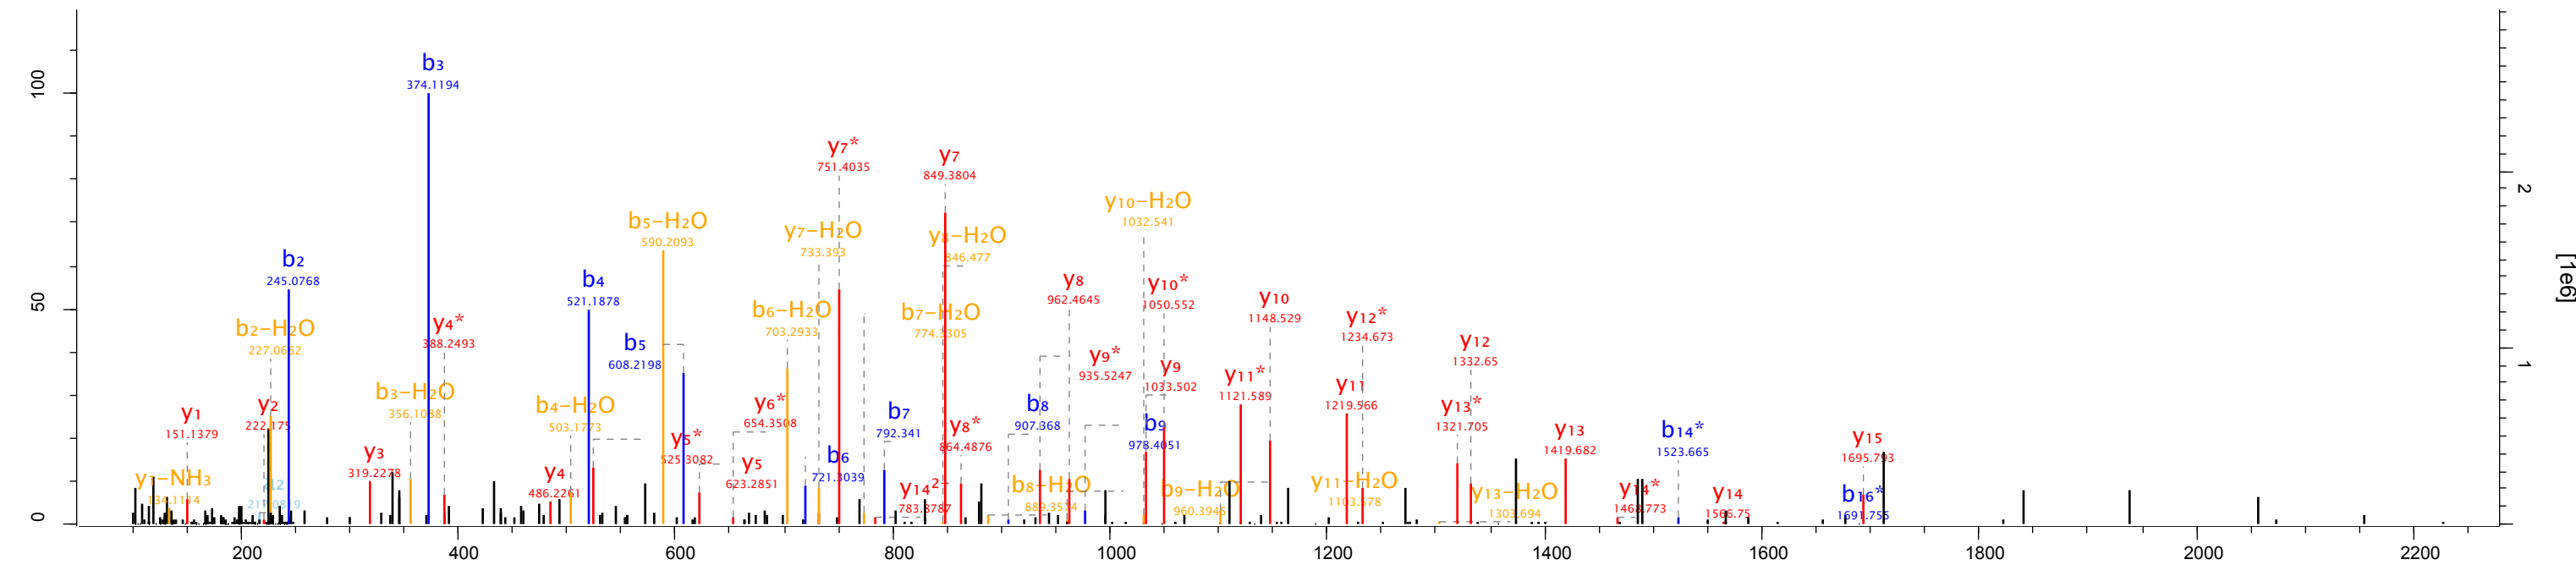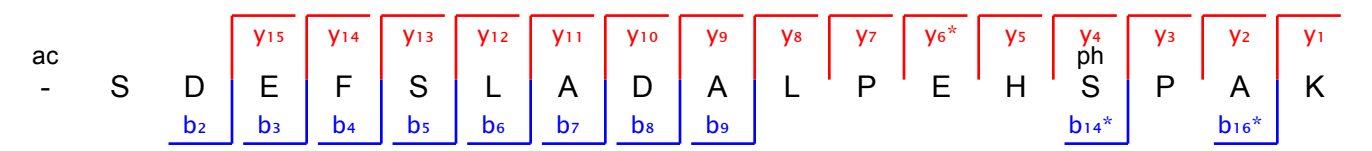

Raw file 20150812\_A375SR\_Phospho\_BR1\_04 Scan 6184 Method FTMS; HCD Score 110.6 m/z 563.24 Gene names YAF2

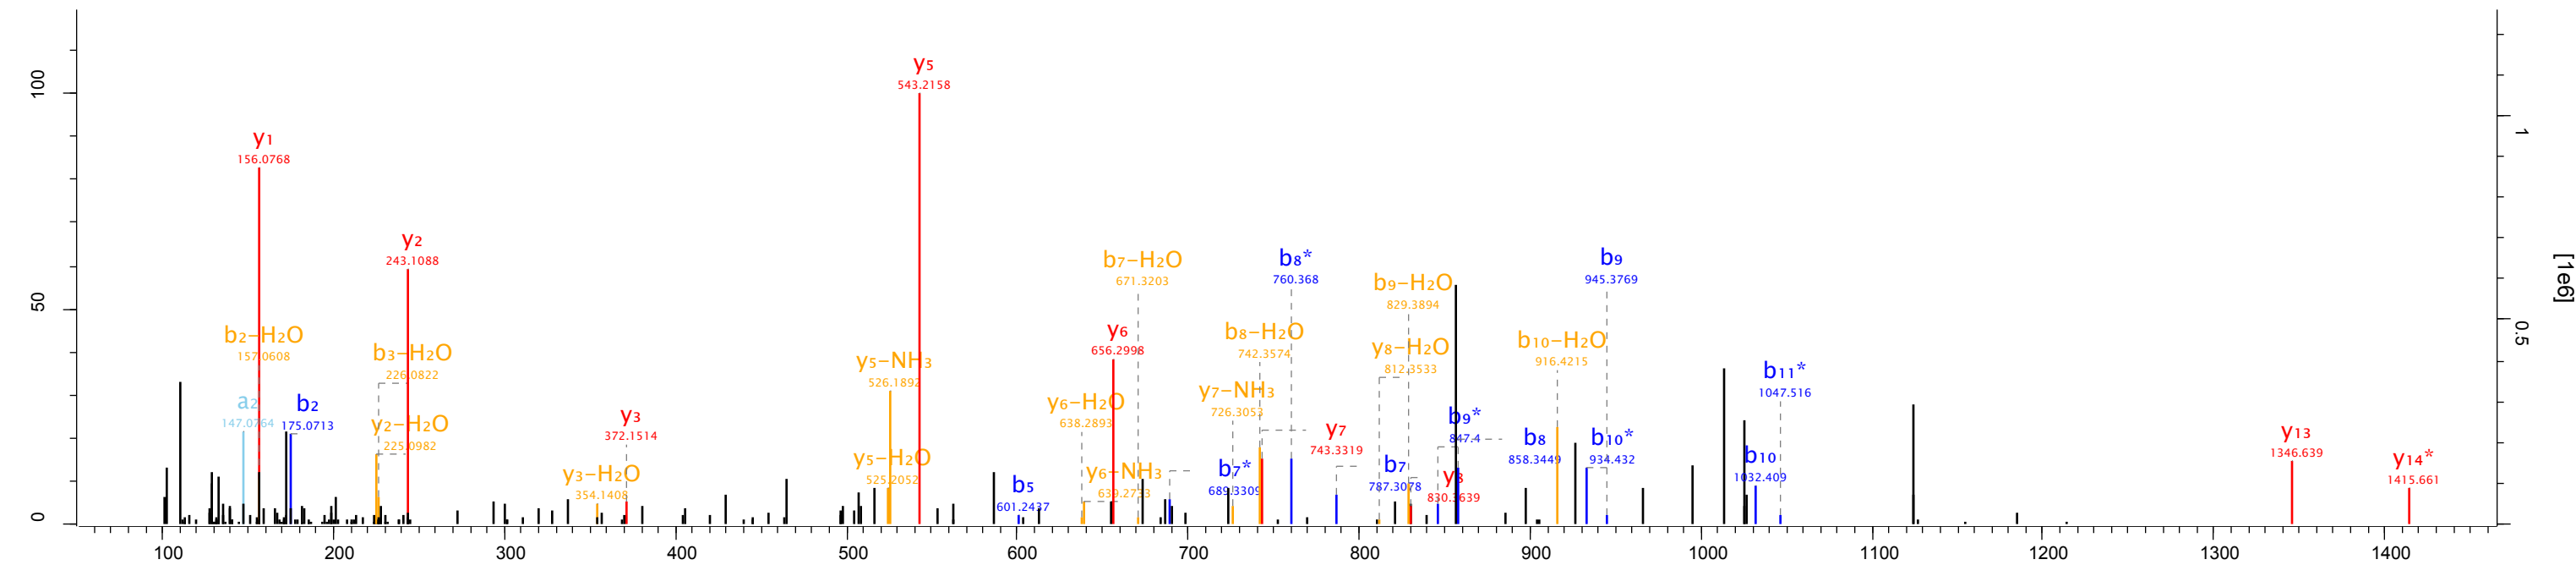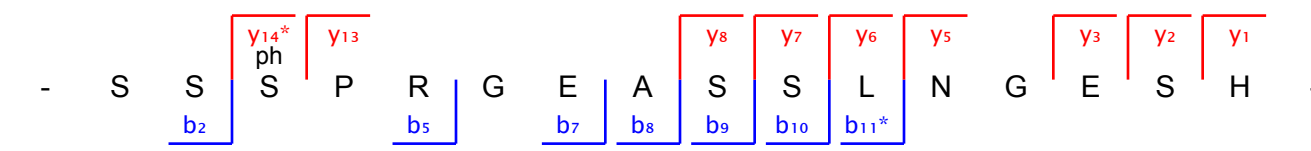



Raw file 20150812\_A375SR\_Phospho\_BR1\_05 Scan 12854 Method FTMS; HCD Score 133.86 m/z 693.33 Gene names CBY1

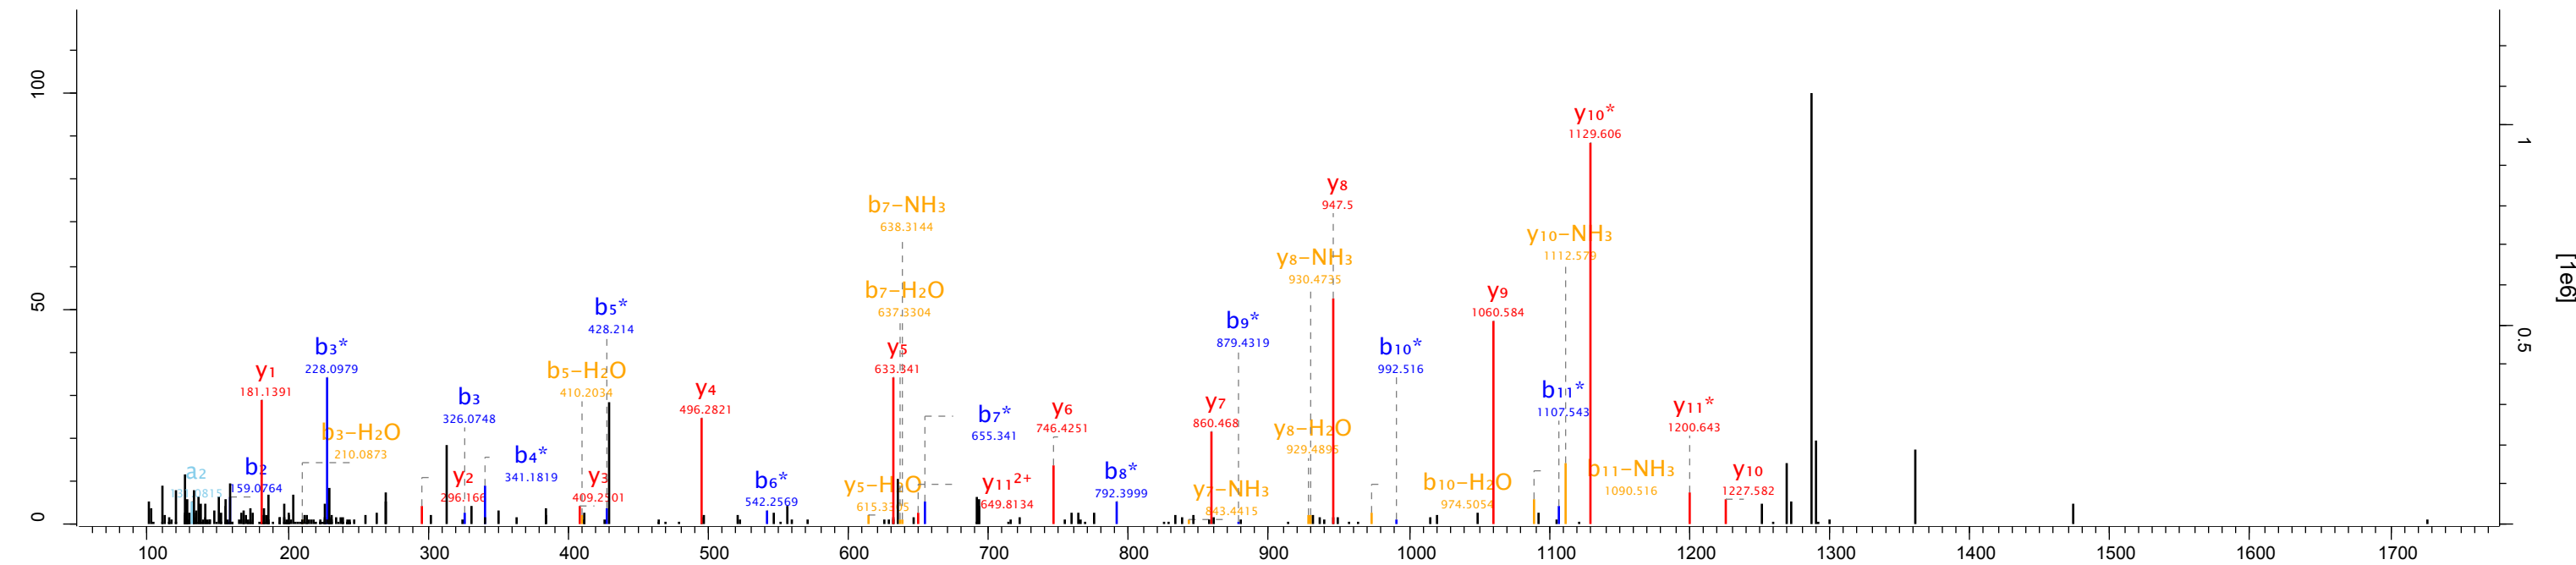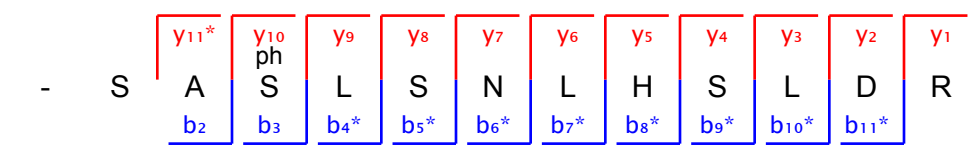

Raw file 20150812\_A375SR\_Phospho\_BR1\_05 Scan 13554 Method FTMS; HCD Score 94.45 m/z 562.64 Gene names MLLT3

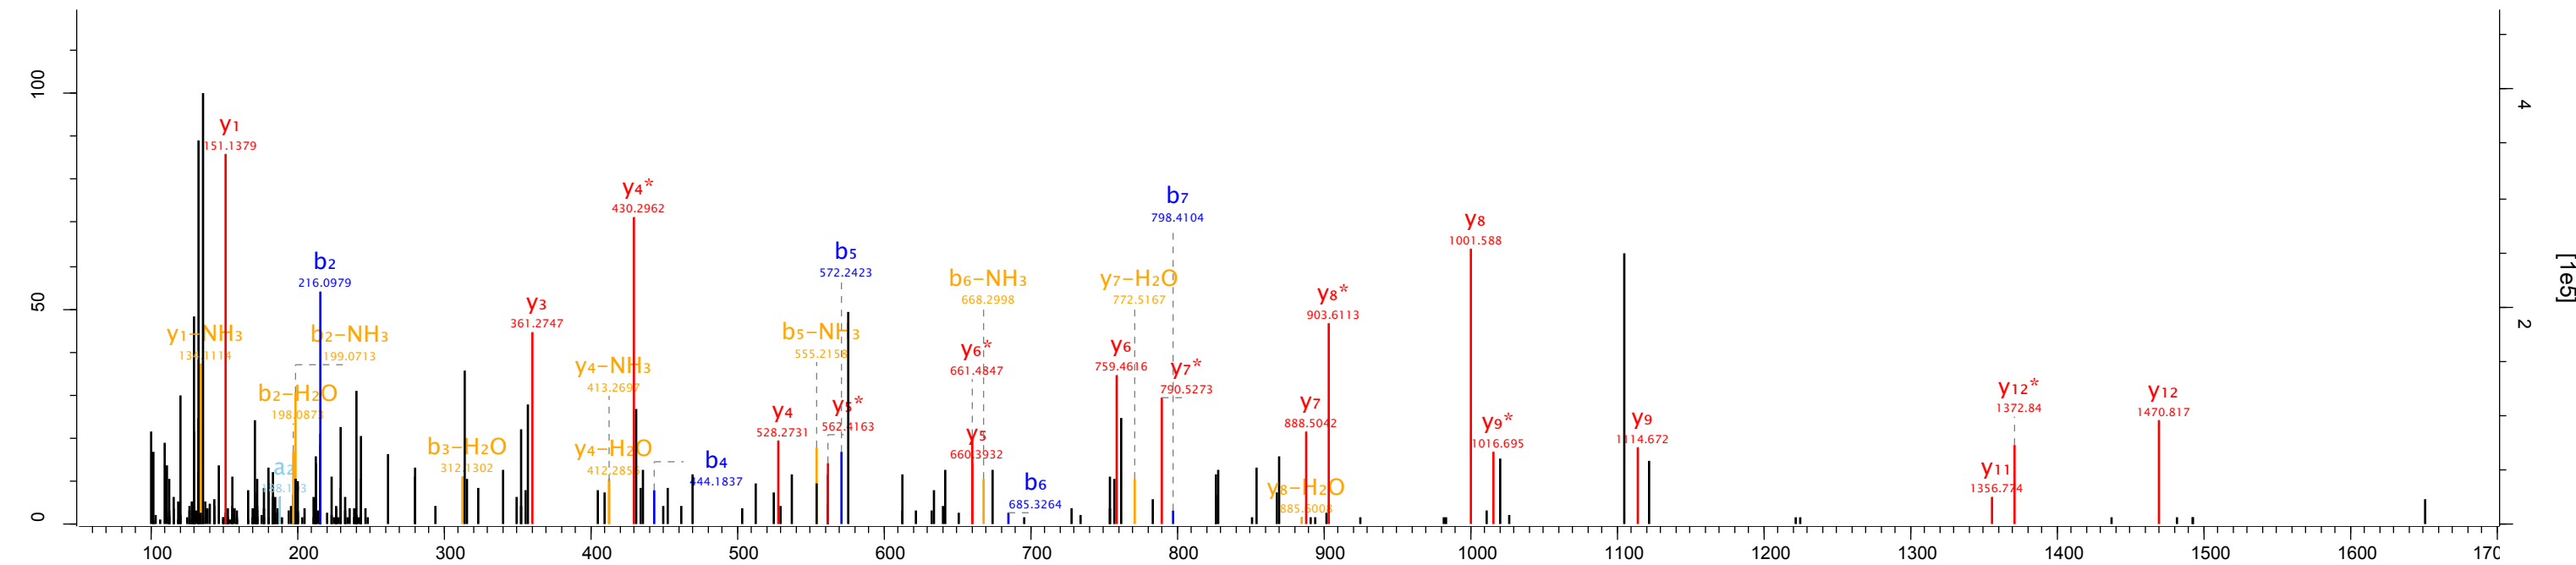

- T N N Q I L E V K S P I K -

Peptide sequence: T N N Q I L E V K S P I K

Fragmentation sites (b and y ions) are indicated by brackets below the sequence:

- b2: N
- b4: NN
- b5: NQ
- b6: NQI
- b7: NQIL
- y1: K
- y3: SP
- y4: Sph
- y5: K
- y6: V
- y7: E
- y8: IL
- y9: IQ
- y11: NN
- y12: NN

Raw file: 20150812\_A375SR\_Phospho\_BR1\_05  
 Scan: 14294 Method: FTMS; HCD Score: 145.9 m/z: 436.58 Gene names: RPL39P5;RPL39

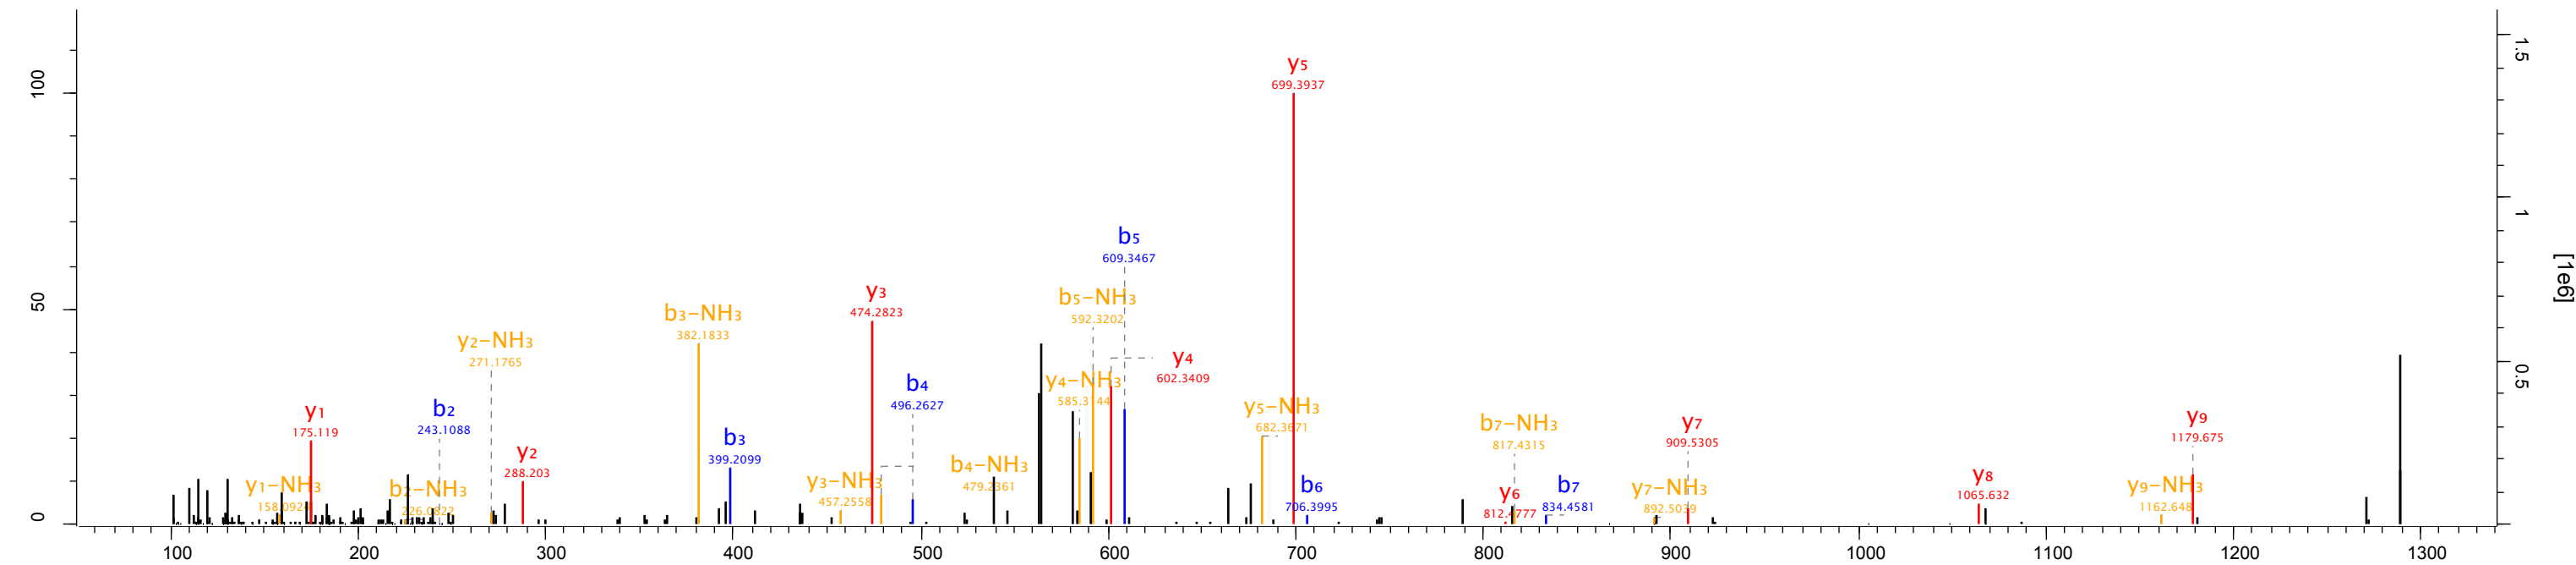

Raw file 20150812\_A375SR\_Phospho\_BR1\_05 Scan 17874 Method FTMS; HCD Score 50.79 m/z 573.77 Gene names GPATCH2L

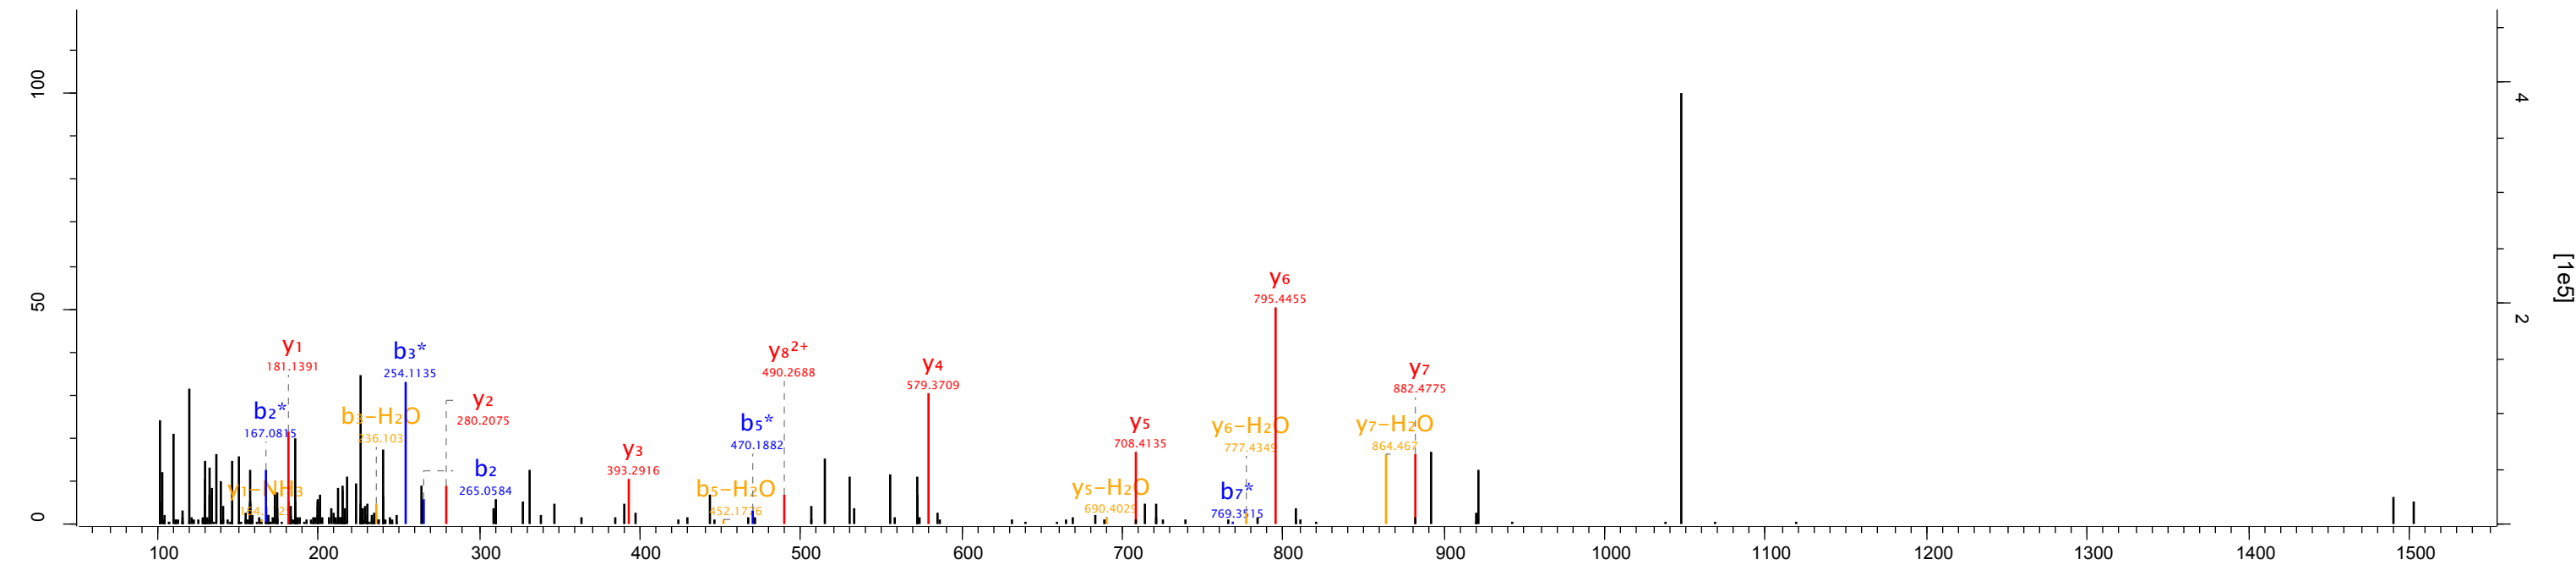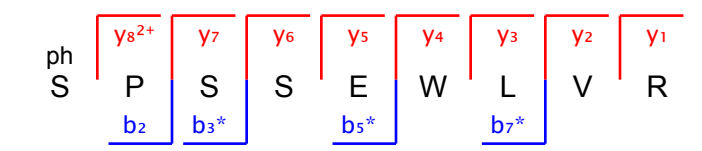

Raw file 20150812\_A375SR\_Phospho\_BR1\_05 Scan 21224 Method FTMS; HCD Score 82.64 m/z 781.42 Gene names ZNF579

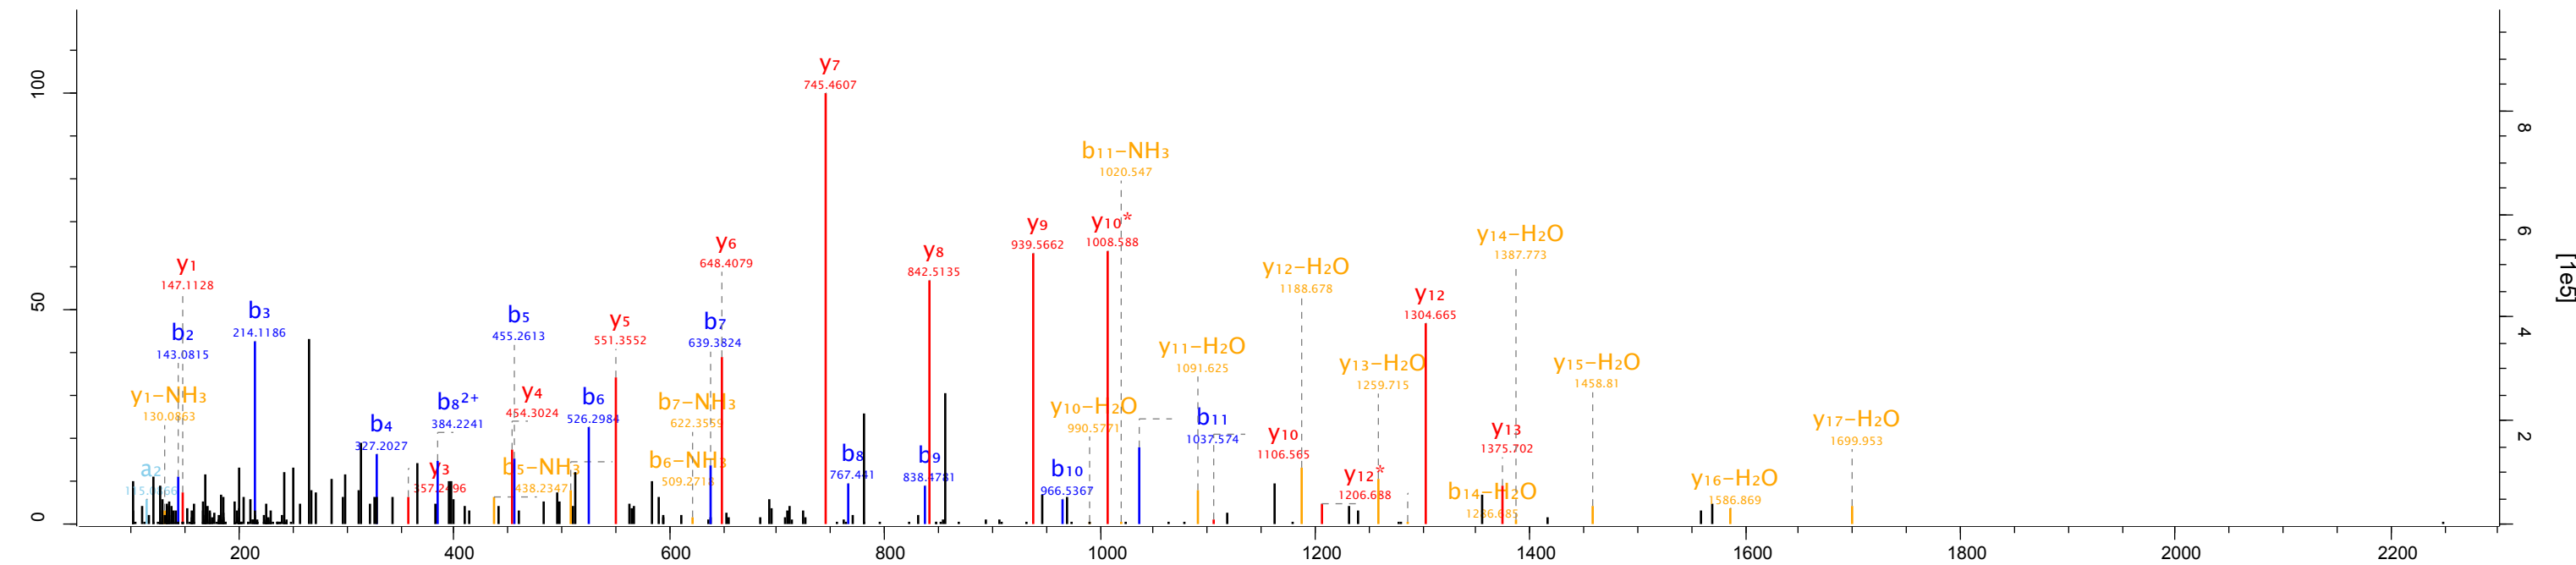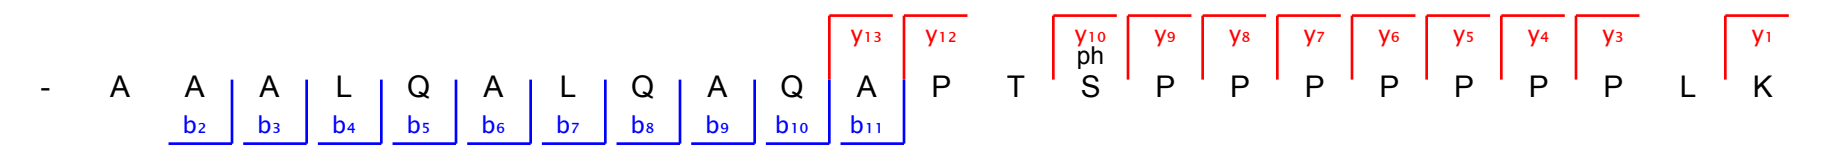

Raw file: 20150812\_A375SR\_Phospho\_BR1\_05  
 Scan: 5374 Method: FTMS; HCD Score: 106.32 m/z: 662.31 Gene names: PLA2G4E

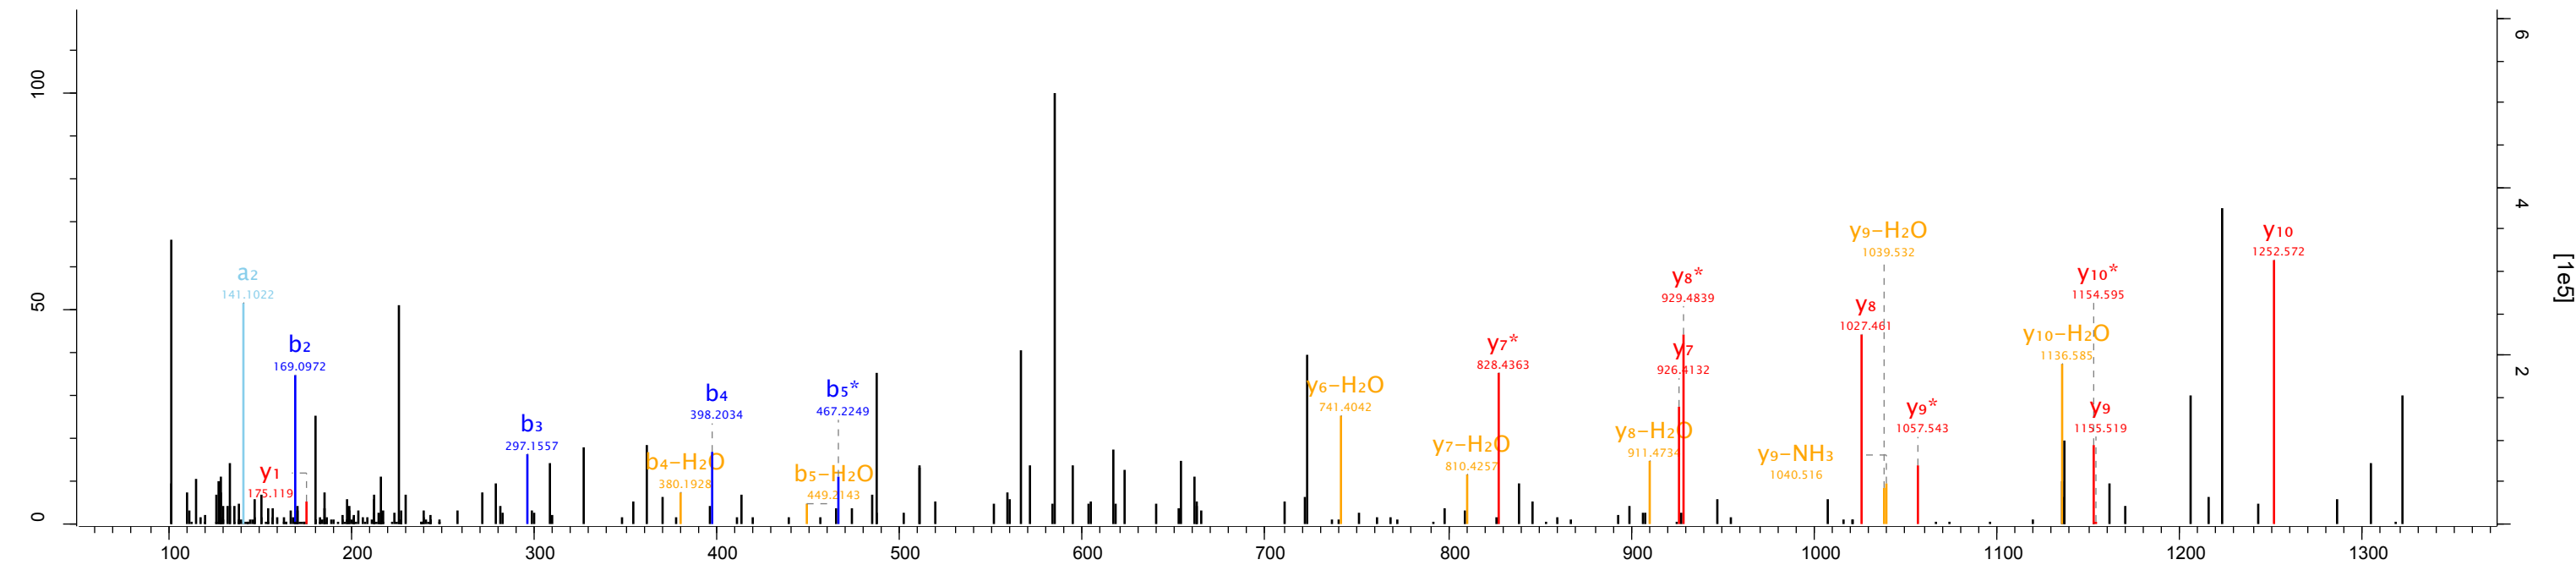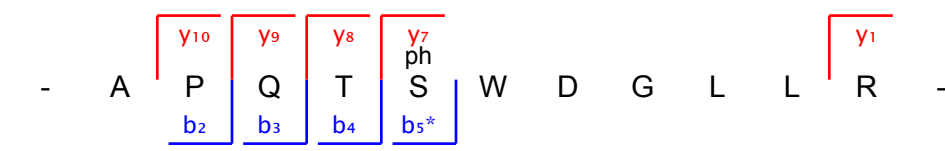

Raw file 20150812\_A375SR\_Phospho\_BR1\_06 Scan 12304 Method FTMS; HCD Score 87.09 m/z 655.82 Gene names PHACTR2

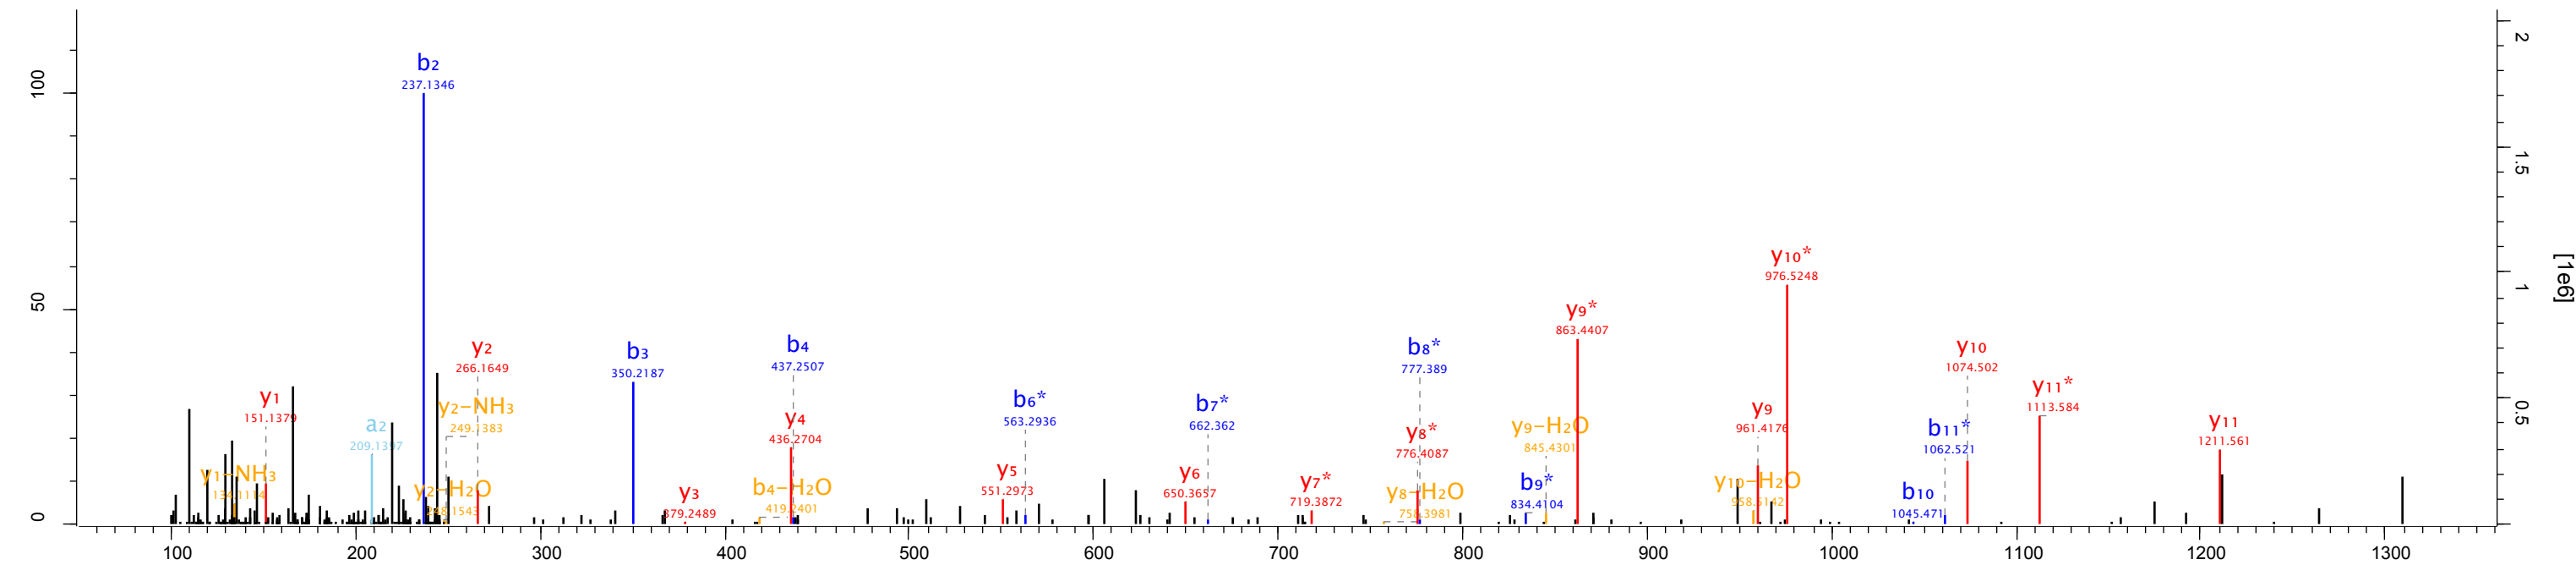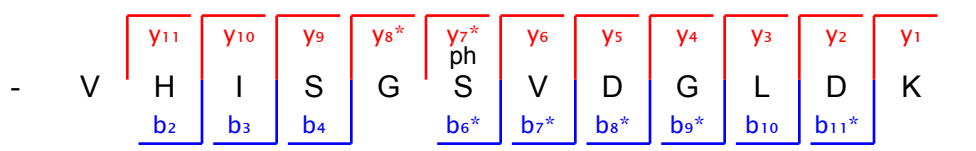

Raw file Scan Method Score m/z  
 20150812\_A375SR\_Phospho\_BR1\_06 9194 FTMS; HCD 44.93 496.9

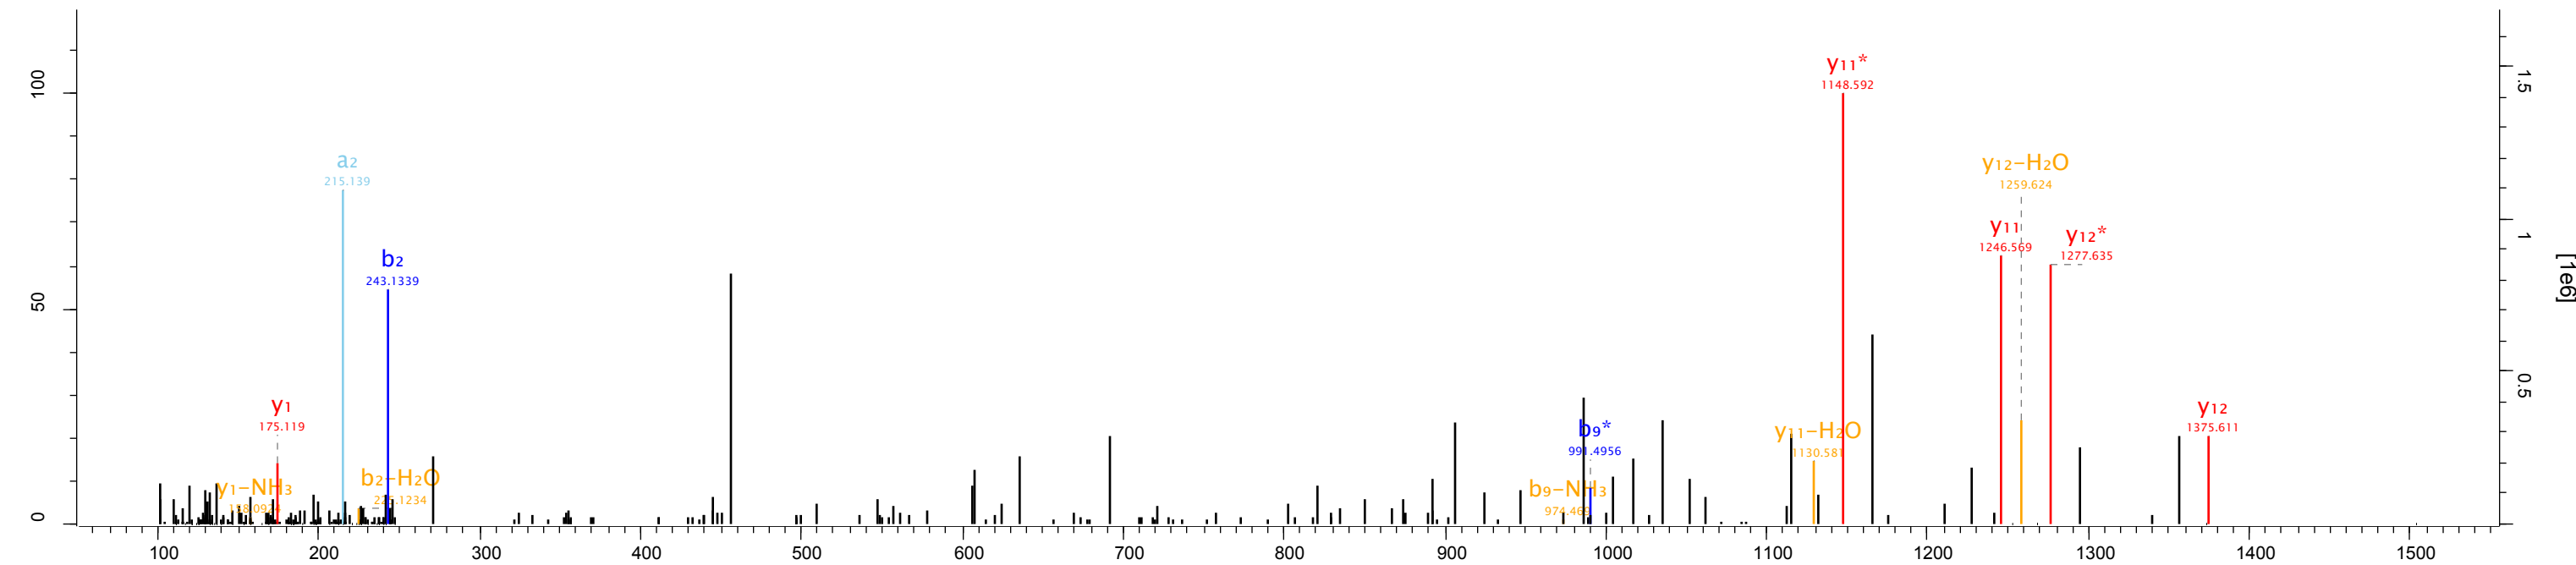

- L E S T P H S R T A G P R -

Fragmentation mapping:

- Red brackets above the sequence:
  - y12 above E
  - y11-ph above S
  - y1 above R
- Blue brackets below the sequence:
  - b2 below E
  - b9\* below T



Raw file: 20150812\_A375SR\_Phospho\_BR1\_07  
 Scan: 14884 Method: FTMS; HCD Score: 175.91 m/z: 436.58 Gene names: RPL39P5;RPL39

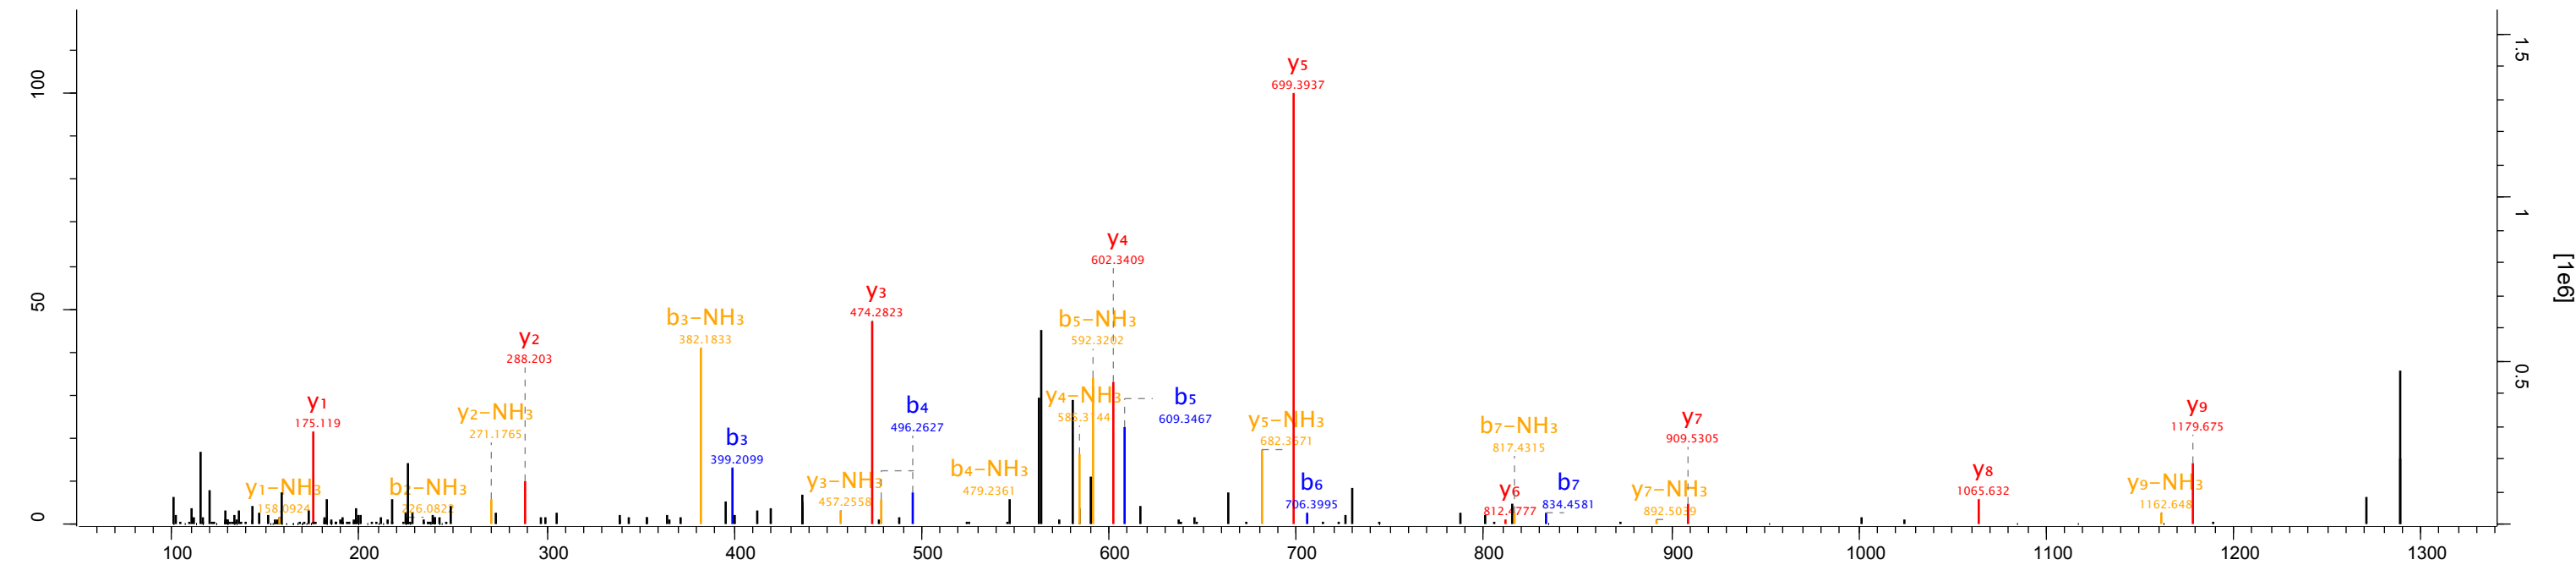

Raw file 20150812\_A375SR\_Phospho\_BR1\_07 Scan 21584 Method FTMS; HCD Score 75.53 m/z 781.42 Gene names ZNF579

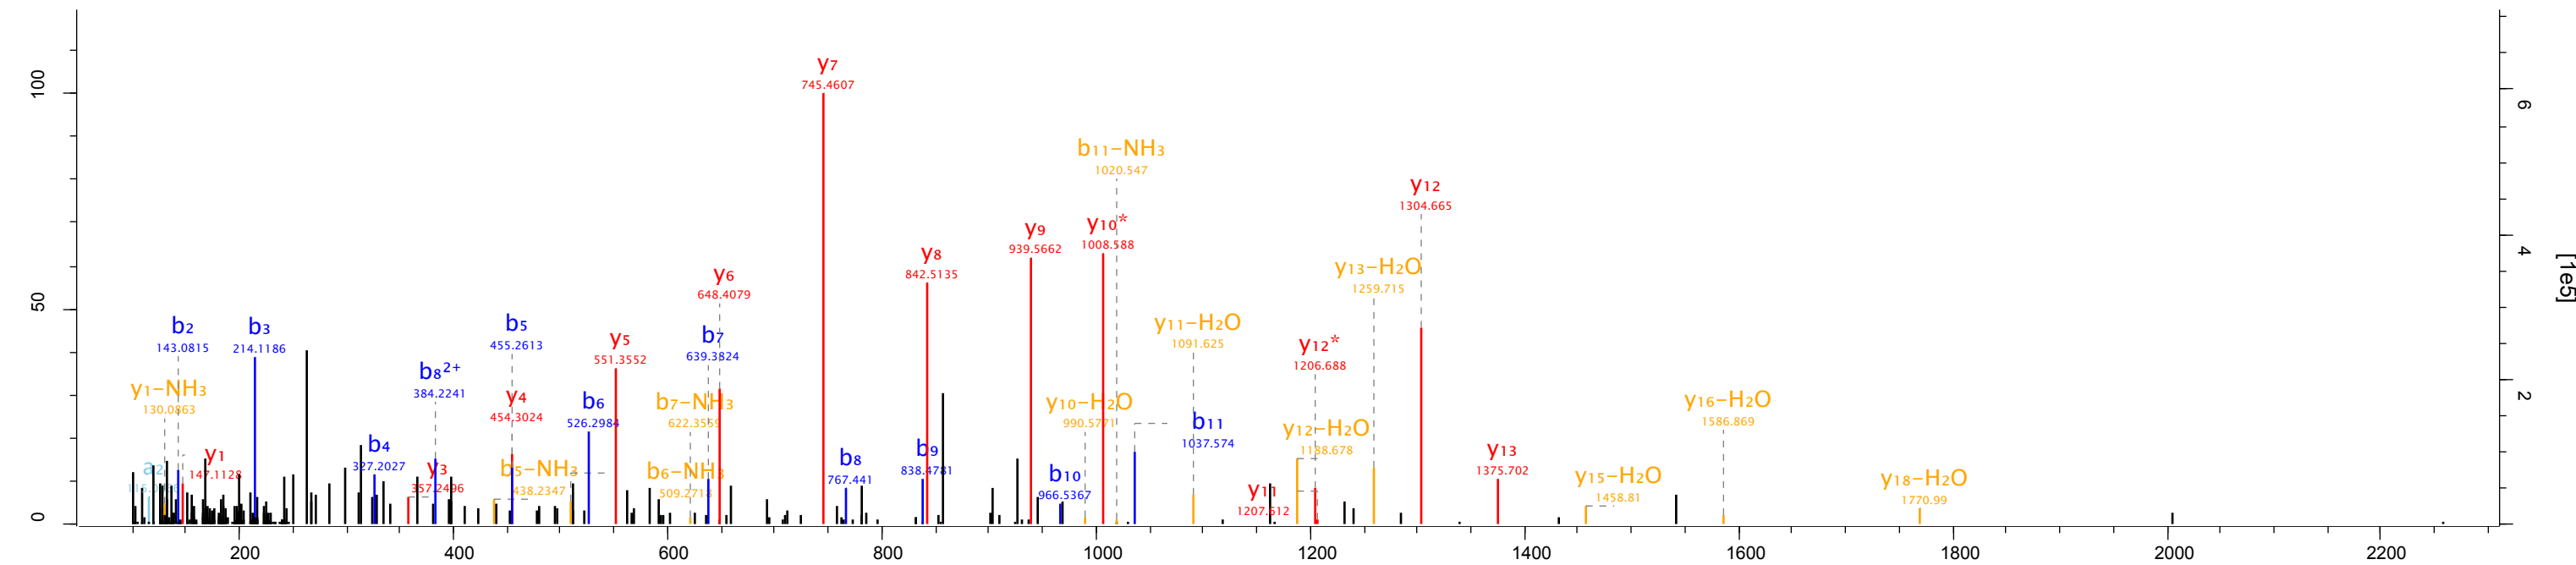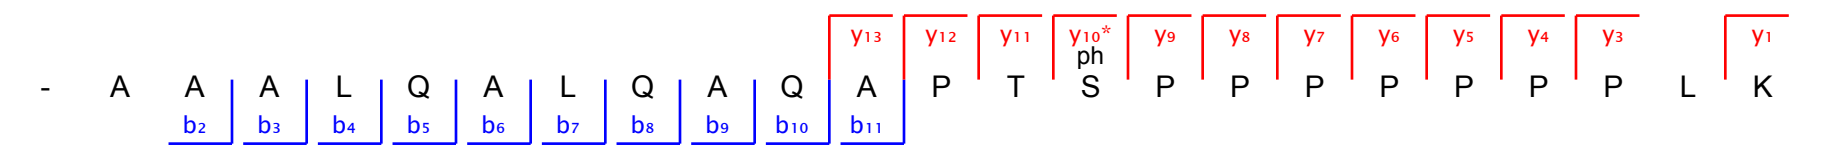

Raw file Scan Method Score m/z Gene names  
 20150812\_A375SR\_Phospho\_BR1\_07 24684 FTMS; HCD 291.68 968.42 MAPK11P1L

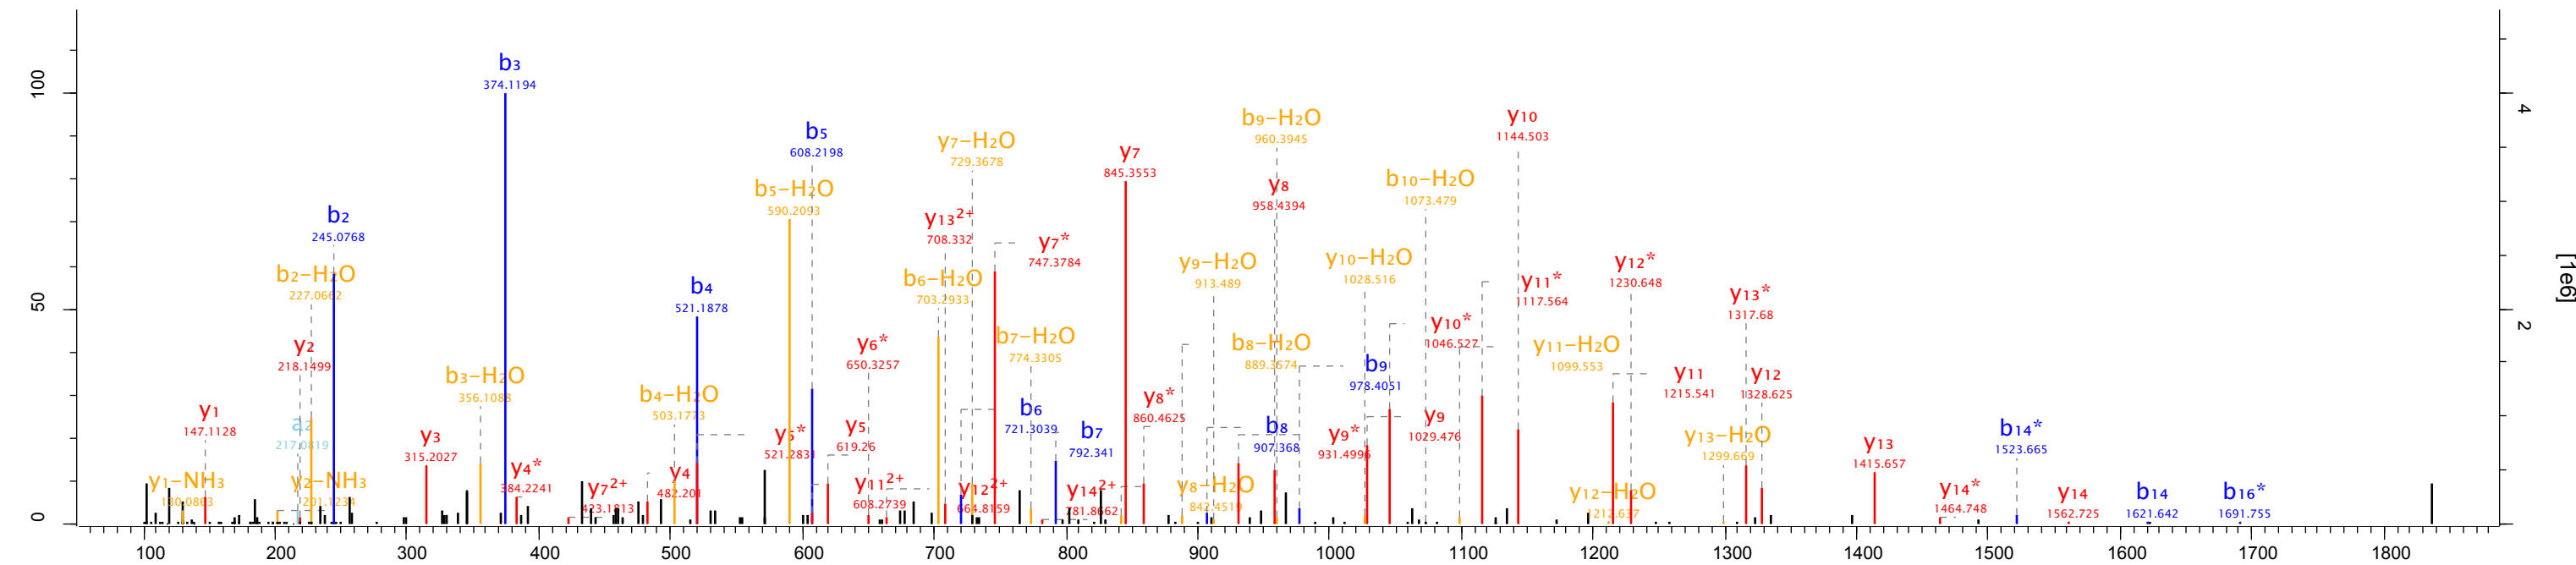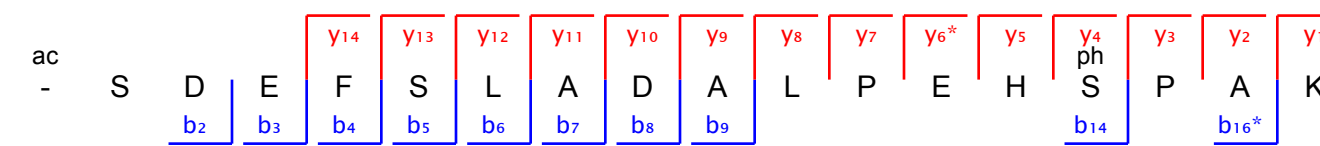

Raw file 20150812\_A375SR\_Phospho\_BR1\_08 Scan 12744 Method FTMS; HCD Score 46.88 m/z 558.29

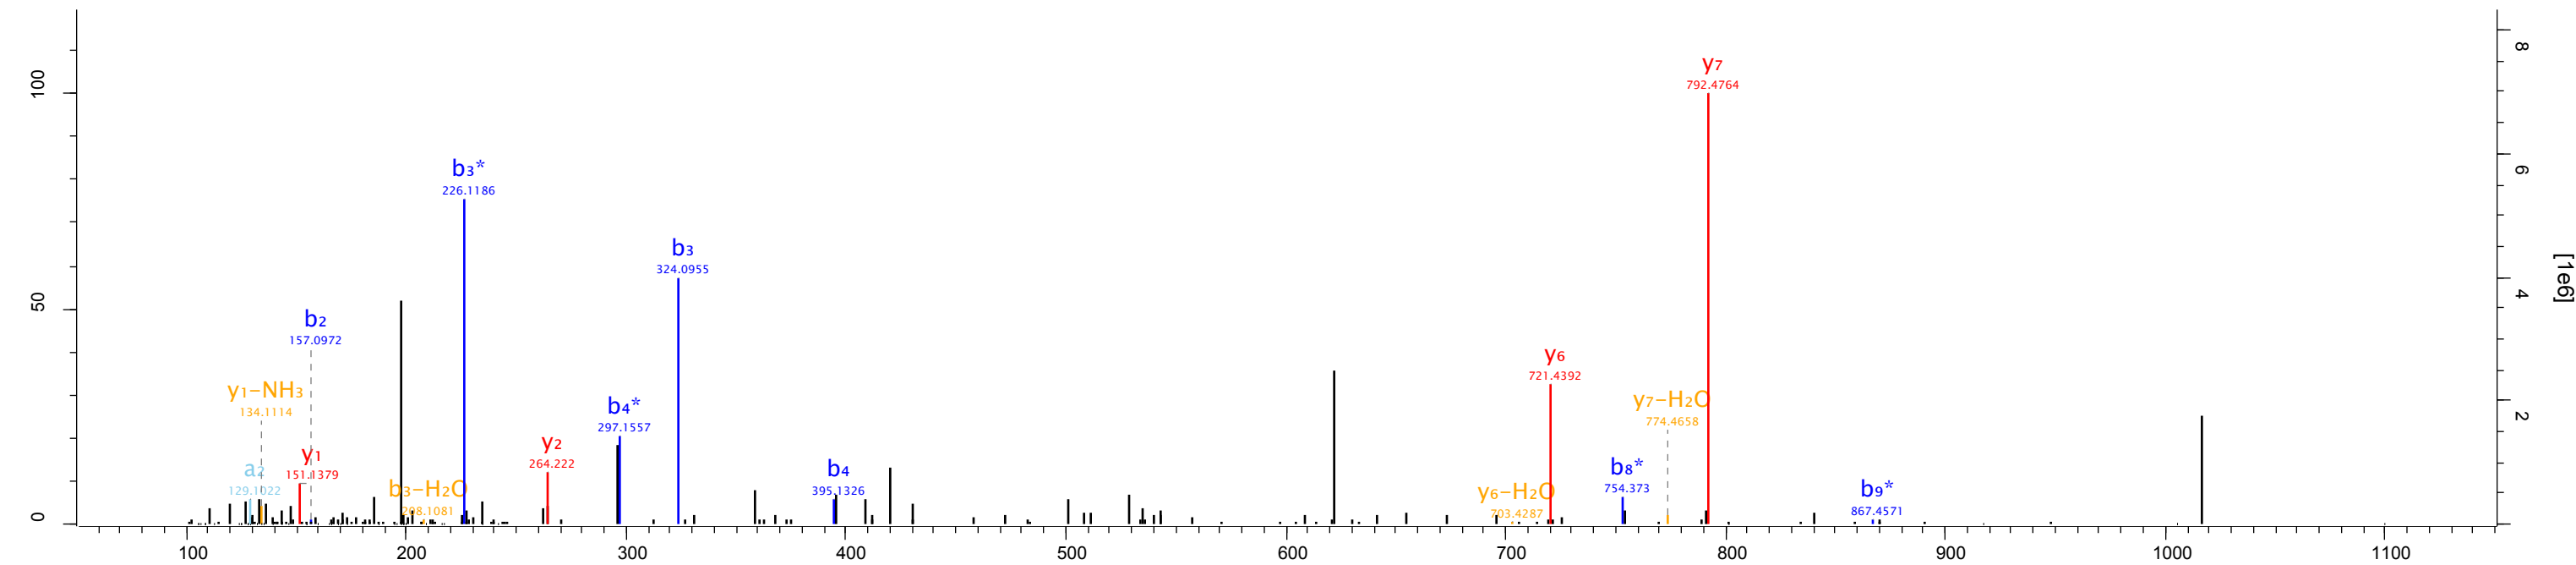

Raw file 20150812\_A375SR\_Phospho\_BR1\_08 Scan 12784 Method FTMS; HCD Score 62.34 m/z 556.27

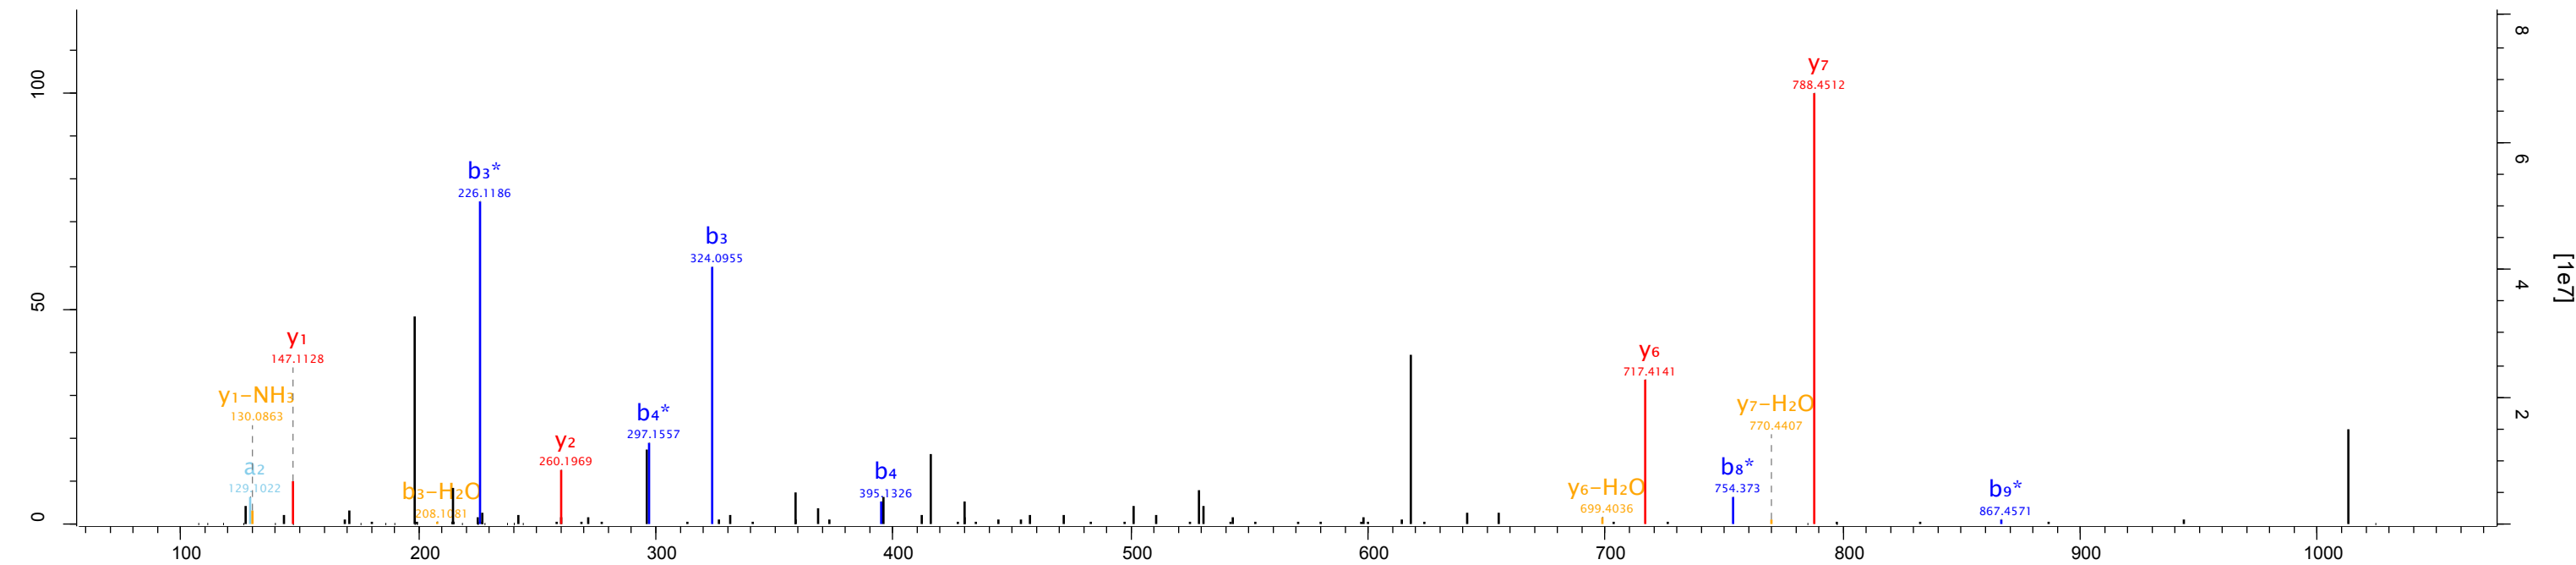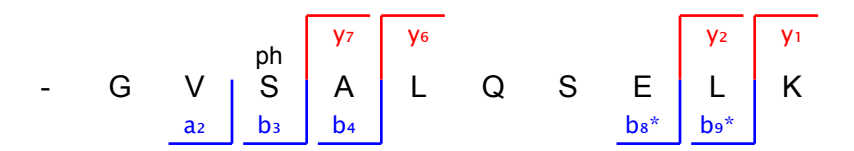

Raw file 20150812\_A375SR\_Phospho\_BR1\_10 Scan 10834 Method FTMS; HCD Score 122.96 m/z 693.35 Gene names ELK3

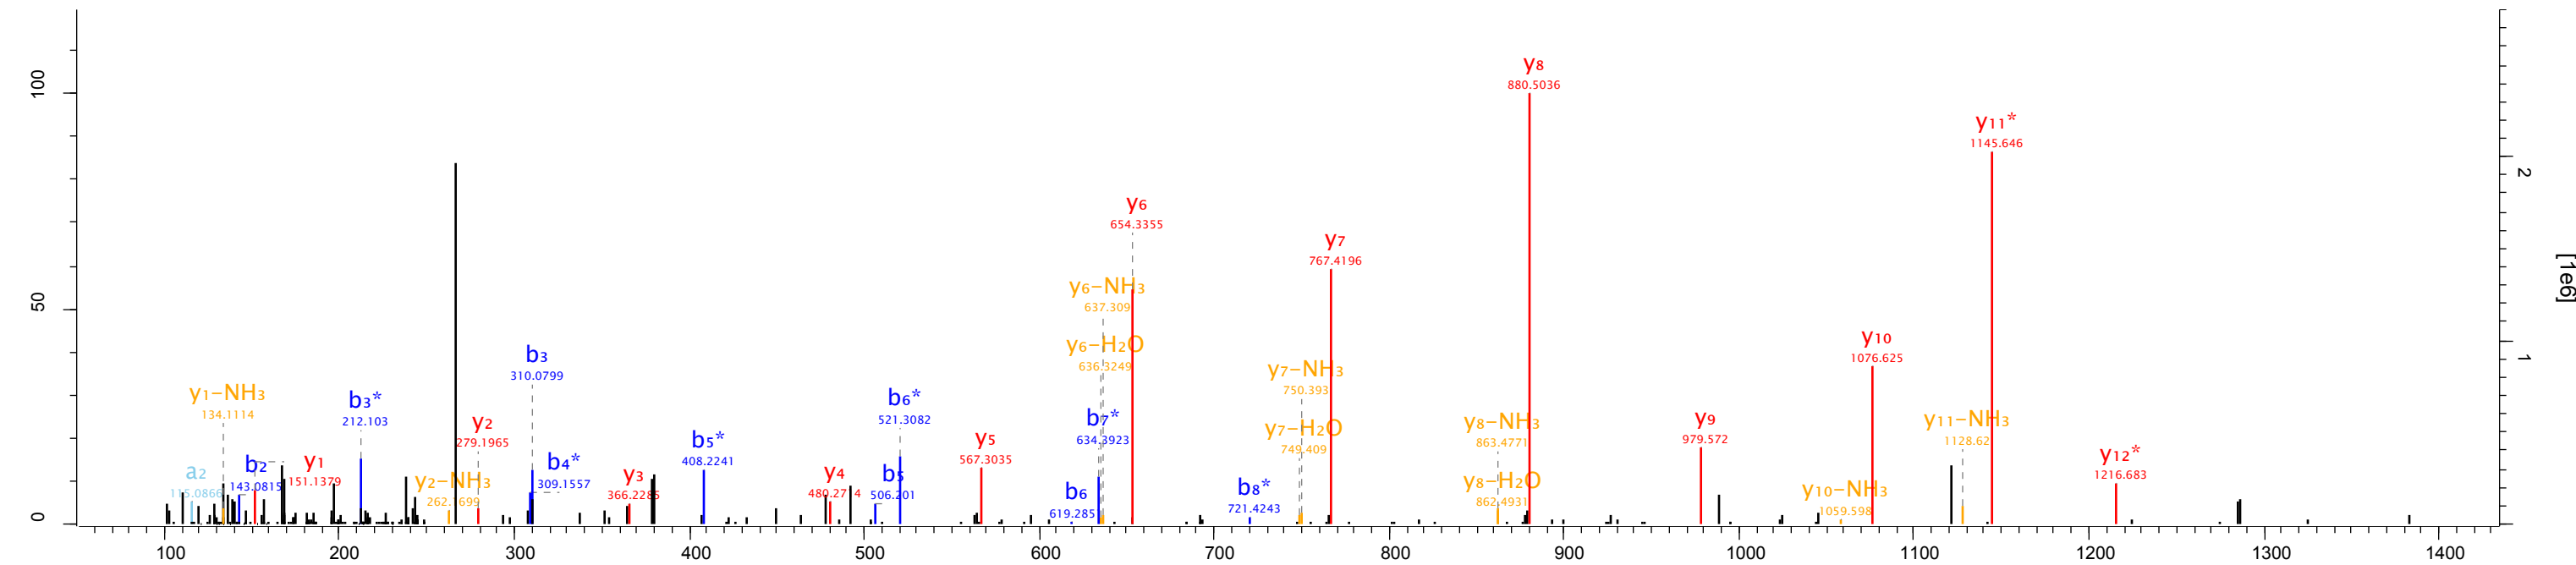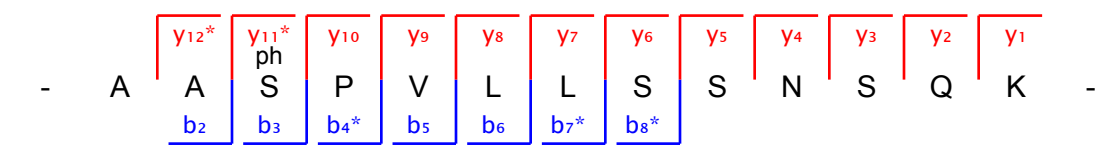

Raw file 20150812\_A375SR\_Phospho\_BR1\_10 Scan 17404 Method FTMS; HCD Score 51.73 m/z 861.88

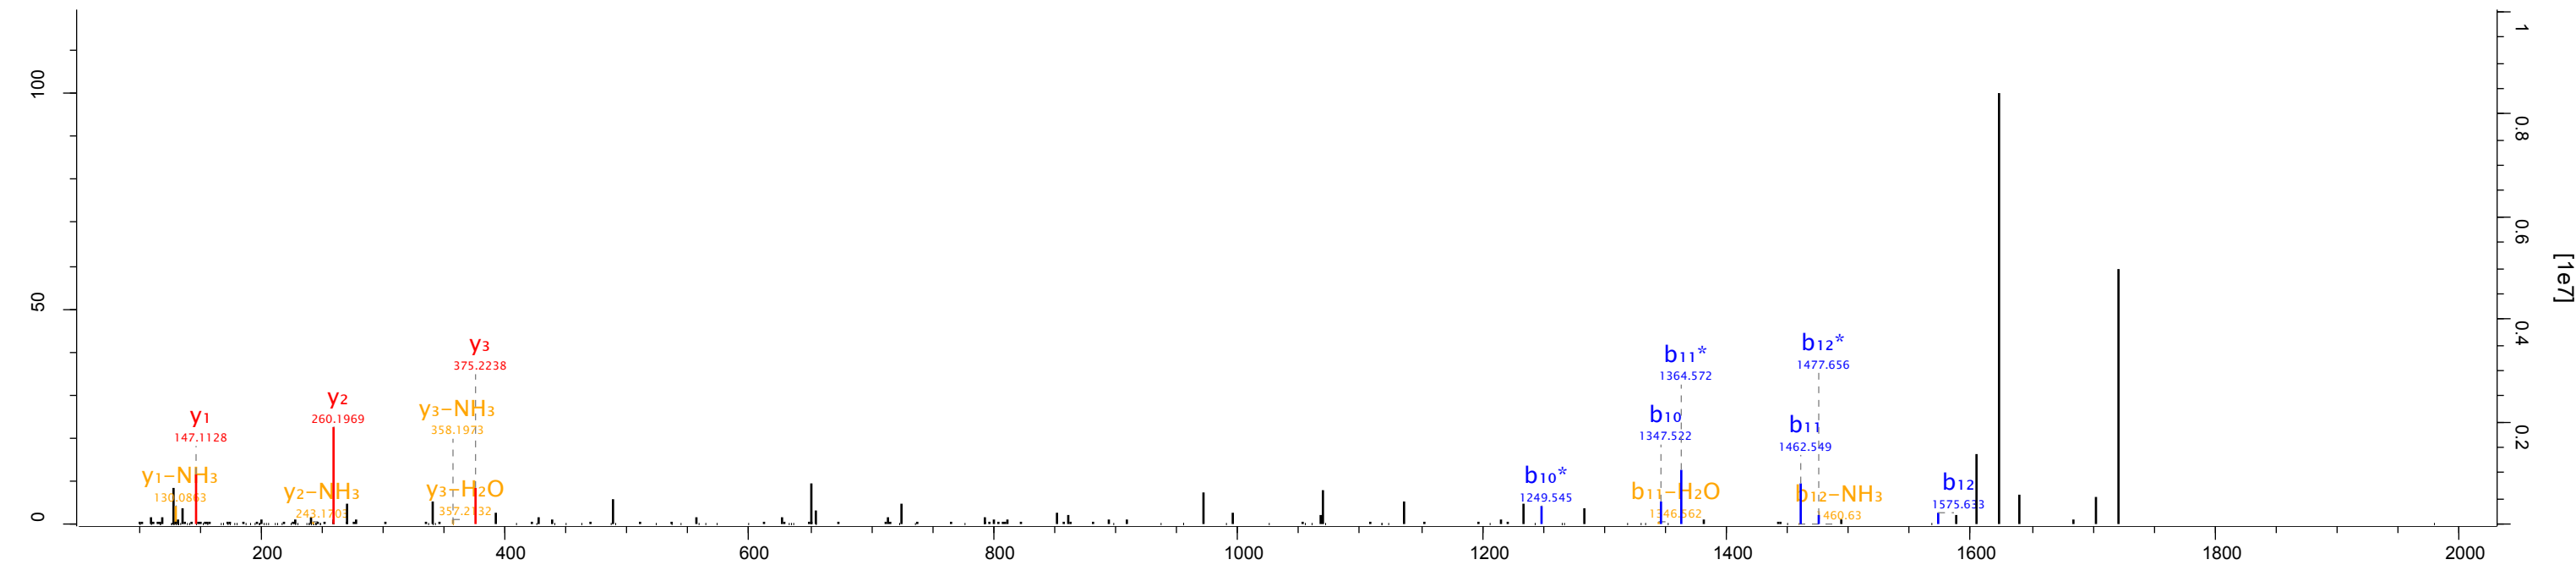

Raw file 20150812\_A375SR\_Phospho\_BR1\_10 Scan 5824 Method FTMS; HCD Score 63.82 m/z 426.73

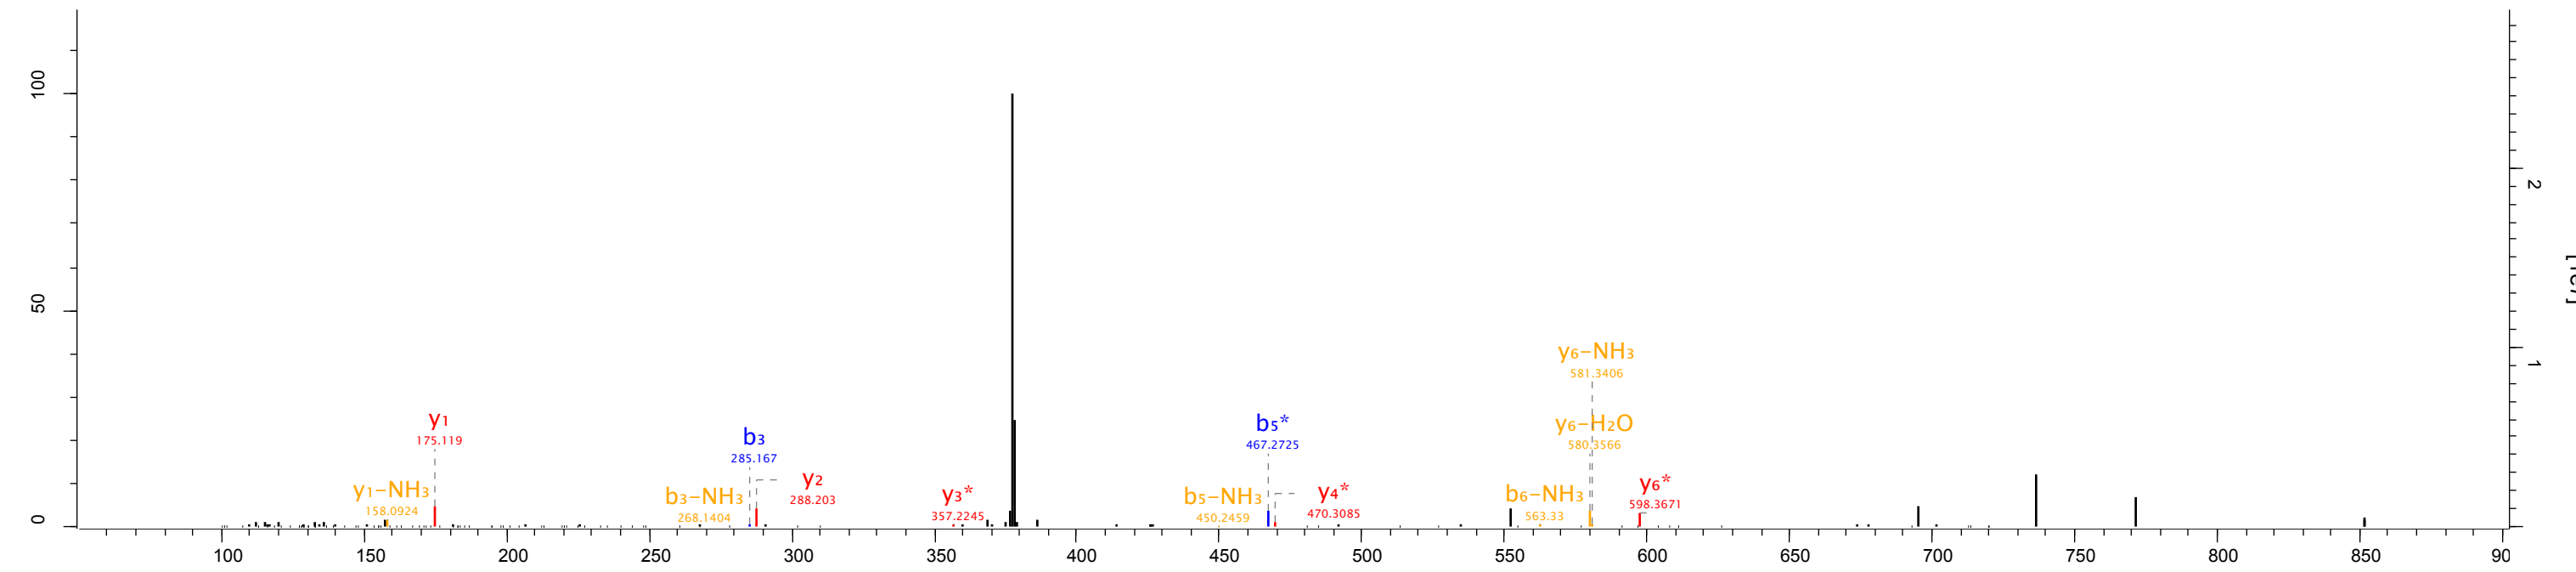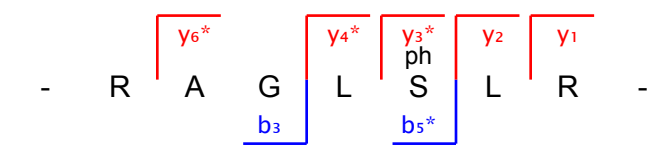



Raw file: 20150814\_A375SR\_Phospho\_BR2\_01  
 Scan: 10354 Method: FTMS; HCD Score: 69.98 m/z: 783.34 Gene names: PWWP2A

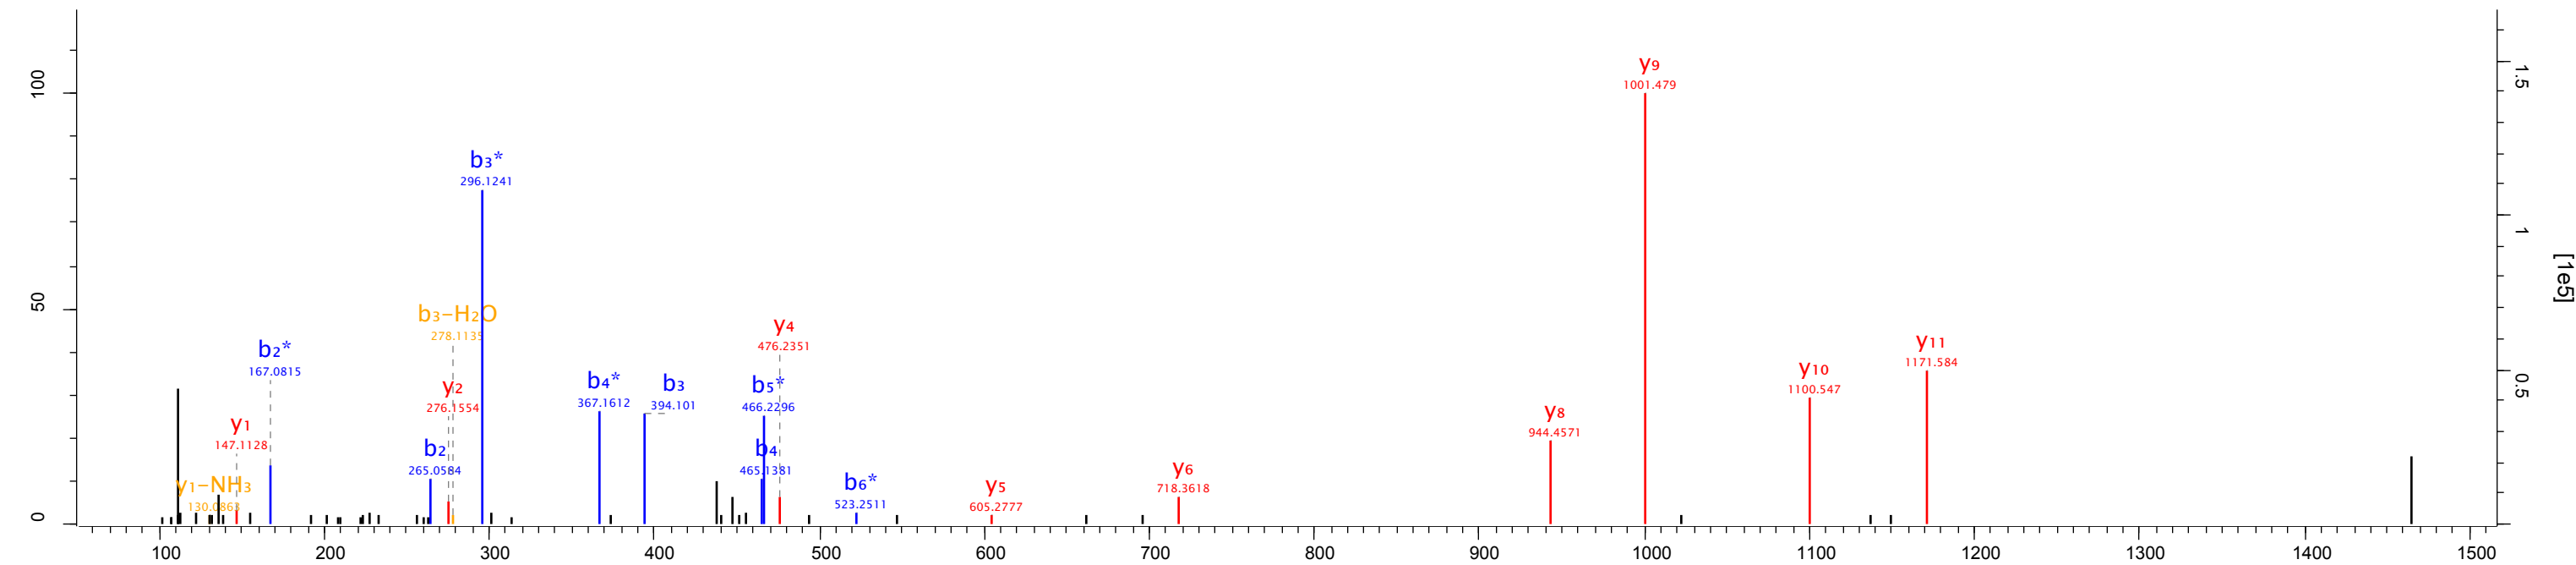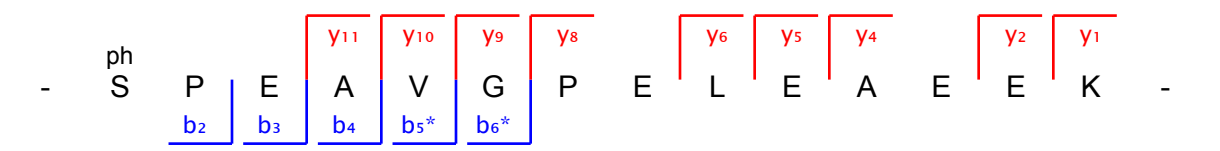

Raw file 20150814\_A375SR\_Phospho\_BR2\_03 Scan 19304 Method FTMS; HCD Score 61.21 m/z 569.76 Gene names CCDC125

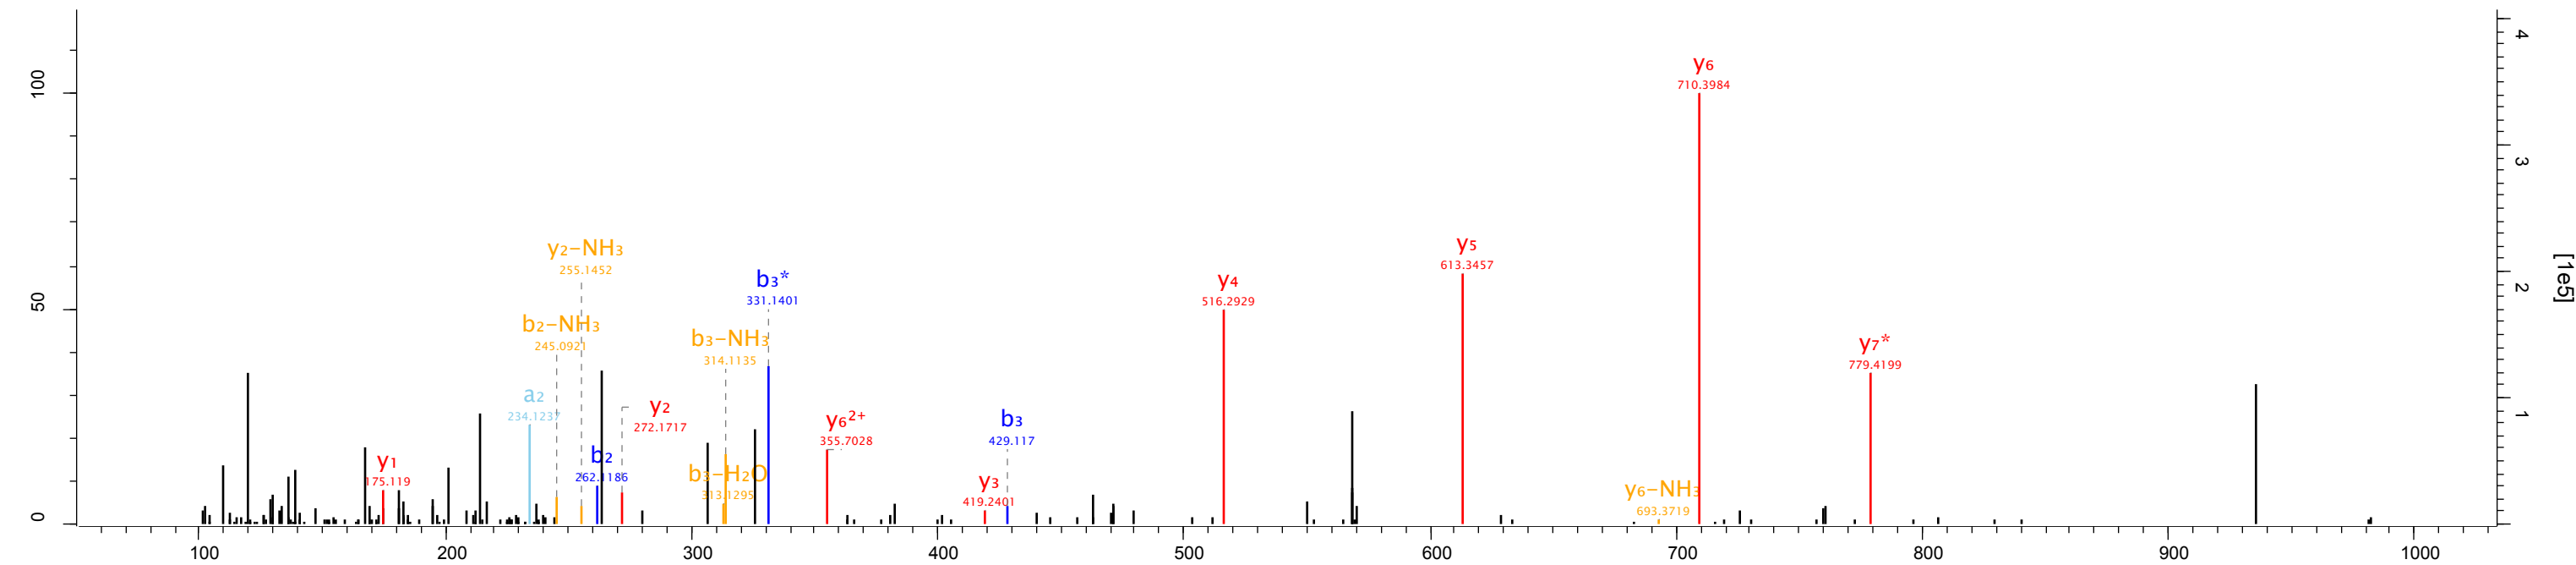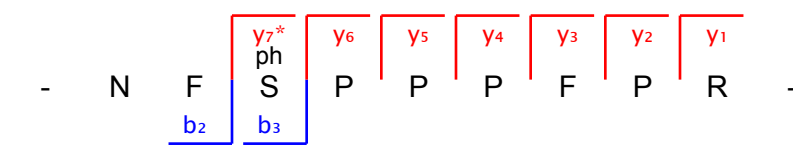

Raw file Scan Method Score m/z Gene names  
 20150814\_A375SR\_Phospho\_BR2\_03 27814 FTMS; HCD 159.06 798.89 BCL11A

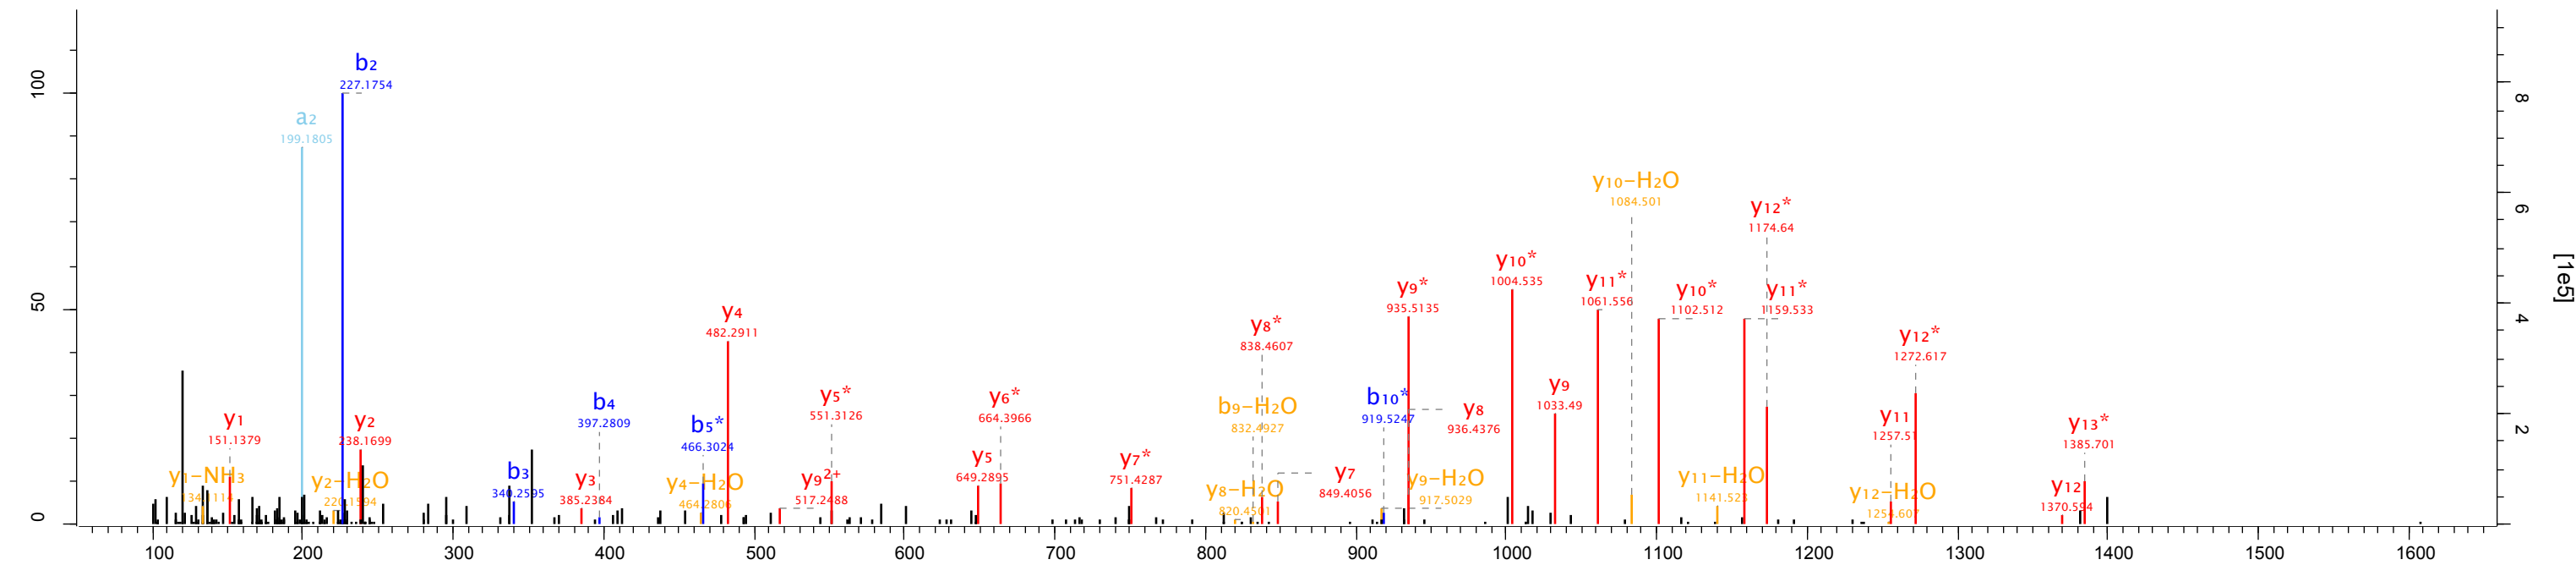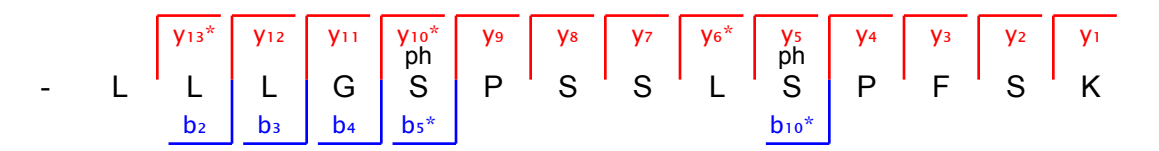

Raw file: 20150814\_A375SR\_Phospho\_BR2\_03  
 Scan: 5314 Method: FTMS; HCD Score: 98.25 m/z: 479.22 Gene names: RHBDF2

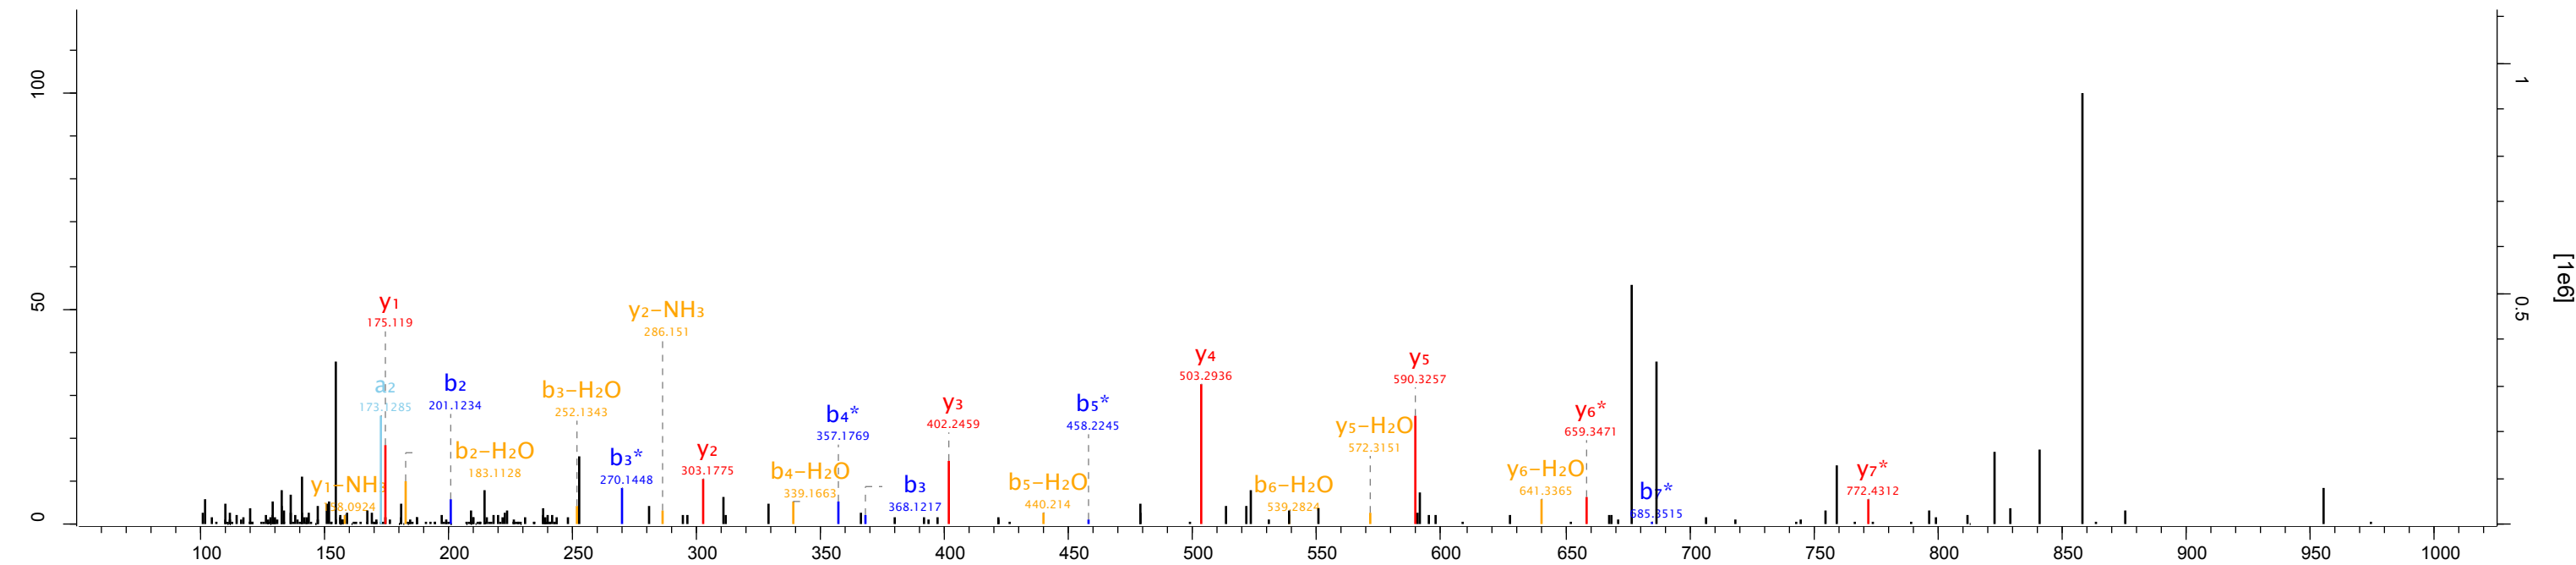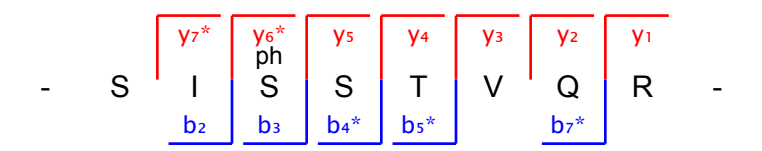

Raw file

20150814\_A375SR\_Phospho\_BR2\_03

| Scan | Method    | Score | m/z    | Gene names |
|------|-----------|-------|--------|------------|
| 5794 | FTMS; HCD | 48.29 | 660.77 | GPSM3      |

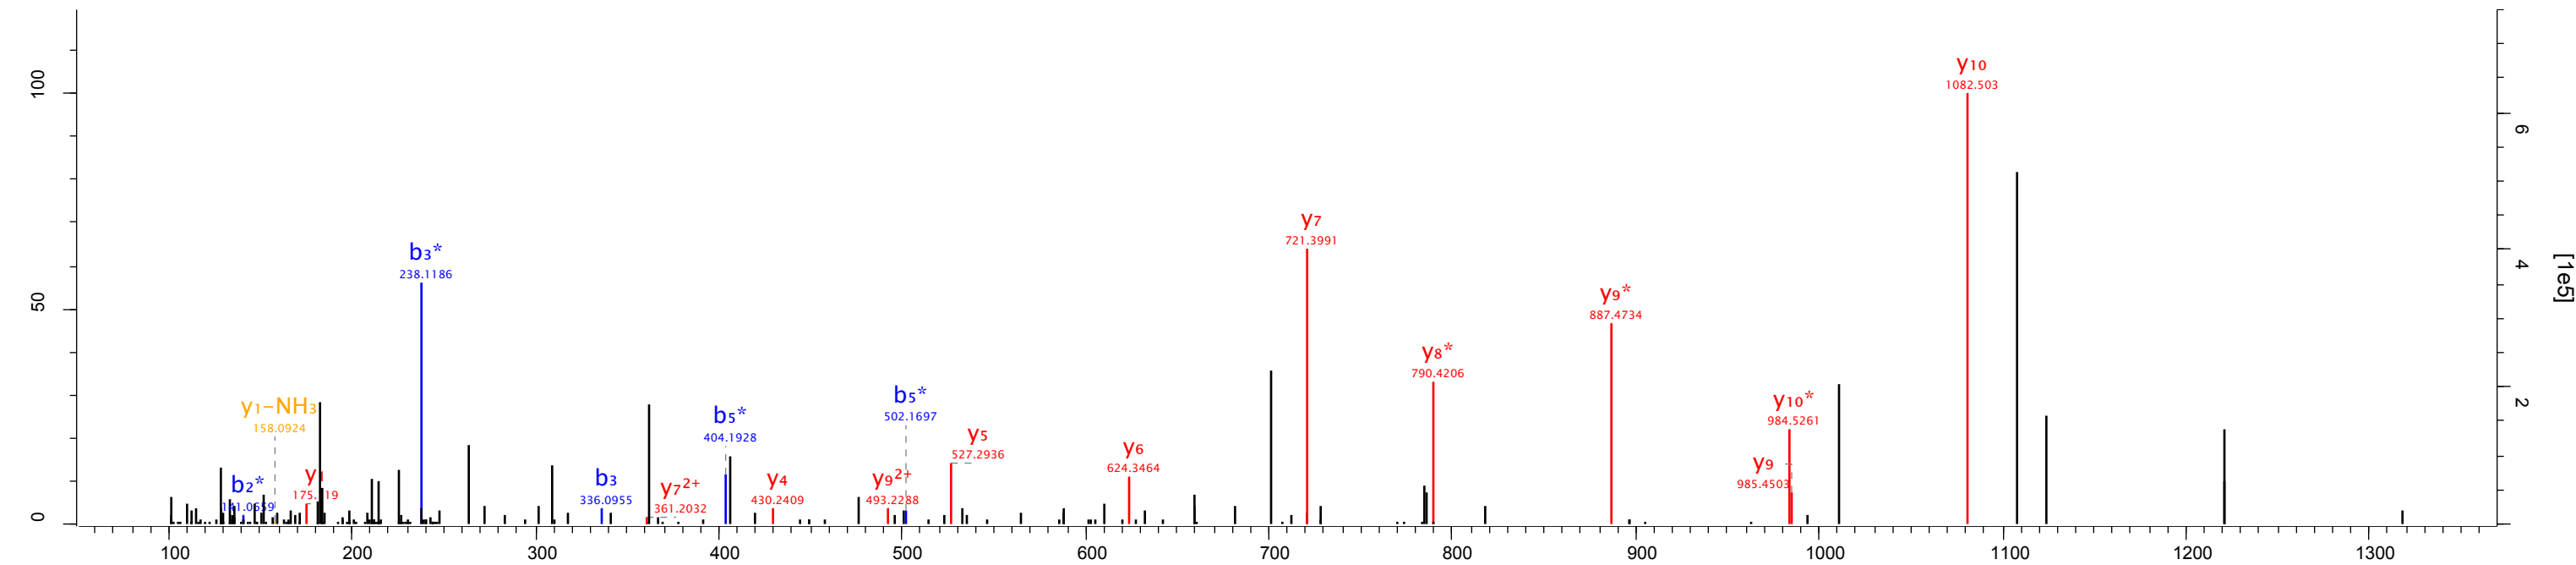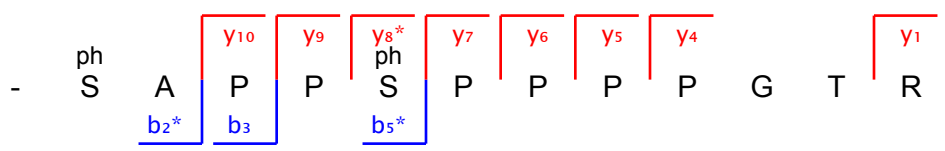

Raw file 20150814\_A375SR\_Phospho\_BR2\_04 Scan 12284 Method FTMS; HCD Score 62.34 m/z 556.27

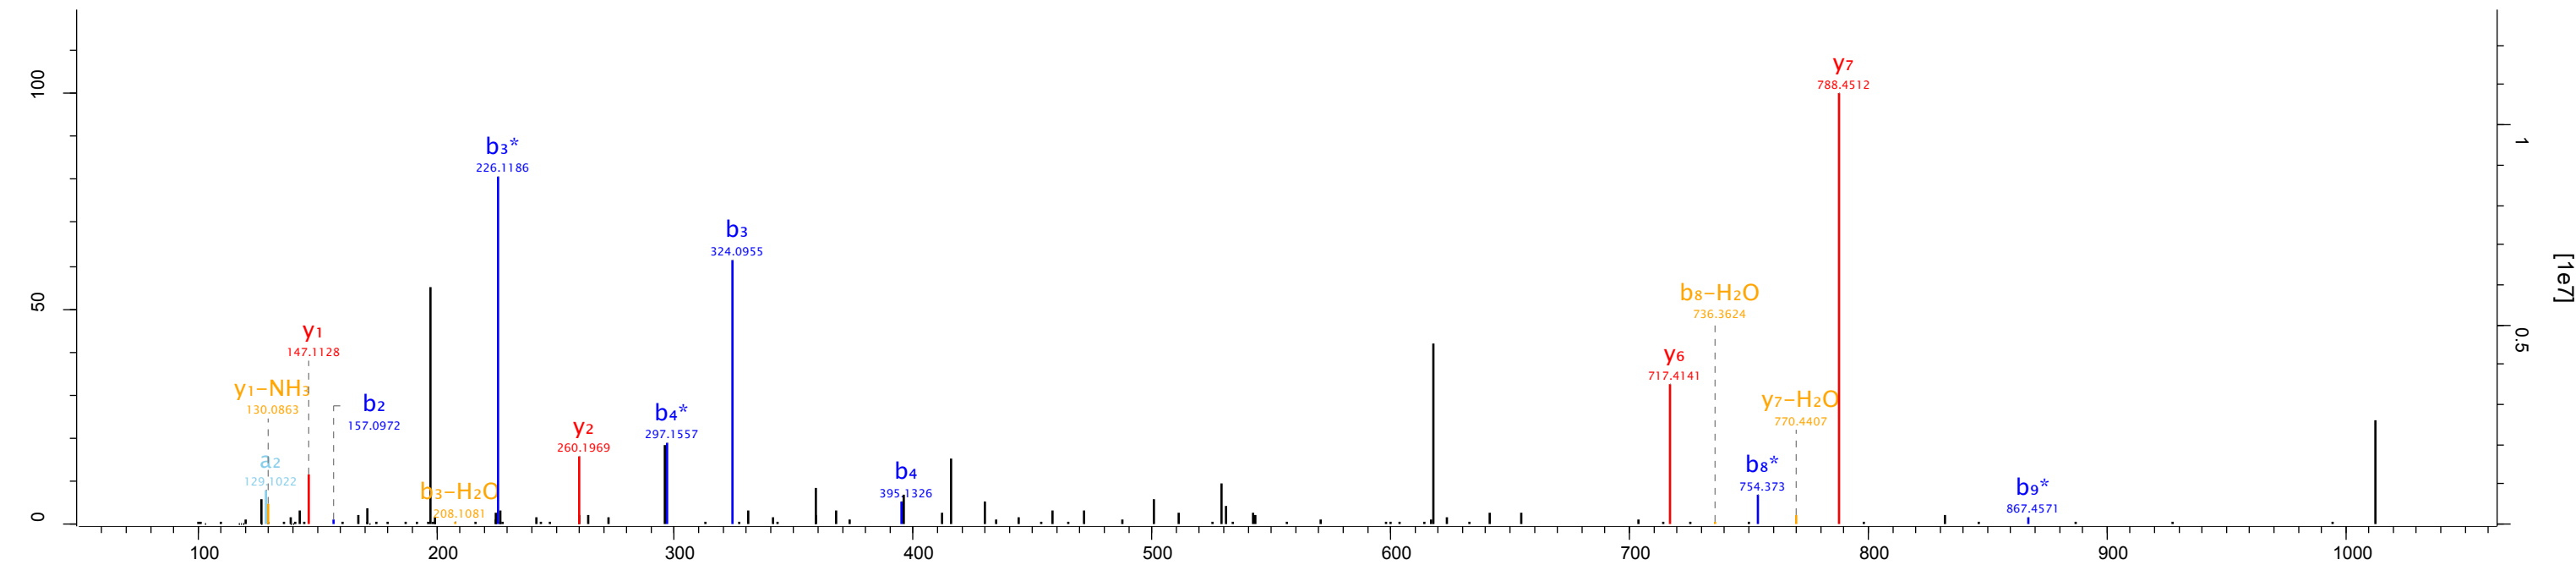

Raw file: 20150814\_A375SR\_Phospho\_BR2\_04  
 Scan: 26844 Method: FTMS; HCD Score: 141.64 m/z: 897.41 Gene names: ARHGAP31

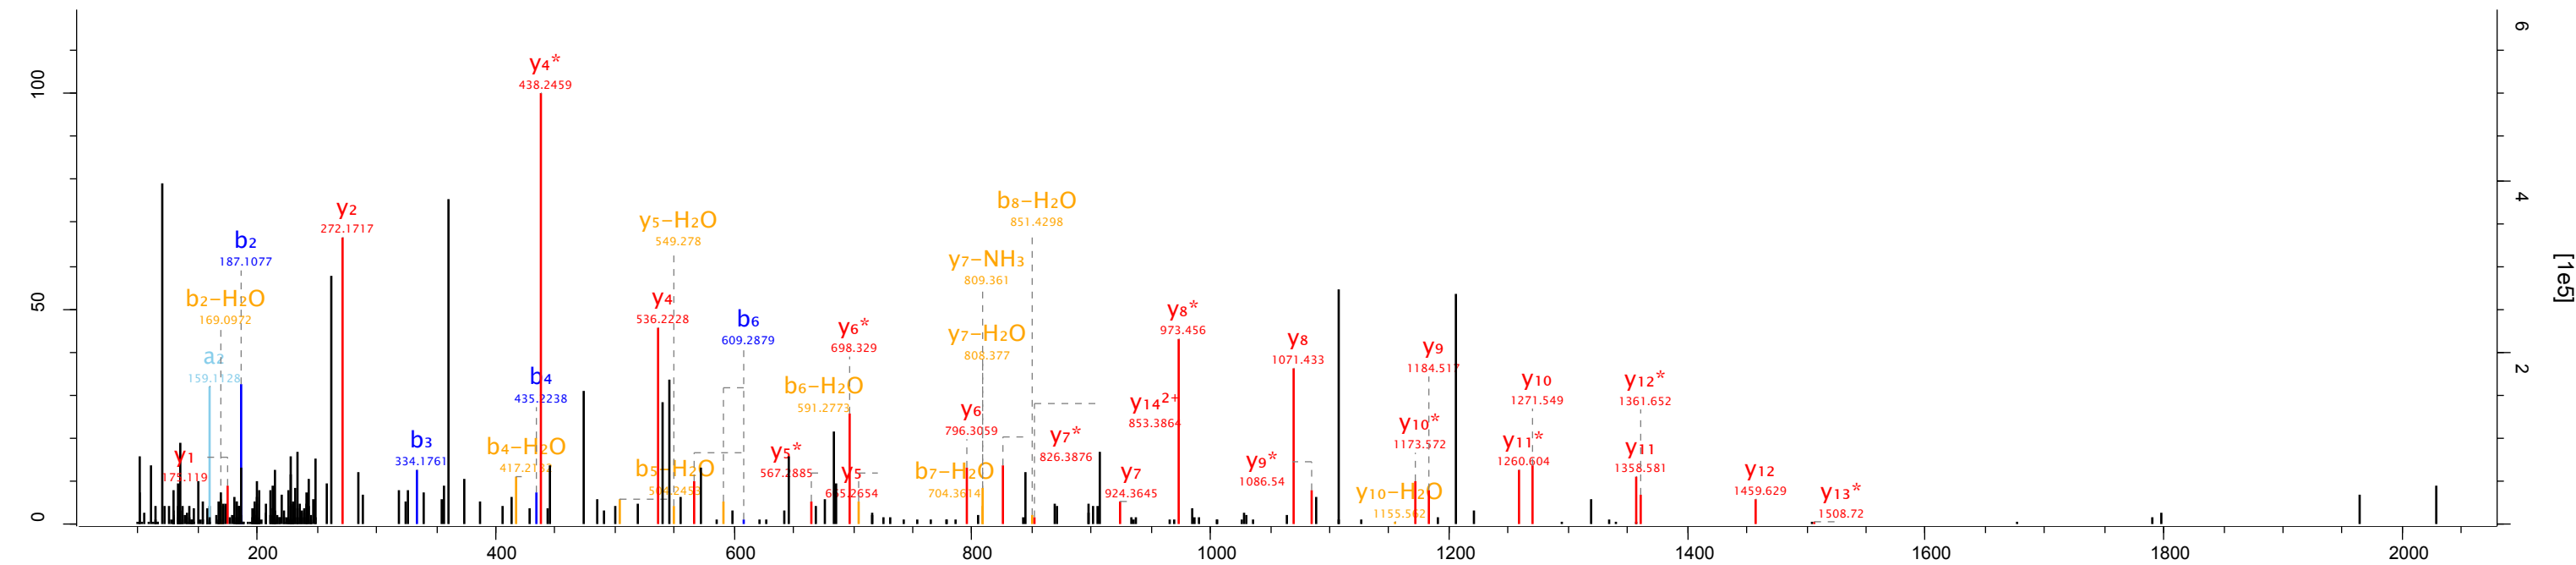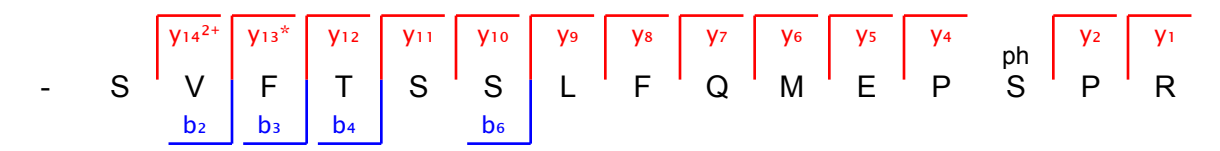

Raw file 20150814\_A375SR\_Phospho\_BR2\_04 Scan 5644 Method FTMS; HCD Score 92.13 m/z 563.24 Gene names YAF2

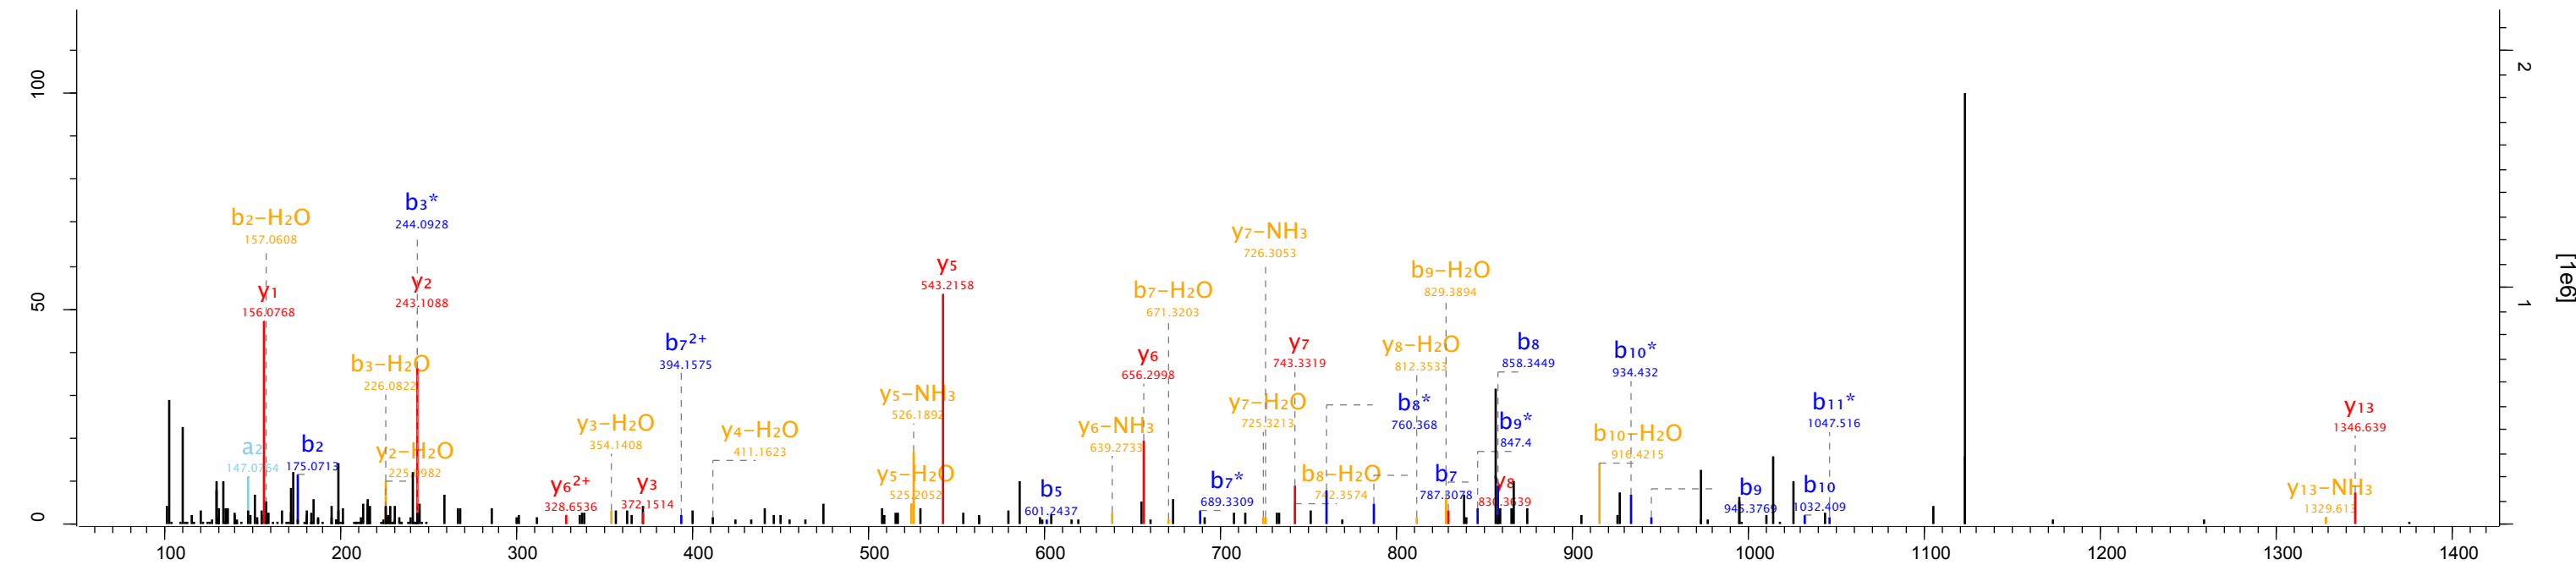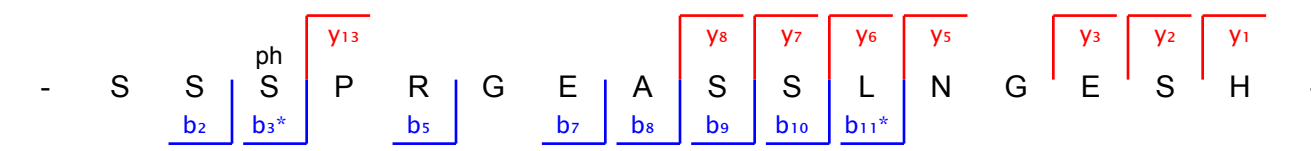



Raw file 20150814\_A375SR\_Phospho\_BR2\_05 Scan 12544 Method FTMS; HCD Score 62.34 m/z 556.27

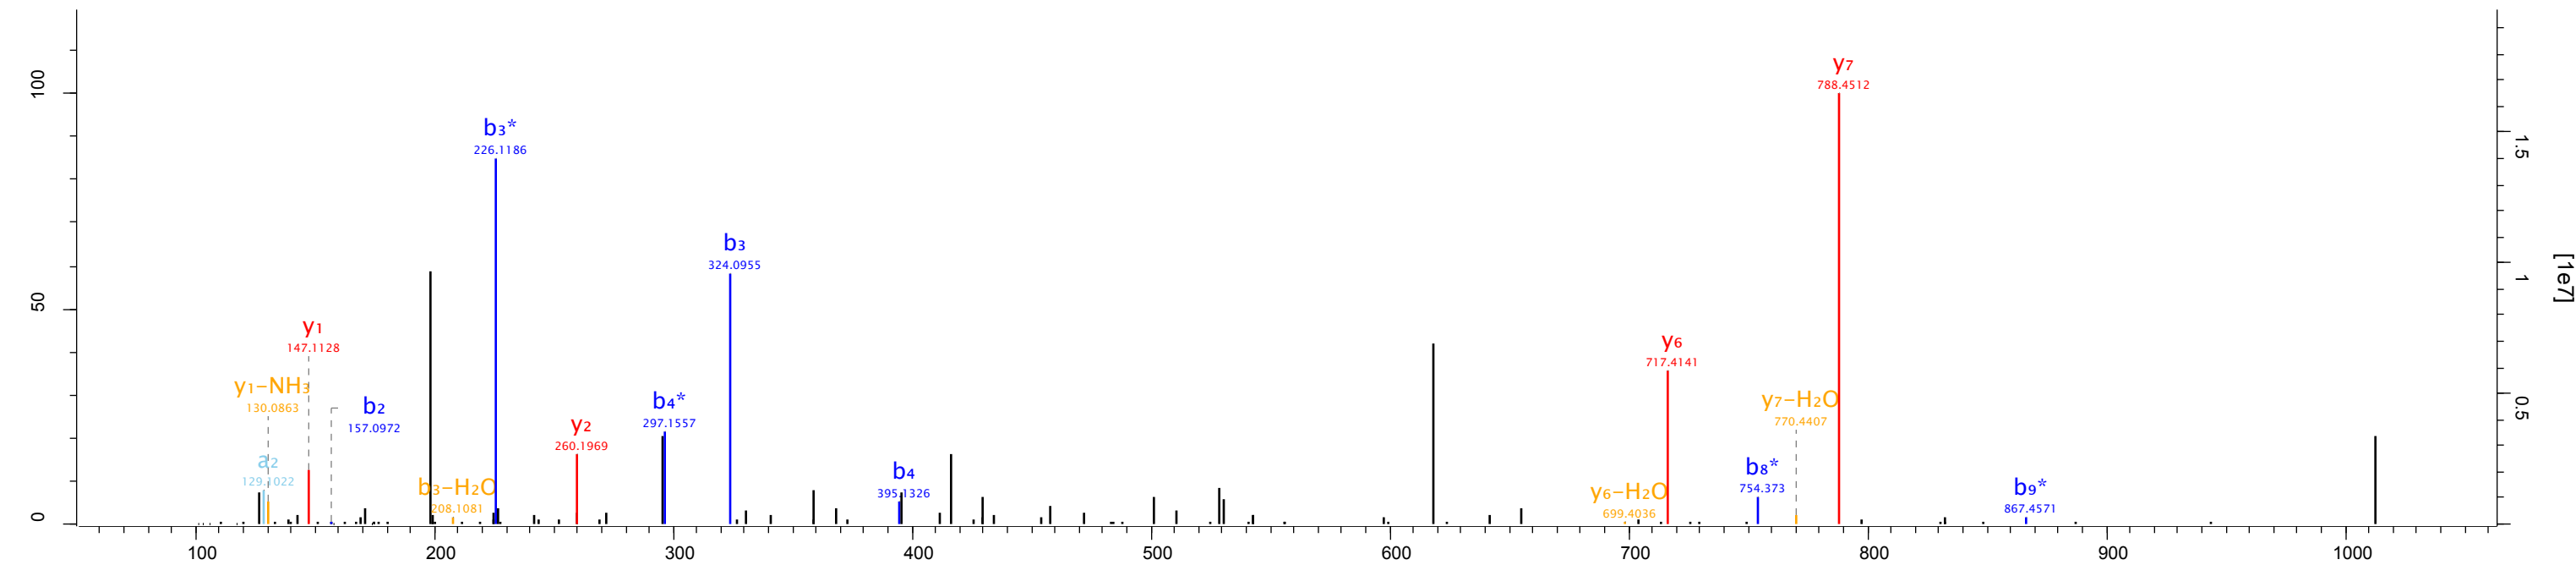

Raw file 20150814\_A375SR\_Phospho\_BR2\_05 Scan 5944 Method FTMS; HCD Score 73.23 m/z 426.73

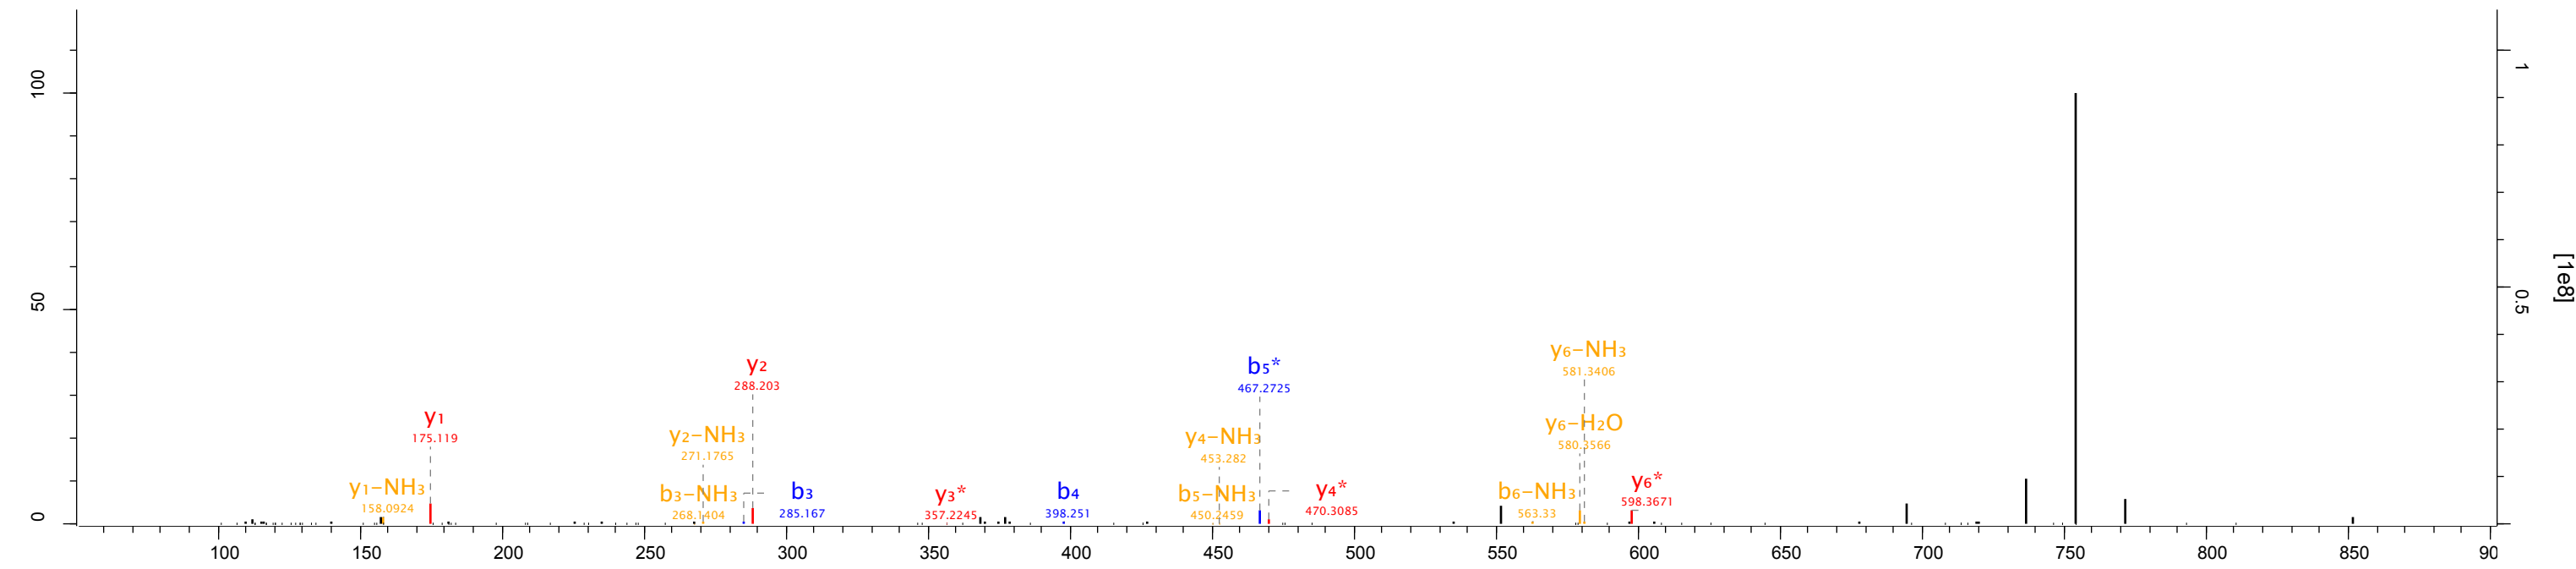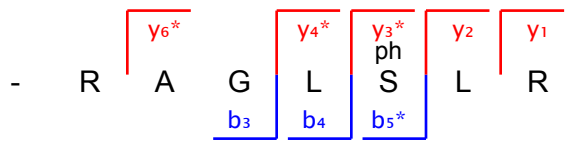

Raw file: 20150814\_A375SR\_Phospho\_BR2\_06  
 Scan: 16744  
 Method: FTMS; HCD  
 Score: 89.61  
 m/z: 503.71  
 Gene names: MLF1

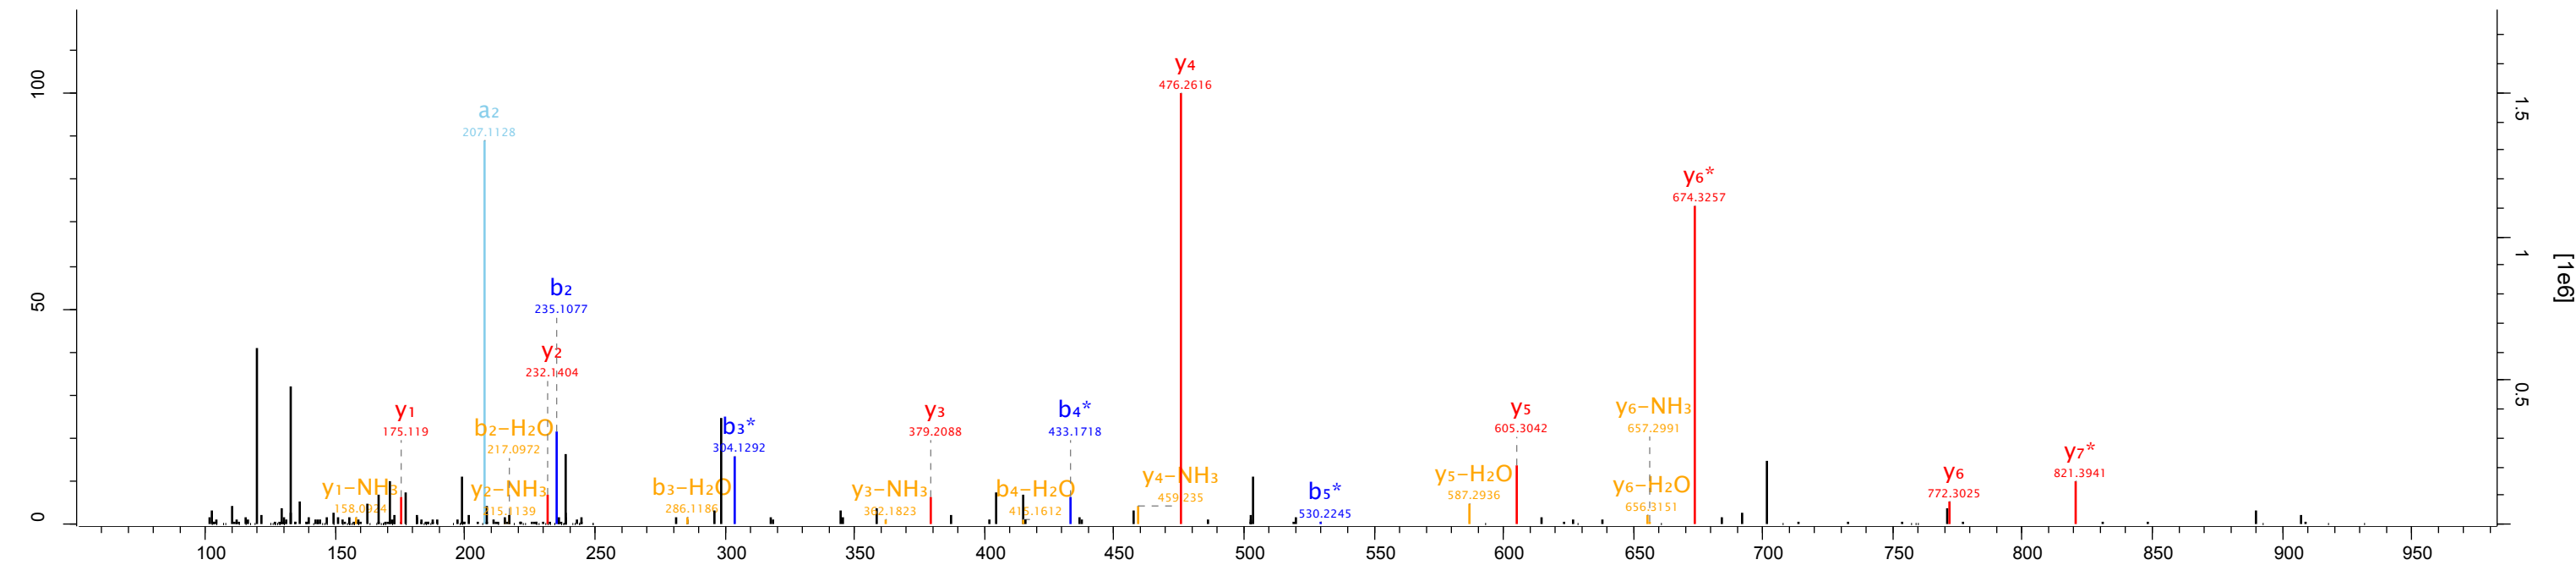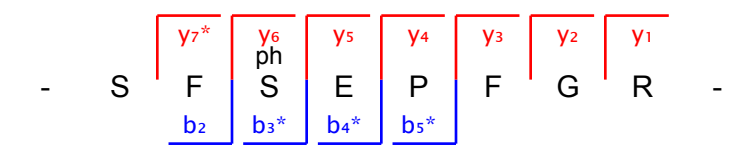

Raw file: 20150814\_A375SR\_Phospho\_BR2\_06  
 Scan: 24014 Method: FTMS; HCD Score: 219.21 m/z: 970.44 Gene names: MAPK11P1L

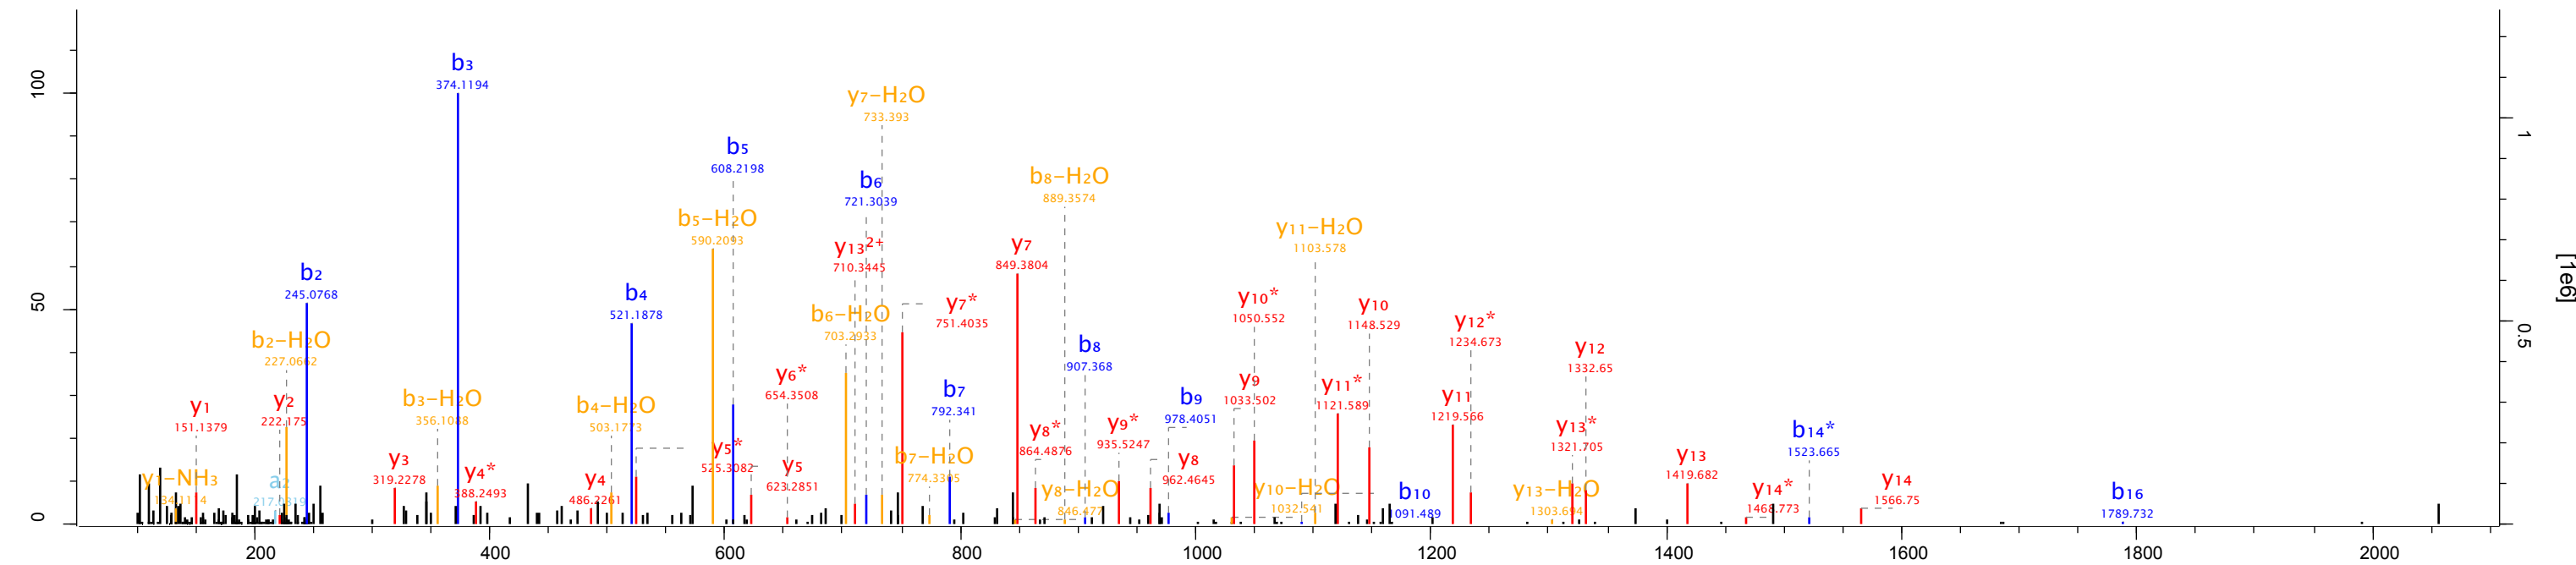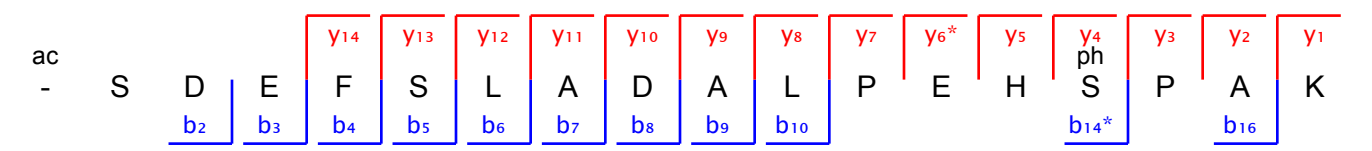

Raw file 20150814\_A375SR\_Phospho\_BR2\_06 Scan 24164 Method FTMS; HCD Score 233.34 m/z 968.42 Gene names MAPK11P1L

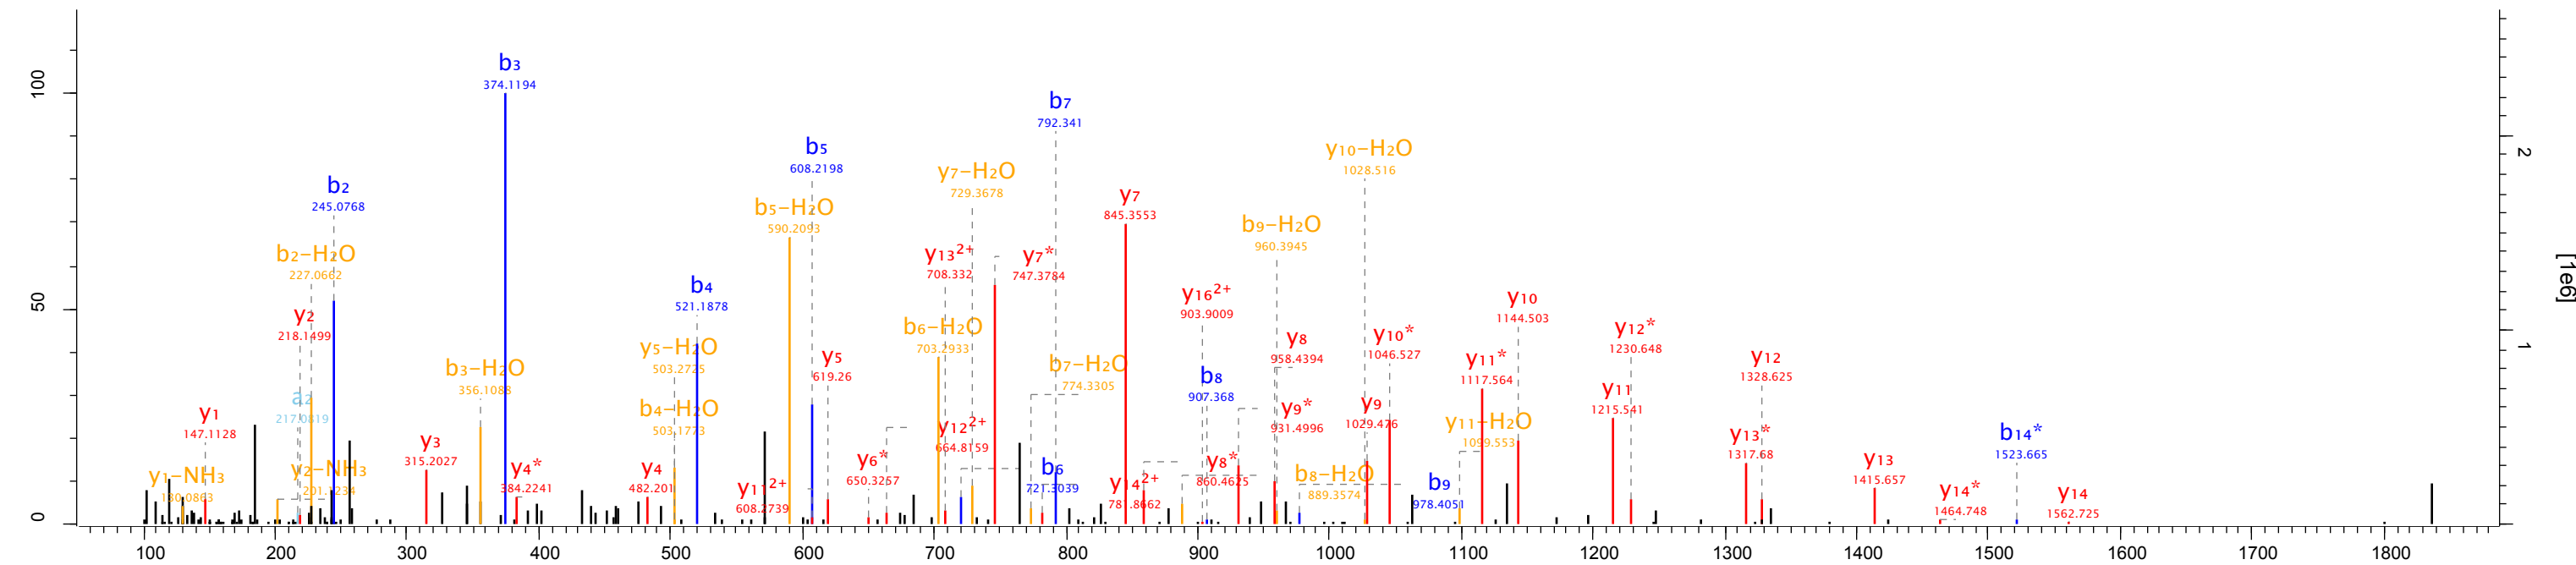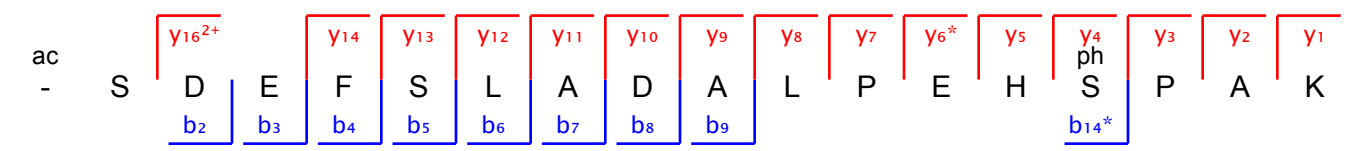

Raw file 20150814\_A375SR\_Phospho\_BR2\_06 Scan 24944 Method FTMS; HCD Score 118.19 m/z 920.91 Gene names MSANTD3

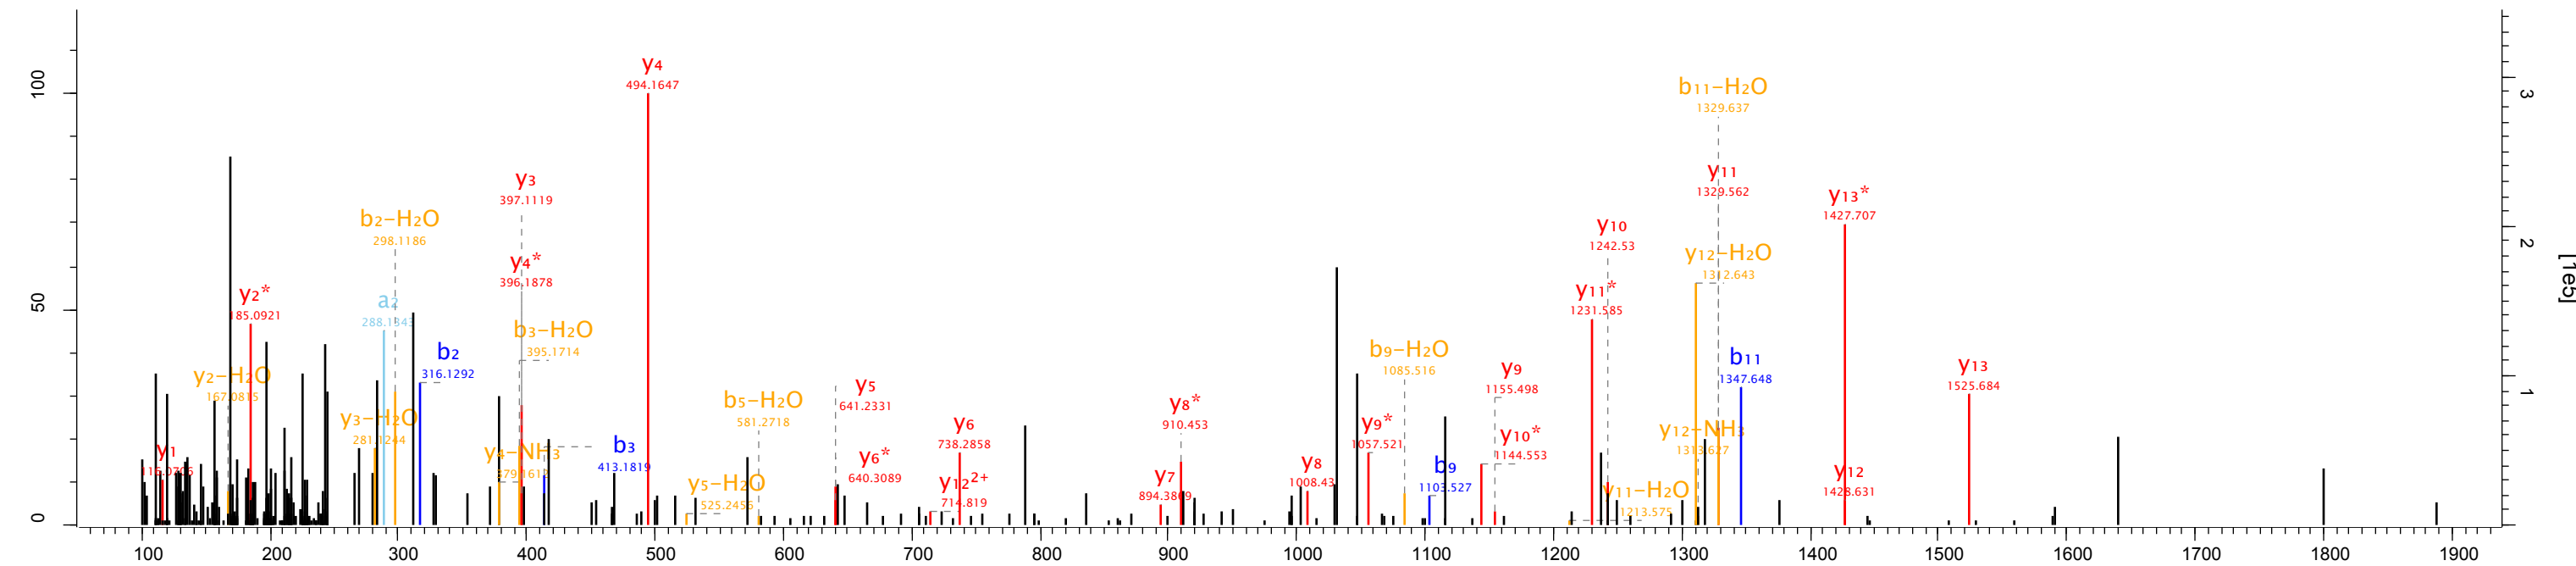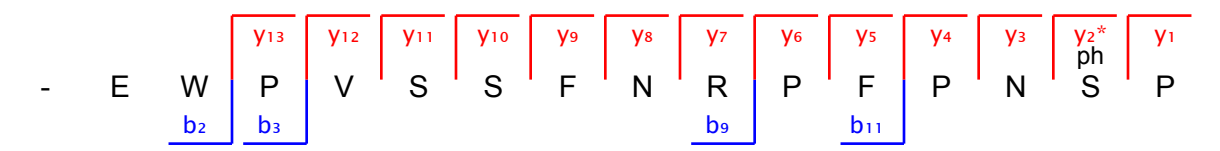

Raw file 20150814\_A375SR\_Phospho\_BR2\_07 Scan 20514 Method FTMS; HCD Score 54.88 m/z 782.42 Gene names ZNF579

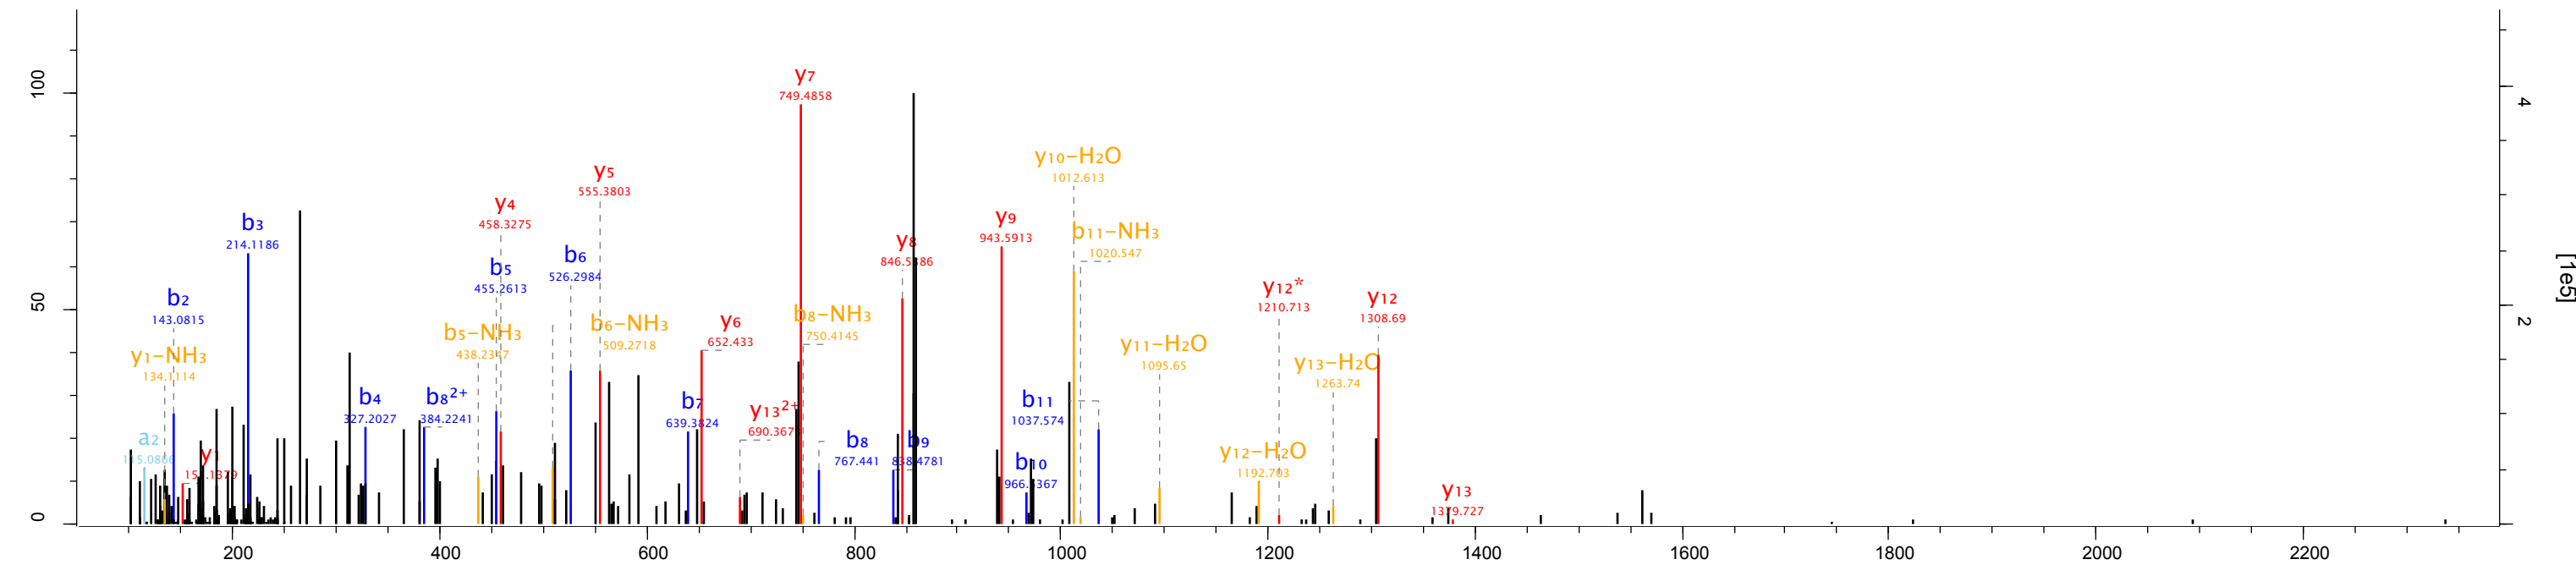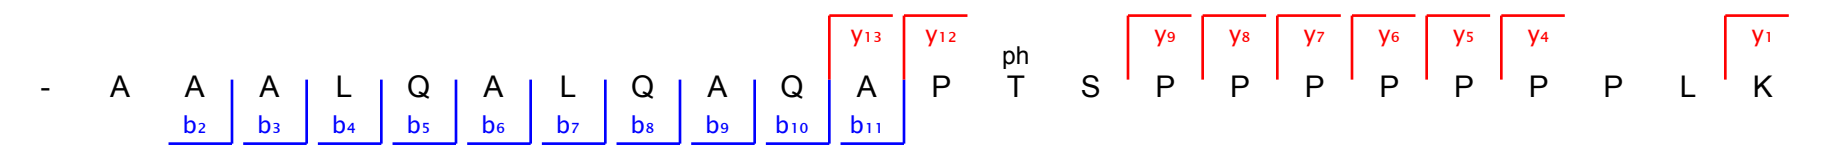

Raw file 20150814\_A375SR\_Phospho\_BR2\_09 Scan 14114 Method FTMS; HCD Score 175.91 m/z 440.6 Gene names RPL39P5;RPL39

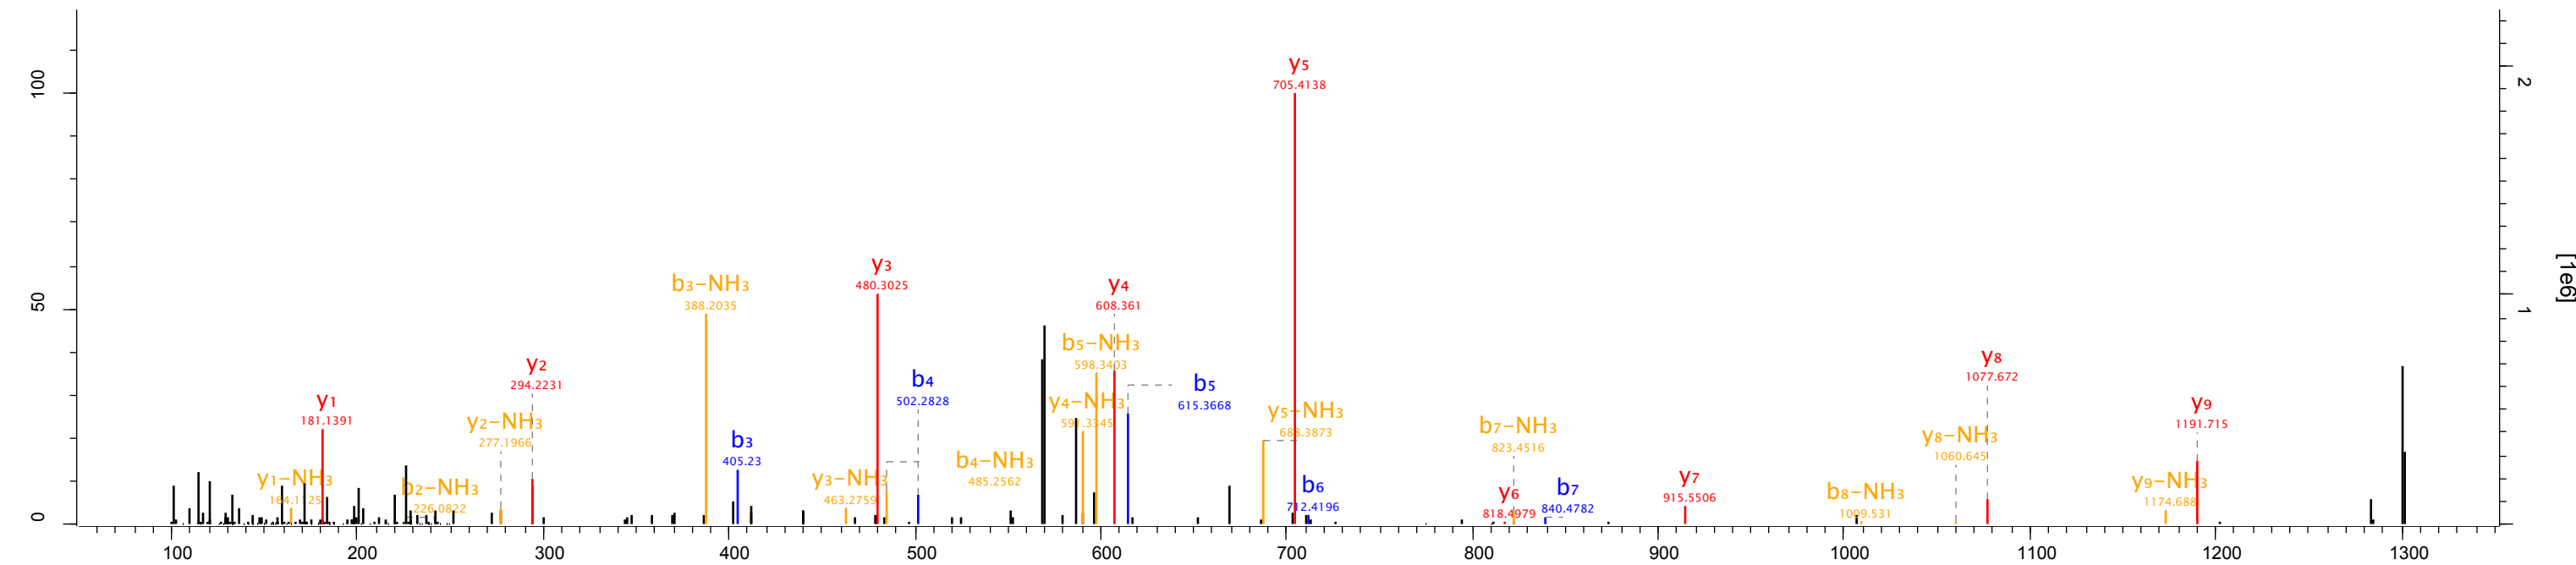



Raw file: 20150814\_A375SR\_Phospho\_BR2\_09  
 Scan: 24174 Method: FTMS; HCD Score: 96.71 m/z: 647.63 Gene names: MAPK11P1L

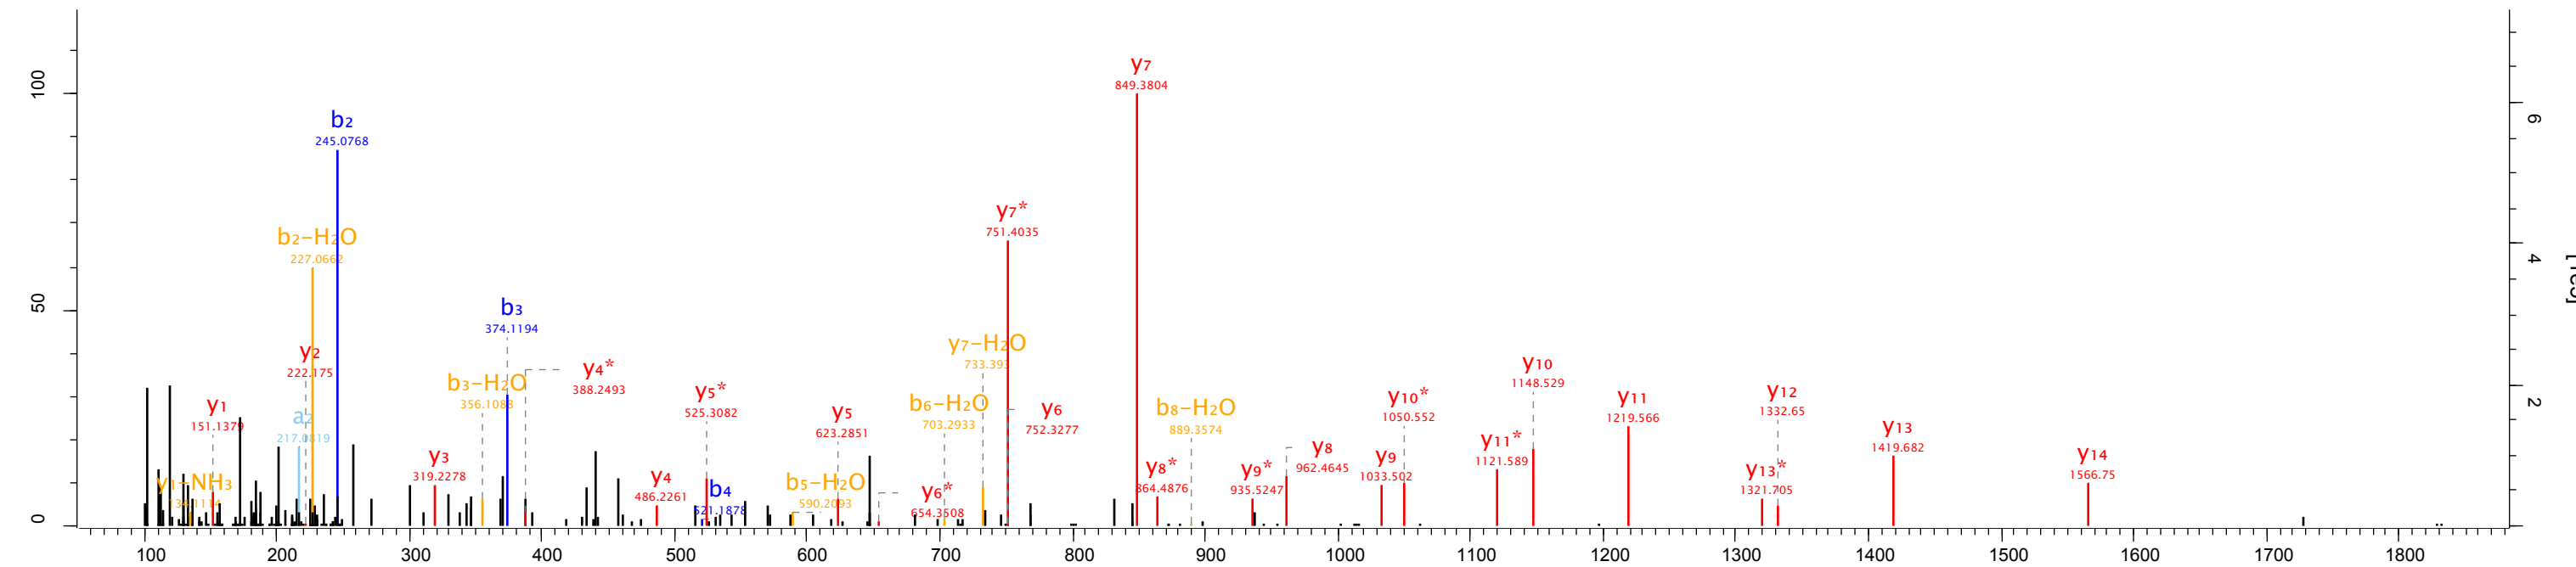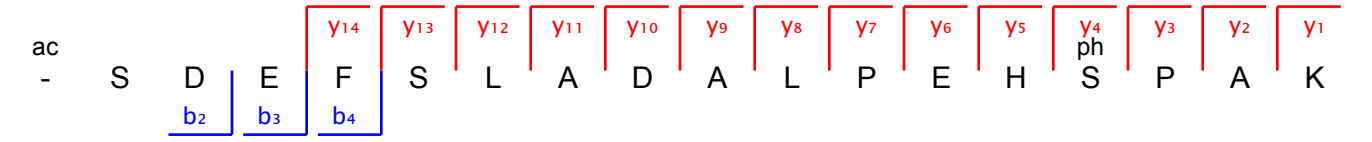

Raw file 20150814\_A375SR\_Phospho\_BR2\_10 Scan 10354 Method FTMS; HCD Score 46.73 m/z 637.34

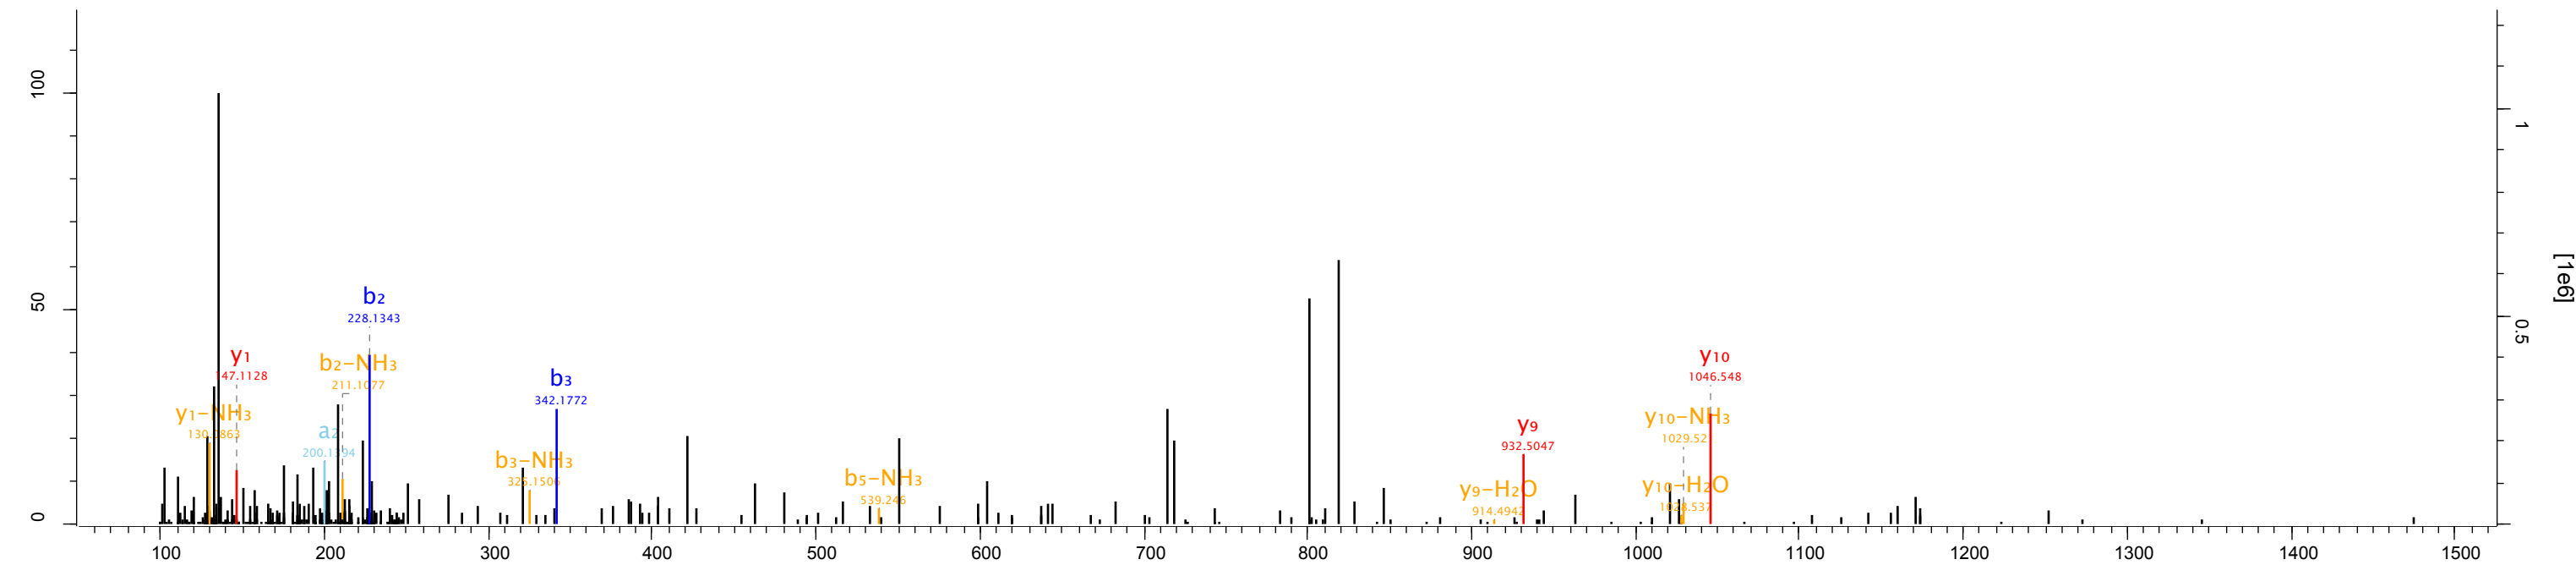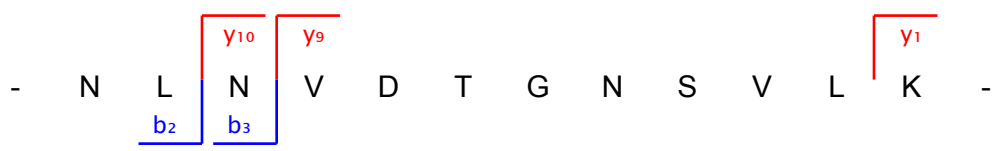

Raw file: 20150814\_A375SR\_Phospho\_BR2\_10  
 Scan: 23734 Method: FTMS; HCD Score: 84.71 m/z: 647.29 Gene names: MAPK11P1L

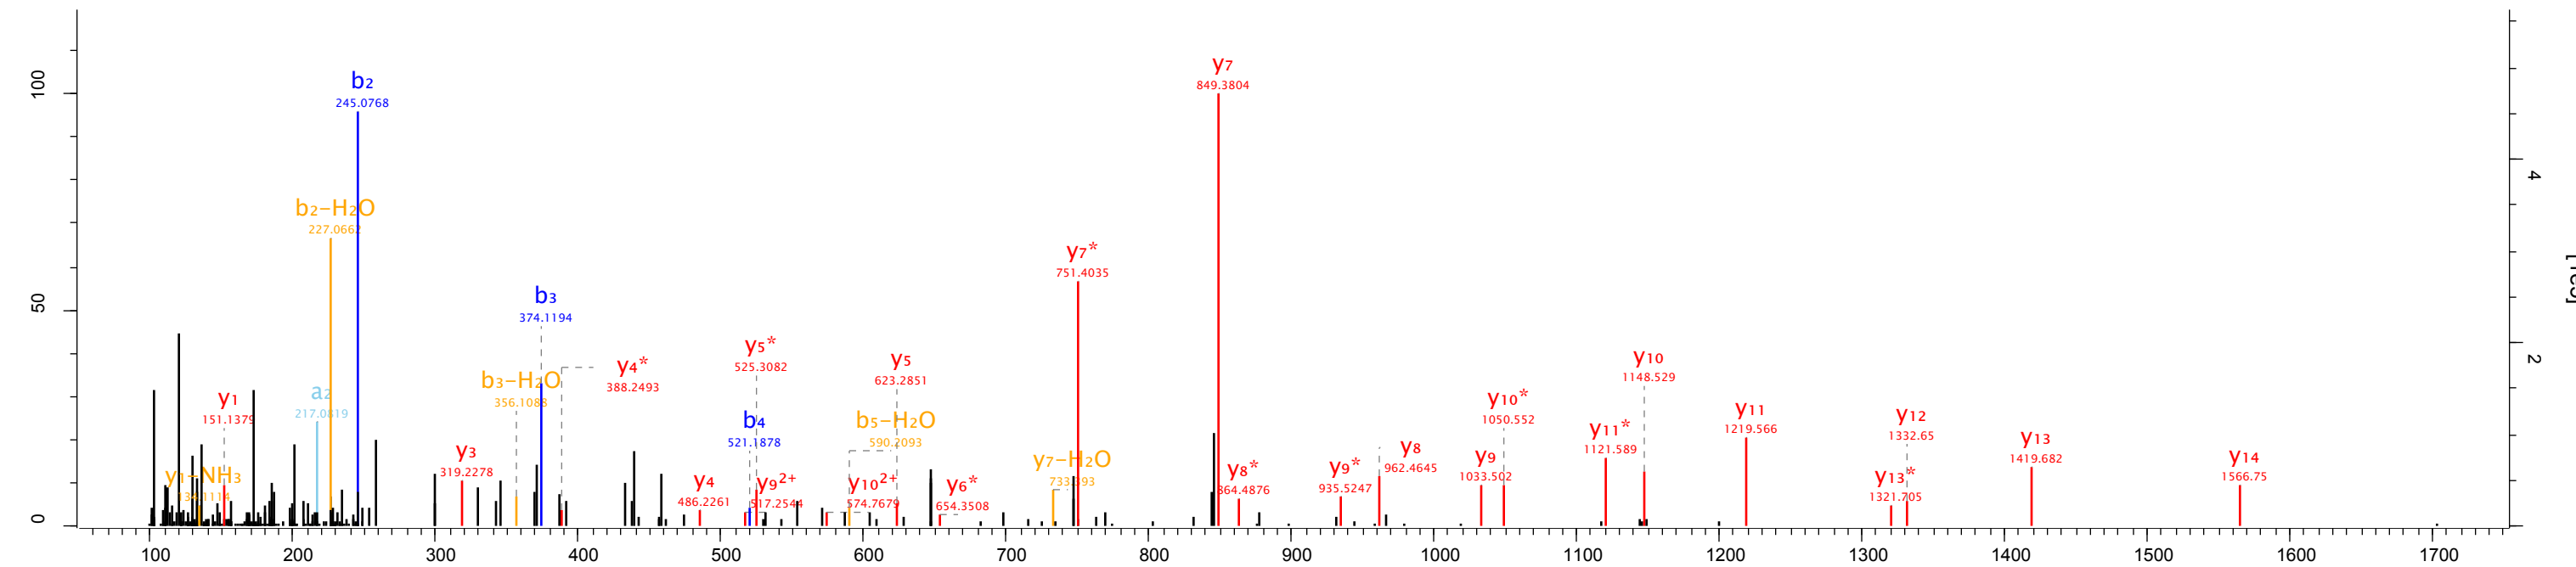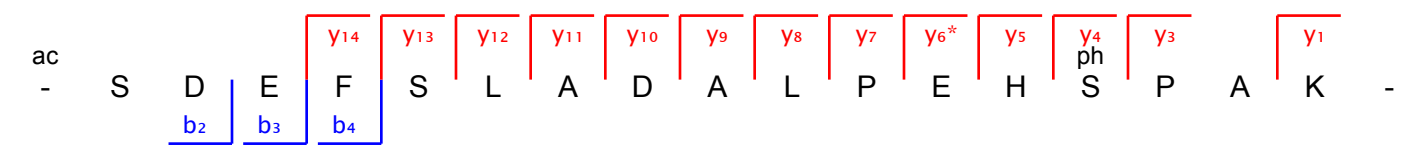

Raw file Scan Method Score m/z  
 20150814\_A375SR\_Phospho\_BR2\_10 4664 FTMS; HCD 49.63 530.24

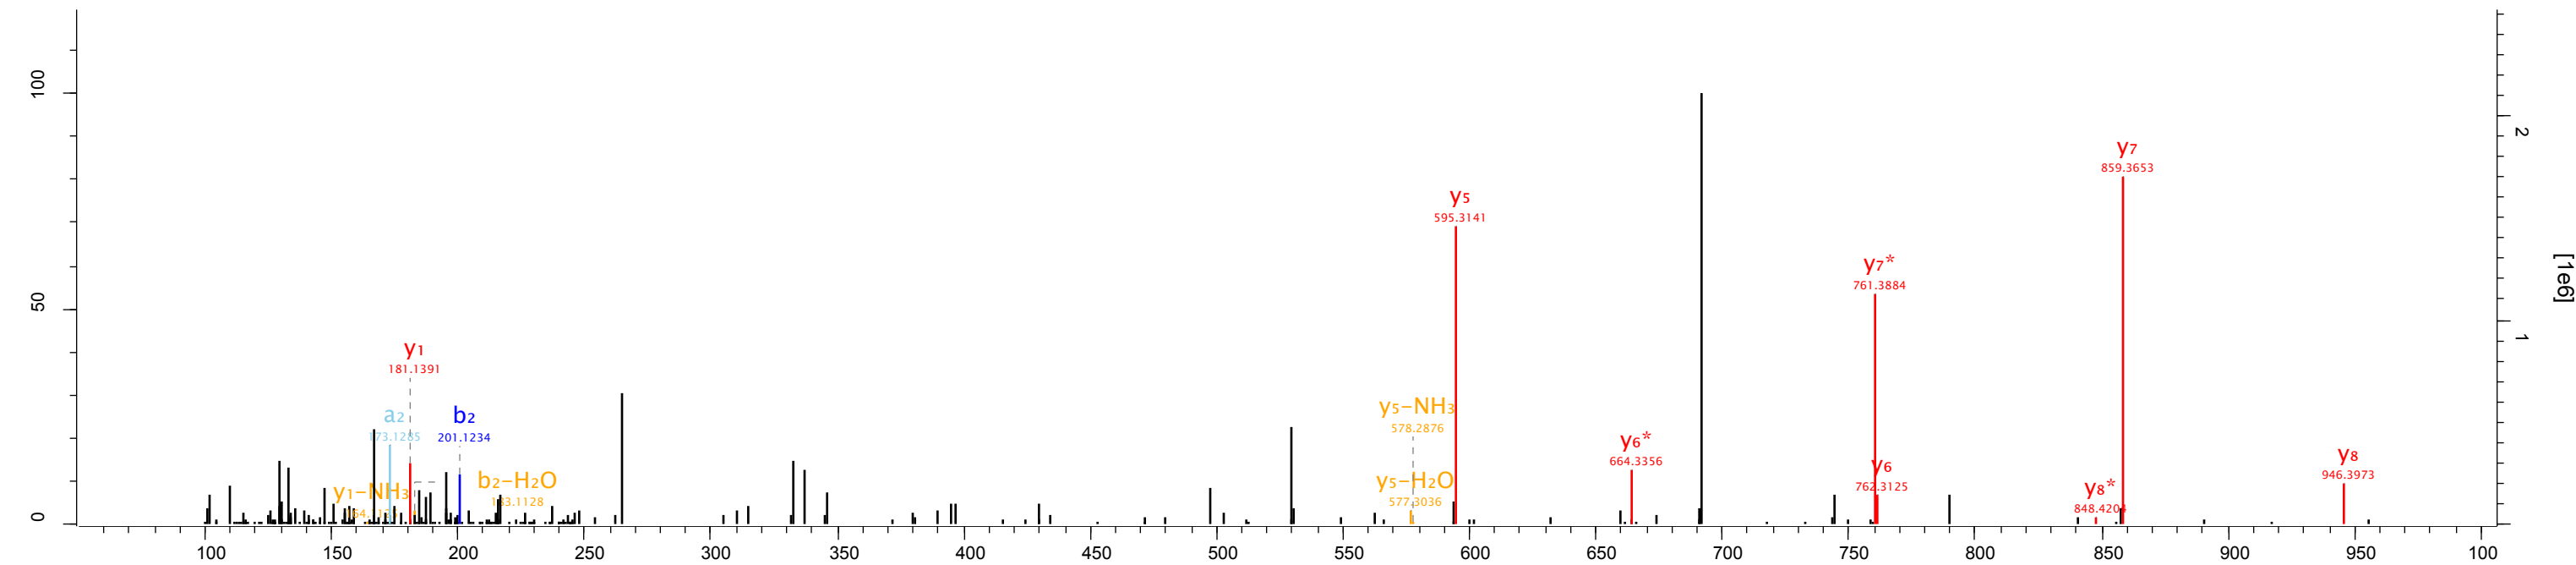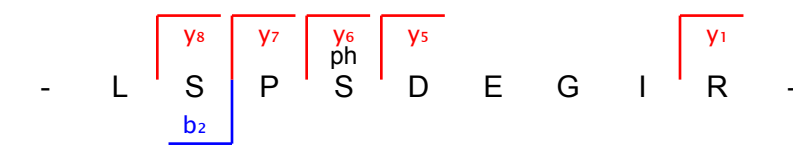

Raw file Scan Method Score m/z Gene names  
 20150818\_A375SR-Proteome\_BR1 116014 FTMS; HCD 63.47 717.92 UQCR11

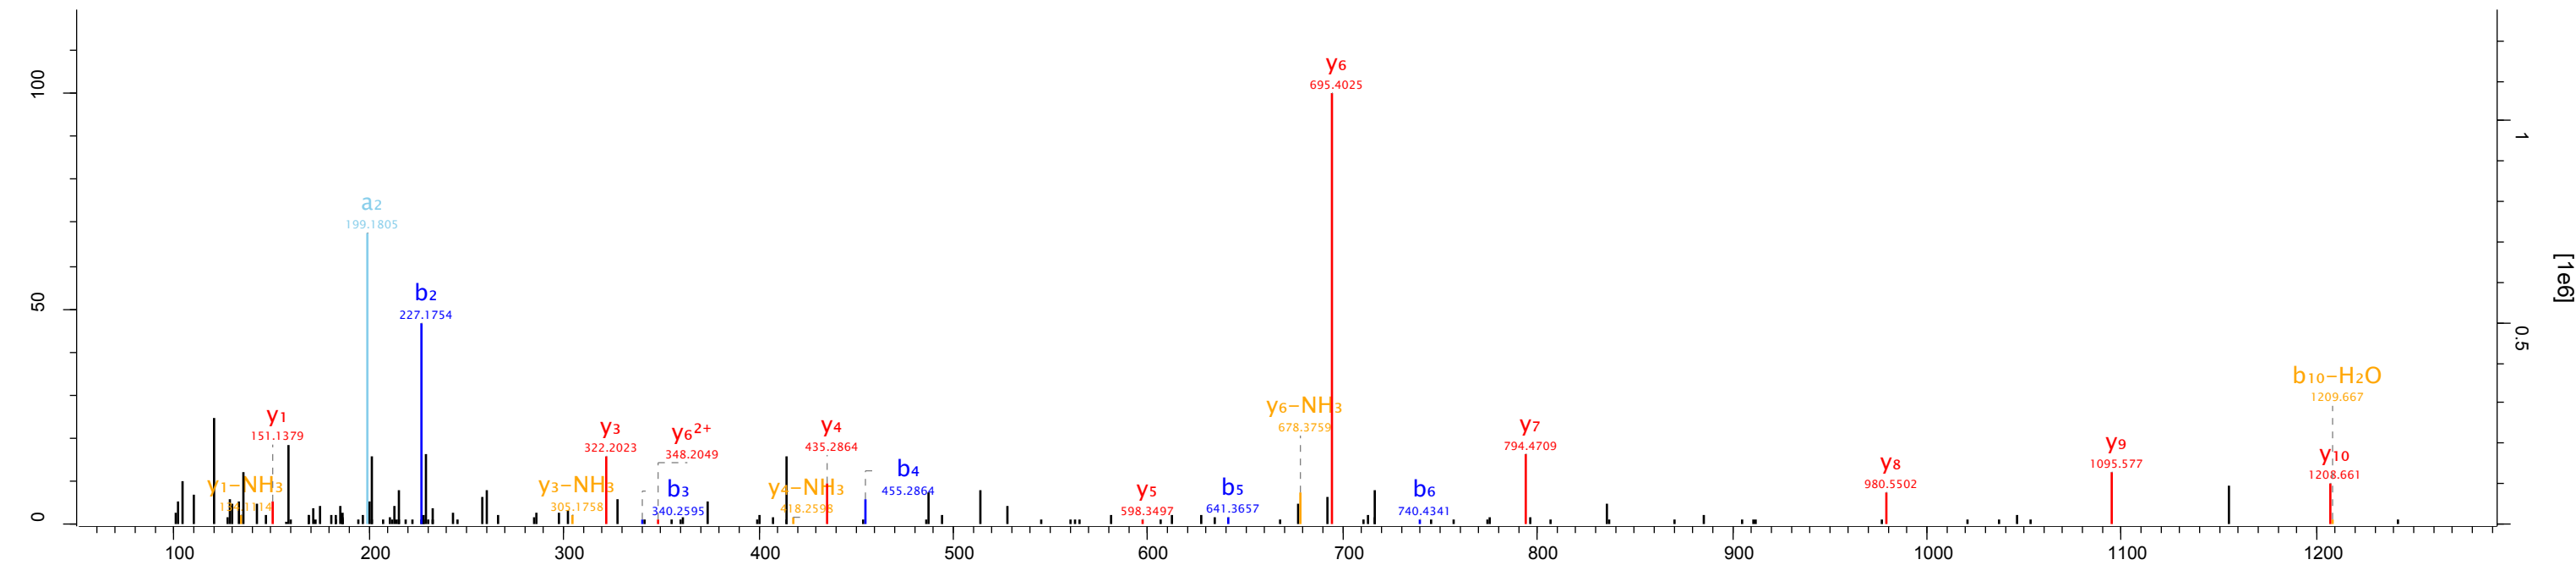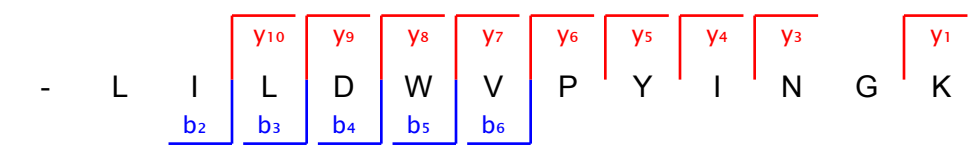

Raw file: 20150818\_A375SR-Proteome\_BR1  
 Scan: 15644 Method: FTMS; HCD Score: 54.09 m/z: 555.8 Gene names: POLR2F

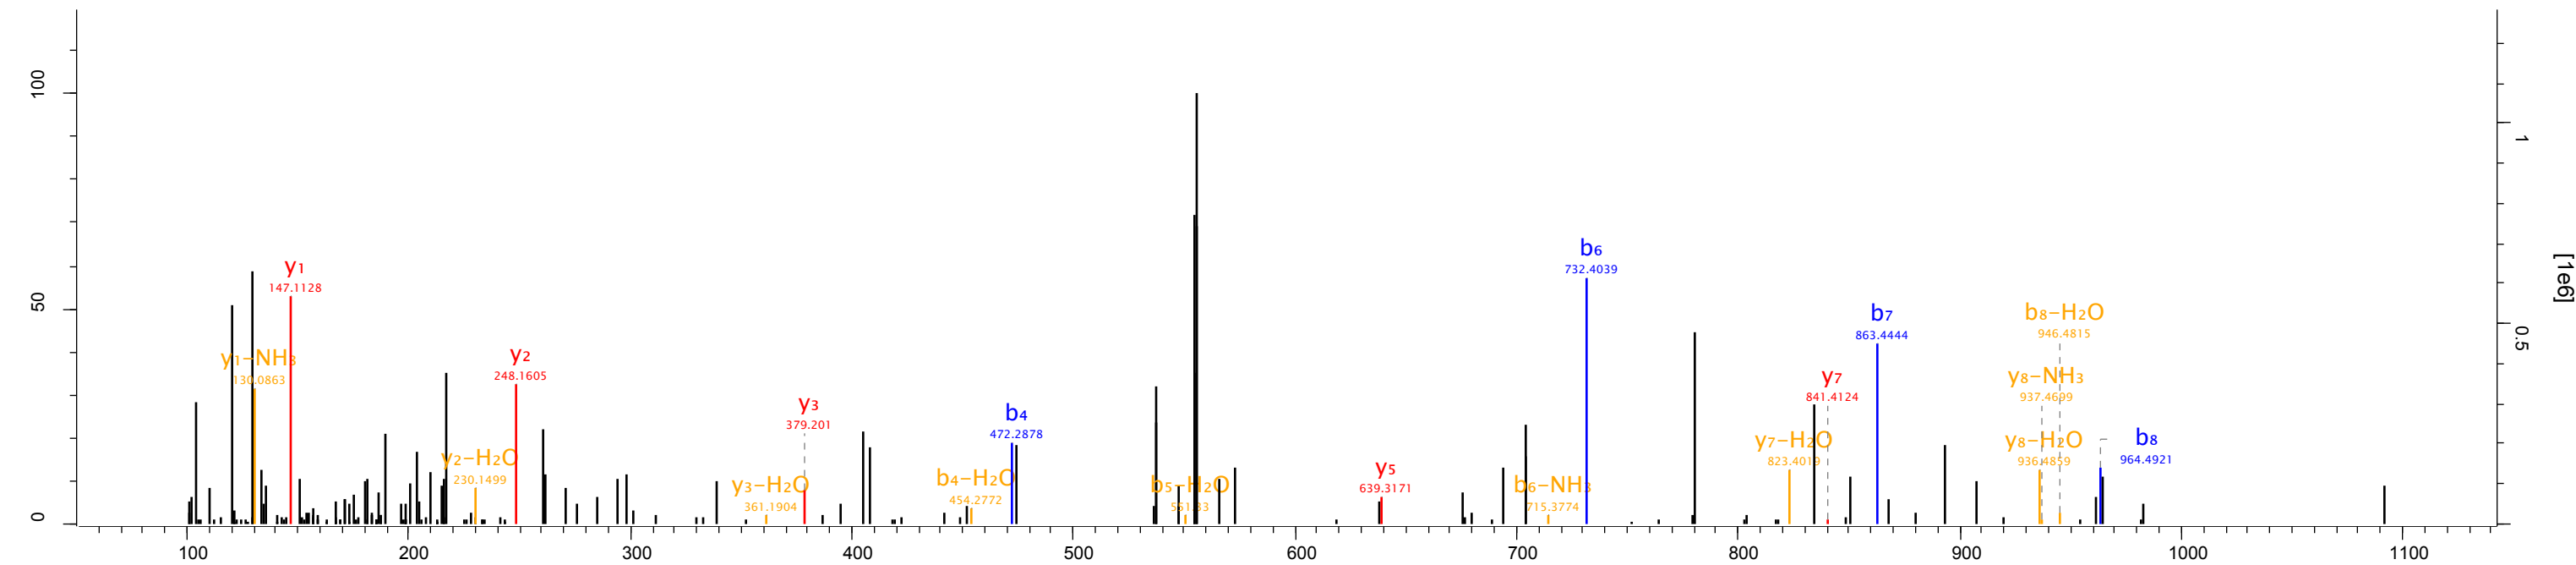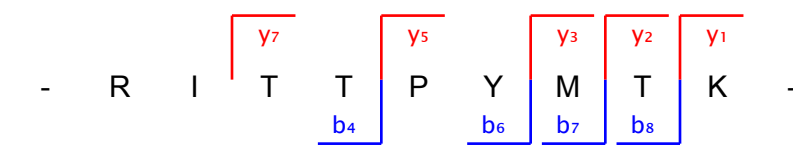

Raw file: 20150818\_A375SR-Proteome\_BR1  
 Scan: 64894 Method: FTMS; HCD Score: 34.25 m/z: 801.09 Gene names: ZNF511

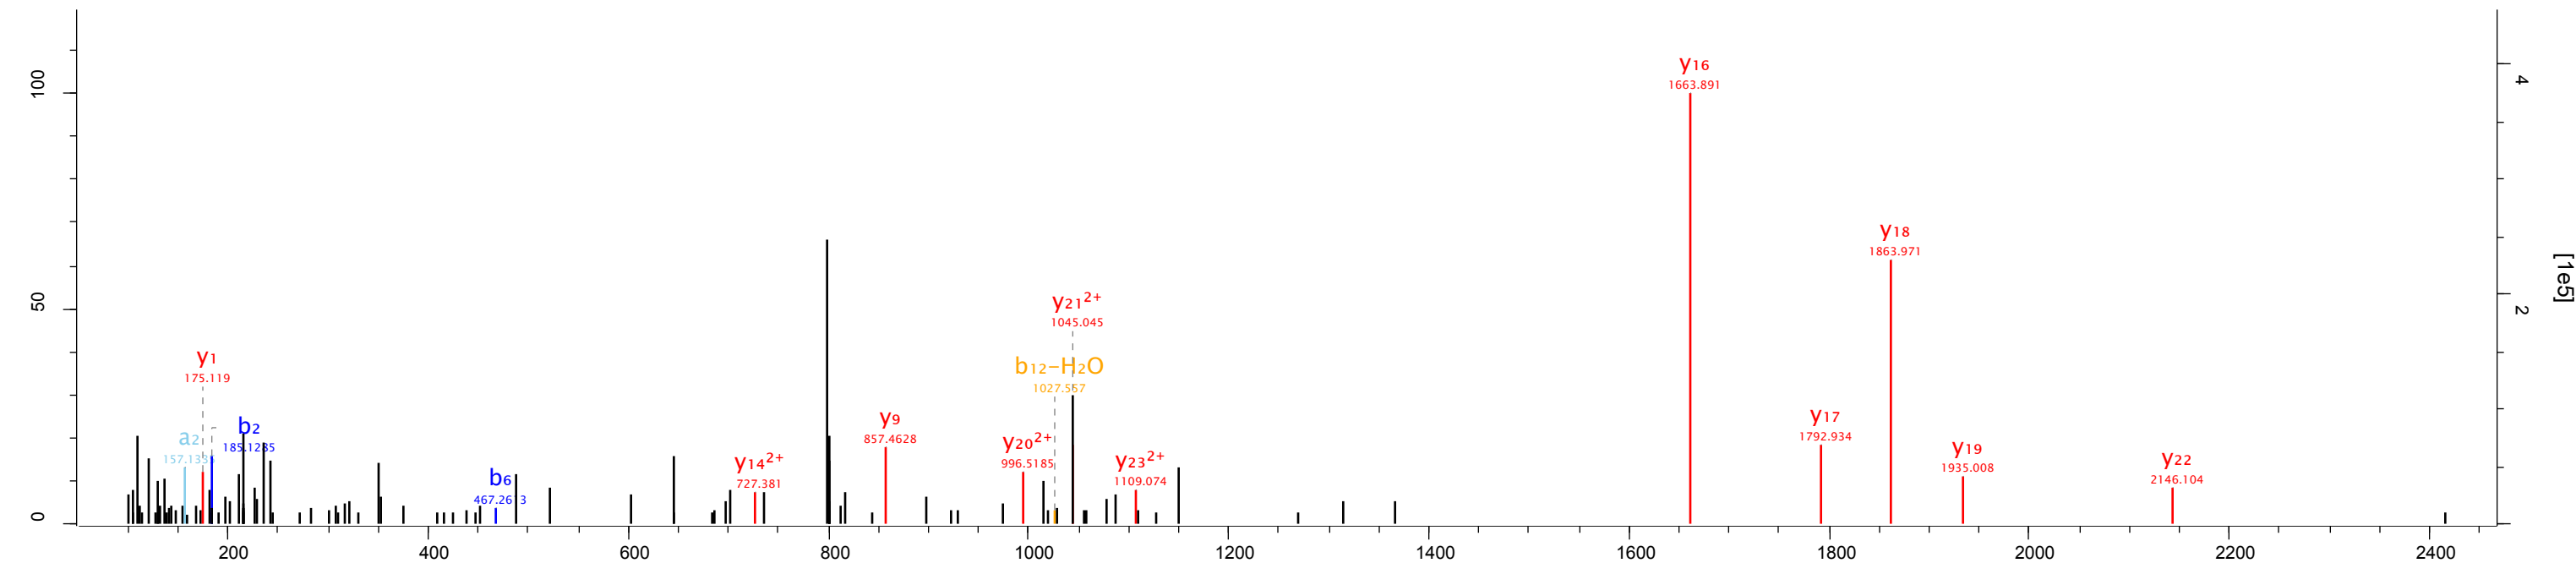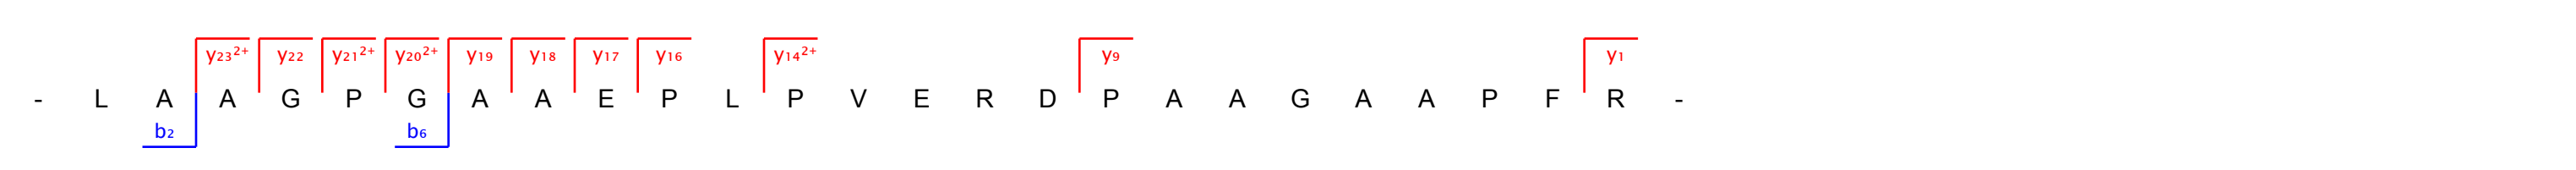

Raw file: 20150818\_A375SR-Proteome\_BR1  
 Scan: 69994 Method: FTMS; HCD Score: 65.23 m/z: 866.49 Gene names: KRTCAP2

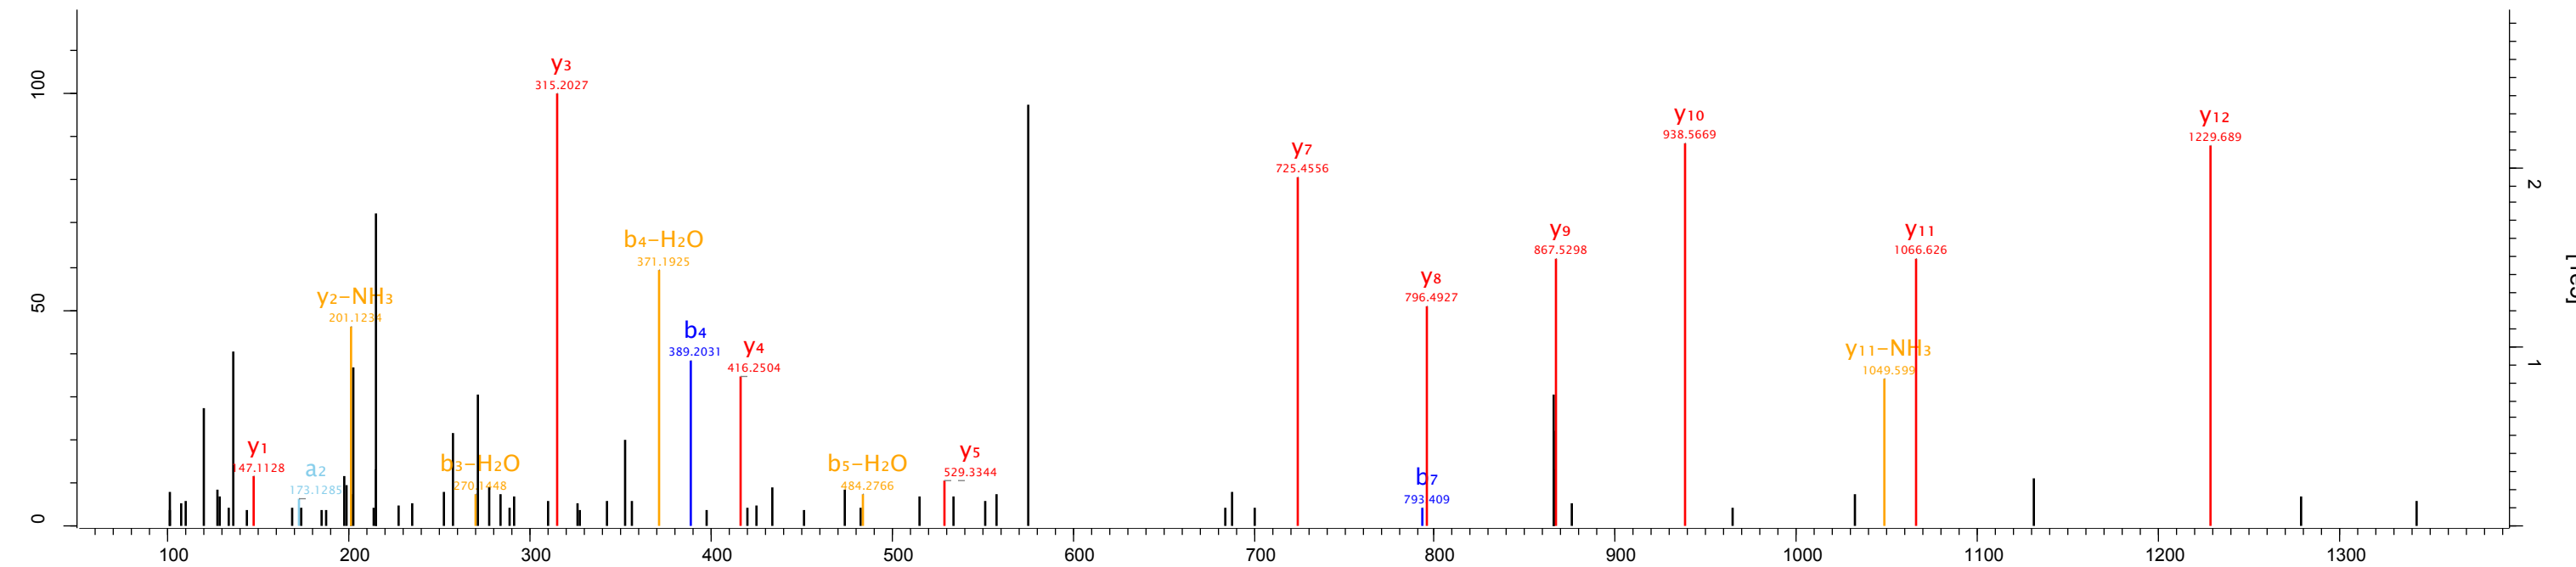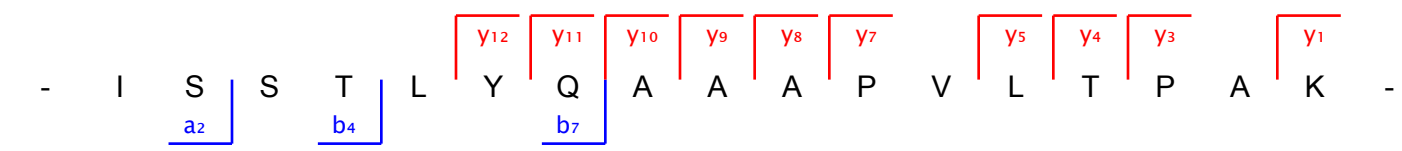



Raw file: 20150818\_A375SR-Proteome\_BR1  
 Scan: 86444 Method: FTMS; HCD Score: 90.71 m/z: 760.38 Gene names: FLNB

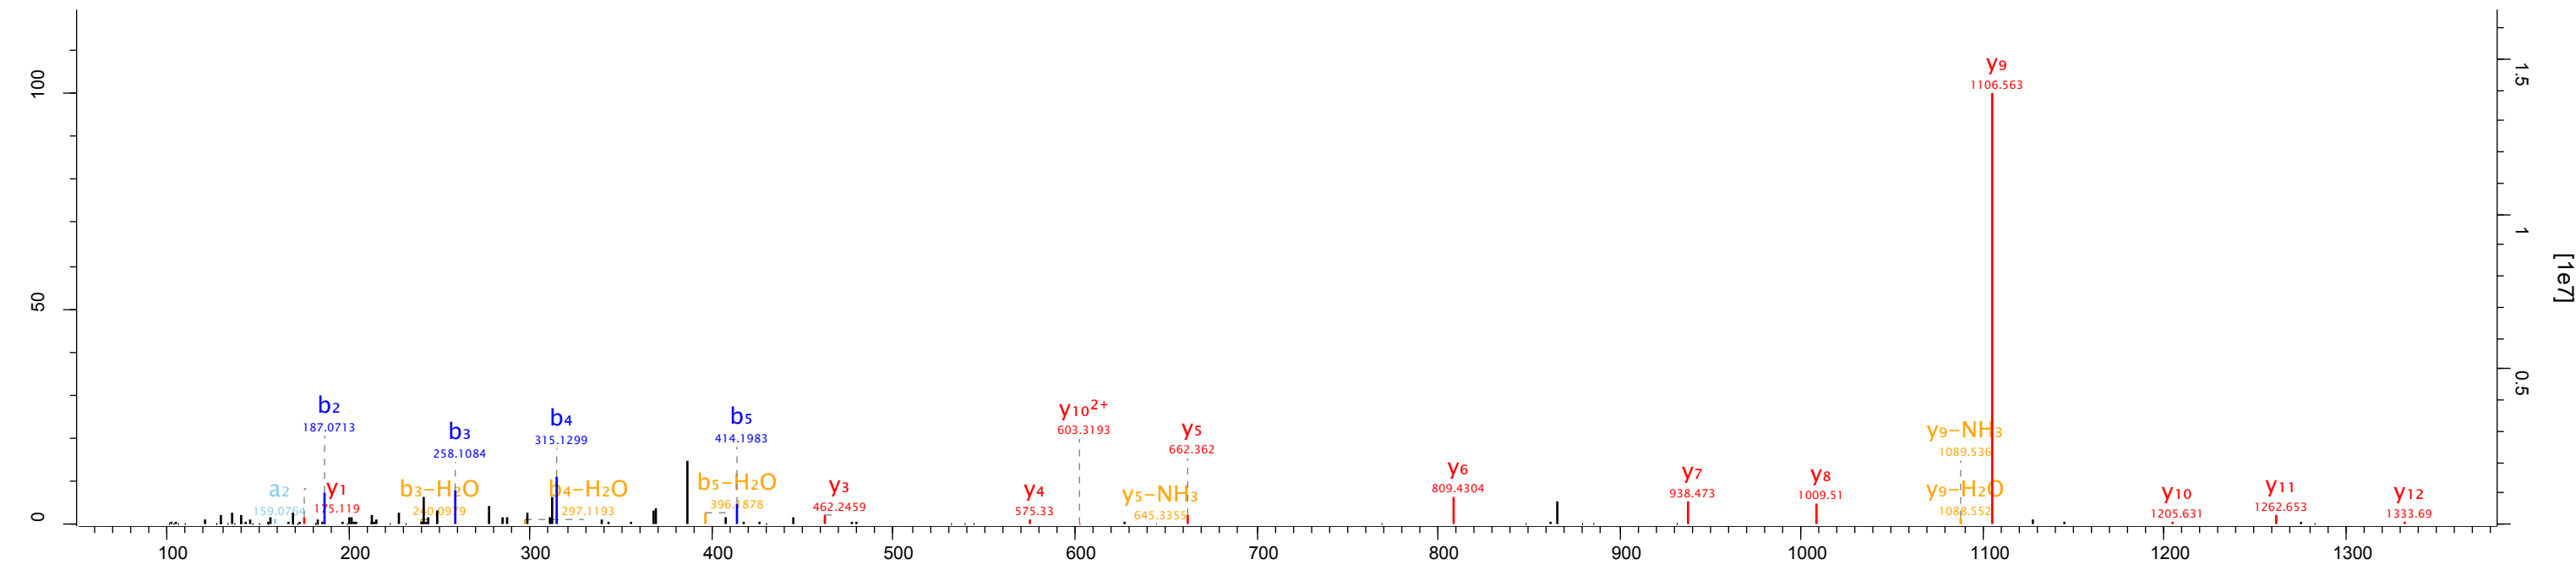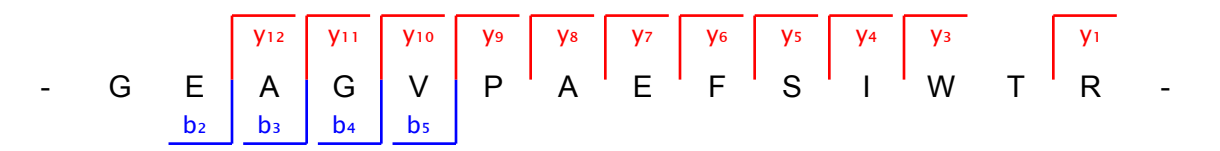

Raw file 20150818\_A375SR-Proteome\_BR2 Scan 114854 Method FTMS; HCD Score 73.44 m/z 718.42 Gene names UQCR11

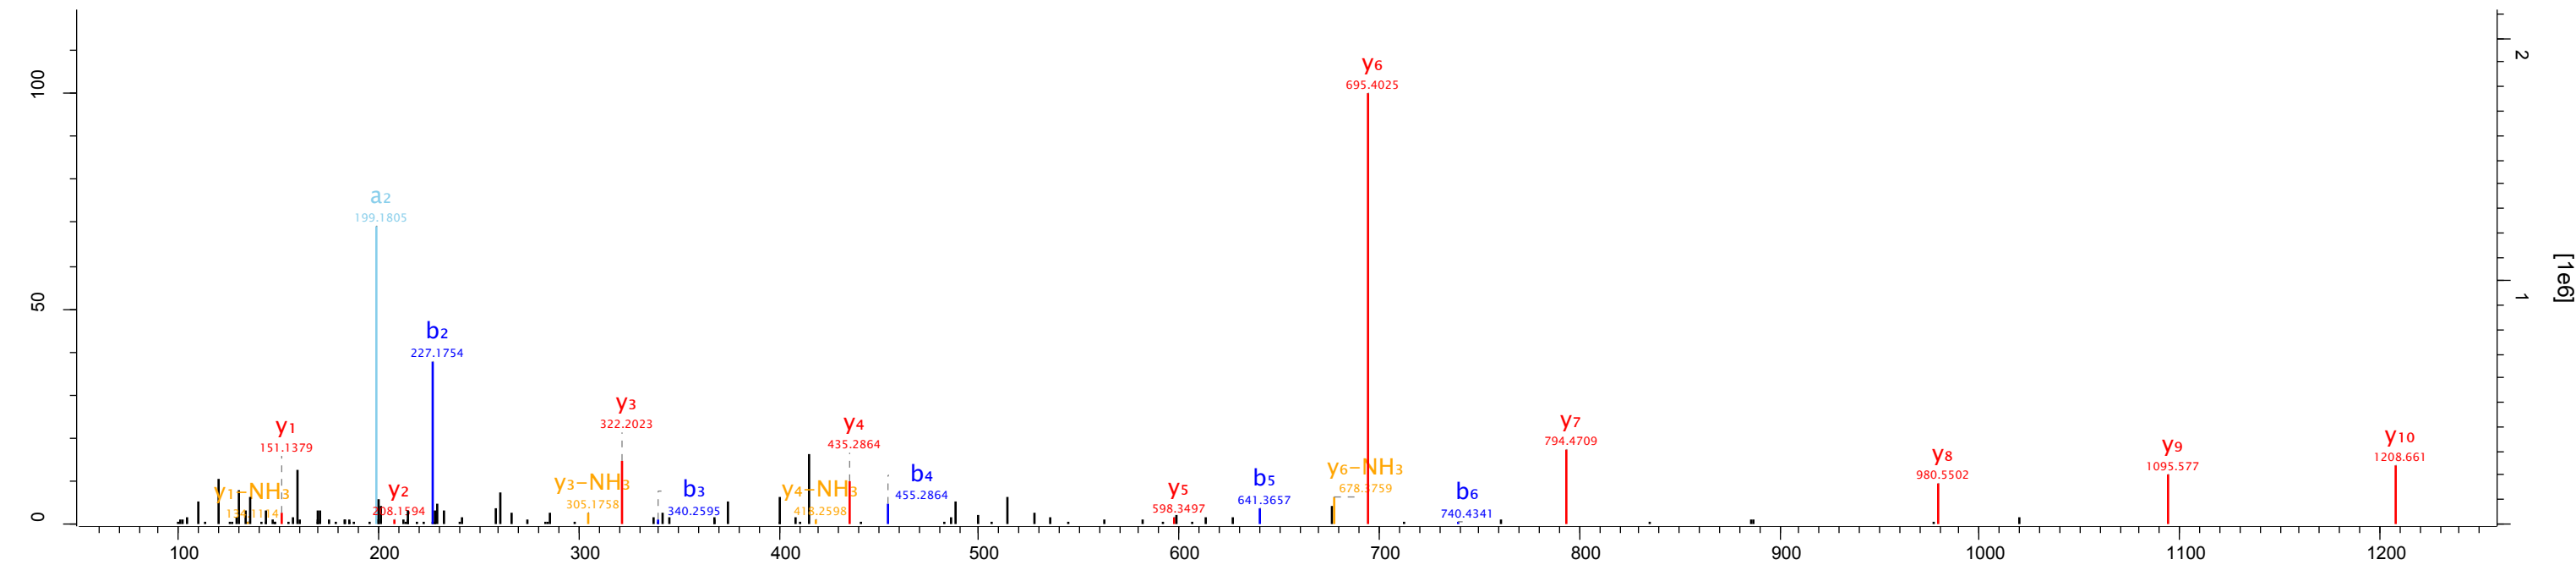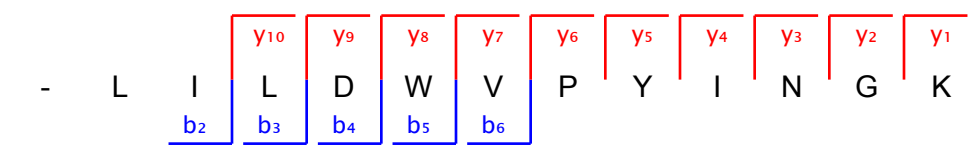

Raw file: 20150818\_A375SR-Proteome\_BR2  
 Scan: 20564 Method: FTMS; HCD Score: 52.3 m/z: 442.23 Gene names: C1orf234

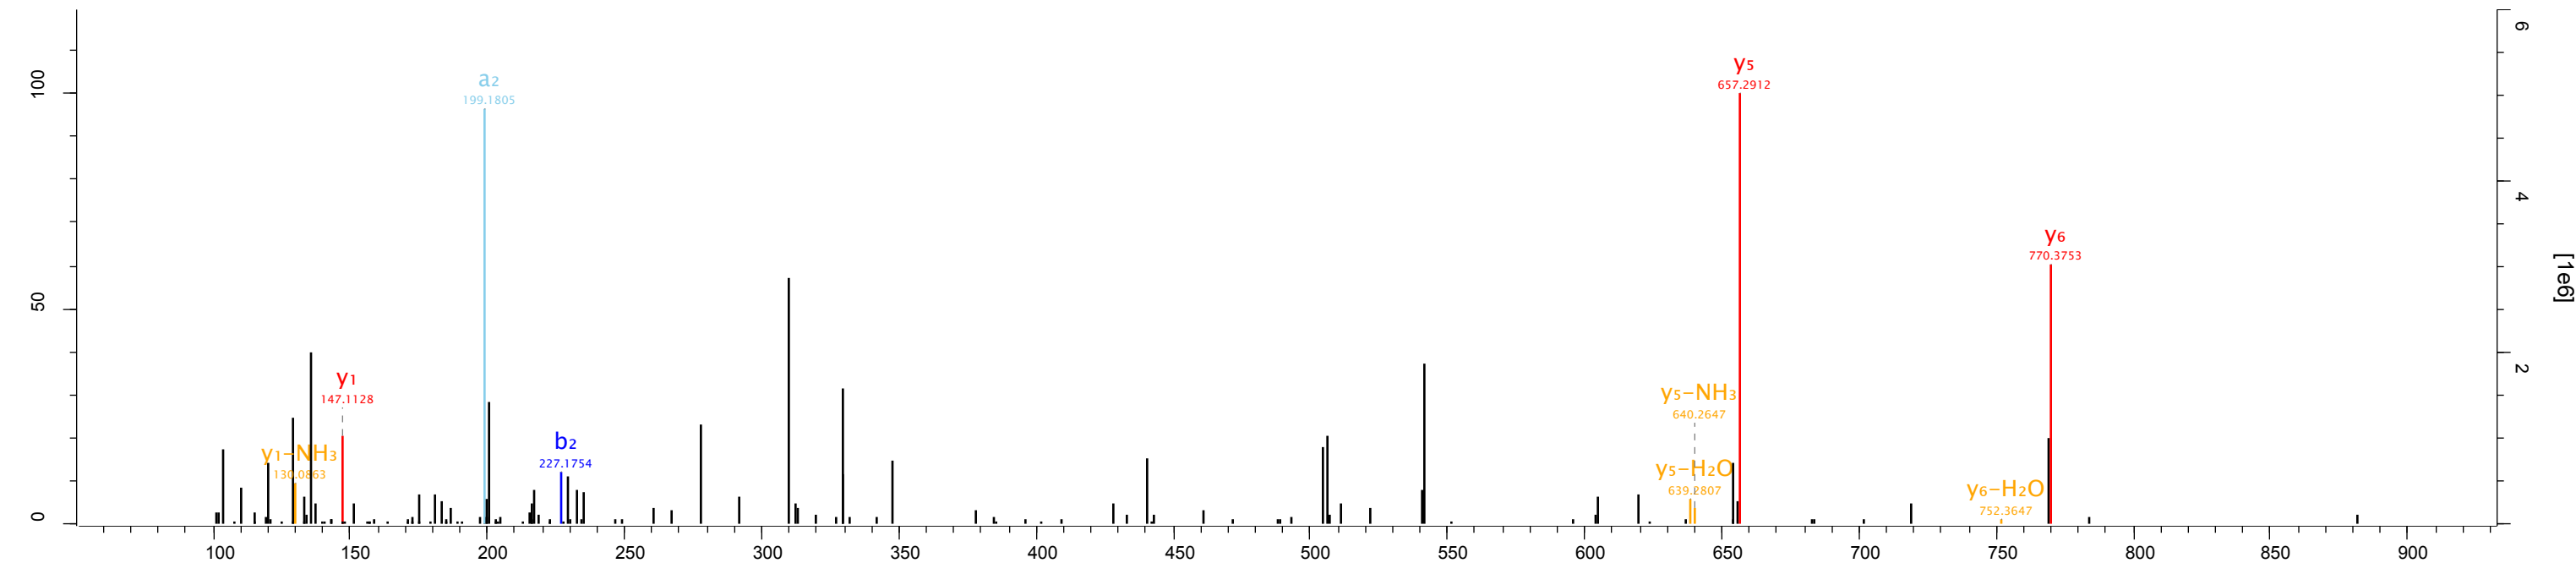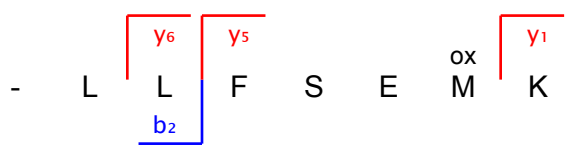

Raw file: 20150818\_A375SR-Proteome\_BR2  
 Scan: 78684 Method: FTMS; HCD Score: 177.04 m/z: 928.44 Gene names: MAPK11P1L

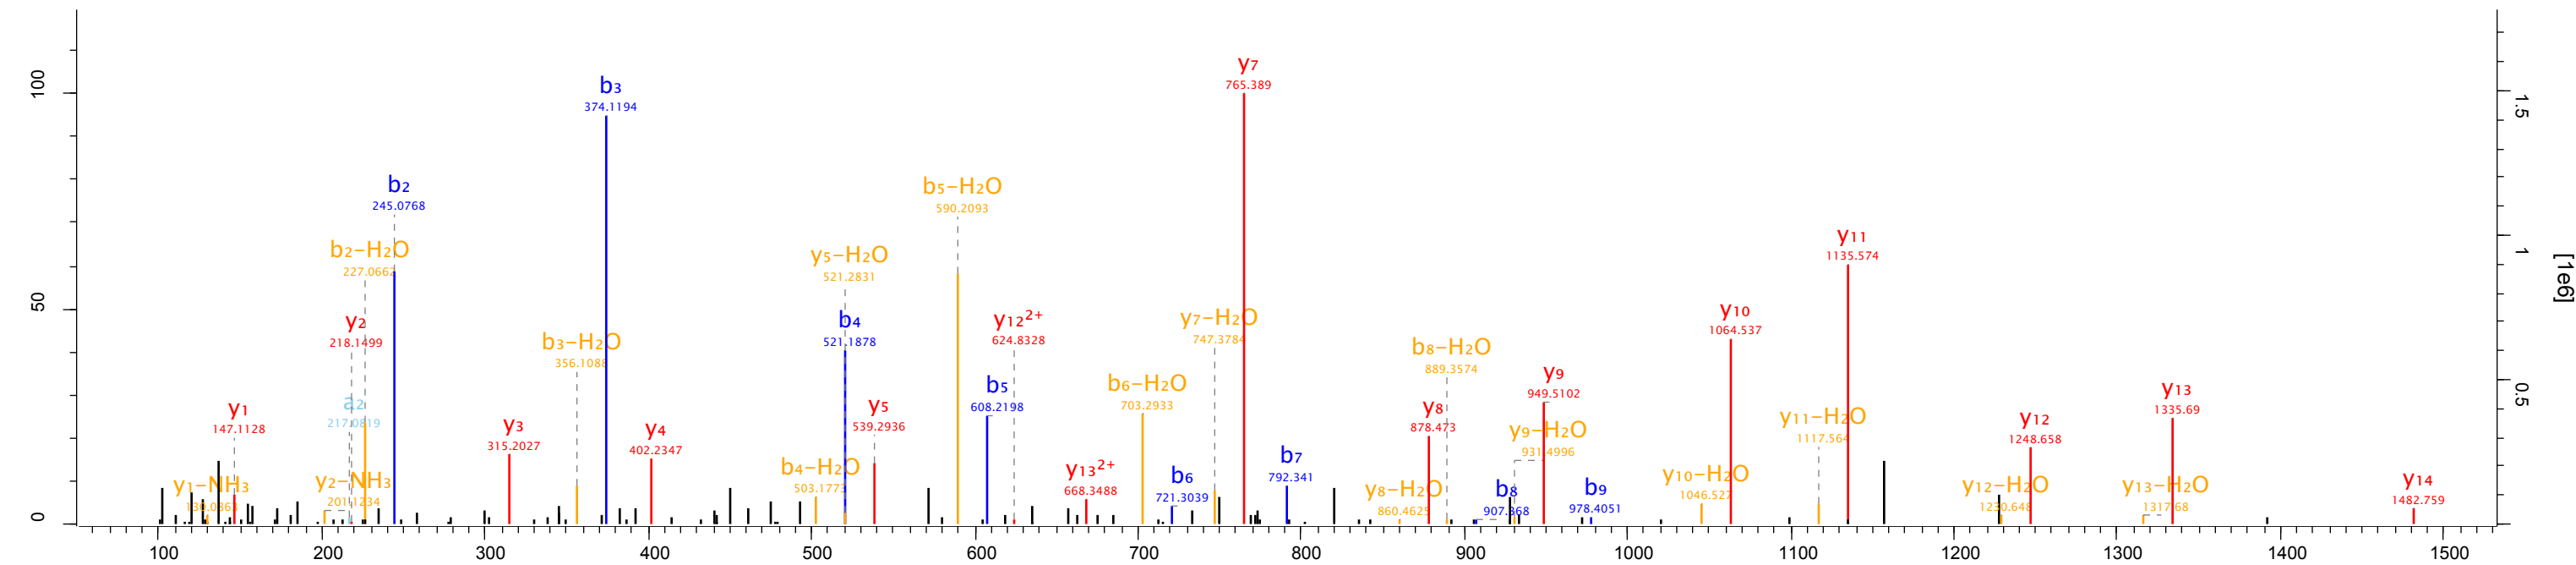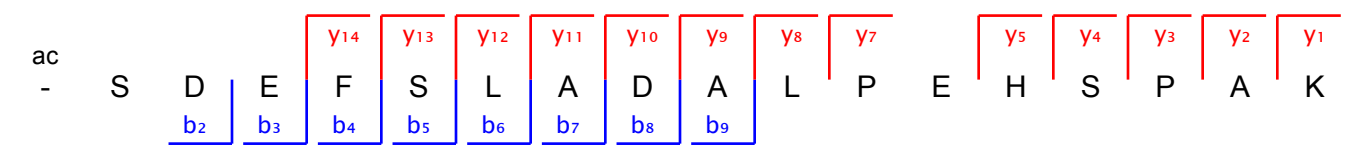

Raw file: 20150822\_A375SR\_Phospho\_BR3\_04  
 Scan: 9694 Method: FTMS; HCD Score: 89.75 m/z: 477.23 Gene names: GPR64

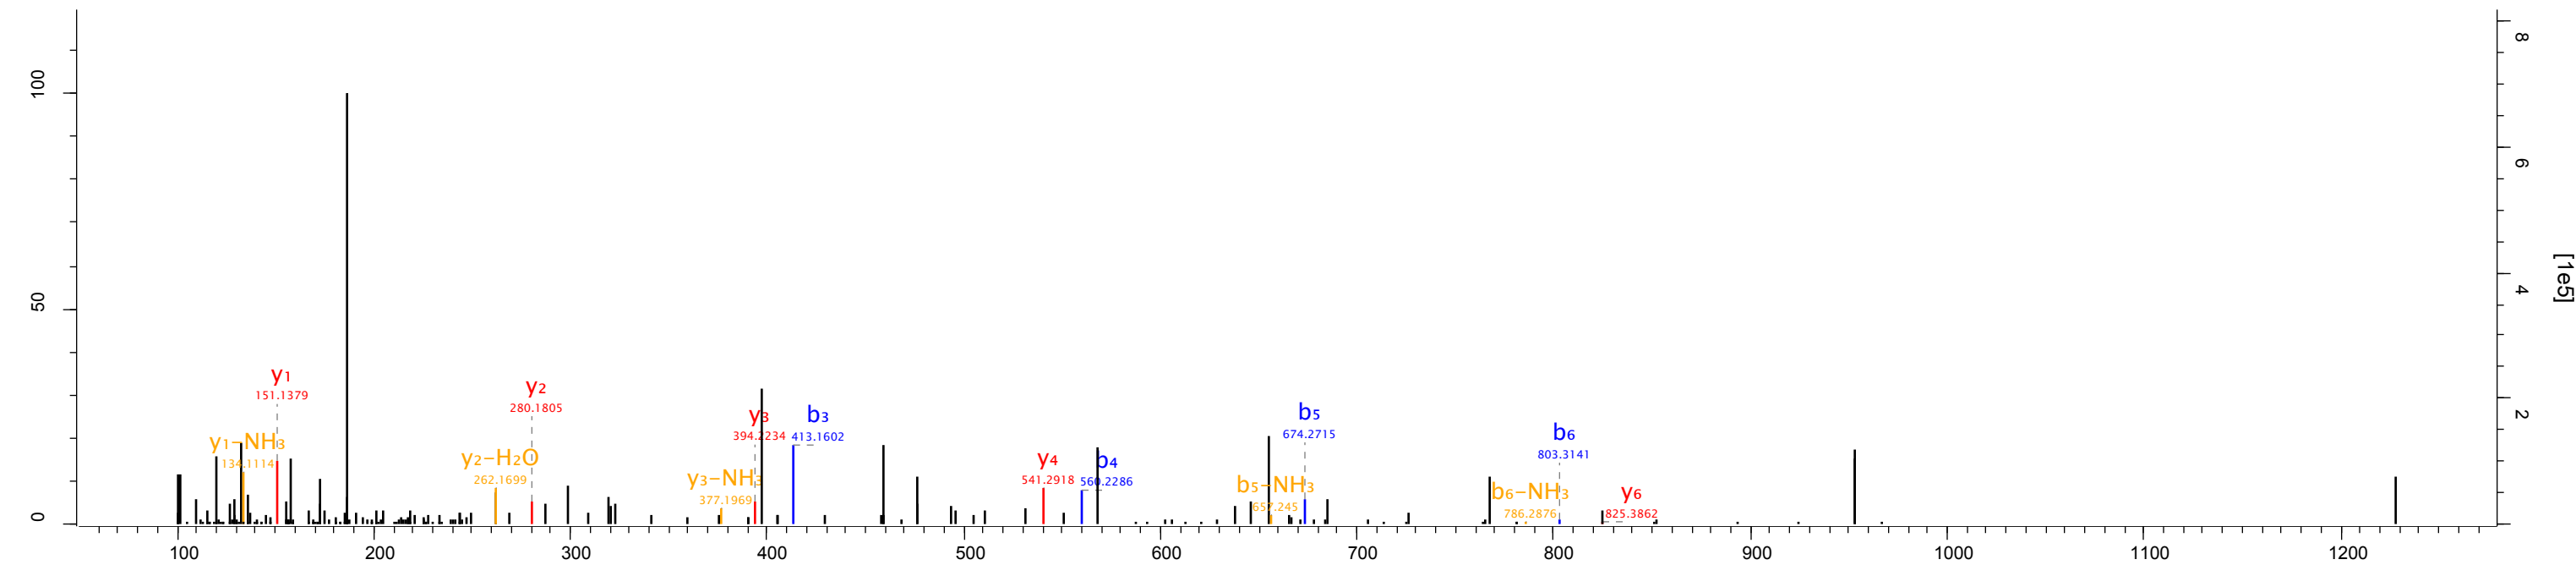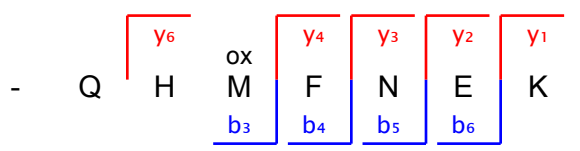

Raw file: 20150822\_A375SR\_Phospho\_BR3\_06  
 Scan: 11174 Method: FTMS; HCD Score: 44.82 m/z: 691.34 Gene names: ELK3

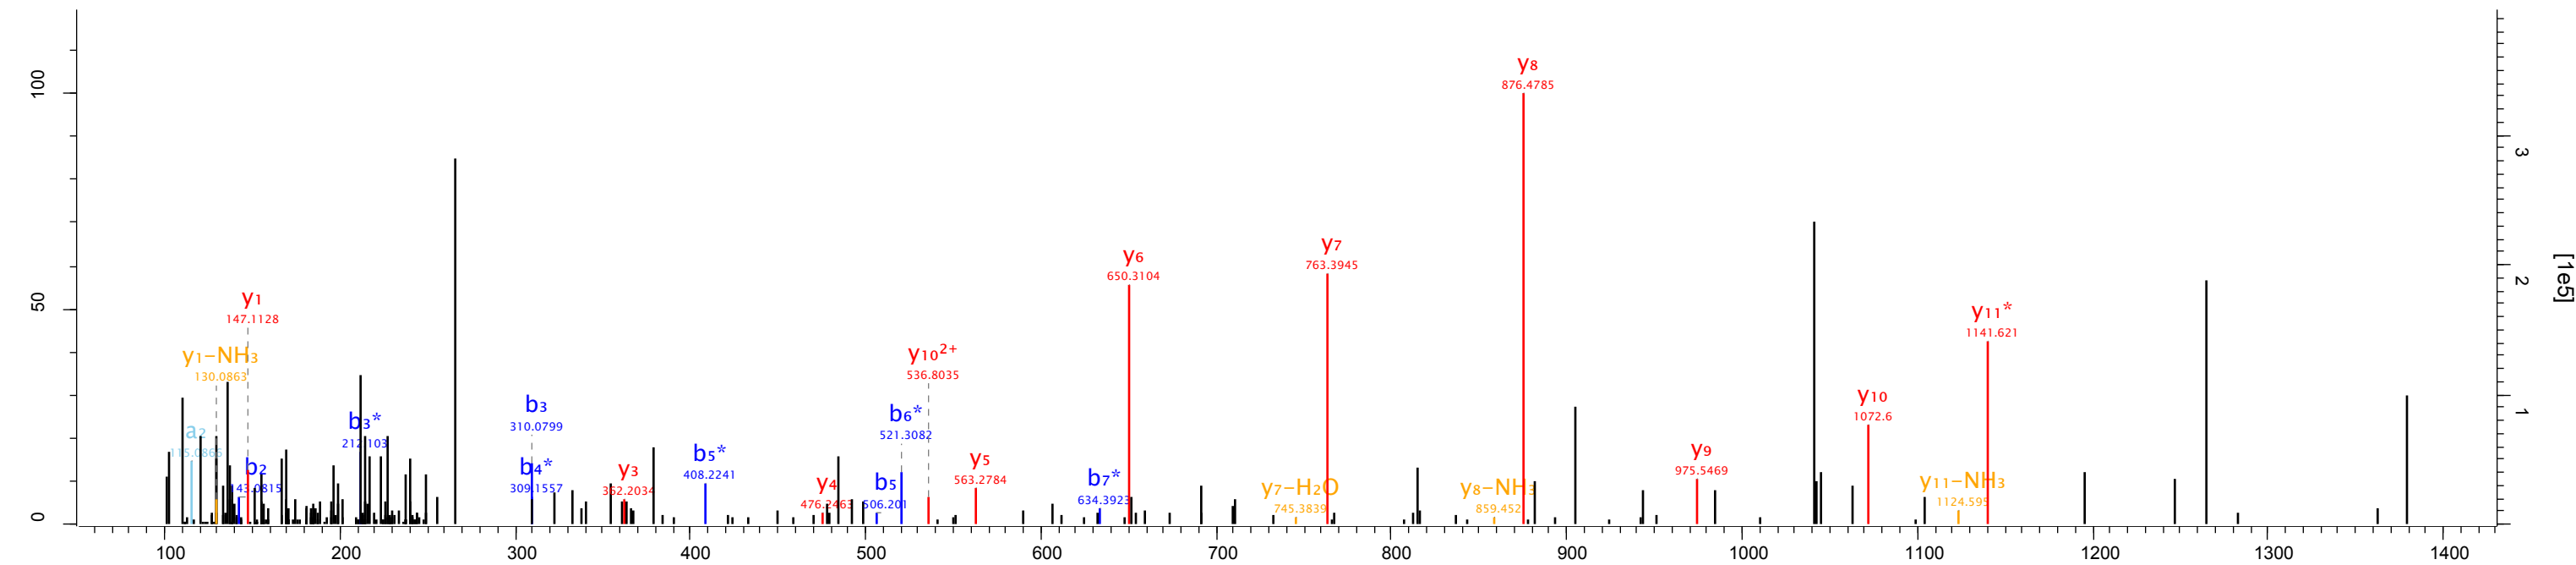

Raw file 20150822\_A375SR\_Phospho\_BR3\_07 Scan 13694 Method FTMS; HCD Score 91.59 m/z 843.96 Gene names MLLT3

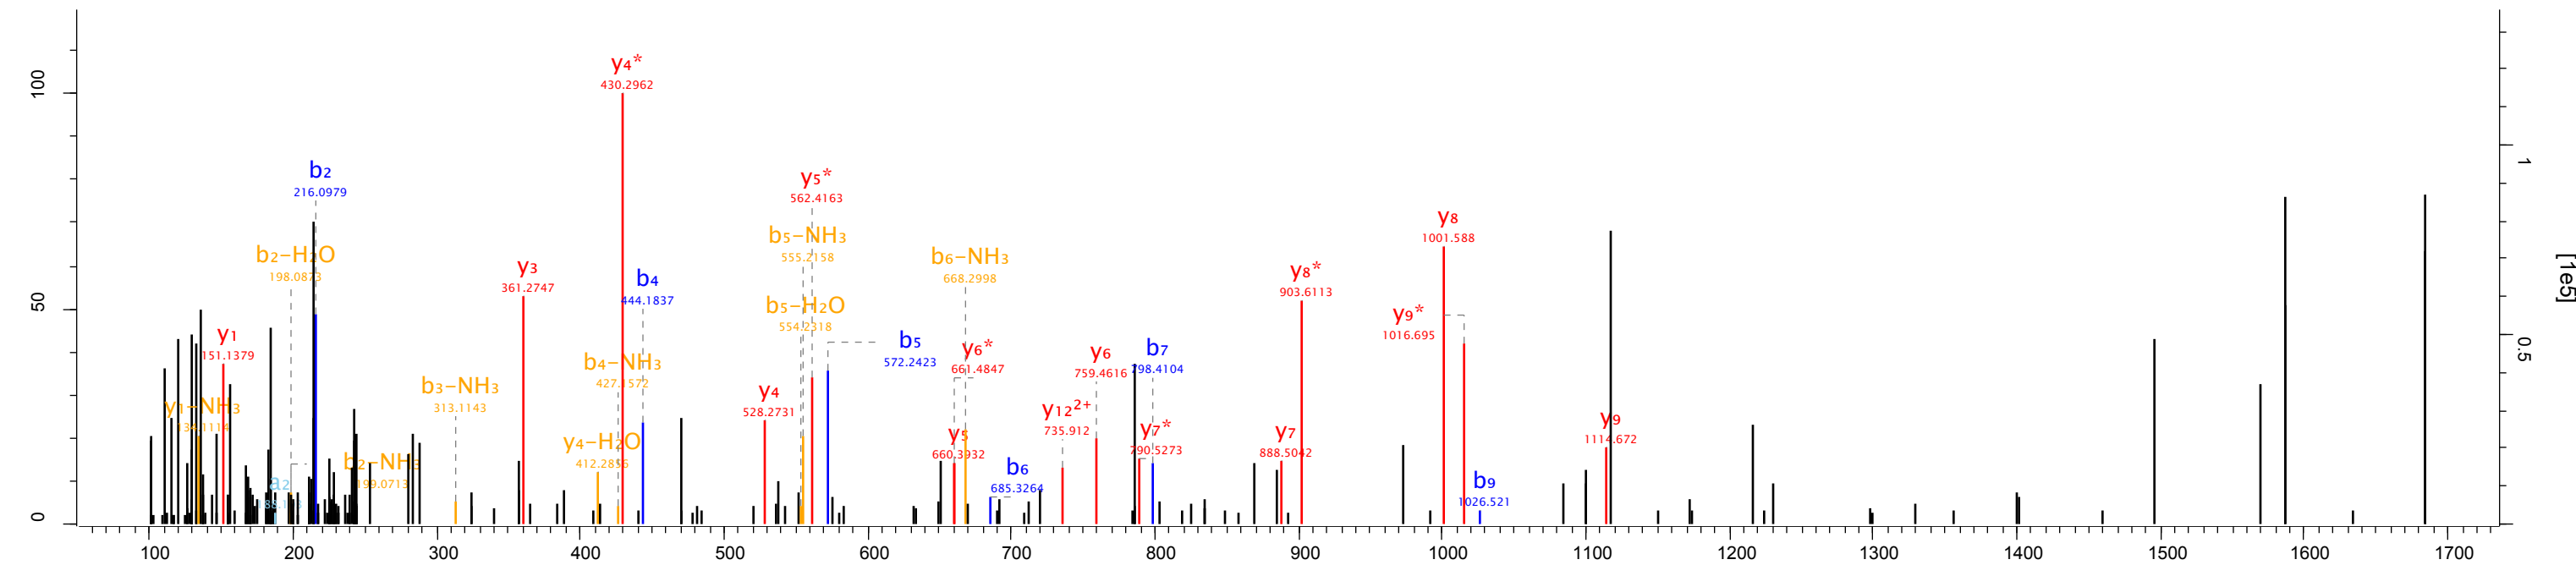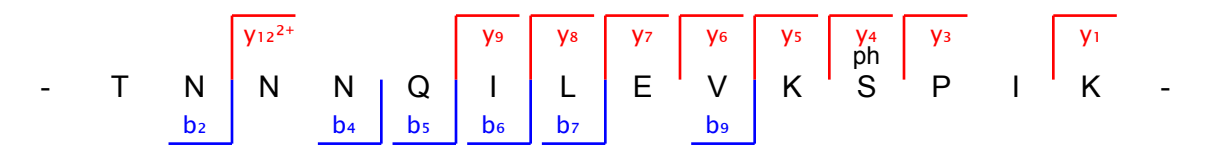

Raw file 20150822\_A375SR\_Phospho\_BR3\_07 Scan 13714 Method FTMS; HCD Score 64.3 m/z 562.64 Gene names MLLT3

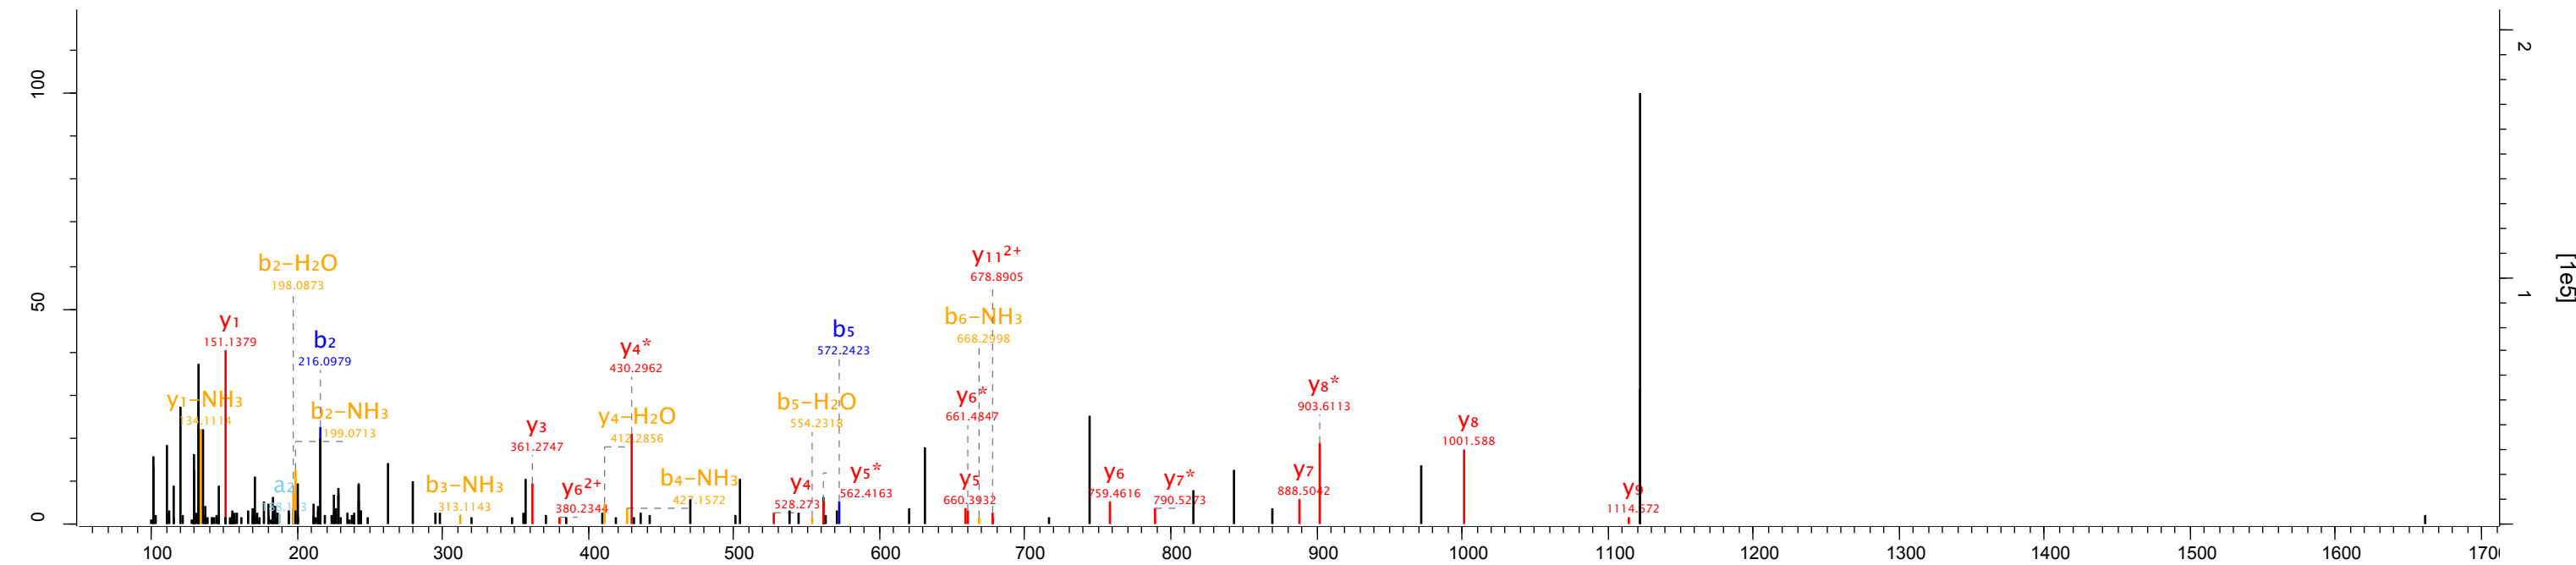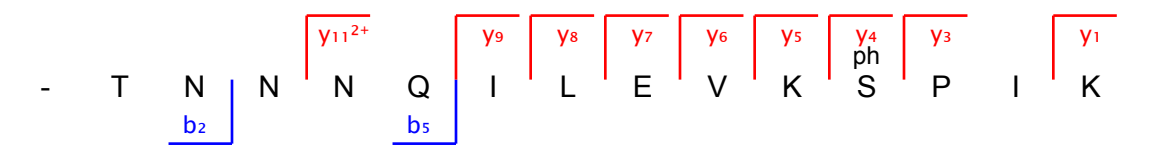



Raw file 20150822\_A375SR\_Phospho\_BR3\_07 Scan 6914 Method FTMS; HCD Score 51.77 m/z 548.61

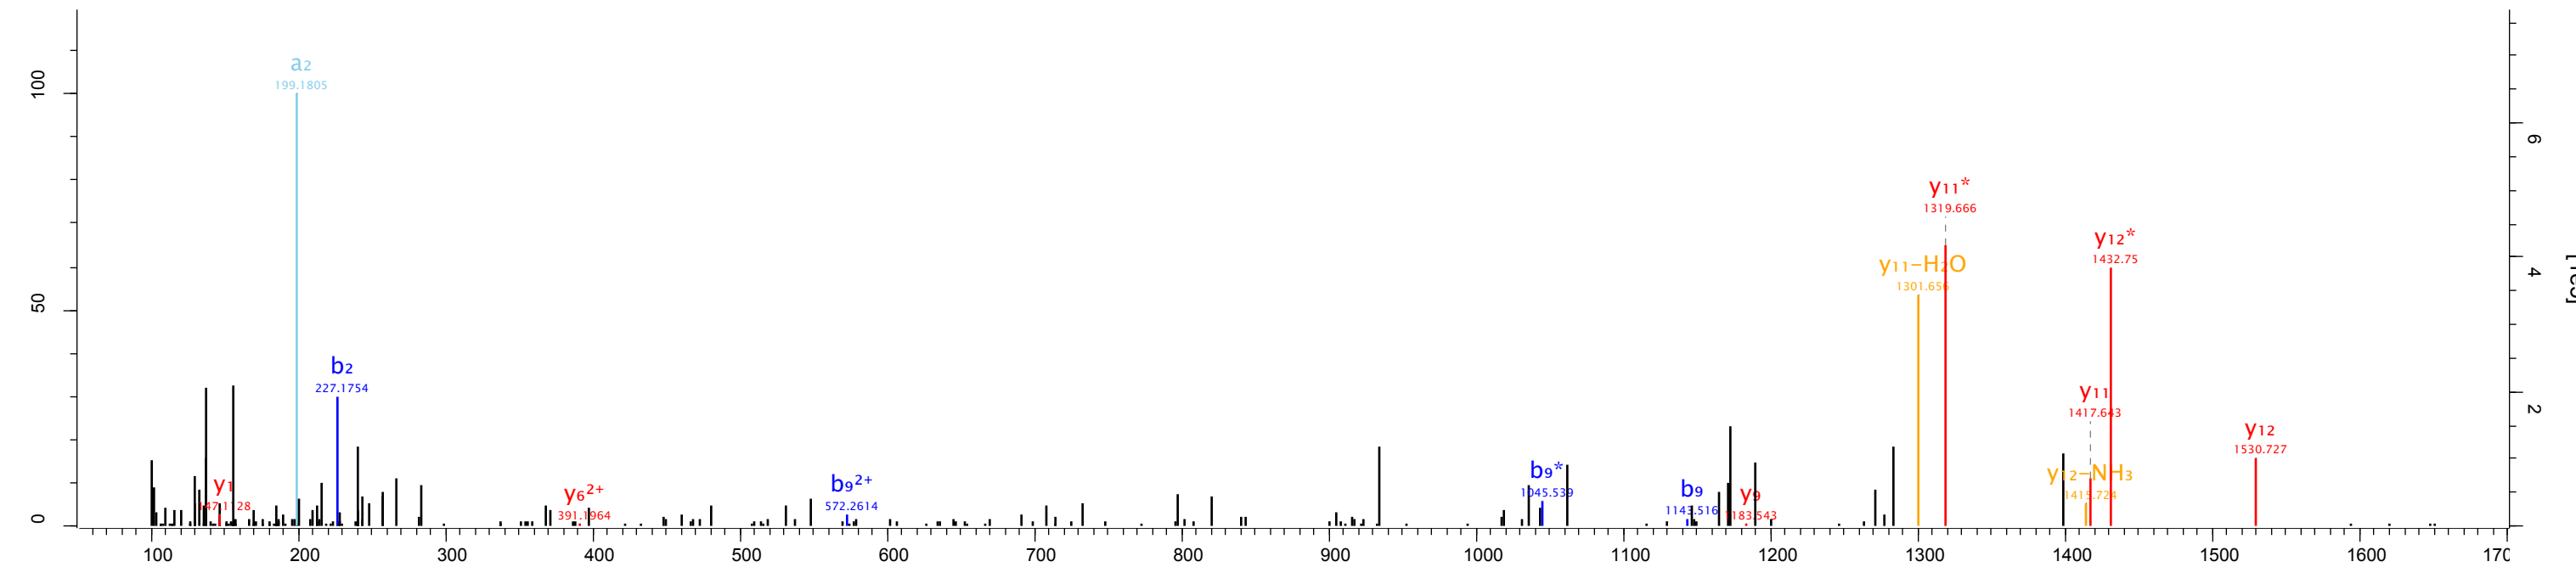

- I L S F E L C S L E K P K -

Fragmentation mapping:  
 - Red brackets above: y12 (L-S), y11 (S-F), y9 (E-L), y6<sup>2+</sup> (C-S), y1 (P-K)  
 - Blue brackets below: b2 (L-S), b9 (C-S)

Raw file 20150822\_A375SR\_Phospho\_BR3\_08 Scan 13174 Method FTMS; HCD Score 55.26 m/z 754.87

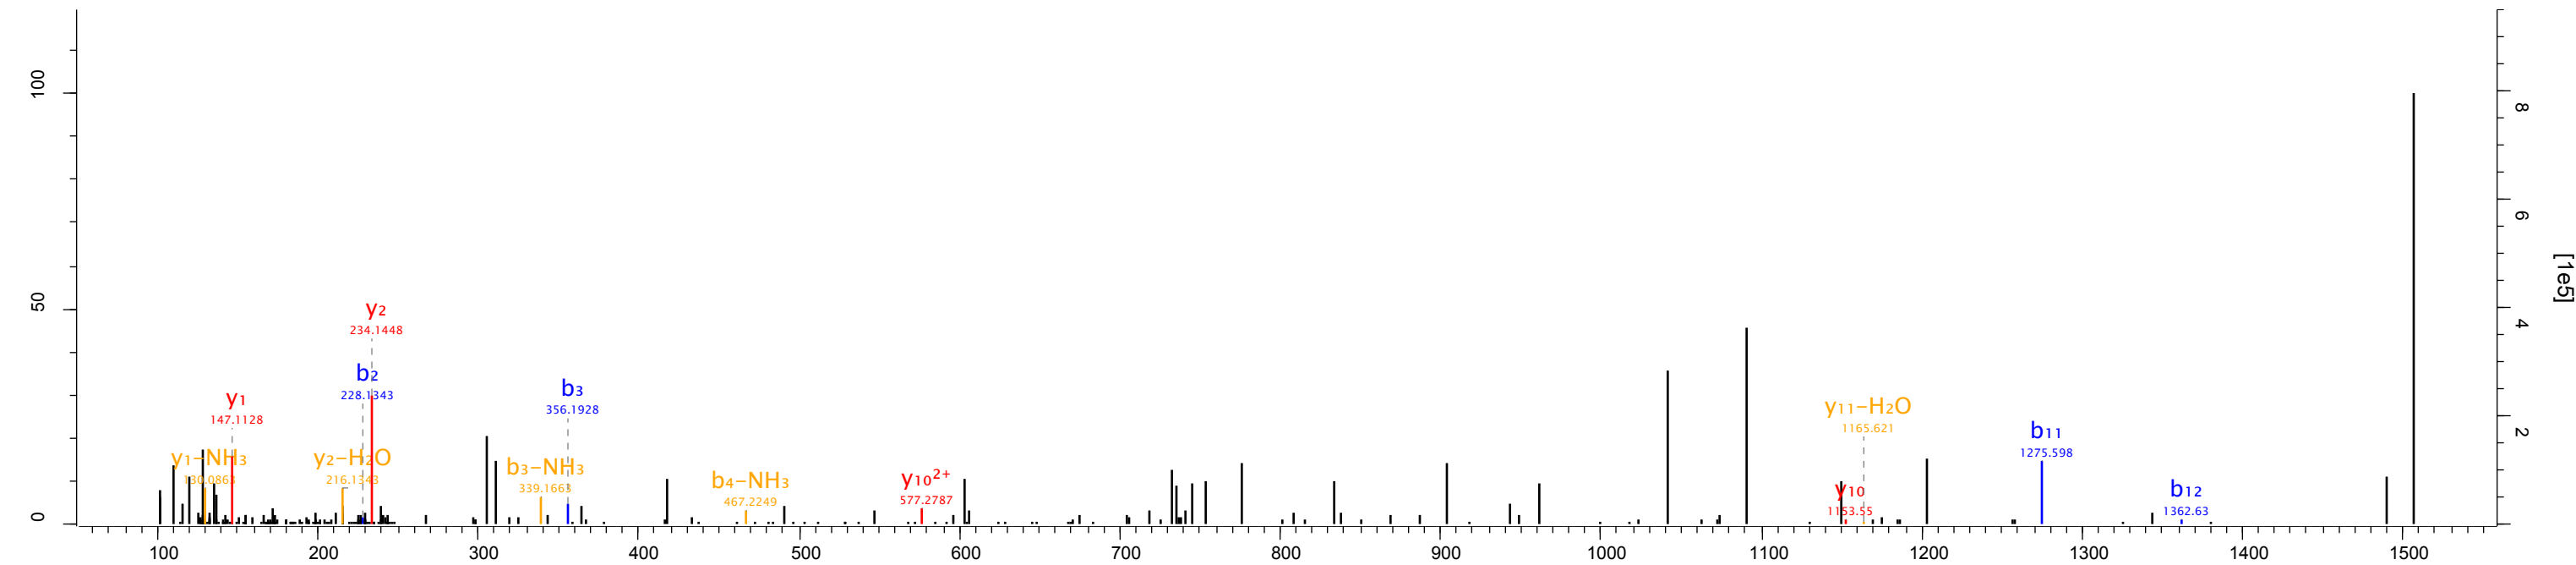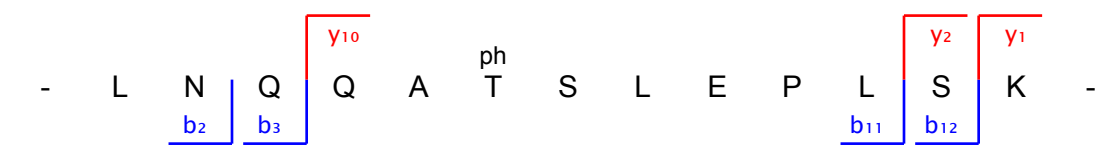

Raw file: 20150822\_A375SR\_Phospho\_BR3\_09  
 Scan: 24074 Method: FTMS; HCD Score: 174.63 m/z: 970.94 Gene names: MAPK11P1L

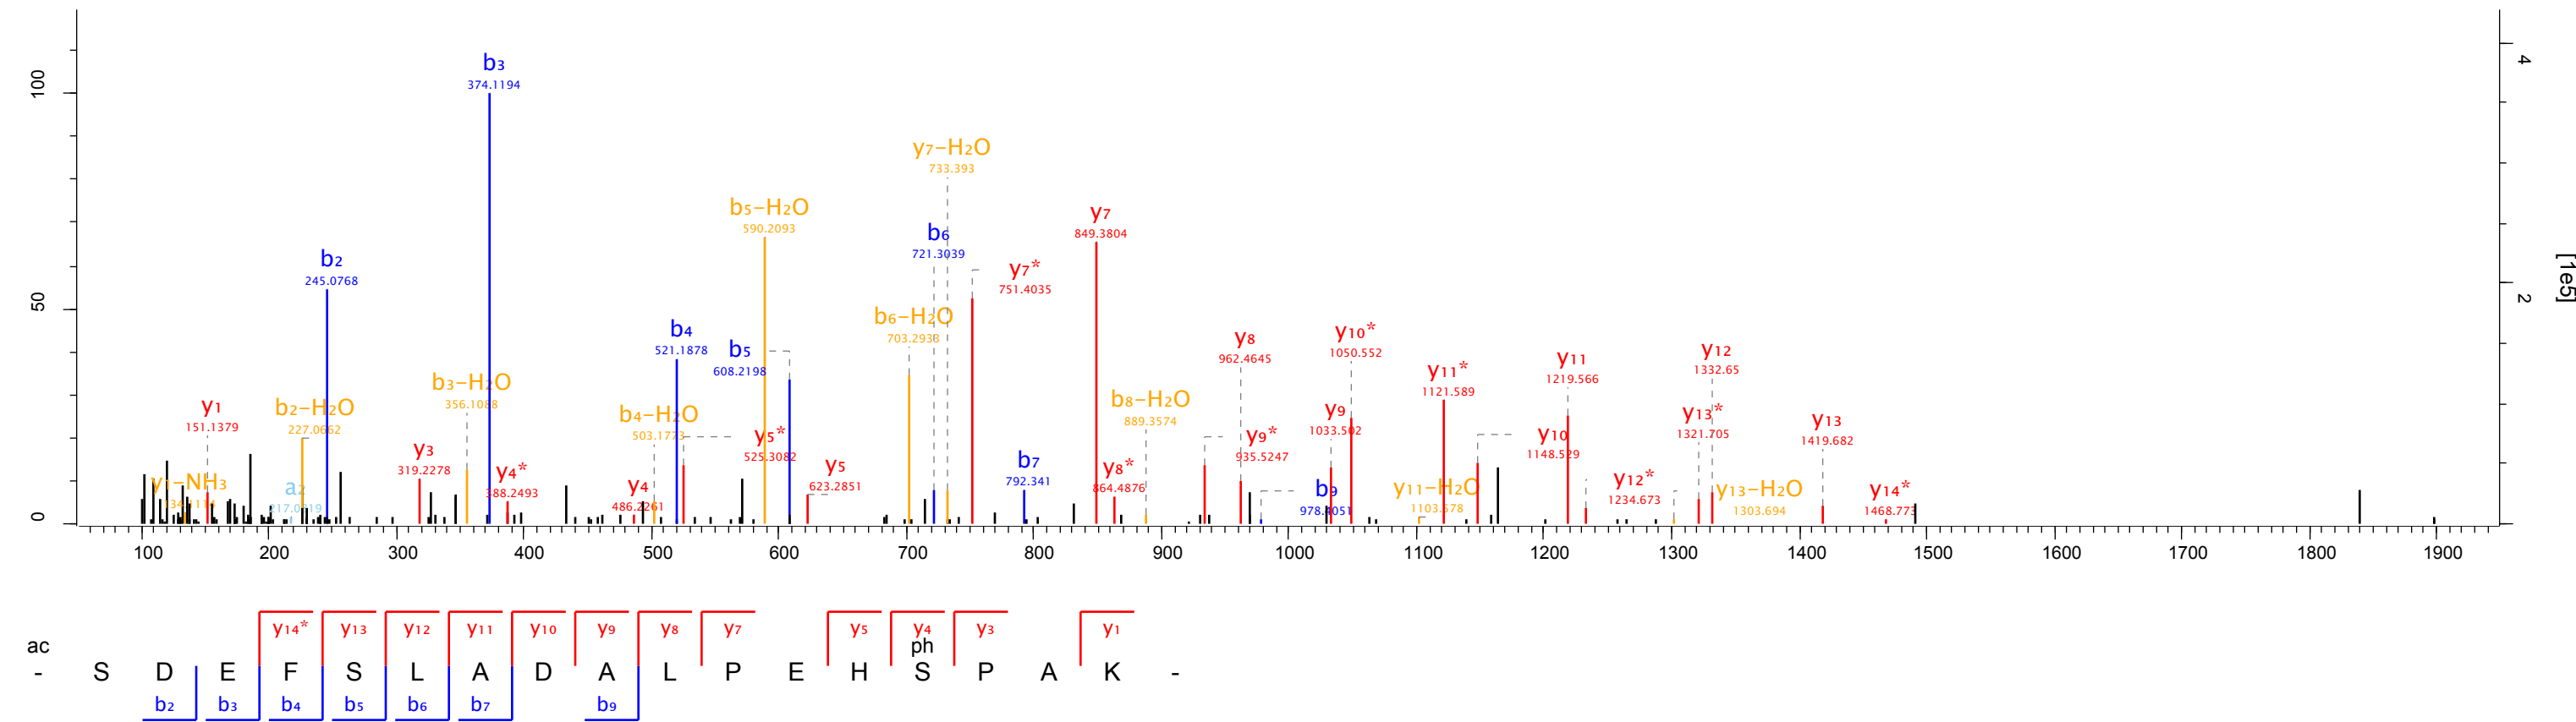

Raw file: 20150822\_A375SR\_Phospho\_BR3\_10  
 Scan: 9874 Method: FTMS; HCD Score: 83.75 m/z: 477.23 Gene names: GPR64

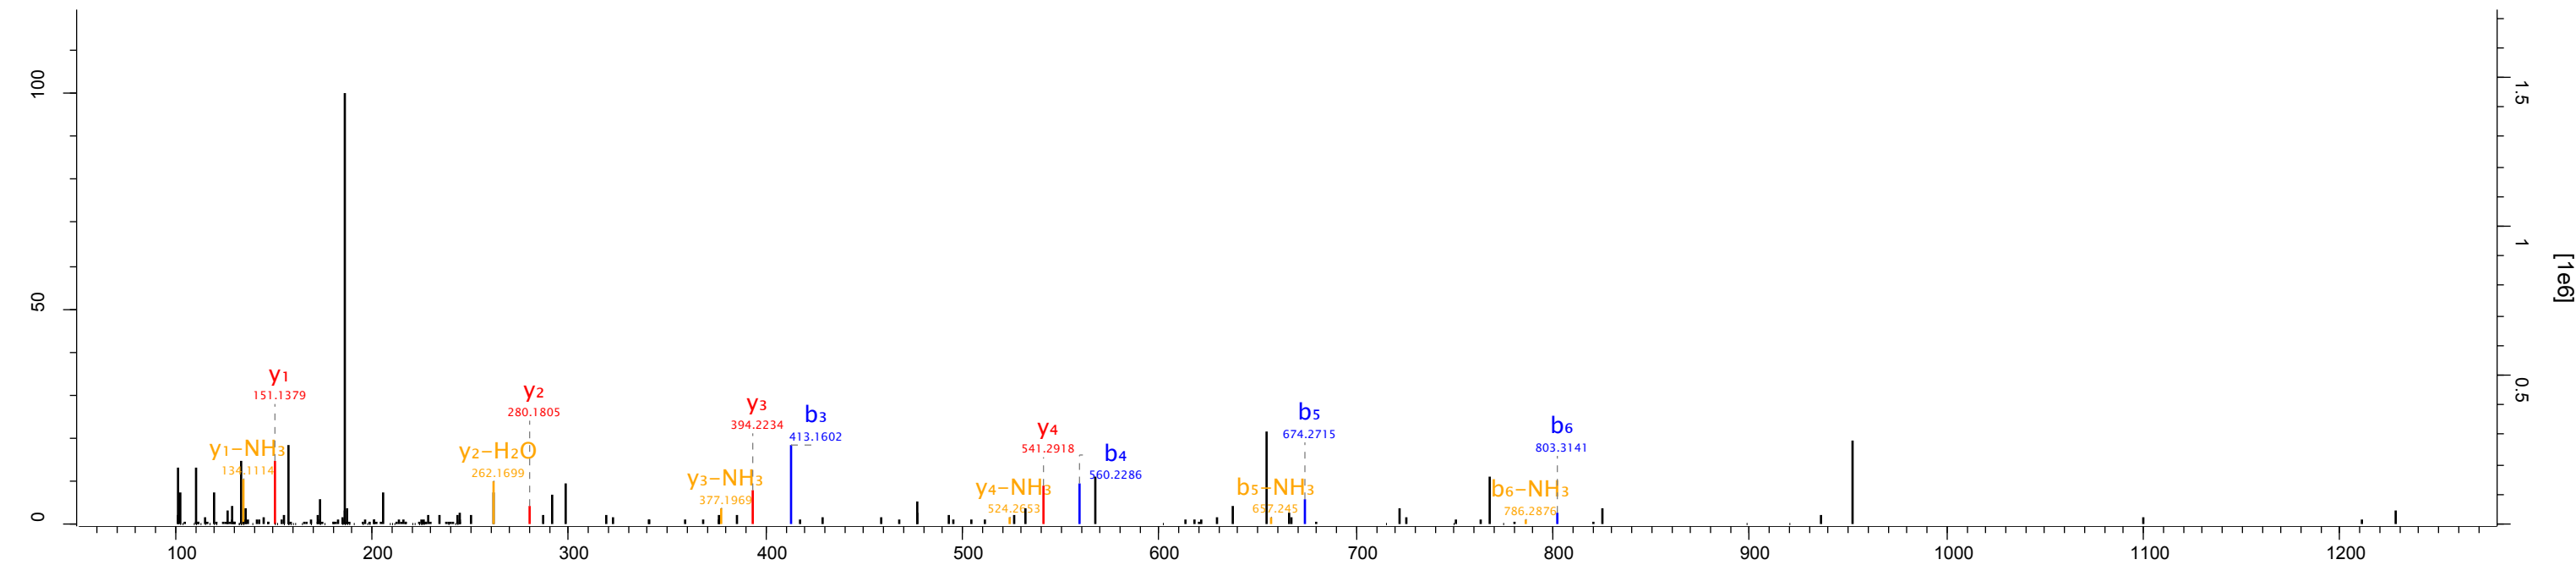

Raw file 20150822\_A375SR-Proteome\_BR3 Scan 6924 Method FTMS; HCD Score 55.35 m/z 578.3

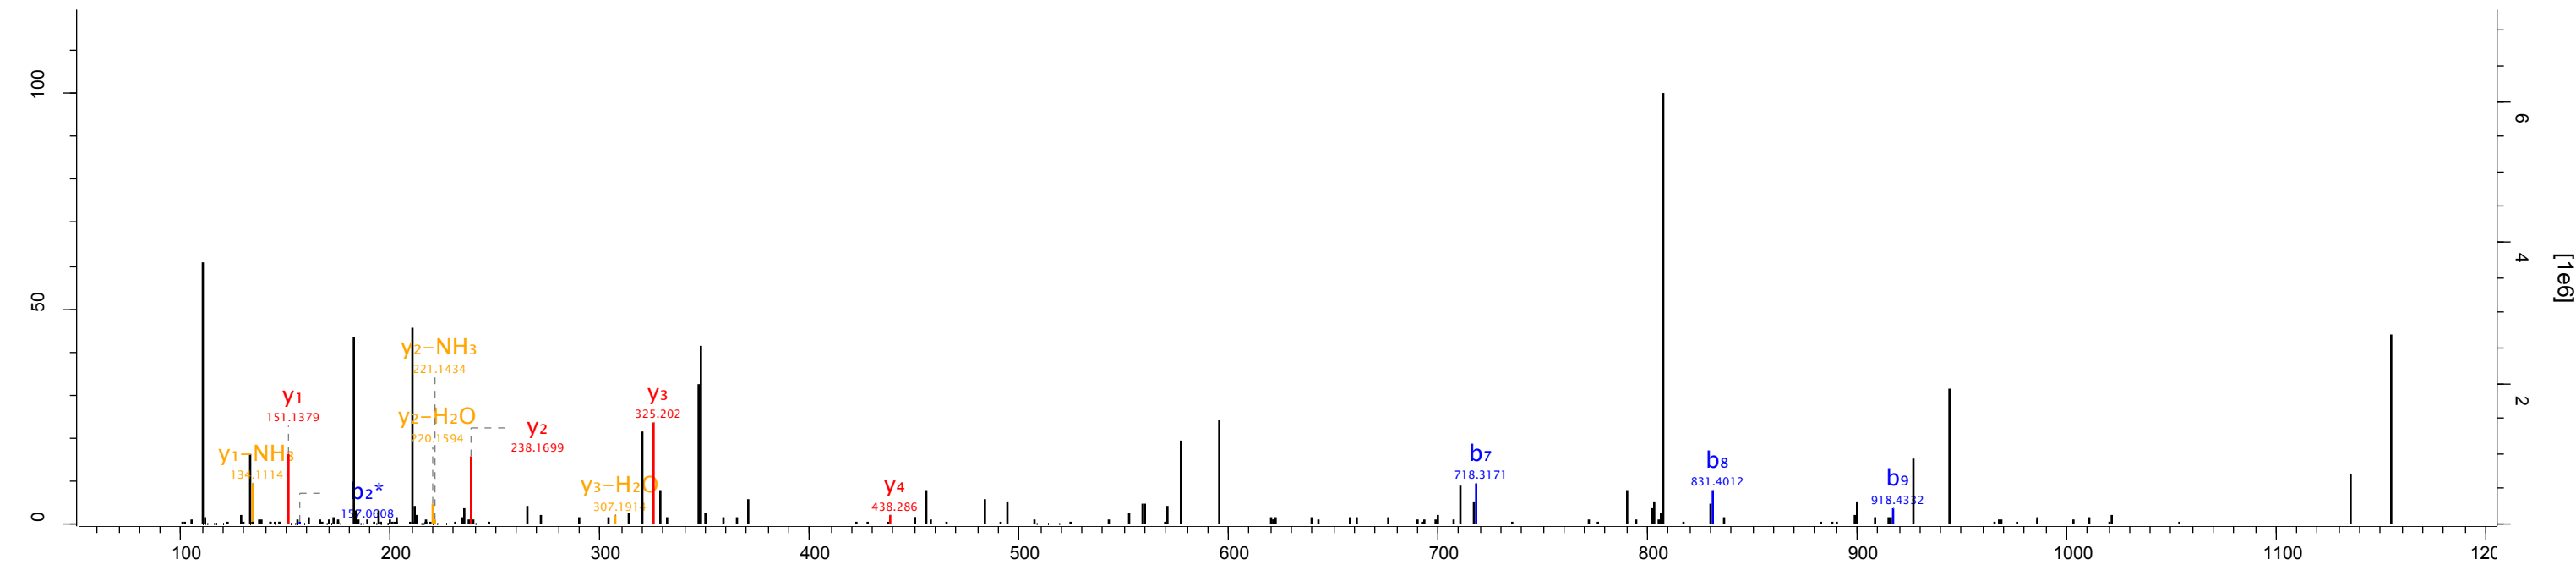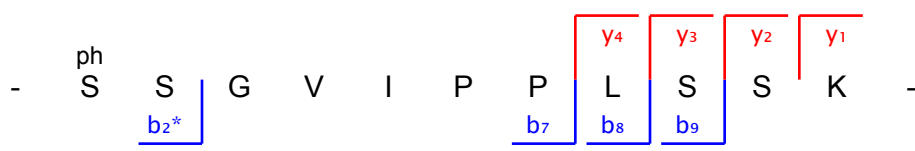

Raw file 20180707\_MaS\_A375SR\_LM\_proteome\_01 Scan 2764 Method FTMS; HCD Score 40.69 m/z 325.17

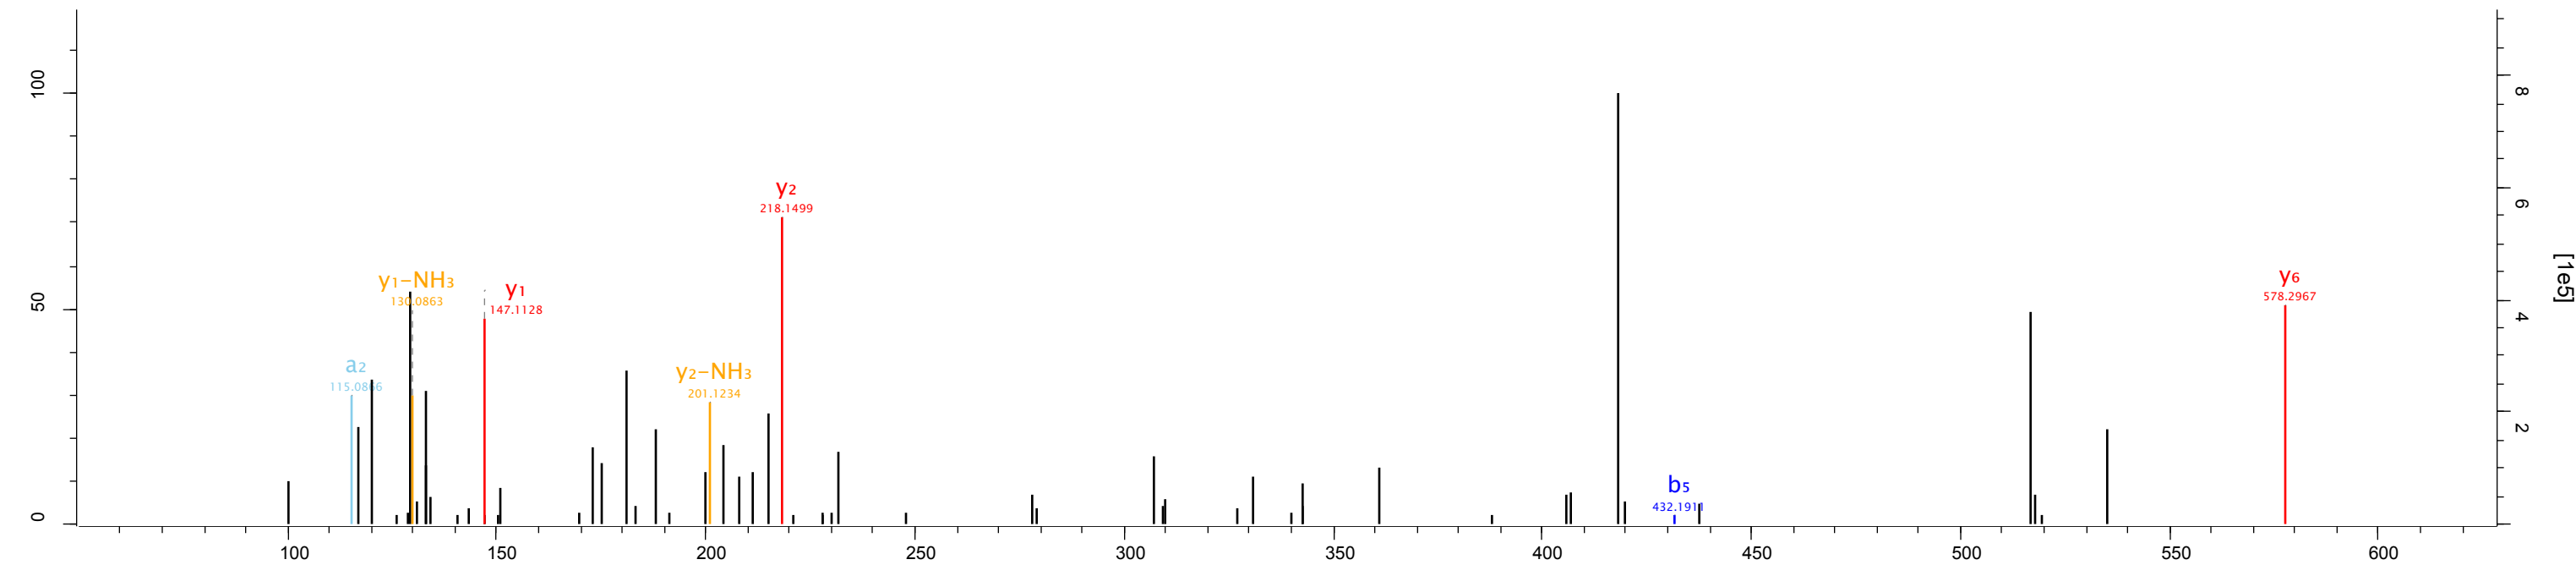

Raw file 20180707\_MaS\_A375SR\_LM\_proteome\_03 Scan 8464 Method FTMS; HCD Score 39.73 m/z 592.82

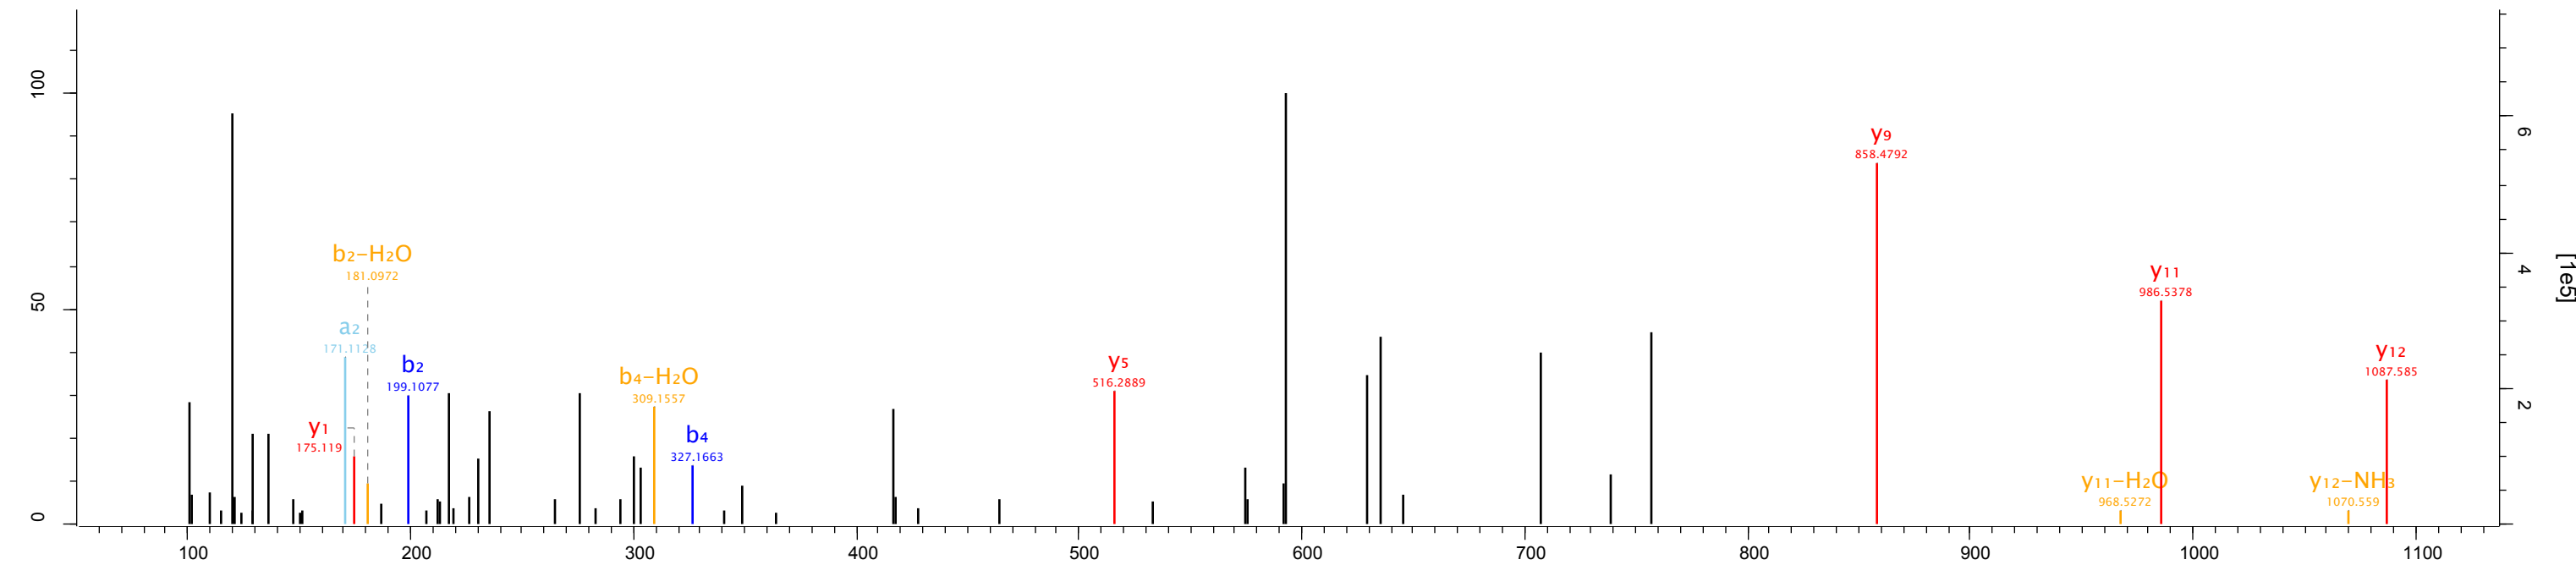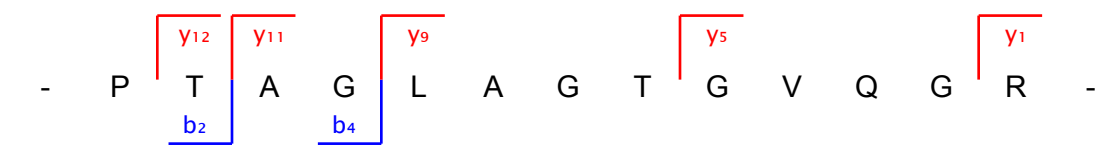

Raw file 20180707\_MaS\_A375SR\_LM\_proteome\_06 Scan 26934 Method FTMS; HCD Score 67.33 m/z 857.42 Gene names SSR3

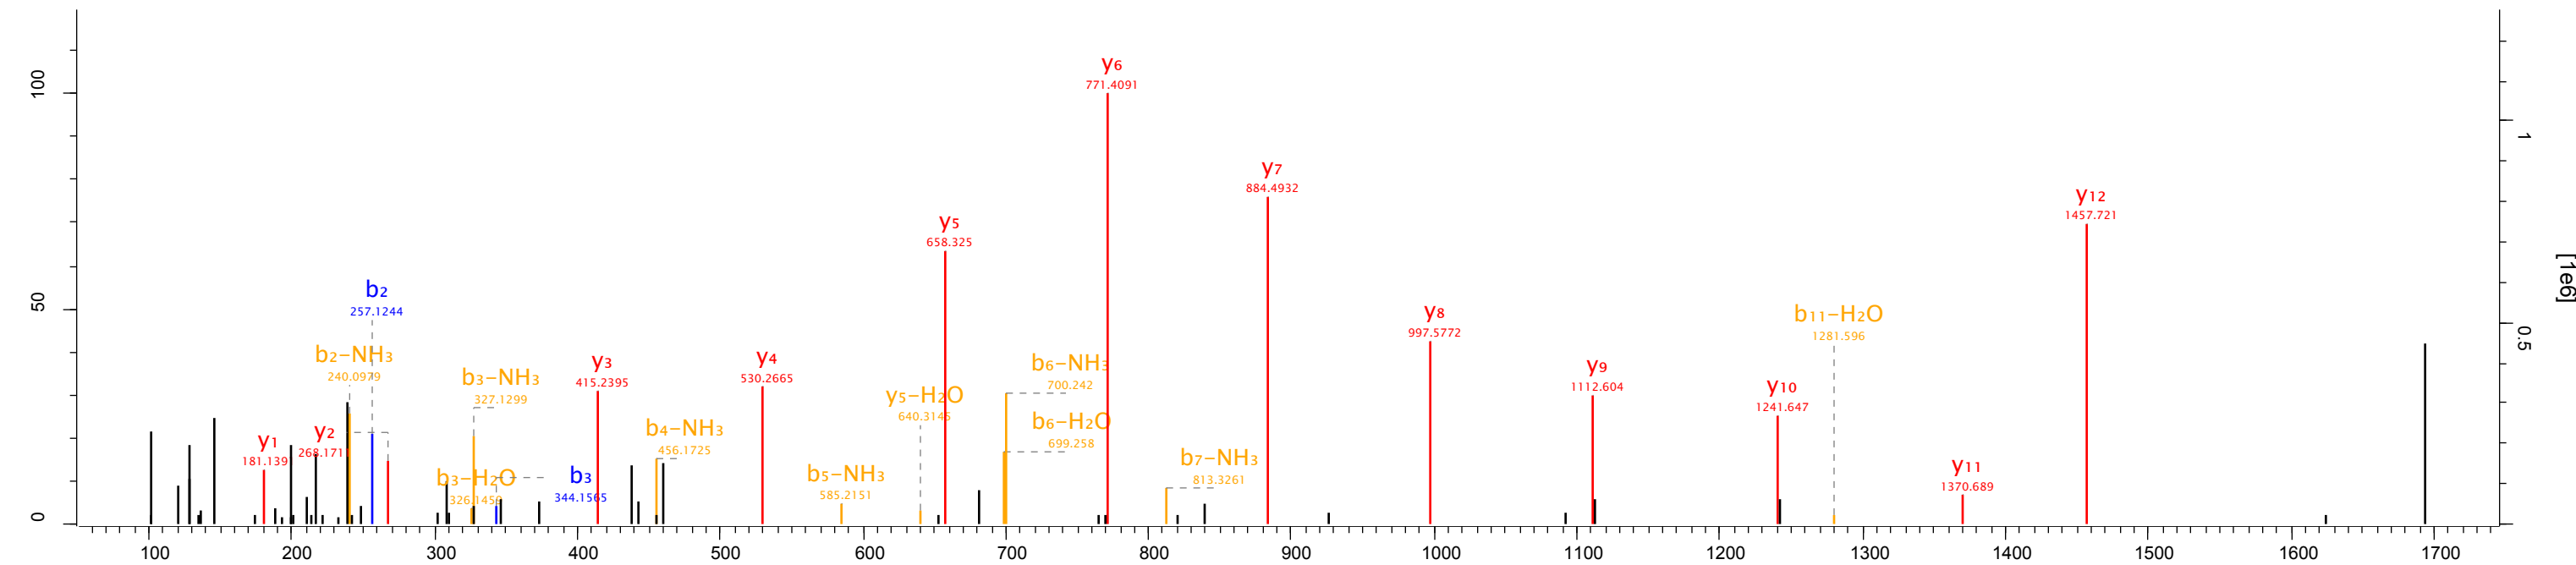



Raw file: 20180707\_MaS\_A375SR\_LM\_proteome\_07  
 Scan: 21004 Method: FTMS; HCD Score: 65.18 m/z: 586.84 Gene names: KATNAL2

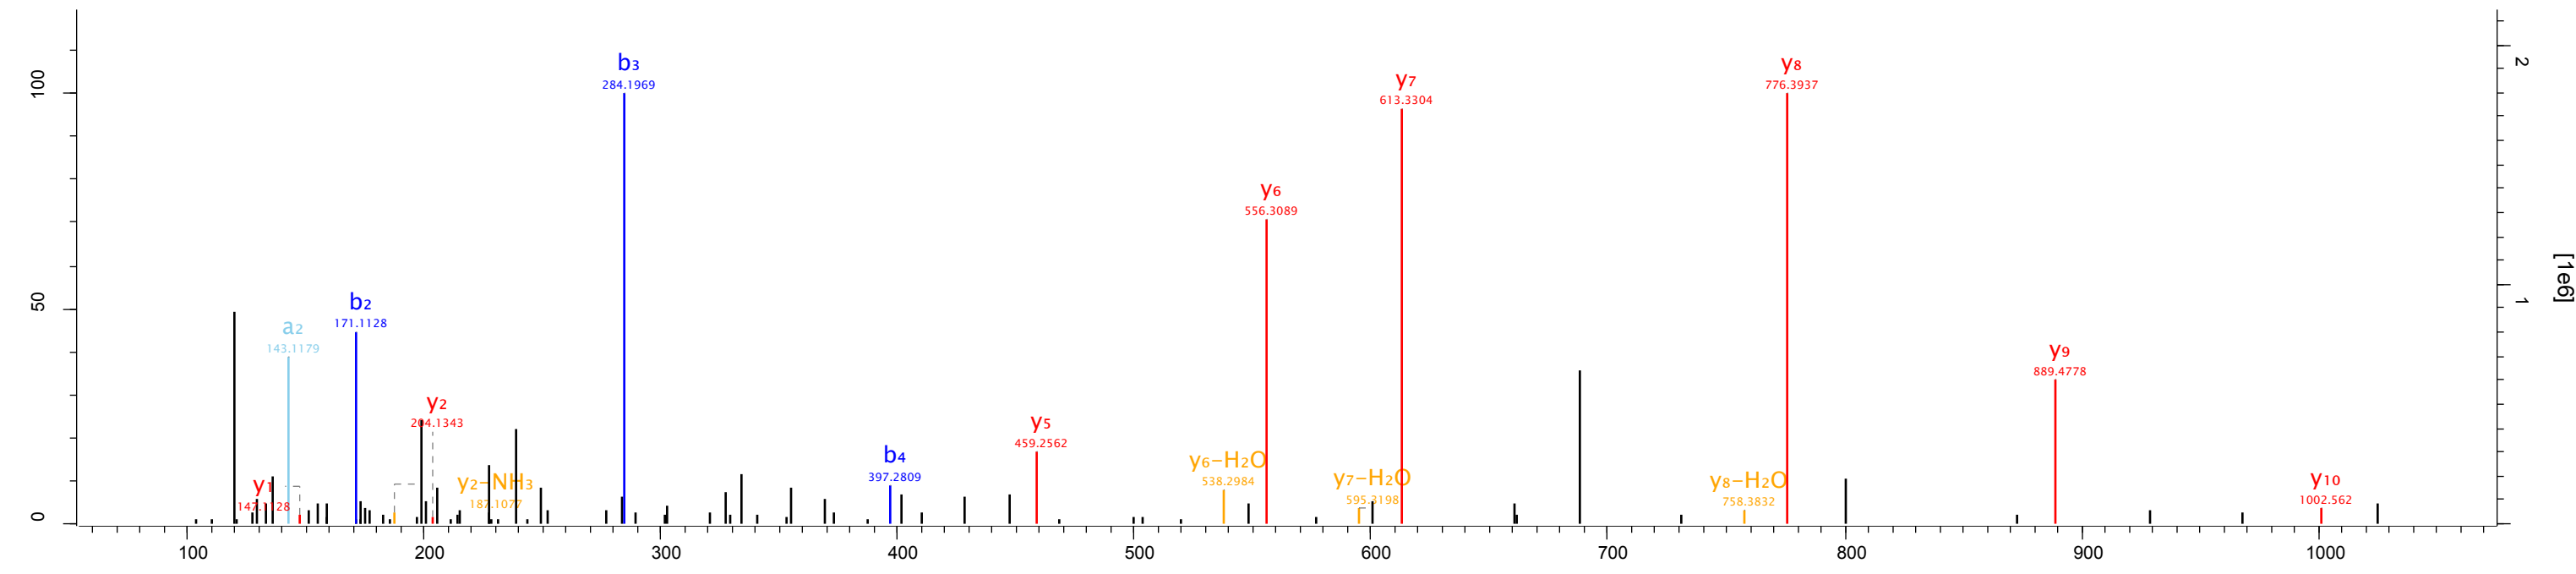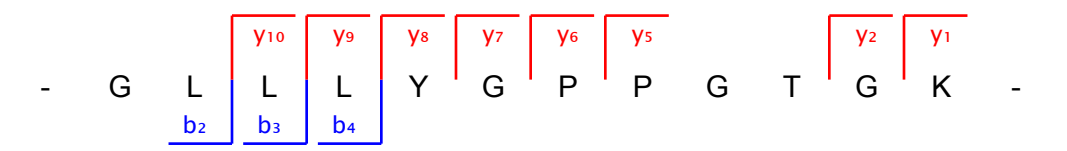

Raw file 20180707\_MaS\_A375SR\_LM\_proteome\_12 Scan 2934 Method FTMS; HCD Score 62 m/z 325.17

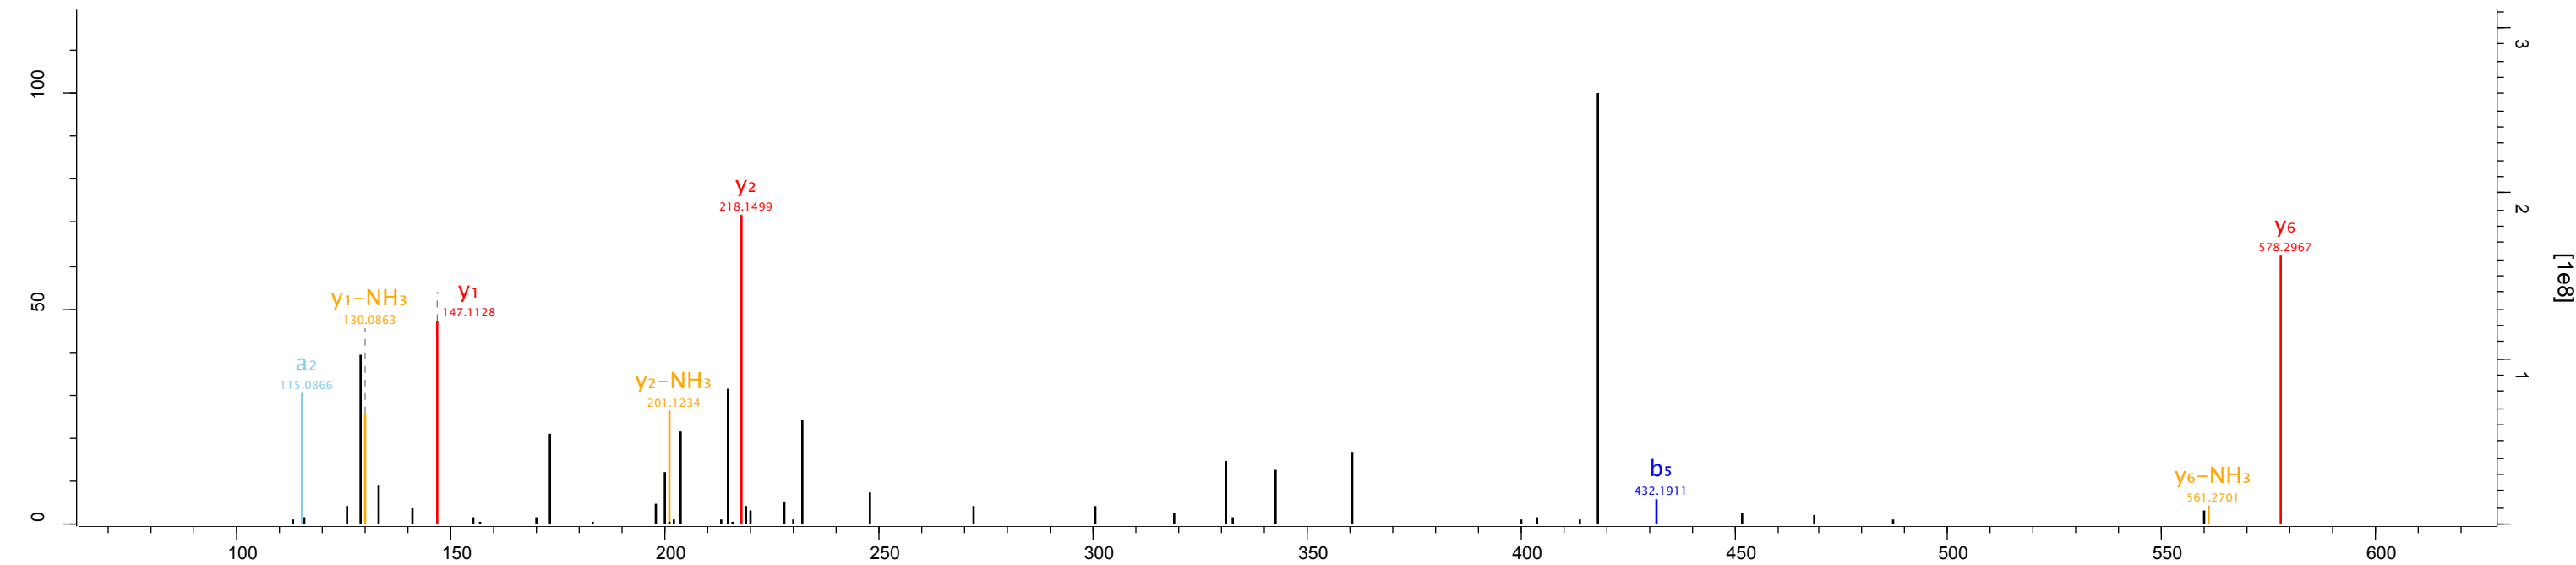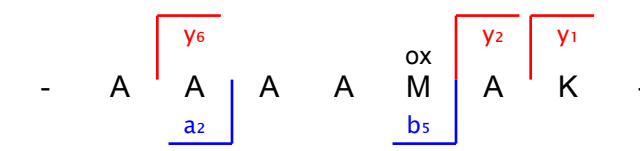

Raw file 20180707\_MaS\_A375SR\_LM\_proteome\_17 Scan 11324 Method FTMS; HCD Score 45.28 m/z 628.78 Gene names ANAPC16

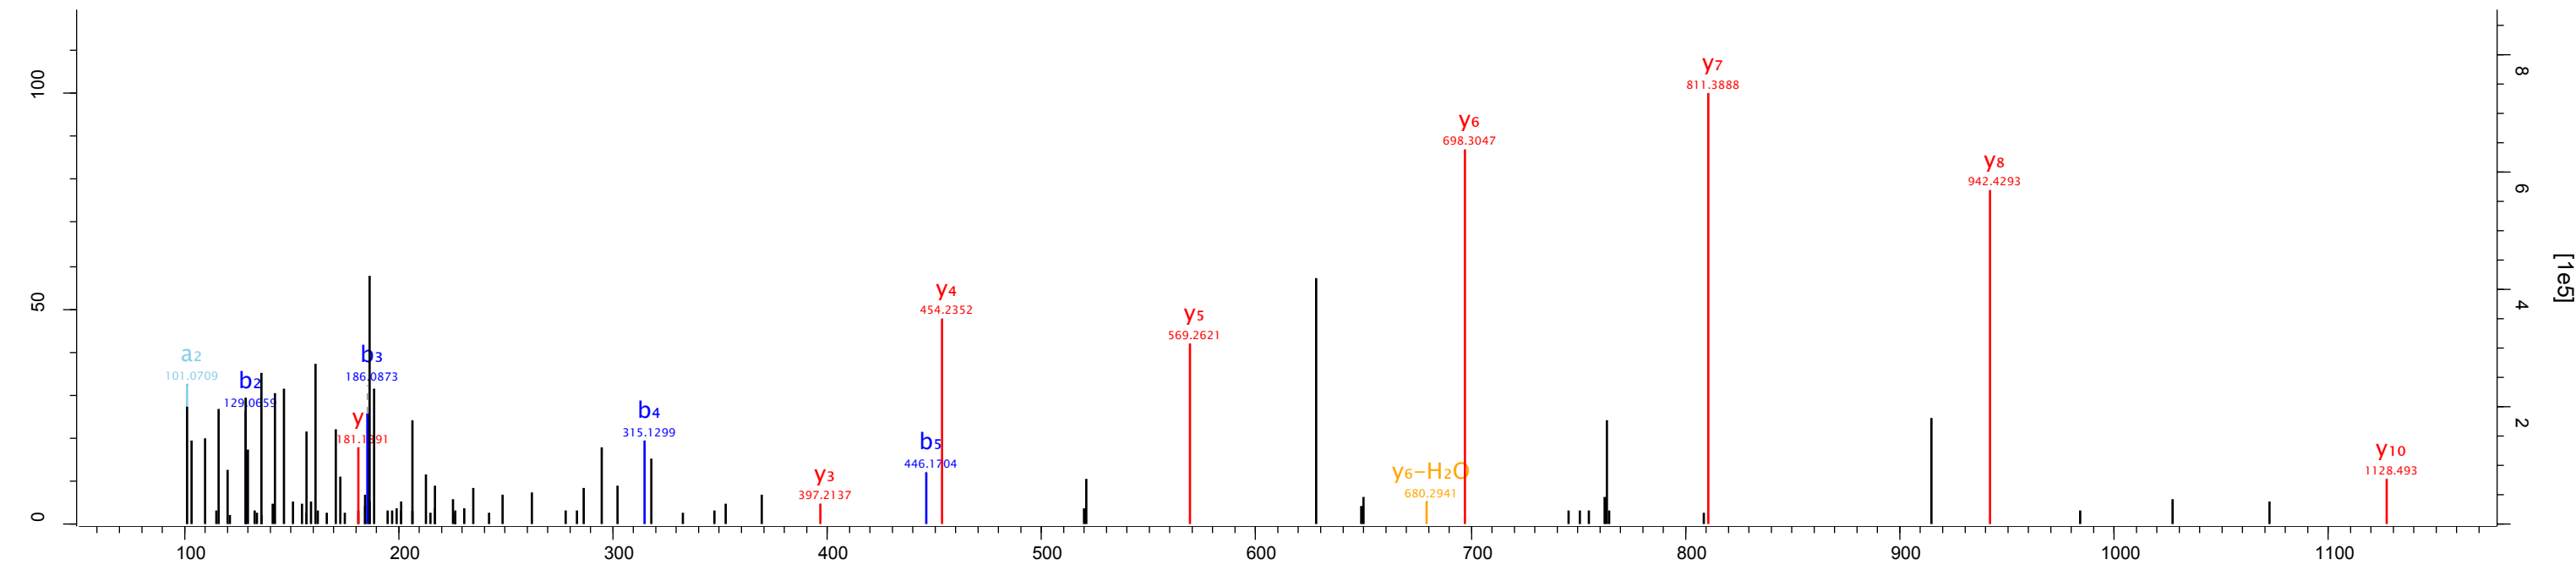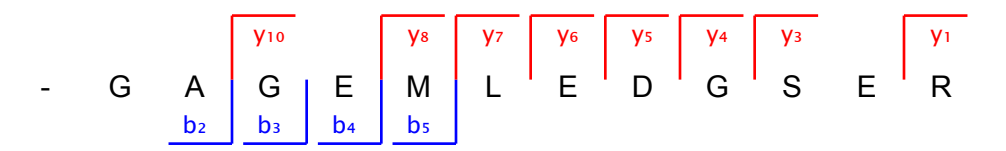

Raw file 20180707\_MaS\_A375SR\_LM\_proteome\_21 Scan 6924 Method FTMS; HCD Score 42.32 m/z 720.32 Gene names LEPROT

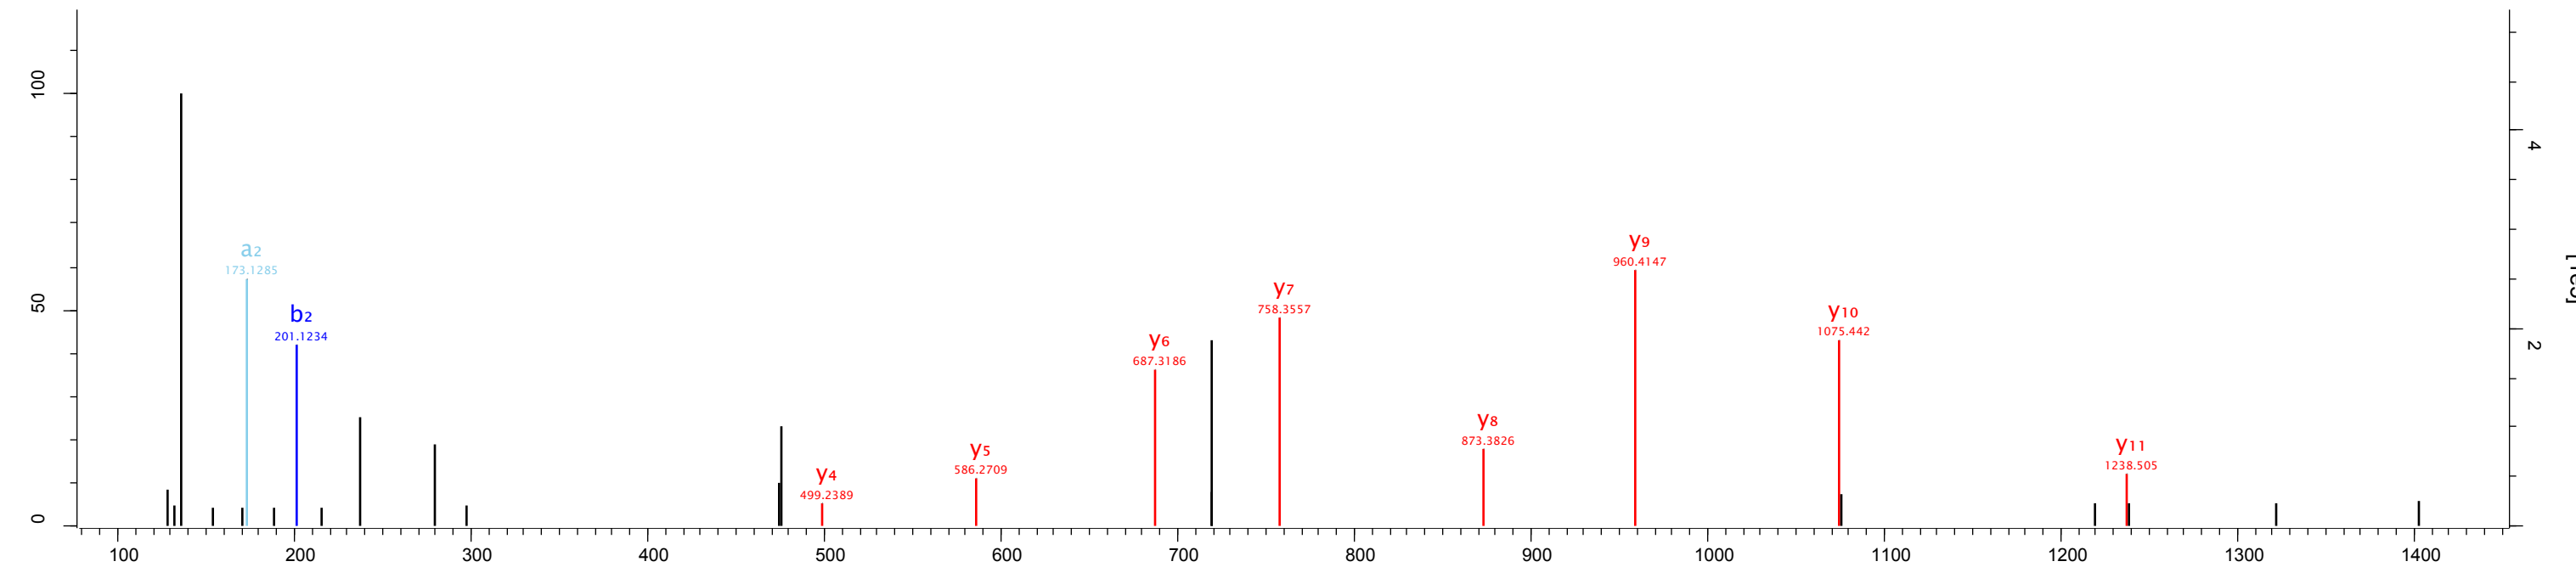

Raw file: 20180707\_MaS\_A375SR\_LM\_proteome\_22  
 Scan: 21744 Method: FTMS; HCD Score: 48.57 m/z: 588.85 Gene names: KATNAL2

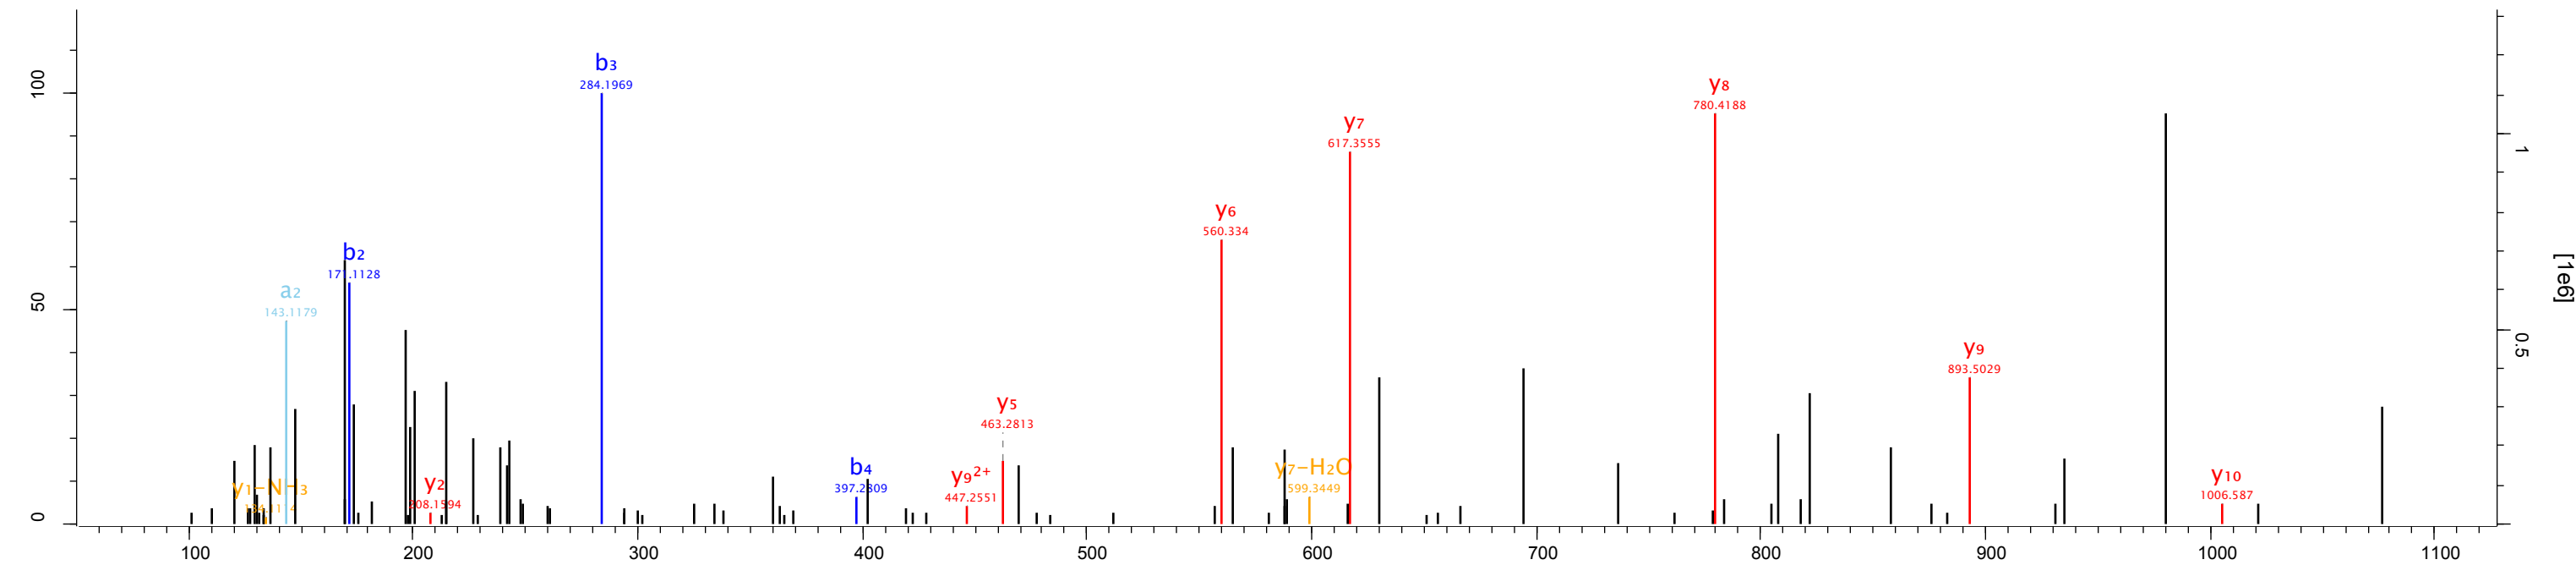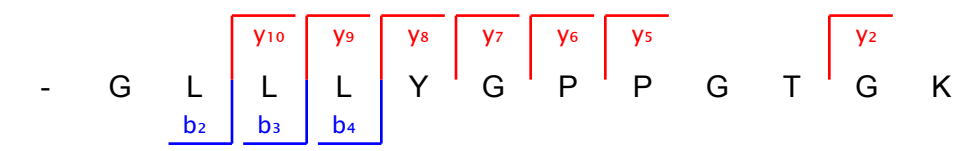

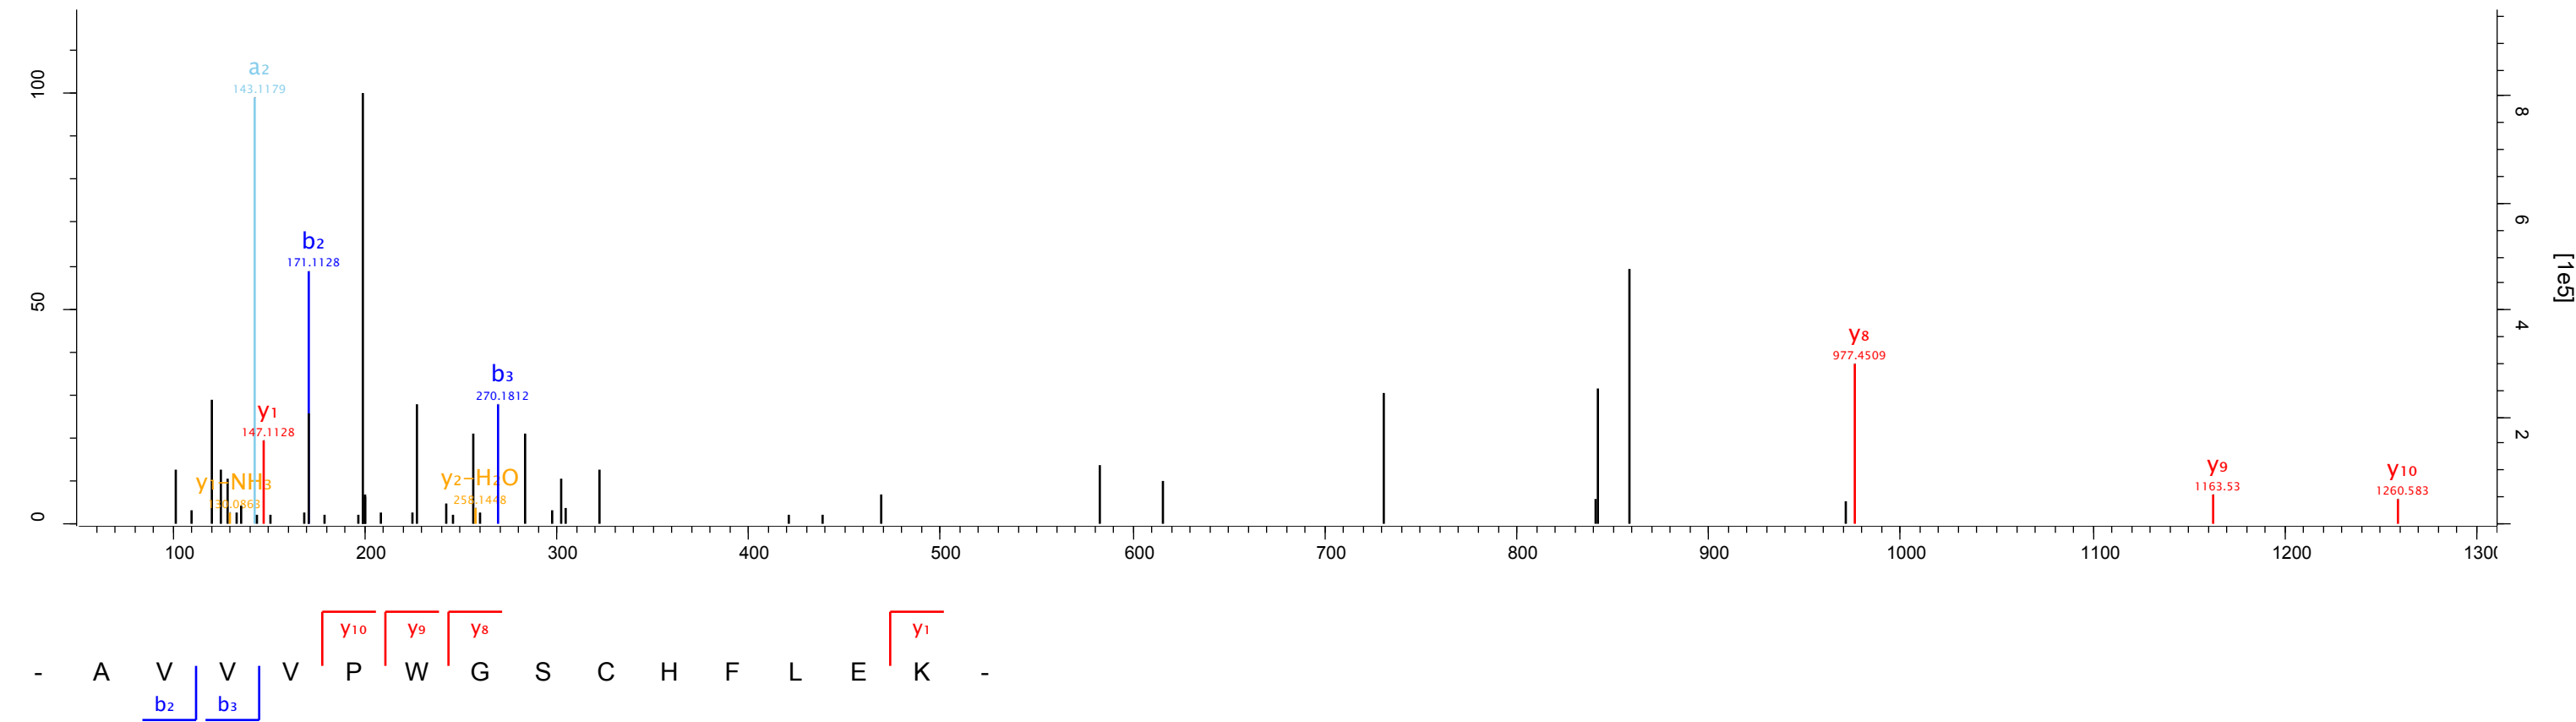

Raw file  
20180707\_MaS\_A375SR\_LM\_proteome\_22

Scan: 25184  
Method: FTMS; HCD  
Score: 61.68  
m/z: 498.77  
Gene names: SEPT3

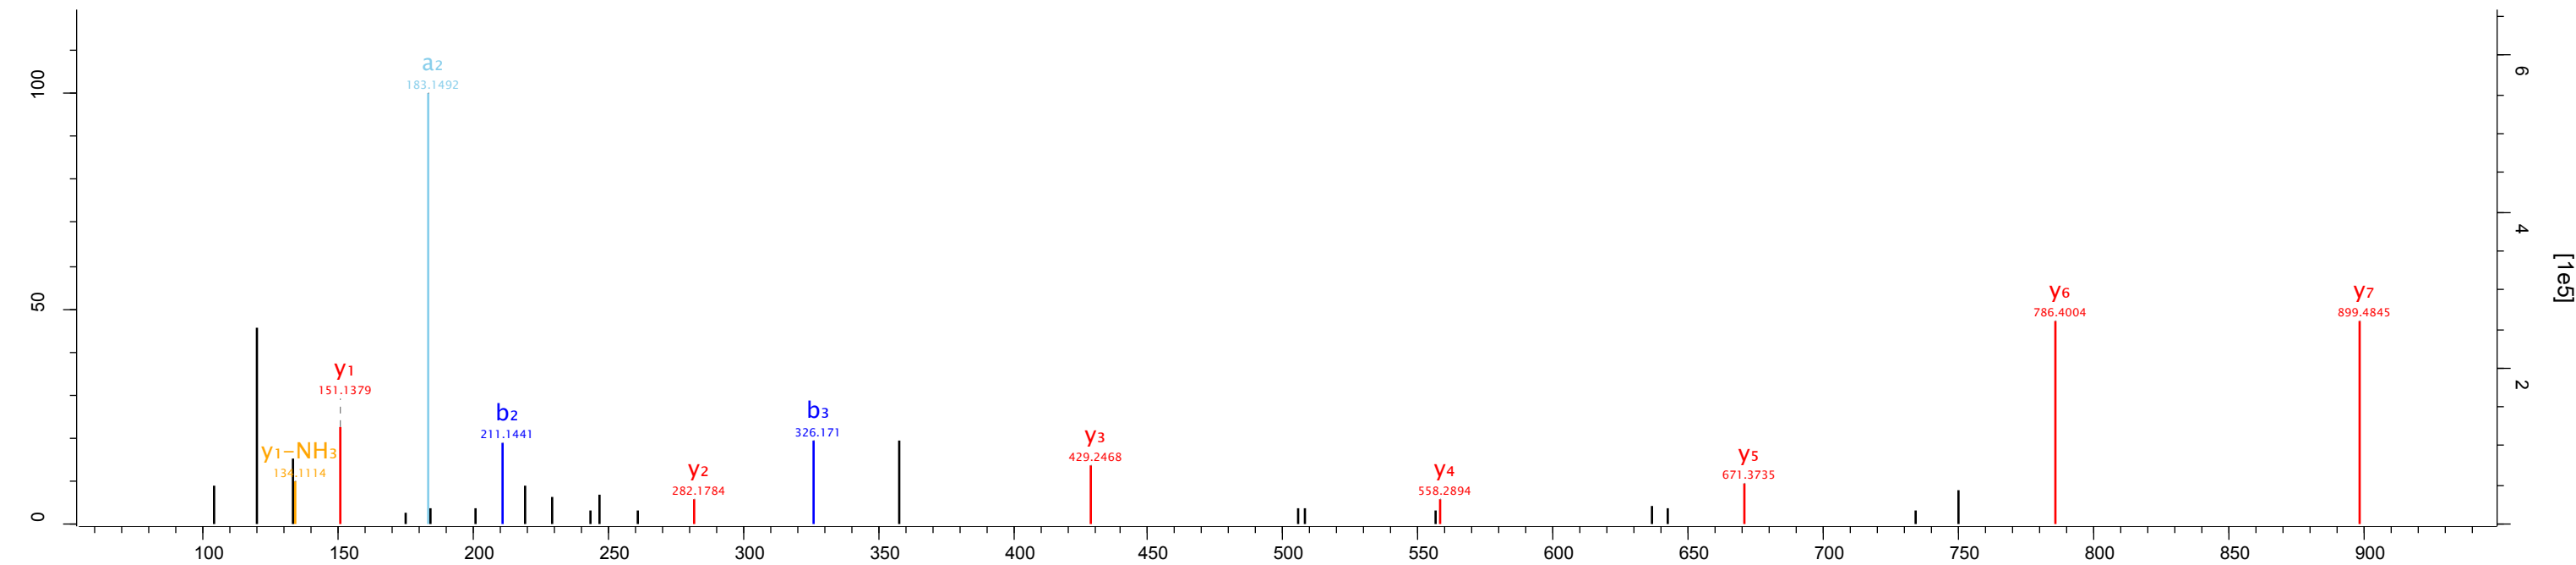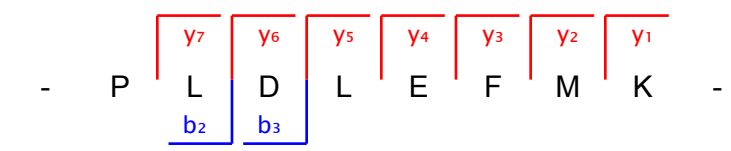

Raw file  
20180707\_MaS\_A375SR\_LM\_proteome\_22

Scan 27514 Method FTMS; HCD Score 33.84 m/z 571.95 Gene names SSR3

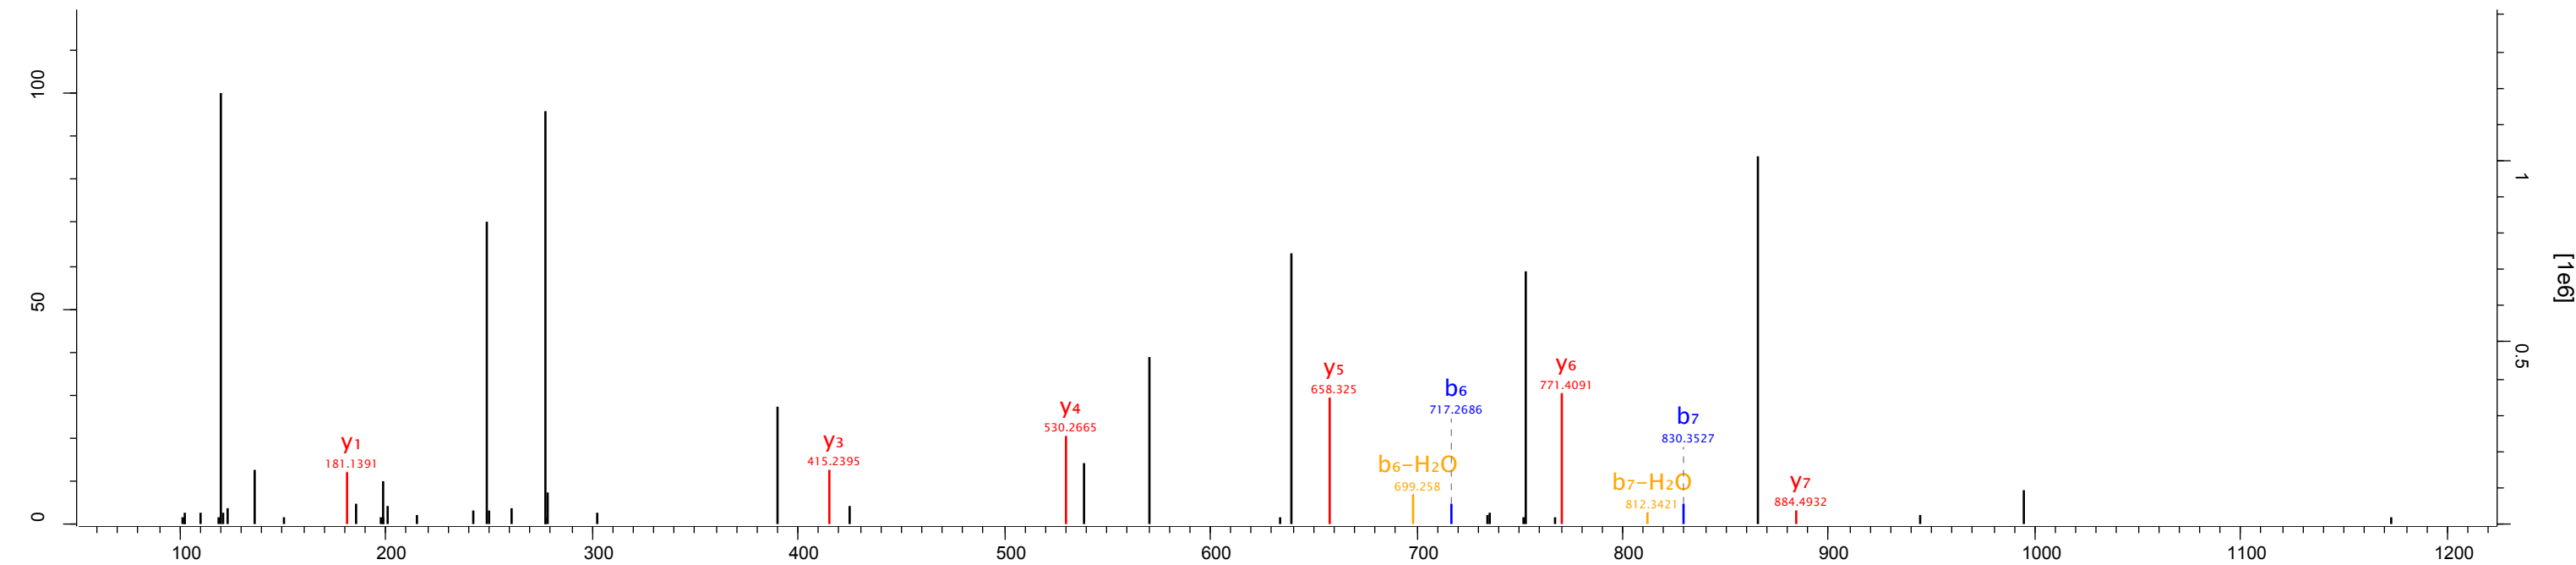

- Q Q S E E D L L L Q D F S R -

b<sub>6</sub> b<sub>7</sub> y<sub>7</sub> y<sub>6</sub> y<sub>5</sub> y<sub>4</sub> y<sub>3</sub> y<sub>1</sub>



Raw file: 20180707\_MaS\_A375SR\_LM\_proteome\_23  
 Scan: 3444 Method: FTMS; HCD Score: 65.47 m/z: 339.17 Gene names: COX7B

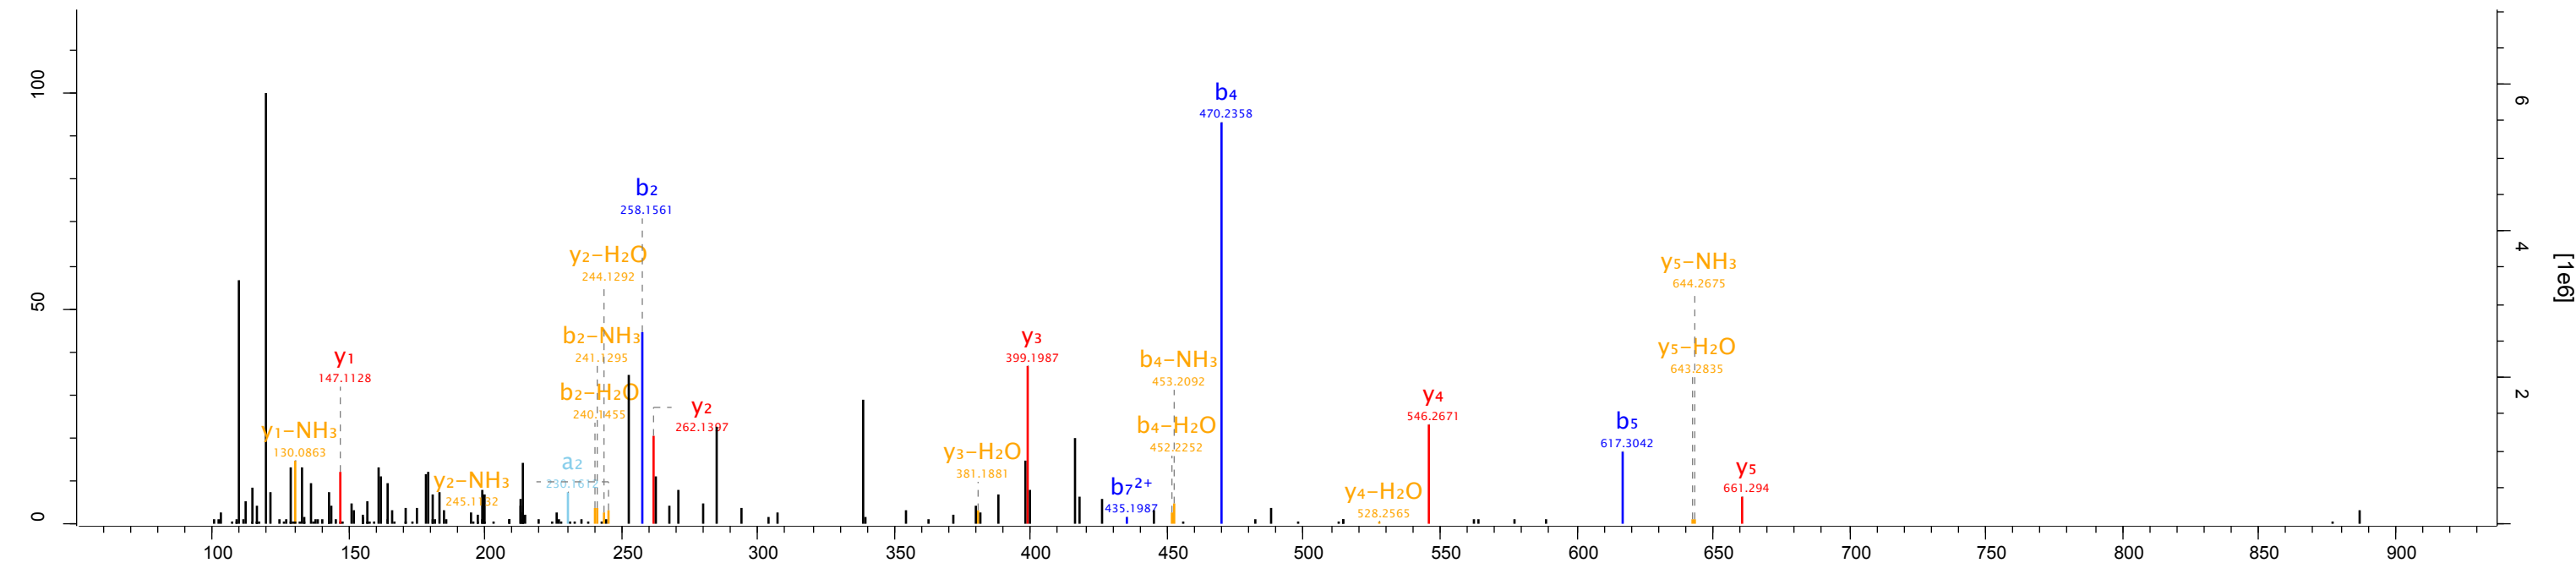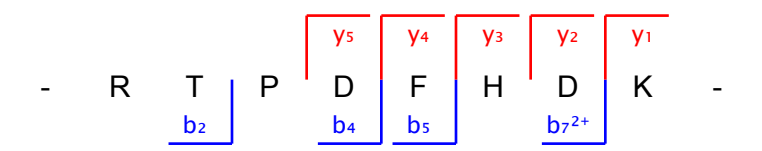

Raw file 20180707\_MaS\_A375SR\_LM\_proteome\_25 Scan 3844 Method FTMS; HCD Score 64.78 m/z 415.7

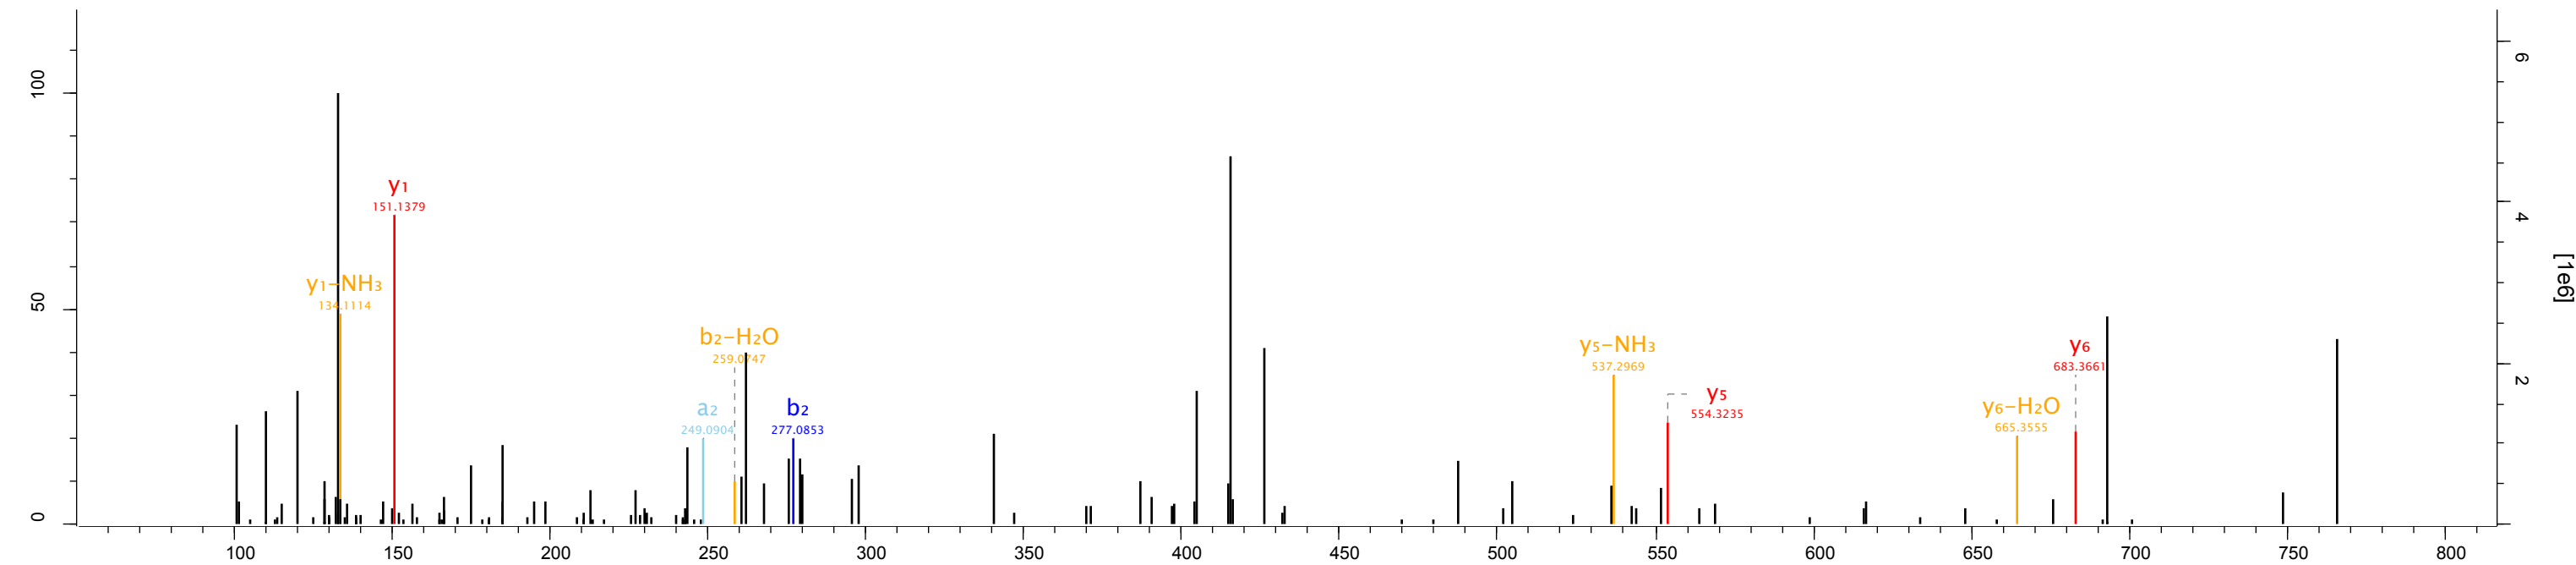

Raw file: 20180707\_MaS\_A375SR\_LM\_proteome\_26  
 Scan: 3724 Method: FTMS; HCD Score: 57.35 m/z: 568.24 Gene names: MAP3K19

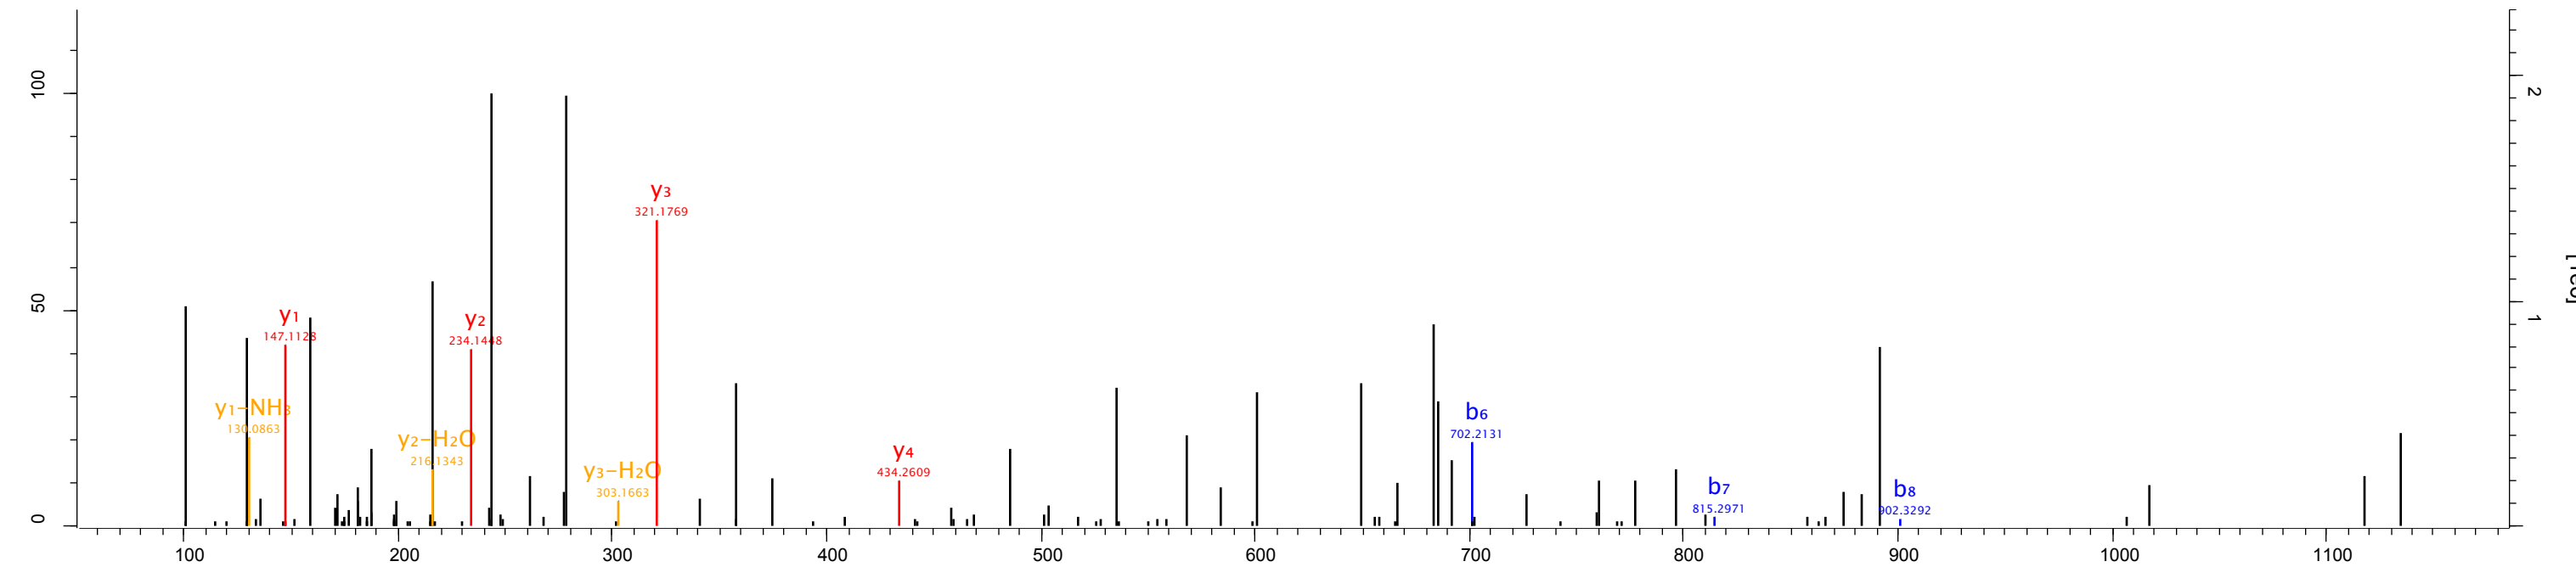

Raw file 20180707\_MaS\_A375SR\_LM\_proteome\_28 Scan 8564 Method FTMS; HCD Score 66.06 m/z 576.29

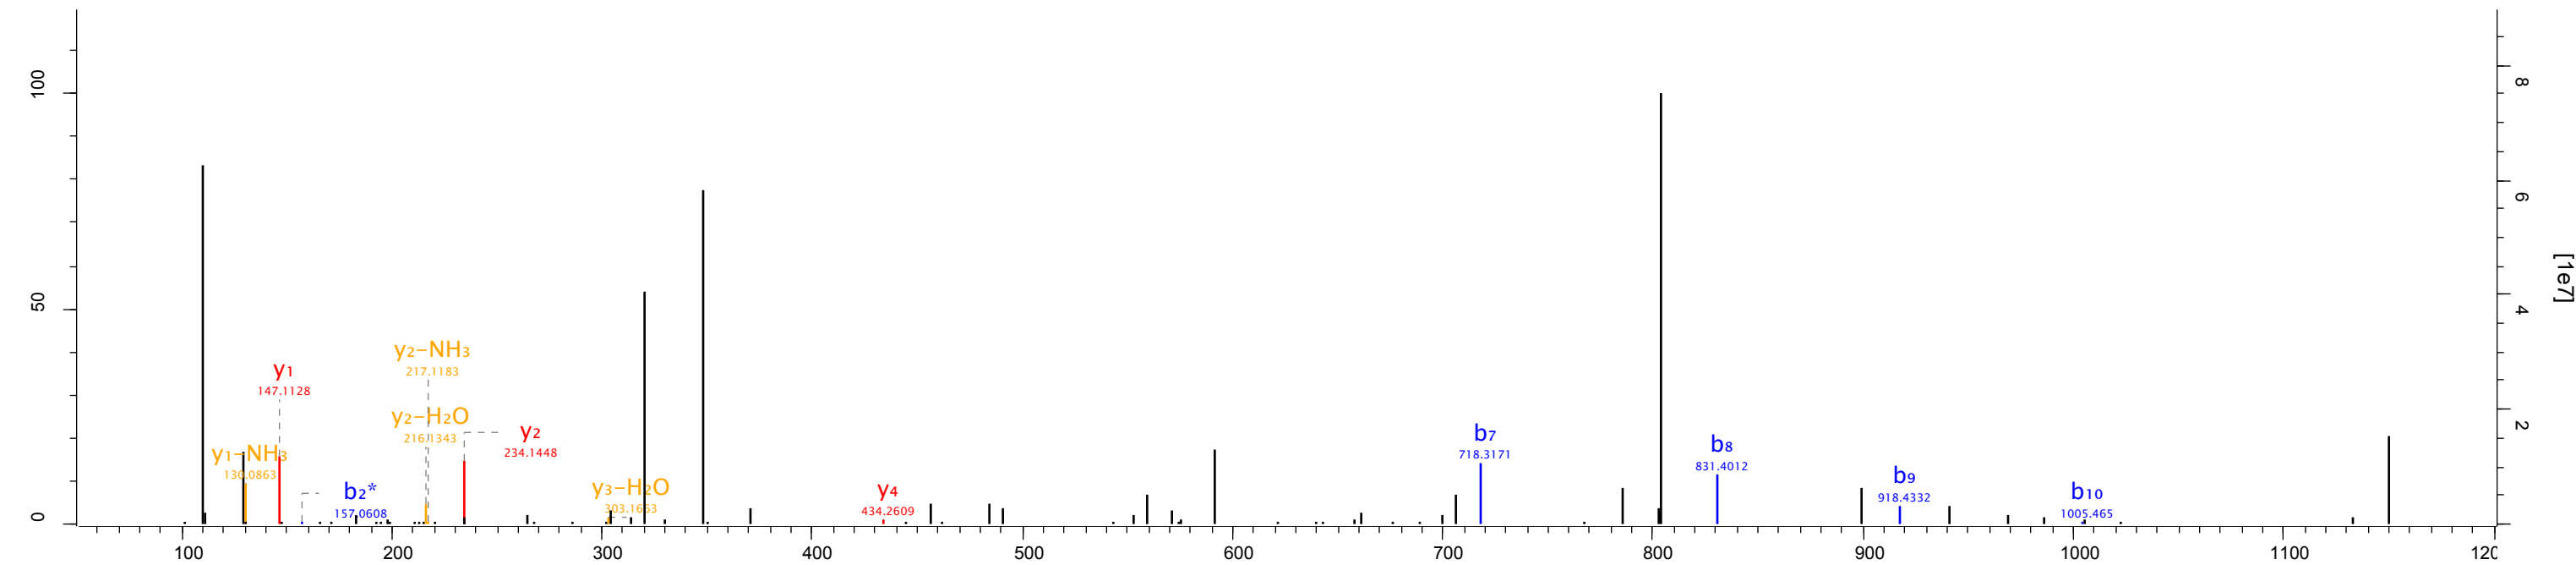

Raw file  
20180707\_MaS\_A375SR\_ML\_proteome\_01

| Scan  | Method    | Score | m/z    | Gene names |
|-------|-----------|-------|--------|------------|
| 15054 | FTMS; HCD | 82.29 | 380.57 | PNKD       |

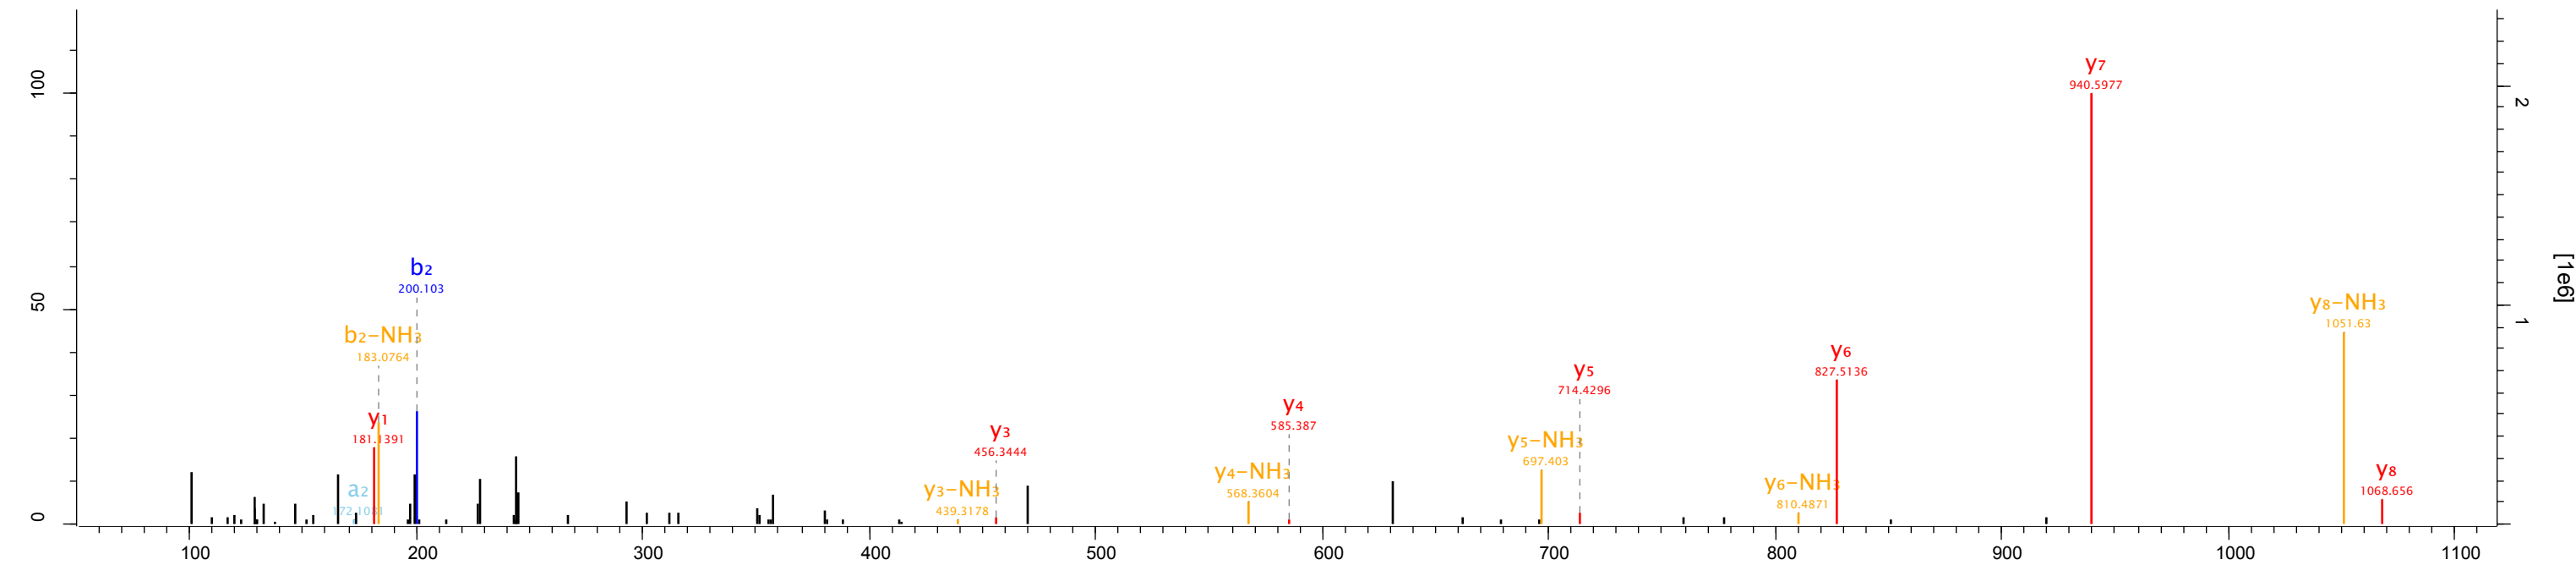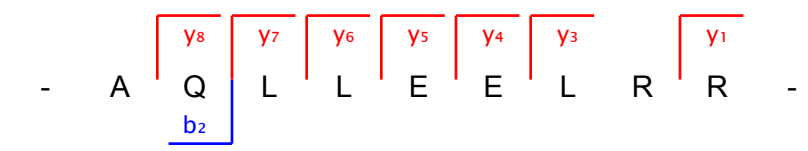

Raw file 20180707\_MaS\_A375SR\_ML\_proteome\_01 Scan 5834 Method FTMS; HCD Score 72.14 m/z 439.23

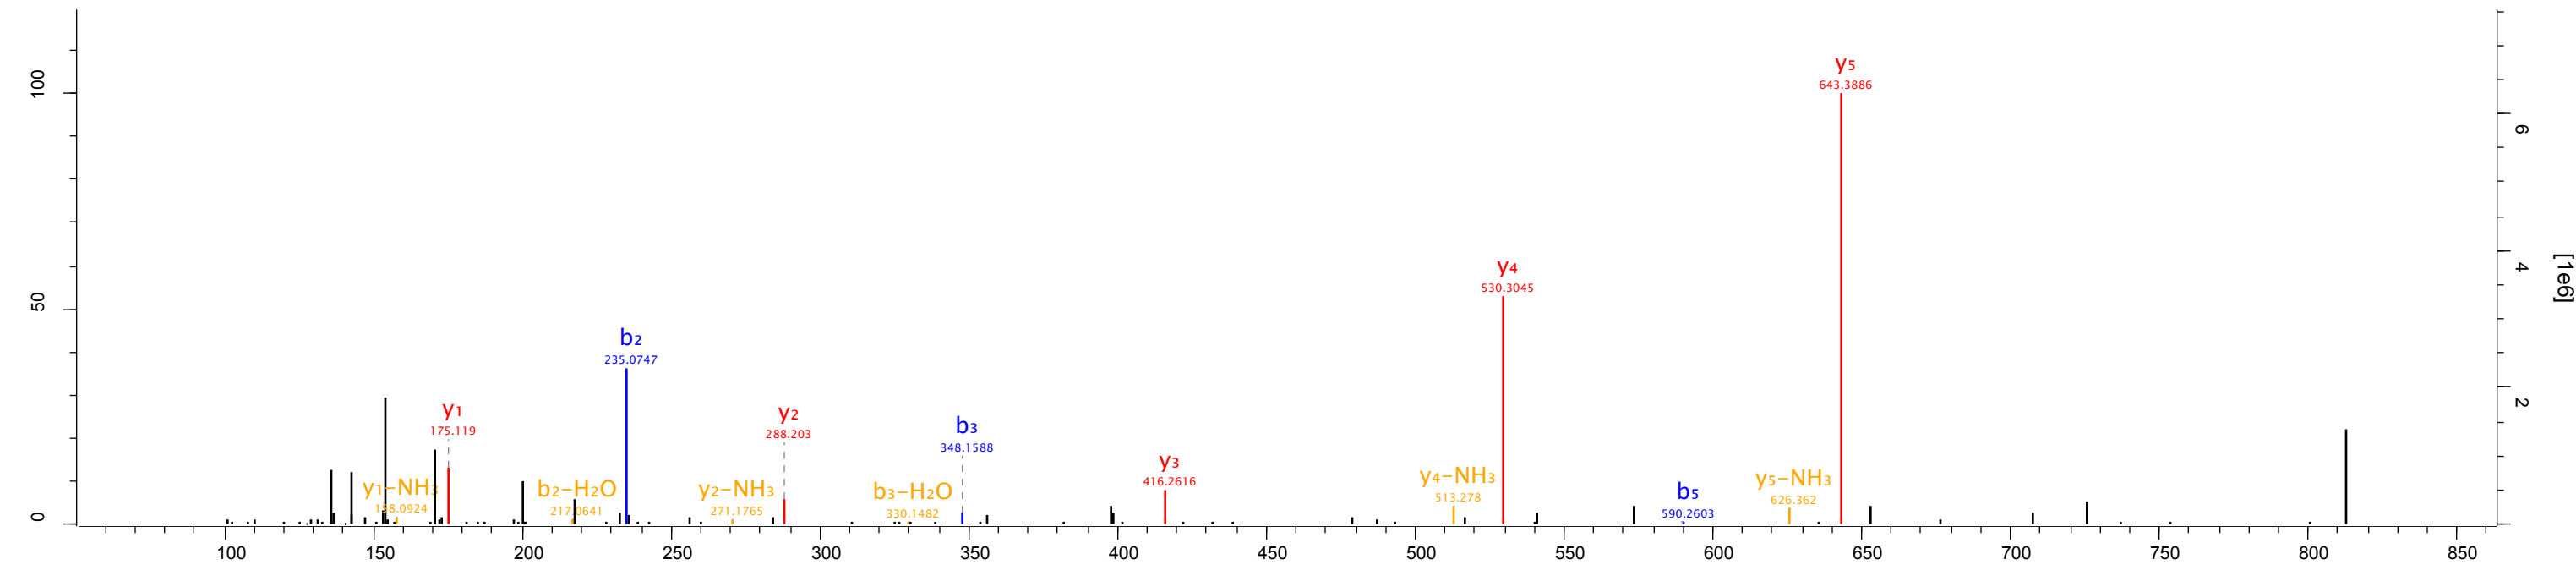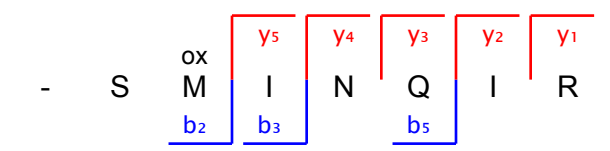

Raw file

20180707\_MaS\_A375SR\_ML\_proteome\_02

| Scan  | Method    | Score | m/z    | Gene names        |
|-------|-----------|-------|--------|-------------------|
| 16034 | FTMS; HCD | 96.6  | 654.33 | PLEKHA8;PLEKHA8P1 |

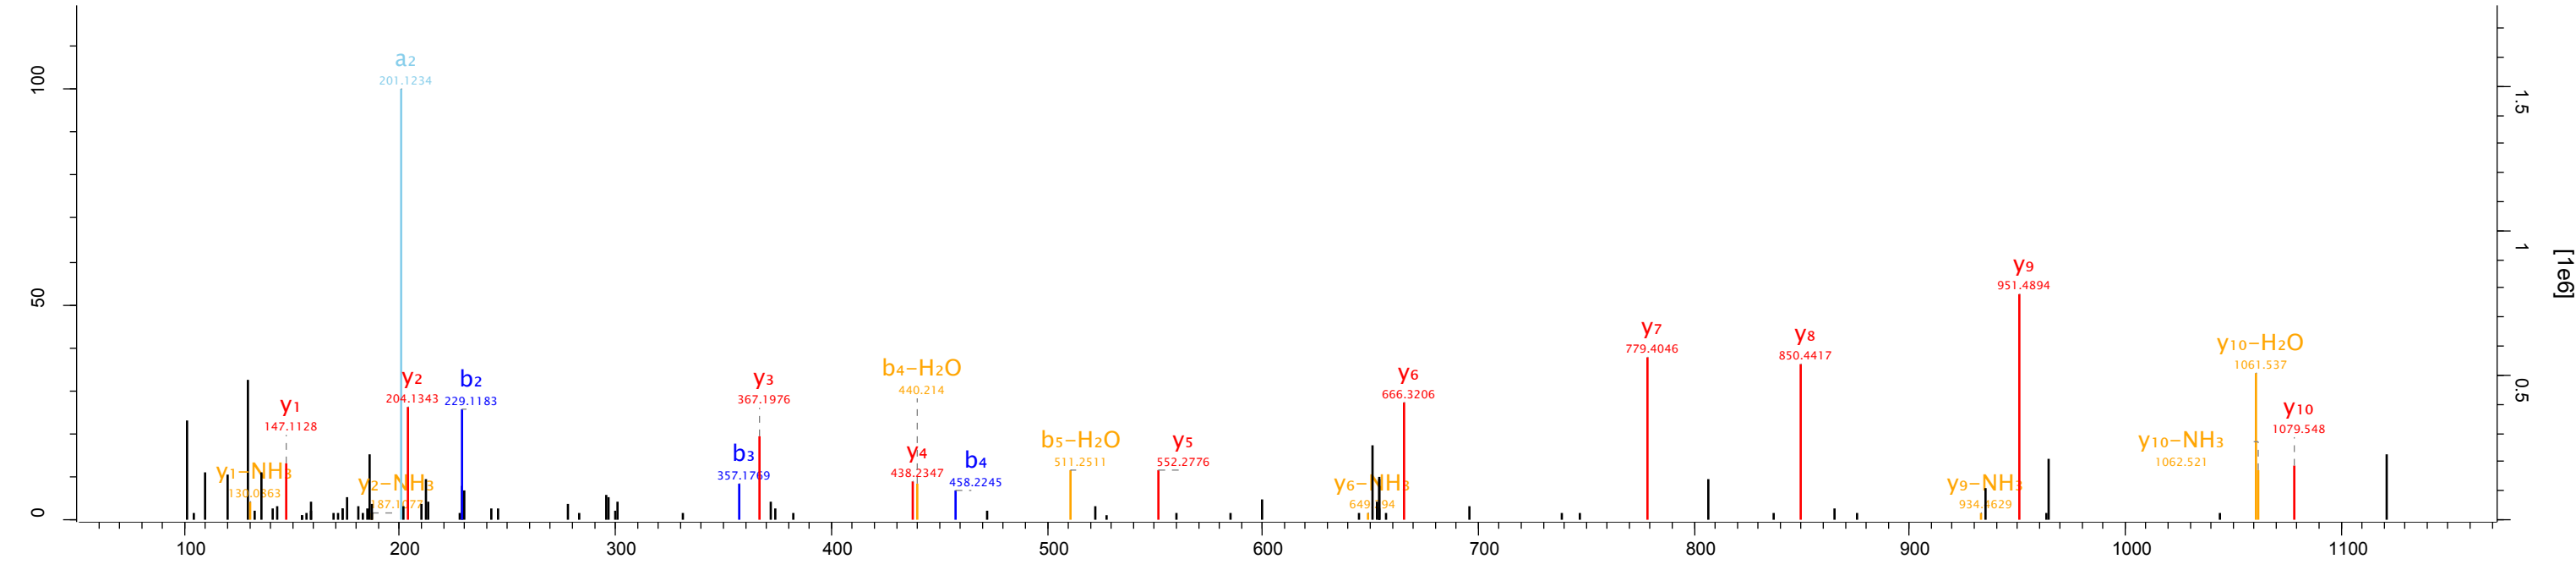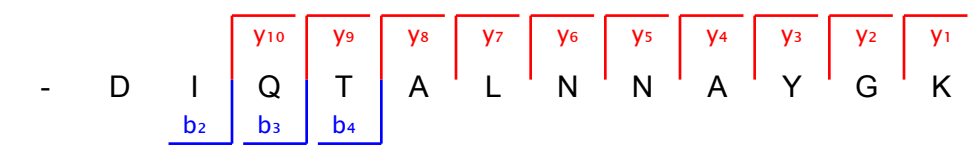

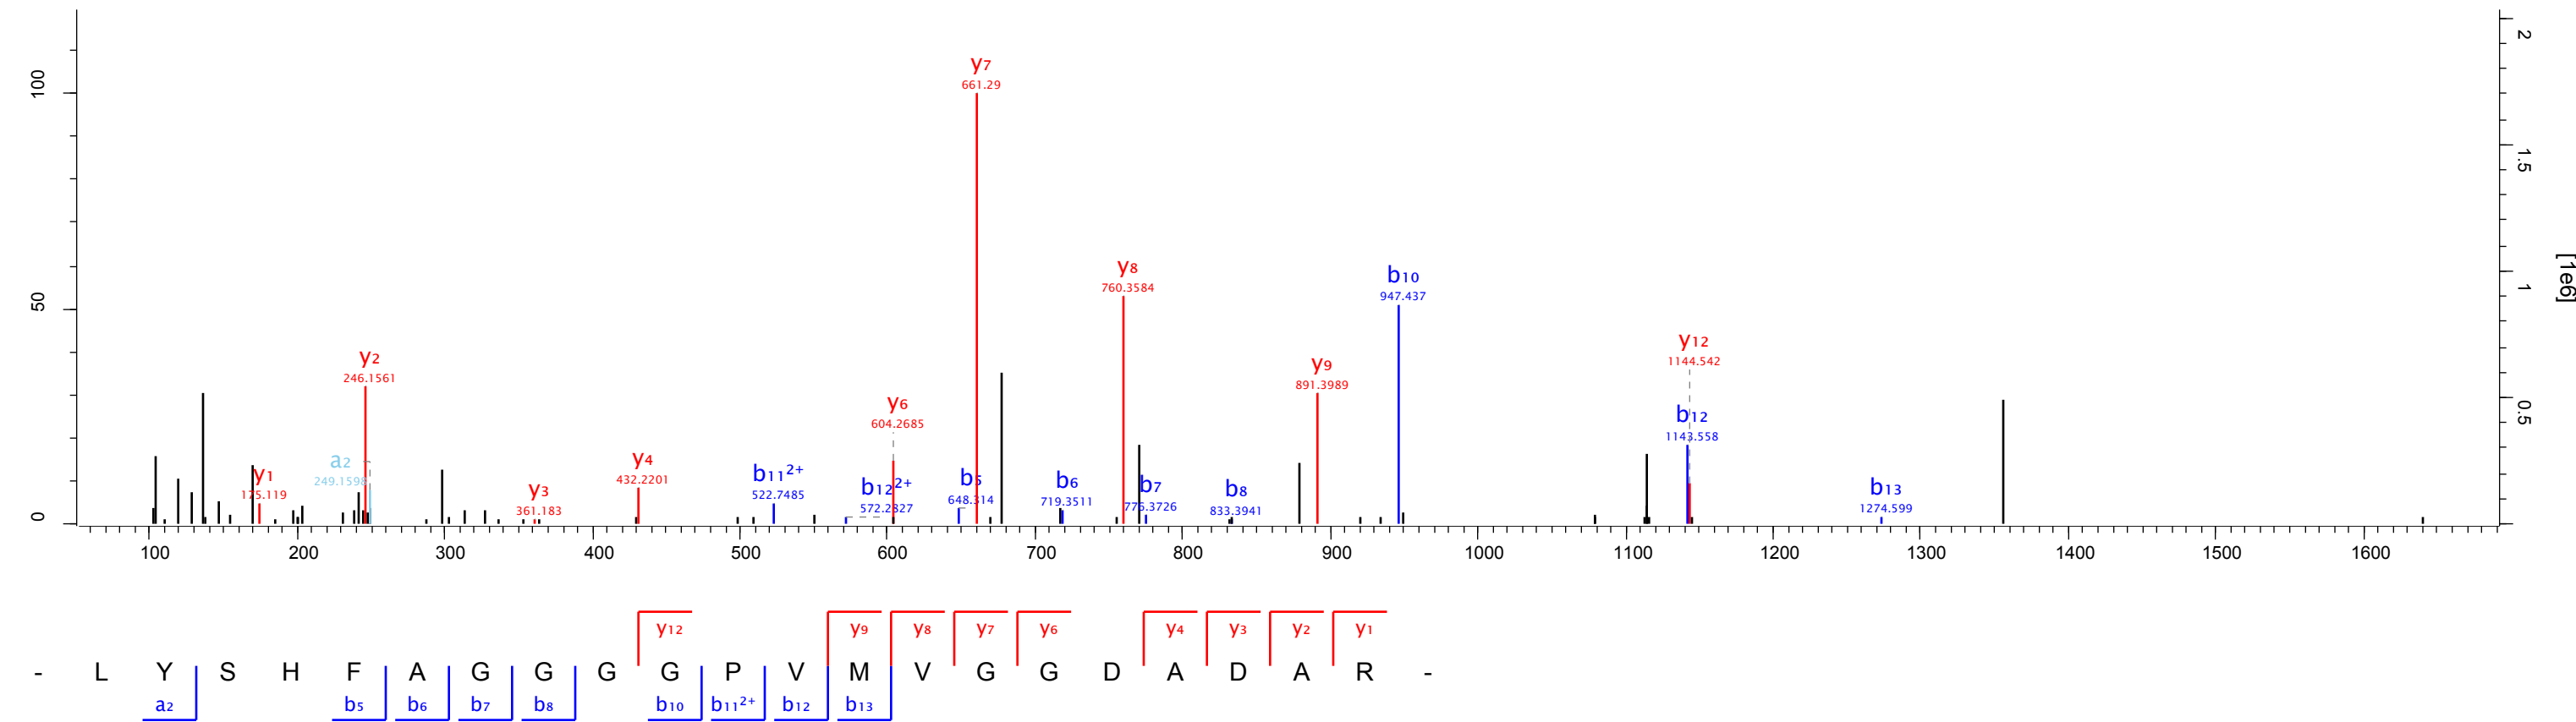



Raw file: 20180707\_MaS\_A375SR\_ML\_proteome\_04  
 Scan: 19664 Method: FTMS; HCD Score: 127.87 m/z: 428.25 Gene names: CT83

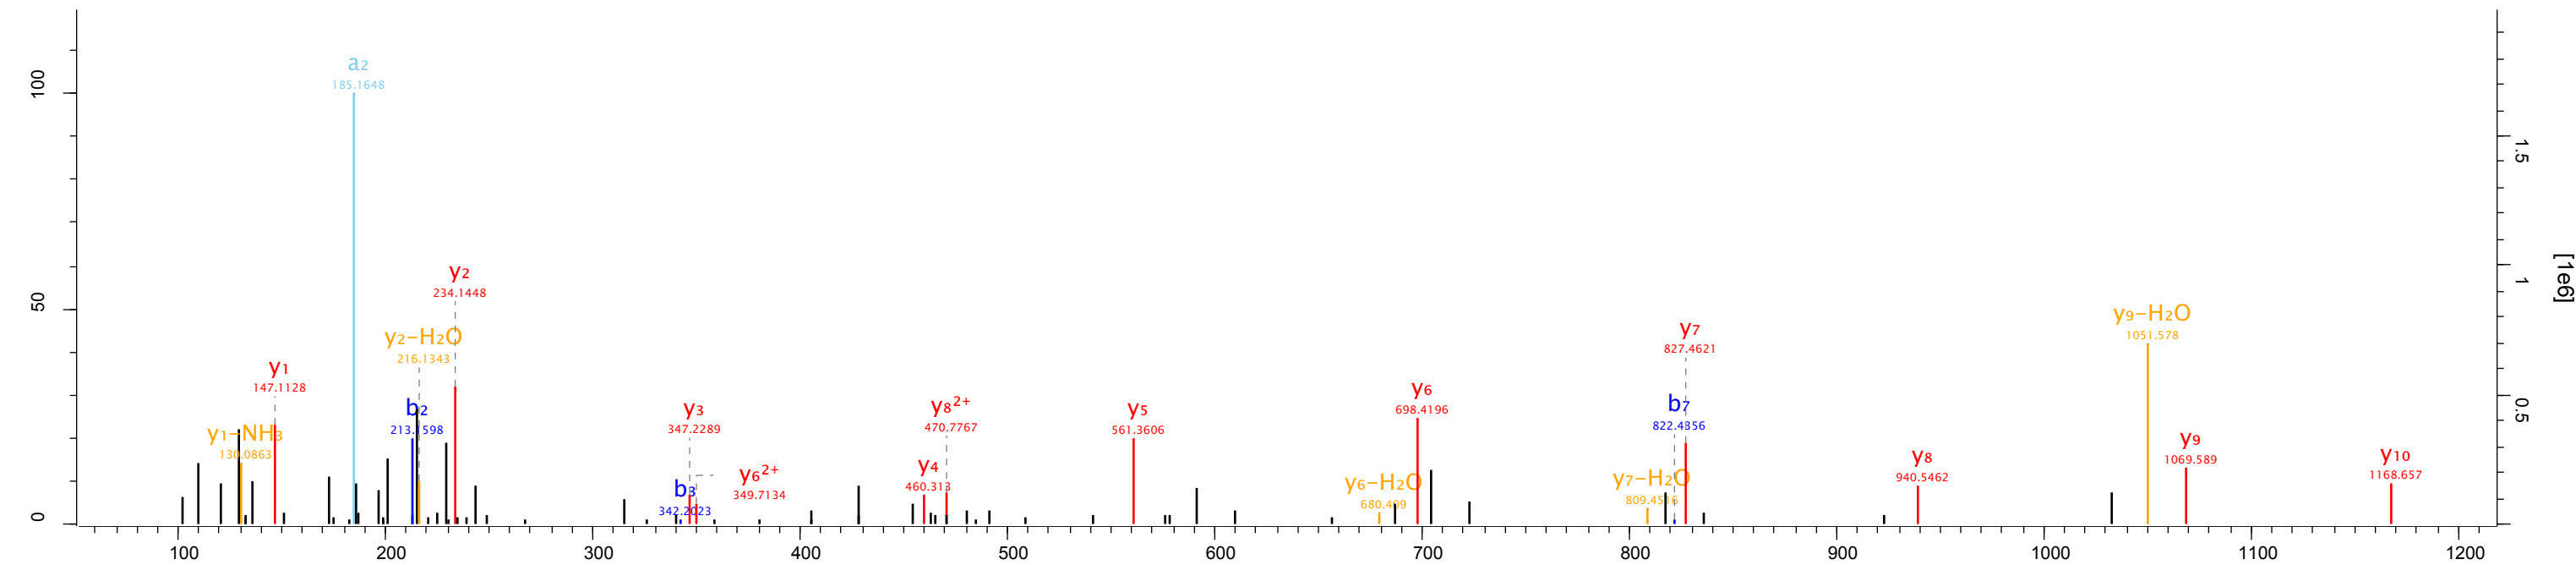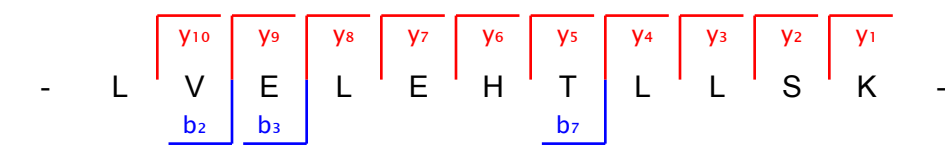

Raw file  
20180707\_MaS\_A375SR\_ML\_proteome\_05

Scan 24744 Method FTMS; HCD Score 70.13 m/z 842.93 Gene names GTF2H5

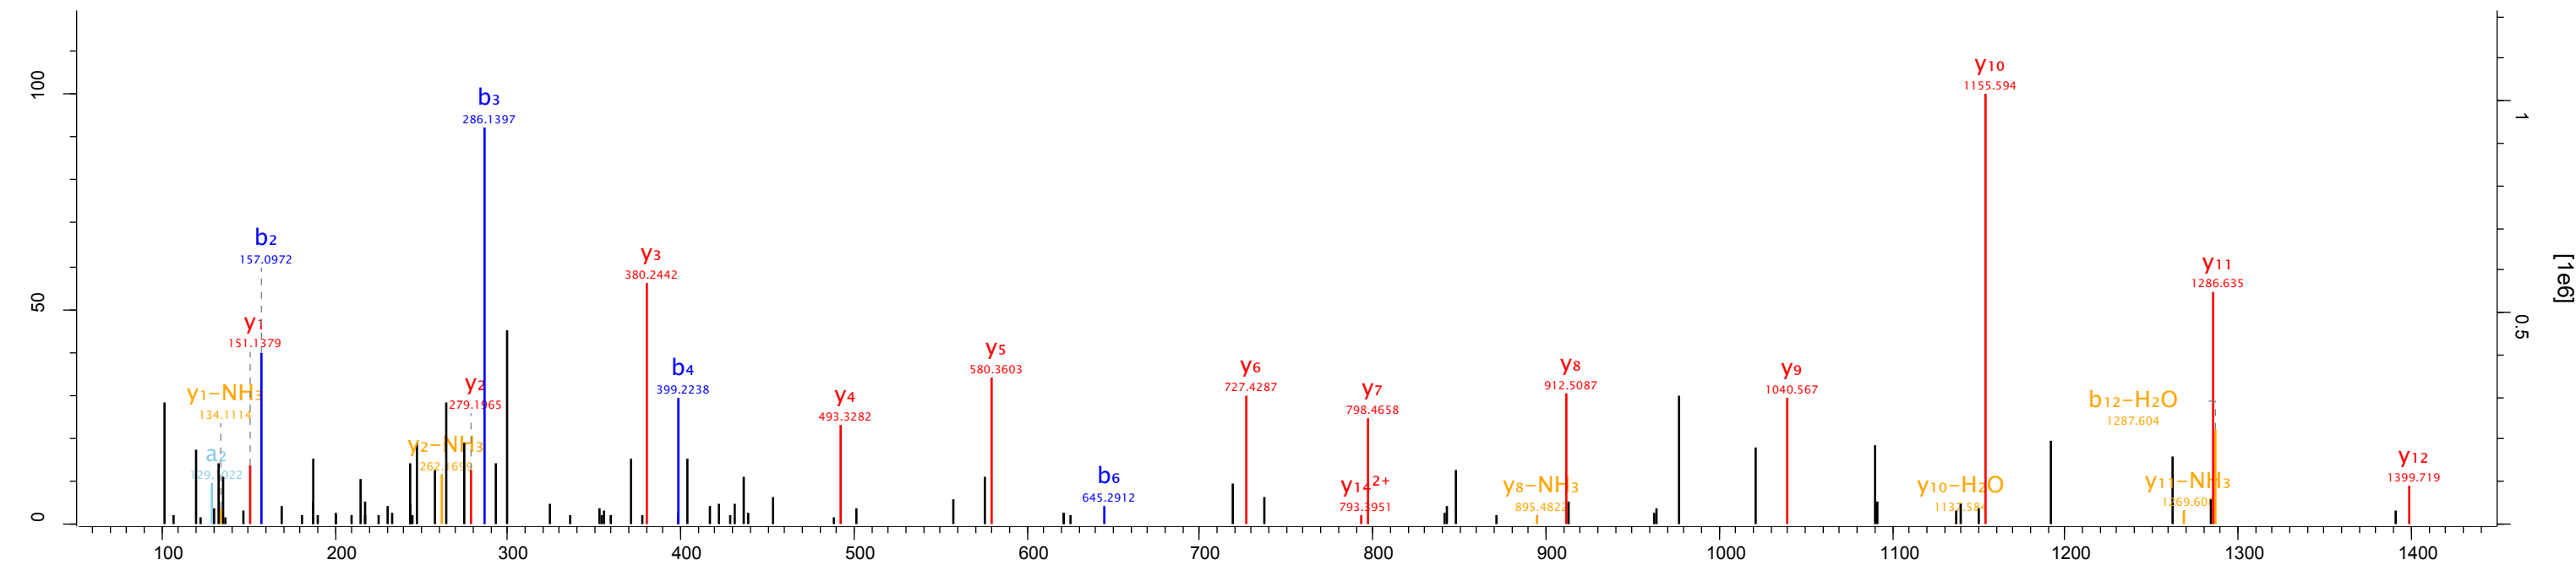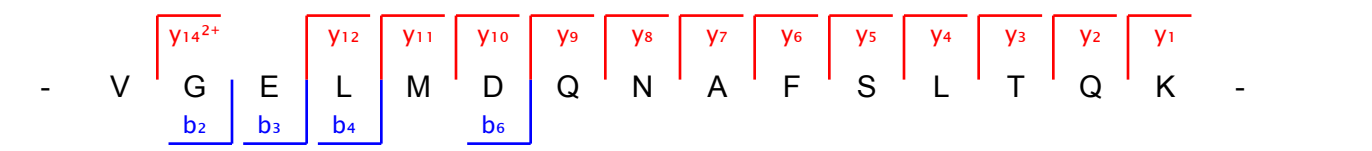

Raw file  
20180707\_MaS\_A375SR\_ML\_proteome\_06

Scan 27664 Method FTMS; HCD Score 111.83 m/z 751.86 Gene names STK11

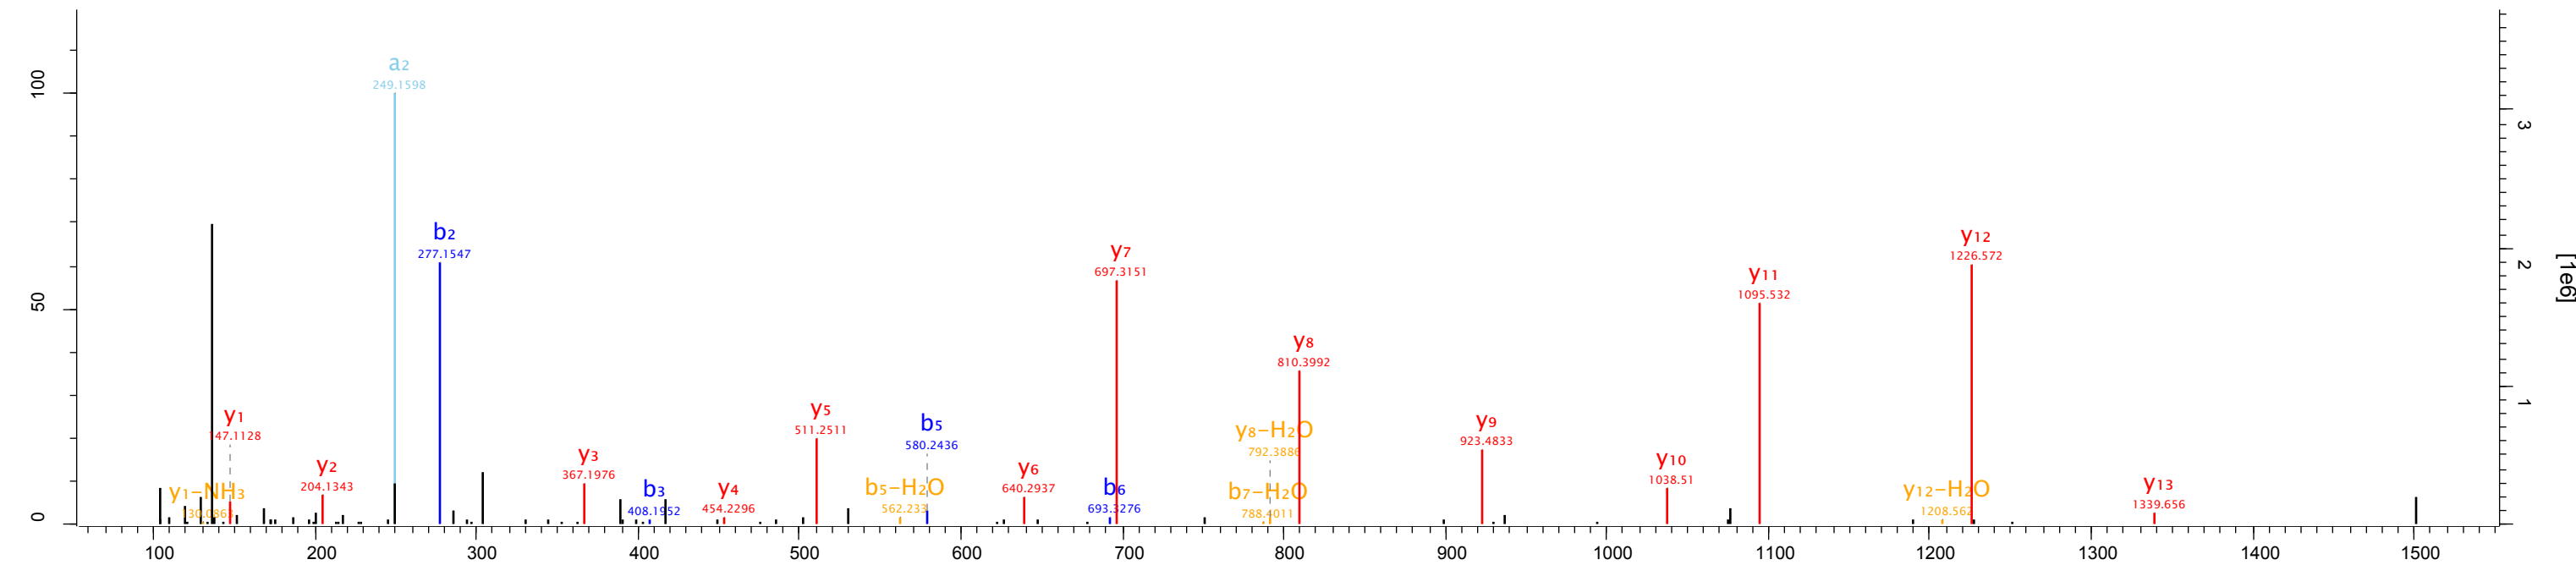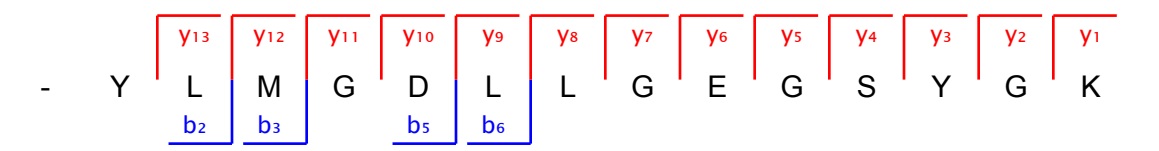

Raw file 20180707\_MaS\_A375SR\_ML\_proteome\_06 Scan 7344 Method FTMS; HCD Score 82.39 m/z 361.69 Gene names ART4

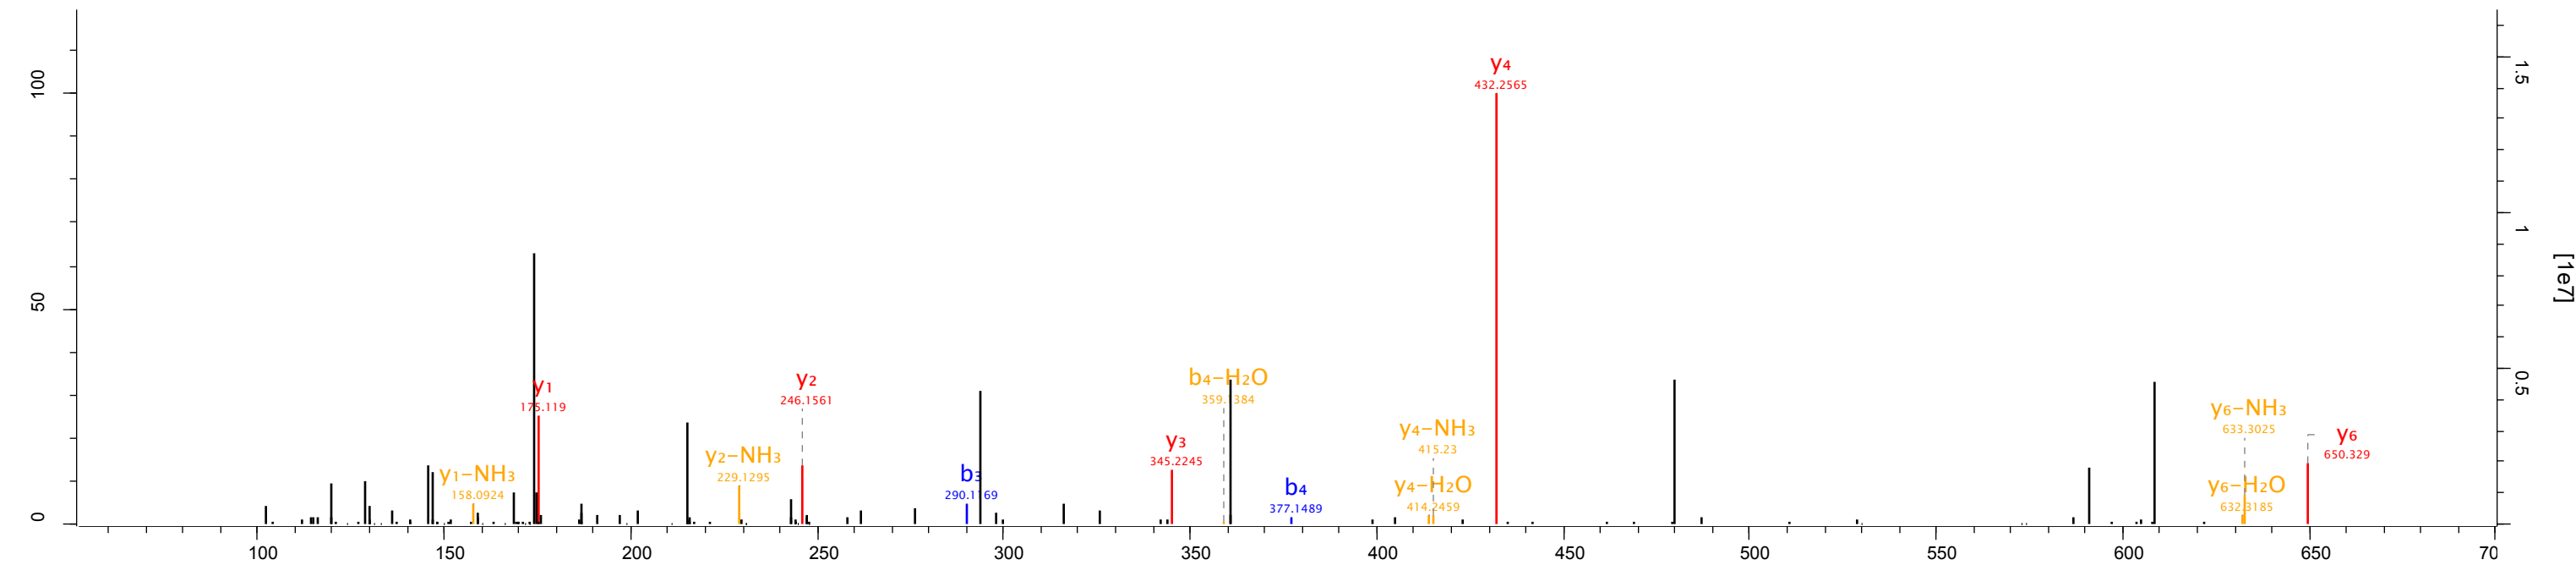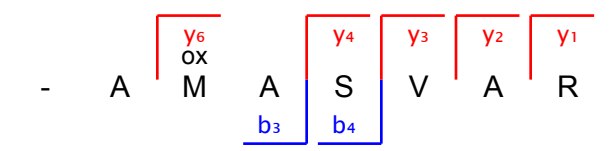

Raw file 20180707\_MaS\_A375SR\_ML\_proteome\_06 Scan 8924 Method FTMS; HCD Score 102.4 m/z 662.79 Gene names NRG1

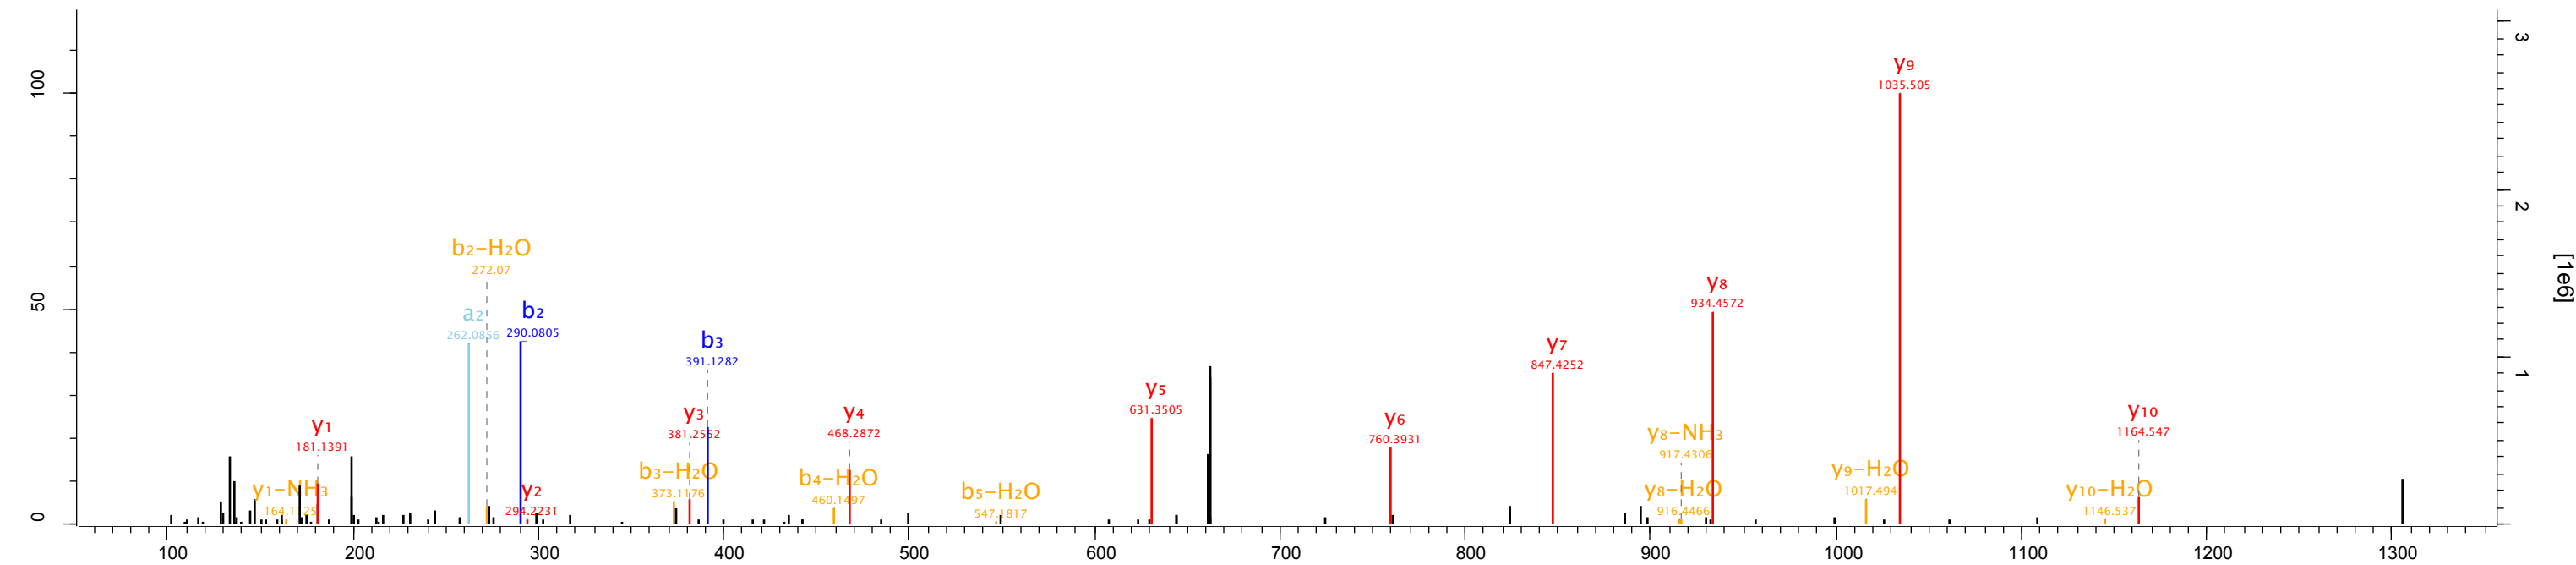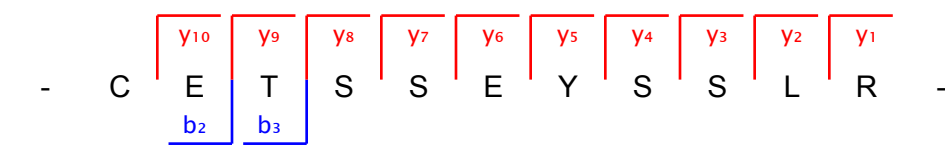

Raw file  
20180707\_MaS\_A375SR\_ML\_proteome\_07

Scan 12574 Method FTMS; HCD Score 56.51 m/z 384.21 Gene names RASD1

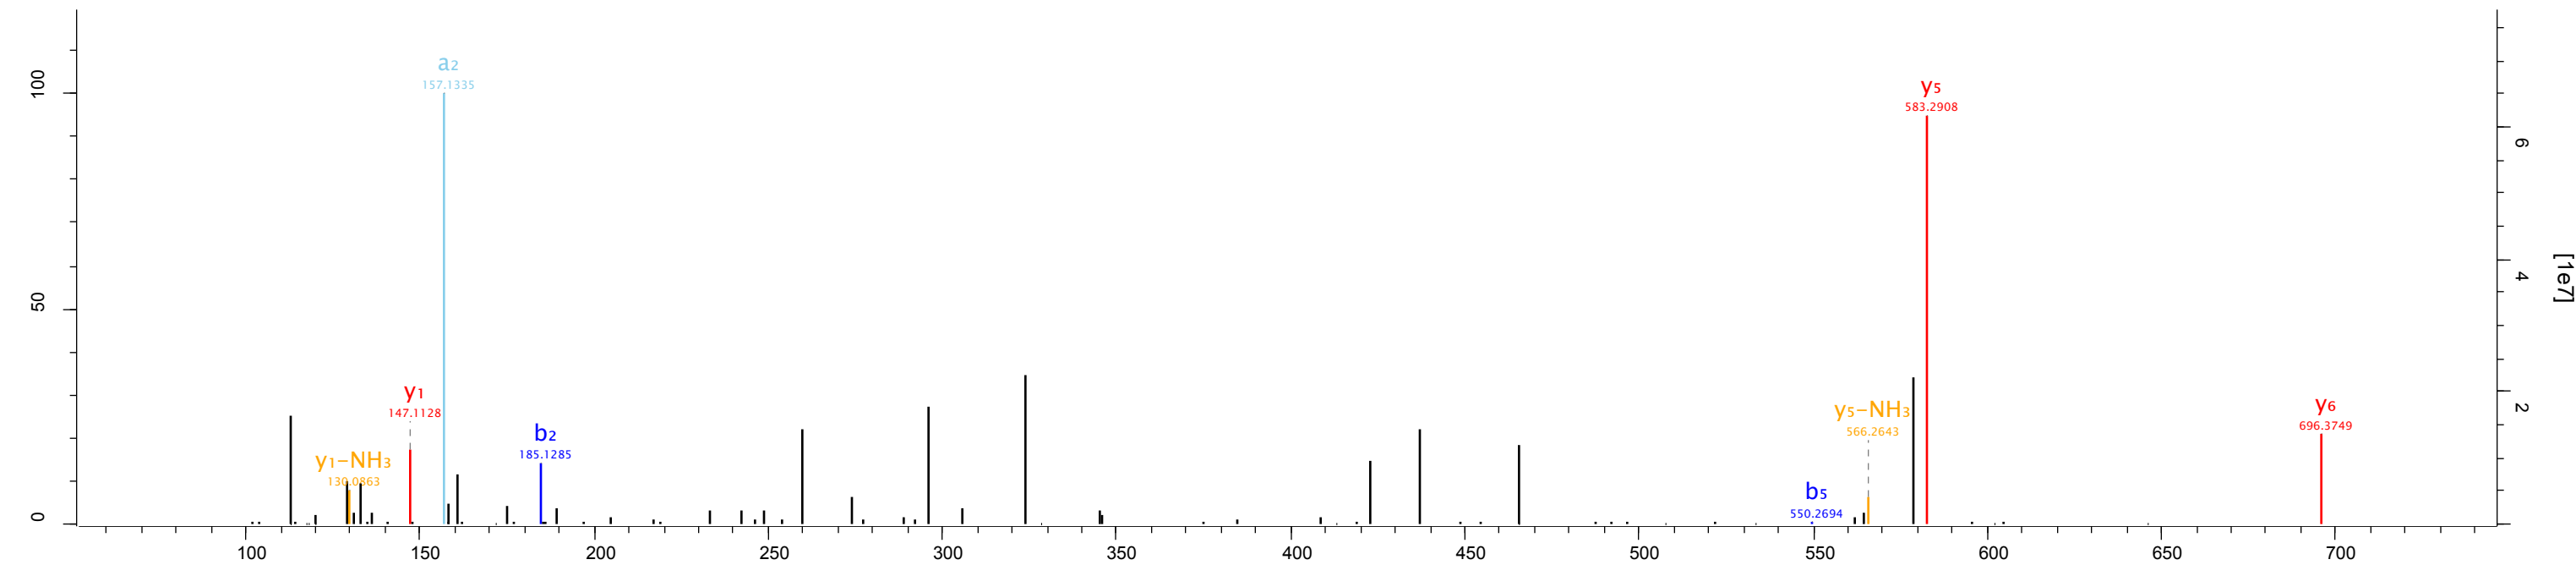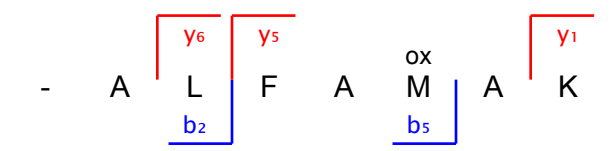

Raw file  
20180707\_MaS\_A375SR\_ML\_proteome\_08

Scan 2894 Method FTMS; HCD Score 60.76 m/z 468.72

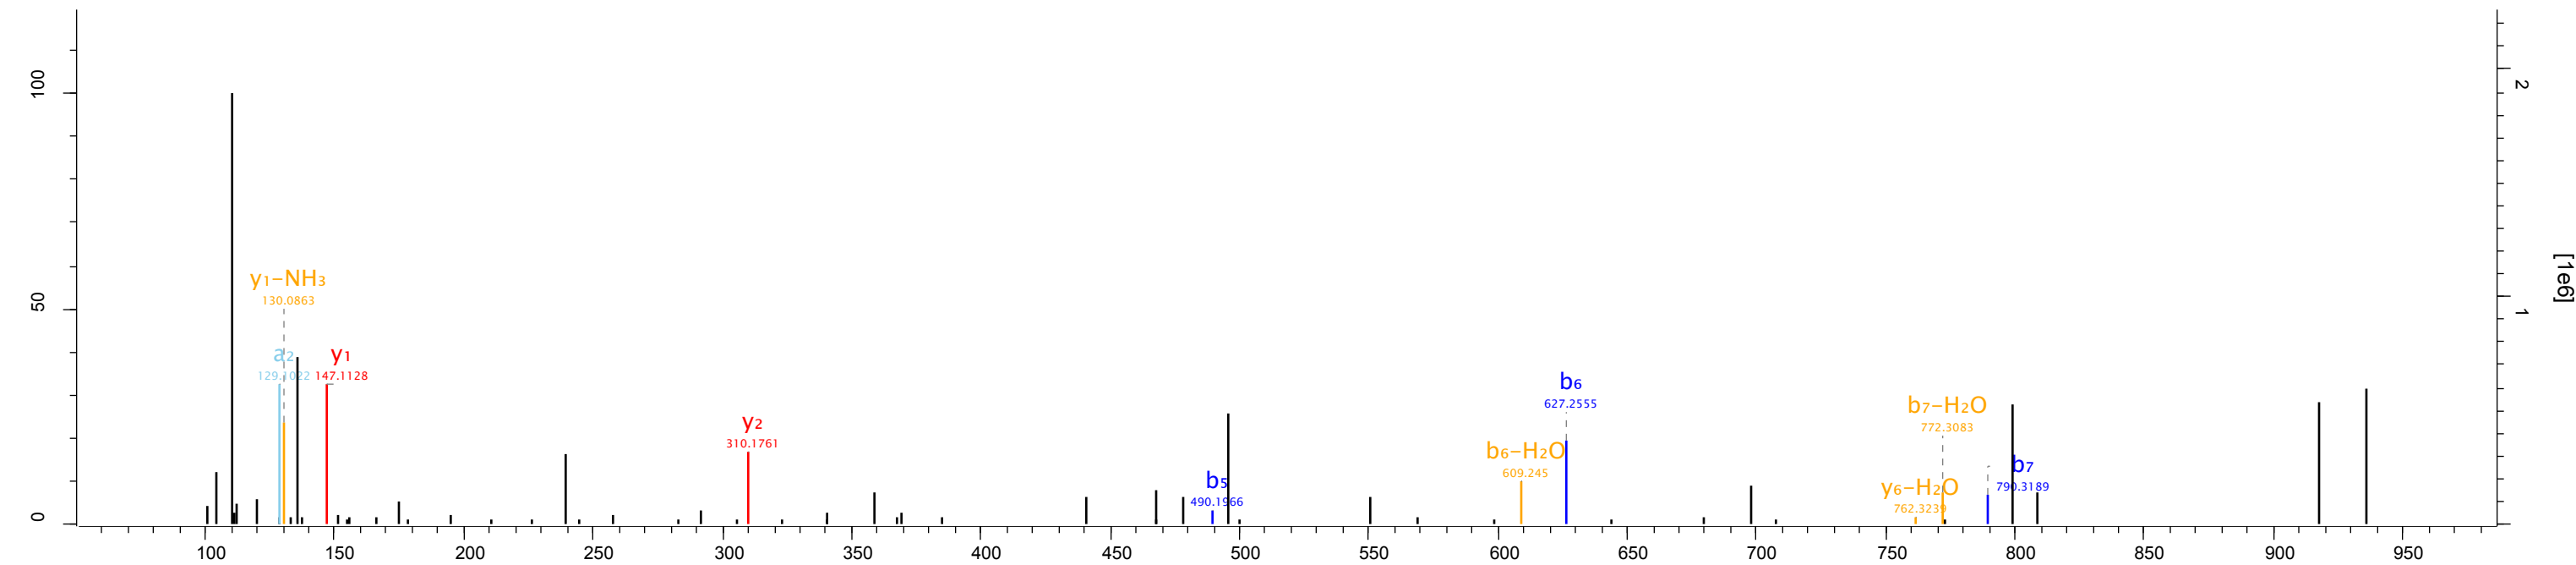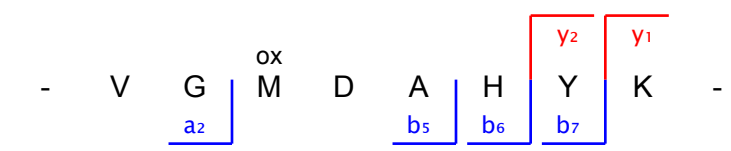

Raw file  
20180707\_MaS\_A375SR\_ML\_proteome\_09

Scan 26594 Method FTMS; HCD Score 226.88 m/z 857.42 Gene names SSR3

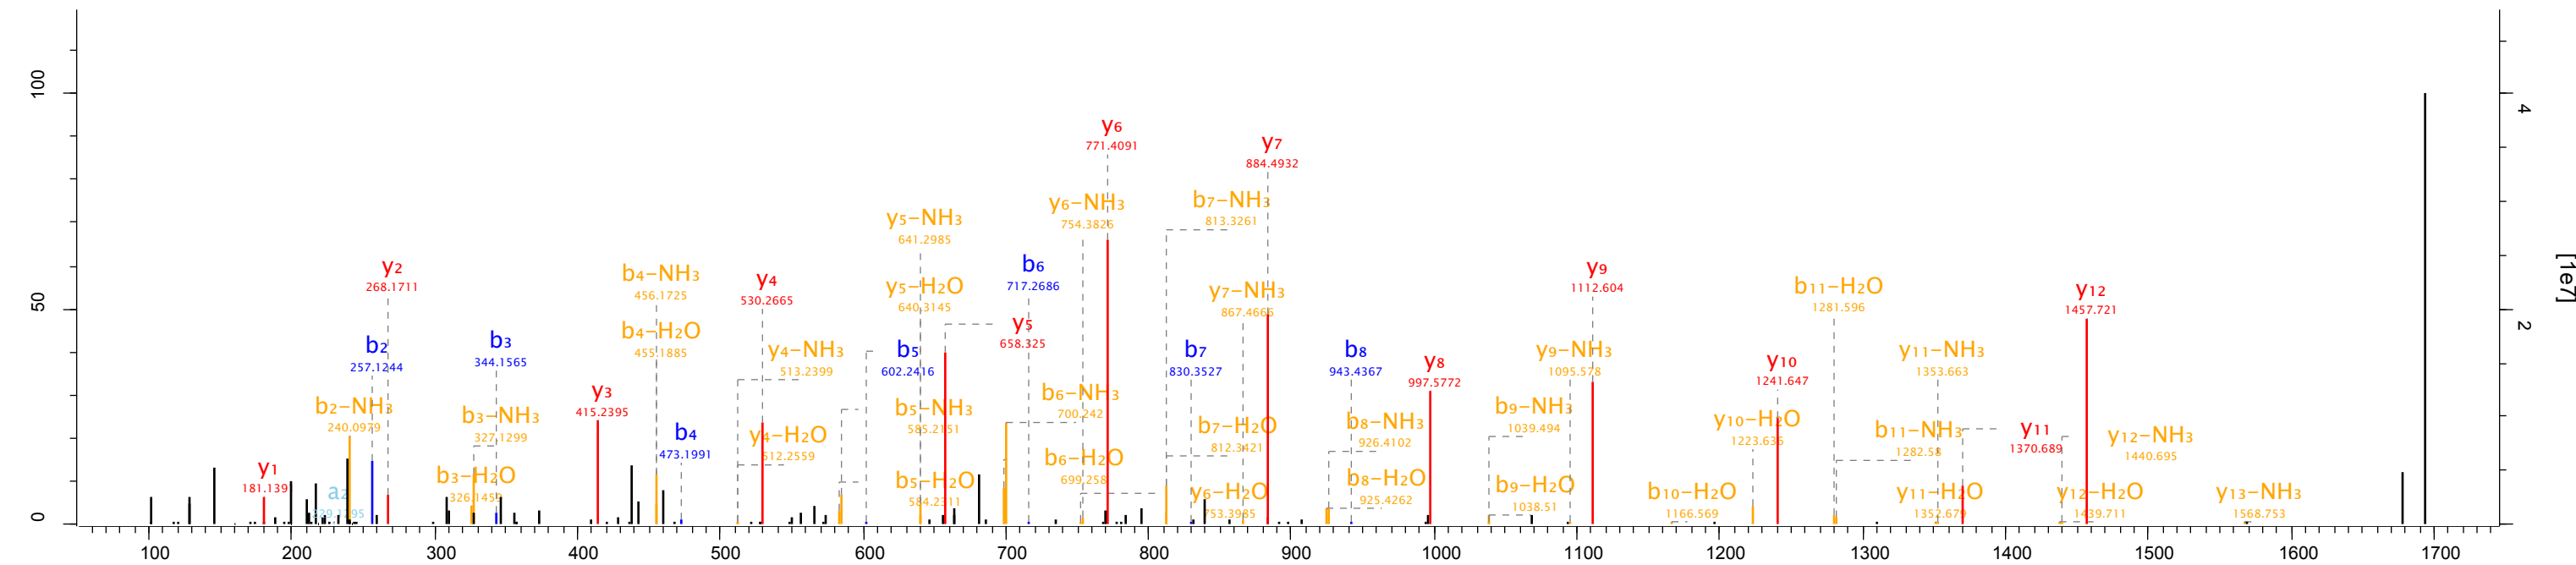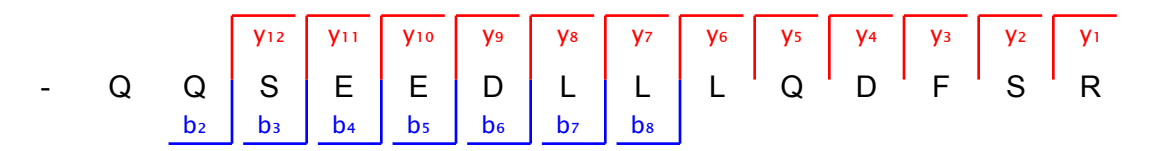



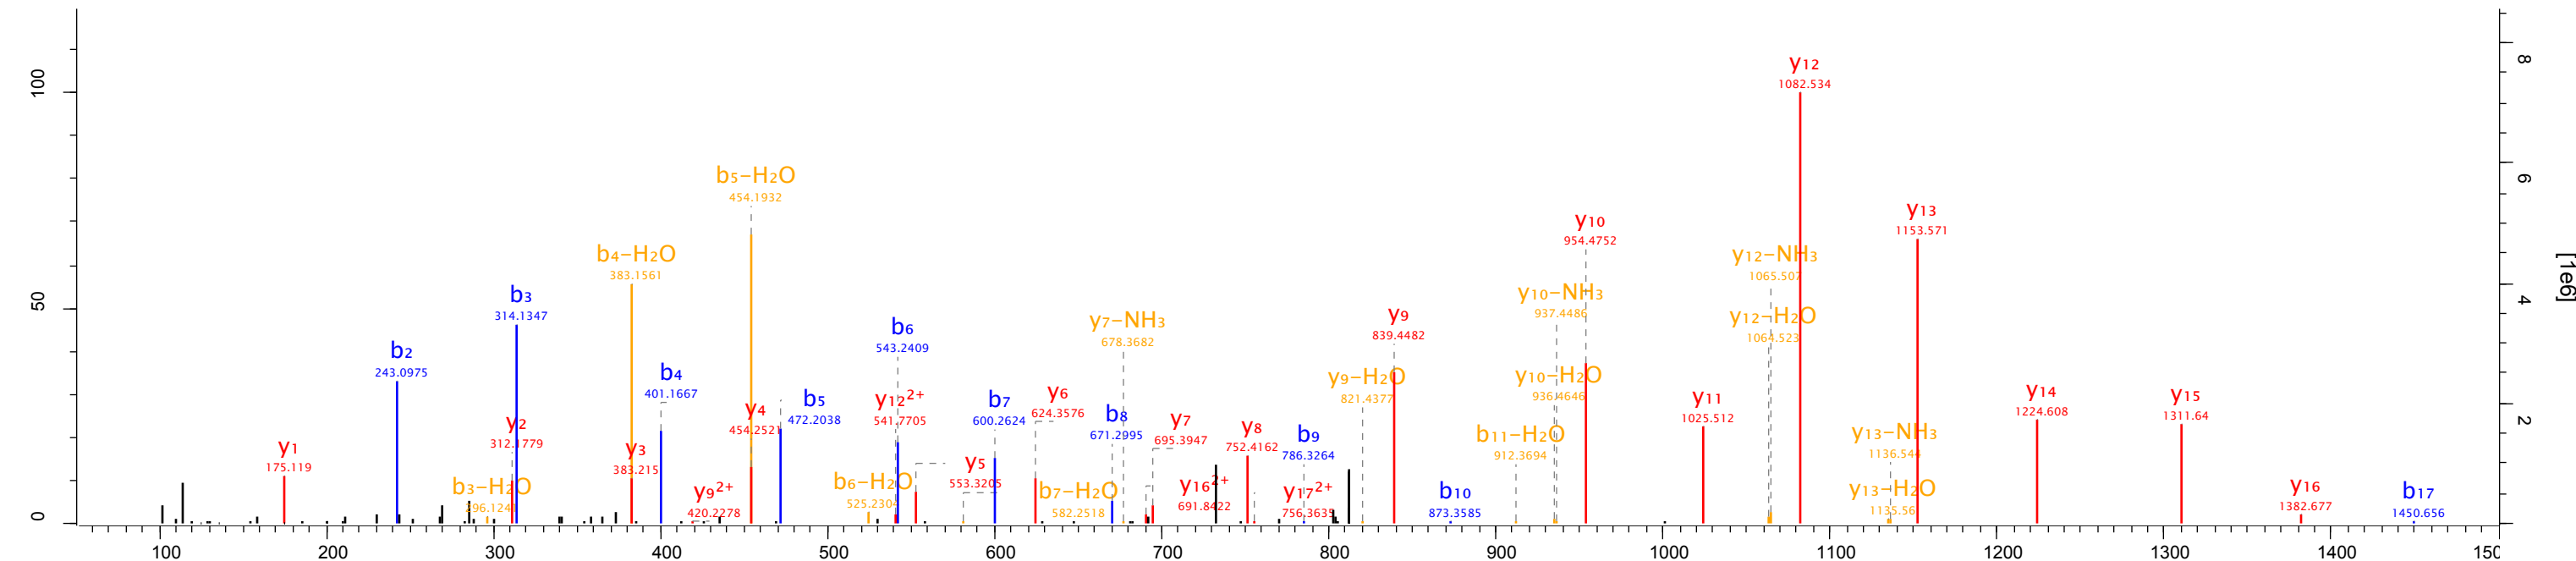

ac - A E A S A A G A D S G A A V A A H R -

Fragmentation scheme showing b and y ions for the peptide sequence: A E A S A A G A D S G A A V A A H R.

Red boxes indicate y ions: y17<sup>2+</sup>, y16, y15, y14, y13, y12, y11, y10, y9, y8, y7, y6, y5, y4, y3, y2, y1.

Blue boxes indicate b ions: b2, b3, b4, b5, b6, b7, b8, b9, b10, b17.

Raw file 20180707\_MaS\_A375SR\_ML\_proteome\_10  
 Scan 10924 Method FTMS; HCD Score 73.93 m/z 899.91

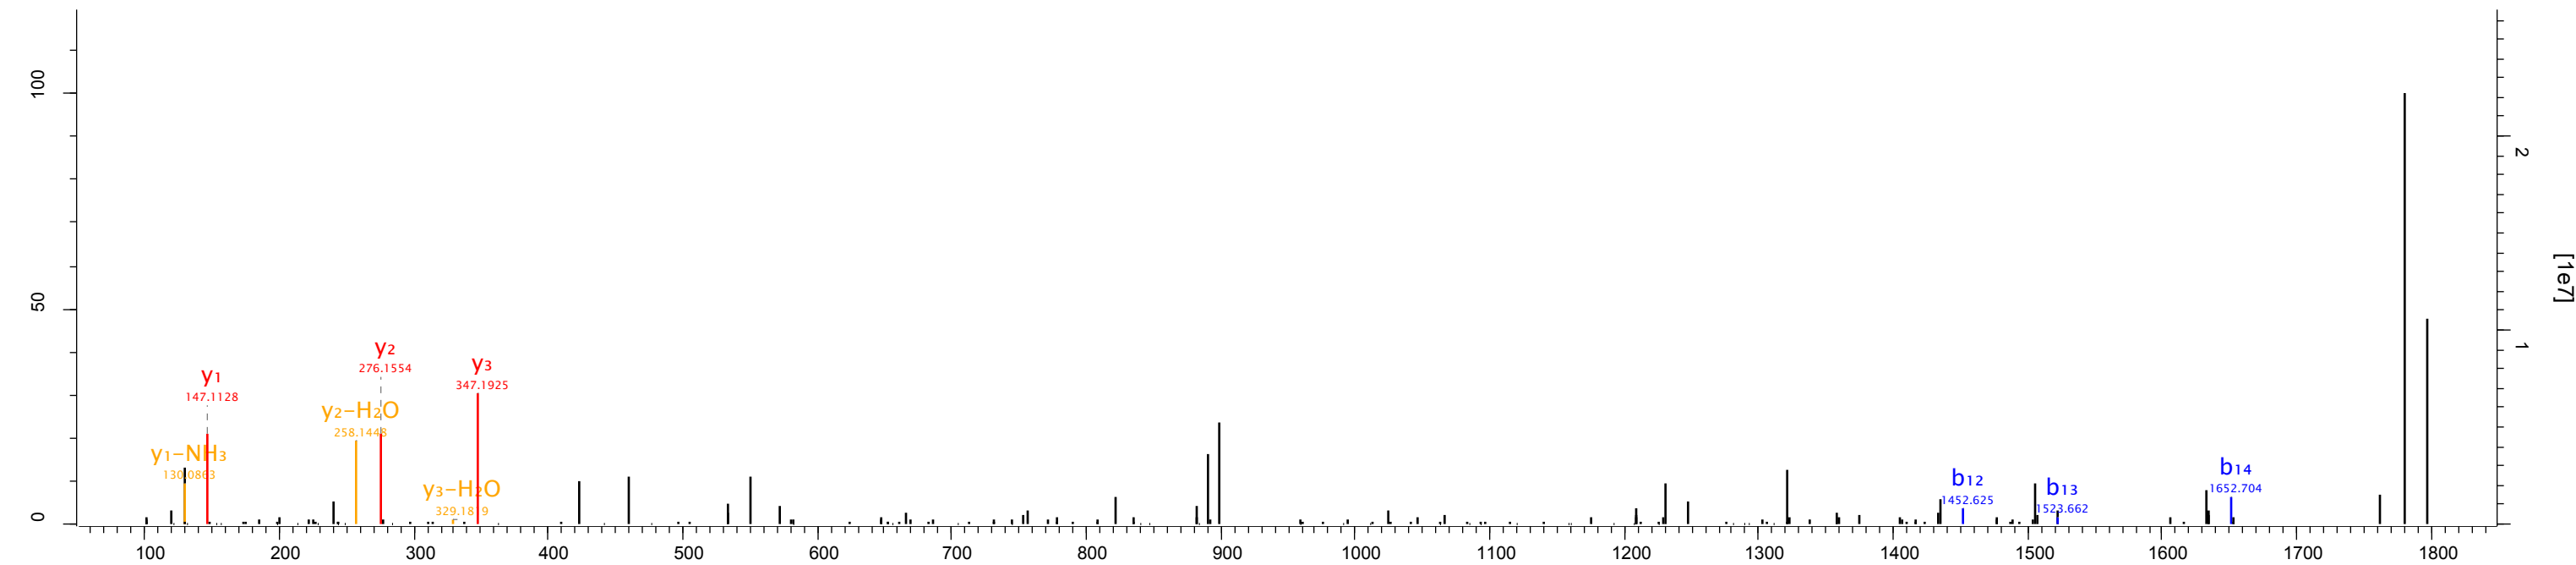

ac ox ph ph  
 - M F L L T G G V S L K S A E K -

b<sub>12</sub> b<sub>13</sub> b<sub>14</sub>

y<sub>3</sub> y<sub>2</sub> y<sub>1</sub>

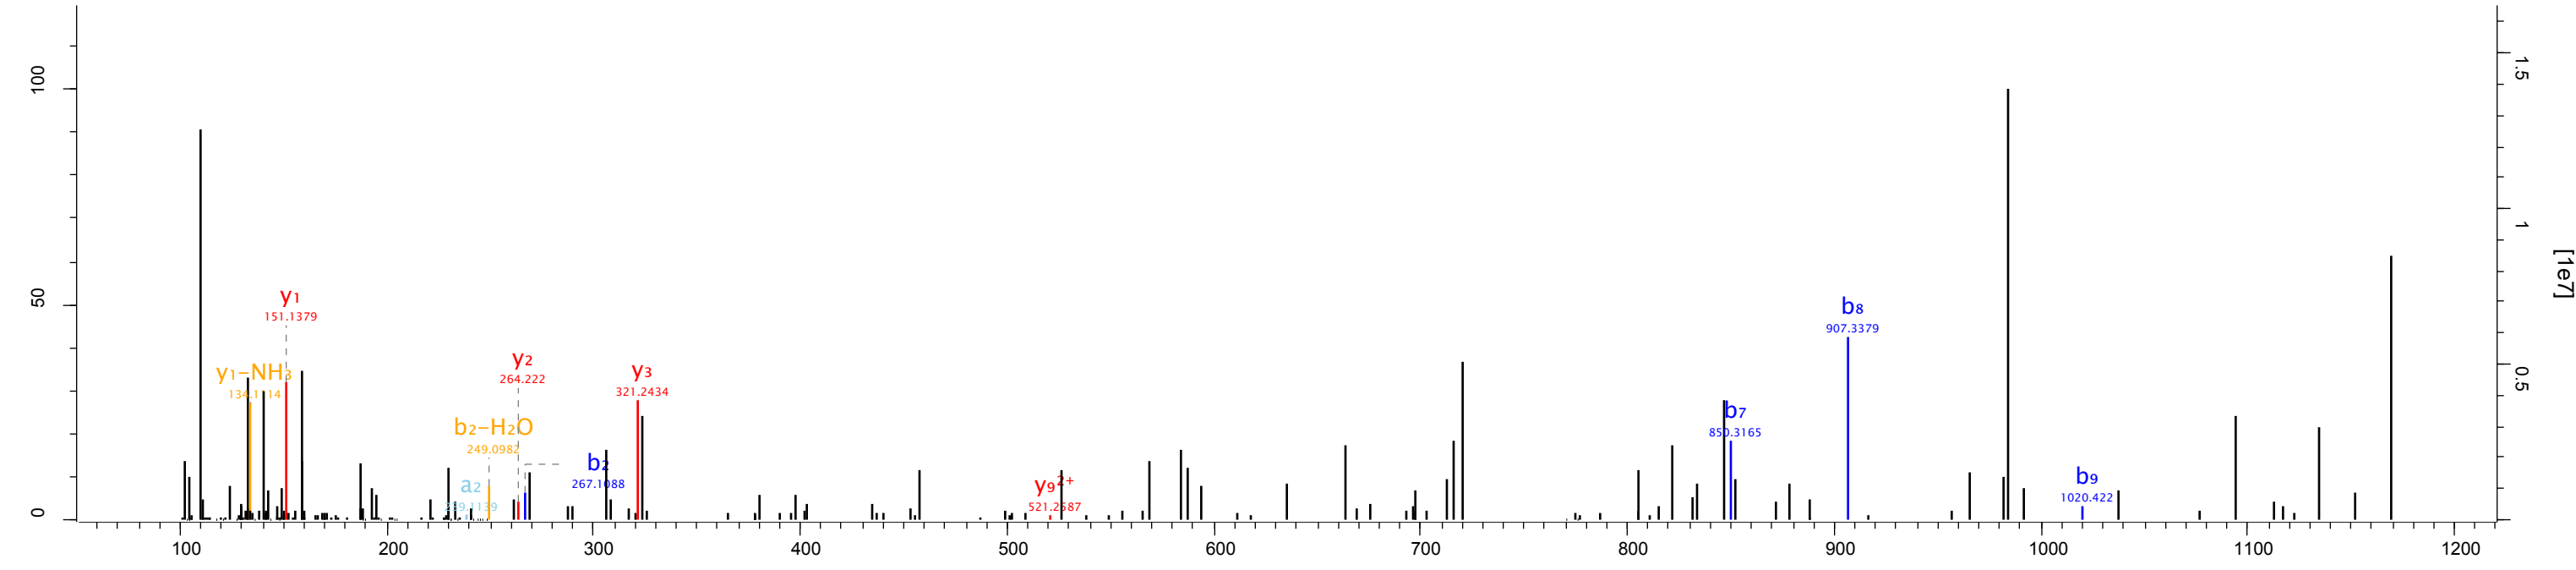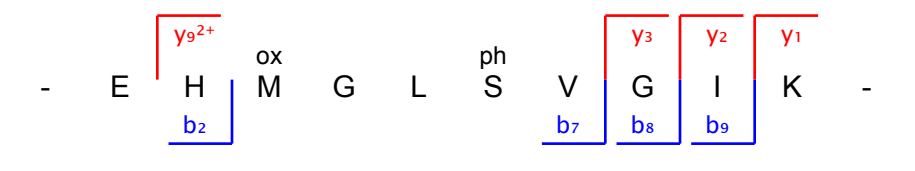

Raw file 20180707\_MaS\_A375SR\_ML\_proteome\_11 Scan 11104 Method FTMS; HCD Score 97.07 m/z 442.2

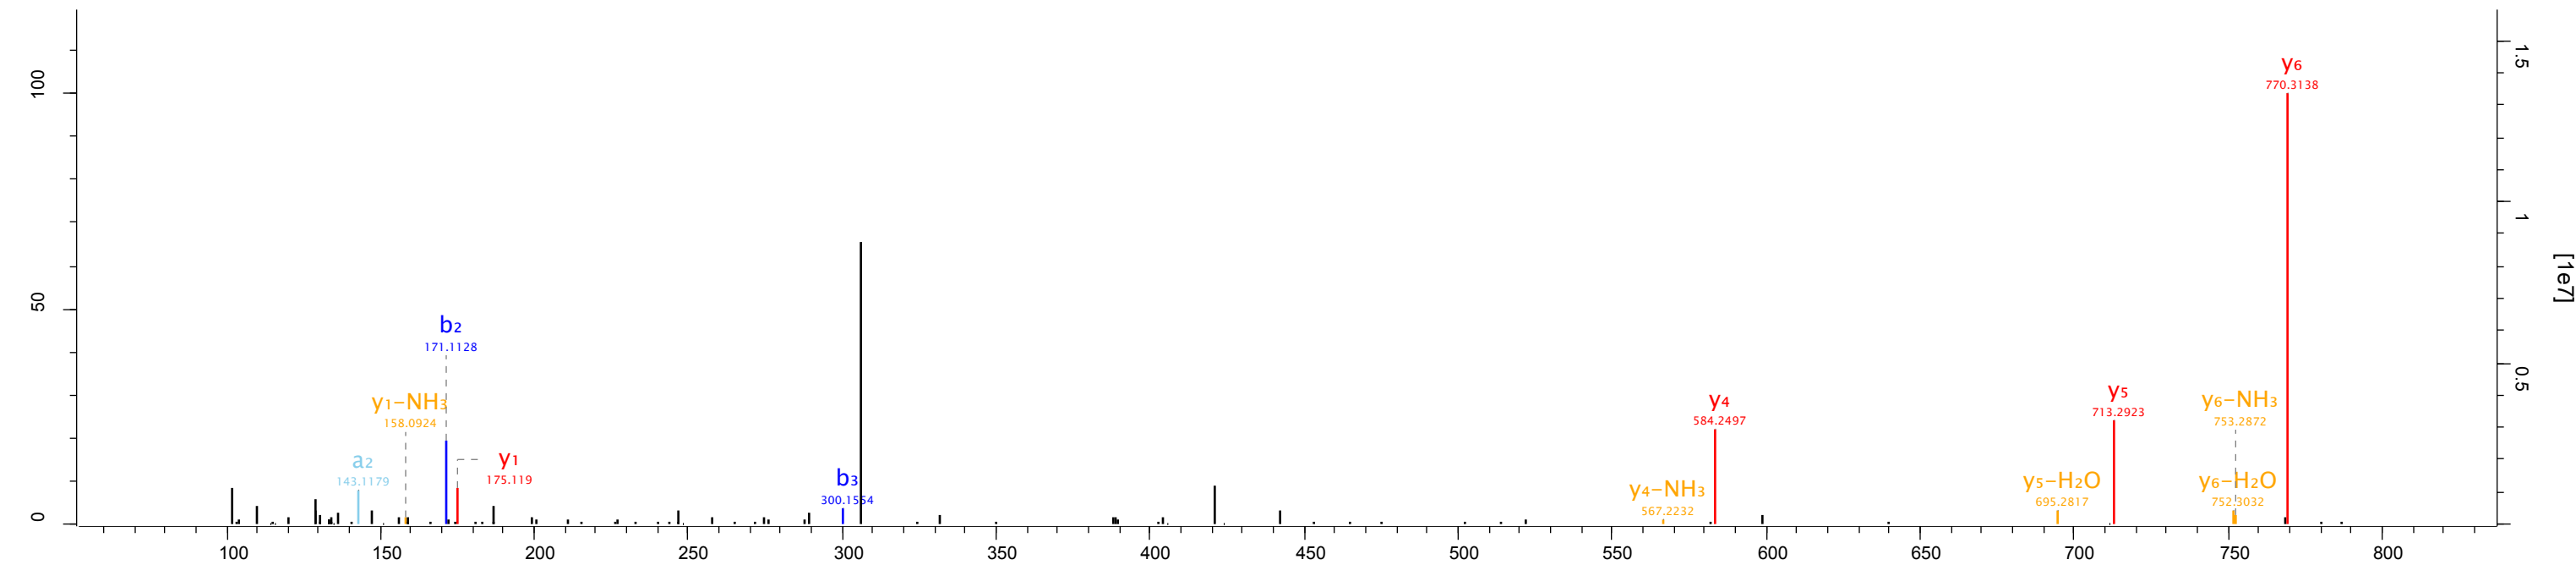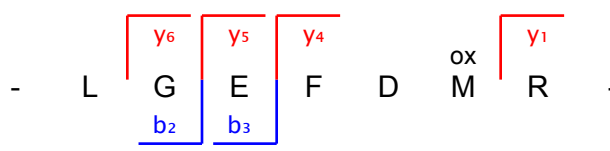

Raw file  
20180707\_MaS\_A375SR\_ML\_proteome\_11

Scan 17694 Method FTMS; HCD Score 59.07 m/z 625.85 Gene names OR9G1;OR9G9

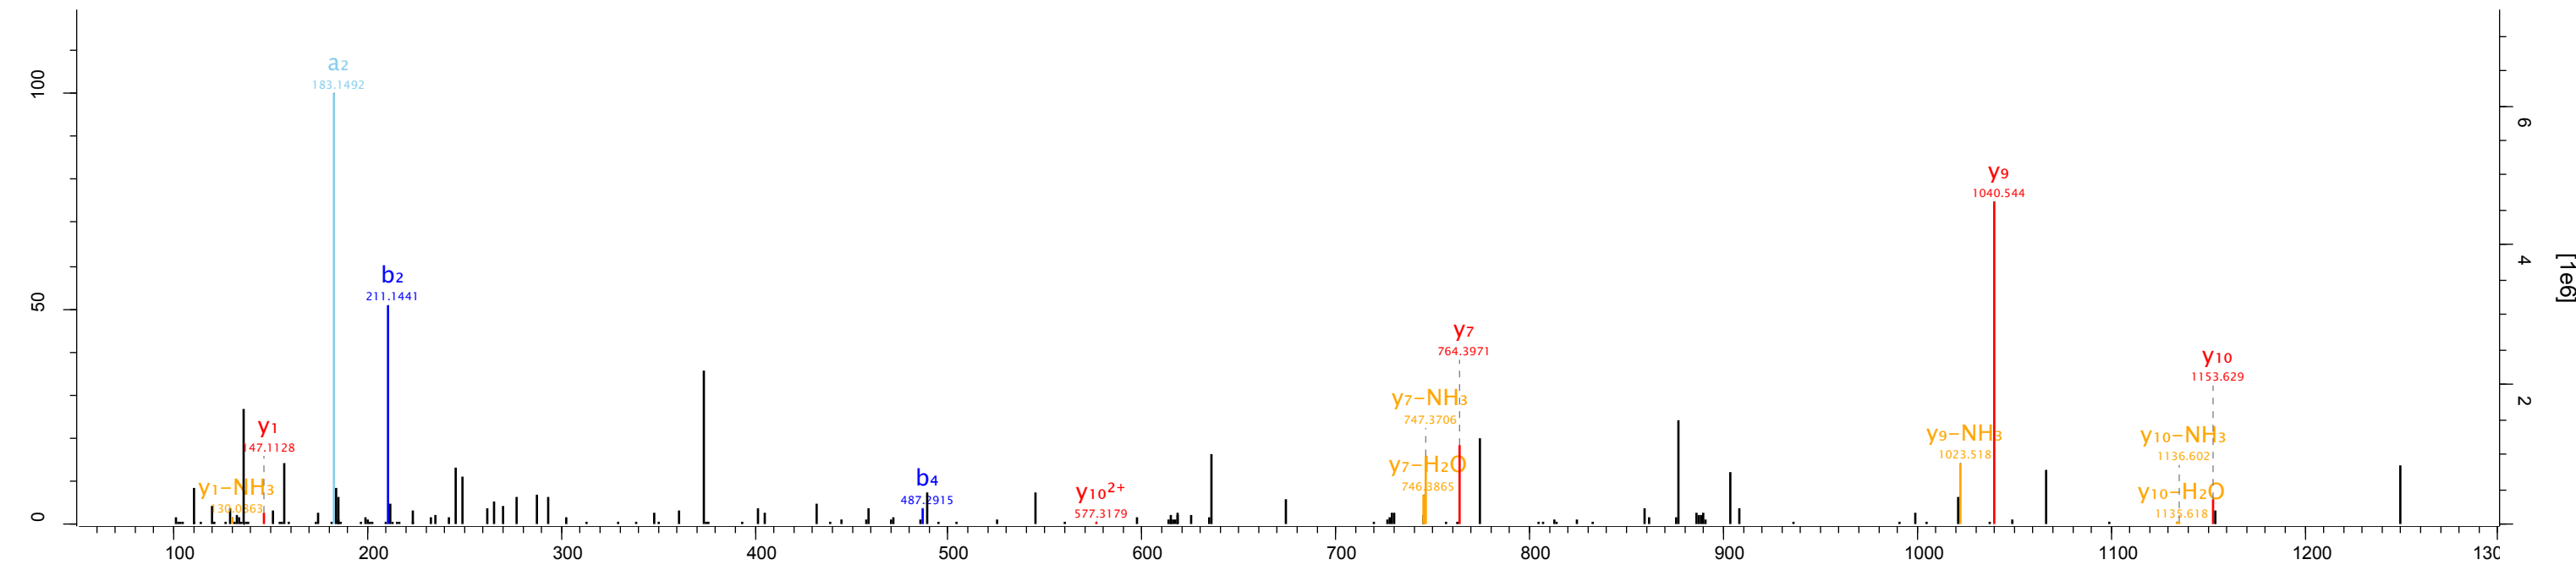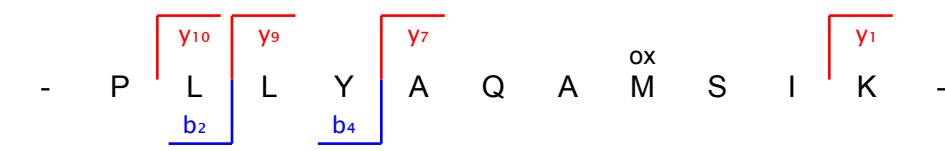

Raw file  
20180707\_MaS\_A375SR\_ML\_proteome\_11

Scan 25584 Method FTMS; HCD Score 96.88 m/z 1059.55 Gene names TMEM261

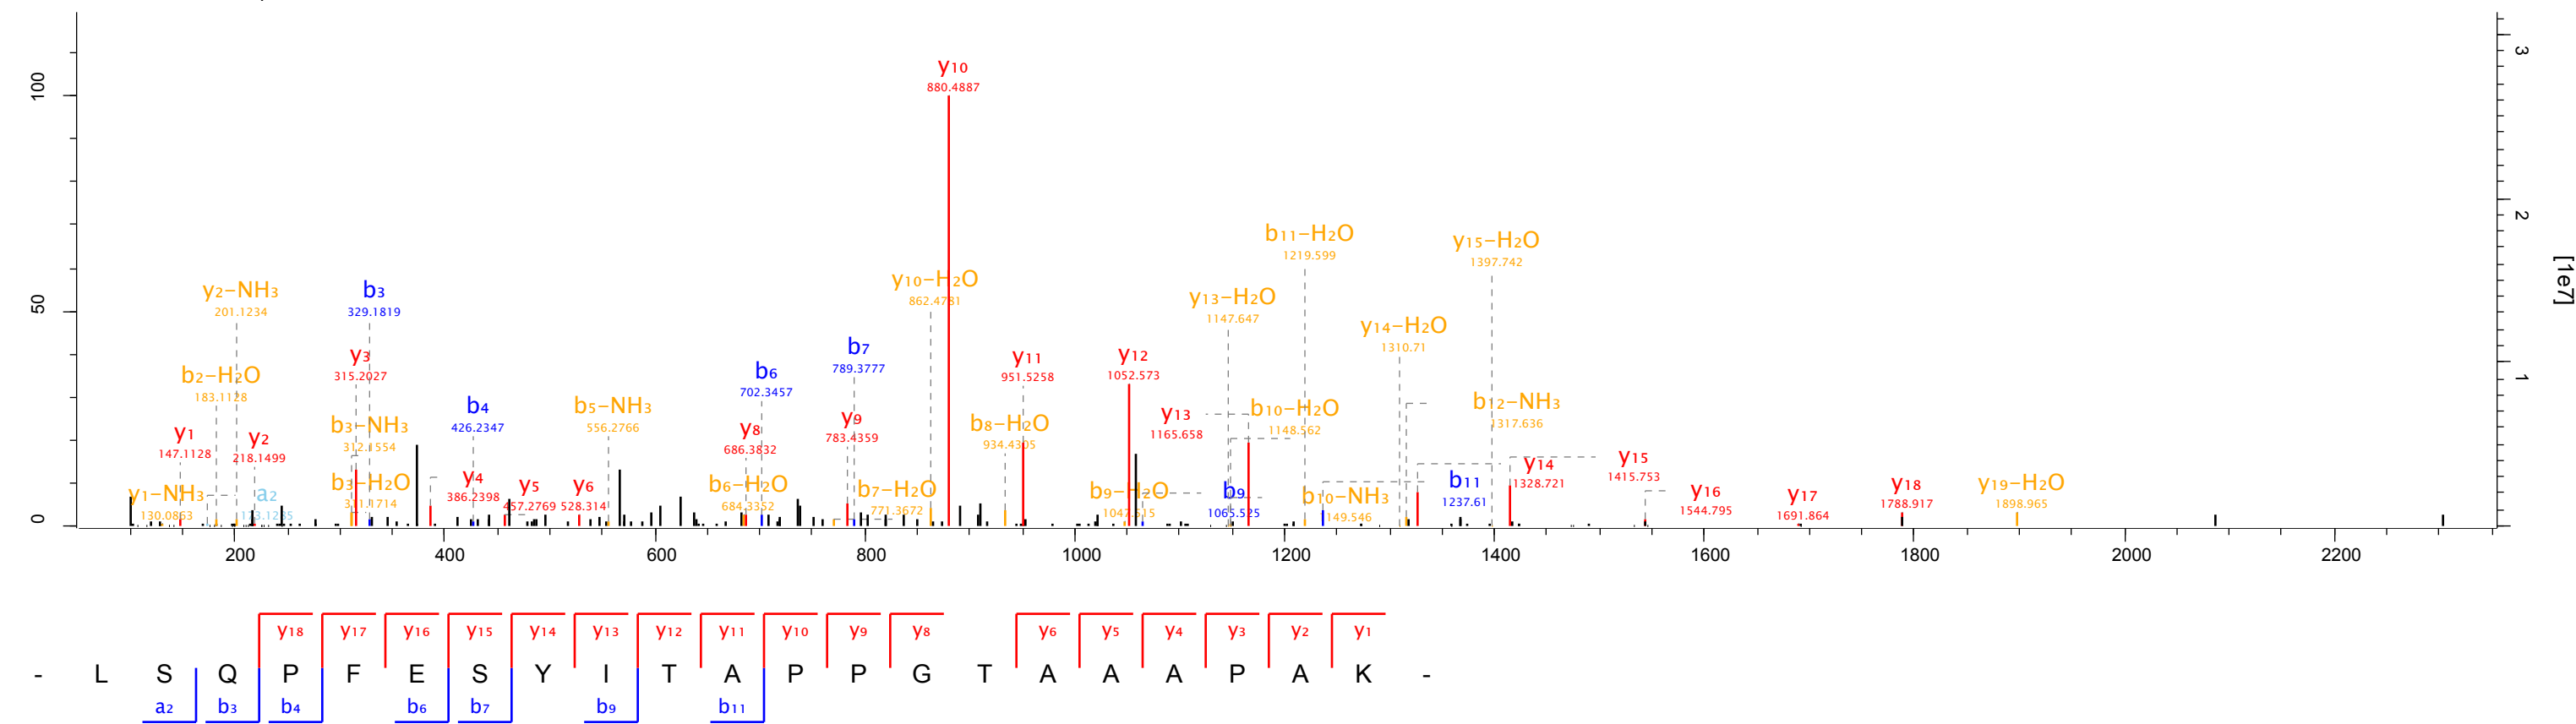

Raw file 20180707\_MaS\_A375SR\_ML\_proteome\_13 Scan 15164 Method FTMS; HCD Score 77.75 m/z 1121.47

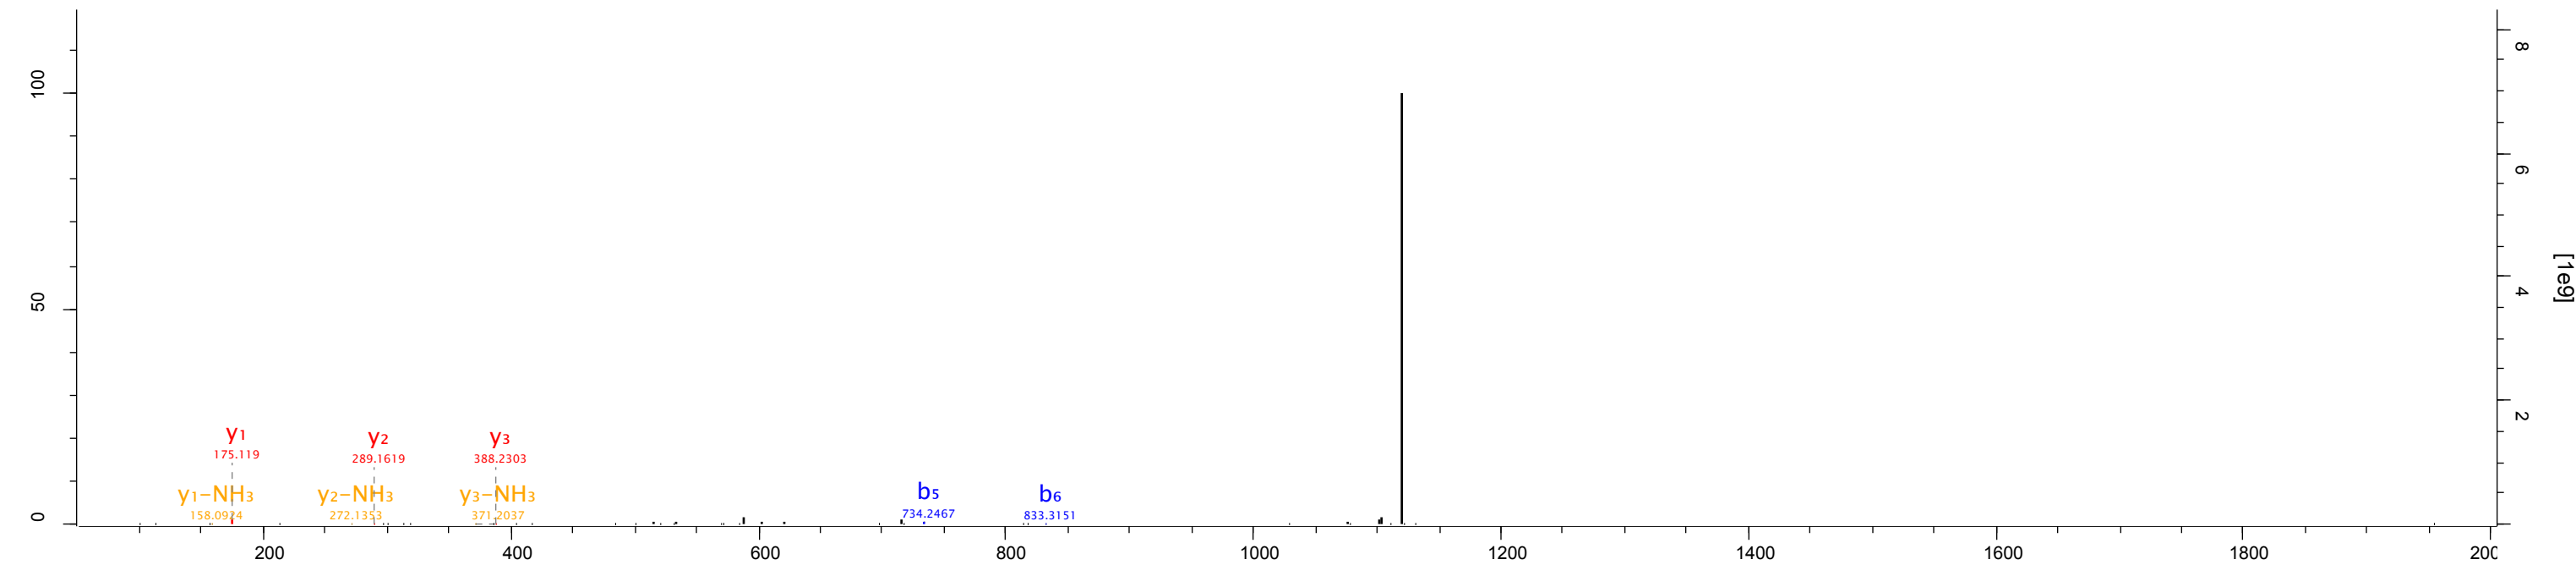

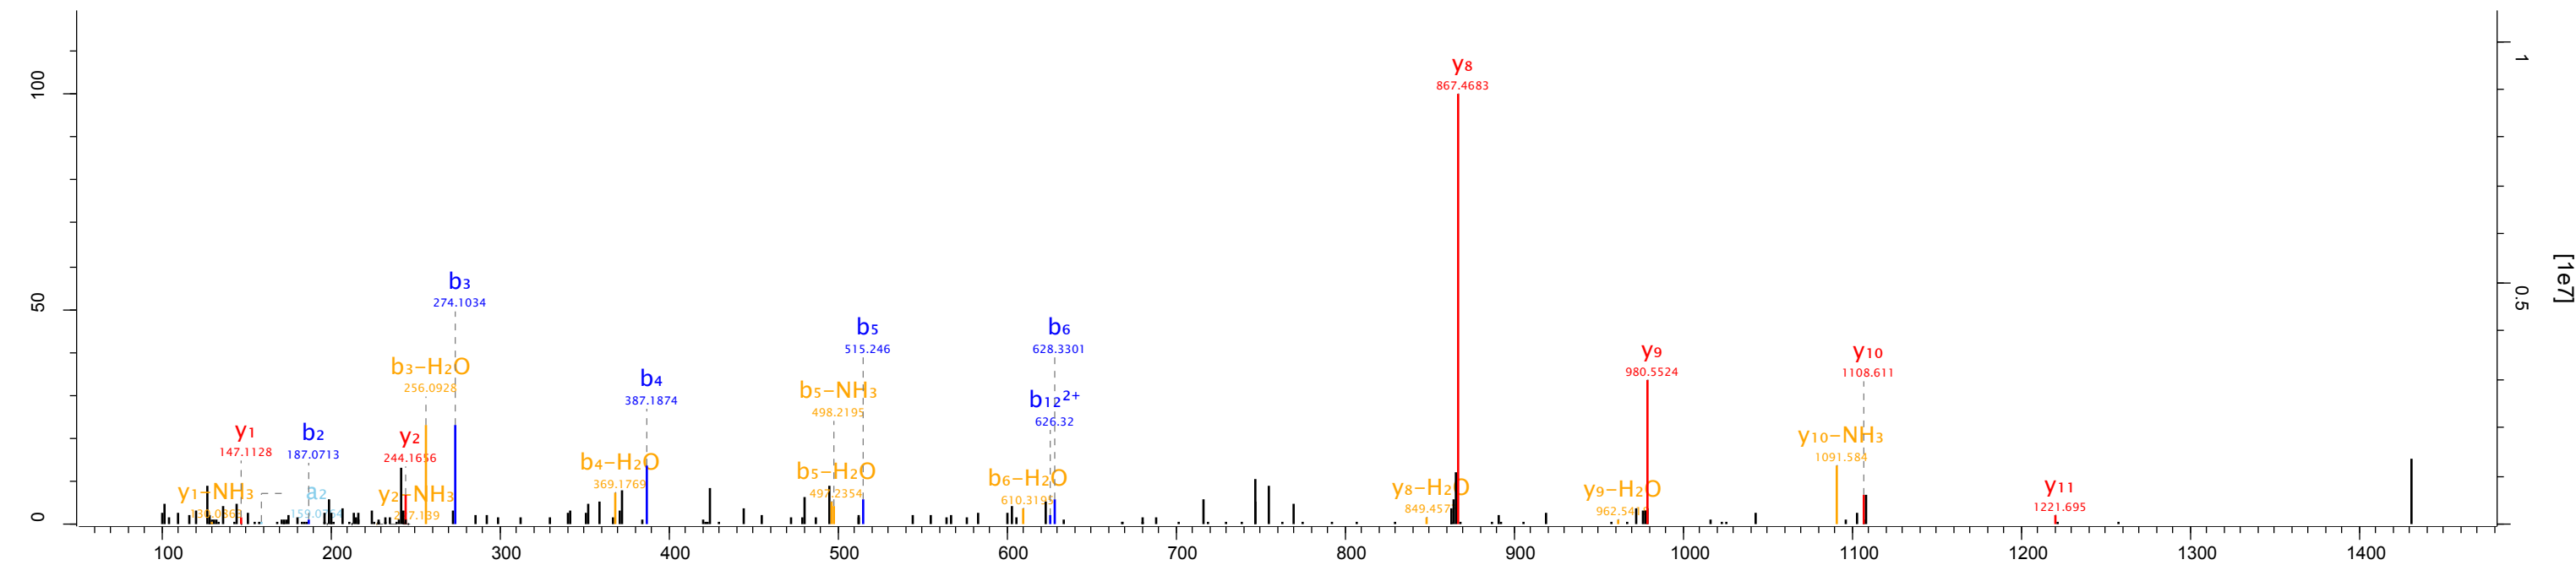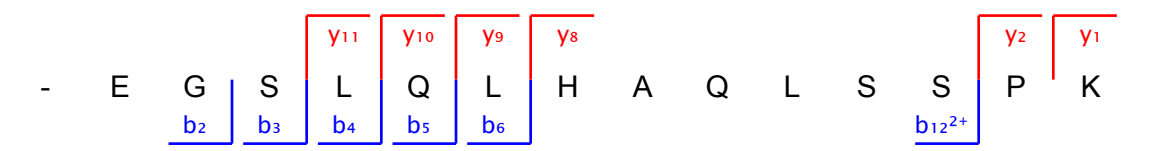



Raw file  
20180707\_MaS\_A375SR\_ML\_proteome\_15

Scan 16944 Method FTMS; HCD Score 73.44 m/z 479.93 Gene names ECE2

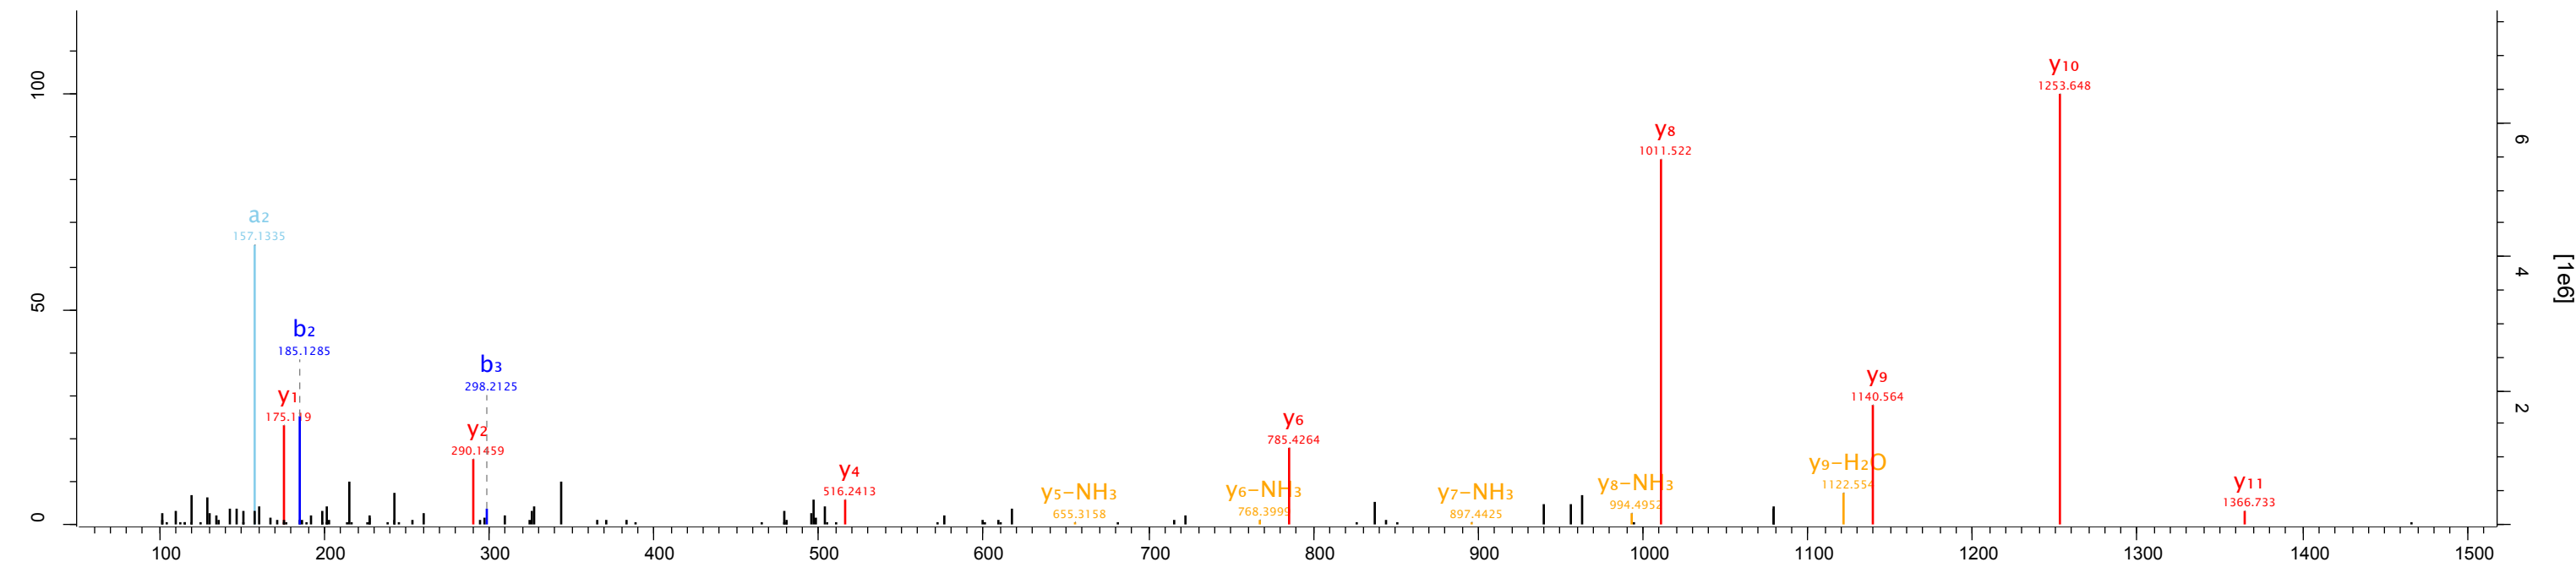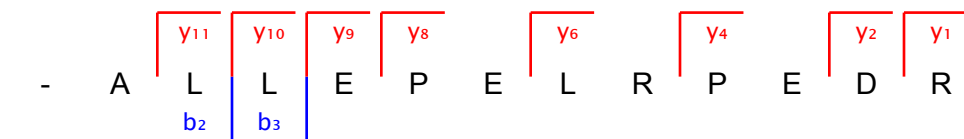

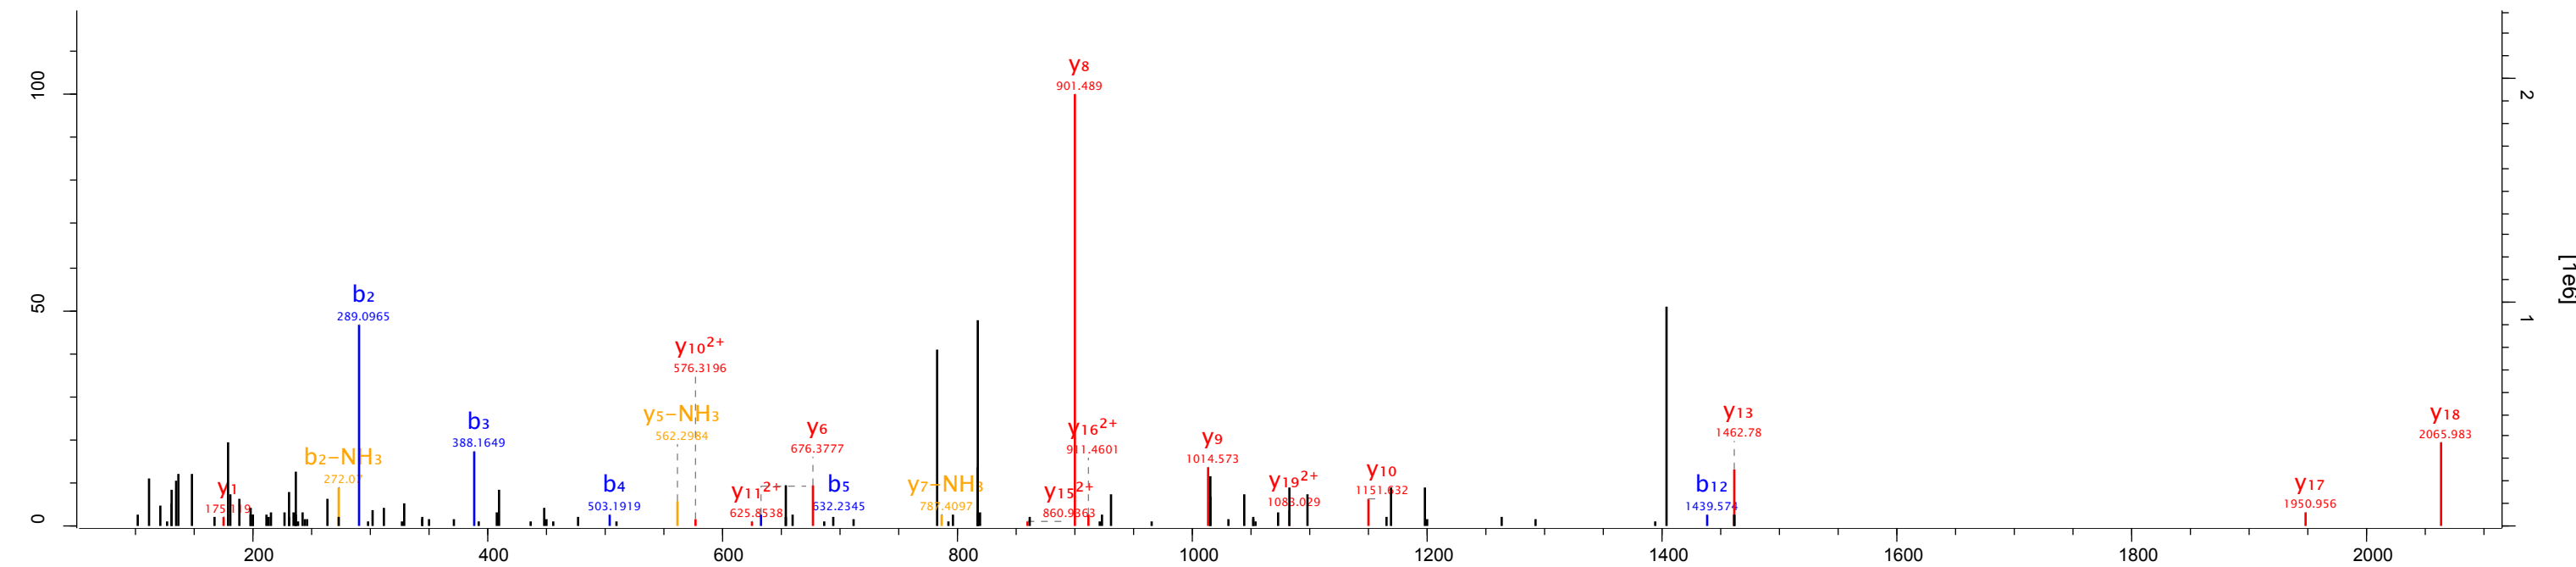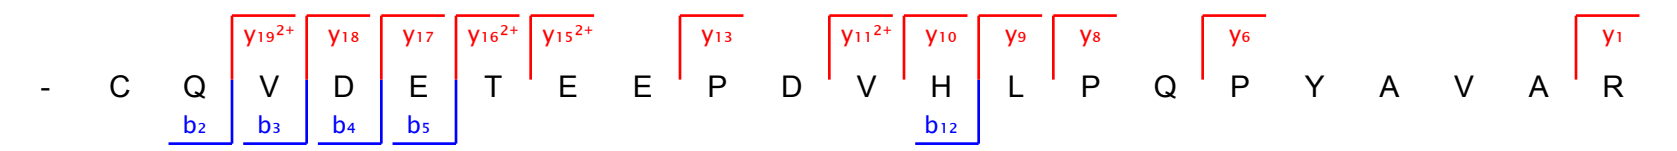

Raw file 20180707\_MaS\_A375SR\_ML\_proteome\_16 Scan 20714 Method FTMS; HCD Score 41.43 m/z 489.25

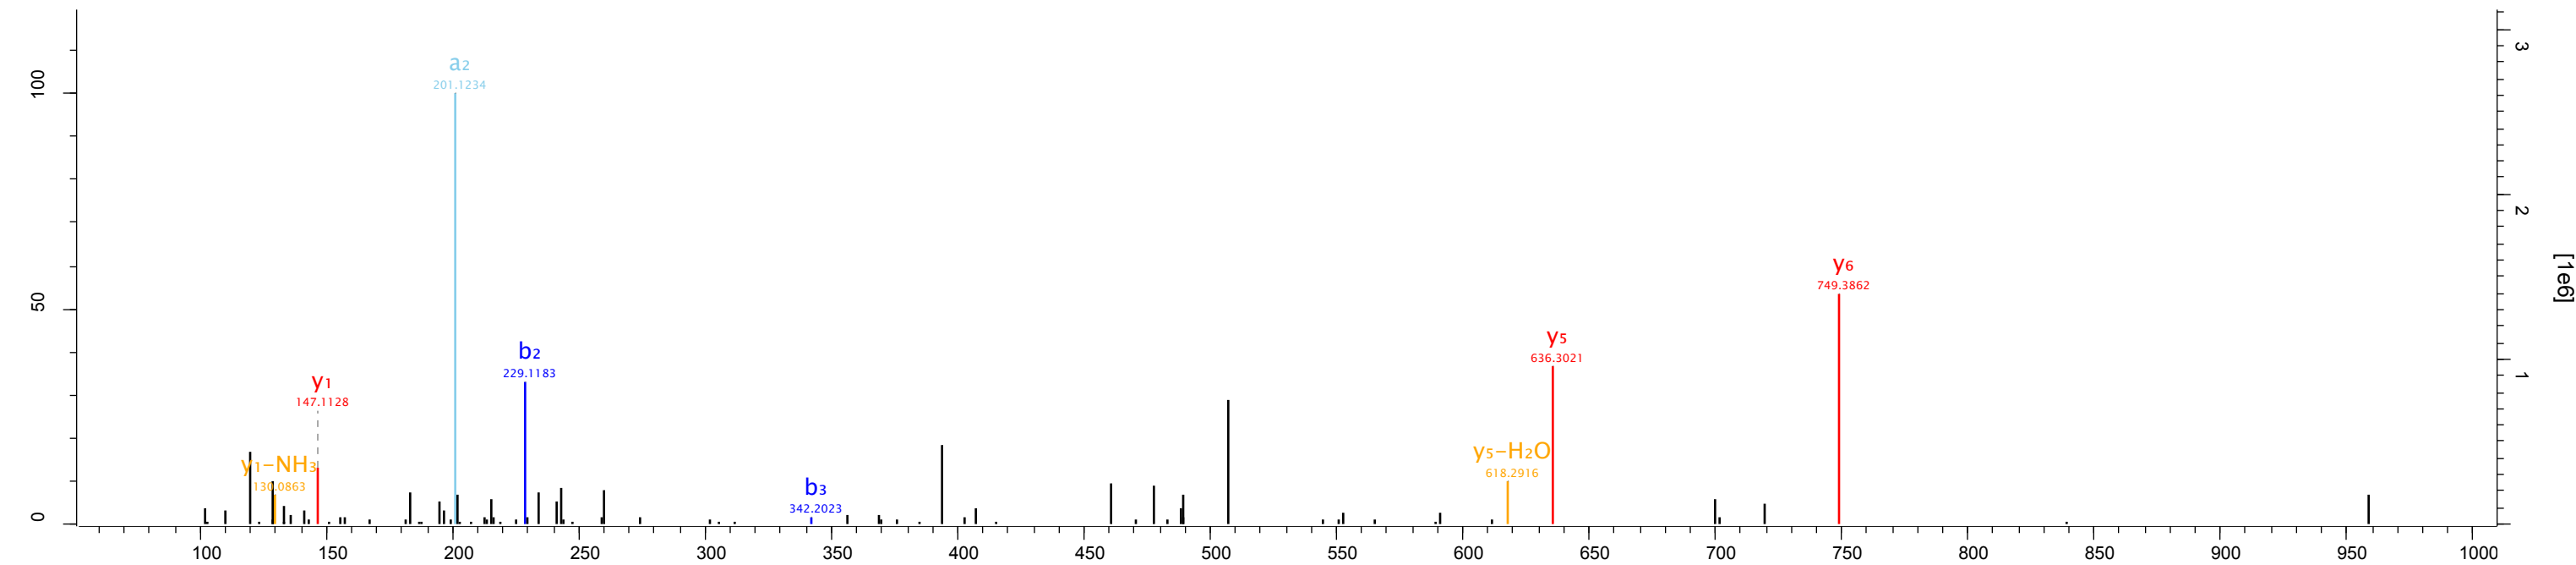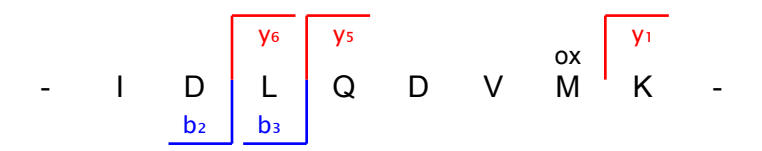

Raw file  
20180707\_MaS\_A375SR\_ML\_proteome\_17

| Scan  | Method    | Score | m/z     |
|-------|-----------|-------|---------|
| 15224 | FTMS; HCD | 77.75 | 1121.47 |

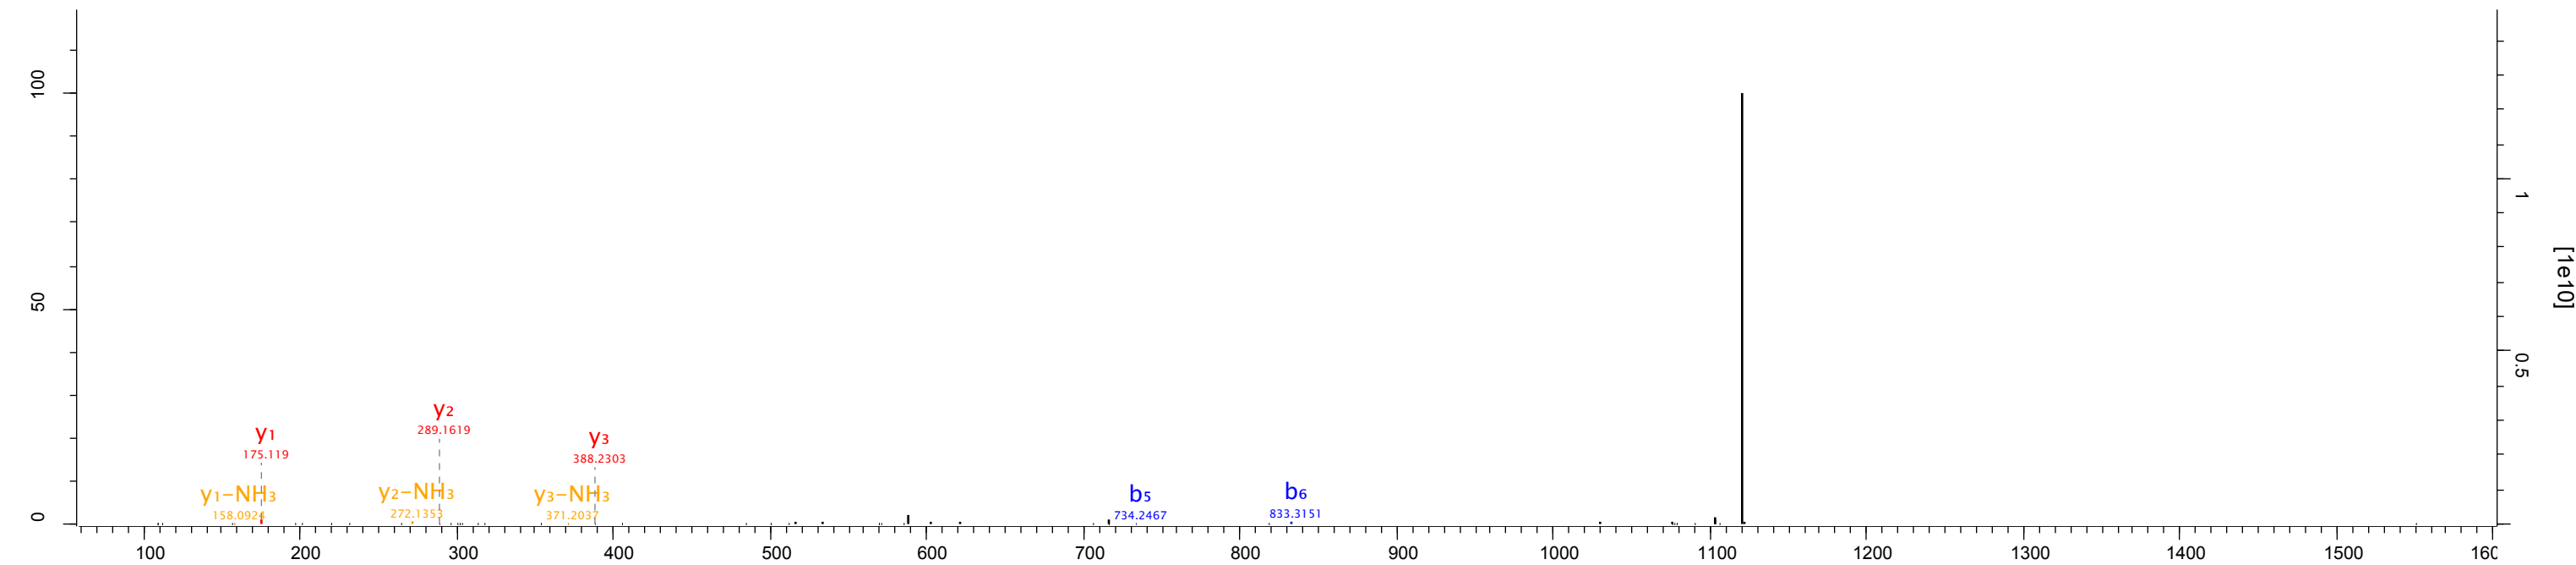

Raw file: 20180707\_MaS\_A375SR\_ML\_proteome\_18  
 Scan: 26124 Method: FTMS; HCD Score: 111.22 m/z: 930.45 Gene names: MAPK11P1L

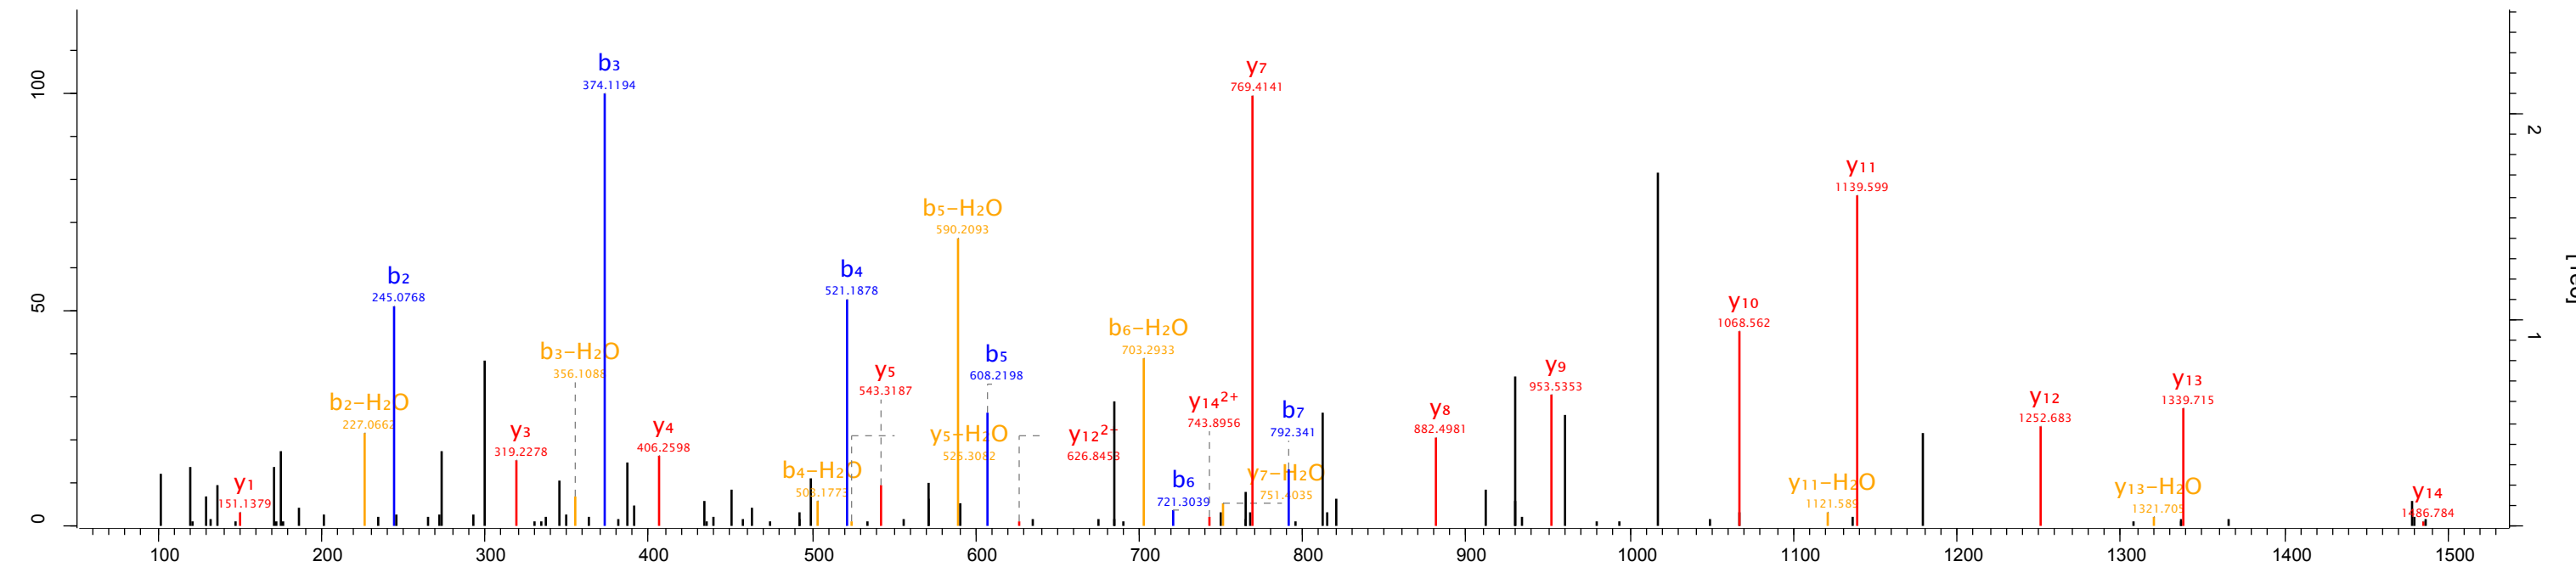

Raw file  
20180707\_MaS\_A375SR\_ML\_proteome\_18

Scan 28524 Method FTMS; HCD Score 76.07 m/z 671.92 Gene names THEMIS2

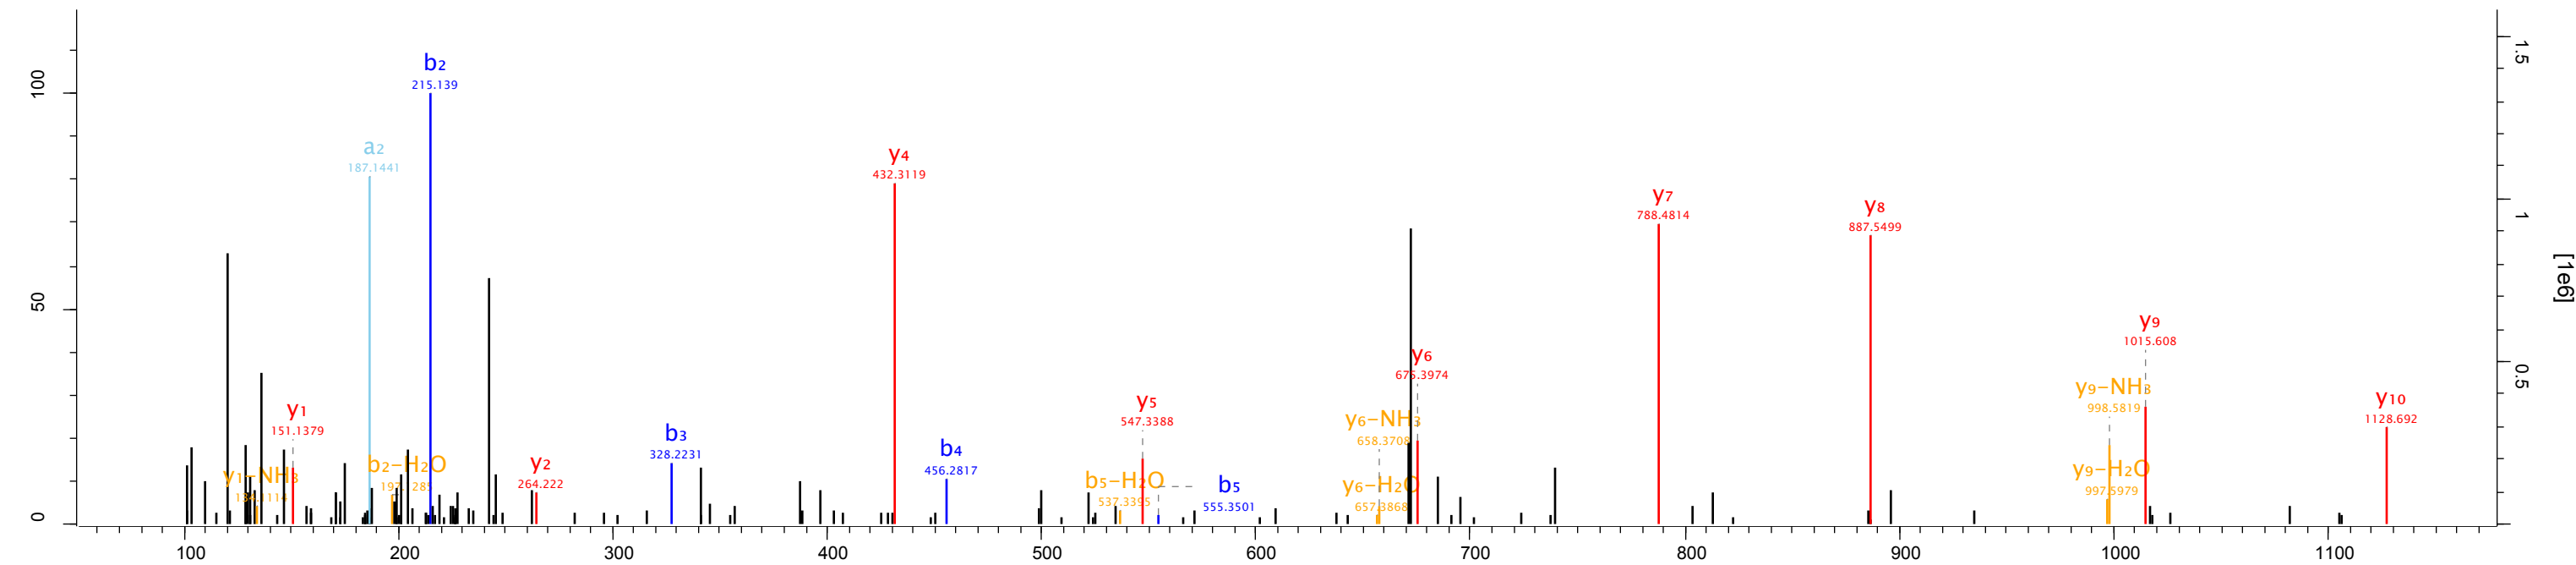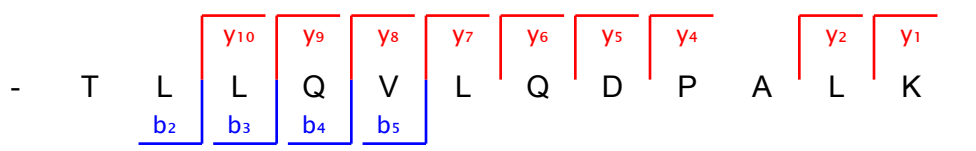

Raw file  
20180707\_MaS\_A375SR\_ML\_proteome\_19

Scan 26374 Method FTMS; HCD Score 191.15 m/z 930.45 Gene names MAPK11P1L

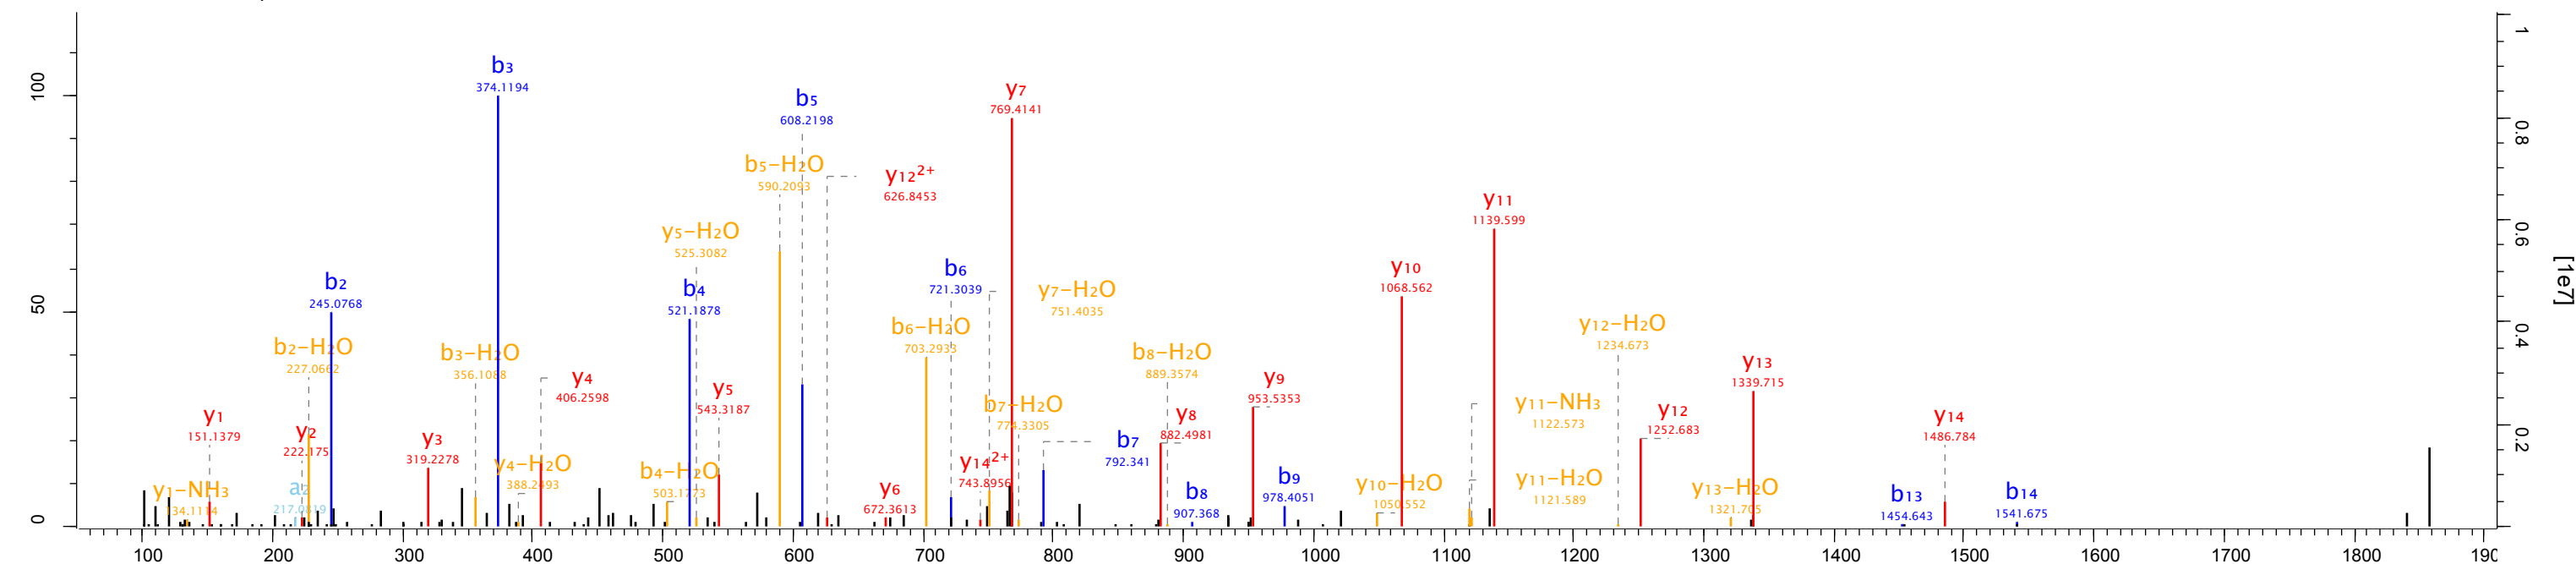

ac  
- S D E F S L A D A L P E H S P A K -  
b2 b3 b4 b5 b6 b7 b8 b9 b13 b14

Raw file 20180707\_MaS\_A375SR\_ML\_proteome\_2\_01 Scan 4514 Method FTMS; HCD Score 43.9 m/z 353.86 Gene names TYMP

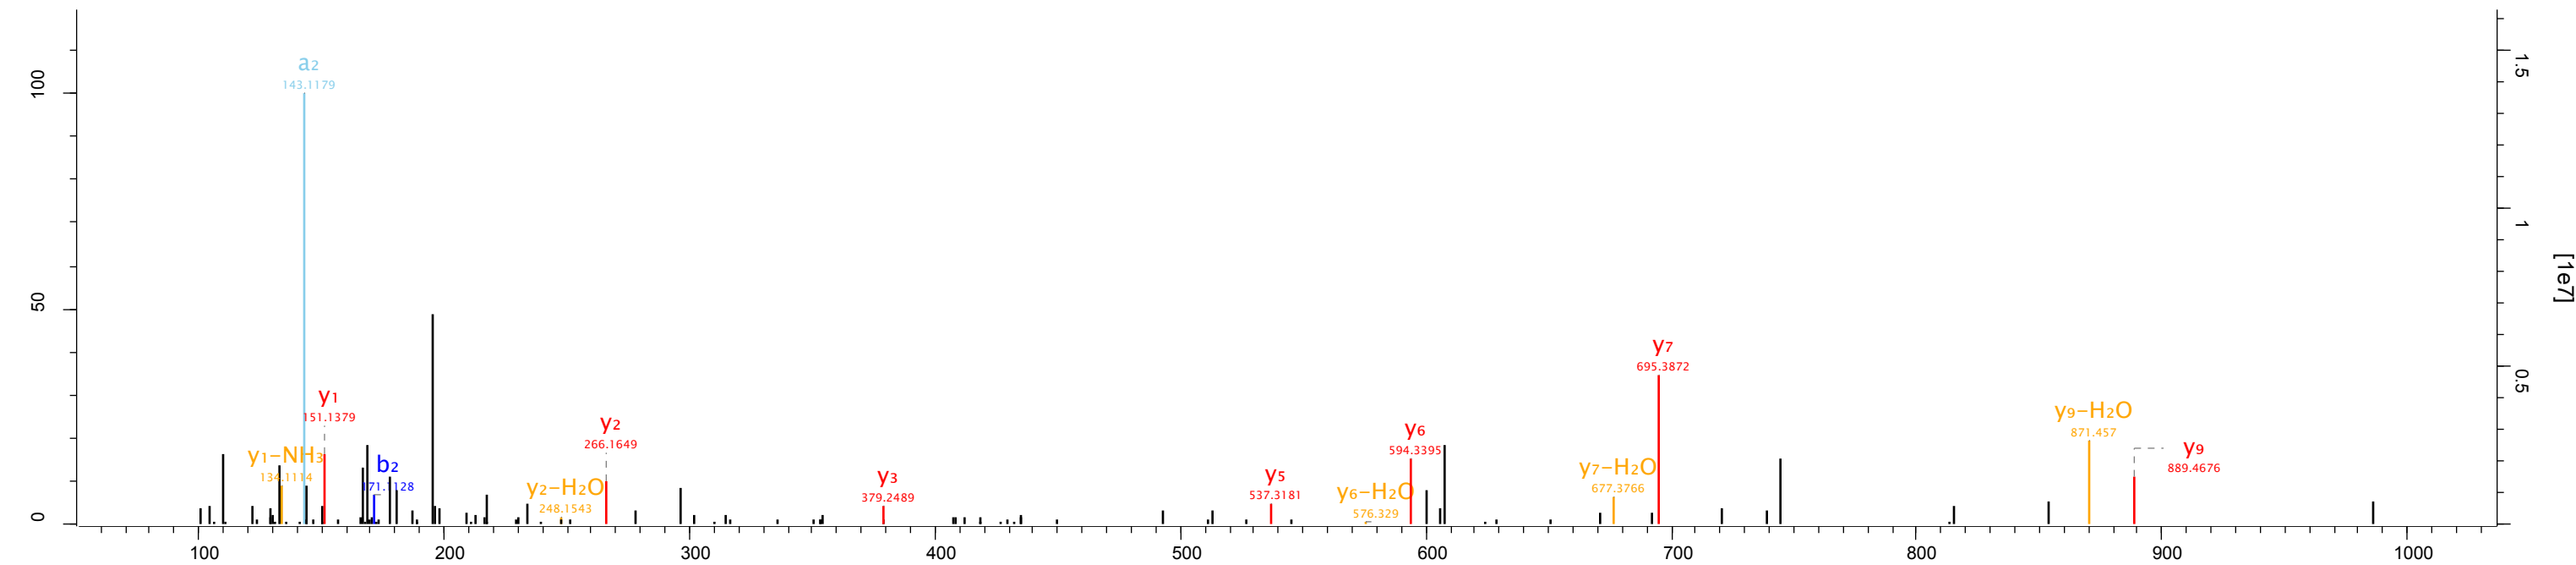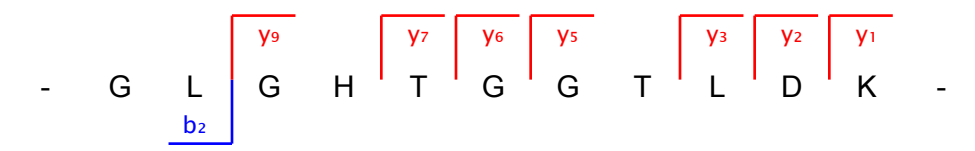



Raw file  
20180707\_MaS\_A375SR\_ML\_proteome\_2\_01

Scan 4544 Method FTMS; HCD Score 99.44 m/z 528.28 Gene names TYMP

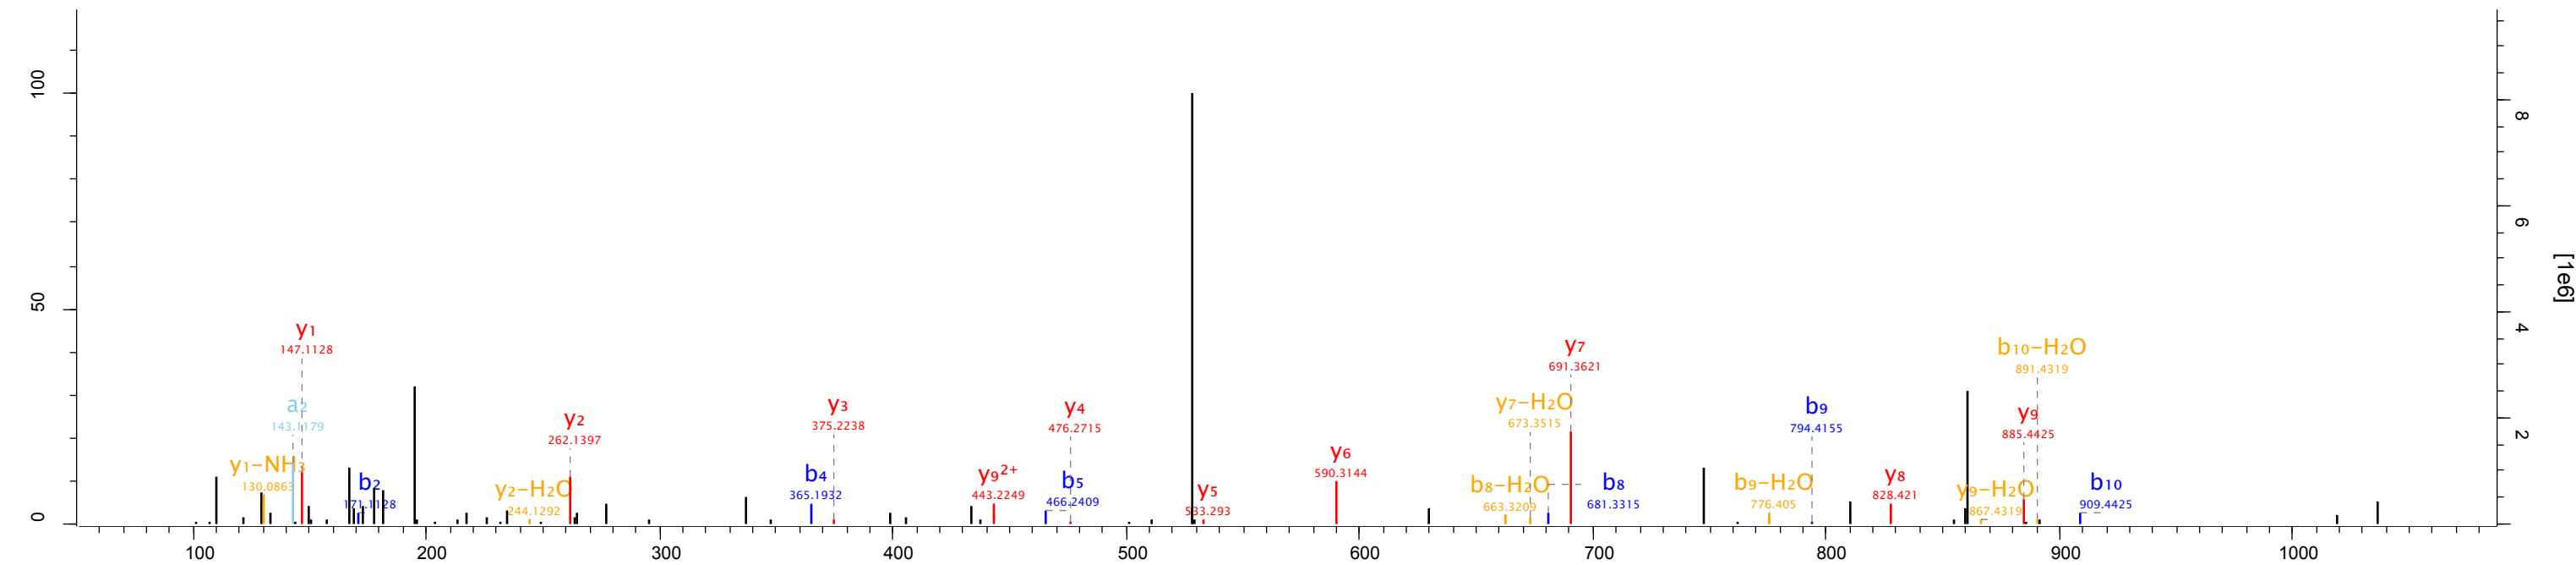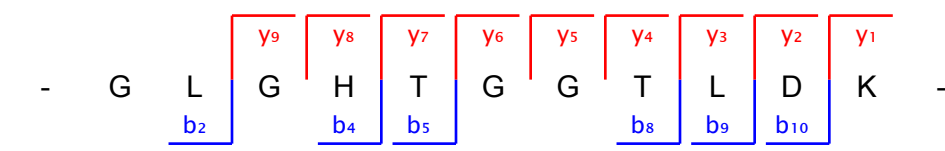

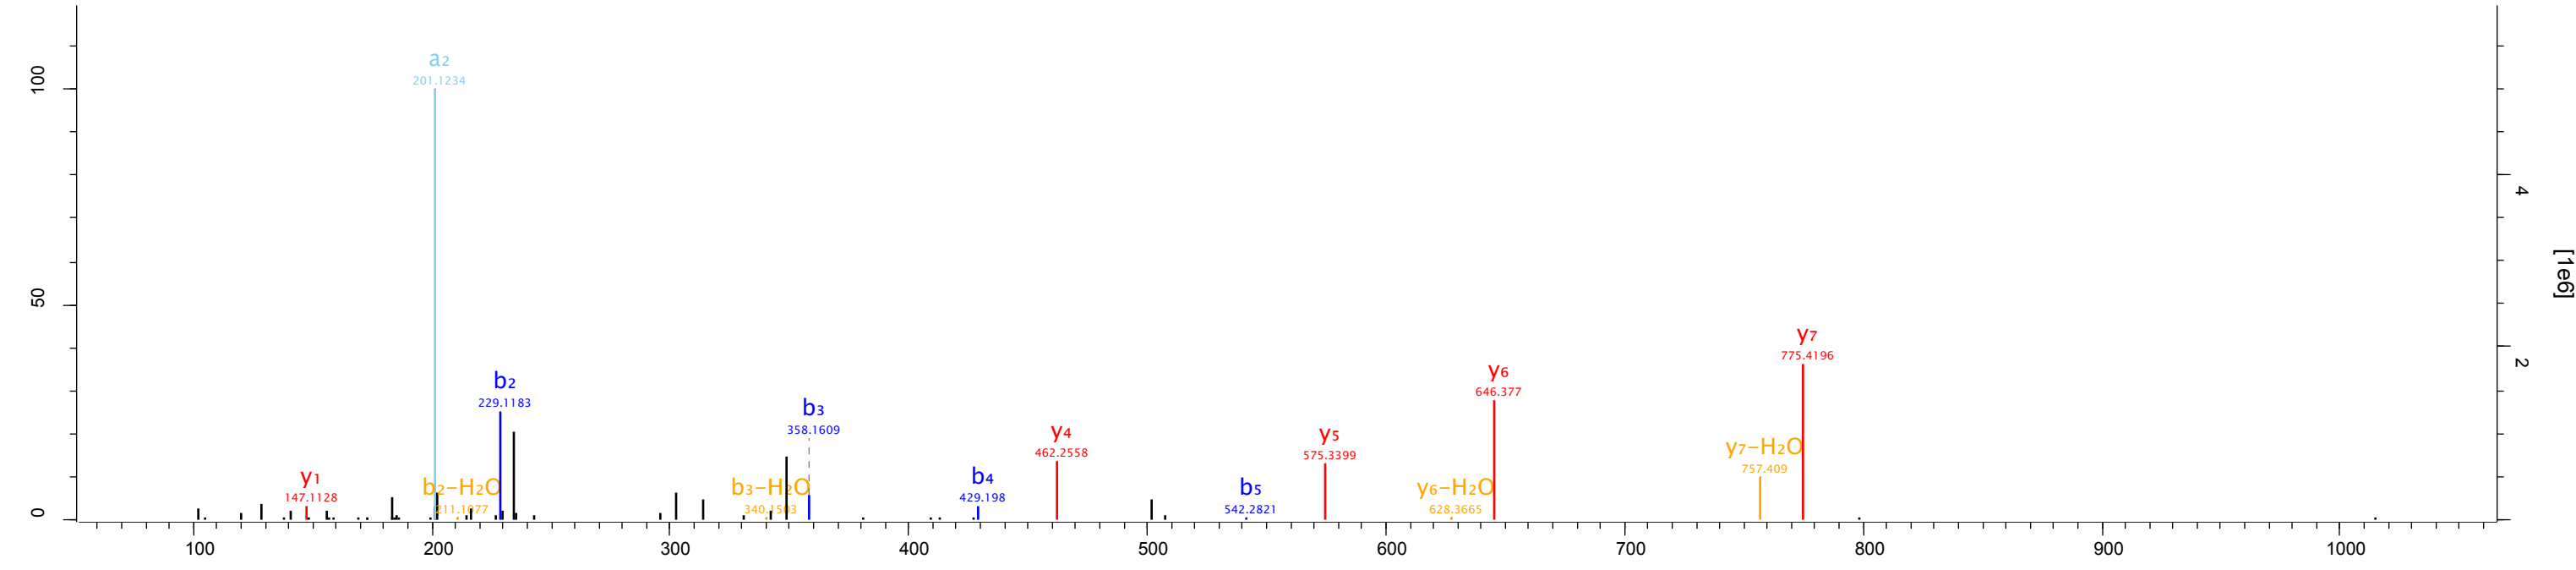

Raw file 20180707\_MaS\_A375SR\_ML\_proteome\_2\_03 Scan 19454 Method FTMS; HCD Score 68.48 m/z 871.95 Gene names MRPL42

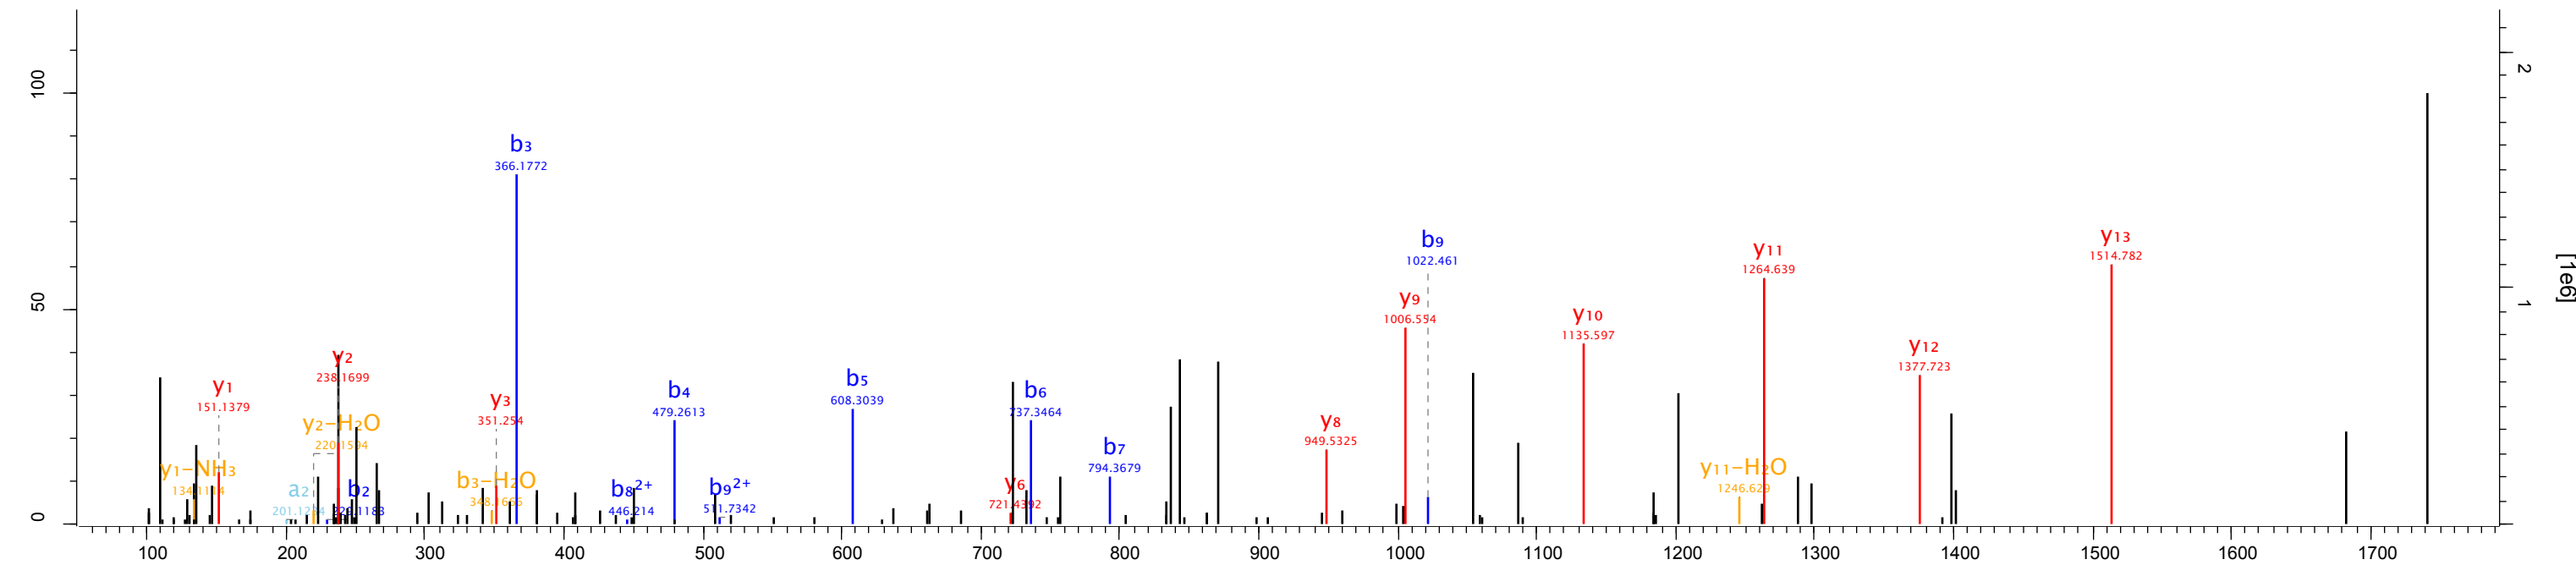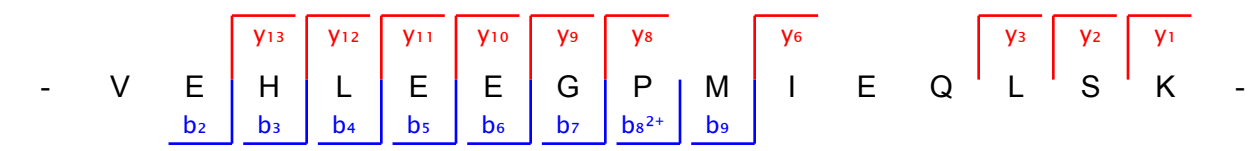

Raw file 20180707\_MaS\_A375SR\_ML\_proteome\_2\_03 Scan 22014 Method FTMS; HCD Score 72.2 m/z 371.57 Gene names BPI

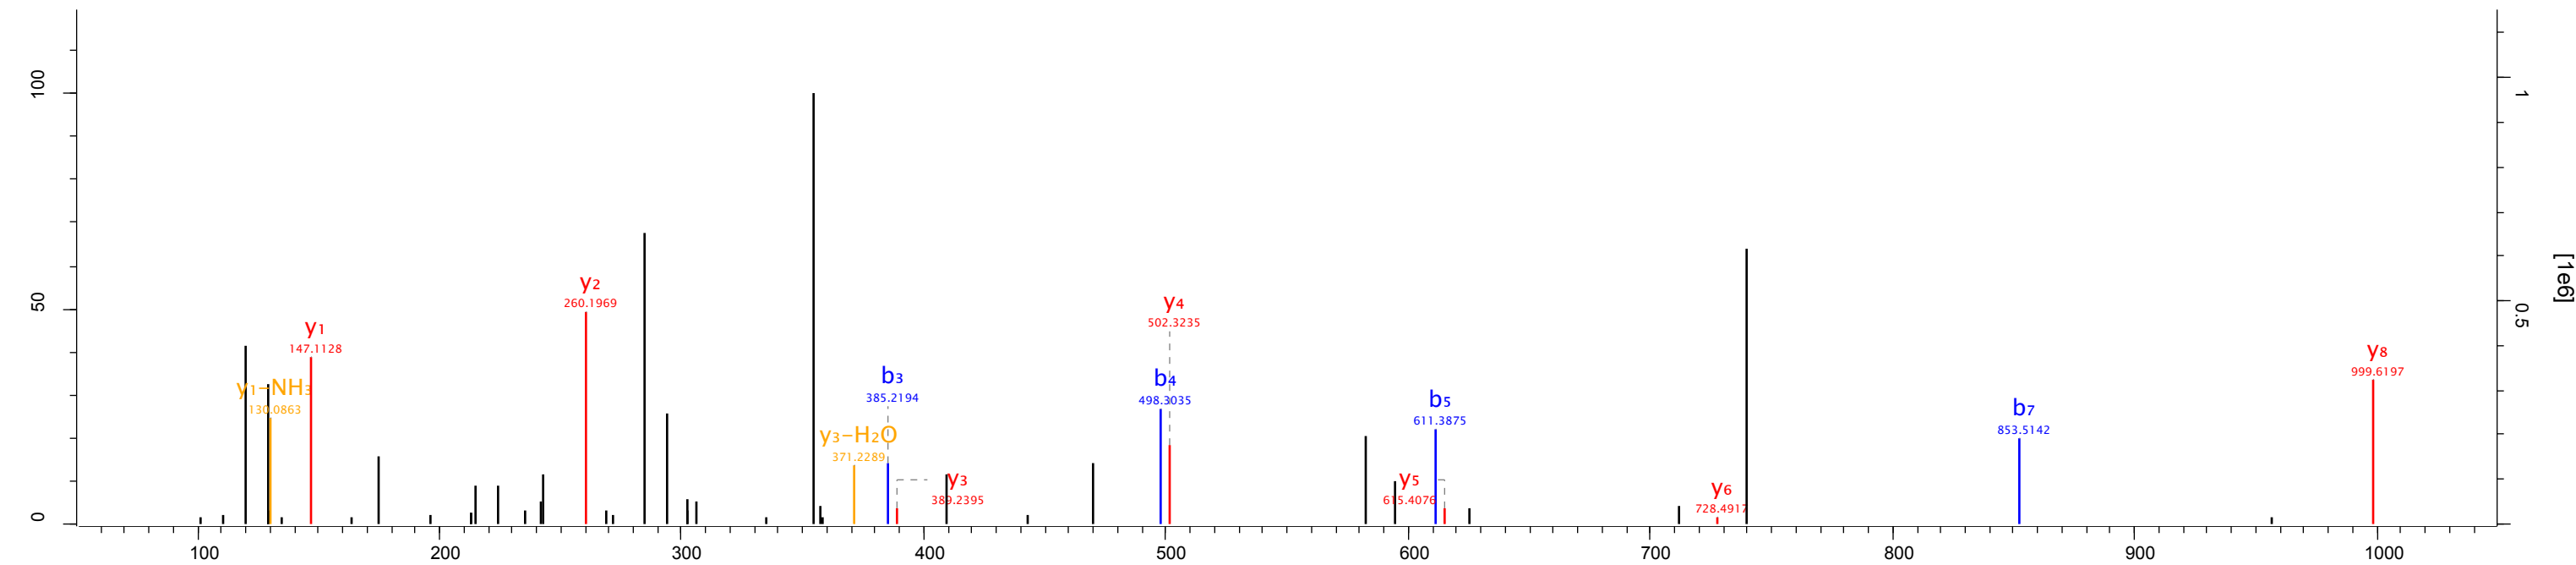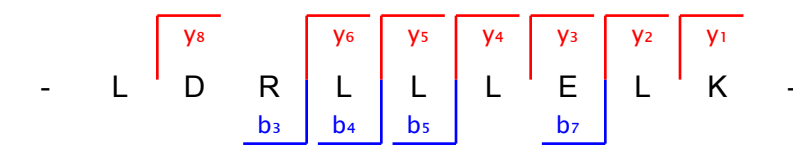

Raw file 20180707\_MaS\_A375SR\_ML\_proteome\_2\_03 Scan 2974 Method FTMS; HCD Score 45.91 m/z 523.29

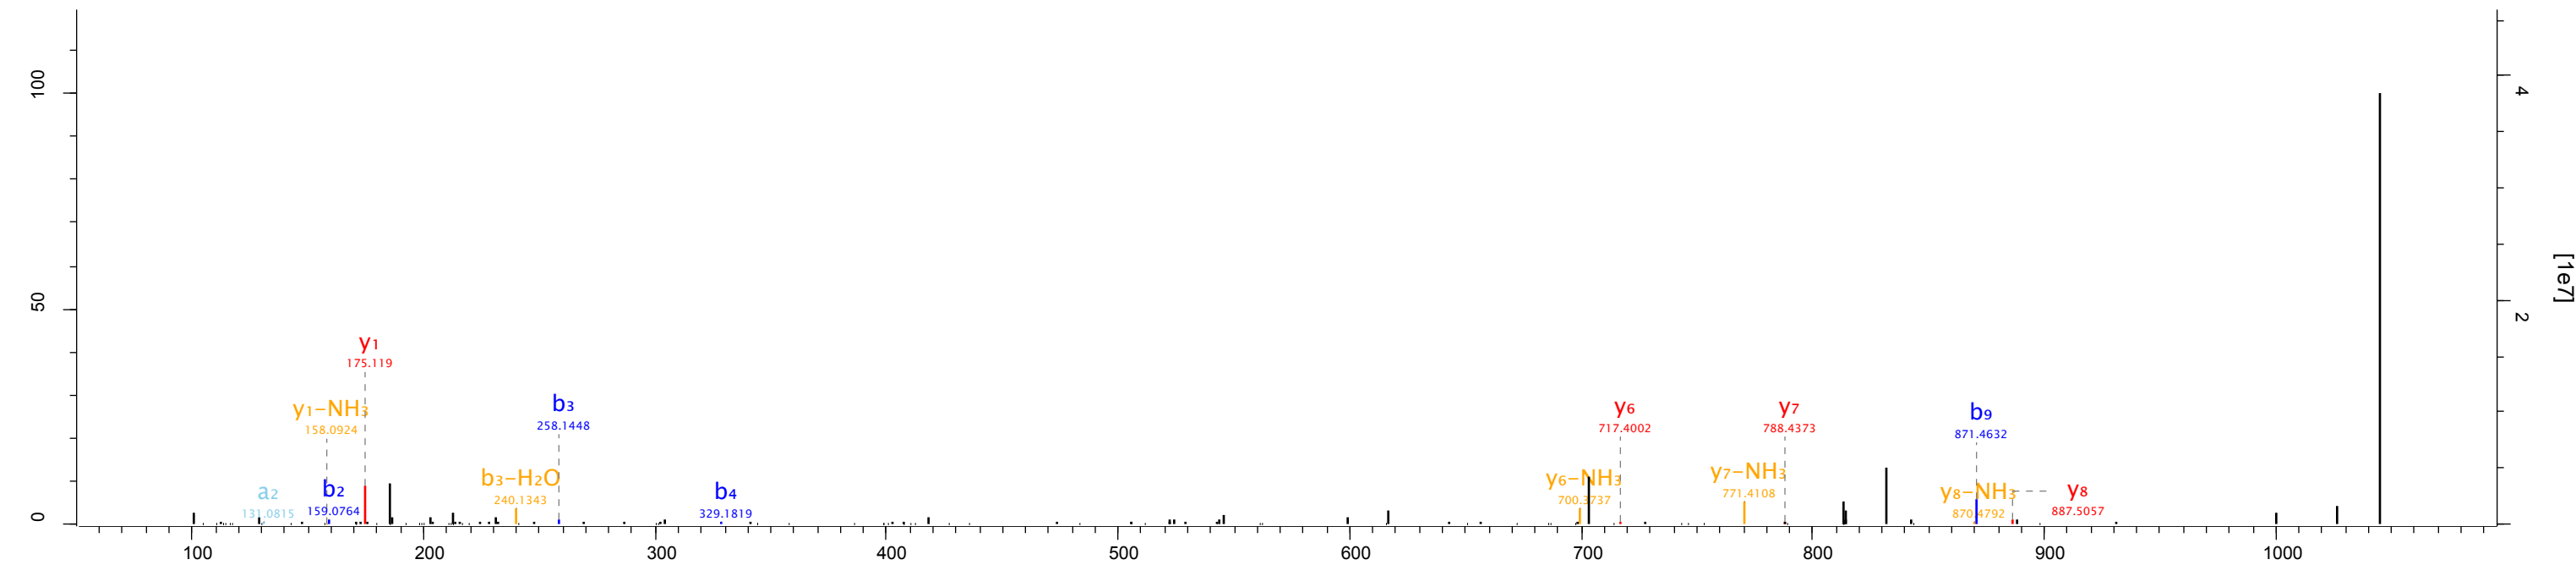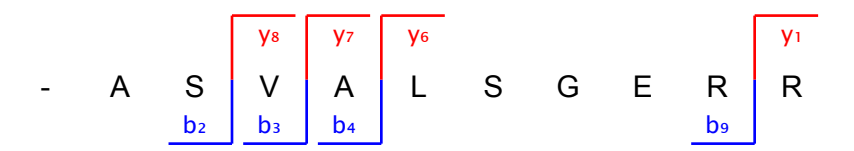

Raw file: 20180707\_MaS\_A375SR\_ML\_proteome\_2\_04  
 Scan: 12434 Method: FTMS; HCD Score: 40.72 m/z: 619.28 Gene names: GHRH

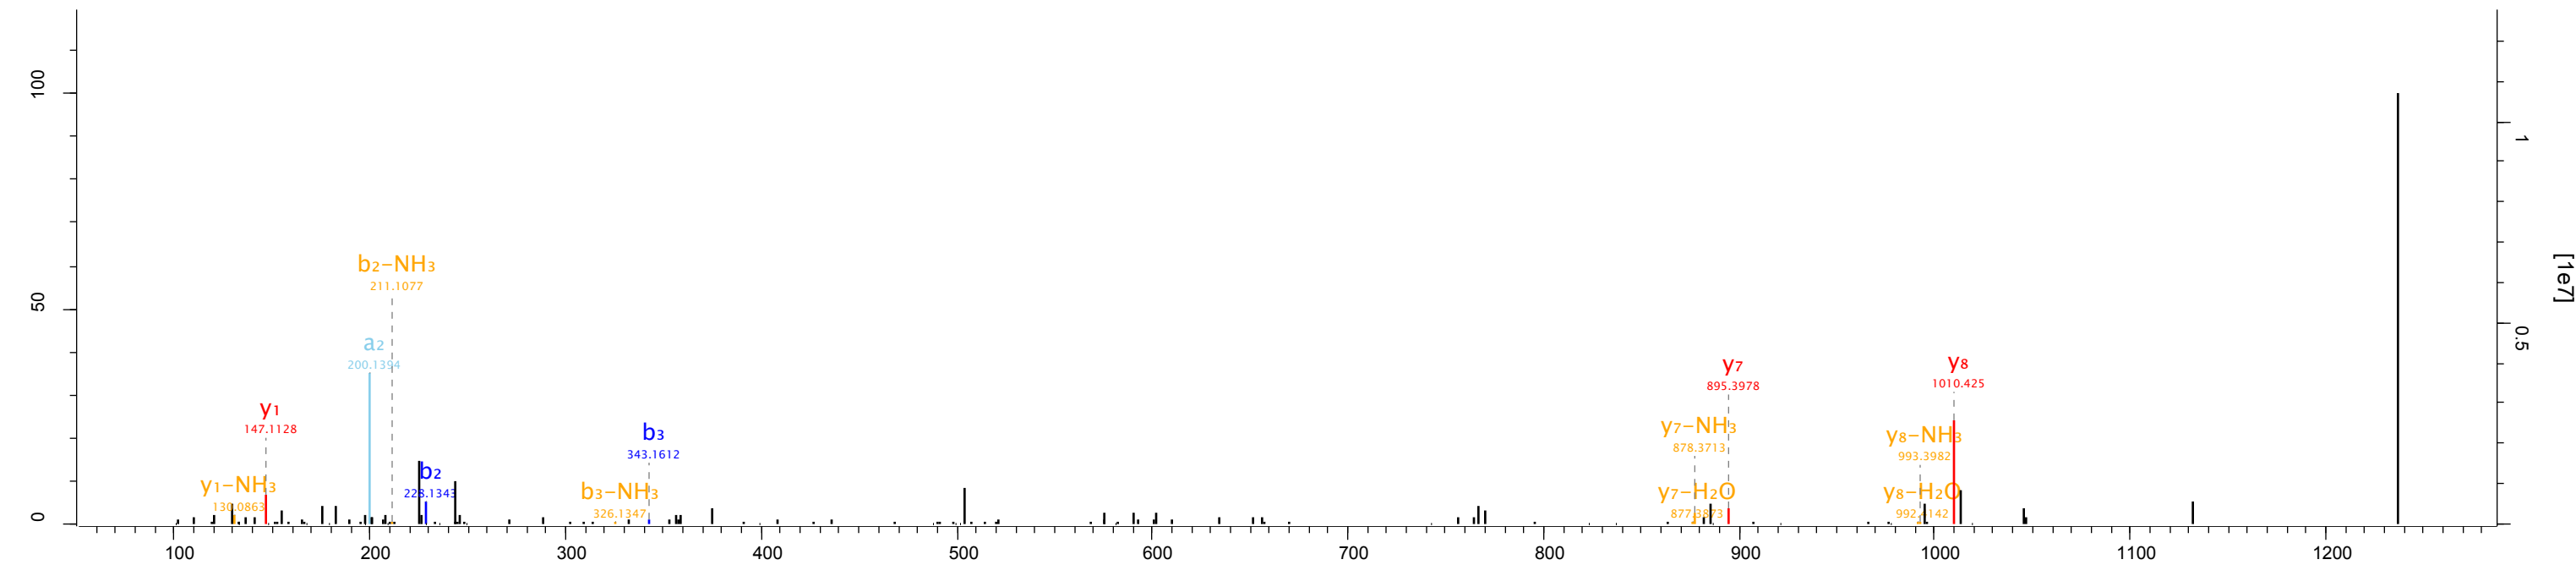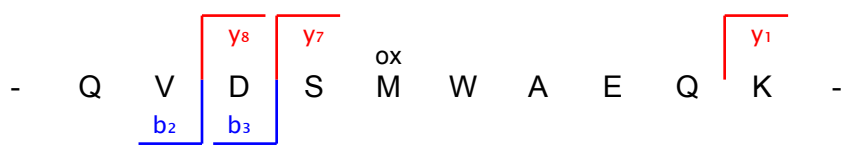

Raw file  
20180707\_MaS\_A375SR\_ML\_proteome\_2\_04

Scan: 21854  
Method: FTMS; HCD  
Score: 117.62  
m/z: 938.44  
Gene names: IFT43;DKFZp686P0738;GJC1

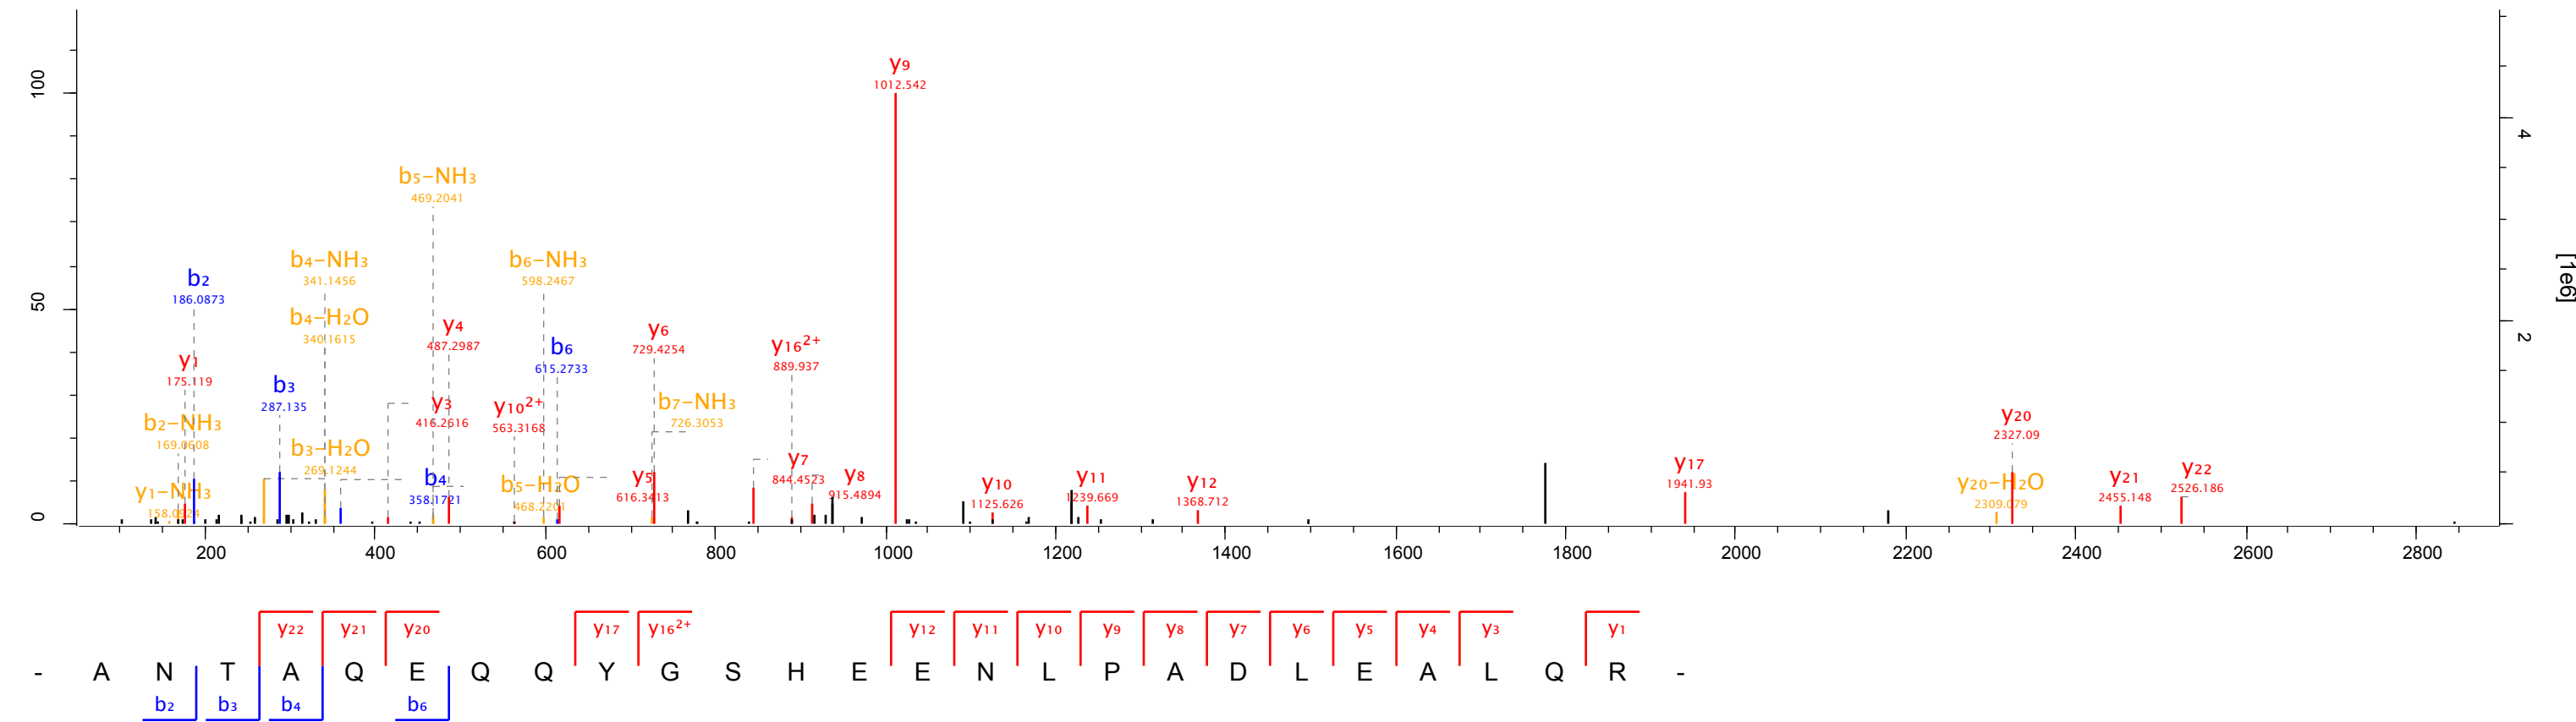

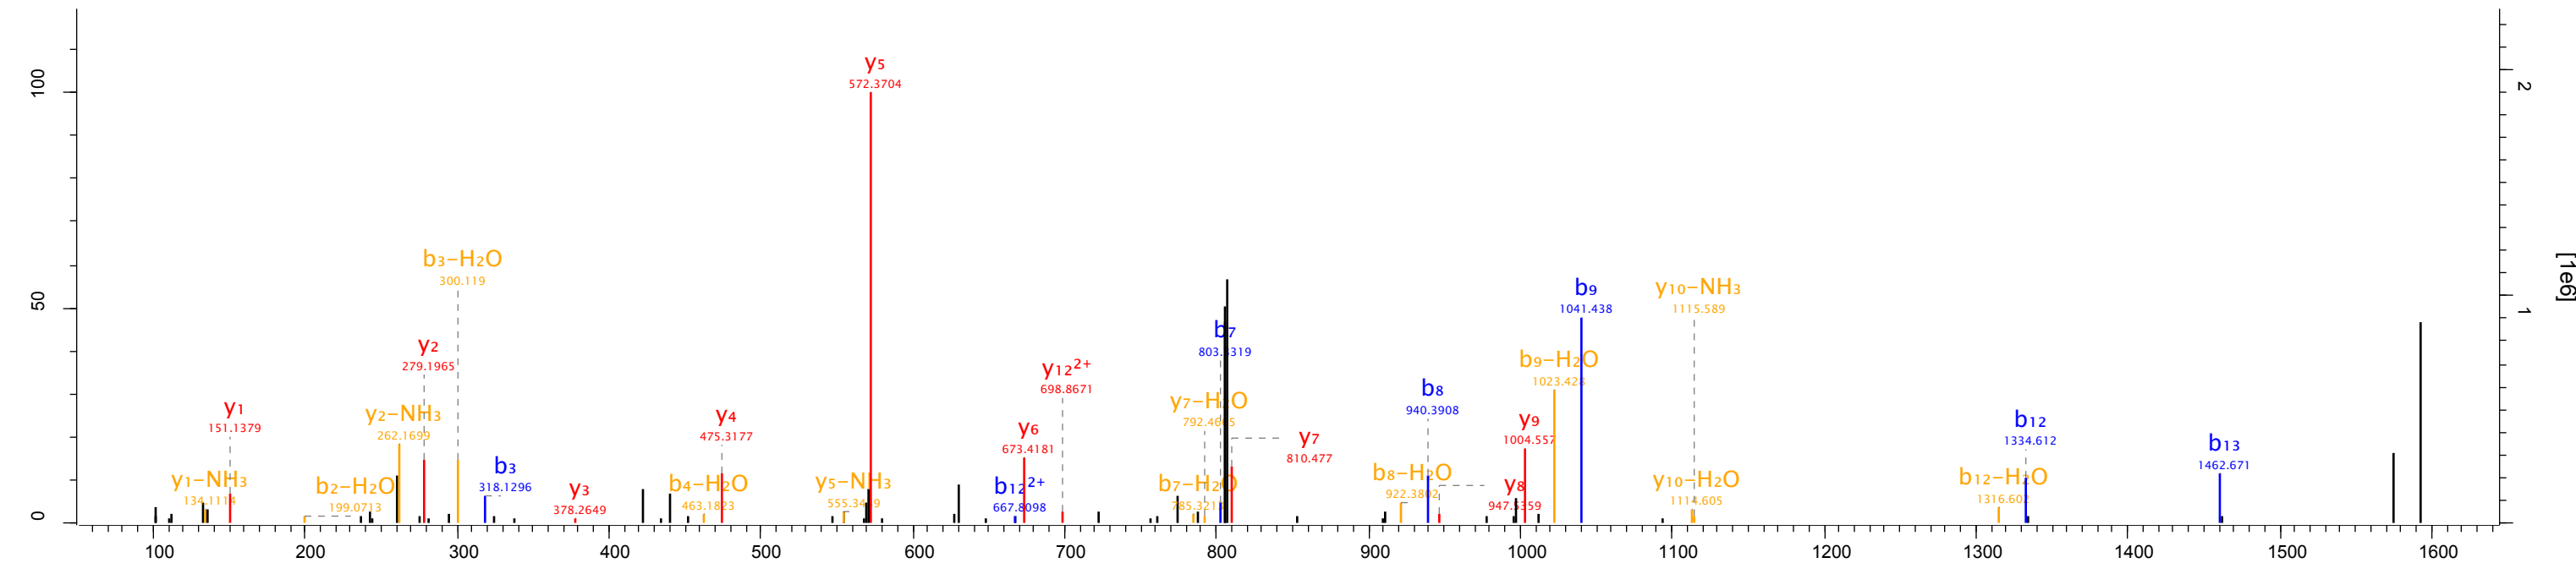

- E S y12<sup>2+</sup> T Y Q y9 y8 y7 y6 y5 y4 y3 y2 y1 -

b3 b7 b8 b9 b12 b13



Raw file  
20180707\_MaS\_A375SR\_ML\_proteome\_2\_04

Scan 7994 Method FTMS; HCD Score 65.72 m/z 576.29

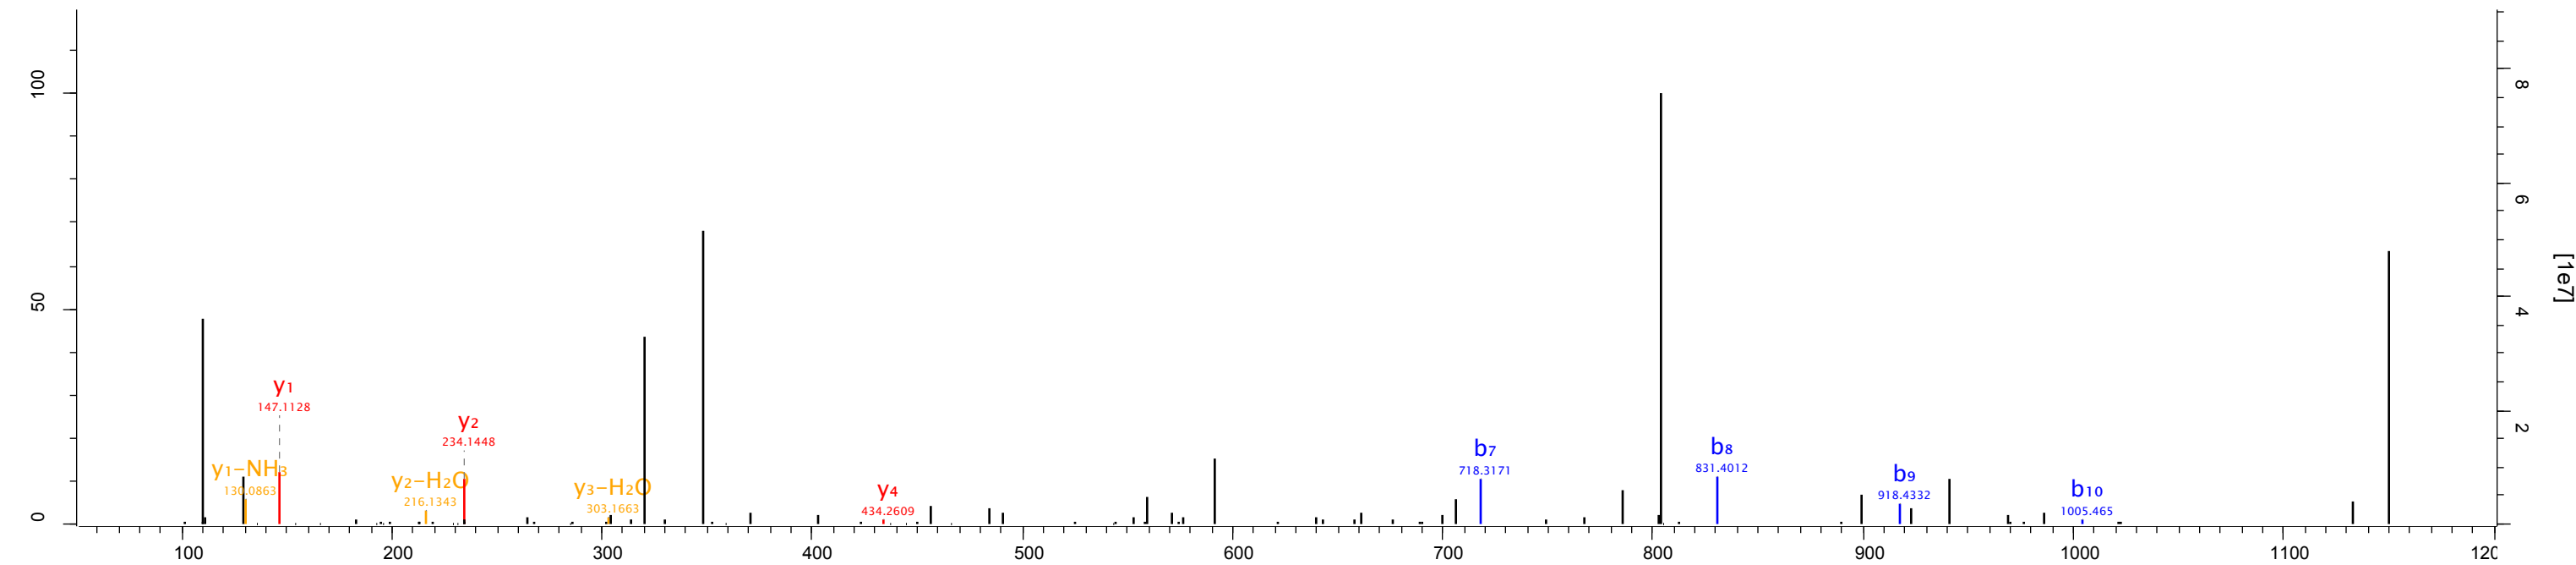

- ph S S G V I P P L S S K -  
                  b7 b8 b9 b10

Raw file  
20180707\_MaS\_A375SR\_ML\_proteome\_2\_04

Scan 9794 Method FTMS; HCD Score 54.34 m/z 513.91 Gene names NAP1L6

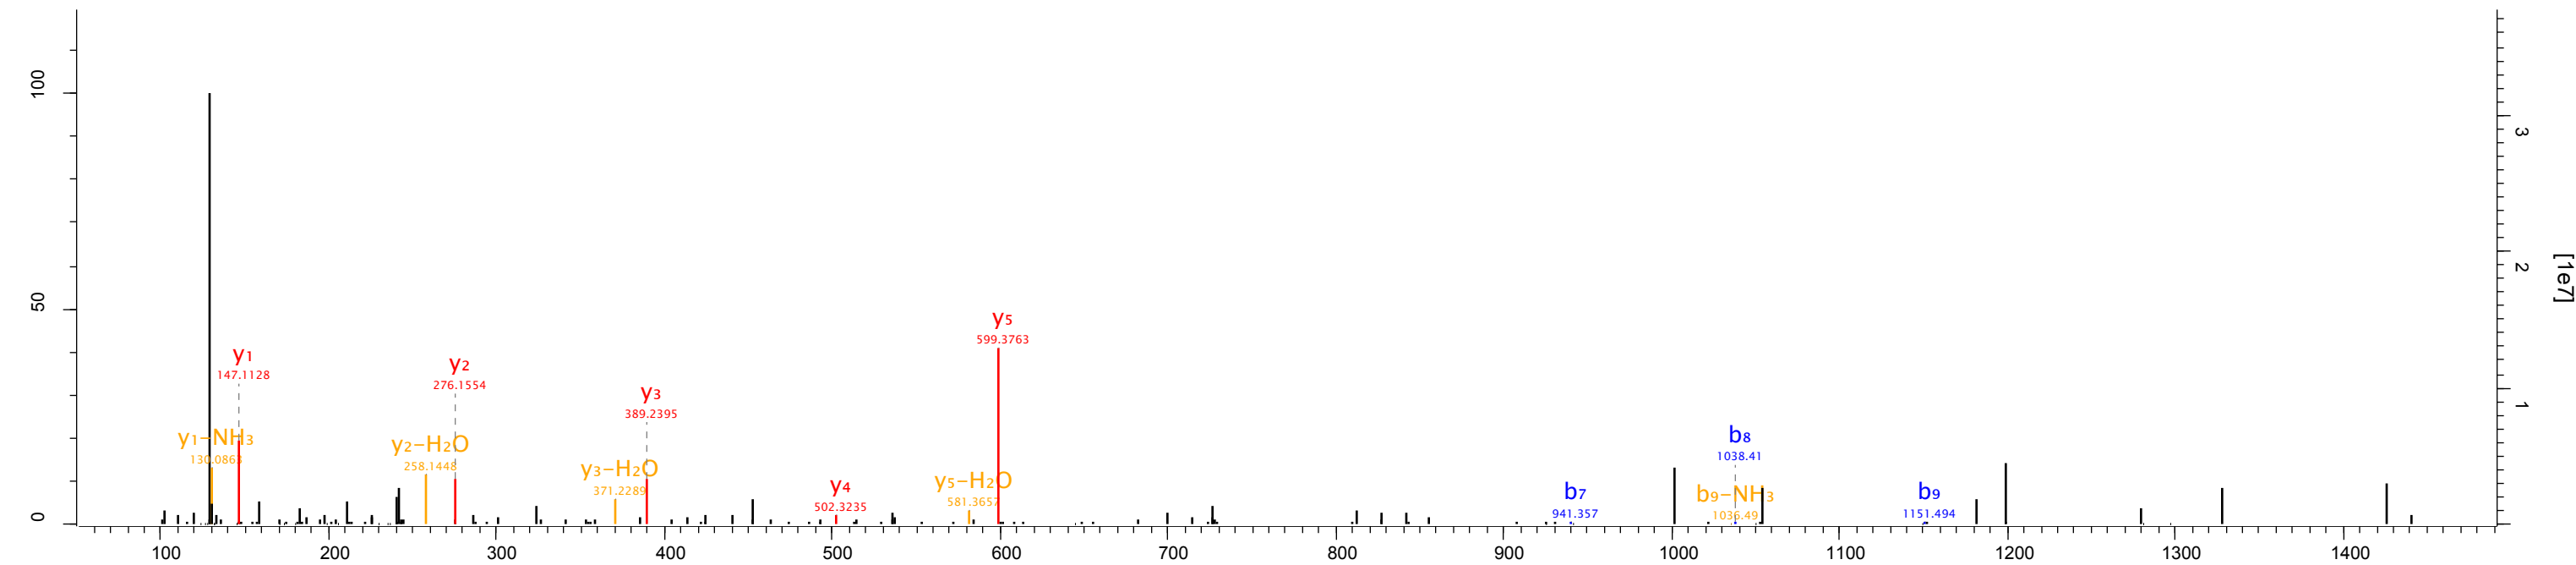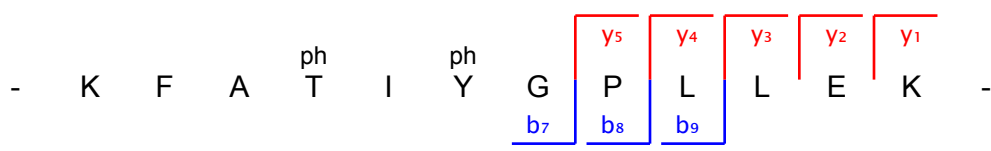

Raw file 20180707\_MaS\_A375SR\_ML\_proteome\_2\_05 Scan 25644 Method FTMS; HCD Score 41.7 m/z 656.87

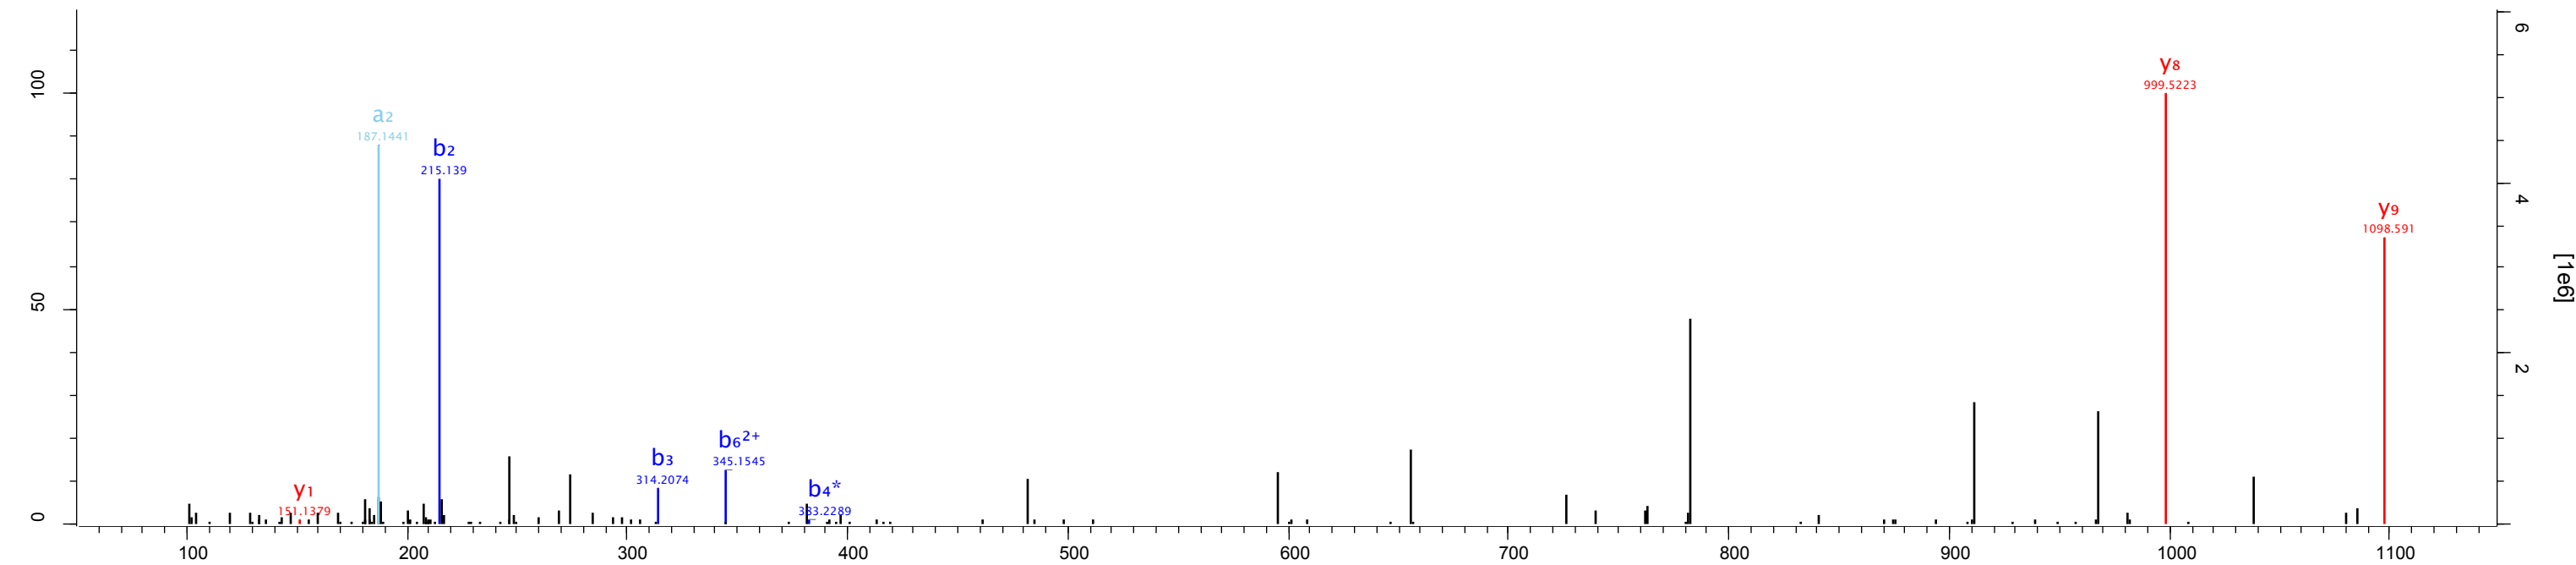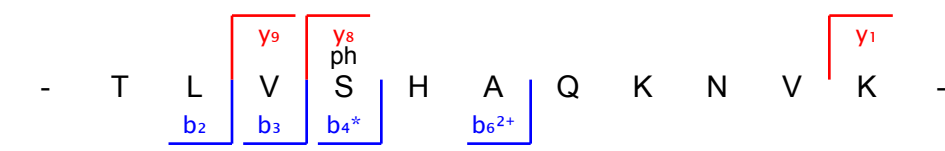

Raw file  
 20180707\_MaS\_A375SR\_ML\_proteome\_2\_05  
 Scan 2804 Method FTMS; HCD Score 44.97 m/z 327.18

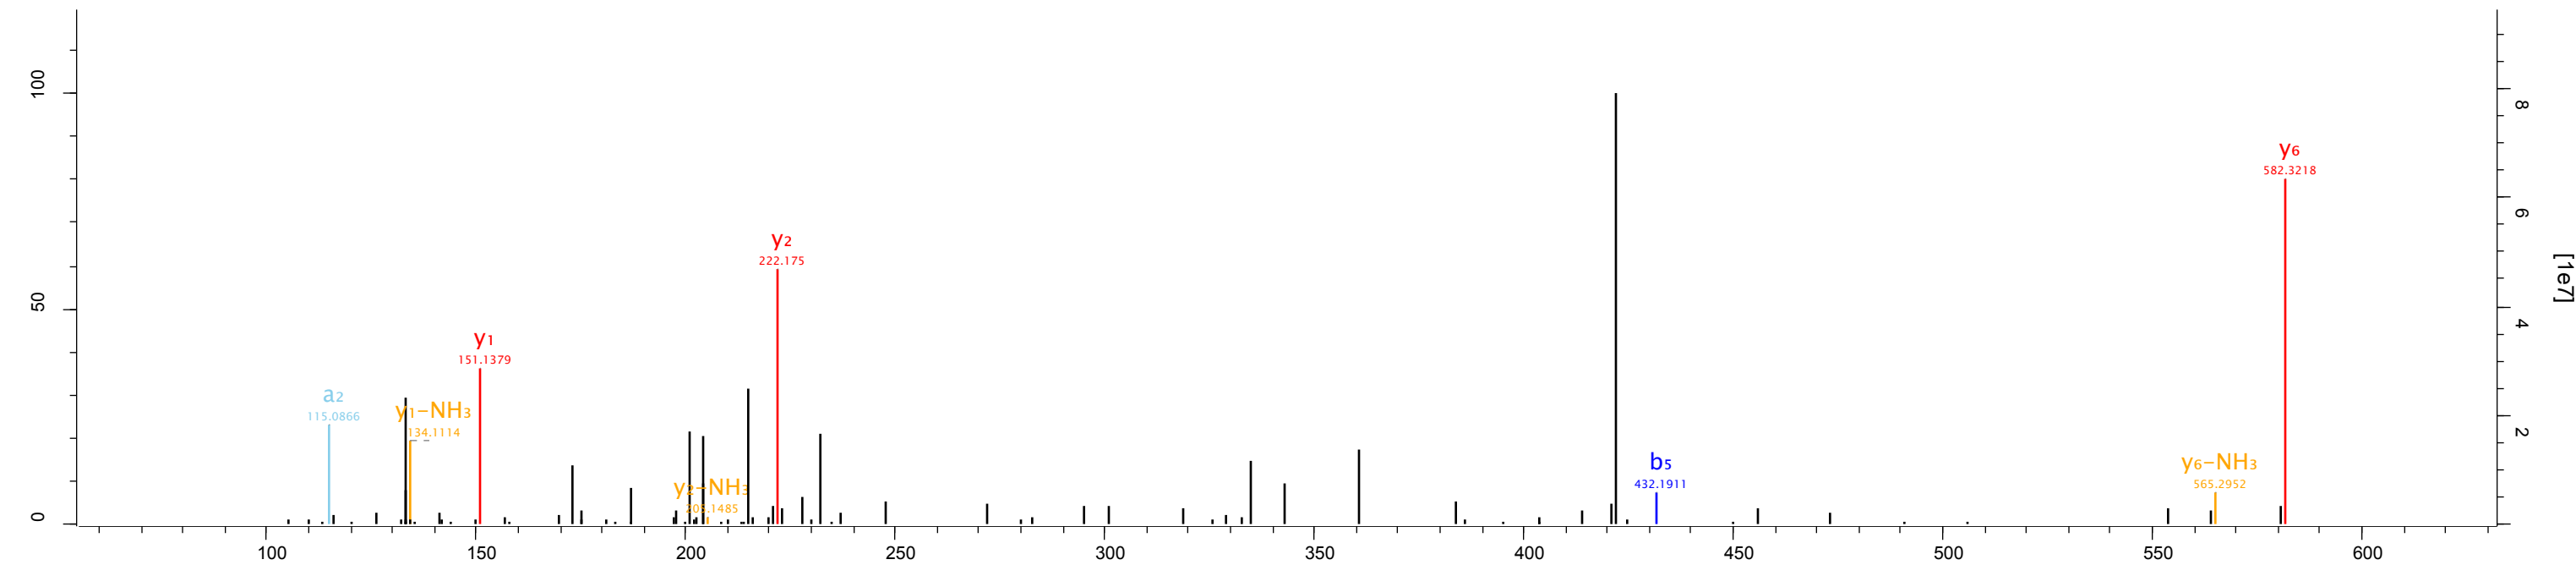

Raw file 20180707\_MaS\_A375SR\_ML\_proteome\_2\_05 Scan 3784 Method FTMS; HCD Score 54.06 m/z 413.69

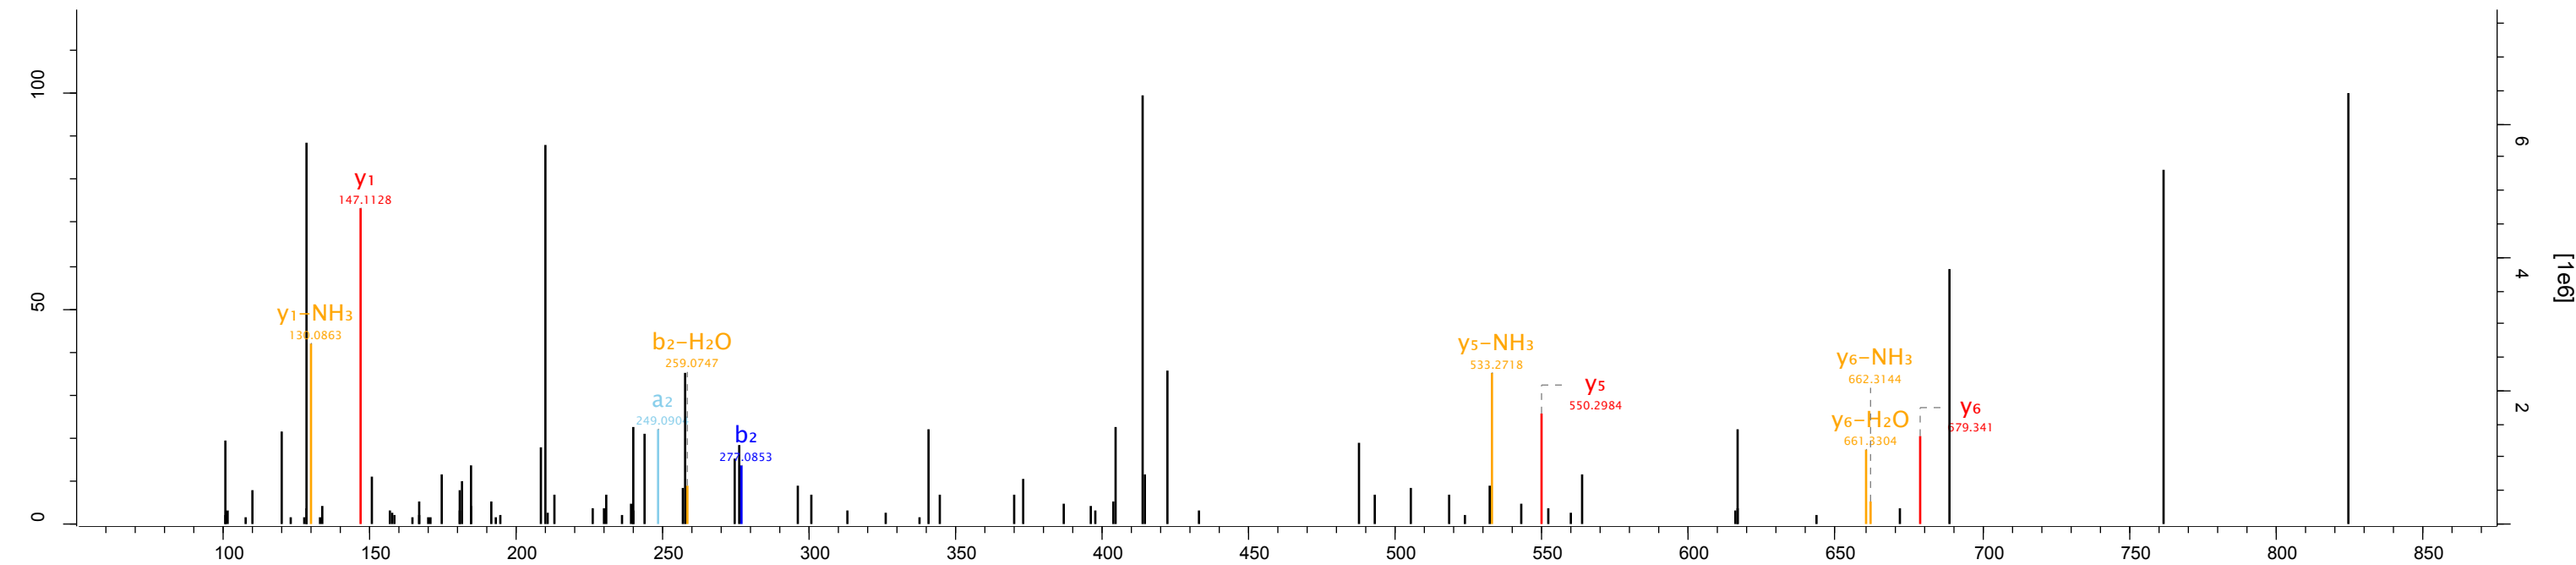

Raw file: 20180707\_MaS\_A375SR\_ML\_proteome\_2\_06  
 Scan: 29054 Method: FTMS; HCD Score: 90.15 m/z: 570.82 Gene names: MT-ND2

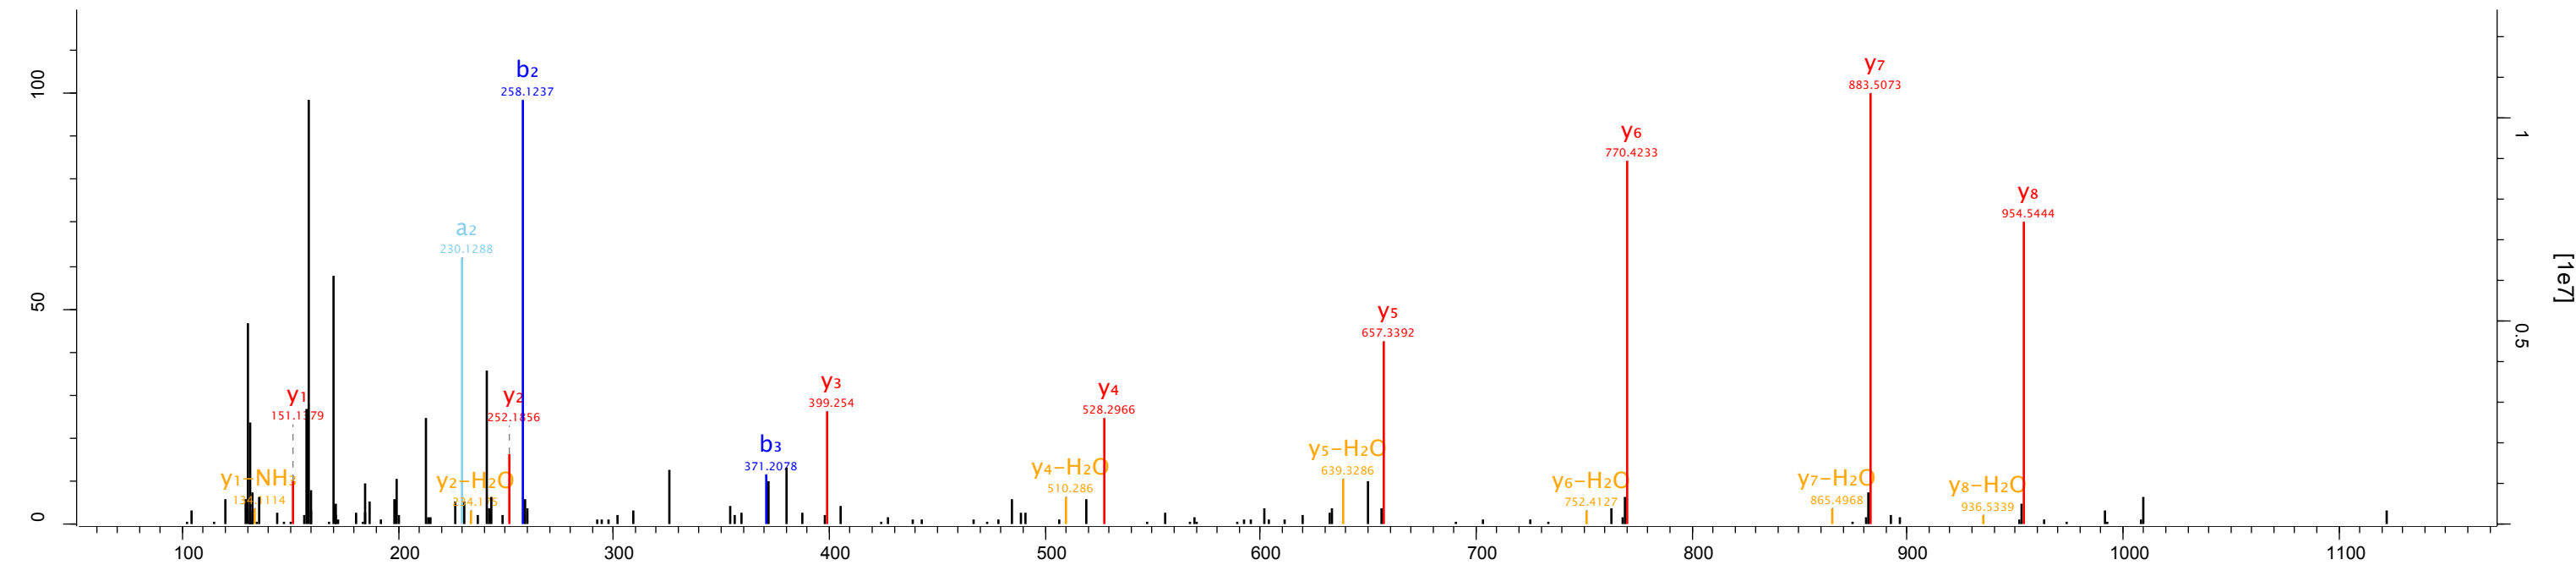

Raw file 20180707\_MaS\_A375SR\_ML\_proteome\_2\_06 Scan 9714 Method FTMS; HCD Score 69.28 m/z 560.83 Gene names POLR2F

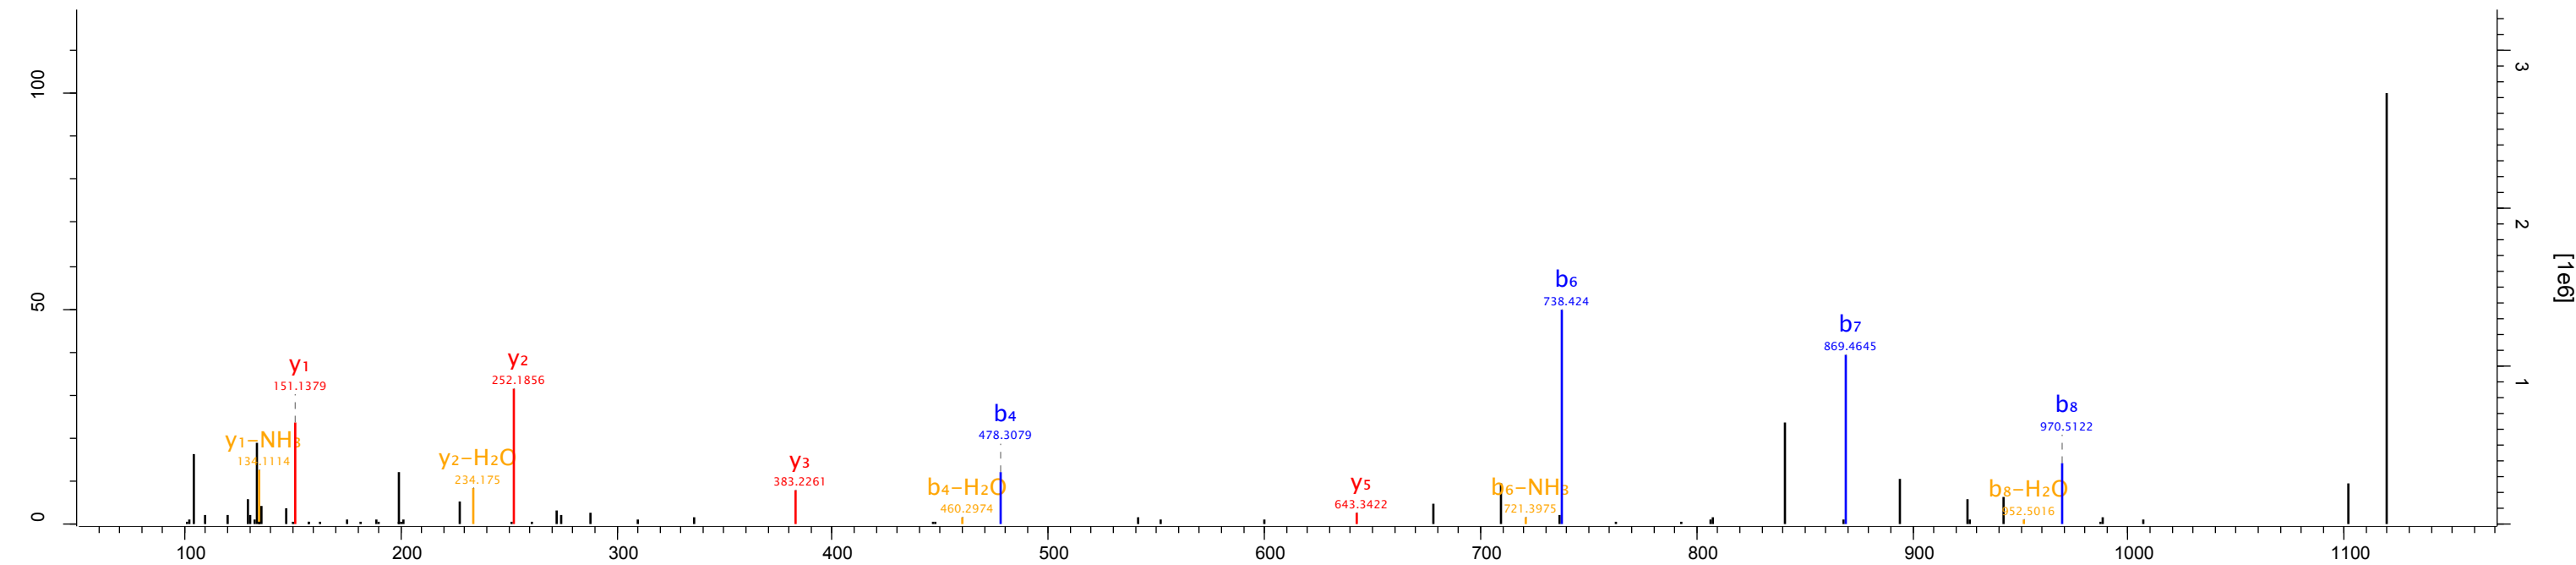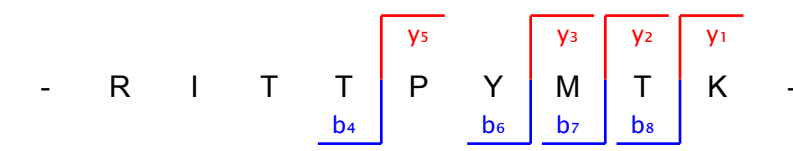

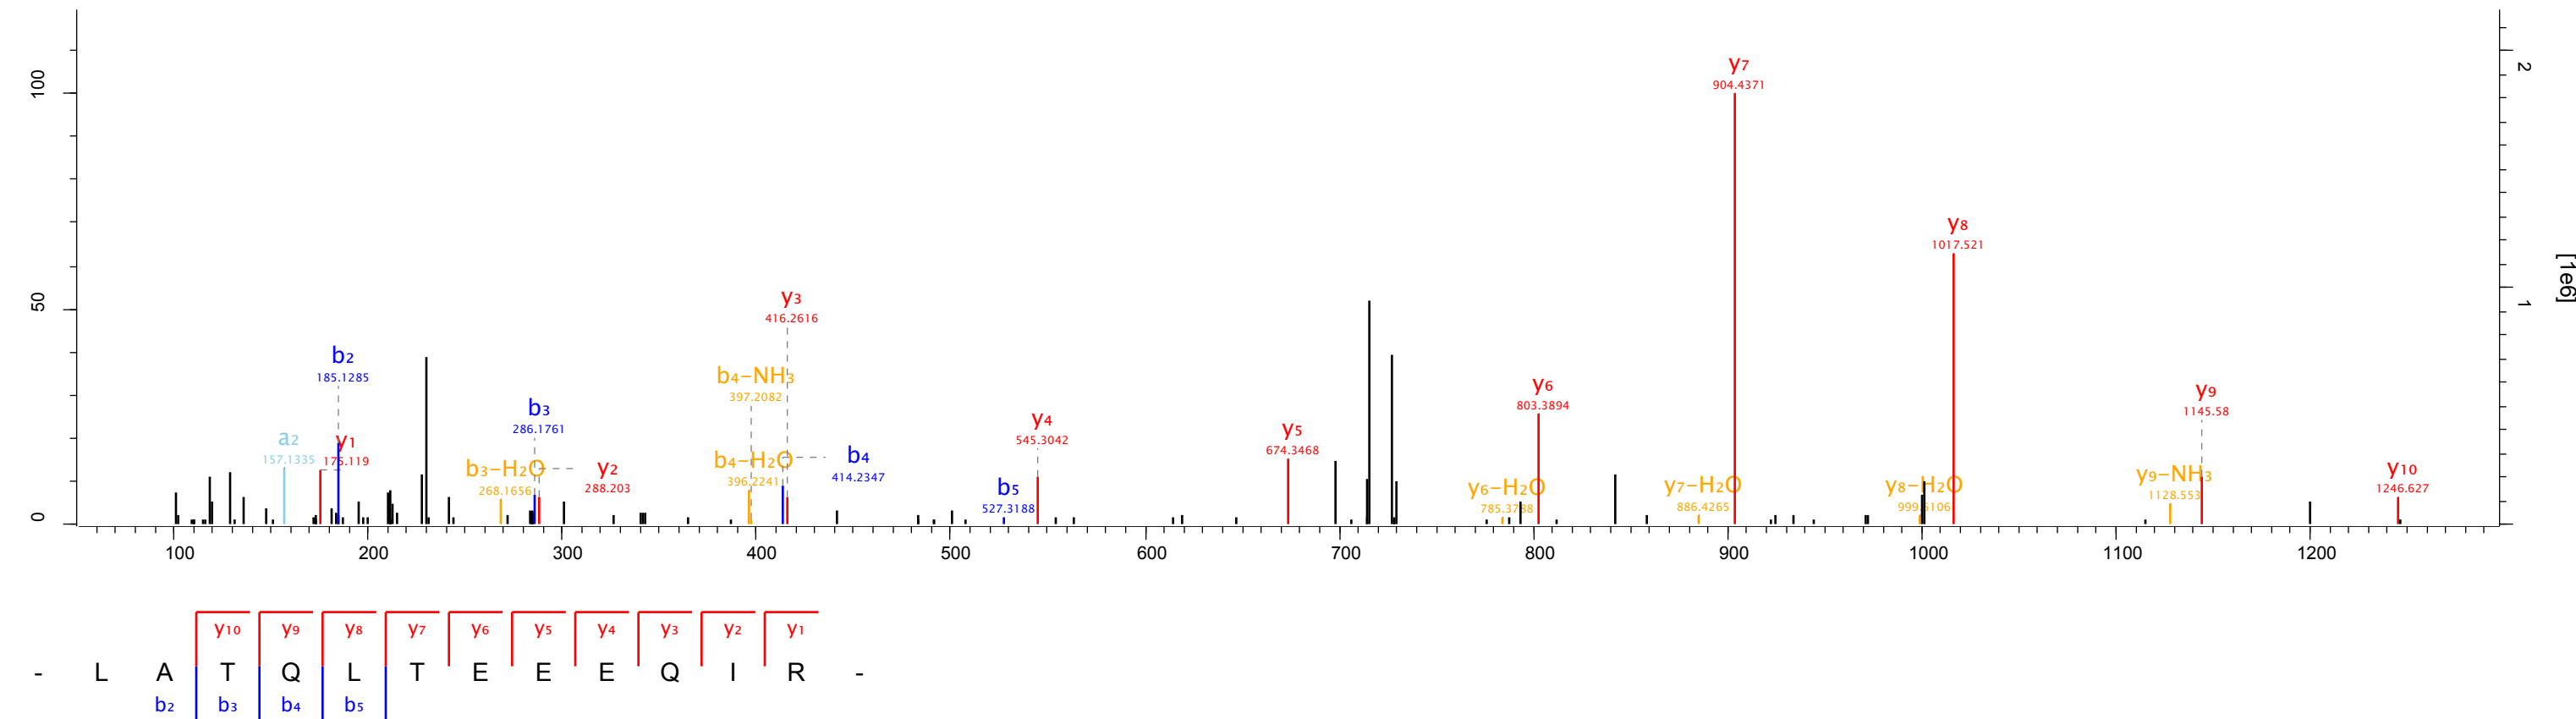



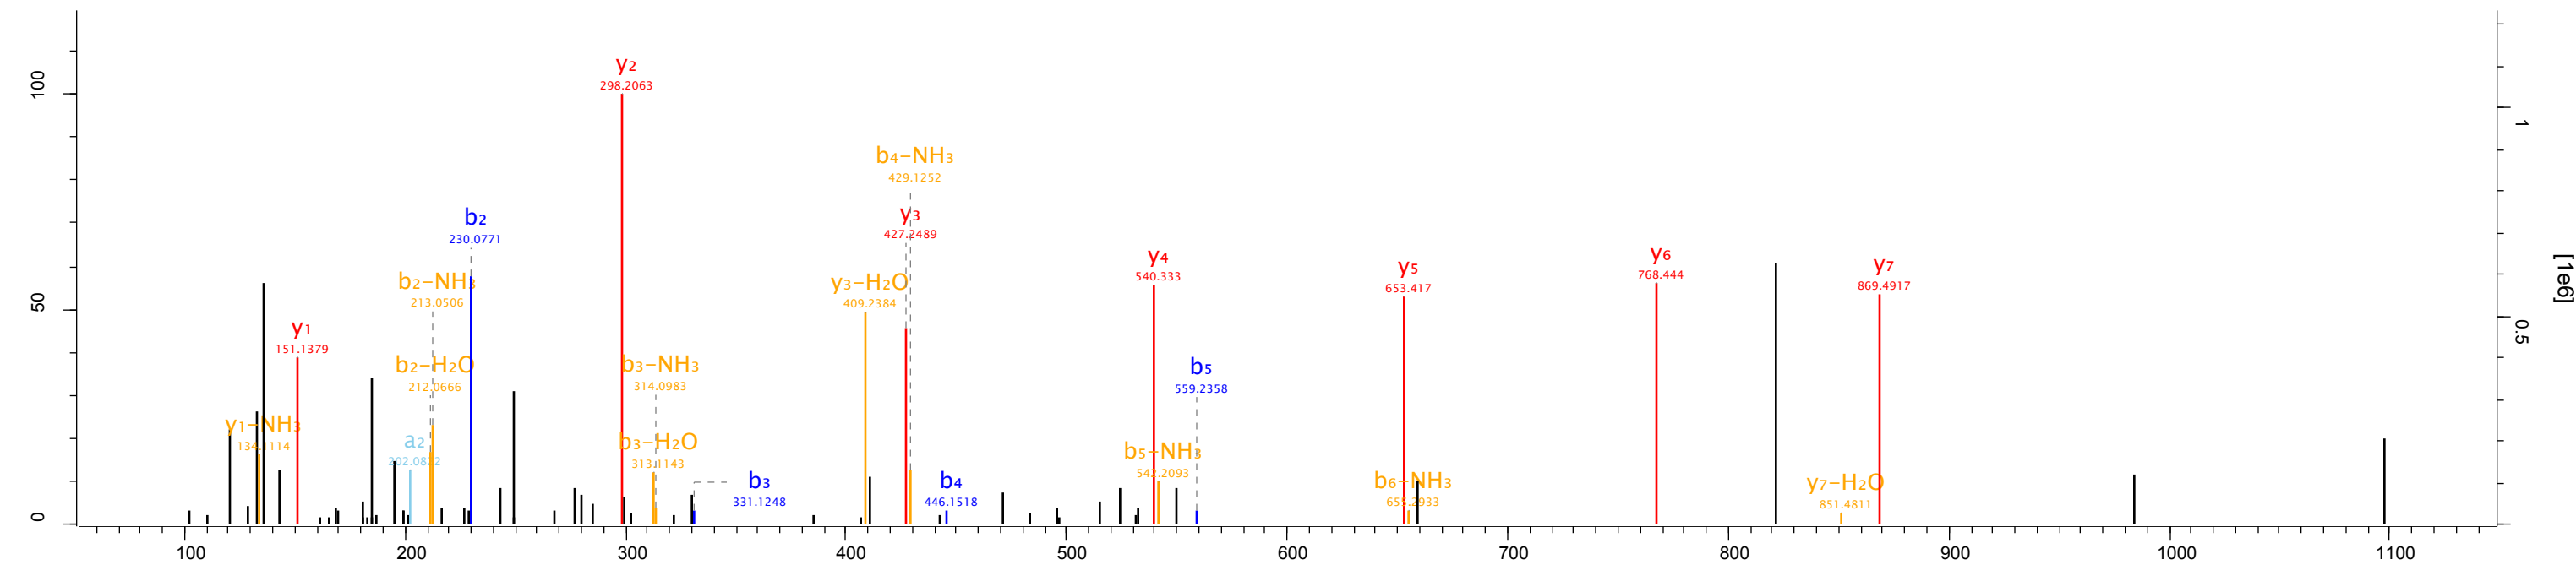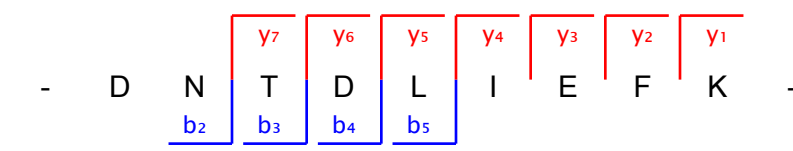

Raw file  
20180707\_MaS\_A375SR\_ML\_proteome\_2\_07

Scan 24414 Method FTMS; HCD Score 95.42 m/z 711.4 Gene names NFE2L1

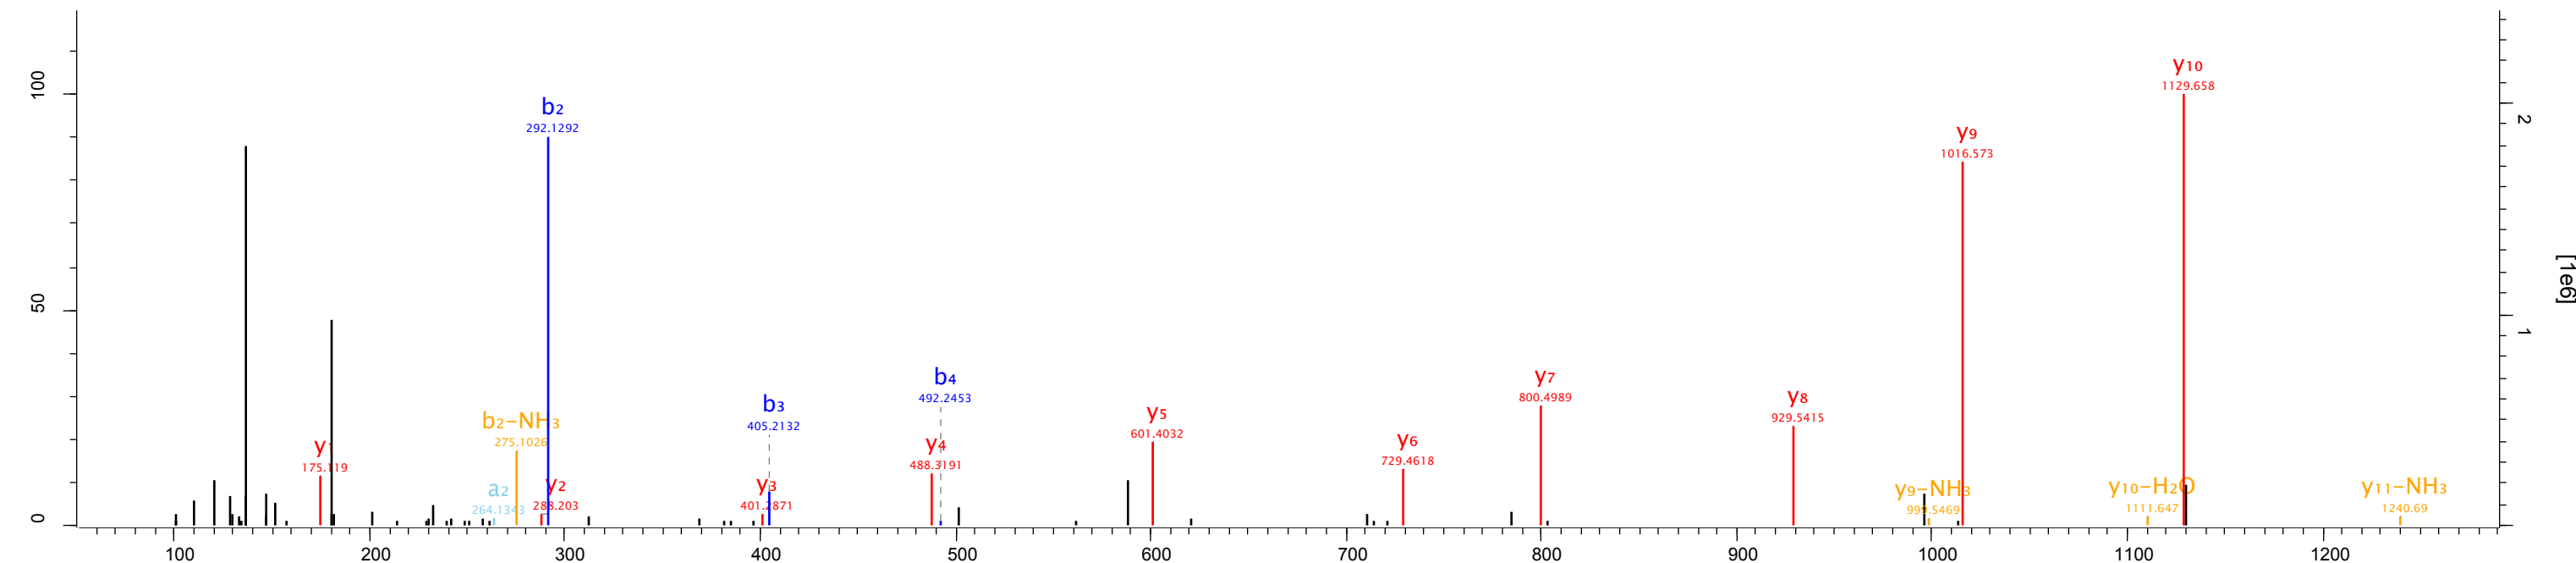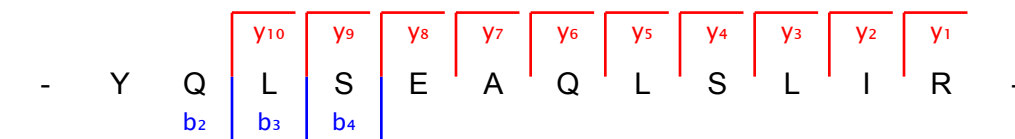

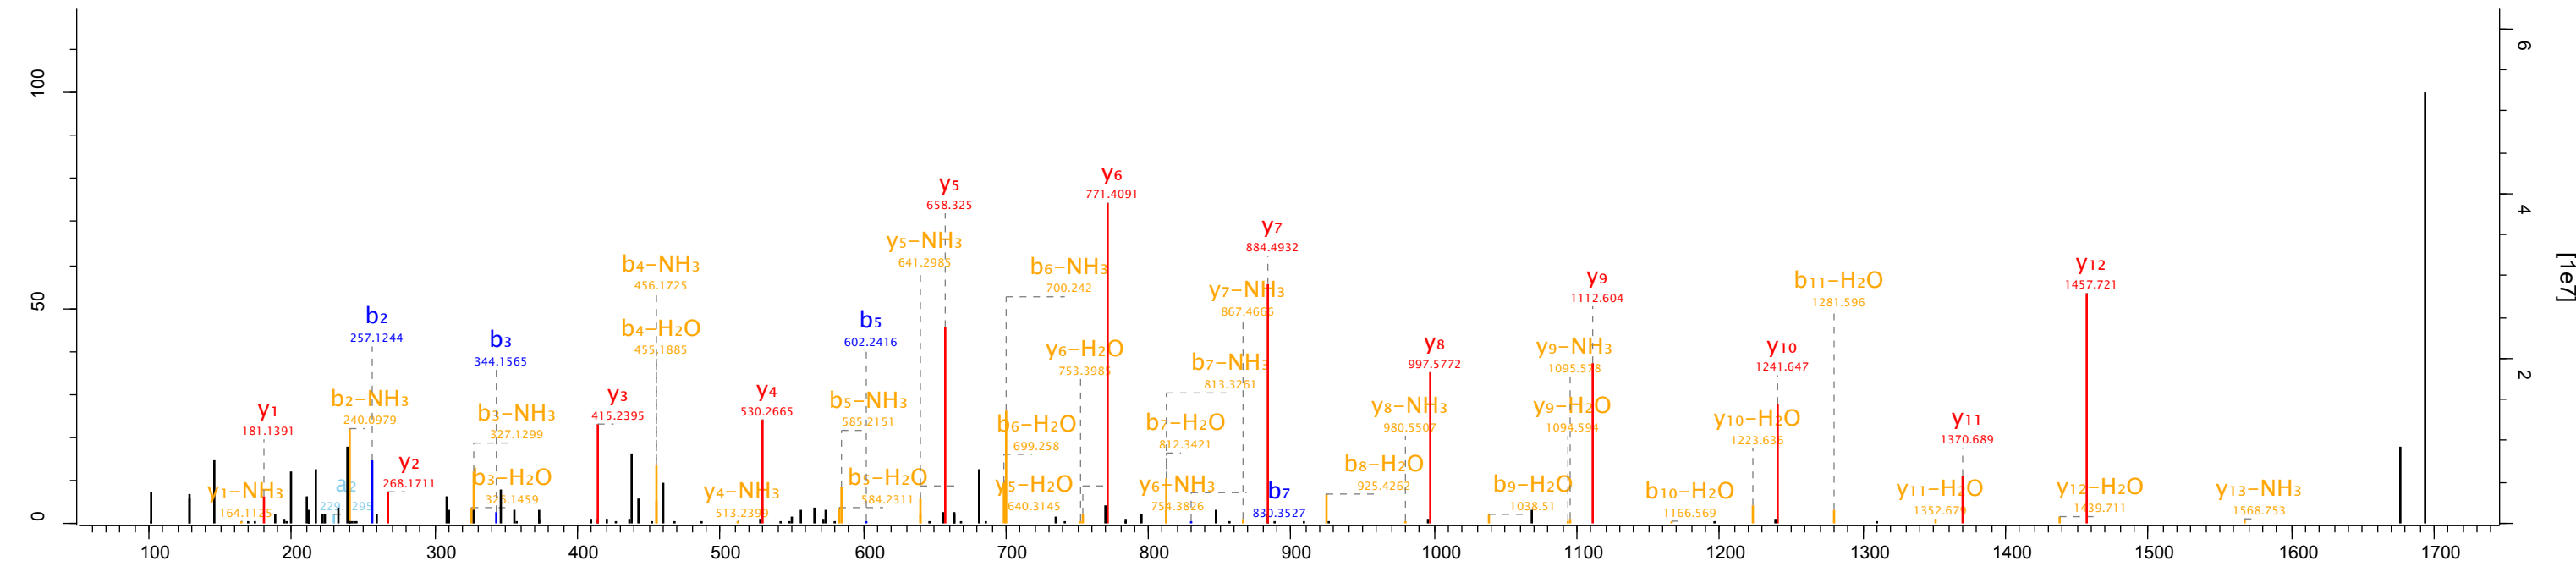

- Q Q S E E D L L L Q D F S R -

b<sub>2</sub>
b<sub>3</sub>
b<sub>5</sub>
b<sub>7</sub>
y<sub>12</sub>
y<sub>11</sub>
y<sub>10</sub>
y<sub>9</sub>
y<sub>8</sub>
y<sub>7</sub>
y<sub>6</sub>
y<sub>5</sub>
y<sub>4</sub>
y<sub>3</sub>
y<sub>2</sub>
y<sub>1</sub>

Raw file: 20180707\_MaS\_A375SR\_ML\_proteome\_2\_08  
 Scan: 21934 Method: FTMS; HCD Score: 118.96 m/z: 696.34 Gene names: SLC31A1

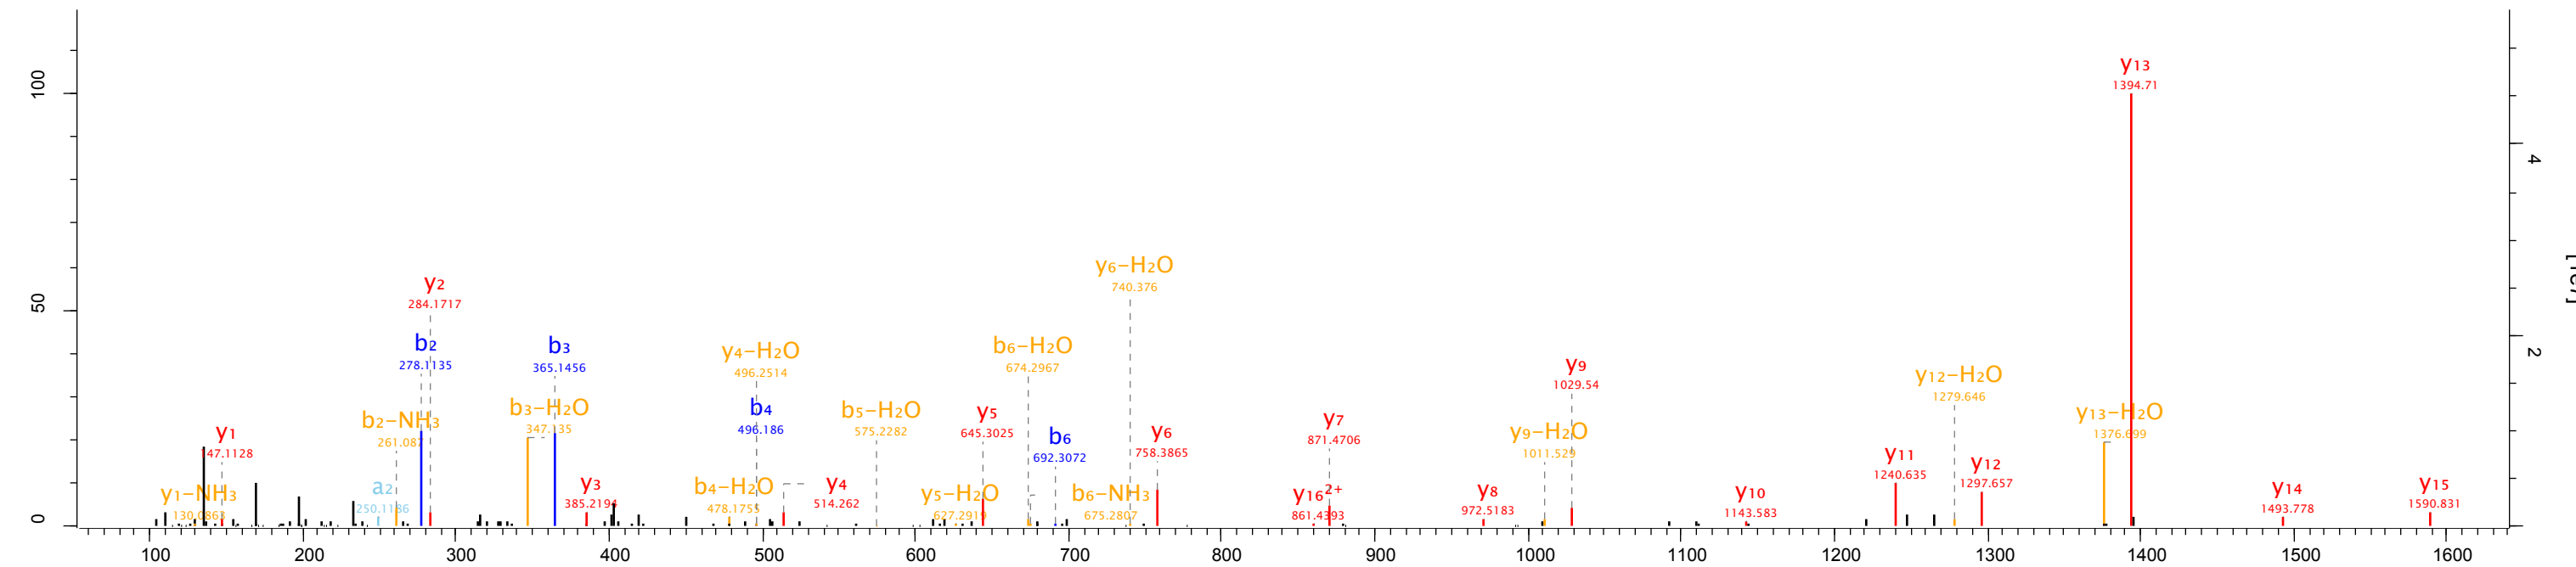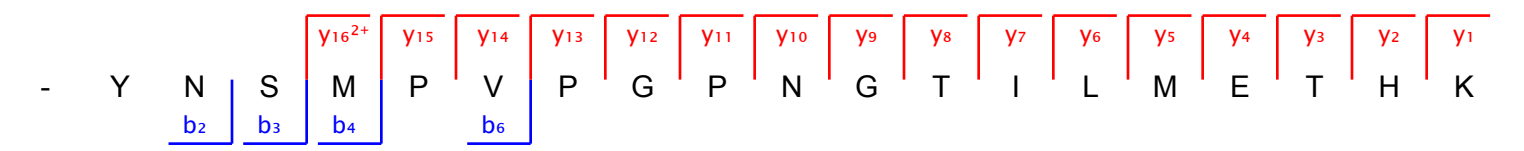

Raw file 20180707\_MaS\_A375SR\_ML\_proteome\_2\_09 Scan 27214 Method FTMS; HCD Score 79.49 m/z 758.38 Gene names CCDC183

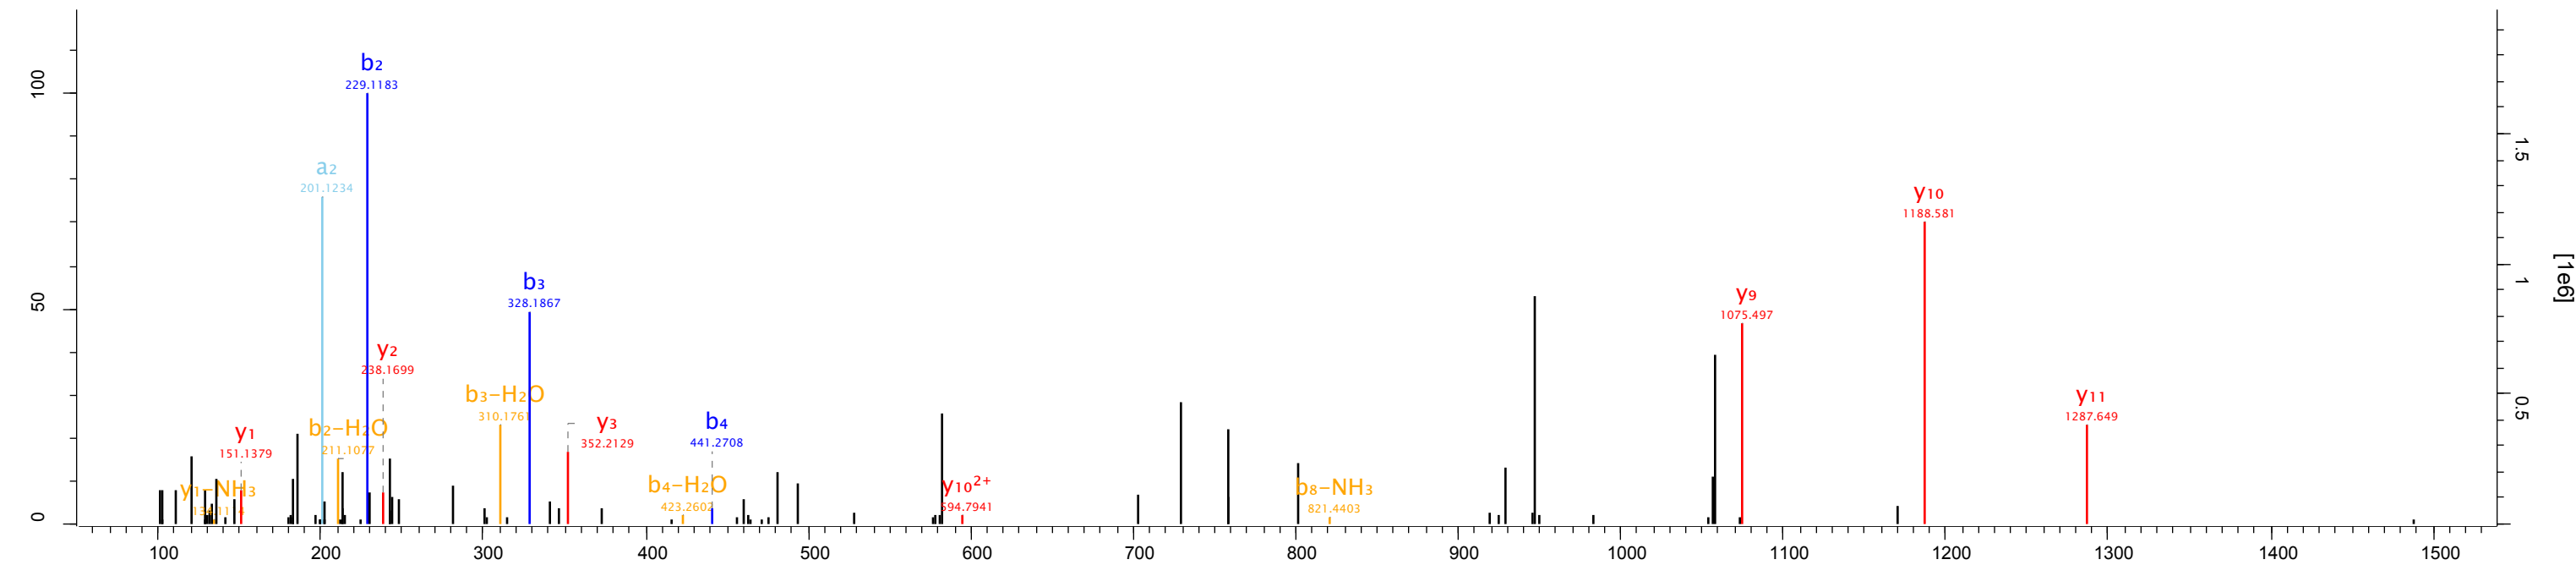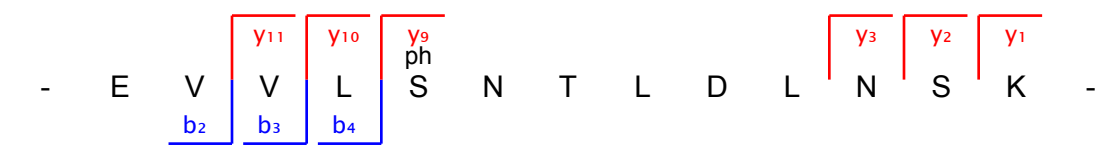

Raw file  
20180707\_MaS\_A375SR\_ML\_proteome\_2\_10

Scan 4014 Method FTMS; HCD Score 57.59 m/z 495.75 Gene names NRXN2

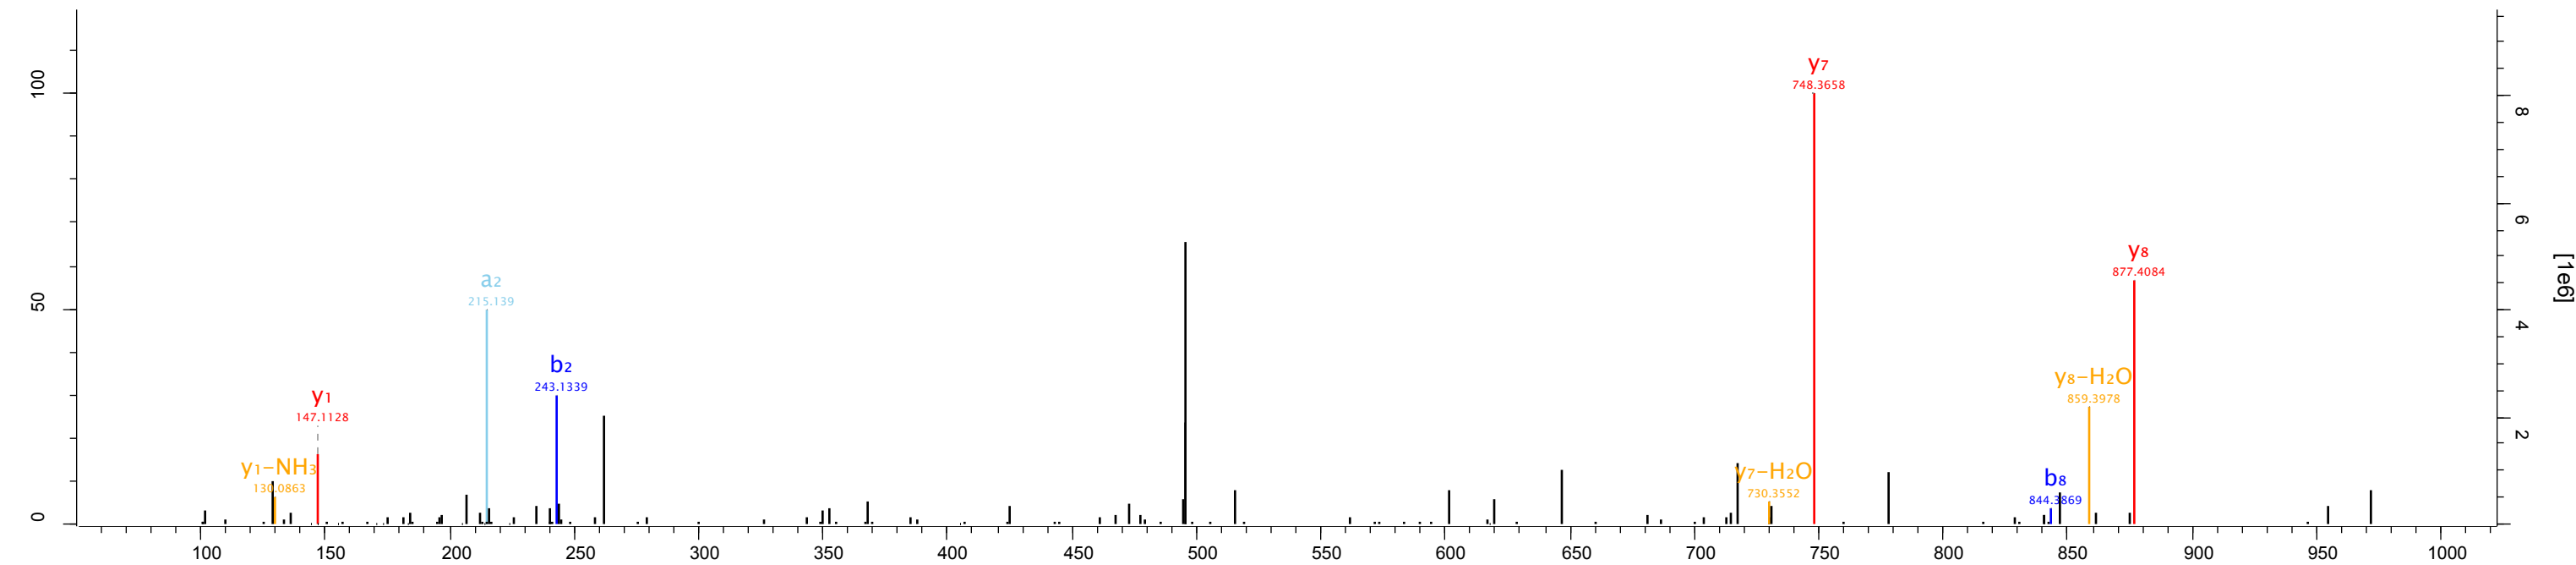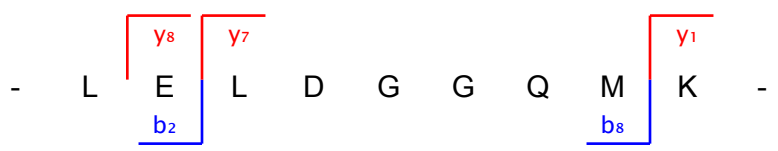

Raw file  
20180707\_MaS\_A375SR\_ML\_proteome\_2\_11

Scan 10484 Method FTMS; HCD Score 188.09 m/z 782.39 Gene names RPA3OS

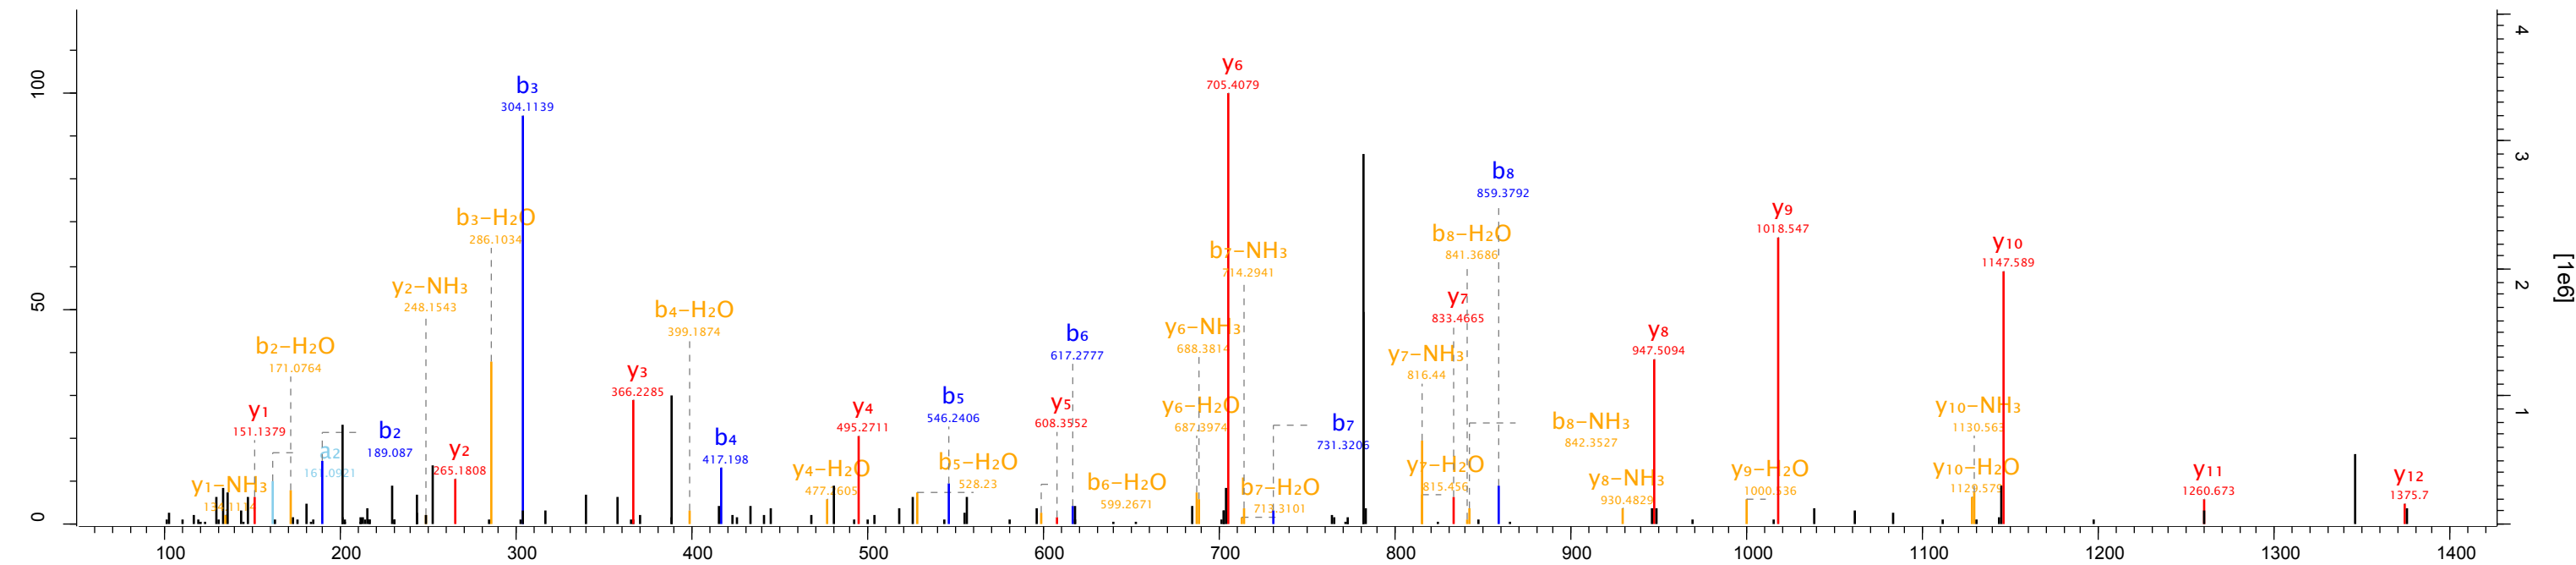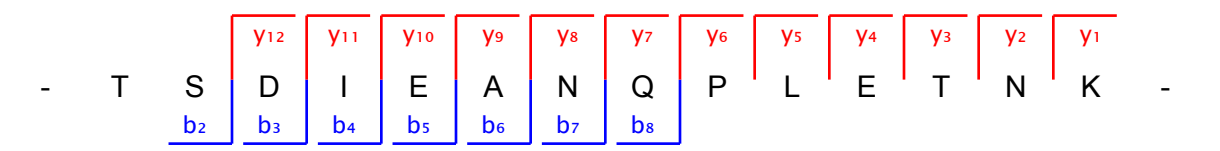

Raw file  
20180707\_MaS\_A375SR\_ML\_proteome\_2\_11

Scan 28444 Method FTMS; HCD Score 182.02 m/z 941.82 Gene names PKNOX1

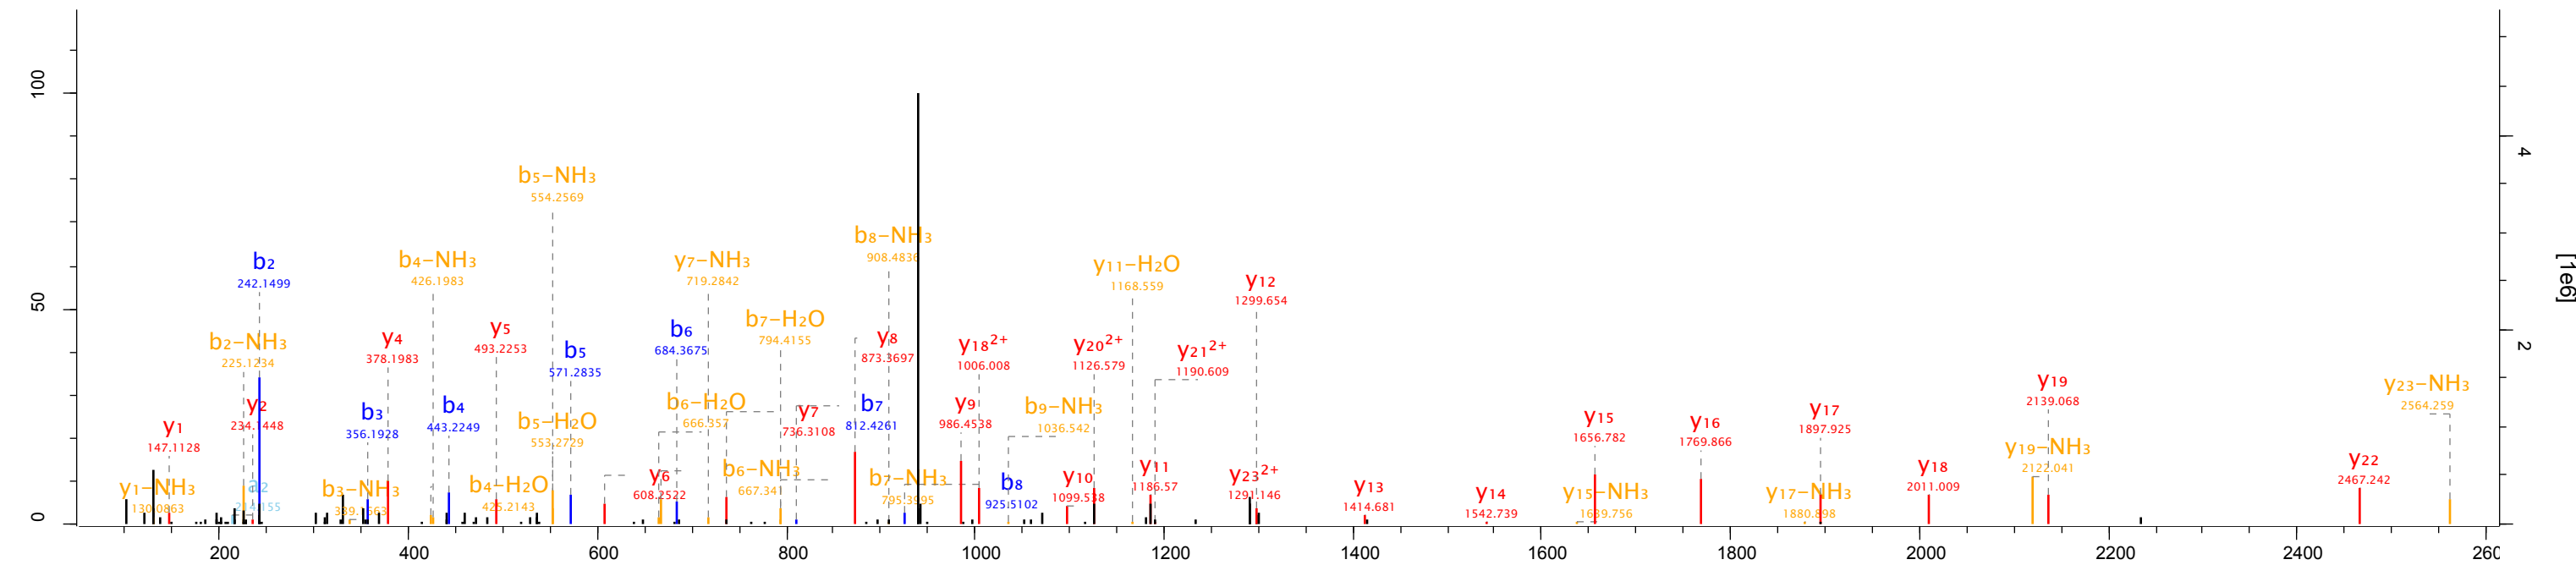

- I Q N S Q L Q L Q L N Q D L S I L H Q D D G S S K -

Fragmentation map showing b and y ion series for the peptide sequence: I Q N S Q L Q L Q L N Q D L S I L H Q D D G S S K. The b ion series (blue) and y ion series (red) are indicated by brackets below the sequence.



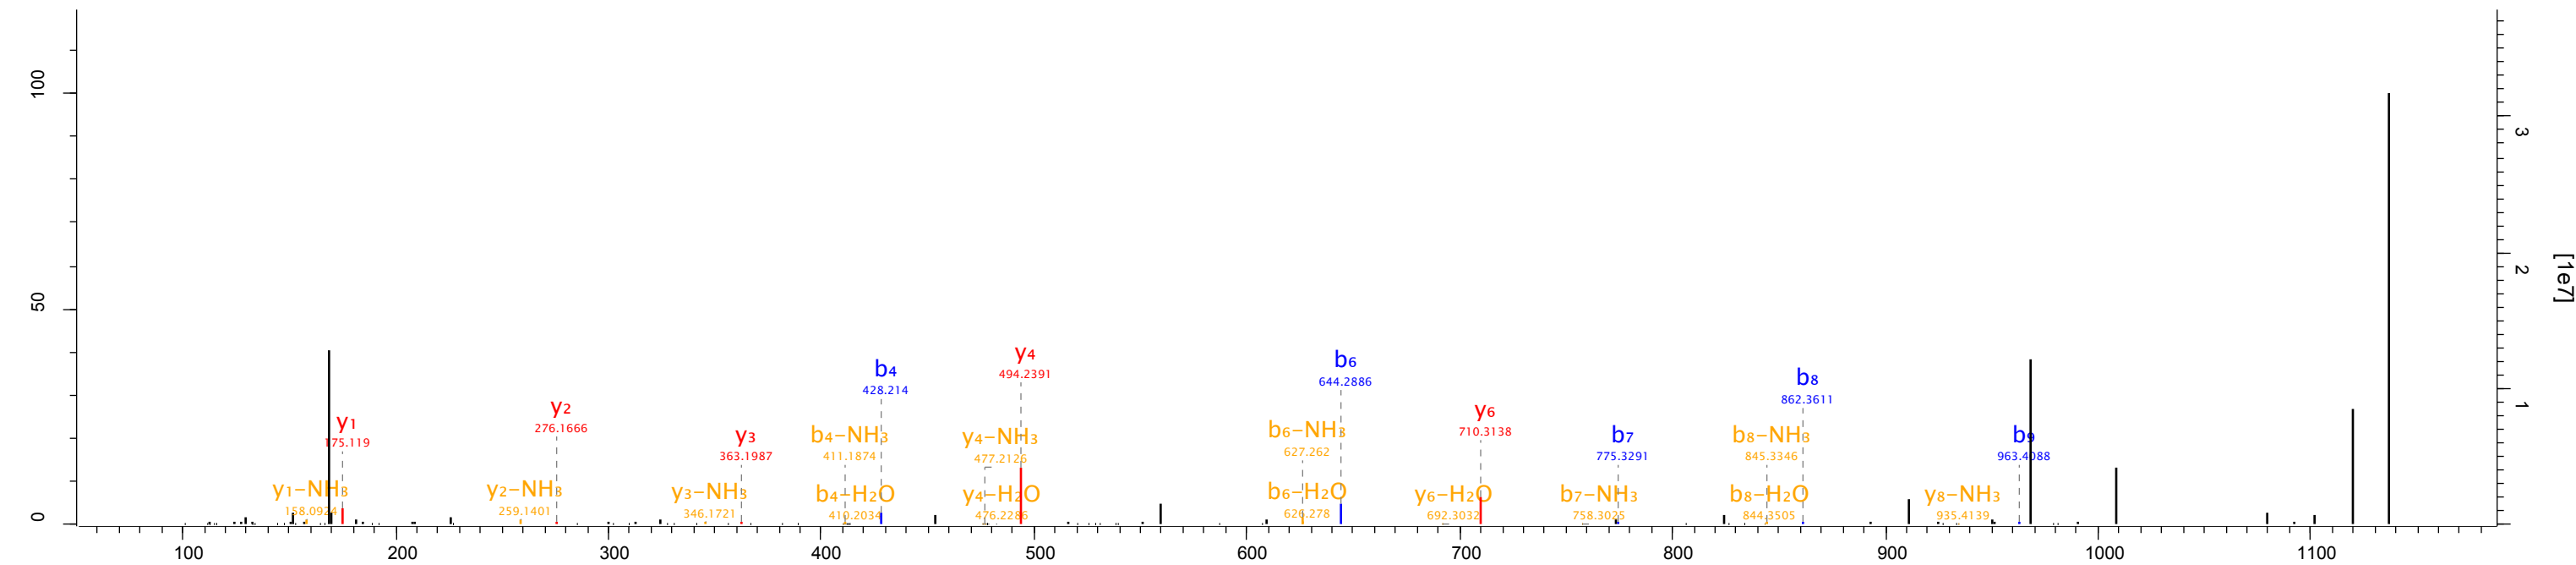

- N A L E S E M S T R -

b<sub>4</sub> y<sub>6</sub> b<sub>6</sub> y<sub>4</sub> y<sub>3</sub> y<sub>2</sub> y<sub>1</sub>

b<sub>7</sub> b<sub>8</sub> b<sub>9</sub>

Raw file  
20180707\_MaS\_A375SR\_ML\_proteome\_2\_11

Scan 3494 Method FTMS; HCD Score 53.55 m/z 363.19

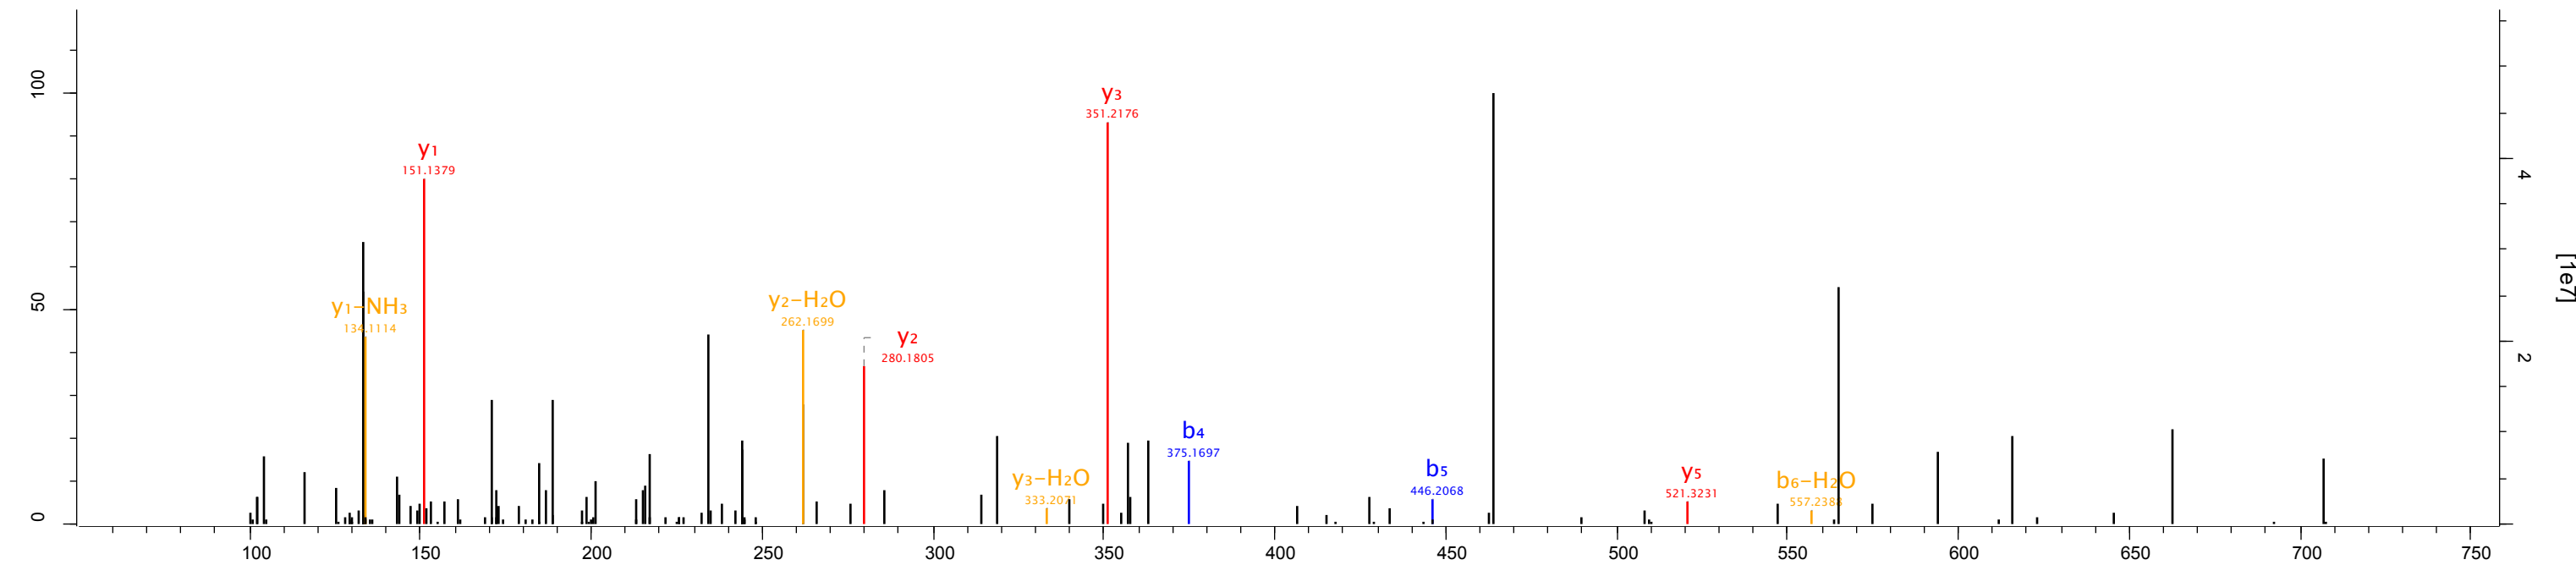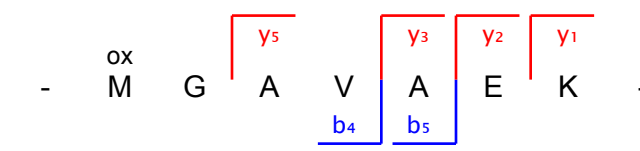

Raw file  
20180707\_MaS\_A375SR\_ML\_proteome\_2\_12

Scan 17904 Method FTMS; HCD Score 65.25 m/z 989.49 Gene names GAP43

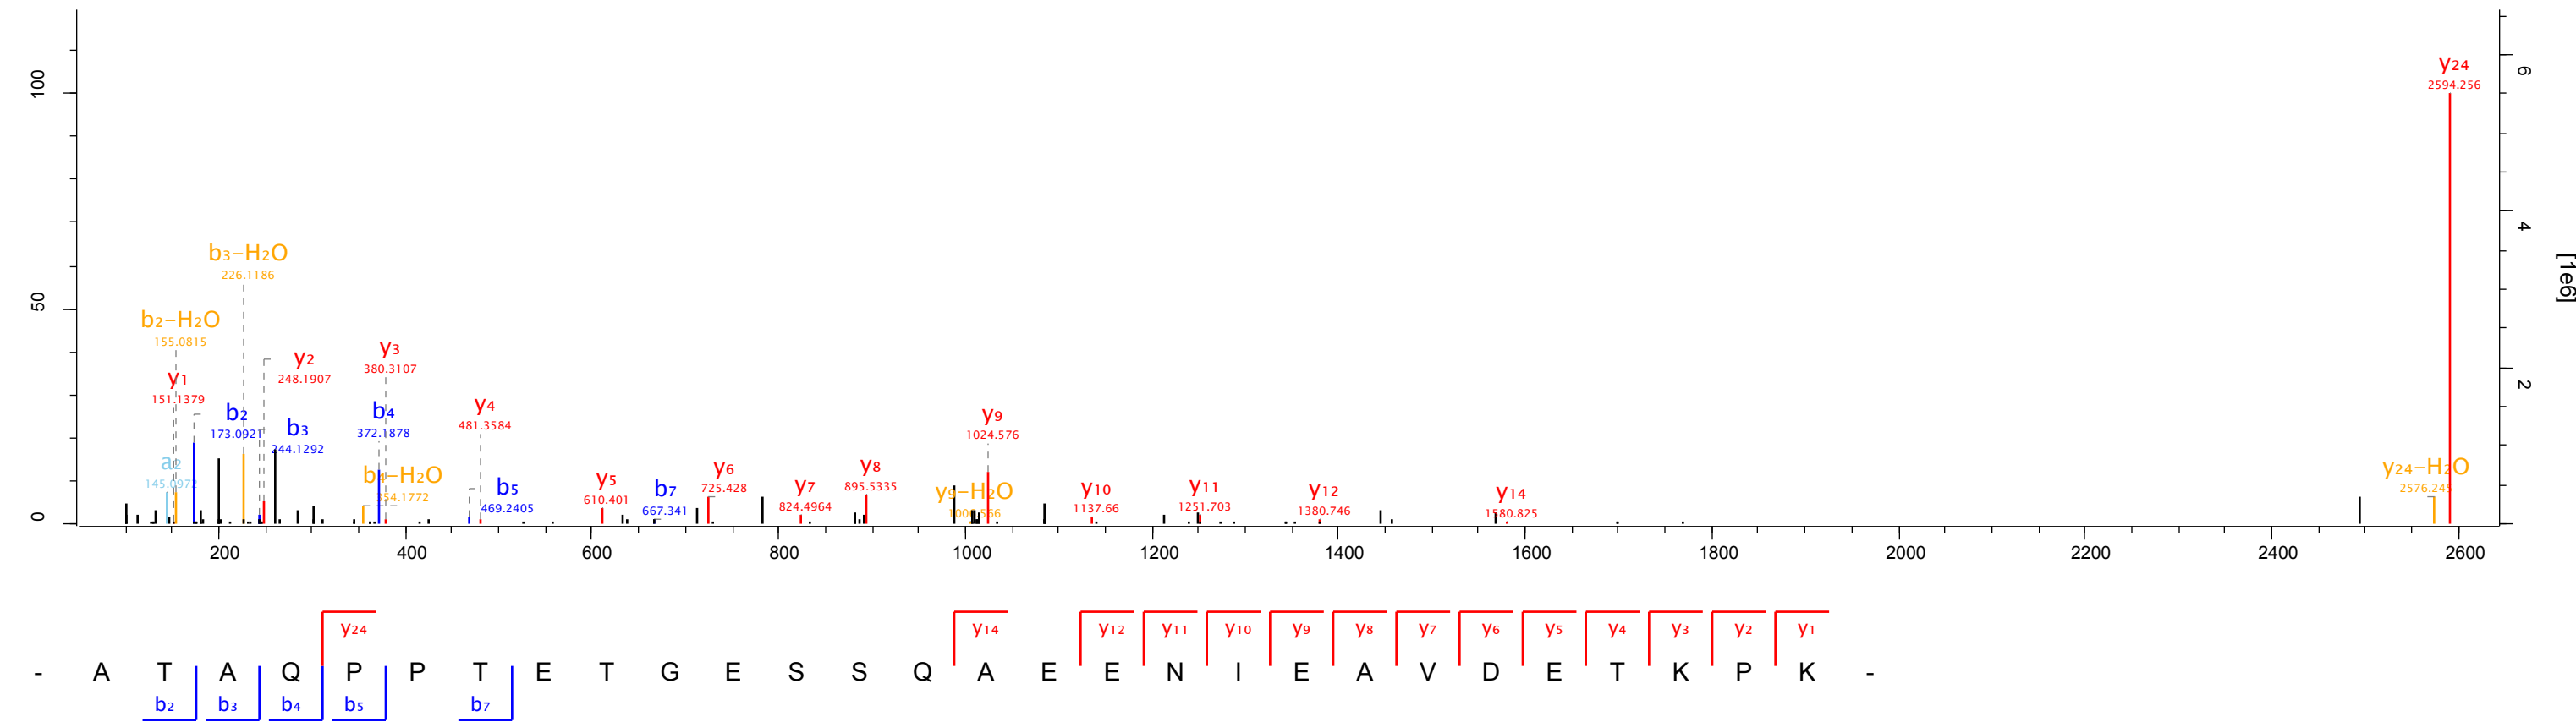

Raw file  
 20180707\_MaS\_A375SR\_ML\_proteome\_2\_15  
 Scan 7994 Method FTMS; HCD Score 42.6 m/z 553.24

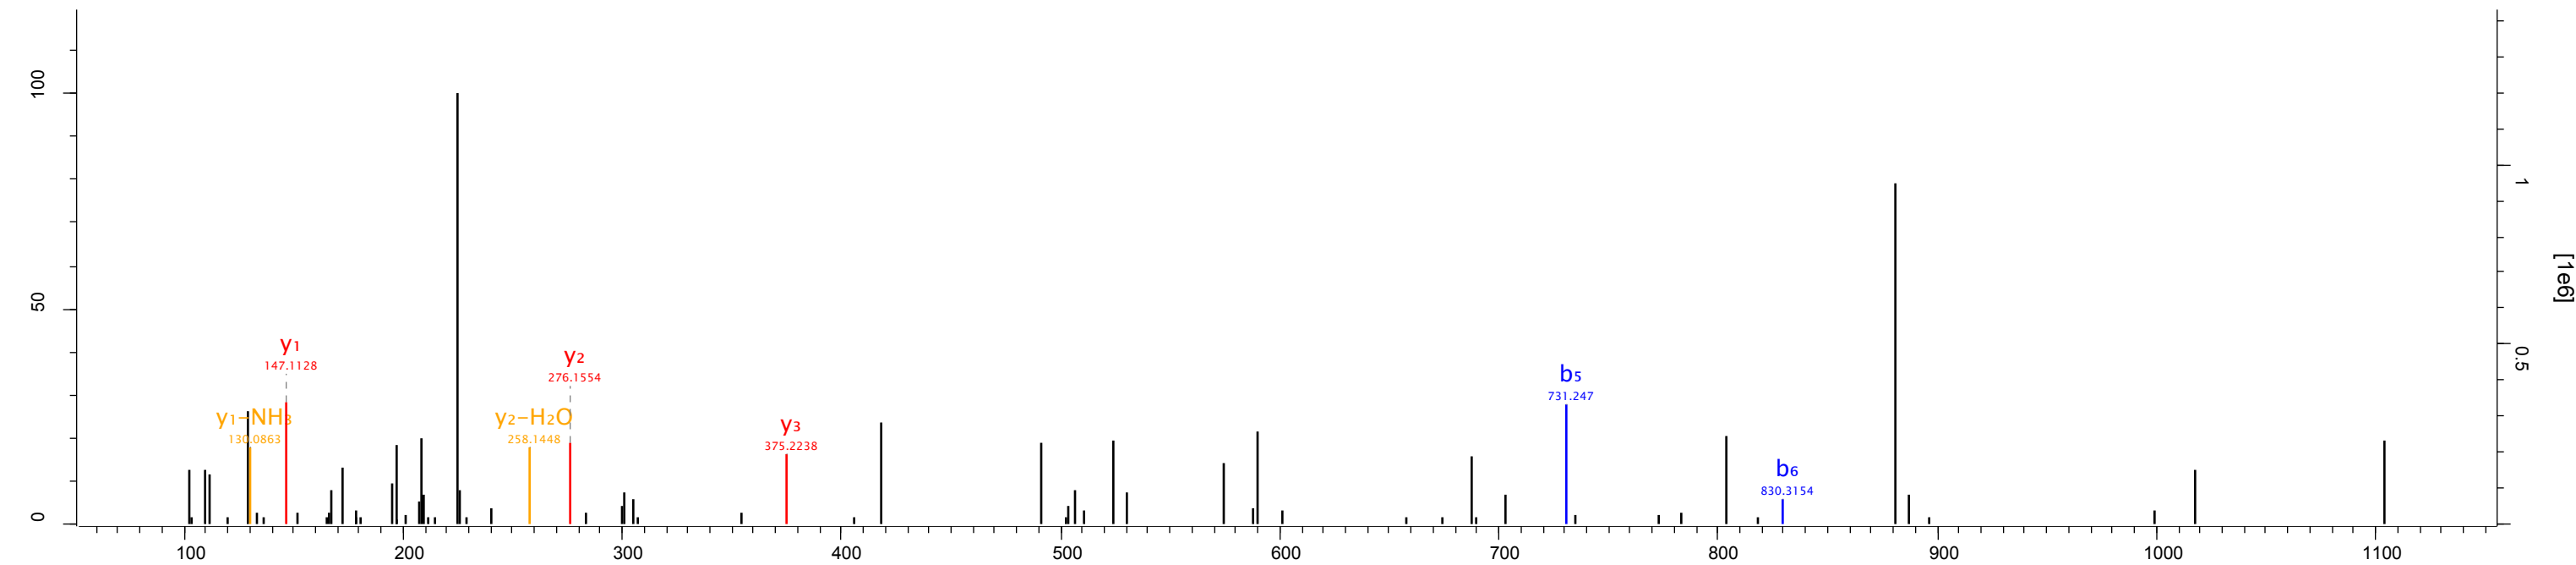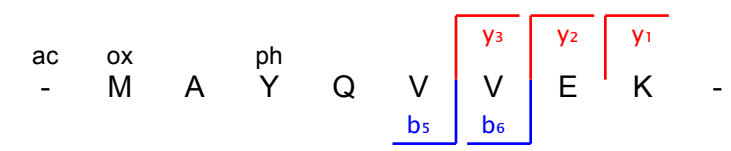

Raw file 20180707\_MaS\_A375SR\_ML\_proteome\_2\_16 Scan 16944 Method FTMS; HCD Score 80.38 m/z 451.73

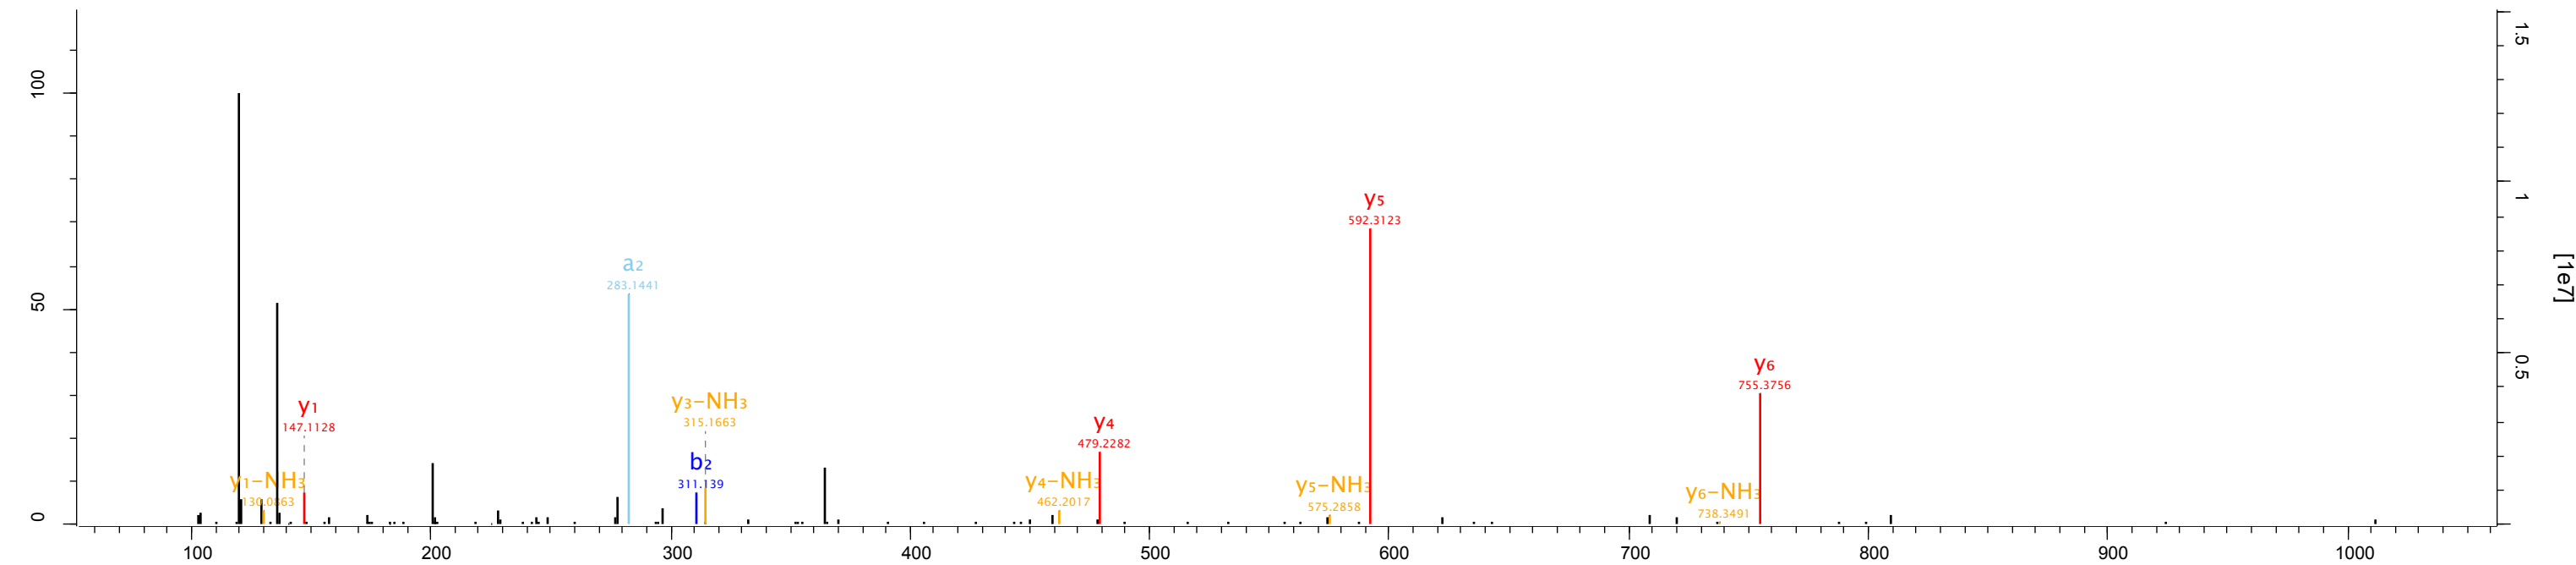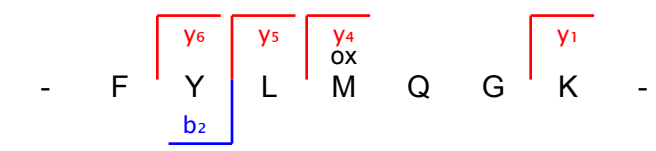

Raw file 20180707\_MaS\_A375SR\_ML\_proteome\_2\_17 Scan 13544 Method FTMS; HCD Score 61.78 m/z 519.26 Gene names ECT2L

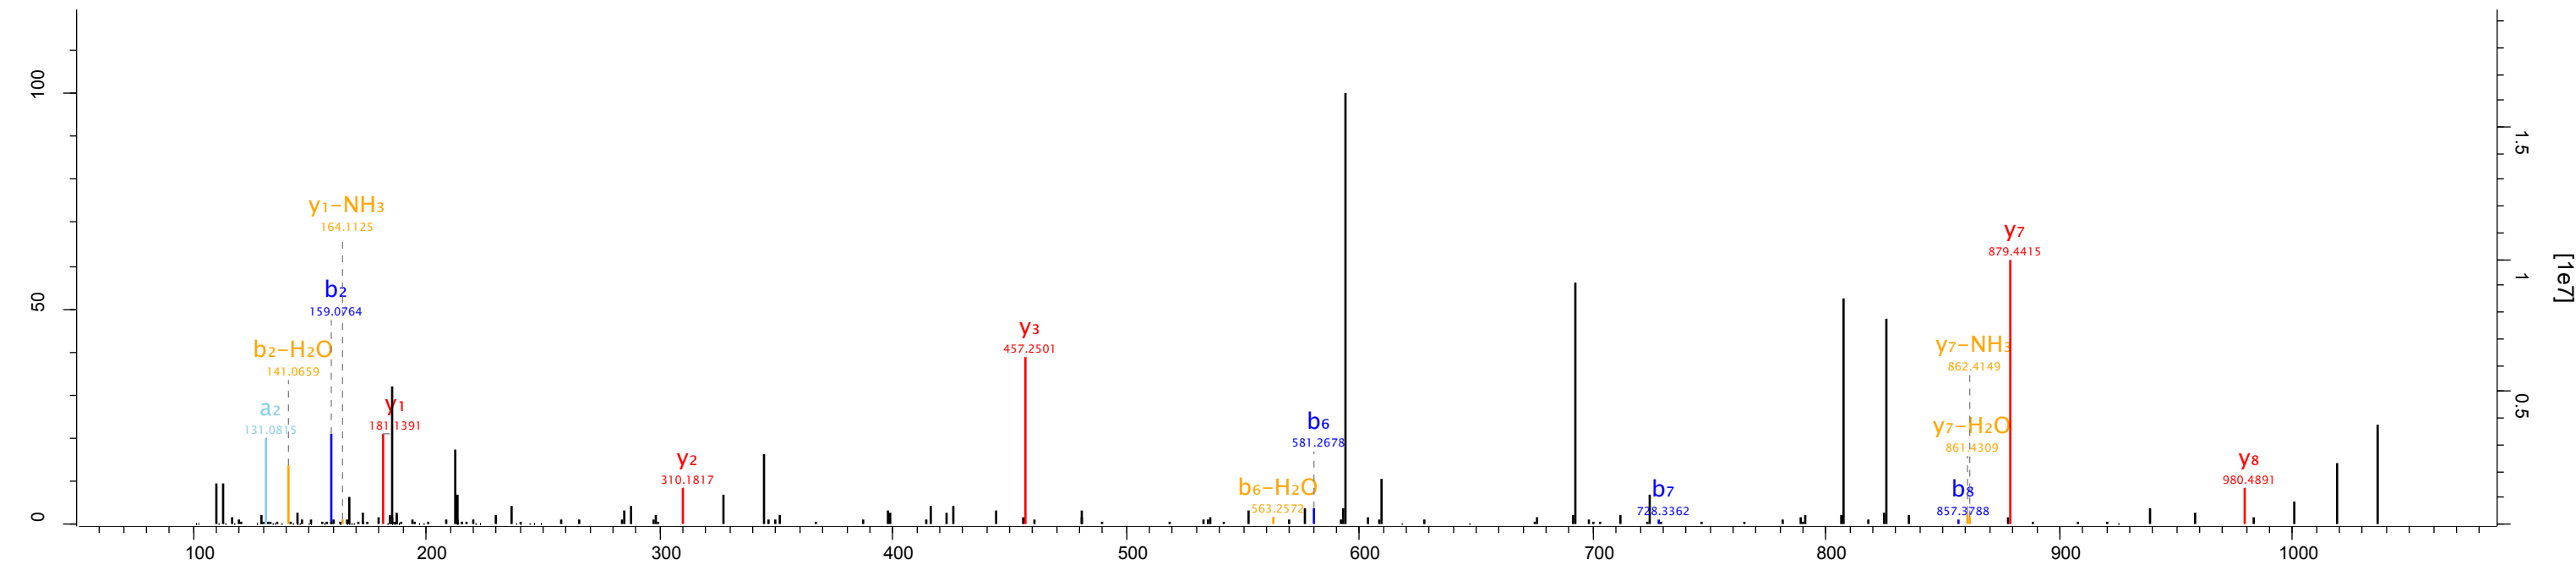

Raw file: 20180707\_MaS\_A375SR\_ML\_proteome\_2\_17  
 Scan: 14874 Method: FTMS; HCD Score: 254.18 m/z: 858.93 Gene names: APOC3

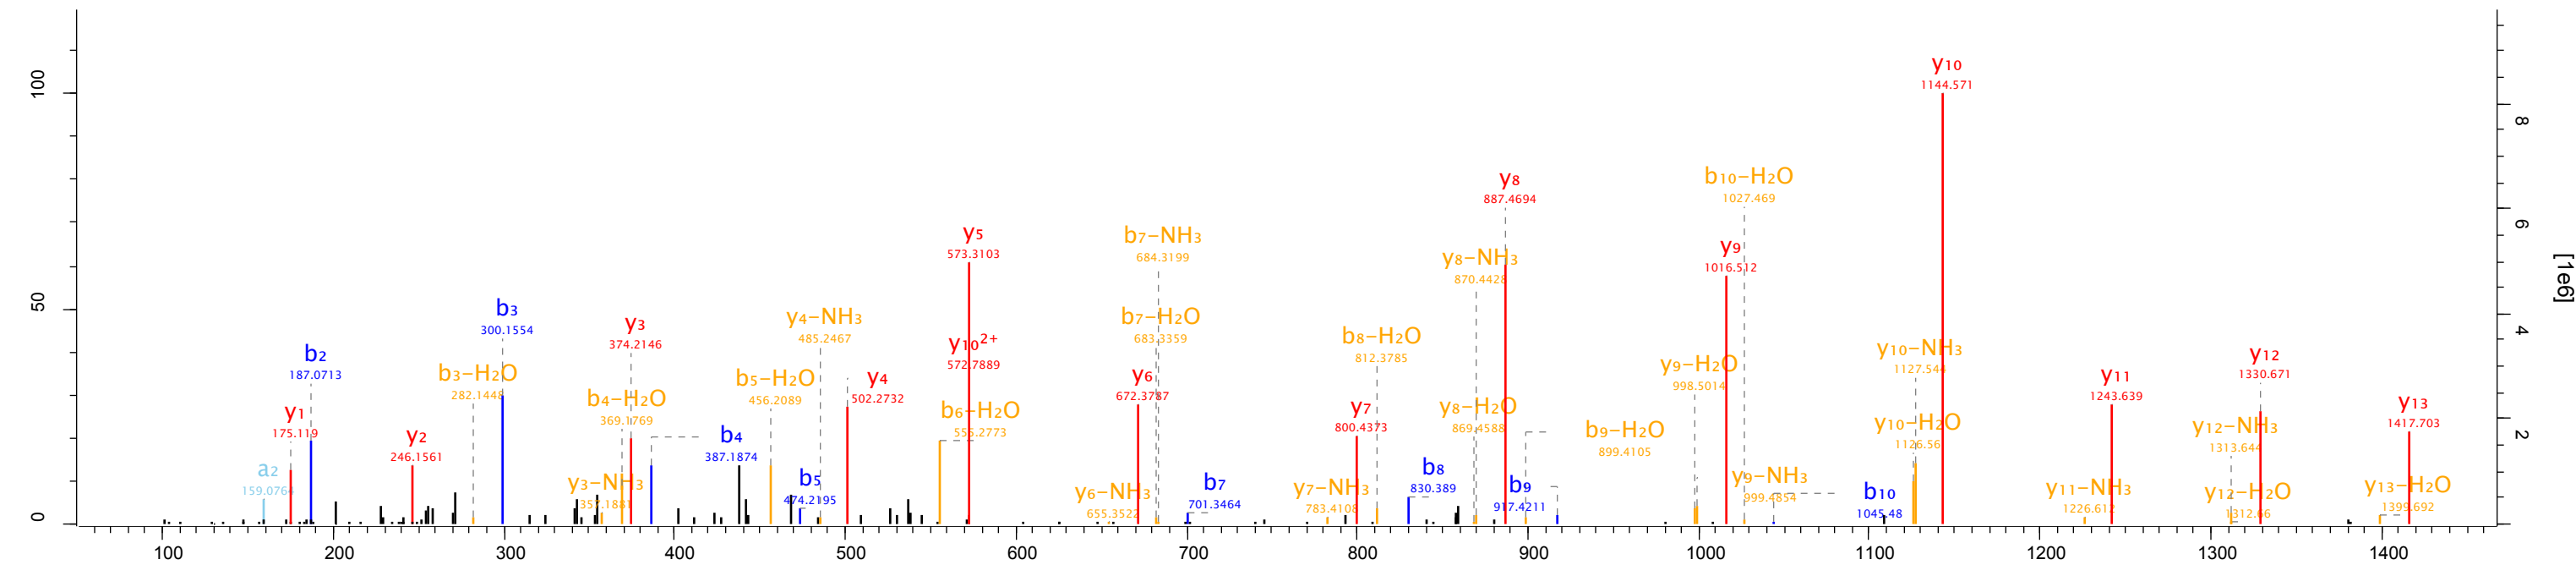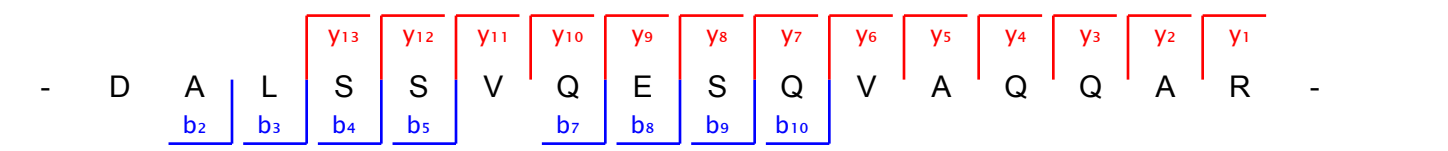

Raw file  
20180707\_MaS\_A375SR\_ML\_proteome\_2\_18

Scan 16804 Method FTMS; HCD Score 53.3 m/z 743.88 Gene names MGST2

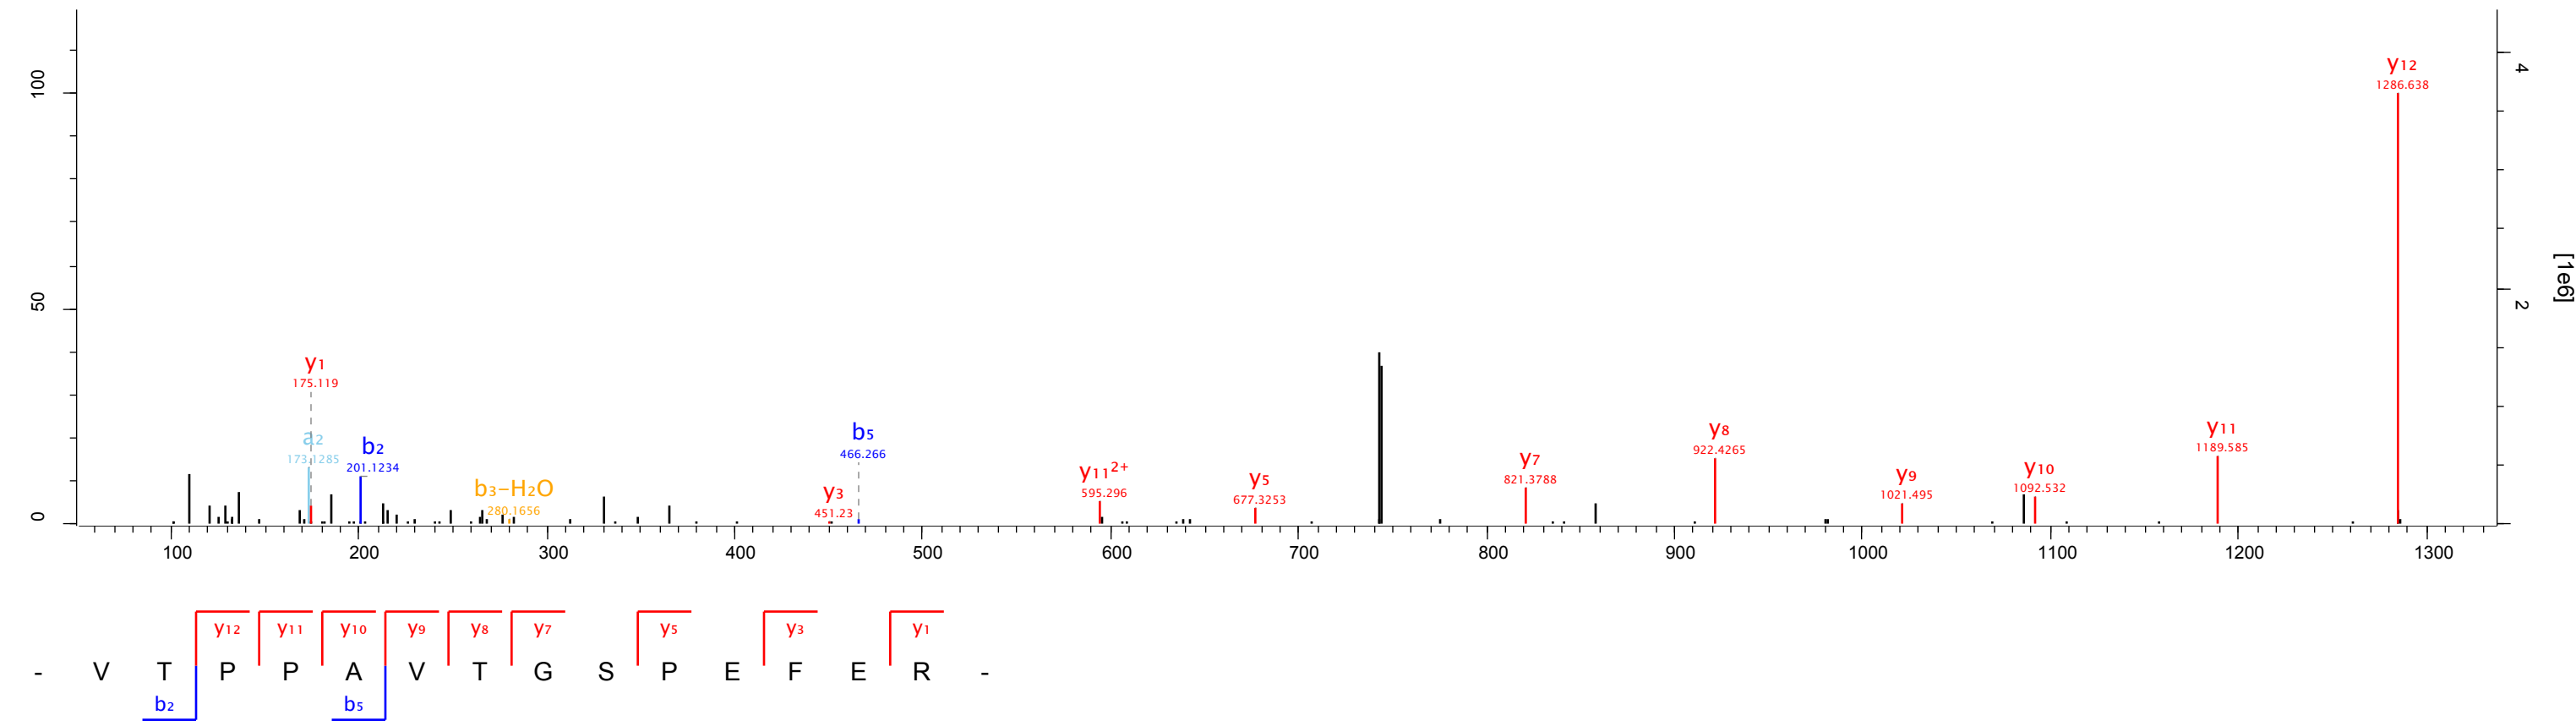



Raw file  
20180707\_MaS\_A375SR\_ML\_proteome\_2\_19

Scan 11604 Method FTMS; HCD Score 43.95 m/z 823.9 Gene names MKRN1

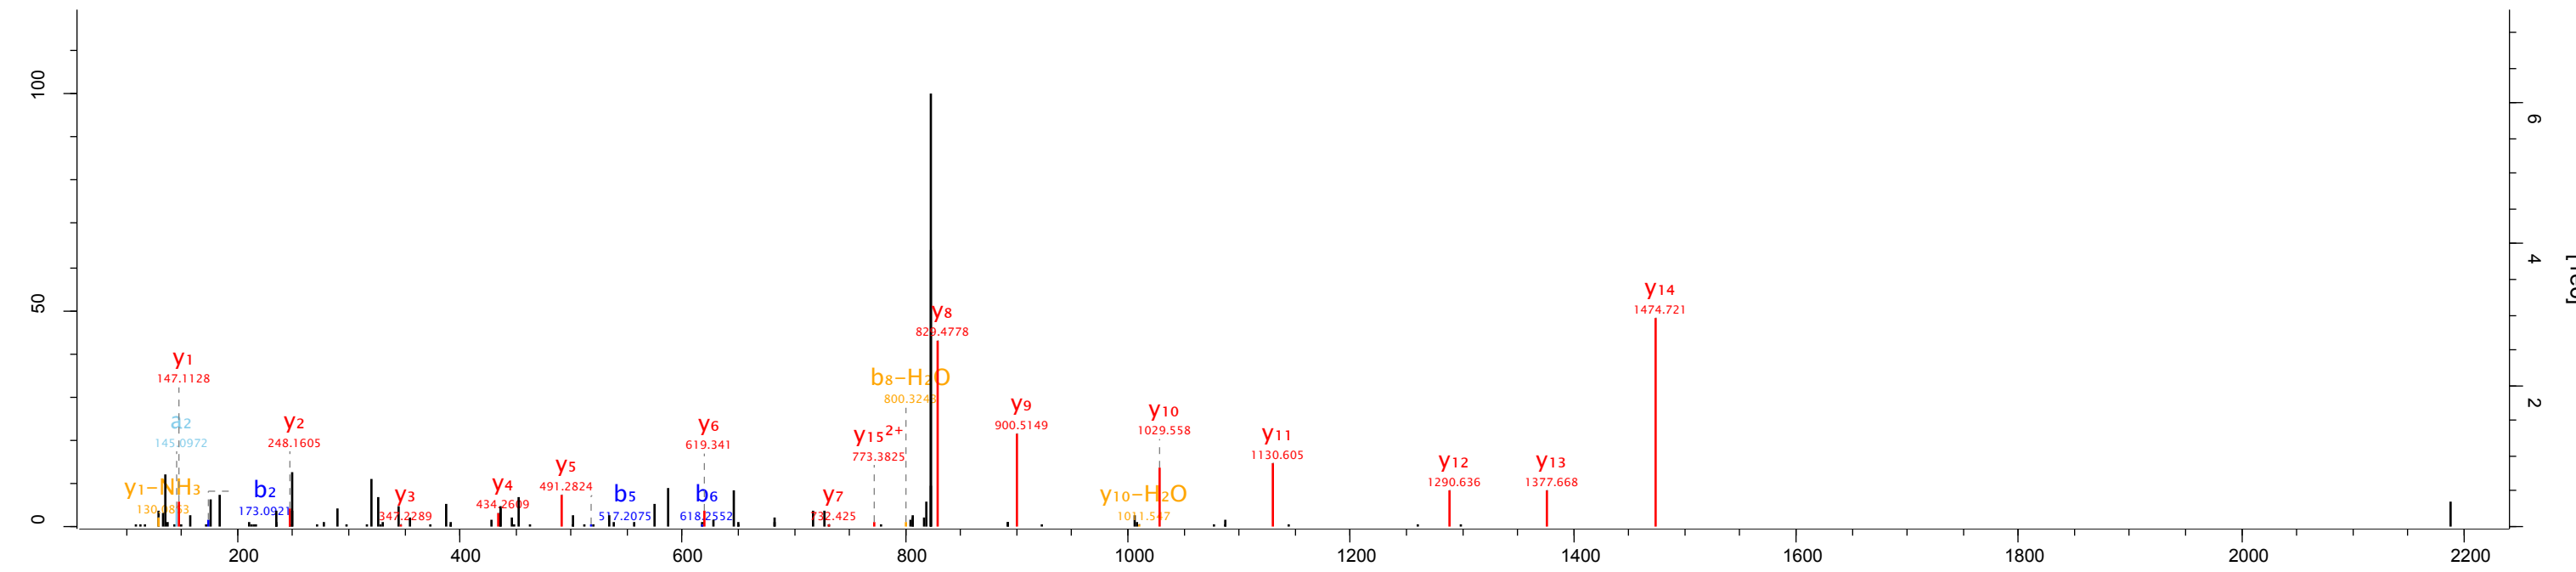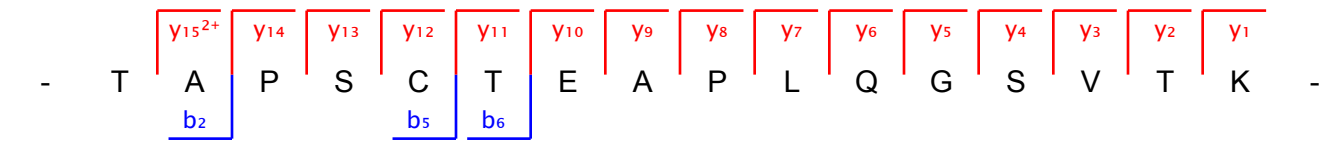

Raw file 20180707\_MaS\_A375SR\_ML\_proteome\_2\_19 Scan 15524 Method FTMS; HCD Score 77.75 m/z 1121.47

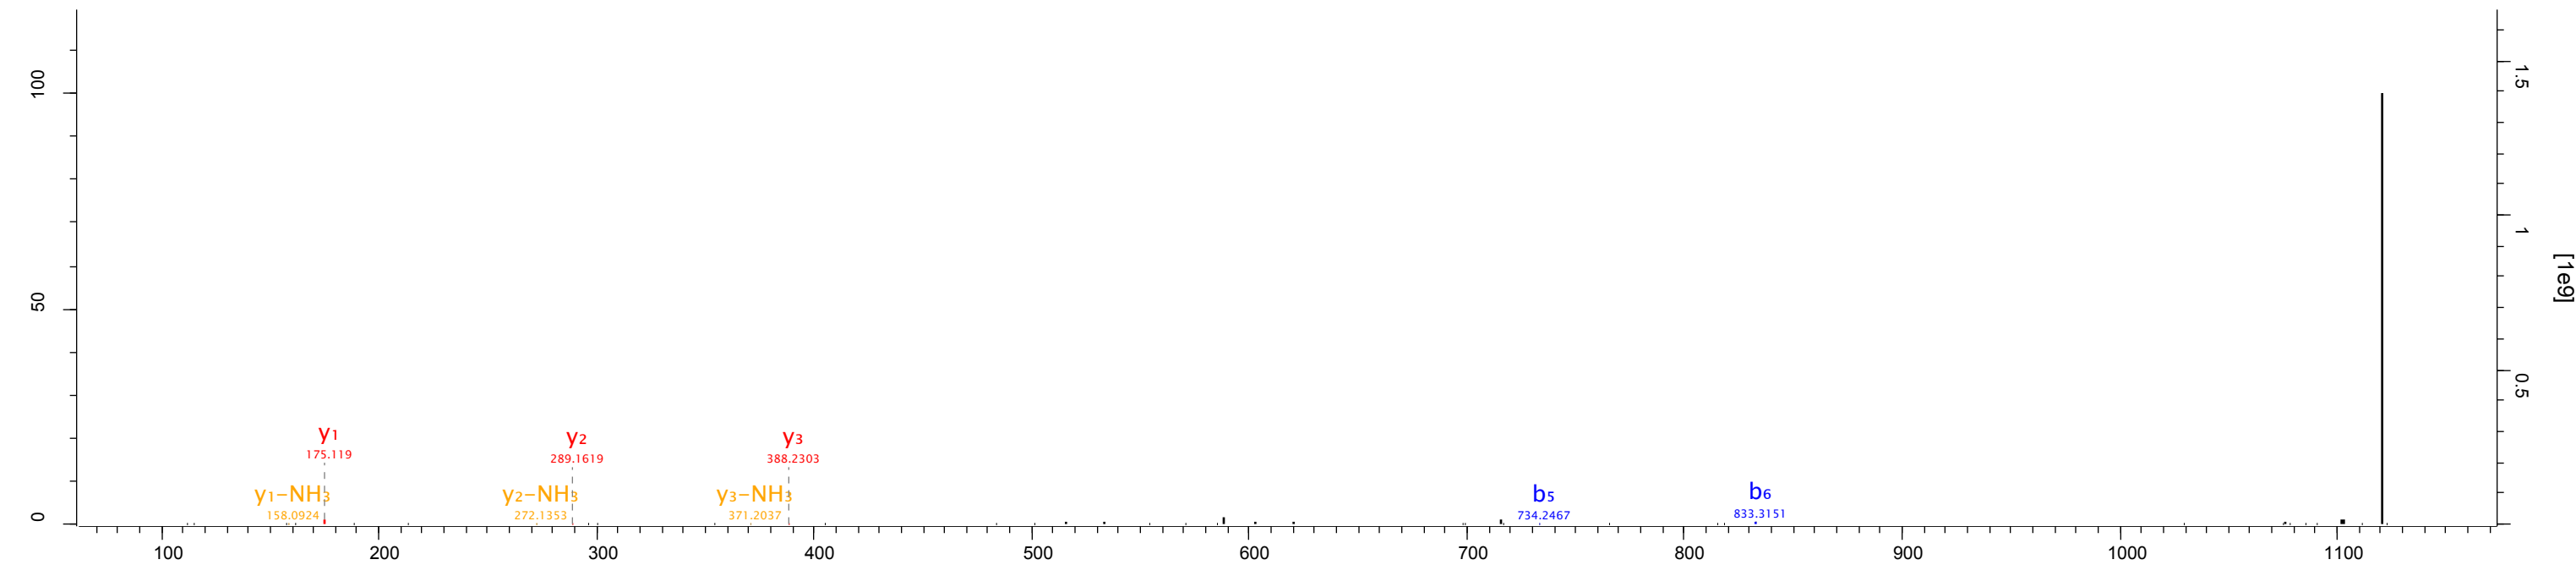

Raw file 20180707\_MaS\_A375SR\_ML\_proteome\_2\_19 Scan 21664 Method FTMS; HCD Score 66.39 m/z 683.32

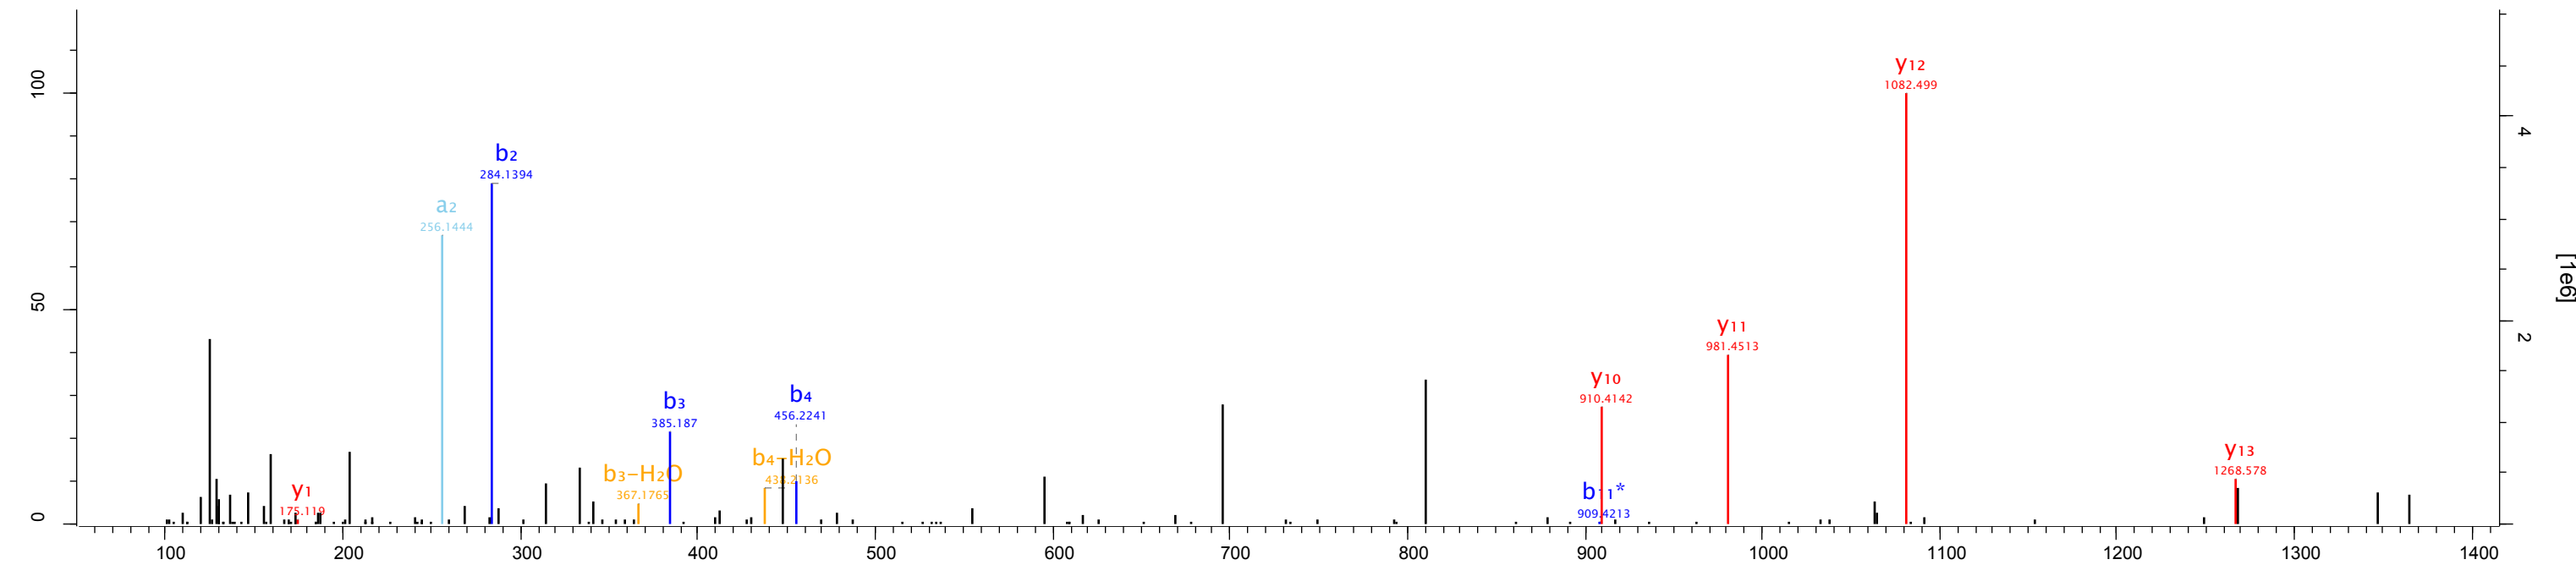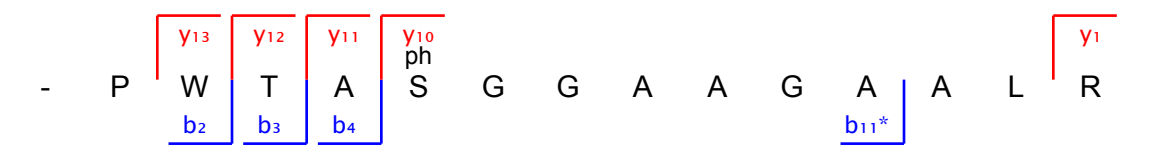

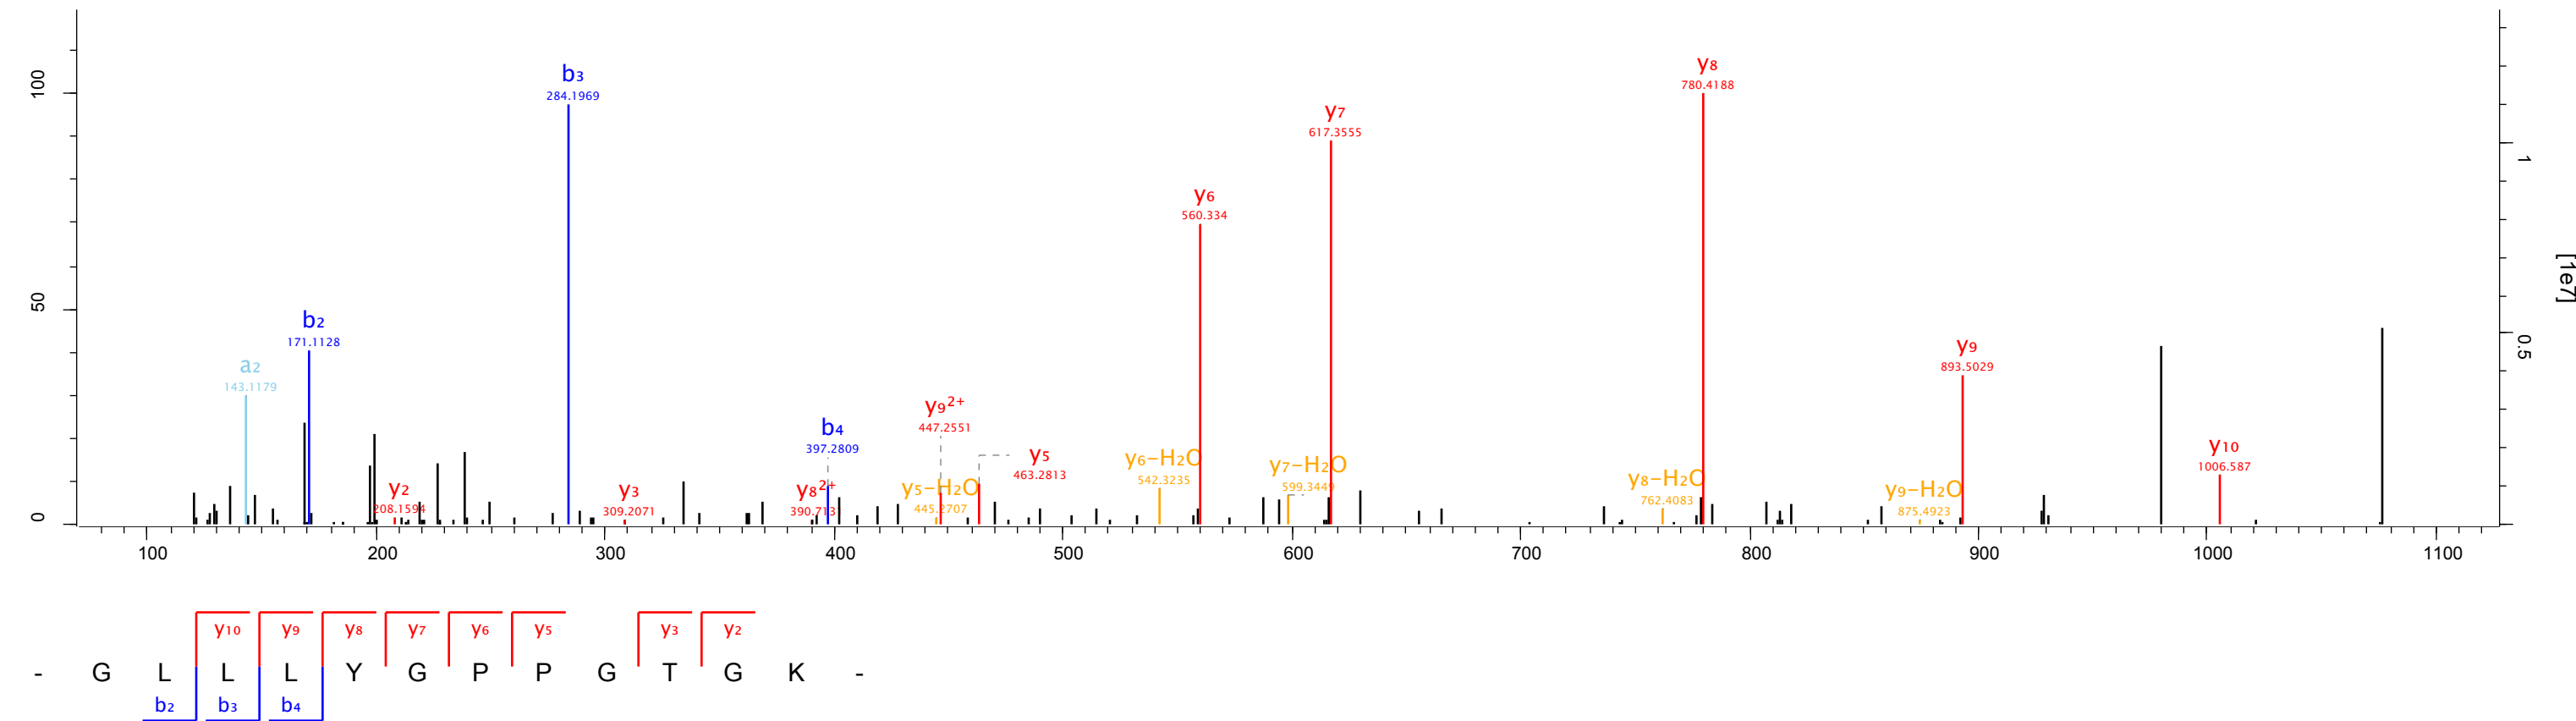

Raw file 20180707\_MaS\_A375SR\_ML\_proteome\_2\_19 Scan 22784 Method FTMS; HCD Score 97.8 m/z 752.37 Gene names MT-ND6

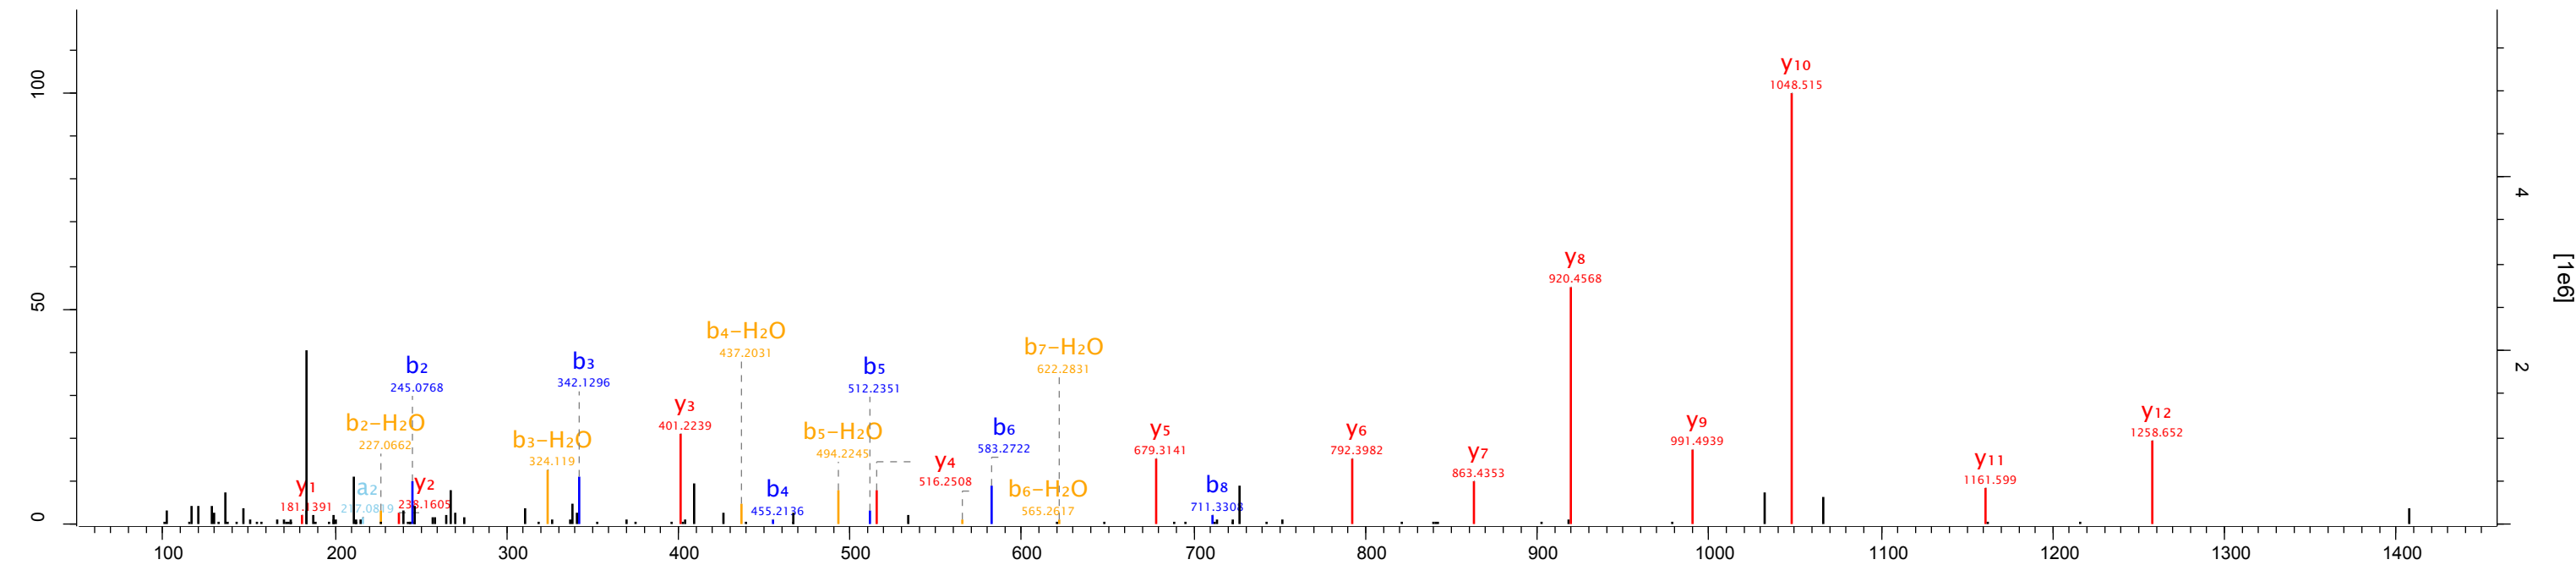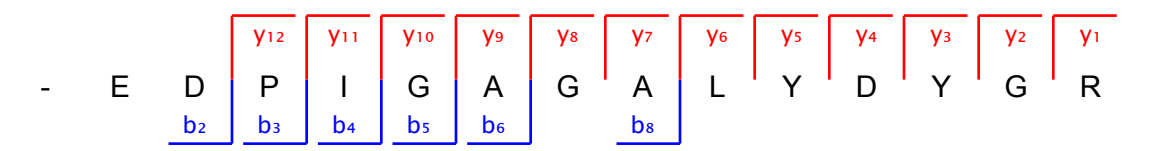

Raw file  
20180707\_MaS\_A375SR\_ML\_proteome\_2\_19

Scan 26114 Method FTMS; HCD Score 76.76 m/z 808.41 Gene names MRC1

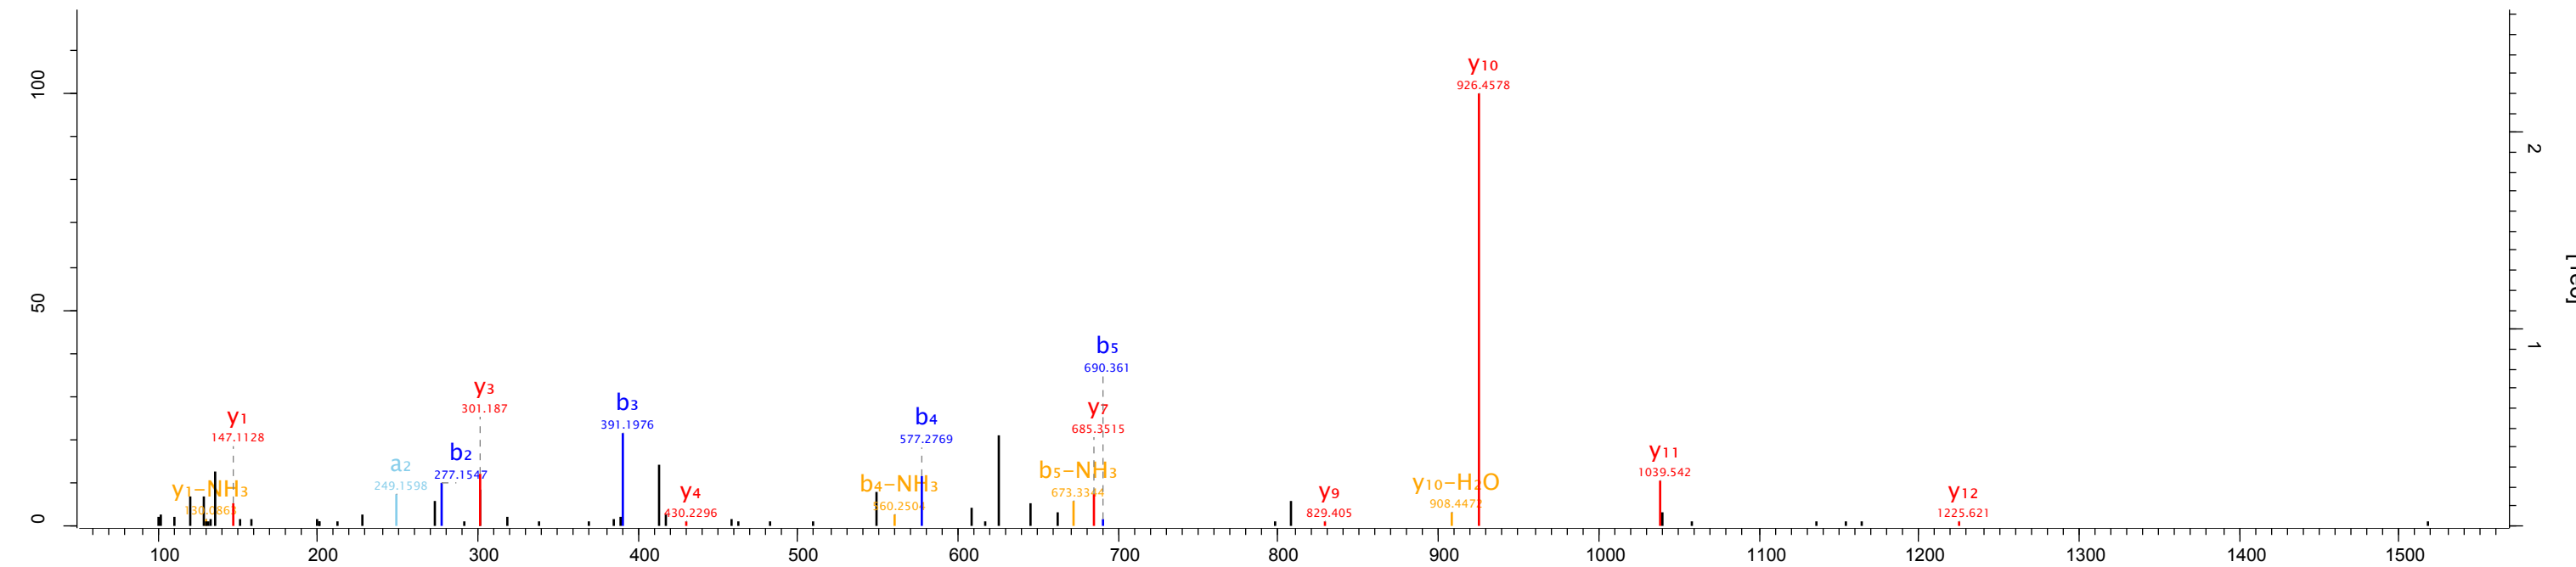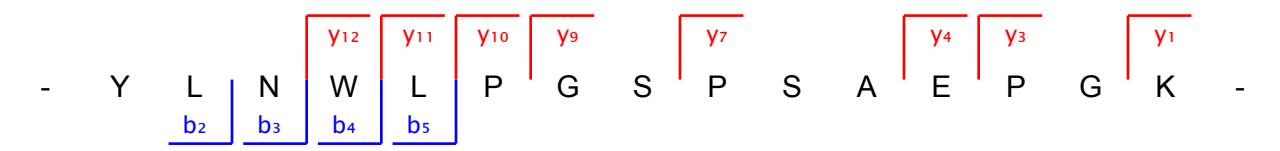

Raw file 20180707\_MaS\_A375SR\_ML\_proteome\_2\_20 Scan 16354 Method FTMS; HCD Score 57.86 m/z 562.26

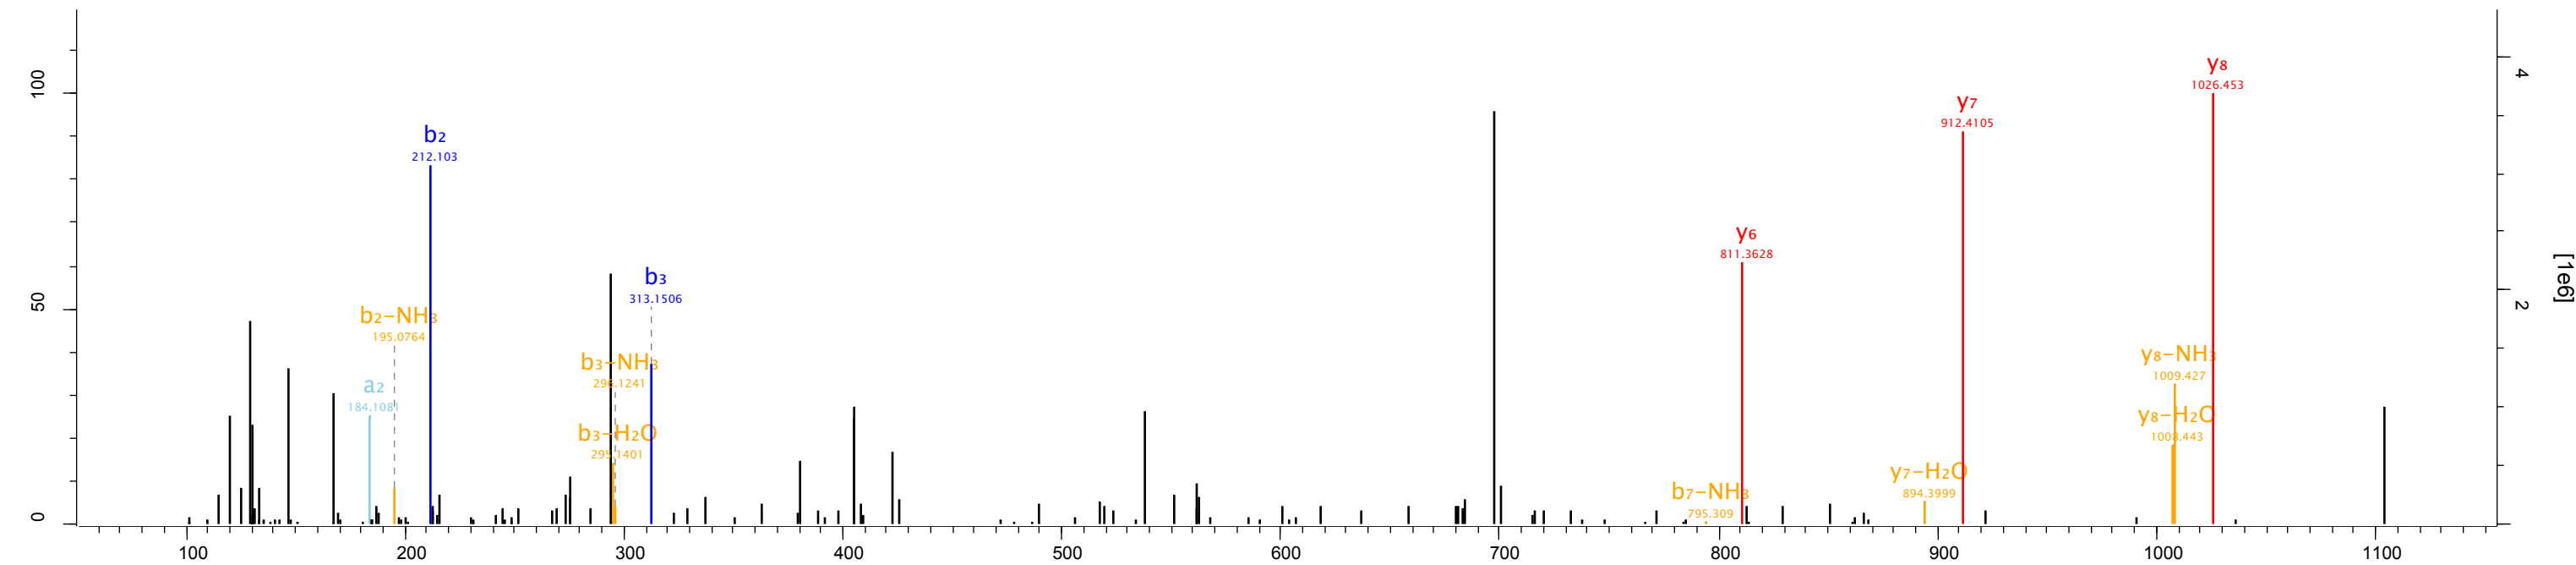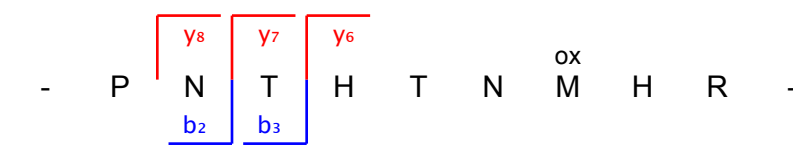

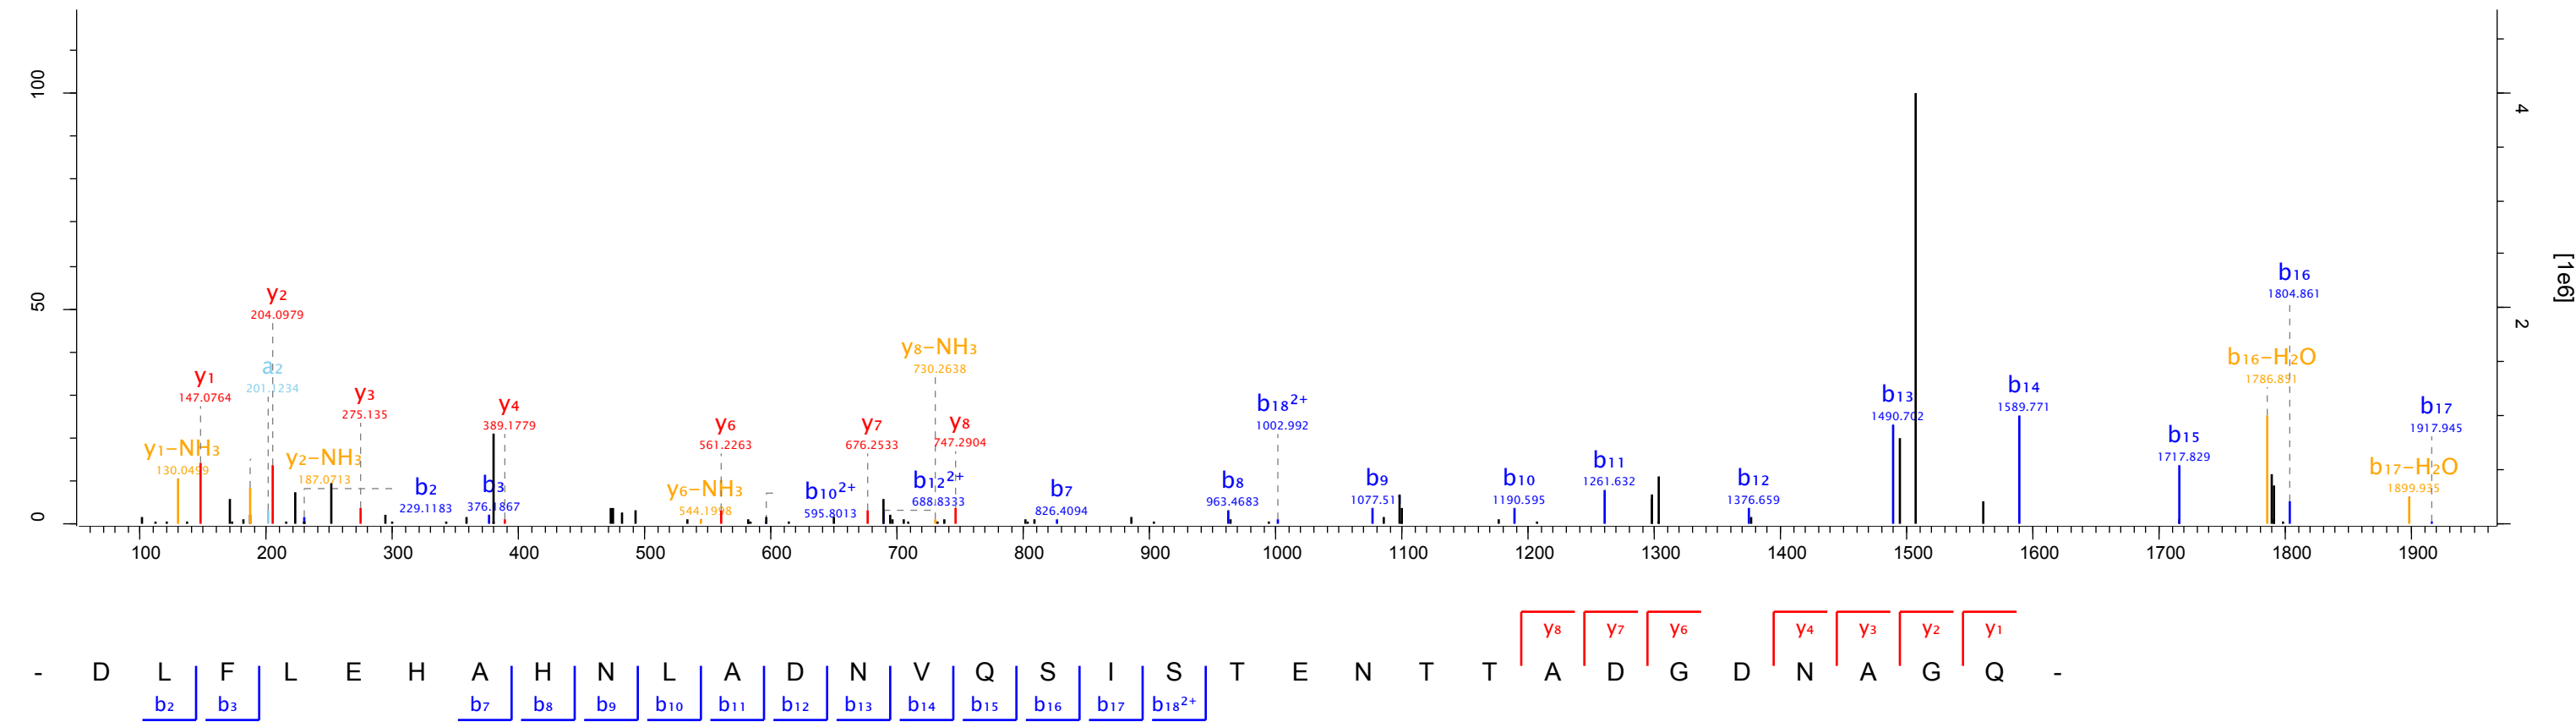



Raw file  
20180707\_MaS\_A375SR\_ML\_proteome\_2\_20

Scan 26434 Method FTMS; HCD Score 83.67 m/z 751.06 Gene names FGFR1

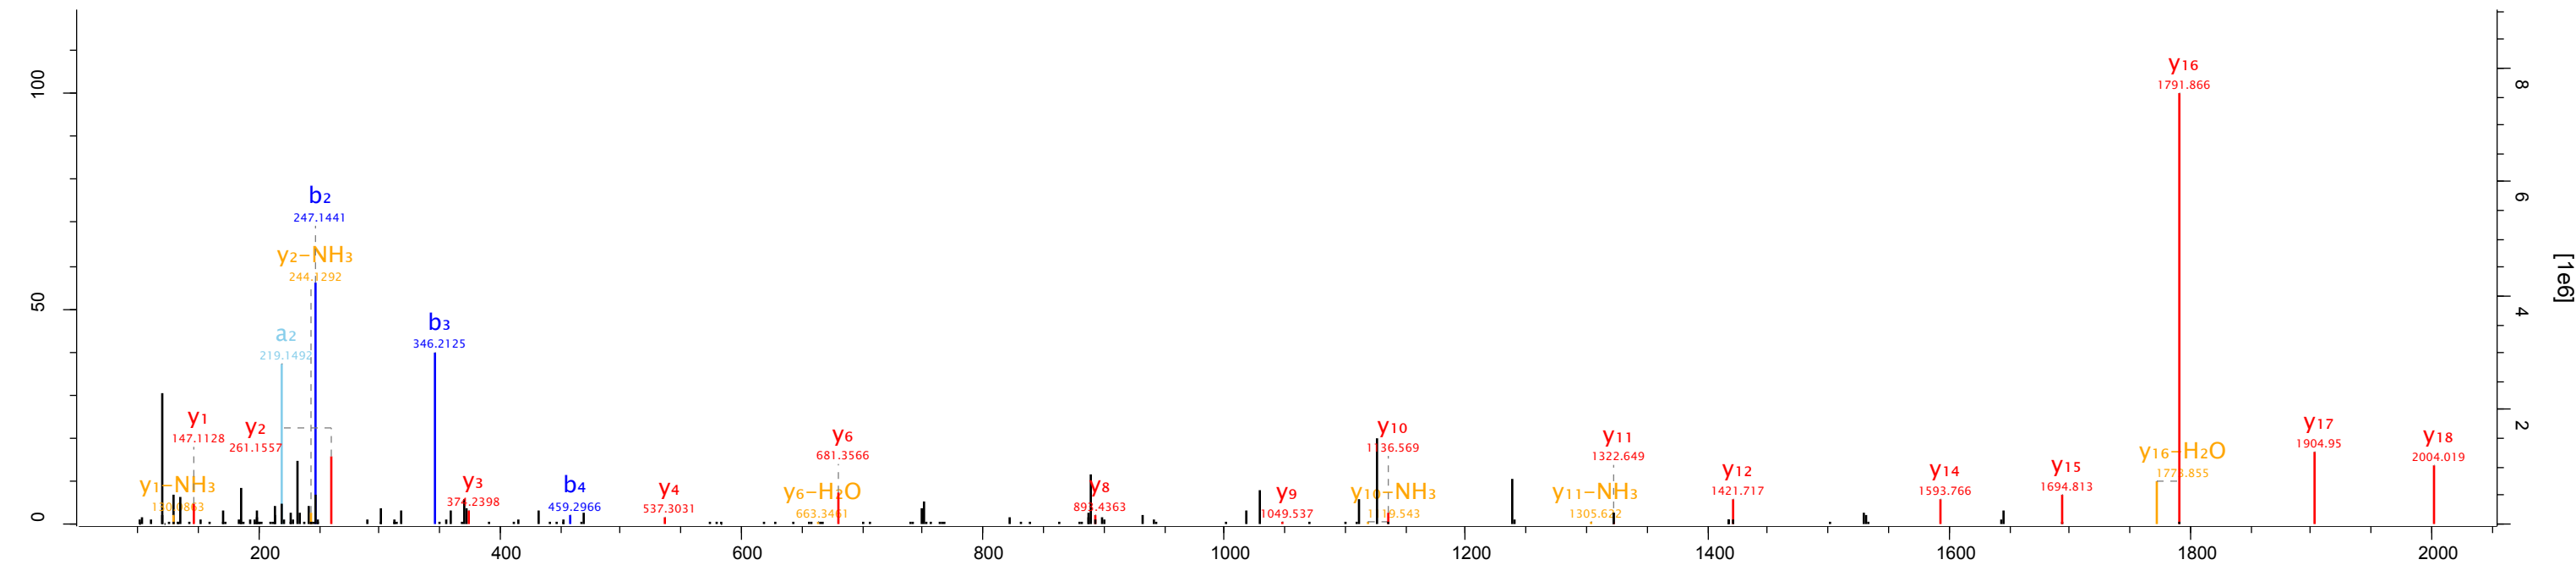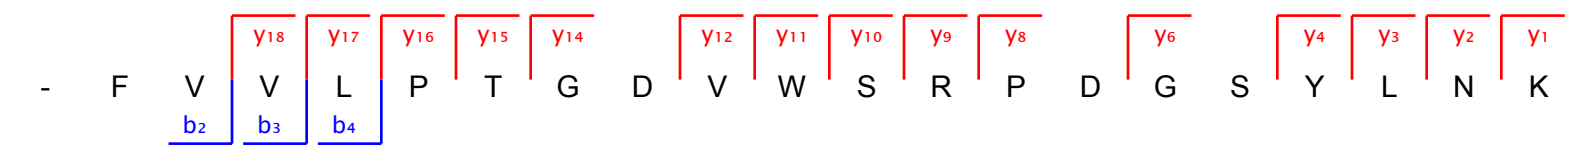

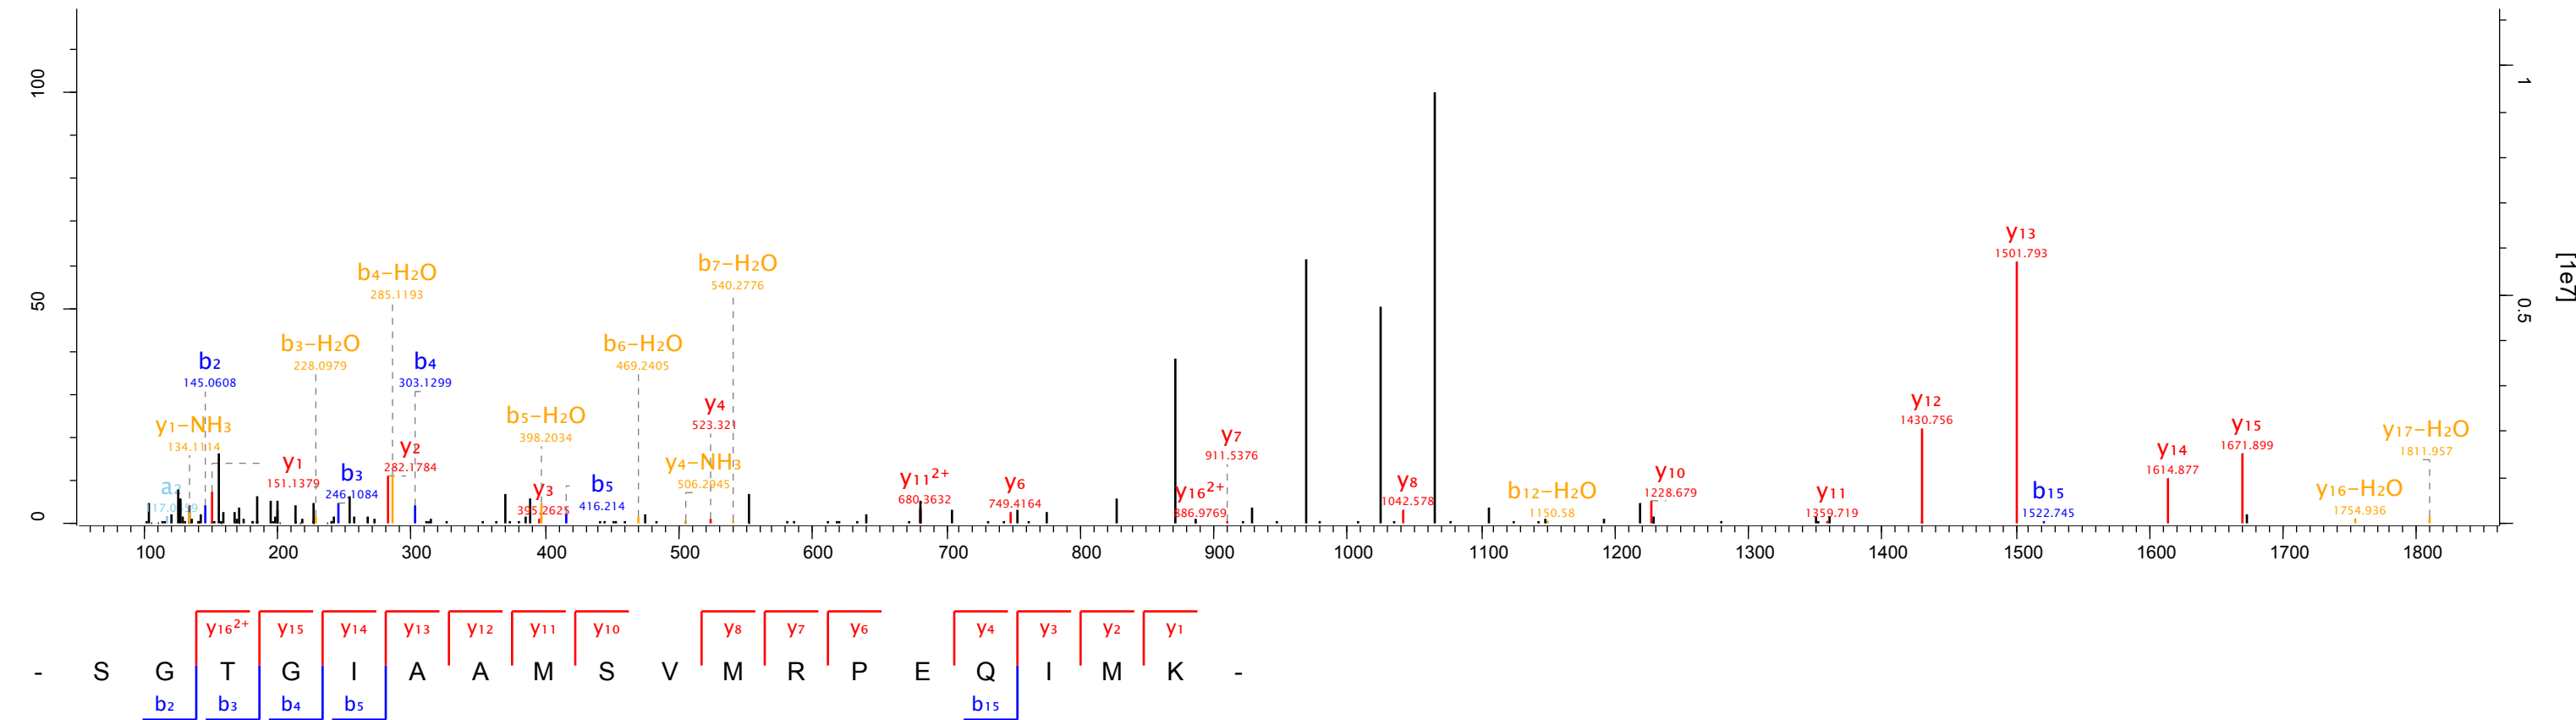

Raw file  
20180707\_MaS\_A375SR\_ML\_proteome\_2\_22

Scan 6724 Method FTMS; HCD Score 46.43 m/z 574.71 Gene names PSPHP1

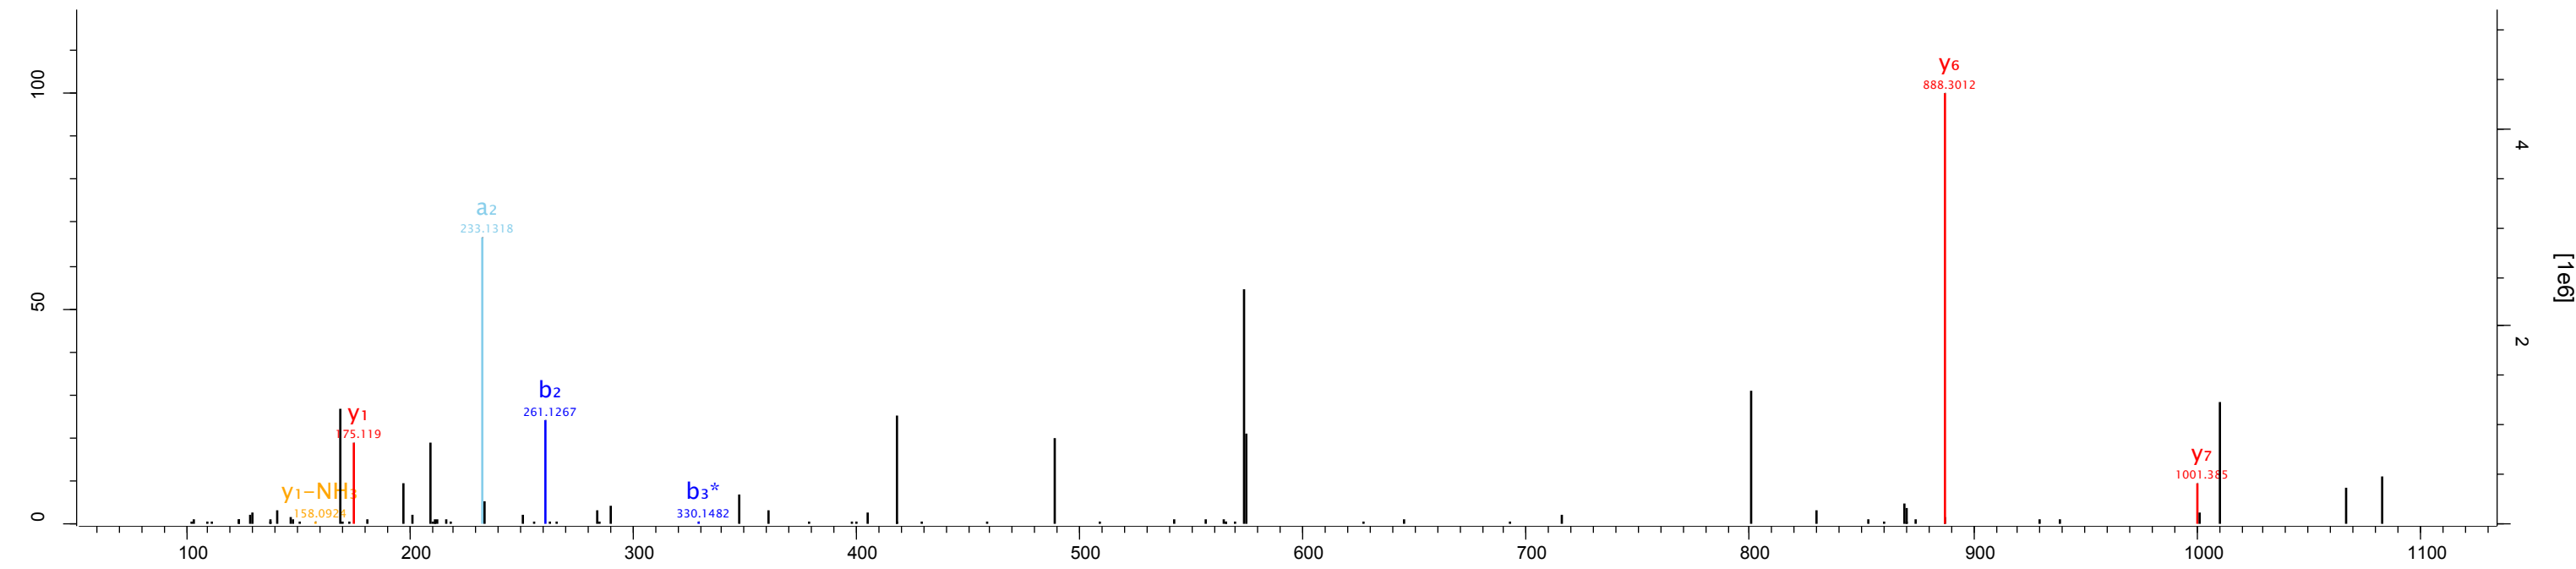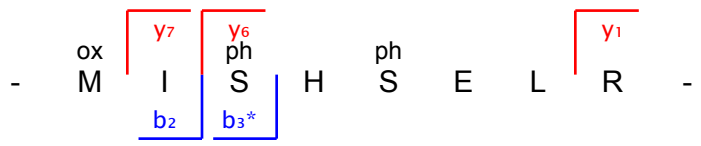

Raw file  
20180707\_MaS\_A375SR\_ML\_proteome\_2\_22

Scan 9224 Method FTMS; HCD Score 48.76 m/z 569.73 Gene names PSPHP1

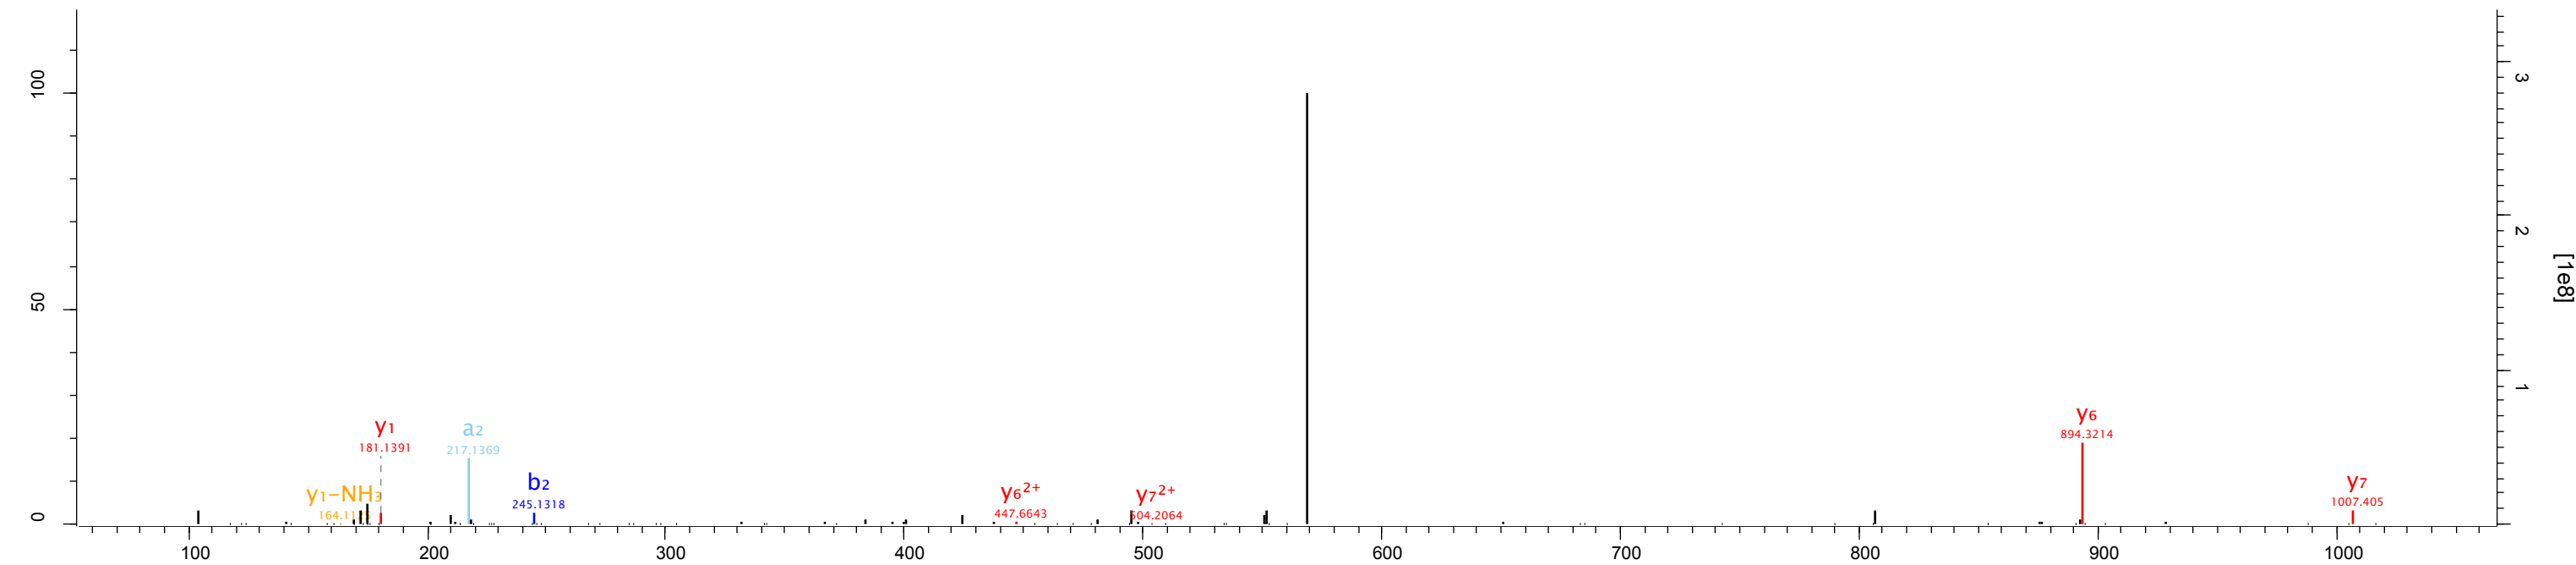

Raw file 20180707\_MaS\_A375SR\_ML\_proteome\_2\_26 Scan 11474 Method FTMS; HCD Score 70.56 m/z 520.95 Gene names TMCO6

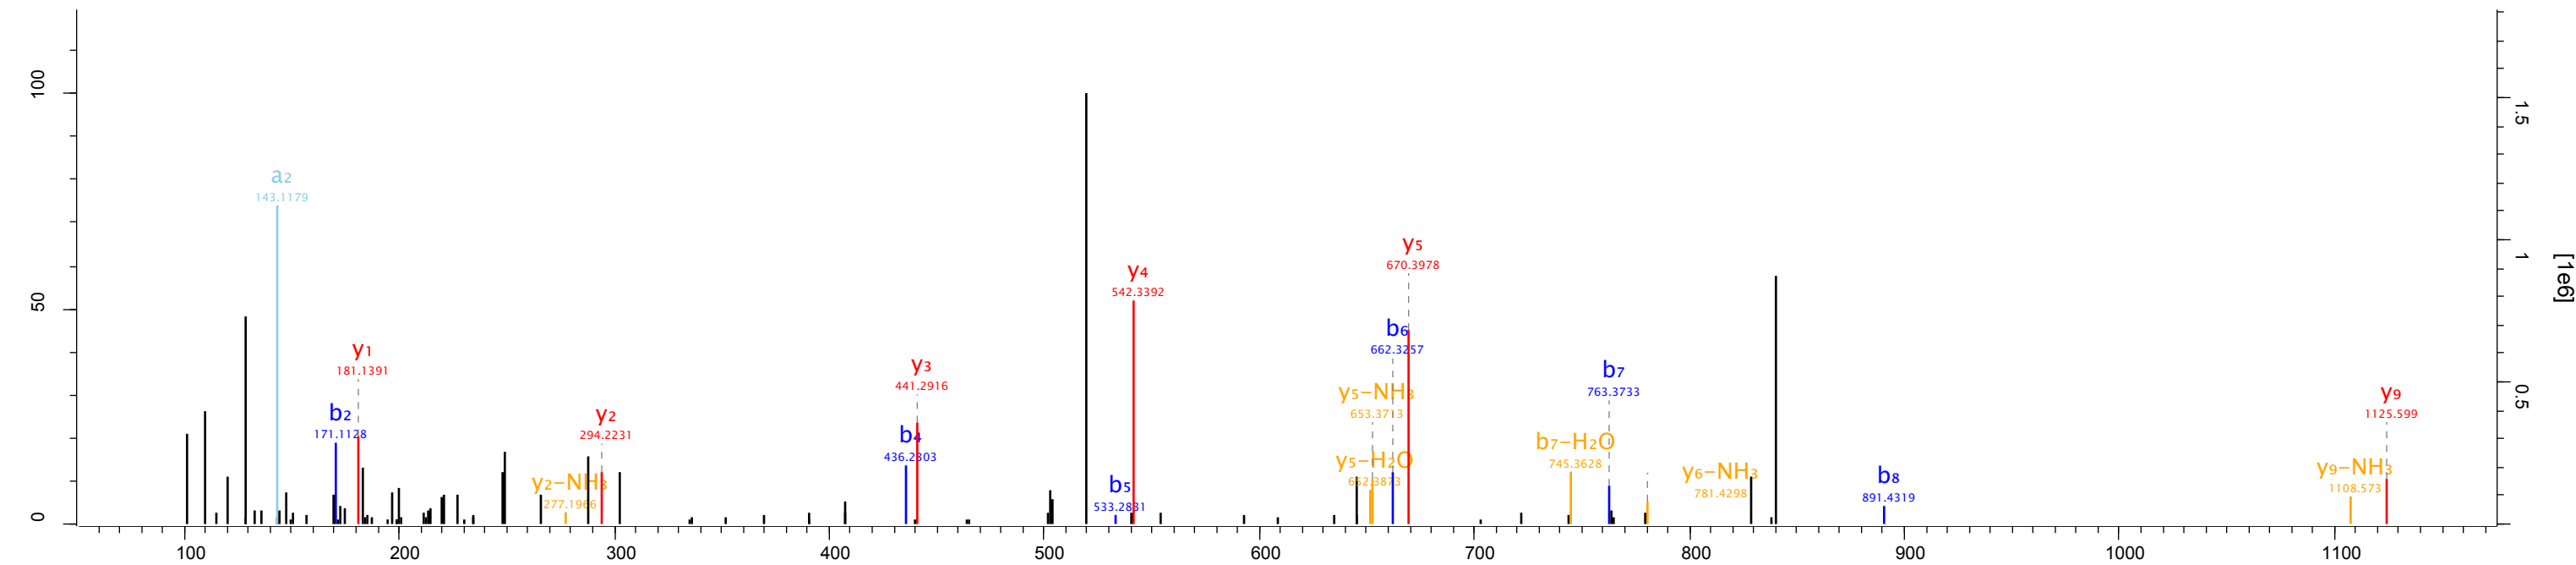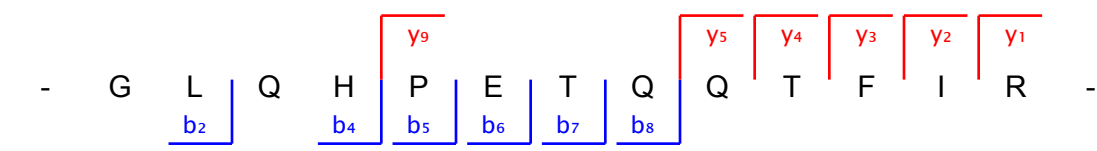

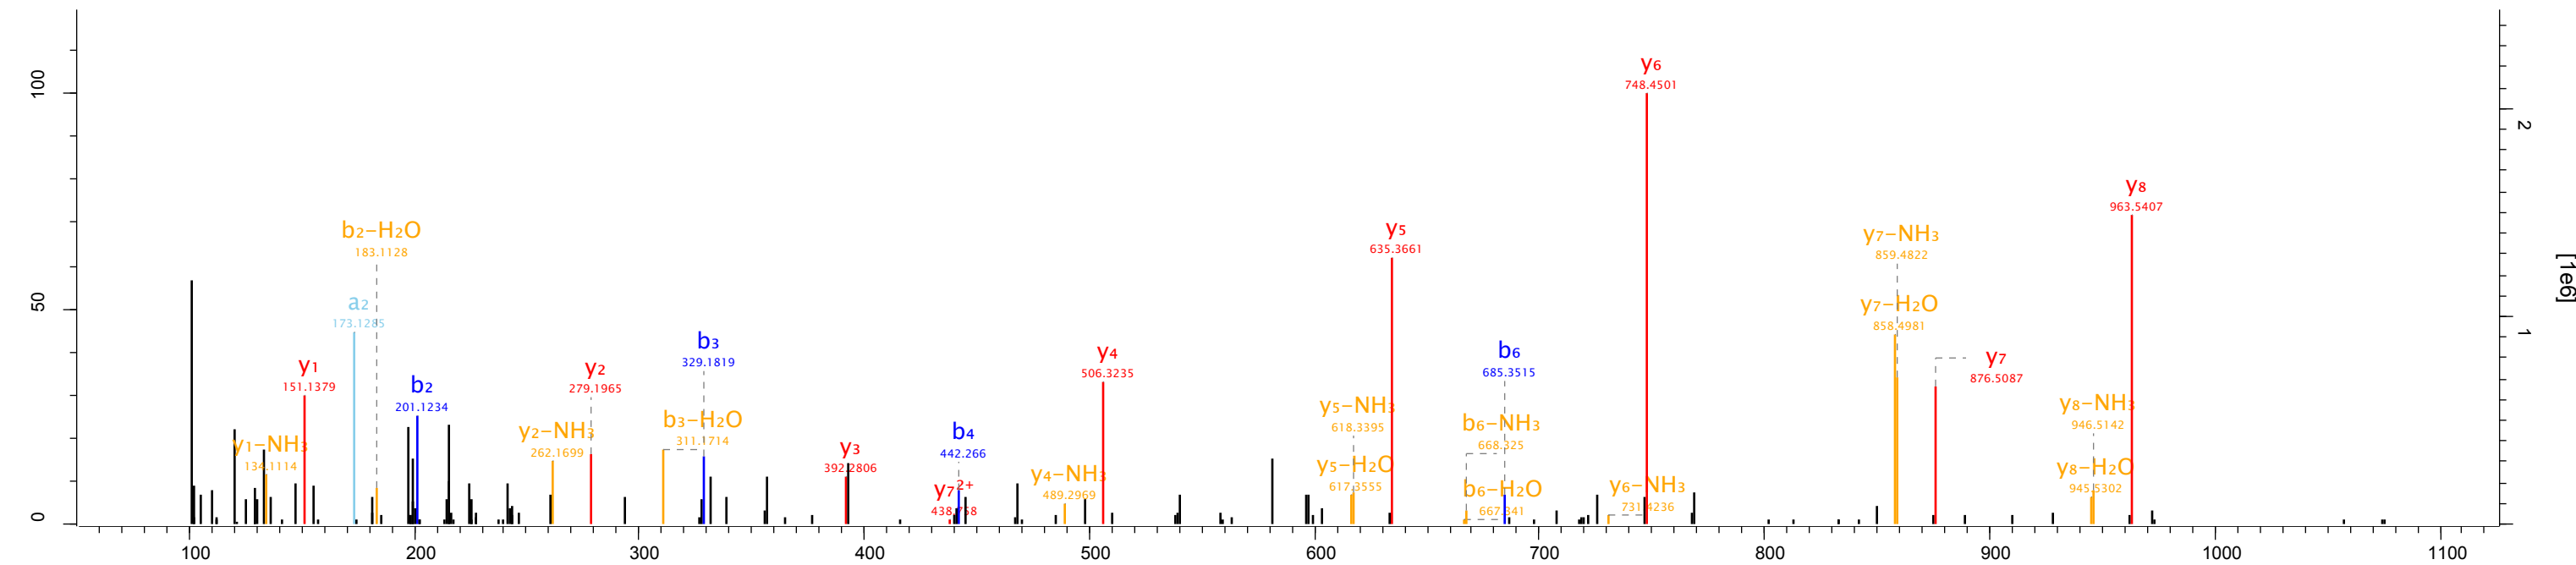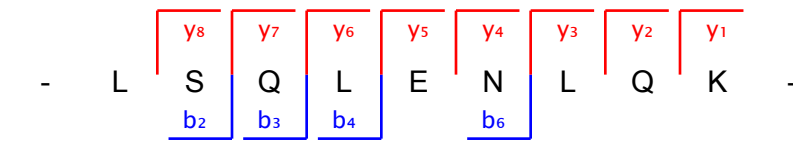

Raw file: 20180707\_MaS\_A375SR\_ML\_proteome\_2\_27  
 Scan: 24064 Method: FTMS; HCD Score: 104.24 m/z: 684.84 Gene names: PIGN

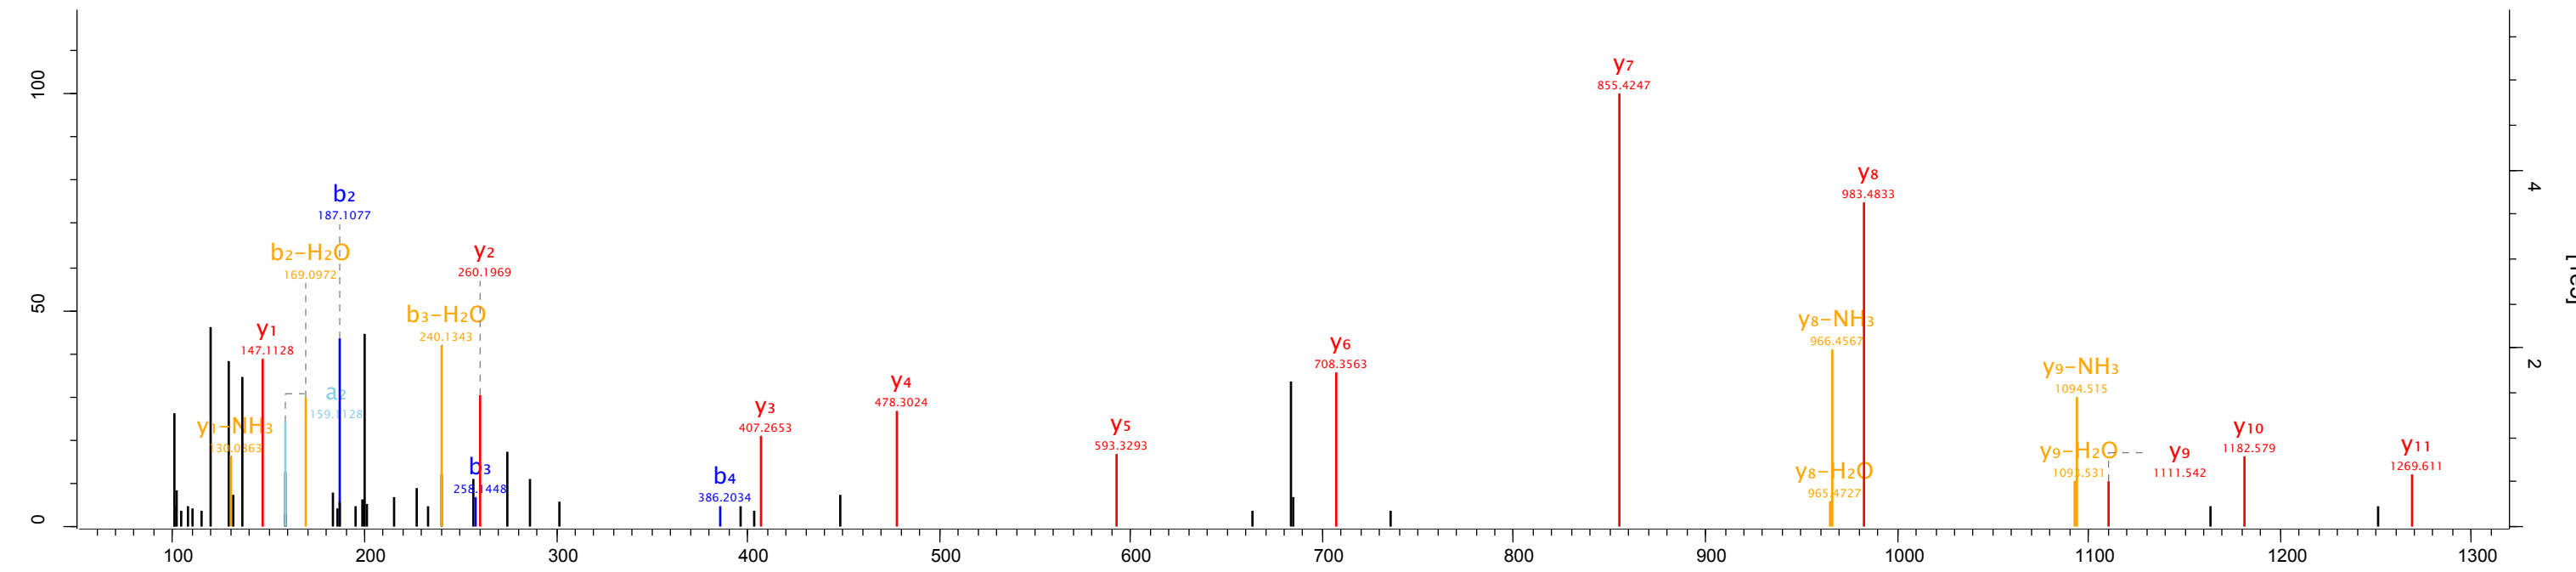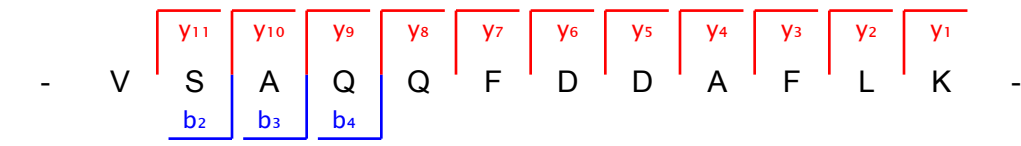

Raw file 20180707\_MaS\_A375SR\_ML\_proteome\_2\_28 Scan 19554 Method FTMS; HCD Score 72.9 m/z 861.37 Gene names MT-ND3

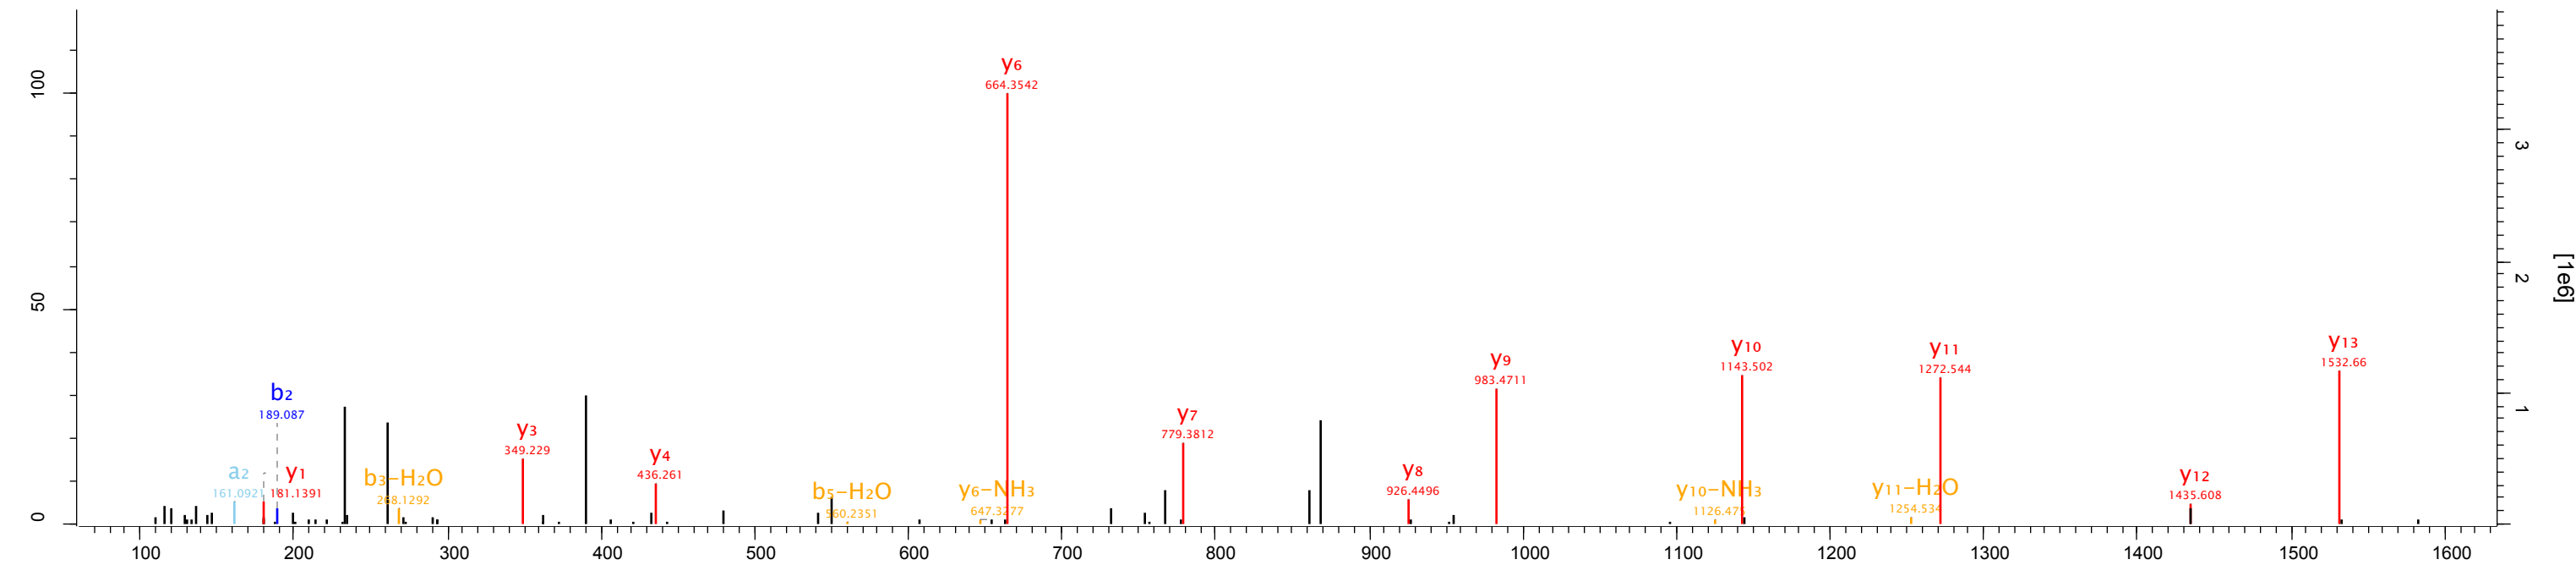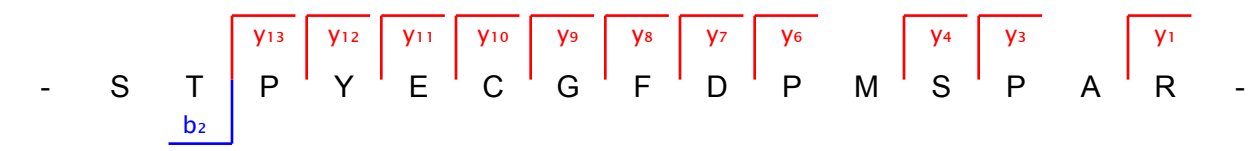



Raw file 20180707\_MaS\_A375SR\_ML\_proteome\_2\_28 Scan 22954 Method FTMS; HCD Score 93.43 m/z 865.99 Gene names KRTCAP2

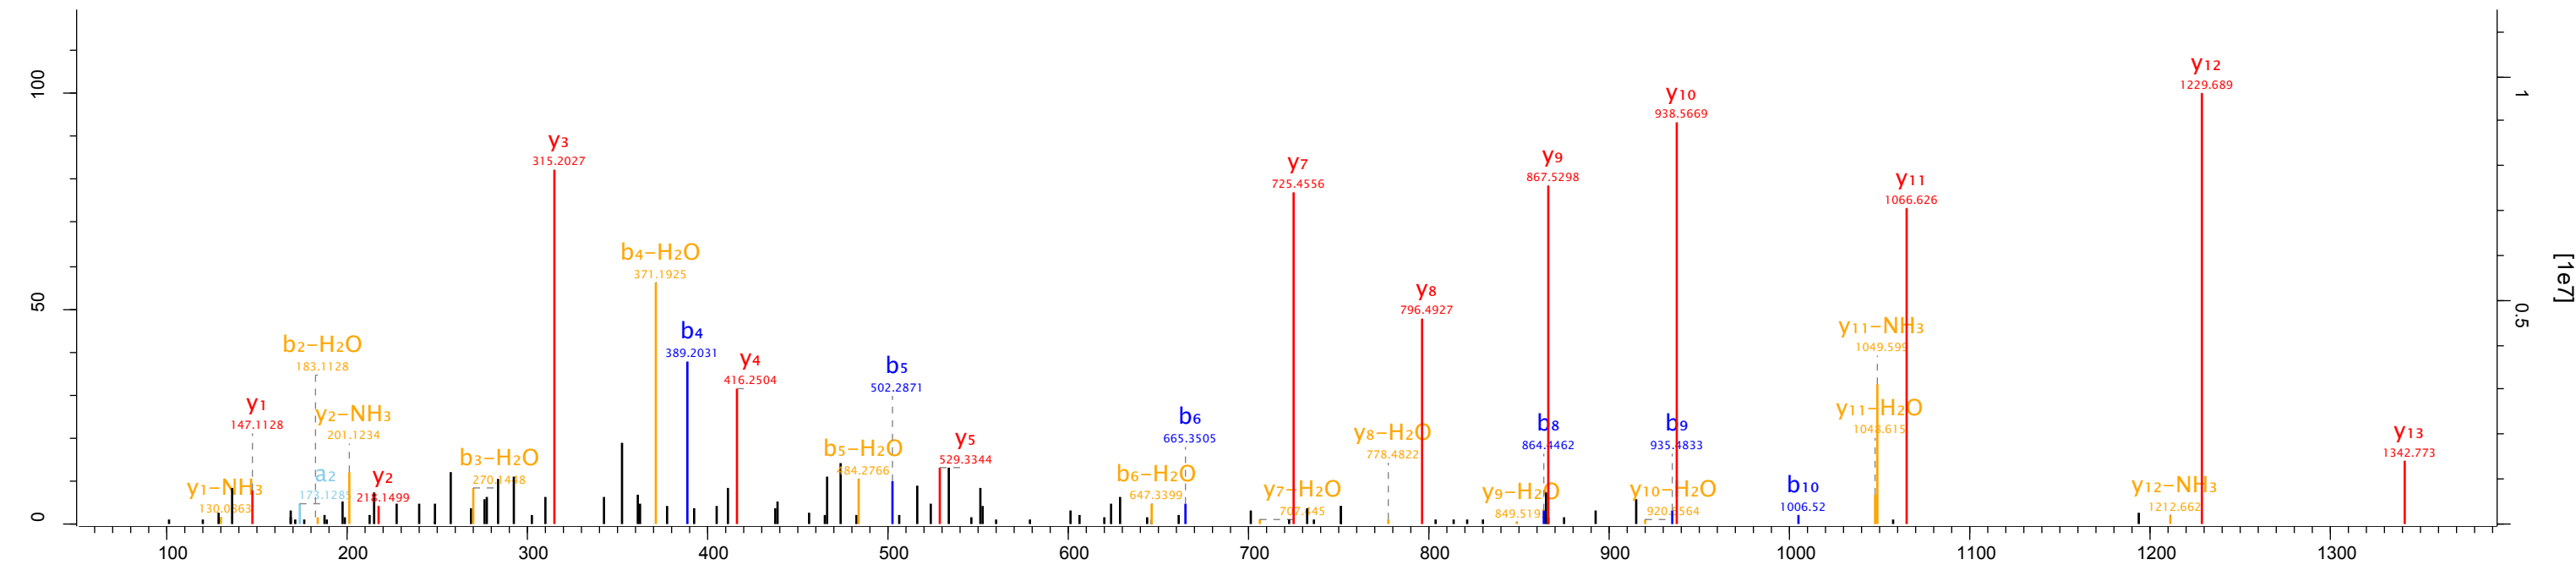

- I S S T L Y Q A A A P V L T P A K -

Fragmentation mapping (b and y ions):

- b ions (blue boxes):** a2 (S), b4 (T), b5 (L), b6 (Y), b8 (A), b9 (A), b10 (A)
- y ions (red boxes):** y1 (K), y2 (A), y3 (P), y4 (T), y5 (L), y7 (P), y8 (A), y9 (A), y10 (A), y11 (Q), y12 (Y), y13 (L)

Raw file: 20180707\_MaS\_A375SR\_ML\_proteome\_2\_29  
 Scan: 19444 Method: FTMS; HCD Score: 49.66 m/z: 696.04 Gene names: OAS1

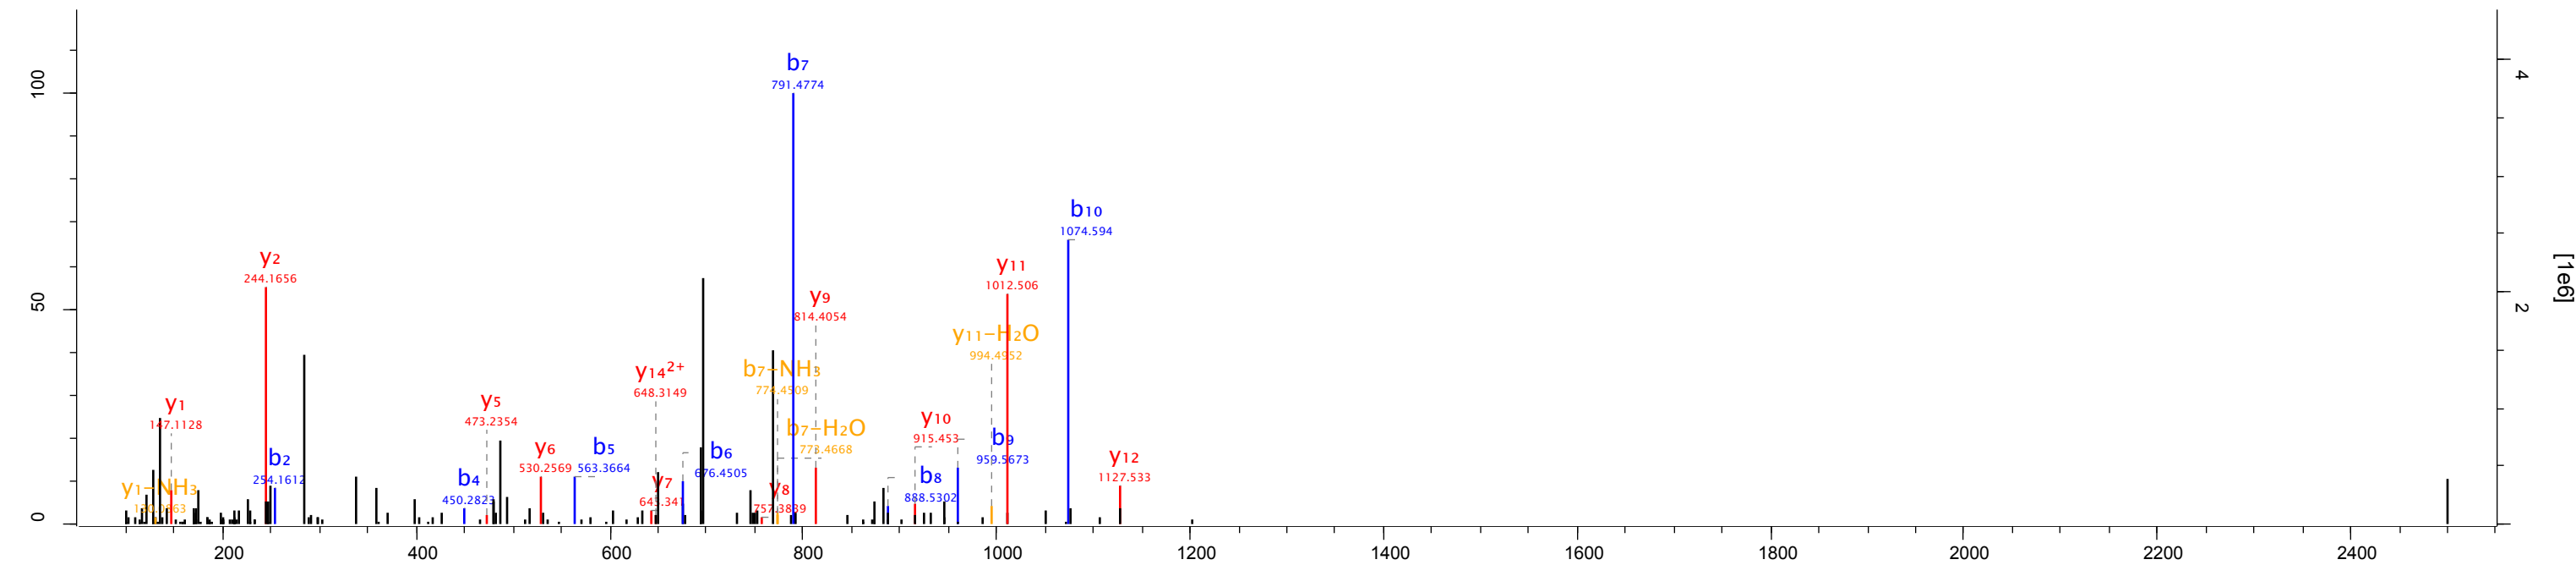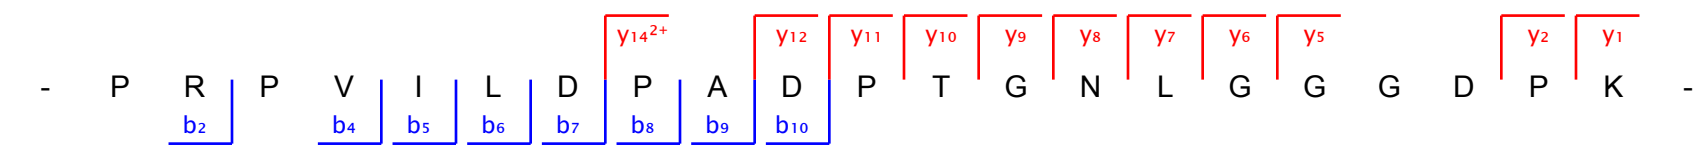

Raw file 20180707\_MaS\_A375SR\_ML\_proteome\_2\_29  
 Scan 29394 Method FTMS; HCD Score 69.92 m/z 566.03 Gene names SMIM11

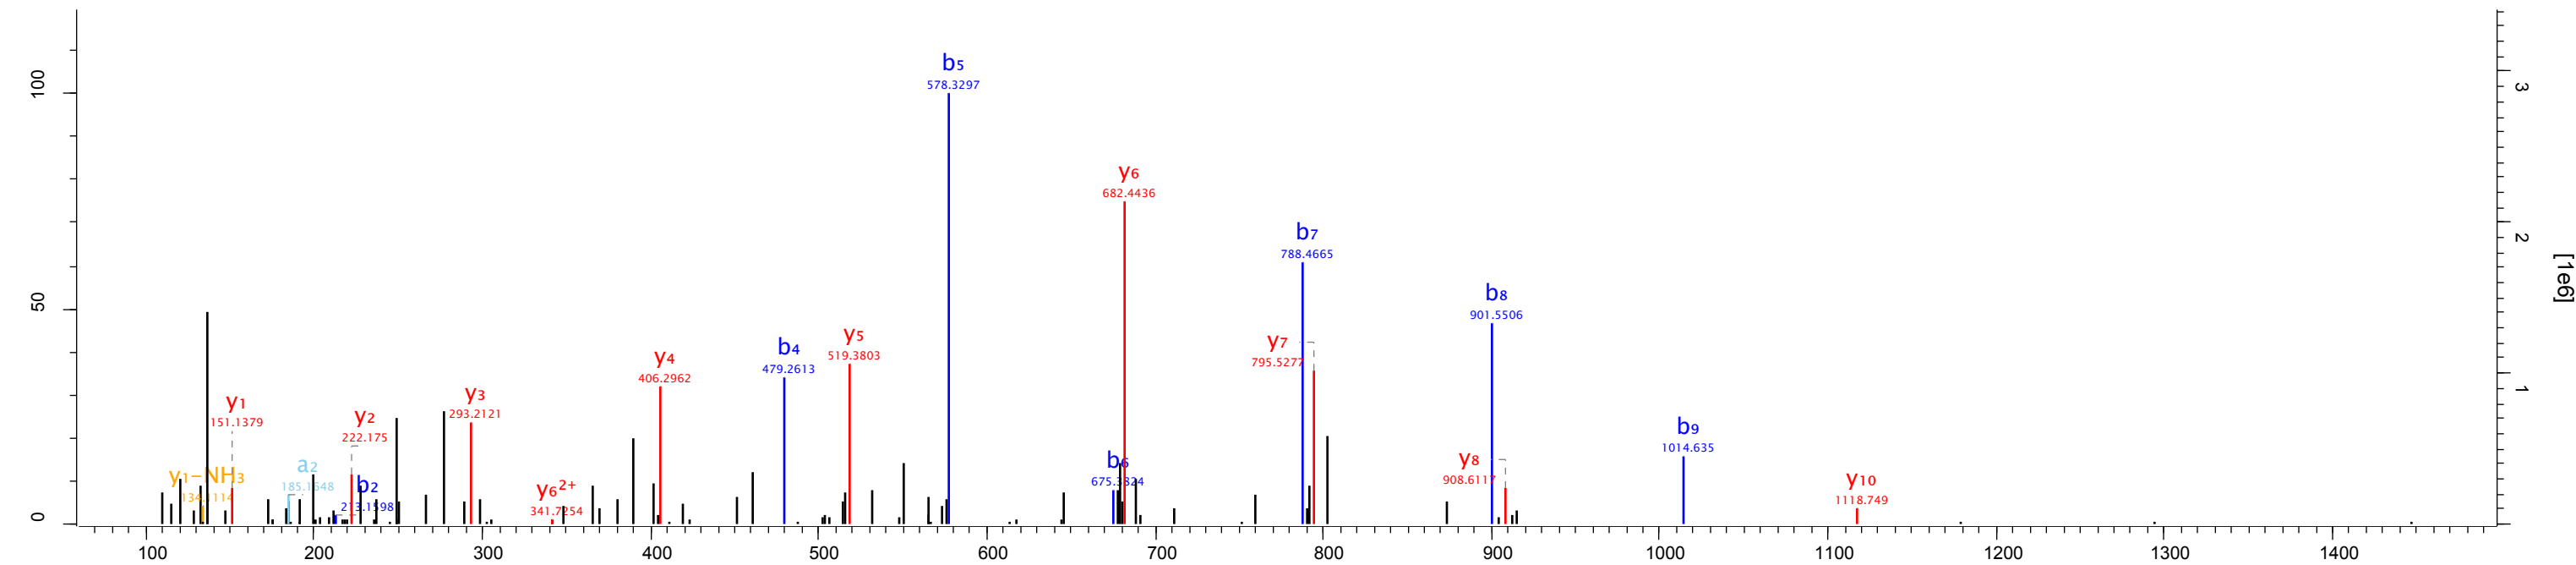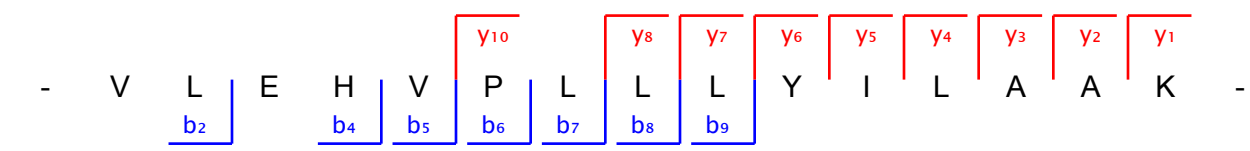

Raw file 20180707\_MaS\_A375SR\_ML\_proteome\_2\_30 Scan 22844 Method FTMS; HCD Score 77.06 m/z 637.88 Gene names KIAA0195

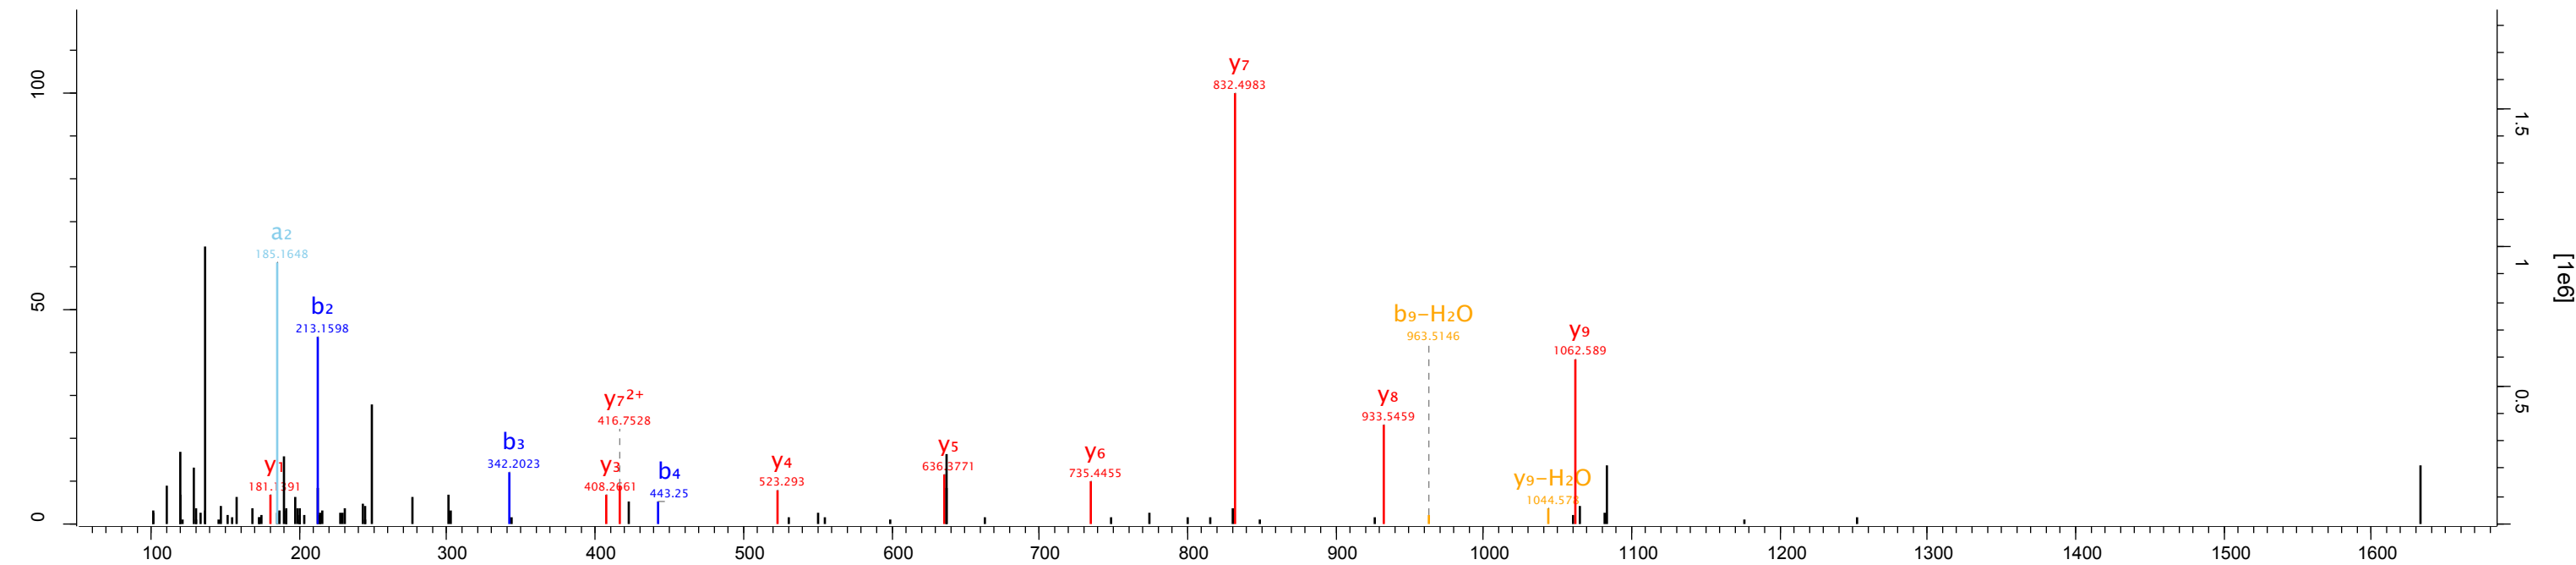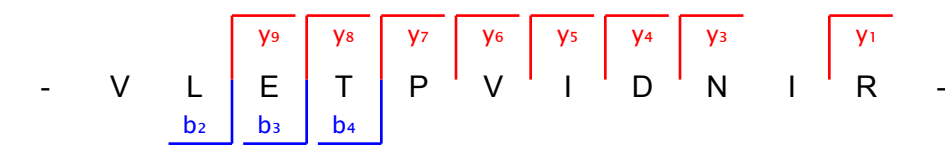

Raw file  
20180707\_MaS\_A375SR\_ML\_proteome\_2\_30  
Scan 6424 Method FTMS; HCD Score 84.36 m/z 353.19

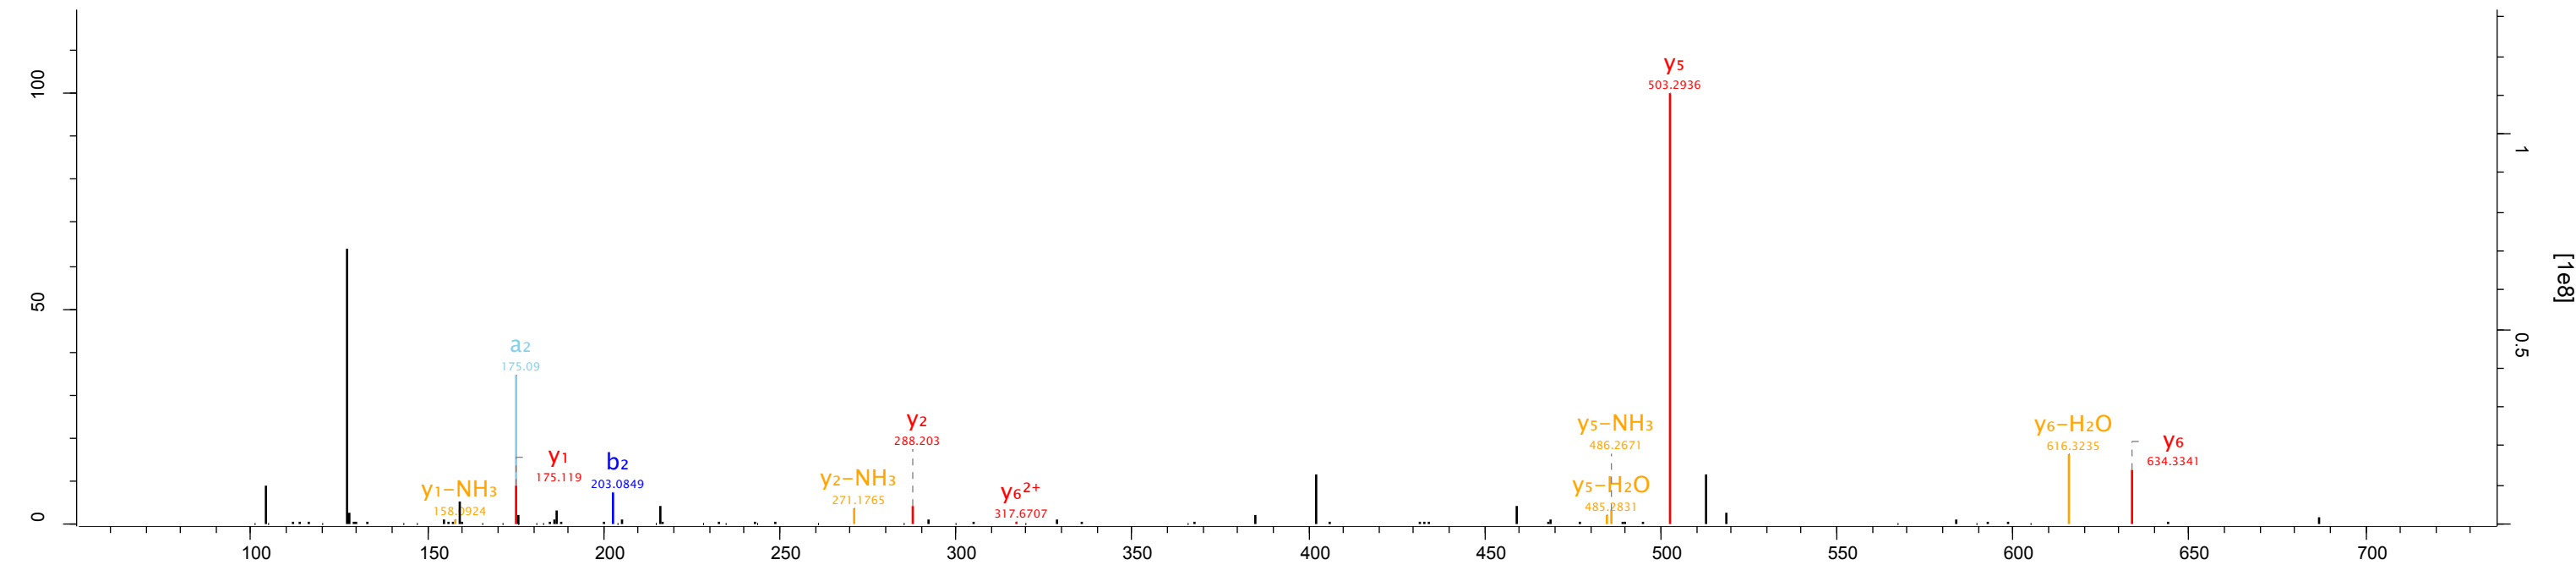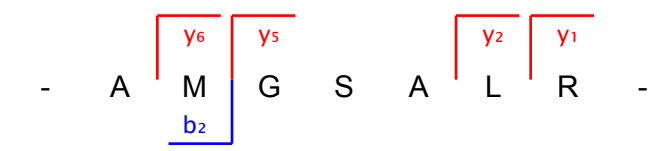

Raw file 20180707\_MaS\_A375SR\_ML\_proteome\_2\_30  
 Scan 8374 Method FTMS; HCD Score 99.75 m/z 595.83

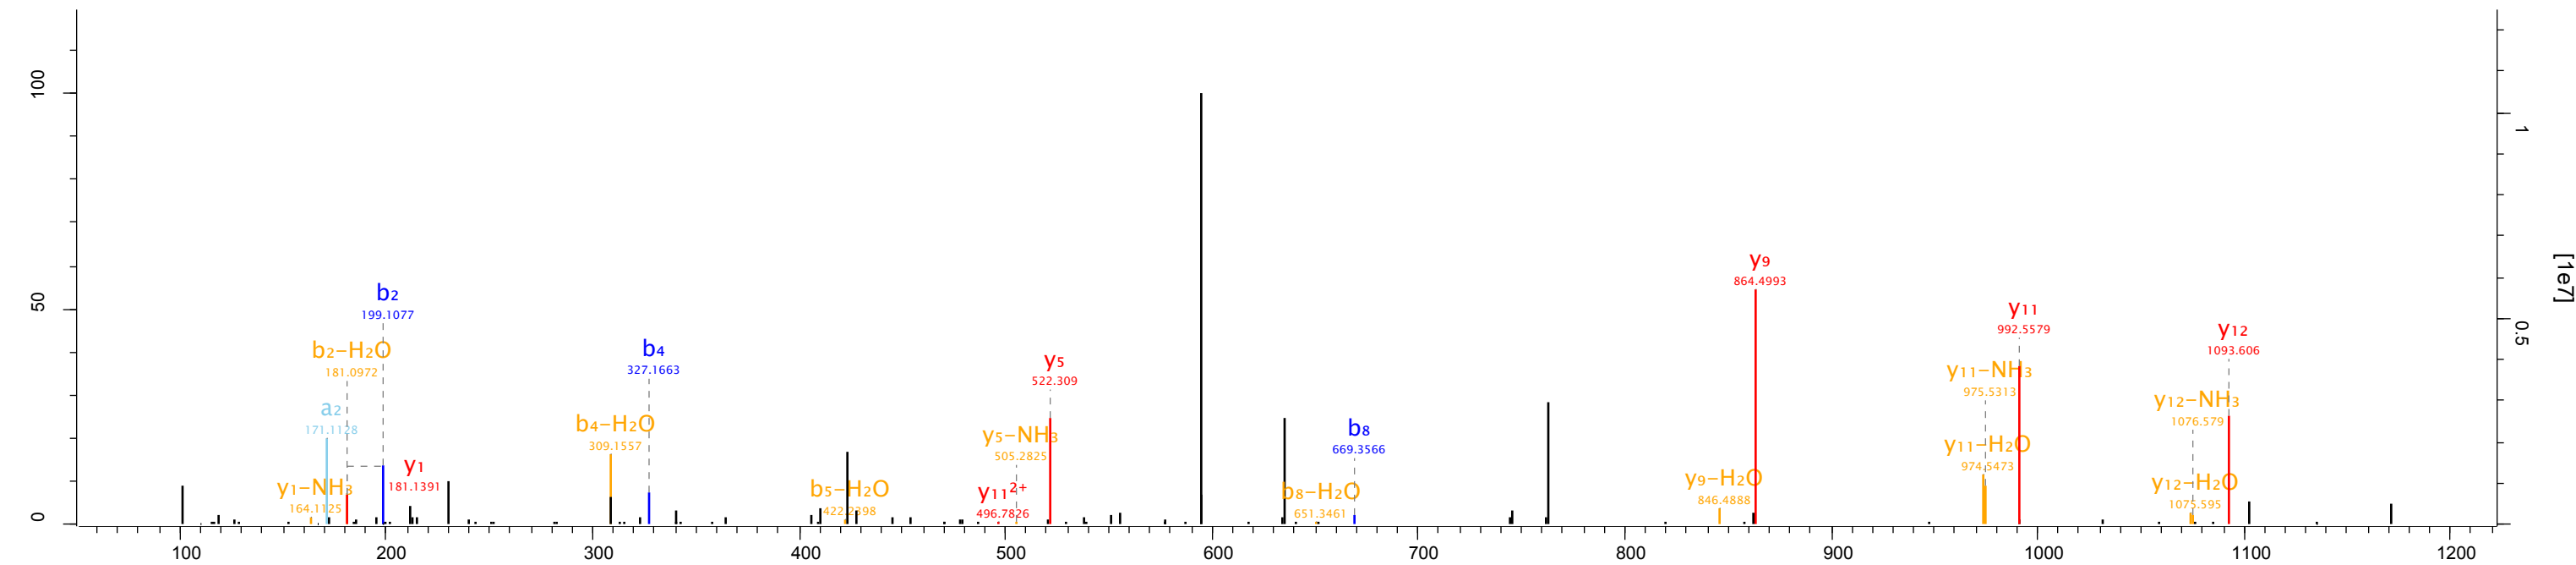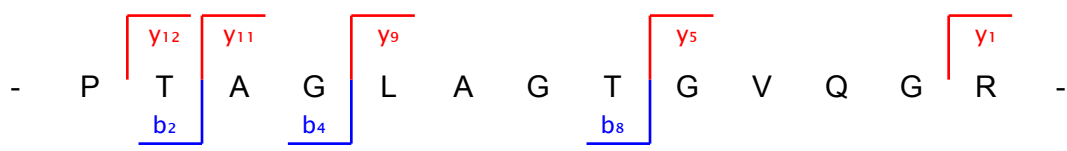

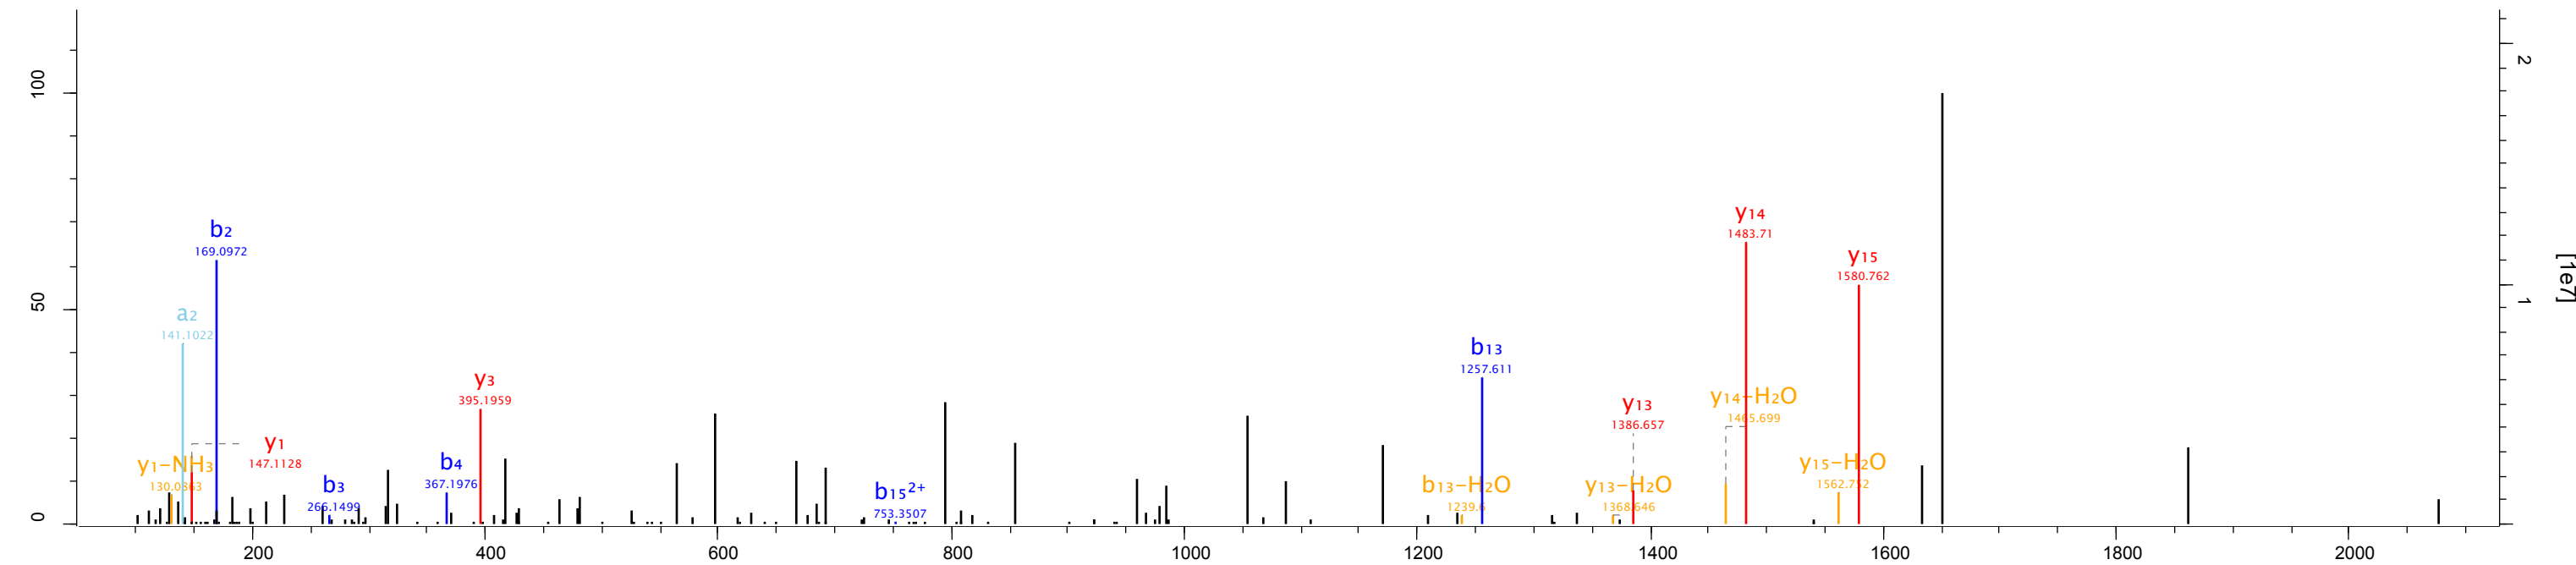

Raw file 20180707\_MaS\_A375SR\_ML\_proteome\_21 Scan 17194 Method FTMS; HCD Score 44.25 m/z 743.88 Gene names MGST2

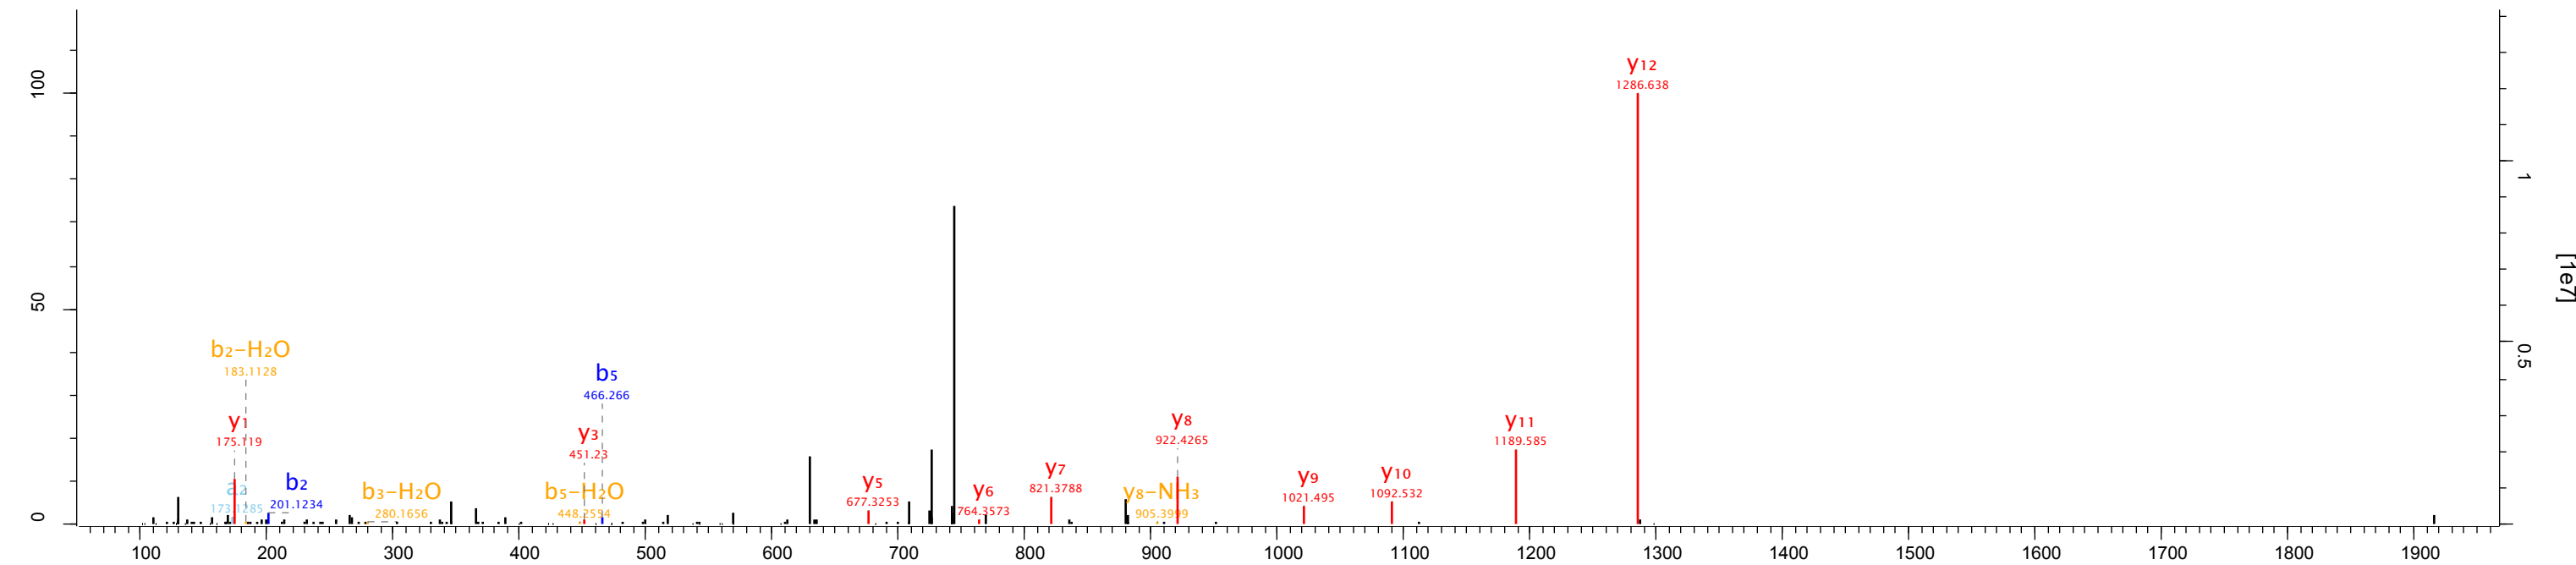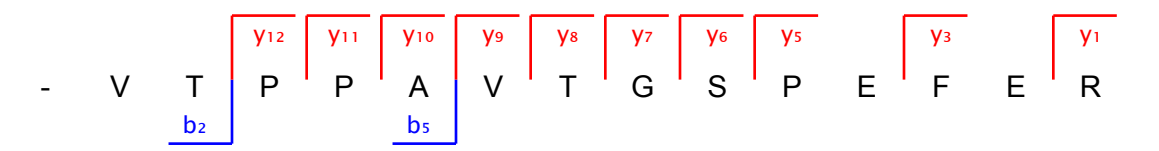



Raw file  
20180707\_MaS\_A375SR\_ML\_proteome\_22

Scan: 19254  
Method: FTMS; HCD  
Score: 87.52  
m/z: 861.38  
Gene names: MT-ND3

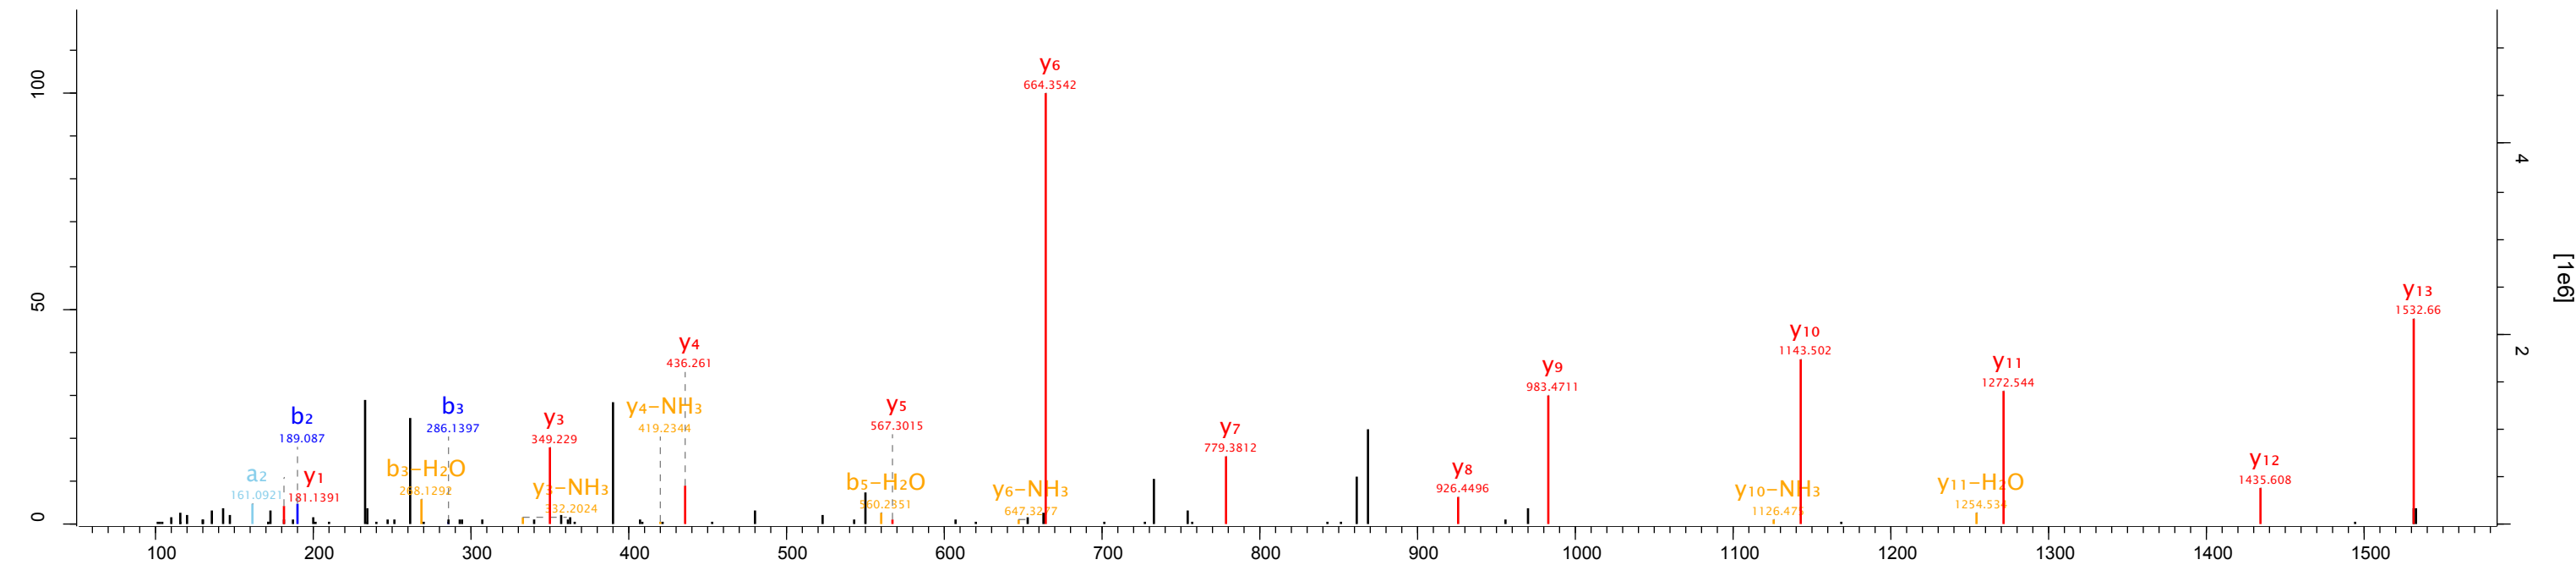

Raw file: 20180707\_MaS\_A375SR\_ML\_proteome\_22  
 Scan: 3384 Method: FTMS; HCD Score: 66.19 m/z: 568.24 Gene names: MAP3K19

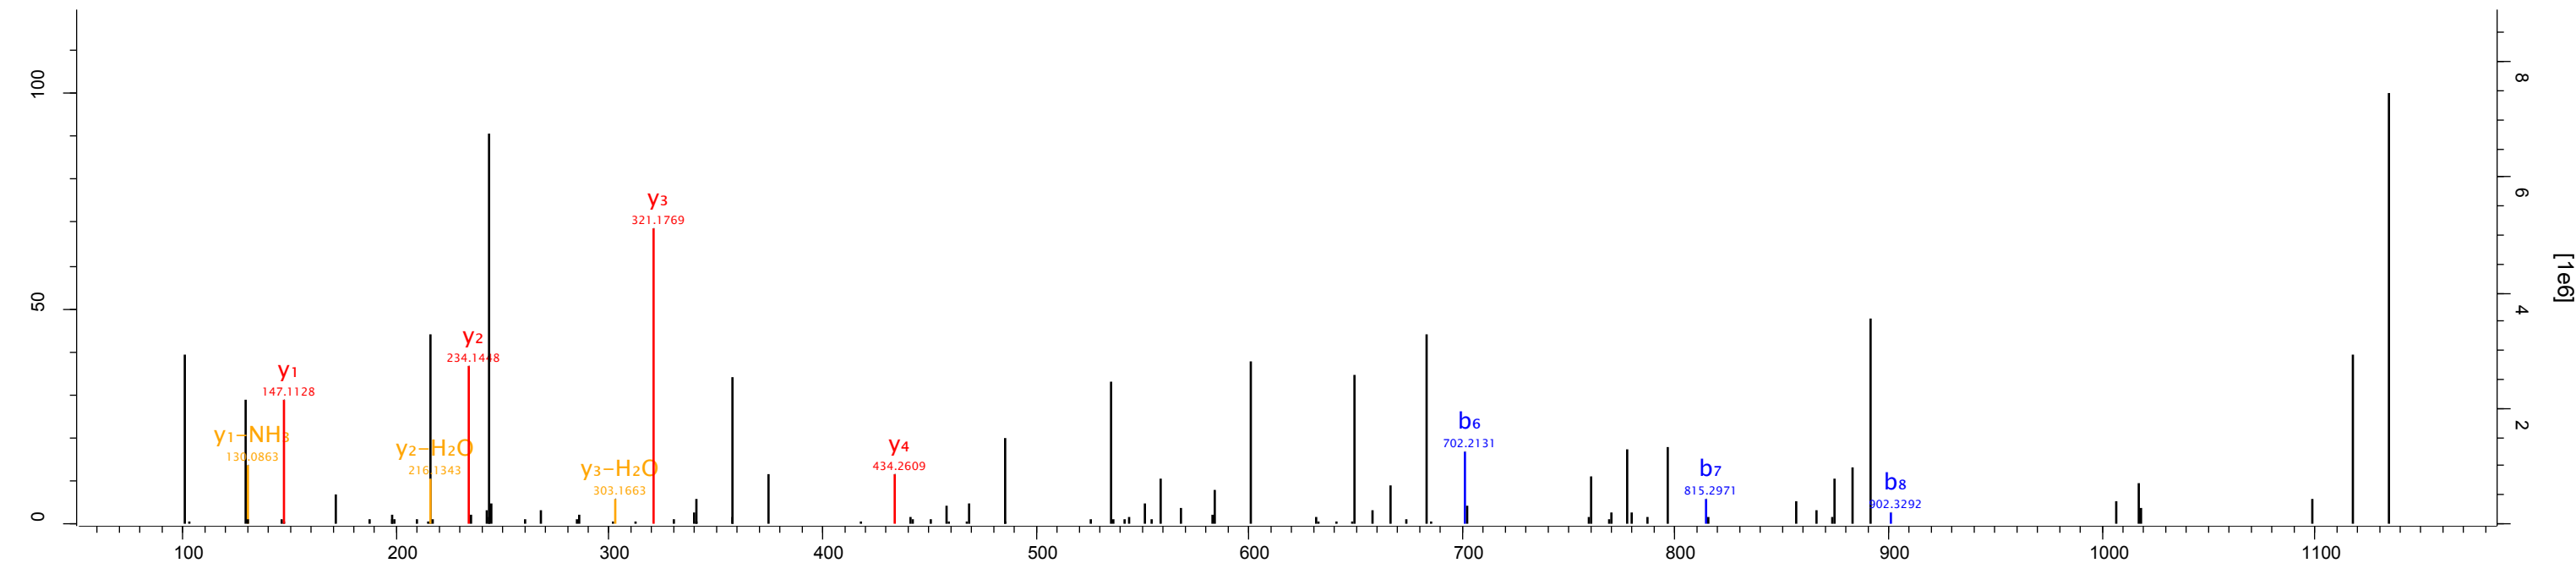

Raw file  
20180707\_MaS\_A375SR\_ML\_proteome\_24

Scan 9724 Method FTMS; HCD Score 40.39 m/z 379.89 Gene names C1orf21

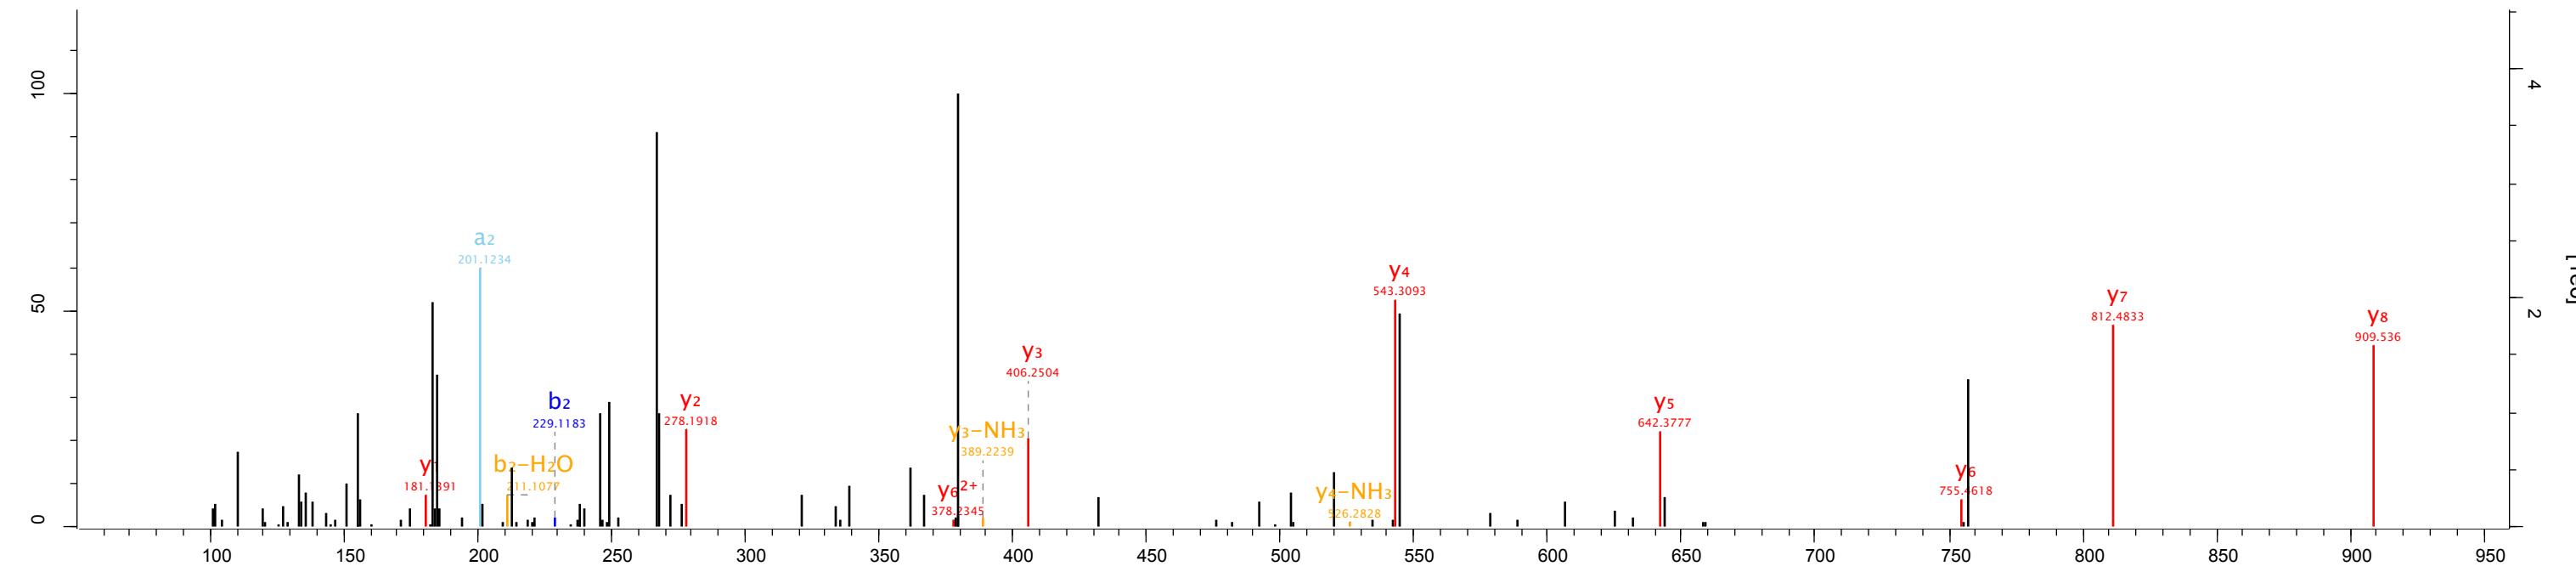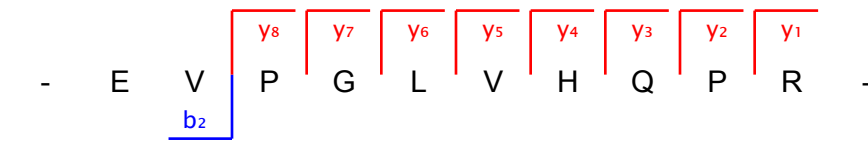

Raw file 20180707\_MaS\_A375SR\_ML\_proteome\_25 Scan 9574 Method FTMS; HCD Score 111.06 m/z 488.26

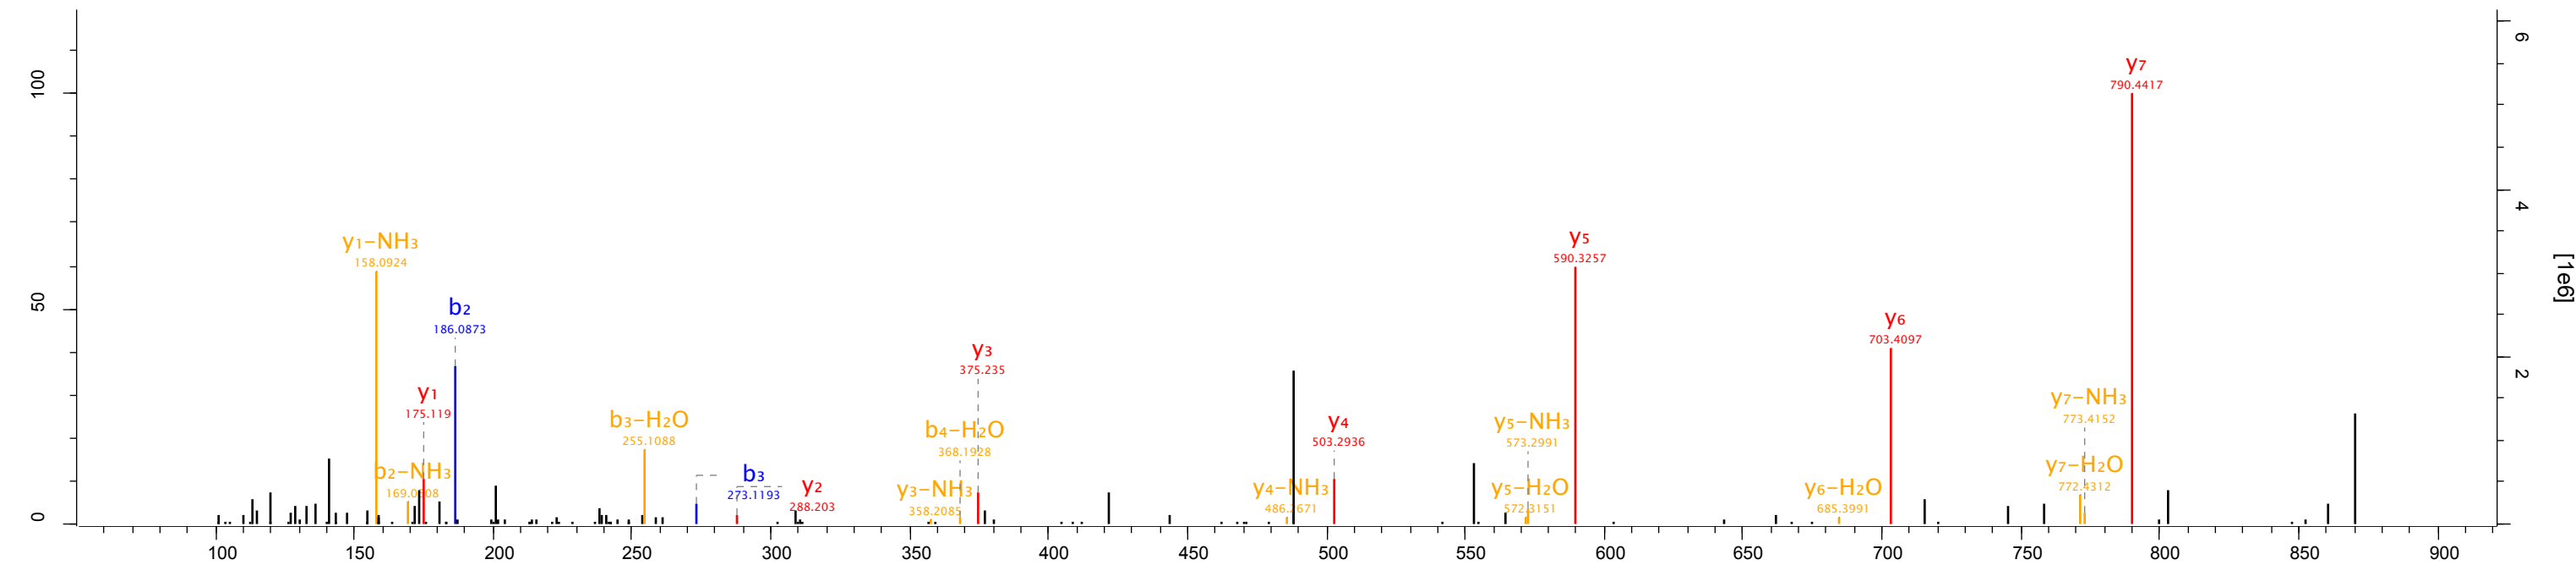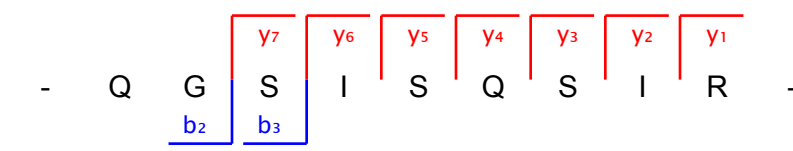

Raw file 20180707\_MaS\_A375SR\_ML\_proteome\_27 Scan 12694 Method FTMS; HCD Score 54.26 m/z 637.34

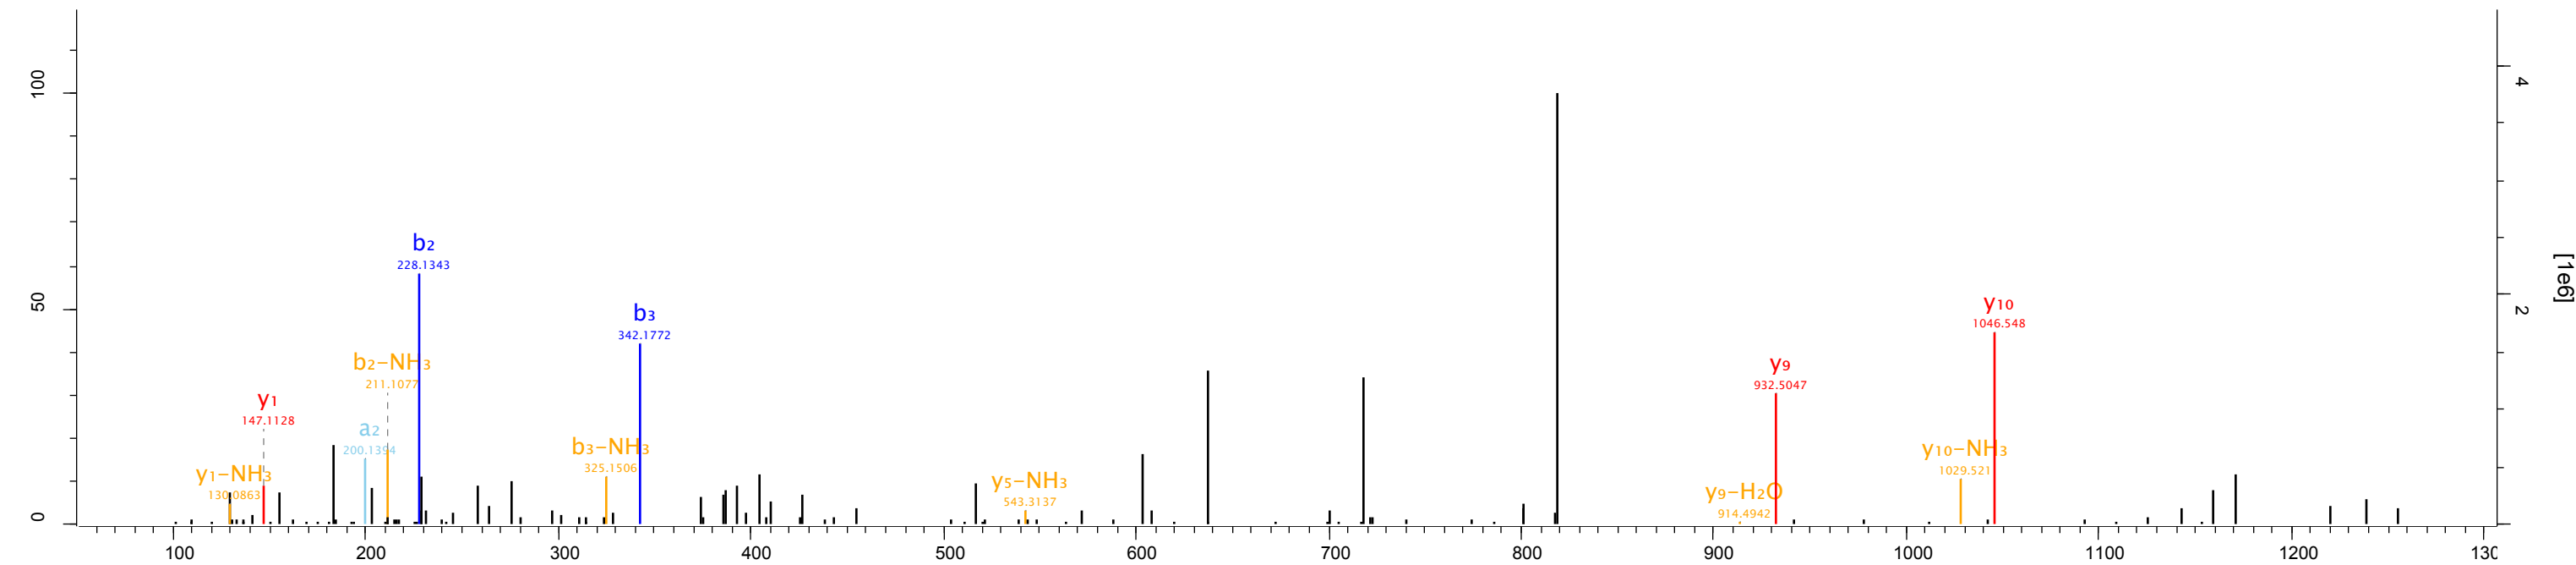

Raw file  
20180707\_MaS\_A375SR\_ML\_proteome\_27

Scan      Method      Score      m/z      Gene names  
14434      FTMS; HCD      36.63      676.81      SELK

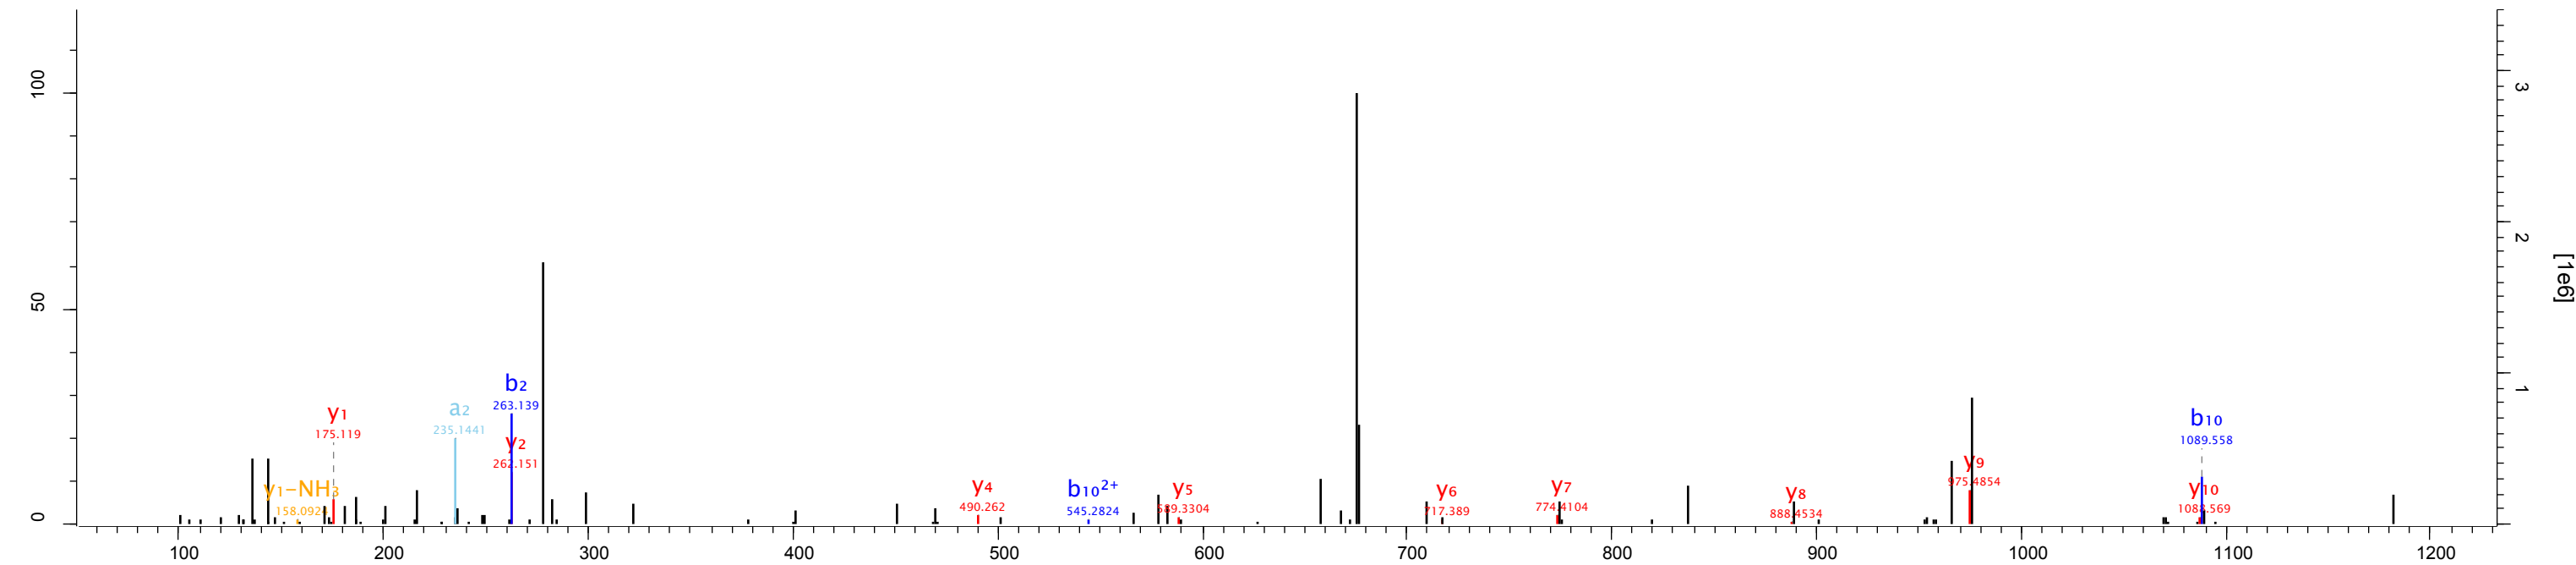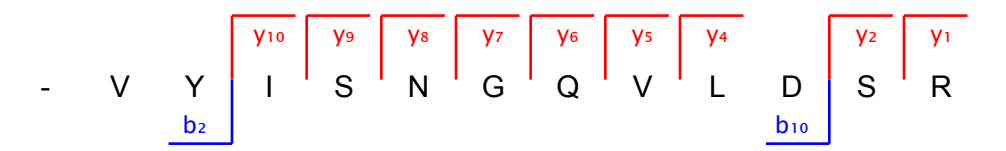

Raw file 20180707\_MaS\_A375SR\_ML\_proteome\_27 Scan 20534 Method FTMS; HCD Score 73.25 m/z 498.74

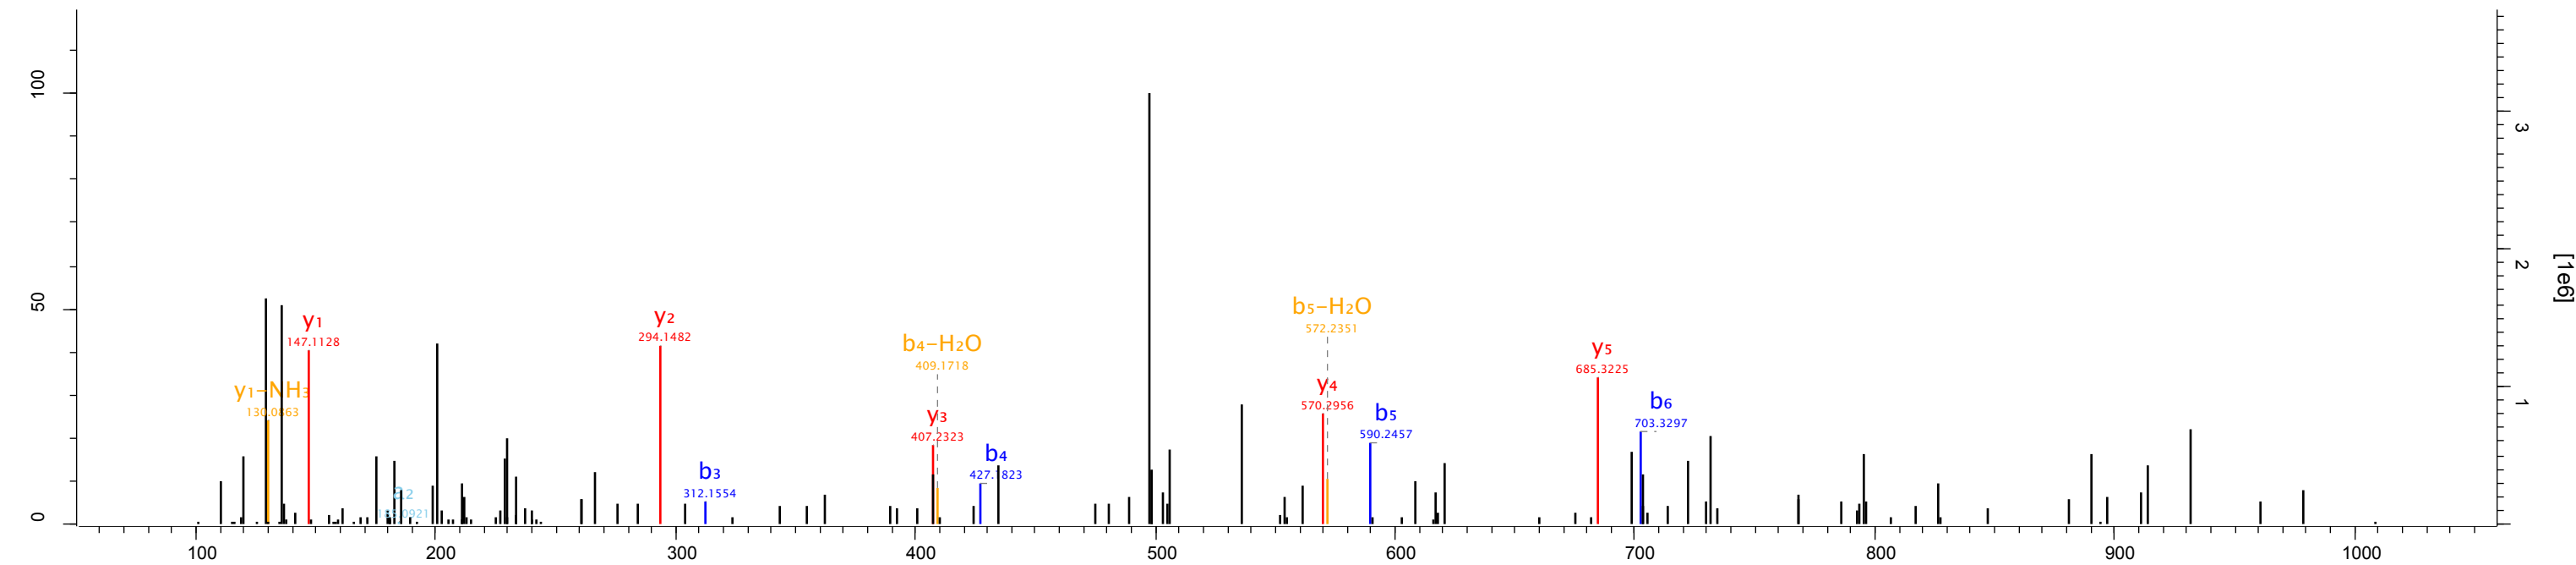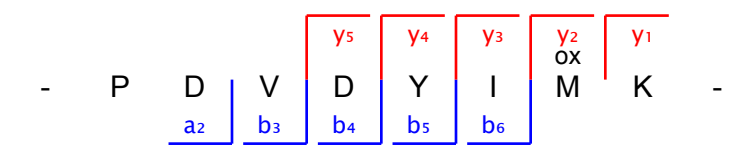

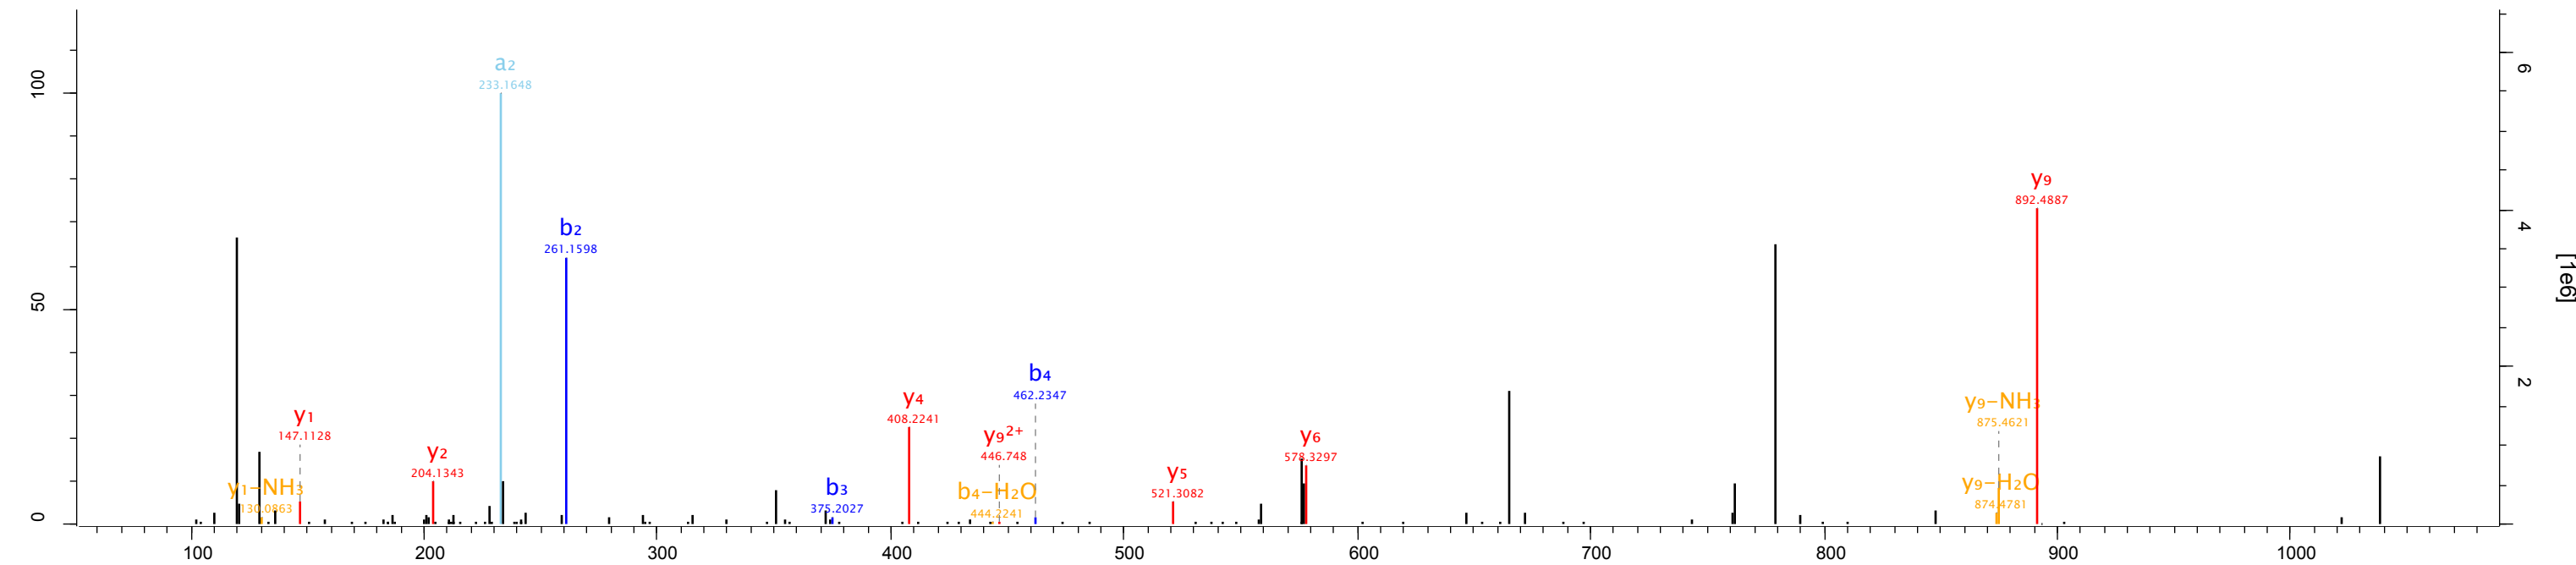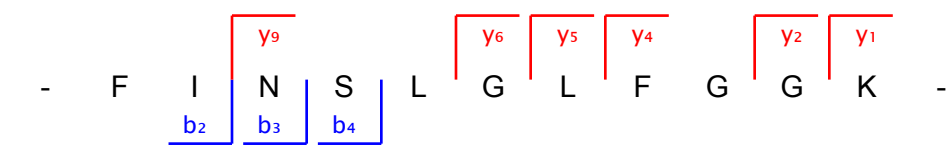



Raw file 20180707\_MaS\_A375SR\_ML\_proteome\_29 Scan 21404 Method FTMS; HCD Score 55.04 m/z 588.85 Gene names KATNAL2

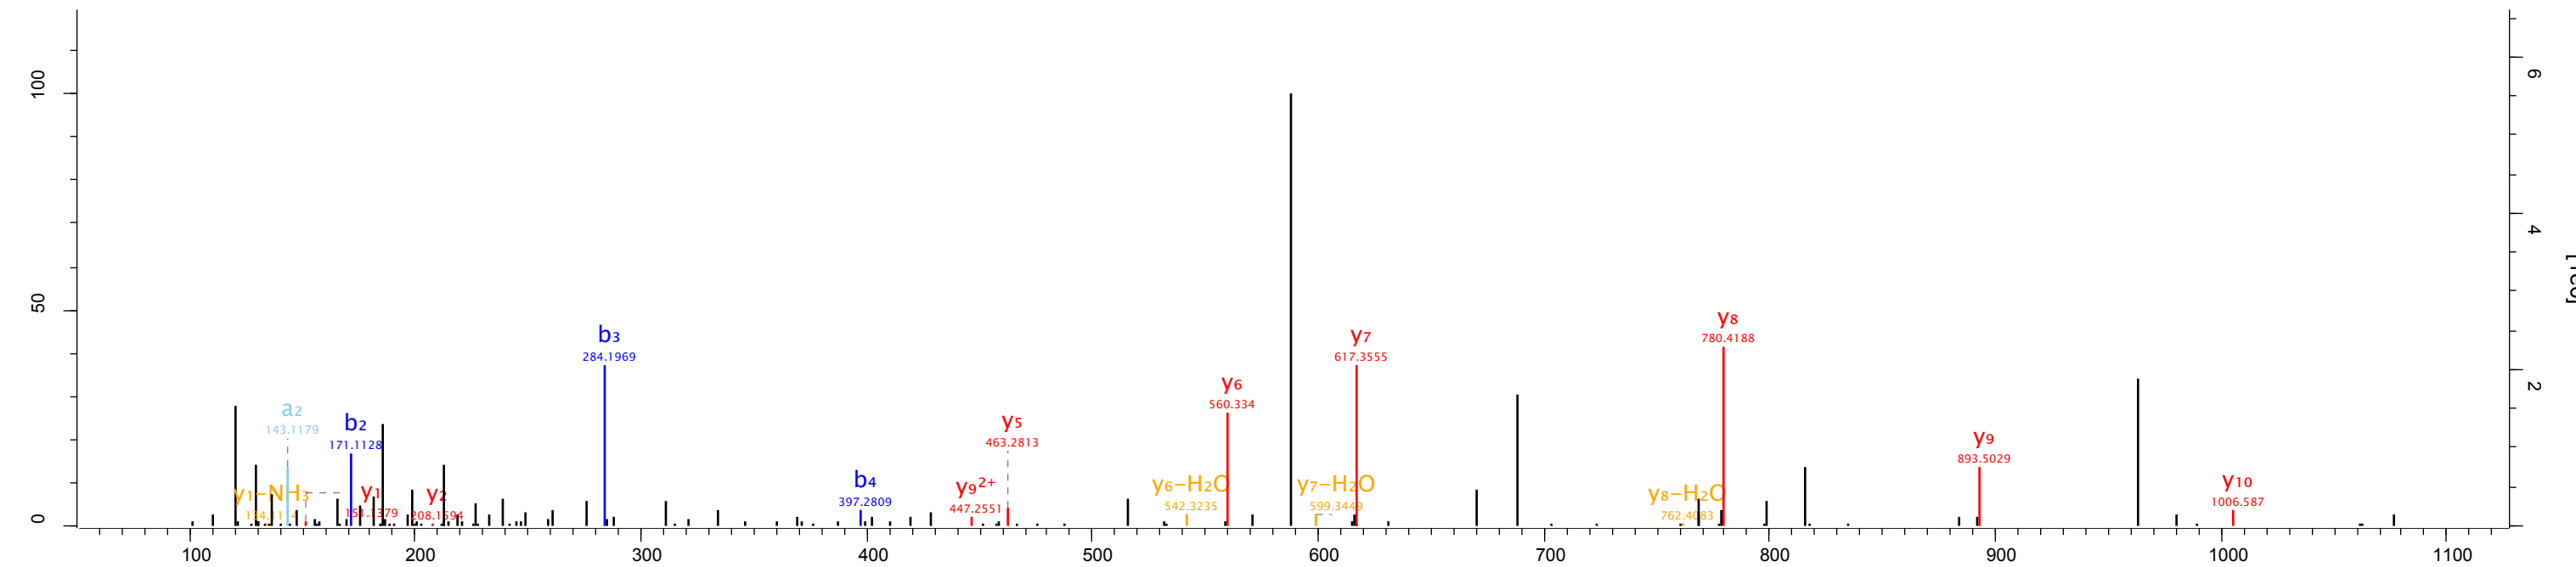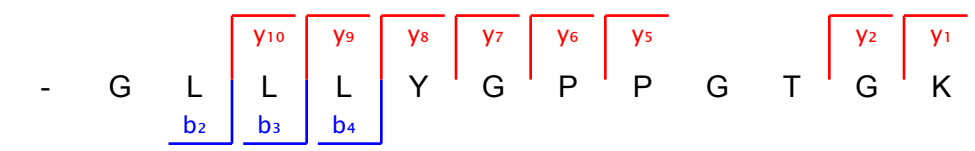

Raw file: 20180707\_MaS\_A375SR\_ML\_proteome\_29  
 Scan: 21954 Method: FTMS; HCD Score: 86.5 m/z: 694.9 Gene names: CHRM3

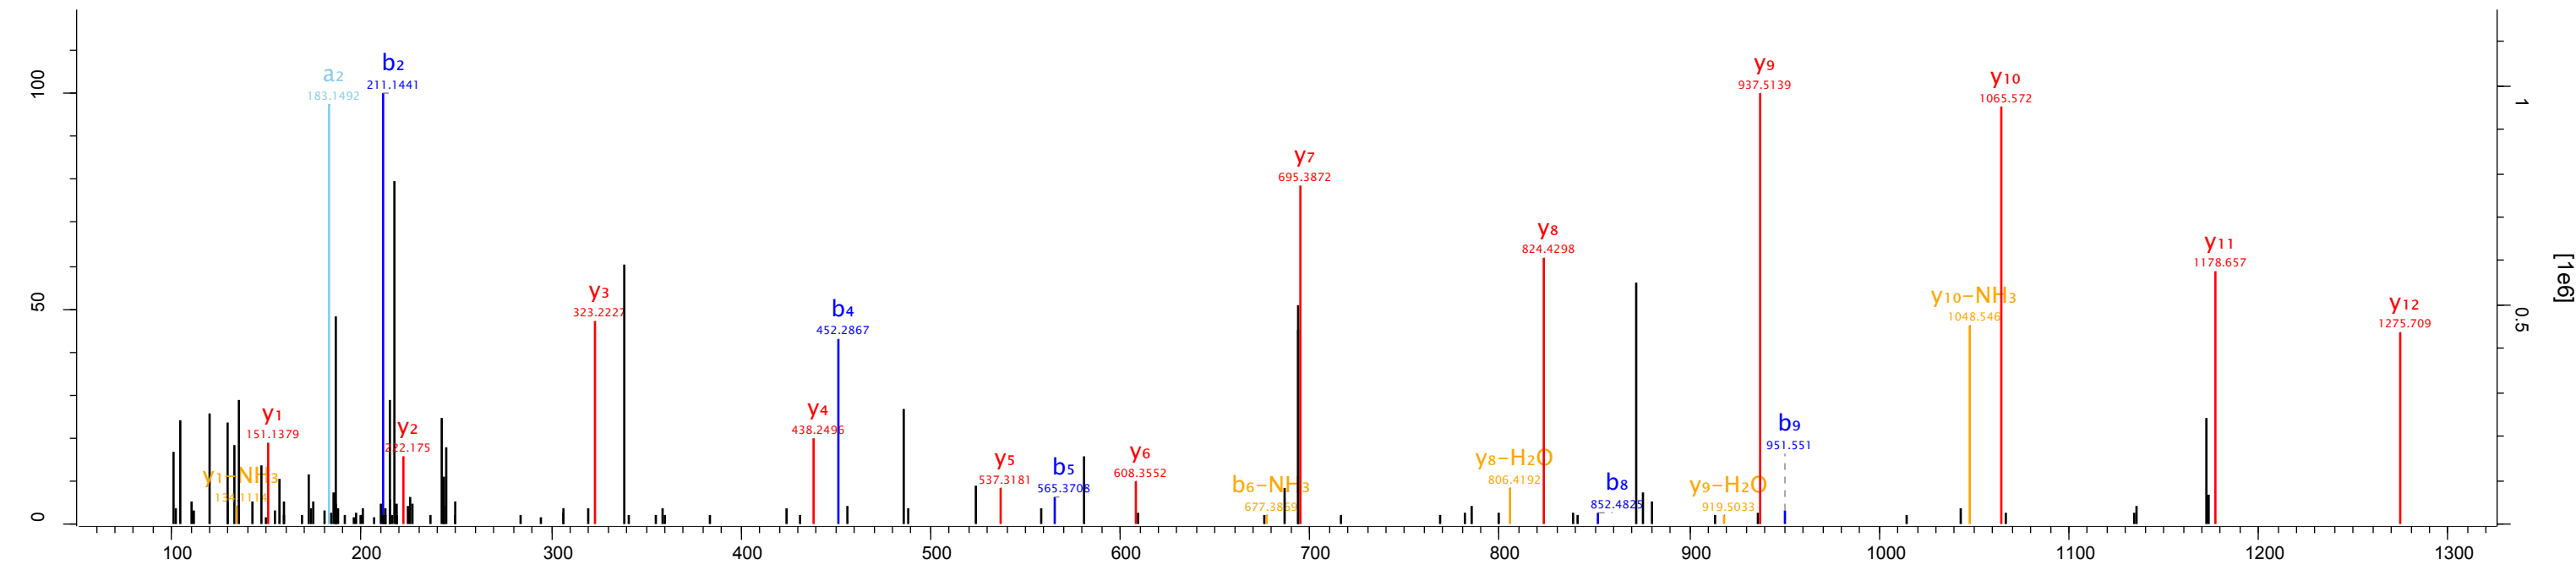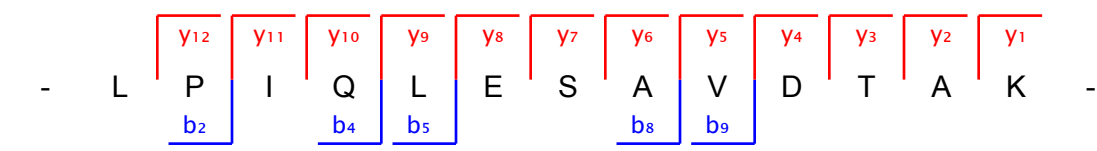

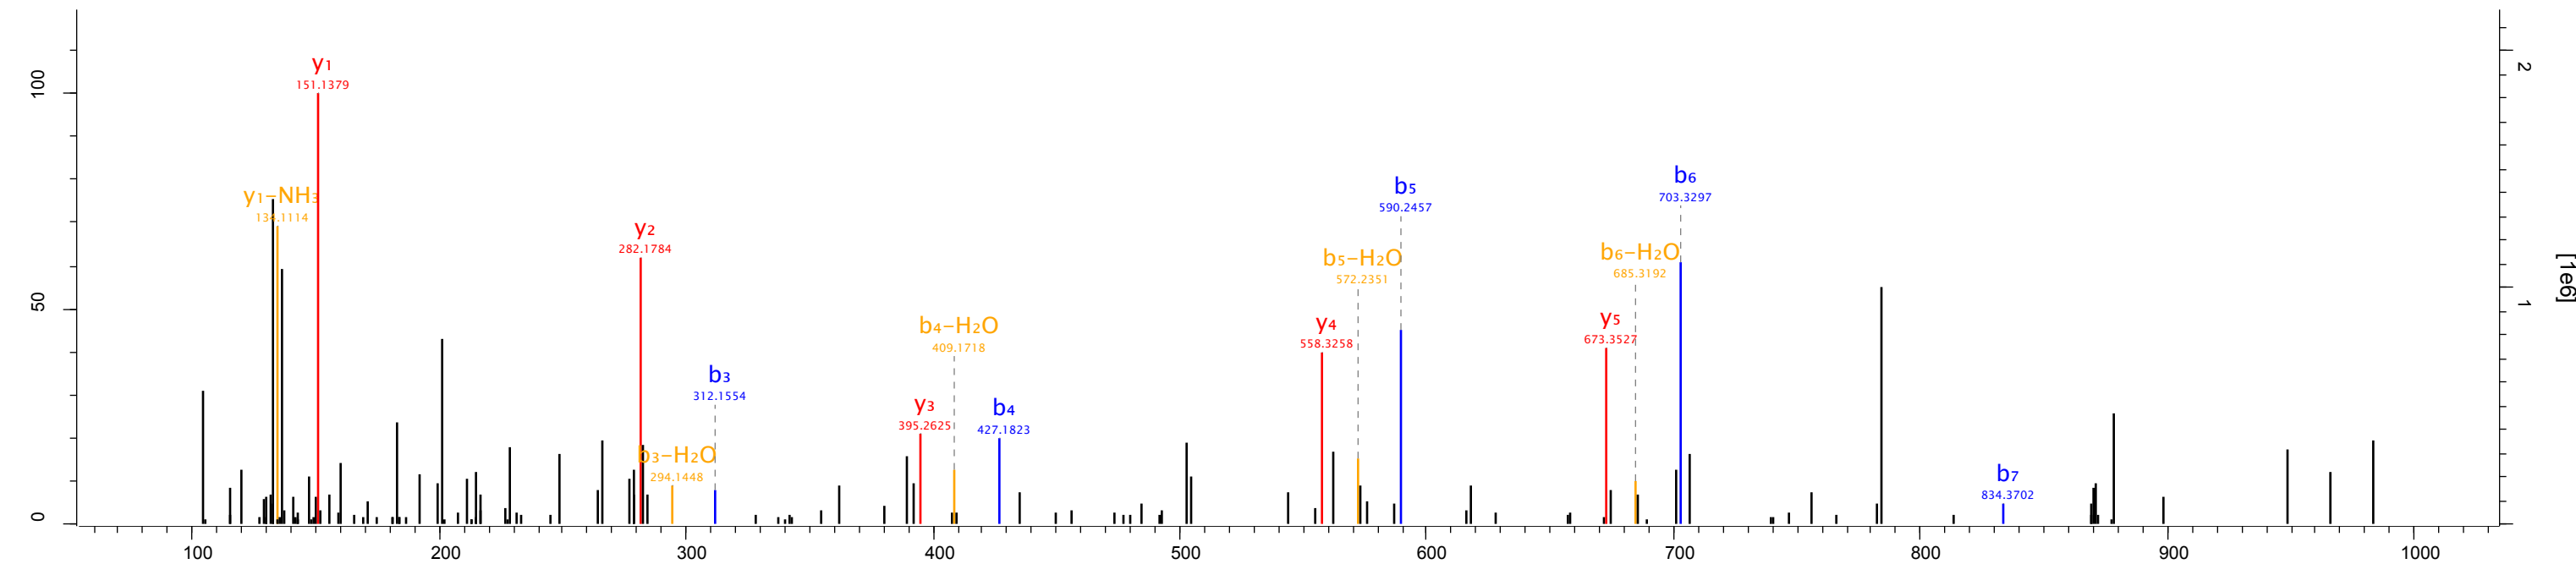

- P D V D Y I M K -

b3 b4 b5 b6 b7

y5 y4 y3 y2 y1

Raw file 20180707\_MaS\_A375SR\_ML\_proteome\_29 Scan 3924 Method FTMS; HCD Score 92.54 m/z 532.8

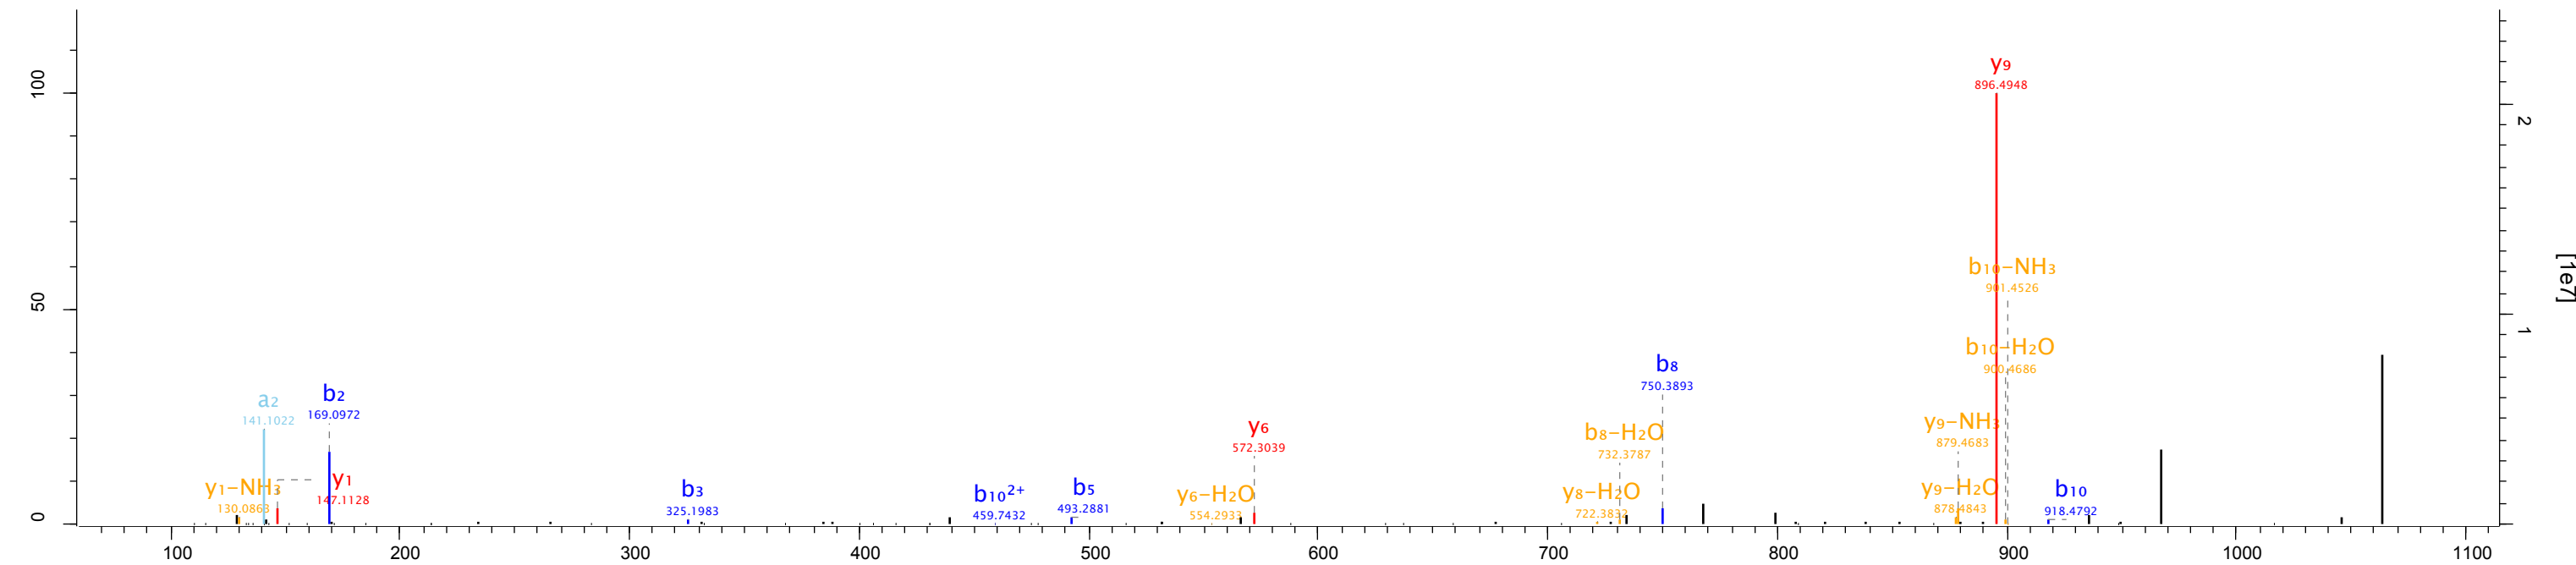

Raw file 20180707\_MaS\_A375SR\_ML\_proteome\_30 Scan 7824 Method FTMS; HCD Score 74.61 m/z 595.83

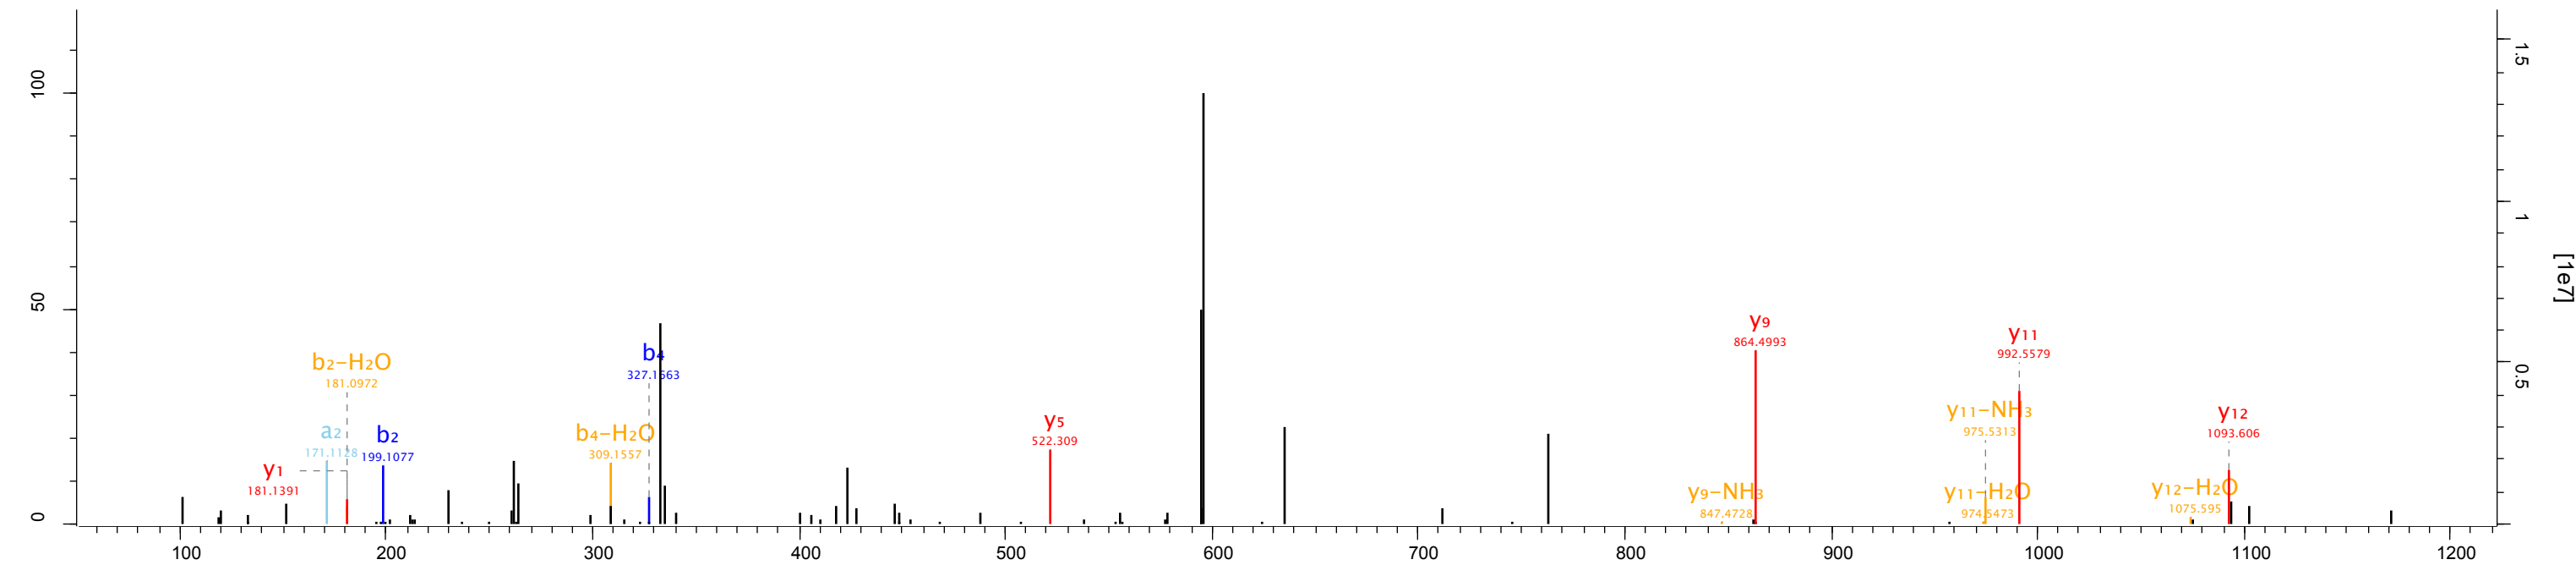

Raw file: 20150812\_A375SR\_Phospho\_BR1\_02  
 Scan: 6635 Method: FTMS; HCD Score: 83.89 m/z: 660.77 Gene names: GPSM3

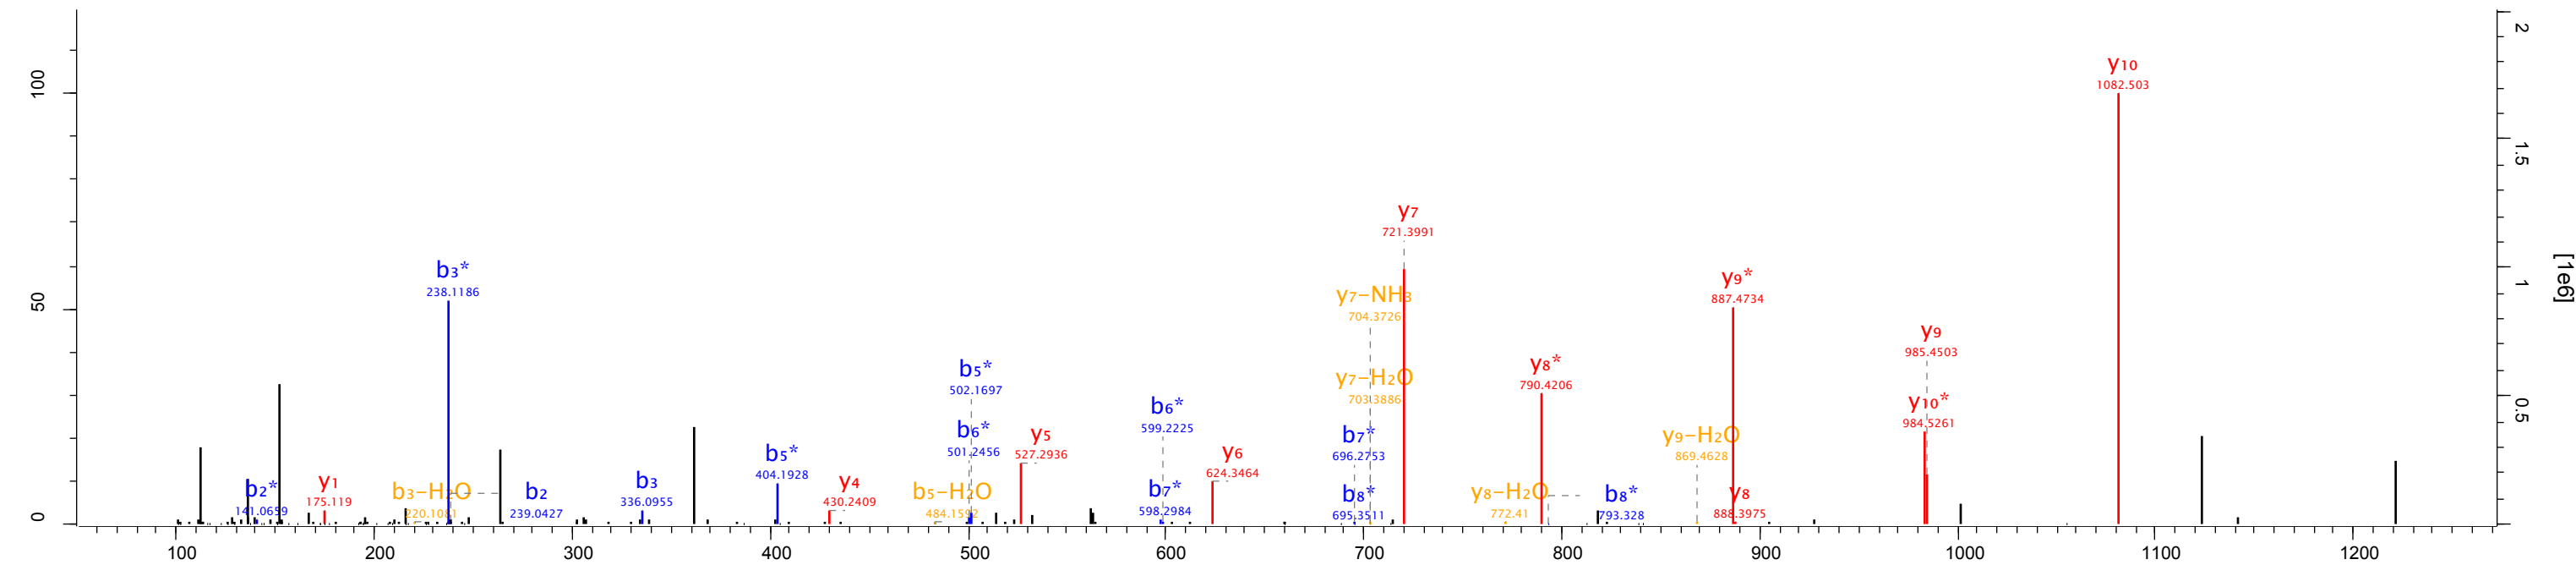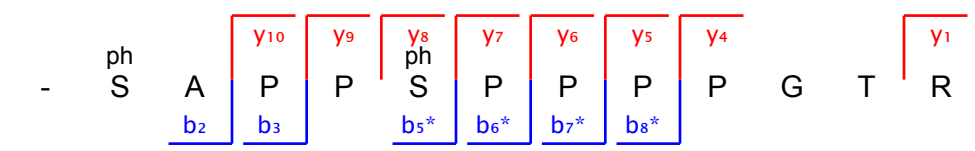

Raw file 20150812\_A375SR\_Phospho\_BR1\_03 Scan 15195 Method FTMS; HCD Score 179.5 m/z 943.89 Gene names KCNJ2

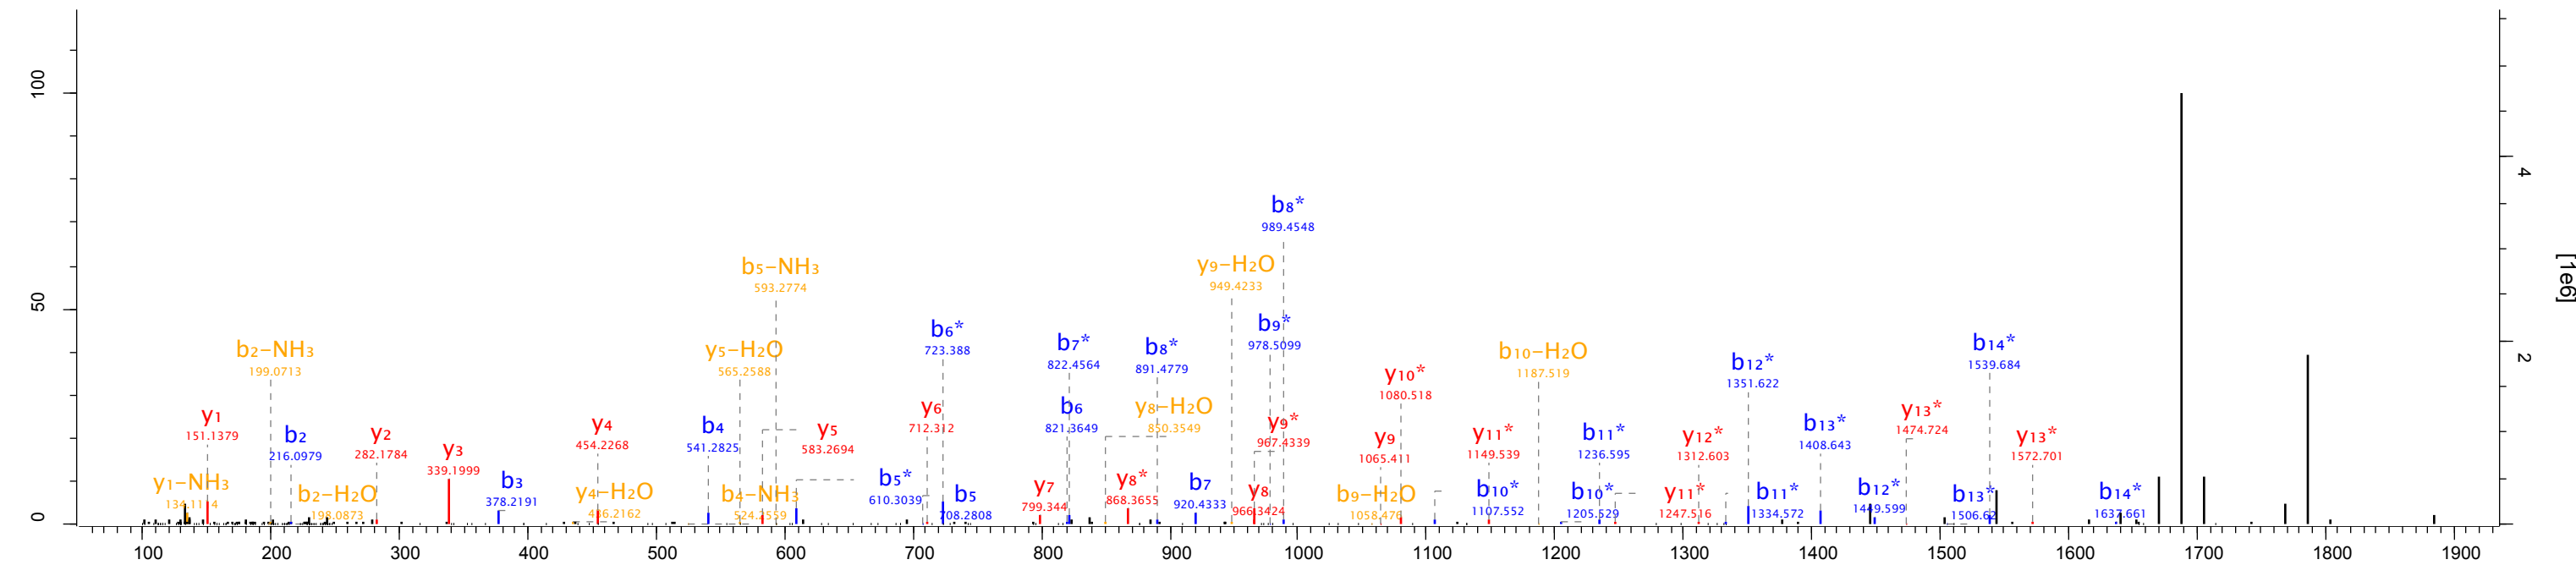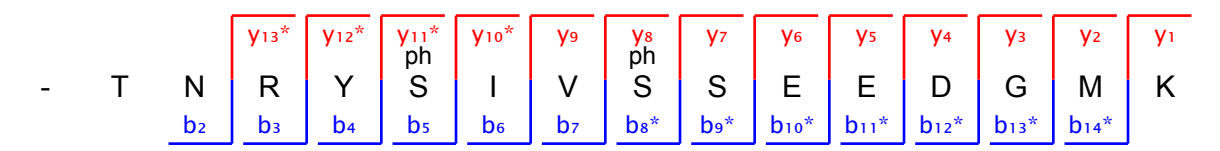

Raw file 20150812\_A375SR\_Phospho\_BR1\_03 Scan 7295 Method FTMS; HCD Score 44.32 m/z 426.73

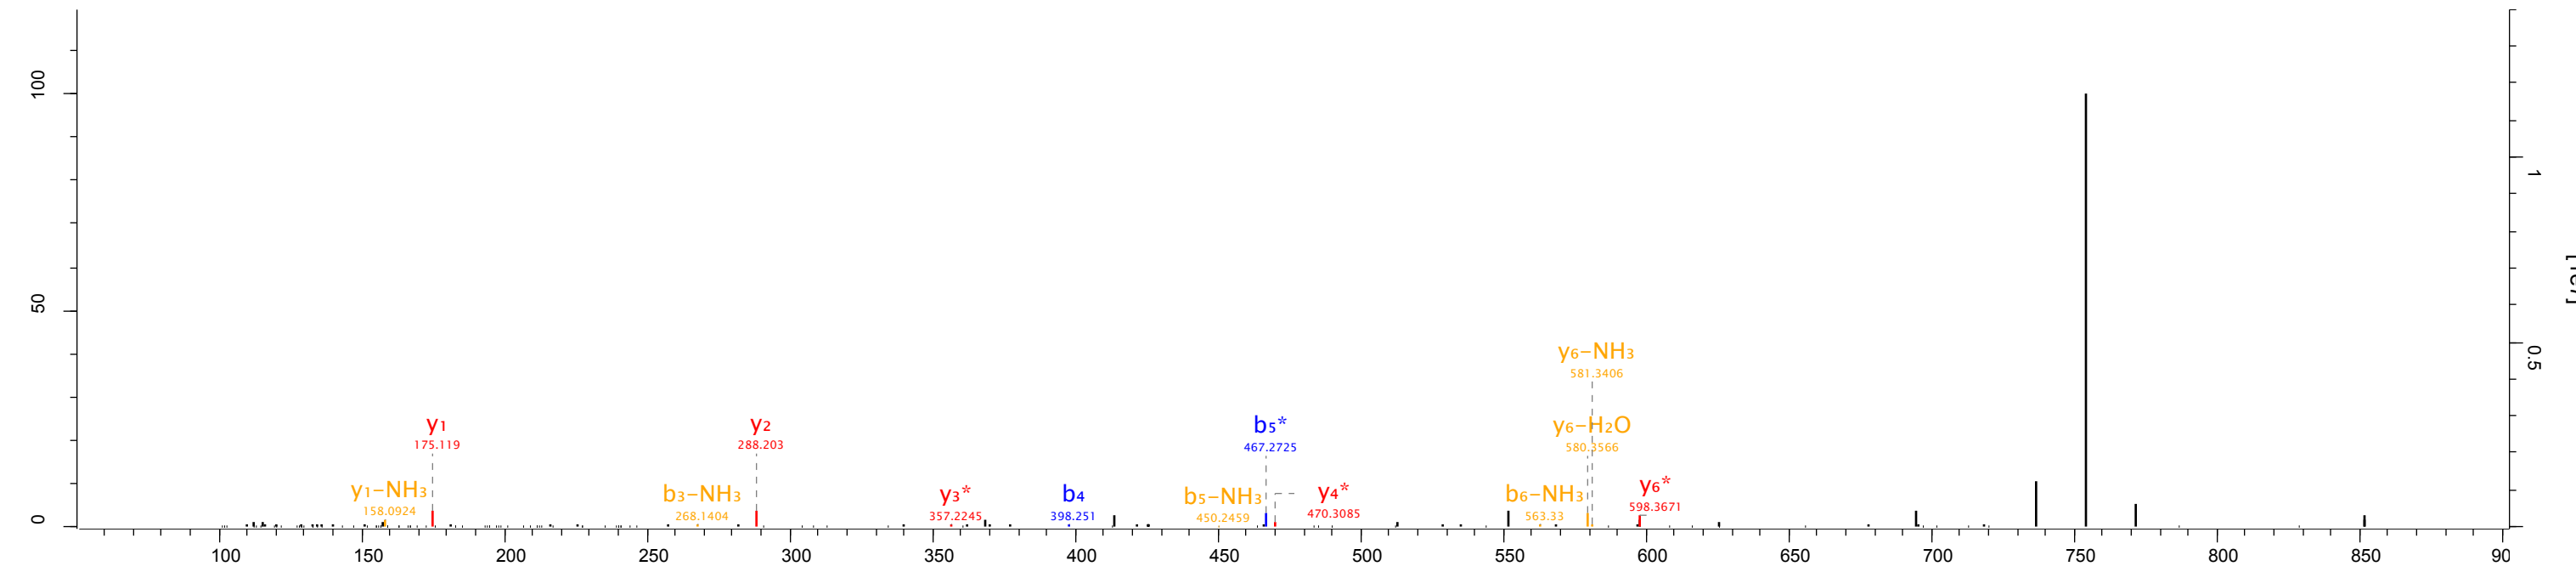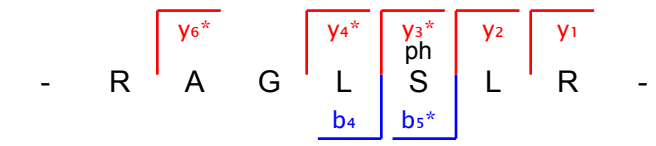



Raw file: 20150812\_A375SR\_Phospho\_BR1\_03  
 Scan: 8195 Method: FTMS; HCD Score: 75.06 m/z: 884.84 Gene names: YAF2

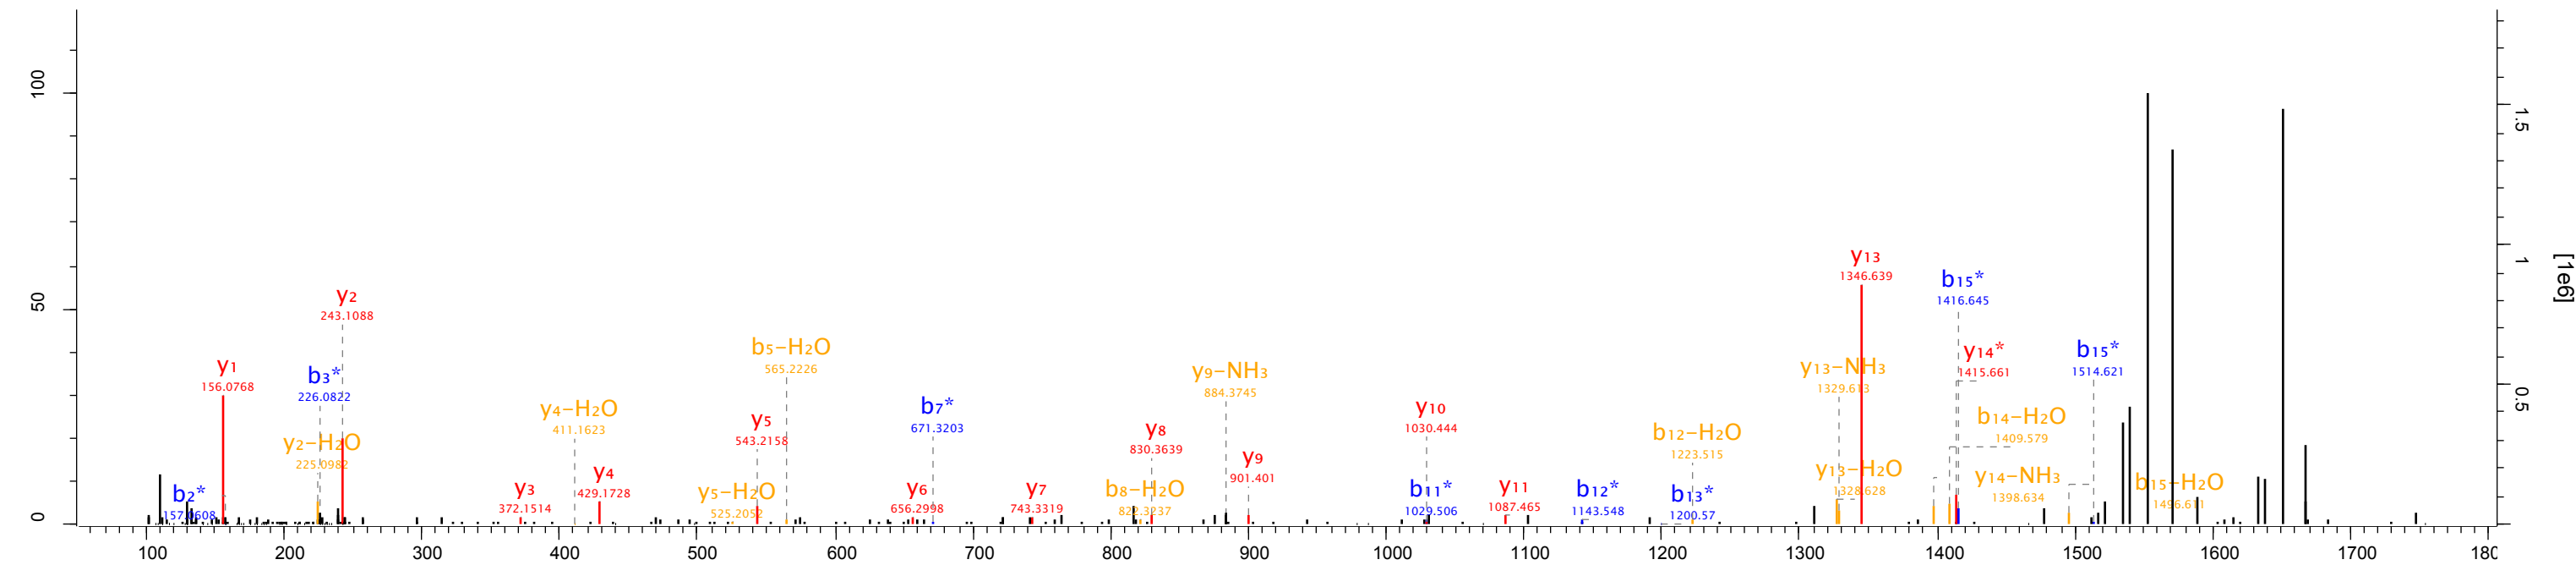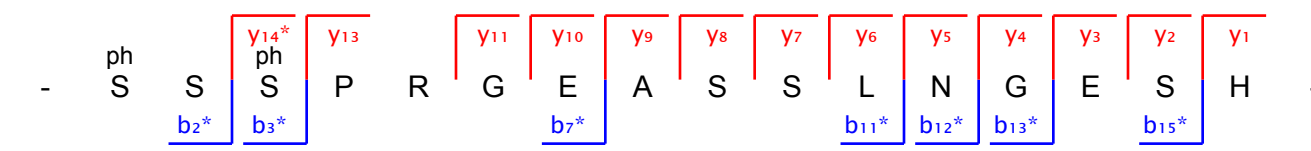

Raw file 20150812\_A375SR\_Phospho\_BR1\_04 Scan 13615 Method FTMS; HCD Score 124.98 m/z 562.64 Gene names MLLT3

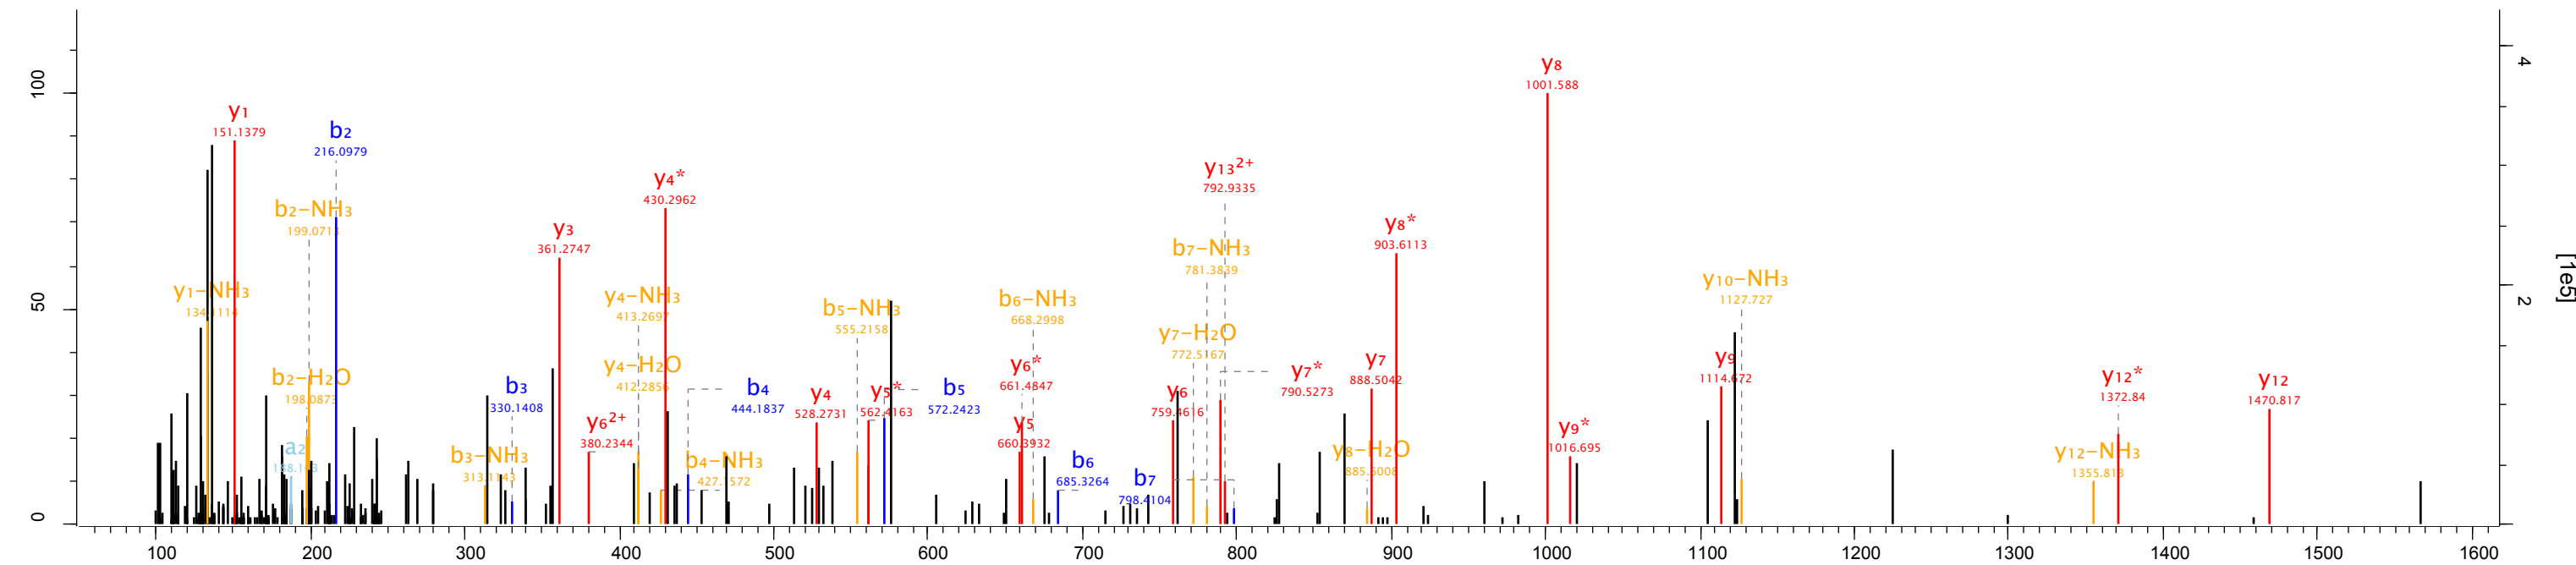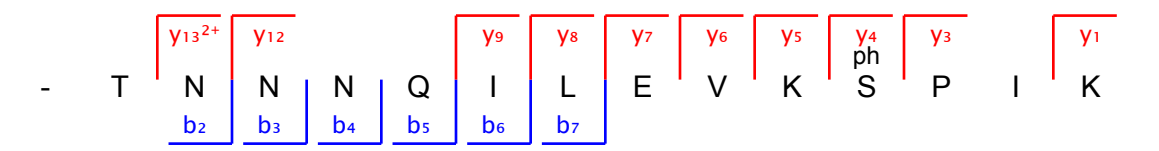

Raw file 20150812\_A375SR\_Phospho\_BR1\_04 Scan 8735 Method FTMS; HCD Score 44.51 m/z 500.92

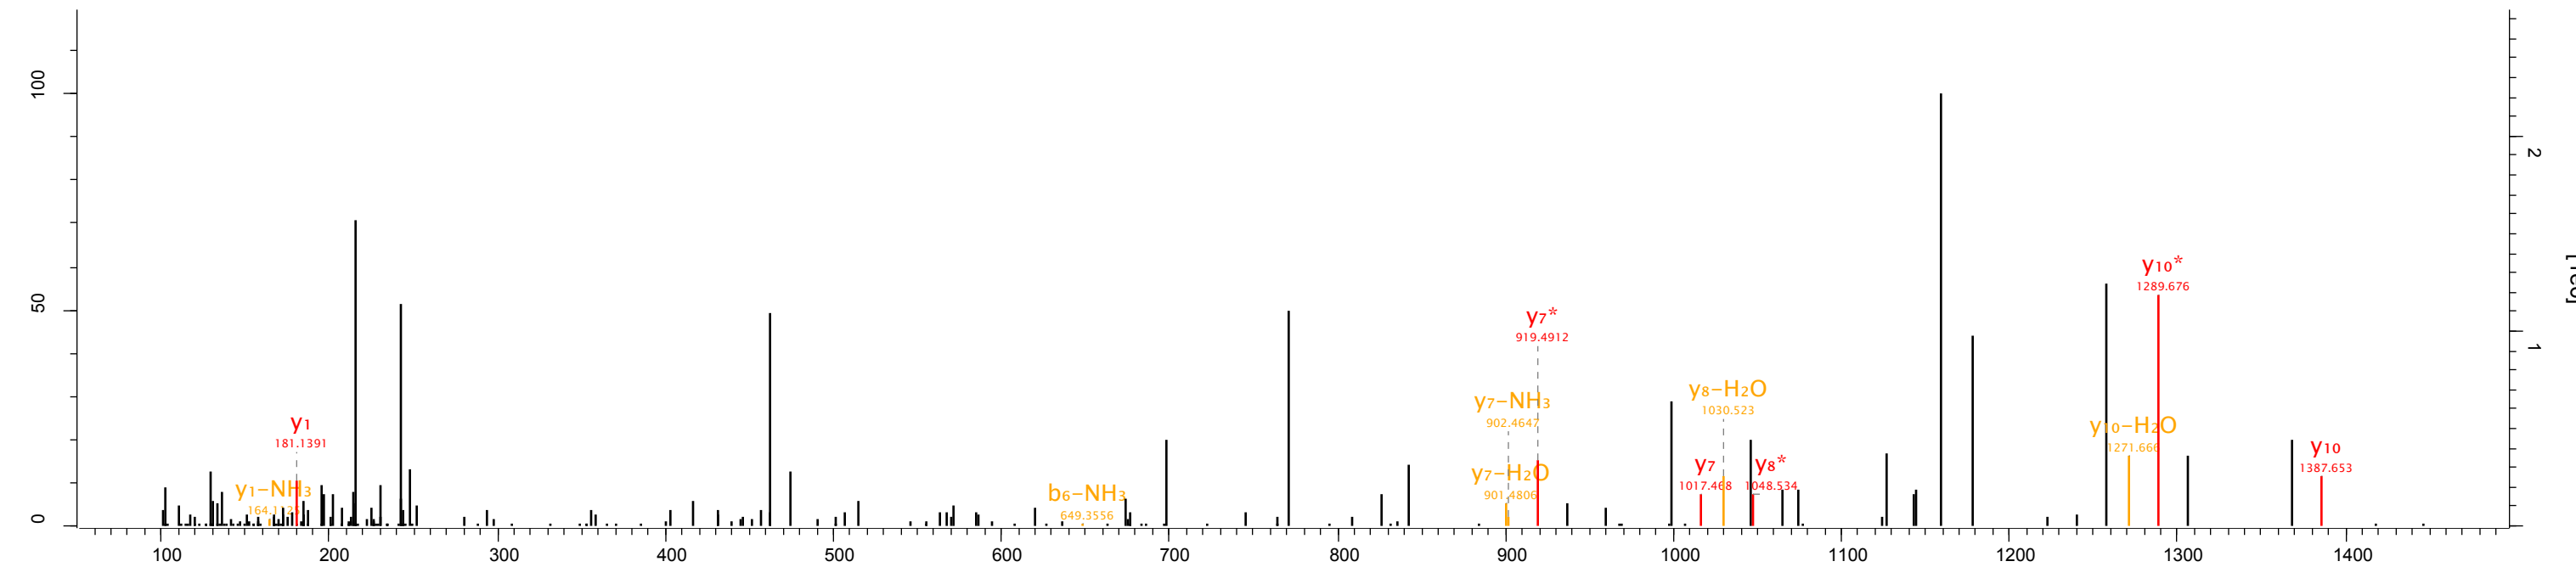

- L L Q E I S S N R I R -

Fragmentation mapping: y10 (L), y8\* (E), y7 (I), y1 (R)

Raw file 20150812\_A375SR\_Phospho\_BR1\_05 Scan 12155 Method FTMS; HCD Score 100.76 m/z 1031.42

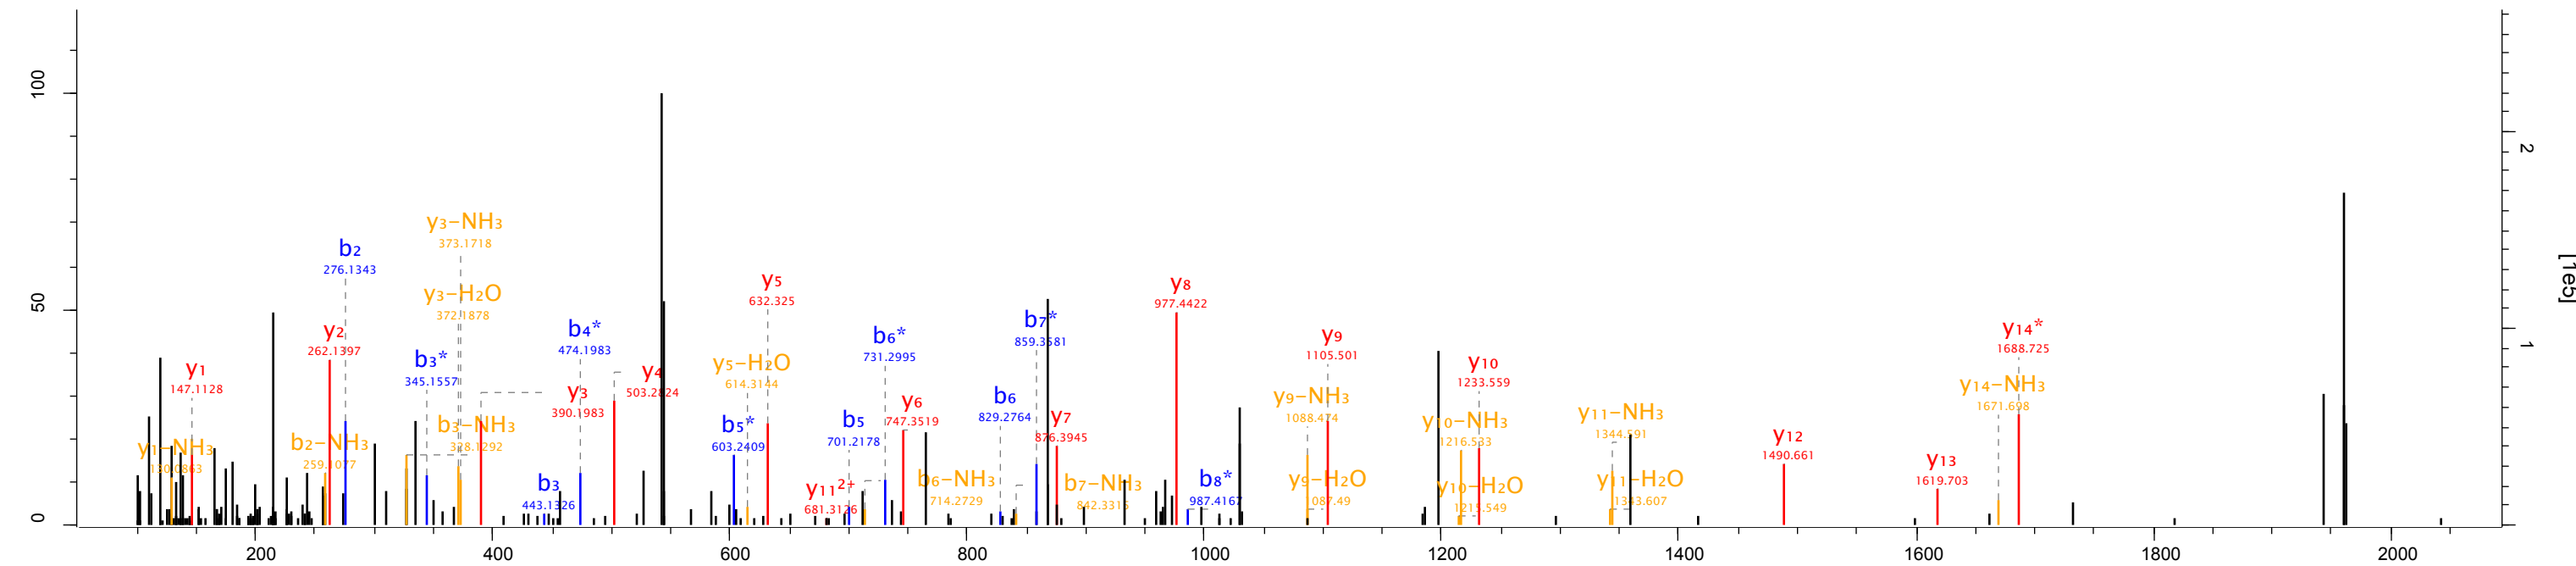

- F Q **Q** **S** **E** **E** **Q** **Q** **Q** T E D E L Q D K -

Fragmentation mapping (b-ions in blue, y-ions in red):

- b2: Q
- b3: **Q**
- b4\*: **S**
- b5: **E**
- b6: **Q**
- b7\*: **Q**
- b8\*: **Q**
- y1: K
- y2: D
- y3: Q
- y4: L
- y5: E
- y6: D
- y7: E
- y8: T
- y9: **Q**
- y10: **Q**
- y11: **Q**
- y12: **E**
- y13: **E**
- y14: **S**
- y14\*: **Q**

Raw file 20150812\_A375SR\_Phospho\_BR1\_05 Scan 21145 Method FTMS; HCD Score 90.06 m/z 782.76 Gene names ZNF579

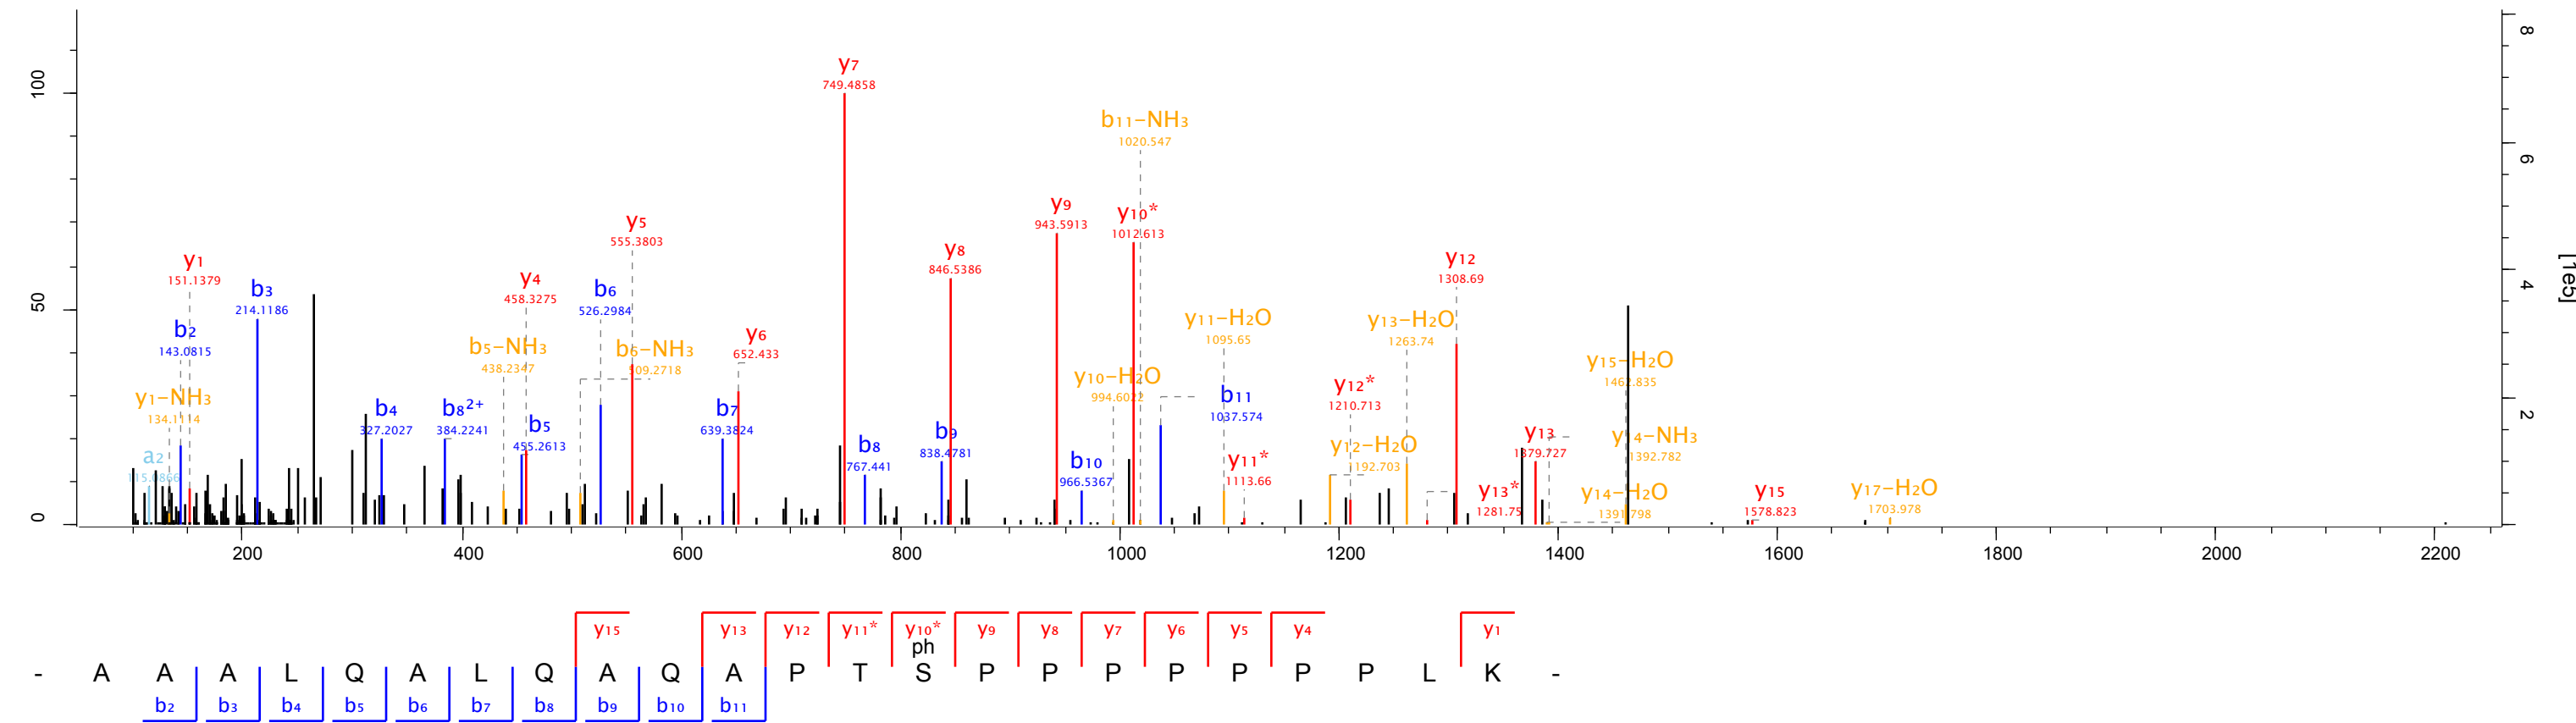

Raw file 20150812\_A375SR\_Phospho\_BR1\_05 Scan 24215 Method FTMS; HCD Score 174.26 m/z 970.44 Gene names MAPK11P1L

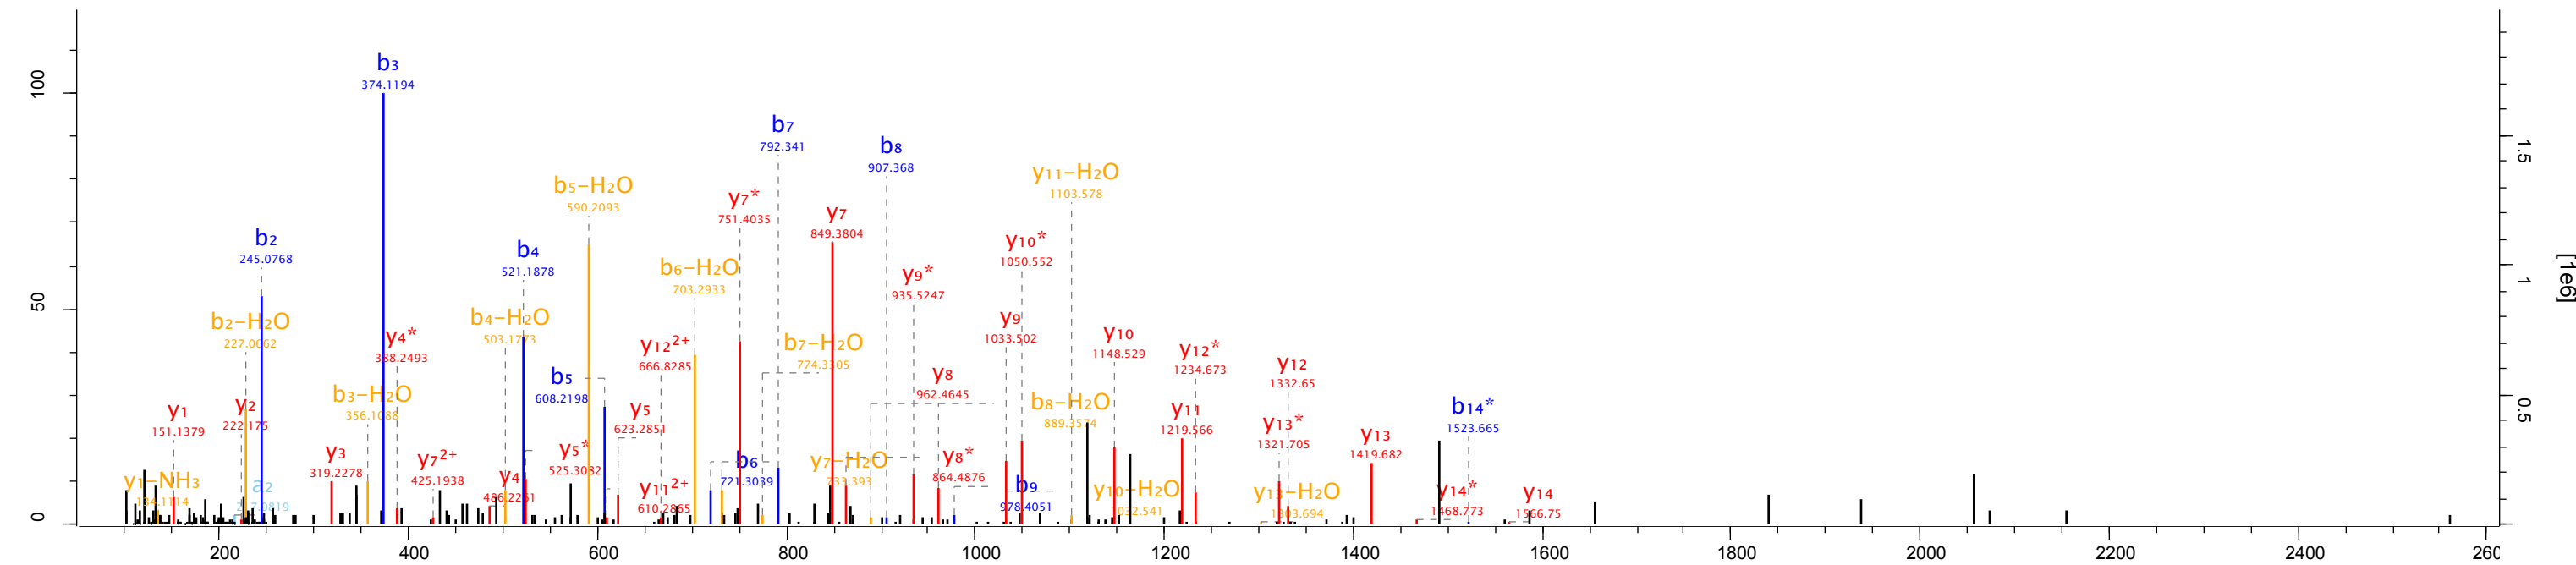

ac  
 - S D E F S L A D A L P E H S P A K -  
 b2 b3 b4 b5 b6 b7 b8 b9 b14\*

Raw file Scan Method Score m/z Gene names  
 20150812\_A375SR\_Phospho\_BR1\_06 12655 FTMS; HCD 109.77 883.4 ZNF446

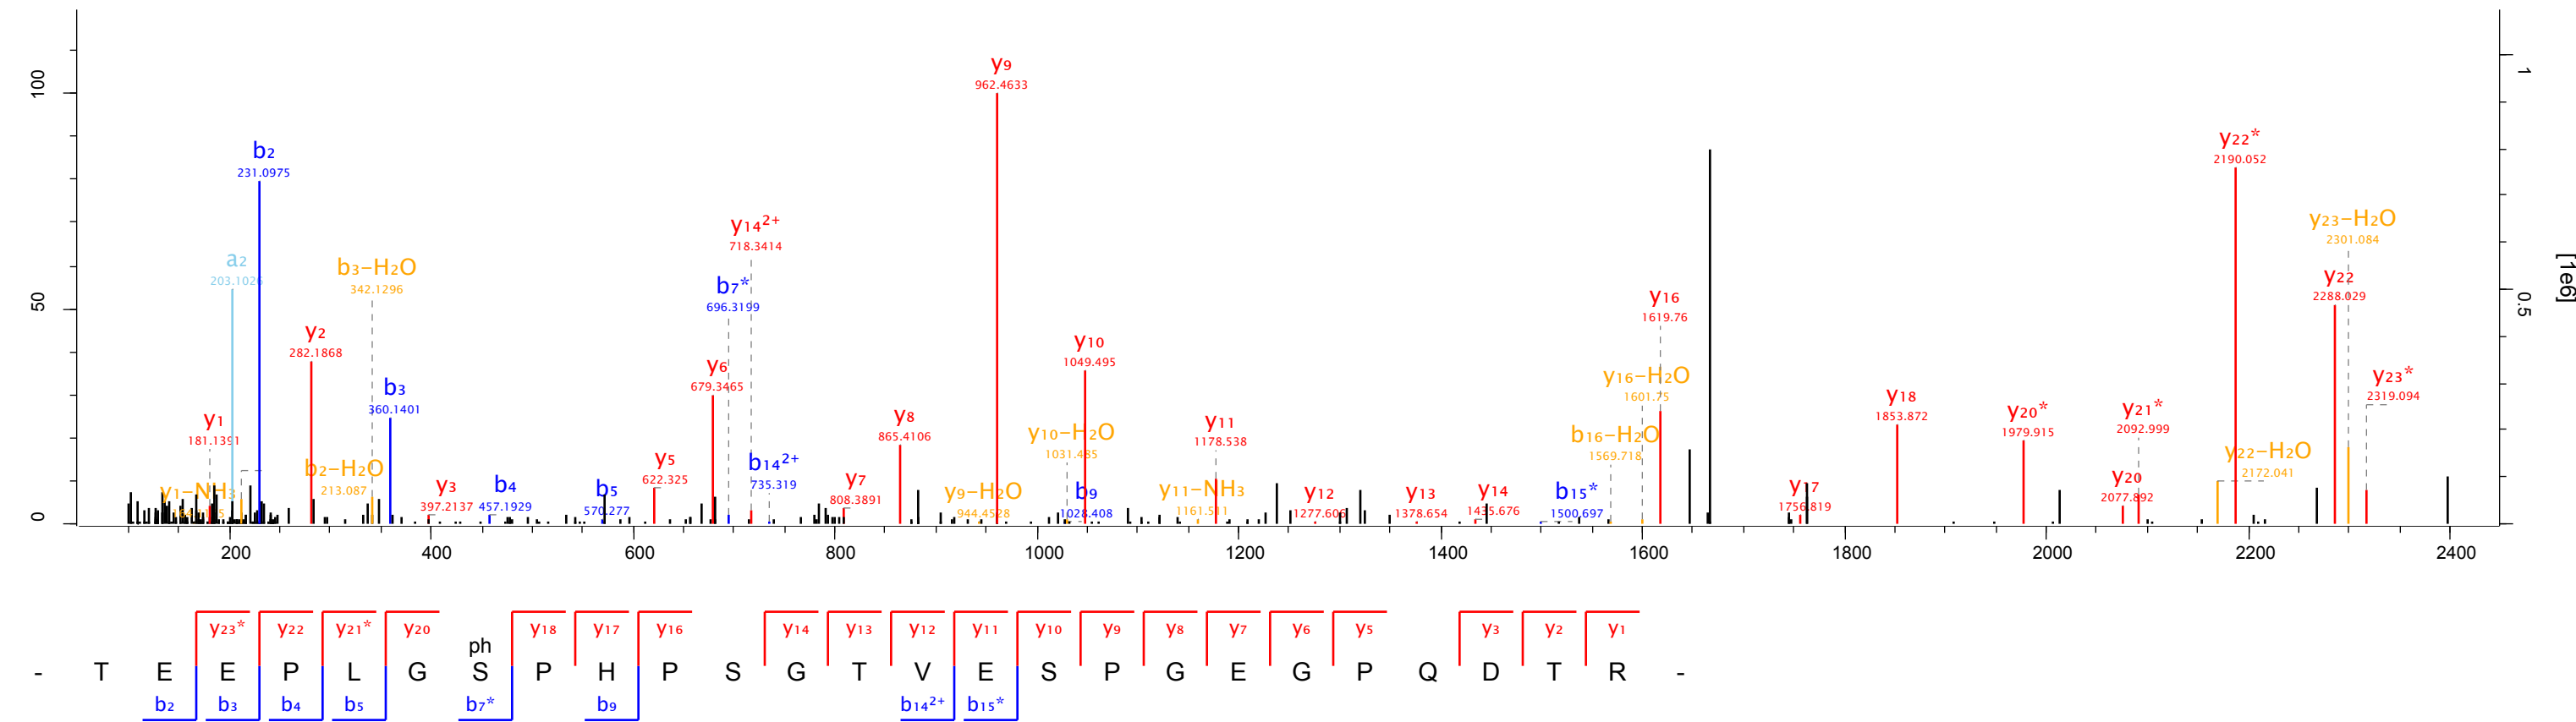

Raw file 20150812\_A375SR\_Phospho\_BR1\_07 Scan 10255 Method FTMS; HCD Score 53.77 m/z 558.79

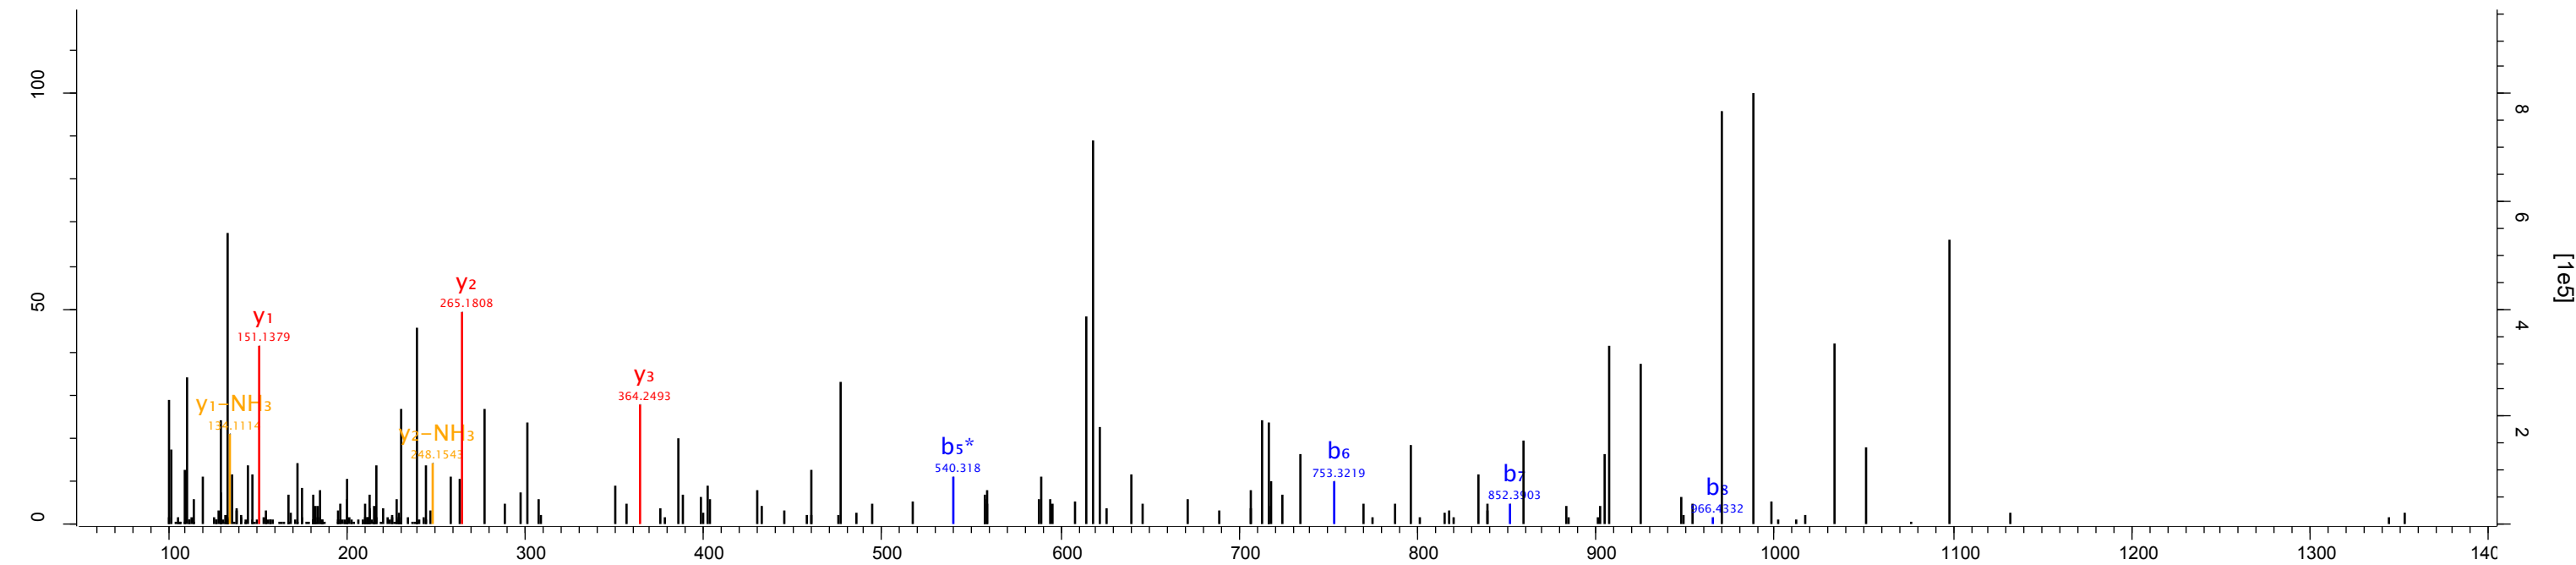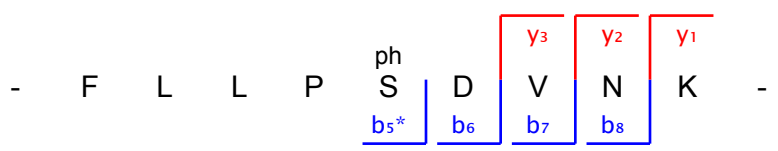



Raw file: 20150812\_A375SR\_Phospho\_BR1\_07  
 Scan: 12635 Method: FTMS; HCD Score: 50.13 m/z: 653.81 Gene names: PHACTR2

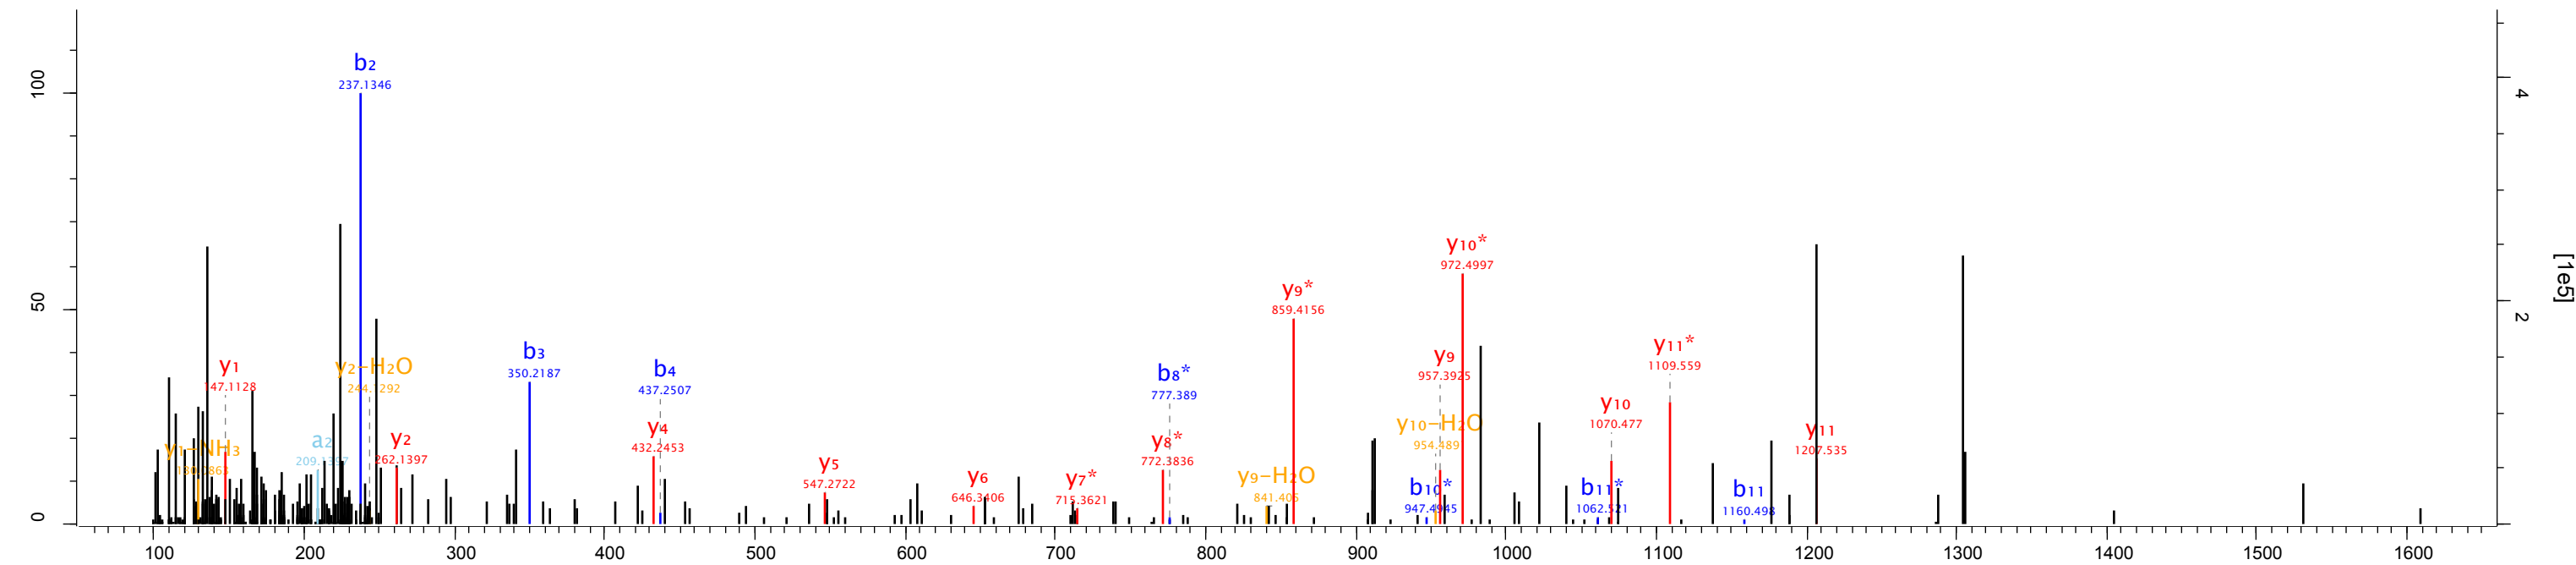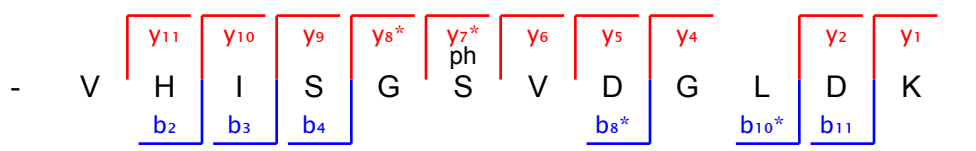

Raw file 20150812\_A375SR\_Phospho\_BR1\_07 Scan 13725 Method FTMS; HCD Score 62.34 m/z 556.27

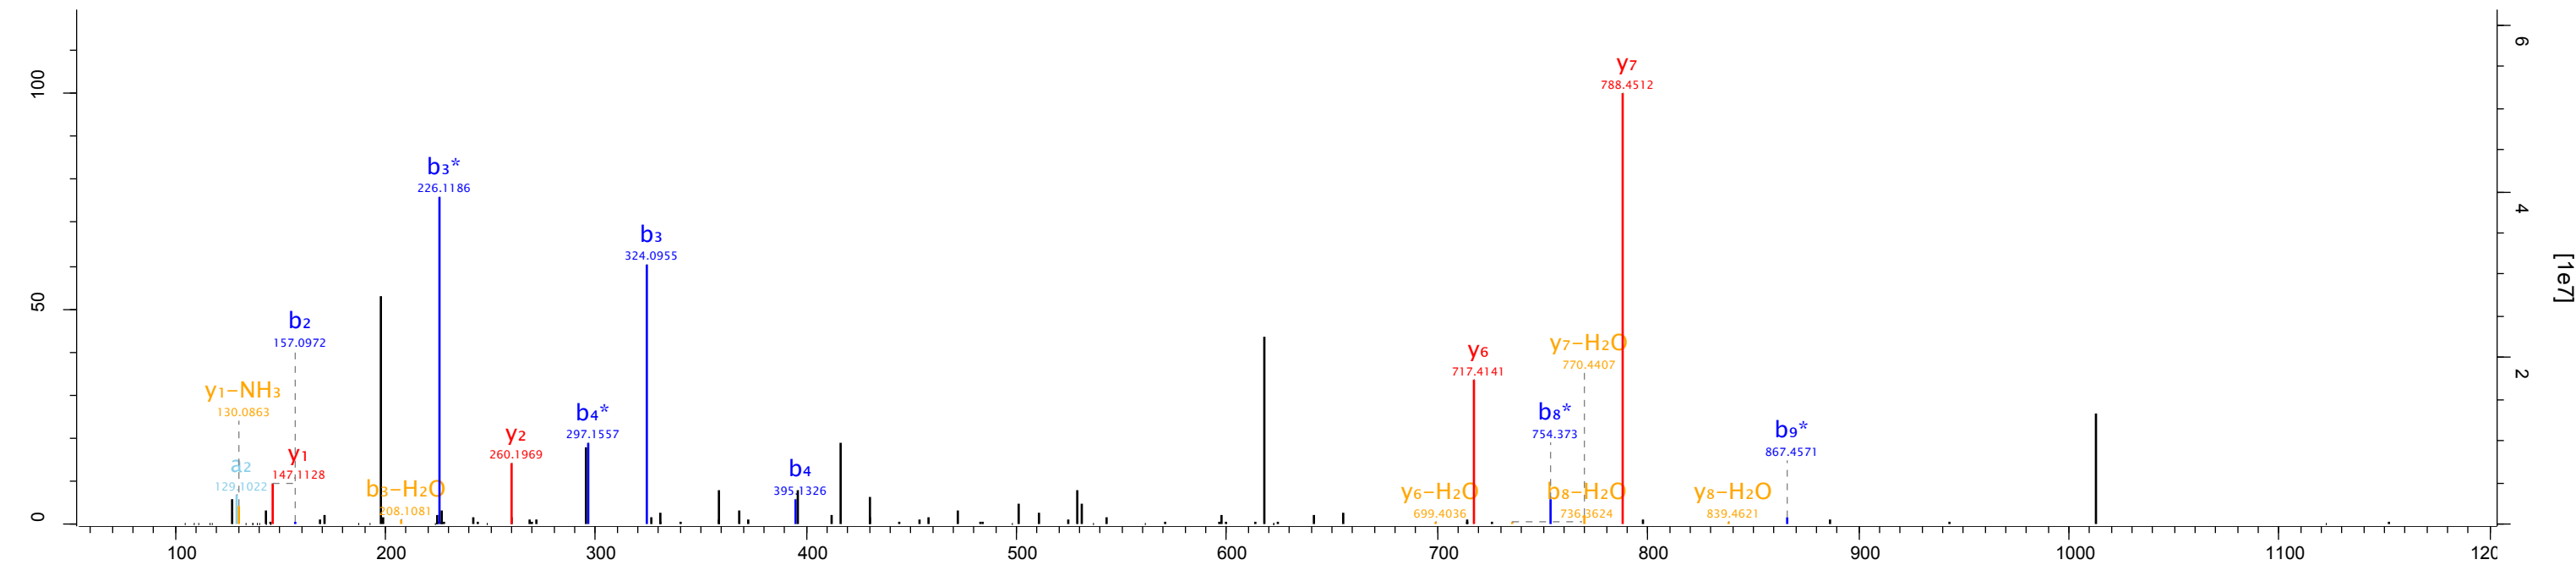

Raw file: 20150812\_A375SR\_Phospho\_BR1\_07  
 Scan: 14675 Method: FTMS; HCD Score: 50.12 m/z: 784.89 Gene names: PWWP2A

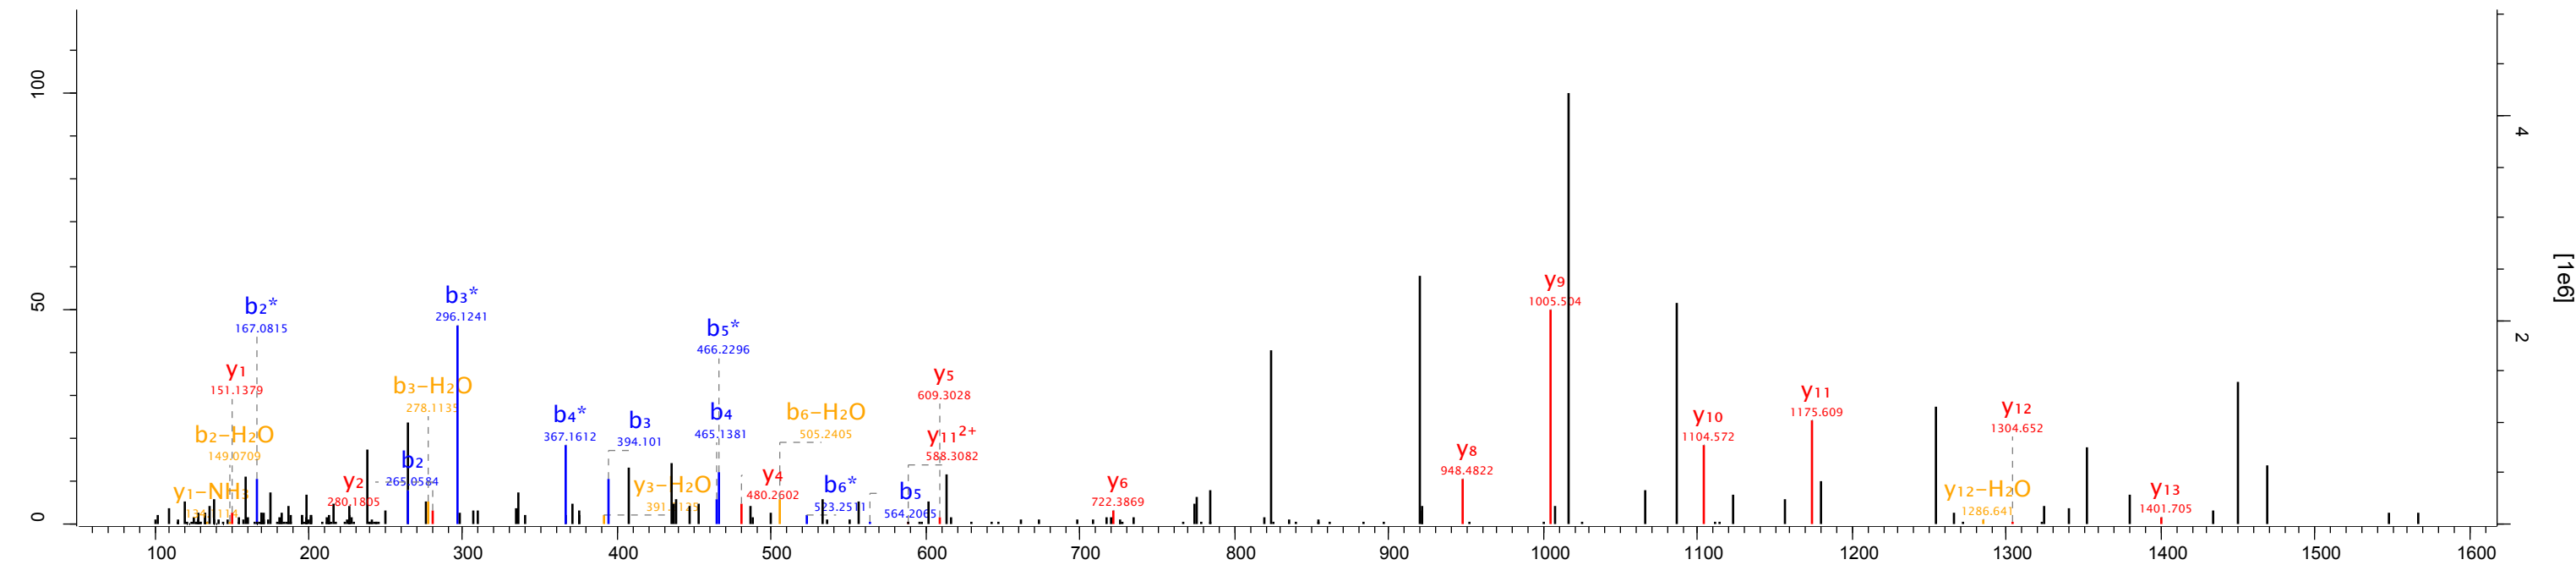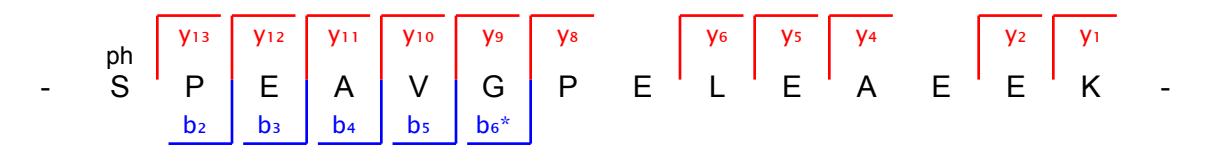

Raw file  
20150812\_A375SR\_Phospho\_BR1\_07

Scan 21625 Method FTMS; HCD Score 88.57 m/z 782.76 Gene names ZNF579

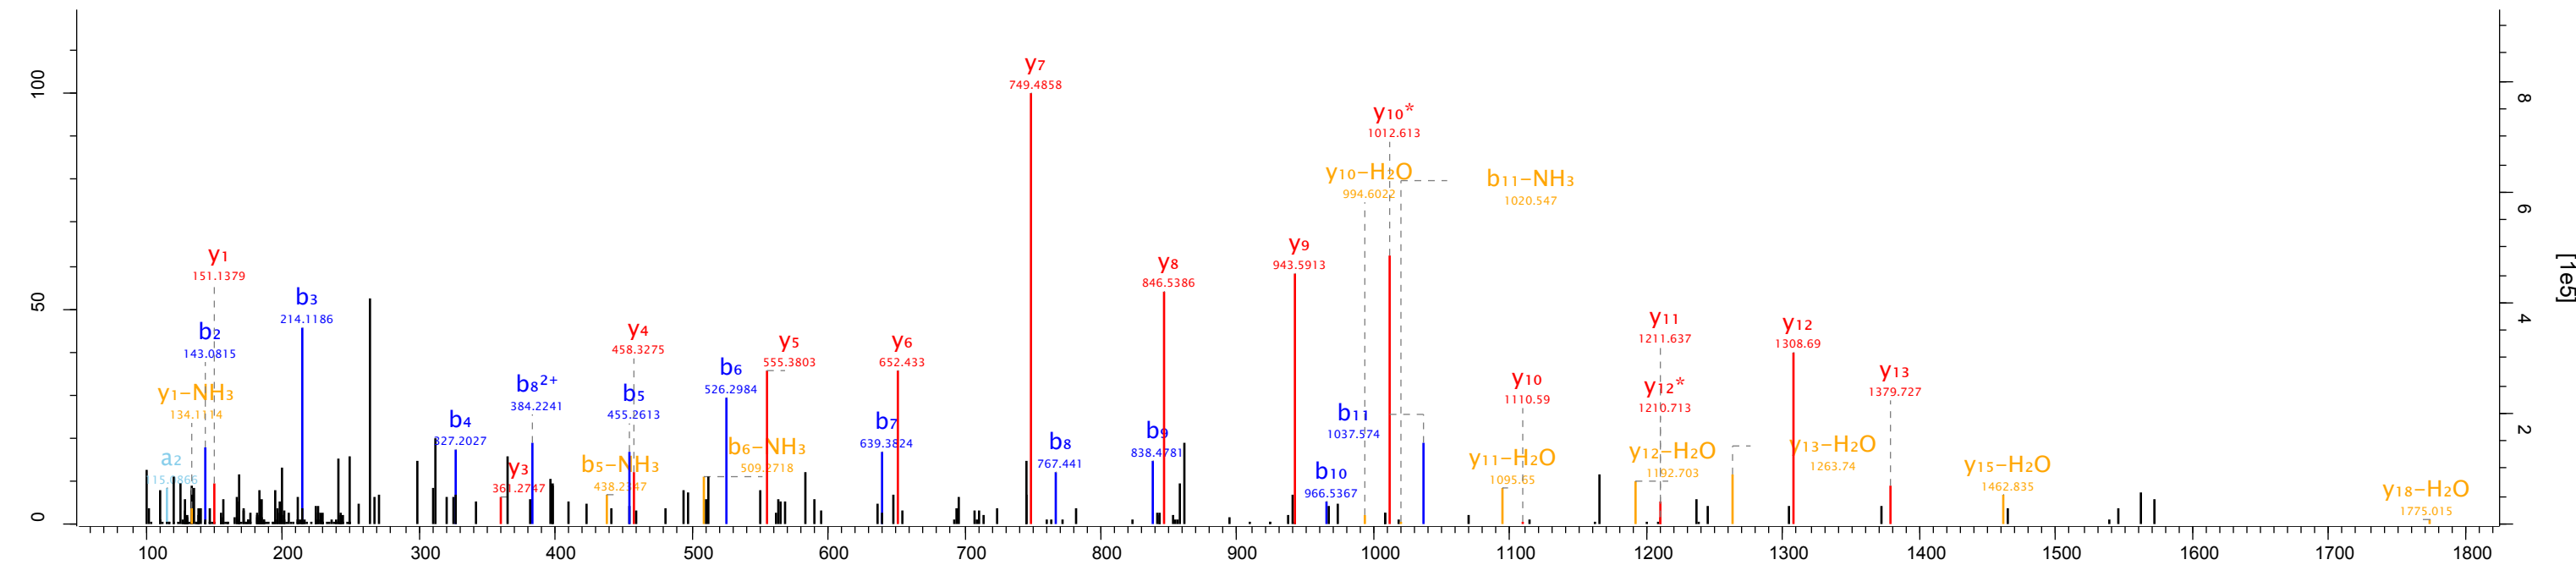

Raw file: 20150812\_A375SR\_Phospho\_BR1\_08  
 Scan: 11615 Method: FTMS; HCD Score: 101.3 m/z: 655.82 Gene names: PHACTR2

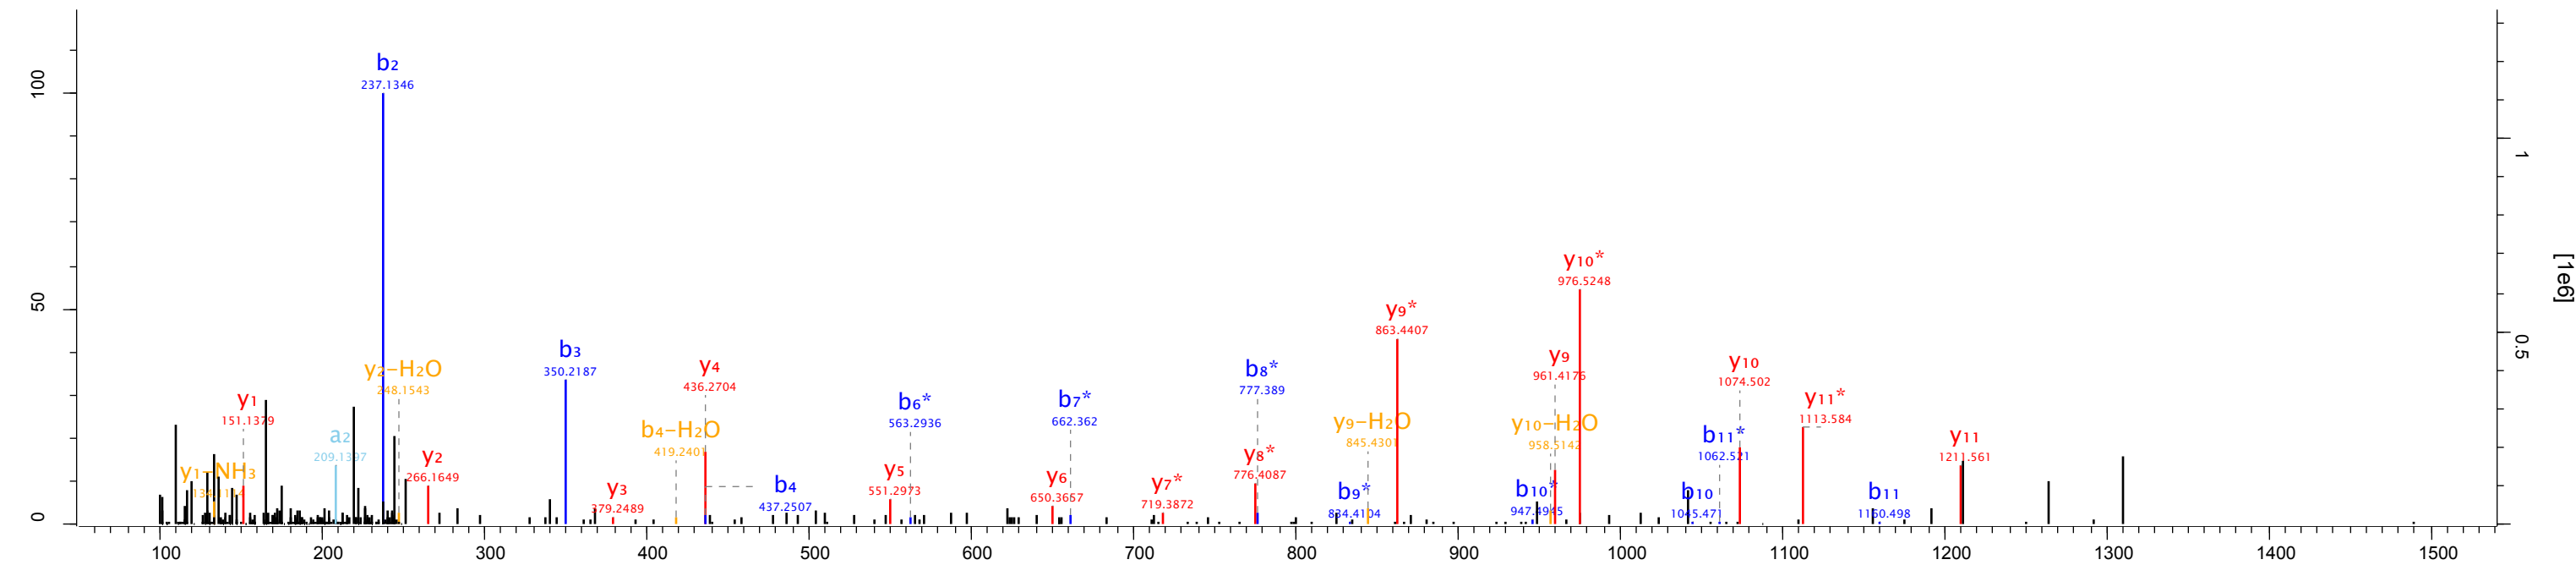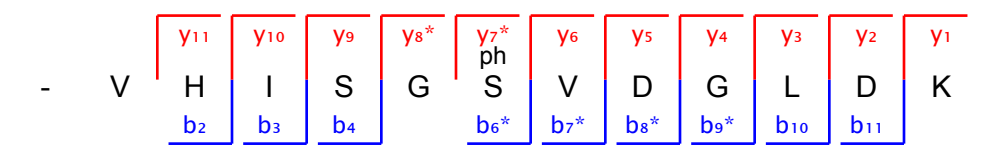

Raw file: 20150812\_A375SR\_Phospho\_BR1\_08  
 Scan: 8315 Method: FTMS; HCD Score: 50.66 m/z: 632.79 Gene names: CNTN3

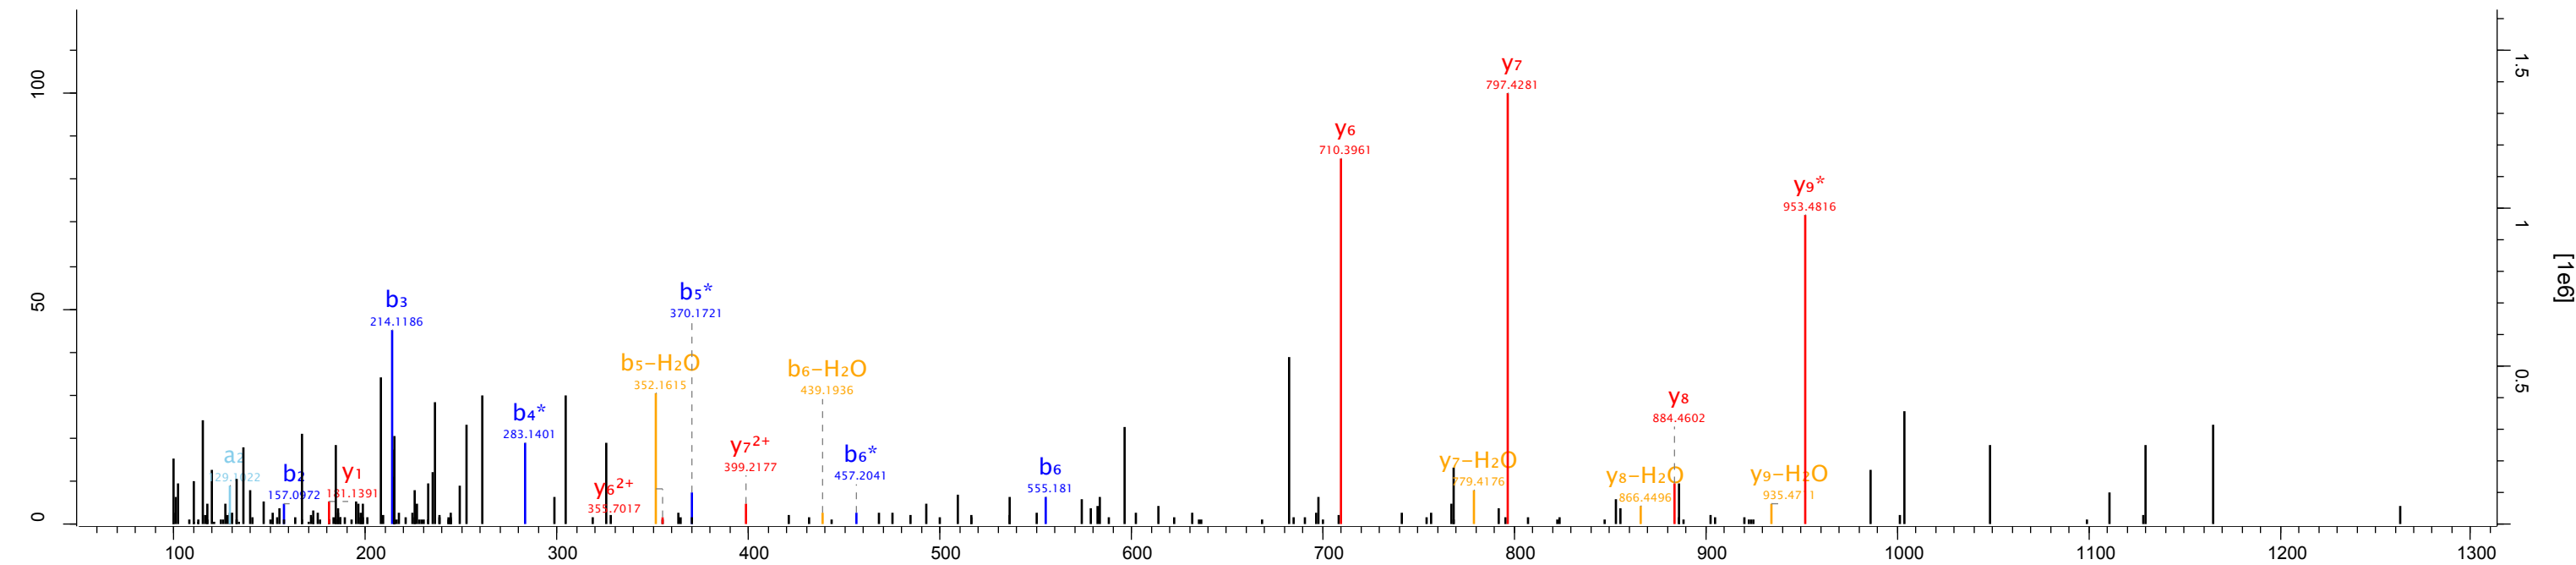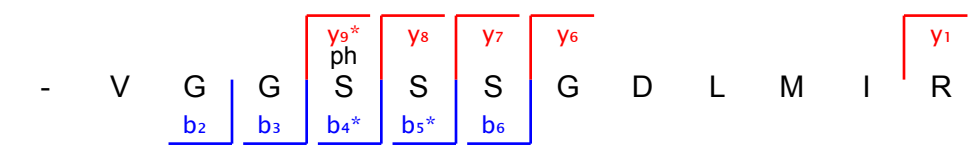

Raw file 20150812\_A375SR\_Phospho\_BR1\_10 Scan 20295 Method FTMS; HCD Score 45.99 m/z 823.45

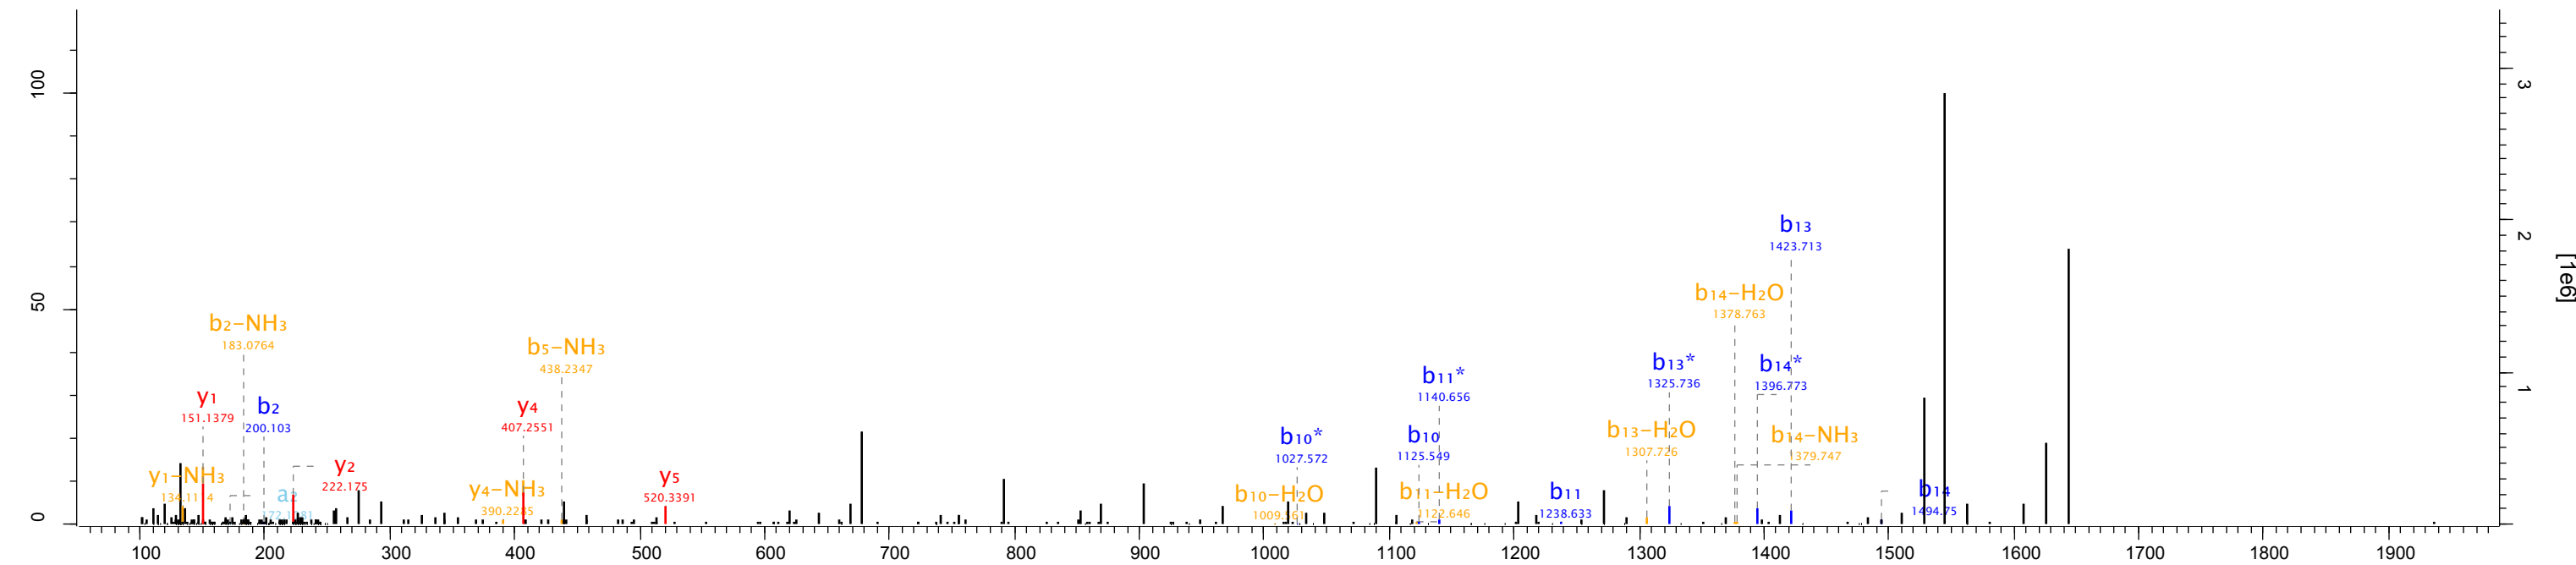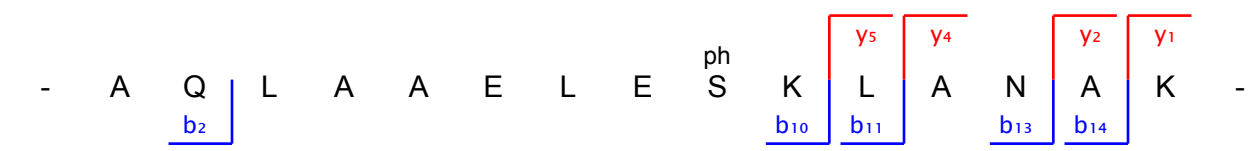

Raw file: 20150814\_A375SR\_Phospho\_BR2\_01  
 Scan: 12895 Method: FTMS; HCD Score: 49.45 m/z: 588.85 Gene names: KATNAL2

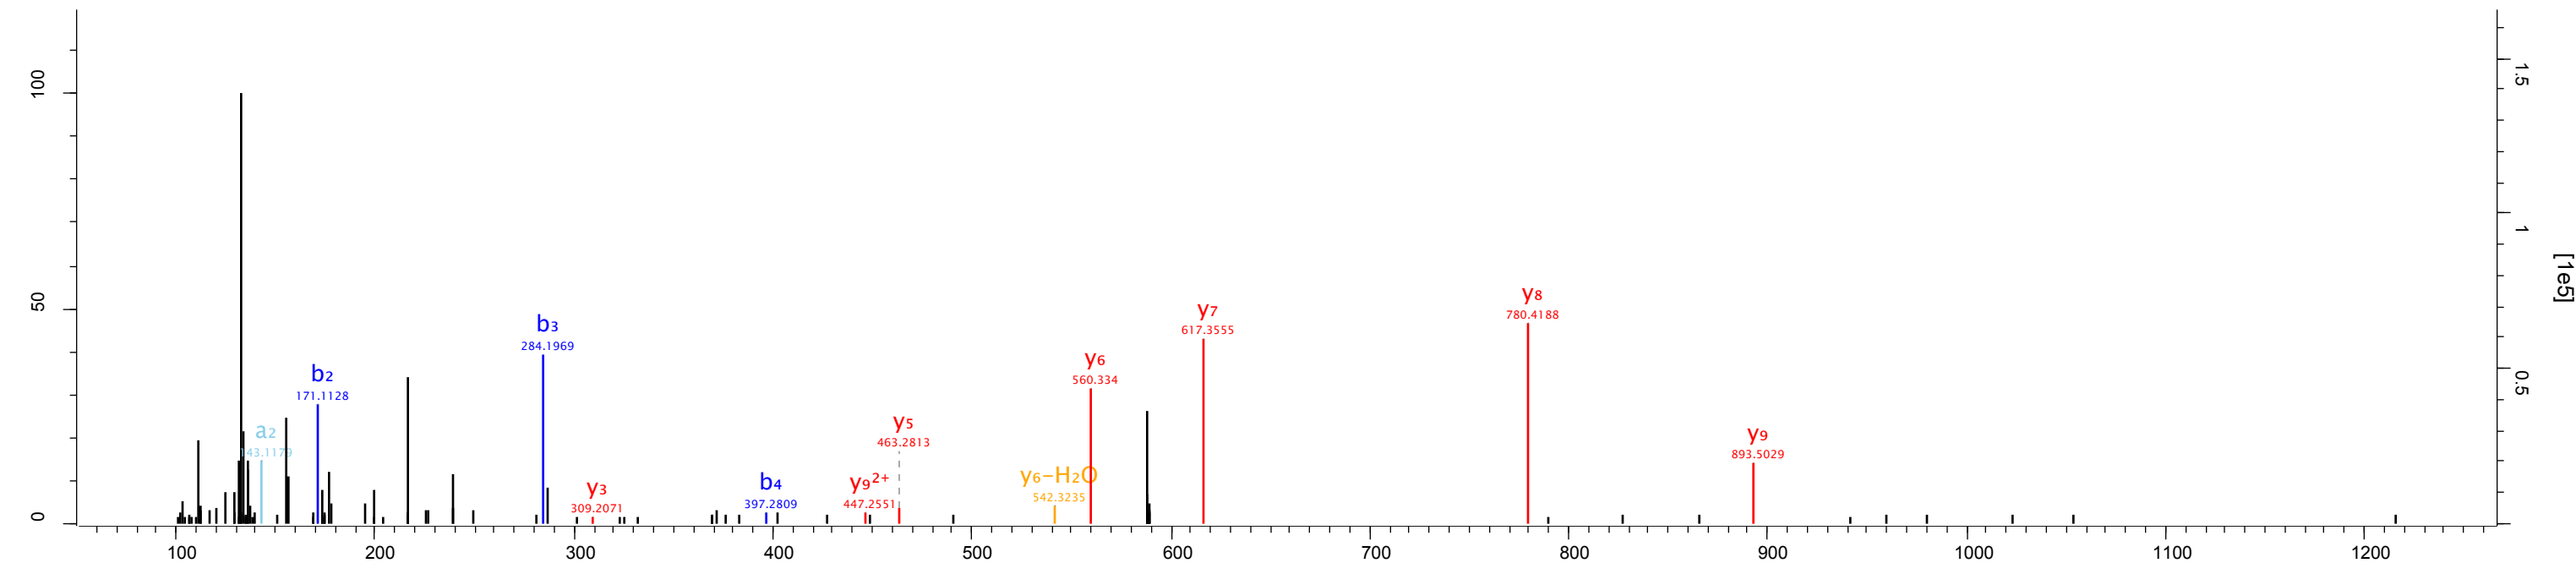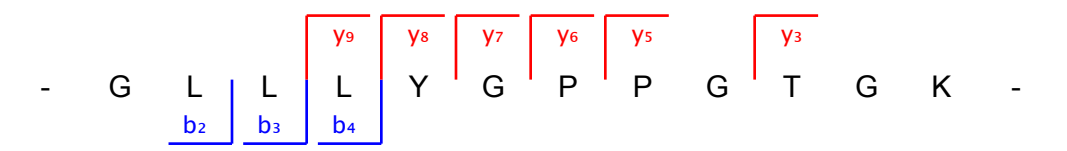



Raw file: 20150814\_A375SR\_Phospho\_BR2\_02  
 Scan: 13635  
 Method: FTMS; HCD  
 Score: 62.44  
 m/z: 782.84  
 Gene names: PWWP2A

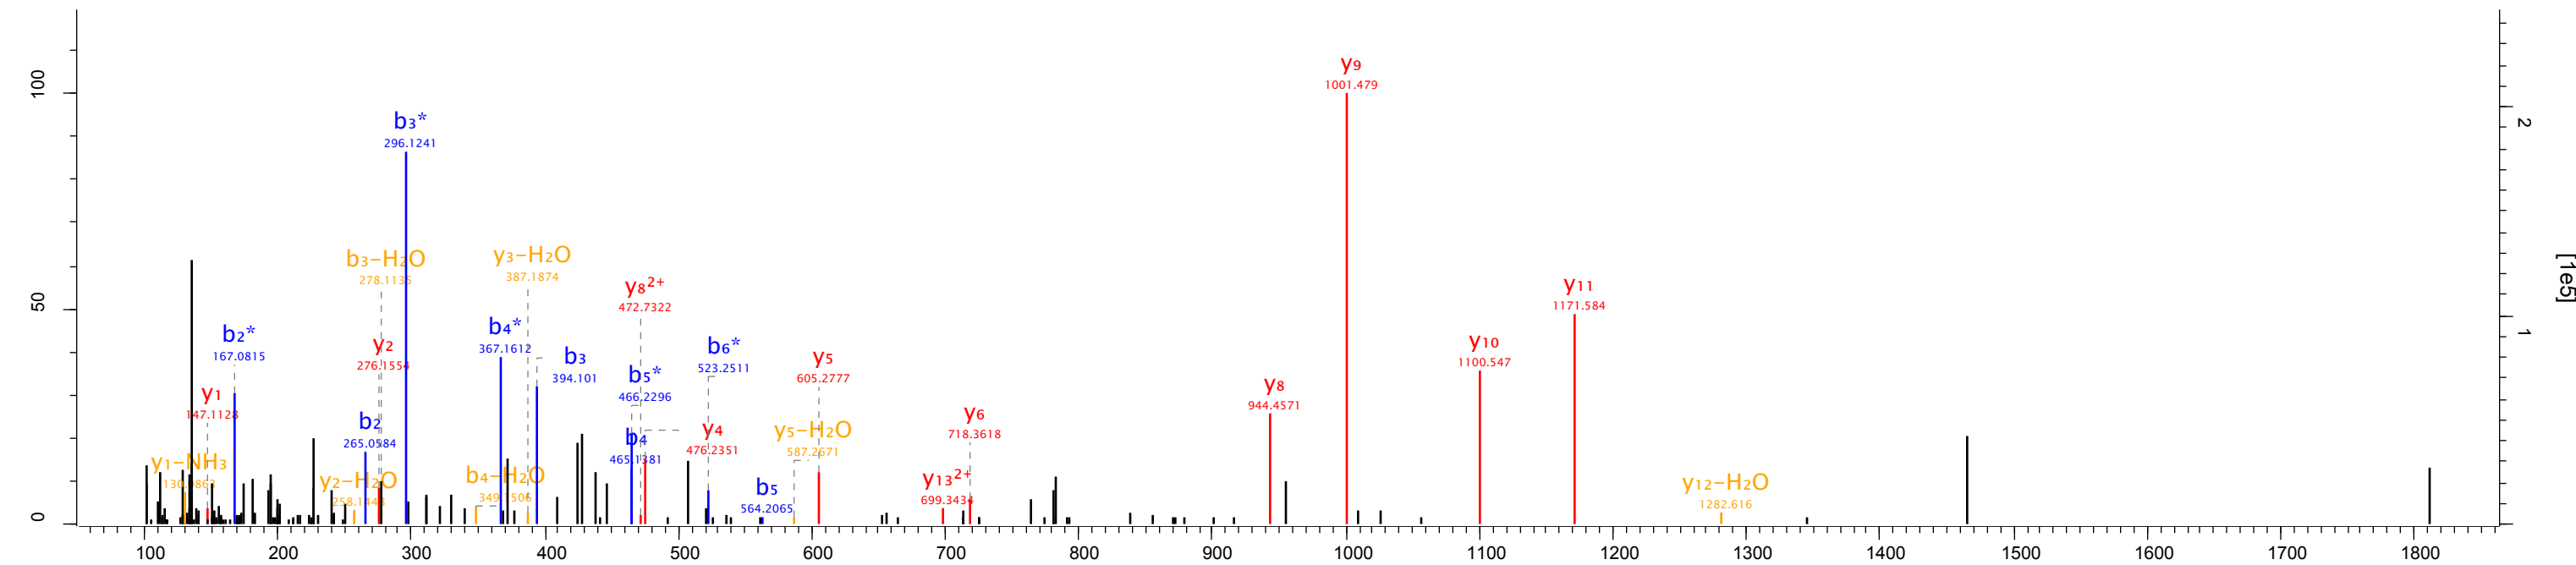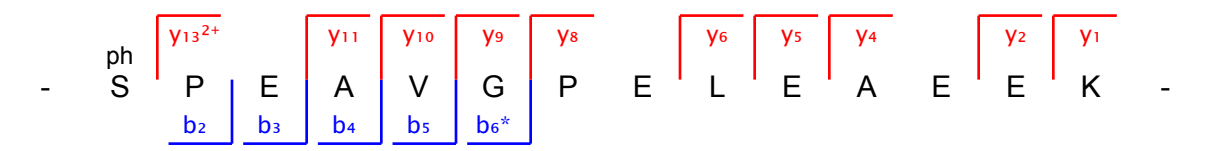

Raw file

20150814\_A375SR\_Phospho\_BR2\_02

| Scan | Method    | Score | m/z    | Gene names |
|------|-----------|-------|--------|------------|
| 6165 | FTMS; HCD | 48.91 | 663.78 | GPSM3      |

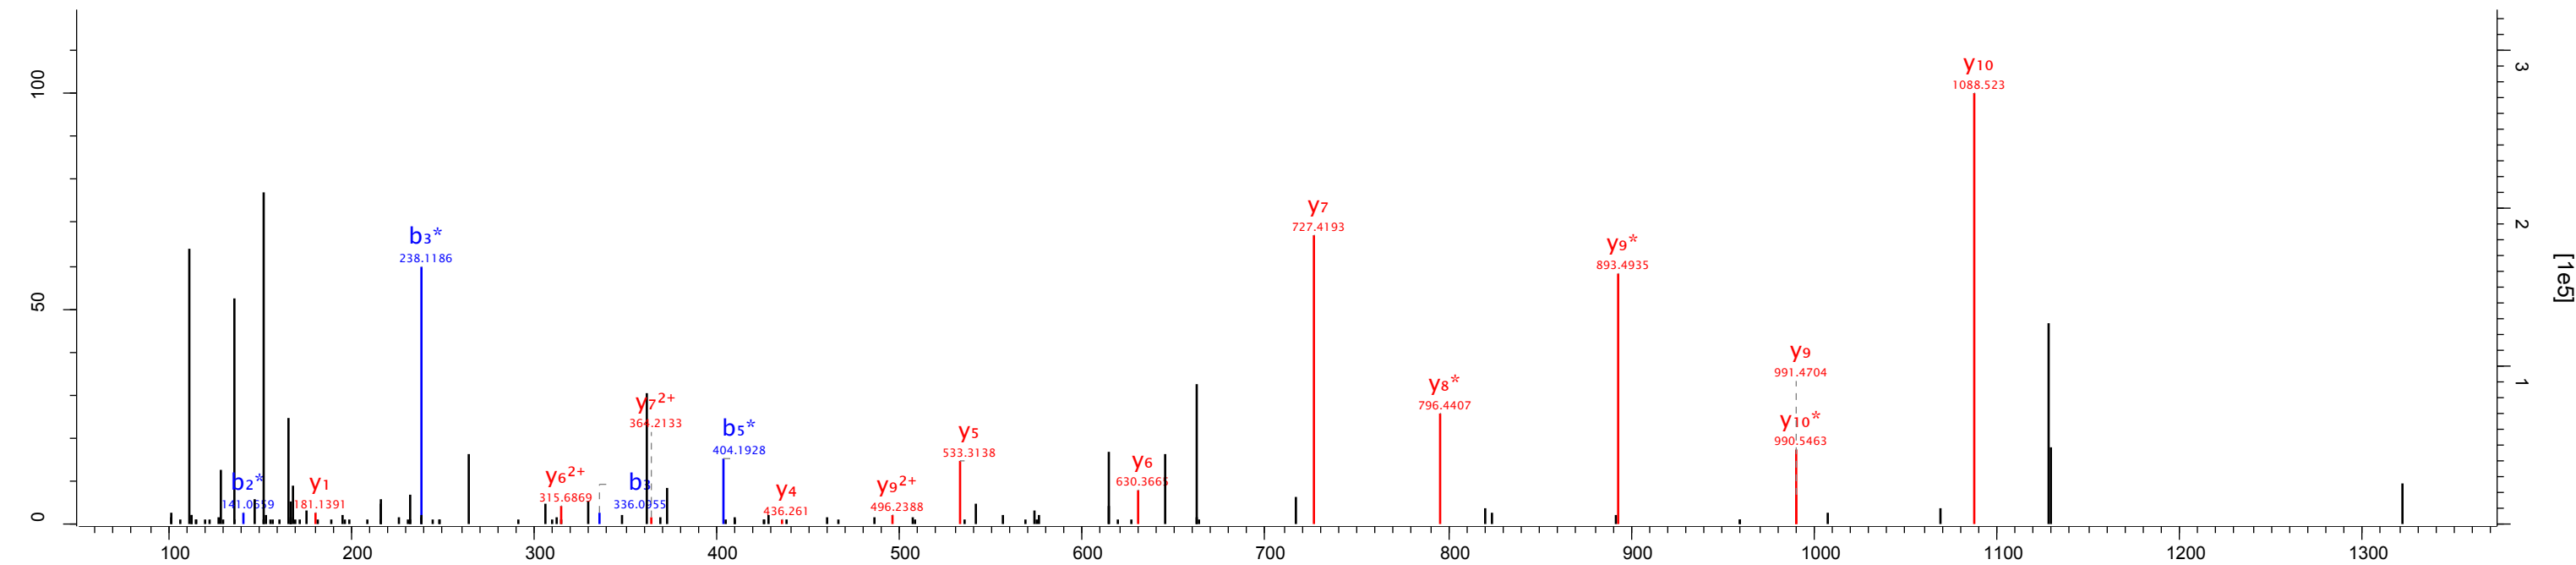

Raw file: 20150814\_A375SR\_Phospho\_BR2\_02  
 Scan: 6325 Method: FTMS; HCD Score: 51.64 m/z: 580.26 Gene names: OTOP3

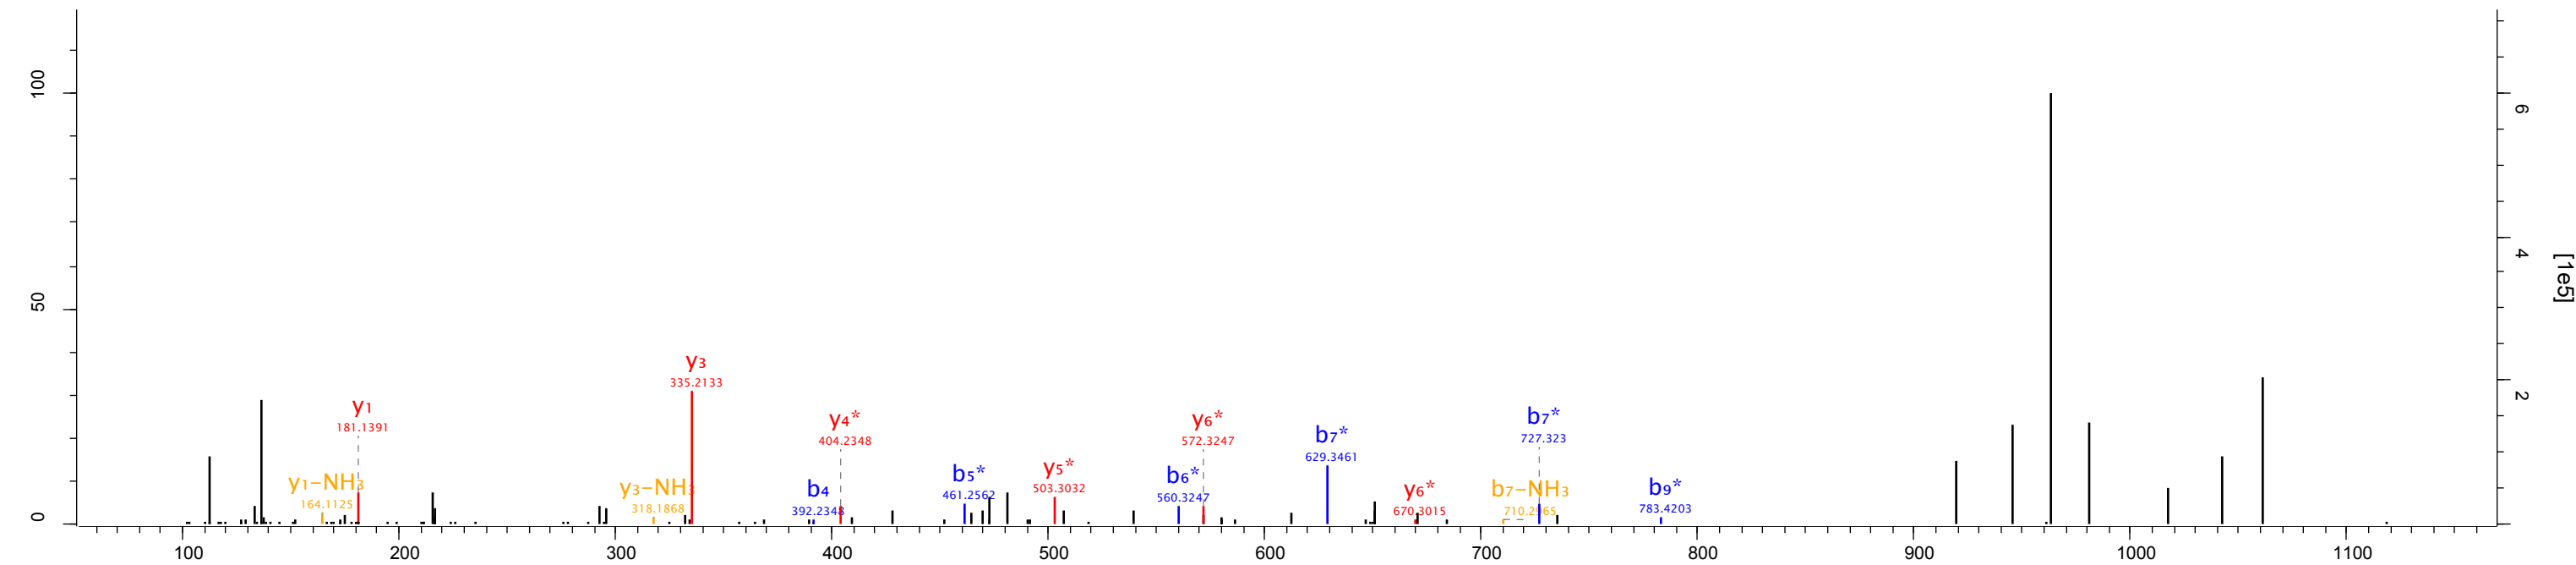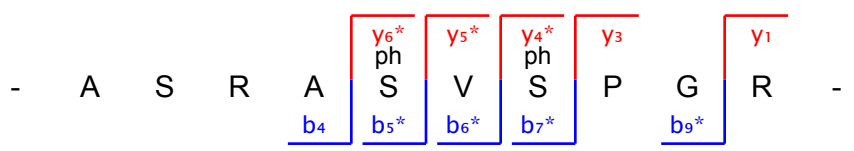

Raw file

20150814\_A375SR\_Phospho\_BR2\_02

Scan 6335 Method FTMS; HCD Score 62.66 m/z 660.77 Gene names GPSM3

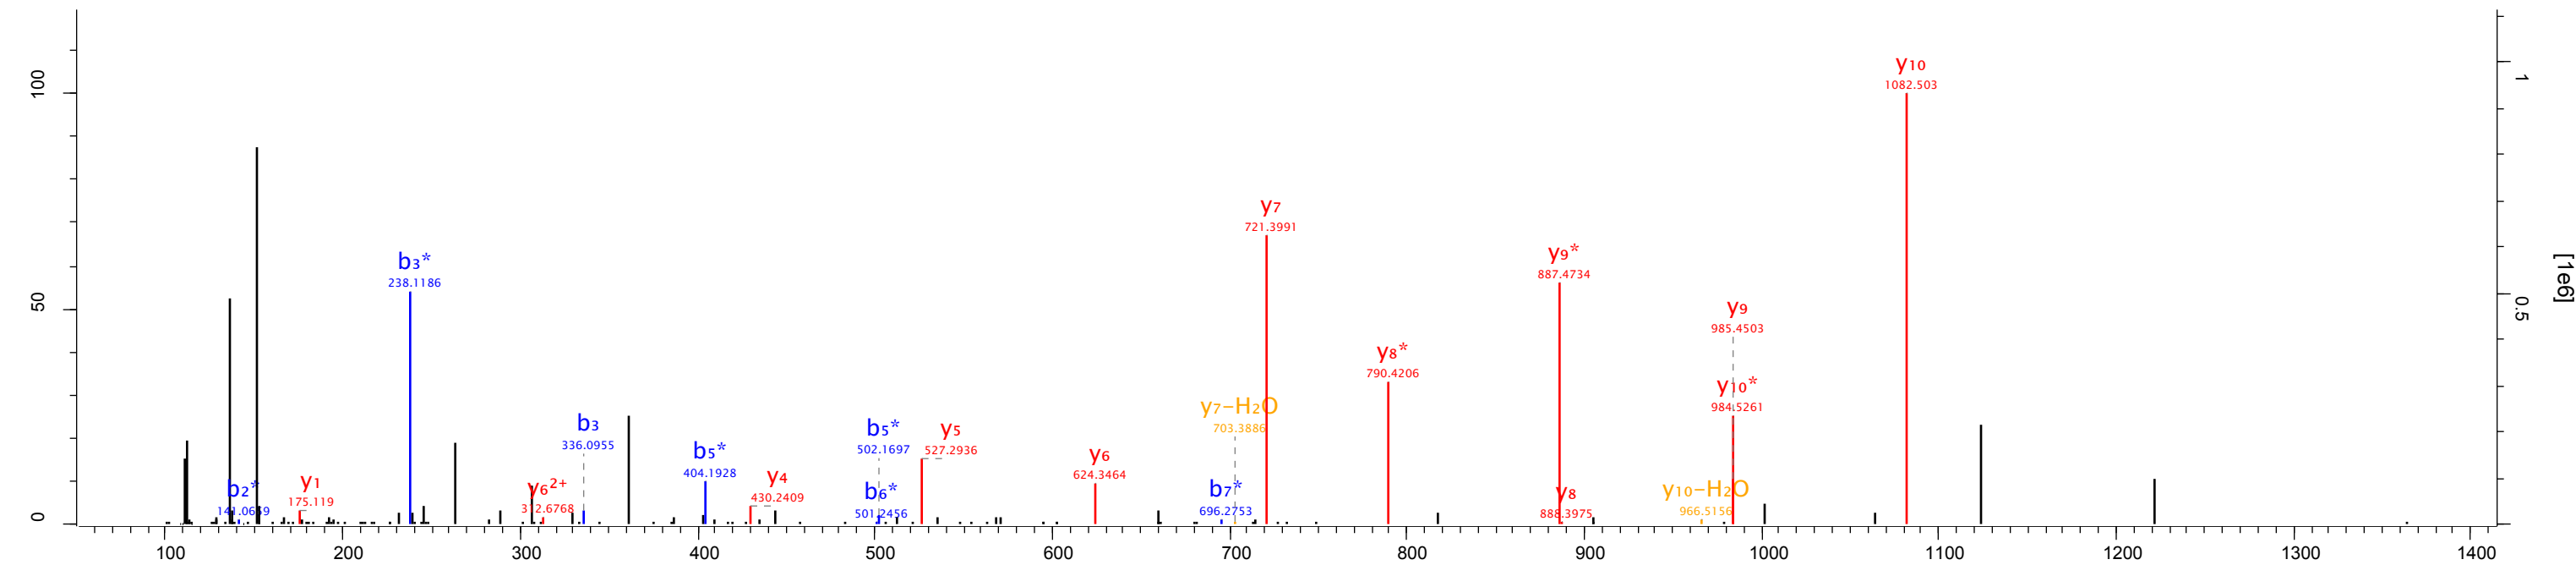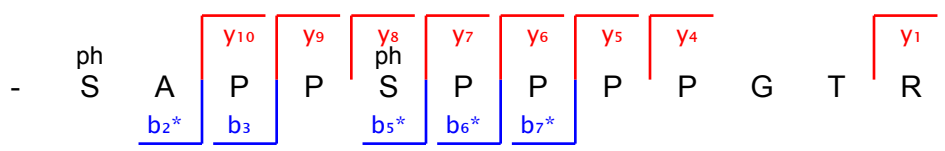

Raw file: 20150814\_A375SR\_Phospho\_BR2\_02  
 Scan: 6435 Method: FTMS; HCD Score: 73.25 m/z: 663.78 Gene names: GPSM3

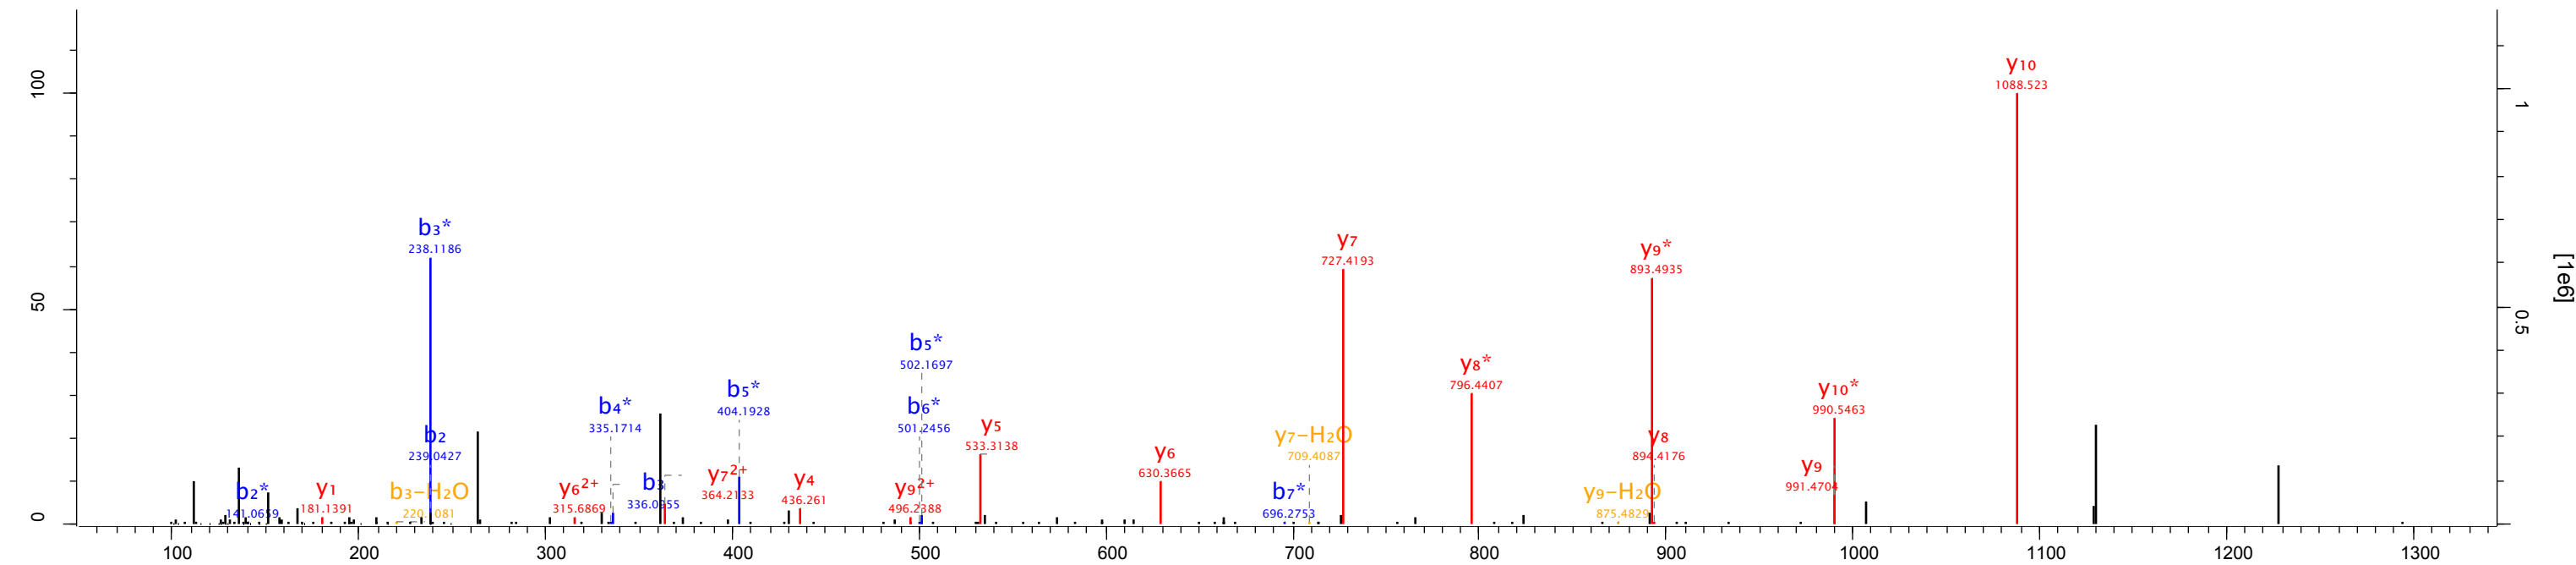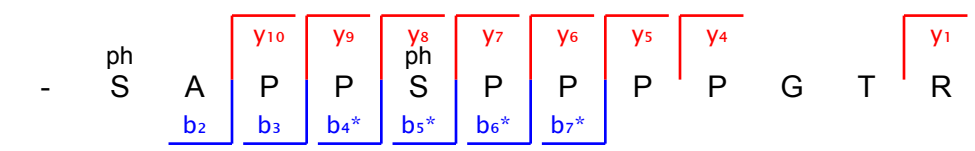

Raw file: 20150814\_A375SR\_Phospho\_BR2\_02  
 Scan: 6635 Method: FTMS; HCD Score: 47.68 m/z: 663.78 Gene names: GPSM3

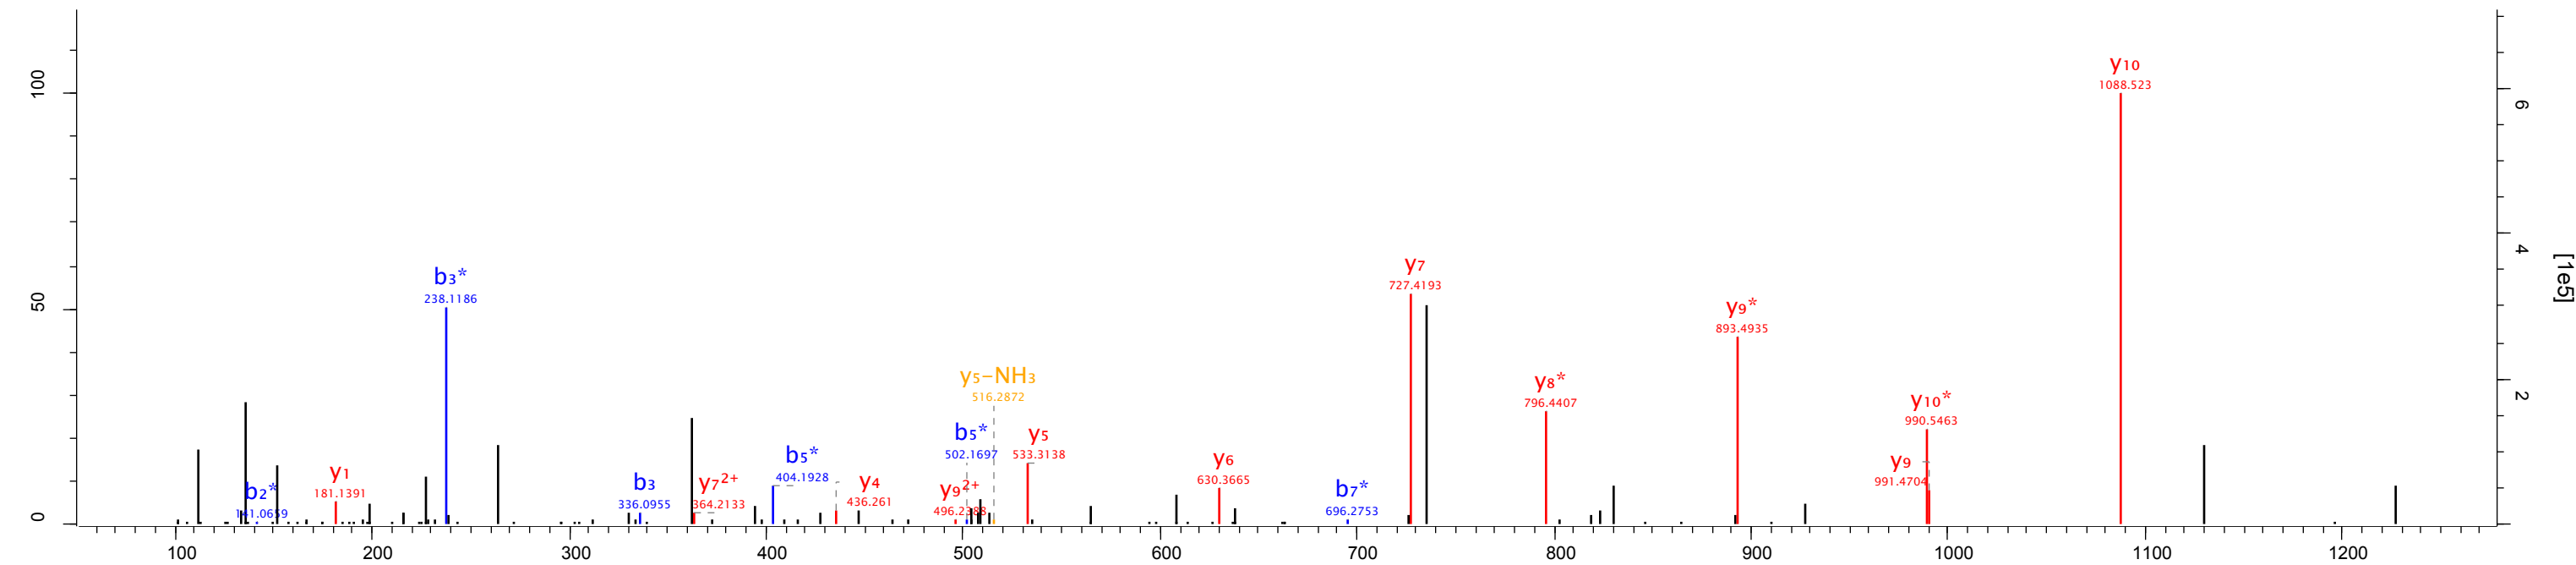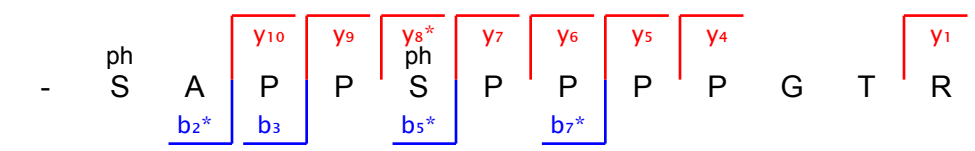

Raw file: 20150814\_A375SR\_Phospho\_BR2\_03  
 Scan: 21545 Method: FTMS; HCD Score: 128.04 m/z: 664.01 Gene names: PDZD2

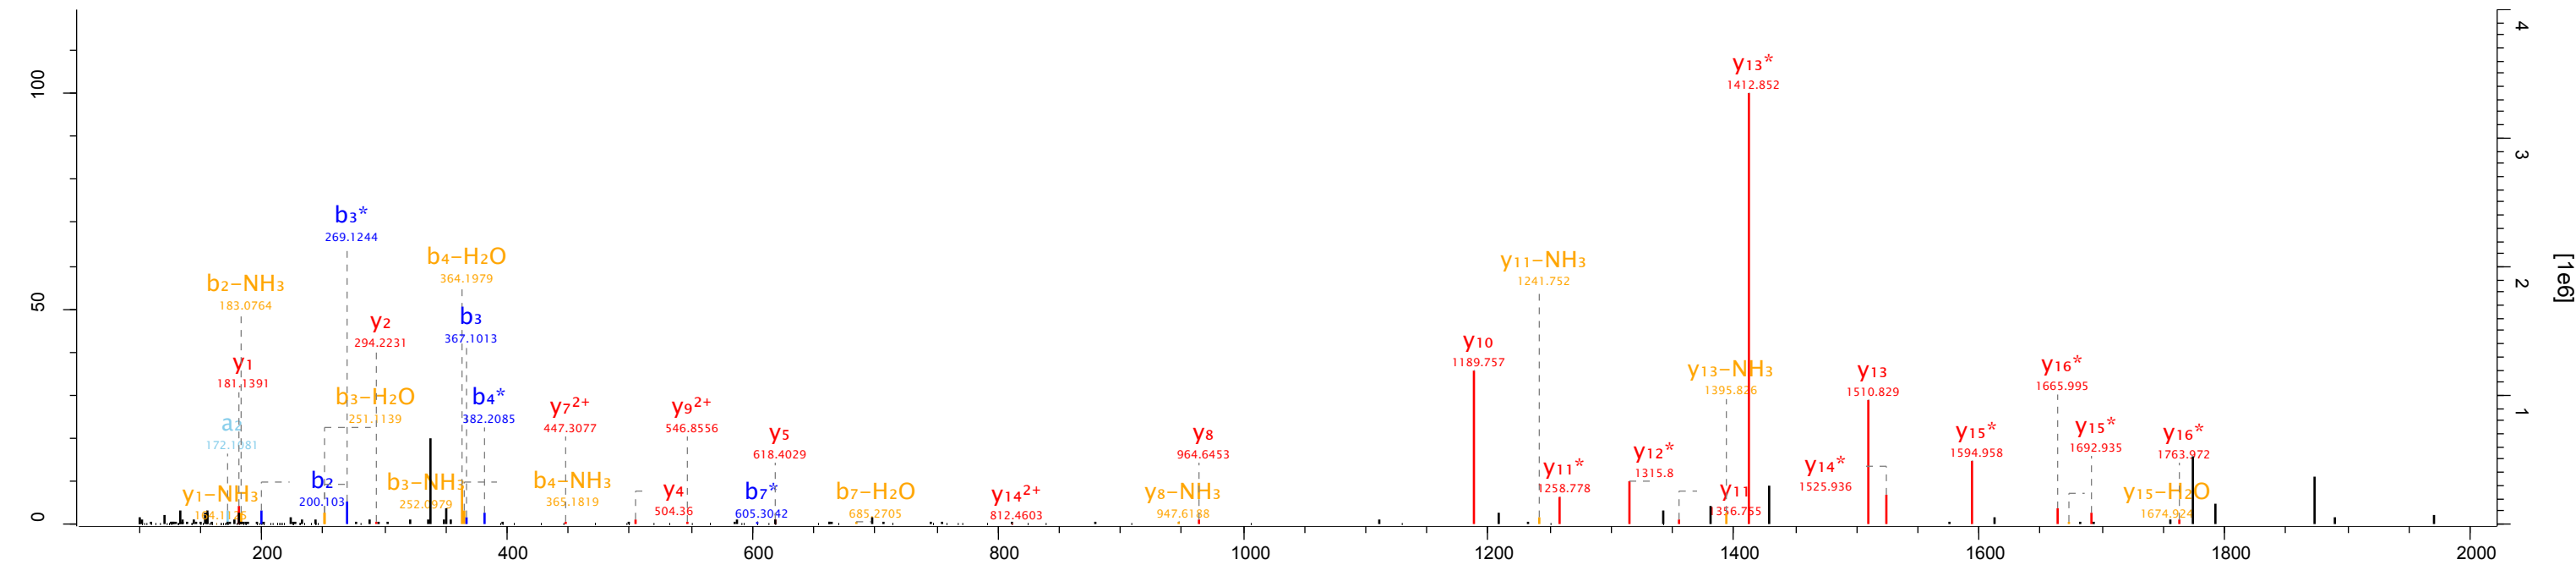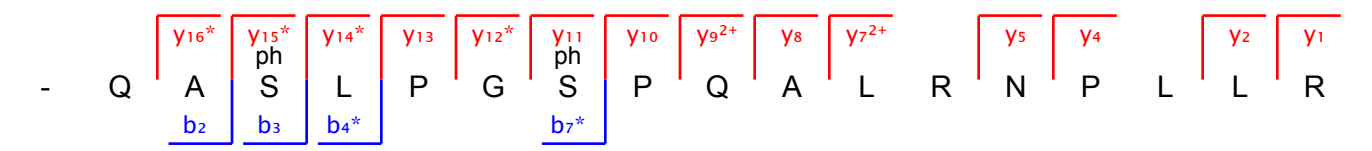

Raw file: 20150814\_A375SR\_Phospho\_BR2\_03  
 Scan: 25685 Method: FTMS; HCD Score: 185.96 m/z: 1010.92 Gene names: MAPK11P1L

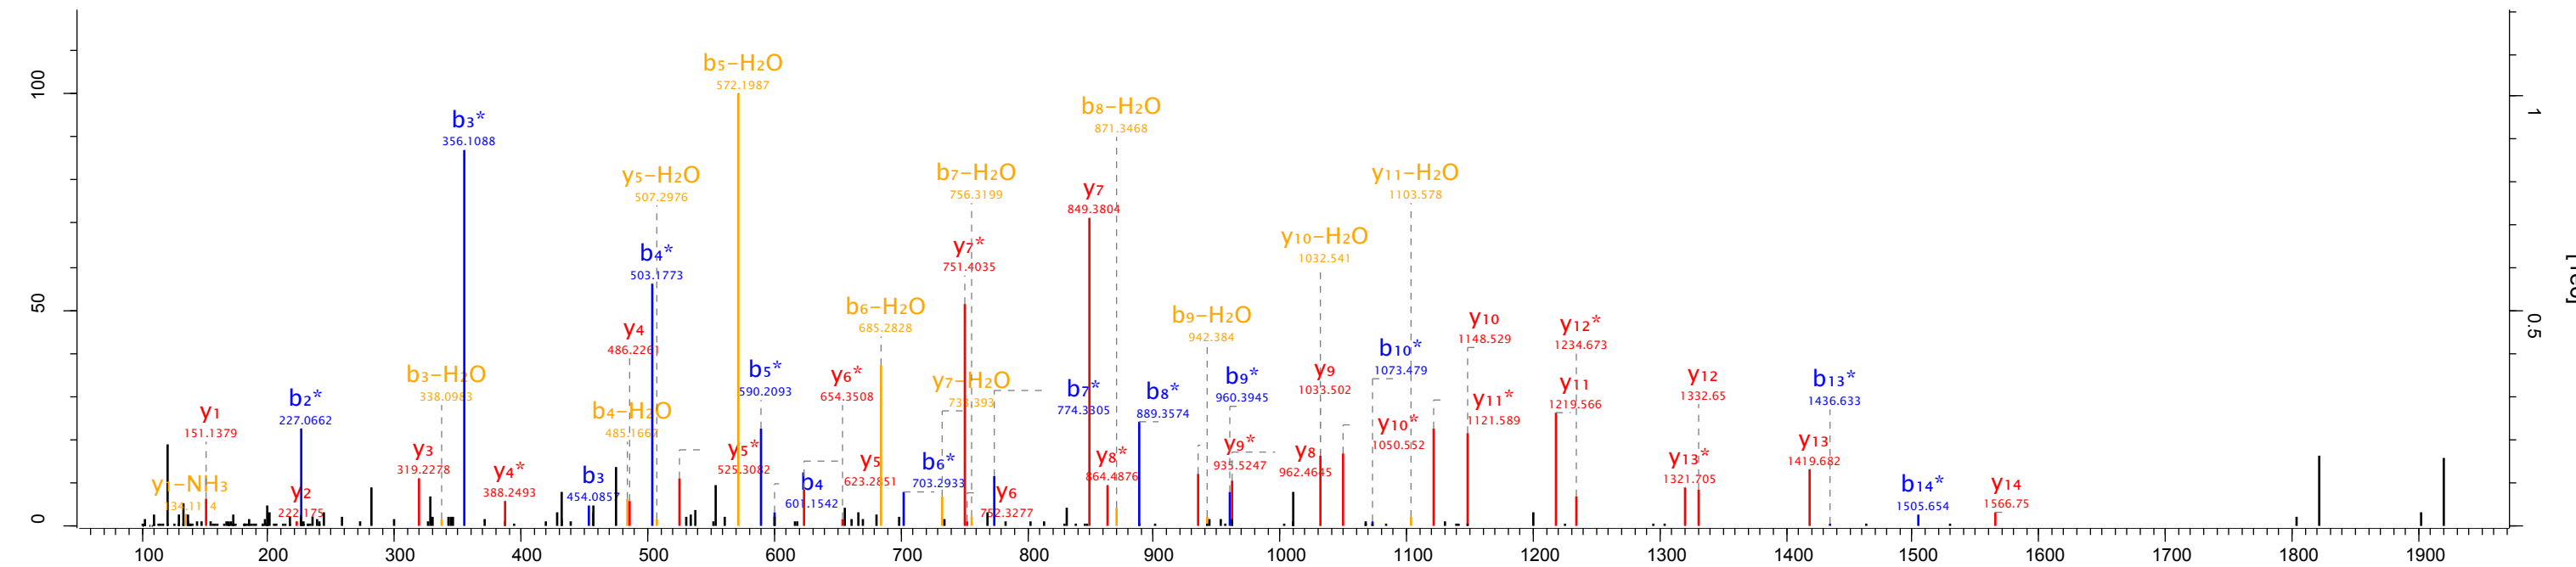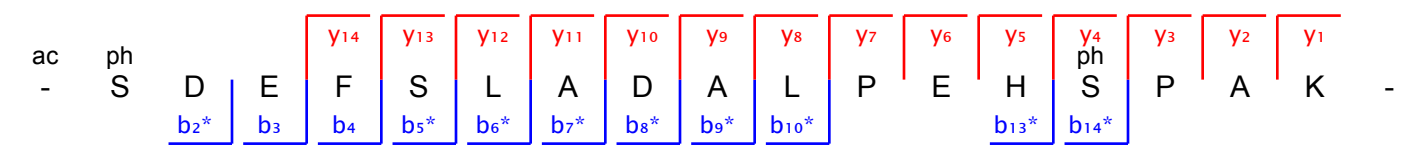



Raw file: 20150814\_A375SR\_Phospho\_BR2\_03  
 Scan: 5685 Method: FTMS; HCD Score: 132.74 m/z: 563.24 Gene names: YAF2

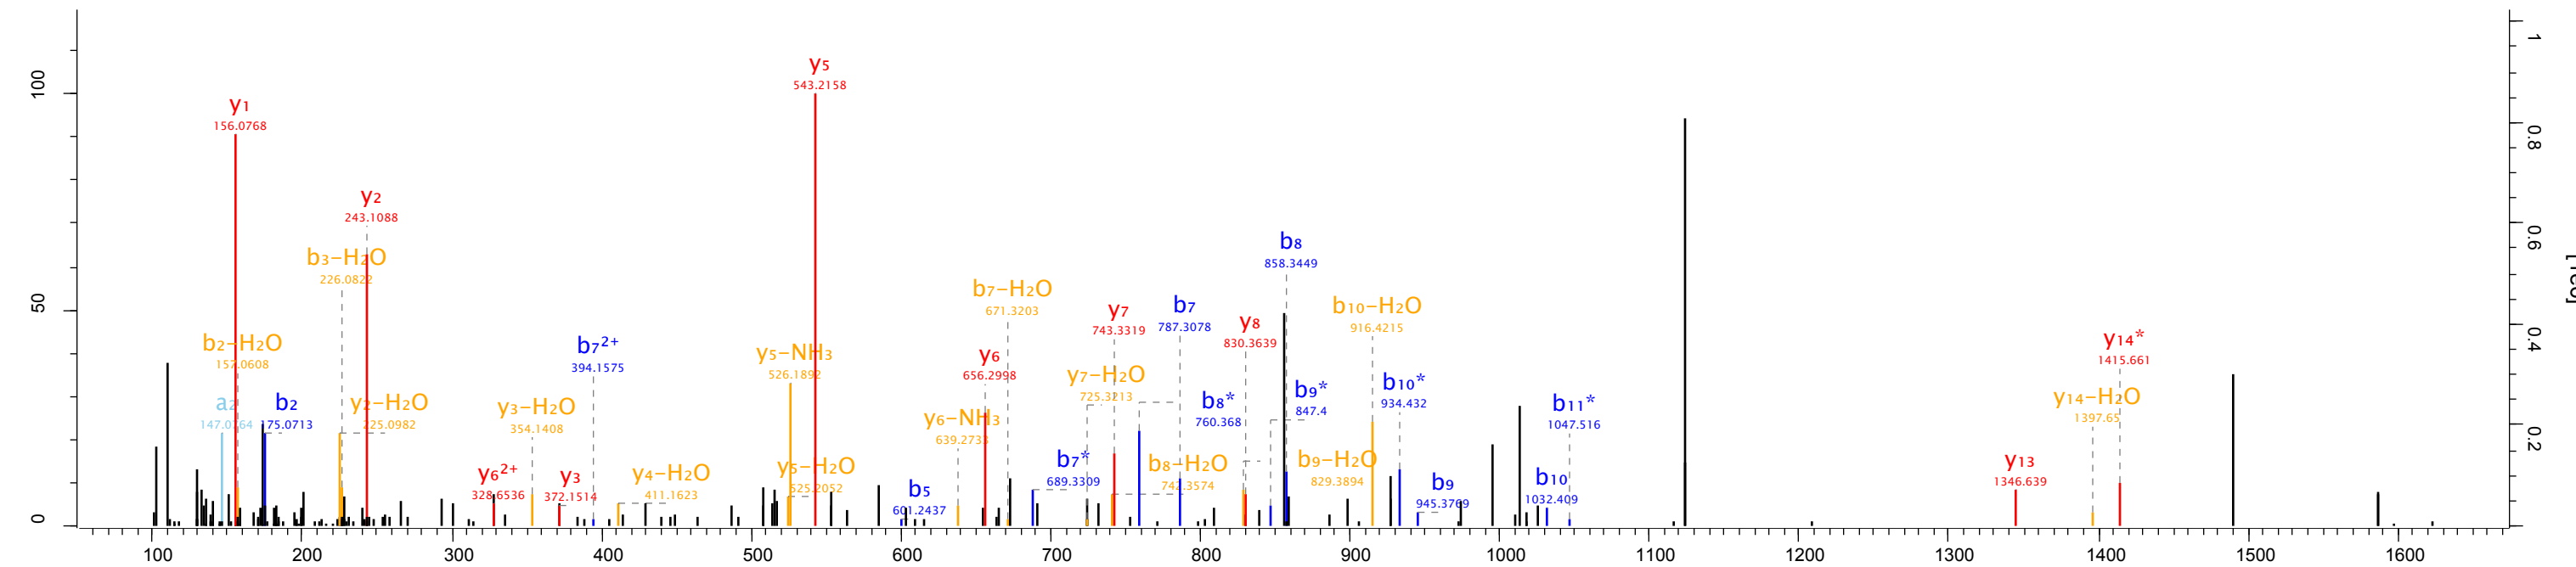

Raw file 20150814\_A375SR\_Phospho\_BR2\_03 Scan 5705 Method FTMS; HCD Score 63.22 m/z 426.73

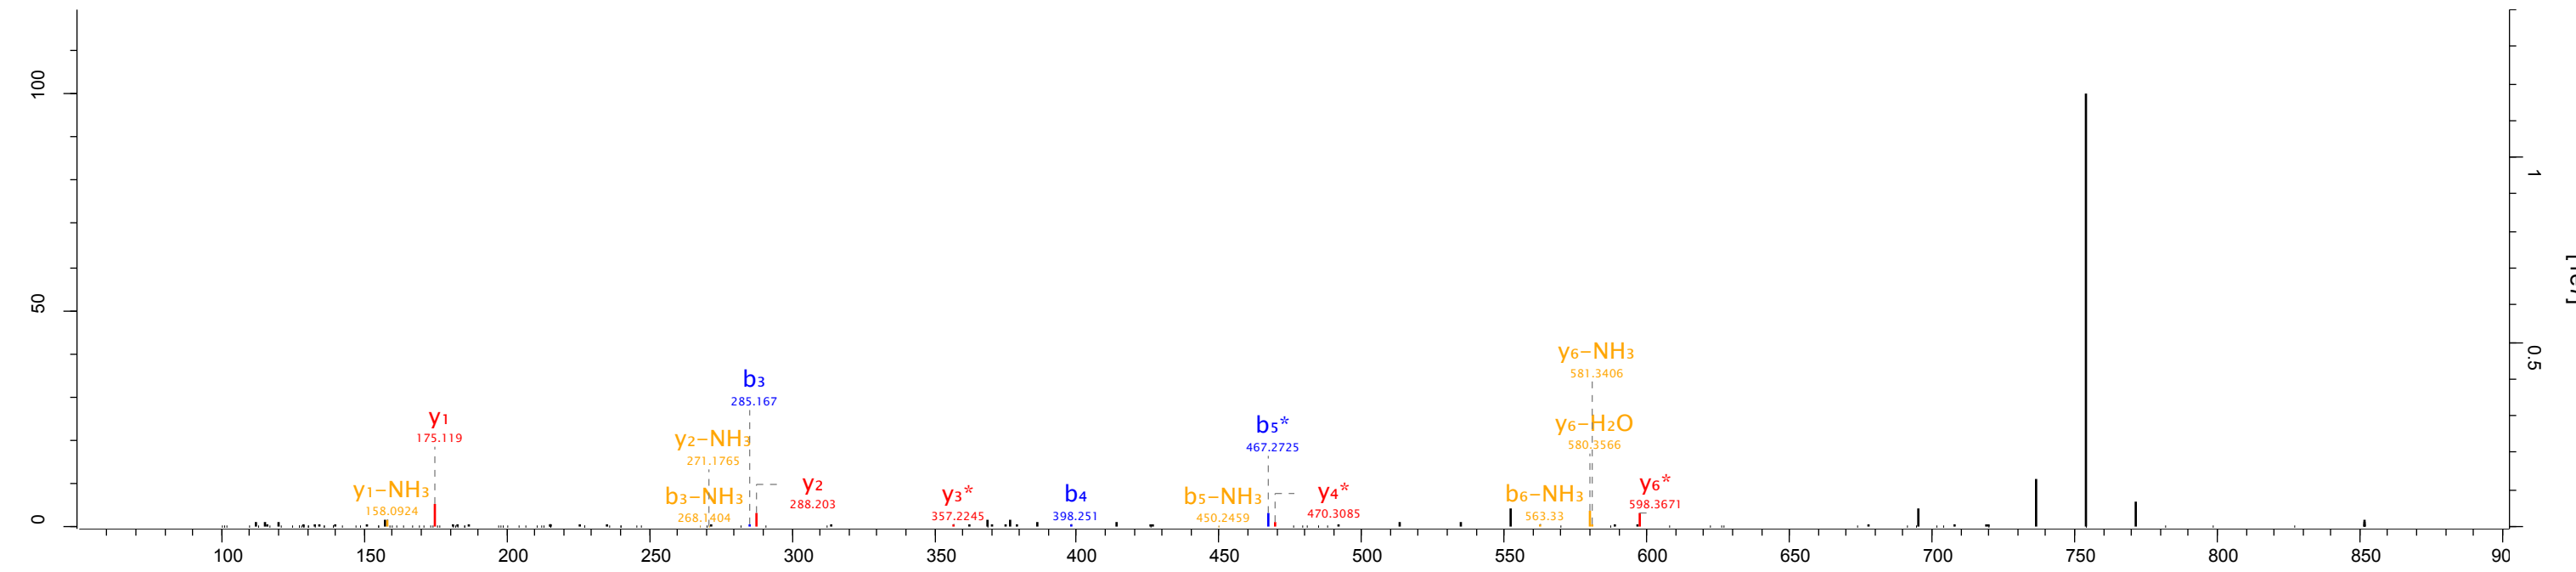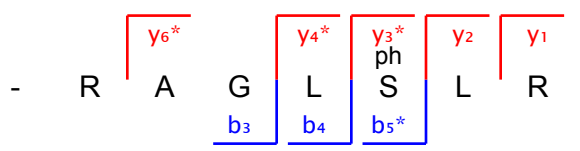

Raw file: 20150814\_A375SR\_Phospho\_BR2\_04  
 Scan: 17295 Method: FTMS; HCD Score: 85.73 m/z: 573.77 Gene names: GPATCH2L

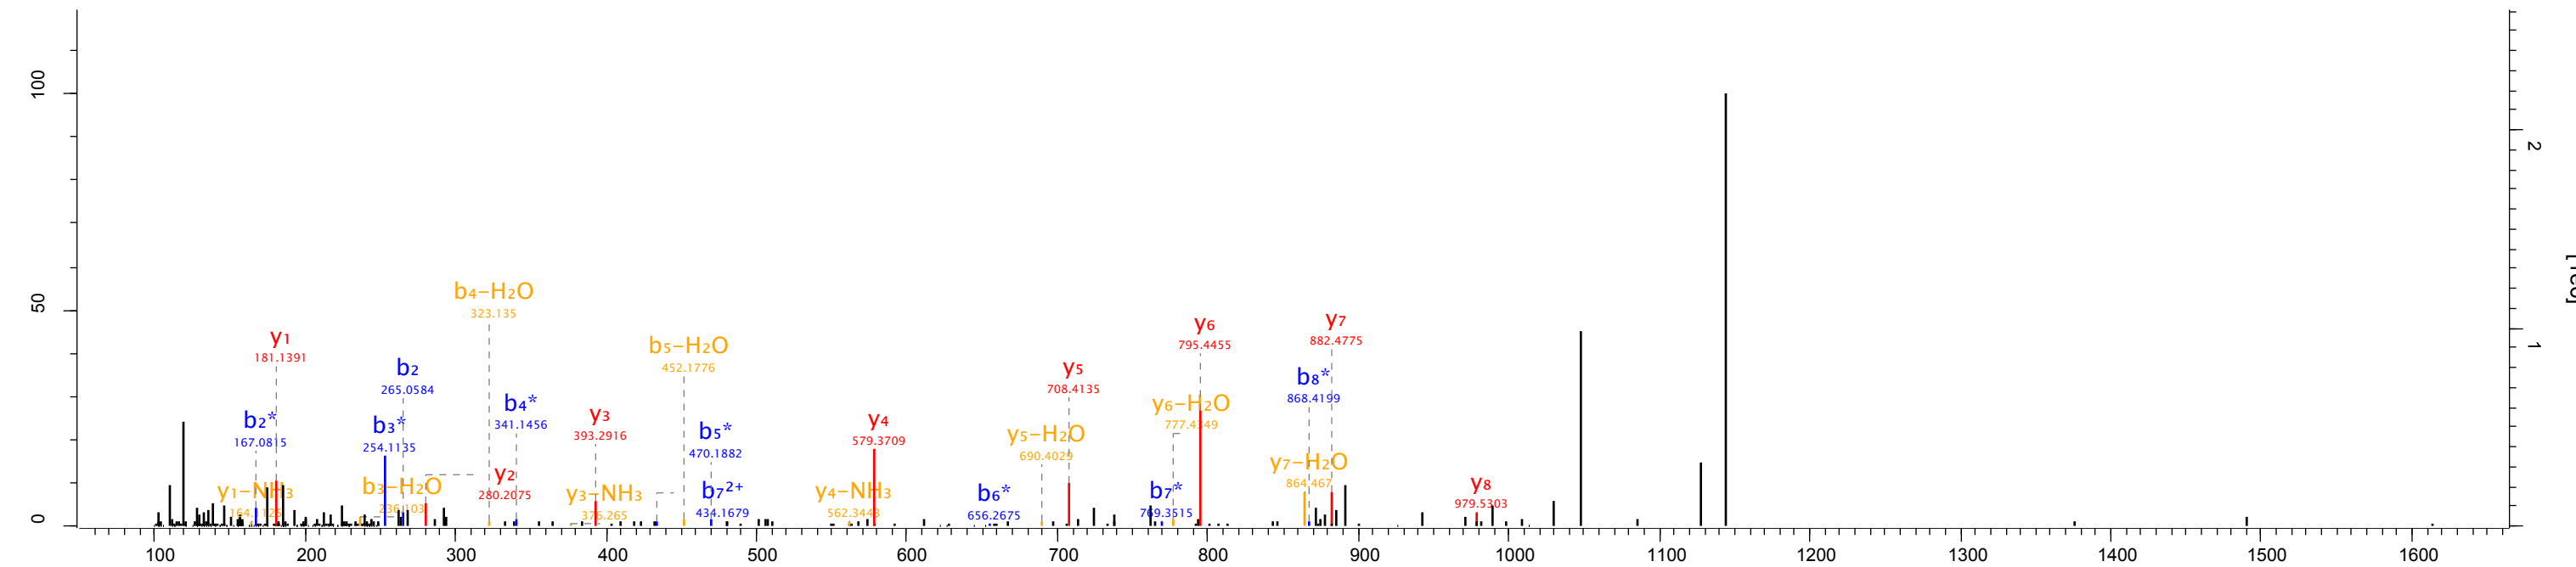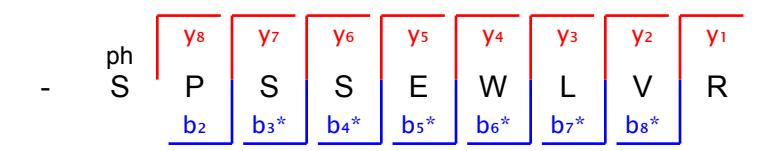

Raw file 20150814\_A375SR\_Phospho\_BR2\_05 Scan 13095 Method FTMS; HCD Score 46.32 m/z 1009.96 Gene names FOXP2

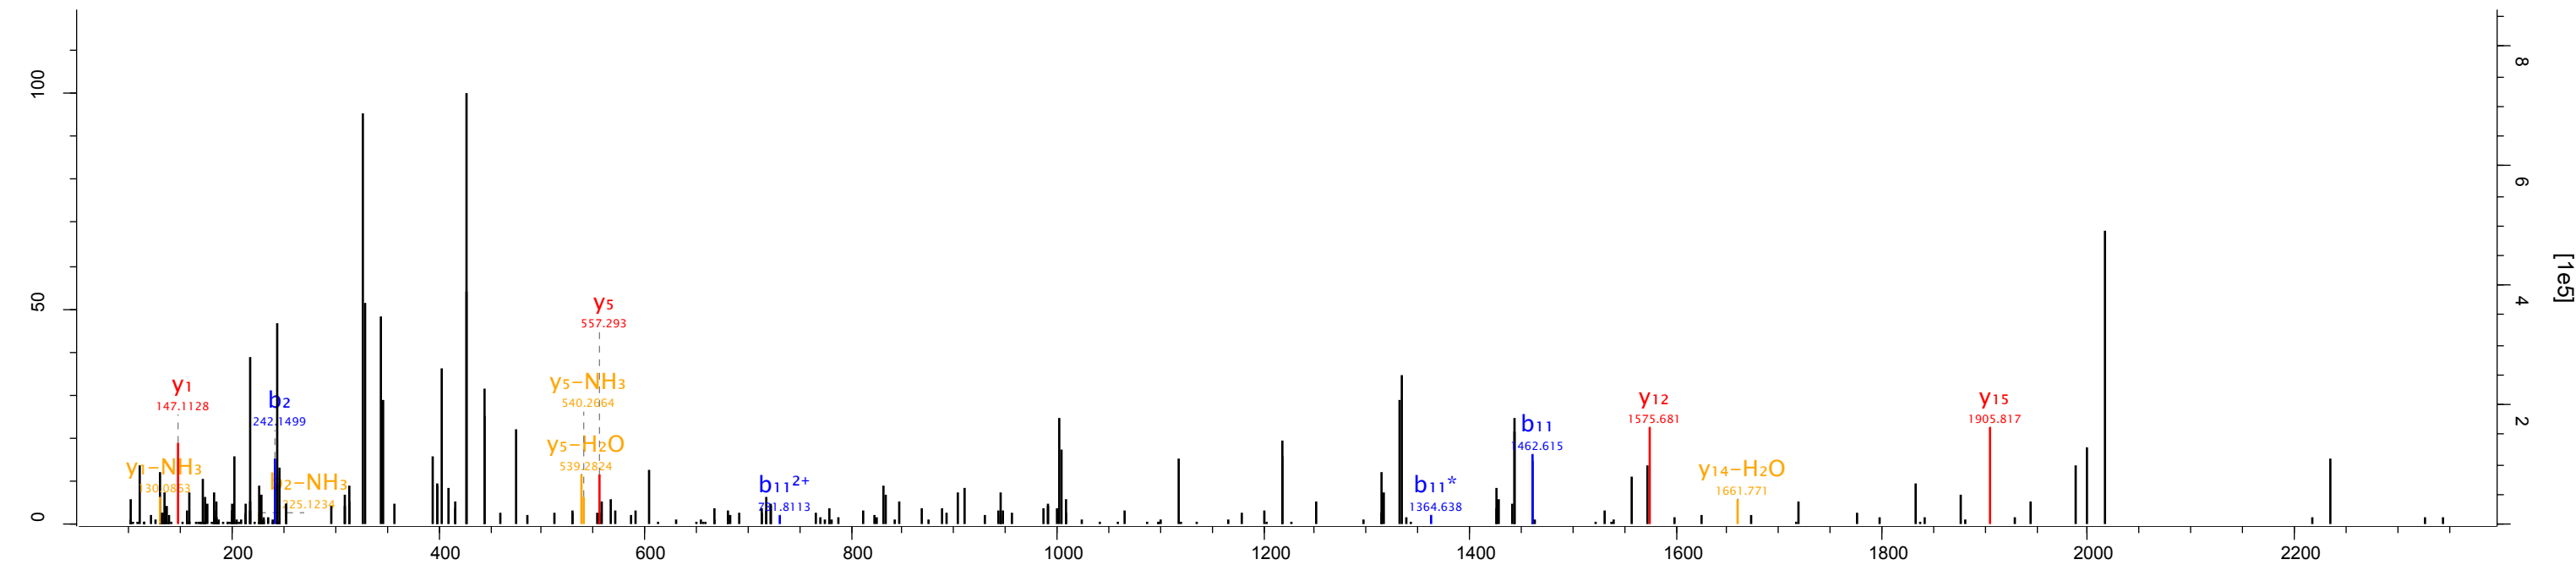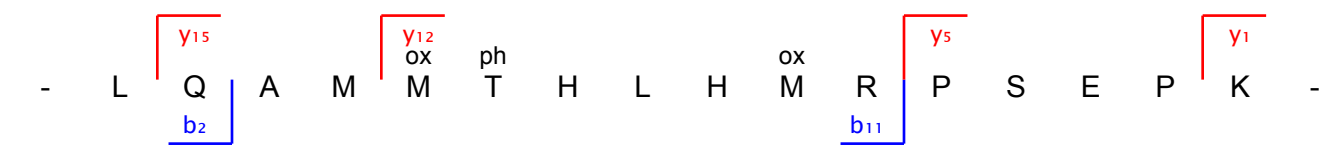

Raw file Scan Method Score m/z Gene names  
 20150814\_A375SR\_Phospho\_BR2\_05 14865 FTMS; HCD 118.07 778.37 PRICKLE1

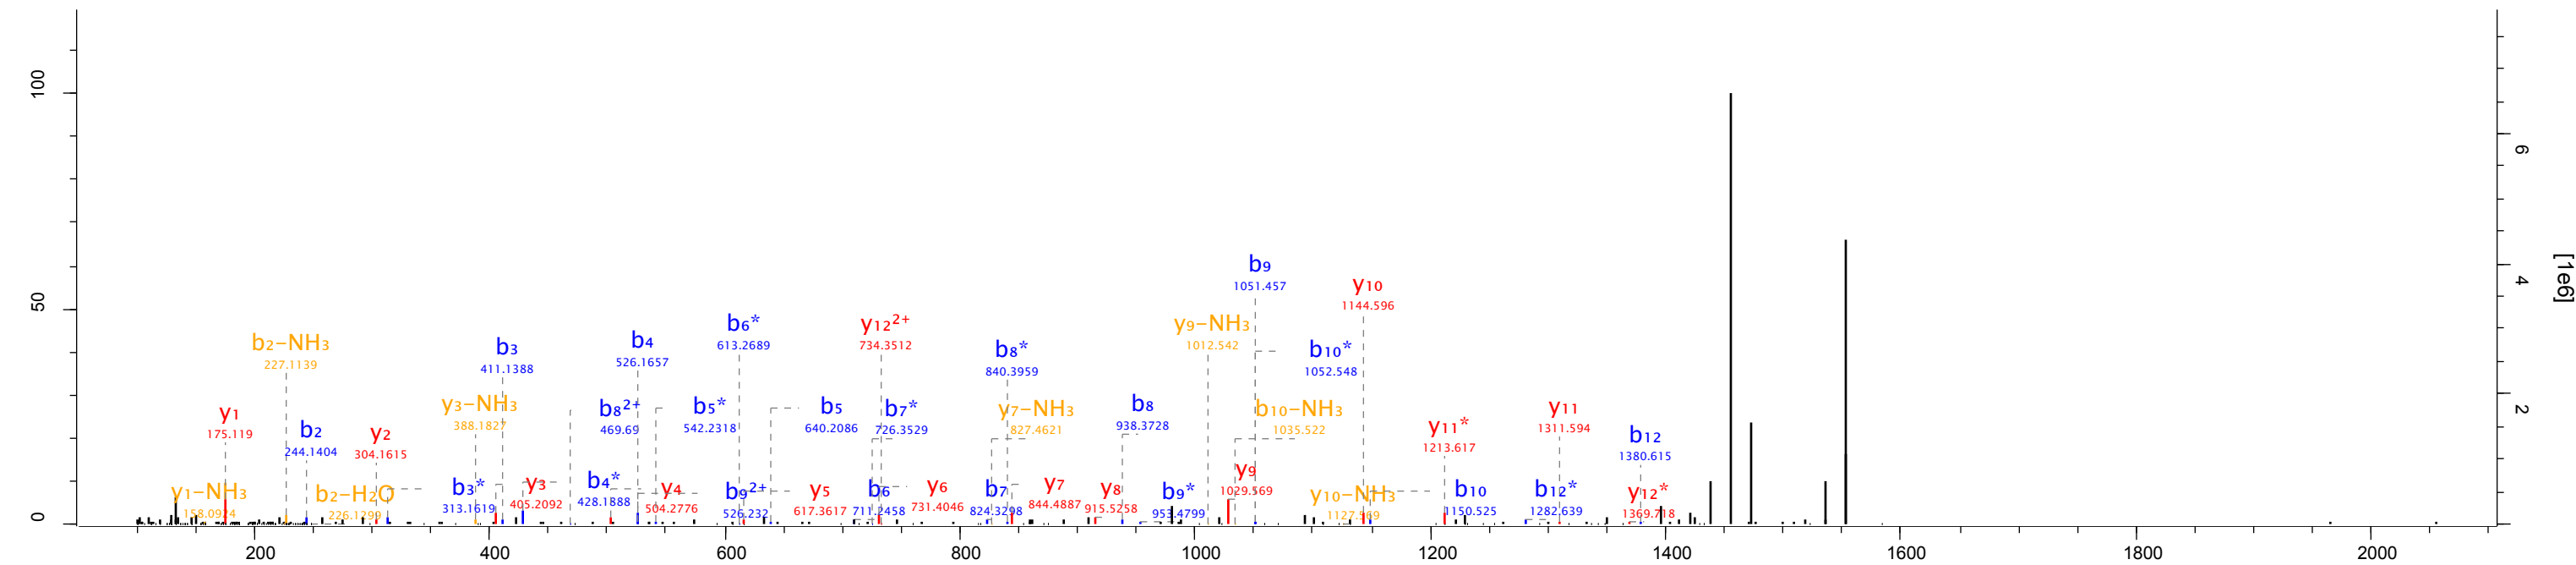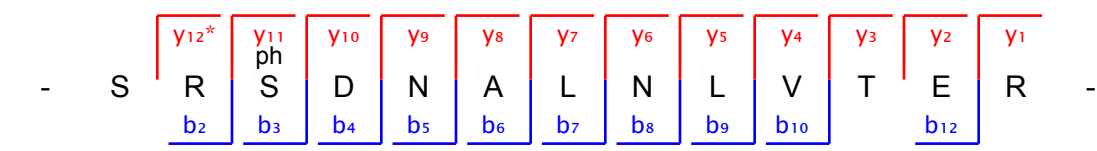

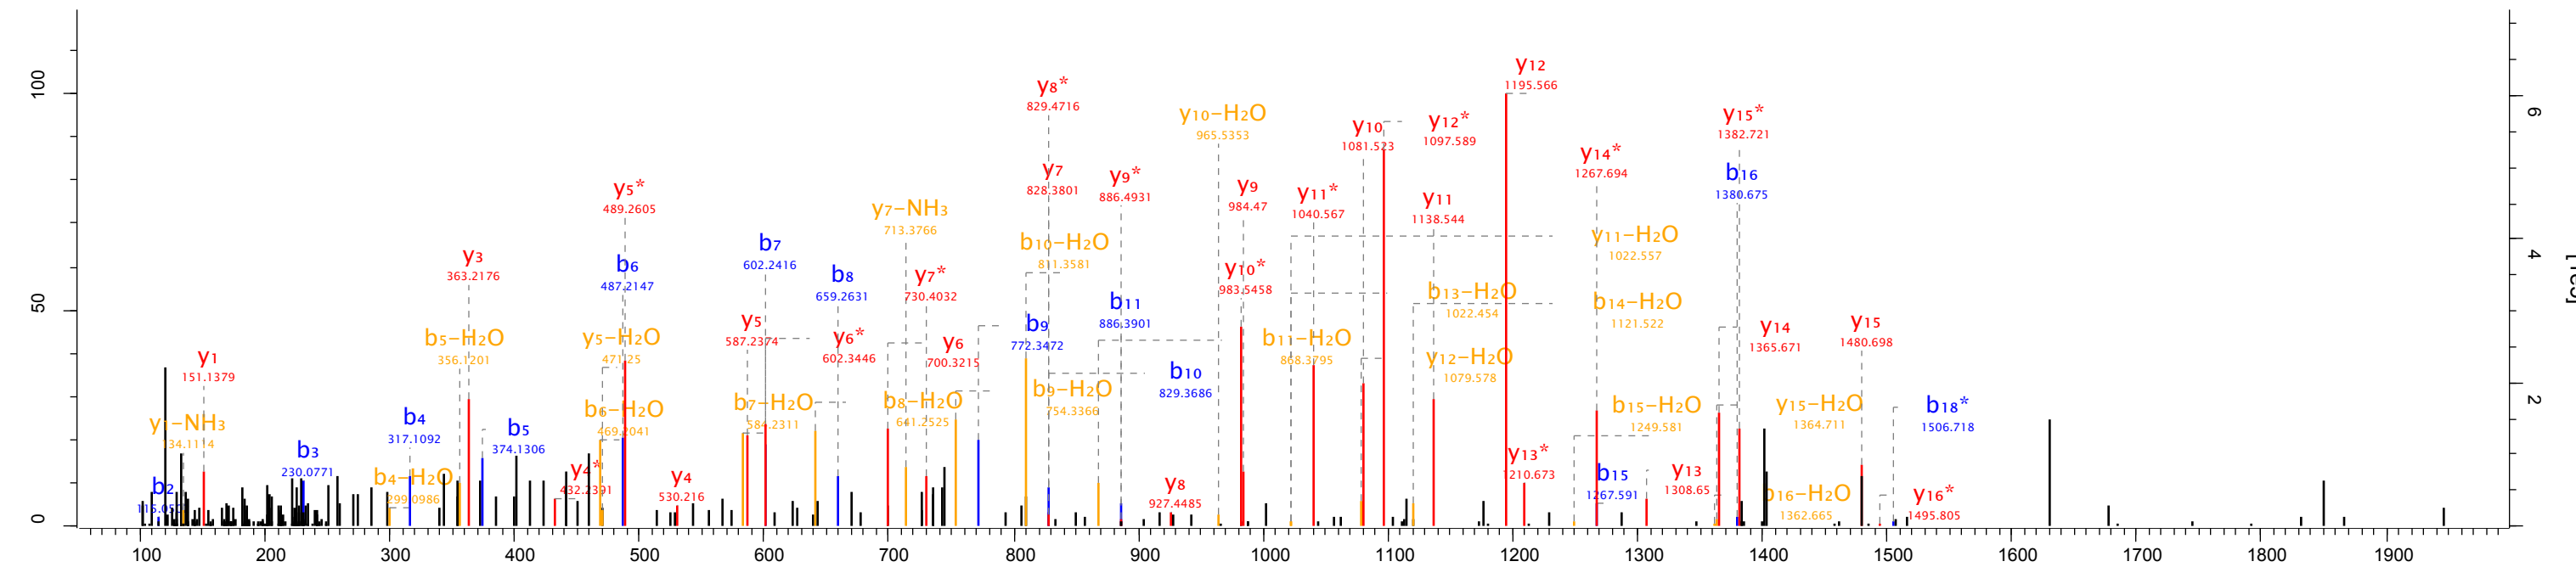

- G G D S G L D G L G G P G V Q L G S P D K -

b<sub>2</sub>
b<sub>3</sub>
b<sub>4</sub>
b<sub>5</sub>
y<sub>16</sub>\*
y<sub>15</sub>
y<sub>14</sub>
y<sub>13</sub>
y<sub>12</sub>
y<sub>11</sub>
y<sub>10</sub>
y<sub>9</sub>
y<sub>8</sub>
y<sub>7</sub>
y<sub>6</sub>
y<sub>5</sub>
y<sub>4</sub>
y<sub>3</sub>
b<sub>15</sub>
b<sub>16</sub>
b<sub>18</sub>\*

Raw file 20150814\_A375SR\_Phospho\_BR2\_05 Scan 1985 Method FTMS; HCD Score 77.53 m/z 454.73

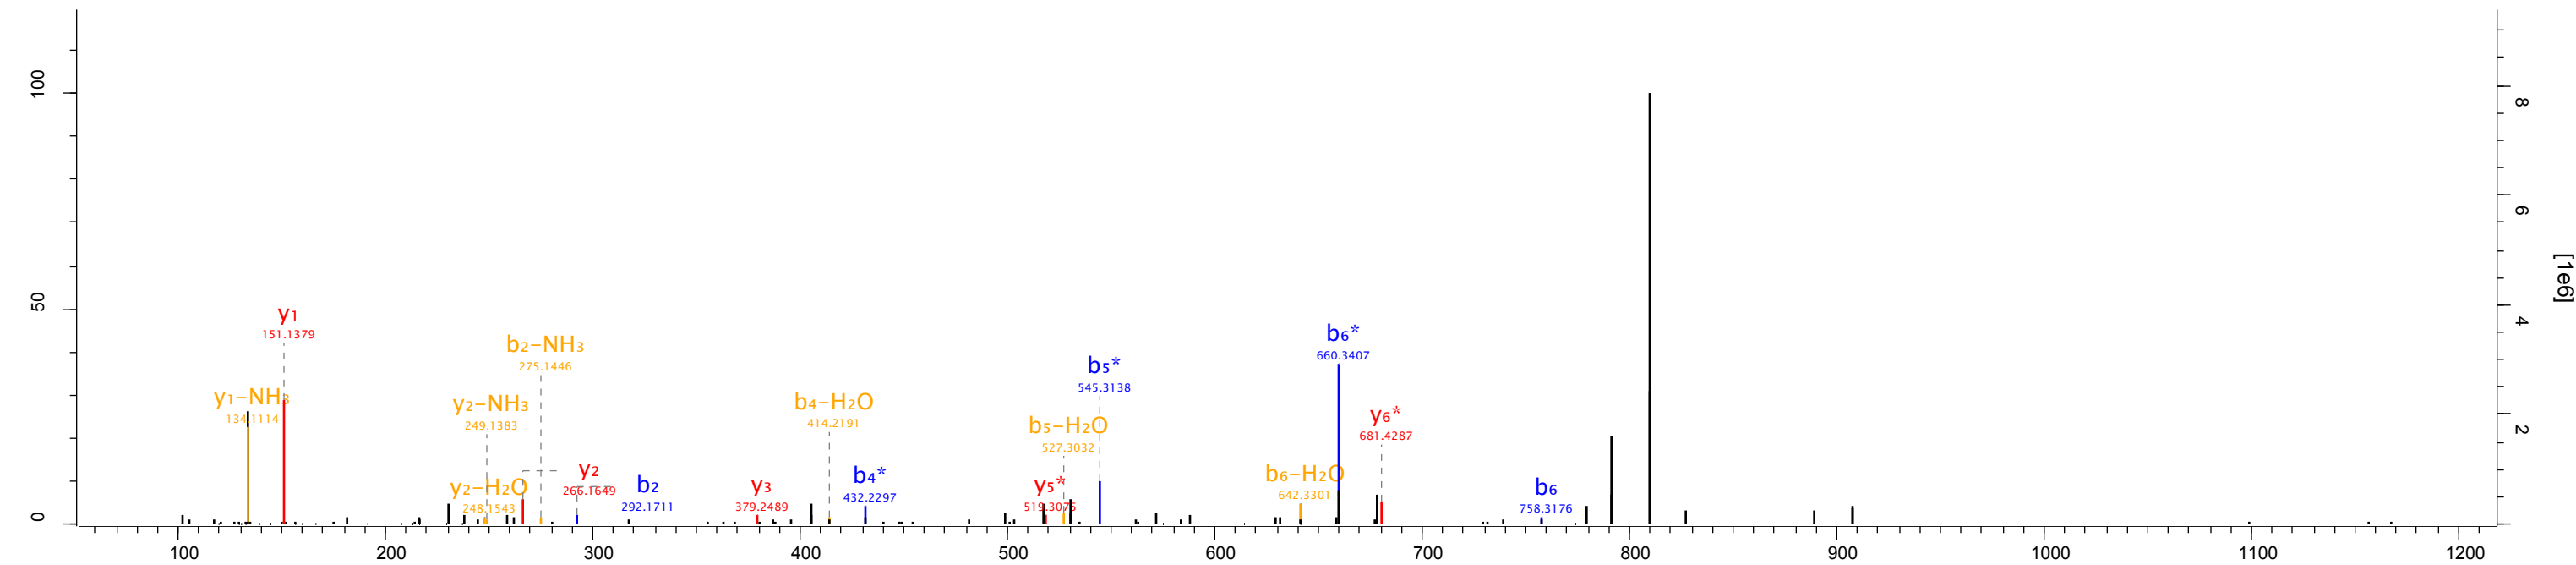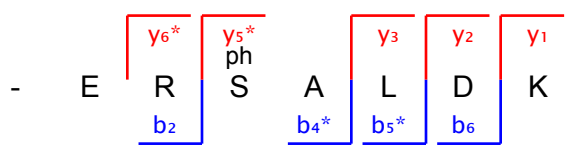

Raw file 20150814\_A375SR\_Phospho\_BR2\_05 Scan 2055 Method FTMS; HCD Score 52.79 m/z 401.56 Gene names NCL

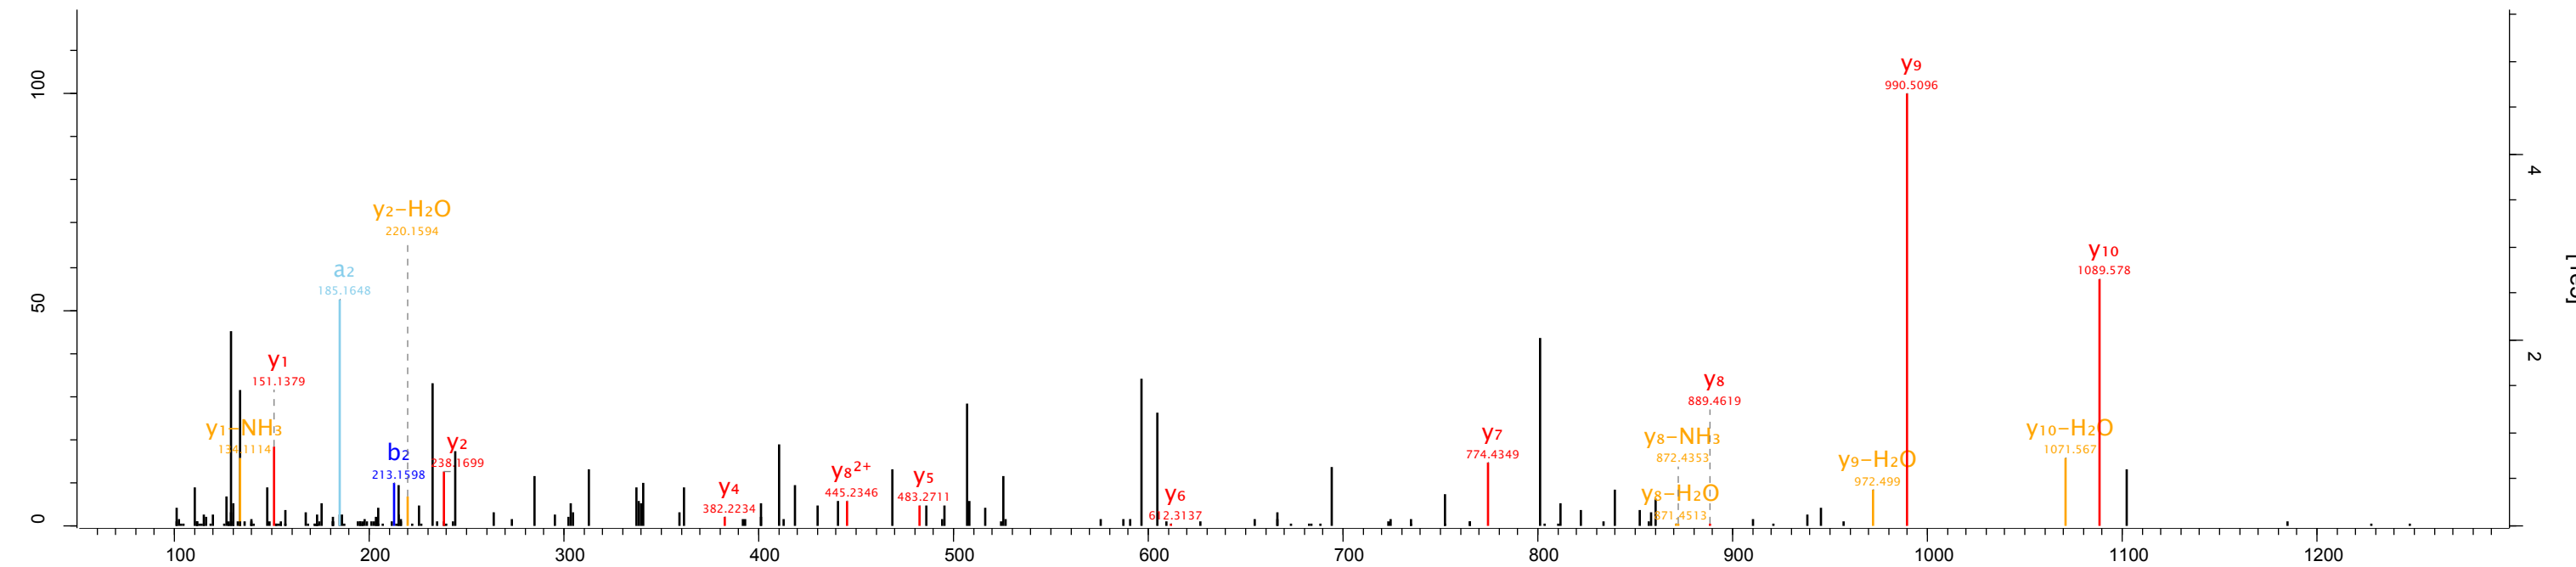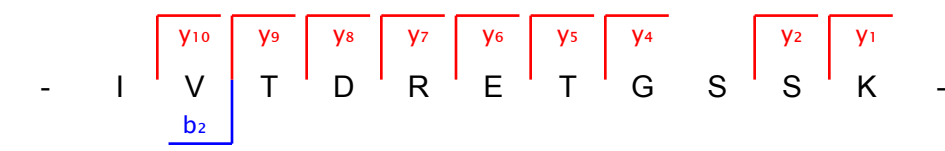



Raw file: 20150814\_A375SR\_Phospho\_BR2\_05  
 Scan: 6015 Method: FTMS; HCD Score: 159.22 m/z: 844.36 Gene names: YAF2

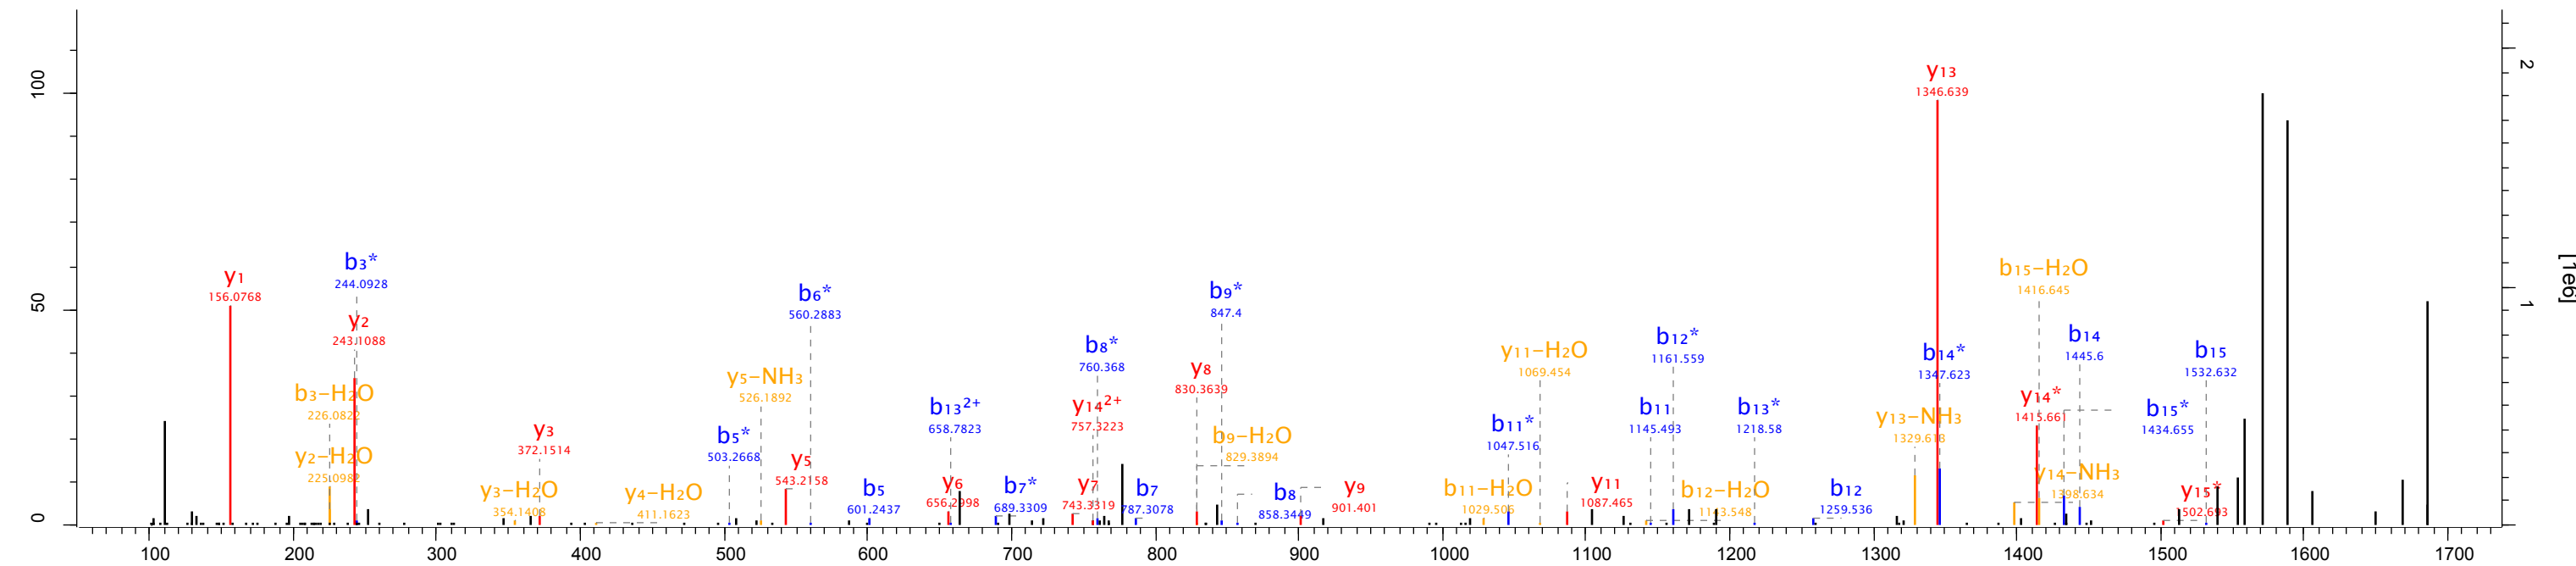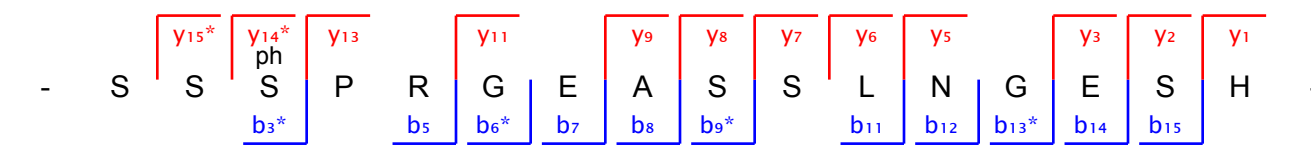

Raw file 20150814\_A375SR\_Phospho\_BR2\_06 Scan 17685 Method FTMS; HCD Score 40.19 m/z 861.87

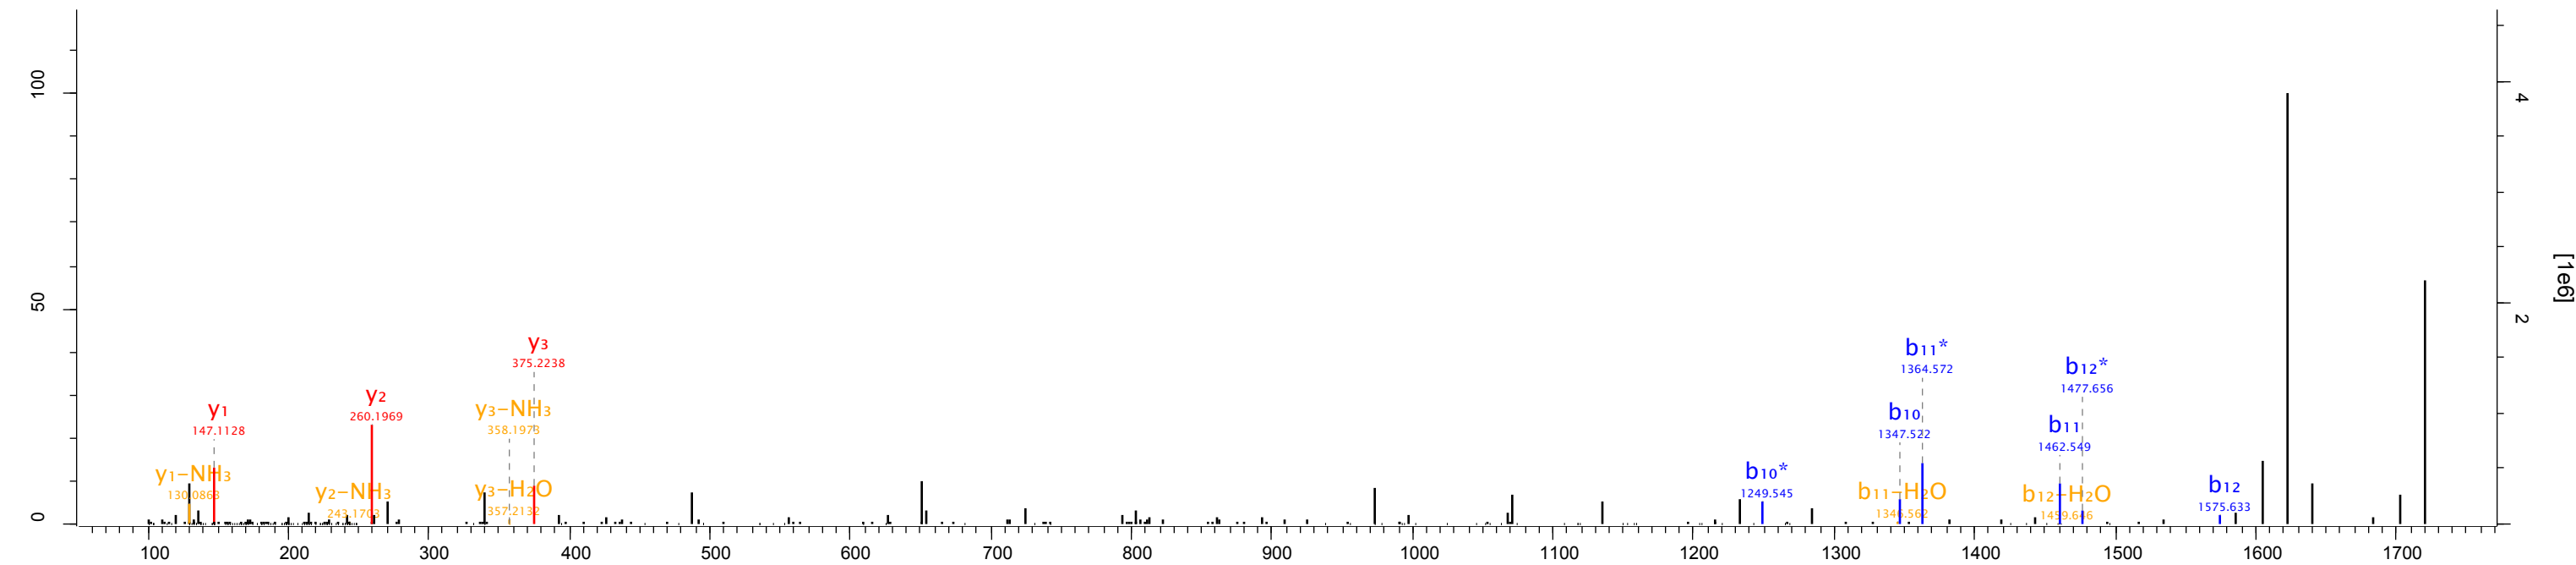

Raw file 20150814\_A375SR\_Phospho\_BR2\_06 Scan 2075 Method FTMS; HCD Score 96.14 m/z 454.73

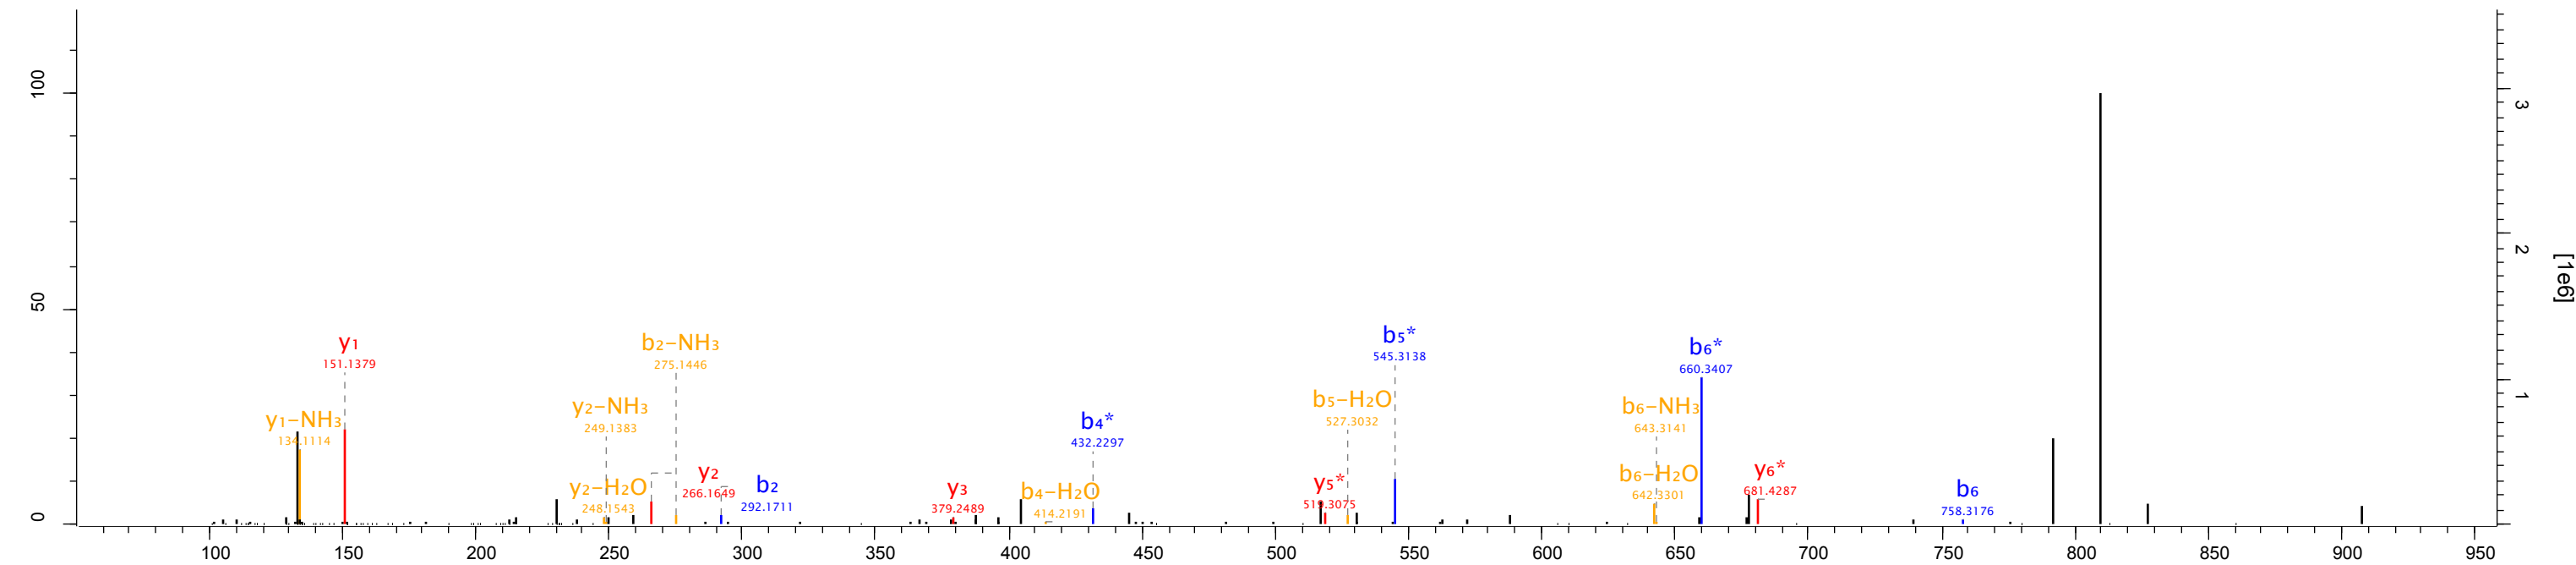

Raw file: 20150814\_A375SR\_Phospho\_BR2\_06  
 Scan: 24955 Method: FTMS; HCD Score: 72.59 m/z: 923.91 Gene names: MSANTD3

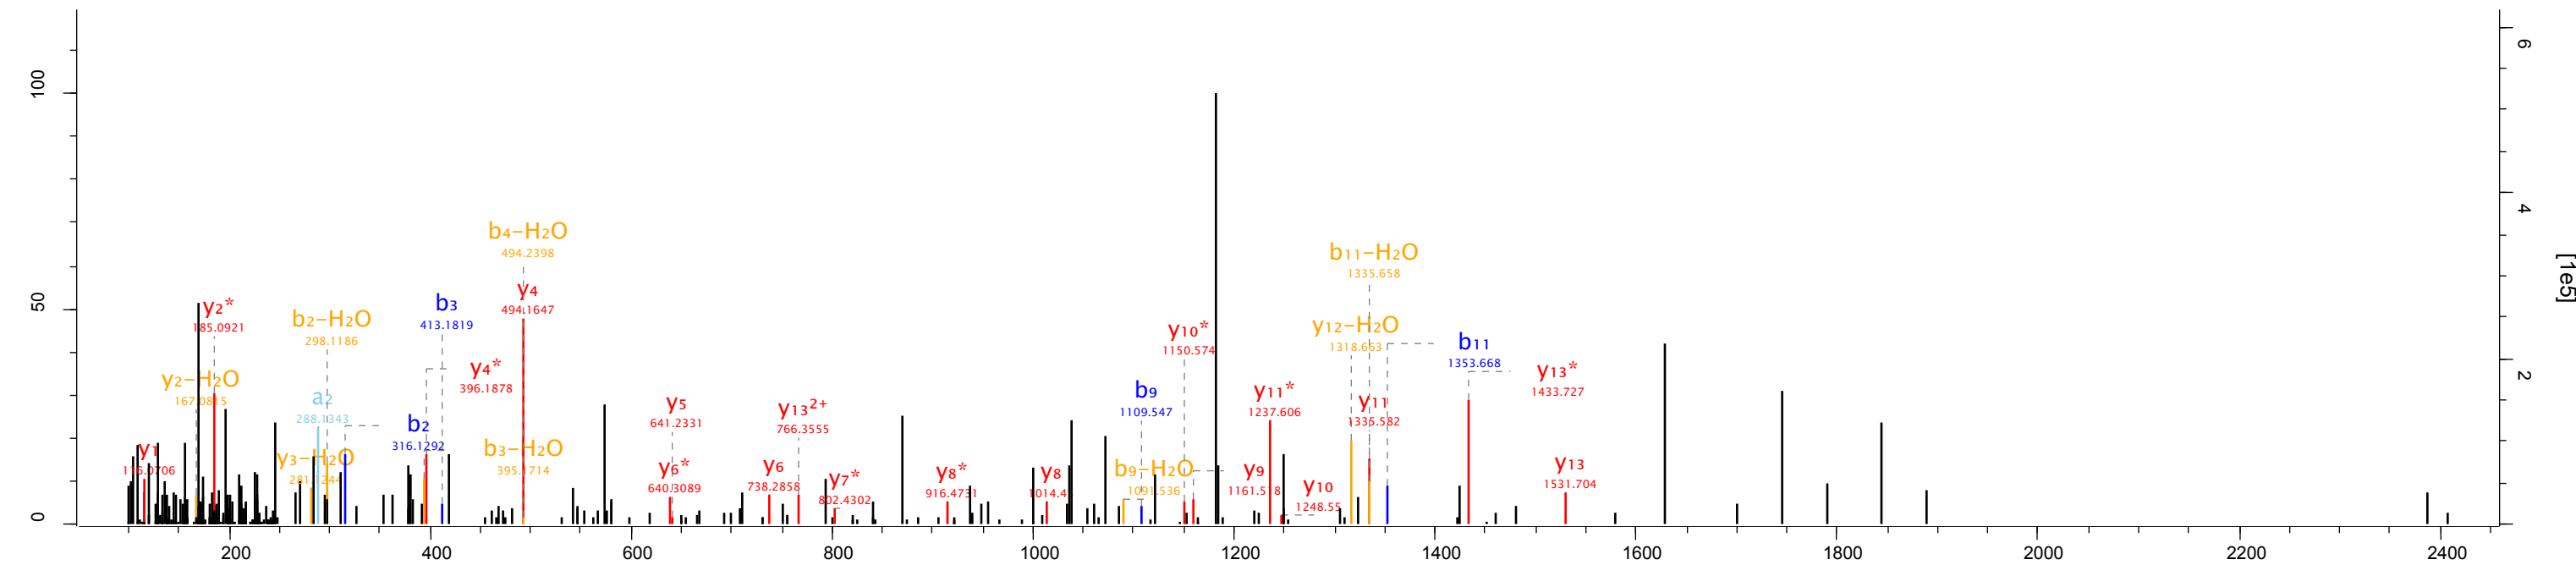

- E W P V S S F N R P F P N S P -  
 b<sub>2</sub> b<sub>3</sub> b<sub>9</sub> b<sub>11</sub> y<sub>13</sub> y<sub>11</sub> y<sub>10</sub> y<sub>9</sub> y<sub>8</sub> y<sub>7</sub>\* y<sub>6</sub> y<sub>5</sub> y<sub>4</sub> y<sub>2</sub>\* y<sub>ph</sub> y<sub>1</sub>

Raw file: 20150814\_A375SR\_Phospho\_BR2\_06  
 Scan: 27115 Method: FTMS; HCD Score: 150.69 m/z: 900.41 Gene names: ARHGAP31

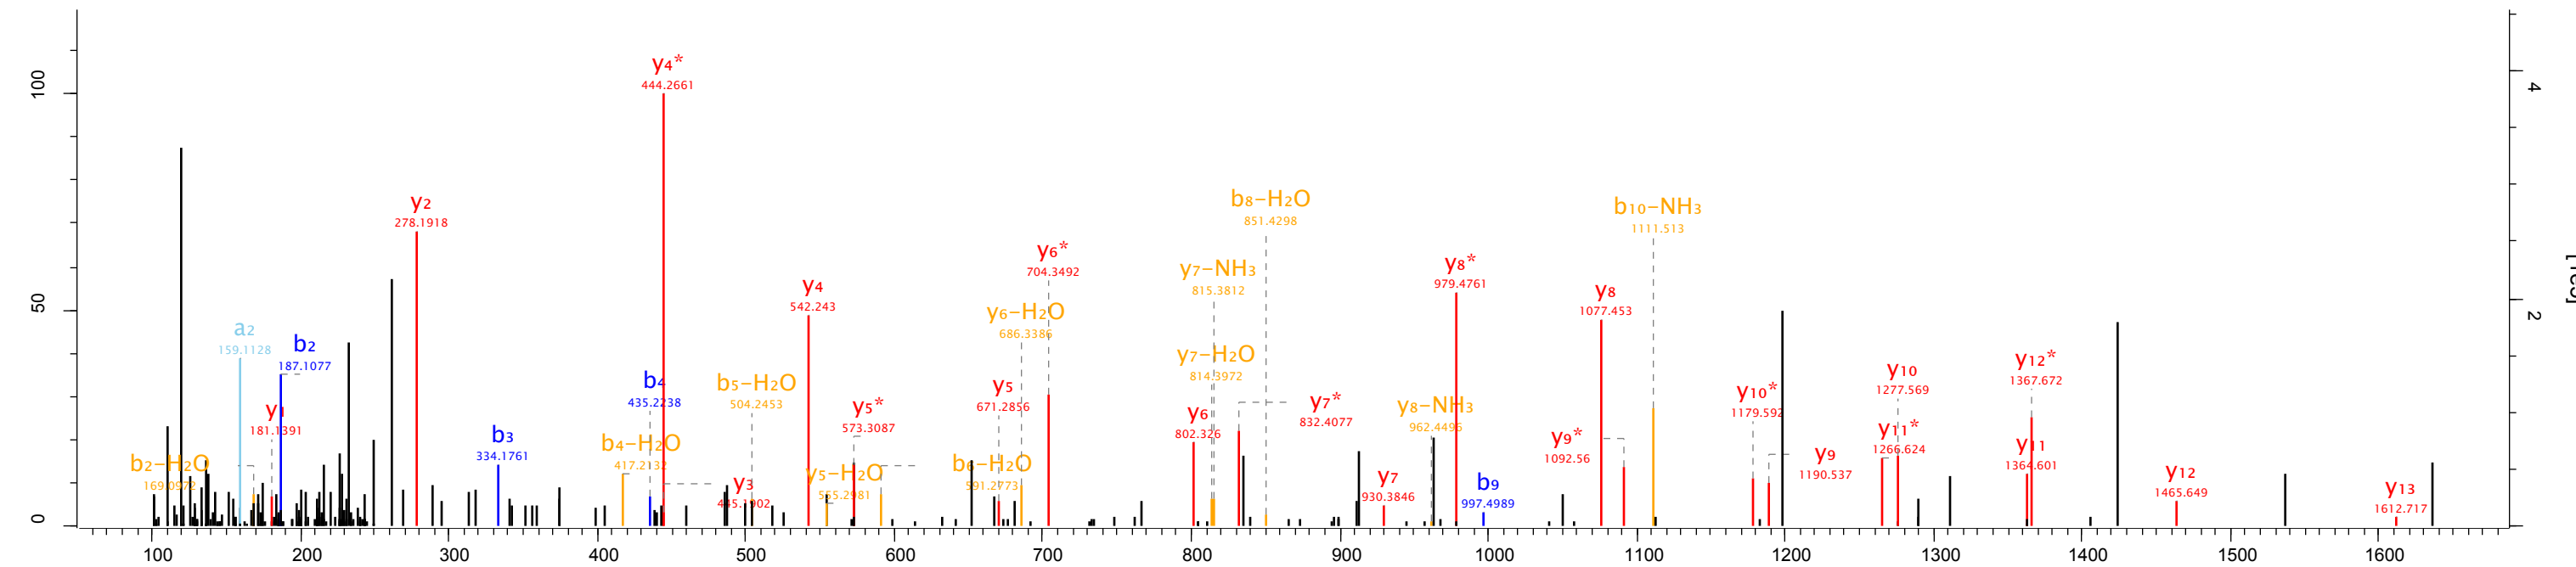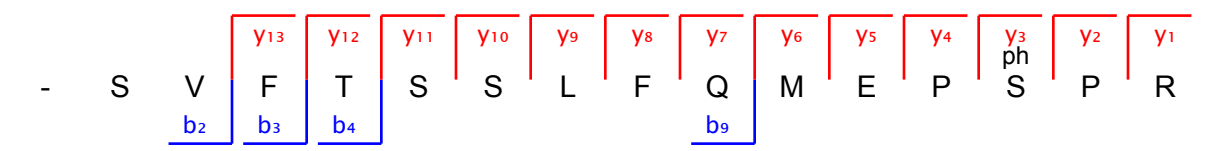

Raw file 20150814\_A375SR\_Phospho\_BR2\_06 Scan 8865 Method FTMS; HCD Score 41.54 m/z 500.92

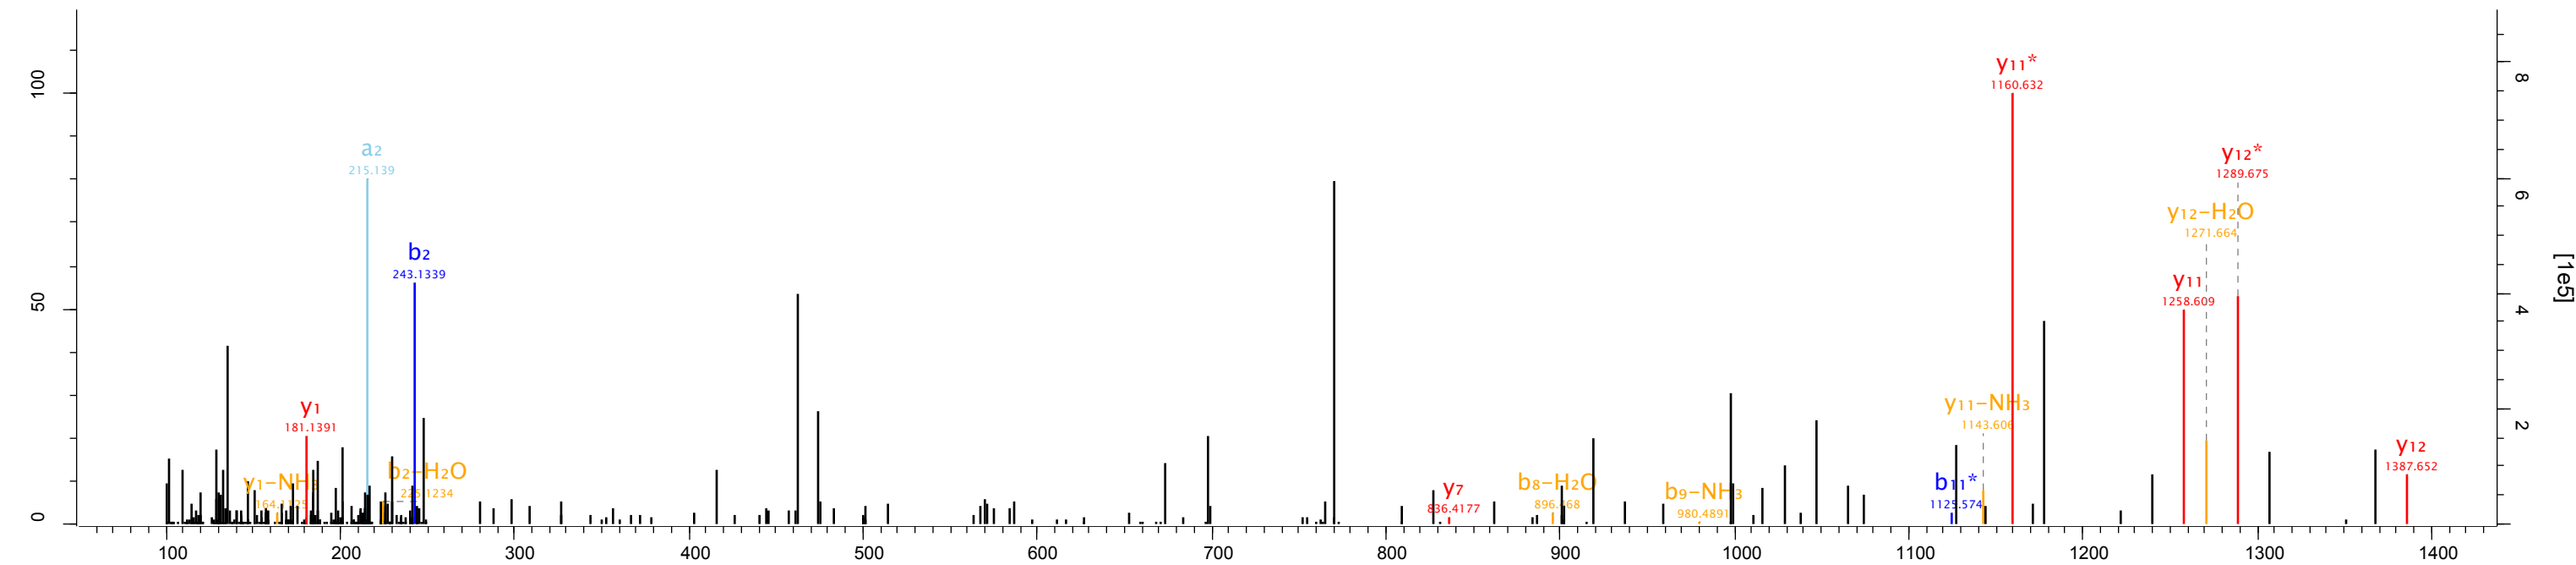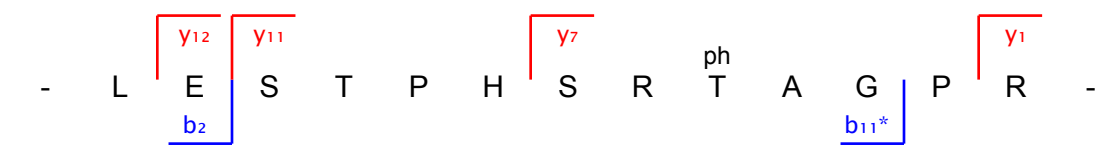

Raw file 20150814\_A375SR\_Phospho\_BR2\_07 Scan 13385 Method FTMS; HCD Score 135.69 m/z 782.84 Gene names PWWP2A

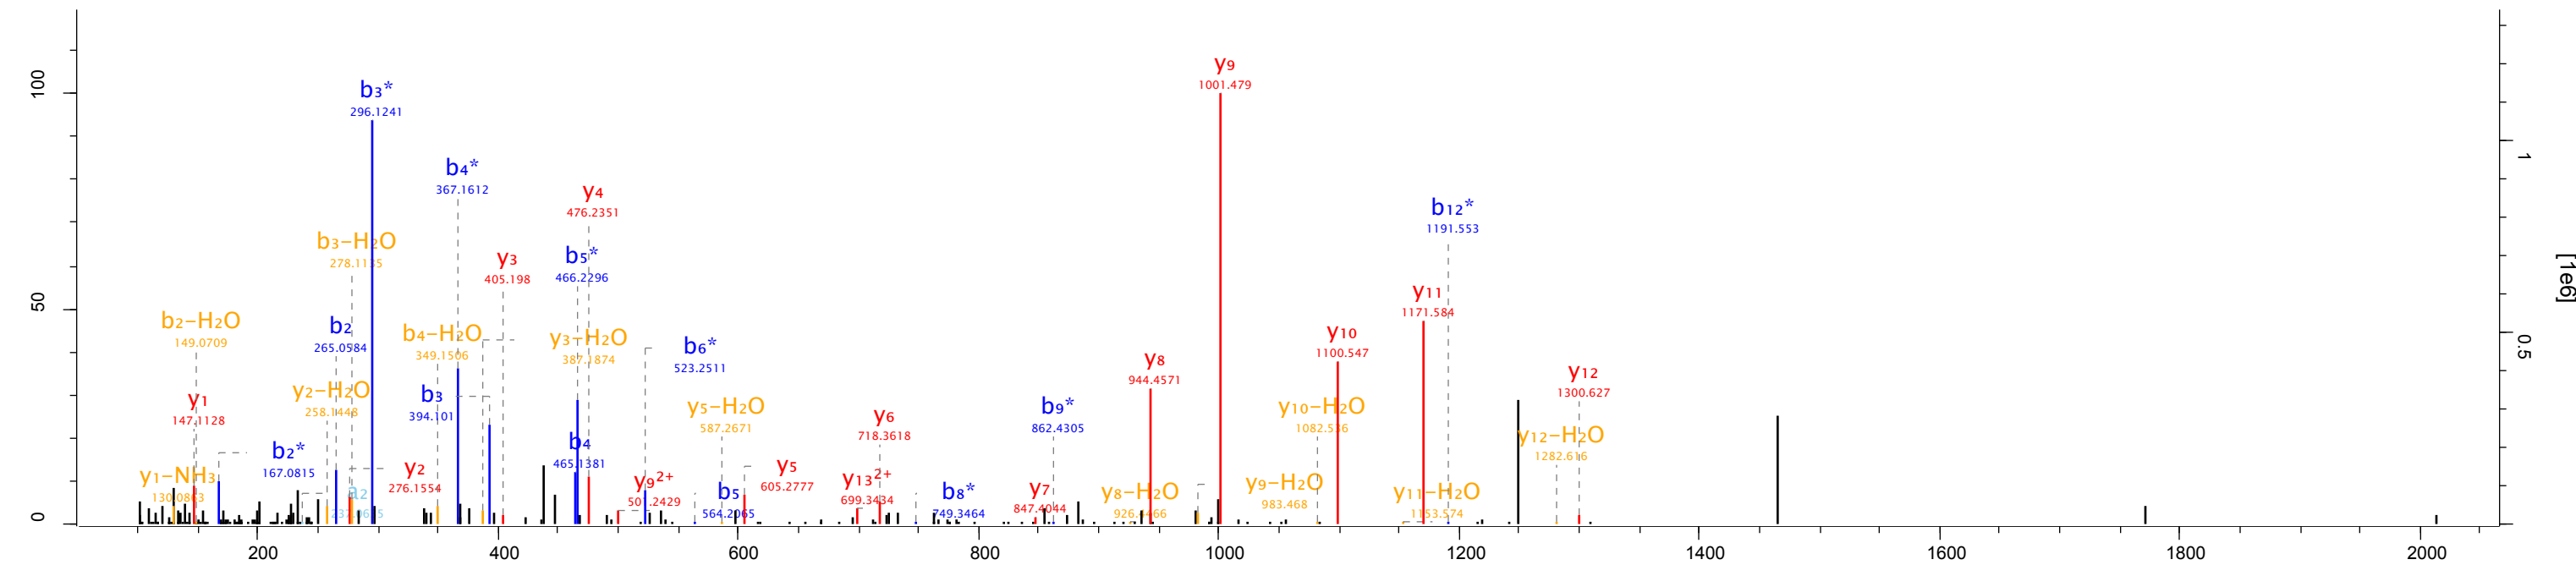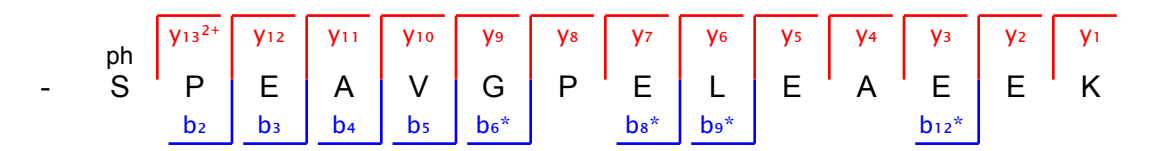

Raw file 20150814\_A375SR\_Phospho\_BR2\_07 Scan 4445 Method FTMS; HCD Score 44.32 m/z 630.79

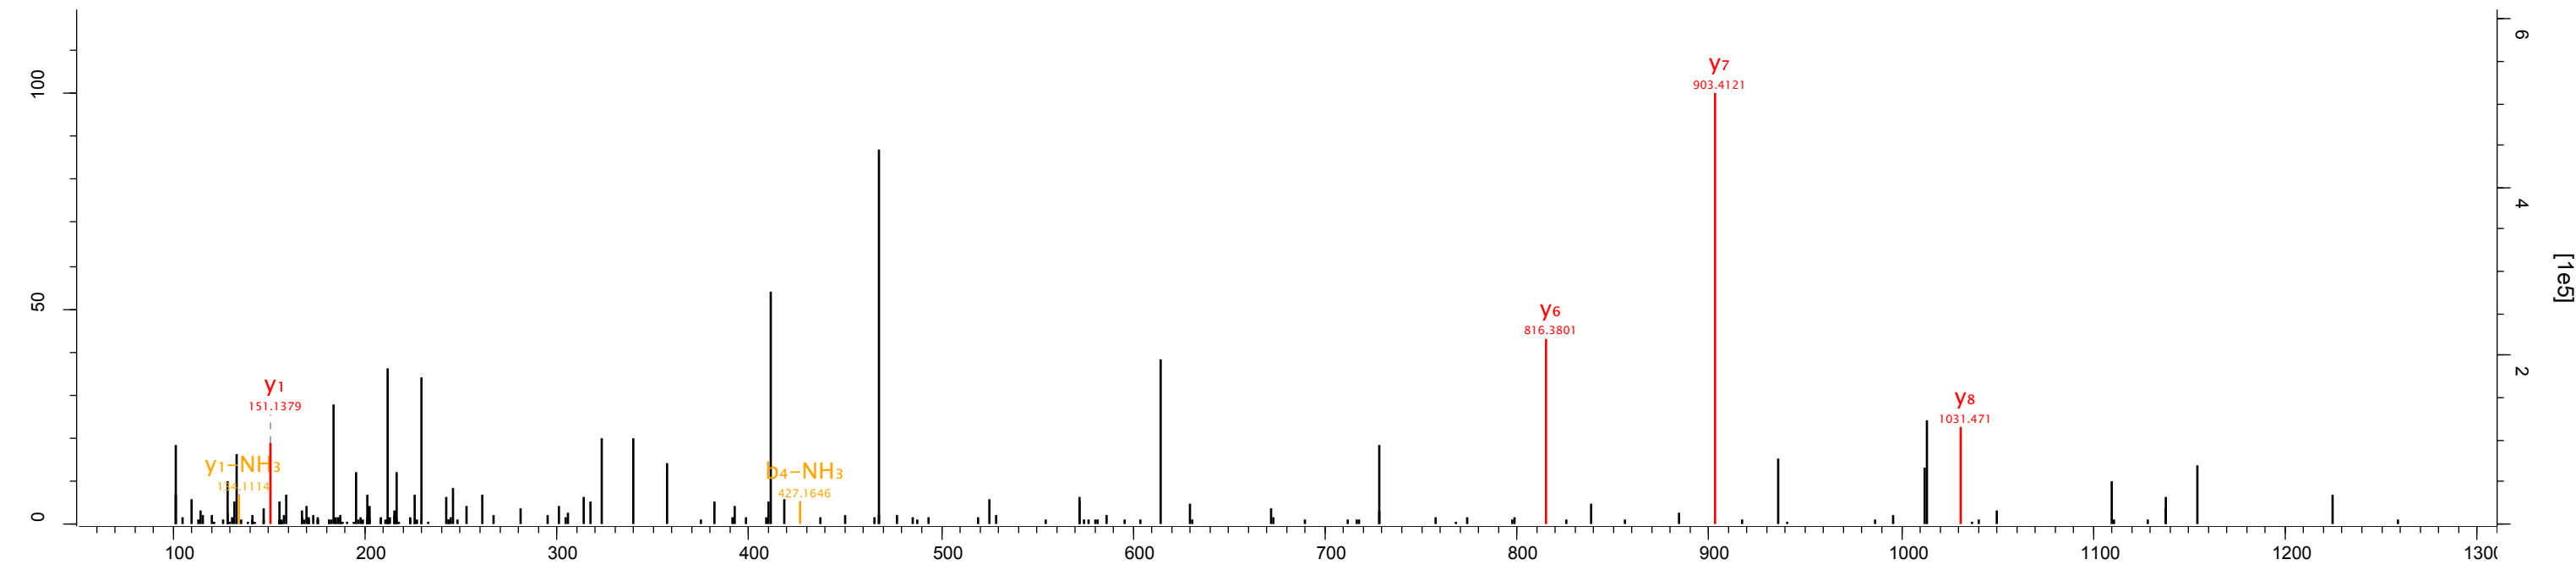

- P M Q S Q L E S Q K -

Annotations above the sequence: y<sub>8</sub> above Q, y<sub>7</sub> above S, y<sub>6</sub> above Q, and y<sub>1</sub> above K.



Raw file 20150814\_A375SR\_Phospho\_BR2\_07 Scan 6135 Method FTMS; HCD Score 41.48 m/z 730.33 Gene names CDON

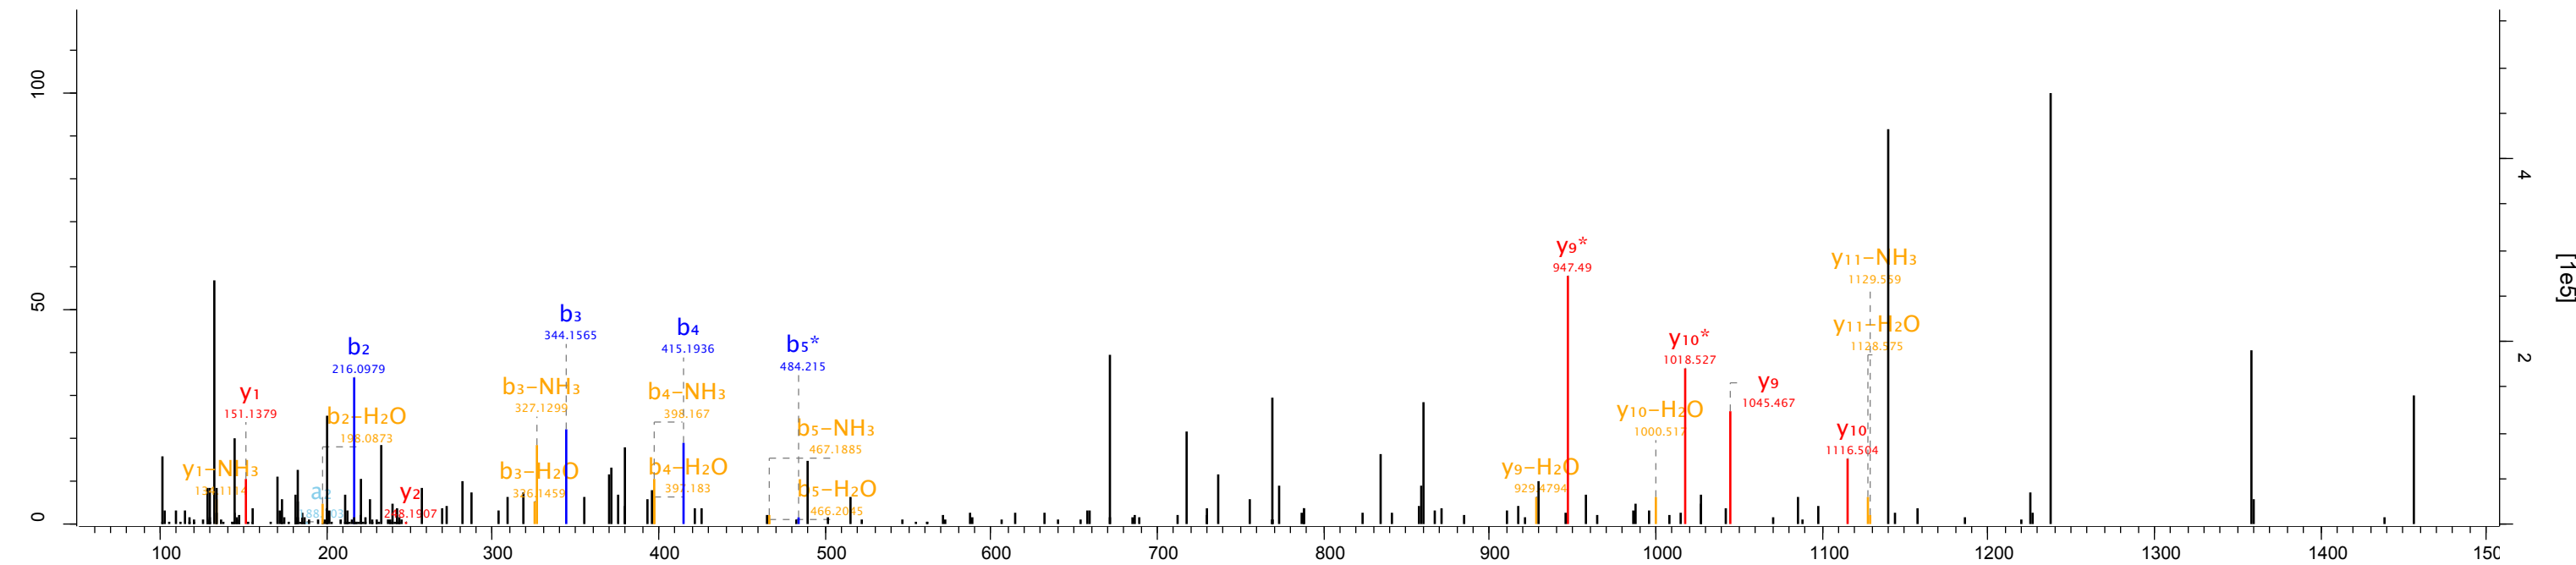

Raw file: 20150814\_A375SR\_Phospho\_BR2\_09  
 Scan: 11405 Method: FTMS; HCD Score: 98.51 m/z: 693.35 Gene names: ELK3

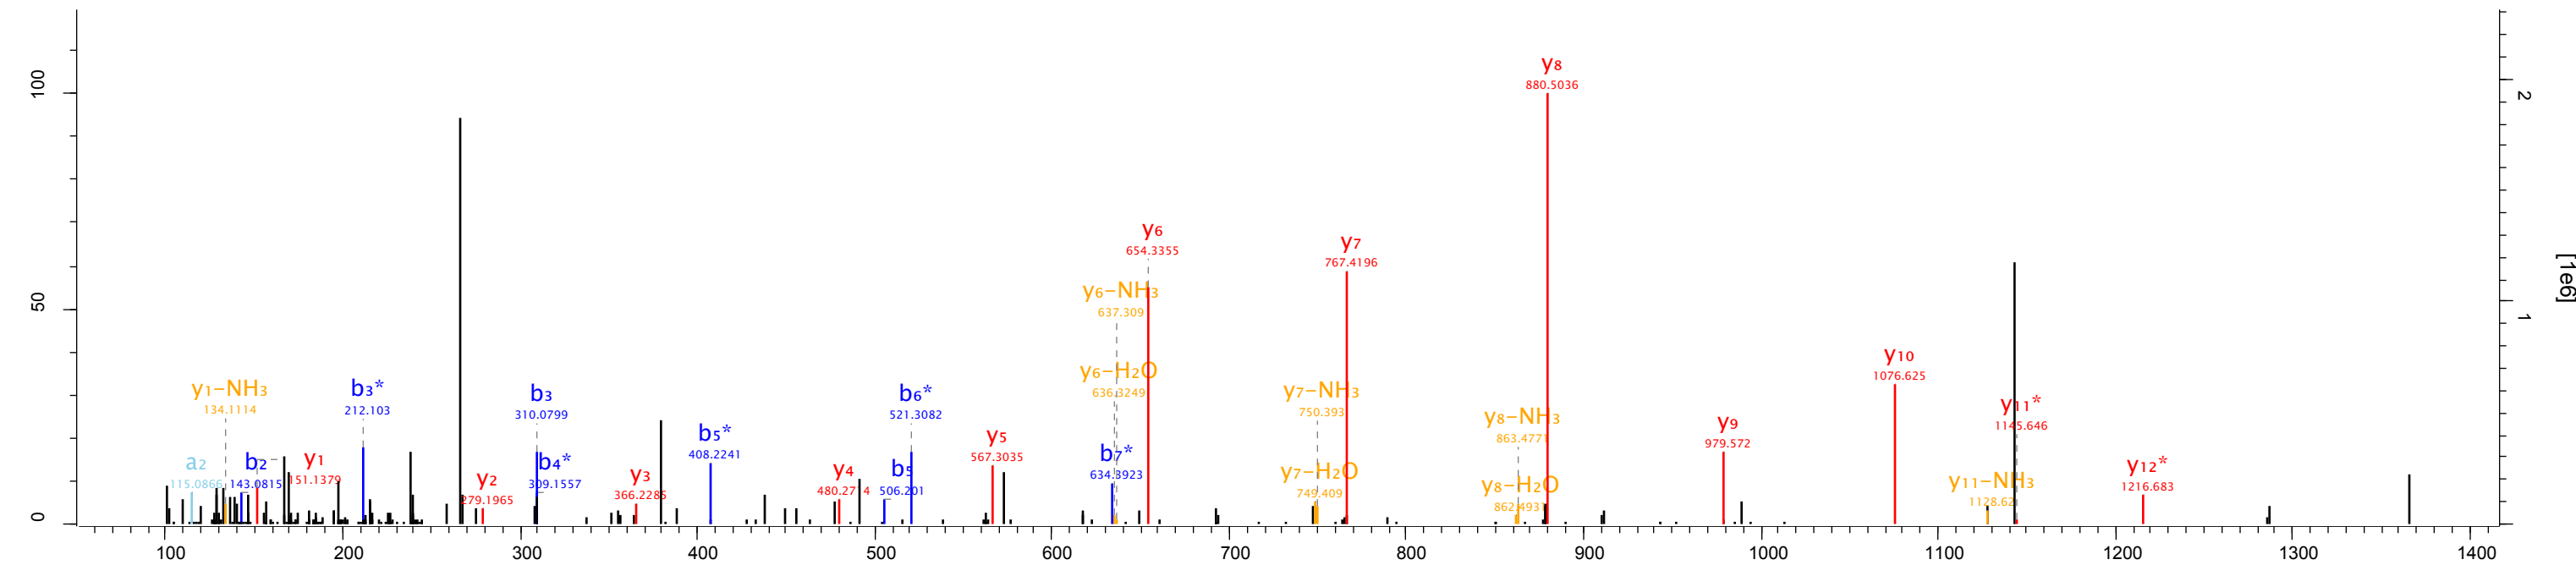

Raw file: 20150814\_A375SR\_Phospho\_BR2\_09  
 Scan: 21505 Method: FTMS; HCD Score: 97.35 m/z: 981.43 Gene names: FAM168B

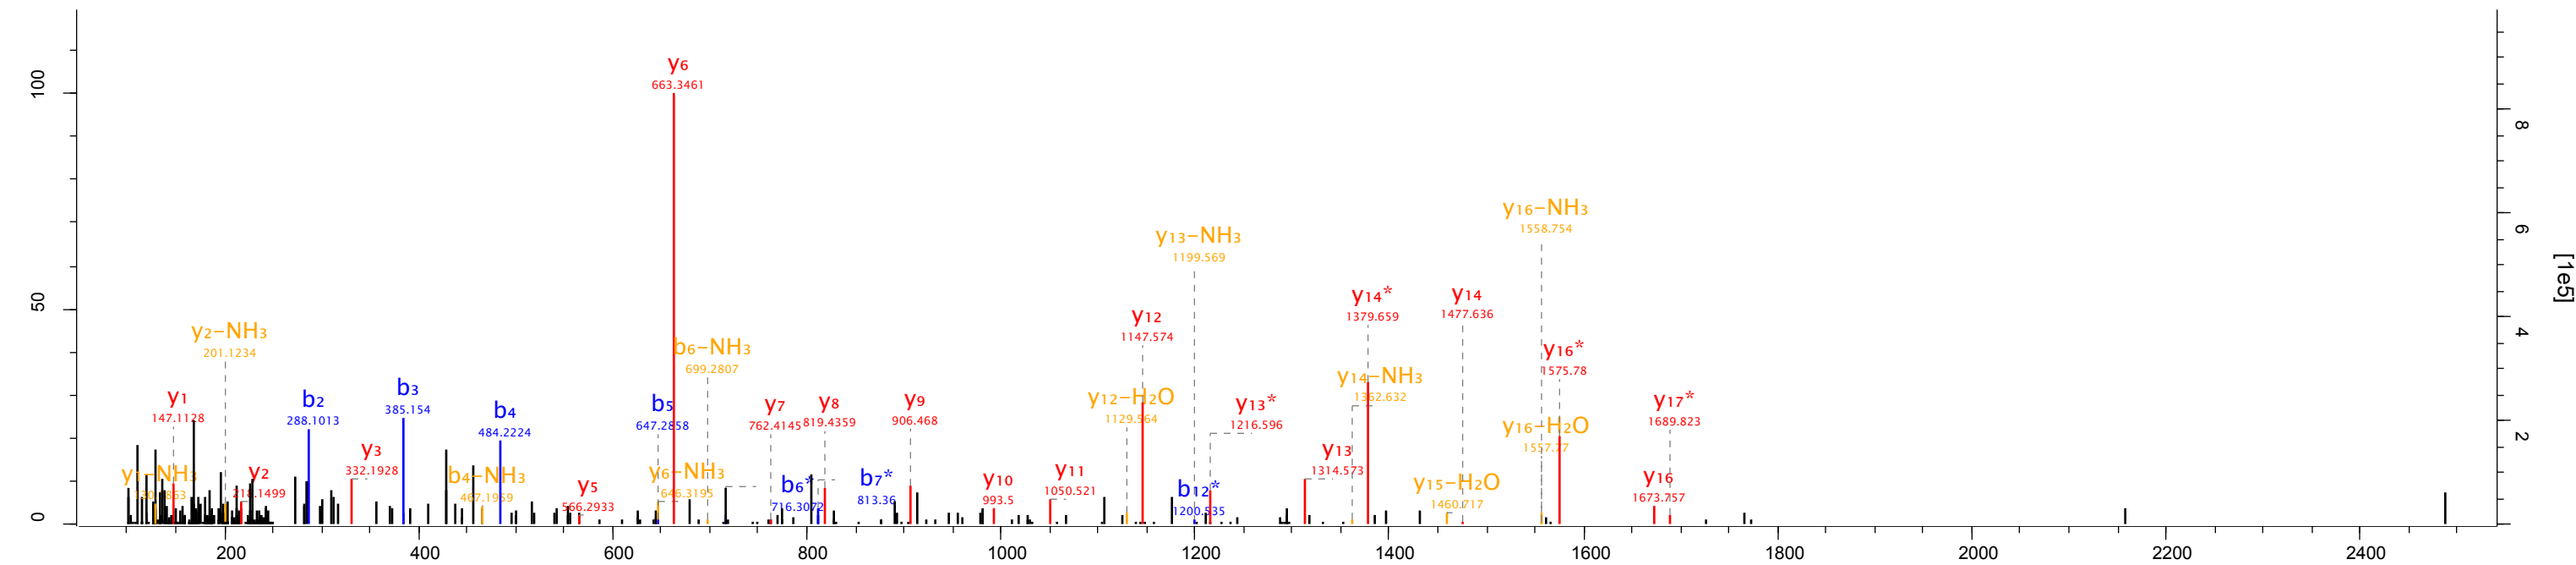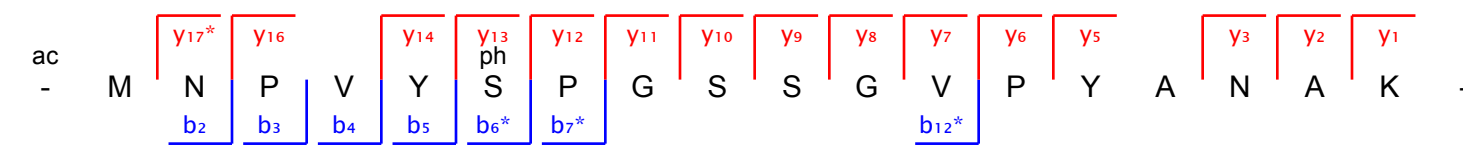

Raw file 20150818\_A375SR-Proteome\_BR1 Scan 27045 Method FTMS; HCD Score 30.73 m/z 637.34

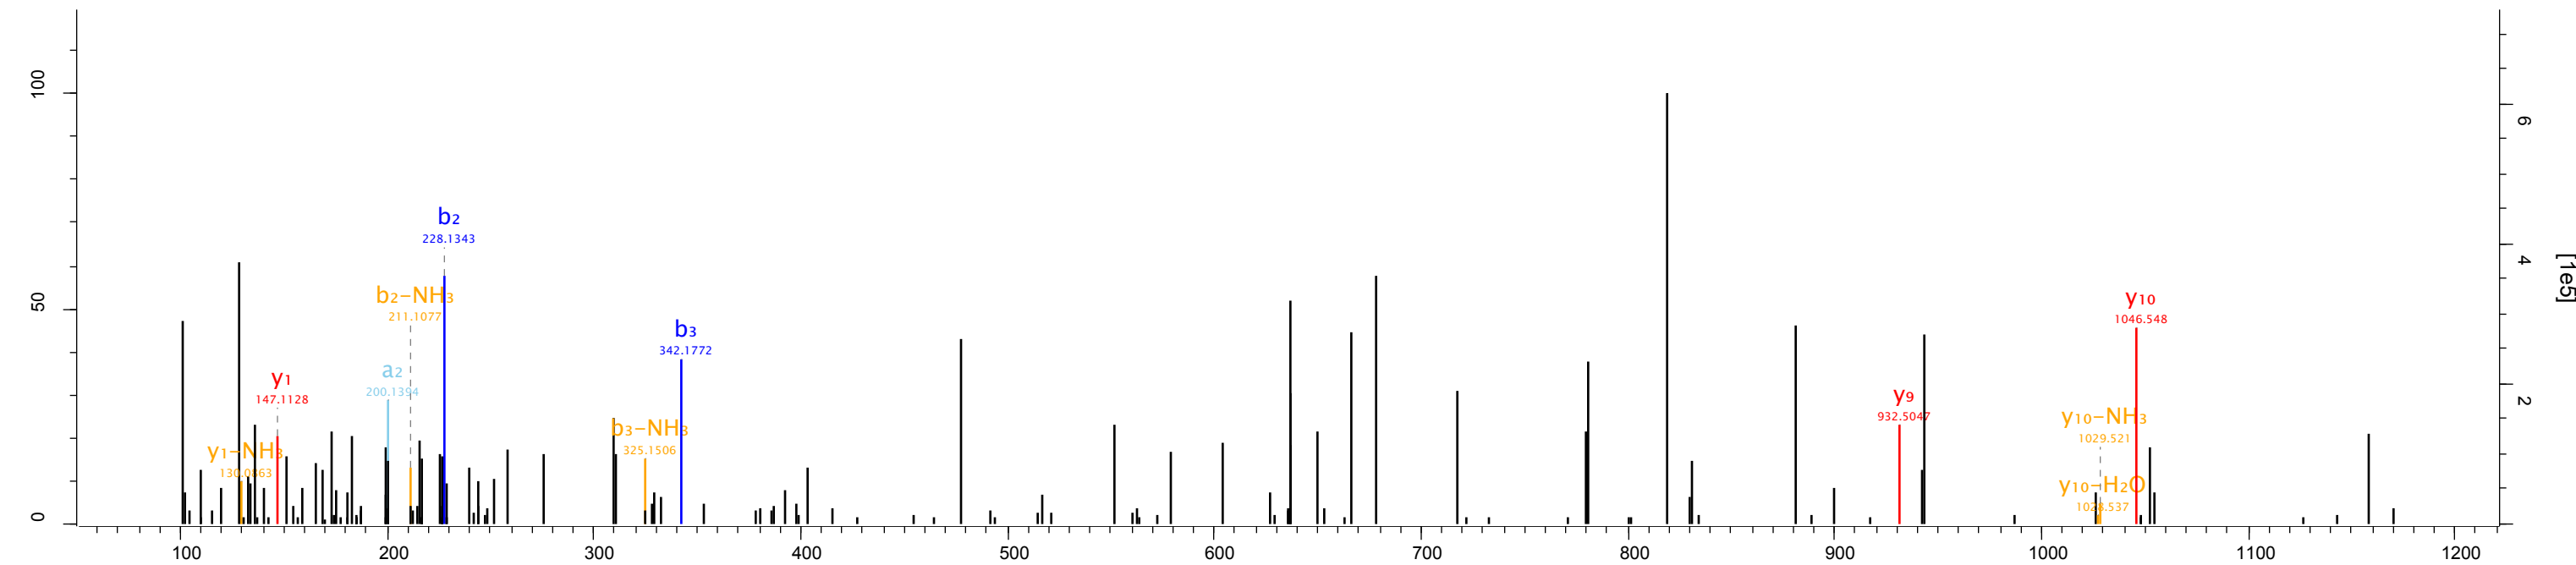

Raw file 20150818\_A375SR-Proteome\_BR1 Scan 38745 Method FTMS; HCD Score 134.05 m/z 440.6 Gene names RPL39P5;RPL39

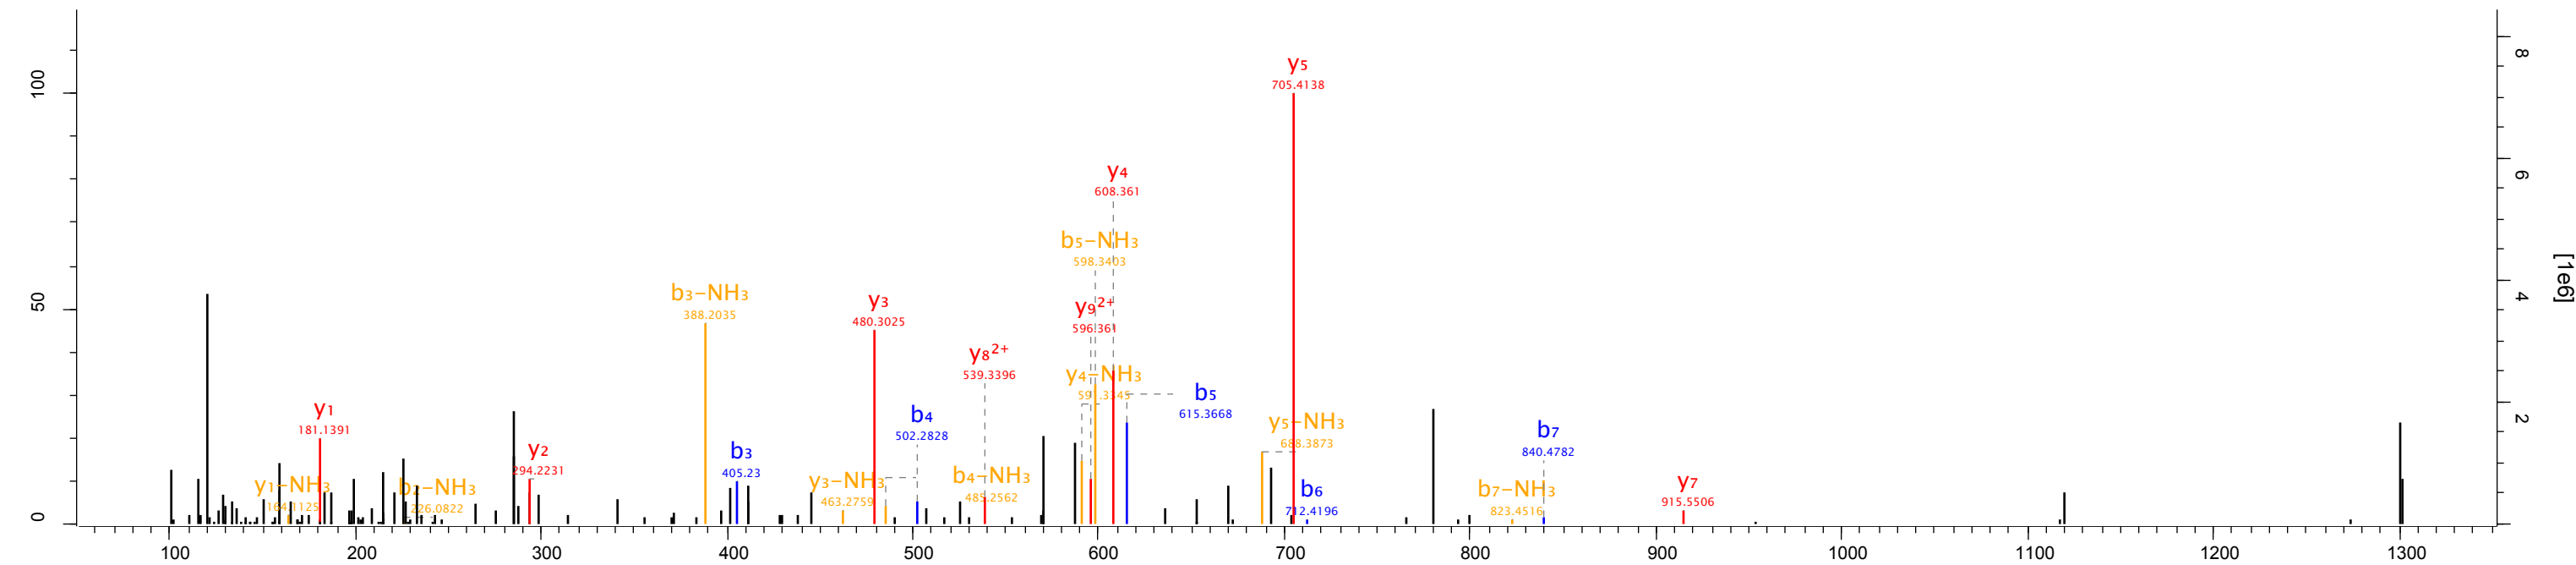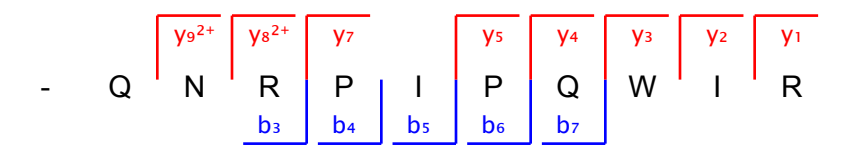

Raw file 20150818\_A375SR-Proteome\_BR2 Scan 37155 Method FTMS; HCD Score 39.01 m/z 488.28

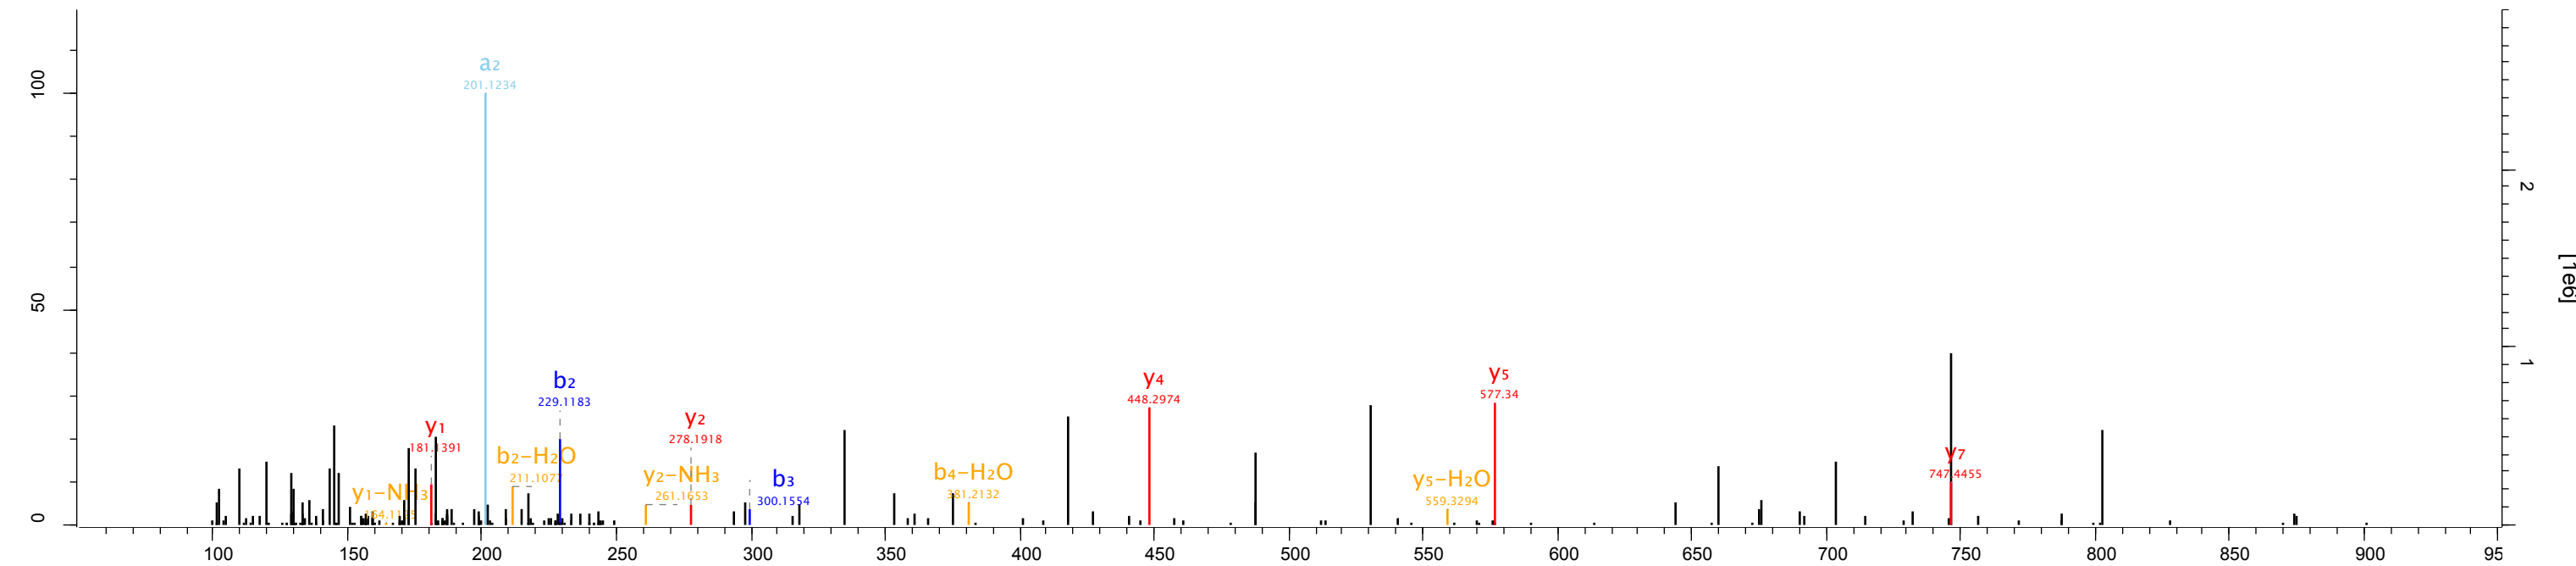

Raw file

20150818\_A375SR-Proteome\_BR2

| Scan  | Method    | Score | m/z    | Gene names |
|-------|-----------|-------|--------|------------|
| 63525 | FTMS; HCD | 29.86 | 801.43 | ZNF511     |

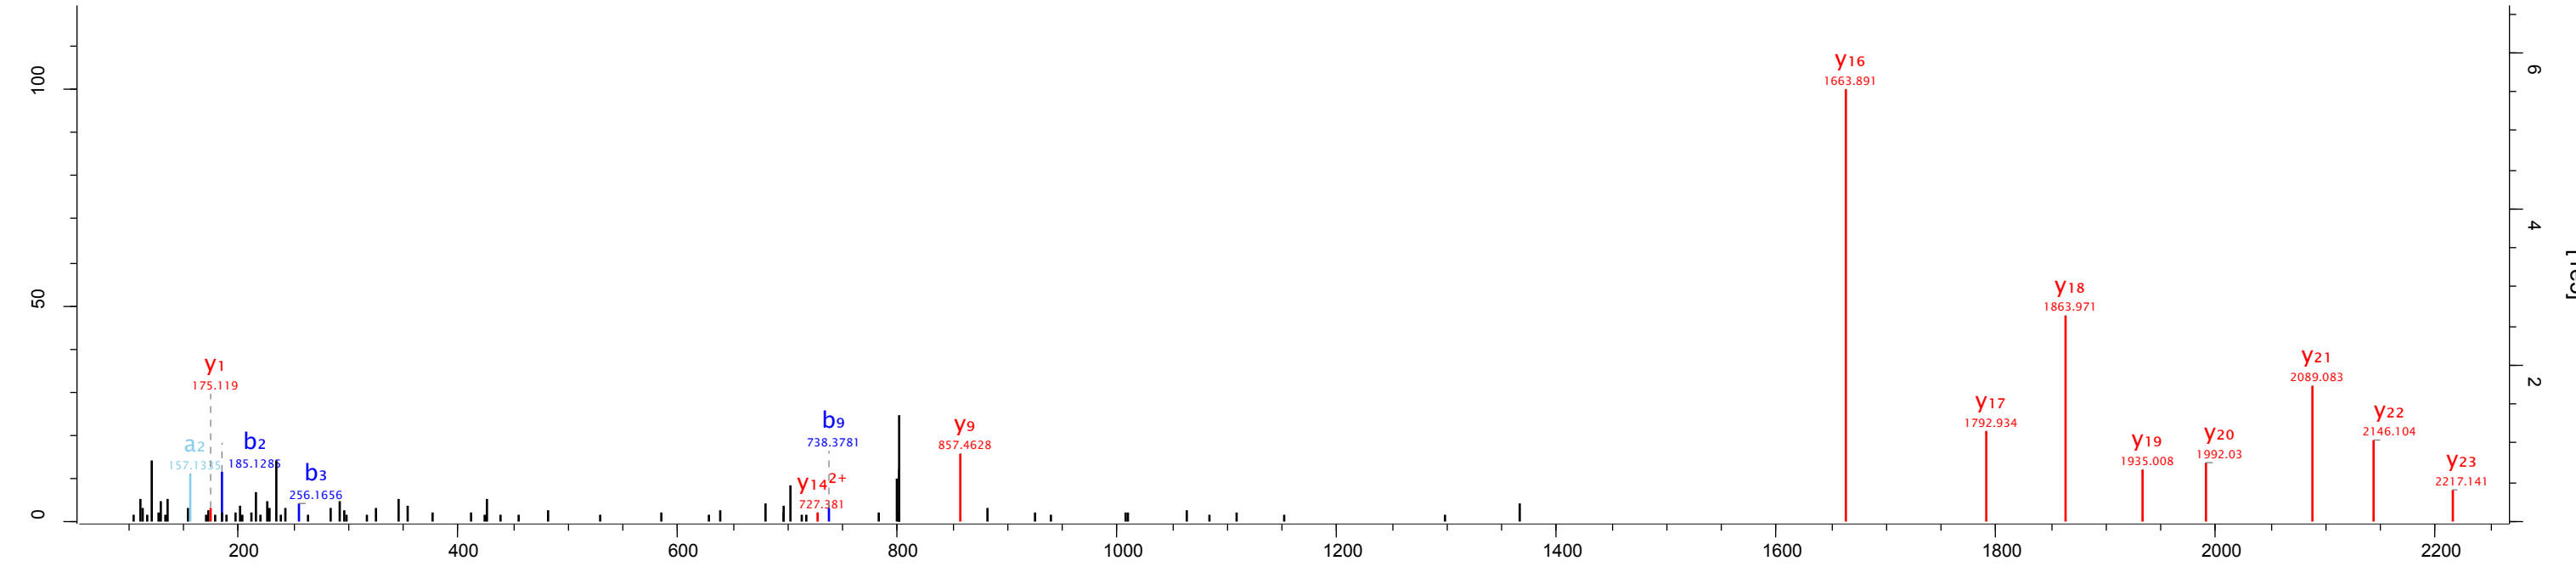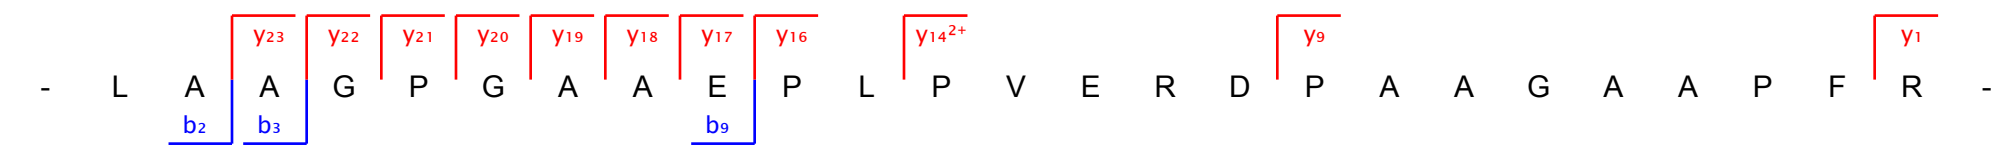

Raw file: 20150822\_A375SR\_Phospho\_BR3\_03  
 Scan: 12785 Method: FTMS; HCD Score: 62.94 m/z: 785.36 Gene names: PWWP2A

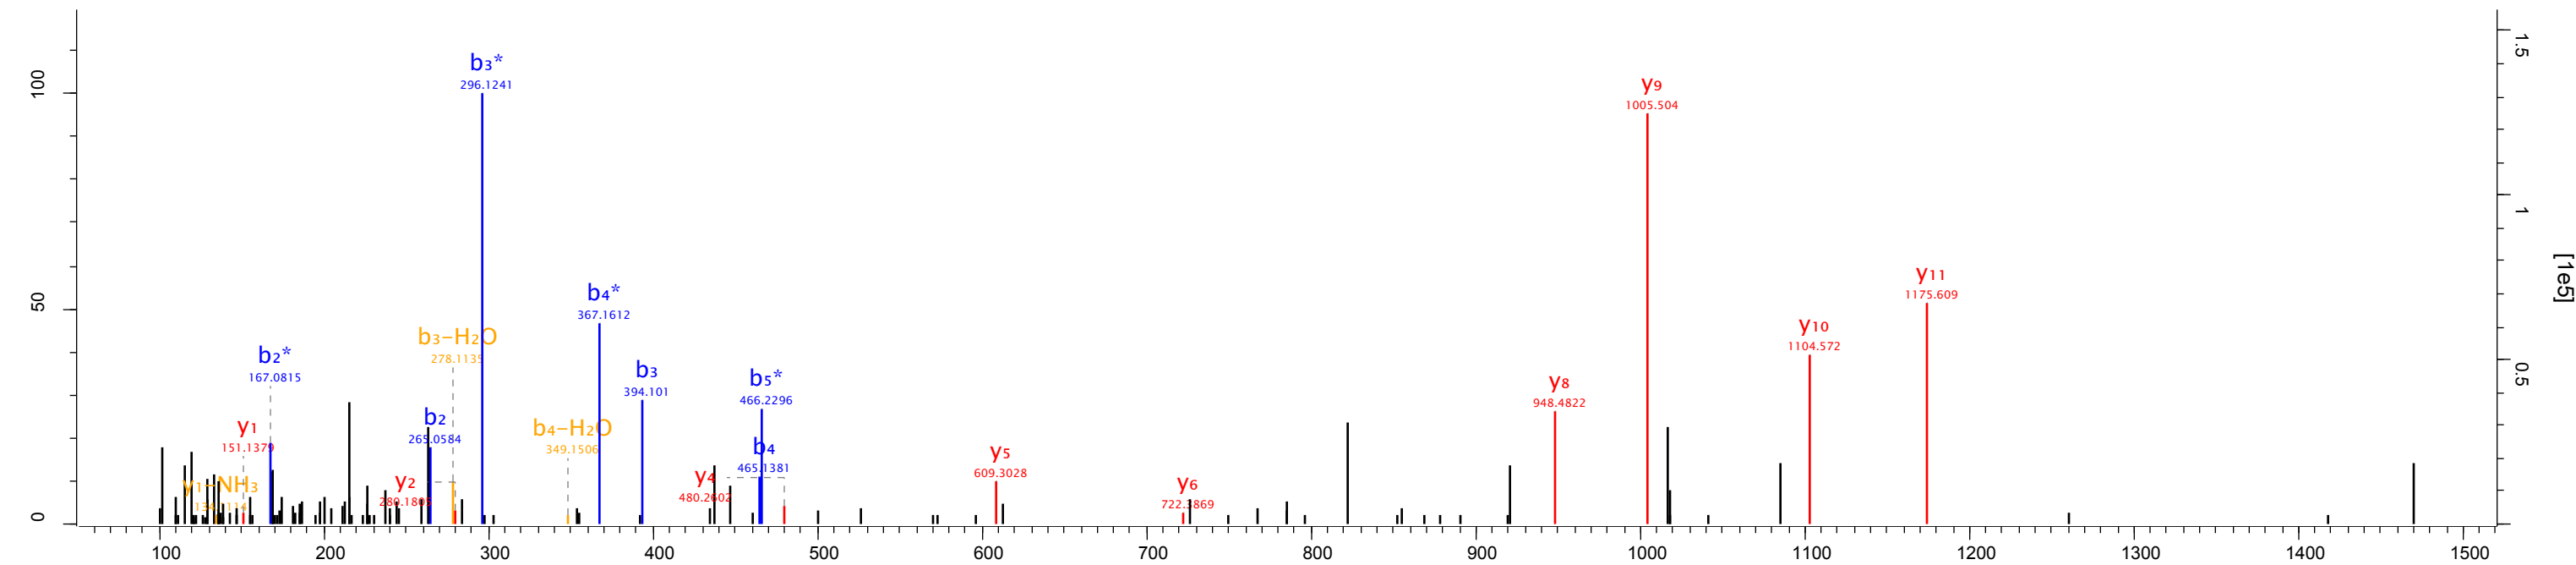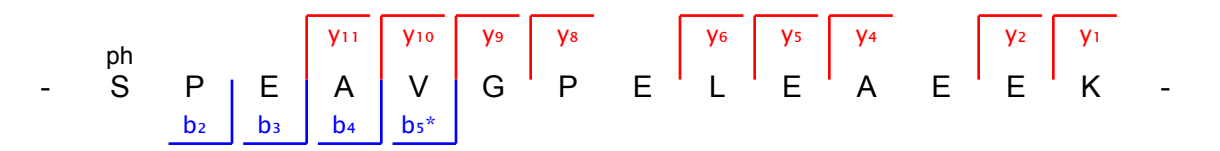



Raw file 20150822\_A375SR\_Phospho\_BR3\_04 Scan 13645 Method FTMS; HCD Score 69.98 m/z 782.84 Gene names PWWP2A

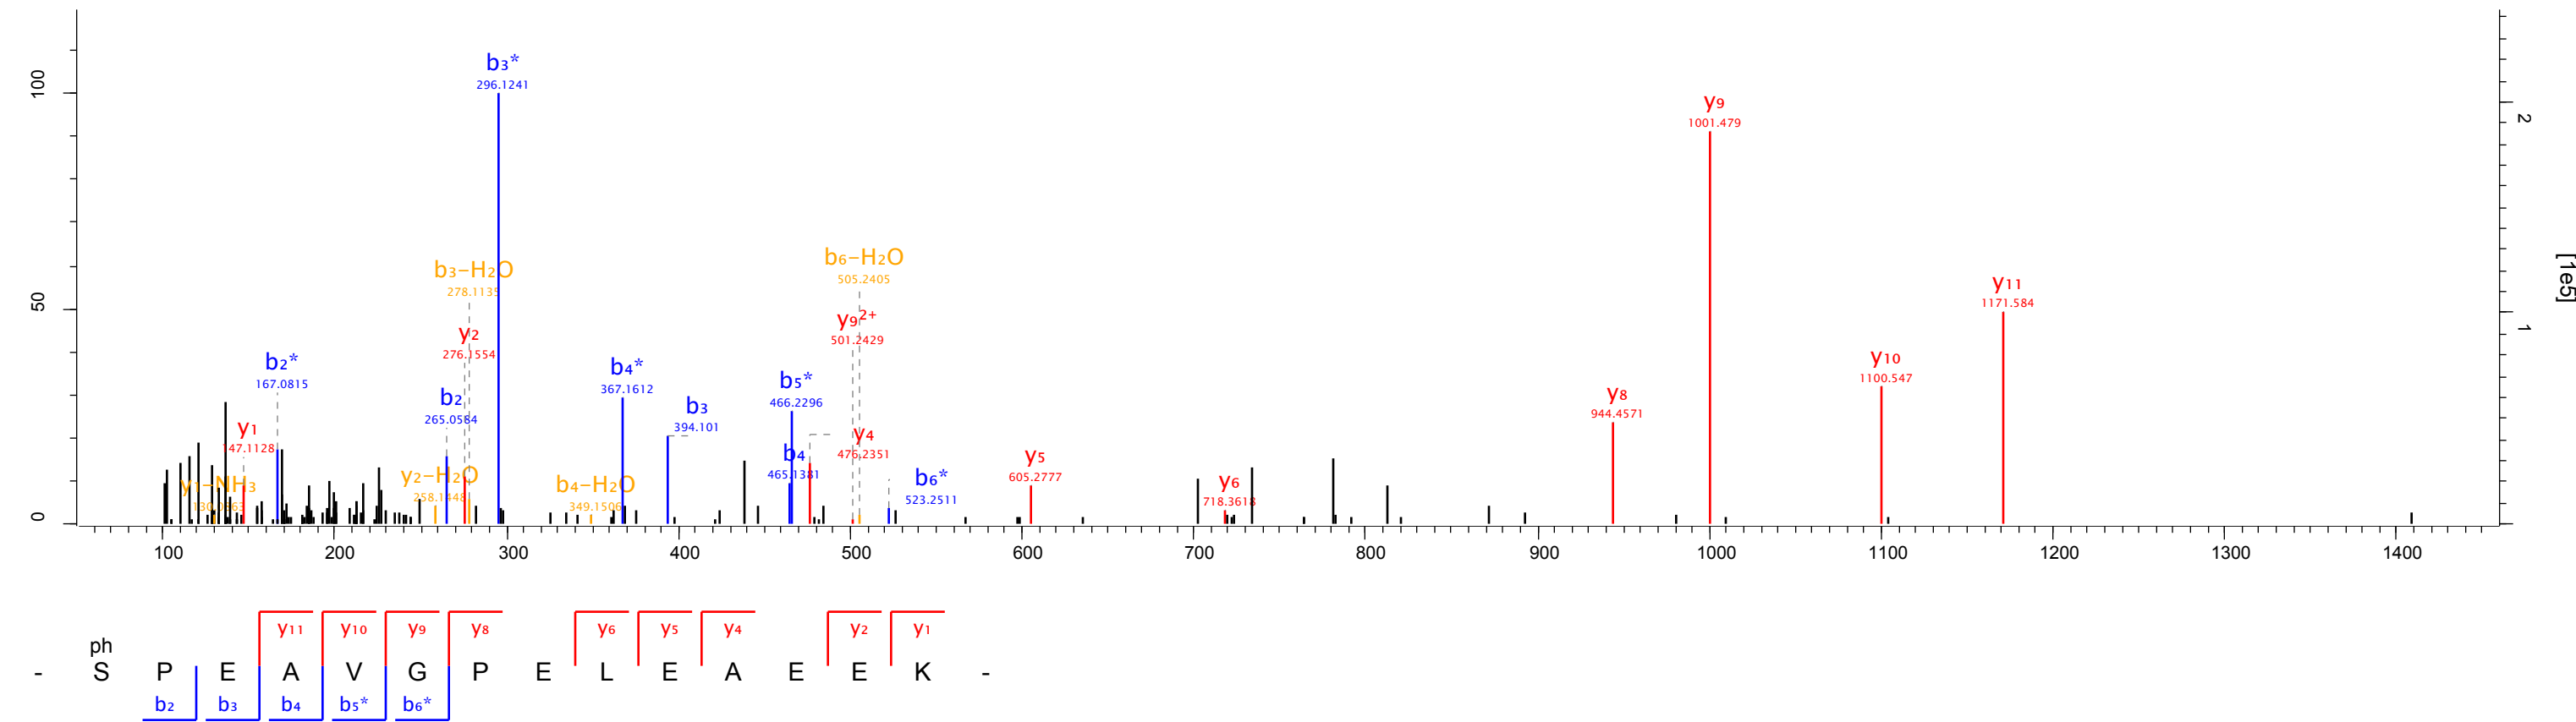

Raw file 20150822\_A375SR\_Phospho\_BR3\_06 Scan 10065 Method FTMS; HCD Score 103.91 m/z 475.21 Gene names GPR64

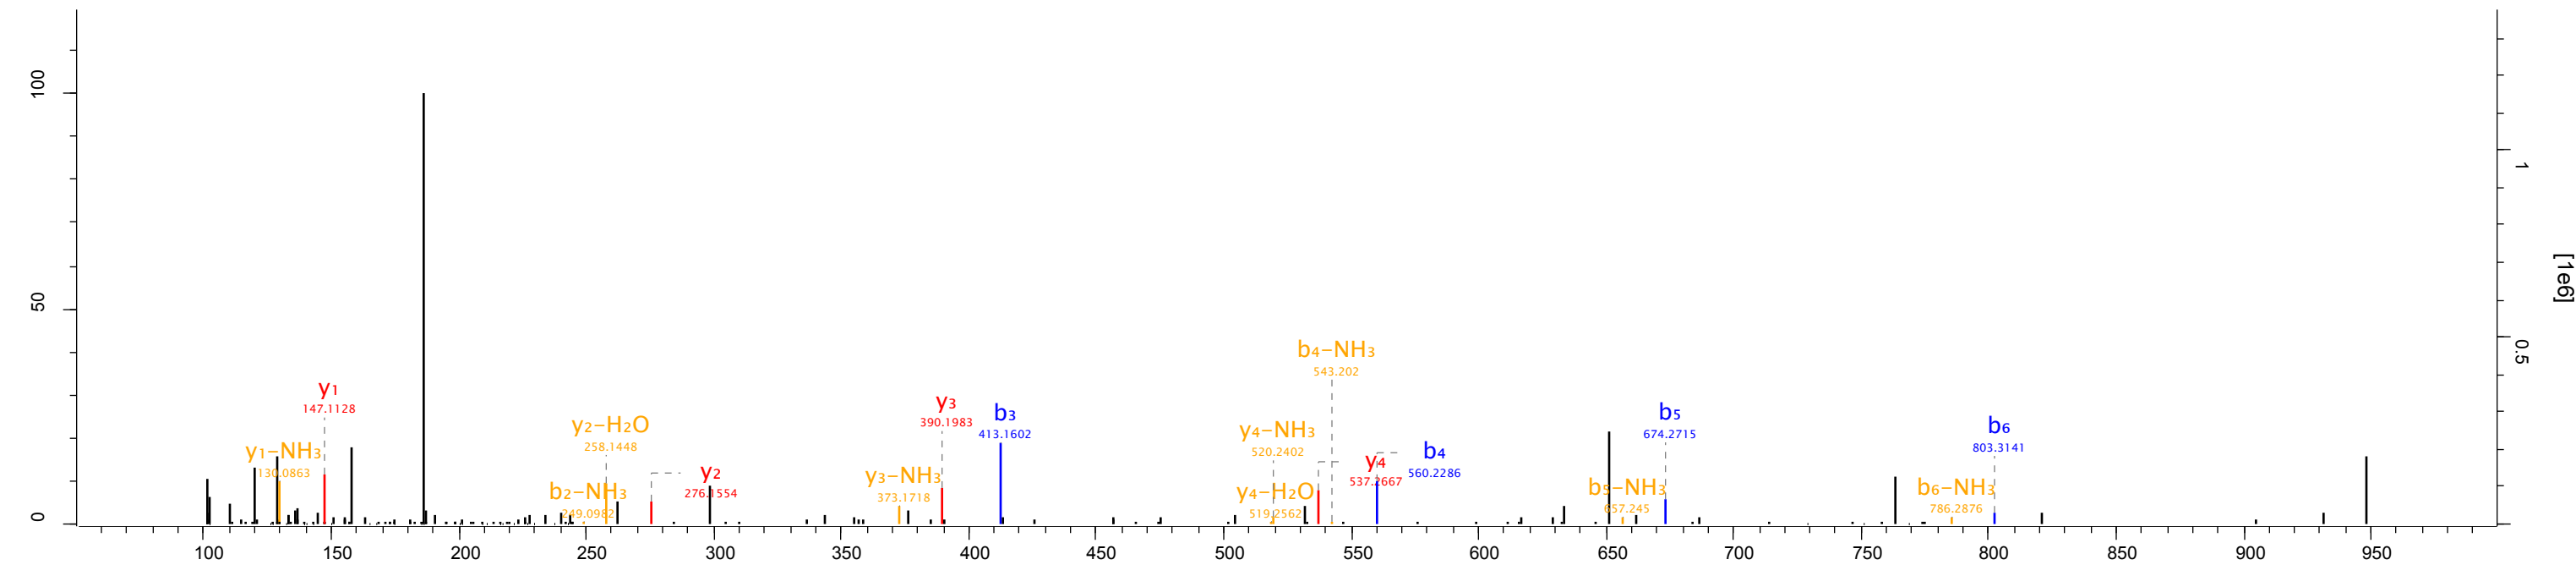

Raw file: 20150822\_A375SR\_Phospho\_BR3\_06  
 Scan: 21465 Method: FTMS; HCD Score: 75.21 m/z: 781.42 Gene names: ZNF579

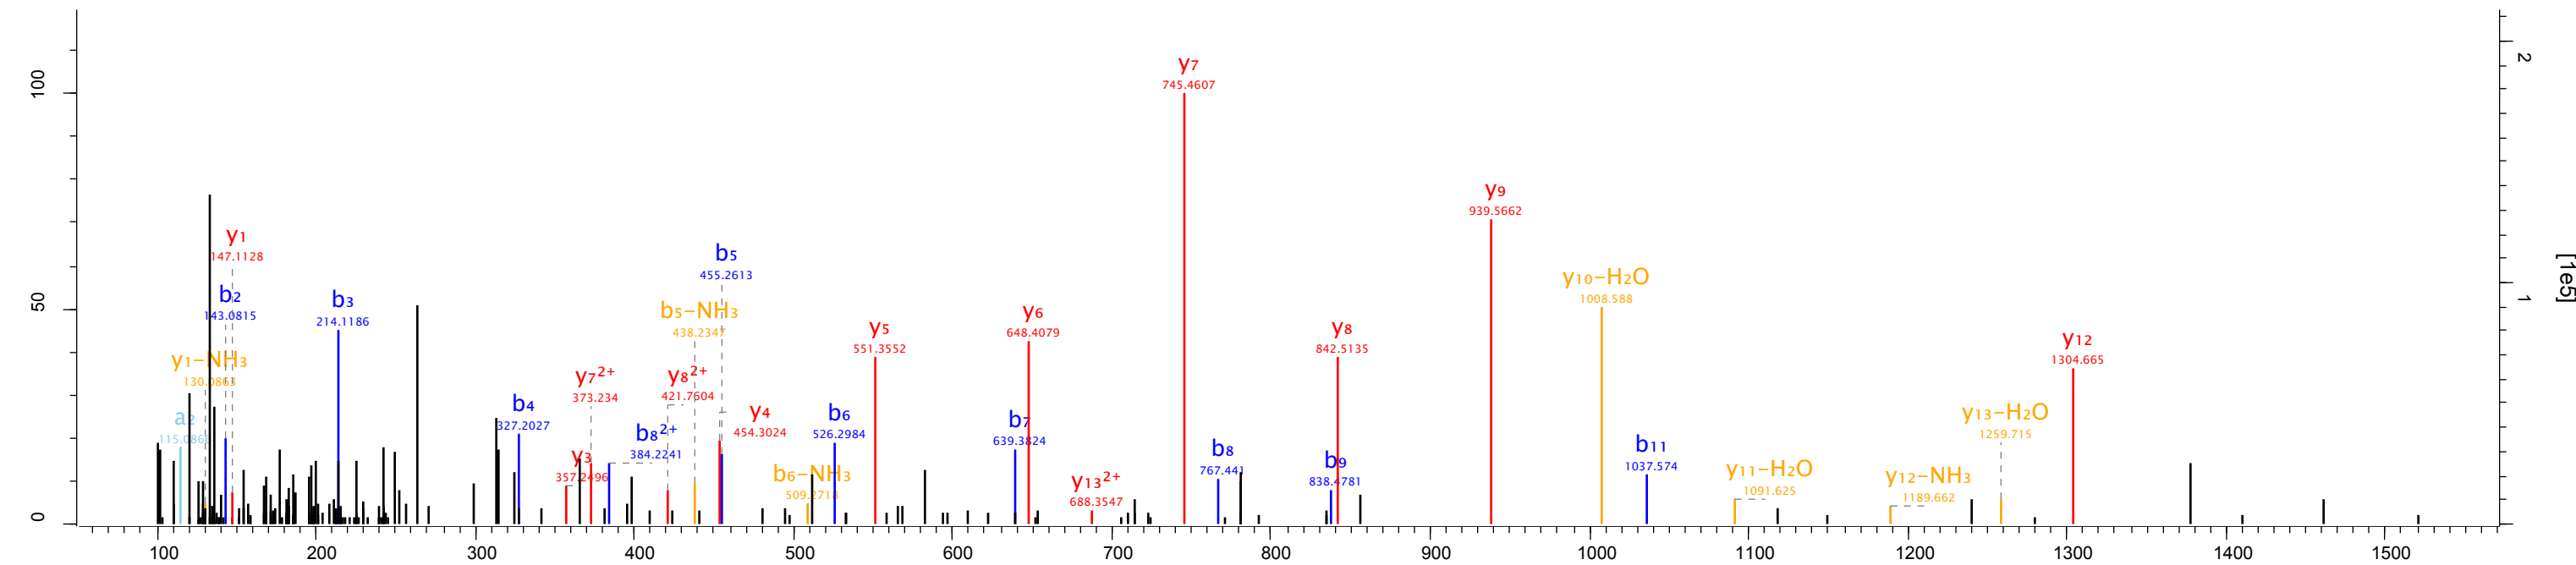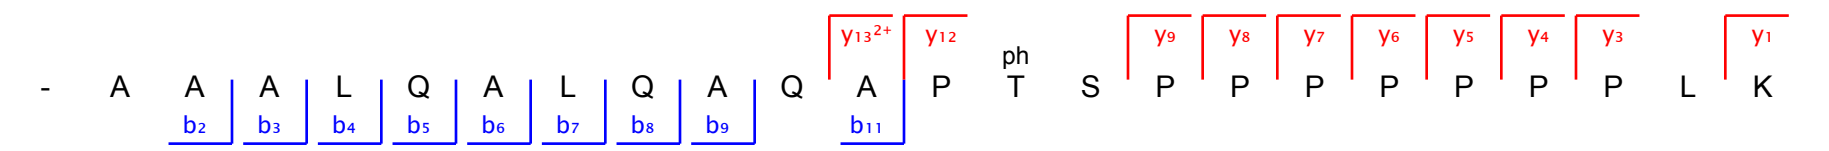

Raw file 20150822\_A375SR\_Phospho\_BR3\_07 Scan 14095 Method FTMS; HCD Score 81.16 m/z 782.84 Gene names PWWP2A

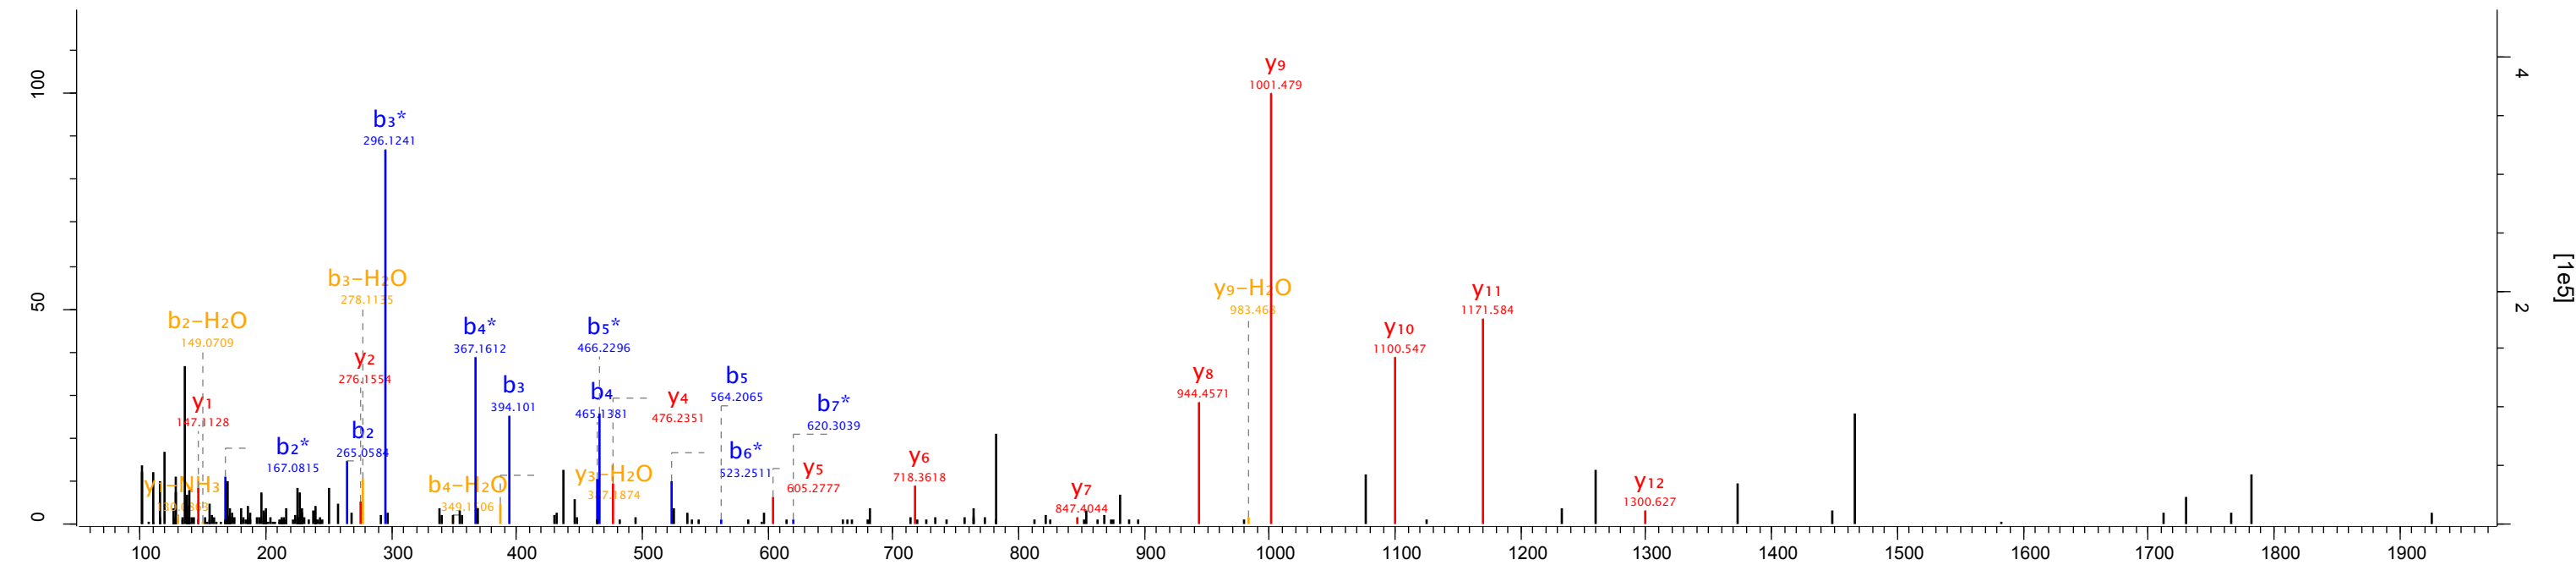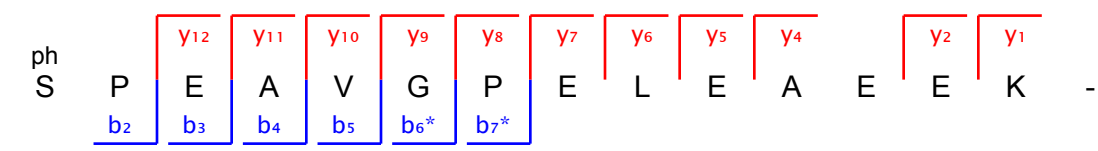

Raw file 20150822\_A375SR\_Phospho\_BR3\_08 Scan 6785 Method FTMS; HCD Score 47.19 m/z 426.73

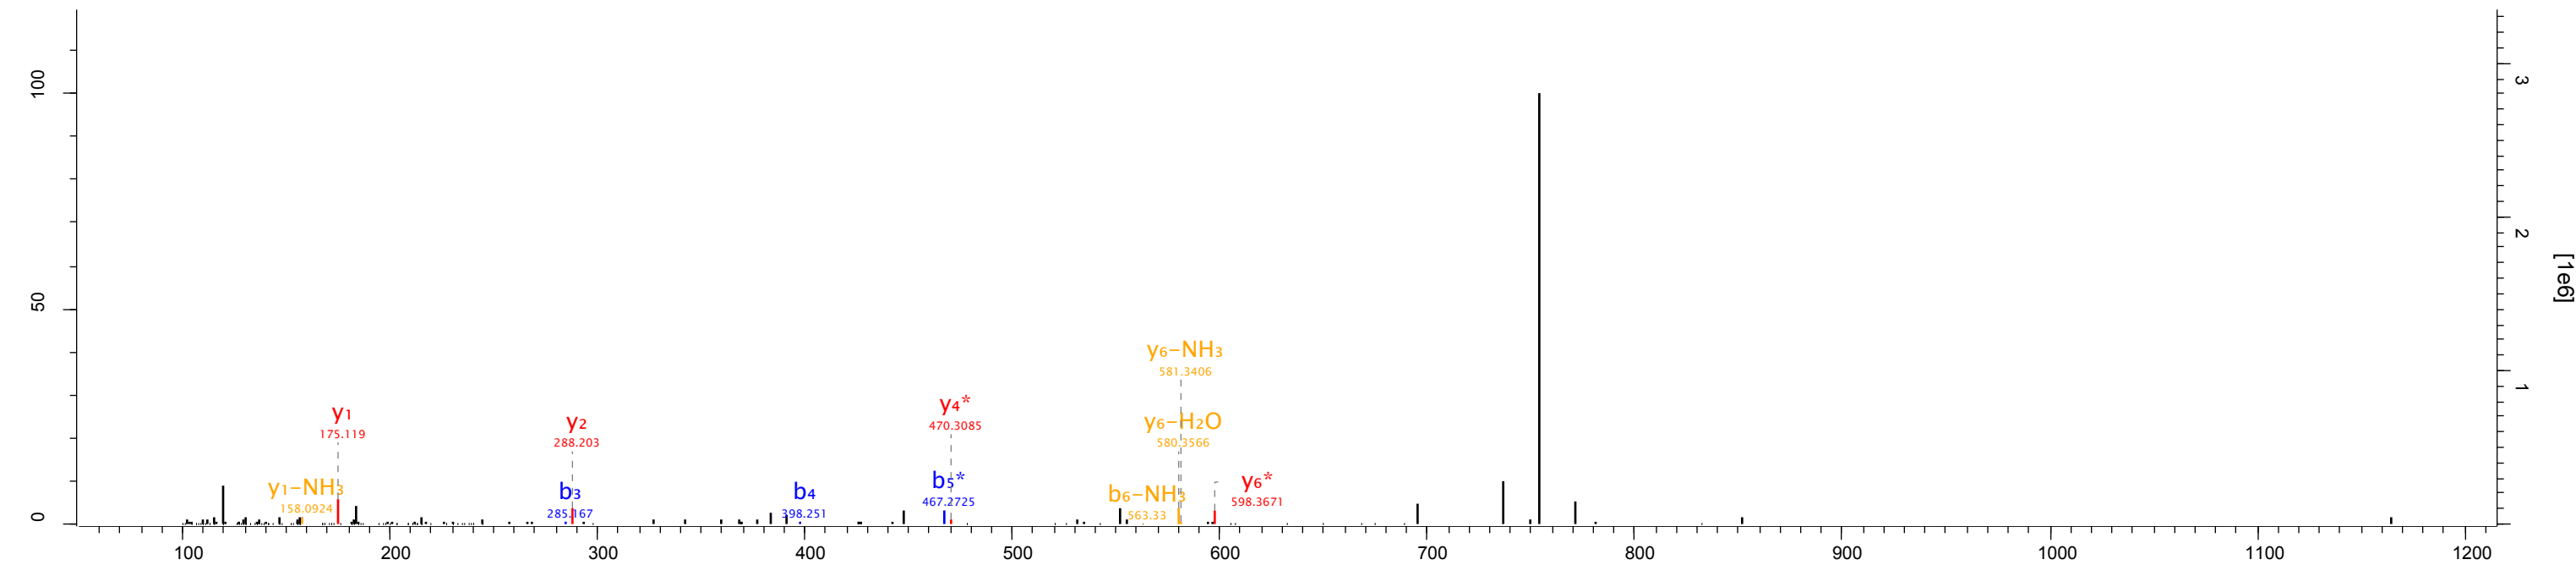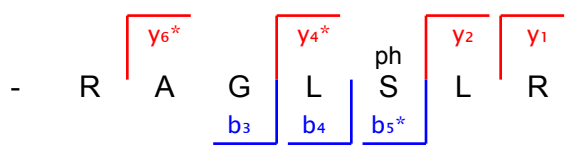

Raw file 20150822\_A375SR\_Phospho\_BR3\_09 Scan 12975 Method FTMS; HCD Score 56.09 m/z 556.27

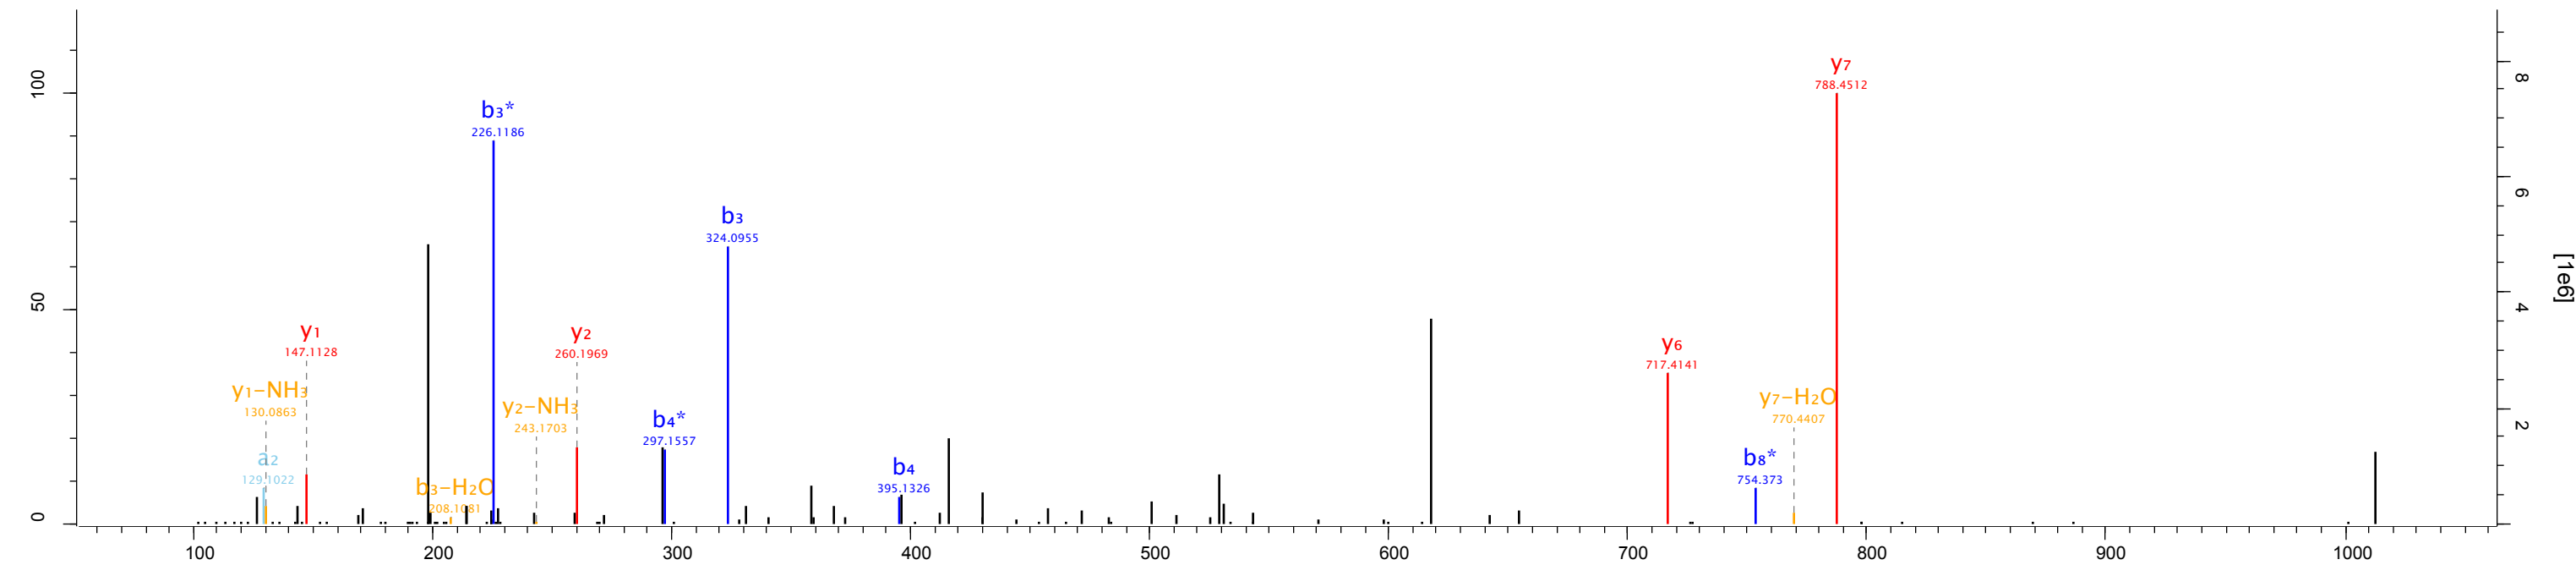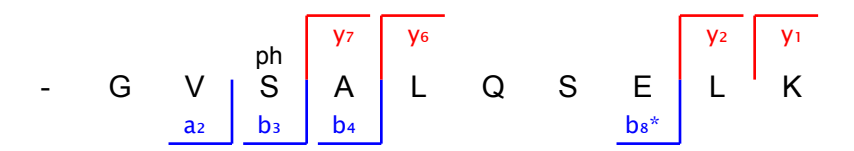

Raw file: 20150822\_A375SR-Proteome\_BR3  
 Scan: 44925 Method: FTMS; HCD Score: 111.46 m/z: 440.6 Gene names: RPL39P5;RPL39

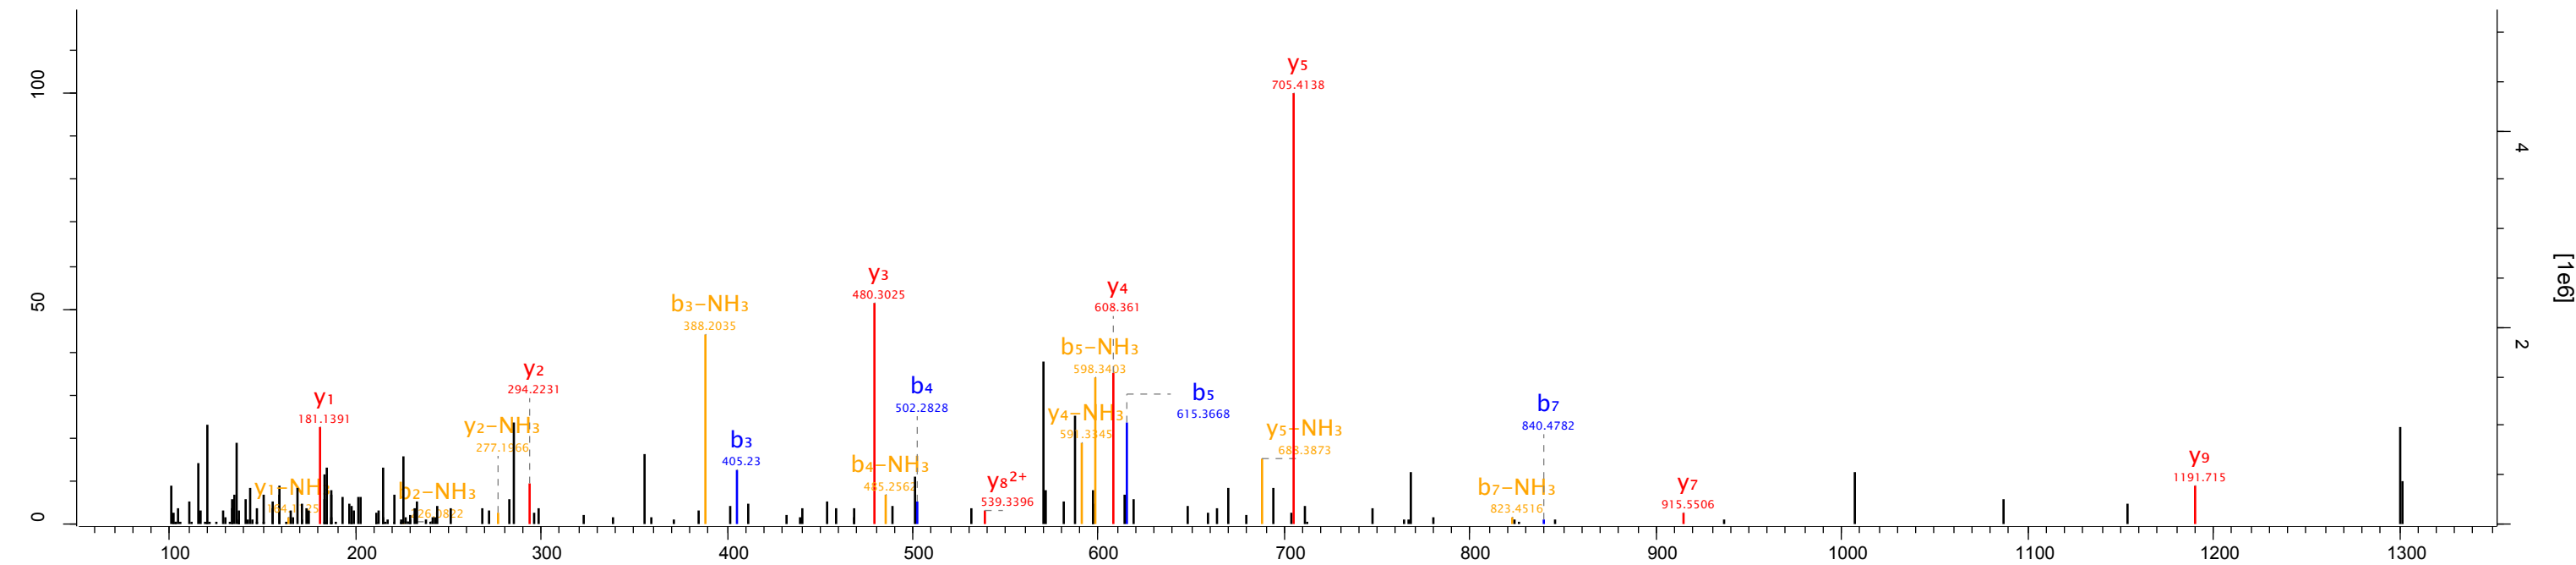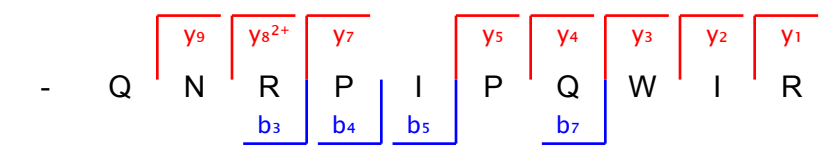

Raw file: 20150822\_A375SR-Proteome\_BR3  
 Scan: 56485 Method: FTMS; HCD Score: 23.26 m/z: 581.78 Gene names: MRPL42

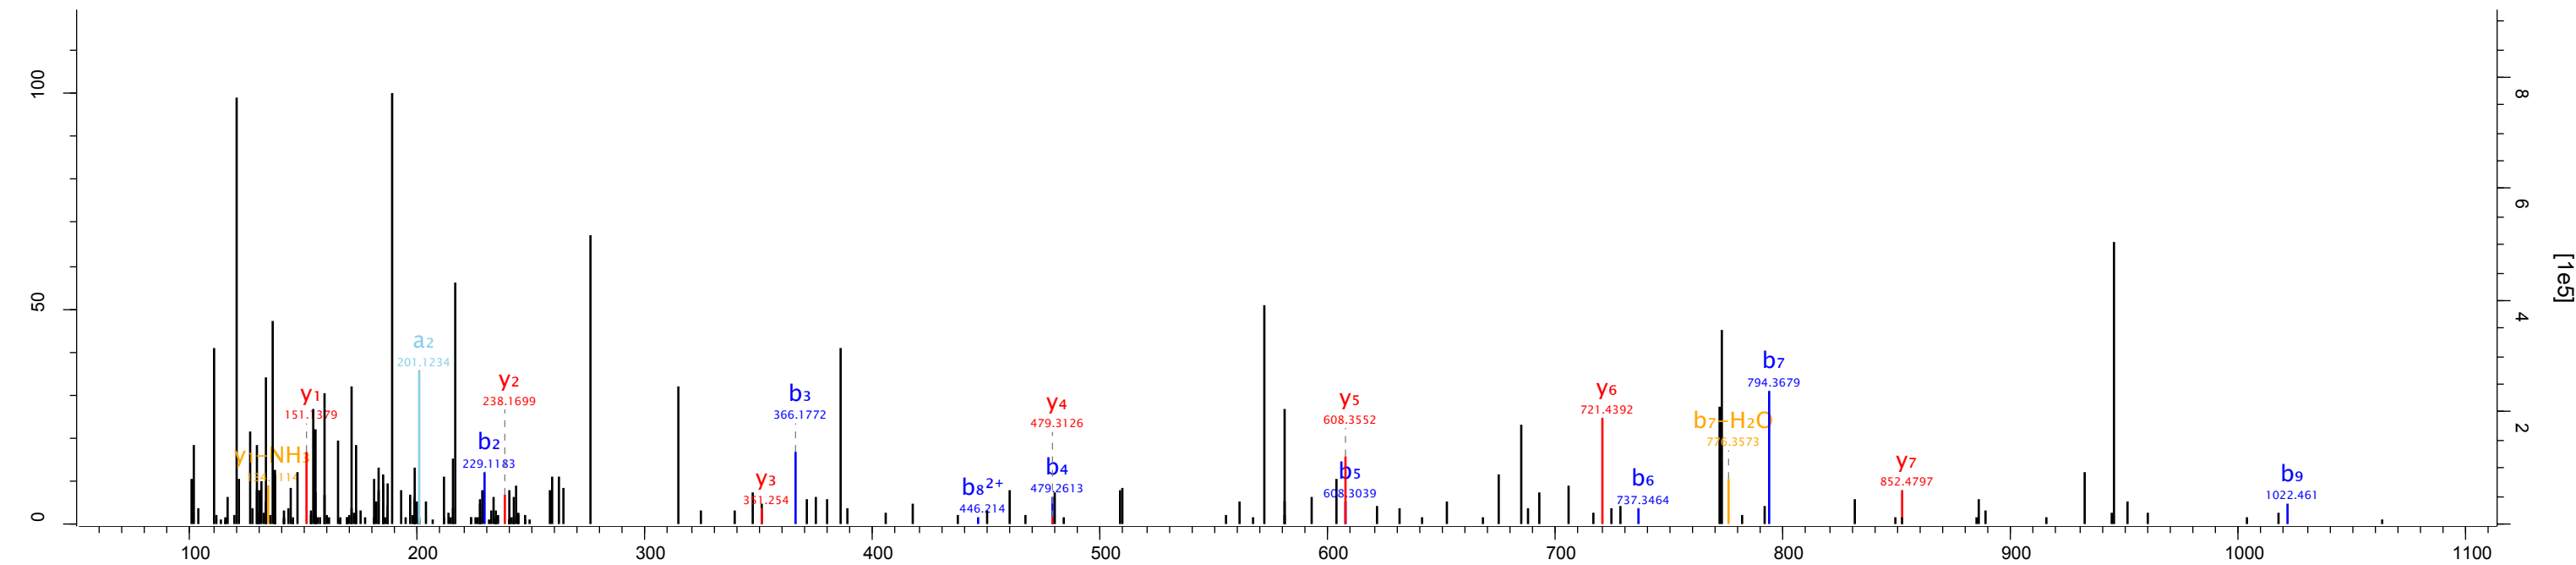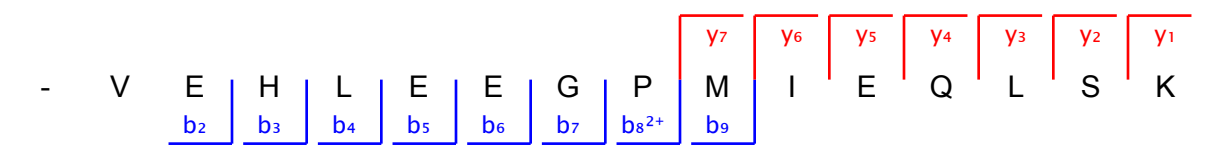



Raw file: 20150822\_A375SR-Proteome\_BR3  
 Scan: 57685 Method: FTMS; HCD Score: 61.11 m/z: 586.84 Gene names: KATNAL2

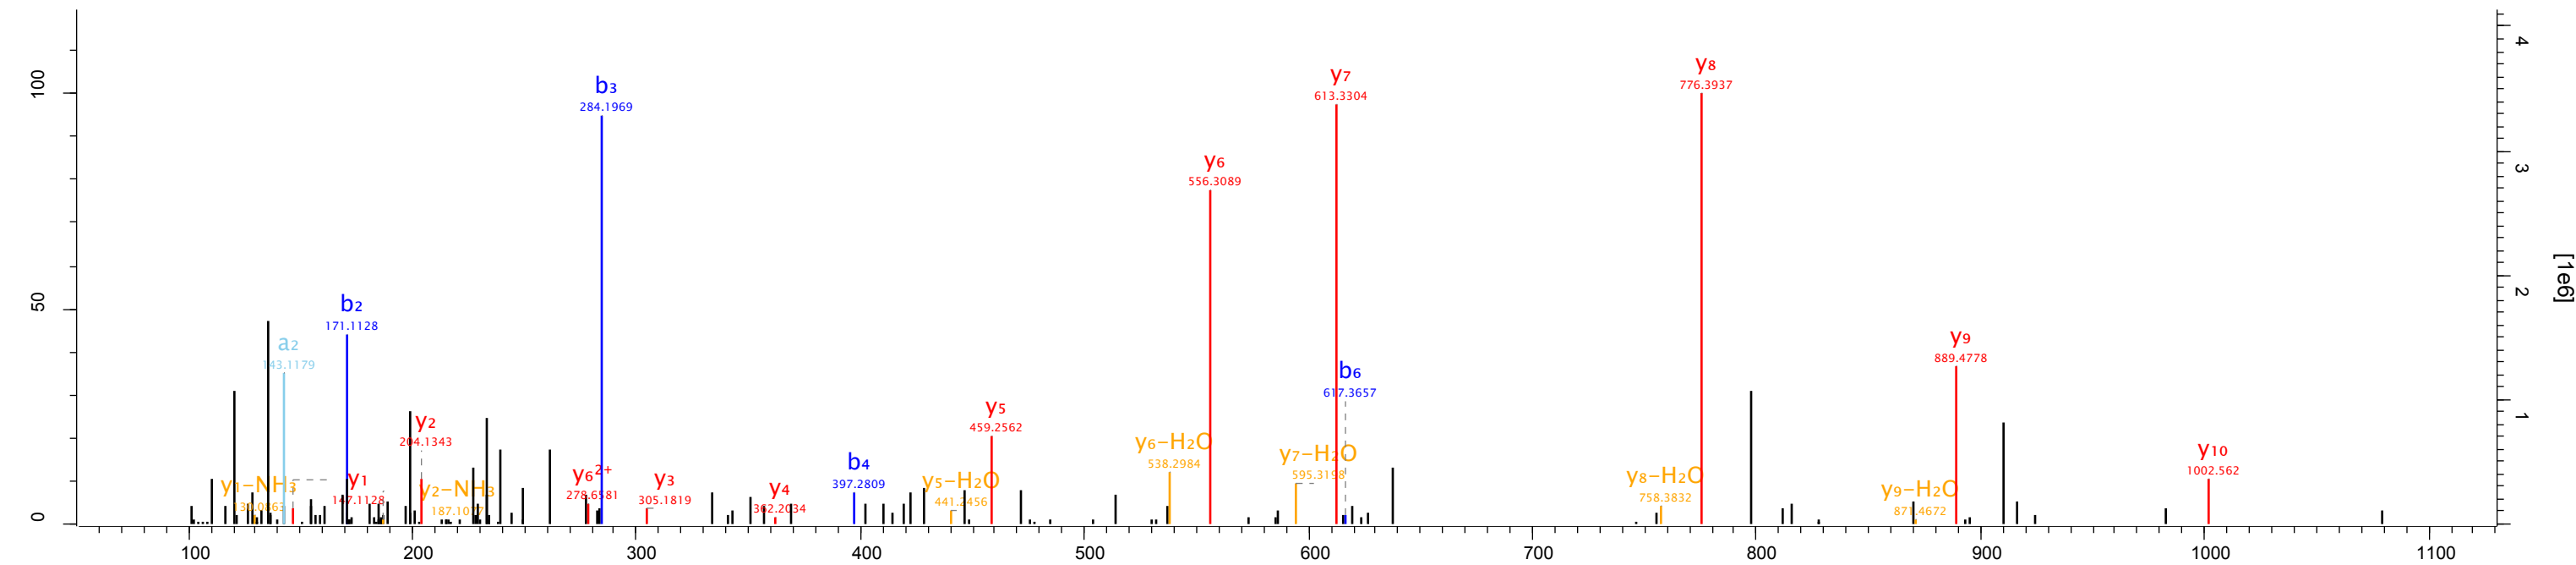

Raw file: 20150822\_A375SR-Proteome\_BR3  
 Scan: 90205 Method: FTMS; HCD Score: 66.78 m/z: 759.7 Gene names: CNIH4

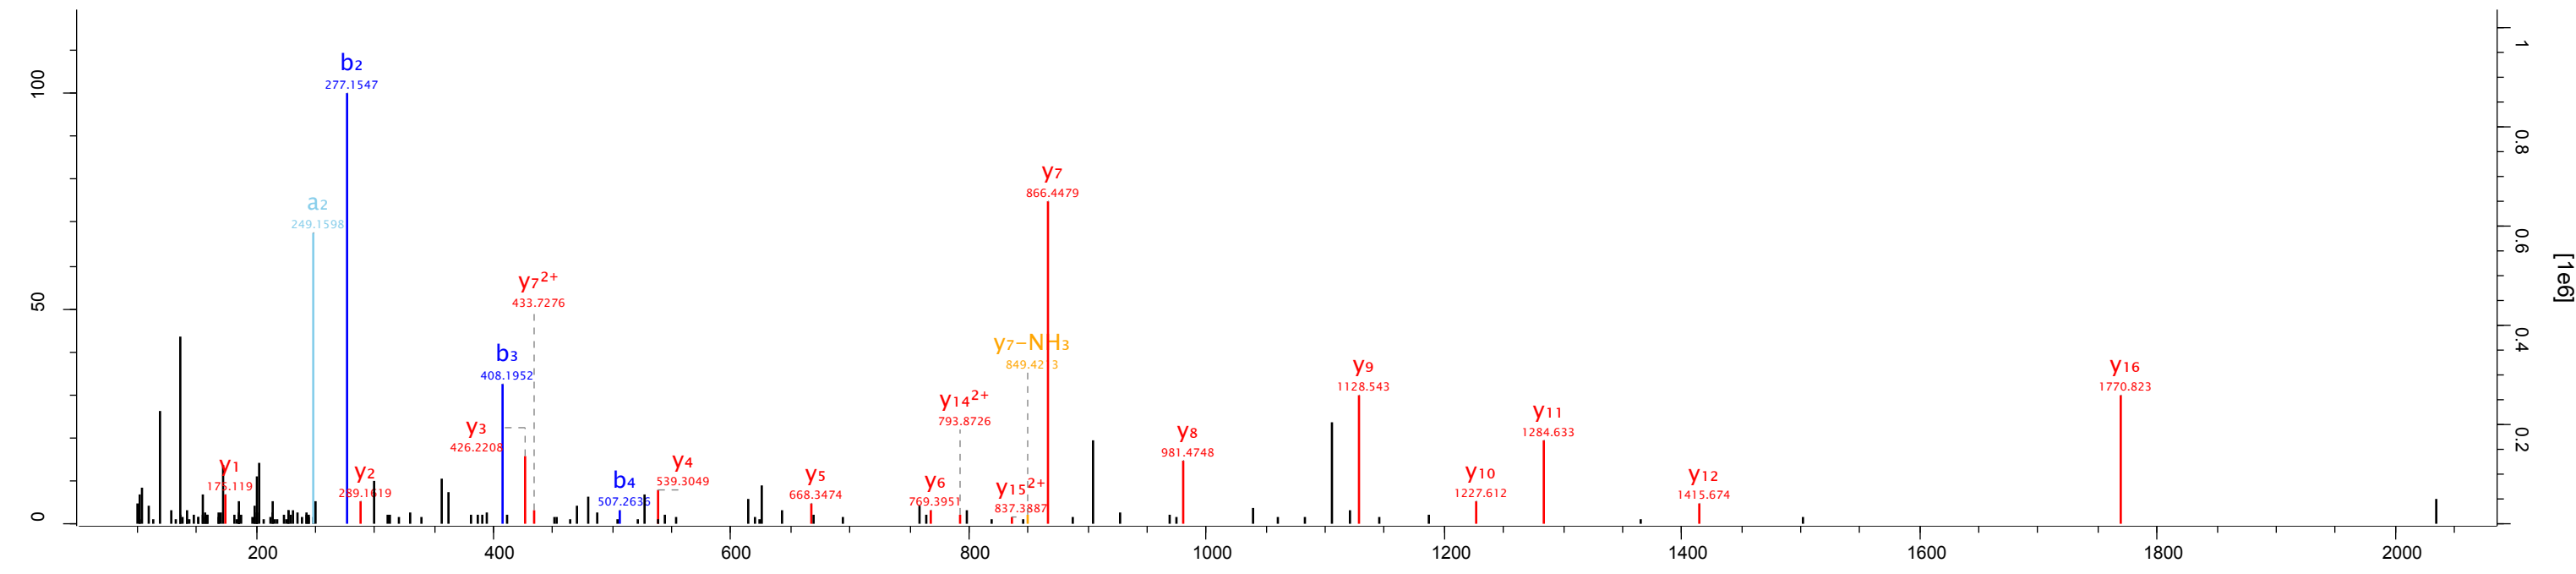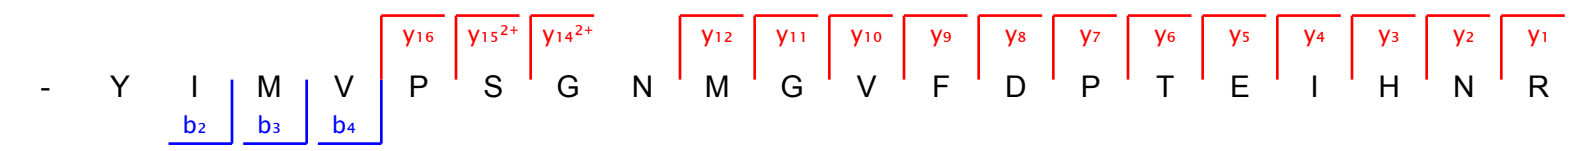

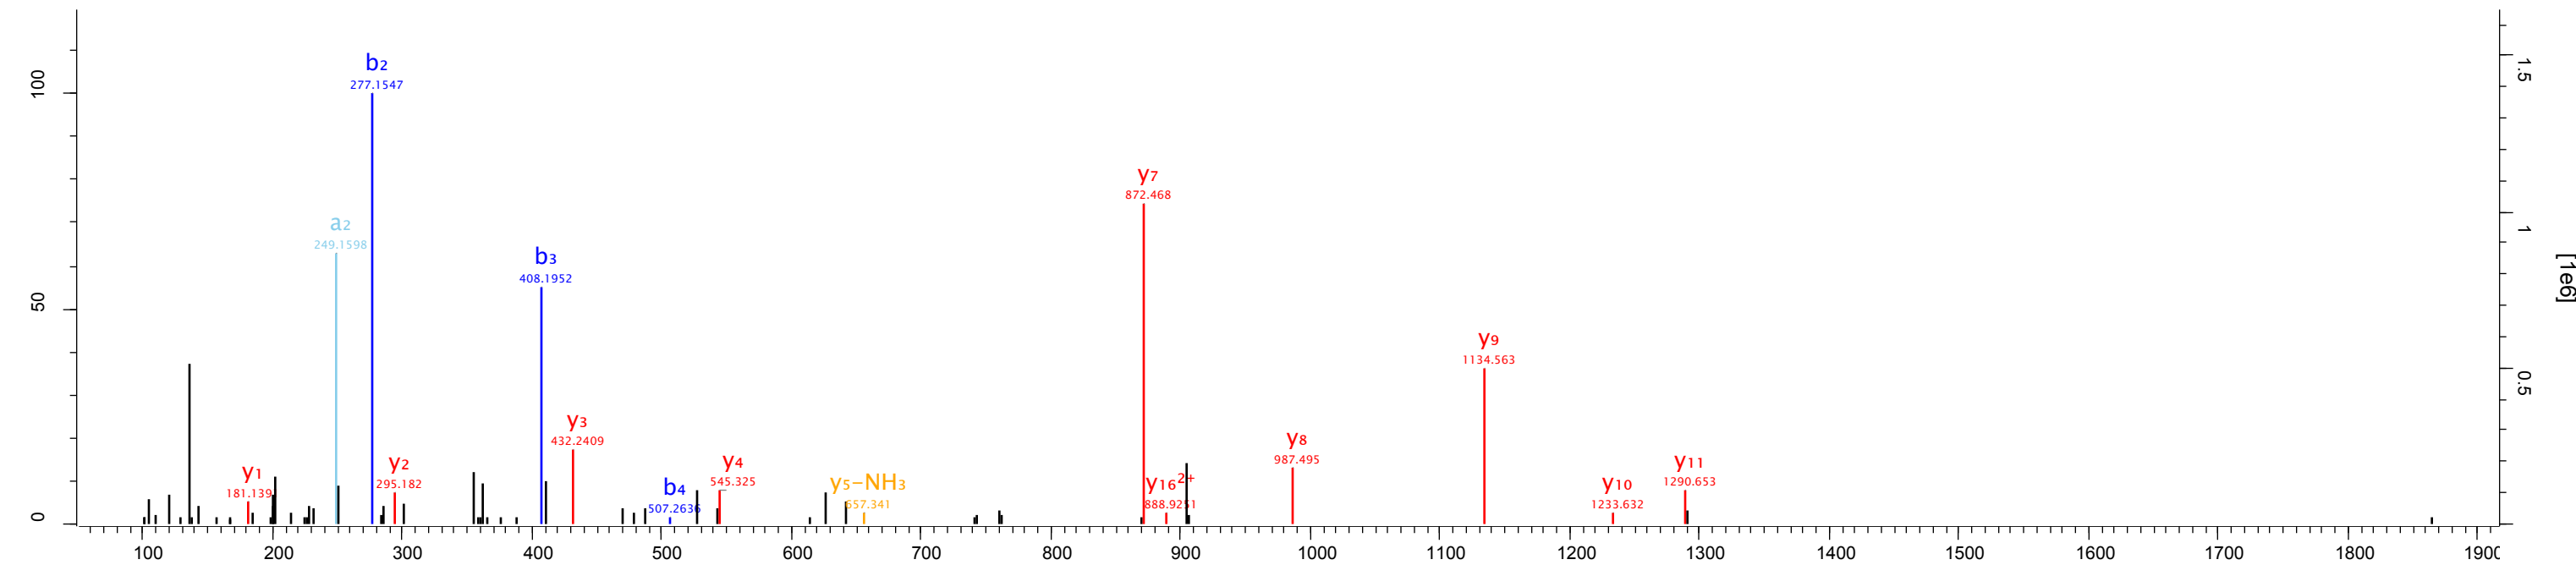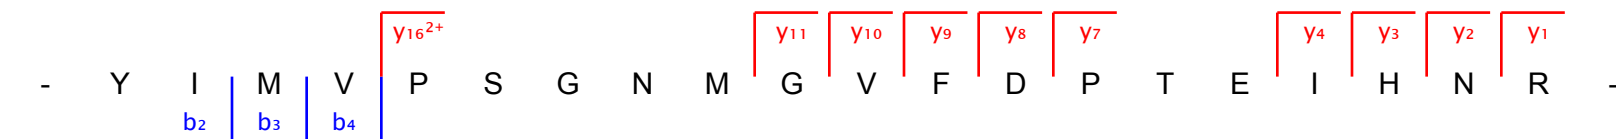

Raw file: 20180707\_MaS\_A375SR\_LM\_proteome\_03  
 Scan: 11015 Method: FTMS; HCD Score: 28.81 m/z: 782.9 Gene names: RPA3OS

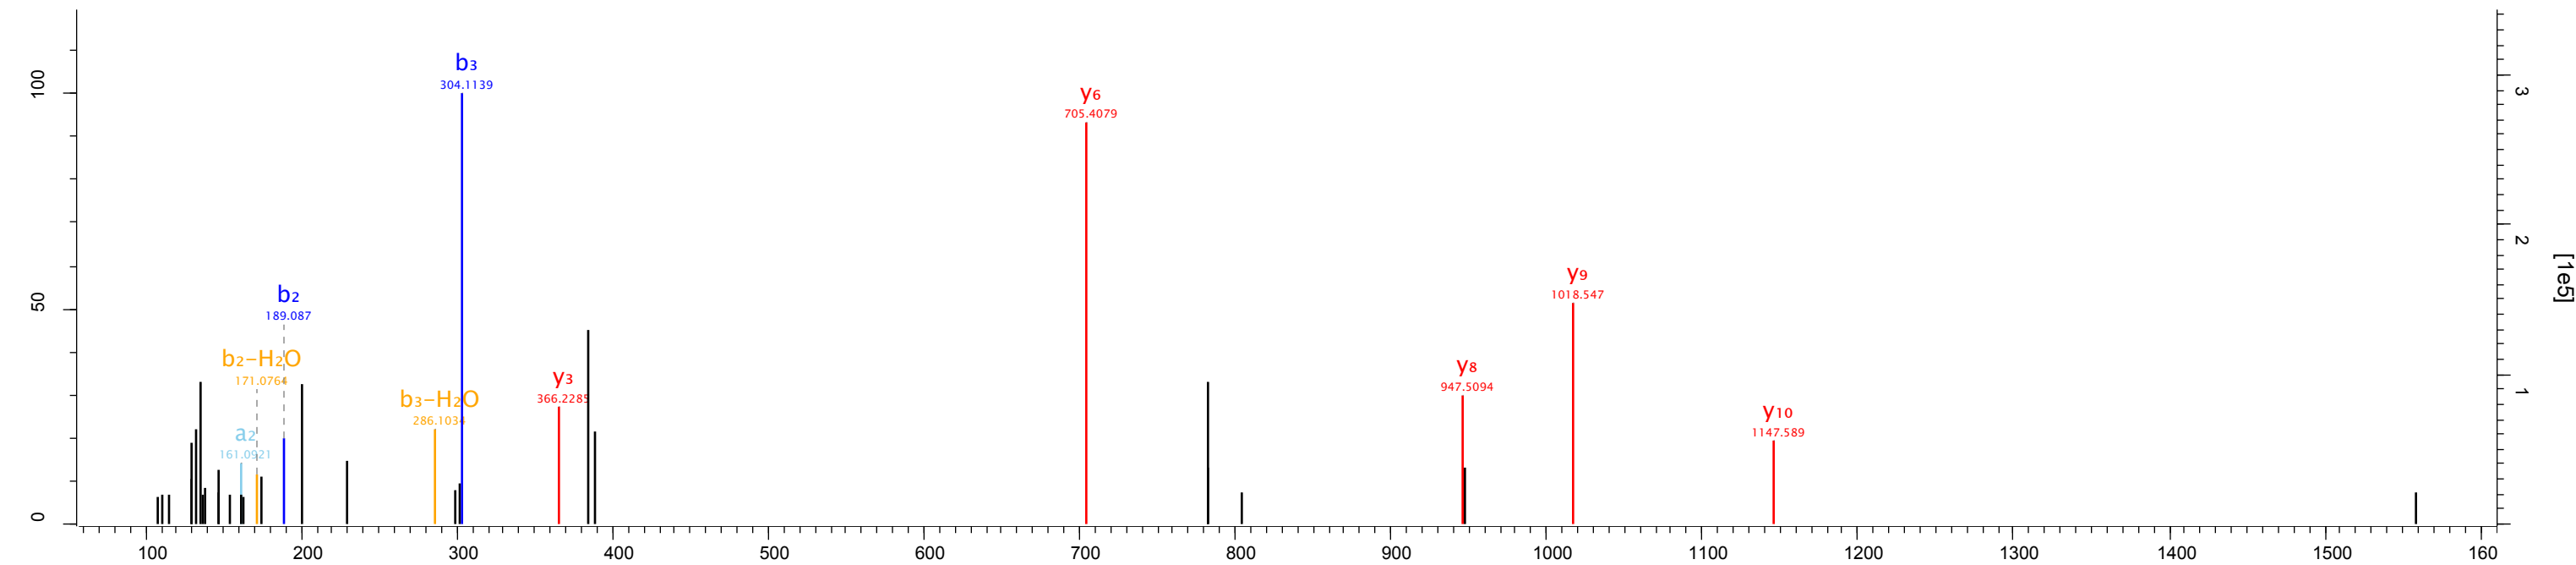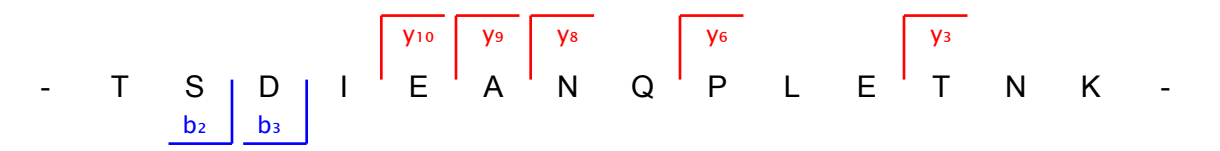

Raw file  
20180707\_MaS\_A375SR\_LM\_proteome\_06

Scan: 24765  
Method: FTMS; HCD  
Score: 70.26  
m/z: 496.76  
Gene names: SEPT3

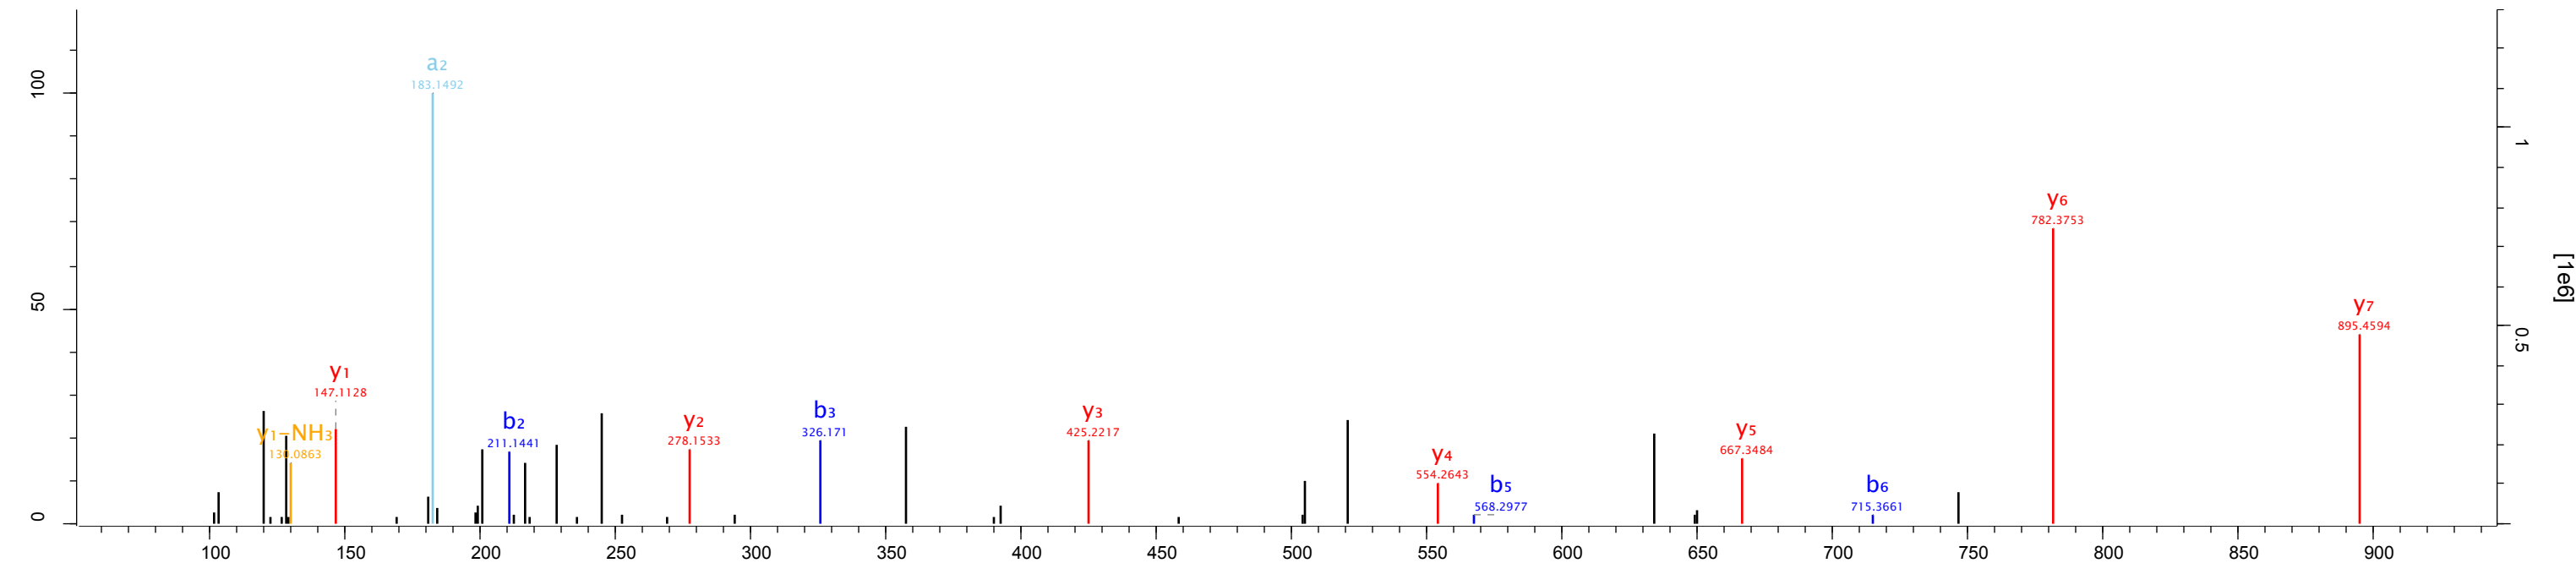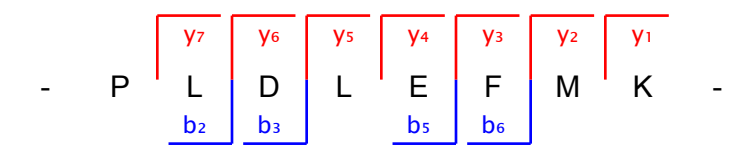

Raw file  
20180707\_MaS\_A375SR\_LM\_proteome\_07

Scan 26915 Method FTMS; HCD Score 61.44 m/z 854.41 Gene names SSR3

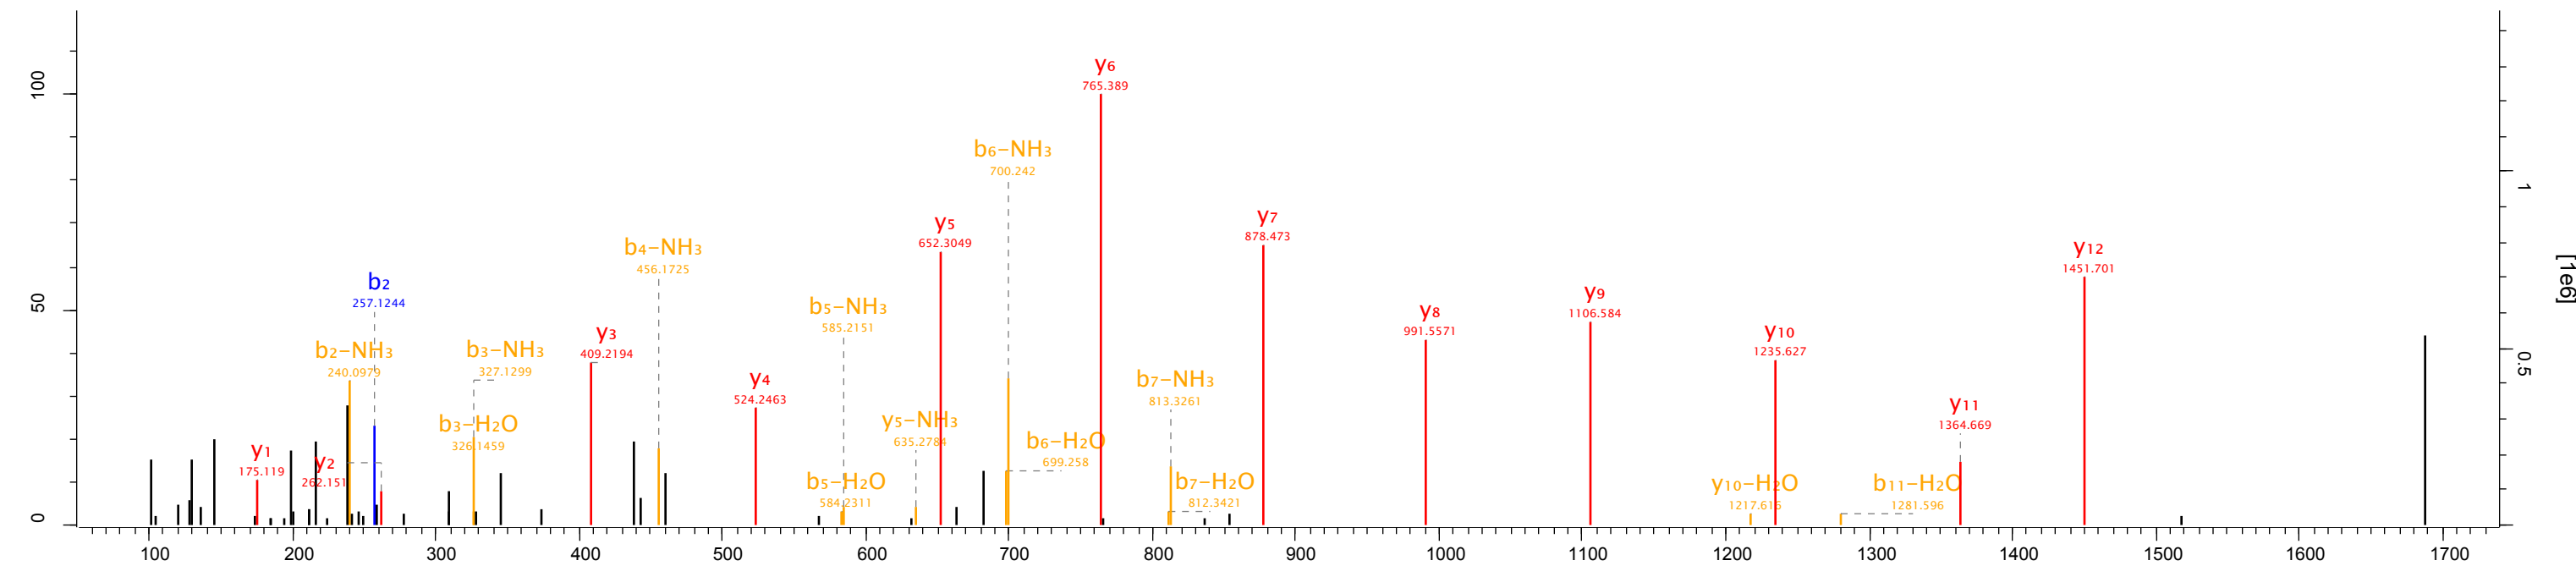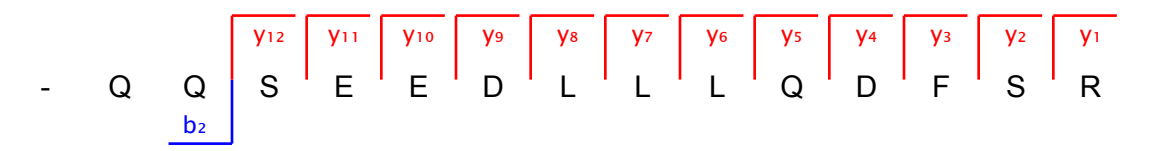

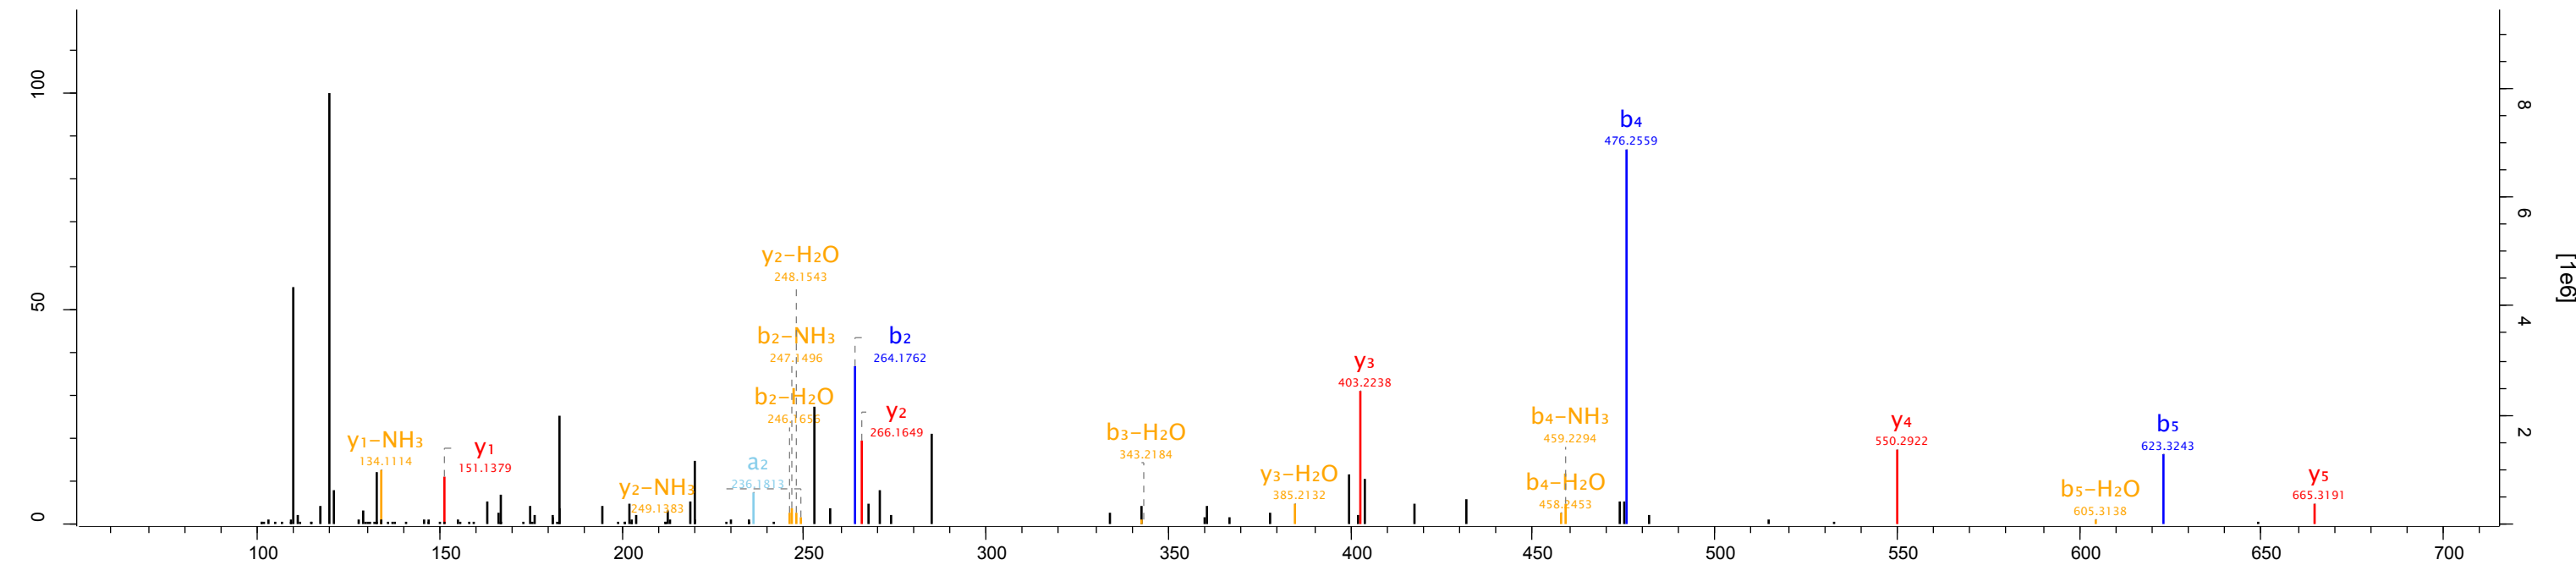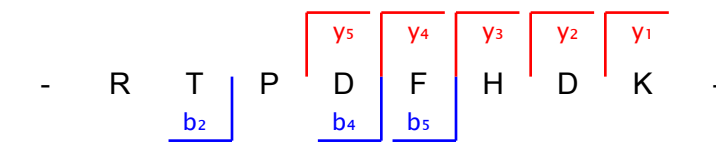

Raw file 20180707\_MaS\_A375SR\_LM\_proteome\_09 Scan 23015 Method FTMS; HCD Score 52.17 m/z 865.99 Gene names KRTCAP2

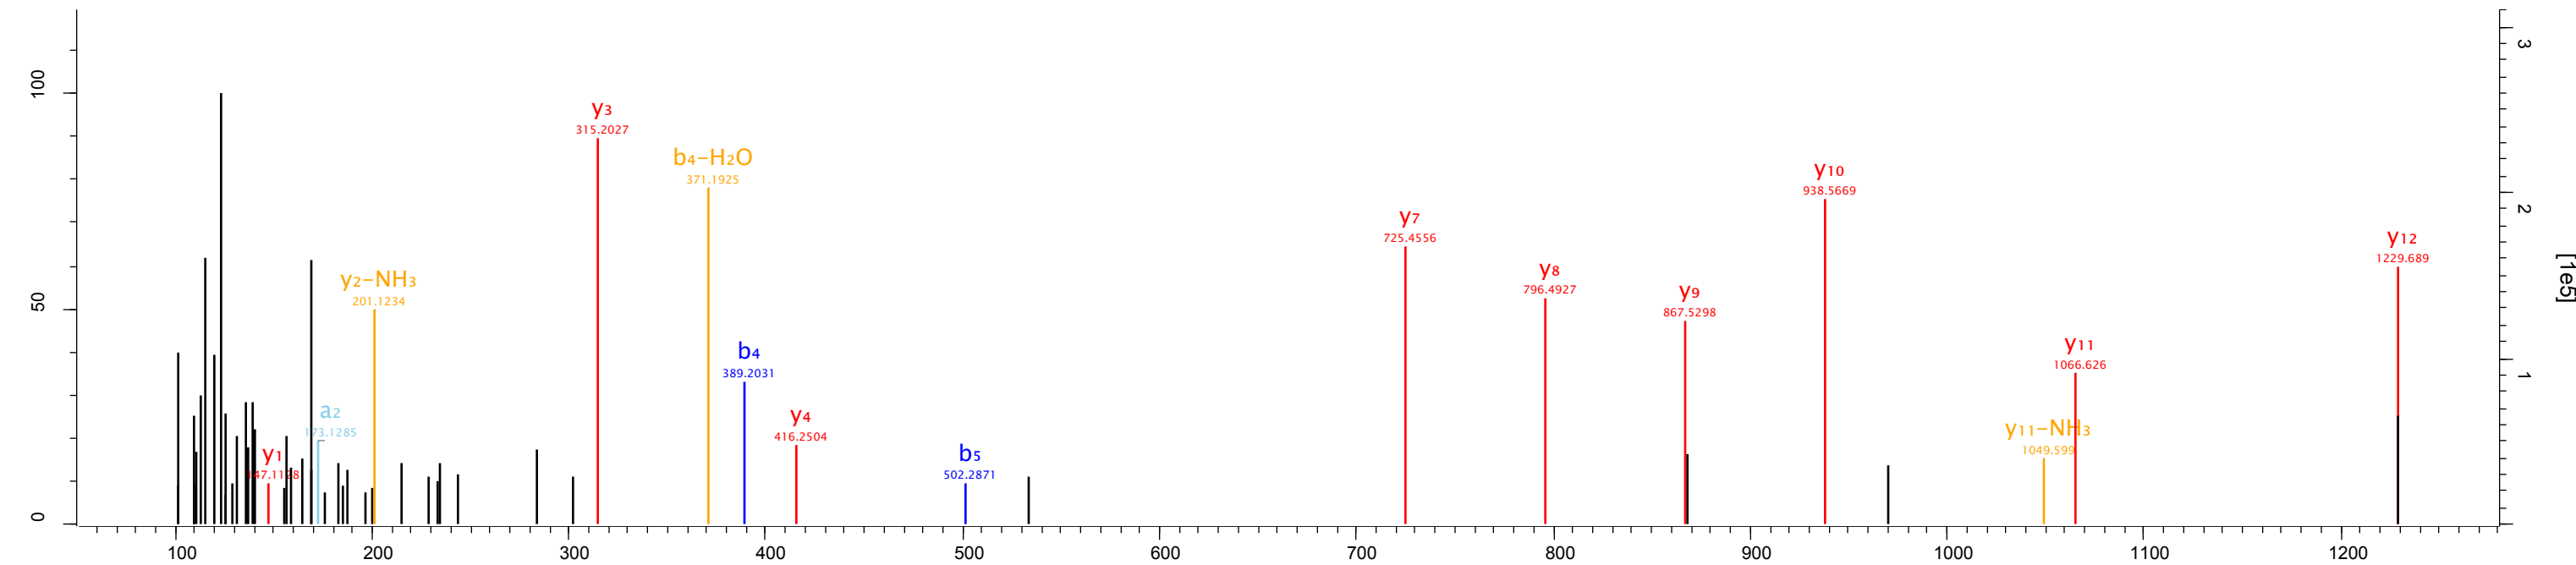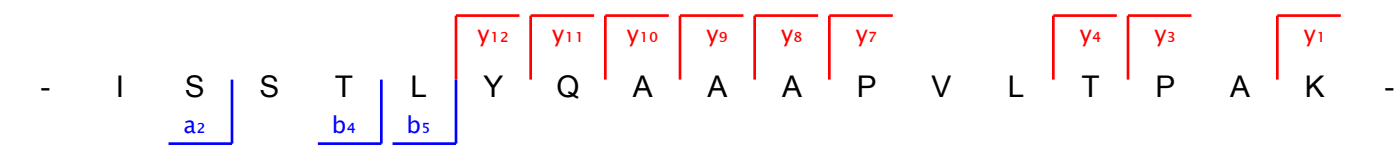



Raw file 20180707\_MaS\_A375SR\_LM\_proteome\_10 Scan 3855 Method FTMS; HCD Score 52.68 m/z 413.69

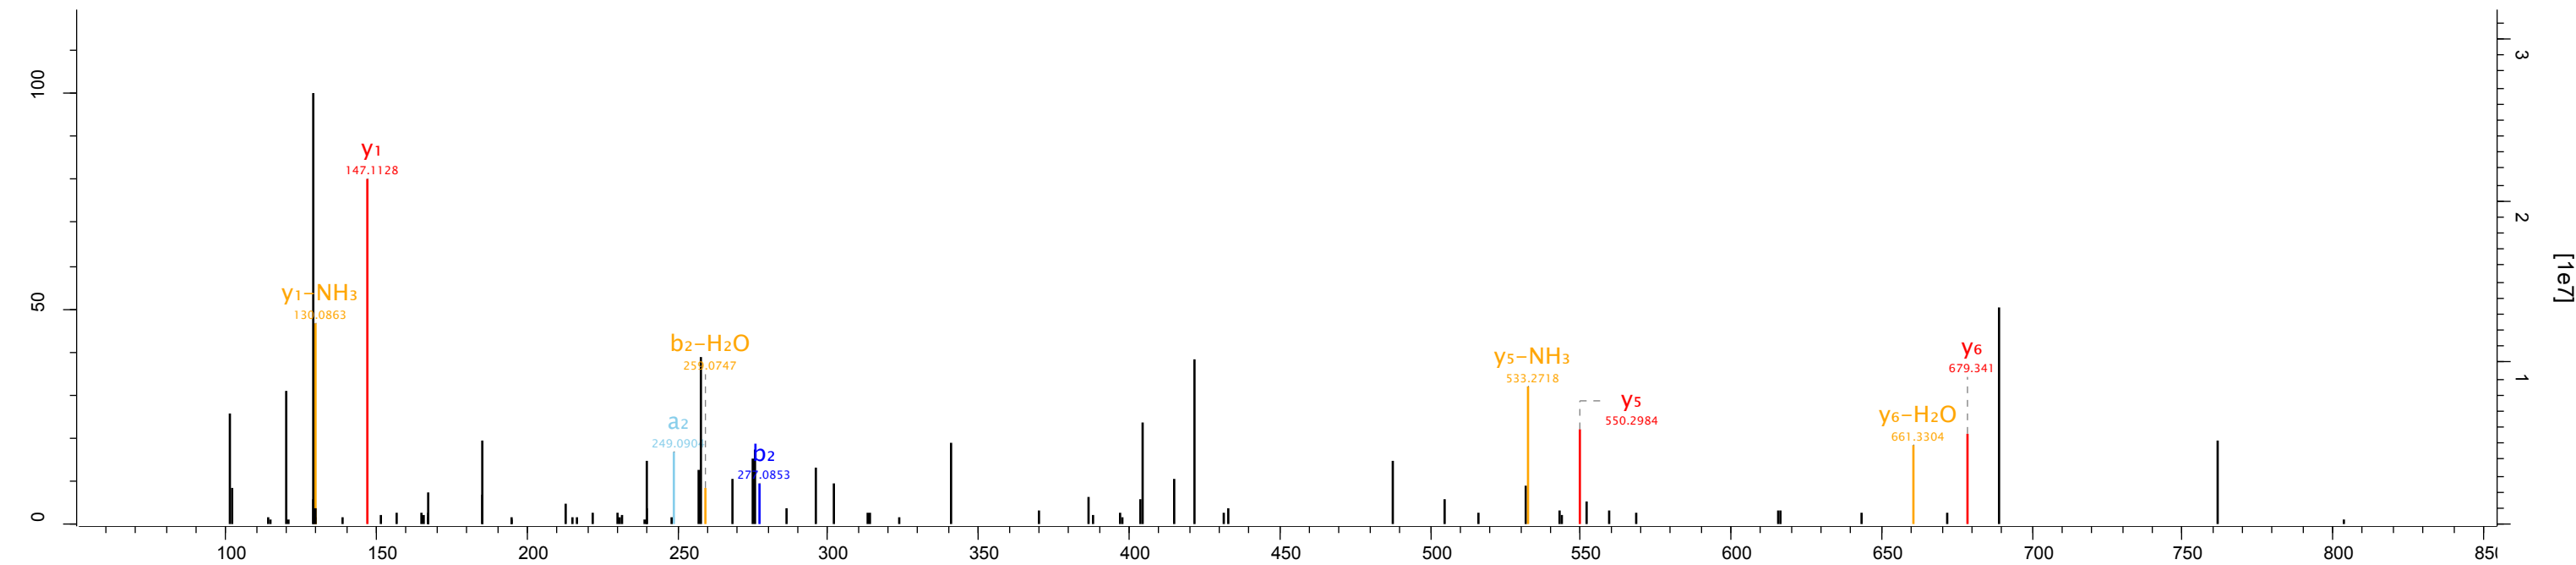

Raw file 20180707\_MaS\_A375SR\_LM\_proteome\_14 Scan 7045 Method FTMS; HCD Score 62.72 m/z 413.71 Gene names PROK2

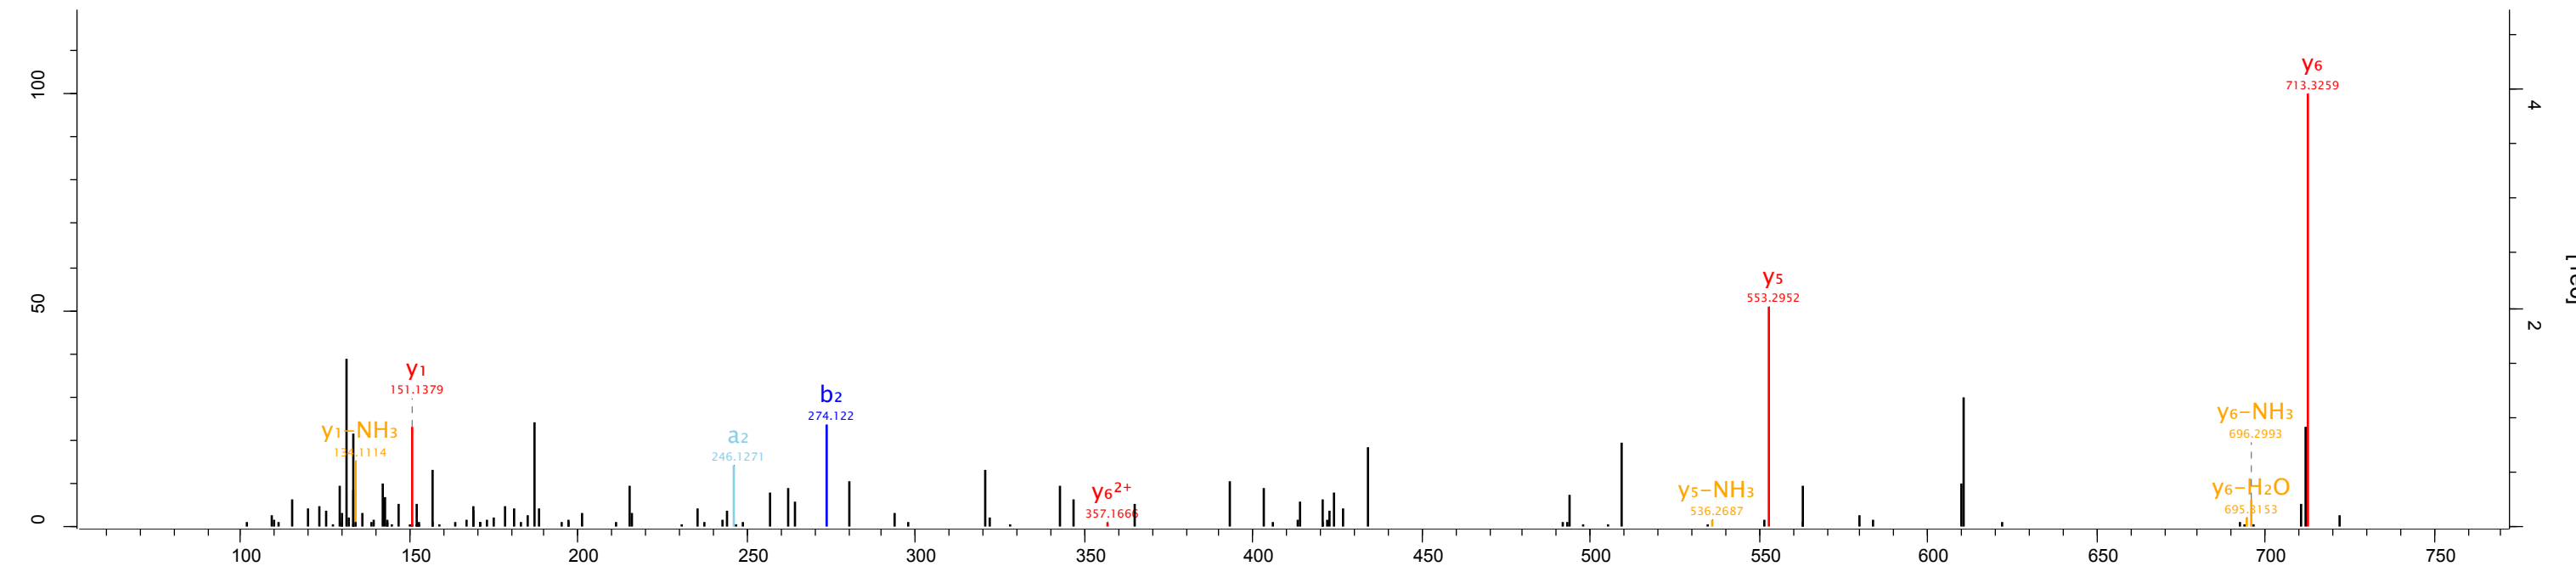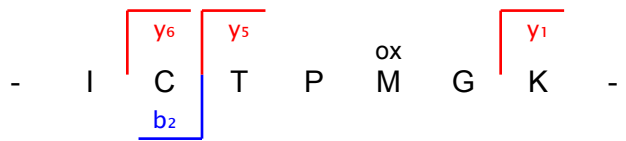

Raw file  
 20180707\_MaS\_A375SR\_LM\_proteome\_18  
 Scan 26405 Method FTMS; HCD Score 54.28 m/z 1042.97 Gene names RNF121

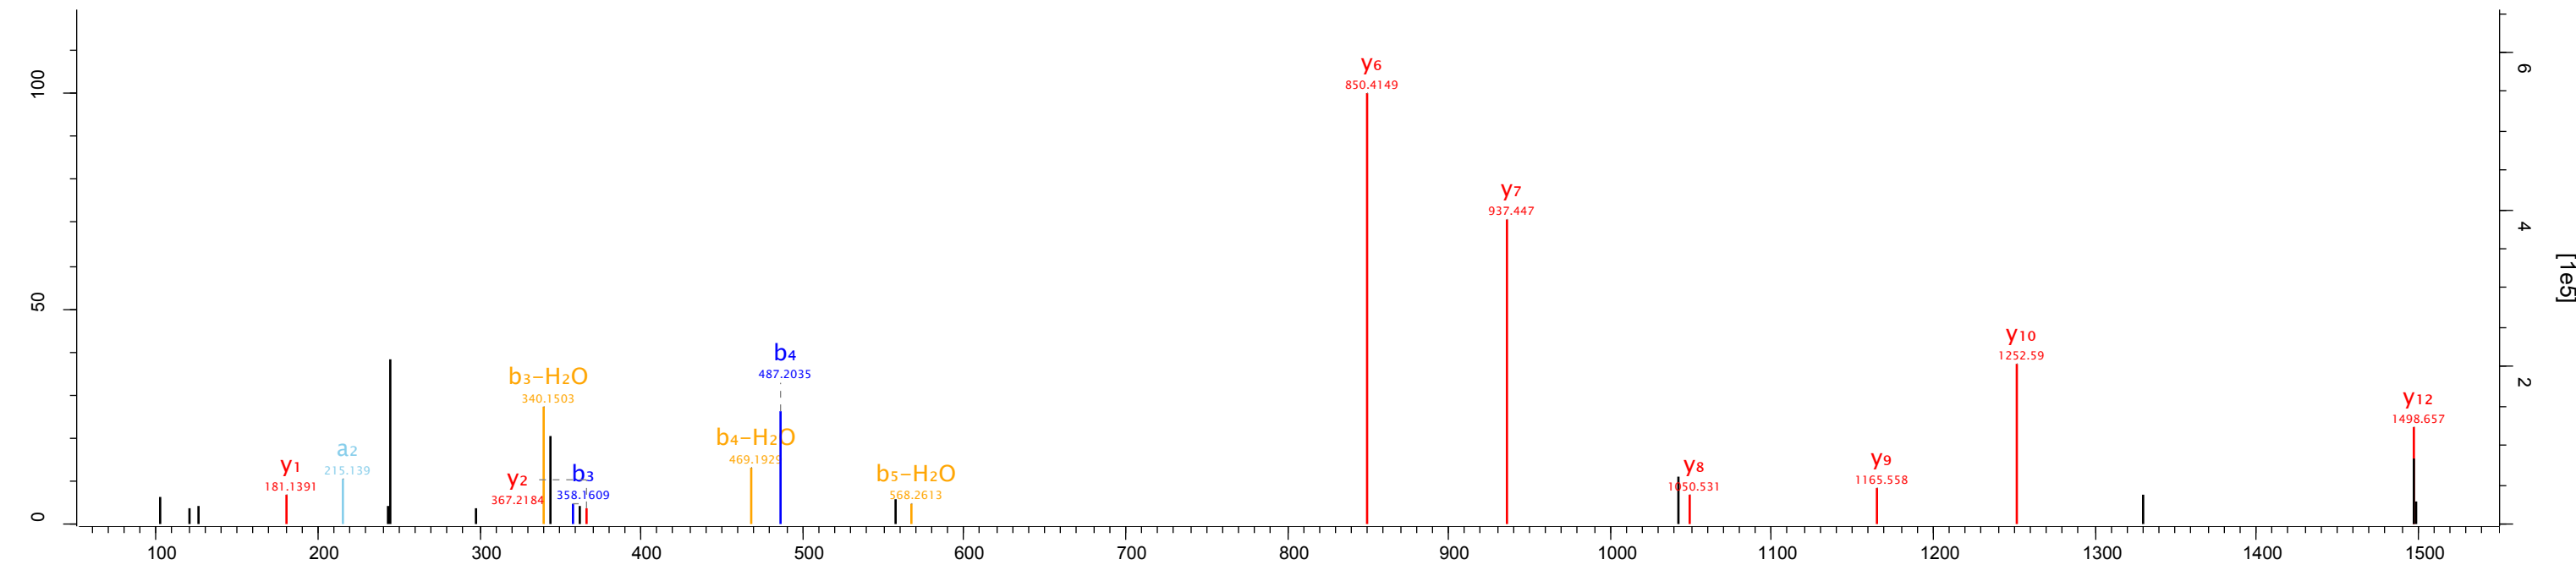

- E L D E V D M S D L S P E E Q W R -

Fragmentation mapping (b-ions in blue, y-ions in red):

- b<sub>2</sub> (L), b<sub>3</sub> (D), b<sub>4</sub> (E)
- y<sub>12</sub> (D), y<sub>10</sub> (S), y<sub>9</sub> (D), y<sub>8</sub> (L), y<sub>7</sub> (S), y<sub>6</sub> (P), y<sub>2</sub> (W), y<sub>1</sub> (R)

Raw file  
20180707\_MaS\_A375SR\_LM\_proteome\_22

Scan 20225 Method FTMS; HCD Score 57.86 m/z 504.76 Gene names SEPT3

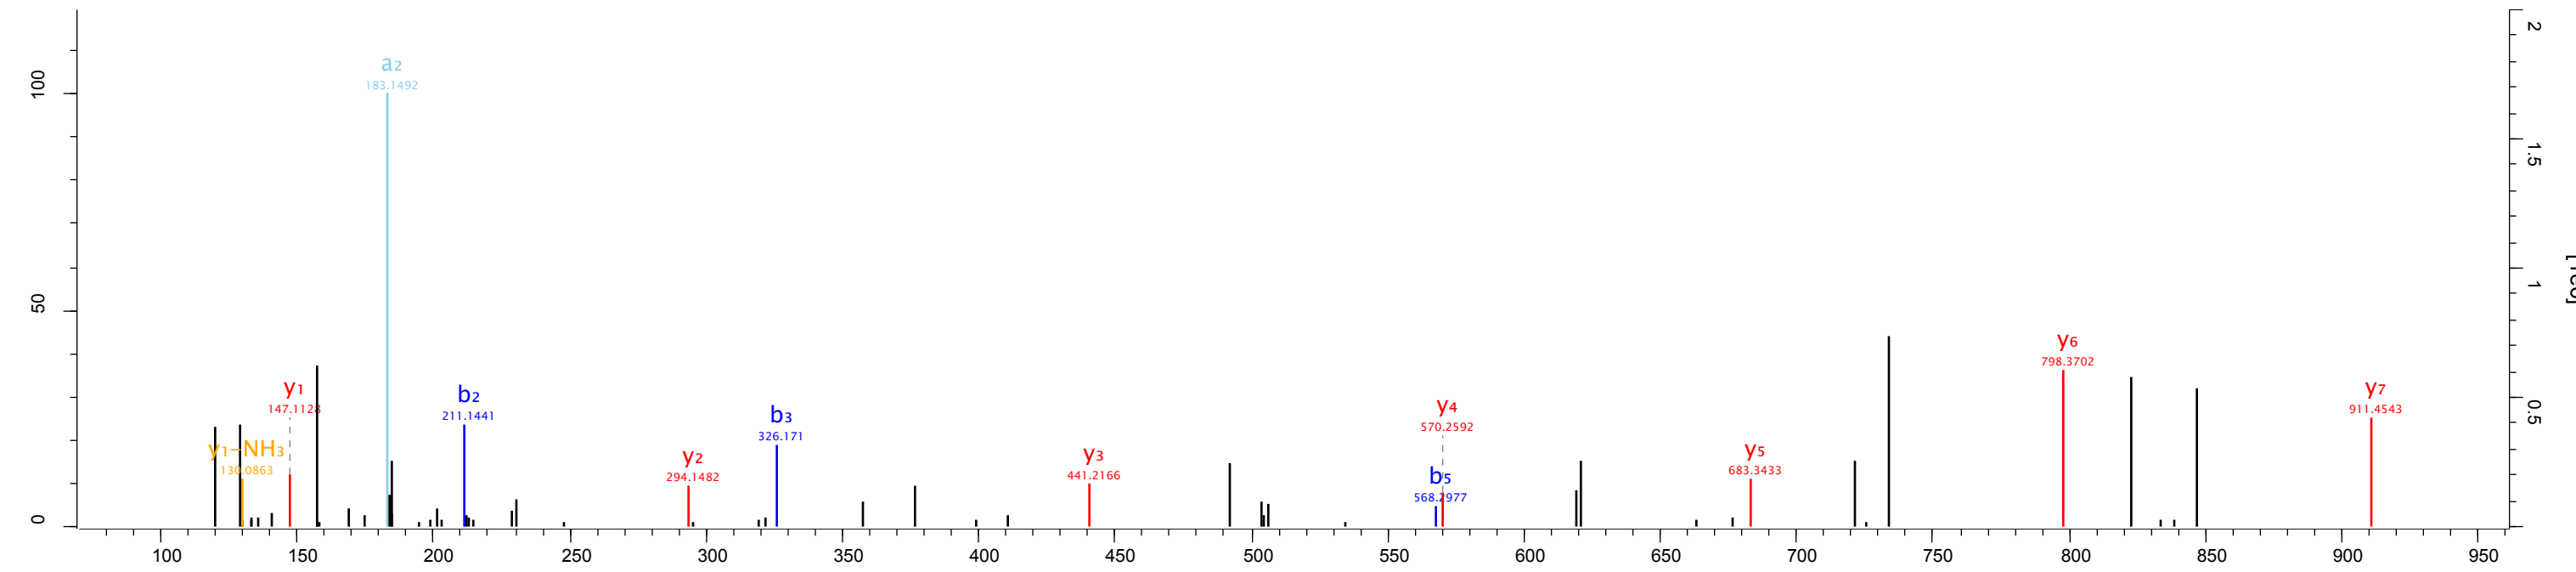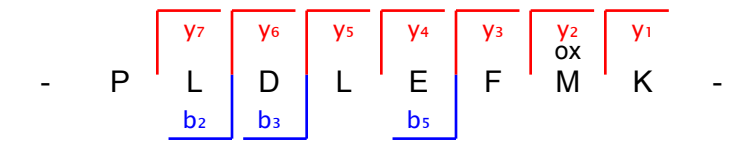

Raw file  
20180707\_MaS\_A375SR\_LM\_proteome\_22

| Scan | Method    | Score | m/z    | Gene names |
|------|-----------|-------|--------|------------|
| 9145 | FTMS; HCD | 0.79  | 653.67 | LAGE3      |

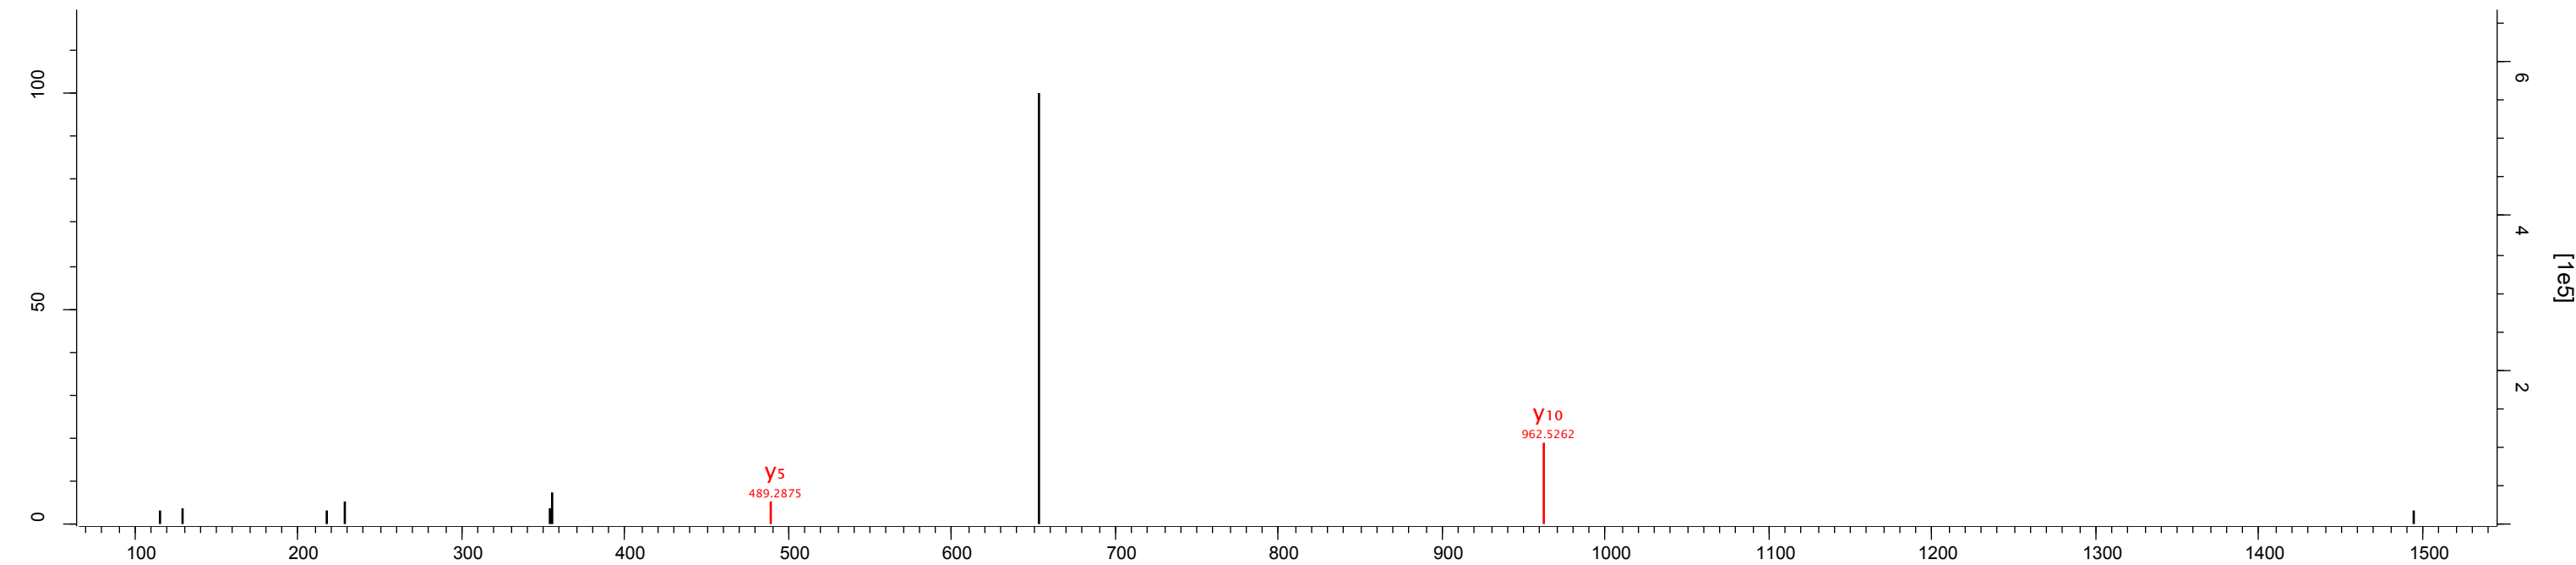

- G G V D T A A A P A G G A P P A H A P G P G R -

Red brackets above the sequence indicate the peptide fragments corresponding to the labeled peaks: y10 (A P P A H A) and y5 (P G P G R).

Raw file  
20180707\_MaS\_A375SR\_LM\_proteome\_27

| Scan | Method    | Score | m/z    | Gene names |
|------|-----------|-------|--------|------------|
| 4645 | FTMS; HCD | 47.96 | 499.72 | TMEM258    |

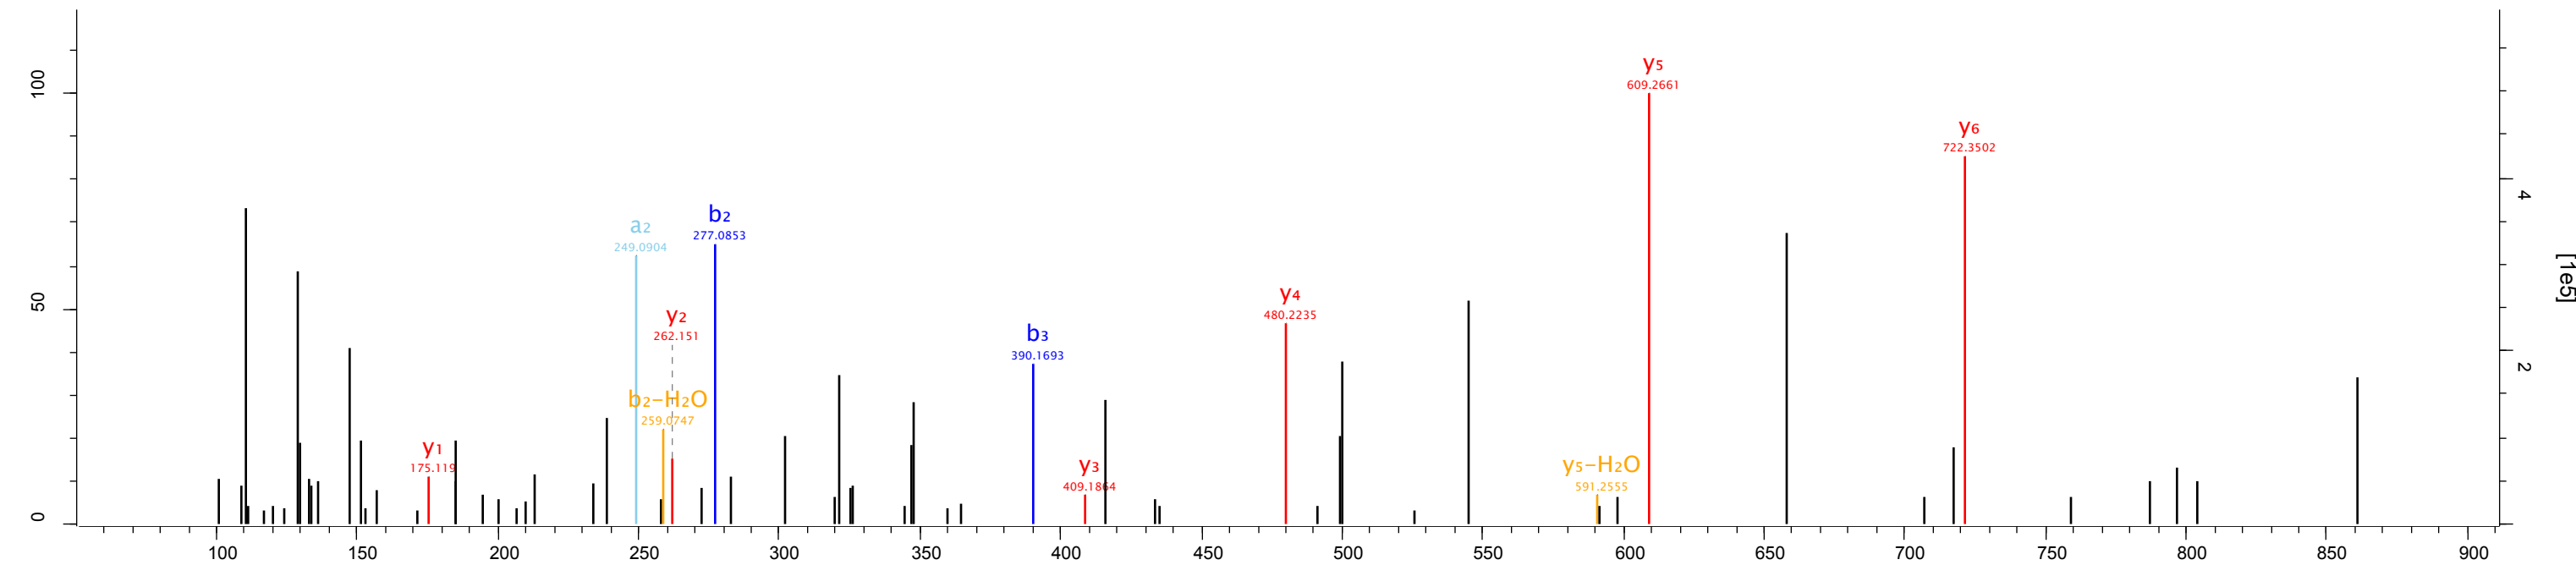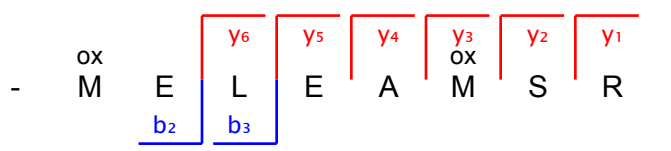

Raw file  
20180707\_MaS\_A375SR\_LM\_proteome\_28

Scan Method Score m/z Gene names  
4295 FTMS; HCD 30.89 352.18 TYMP

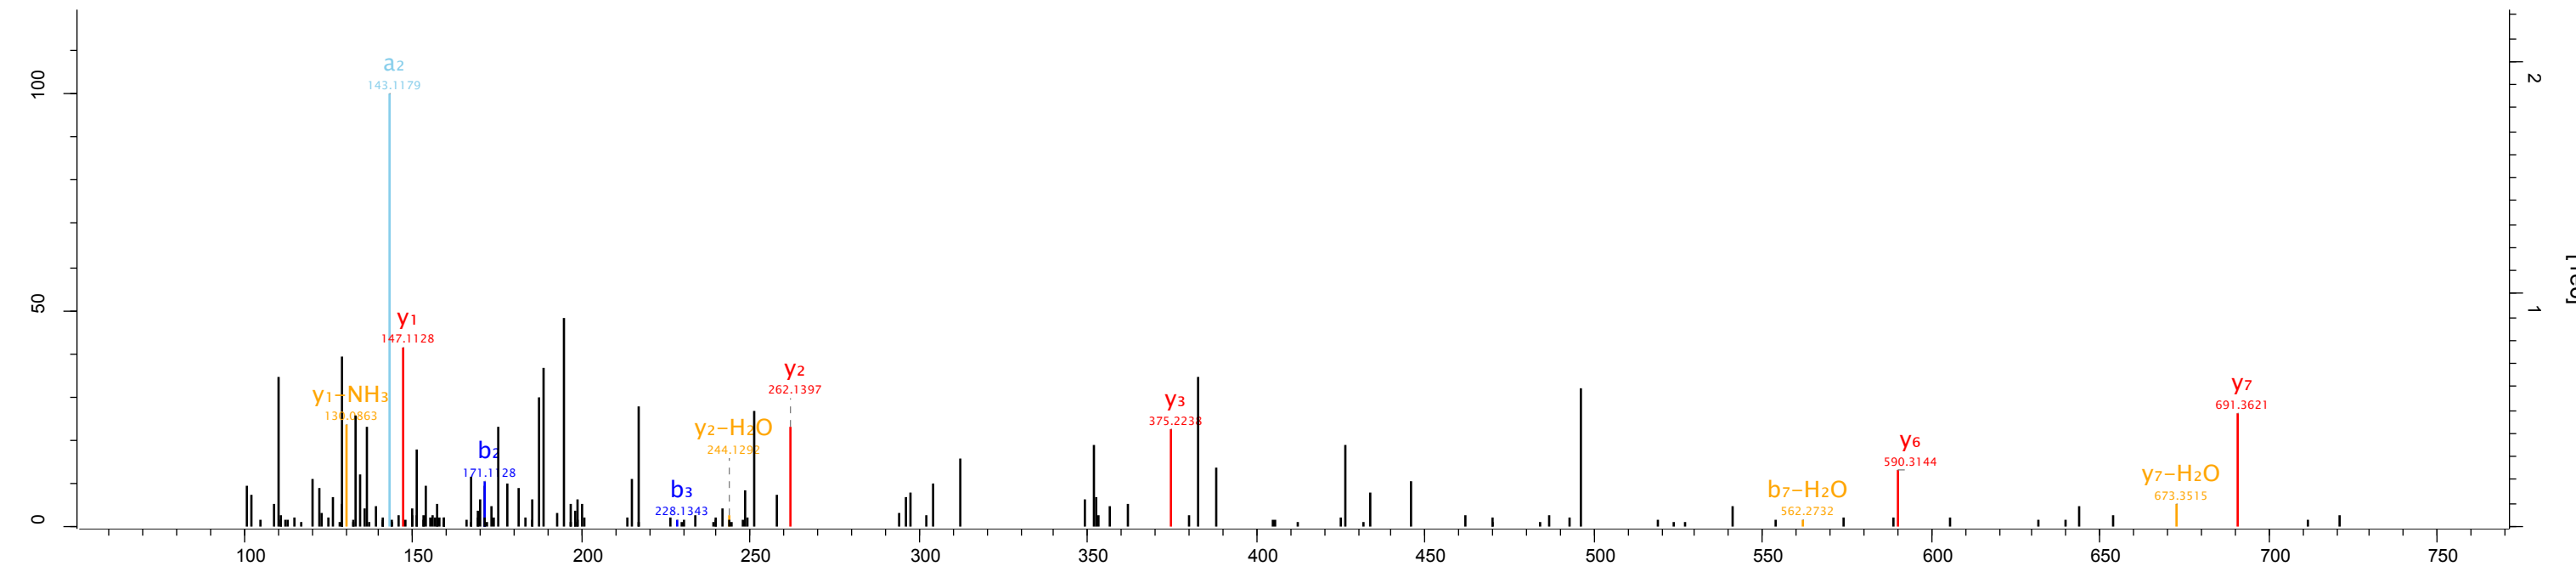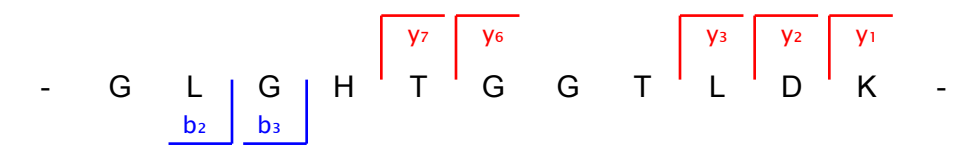

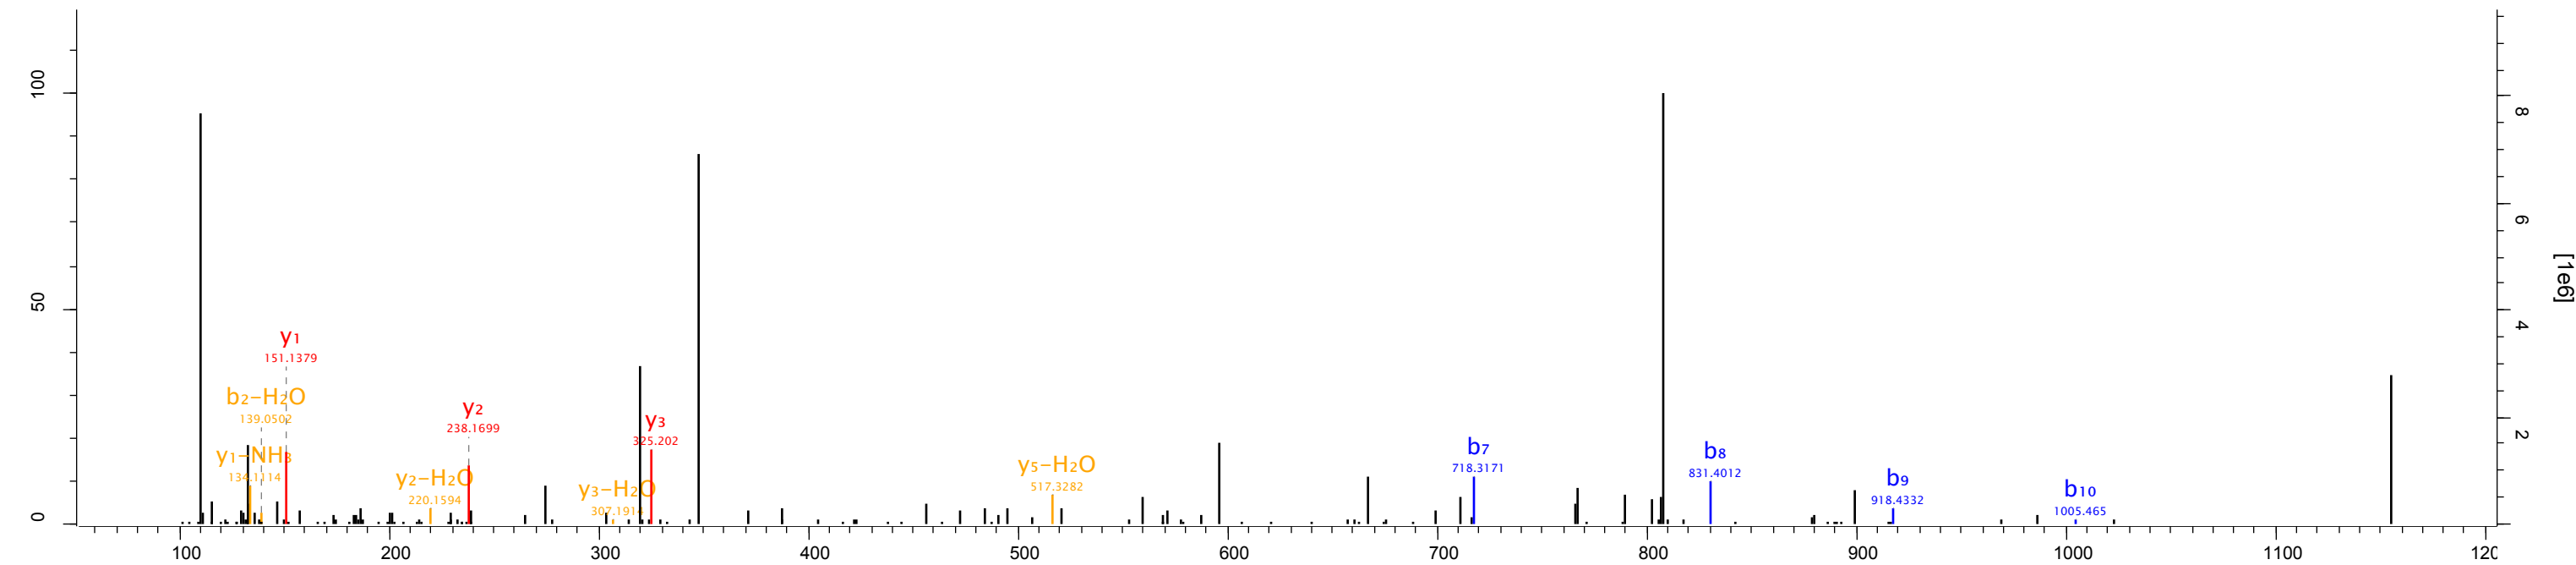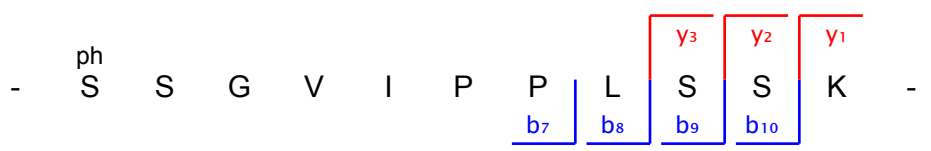



Raw file 20180707\_MaS\_A375SR\_LM\_proteome\_29 Scan 17215 Method FTMS; HCD Score 61.11 m/z 712.86 Gene names CYB561D2

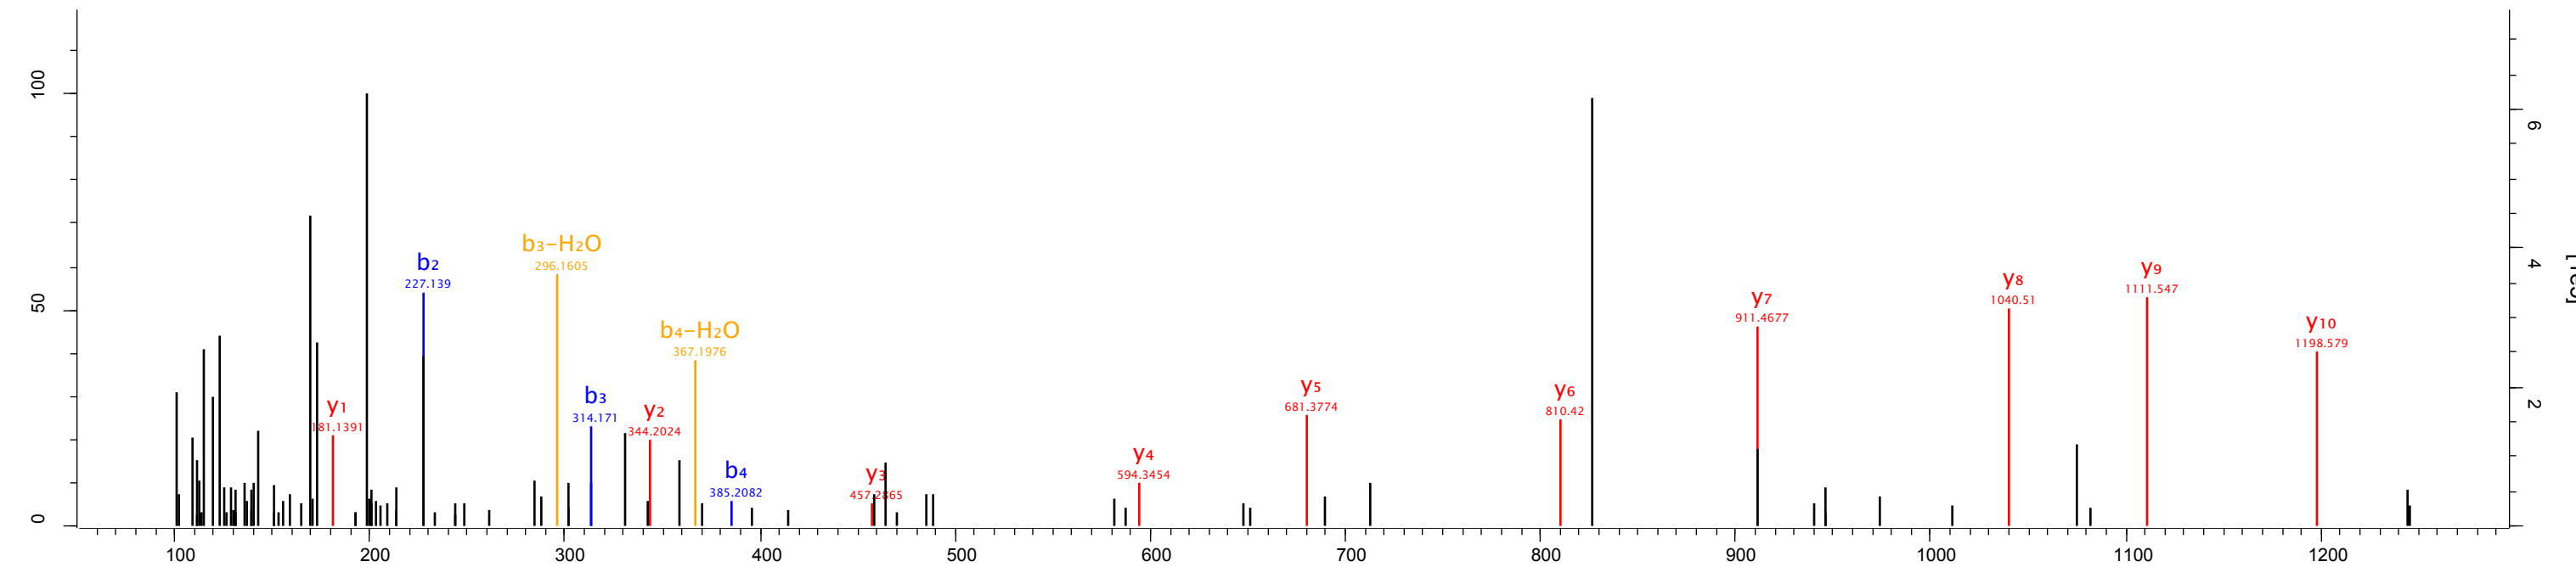

Raw file  
20180707\_MaS\_A375SR\_ML\_proteome\_03

Scan 21265 Method FTMS; HCD Score 31 m/z 496.29 Gene names SELM

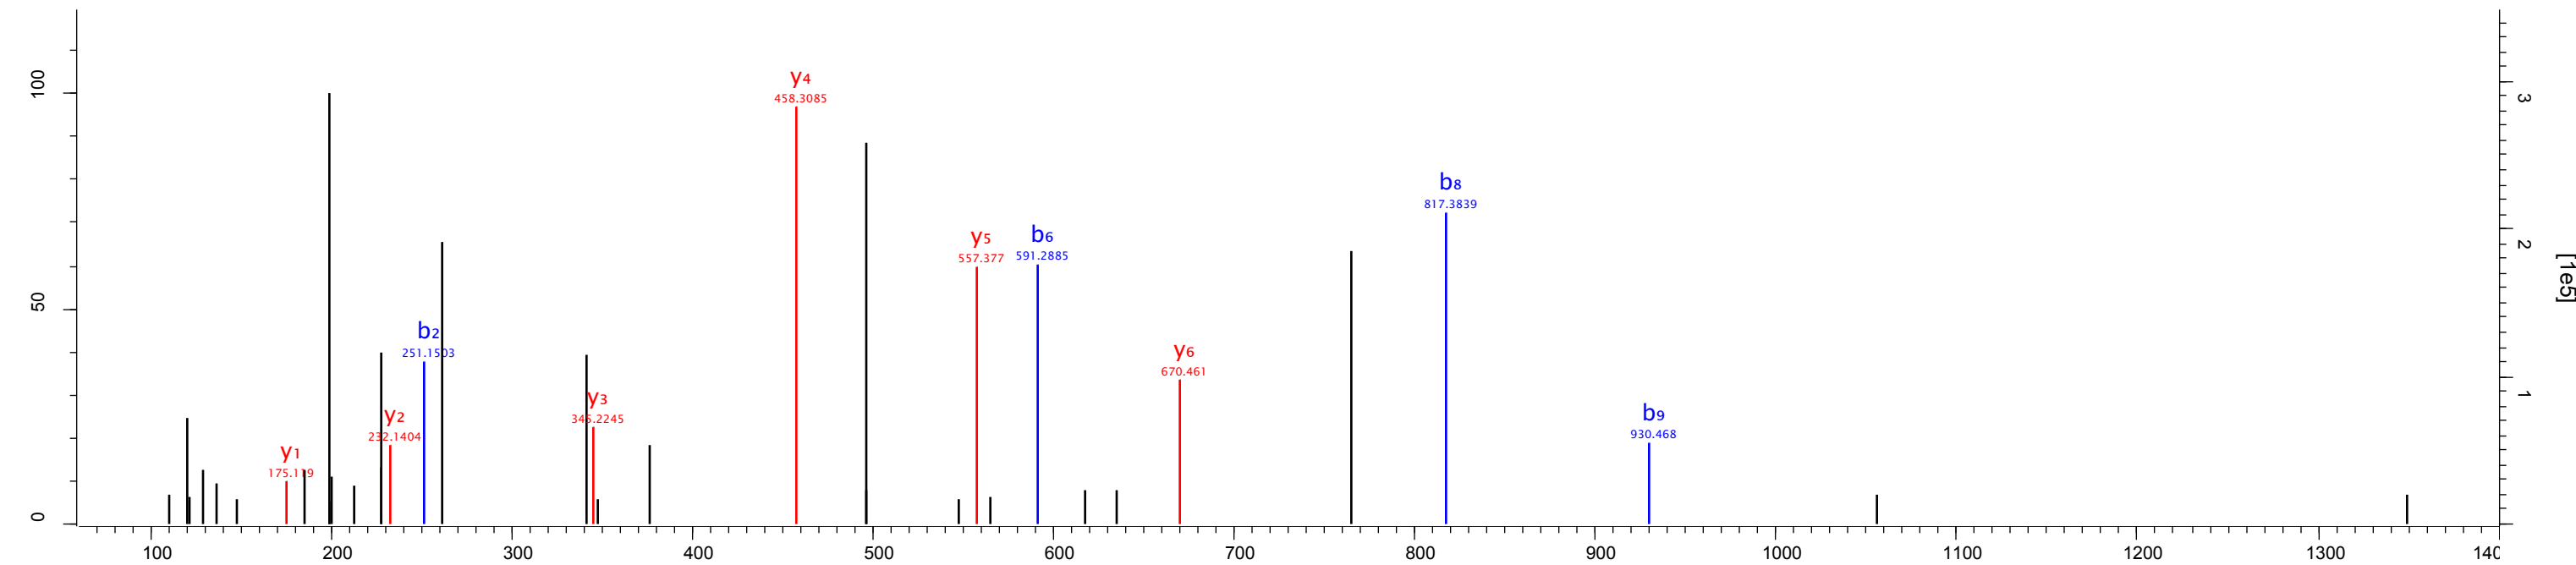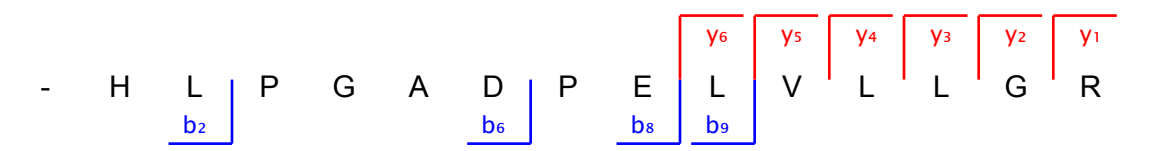

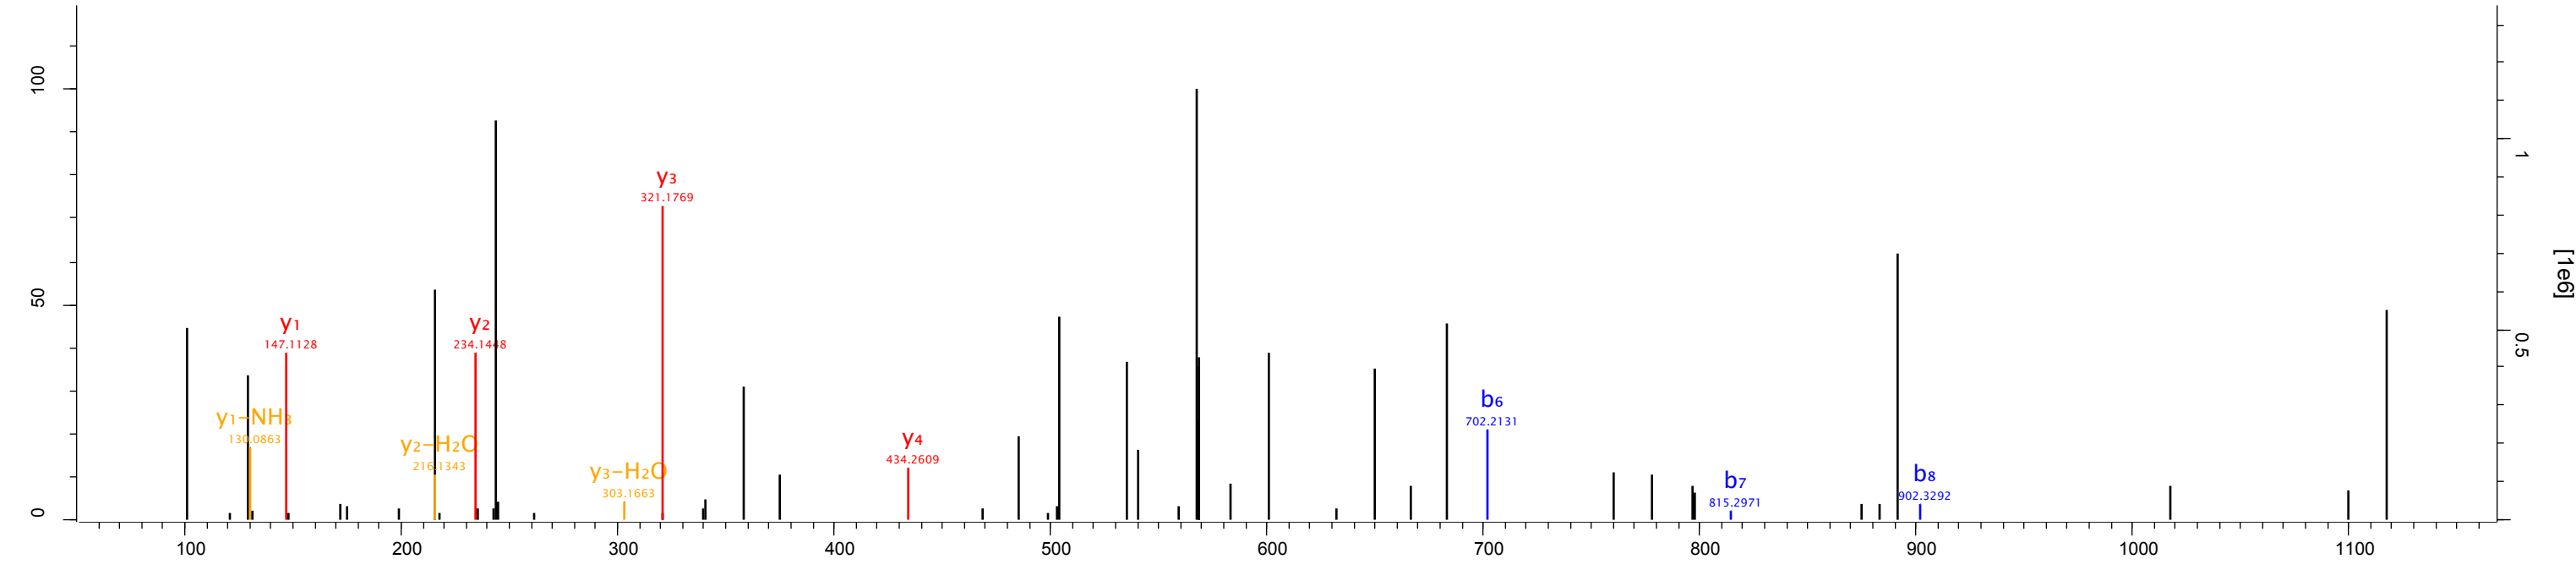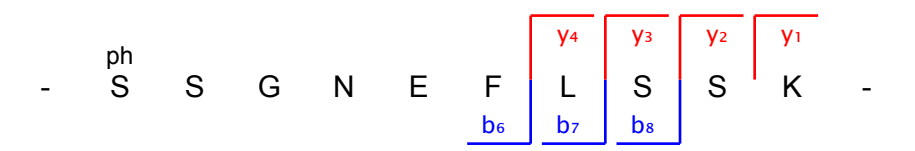

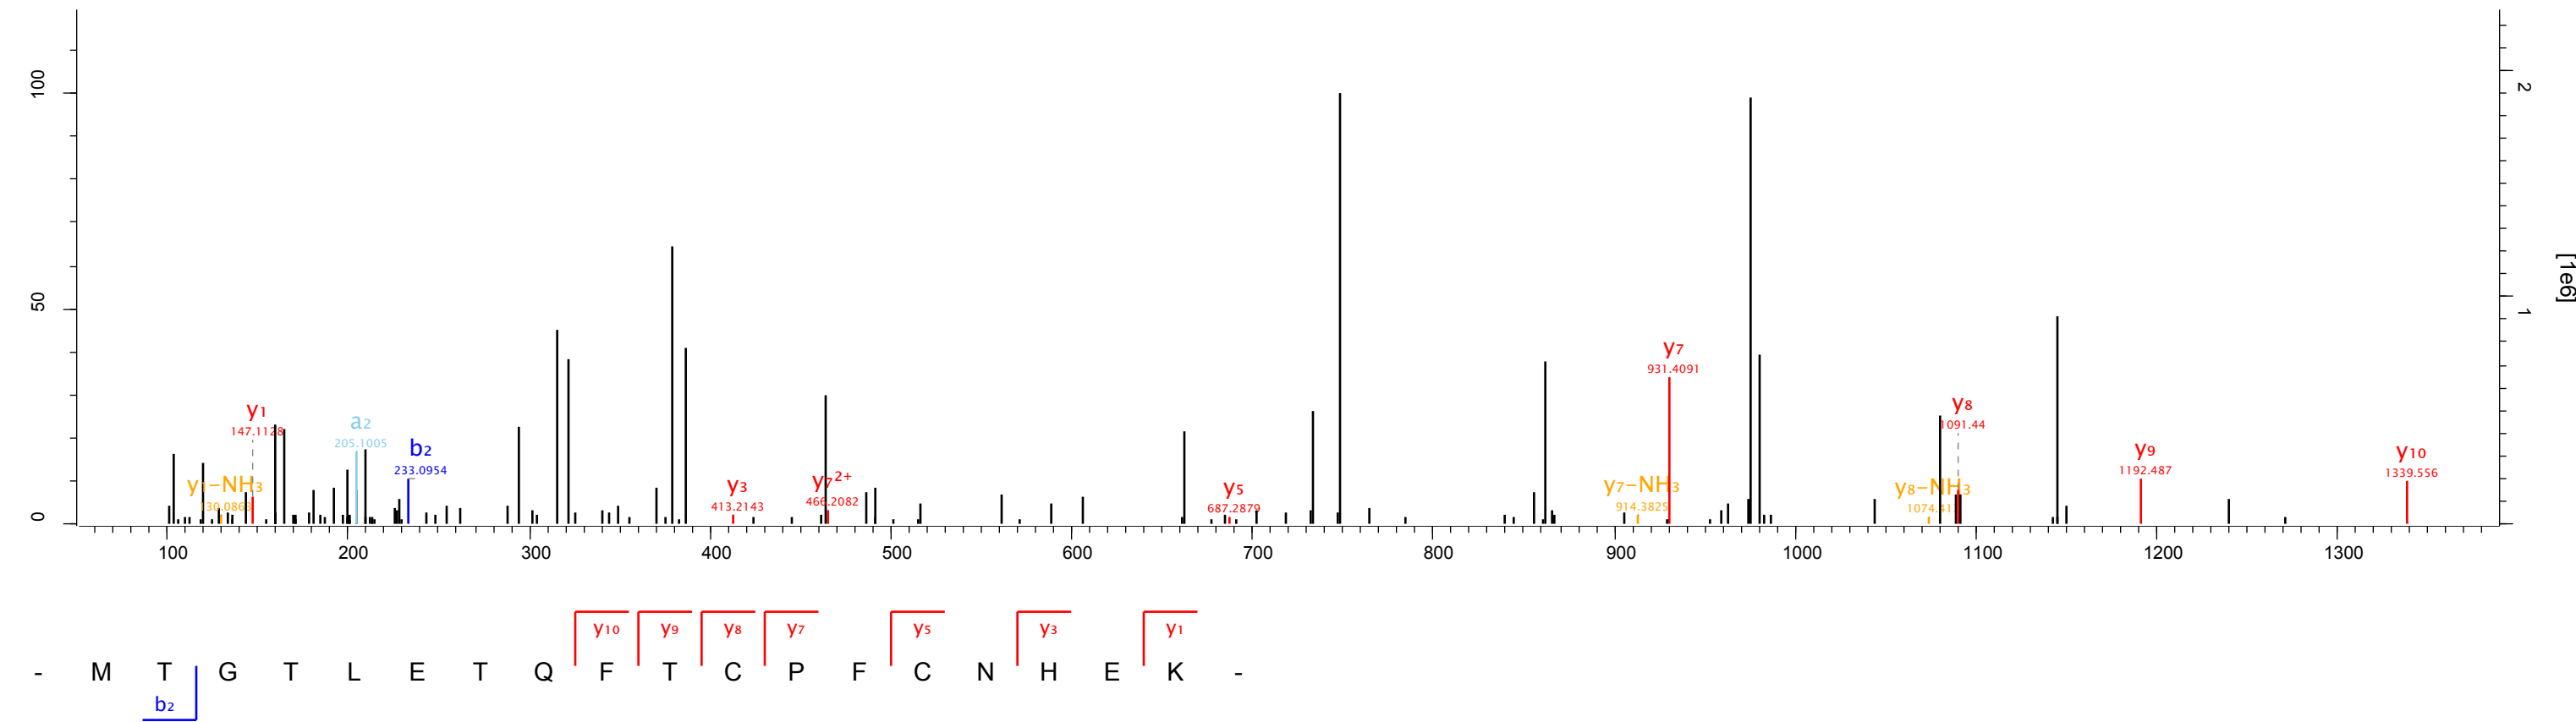

Raw file: 20180707\_MaS\_A375SR\_ML\_proteome\_05  
 Scan: 7715 Method: FTMS; HCD Score: 91.7 m/z: 582.8 Gene names: DDIT3

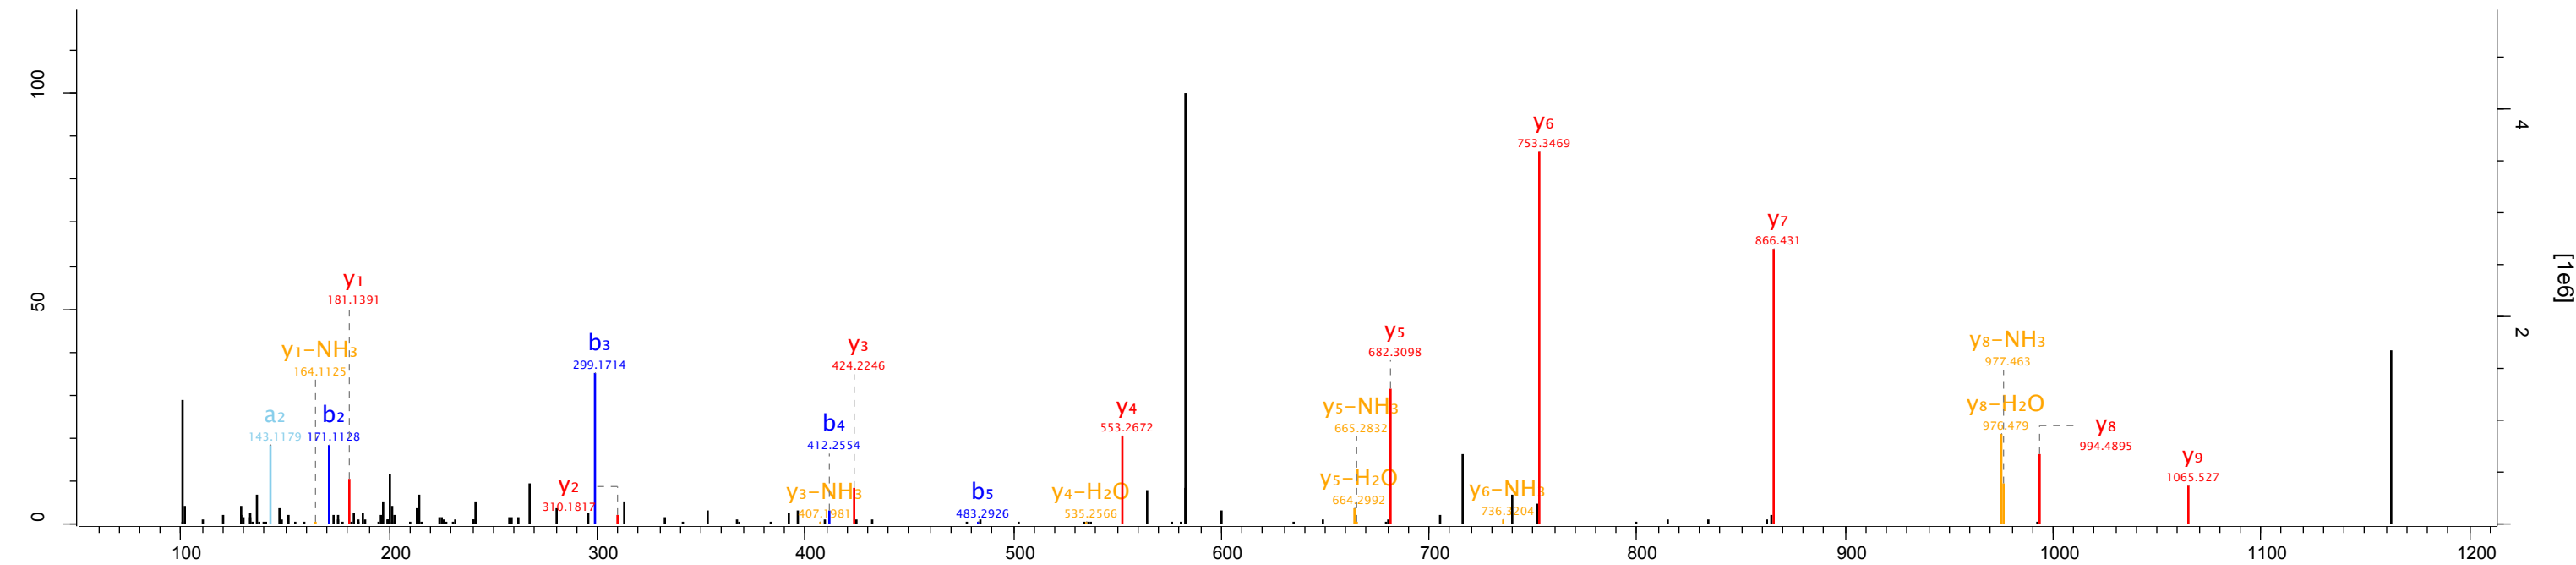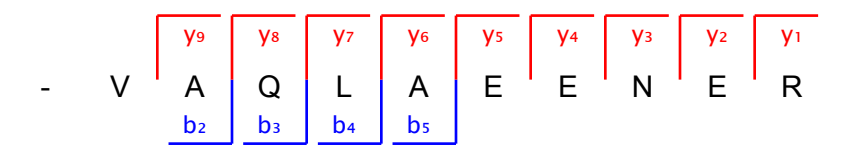

Raw file: 20180707\_MaS\_A375SR\_ML\_proteome\_06  
 Scan: 19345 Method: FTMS; HCD Score: 51.09 m/z: 949.44 Gene names: FAM168B

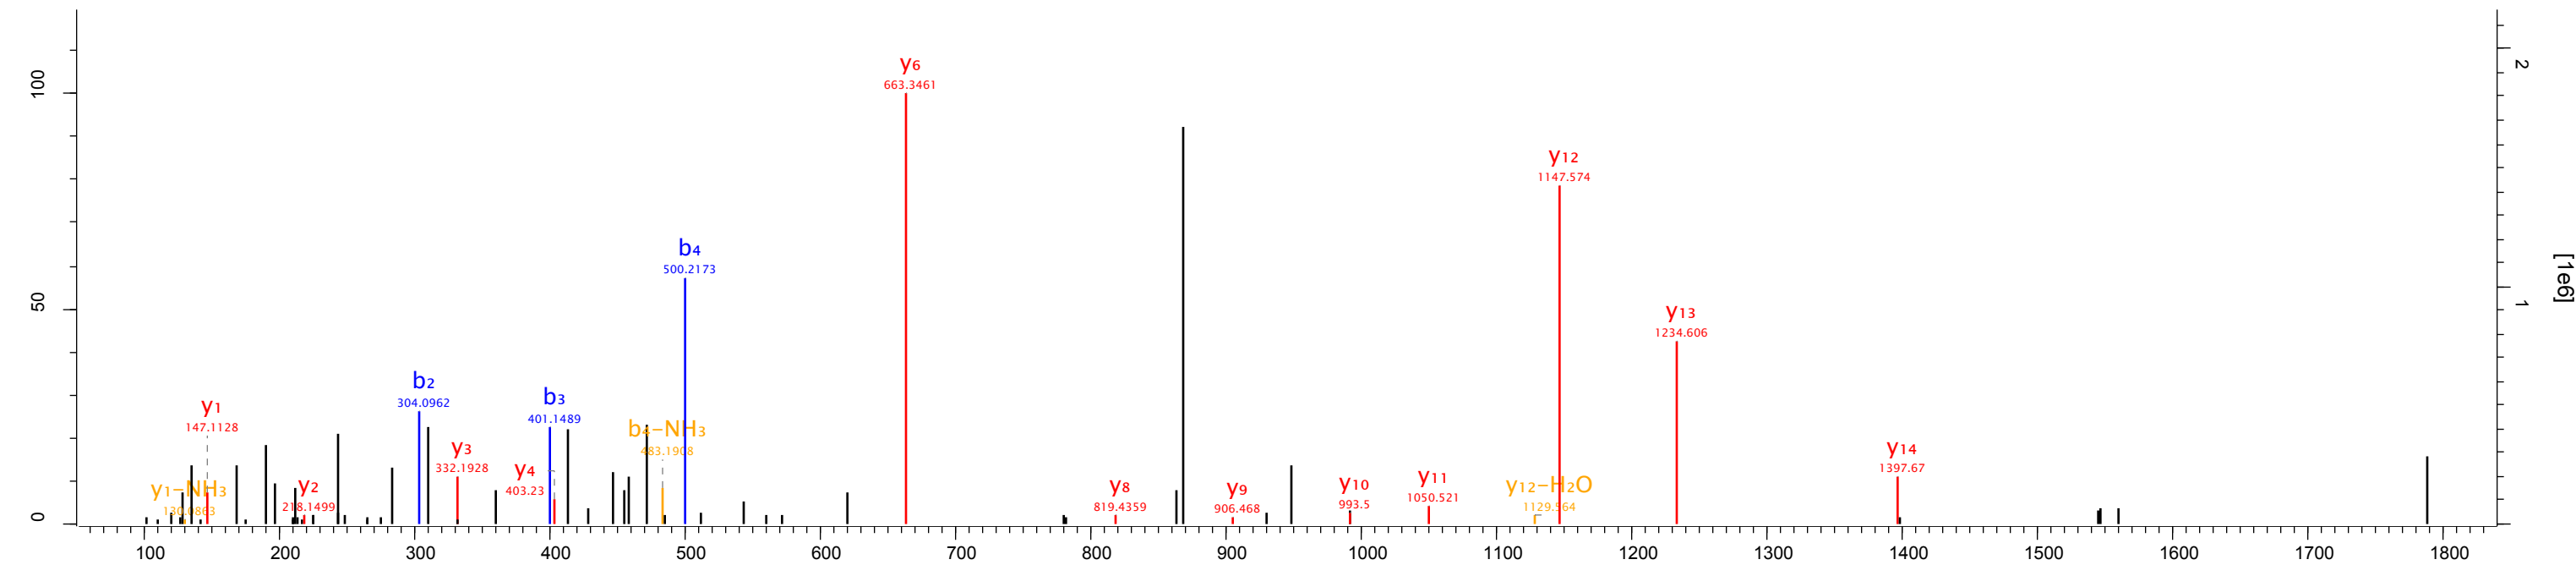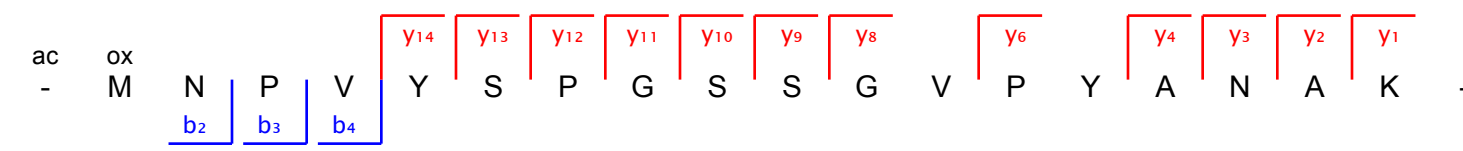



Raw file 20180707\_MaS\_A375SR\_ML\_proteome\_06 Scan 27465 Method FTMS; HCD Score 74.61 m/z 663.83 Gene names ANKRD30A

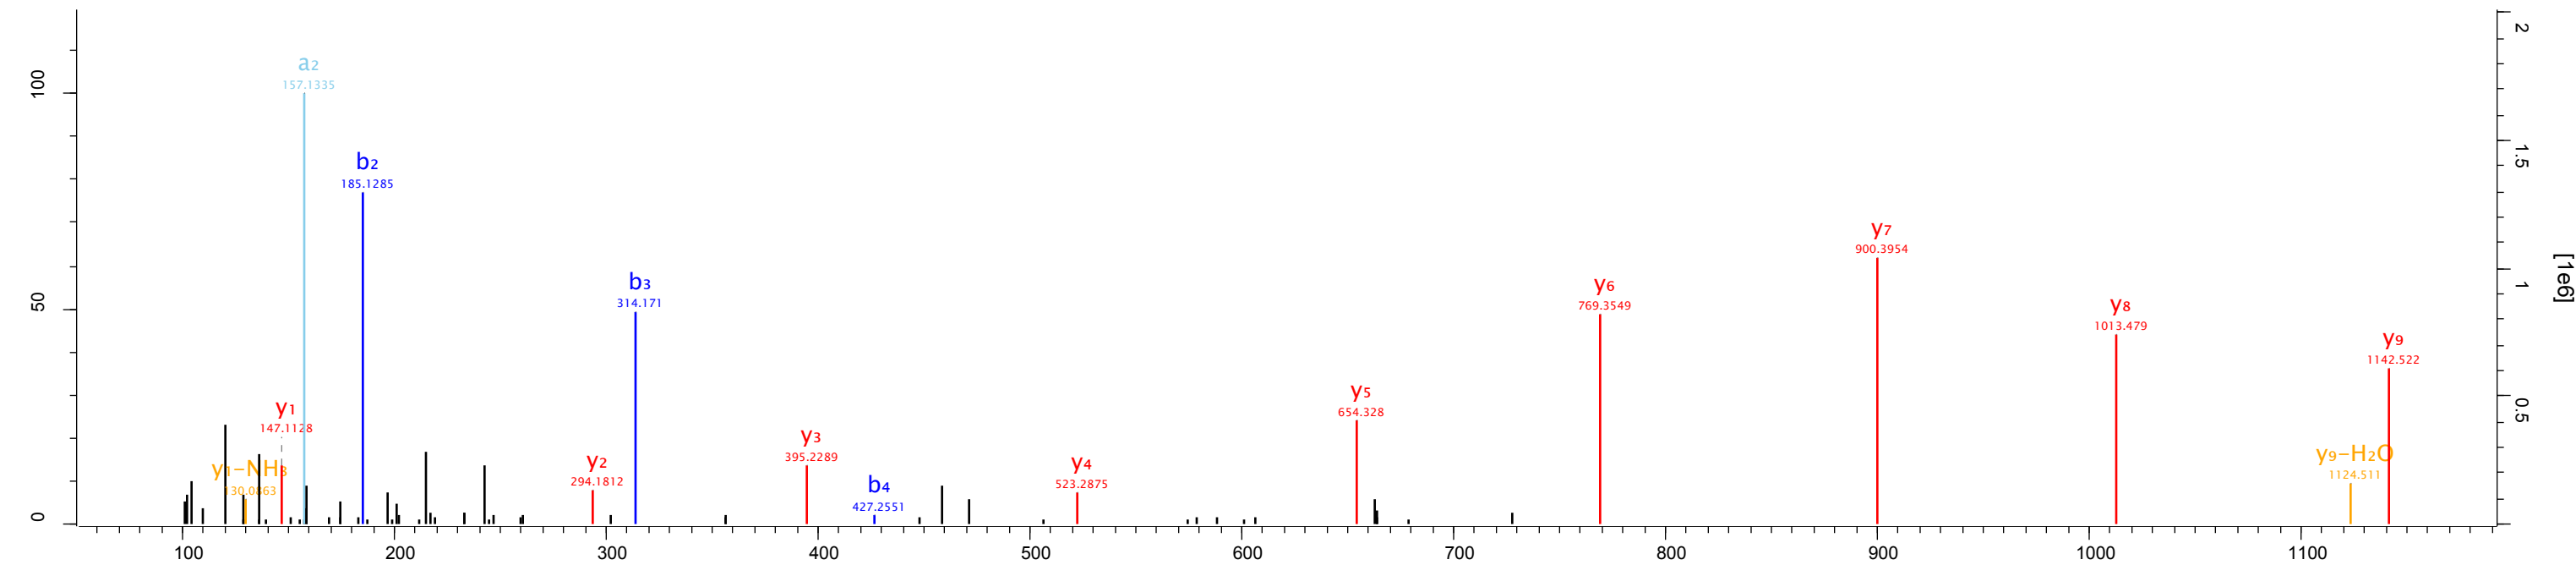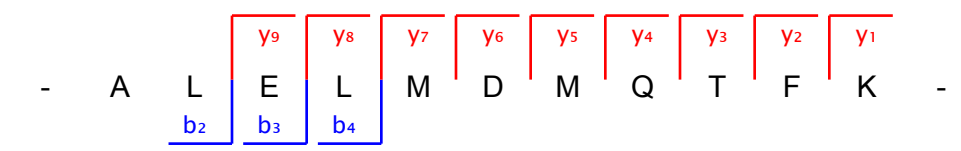



Raw file  
20180707\_MaS\_A375SR\_ML\_proteome\_07

Scan: 12515  
Method: FTMS; HCD  
Score: 48.76  
m/z: 386.22  
Gene names: RASD1

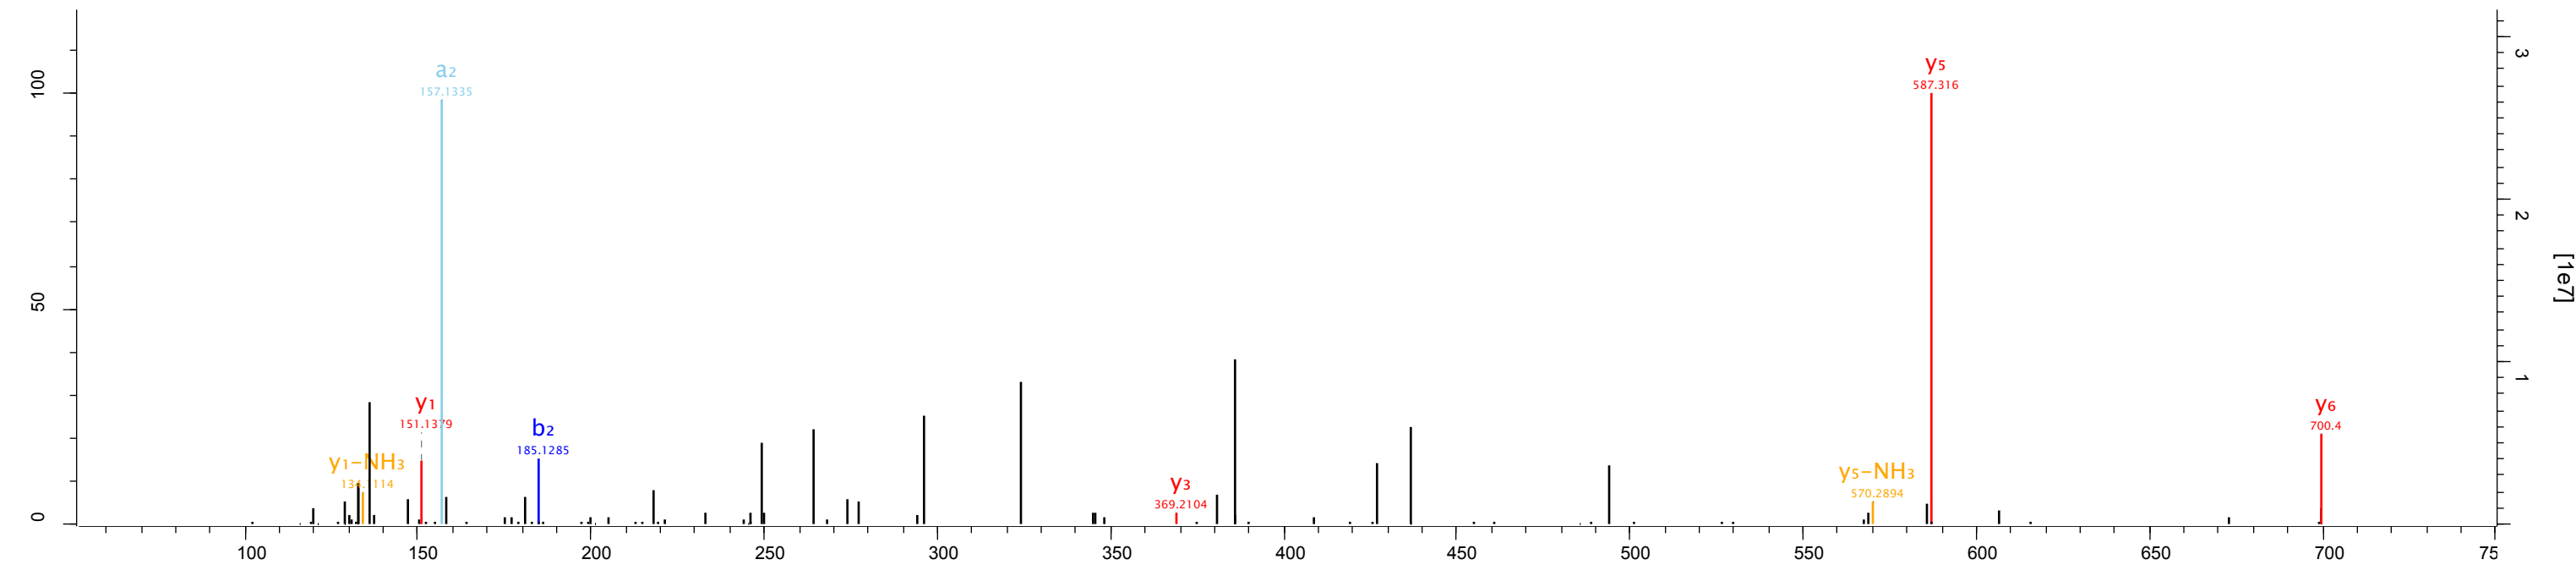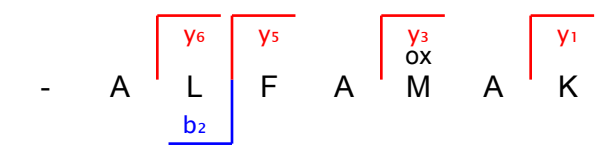

Raw file: 20180707\_MaS\_A375SR\_ML\_proteome\_08  
 Scan: 21875 Method: FTMS; HCD Score: 82.77 m/z: 697.35 Gene names: SLC31A1

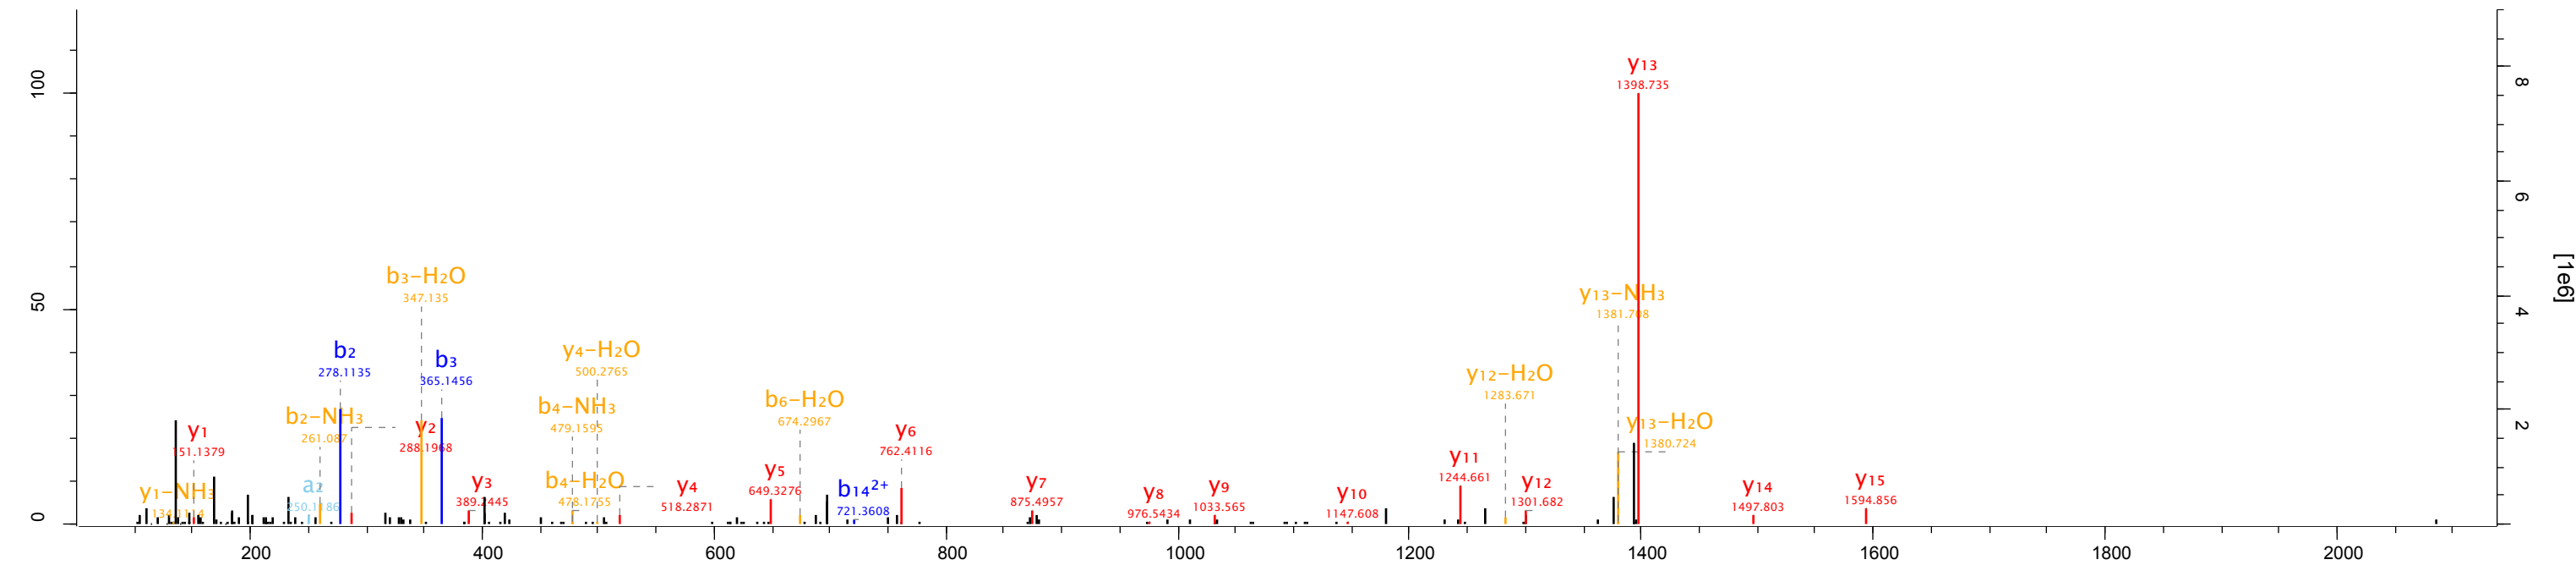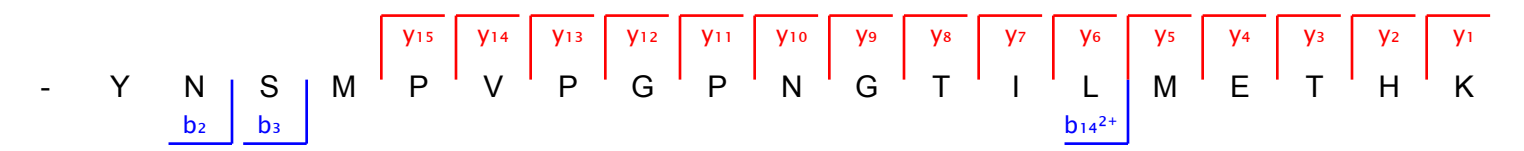

Raw file: 20180707\_MaS\_A375SR\_ML\_proteome\_08  
 Scan: 6755 Method: FTMS; HCD Score: 88.09 m/z: 720.32 Gene names: LEPROT

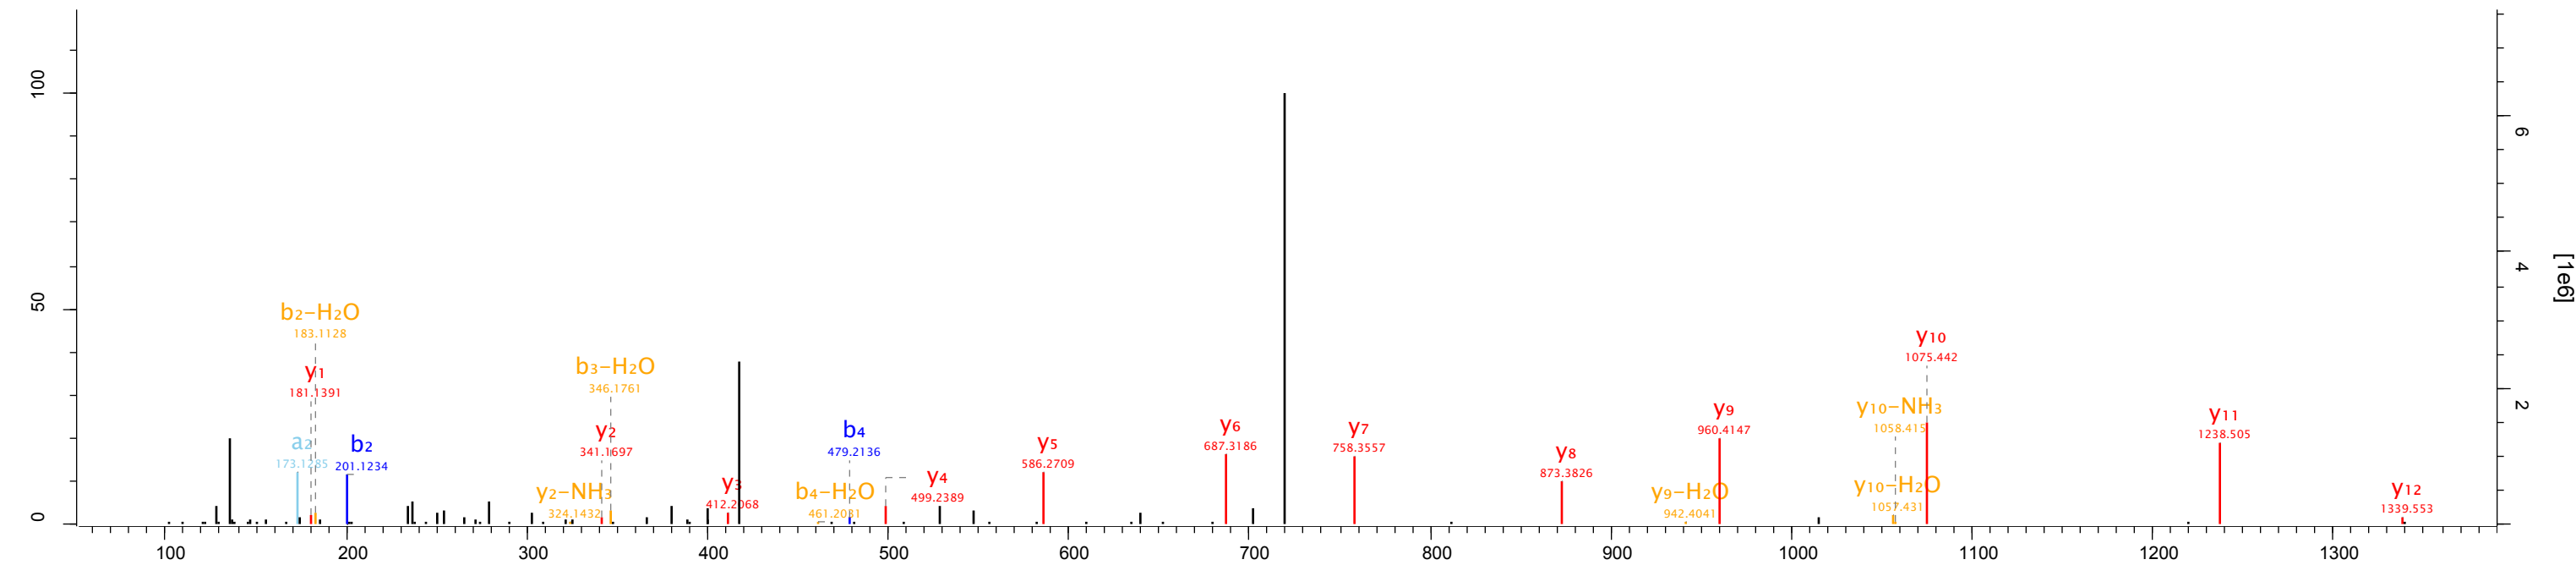

Raw file: 20180707\_MaS\_A375SR\_ML\_proteome\_09  
 Scan: 11895 Method: FTMS; HCD Score: 128.36 m/z: 495.27 Gene names: SLC11A2

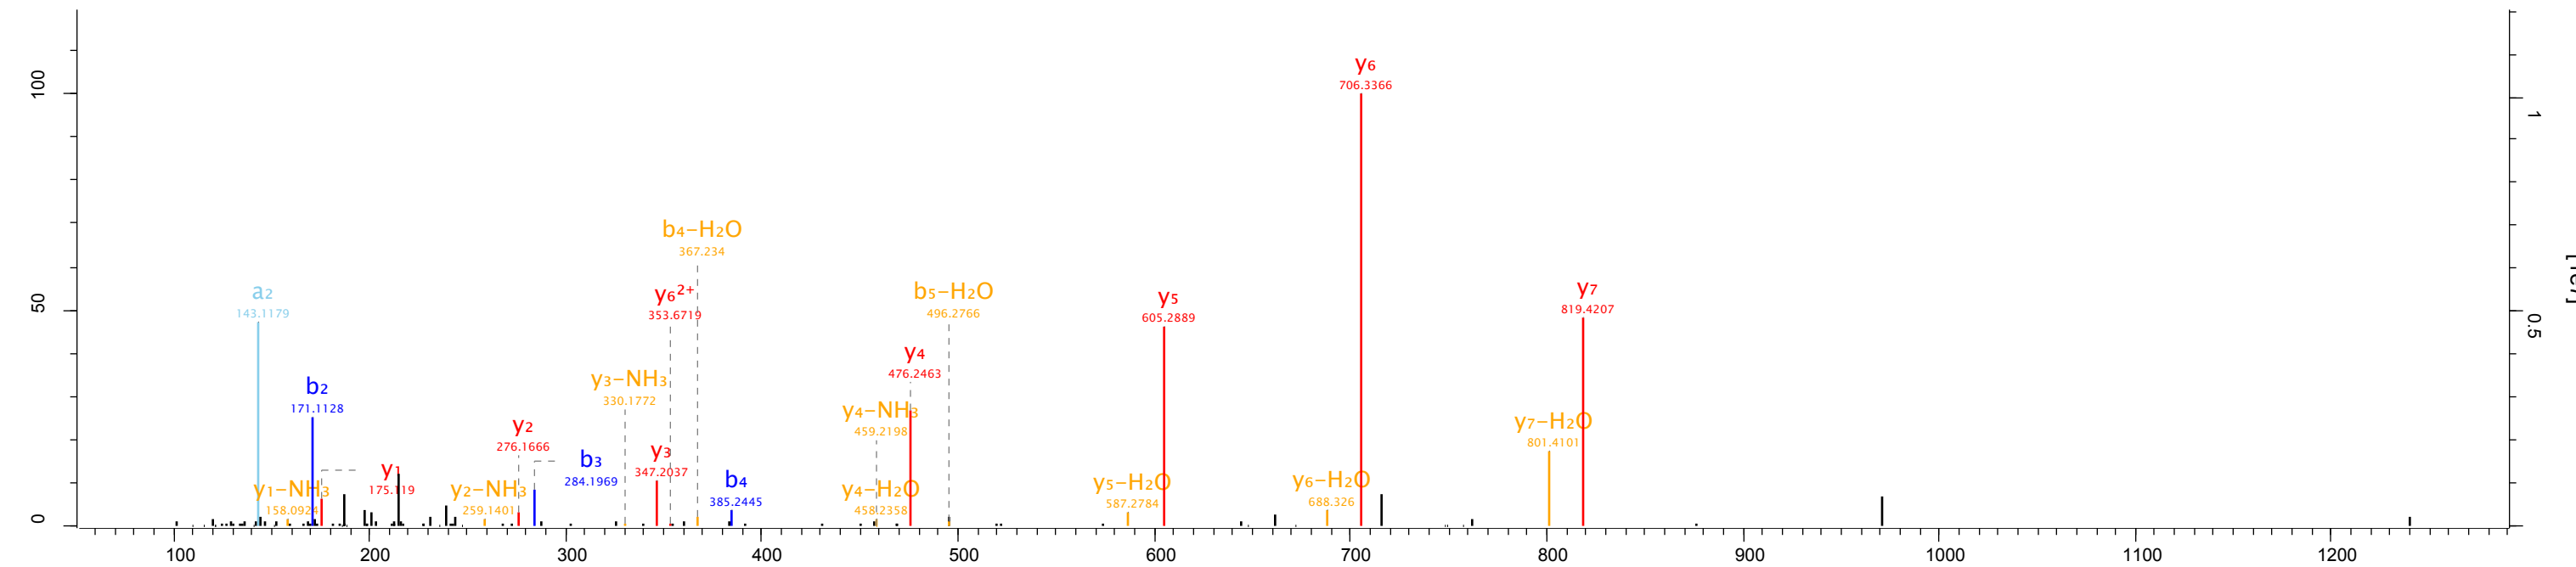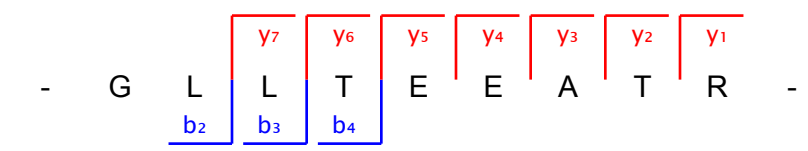

20180707\_MaS\_A375SR\_ML\_proteome\_09

26635 FTMS; HCD 130.19 569.94 SSR3

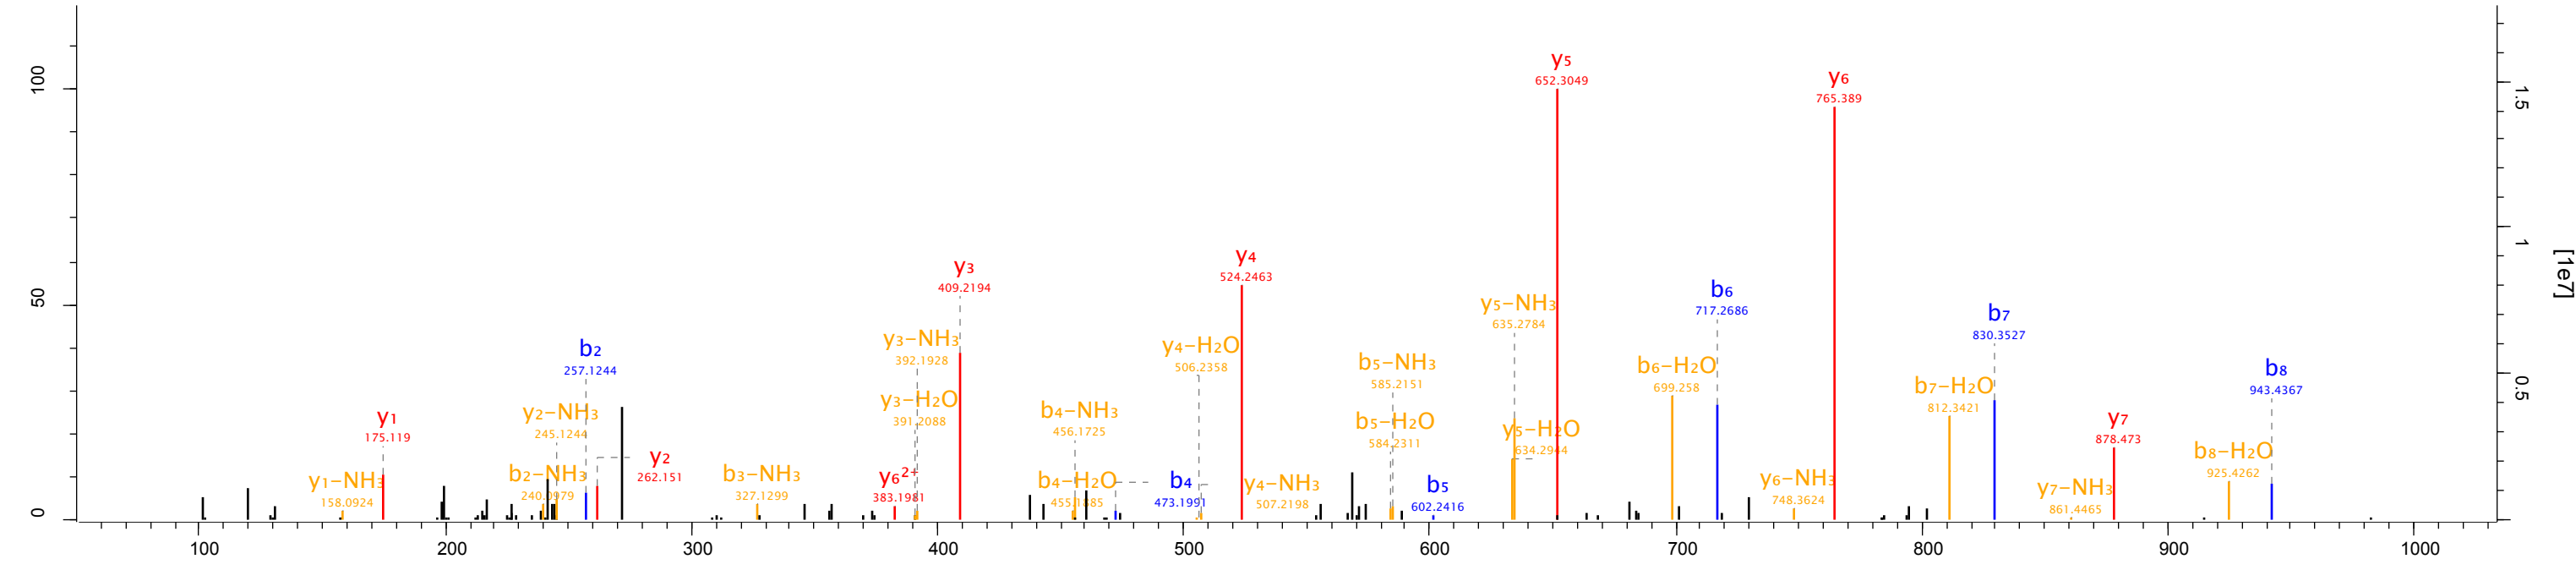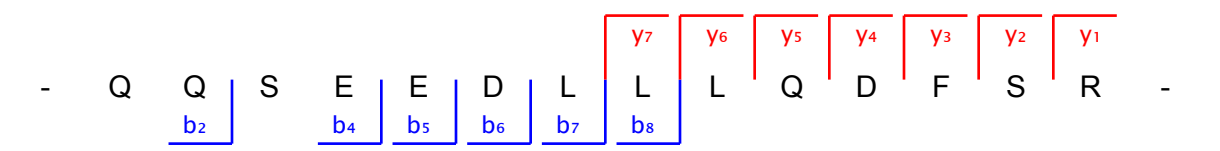

Raw file: 20180707\_MaS\_A375SR\_ML\_proteome\_09  
 Scan: 27655 Method: FTMS; HCD Score: 51.28 m/z: 743.32 Gene names: KLK10

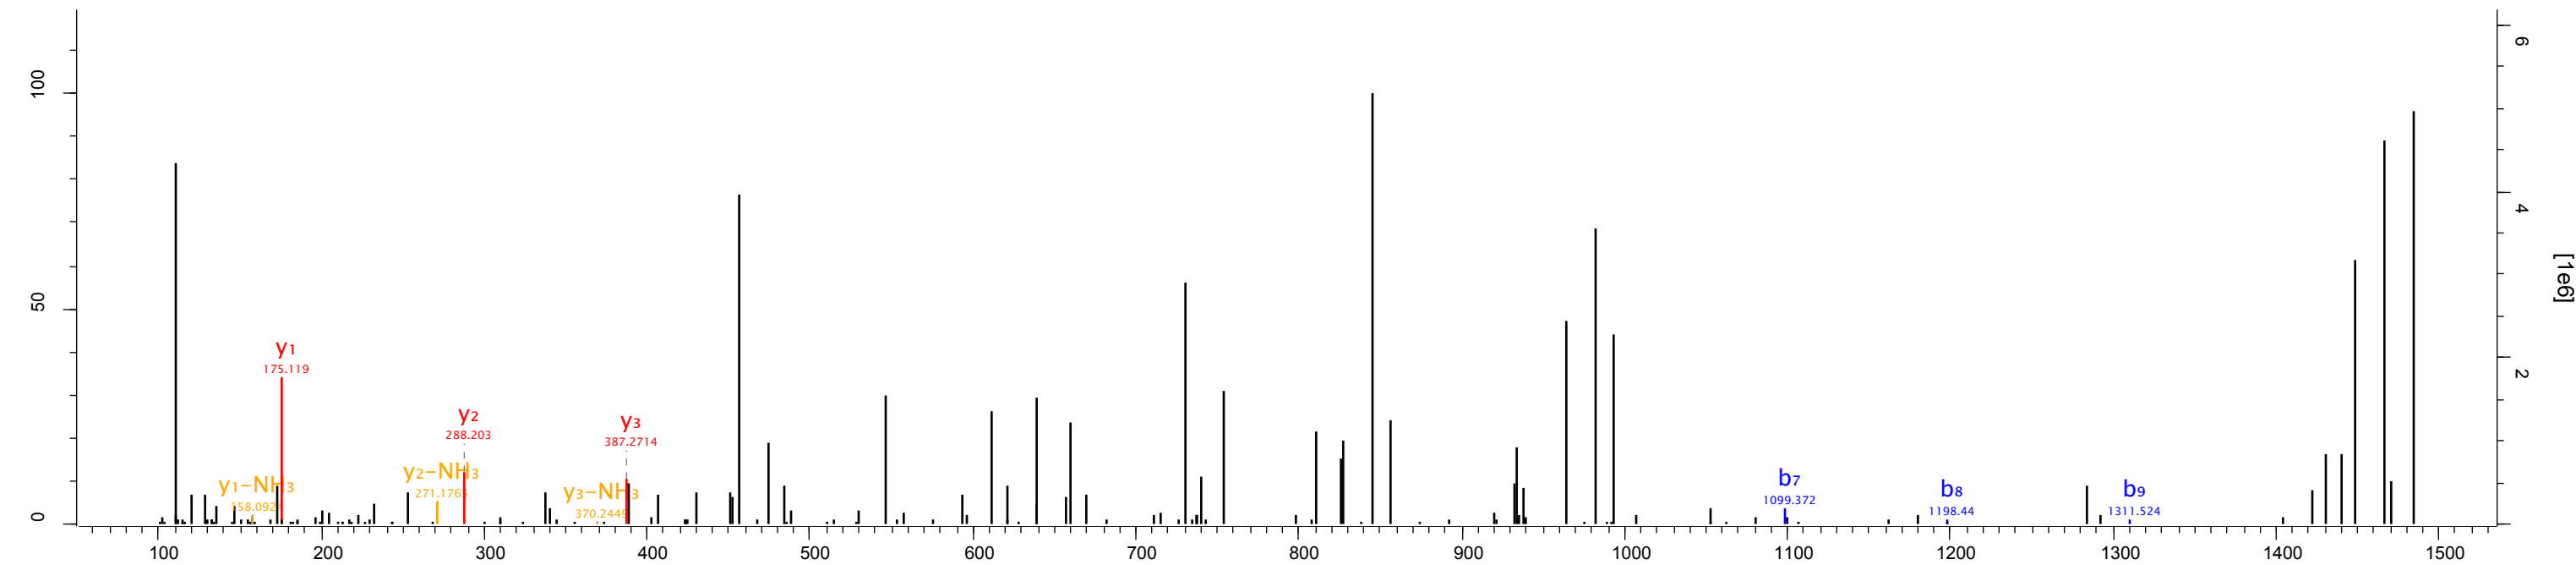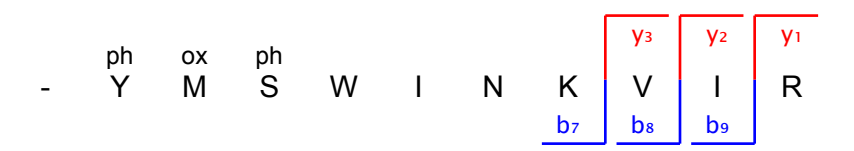



Raw file  
20180707\_MaS\_A375SR\_ML\_proteome\_10

Scan 27885 Method FTMS; HCD Score 105.58 m/z 857.92 Gene names SSR3

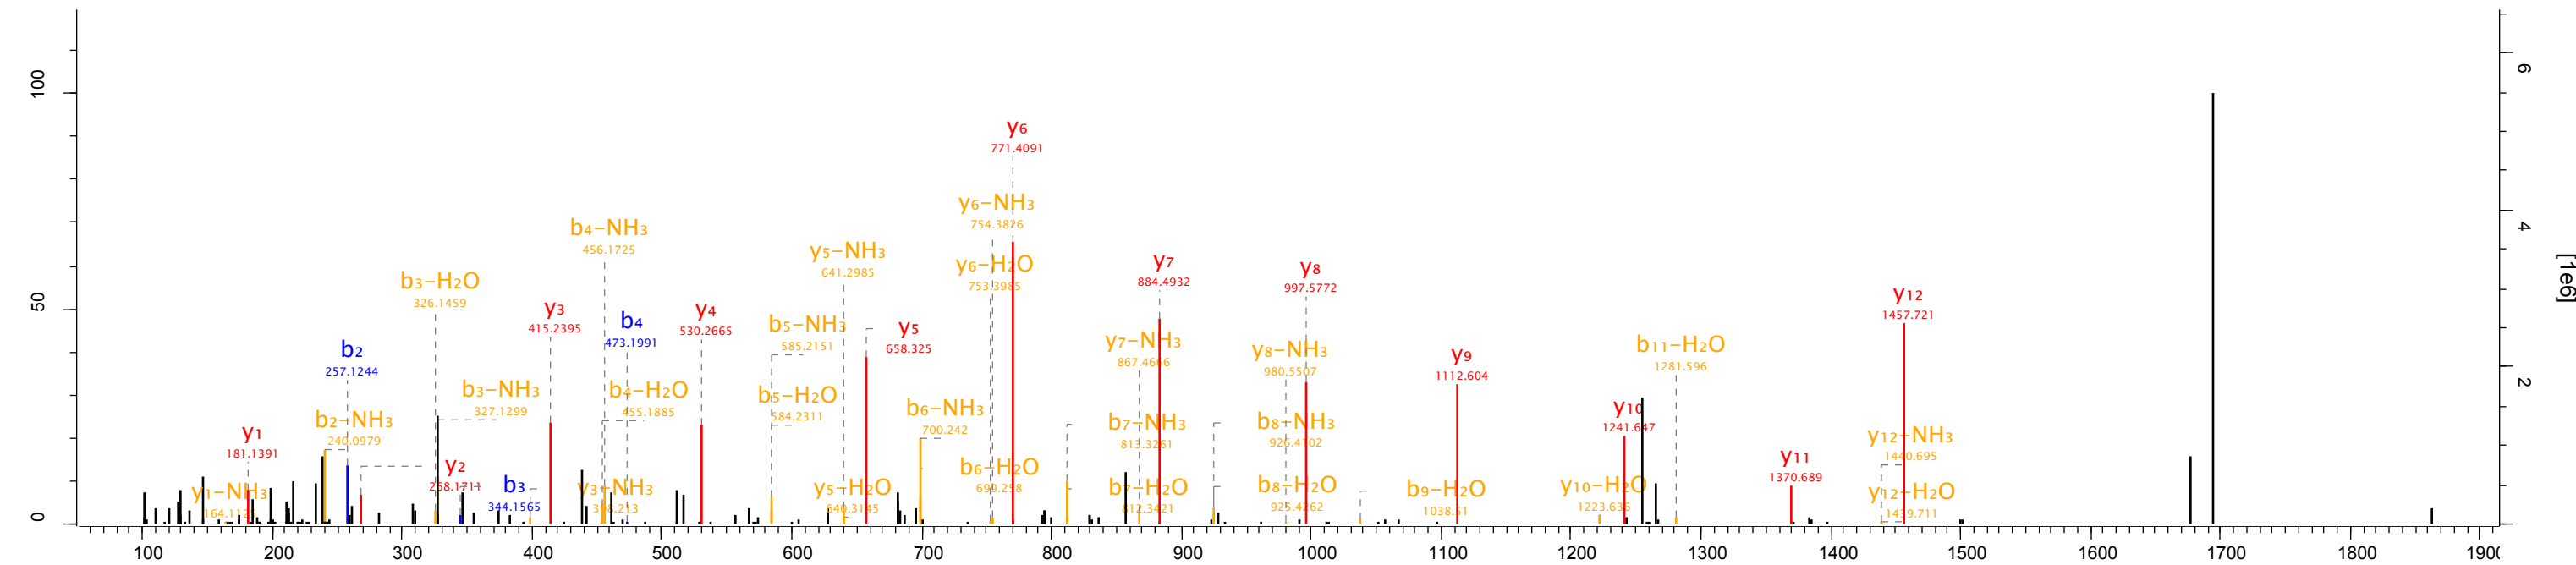

- Q Q S E E D L L L Q D F S R -  
b2 b3 b4



Raw file: 20180707\_MaS\_A375SR\_ML\_proteome\_10  
 Scan: 9985 Method: FTMS; HCD Score: 107.21 m/z: 550.29 Gene names: ESCO1

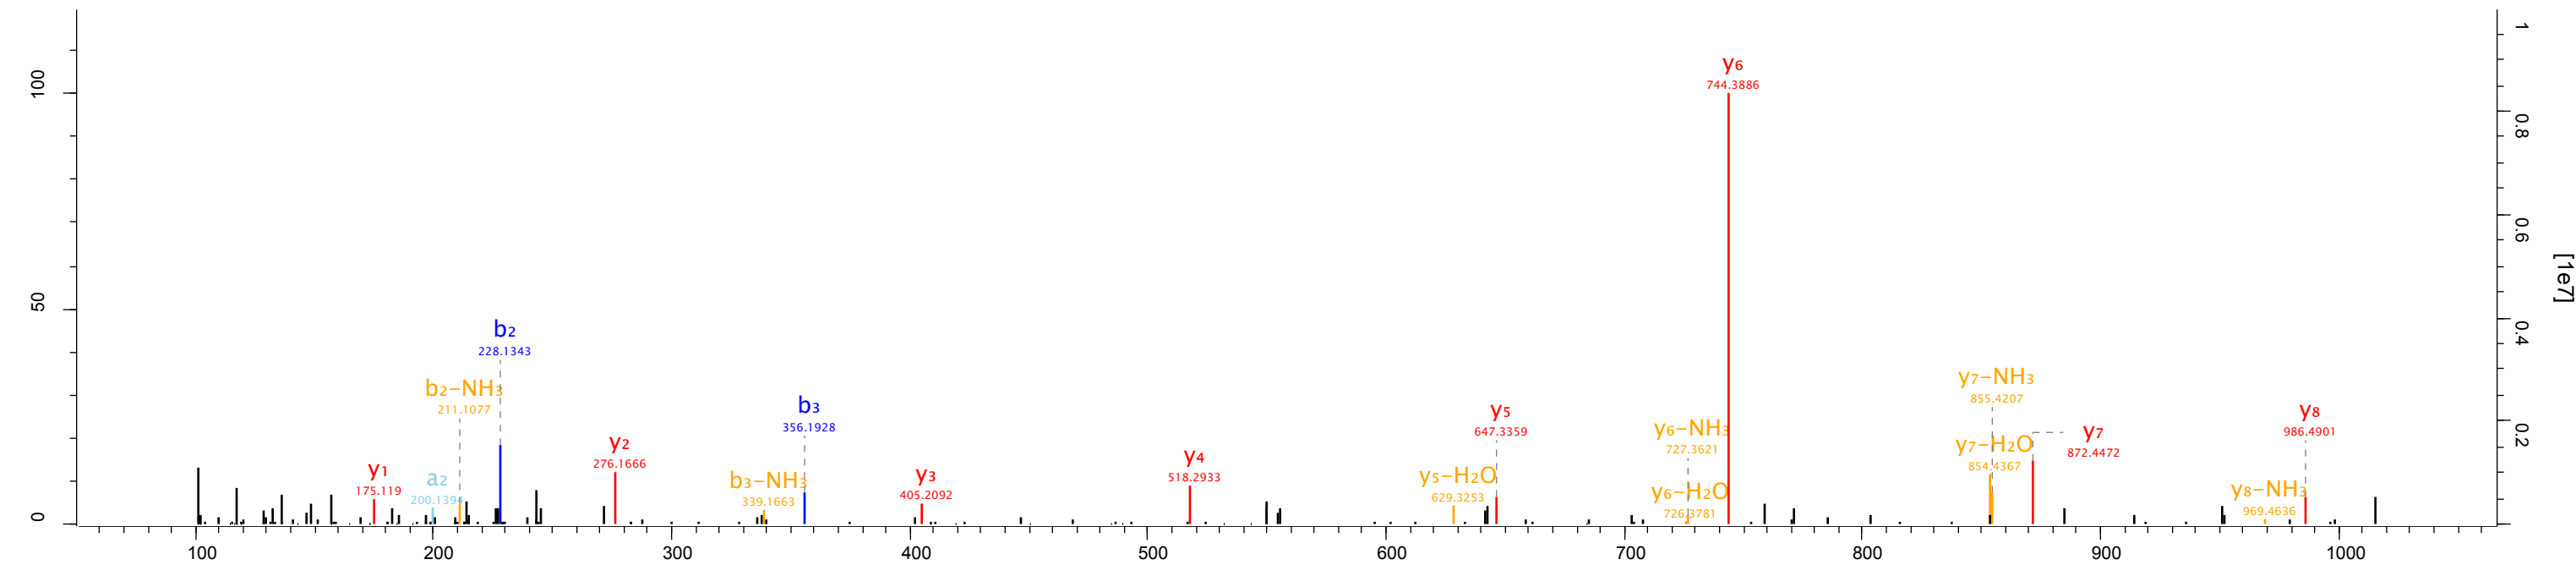

Raw file  
20180707\_MaS\_A375SR\_ML\_proteome\_11

Scan 27985 Method FTMS; HCD Score 90.91 m/z 531.3 Gene names CYB561

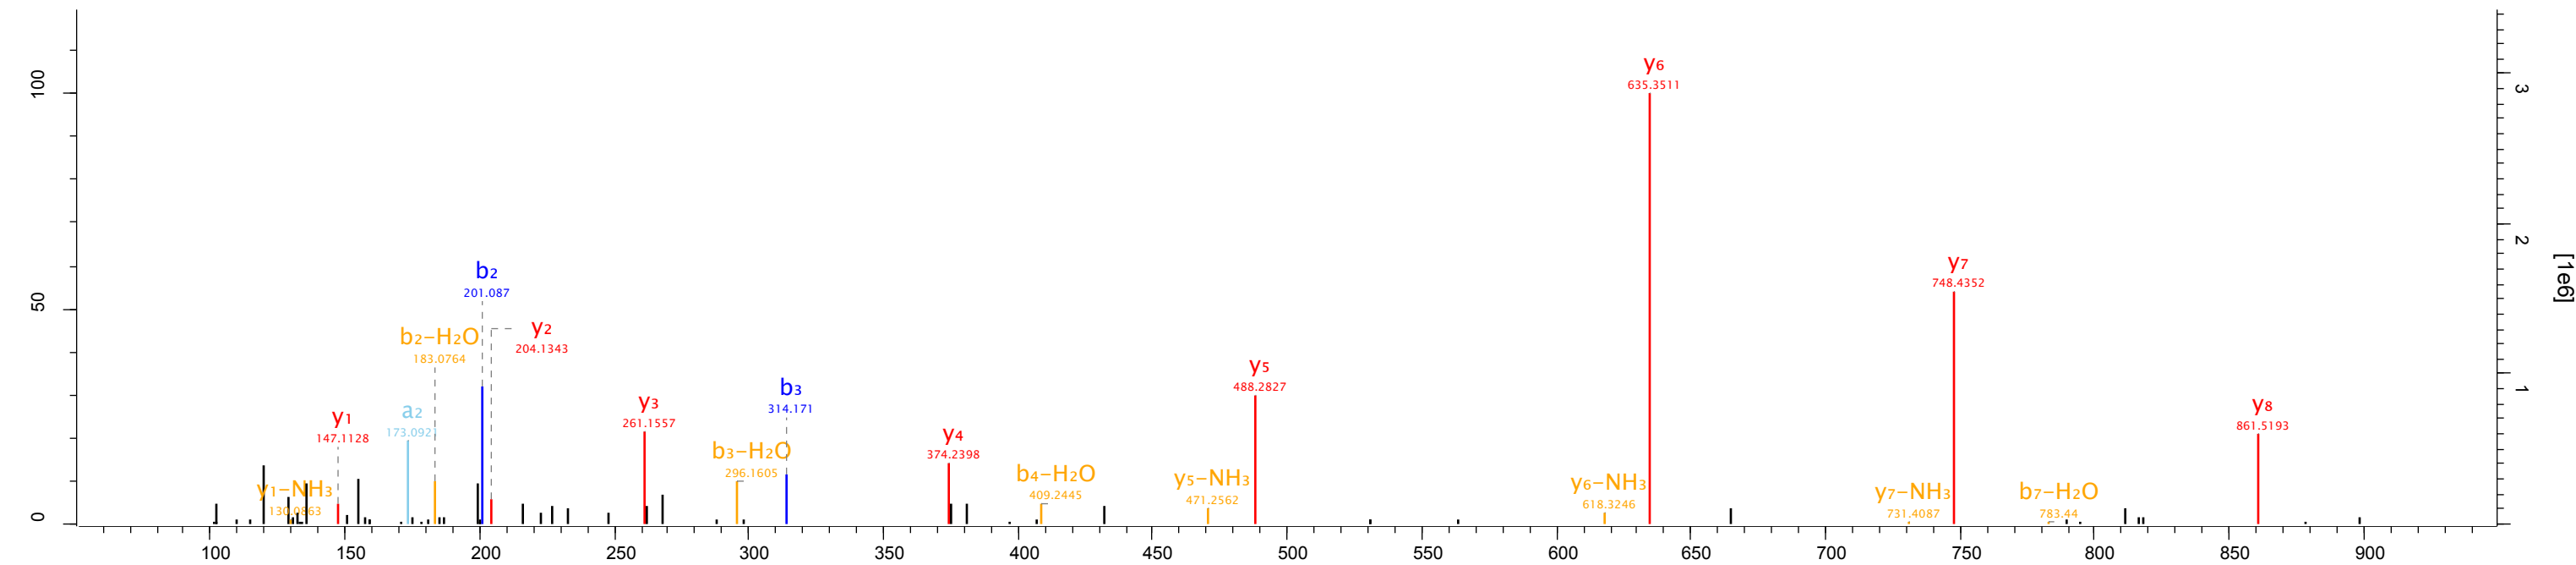

Raw file  
20180707\_MaS\_A375SR\_ML\_proteome\_11

Scan 3165 Method FTMS; HCD Score 110.53 m/z 541.77 Gene names TM4SF1

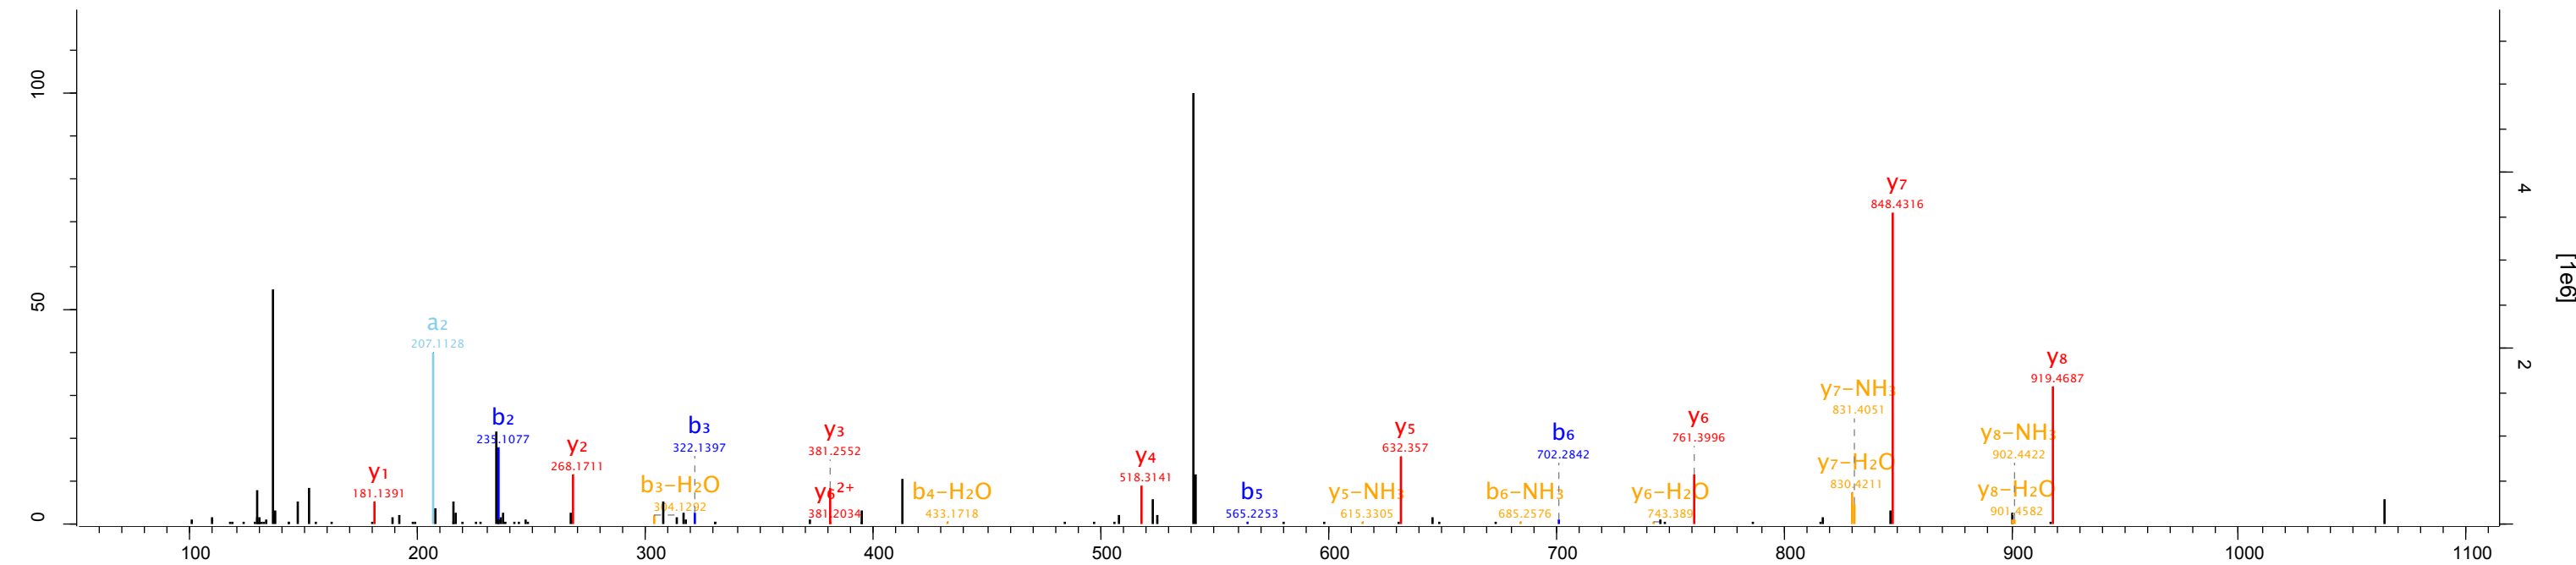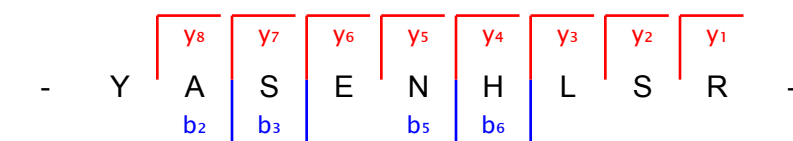

Raw file: 20180707\_MaS\_A375SR\_ML\_proteome\_11  
 Scan: 3335 Method: FTMS; HCD Score: 41.23 m/z: 403.2 Gene names: MT-CO3

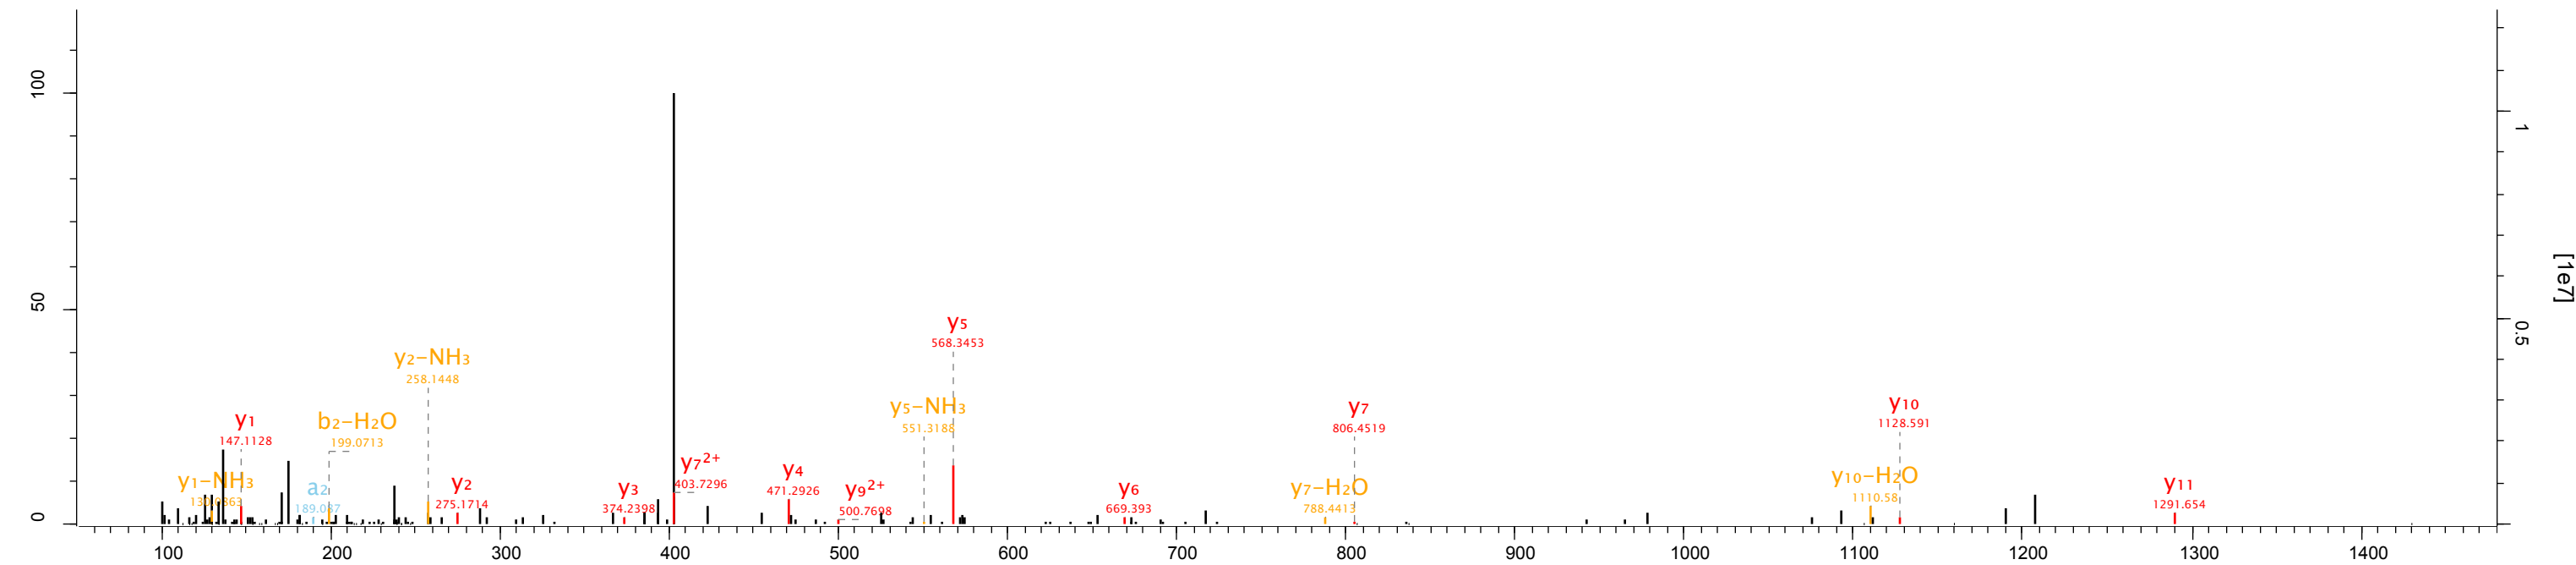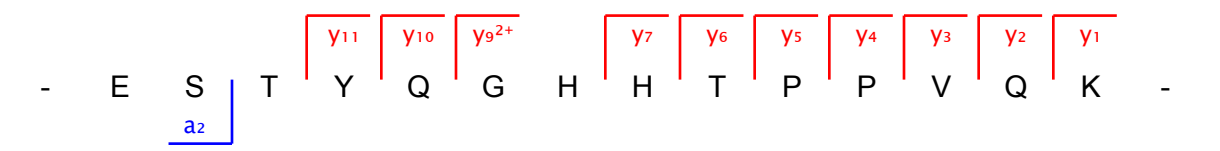

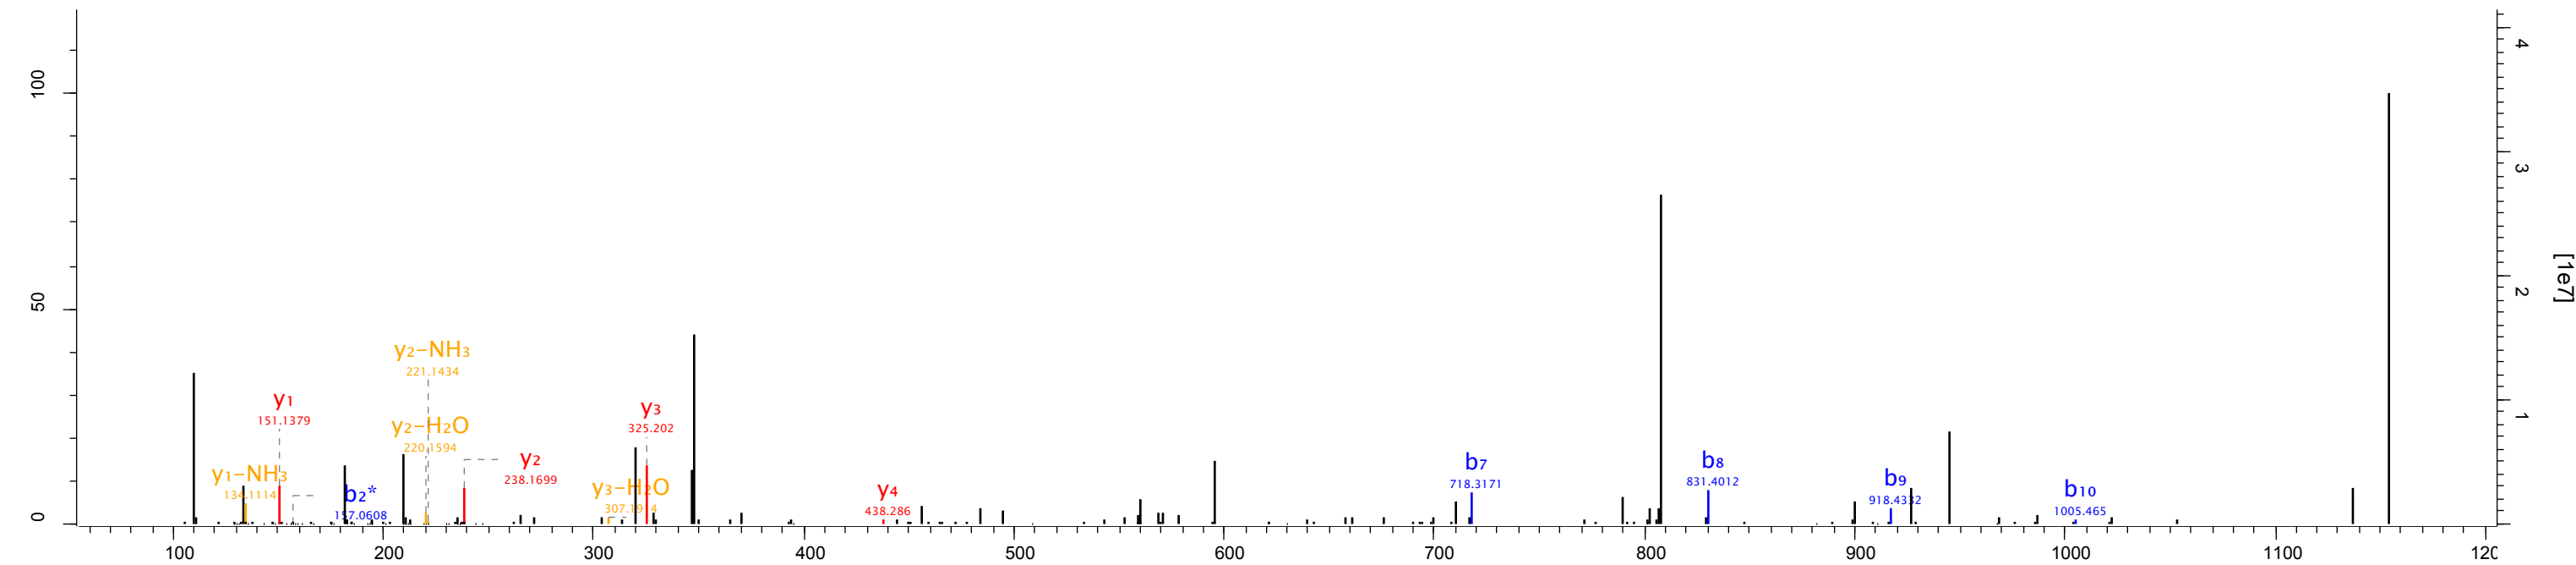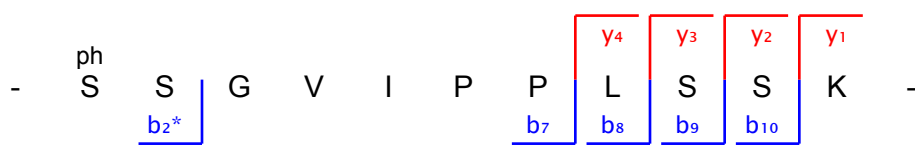

Raw file 20180707\_MaS\_A375SR\_ML\_proteome\_11 Scan 4295 Method FTMS; HCD Score 66.19 m/z 576.29

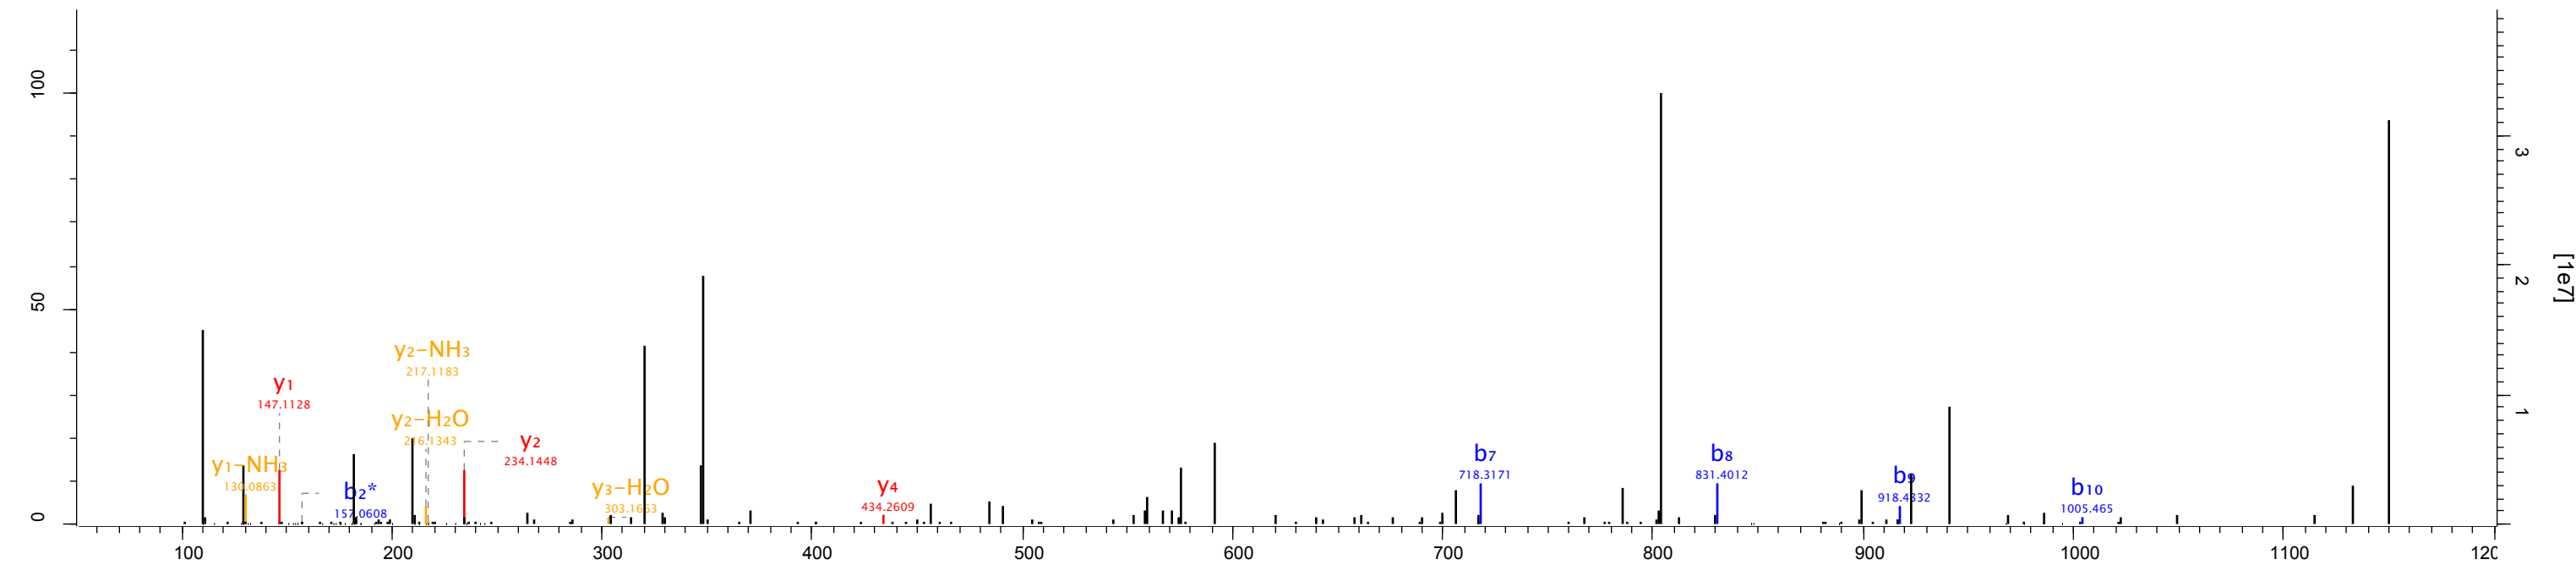

Raw file: 20180707\_MaS\_A375SR\_ML\_proteome\_12  
 Scan: 11445 Method: FTMS; HCD Score: 47.71 m/z: 716.3

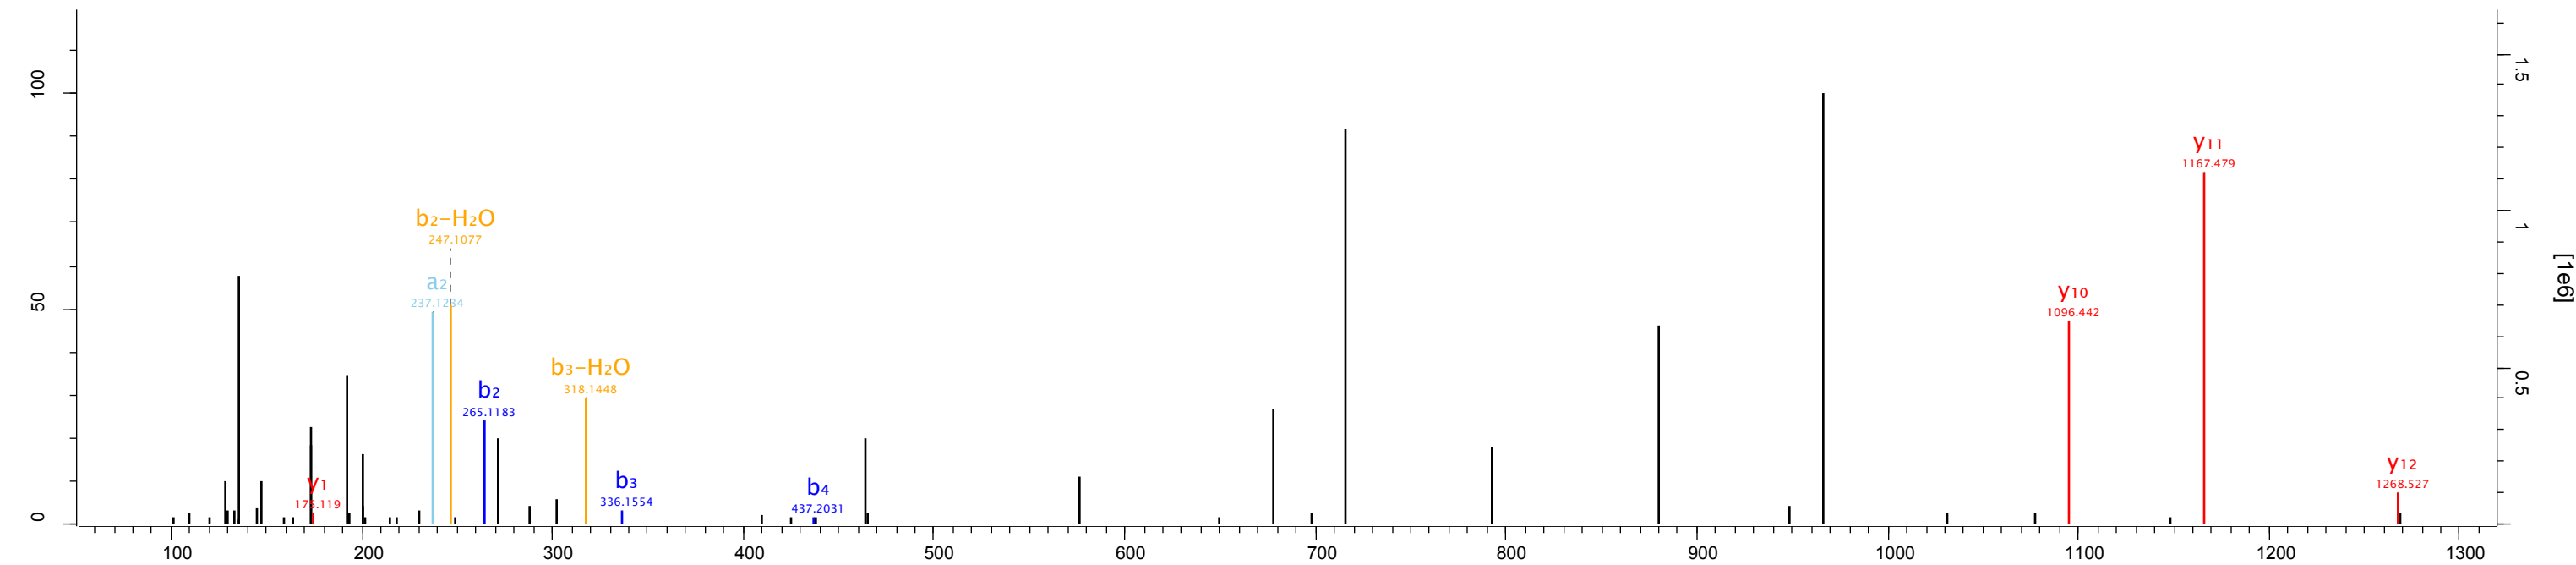

Raw file: 20180707\_MaS\_A375SR\_ML\_proteome\_12  
 Scan: 11505 Method: FTMS; HCD Score: 56.2 m/z: 719.31

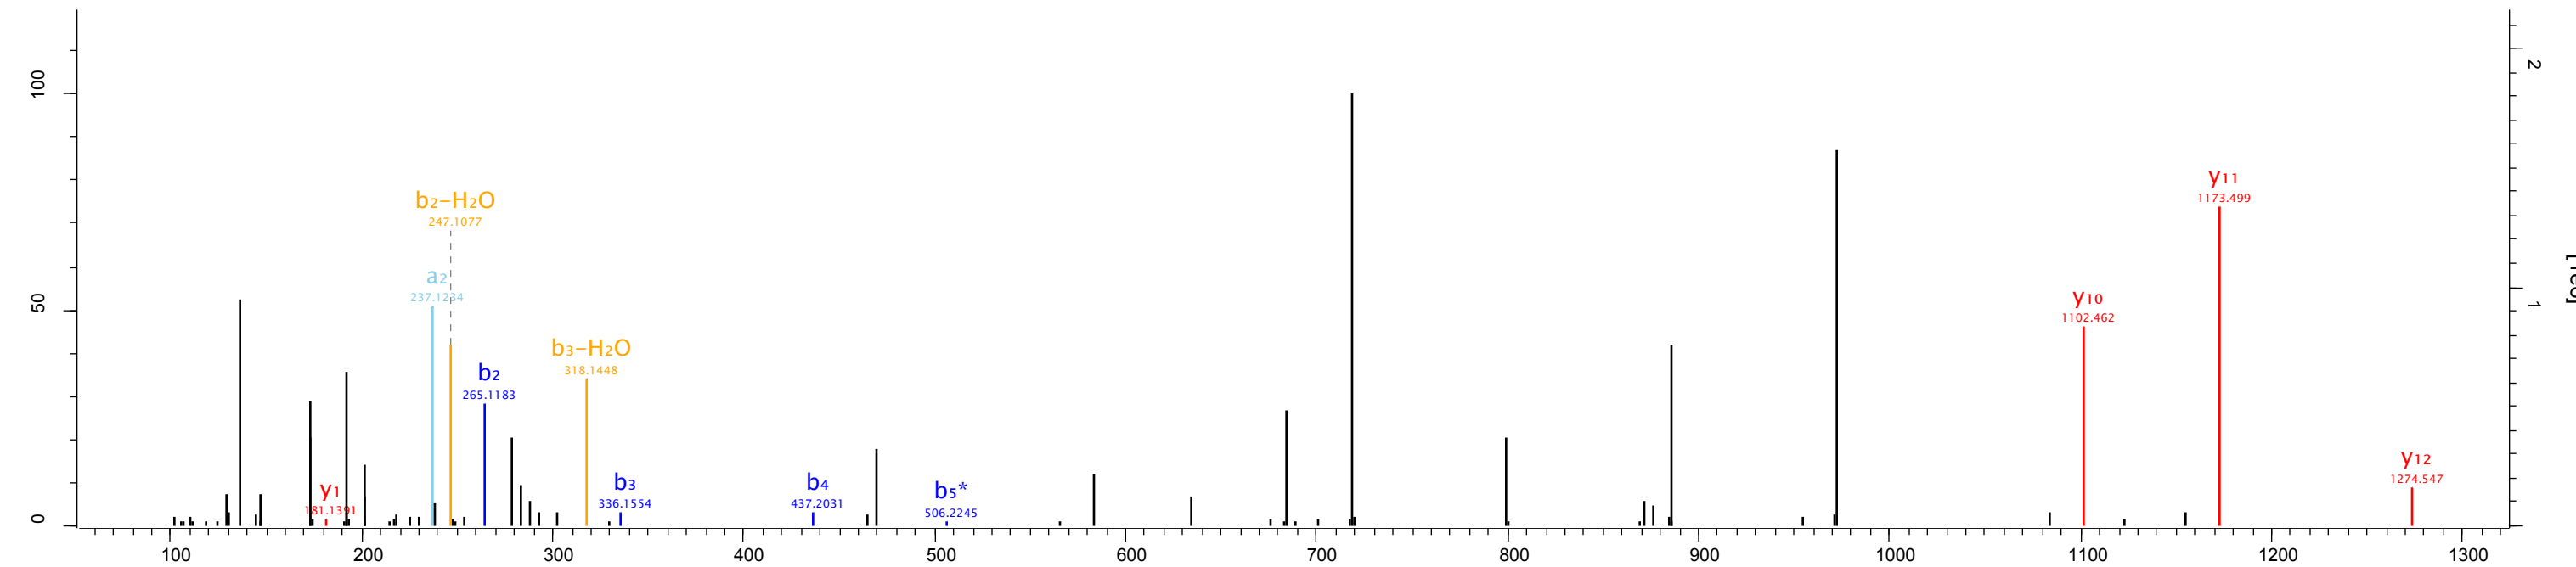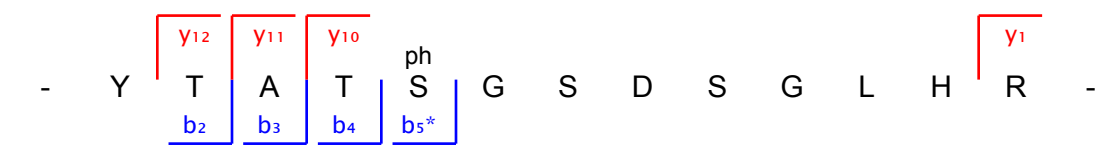



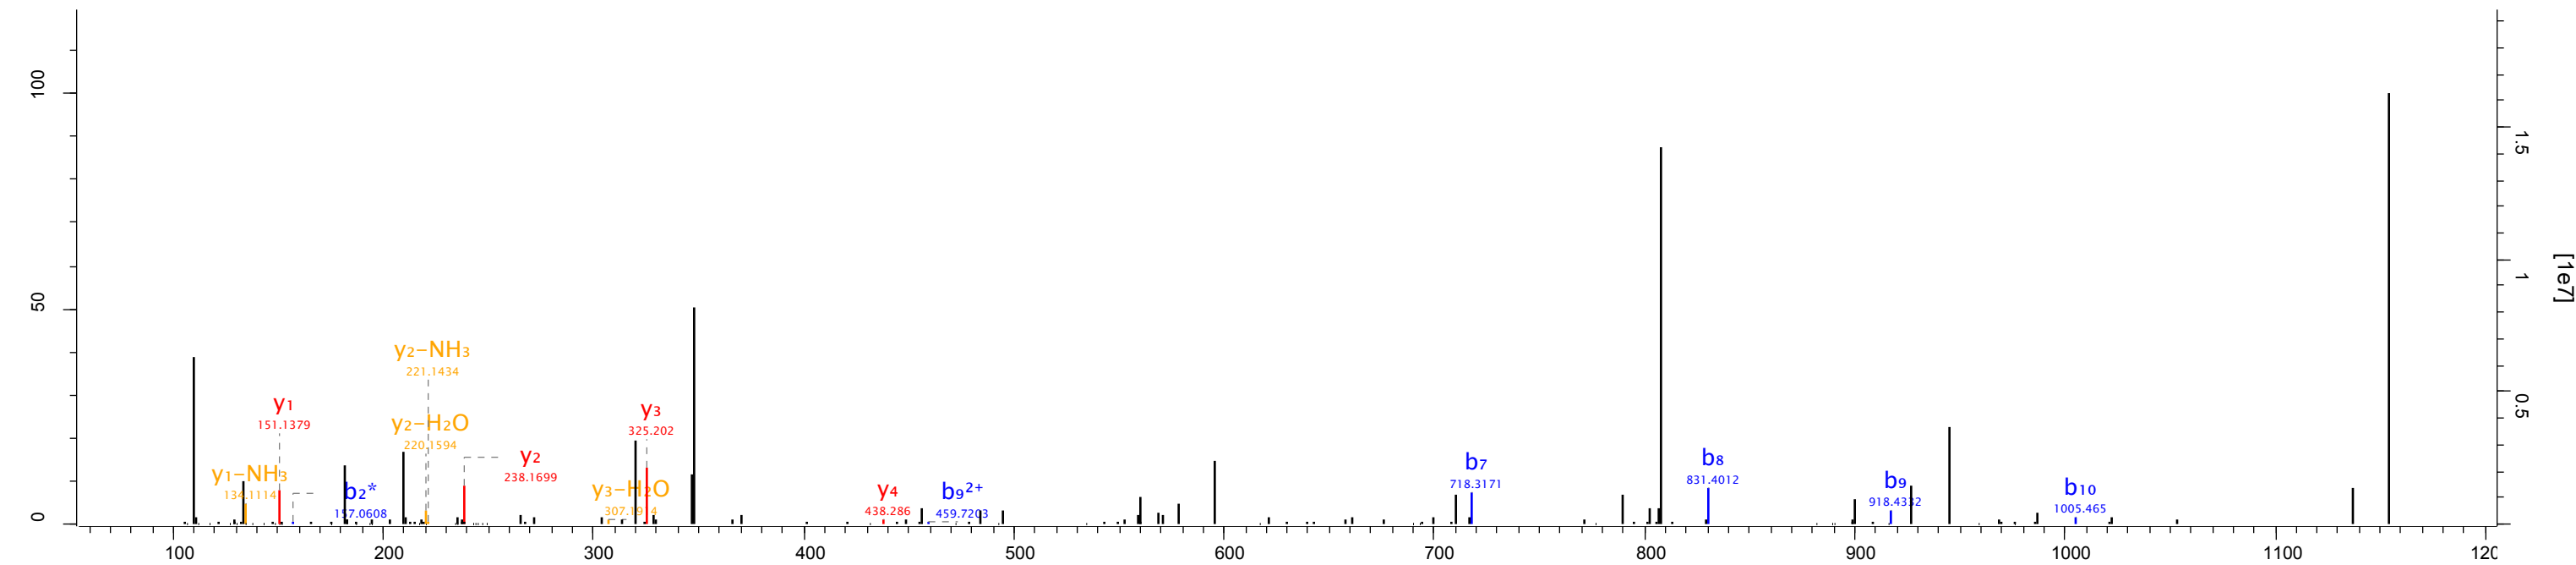

Raw file  
20180707\_MaS\_A375SR\_ML\_proteome\_13

Scan 14085 Method FTMS; HCD Score 122.19 m/z 483.72 Gene names TMEM258

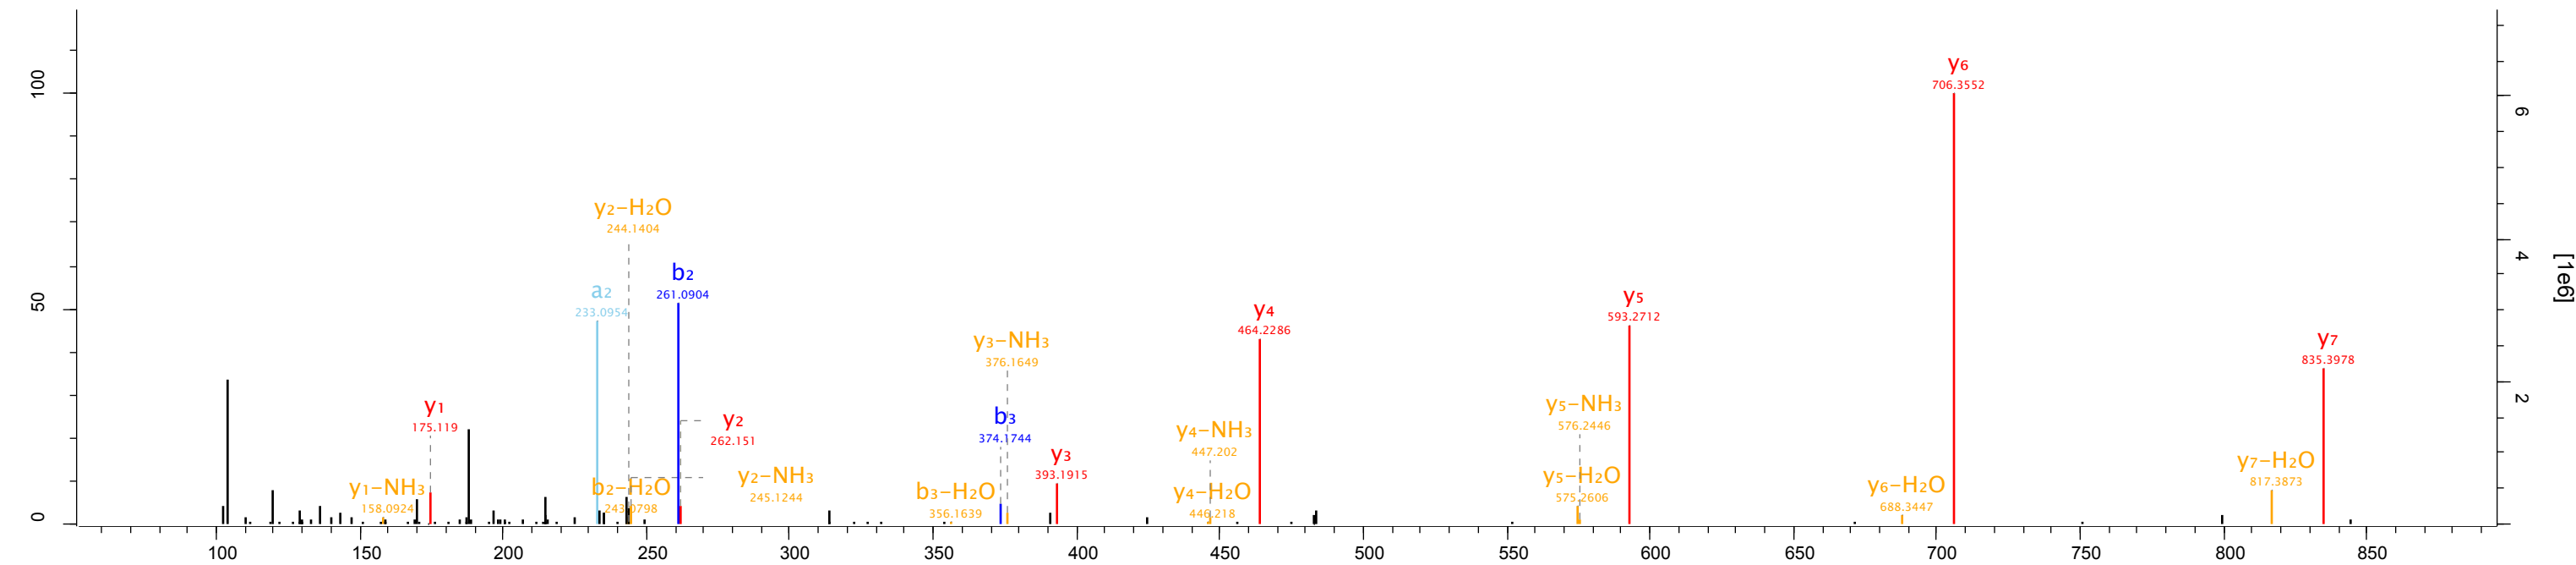

Raw file  
20180707\_MaS\_A375SR\_ML\_proteome\_14

Scan 17765 Method FTMS; HCD Score 107.95 m/z 559.35 Gene names NAT9

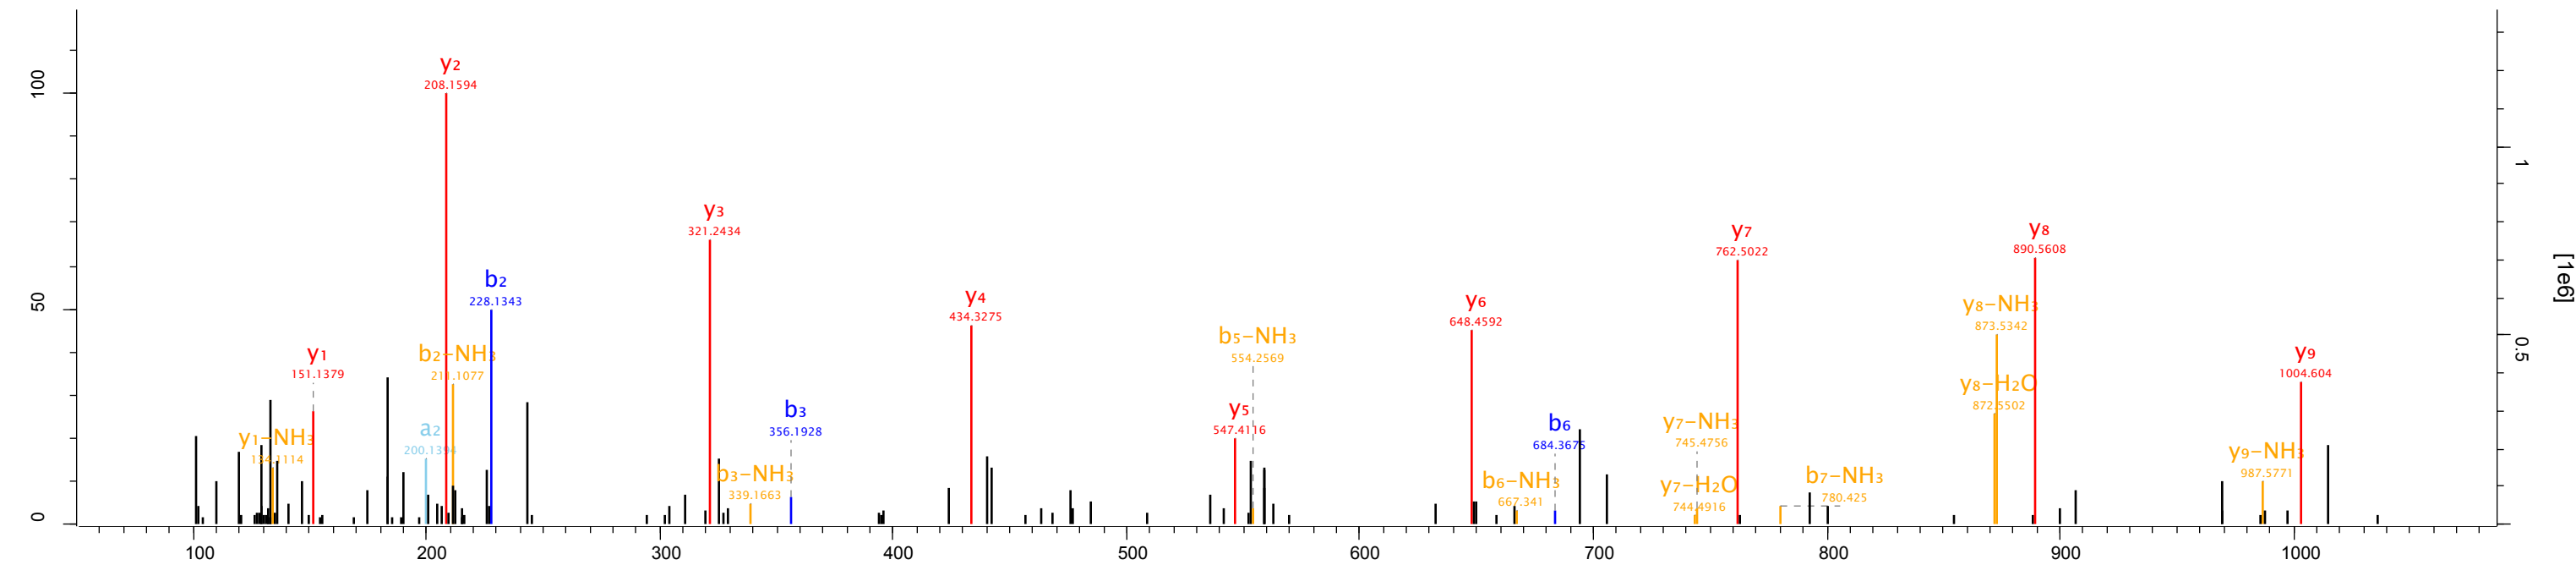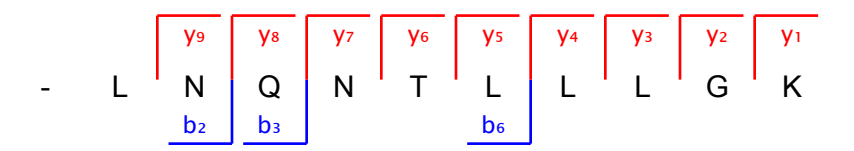

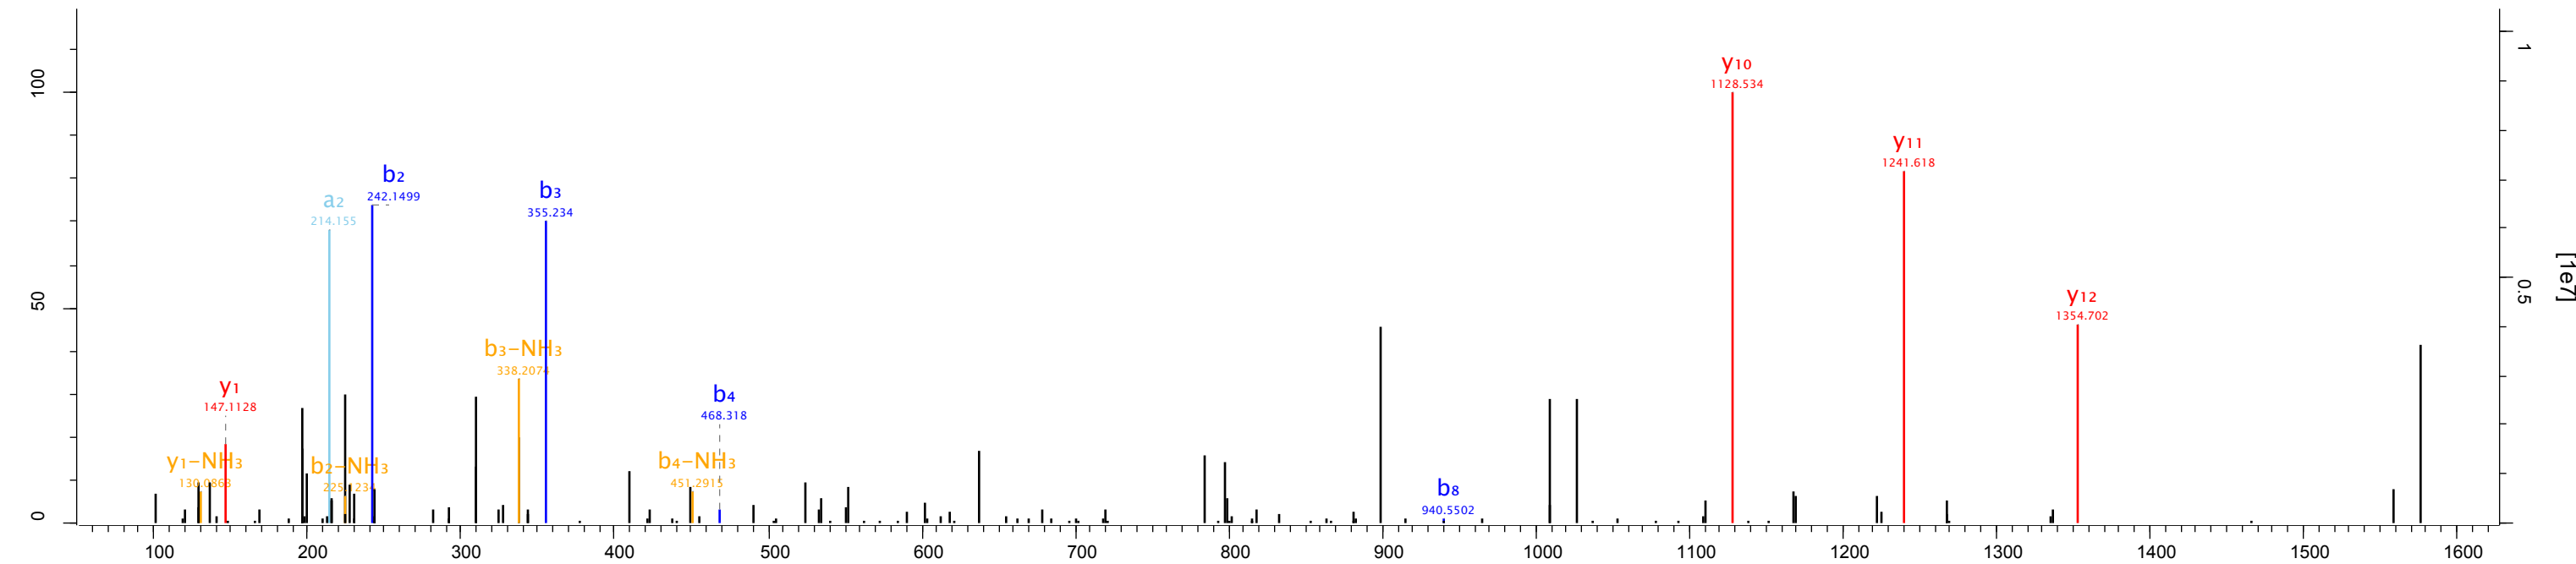

- L Q L L F D L P A L T G S K -

Fragmentation mapping:

- Q: b2
- L: b3
- L: b4
- P: b8
- T: ph
- S: y1
- K: y1
- F: y10
- L: y11
- L: y12

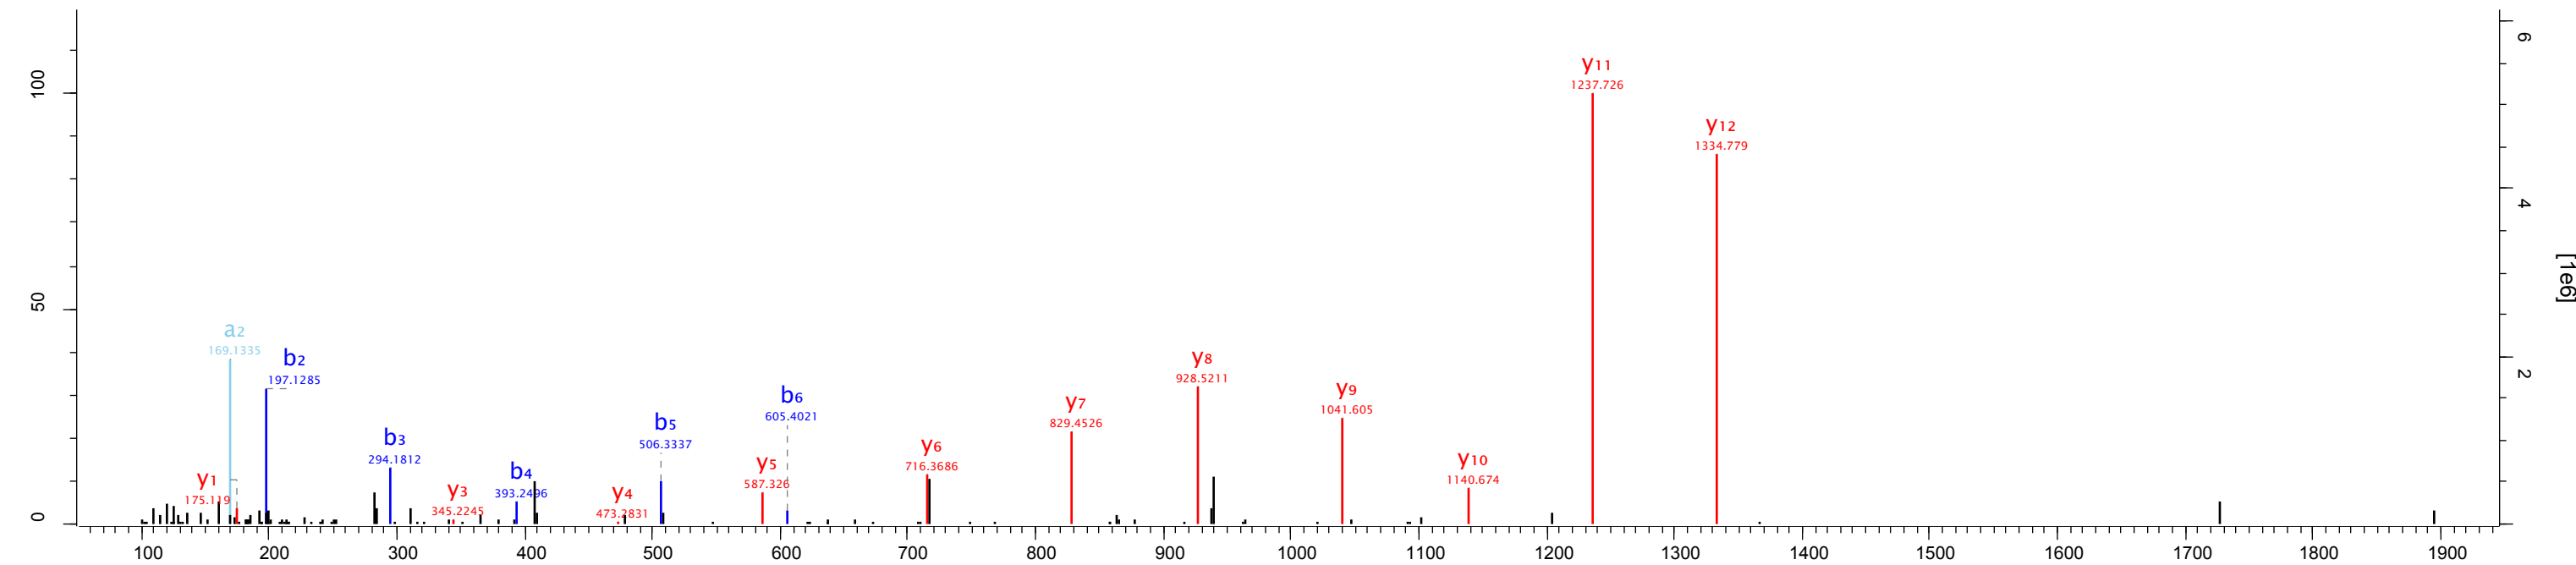

- V P P V I V L E N Q G L R -

Fragmentation mapping (b and y ions):

- b2: P
- b3: P
- b4: V
- b5: I
- b6: V
- y1: R
- y3: Q
- y4: G
- y5: N
- y6: E
- y7: L
- y8: V
- y9: I
- y10: V
- y11: P
- y12: P

Raw file

20180707\_MaS\_A375SR\_ML\_proteome\_15

Scan 8015 Method FTMS; HCD Score 61.59 m/z 709.27 Gene names ZNF704

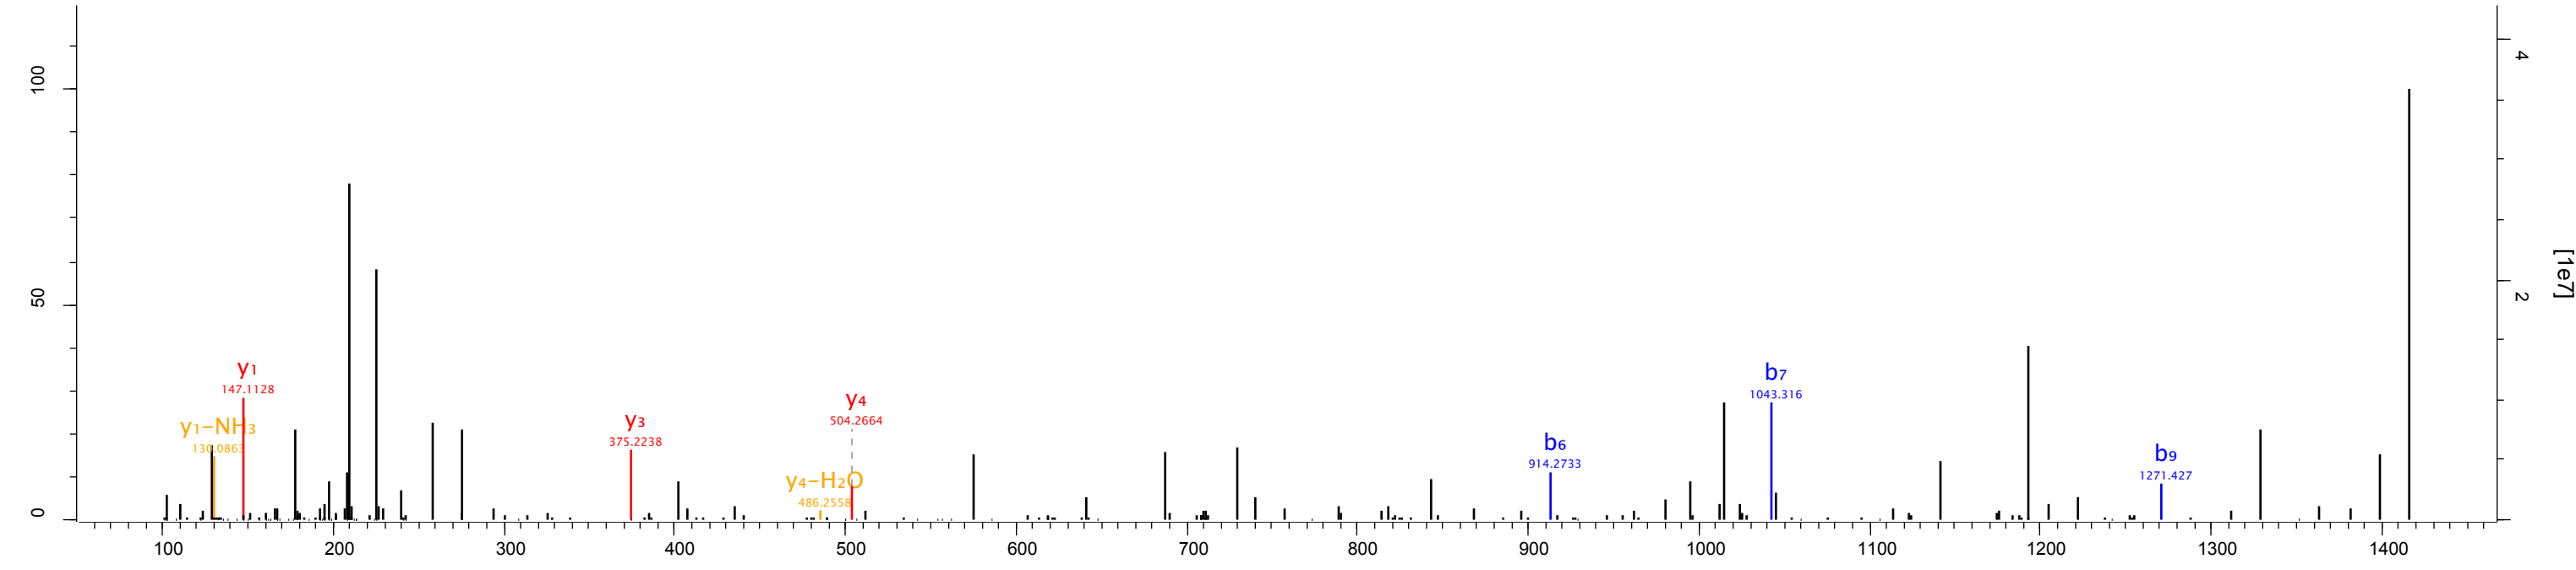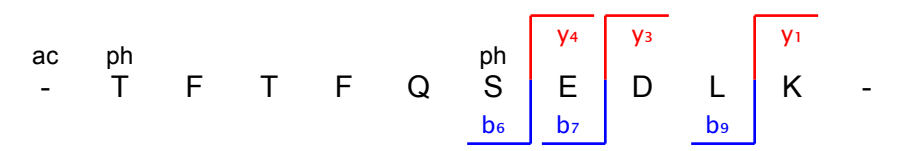

Raw file  
20180707\_MaS\_A375SR\_ML\_proteome\_17

Scan 25815 Method FTMS; HCD Score 50.35 m/z 728.93 Gene names IL1R1

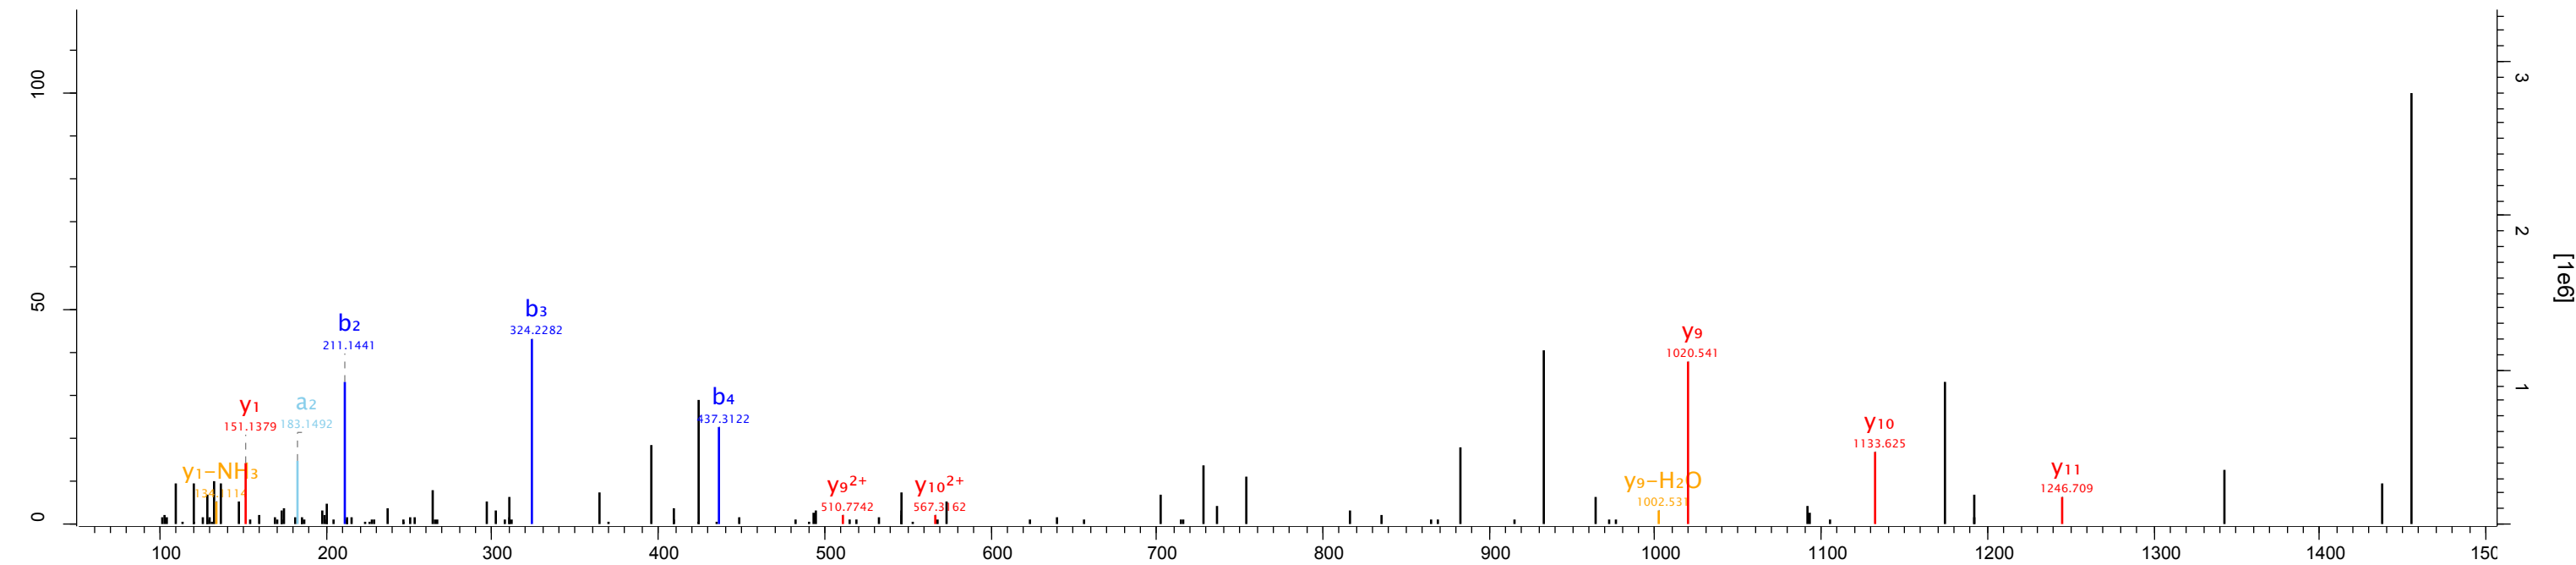

Raw file: 20180707\_MaS\_A375SR\_ML\_proteome\_18  
 Scan: 14795 Method: FTMS; HCD Score: 70.09 m/z: 735.34 Gene names: PIGX

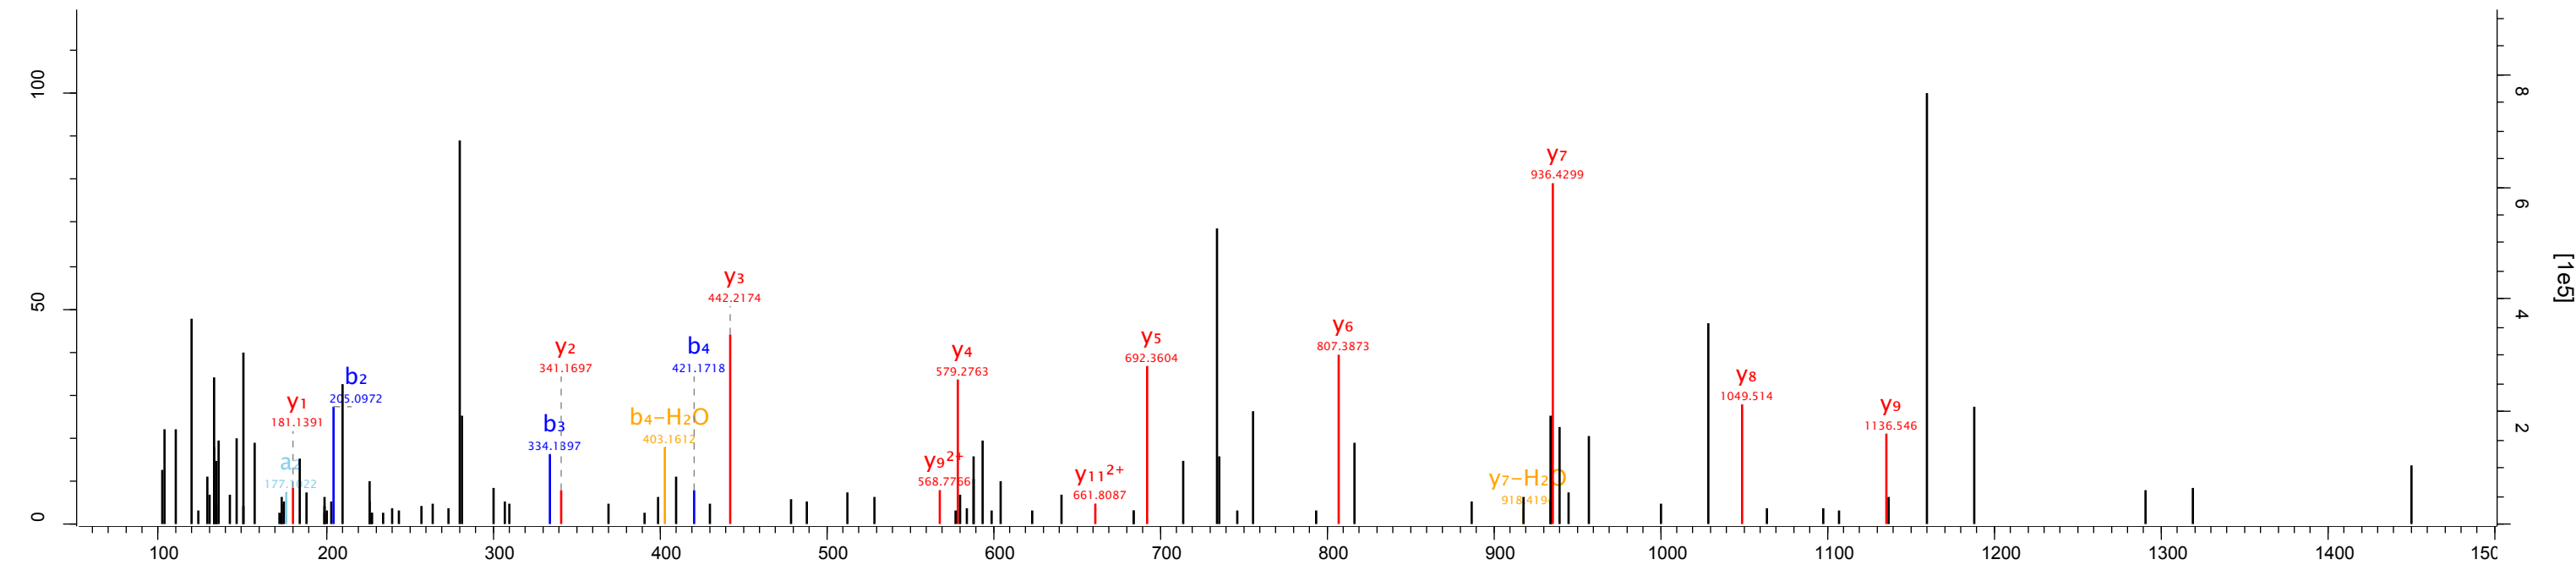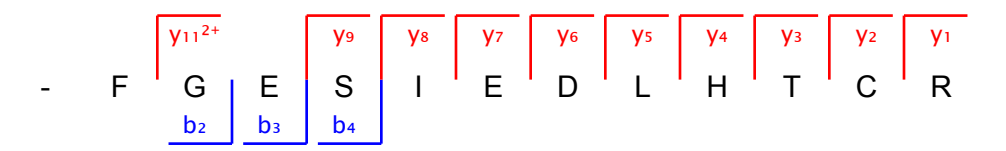



Raw file: 20180707\_MaS\_A375SR\_ML\_proteome\_18  
 Scan: 24505 Method: FTMS; HCD Score: 47.77 m/z: 545.61 Gene names: METAP1D

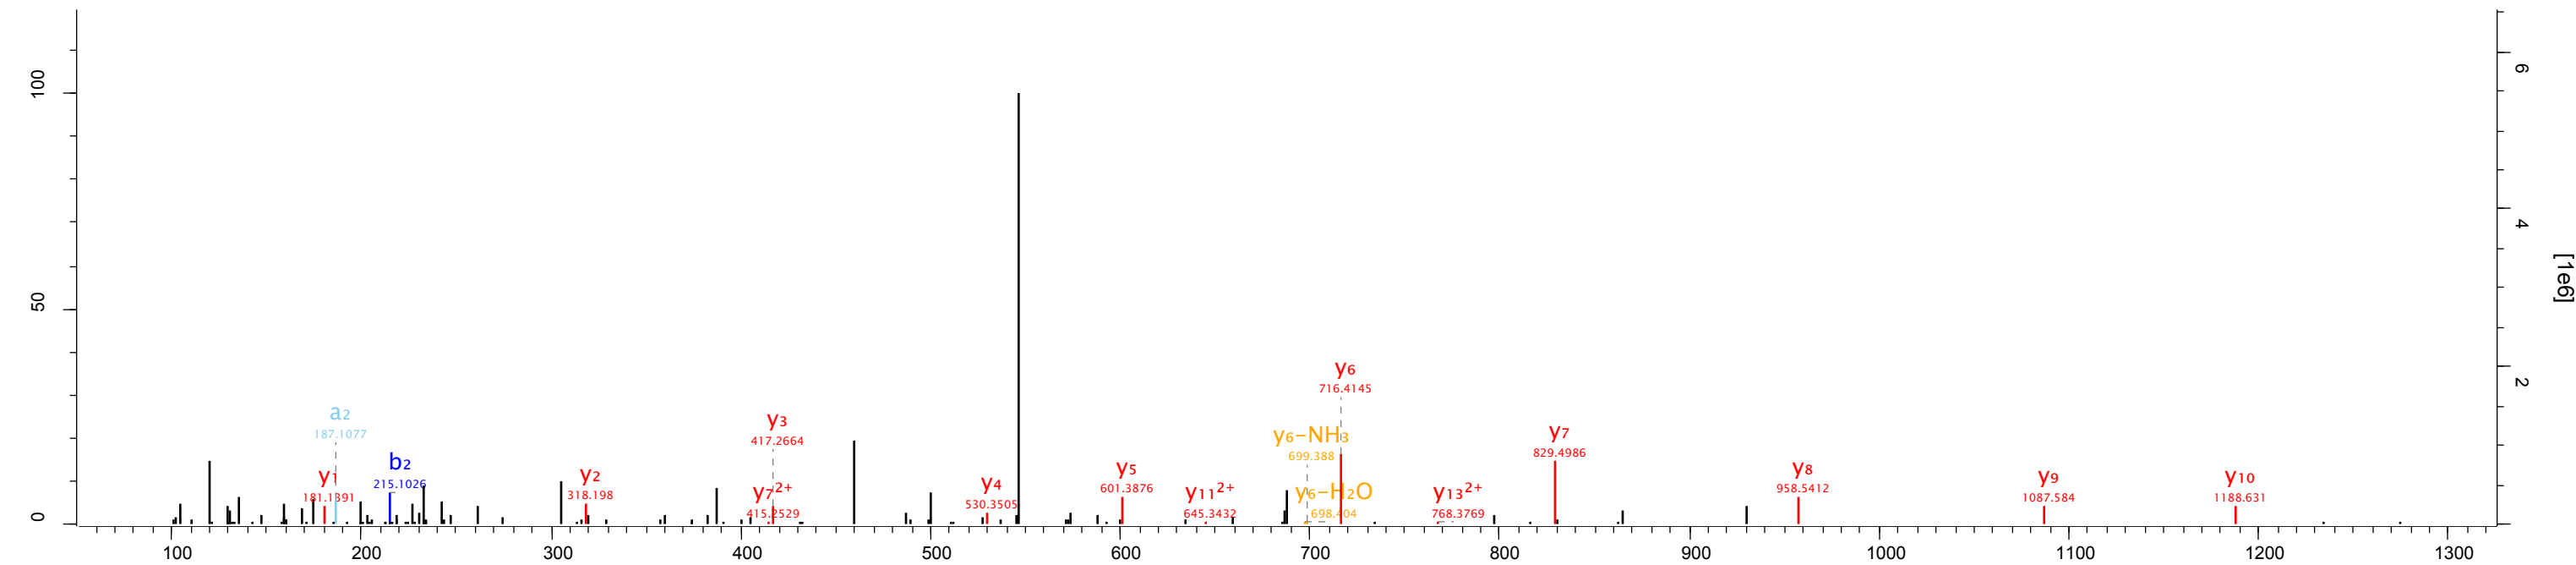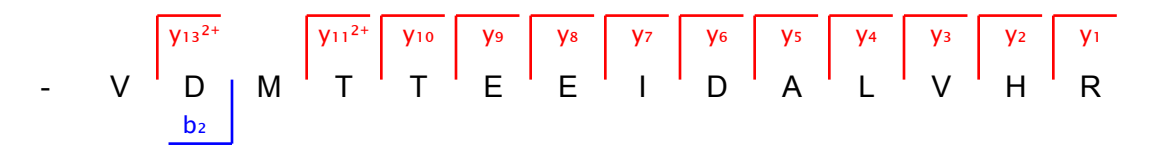

Raw file  
20180707\_MaS\_A375SR\_ML\_proteome\_18

Scan 26405 Method FTMS; HCD Score 90.71 m/z 929.45 Gene names MAPK1IP1L

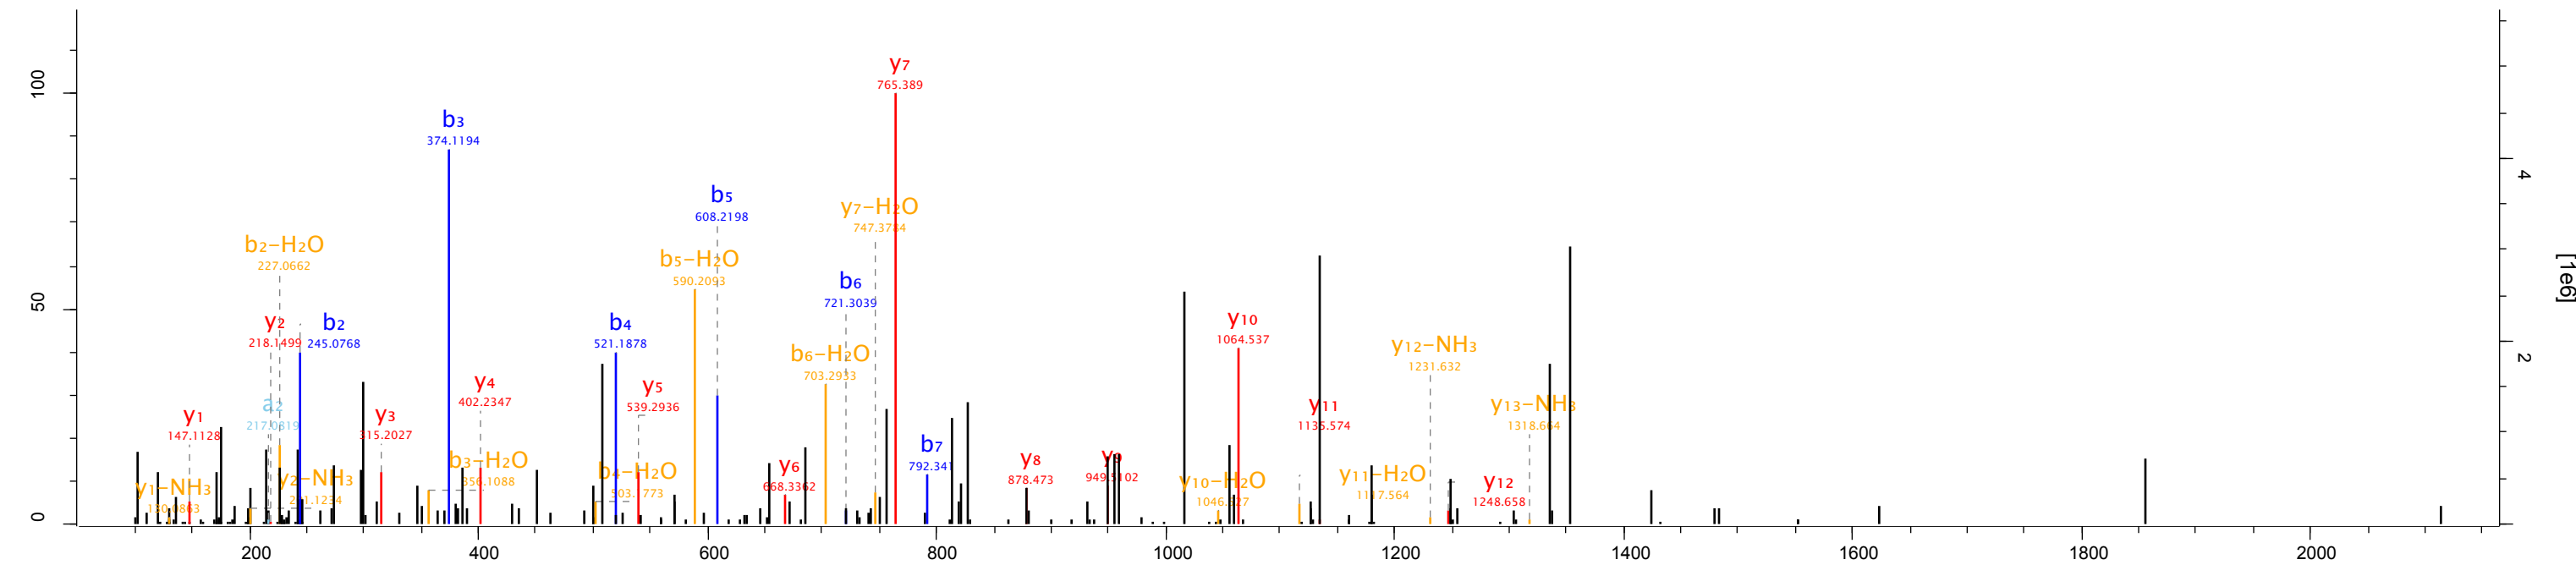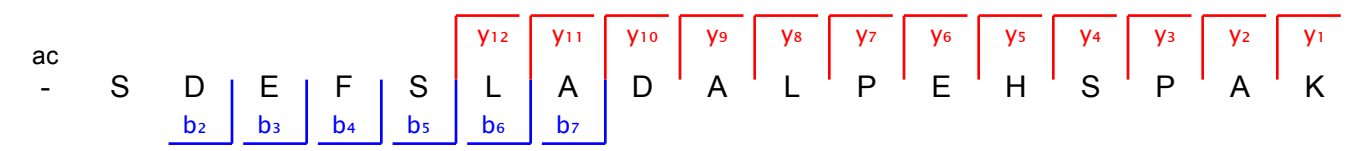

Raw file  
20180707\_MaS\_A375SR\_ML\_proteome\_18

Scan 2815 Method FTMS; HCD Score 40.75 m/z 432.23 Gene names FAM89B

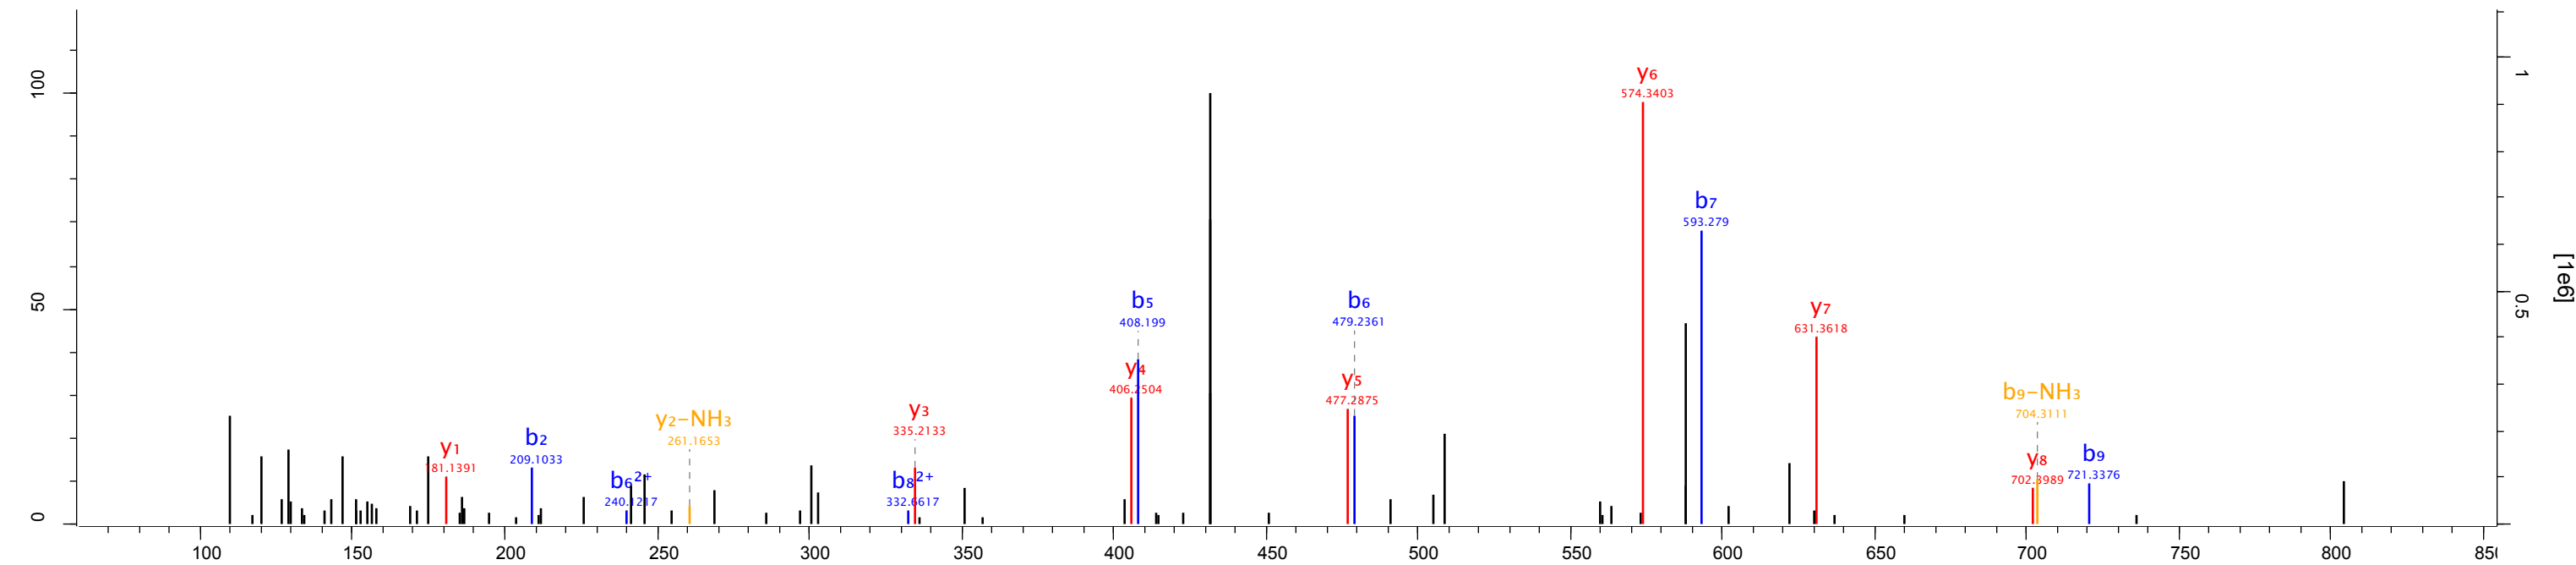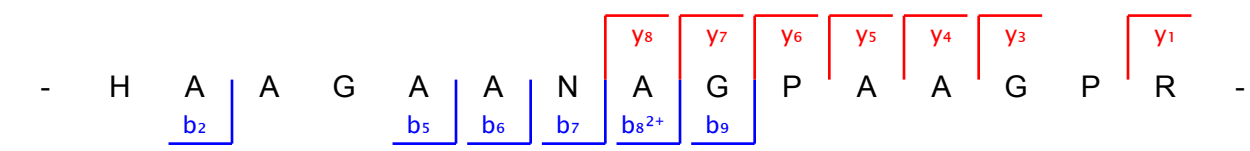

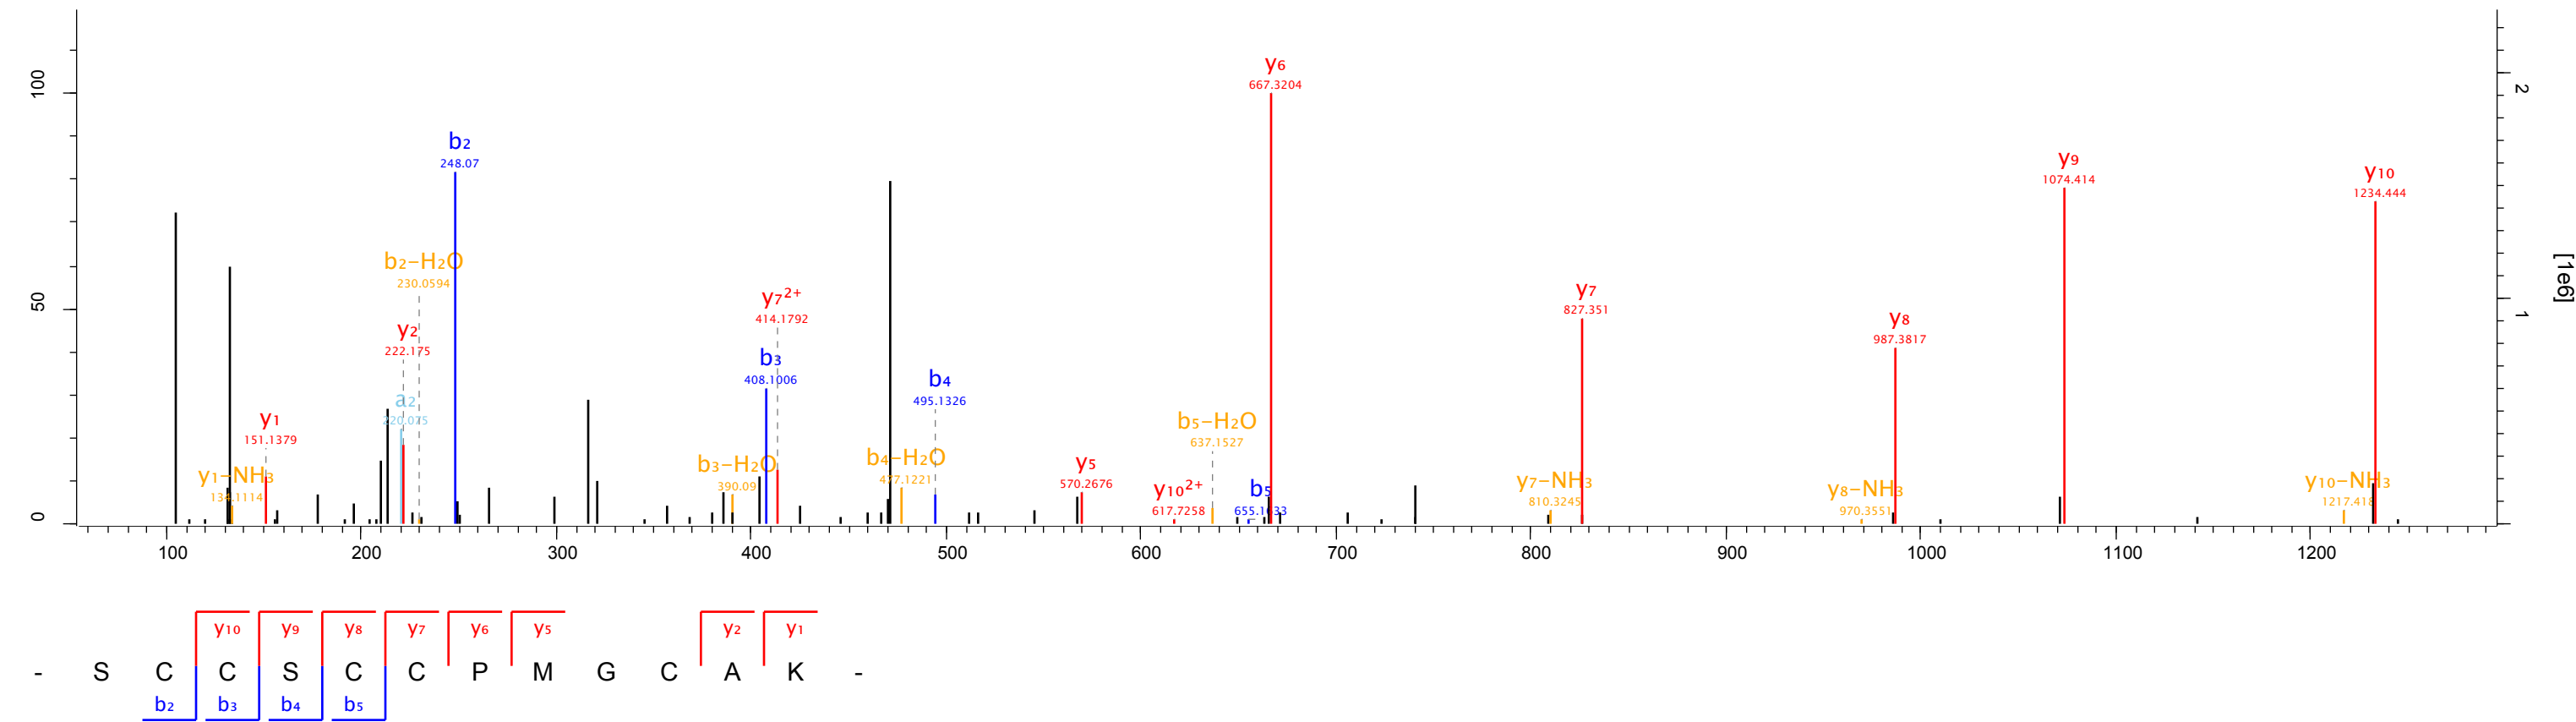

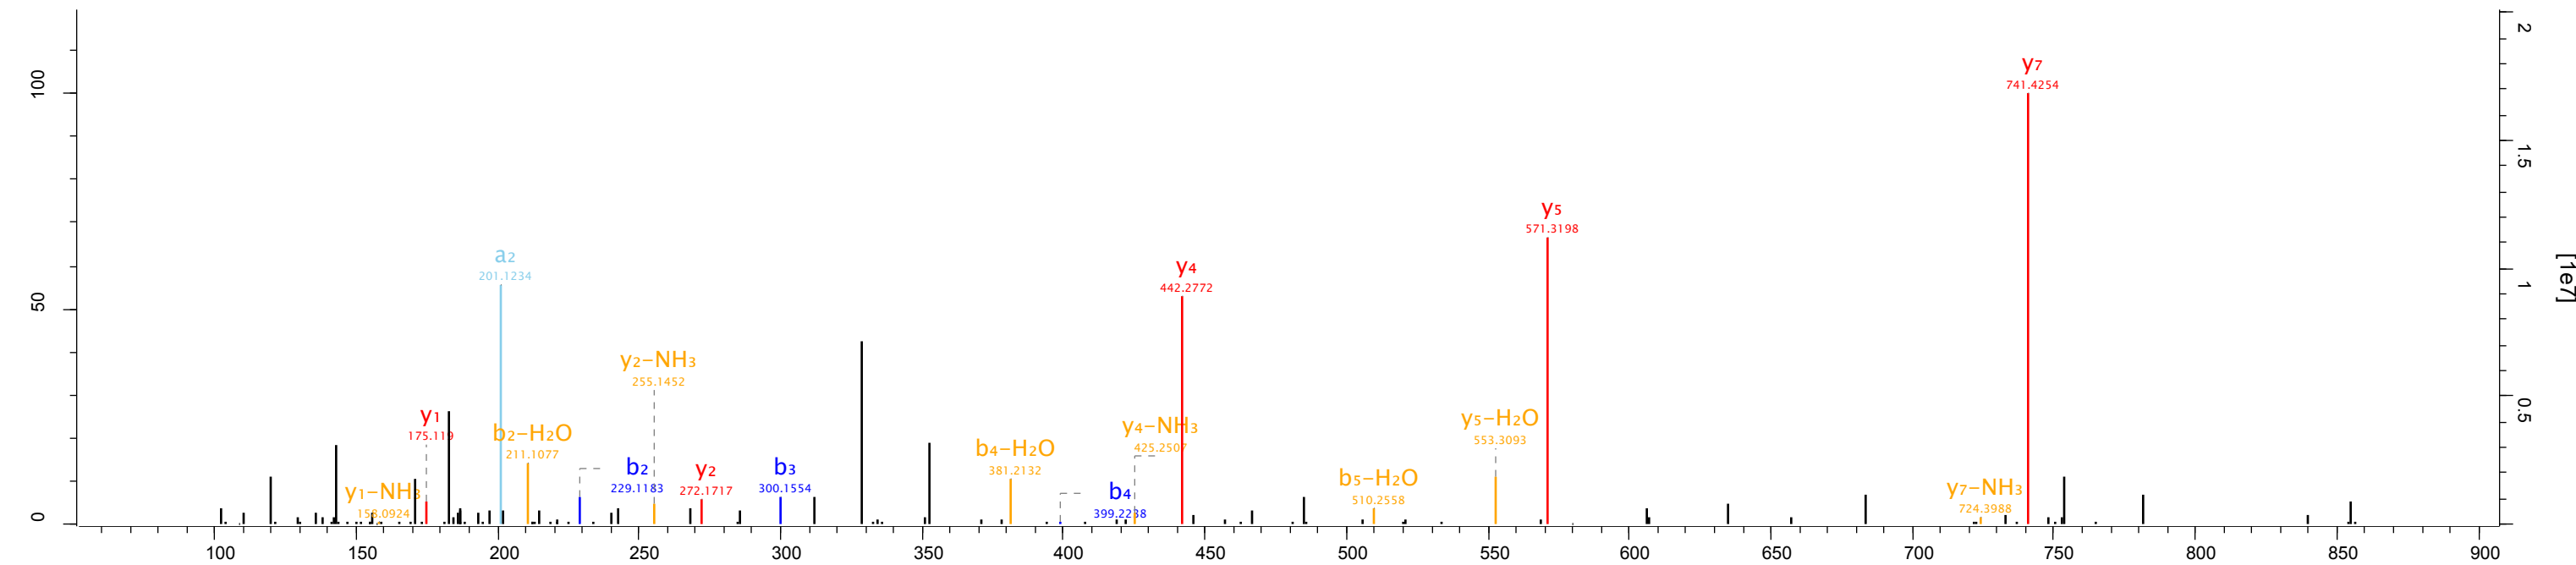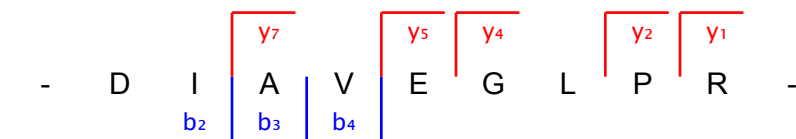

Raw file  
 20180707\_MaS\_A375SR\_ML\_proteome\_19  
 Scan 21375 Method FTMS; HCD Score 73.44 m/z 586.84 Gene names KATNAL2

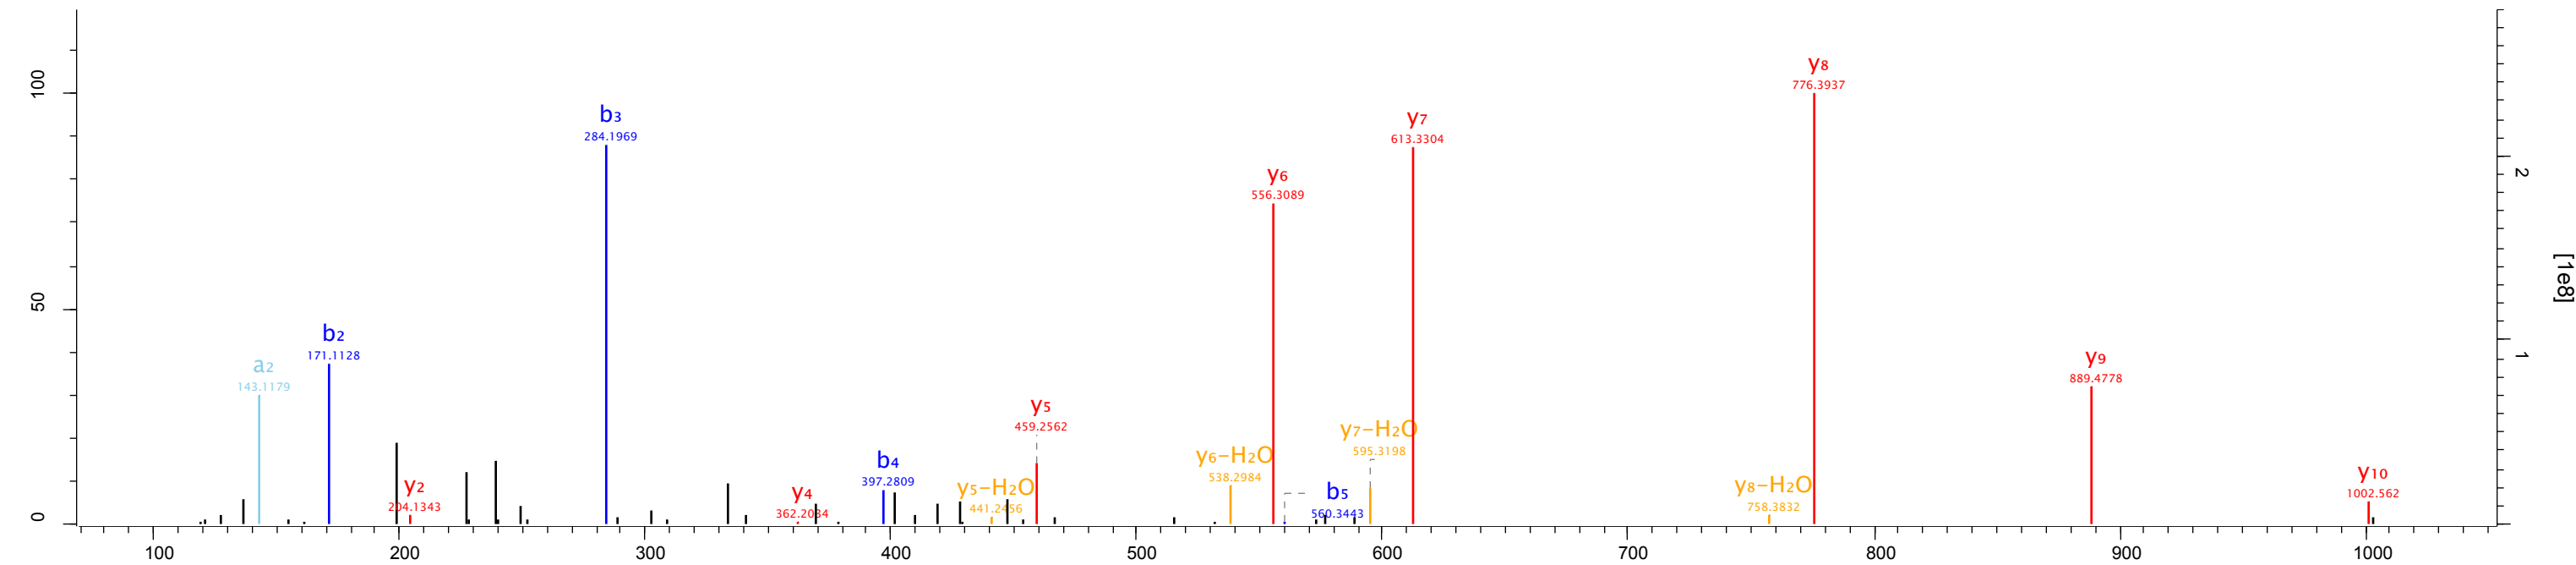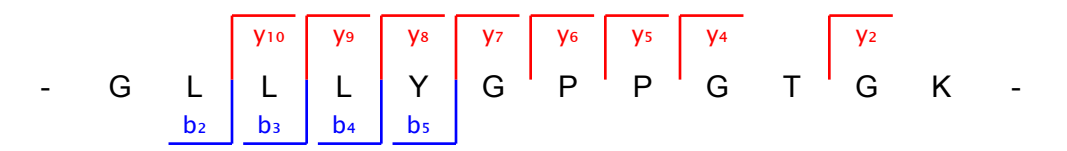

Raw file: 20180707\_MaS\_A375SR\_ML\_proteome\_2\_01  
 Scan: 11765 Method: FTMS; HCD Score: 136.96 m/z: 593.3 Gene names: IGFBP5

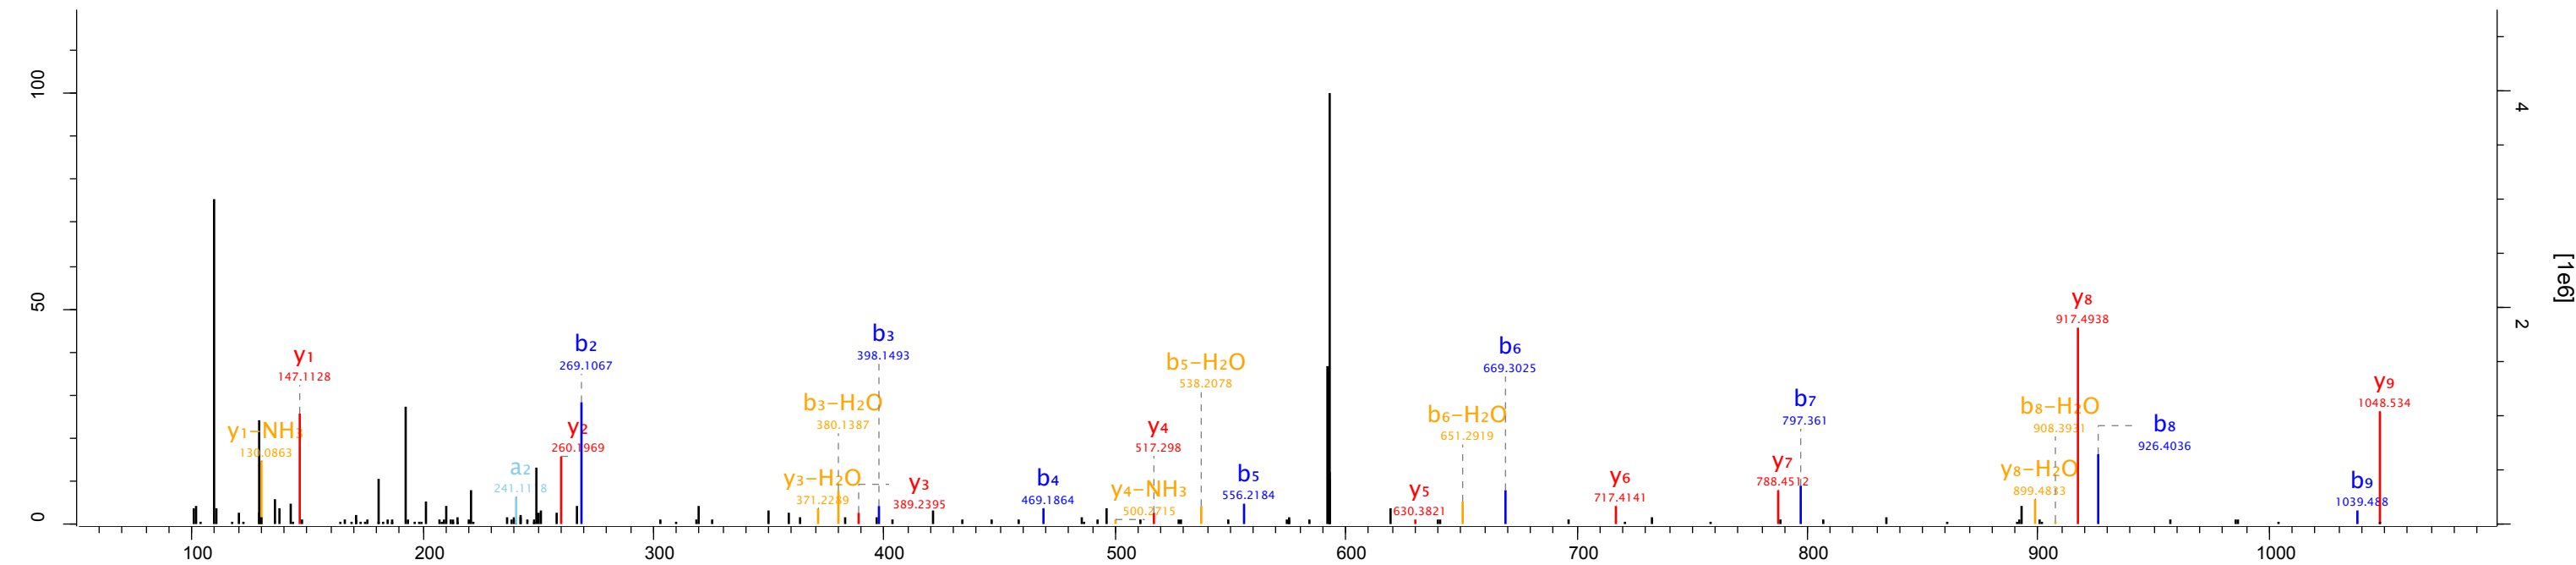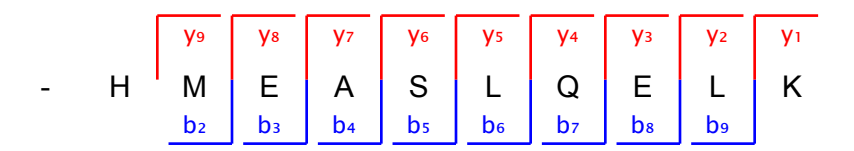

Raw file  
20180707\_MaS\_A375SR\_ML\_proteome\_2\_01

Scan 23605 Method FTMS; HCD Score 68.42 m/z 1020.99 Gene names RNFT2

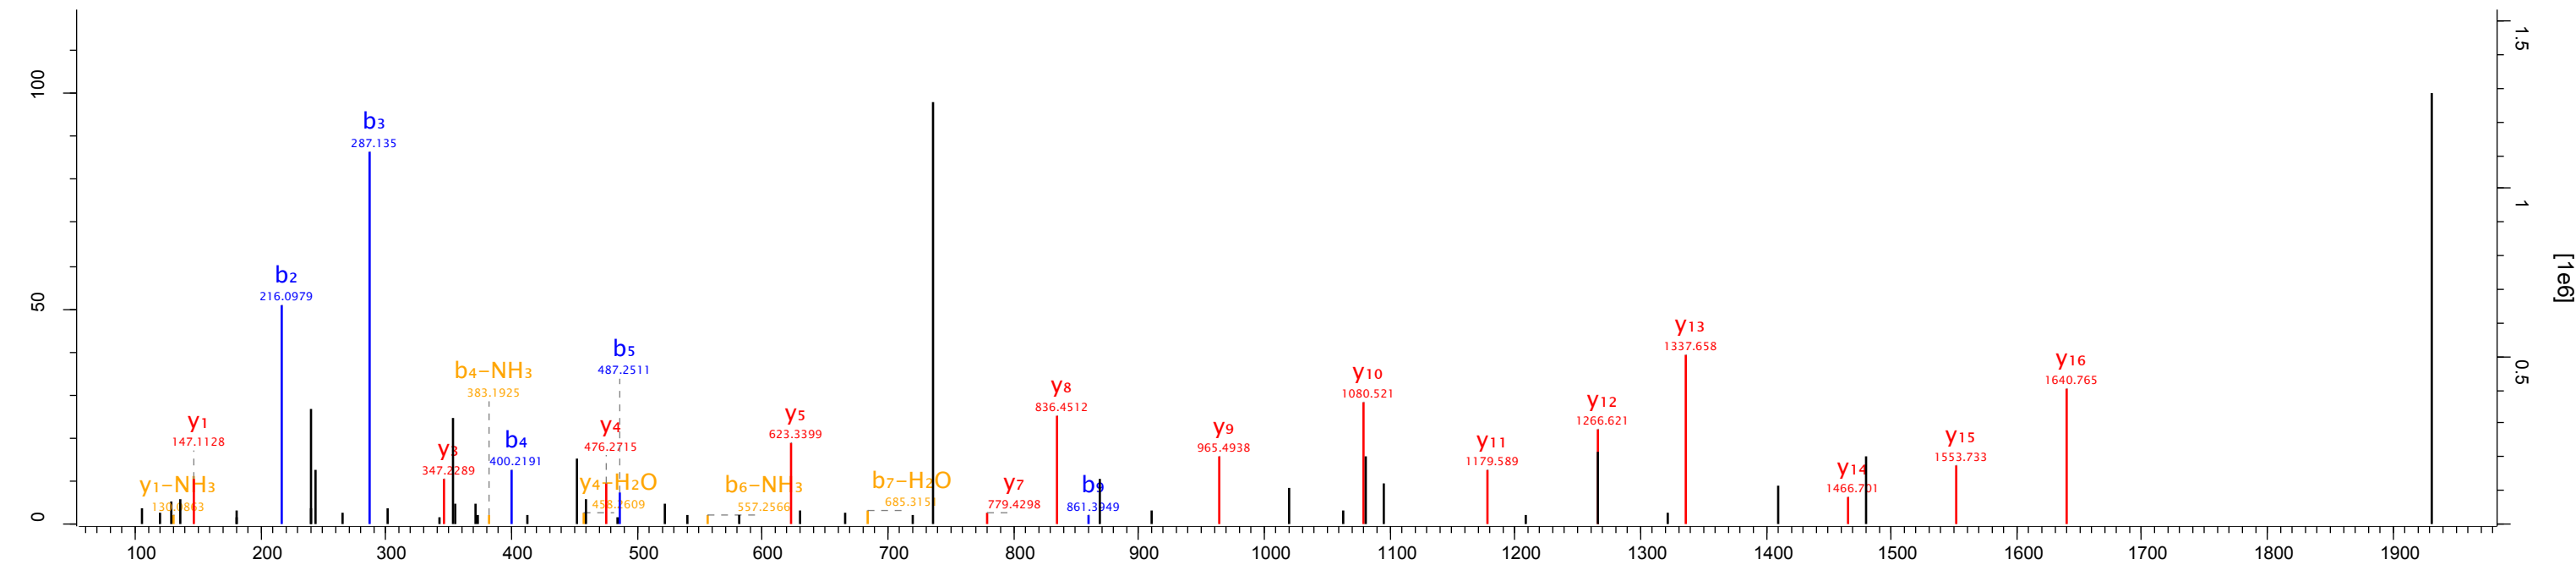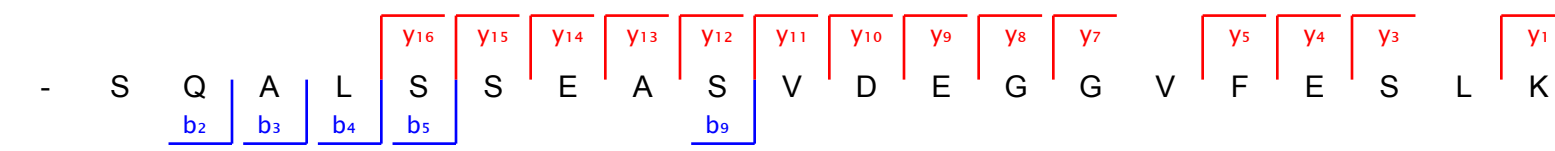



Raw file 20180707\_MaS\_A375SR\_ML\_proteome\_2\_01 Scan 4815 Method FTMS; HCD Score 64.26 m/z 307.83

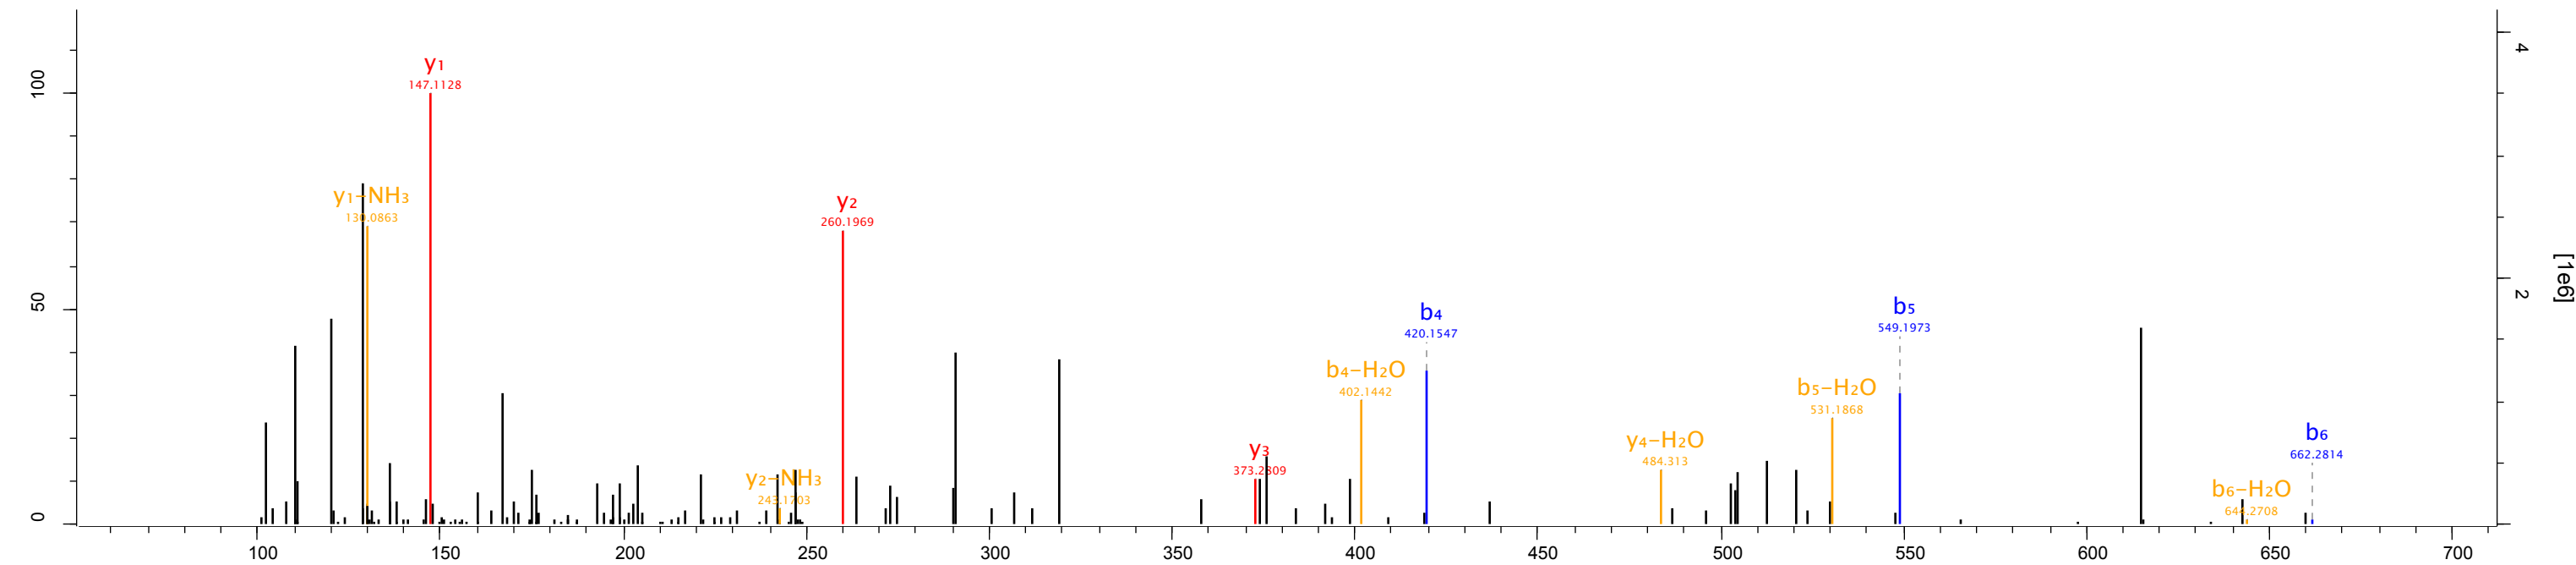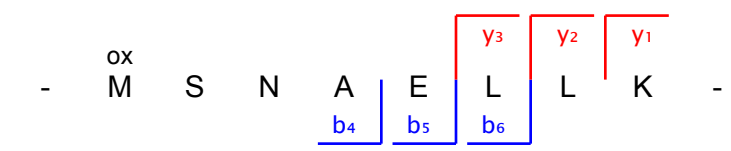

Raw file  
20180707\_MaS\_A375SR\_ML\_proteome\_2\_01

| Scan | Method    | Score | m/z    | Gene names |
|------|-----------|-------|--------|------------|
| 5135 | FTMS; HCD | 54.53 | 406.69 | KCNN2      |

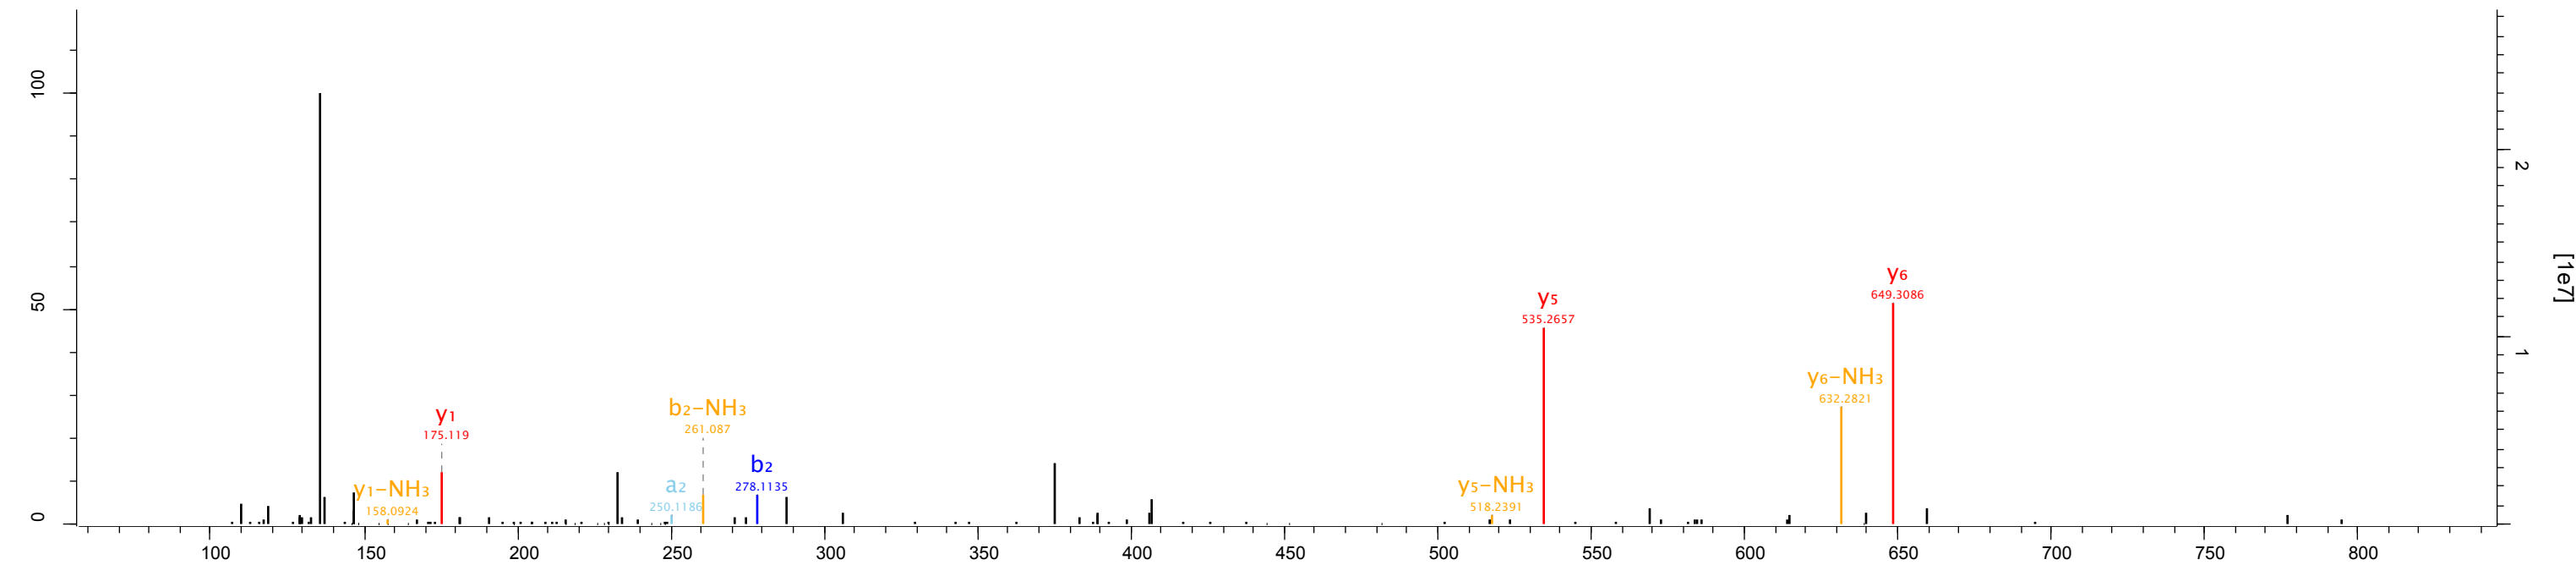

Raw file 20180707\_MaS\_A375SR\_ML\_proteome\_2\_01  
 Scan 9675 Method FTMS; HCD Score 72.29 m/z 461.57 Gene names CYB561D2

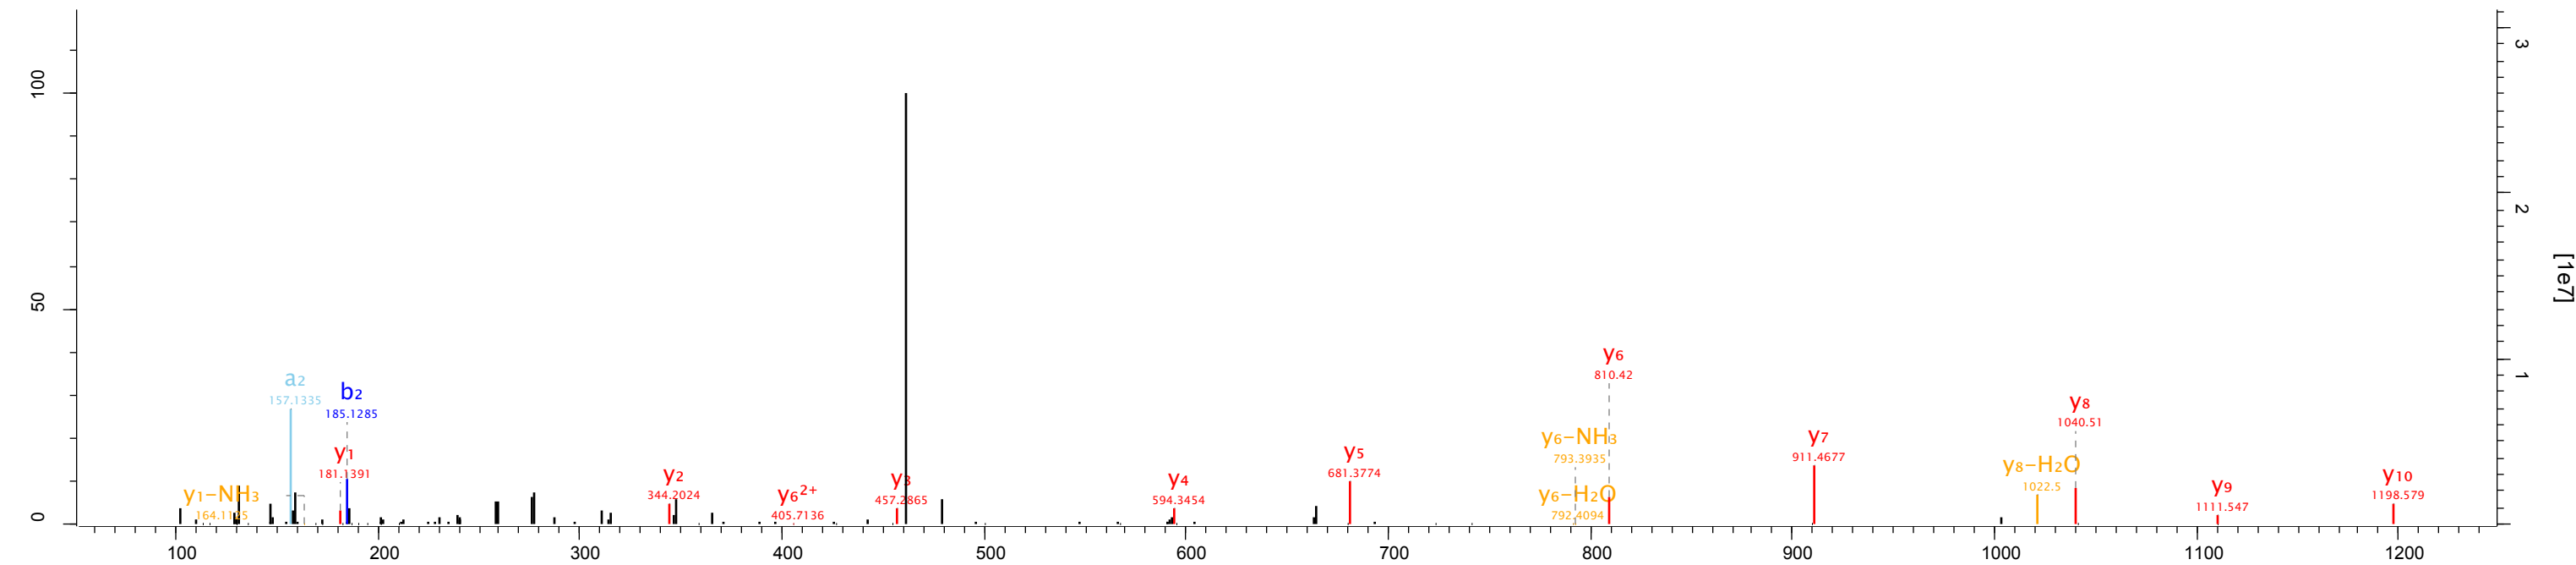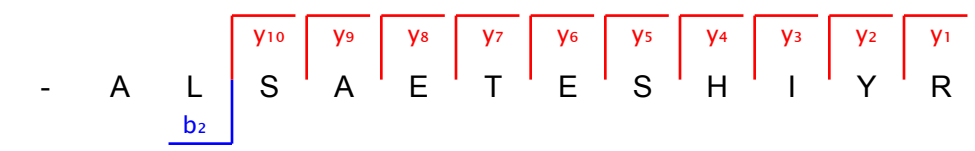

Raw file  
20180707\_MaS\_A375SR\_ML\_proteome\_2\_01

Scan 9685 Method FTMS; HCD Score 90.61 m/z 459.56 Gene names CYB561D2

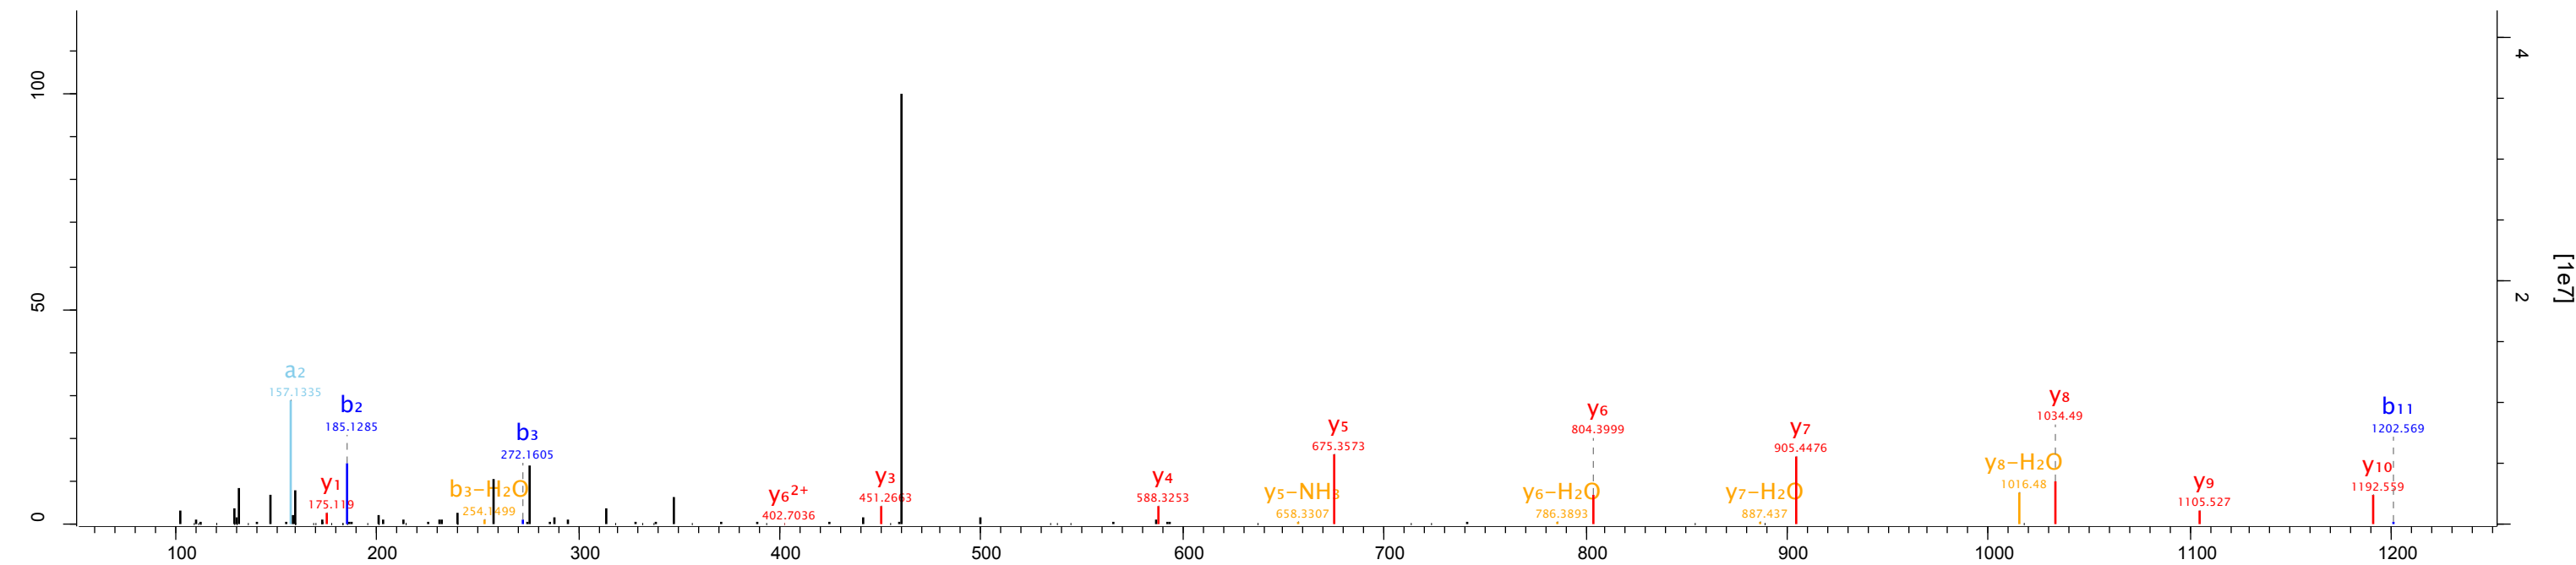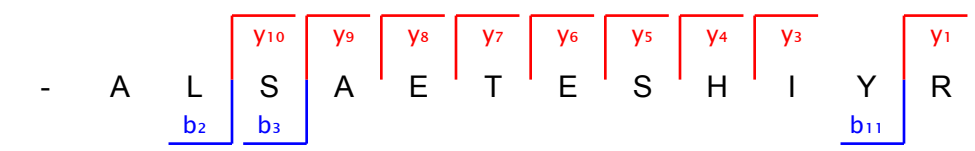

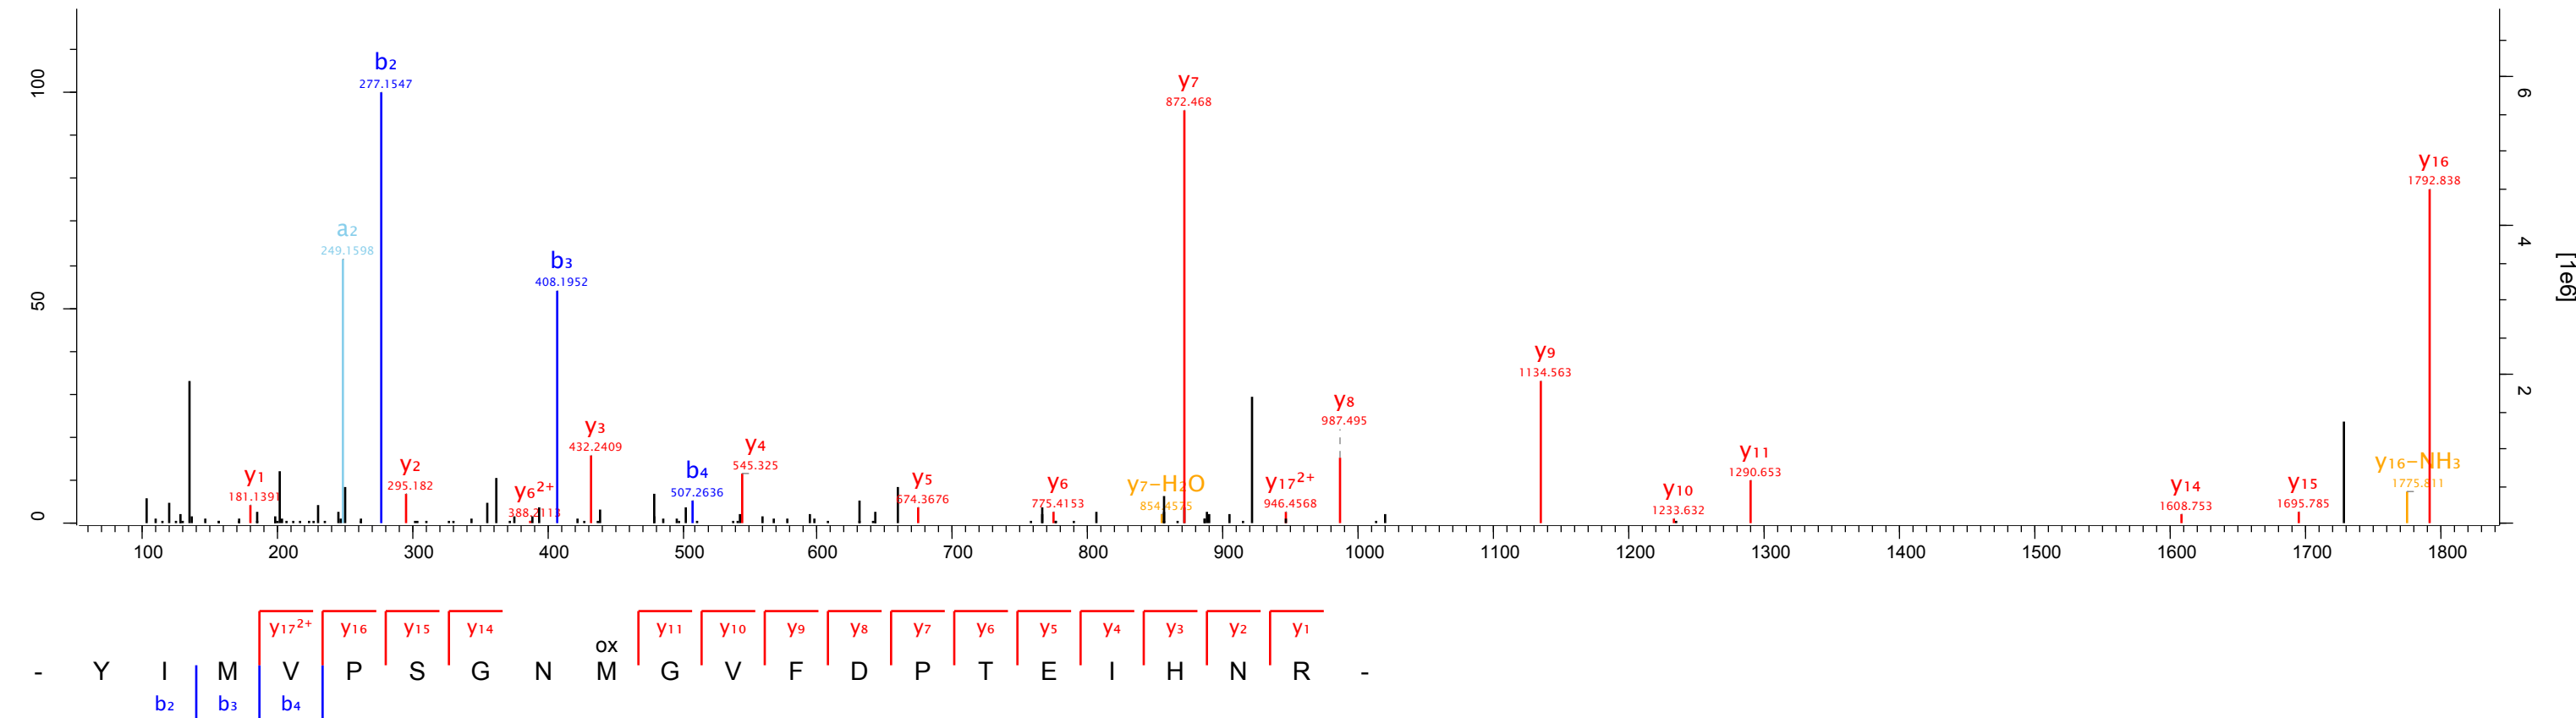

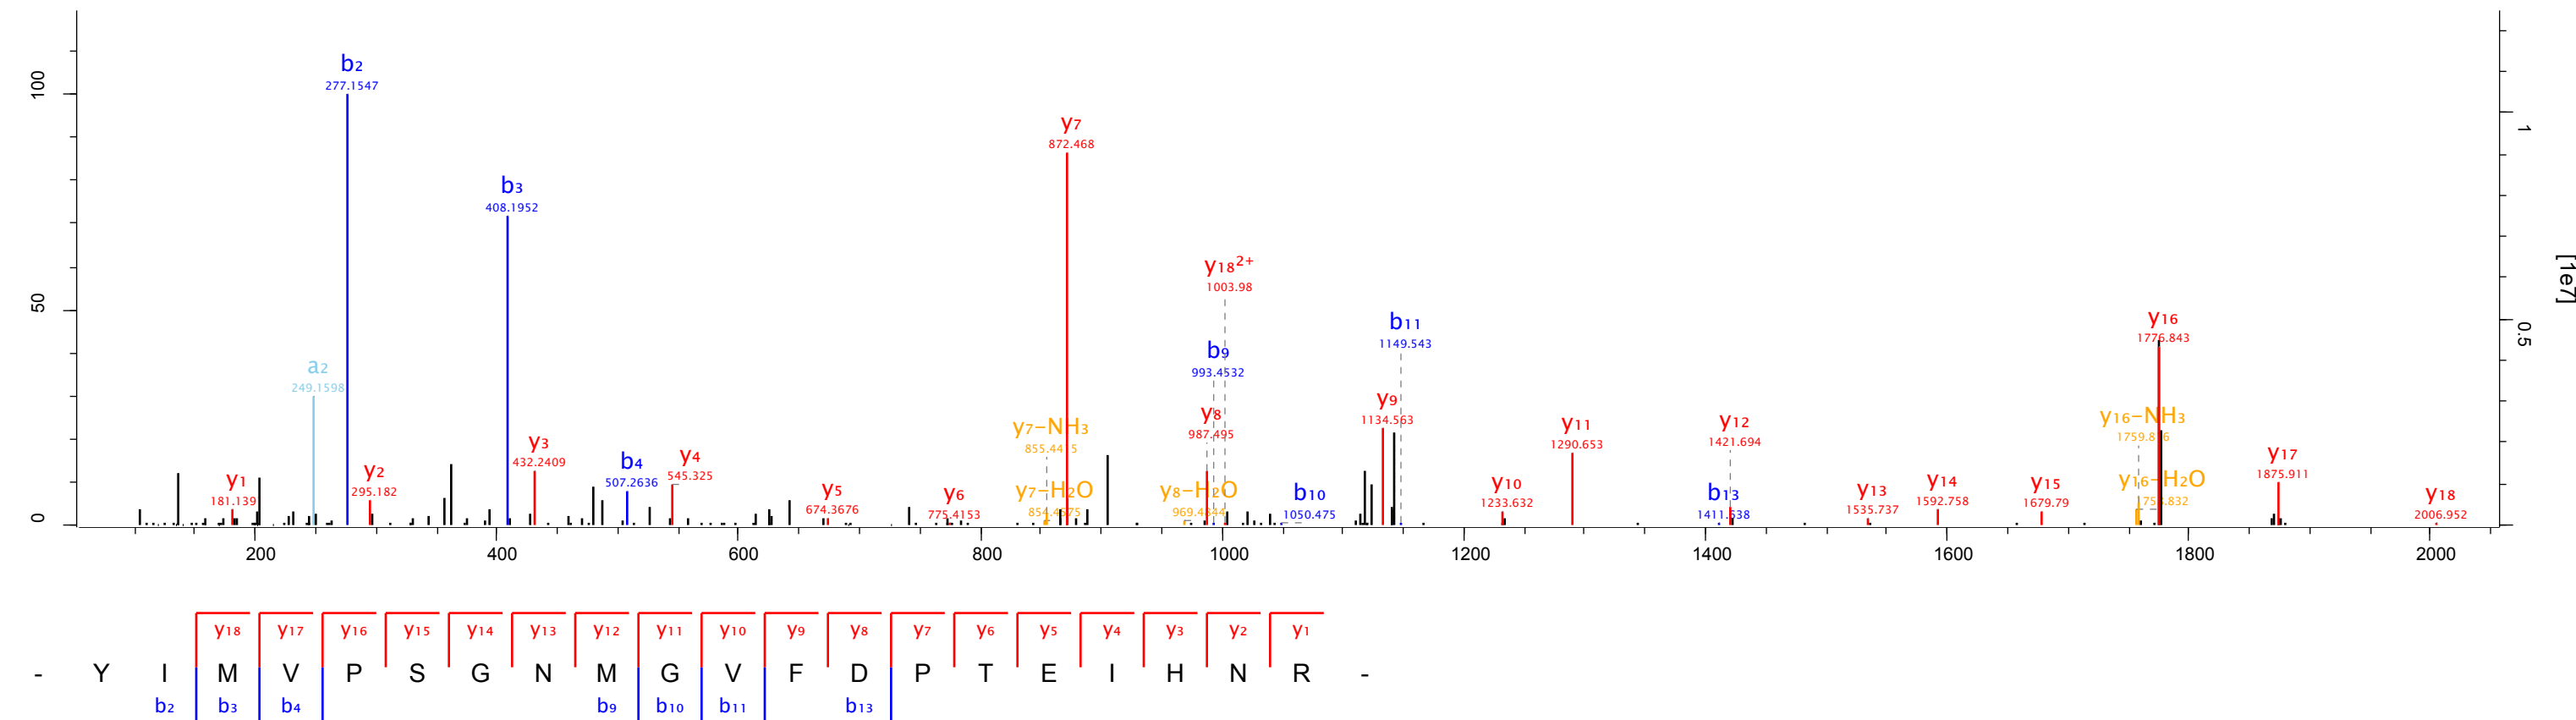

Raw file 20180707\_MaS\_A375SR\_ML\_proteome\_2\_03  
 Scan 26465 Method FTMS; HCD Score 110.88 m/z 492.81 Gene names STON2

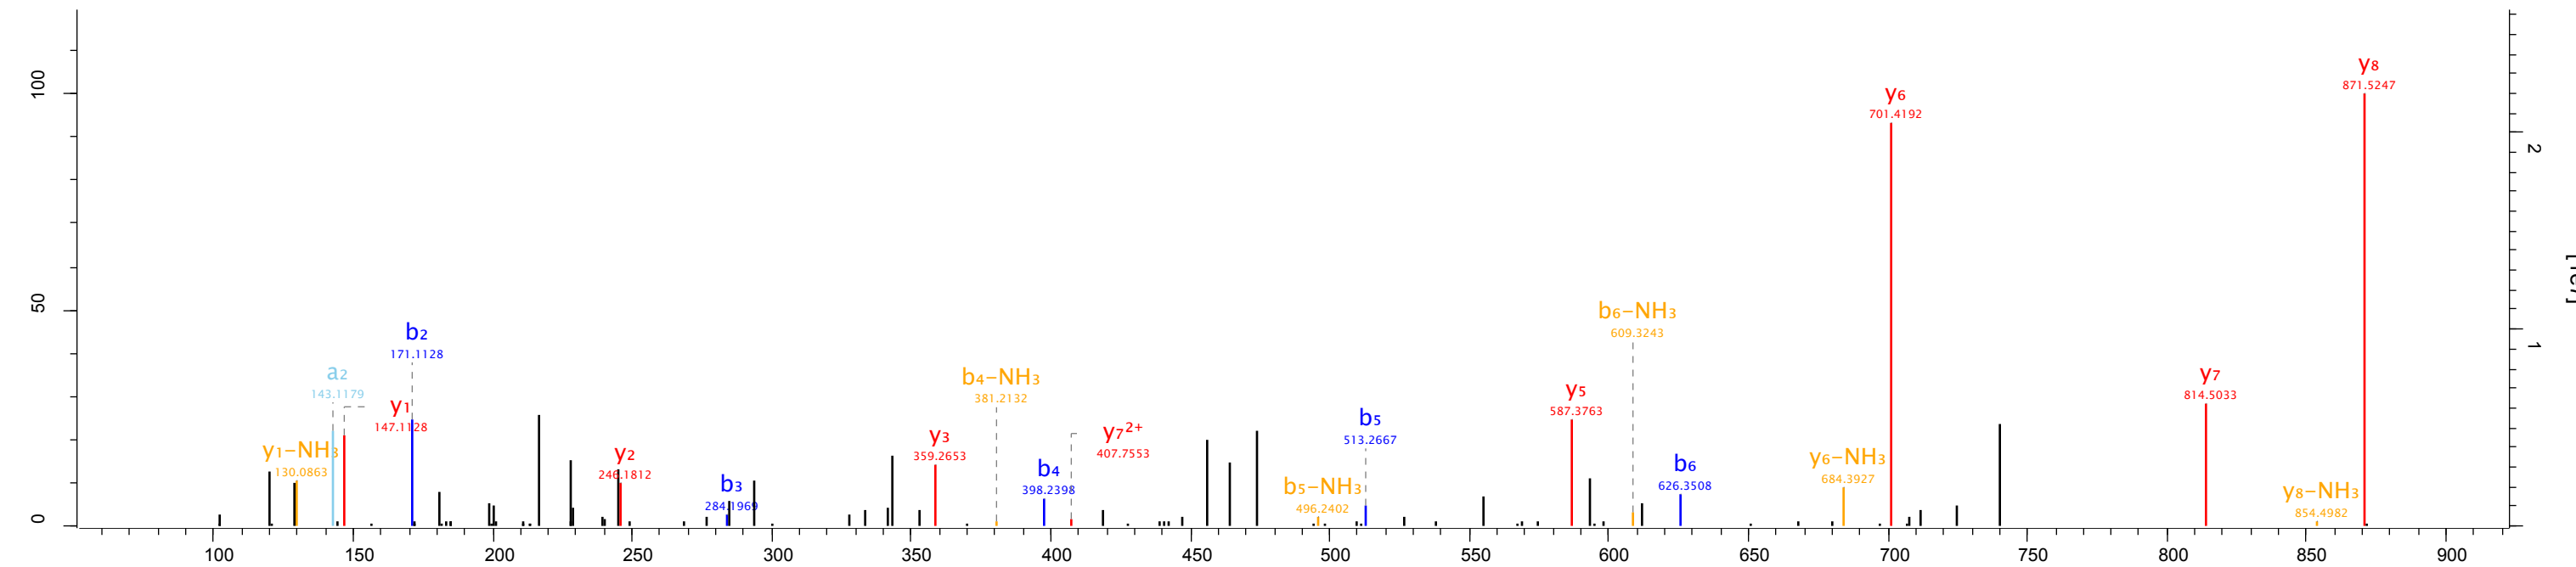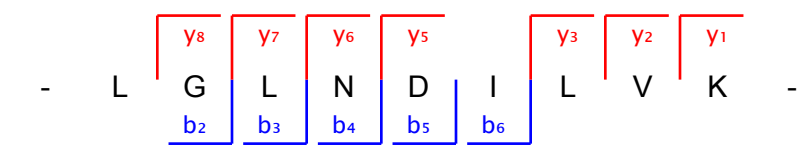

Raw file 20180707\_MaS\_A375SR\_ML\_proteome\_2\_03 Scan 2955 Method FTMS; HCD Score 32.73 m/z 353.21

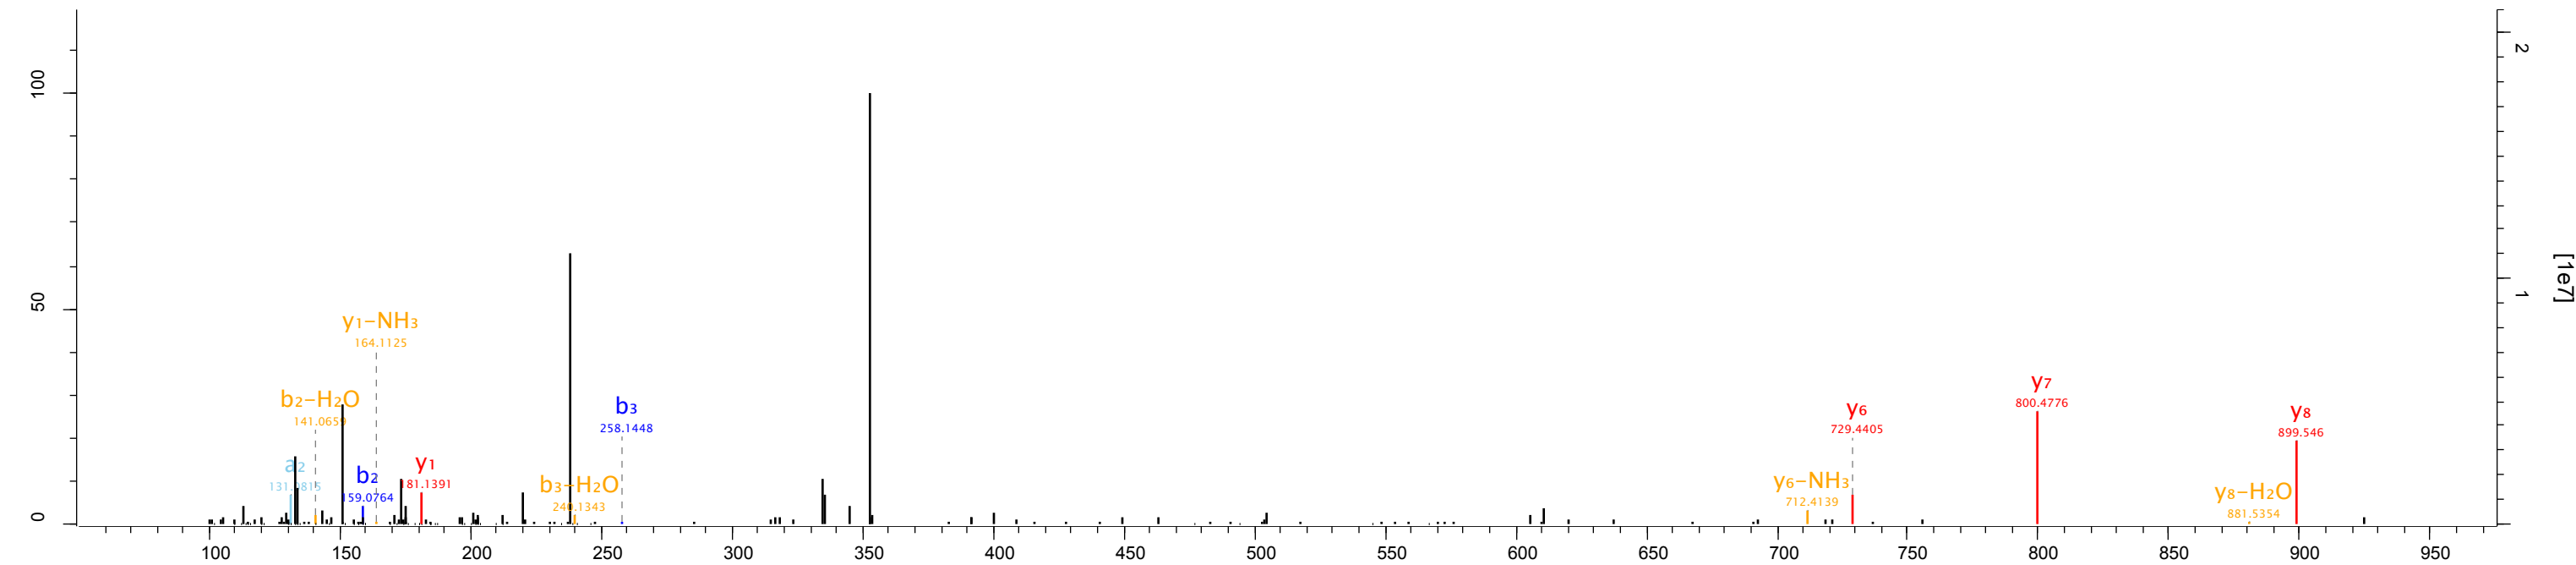



Raw file 20180707\_MaS\_A375SR\_ML\_proteome\_2\_04 Scan 16485 Method FTMS; HCD Score 79.65 m/z 899.45 Gene names C8orf37

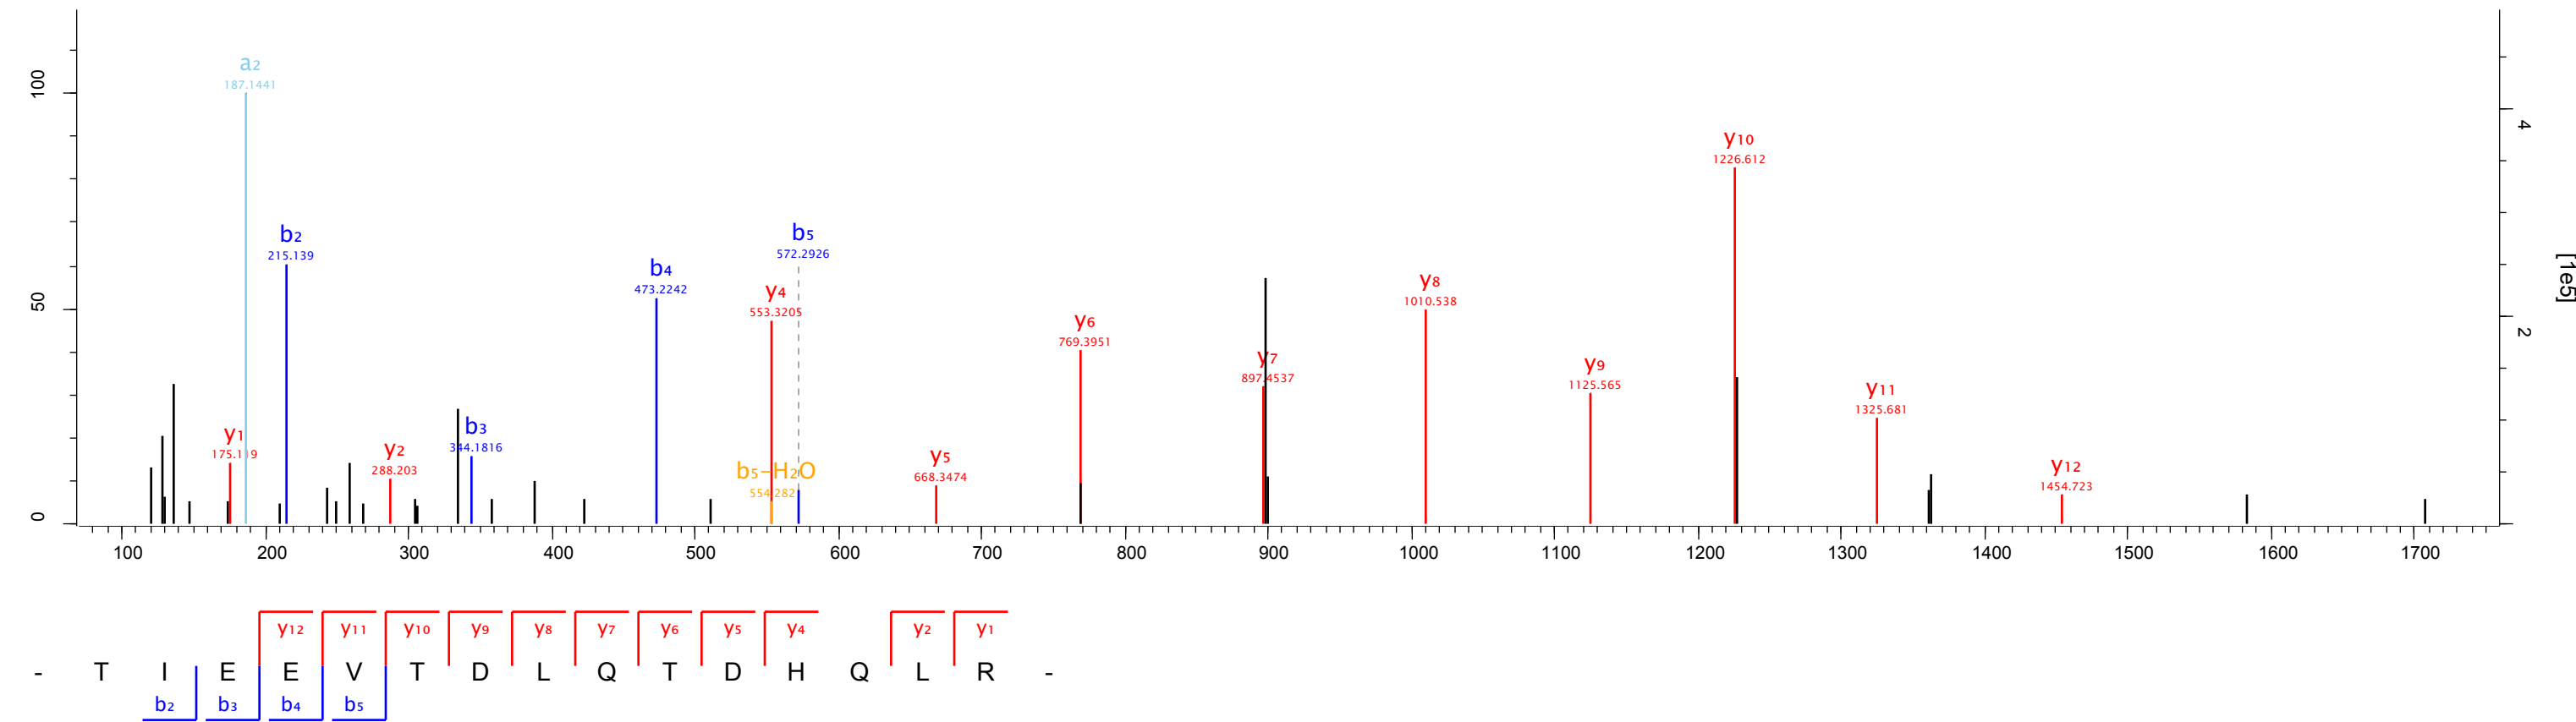

Raw file 20180707\_MaS\_A375SR\_ML\_proteome\_2\_04 Scan 18915 Method FTMS; HCD Score 45.37 m/z 544.79

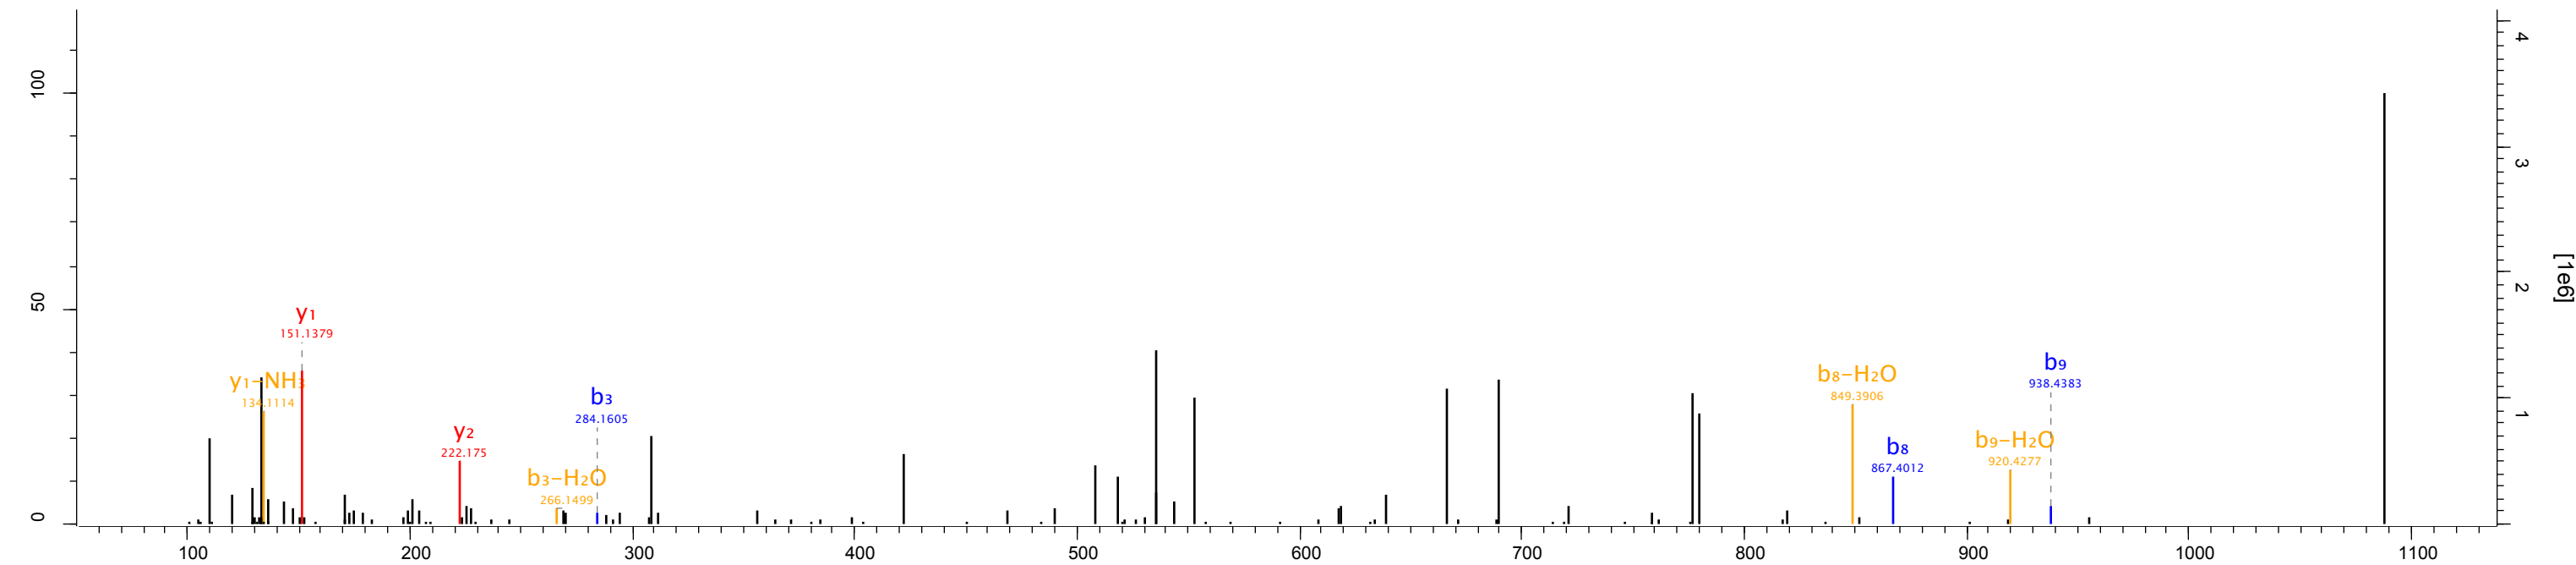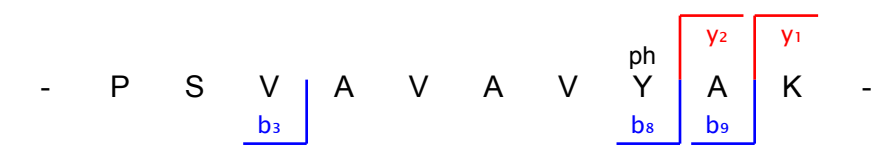

Raw file 20180707\_MaS\_A375SR\_ML\_proteome\_2\_04  
 Scan 2525 Method FTMS; HCD Score 44.97 m/z 327.18

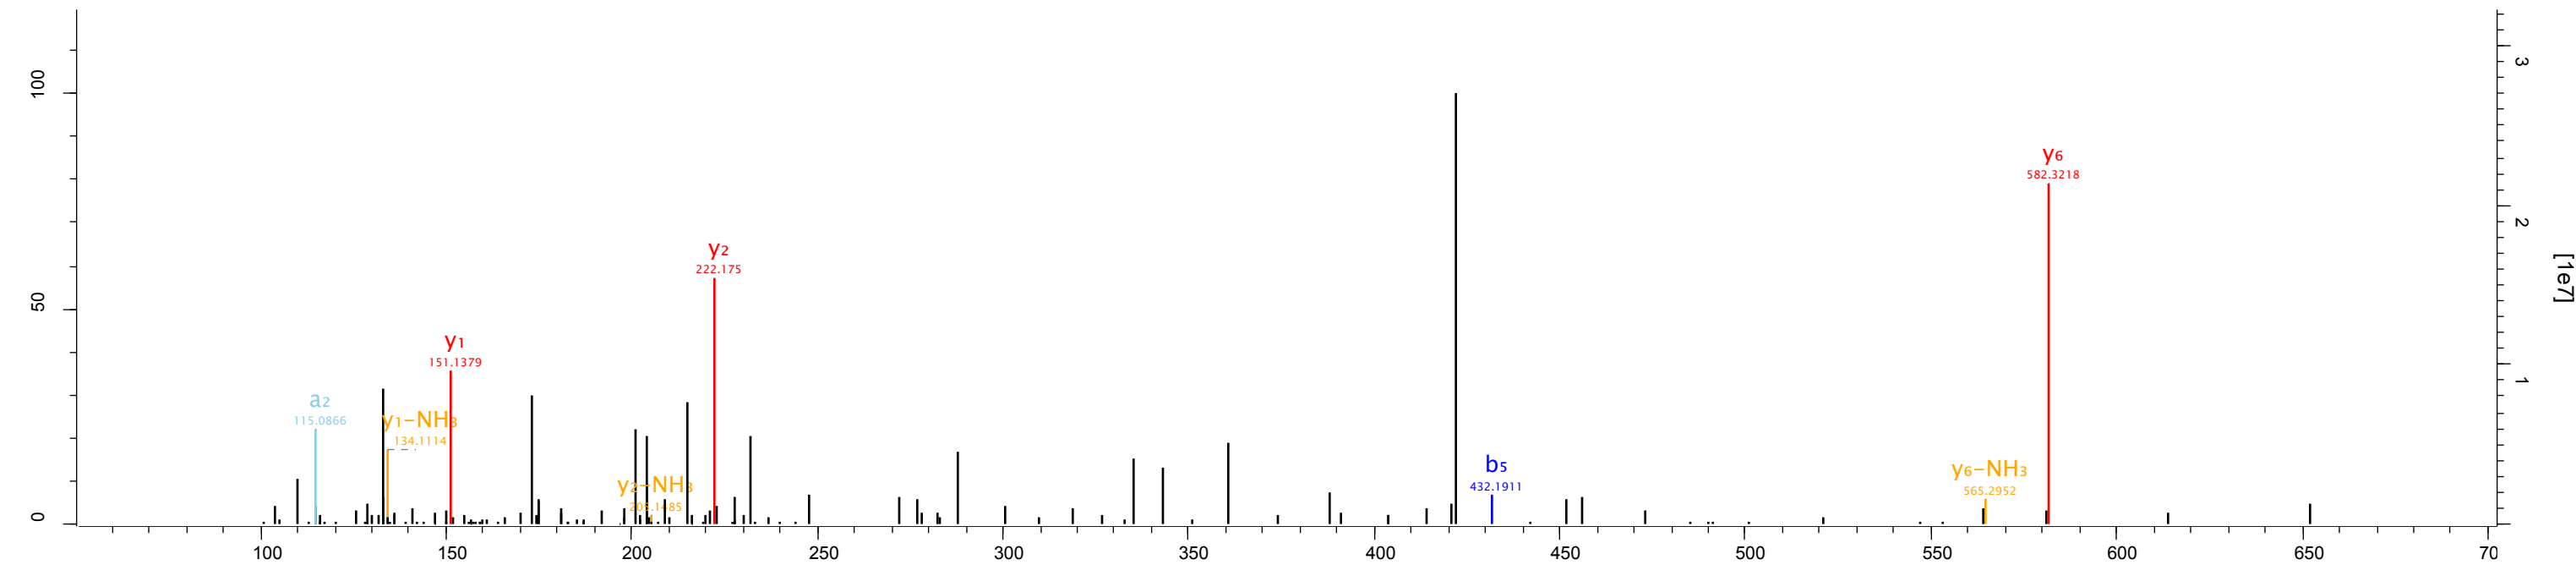

Raw file 20180707\_MaS\_A375SR\_ML\_proteome\_2\_04 Scan 28805 Method FTMS; HCD Score 79.49 m/z 835.9 Gene names HLA-DMA

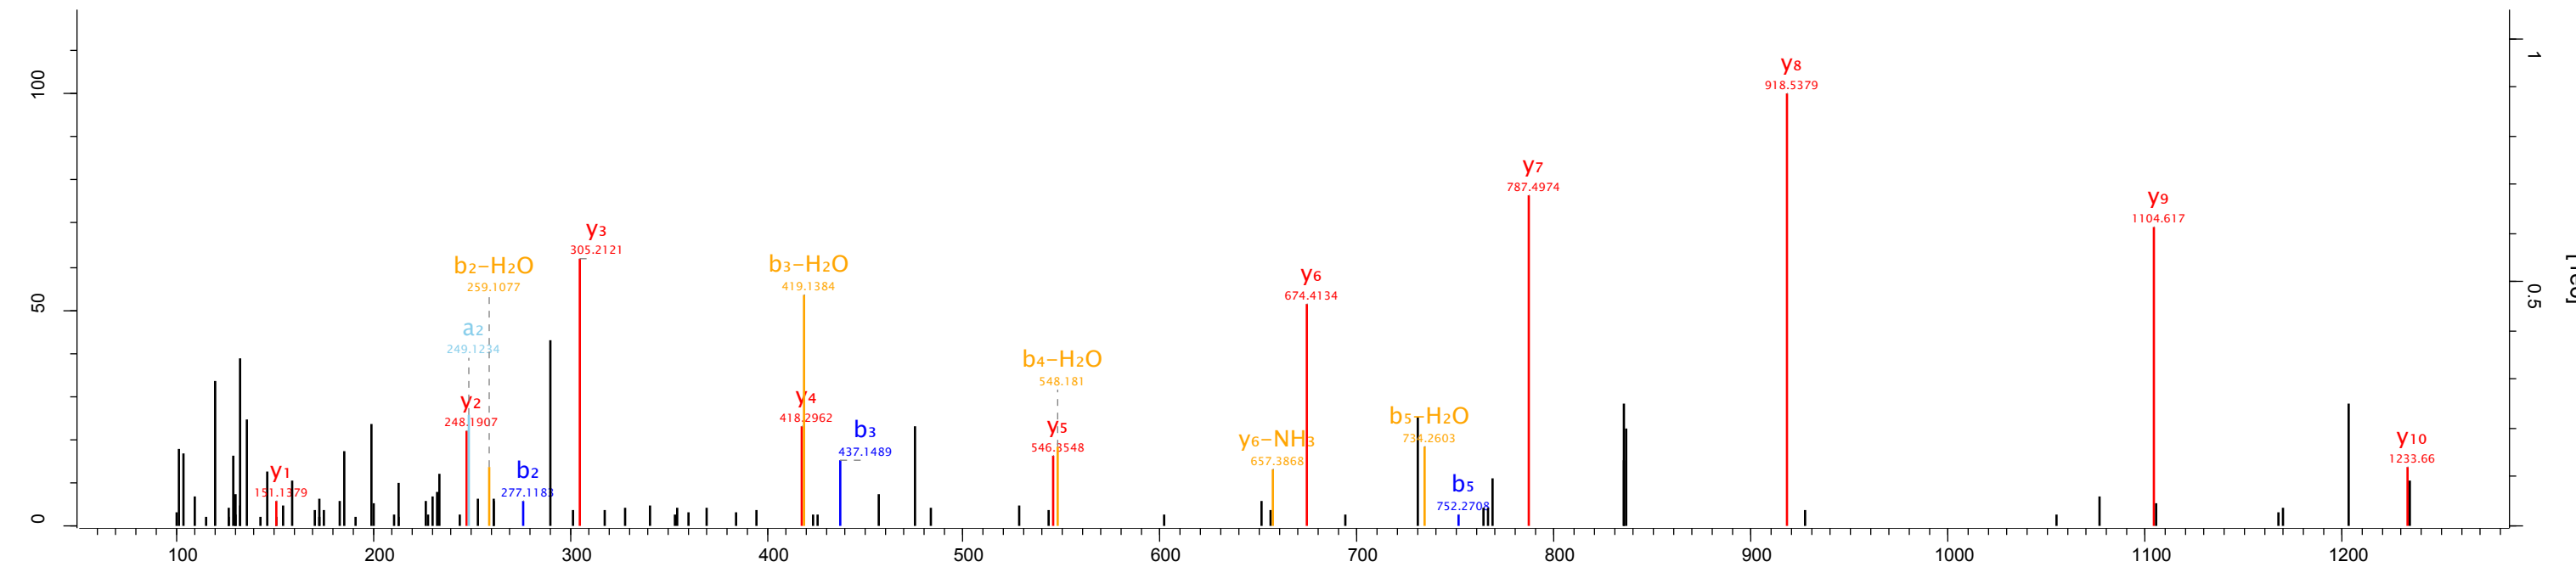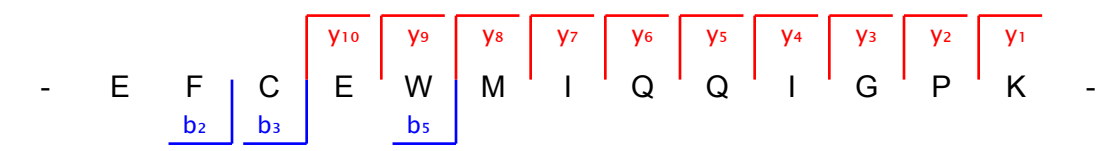

Raw file 20180707\_MaS\_A375SR\_ML\_proteome\_2\_05 Scan 25755 Method FTMS; HCD Score 74.99 m/z 717.93 Gene names EMC9

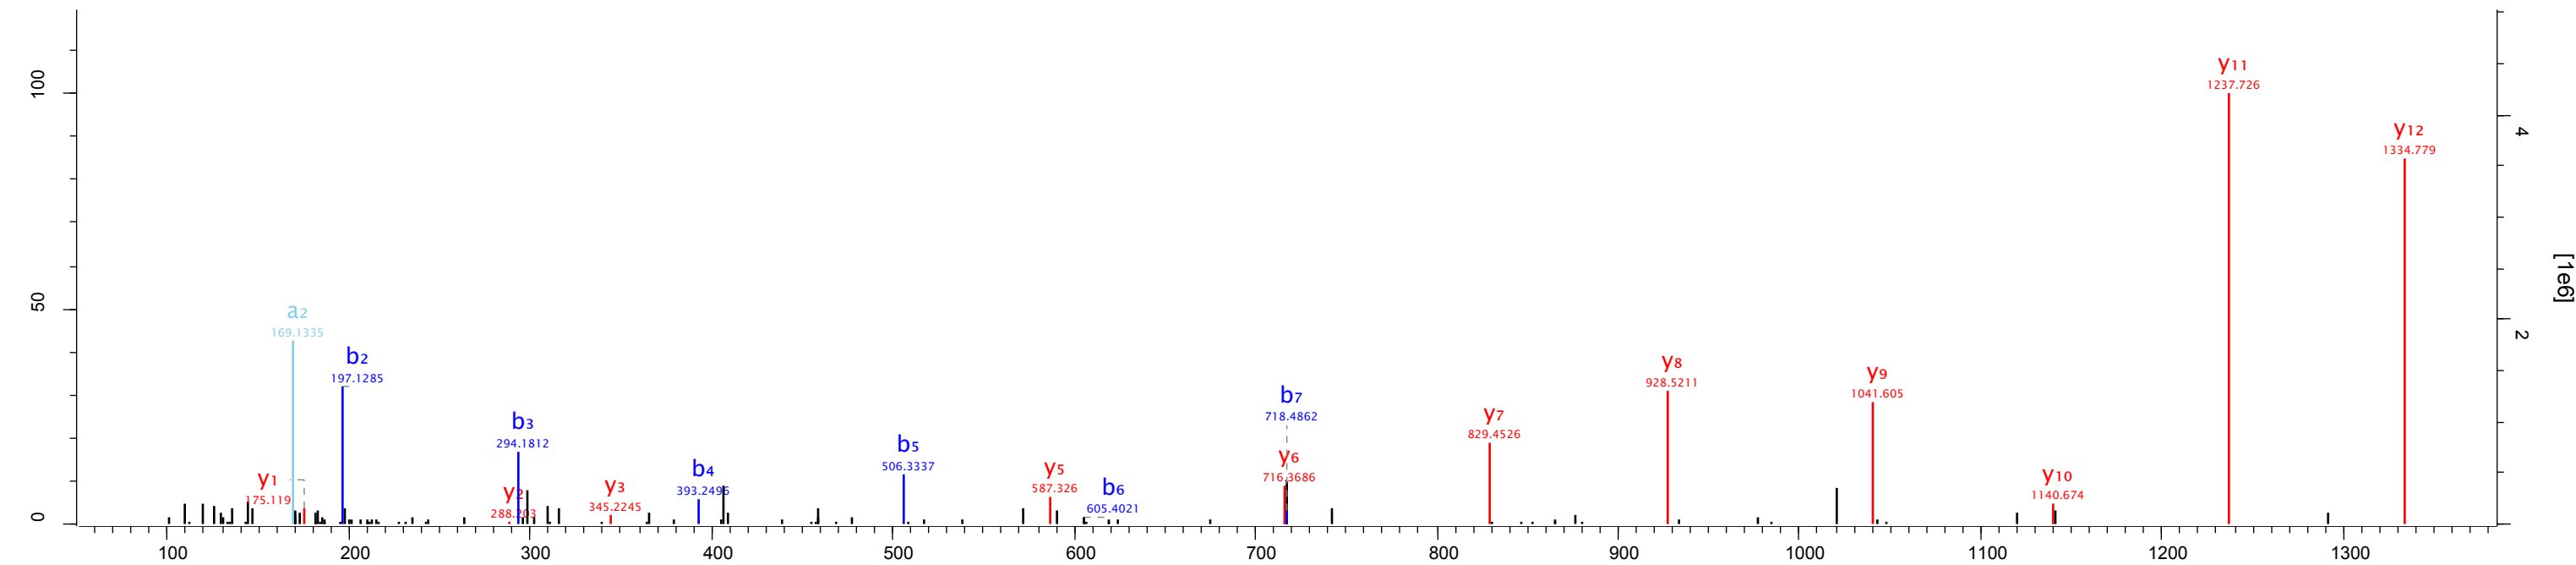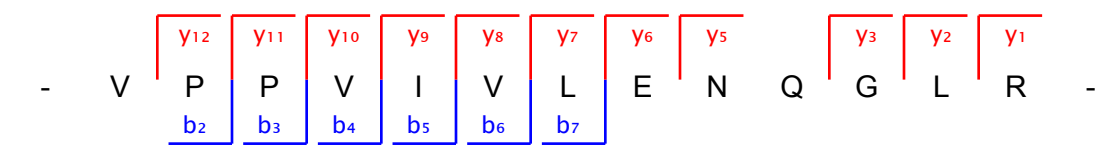

Raw file 20180707\_MaS\_A375SR\_ML\_proteome\_2\_06 Scan 26045 Method FTMS; HCD Score 59.23 m/z 717.93 Gene names EMC9

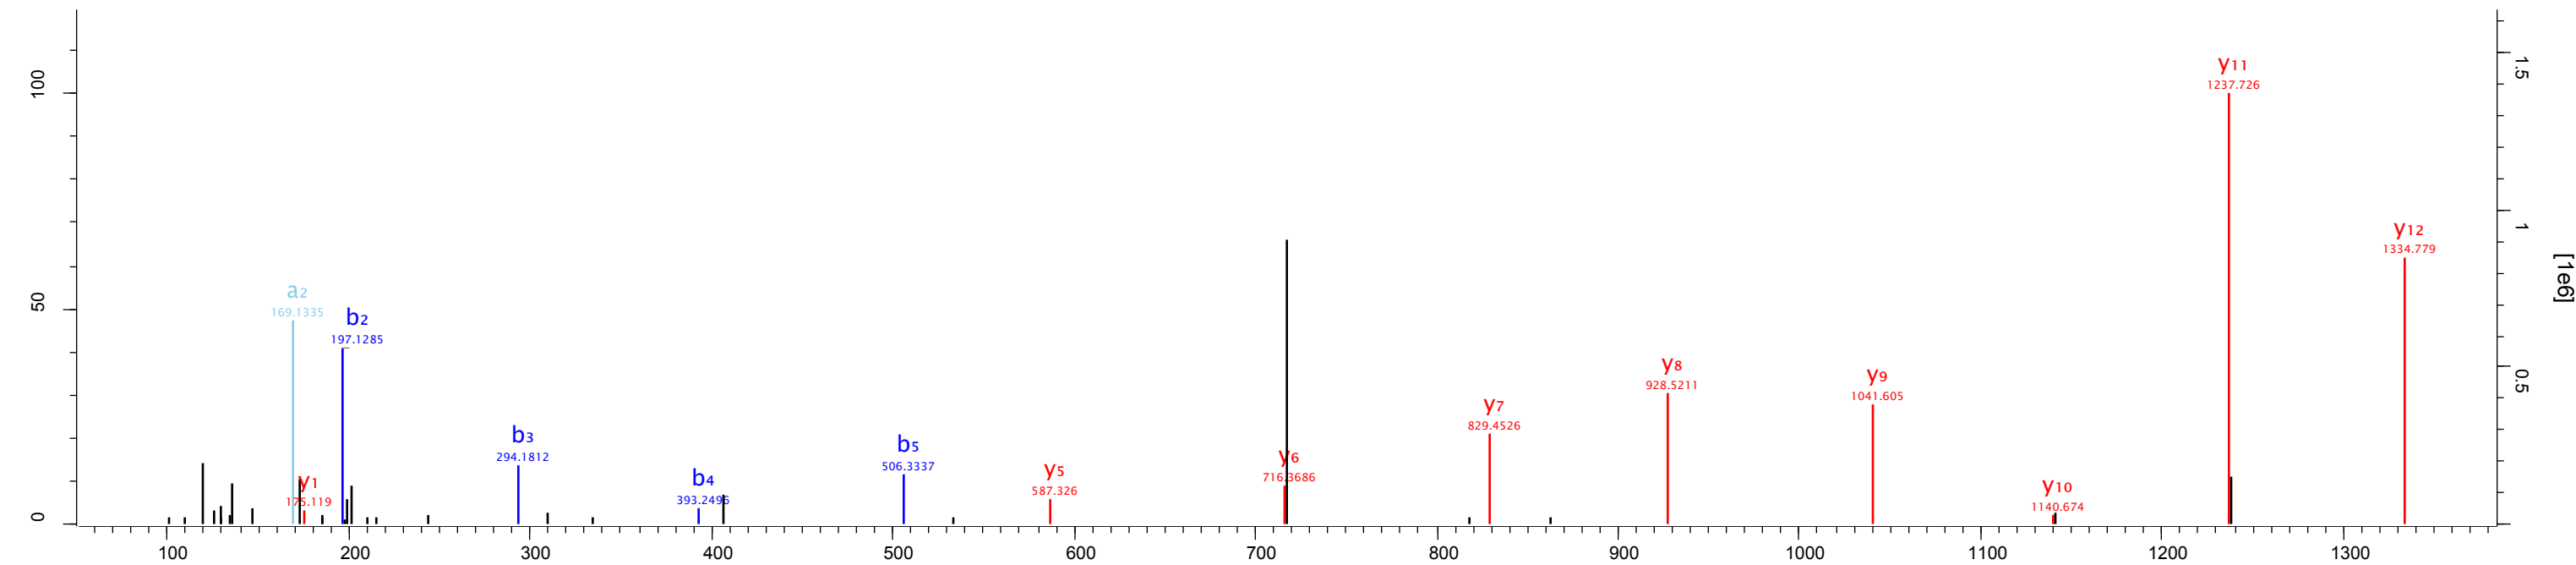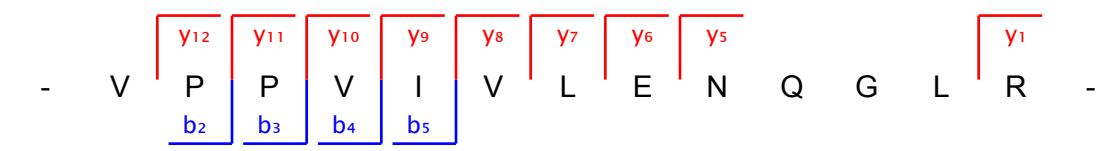

Raw file 20180707\_MaS\_A375SR\_ML\_proteome\_2\_06 Scan 26515 Method FTMS; HCD Score 80.69 m/z 492.81 Gene names STON2

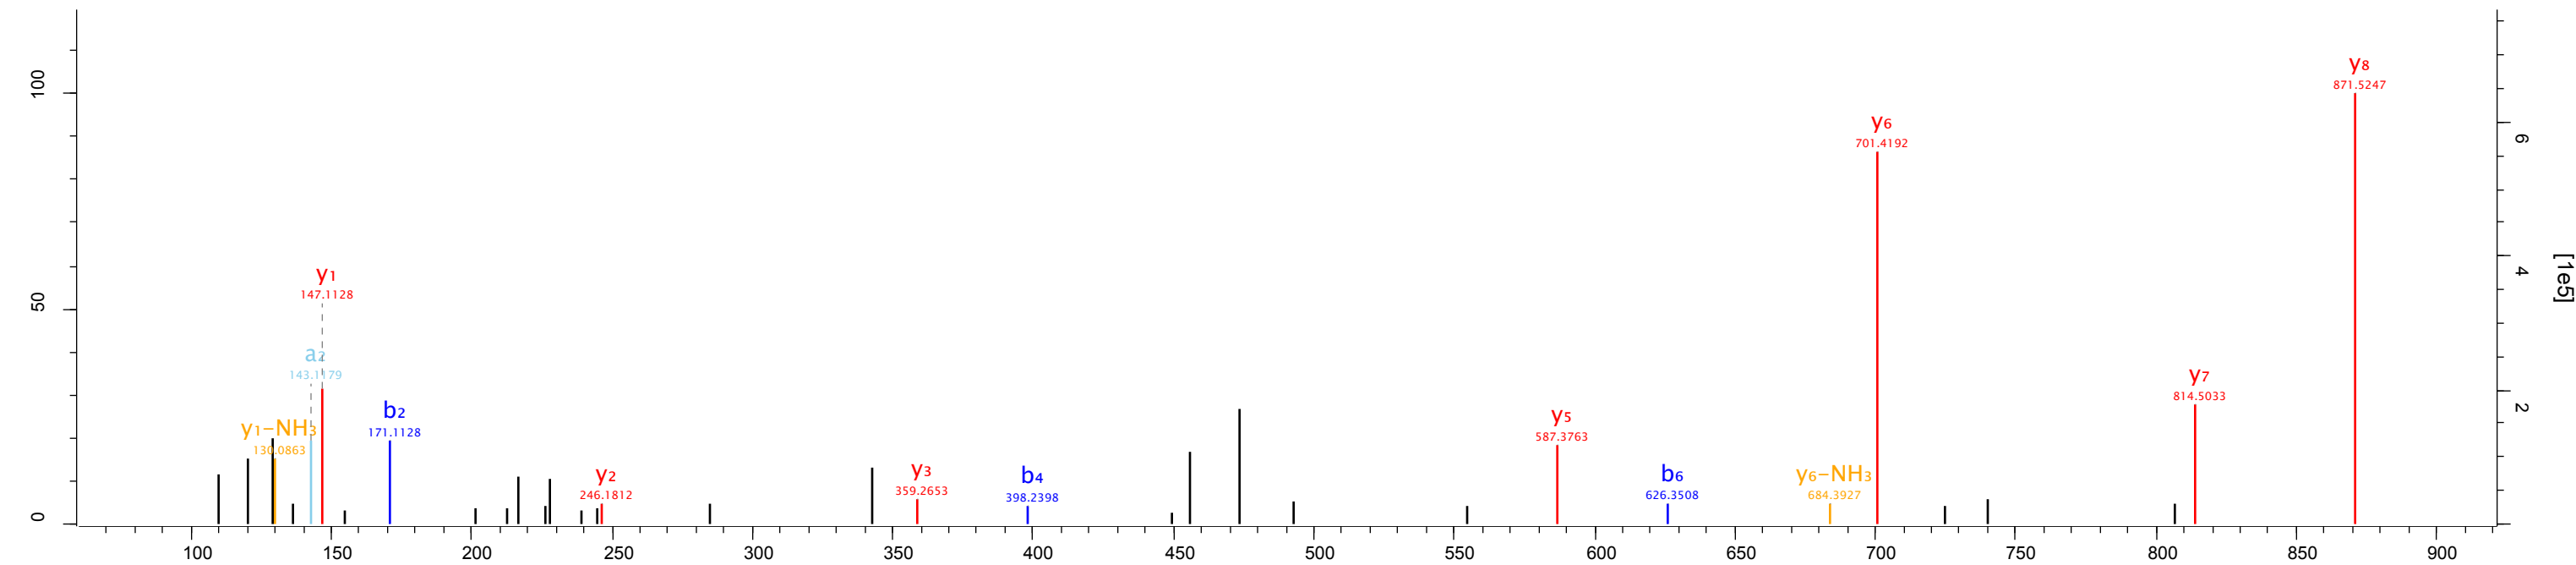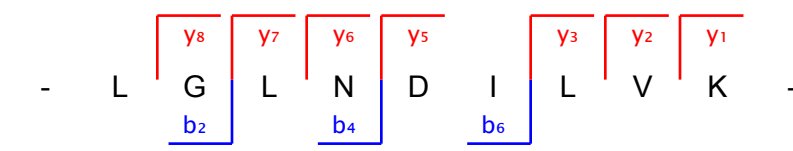

Raw file 20180707\_MaS\_A375SR\_ML\_proteome\_2\_06 Scan 7815 Method FTMS; HCD Score 46.73 m/z 591.3

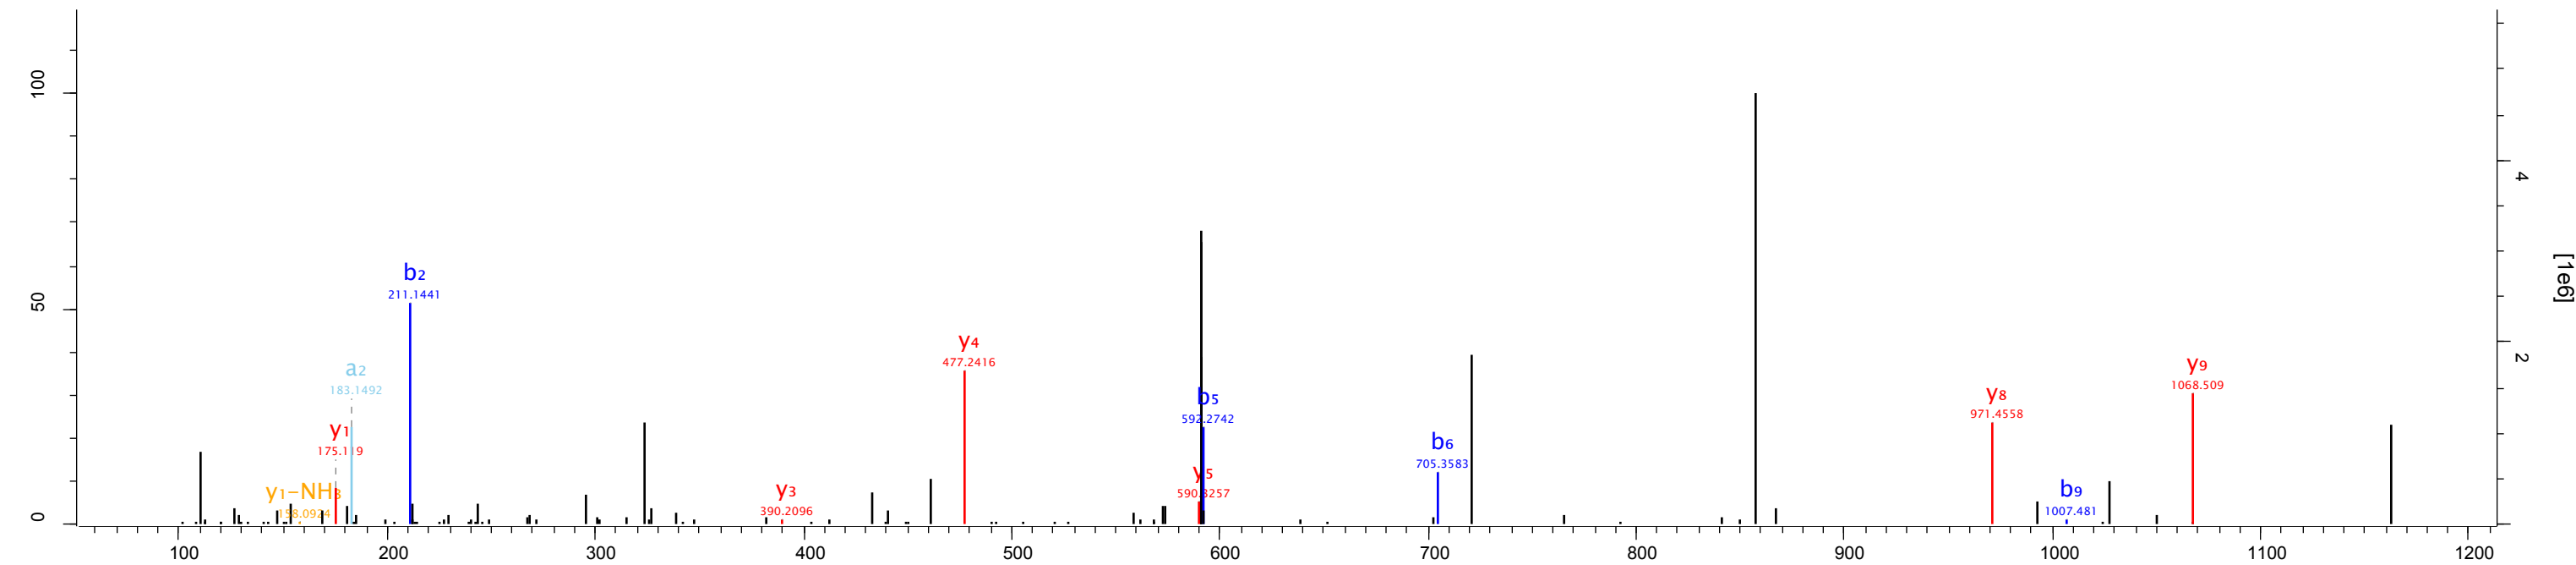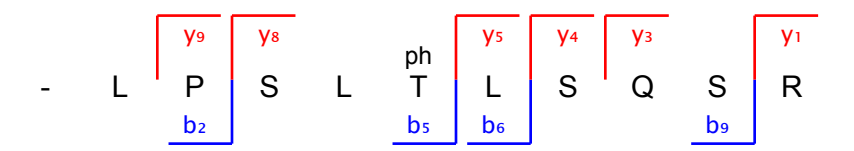



Raw file: 20180707\_MaS\_A375SR\_ML\_proteome\_2\_07  
 Scan: 23445 Method: FTMS; HCD Score: 81.85 m/z: 724.7 Gene names: LMBRD1

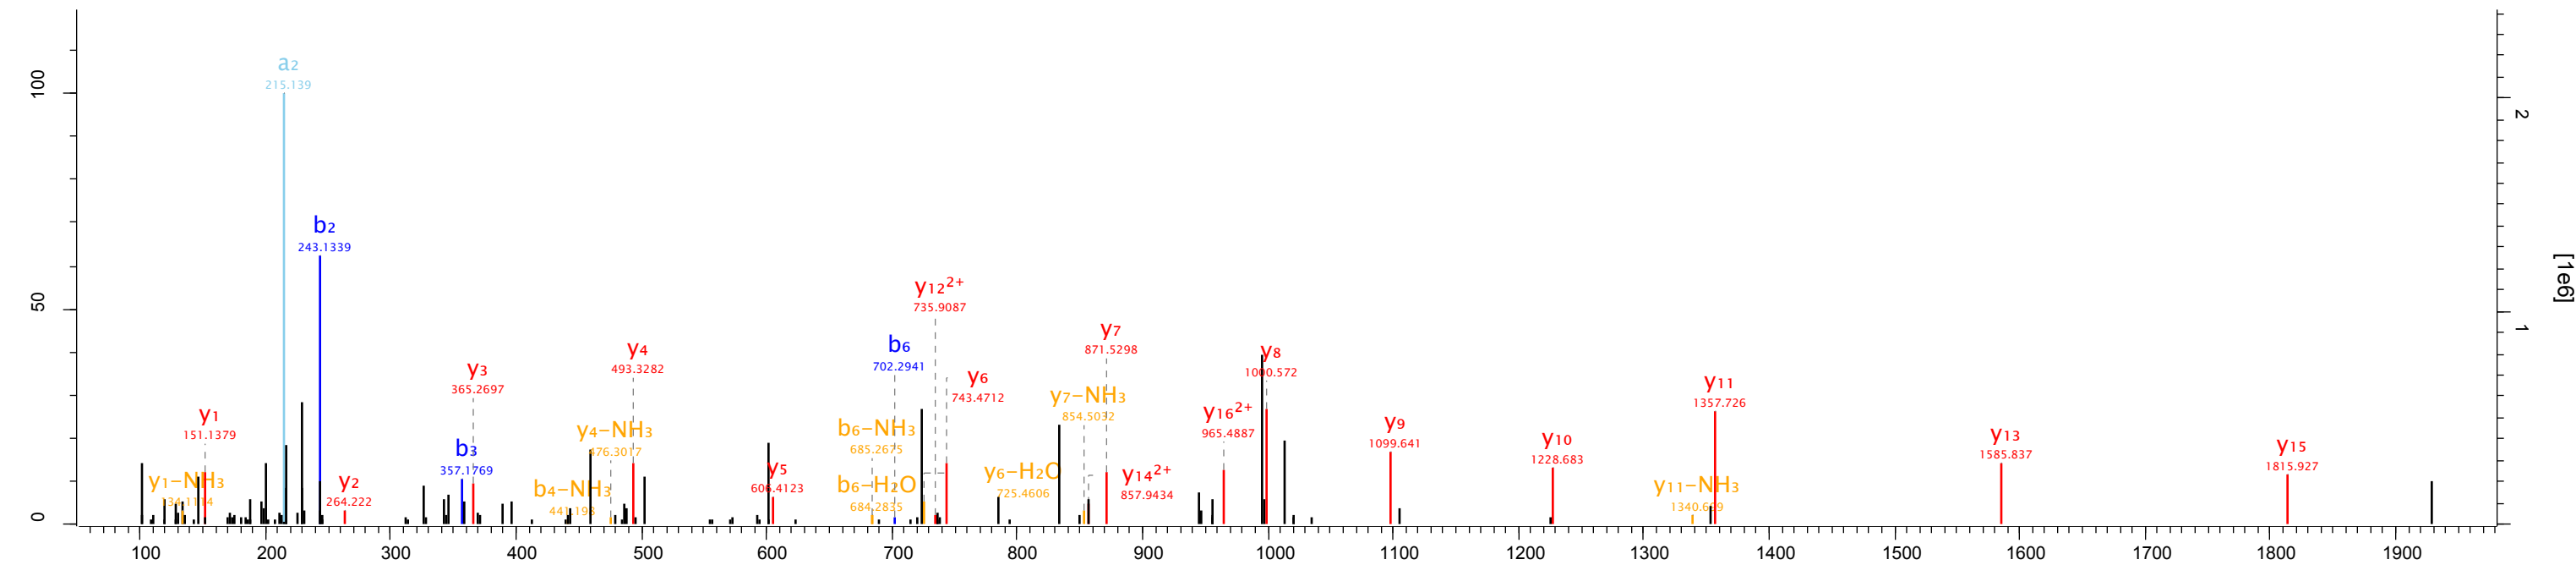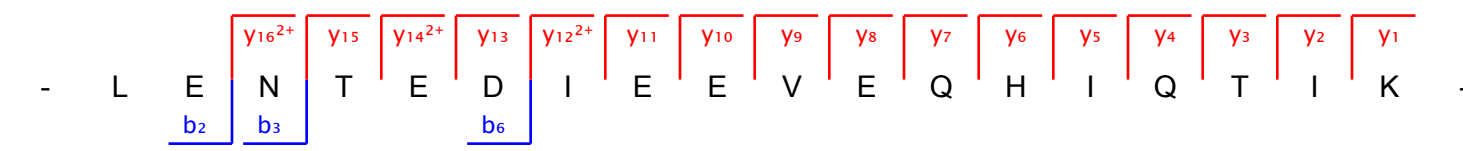

Raw file 20180707\_MaS\_A375SR\_ML\_proteome\_2\_08 Scan 3195 Method FTMS; HCD Score 45.02 m/z 342.52 Gene names COX7B

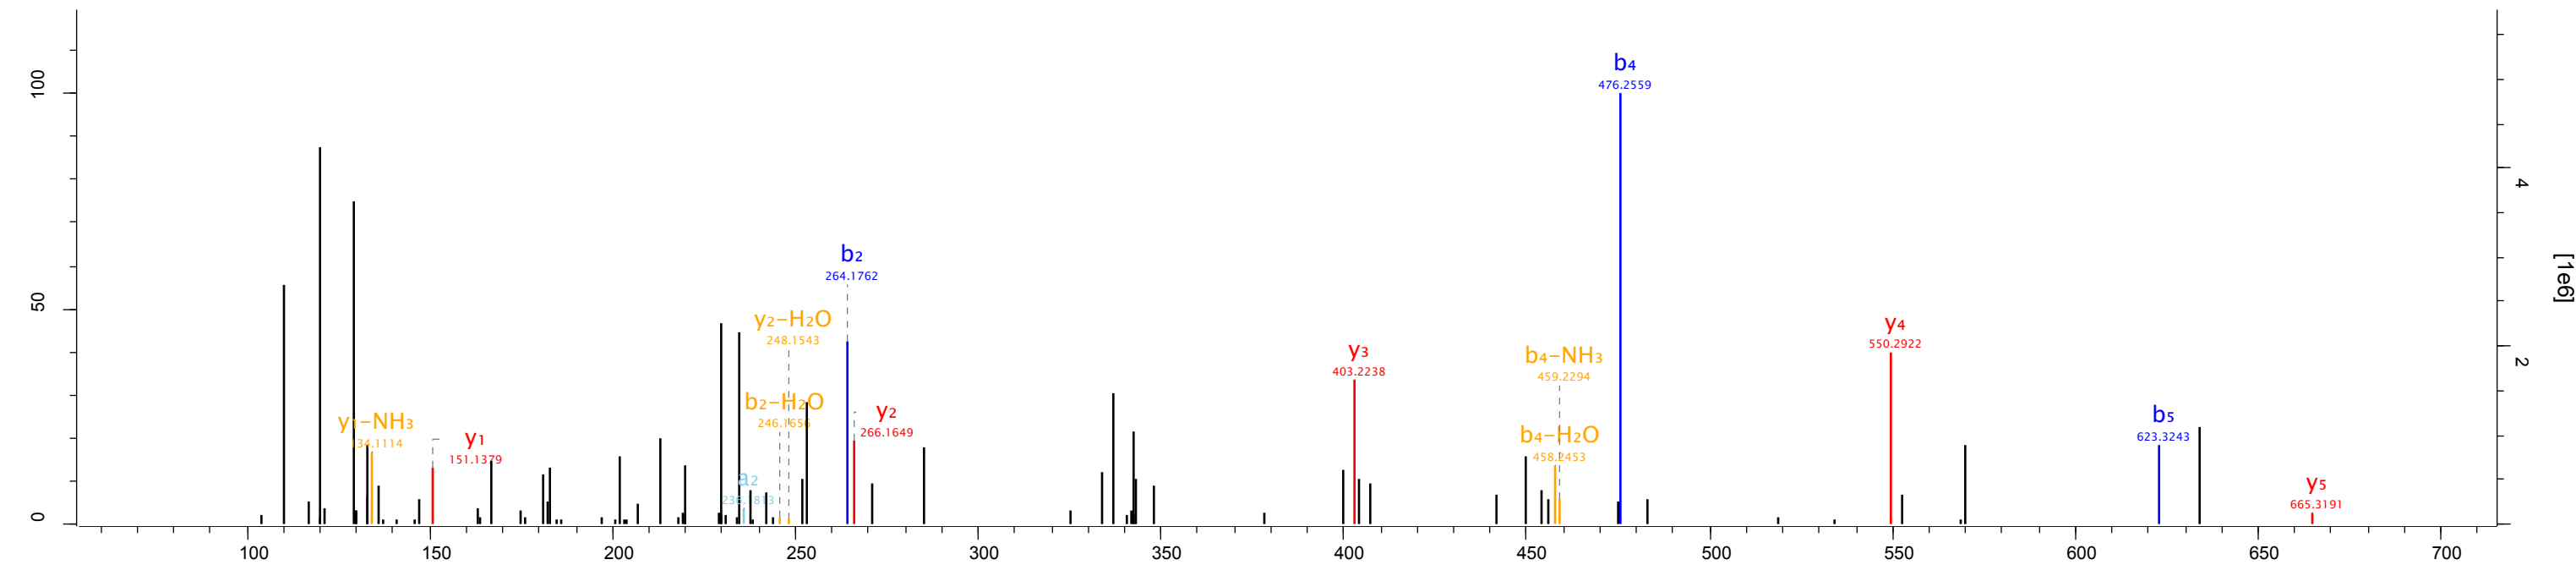

Raw file  
20180707\_MaS\_A375SR\_ML\_proteome\_2\_08

| Scan | Method    | Score | m/z    |
|------|-----------|-------|--------|
| 9395 | FTMS; HCD | 44.97 | 397.21 |

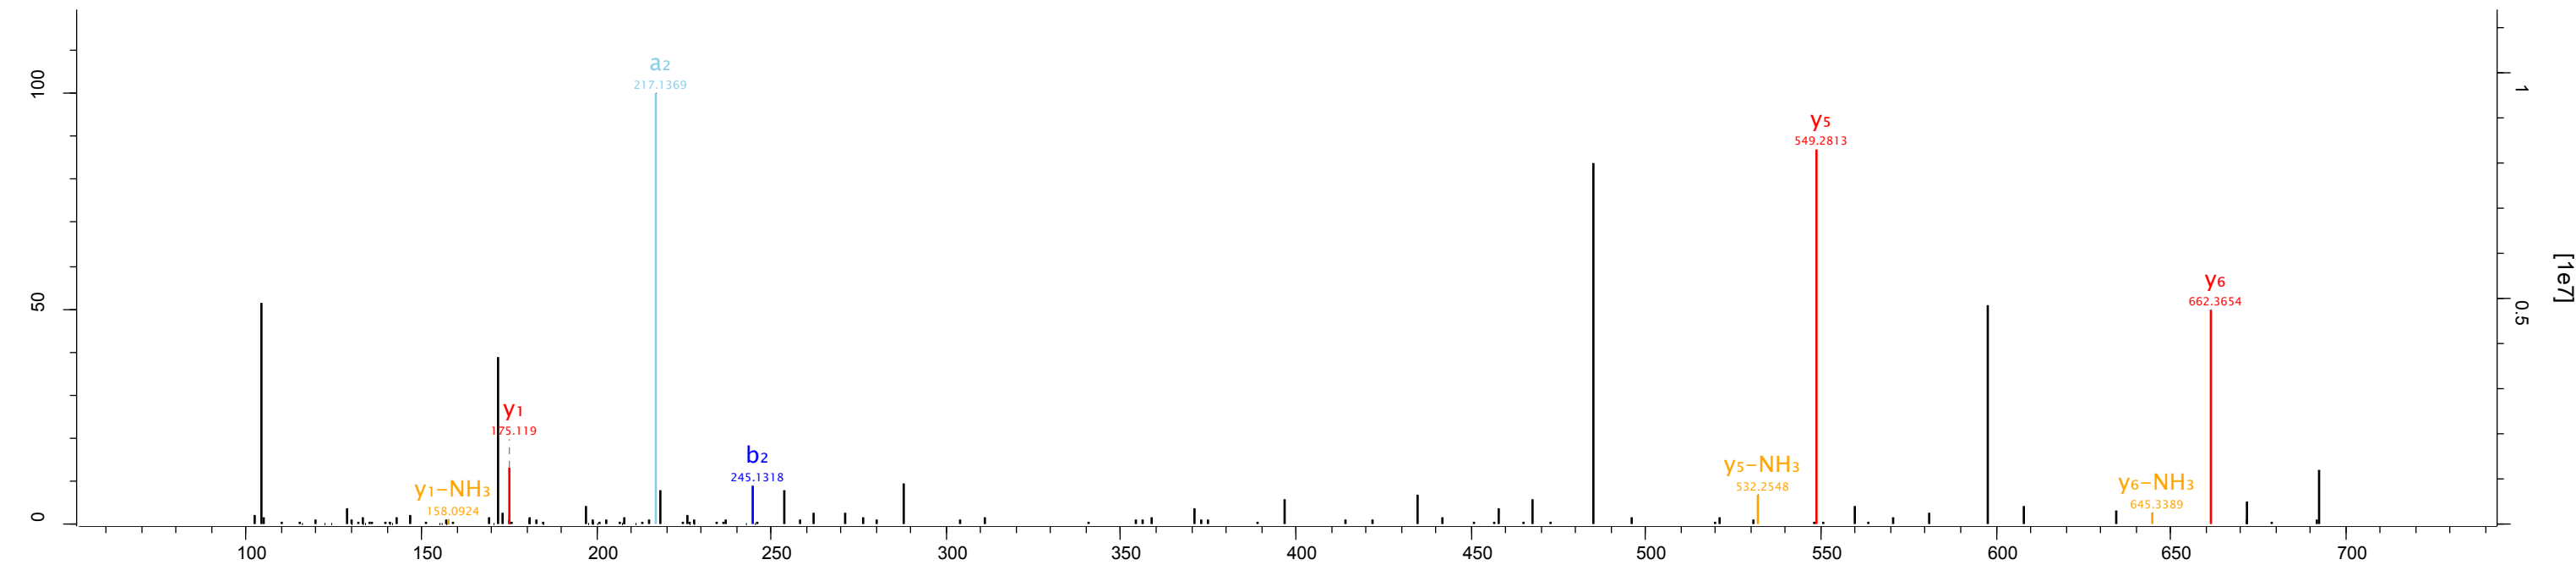

Raw file  
 20180707\_MaS\_A375SR\_ML\_proteome\_2\_09  
 Scan 14975 Method FTMS; HCD Score 54.78 m/z 625.73

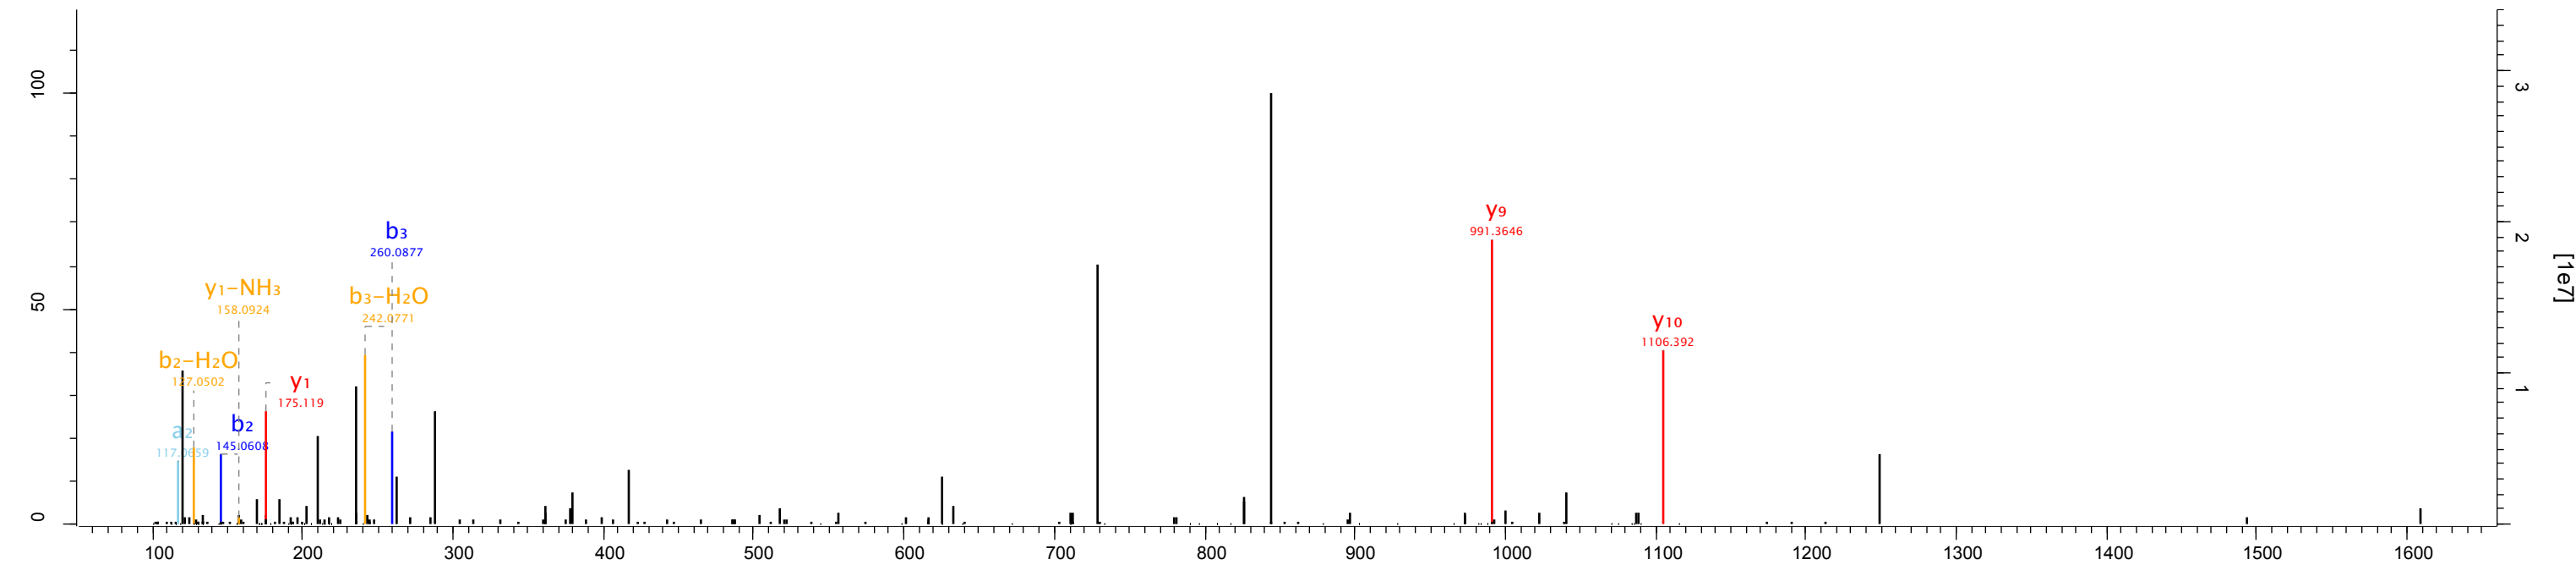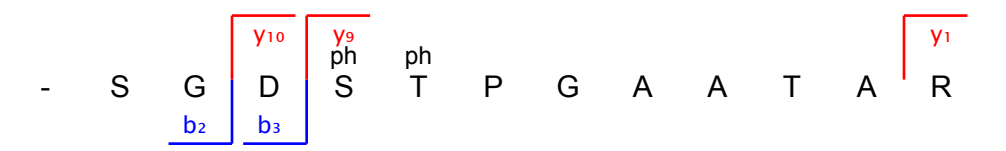

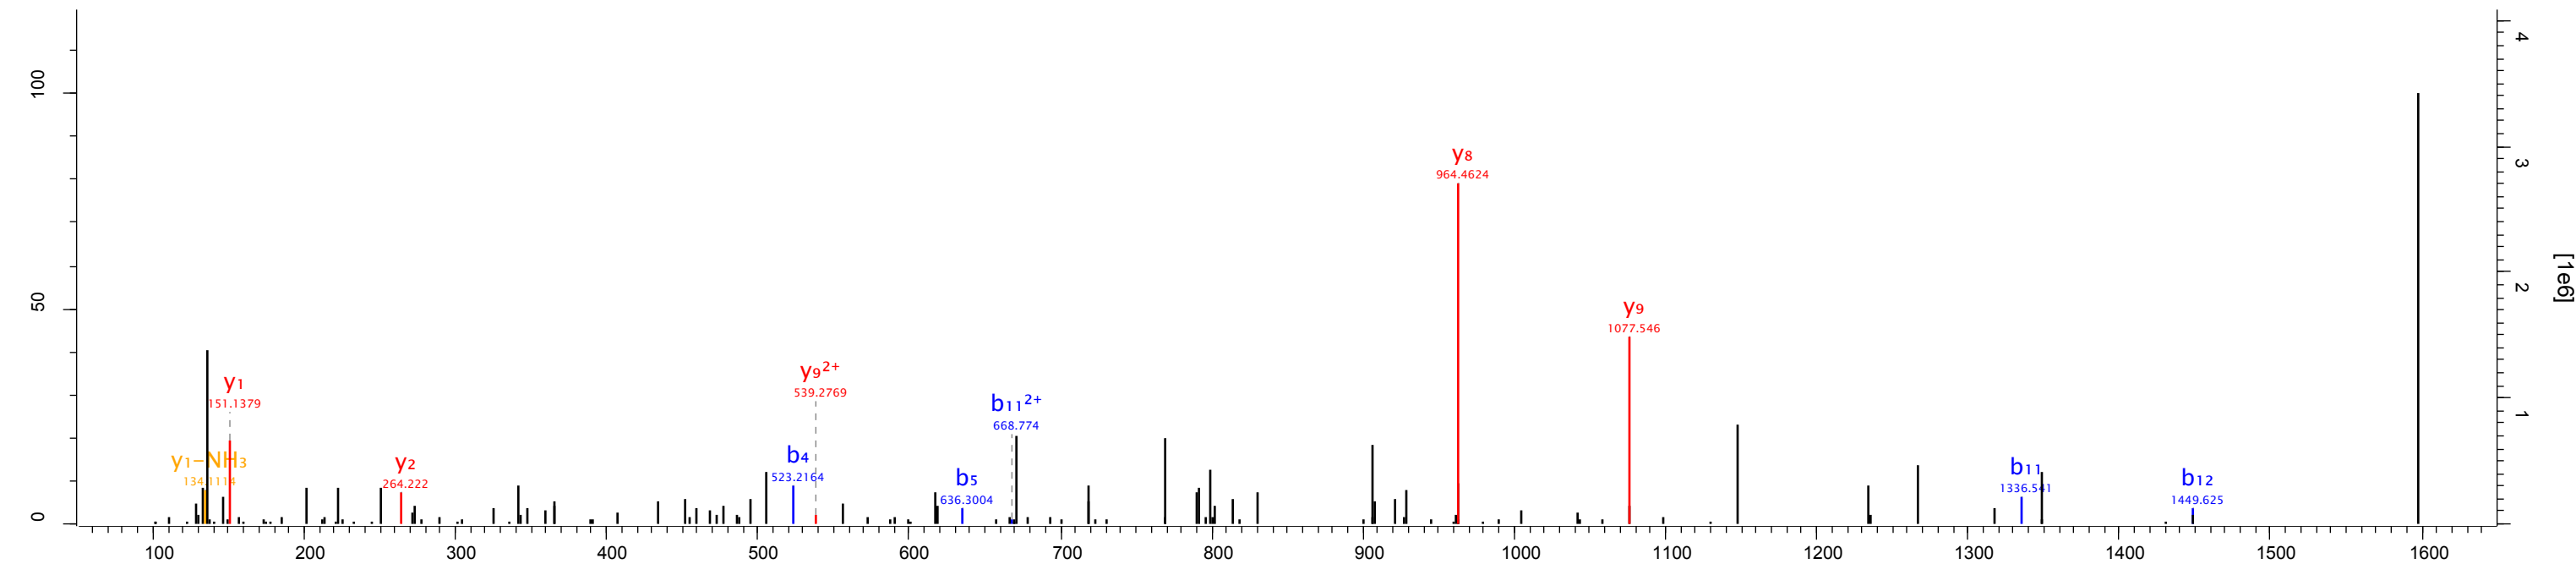

- ph S L I E L P H ph S A P M L K -

Fragmentation labels (b and y ions) are shown below the corresponding amino acids:

- b<sub>4</sub> (under E)
- b<sub>5</sub> (under L)
- b<sub>11</sub> (under M)
- b<sub>12</sub> (under L)
- y<sub>9</sub> (above E)
- y<sub>8</sub> (above P)
- y<sub>2</sub> (above L)
- y<sub>1</sub> (above K)

Raw file: 20180707\_MaS\_A375SR\_ML\_proteome\_2\_11  
 Scan: 10705 Method: FTMS; HCD Score: 112.95 m/z: 610.79

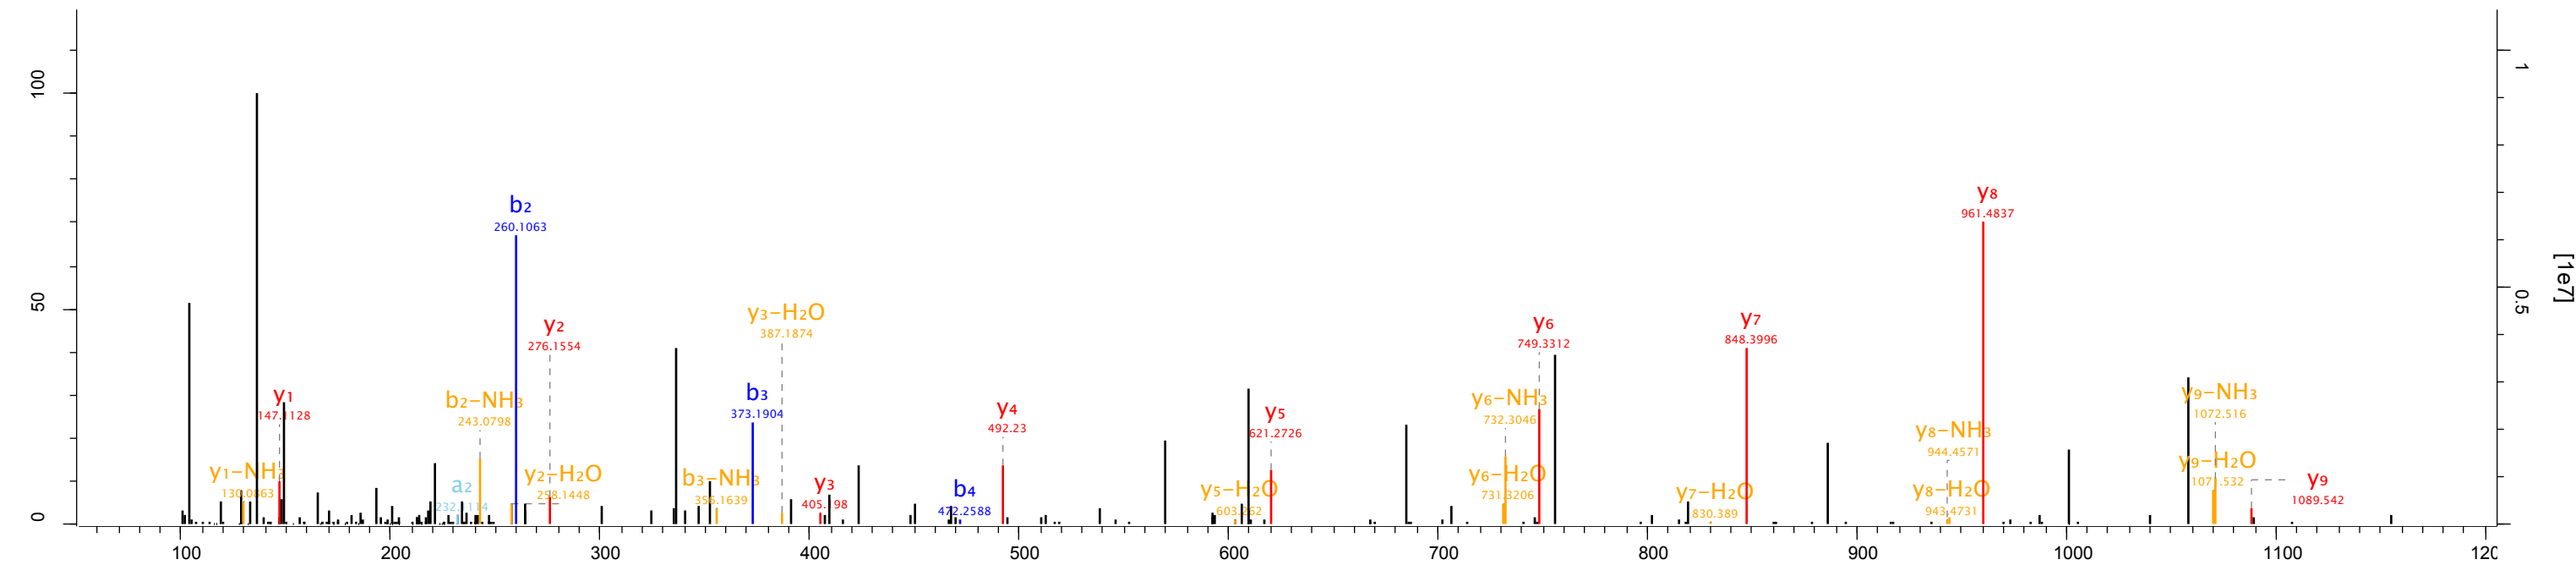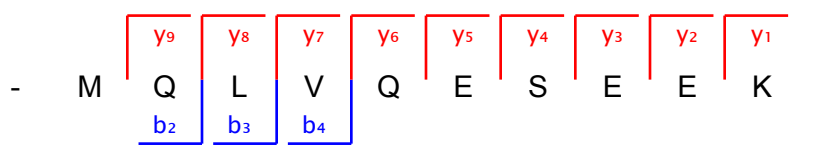

Raw file  
20180707\_MaS\_A375SR\_ML\_proteome\_2\_11

Scan 23585 Method FTMS; HCD Score 68.91 m/z 896.5 Gene names MYO16

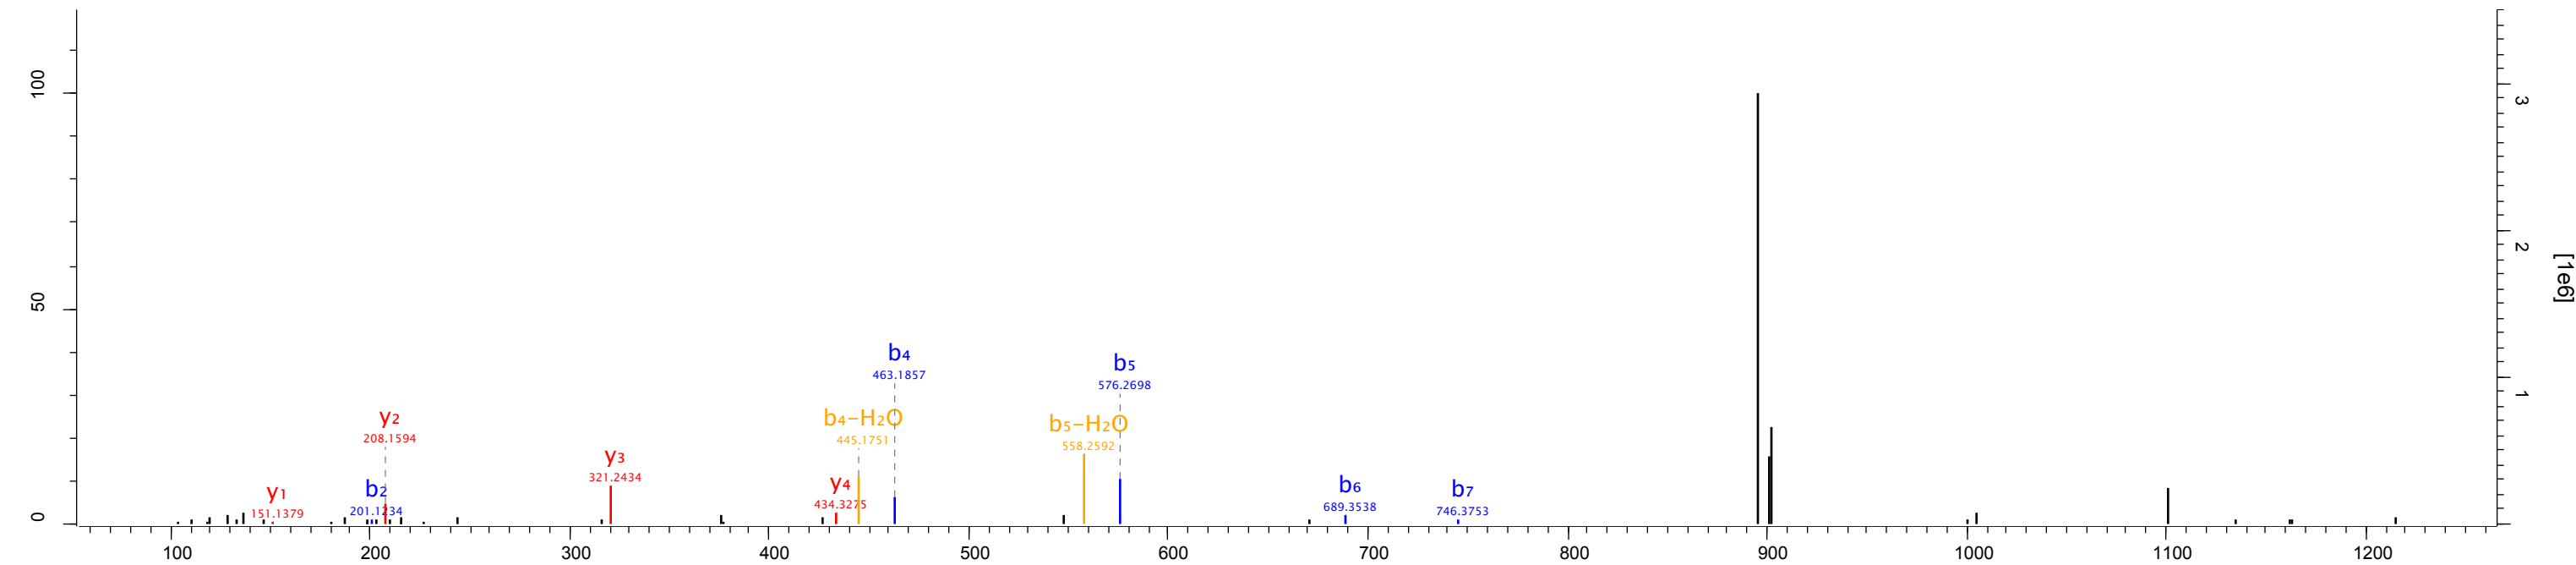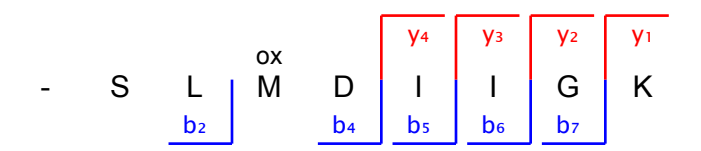

Raw file  
20180707\_MaS\_A375SR\_ML\_proteome\_2\_11

Scan 27835 Method FTMS; HCD Score 101.39 m/z 663.83 Gene names ANKRD30A

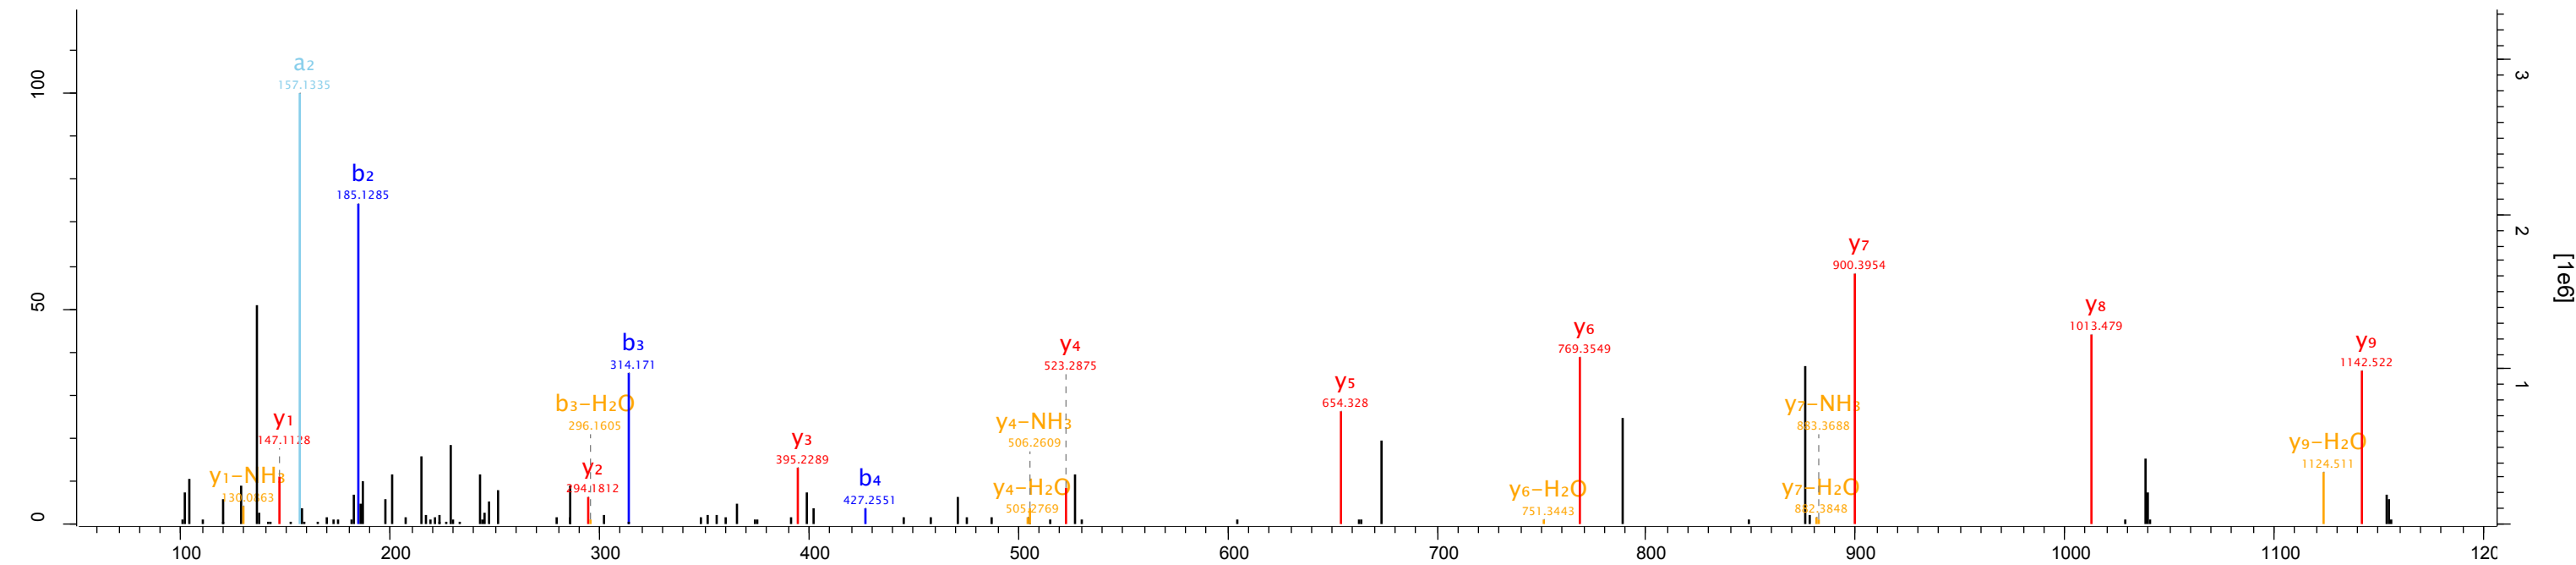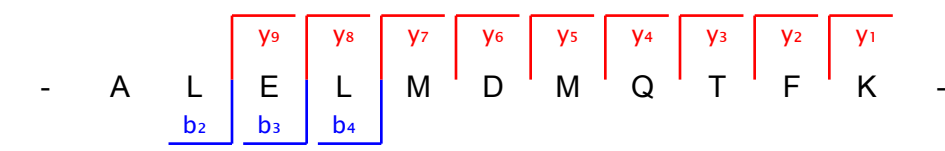



Raw file  
20180707\_MaS\_A375SR\_ML\_proteome\_2\_13

Scan: 21505  
Method: FTMS; HCD  
Score: 96.49  
m/z: 823.4  
Gene names: UBXN2A

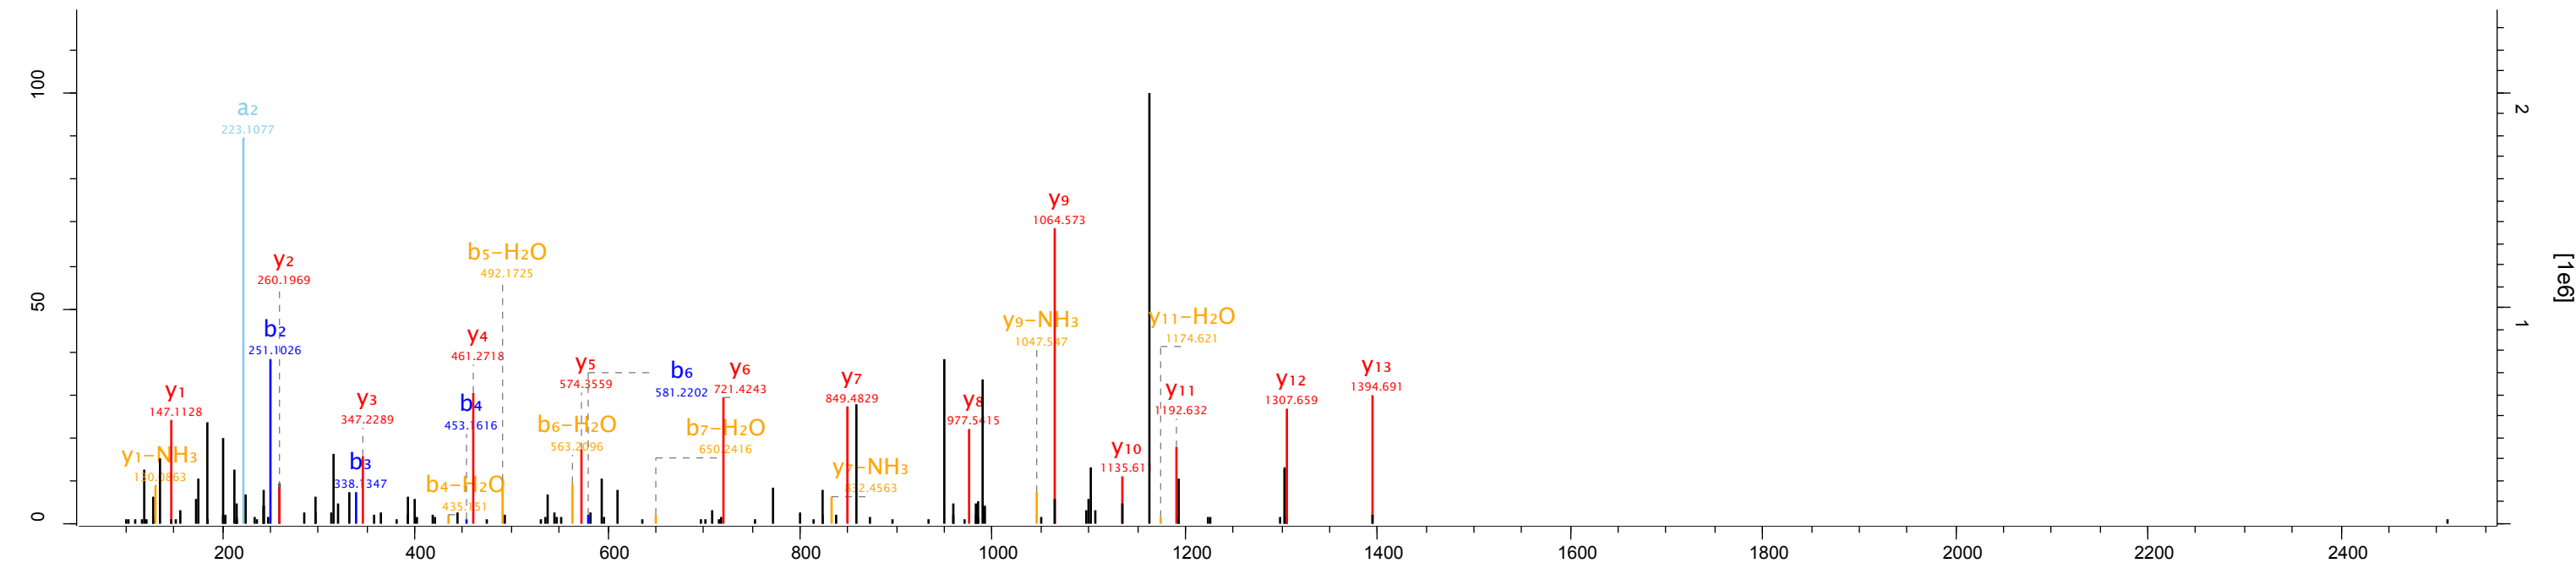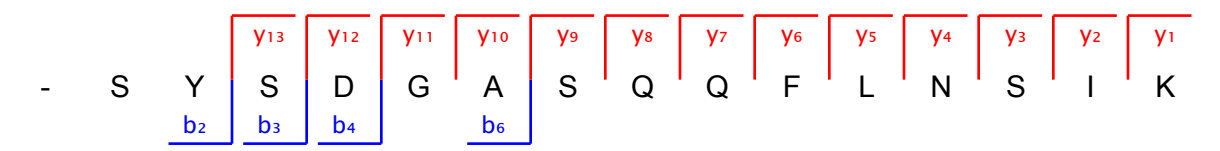

Raw file  
20180707\_MaS\_A375SR\_ML\_proteome\_2\_13

Scan 24635 Method FTMS; HCD Score 94.12 m/z 498.29 Gene names SELM

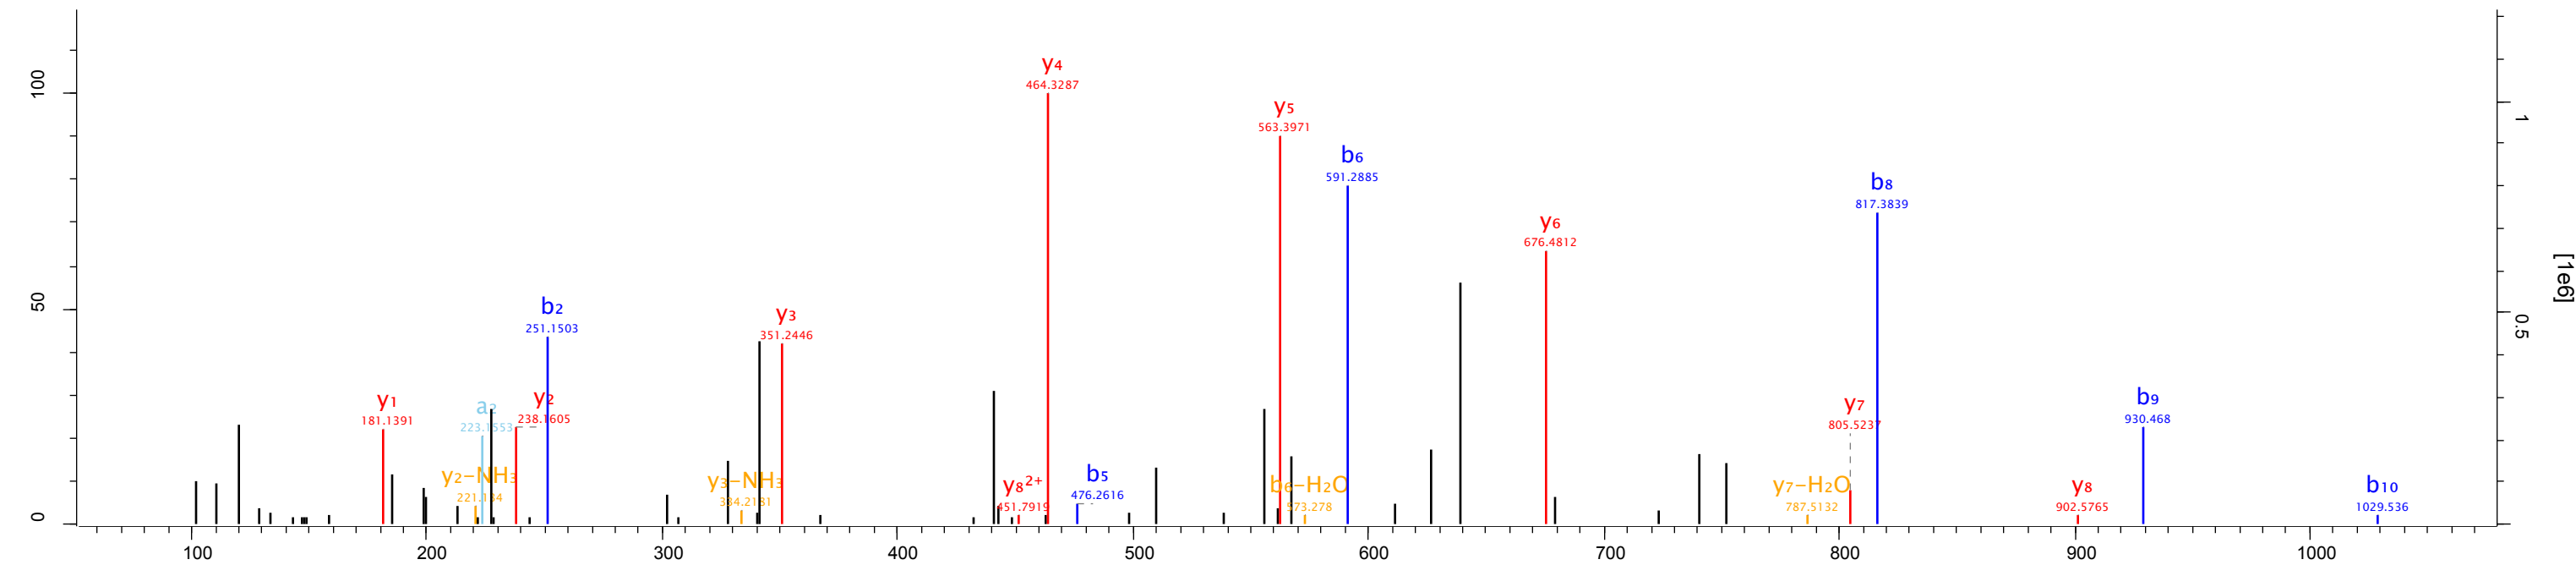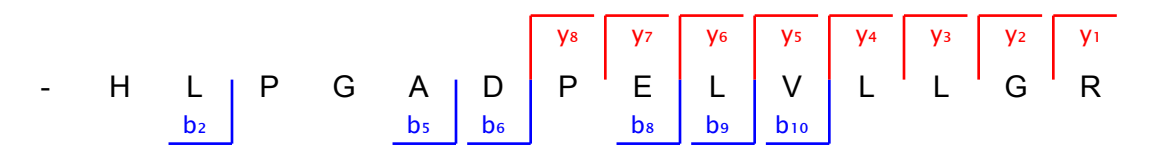

Raw file  
20180707\_MaS\_A375SR\_ML\_proteome\_2\_14

Scan 10605 Method FTMS; HCD Score 130.77 m/z 421.22 Gene names PTGDS

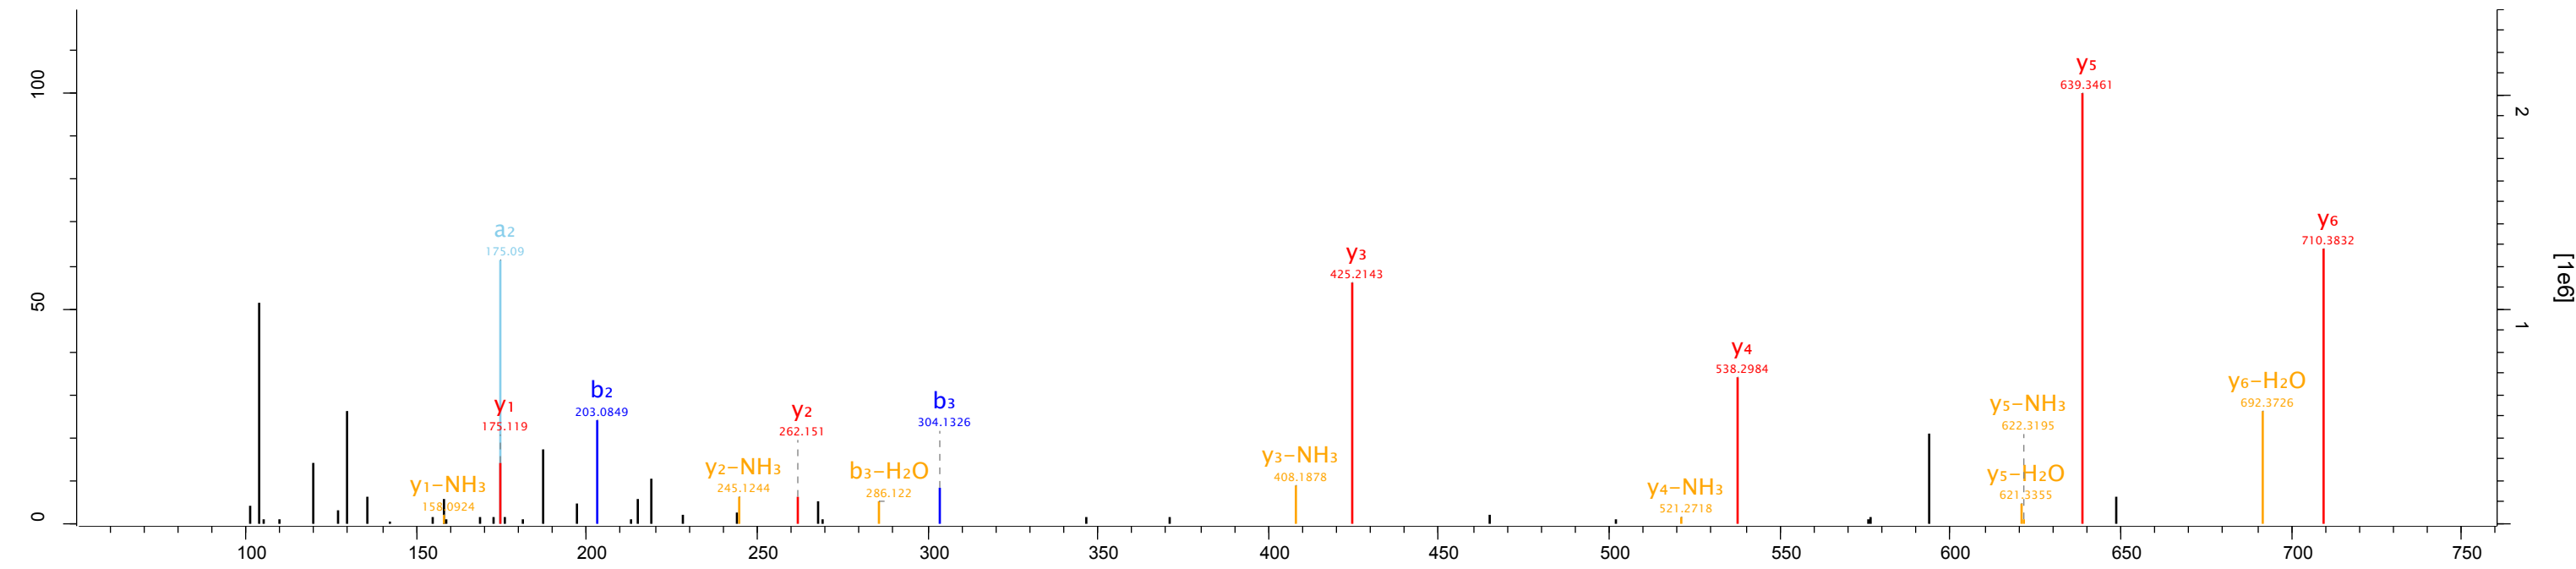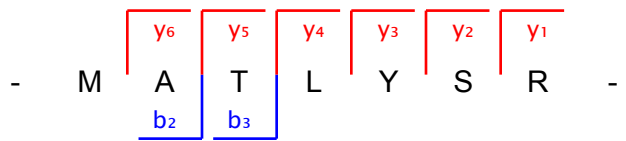

Raw file 20180707\_MaS\_A375SR\_ML\_proteome\_2\_14 Scan 18535 Method FTMS; HCD Score 46.8 m/z 678.36 Gene names RNF207

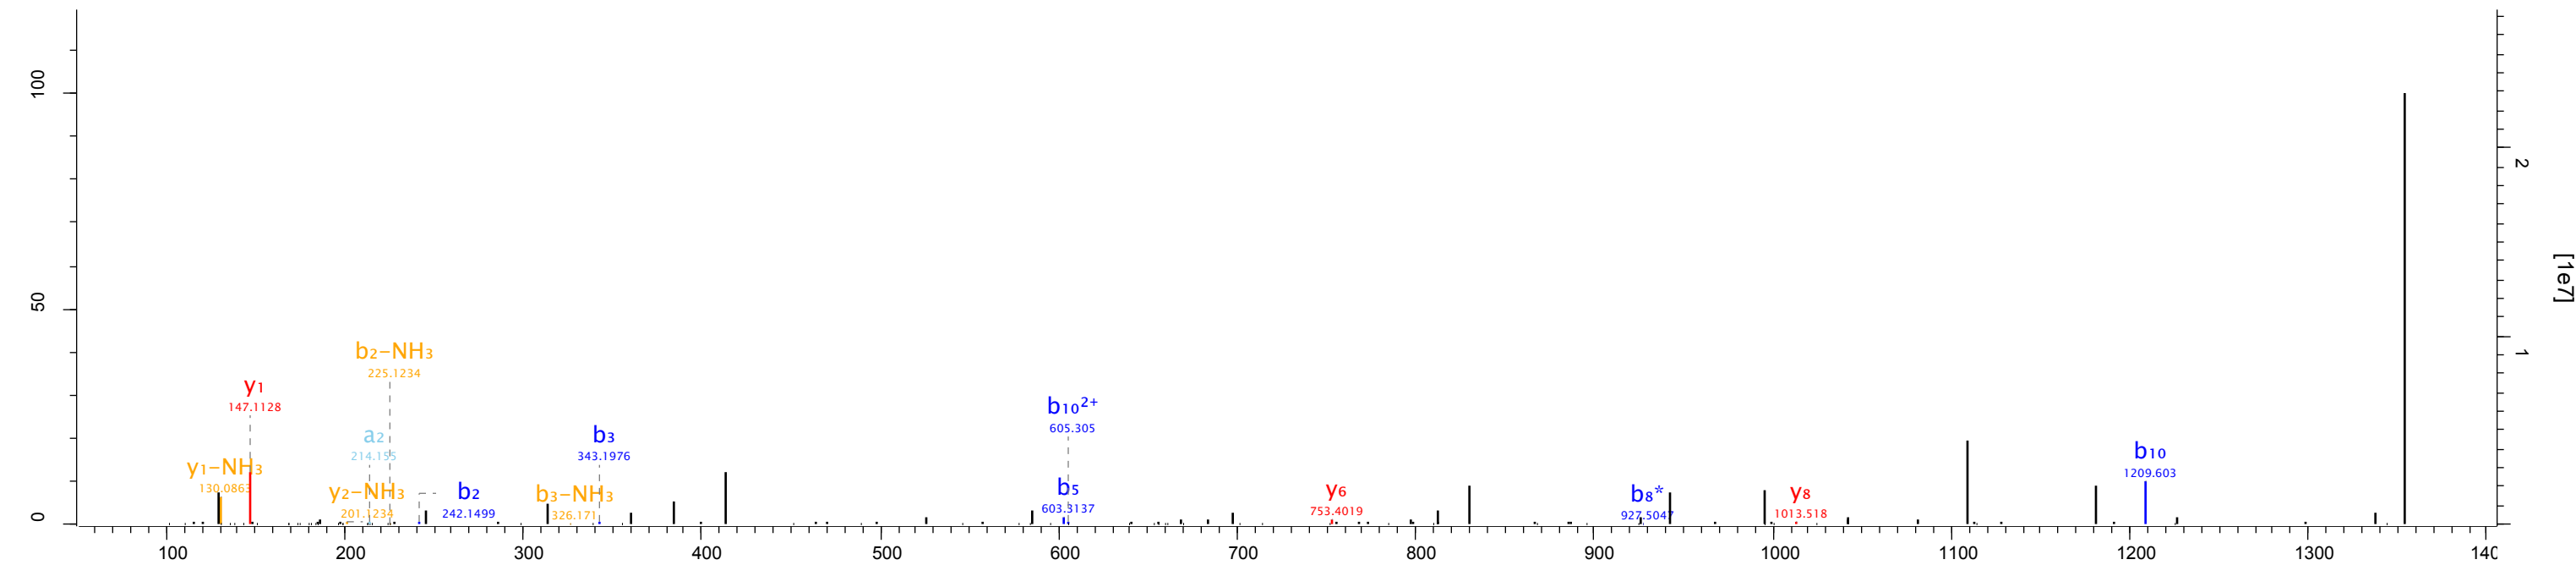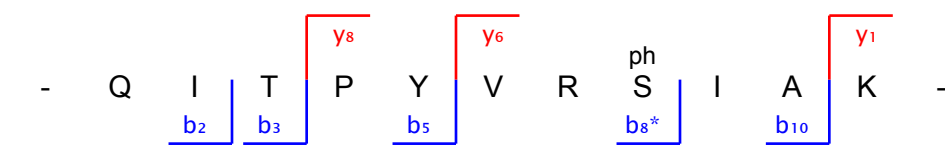

Raw file 20180707\_MaS\_A375SR\_ML\_proteome\_2\_15 Scan 25005 Method FTMS; HCD Score 73.5 m/z 861.94 Gene names PIK3C2B

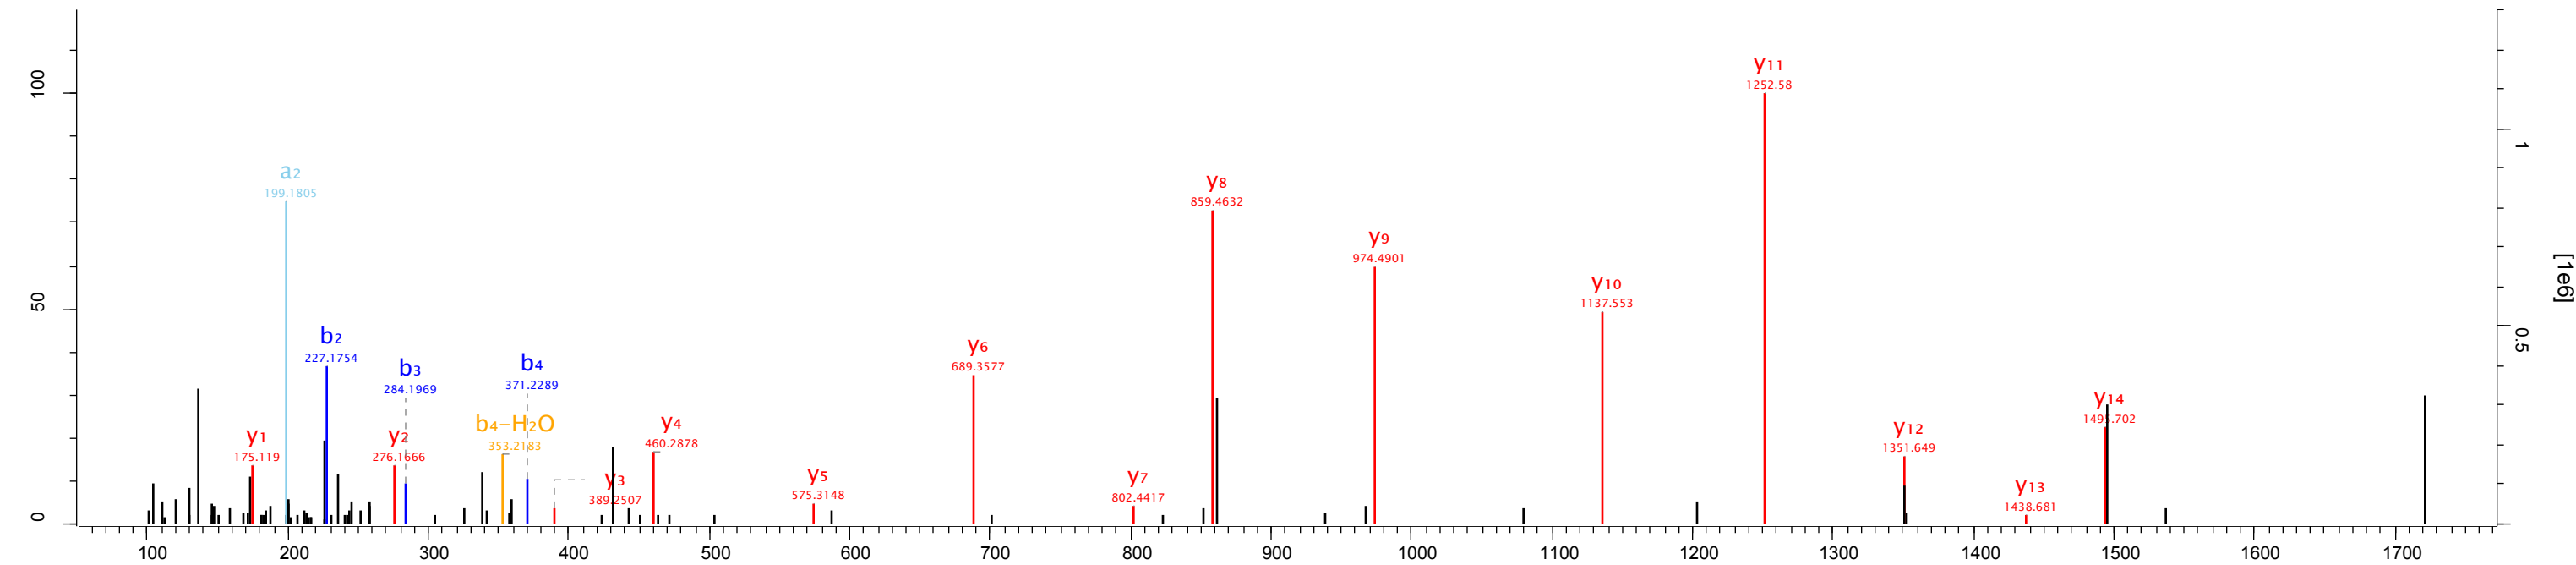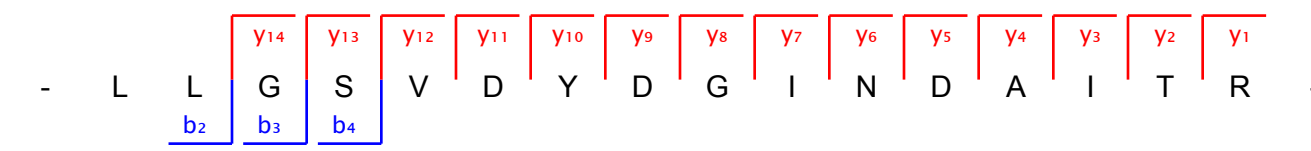

Raw file  
 20180707\_MaS\_A375SR\_ML\_proteome\_2\_16  
 Scan 8265 Method FTMS; HCD Score 66.19 m/z 576.29

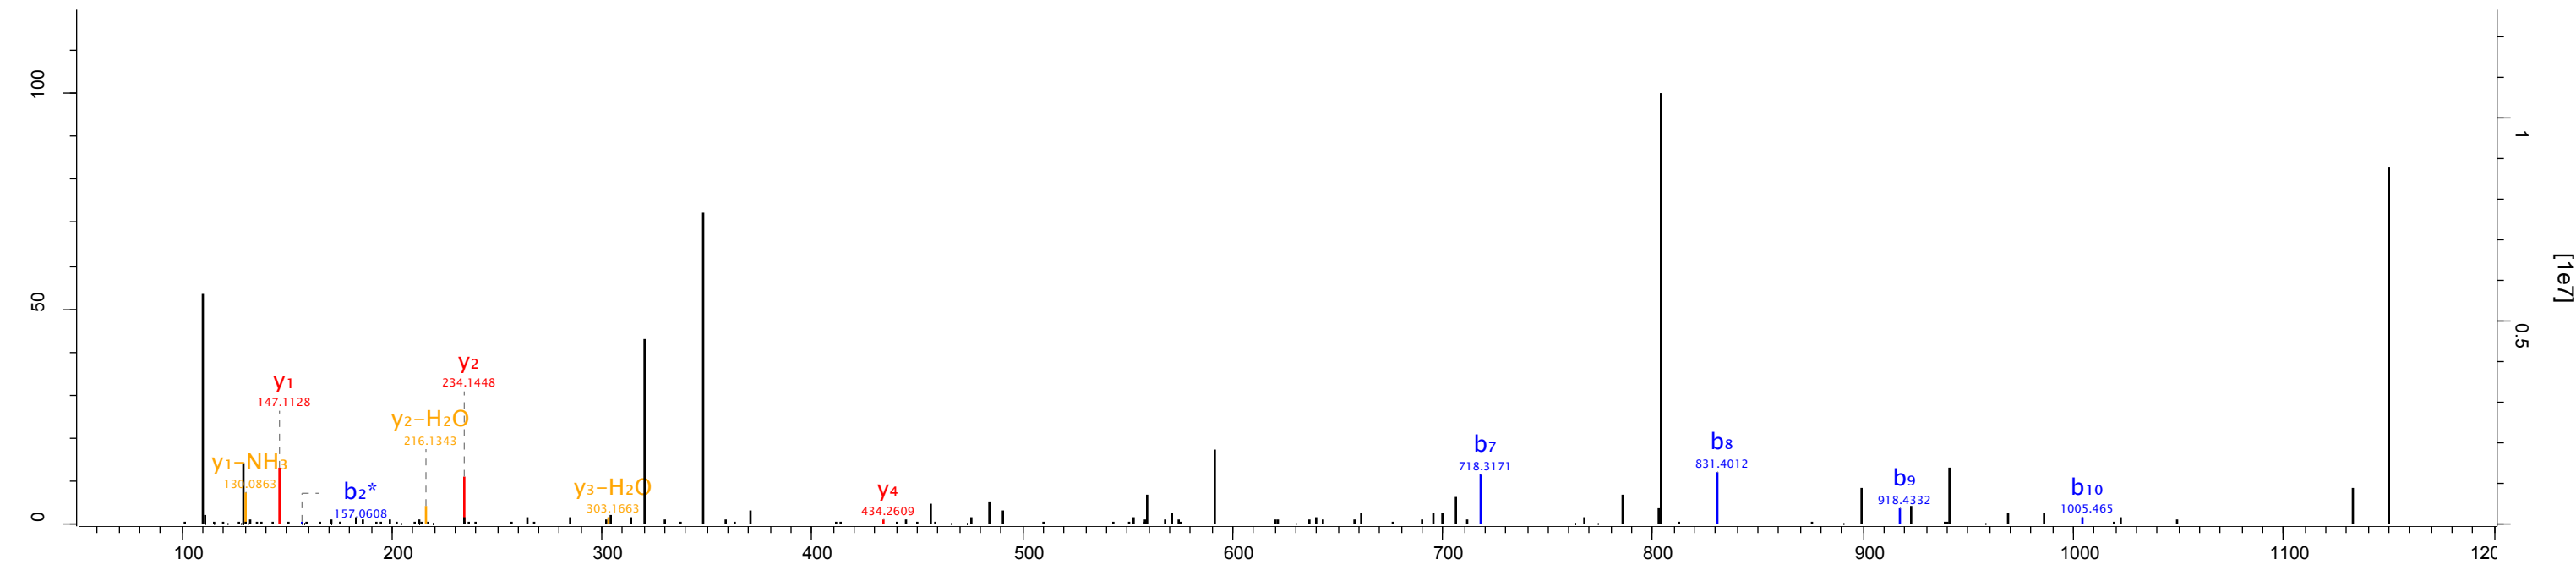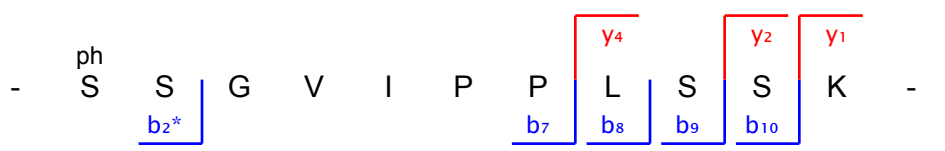

Raw file  
20180707\_MaS\_A375SR\_ML\_proteome\_2\_17

Scan 18995 Method FTMS; HCD Score 44.6 m/z 954.44 Gene names C6orf120

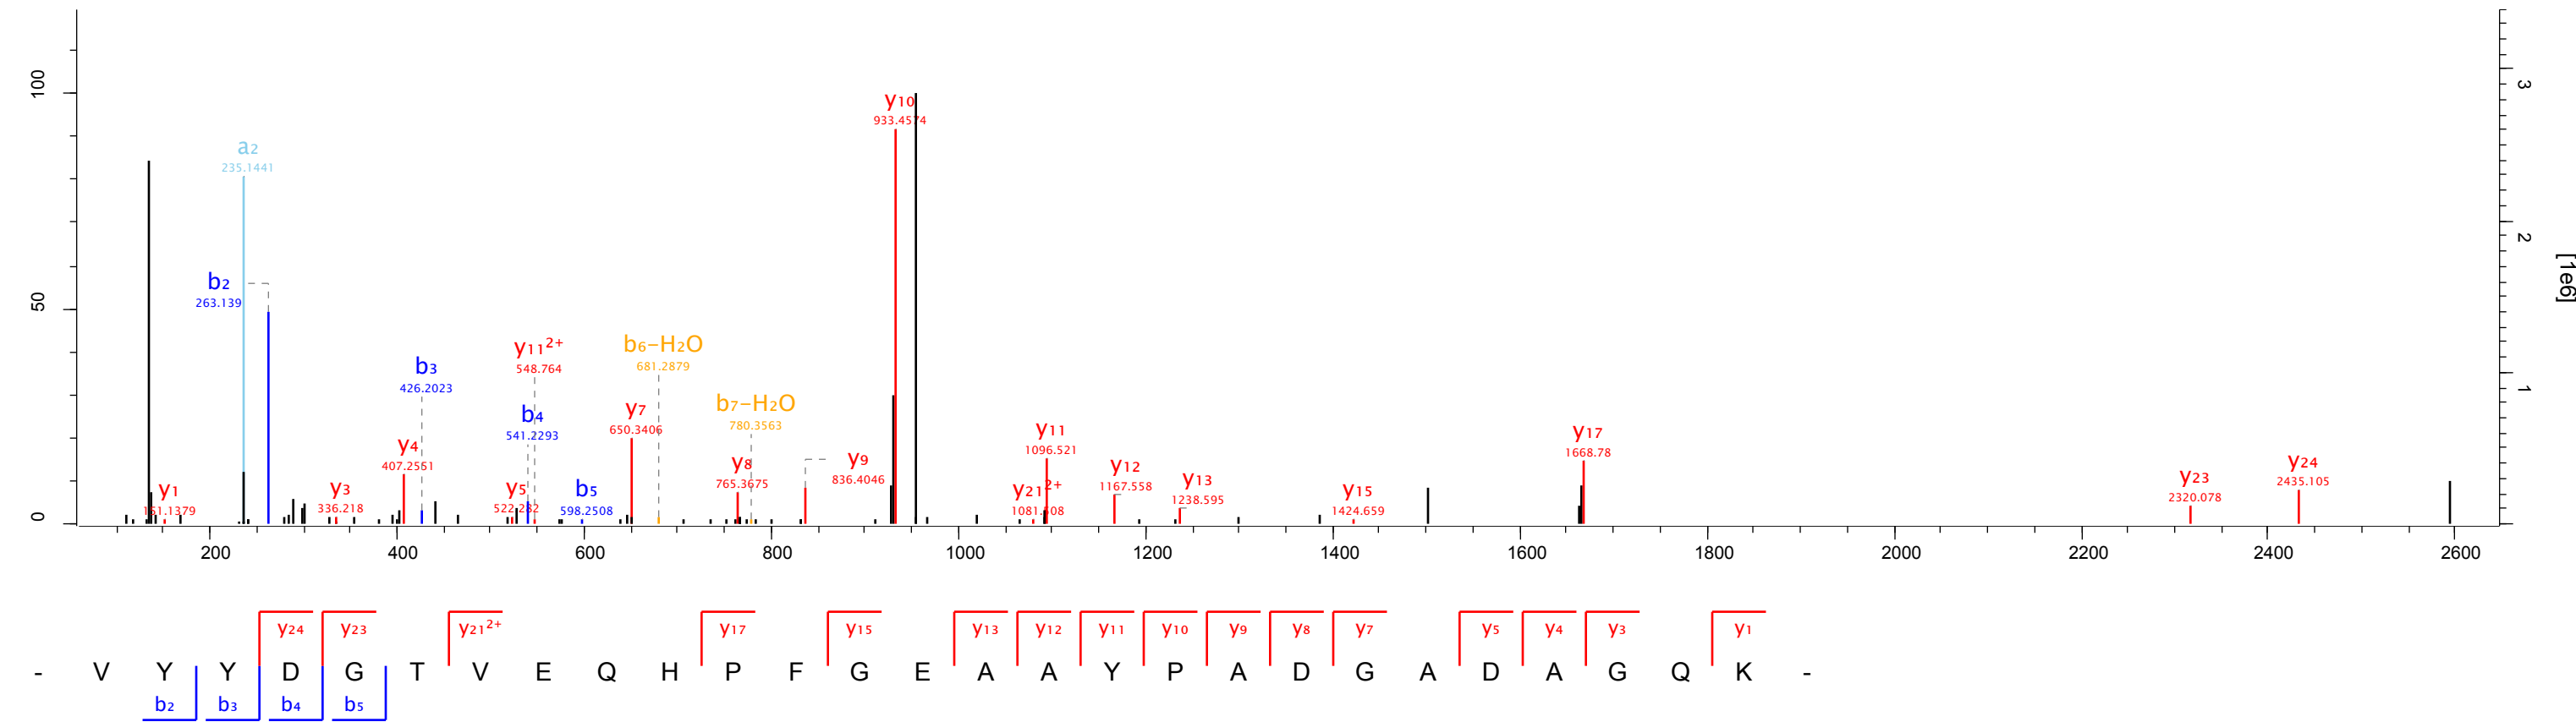

Raw file 20180707\_MaS\_A375SR\_ML\_proteome\_2\_17 Scan 20655 Method FTMS; HCD Score 66.15 m/z 682.34 Gene names GLYCTK

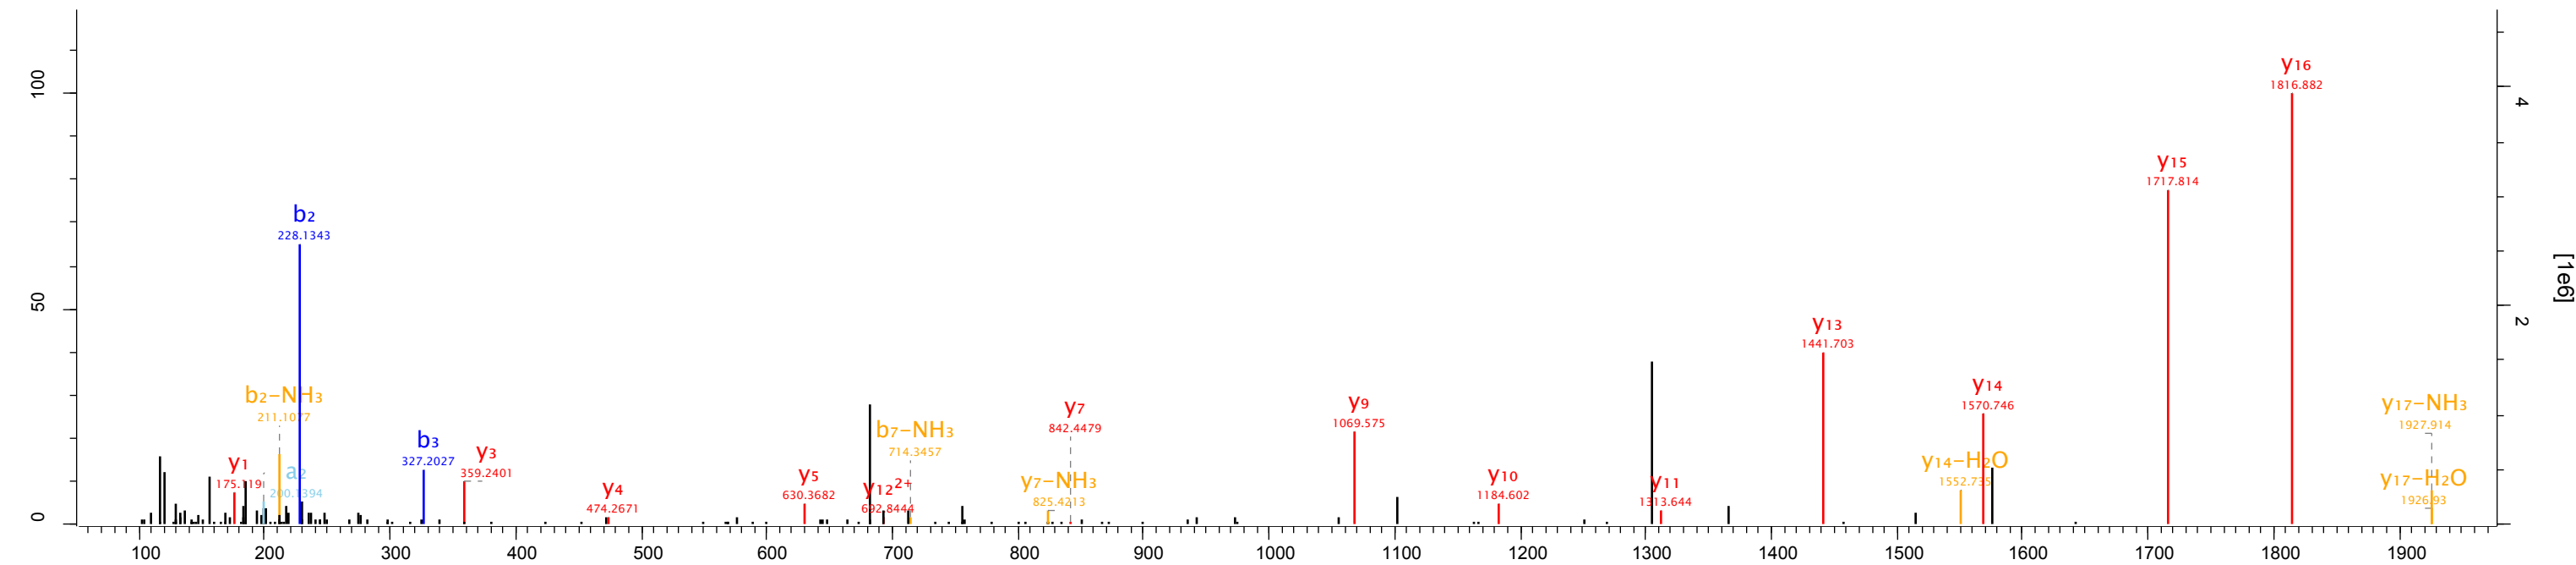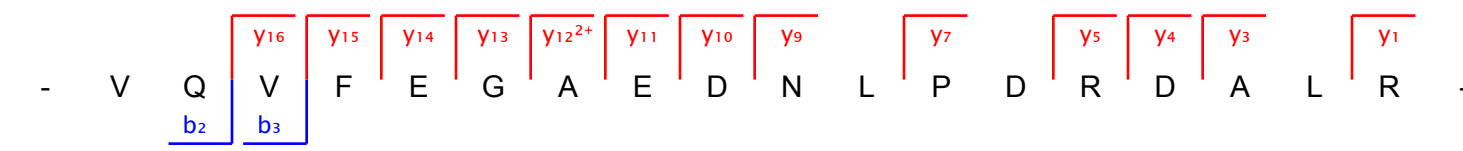



Raw file  
20180707\_MaS\_A375SR\_ML\_proteome\_2\_17

Scan 25965 Method FTMS; HCD Score 67.08 m/z 729.43 Gene names IL1R1

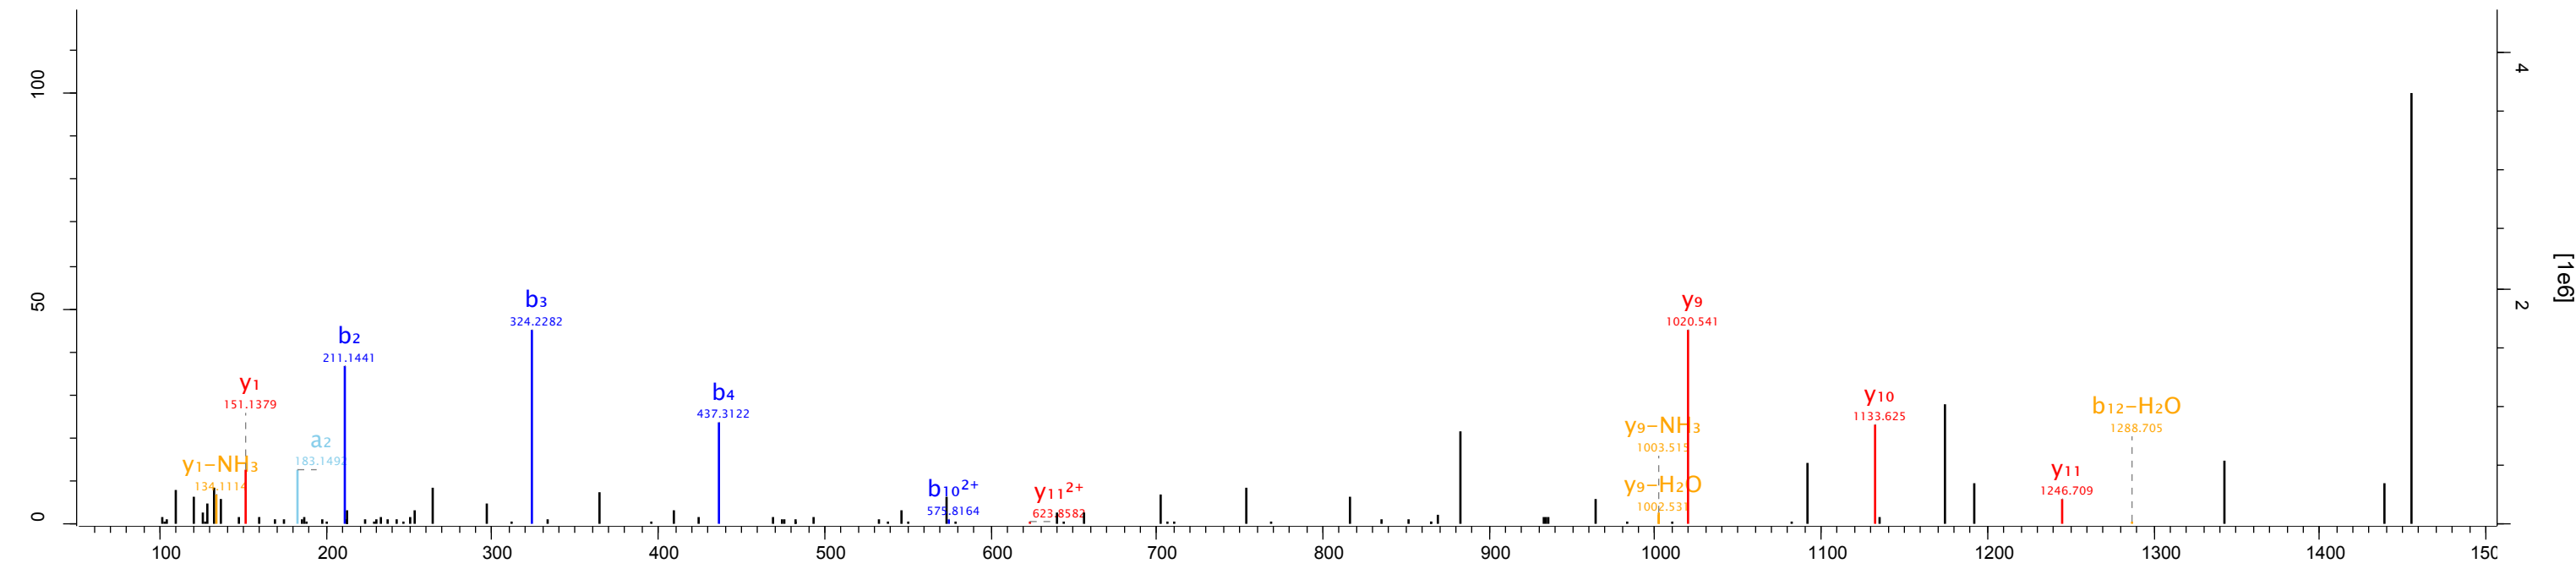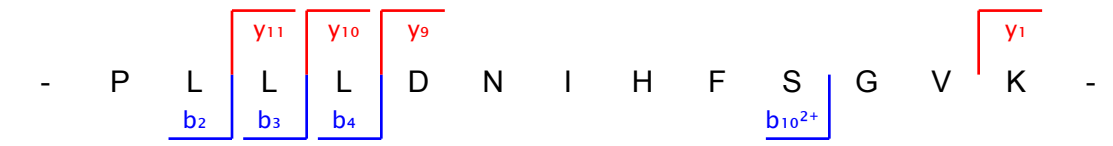

Raw file  
20180707\_MaS\_A375SR\_ML\_proteome\_2\_18

Scan 10805 Method FTMS; HCD Score 84.36 m/z 695.31 Gene names KIAA1549L

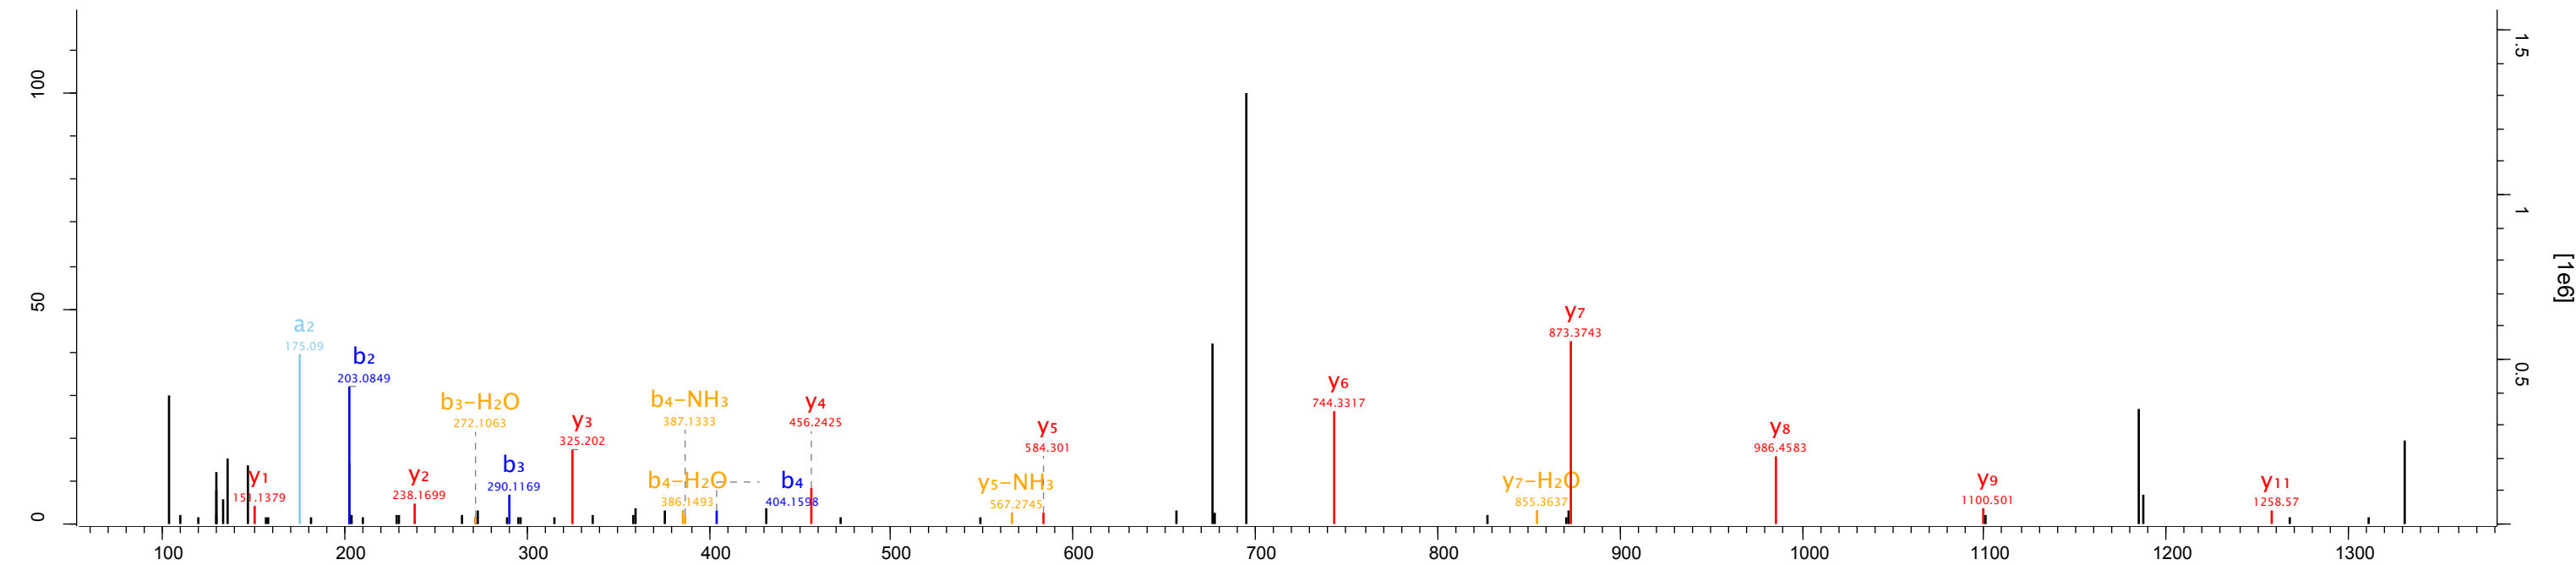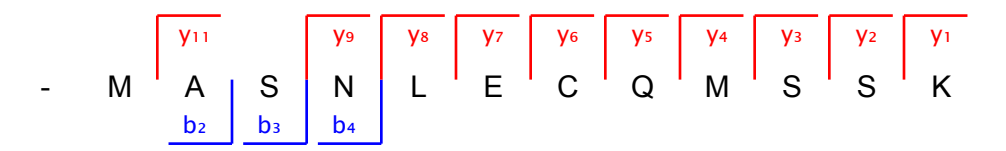

Raw file 20180707\_MaS\_A375SR\_ML\_proteome\_2\_18  
 Scan 19775 Method FTMS; HCD Score 41.45 m/z 1062.15

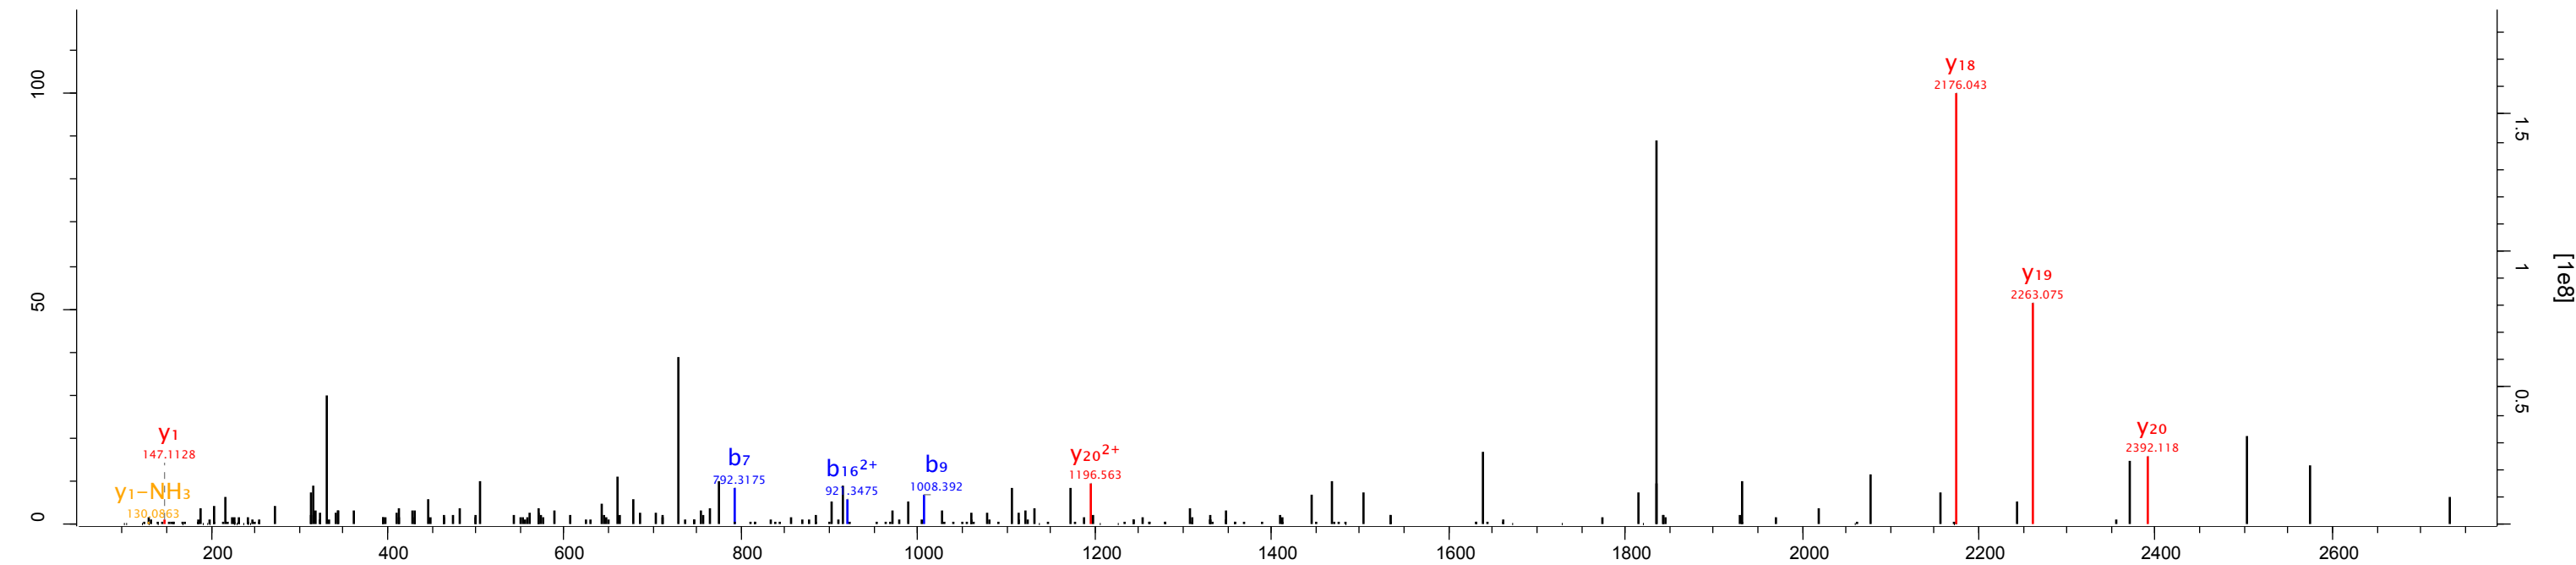

- L P P ph S S T E E S E E S S H A L F D H K L Q V L T N K -

Fragmentation mapping:  
 - Blue brackets below 'E' (residue 7) and 'S' (residue 11) are labeled b7 and b9 respectively.  
 - A blue bracket below 'L' (residue 14) is labeled b16<sup>2+</sup>.  
 - Red brackets above 'E' (residue 7), 'S' (residue 11), and 'E' (residue 15) are labeled y20, y19, and y18 respectively.  
 - A red bracket above 'K' (residue 23) is labeled y1.

Raw file 20180707\_MaS\_A375SR\_ML\_proteome\_2\_18 Scan 22075 Method FTMS; HCD Score 70.09 m/z 586.84 Gene names KATNAL2

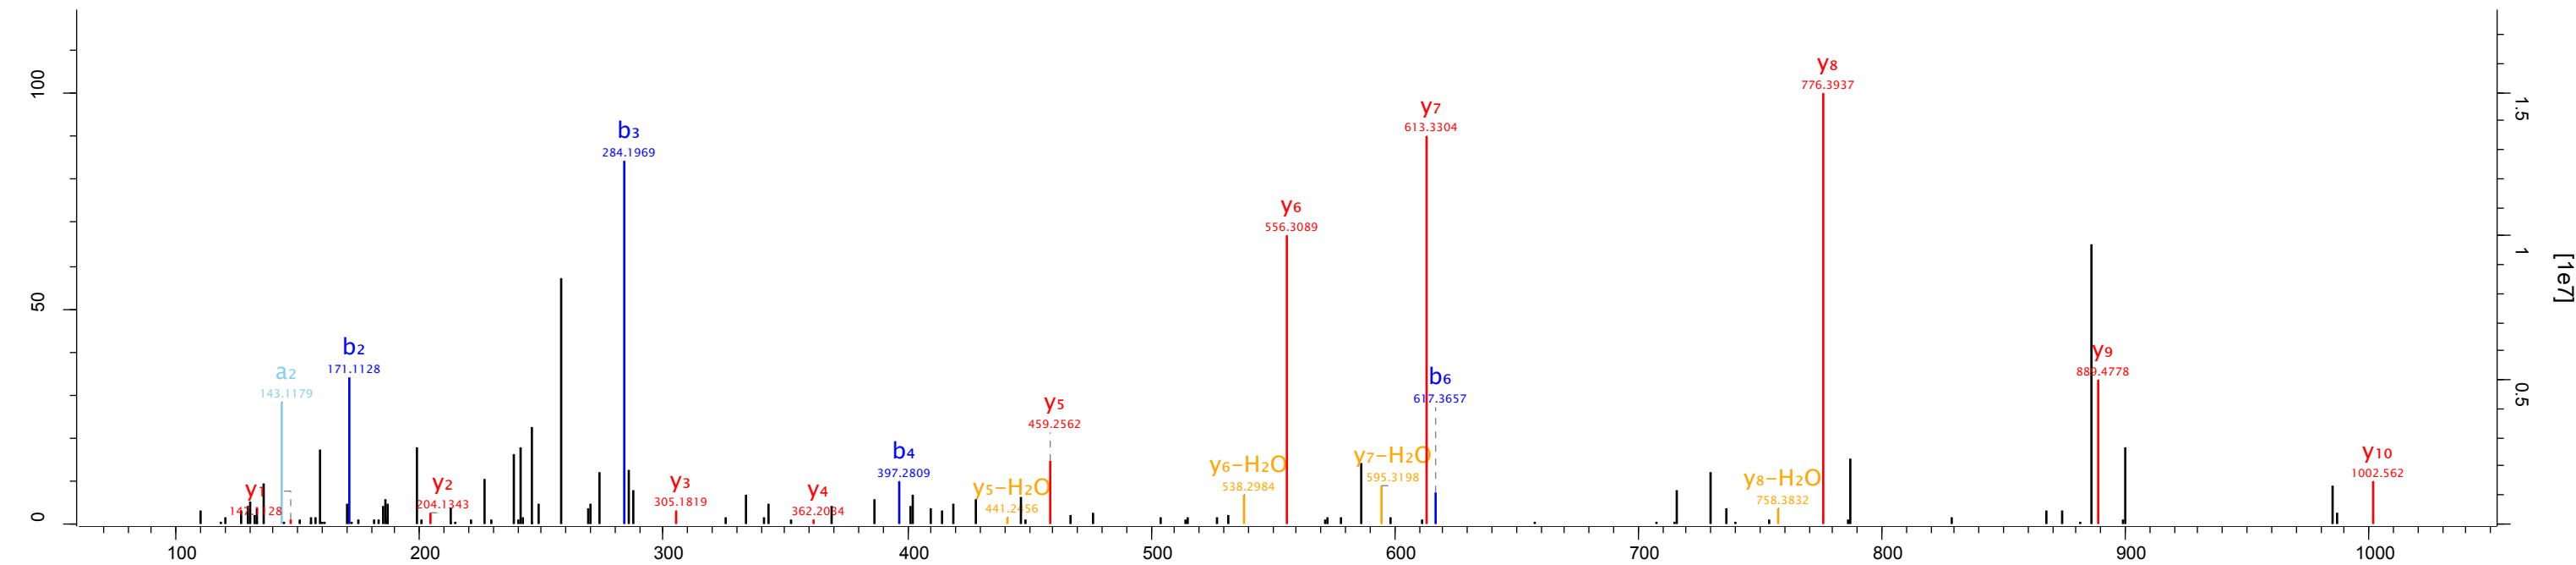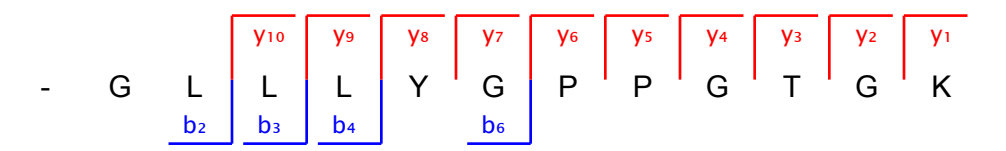

Raw file  
 20180707\_MaS\_A375SR\_ML\_proteome\_2\_18  
 Scan 23625 Method FTMS; HCD Score 82.87 m/z 636.66 Gene names ATP6V0C

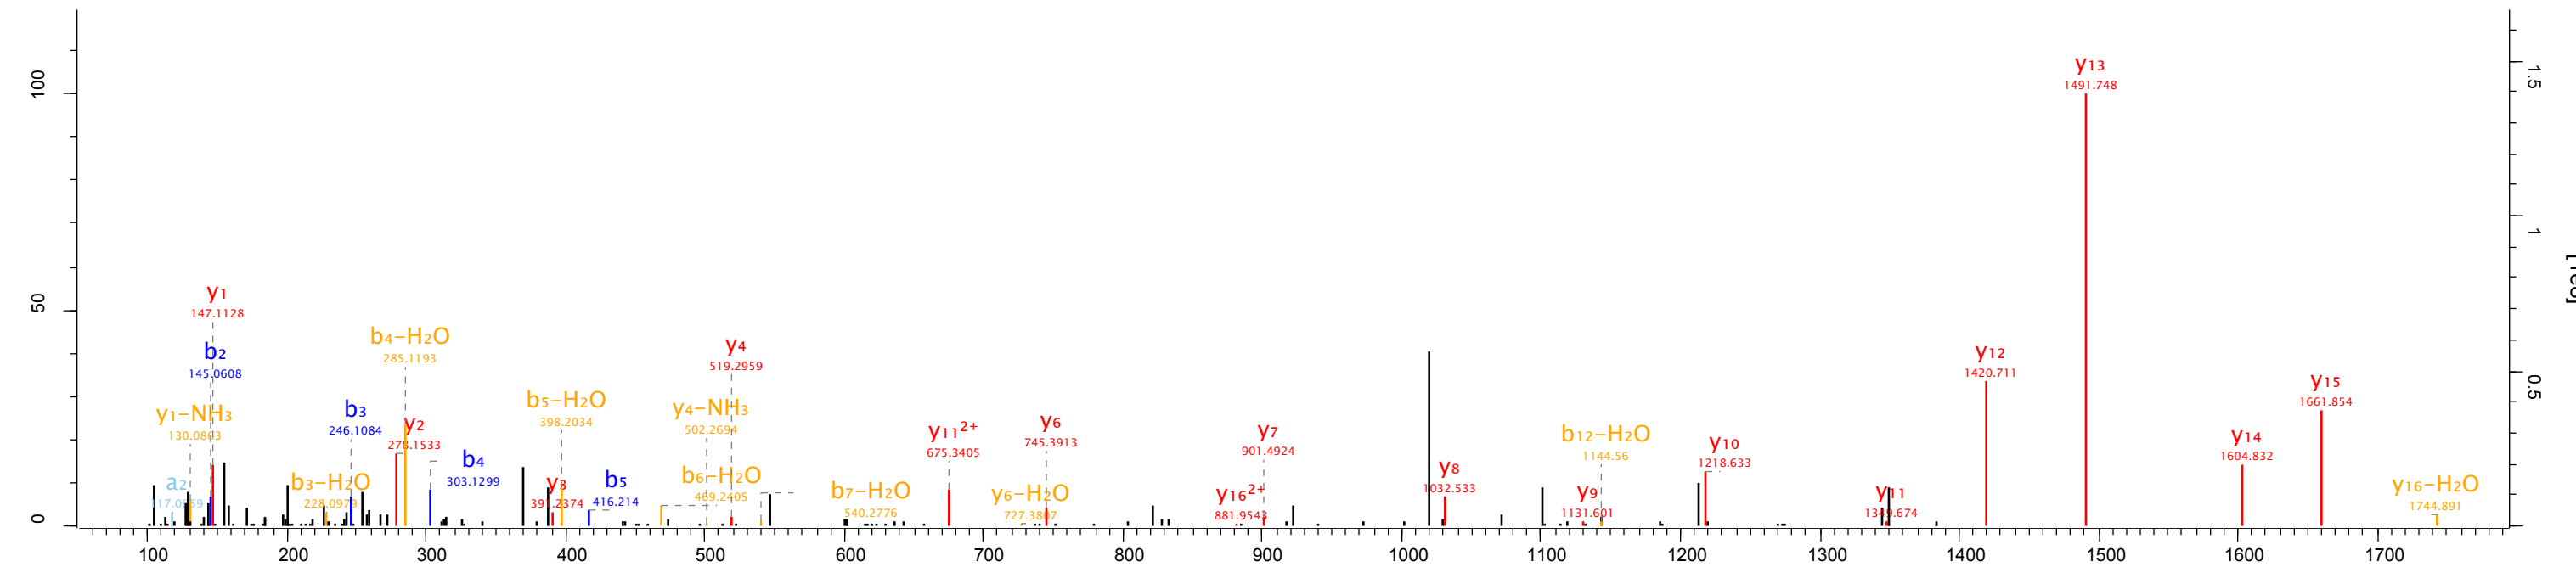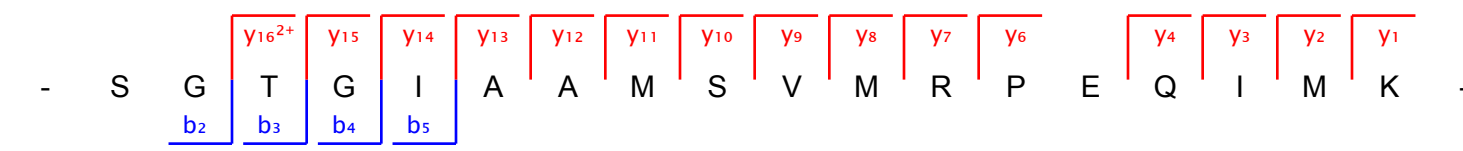

Raw file 20180707\_MaS\_A375SR\_ML\_proteome\_2\_19 Scan 16355 Method FTMS; HCD Score 53.45 m/z 818.88 Gene names RASEF

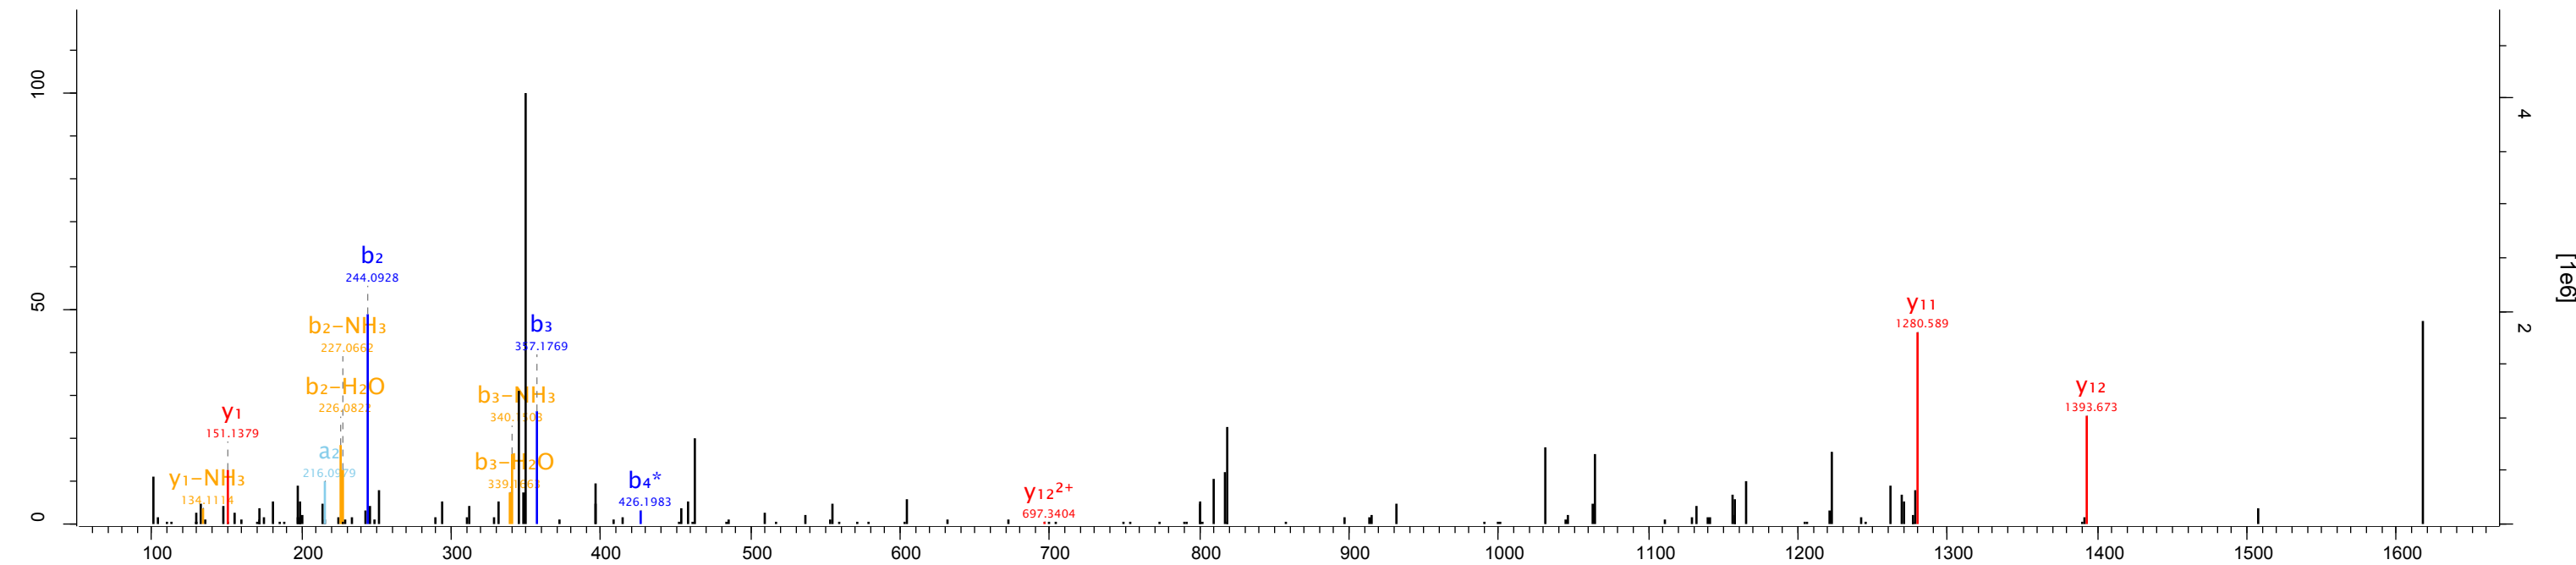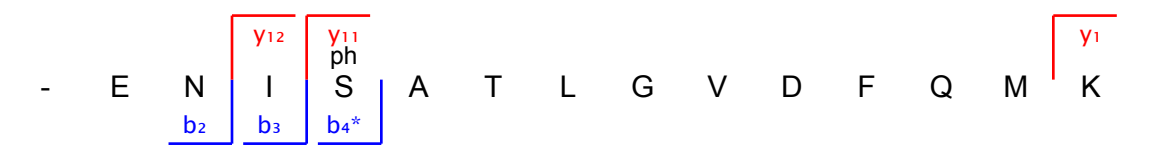

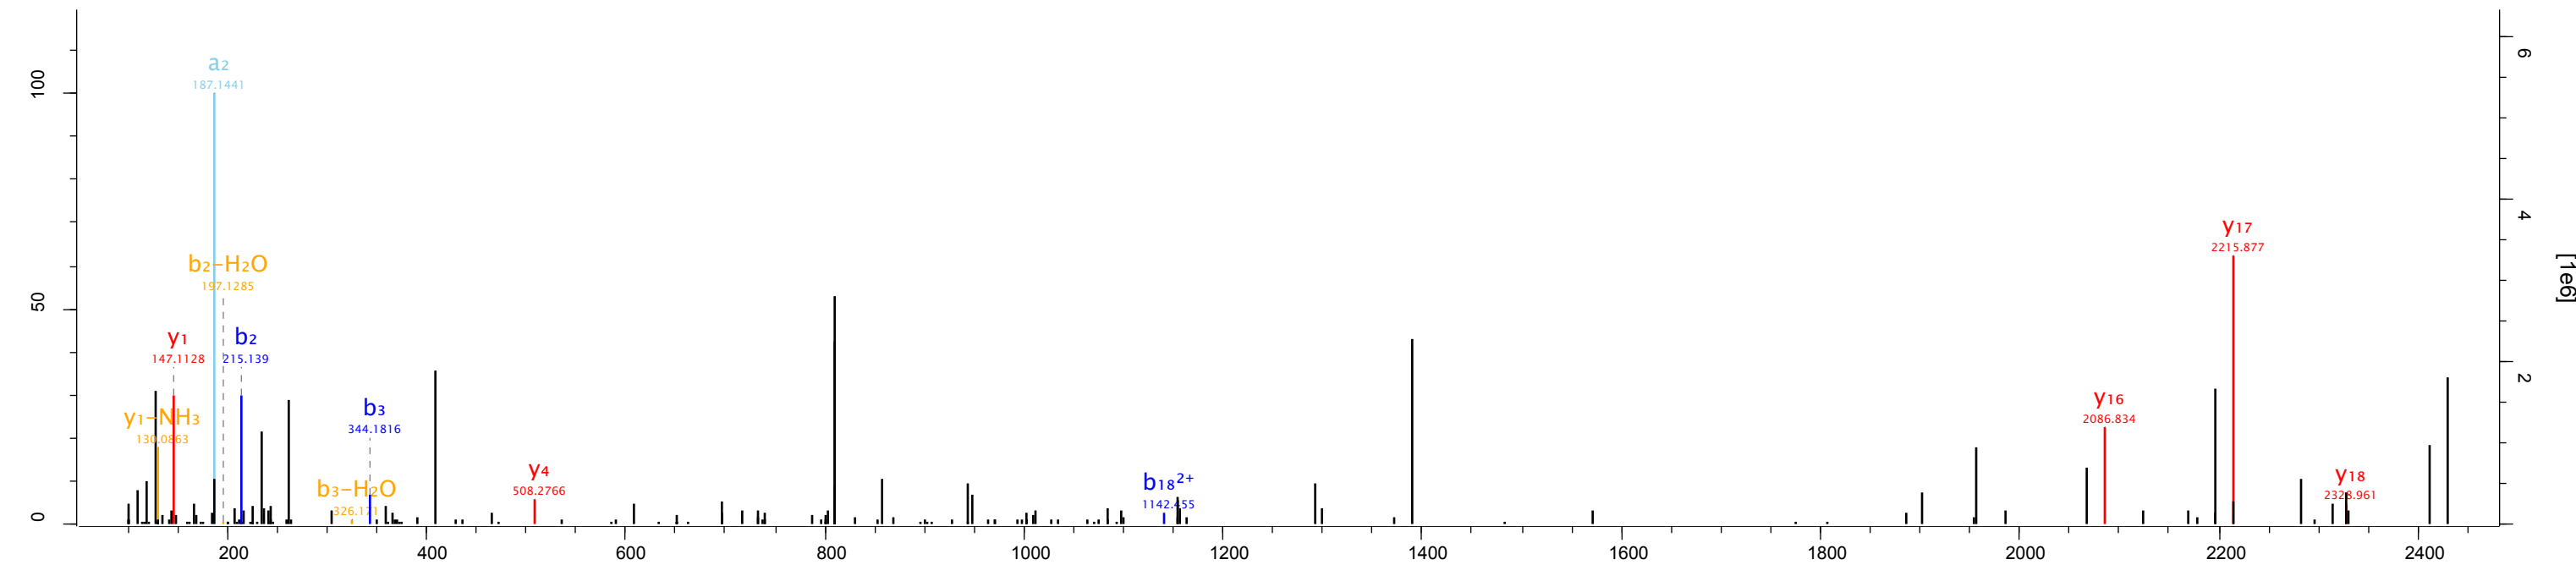

- T I E F ph T L P ph T V T N T V G K P T Y K -

Fragmentation labels (b-ions in blue, y-ions in red) are shown below the corresponding amino acids:

- $b_2$  (under I)
- $b_3$  (under E)
- $y_{18}$  (above I)
- $y_{17}$  (above E)
- $y_{16}$  (above F)
- $y_4$  (above P)
- $b_{18}^{2+}$  (under Y)
- $y_1$  (above K)

Raw file  
20180707\_MaS\_A375SR\_ML\_proteome\_2\_19

Scan 23735 Method FTMS; HCD Score 25.16 m/z 639.67 Gene names ATP6V0C

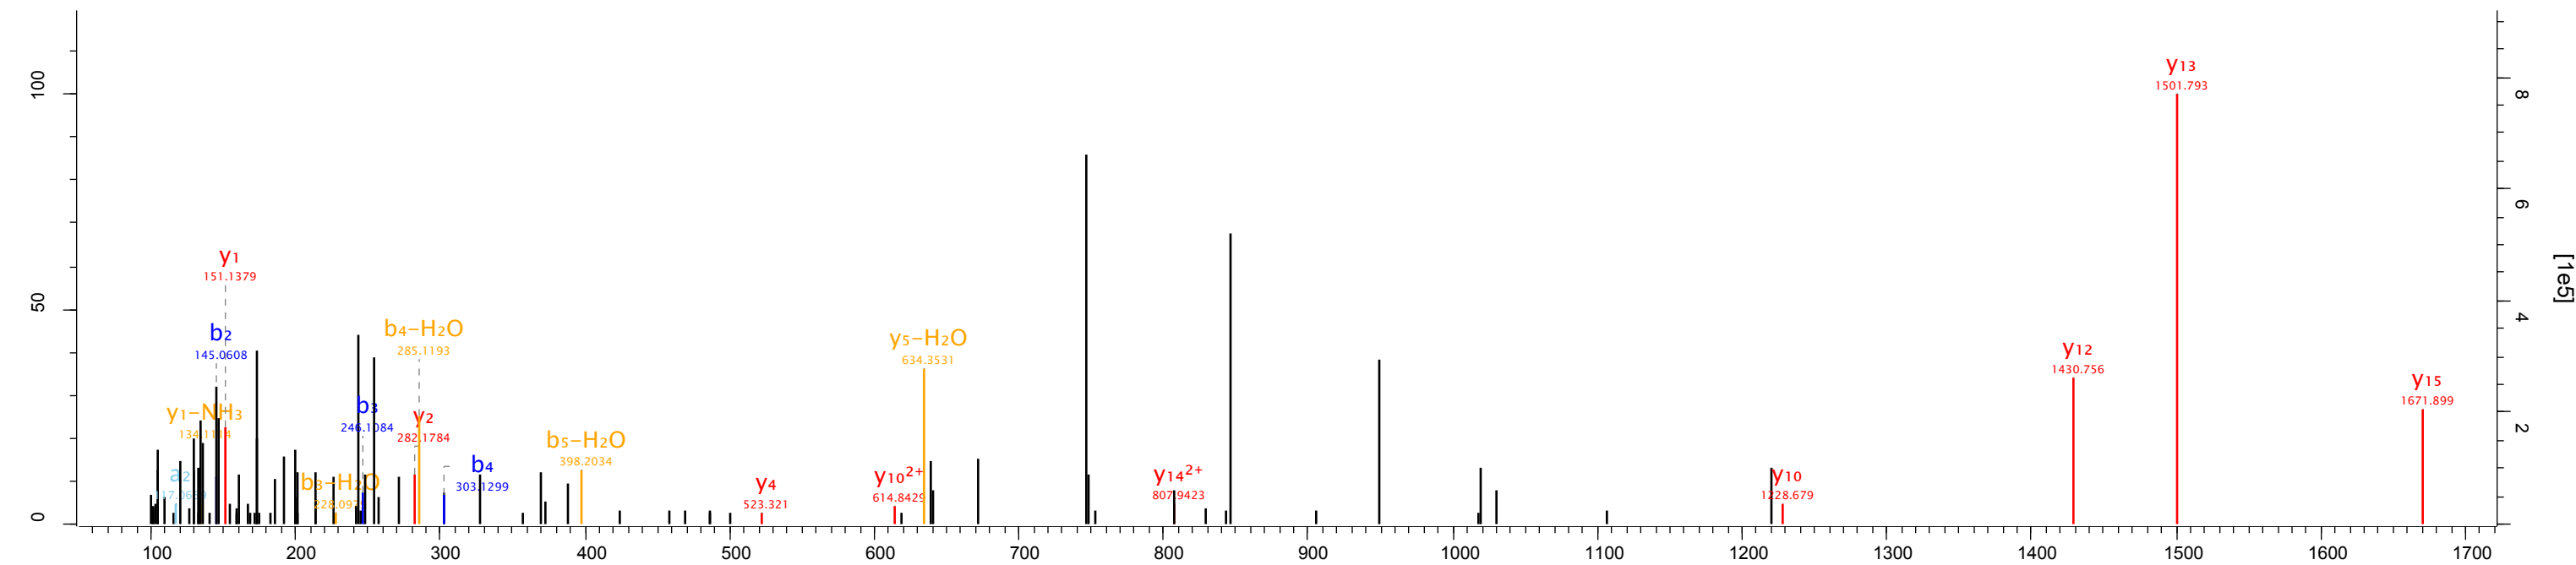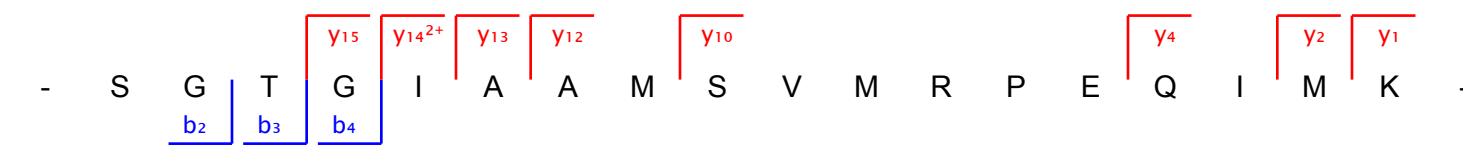



Raw file  
20180707\_MaS\_A375SR\_ML\_proteome\_2\_20

Scan 24285 Method FTMS; HCD Score 54.83 m/z 667.01 Gene names ACP5

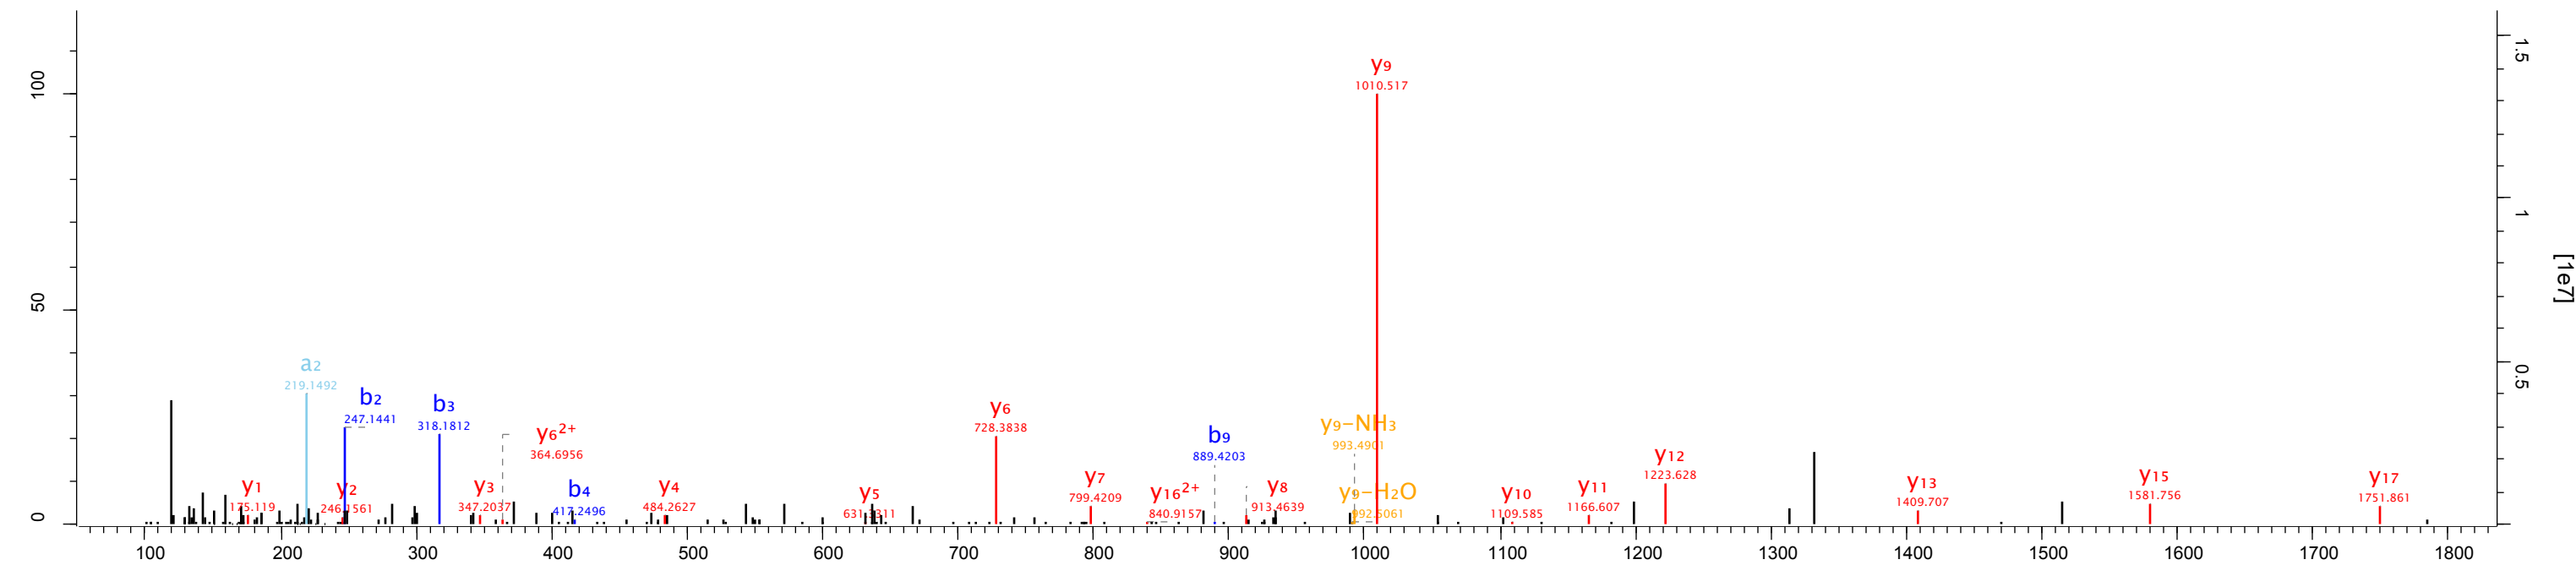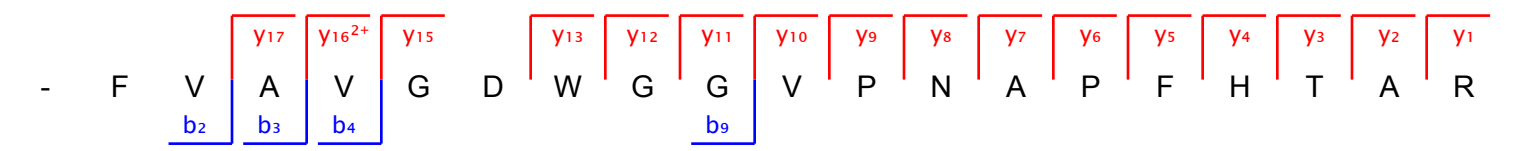

Raw file 20180707\_MaS\_A375SR\_ML\_proteome\_2\_20 Scan 6465 Method FTMS; HCD Score 40.15 m/z 477.76 Gene names EPM2A

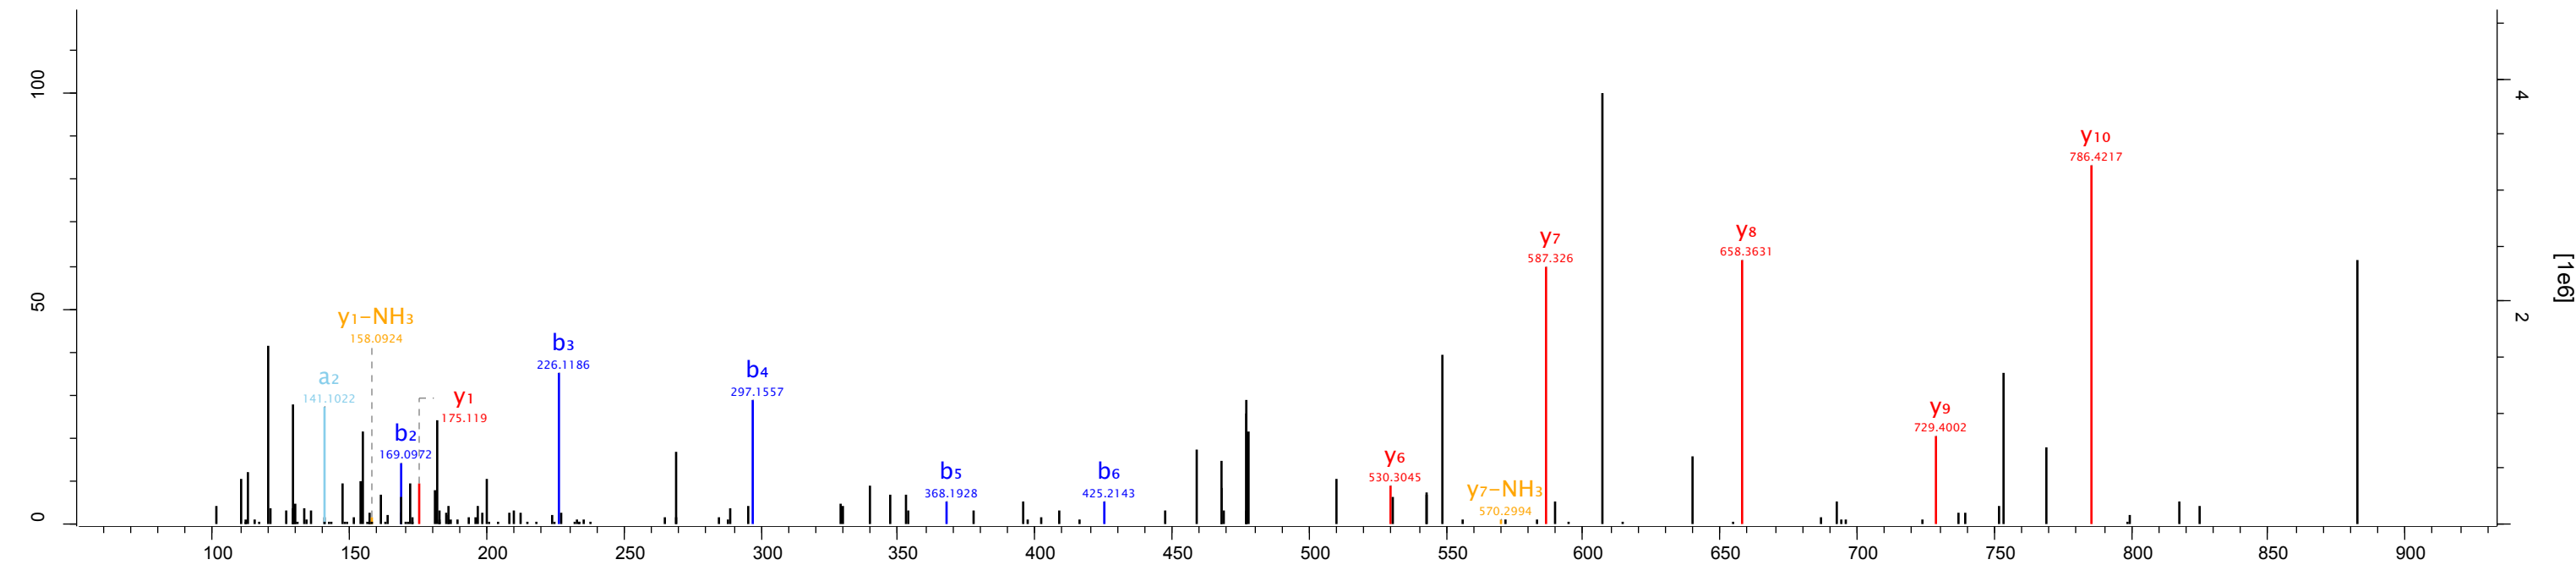

Raw file 20180707\_MaS\_A375SR\_ML\_proteome\_2\_21 Scan 16565 Method FTMS; HCD Score 44.97 m/z 405.2

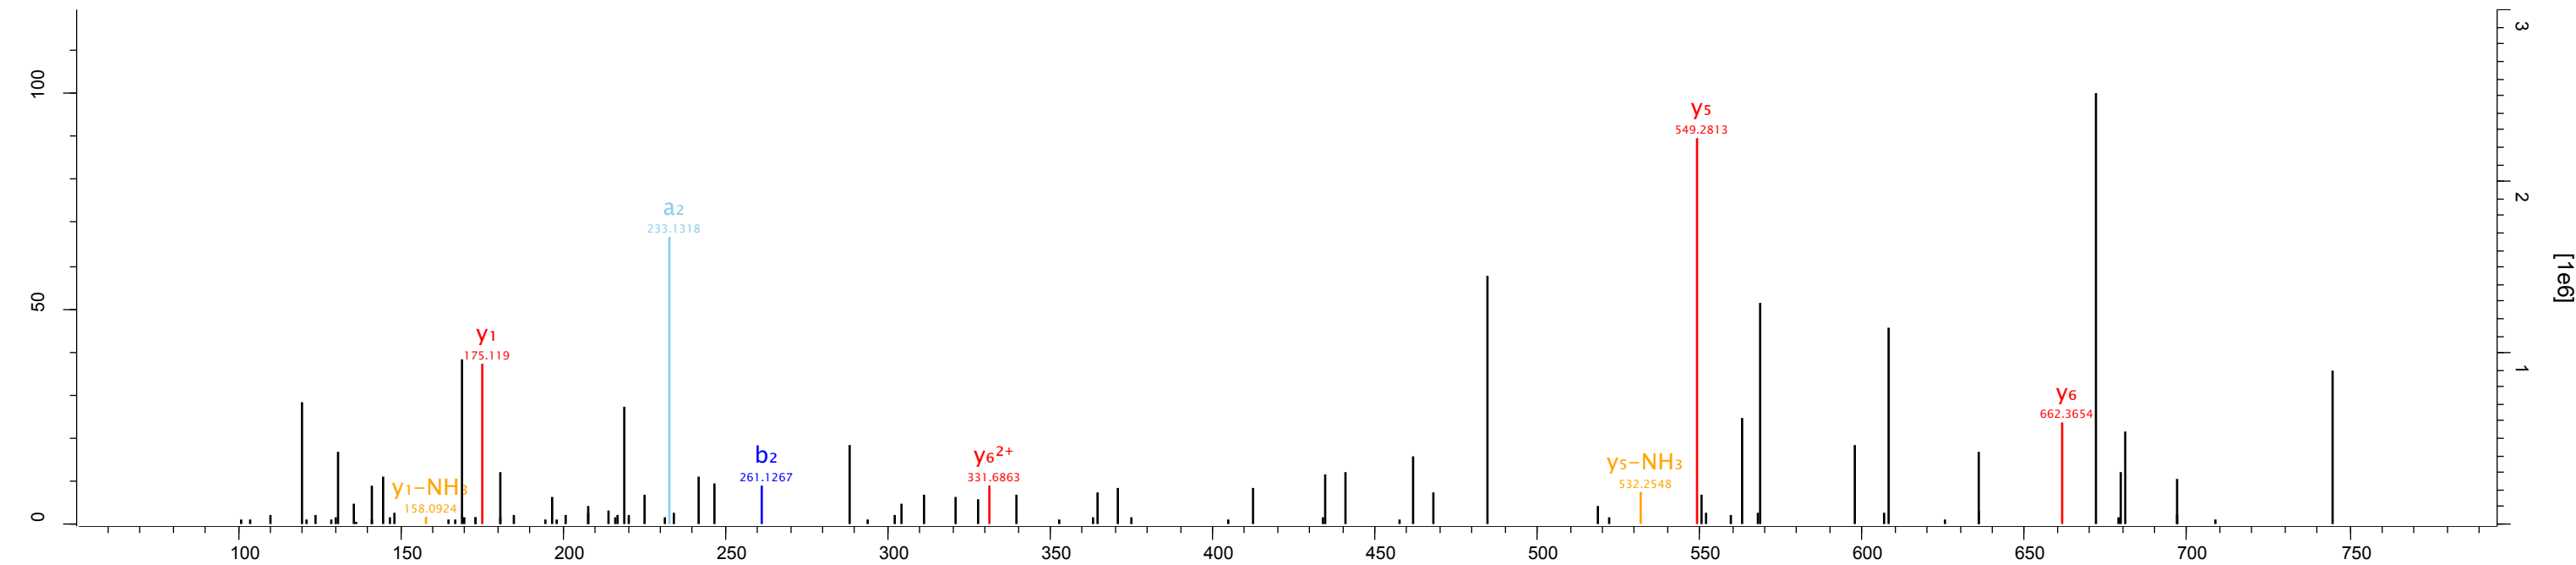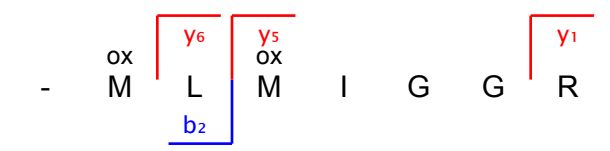

Raw file: 20180707\_MaS\_A375SR\_ML\_proteome\_2\_21  
 Scan: 22475 Method: FTMS; HCD Score: 63.09 m/z: 586.84 Gene names: KATNAL2

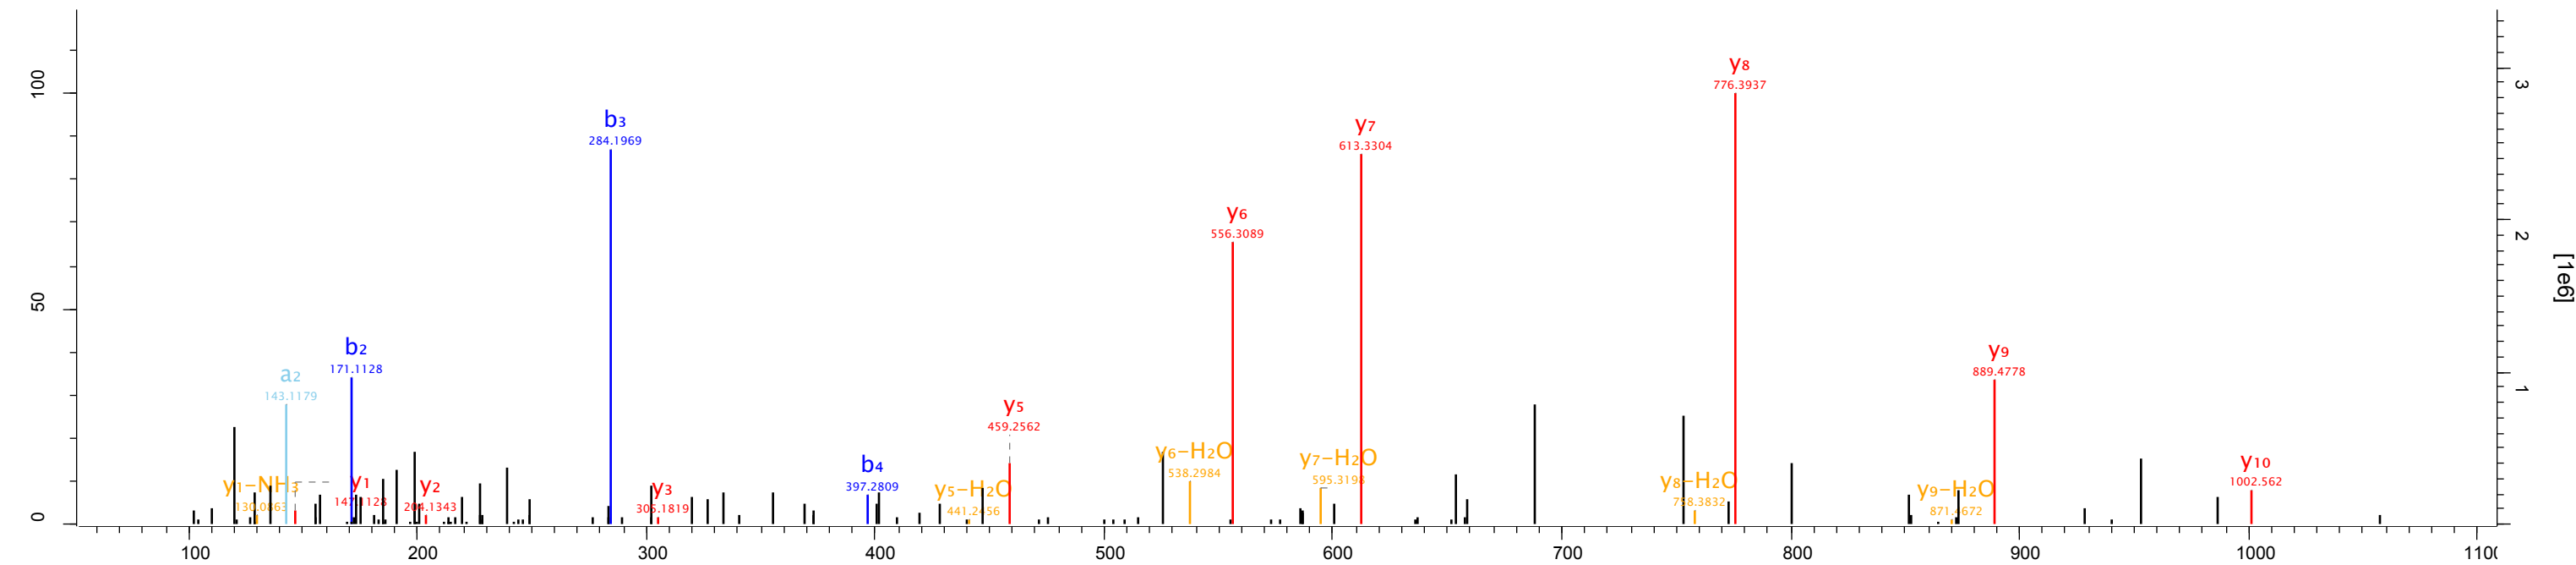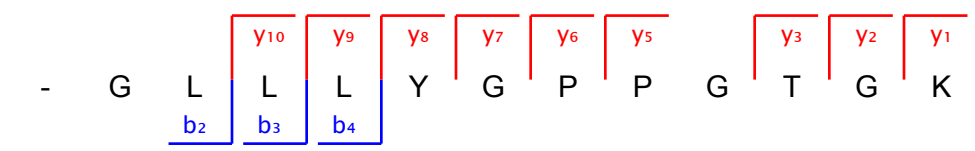

Raw file 20180707\_MaS\_A375SR\_ML\_proteome\_2\_21  
 Scan 22485 Method FTMS; HCD Score 63.09 m/z 587.33 Gene names KATNAL2

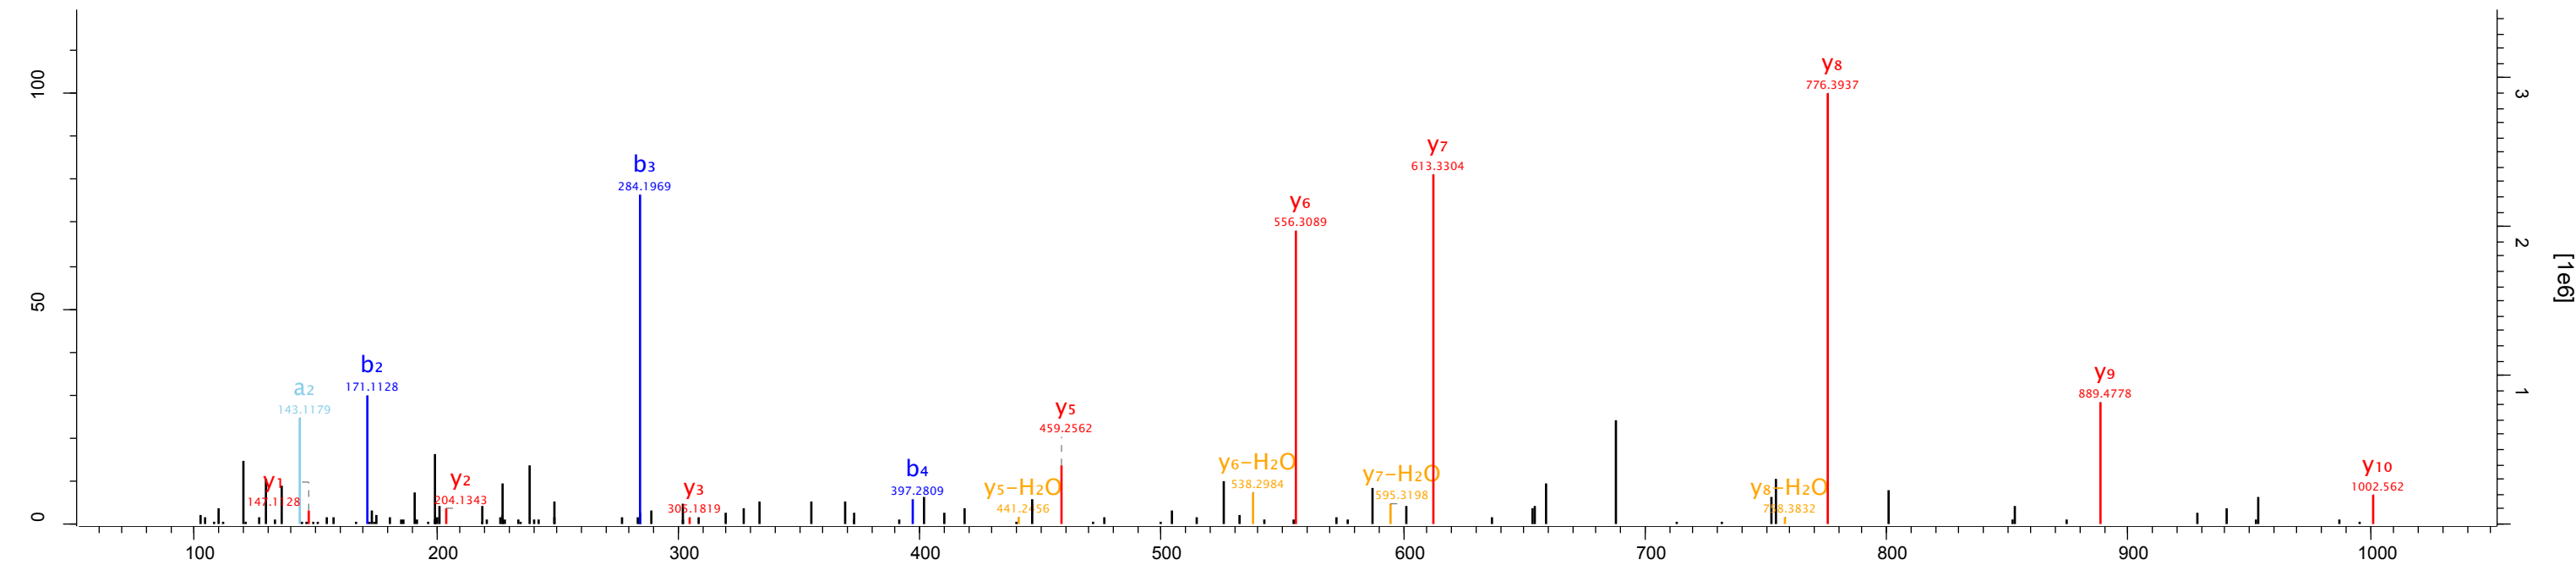

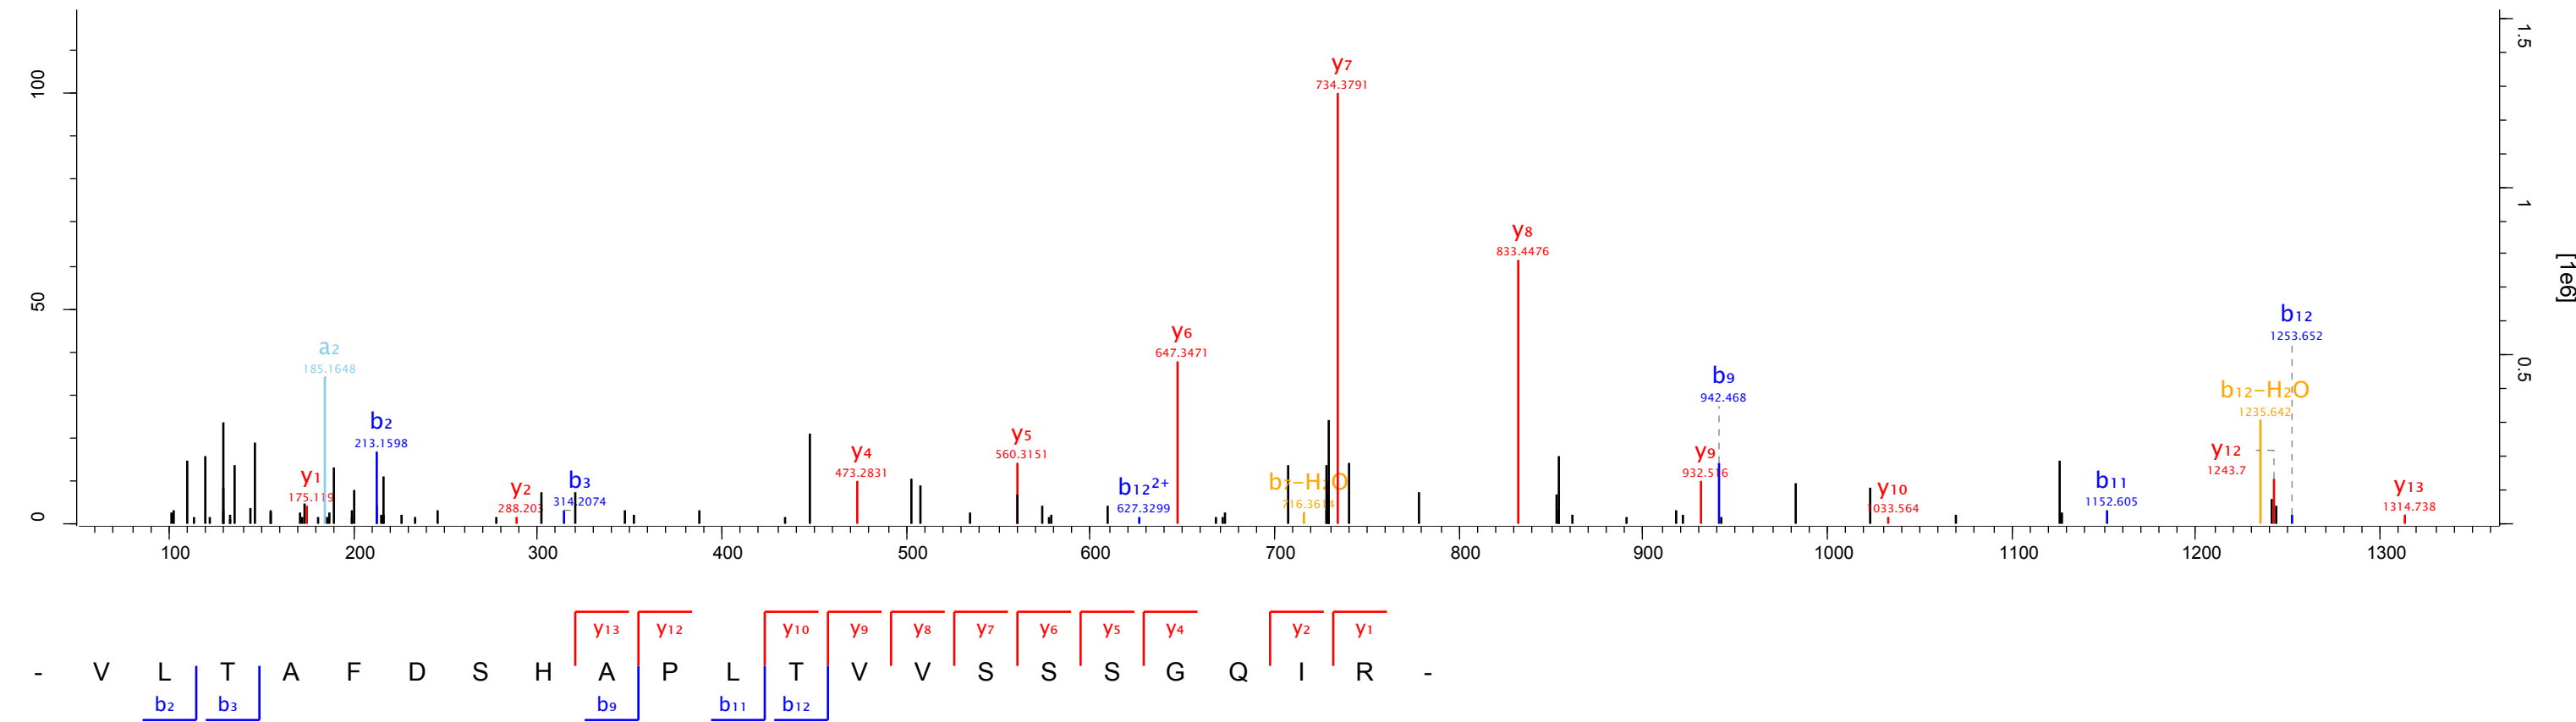

Raw file  
20180707\_MaS\_A375SR\_ML\_proteome\_2\_23

Scan 16705 Method FTMS; HCD Score 199.46 m/z 660.39 Gene names RPL39P5;RPL39

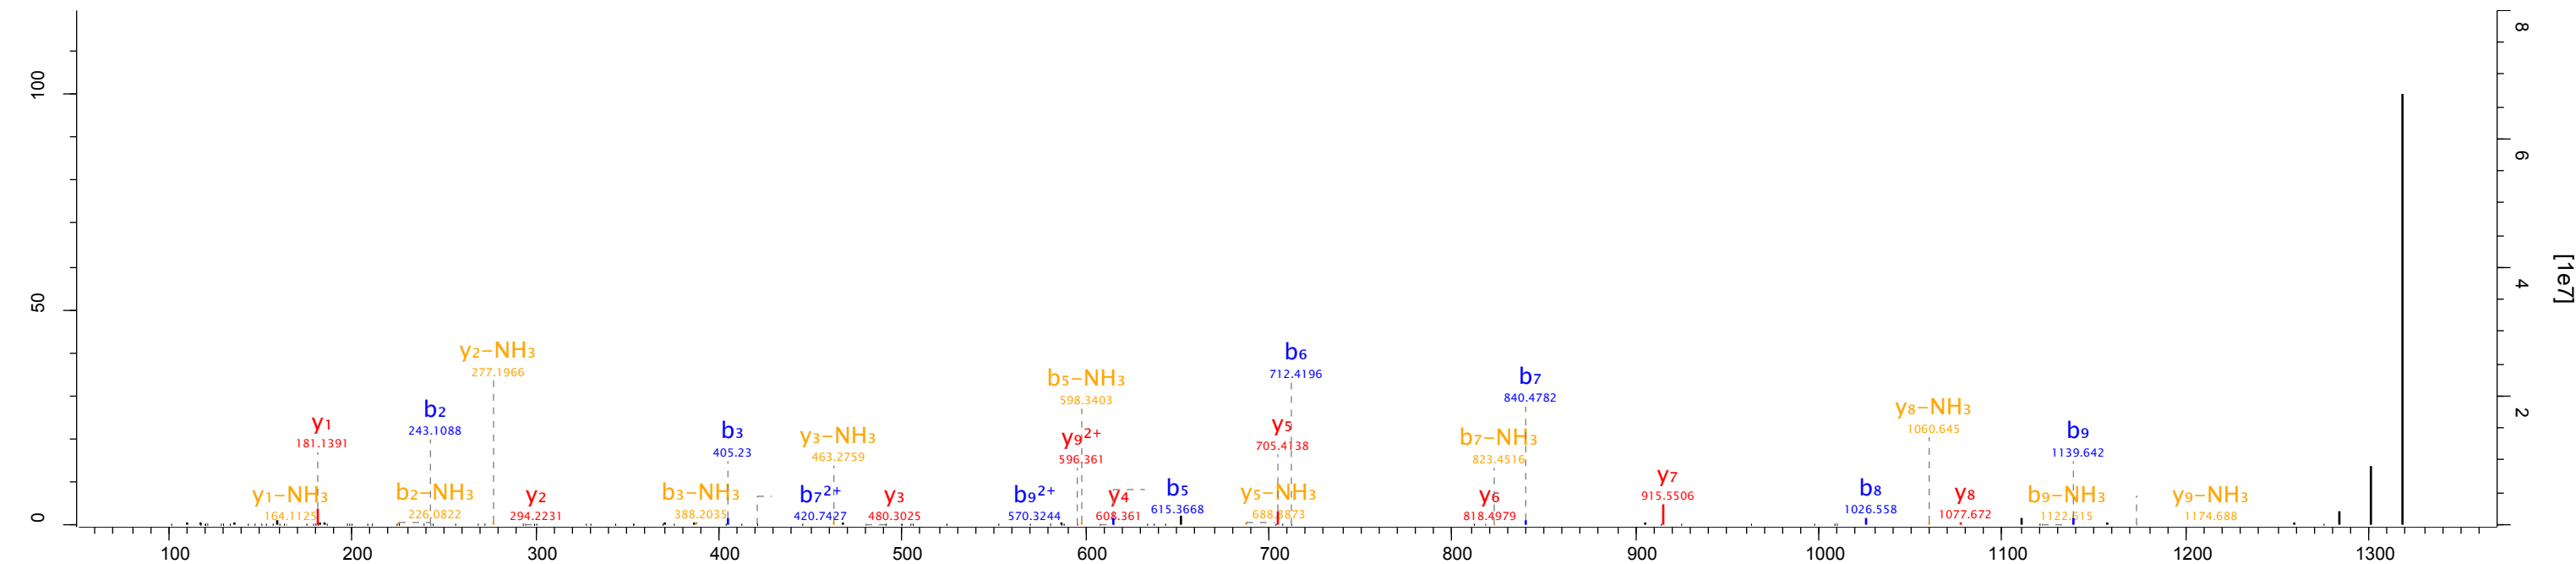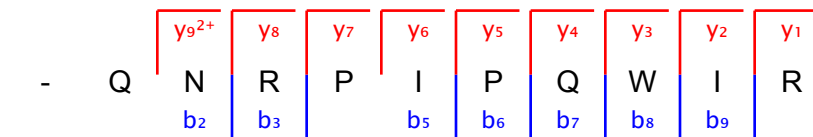

20180707\_MaS\_A375SR\_ML\_proteome\_2\_24

15625

FTMS; HCD

121.64

660.39

RPL39P5;RPL39

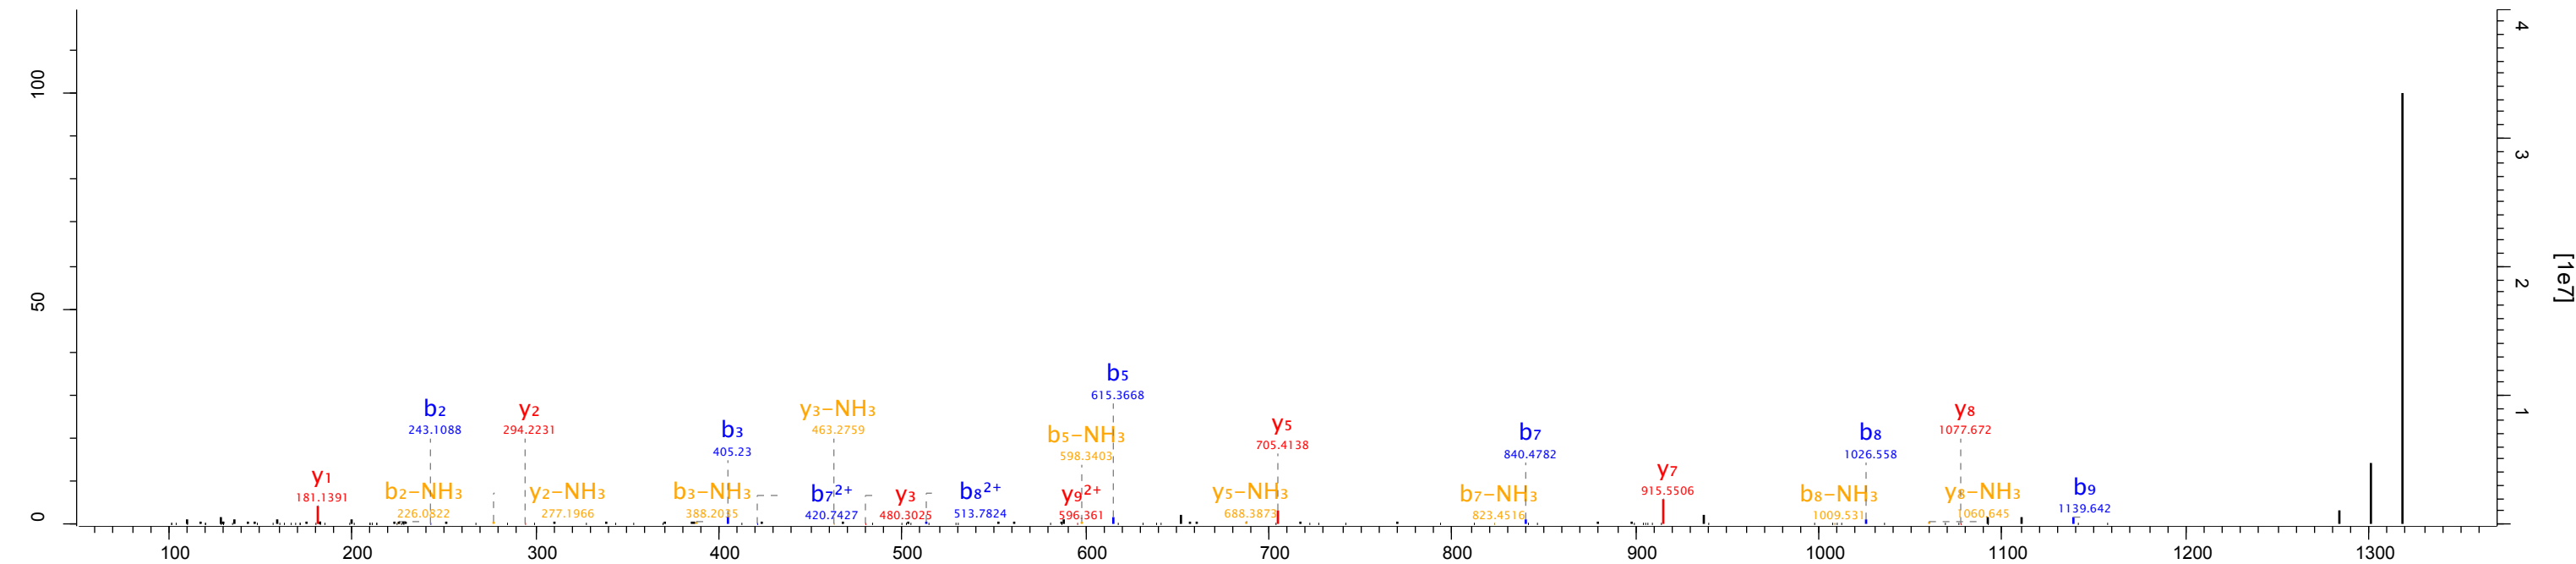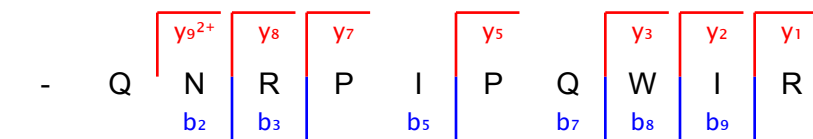



Raw file: 20180707\_MaS\_A375SR\_ML\_proteome\_2\_24  
 Scan: 17875 Method: FTMS; HCD Score: 220.81 m/z: 712.86 Gene names: SPATA22

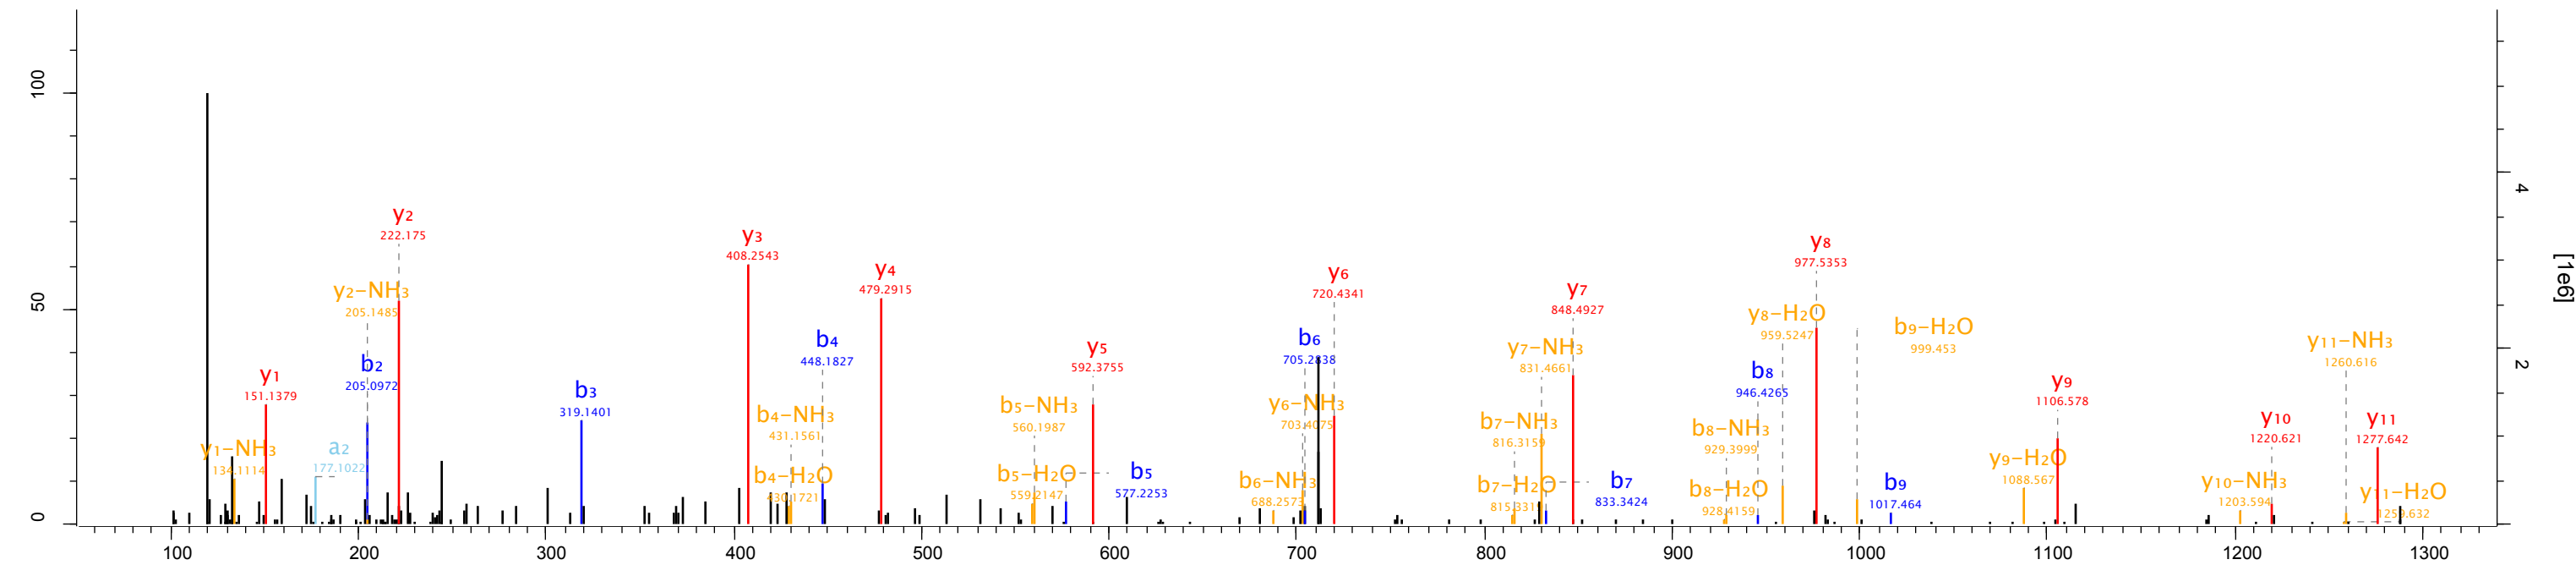

Raw file 20180707\_MaS\_A375SR\_ML\_proteome\_2\_25 Scan 12125 Method FTMS; HCD Score 66.69 m/z 500.26

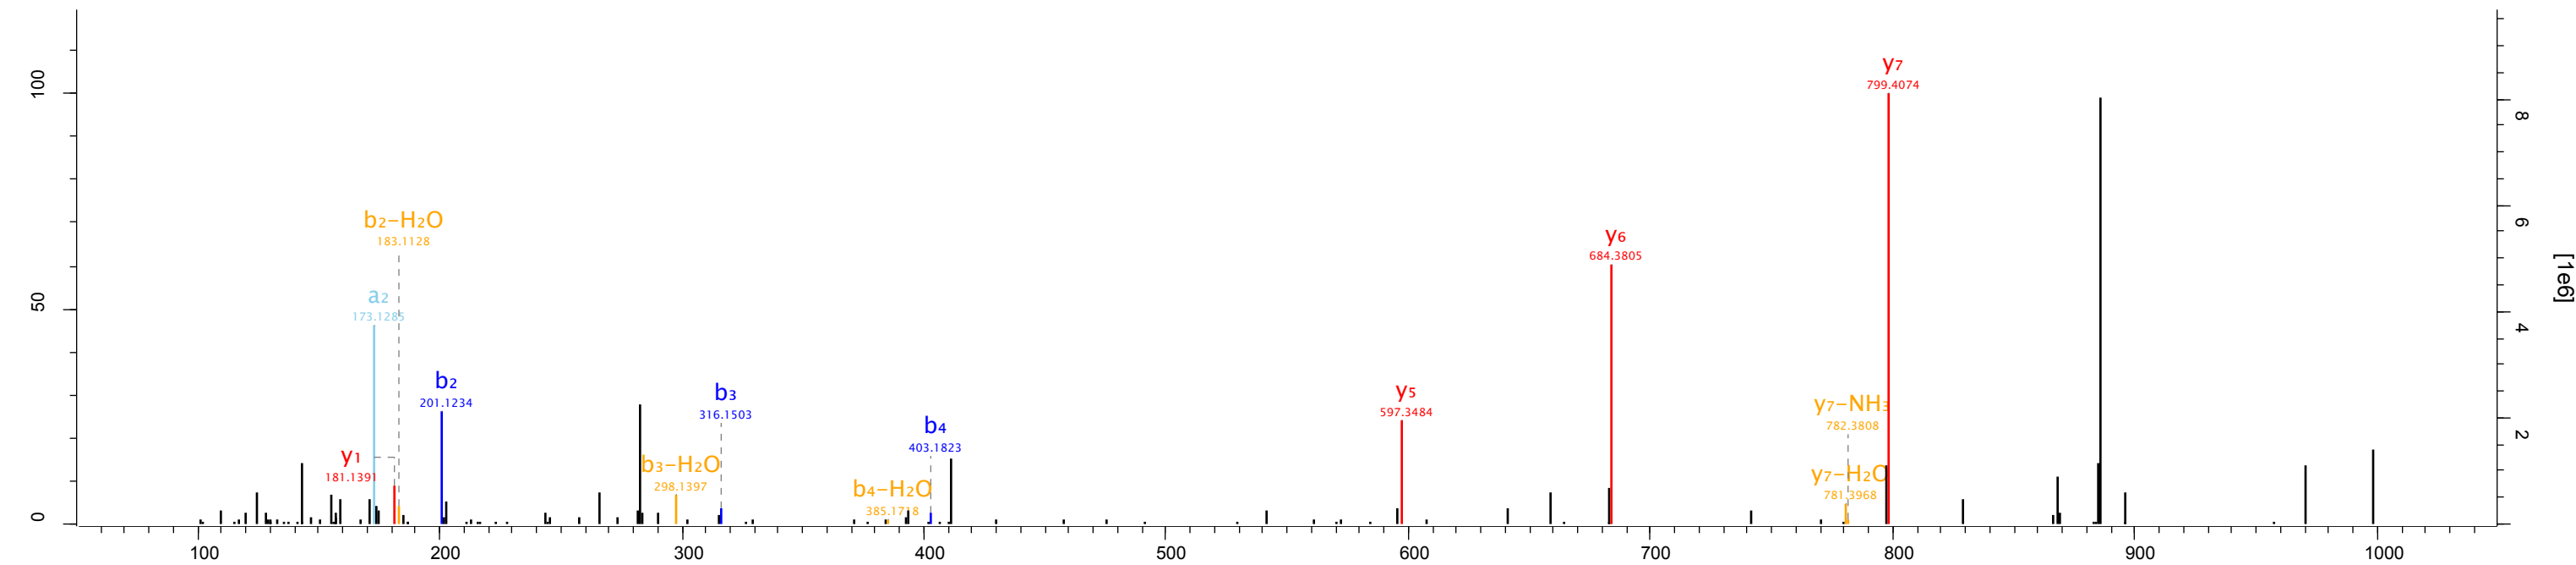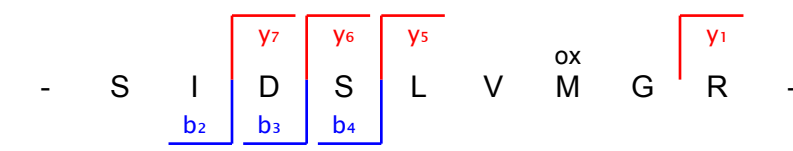

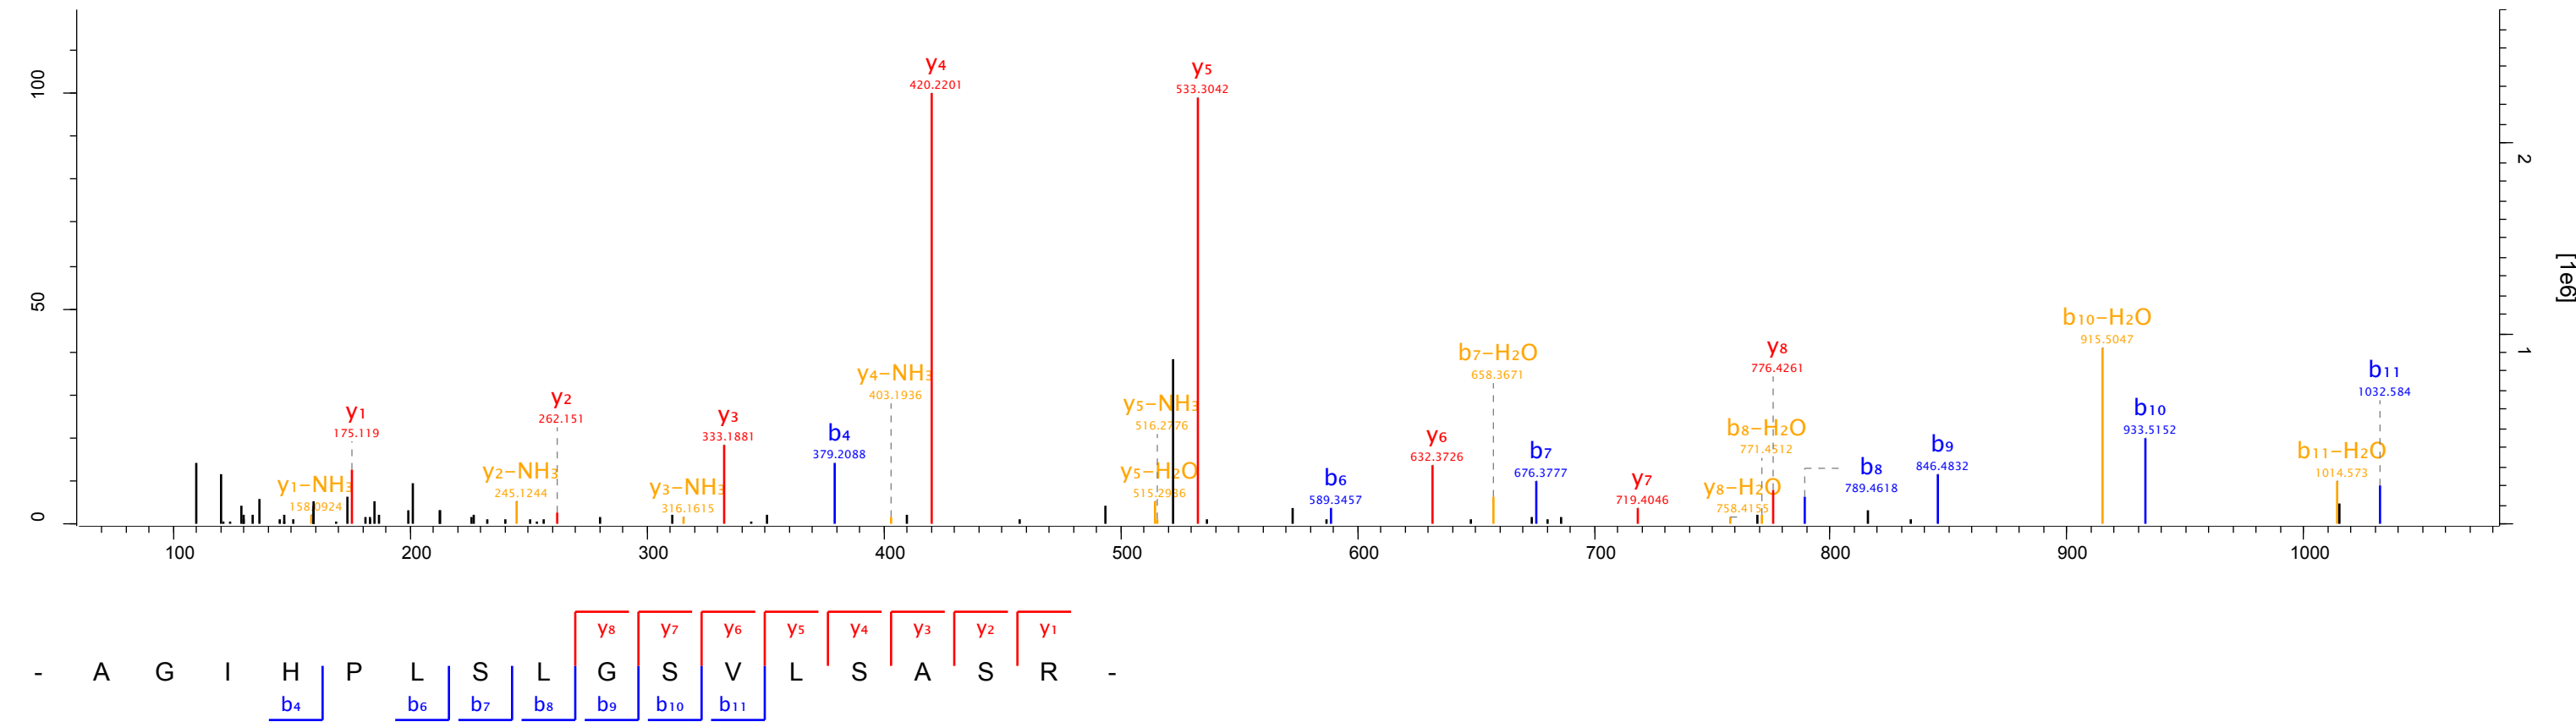

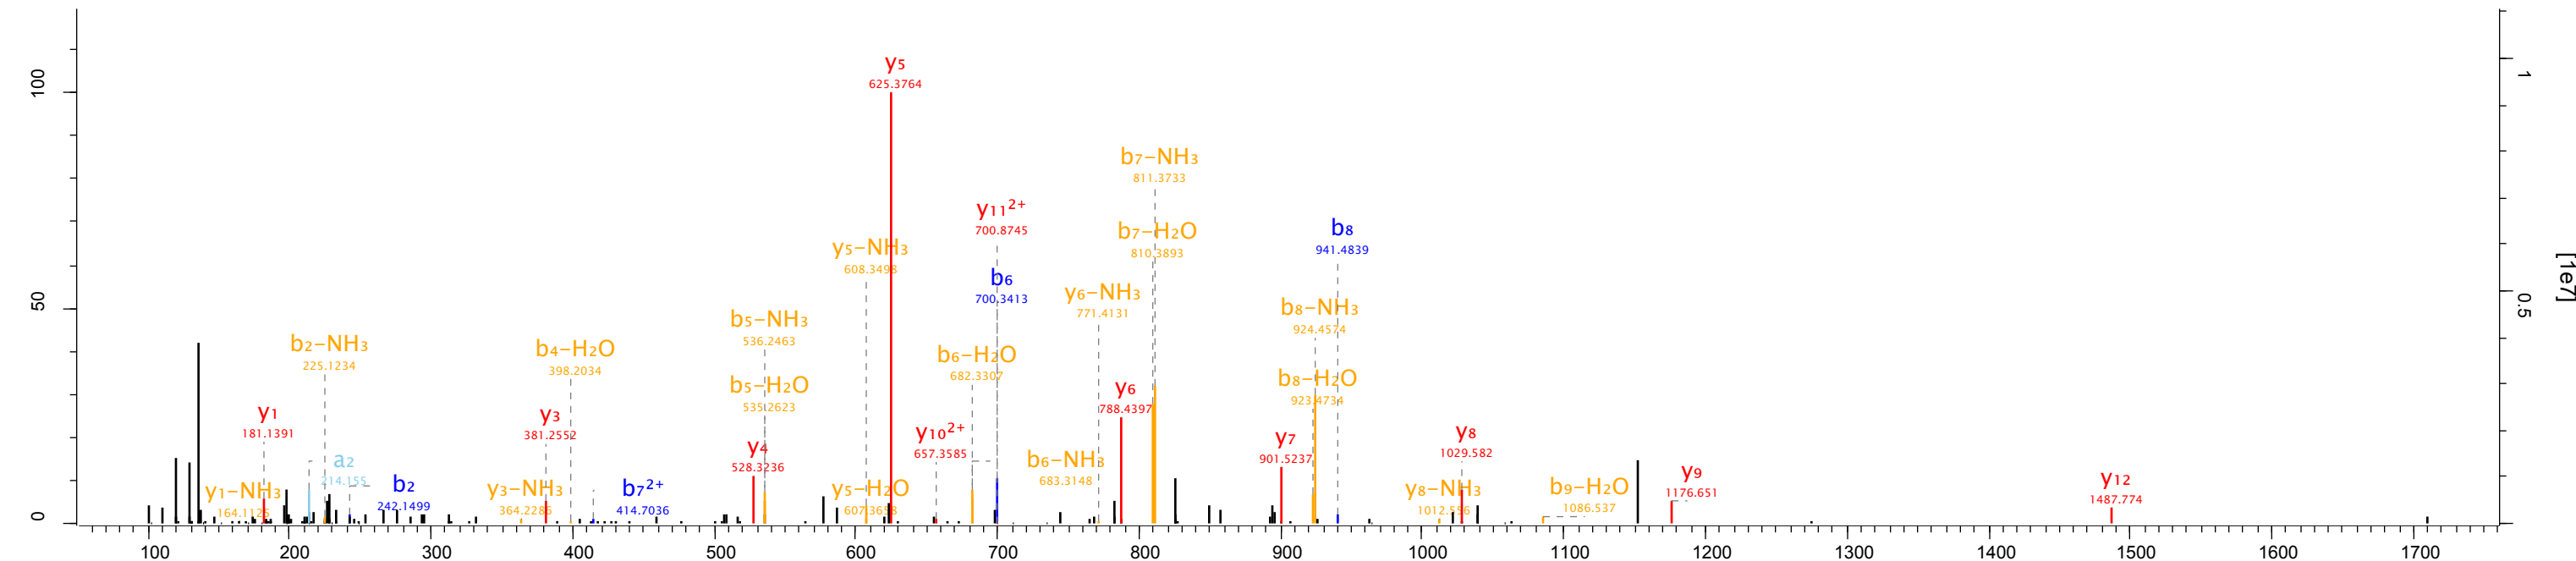

- Q L S S H F Q I Y P F S L R -

b<sub>2</sub> b<sub>6</sub> b<sub>7<sup>2+</sup></sub> b<sub>8</sub>

y<sub>12</sub> y<sub>11<sup>2+</sup></sub> y<sub>10<sup>2+</sup></sub> y<sub>9</sub> y<sub>8</sub> y<sub>7</sub> y<sub>6</sub> y<sub>5</sub> y<sub>4</sub> y<sub>3</sub> y<sub>1</sub>

Raw file

20180707\_MaS\_A375SR\_ML\_proteome\_2\_26

Scan

13015

Method

FTMS; HCD

Score

47.68

m/z

638.35

Gene names

FABP7

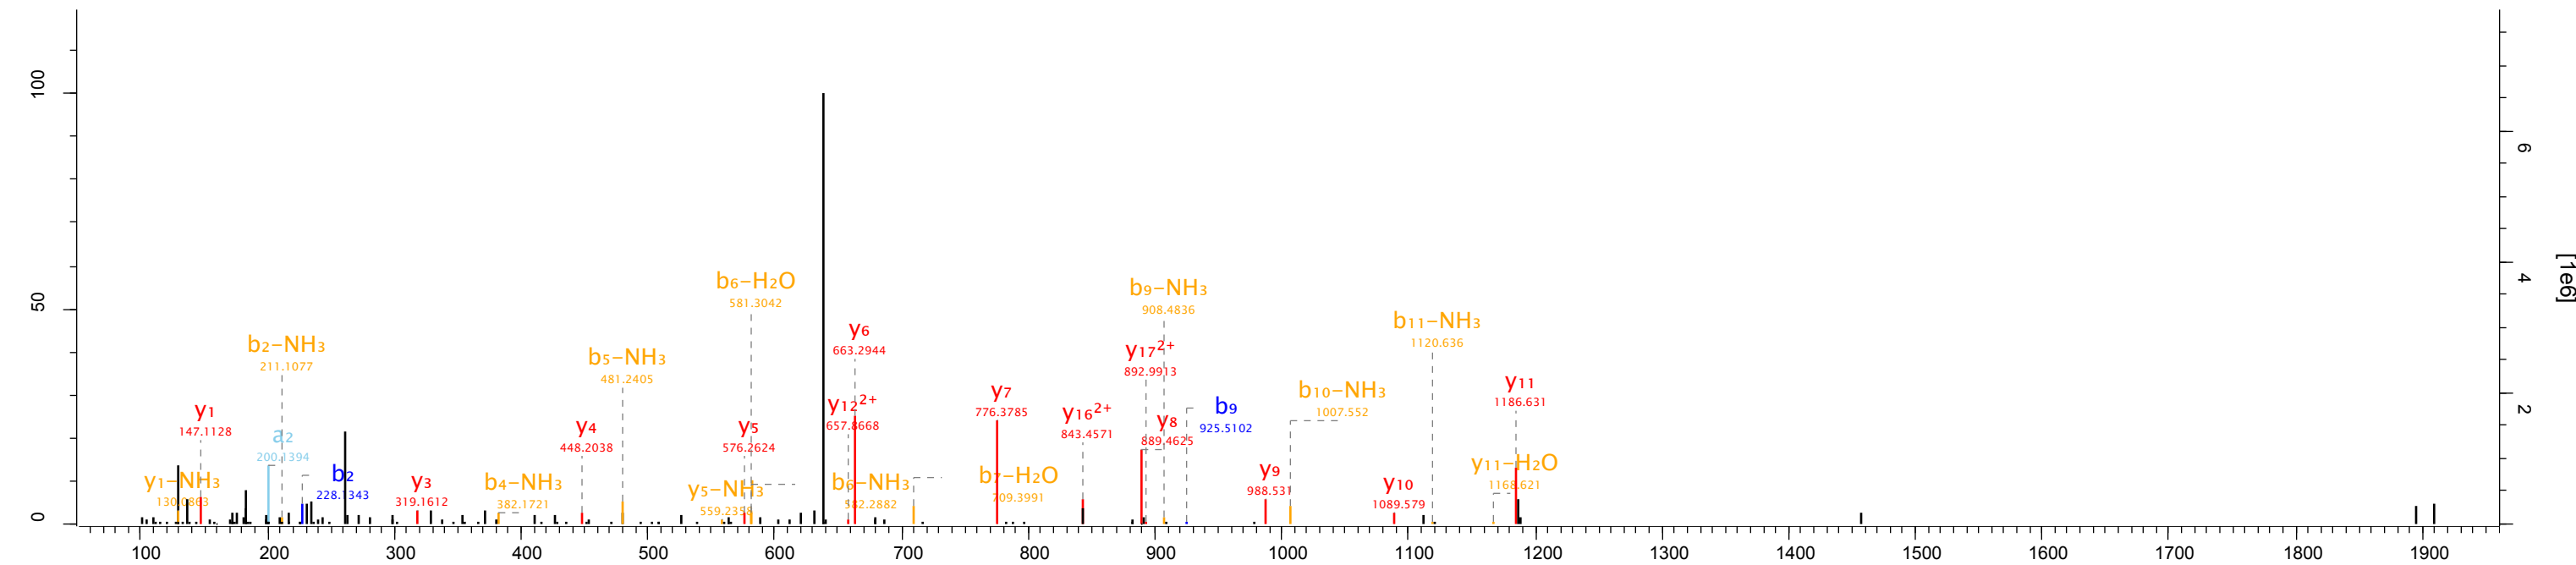

- Q V G N V T K P T V I I S Q E G D K -

b<sub>2</sub> b<sub>9</sub>

Raw file  
20180707\_MaS\_A375SR\_ML\_proteome\_2\_27

Scan 14485 Method FTMS; HCD Score 151.26 m/z 675.85 Gene names SELK

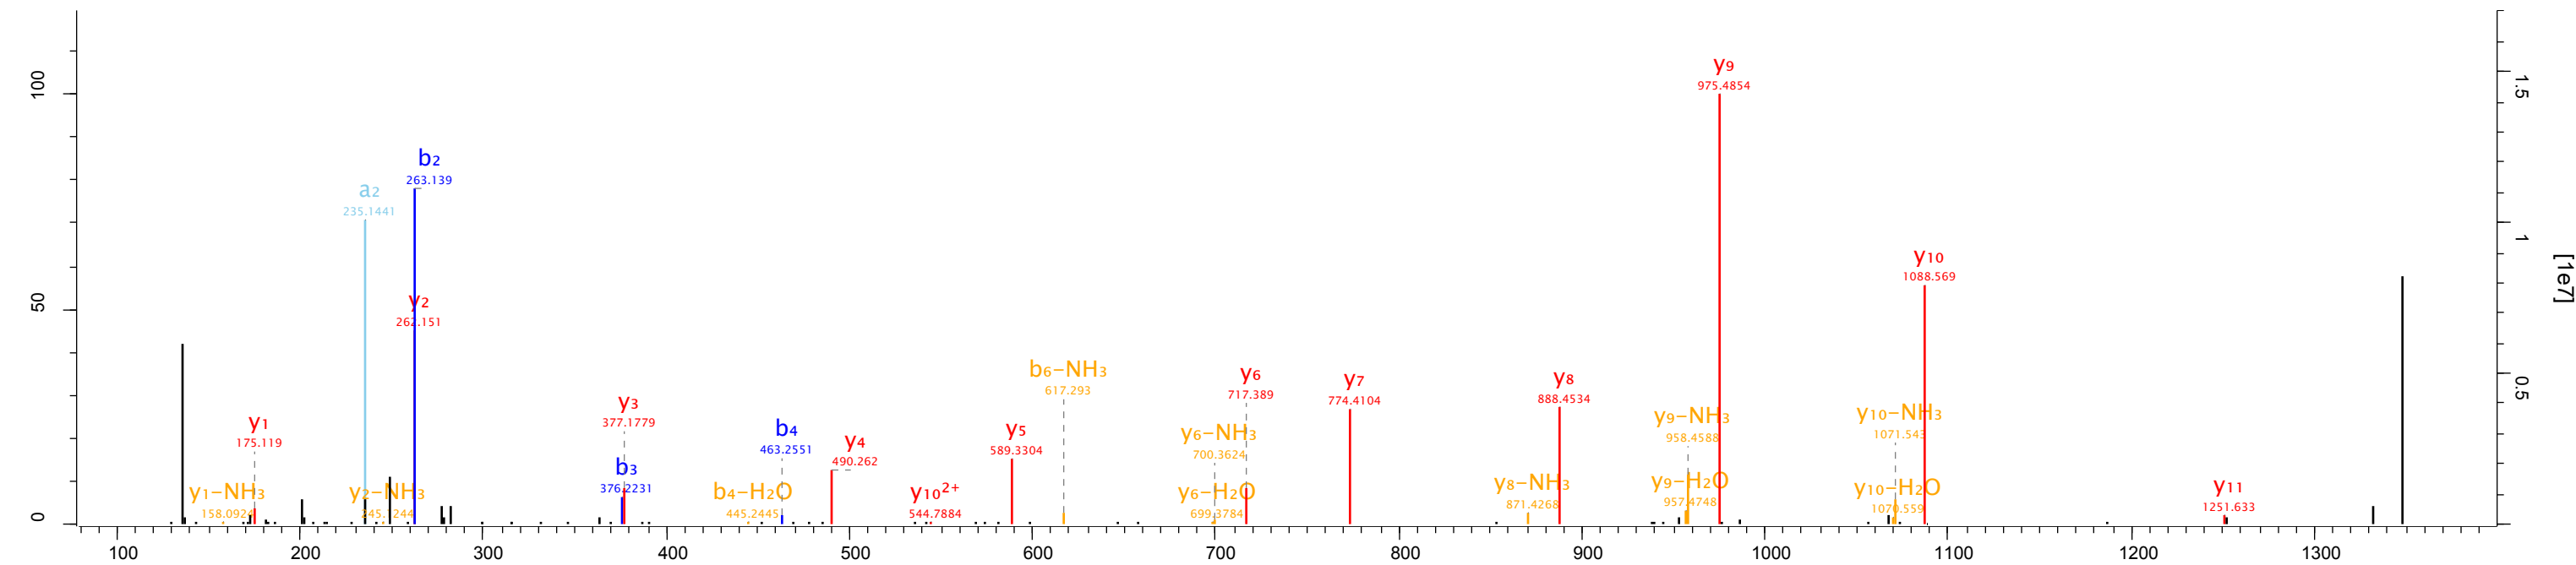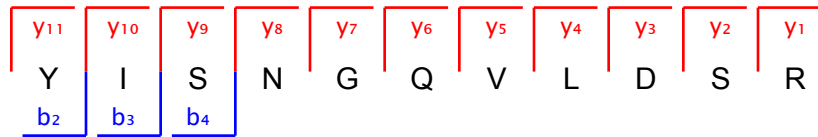

Raw file 20180707\_MaS\_A375SR\_ML\_proteome\_2\_27  
 Scan 6235 Method FTMS; HCD Score 107.74 m/z 353.19 Gene names ART4

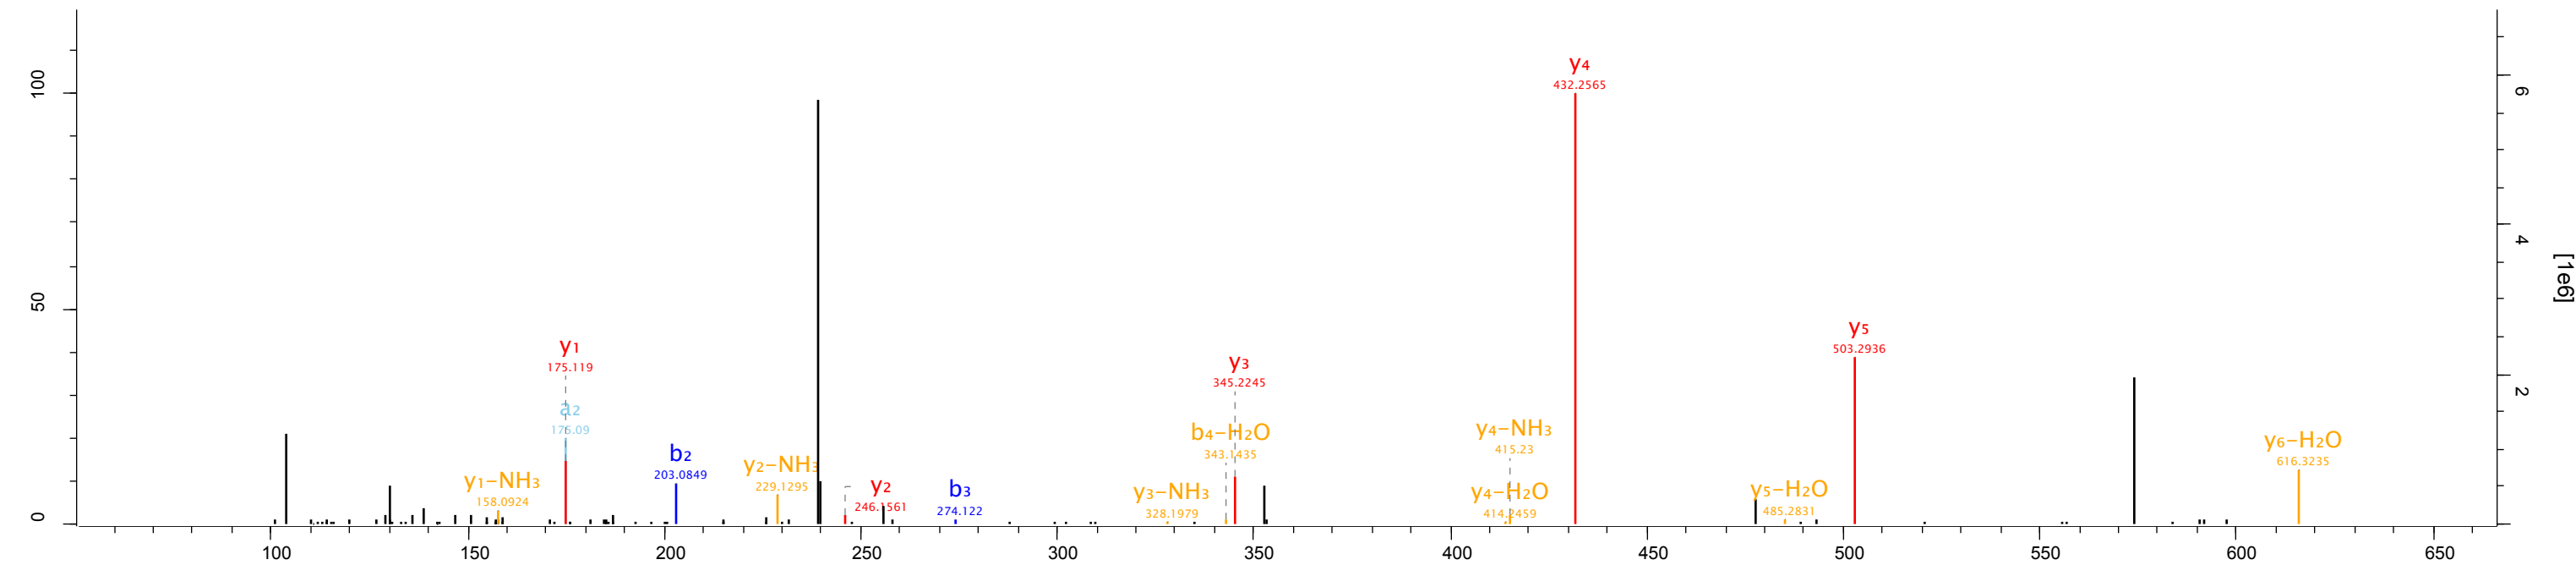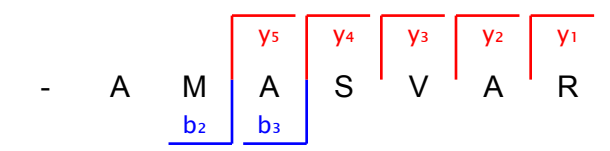

Raw file 20180707\_MaS\_A375SR\_ML\_proteome\_2\_27 Scan 9415 Method FTMS; HCD Score 120.45 m/z 515.26 Gene names CR2

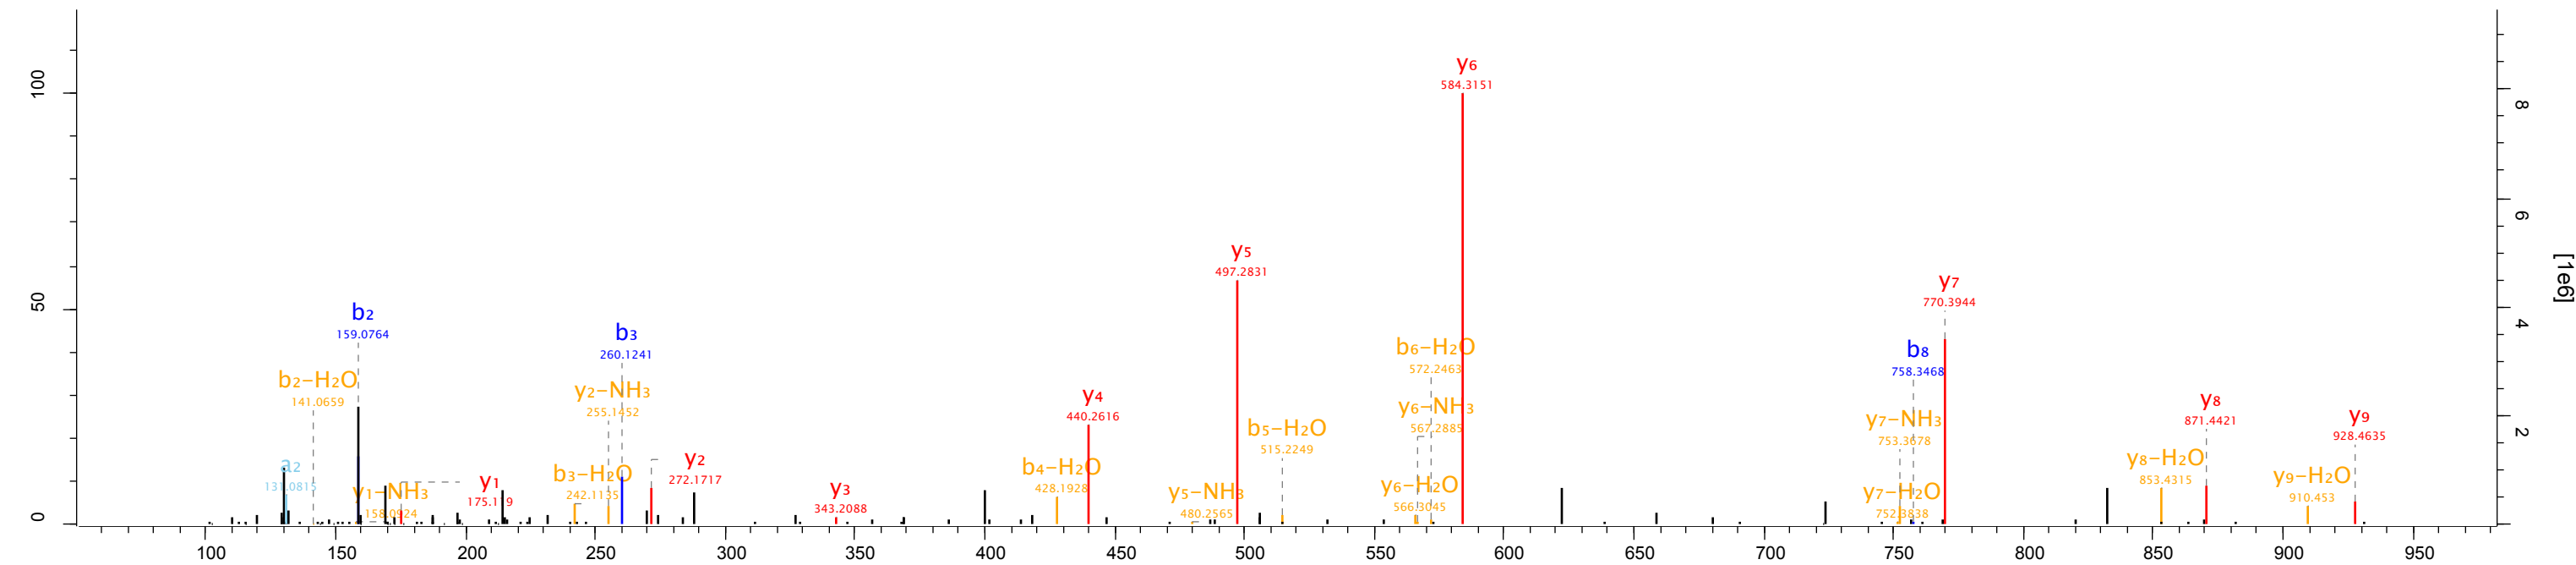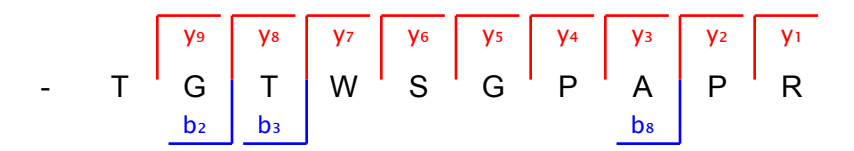



Raw file 20180707\_MaS\_A375SR\_ML\_proteome\_2\_28 Scan 17665 Method FTMS; HCD Score 135.99 m/z 713.36 Gene names SPATA22

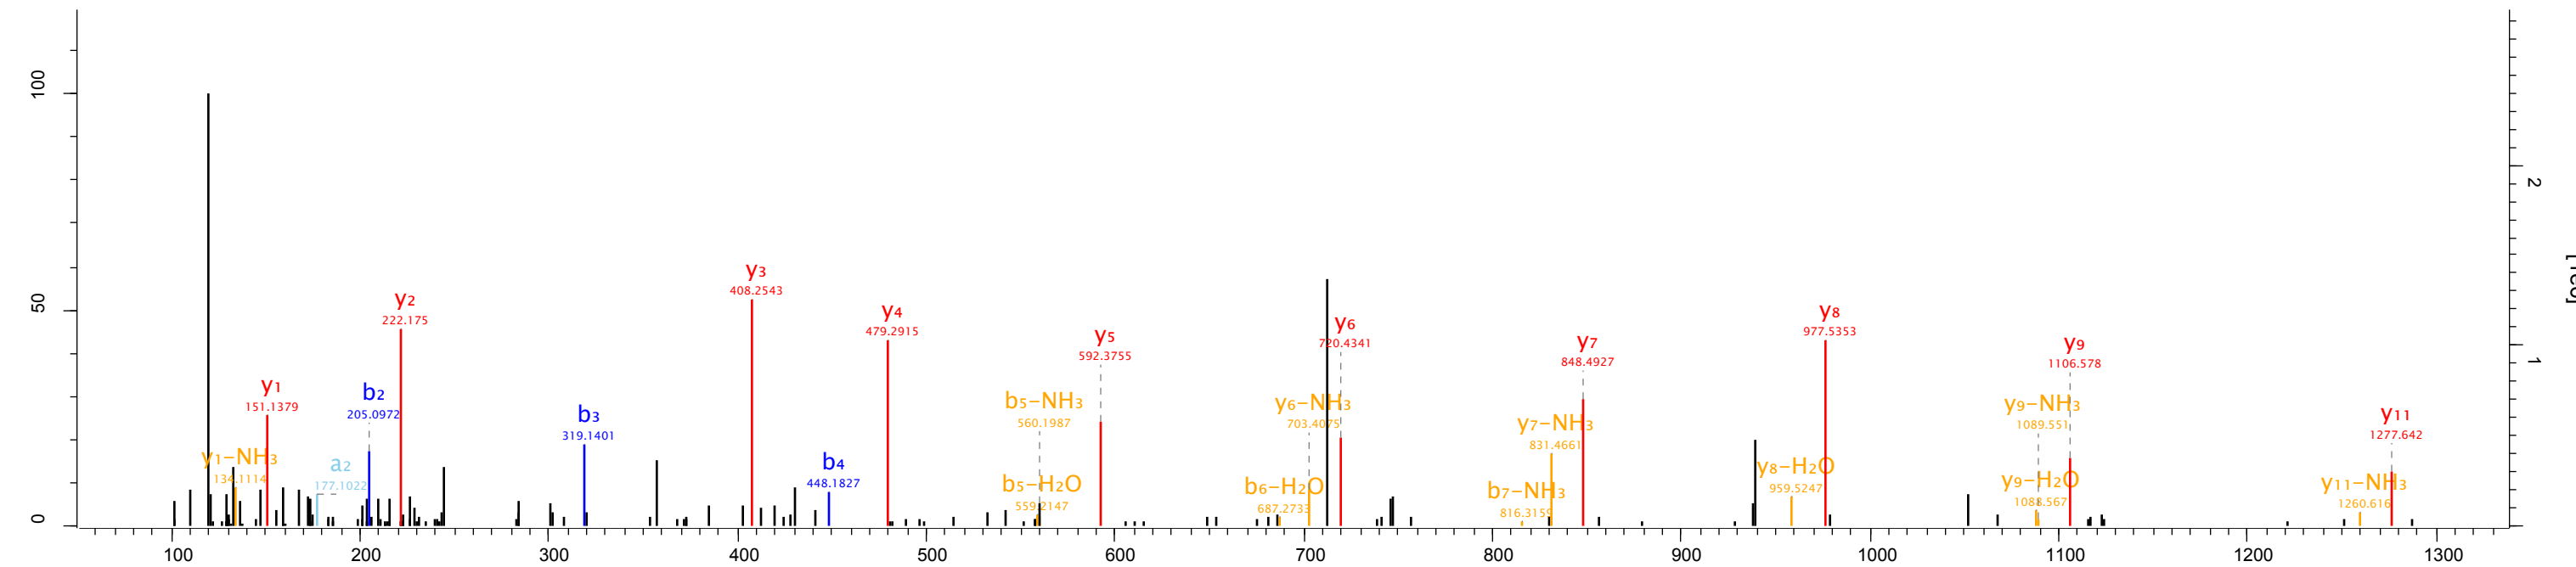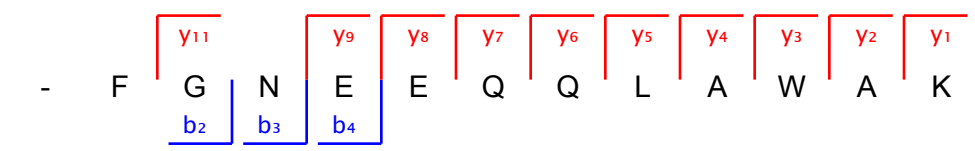

Raw file 20180707\_MaS\_A375SR\_ML\_proteome\_2\_29 Scan 11875 Method FTMS; HCD Score 68.68 m/z 555.82

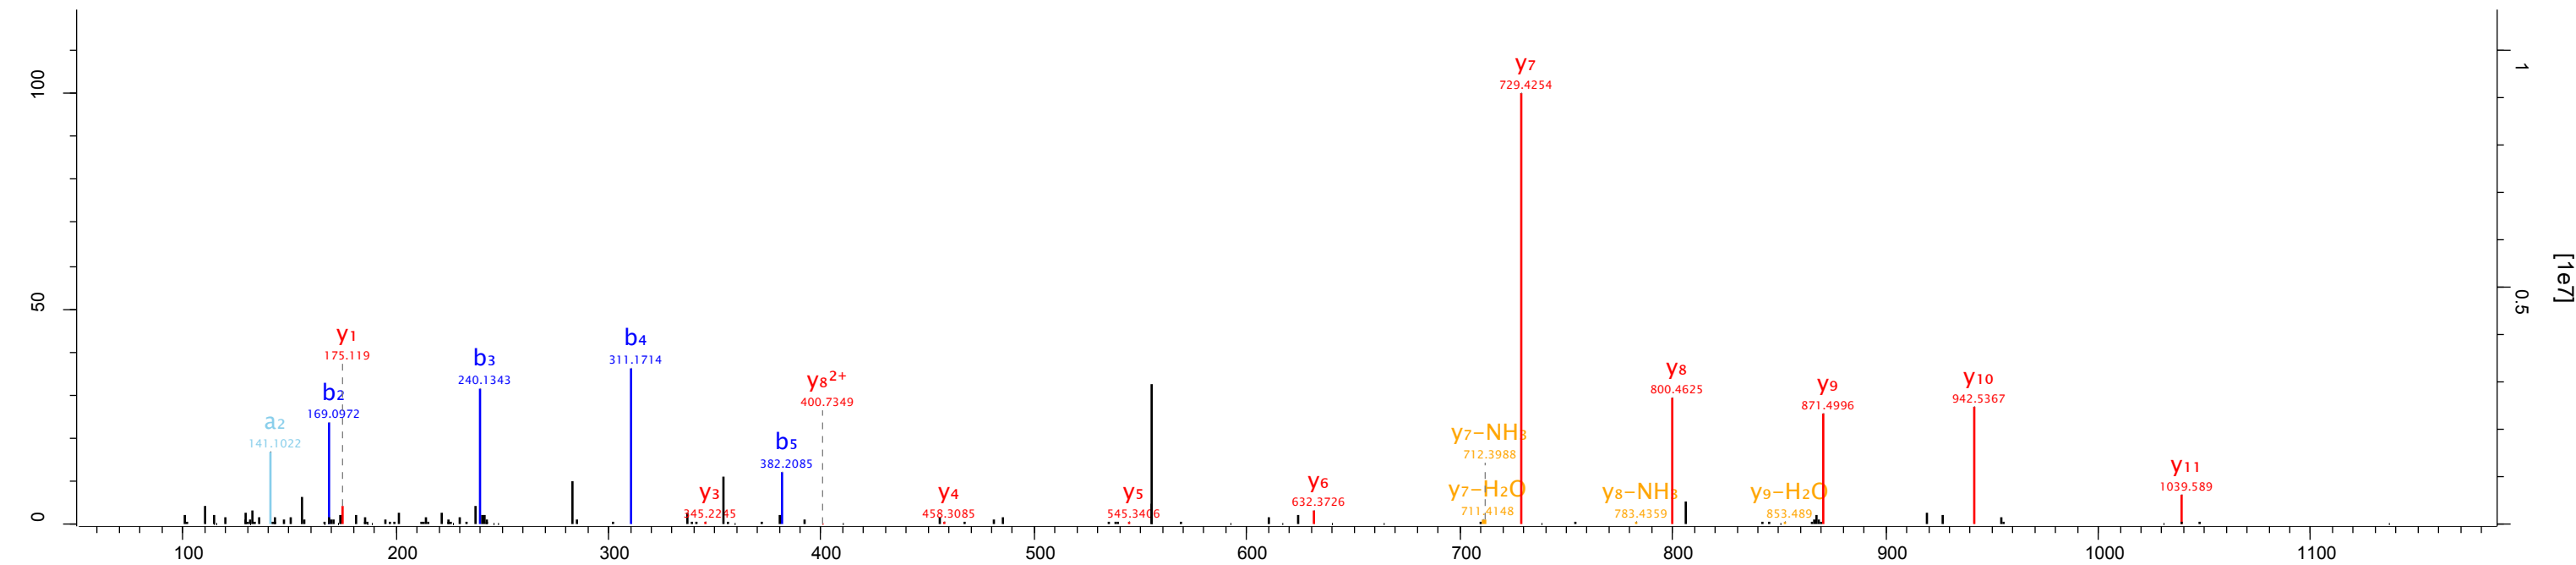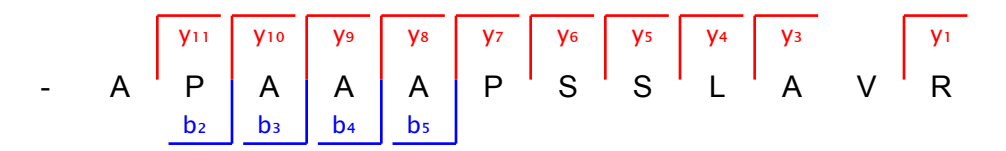

Raw file  
20180707\_MaS\_A375SR\_ML\_proteome\_2\_29

Scan 14335 Method FTMS; HCD Score 46.43 m/z 491.26

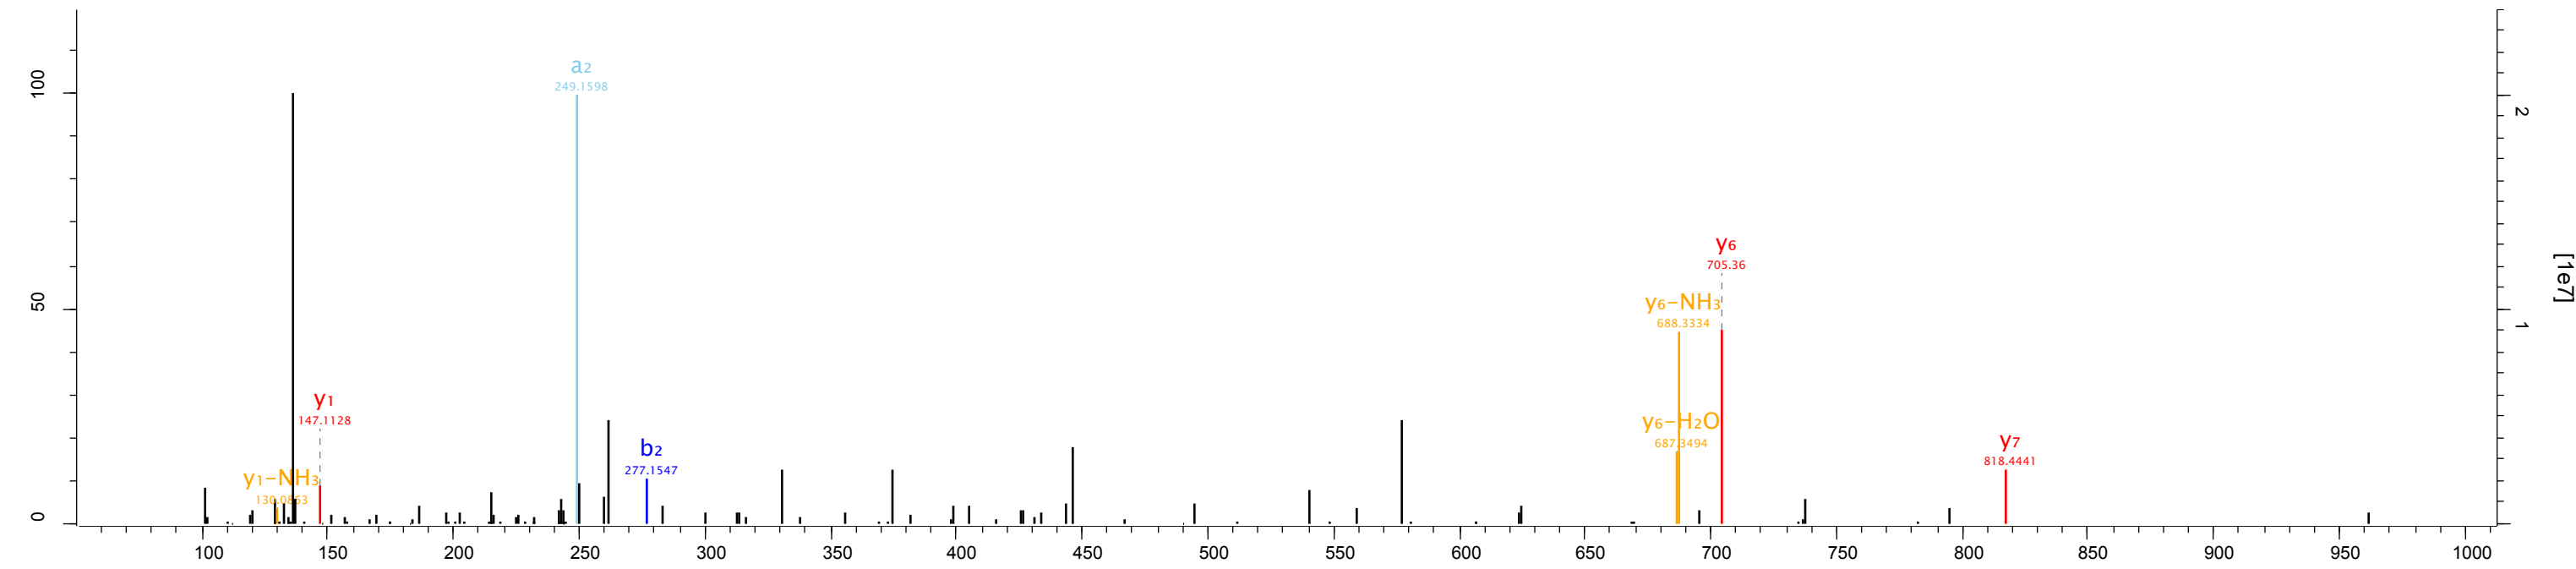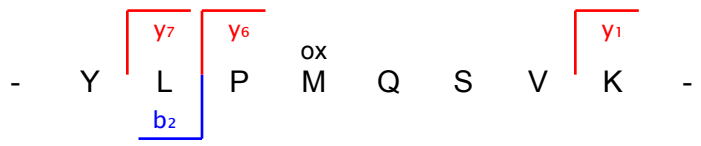

Raw file 20180707\_MaS\_A375SR\_ML\_proteome\_2\_29 Scan 5825 Method FTMS; HCD Score 42.6 m/z 475.26

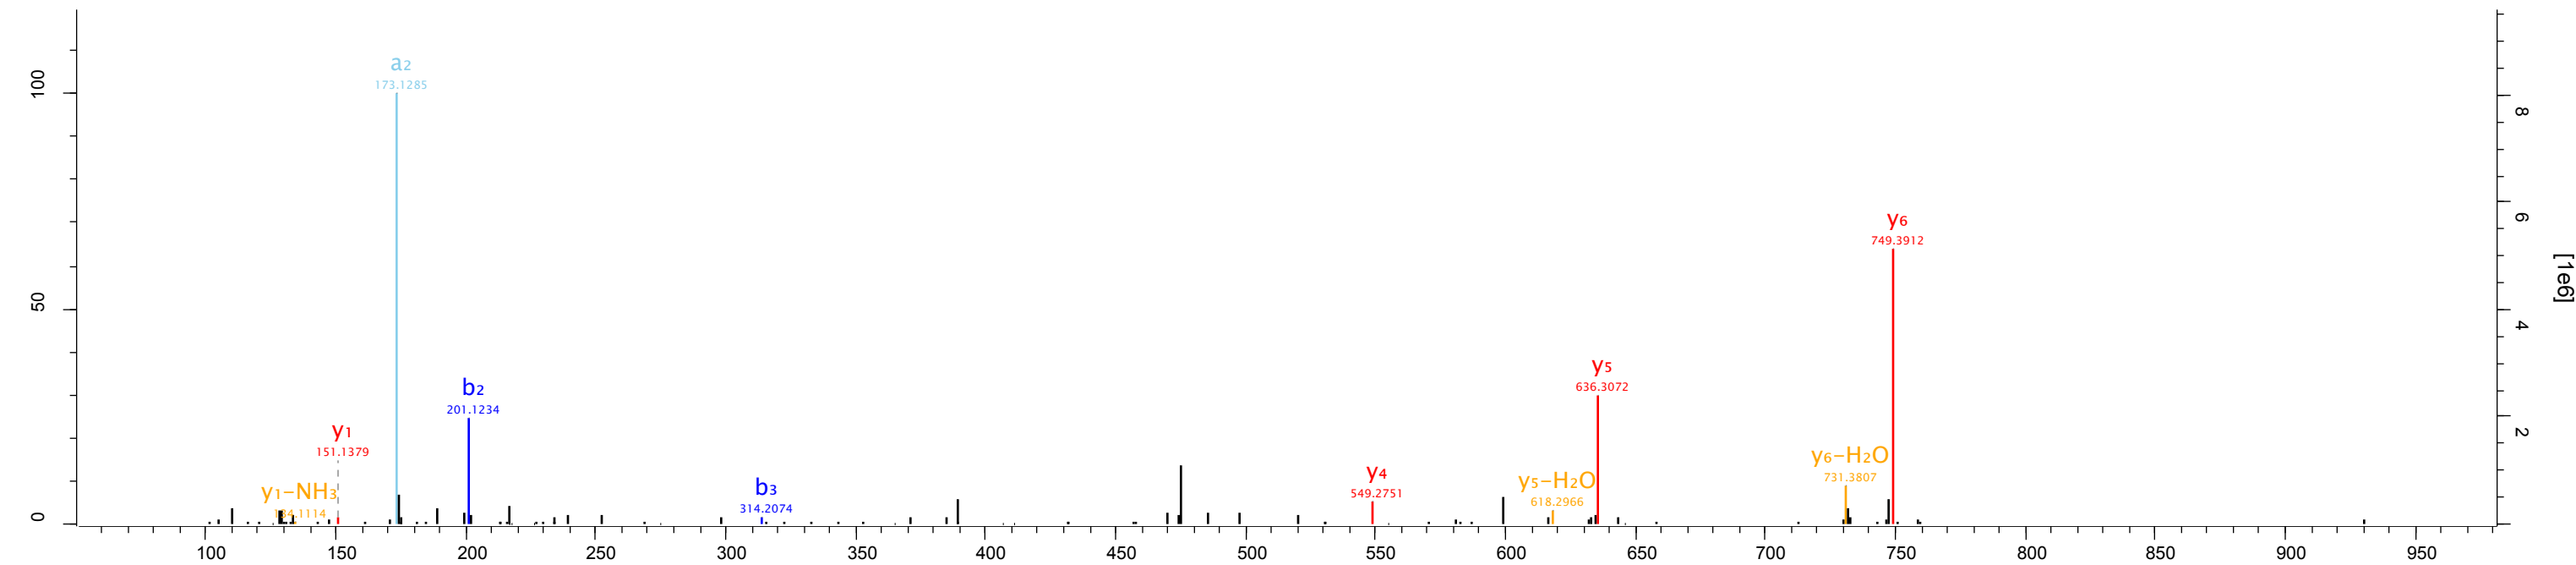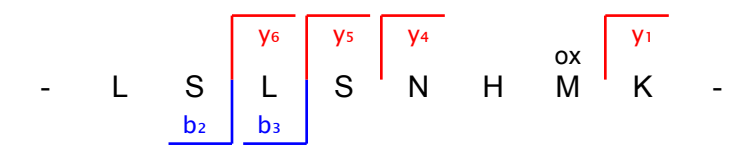

Raw file 20180707\_MaS\_A375SR\_ML\_proteome\_2\_30  
 Scan 4055 Method FTMS; HCD Score 34.77 m/z 355.53

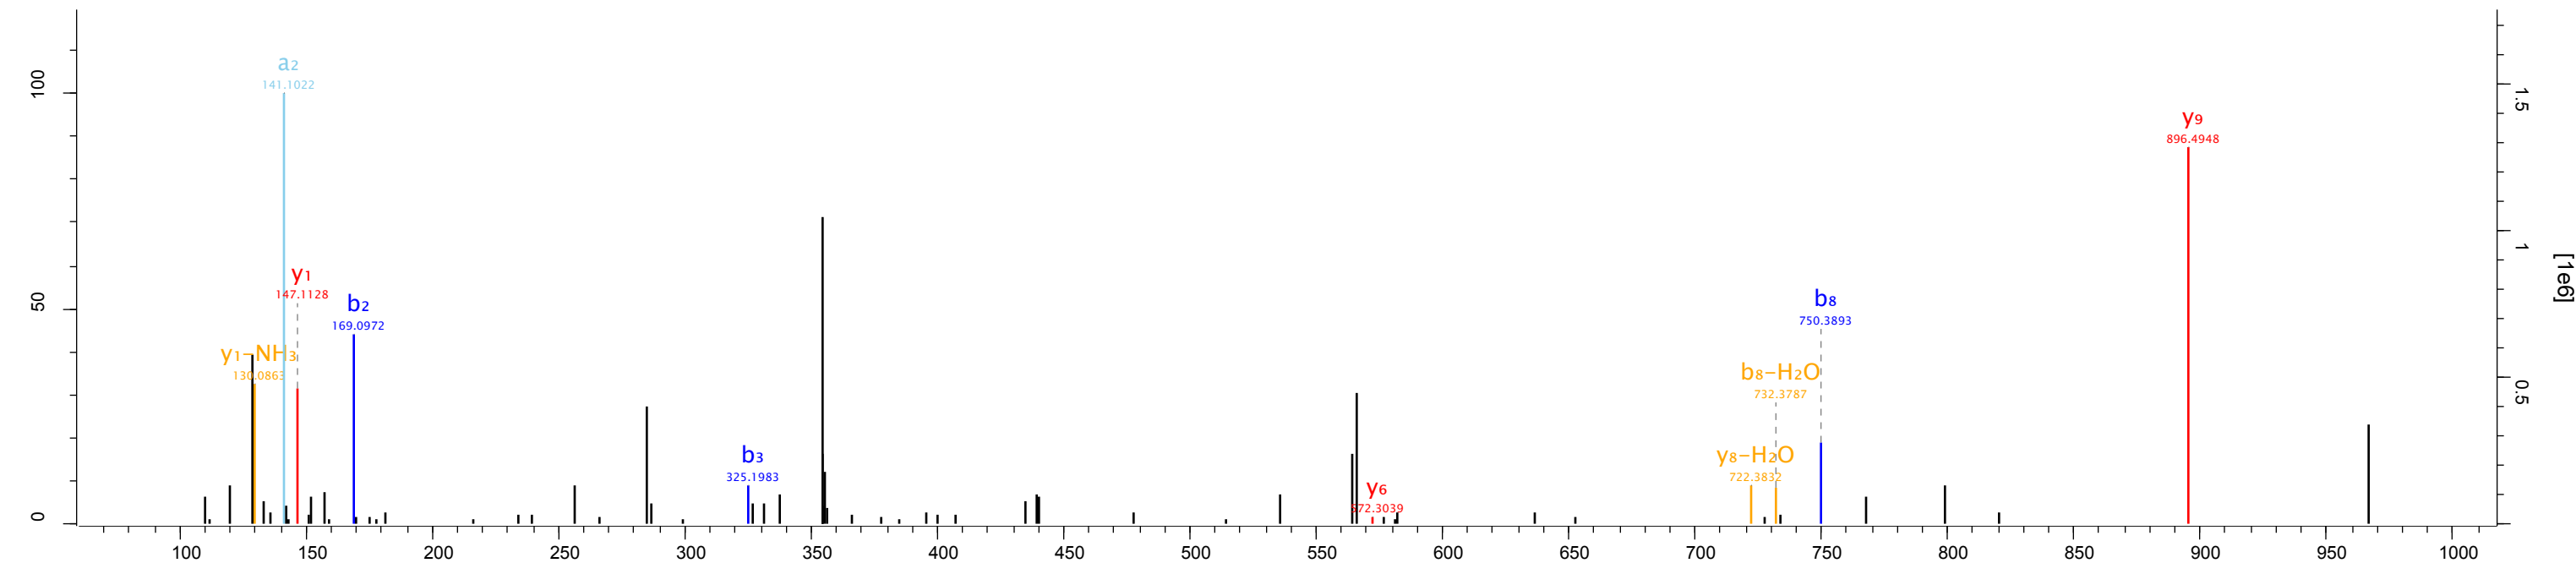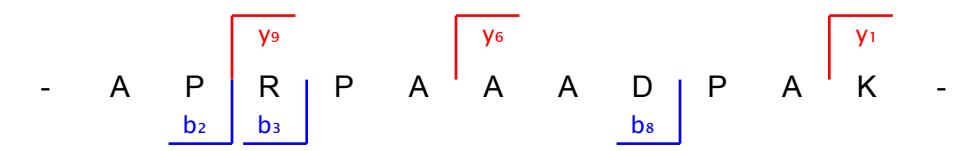

Raw file 20180707\_MaS\_A375SR\_ML\_proteome\_20 Scan 18725 Method FTMS; HCD Score 81.51 m/z 641.99 Gene names ATP6V0C

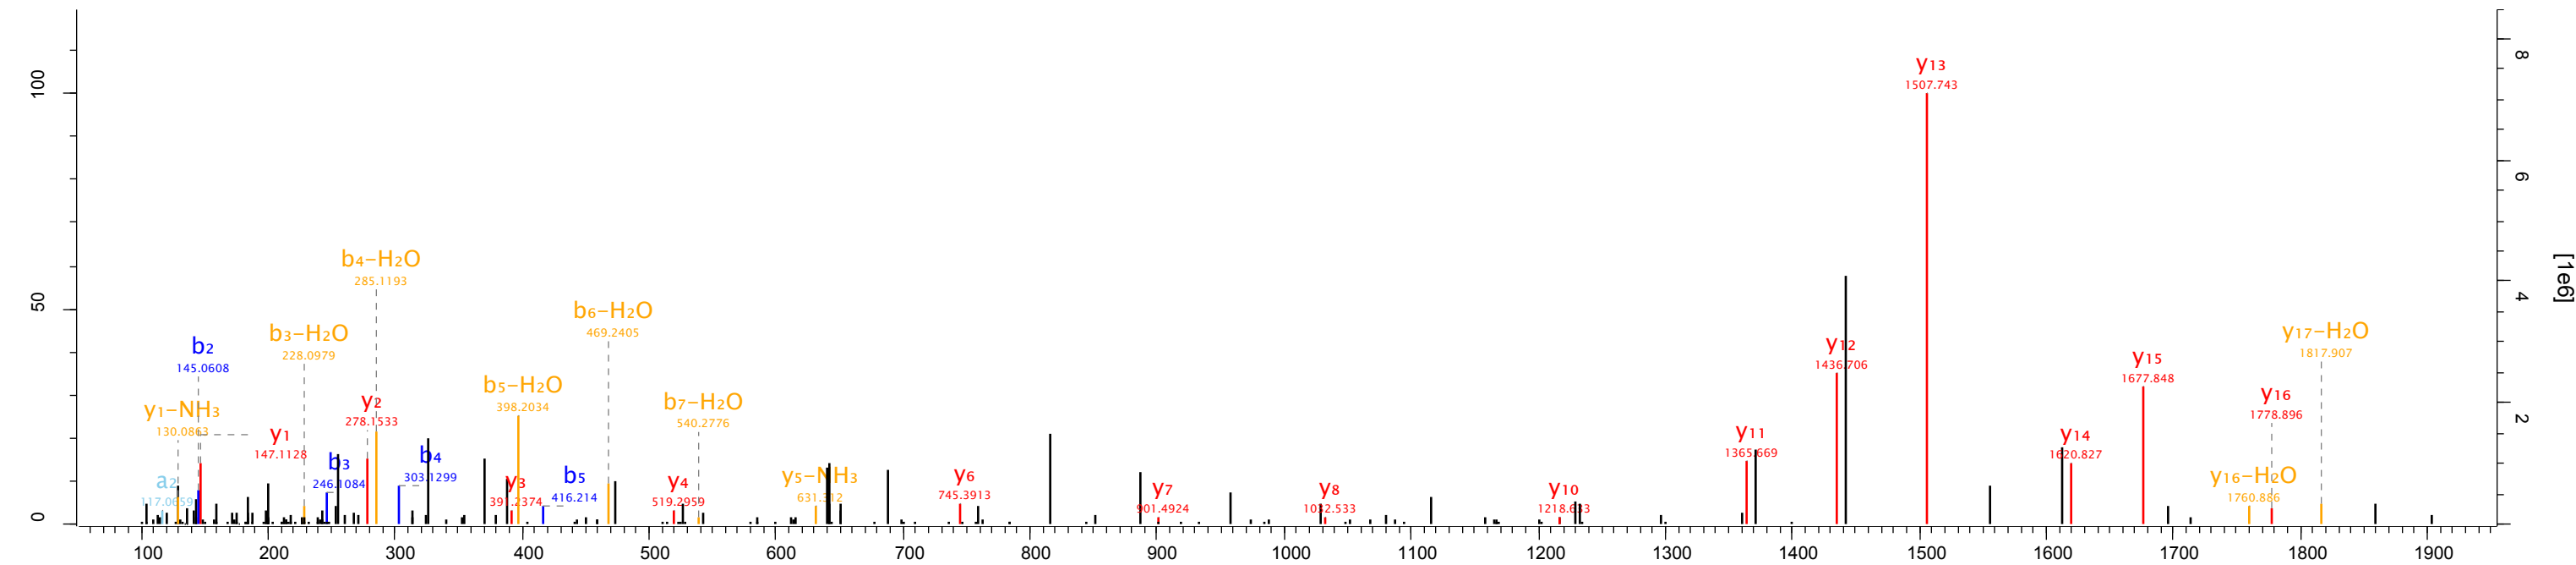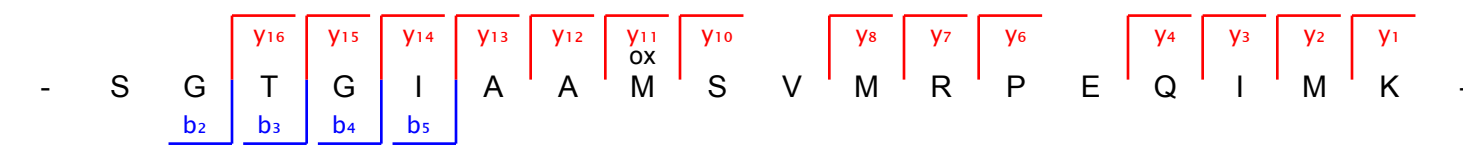

Raw file 20180707\_MaS\_A375SR\_ML\_proteome\_20 Scan 19575 Method FTMS; HCD Score 54.25 m/z 645 Gene names ATP6V0C

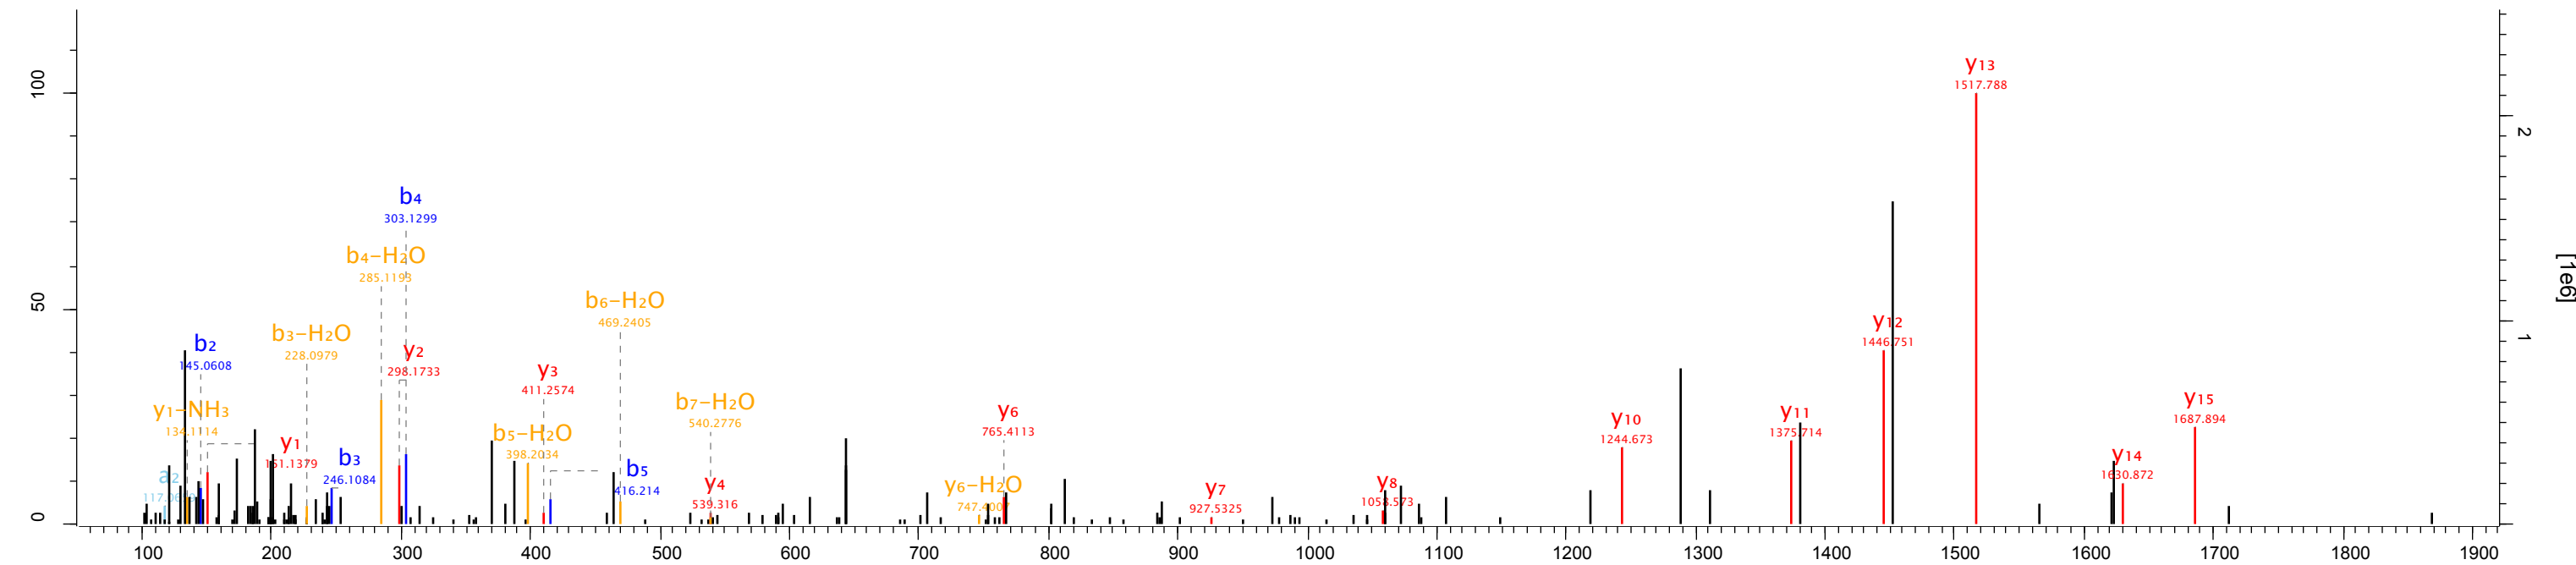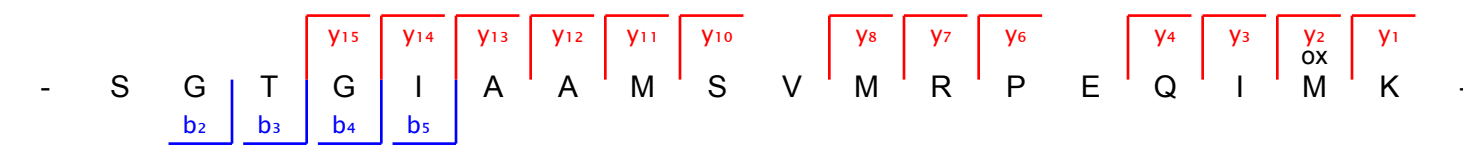

Raw file  
20180707\_MaS\_A375SR\_ML\_proteome\_20

Scan 23705 Method FTMS; HCD Score 216.34 m/z 954.48 Gene names ATP6V0C

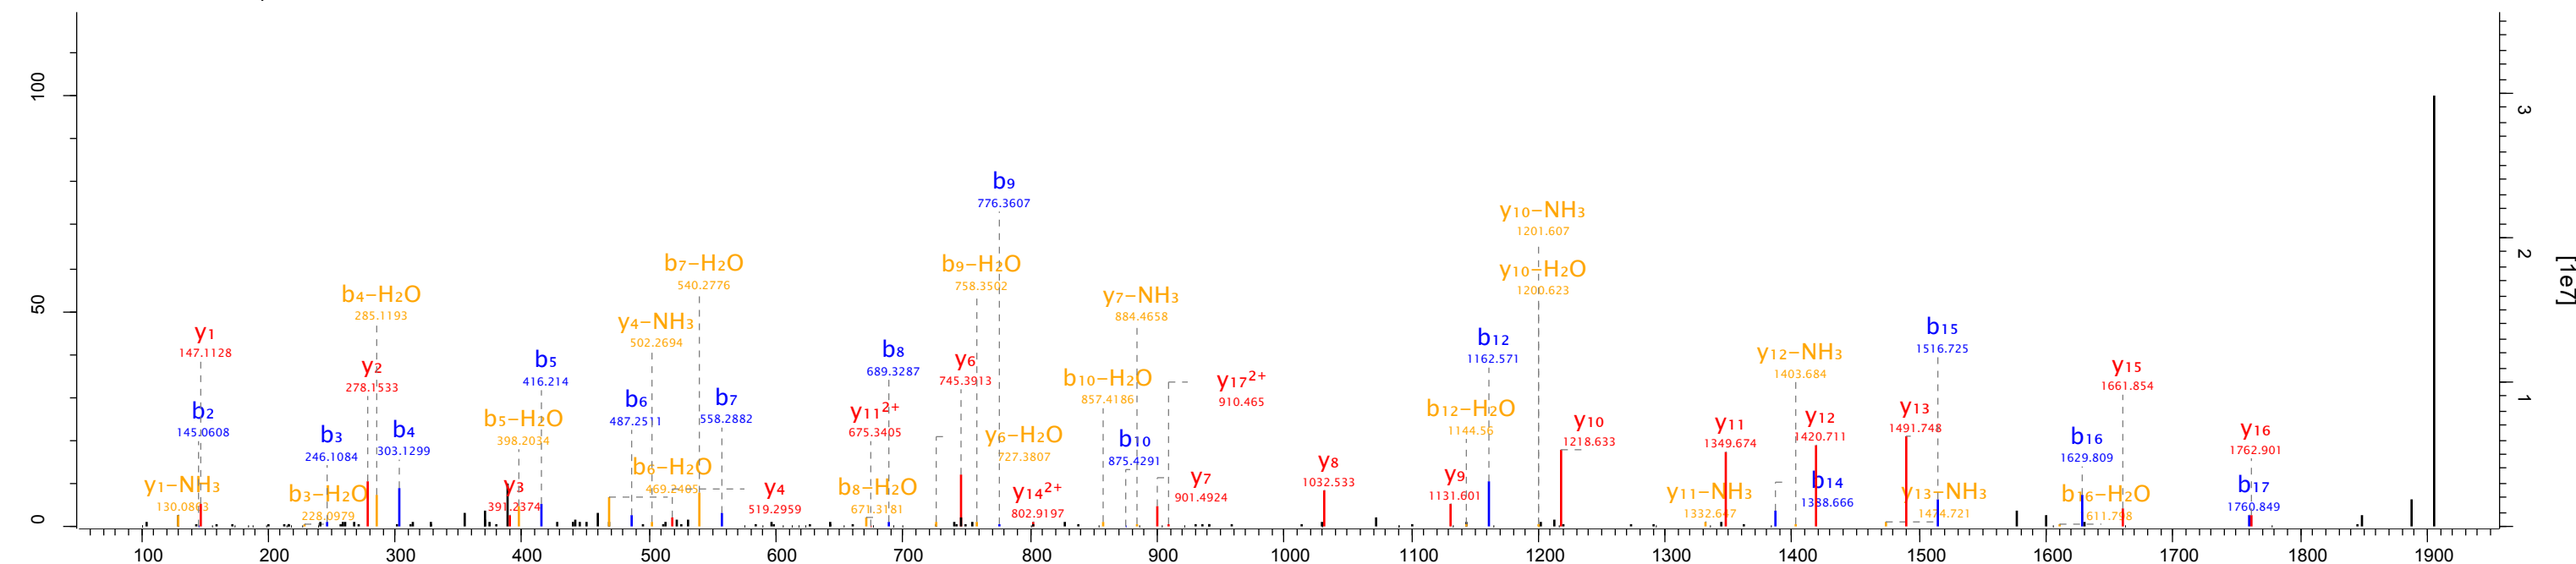

- S G T G I A A M S V M R P E Q I M K -

|                   |     |     |                   |     |     |     |     |     |     |     |     |     |     |    |    |
|-------------------|-----|-----|-------------------|-----|-----|-----|-----|-----|-----|-----|-----|-----|-----|----|----|
| y17 <sup>2+</sup> | y16 | y15 | y14 <sup>2+</sup> | y13 | y12 | y11 | y10 | y9  | y8  | y7  | y6  | y4  | y3  | y2 | y1 |
| b2                | b3  | b4  | b5                | b6  | b7  | b8  | b9  | b10 | b12 | b14 | b15 | b16 | b17 |    |    |



Raw file  
20180707\_MaS\_A375SR\_ML\_proteome\_20

Scan 8475 Method FTMS; HCD Score 55.26 m/z 522.26

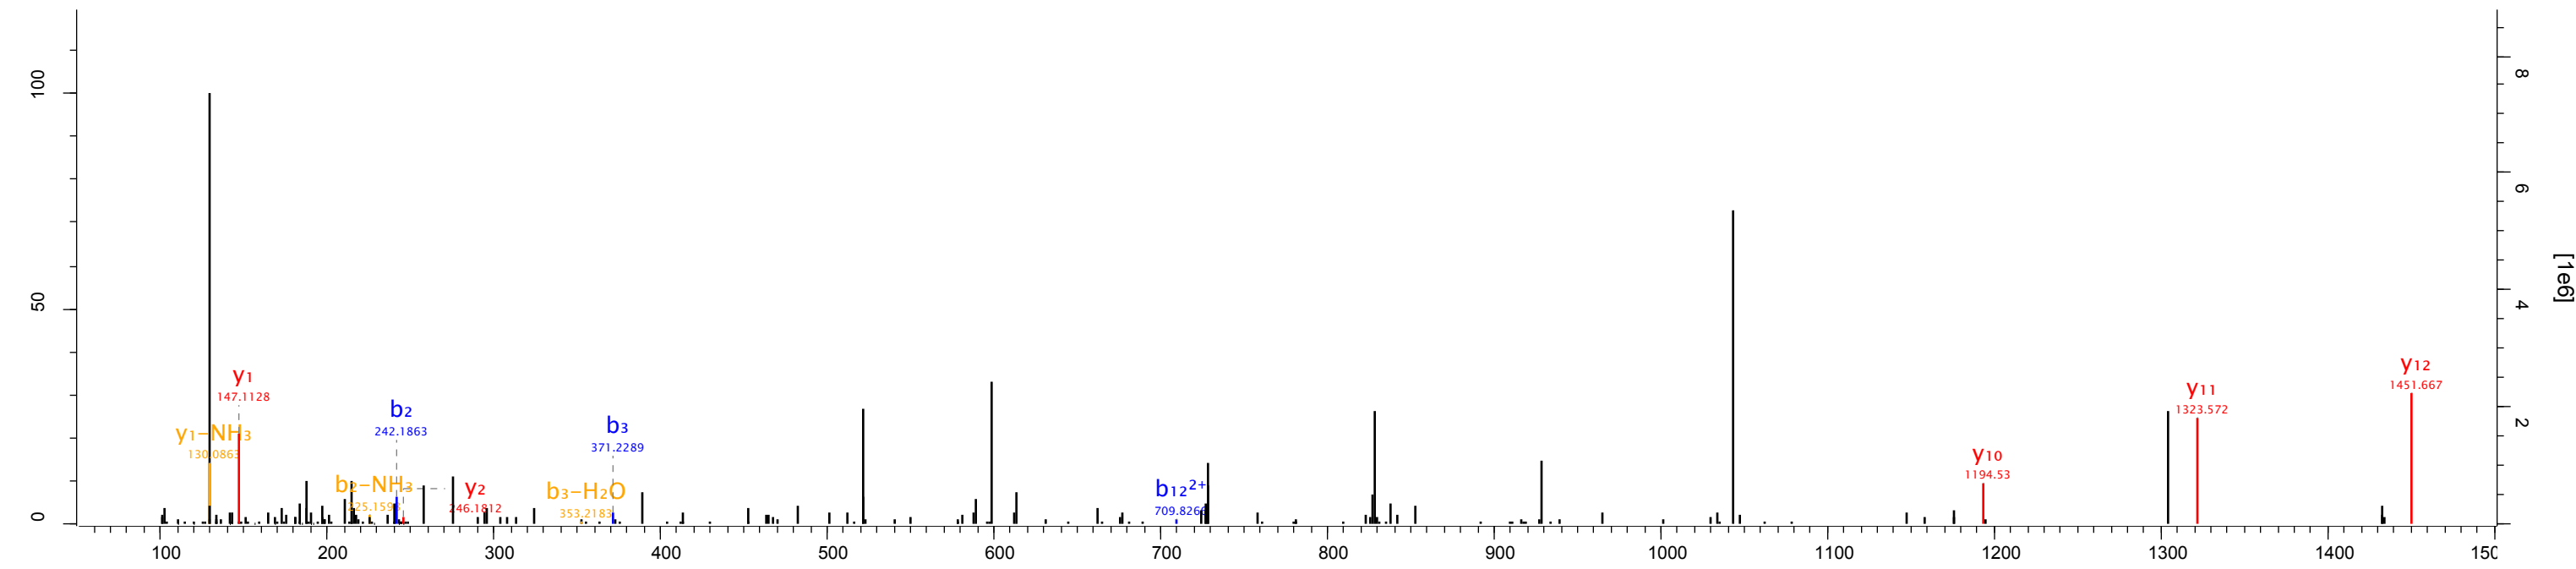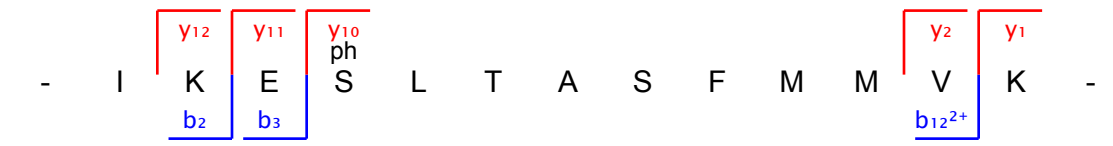

Raw file 20180707\_MaS\_A375SR\_ML\_proteome\_22 Scan 15795 Method FTMS; HCD Score 57.86 m/z 562.26

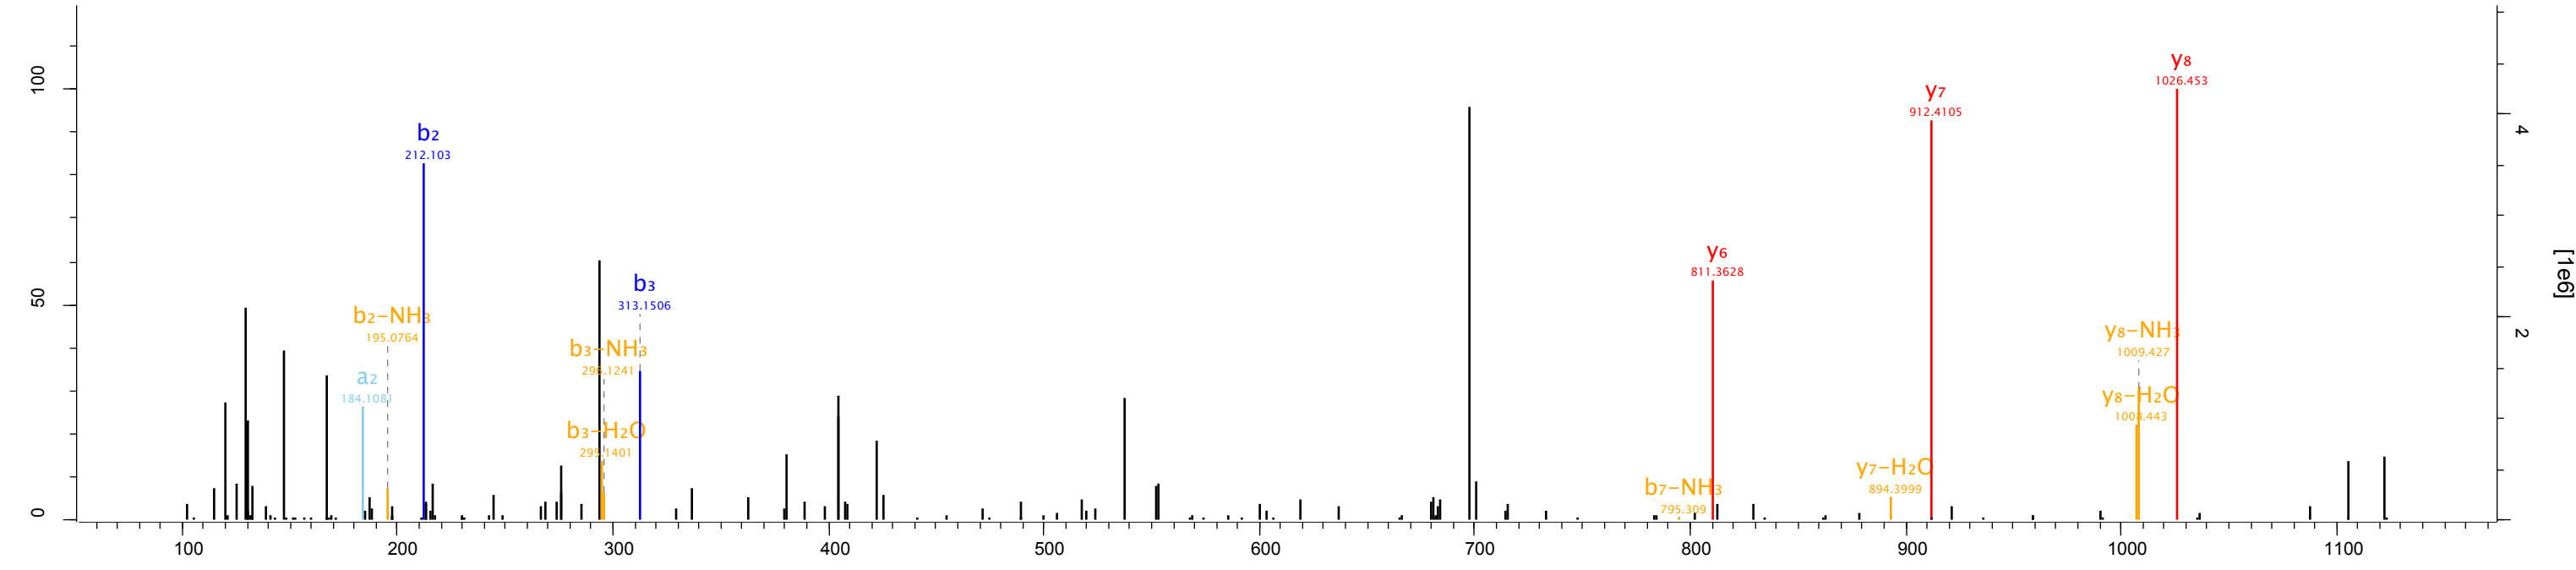

Raw file 20180707\_MaS\_A375SR\_ML\_proteome\_22 Scan 18735 Method FTMS; HCD Score 99.54 m/z 689.33 Gene names SMIM4

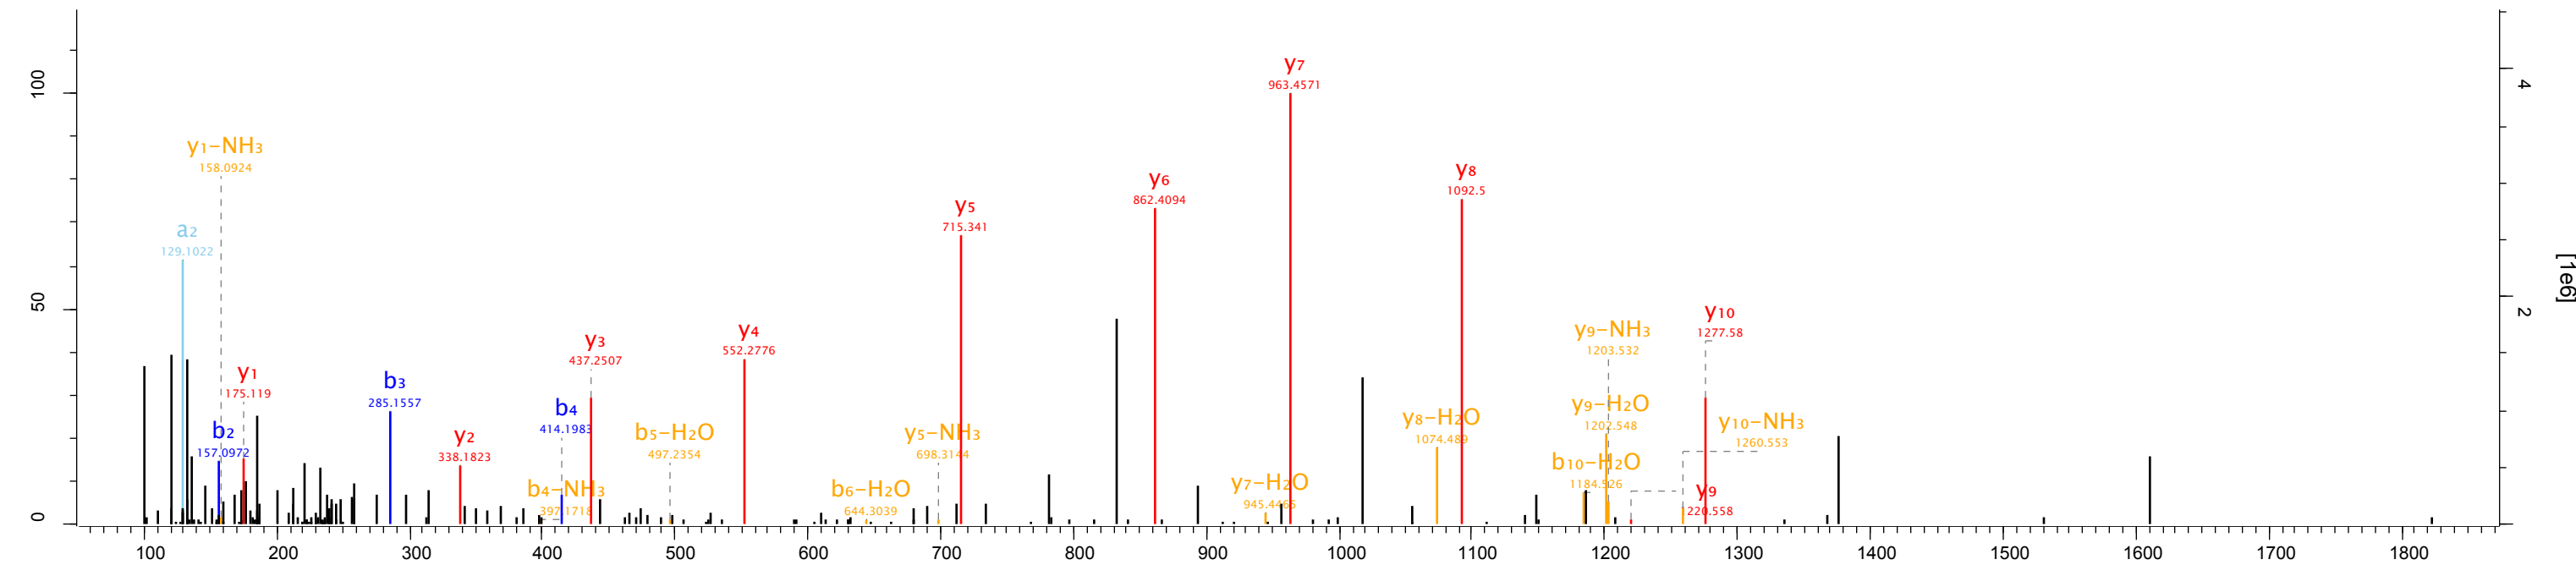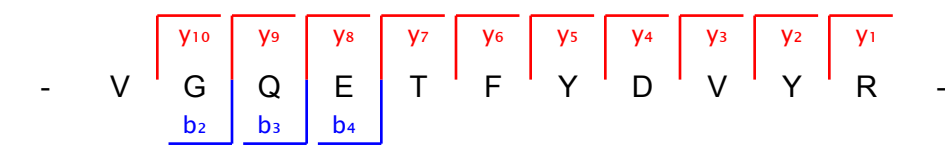

Raw file: 20180707\_MaS\_A375SR\_ML\_proteome\_22  
 Scan: 21615 Method: FTMS; HCD Score: 73.92 m/z: 639.67 Gene names: ATP6V0C

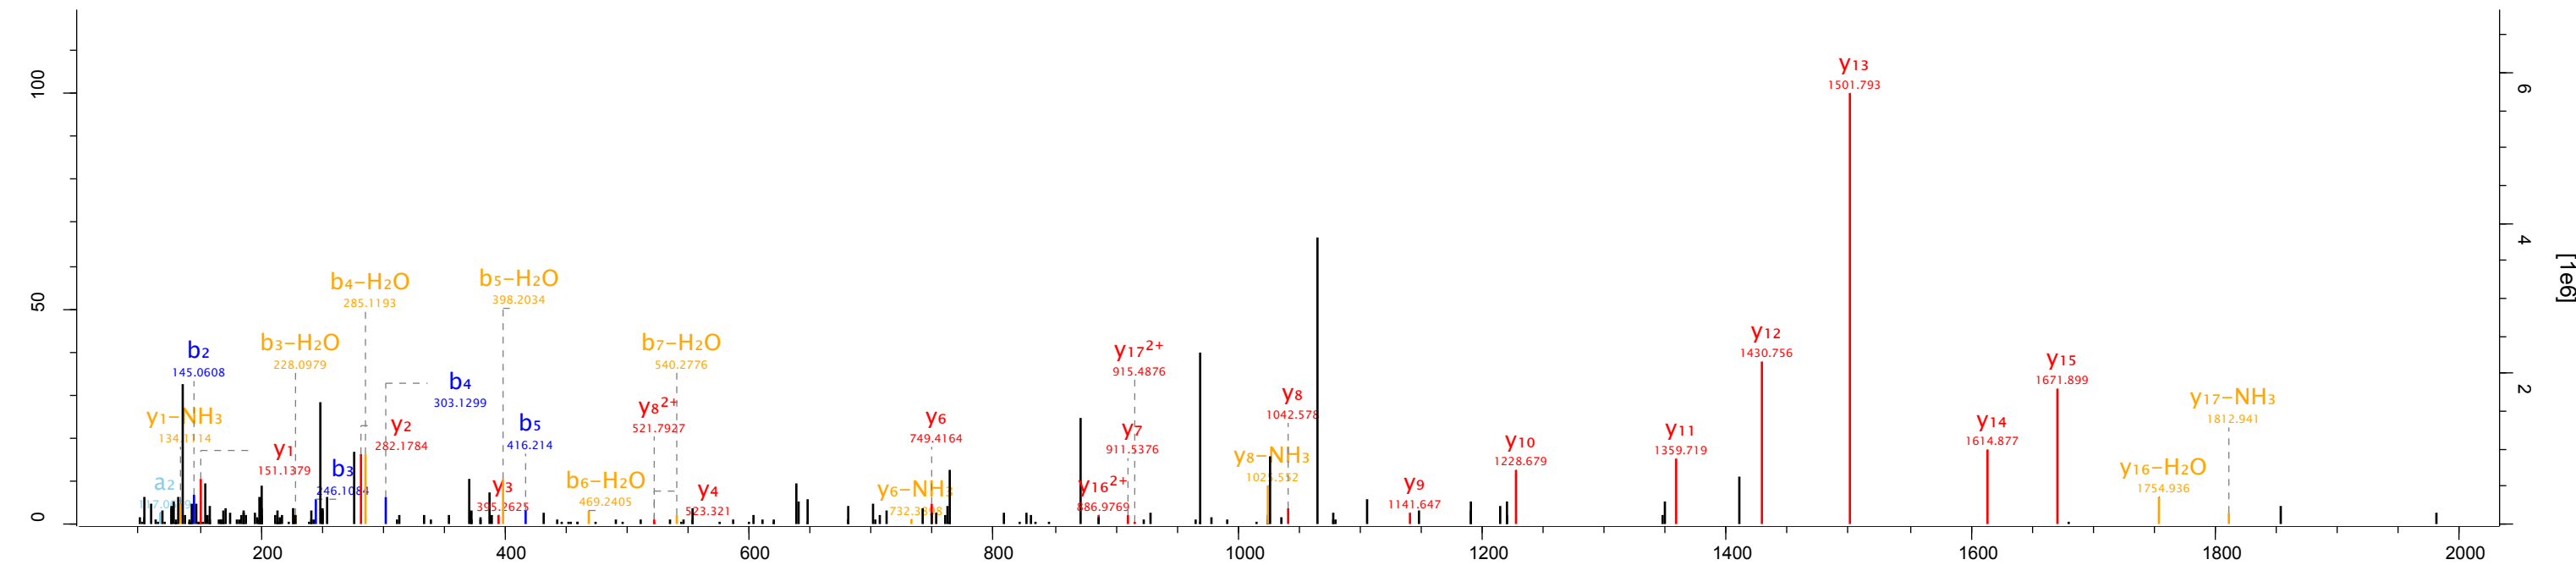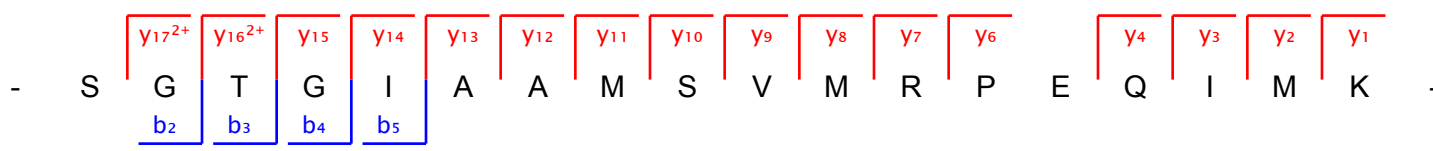

Raw file 20180707\_MaS\_A375SR\_ML\_proteome\_22 Scan 22505 Method FTMS; HCD Score 103.13 m/z 868.5 Gene names KRTCAP2

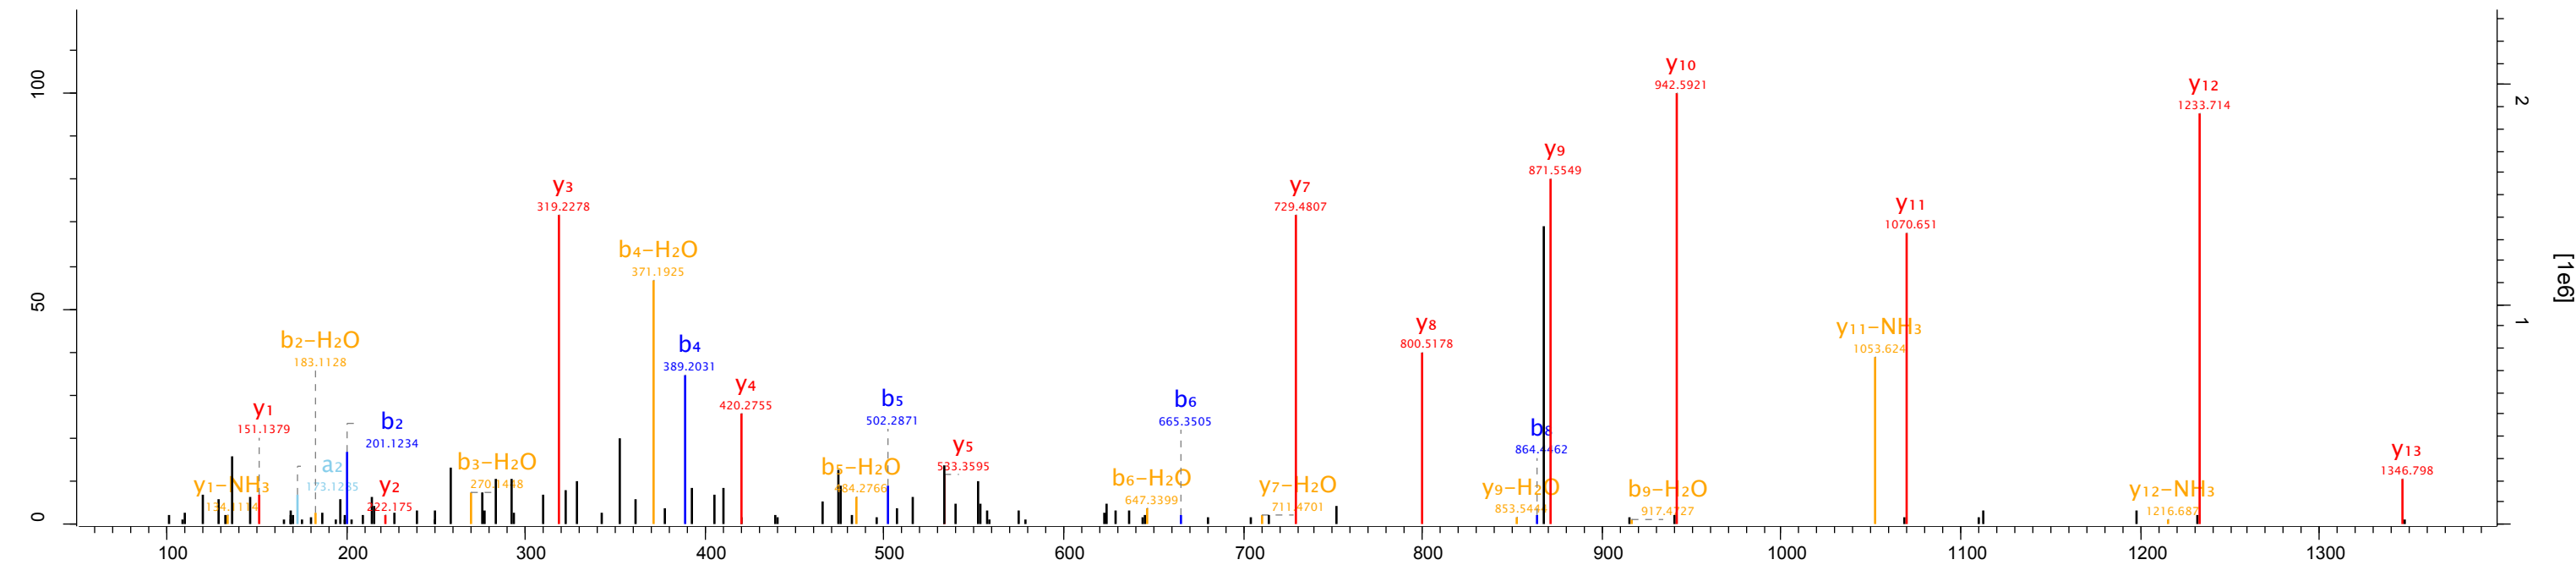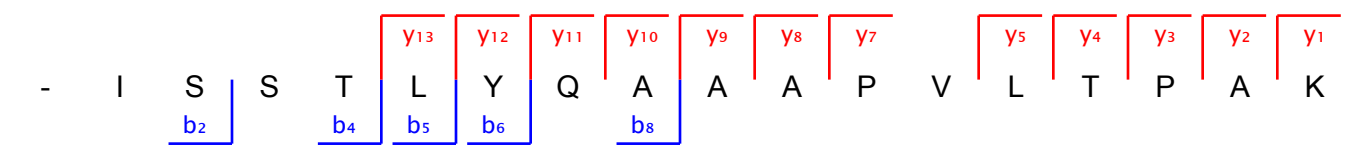

Raw file

20180707\_MaS\_A375SR\_ML\_proteome\_22

| Scan | Method    | Score | m/z    | Gene names |
|------|-----------|-------|--------|------------|
| 6205 | FTMS; HCD | 92.19 | 353.19 | ART4       |

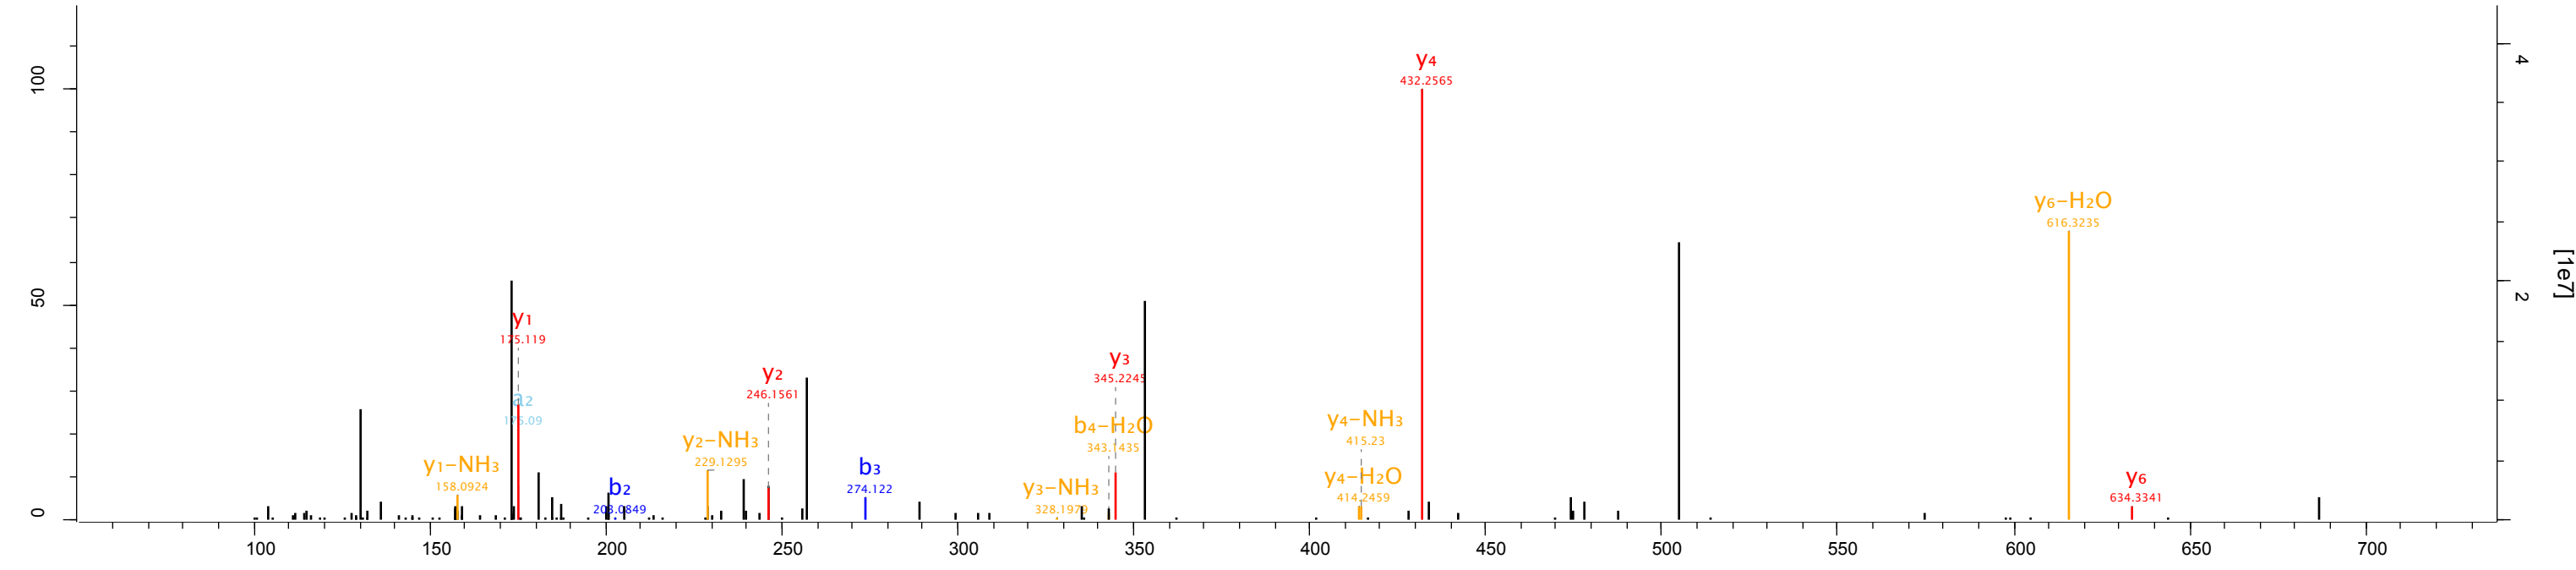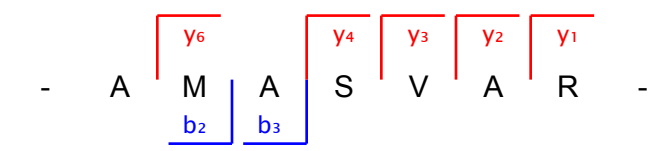

Raw file: 20180707\_MaS\_A375SR\_ML\_proteome\_23  
 Scan: 17675 Method: FTMS; HCD Score: 160.16 m/z: 711.35 Gene names: SPATA22

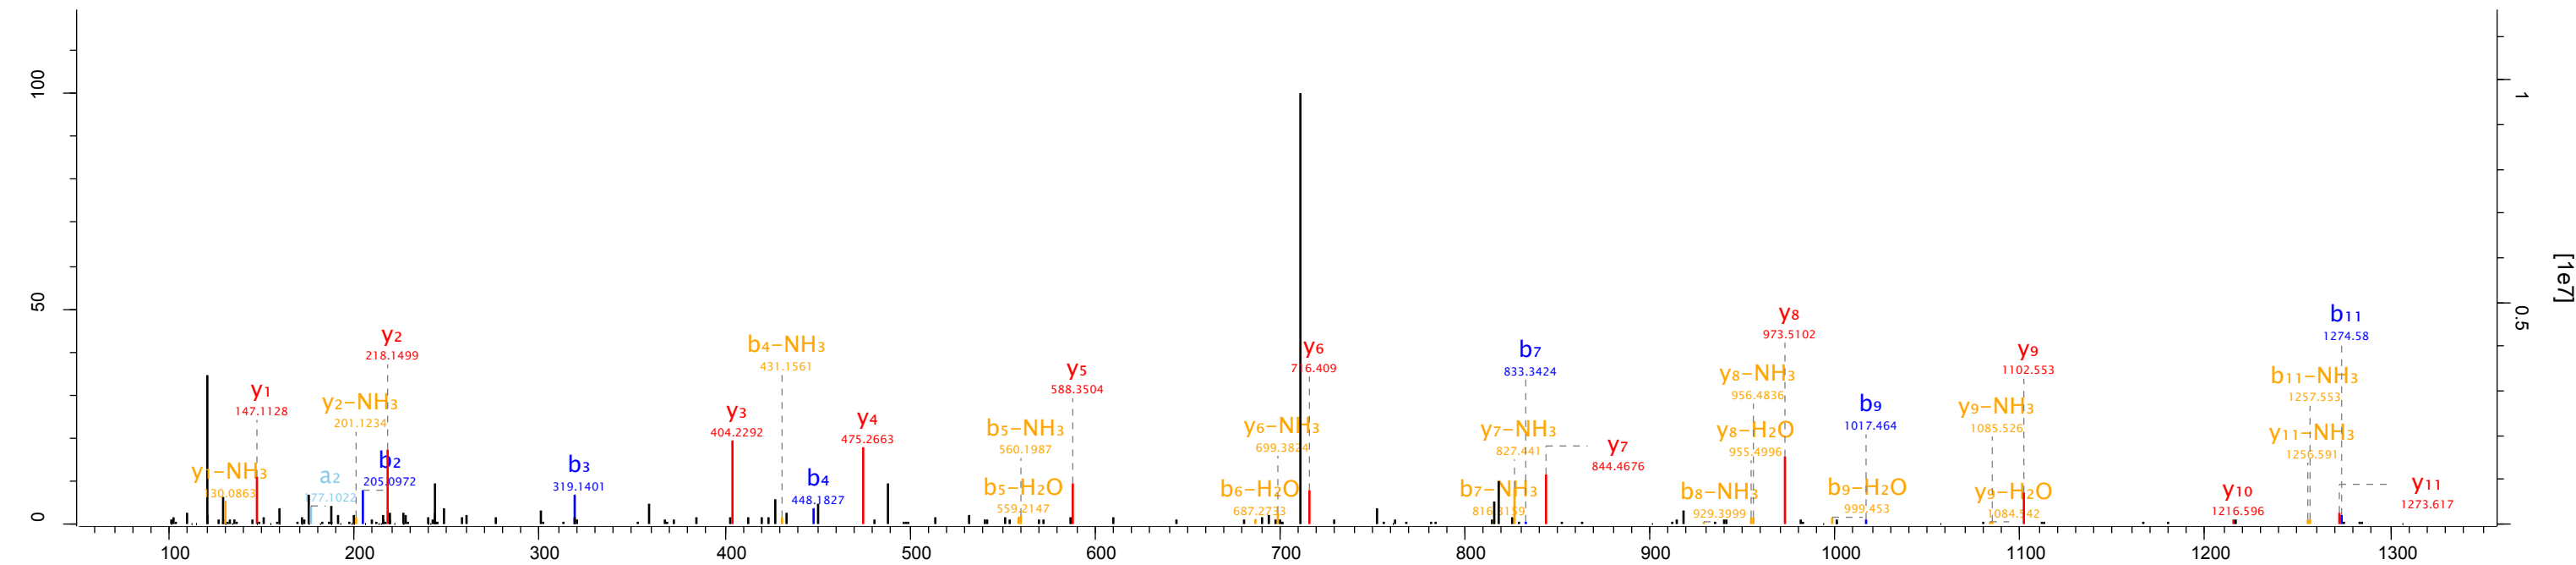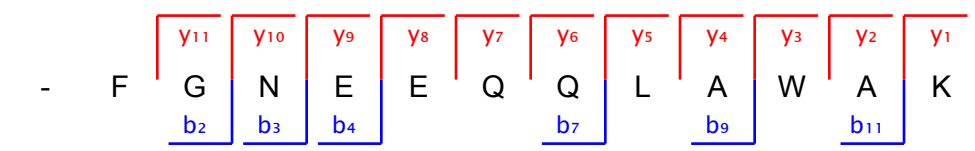

Raw file 20180707\_MaS\_A375SR\_ML\_proteome\_23 Scan 24005 Method FTMS; HCD Score 43.3 m/z 708.83 Gene names SOX17

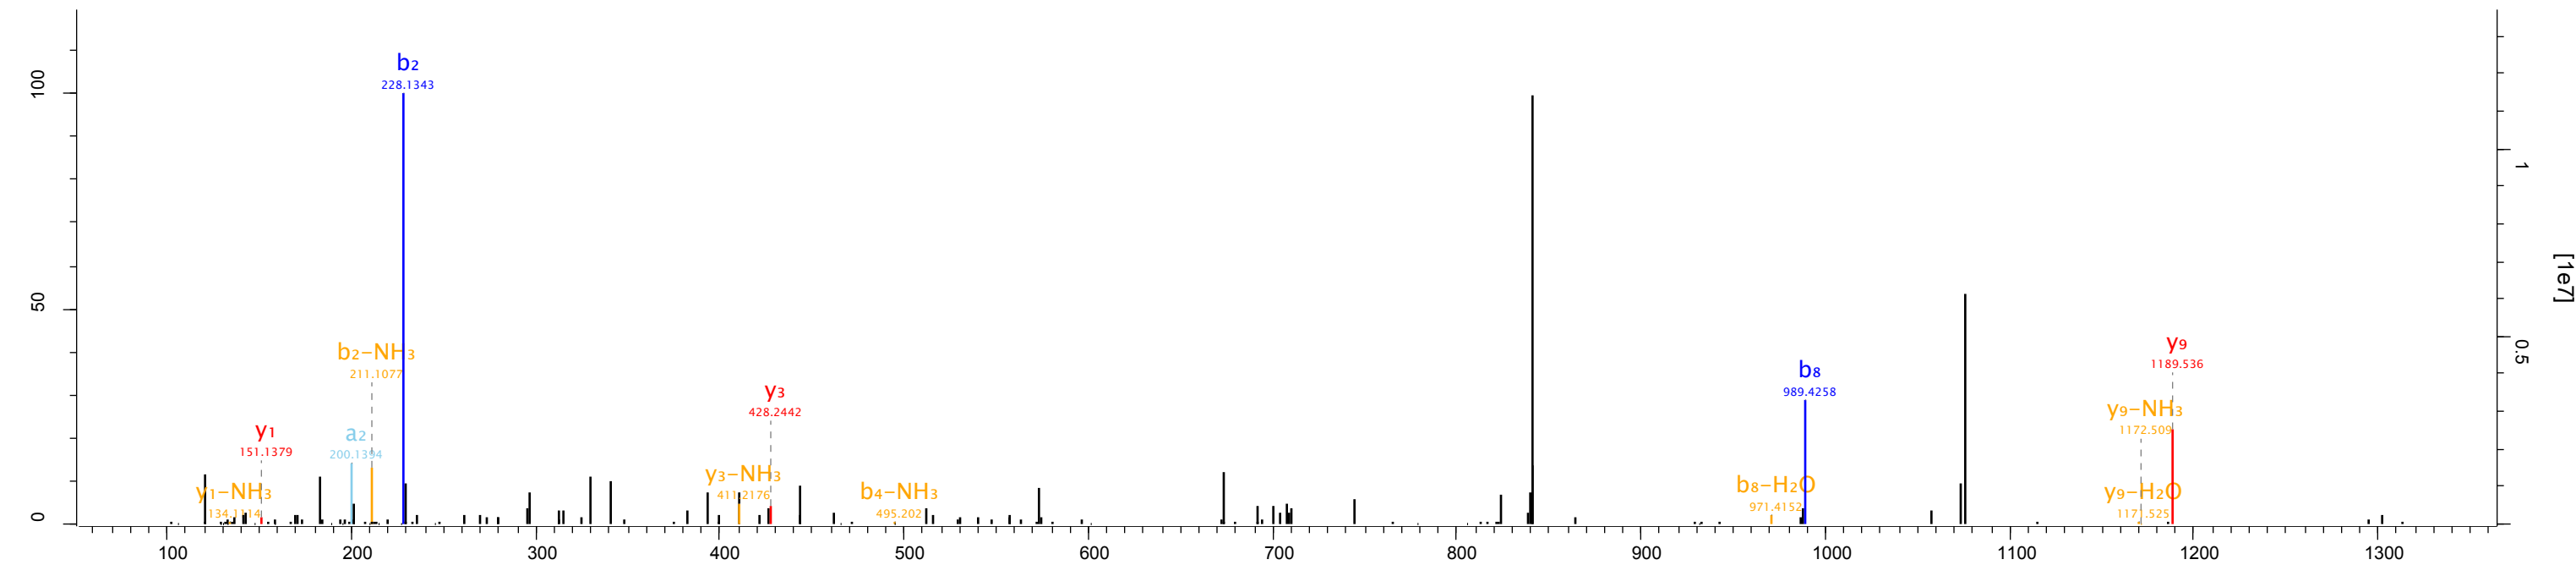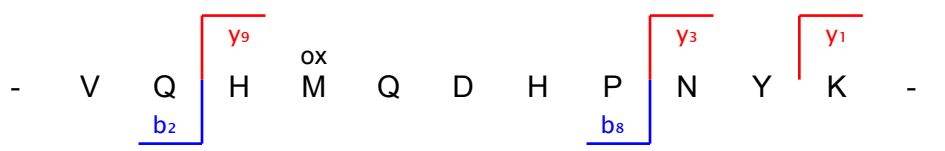



Raw file: 20180707\_MaS\_A375SR\_ML\_proteome\_23  
 Scan: 8145    Method: FTMS; HCD    Score: 54.2    m/z: 569.73    Gene names: PSPHP1

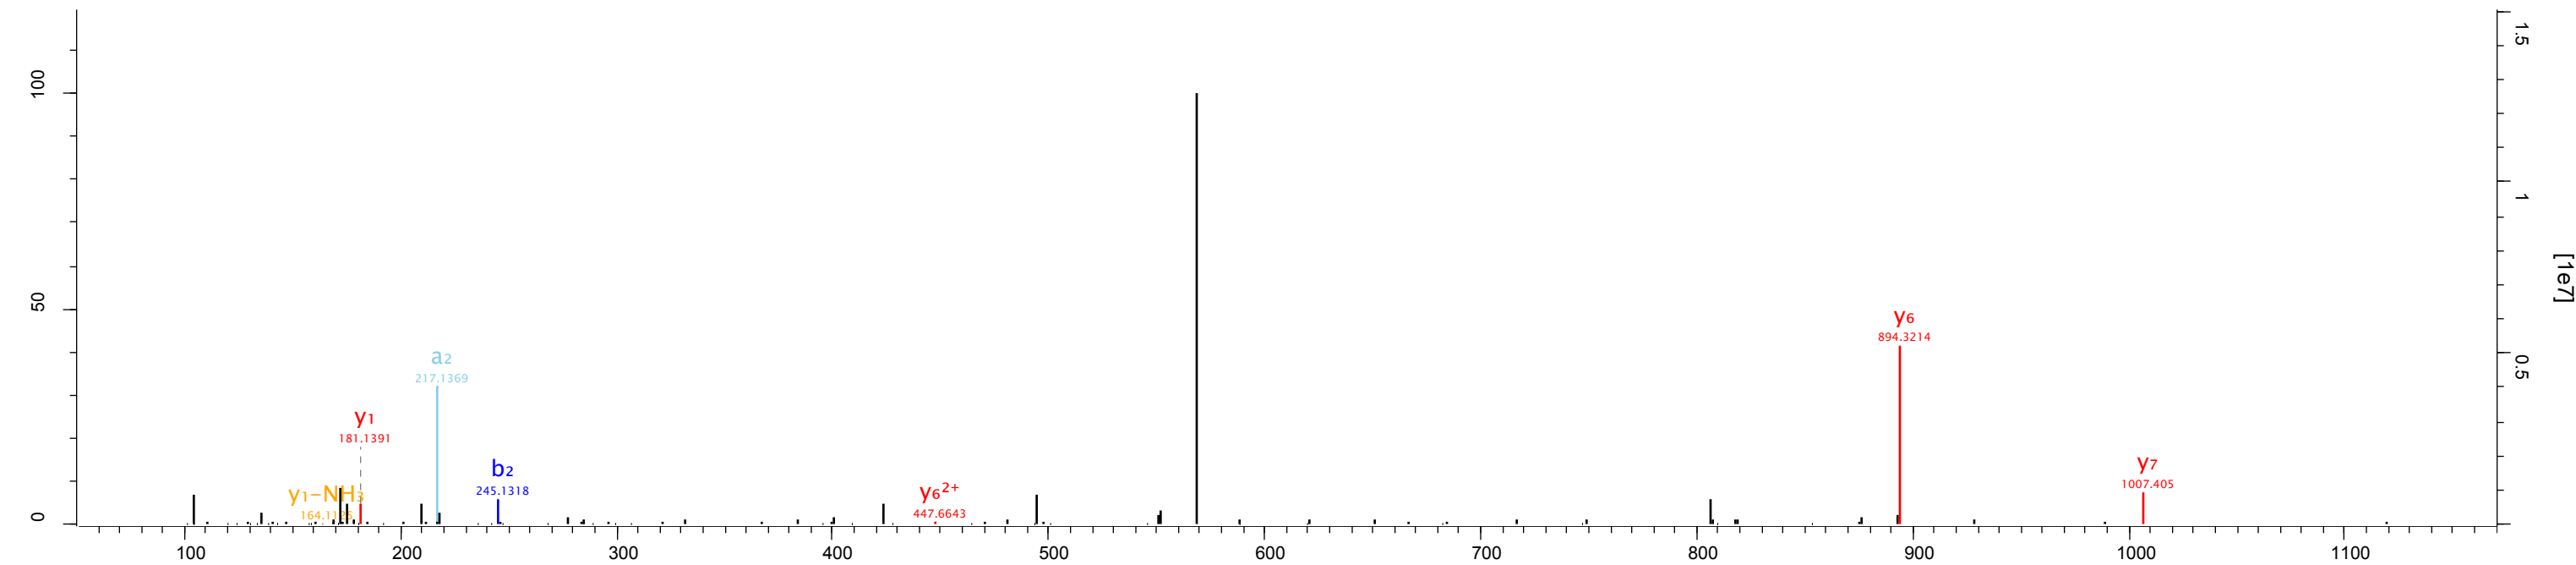

Raw file  
20180707\_MaS\_A375SR\_ML\_proteome\_24

Scan 23235 Method FTMS; HCD Score 49.44 m/z 515.3

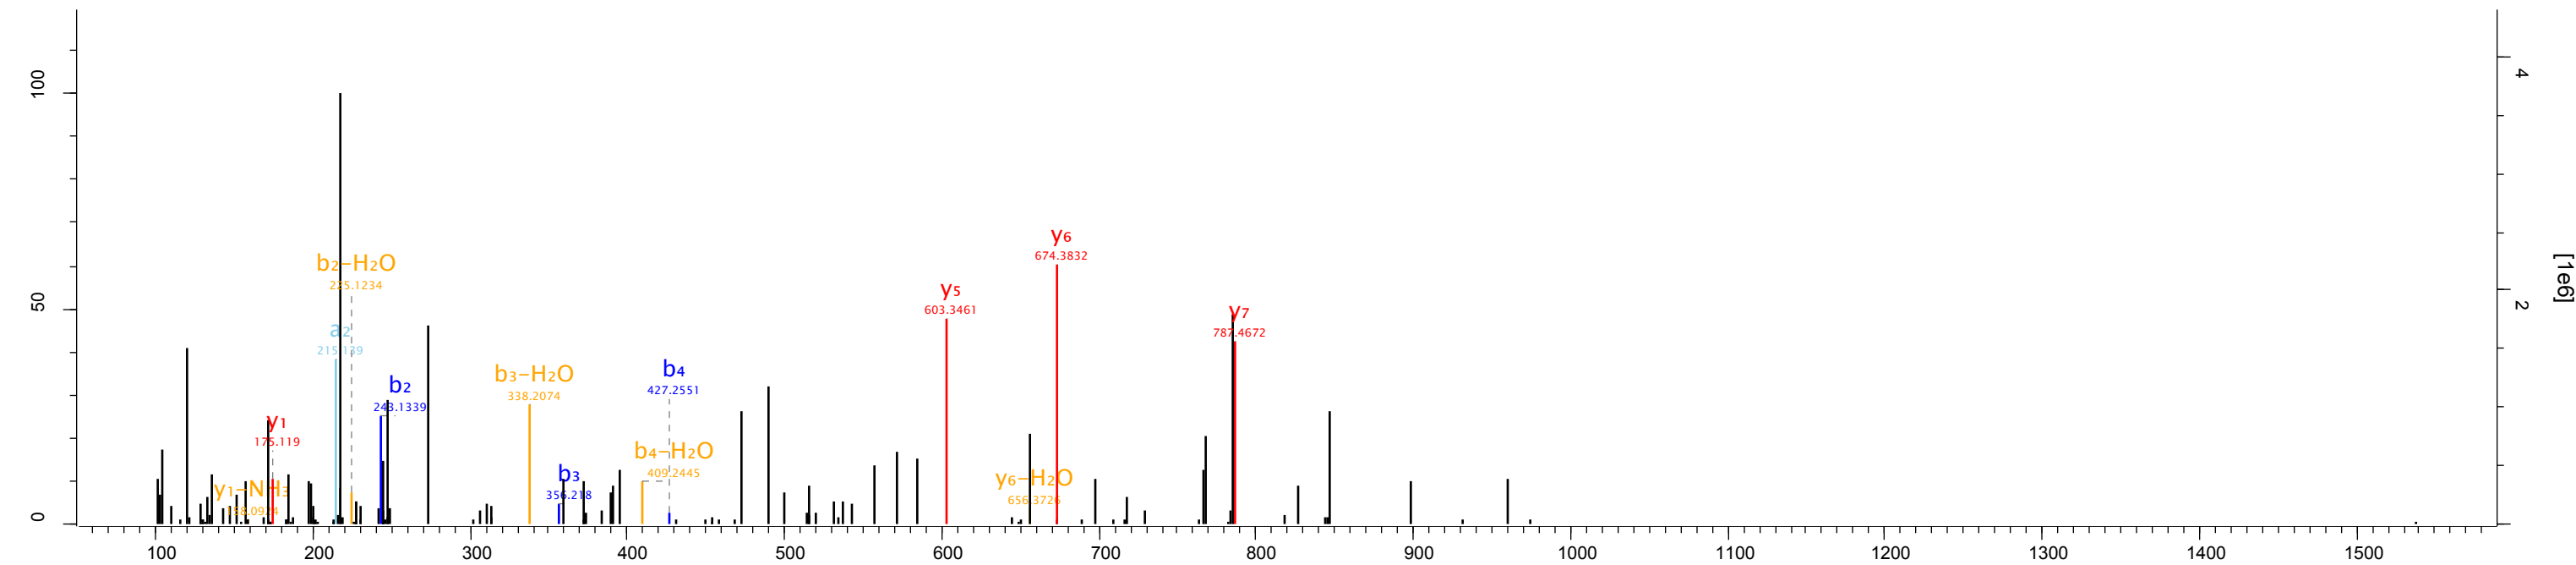

- L E I A E V S L R -  
b2 b3 b4 y1 y6 y5

Raw file: 20180707\_MaS\_A375SR\_ML\_proteome\_24  
 Scan: 24945 Method: FTMS; HCD Score: 122.46 m/z: 991.01 Gene names: UBE2W

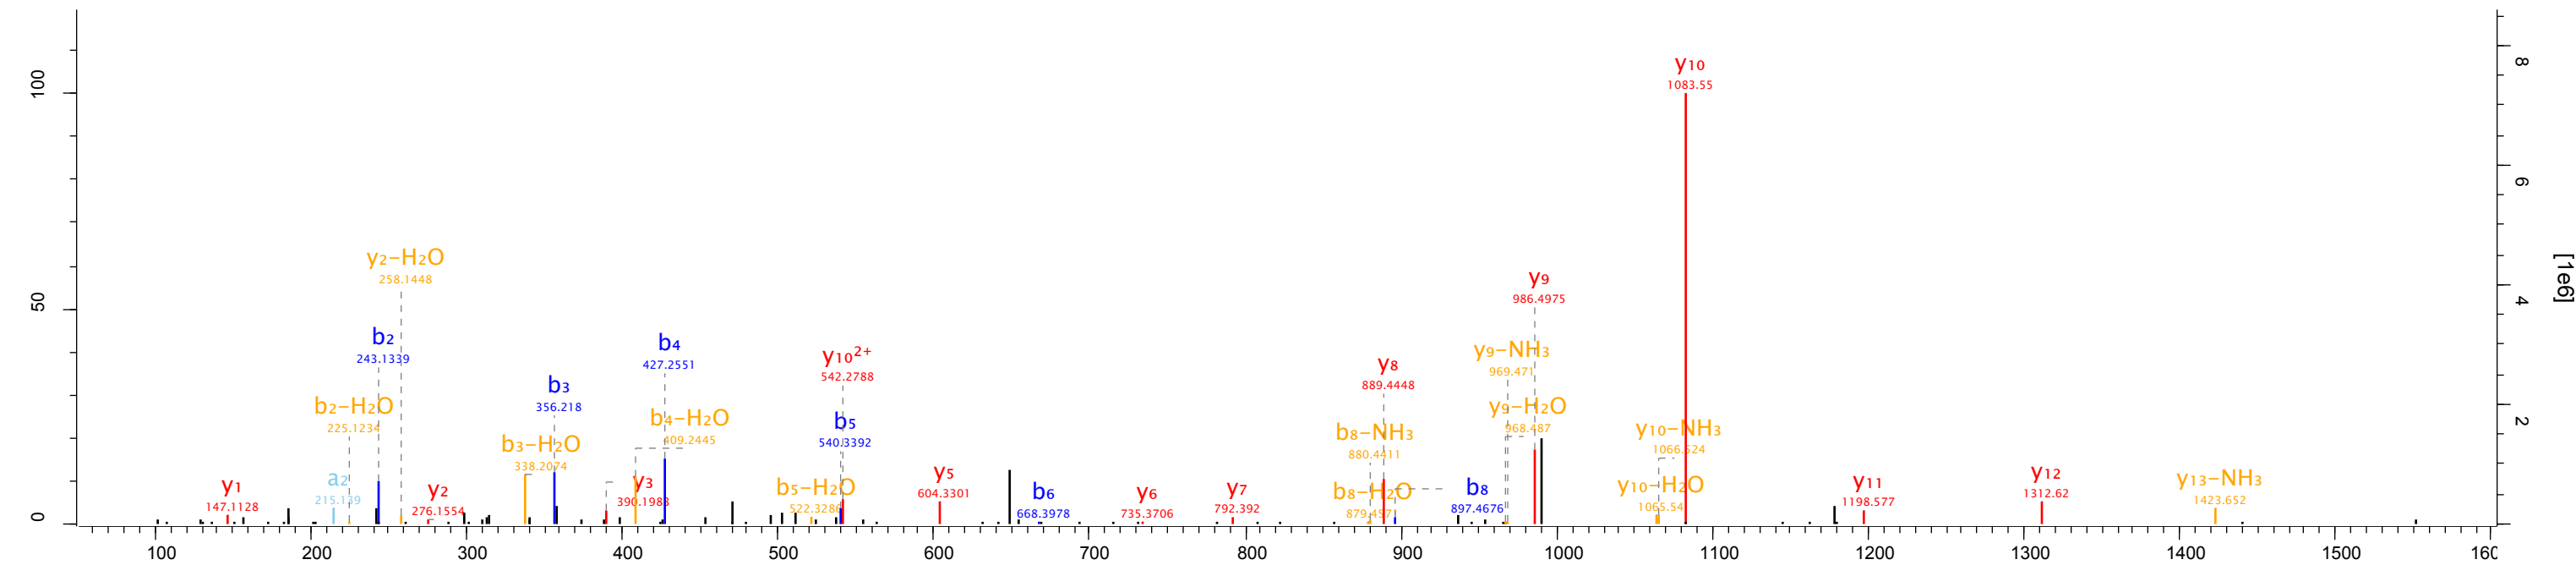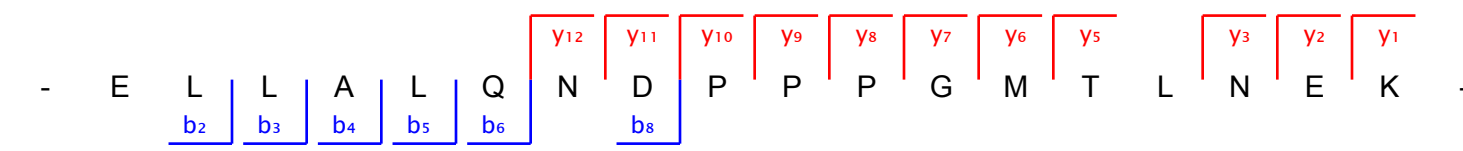

Raw file: 20180707\_MaS\_A375SR\_ML\_proteome\_24  
 Scan: 9455 Method: FTMS; HCD Score: 63.68 m/z: 597.35 Gene names: C20orf24

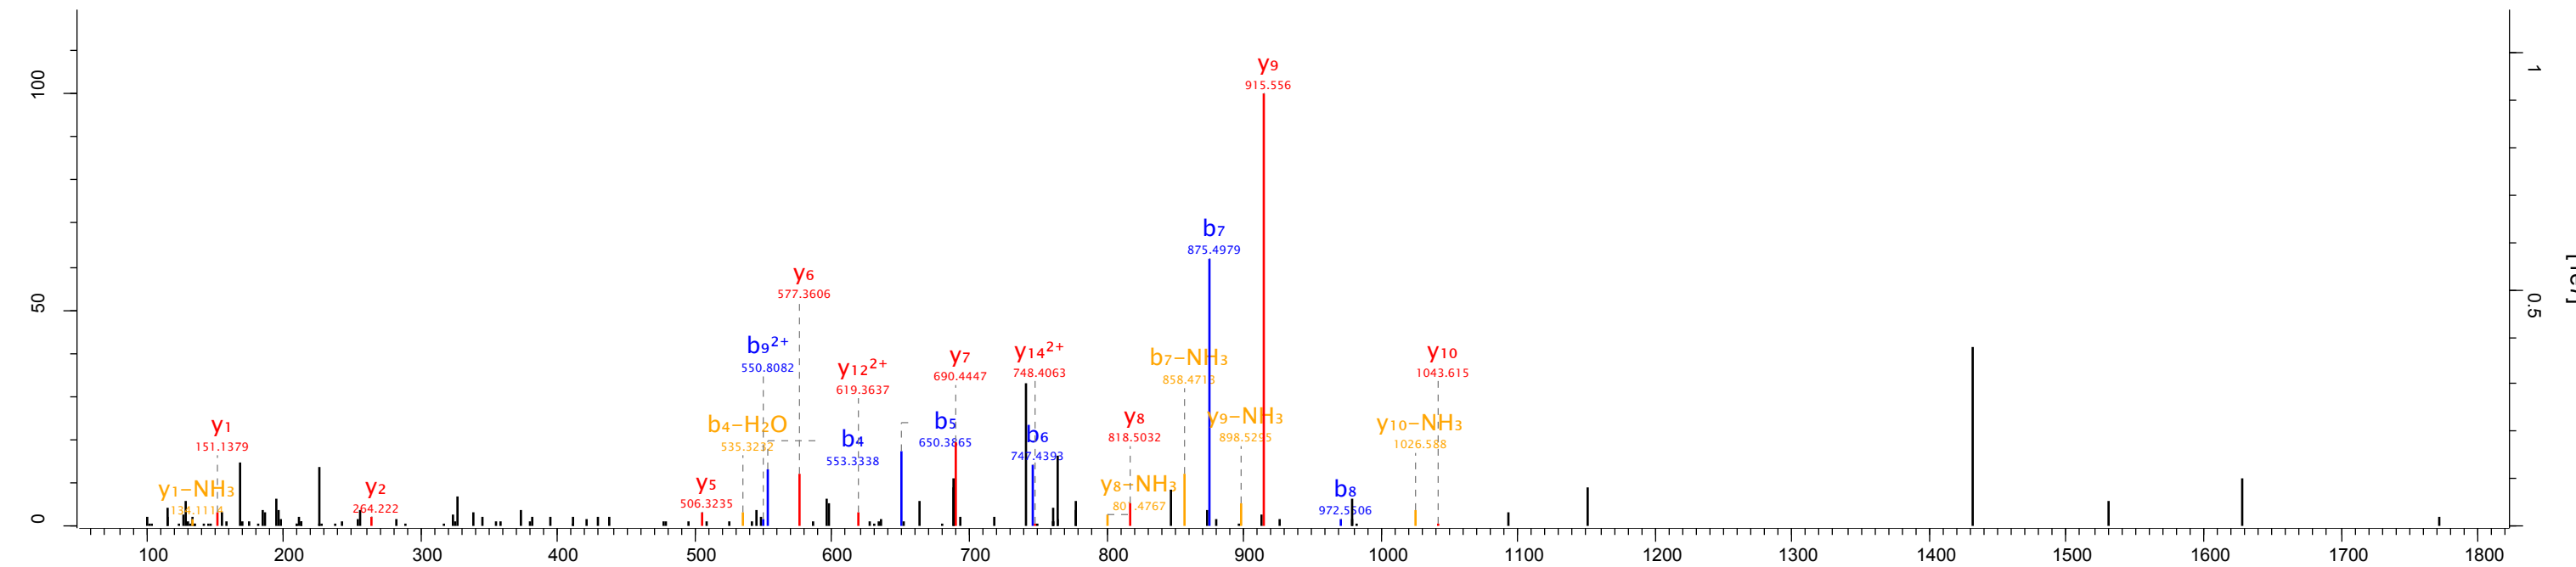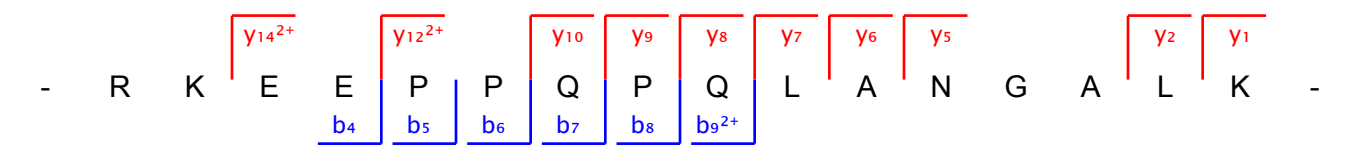

Raw file 20180707\_MaS\_A375SR\_ML\_proteome\_25 Scan 16545 Method FTMS; HCD Score 140.83 m/z 436.58 Gene names RPL39P5;RPL39

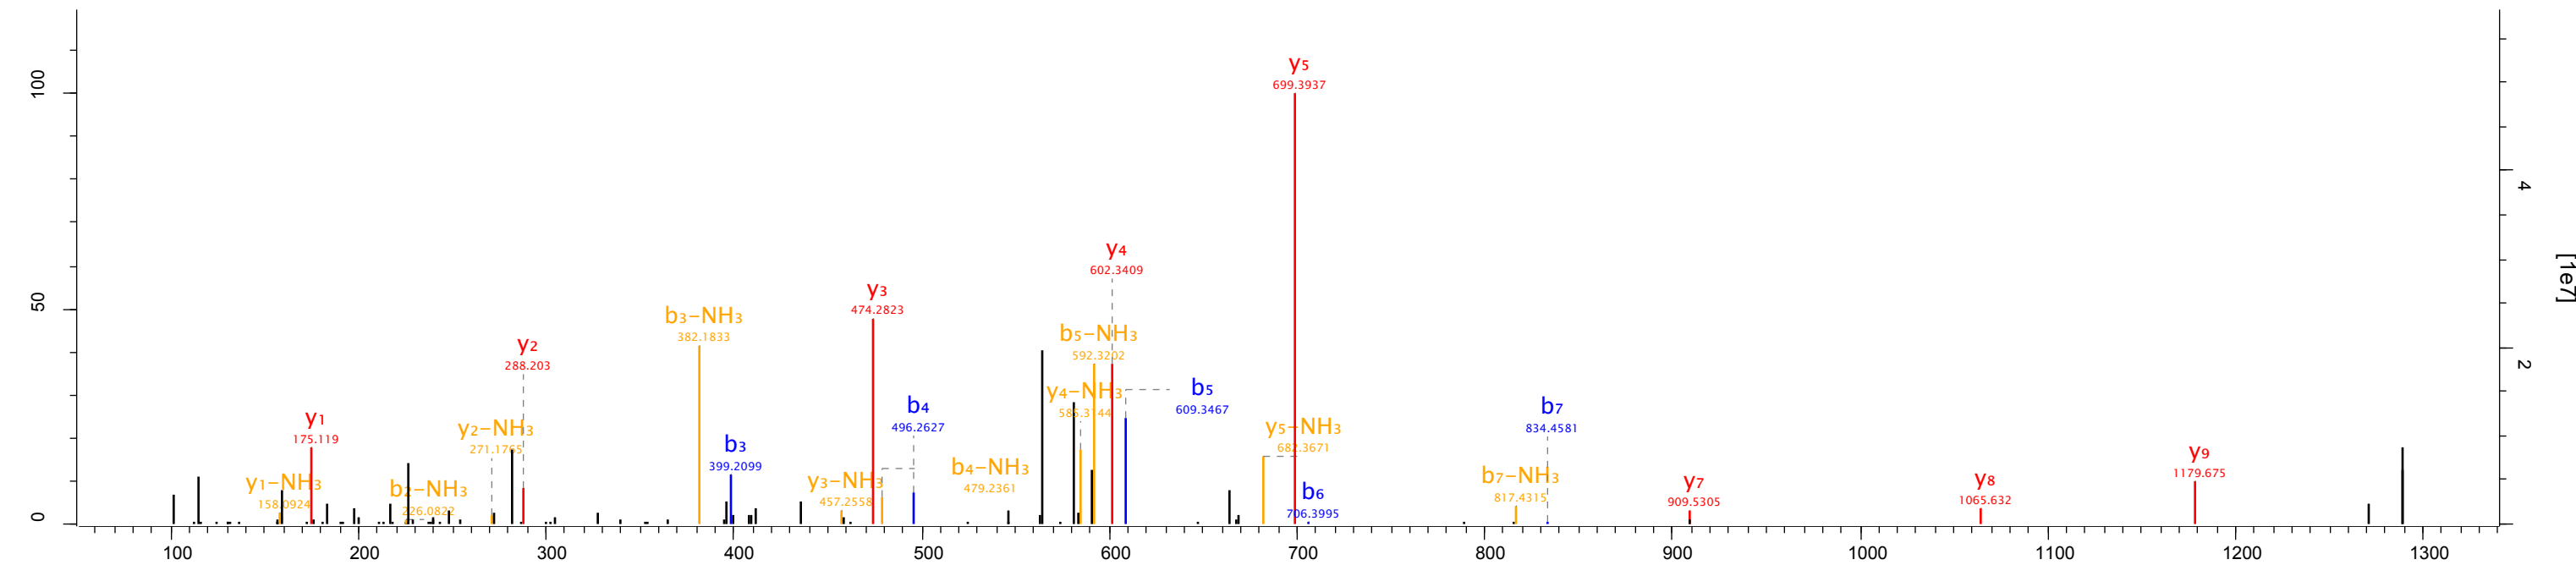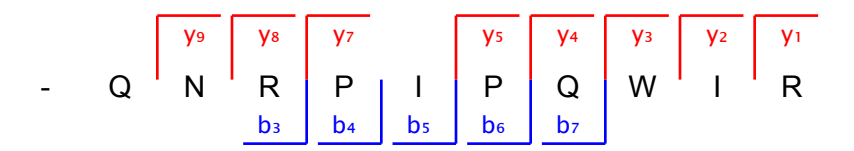

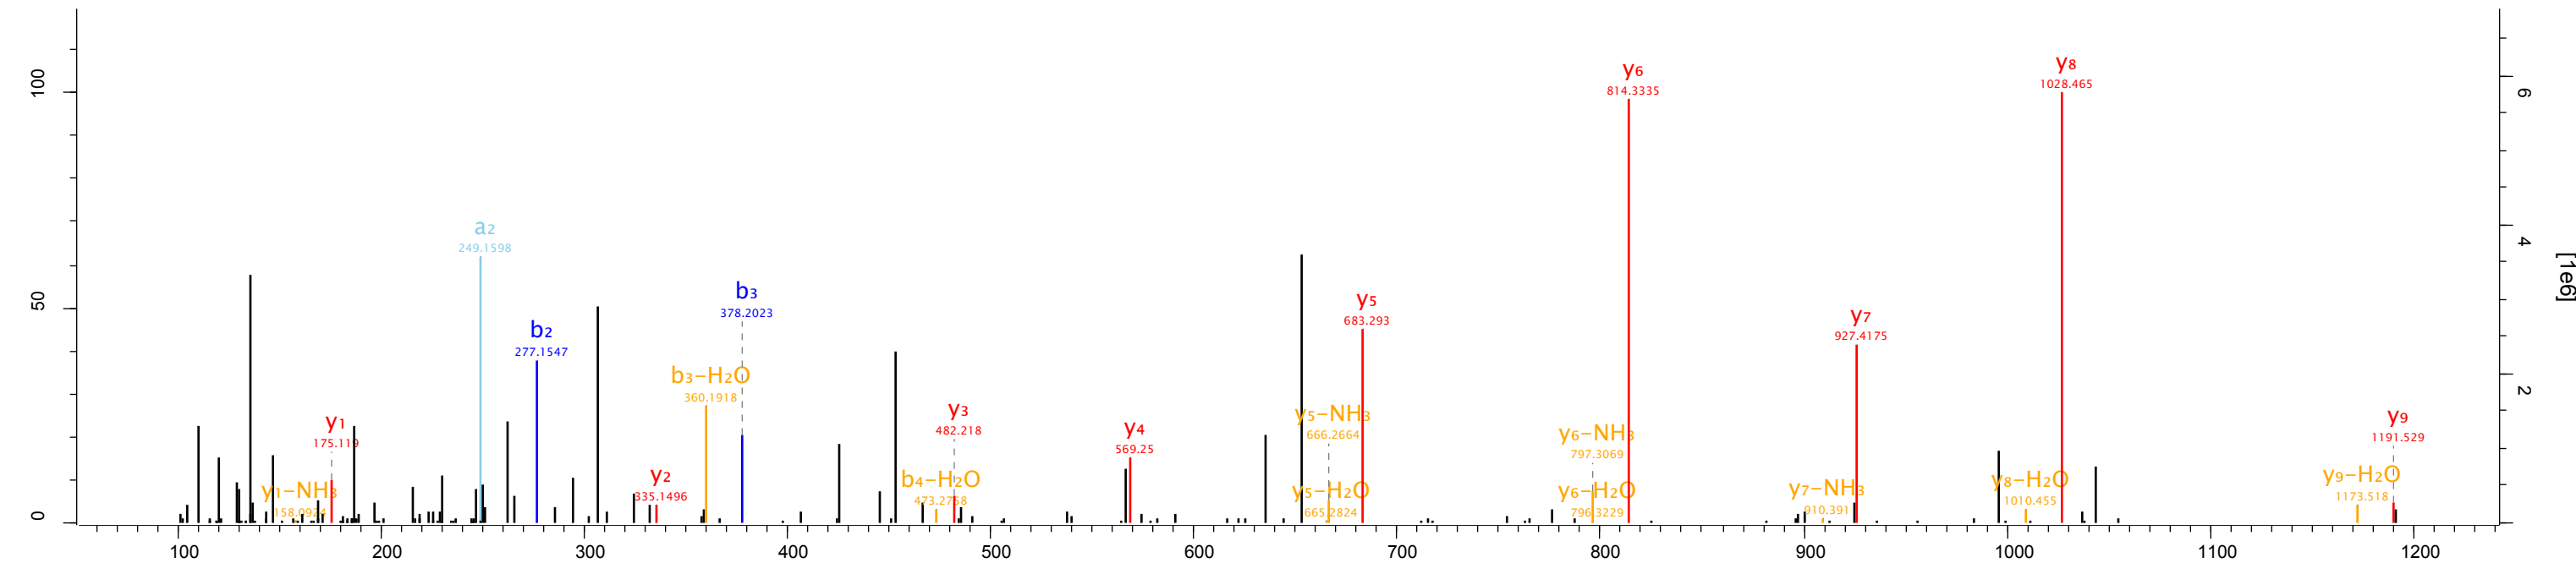

- L Y T I M N S F C R -

b2 b3

Raw file  
20180707\_MaS\_A375SR\_ML\_proteome\_27

Scan 14455 Method FTMS; HCD Score 124.21 m/z 678.86 Gene names SELK

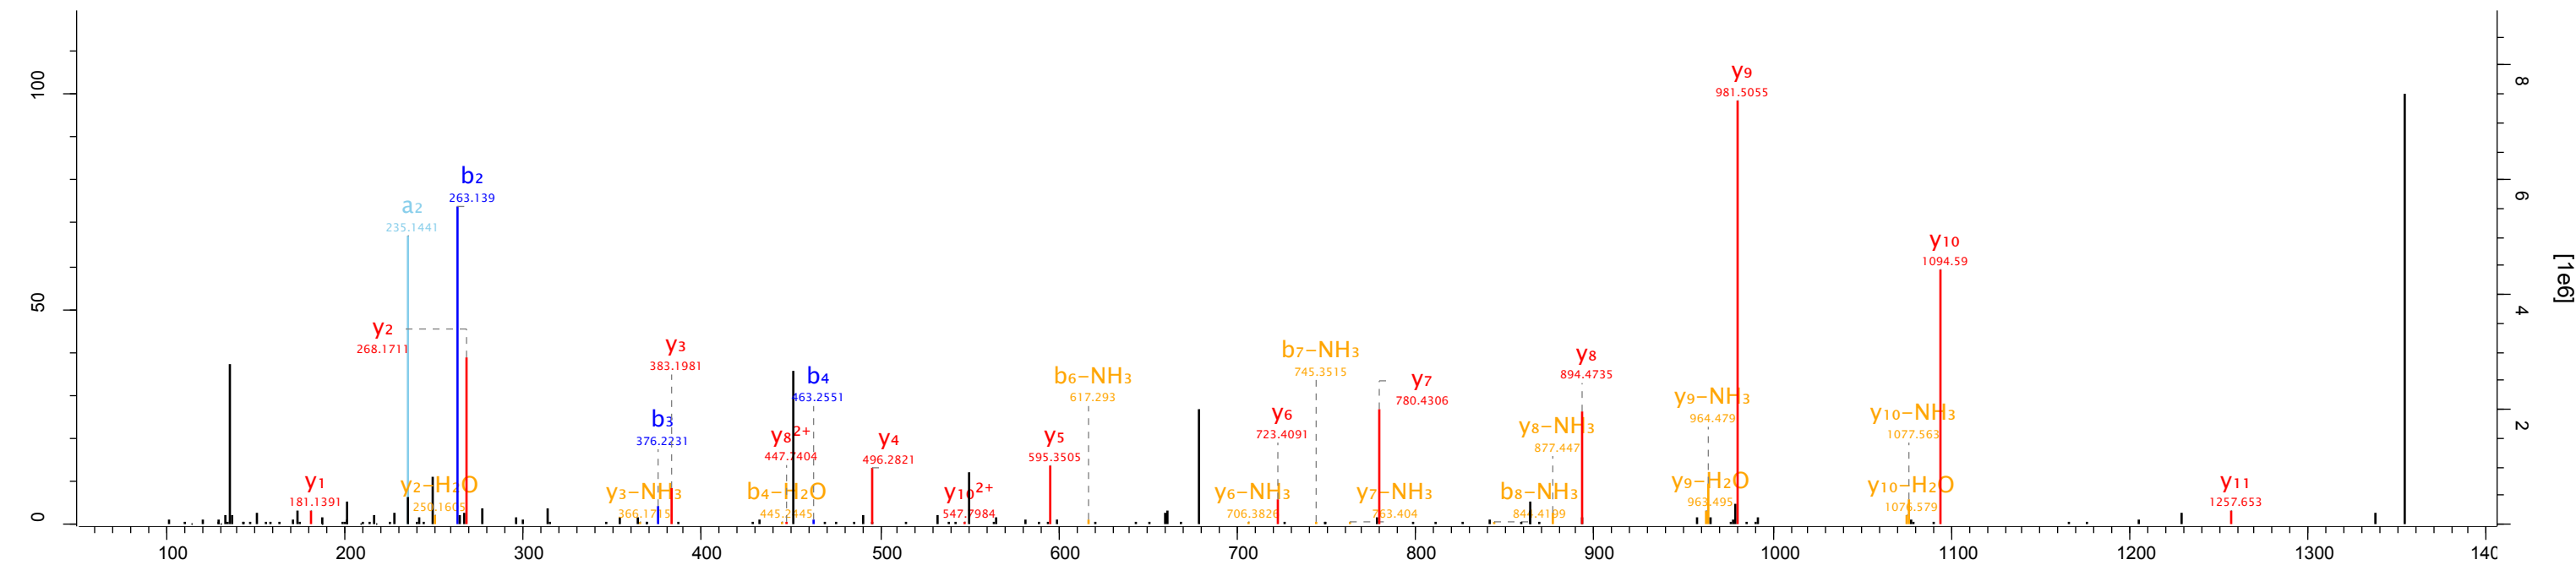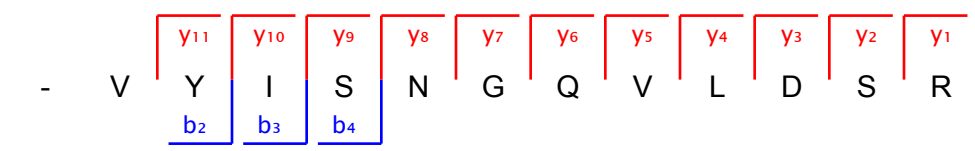

Raw file  
20180707\_MaS\_A375SR\_ML\_proteome\_27

Scan Method Score m/z Gene names  
24075 FTMS; HCD 68 687.36 PIGN

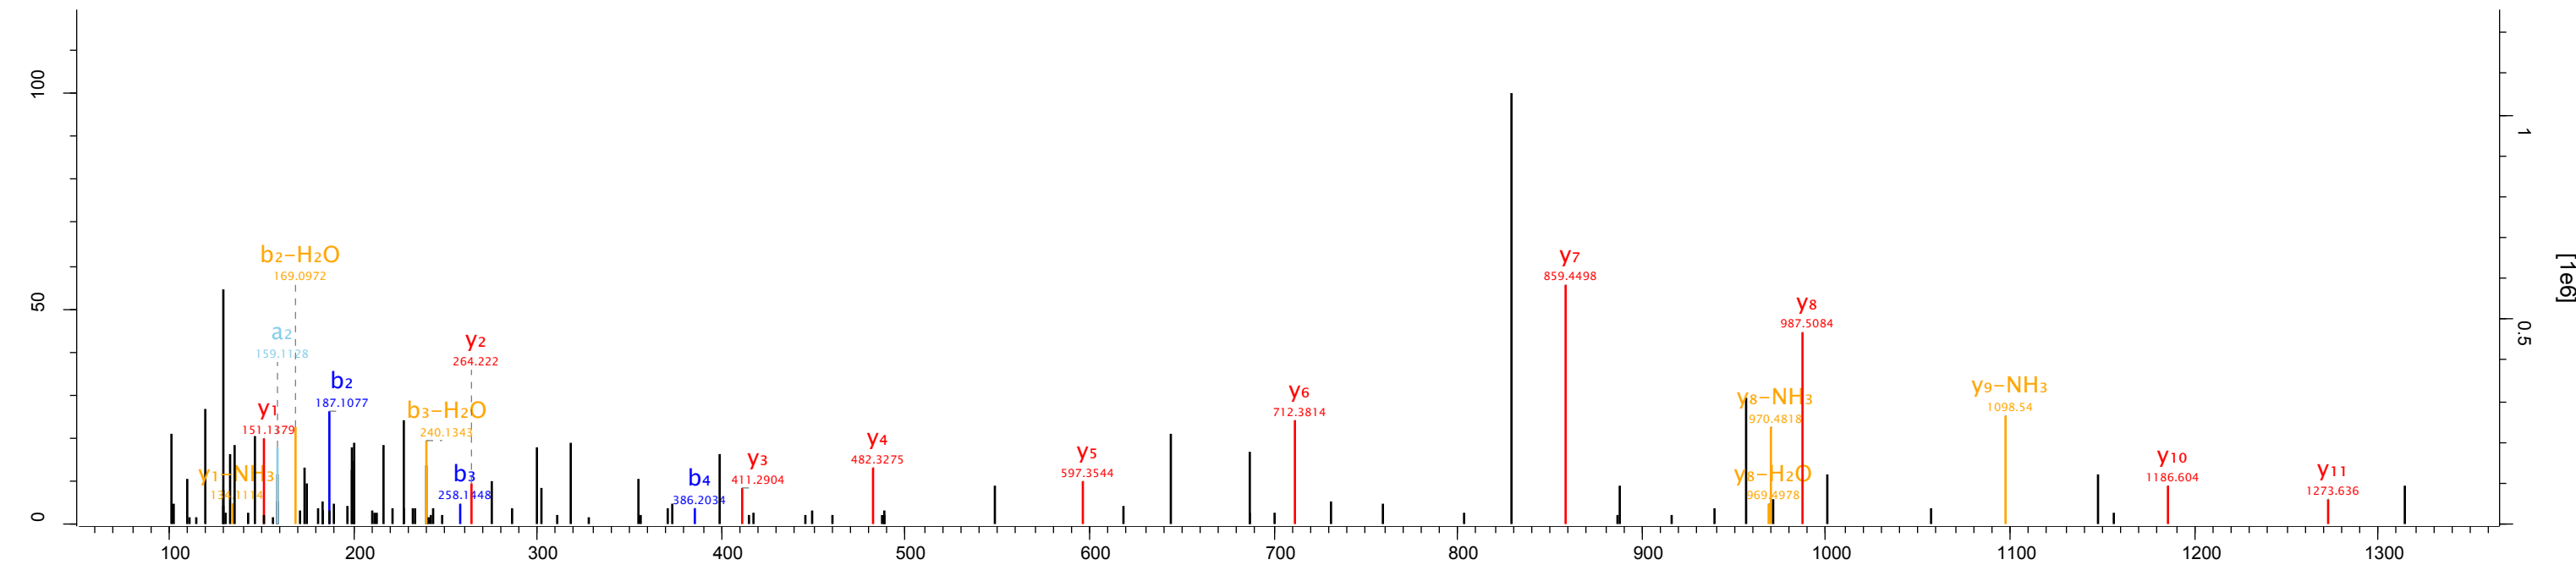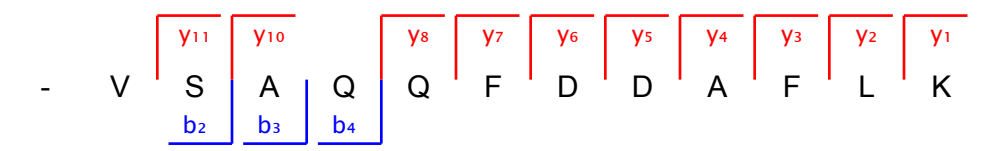



Raw file: 20180707\_MaS\_A375SR\_ML\_proteome\_27  
 Scan: 9385 Method: FTMS; HCD Score: 101.97 m/z: 515.26 Gene names: CR2

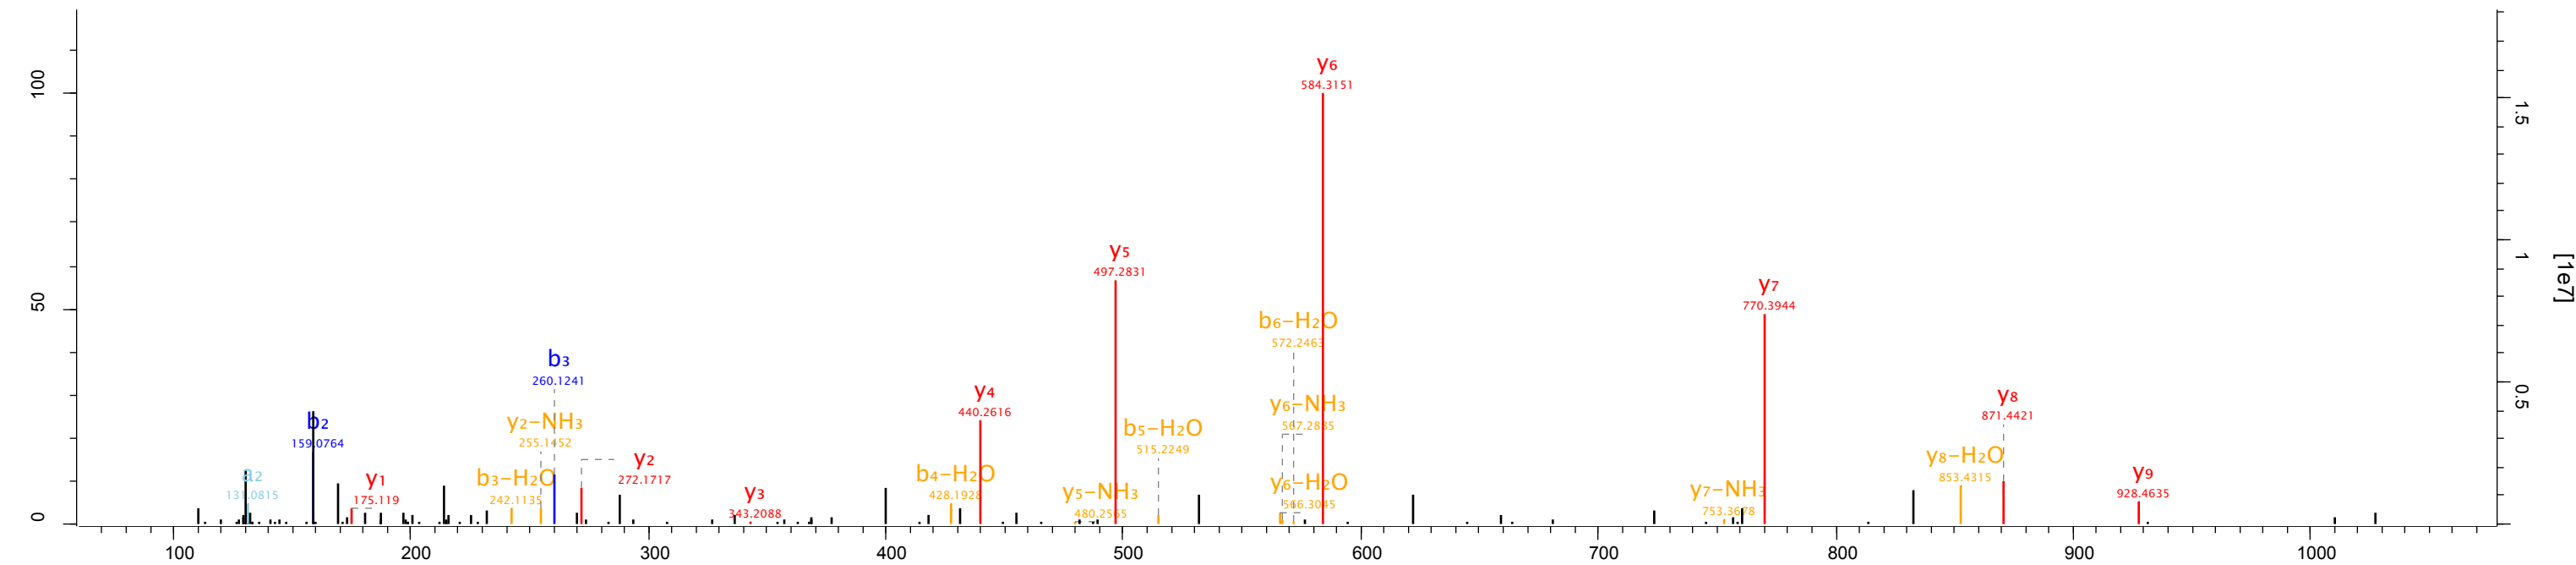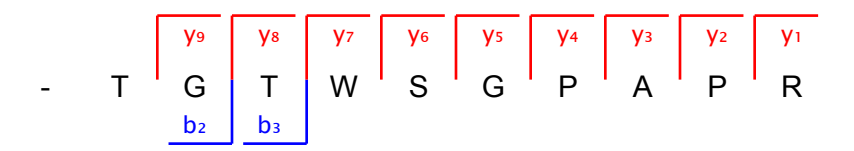

Raw file 20180707\_MaS\_A375SR\_ML\_proteome\_28 Scan 11245 Method FTMS; HCD Score 83.53 m/z 518.94 Gene names TMC06

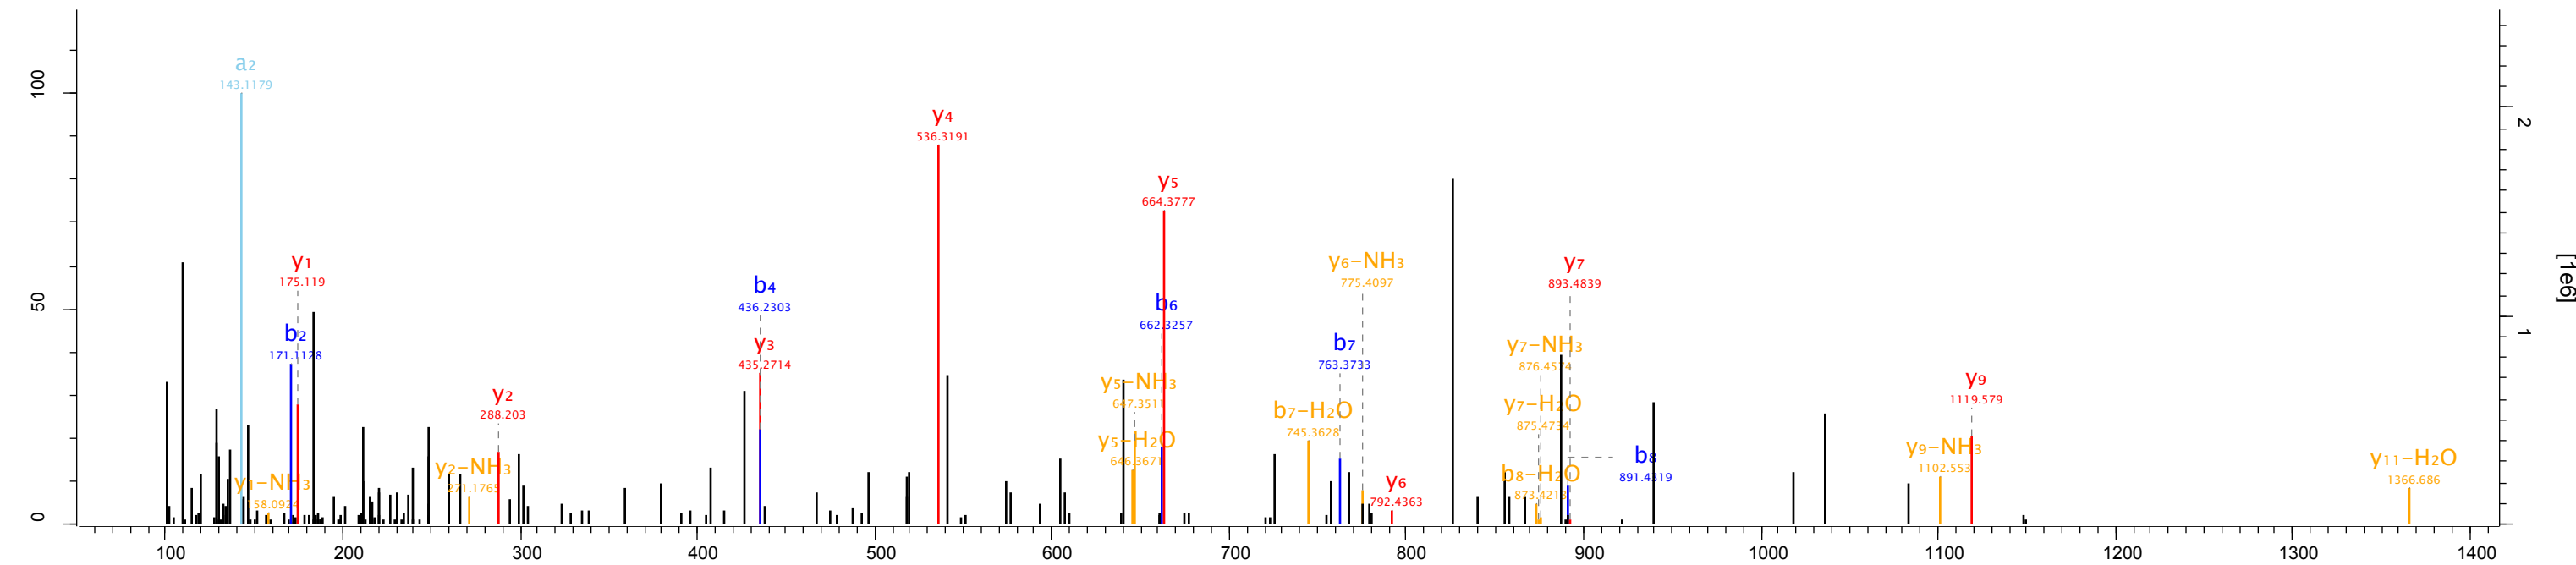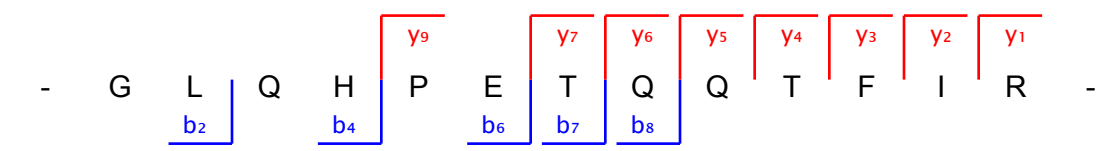

Raw file: 20180707\_MaS\_A375SR\_ML\_proteome\_28  
 Scan: 12825 Method: FTMS; HCD Score: 39.9 m/z: 638.35 Gene names: FABP7

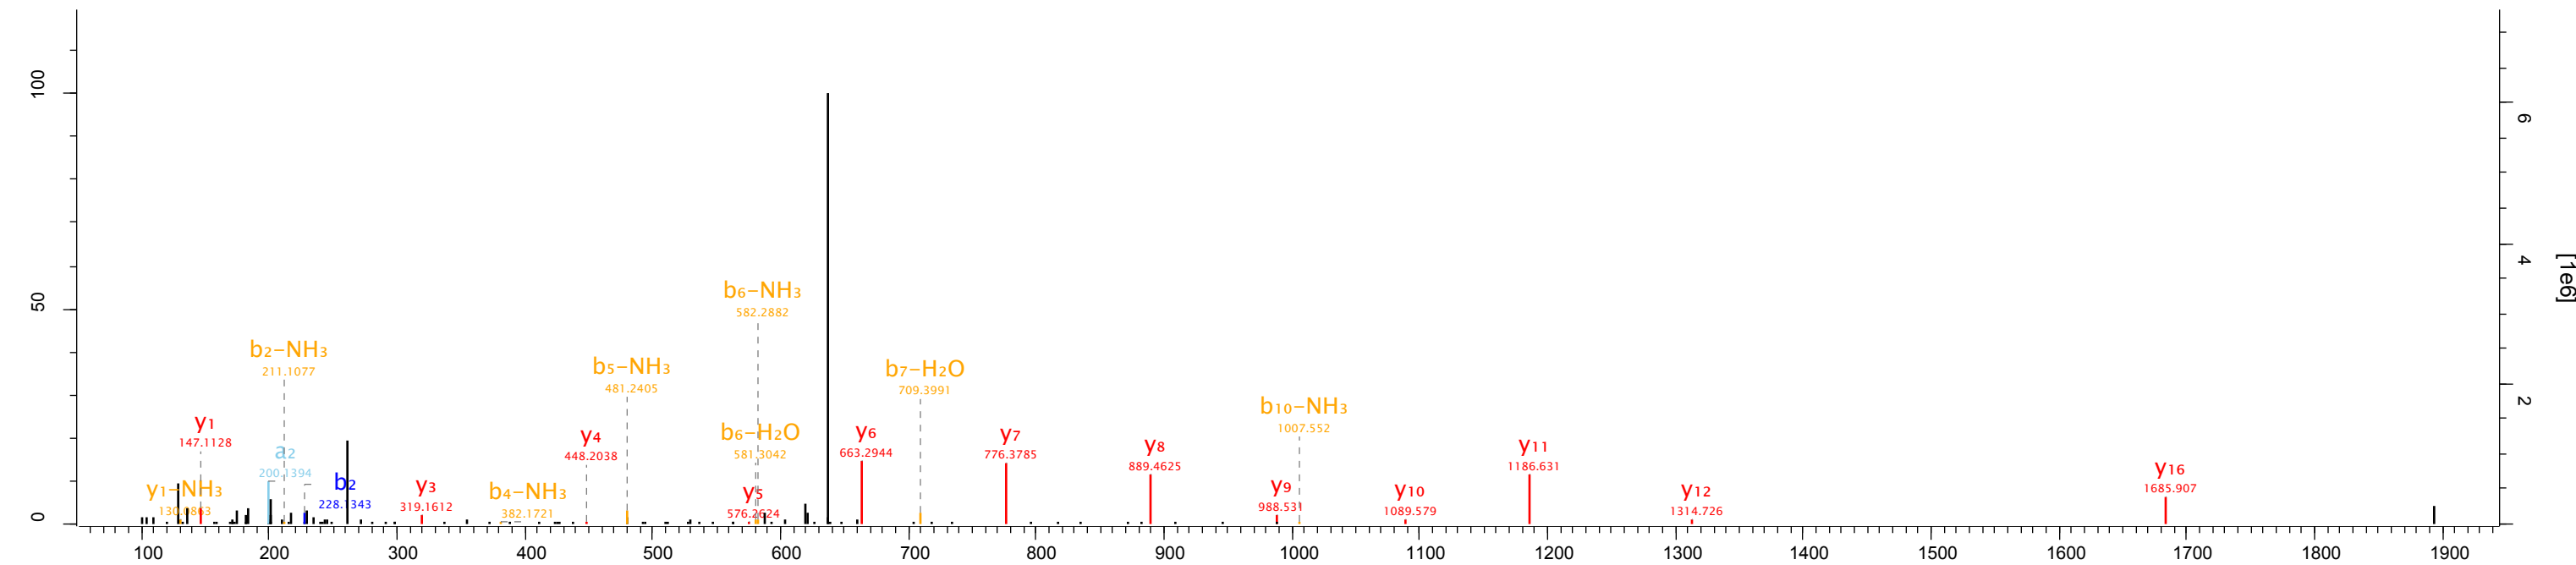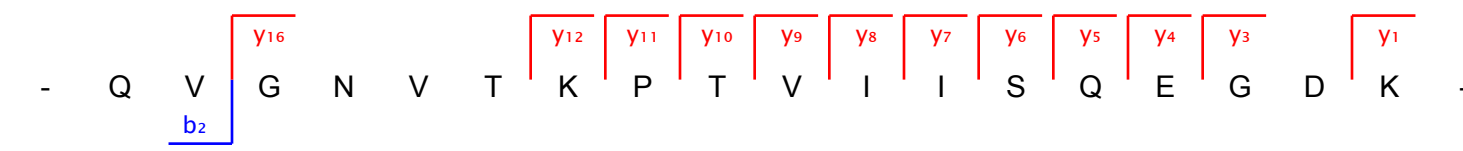

Raw file: 20180707\_MaS\_A375SR\_ML\_proteome\_29  
 Scan: 11765 Method: FTMS; HCD Score: 130.01 m/z: 578.79 Gene names: TMEM254

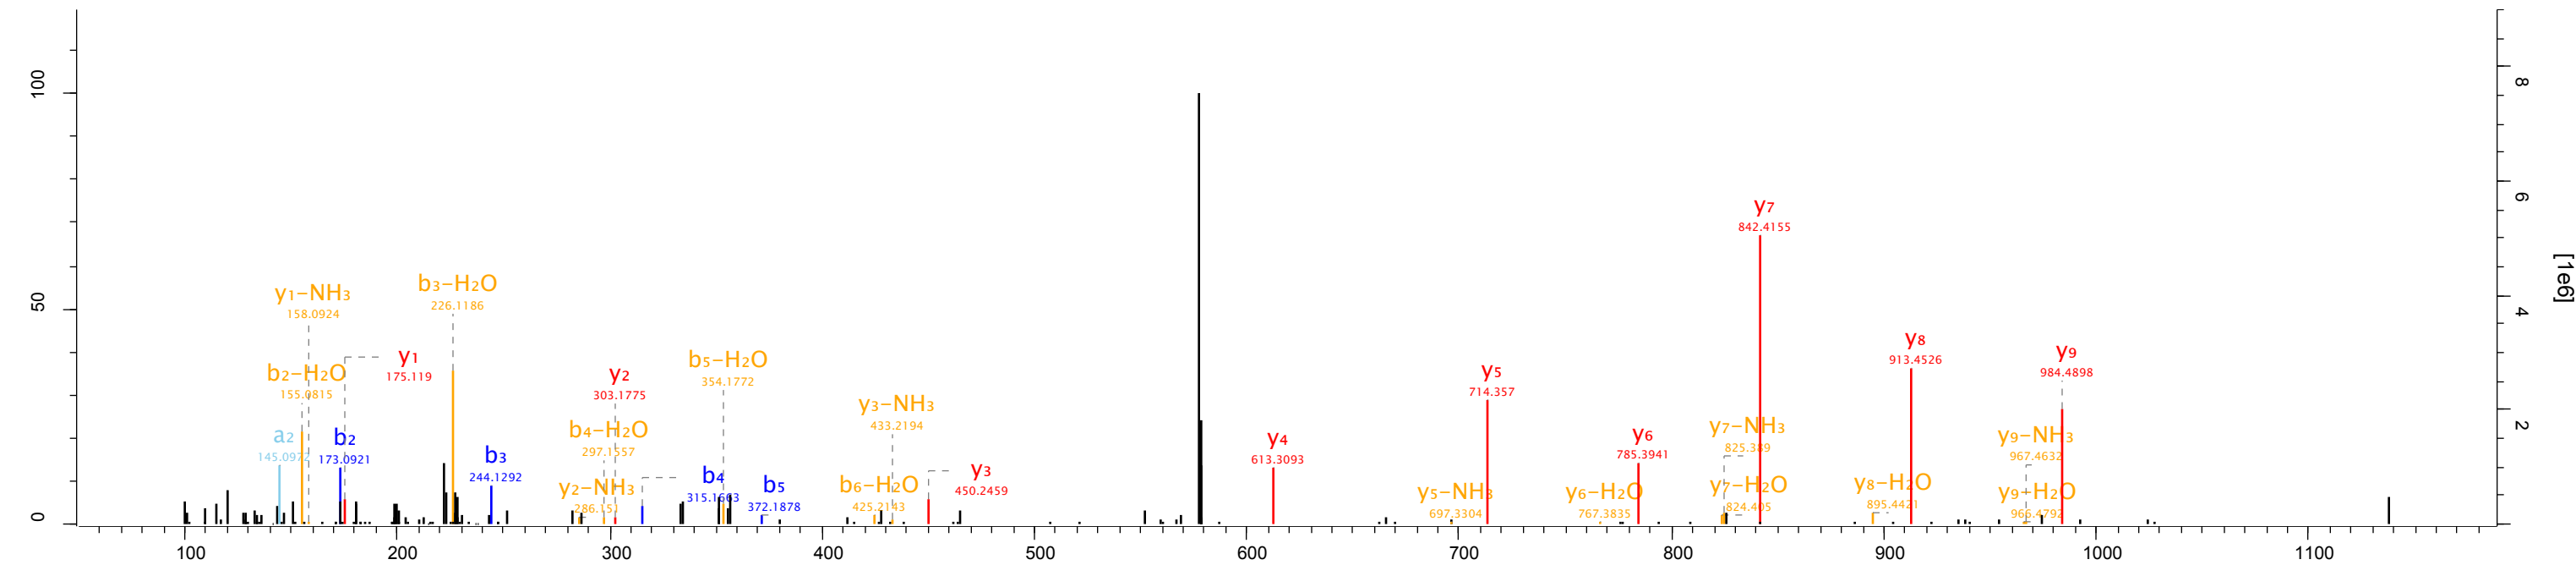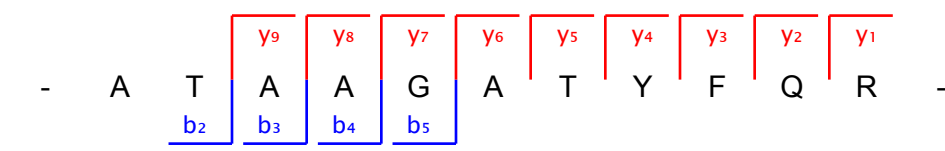

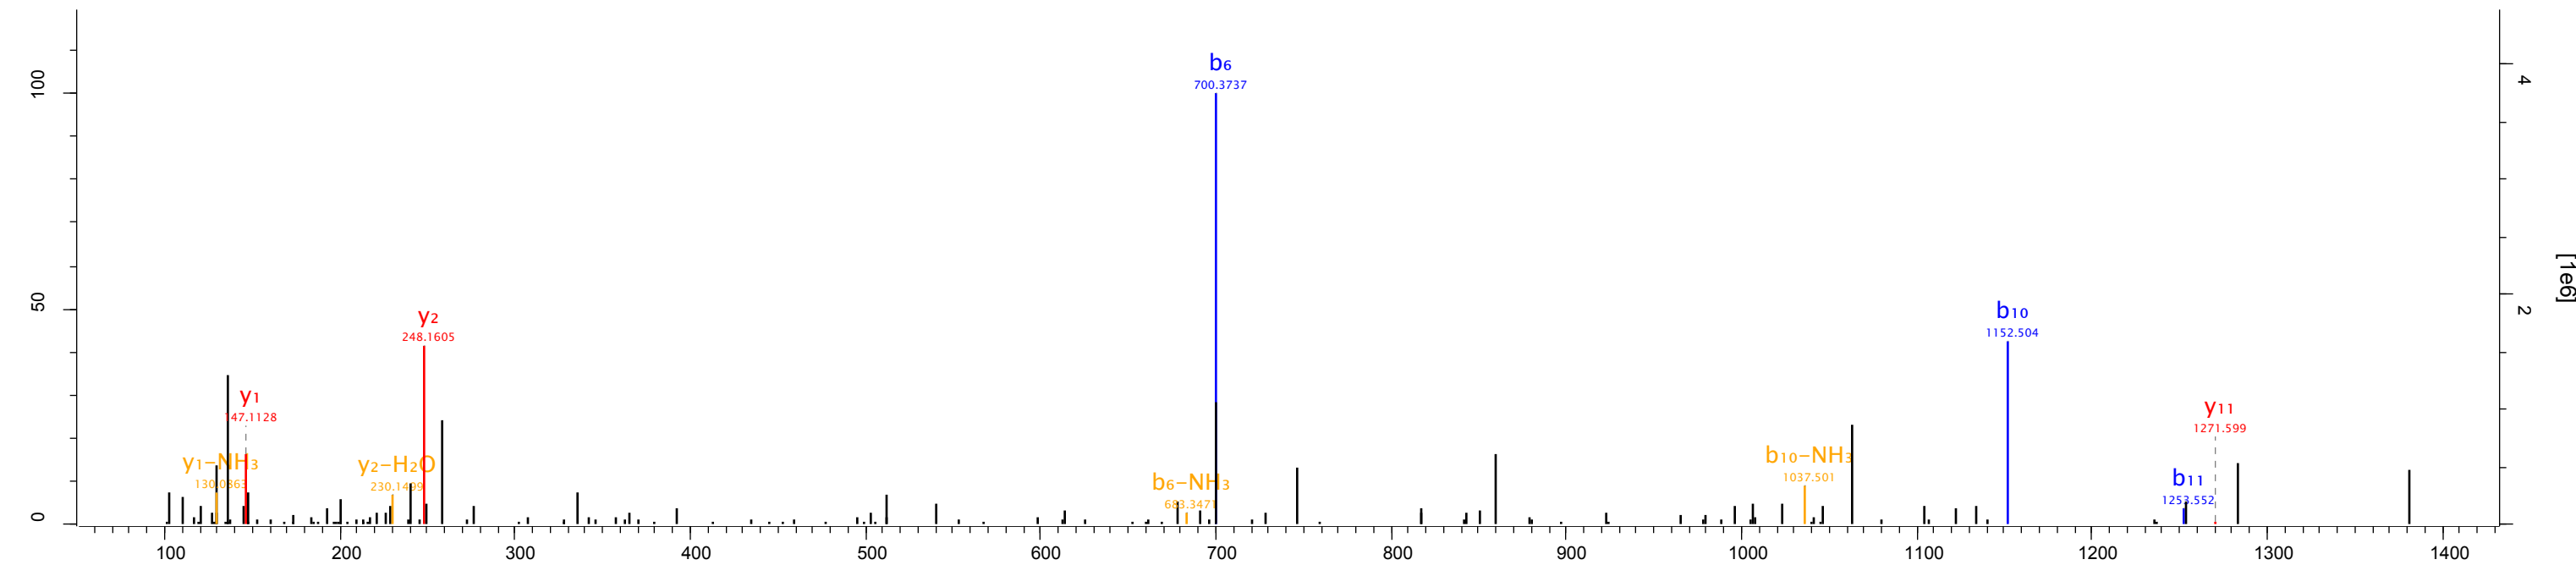

- Q Q S R L S ph S S T P T K -

Fragmentation sites are indicated by brackets below the sequence:

- $y_{11}$  (red bracket above Q)
- $b_6$  (blue bracket below S)
- $b_{10}$  (blue bracket below P)
- $b_{11}$  (blue bracket below T)
- $y_2$  (red bracket above T)
- $y_1$  (red bracket above K)

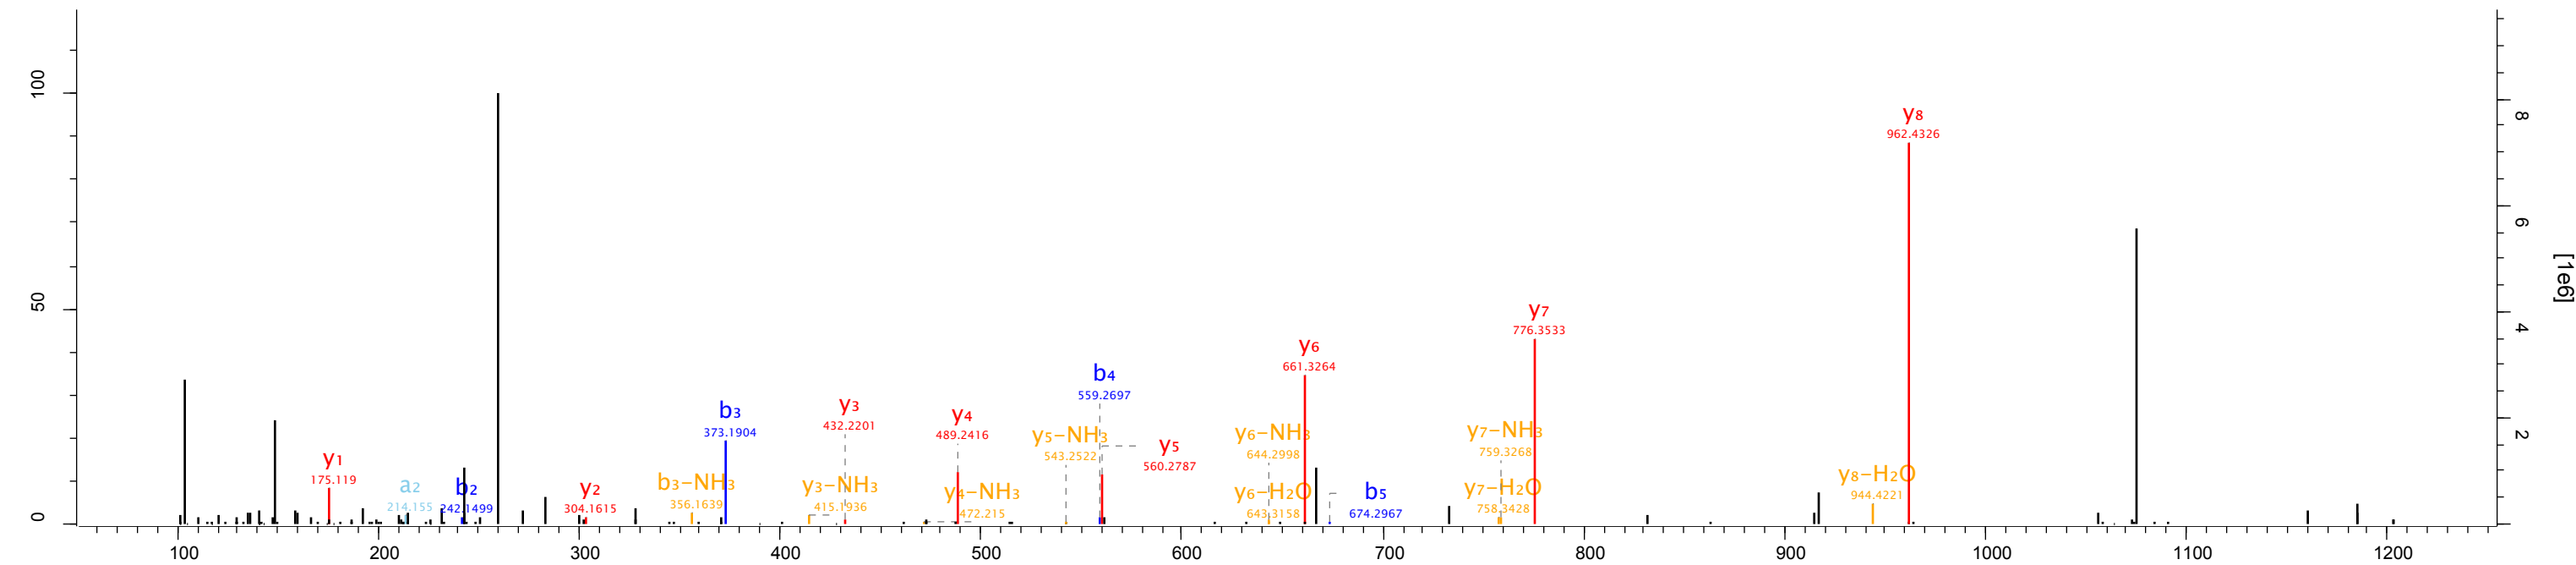

- L Q M W D T A G Q E R -

Fragmentation sites are indicated by boxes below the sequence:

- Q (b<sub>2</sub>)
- M (b<sub>3</sub>)
- W (b<sub>4</sub>)
- D (b<sub>5</sub>)
- W (y<sub>8</sub>)
- D (y<sub>7</sub>)
- T (y<sub>6</sub>)
- A (y<sub>5</sub>)
- G (y<sub>4</sub>)
- Q (y<sub>3</sub>)
- E (y<sub>2</sub>)
- R (y<sub>1</sub>)

Raw file 20180707\_MaS\_A375SR\_ML\_proteome\_29 Scan 8125 Method FTMS; HCD Score 102.62 m/z 490.8 Gene names FBXO27

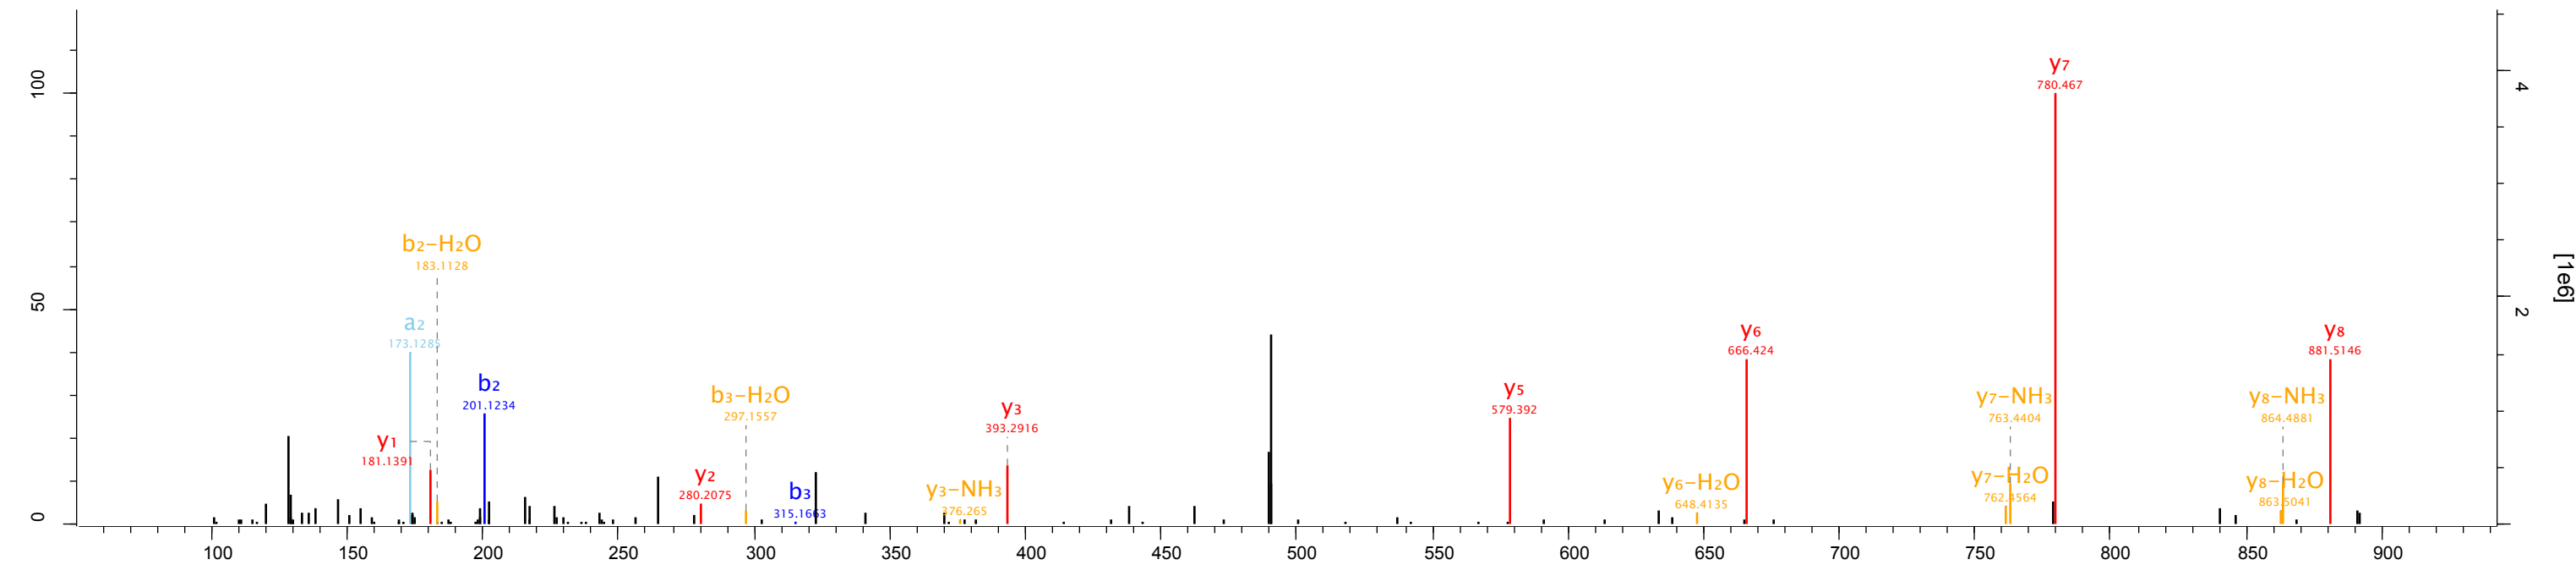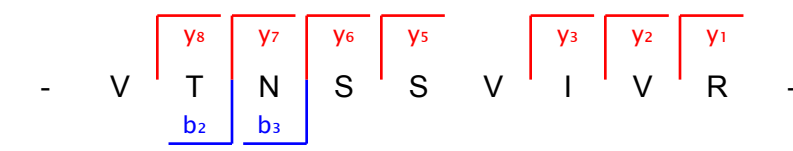

Raw file  
20180707\_MaS\_A375SR\_ML\_proteome\_30

Scan: 23335  
Method: FTMS; HCD  
Score: 92.47  
m/z: 933.48  
Gene names: HIAT1

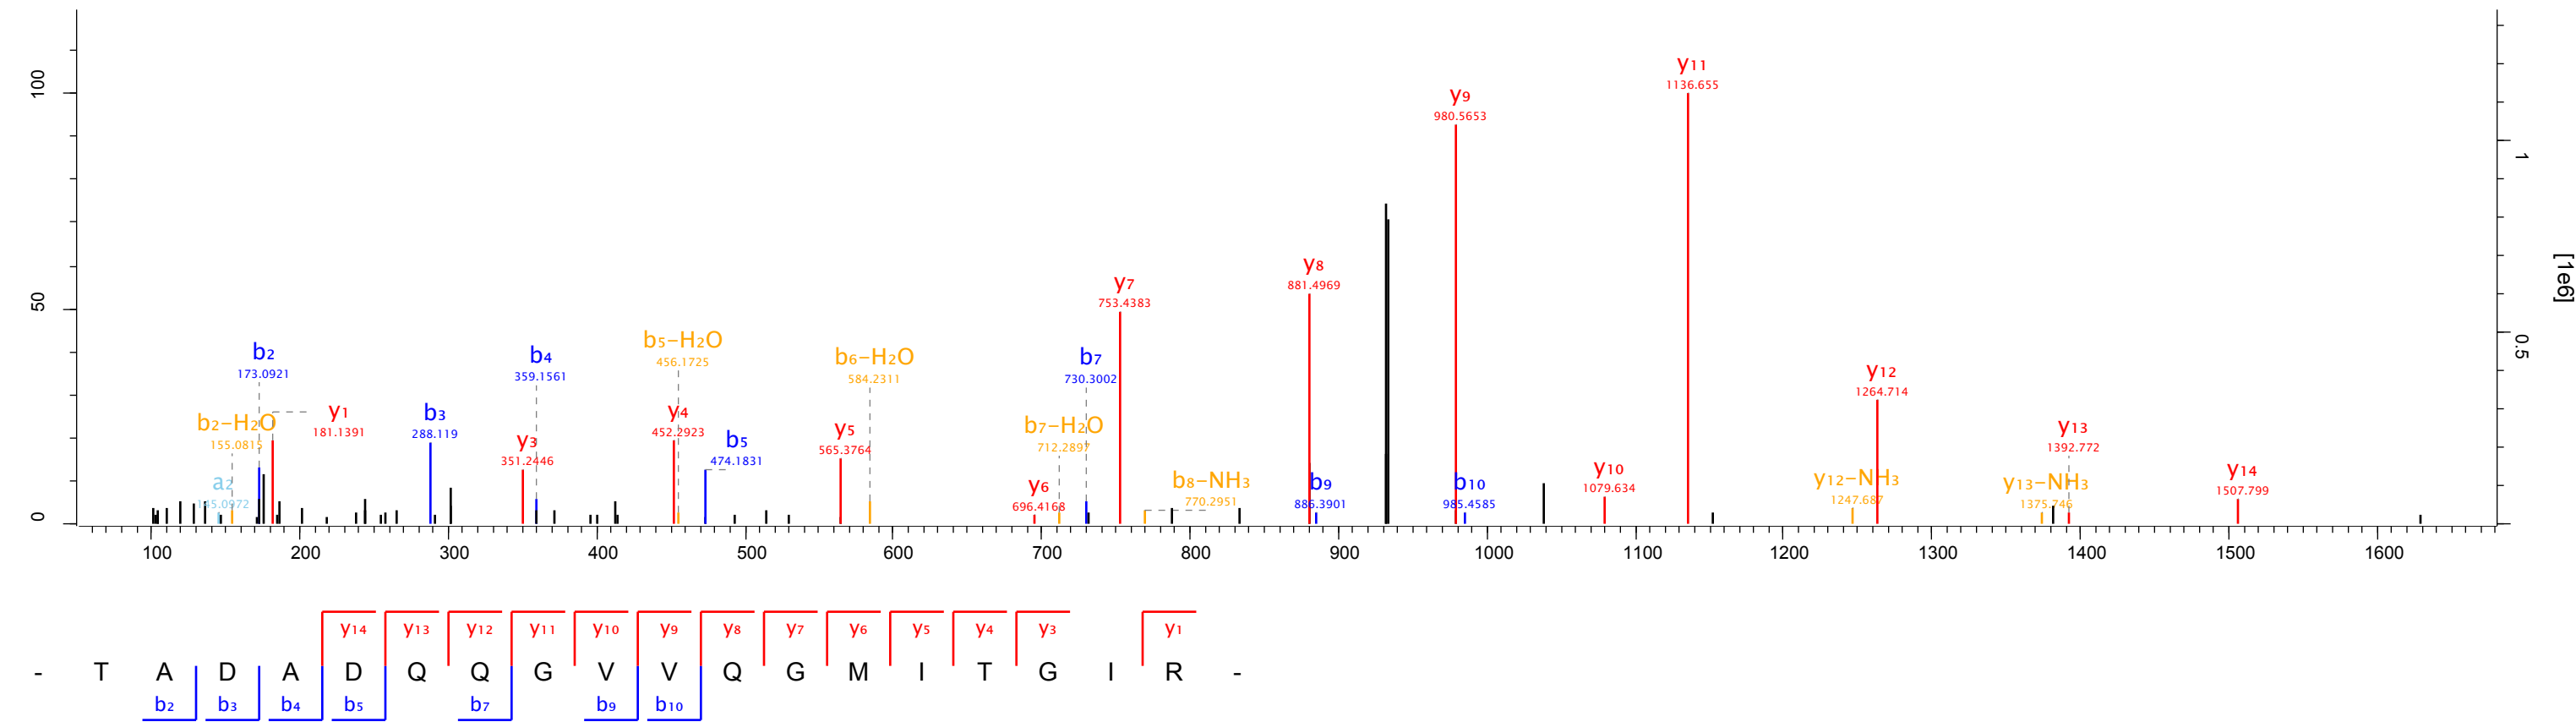



Raw file 20180707\_MaS\_A375SR\_ML\_proteome\_30 Scan 5555 Method FTMS; HCD Score 45.68 m/z 475.26

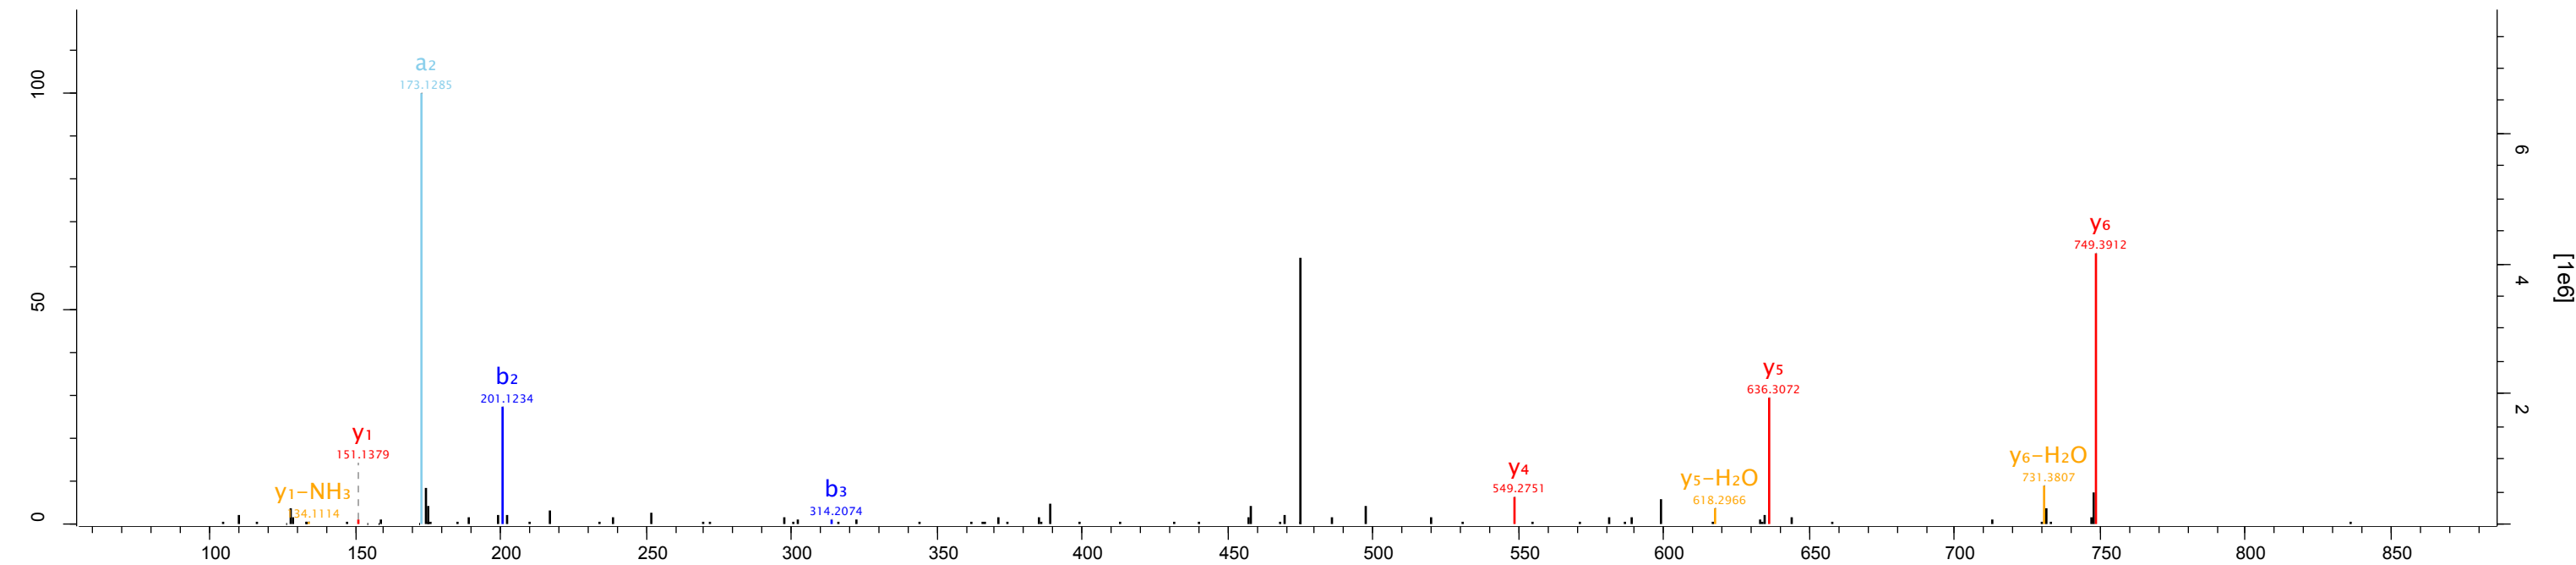

Raw file: 20150812\_A375SR\_Phospho\_BR1\_02  
 Scan: 20426 Method: FTMS; HCD Score: 124.99 m/z: 1208.47 Gene names: PAX3

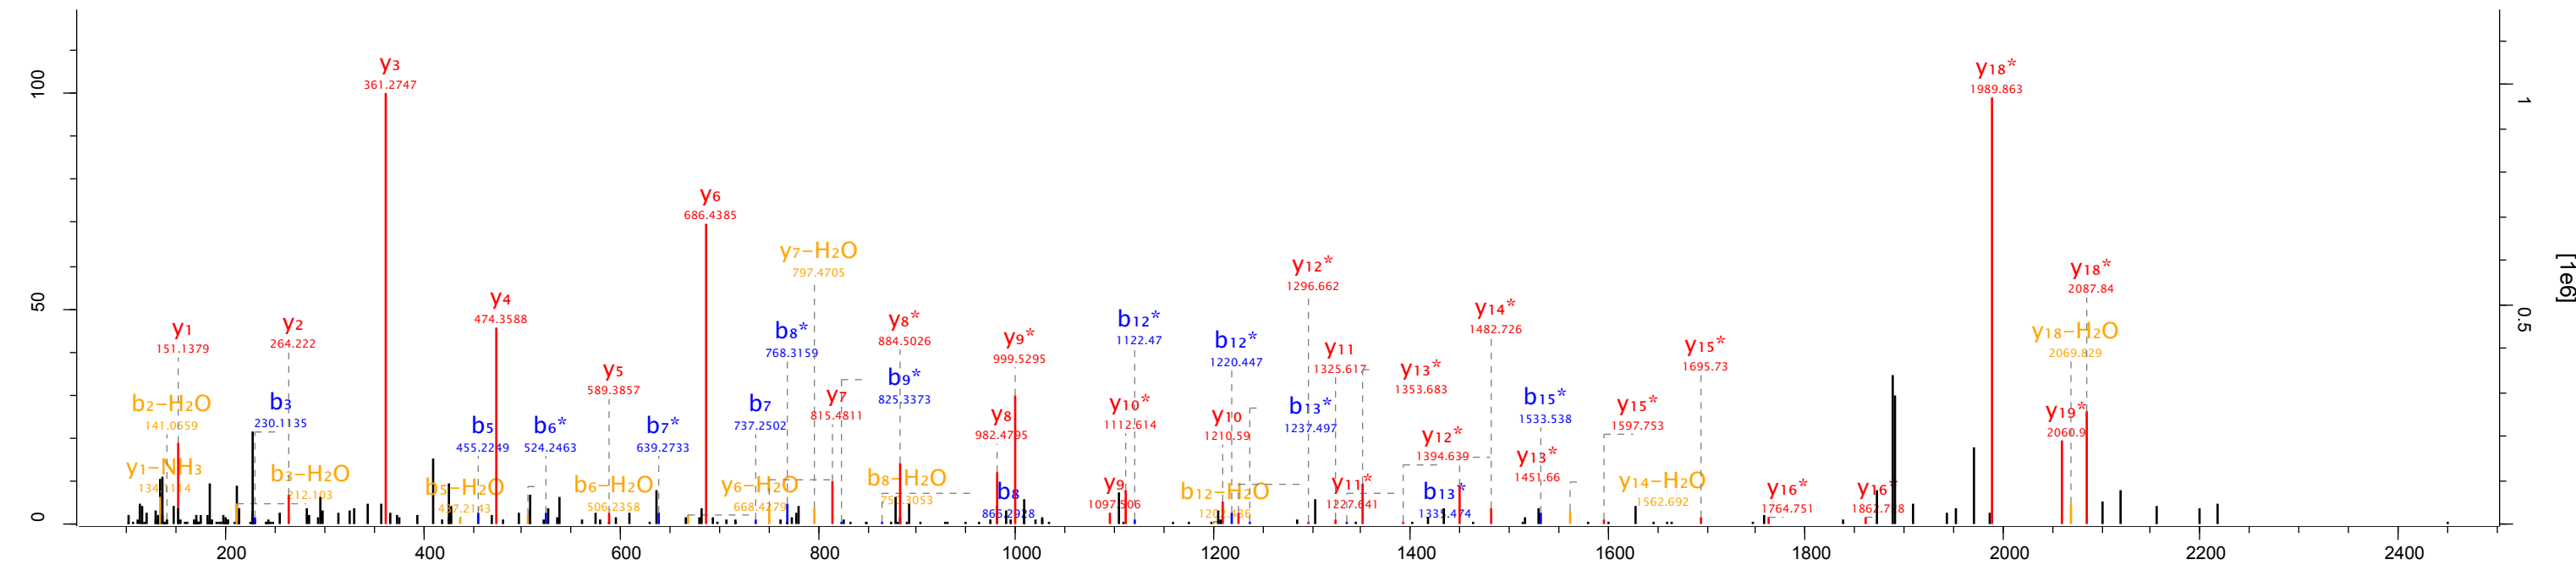

Sequence: - A S A P Q S D I D S E P D L P L K -

Fragmentation sites (b ions): b3, b5, b6\*, b7, b8, b9\*, b12\*, b13\*, b15\*

Fragmentation sites (y ions): y1, y2, y3, y4, y5, y6, y7, y8, y9, y10, y11, y12\*, y13\*, y14\*, y15\*, y16\*, y18\*, y19\*

Raw file: 20150812\_A375SR\_Phospho\_BR1\_02  
 Scan: 8446 Method: FTMS; HCD Score: 91.04 m/z: 519.21 Gene names: RHBDF2

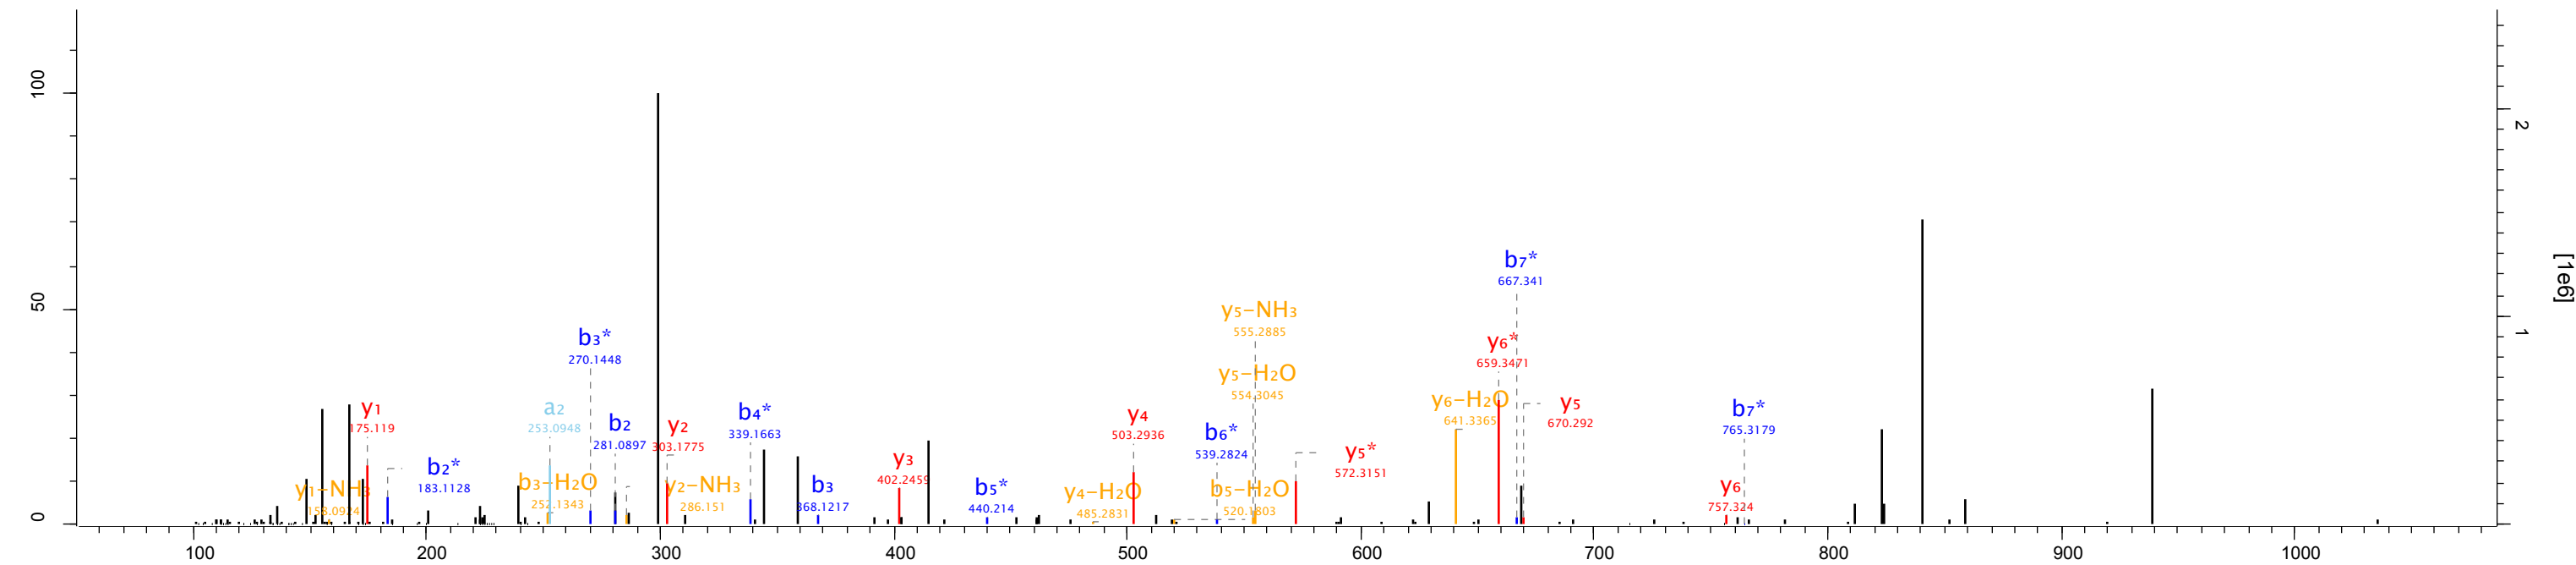

Raw file  
 20150812\_A375SR\_Phospho\_BR1\_03  
 Scan 24836 Method FTMS; HCD Score 258.37 m/z 970.94 Gene names MAPK11P1L

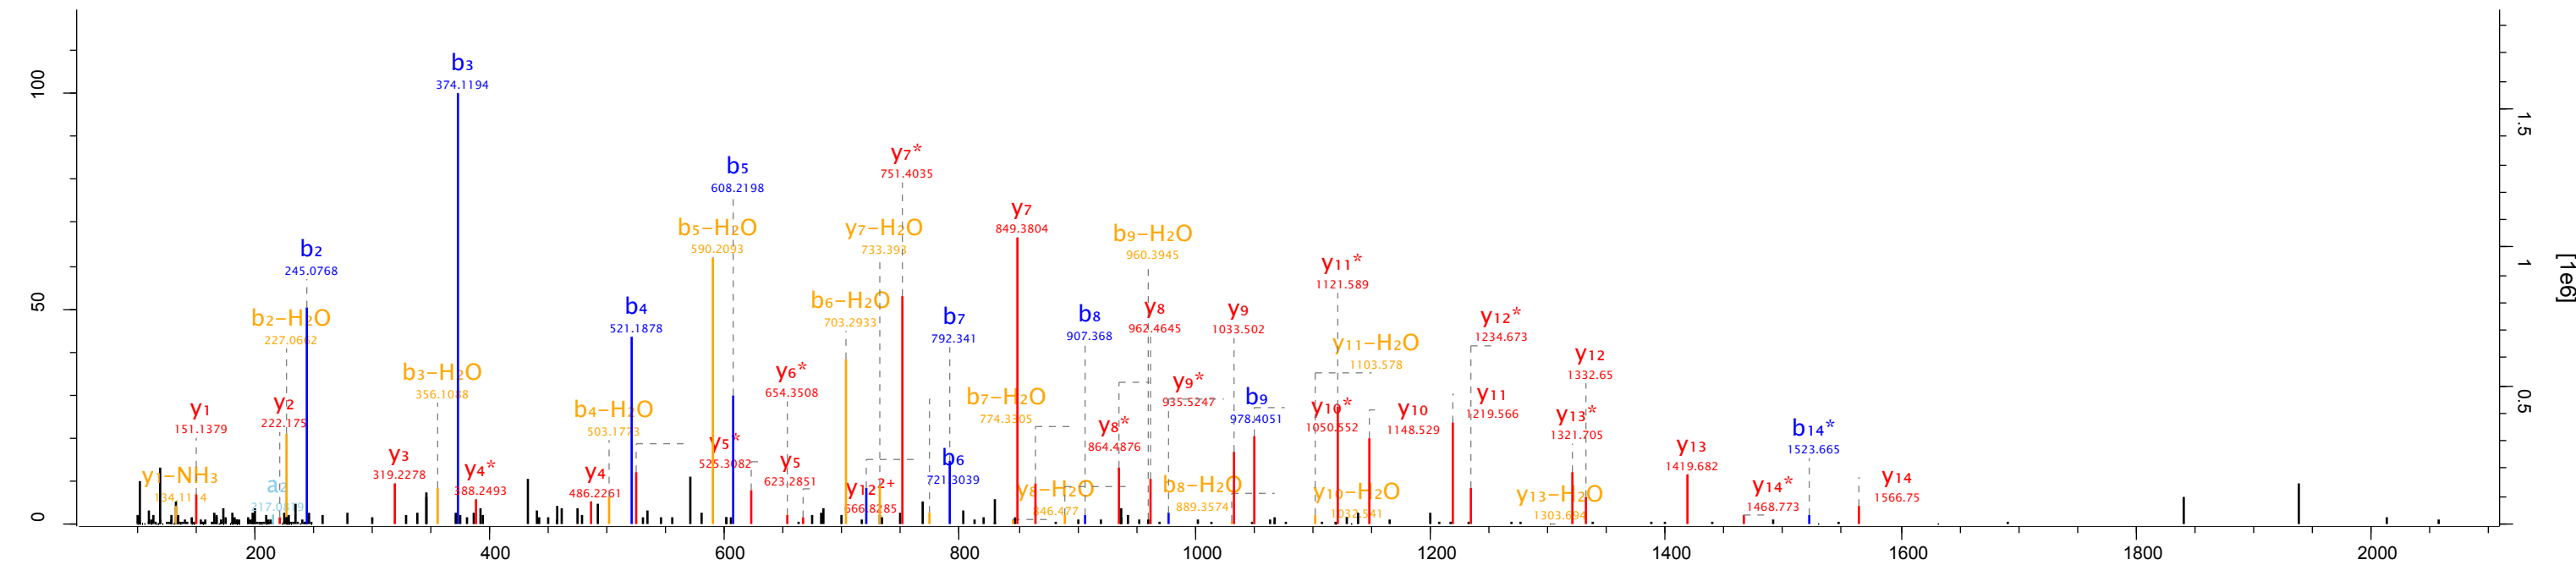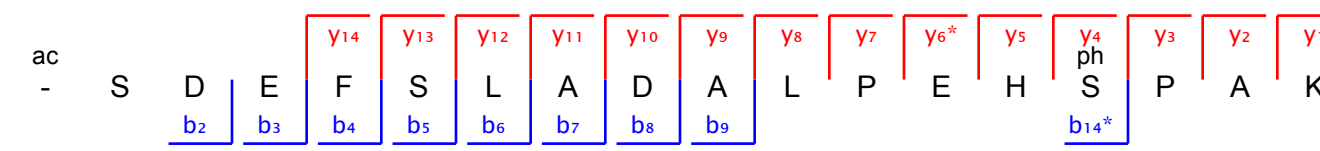

Raw file 20150812\_A375SR\_Phospho\_BR1\_03 Scan 24846 Method FTMS; HCD Score 257.37 m/z 968.42 Gene names MAPK11P1L

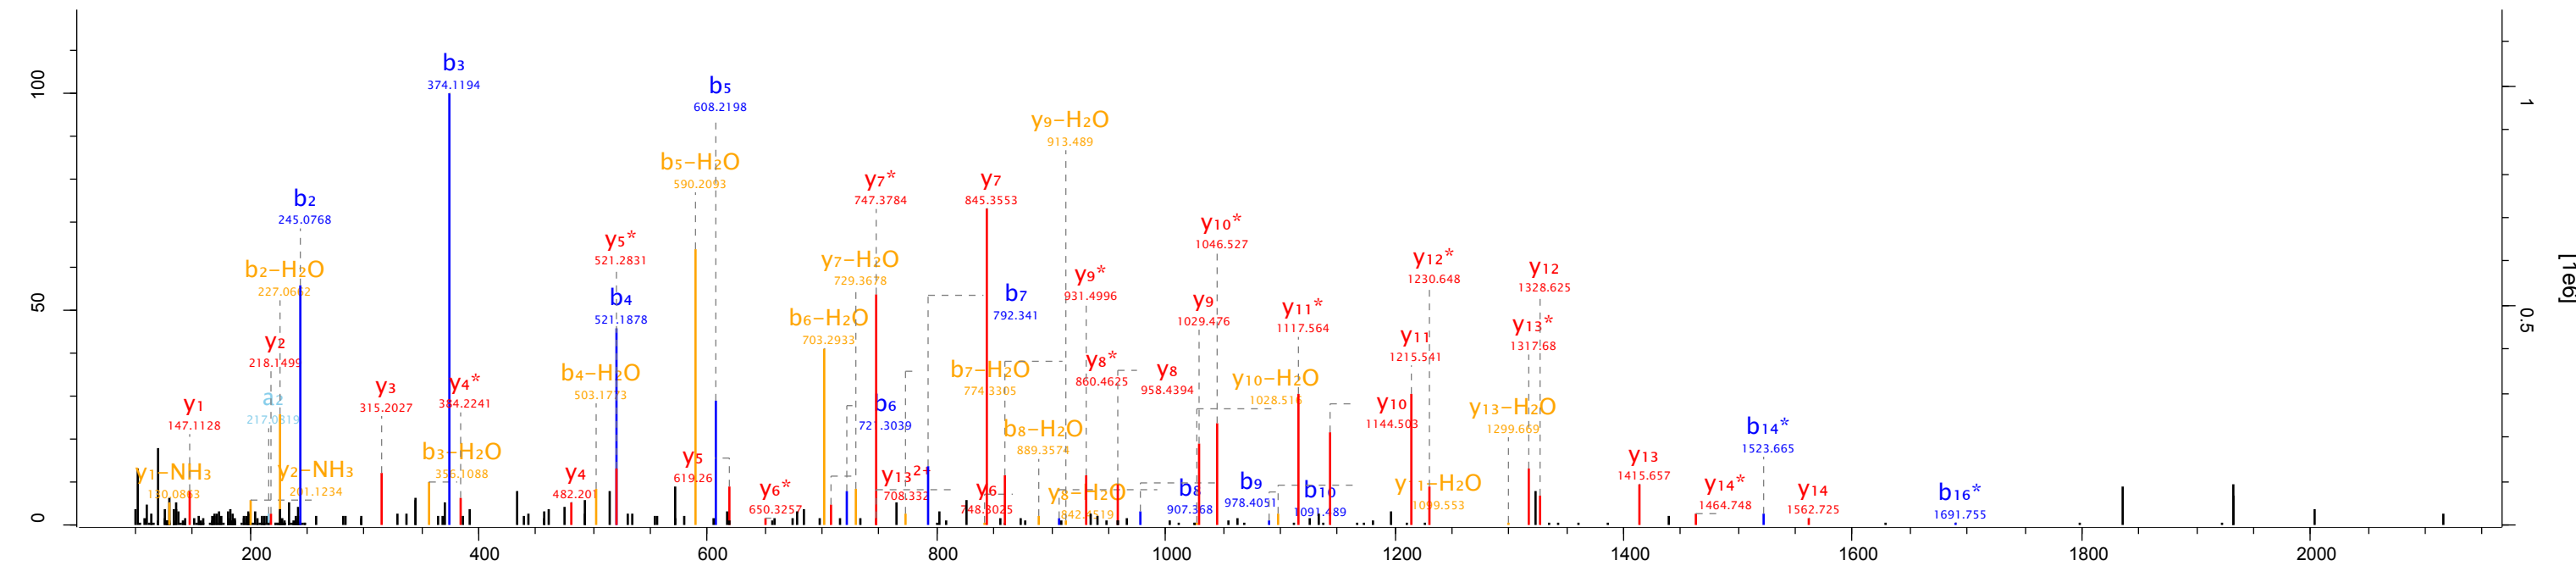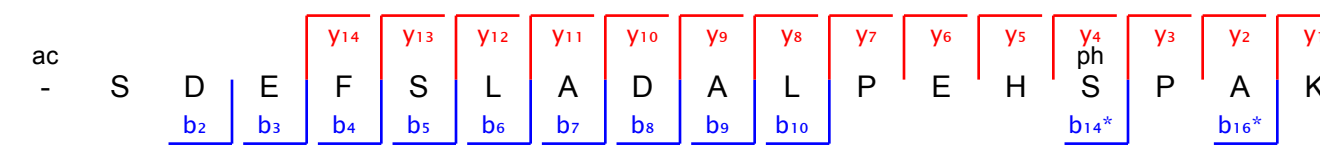

Raw file 20150812\_A375SR\_Phospho\_BR1\_04 Scan 21246 Method FTMS; HCD Score 84.68 m/z 781.42 Gene names ZNF579

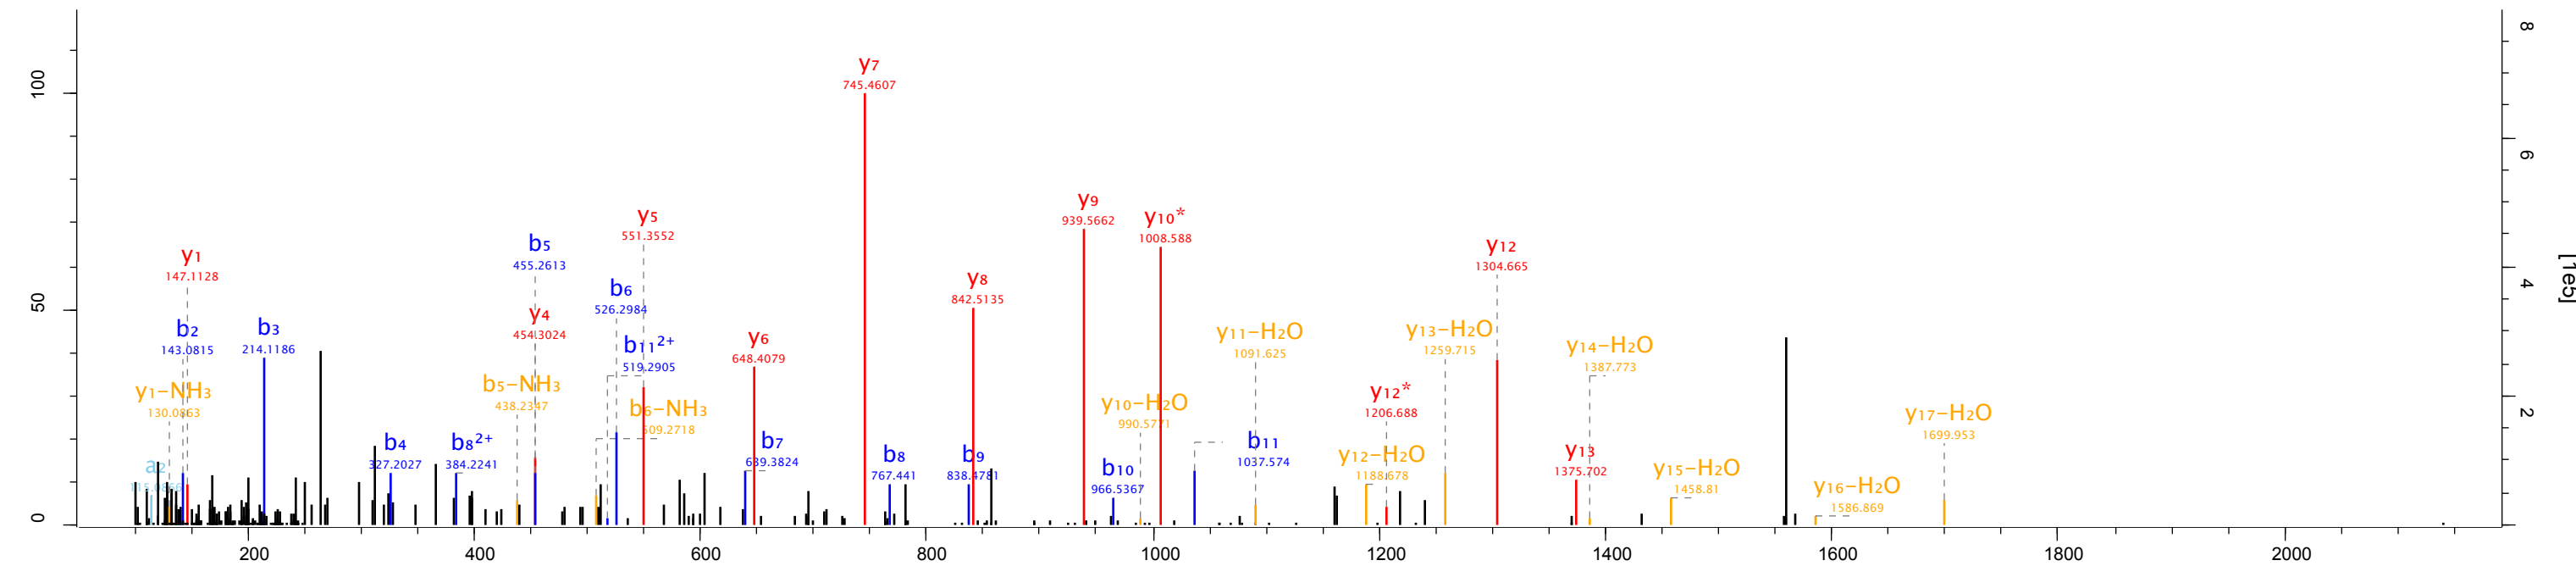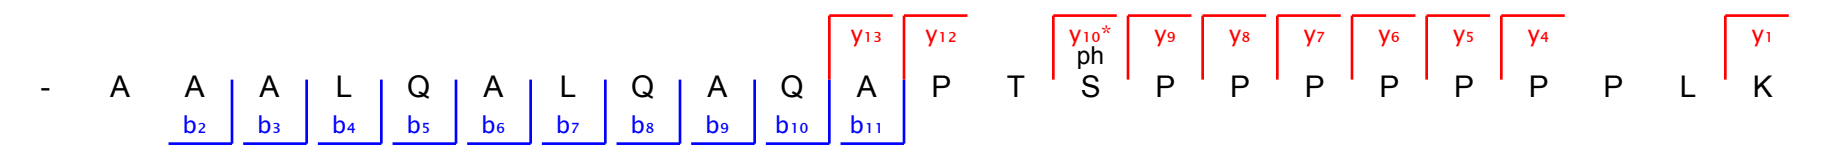

Raw file  
20150812\_A375SR\_Phospho\_BR1\_04

Scan 6106 Method FTMS; HCD Score 102.65 m/z 841.35 Gene names YAF2

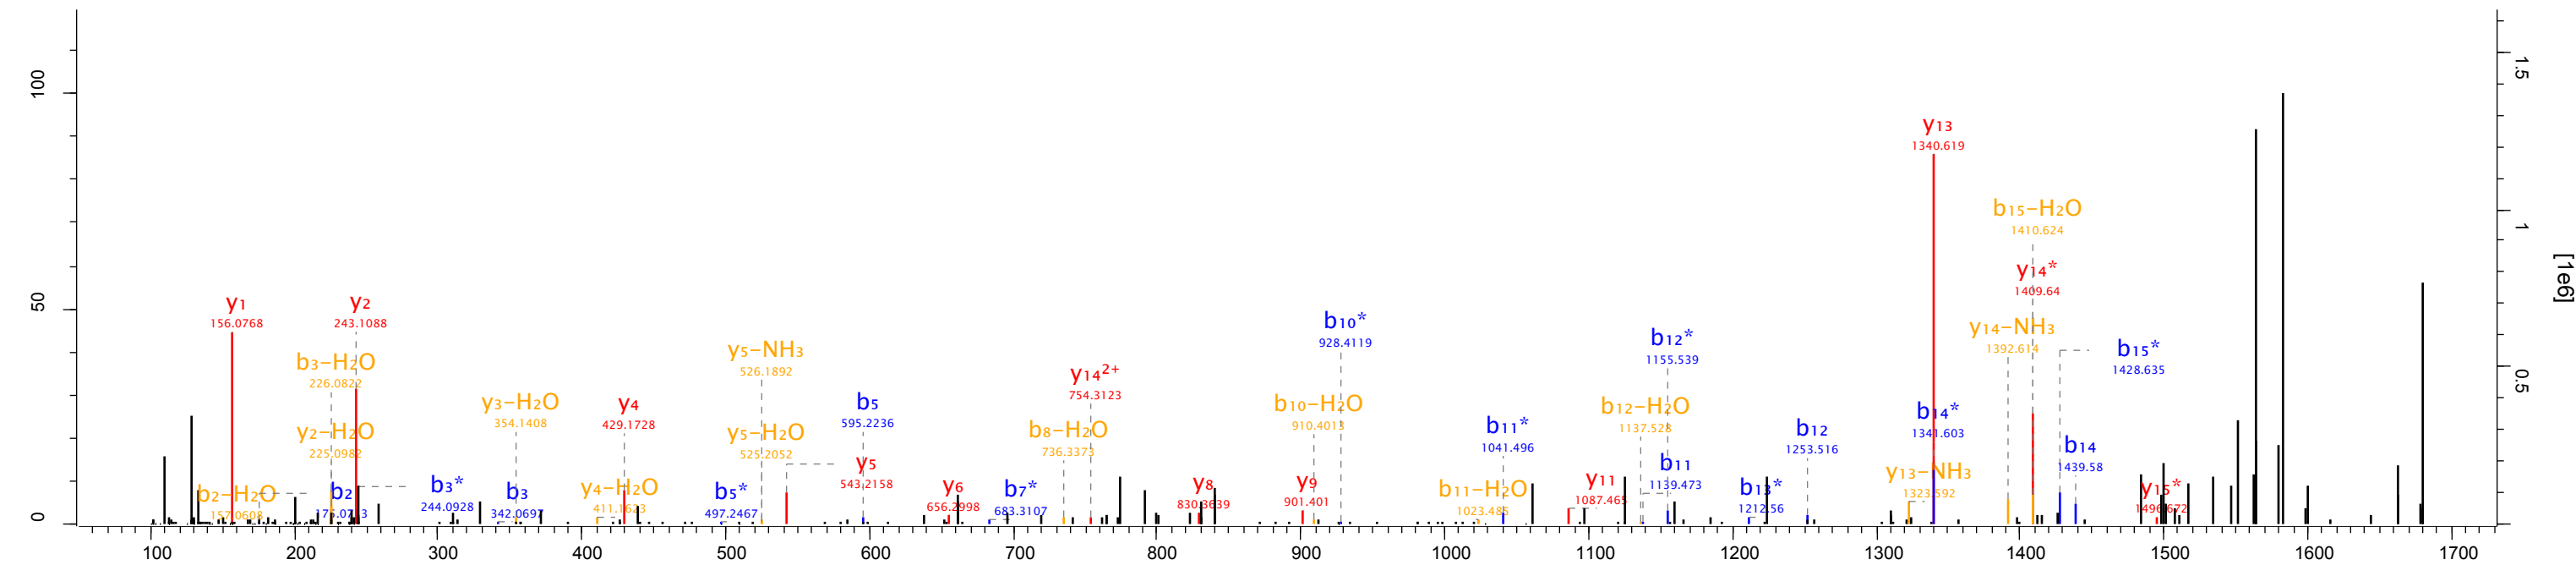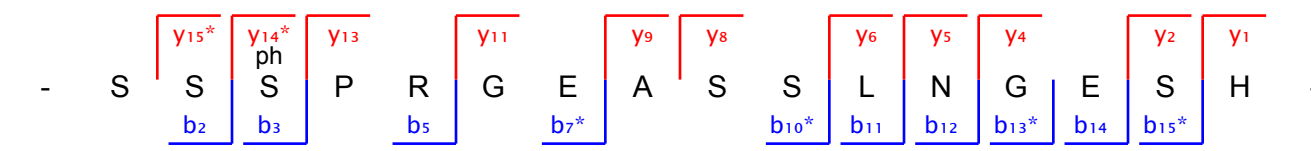

Raw file 20150812\_A375SR\_Phospho\_BR1\_05 Scan 12916 Method FTMS; HCD Score 71.08 m/z 556.28

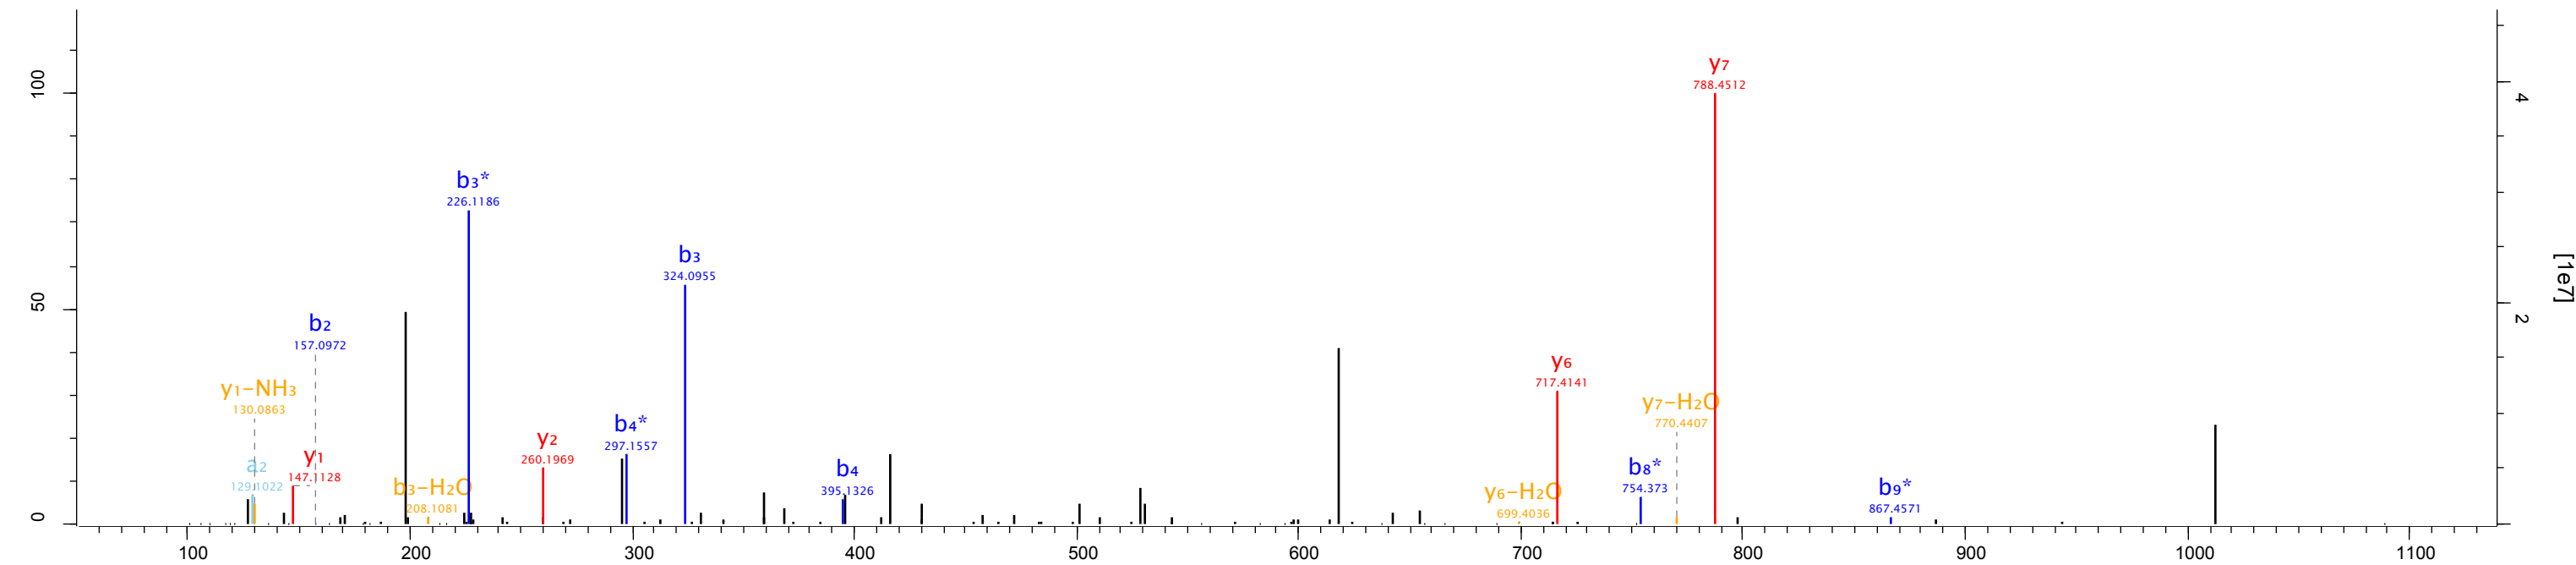



Raw file: 20150812\_A375SR\_Phospho\_BR1\_06  
 Scan: 14456 Method: FTMS; HCD Score: 62.92 m/z: 784.86 Gene names: PWWP2A

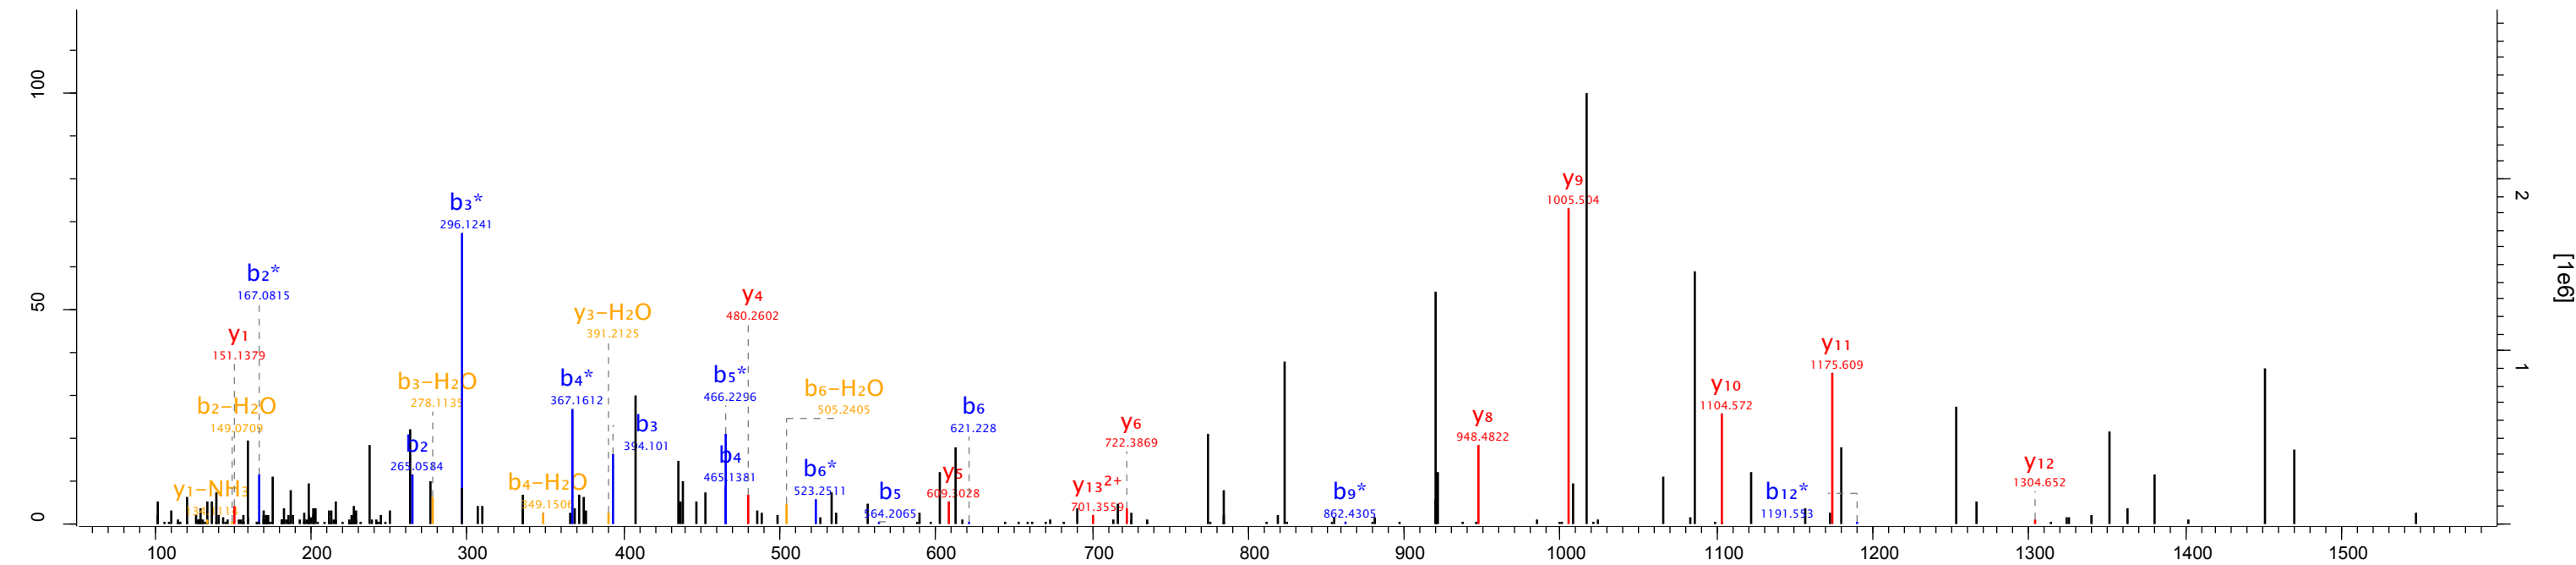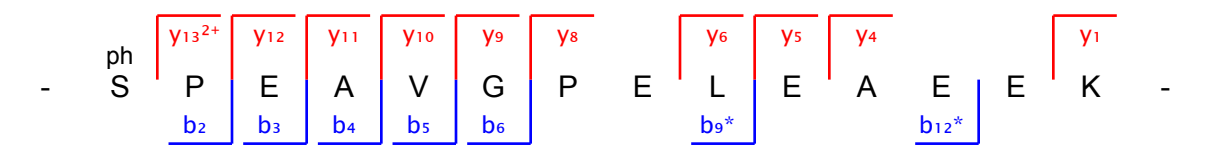

Raw file 20150812\_A375SR\_Phospho\_BR1\_06 Scan 15716 Method FTMS; HCD Score 145.88 m/z 783.89 Gene names PRICKLE1

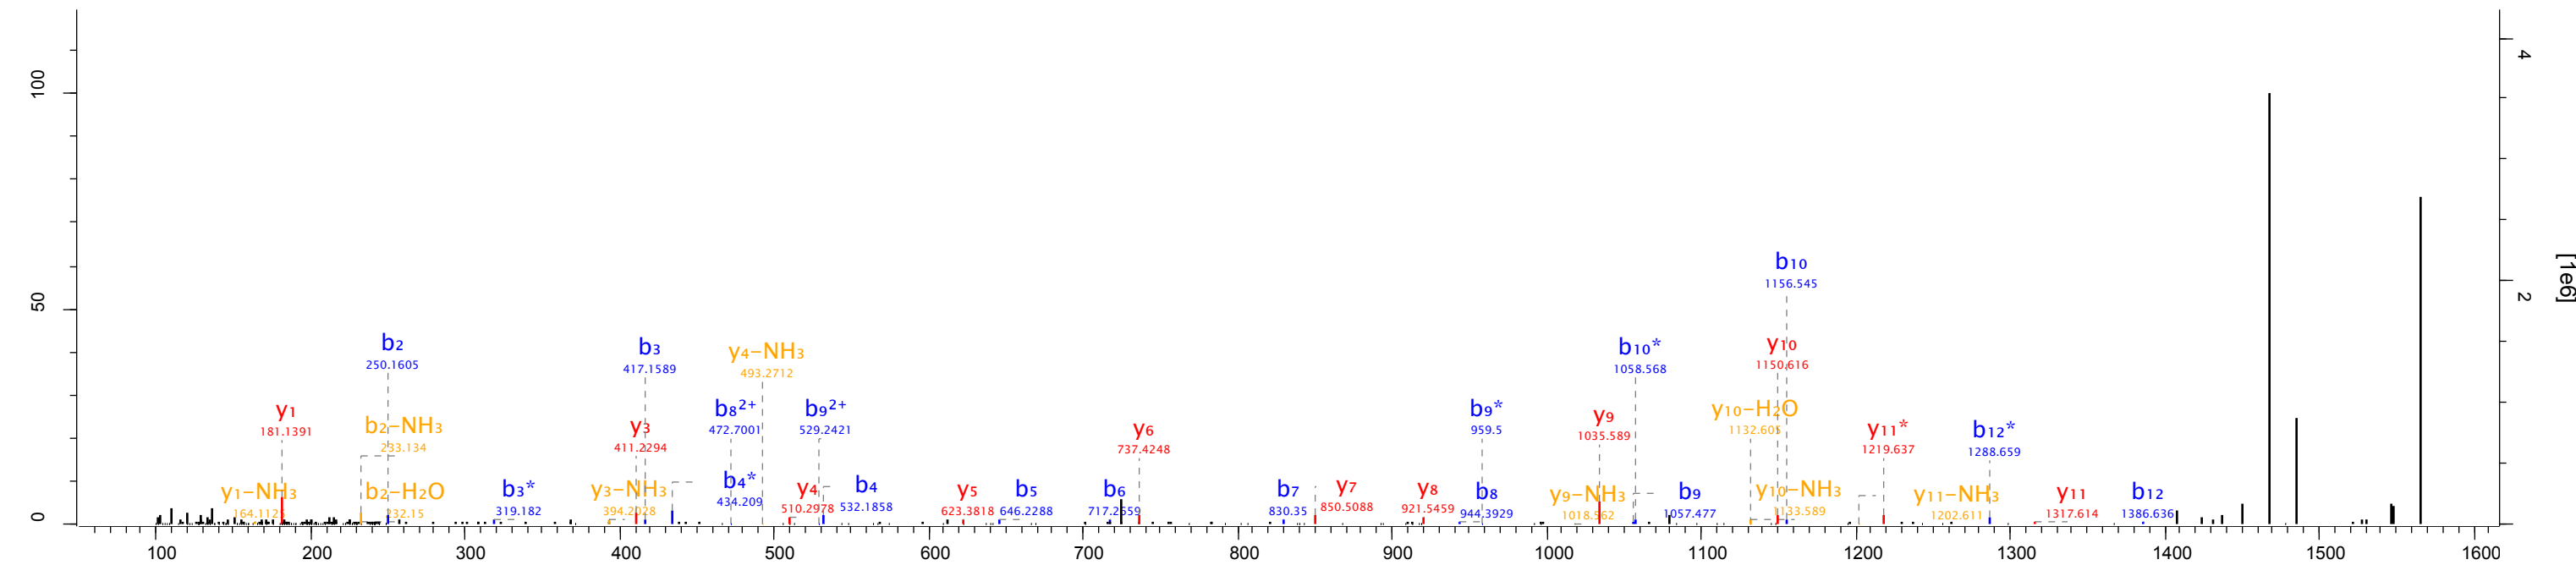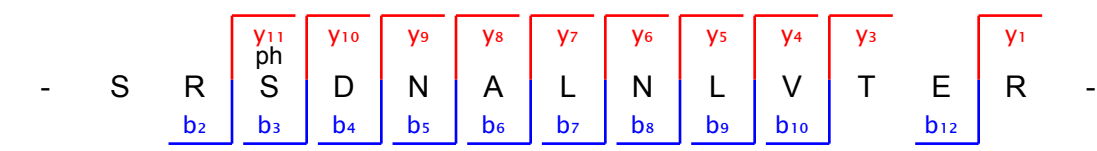

Raw file: 20150812\_A375SR\_Phospho\_BR1\_06  
 Scan: 2426 Method: FTMS; HCD Score: 39.18 m/z: 401.56 Gene names: NCL

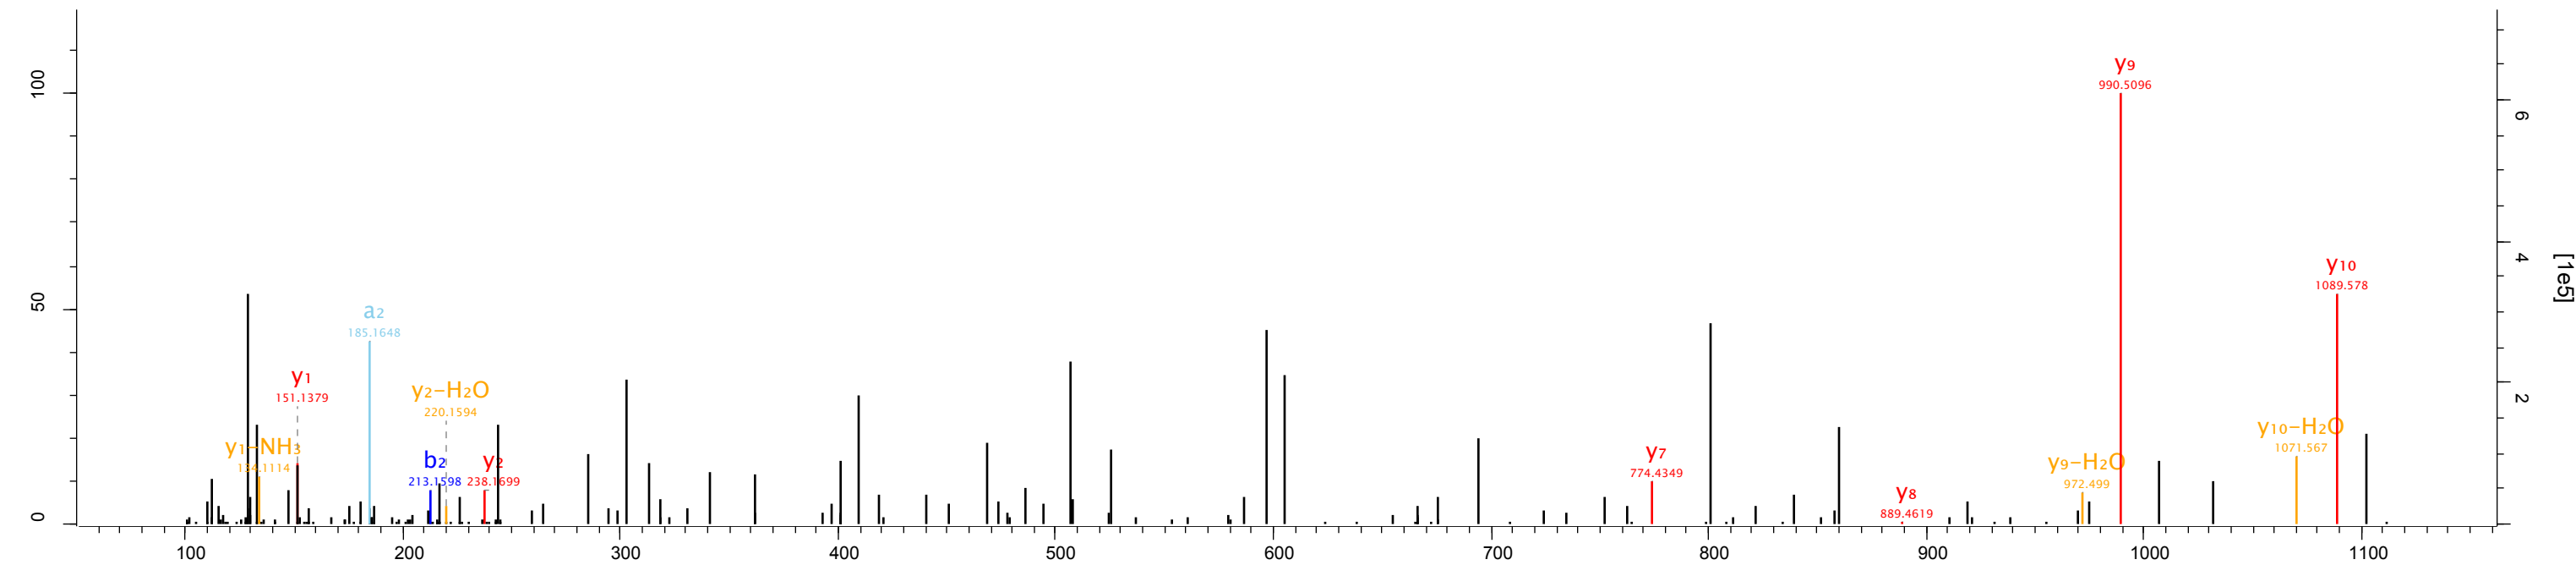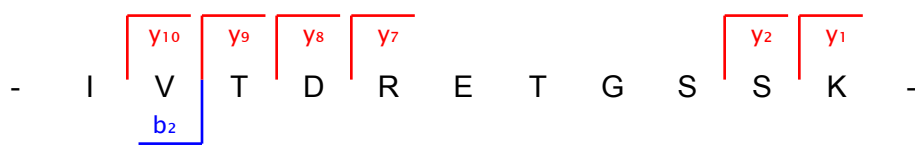

Raw file: 20150812\_A375SR\_Phospho\_BR1\_06  
 Scan: 6696 Method: FTMS; HCD Score: 177.09 m/z: 844.36 Gene names: YAF2

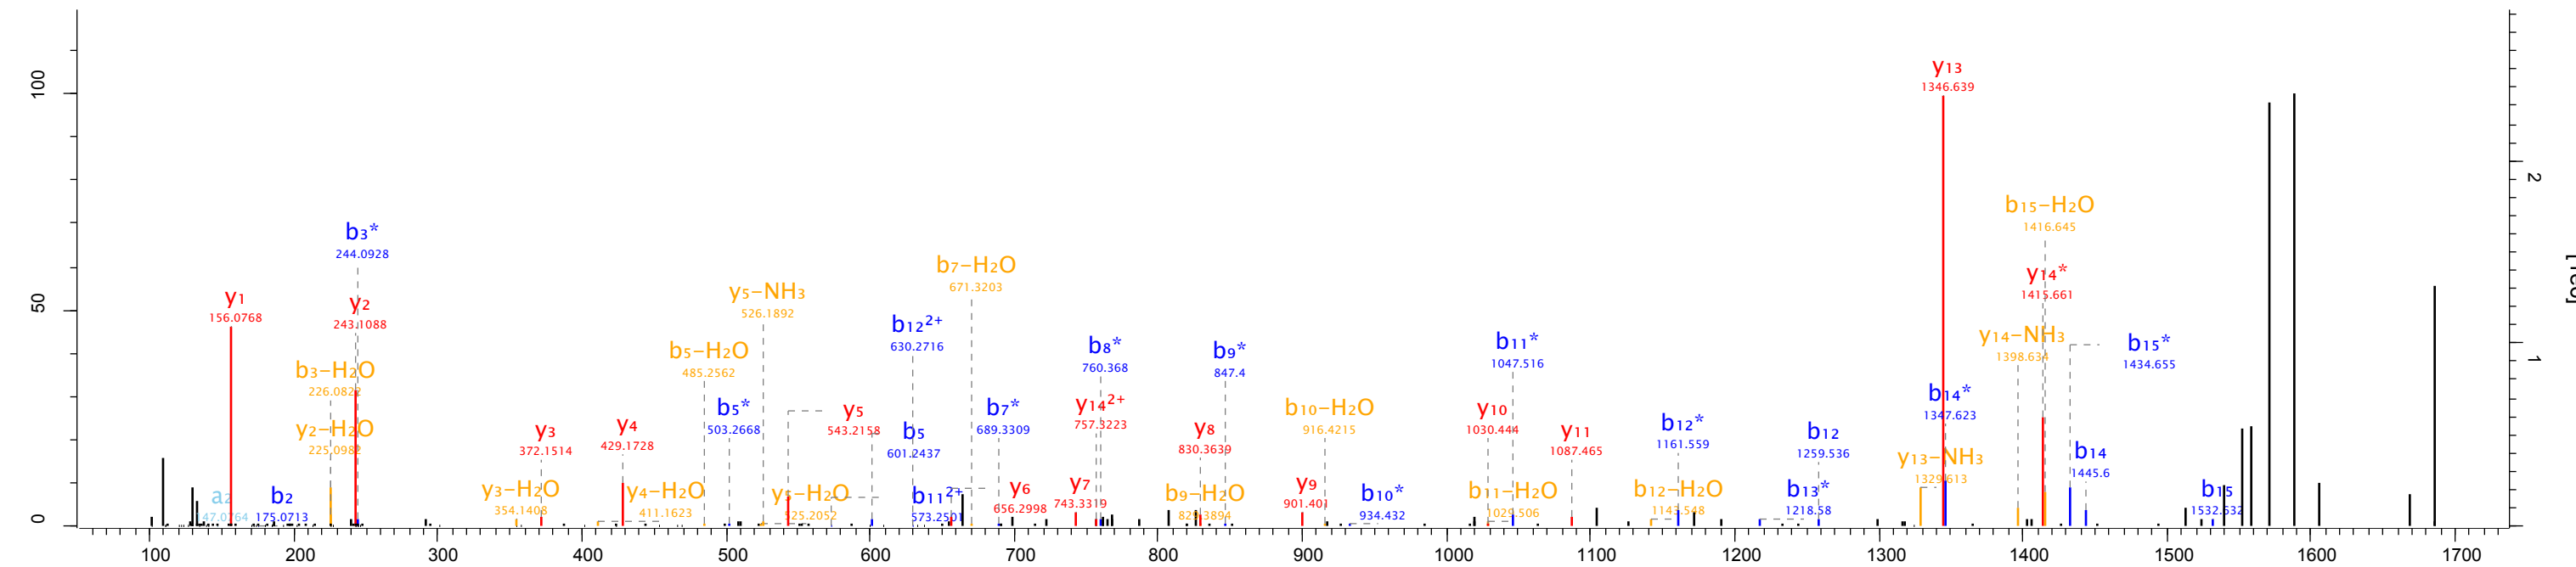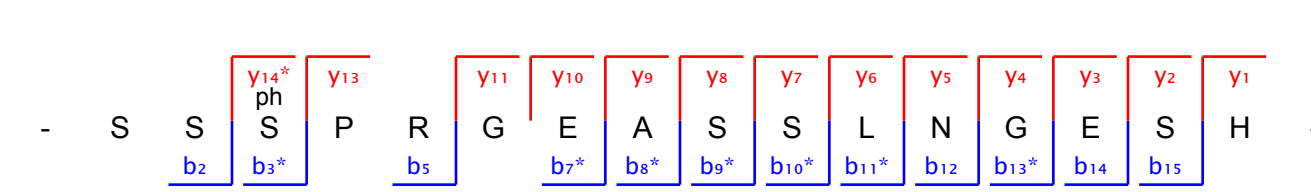

Raw file  
 20150812\_A375SR\_Phospho\_BR1\_07  
 Scan 16406 Method FTMS; HCD Score 47.55 m/z 711.63 Gene names LINC00614

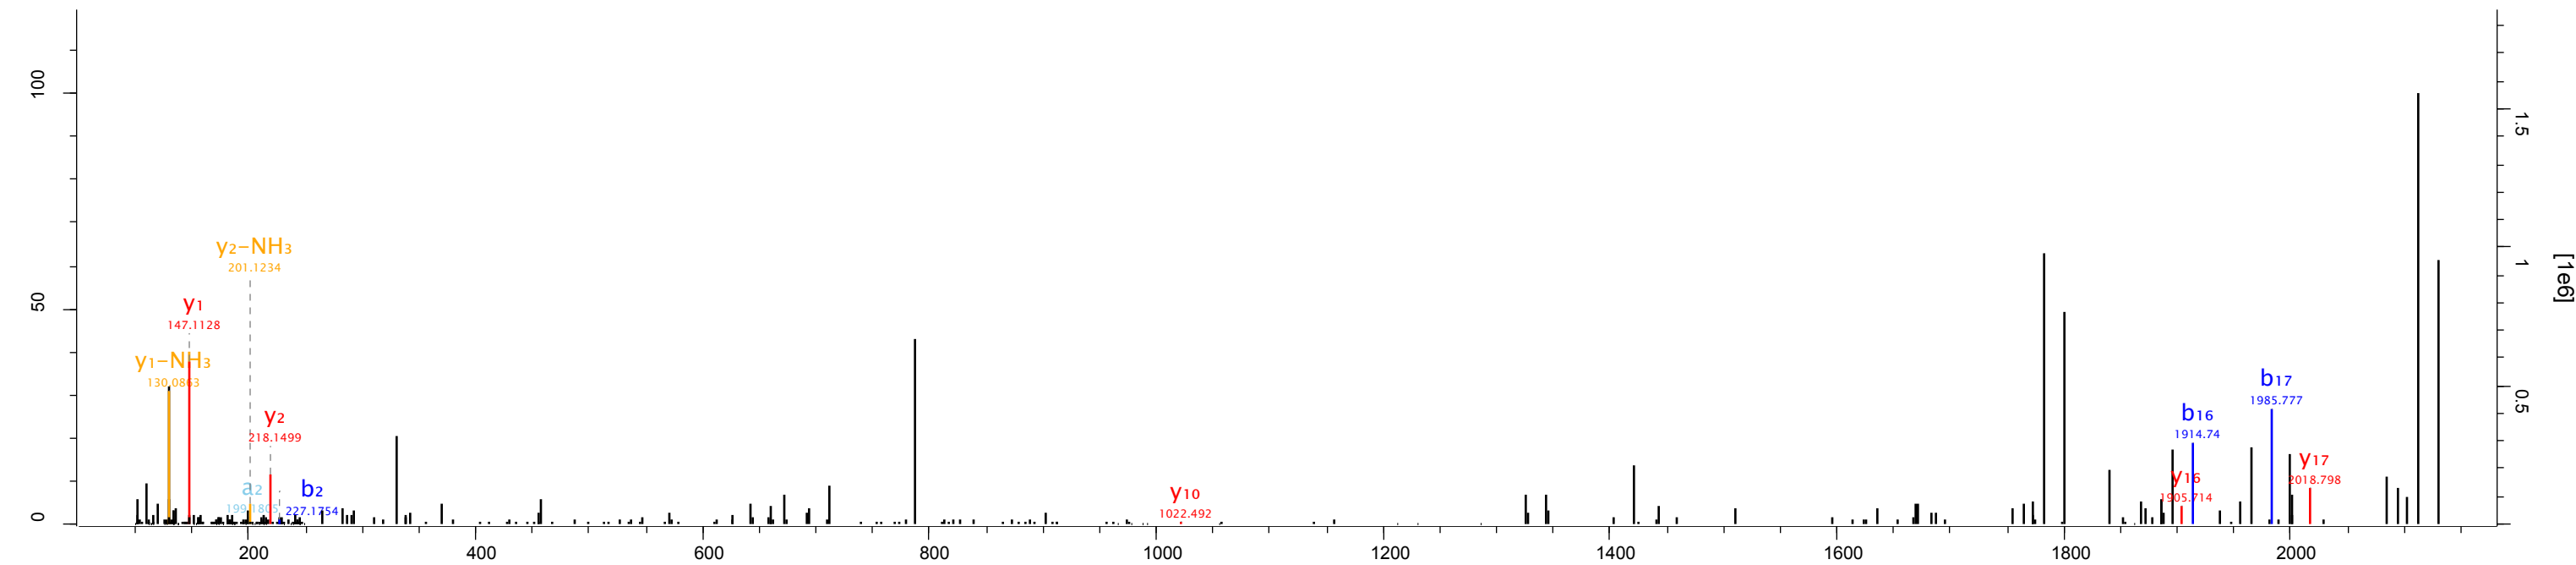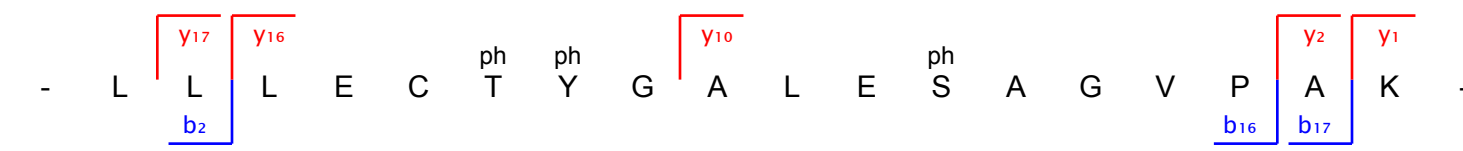

Raw file: 20150812\_A375SR\_Phospho\_BR1\_07  
 Scan: 22966 Method: FTMS; HCD Score: 75.1 m/z: 643.85 Gene names: LSR

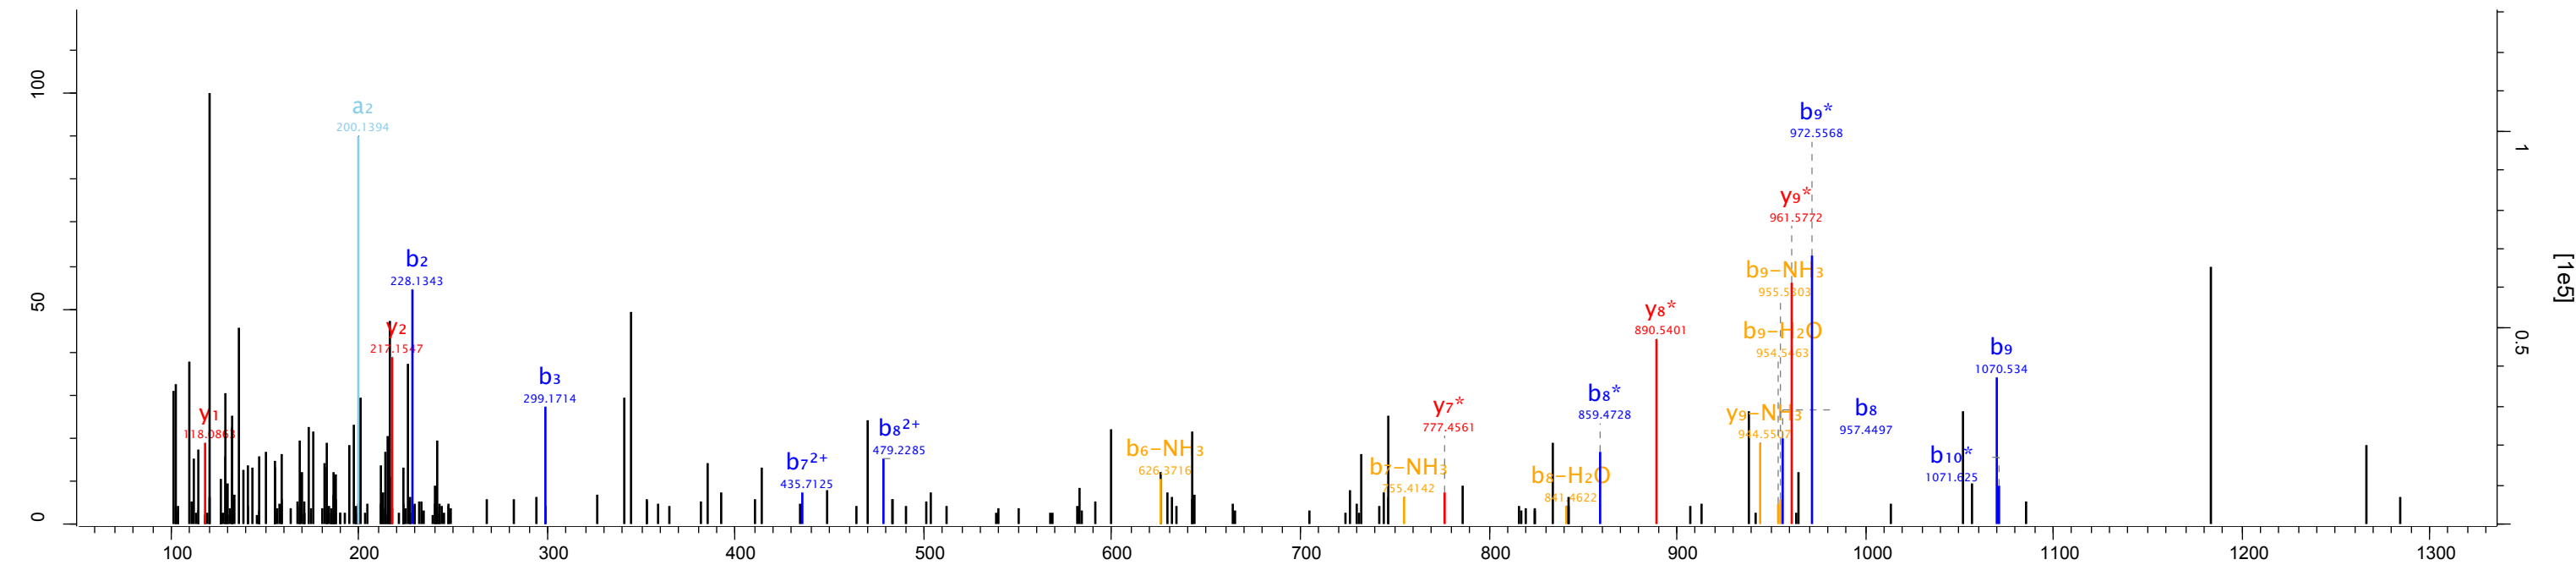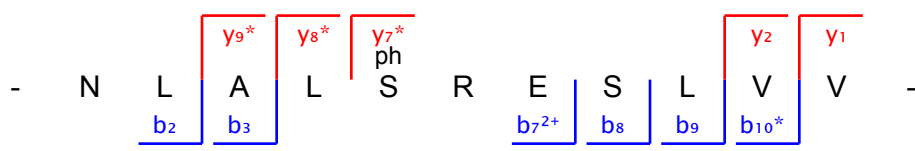

Raw file 20150812\_A375SR\_Phospho\_BR1\_07 Scan 2396 Method FTMS; HCD Score 85.81 m/z 449.71

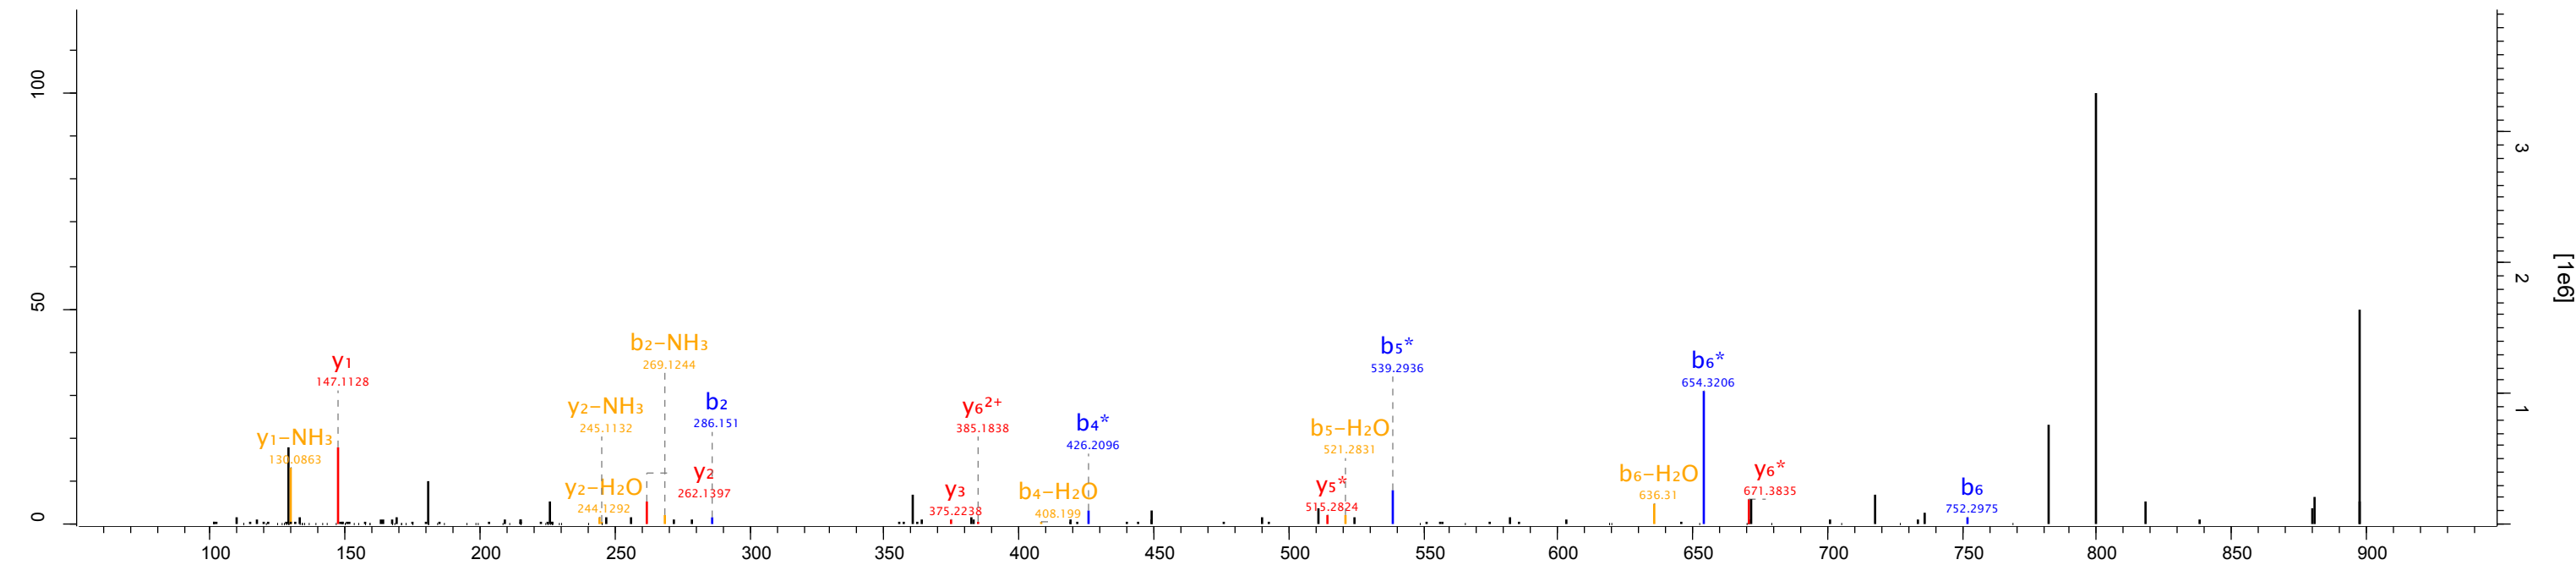

Raw file  
 20150812\_A375SR\_Phospho\_BR1\_08  
 Scan 13056 Method FTMS; HCD Score 56.12 m/z 933.93 Gene names CPM

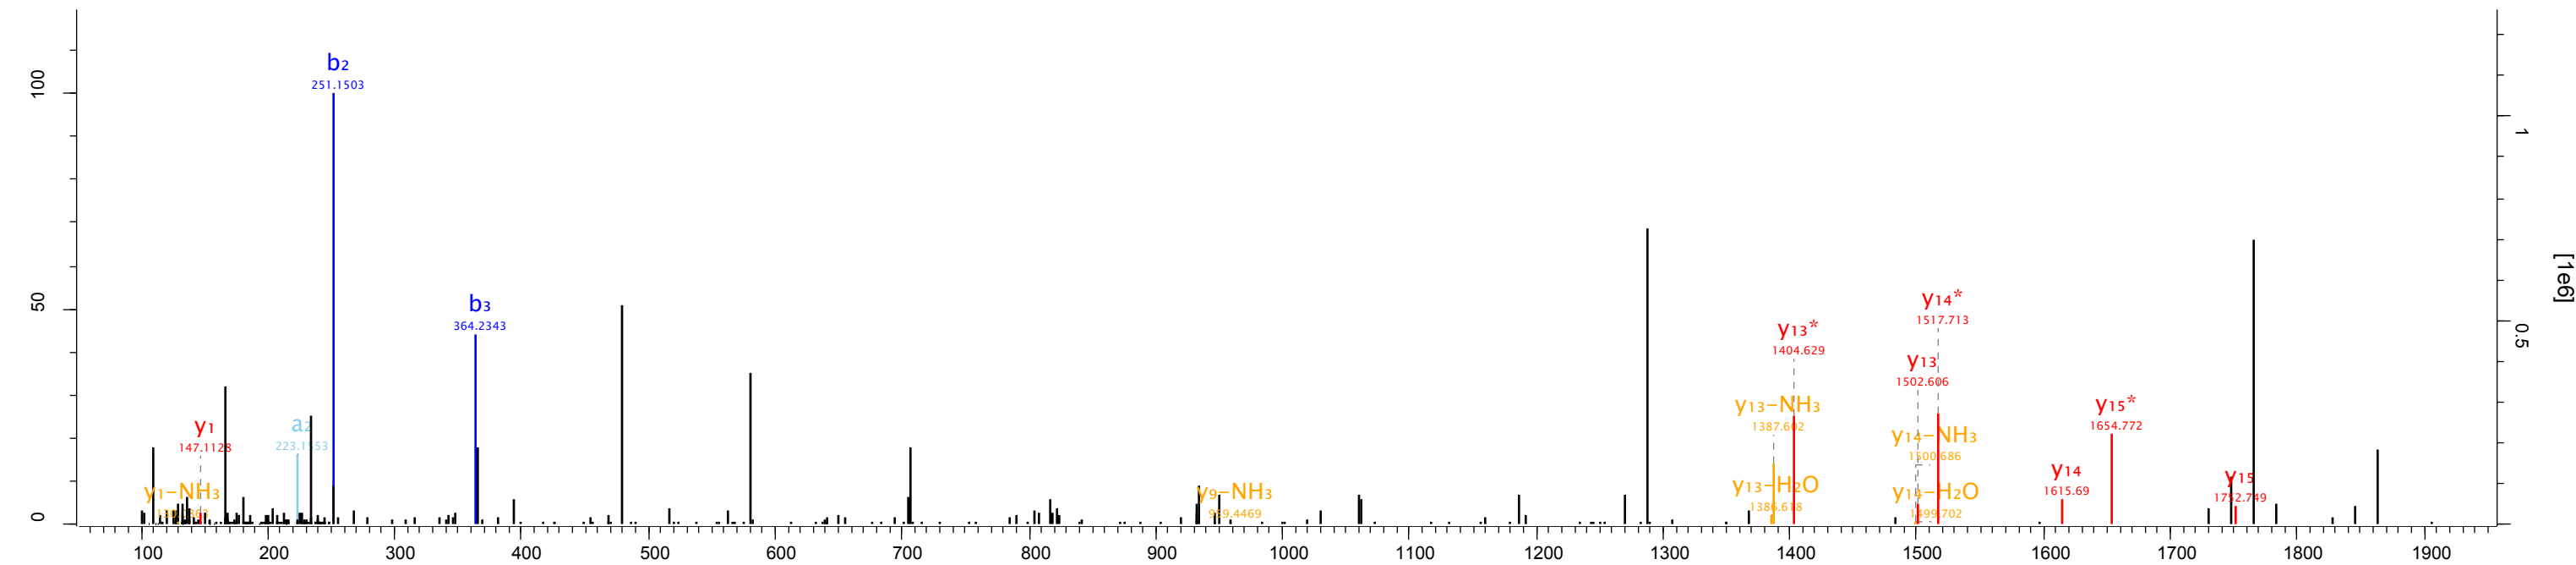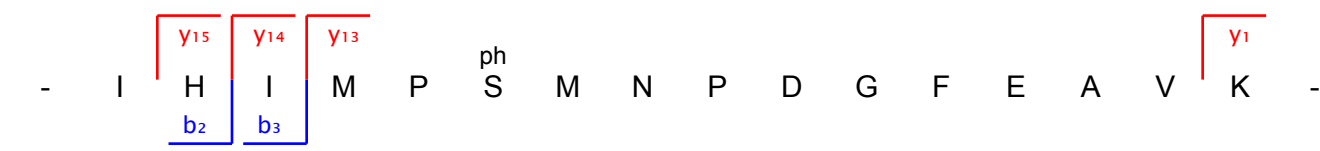



Raw file 20150812\_A375SR\_Phospho\_BR1\_08 Scan 6066 Method FTMS; HCD Score 72.93 m/z 426.73

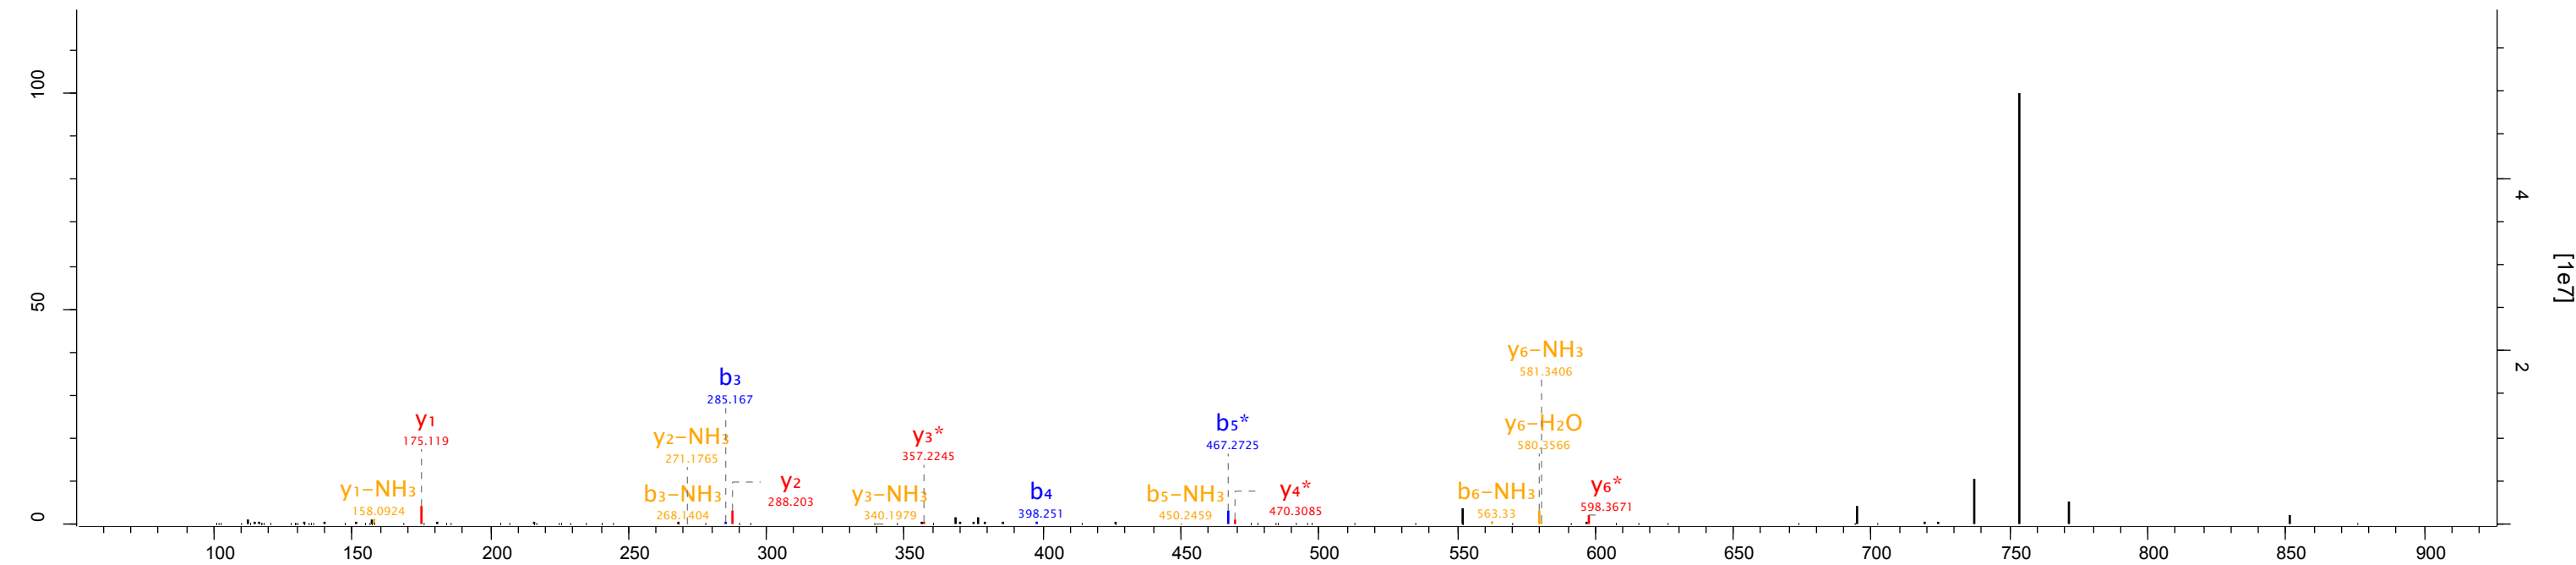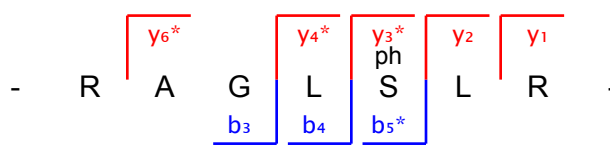

Raw file: 20150812\_A375SR\_Phospho\_BR1\_09  
 Scan: 10716 Method: FTMS; HCD Score: 107.73 m/z: 693.35 Gene names: ELK3

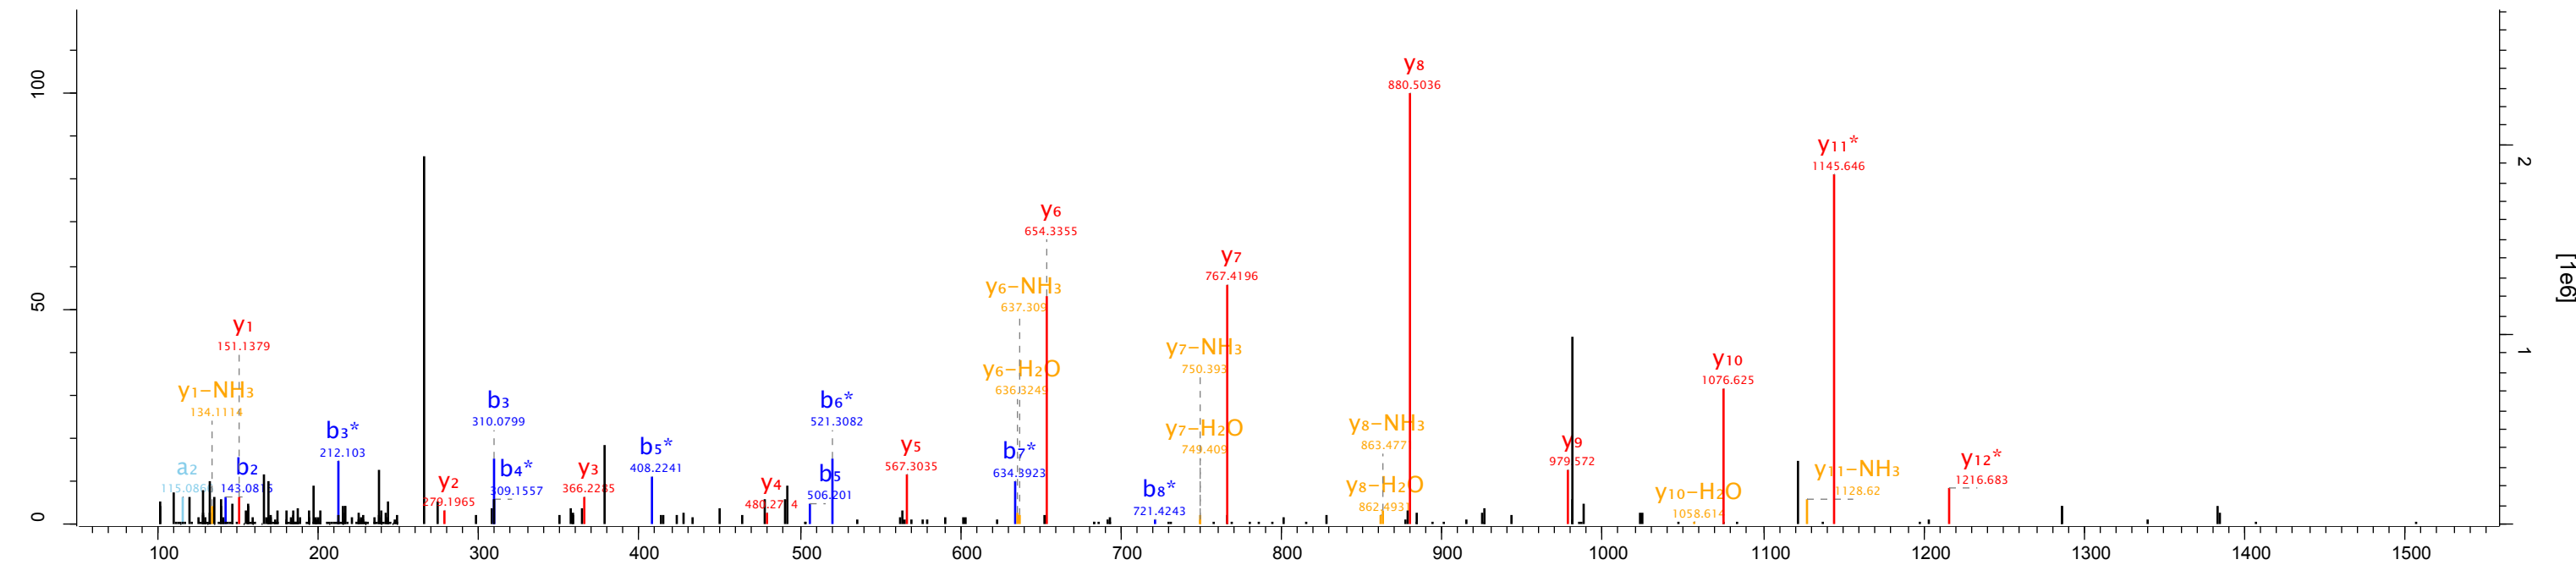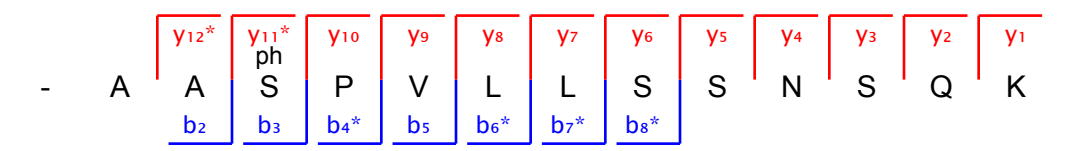

Raw file: 20150812\_A375SR\_Phospho\_BR1\_09  
 Scan: 4746 Method: FTMS; HCD Score: 50.27 m/z: 530.25

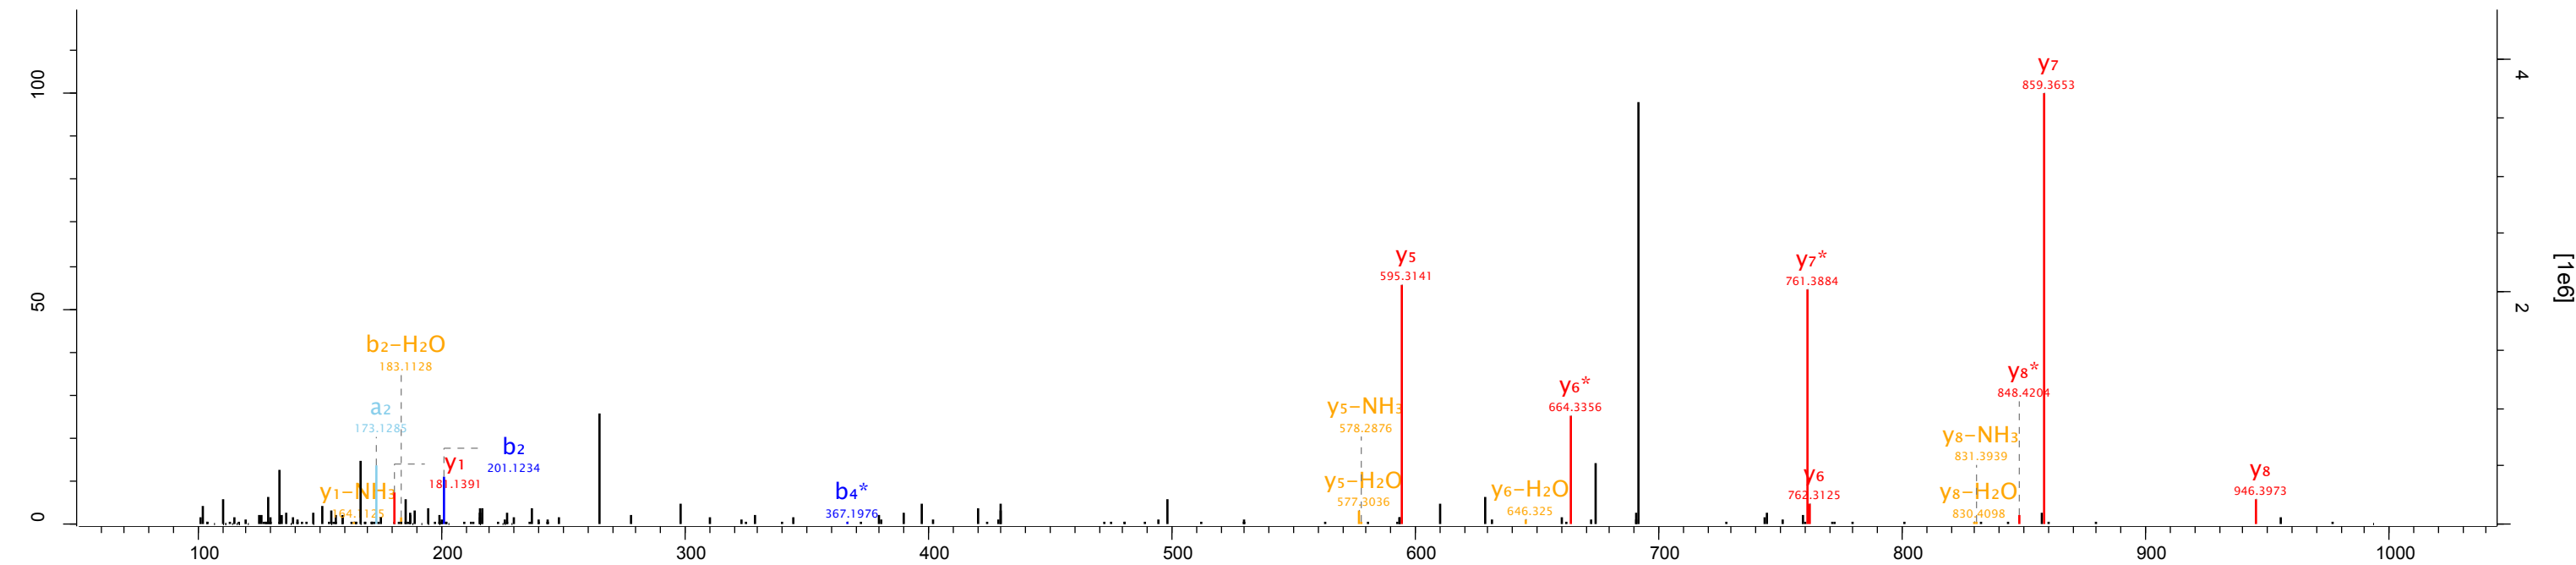

Raw file 20150812\_A375SR\_Phospho\_BR1\_09 Scan 5666 Method FTMS; HCD Score 65.4 m/z 426.73

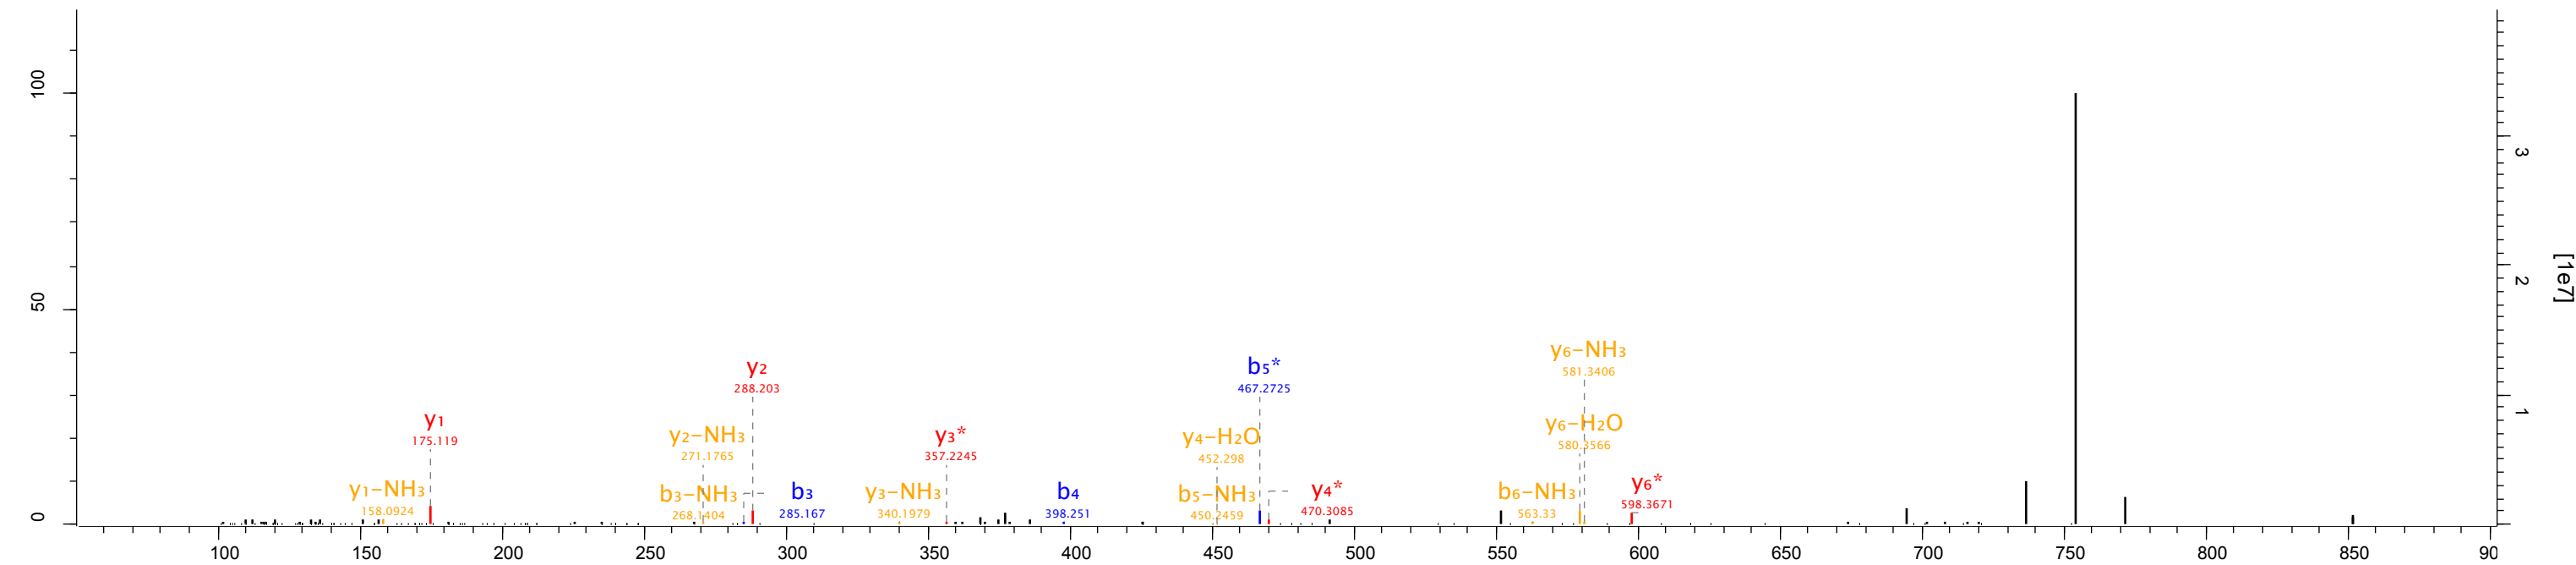

Raw file  
20150814\_A375SR\_Phospho\_BR2\_02

Scan 7076 Method FTMS; HCD Score 42.72 m/z 576.29

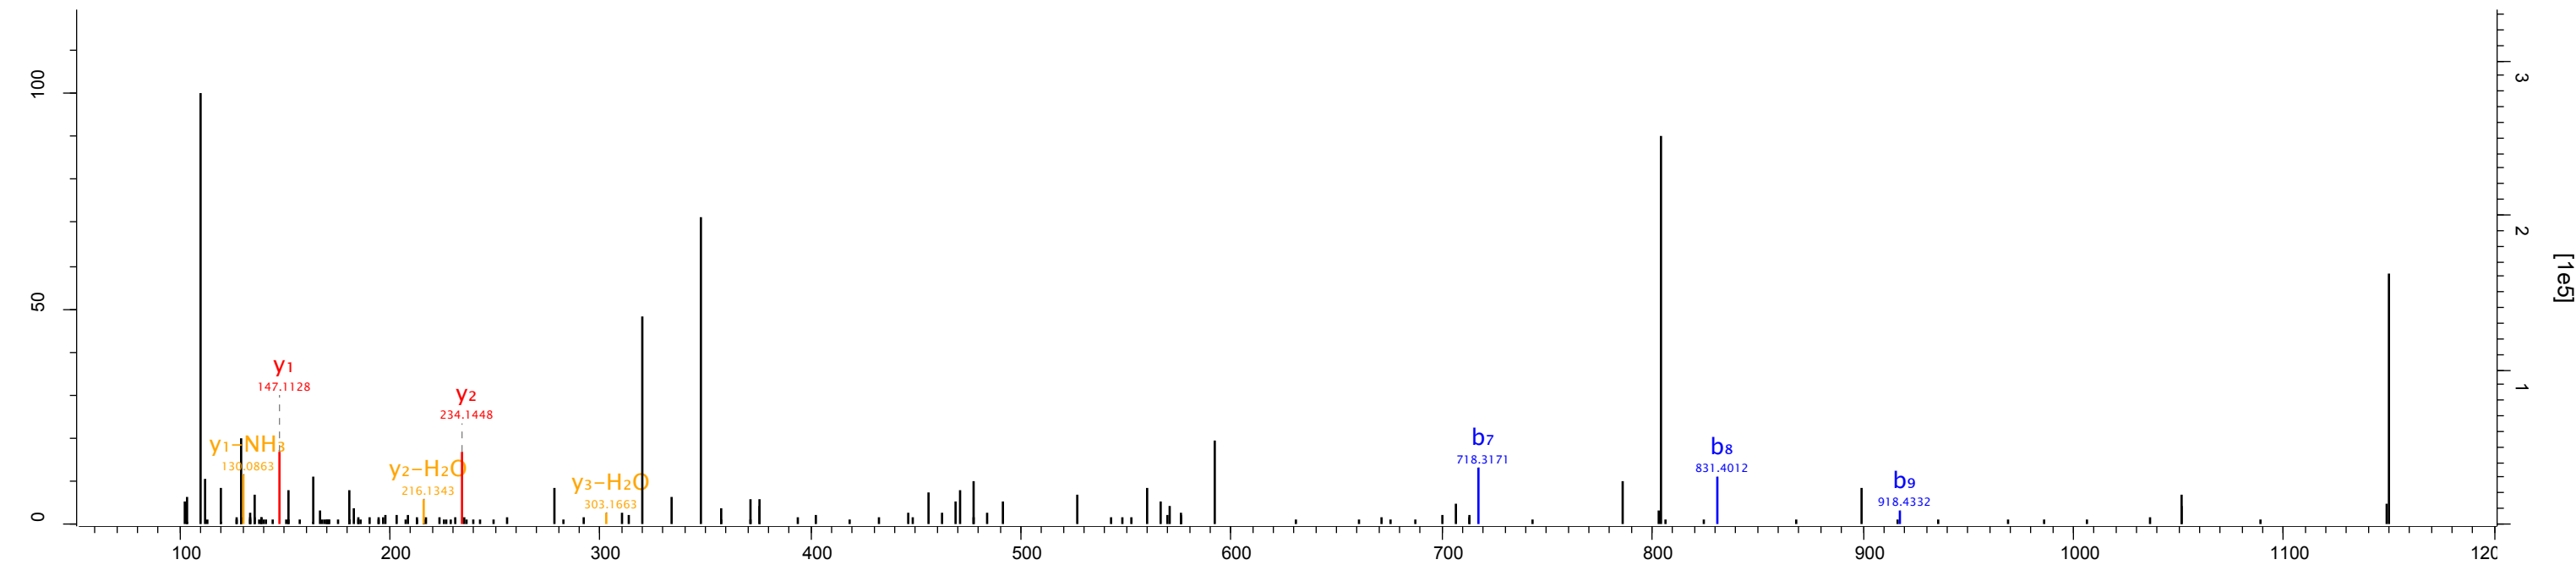

- ph  
S S G V I P P L S S K -  
b7 b8 b9 y2 y1

Raw file: 20150814\_A375SR\_Phospho\_BR2\_03  
 Scan: 9066 Method: FTMS; HCD Score: 54.1 m/z: 785.38 Gene names: CRYBB1

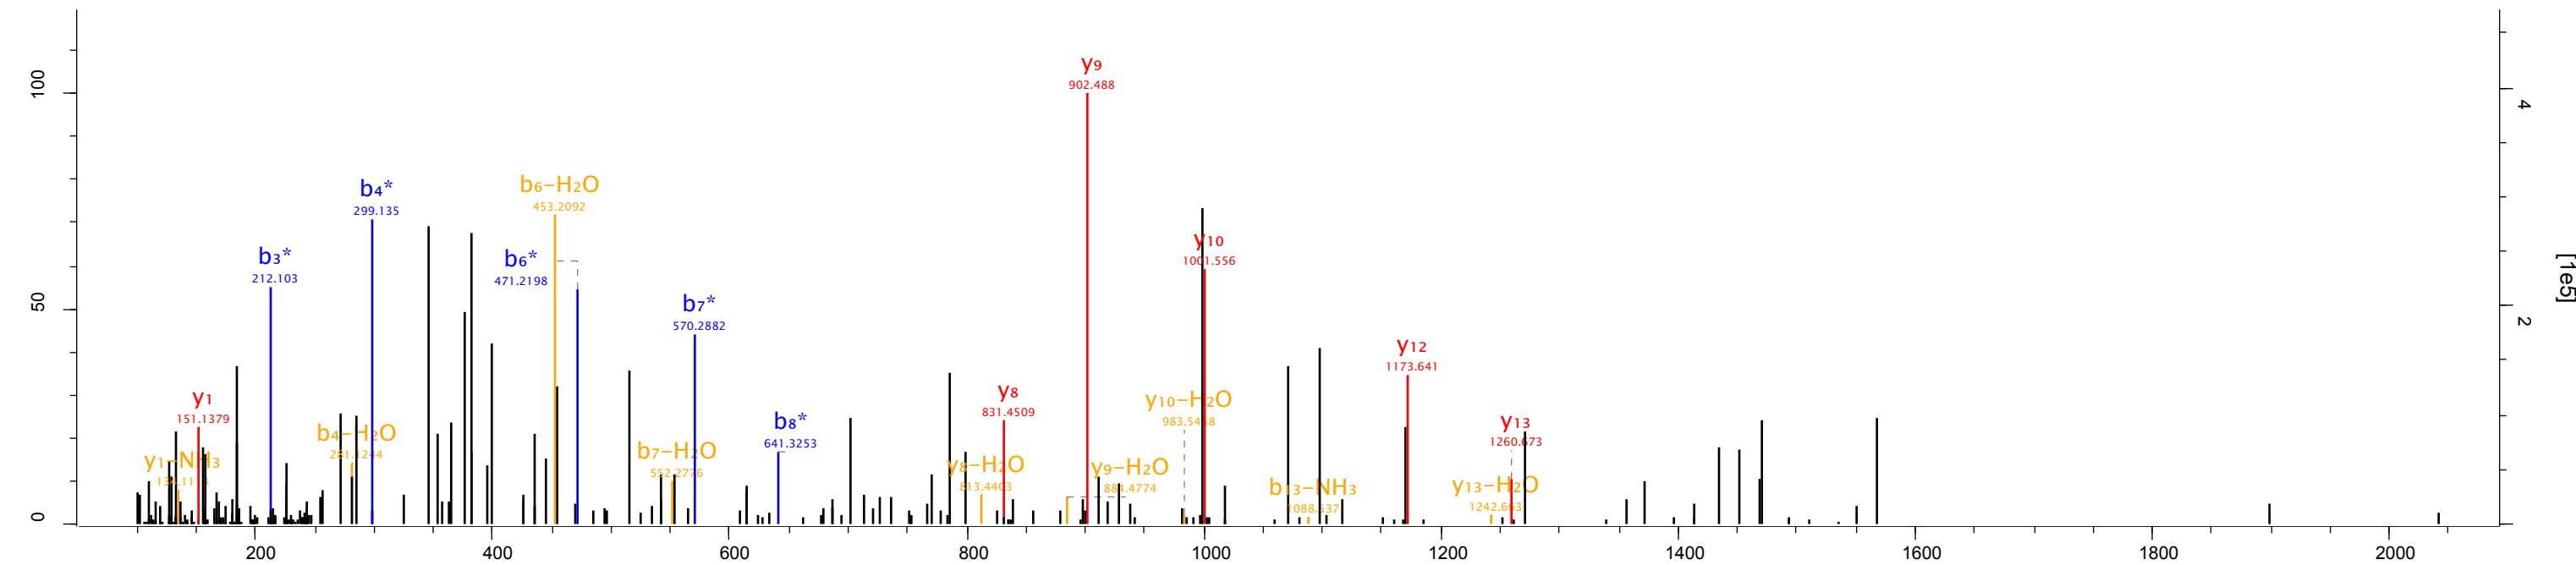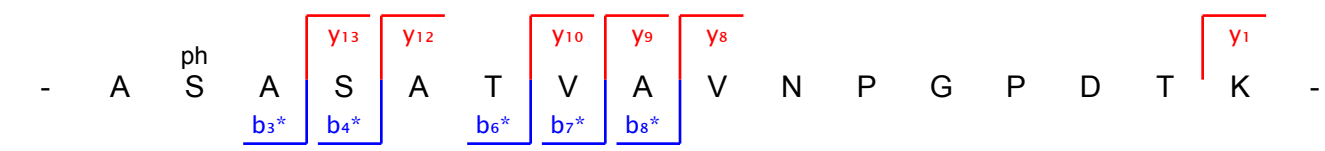

Raw file: 20150814\_A375SR\_Phospho\_BR2\_04  
 Scan: 12526 Method: FTMS; HCD Score: 95.23 m/z: 907.4 Gene names: NPHP4

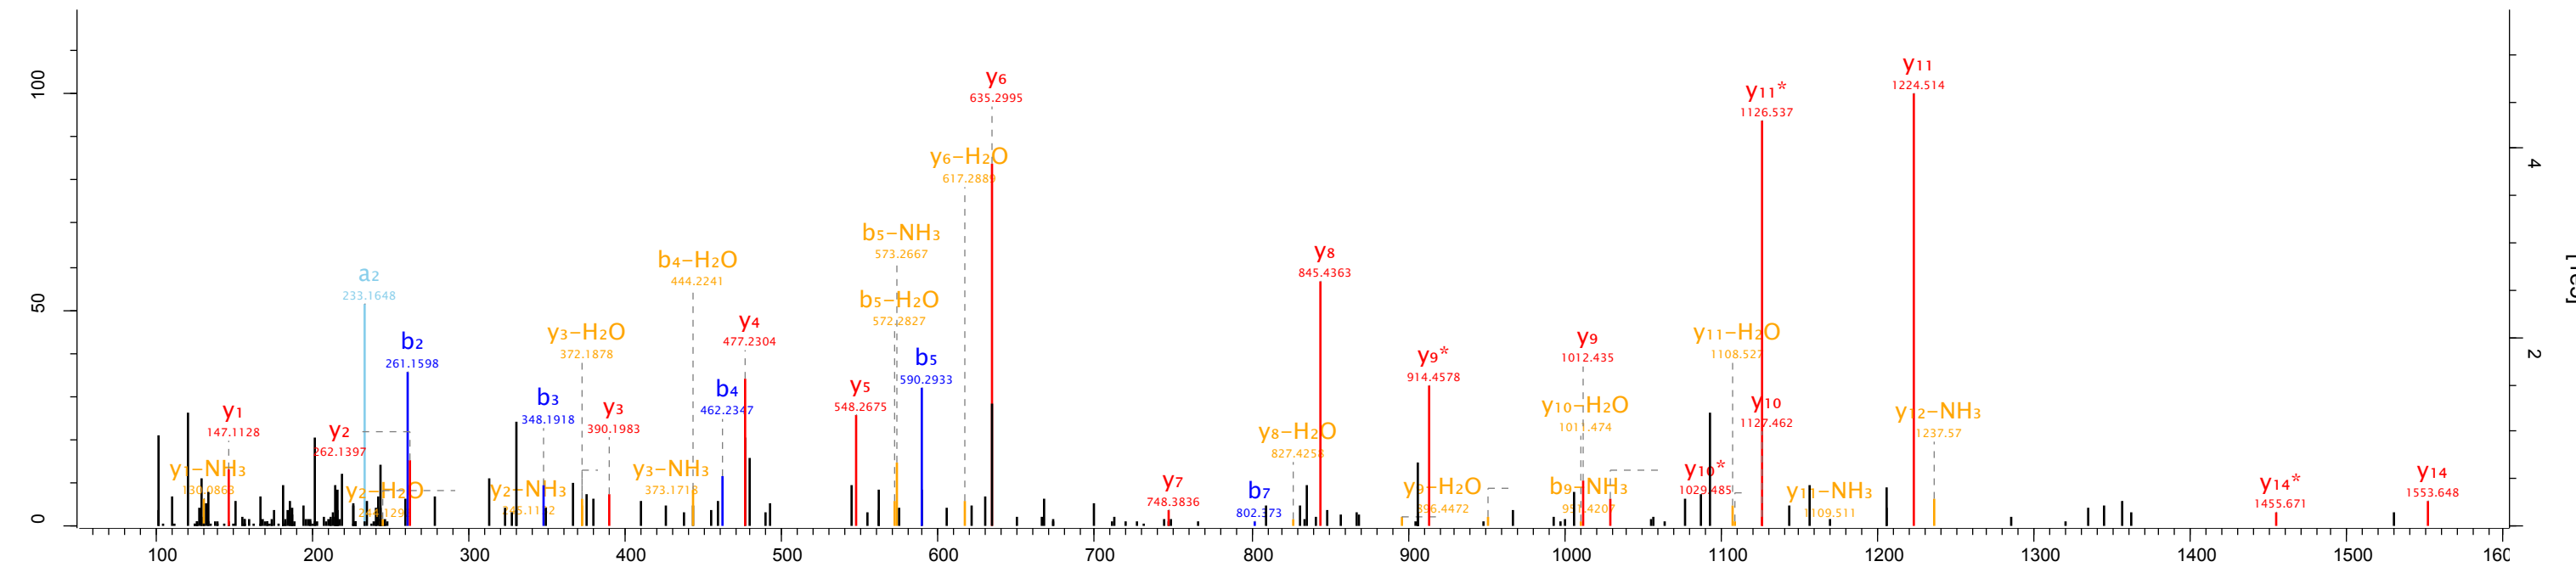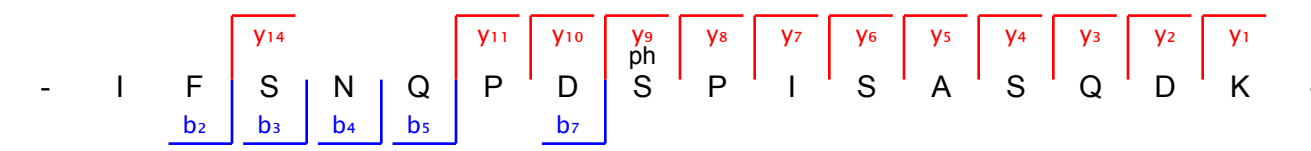

Raw file 20150814\_A375SR\_Phospho\_BR2\_04 Scan 13436 Method FTMS; HCD Score 174.59 m/z 782.84 Gene names PWWP2A

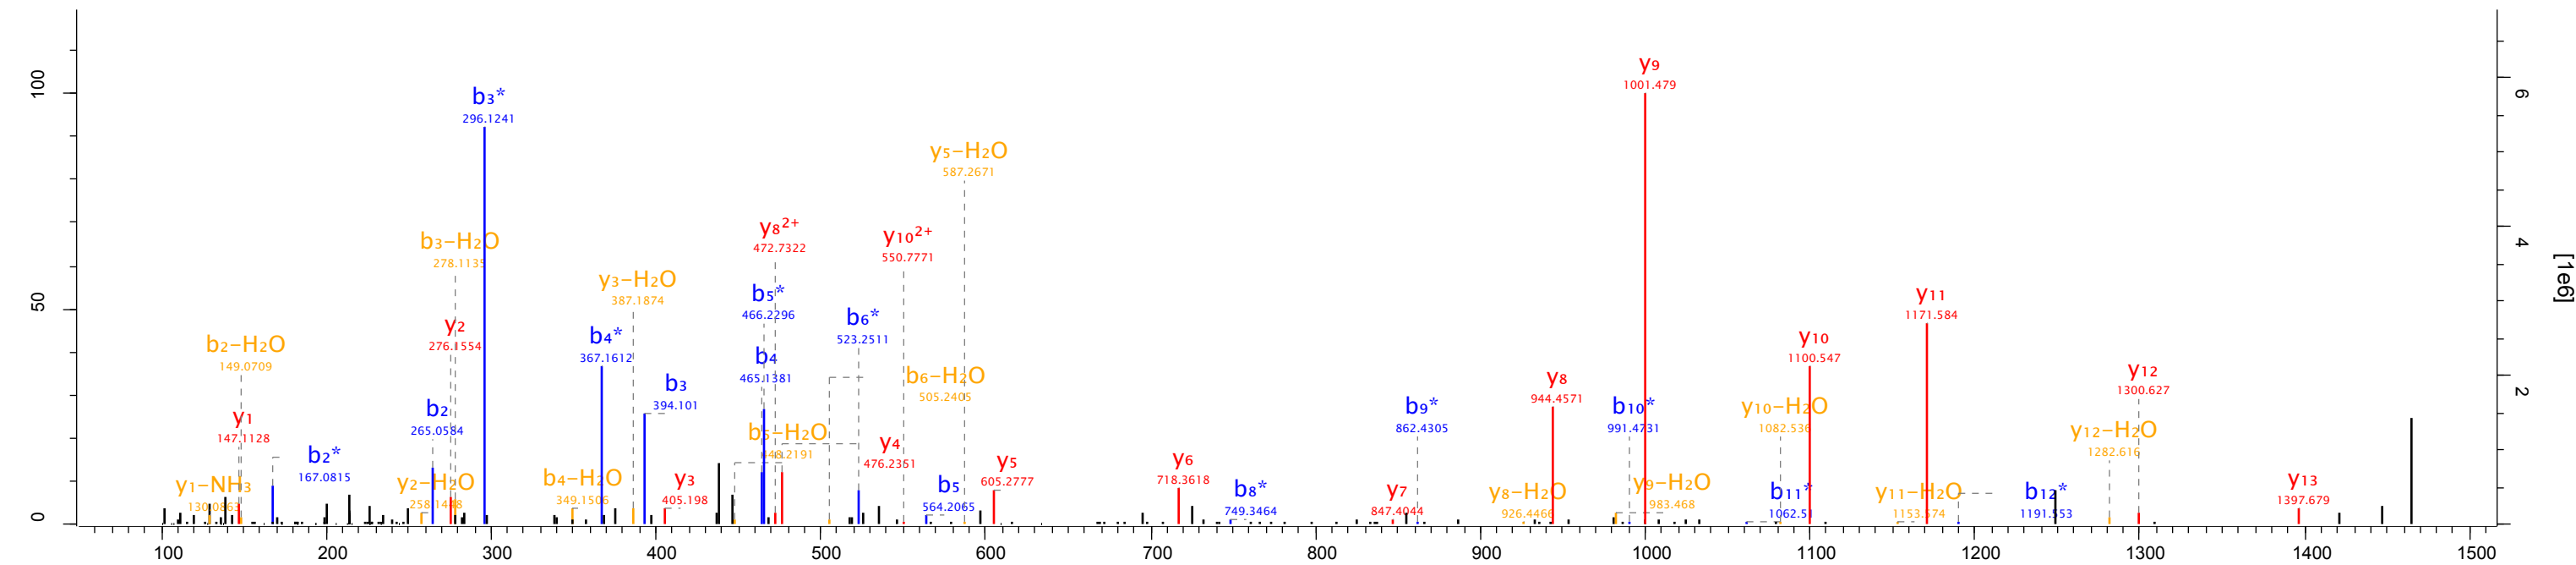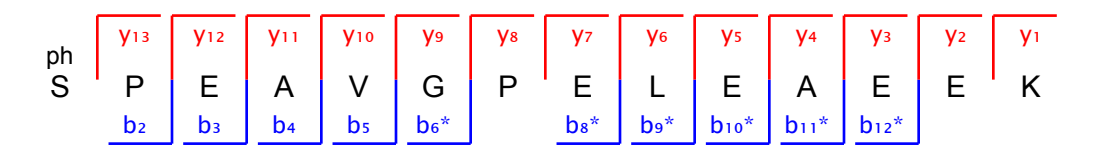



Raw file 20150814\_A375SR\_Phospho\_BR2\_04 Scan 26606 Method FTMS; HCD Score 85.16 m/z 924.4 Gene names C19orf26;DOS

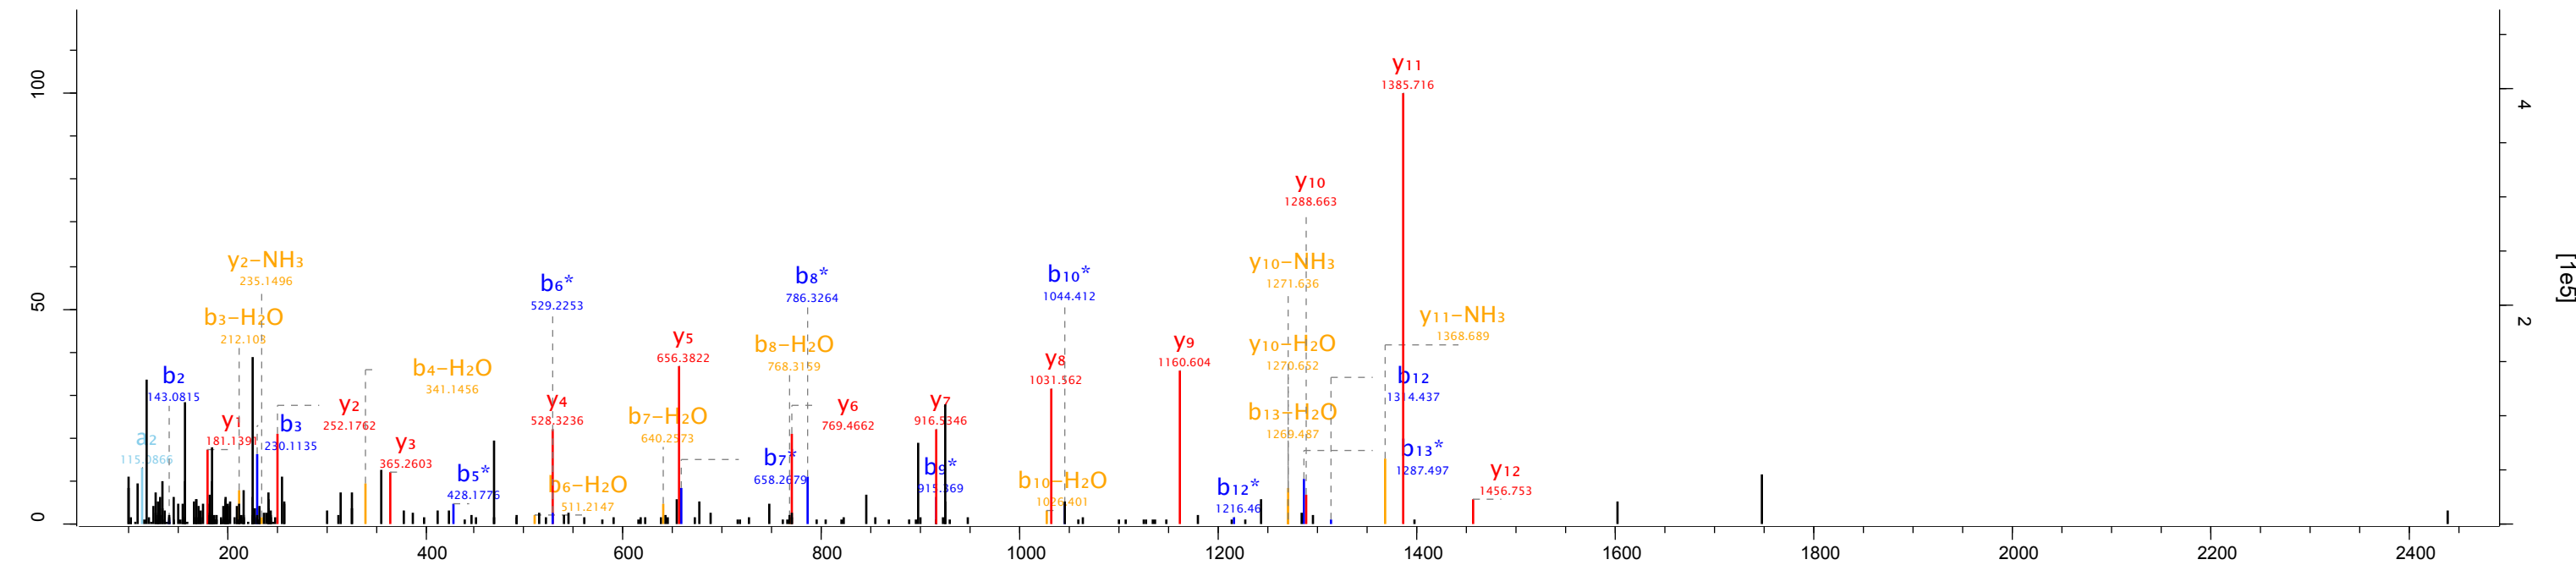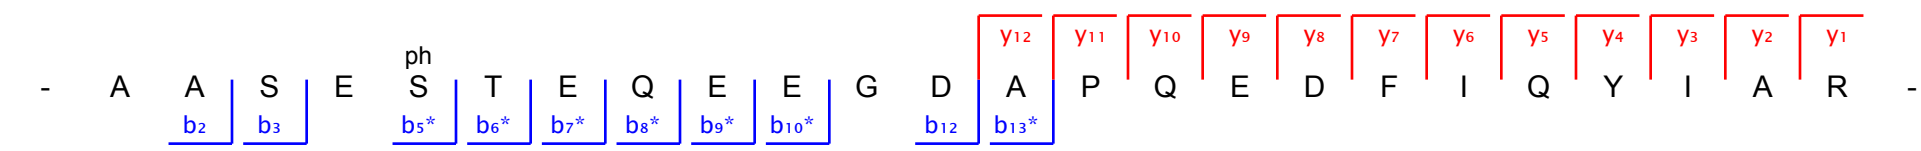

Raw file: 20150814\_A375SR\_Phospho\_BR2\_04  
 Scan: 5566 Method: FTMS; HCD Score: 149.67 m/z: 844.86 Gene names: YAF2

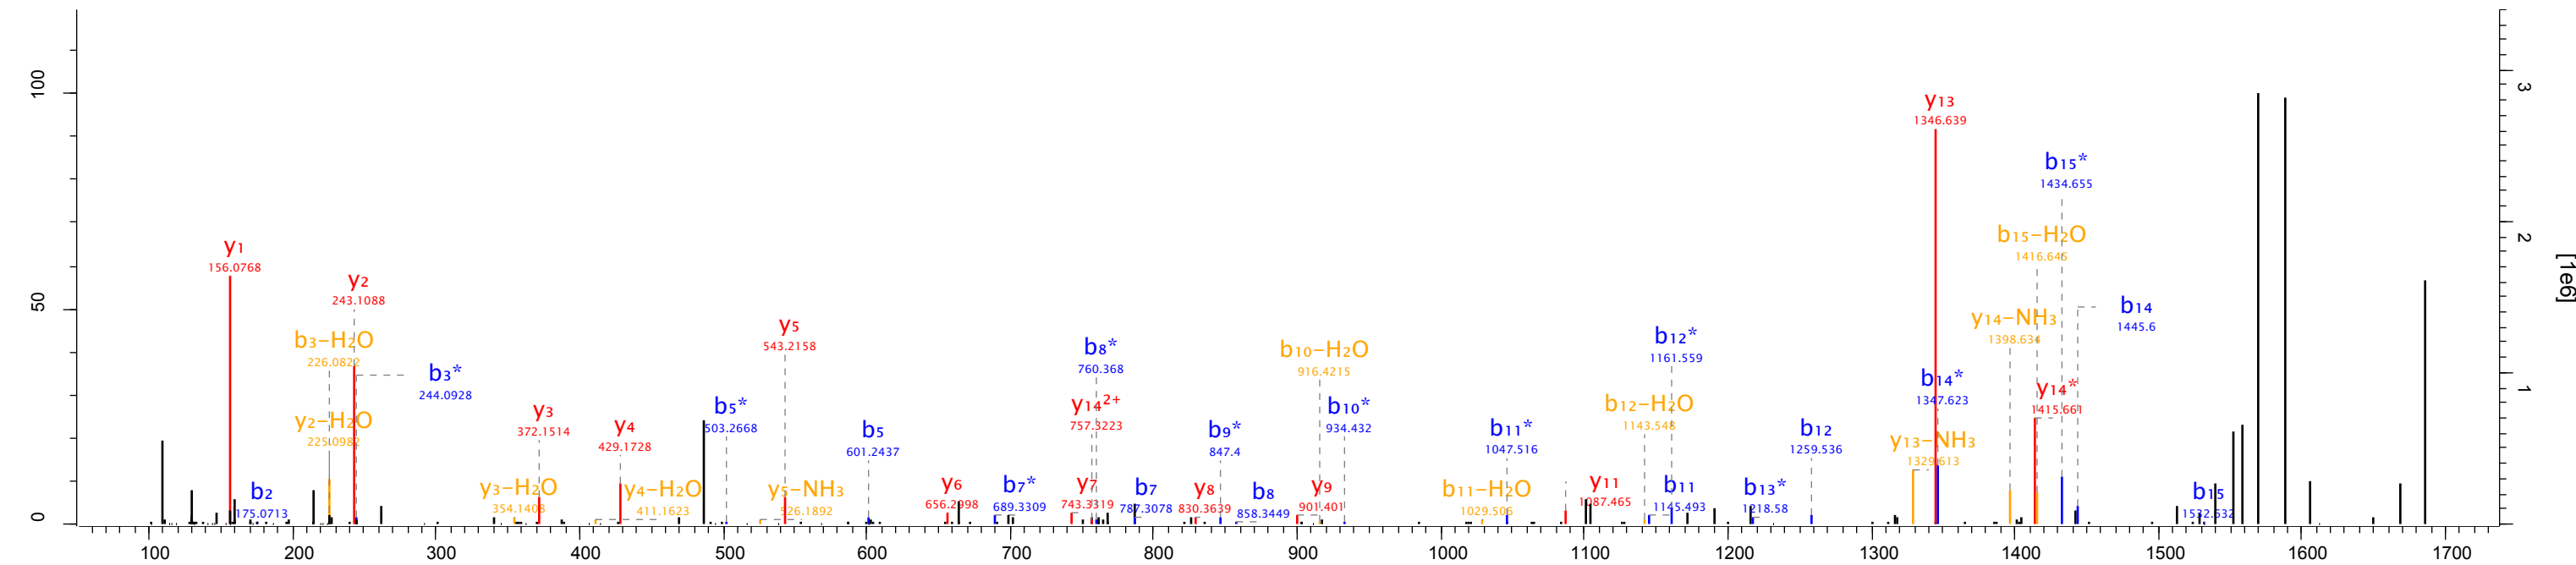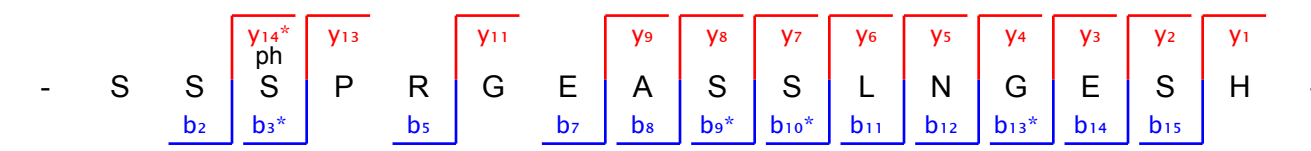

Raw file 20150814\_A375SR\_Phospho\_BR2\_05 Scan 11986 Method FTMS; HCD Score 205.96 m/z 1031.42

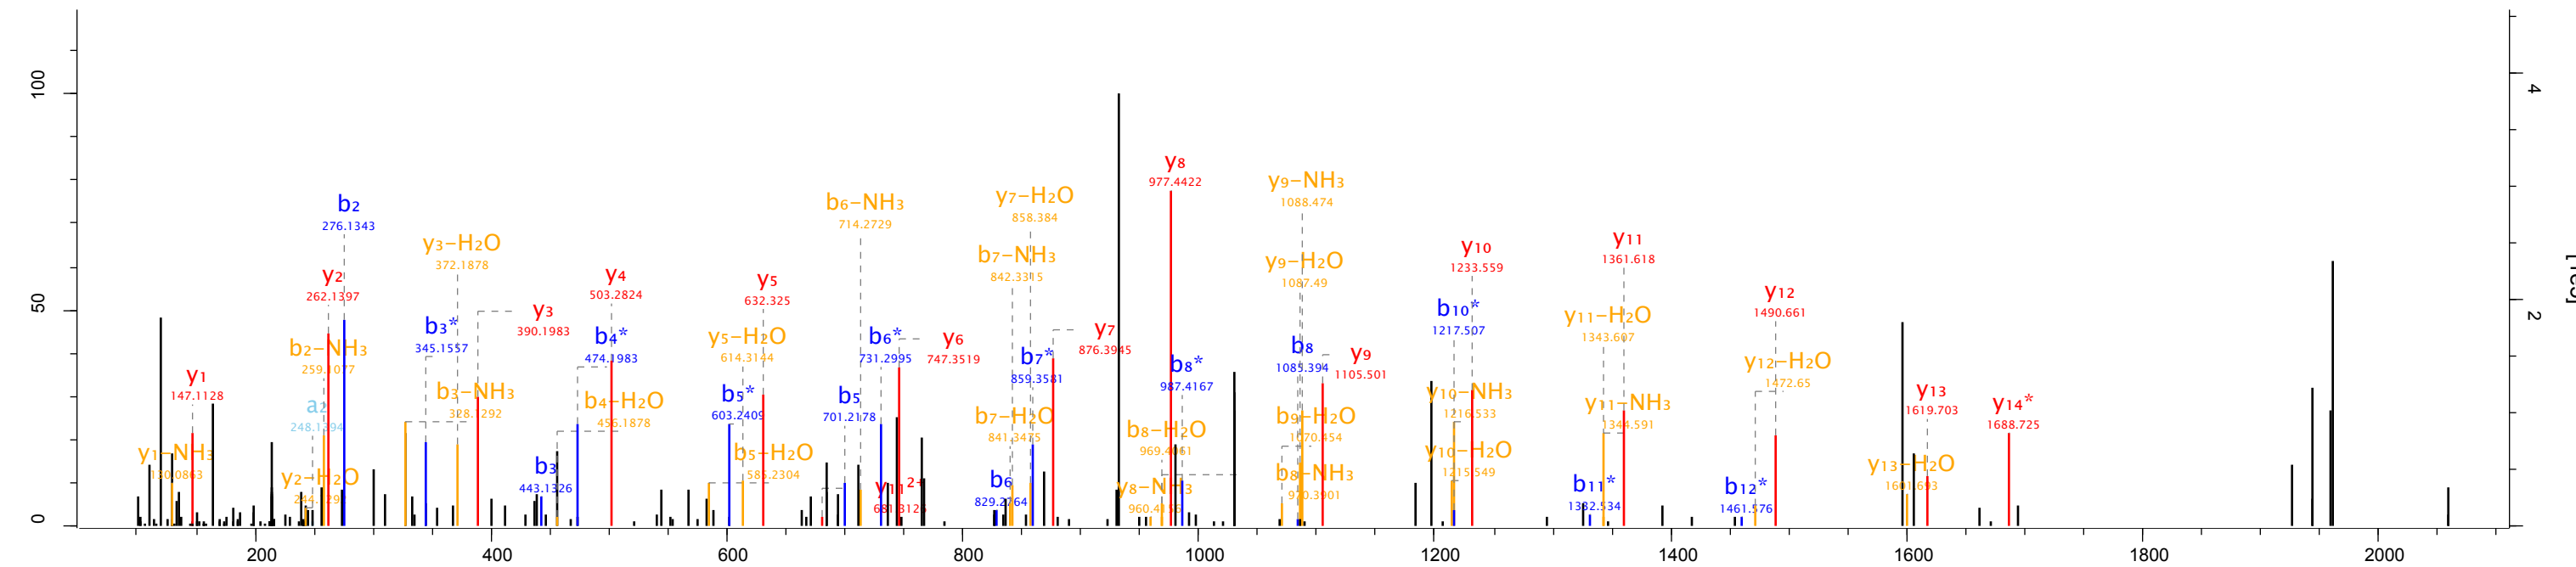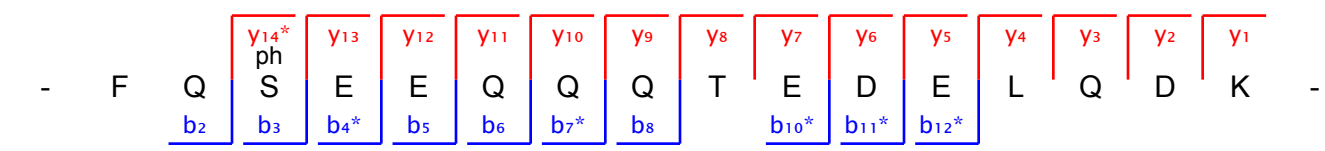

Raw file: 20150814\_A375SR\_Phospho\_BR2\_05  
 Scan: 13716 Method: FTMS; HCD Score: 89.89 m/z: 654.37 Gene names: RPL39P5;RPL39

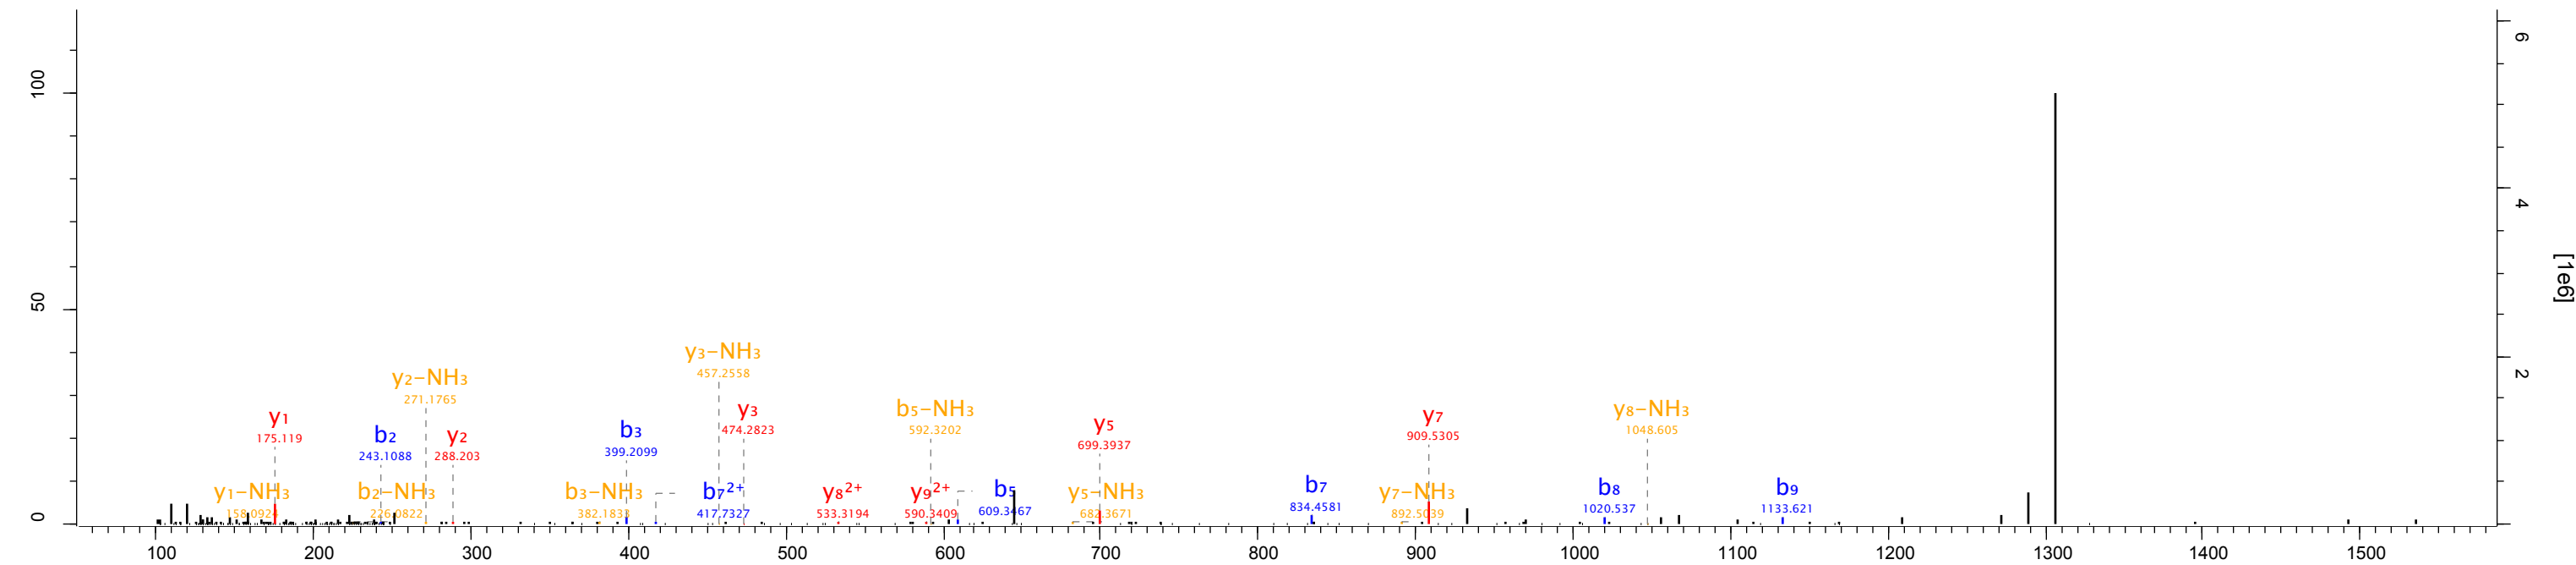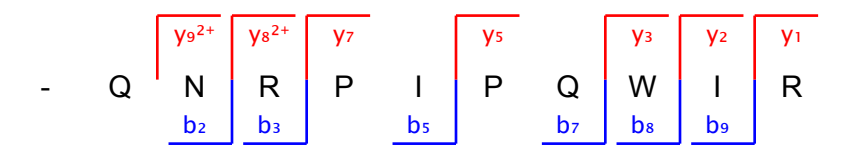

Raw file: 20150814\_A375SR\_Phospho\_BR2\_05  
 Scan: 16436 Method: FTMS; HCD Score: 59.01 m/z: 506.72 Gene names: MLF1

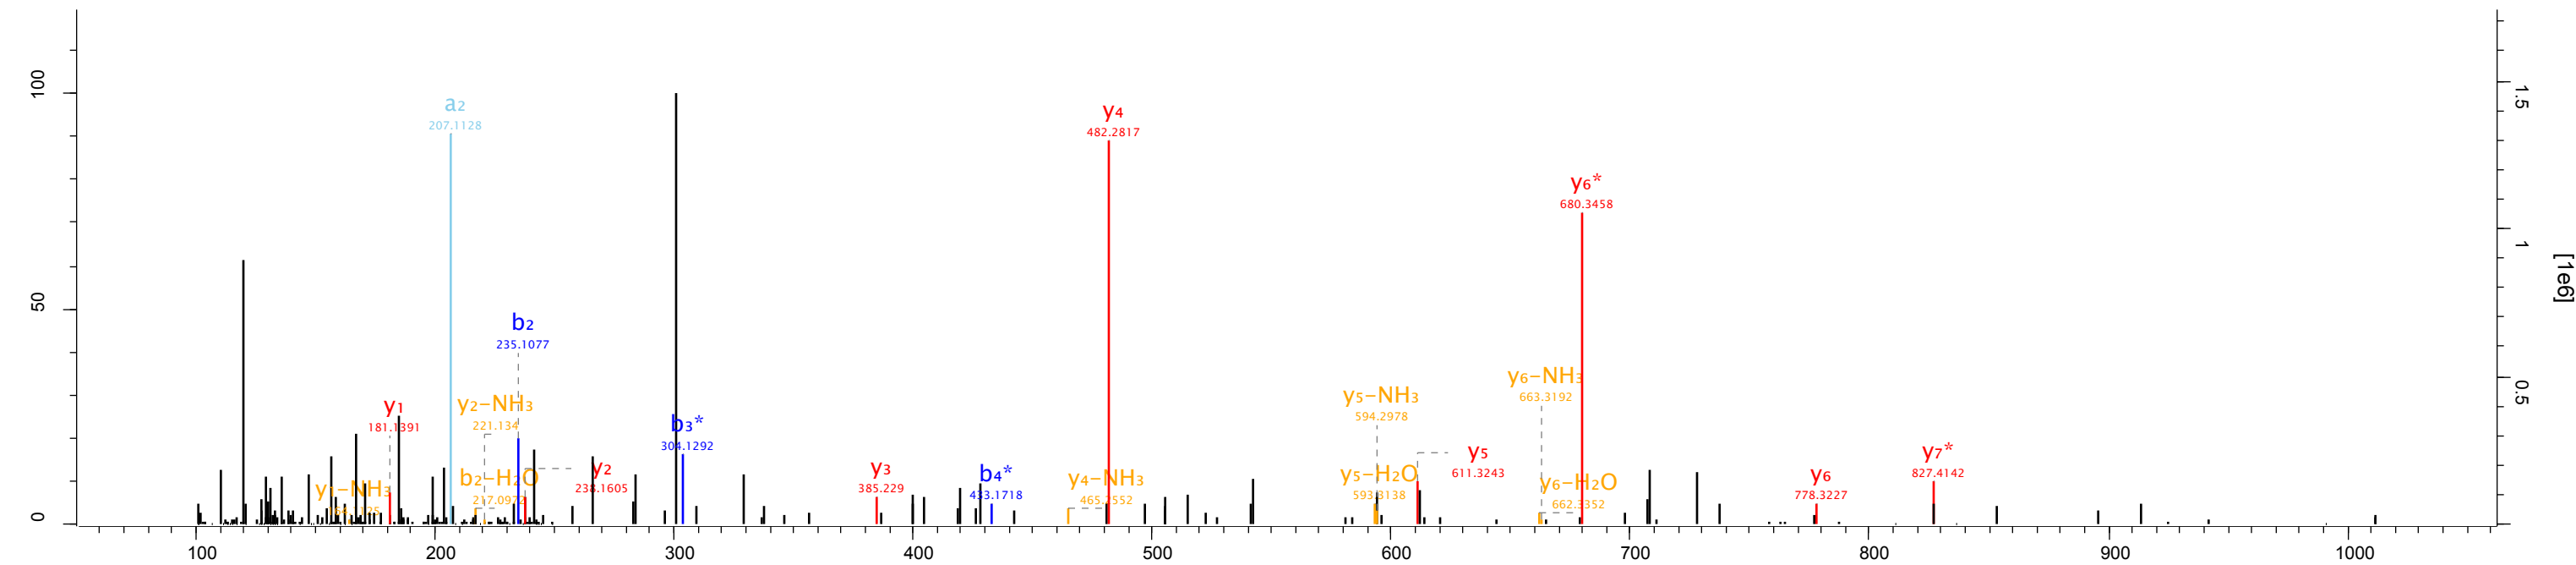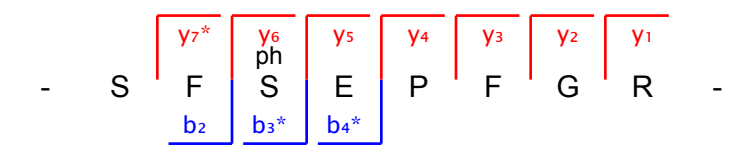

Raw file: 20150814\_A375SR\_Phospho\_BR2\_05  
 Scan: 19516 Method: FTMS; HCD Score: 55.98 m/z: 569.76 Gene names: CCDC125

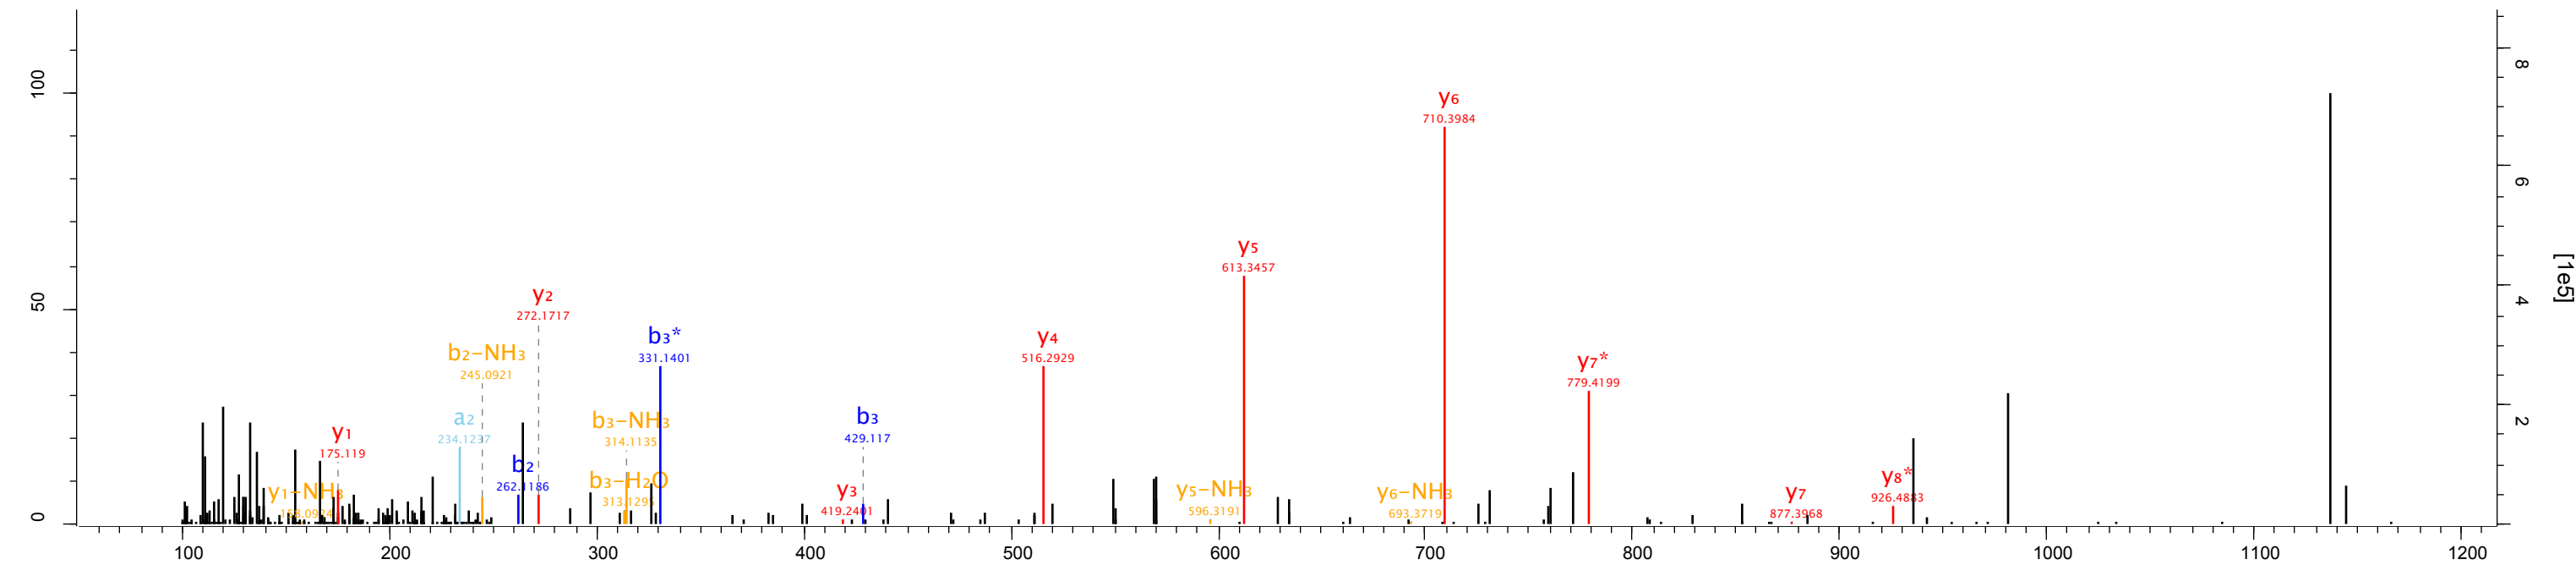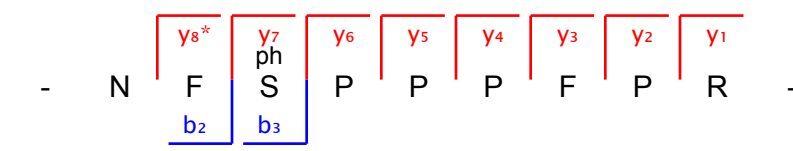

Raw file 20150814\_A375SR\_Phospho\_BR2\_05 Scan 22036 Method FTMS; HCD Score 98.68 m/z 643.84 Gene names LSR

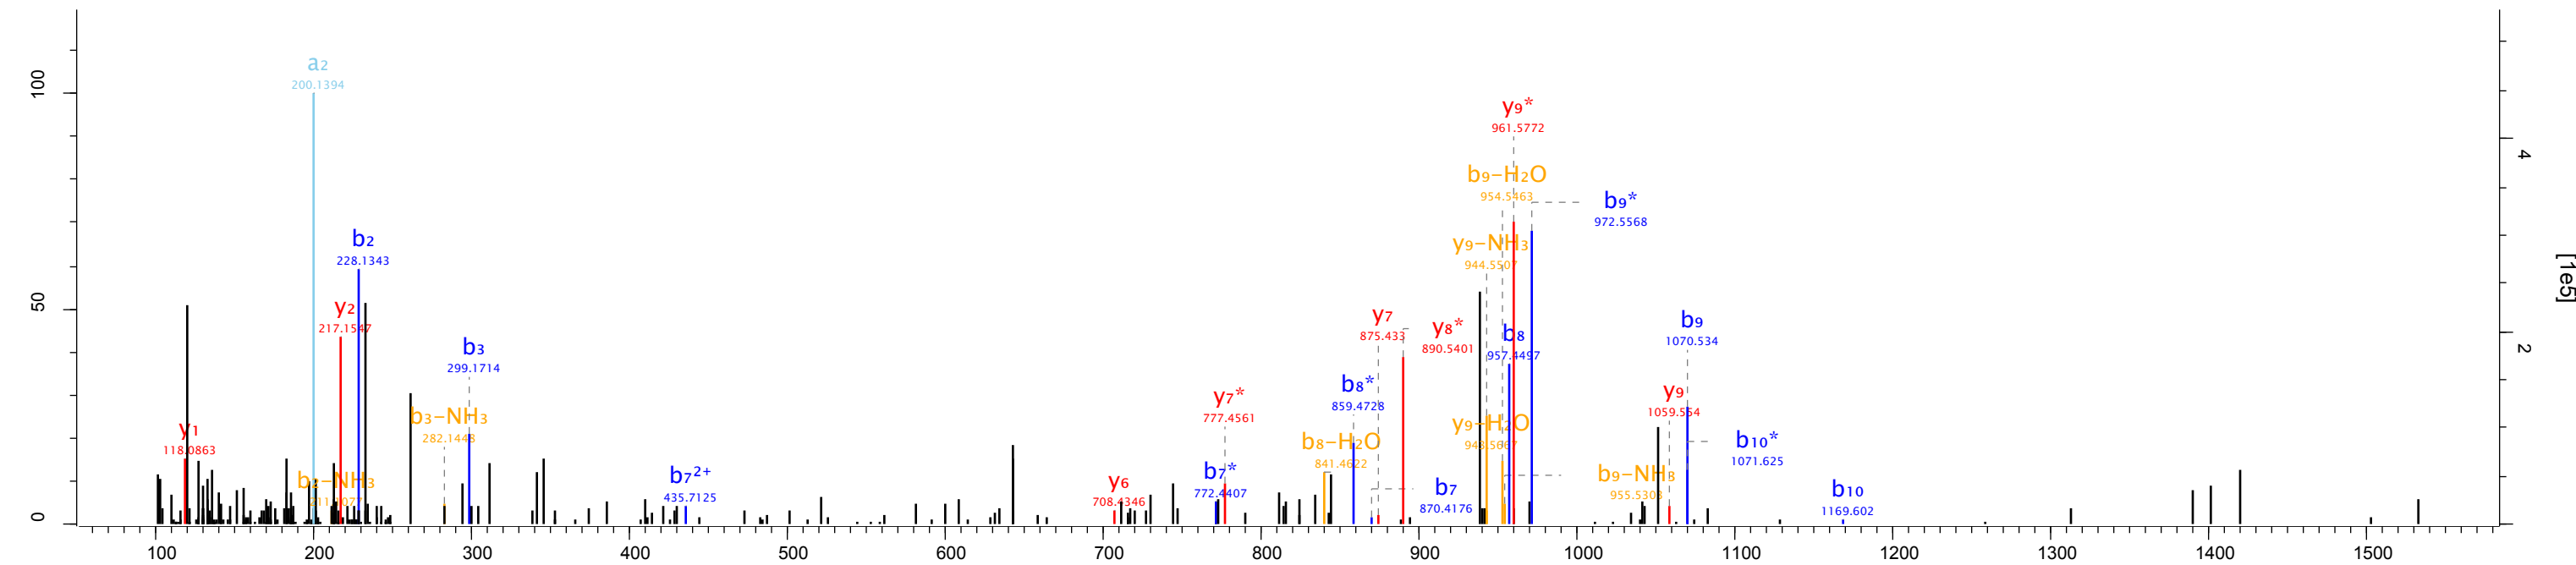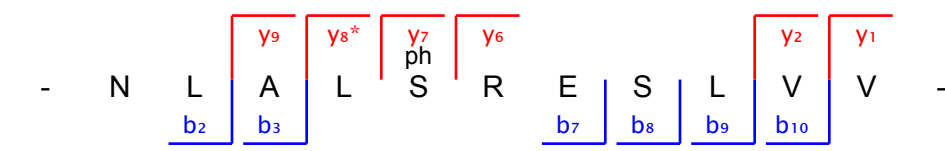

Raw file 20150814\_A375SR\_Phospho\_BR2\_06 Scan 11356 Method FTMS; HCD Score 82.66 m/z 693.35 Gene names ELK3

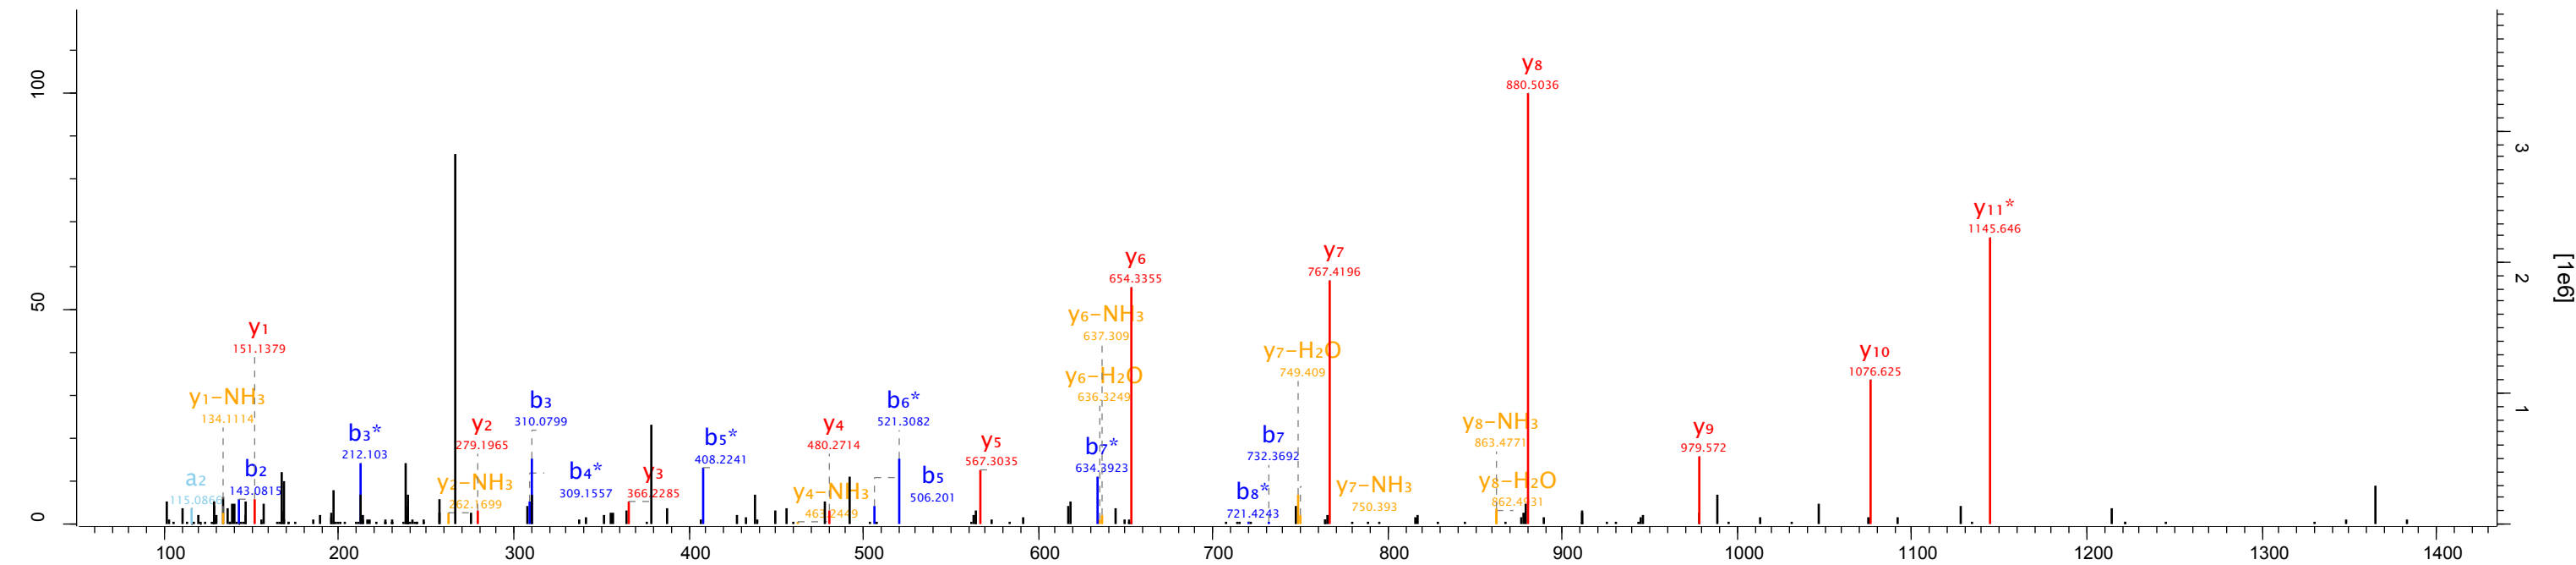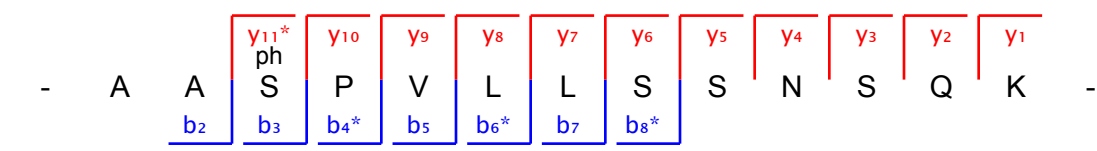



Raw file: 20150814\_A375SR\_Phospho\_BR2\_06  
 Scan: 15216 Method: FTMS; HCD Score: 109.5 m/z: 887.89 Gene names: RANBP3;ZNF8

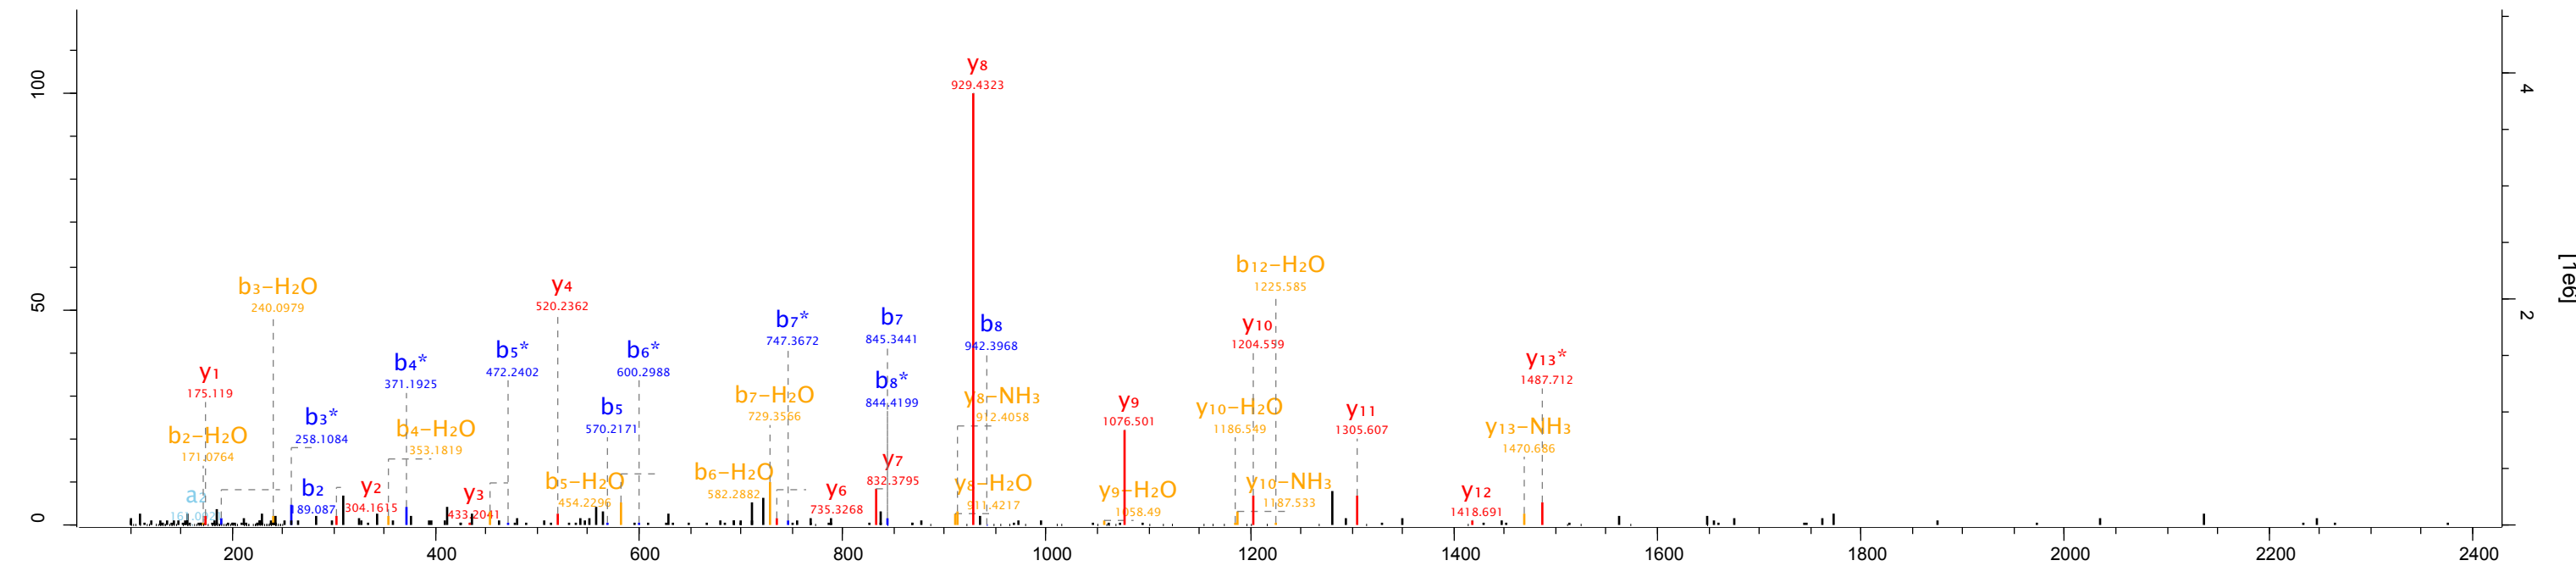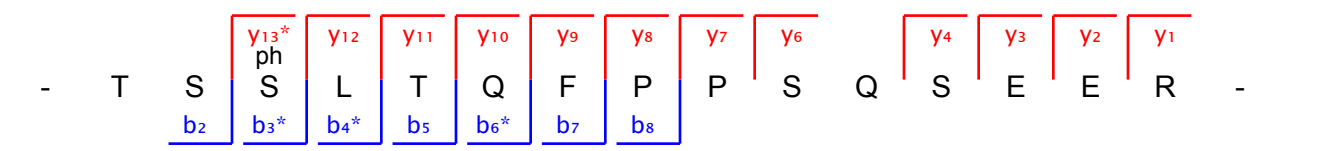

Raw file 20150814\_A375SR\_Phospho\_BR2\_08 Scan 22356 Method FTMS; HCD Score 143.92 m/z 1100.51 Gene names CEBPG

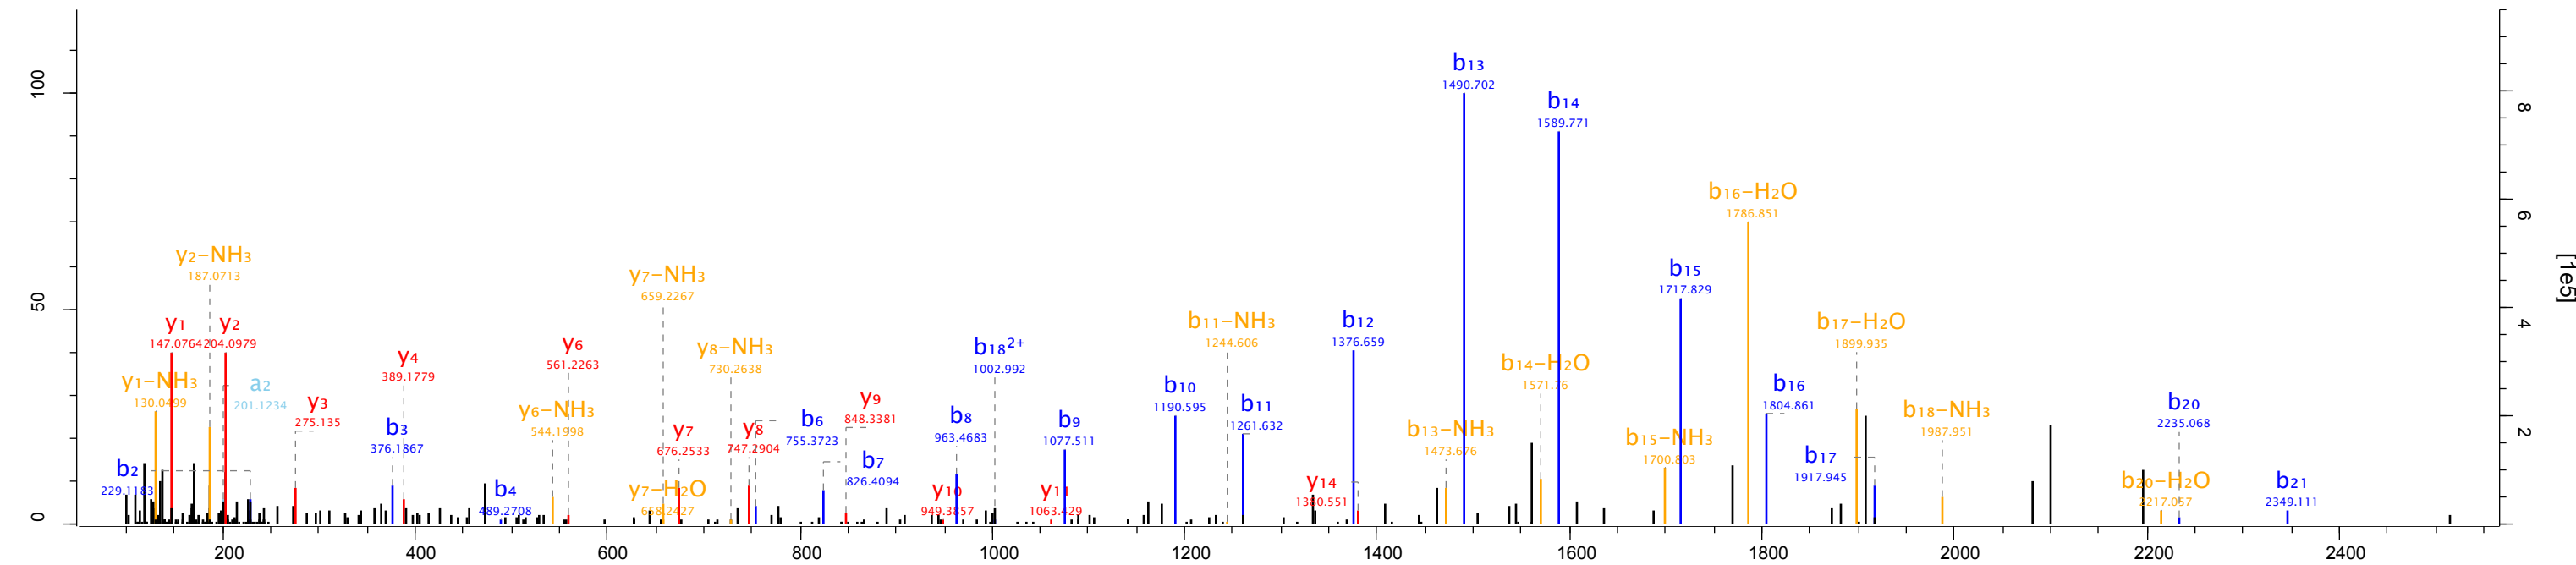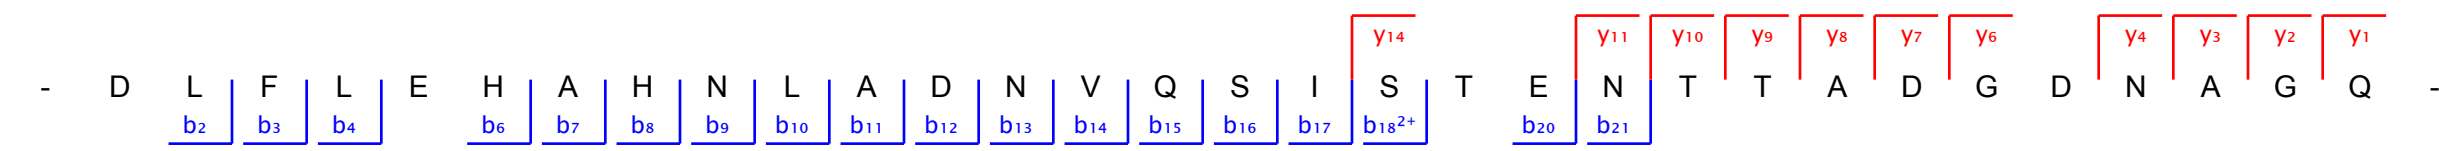

Raw file 20150814\_A375SR\_Phospho\_BR2\_09 Scan 17786 Method FTMS; HCD Score 64.26 m/z 596.63 Gene names MKNK2

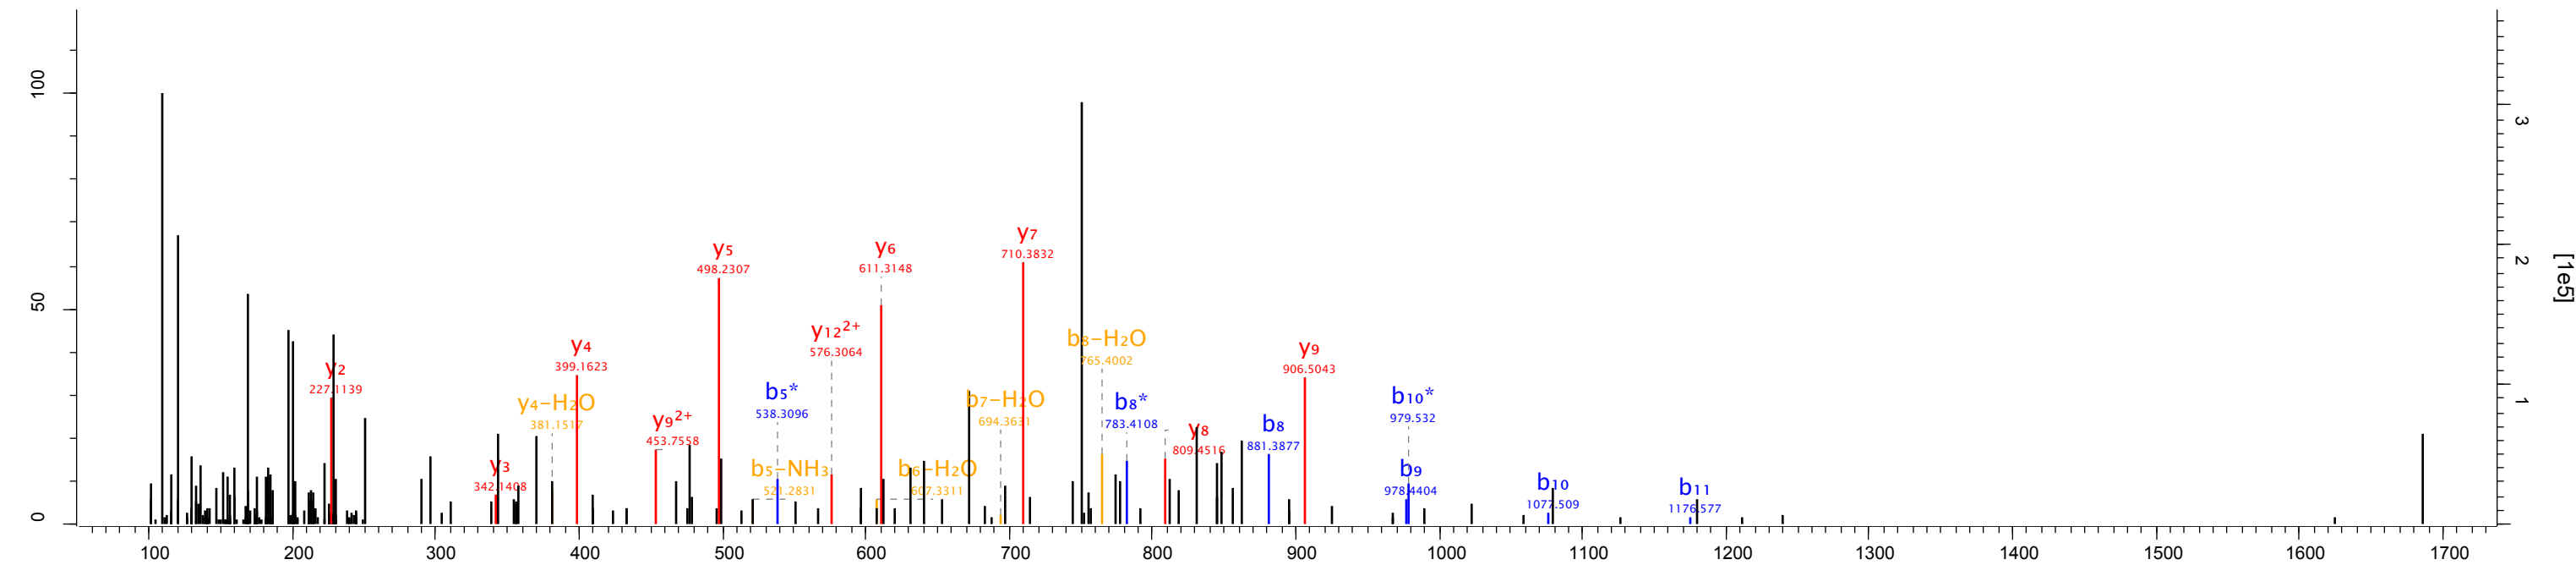

- Q R A S L S S A P V V L V G D H A -

b<sub>5</sub>\*
y<sub>12</sub><sup>2+</sup>
b<sub>8</sub>
y<sub>9</sub>
b<sub>9</sub>
y<sub>8</sub>
b<sub>10</sub>
y<sub>7</sub>
b<sub>11</sub>
y<sub>6</sub>
y<sub>5</sub>
y<sub>4</sub>
y<sub>3</sub>
y<sub>2</sub>

Raw file 20150814\_A375SR\_Phospho\_BR2\_09 Scan 28736 Method FTMS; HCD Score 155.38 m/z 725.37 Gene names SLC35C2

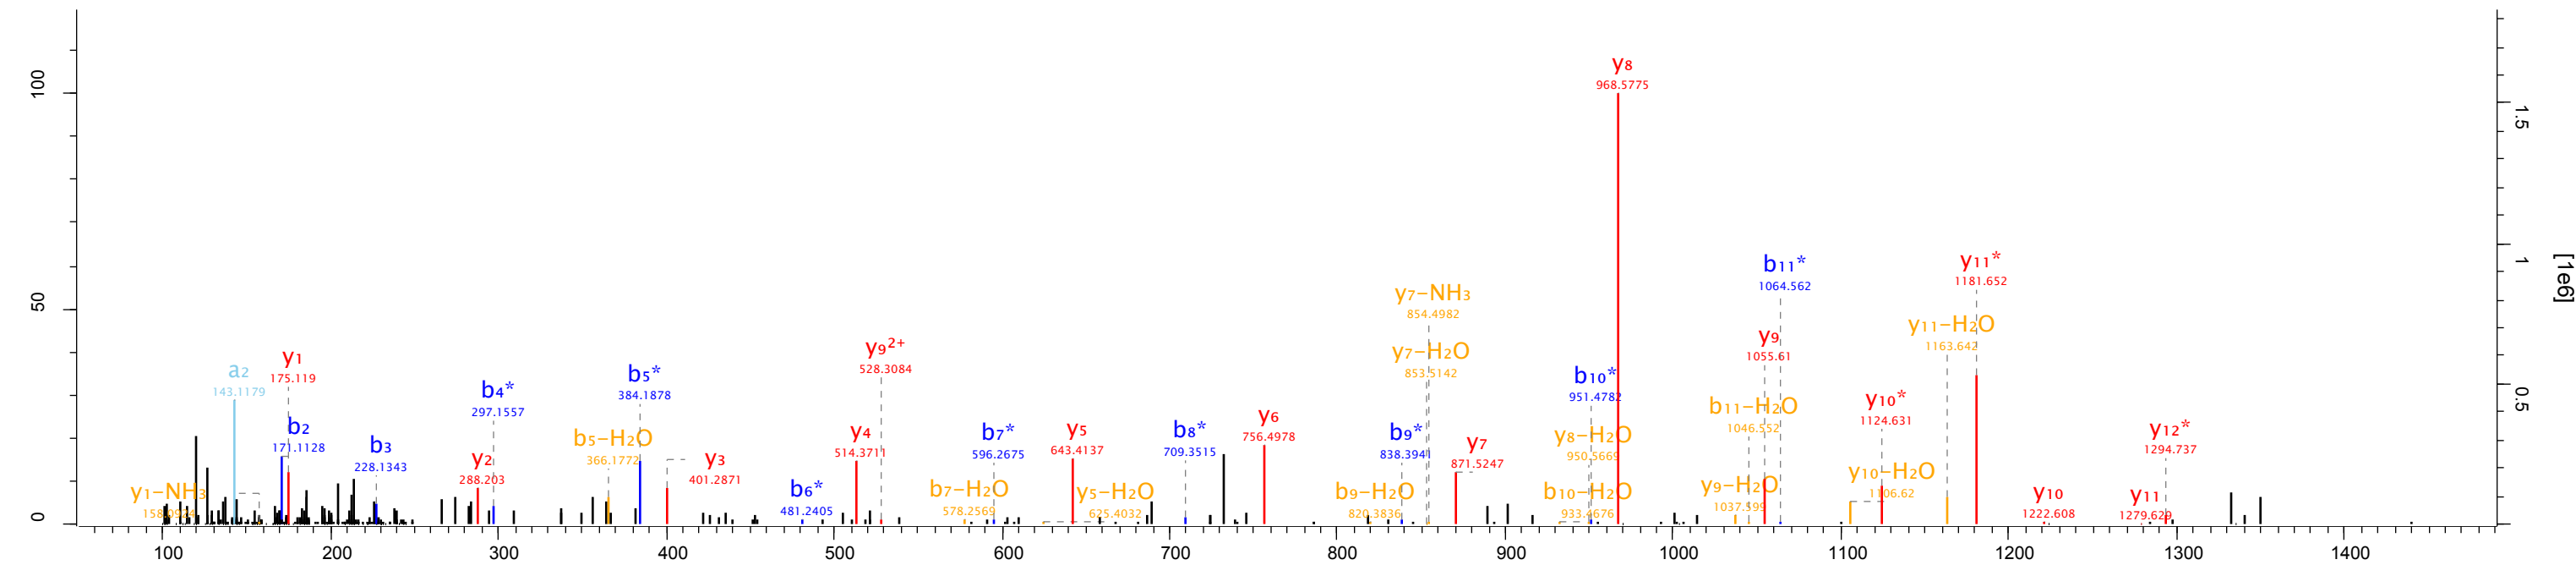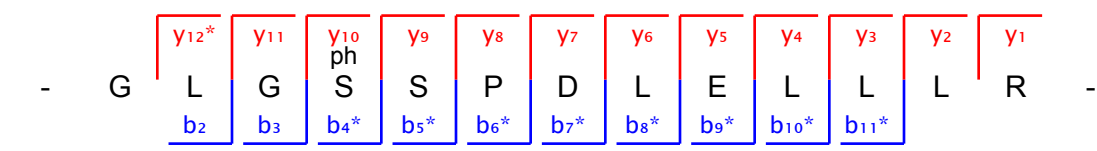

Raw file: 20150814\_A375SR\_Phospho\_BR2\_09  
 Scan: 9076 Method: FTMS; HCD Score: 41.74 m/z: 500.92

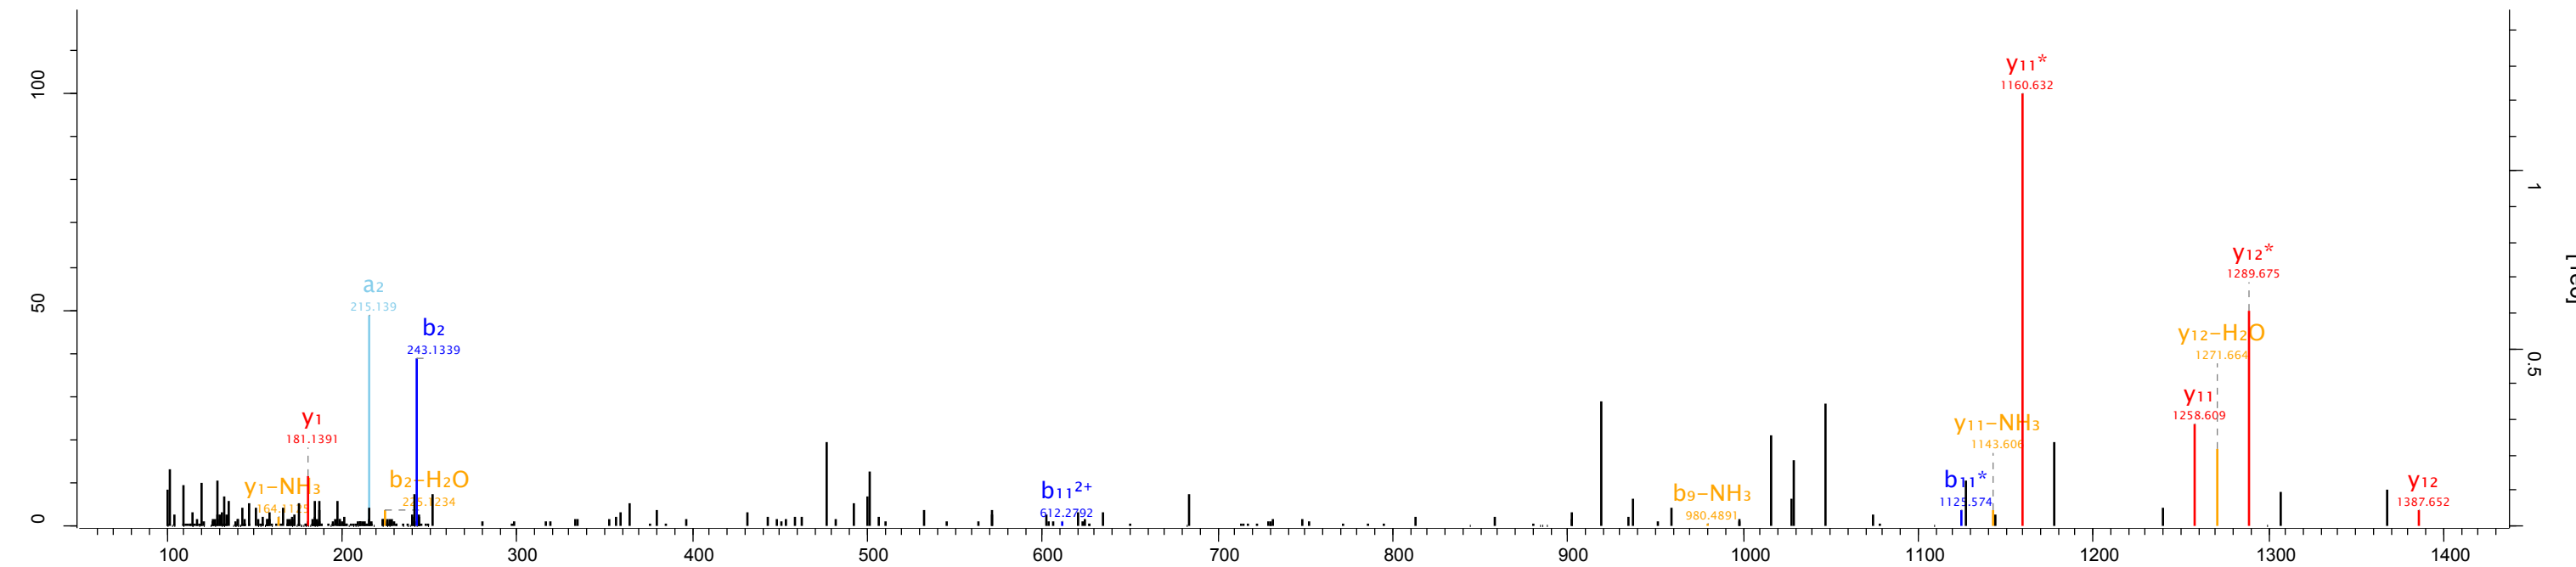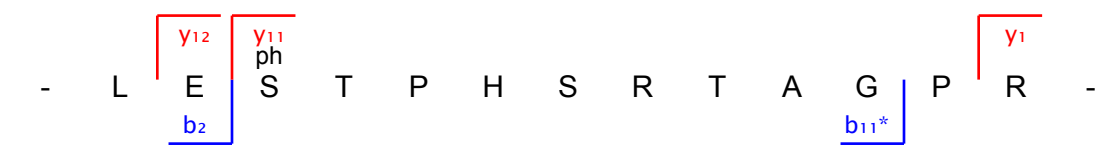

Raw file: 20150814\_A375SR\_Phospho\_BR2\_10  
 Scan: 5556 Method: FTMS; HCD Score: 46.82 m/z: 426.73

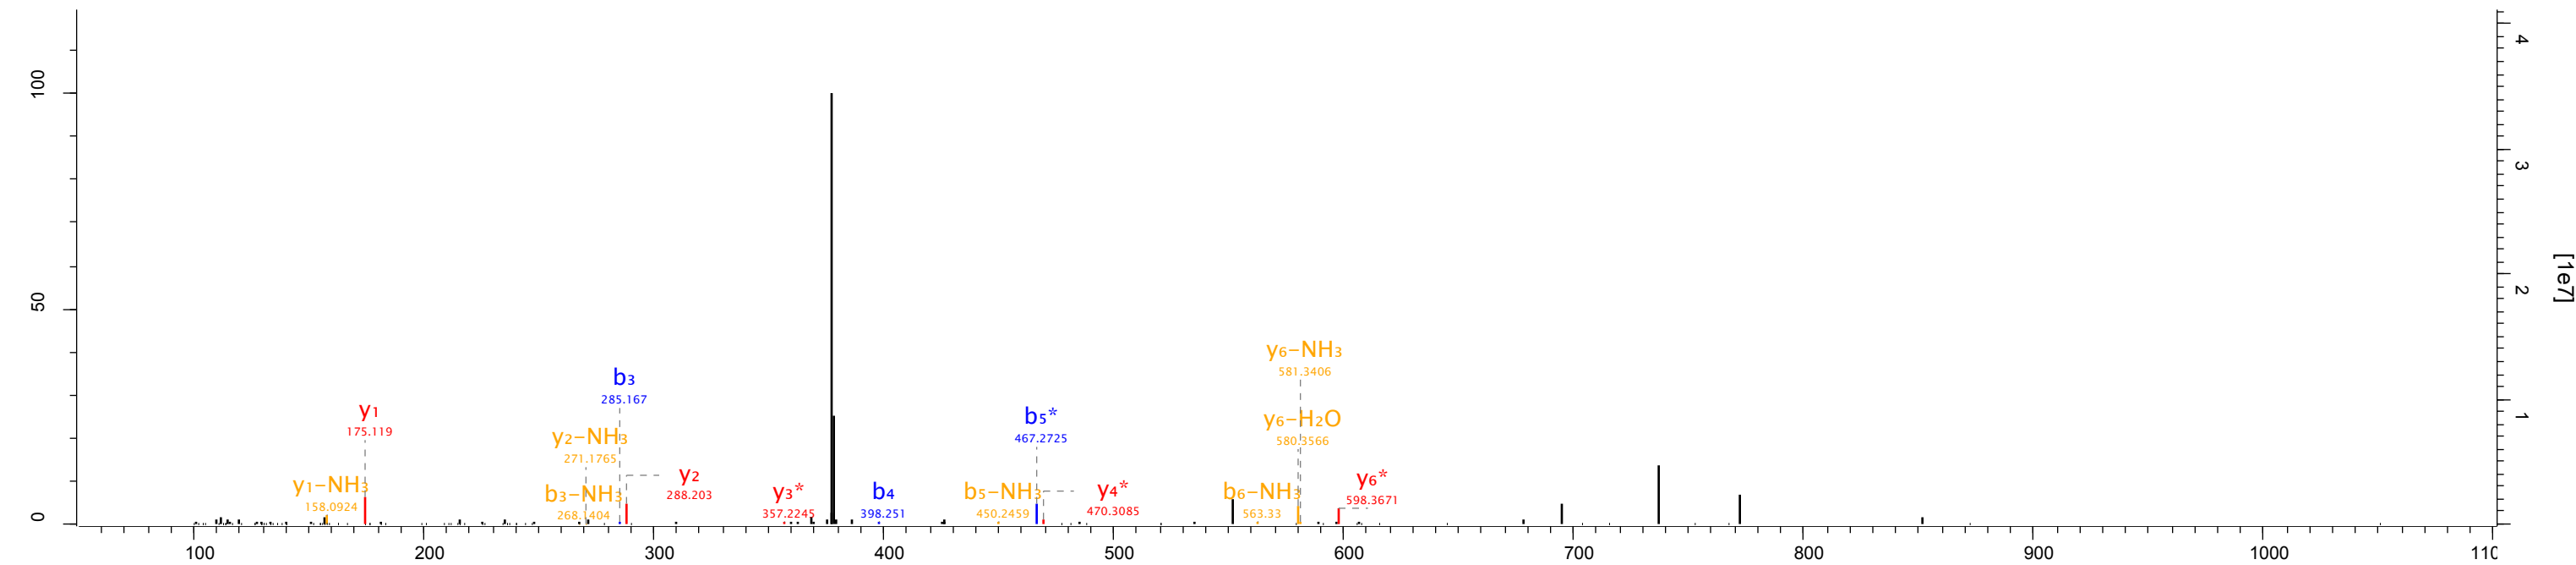

Raw file: 20150818\_A375SR-Proteome\_BR1  
 Scan: 117716  
 Method: FTMS; HCD  
 Score: 74.99  
 m/z: 753.43  
 Gene names: GEMIN7

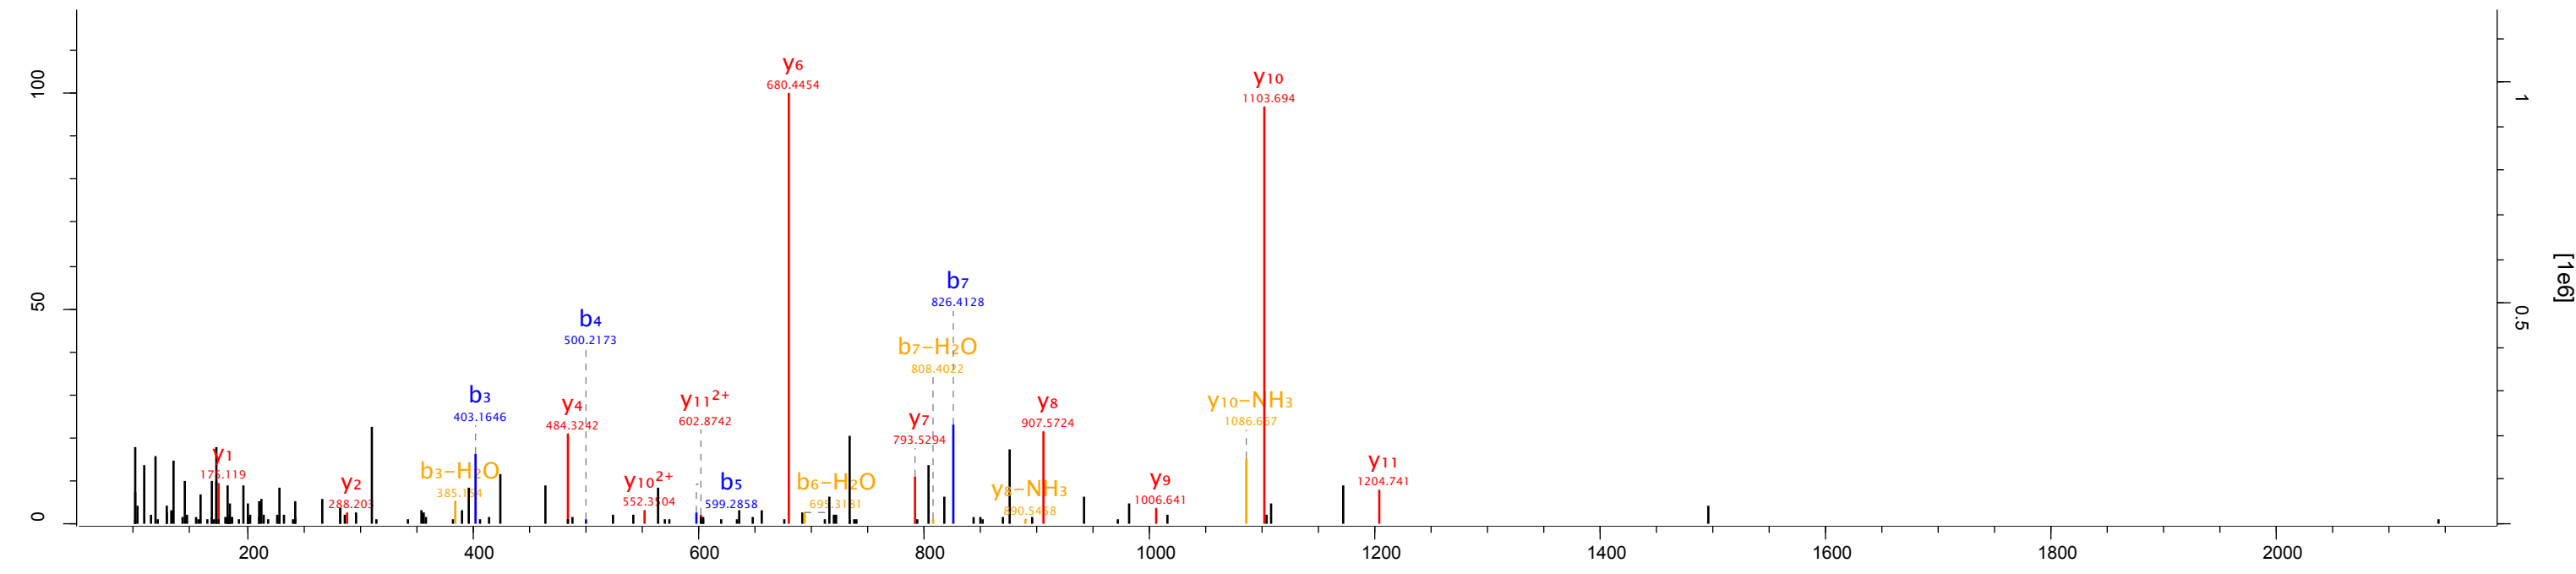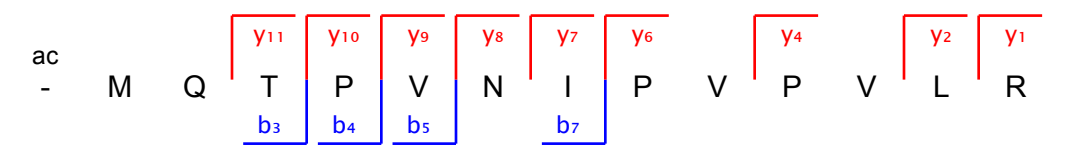

Raw file: 20150818\_A375SR-Proteome\_BR1  
 Scan: 68306 Method: FTMS; HCD Score: 109.71 m/z: 496.76 Gene names: SEPT3

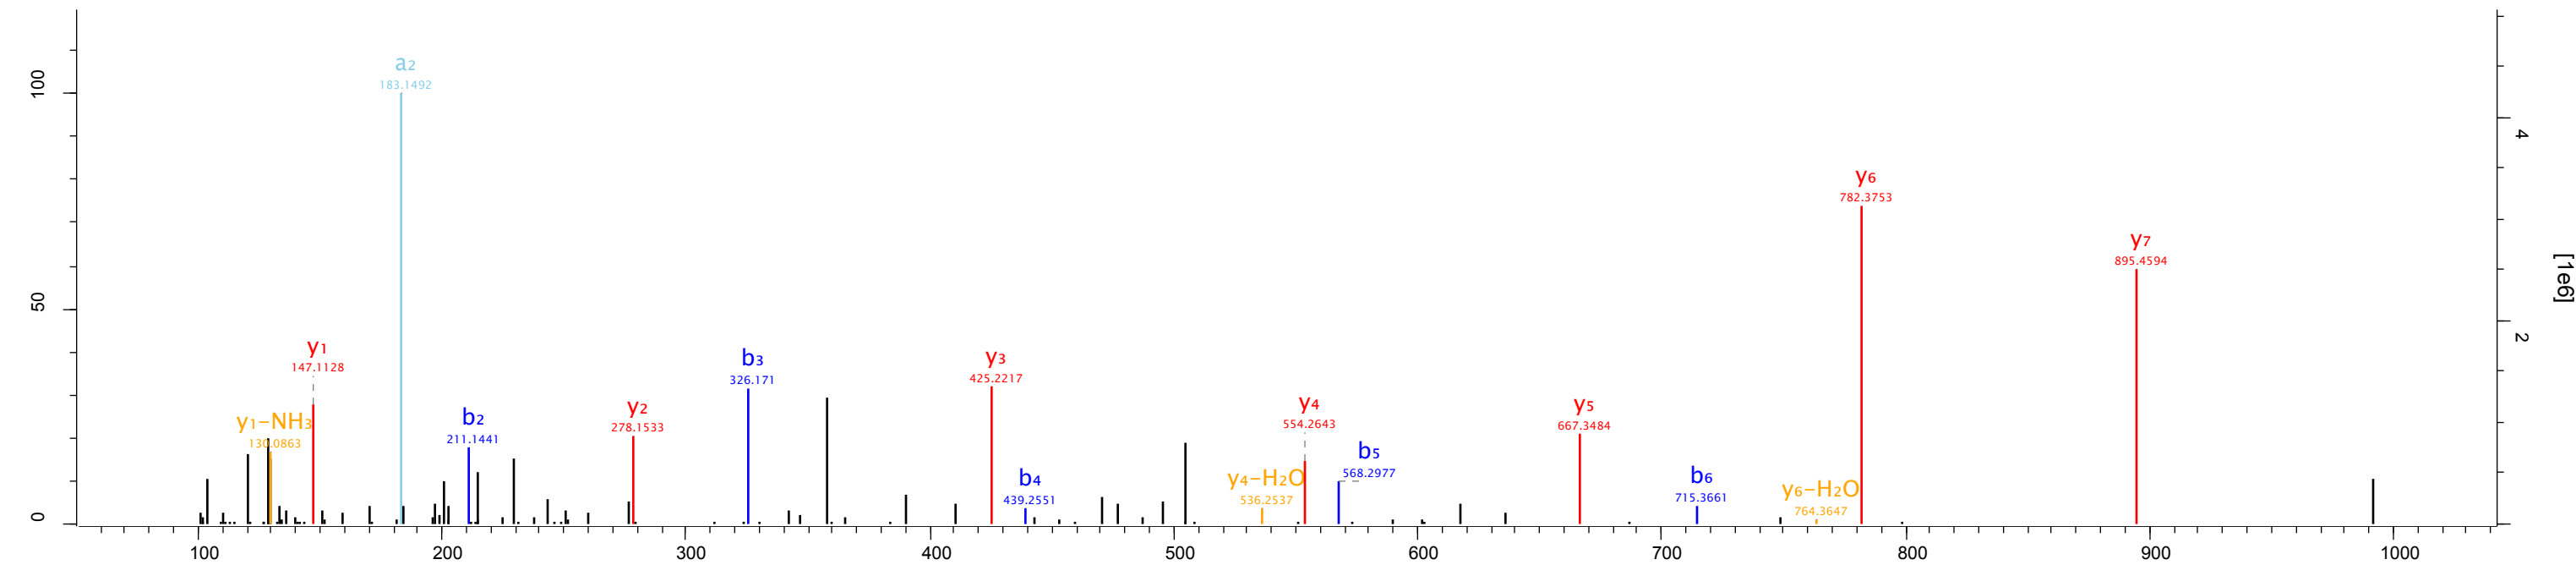



Raw file: 20150818\_A375SR-Proteome\_BR1  
 Scan: 79686 Method: FTMS; HCD Score: 79.84 m/z: 930.95 Gene names: MAPK1IP1L

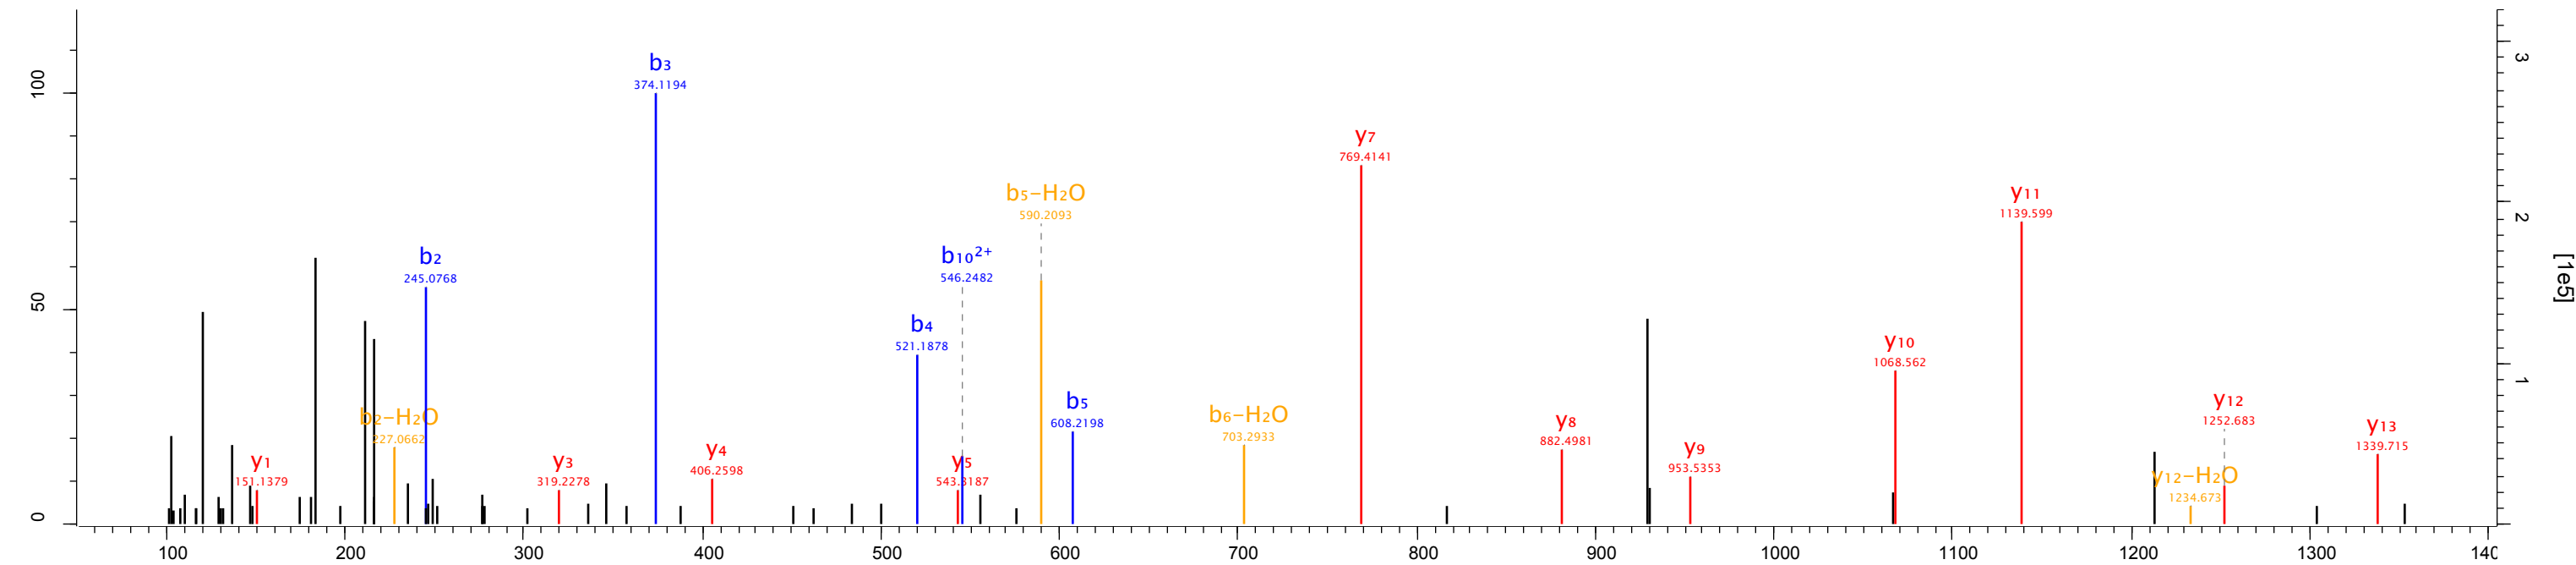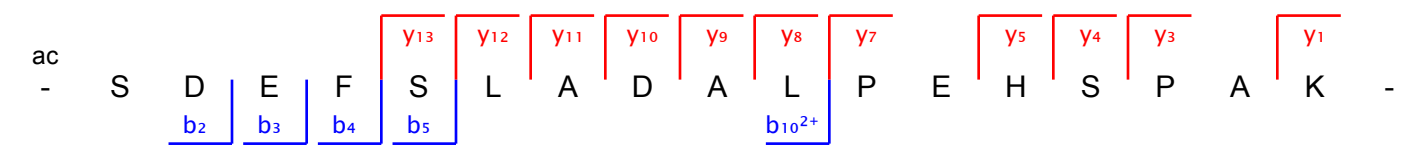

Raw file: 20150818\_A375SR-Proteome\_BR2  
 Scan: 4466 Method: FTMS; HCD Score: 72.2 m/z: 563.28 Gene names: SFT2D2

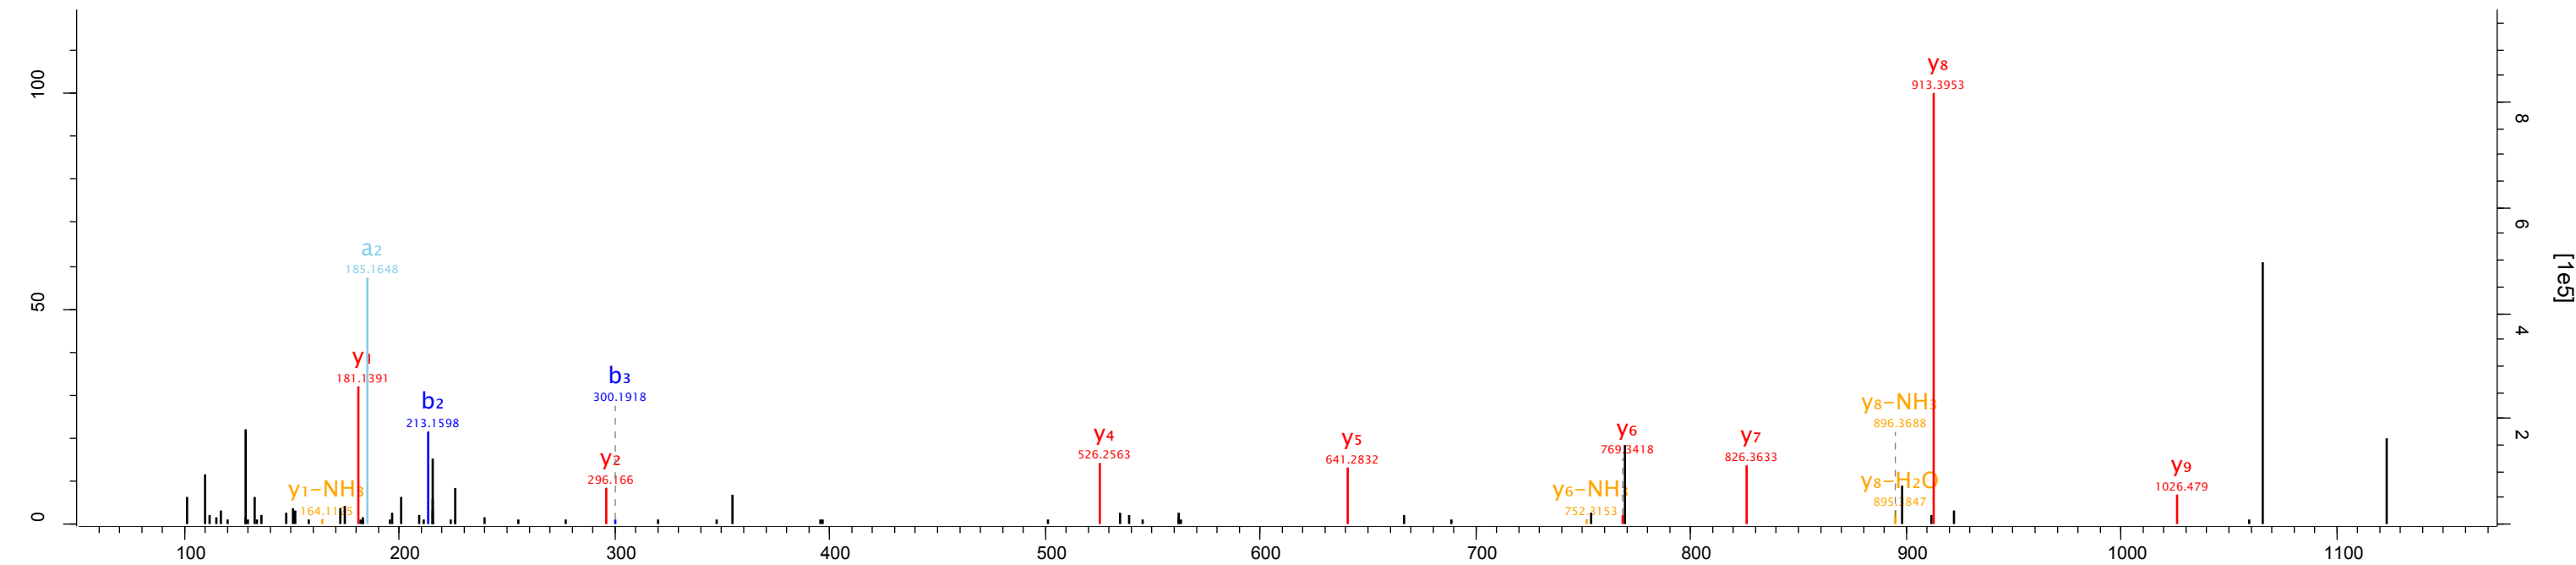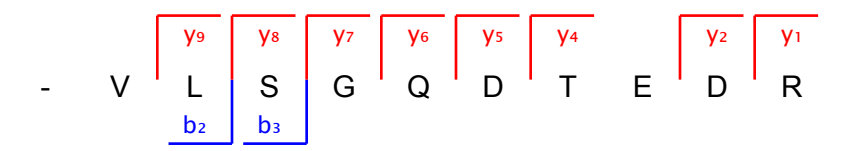

Raw file: 20150818\_A375SR-Proteome\_BR2  
 Scan: 66796 Method: FTMS; HCD Score: 86.67 m/z: 496.76 Gene names: SEPT3

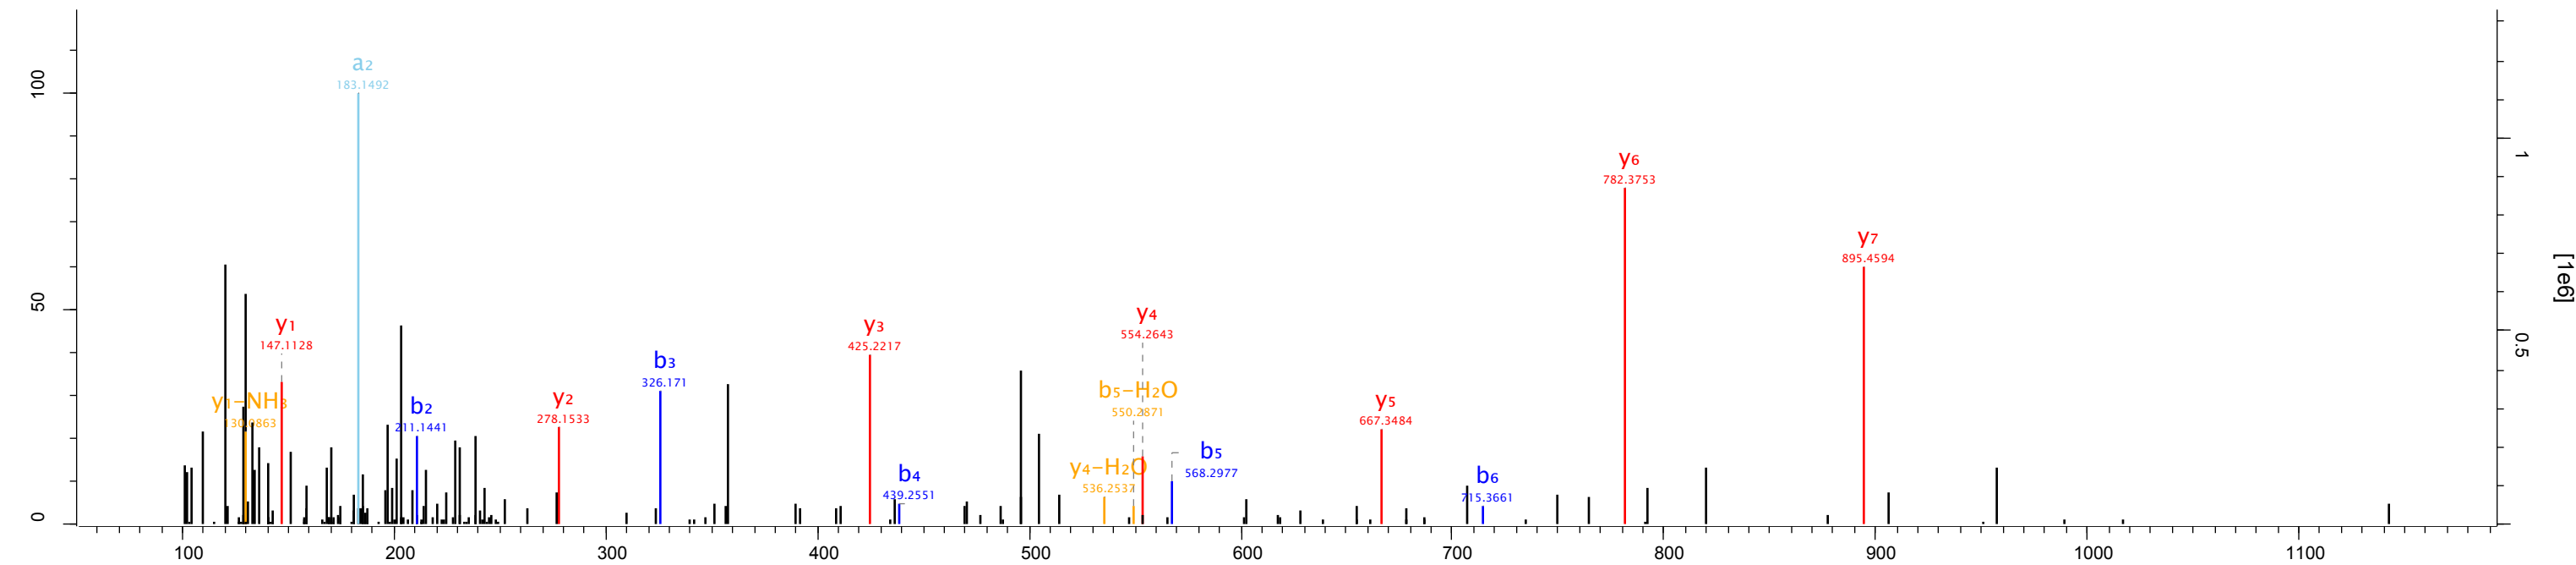

Raw file: 20150818\_A375SR-Proteome\_BR2  
 Scan: 70746 Method: FTMS; HCD Score: 98.04 m/z: 492.81 Gene names: STON2

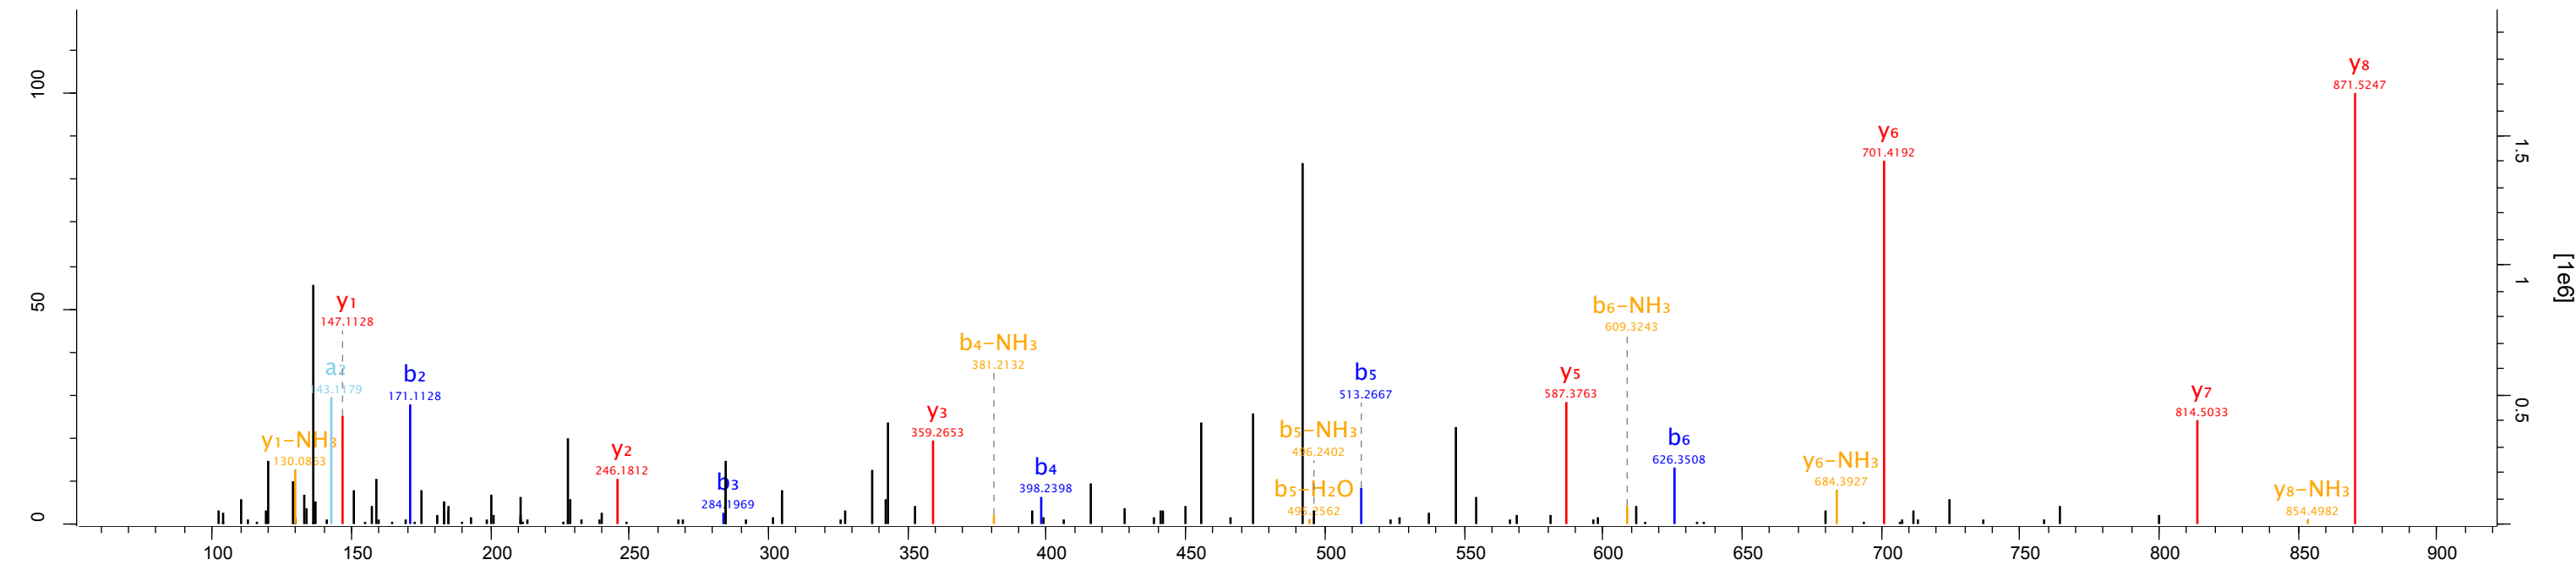

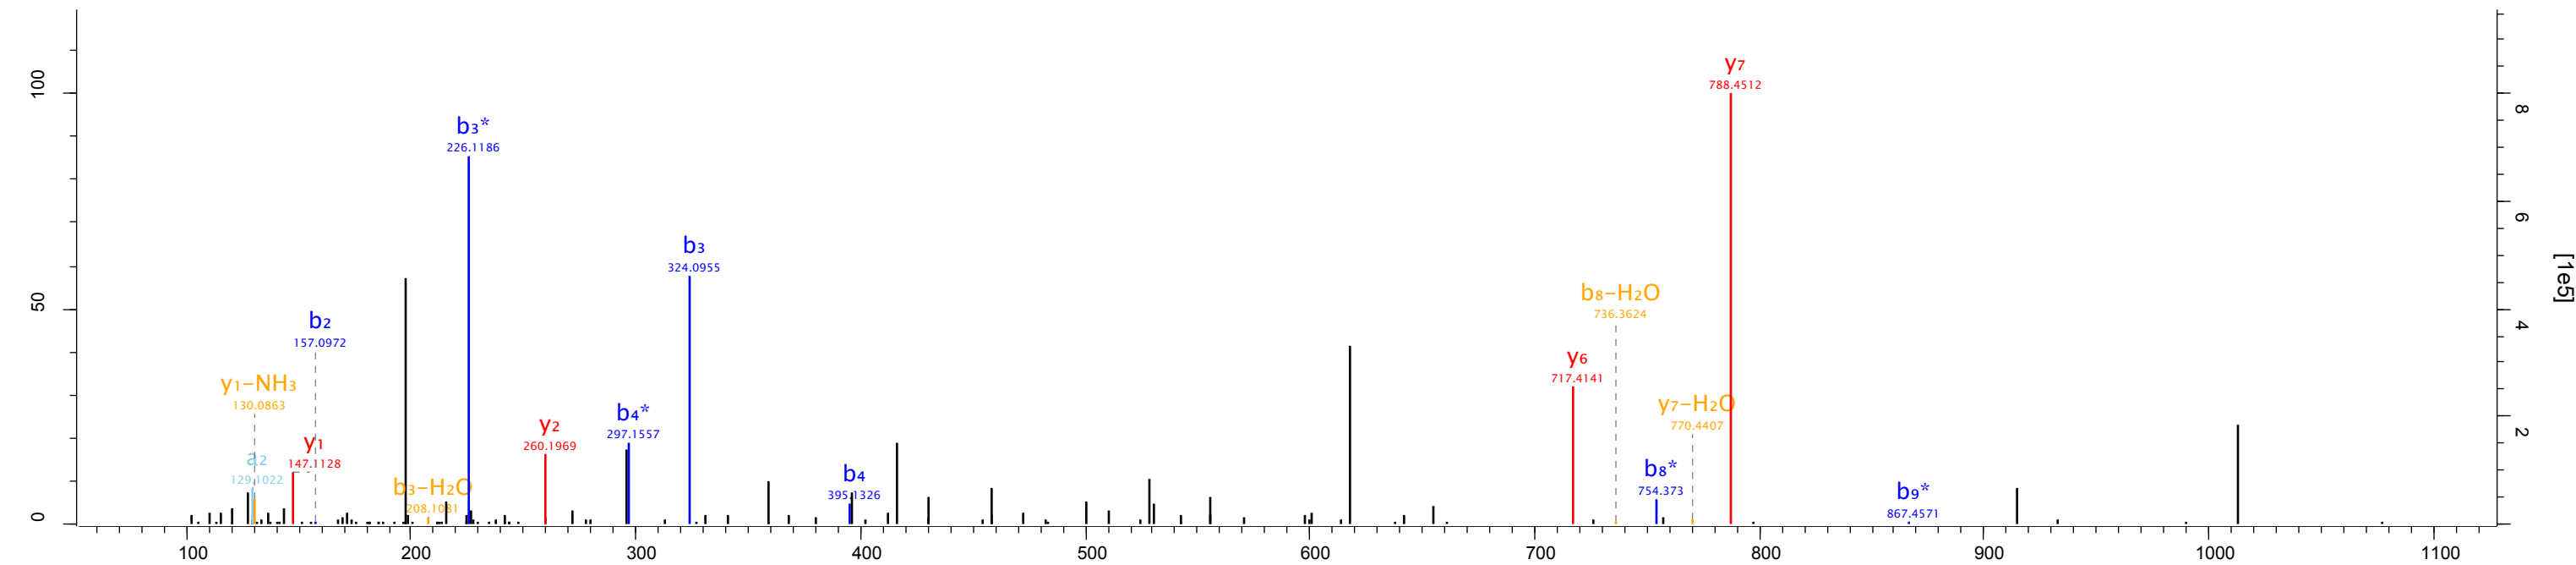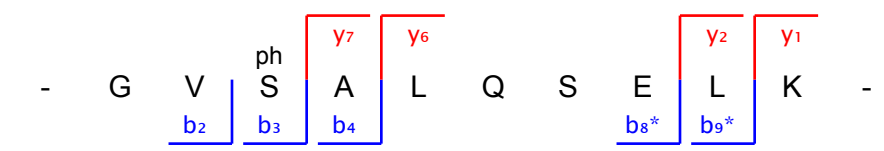

Raw file 20150822\_A375SR\_Phospho\_BR3\_03 Scan 22416 Method FTMS; HCD Score 86.54 m/z 970.94 Gene names MAPK11P1L

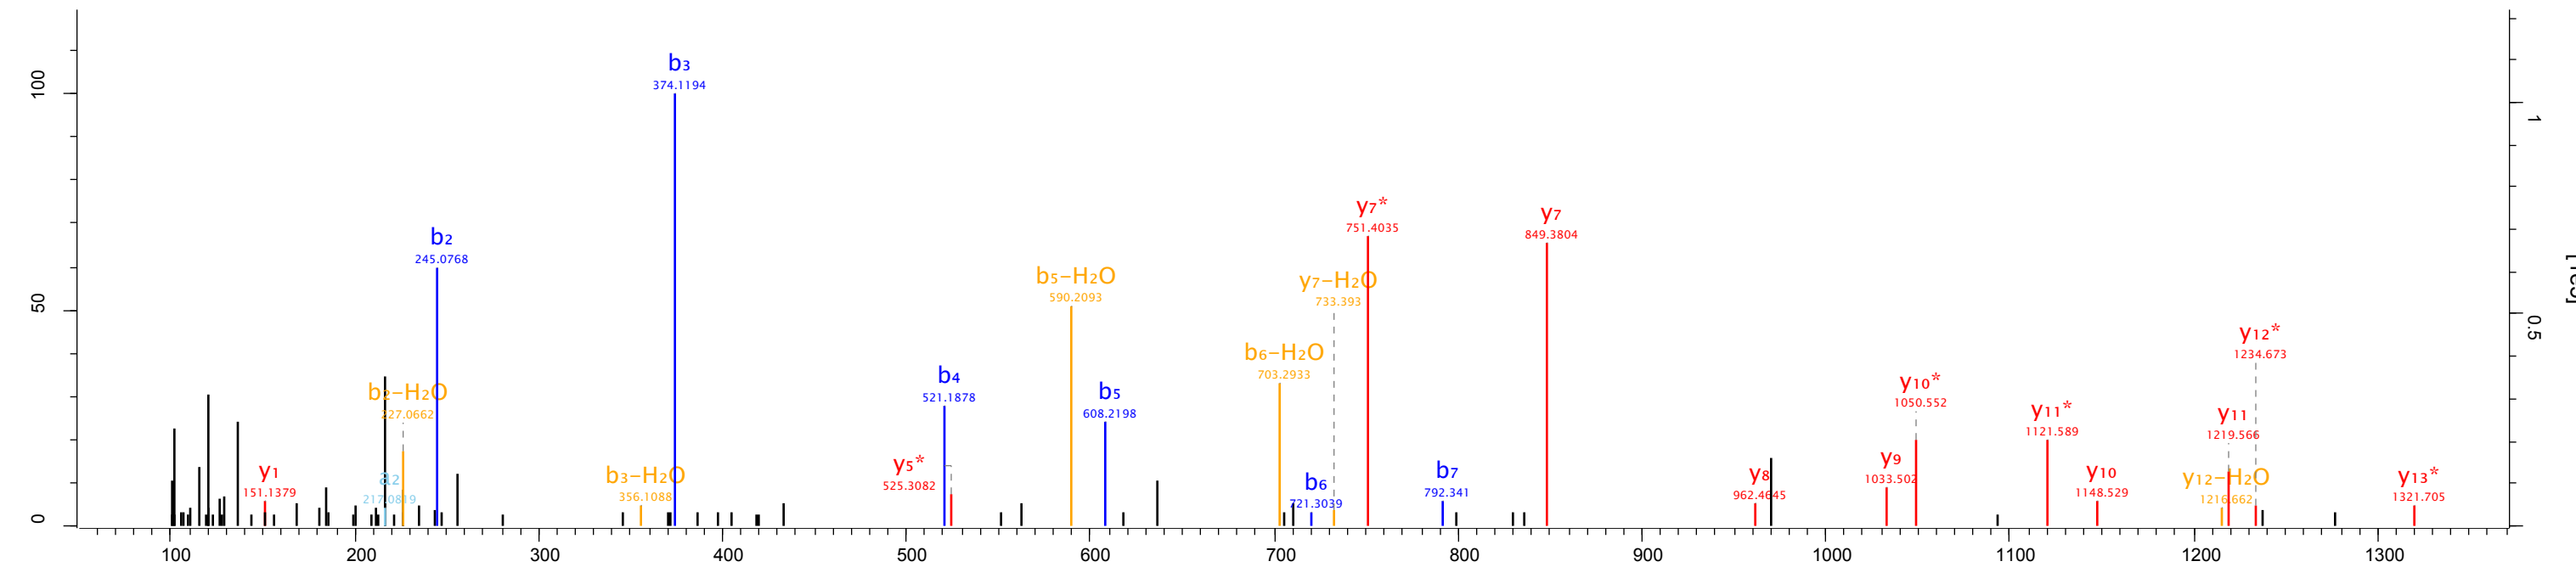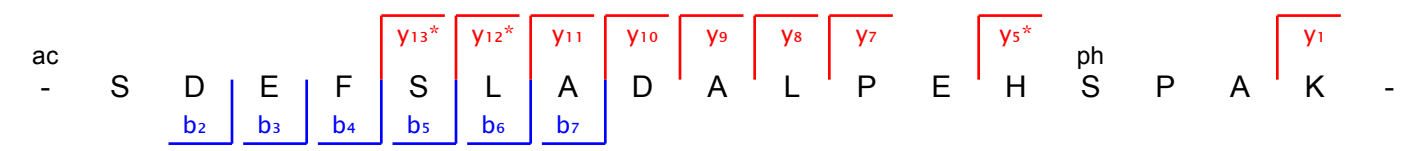

Raw file 20150822\_A375SR\_Phospho\_BR3\_06 Scan 12666 Method FTMS; HCD Score 46.7 m/z 558.29

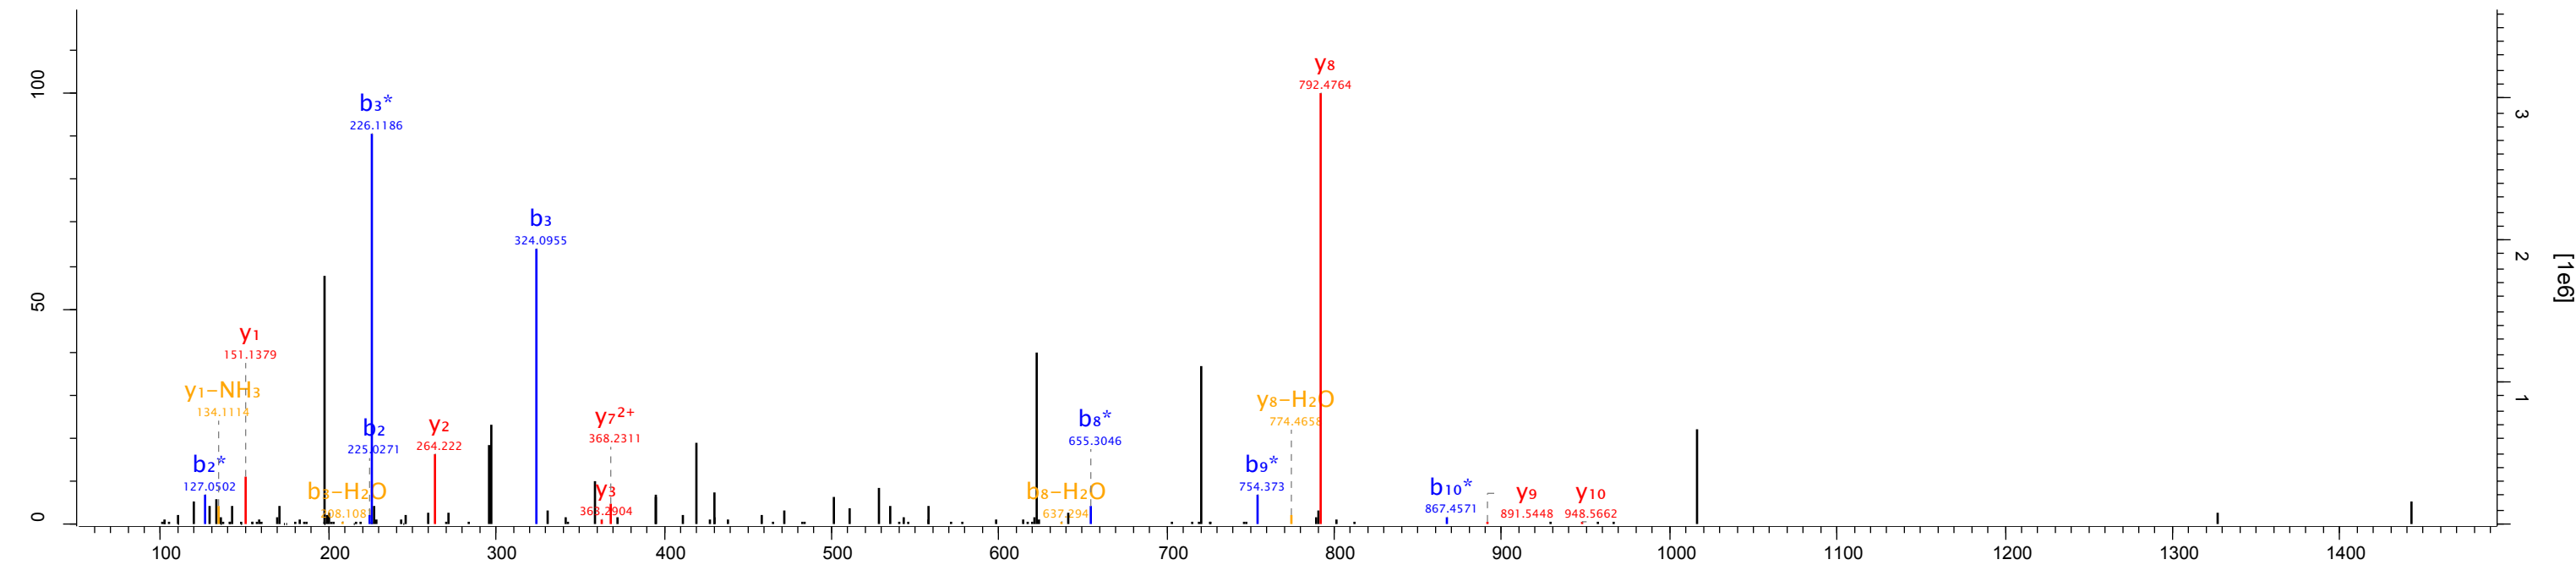

Raw file 20150822\_A375SR\_Phospho\_BR3\_07 Scan 6496 Method FTMS; HCD Score 65.22 m/z 426.73

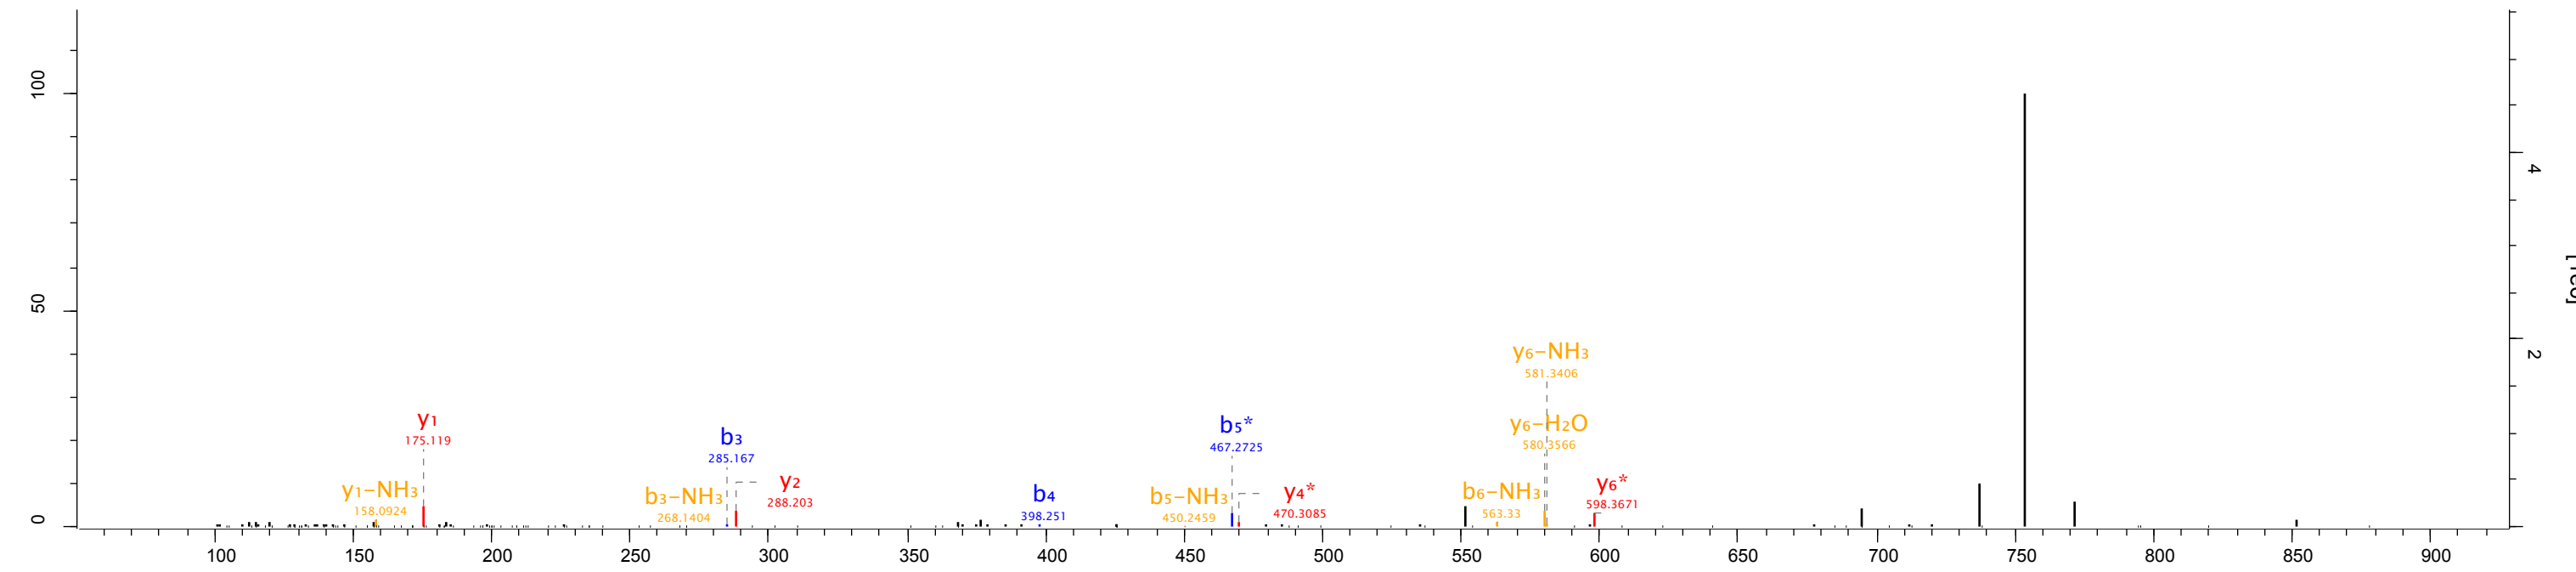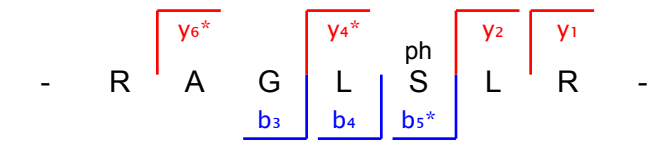



Raw file: 20150822\_A375SR\_Phospho\_BR3\_08  
 Scan: 14506 Method: FTMS; HCD Score: 70.8 m/z: 782.84 Gene names: PWWP2A

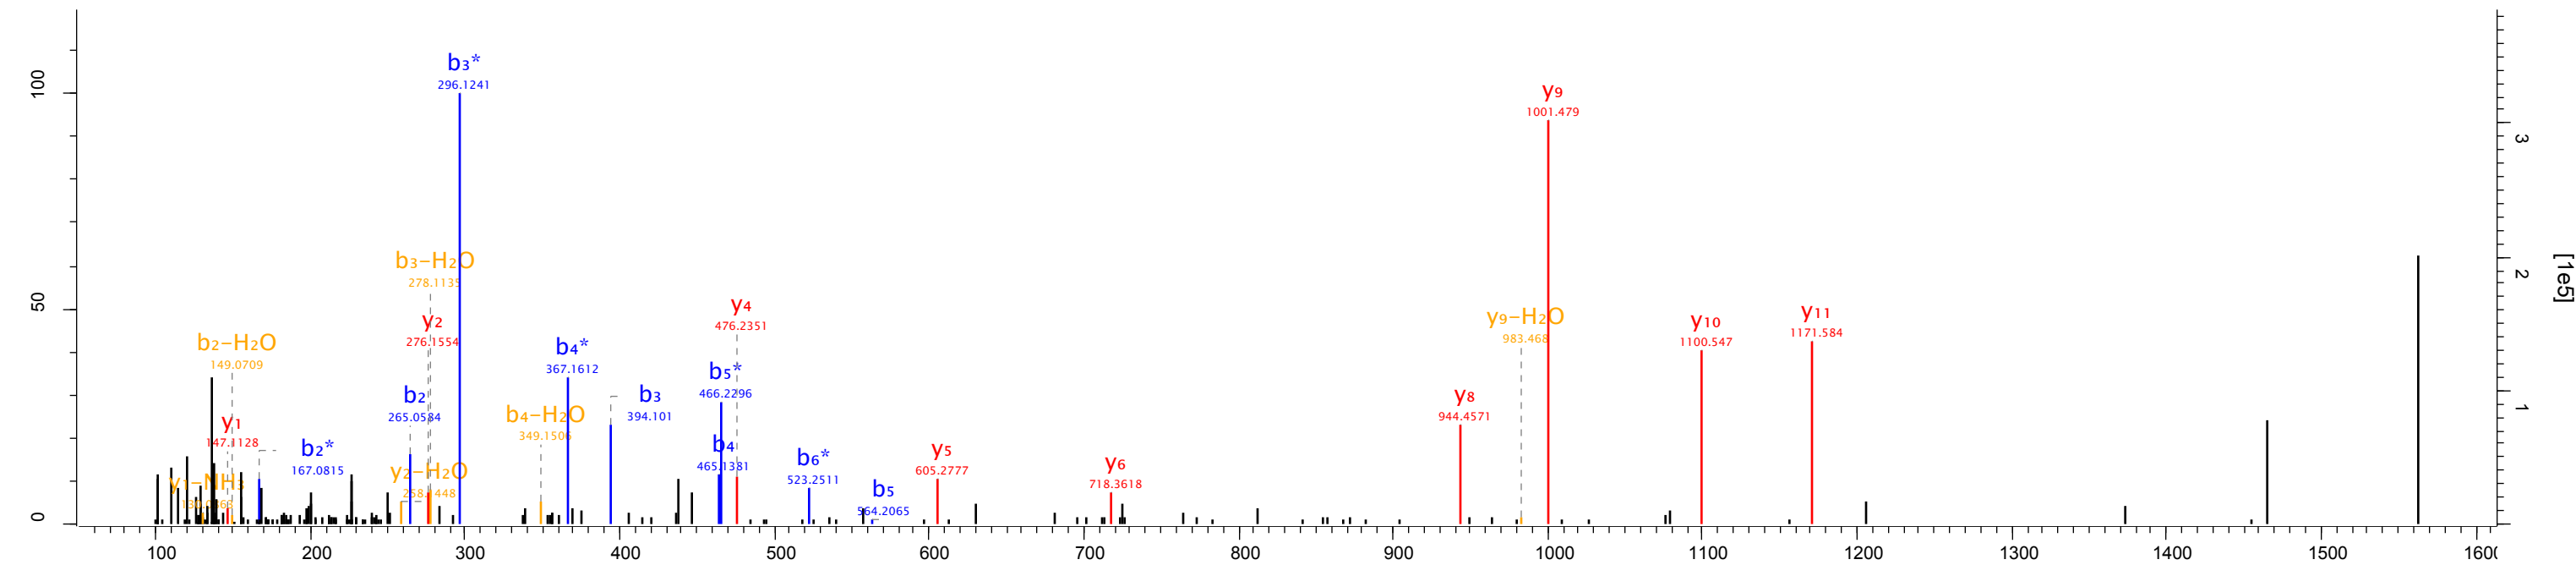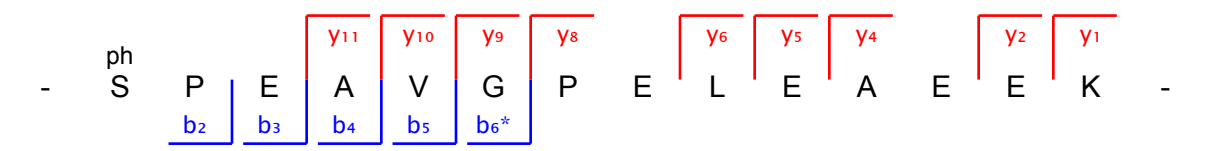

Raw file 20150822\_A375SR\_Phospho\_BR3\_09 Scan 12806 Method FTMS; HCD Score 48.57 m/z 754.87

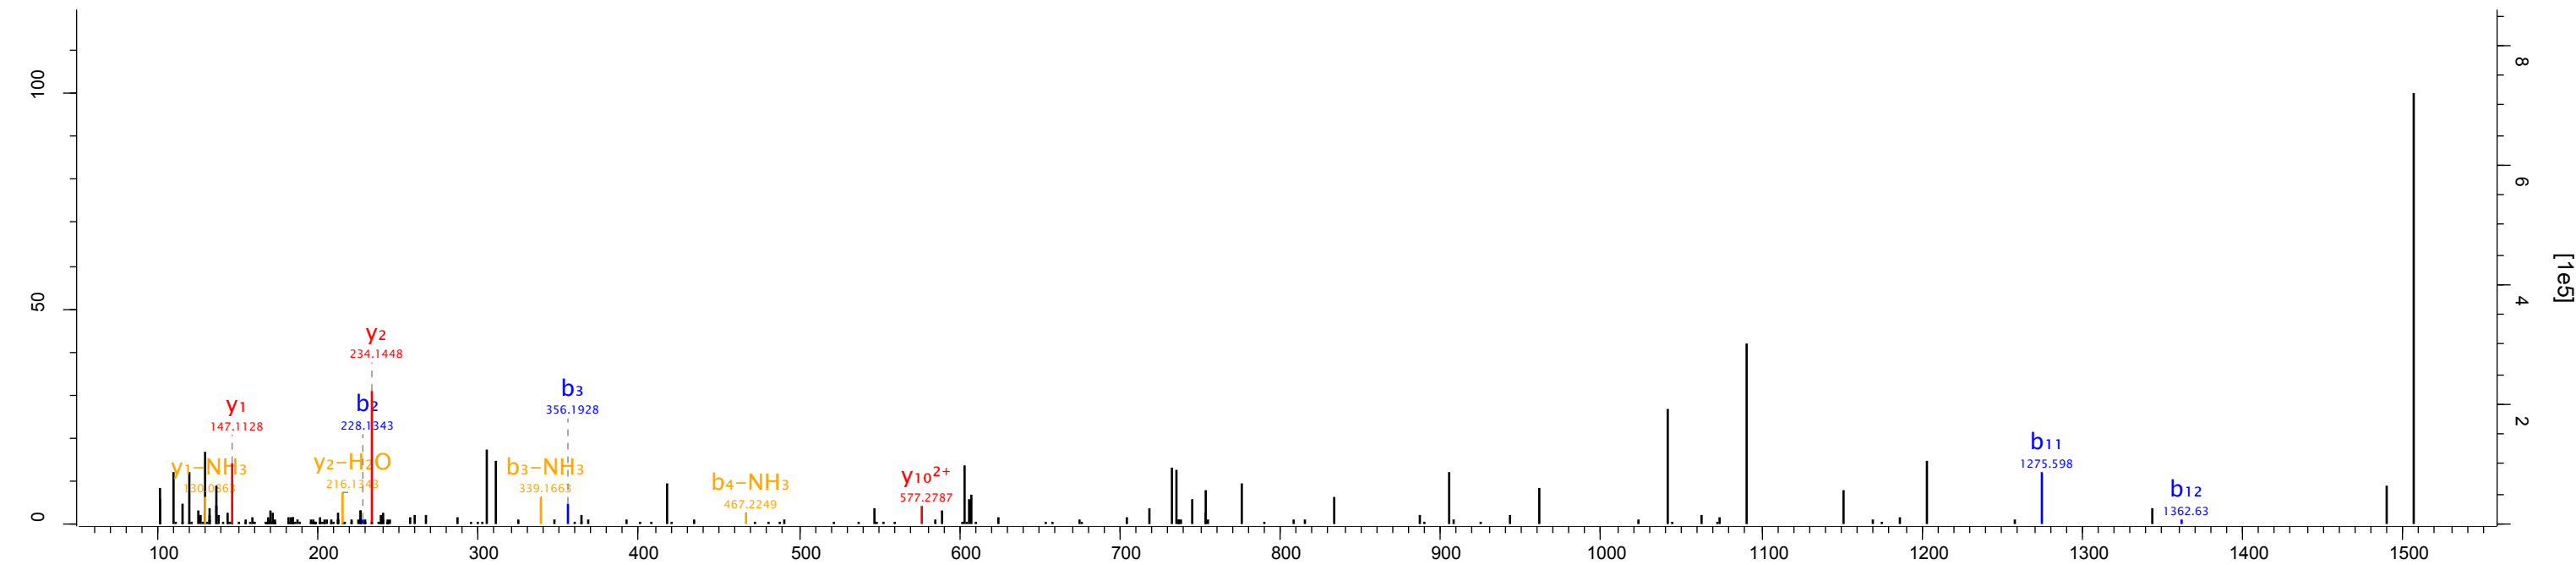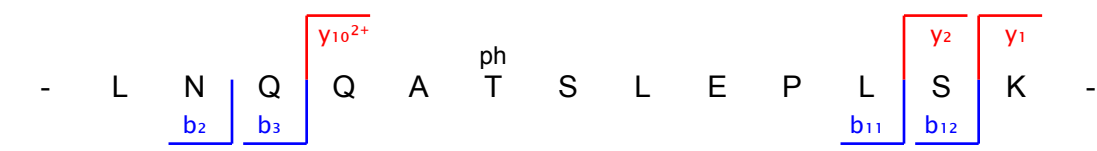

Raw file 20150822\_A375SR-Proteome\_BR3 Scan 72436 Method FTMS; HCD Score 84.57 m/z 490.74

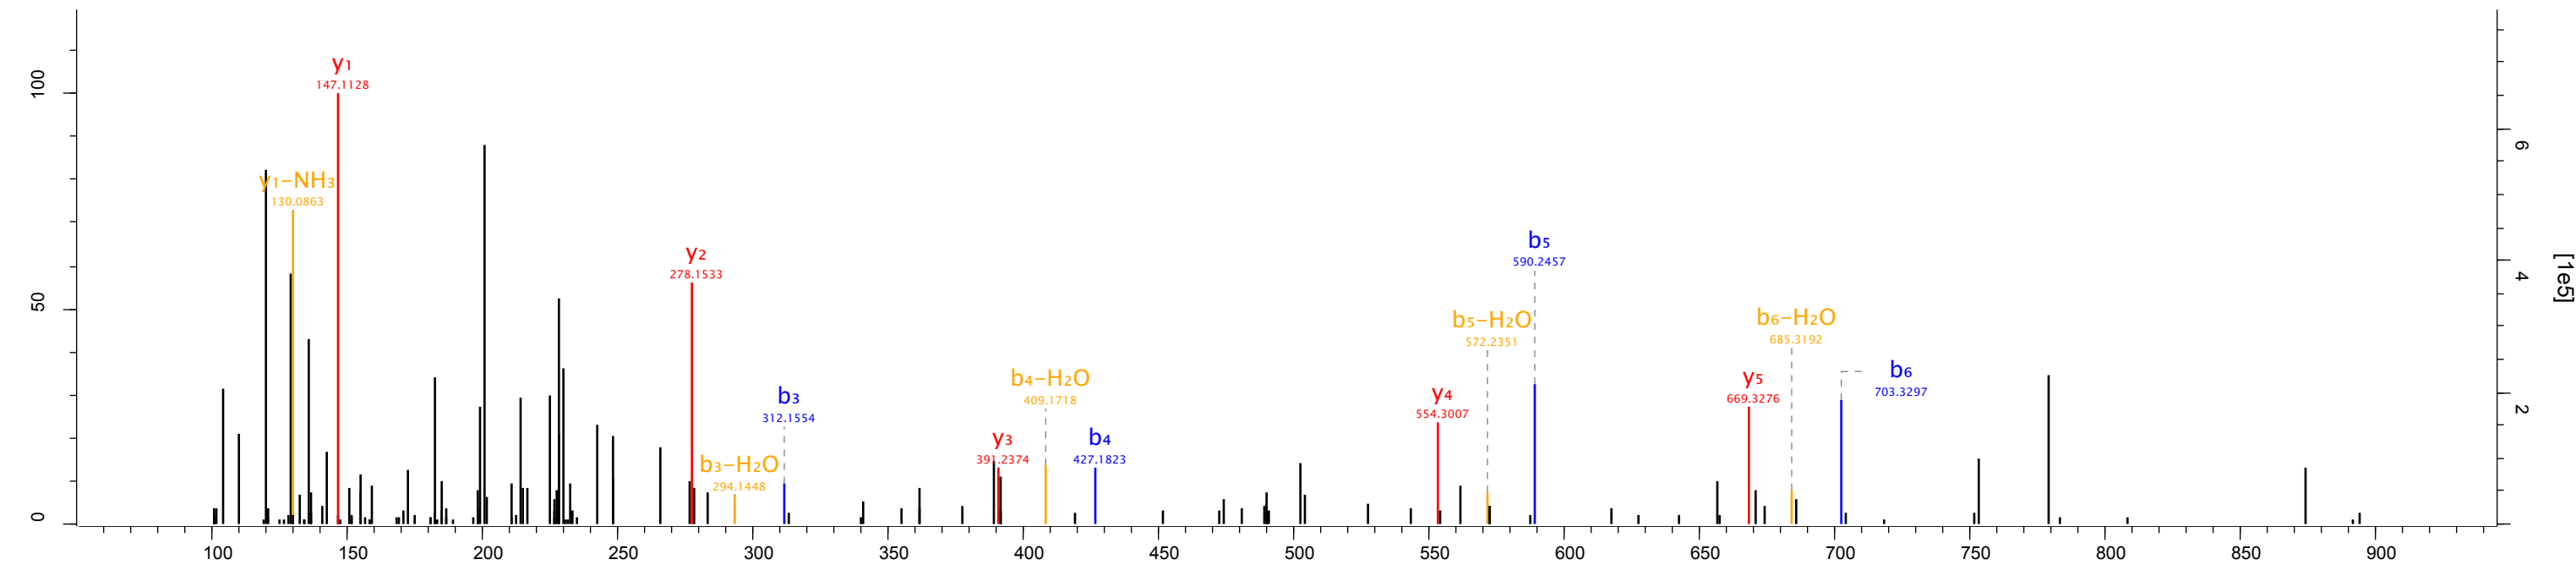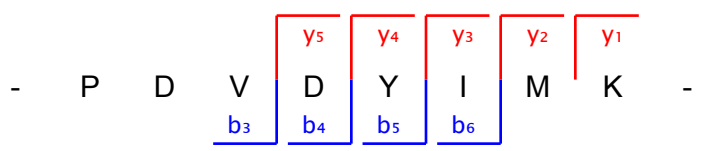

Raw file  
20180707\_MaS\_A375SR\_LM\_proteome\_02

Scan 9366 Method FTMS; HCD Score 45.88 m/z 400.18

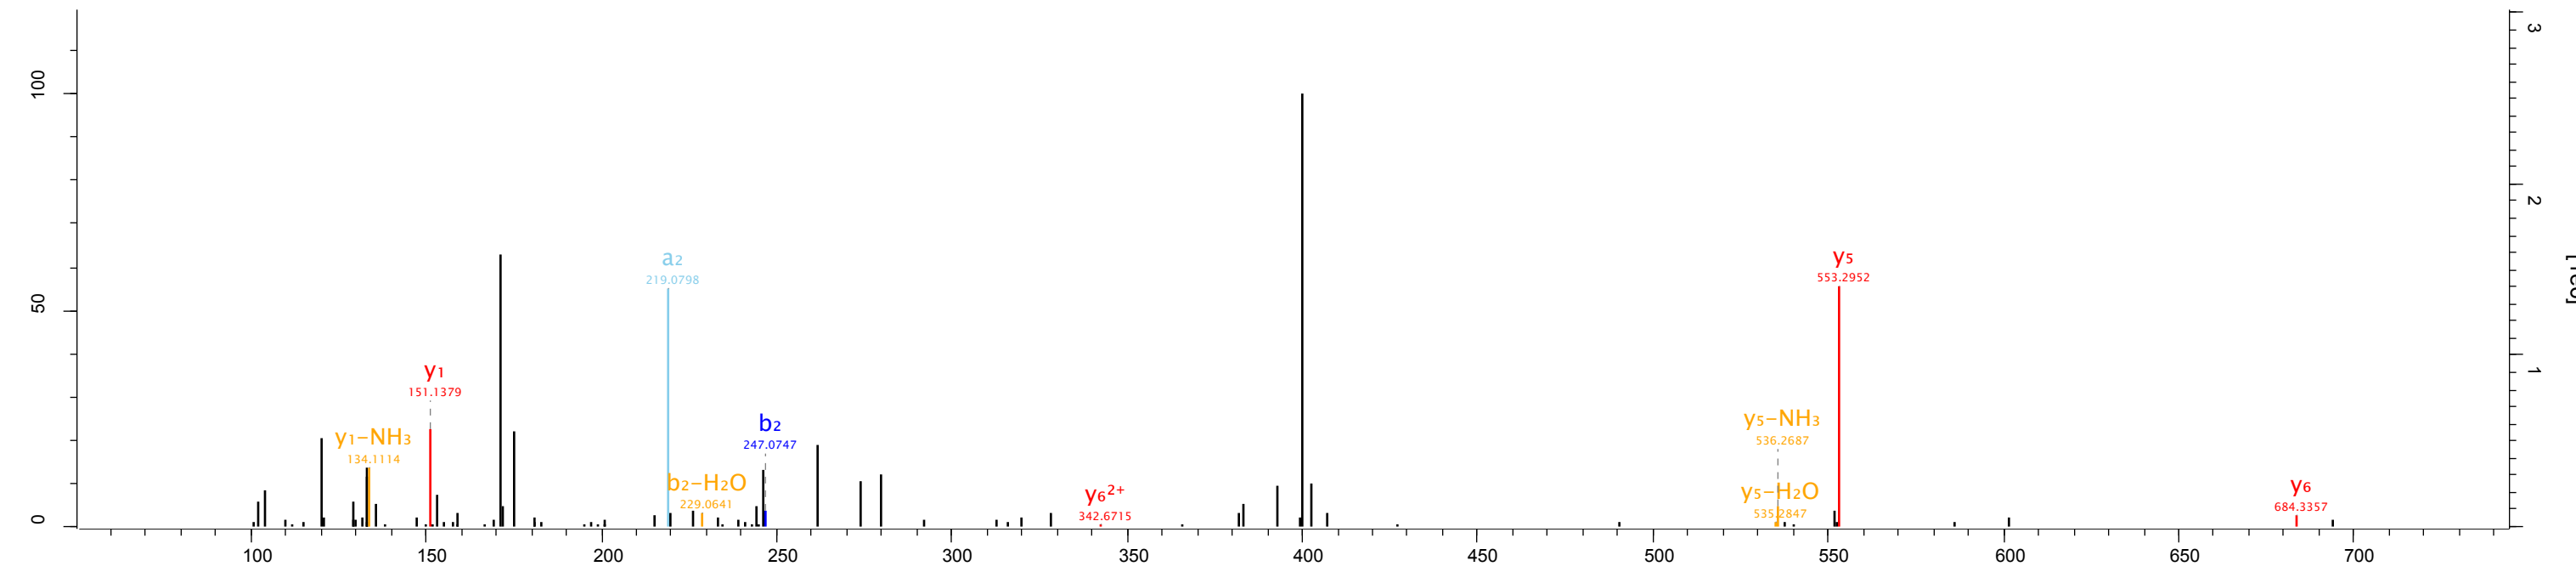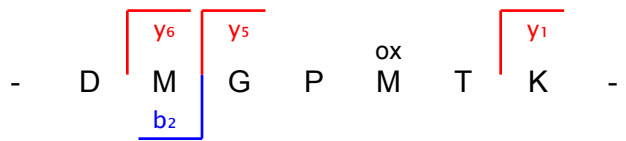

Raw file  
20180707\_MaS\_A375SR\_LM\_proteome\_03

Scan 26386 Method FTMS; HCD Score 34.93 m/z 1042.46 Gene names RNF121

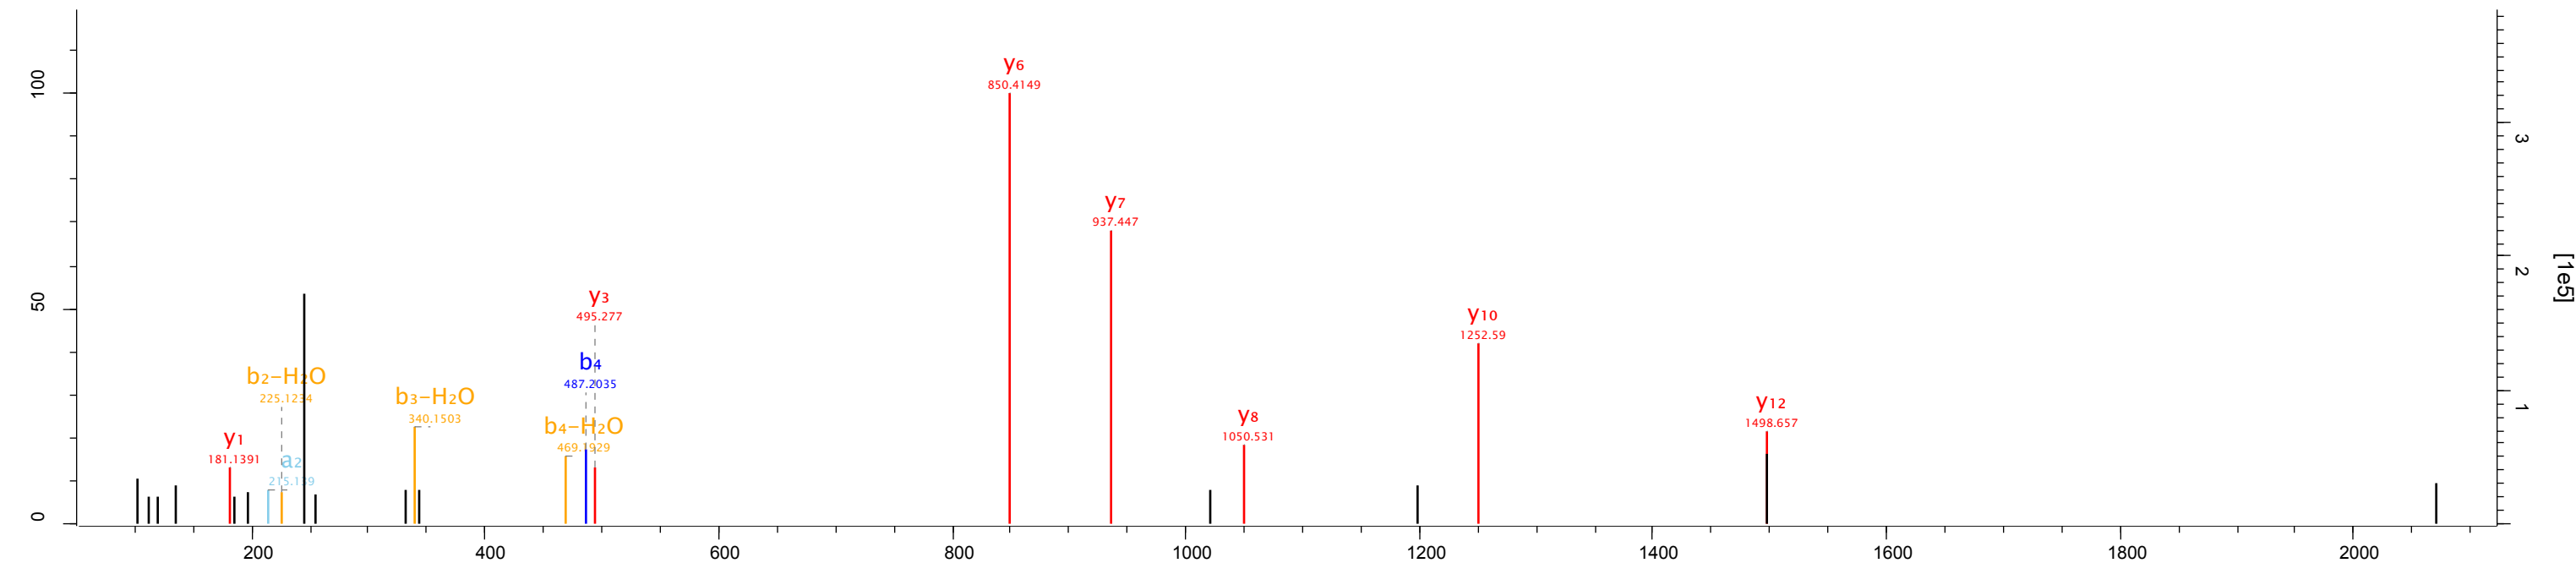

- E L D E V D M S D L S P E E Q W R -  
a2 b4 y12 y10 y8 y7 y6 y3 y1

[1e5]

Raw file  
20180707\_MaS\_A375SR\_LM\_proteome\_04

| Scan  | Method    | Score | m/z    |
|-------|-----------|-------|--------|
| 15306 | FTMS; HCD | 48.76 | 374.23 |

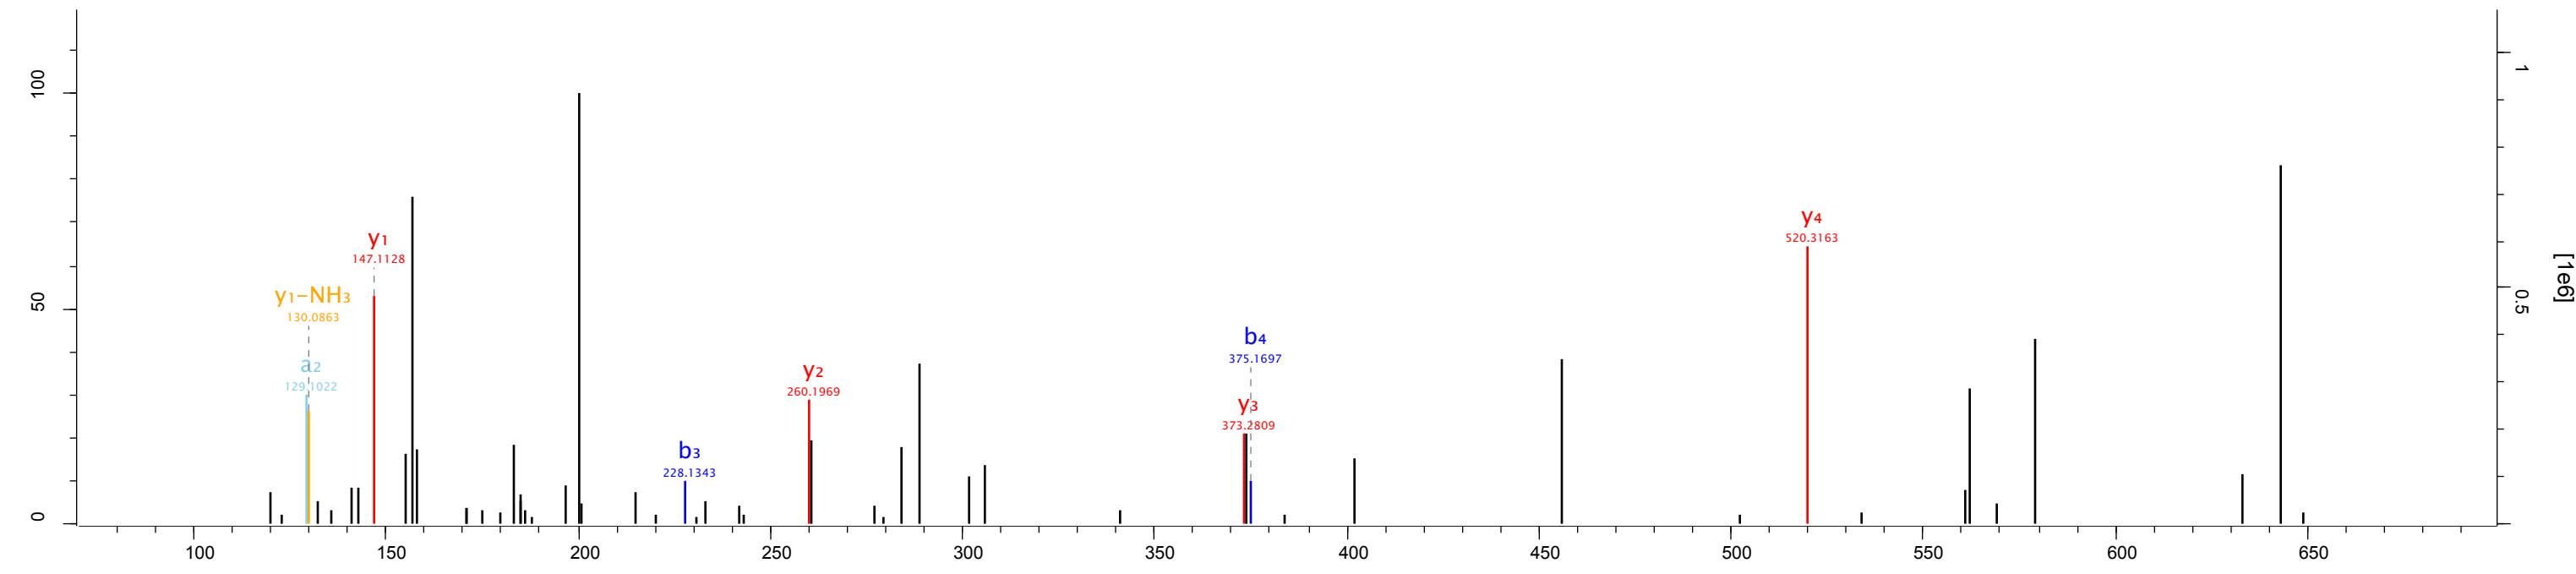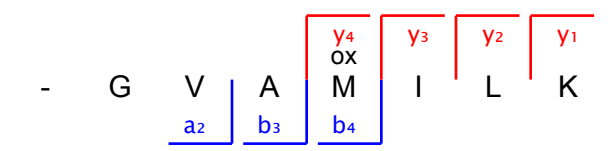

Raw file  
20180707\_MaS\_A375SR\_LM\_proteome\_05

Scan 2626 Method FTMS; HCD Score 54.79 m/z 382.69

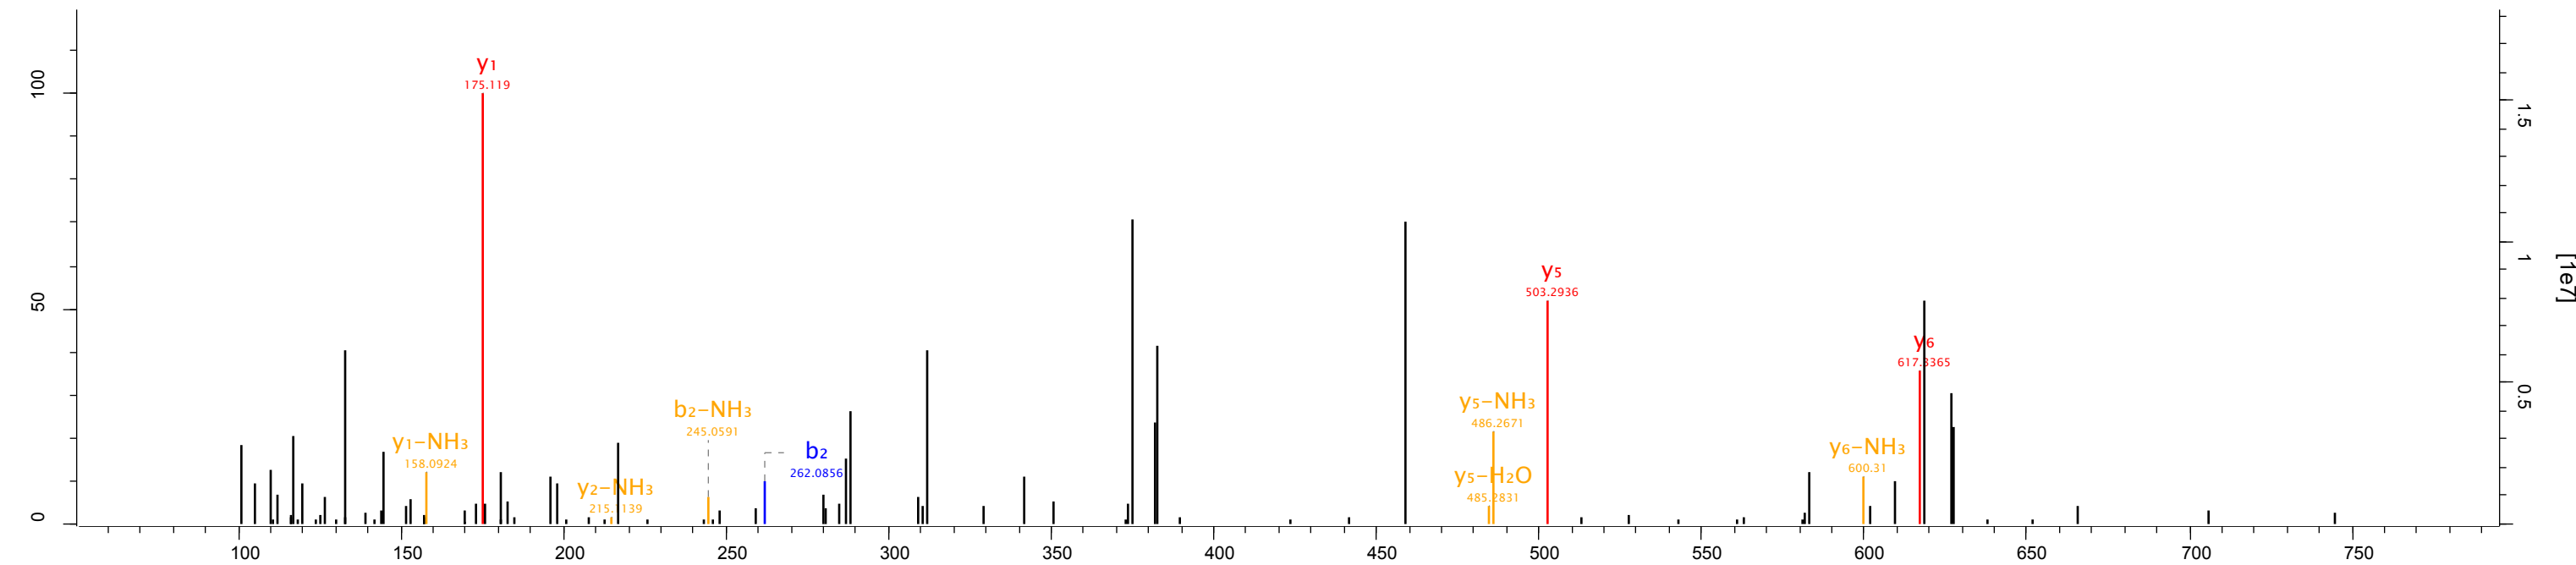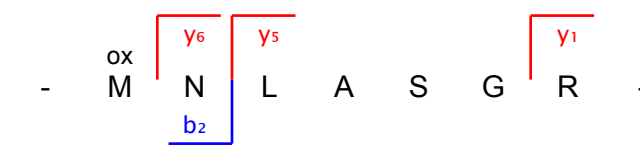

Raw file  
20180707\_MaS\_A375SR\_LM\_proteome\_07

Scan 21256 Method FTMS; HCD Score 58.17 m/z 588.85 Gene names KATNAL2

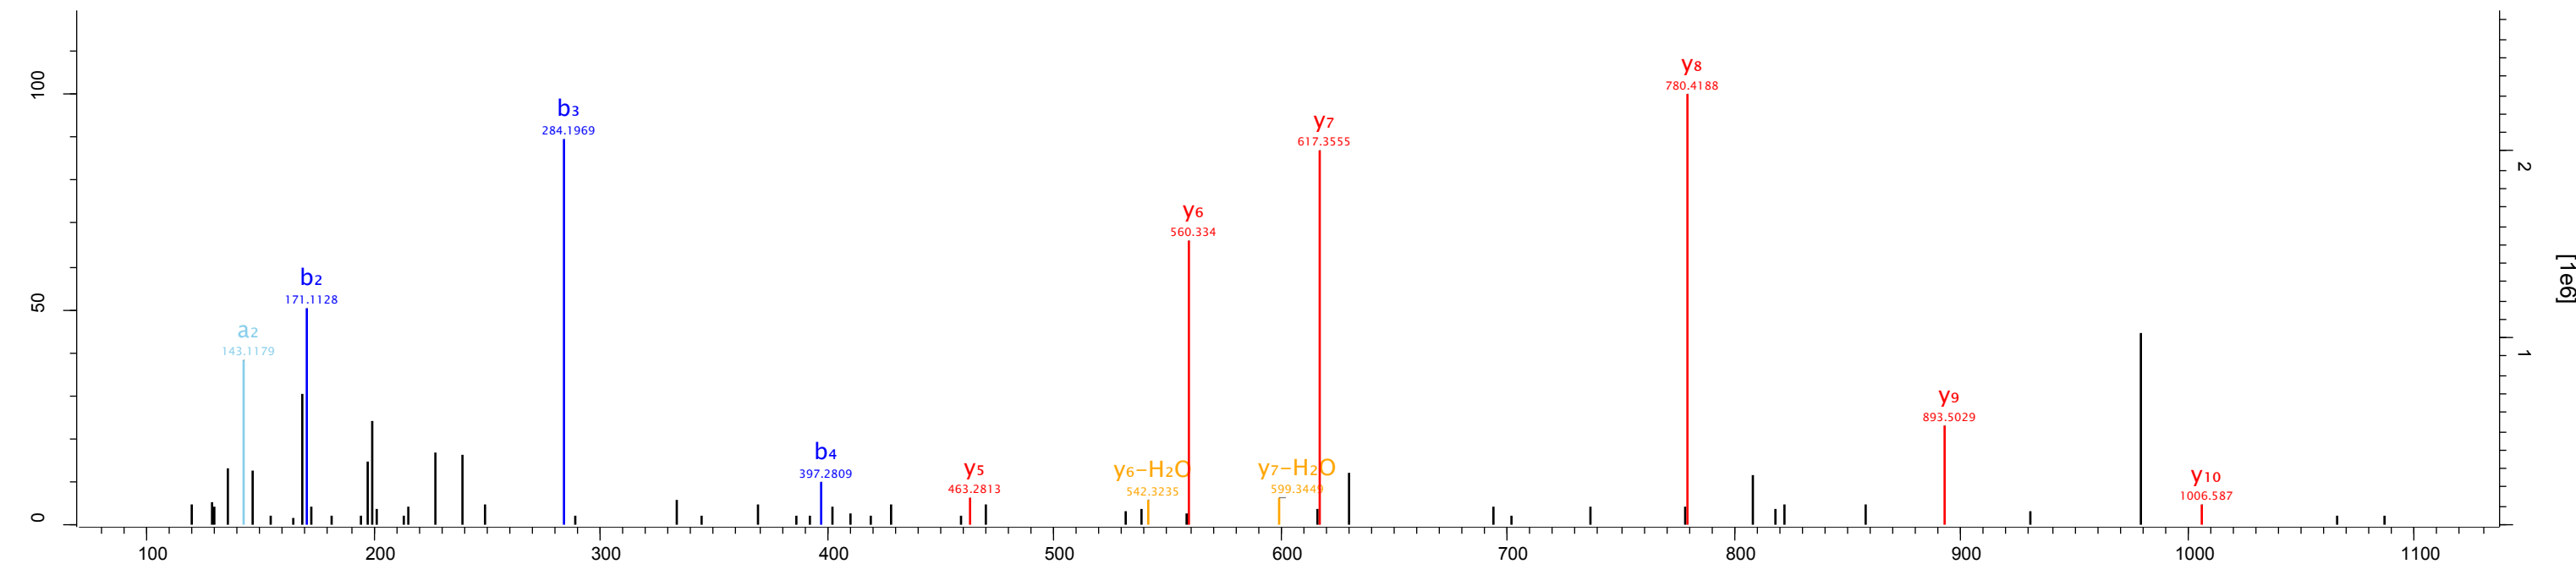

- G L L L Y G P P G T G K -  
b2 b3 b4 y10 y9 y8 y7 y6 y5



Raw file  
20180707\_MaS\_A375SR\_LM\_proteome\_07

Scan 24706 Method FTMS; HCD Score 109.11 m/z 496.76 Gene names SEPT3

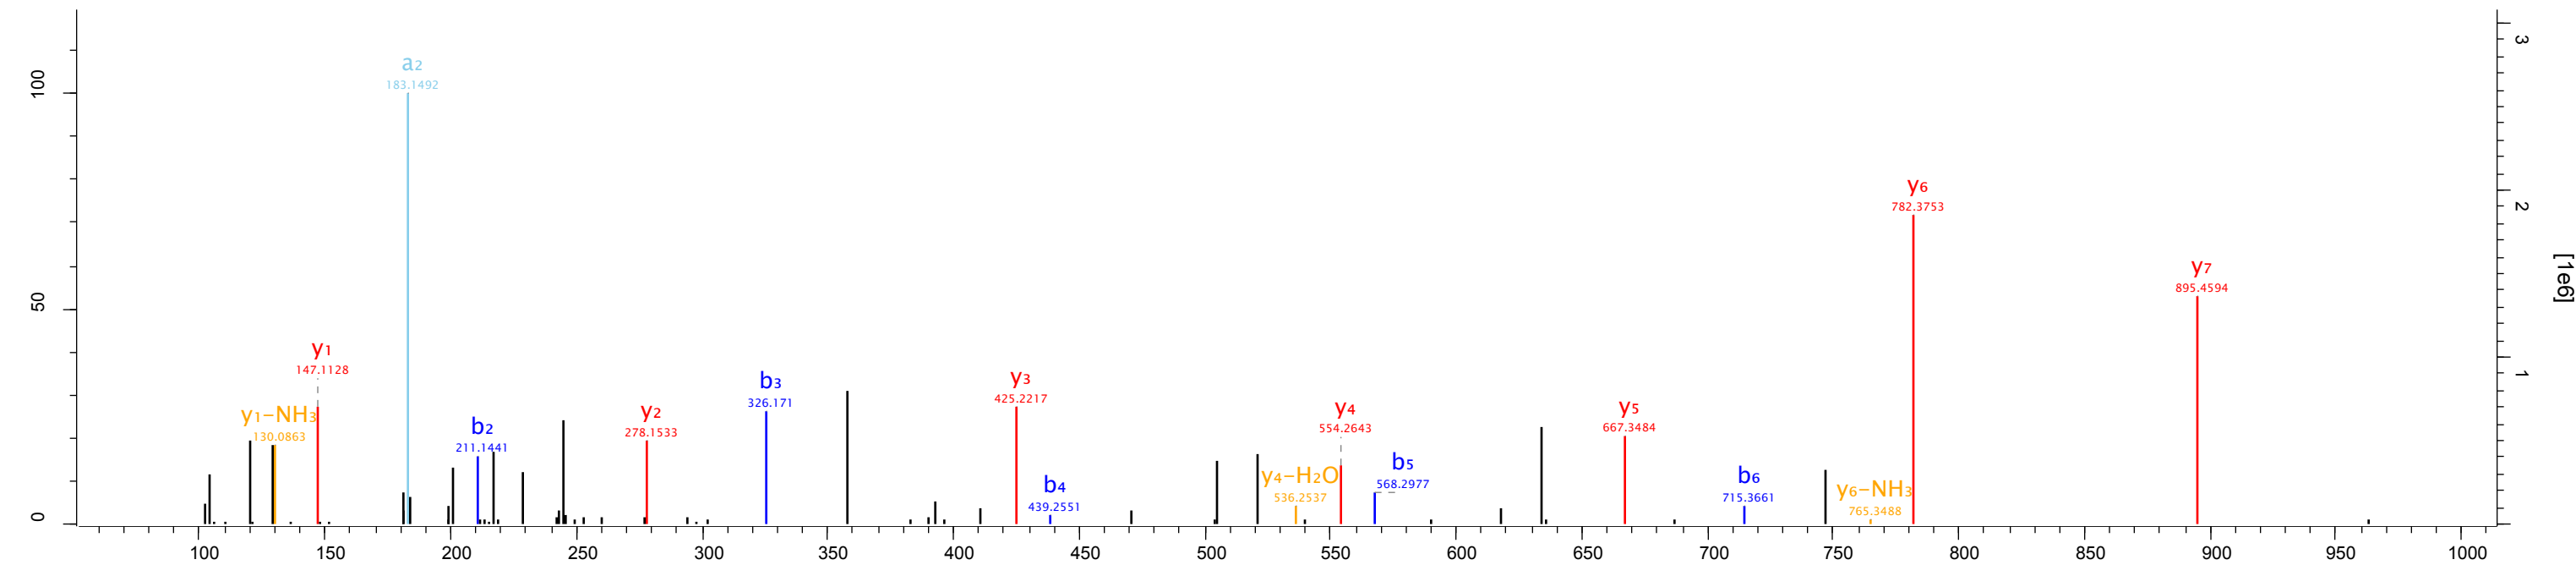

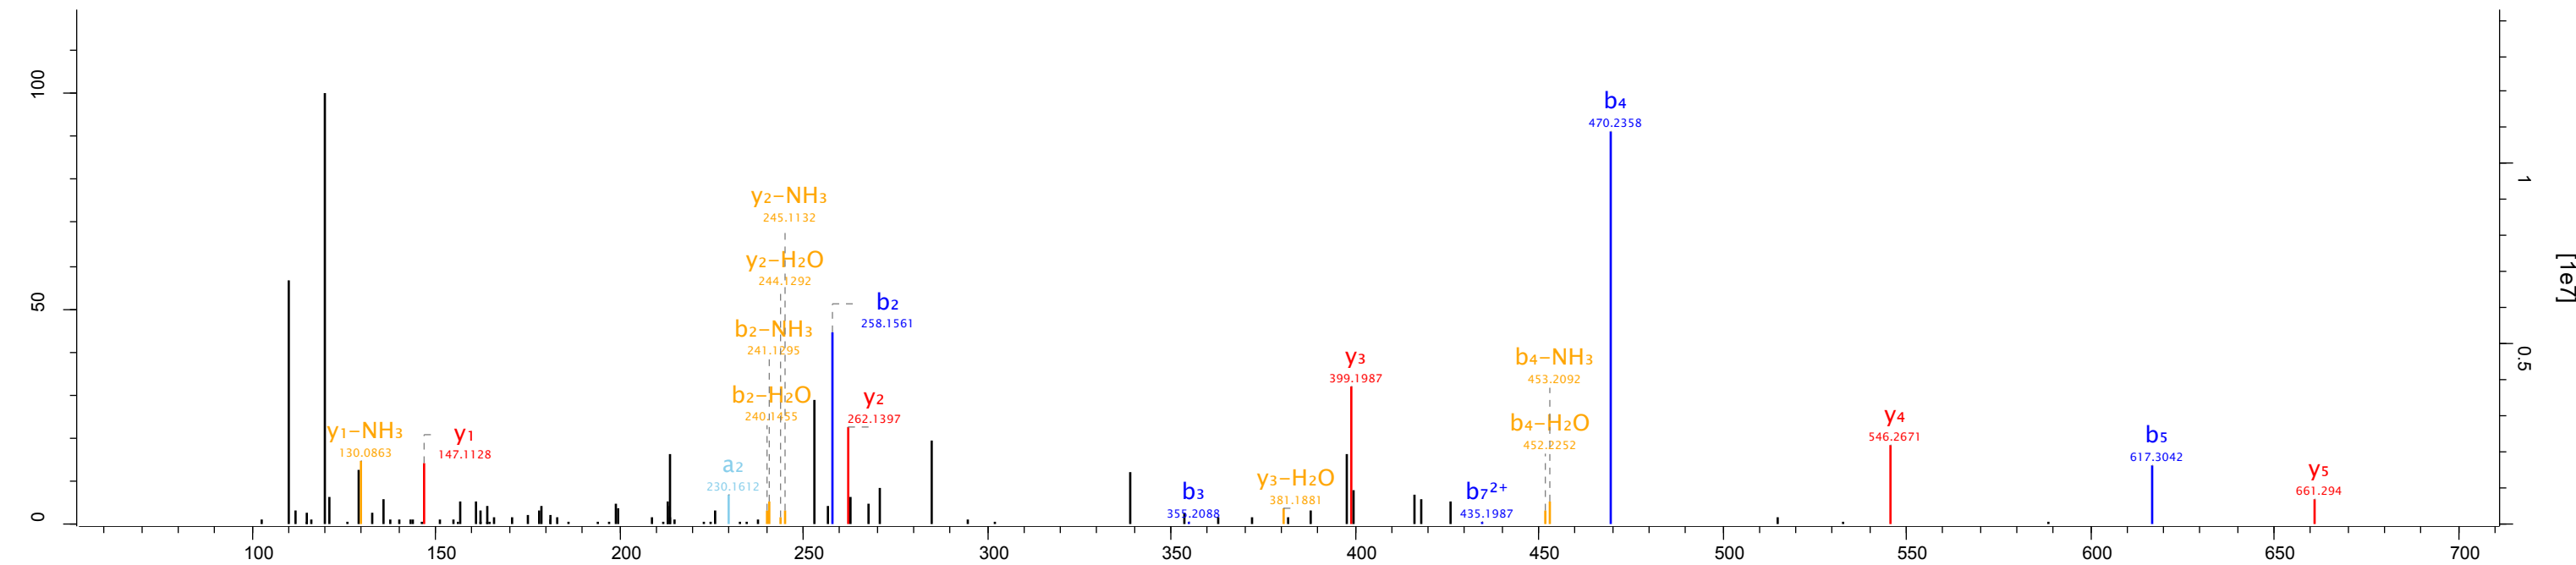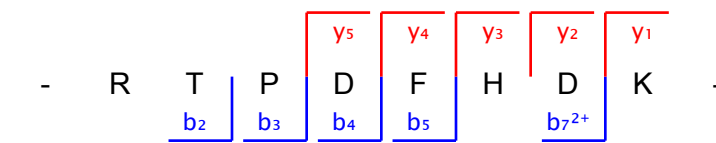

Raw file  
20180707\_MaS\_A375SR\_LM\_proteome\_12

Scan 3126 Method FTMS; HCD Score 62.71 m/z 361.19

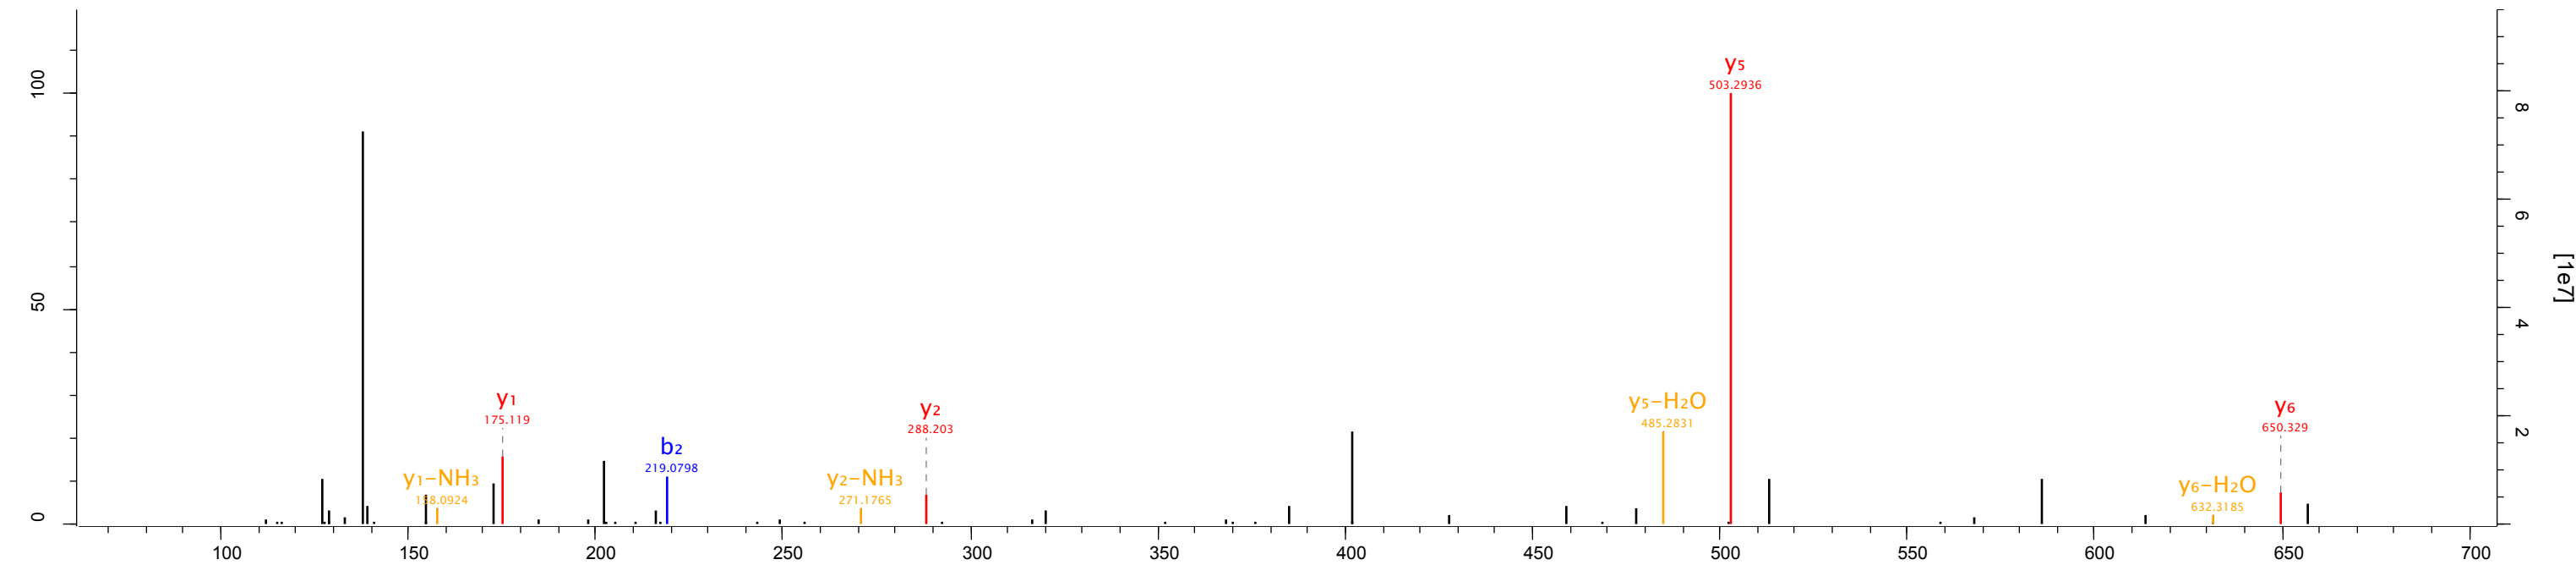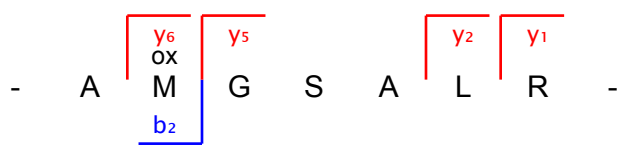

Raw file  
20180707\_MaS\_A375SR\_LM\_proteome\_12

Scan Method Score m/z Gene names  
4856 FTMS; HCD 59.15 502.73 TMEM258

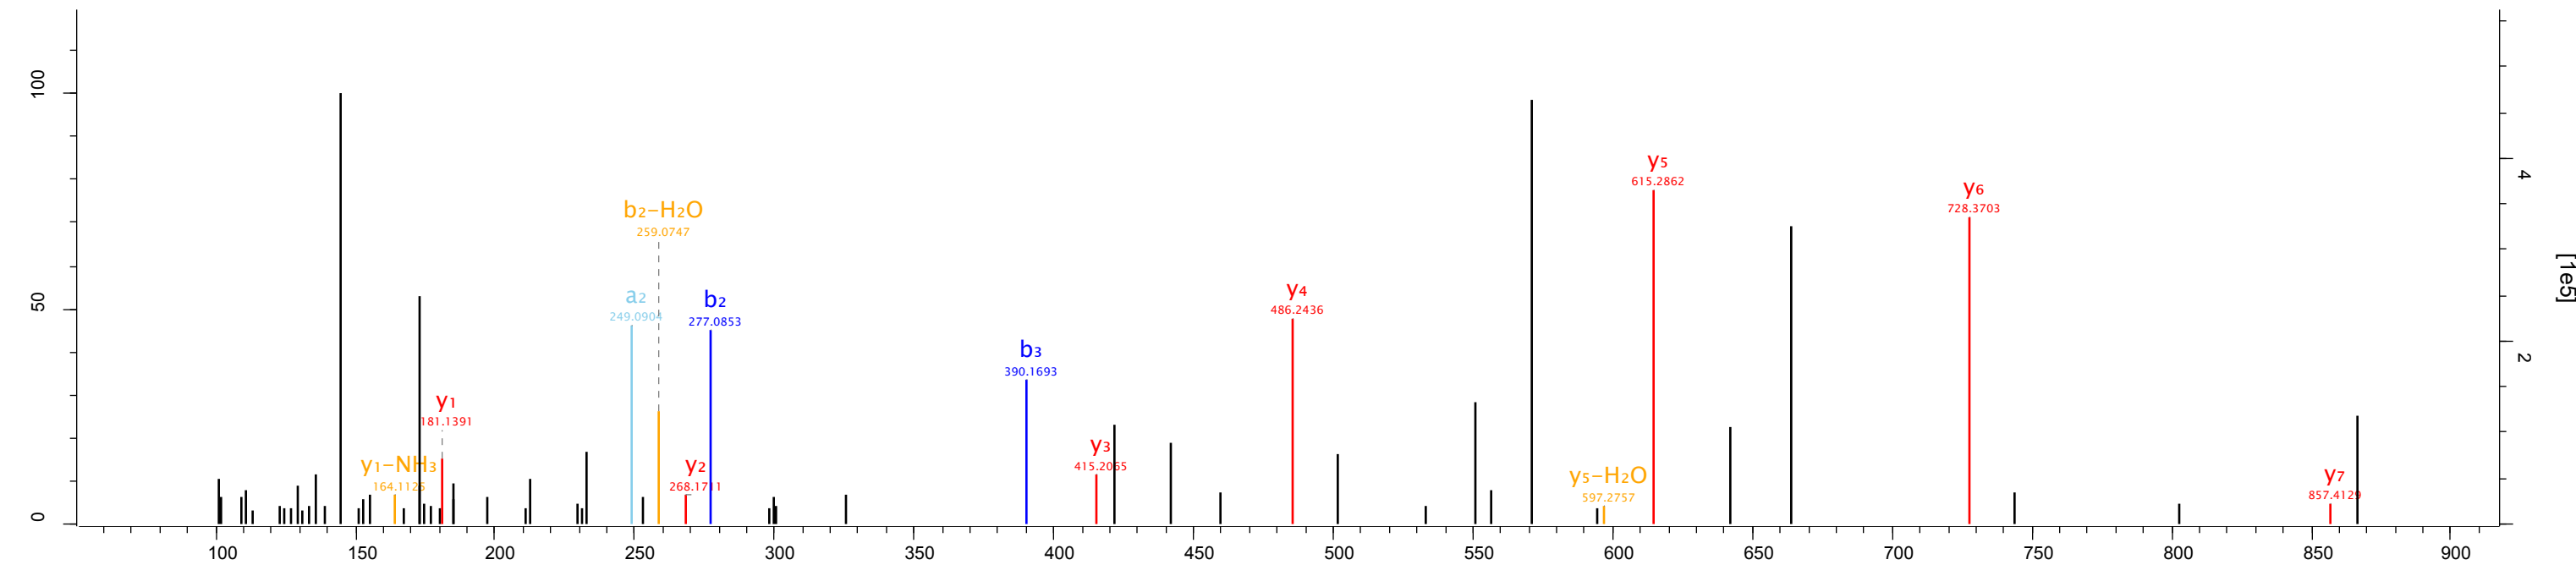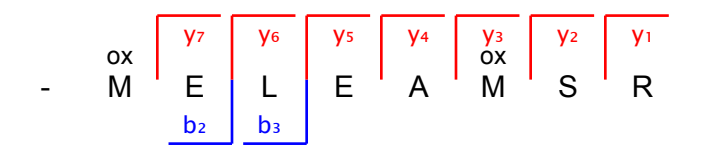

Raw file  
20180707\_MaS\_A375SR\_LM\_proteome\_17

Scan 20376 Method FTMS; HCD Score 68.56 m/z 556.28

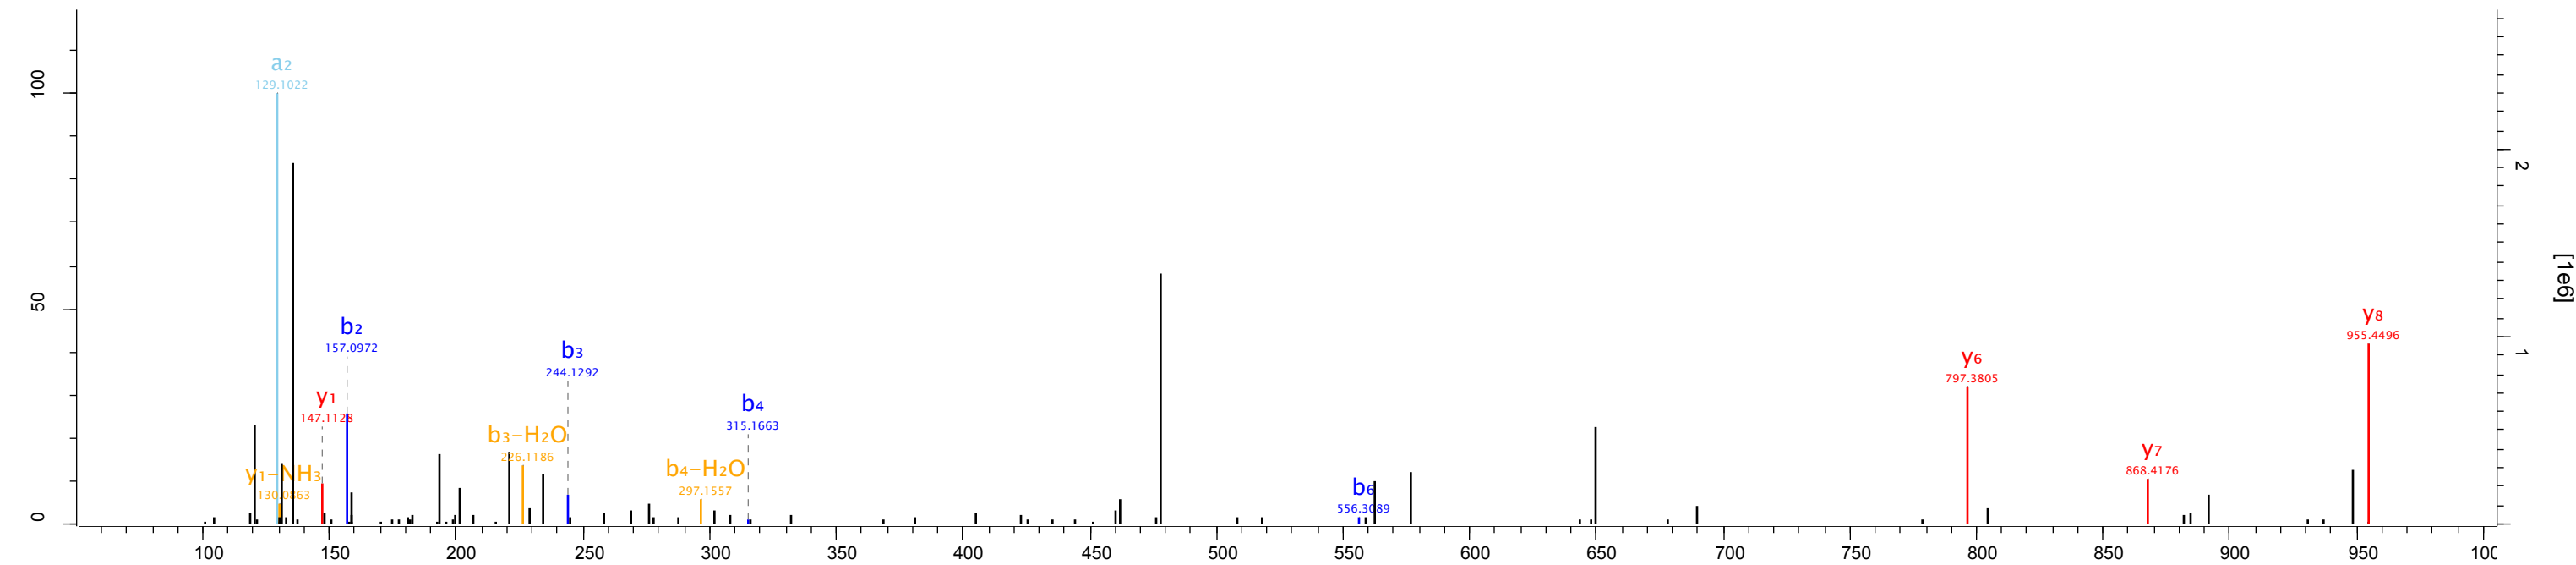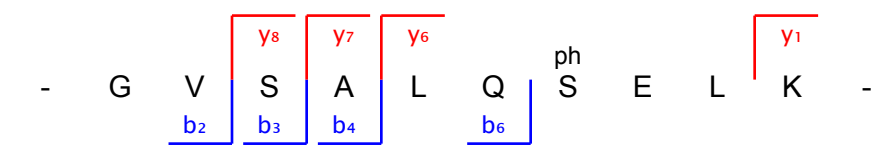

Raw file: 20180707\_MaS\_A375SR\_LM\_proteome\_18  
 Scan: 26406 Method: FTMS; HCD Score: 45 m/z: 1039.46 Gene names: RNF121

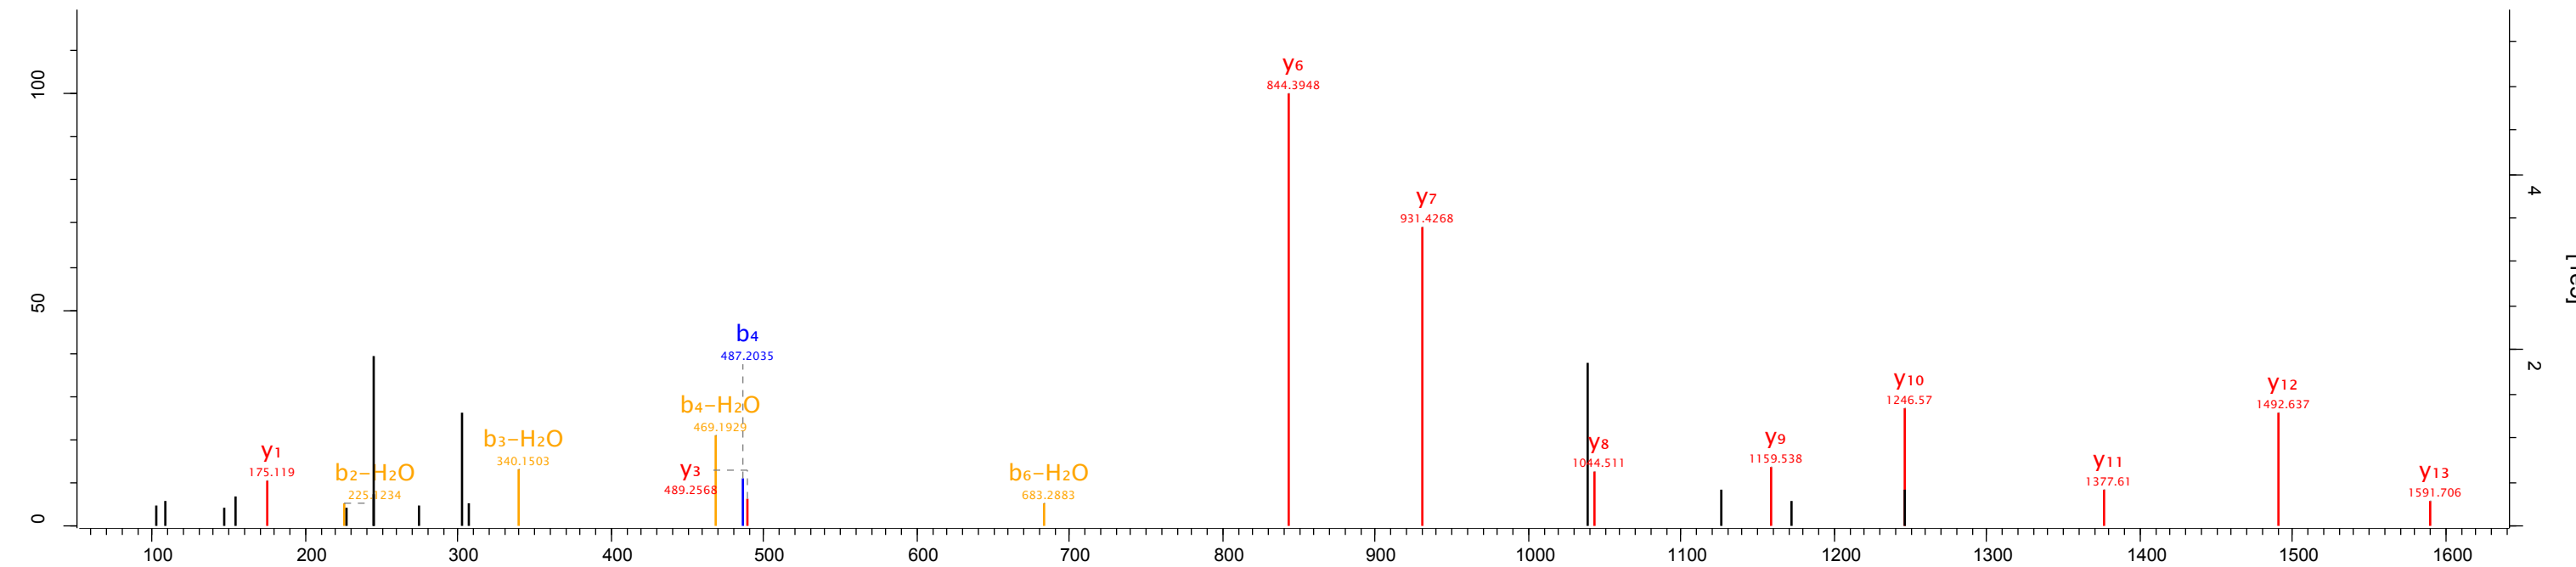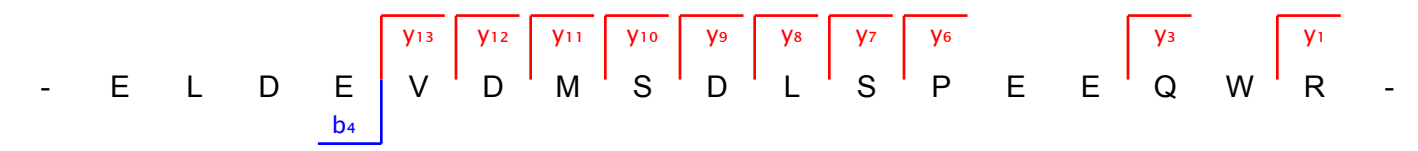

Raw file: 20180707\_MaS\_A375SR\_LM\_proteome\_21  
 Scan: 21426 Method: FTMS; HCD Score: 57.16 m/z: 586.84 Gene names: KATNAL2

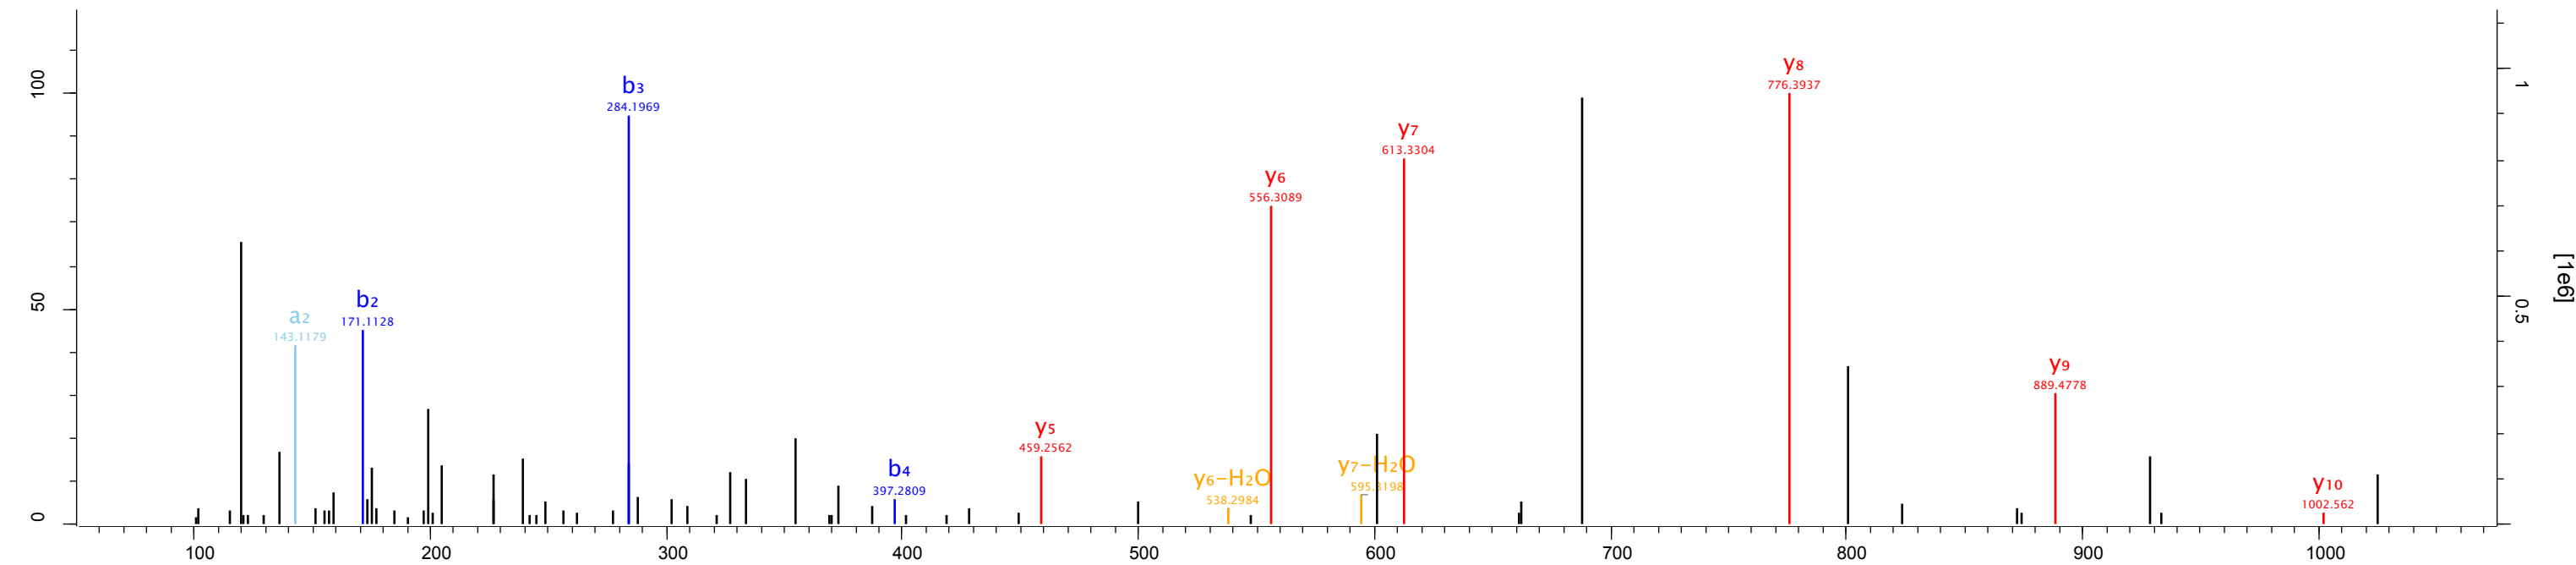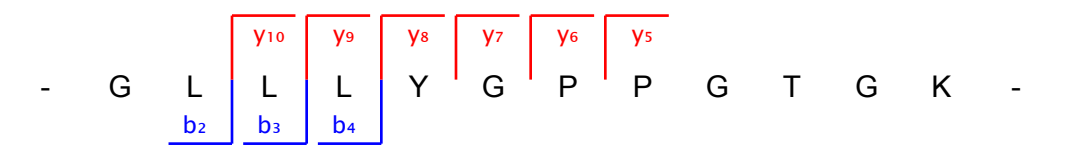

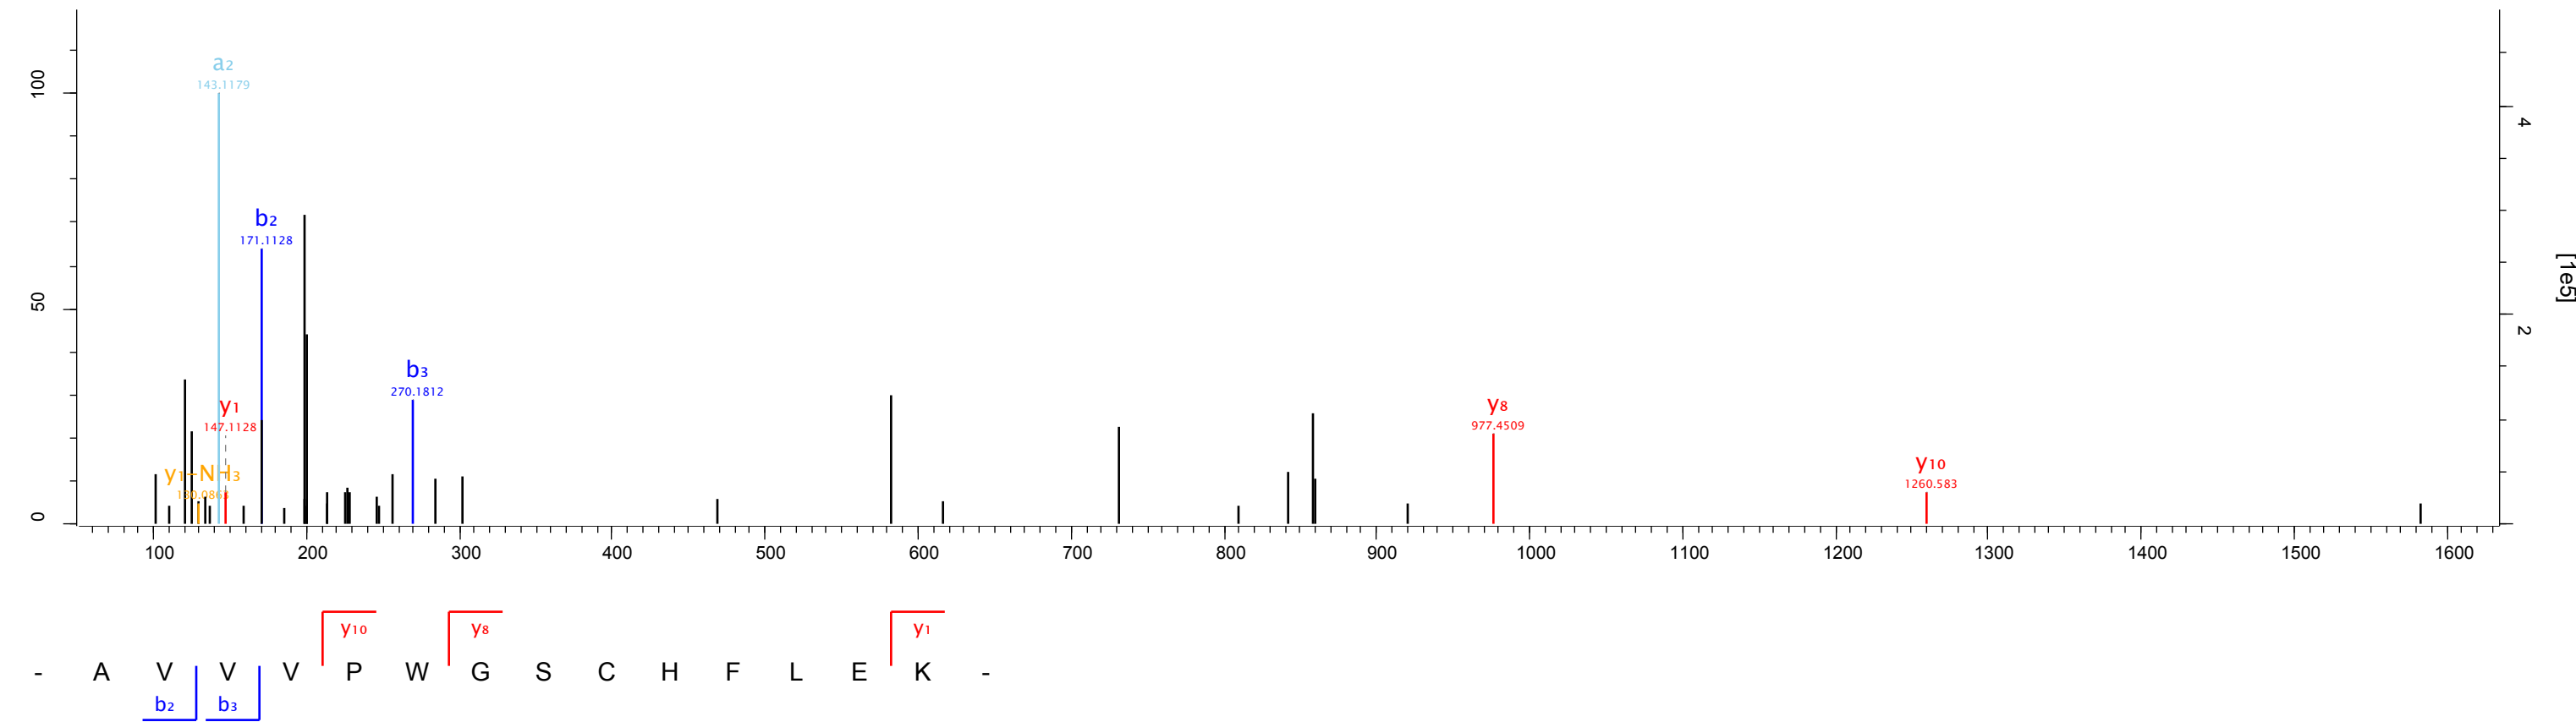



Raw file 20180707\_MaS\_A375SR\_LM\_proteome\_24 Scan 23326 Method FTMS; HCD Score 61.13 m/z 865.99 Gene names KRTCAP2

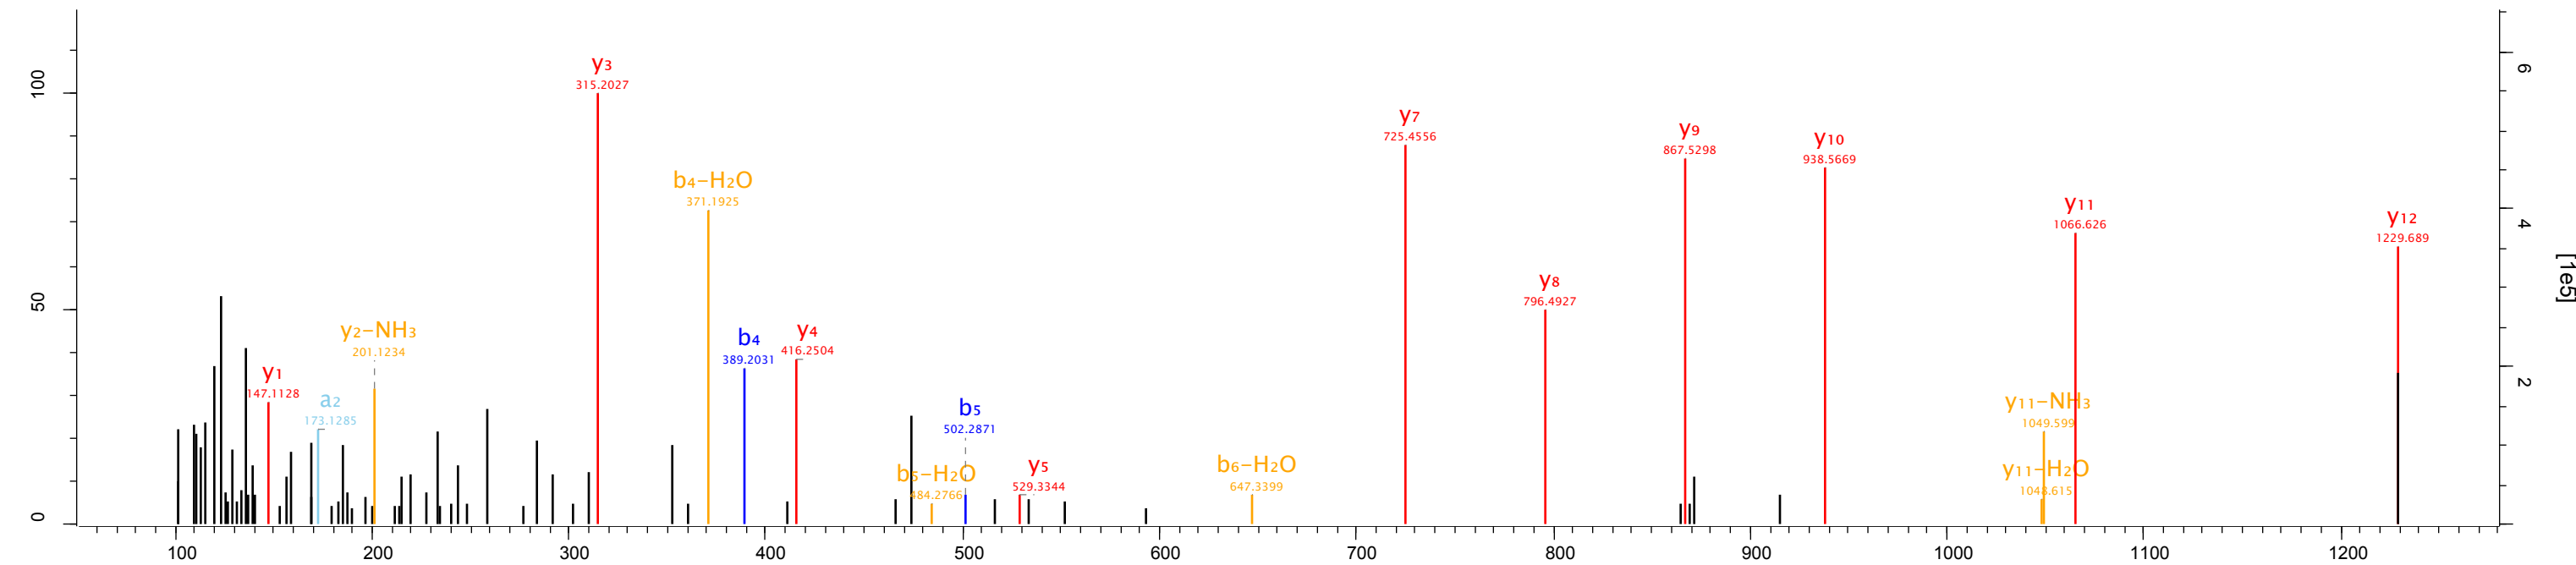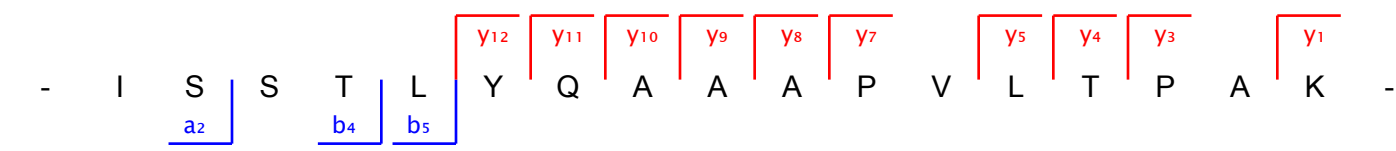

Raw file 20180707\_MaS\_A375SR\_LM\_proteome\_24 Scan 3526 Method FTMS; HCD Score 49.53 m/z 342.52 Gene names COX7B

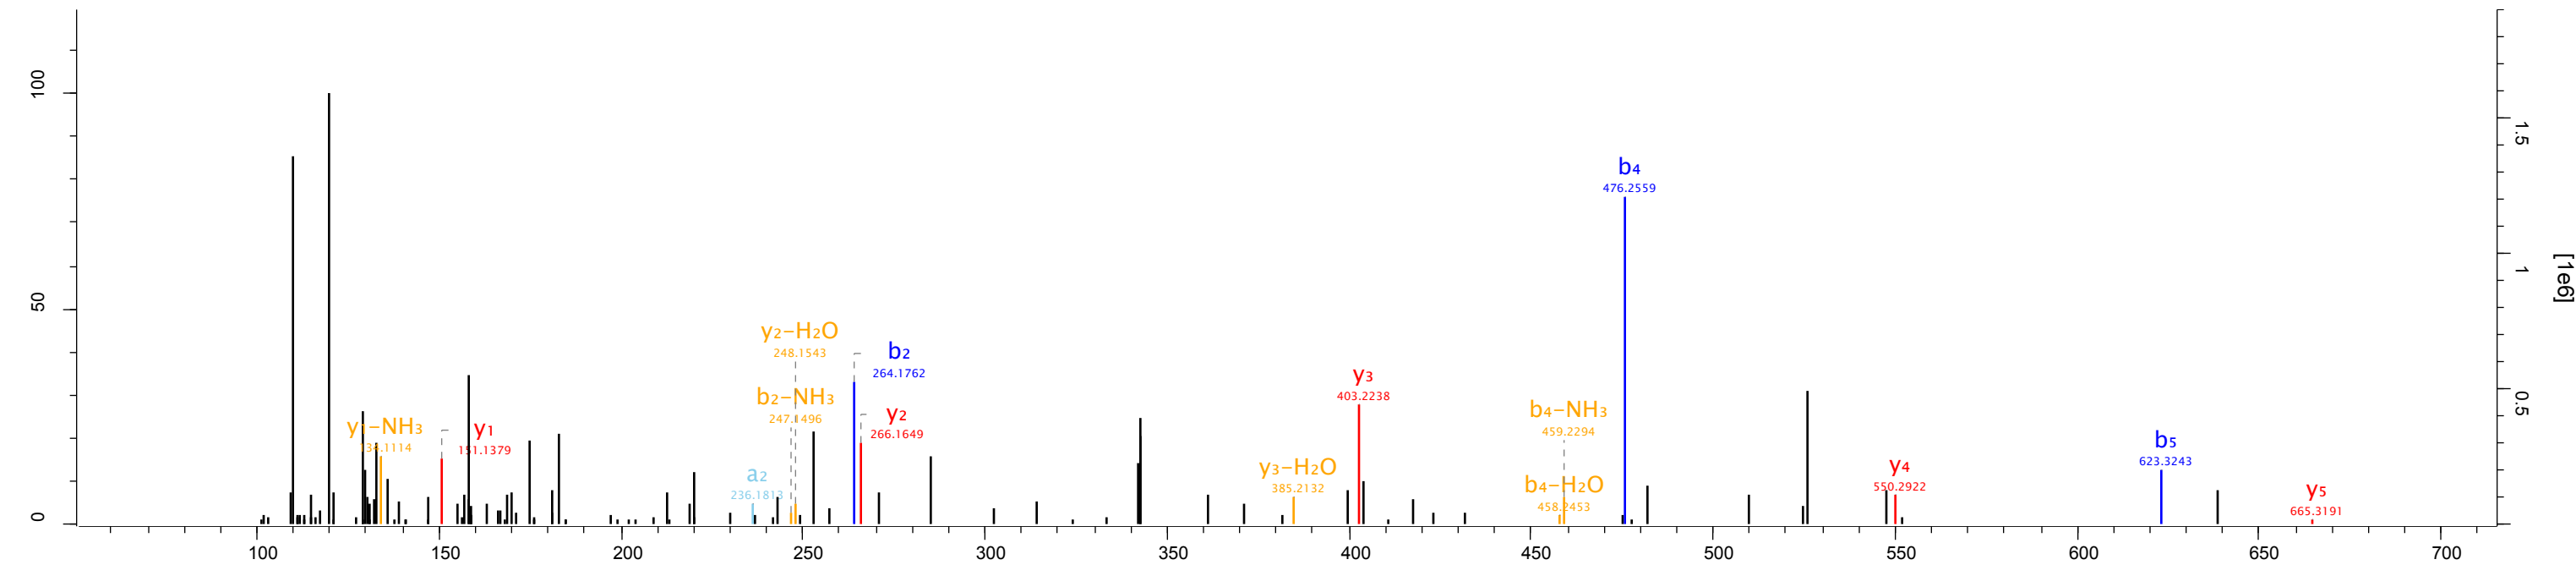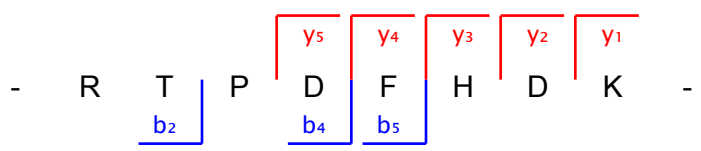

Raw file: 20180707\_MaS\_A375SR\_LM\_proteome\_27  
 Scan: 3716 Method: FTMS; HCD Score: 25.12 m/z: 402.95 Gene names: MT-CO3

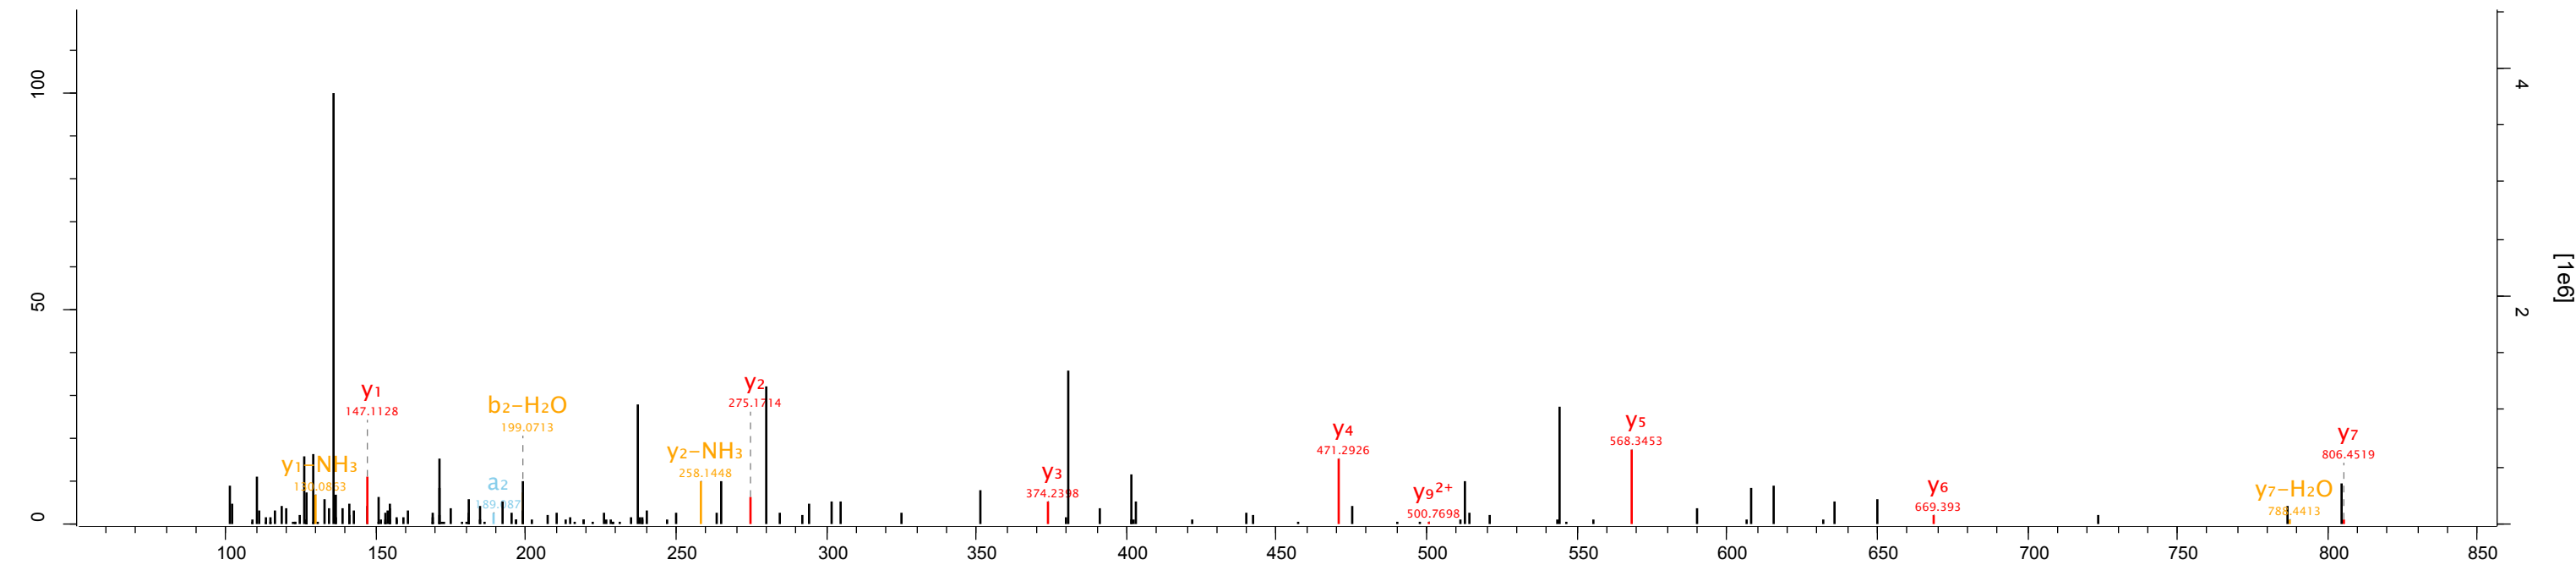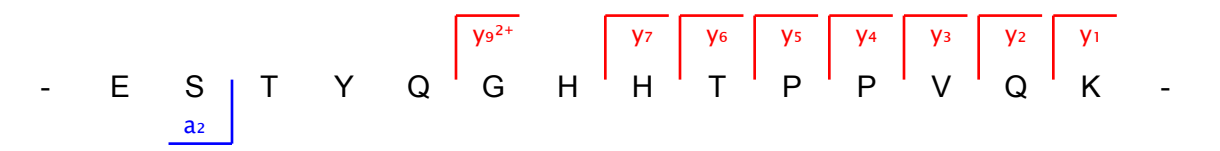

Raw file: 20180707\_MaS\_A375SR\_ML\_proteome\_01  
 Scan: 16706 Method: FTMS; HCD Score: 101.54 m/z: 535.77 Gene names: SAMD8

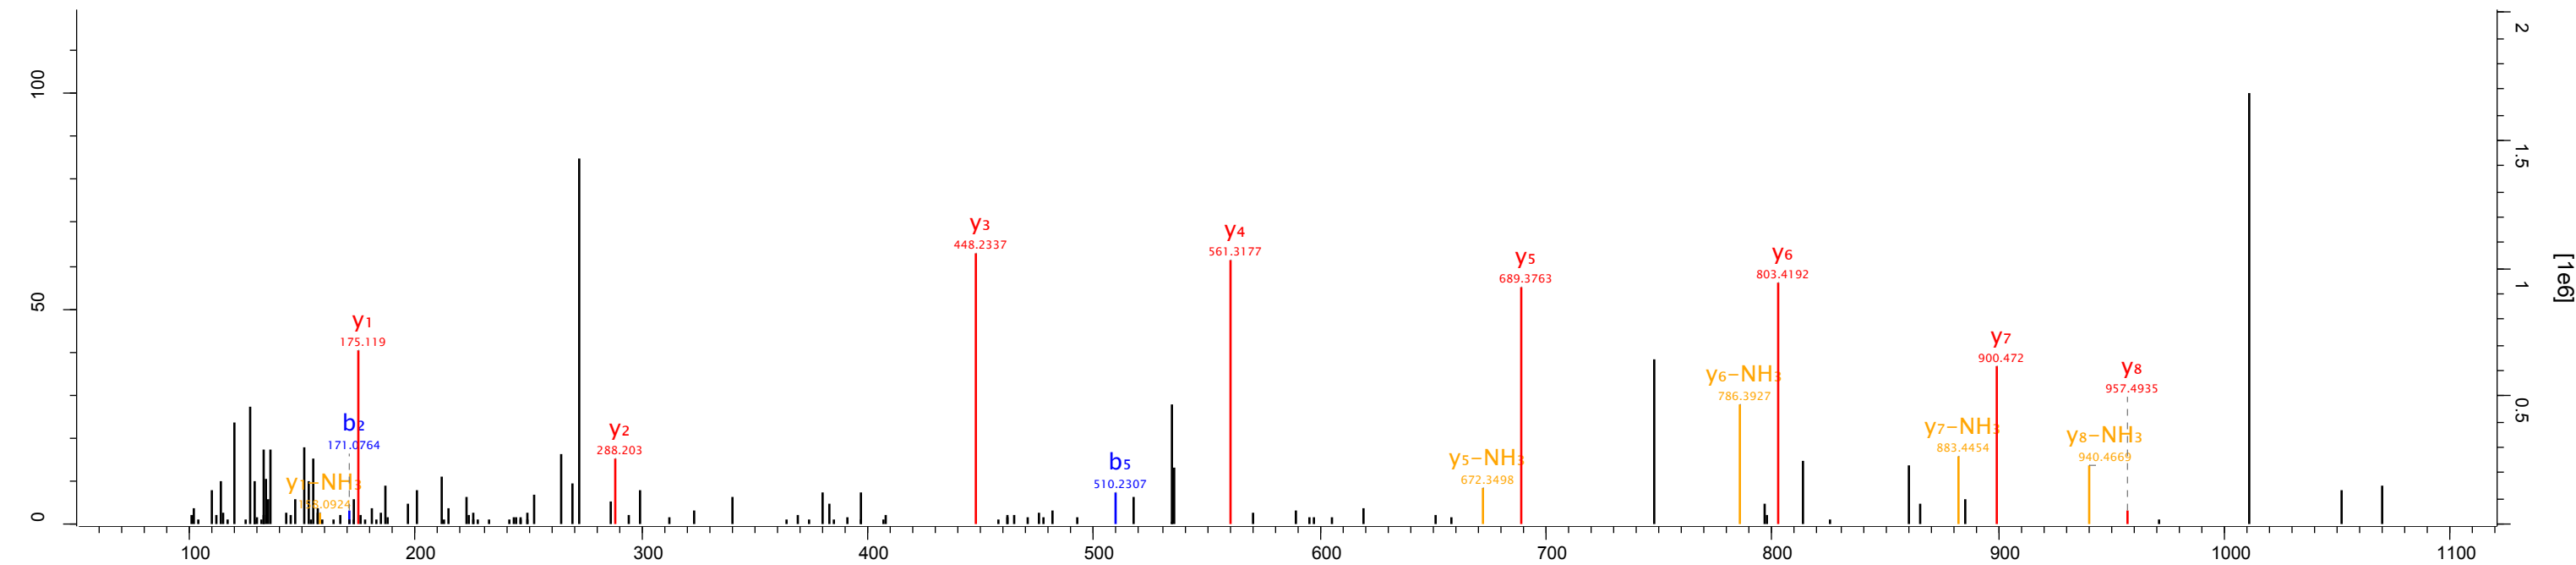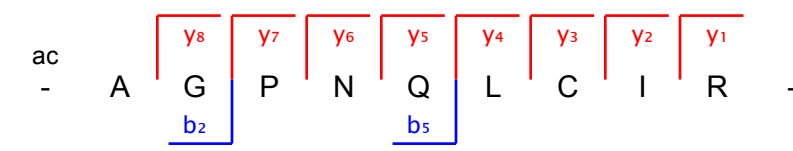

Raw file: 20180707\_MaS\_A375SR\_ML\_proteome\_02  
 Scan: 10916 Method: FTMS; HCD Score: 72.34 m/z: 653.85 Gene names: MEIS2;MEIS3;MEIS1;MEIS3P1

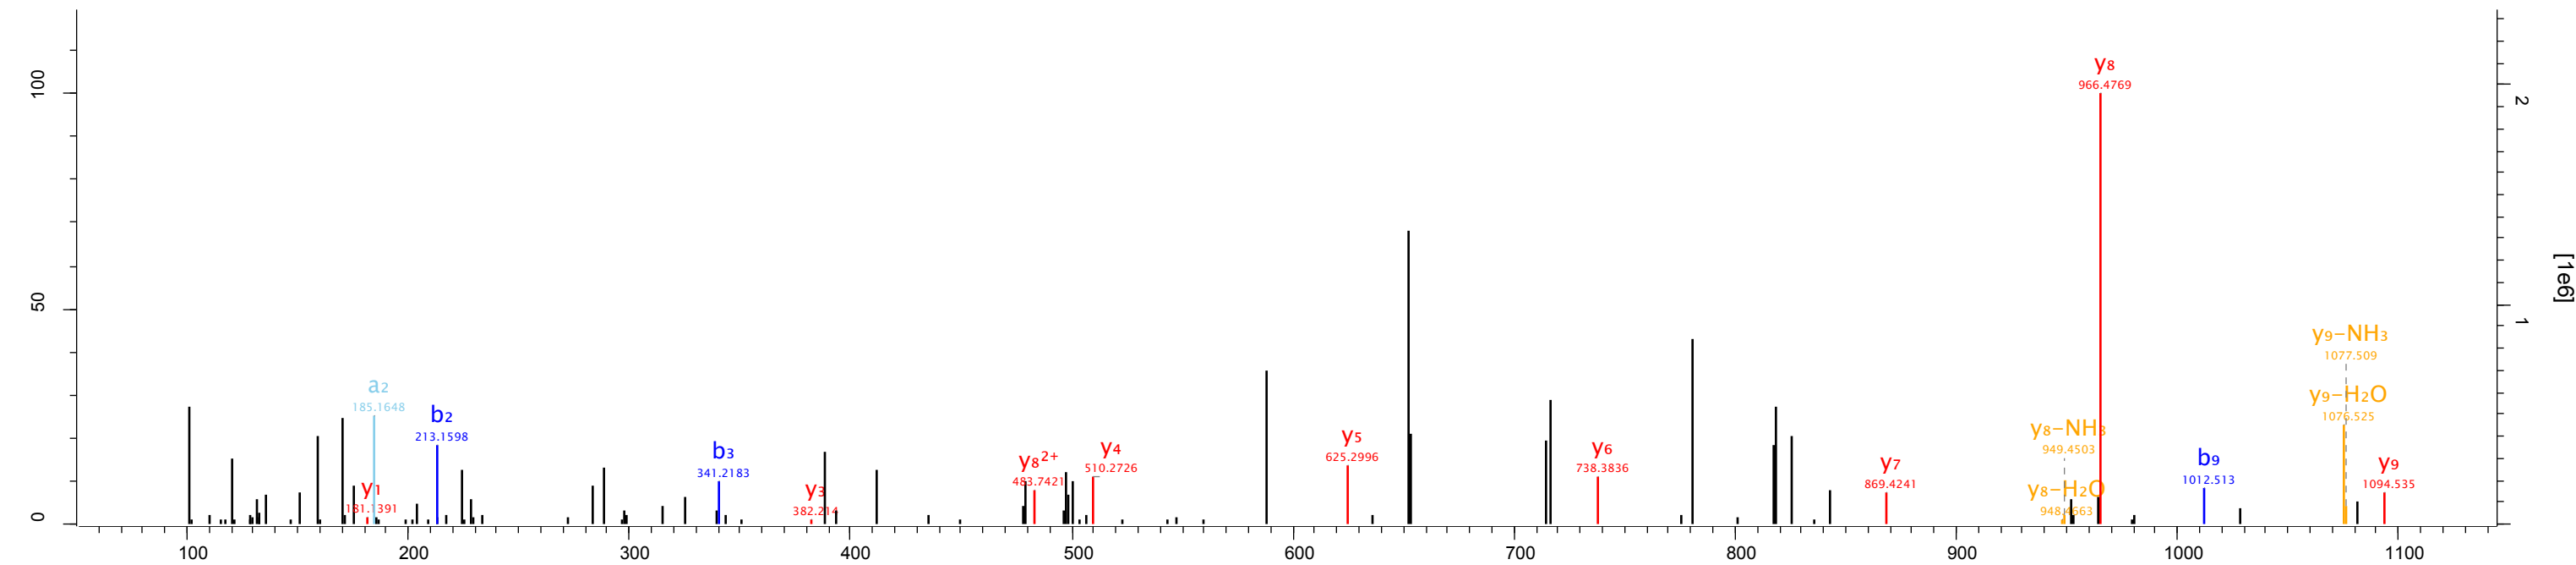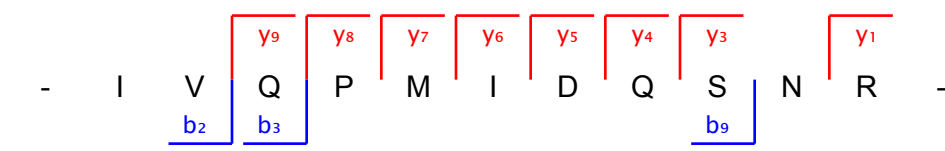

Raw file: 20180707\_MaS\_A375SR\_ML\_proteome\_02  
 Scan: 5556 Method: FTMS; HCD Score: 92.47 m/z: 353.19 Gene names: ART4

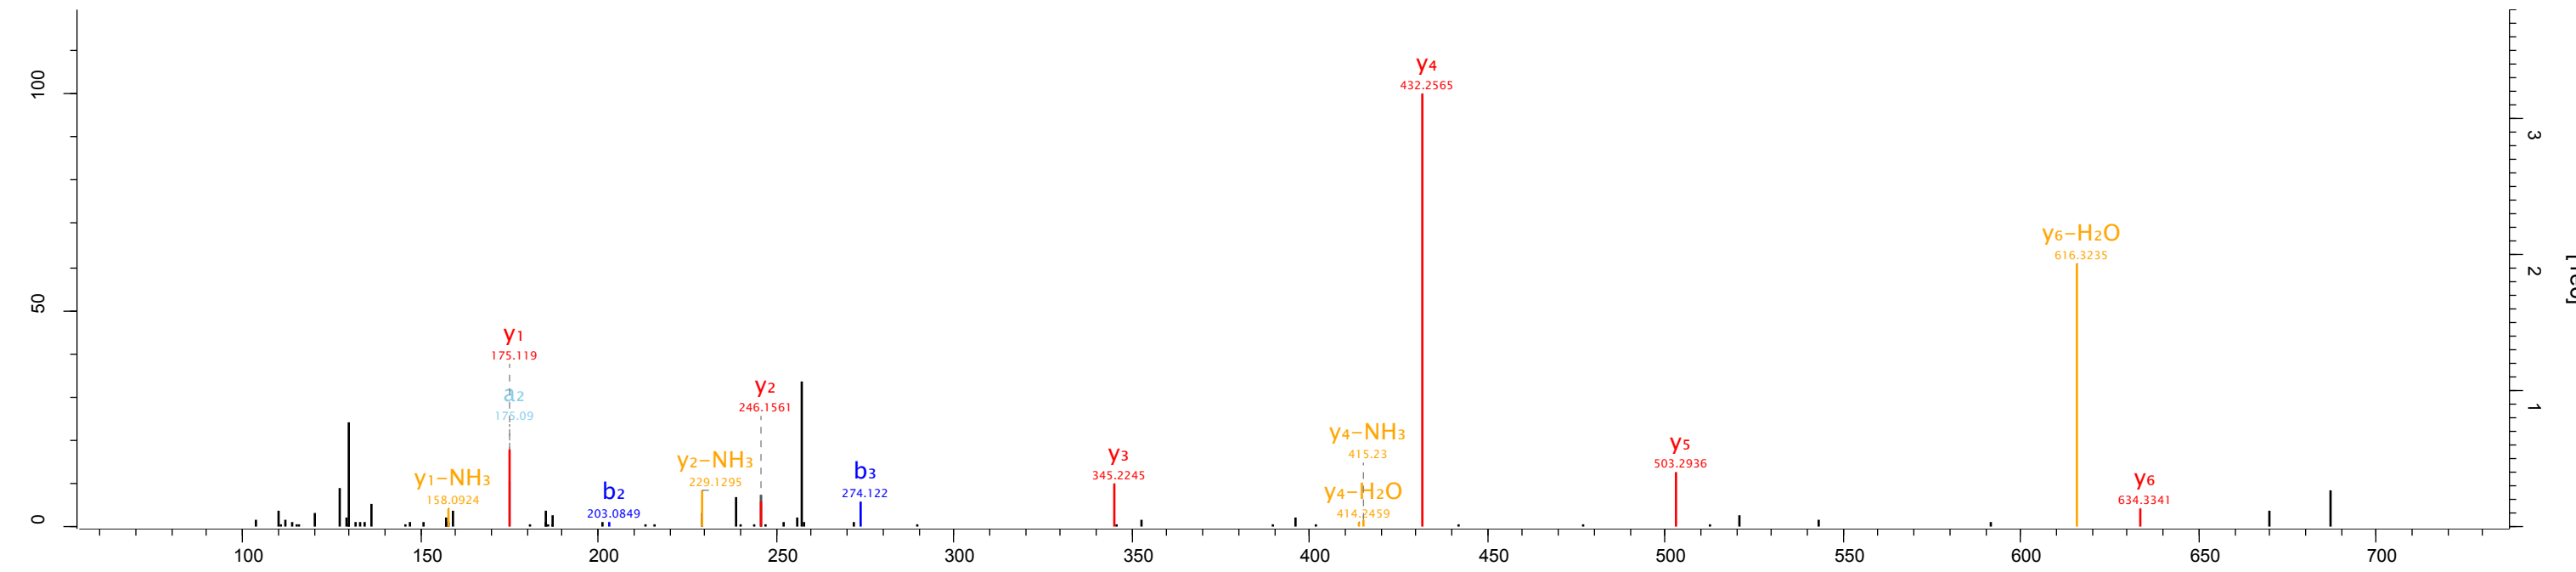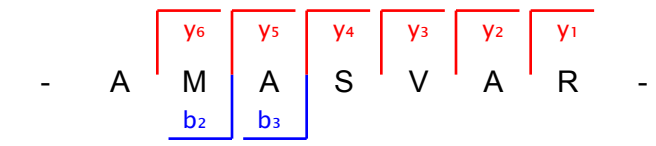

Raw file: 20180707\_MaS\_A375SR\_ML\_proteome\_04  
 Scan: 10556 Method: FTMS; HCD Score: 74.96 m/z: 610.79

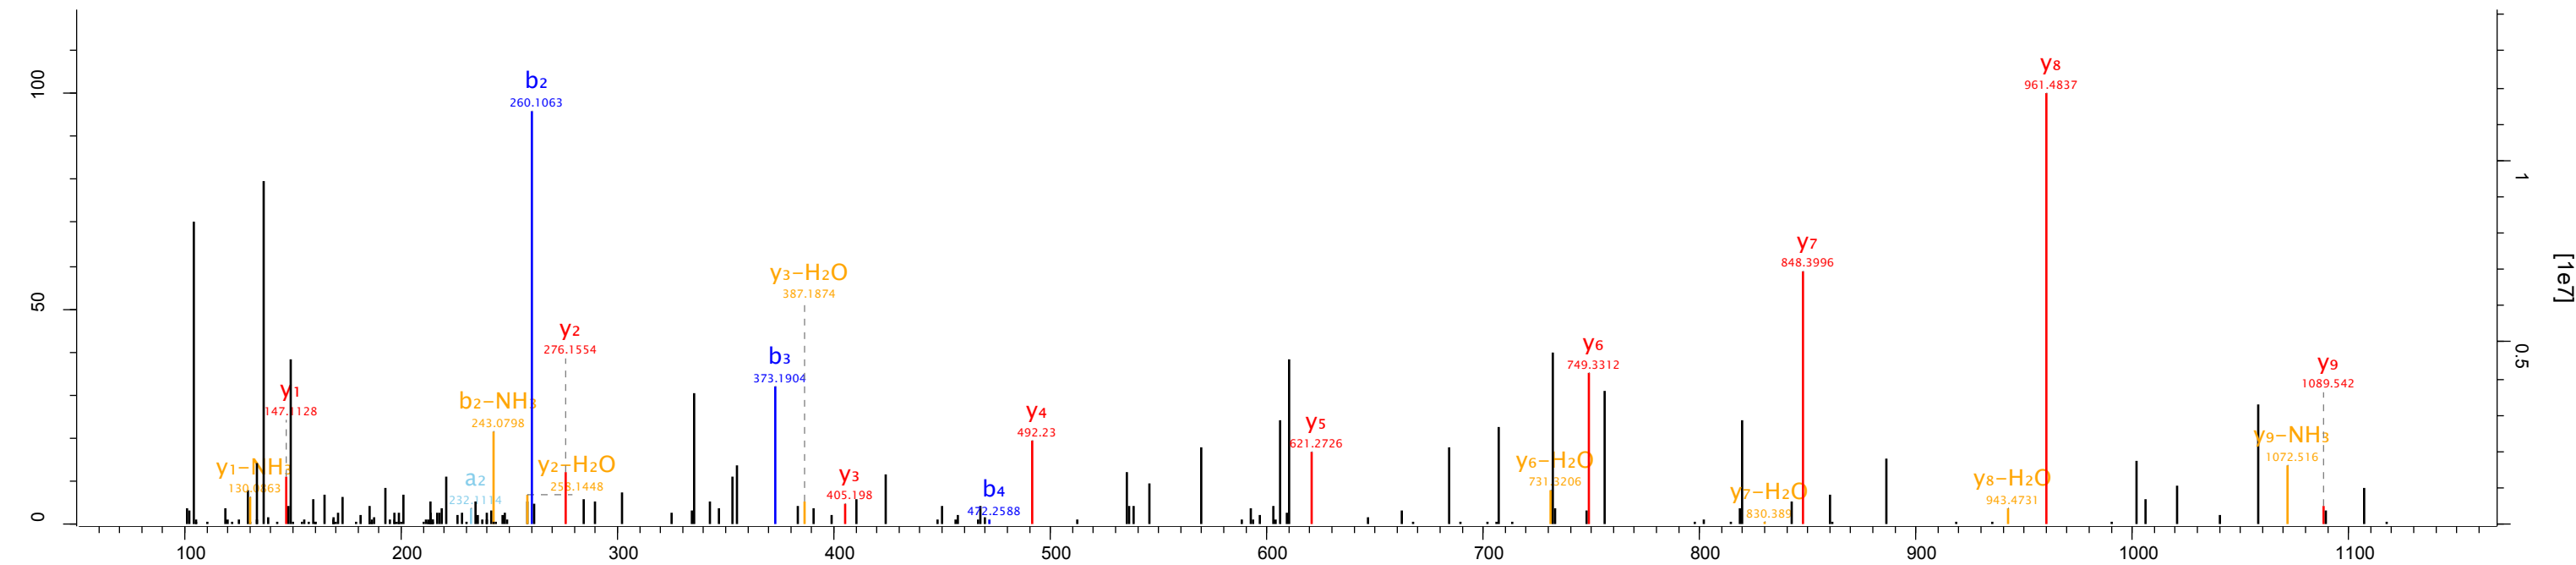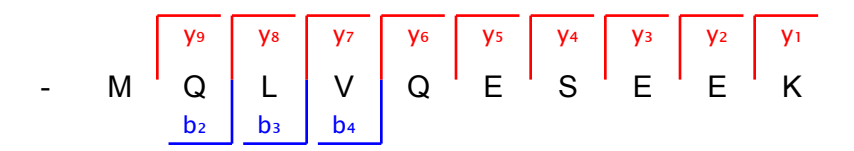

Raw file: 20180707\_MaS\_A375SR\_ML\_proteome\_04  
 Scan: 12236 Method: FTMS; HCD Score: 60.79 m/z: 444.24 Gene names: C1orf234

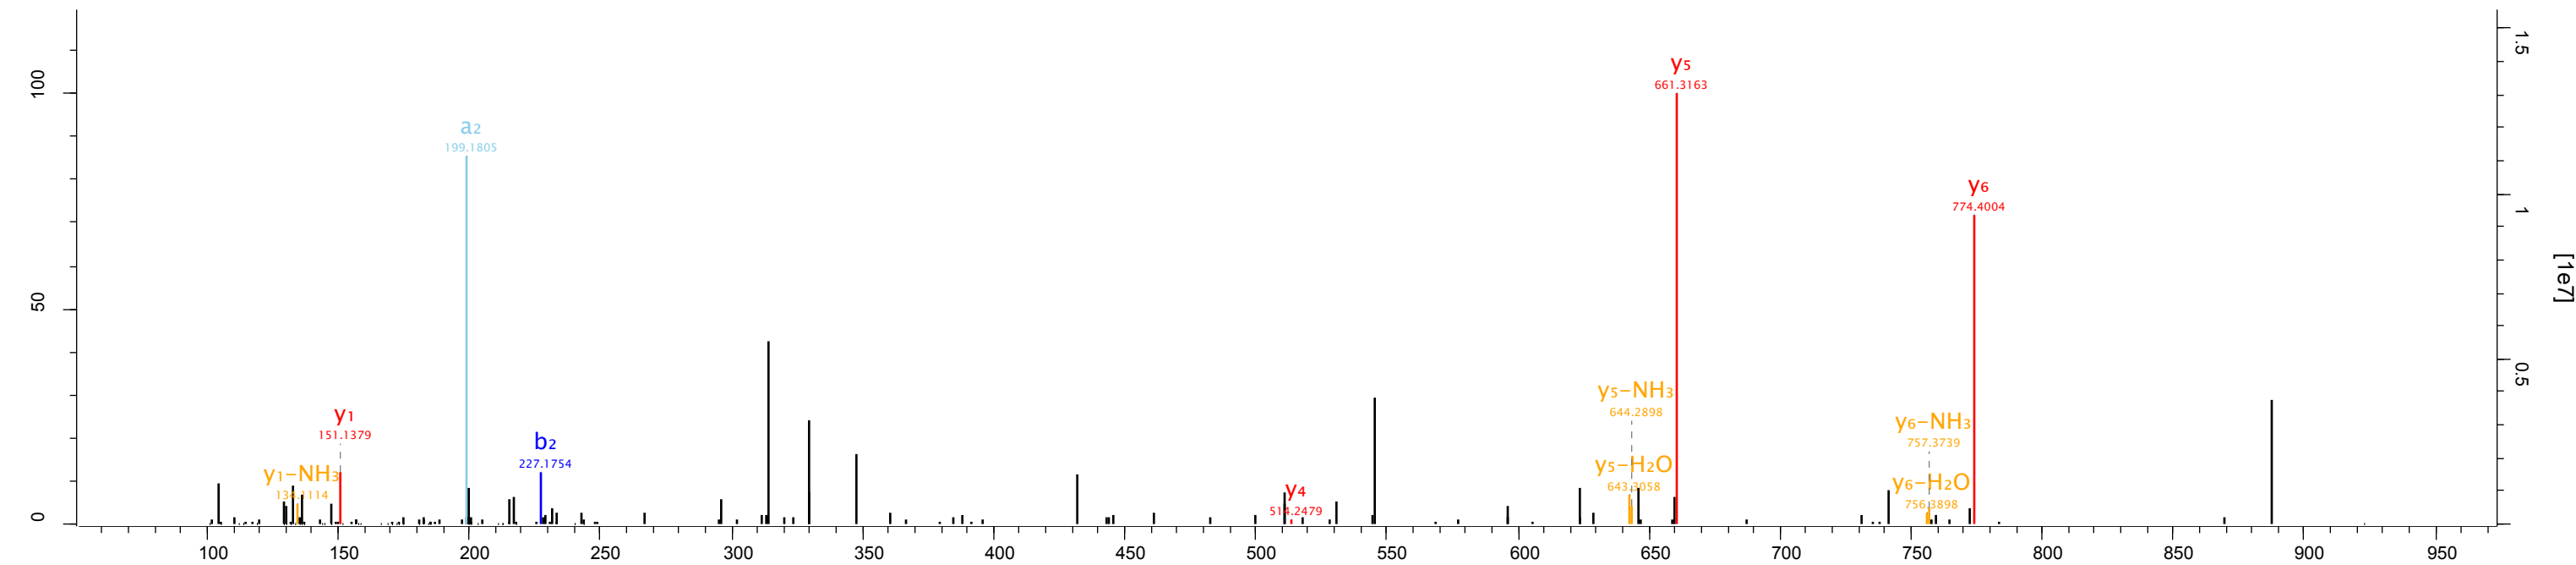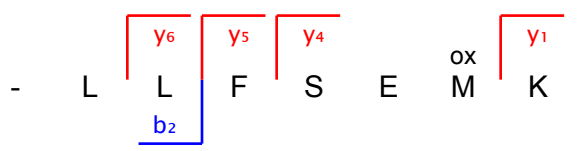



Raw file: 20180707\_MaS\_A375SR\_ML\_proteome\_04  
 Scan: 14926 Method: FTMS; HCD Score: 62.94 m/z: 916.9 Gene names: ADPRM

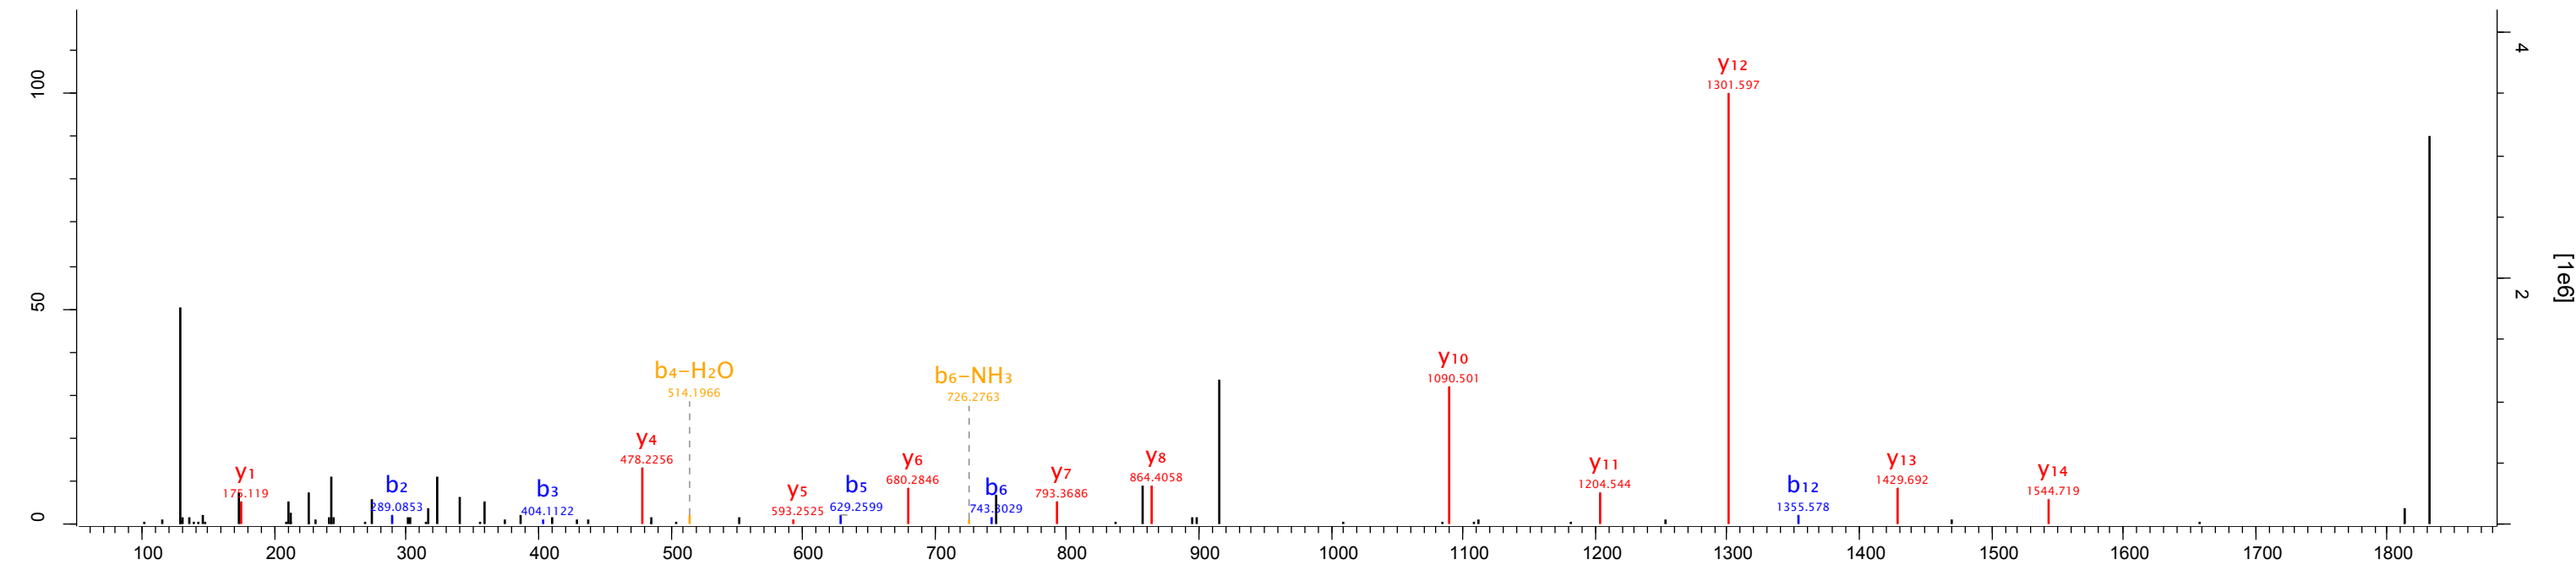

ac - M D D K P N P E A L S D S S E R -

Fragmentation mapping (b and y ions):

- b2: M-D
- b3: D-D
- b5: P-P
- b6: N-P
- b12: D-S
- y1: E-R
- y4: S-S
- y5: D-S
- y6: S-S
- y7: L-S
- y8: A-S
- y10: P-E
- y11: N-E
- y12: P-E
- y13: D-E
- y14: D-E

Raw file: 20180707\_MaS\_A375SR\_ML\_proteome\_06  
 Scan: 17326 Method: FTMS; HCD Score: 63.95 m/z: 445.75 Gene names: SLC35A3

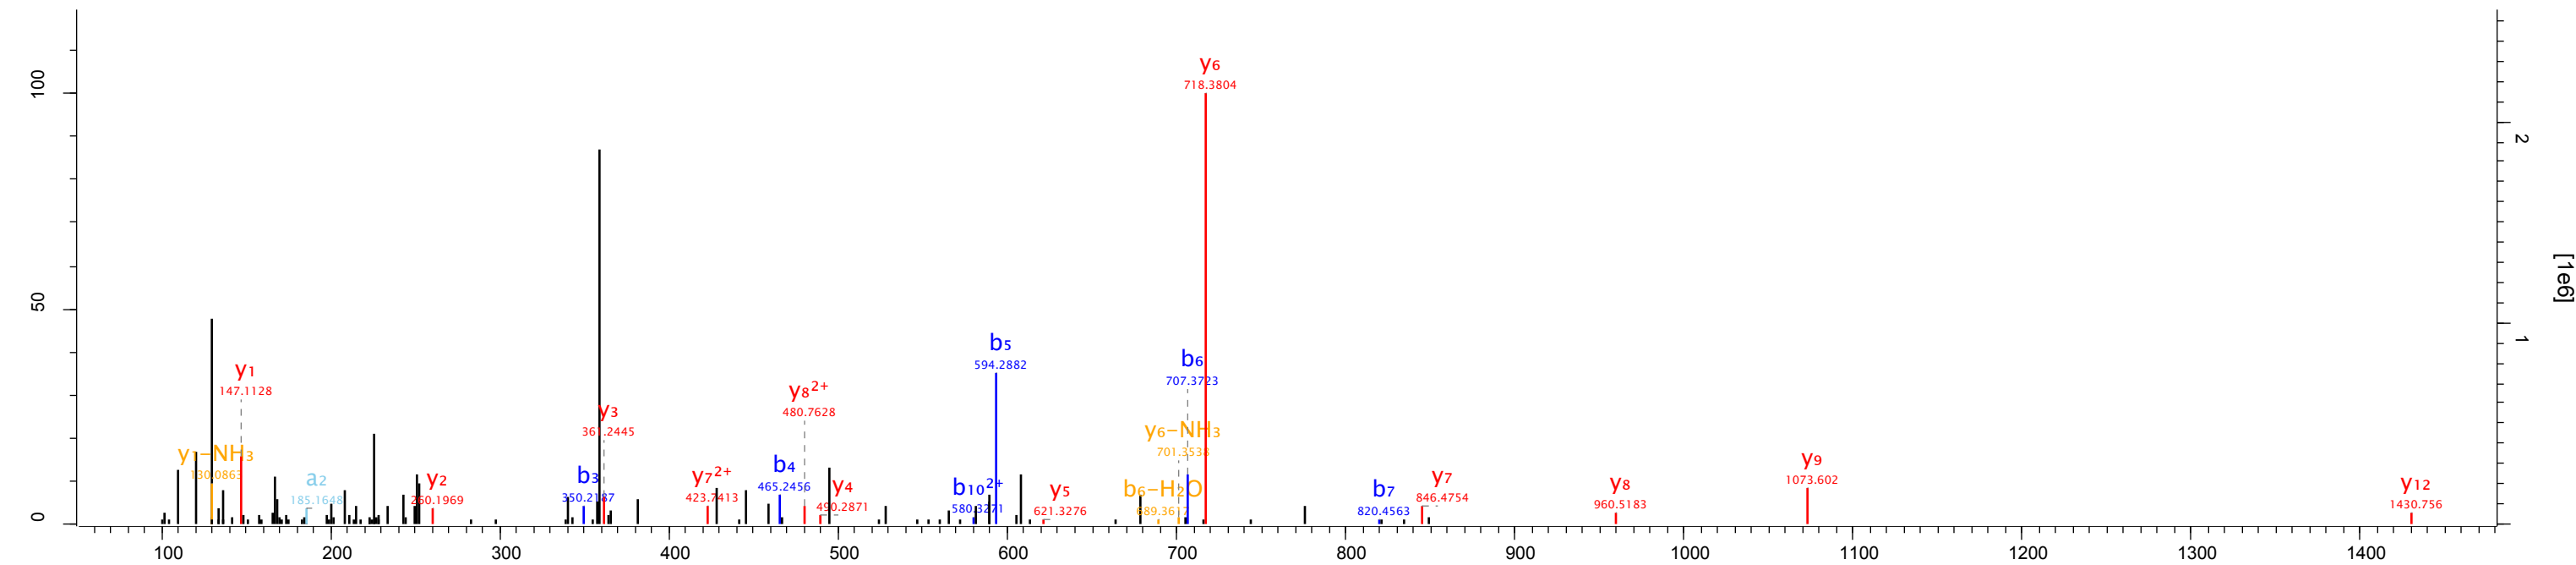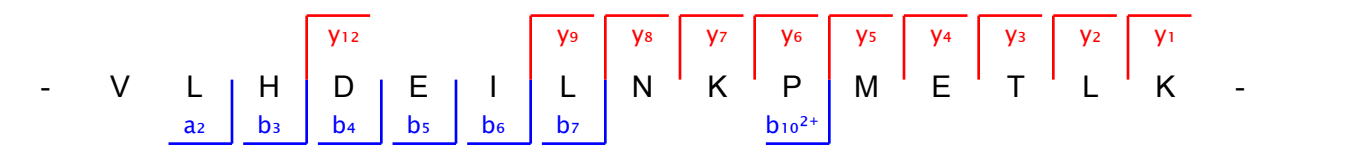

Raw file: 20180707\_MaS\_A375SR\_ML\_proteome\_06  
 Scan: 22916 Method: FTMS; HCD Score: 84.41 m/z: 546.97 Gene names: EDEM2

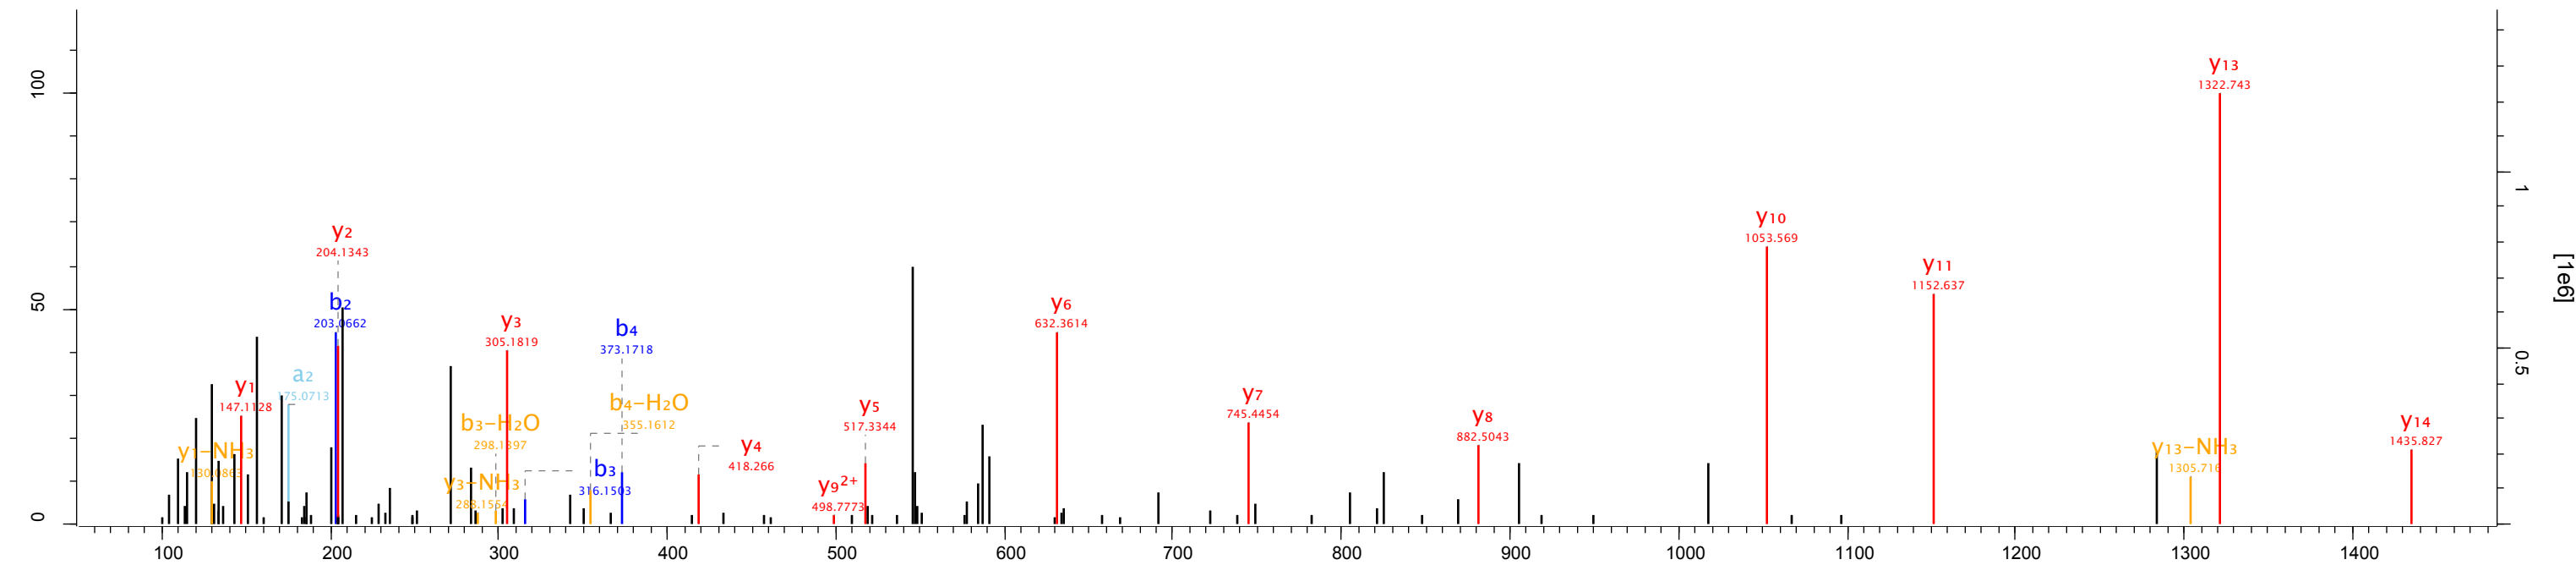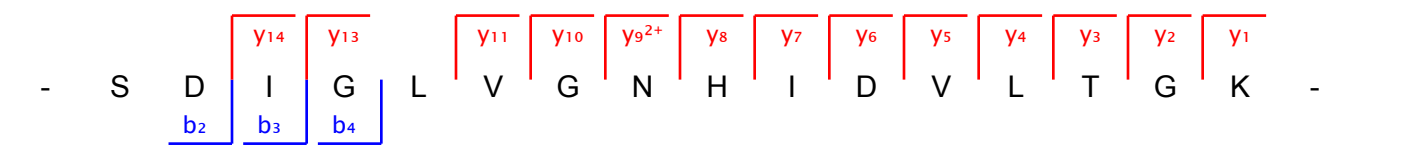

Raw file: 20180707\_MaS\_A375SR\_ML\_proteome\_06  
 Scan: 26436 Method: FTMS; HCD Score: 43.95 m/z: 1042.46 Gene names: RNF121

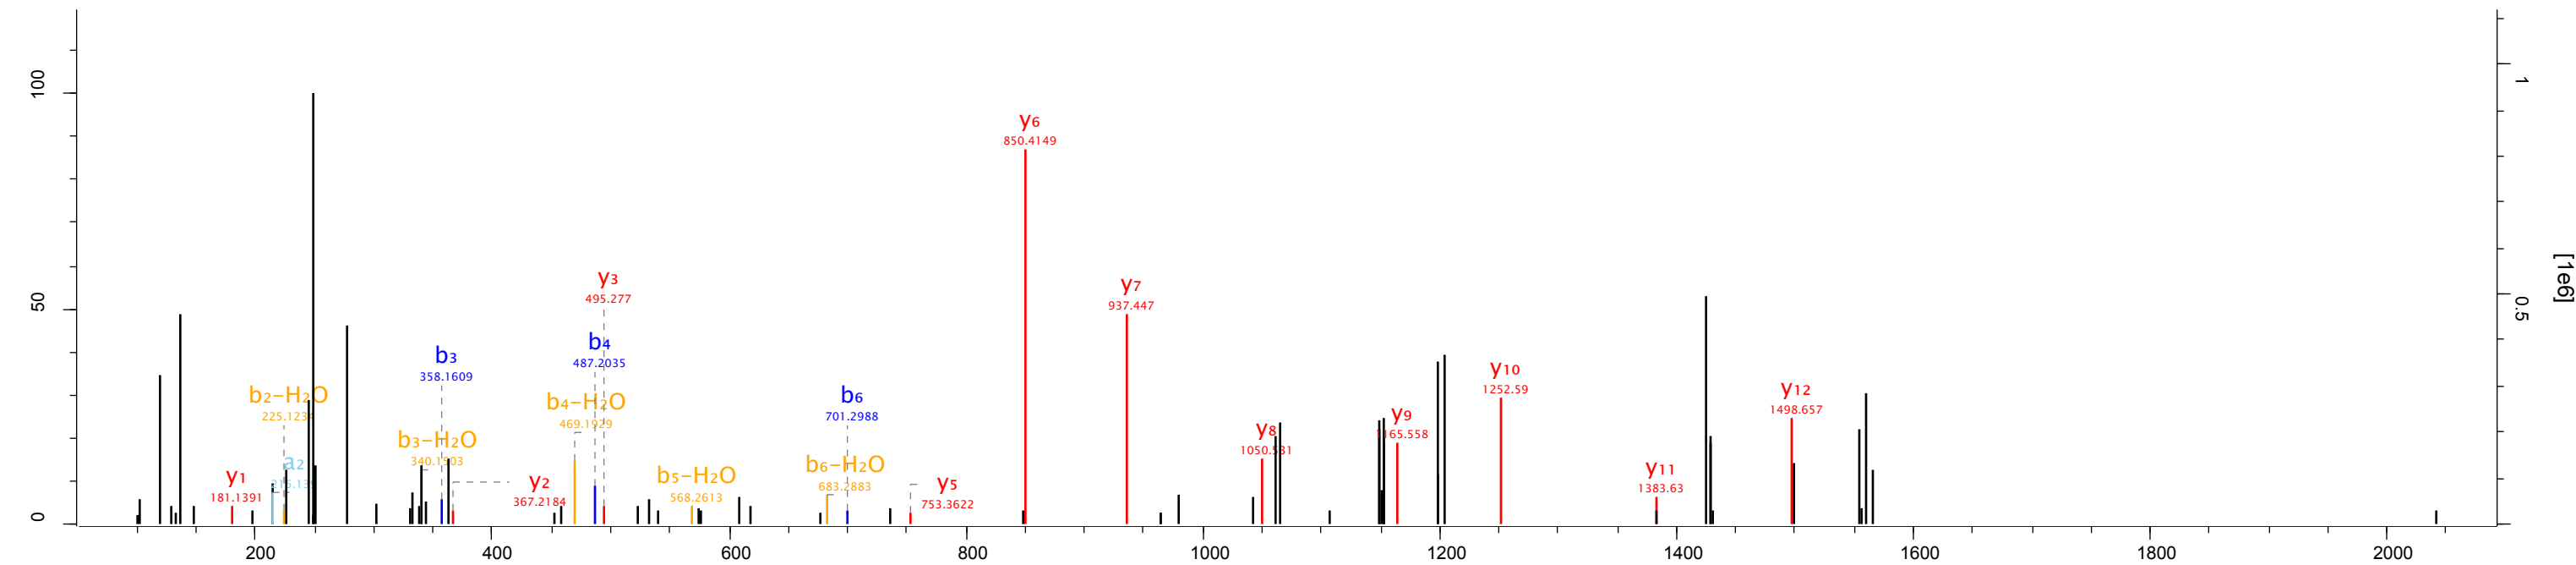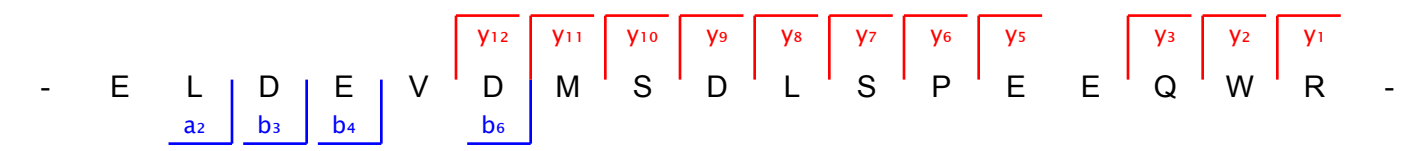

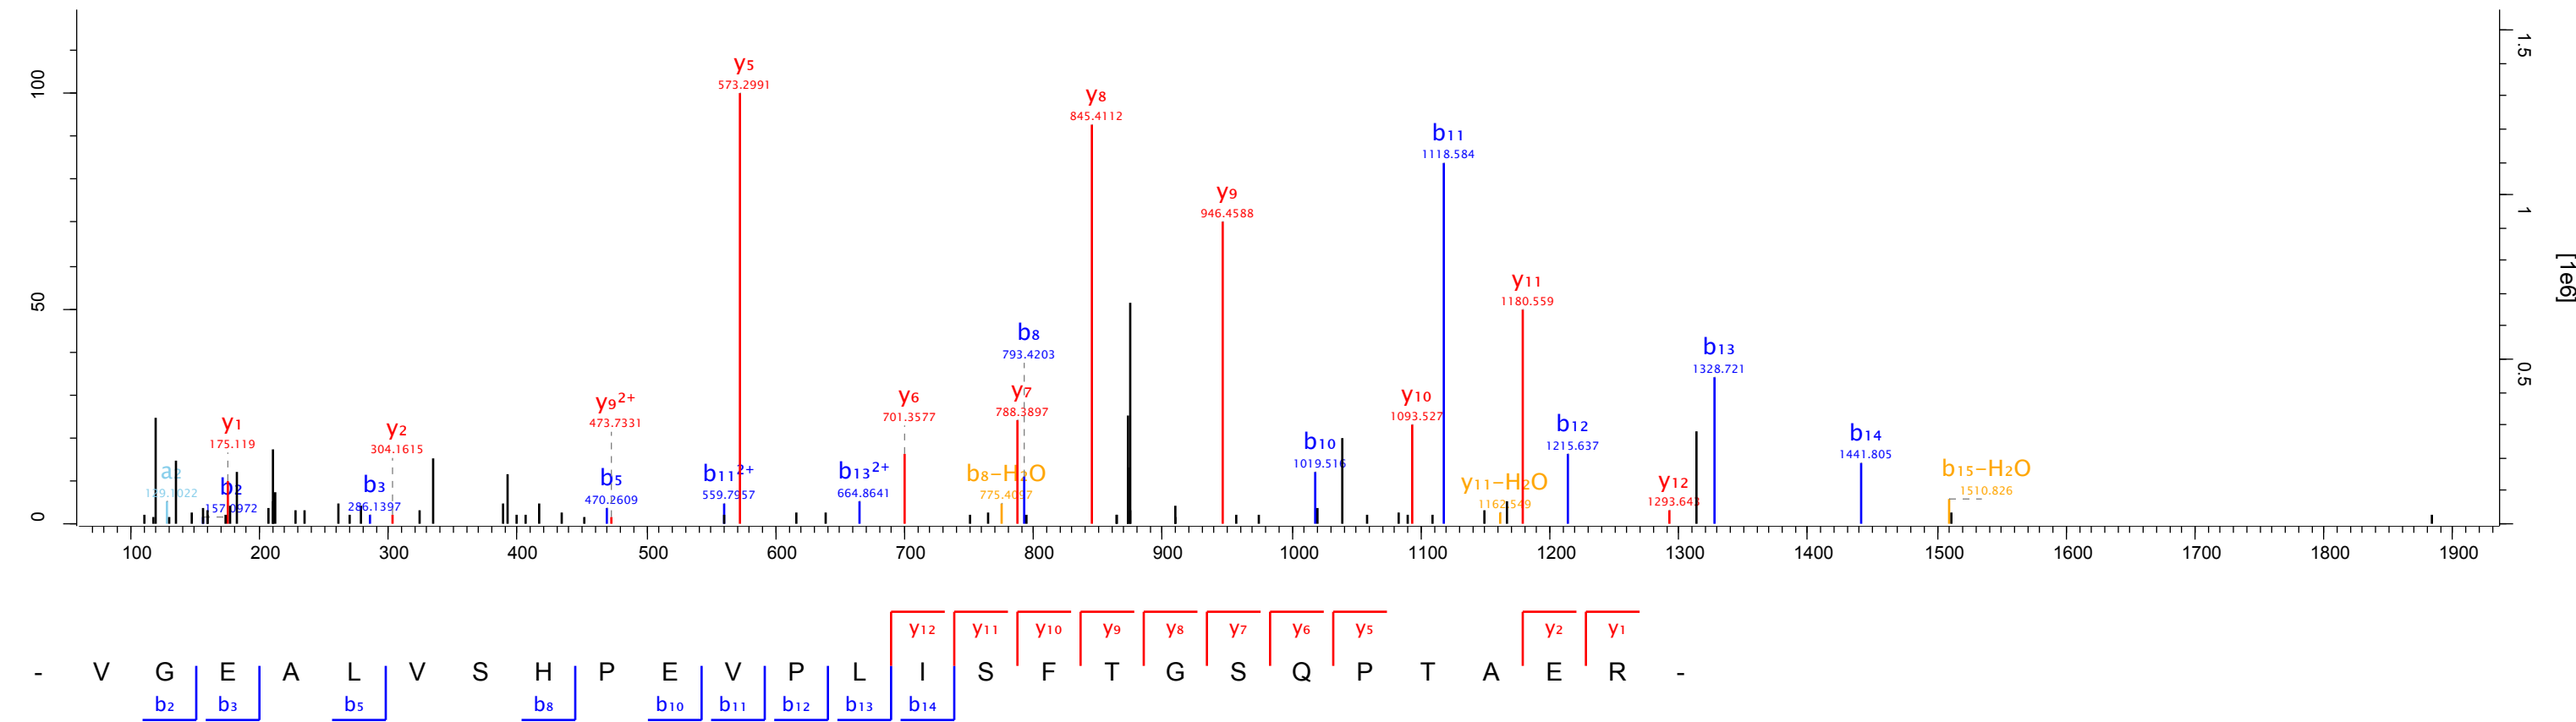

Raw file  
20180707\_MaS\_A375SR\_ML\_proteome\_08

Scan 28406 Method FTMS; HCD Score 40.49 m/z 632.01

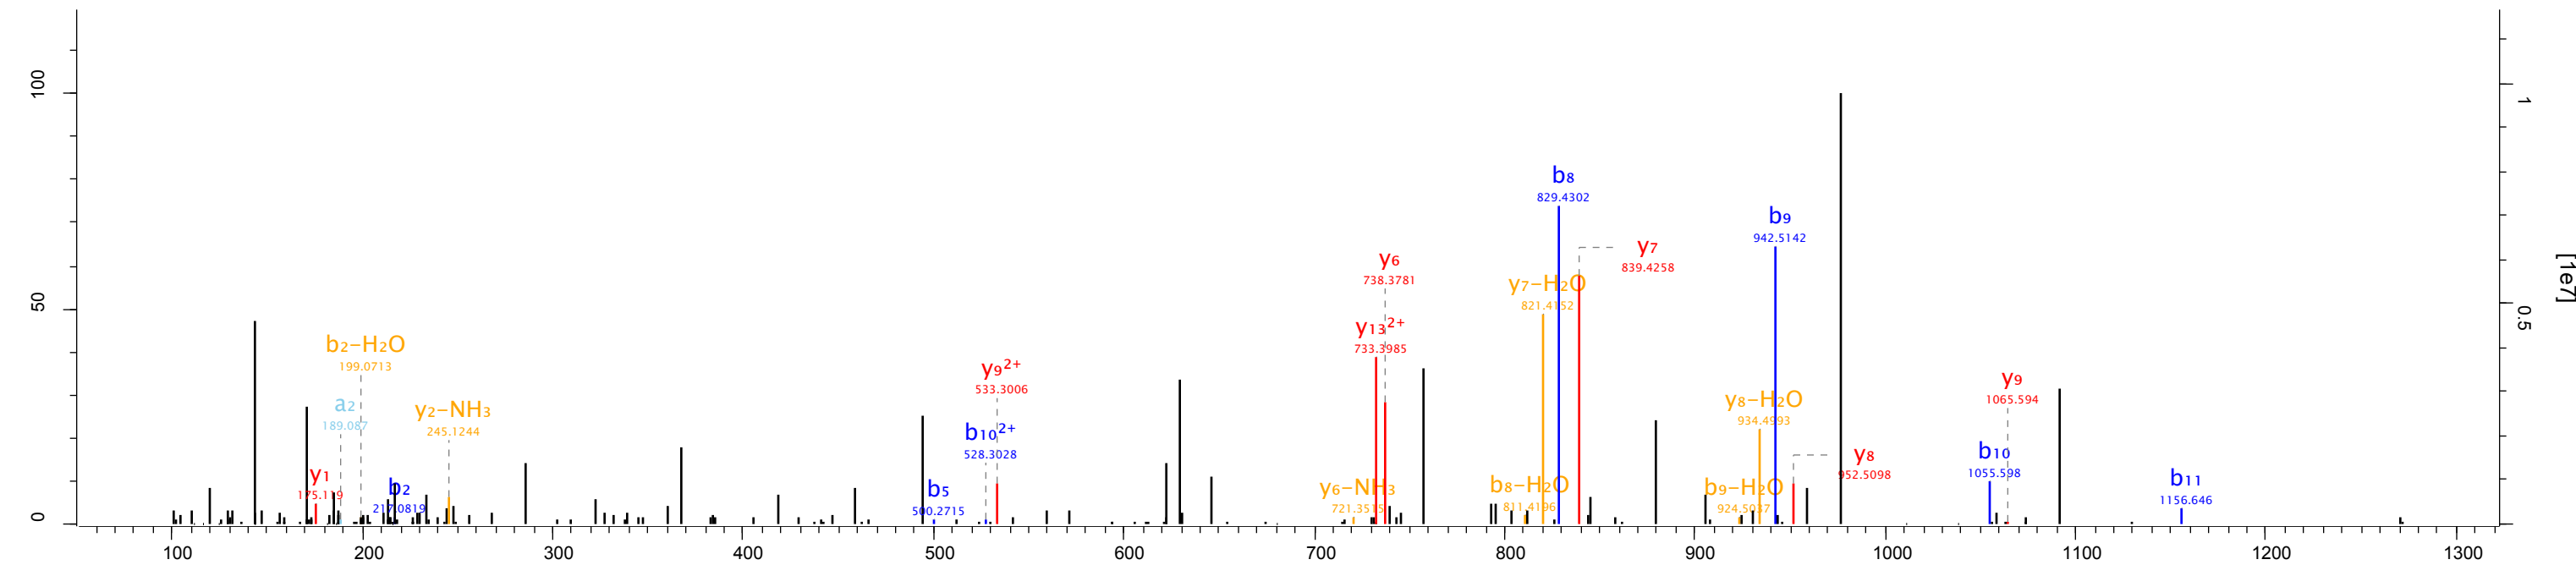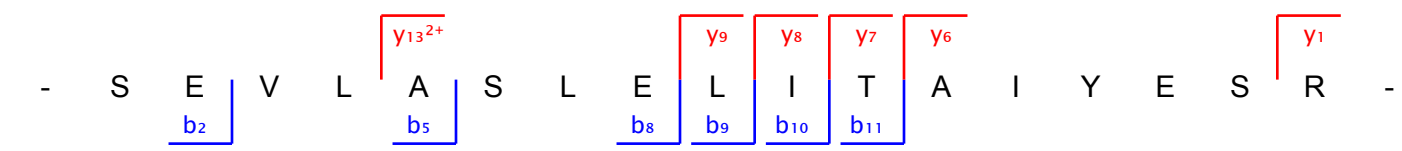

Raw file  
20180707\_MaS\_A375SR\_ML\_proteome\_08

Scan 29056 Method FTMS; HCD Score 75.06 m/z 1117.1 Gene names GPLD1

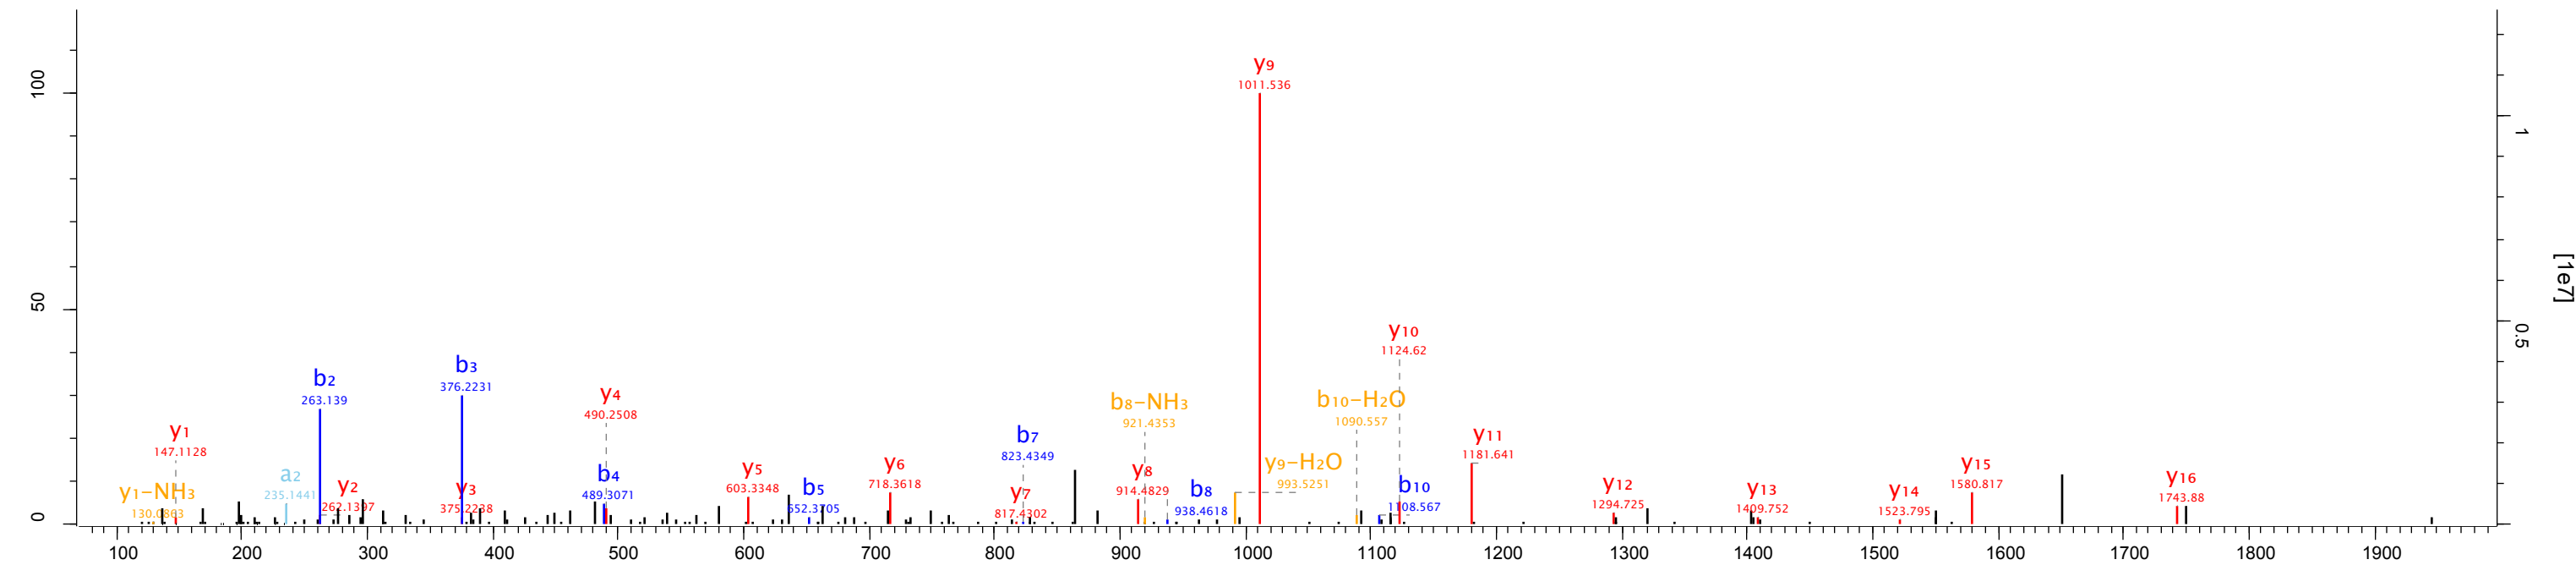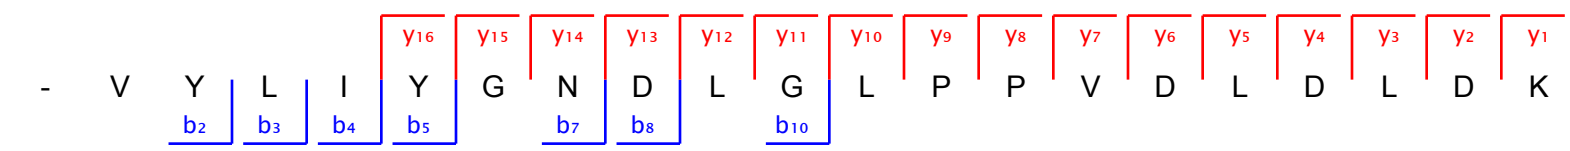

Raw file  
20180707\_MaS\_A375SR\_ML\_proteome\_09

Scan Method Score m/z Gene names  
26576 FTMS; HCD 164.57 854.41 SSR3

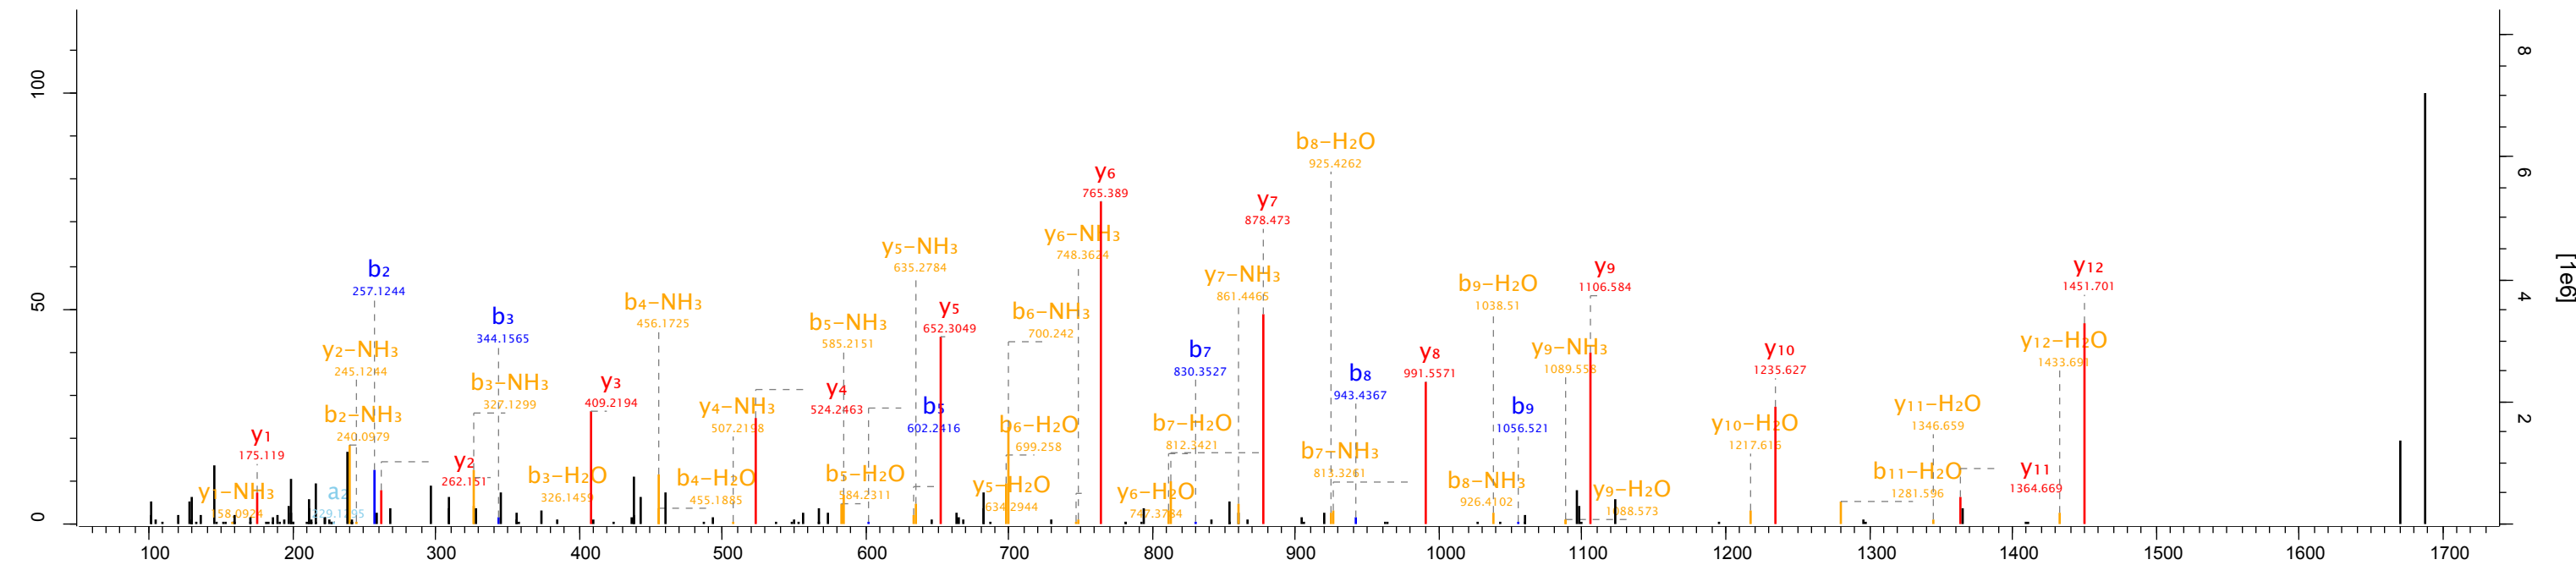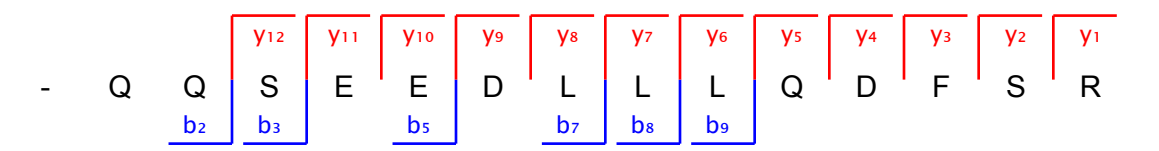



Raw file  
20180707\_MaS\_A375SR\_ML\_proteome\_09

Scan 2856 Method FTMS; HCD Score 51.07 m/z 539.78

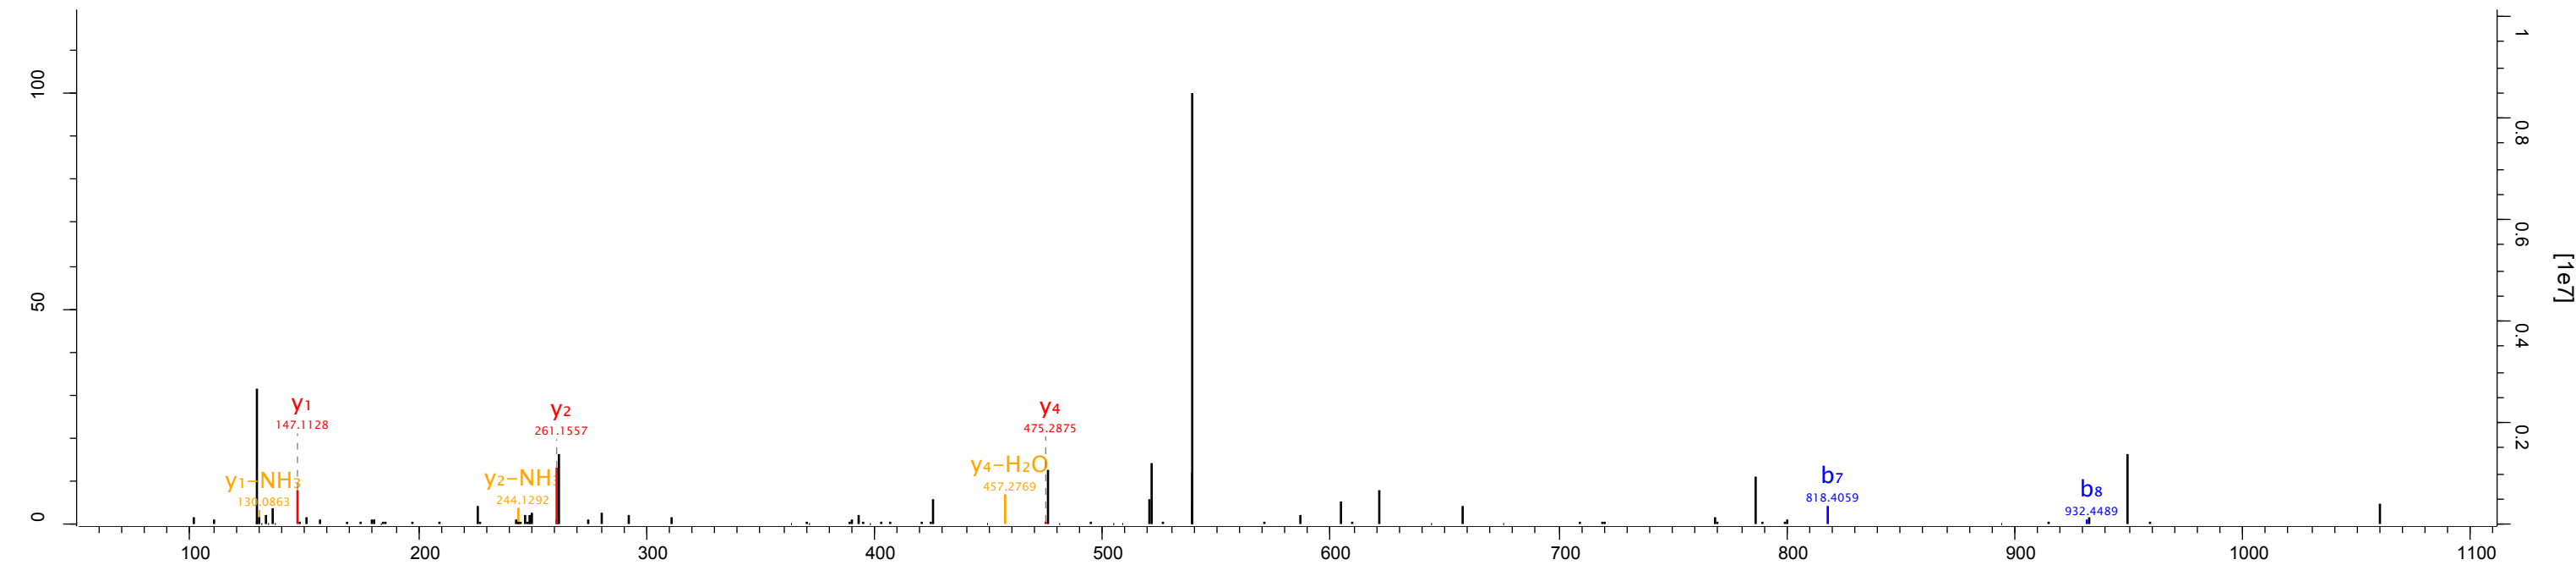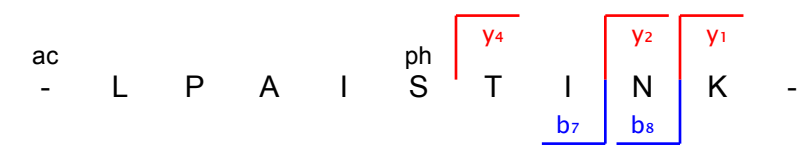

Raw file: 20180707\_MaS\_A375SR\_ML\_proteome\_09  
 Scan: 7976 Method: FTMS; HCD Score: 45.08 m/z: 481.77 Gene names: CAPN6

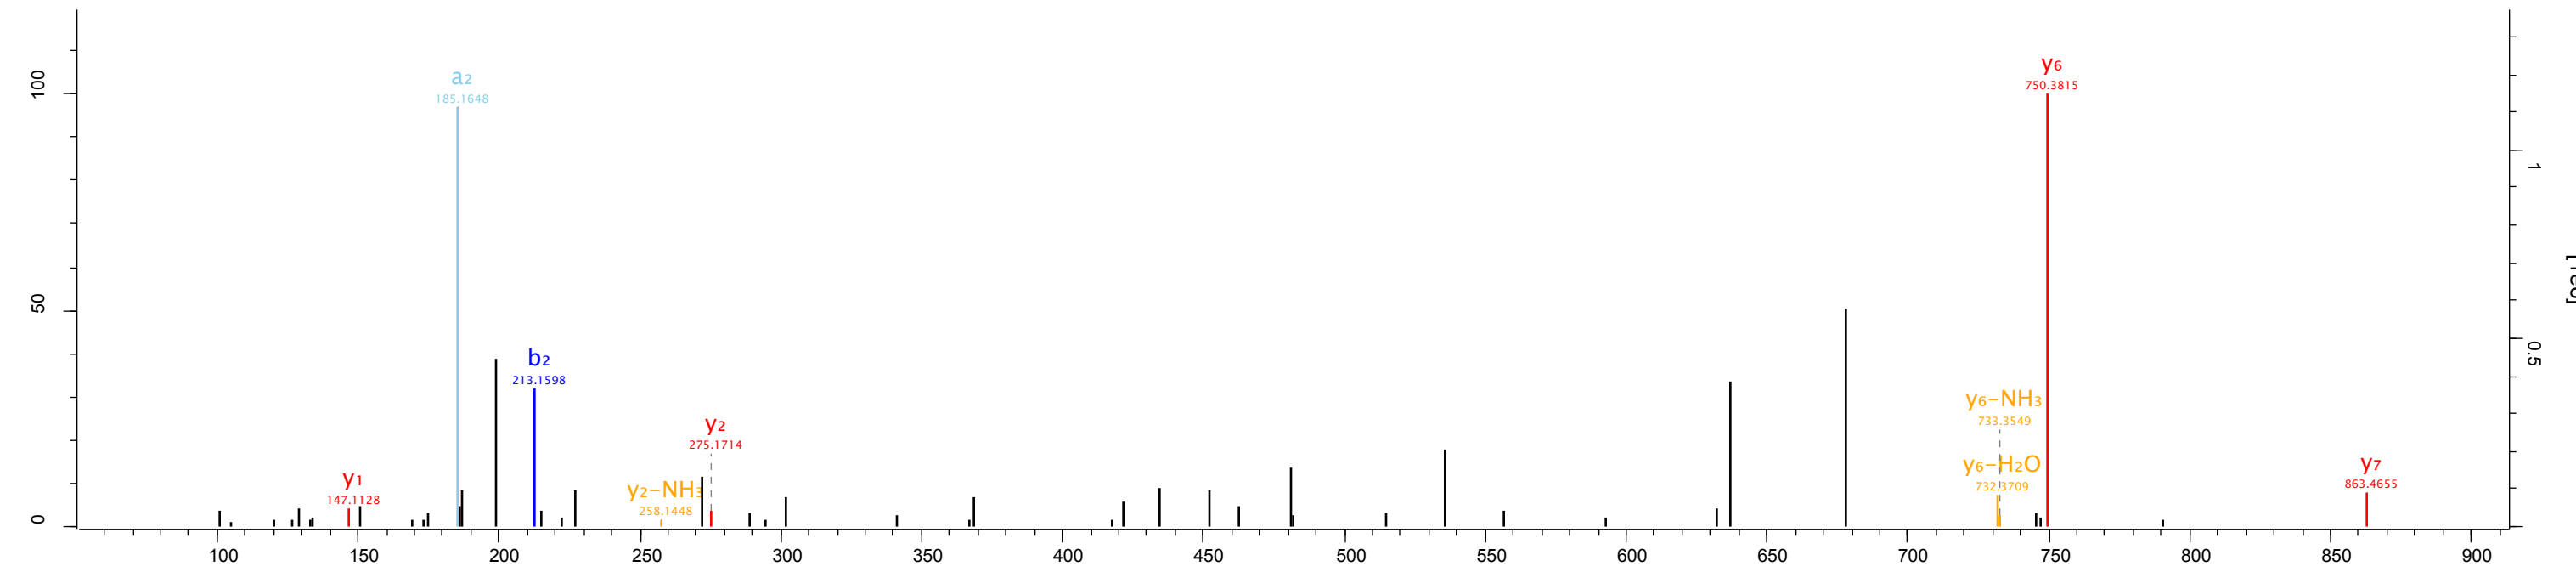

Raw file 20180707\_MaS\_A375SR\_ML\_proteome\_10 Scan 17526 Method FTMS; HCD Score 48.09 m/z 640.84

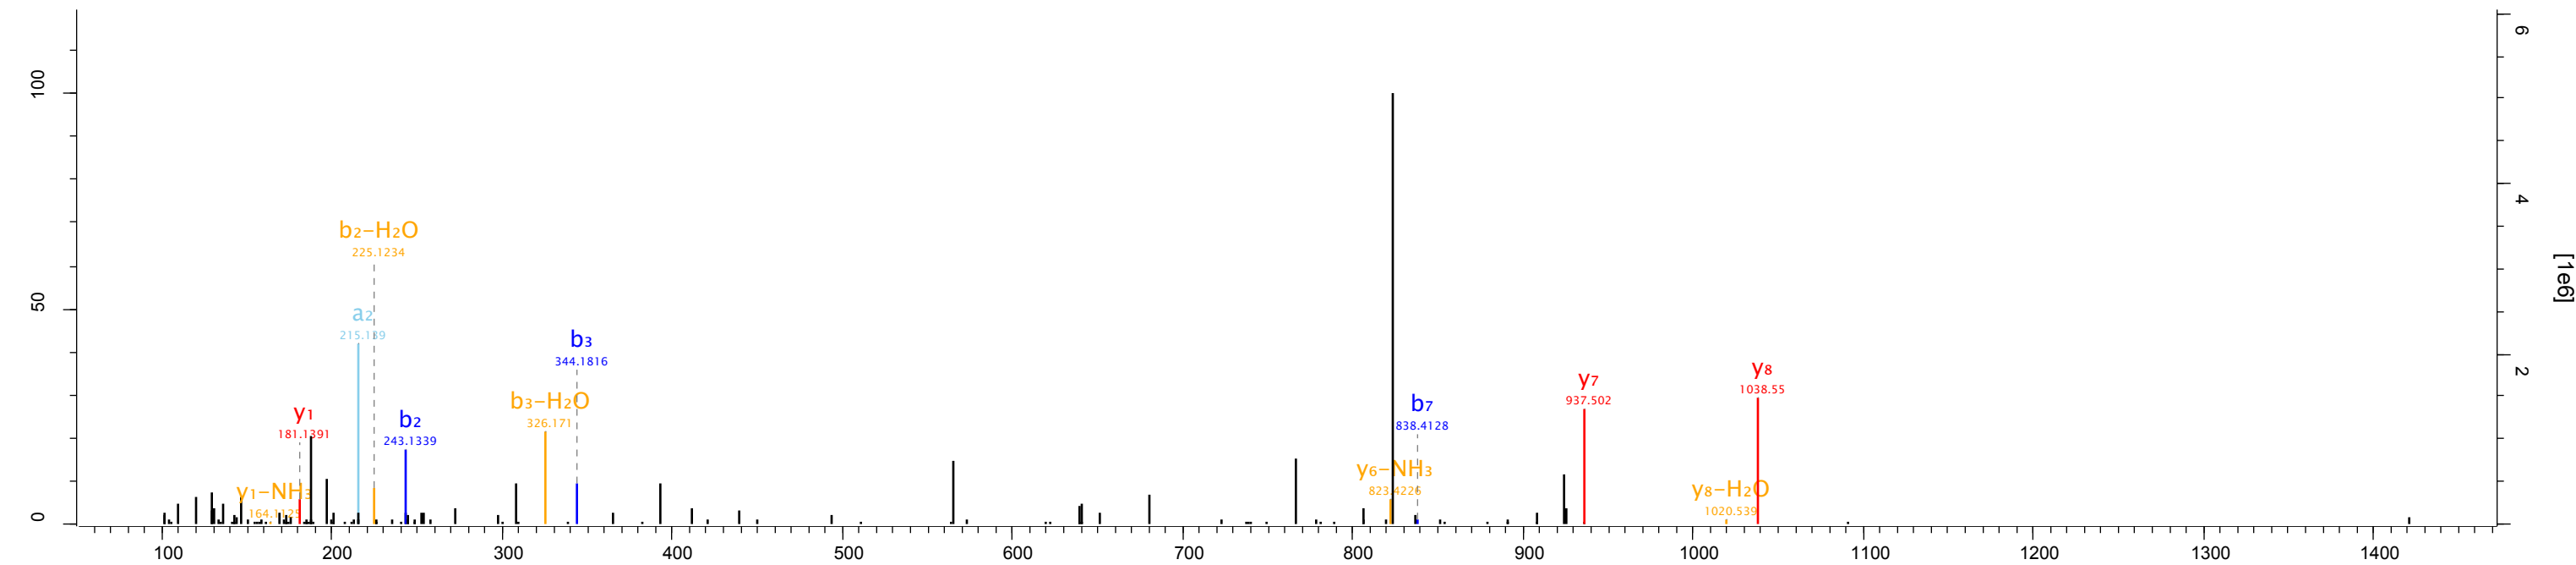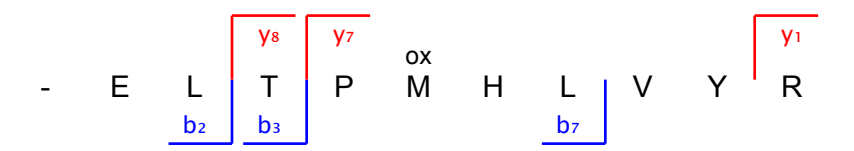



Raw file 20180707\_MaS\_A375SR\_ML\_proteome\_10 Scan 7576 Method FTMS; HCD Score 41.4 m/z 594.31

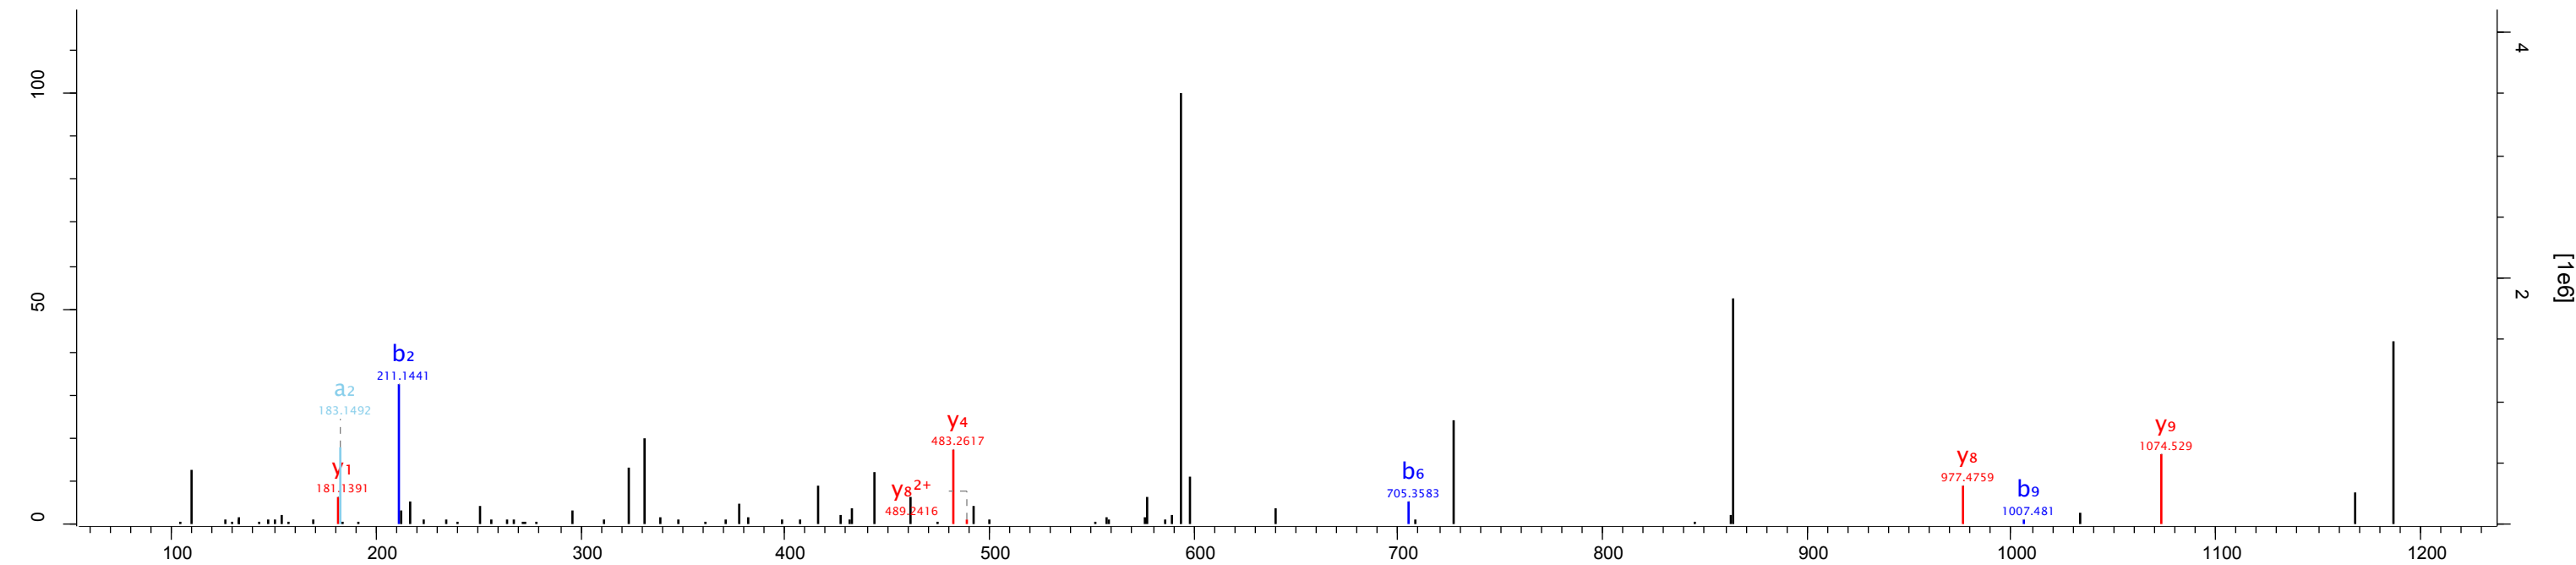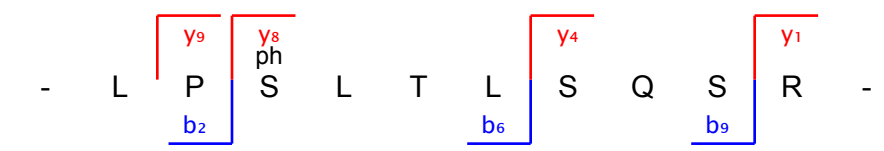

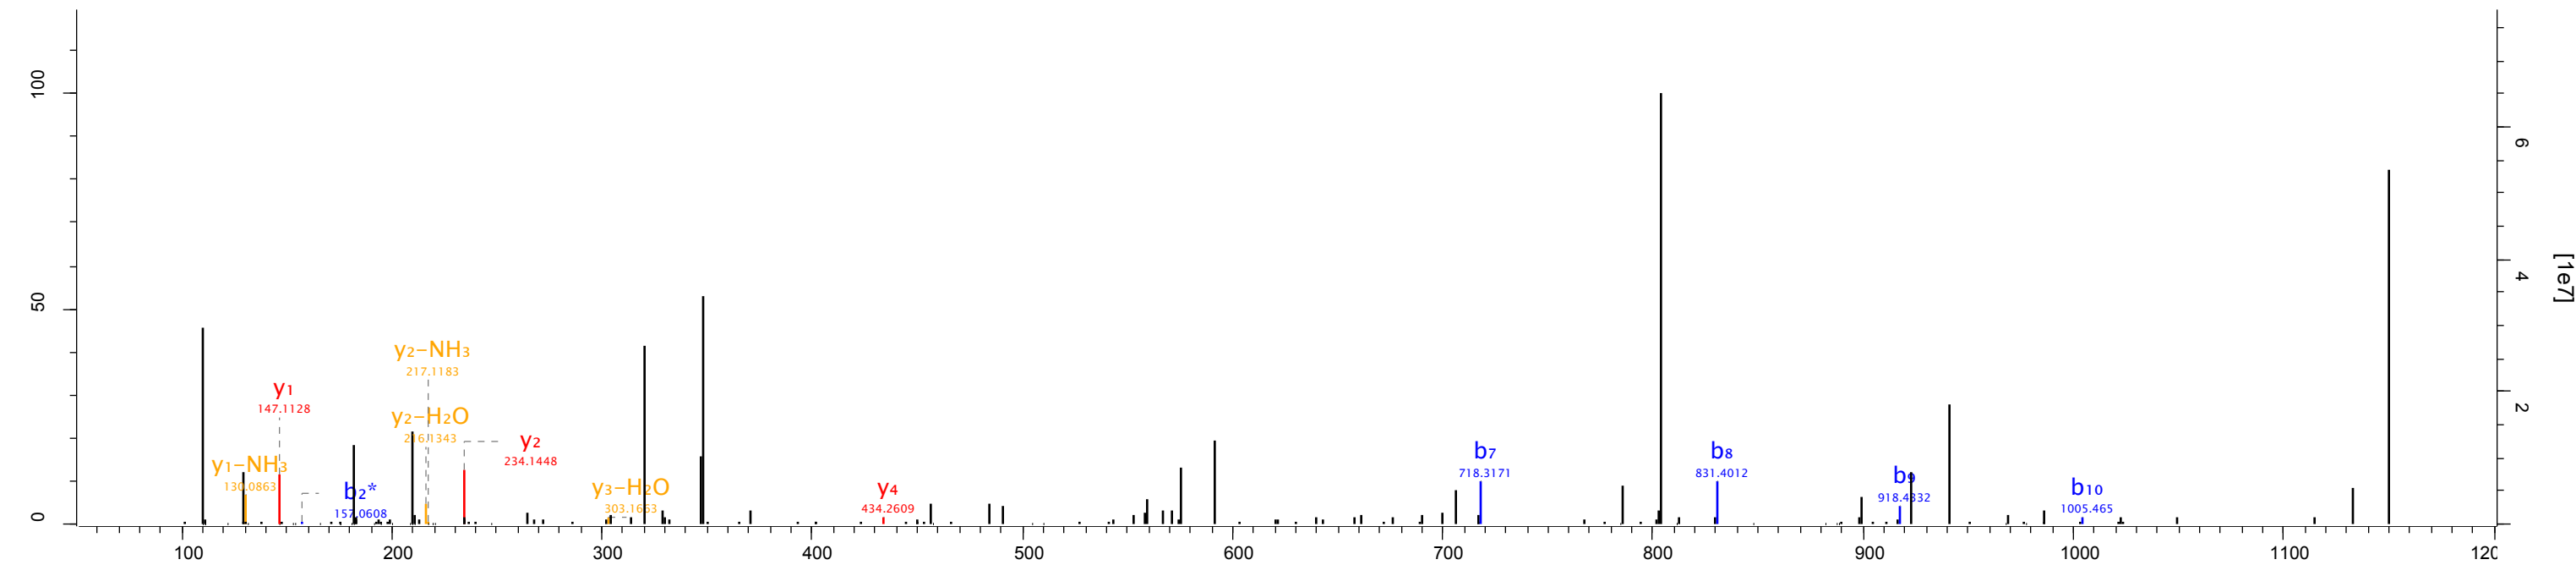

Raw file  
20180707\_MaS\_A375SR\_ML\_proteome\_12

Scan: 27476  
Method: FTMS; HCD  
Score: 90.91  
m/z: 533.32  
Gene names: CYB561

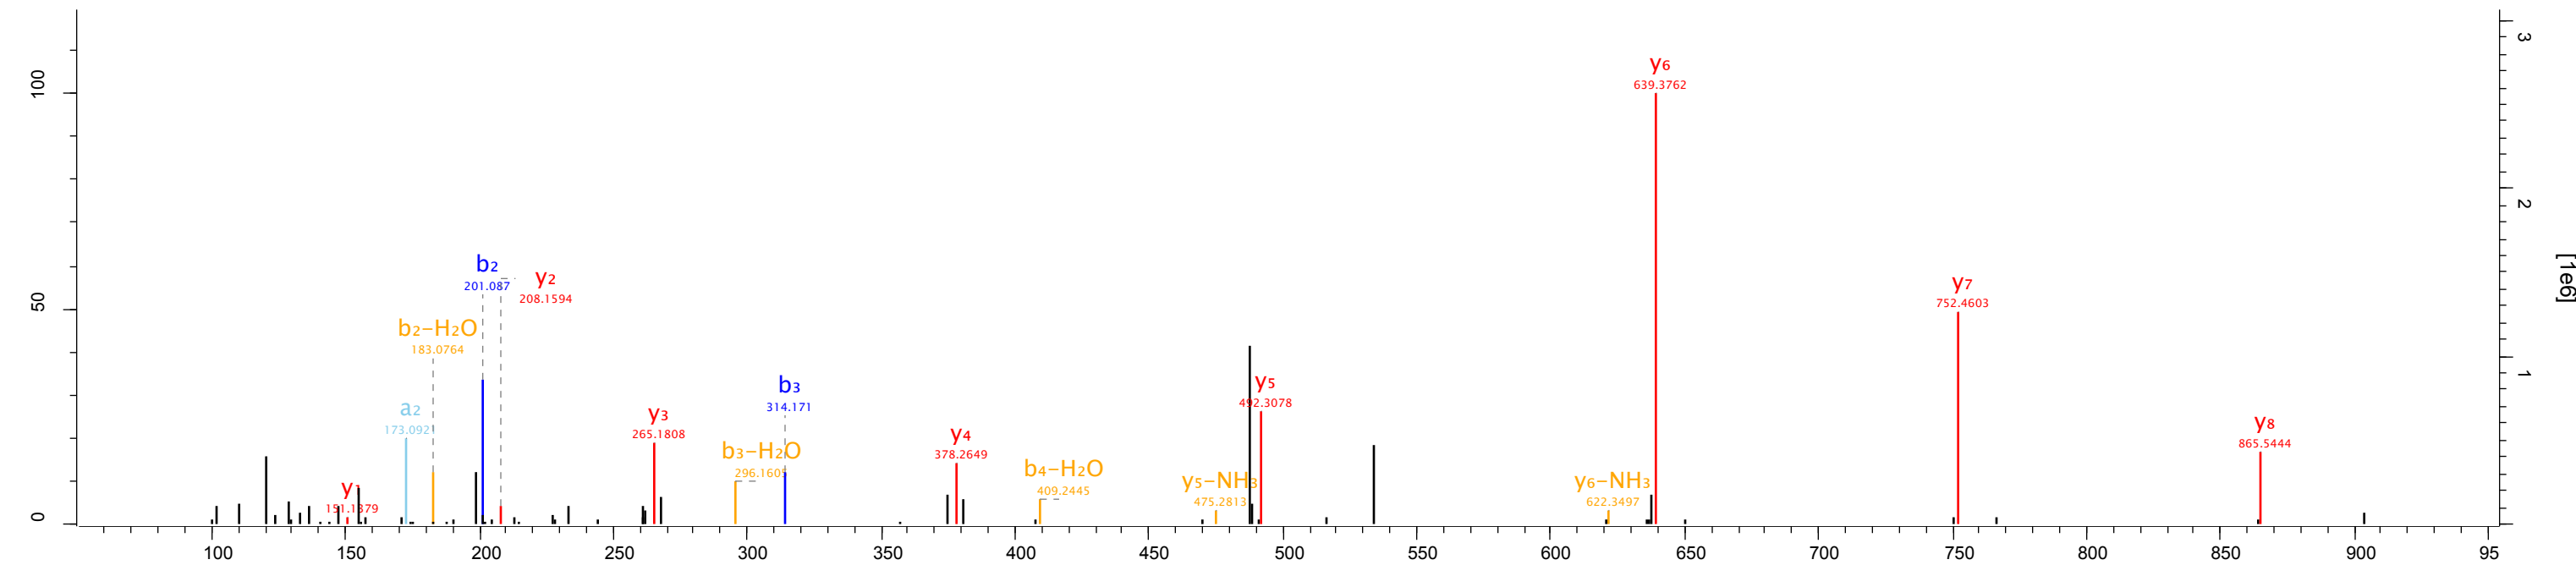

Raw file 20180707\_MaS\_A375SR\_ML\_proteome\_12 Scan 6026 Method FTMS; HCD Score 52.25 m/z 451.59

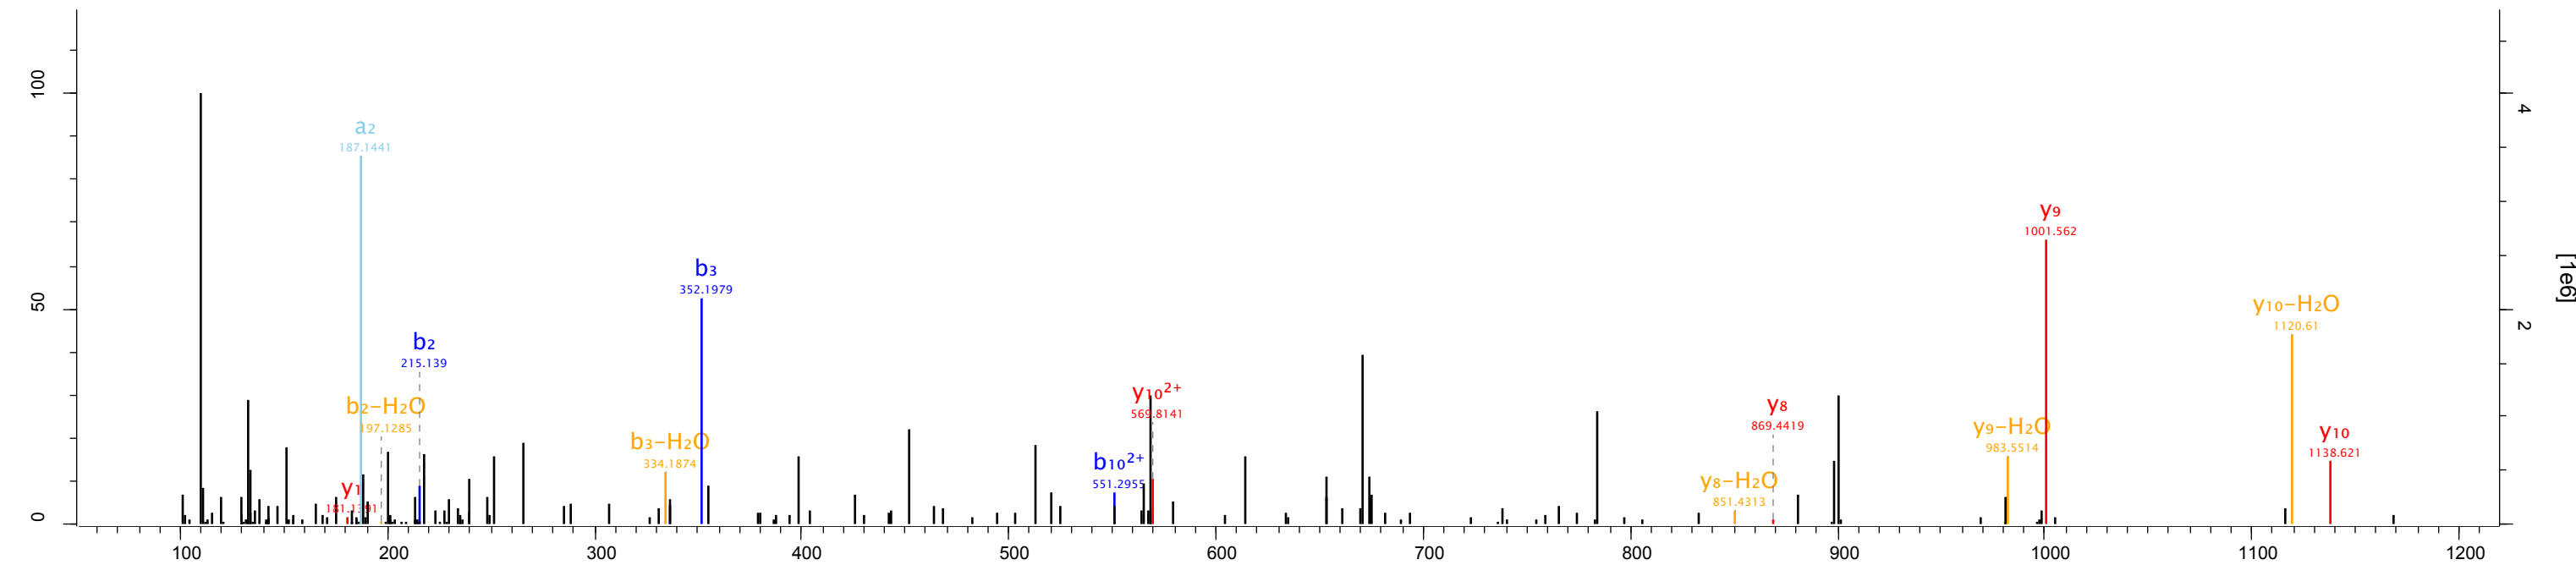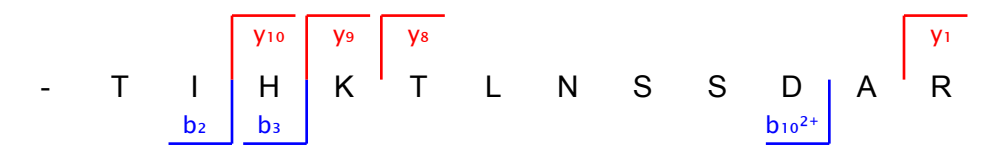



Raw file  
20180707\_MaS\_A375SR\_ML\_proteome\_13

Scan 23726 Method FTMS; HCD Score 65.42 m/z 767.7 Gene names CNIH4

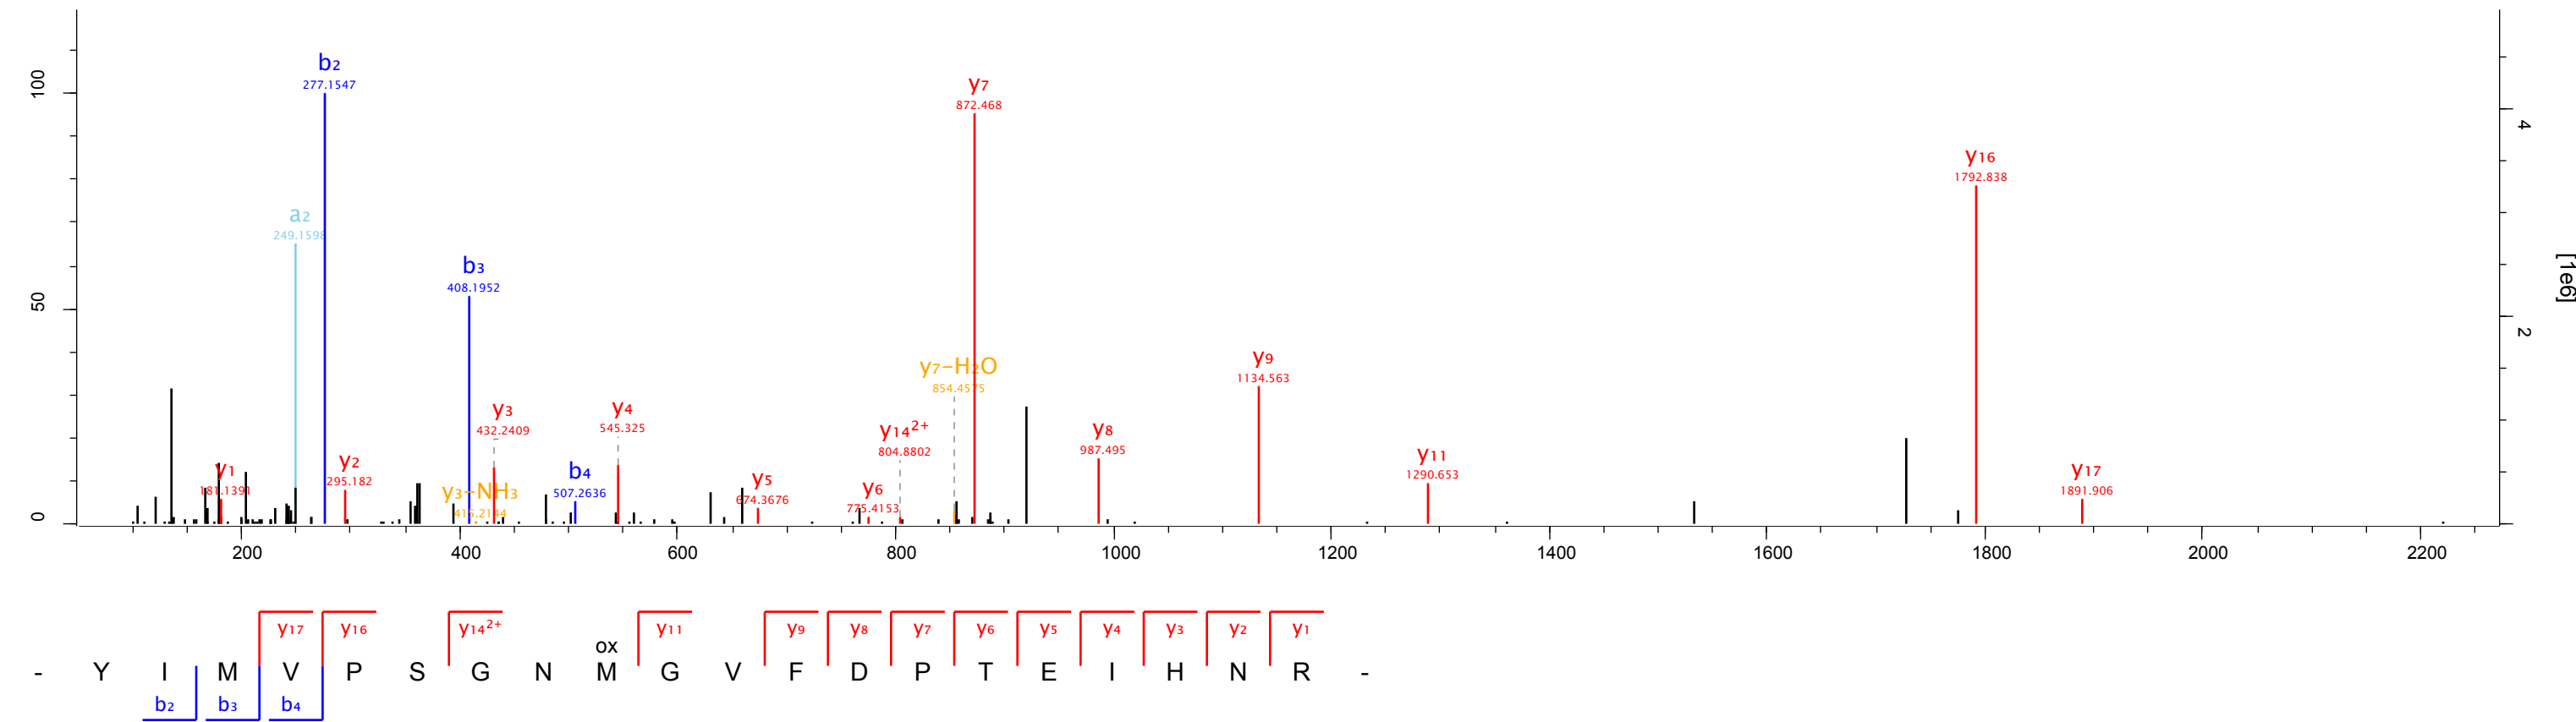

Raw file  
20180707\_MaS\_A375SR\_ML\_proteome\_13

Scan 26116 Method FTMS; HCD Score 84 m/z 502.27 Gene names PGM5

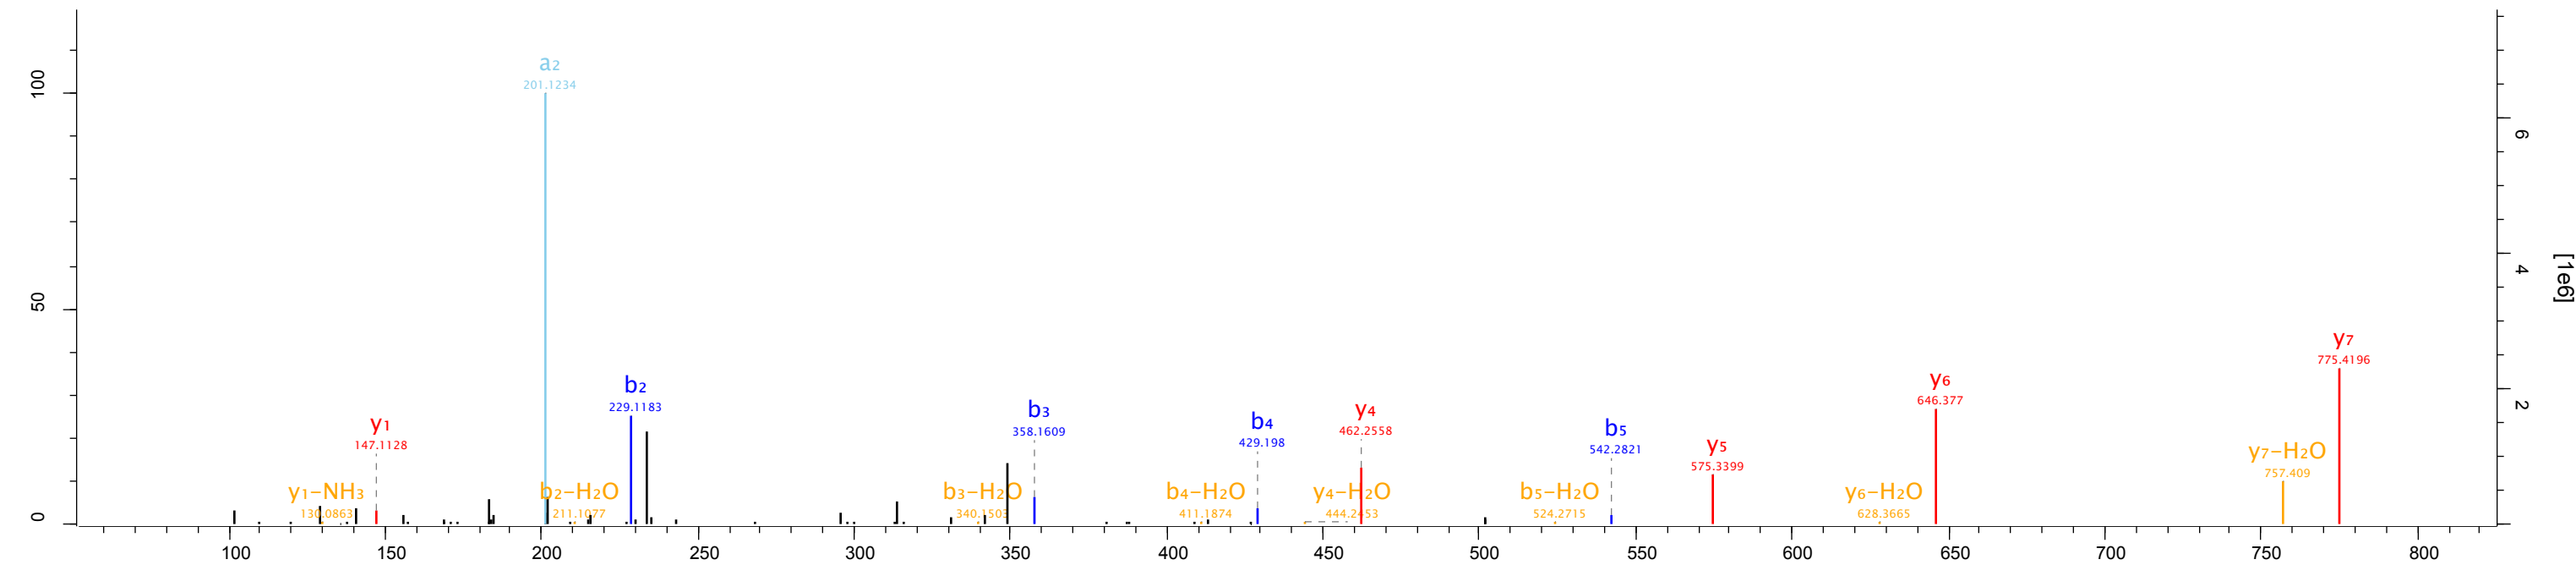

Raw file 20180707\_MaS\_A375SR\_ML\_proteome\_14 Scan 11806 Method FTMS; HCD Score 165.63 m/z 593.3 Gene names IGFBP5

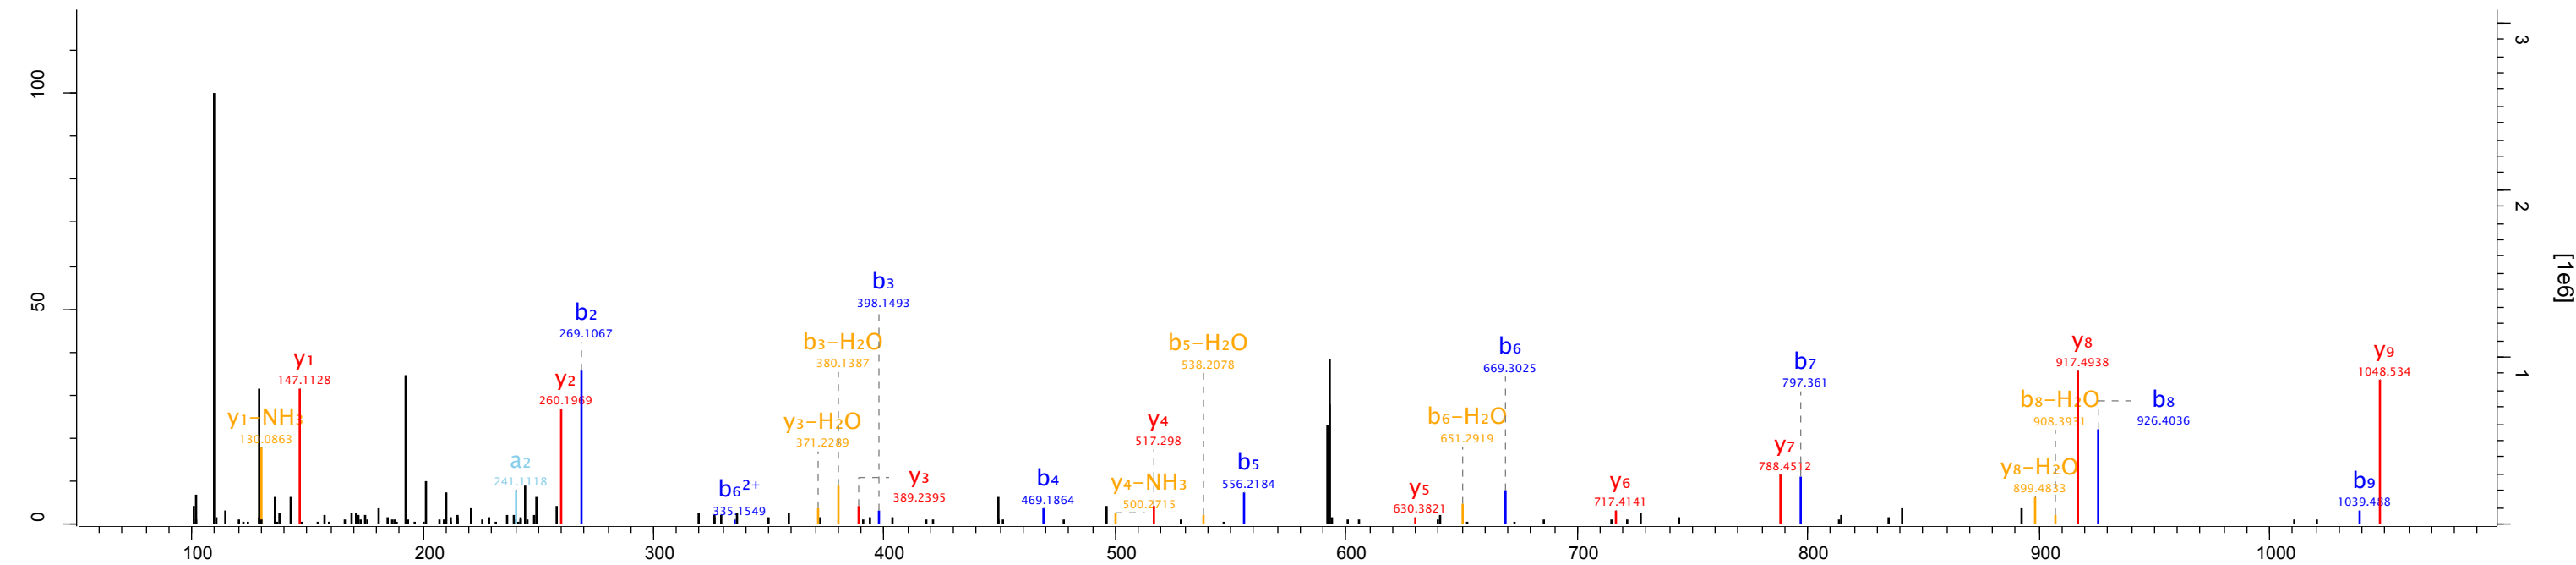

Raw file  
20180707\_MaS\_A375SR\_ML\_proteome\_14

Scan 21046 Method FTMS; HCD Score 101.65 m/z 646.31 Gene names IFIT2

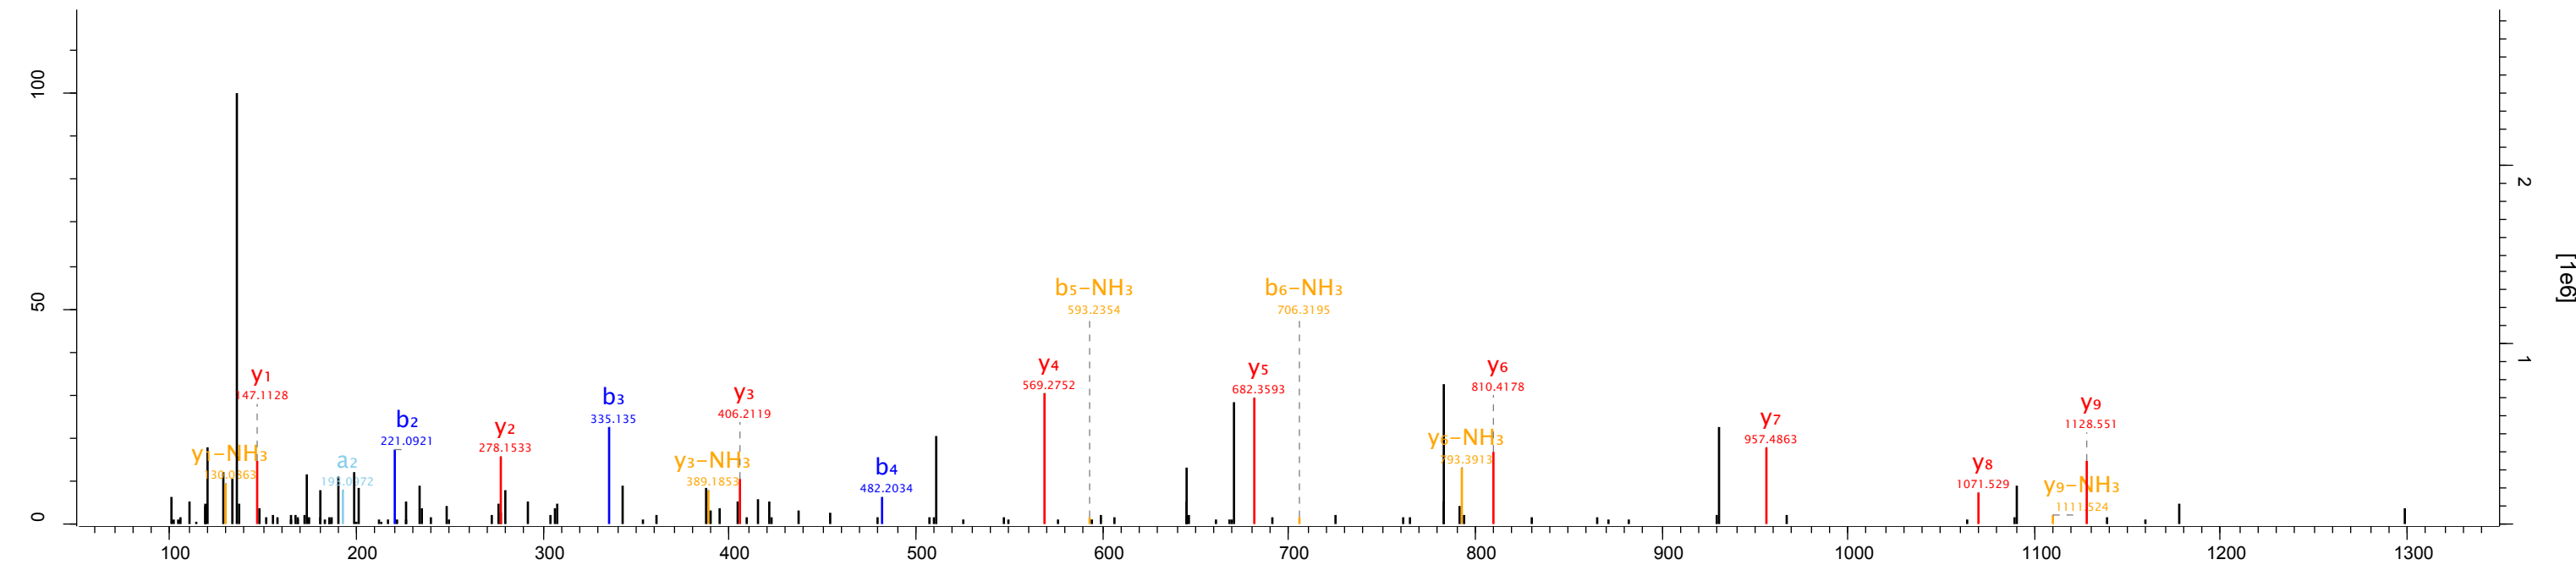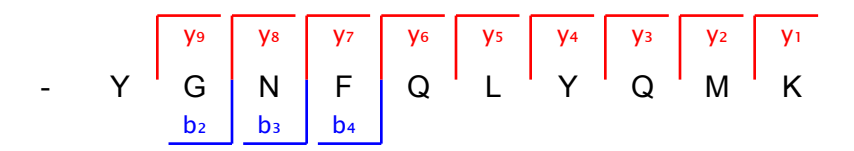

Raw file  
20180707\_MaS\_A375SR\_ML\_proteome\_14

Scan 5186 Method FTMS; HCD Score 43.07 m/z 406.69 Gene names KCNN2

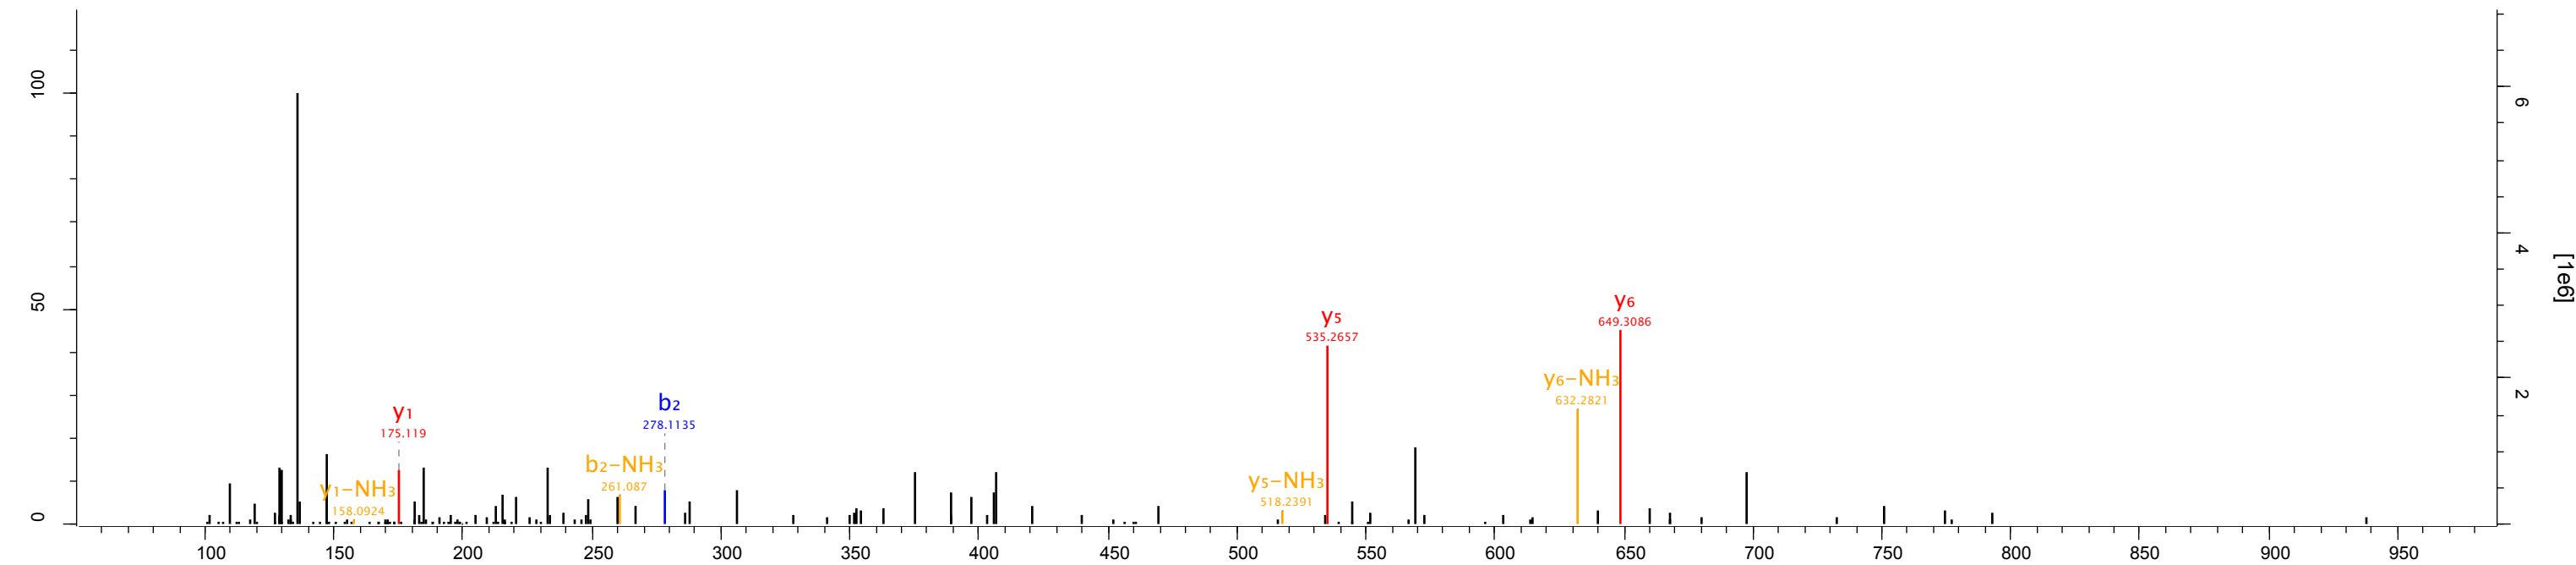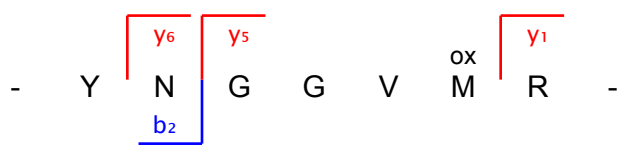

Raw file  
20180707\_MaS\_A375SR\_ML\_proteome\_14

Scan 5216 Method FTMS; HCD Score 48.17 m/z 409.7 Gene names KCNN2

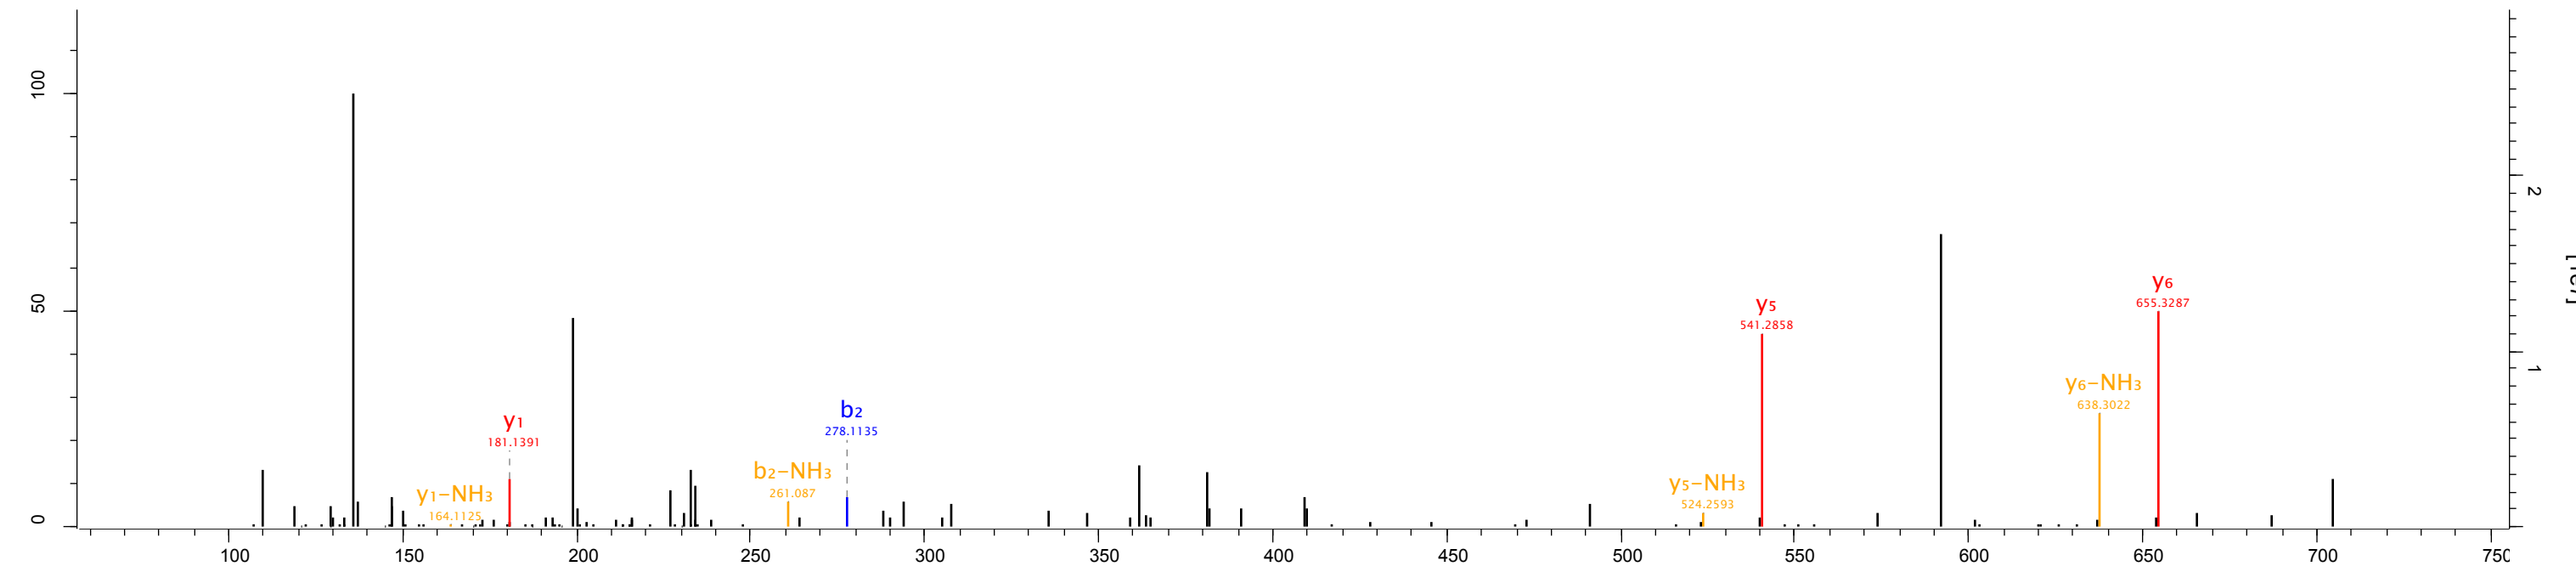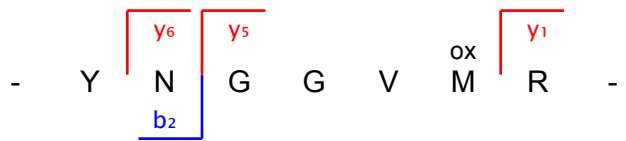

Raw file  
20180707\_MaS\_A375SR\_ML\_proteome\_15

Scan: 28486  
Method: FTMS; HCD  
Score: 89.05  
m/z: 570.81  
Gene names: MT-ND2

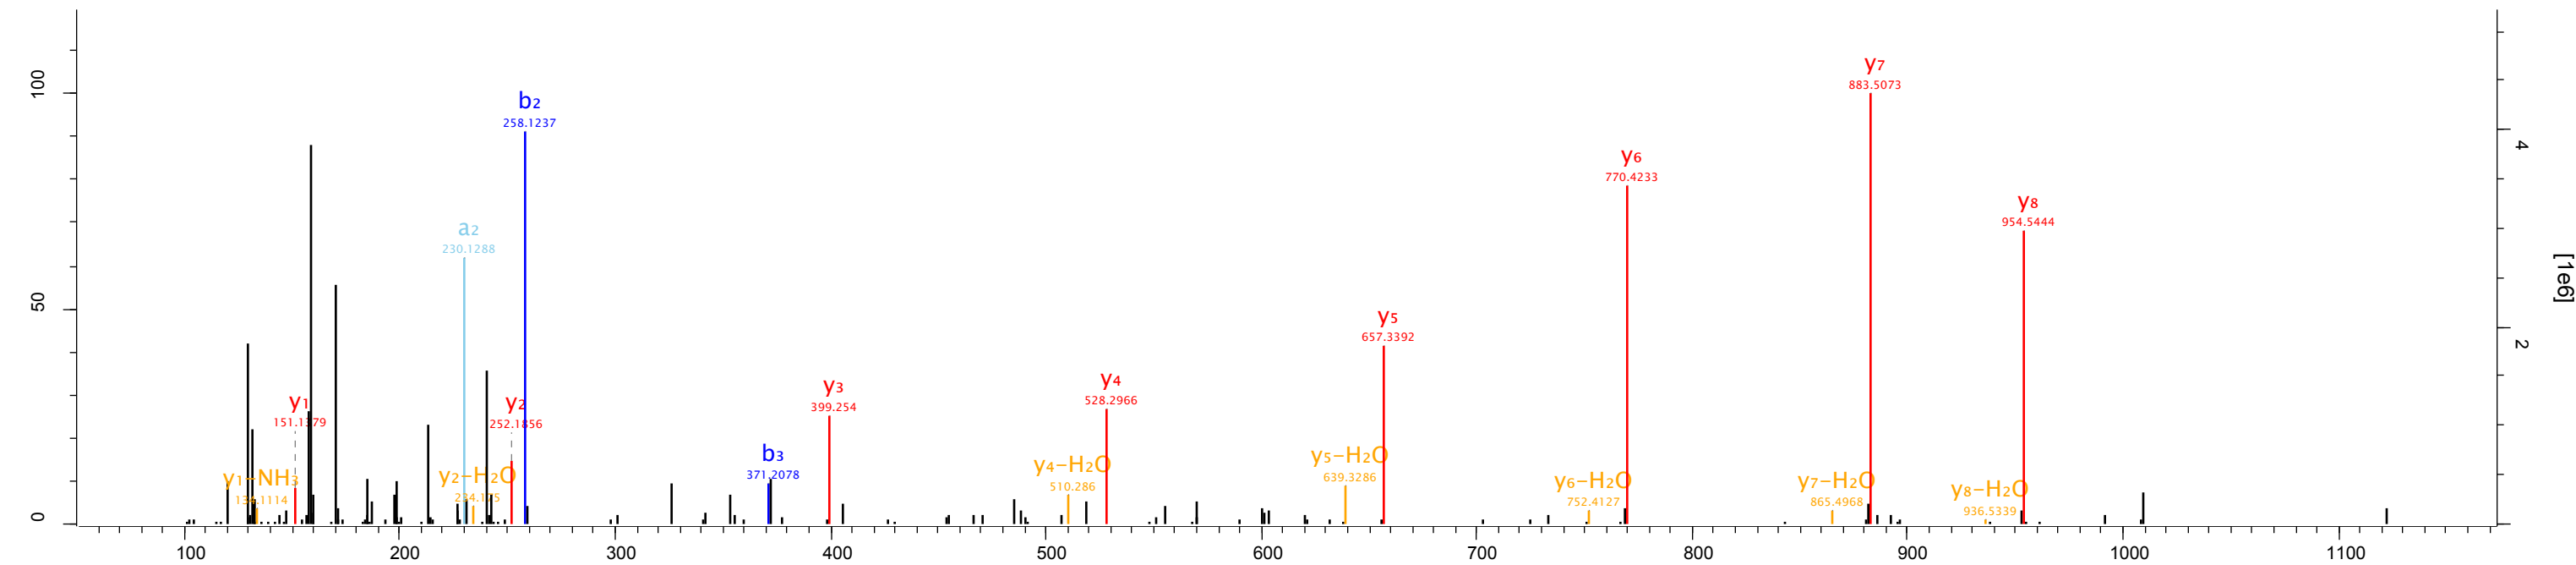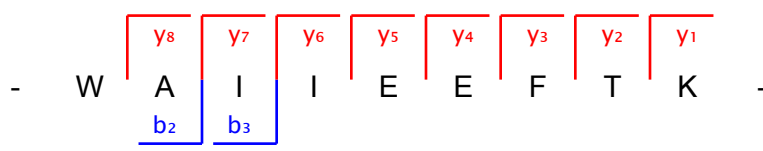

Raw file 20180707\_MaS\_A375SR\_ML\_proteome\_15 Scan 5256 Method FTMS; HCD Score 79.45 m/z 461.24

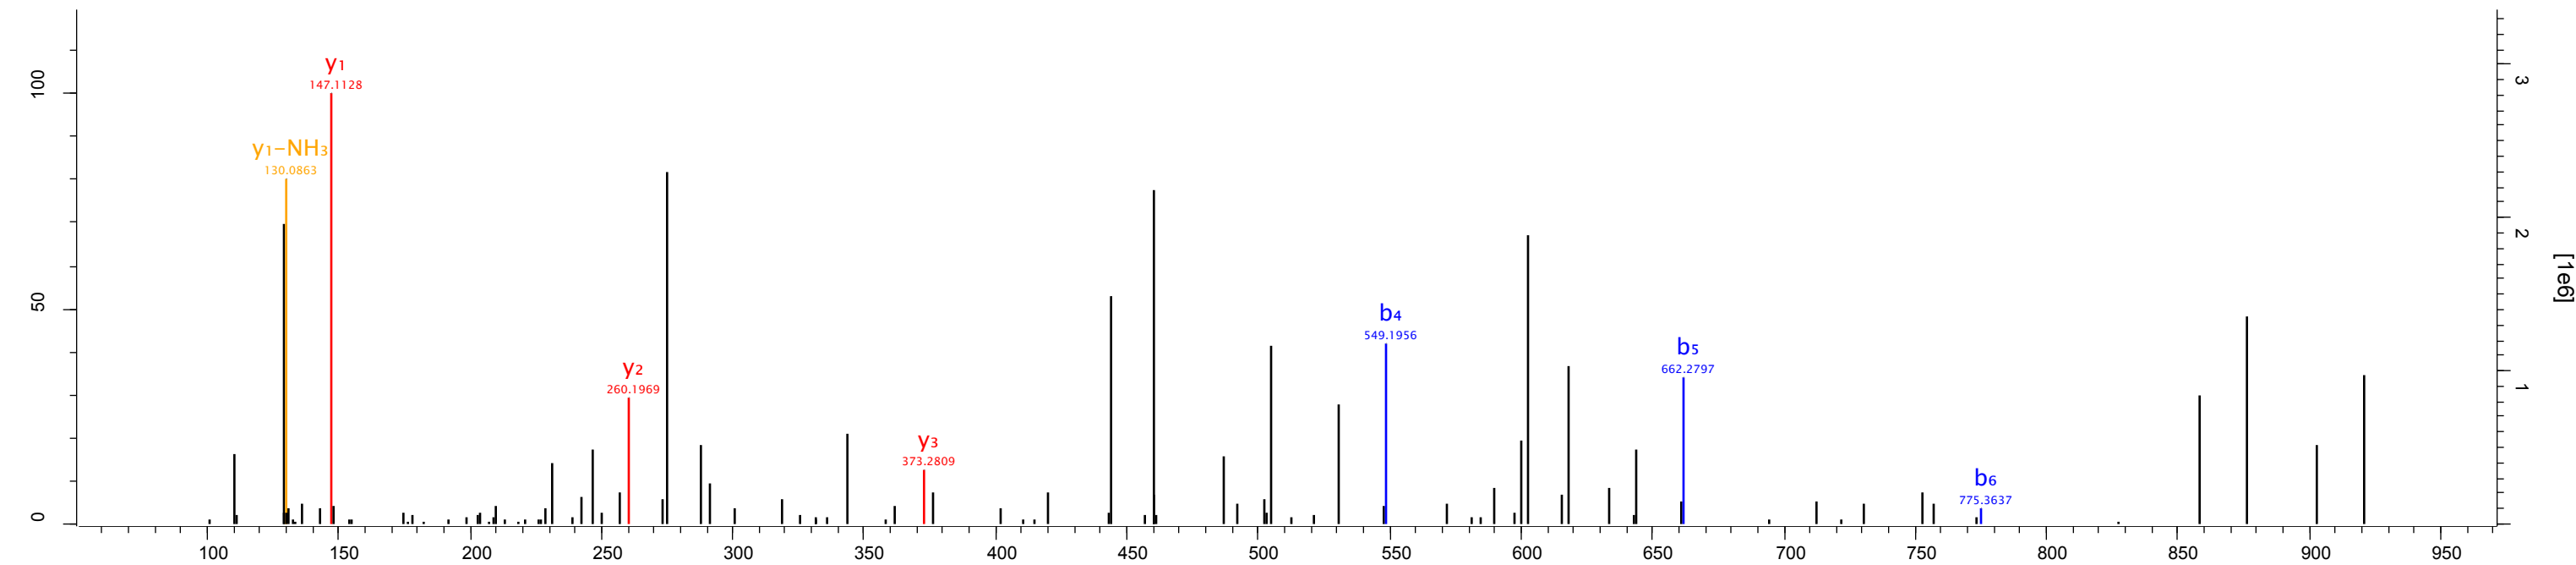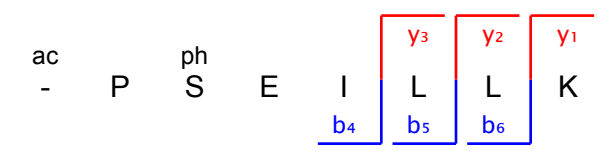



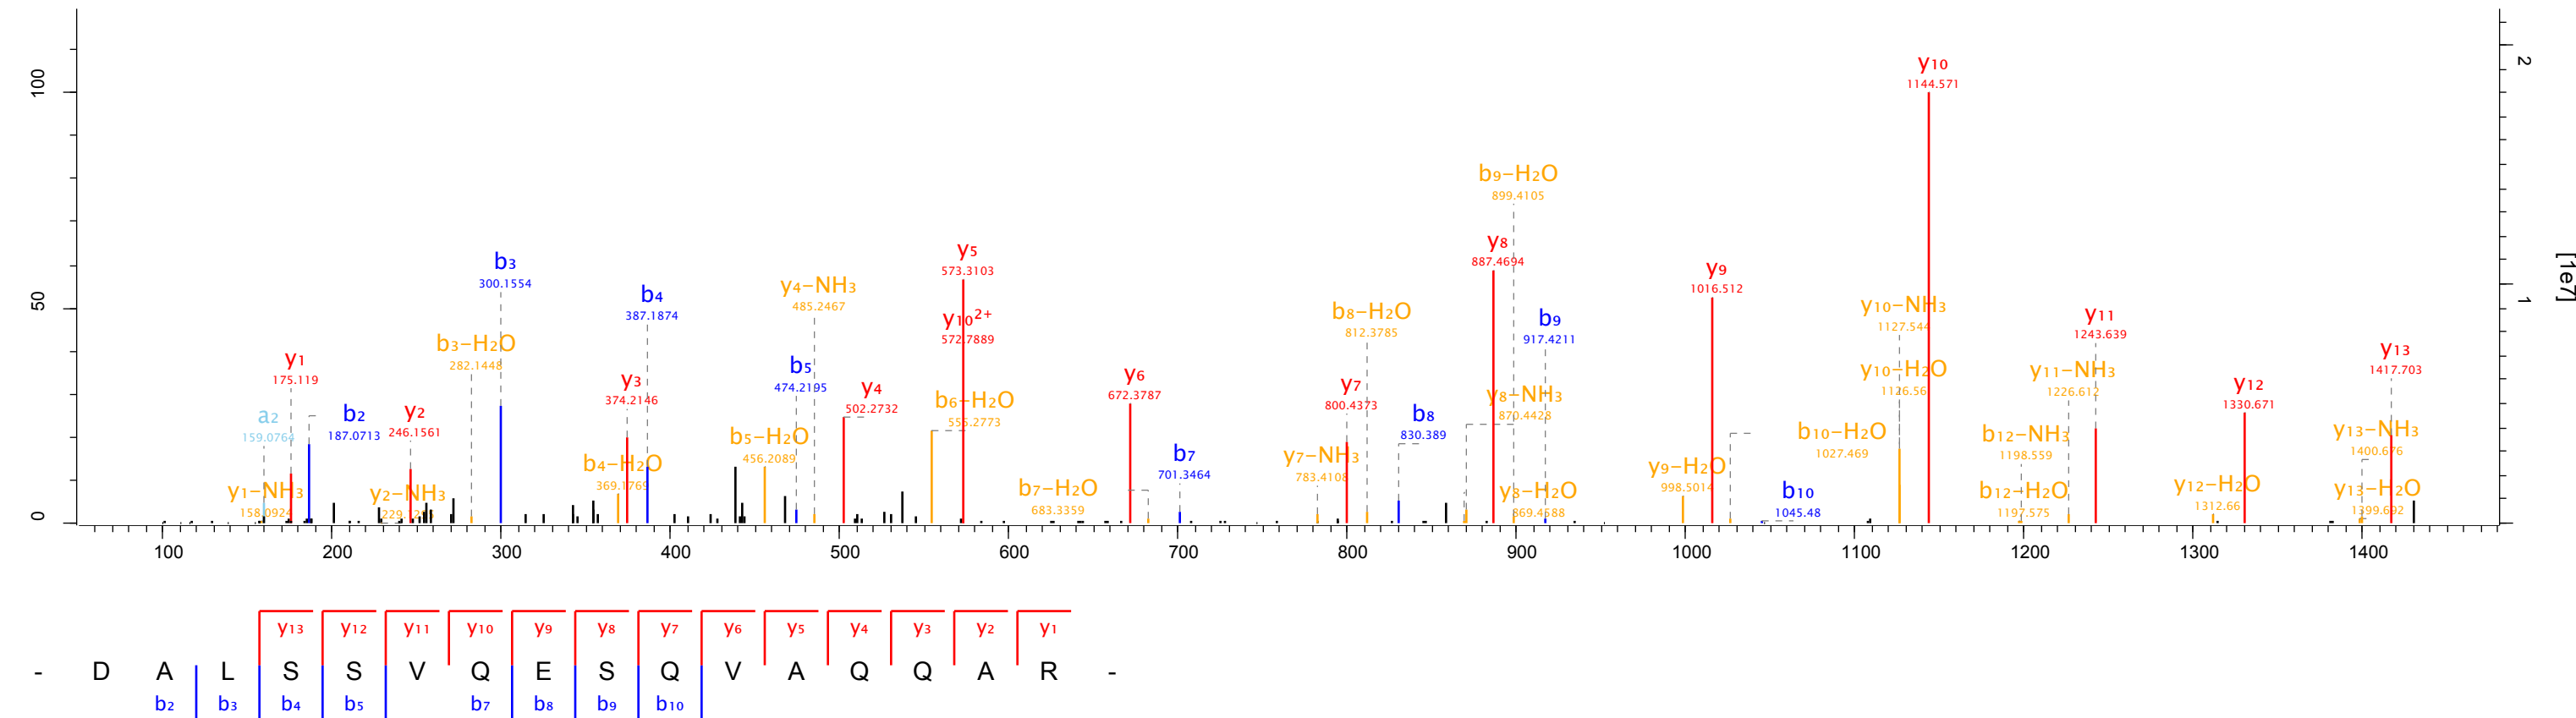

Raw file  
20180707\_MaS\_A375SR\_ML\_proteome\_17

Scan 18726 Method FTMS; HCD Score 85.8 m/z 953.43 Gene names C6orf120

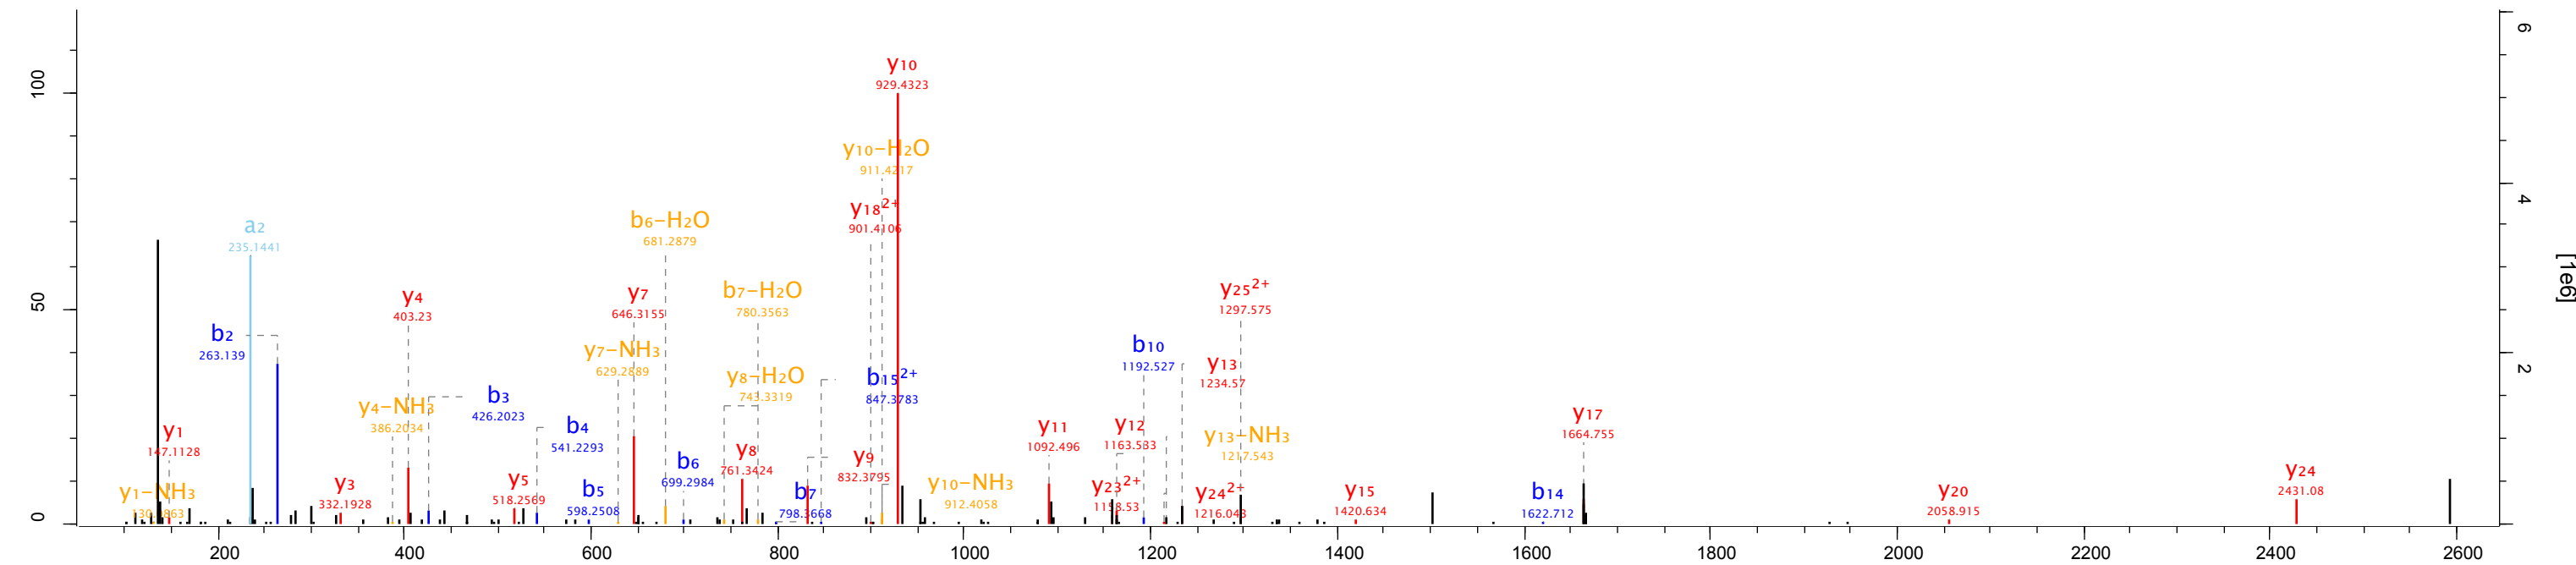

- V Y Y D G T V E Q H P F G E A A Y P A D G A D A G Q K -

Fragmentation scheme (b and y ions) shown below the sequence:

- b2: Y
- b3: Y
- b4: D
- b5: G
- b6: T
- b7: V
- b10: H
- b14: E
- b15<sup>2+</sup>: EA
- y1: K
- y3: G
- y4: A
- y5: D
- y7: G
- y8: D
- y9: A
- y10: P
- y11: Y
- y12: A
- y13: A
- y15: G
- y17: P
- y18<sup>2+</sup>: H
- y20: E
- y23<sup>2+</sup>: G
- y24: D
- y25<sup>2+</sup>: Y

Raw file

20180707\_MaS\_A375SR\_ML\_proteome\_17

| Scan  | Method    | Score  | m/z    | Gene names |
|-------|-----------|--------|--------|------------|
| 24456 | FTMS; HCD | 108.56 | 582.33 | GADD45A    |

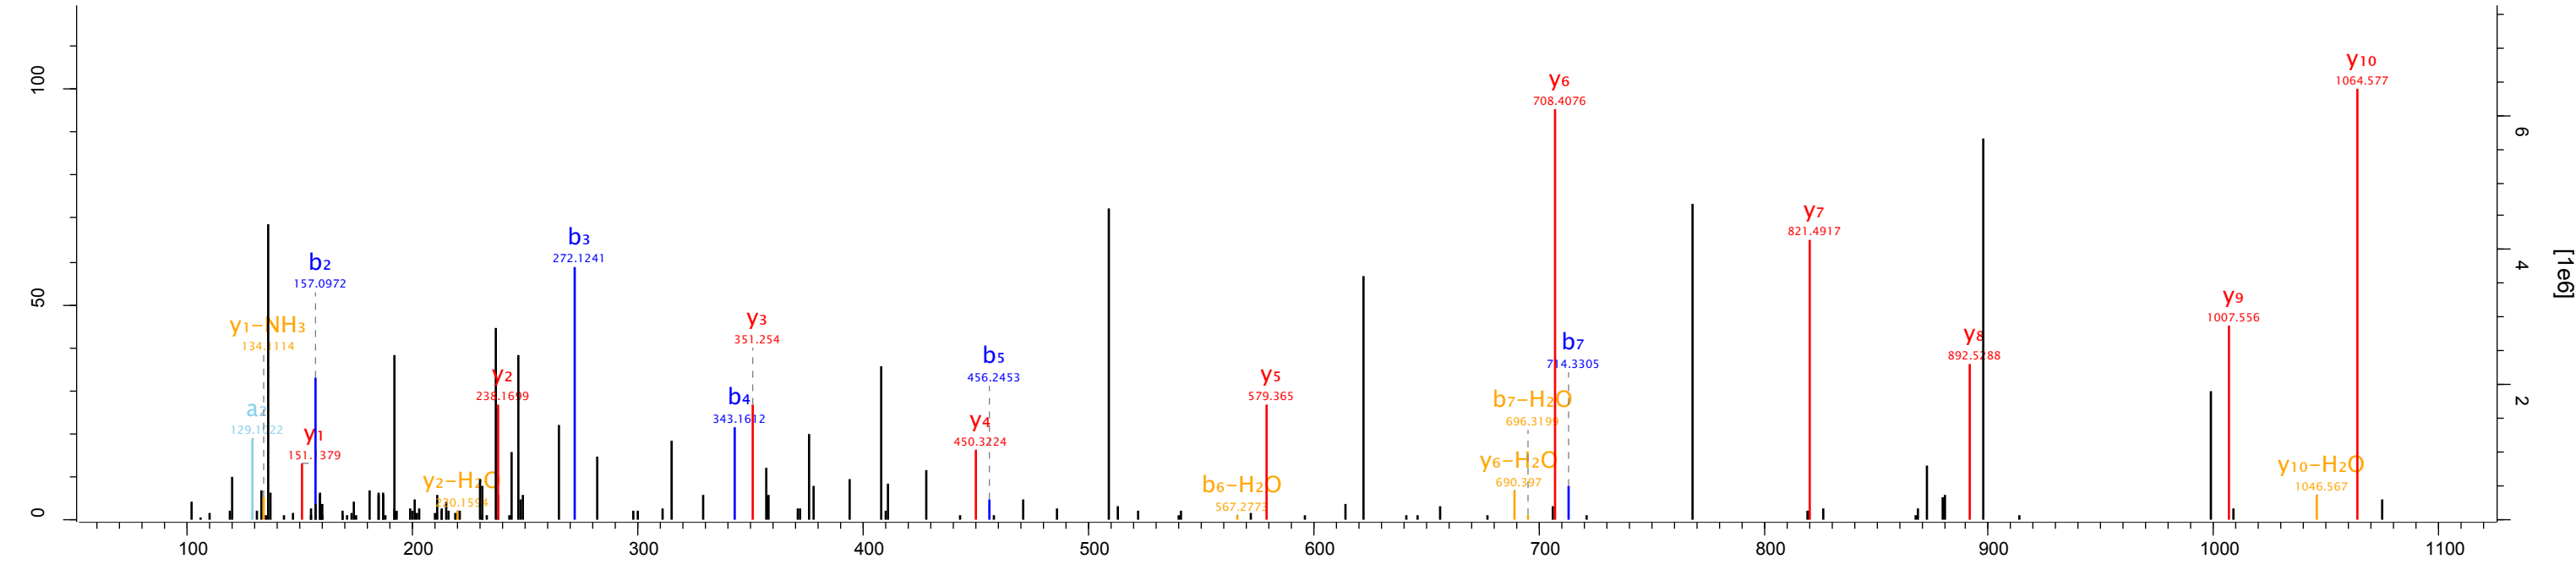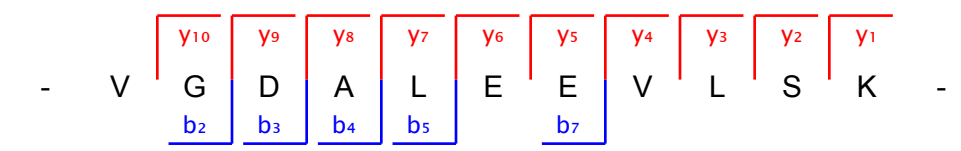

Raw file 20180707\_MaS\_A375SR\_ML\_proteome\_17 Scan 3956 Method FTMS; HCD Score 64.71 m/z 522.29

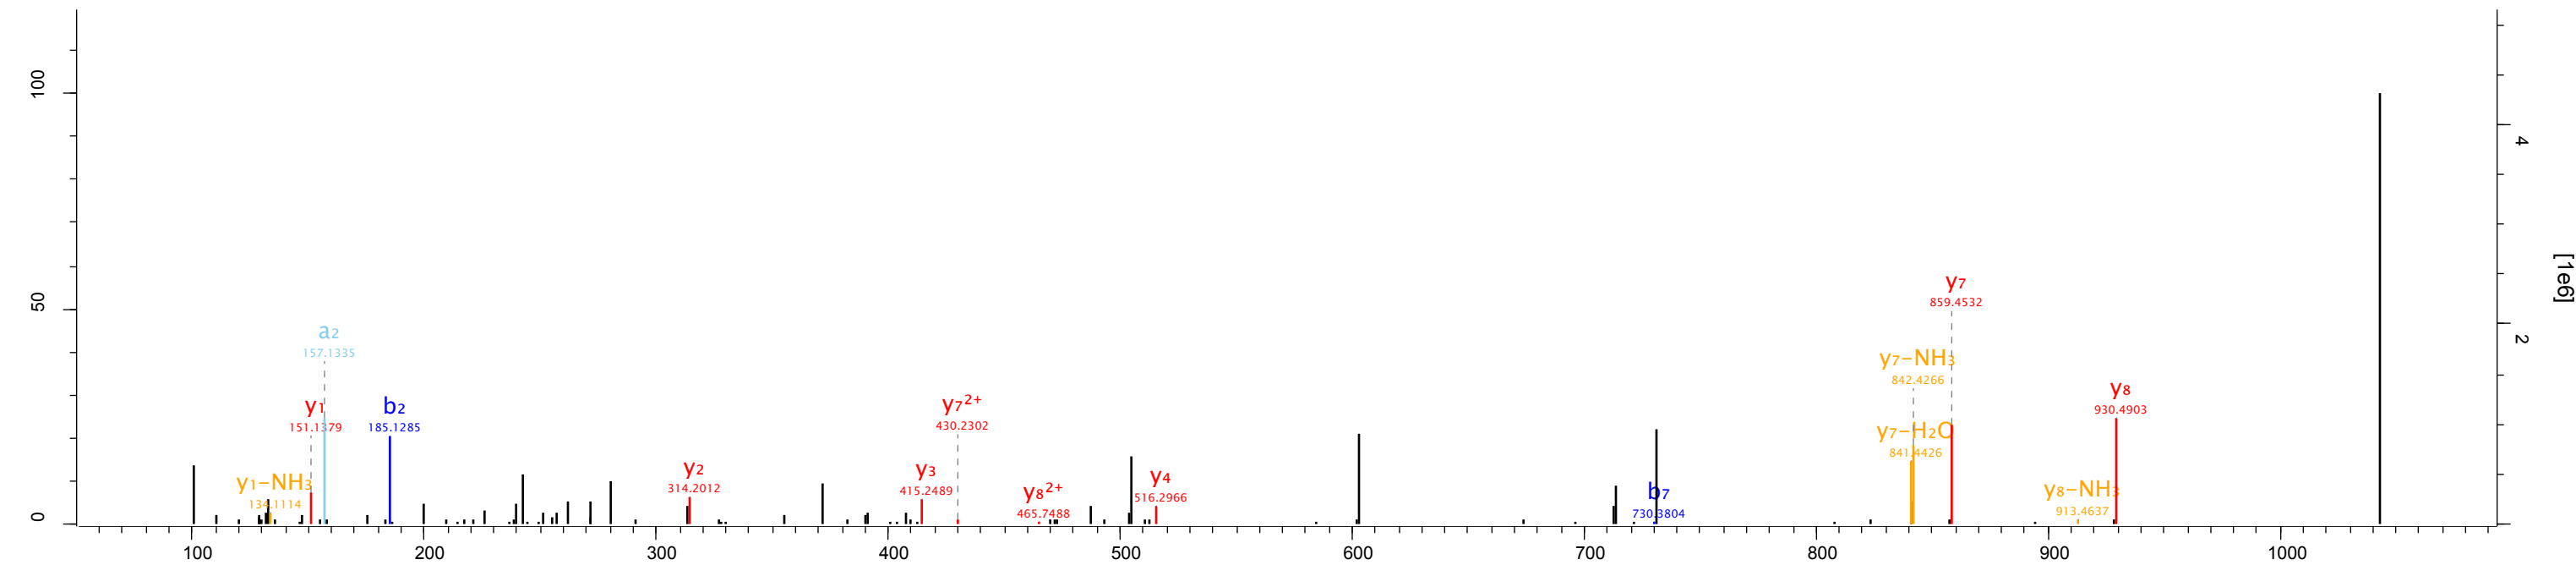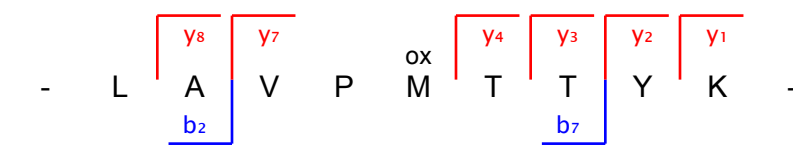

Raw file 20180707\_MaS\_A375SR\_ML\_proteome\_18 Scan 17466 Method FTMS; HCD Score 100.02 m/z 488.28

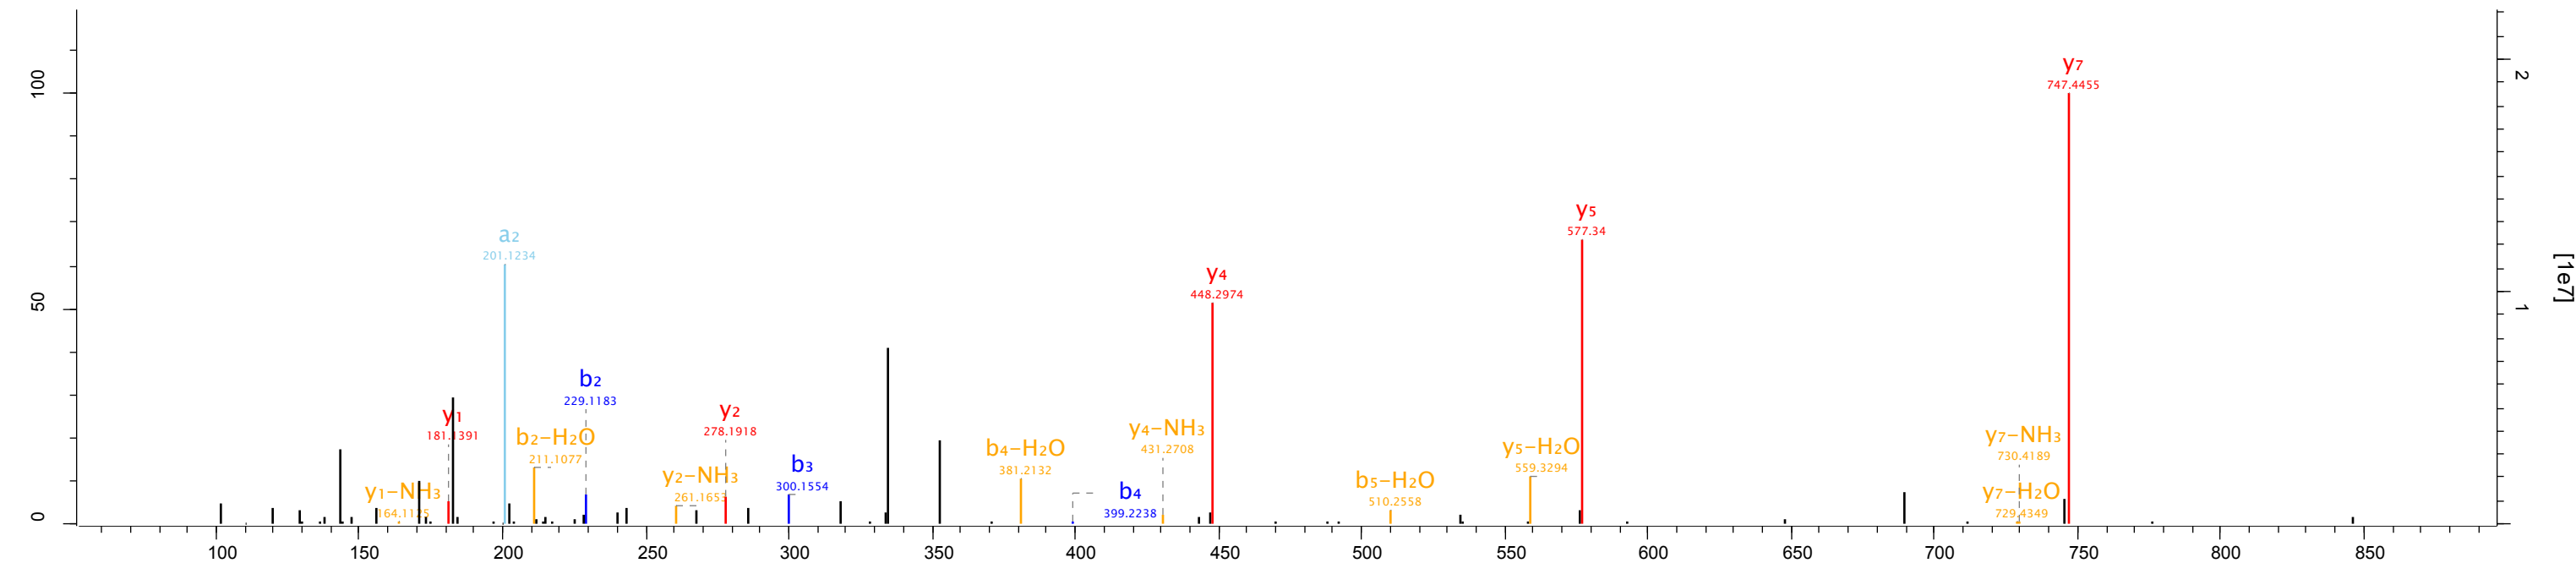

Raw file  
20180707\_MaS\_A375SR\_ML\_proteome\_19

Scan 24736 Method FTMS; HCD Score 77.2 m/z 544.96 Gene names SPPL2A

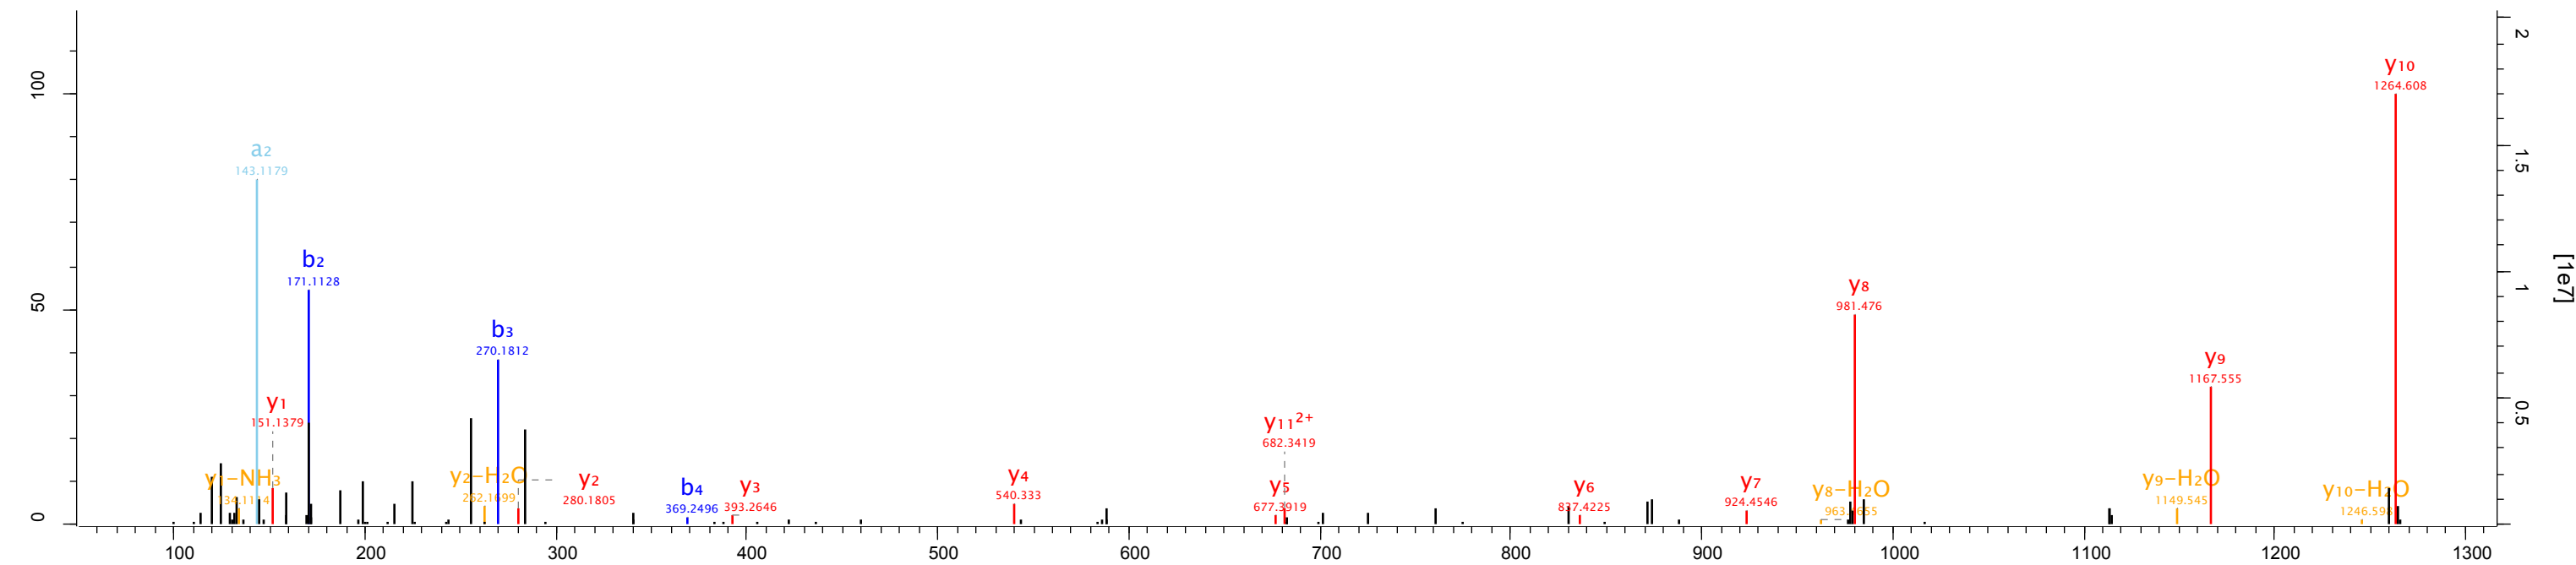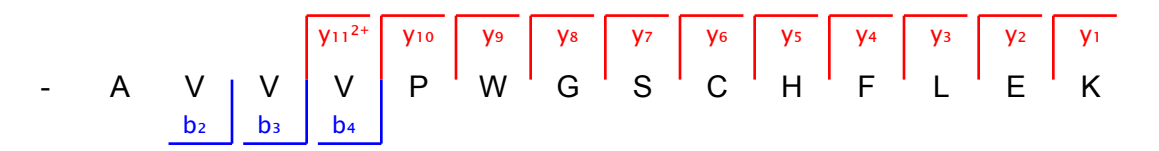

Raw file: 20180707\_MaS\_A375SR\_ML\_proteome\_2\_01  
 Scan: 9676 Method: FTMS; HCD Score: 142.19 m/z: 691.86 Gene names: CYB561D2

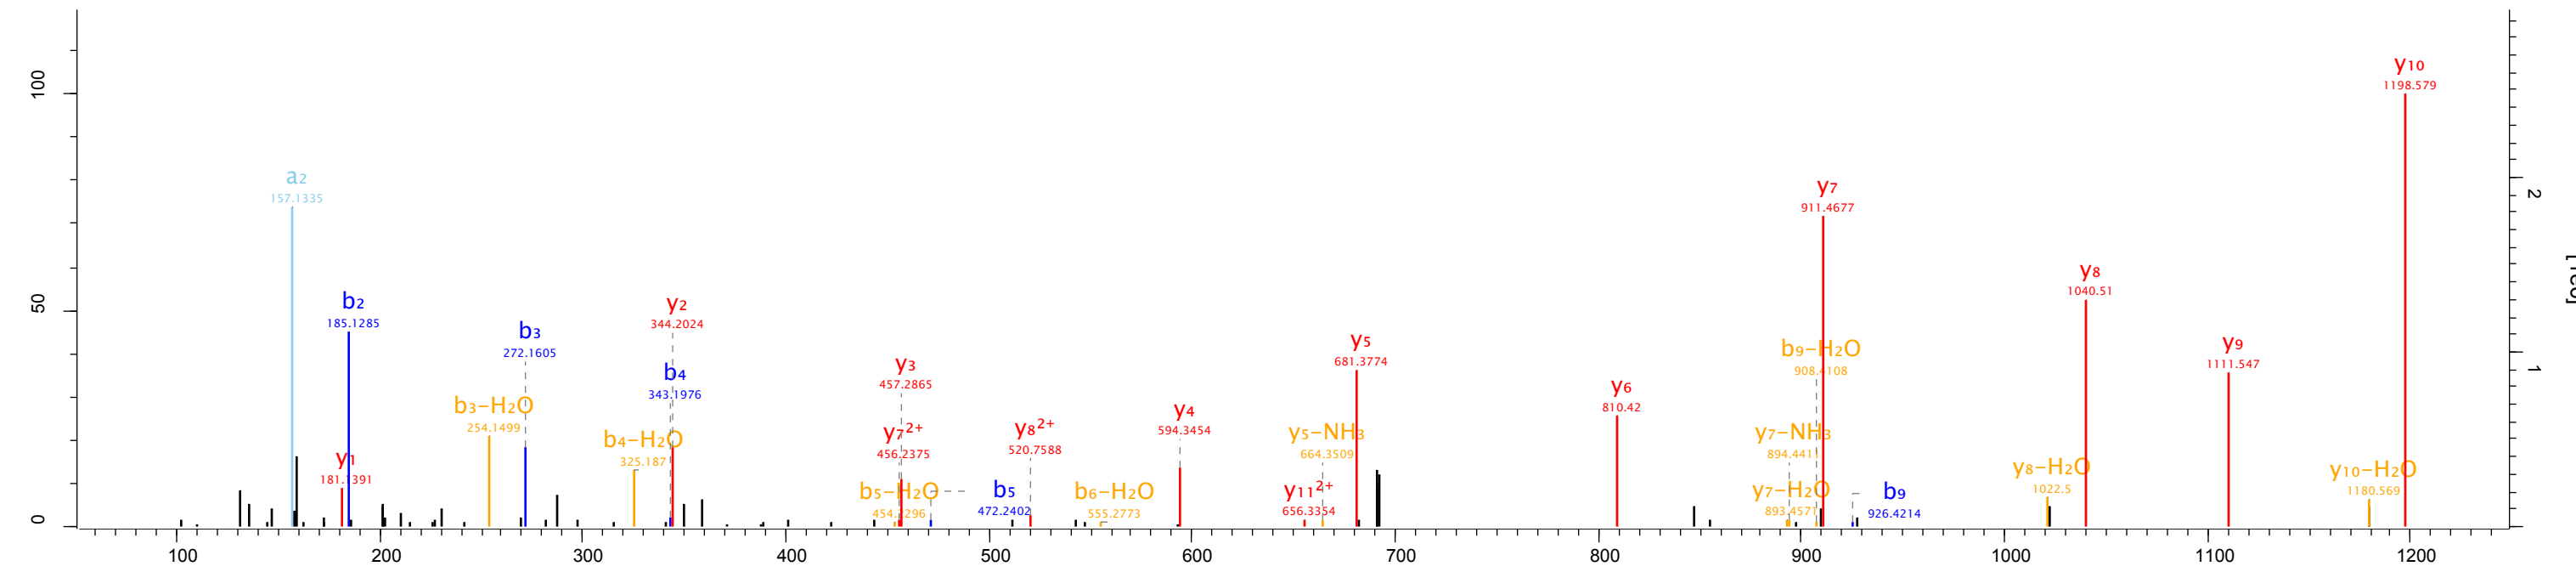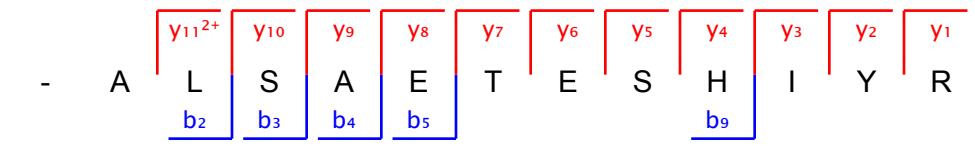

Raw file: 20180707\_MaS\_A375SR\_ML\_proteome\_2\_02  
 Scan: 13976 Method: FTMS; HCD Score: 99.14 m/z: 483.72 Gene names: TMEM258

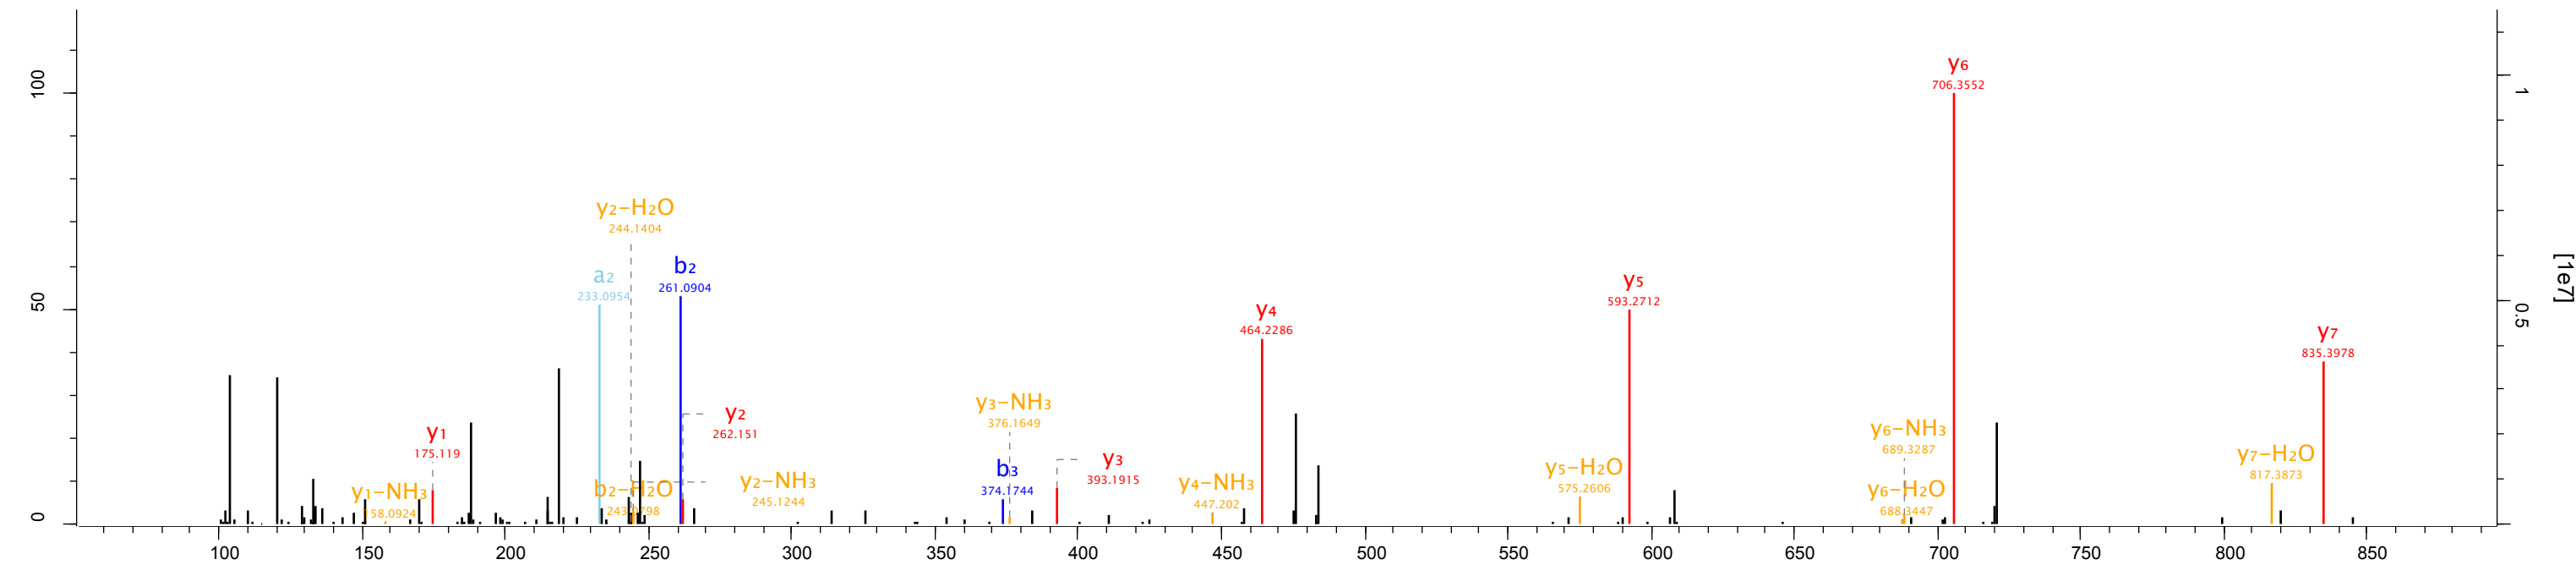



Raw file: 20180707\_MaS\_A375SR\_ML\_proteome\_2\_03  
 Scan: 25796 Method: FTMS; HCD Score: 164.11 m/z: 770.38 Gene names: R3HDM4

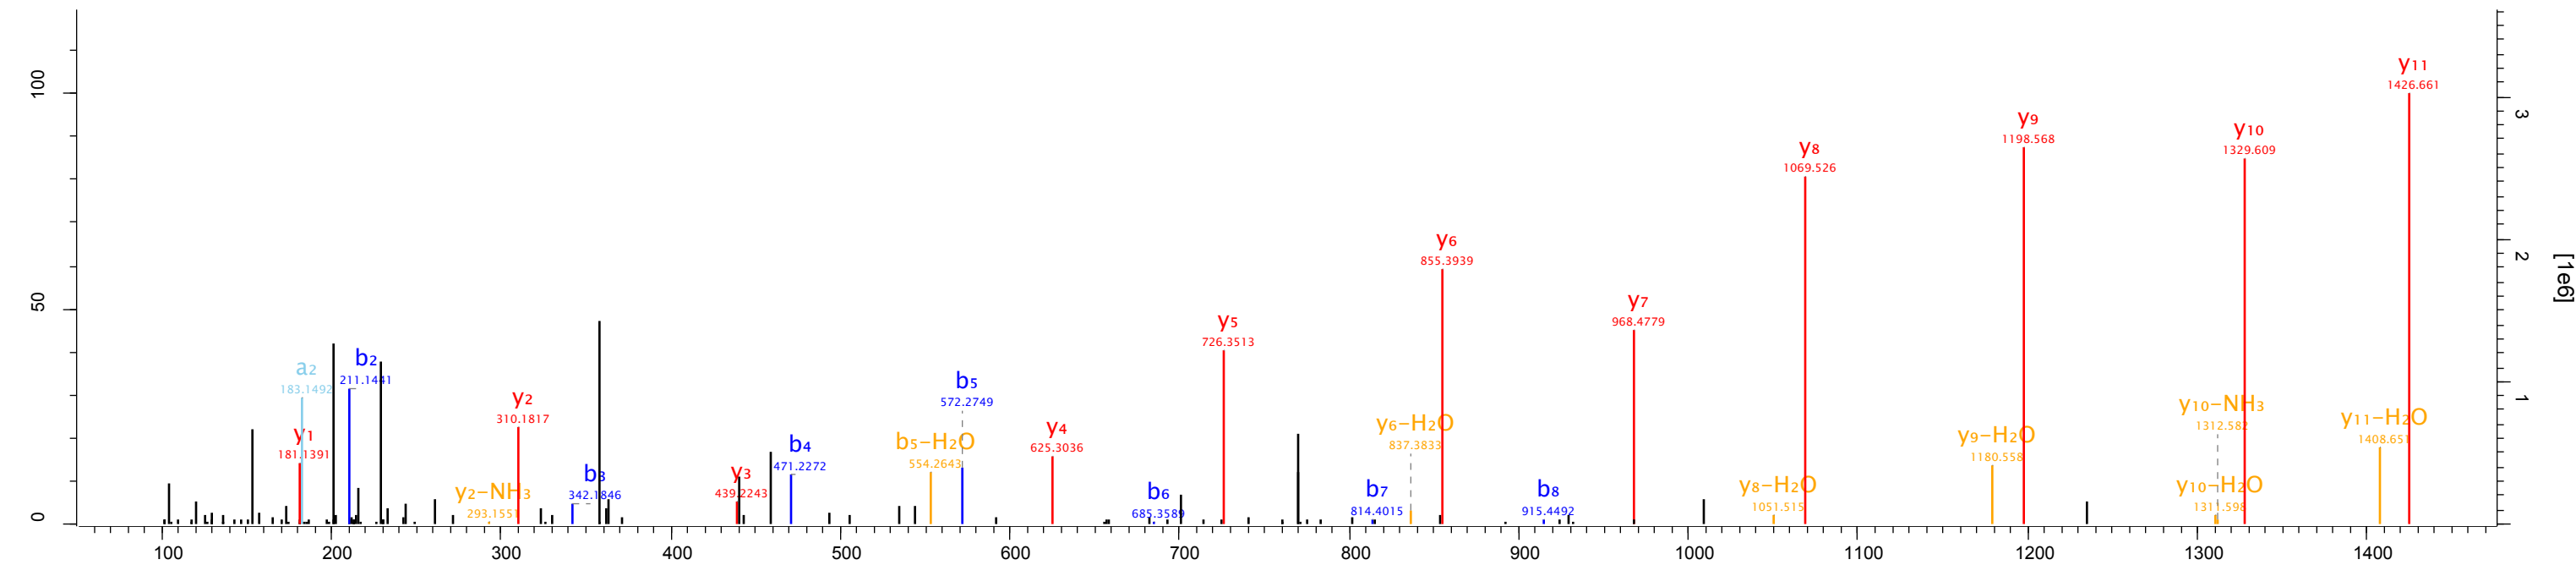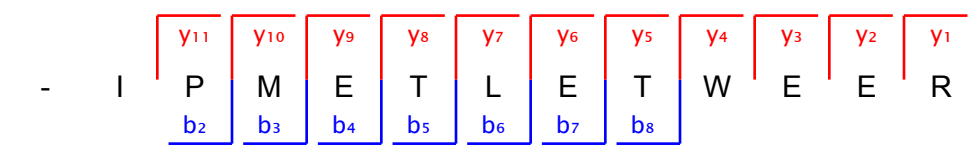

Raw file: 20180707\_MaS\_A375SR\_ML\_proteome\_2\_03  
 Scan: 26466 Method: FTMS; HCD Score: 114.86 m/z: 494.82 Gene names: STON2

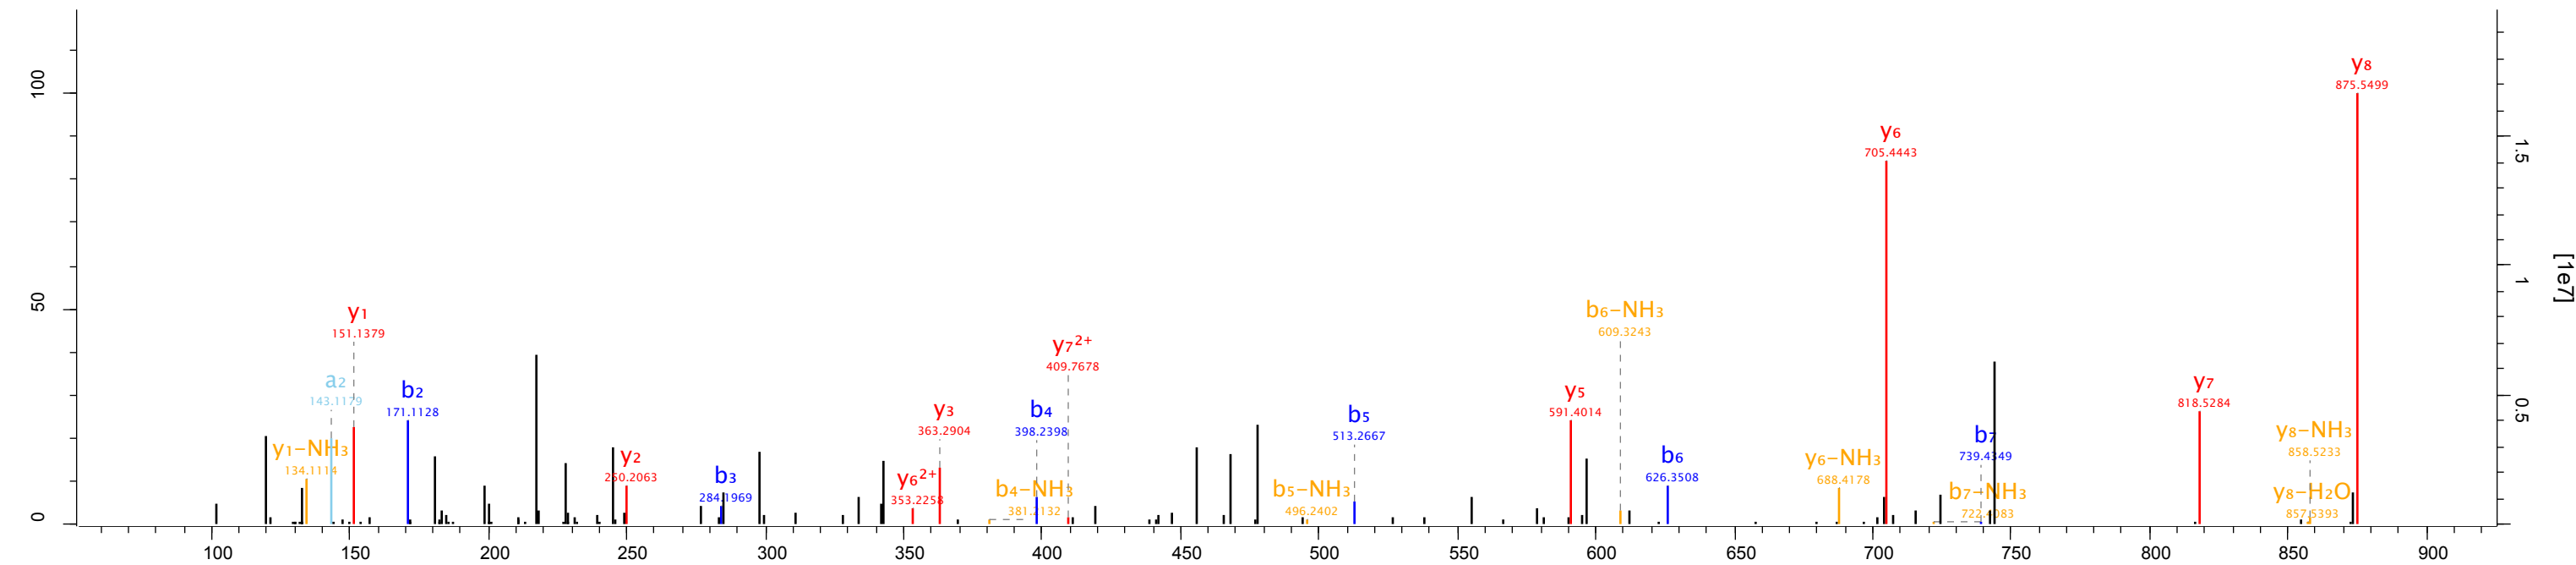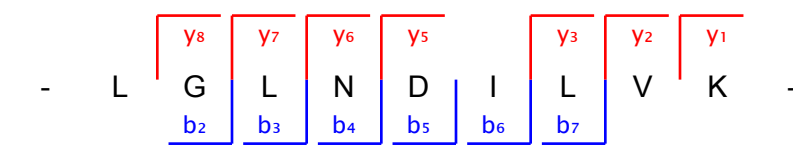

Raw file 20180707\_MaS\_A375SR\_ML\_proteome\_2\_03 Scan 4156 Method FTMS; HCD Score 63.62 m/z 578.3

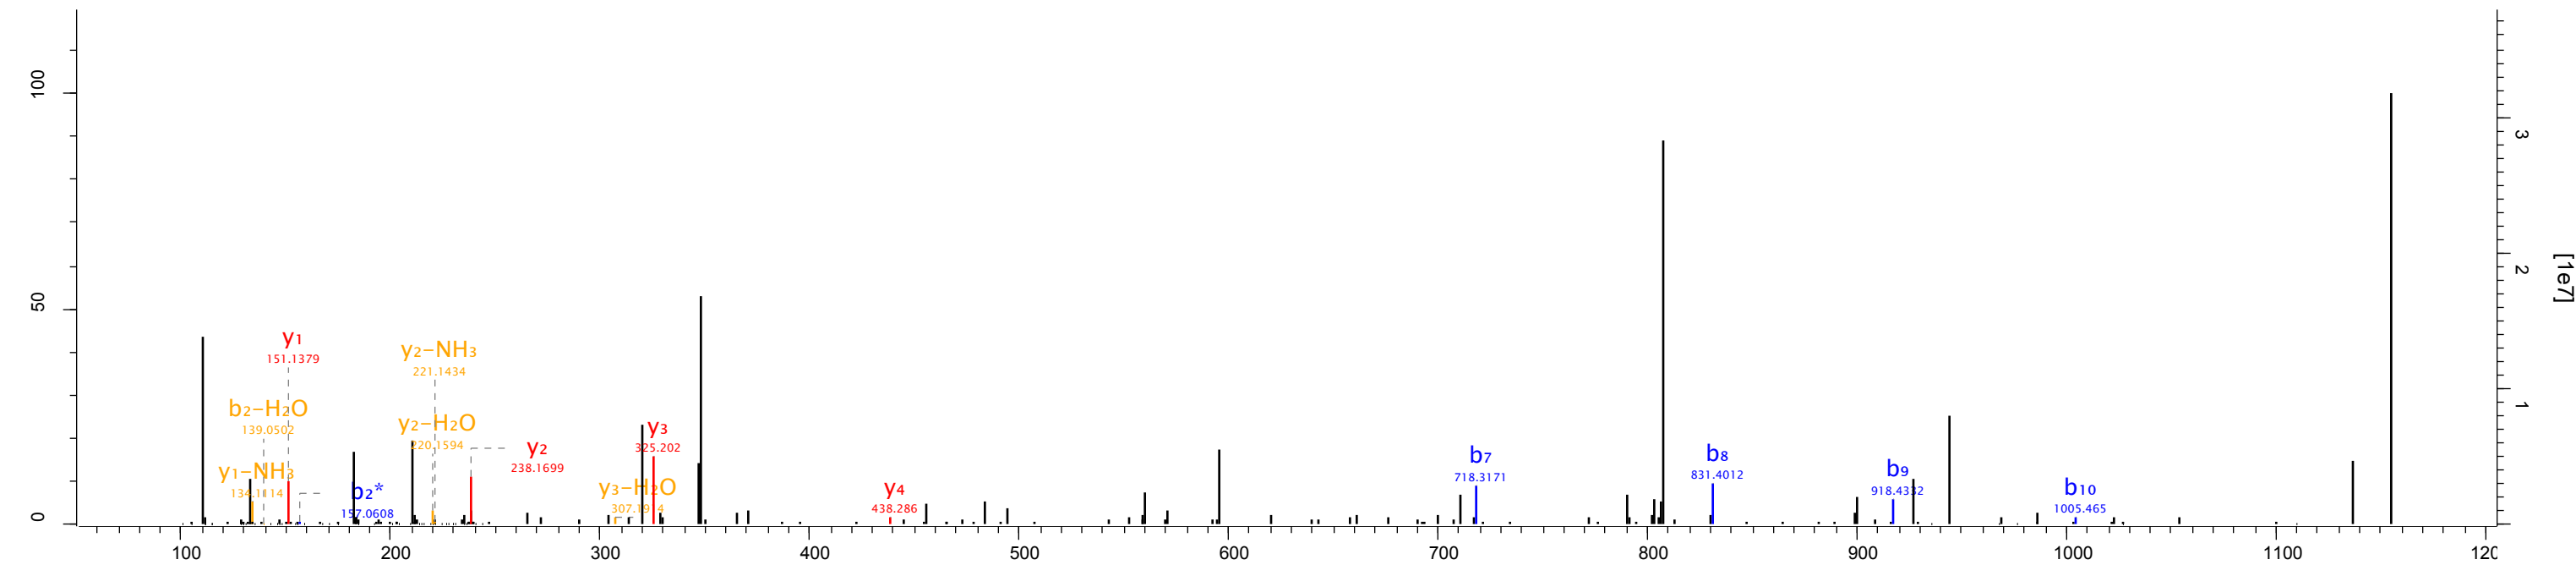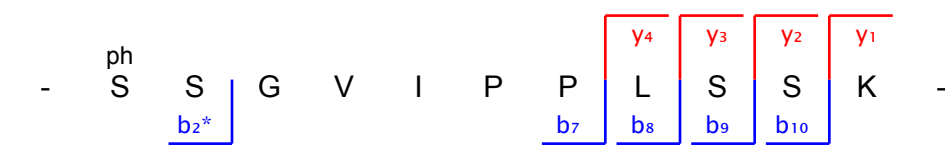

Raw file 20180707\_MaS\_A375SR\_ML\_proteome\_2\_04 Scan 16476 Method FTMS; HCD Score 64.04 m/z 602.31 Gene names C8orf37

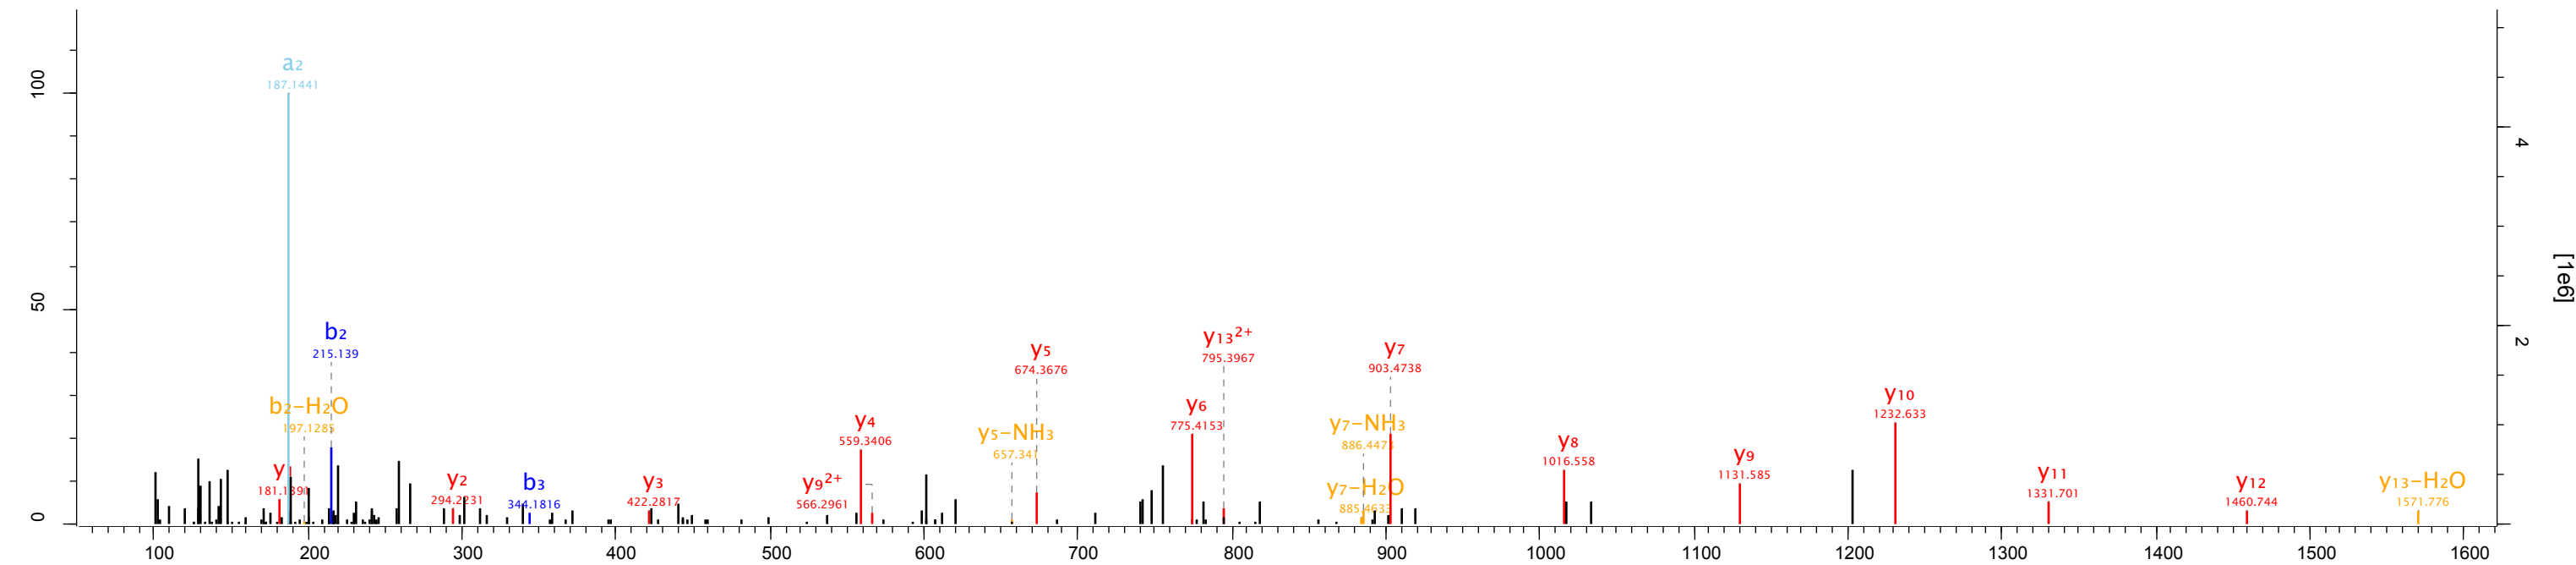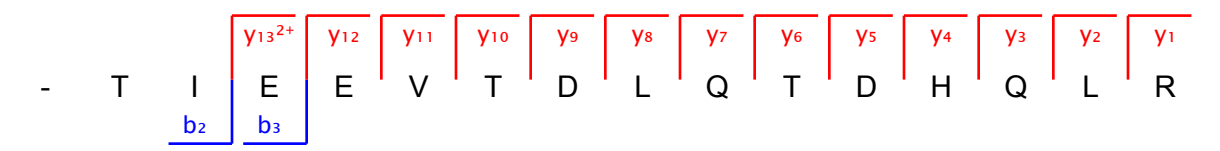

Raw file 20180707\_MaS\_A375SR\_ML\_proteome\_2\_04 Scan 23466 Method FTMS; HCD Score 127.83 m/z 625.35

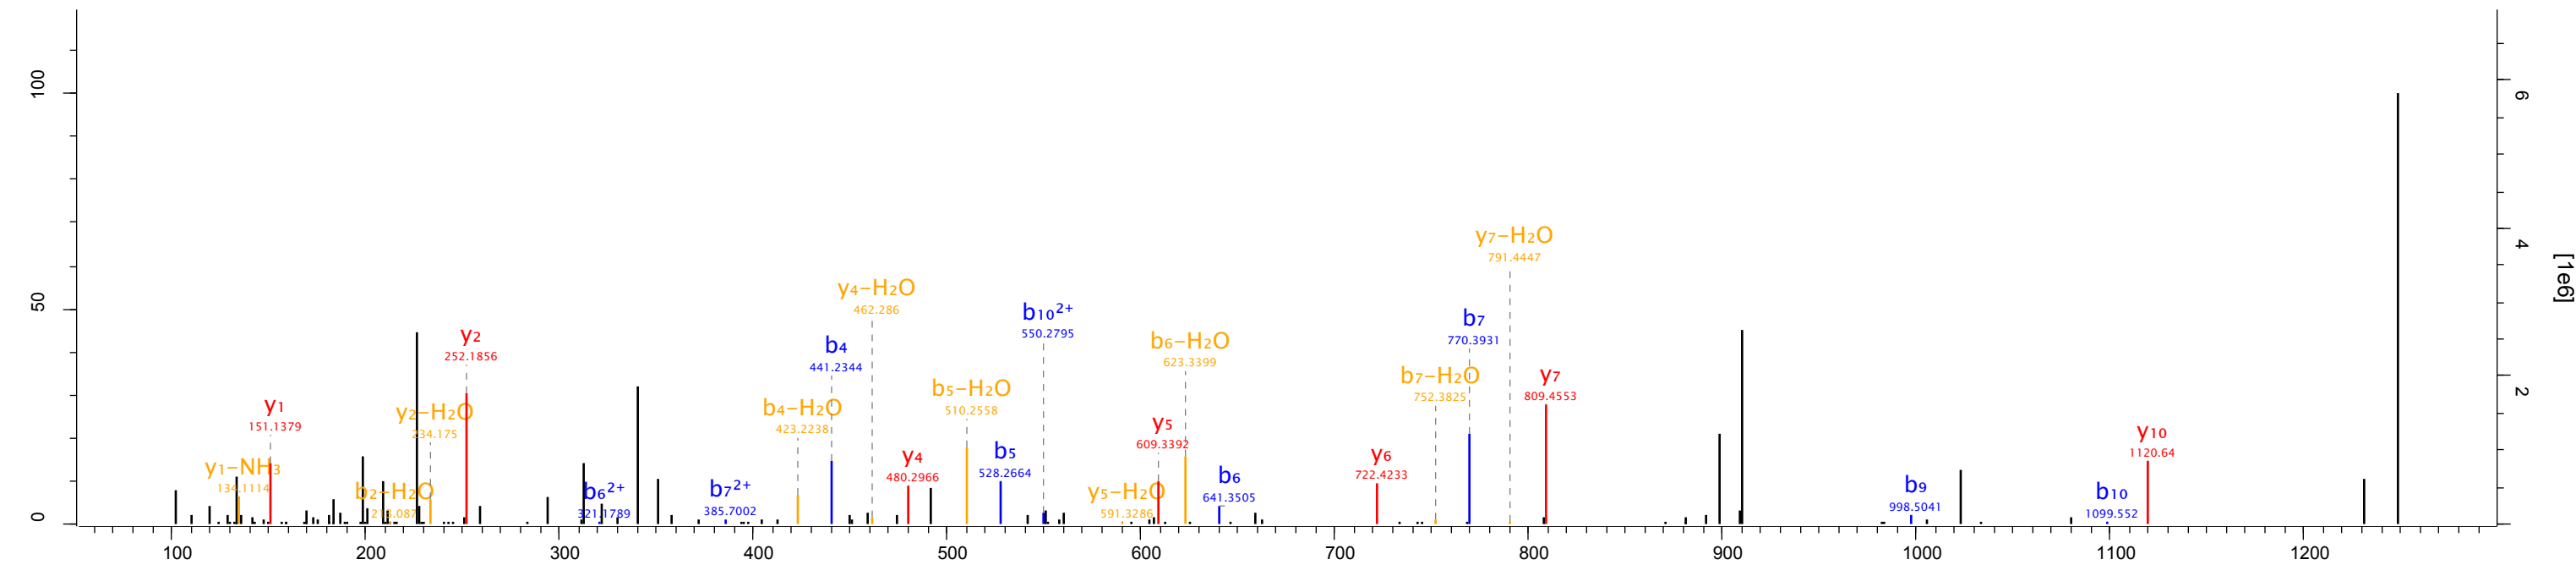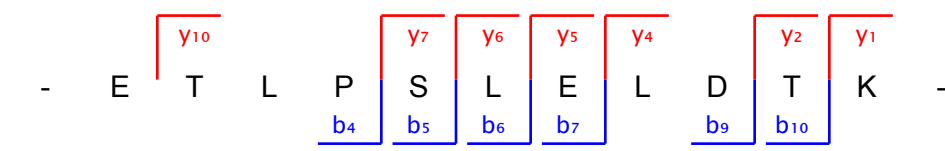

Raw file  
20180707\_MaS\_A375SR\_ML\_proteome\_2\_05

Scan 8906 Method FTMS; HCD Score 49 m/z 560.83 Gene names POLR2F

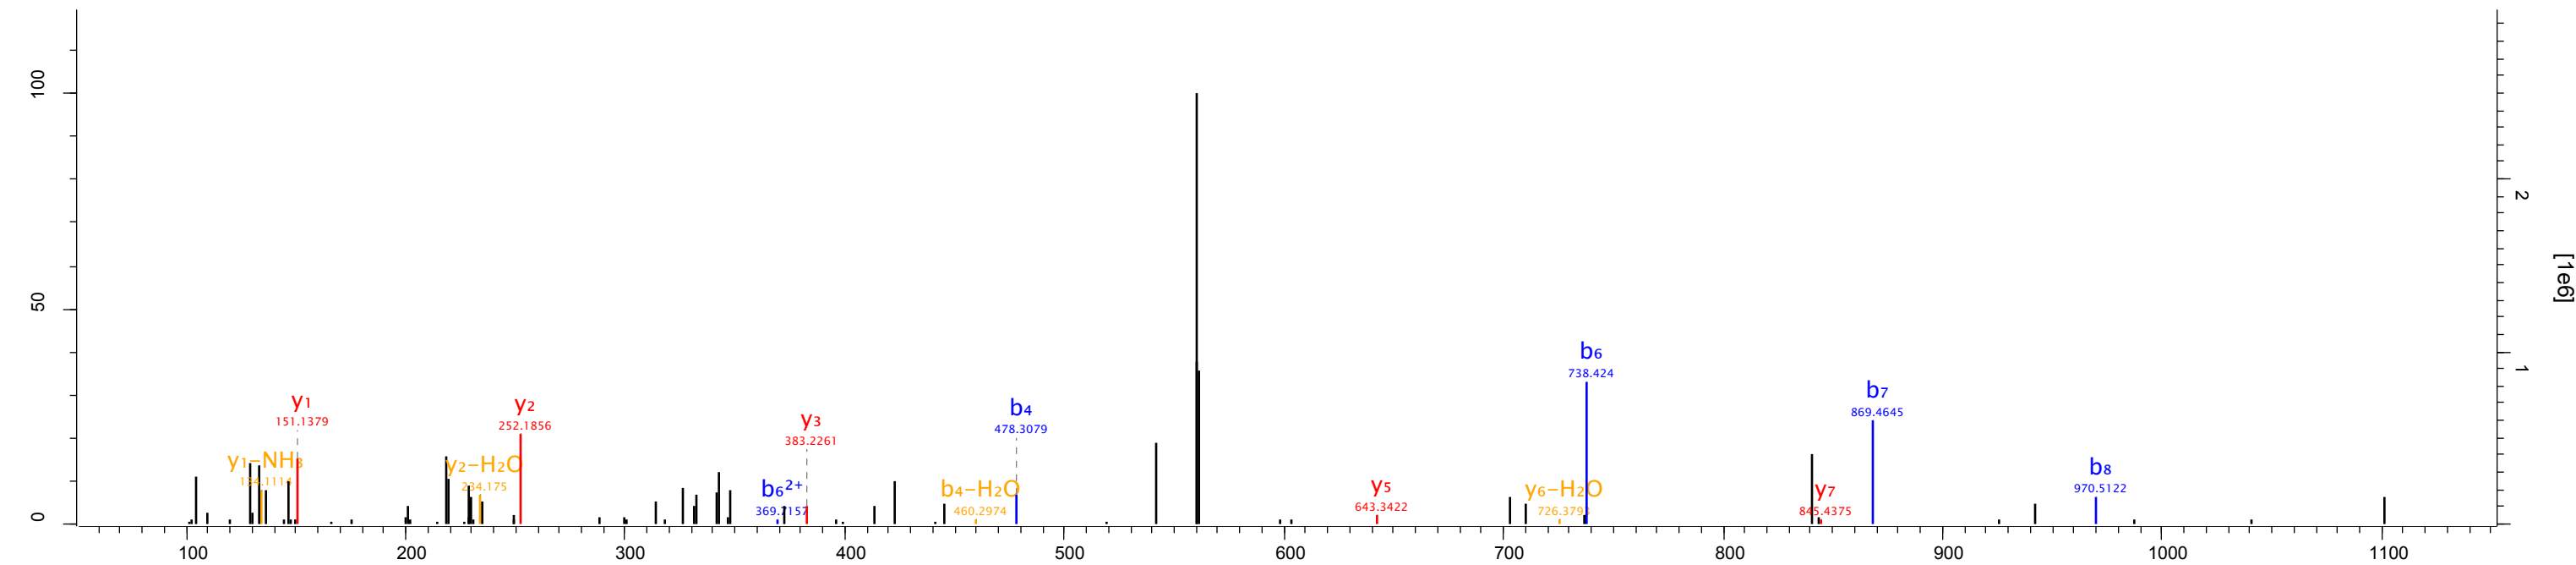

Raw file 20180707\_MaS\_A375SR\_ML\_proteome\_2\_06 Scan 4666 Method FTMS; HCD Score 69.82 m/z 535.8

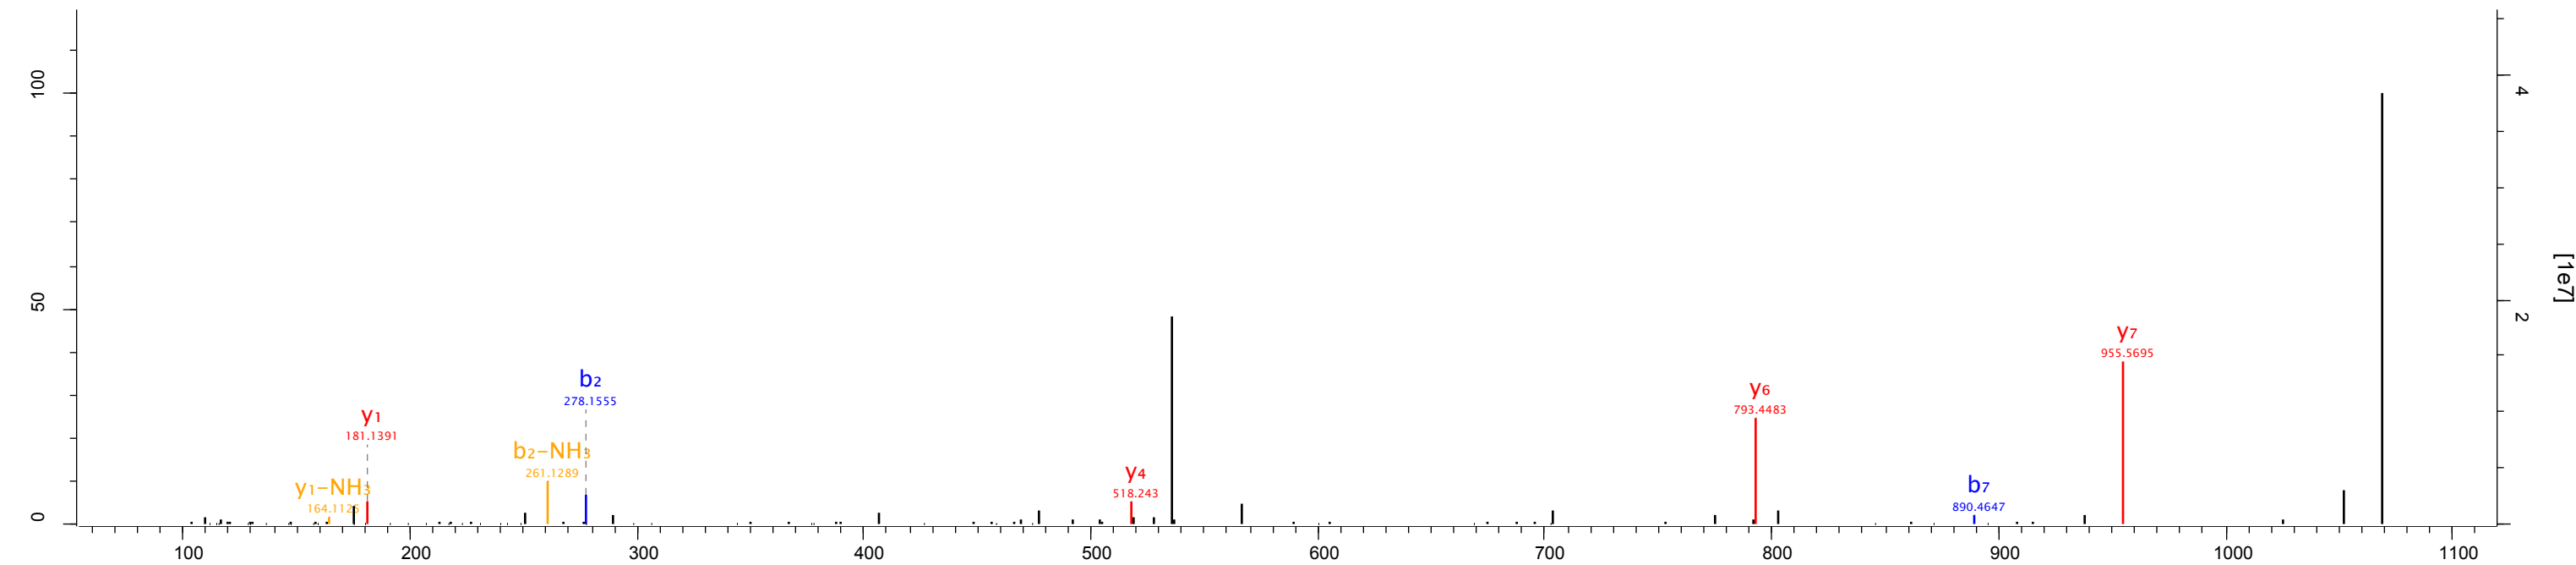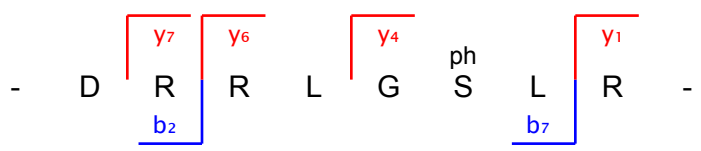

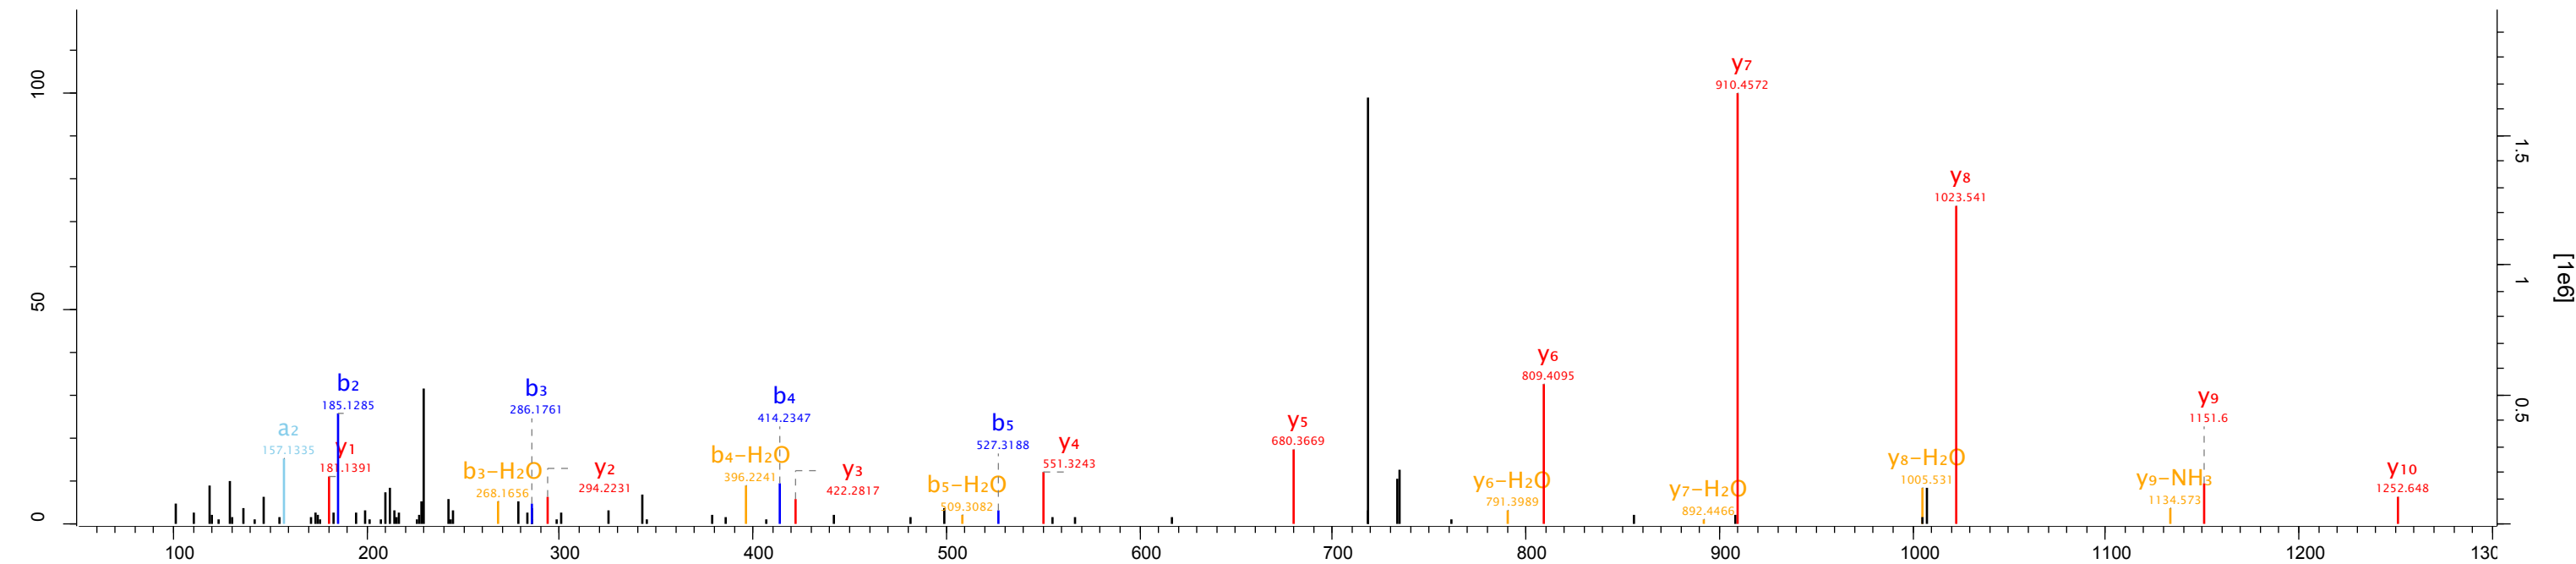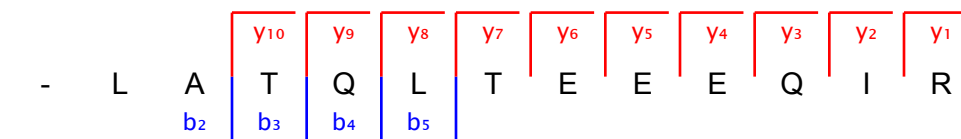



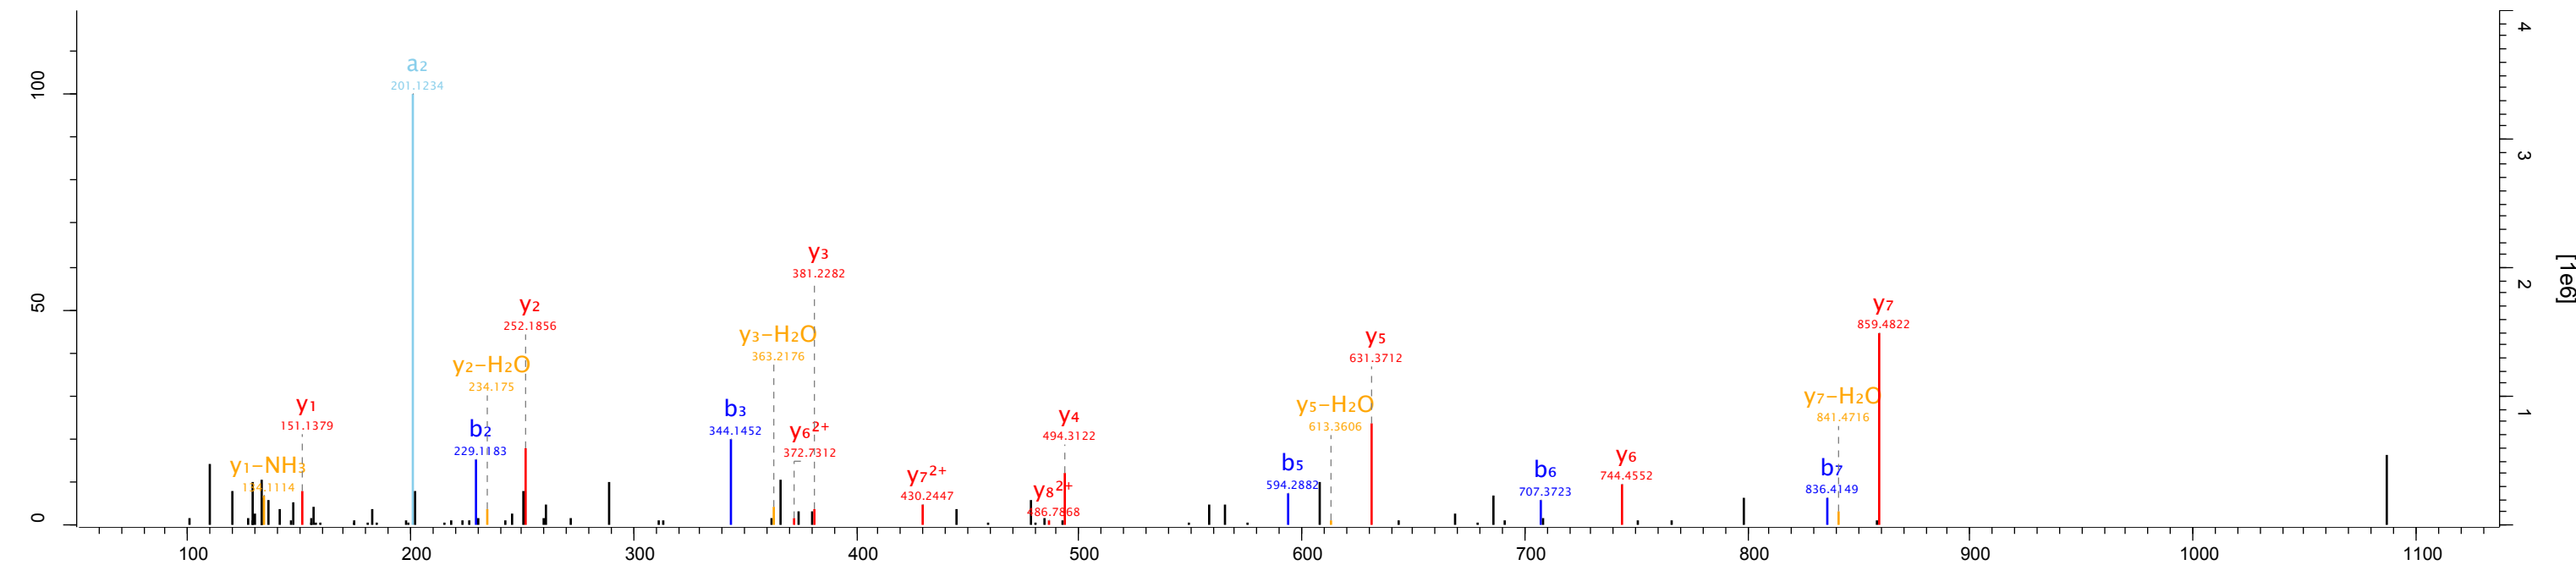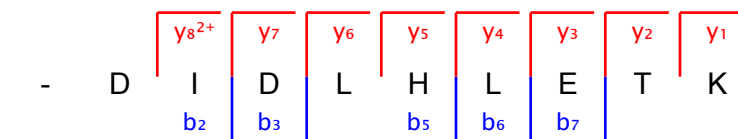

Raw file 20180707\_MaS\_A375SR\_ML\_proteome\_2\_08 Scan 27176 Method FTMS; HCD Score 81.57 m/z 632.82 Gene names CCNF

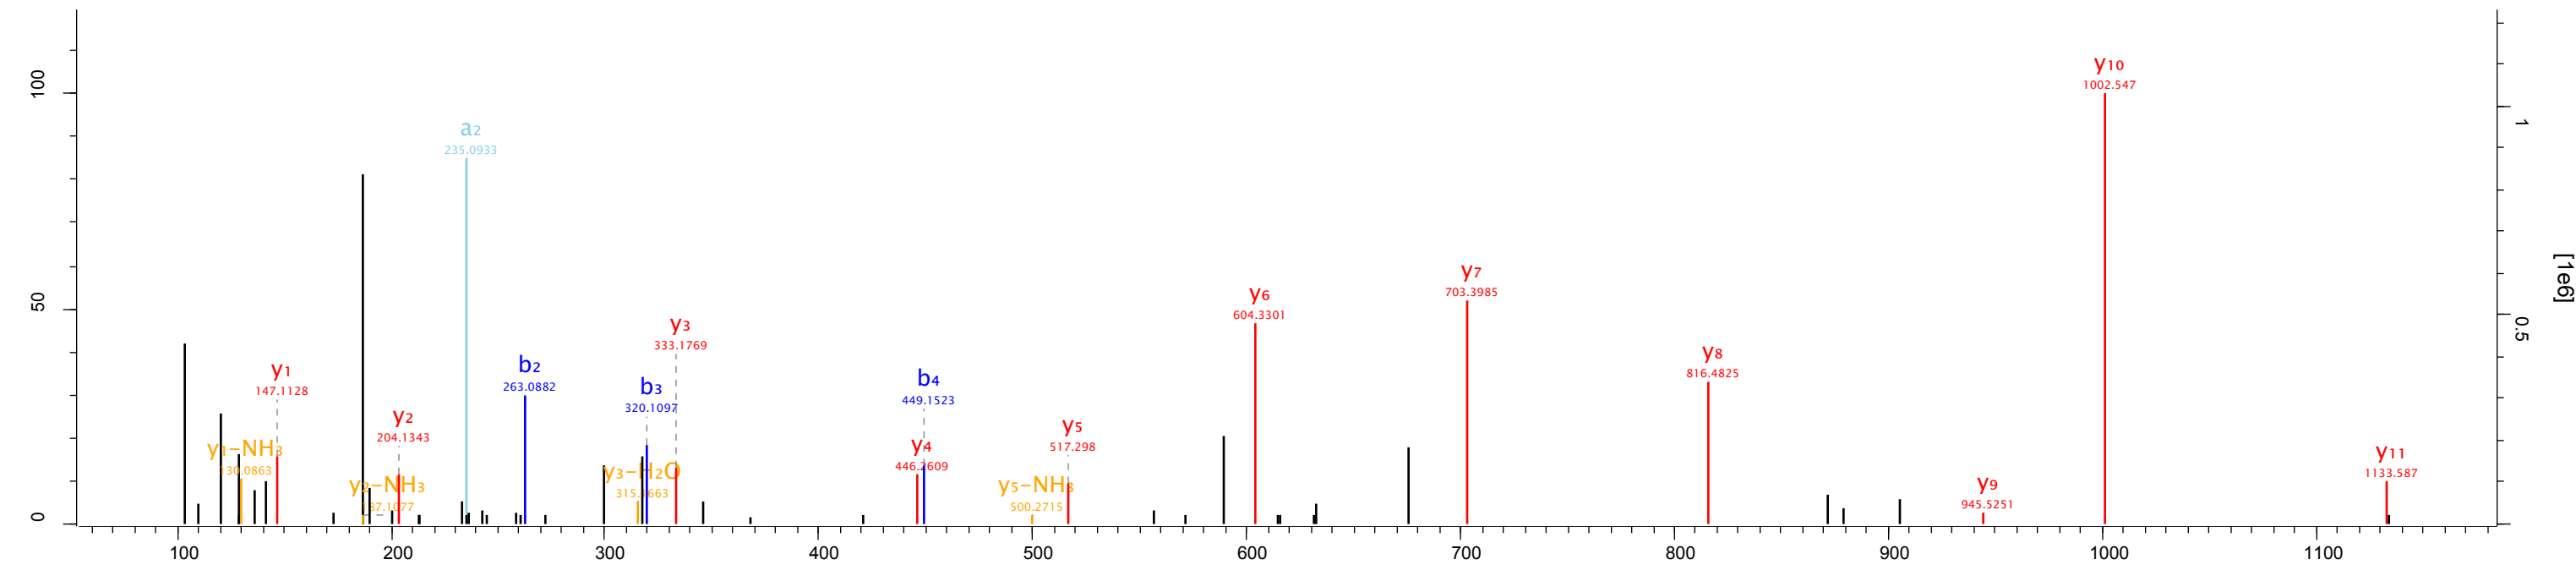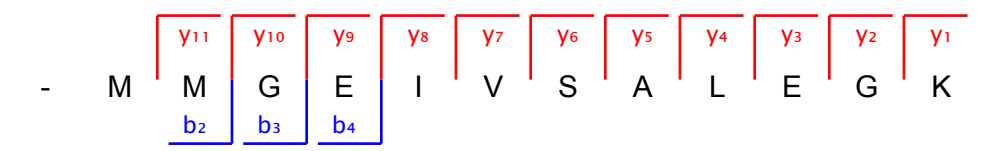

Raw file  
20180707\_MaS\_A375SR\_ML\_proteome\_2\_08

Scan 5646 Method FTMS; HCD Score 46 m/z 577.77

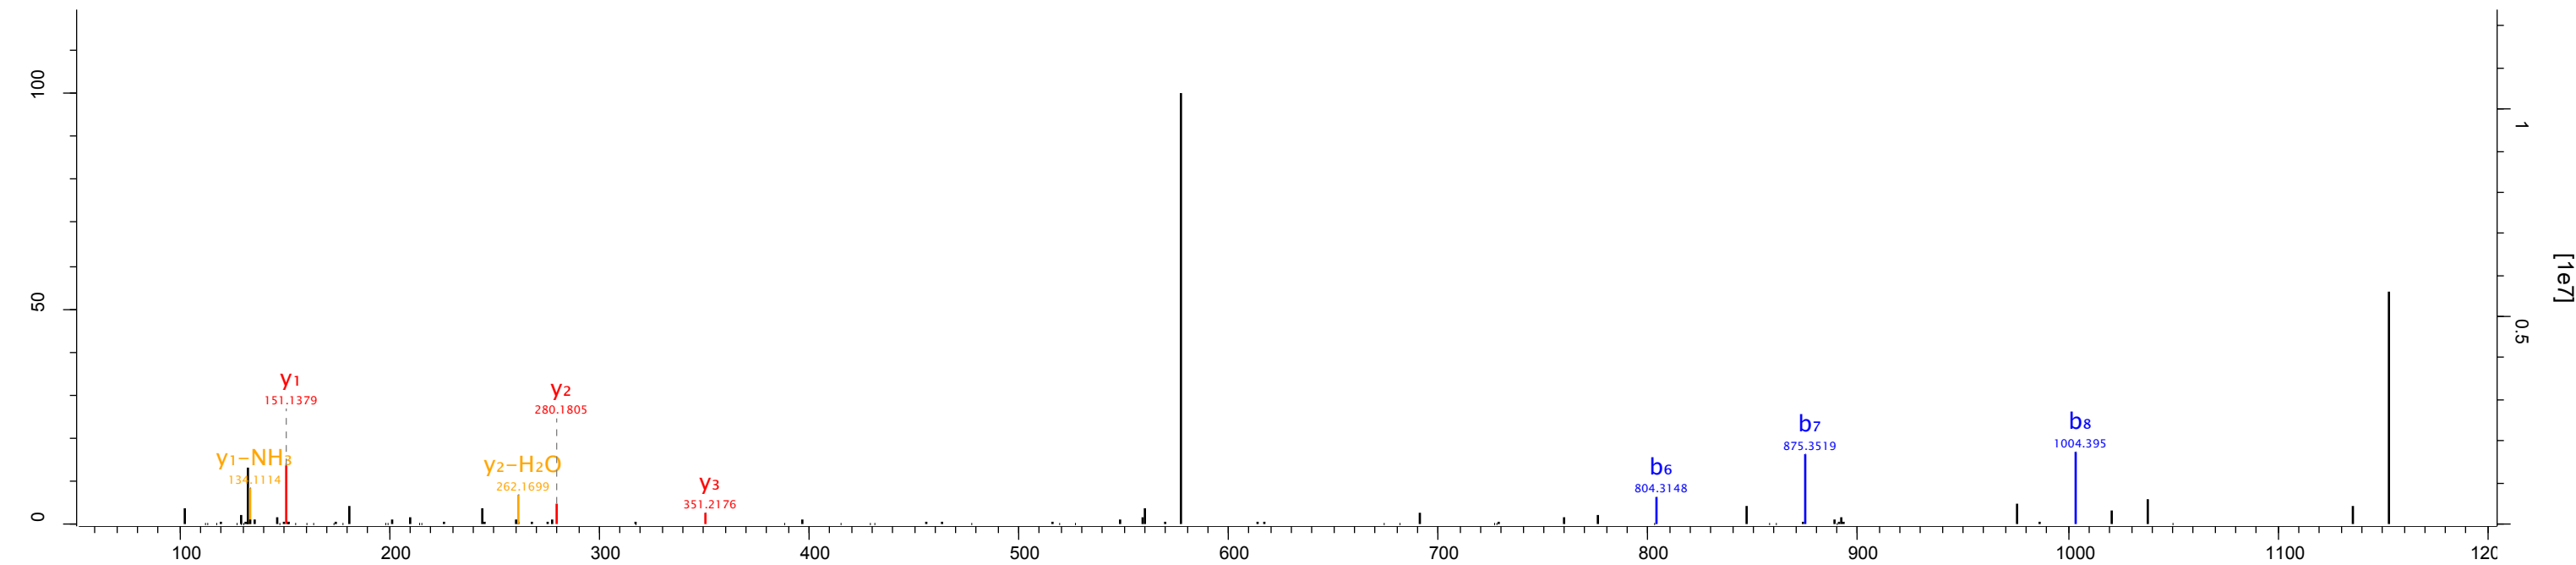

Raw file  
20180707\_MaS\_A375SR\_ML\_proteome\_2\_08

Scan 5656 Method FTMS; HCD Score 53.76 m/z 572.74

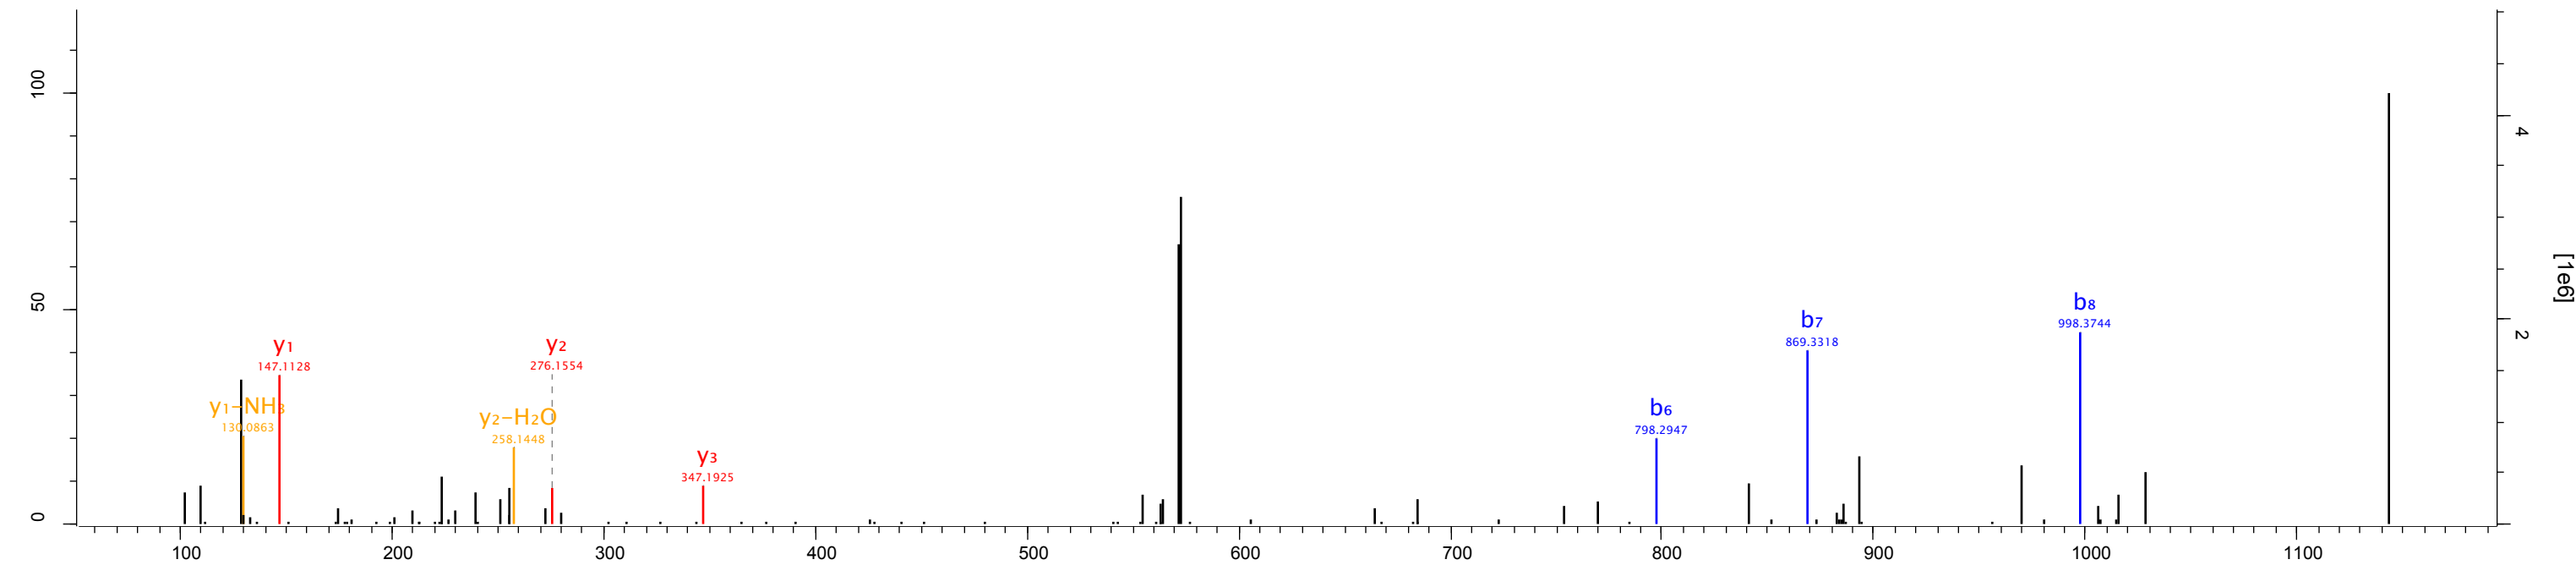

Raw file 20180707\_MaS\_A375SR\_ML\_proteome\_2\_09 Scan 11276 Method FTMS; HCD Score 78.34 m/z 772.4 Gene names VAV1

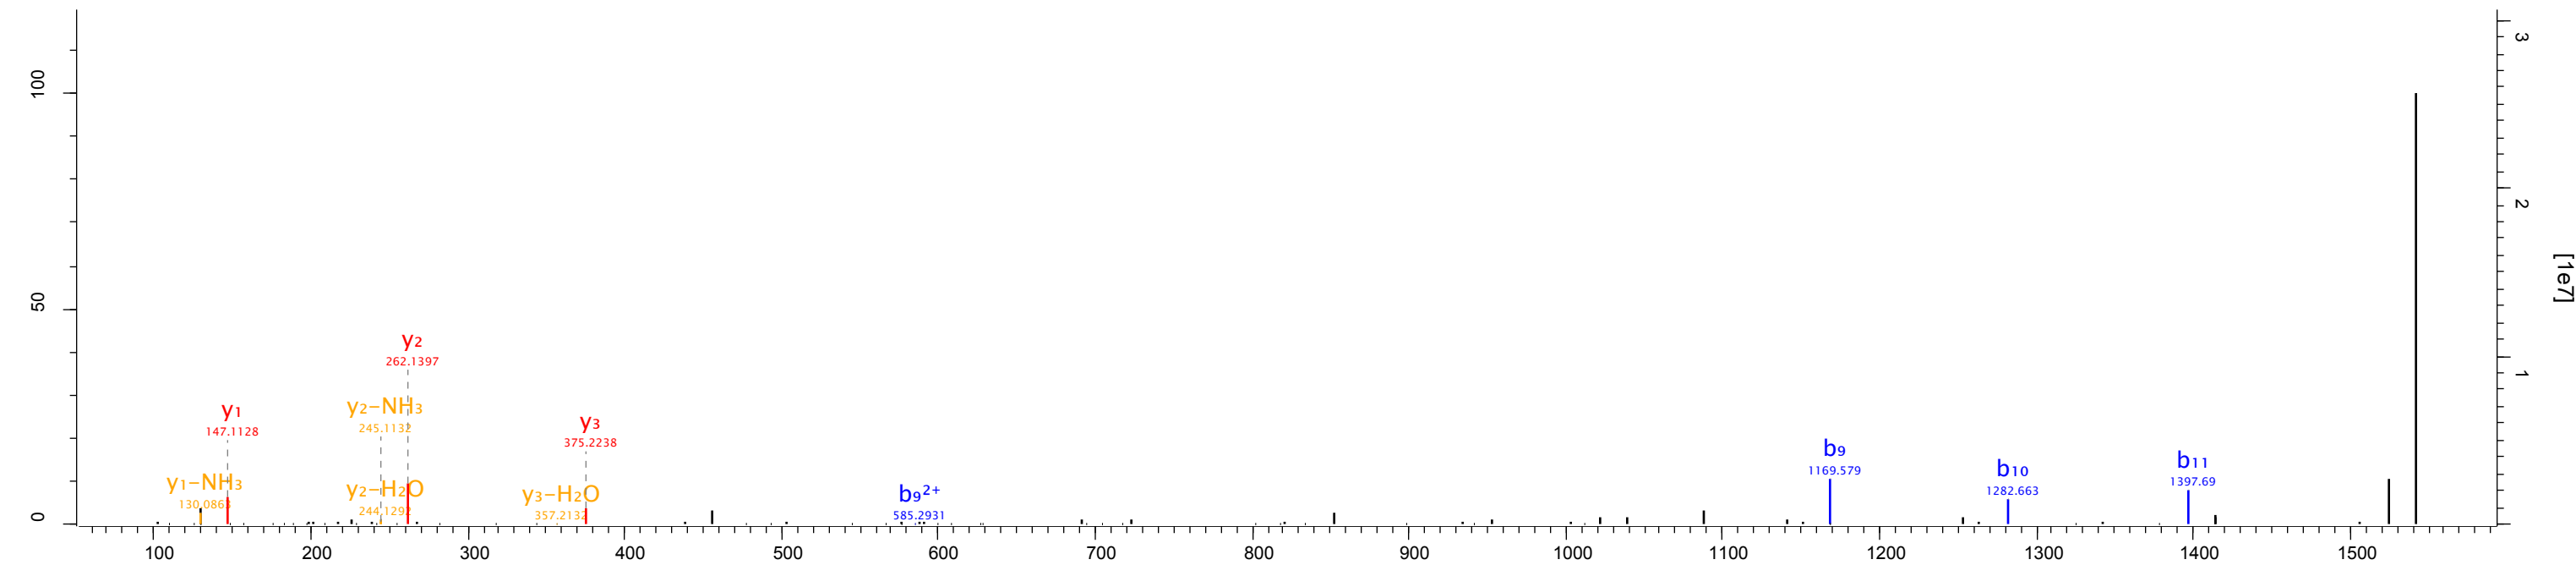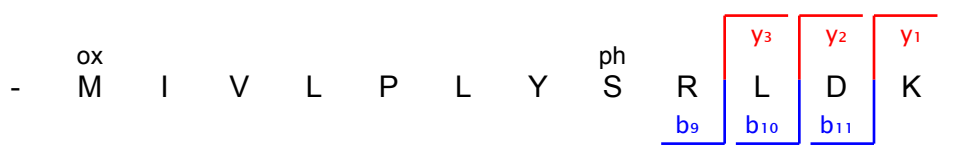

Raw file  
20180707\_MaS\_A375SR\_ML\_proteome\_2\_09

Scan 12506 Method FTMS; HCD Score 53.1 m/z 386.22 Gene names RASD1

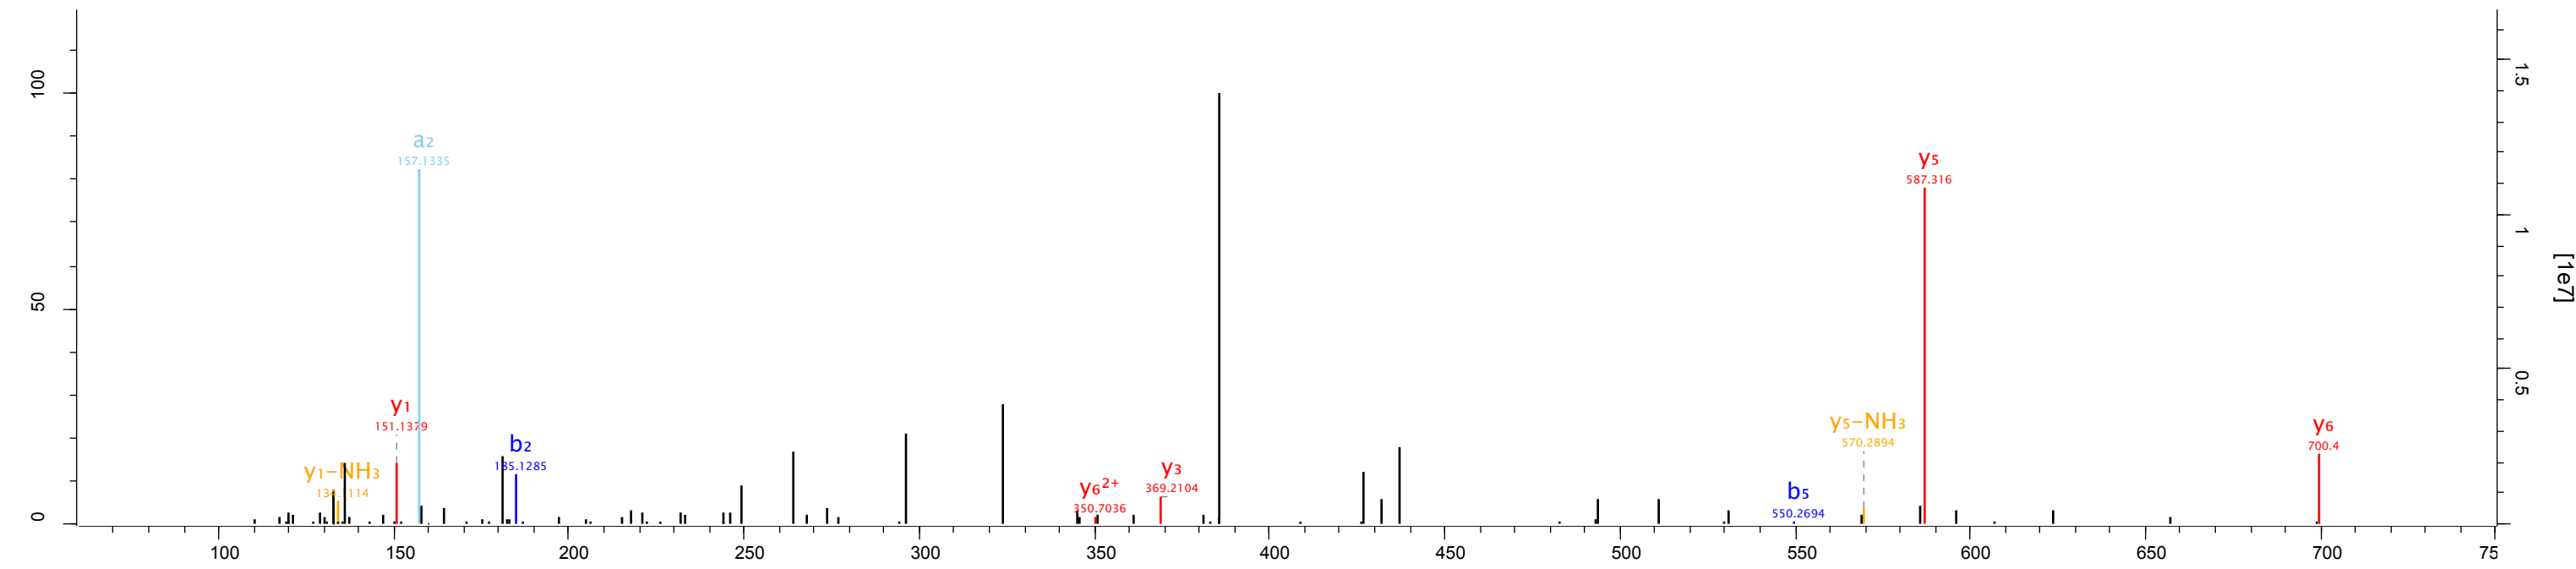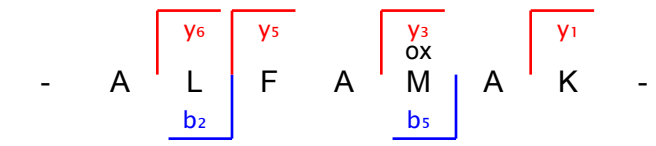

Raw file 20180707\_MaS\_A375SR\_ML\_proteome\_2\_10 Scan 25226 Method FTMS; HCD Score 52.73 m/z 611.36

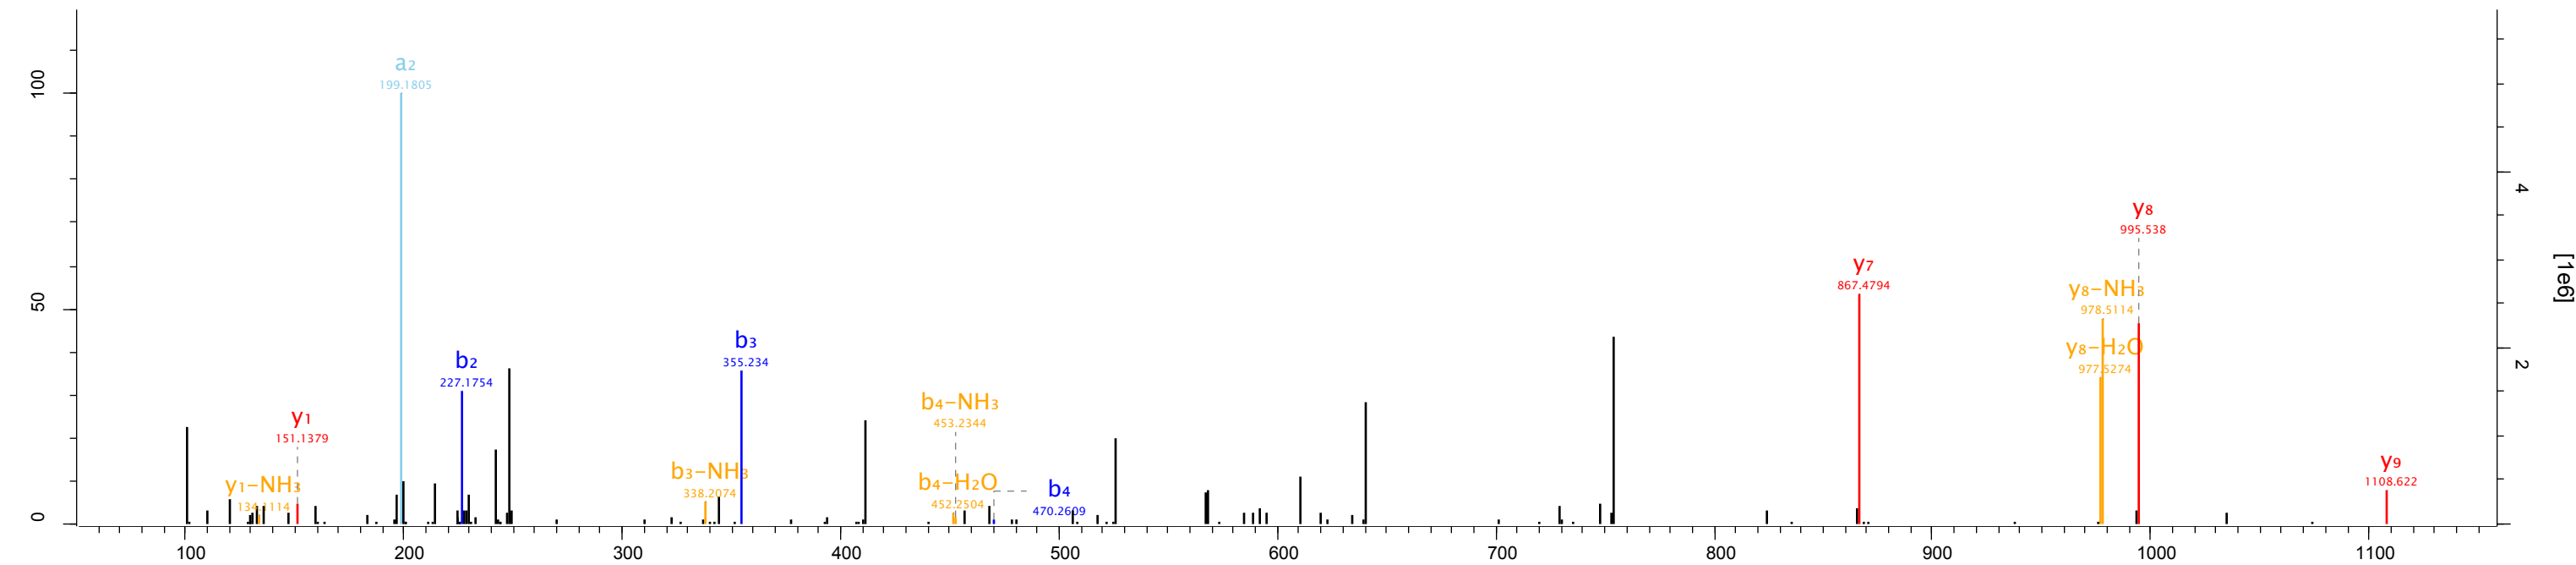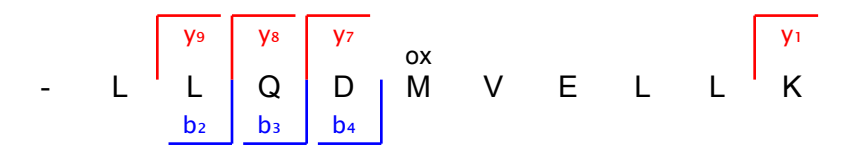

20180707\_MaS\_A375SR\_ML\_proteome\_2\_11

15176 FTMS; HCD 54.1 916.9 ADPRM

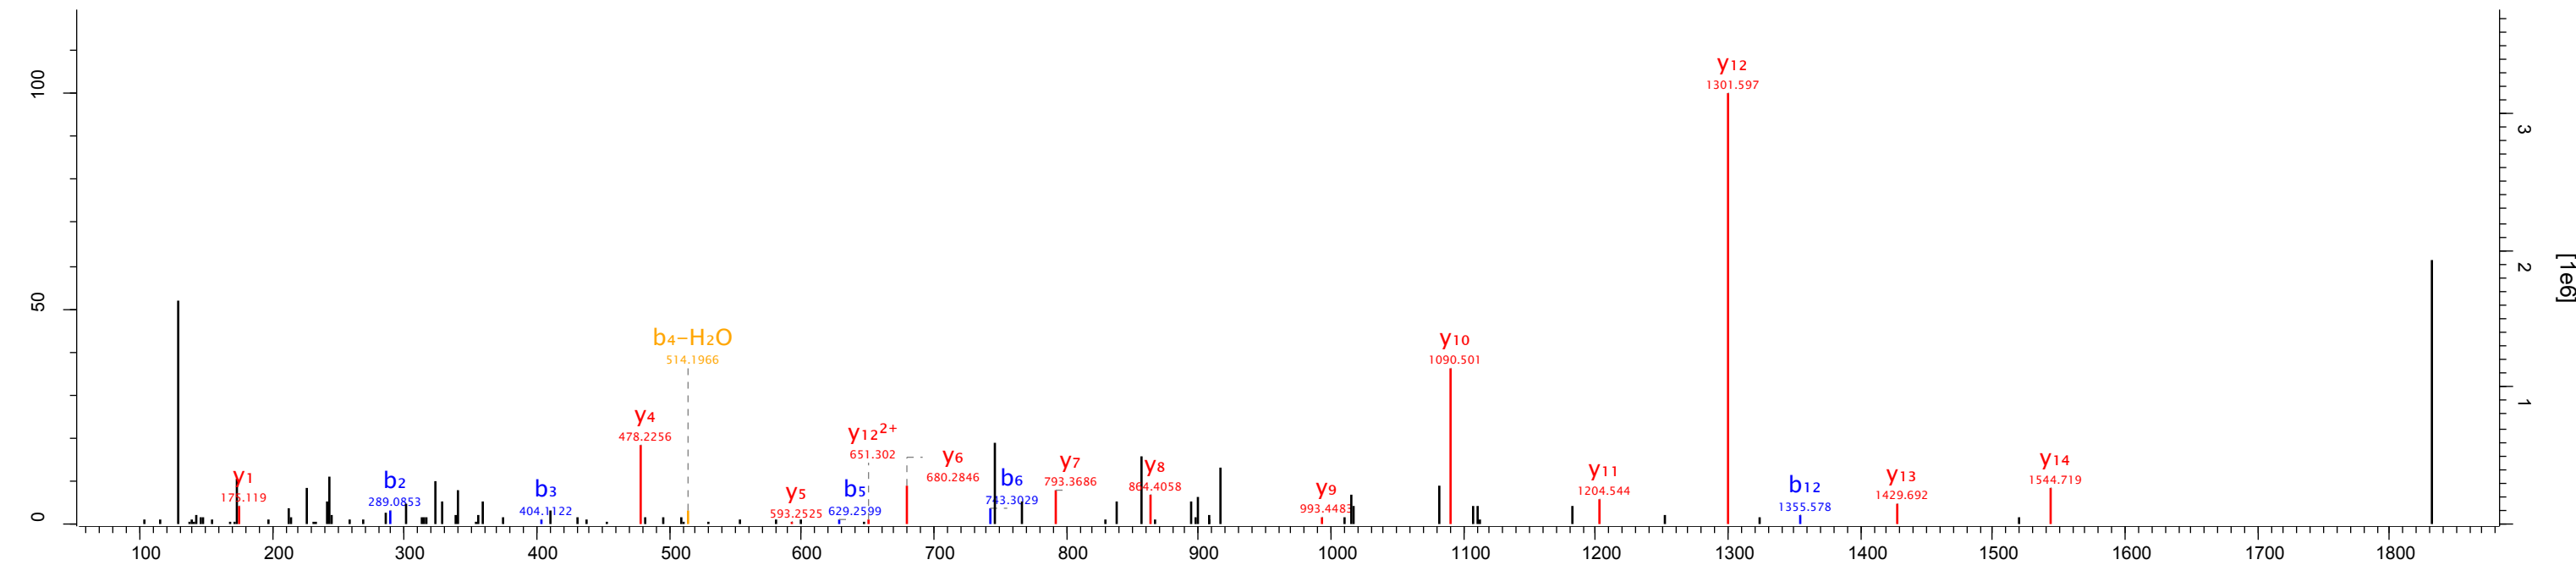

ac

- M D D K P N P E A L S D S S E R -

Fragmentation mapping (b and y ions) is shown below the sequence:

- b<sub>2</sub> (under D)
- b<sub>3</sub> (under D)
- b<sub>5</sub> (under P)
- b<sub>6</sub> (under N)
- b<sub>12</sub> (under D)
- y<sub>1</sub> (above R)
- y<sub>4</sub> (above S)
- y<sub>5</sub> (above D)
- y<sub>6</sub> (above S)
- y<sub>7</sub> (above L)
- y<sub>8</sub> (above A)
- y<sub>9</sub> (above E)
- y<sub>10</sub> (above P)
- y<sub>11</sub> (above N)
- y<sub>12</sub> (above P)
- y<sub>13</sub> (above K)
- y<sub>14</sub> (above D)



Raw file

20180707\_MaS\_A375SR\_ML\_proteome\_2\_11

Scan 15736 Method FTMS; HCD Score 53.38 m/z 1009.96 Gene names FOXP2

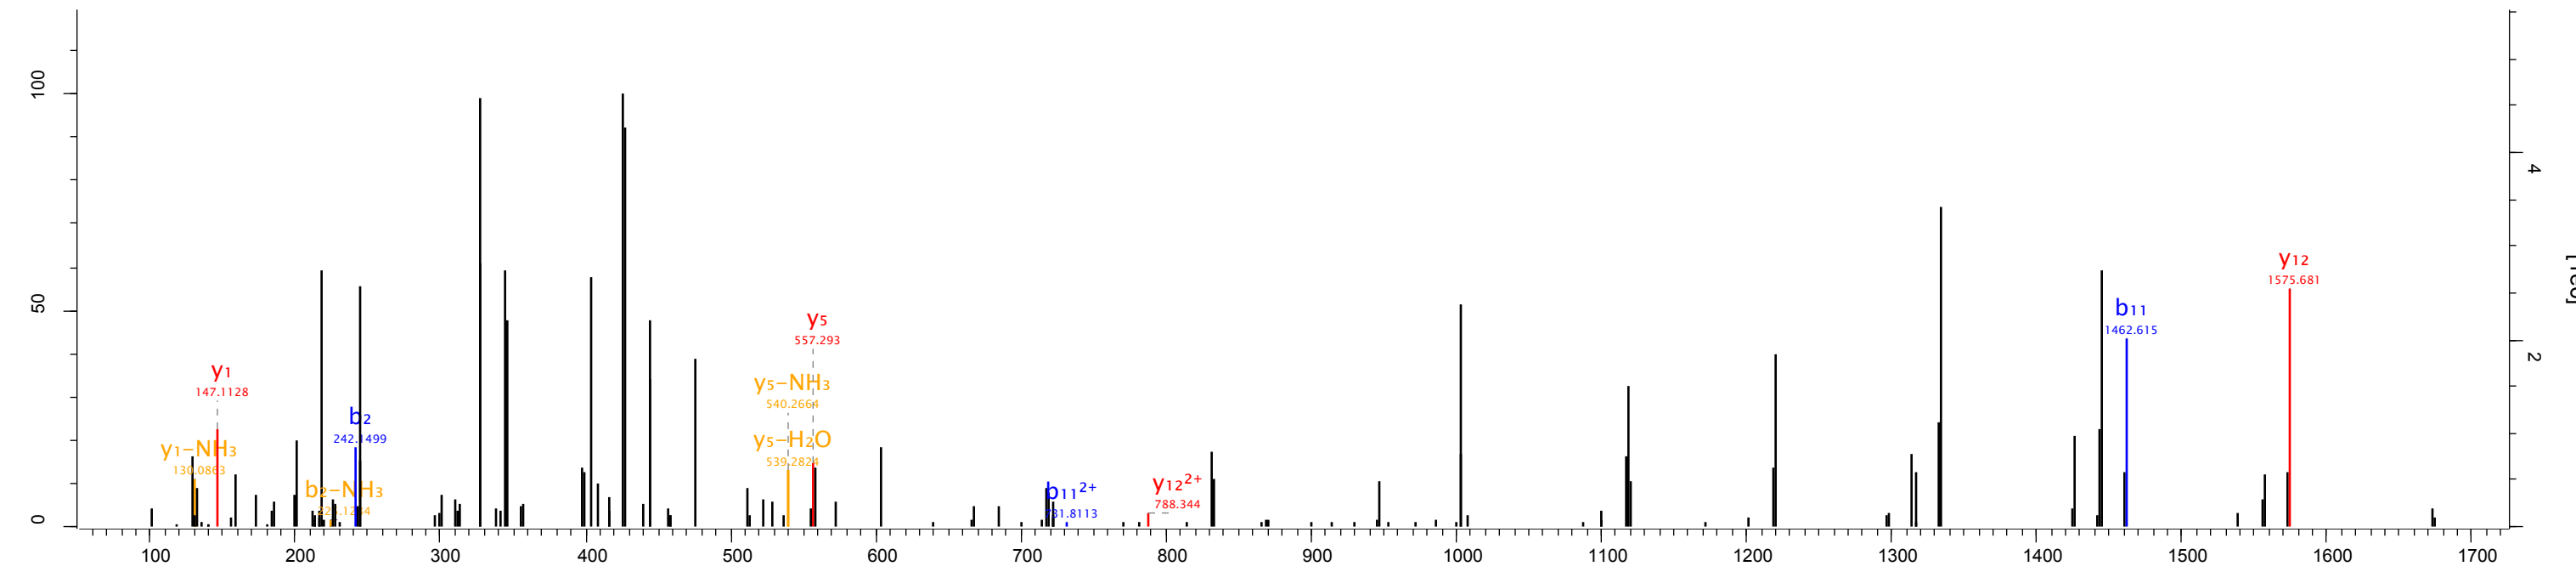

- L Q A M M T H L H M R P S E P K -

Fragmentation labels: b2 (under Q), y12 ox (above M), y5 (above P), y1 (above K)

Raw file

20180707\_MaS\_A375SR\_ML\_proteome\_2\_12

| Scan  | Method    | Score | m/z    | Gene names |
|-------|-----------|-------|--------|------------|
| 11646 | FTMS; HCD | 41.82 | 740.81 | DNAJB13    |

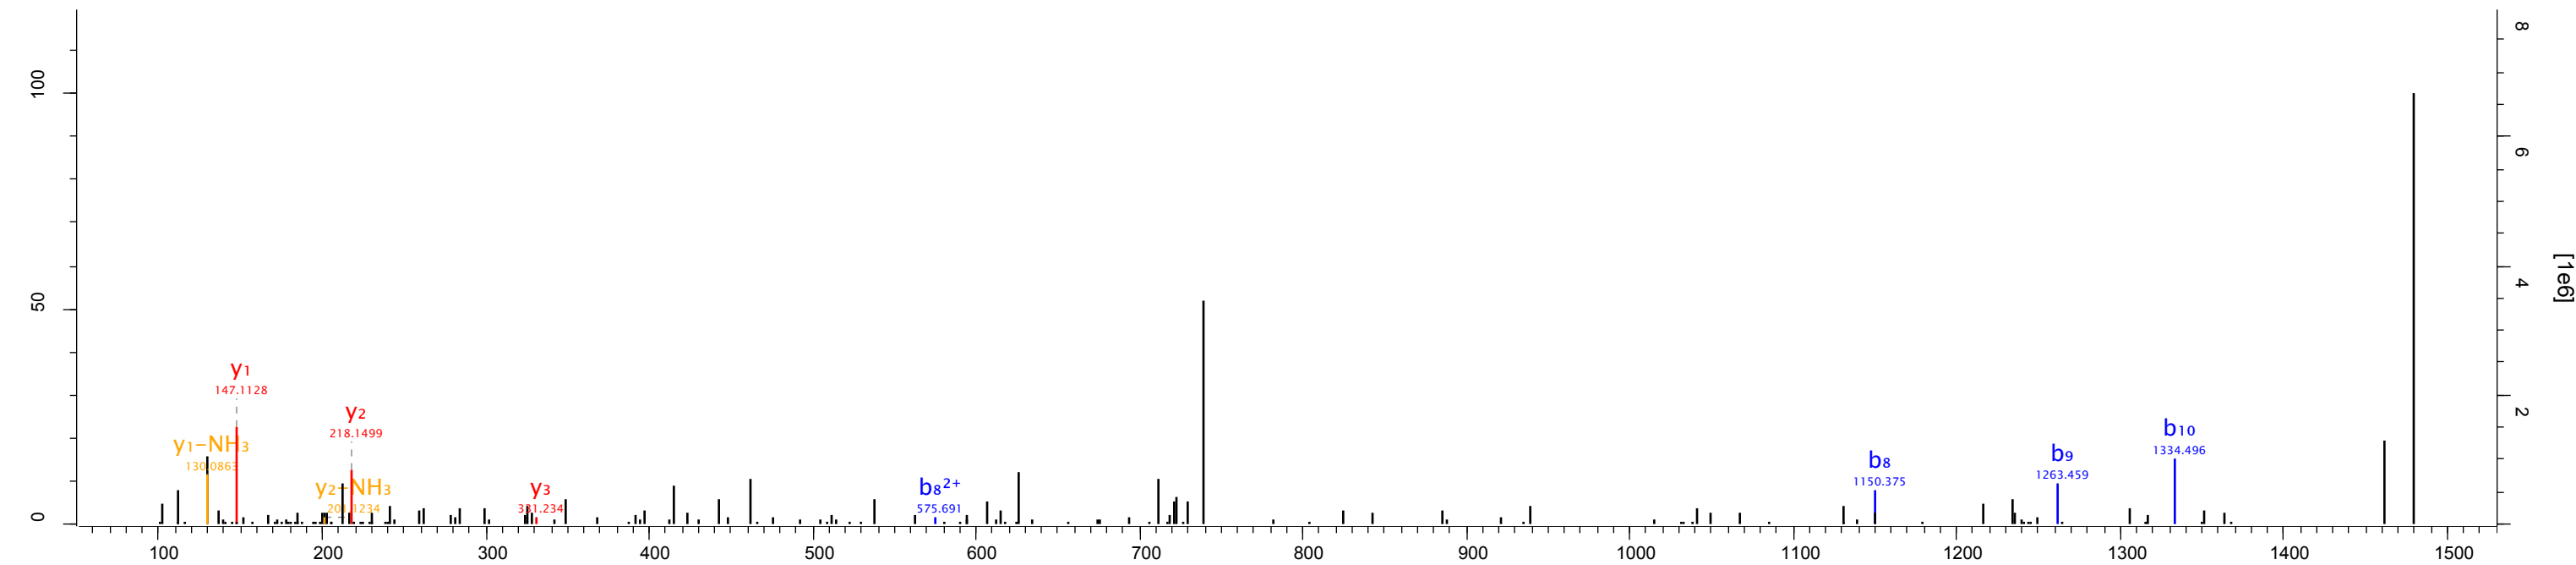

ac - ox M E ph T ph S R G R N L A K -

Fragmentation mapping:  
 - Red boxes above the sequence: y3 (L), y2 (A), y1 (K)  
 - Blue boxes below the sequence: b8 (N), b9 (L), b10 (A)

Raw file 20180707\_MaS\_A375SR\_ML\_proteome\_2\_12 Scan 25666 Method FTMS; HCD Score 94.2 m/z 925.96 Gene names PDPDF

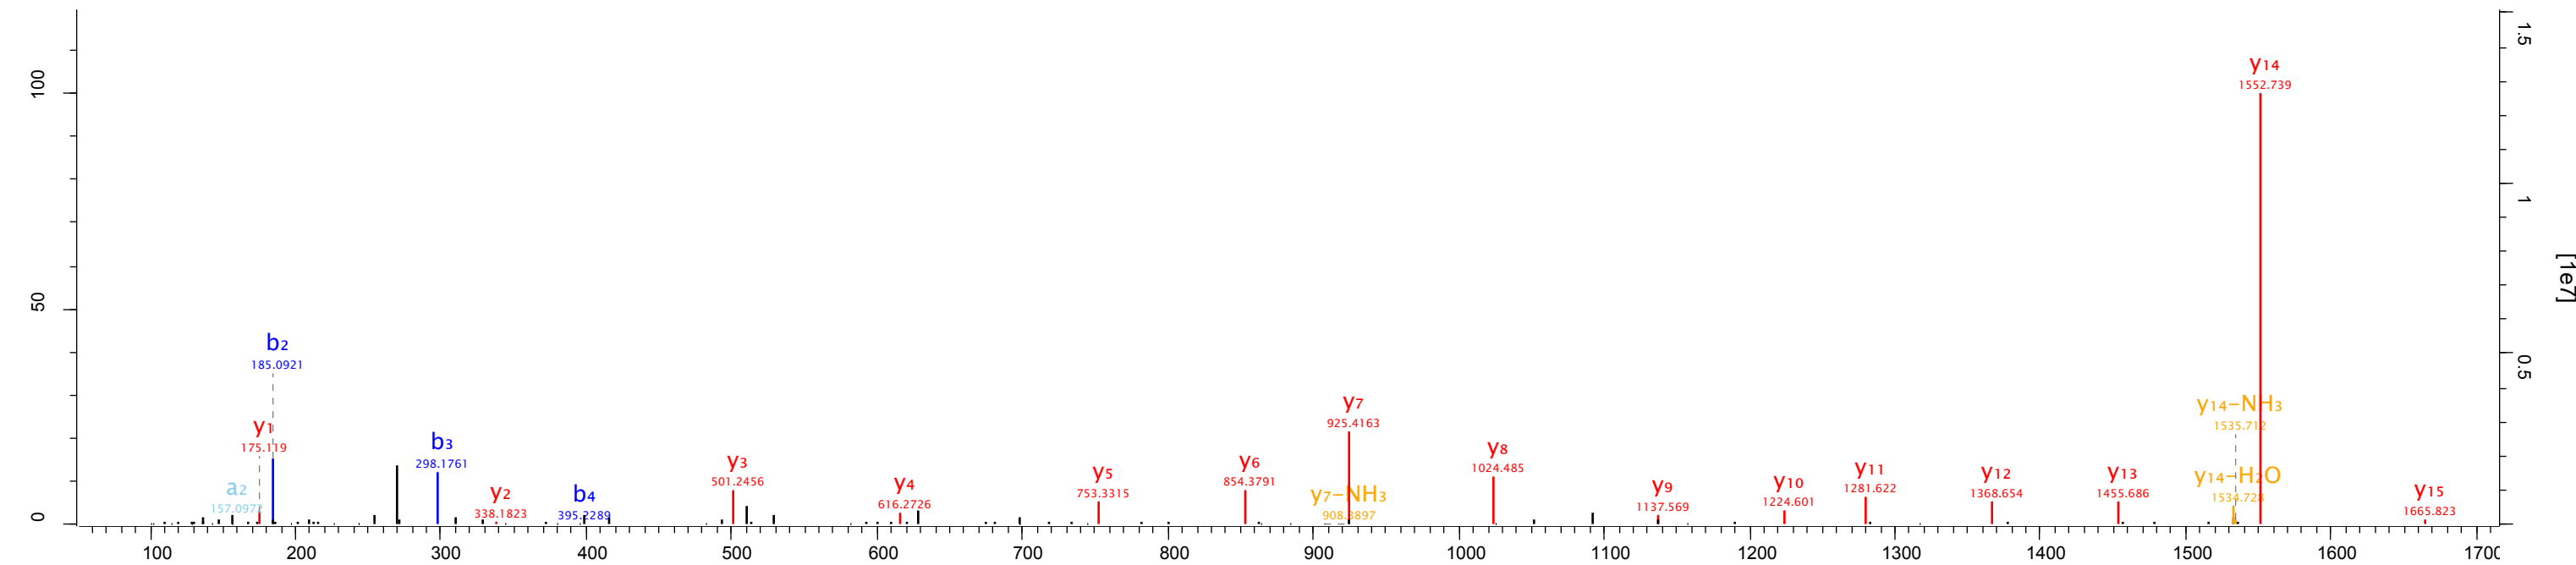

ac - A A I P S S G S L V A T H D Y Y R -

Fragmentation scheme showing b and y ions for the peptide sequence: A A I P S S G S L V A T H D Y Y R -

Red boxes indicate y ions (y1 to y15) above the amino acids. Blue boxes indicate b ions (b2, b3, b4) below the amino acids.

Raw file: 20180707\_MaS\_A375SR\_ML\_proteome\_2\_13  
 Scan: 13406 Method: FTMS; HCD Score: 67.38 m/z: 653.85 Gene names: MEIS2;MEIS3;MEIS1;MEIS3P1

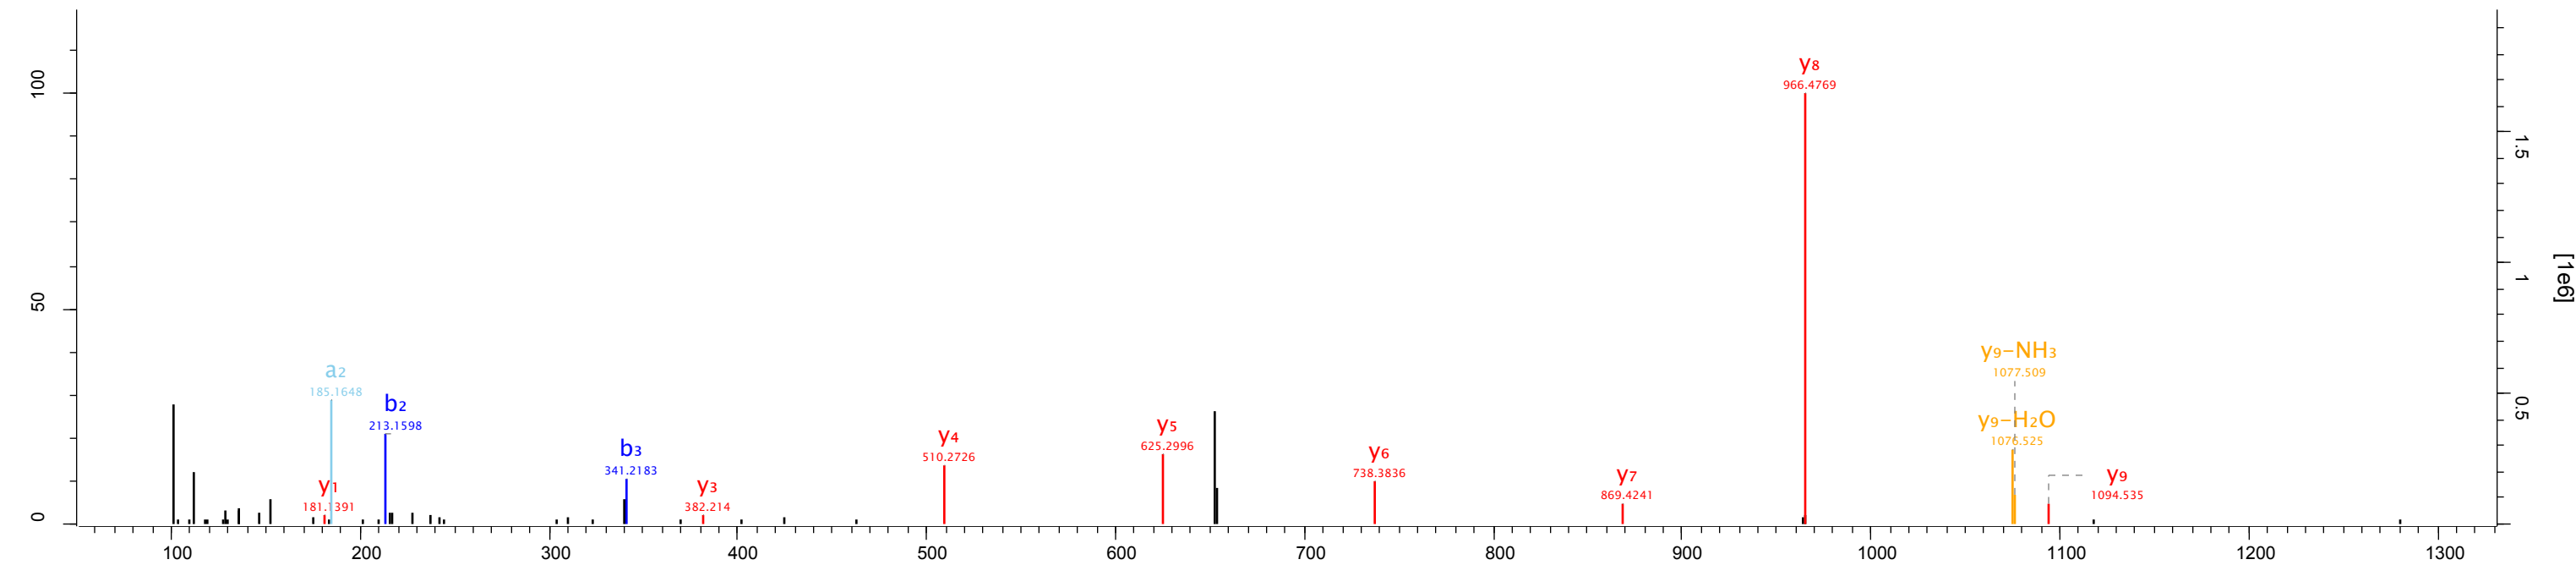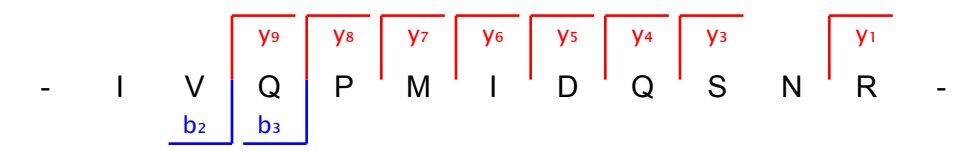

Raw file 20180707\_MaS\_A375SR\_ML\_proteome\_2\_13  
 Scan 23426 Method FTMS; HCD Score 59.67 m/z 840.92 Gene names GTF2H5

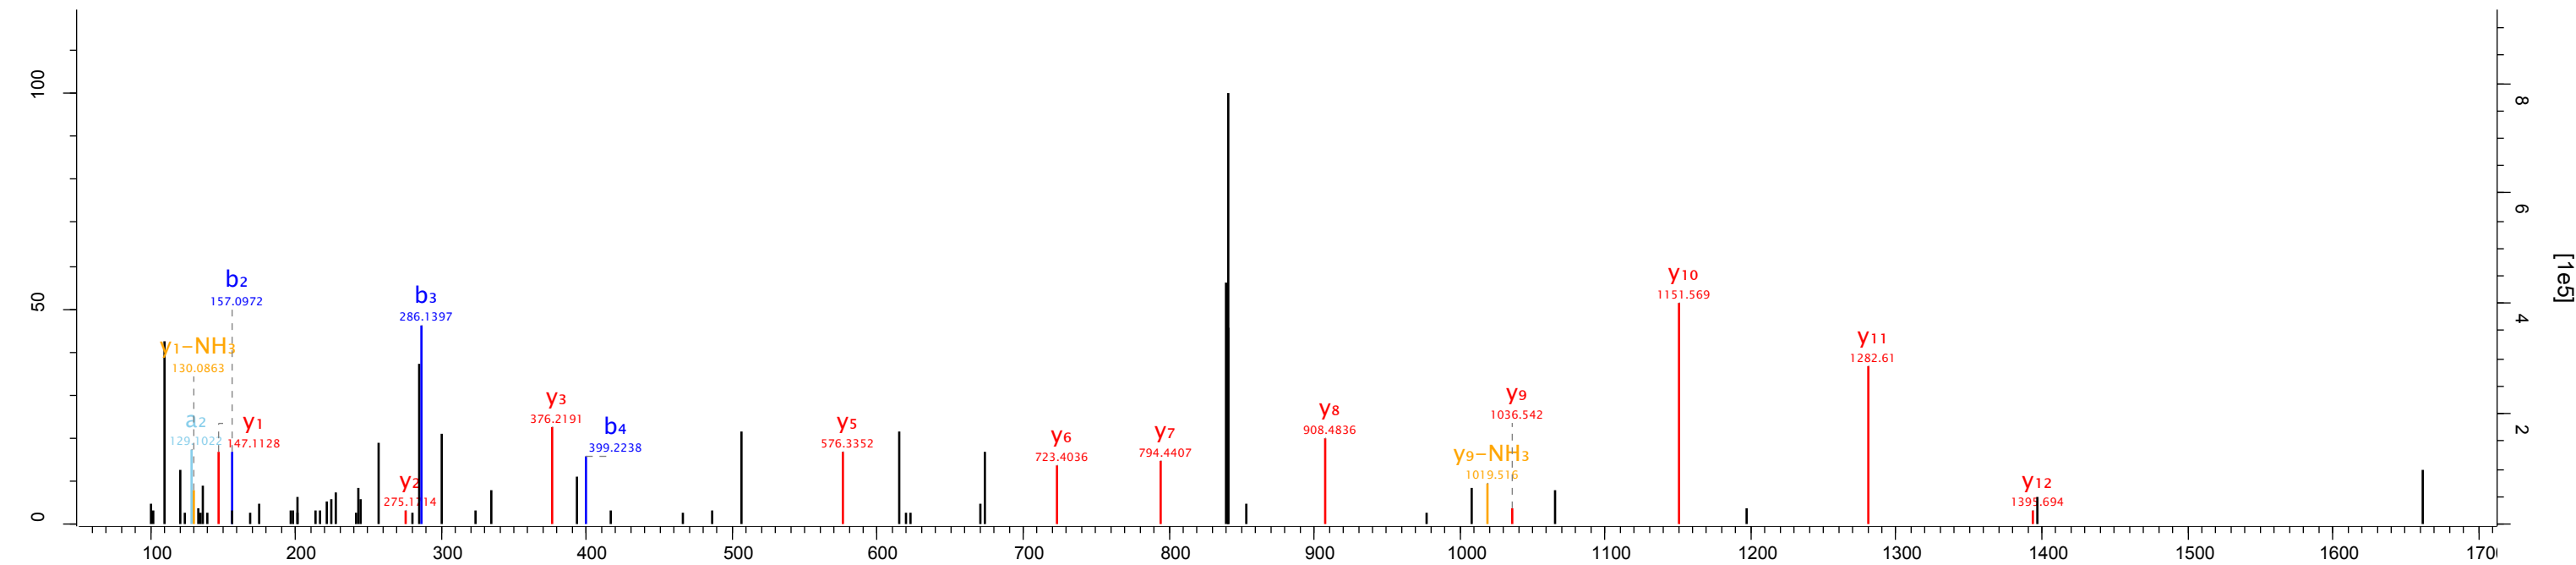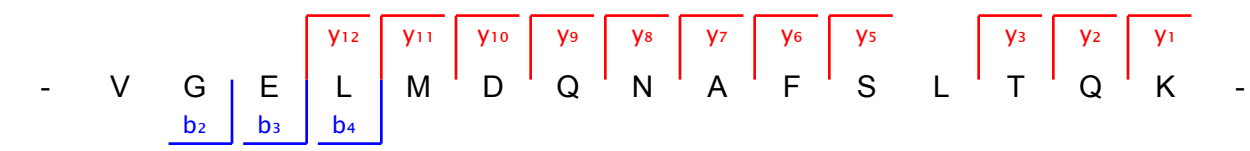

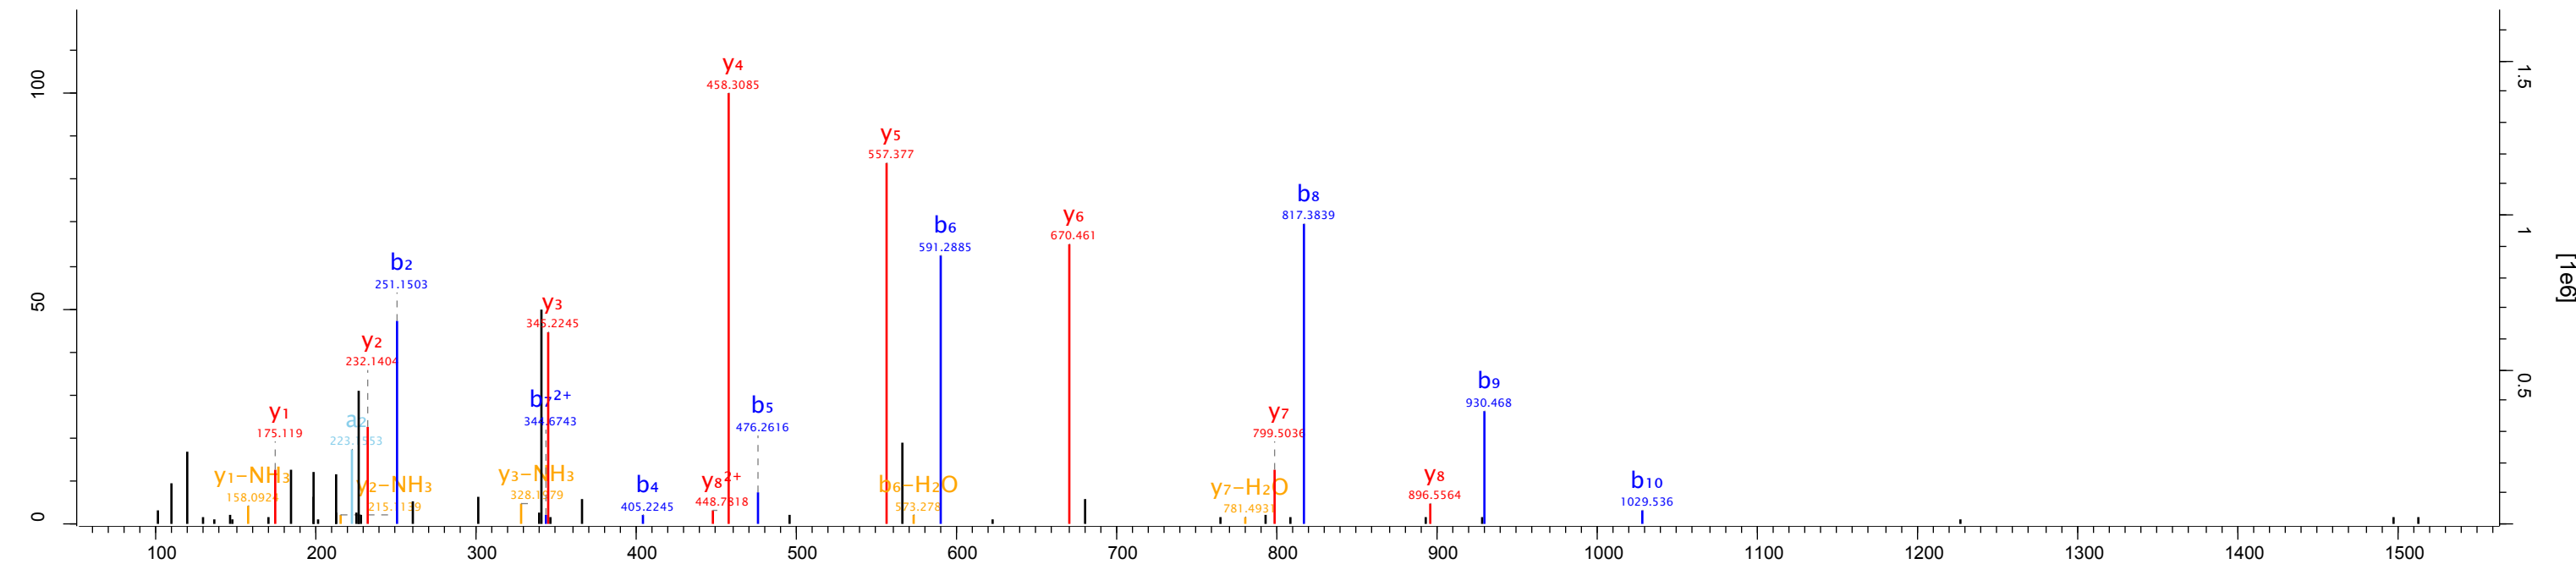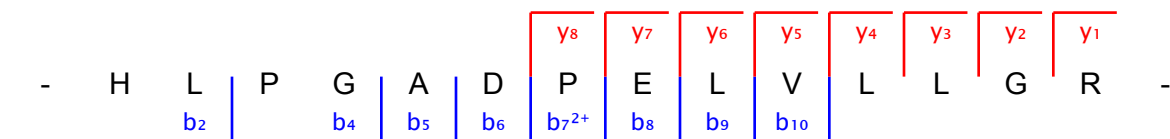

Raw file  
20180707\_MaS\_A375SR\_ML\_proteome\_2\_14

Scan 4836 Method FTMS; HCD Score 79.66 m/z 560.27 Gene names SFT2D2

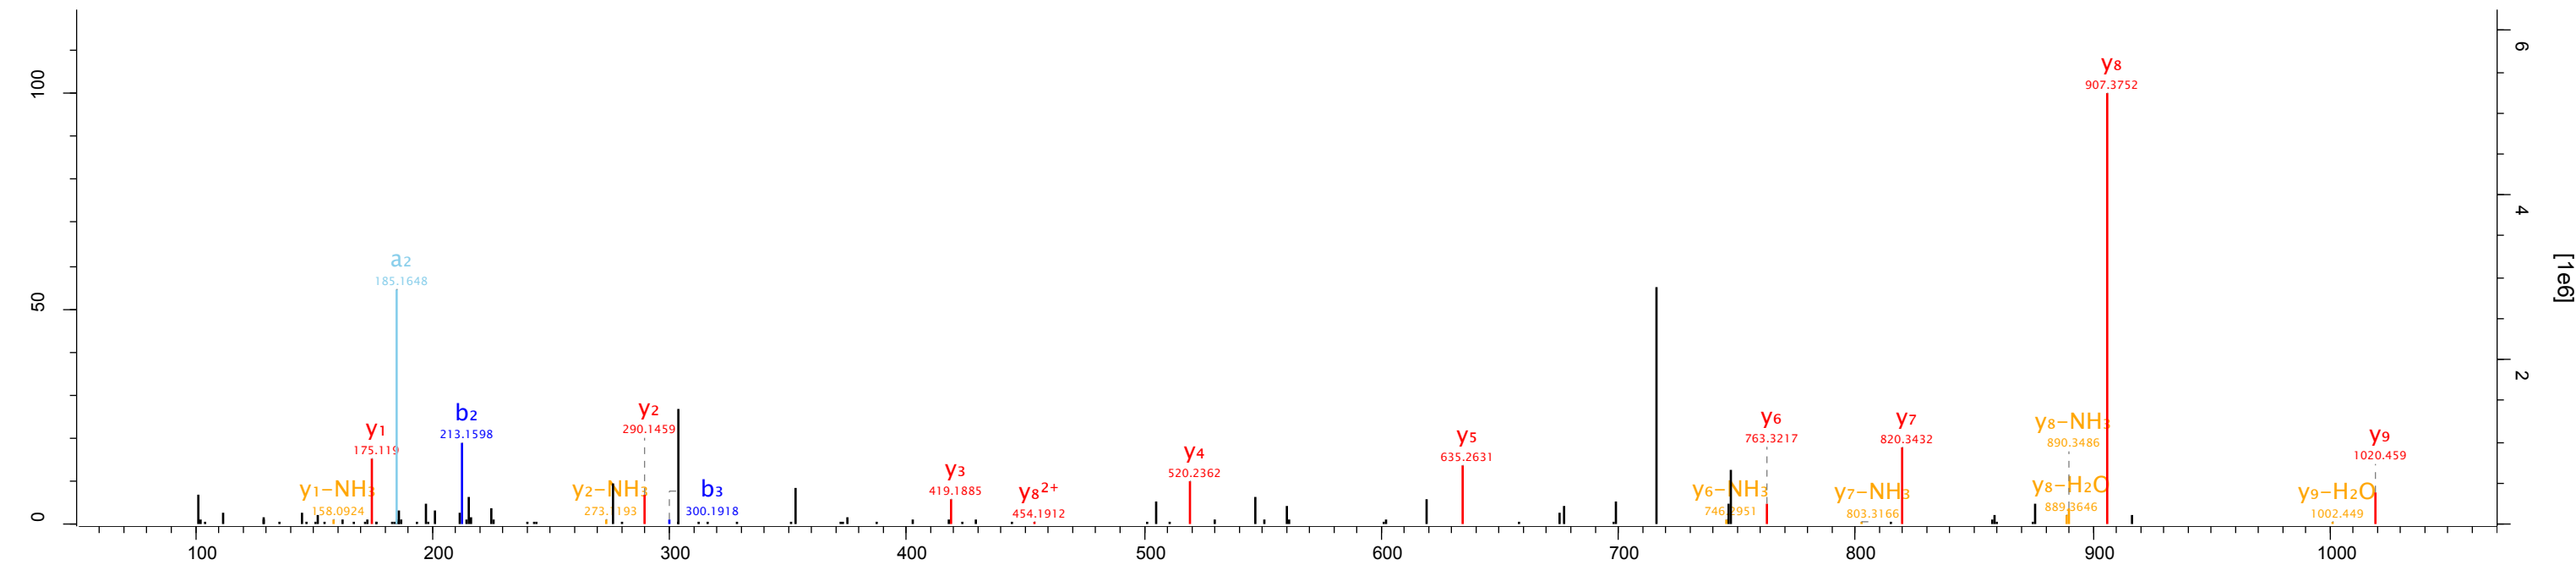

Raw file  
20180707\_MaS\_A375SR\_ML\_proteome\_2\_15

Scan 16696 Method FTMS; HCD Score 66.27 m/z 380.57 Gene names PNKD

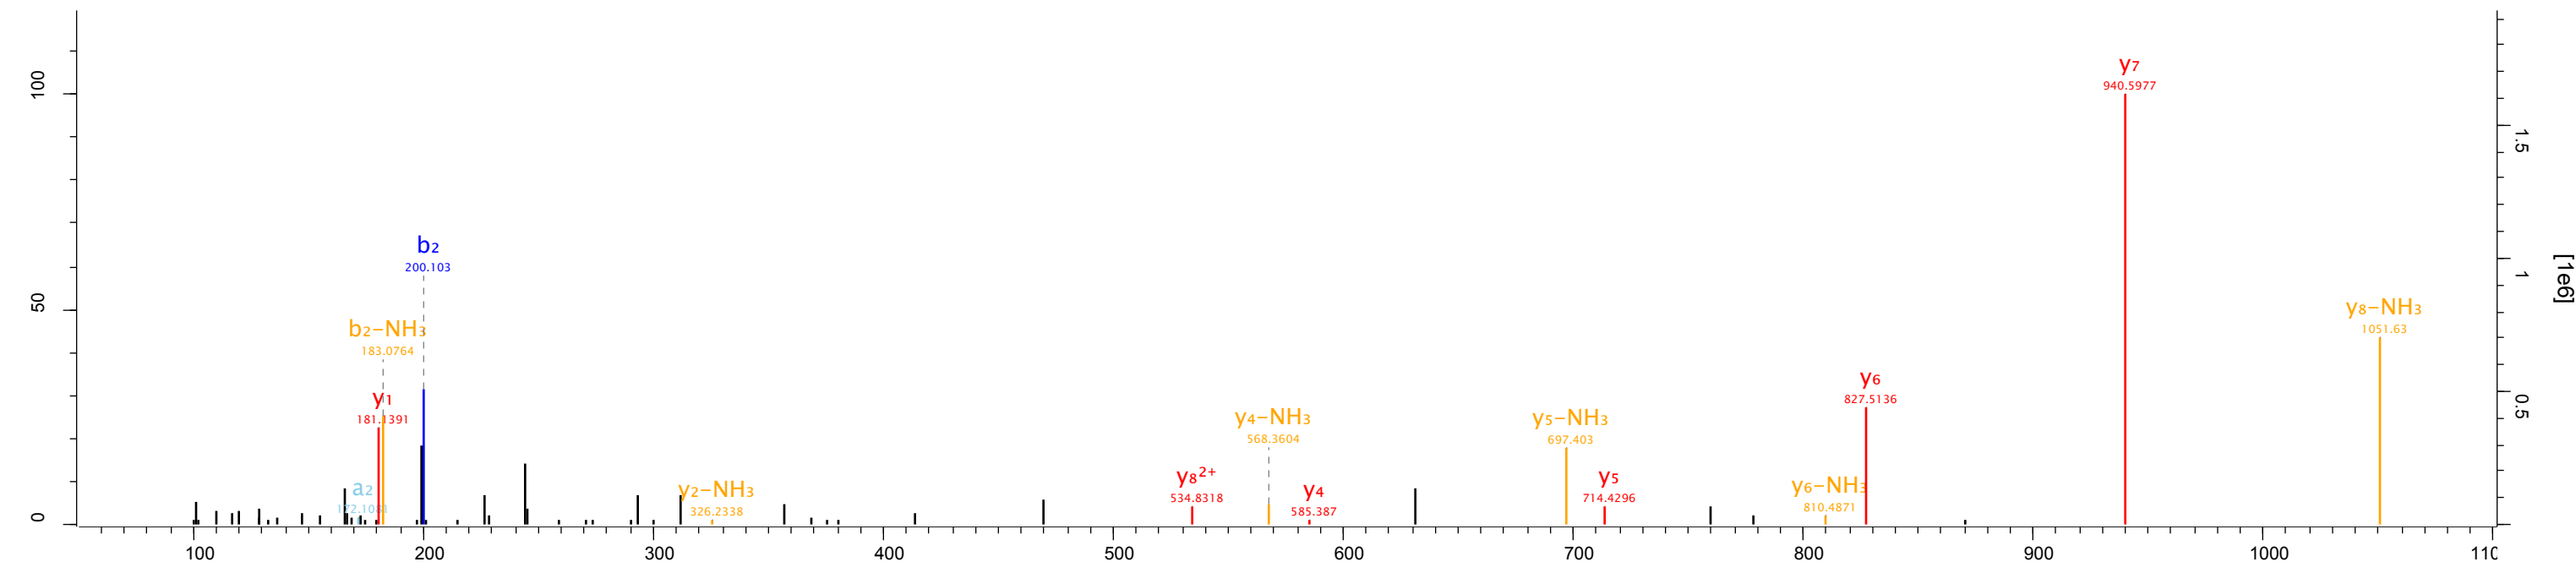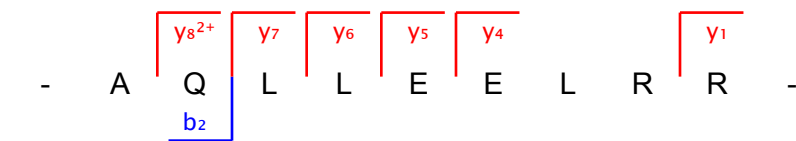



Raw file 20180707\_MaS\_A375SR\_ML\_proteome\_2\_15 Scan 21706 Method FTMS; HCD Score 54.78 m/z 672.86

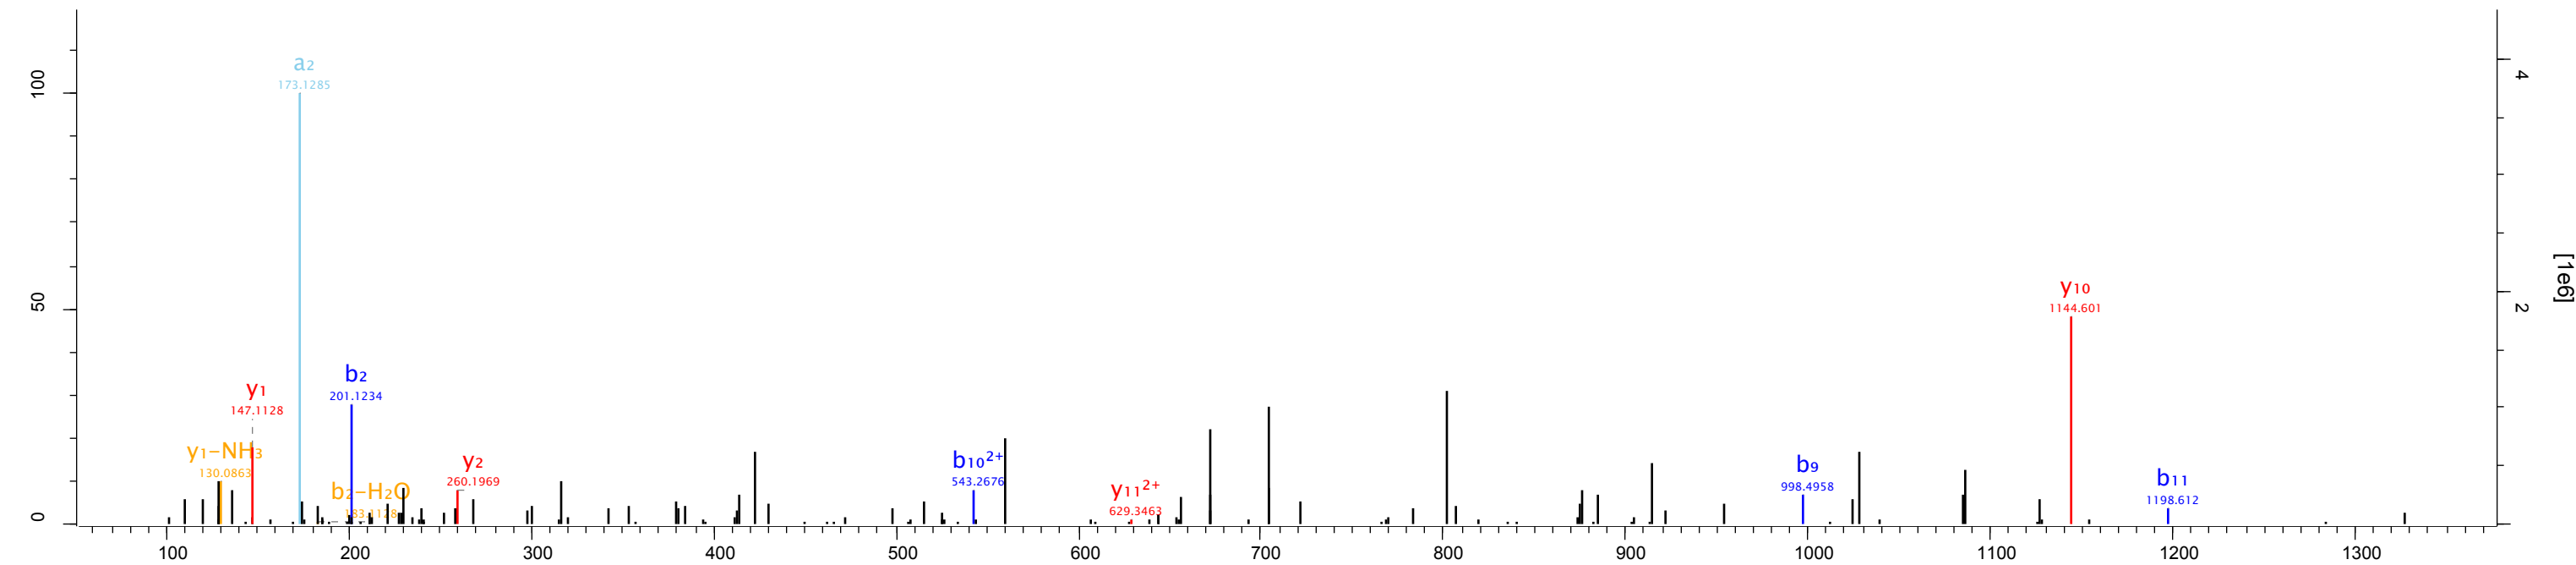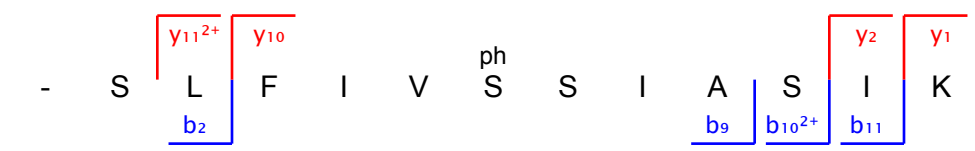

Raw file 20180707\_MaS\_A375SR\_ML\_proteome\_2\_15 Scan 26716 Method FTMS; HCD Score 57.53 m/z 655.38

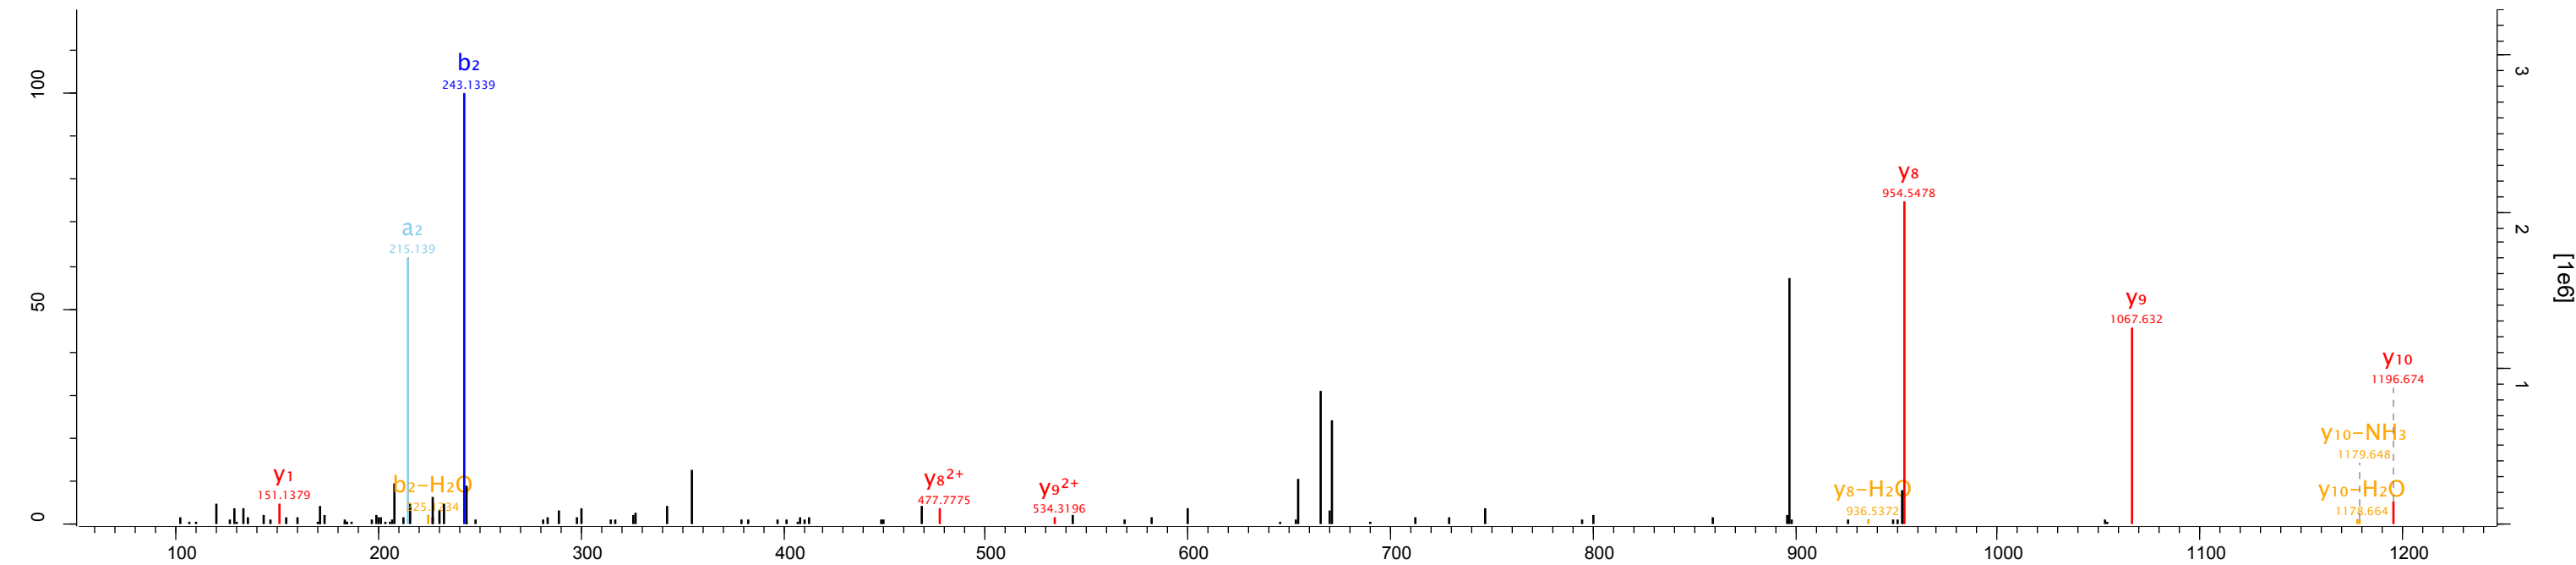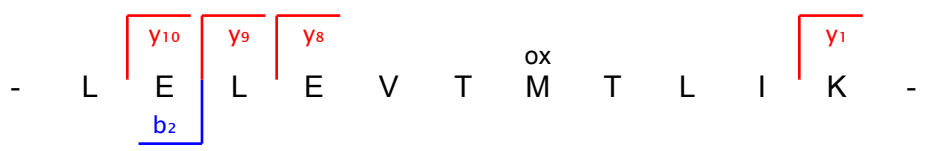

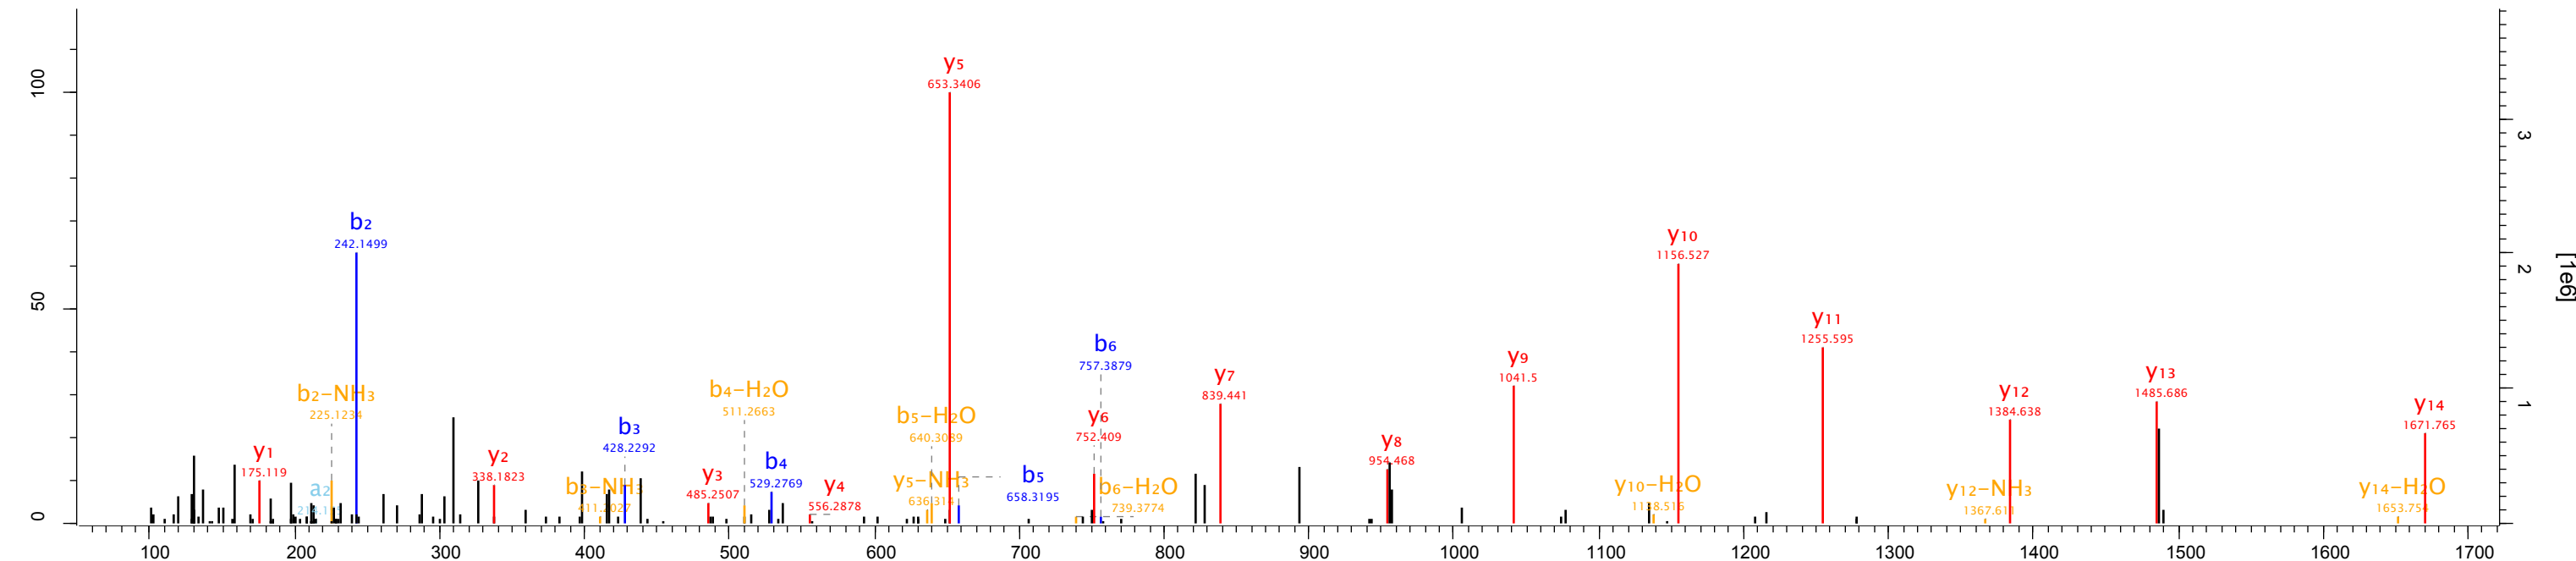

- L Q W T E V D S D S V P A F Y R -

Fragmentation sites are indicated by boxes below the amino acid sequence:

- Red boxes (y ions): W, T, E, V, D, S, D, S, V, P, A, F, Y, R
- Blue boxes (b ions): Q, W, T, E, V

Raw file 20180707\_MaS\_A375SR\_ML\_proteome\_2\_16 Scan 15036 Method FTMS; HCD Score 55.04 m/z 488.56 Gene names PIGX

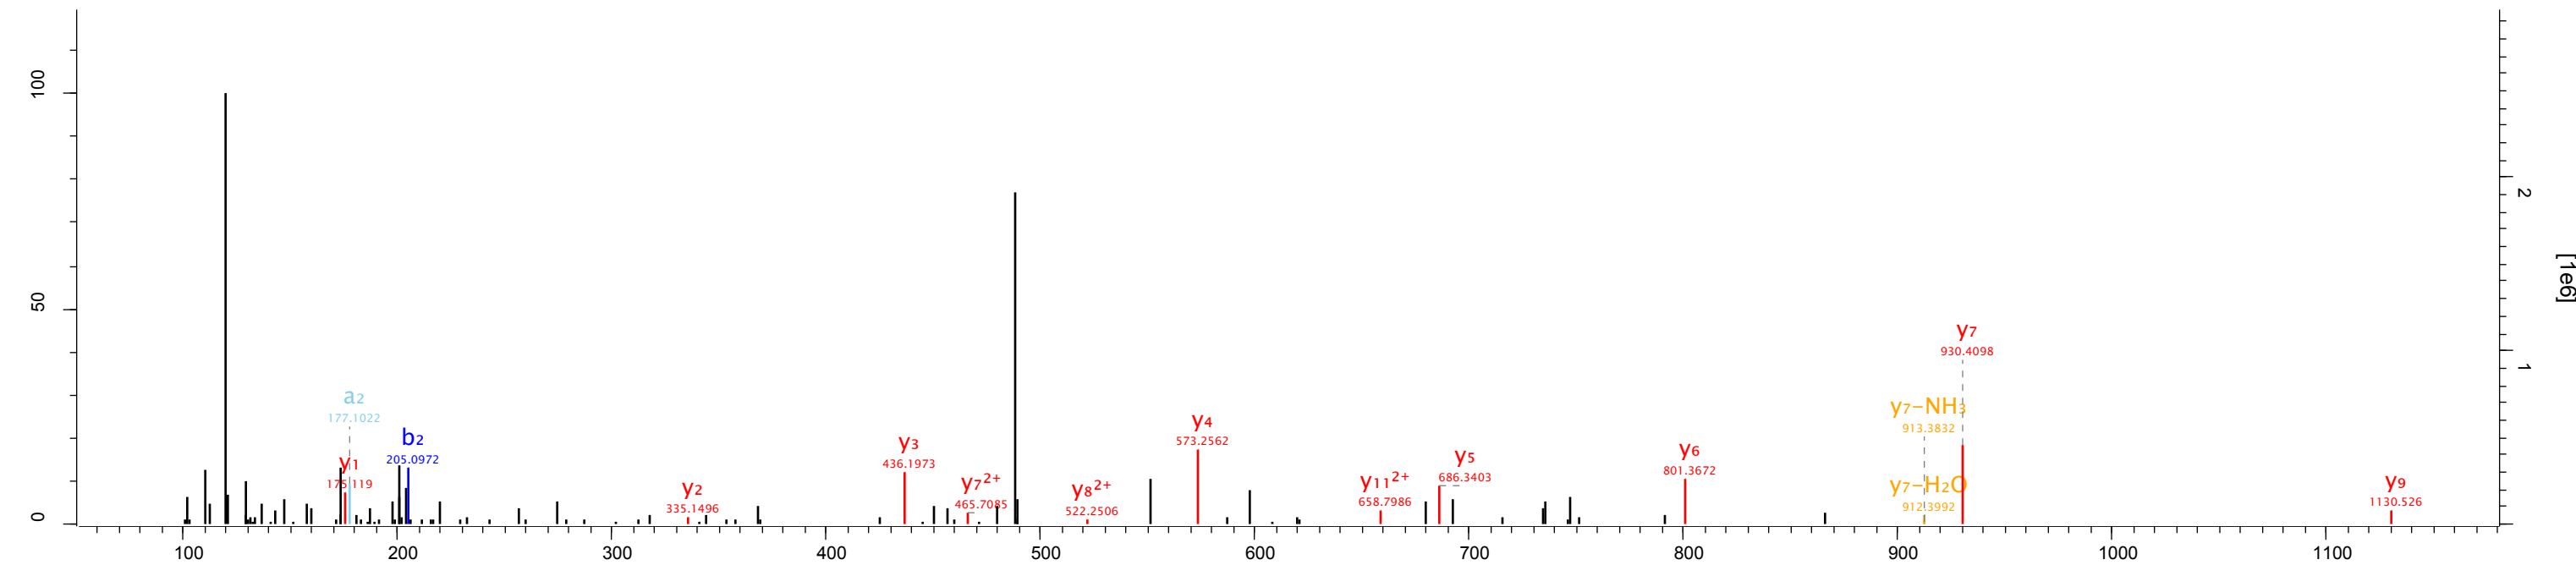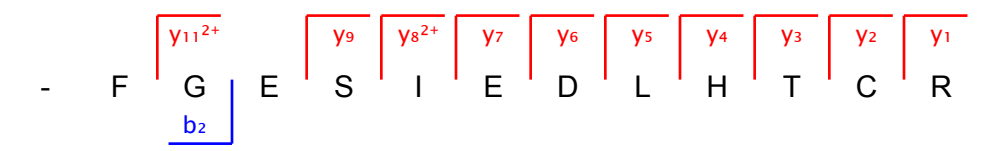

Raw file  
20180707\_MaS\_A375SR\_ML\_proteome\_2\_16

Scan: 27616  
Method: FTMS; HCD  
Score: 88.71  
m/z: 961.83  
Gene names: TMEM128

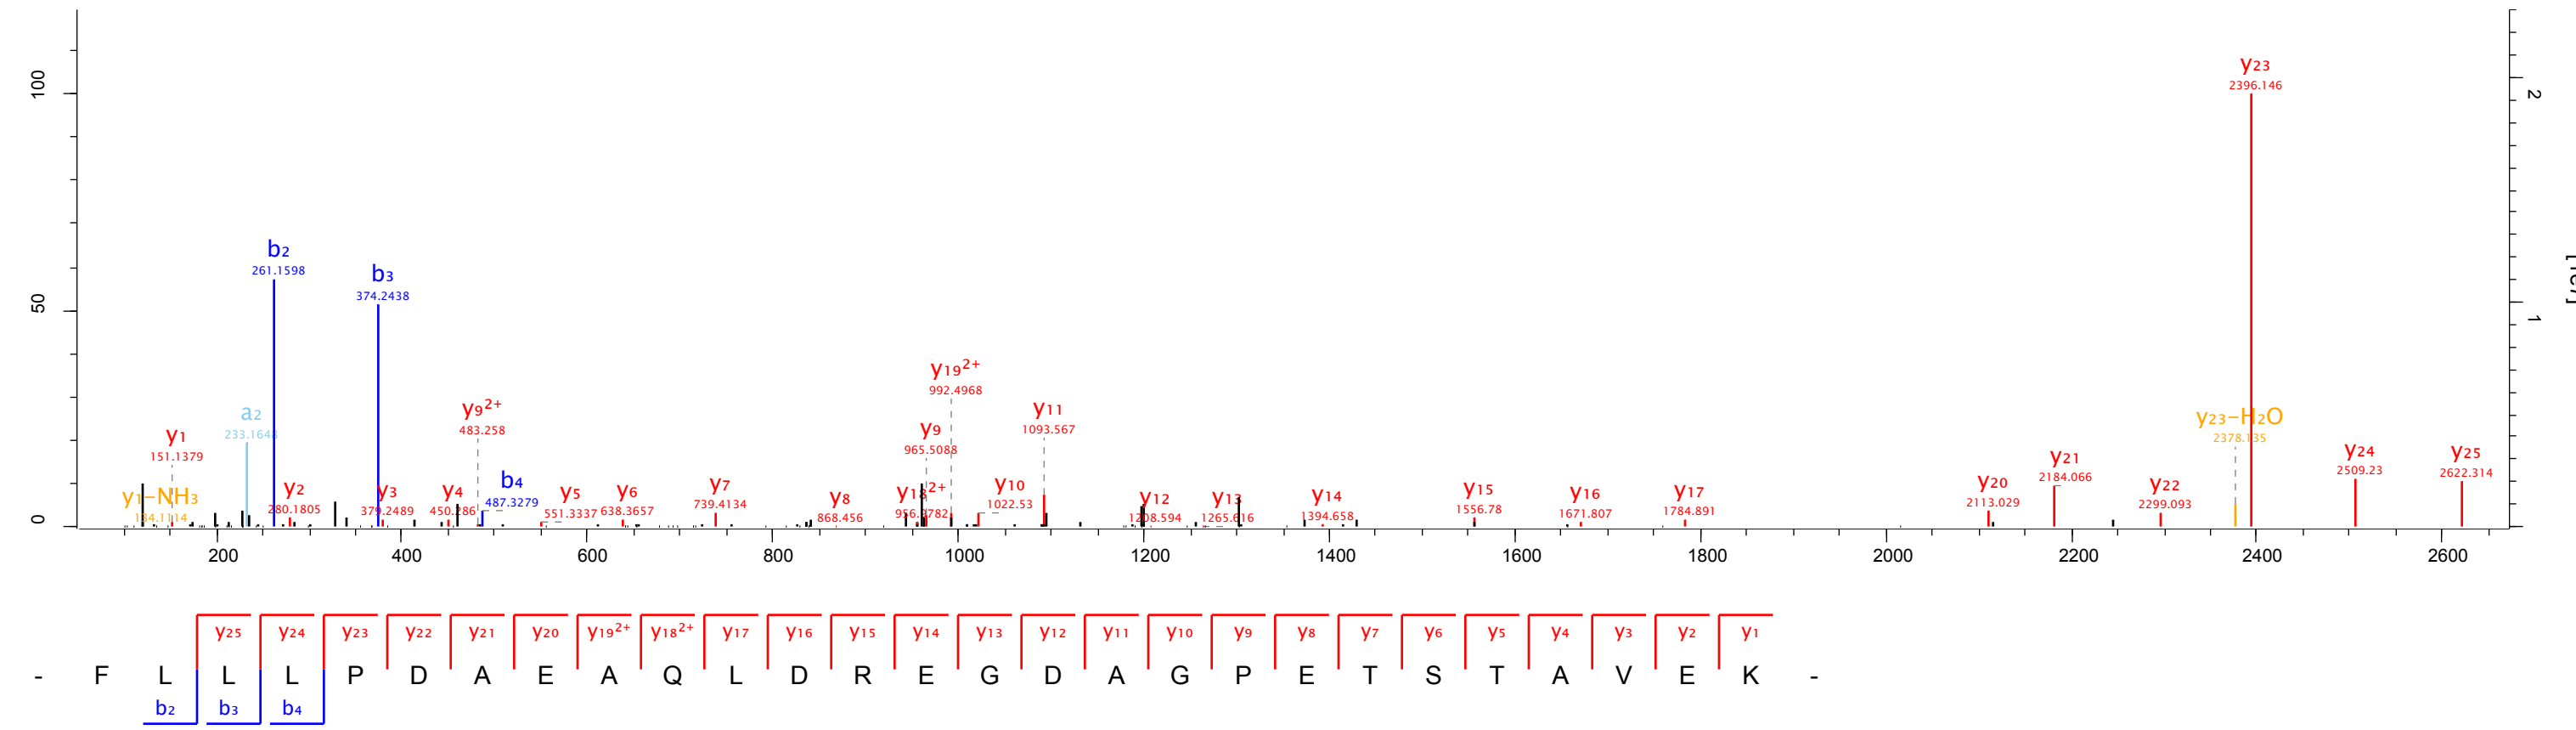

Raw file  
20180707\_MaS\_A375SR\_ML\_proteome\_2\_16

Scan 2796 Method FTMS; HCD Score 57.45 m/z 325.17

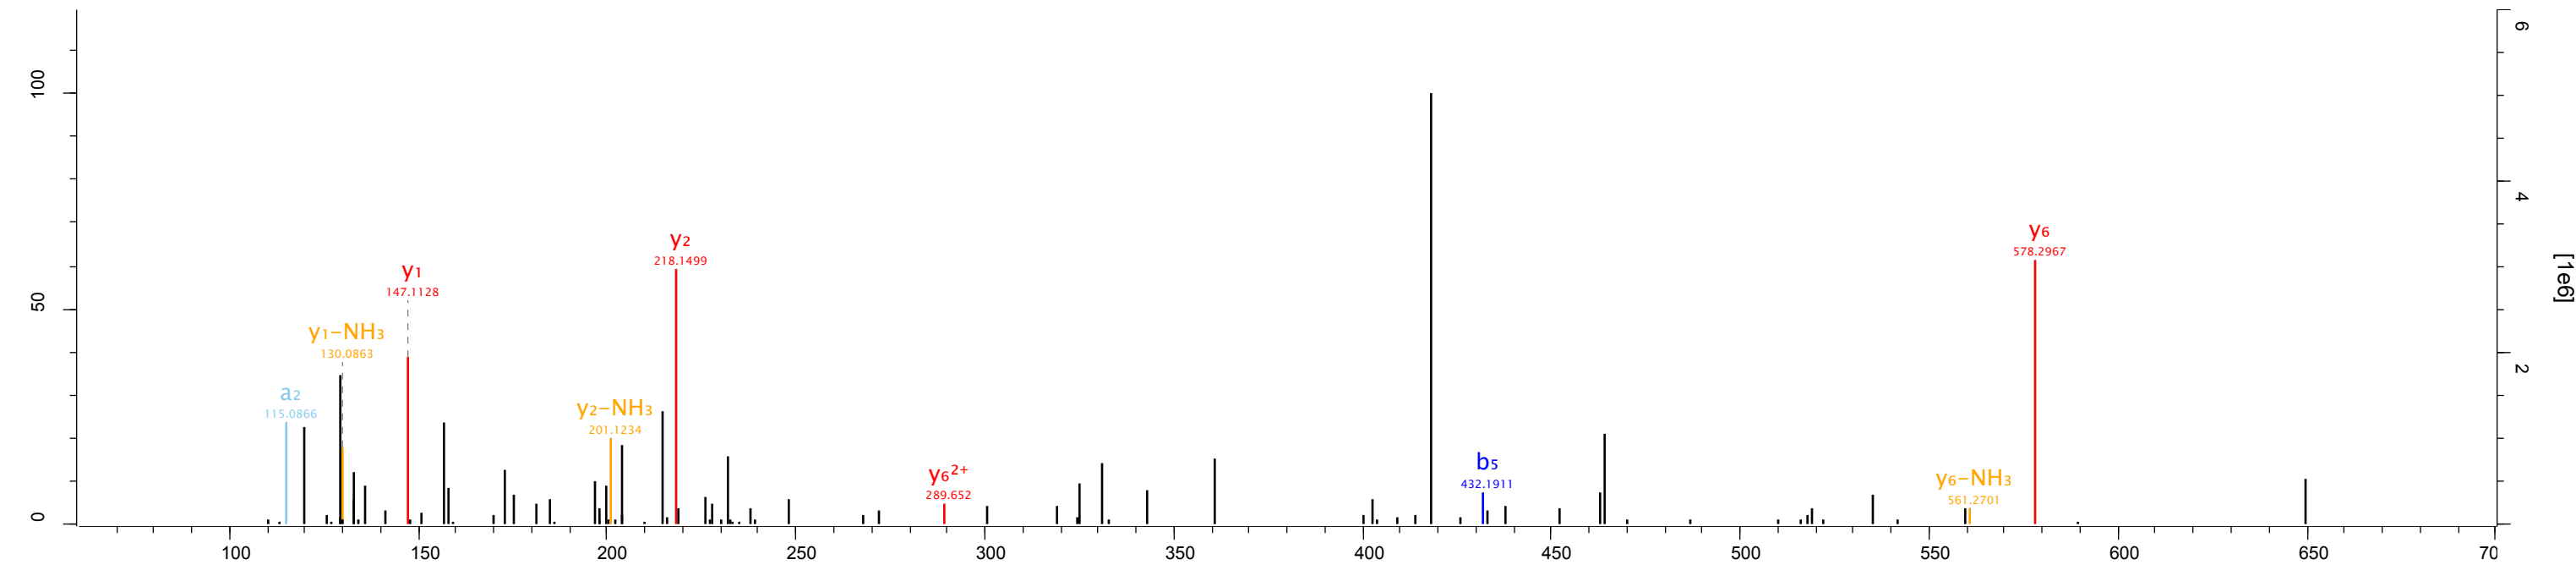

Raw file  
20180707\_MaS\_A375SR\_ML\_proteome\_2\_17

Scan 10316 Method FTMS; HCD Score 38.38 m/z 552.29 Gene names LSM10

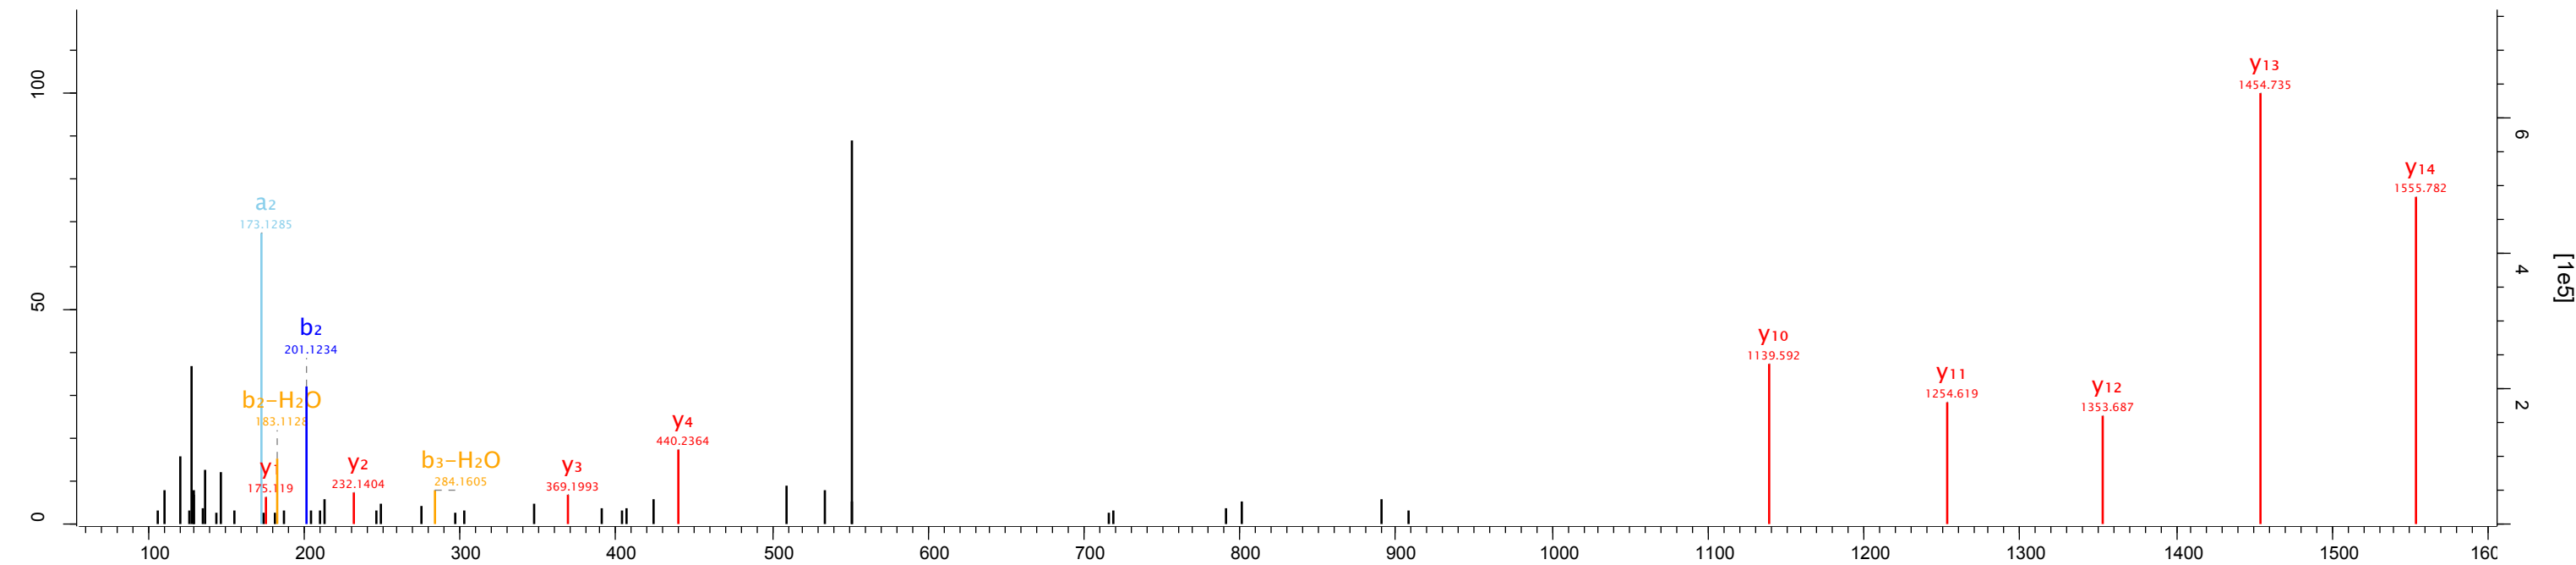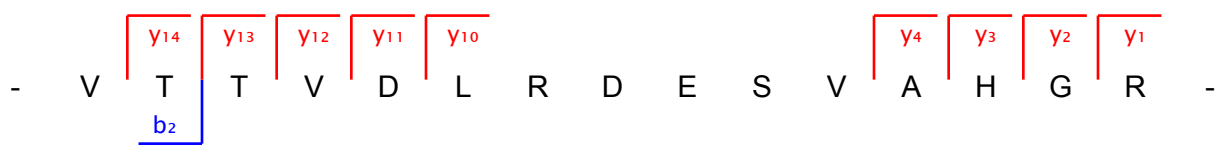

Raw file 20180707\_MaS\_A375SR\_ML\_proteome\_2\_17  
 Scan 27536 Method FTMS; HCD Score 65.04 m/z 596.32 Gene names TPST2

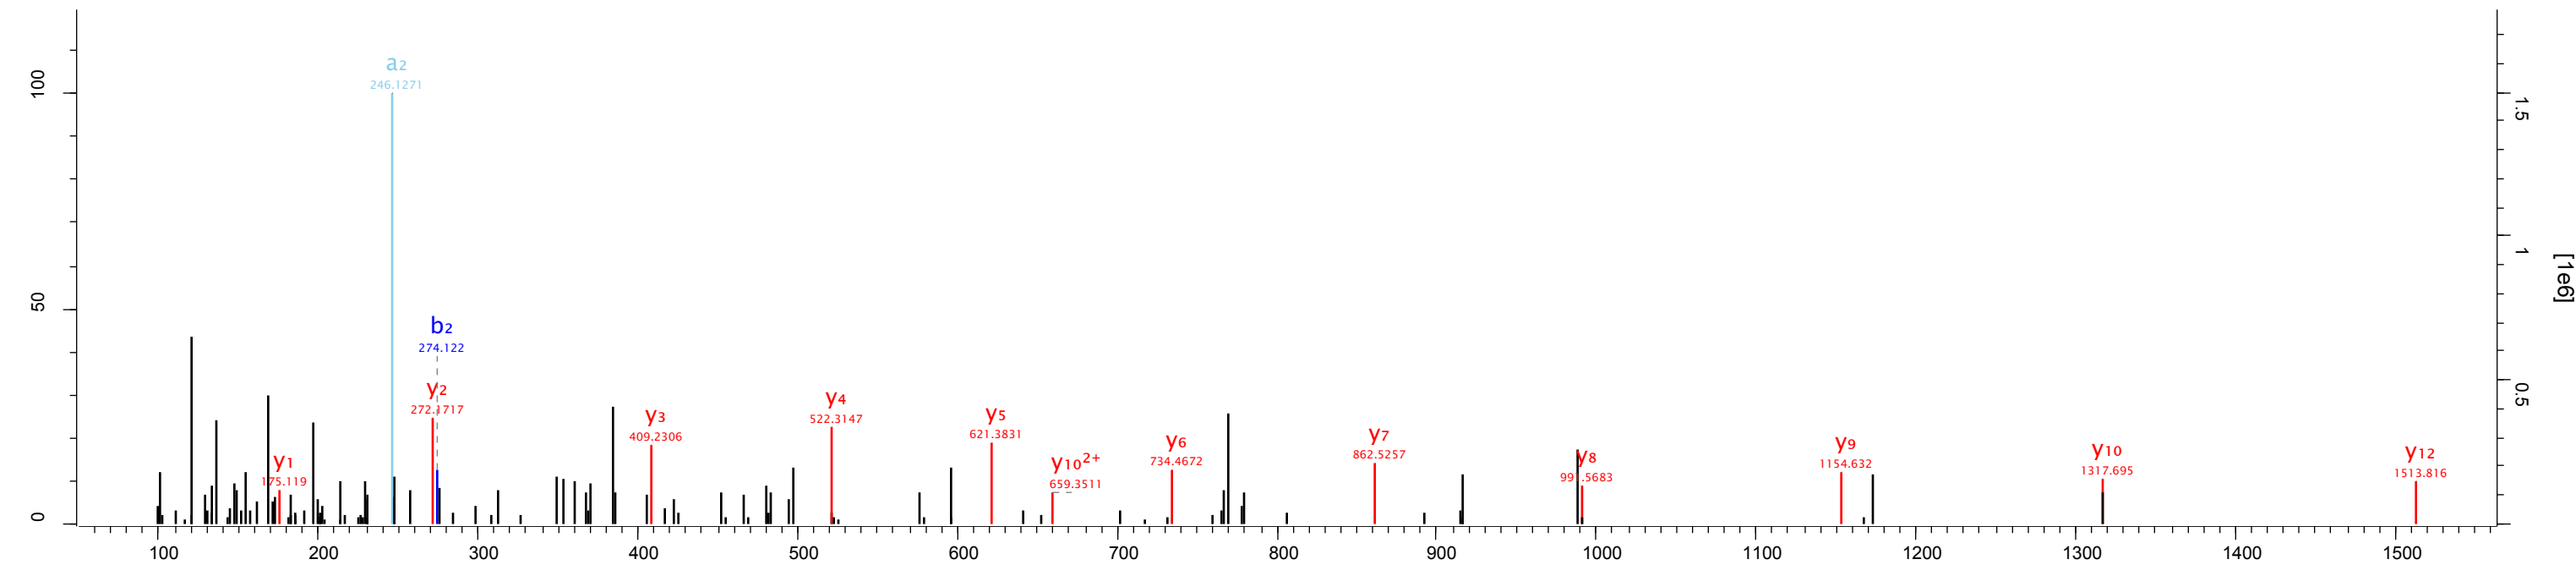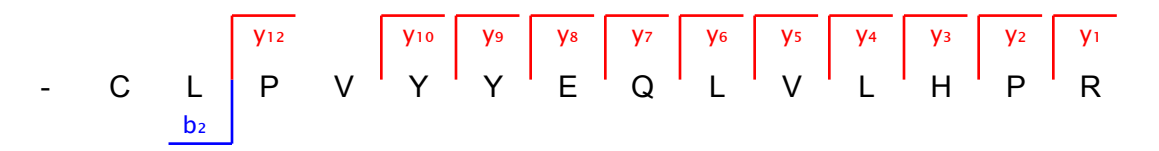



Raw file 20180707\_MaS\_A375SR\_ML\_proteome\_2\_17  
 Scan 6156 Method FTMS; HCD Score 58.17 m/z 741.26 Gene names MT1L

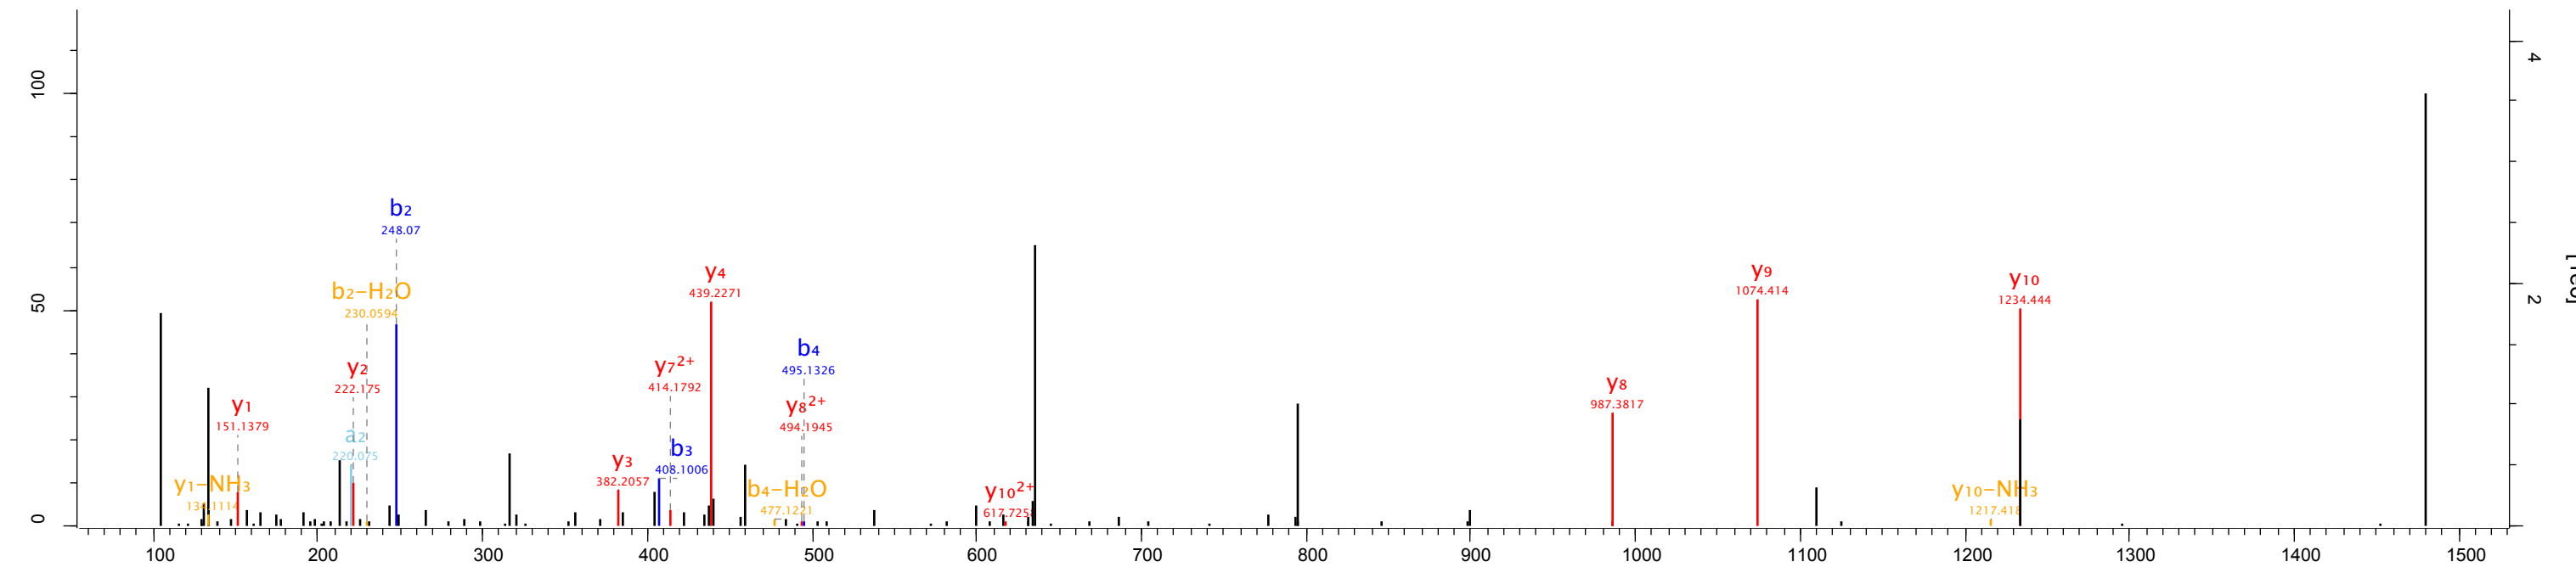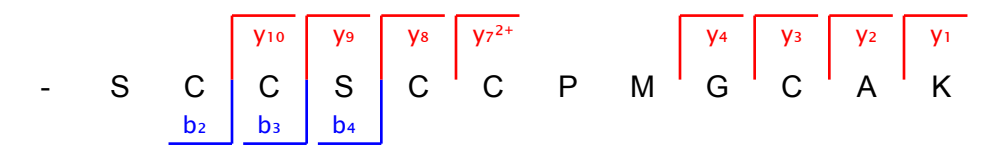

Raw file  
20180707\_MaS\_A375SR\_ML\_proteome\_2\_18

Scan 18356 Method FTMS; HCD Score 85.81 m/z 644.82 Gene names AGMO

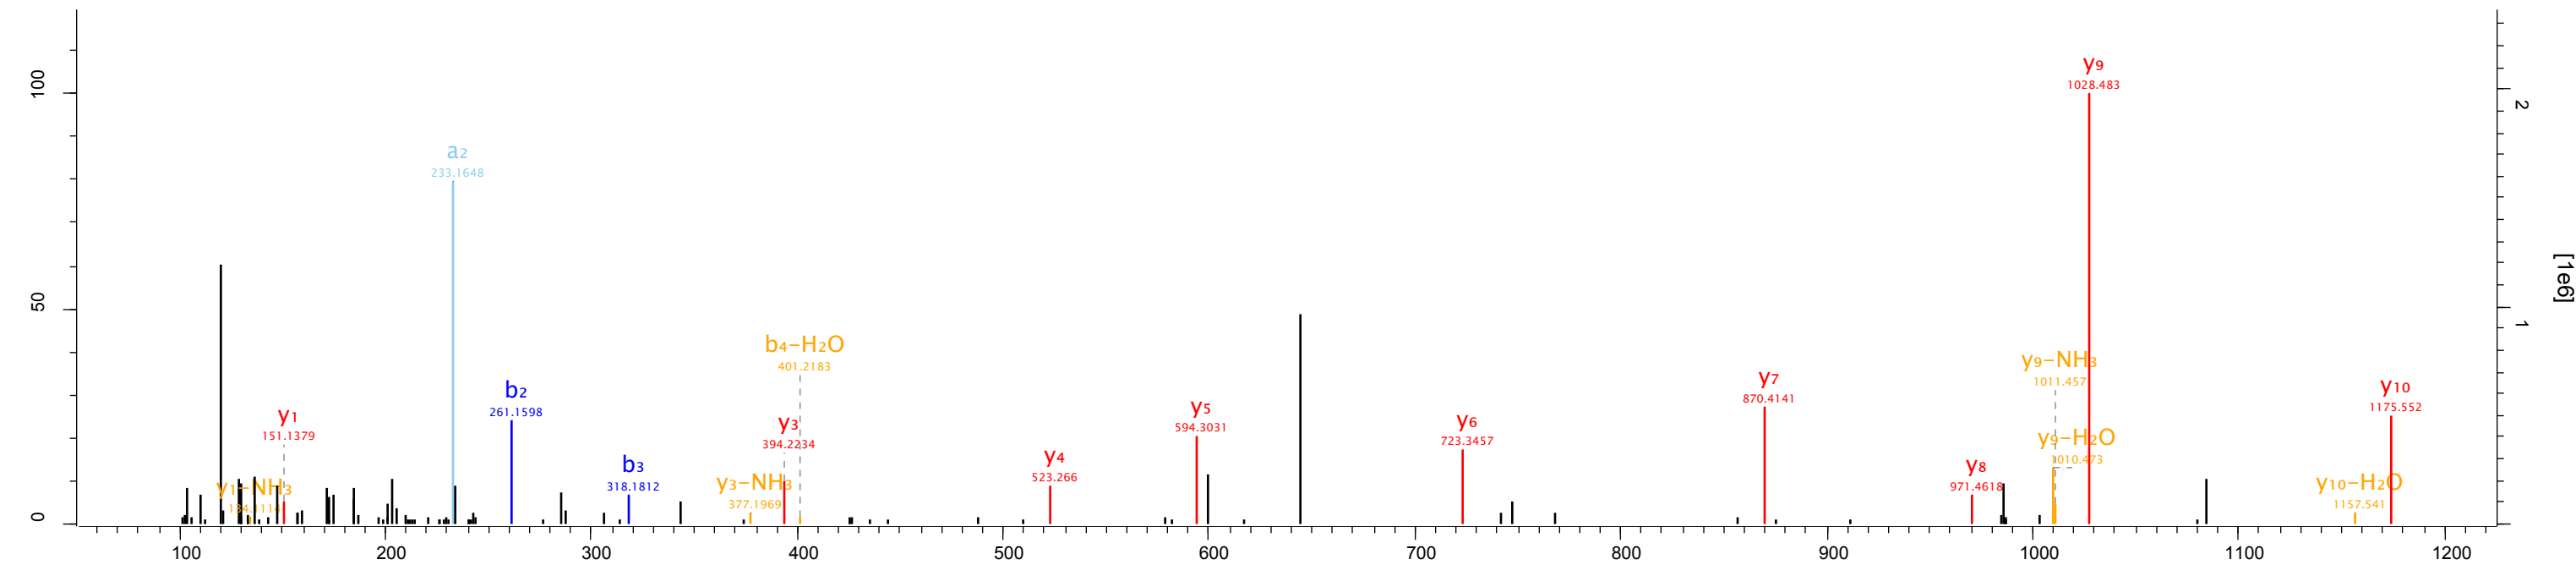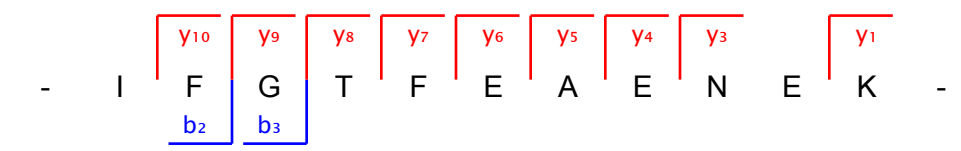

Raw file  
20180707\_MaS\_A375SR\_ML\_proteome\_2\_19

Scan 24656 Method FTMS; HCD Score 103.21 m/z 727.86 Gene names FBP1

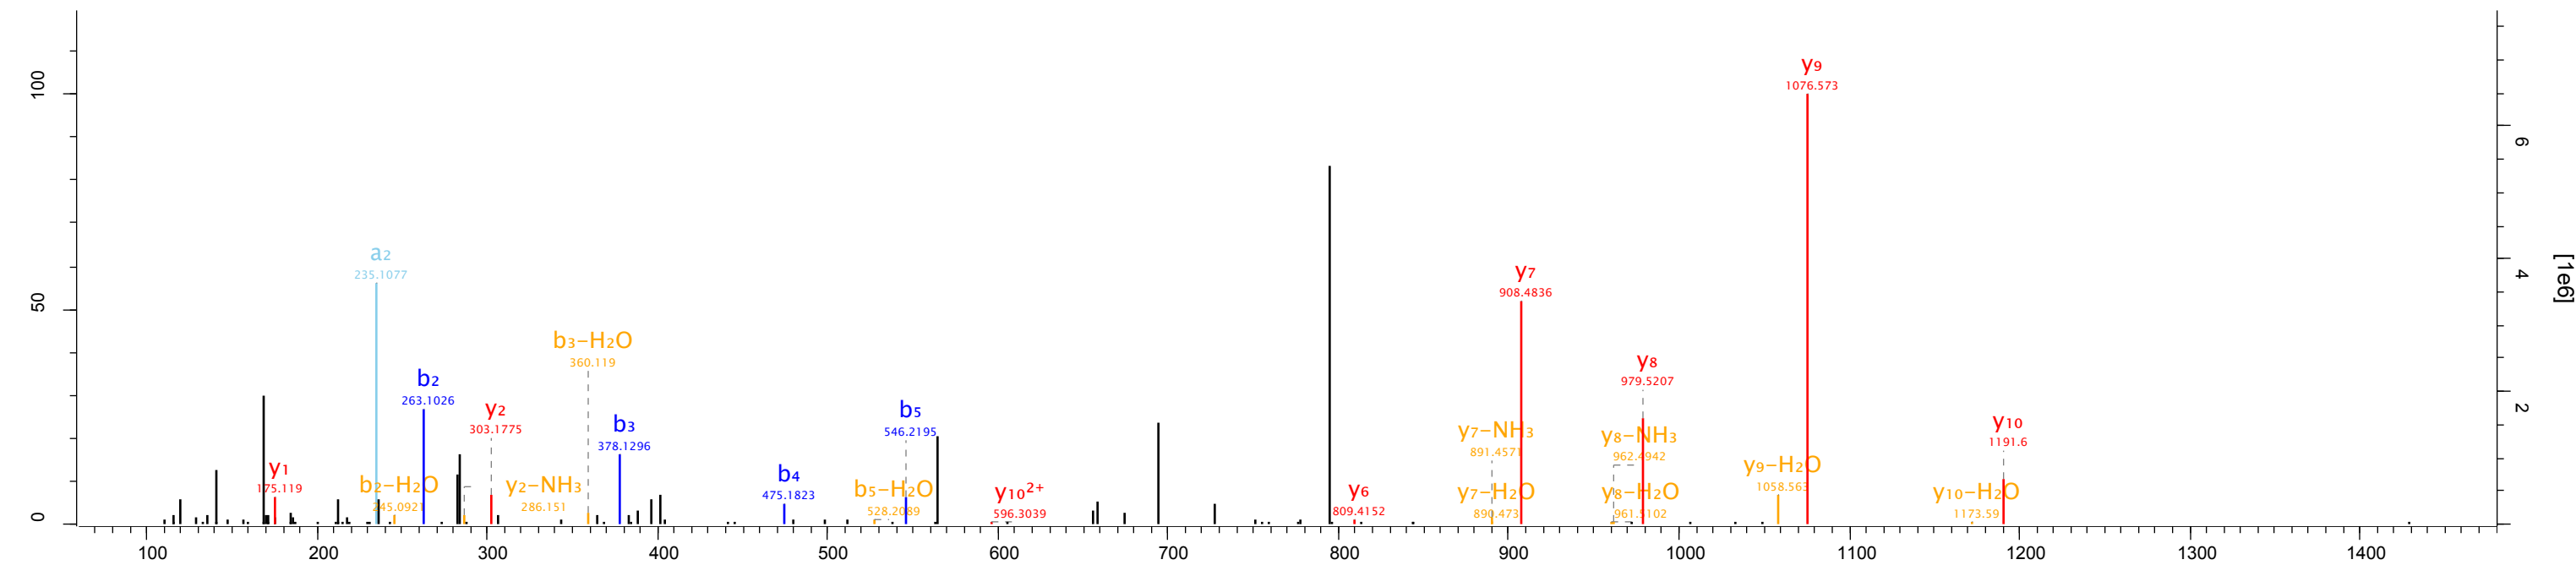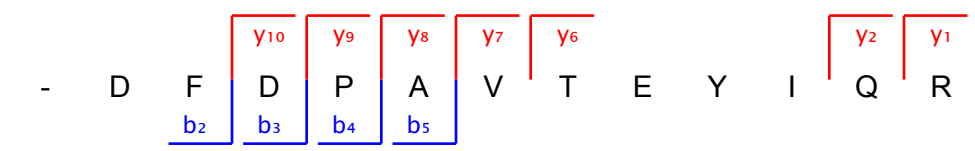

Raw file 20180707\_MaS\_A375SR\_ML\_proteome\_2\_20  
 Scan 3436 Method FTMS; HCD Score 85.53 m/z 568.24 Gene names MAP3K19

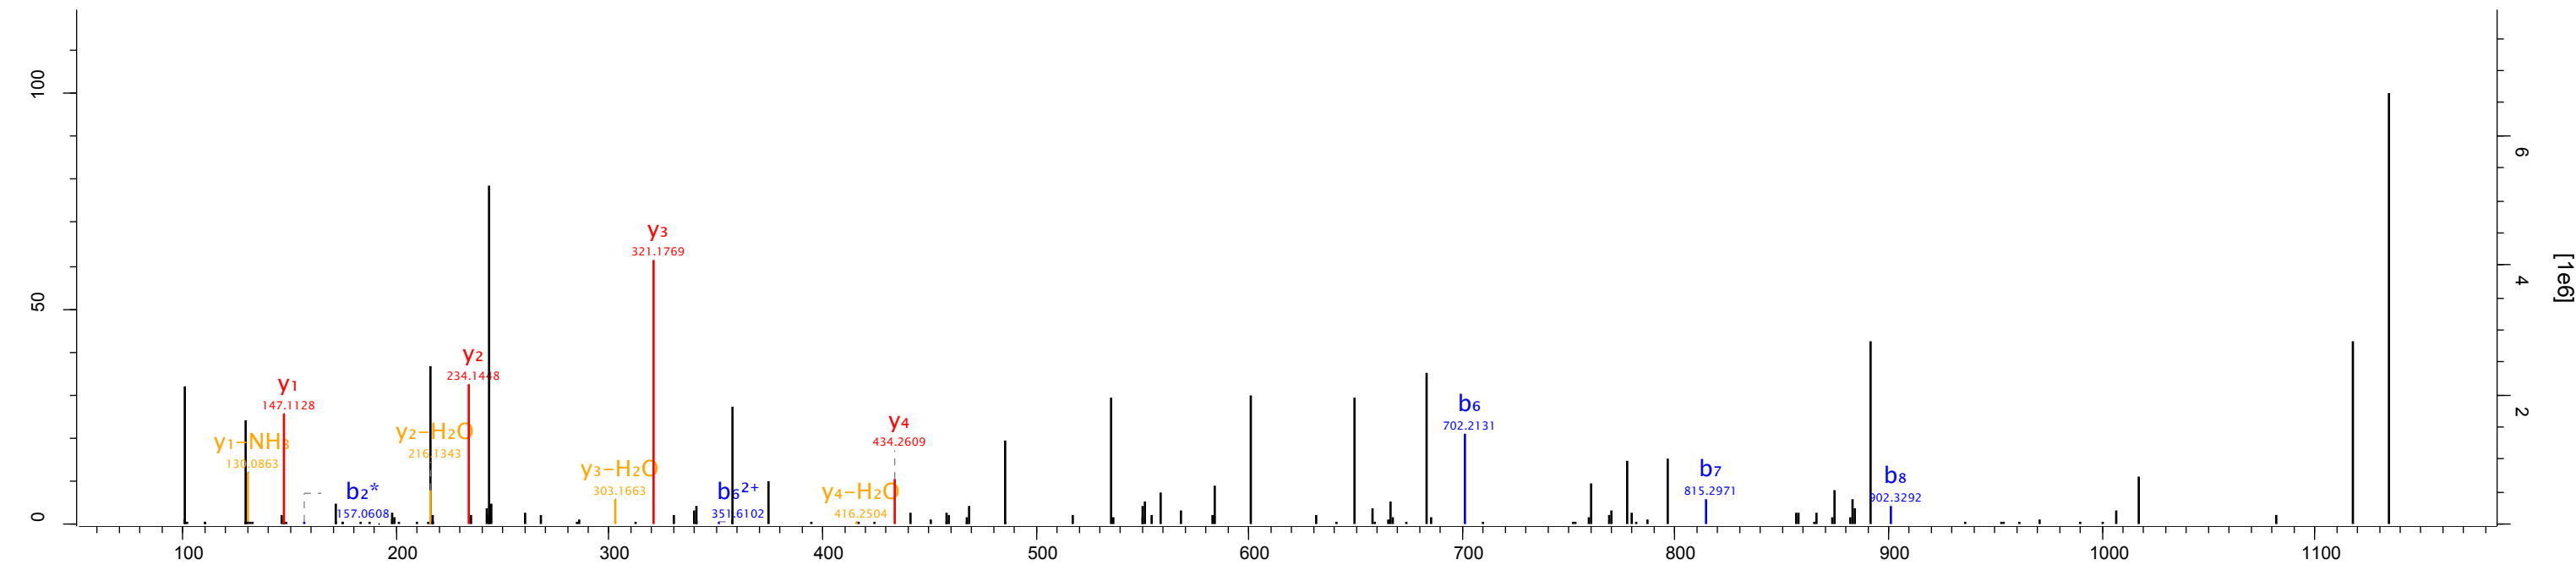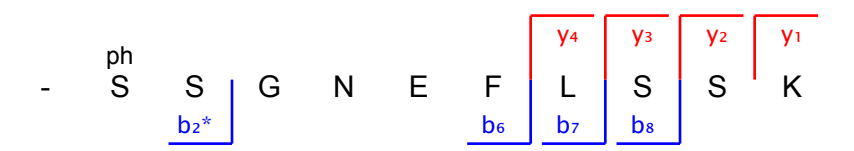

Raw file 20180707\_MaS\_A375SR\_ML\_proteome\_2\_22 Scan 12806 Method FTMS; HCD Score 71.98 m/z 702.84 Gene names ODC1

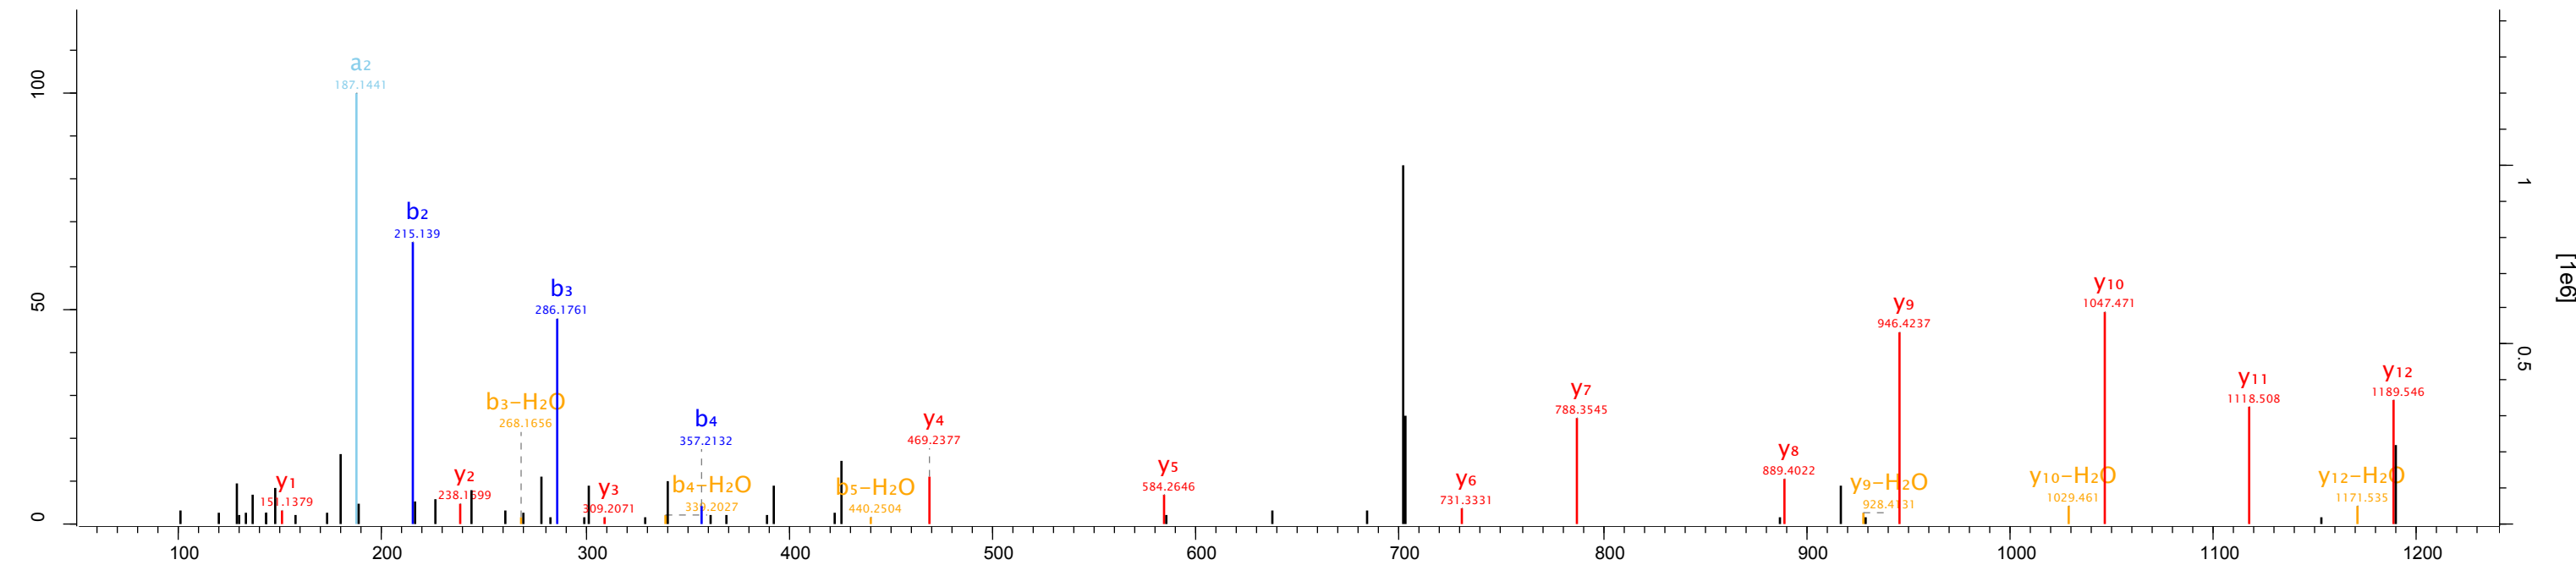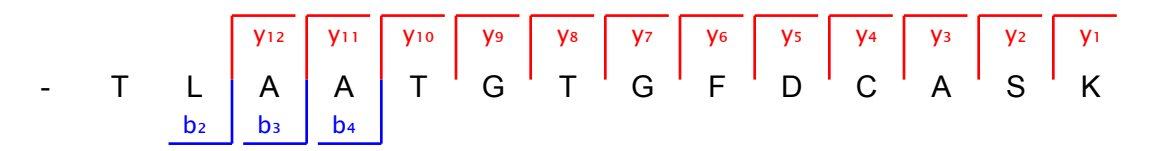

Raw file 20180707\_MaS\_A375SR\_ML\_proteome\_2\_23 Scan 29686 Method FTMS; HCD Score 81.02 m/z 622.8 Gene names TOR2A

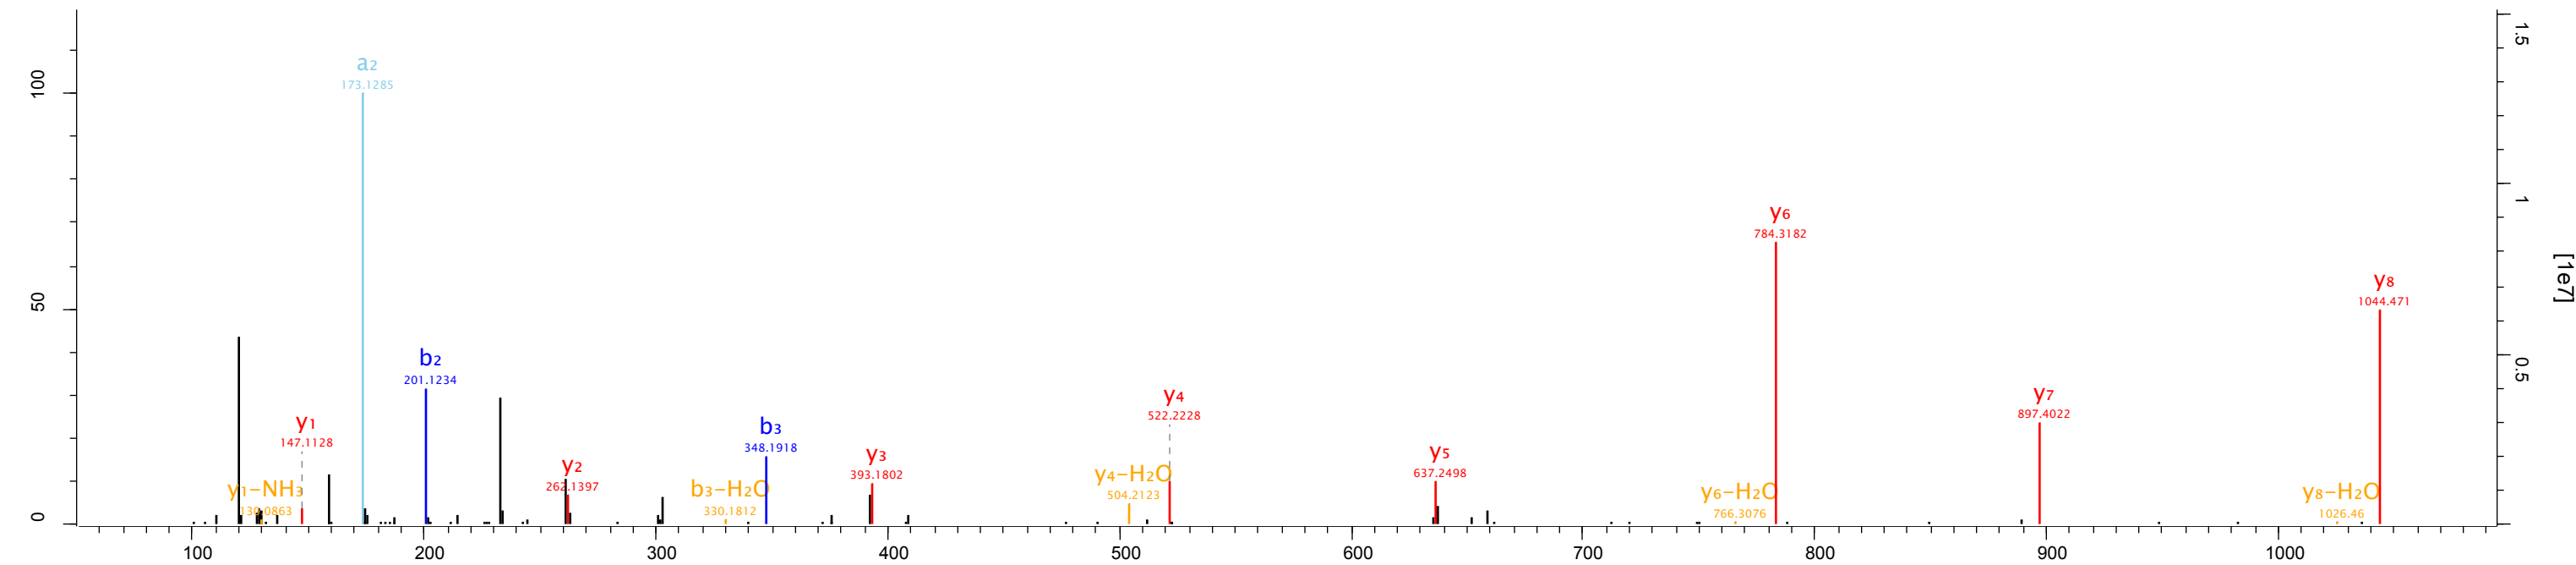

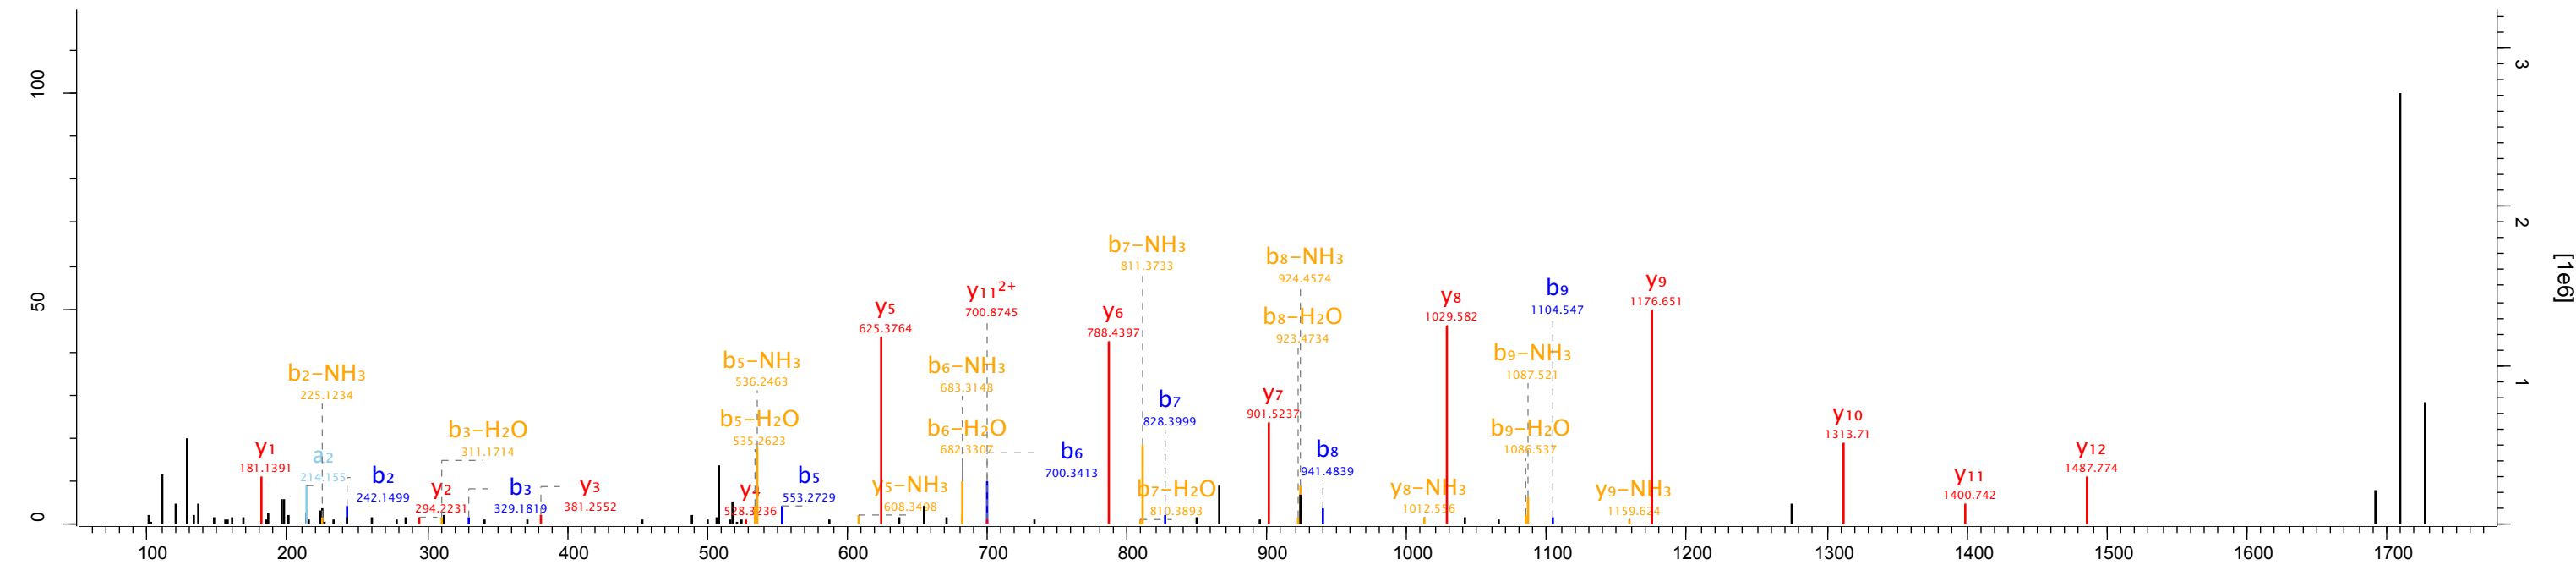

- Q L S S H F Q I Y P F S L R -

Fragmentation sites are indicated by boxes below the sequence:

- Red boxes: y12 (S), y11 (S), y10 (H), y9 (F), y8 (Q), y7 (I), y6 (Y), y5 (P), y4 (F), y3 (S), y2 (L), y1 (R)
- Blue boxes: b2 (L), b3 (S), b5 (H), b6 (F), b7 (Q), b8 (I), b9 (Y)

Raw file  
20180707\_MaS\_A375SR\_ML\_proteome\_2\_25

Scan 28346 Method FTMS; HCD Score 74.48 m/z 587.32 Gene names AOC1

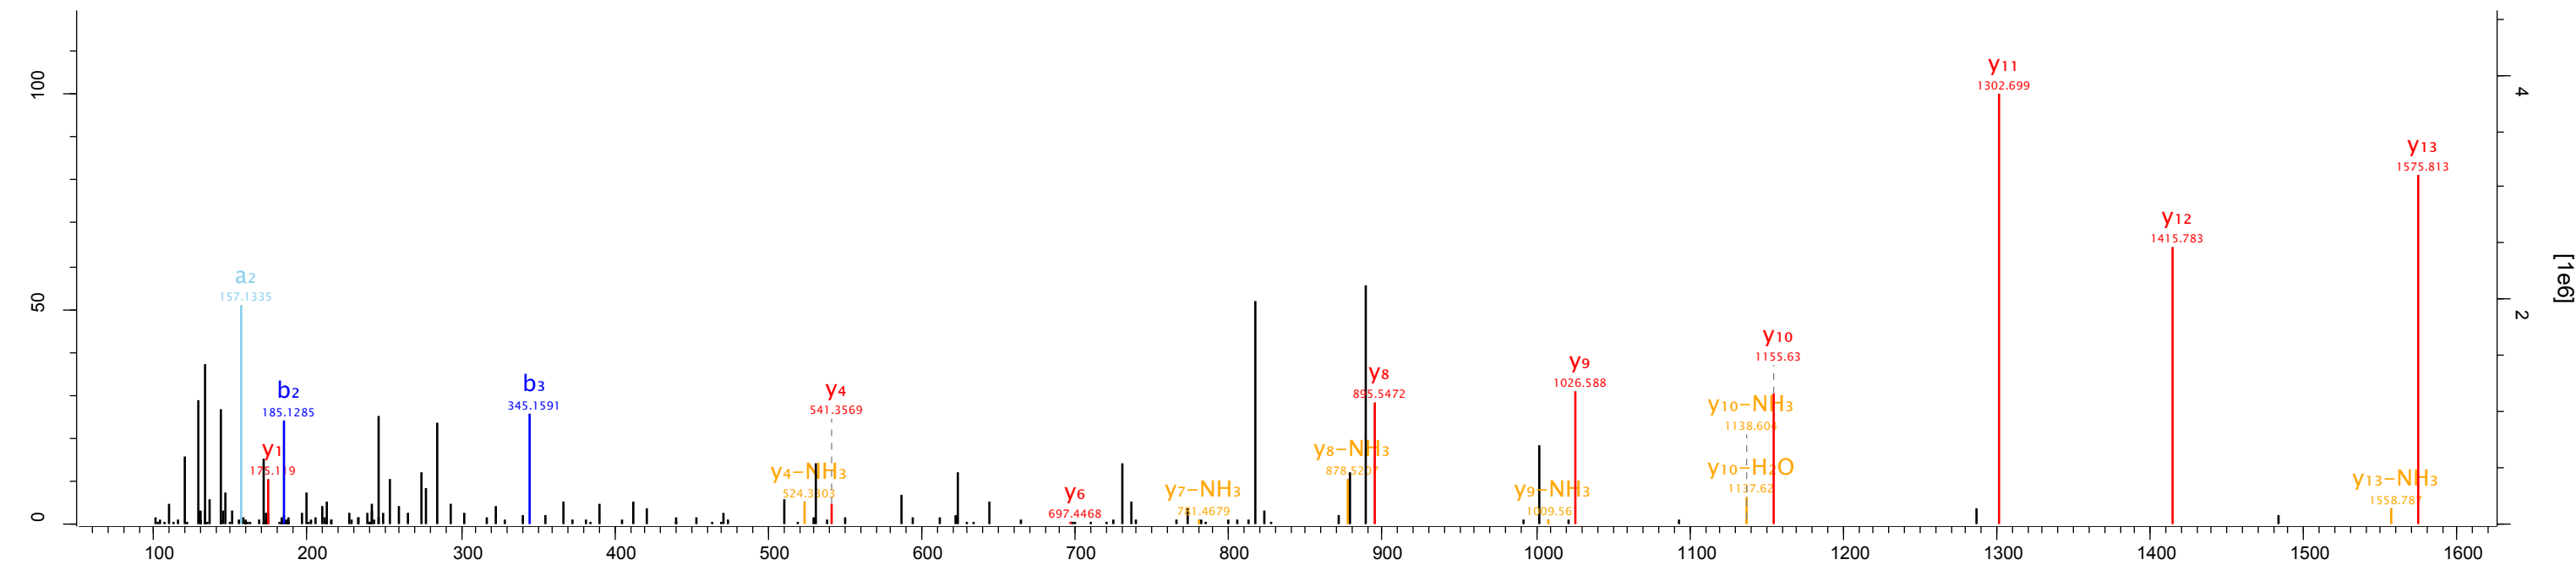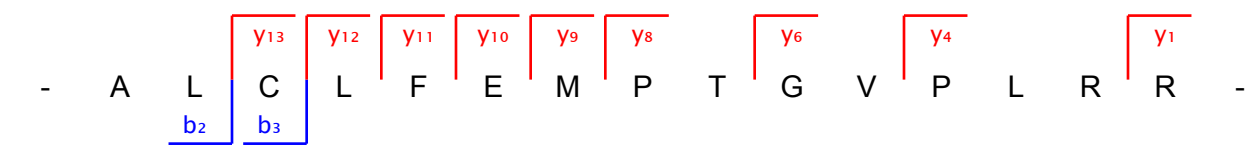



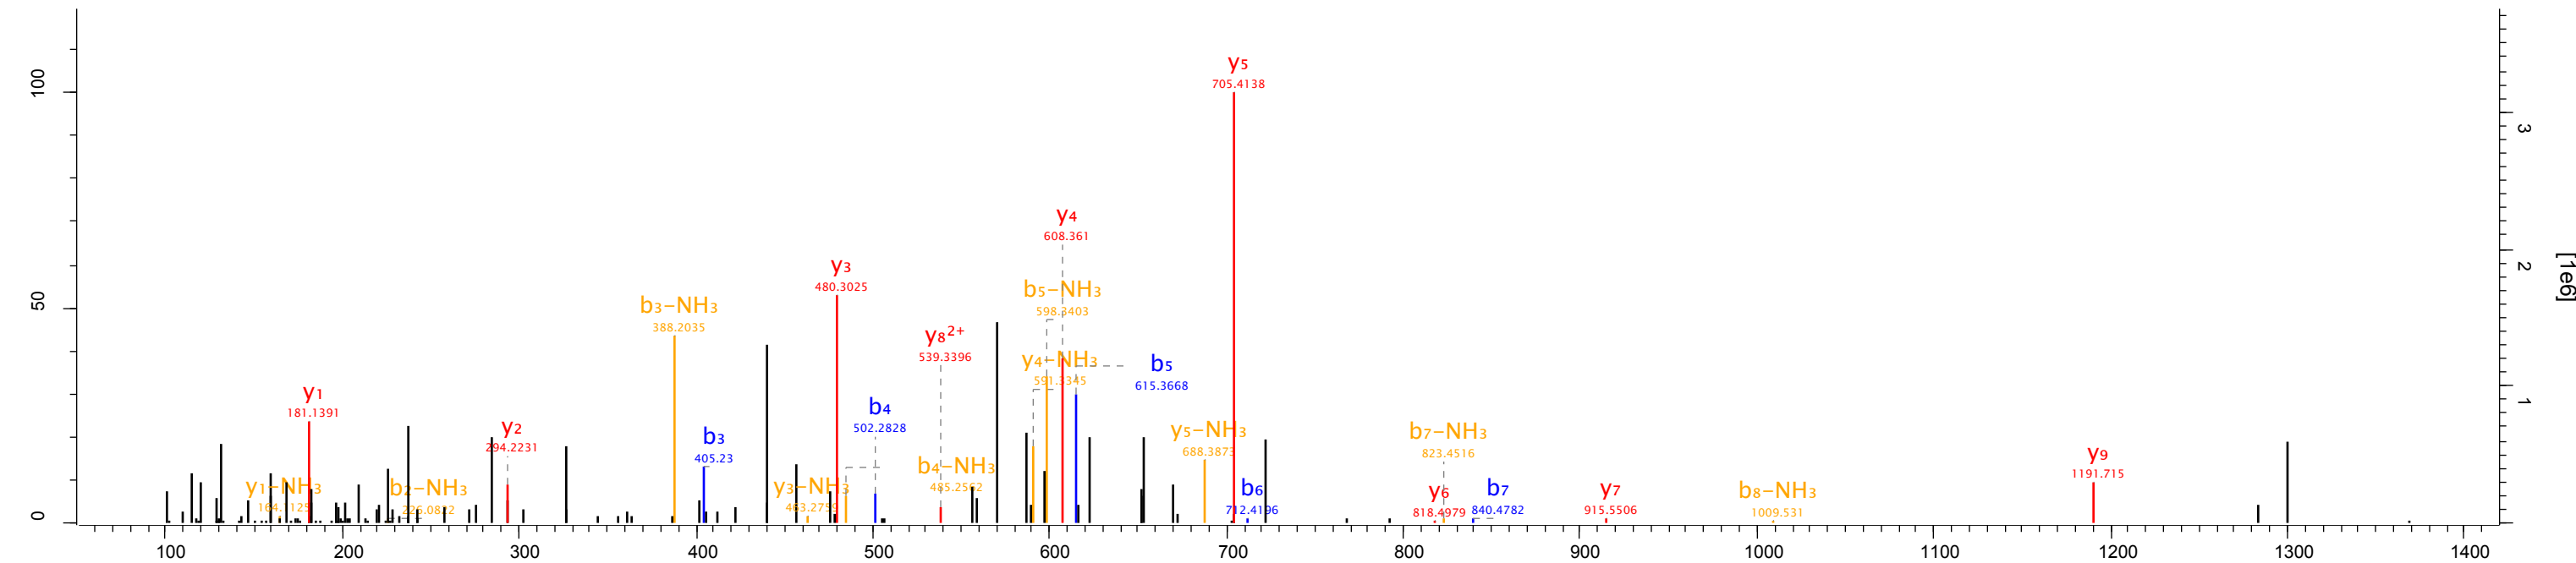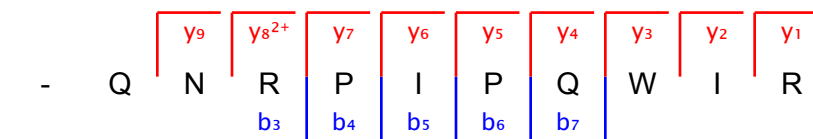

Raw file  
20180707\_MaS\_A375SR\_ML\_proteome\_2\_27

Scan 24916 Method FTMS; HCD Score 63.62 m/z 652.81 Gene names CYTL1

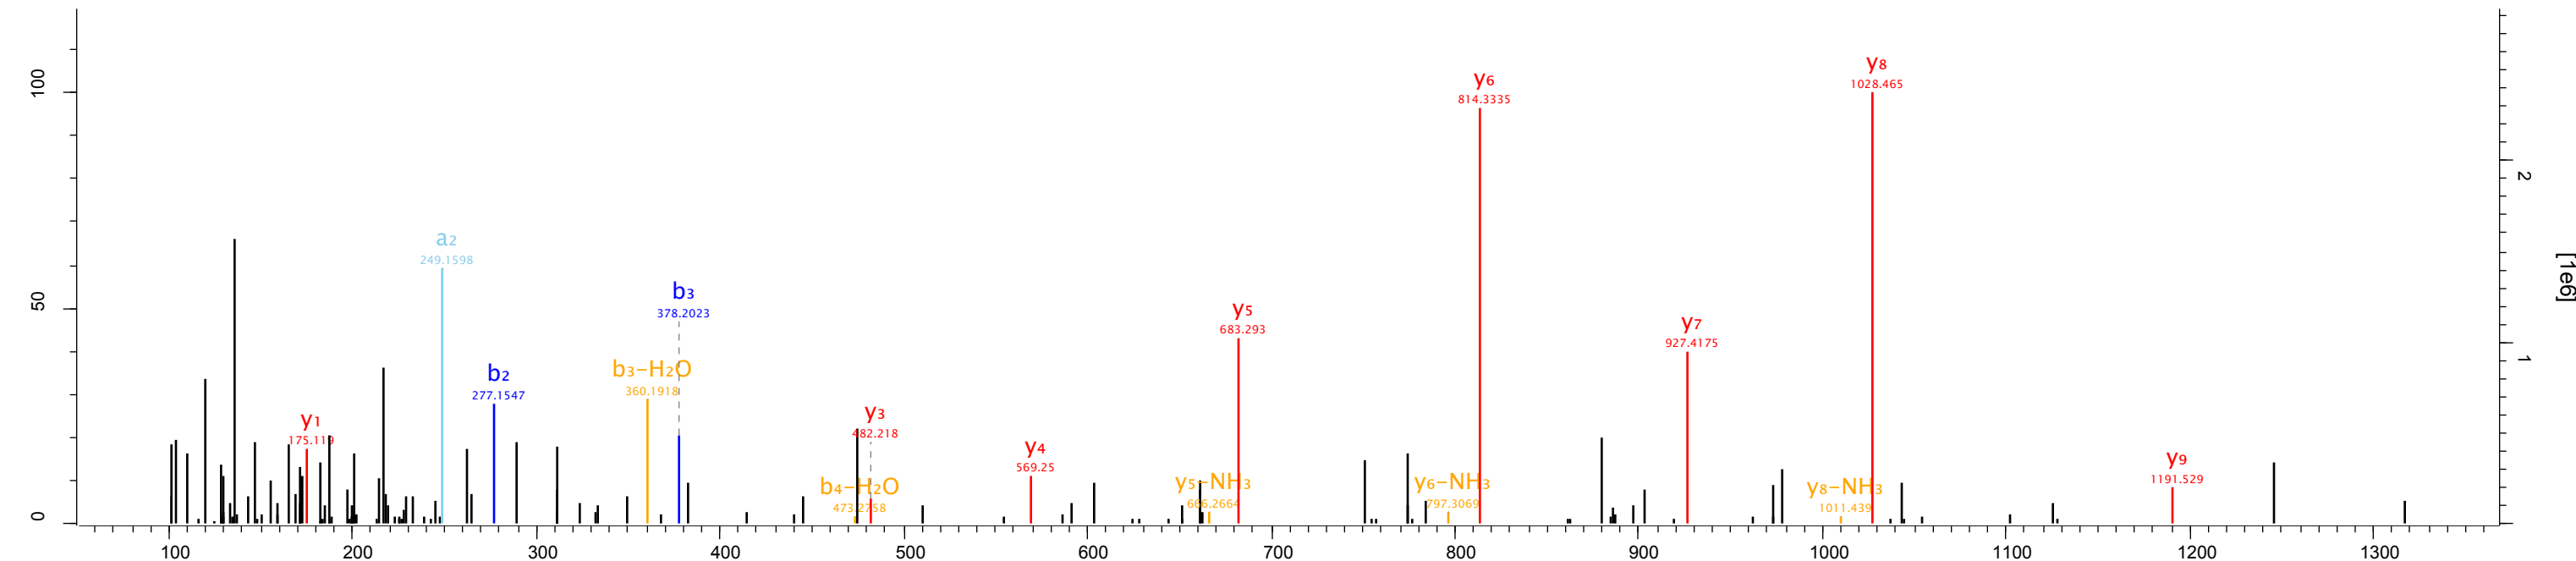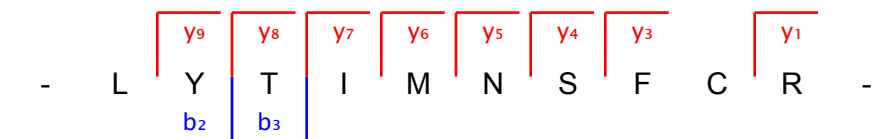

Raw file 20180707\_MaS\_A375SR\_ML\_proteome\_2\_29 Scan 19946 Method FTMS; HCD Score 90.71 m/z 803.45 Gene names ZCCHC10

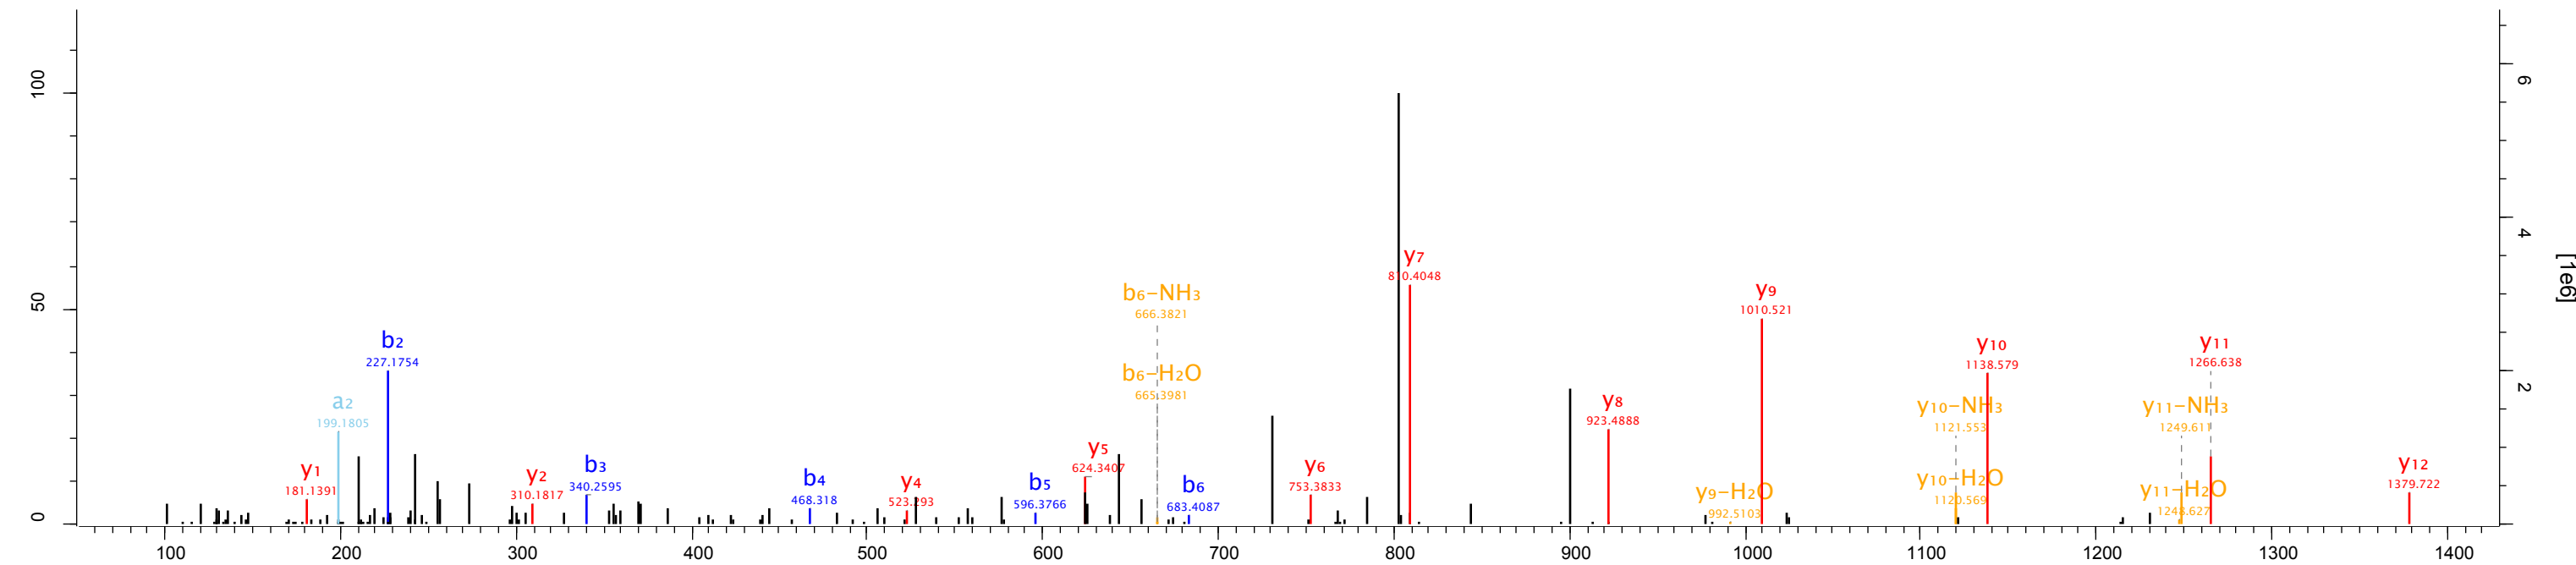

- L L L Q Q S I G E T N V E R -

b<sub>2</sub>
b<sub>3</sub>
b<sub>4</sub>
b<sub>5</sub>
b<sub>6</sub>
y<sub>1</sub>
y<sub>2</sub>
y<sub>4</sub>
y<sub>5</sub>
y<sub>6</sub>
y<sub>7</sub>
y<sub>8</sub>
y<sub>9</sub>
y<sub>10</sub>
y<sub>11</sub>
y<sub>12</sub>

Raw file  
 20180707\_MaS\_A375SR\_ML\_proteome\_2\_29  
 Scan 8146 Method FTMS; HCD Score 55.26 m/z 592.82

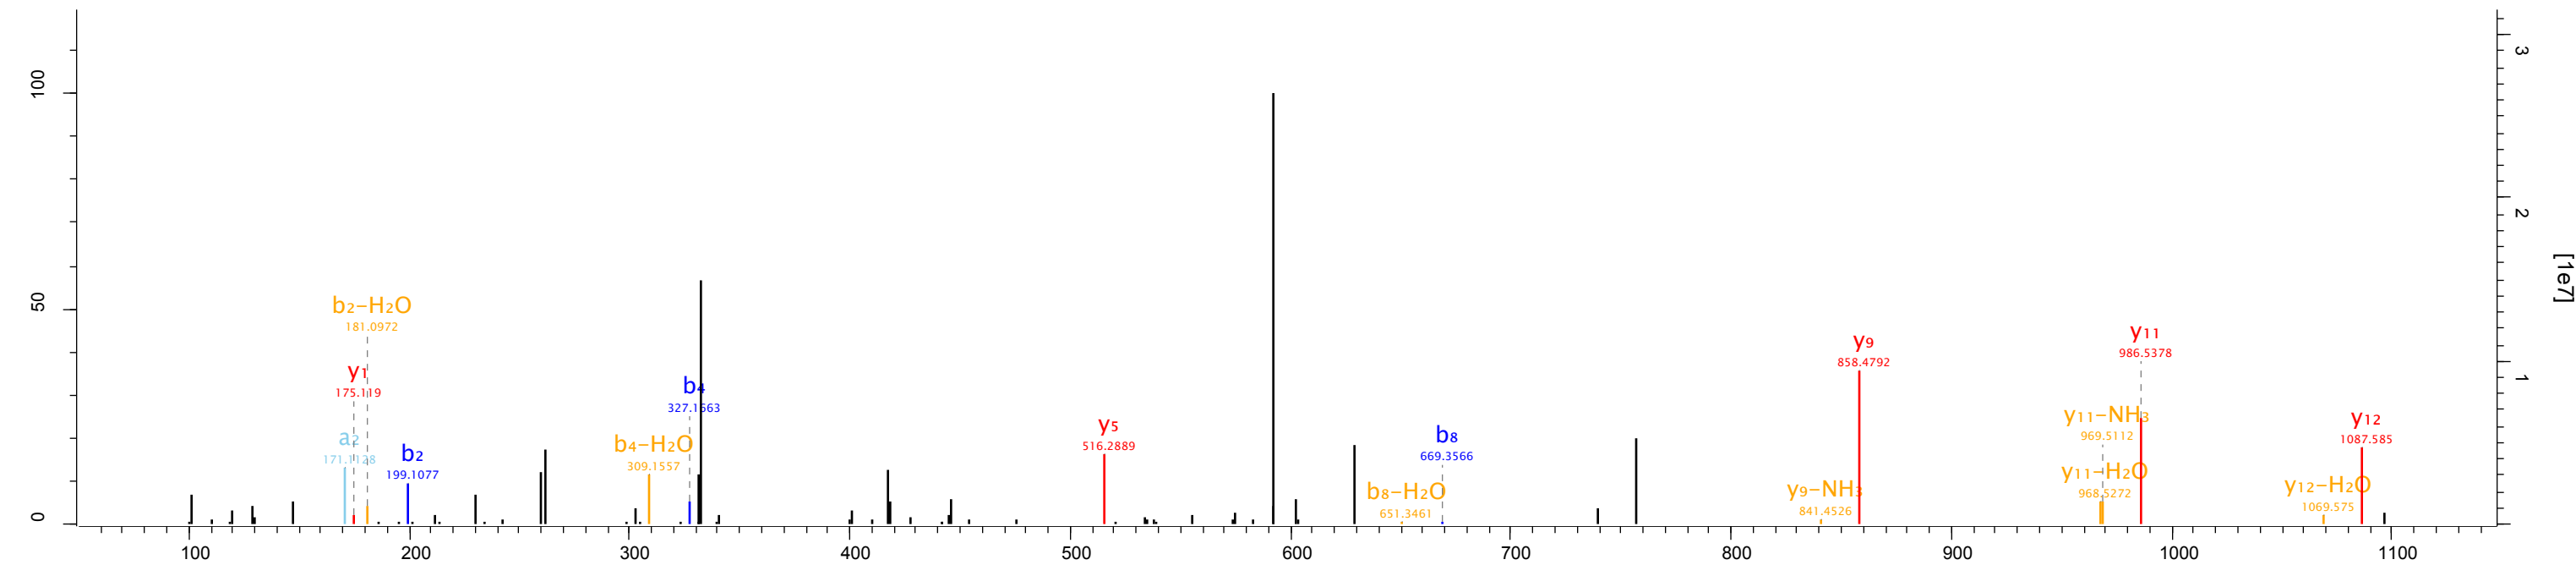

Raw file 20180707\_MaS\_A375SR\_ML\_proteome\_2\_30 Scan 14016 Method FTMS; HCD Score 46.46 m/z 622.84

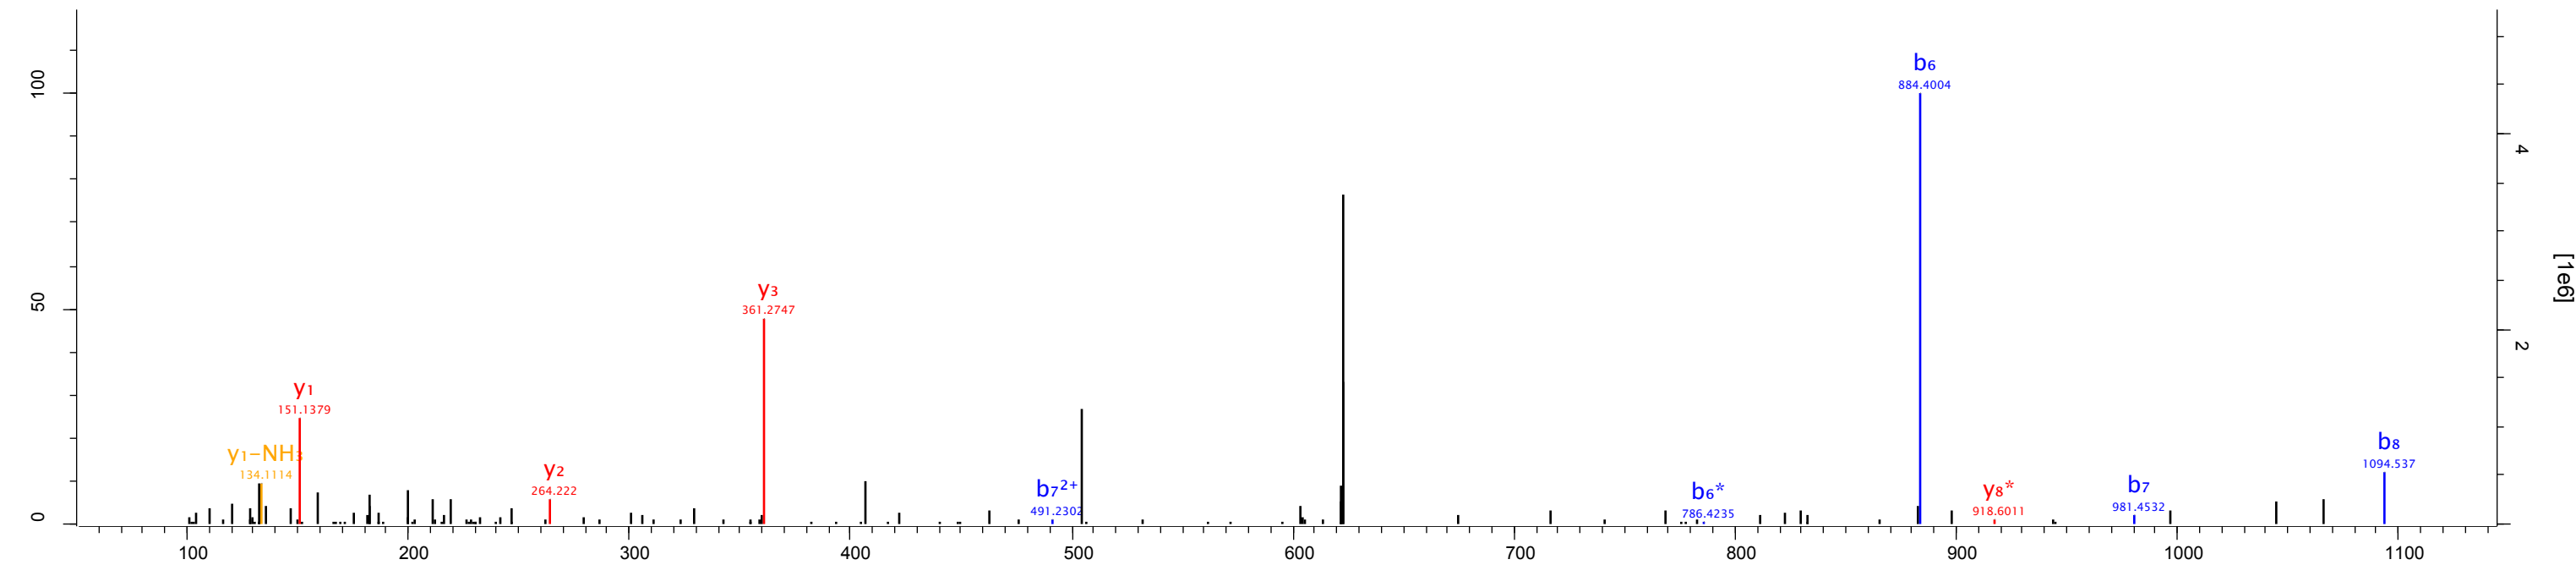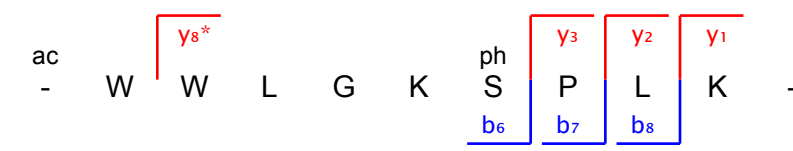

Raw file  
 20180707\_MaS\_A375SR\_ML\_proteome\_2\_30  
 Scan 3496 Method FTMS; HCD Score 60.17 m/z 568.24 Gene names MAP3K19

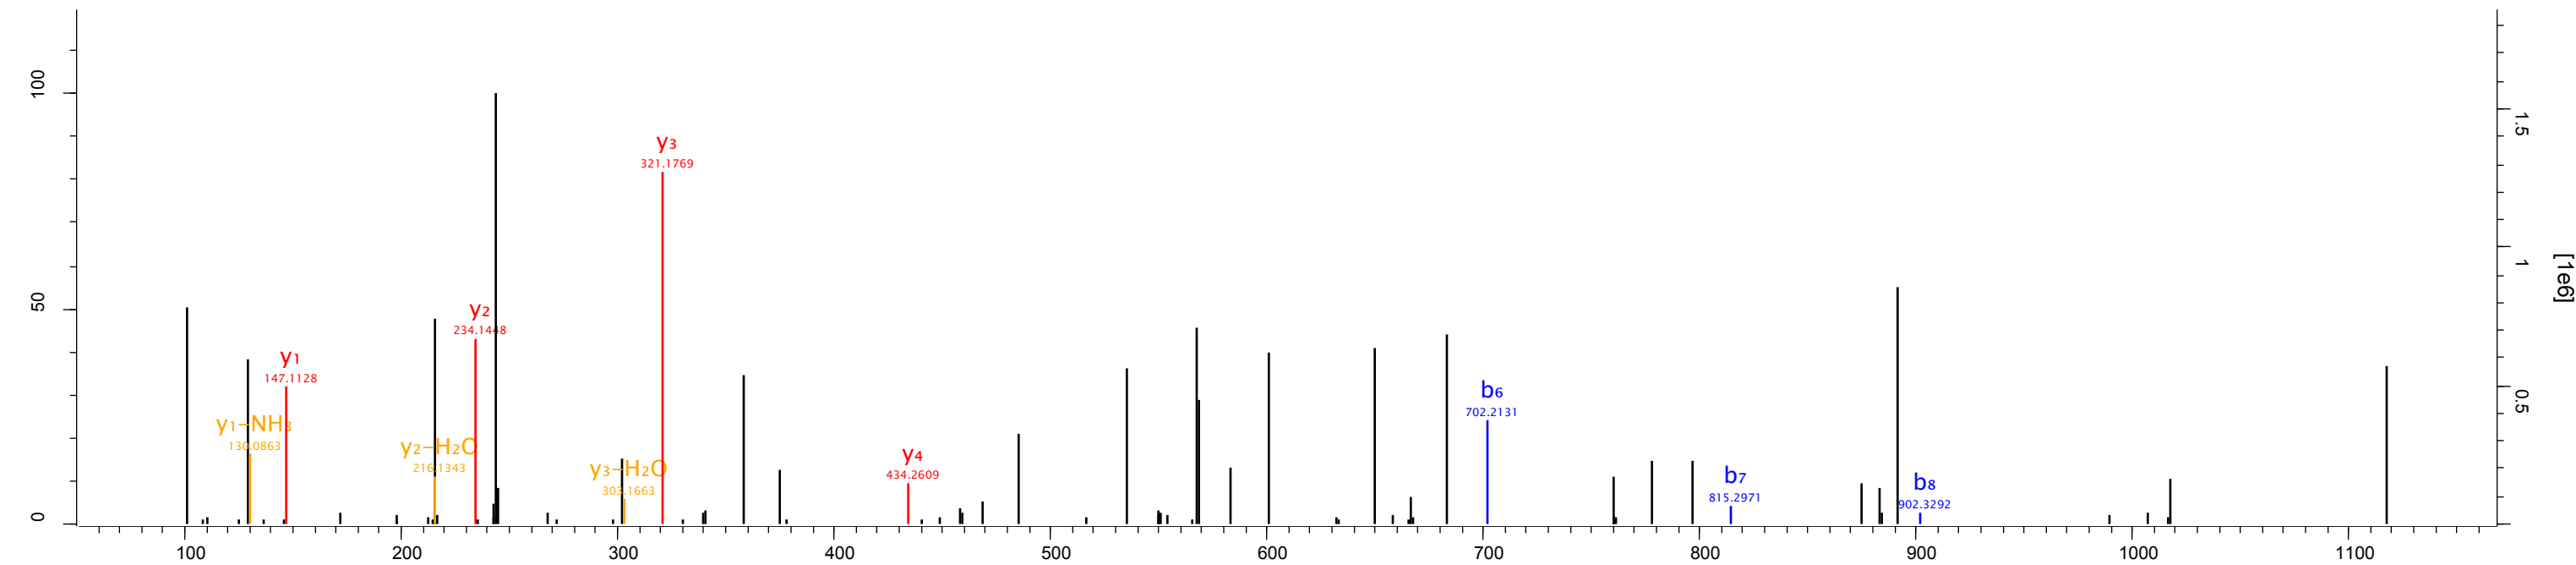

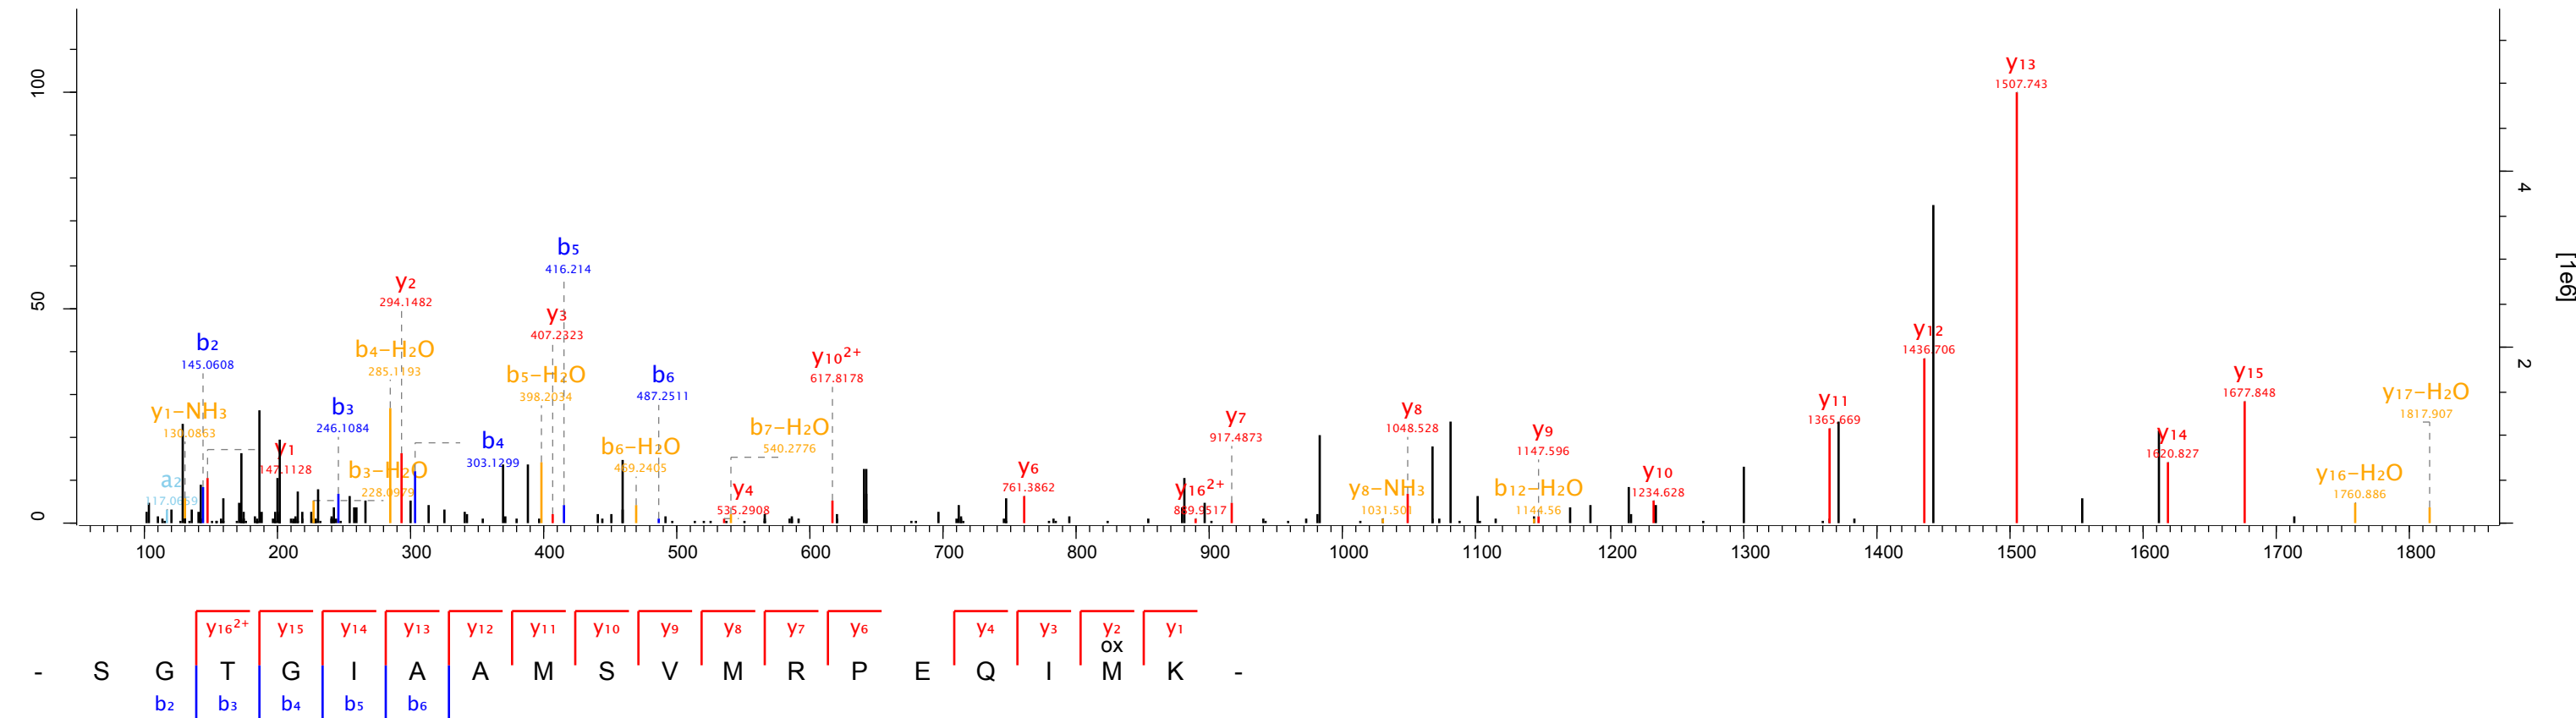

Raw file  
20180707\_MaS\_A375SR\_ML\_proteome\_22

Scan 17316 Method FTMS; HCD Score 216.53 m/z 710.85 Gene names SPATA22

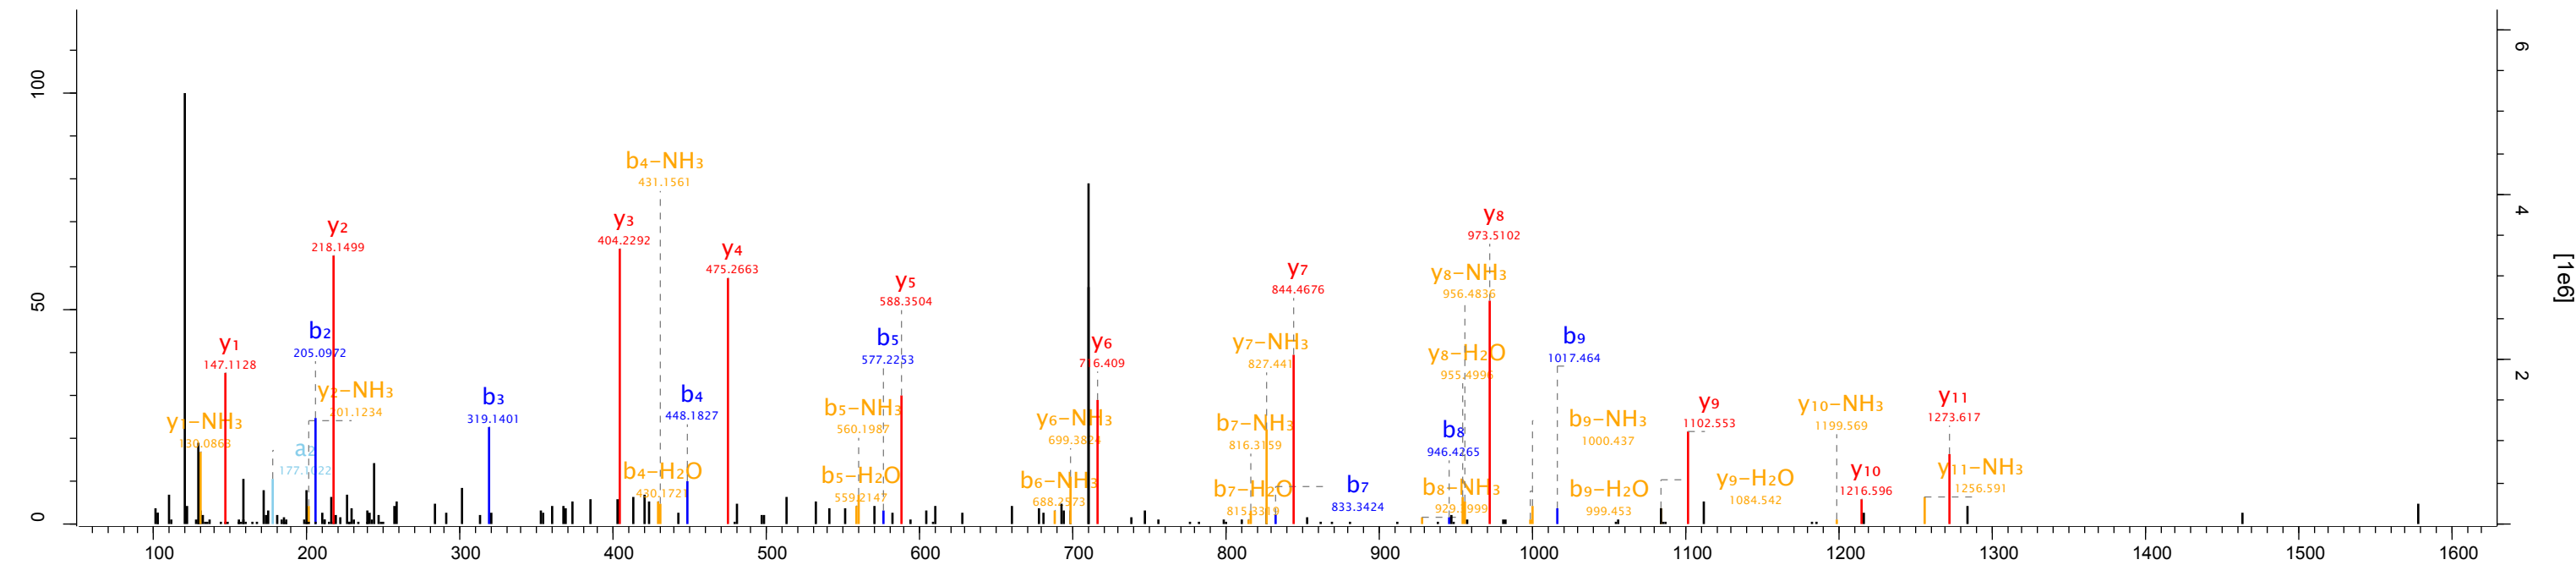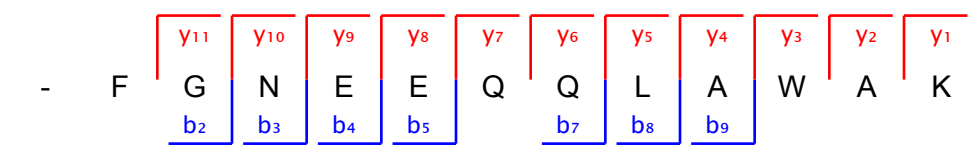



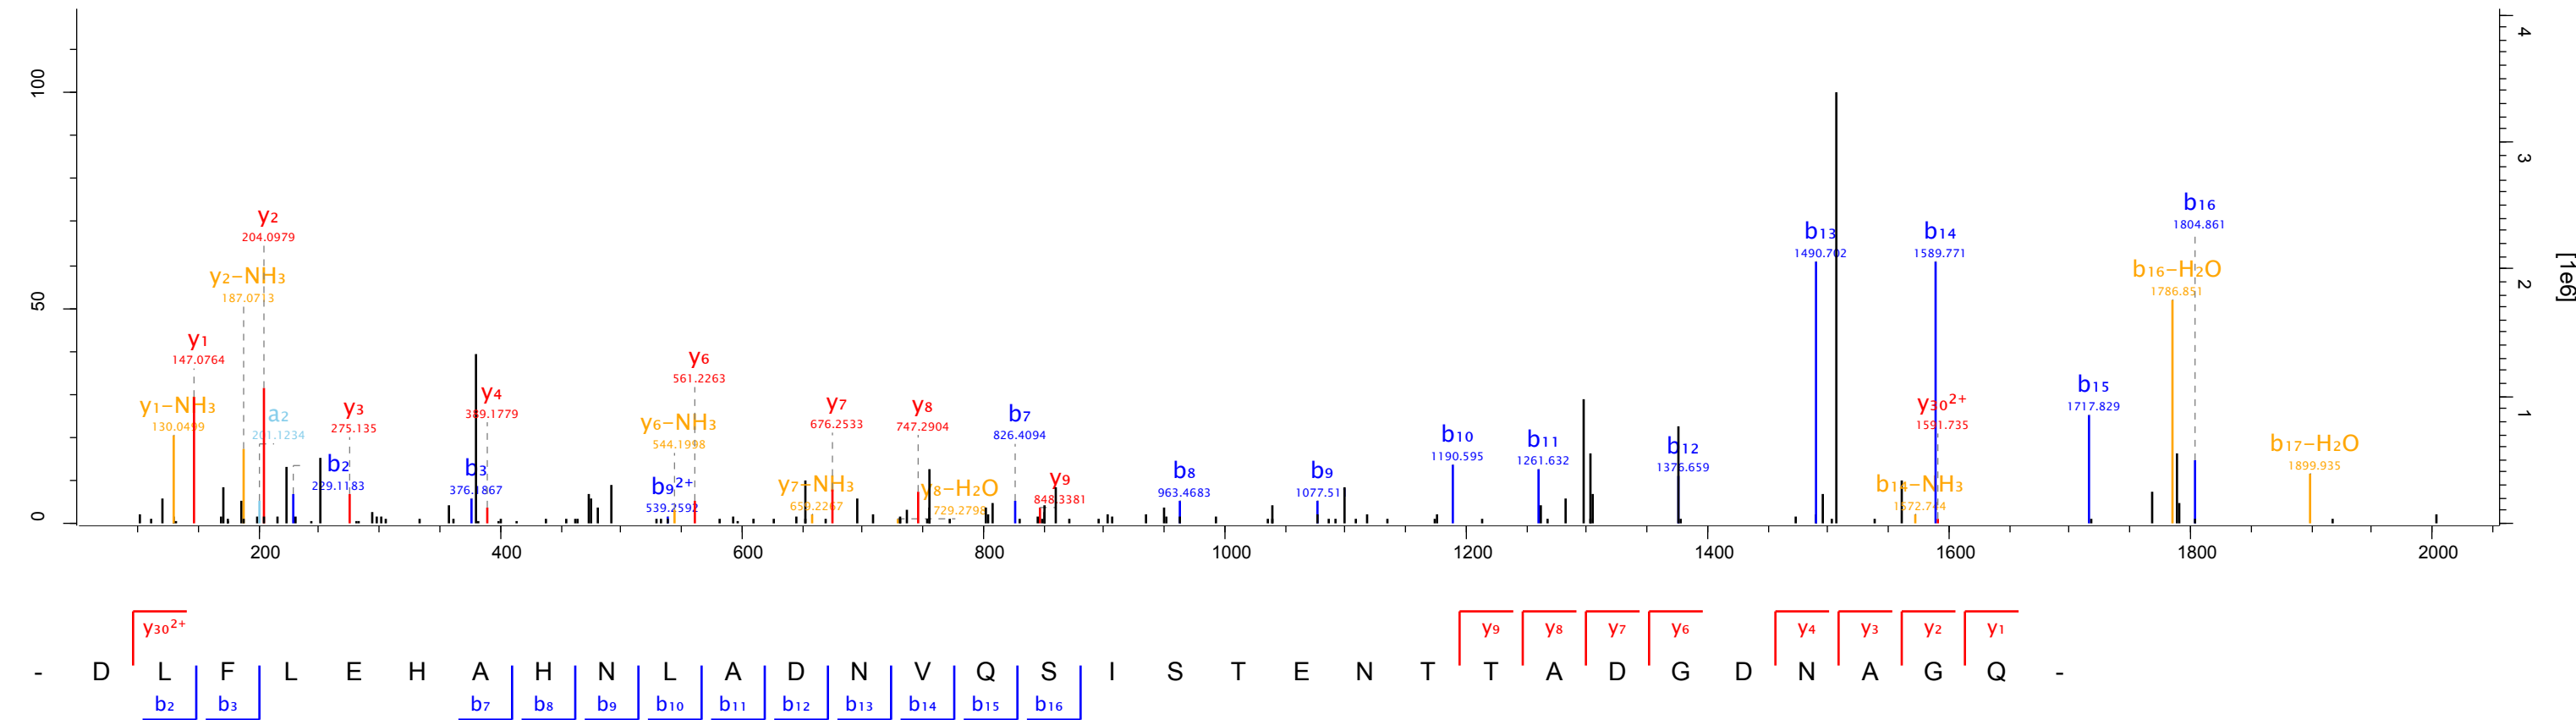

Raw file 20180707\_MaS\_A375SR\_ML\_proteome\_22 Scan 25336 Method FTMS; HCD Score 77.06 m/z 663.38 Gene names LRIG2

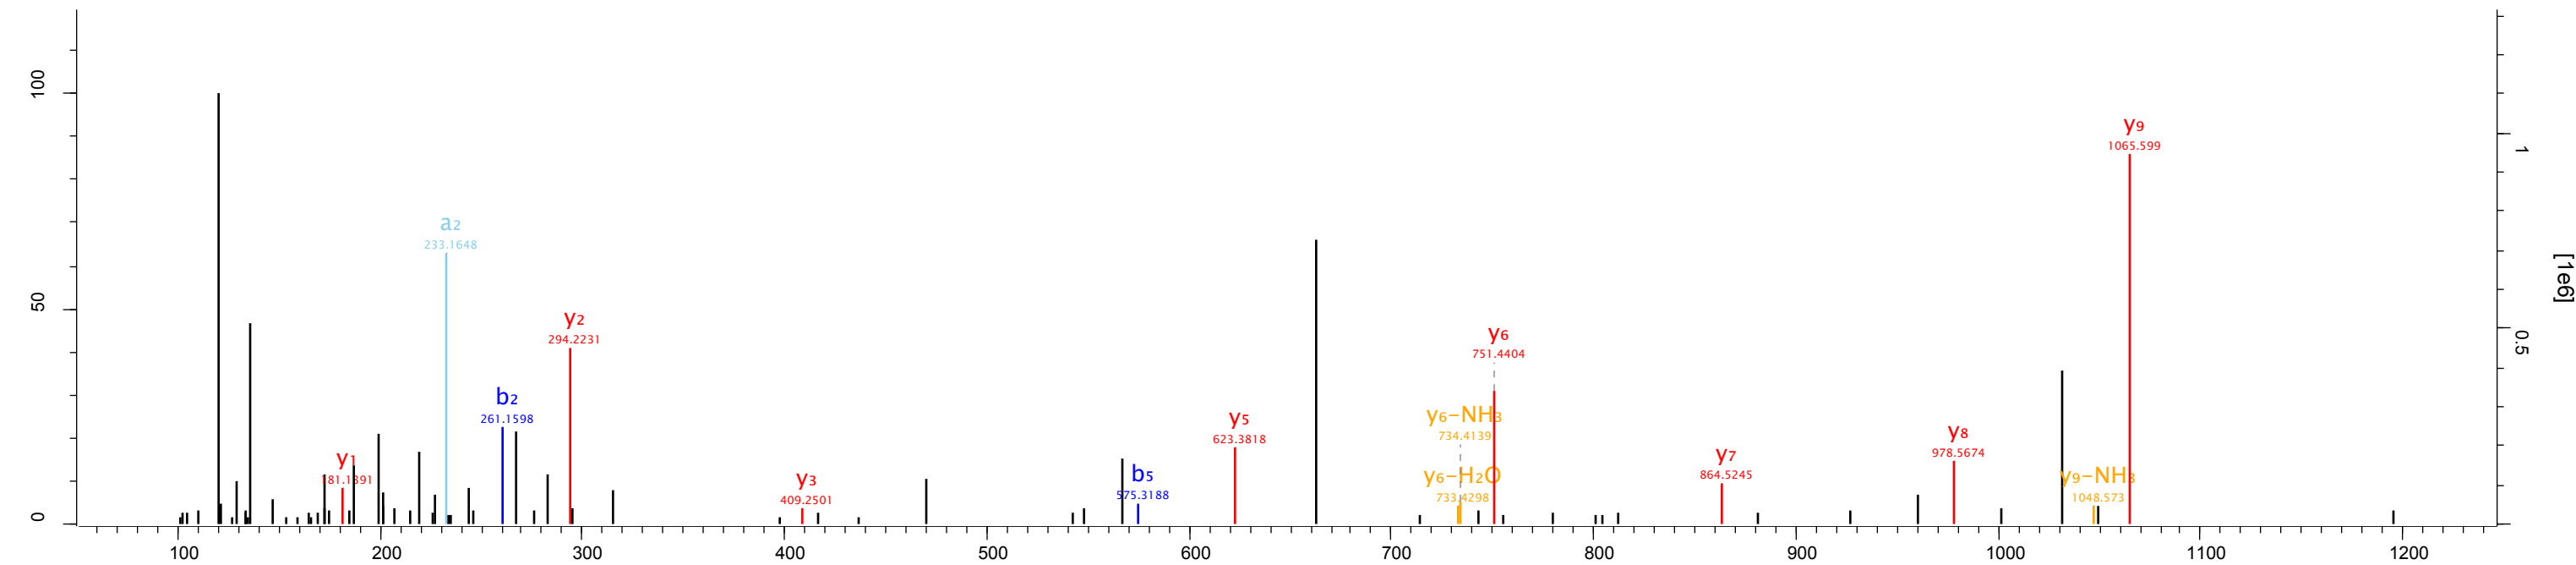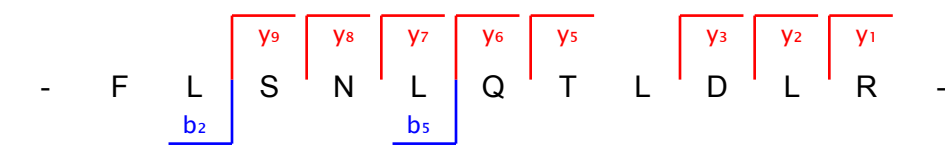

Raw file: 20180707\_MaS\_A375SR\_ML\_proteome\_23  
 Scan: 22776 Method: FTMS; HCD Score: 76.59 m/z: 868.5 Gene names: KRTCAP2

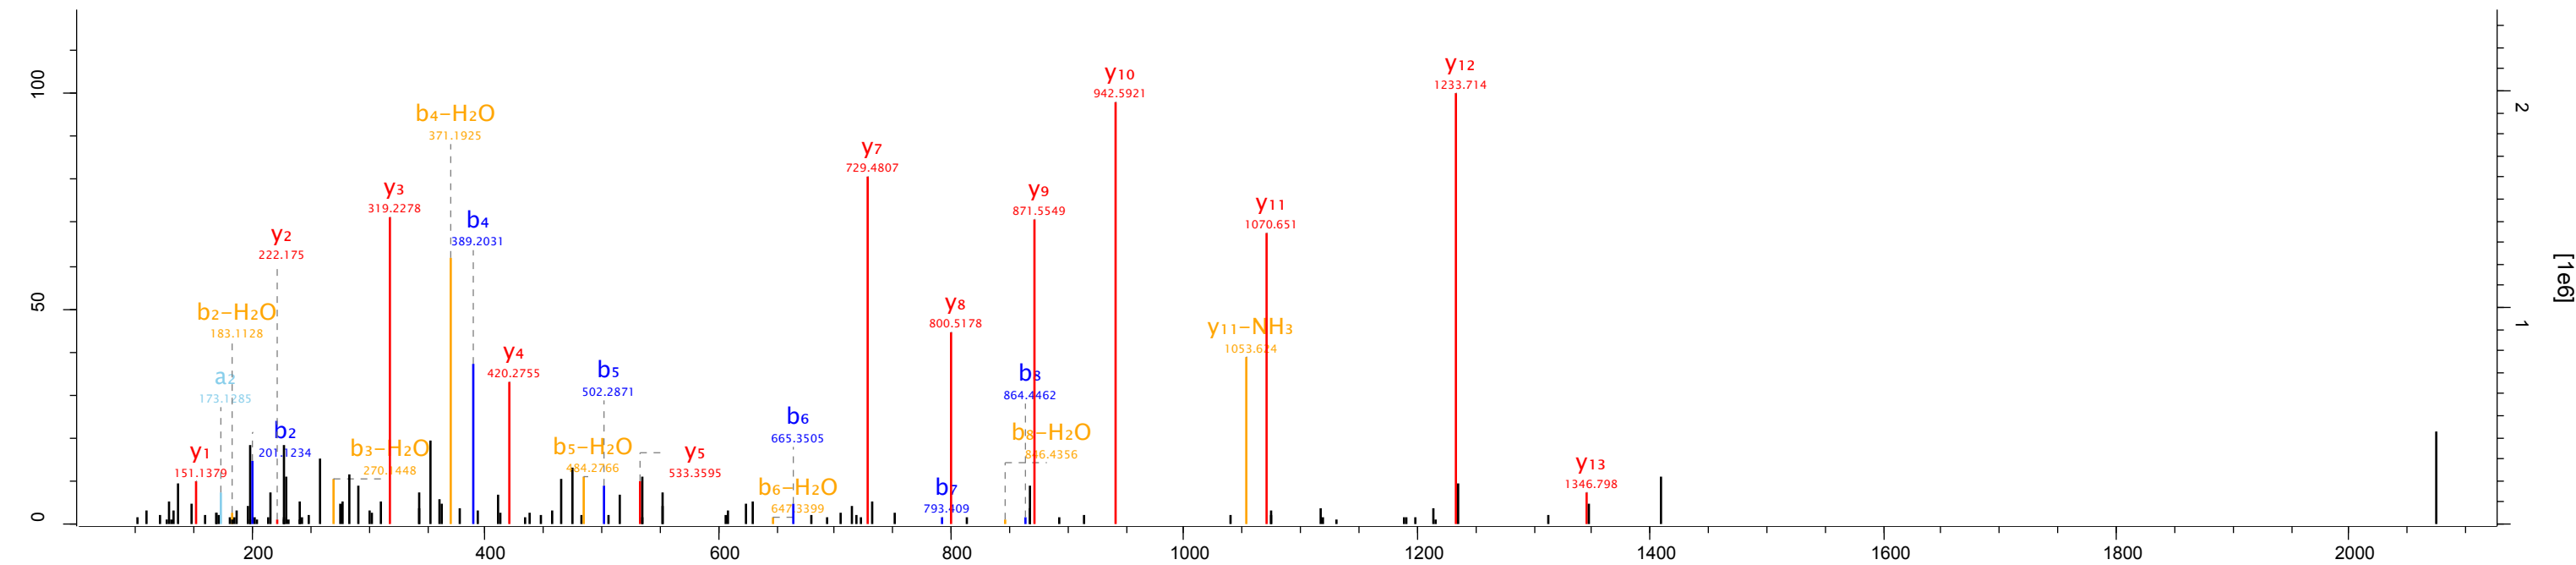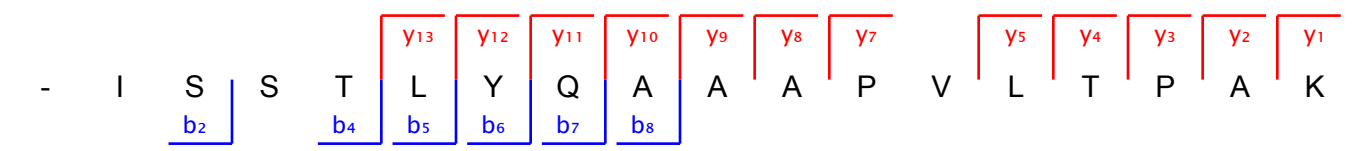

Raw file  
20180707\_MaS\_A375SR\_ML\_proteome\_24

Scan 13666 Method FTMS; HCD Score 40.5 m/z 403.22

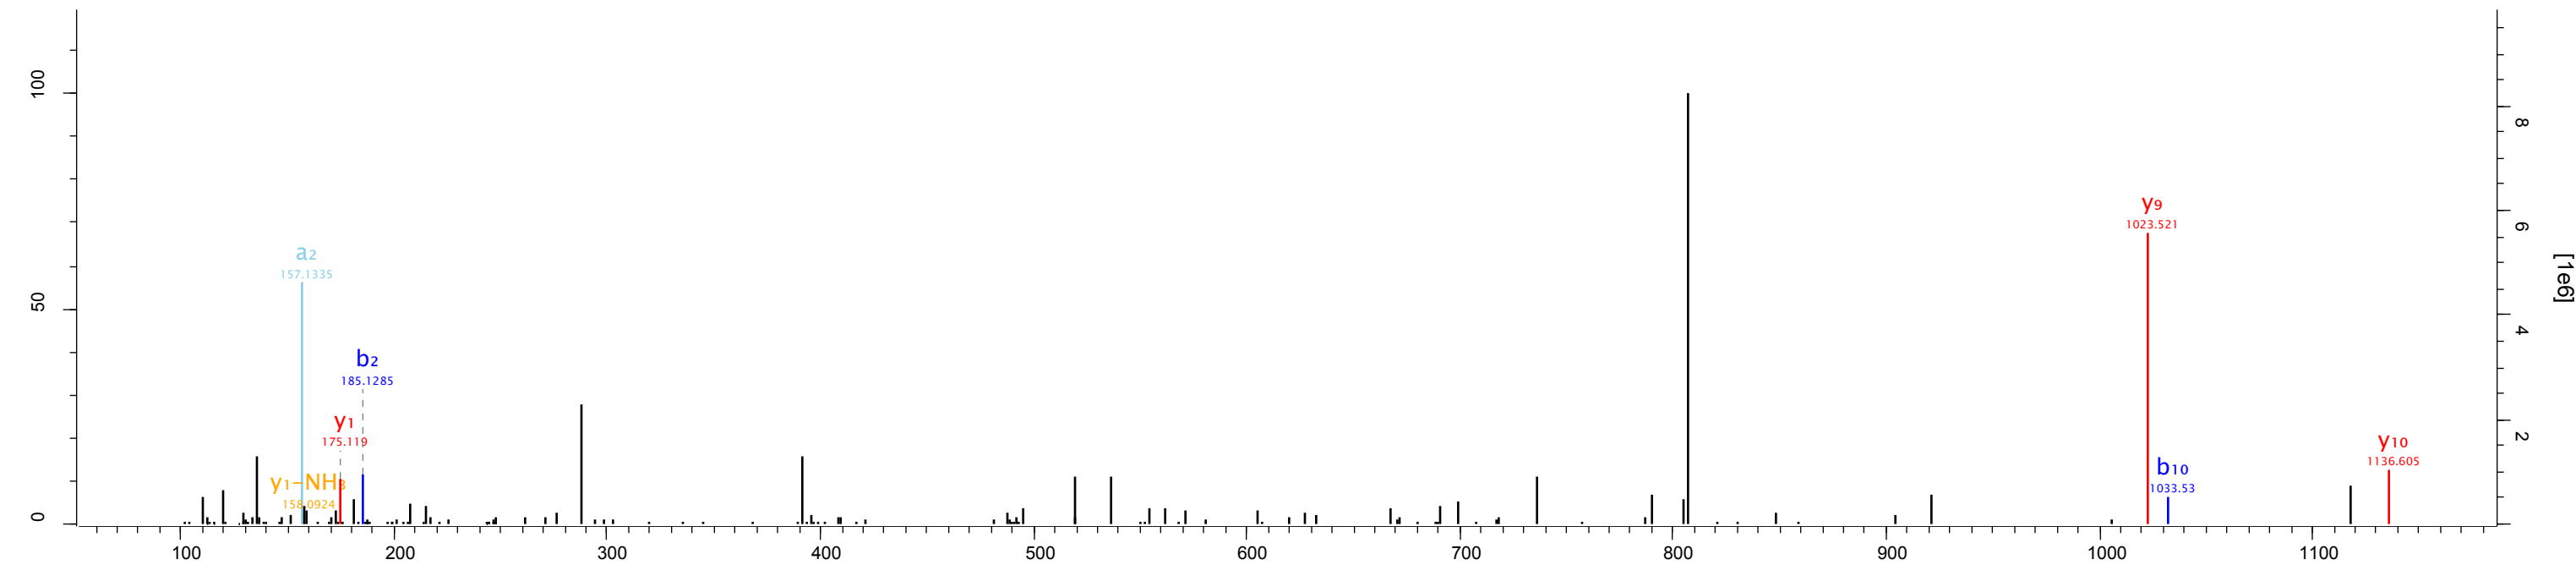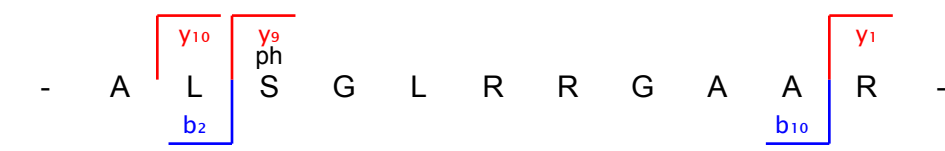

Raw file 20180707\_MaS\_A375SR\_ML\_proteome\_24 Scan 9706 Method FTMS; HCD Score 37.7 m/z 569.33 Gene names C1orf21

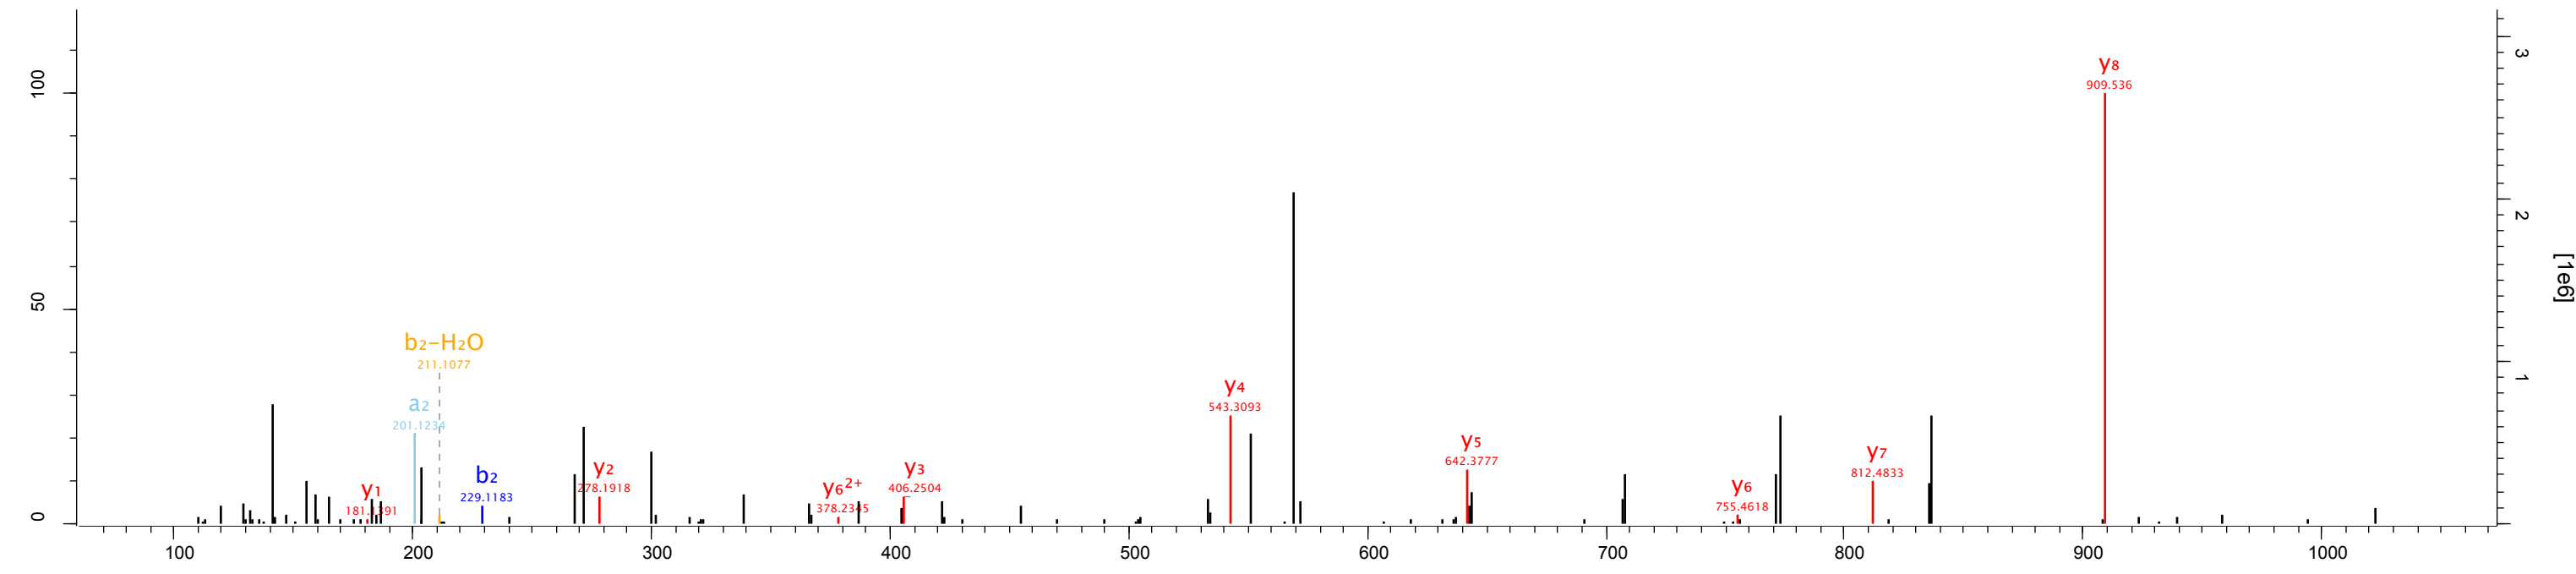

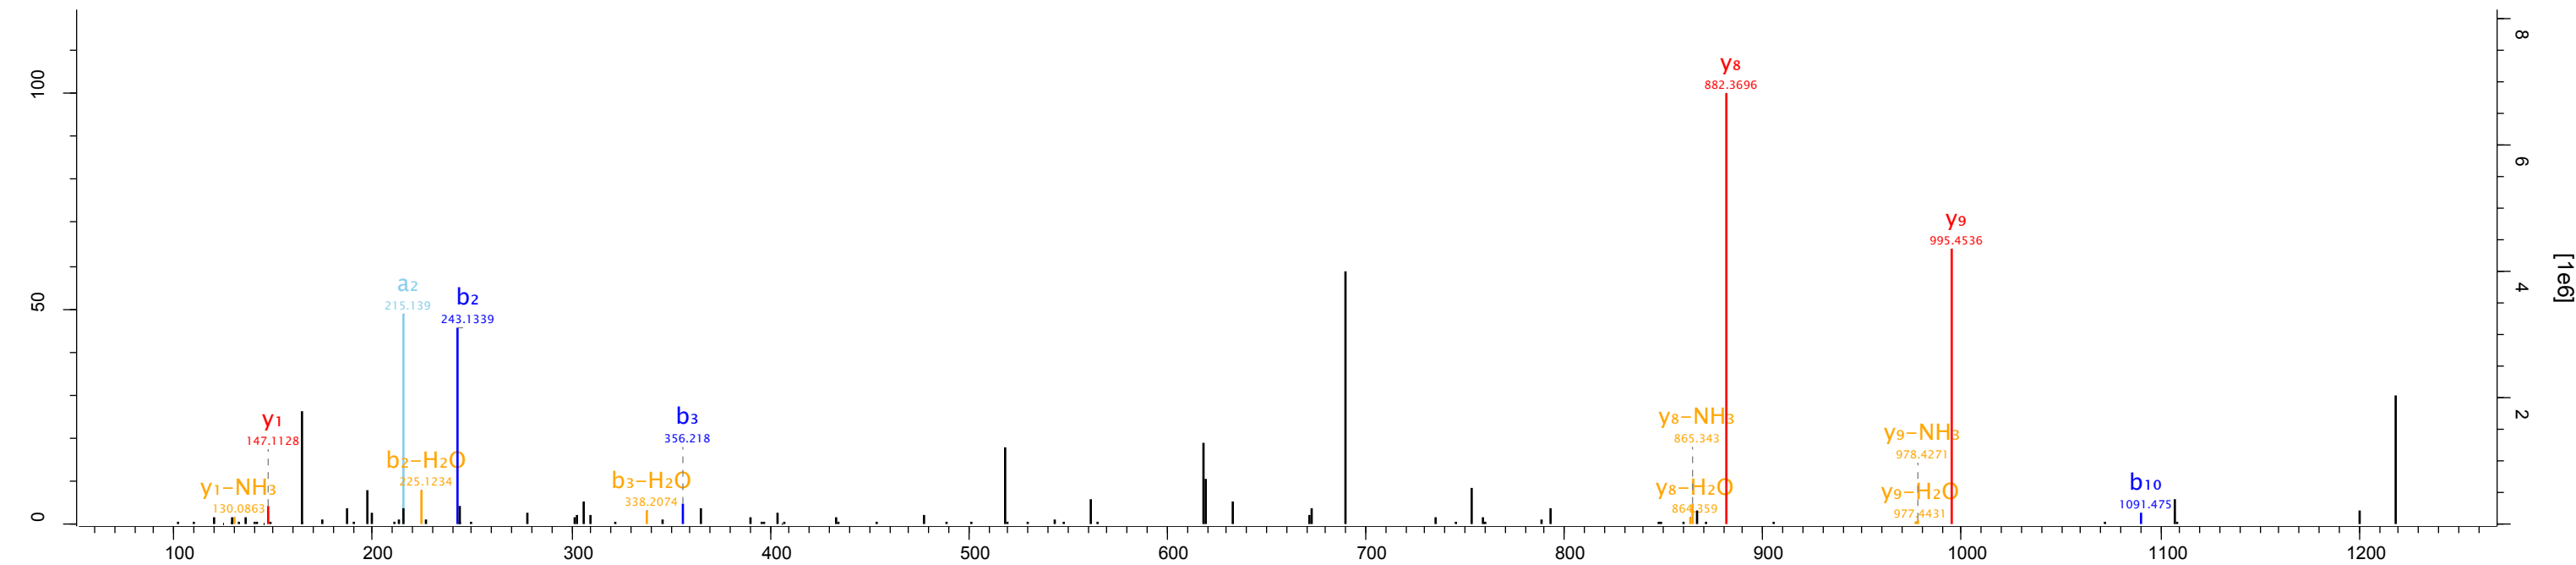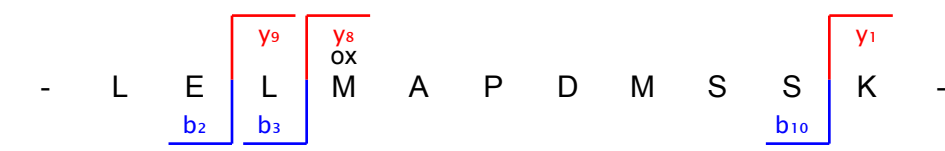

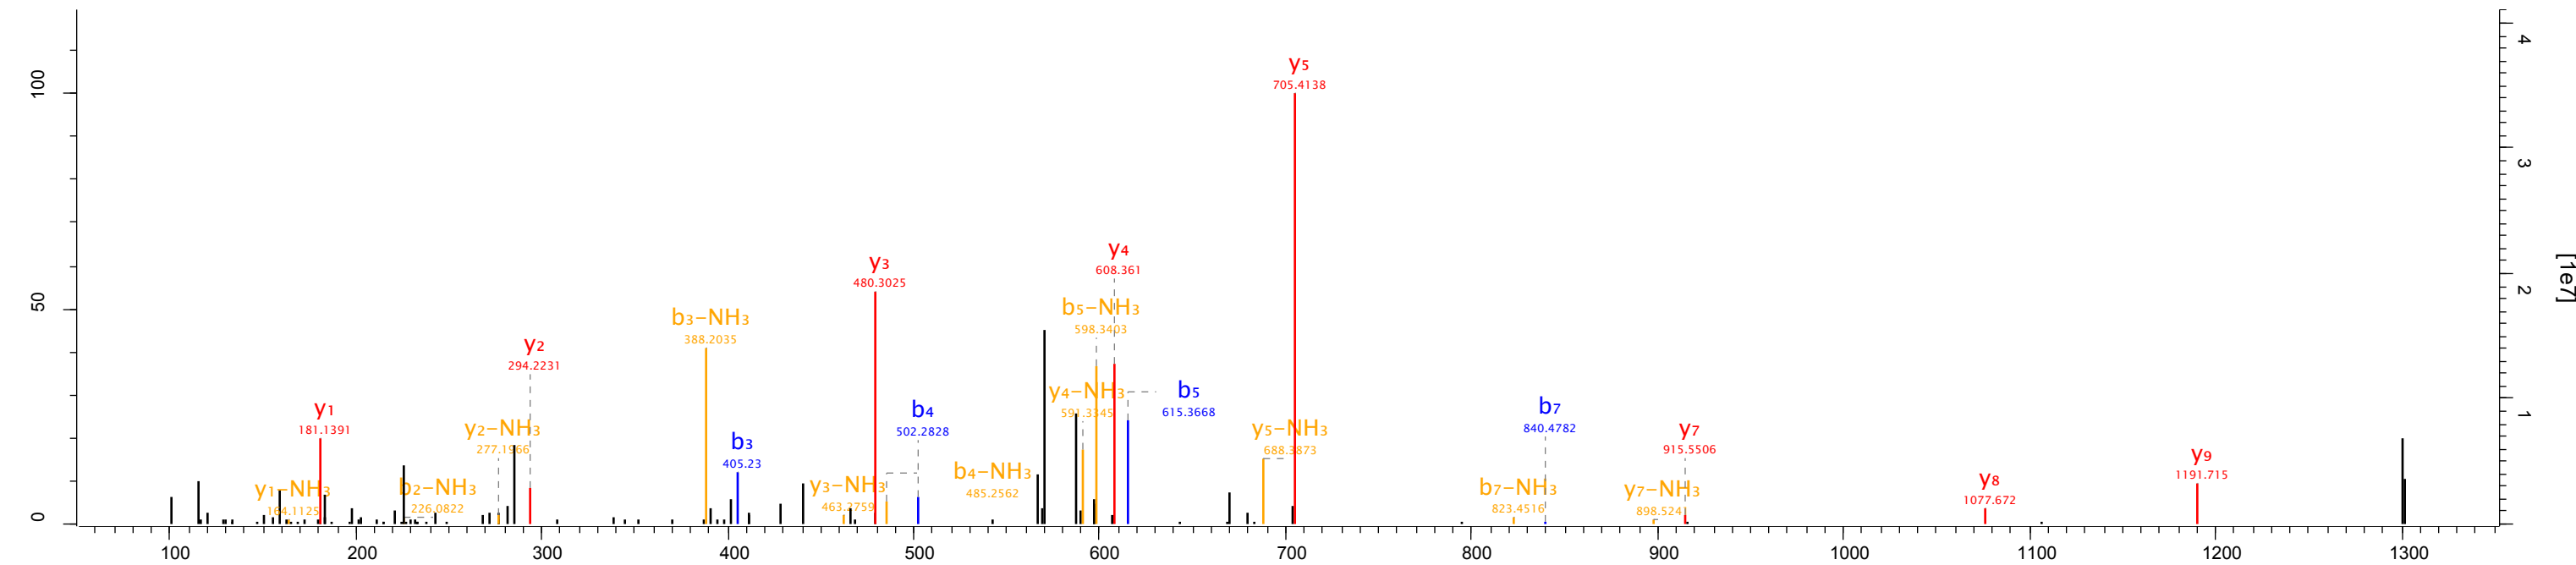

- Q N R P I P Q W I R -  
 (Red boxes above: y9, y8, y7, y5, y4, y3, y2, y1)  
 (Blue boxes below: b3, b4, b5, b7)

Raw file  
20180707\_MaS\_A375SR\_ML\_proteome\_27

Scan 5626 Method FTMS; HCD Score 79.45 m/z 353.19

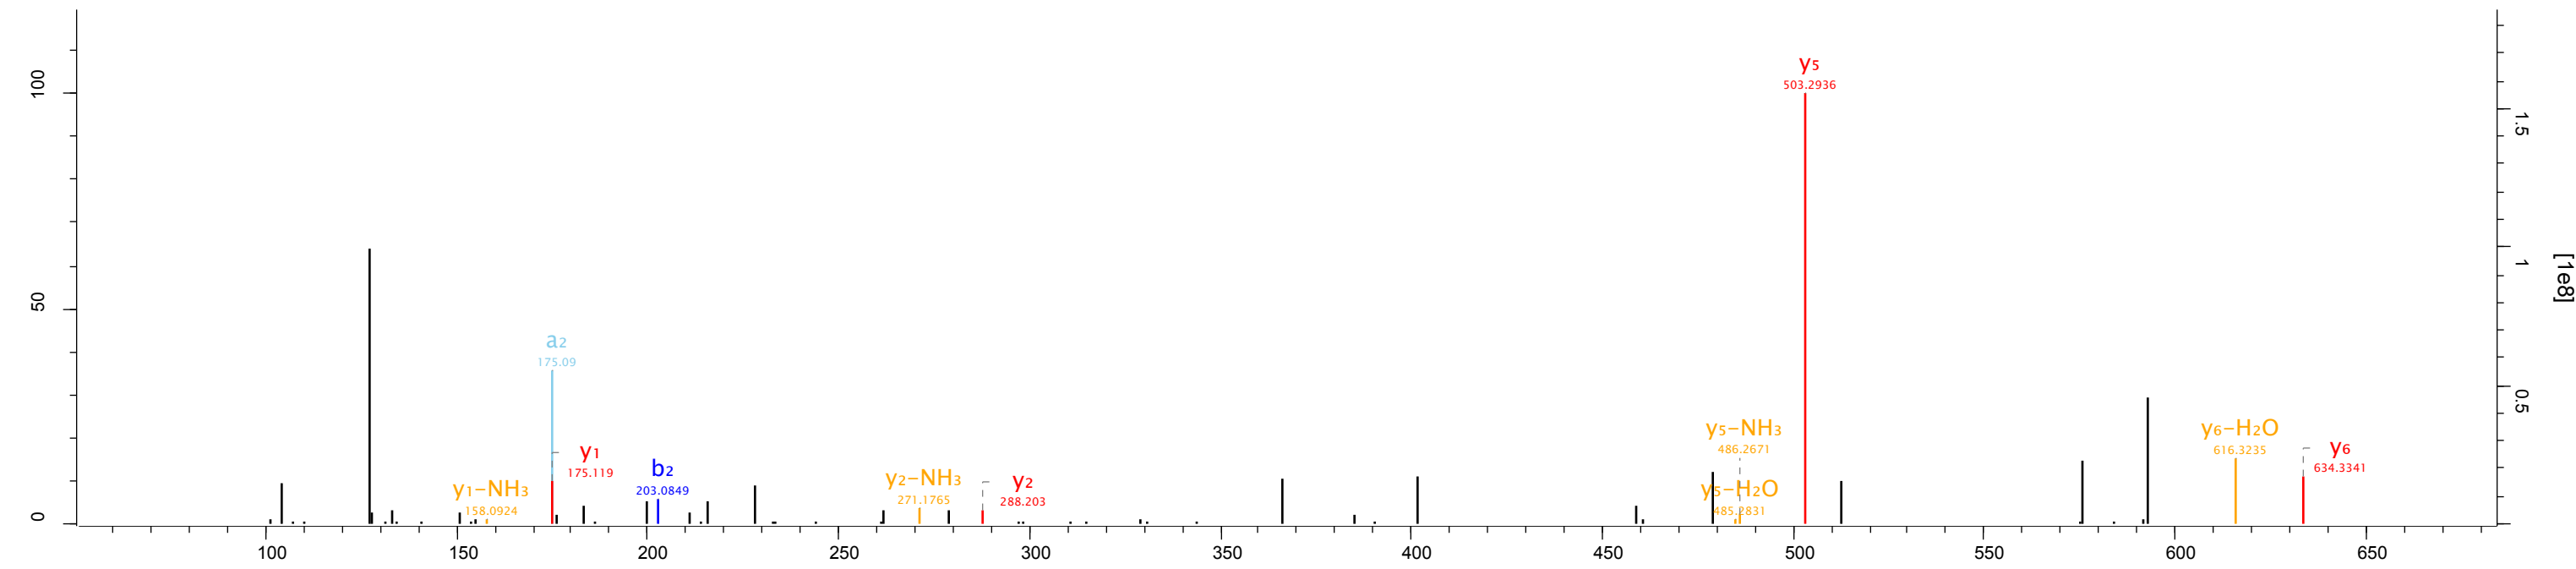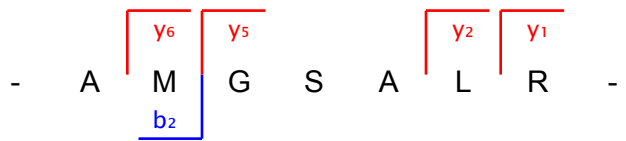



Raw file 20180707\_MaS\_A375SR\_ML\_proteome\_28 Scan 4636 Method FTMS; HCD Score 76.23 m/z 522.31 Gene names VCPKMT

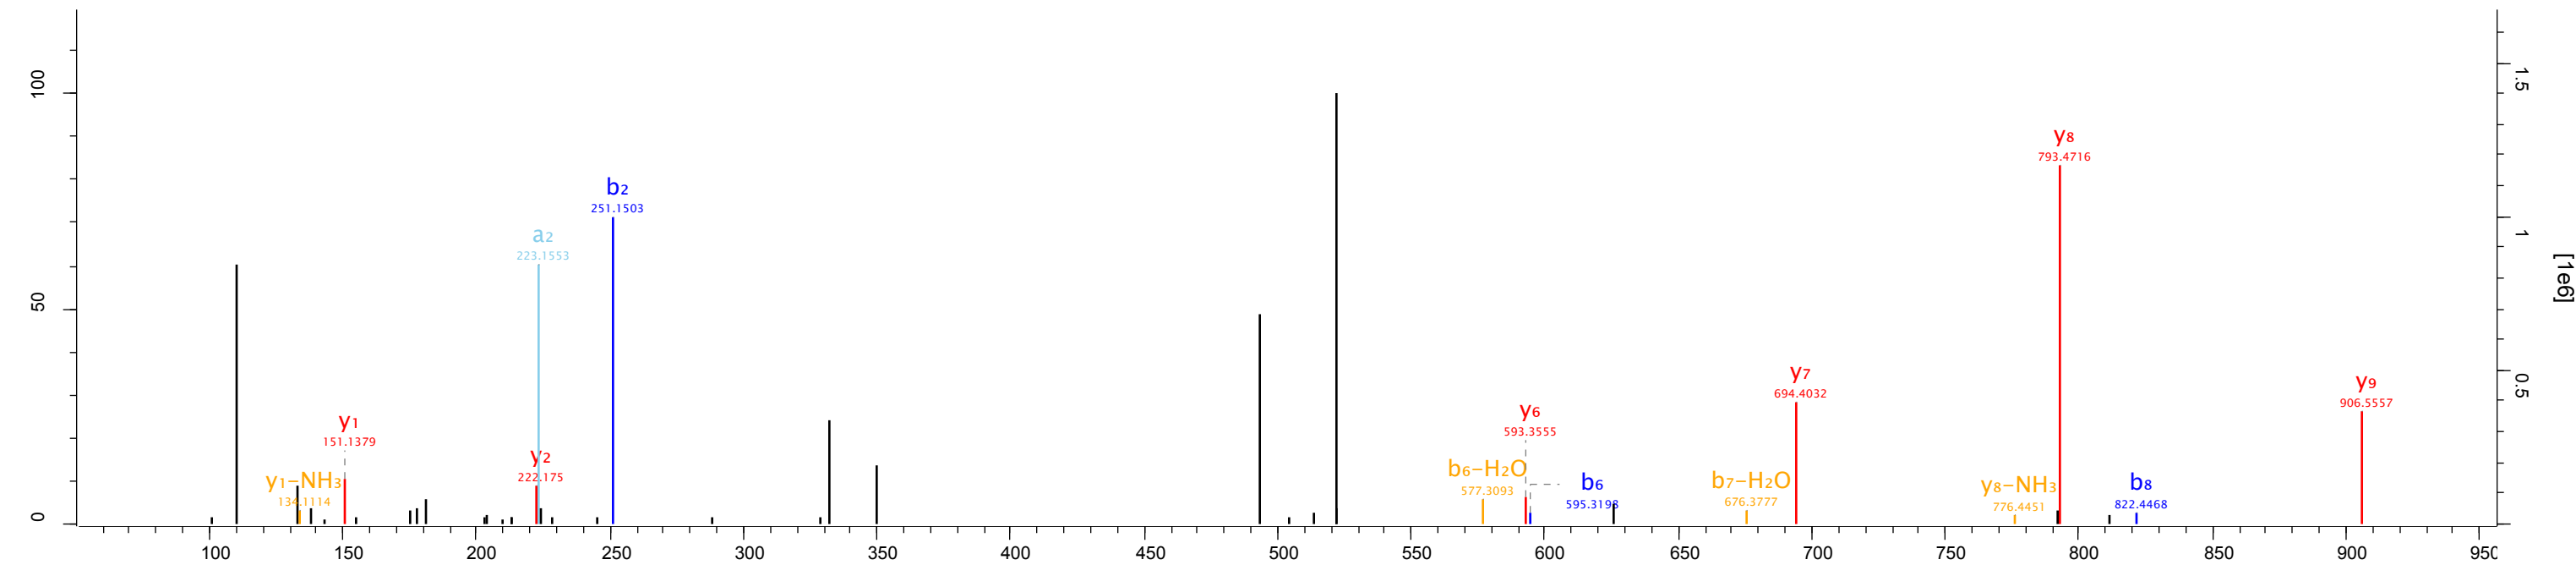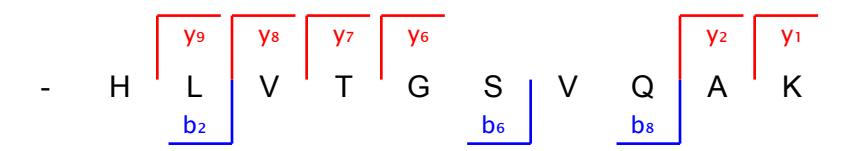

Raw file 20180707\_MaS\_A375SR\_ML\_proteome\_29 Scan 12026 Method FTMS; HCD Score 105.65 m/z 653.84 Gene names ZNF280D

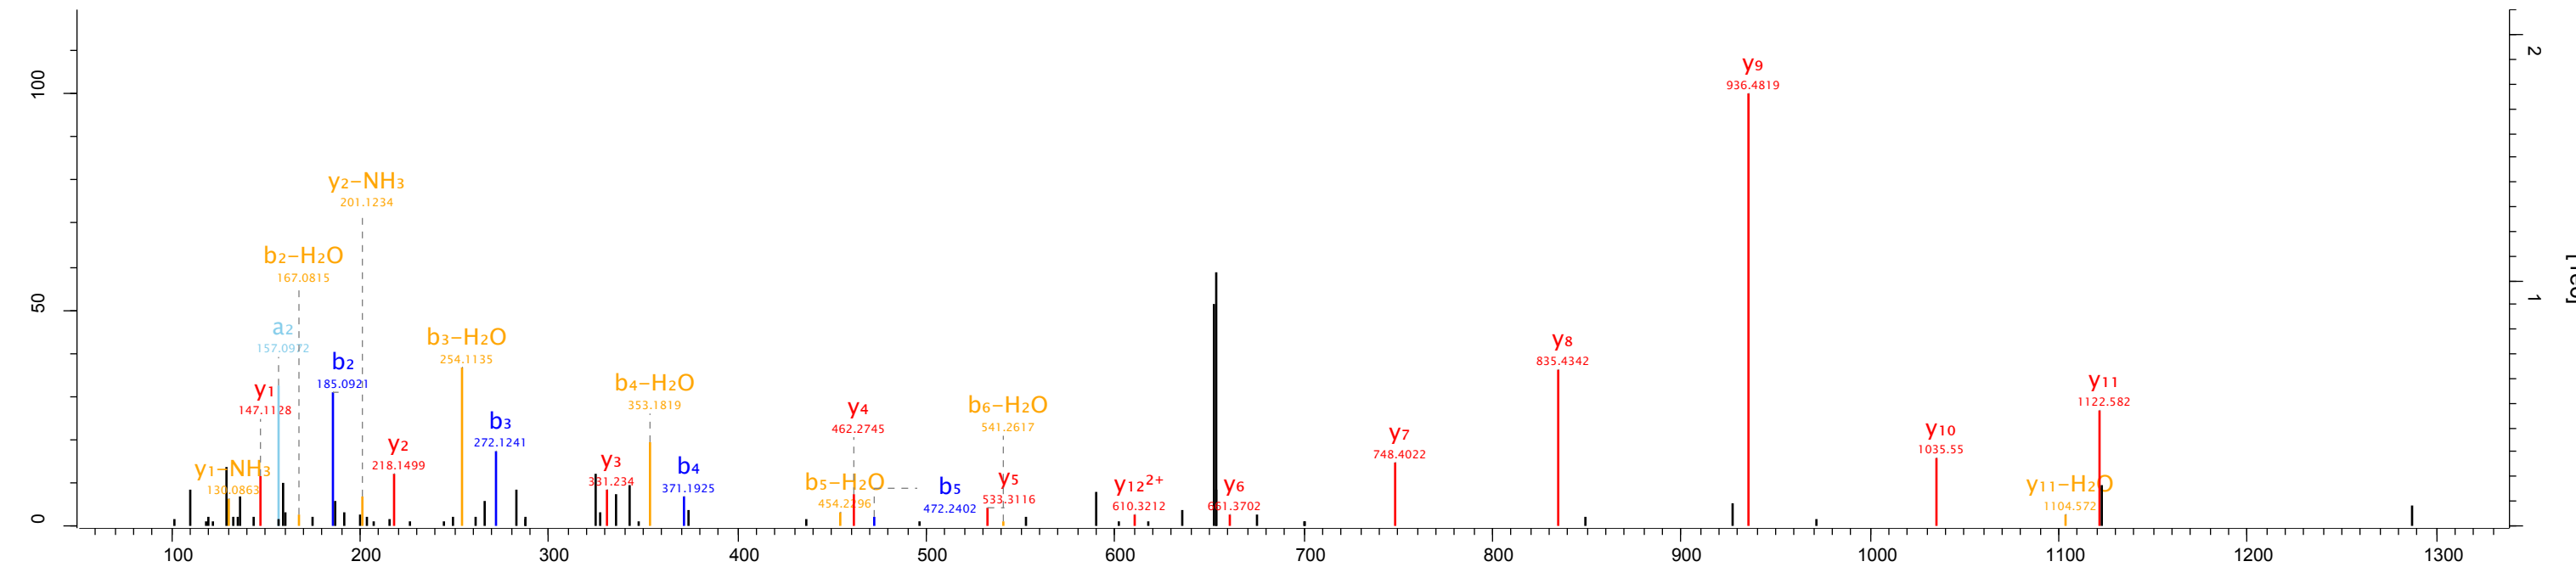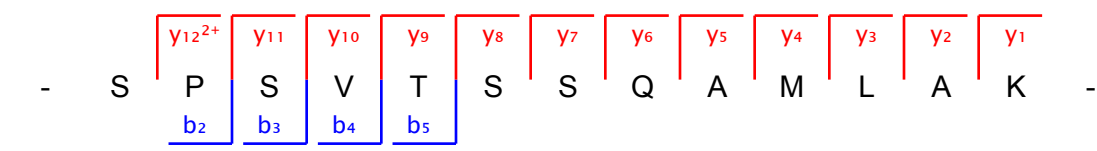

Raw file: 20180707\_MaS\_A375SR\_ML\_proteome\_29  
 Scan: 8106 Method: FTMS; HCD Score: 93.18 m/z: 487.79 Gene names: FBXO27

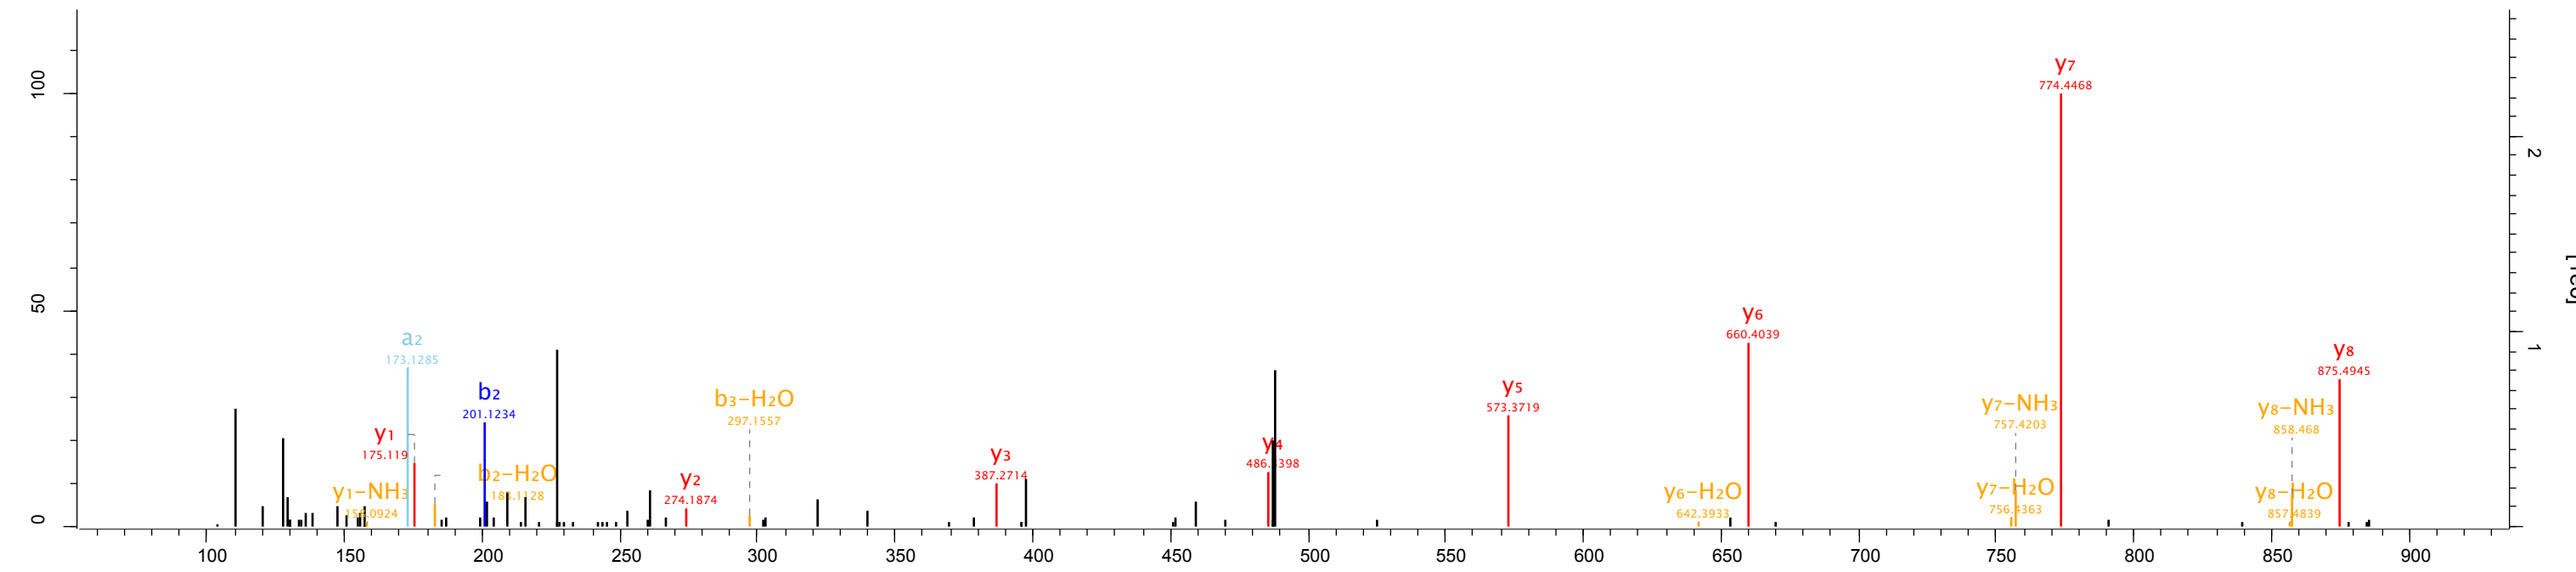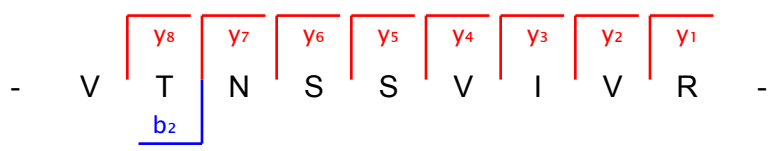

Raw file

20180707\_MaS\_A375SR\_ML\_proteome\_30

| Scan  | Method    | Score | m/z    |
|-------|-----------|-------|--------|
| 11486 | FTMS; HCD | 89.8  | 555.82 |

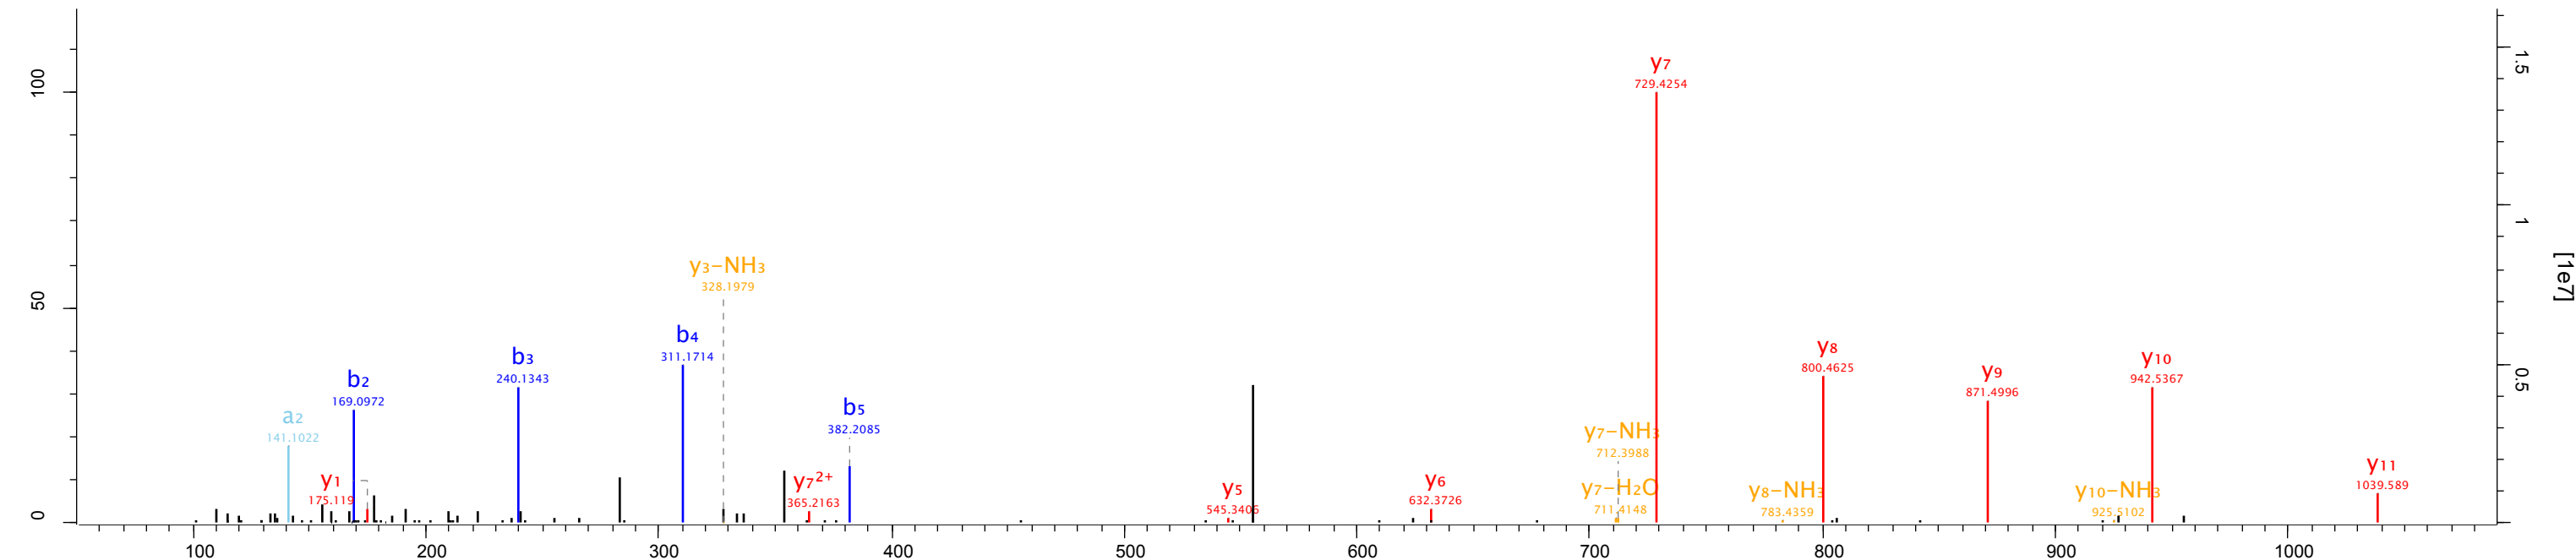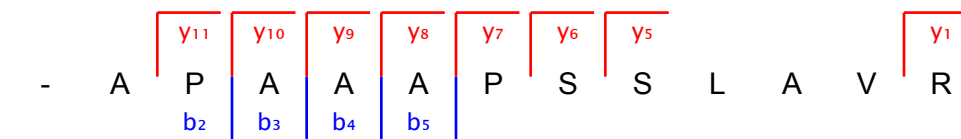

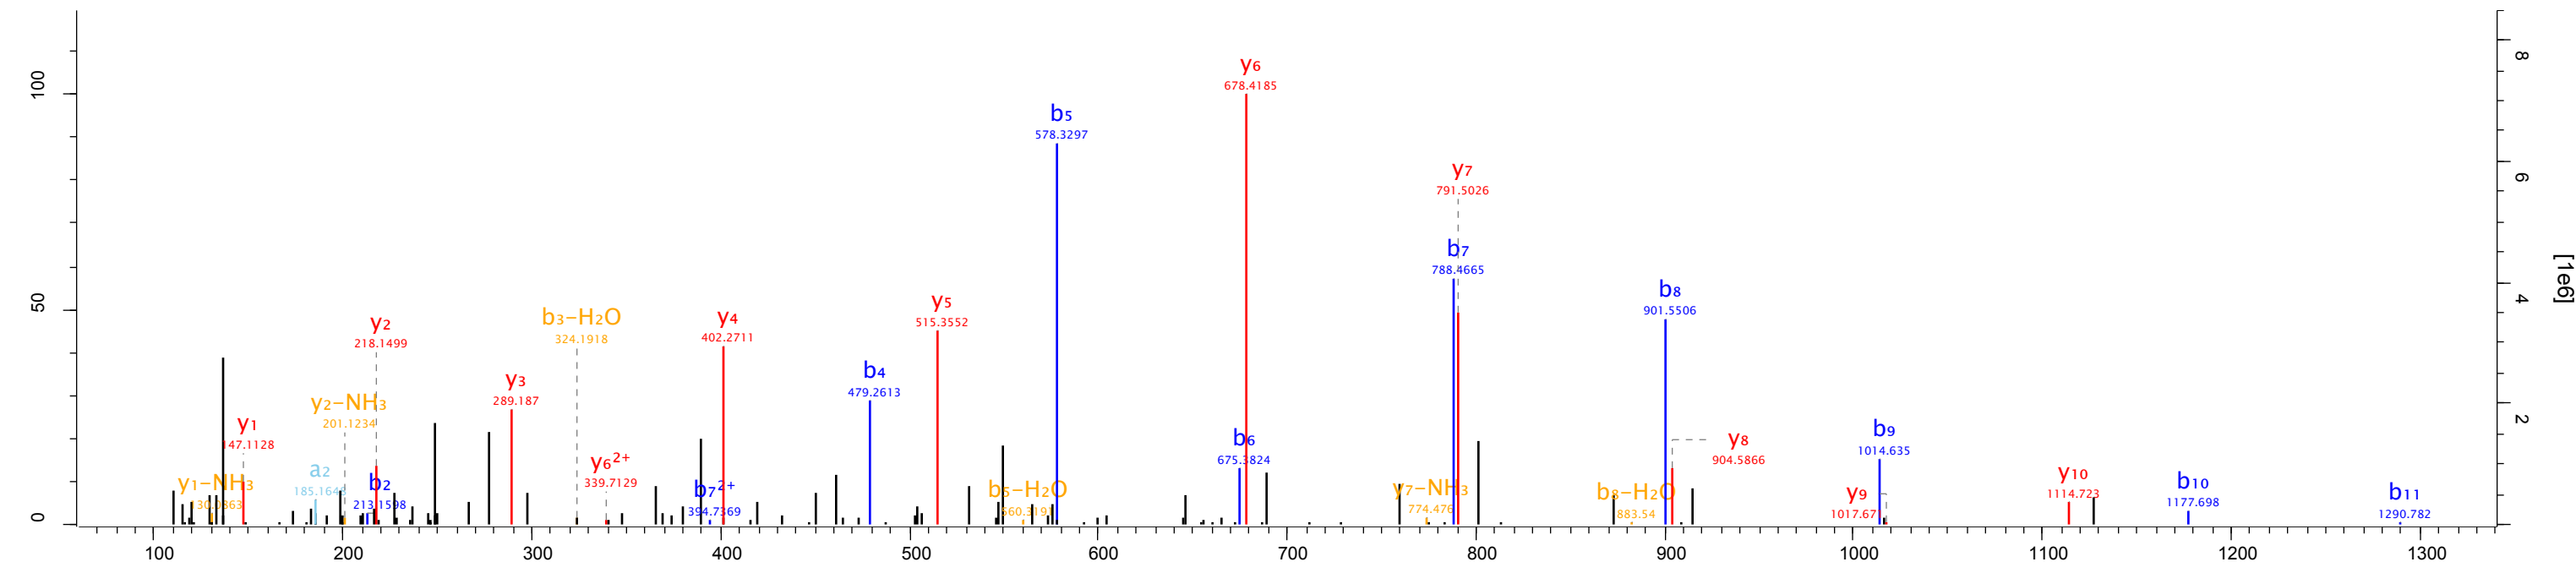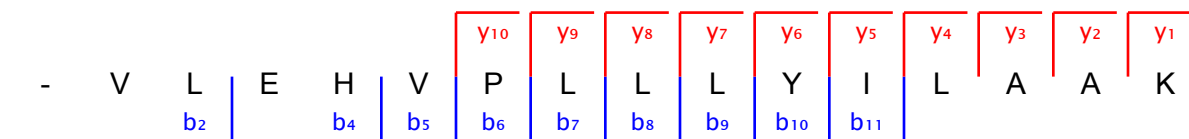

Raw file: 20150812\_A375SR\_Phospho\_BR1\_01  
 Scan: 6217 Method: FTMS; HCD Score: 43.21 m/z: 660.77 Gene names: GPSM3

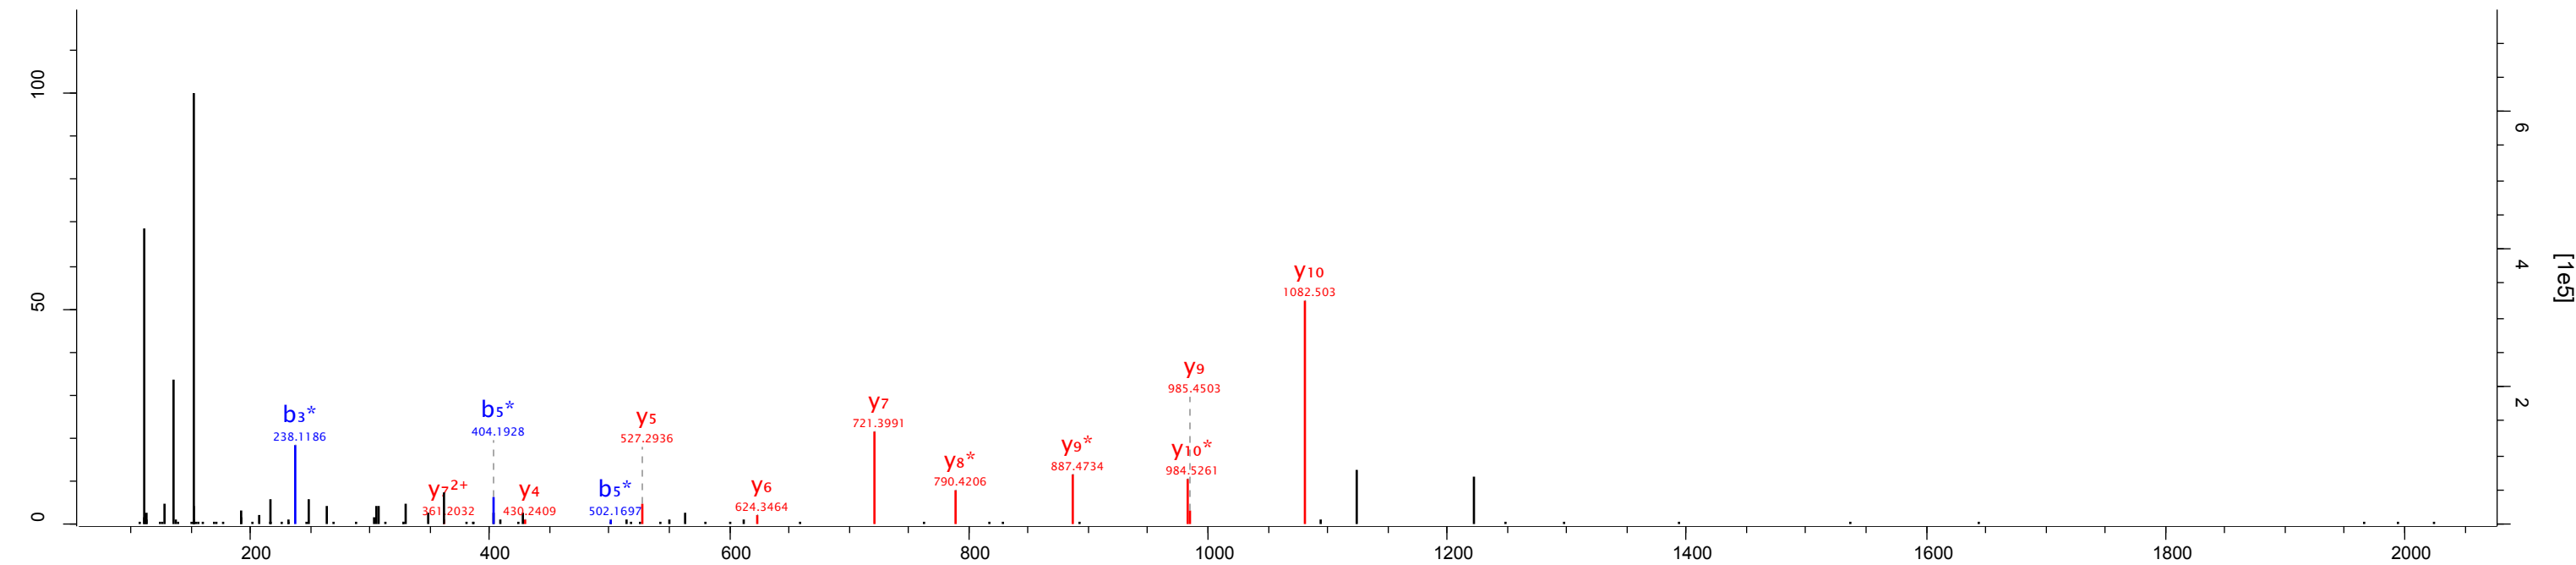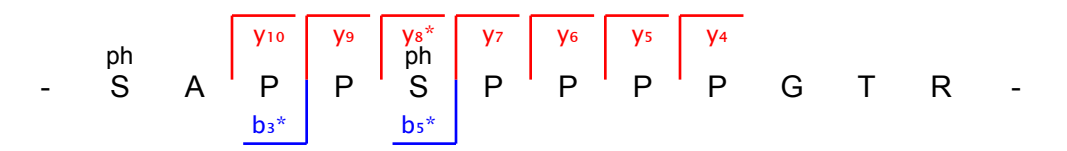

Raw file 20150812\_A375SR\_Phospho\_BR1\_01 Scan 6367 Method FTMS; HCD Score 45.61 m/z 574.24 Gene names OTOP3

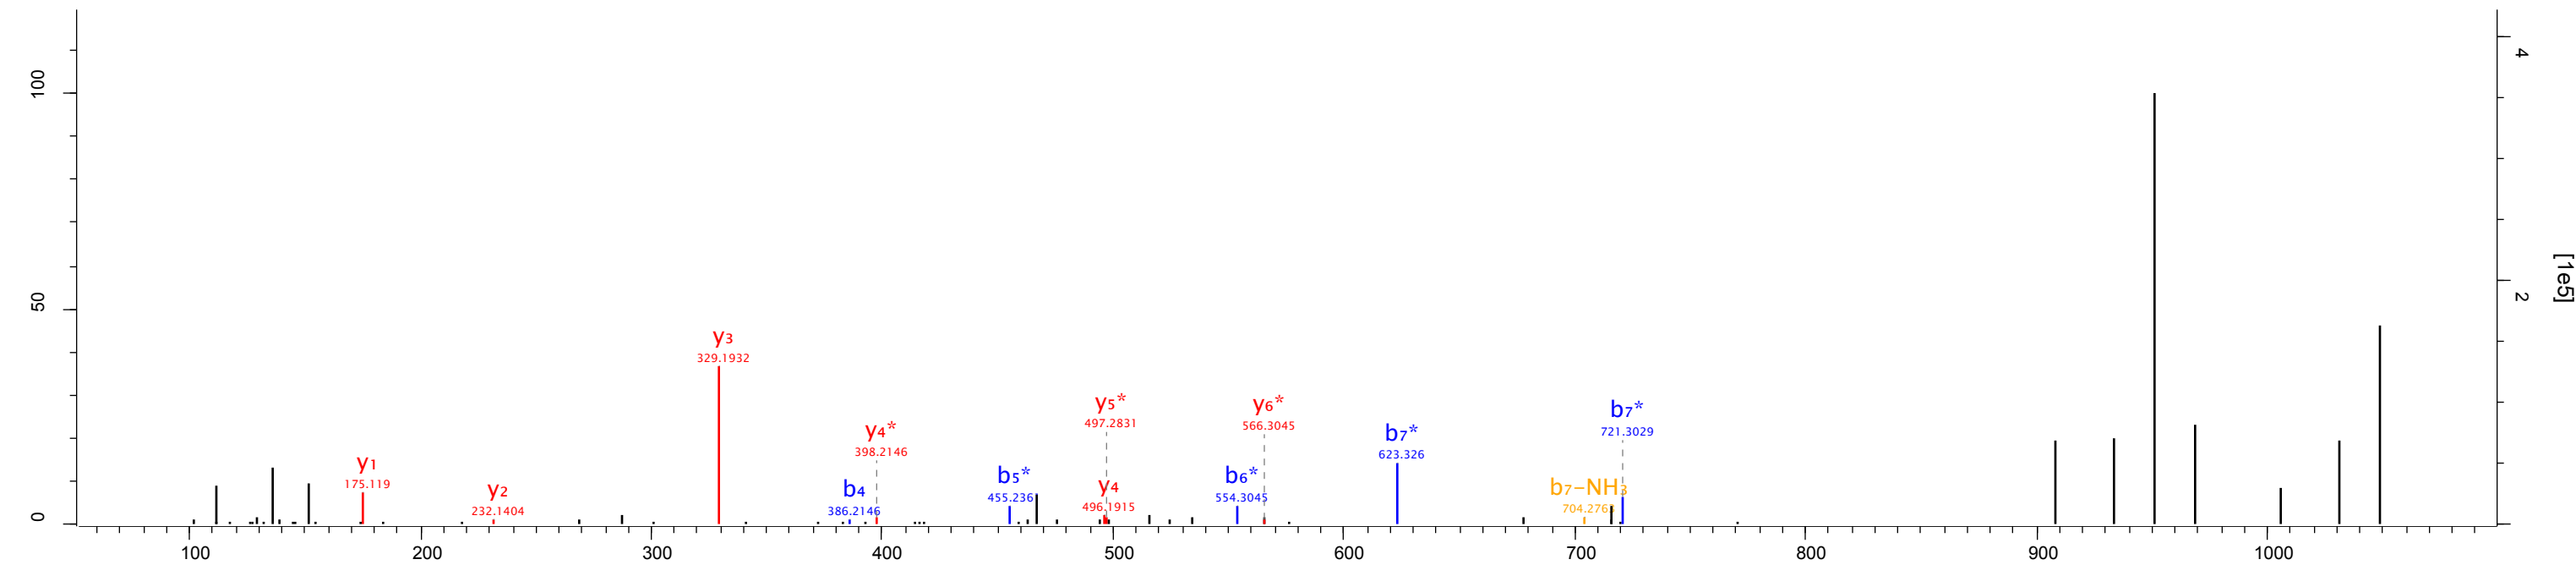

- A S R A y6\*  
ph  
S y5\*  
V y4  
ph  
S y3  
P y2  
G y1  
R -

b4 b5\* b6\* b7\*

Raw file 20150812\_A375SR\_Phospho\_BR1\_02 Scan 13057 Method FTMS; HCD Score 68.29 m/z 910.05 Gene names ZNF446

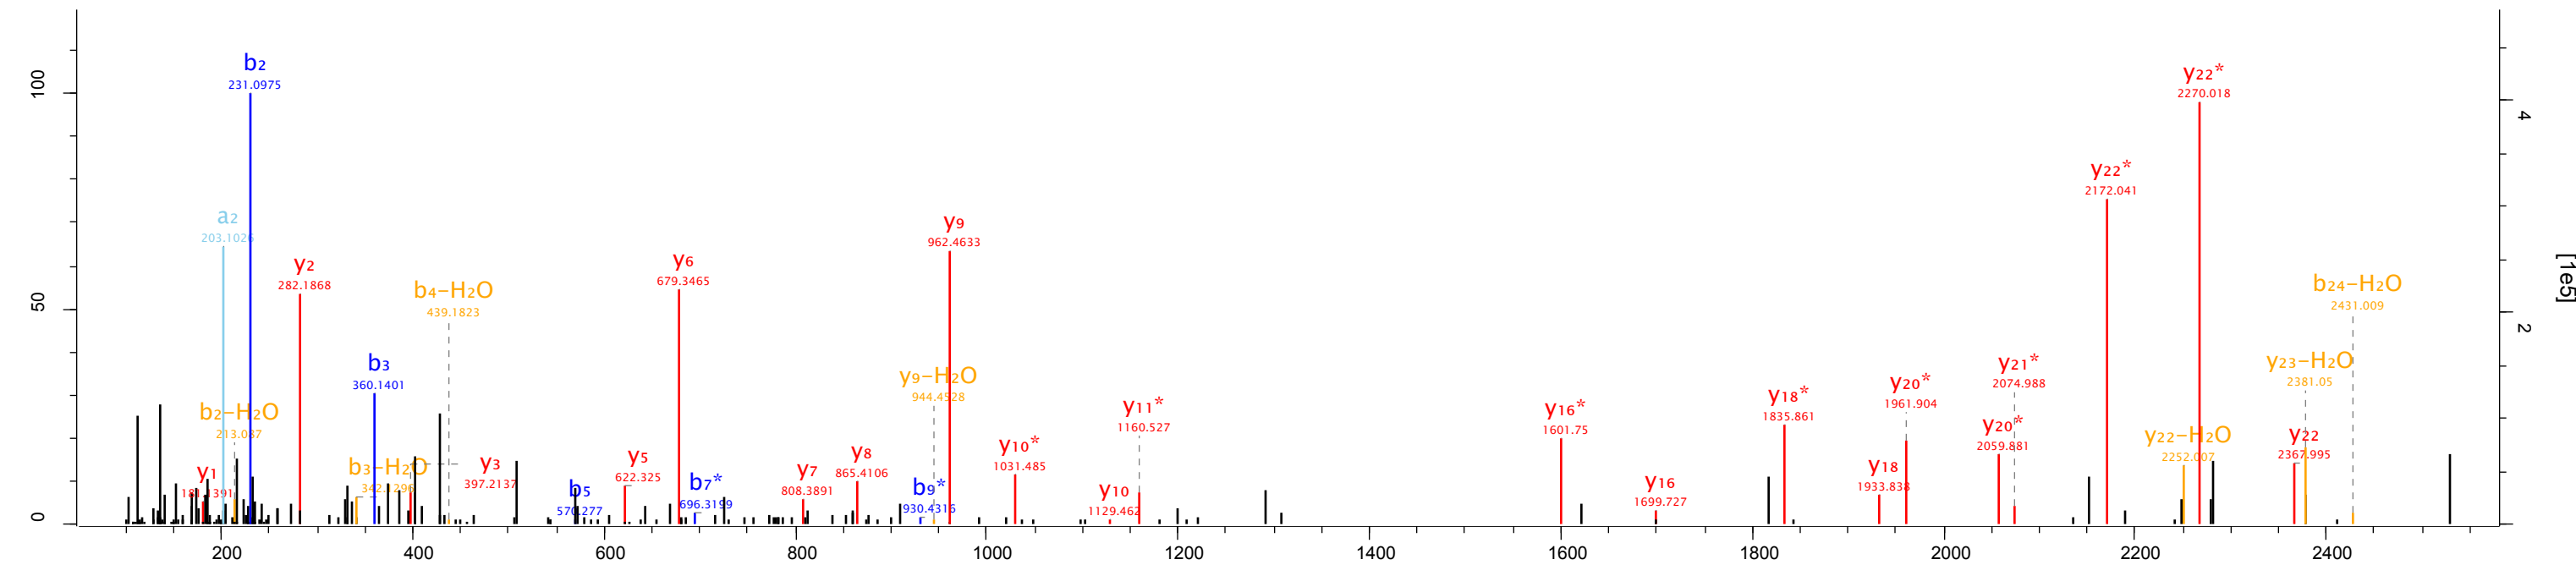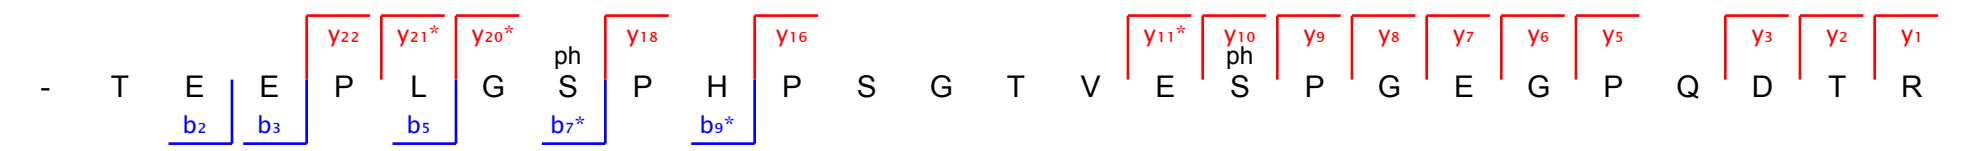



Raw file: 20150812\_A375SR\_Phospho\_BR1\_02  
 Scan: 6827 Method: FTMS; HCD Score: 43.95 m/z: 660.77 Gene names: GPSM3

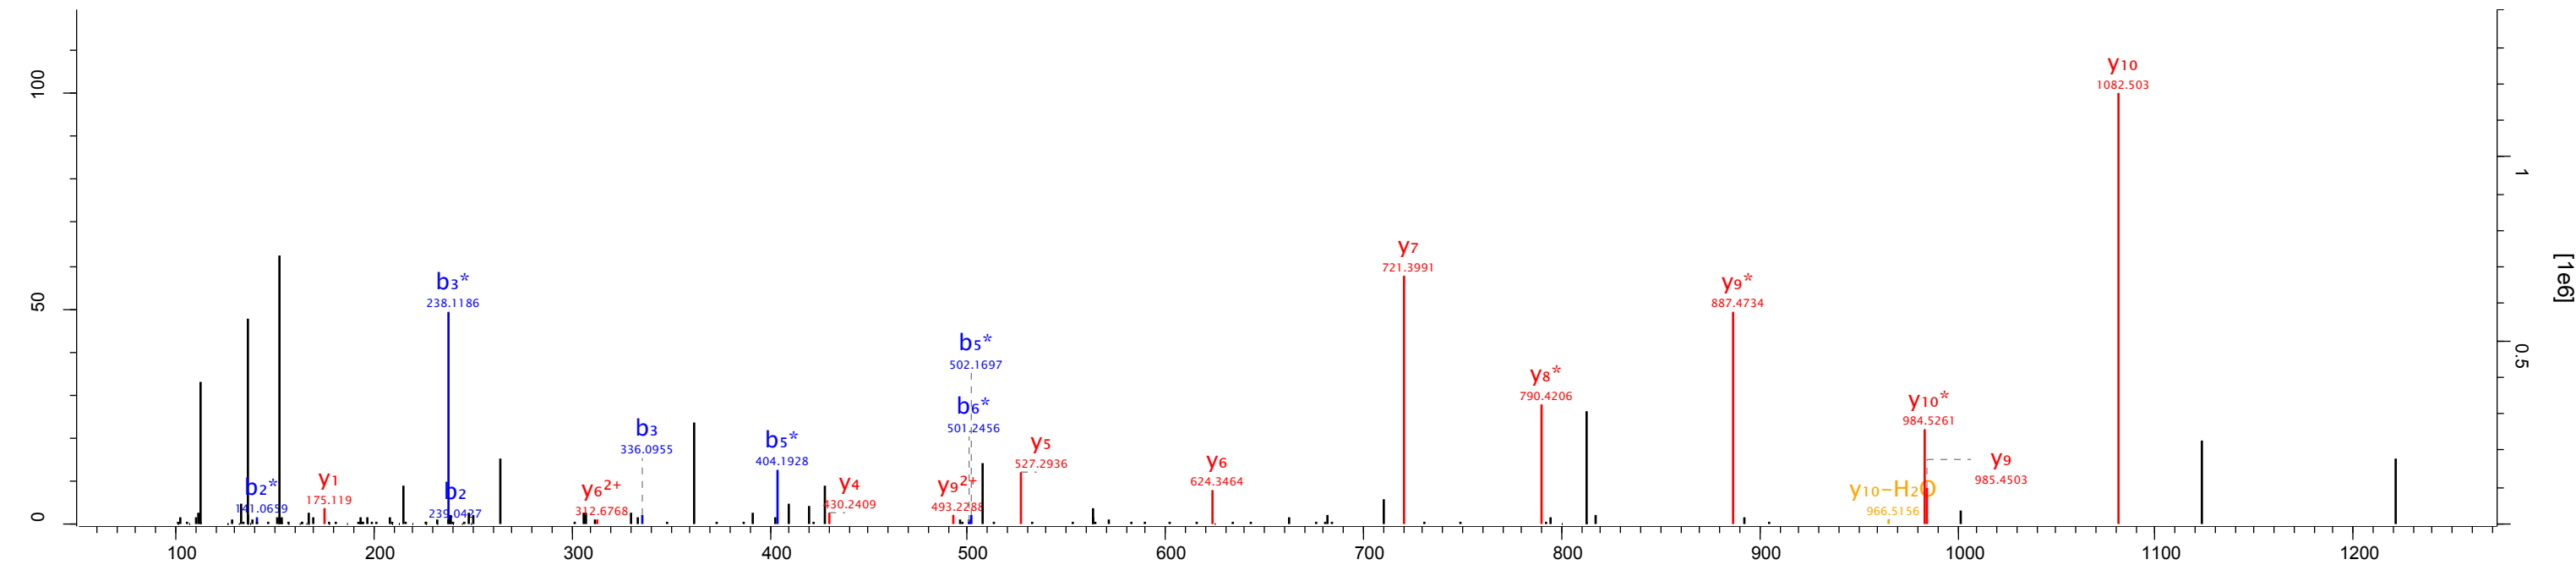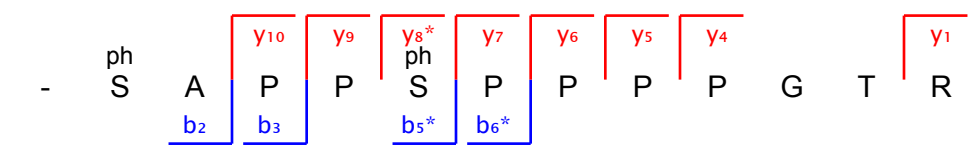

Raw file 20150812\_A375SR\_Phospho\_BR1\_03 Scan 20047 Method FTMS; HCD Score 66.15 m/z 749.31 Gene names ZBTB44

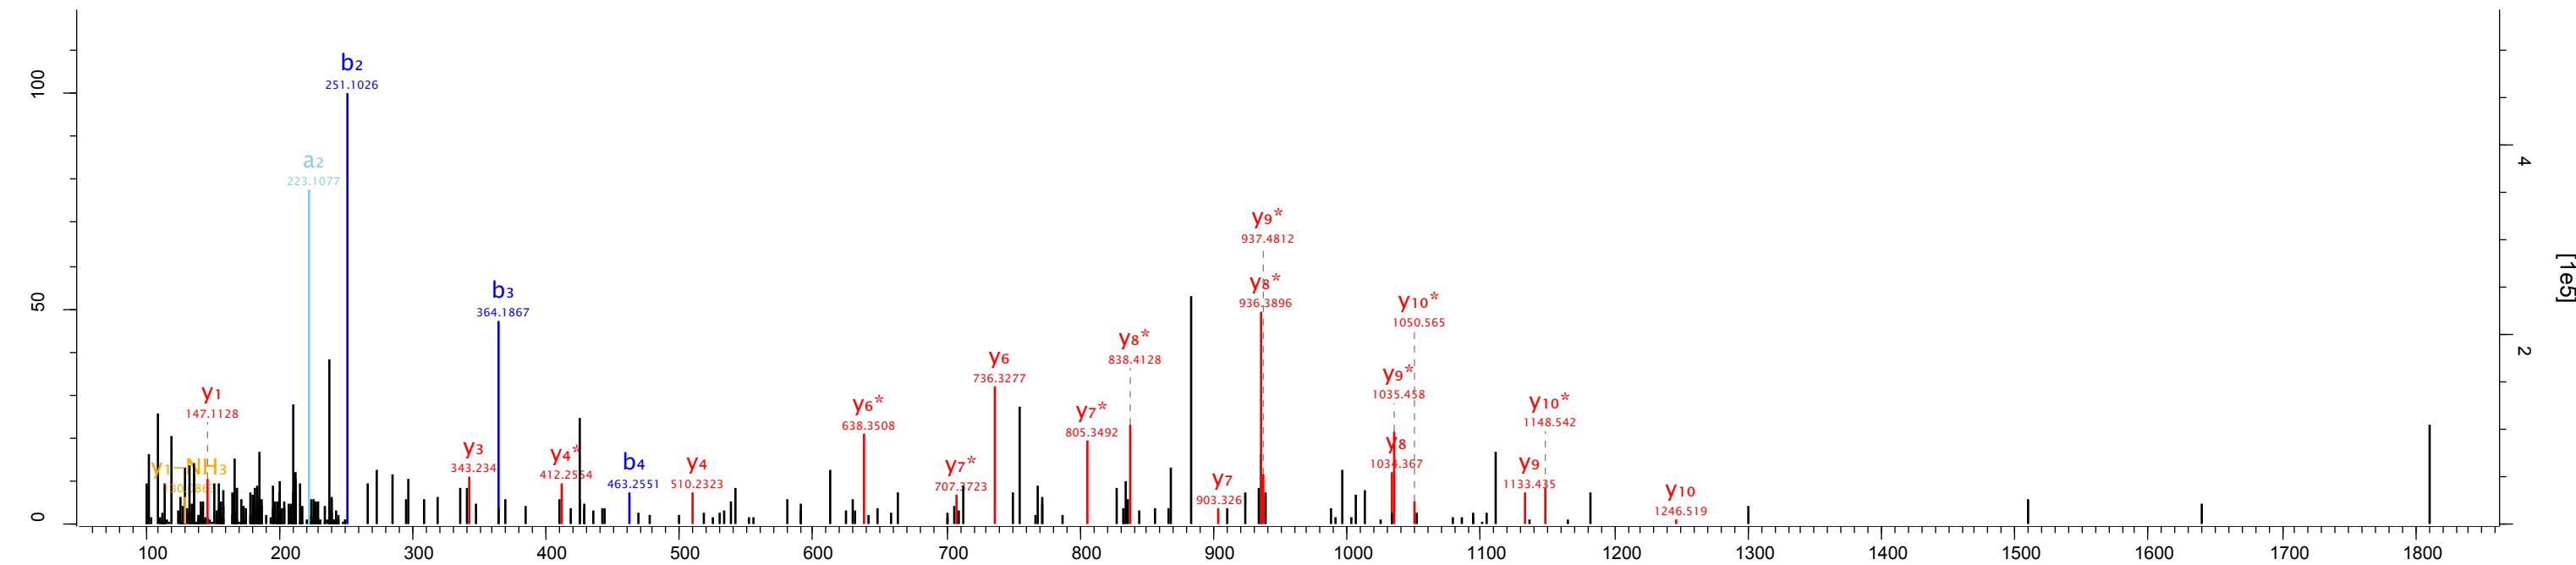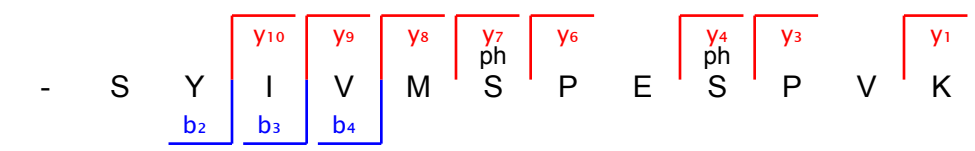

Raw file 20150812\_A375SR\_Phospho\_BR1\_03 Scan 28507 Method FTMS; HCD Score 92.91 m/z 798.89 Gene names BCL11A

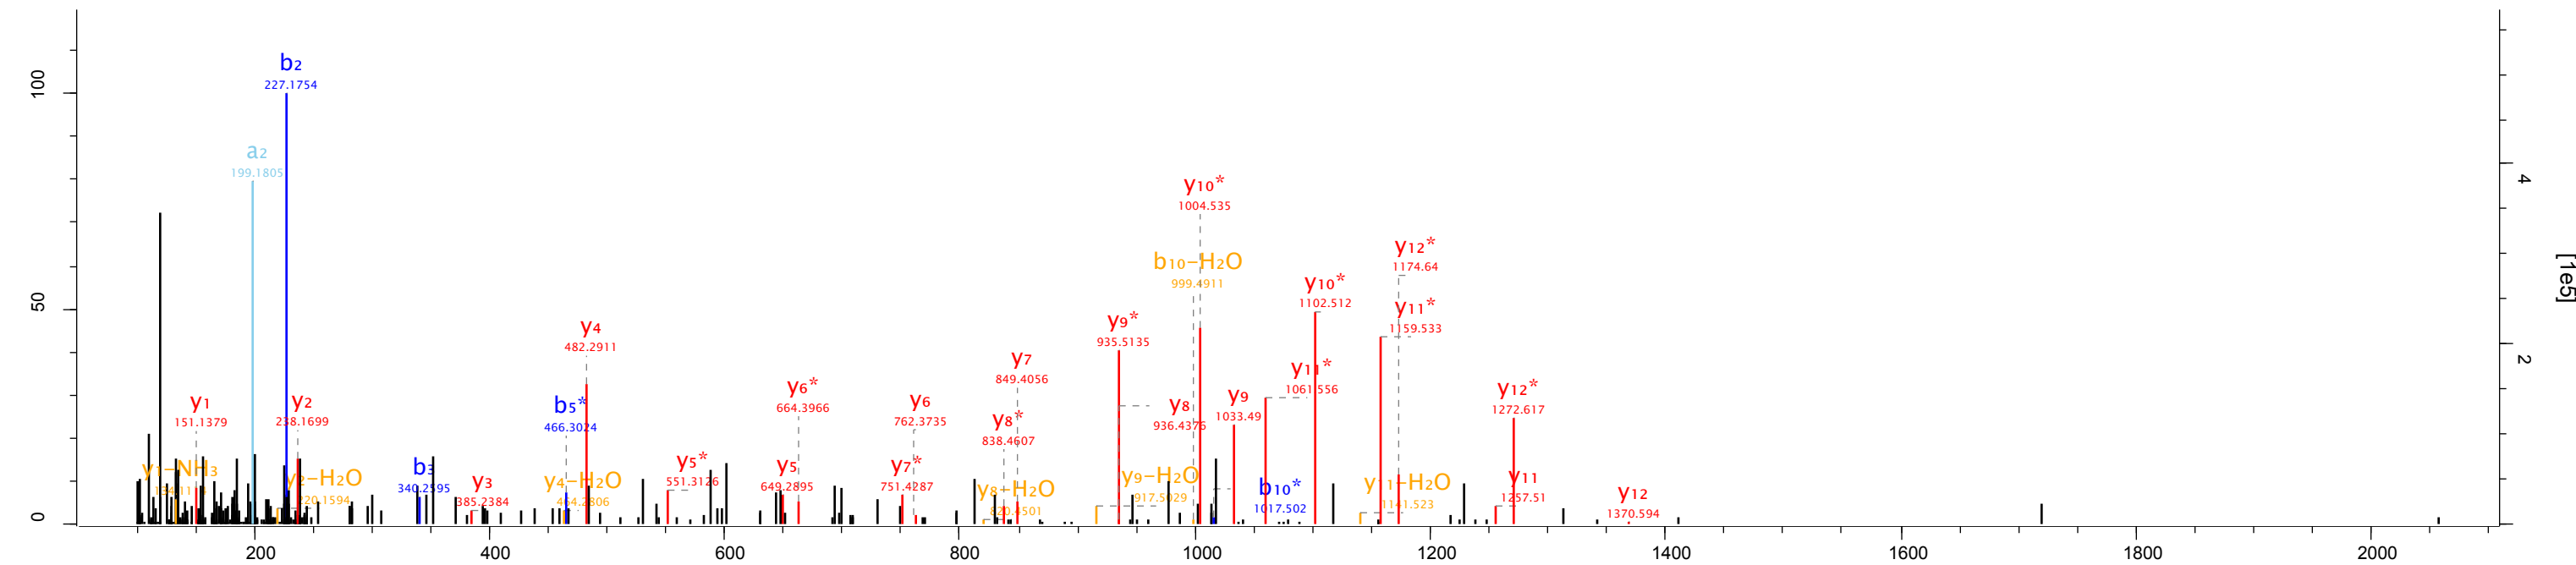

- L L L G S P S S L S P F S K -

Fragmentation mapping (b and y ions):

- b<sub>2</sub> (L)
- b<sub>3</sub> (L)
- b<sub>5</sub>\* (S)
- b<sub>10</sub>\* (S)
- y<sub>1</sub> (K)
- y<sub>2</sub> (S)
- y<sub>3</sub> (F)
- y<sub>4</sub> (P)
- y<sub>5</sub> (S)
- y<sub>5</sub>ph (S)
- y<sub>6</sub> (L)
- y<sub>7</sub> (S)
- y<sub>8</sub> (S)
- y<sub>9</sub> (P)
- y<sub>10</sub>\* (S)
- y<sub>11</sub> (G)
- y<sub>12</sub> (L)

Raw file  
20150812\_A375SR\_Phospho\_BR1\_06

Scan 14007 Method FTMS; HCD Score 264.83 m/z 843.46 Gene names MLLT3

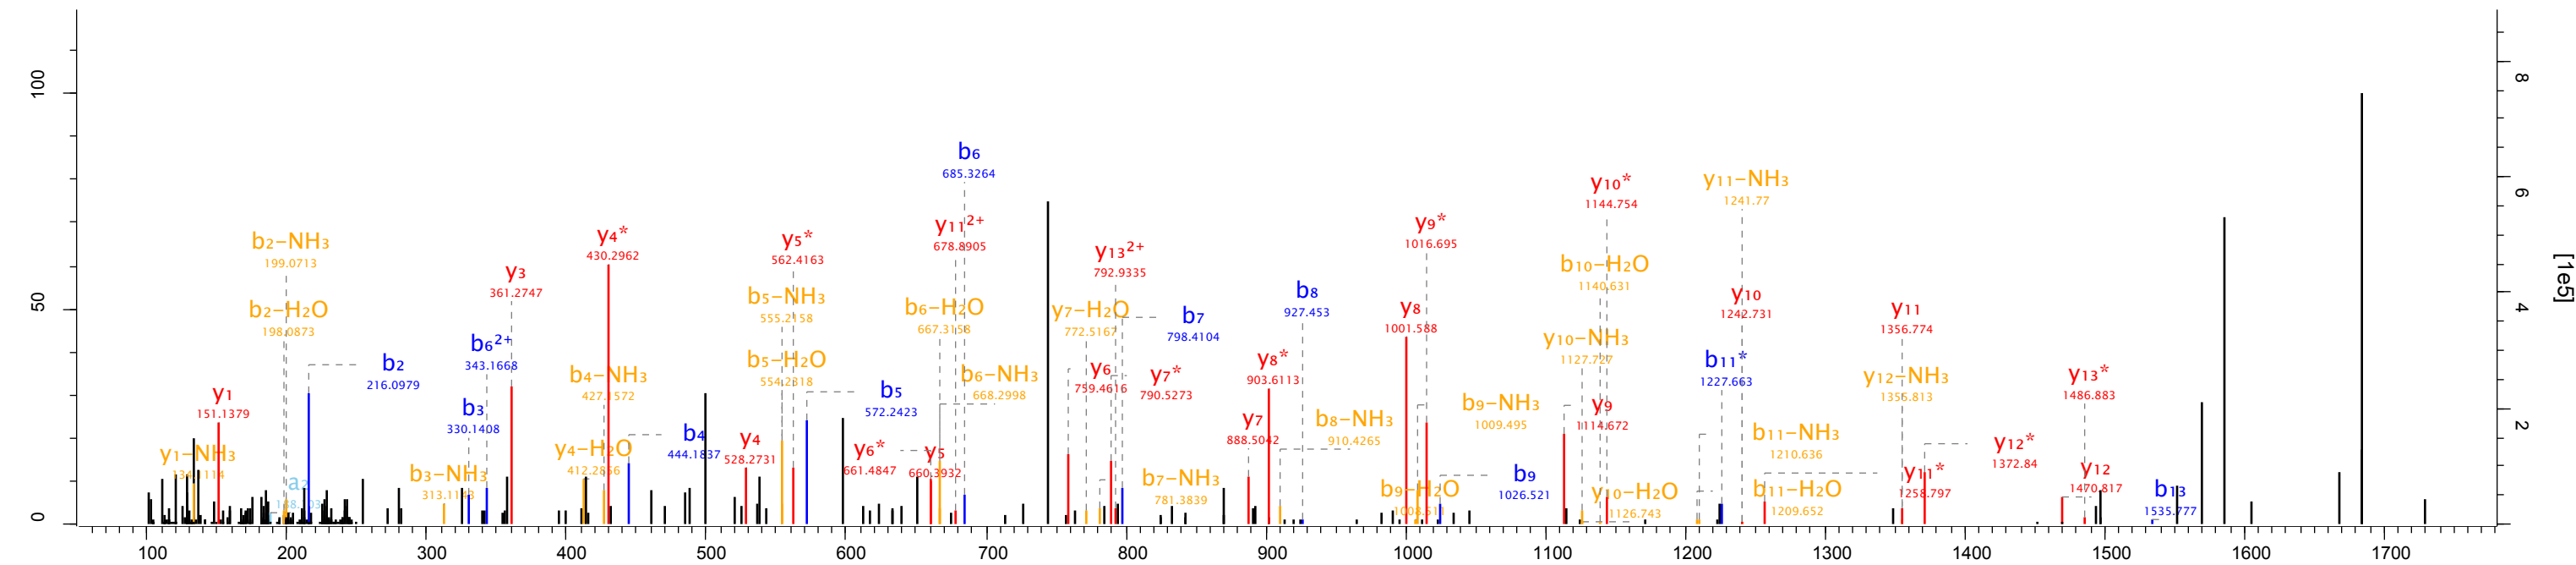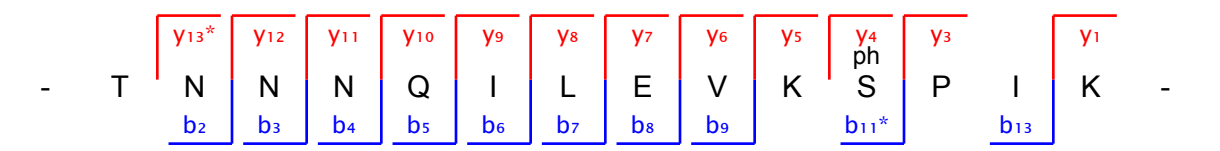

Raw file: 20150812\_A375SR\_Phospho\_BR1\_06  
 Scan: 6657 Method: FTMS; HCD Score: 141.91 m/z: 841.35 Gene names: YAF2

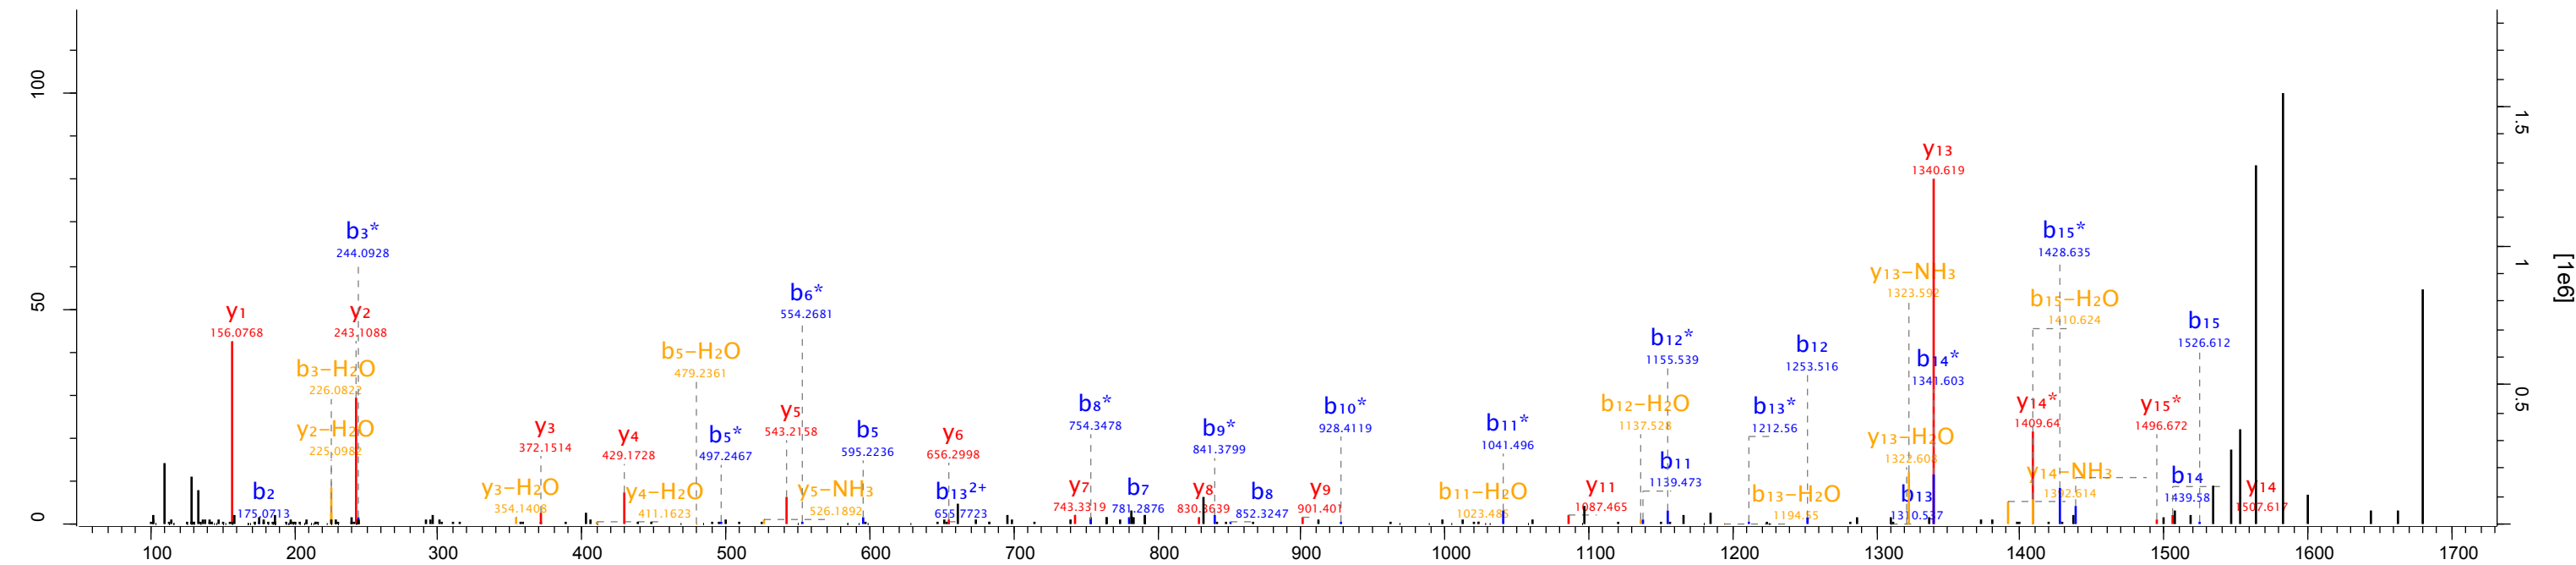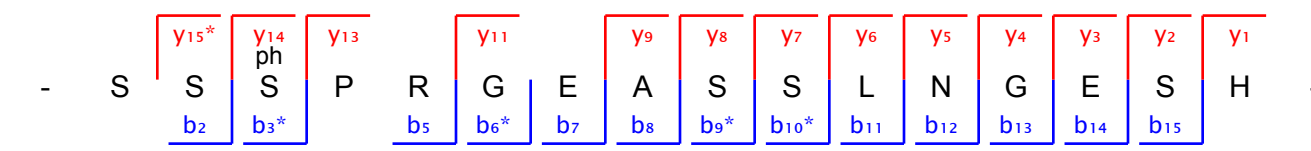

Raw file 20150812\_A375SR\_Phospho\_BR1\_07 Scan 13617 Method FTMS; HCD Score 68.77 m/z 693.33 Gene names CBY1

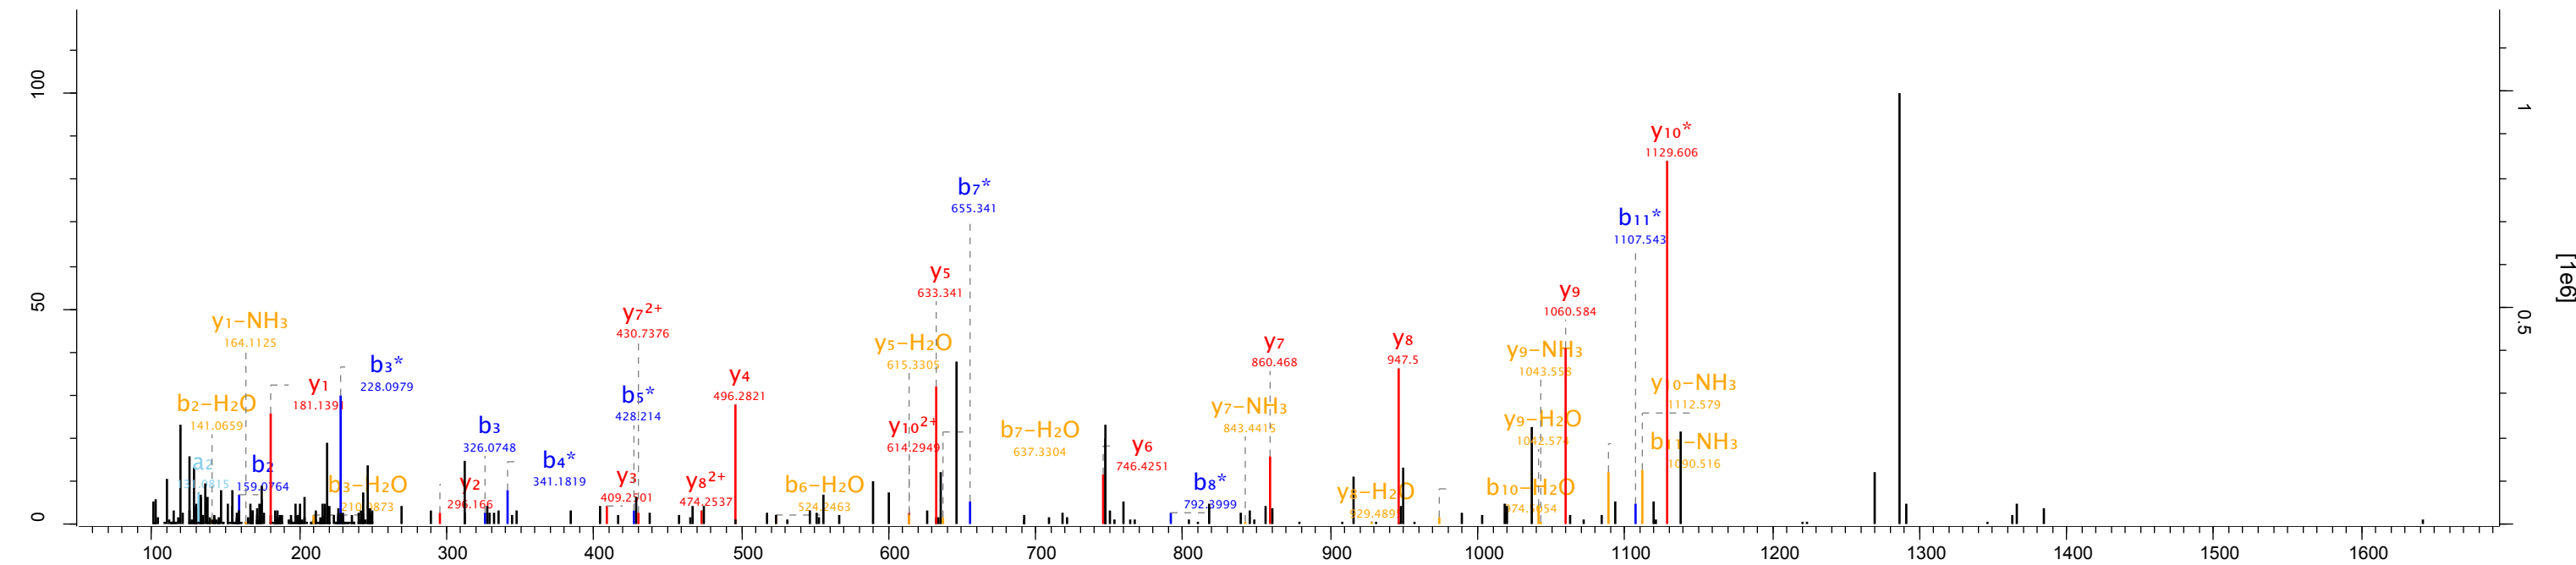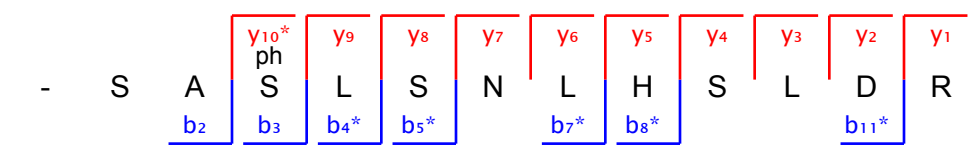

Raw file 20150812\_A375SR\_Phospho\_BR1\_07 Scan 5627 Method FTMS; HCD Score 44.43 m/z 630.29

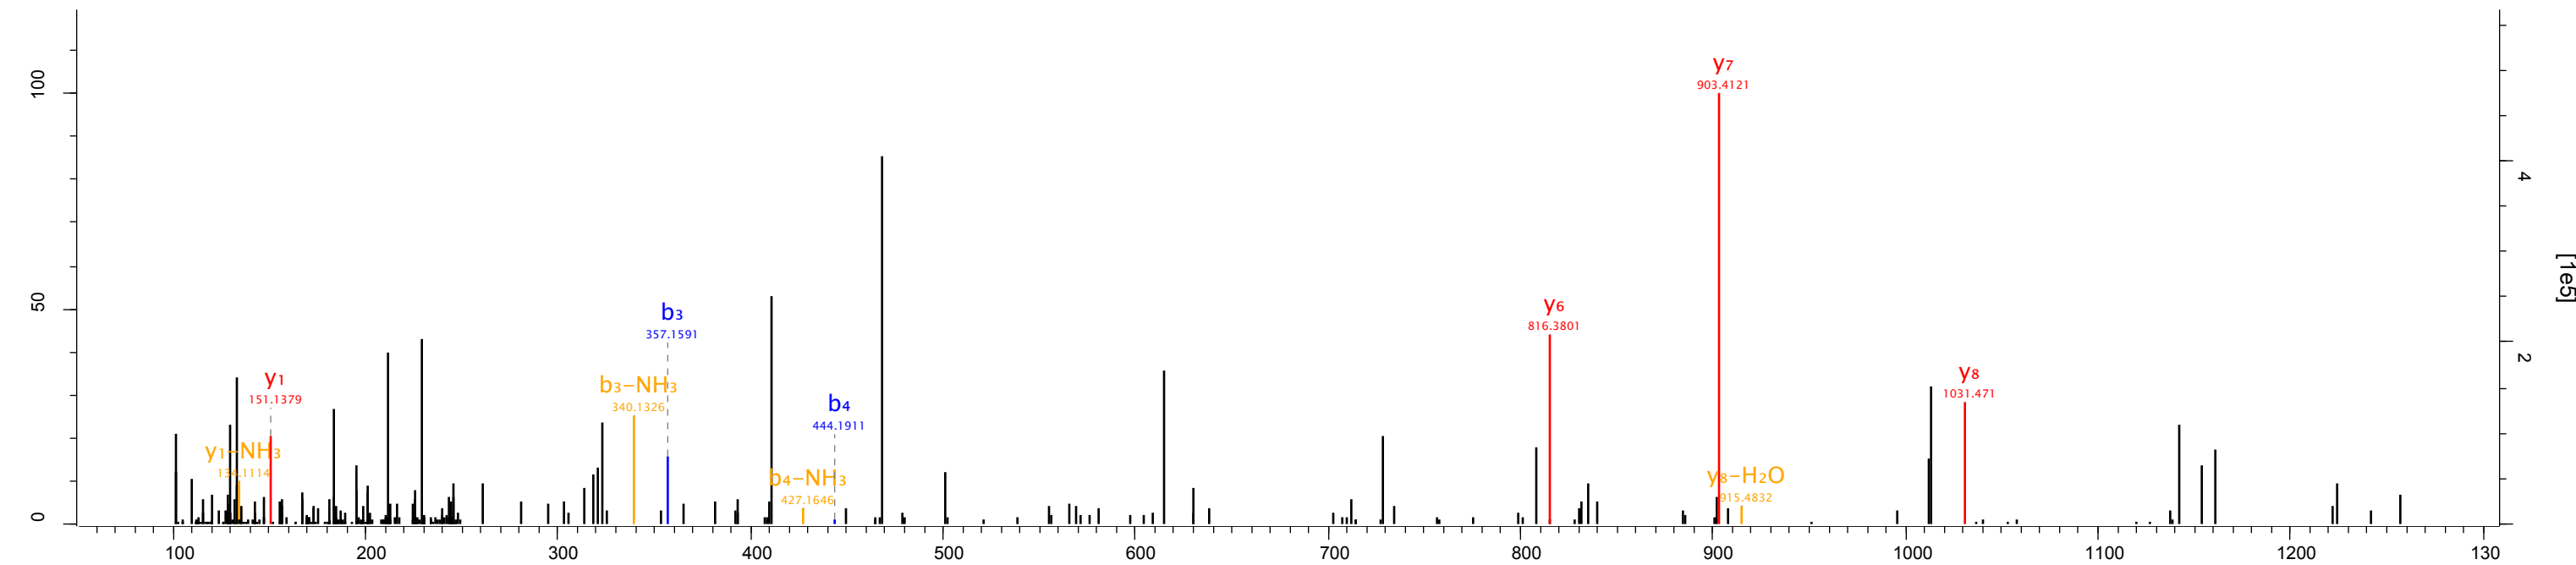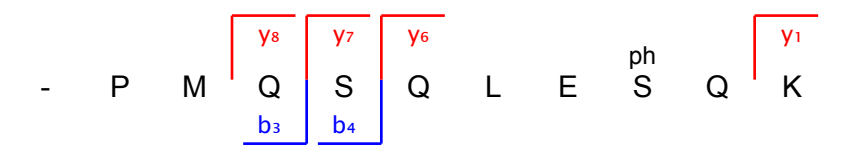

Raw file 20150812\_A375SR\_Phospho\_BR1\_07 Scan 6987 Method FTMS; HCD Score 57.55 m/z 426.73

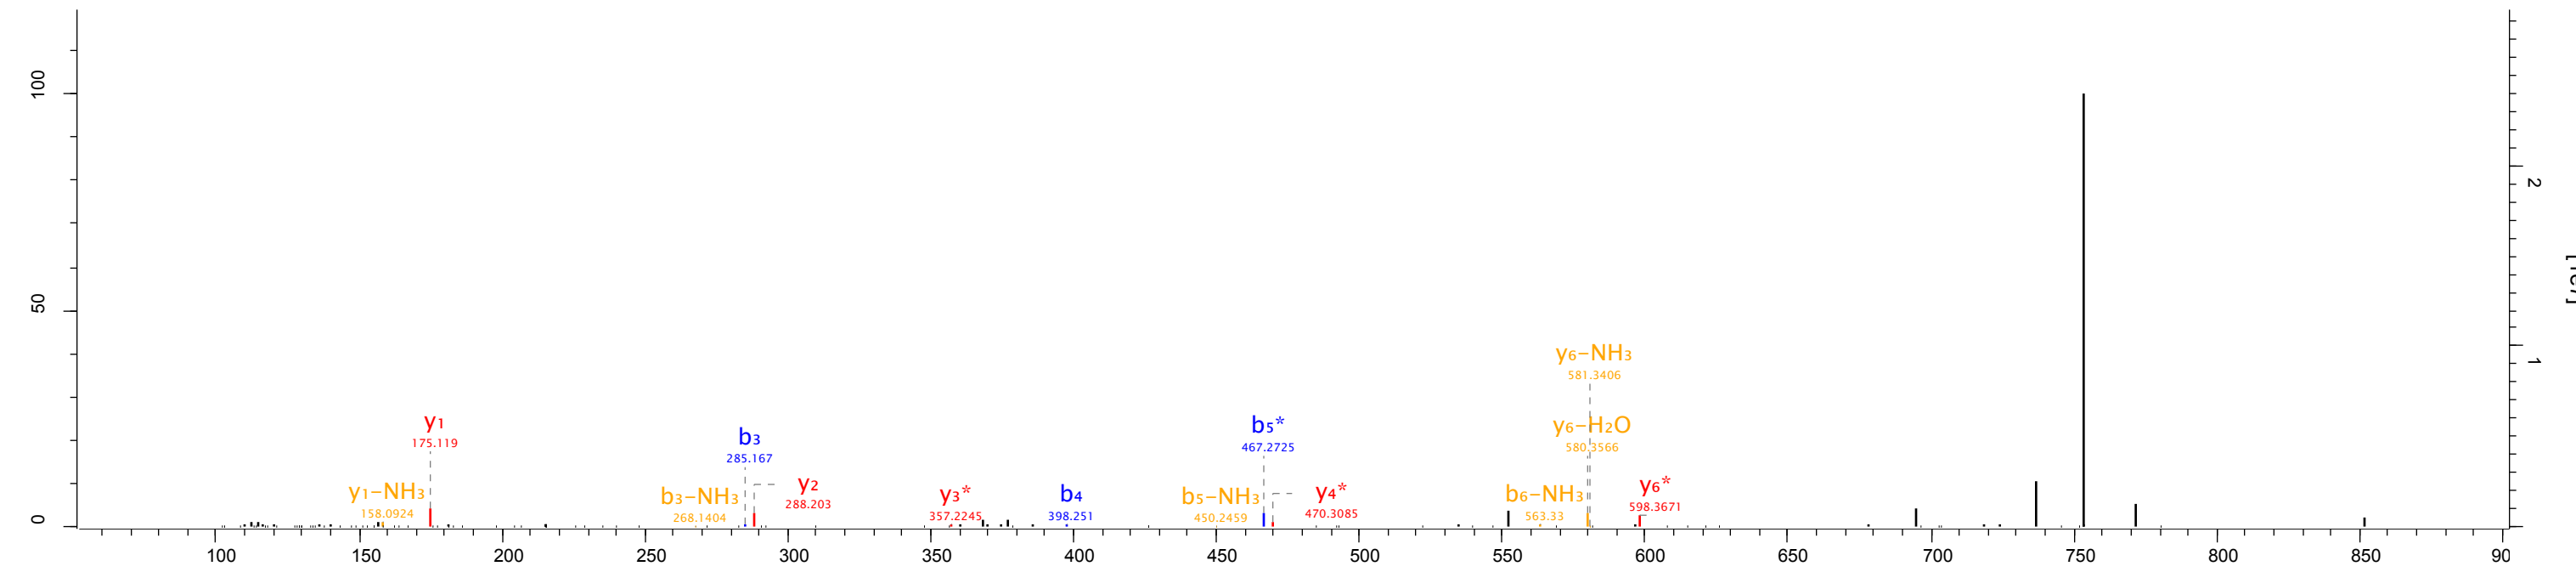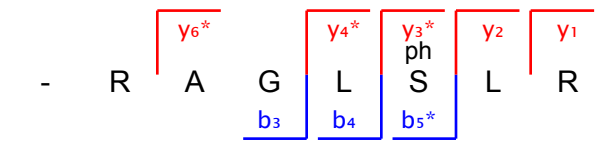



Raw file 20150812\_A375SR\_Phospho\_BR1\_07 Scan 9727 Method FTMS; HCD Score 60.12 m/z 558.79

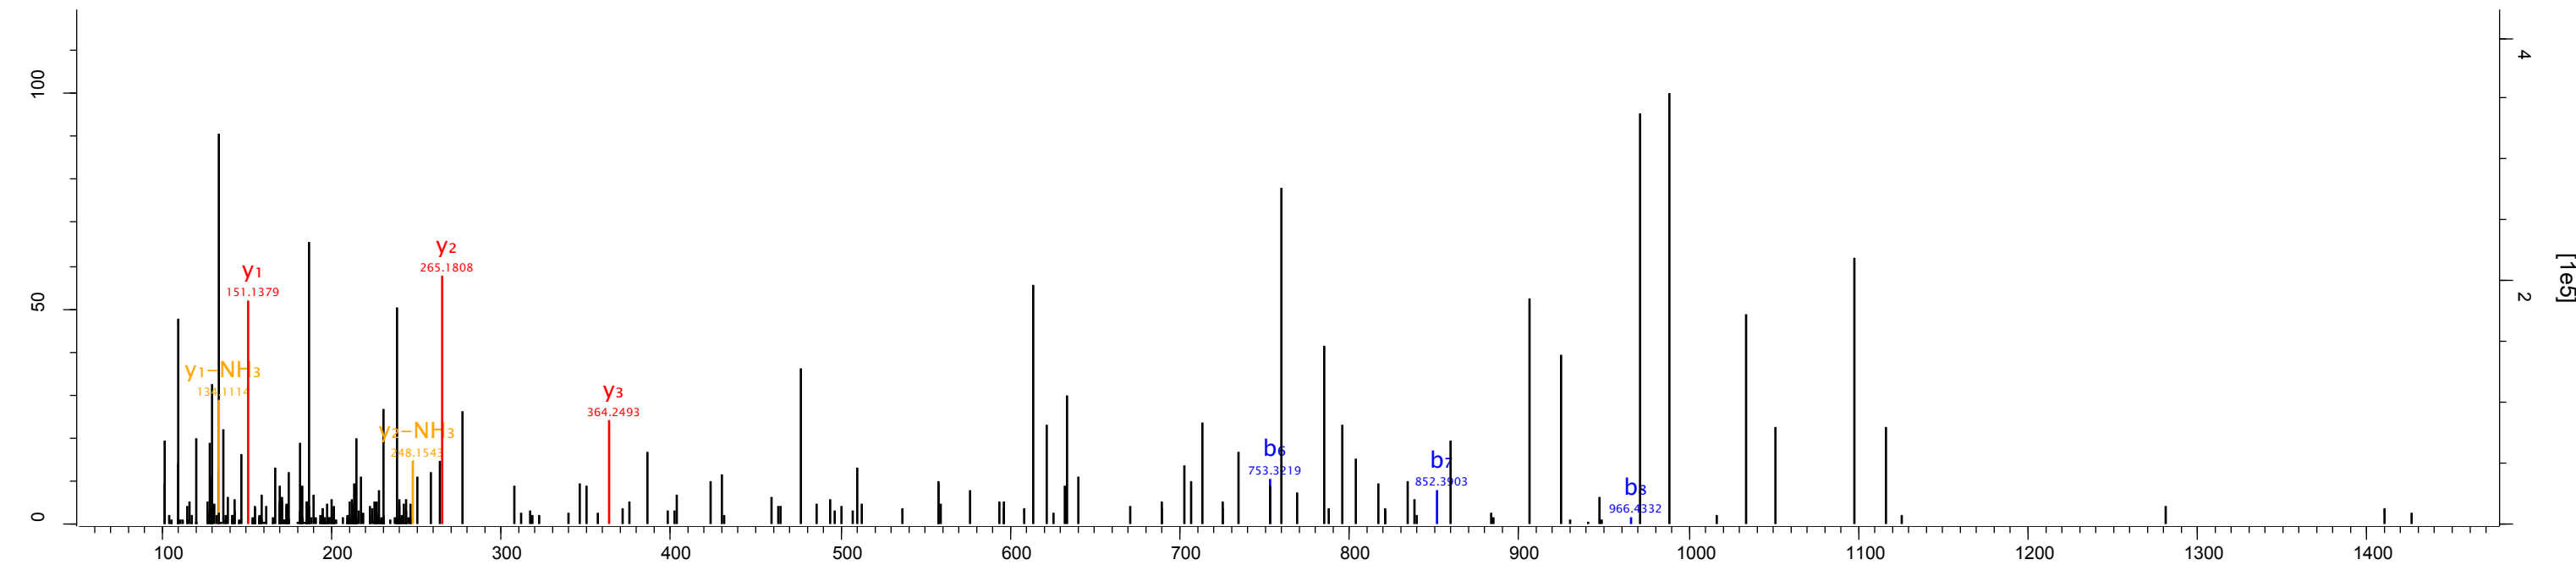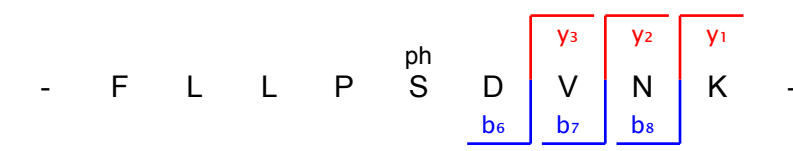

Raw file 20150812\_A375SR\_Phospho\_BR1\_08 Scan 13347 Method FTMS; HCD Score 227.57 m/z 843.96 Gene names MLLT3

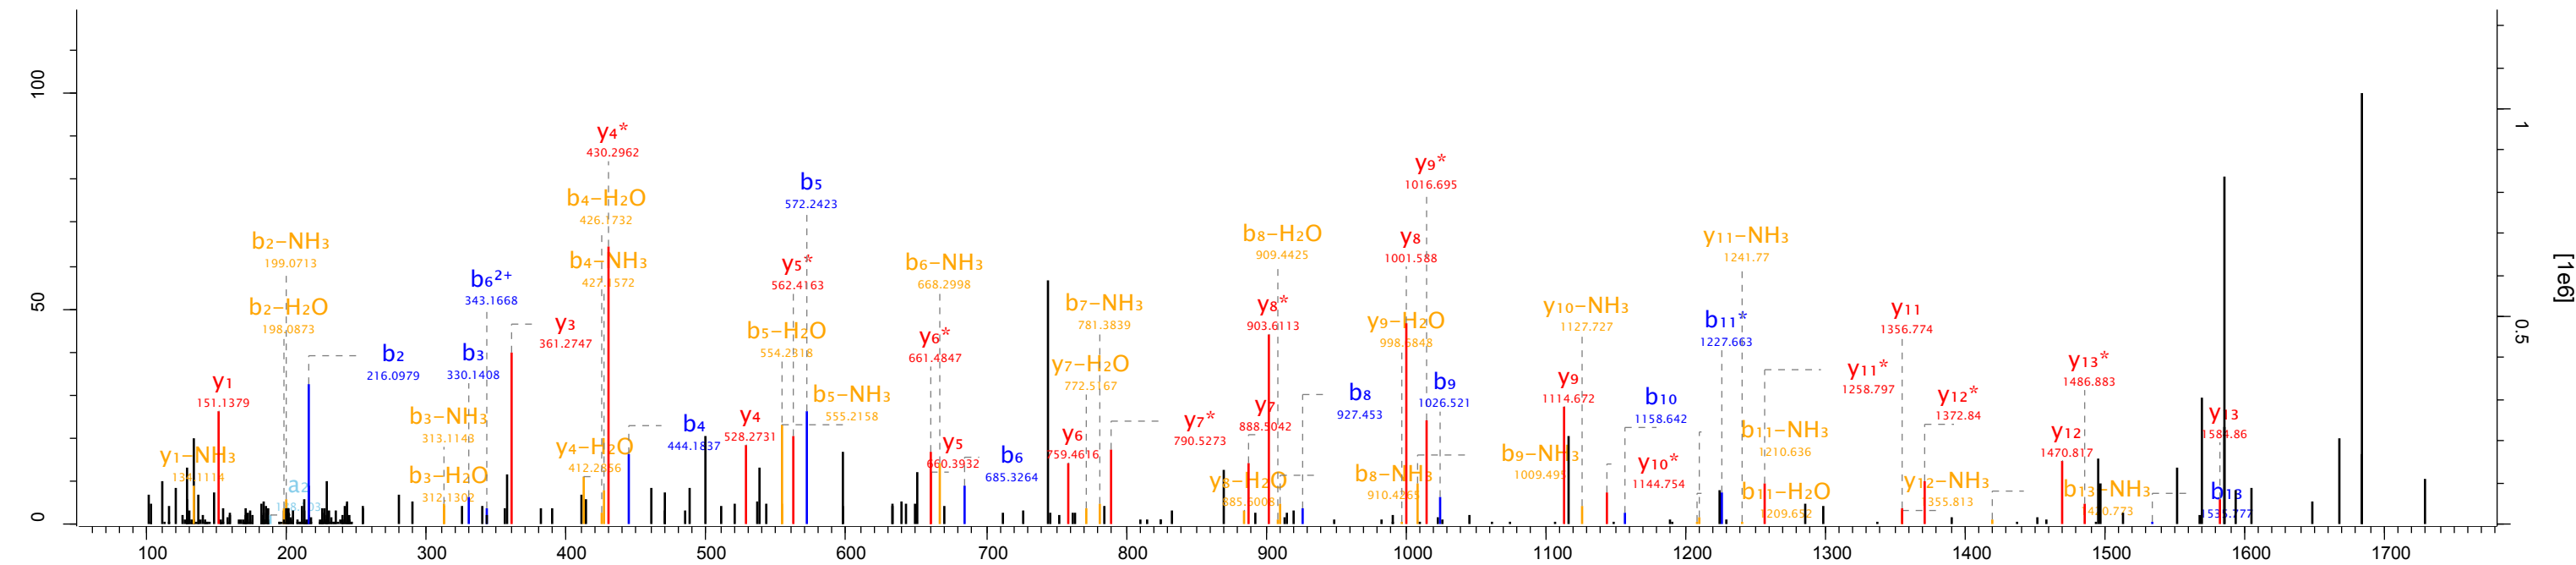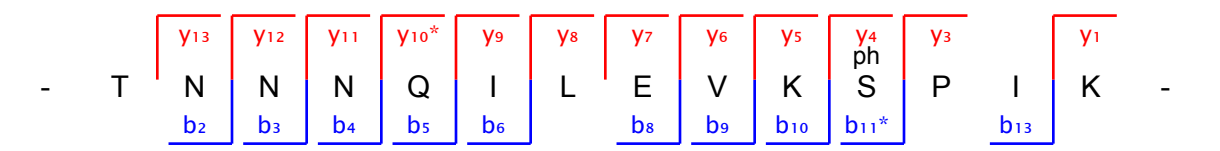

Raw file 20150812\_A375SR\_Phospho\_BR1\_08 Scan 14297 Method FTMS; HCD Score 43.86 m/z 866.4

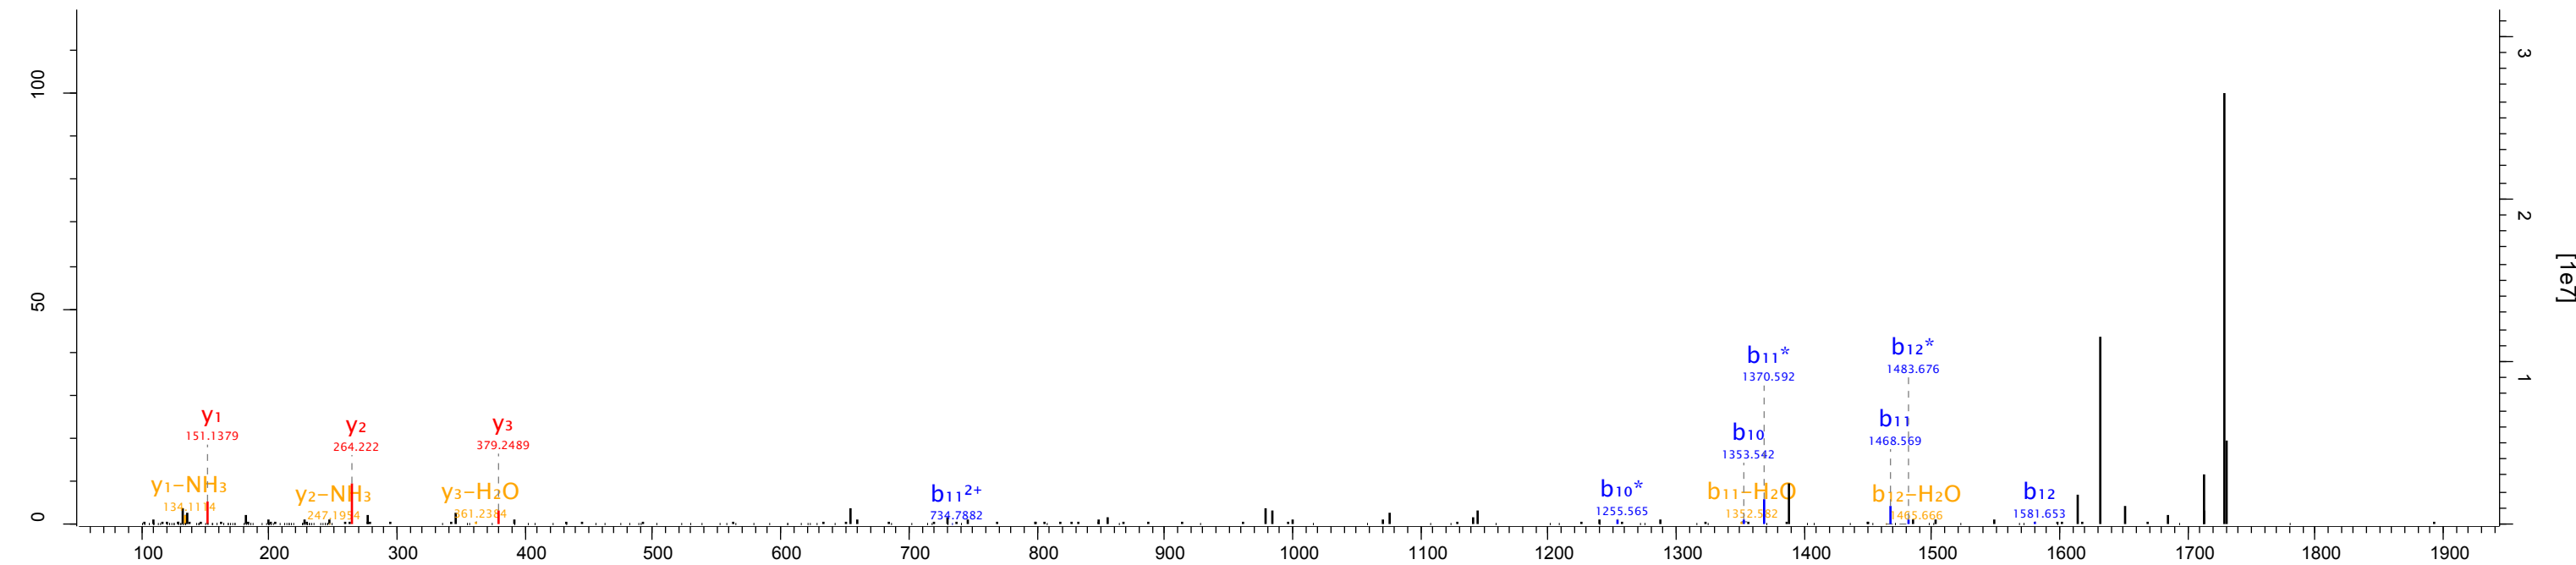

Raw file: 20150812\_A375SR\_Phospho\_BR1\_08  
 Scan: 2127 Method: FTMS; HCD Score: 72.9 m/z: 406.2 Gene names: TBC1D14

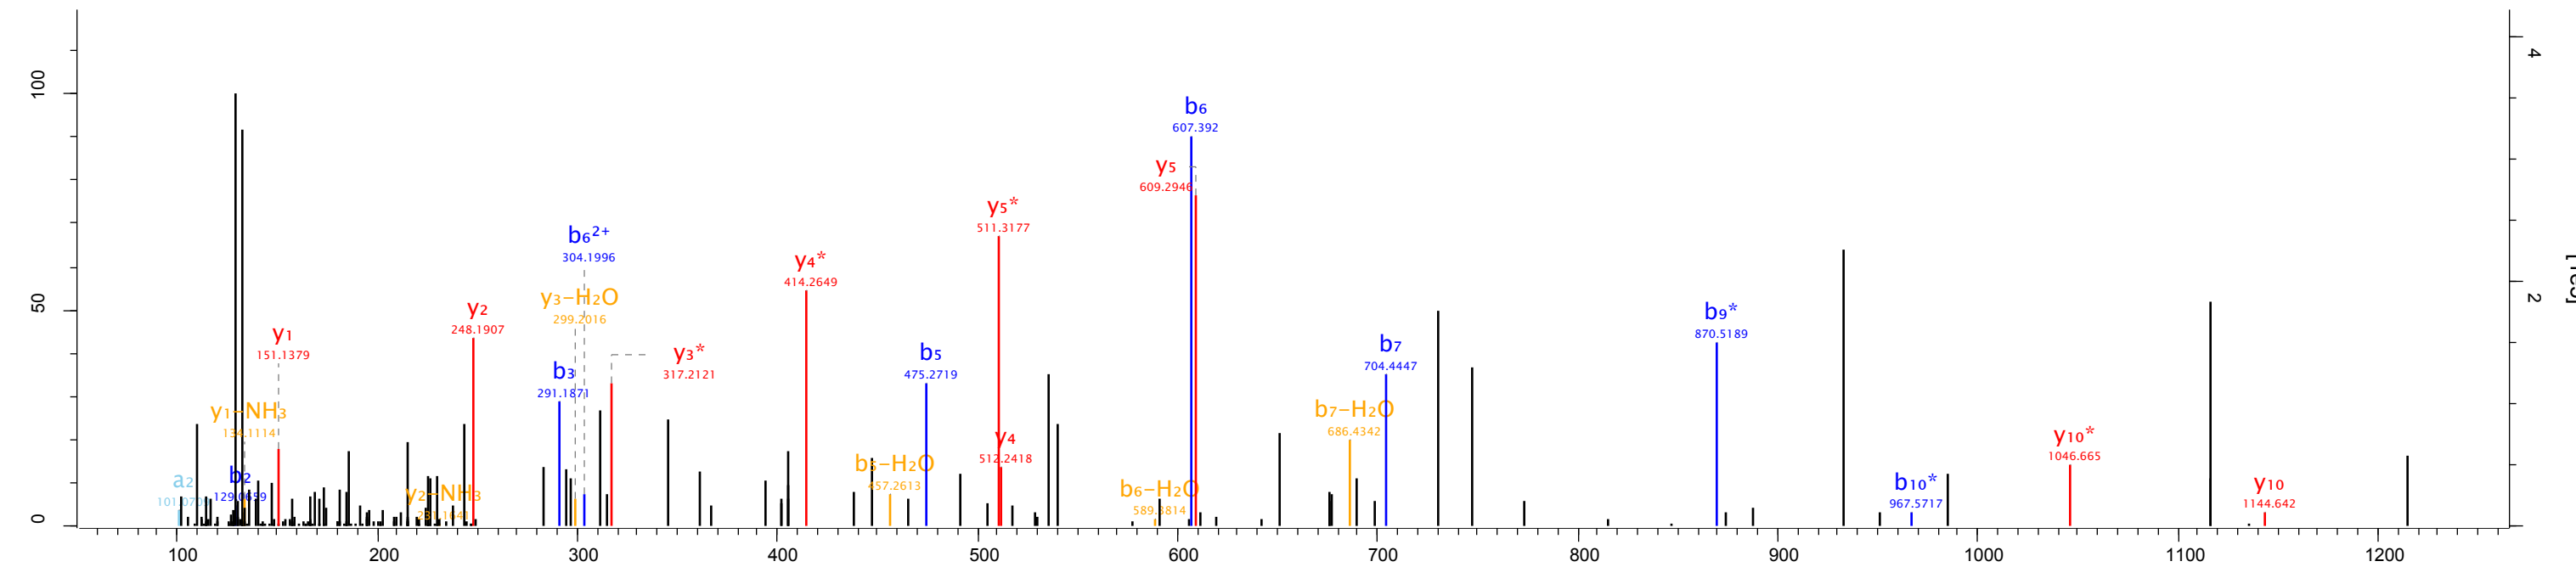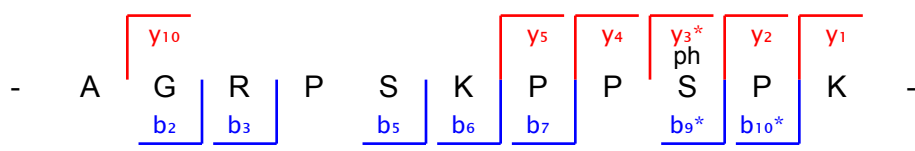

Raw file 20150812\_A375SR\_Phospho\_BR1\_08 Scan 24137 Method FTMS; HCD Score 175.23 m/z 970.44 Gene names MAPK11P1L

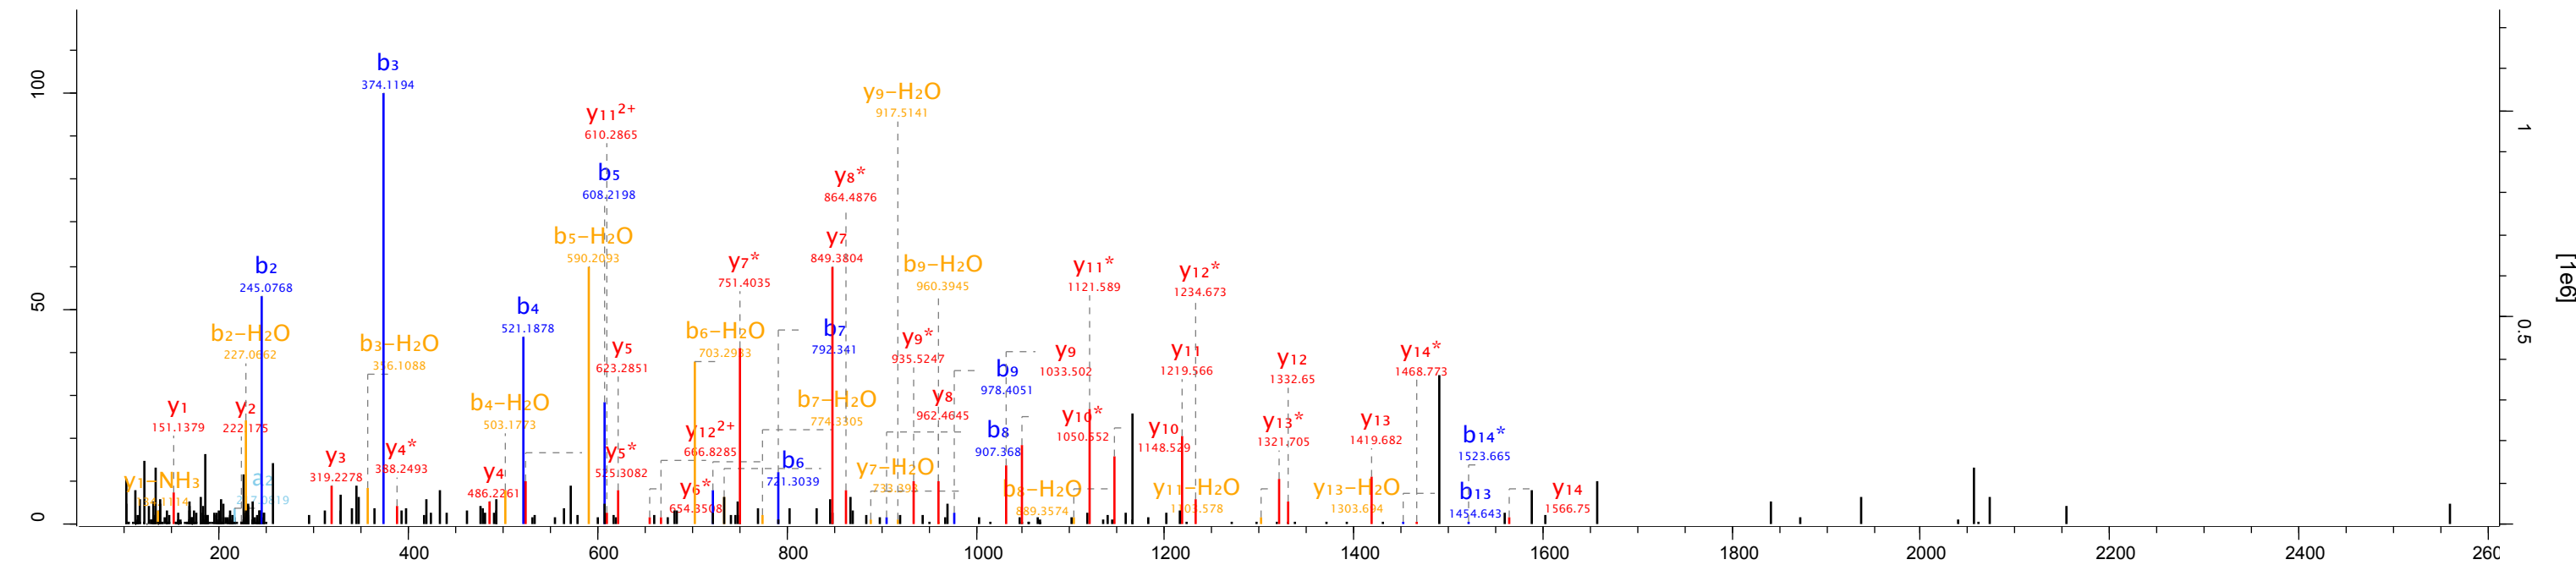

ac - S D E F S L A D A L P E H S P A K -

b<sub>2</sub>
b<sub>3</sub>
b<sub>4</sub>
b<sub>5</sub>
b<sub>6</sub>
b<sub>7</sub>
b<sub>8</sub>
b<sub>9</sub>
b<sub>13</sub>
b<sub>14</sub><sup>\*</sup>
y<sub>14</sub>
y<sub>13</sub>
y<sub>12</sub>
y<sub>11</sub>
y<sub>10</sub>
y<sub>9</sub>
y<sub>8</sub>
y<sub>7</sub>
y<sub>6</sub><sup>\*</sup>
y<sub>5</sub>
y<sub>4</sub><sub>ph</sub>
y<sub>3</sub>
y<sub>2</sub>
y<sub>1</sub>

Raw file: 20150812\_A375SR\_Phospho\_BR1\_08  
 Scan: 8307 Method: FTMS; HCD Score: 47.77 m/z: 629.78 Gene names: CNTN3

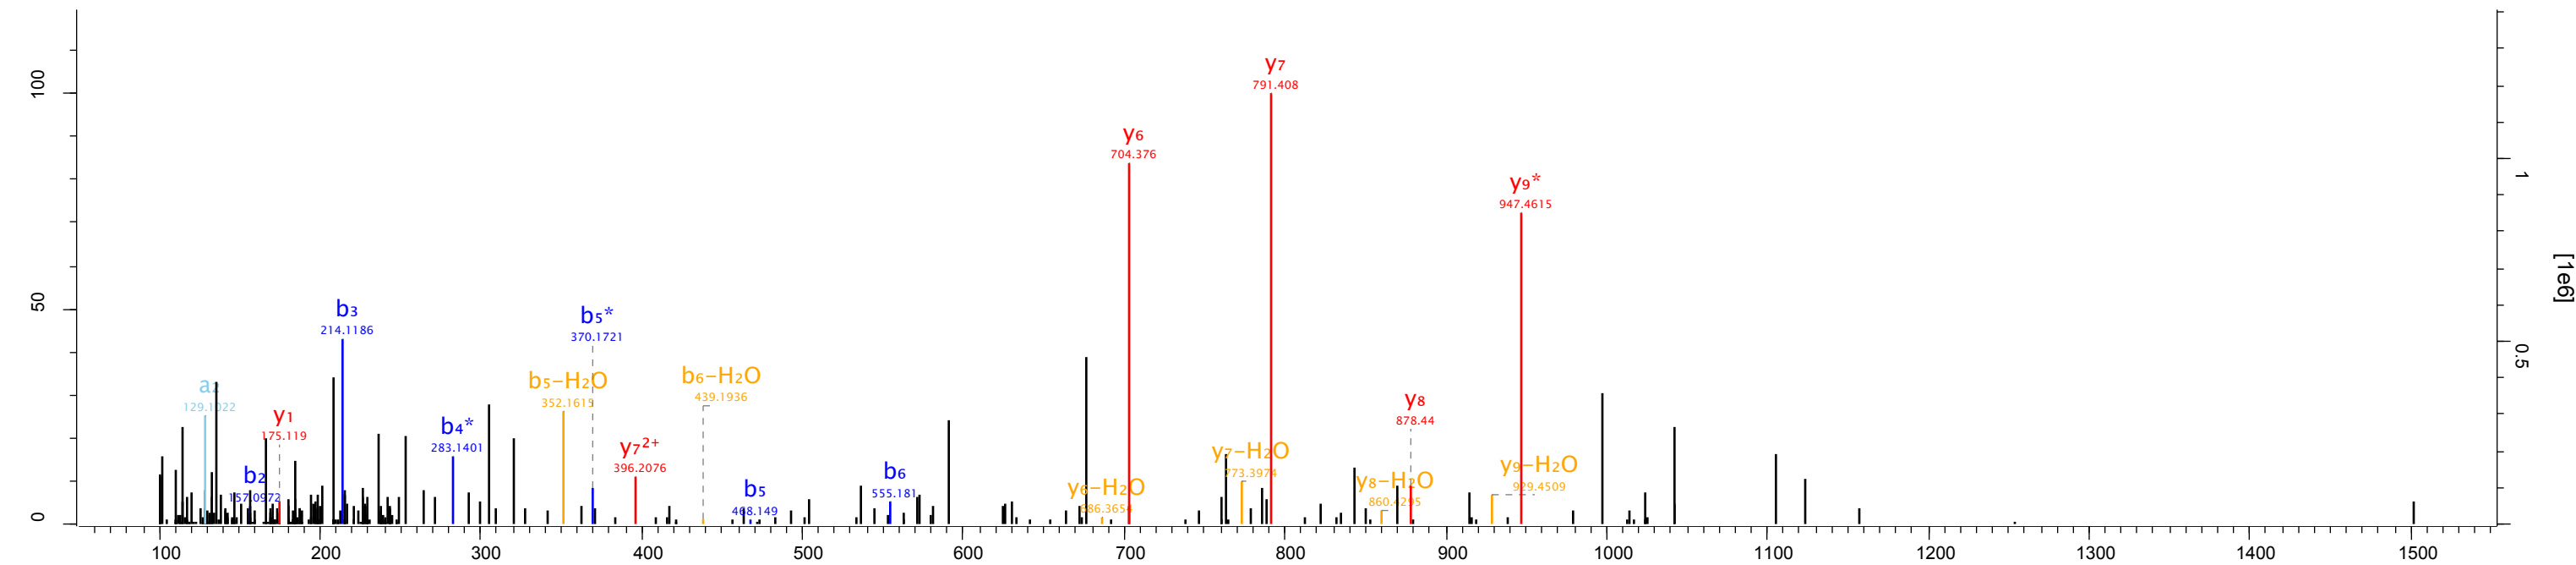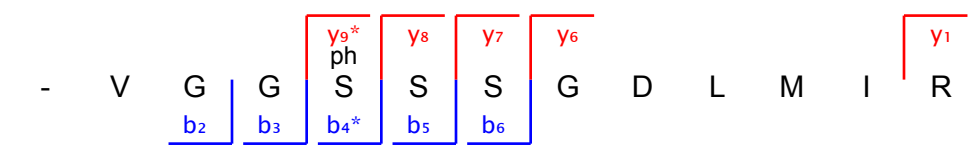

Raw file 20150812\_A375SR\_Phospho\_BR1\_09 Scan 11207 Method FTMS; HCD Score 114.28 m/z 655.82 Gene names PHACTR2

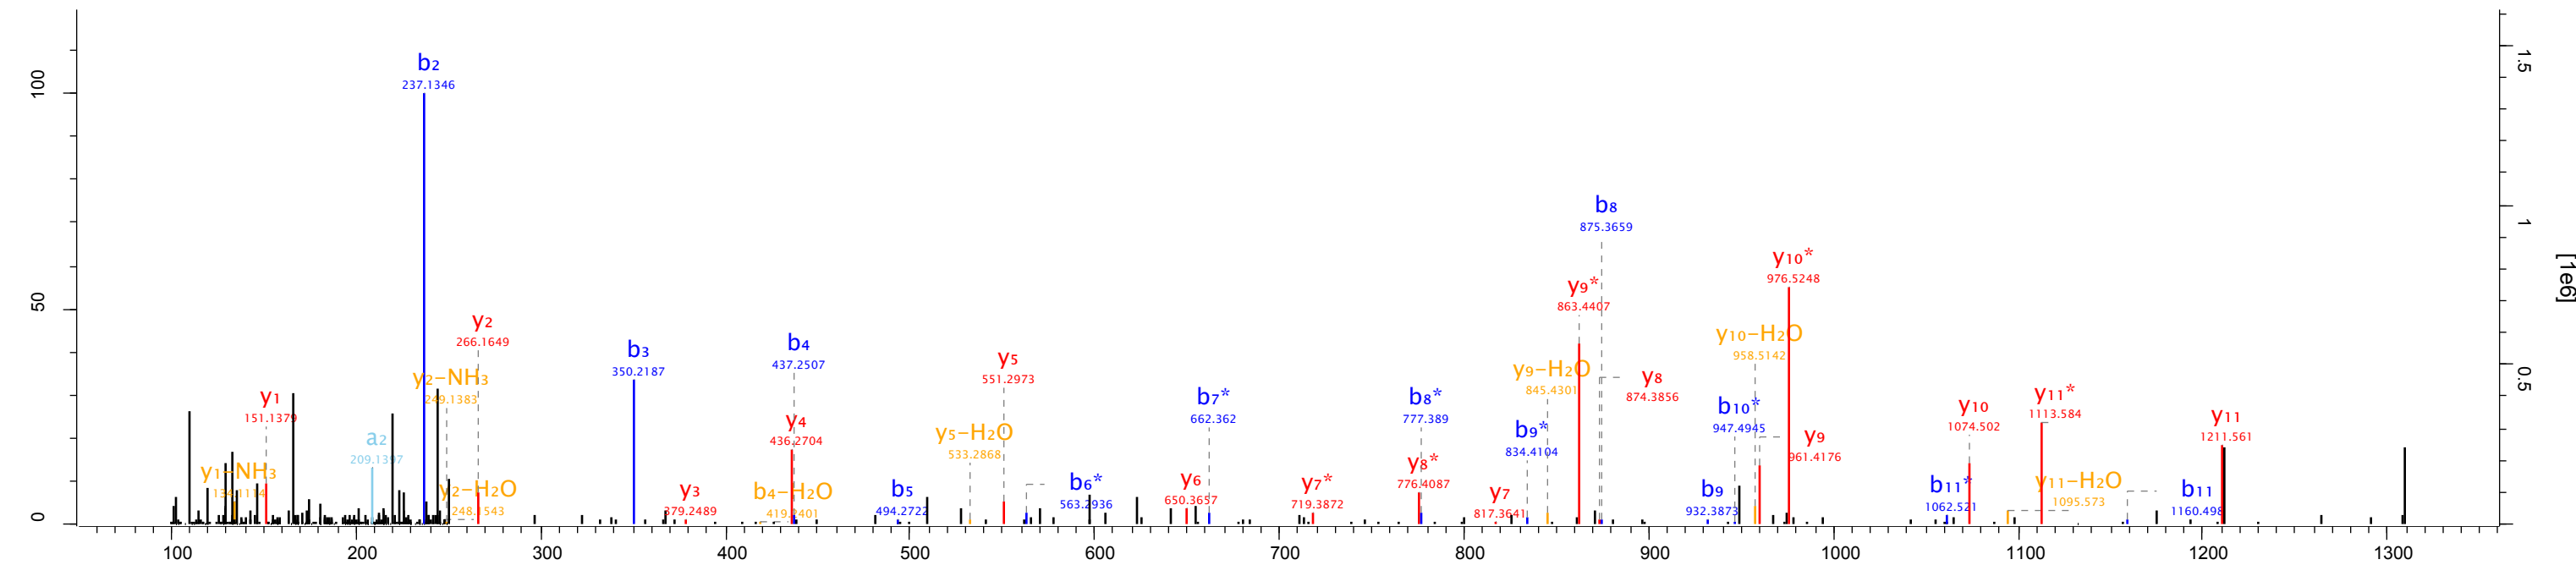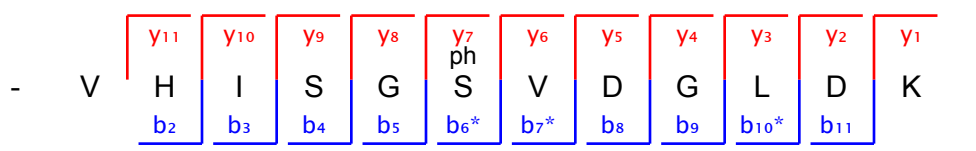

H I S G S V D G L D K  
 b2 b3 b4 b5 b6\* b7\* b8 b9 b10\* b11

Raw file 20150812\_A375SR\_Phospho\_BR1\_09 Scan 12967 Method FTMS; HCD Score 52.37 m/z 866.4

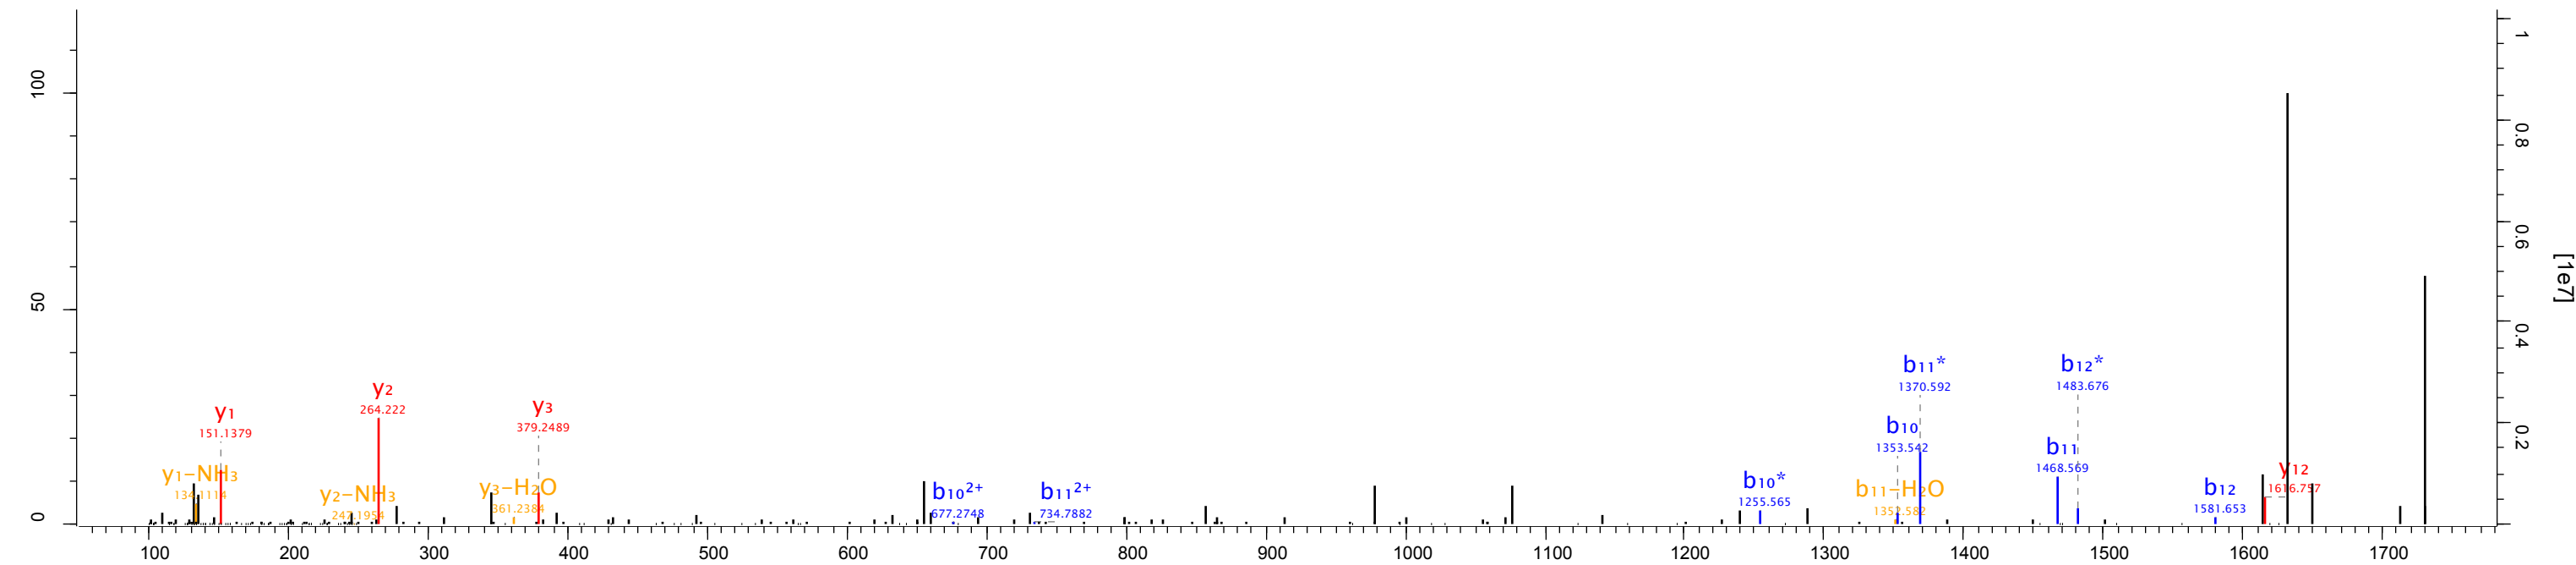

- D M Y Q V C V R Q ph S D L K -  
y12  
b10 y3 y2 y1  
b11 b12



Raw file  
20150812\_A375SR\_Phospho\_BR1\_09

Scan 8727 Method FTMS; HCD Score 43.18 m/z 556.77

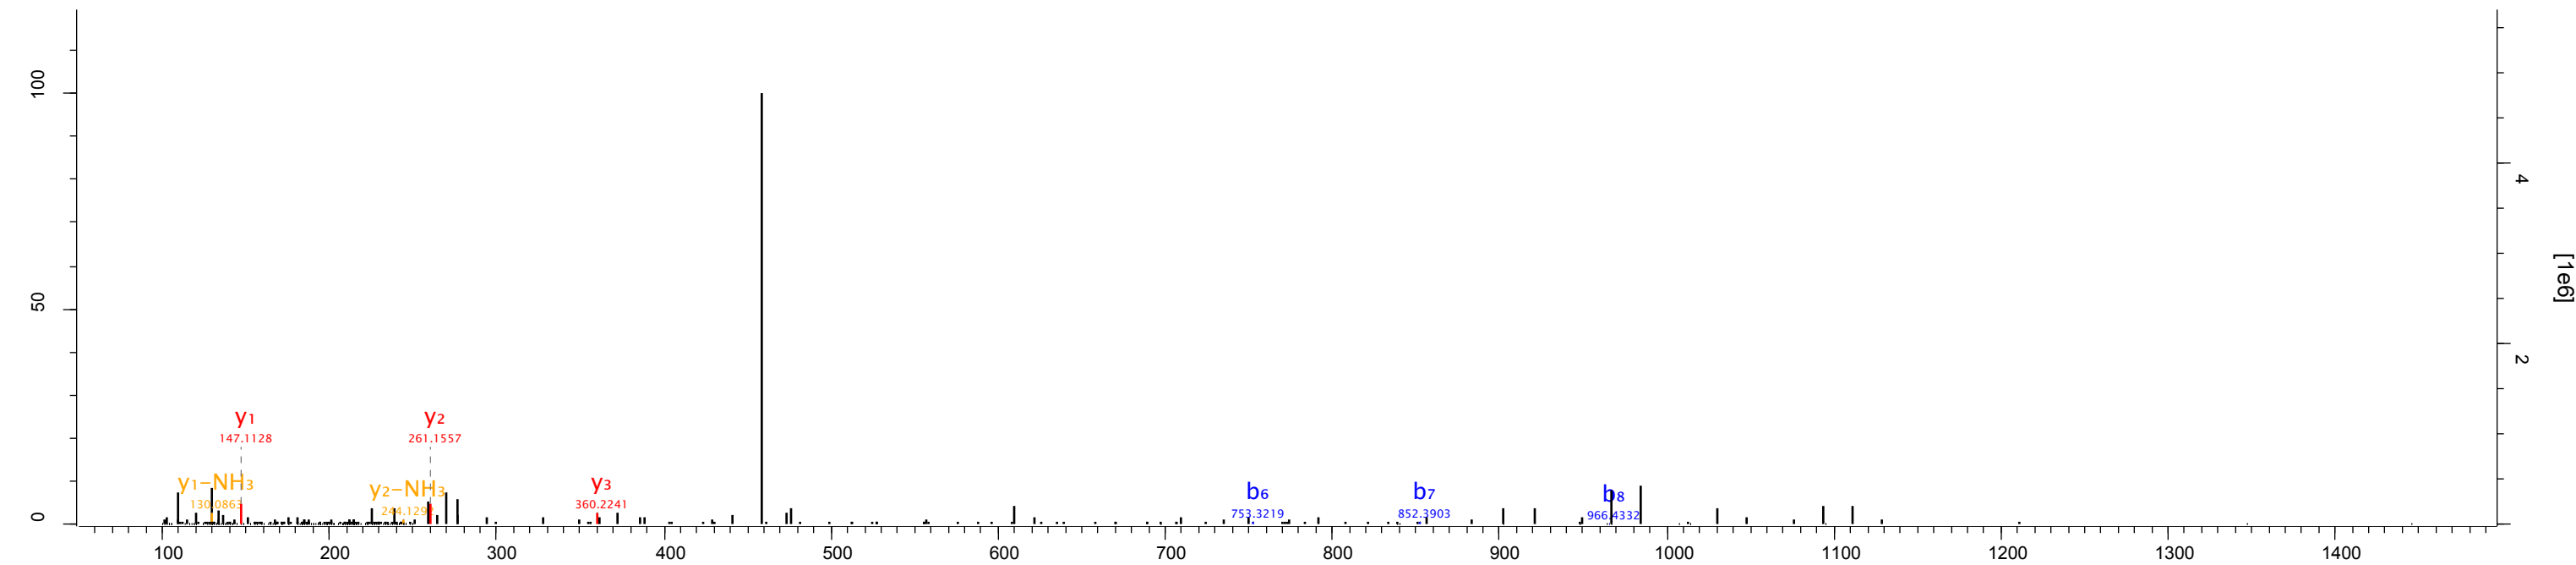

Raw file: 20150814\_A375SR\_Phospho\_BR2\_02  
 Scan: 6527 Method: FTMS; HCD Score: 49.04 m/z: 660.77 Gene names: GPSM3

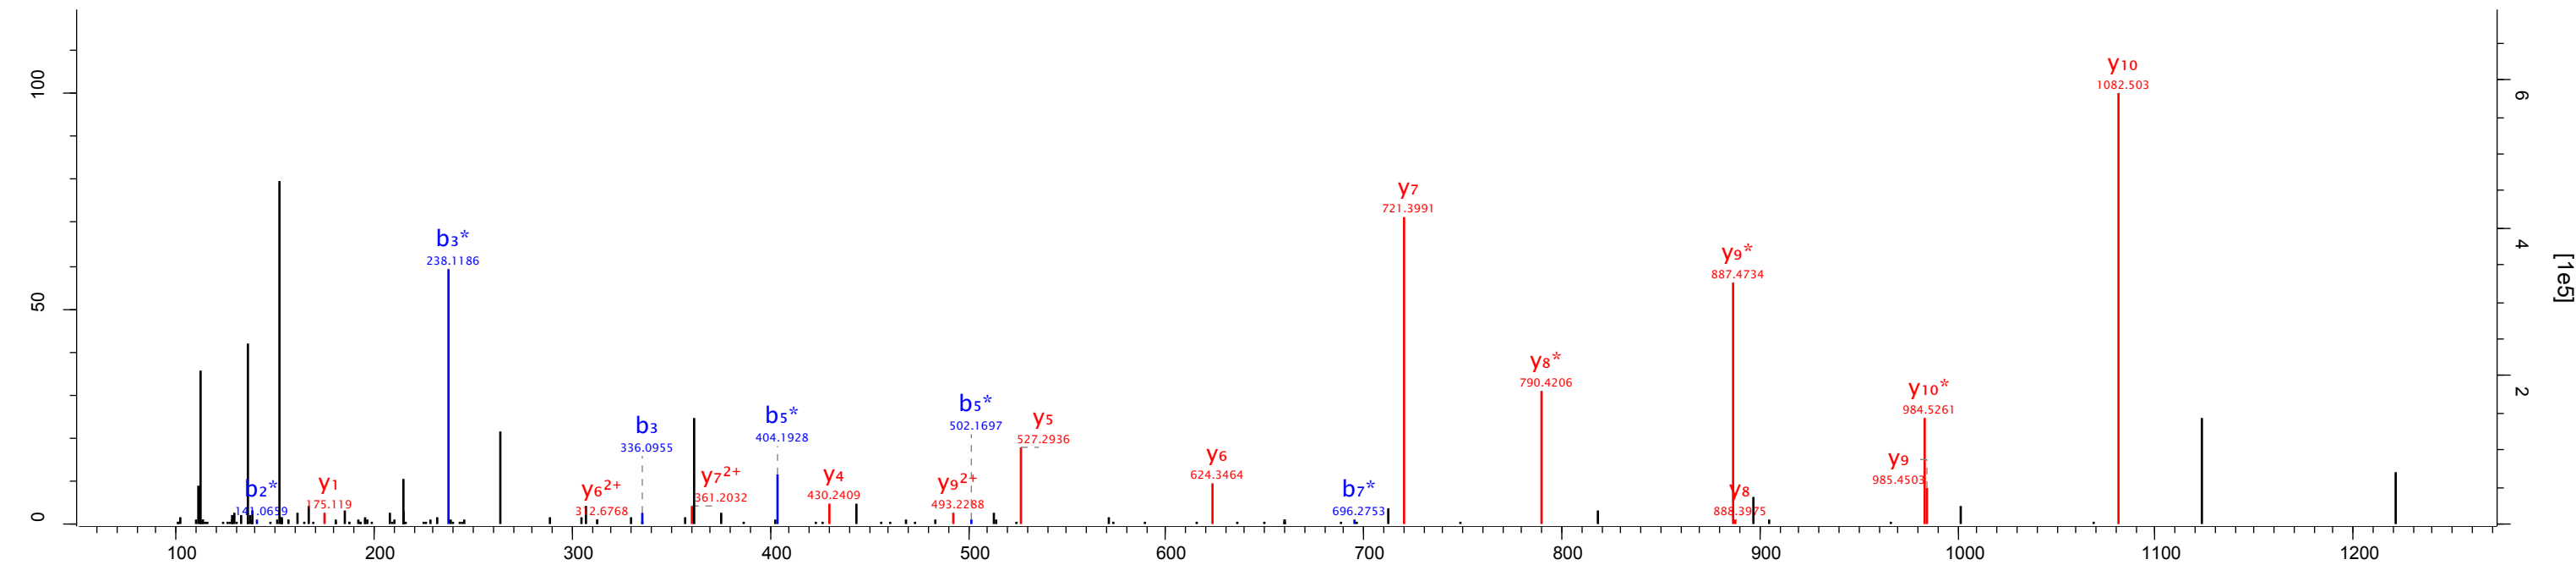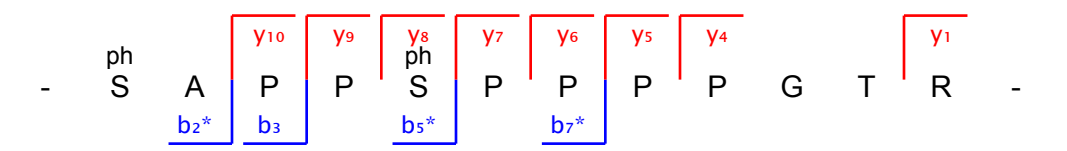

Raw file 20150814\_A375SR\_Phospho\_BR2\_02 Scan 7377 Method FTMS; HCD Score 62.7 m/z 940.39 Gene names RGL3

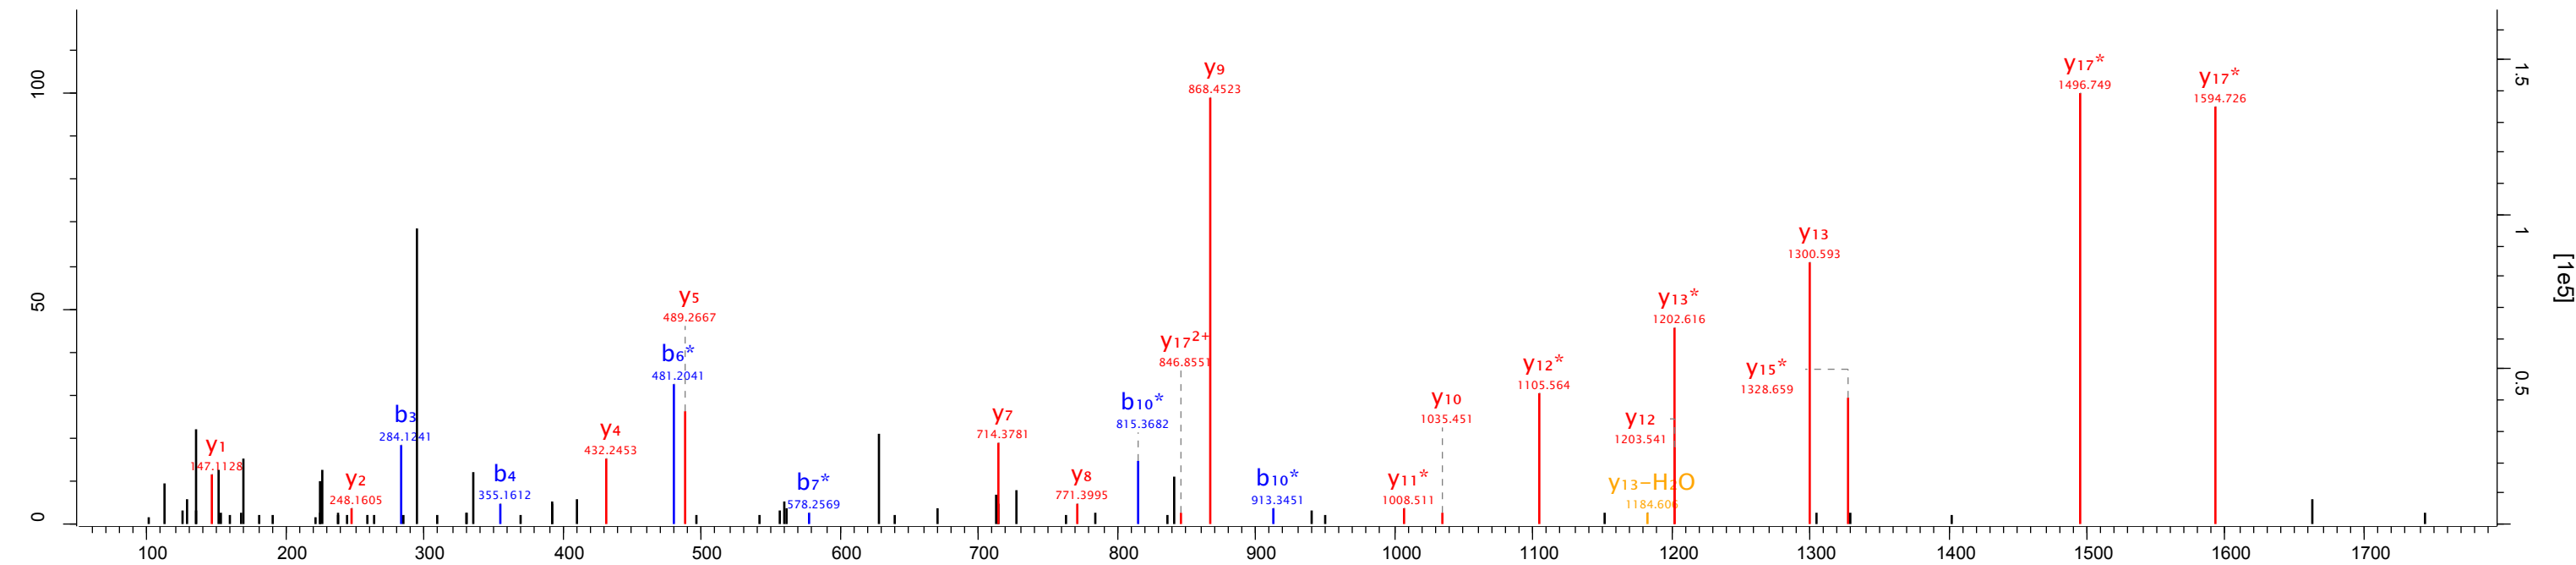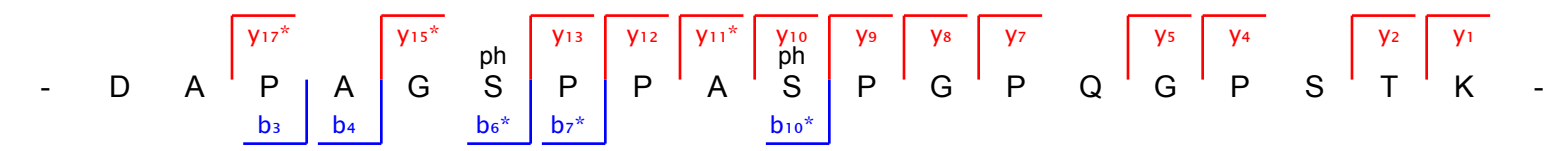

Raw file: 20150814\_A375SR\_Phospho\_BR2\_03  
 Scan: 17257 Method: FTMS; HCD Score: 107.51 m/z: 573.77 Gene names: GPATCH2L

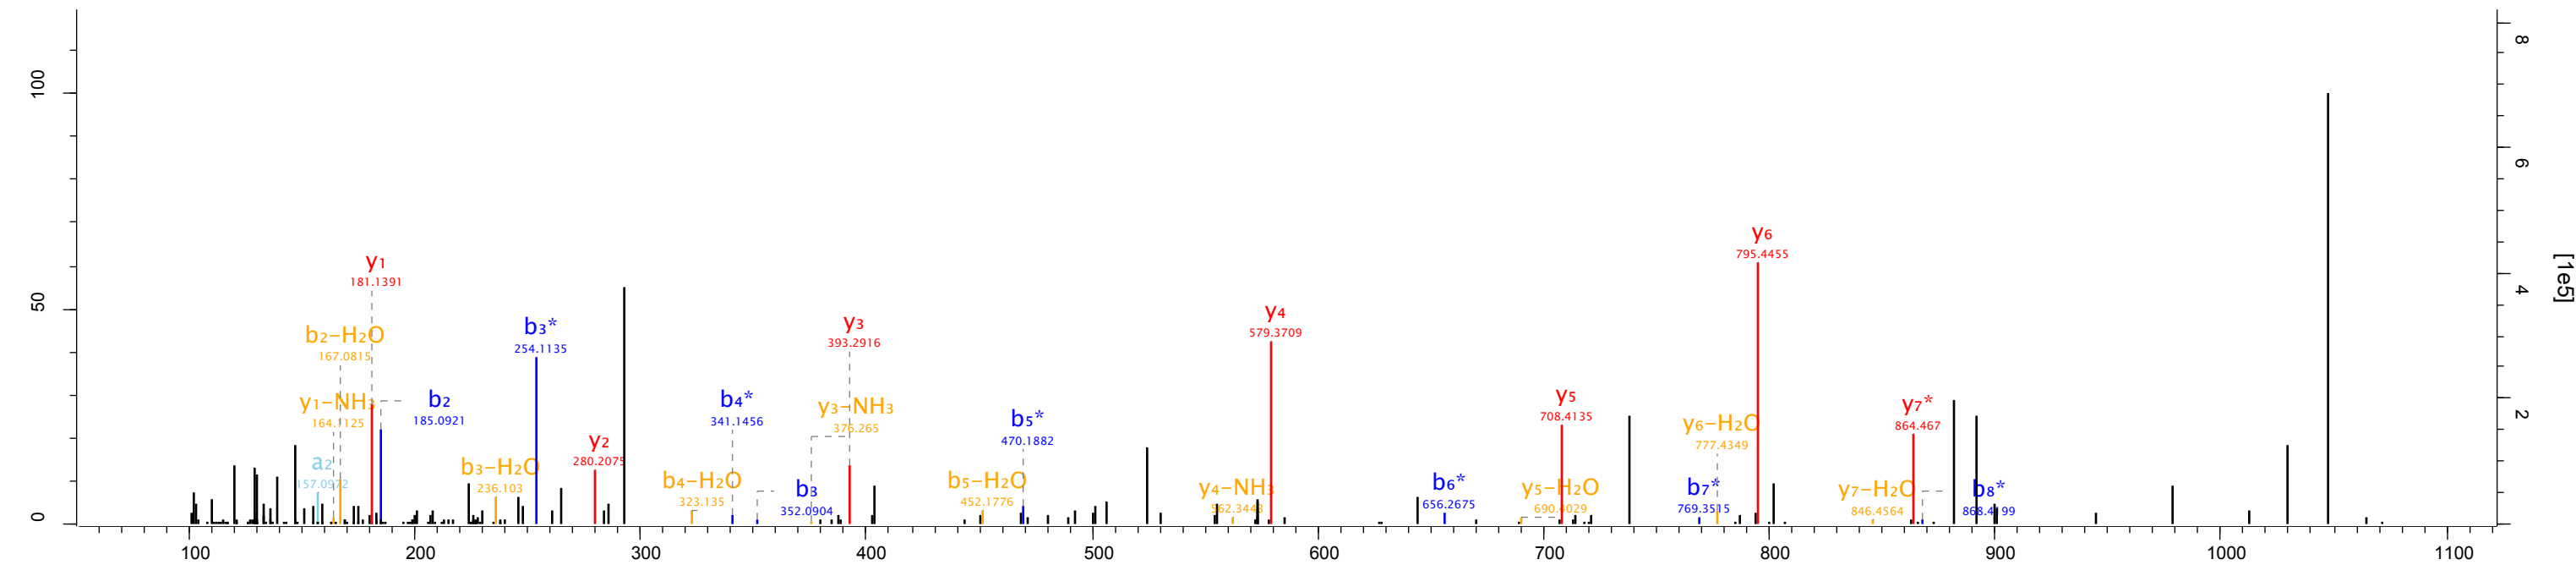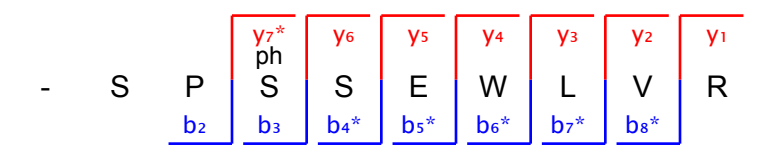

Raw file: 20150814\_A375SR\_Phospho\_BR2\_03  
 Scan: 20887 Method: FTMS; HCD Score: 108.5 m/z: 983.44 Gene names: FAM168B

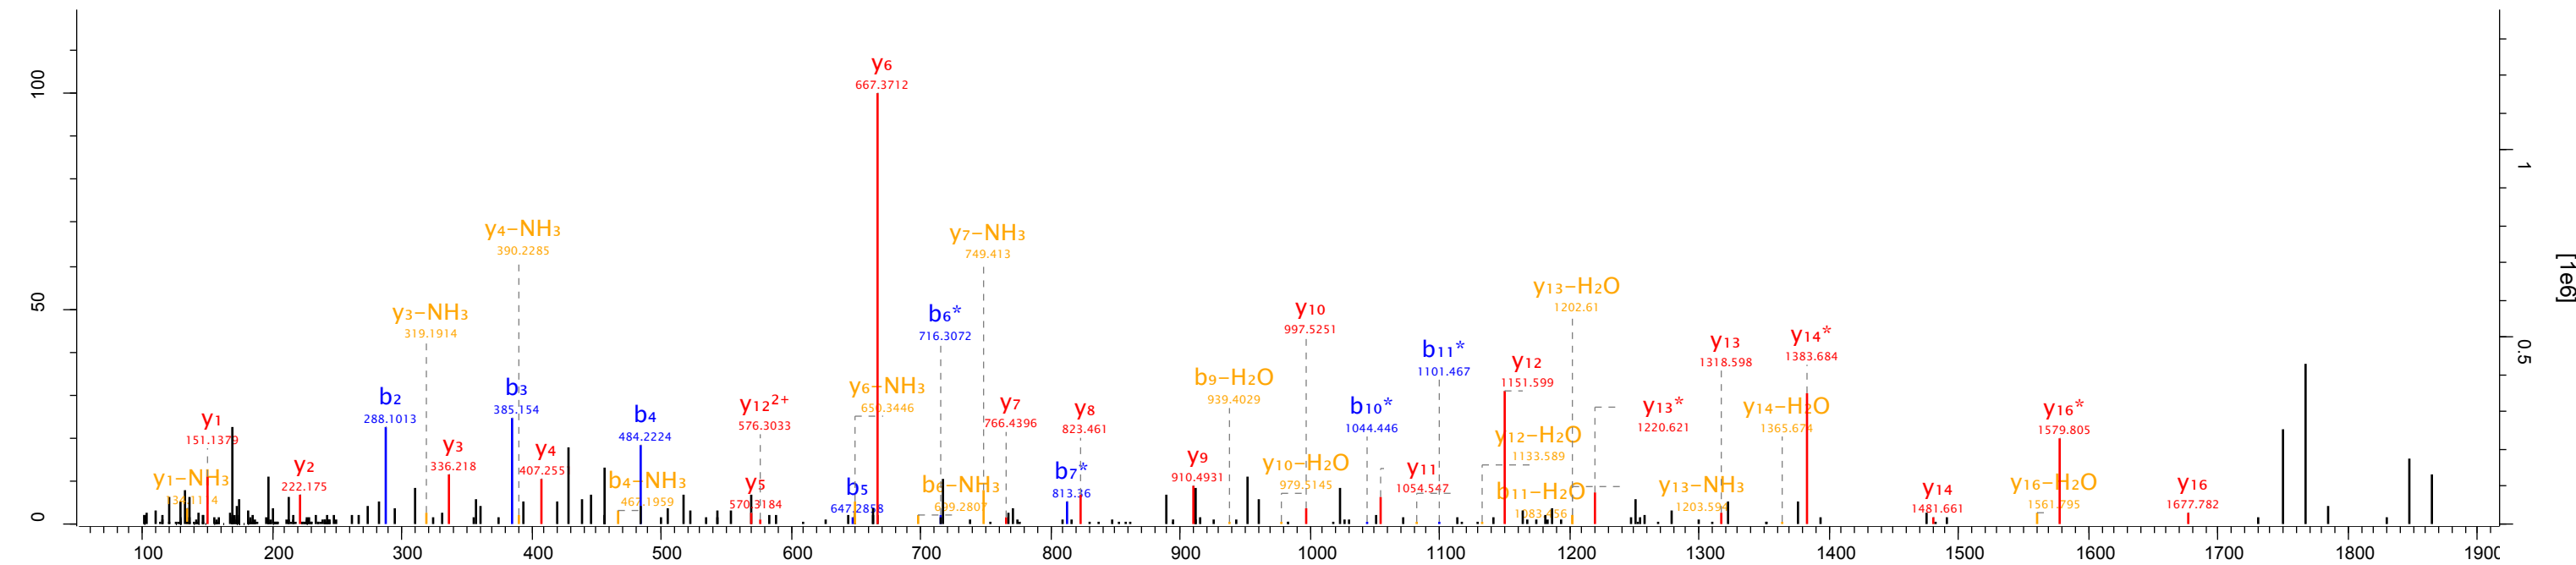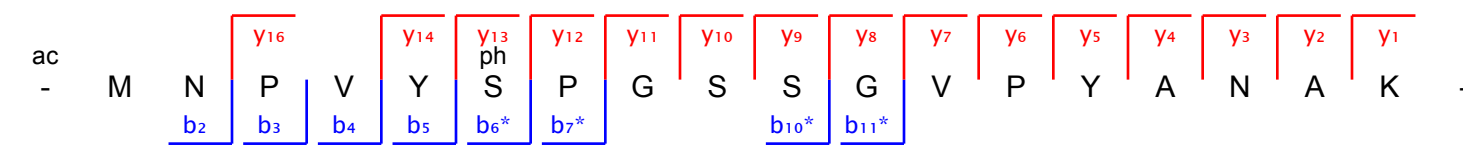

Raw file: 20150814\_A375SR\_Phospho\_BR2\_03  
 Scan: 27867 Method: FTMS; HCD Score: 186.74 m/z: 796.87 Gene names: BCL11A

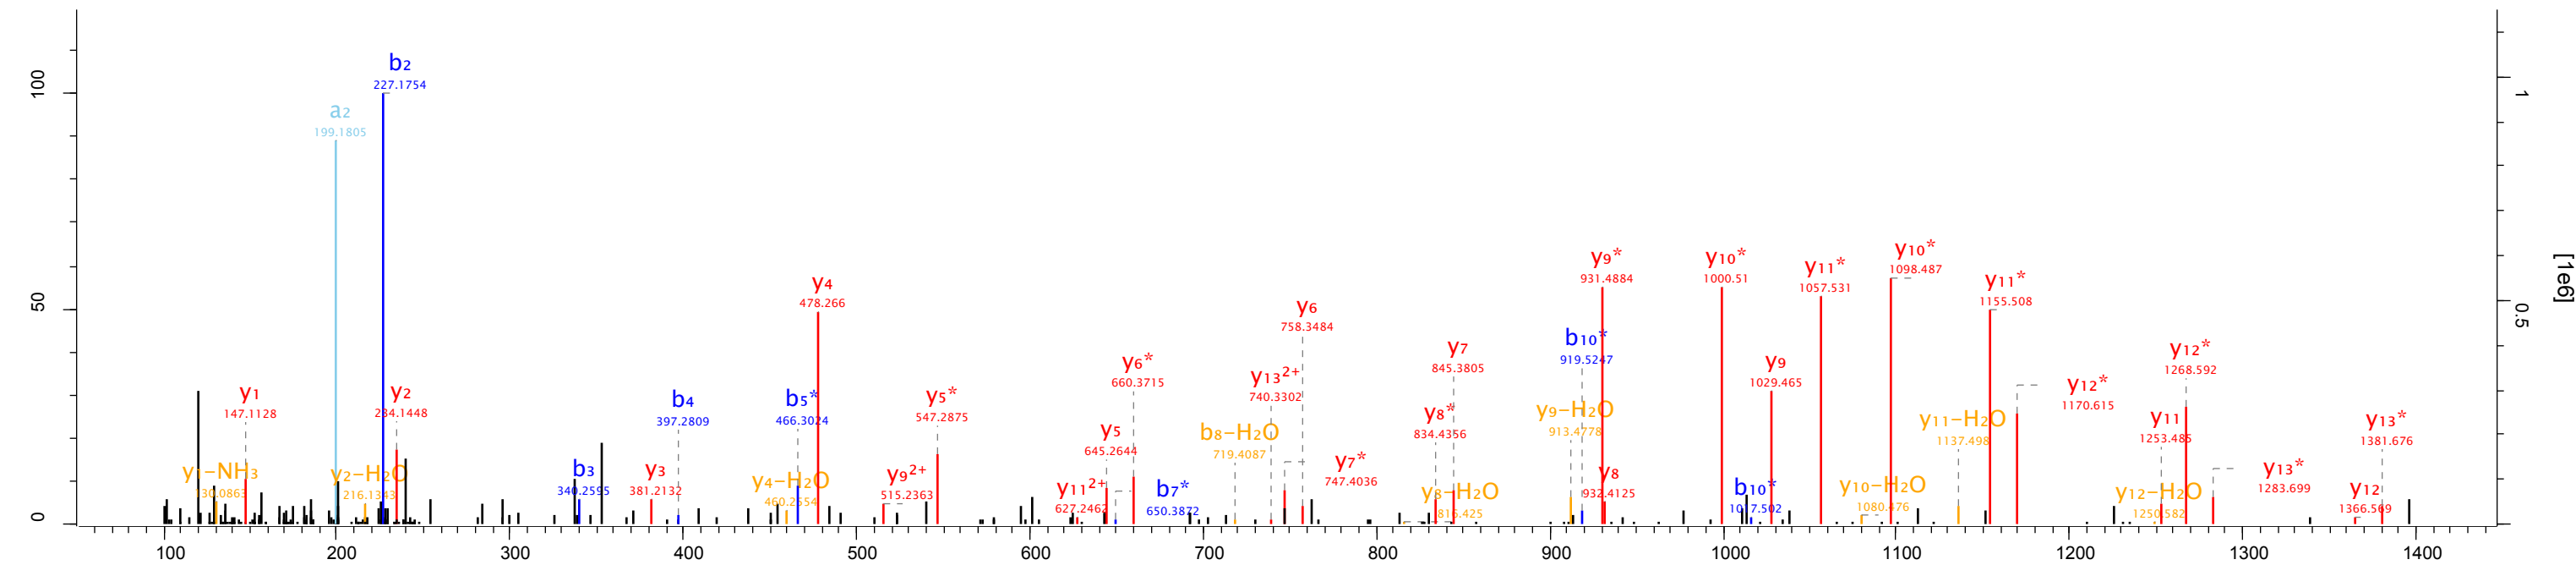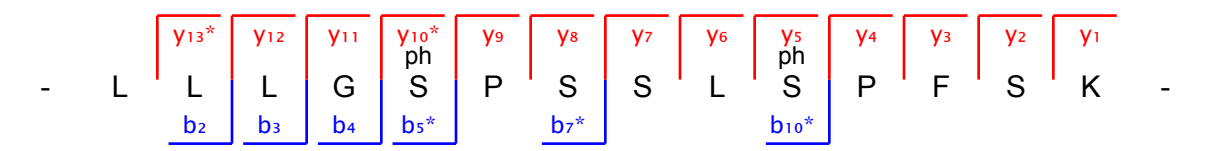

Raw file  
20150814\_A375SR\_Phospho\_BR2\_03

| Scan | Method    | Score | m/z    |
|------|-----------|-------|--------|
| 5707 | FTMS; HCD | 73.23 | 432.75 |

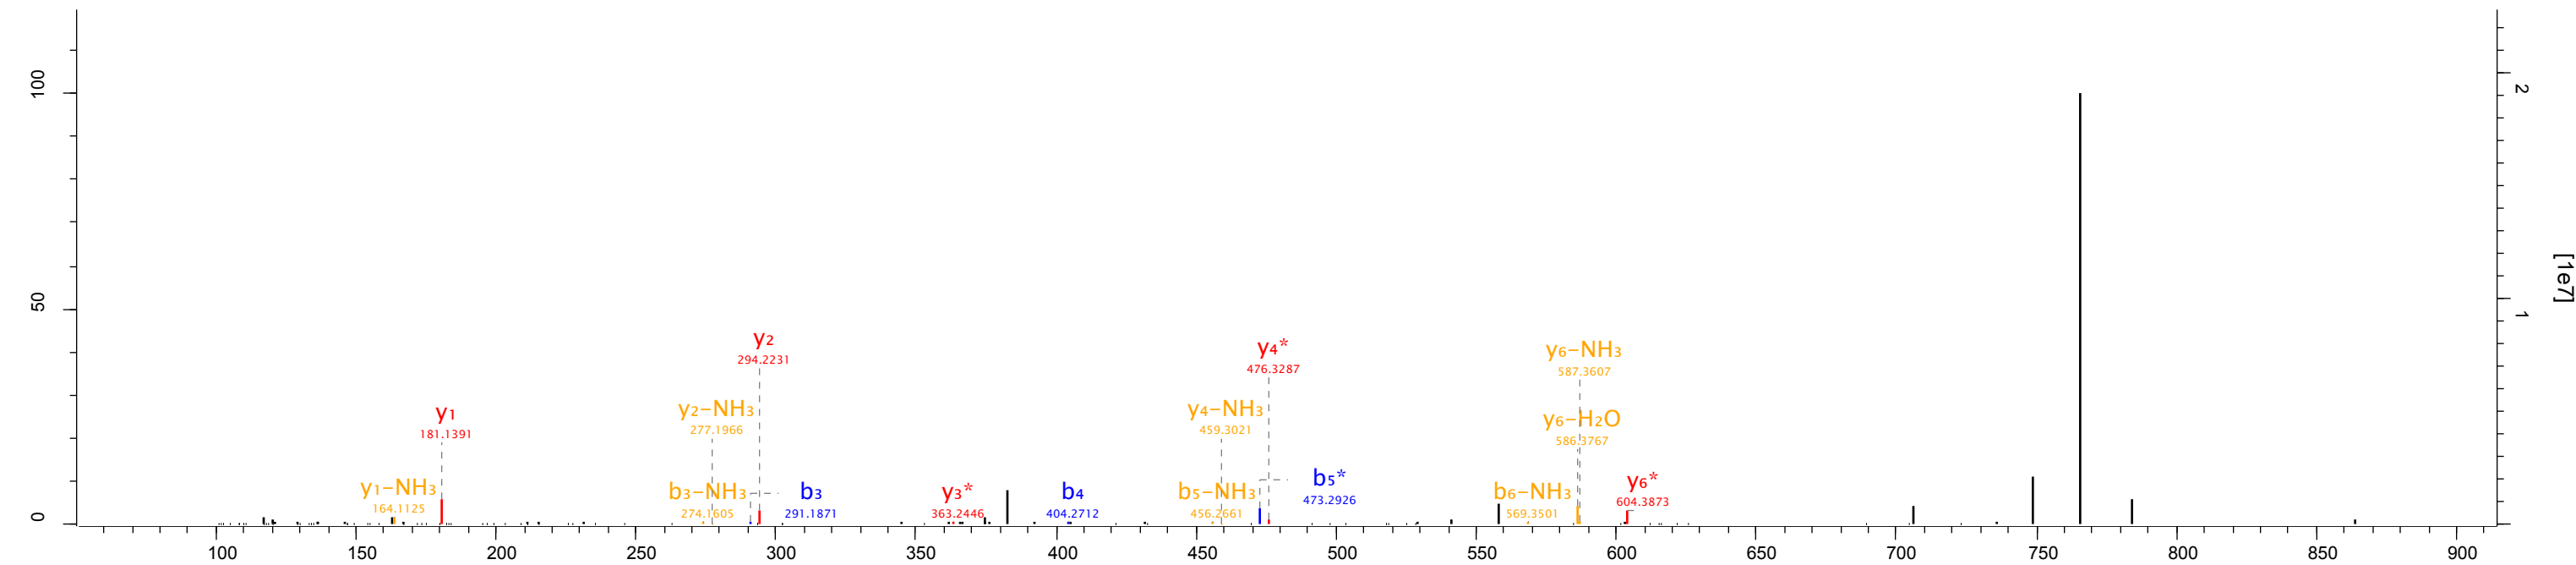

Raw file  
 20150814\_A375SR\_Phospho\_BR2\_03  
 Scan 6007 Method FTMS; HCD Score 49.71 m/z 660.77 Gene names GPSM3

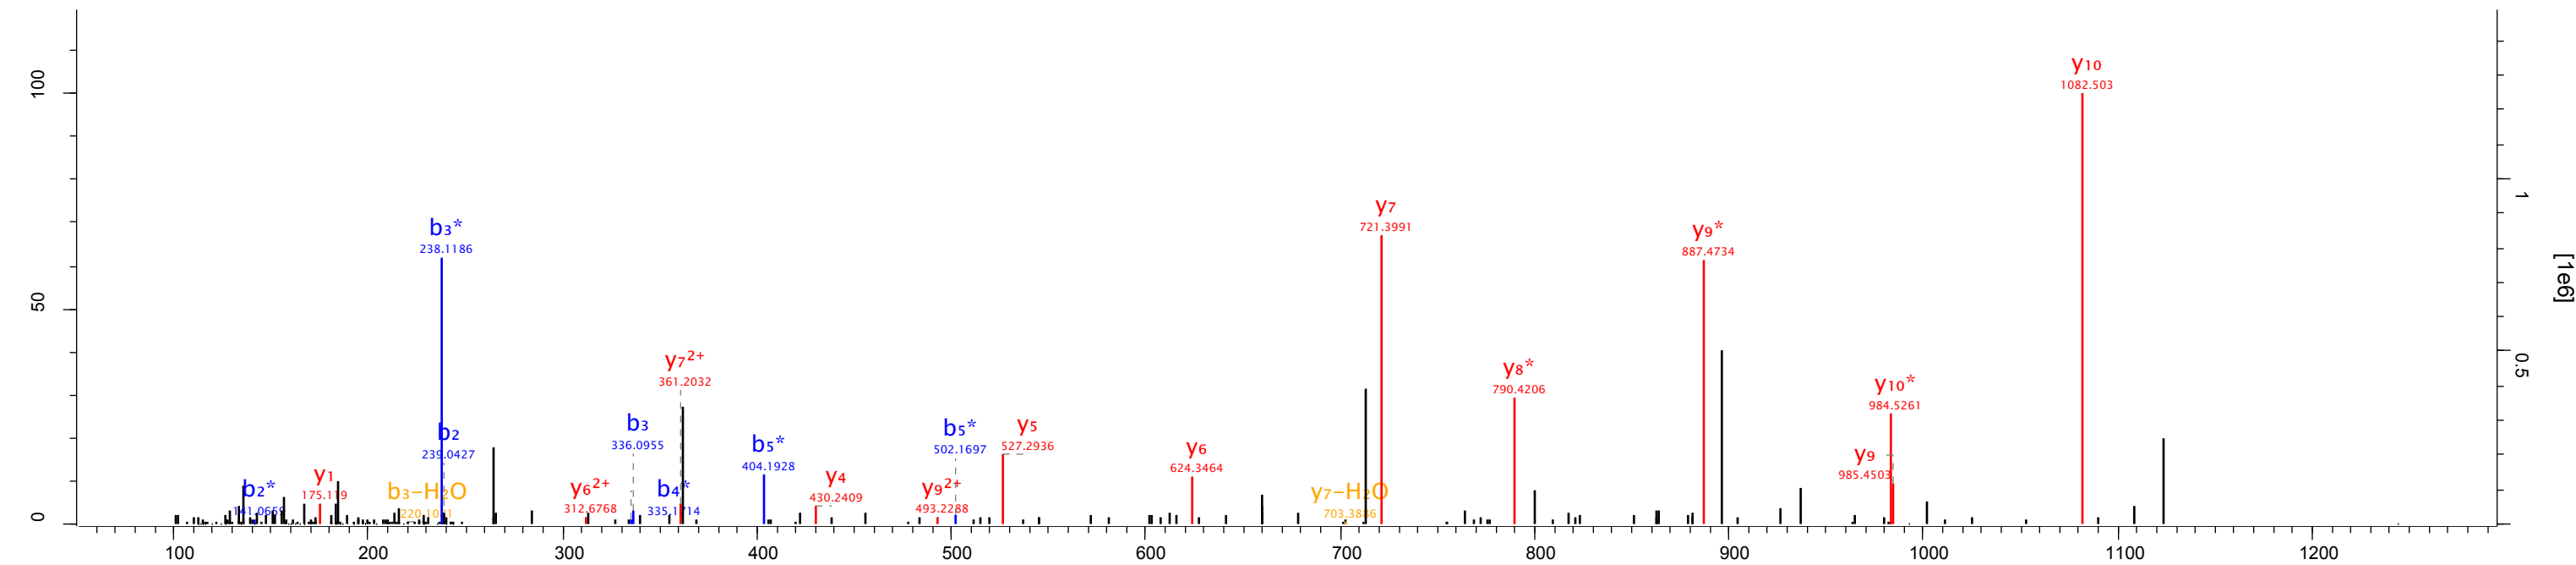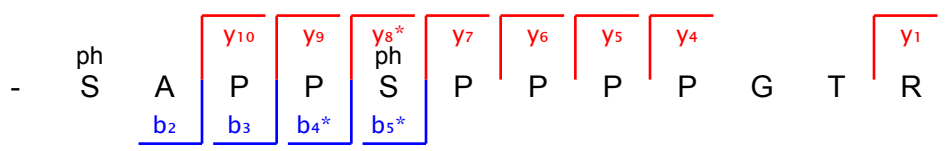



Raw file: 20150814\_A375SR\_Phospho\_BR2\_04  
 Scan: 11107 Method: FTMS; HCD Score: 109.14 m/z: 655.82 Gene names: PHACTR2

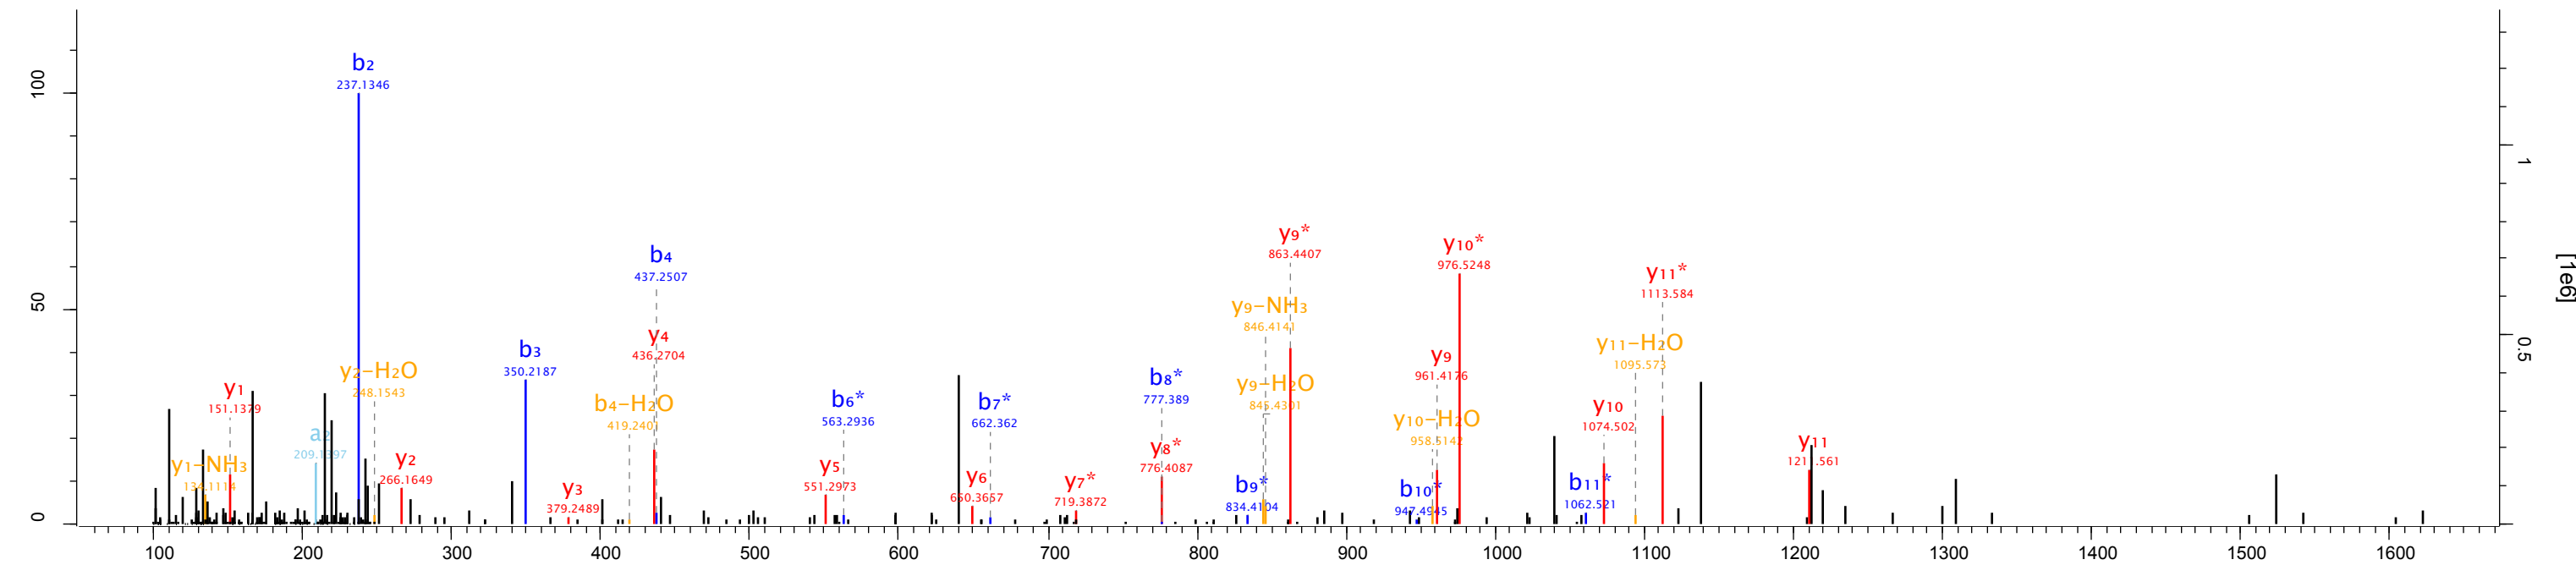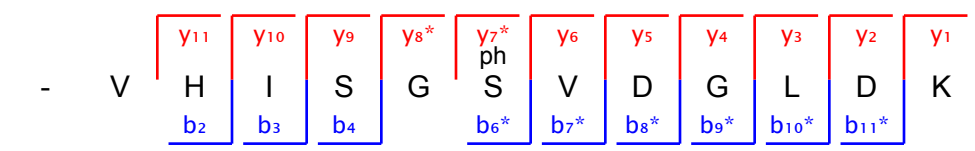

Raw file 20150814\_A375SR\_Phospho\_BR2\_04 Scan 12807 Method FTMS; HCD Score 190.1 m/z 843.46 Gene names MLLT3

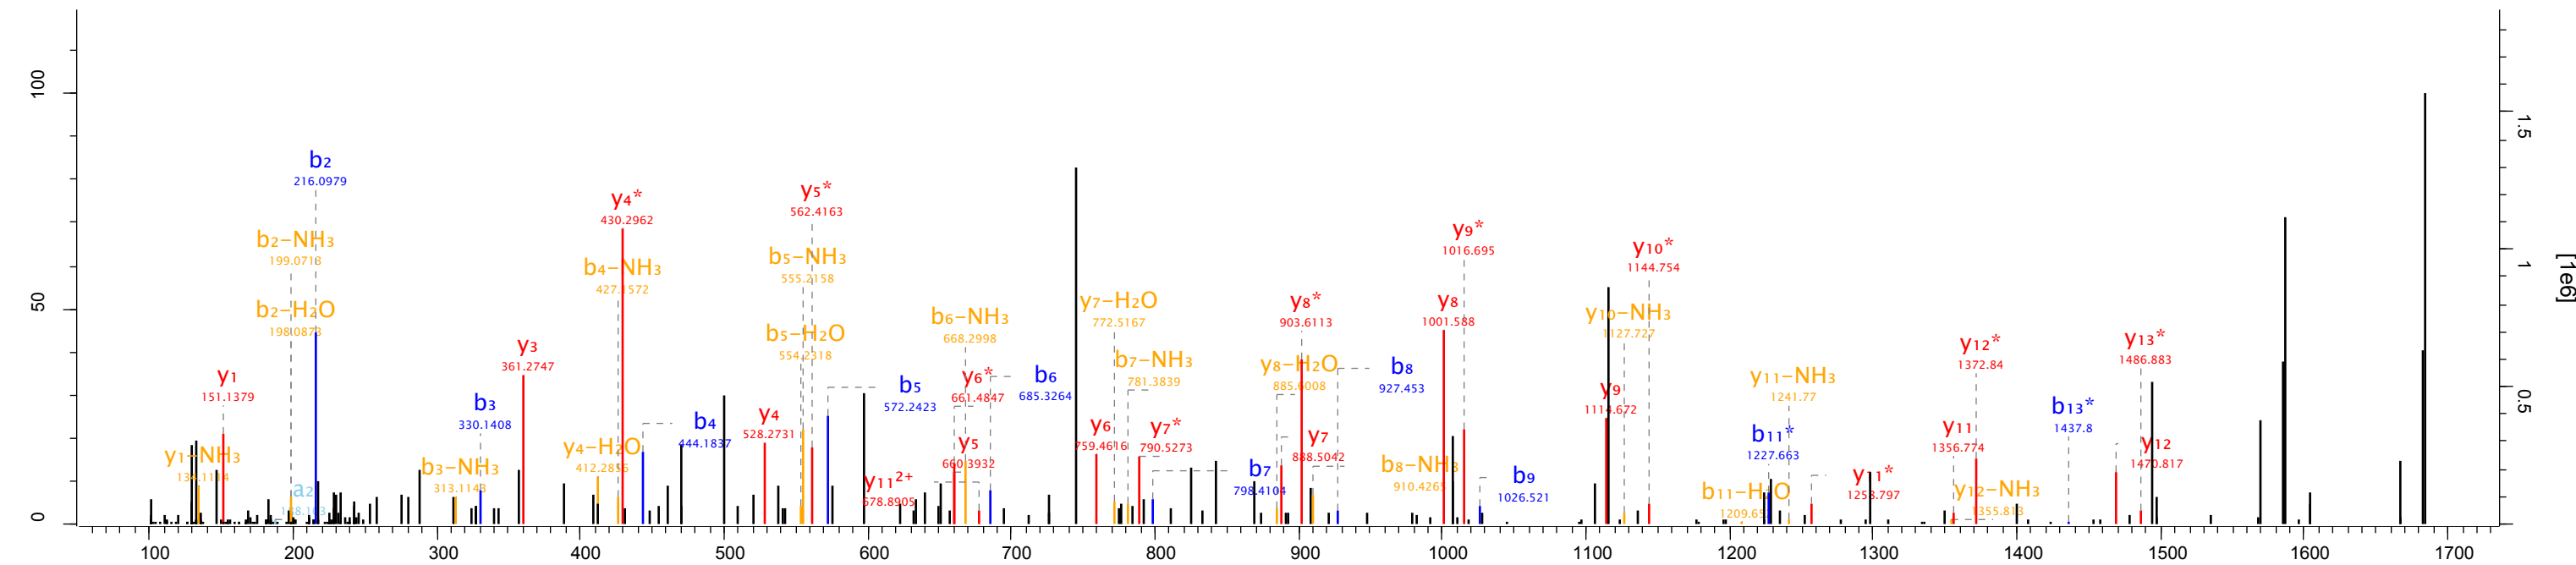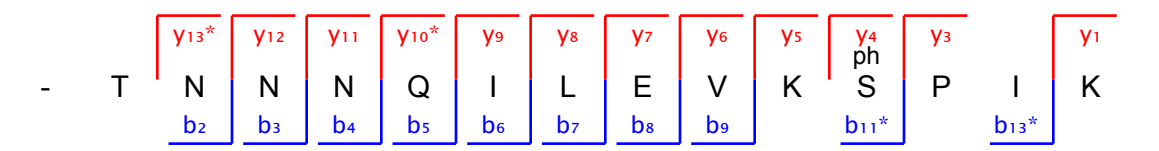

Raw file: 20150814\_A375SR\_Phospho\_BR2\_04  
 Scan: 17807 Method: FTMS; HCD Score: 110.22 m/z: 658.31 Gene names: ZFP36

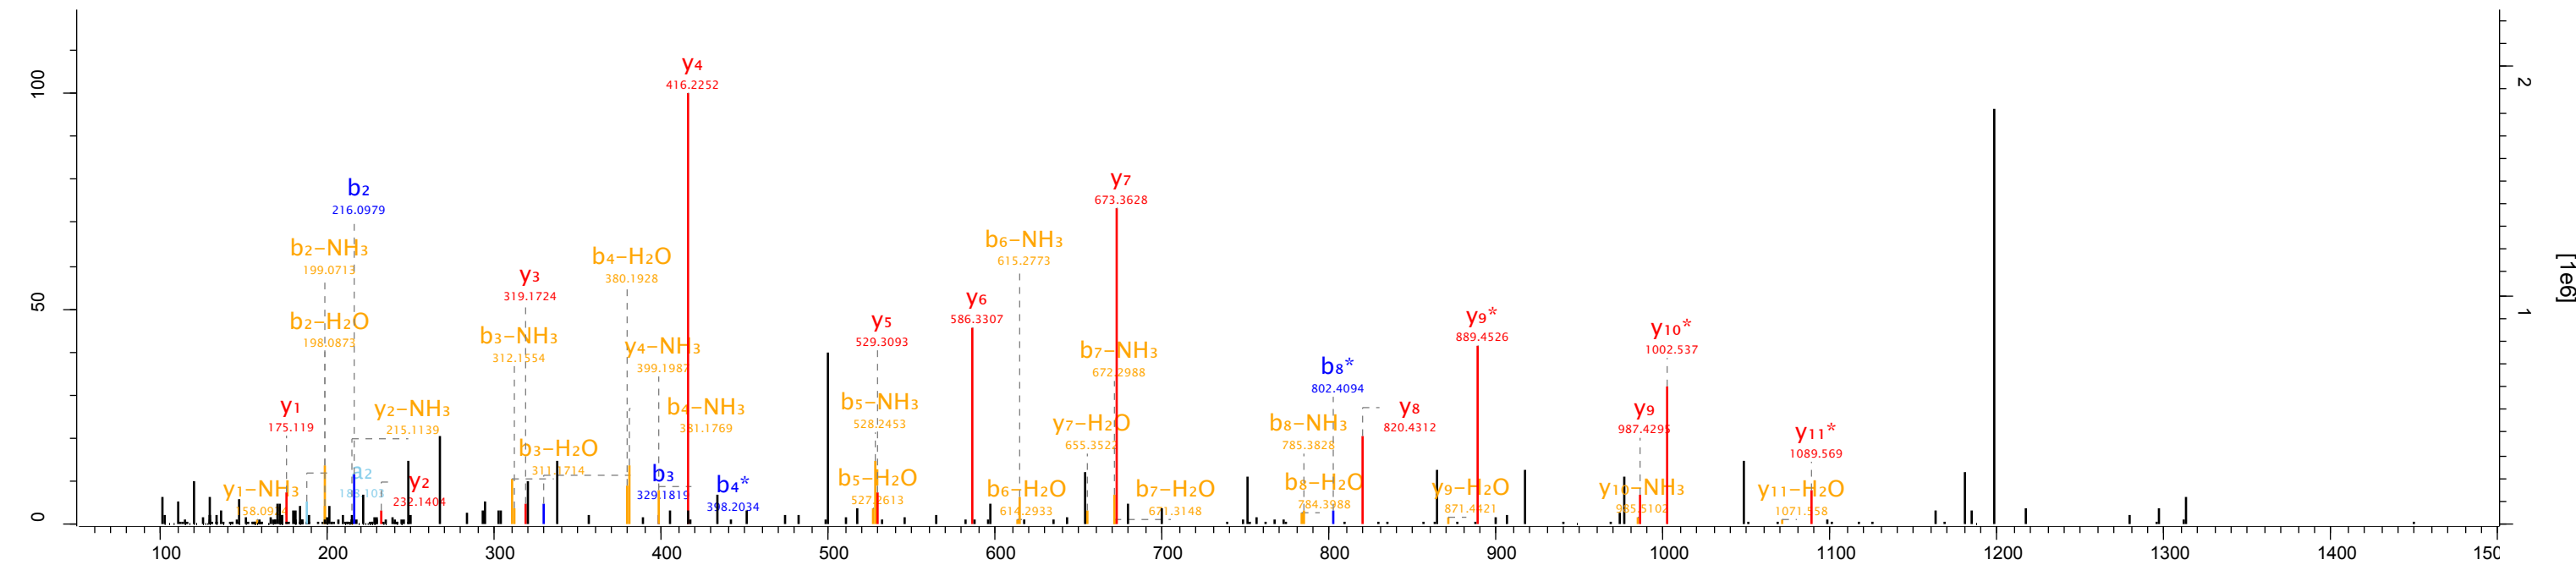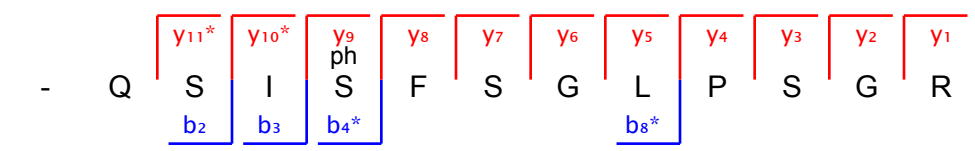

Raw file 20150814\_A375SR\_Phospho\_BR2\_04 Scan 24597 Method FTMS; HCD Score 125.64 m/z 920.91 Gene names MSANTD3

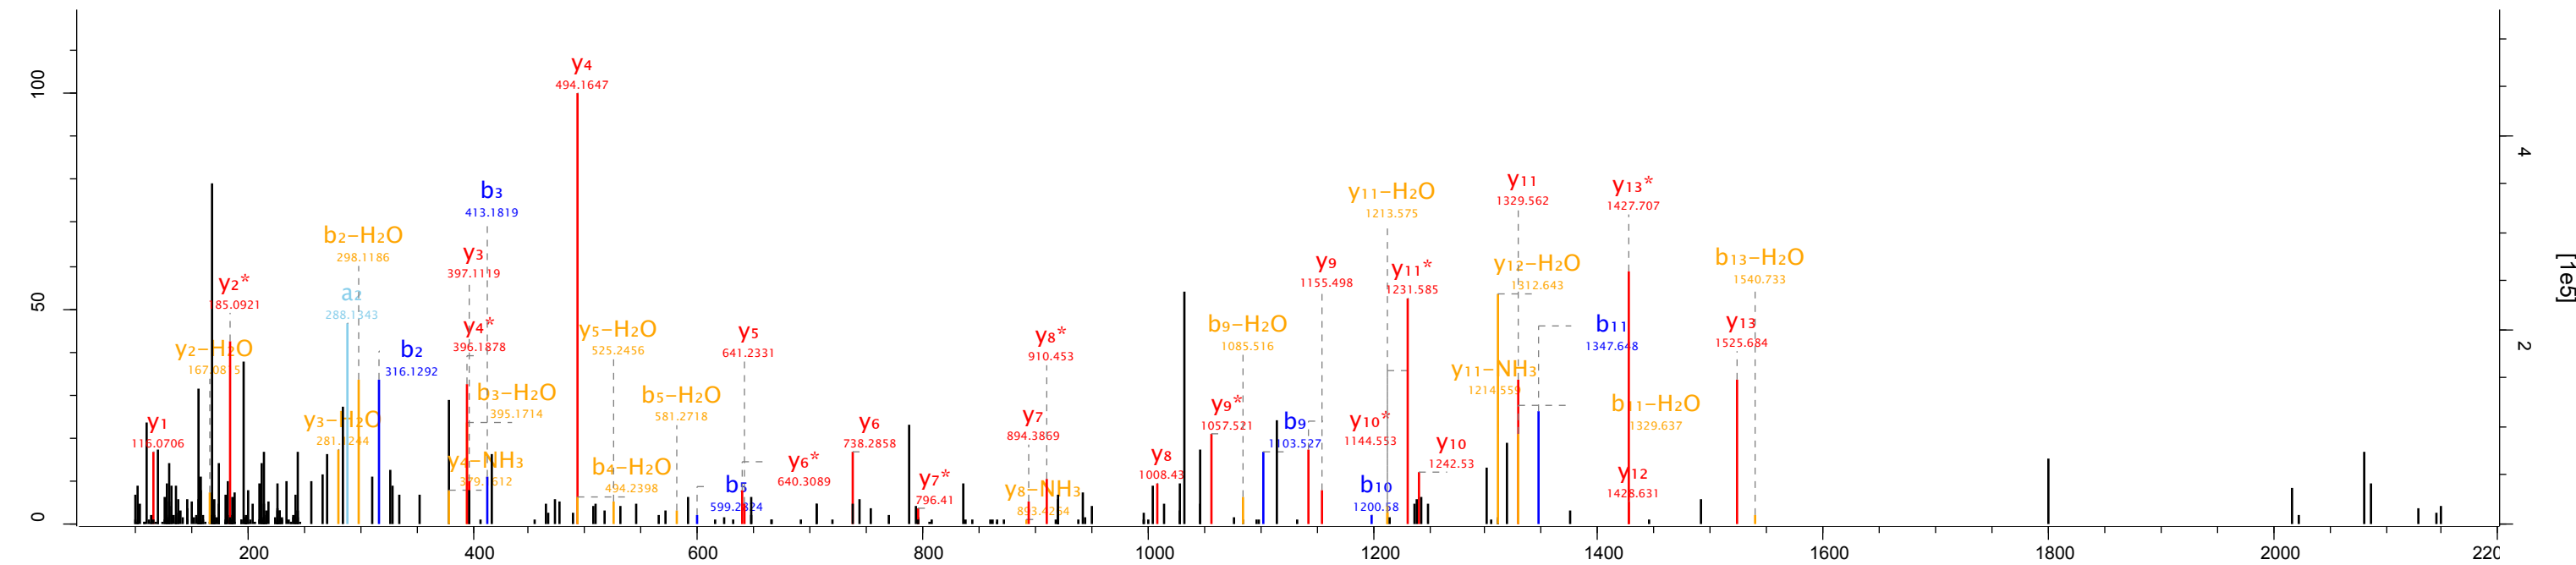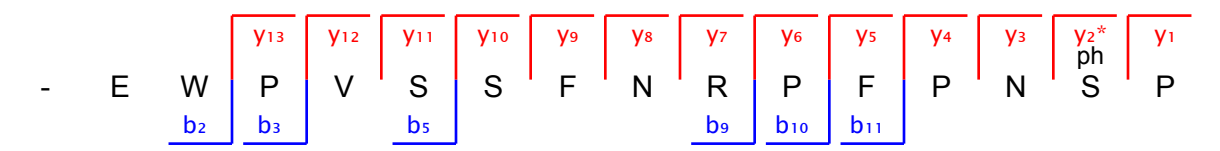

20150814\_A375SR\_Phospho\_BR2\_04 9187 FTMS; HCD 57.79 639.79 KLF10

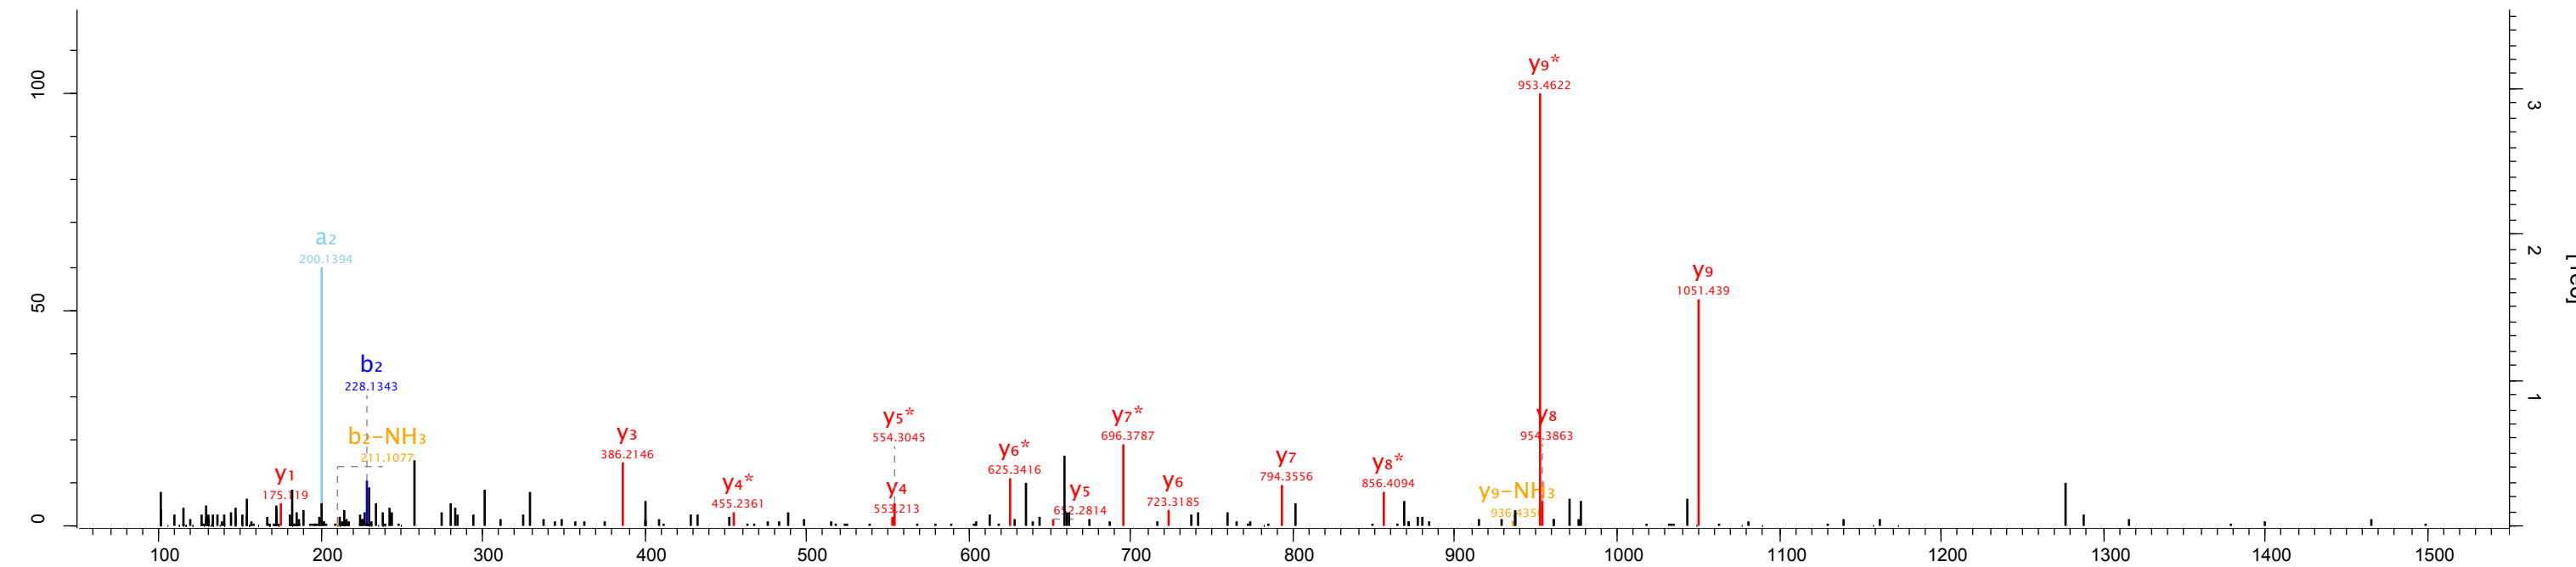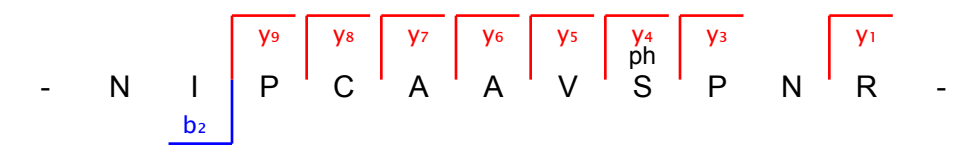

Raw file: 20150814\_A375SR\_Phospho\_BR2\_05  
 Scan: 10907 Method: FTMS; HCD Score: 93.18 m/z: 693.35 Gene names: ELK3

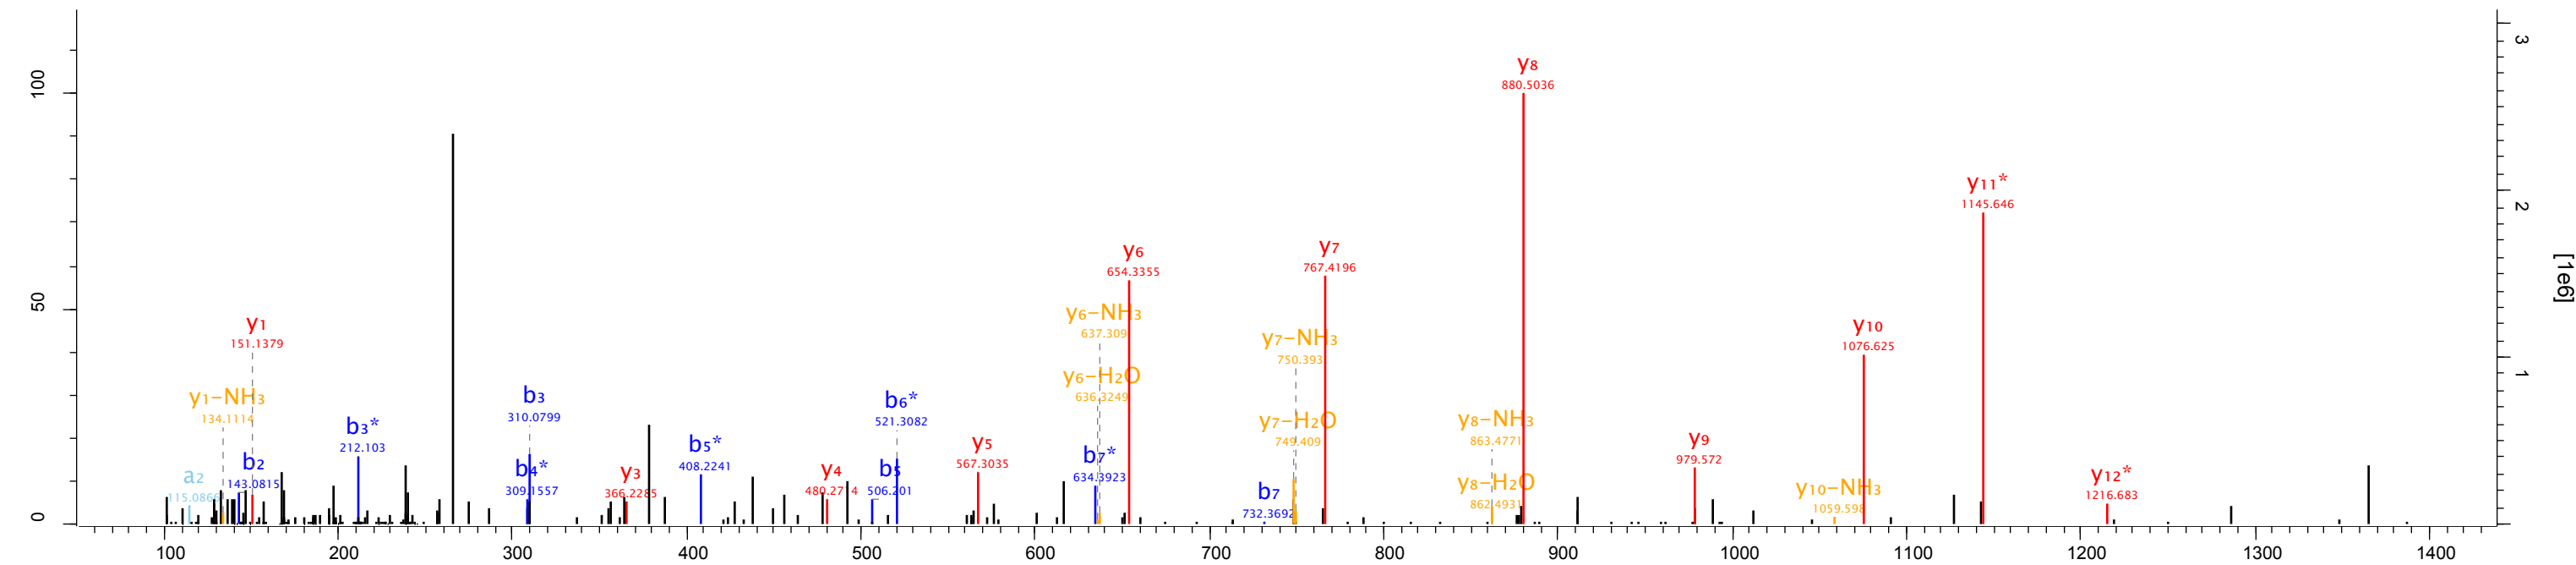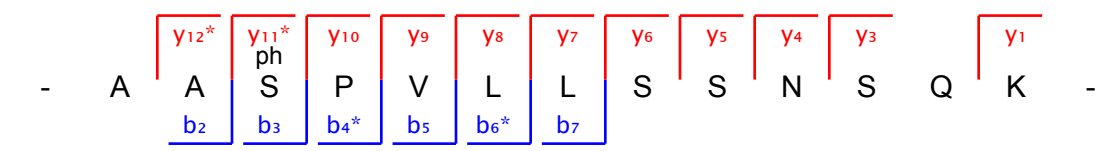

Raw file: 20150814\_A375SR\_Phospho\_BR2\_05  
 Scan: 13707 Method: FTMS; HCD Score: 140.11 m/z: 436.58 Gene names: RPL39P5;RPL39

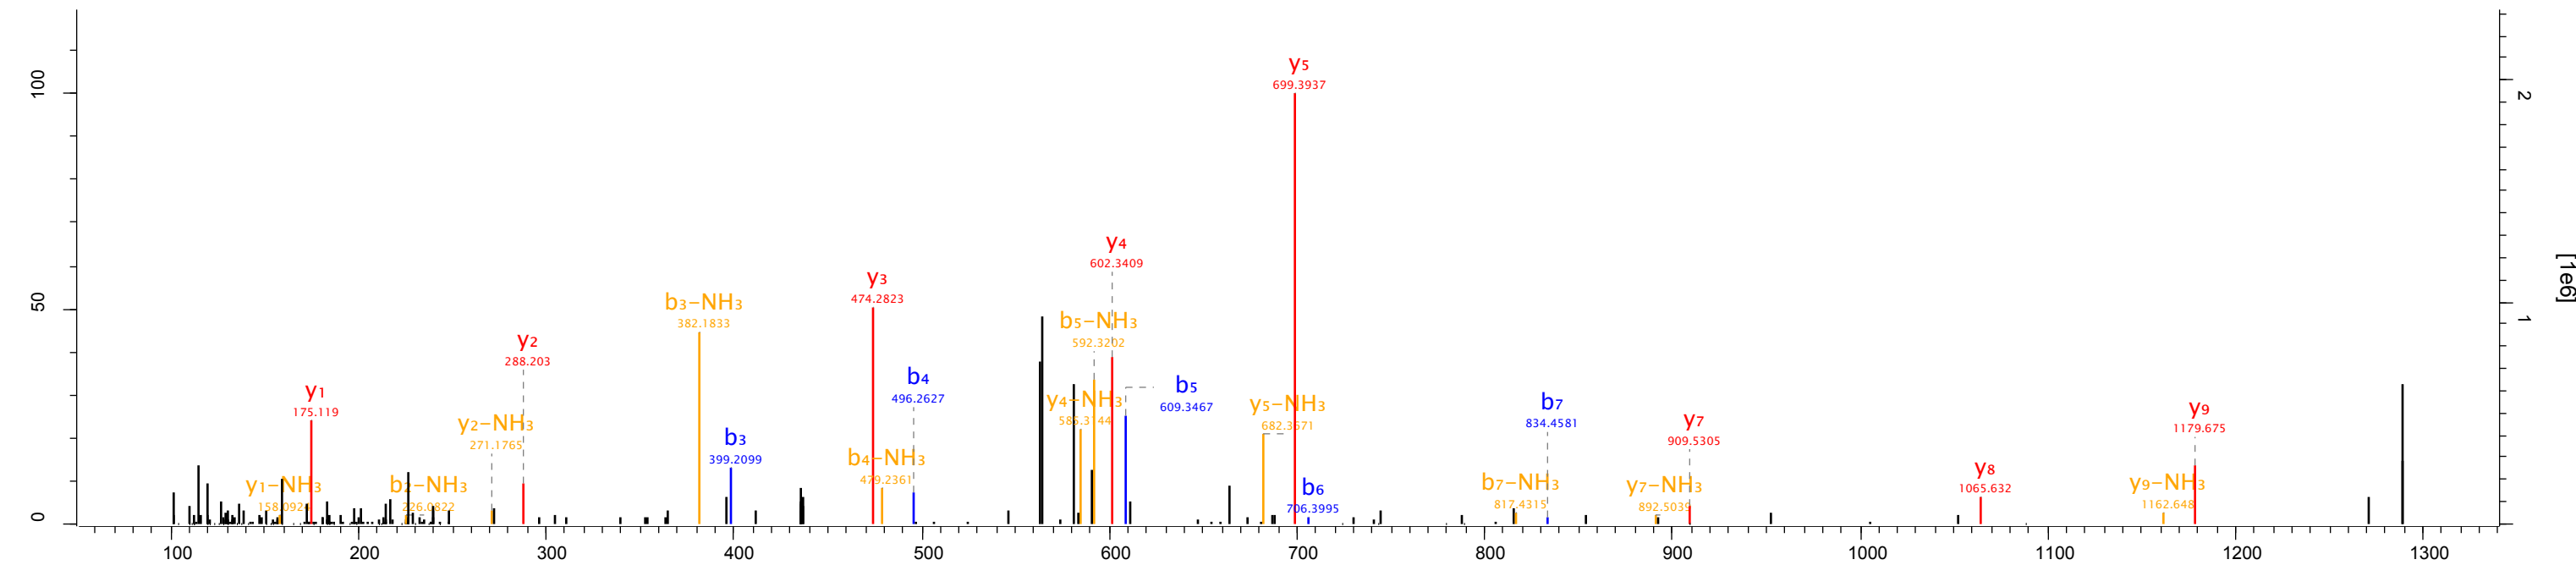

Raw file  
20150814\_A375SR\_Phospho\_BR2\_05

Scan 24027 Method FTMS; HCD Score 260.67 m/z 968.42 Gene names MAPK11P1L

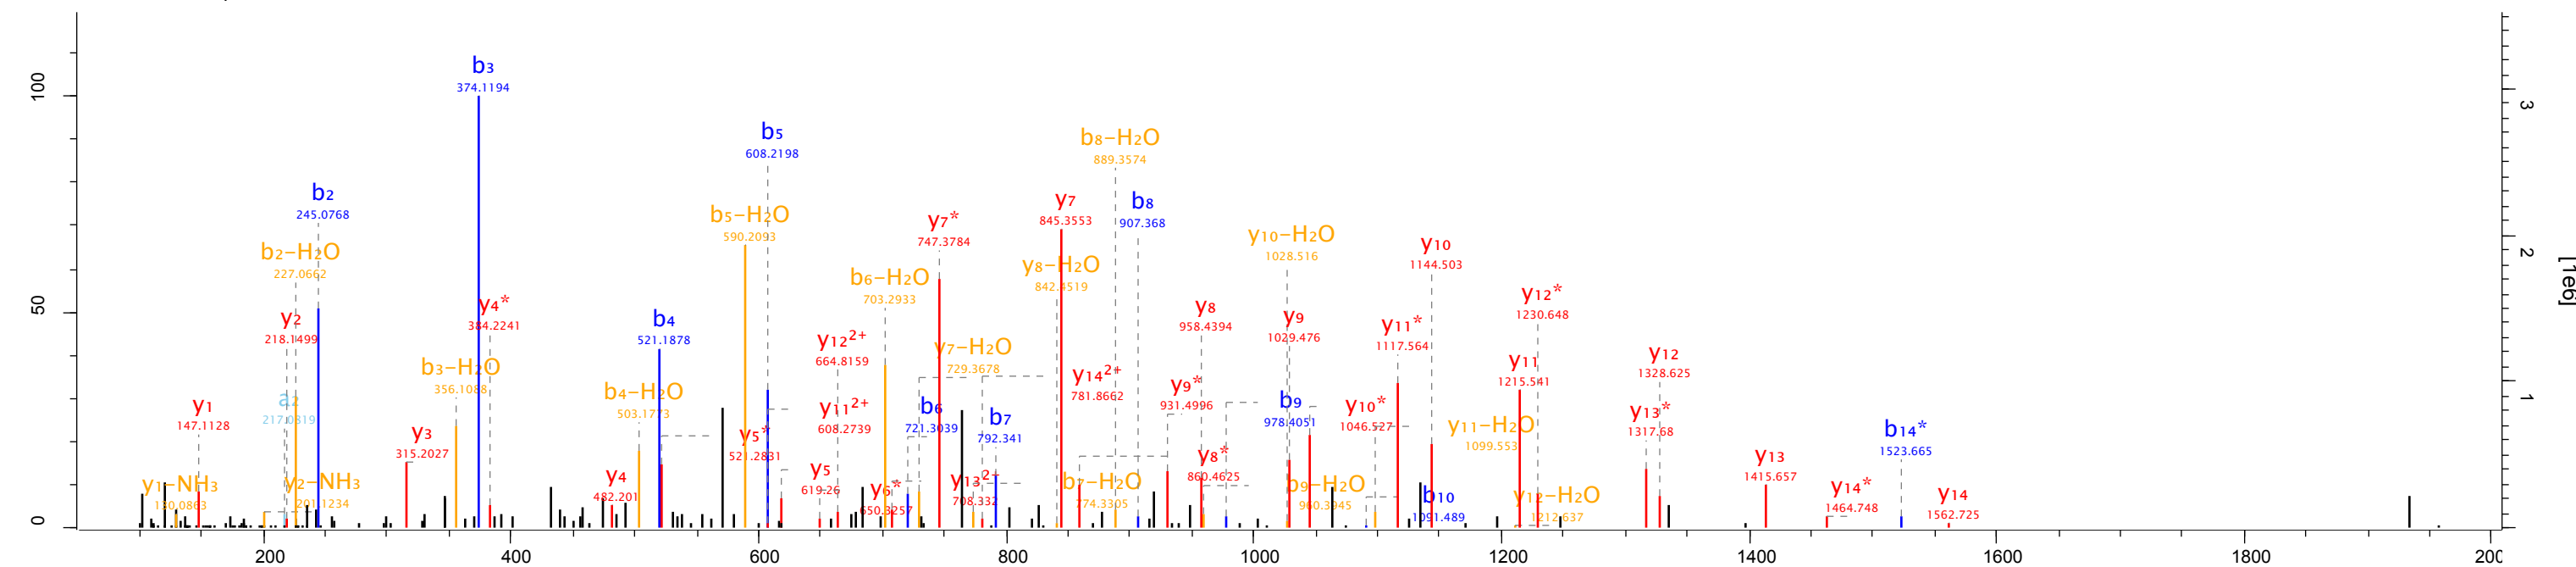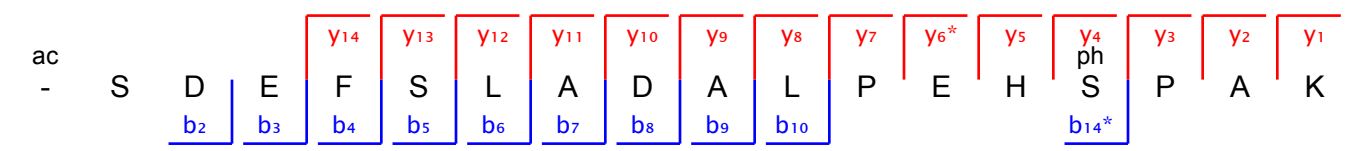



Raw file: 20150814\_A375SR\_Phospho\_BR2\_05  
 Scan: 8687 Method: FTMS; HCD Score: 103.31 m/z: 483.24 Gene names: C16orf72

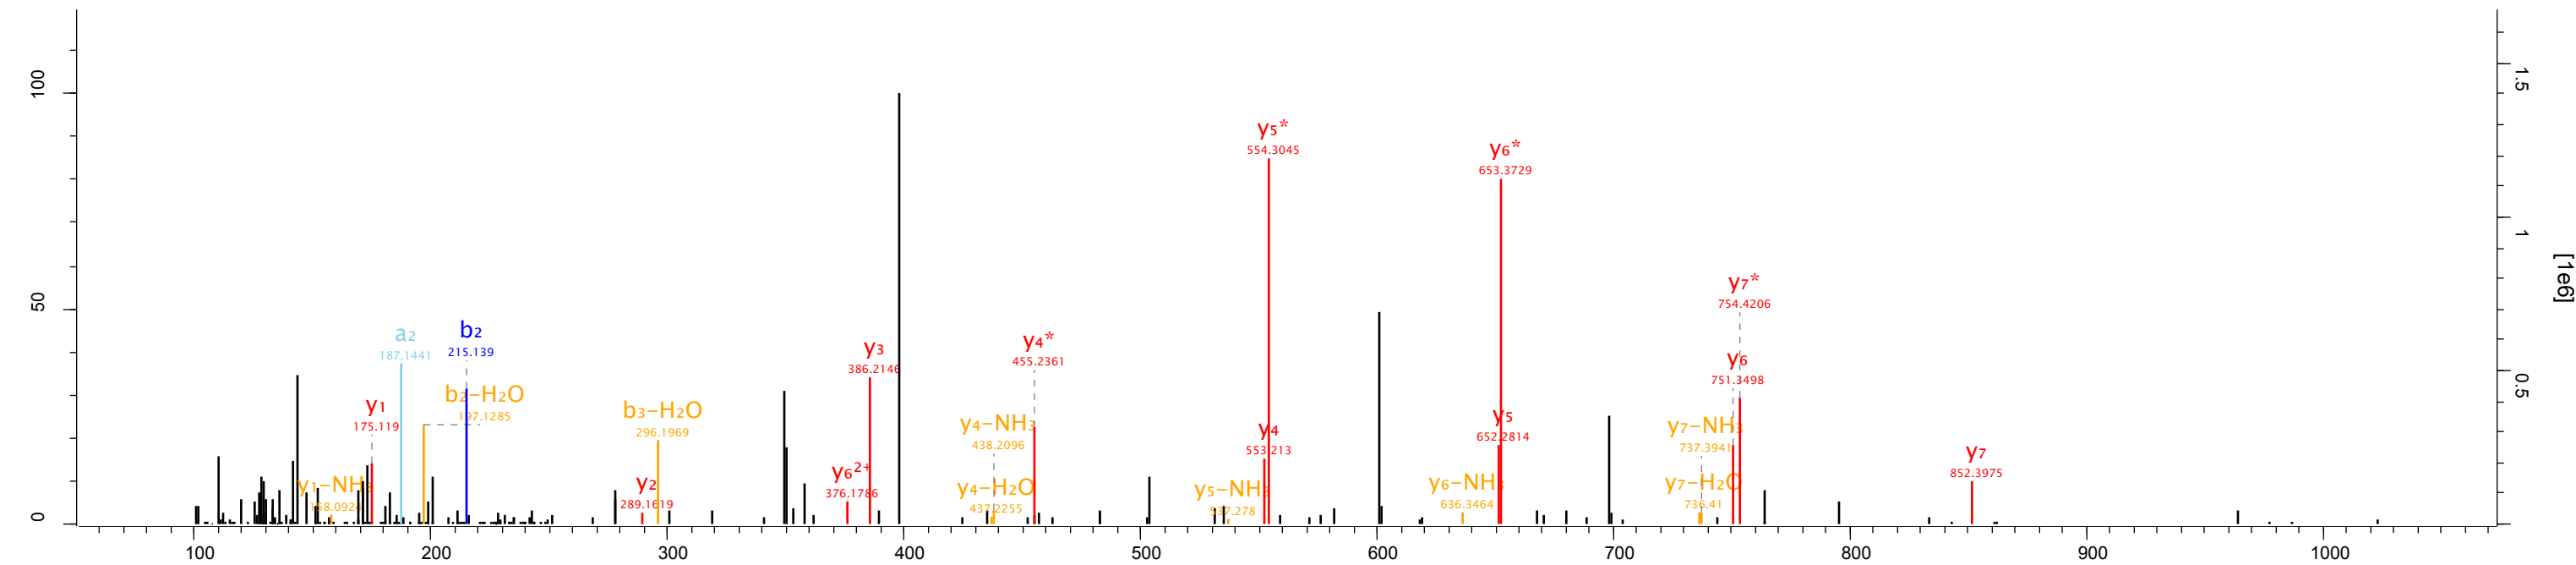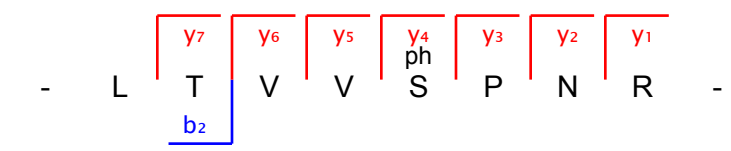

Raw file: 20150814\_A375SR\_Phospho\_BR2\_06  
 Scan: 14147  
 Method: FTMS; HCD  
 Score: 175.91  
 m/z: 436.58  
 Gene names: RPL39P5;RPL39

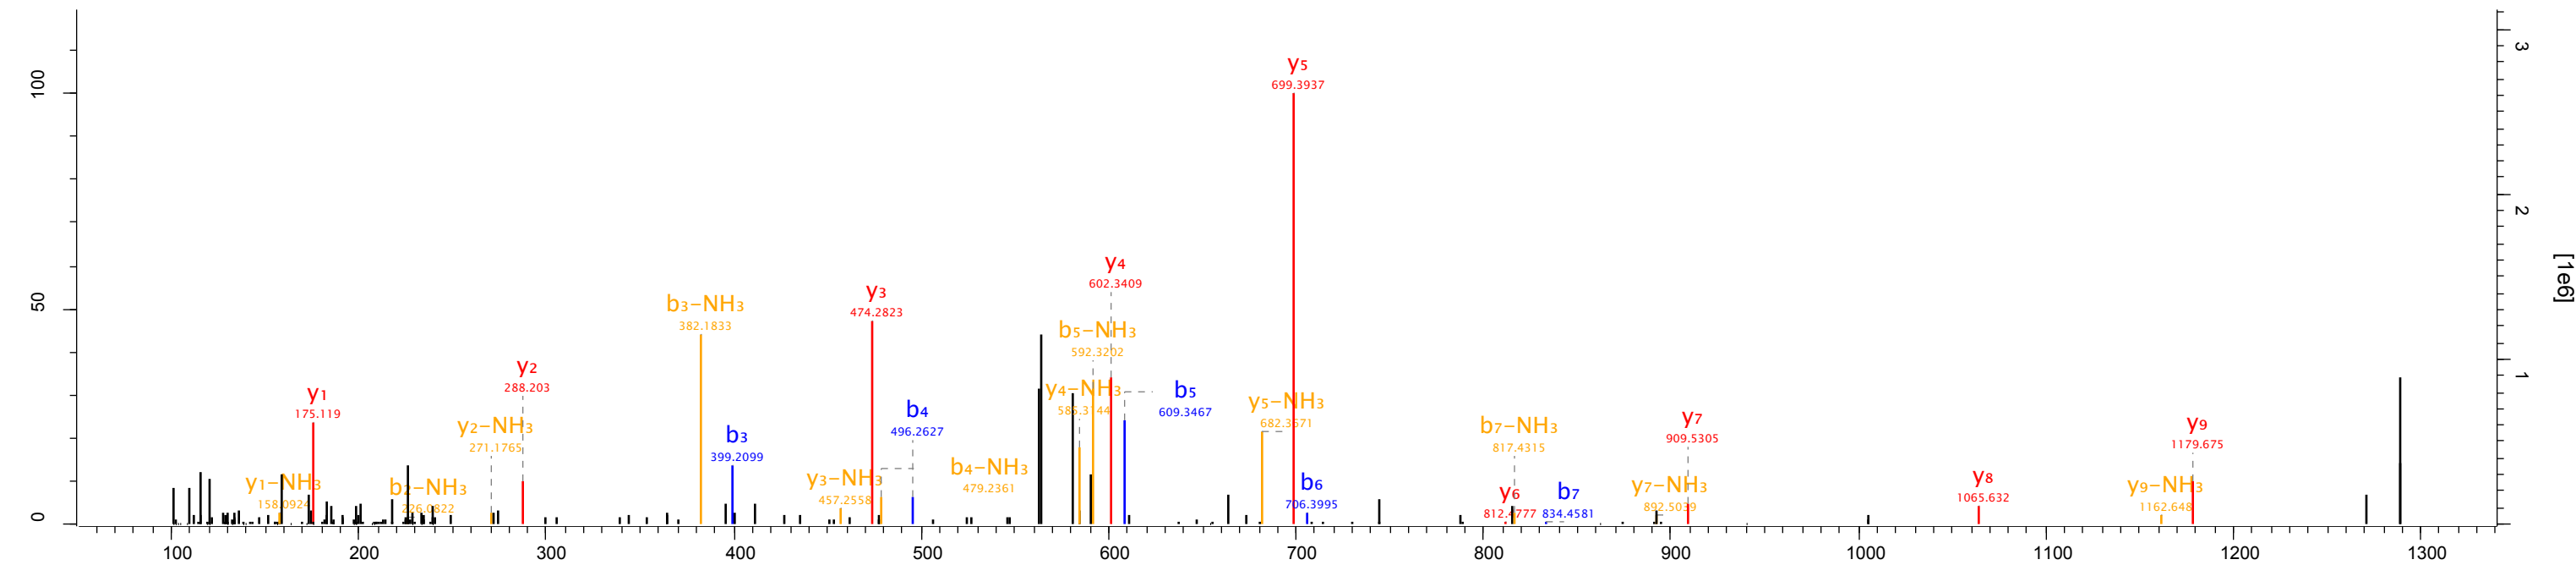

Raw file 20150814\_A375SR\_Phospho\_BR2\_06 Scan 18267 Method FTMS; HCD Score 72.47 m/z 658.31 Gene names ZFP36

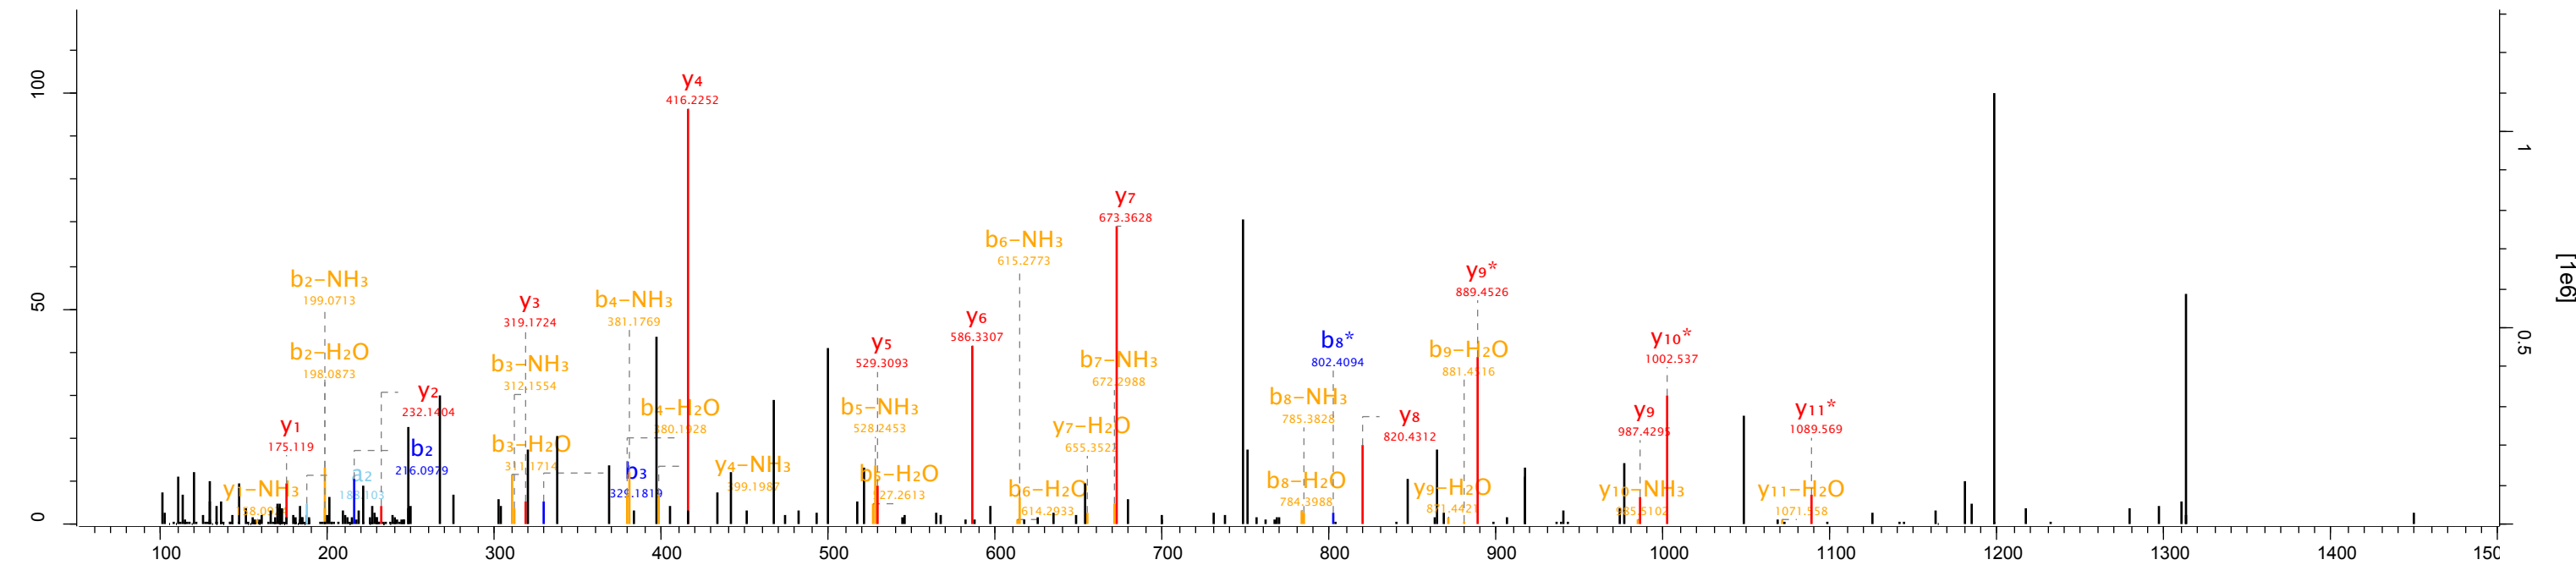

Raw file  
20150814\_A375SR\_Phospho\_BR2\_06

Scan 3387 Method FTMS; HCD Score 66.99 m/z 892.43

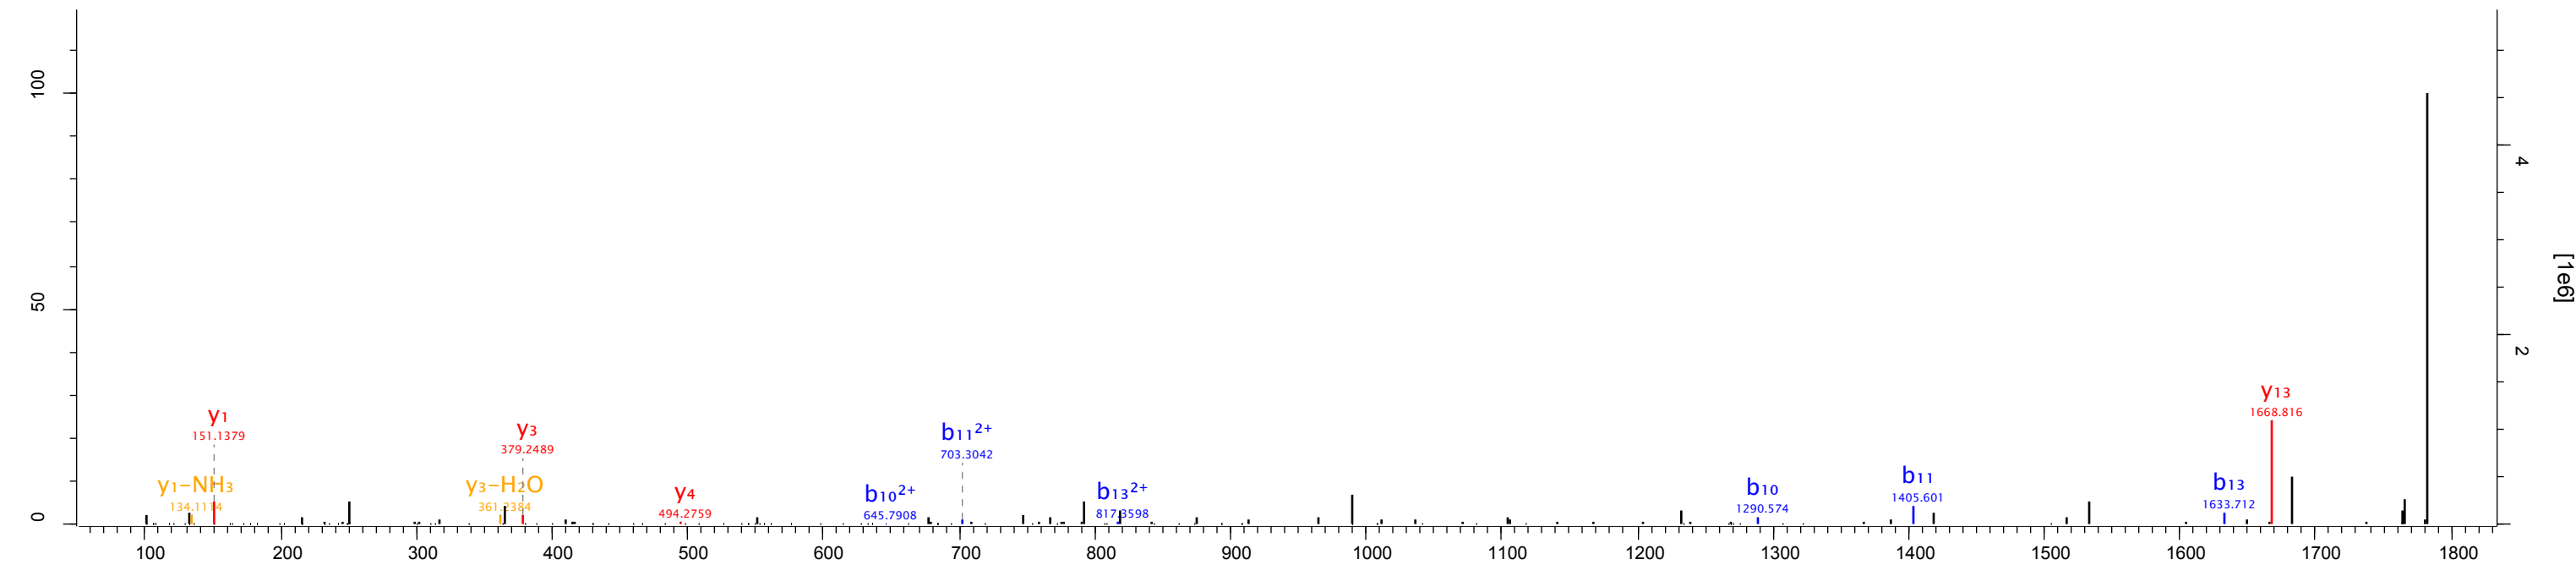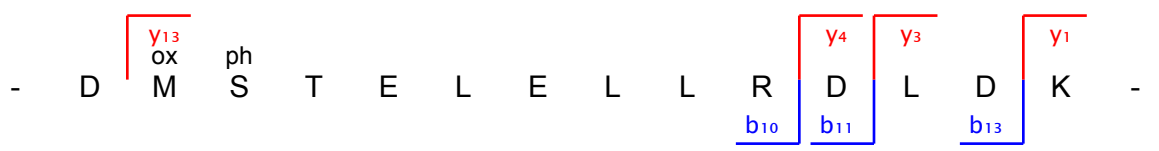

Raw file 20150814\_A375SR\_Phospho\_BR2\_07 Scan 11477 Method FTMS; HCD Score 92.86 m/z 883.39 Gene names ZNF446

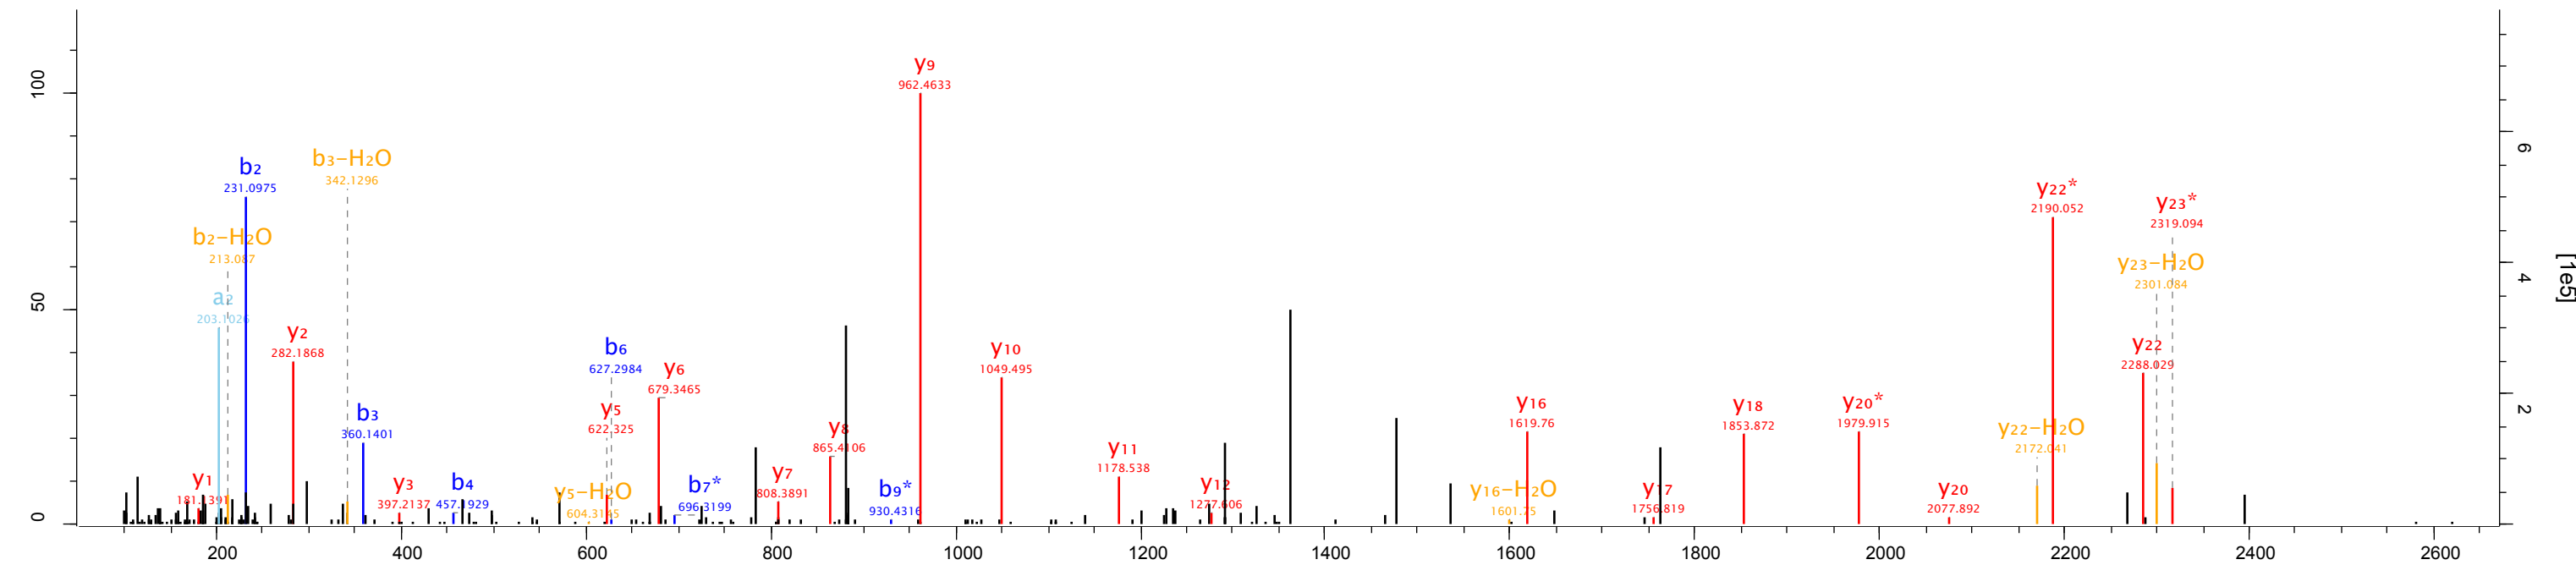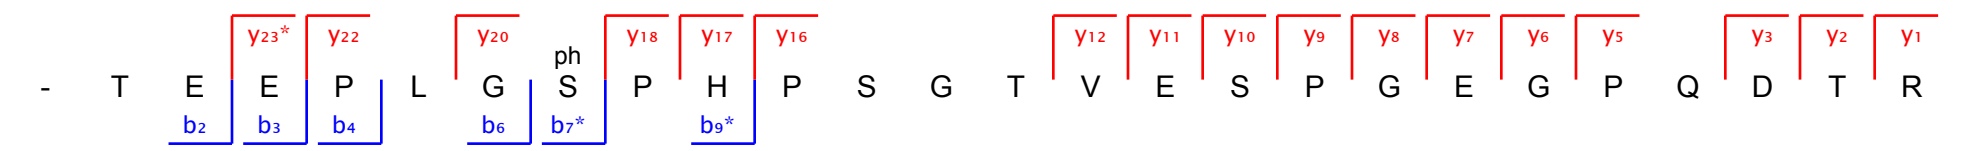



Raw file 20150814\_A375SR\_Phospho\_BR2\_07 Scan 23497 Method FTMS; HCD Score 137.64 m/z 970.43 Gene names MAPK11P1L

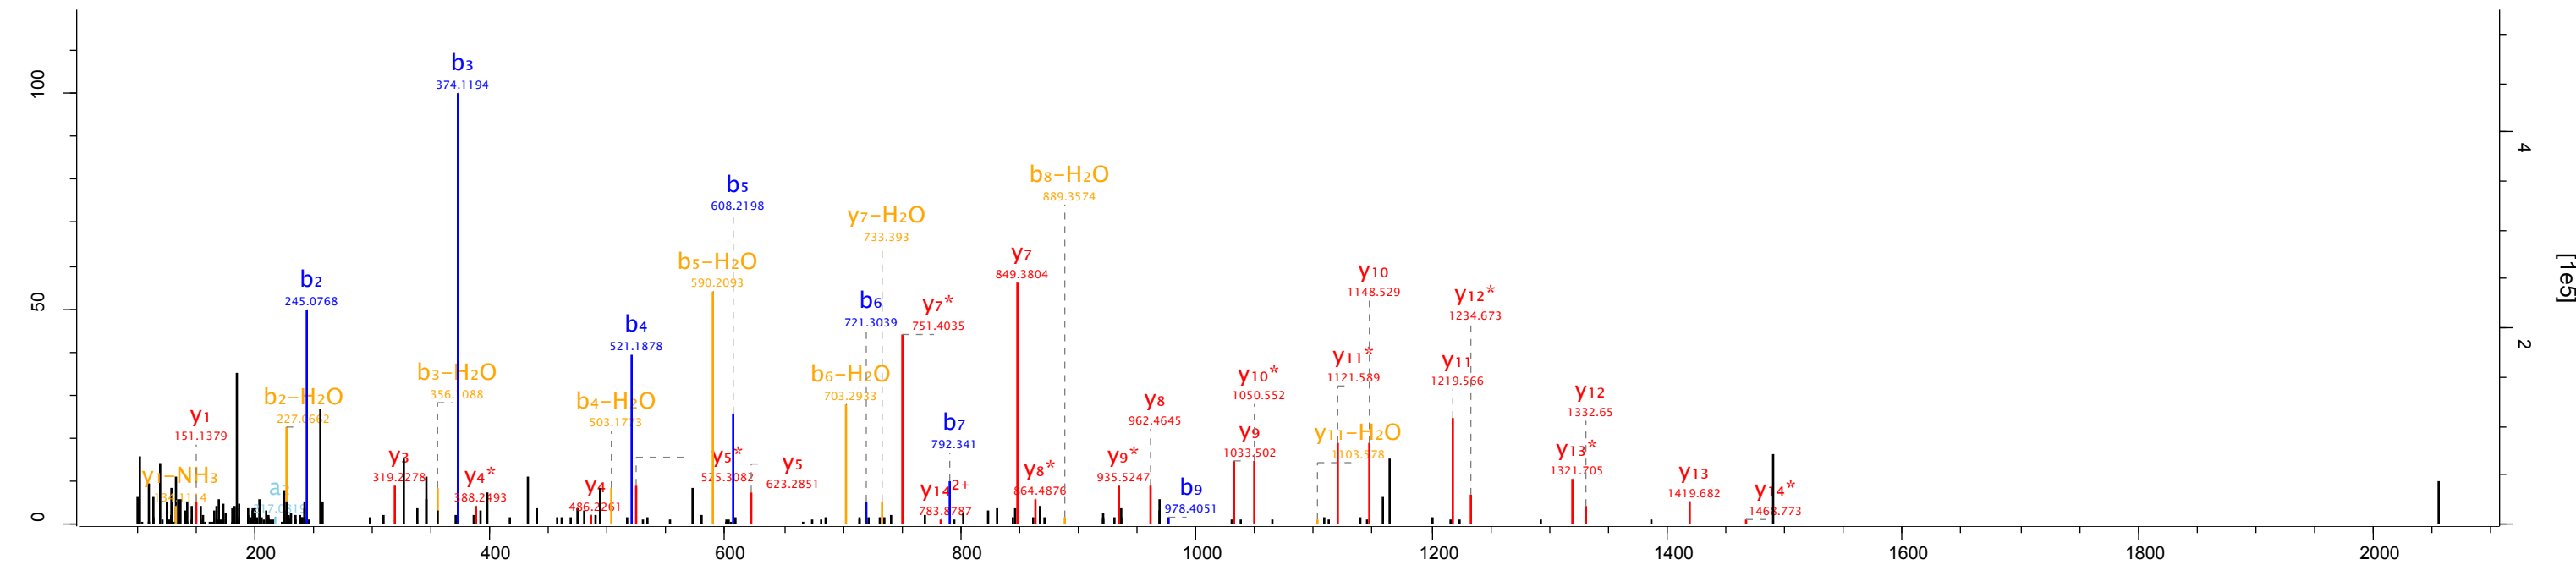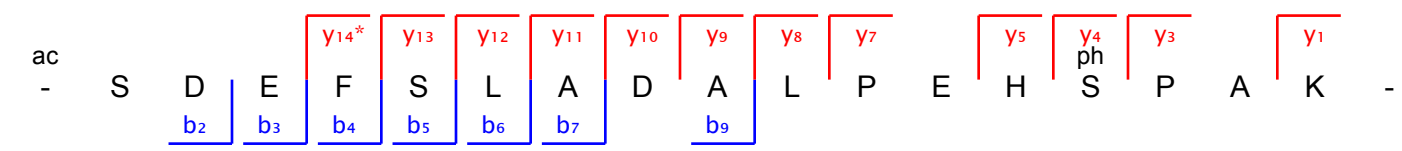

Raw file 20150814\_A375SR\_Phospho\_BR2\_07 Scan 4677 Method FTMS; HCD Score 58.83 m/z 530.24

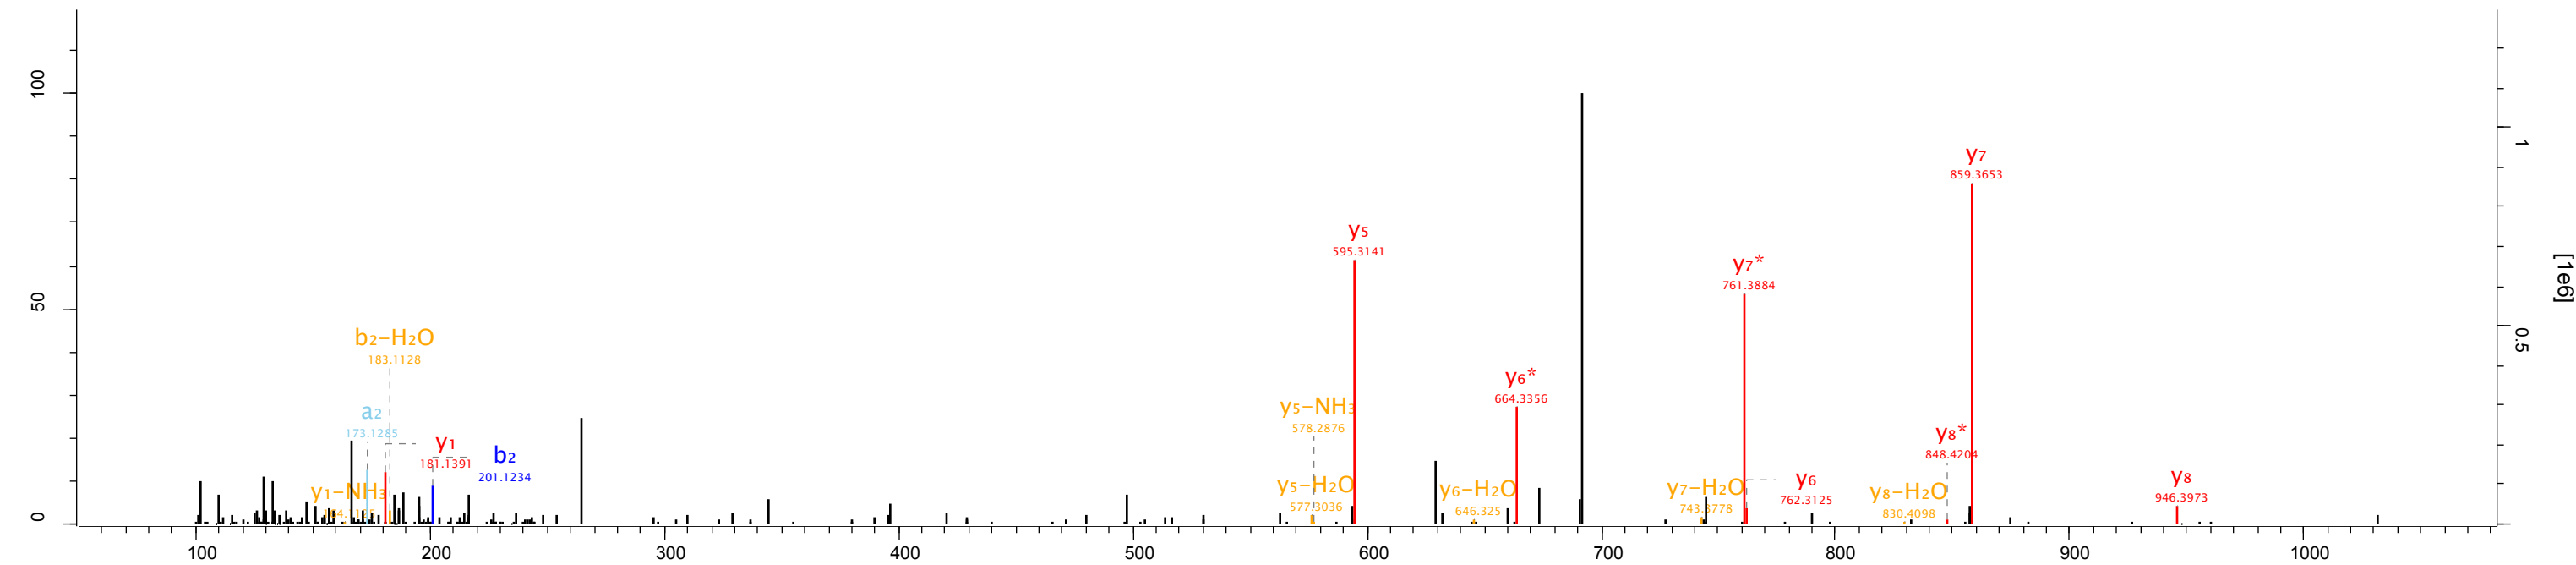



Raw file: 20150814\_A375SR\_Phospho\_BR2\_08  
 Scan: 16877 Method: FTMS; HCD Score: 63.62 m/z: 503.7 Gene names: MLF1

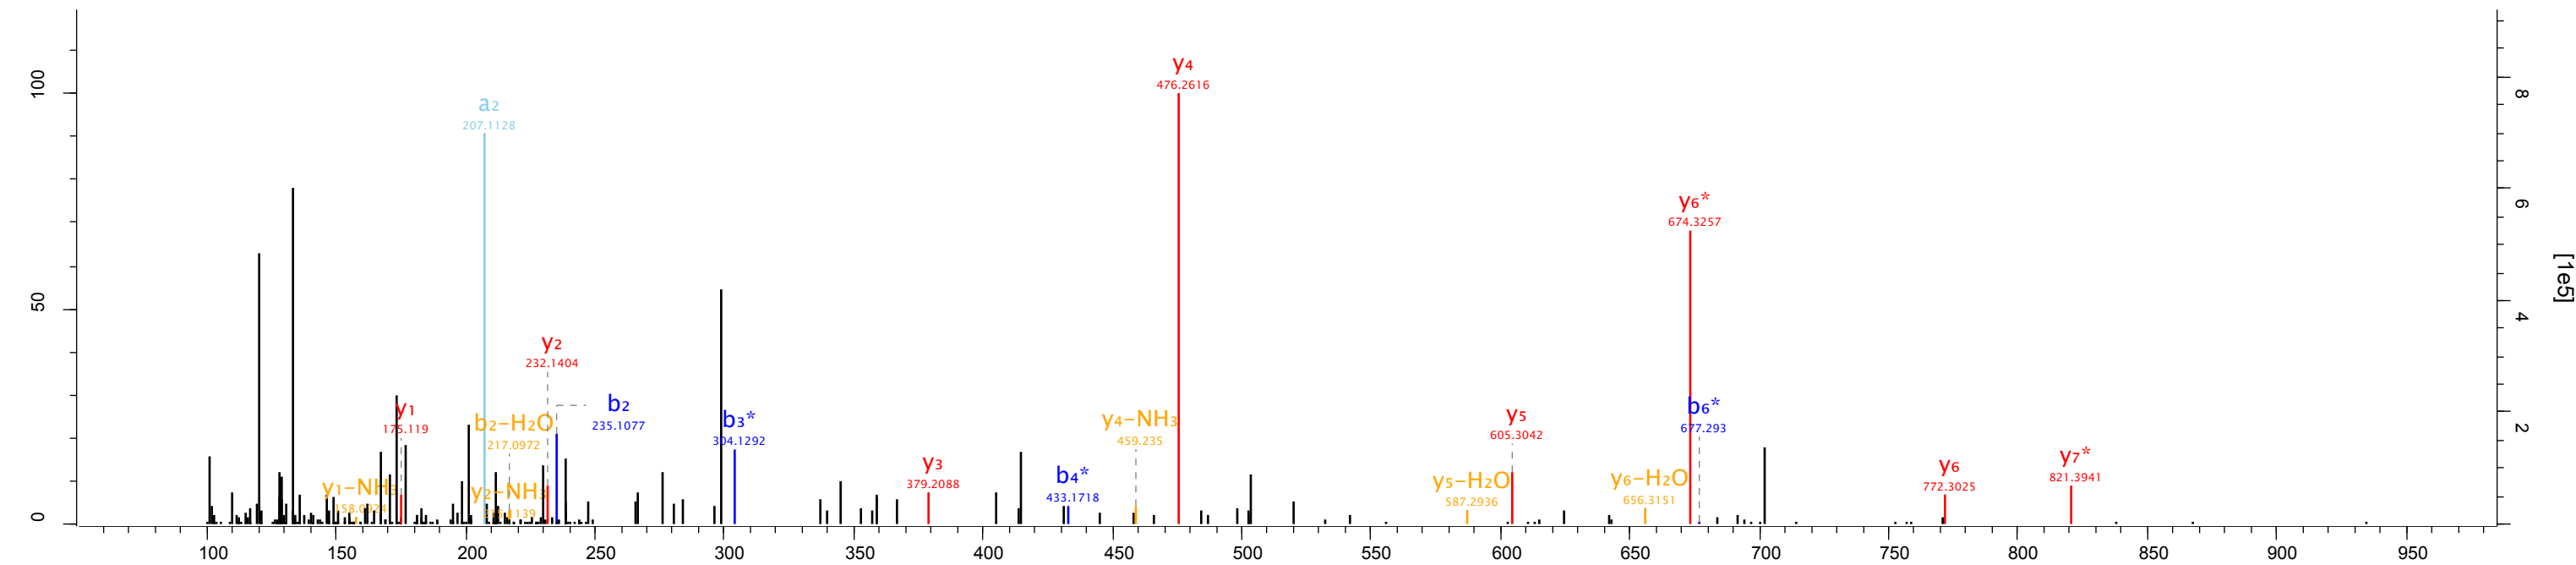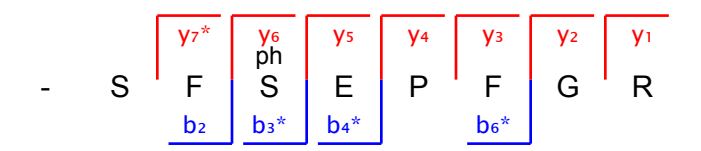

Raw file 20150814\_A375SR\_Phospho\_BR2\_10 Scan 13327 Method FTMS; HCD Score 163.16 m/z 440.6 Gene names RPL39P5;RPL39

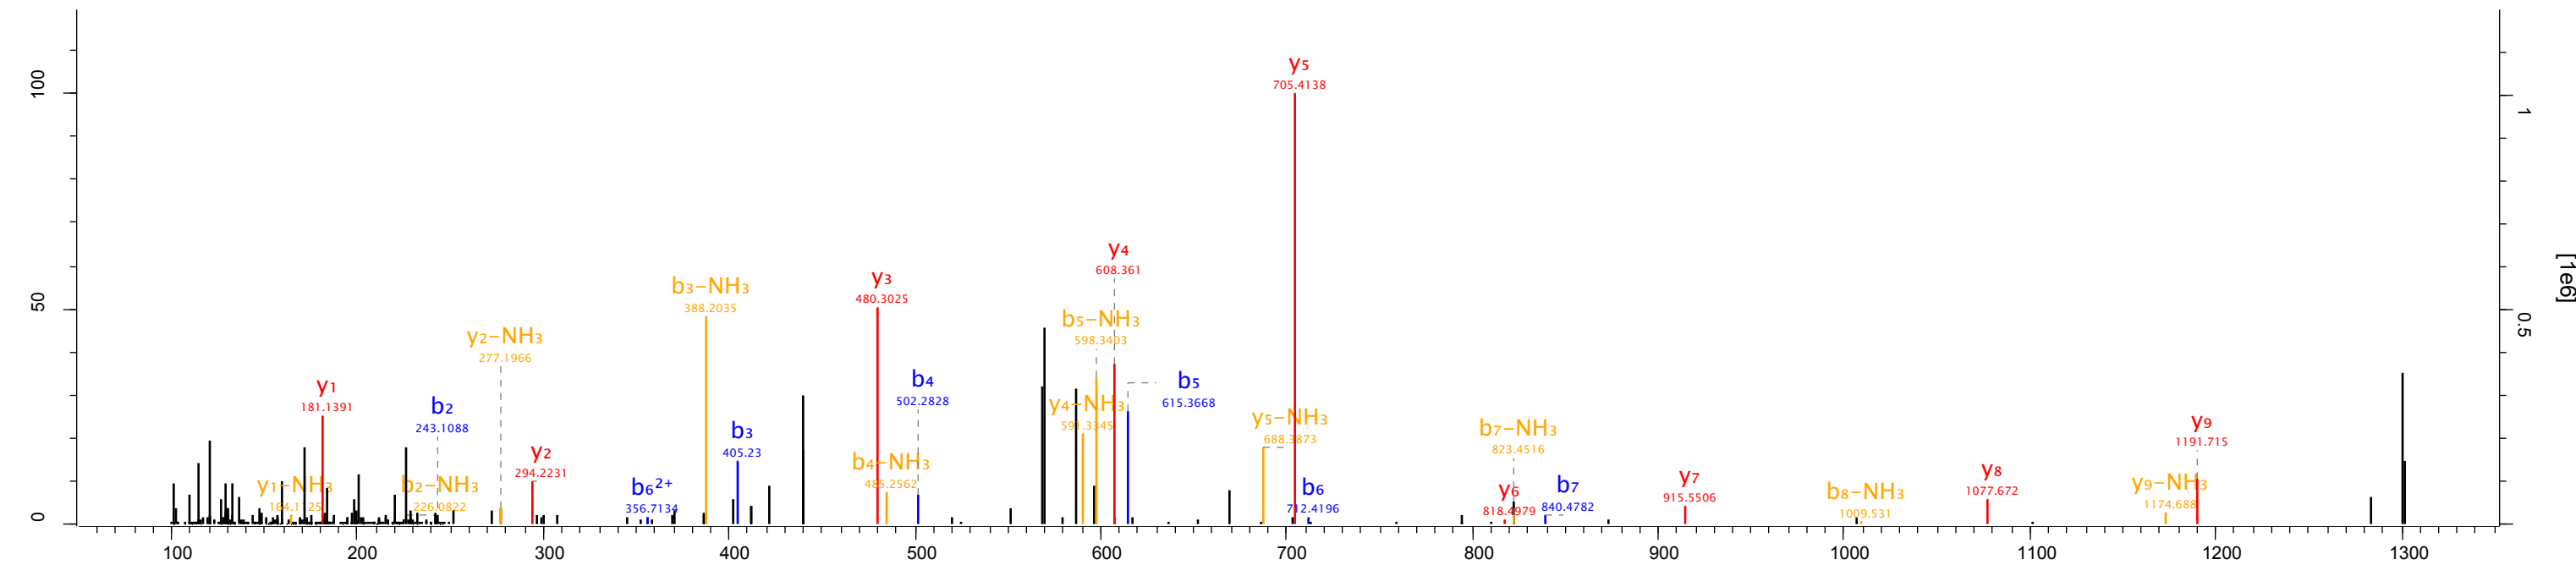

Raw file 20150814\_A375SR\_Phospho\_BR2\_10 Scan 20997 Method FTMS; HCD Score 92.55 m/z 981.43 Gene names FAM168B

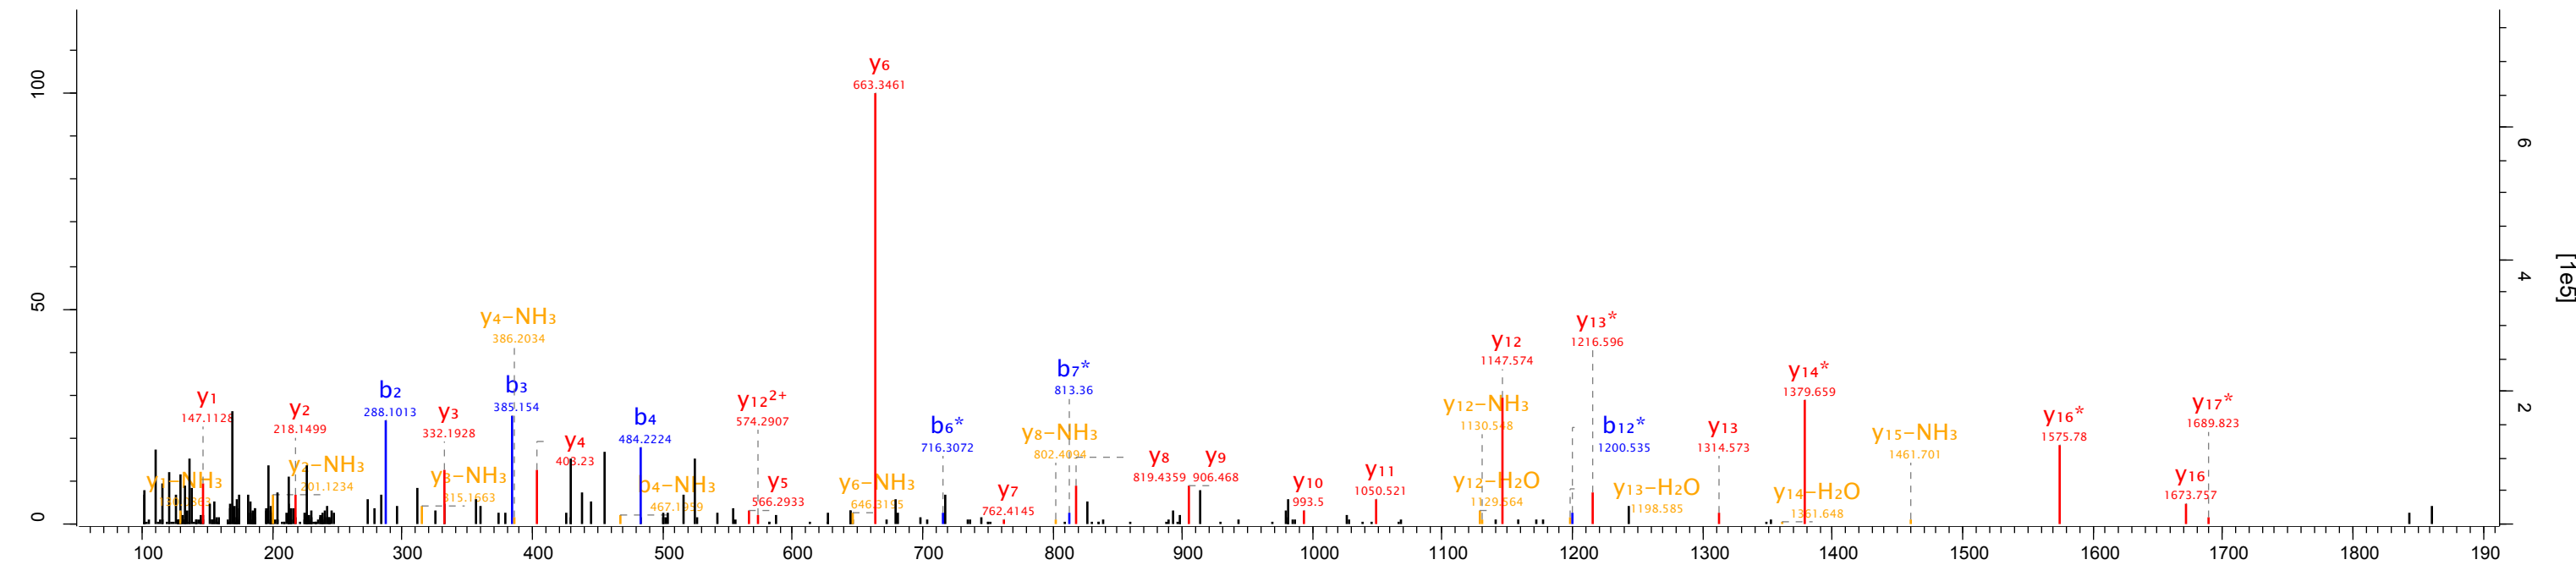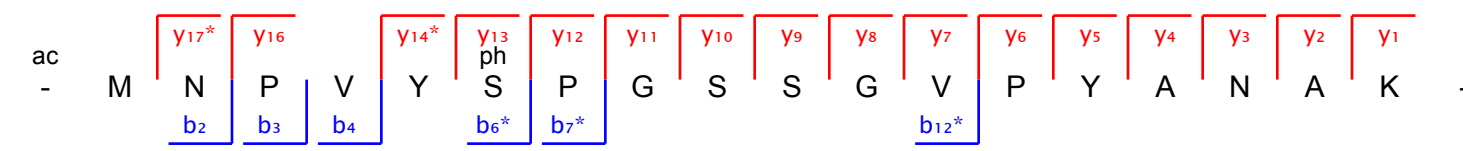

Raw file: 20150818\_A375SR-Proteome\_BR1  
 Scan: 67207 Method: FTMS; HCD Score: 68.28 m/z: 745.43 Gene names: MED21

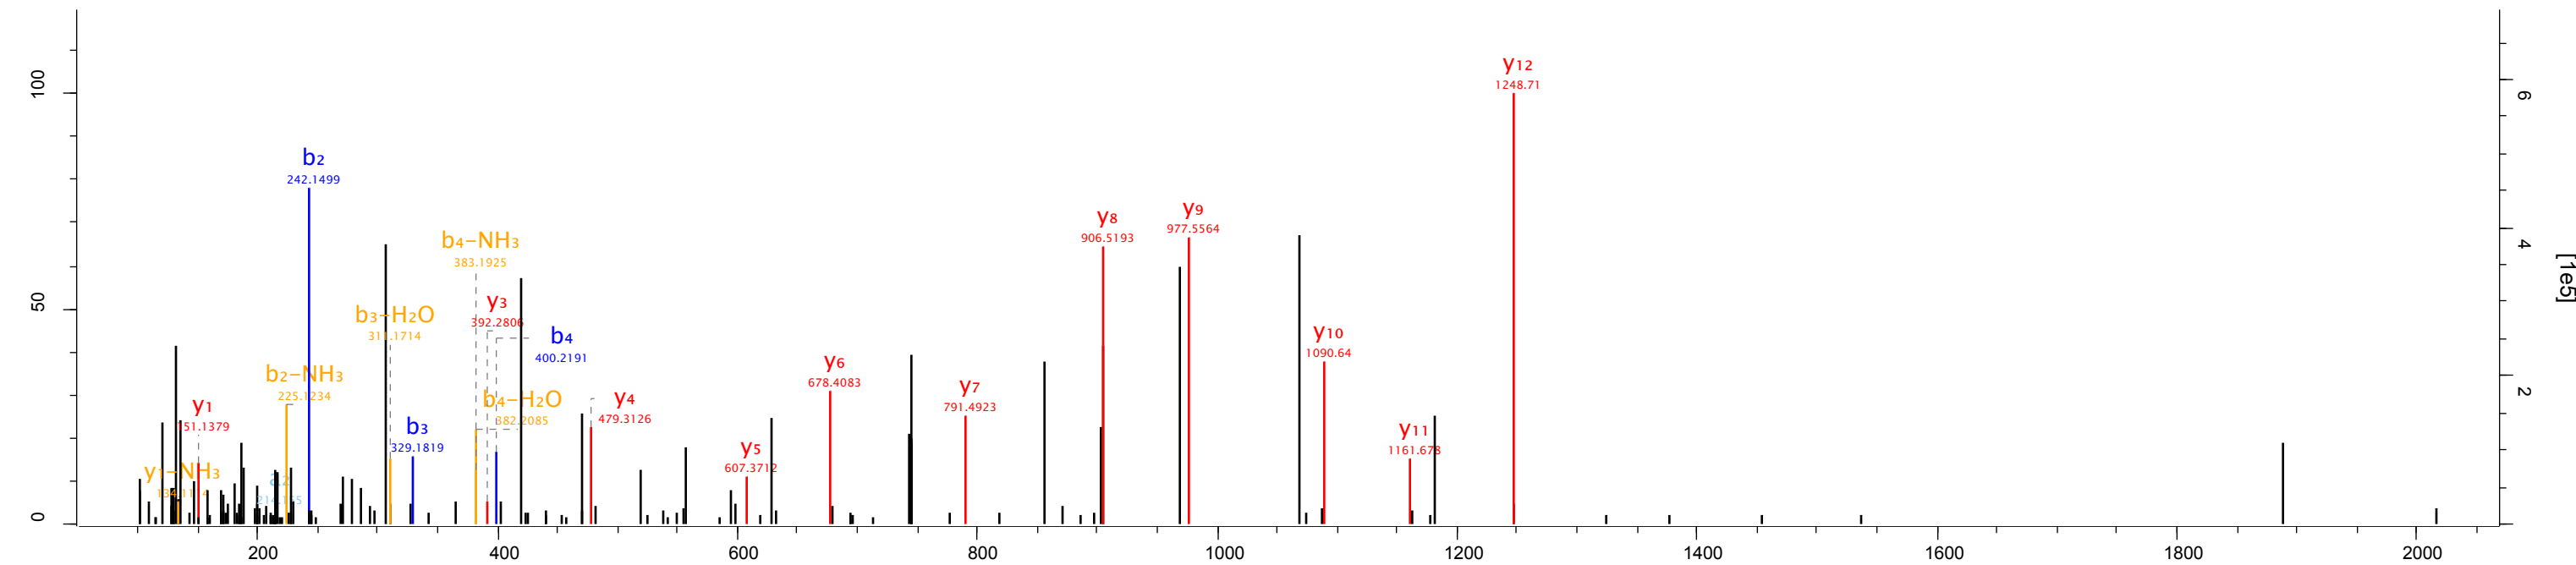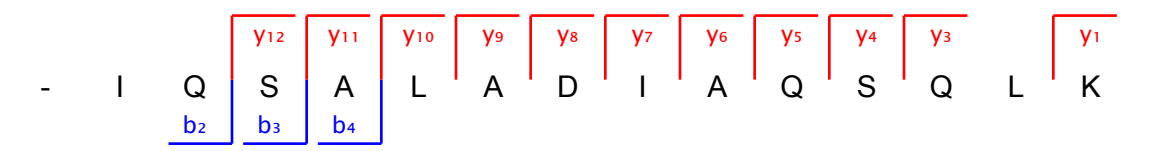

Raw file 20150818\_A375SR-Proteome\_BR1 Scan 74647 Method FTMS; HCD Score 40.15 m/z 576.82

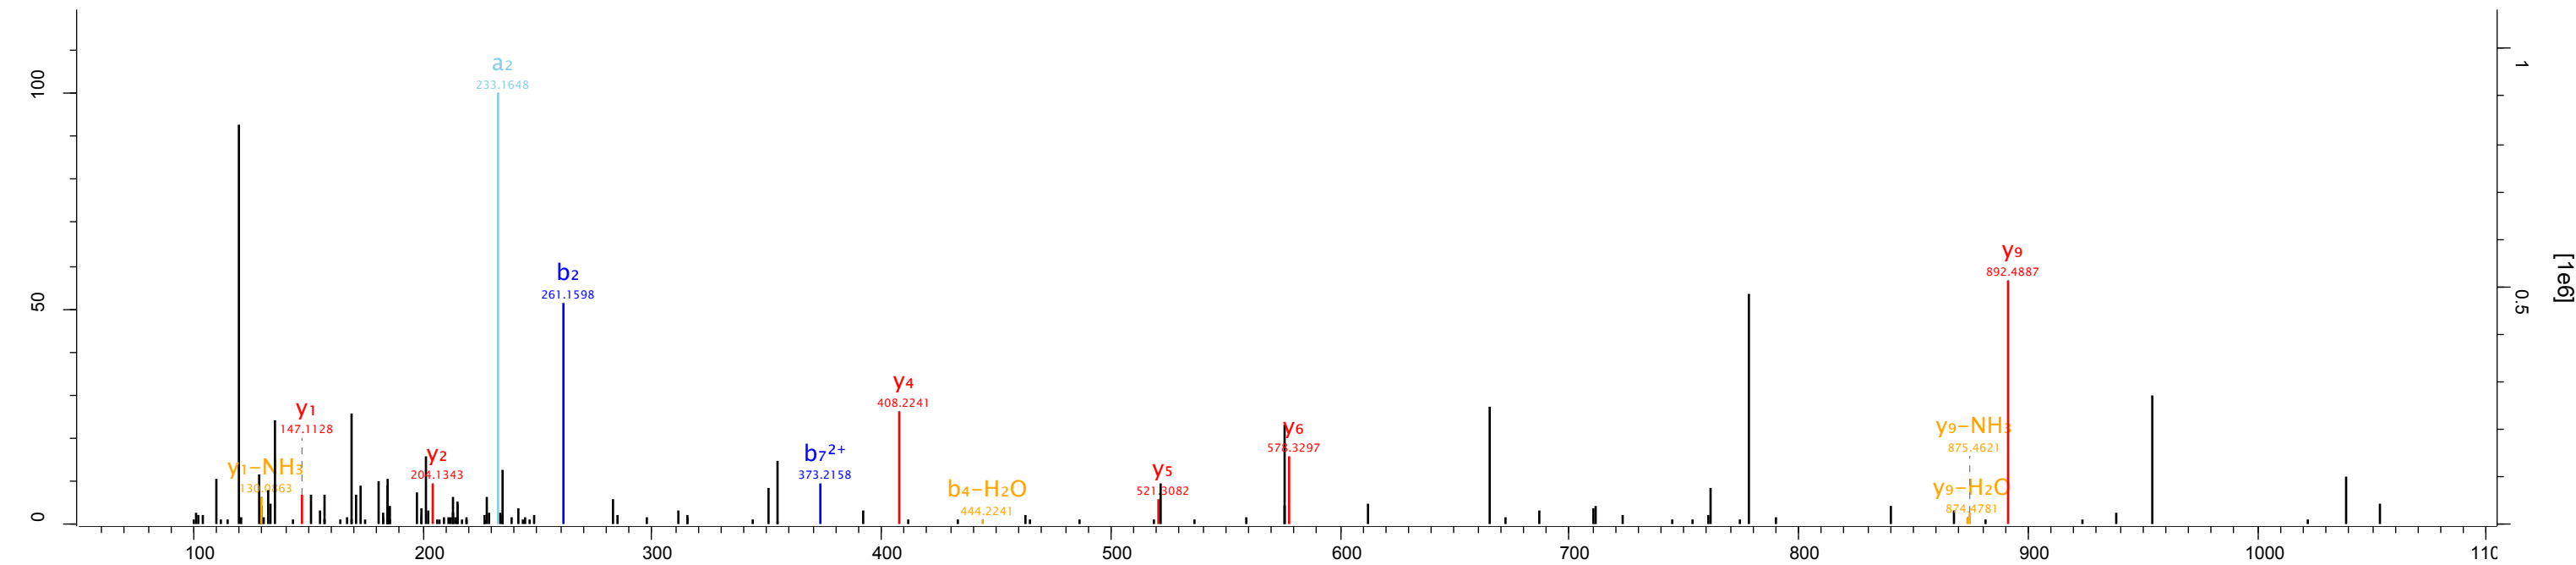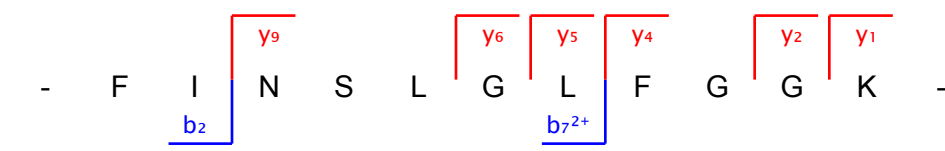

Raw file: 20150818\_A375SR-Proteome\_BR2  
 Scan: 70547 Method: FTMS; HCD Score: 51.44 m/z: 494.82 Gene names: STON2

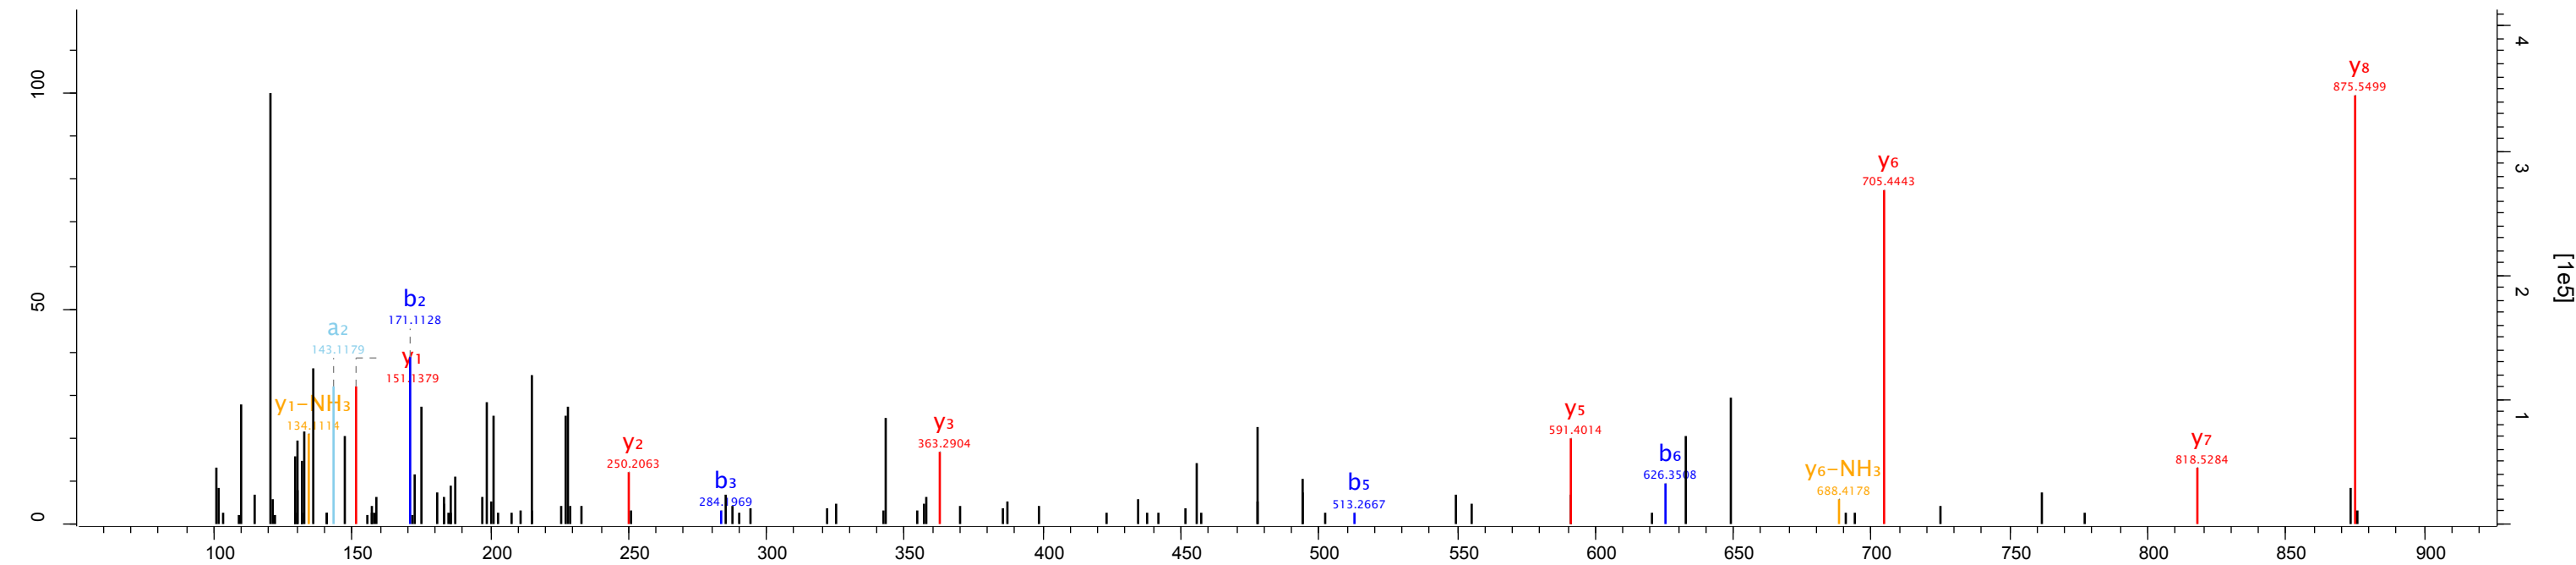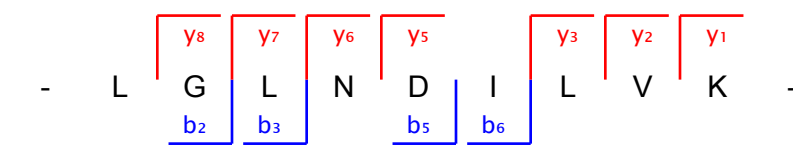

Raw file: 20150818\_A375SR-Proteome\_BR2  
 Scan: 84997 Method: FTMS; HCD Score: 100.11 m/z: 760.38 Gene names: FLNB

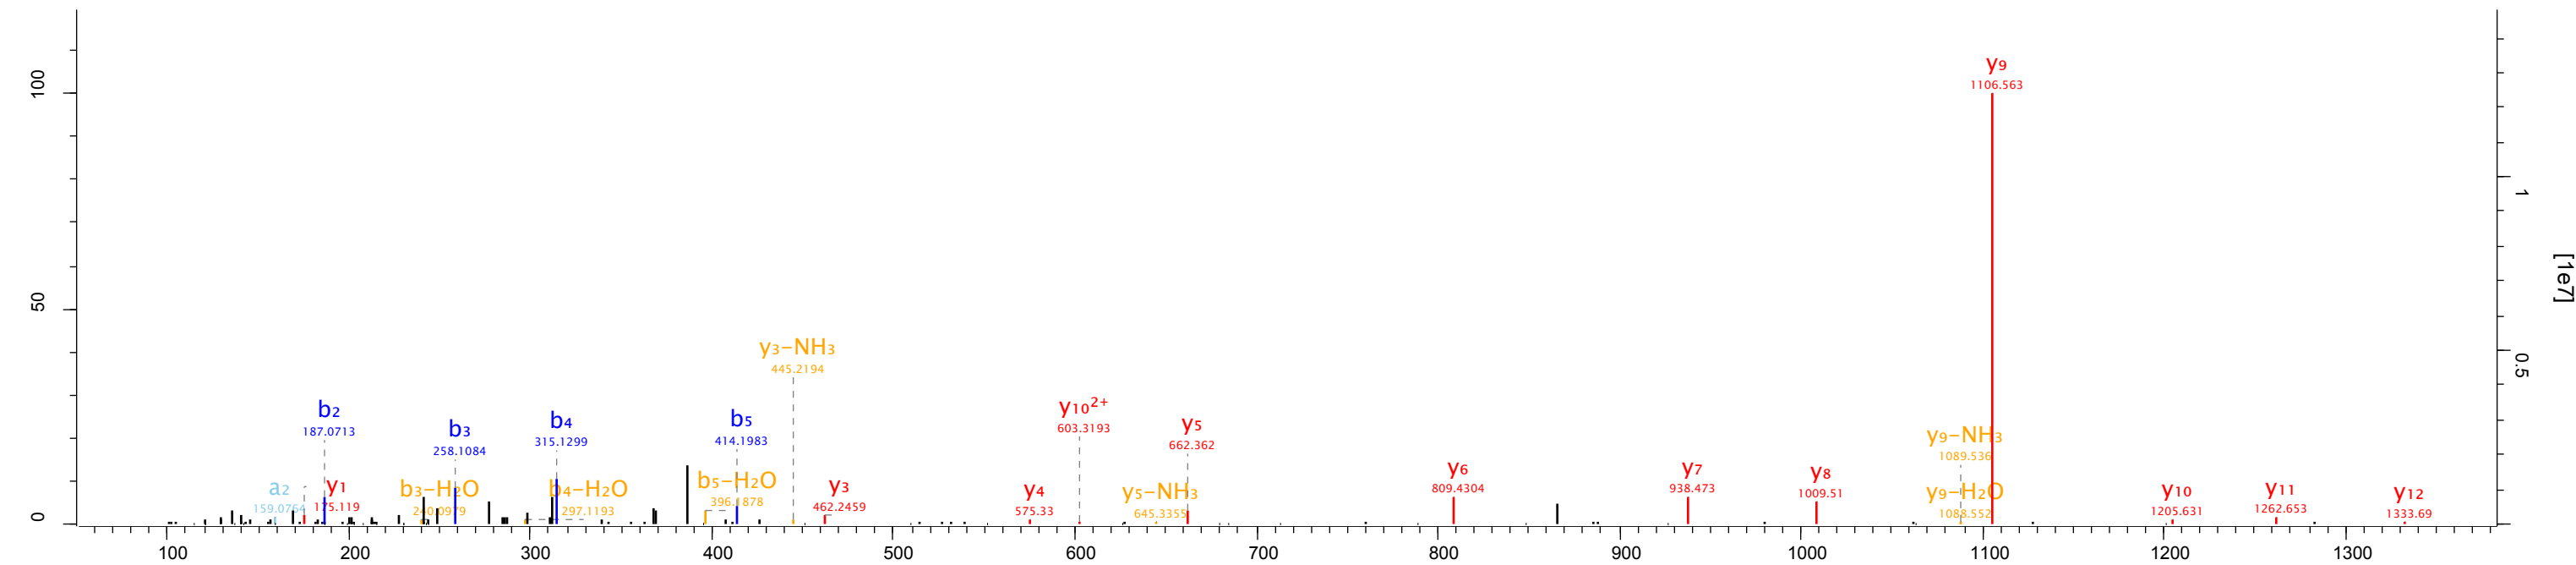

Raw file 20150822\_A375SR\_Phospho\_BR3\_02 Scan 10697 Method FTMS; HCD Score 57.53 m/z 1031.92

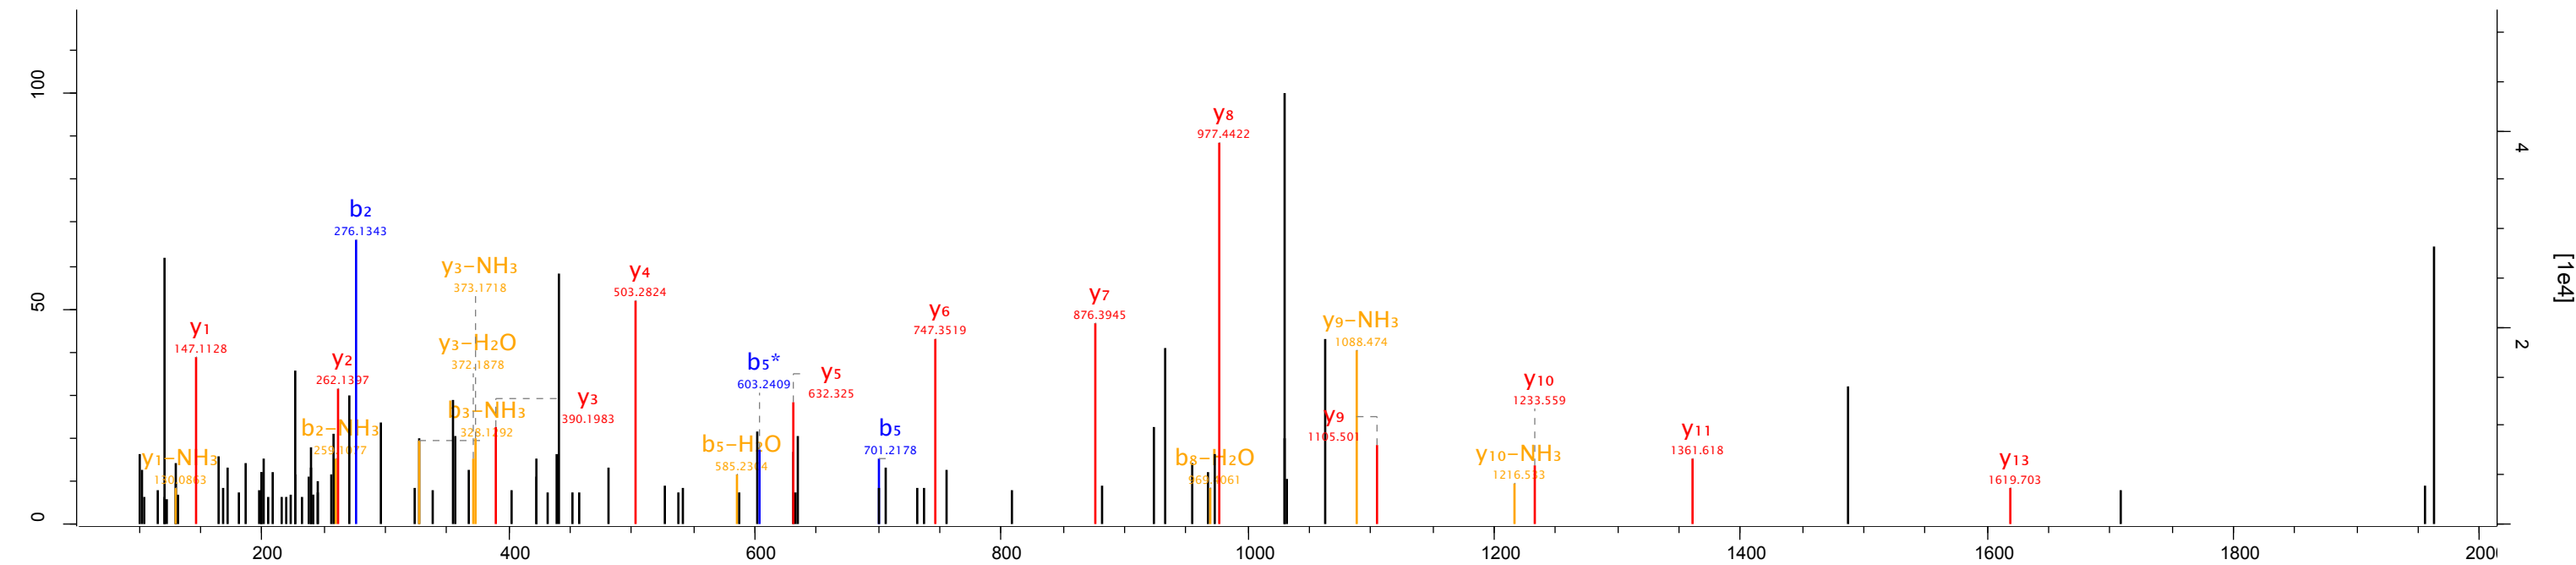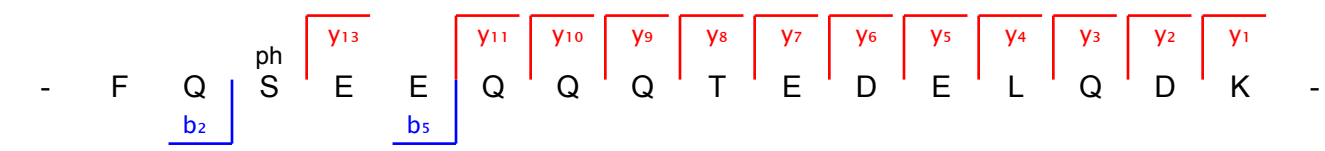



Raw file: 20150822\_A375SR\_Phospho\_BR3\_02  
 Scan: 5297 Method: FTMS; HCD Score: 48.91 m/z: 663.78 Gene names: GPSM3

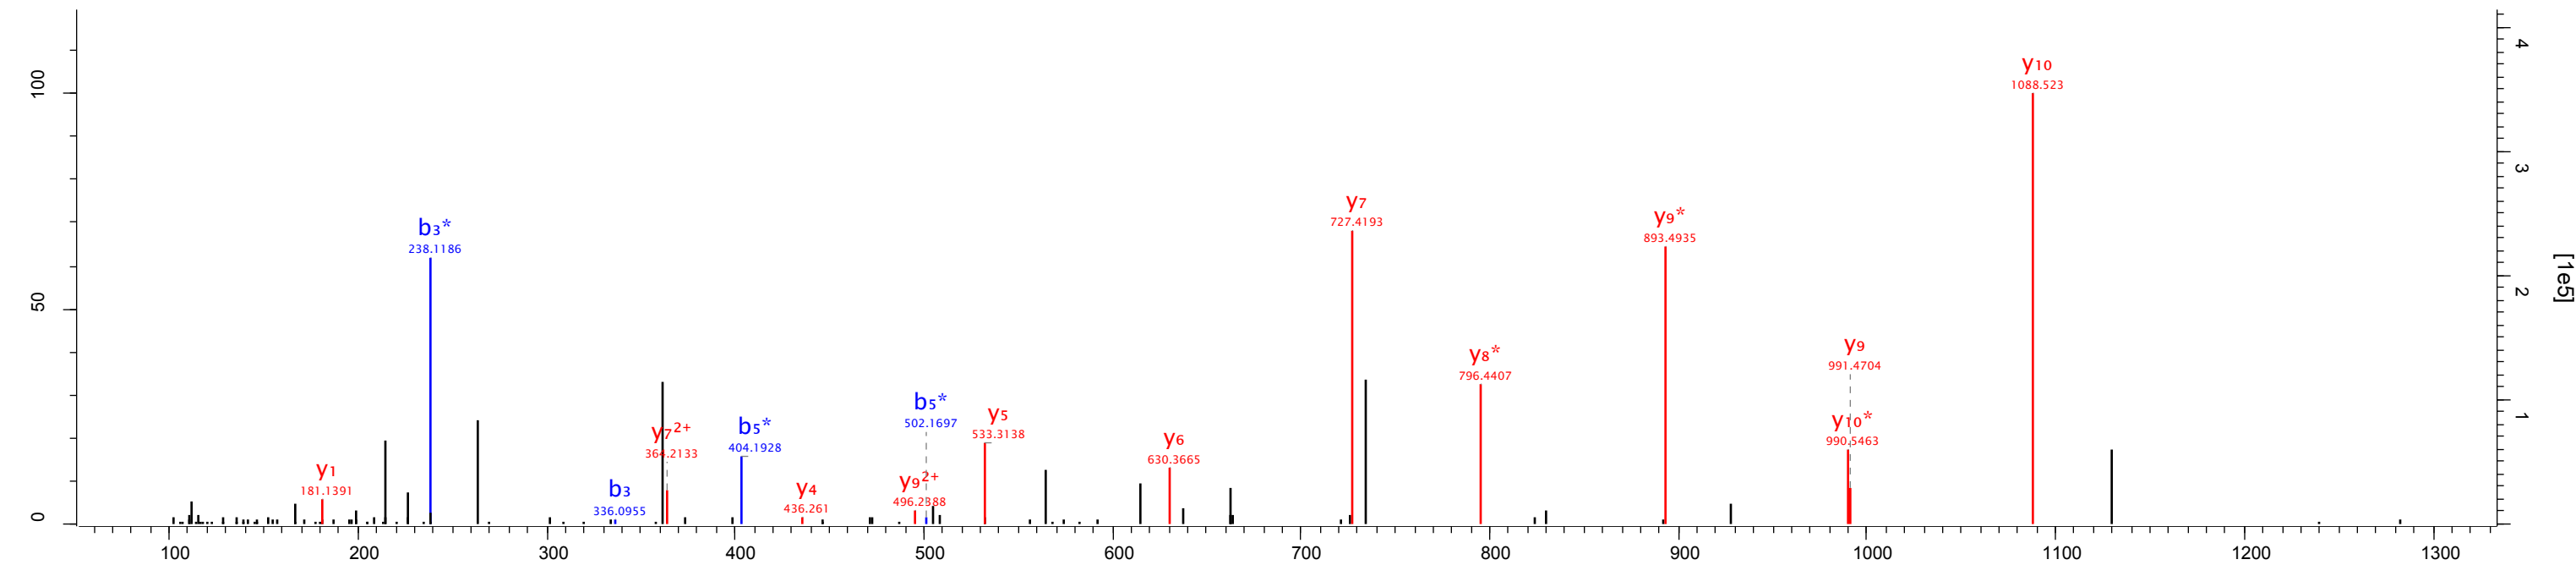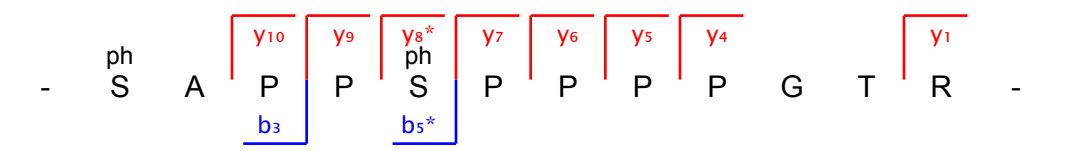

Raw file 20150822\_A375SR\_Phospho\_BR3\_04 Scan 11817 Method FTMS; HCD Score 134.86 m/z 1031.92

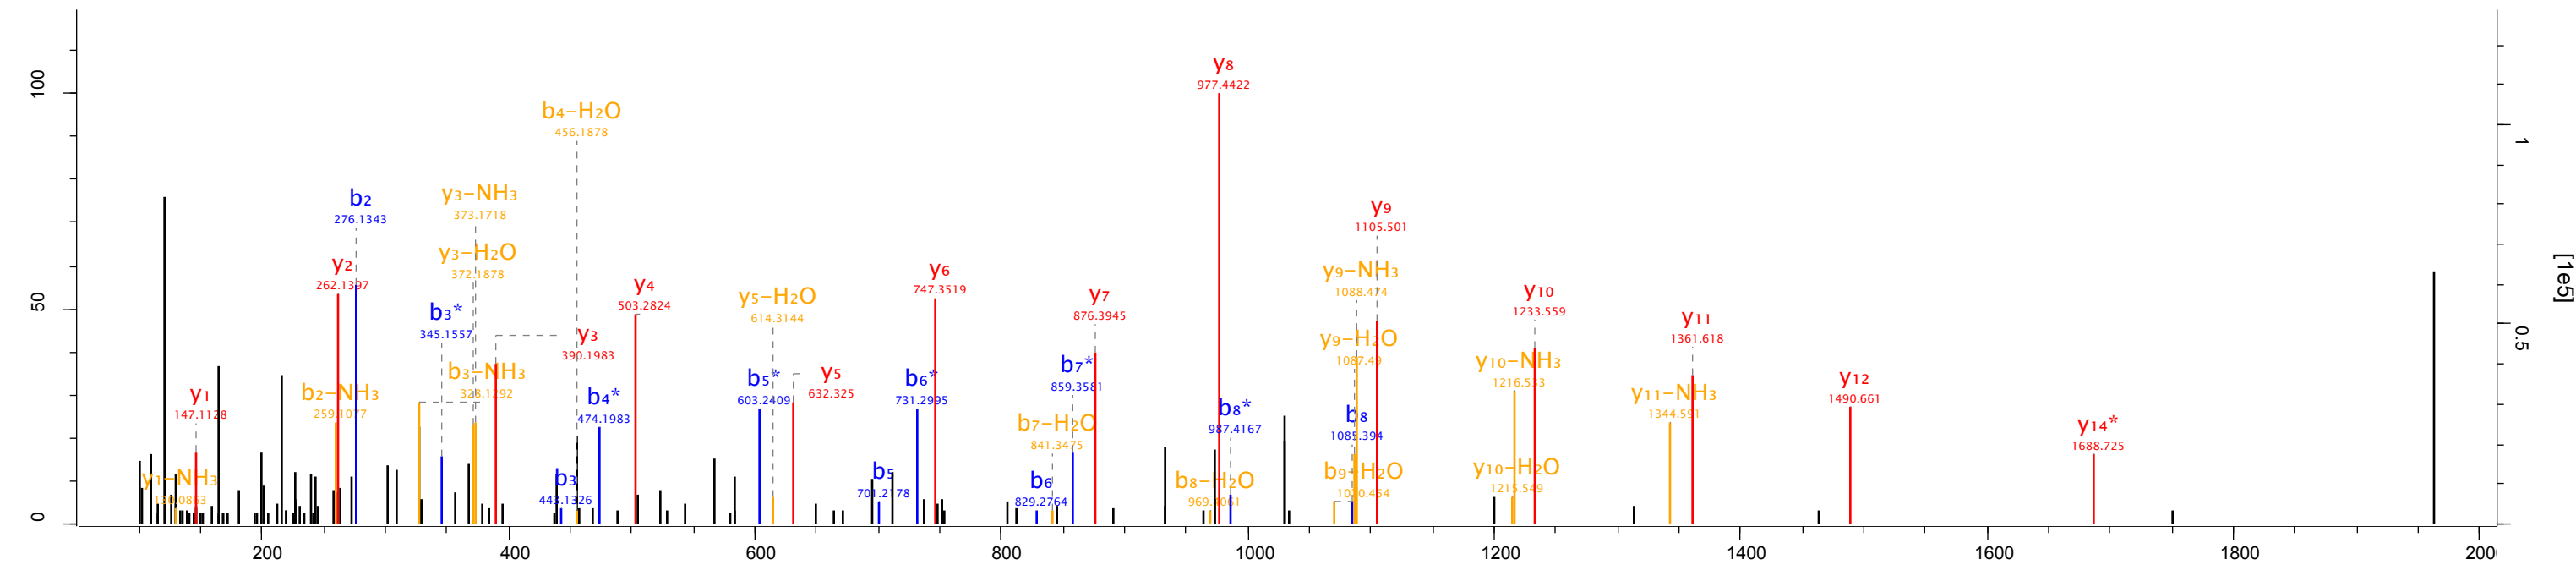

- F Q S E E Q Q Q T E D E L Q D K -

b<sub>2</sub>
b<sub>3</sub>
b<sub>4</sub>\*
b<sub>5</sub>
b<sub>6</sub>
b<sub>7</sub>\*
b<sub>8</sub>
y<sub>14</sub>\*
y<sub>12</sub>
y<sub>11</sub>
y<sub>10</sub>
y<sub>9</sub>
y<sub>8</sub>
y<sub>7</sub>
y<sub>6</sub>
y<sub>5</sub>
y<sub>4</sub>
y<sub>3</sub>
y<sub>2</sub>
y<sub>1</sub>

Raw file: 20150822\_A375SR\_Phospho\_BR3\_05  
 Scan: 6497 Method: FTMS; HCD Score: 46.42 m/z: 841.34 Gene names: YAF2

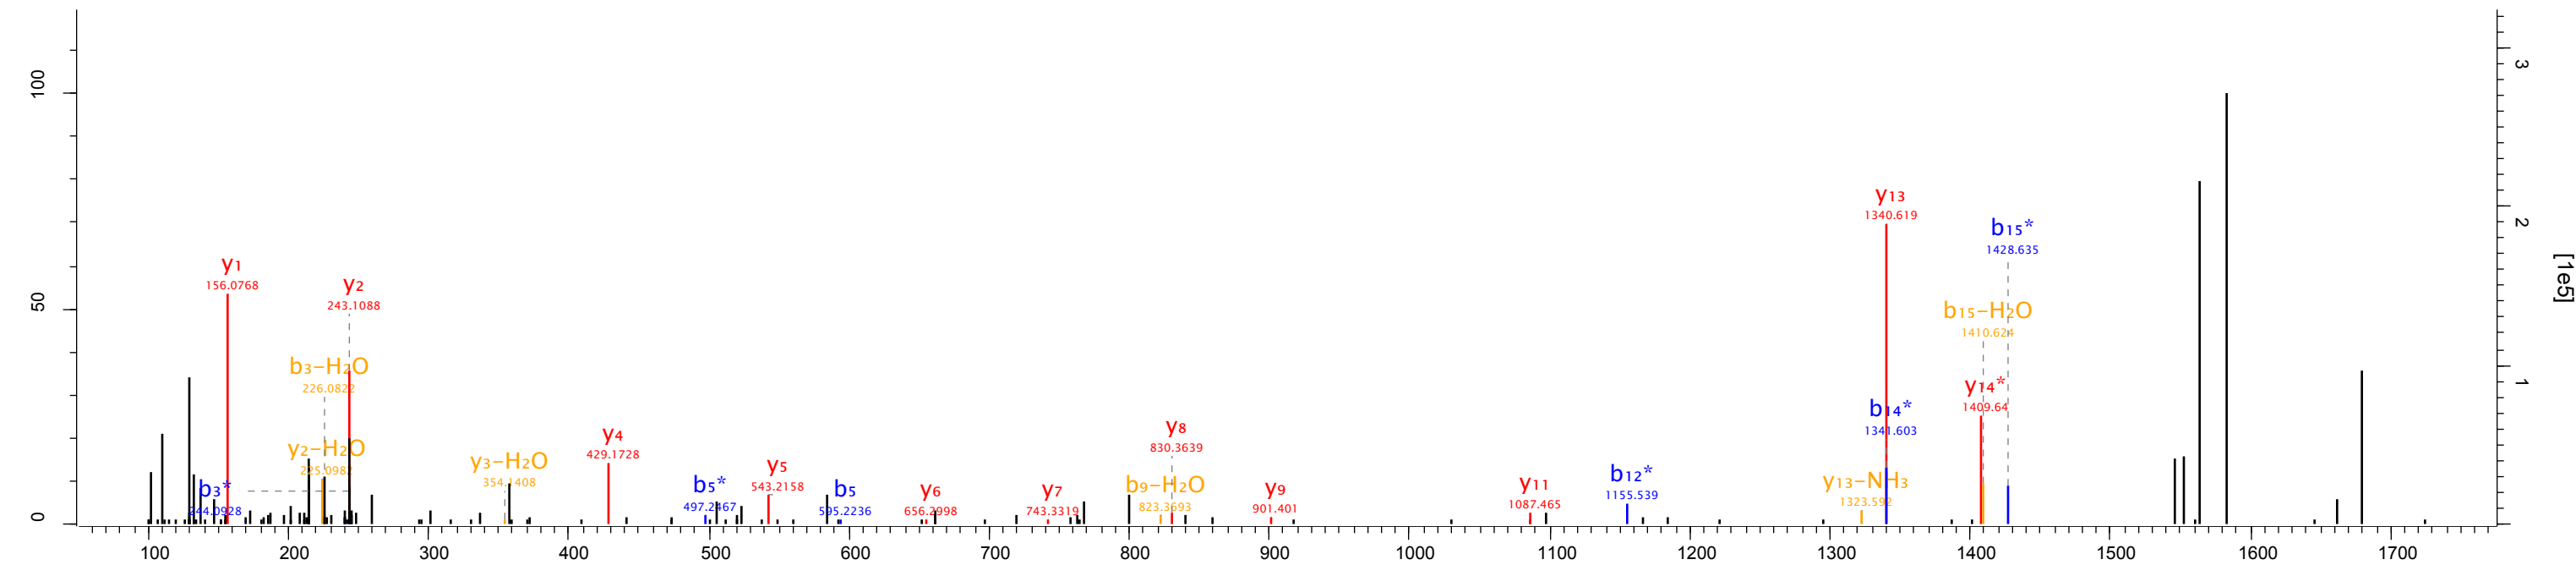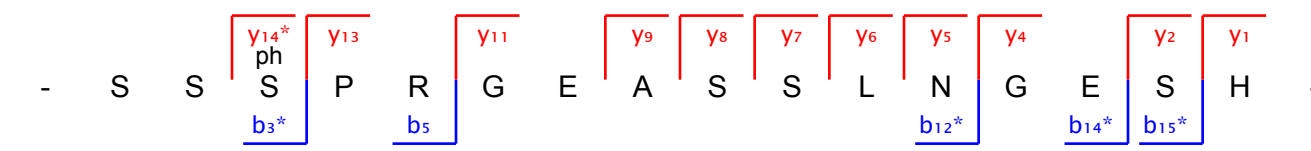

Raw file: 20150822\_A375SR\_Phospho\_BR3\_06  
 Scan: 24047 Method: FTMS; HCD Score: 113.51 m/z: 970.44 Gene names: MAPK11P1L

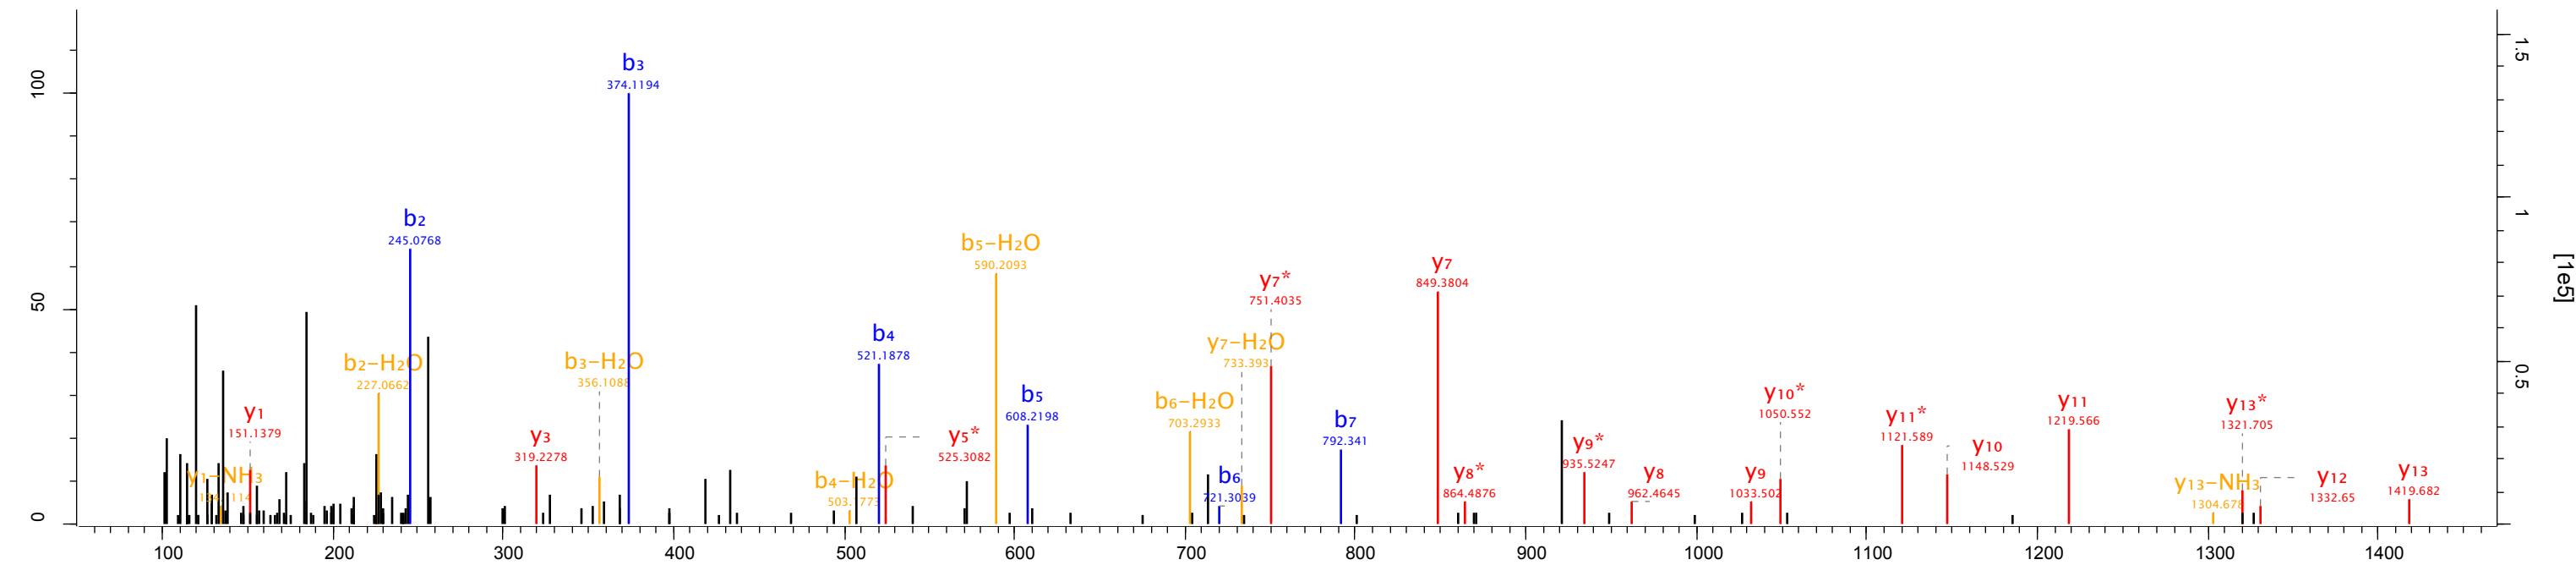

ac  
 - S D E F S L A D A L P E H S P A K -  
 b2 b3 b4 b5 b6 b7 y13 y12 y11 y10 y9 y8 y7 y5\* y3 y1

Raw file  
20150822\_A375SR\_Phospho\_BR3\_08

Scan 21597 Method FTMS; HCD Score 69.26 m/z 781.42 Gene names ZNF579

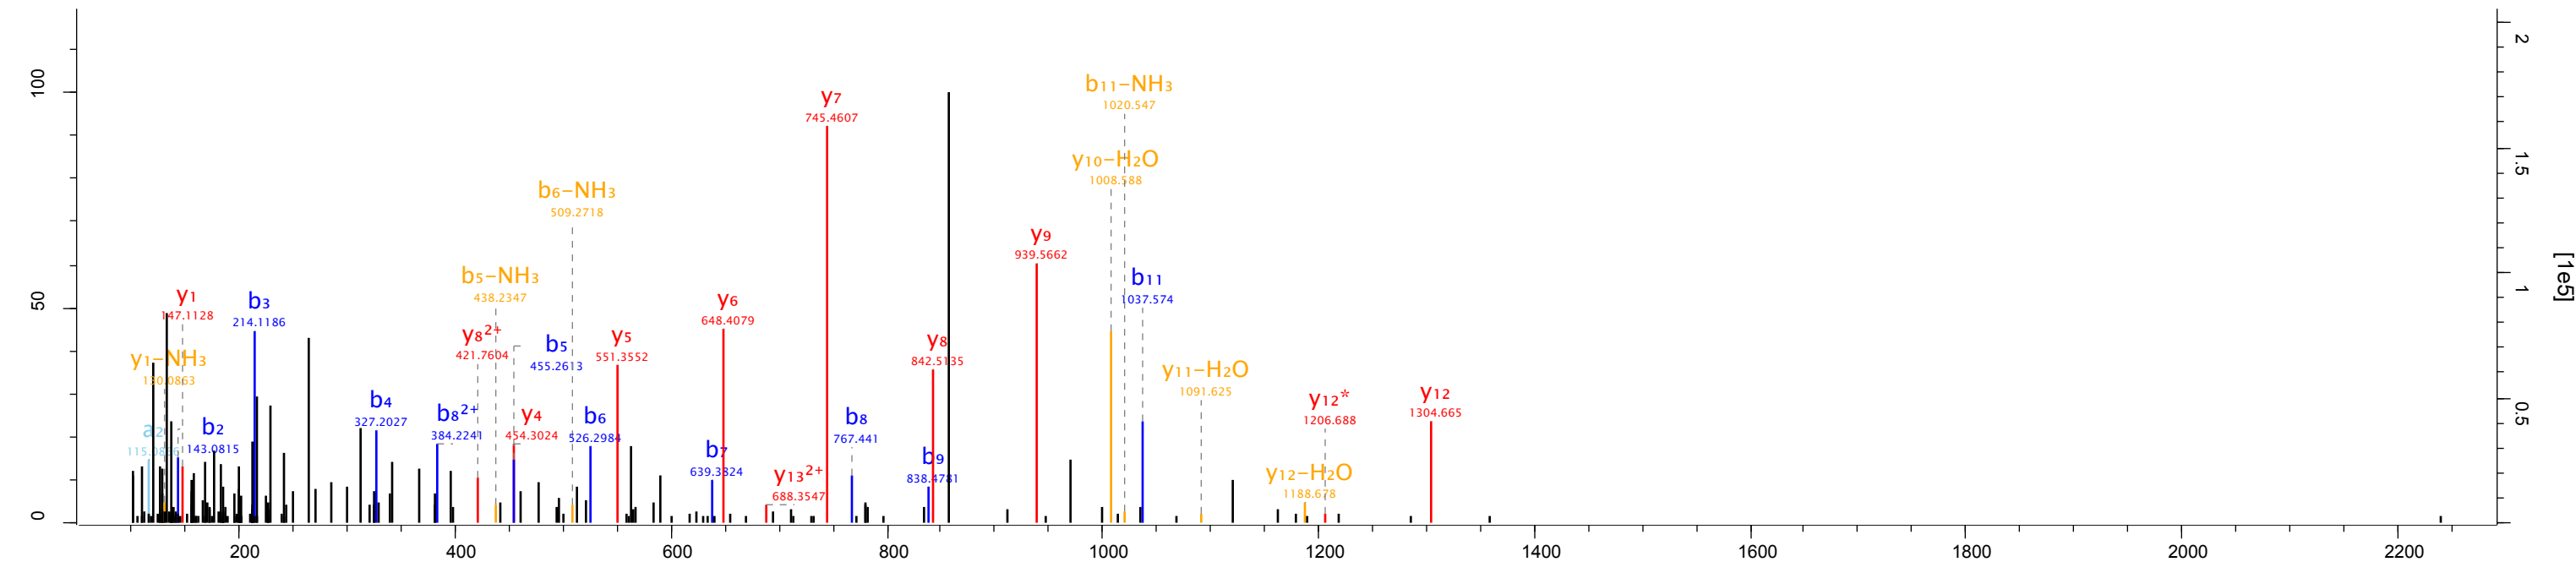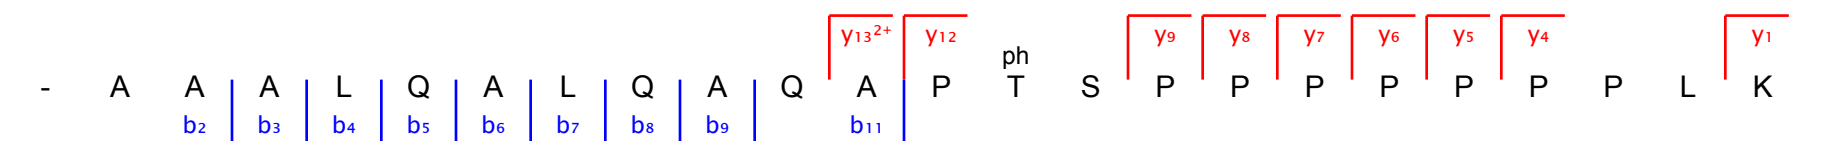

Raw file: 20150822\_A375SR\_Phospho\_BR3\_08  
 Scan: 24247 Method: FTMS; HCD Score: 117.35 m/z: 970.94 Gene names: MAPK11P1L

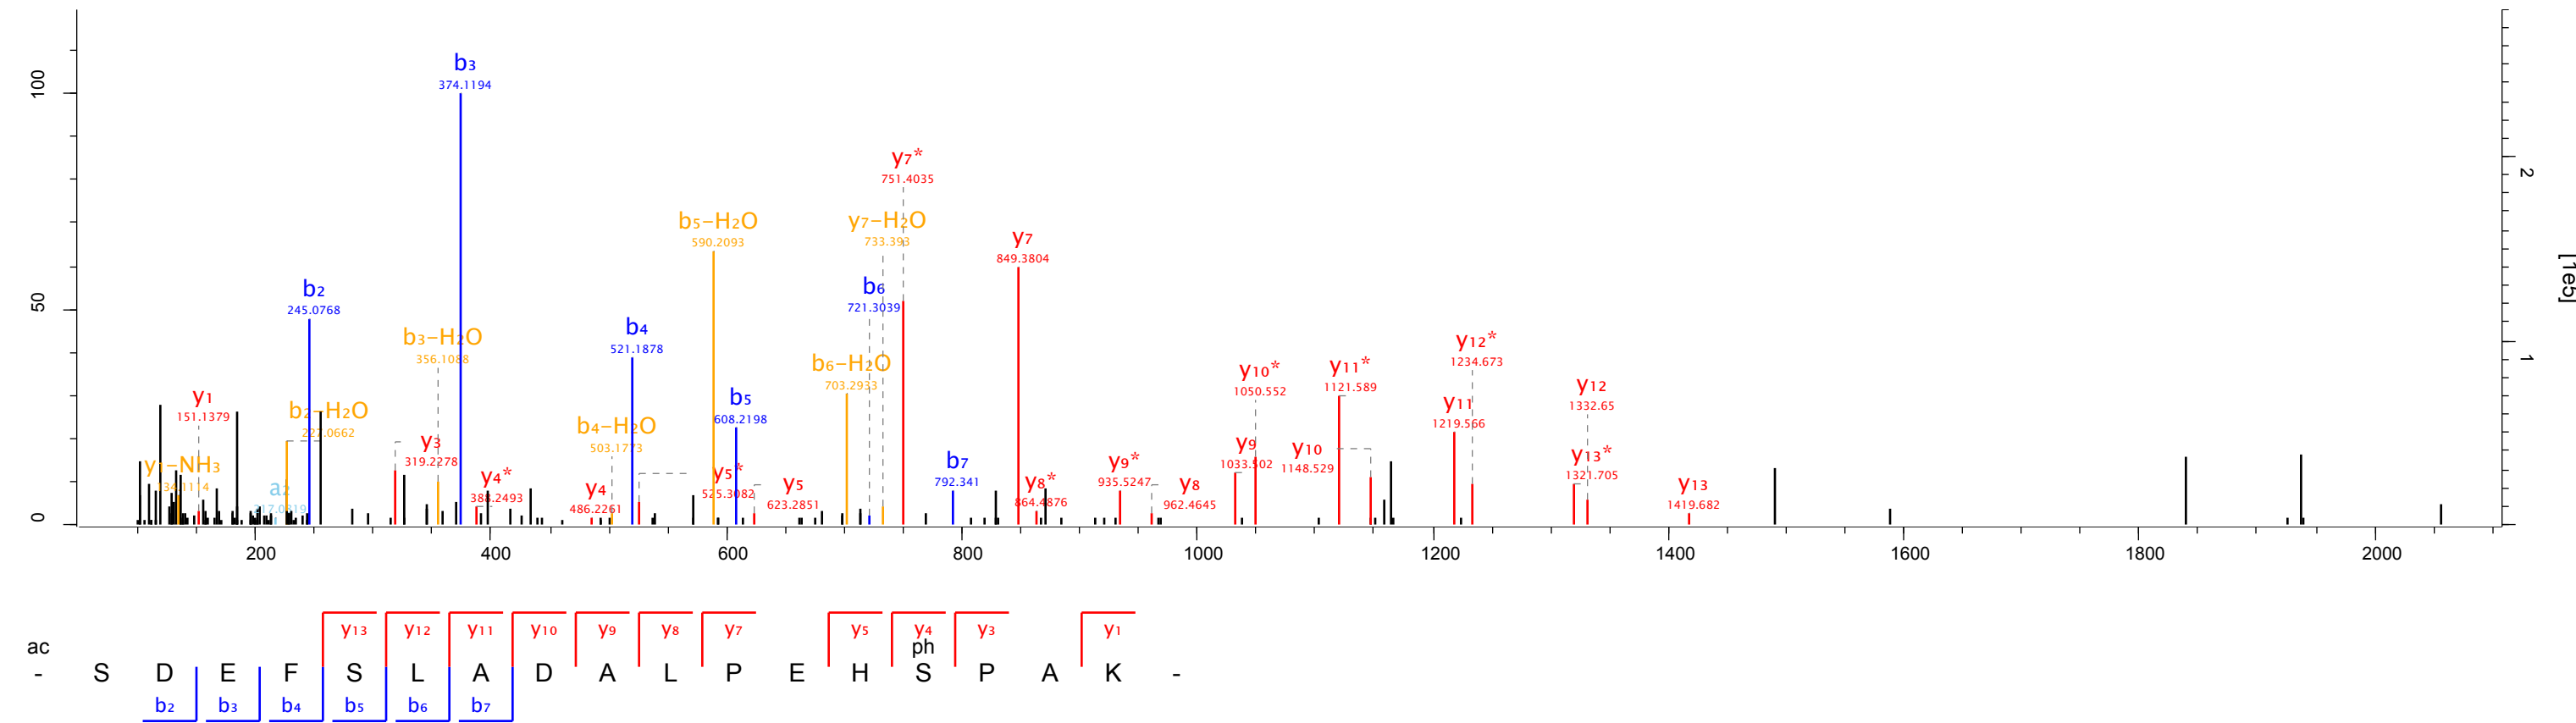

Raw file 20150822\_A375SR\_Phospho\_BR3\_09 Scan 11417 Method FTMS; HCD Score 57.53 m/z 693.35 Gene names ELK3

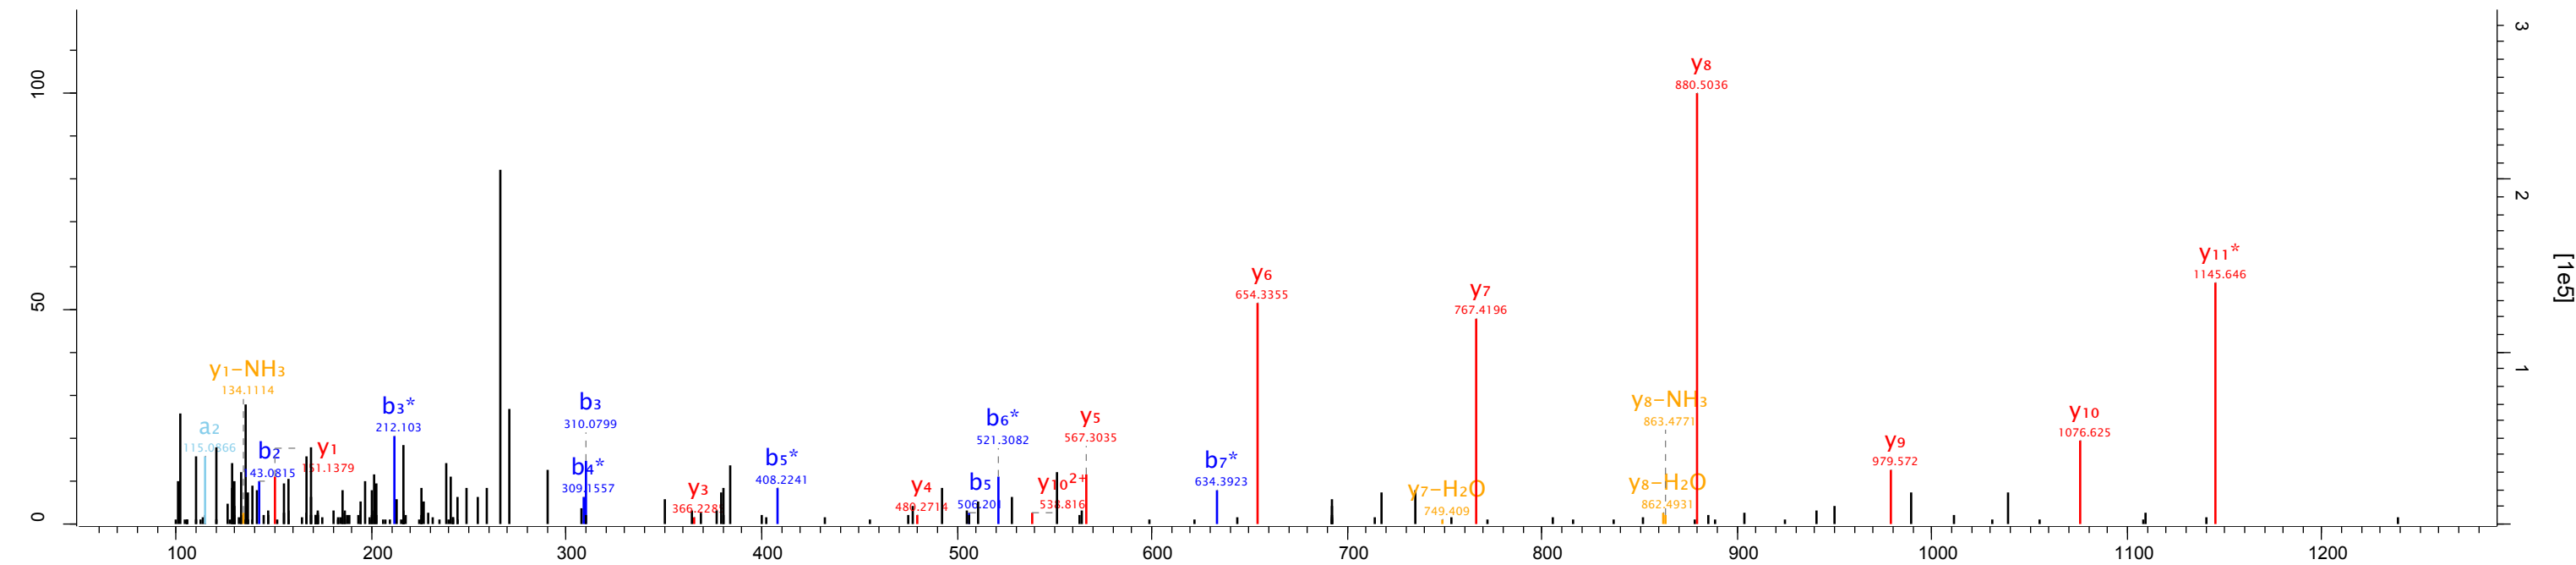

Raw file 20150822\_A375SR\_Phospho\_BR3\_10 Scan 4977 Method FTMS; HCD Score 47.15 m/z 527.23

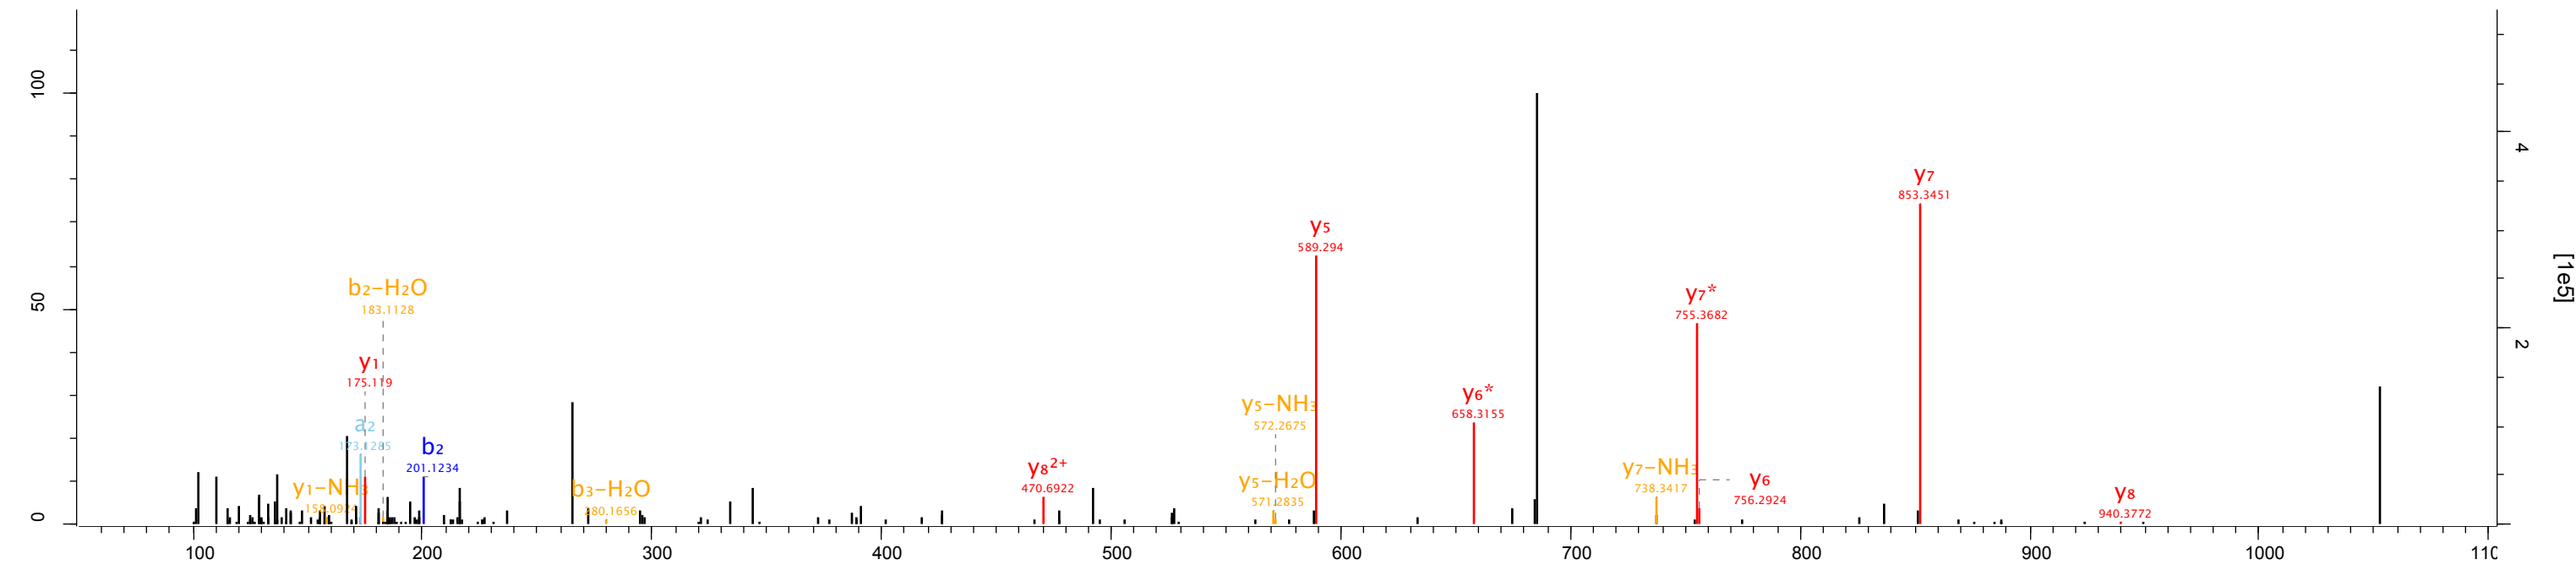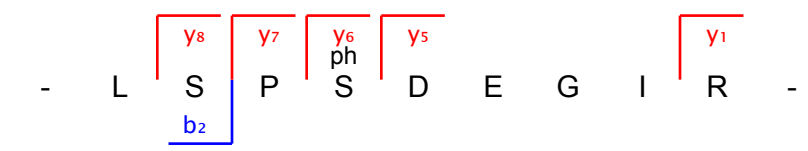



Raw file: 20150822\_A375SR-Proteome\_BR3  
 Scan: 95347 Method: FTMS; HCD Score: 36.32 m/z: 625.37 Gene names: TOR2A

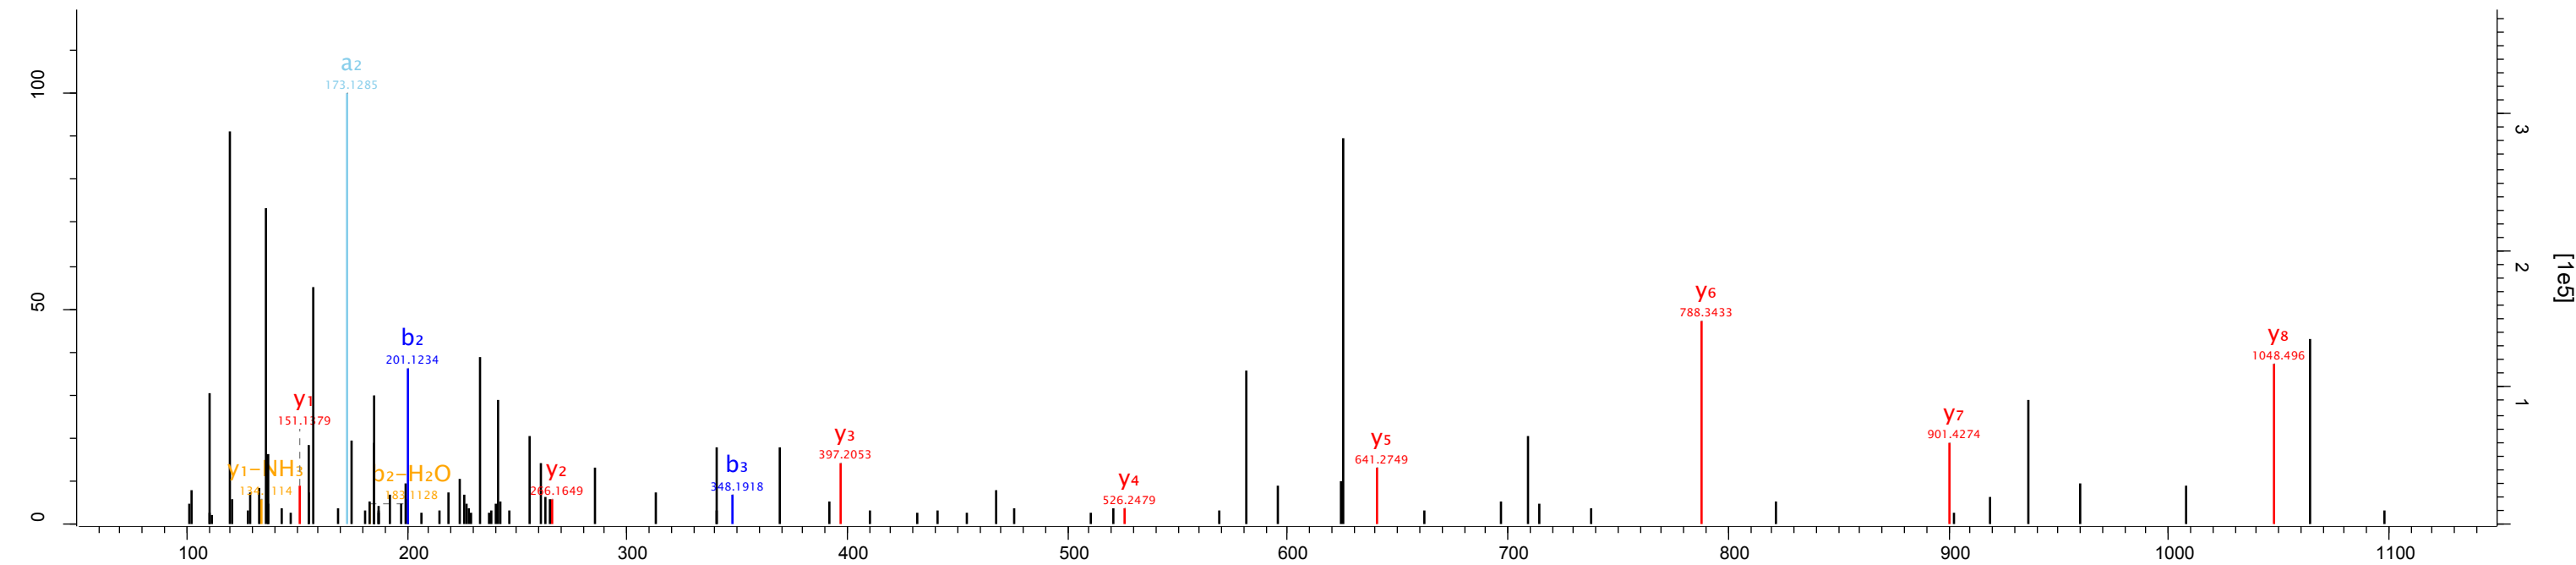

Raw file  
20180707\_MaS\_A375SR\_LM\_proteome\_01

Scan 12837 Method FTMS; HCD Score 41.7 m/z 859.43 Gene names APOC3

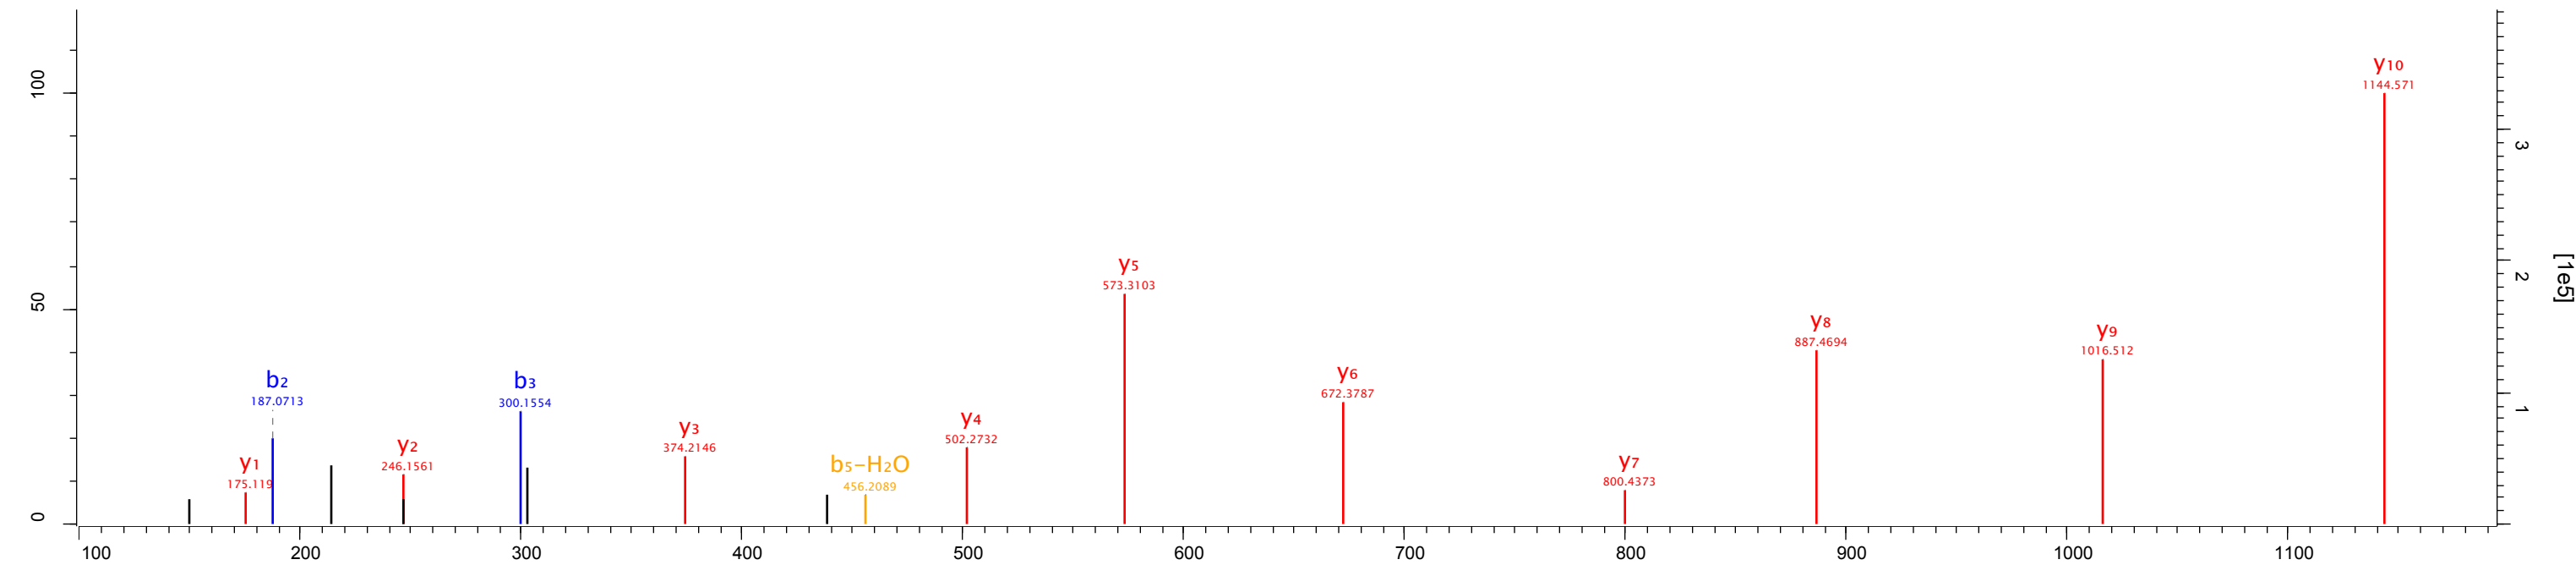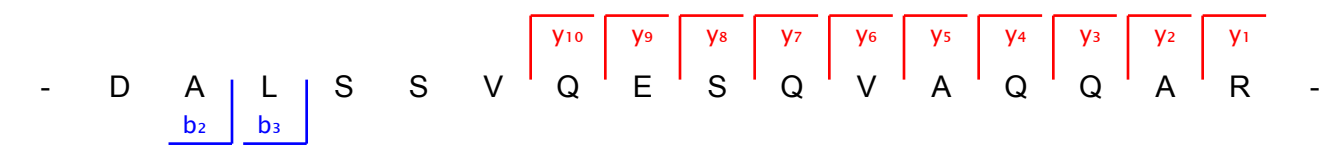

Raw file 20180707\_MaS\_A375SR\_LM\_proteome\_03 Scan 26677 Method FTMS; HCD Score 56.2 m/z 781.38

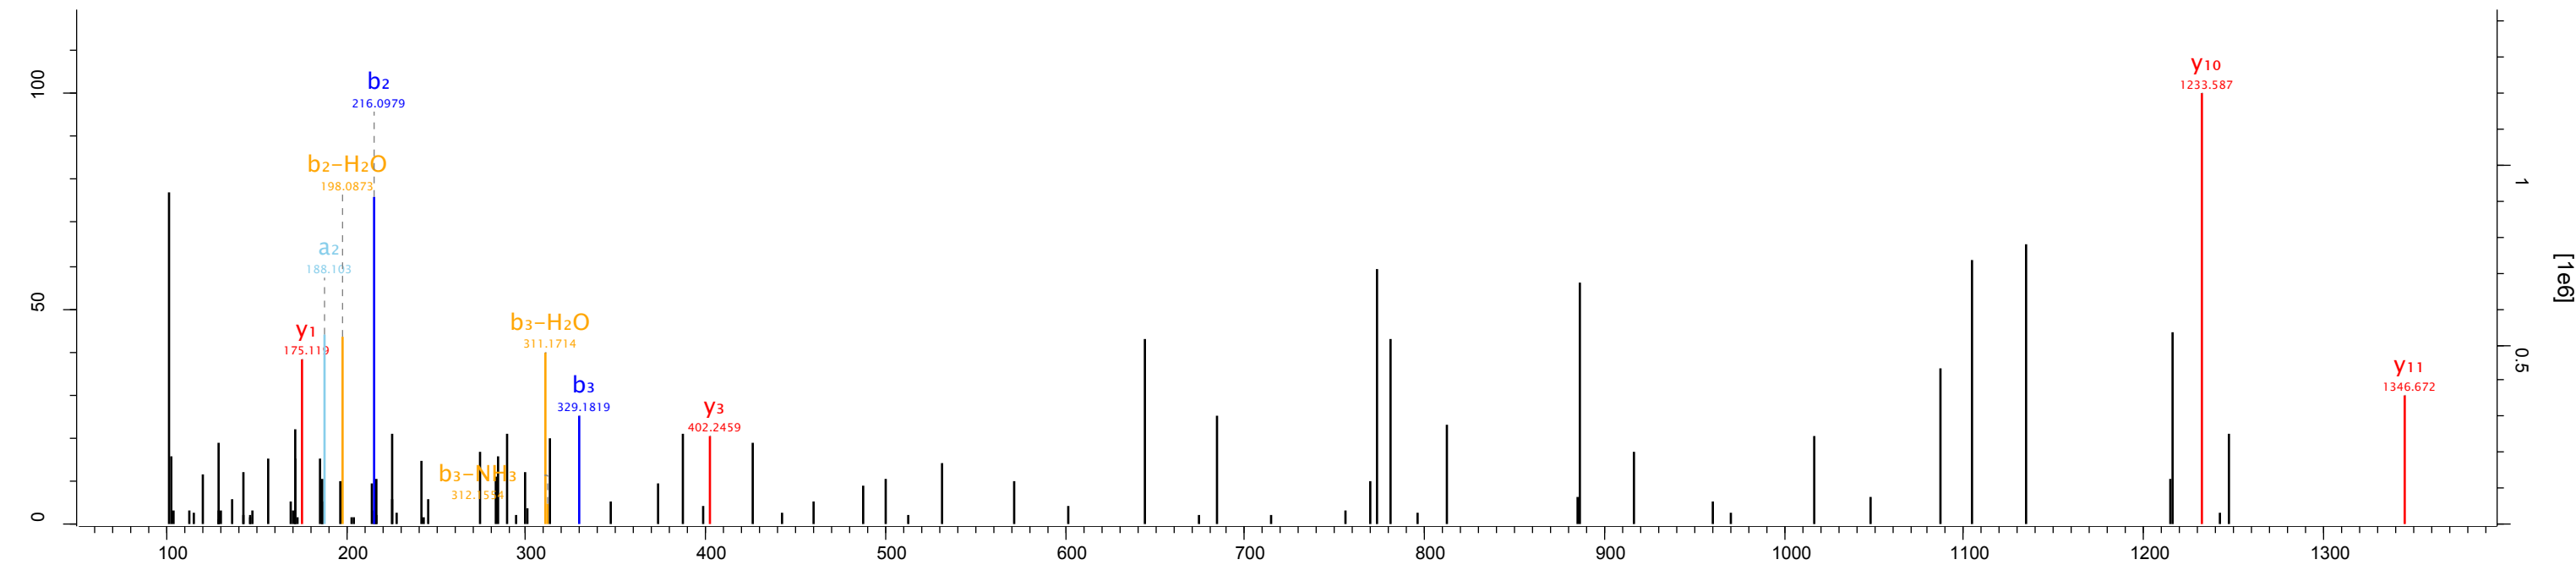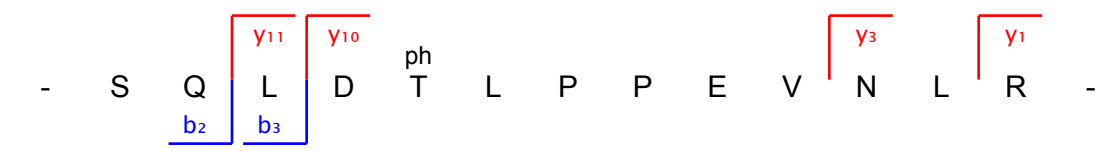

20180707\_MaS\_A375SR\_LM\_proteome\_03 2917 FTMS; HCD 54.34 569.76 ZEB2

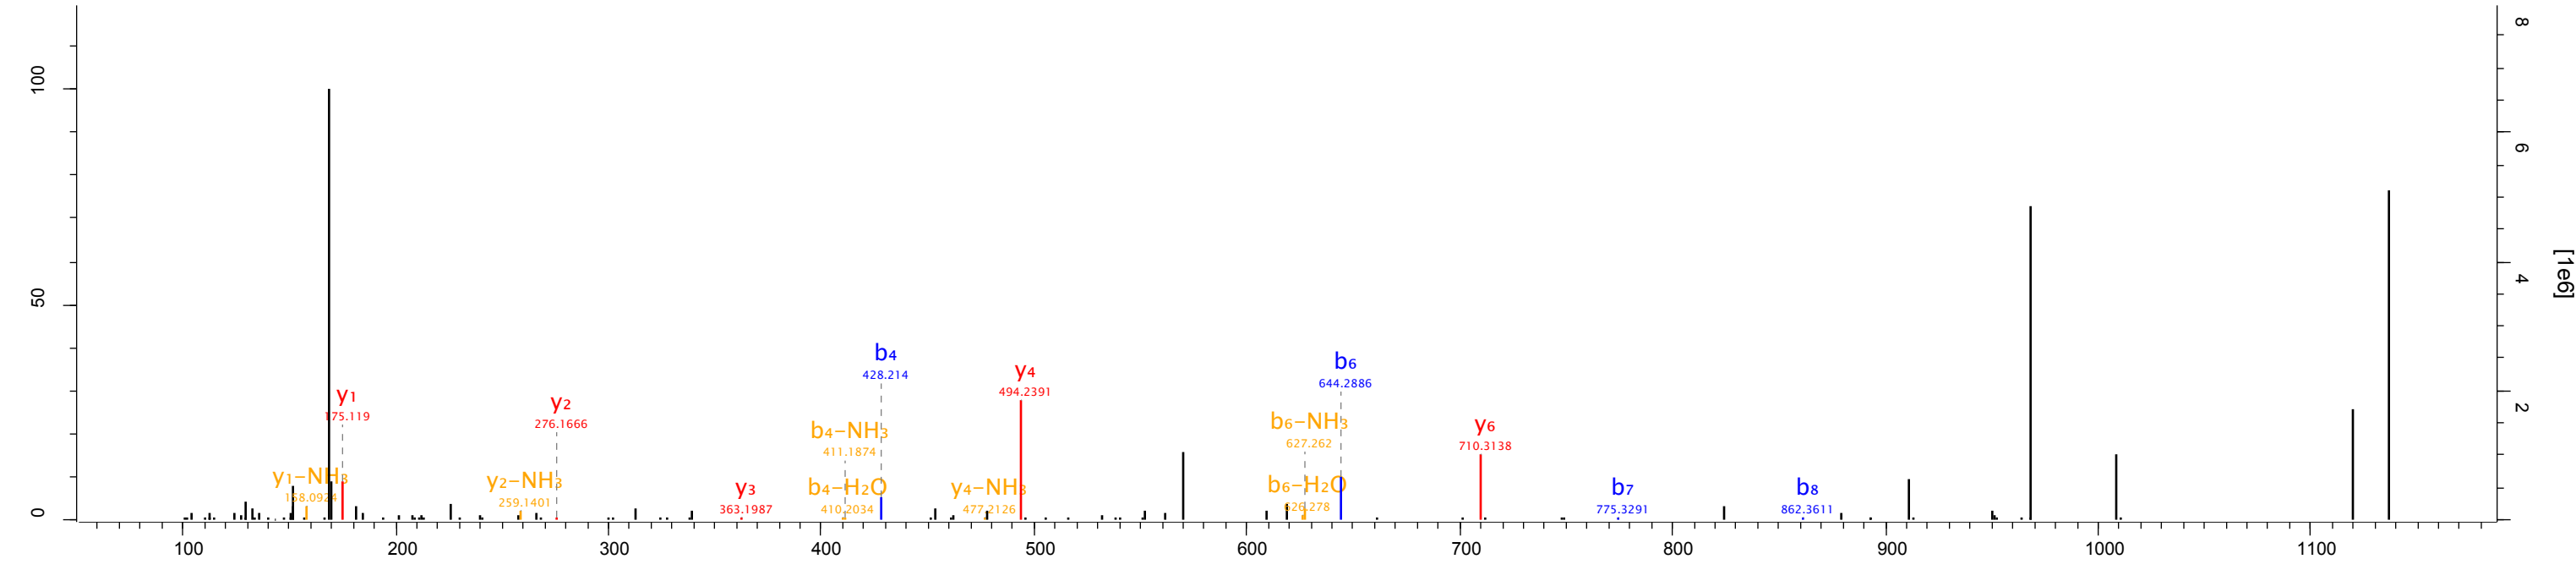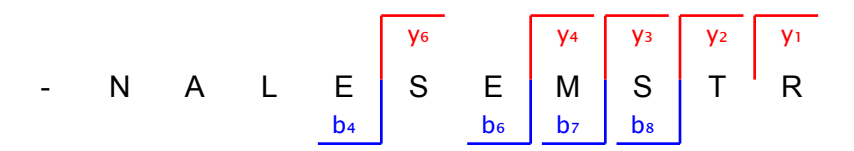

Raw file: 20180707\_MaS\_A375SR\_LM\_proteome\_03  
 Scan: 4647 Method: FTMS; HCD Score: 65.84 m/z: 563.28 Gene names: SFT2D2

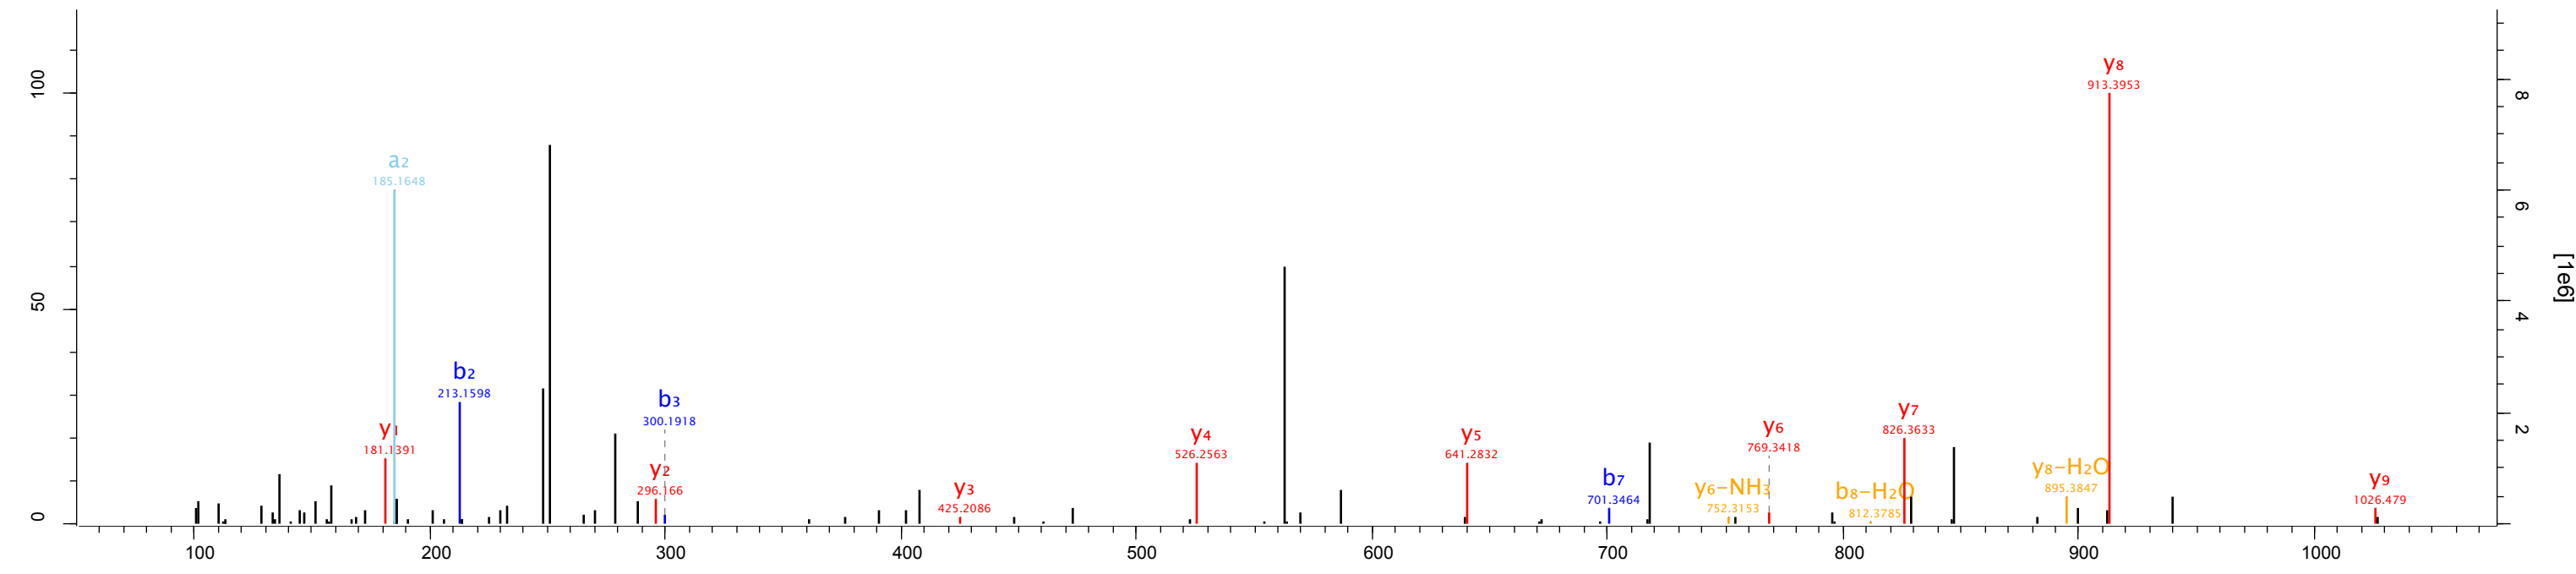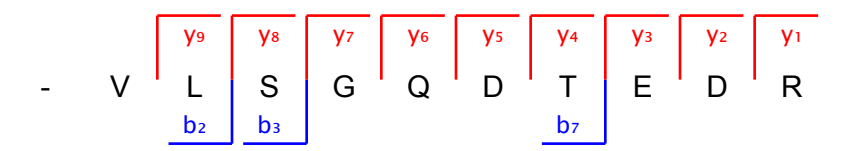

Raw file 20180707\_MaS\_A375SR\_LM\_proteome\_05 Scan 8377 Method FTMS; HCD Score 47.71 m/z 686.36

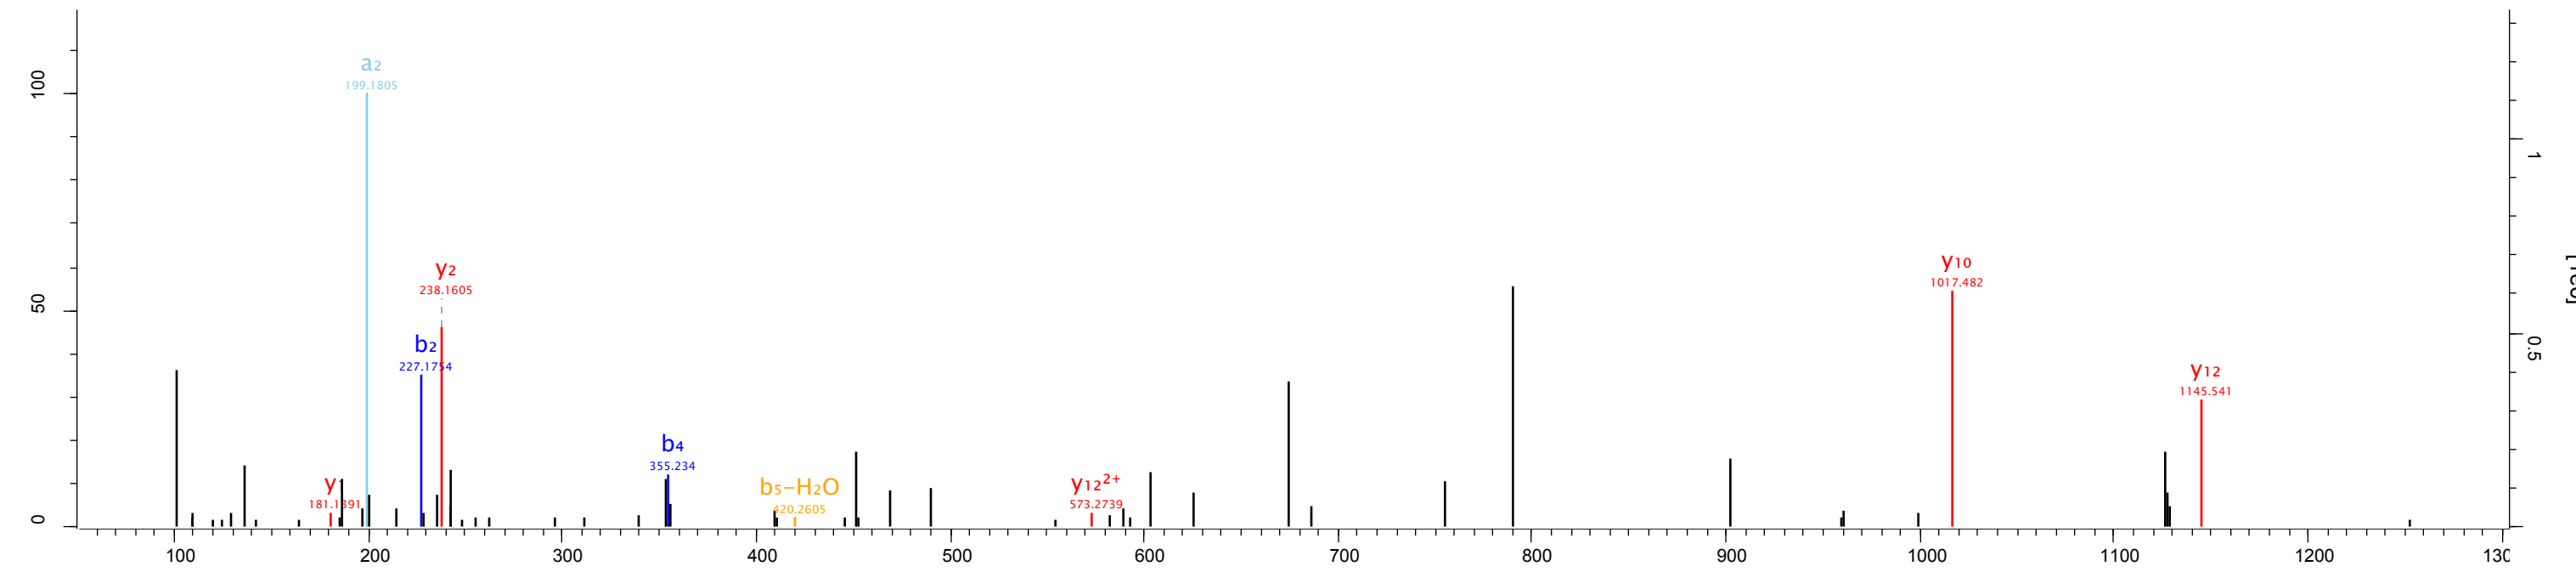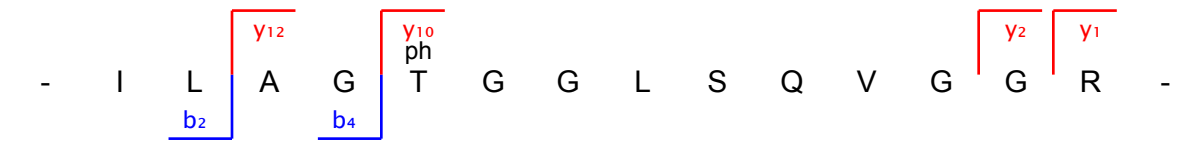

Raw file  
20180707\_MaS\_A375SR\_LM\_proteome\_06

Scan: 24727  
Method: FTMS; HCD  
Score: 68.22  
m/z: 498.77  
Gene names: SEPT3

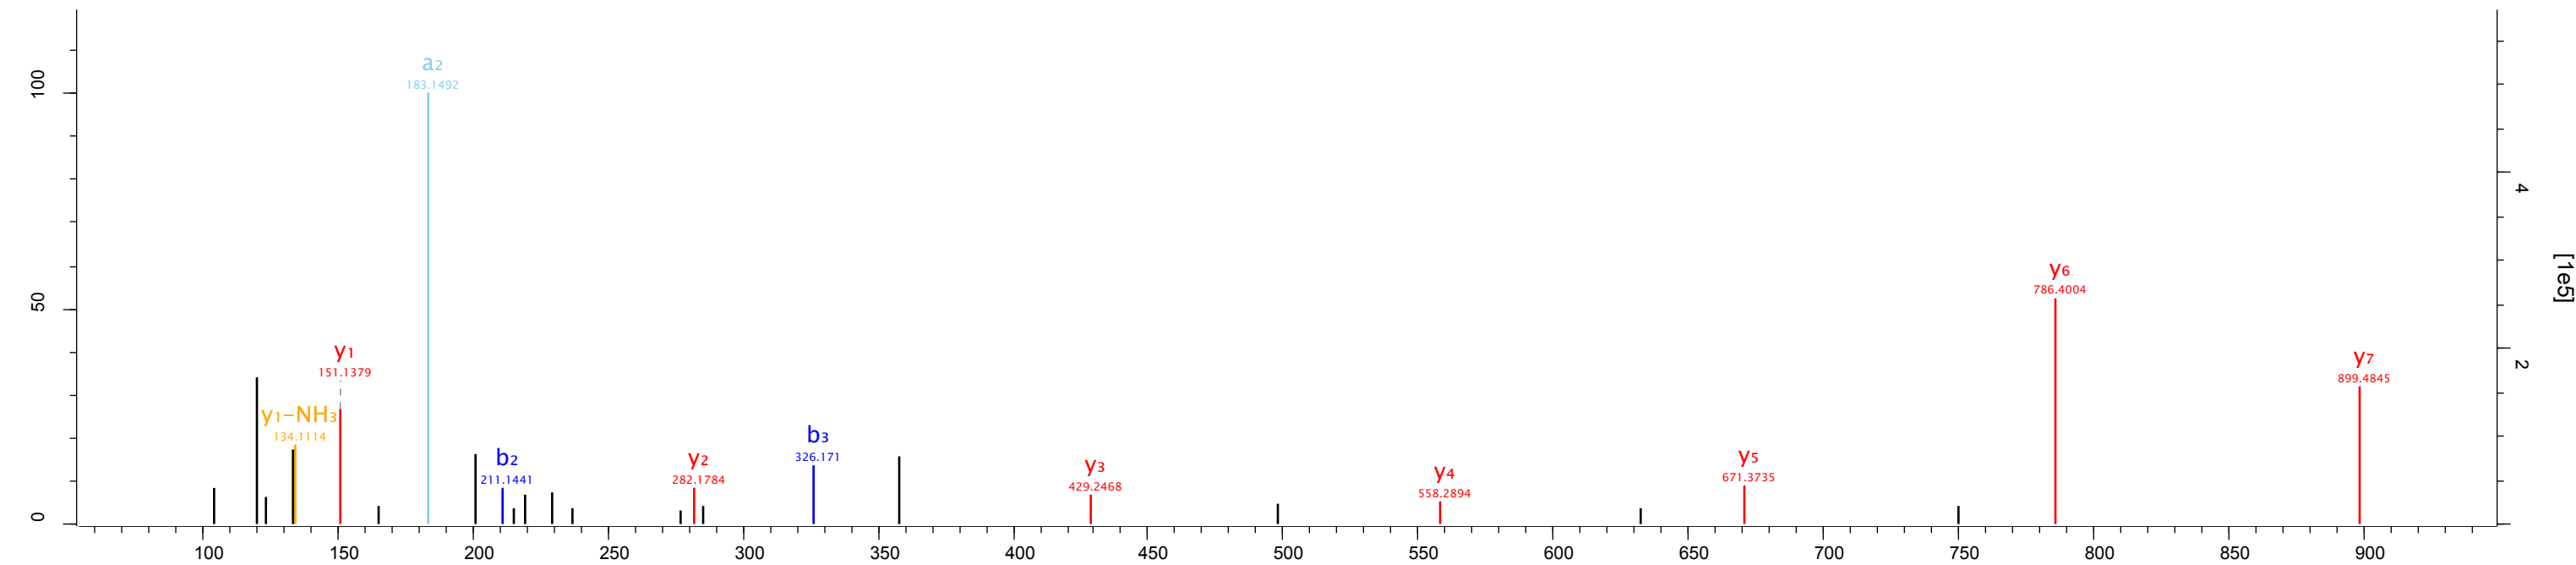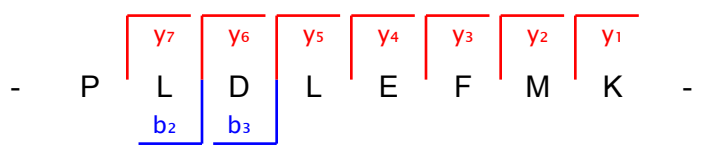

Raw file  
20180707\_MaS\_A375SR\_LM\_proteome\_07

Scan 6707 Method FTMS; HCD Score 36.29 m/z 719.82 Gene names LEPROT

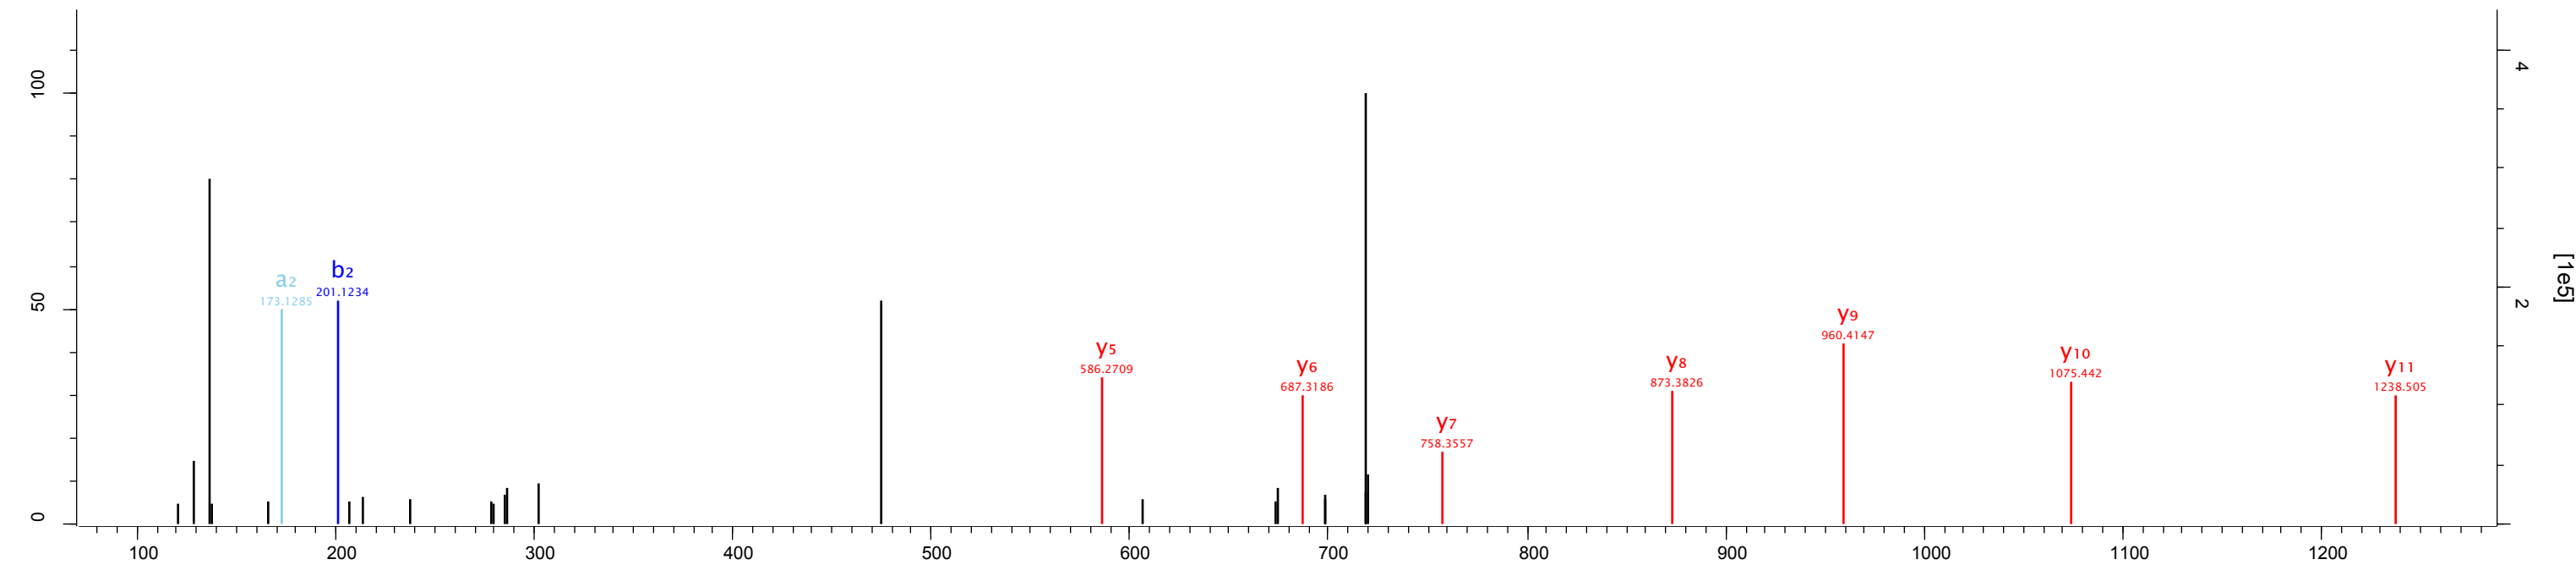



Raw file: 20180707\_MaS\_A375SR\_LM\_proteome\_09  
 Scan: 3537 Method: FTMS; HCD Score: 35.32 m/z: 342.52 Gene names: COX7B

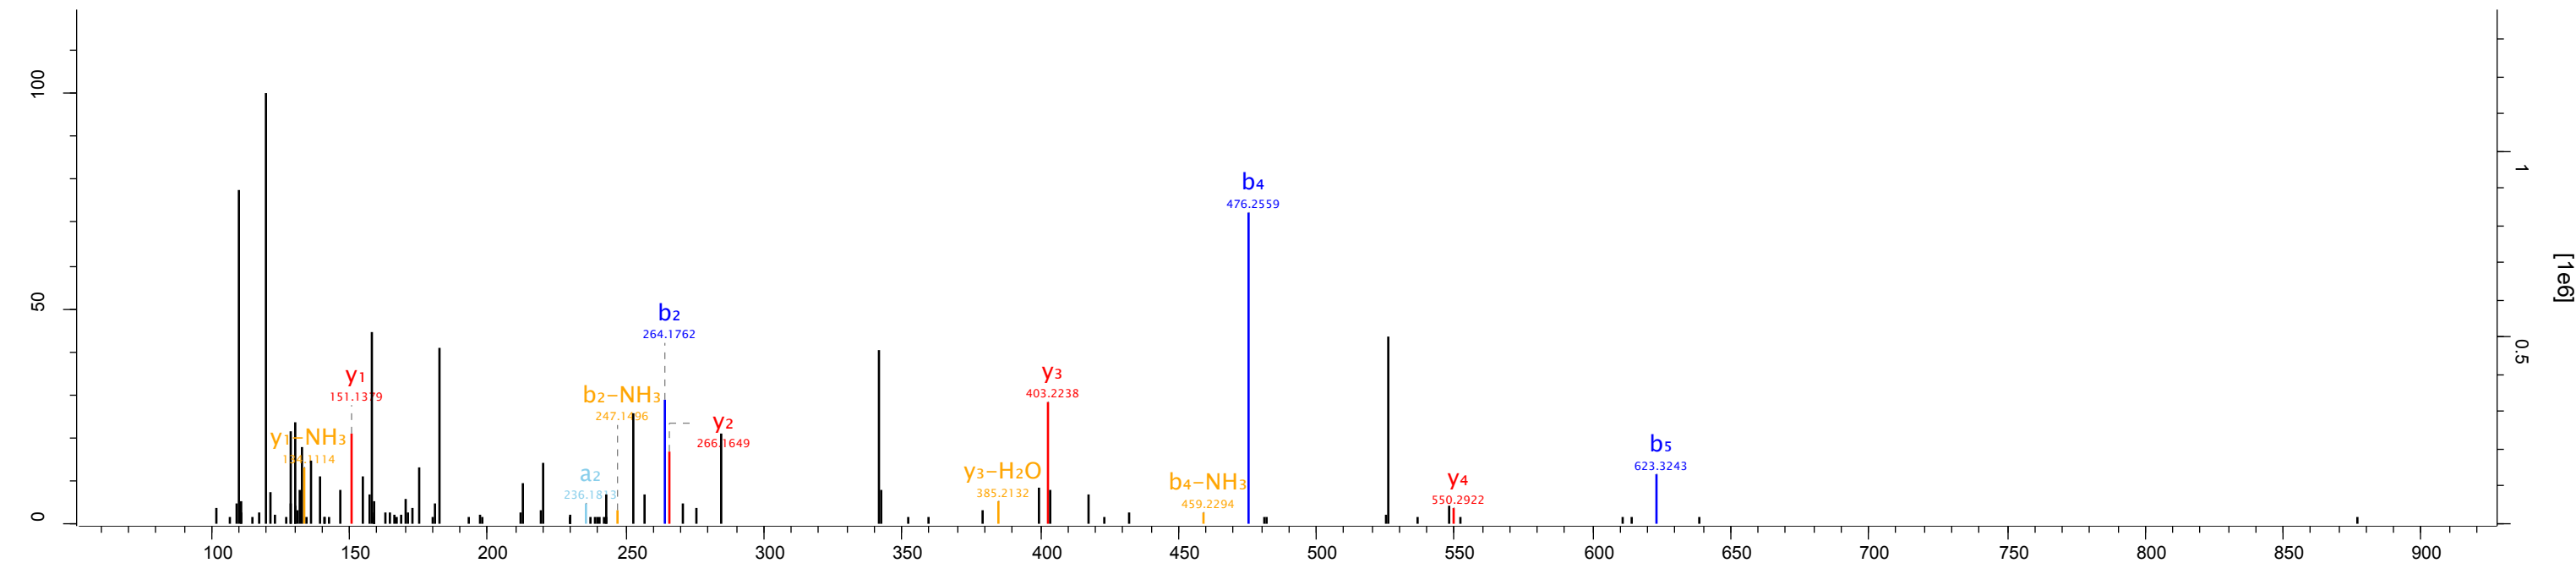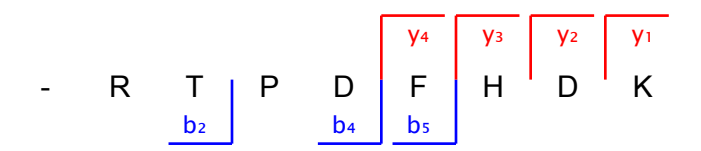

Raw file 20180707\_MaS\_A375SR\_LM\_proteome\_09 Scan 3587 Method FTMS; HCD Score 55.06 m/z 339.17 Gene names COX7B

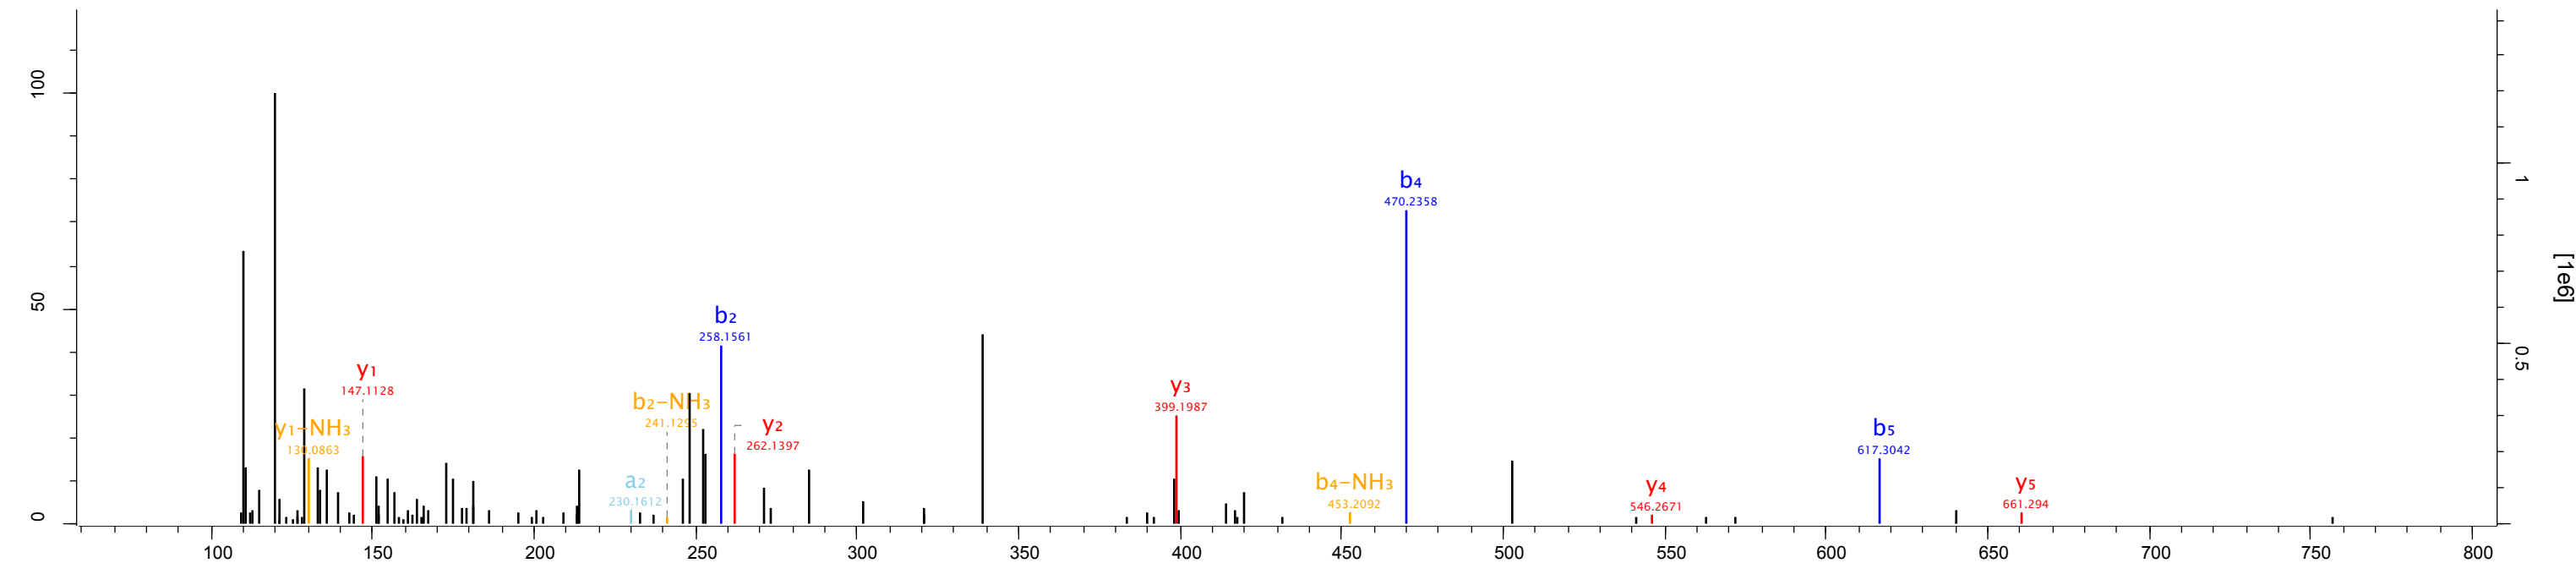

Raw file 20180707\_MaS\_A375SR\_LM\_proteome\_09 Scan 8567 Method FTMS; HCD Score 57.53 m/z 591.3

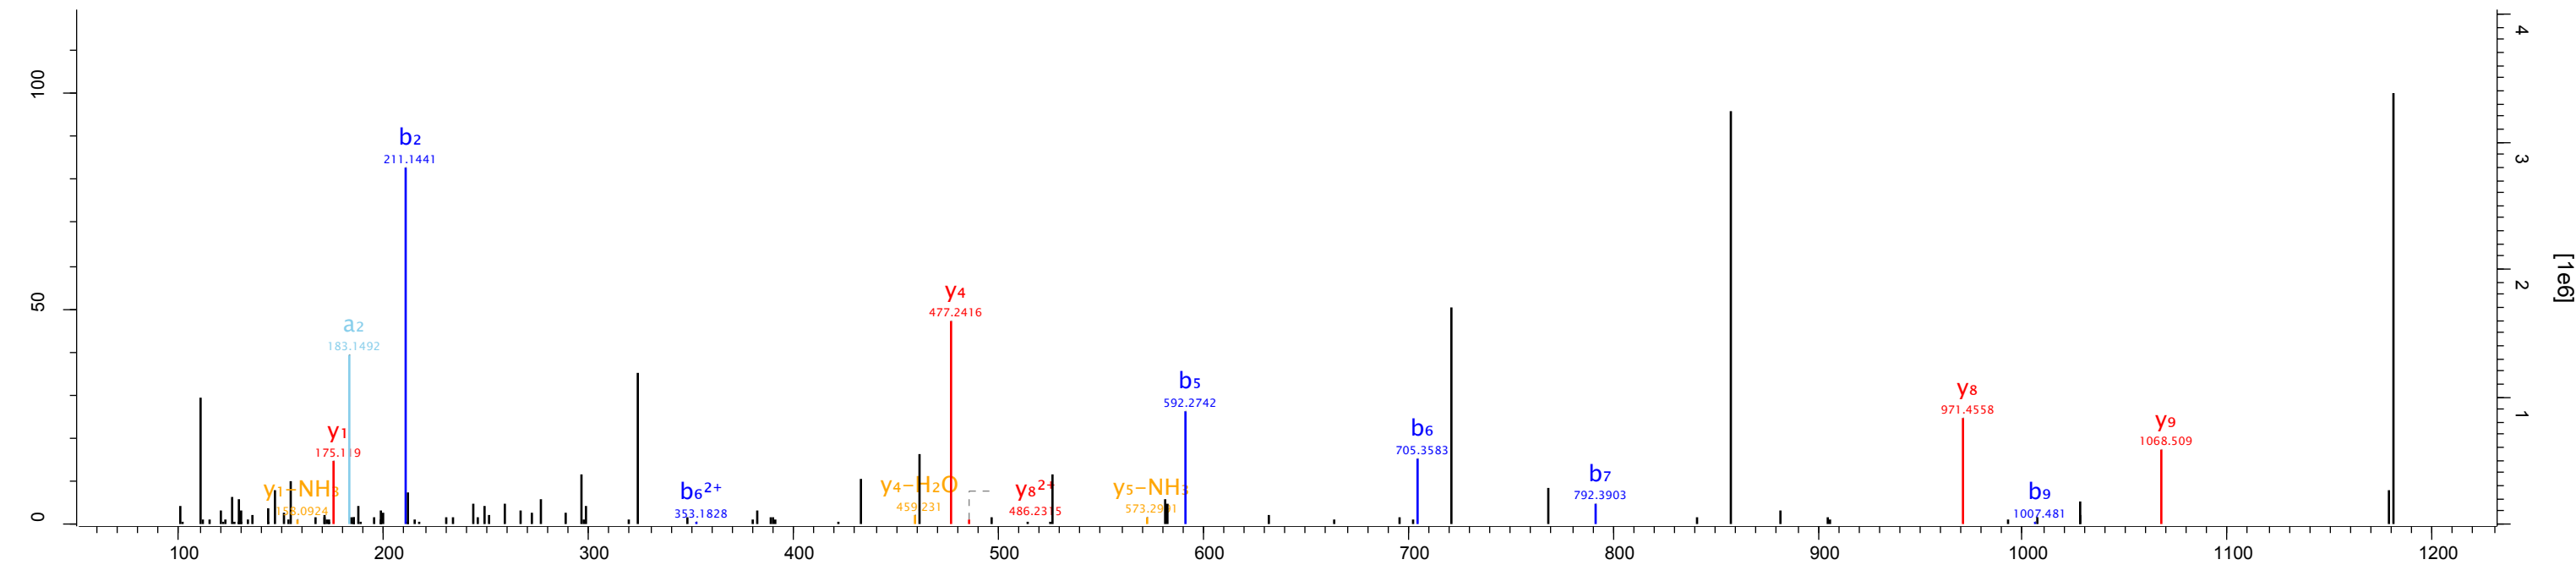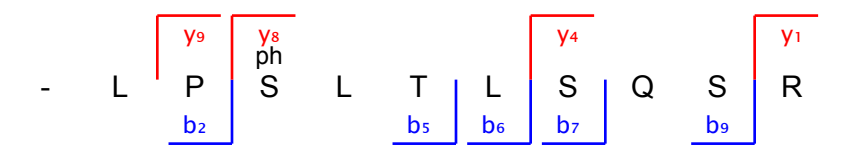

Raw file 20180707\_MaS\_A375SR\_LM\_proteome\_15 Scan 16677 Method FTMS; HCD Score 57.43 m/z 703.35 Gene names HPX

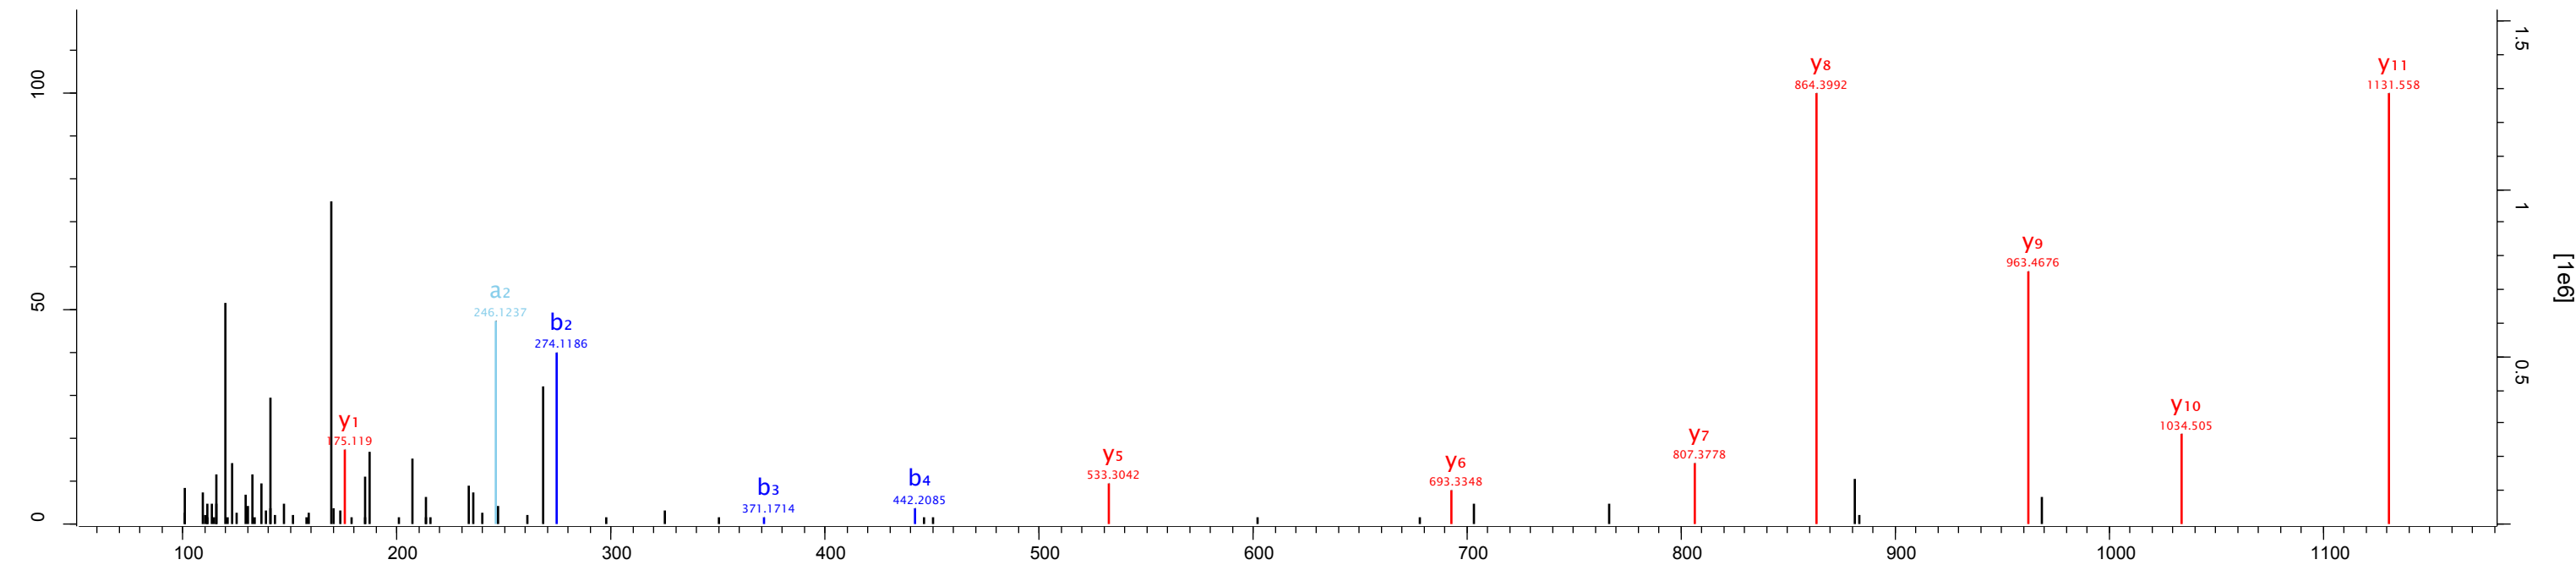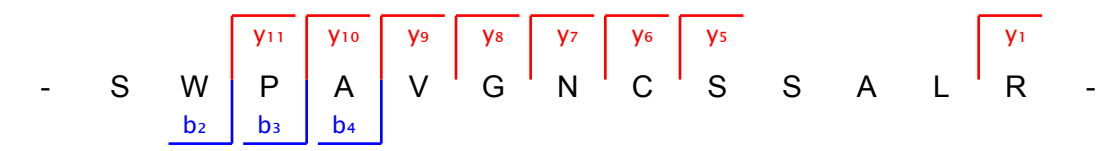

Raw file 20180707\_MaS\_A375SR\_LM\_proteome\_18 Scan 2997 Method FTMS; HCD Score 61.34 m/z 569.27 Gene names ZEB2

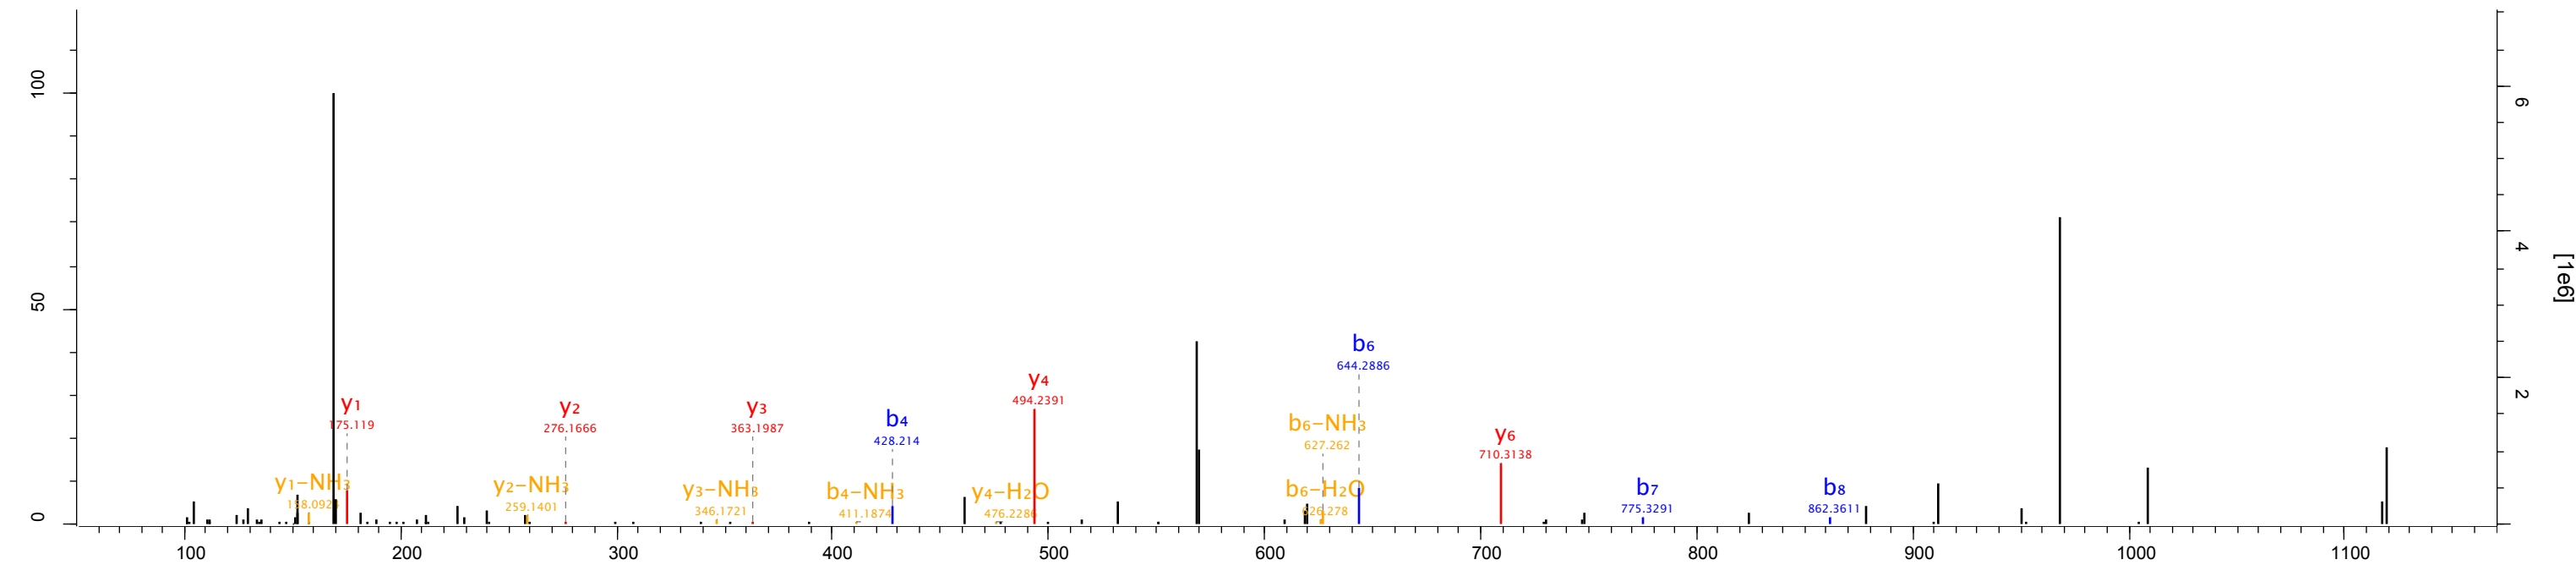

Raw file  
20180707\_MaS\_A375SR\_LM\_proteome\_21

Scan Method Score m/z Gene names  
27297 FTMS; HCD 22.36 572.29 SSR3

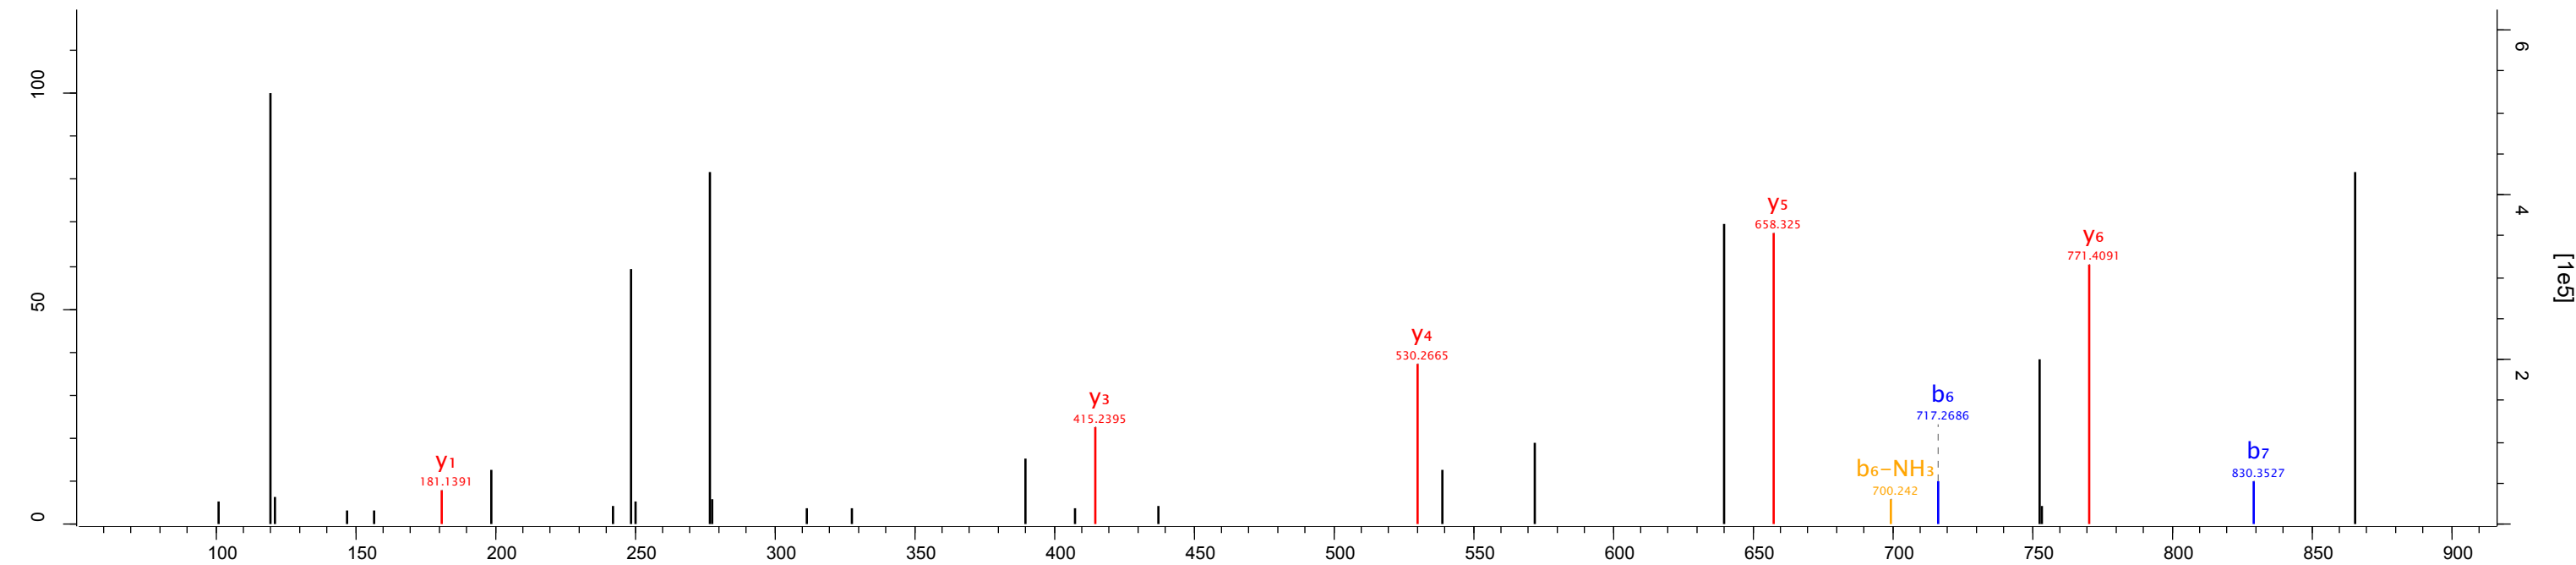

- Q Q S E E D L L L L Q D F S R -  
b6 b7

Raw file  
20180707\_MaS\_A375SR\_LM\_proteome\_22

Scan 21437 Method FTMS; HCD Score 35.52 m/z 586.84 Gene names KATNAL2

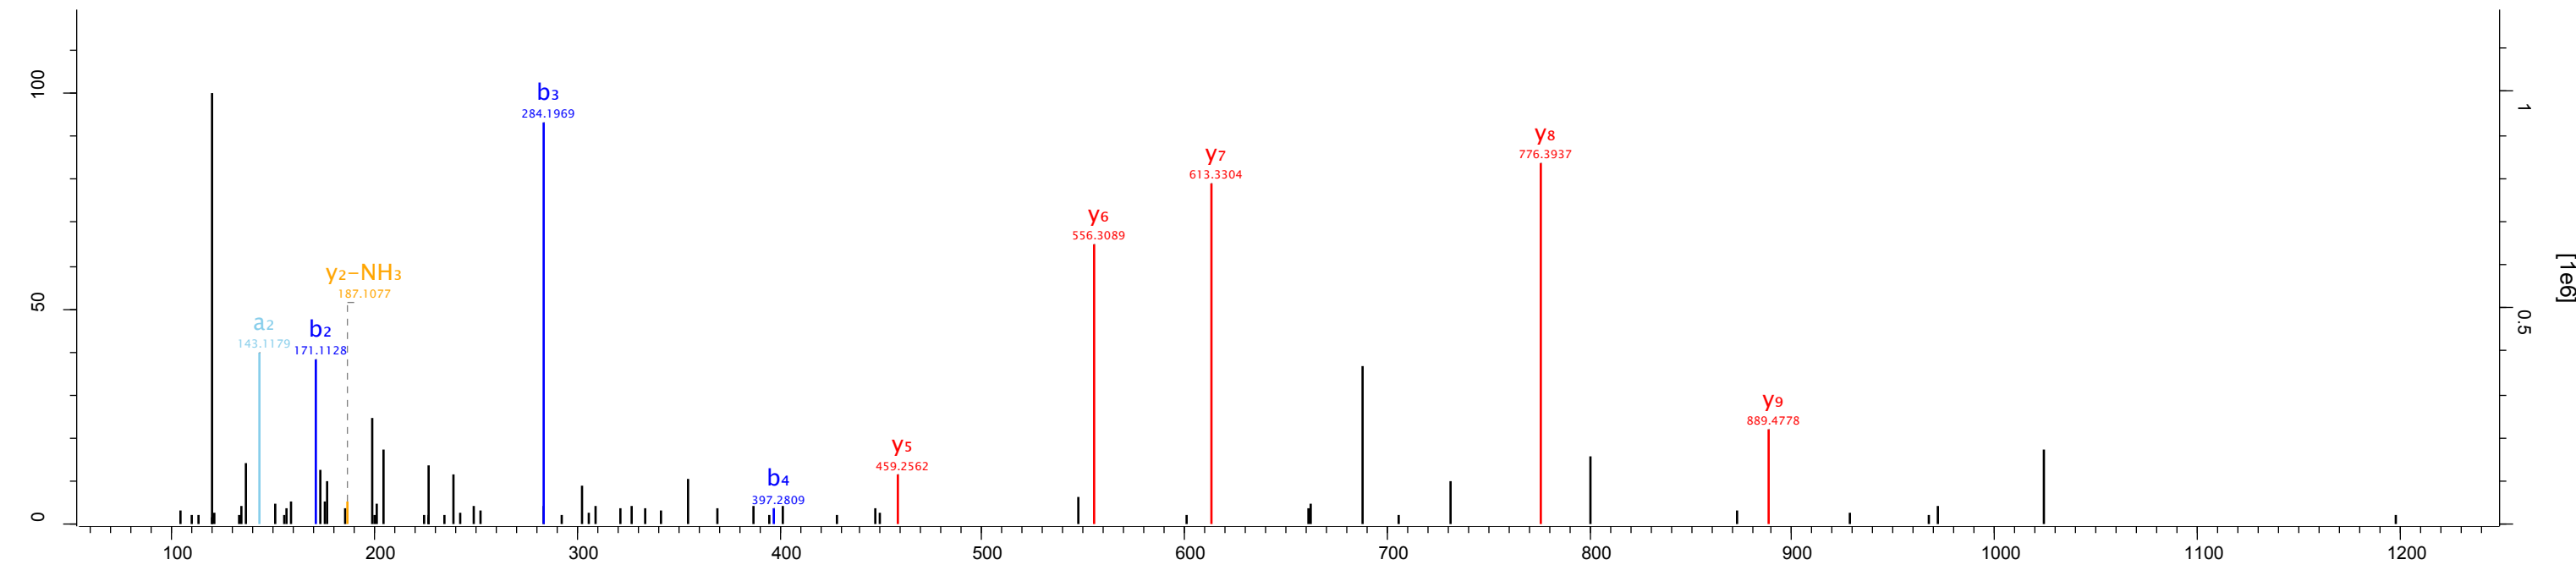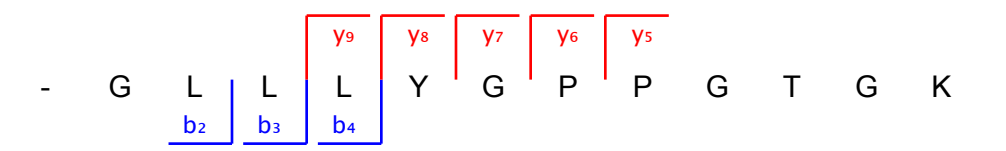

Raw file  
20180707\_MaS\_A375SR\_LM\_proteome\_22

Scan Method Score m/z Gene names  
25197 FTMS; HCD 67.9 496.76 SEPT3

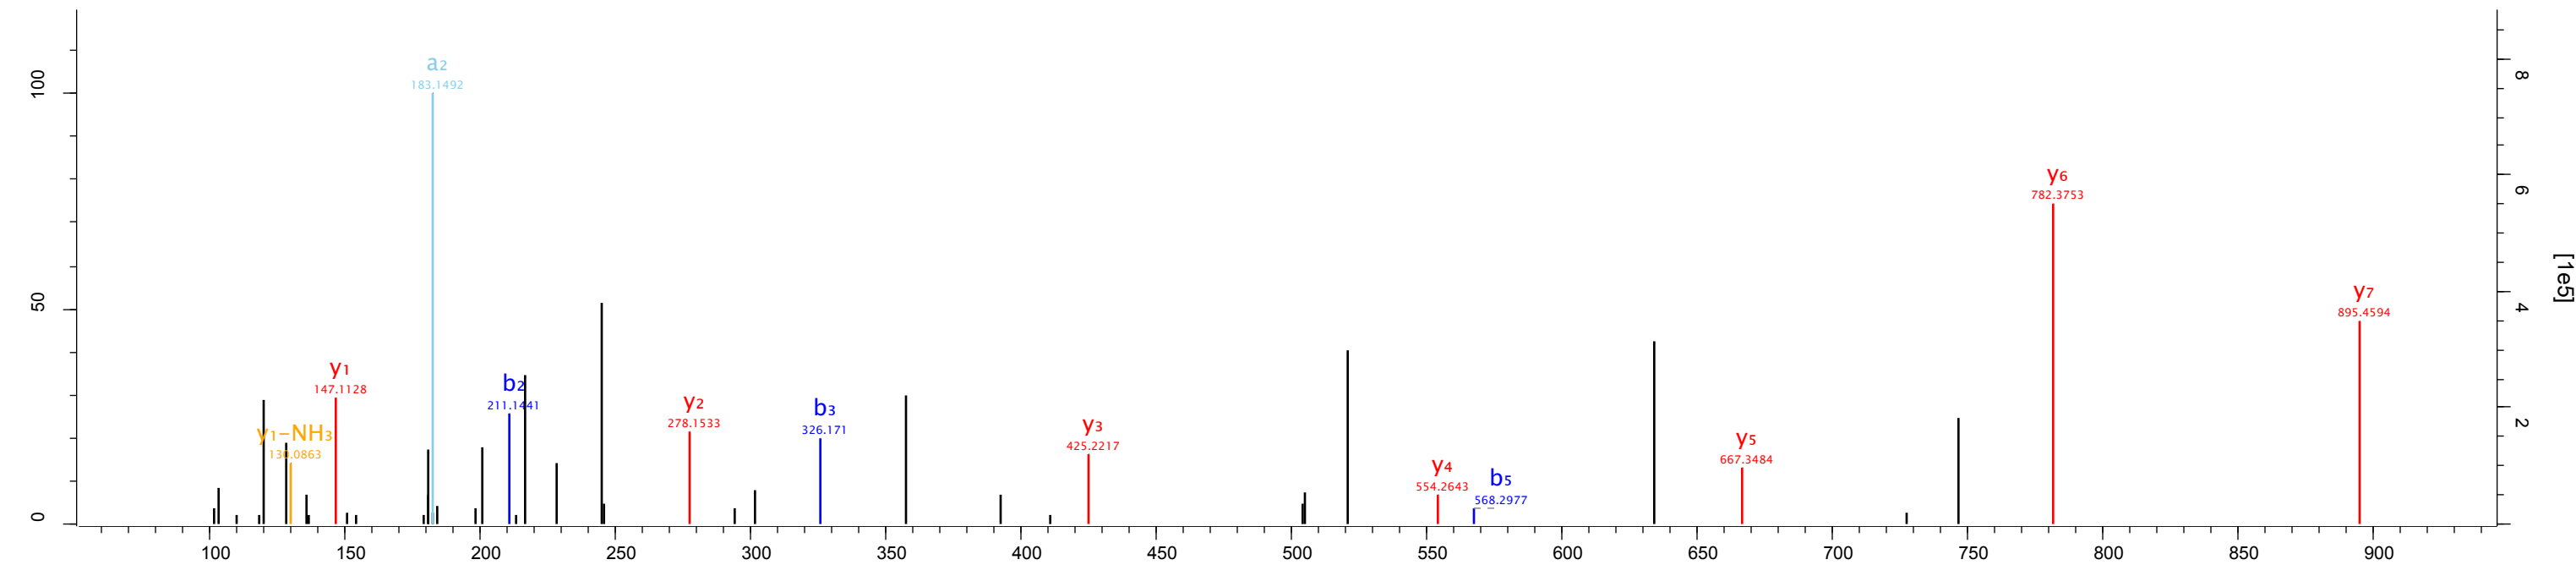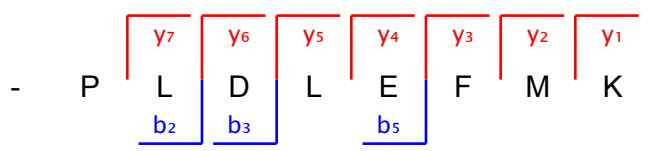



Raw file  
20180707\_MaS\_A375SR\_LM\_proteome\_22

Scan Method Score m/z Gene names  
26917 FTMS; HCD 17.93 936.83 C1orf85

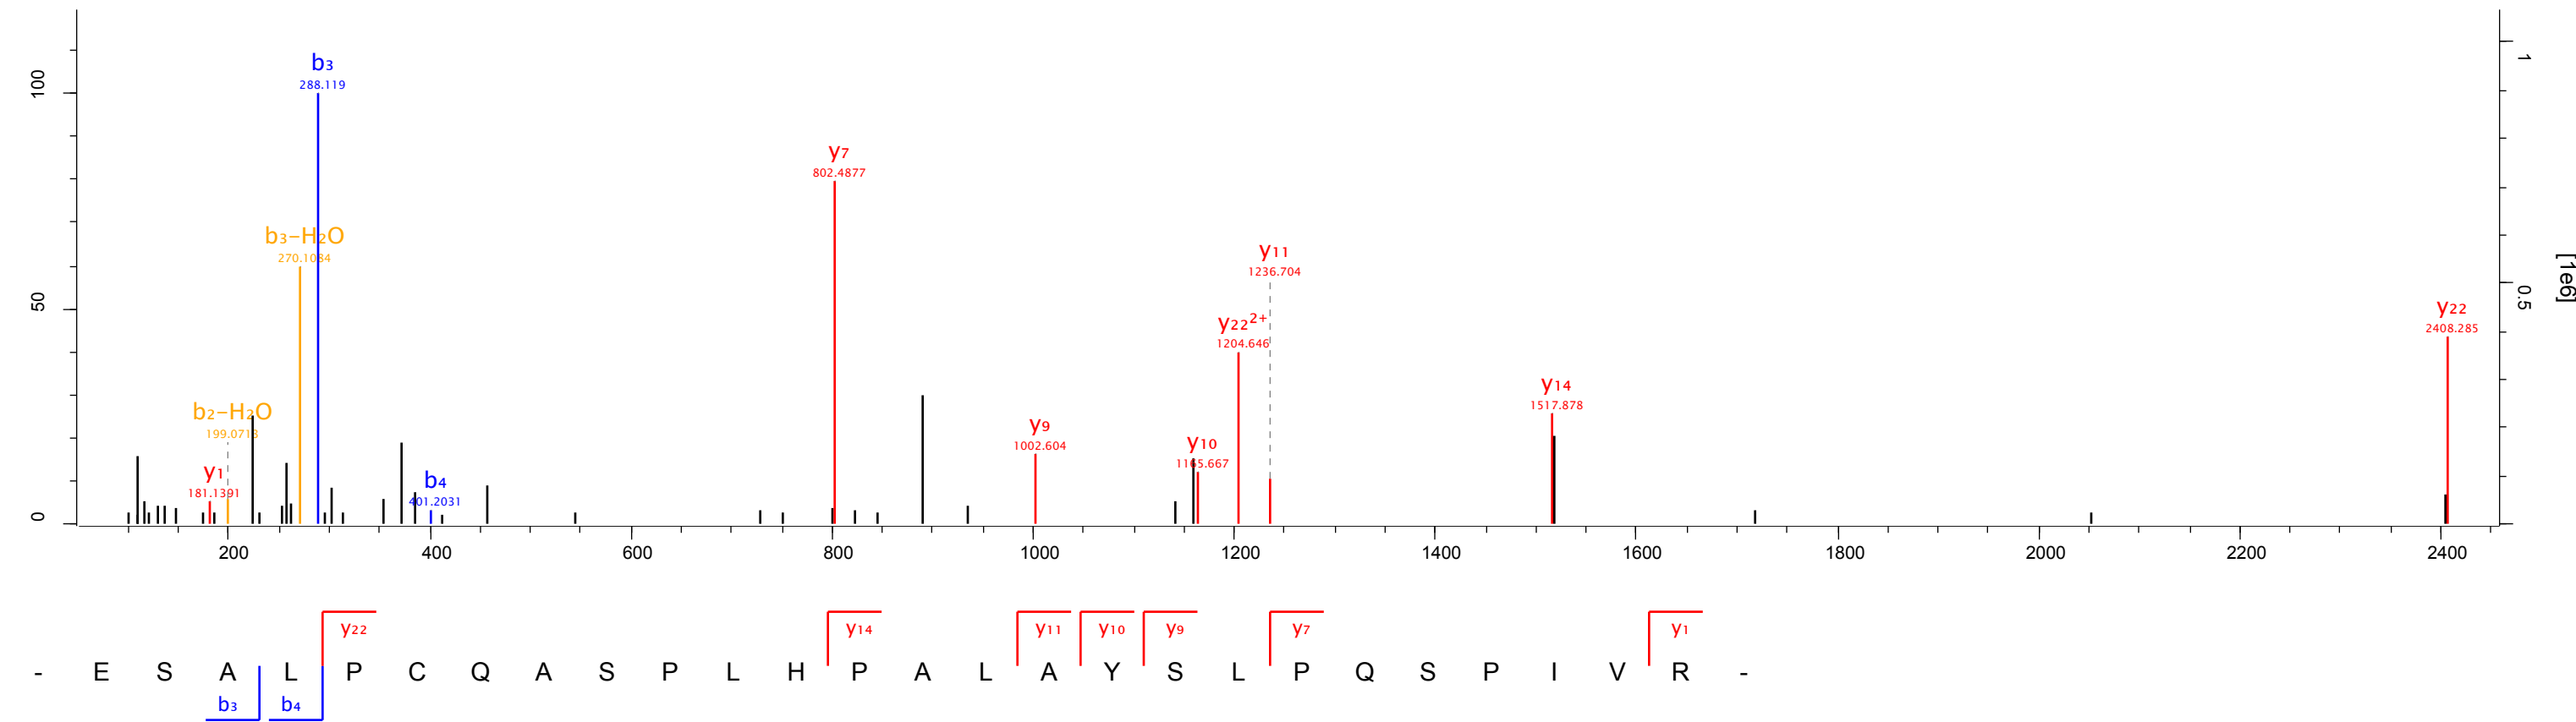

Raw file: 20180707\_MaS\_A375SR\_LM\_proteome\_22  
 Scan: 27427 Method: FTMS; HCD Score: 45.28 m/z: 758.89 Gene names: CCDC183

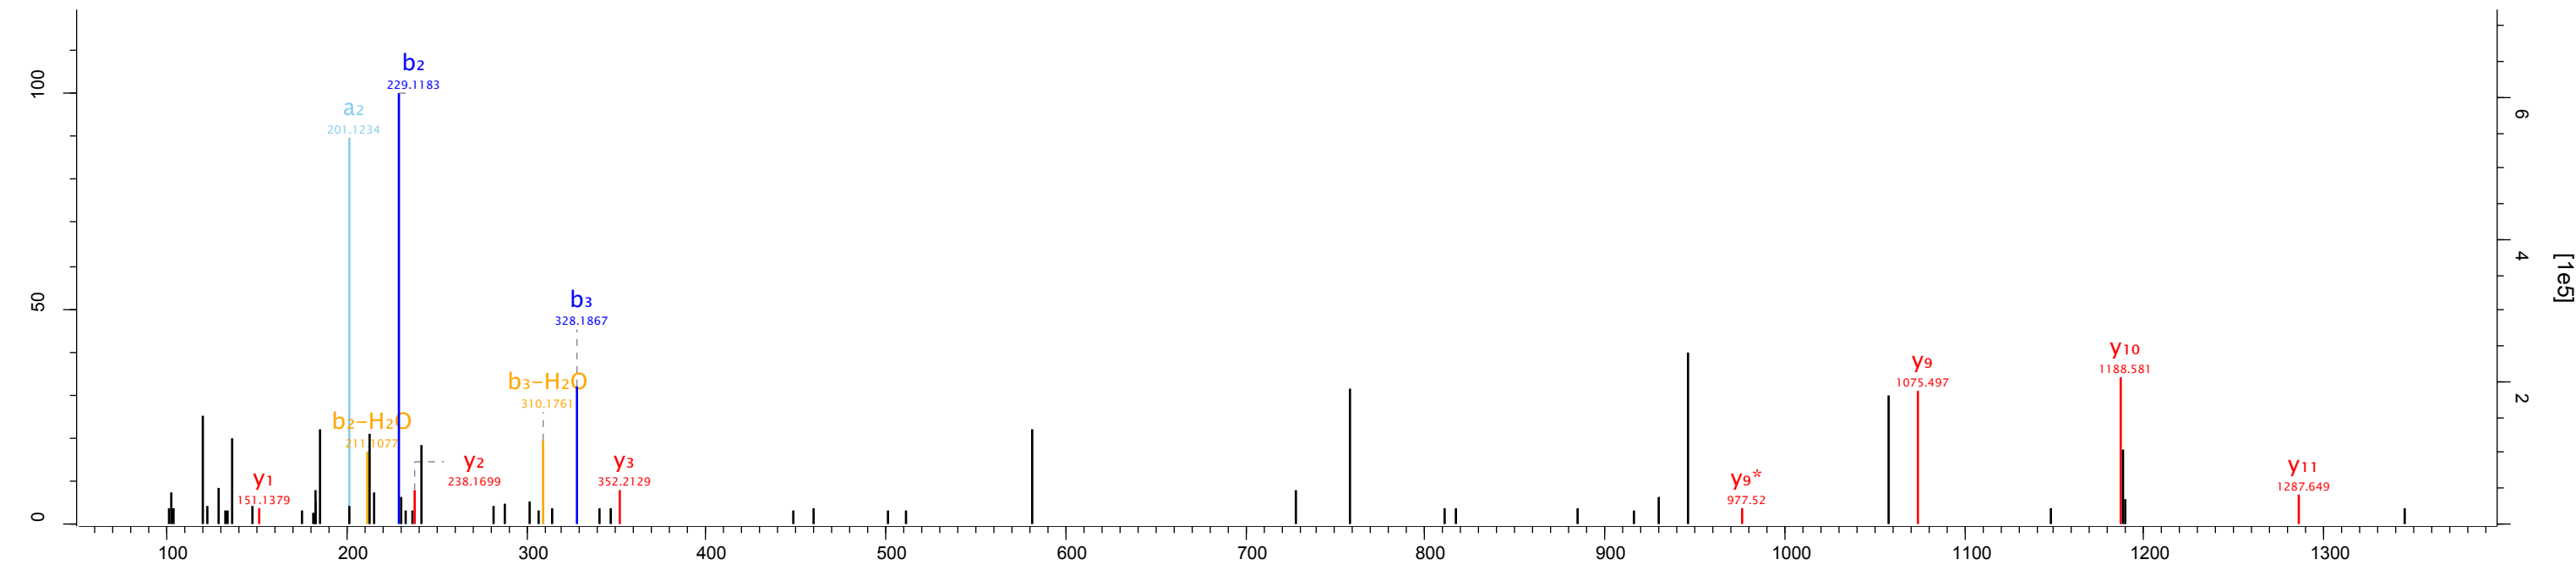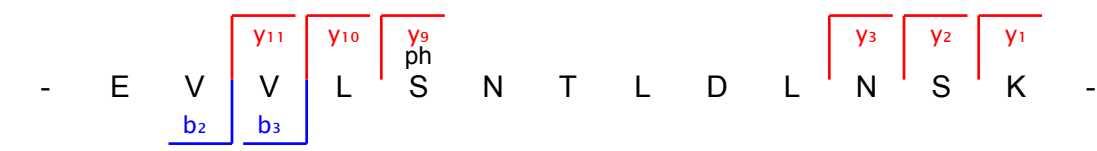

Raw file 20180707\_MaS\_A375SR\_LM\_proteome\_22 Scan 27447 Method FTMS; HCD Score 56.79 m/z 857.42 Gene names SSR3

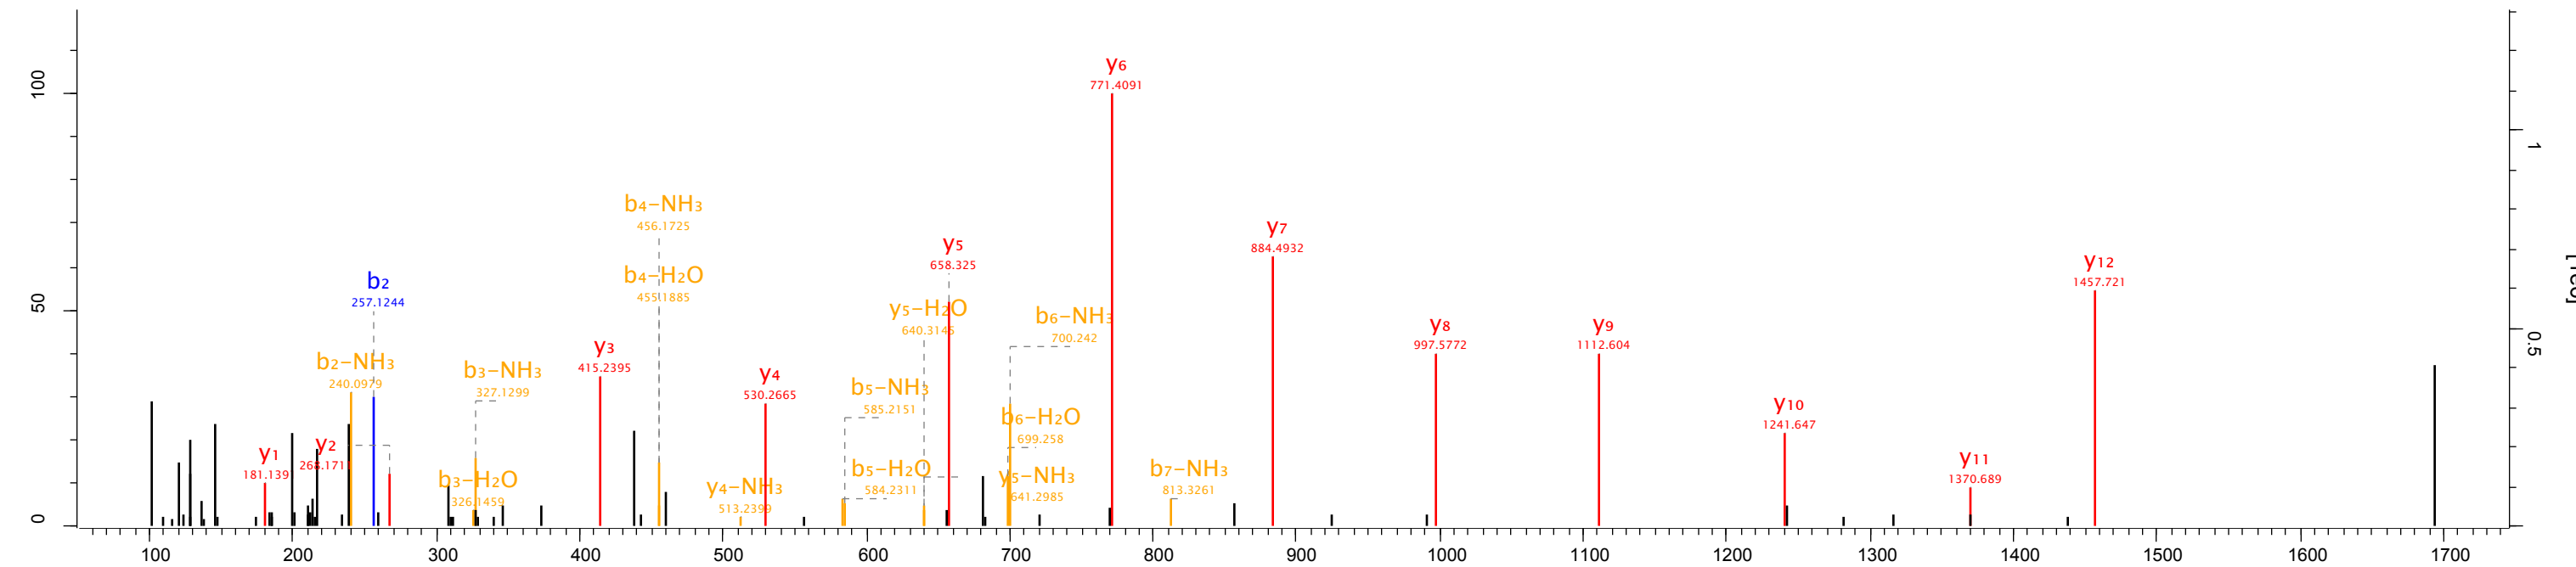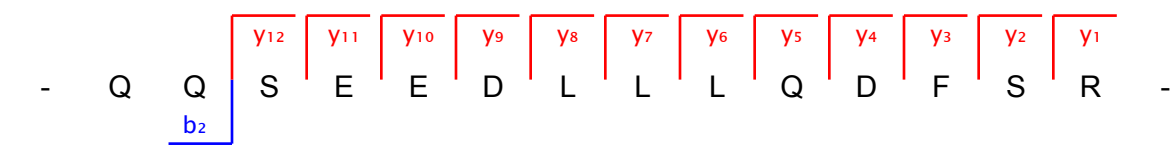

Raw file  
20180707\_MaS\_A375SR\_LM\_proteome\_22

Scan Method Score m/z Gene names  
3457 FTMS; HCD 57.59 533.19 TNFRSF12A

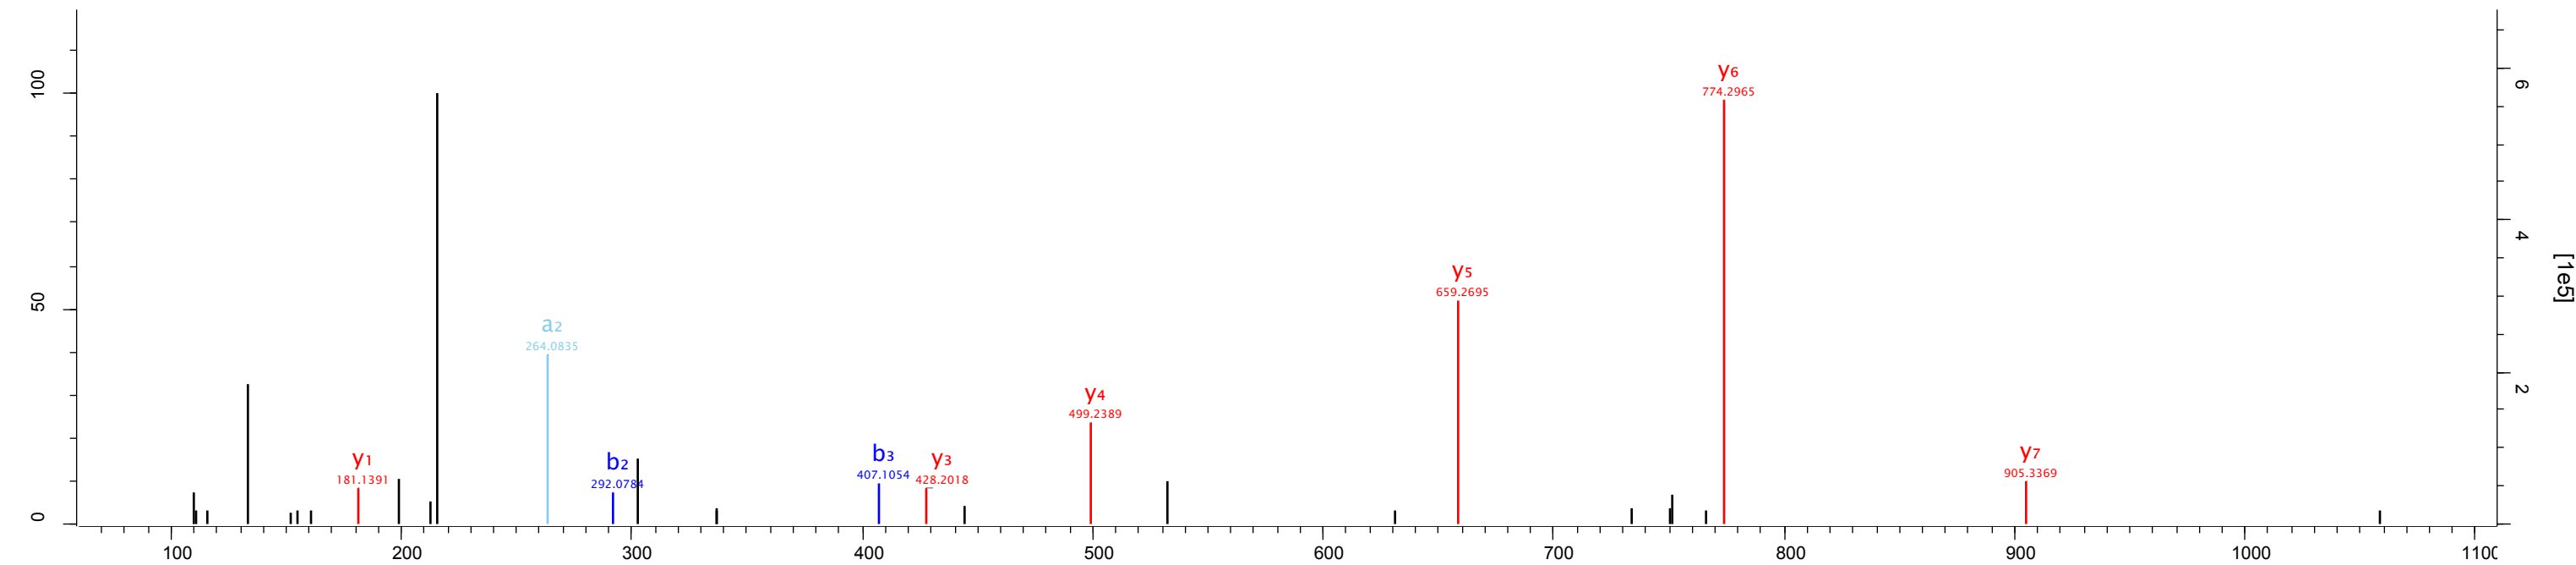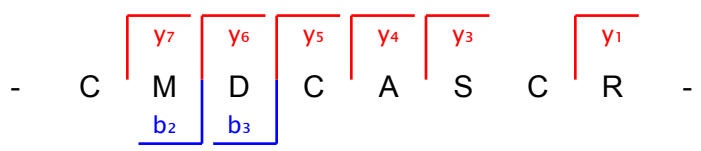

Raw file  
20180707\_MaS\_A375SR\_LM\_proteome\_25

| Scan | Method    | Score | m/z    |
|------|-----------|-------|--------|
| 3897 | FTMS; HCD | 64.78 | 413.69 |

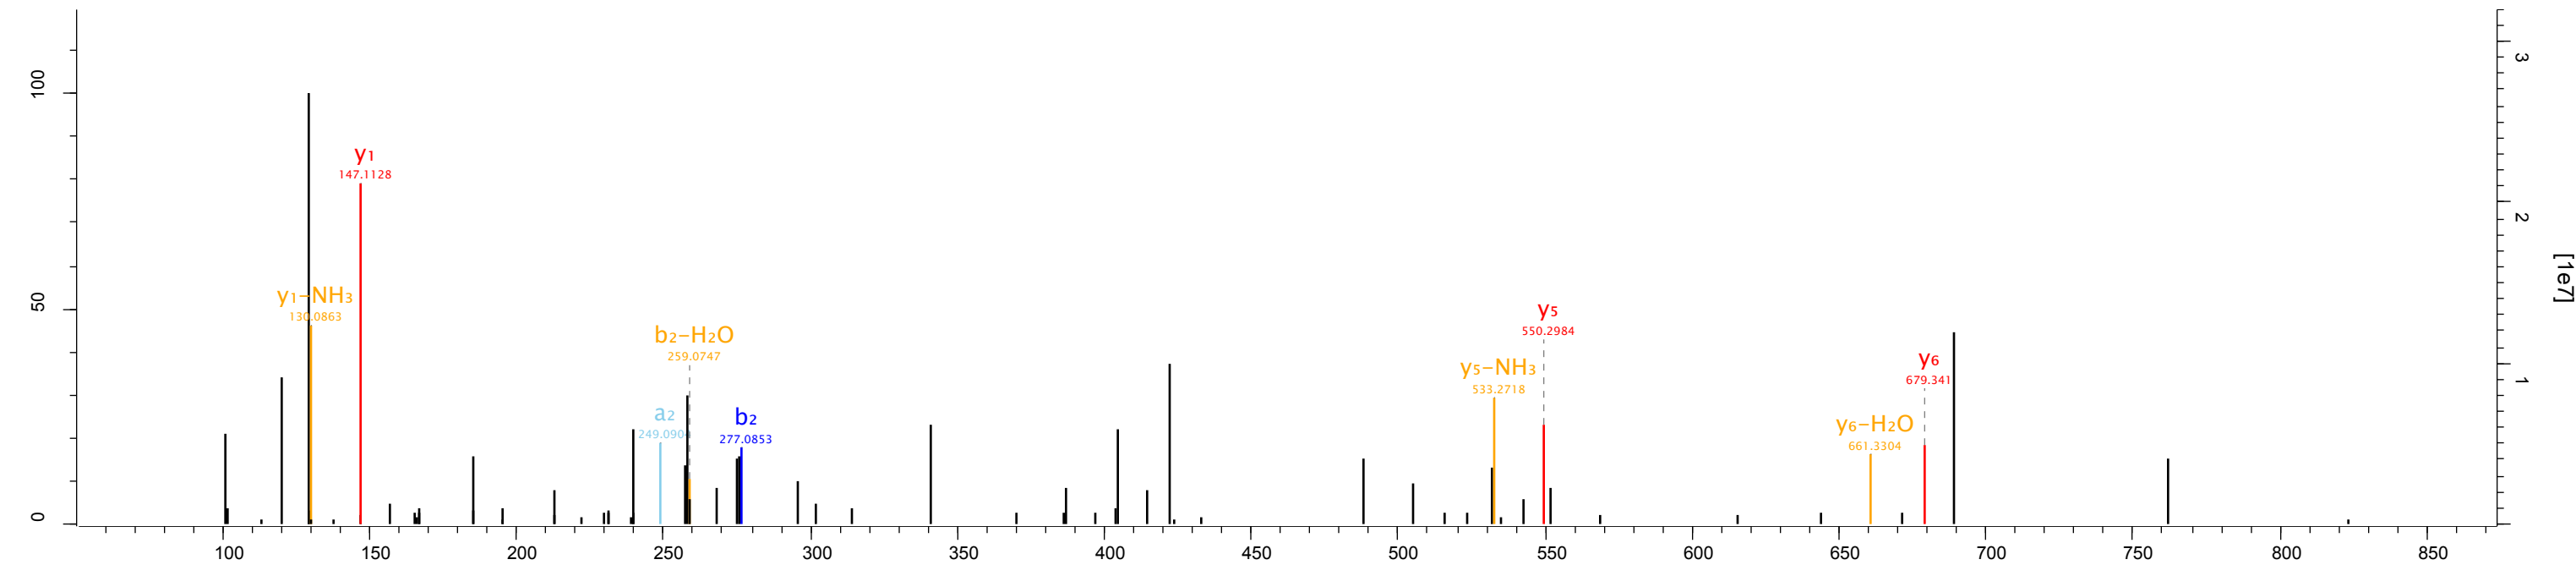

Raw file 20180707\_MaS\_A375SR\_LM\_proteome\_29 Scan 7067 Method FTMS; HCD Score 52.3 m/z 413.71 Gene names PROK2

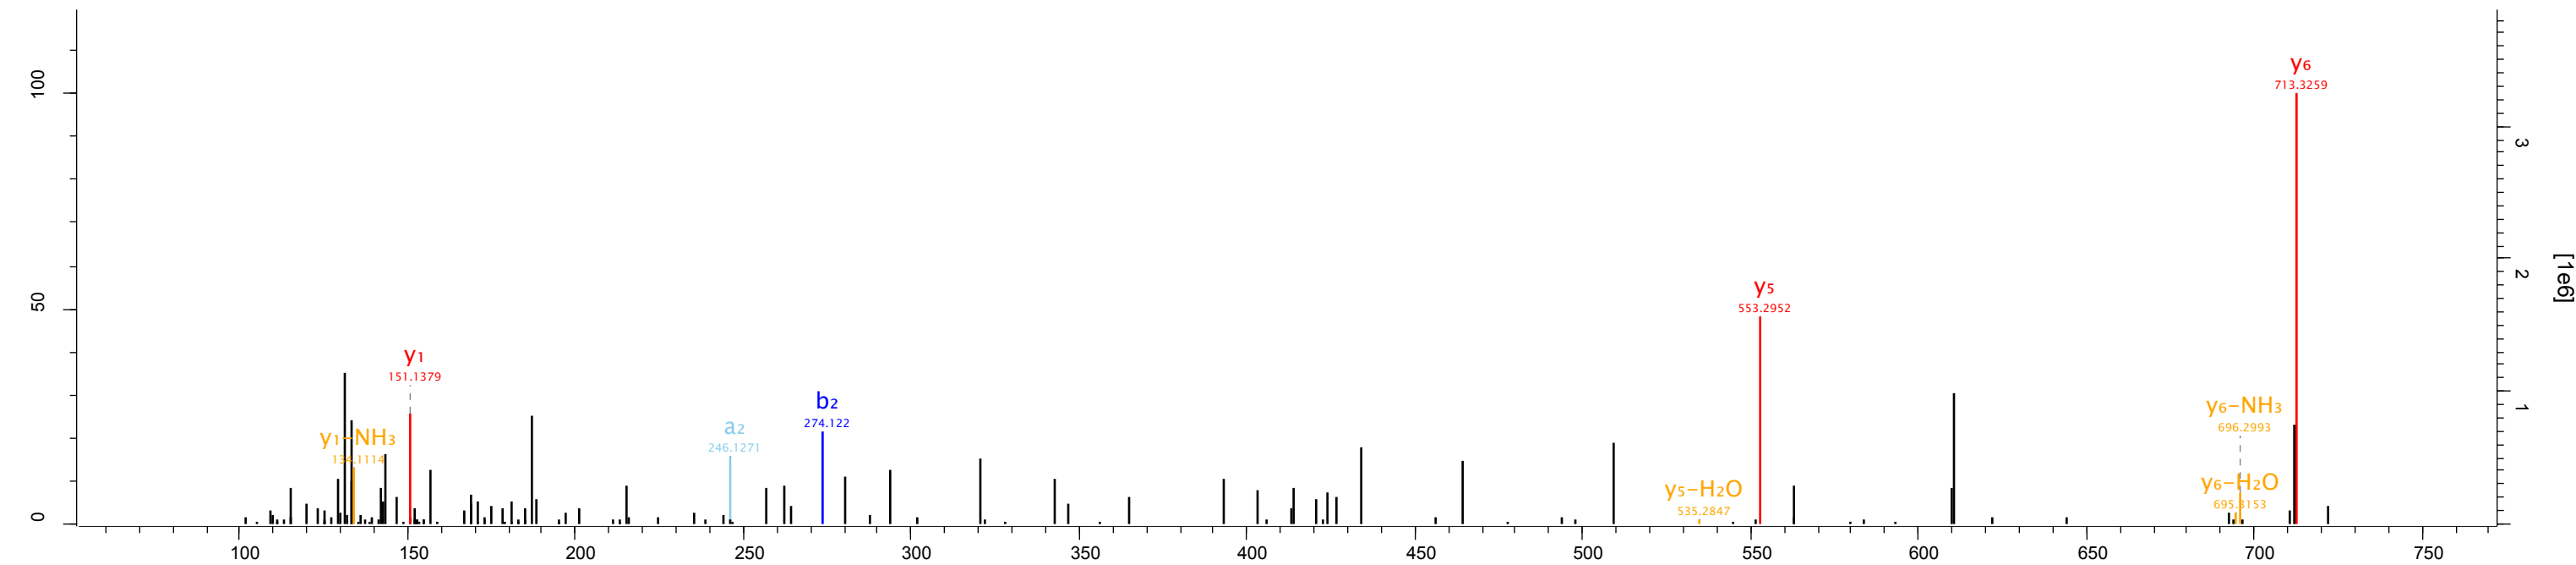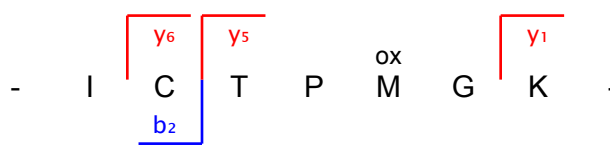

Raw file 20180707\_MaS\_A375SR\_ML\_proteome\_01 Scan 10907 Method FTMS; HCD Score 57.97 m/z 791.37 Gene names MTSS1L

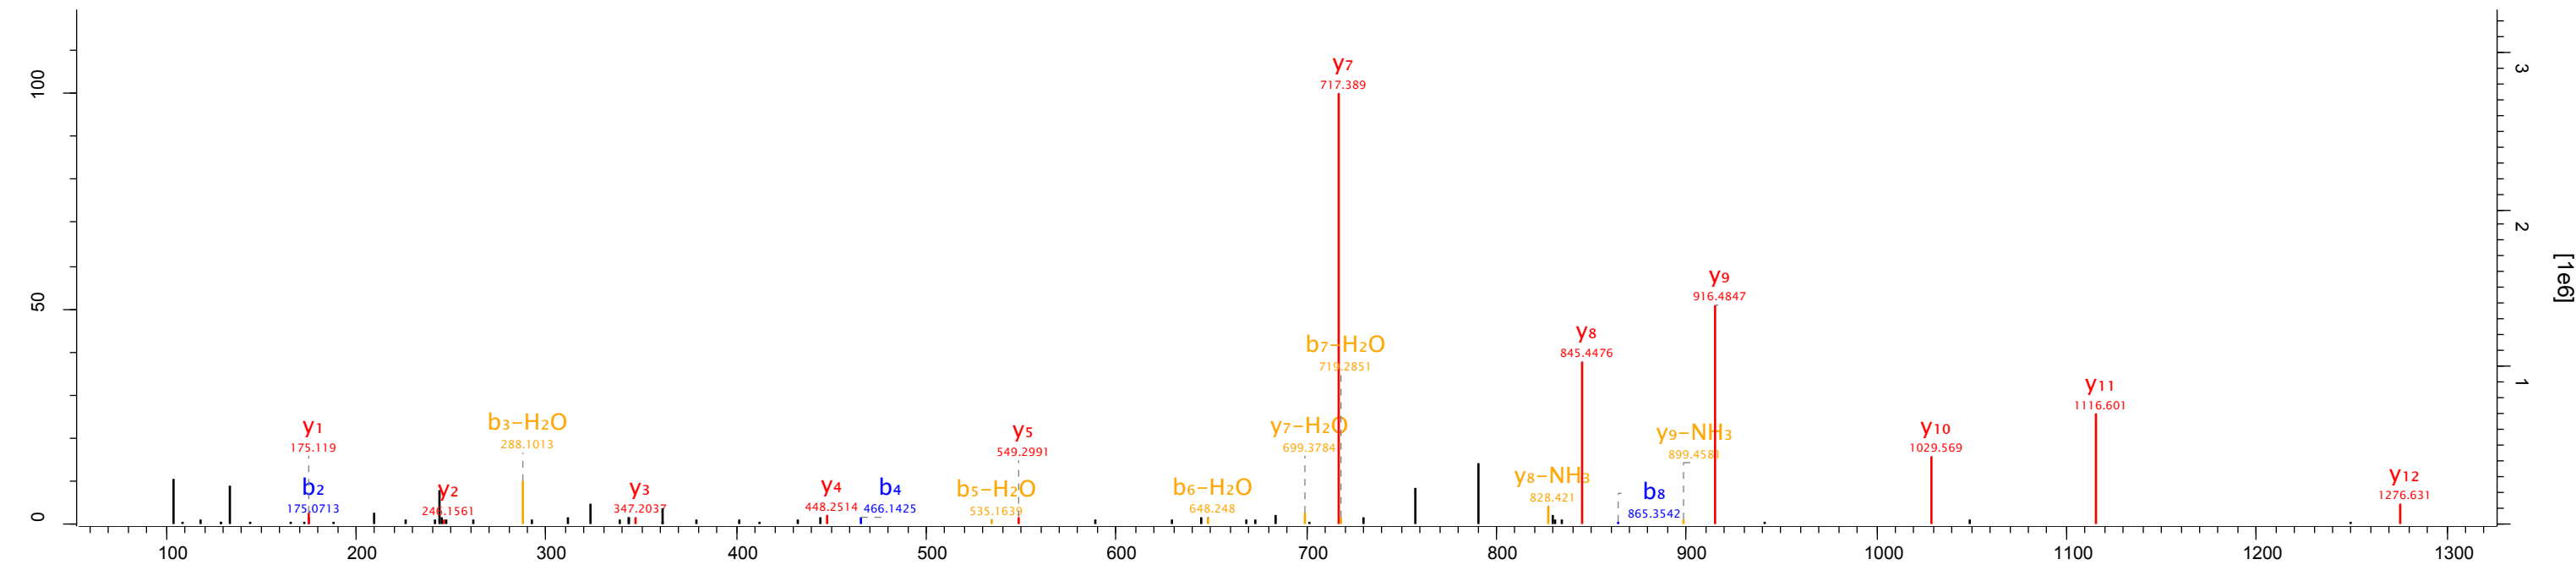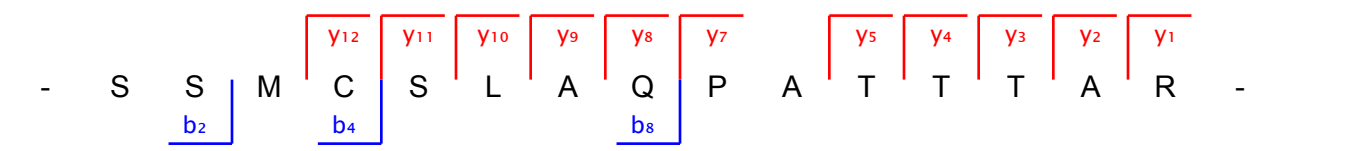

Raw file: 20180707\_MaS\_A375SR\_ML\_proteome\_02  
 Scan: 15137 Method: FTMS; HCD Score: 94.77 m/z: 616.3 Gene names: TRMT44

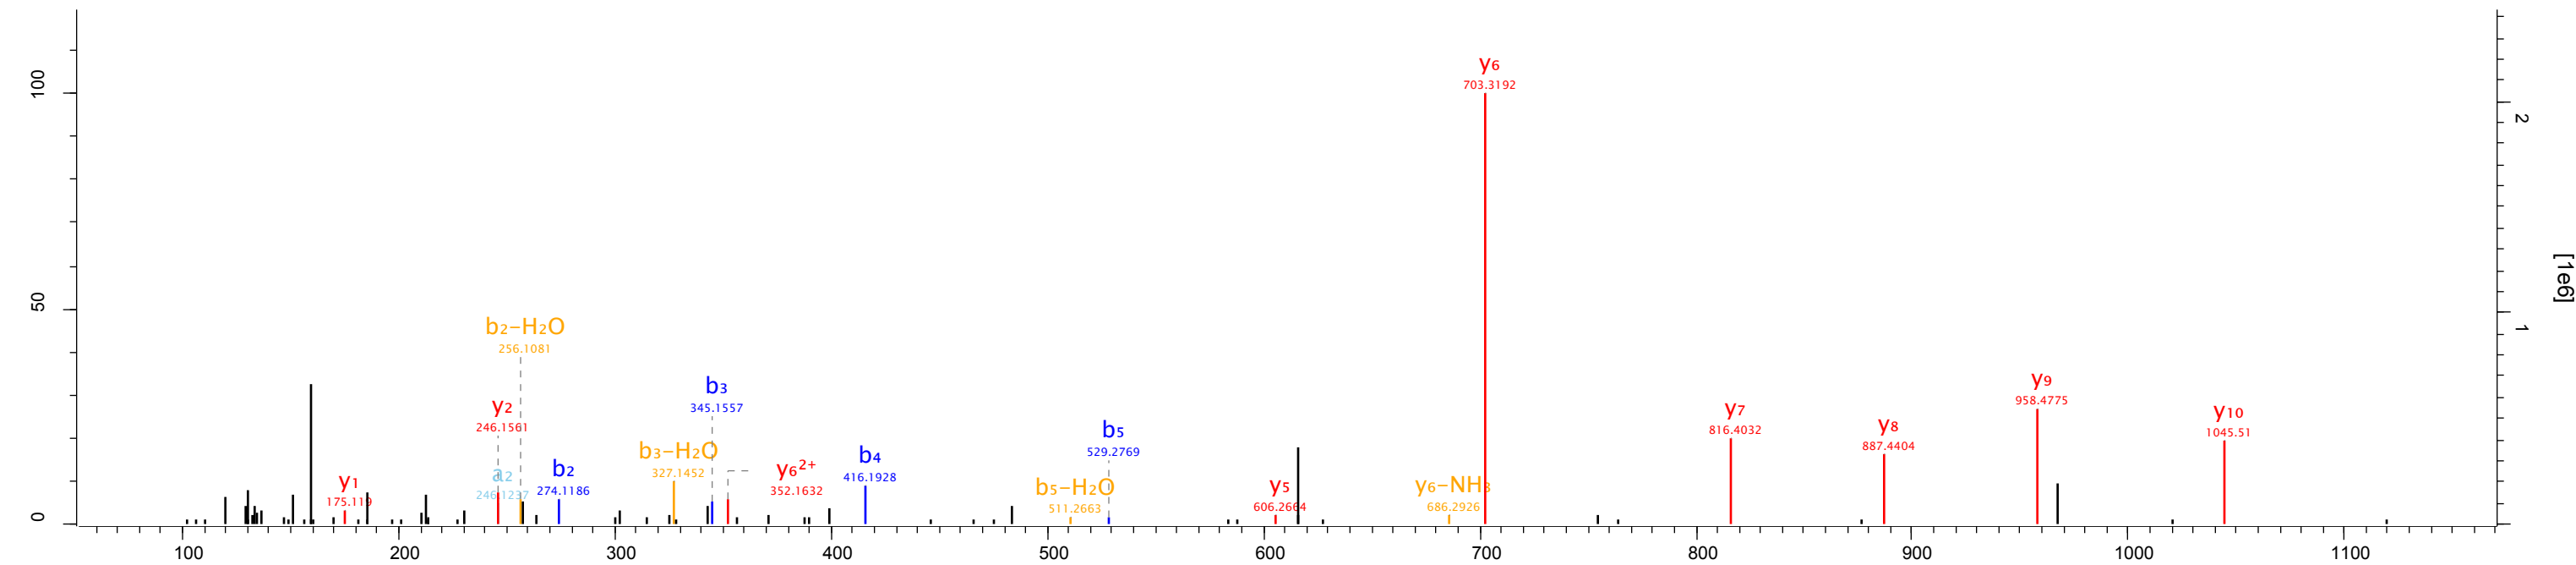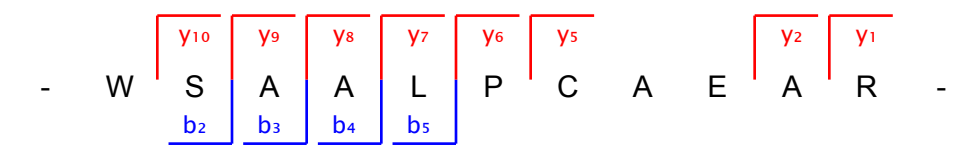



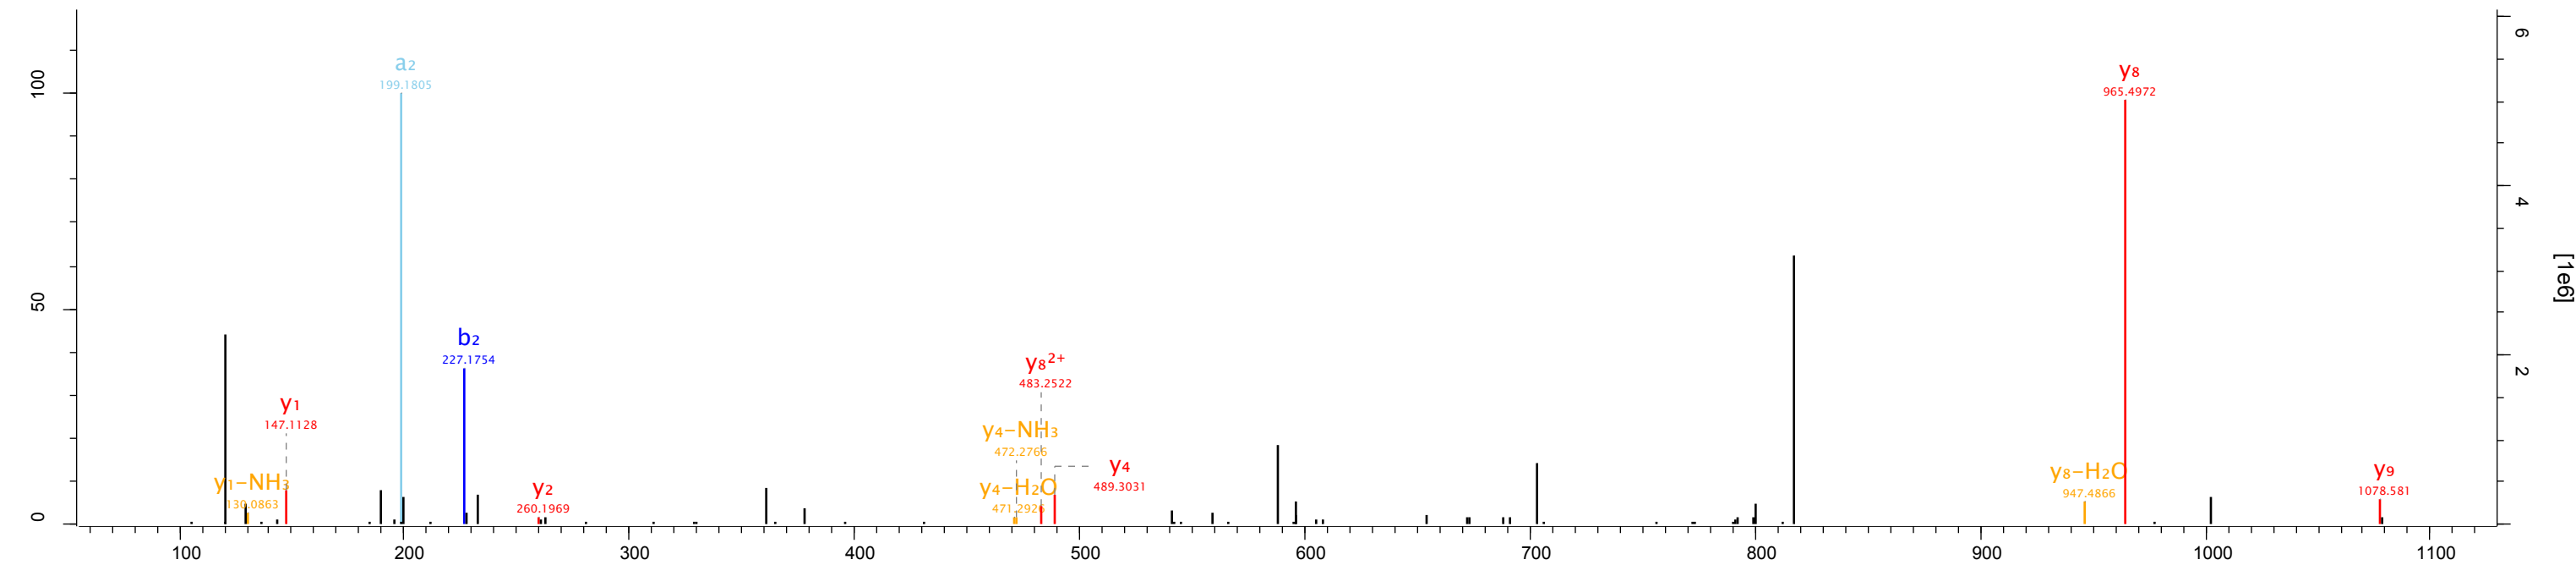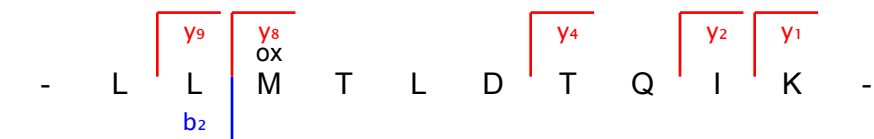

Raw file: 20180707\_MaS\_A375SR\_ML\_proteome\_04  
 Scan: 17307 Method: FTMS; HCD Score: 117.09 m/z: 642.3 Gene names: FRRS1

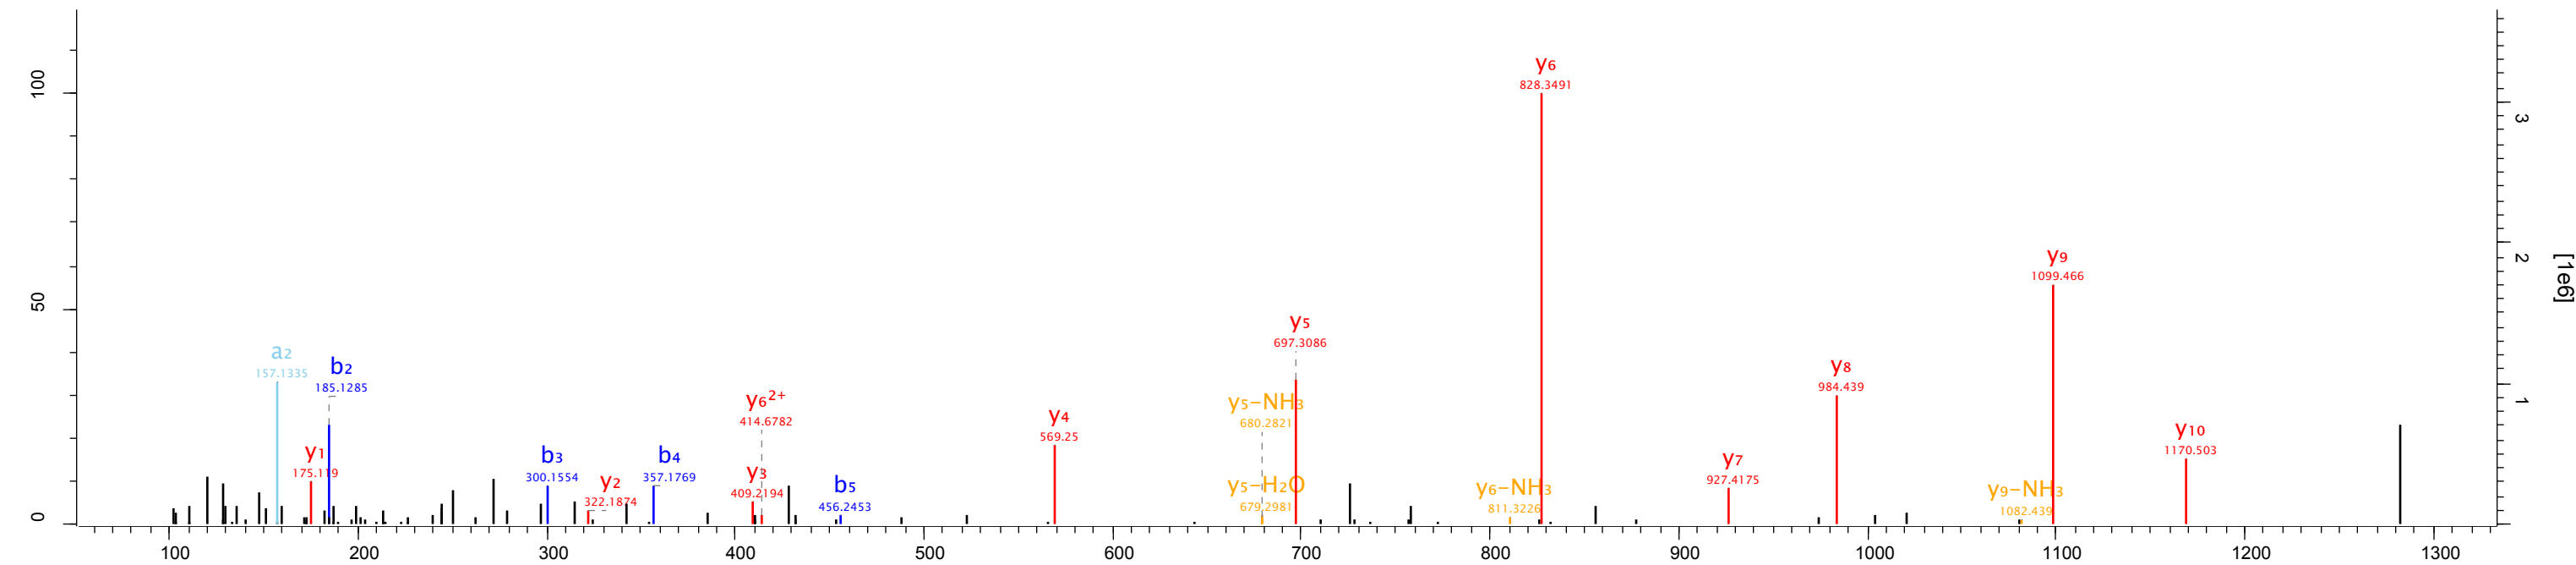

Raw file  
20180707\_MaS\_A375SR\_ML\_proteome\_04

Scan: 26887  
Method: FTMS; HCD  
Score: 54.77  
m/z: 586.98  
Gene names: MZT1

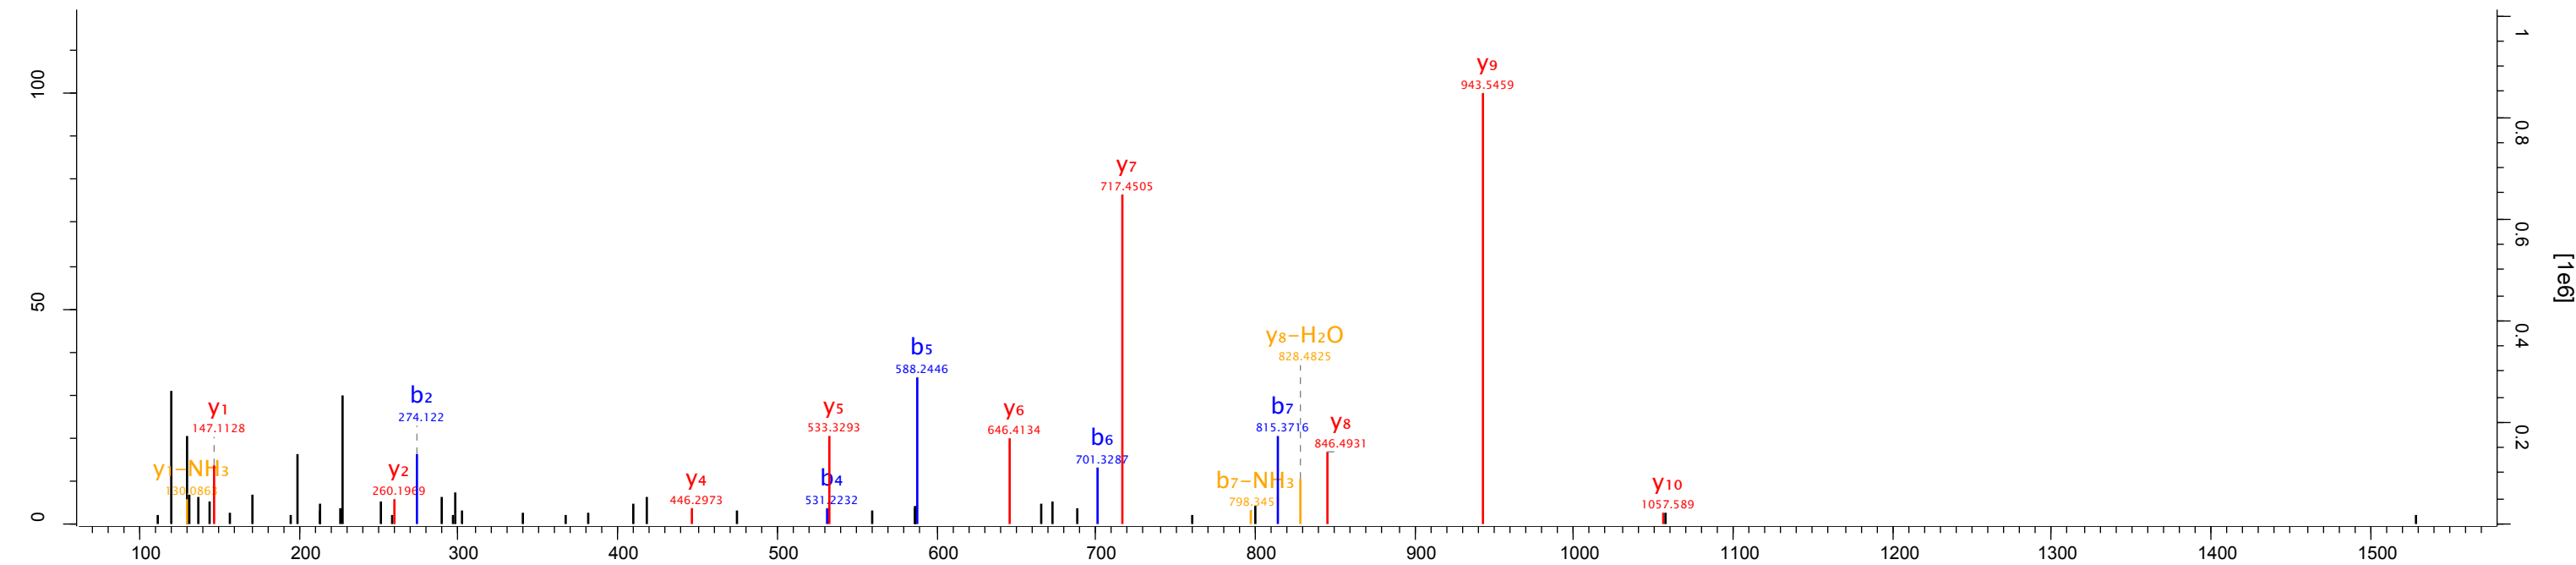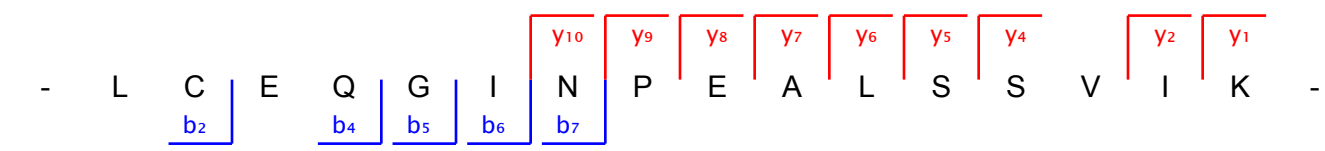

Raw file  
20180707\_MaS\_A375SR\_ML\_proteome\_05

Scan 22797 Method FTMS; HCD Score 78.08 m/z 925.96 Gene names PDPDF

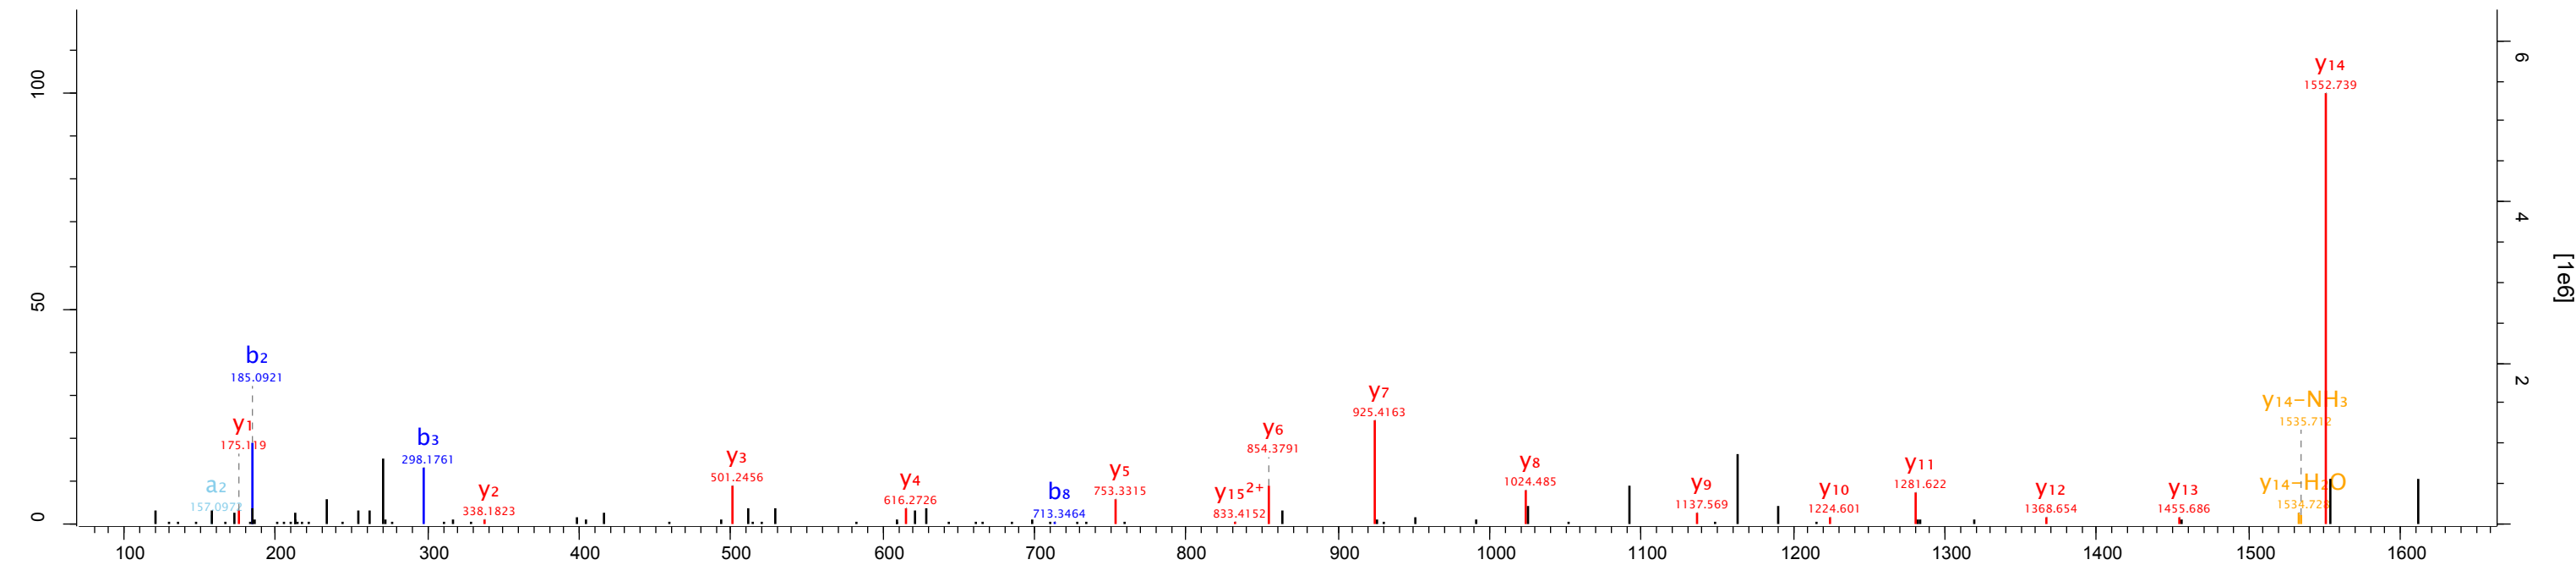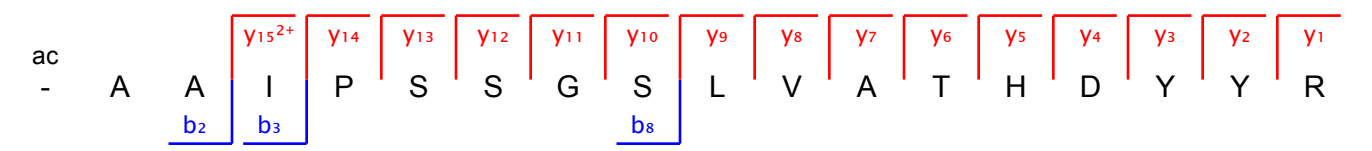

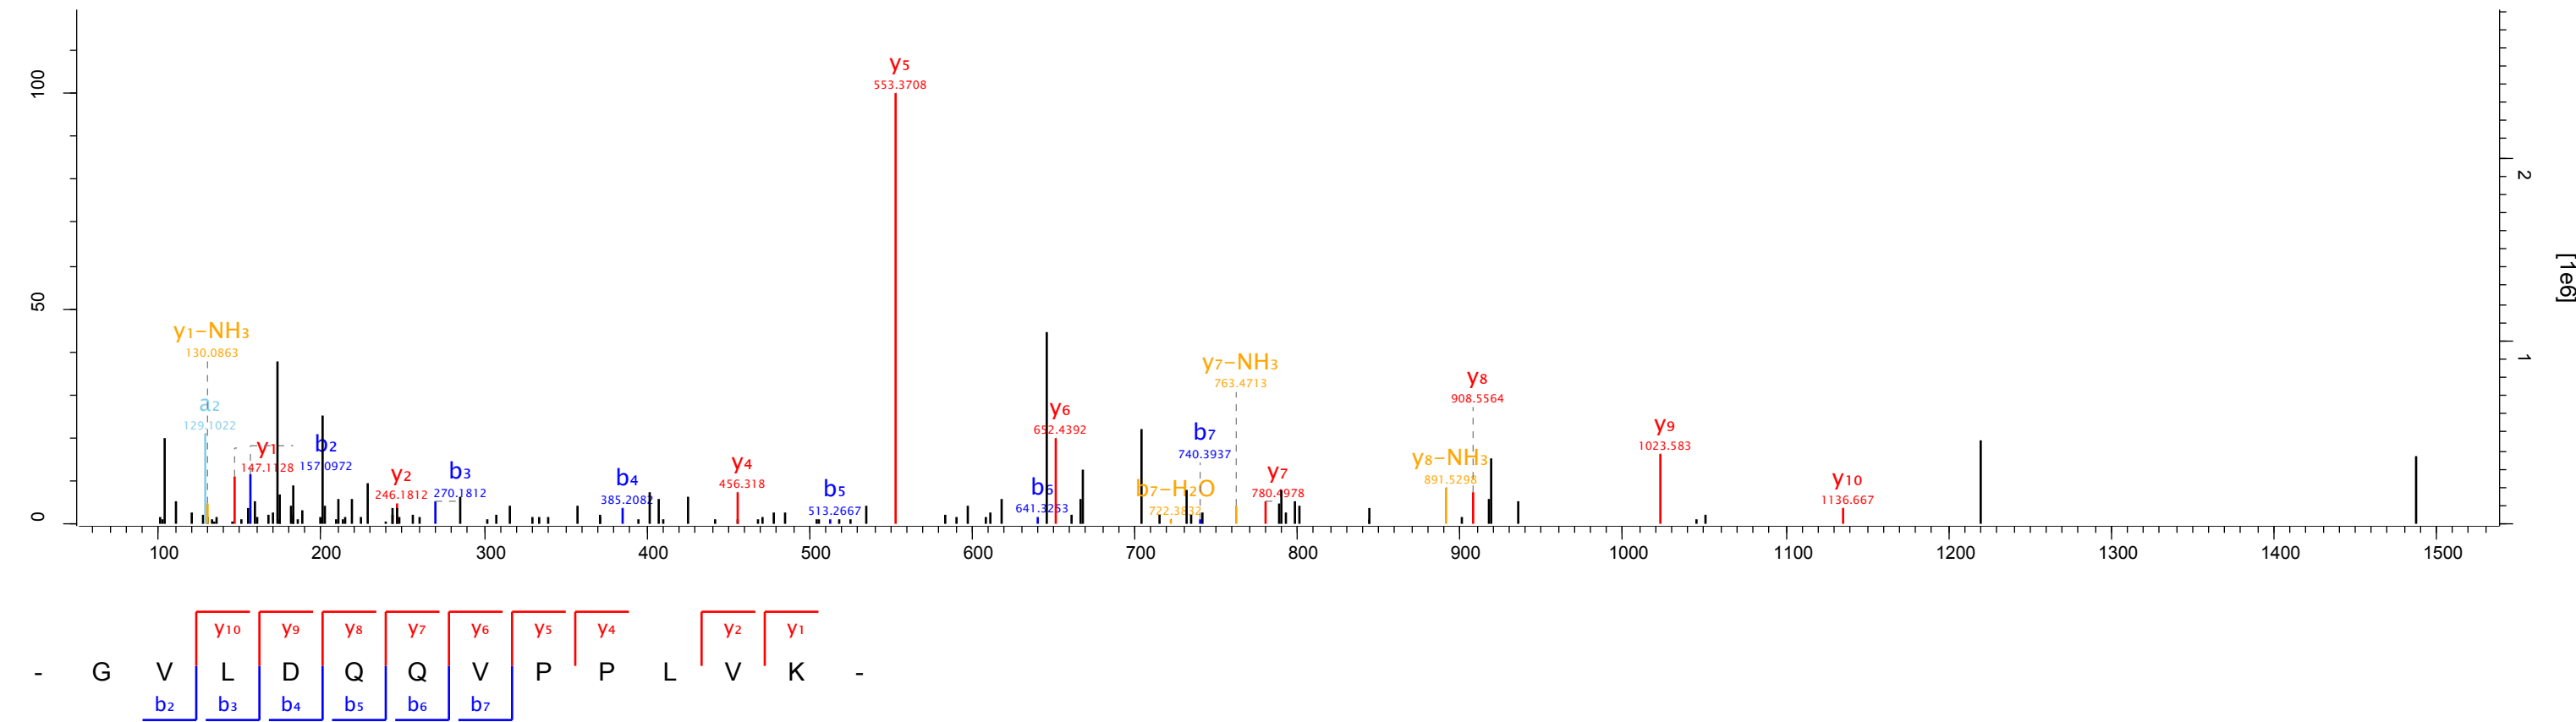

Raw file  
20180707\_MaS\_A375SR\_ML\_proteome\_06

| Scan  | Method    | Score | m/z    | Gene names |
|-------|-----------|-------|--------|------------|
| 15547 | FTMS; HCD | 41.4  | 660.79 | CHRD1      |

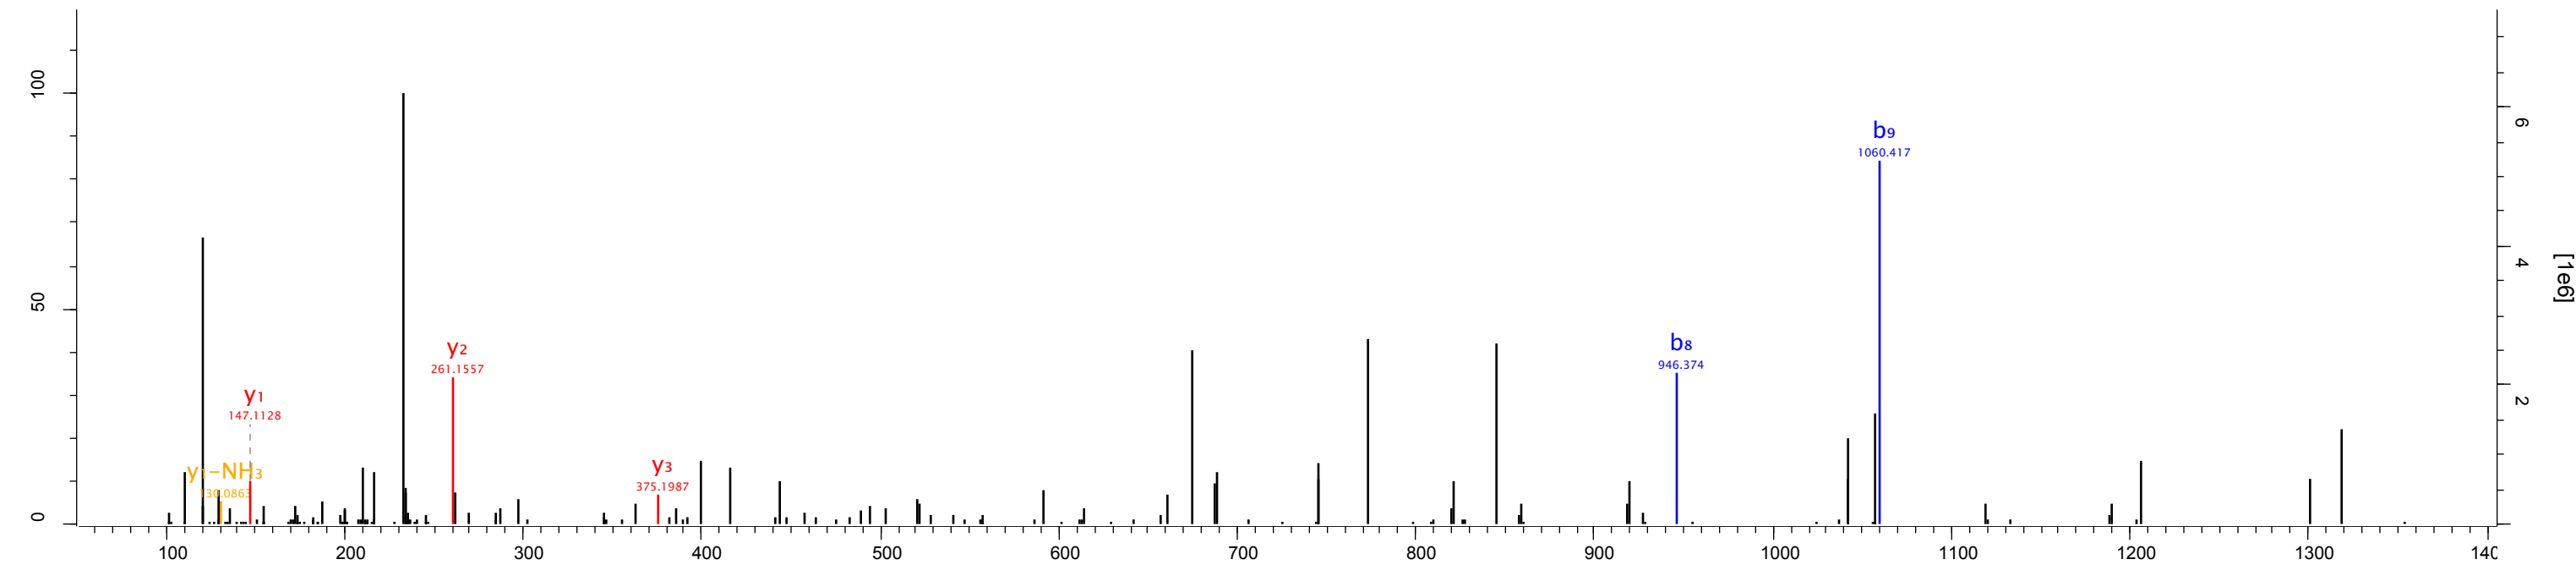

- C P D S L P P V N N K -

ph

b8 b9 y3 y2 y1

Raw file: 20180707\_MaS\_A375SR\_ML\_proteome\_06  
 Scan: 24697 Method: FTMS; HCD Score: 117.48 m/z: 1045.99 Gene names: FAM98C

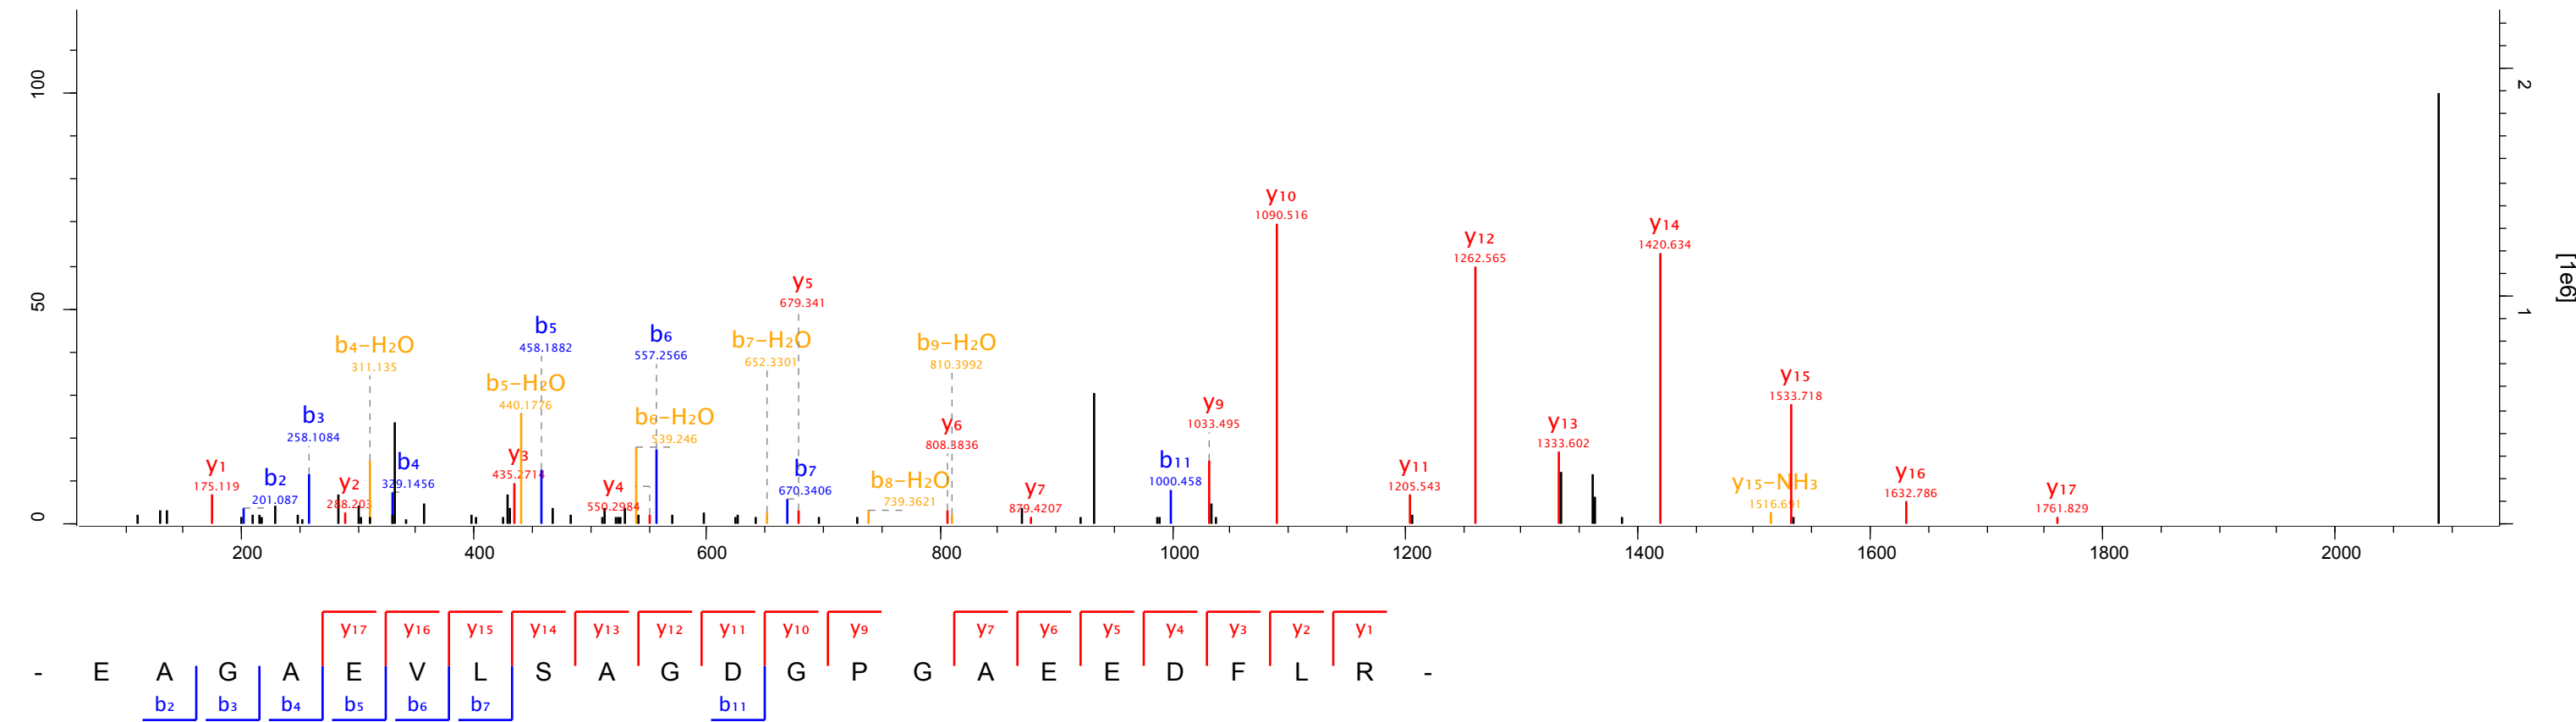

Raw file  
20180707\_MaS\_A375SR\_ML\_proteome\_07

Scan Method Score m/z Gene names  
3207 FTMS; HCD 151.5 530.18 TNFRSF12A

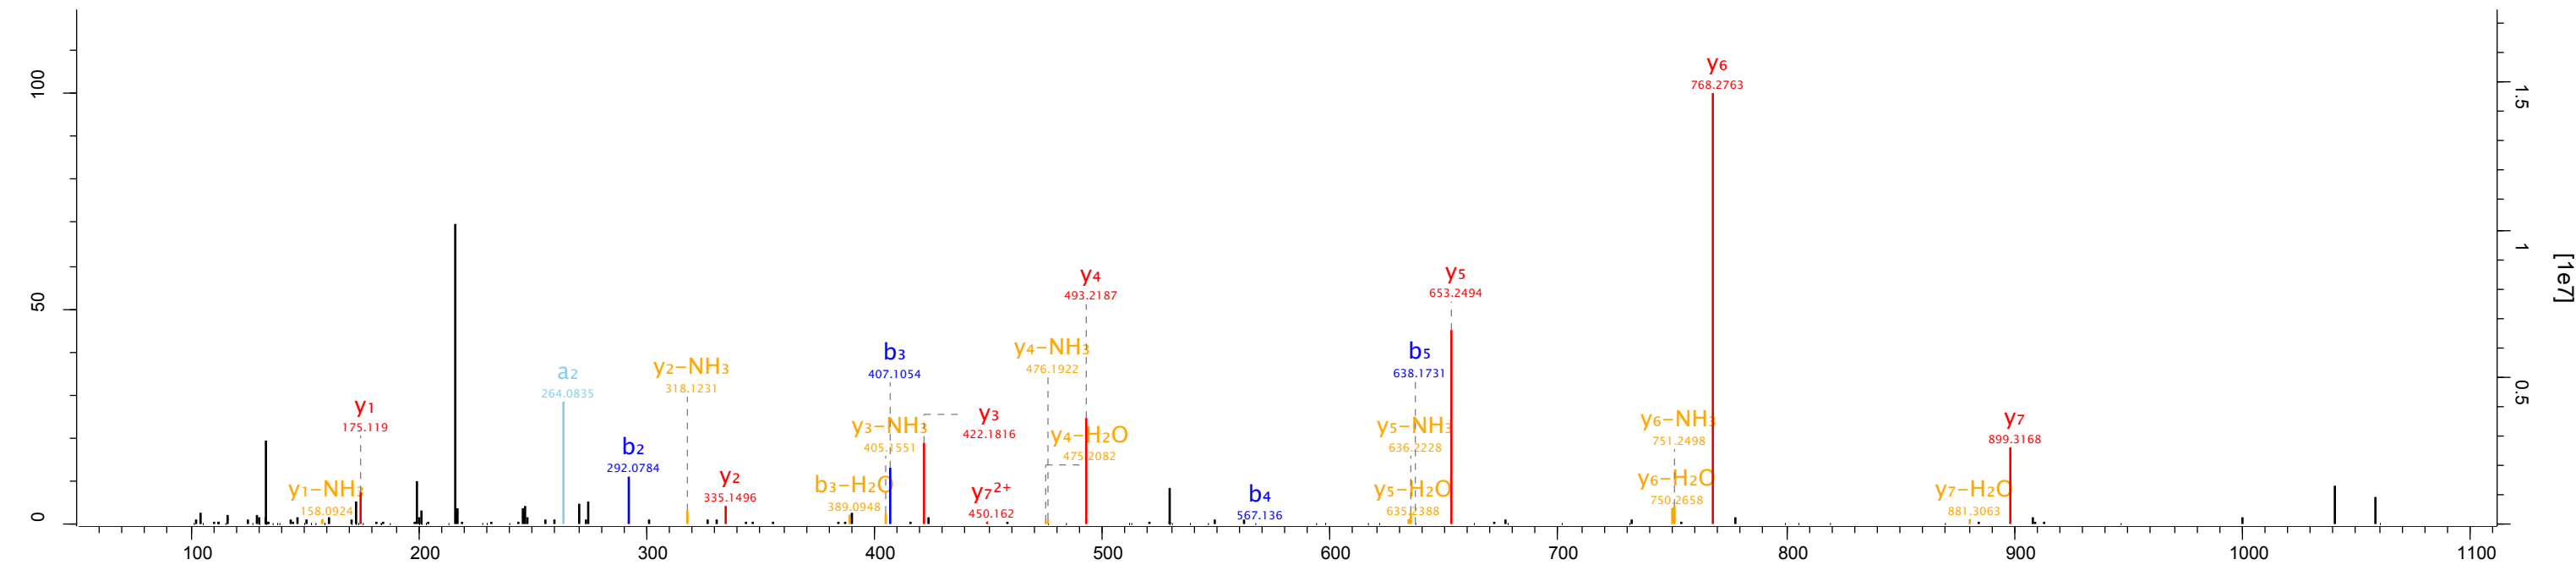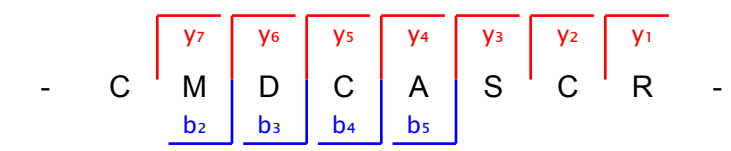



Raw file: 20180707\_MaS\_A375SR\_ML\_proteome\_09  
 Scan: 15757 Method: FTMS; HCD Score: 126.31 m/z: 544.3 Gene names: TMEM161B

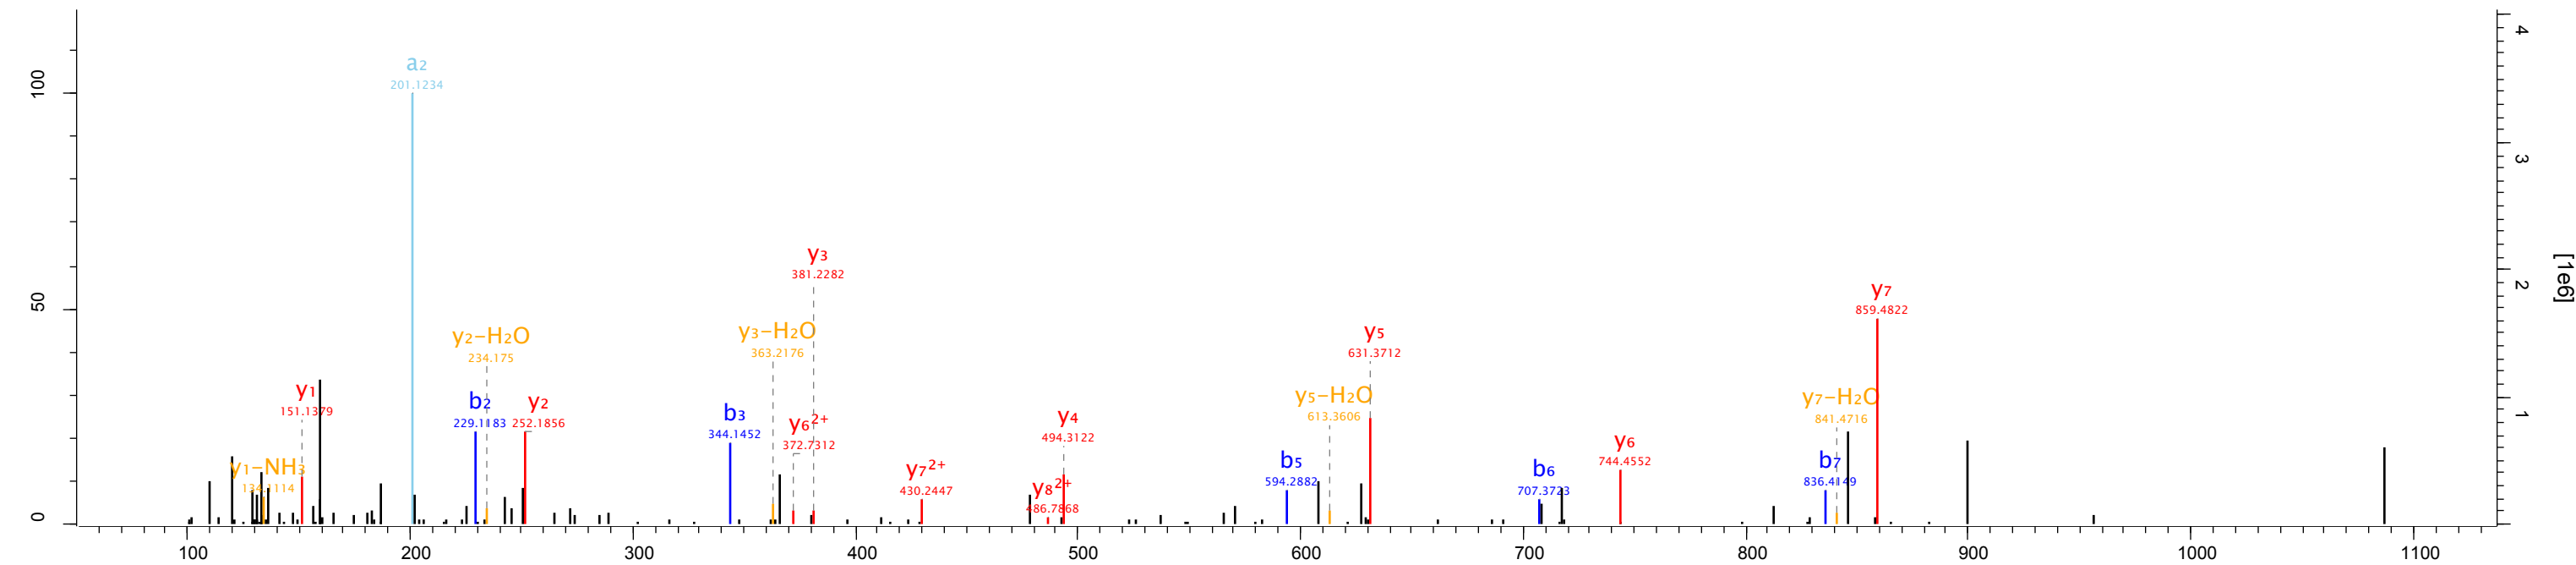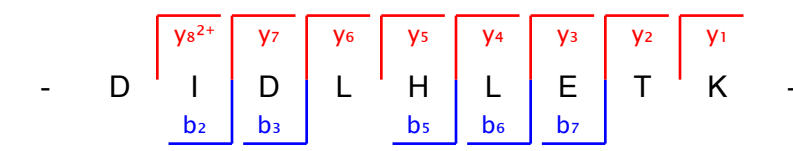

Raw file 20180707\_MaS\_A375SR\_ML\_proteome\_09 Scan 28267 Method FTMS; HCD Score 56.57 m/z 905.97 Gene names MYBPC2

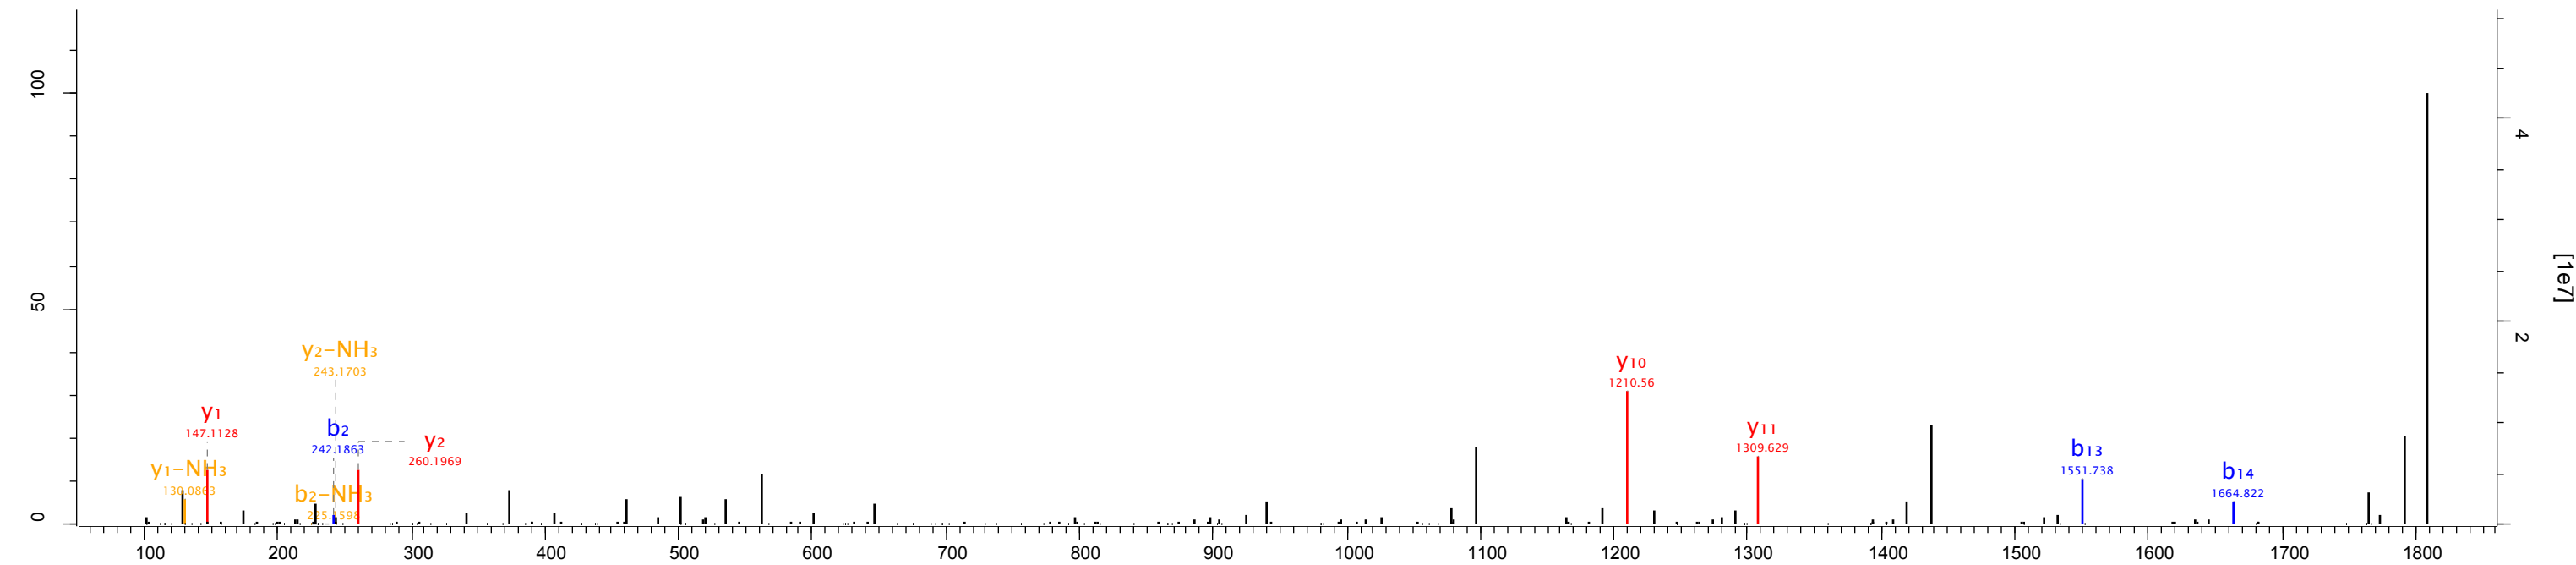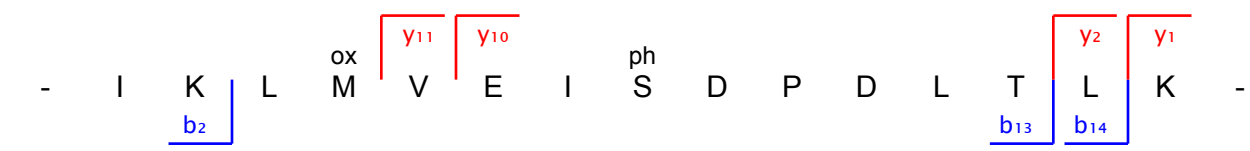

Raw file: 20180707\_MaS\_A375SR\_ML\_proteome\_10  
 Scan: 10017 Method: FTMS; HCD Score: 181.72 m/z: 815.9 Gene names: RNF115

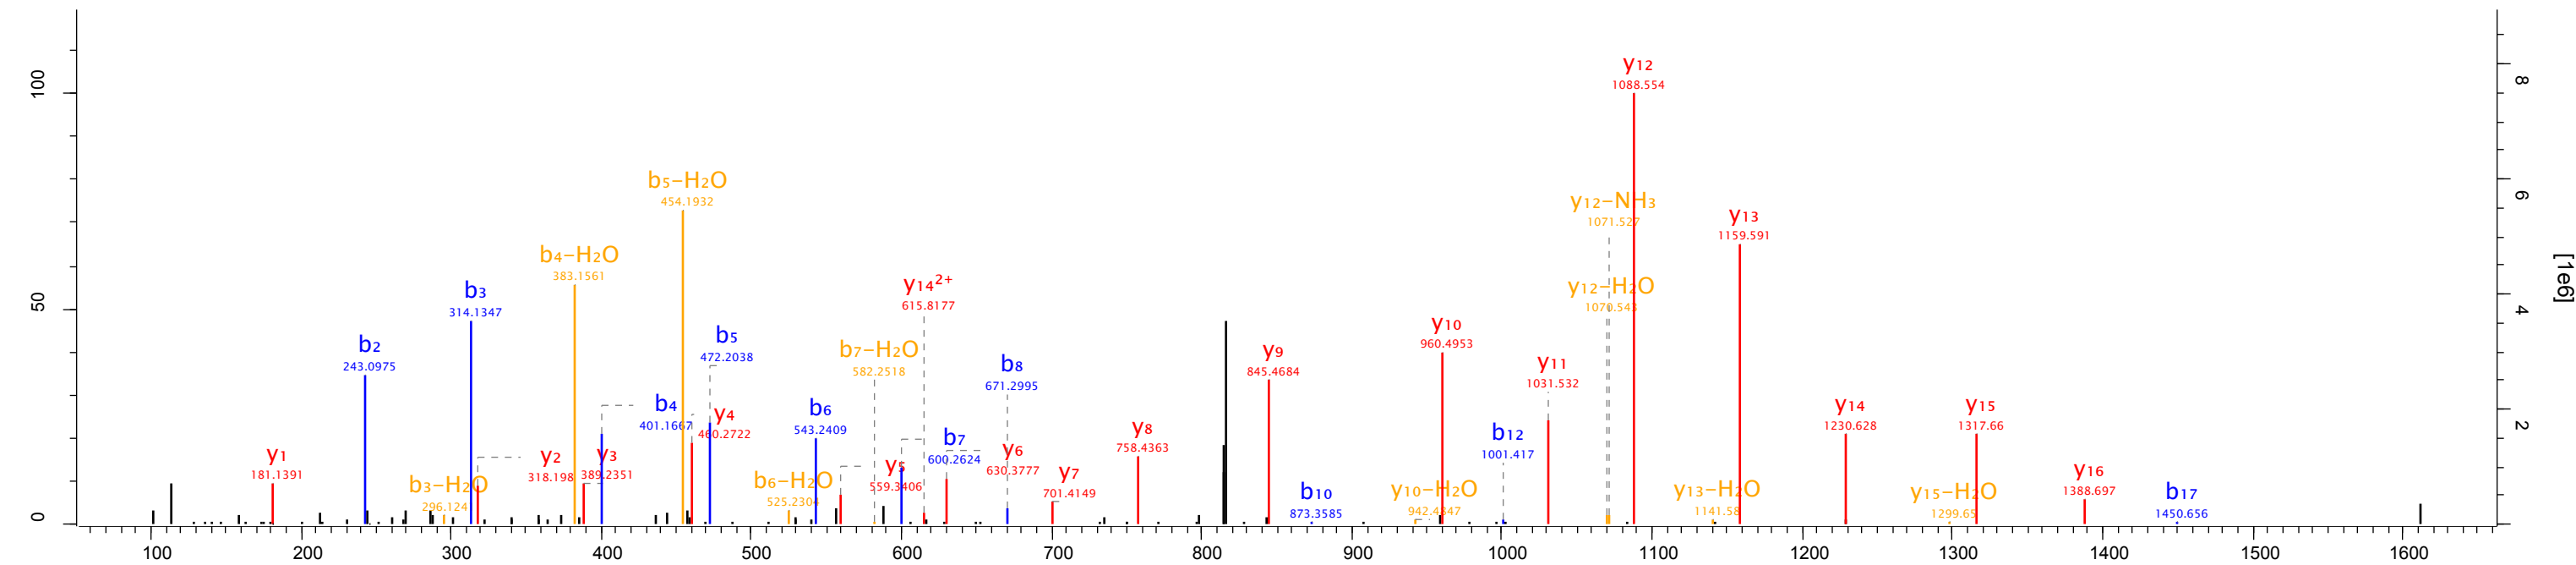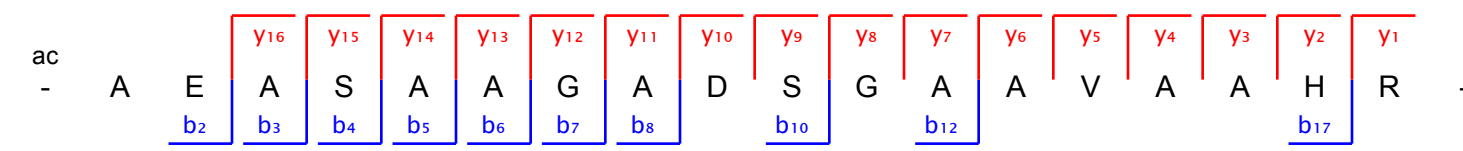

Raw file  
20180707\_MaS\_A375SR\_ML\_proteome\_10

Scan Method Score m/z Gene names  
20917 FTMS; HCD 51.79 652.65 BBS4

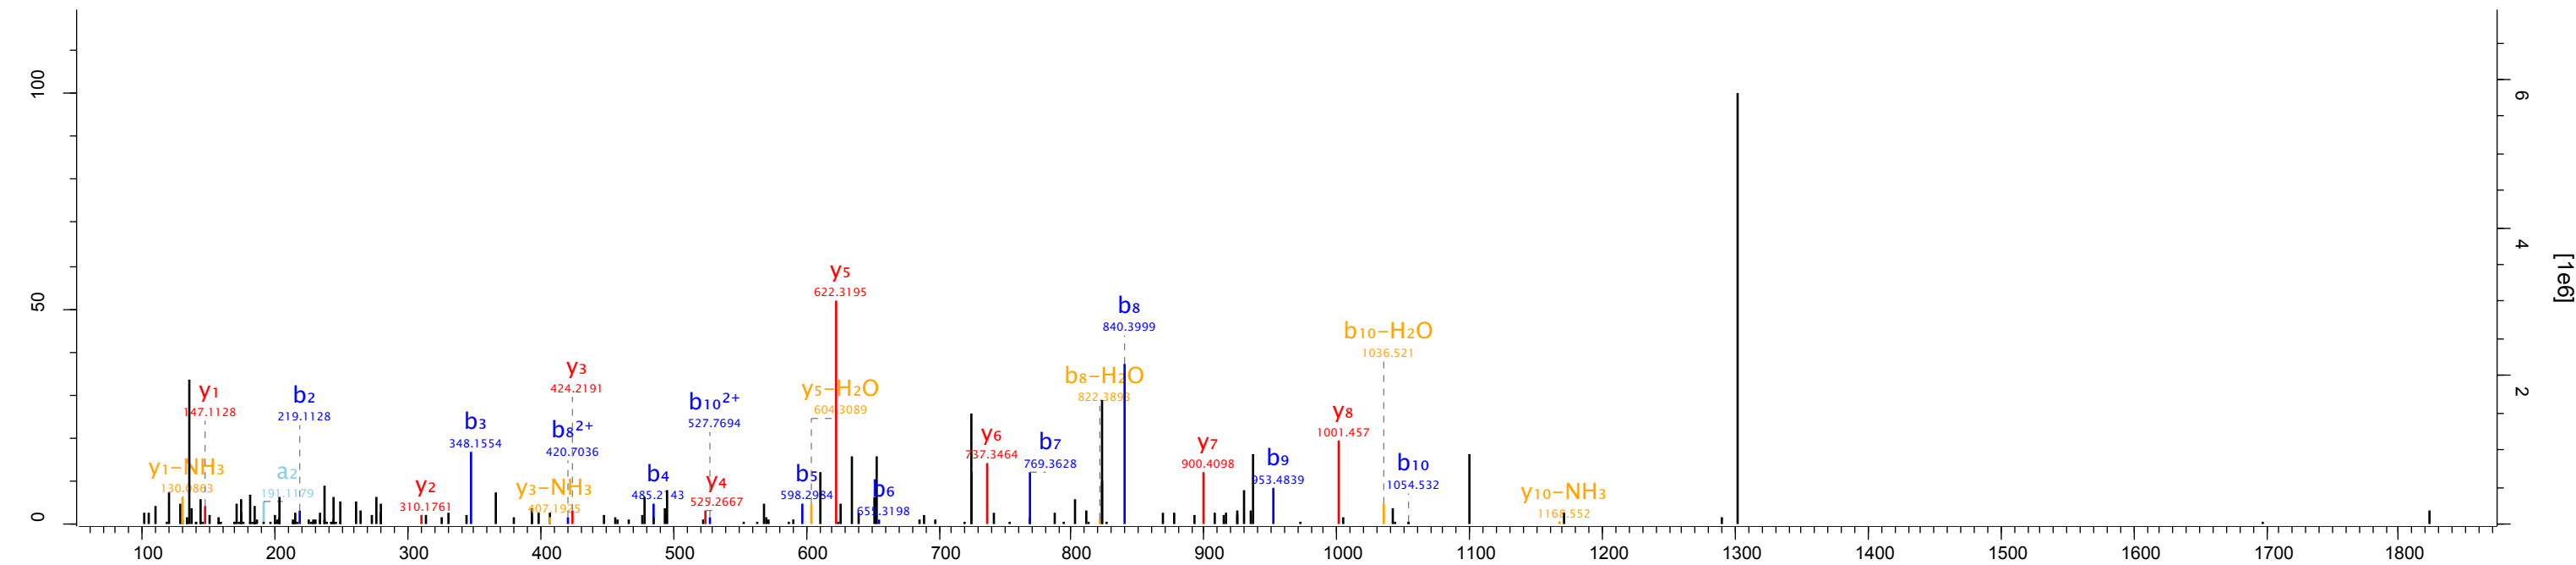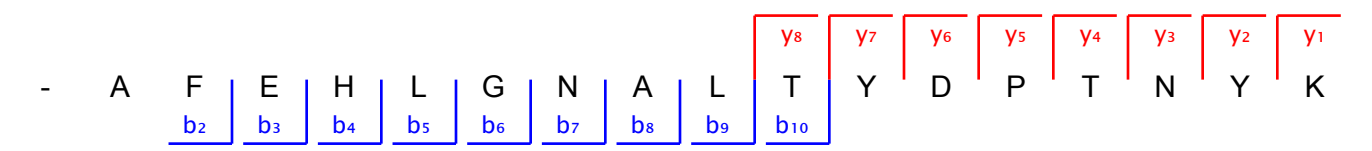

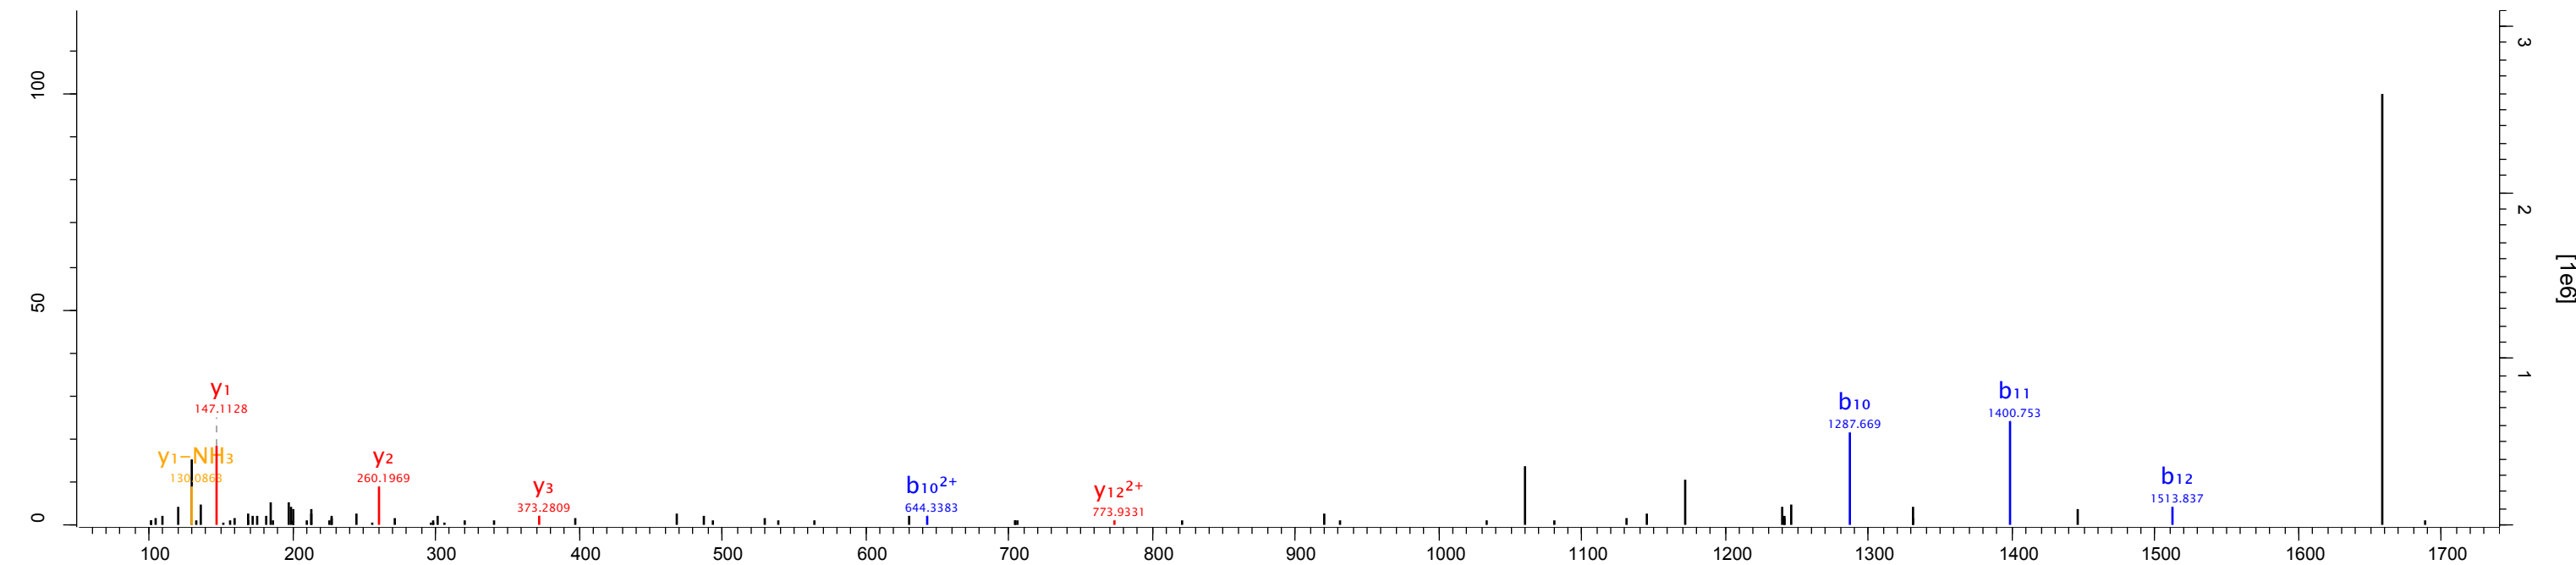

- I F T Y I F I L E -

ox M

$y_{12}^{2+}$

$b_{10}$   $b_{11}$   $b_{12}$  K -

$y_3$   $y_2$   $y_1$

Raw file  
20180707\_MaS\_A375SR\_ML\_proteome\_10

Scan 28727 Method FTMS; HCD Score 113.62 m/z 568.8 Gene names MT-ND2

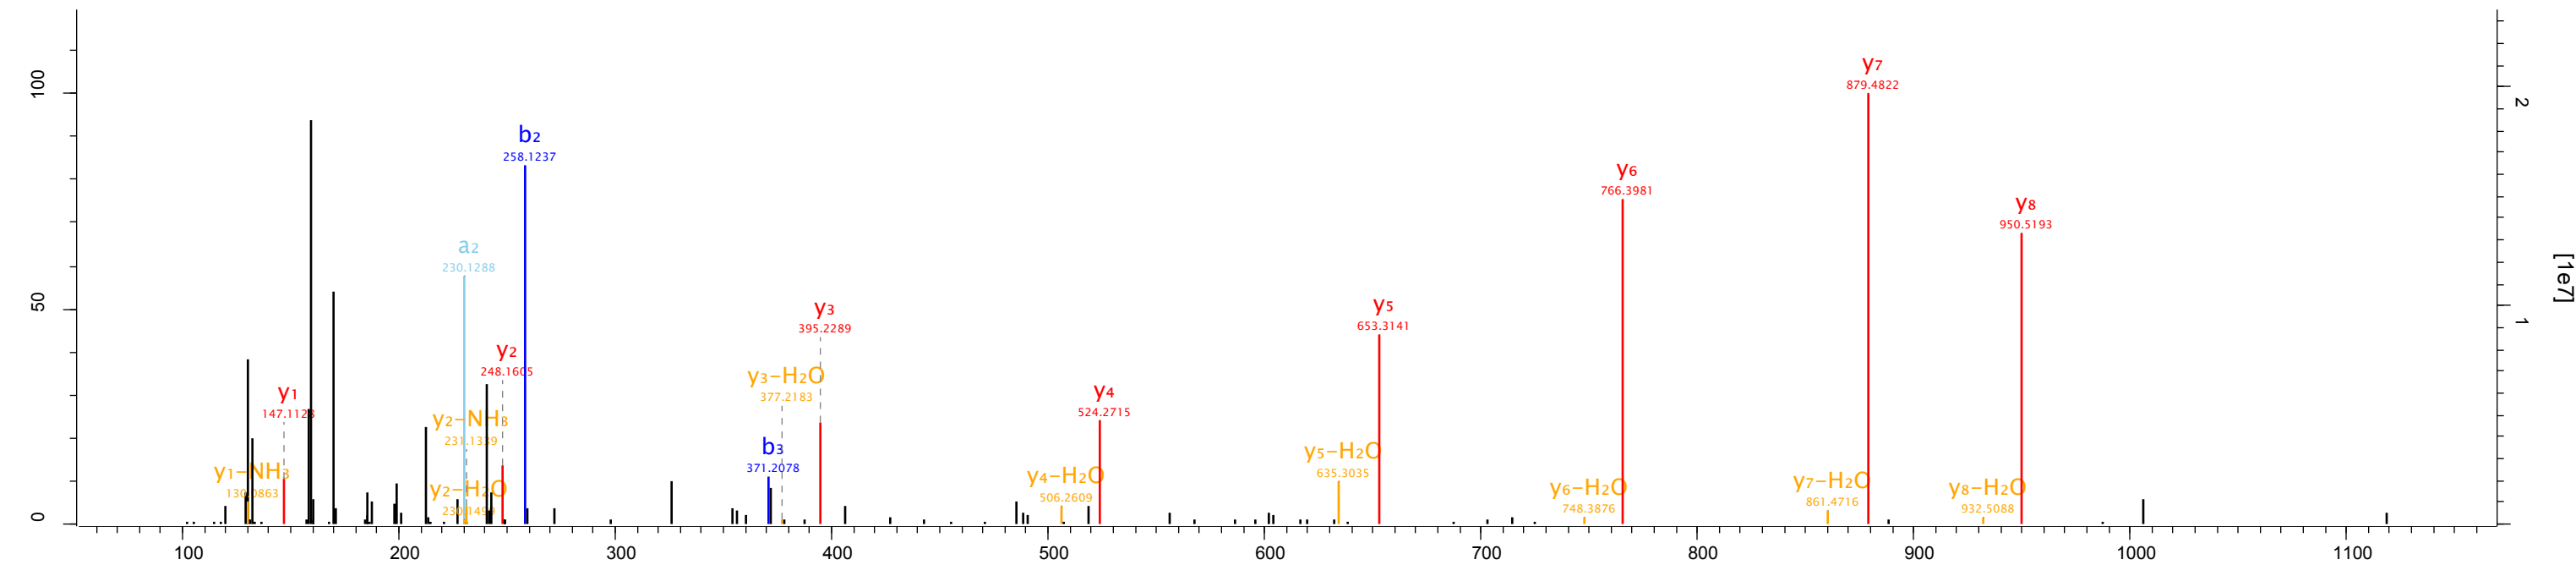

Raw file  
20180707\_MaS\_A375SR\_ML\_proteome\_10

Scan 5007 Method FTMS; HCD Score 138.54 m/z 449.22 Gene names JKAMP

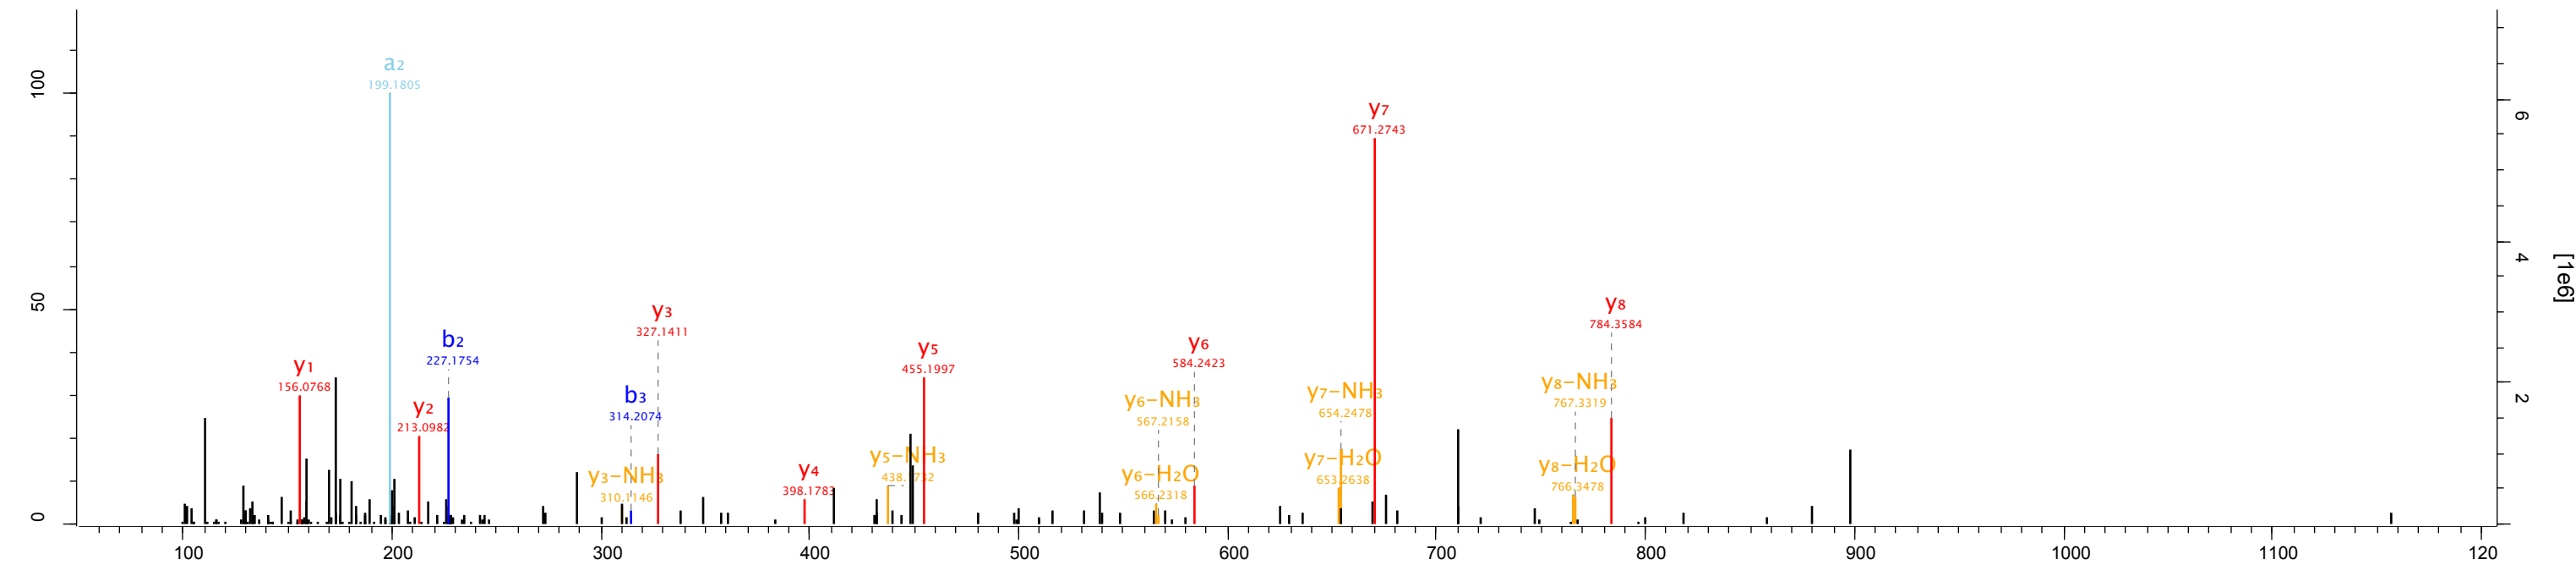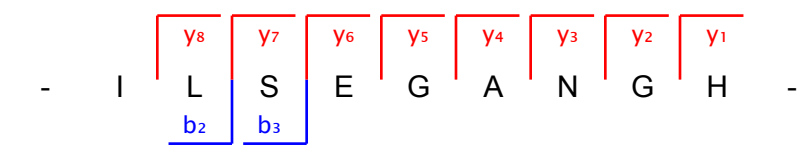

Raw file 20180707\_MaS\_A375SR\_ML\_proteome\_10 Scan 9607 Method FTMS; HCD Score 51.8 m/z 976.89

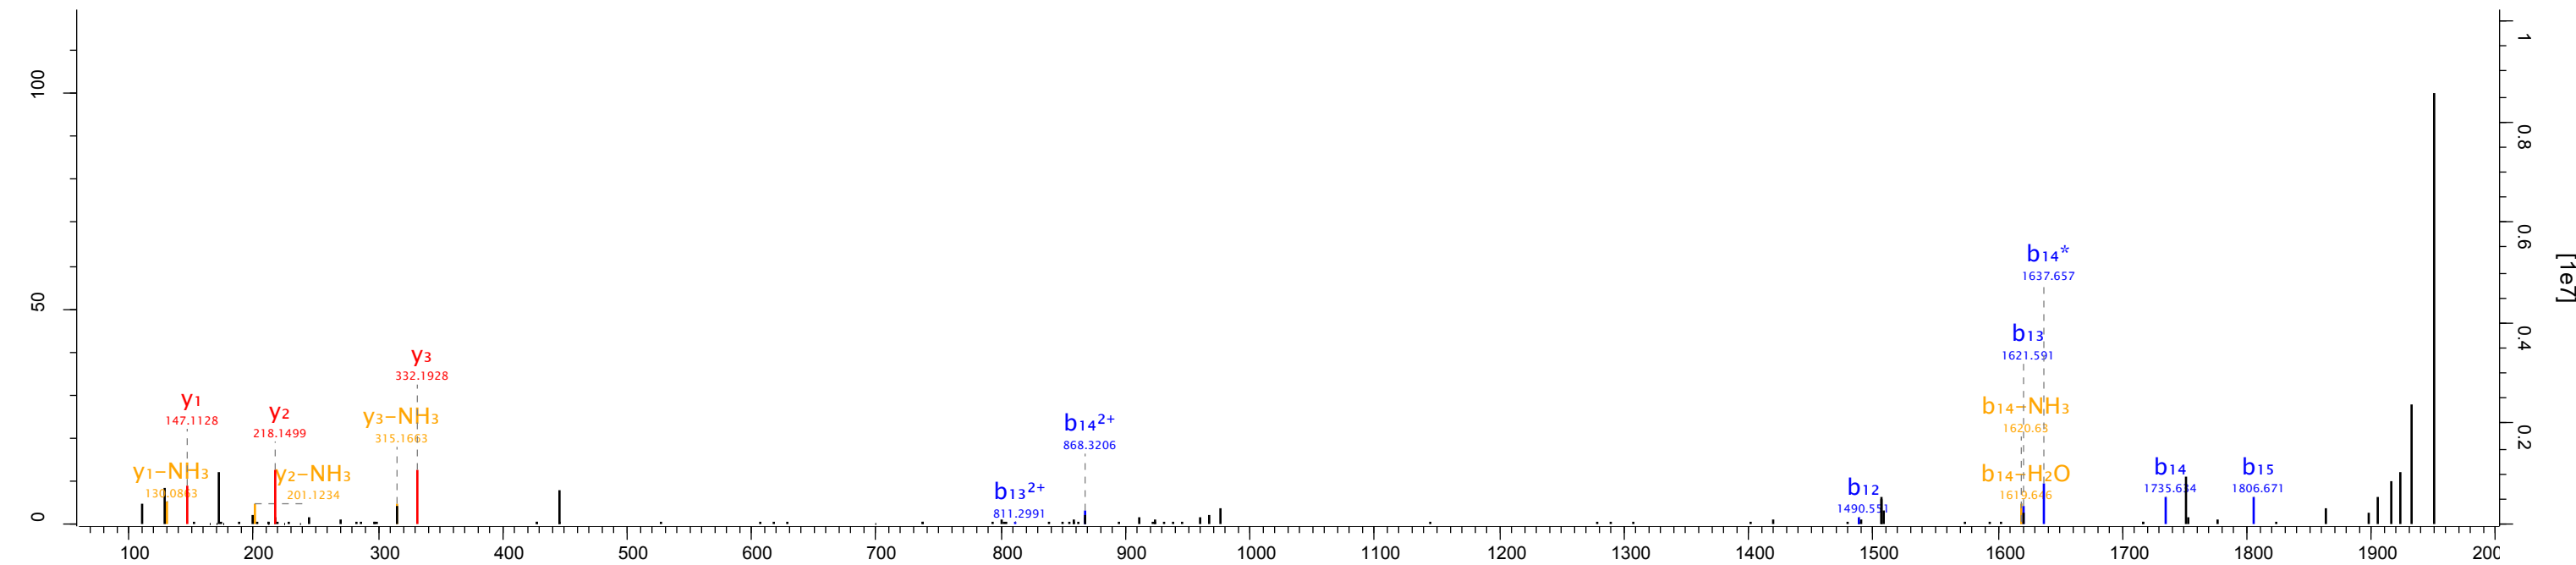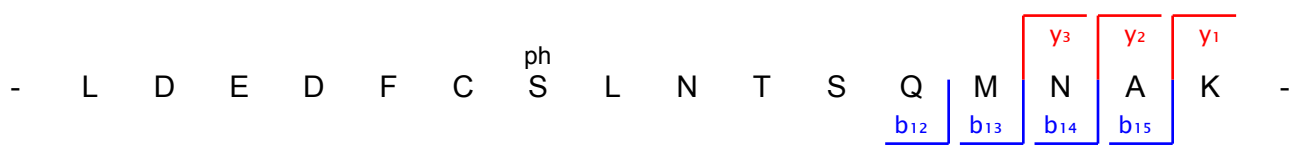



Raw file 20180707\_MaS\_A375SR\_ML\_proteome\_11 Scan 3027 Method FTMS; HCD Score 91.87 m/z 529.31

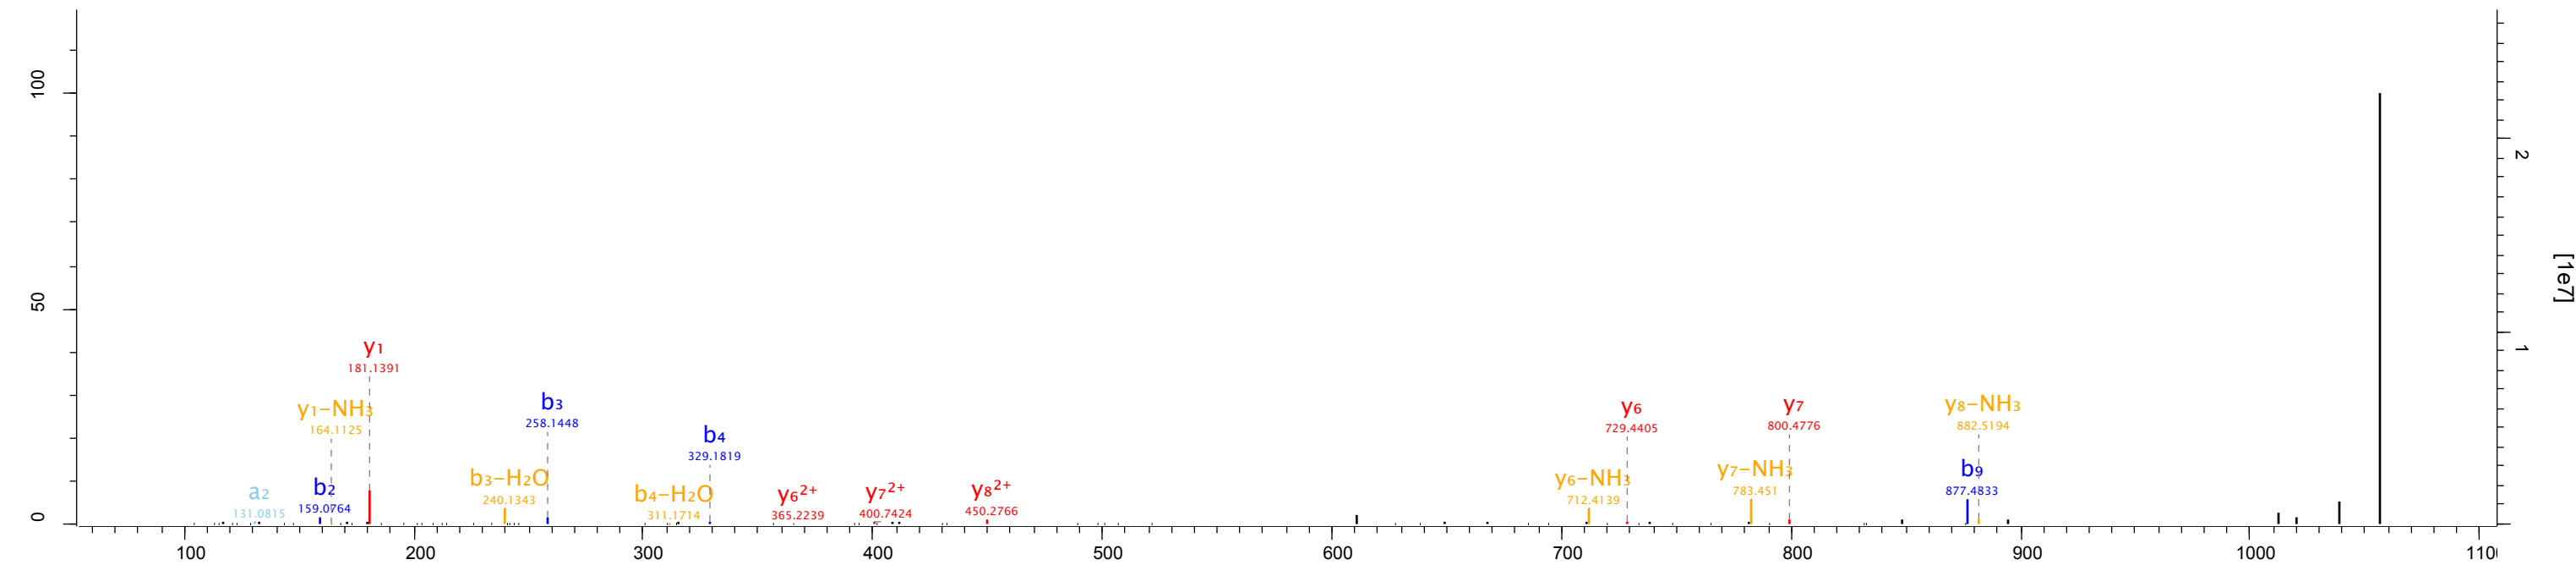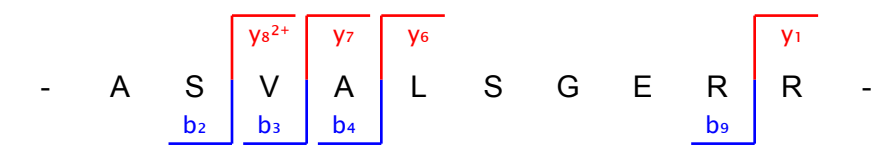

Raw file 20180707\_MaS\_A375SR\_ML\_proteome\_12 Scan 26467 Method FTMS; HCD Score 111.61 m/z 492.81 Gene names STON2

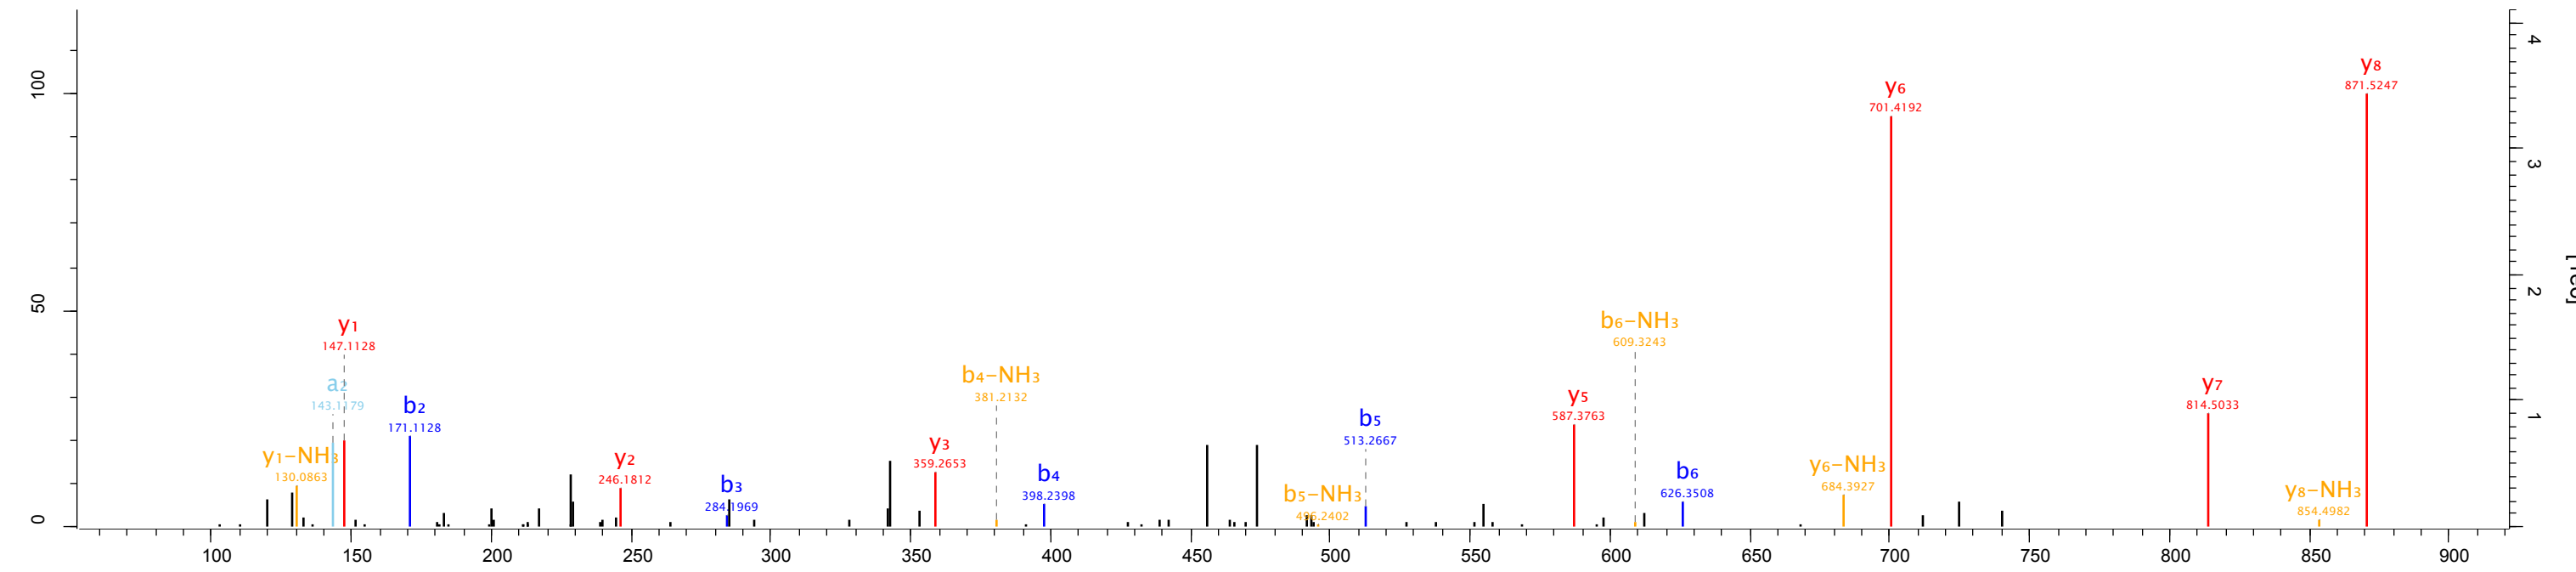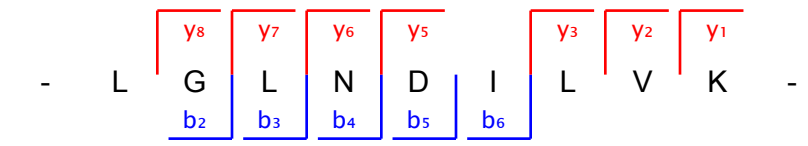

Raw file  
20180707\_MaS\_A375SR\_ML\_proteome\_12

Scan Method Score m/z Gene names  
3047 FTMS; HCD 148.94 541.77 TM4SF1

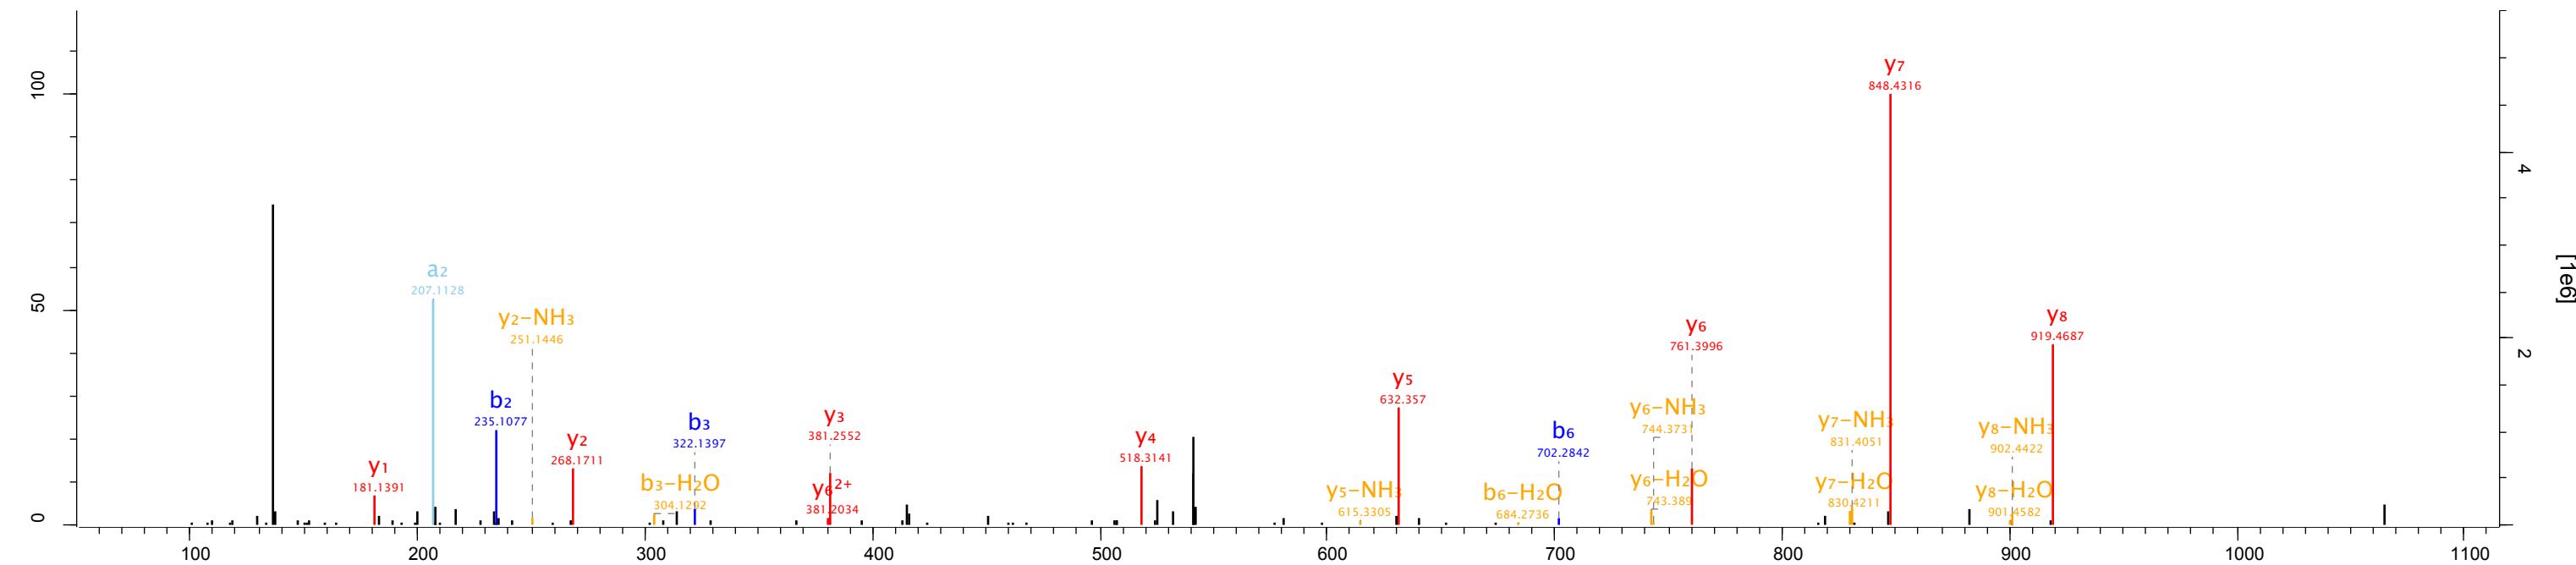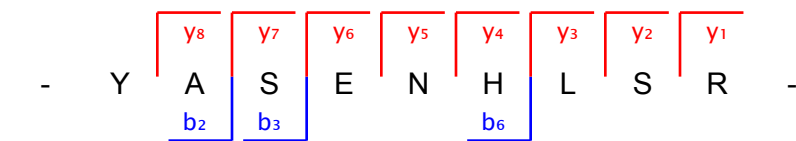

Raw file: 20180707\_MaS\_A375SR\_ML\_proteome\_12  
 Scan: 3177 Method: FTMS; HCD Score: 90.76 m/z: 536.93 Gene names: MT-CO3

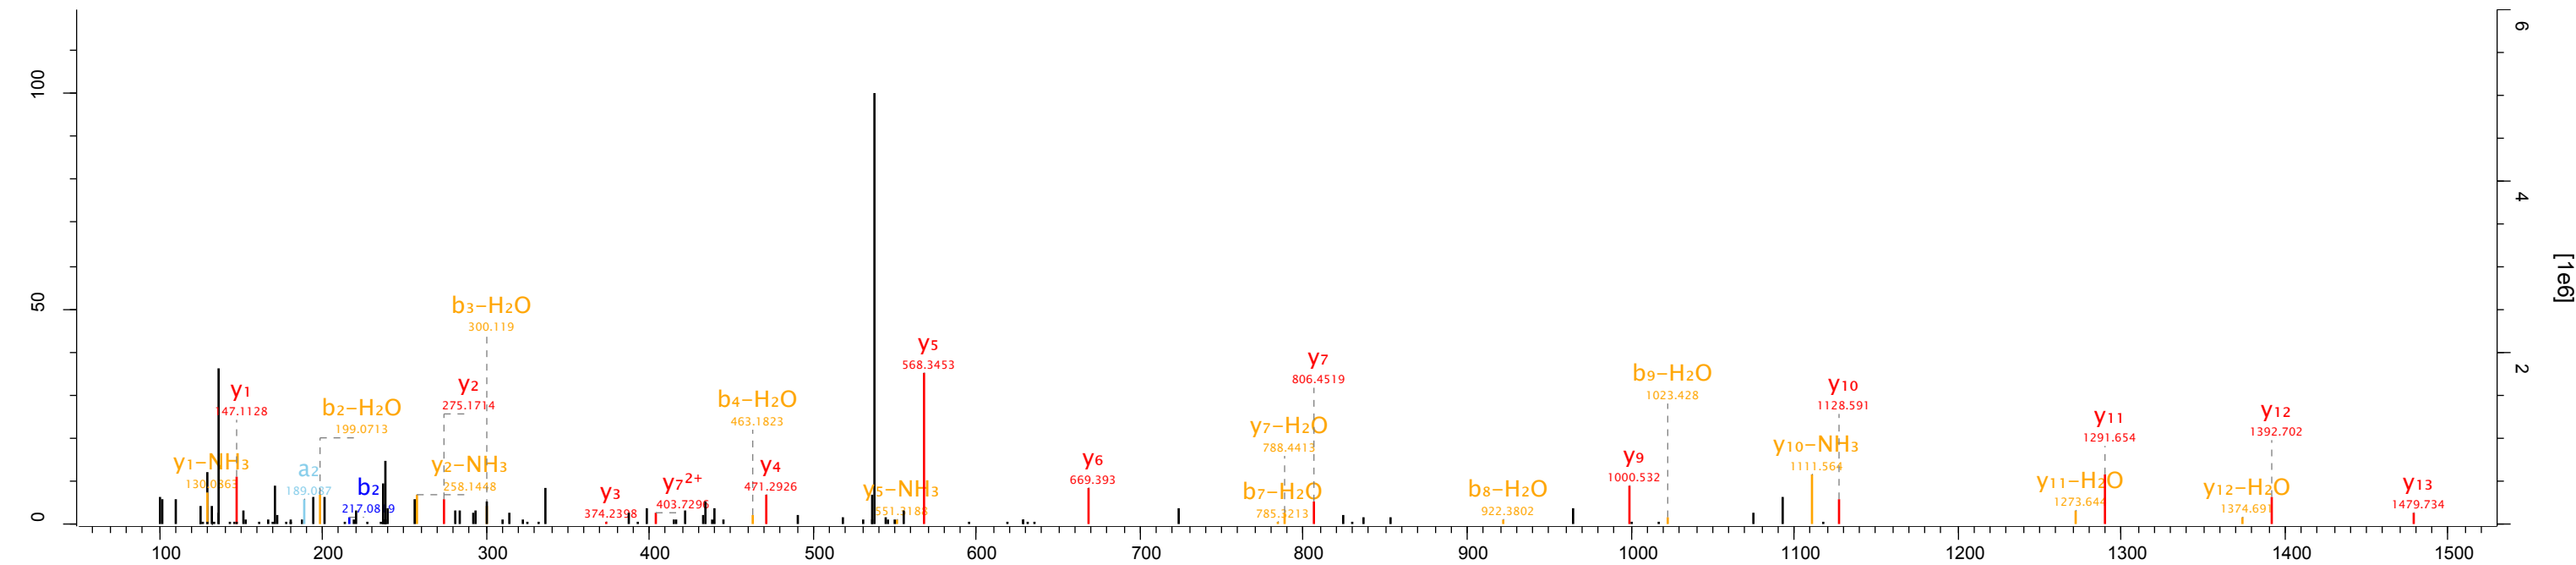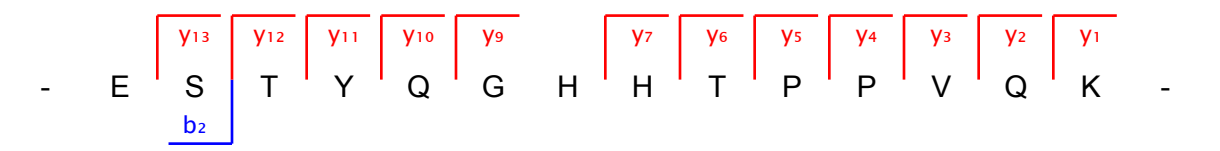

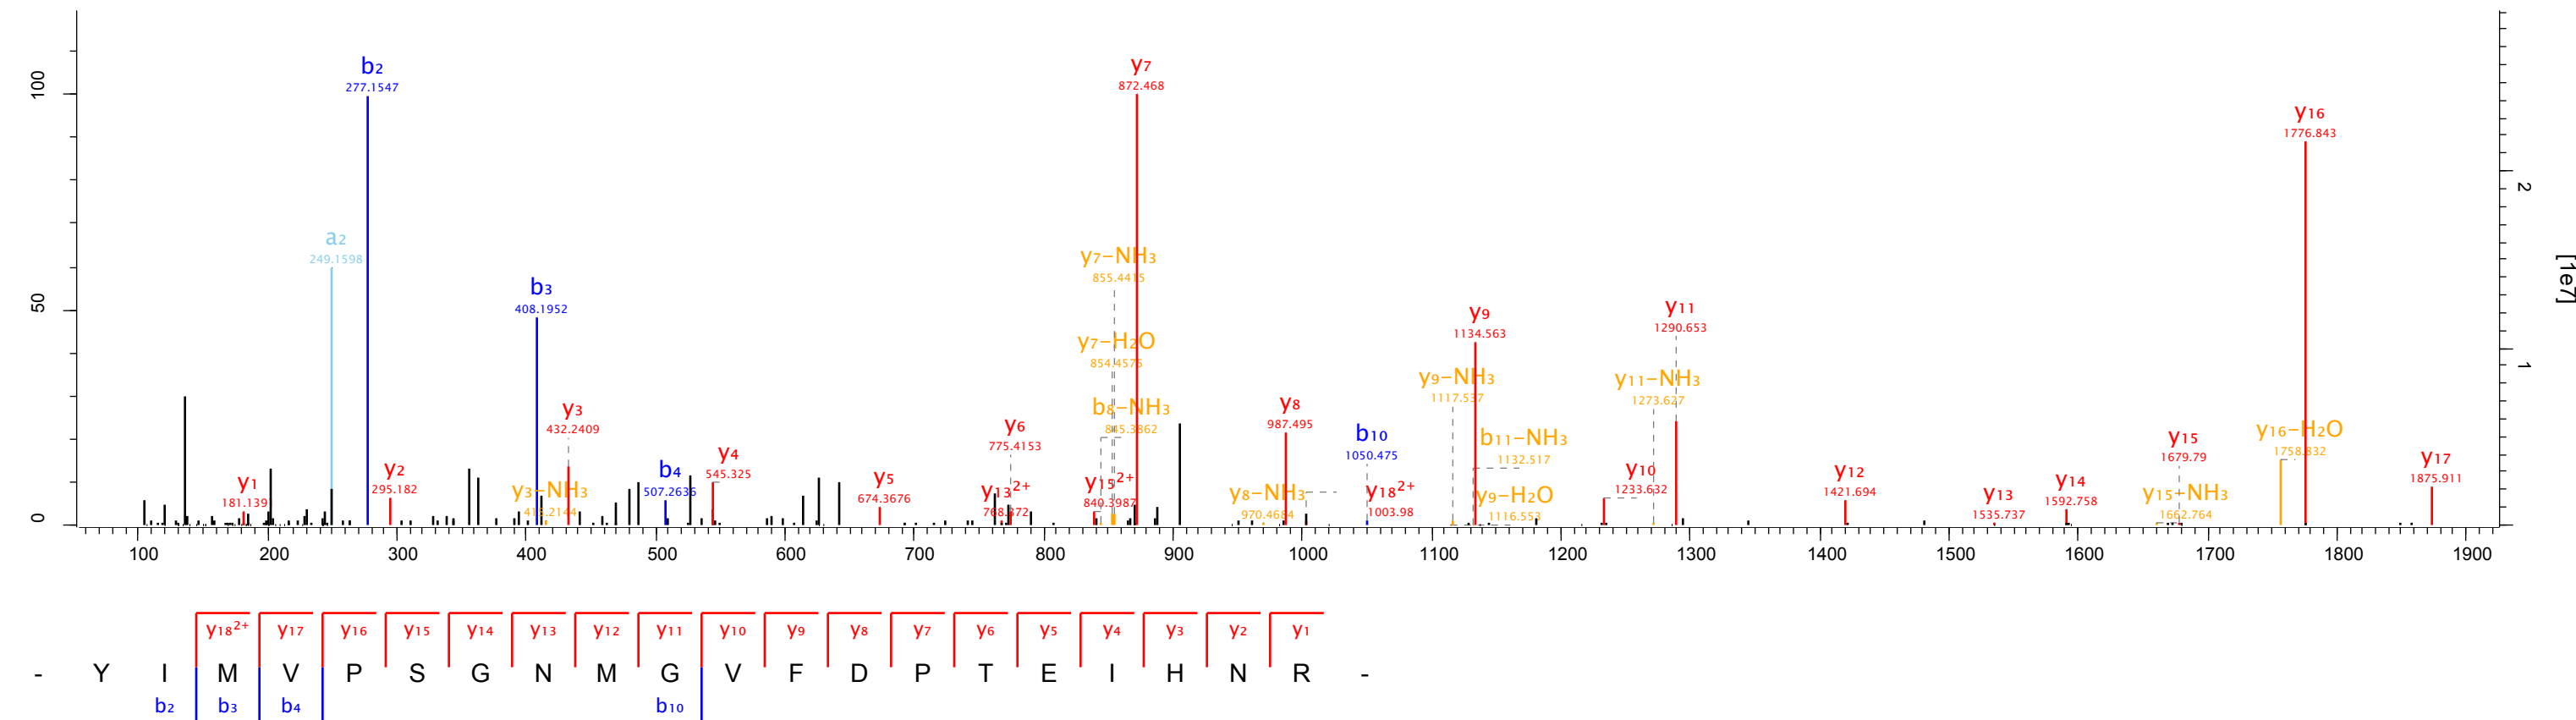

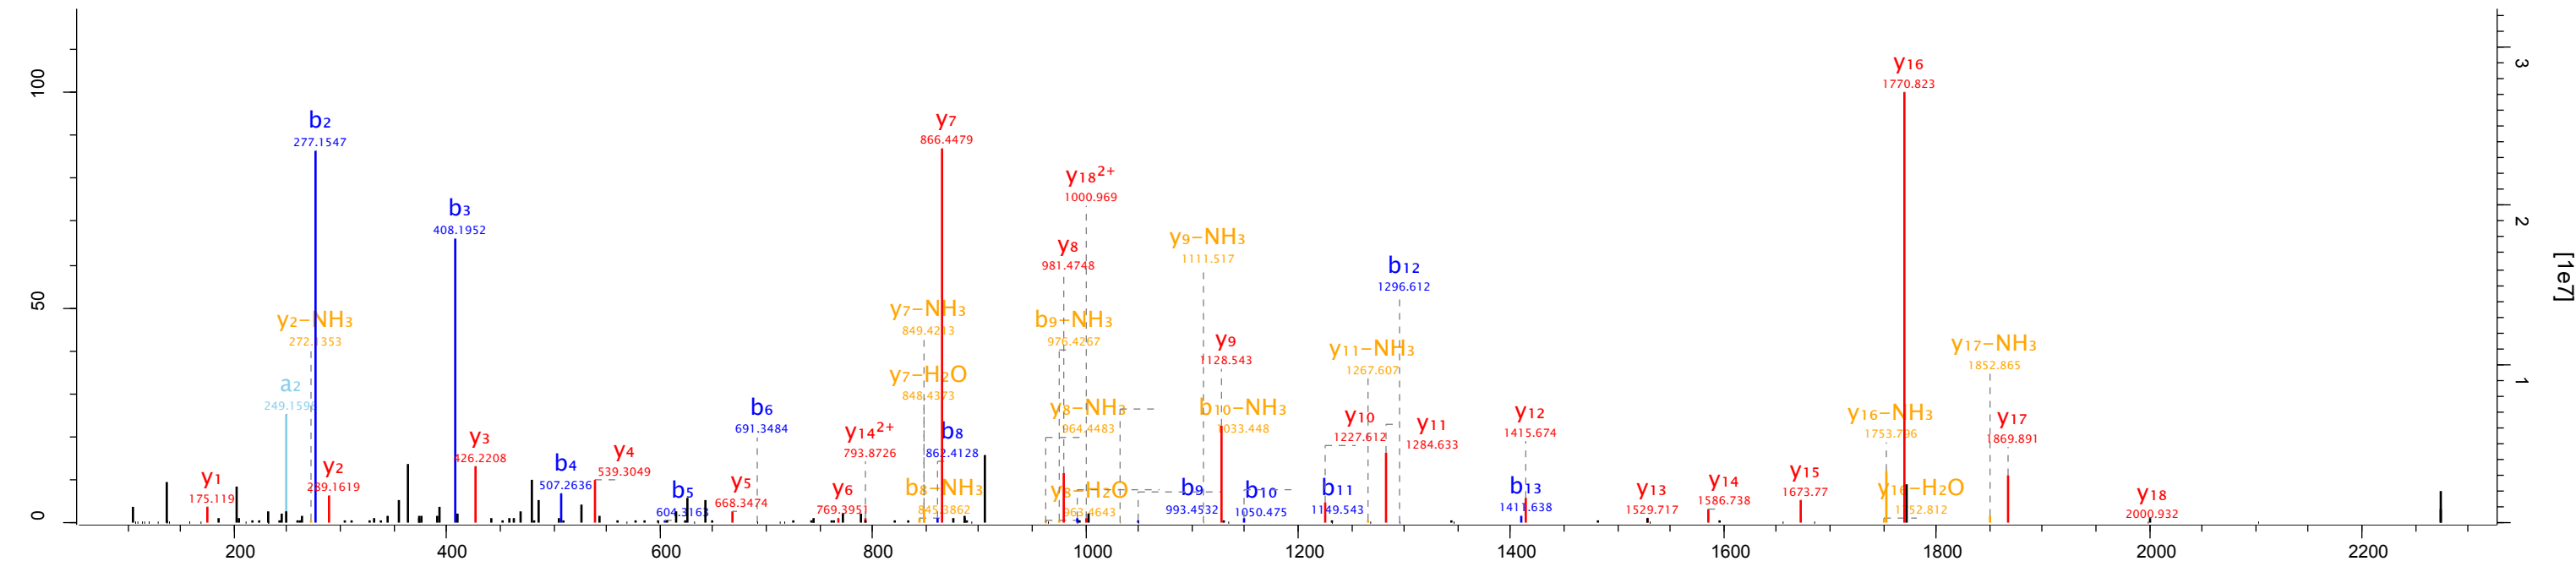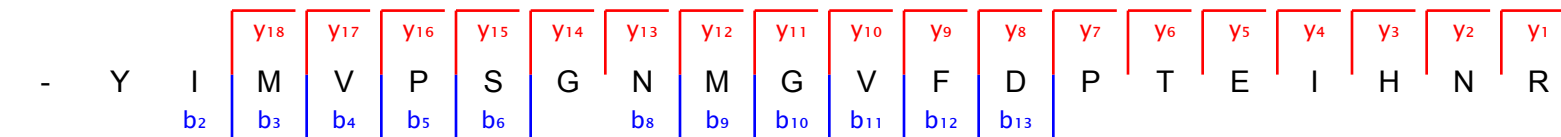

Raw file  
20180707\_MaS\_A375SR\_ML\_proteome\_13

Scan 4397 Method FTMS; HCD Score 155.33 m/z 528.28 Gene names TYMP

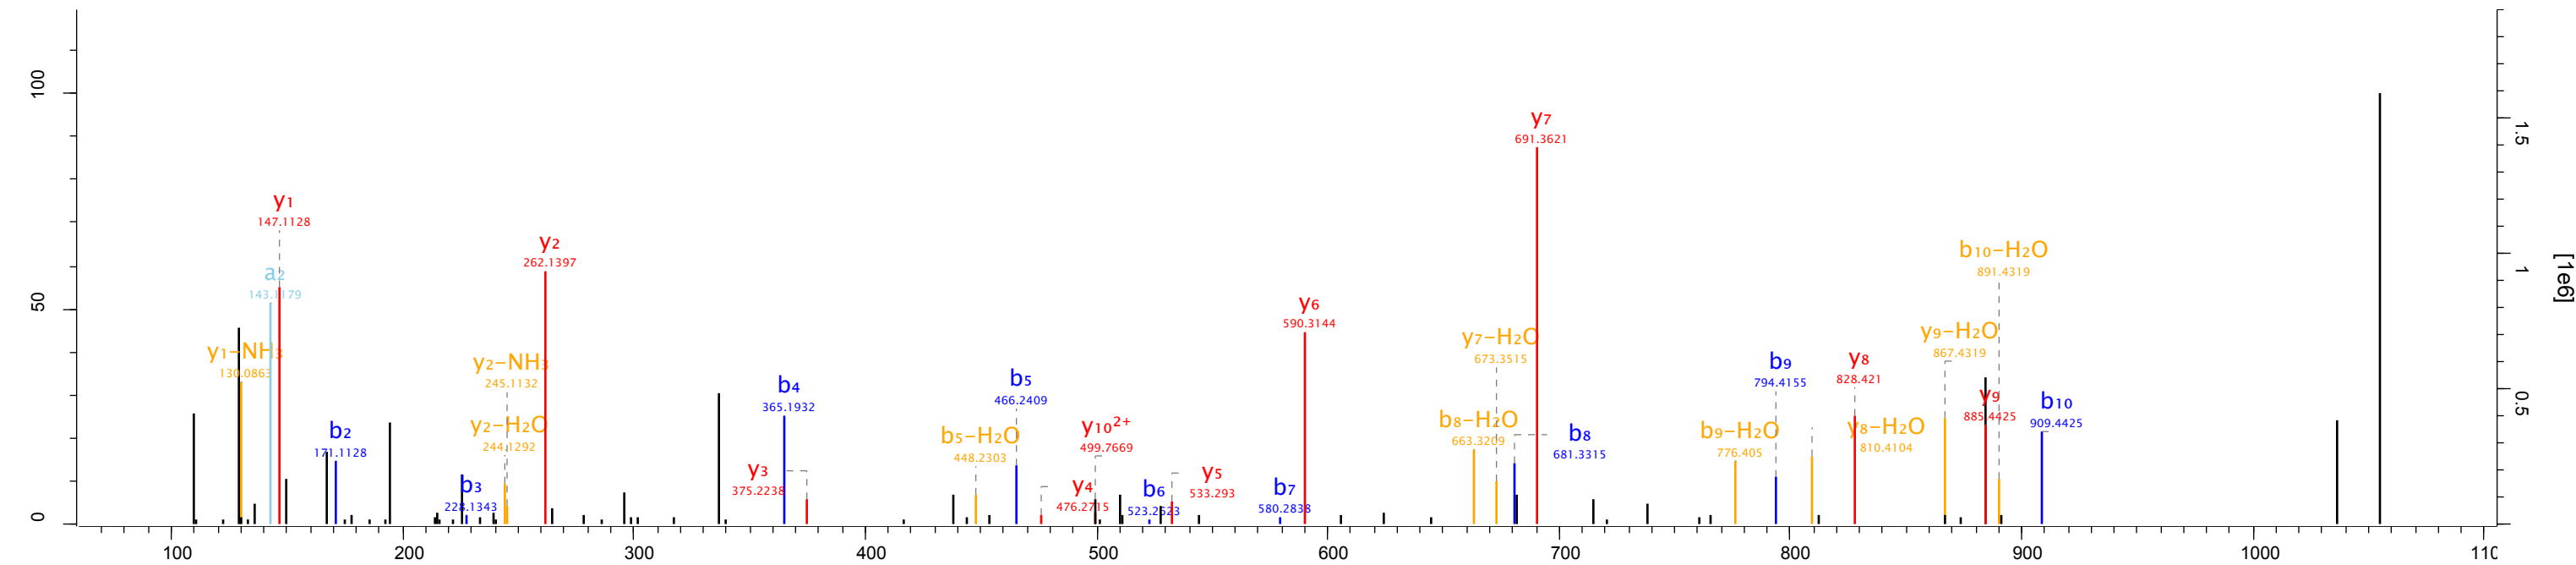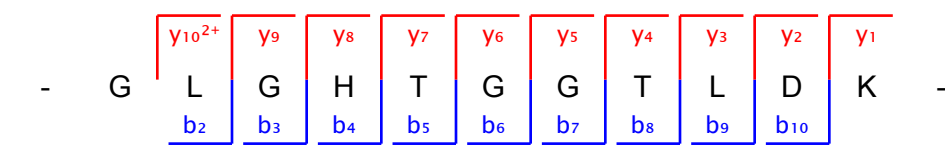

Raw file 20180707\_MaS\_A375SR\_ML\_proteome\_14 Scan 12707 Method FTMS; HCD Score 40.78 m/z 468.71

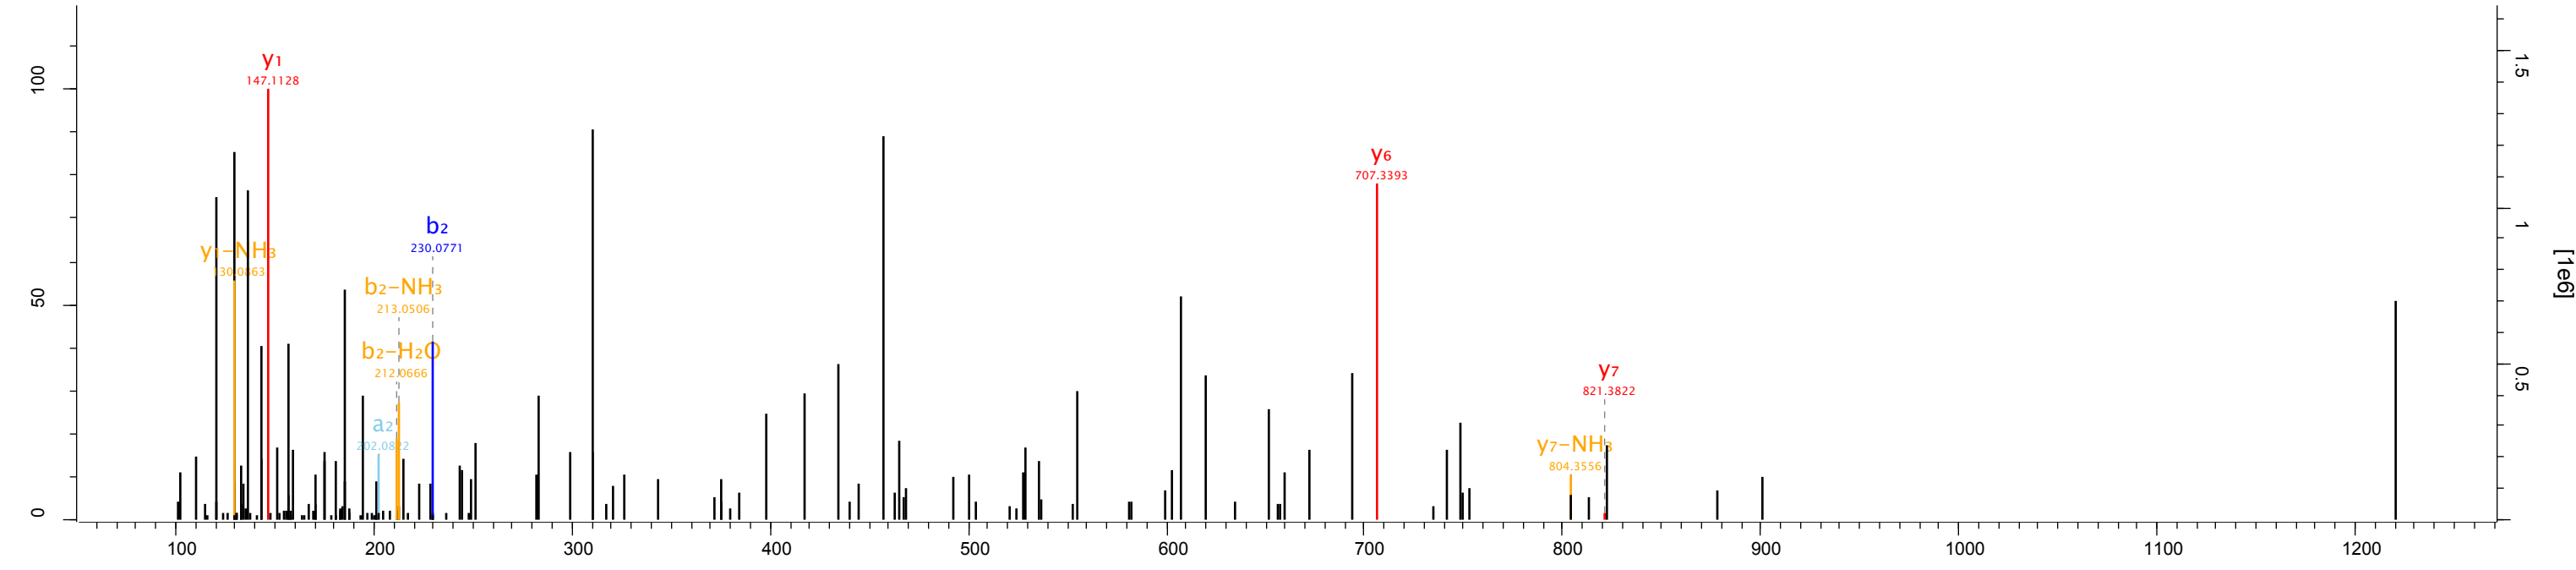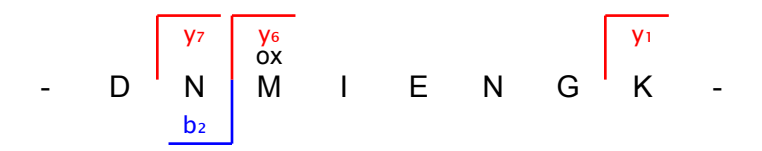



Raw file 20180707\_MaS\_A375SR\_ML\_proteome\_14 Scan 13237 Method FTMS; HCD Score 94.16 m/z 402.22

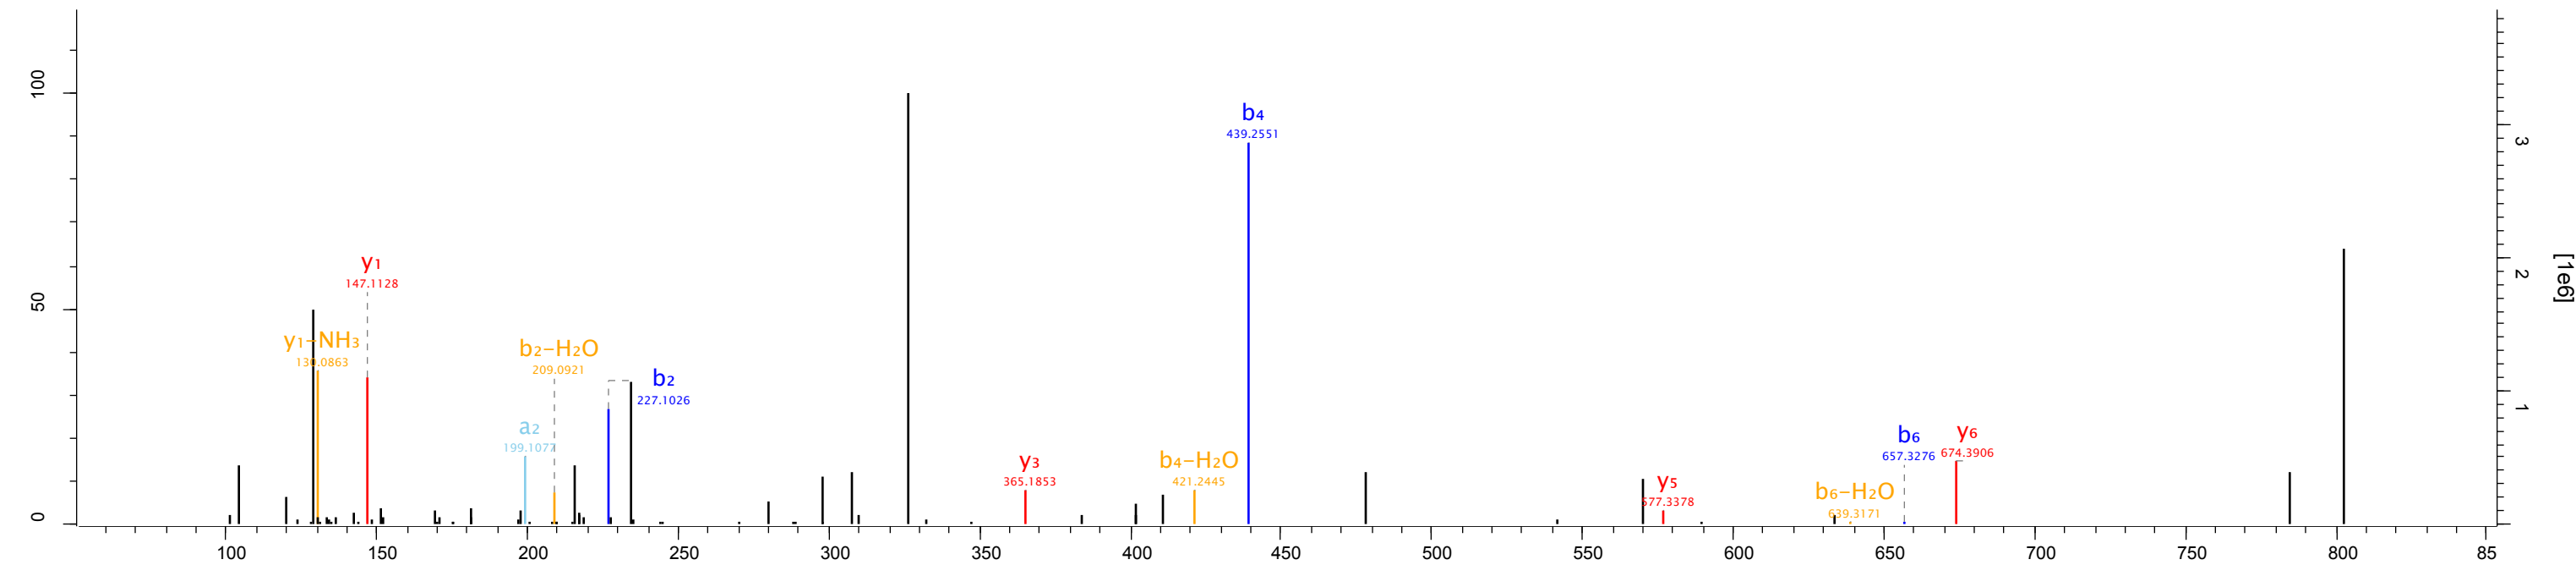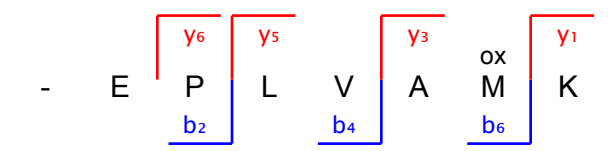

Raw file: 20180707\_MaS\_A375SR\_ML\_proteome\_14  
 Scan: 17487 Method: FTMS; HCD Score: 48.09 m/z: 515.73 Gene names: TMEM258

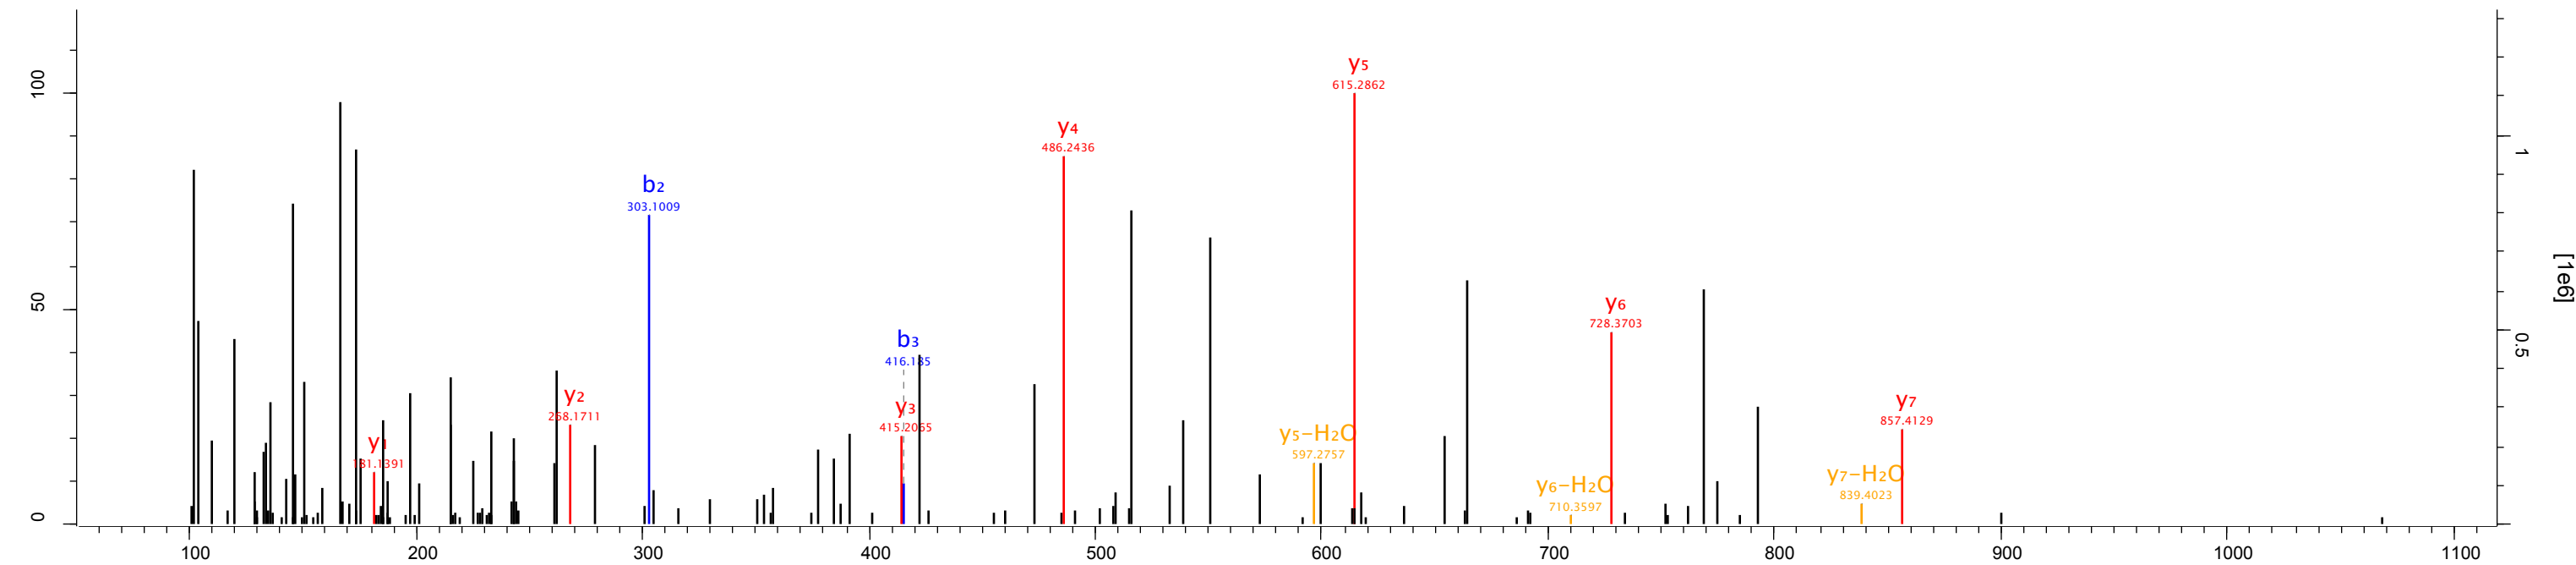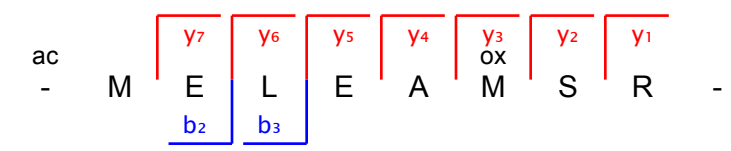

Raw file 20180707\_MaS\_A375SR\_ML\_proteome\_14 Scan 6547 Method FTMS; HCD Score 74.72 m/z 413.71 Gene names PROK2

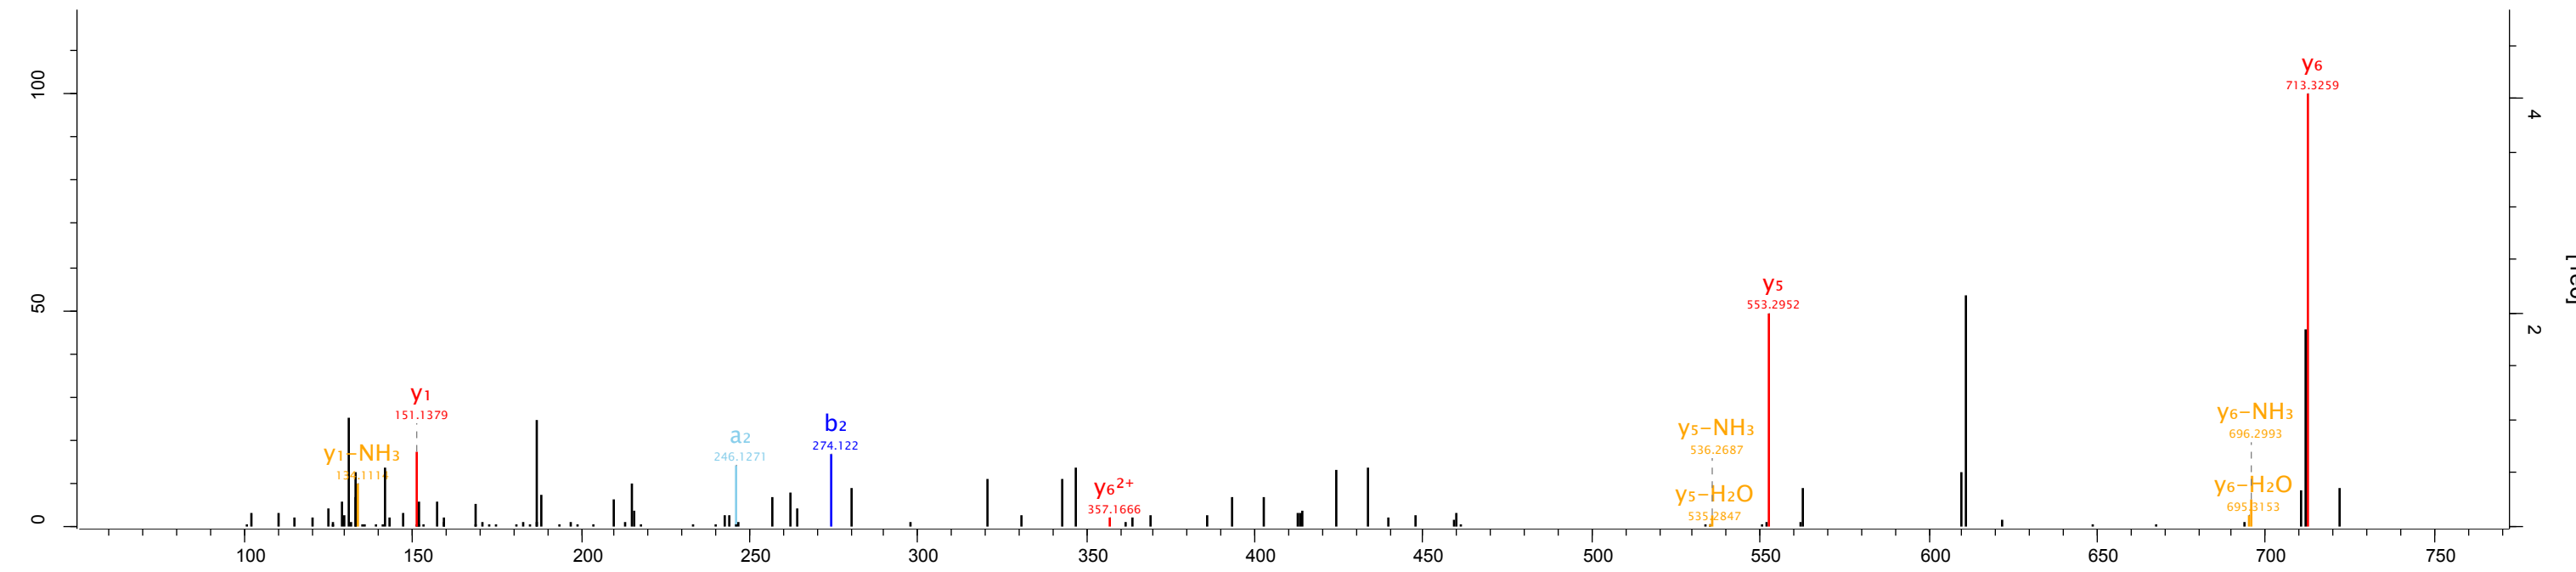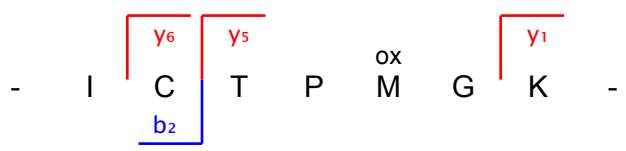

Raw file: 20180707\_MaS\_A375SR\_ML\_proteome\_15  
 Scan: 16877 Method: FTMS; HCD Score: 40.38 m/z: 484.25 Gene names: ECE2

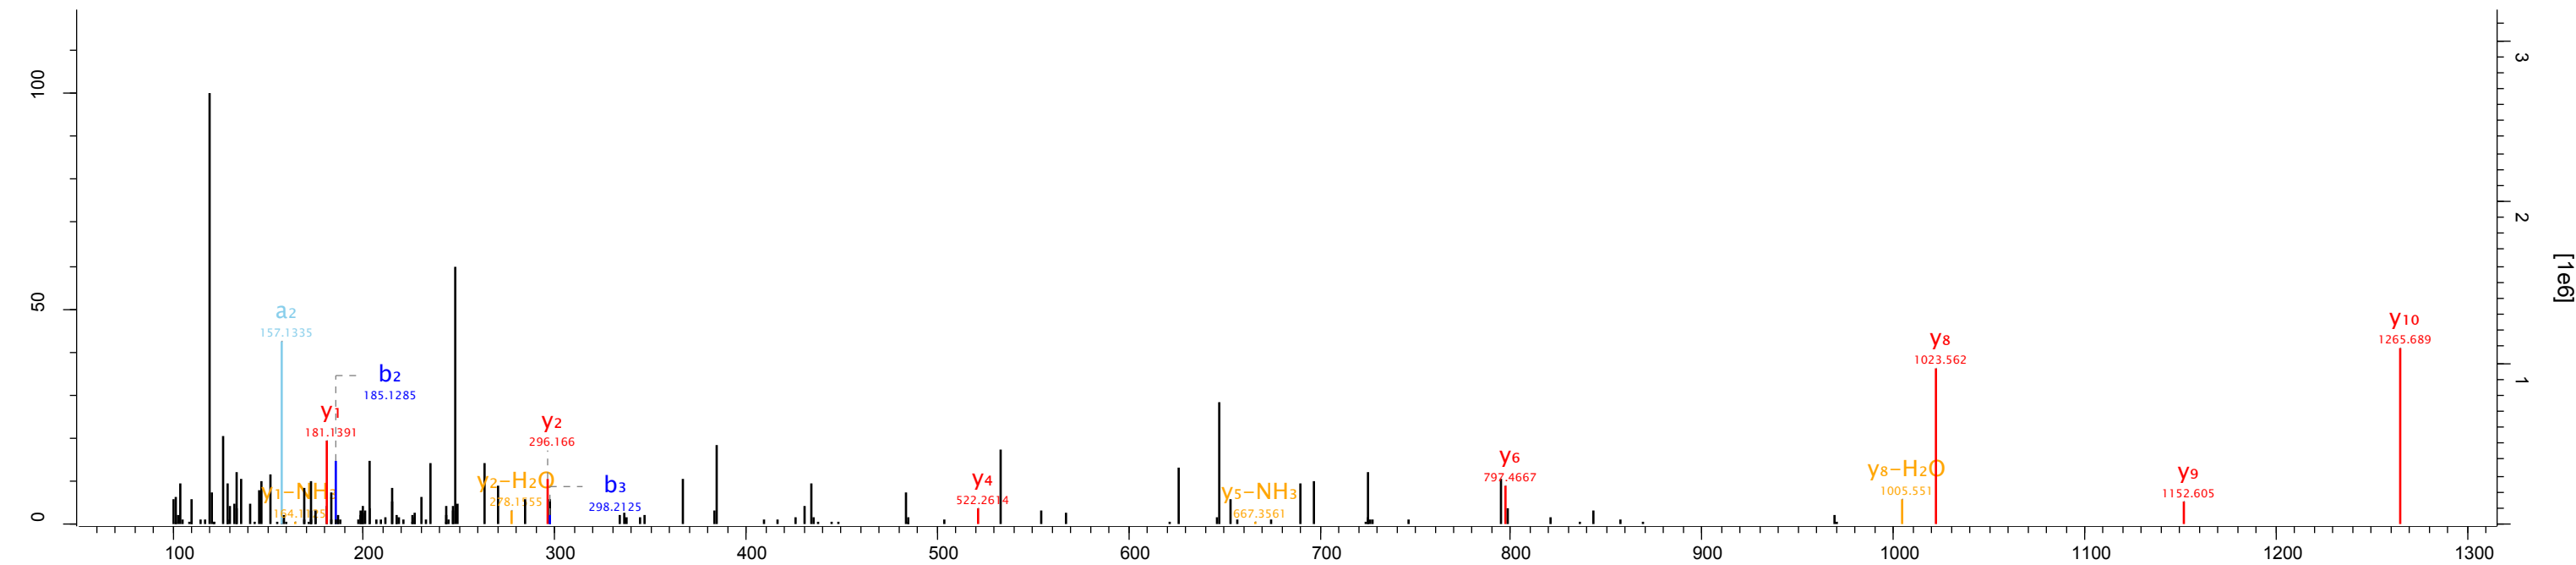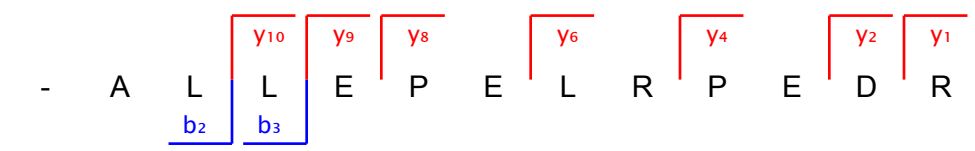

Raw file: 20180707\_MaS\_A375SR\_ML\_proteome\_15  
 Scan: 22747 Method: FTMS; HCD Score: 46.95 m/z: 718.36 Gene names: DDO

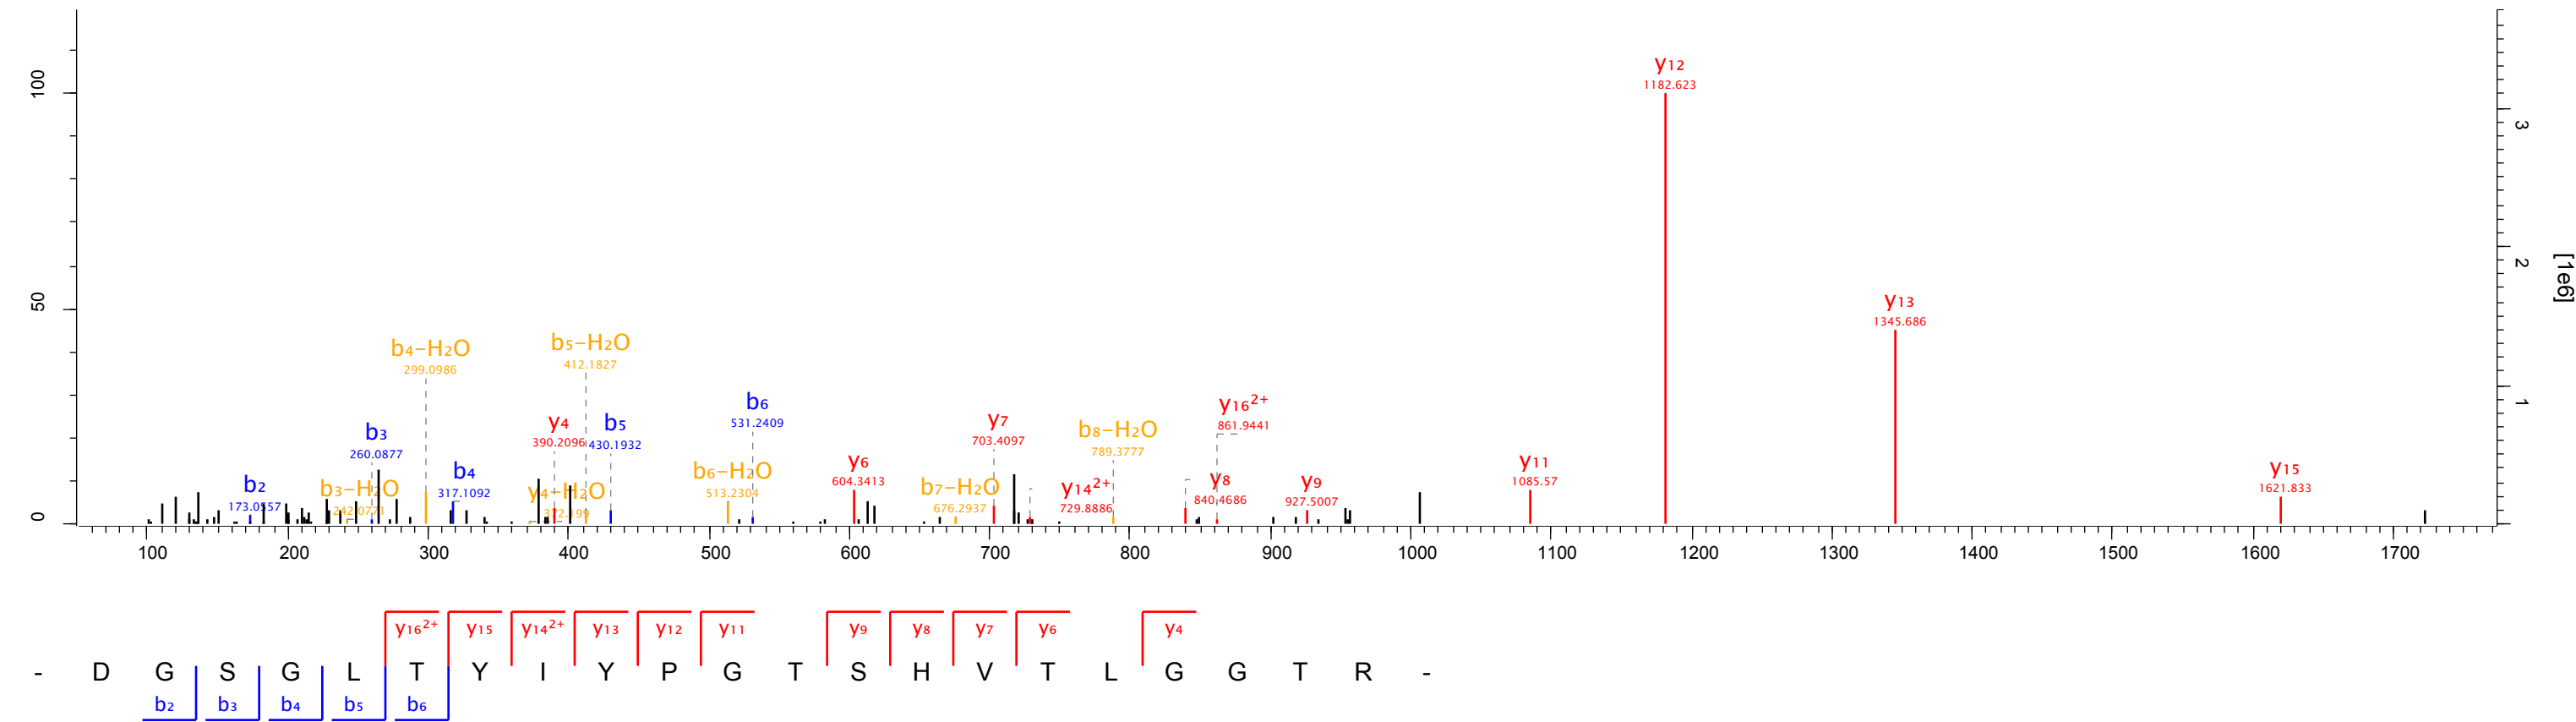

Raw file  
20180707\_MaS\_A375SR\_ML\_proteome\_15

Scan 23907 Method FTMS; HCD Score 43.76 m/z 712.34

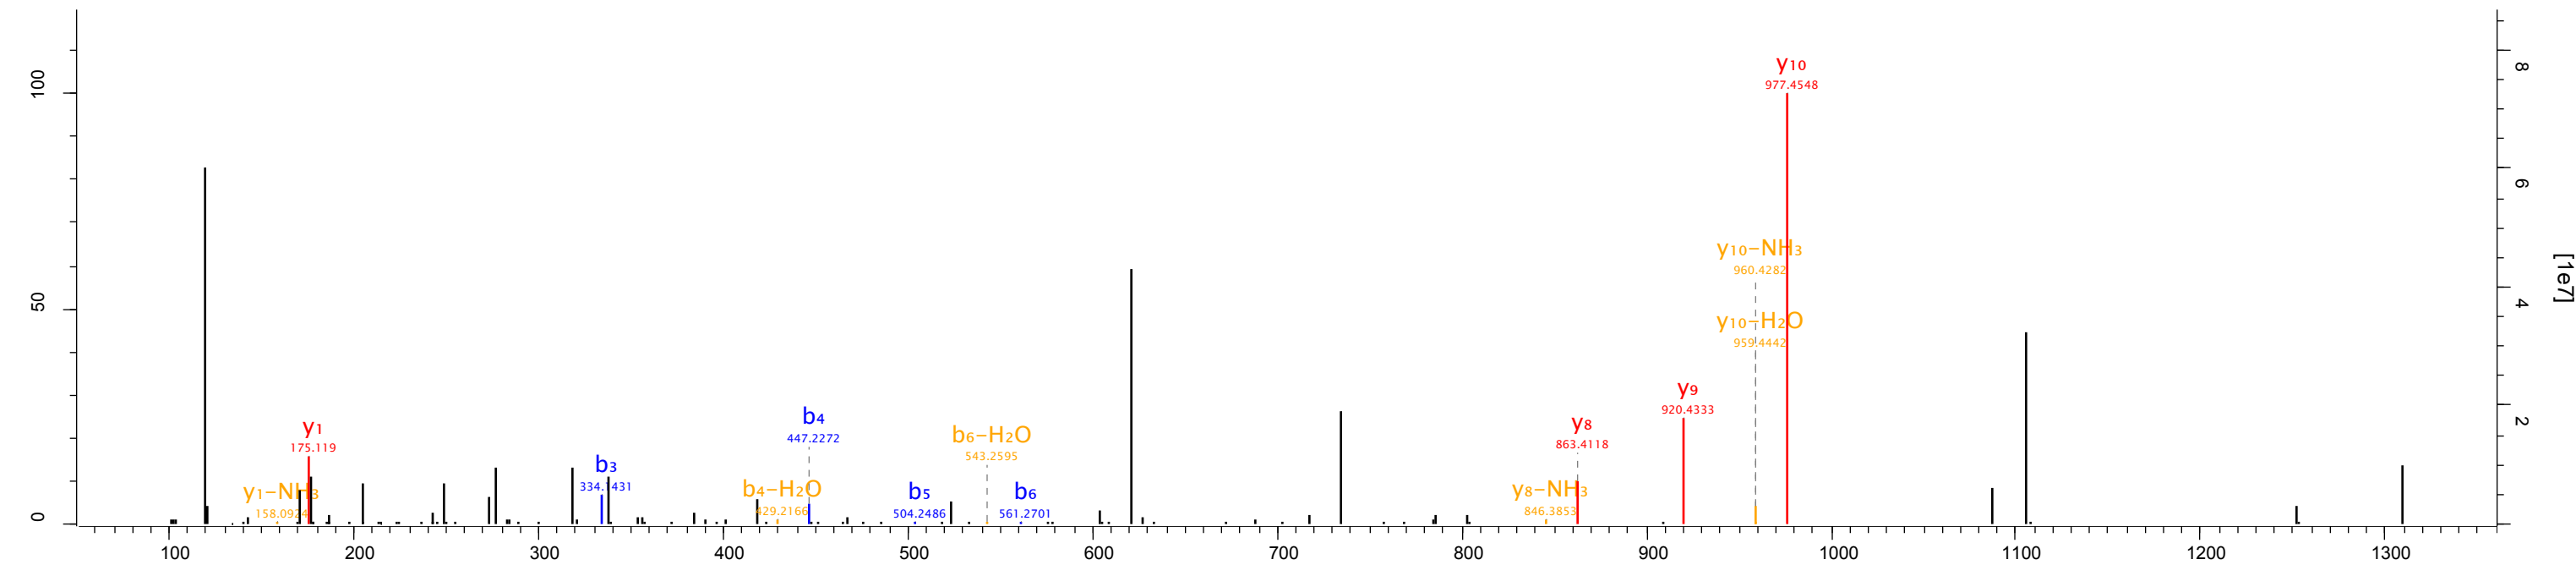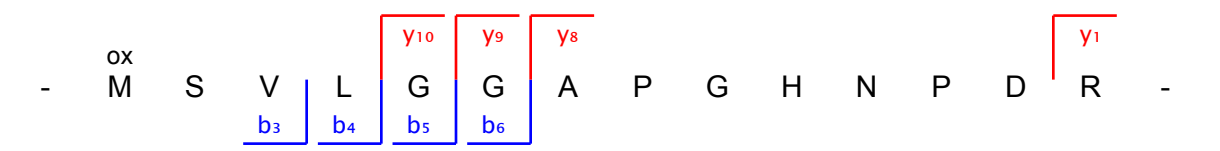

Raw file: 20180707\_MaS\_A375SR\_ML\_proteome\_15  
 Scan: 25357 Method: FTMS; HCD Score: 88.18 m/z: 507.74 Gene names: TMEM258

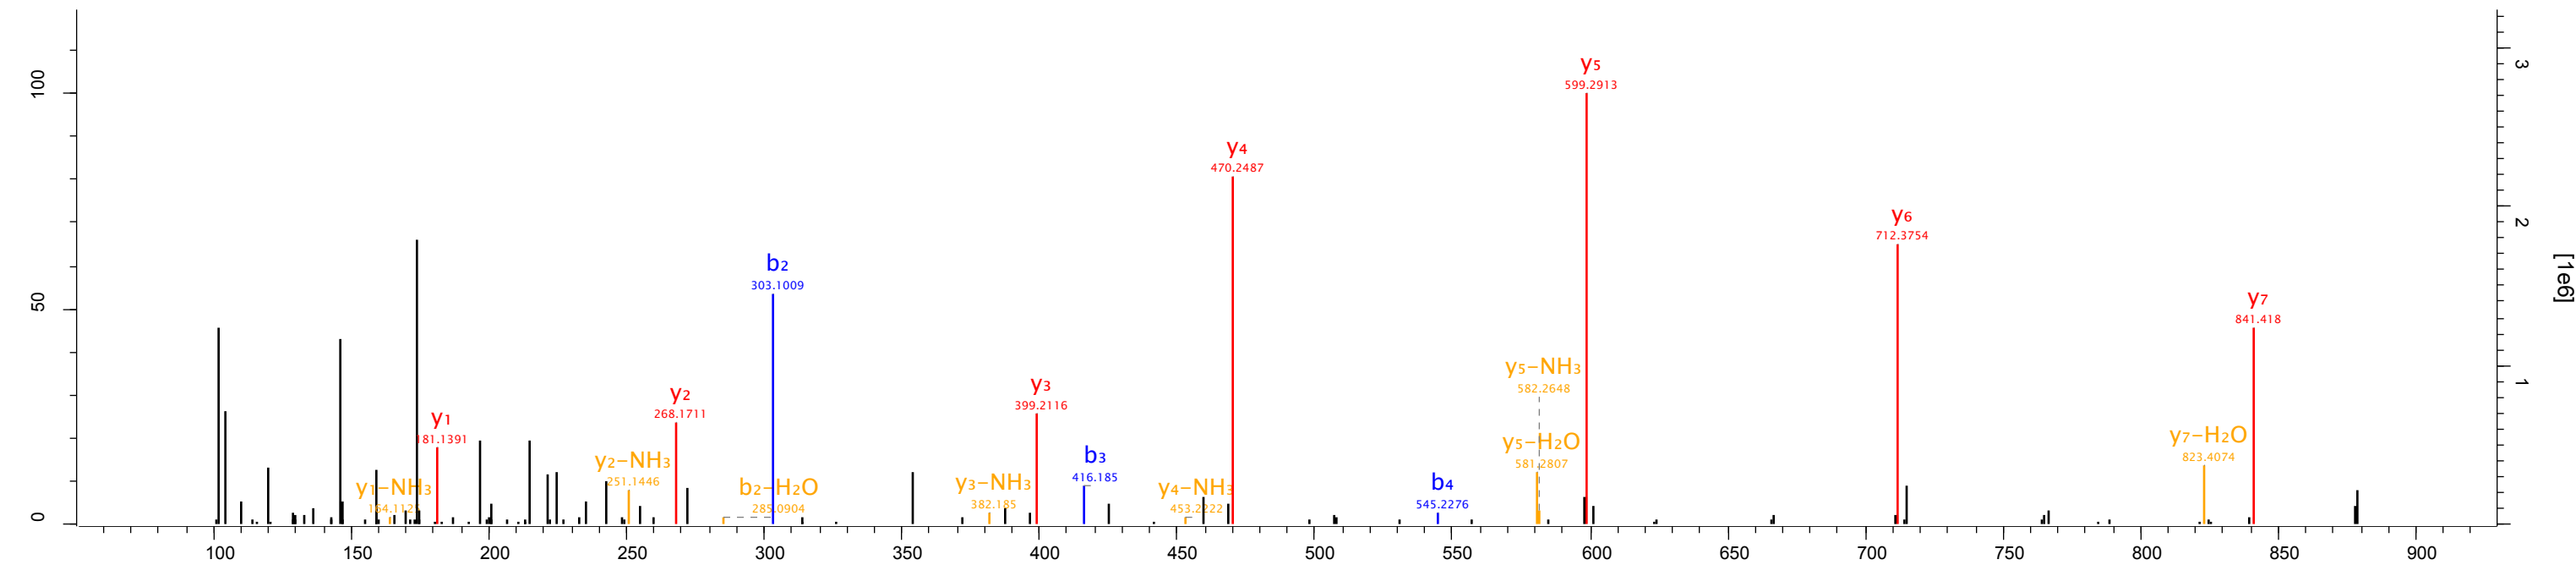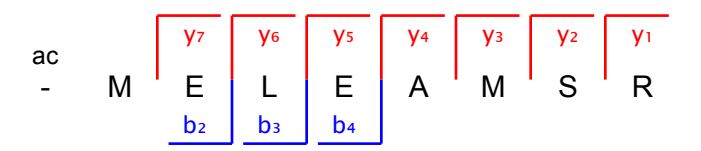

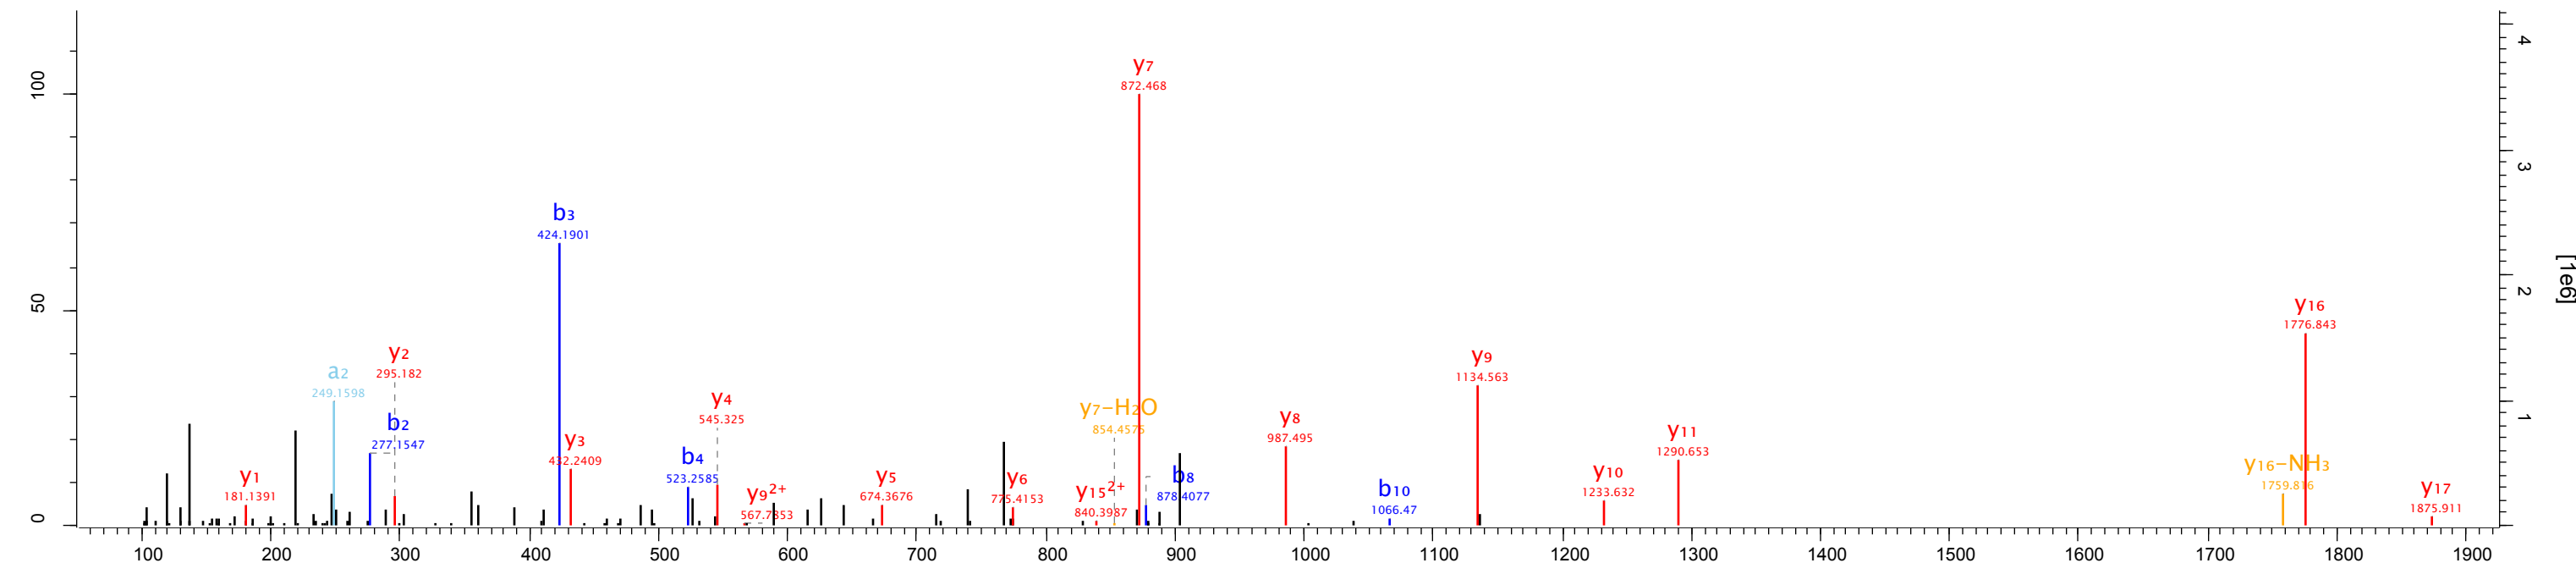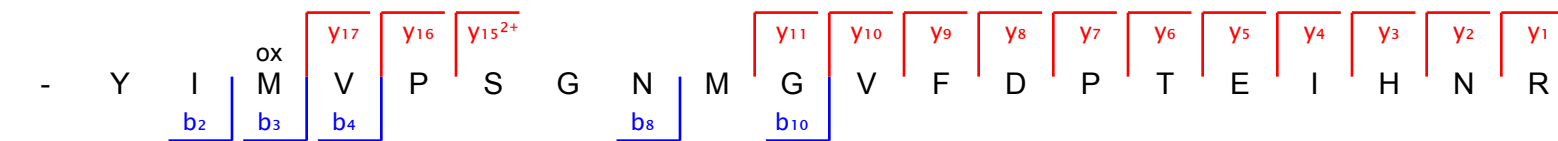



Raw file 20180707\_MaS\_A375SR\_ML\_proteome\_15 Scan 26267 Method FTMS; HCD Score 77.19 m/z 492.81 Gene names STON2

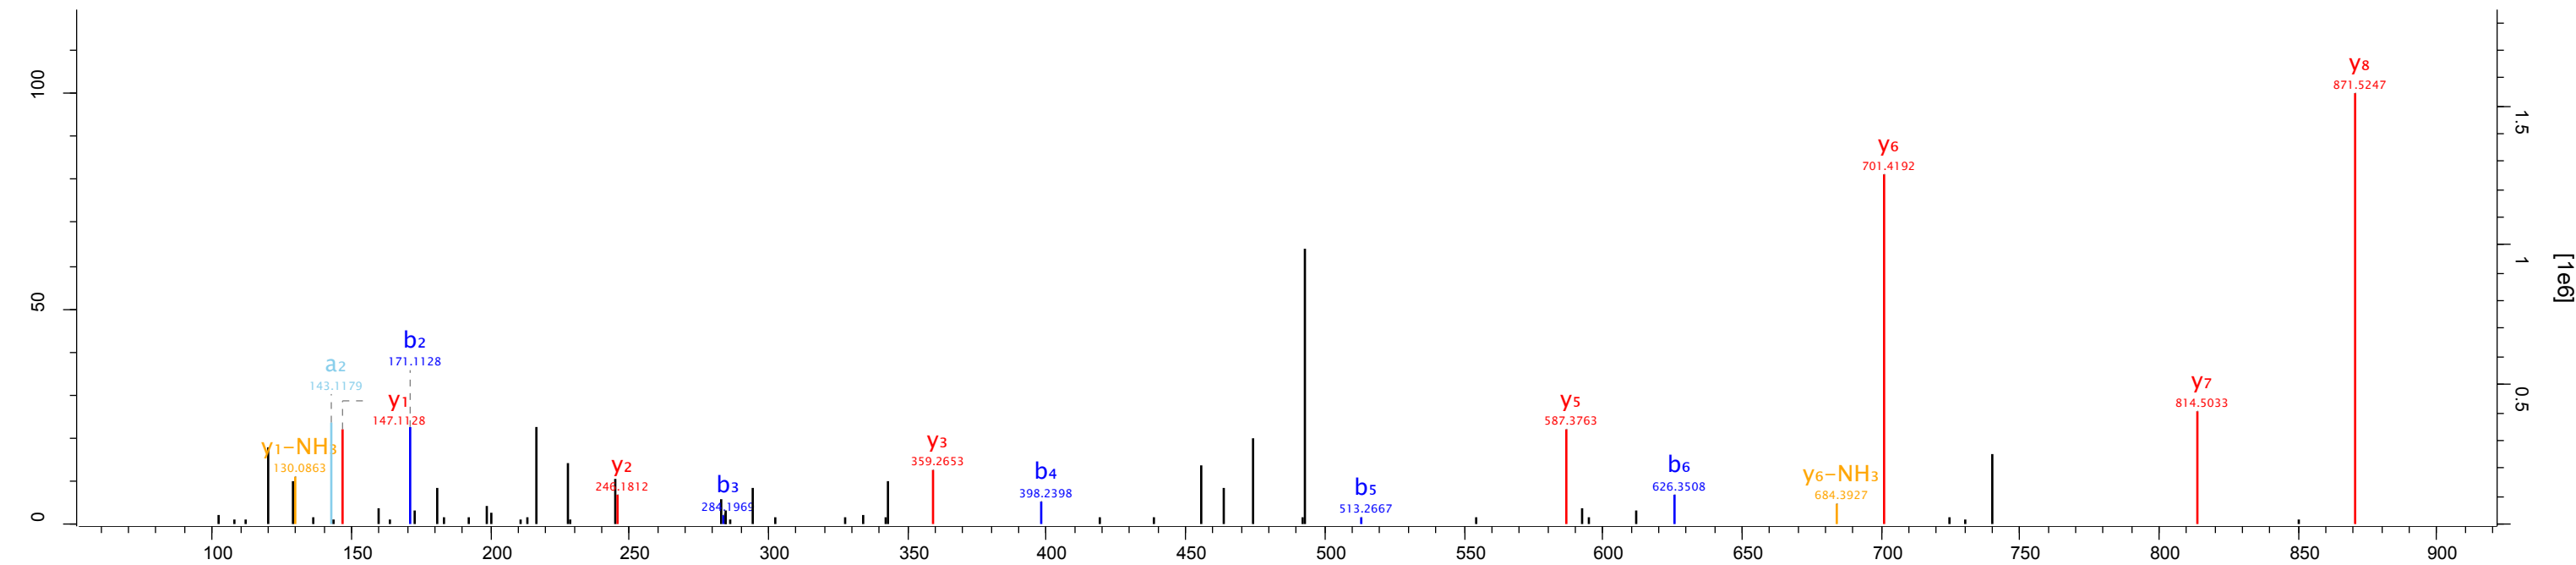

Raw file  
20180707\_MaS\_A375SR\_ML\_proteome\_15

Scan 27217 Method FTMS; HCD Score 62.23 m/z 759.7 Gene names CNIH4

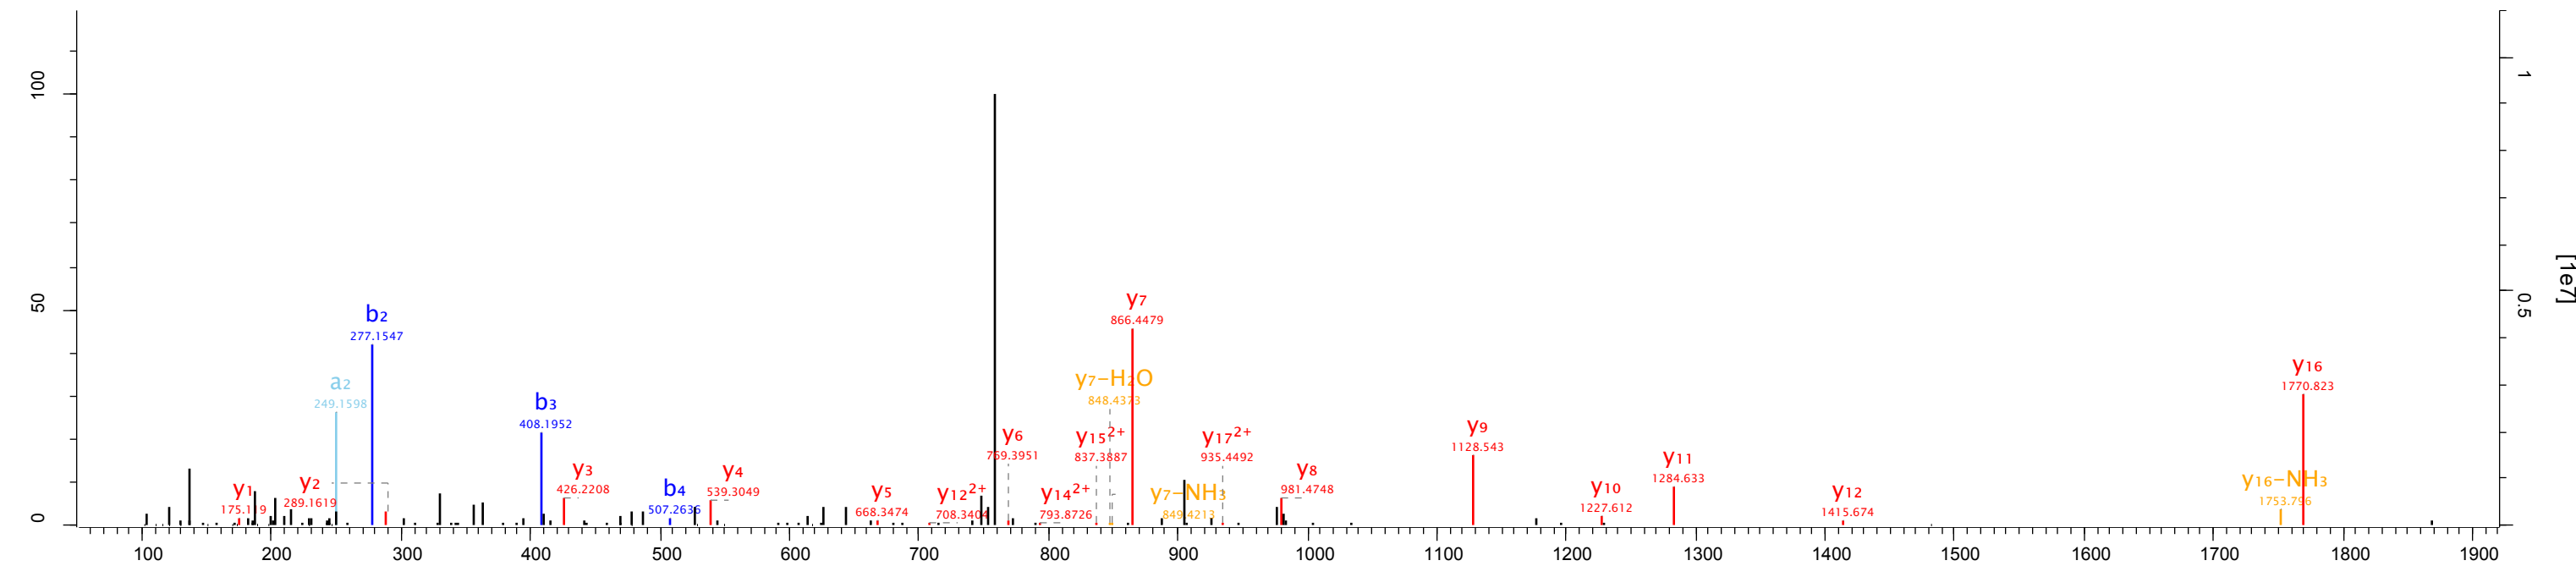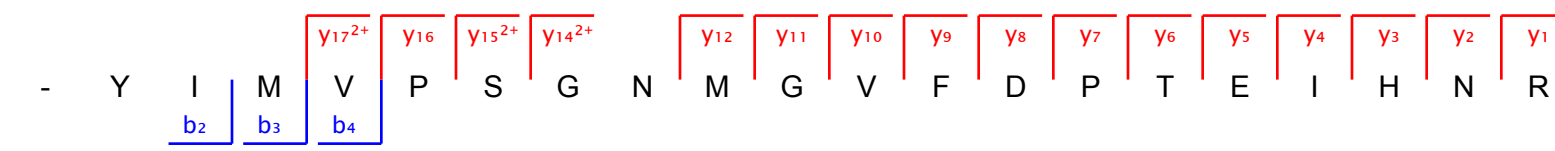

Raw file  
20180707\_MaS\_A375SR\_ML\_proteome\_16

Scan 11387 Method FTMS; HCD Score 50.83 m/z 825.92 Gene names MKRN1

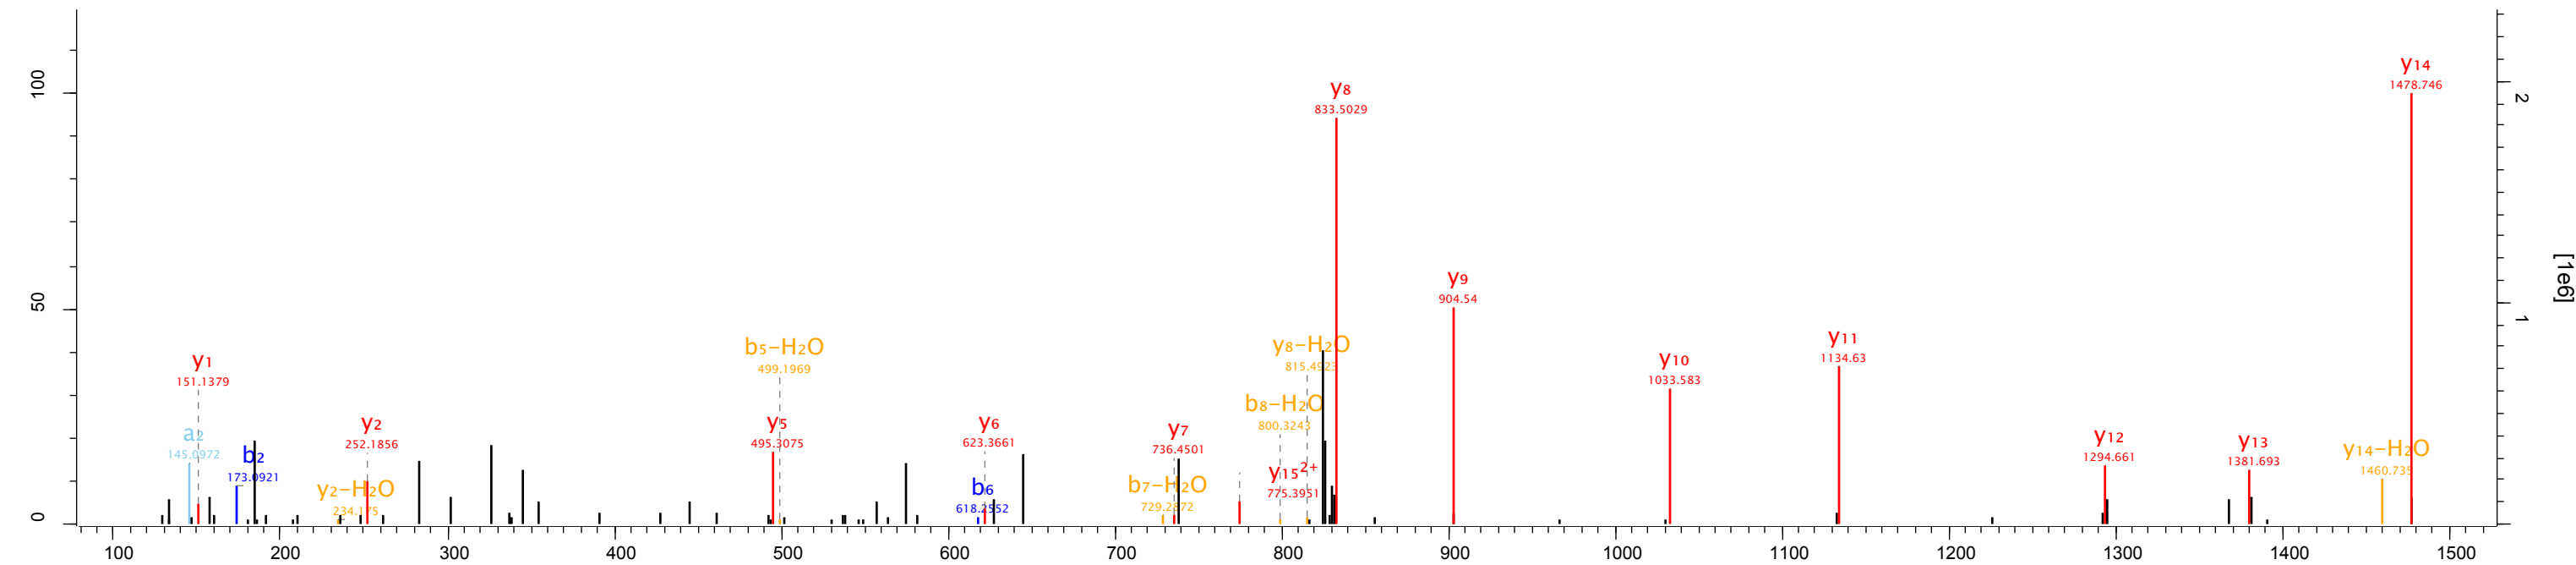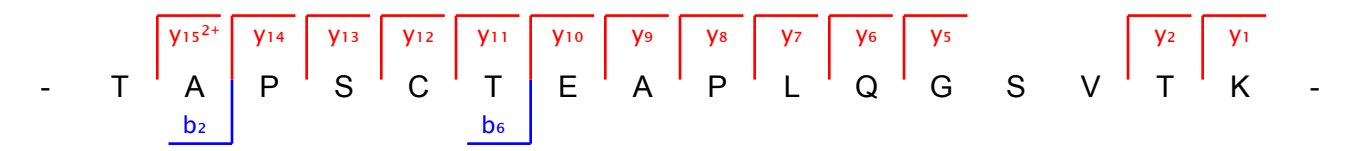

Raw file

20180707\_MaS\_A375SR\_ML\_proteome\_16

| Scan  | Method    | Score | m/z    | Gene names |
|-------|-----------|-------|--------|------------|
| 11467 | FTMS; HCD | 29.76 | 823.91 | MKRN1      |

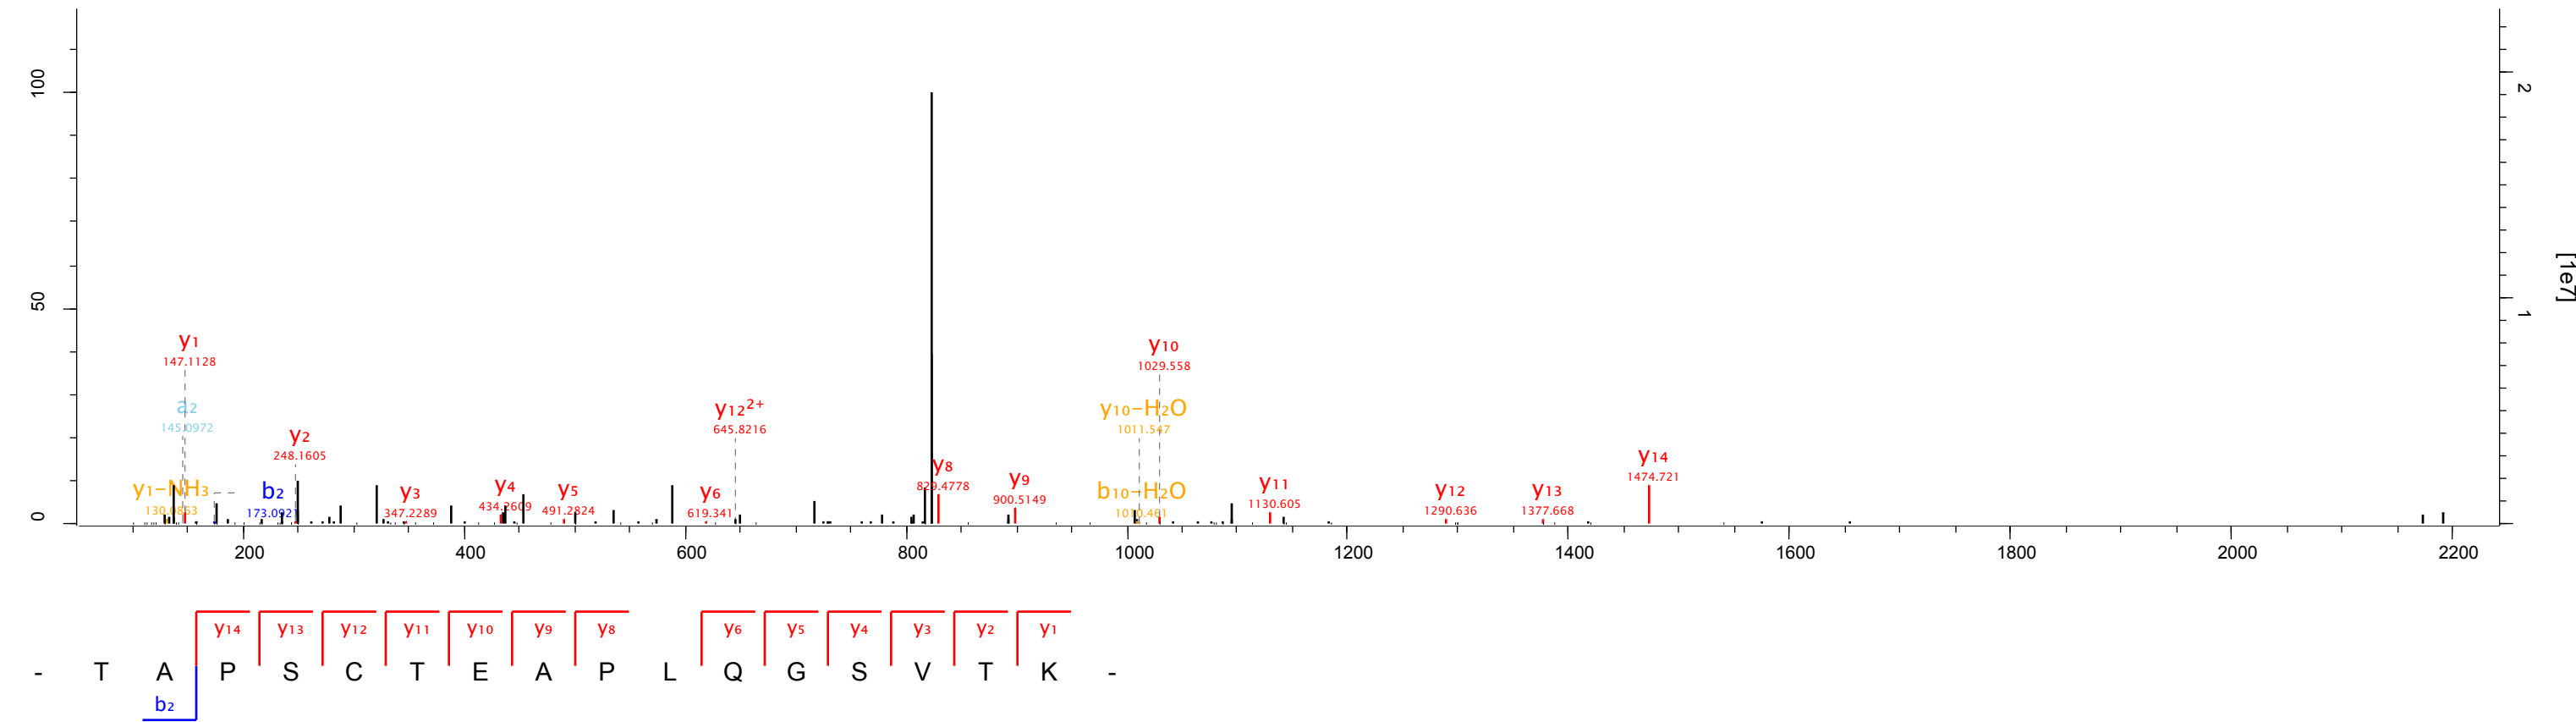

Raw file  
20180707\_MaS\_A375SR\_ML\_proteome\_16

Scan: 21547  
Method: FTMS; HCD  
Score: 71.88  
m/z: 487.27  
Gene names: WFIKKN2

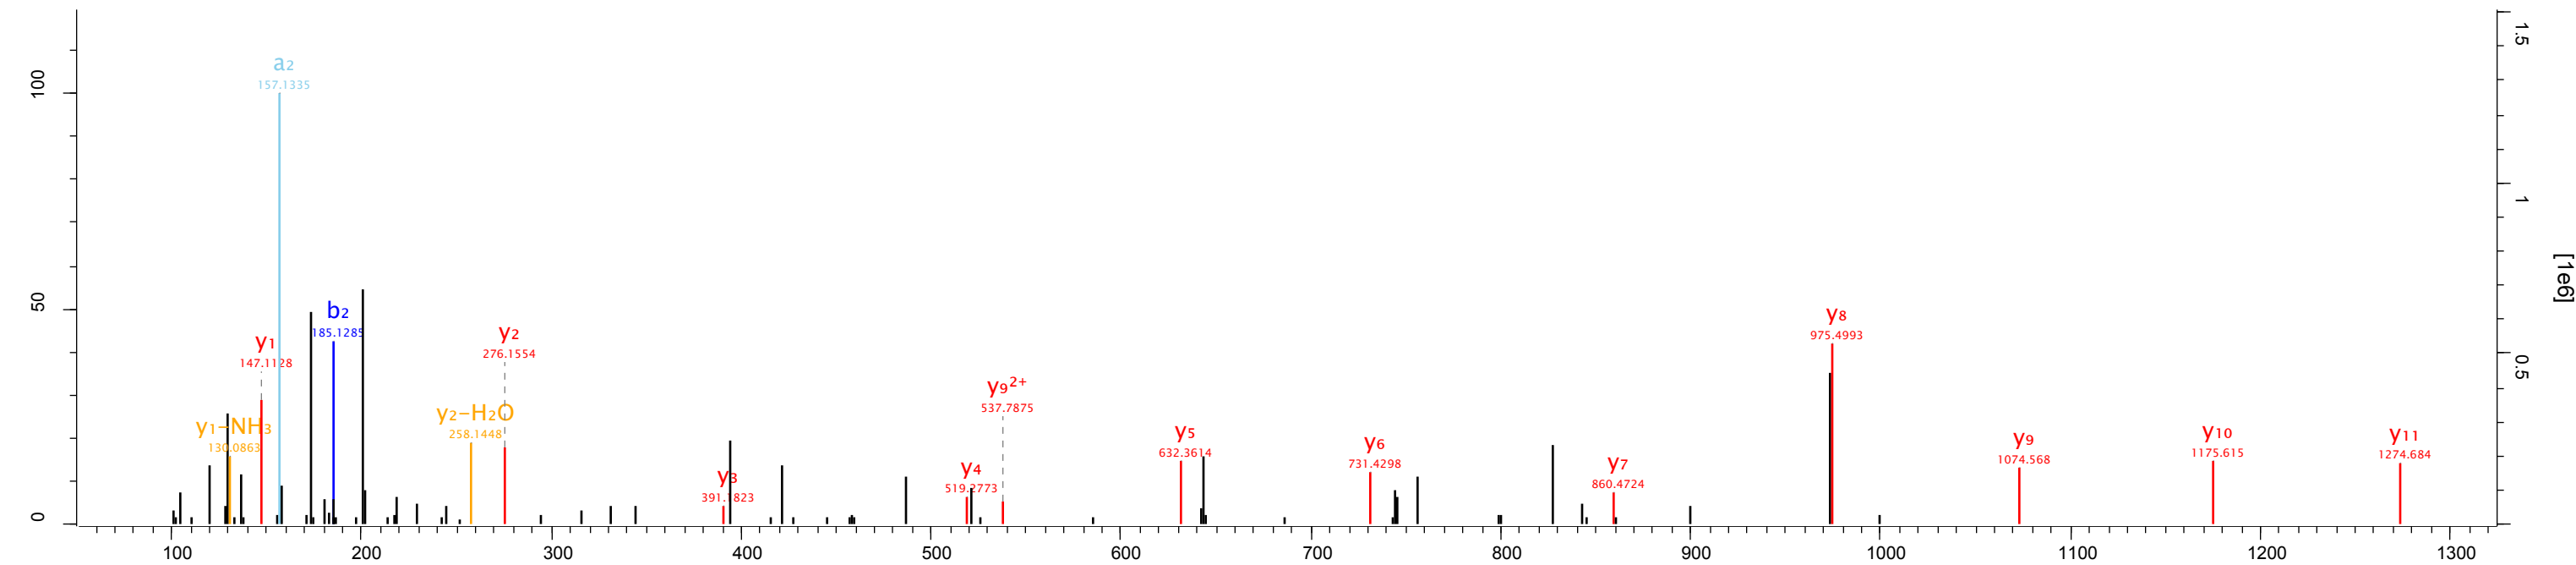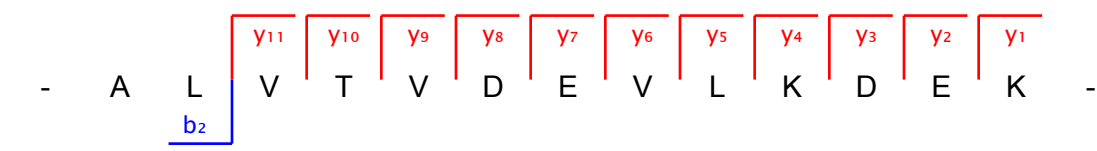

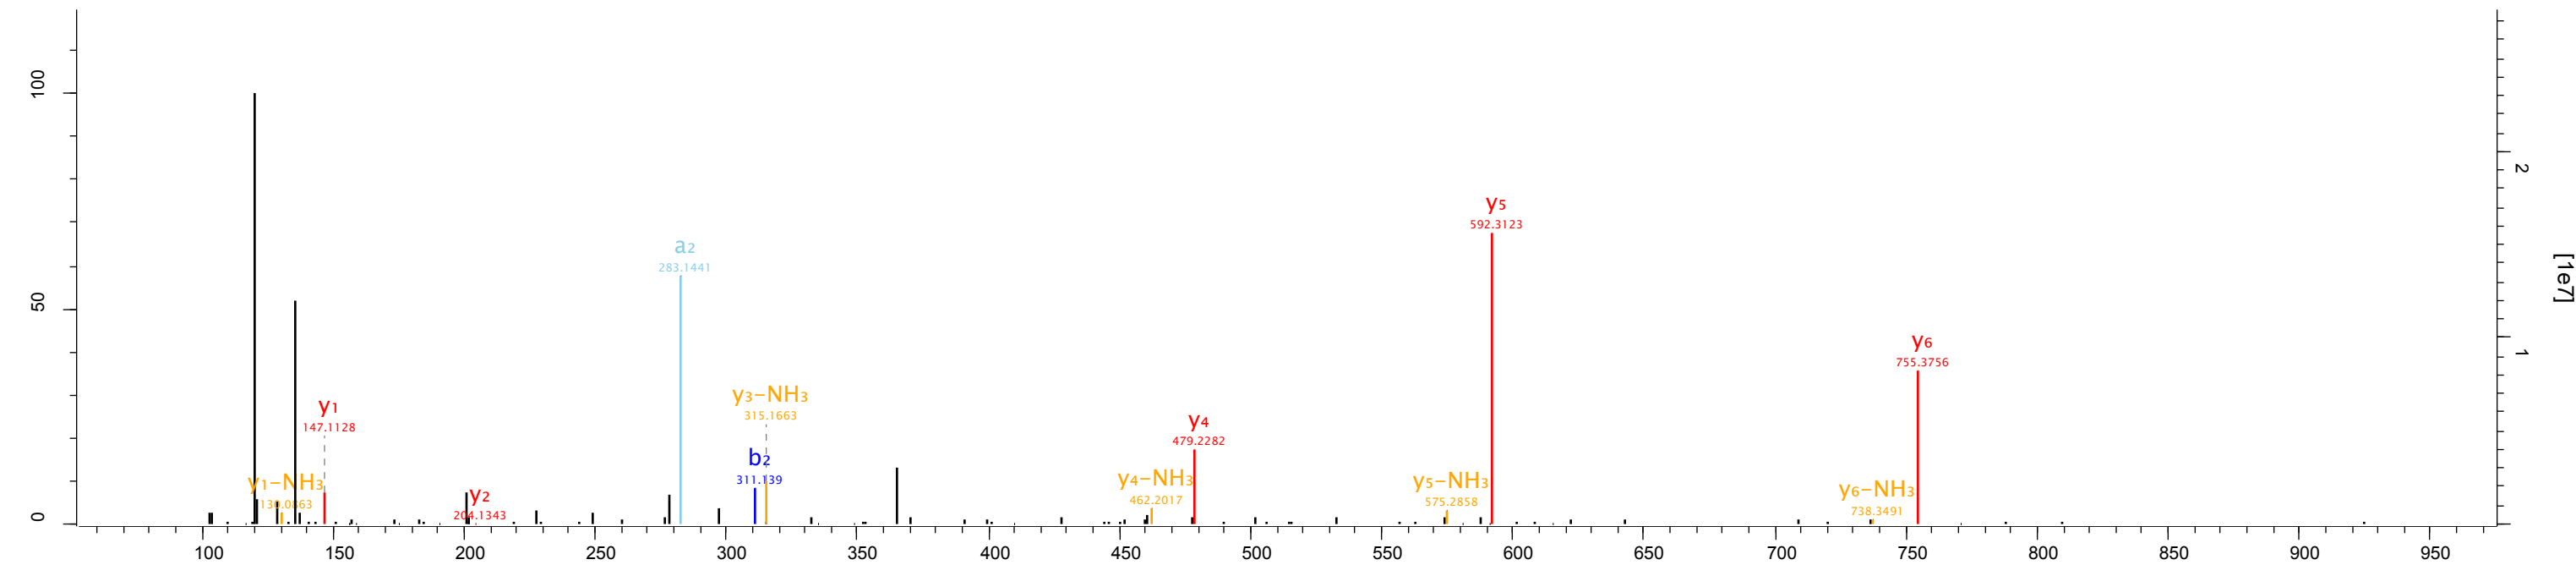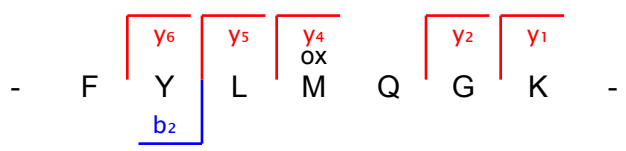

Raw file  
20180707\_MaS\_A375SR\_ML\_proteome\_18

Scan 23077 Method FTMS; HCD Score 53.98 m/z 550.64 Gene names PVRL1

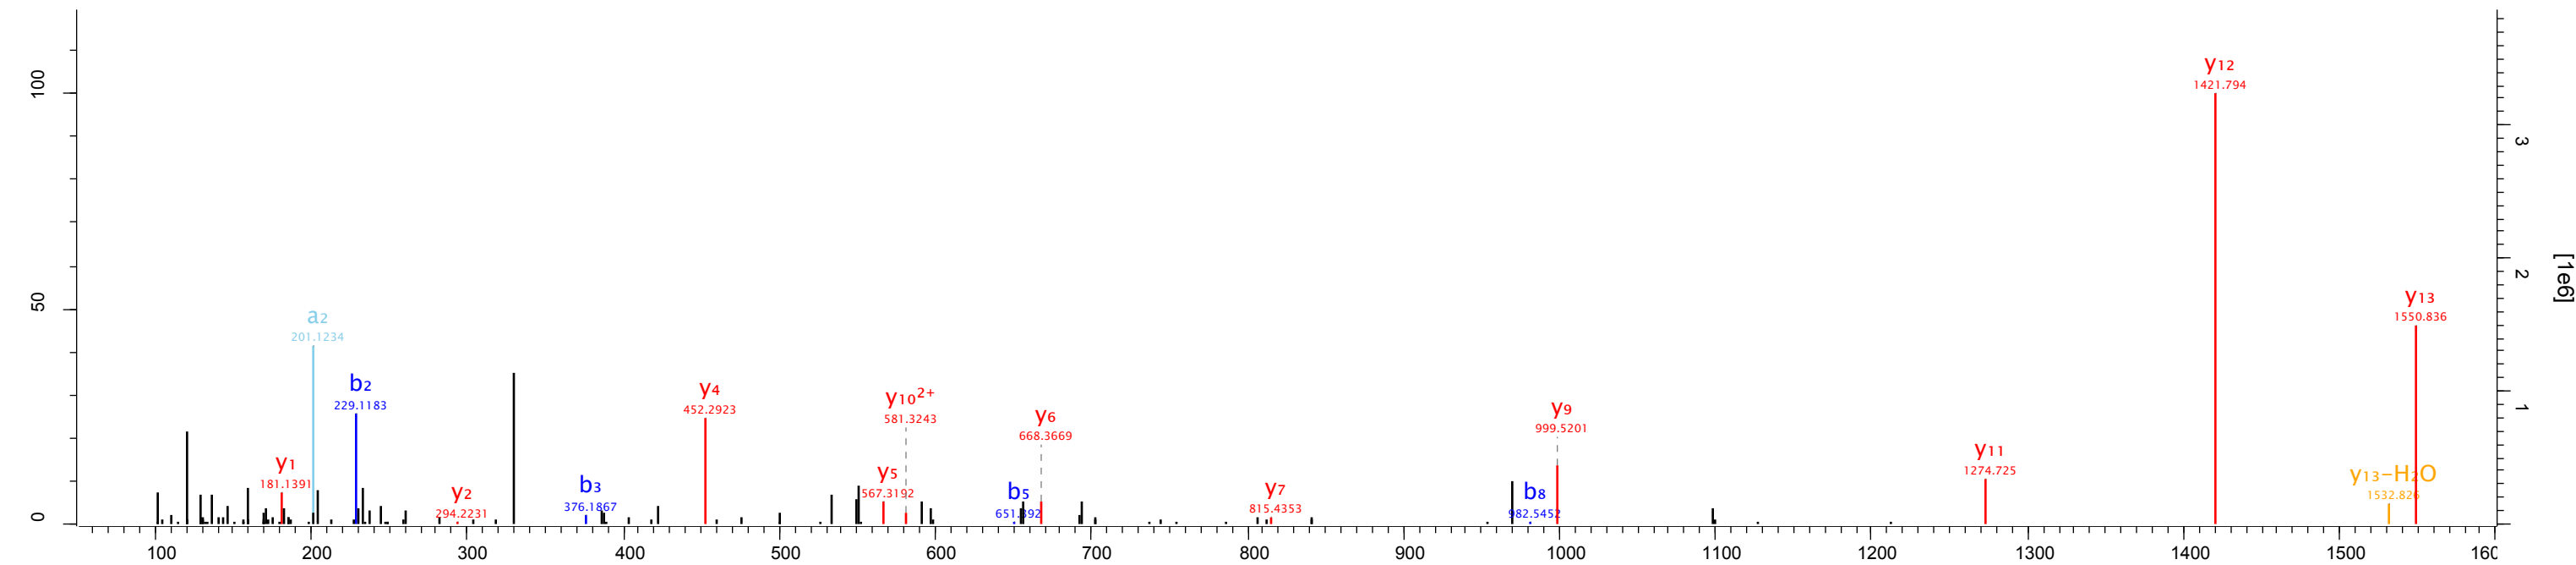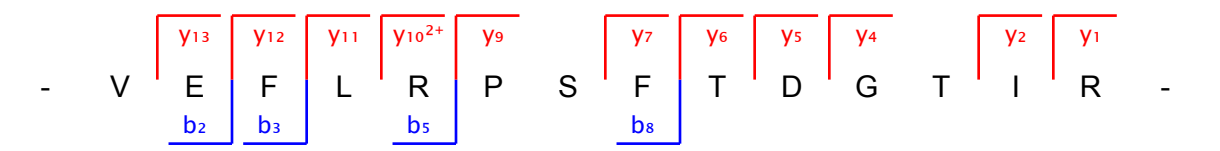

Raw file 20180707\_MaS\_A375SR\_ML\_proteome\_19 Scan 14927 Method FTMS; HCD Score 77.75 m/z 1121.47

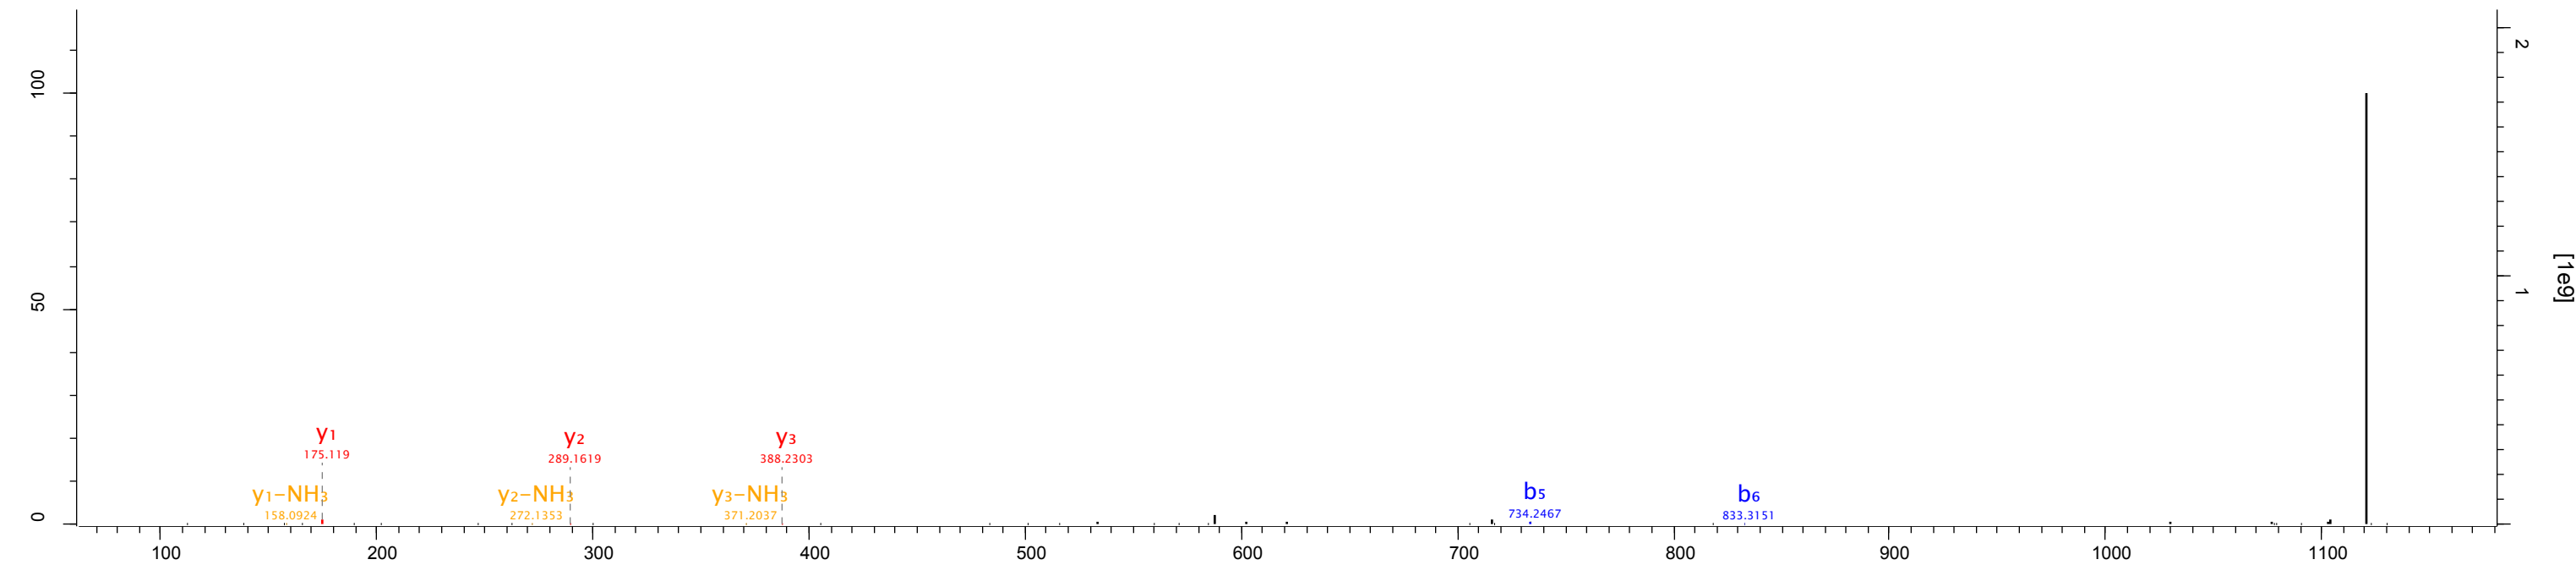



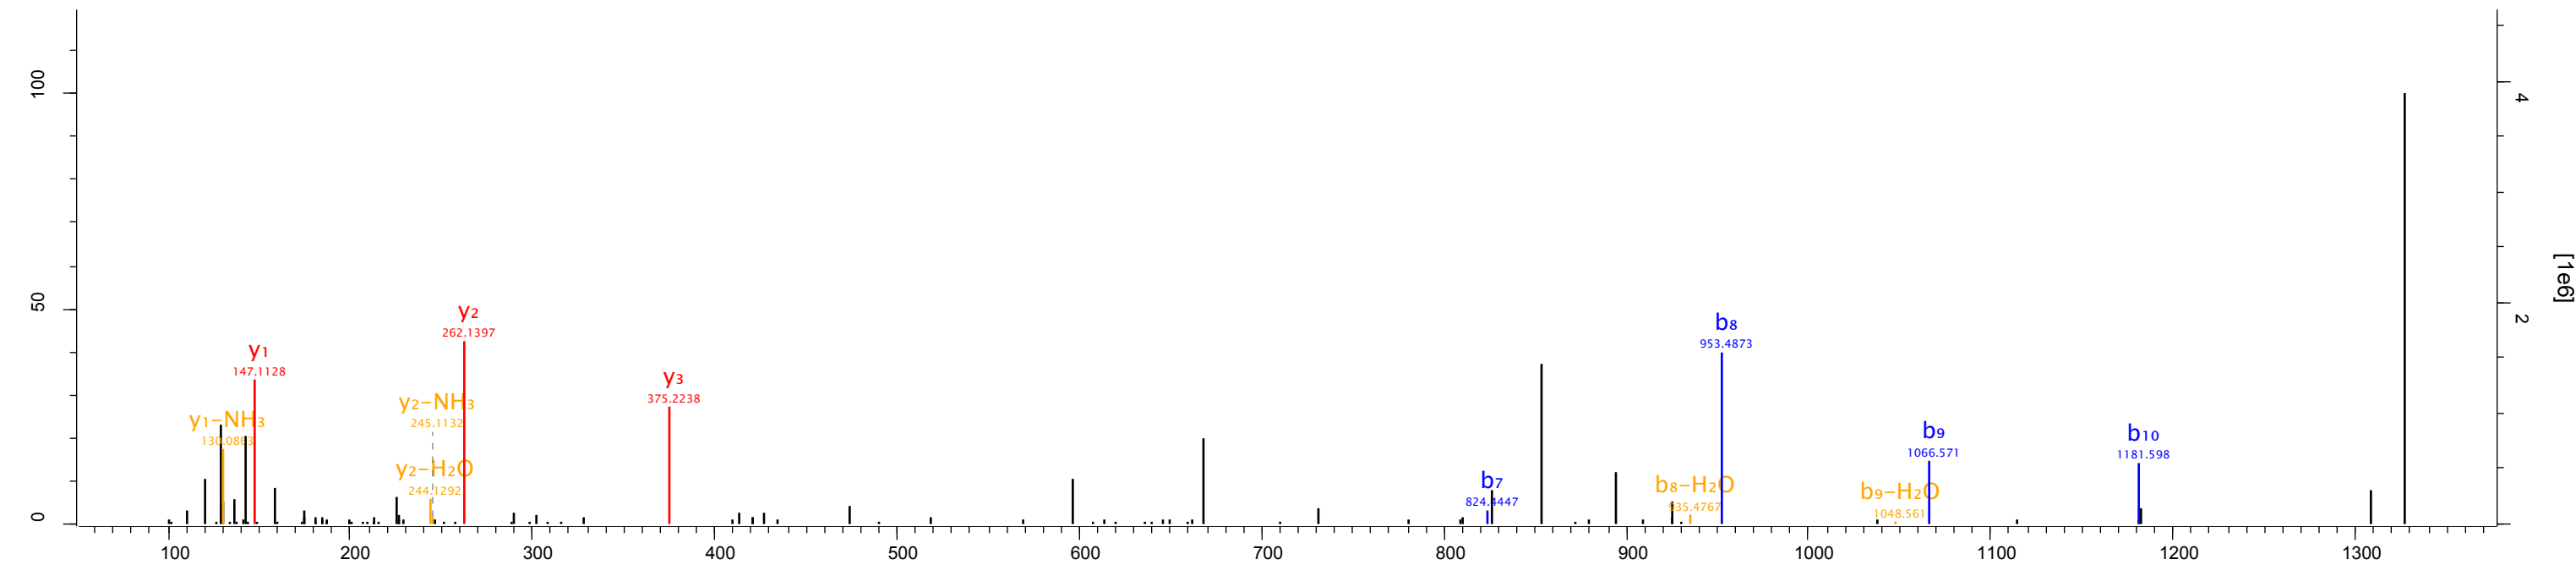

Raw file: 20180707\_MaS\_A375SR\_ML\_proteome\_2\_01  
 Scan: 16787 Method: FTMS; HCD Score: 216.06 m/z: 709.85 Gene names: CYB561D2

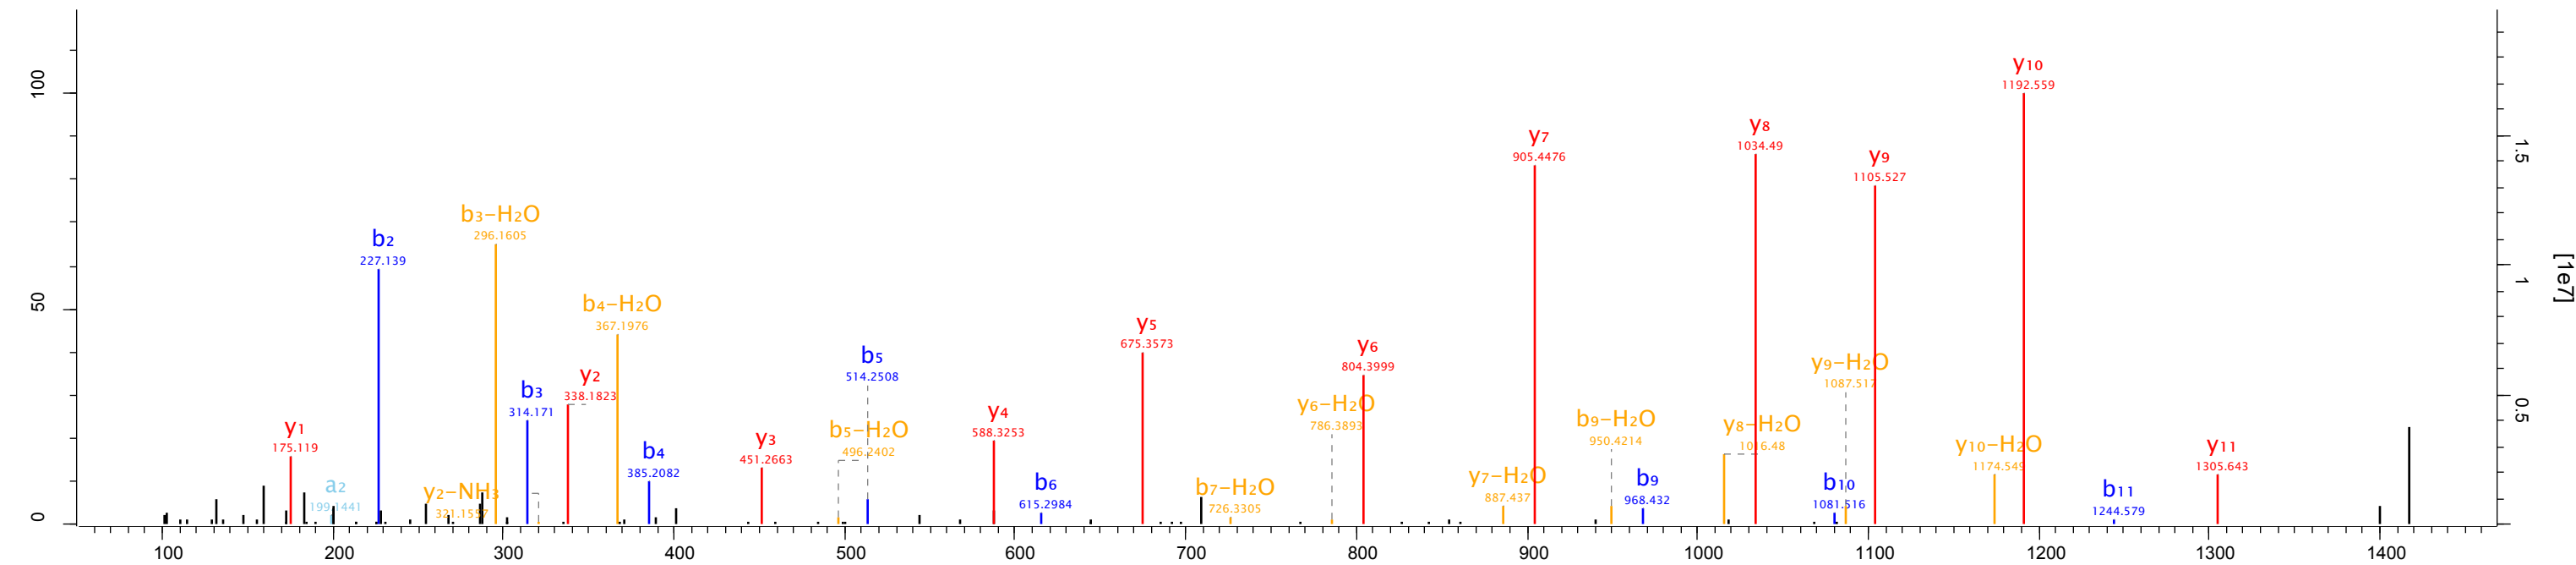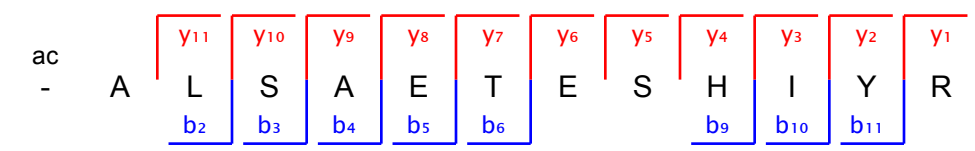

Raw file  
20180707\_MaS\_A375SR\_ML\_proteome\_2\_02

Scan 13607 Method FTMS; HCD Score 59.98 m/z 882.94 Gene names NLRP14

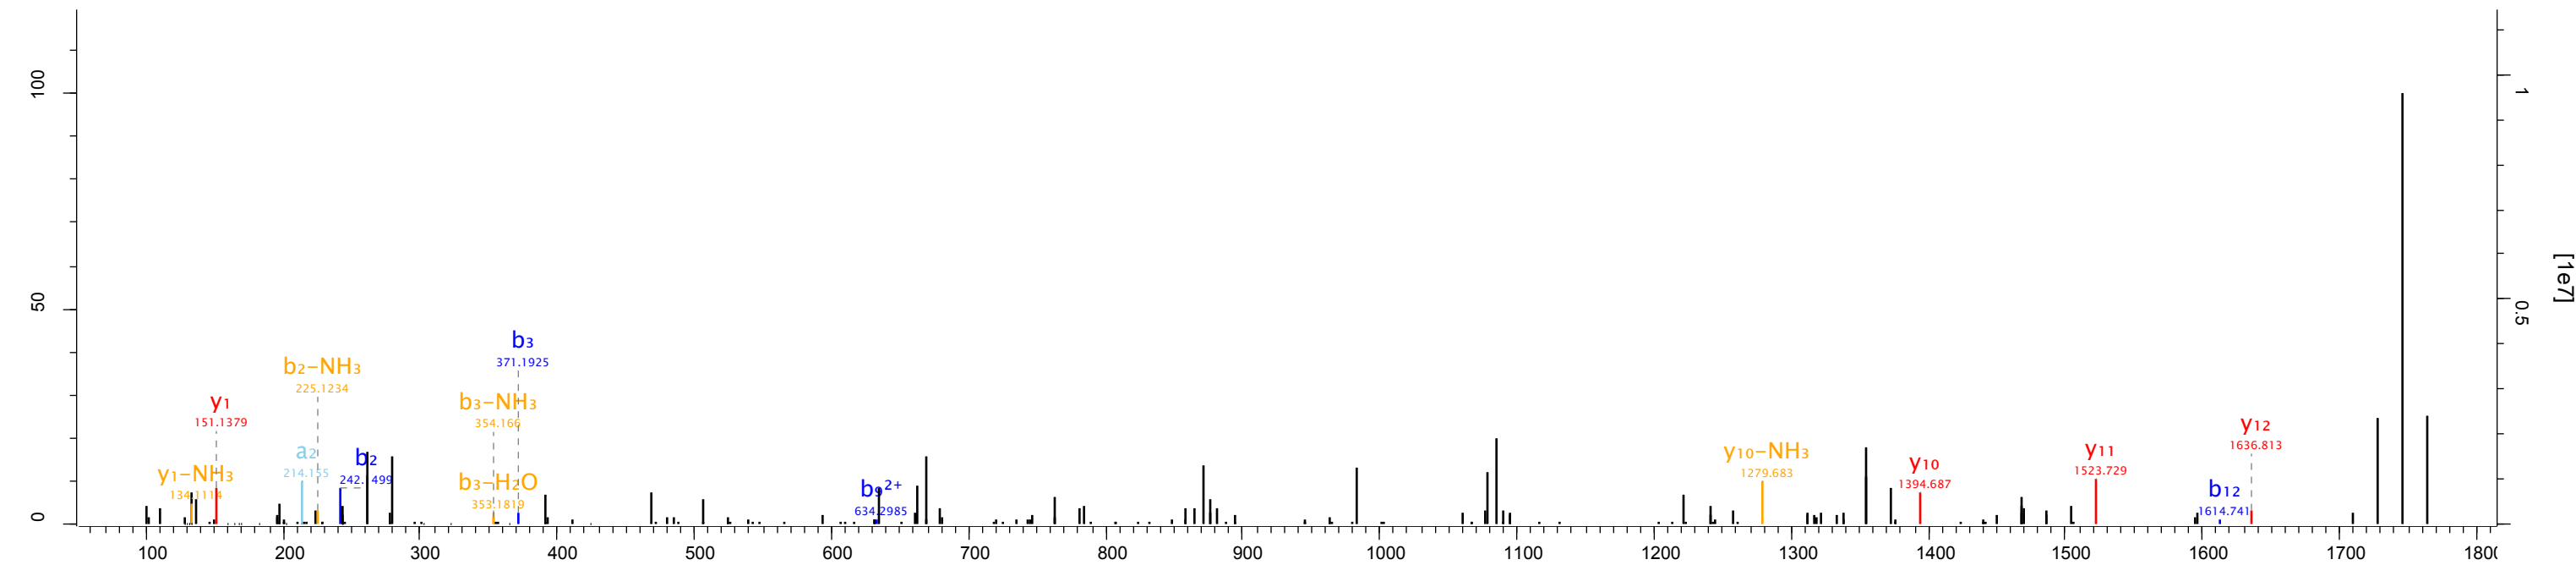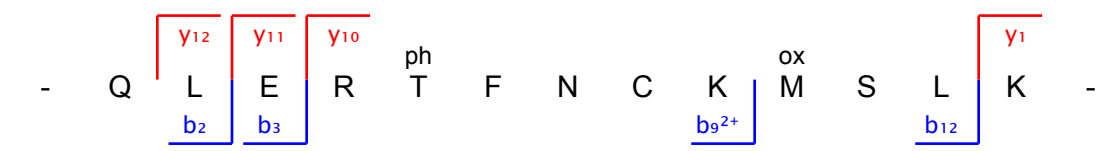

Raw file 20180707\_MaS\_A375SR\_ML\_proteome\_2\_02 Scan 15077 Method FTMS; HCD Score 77.75 m/z 1121.47

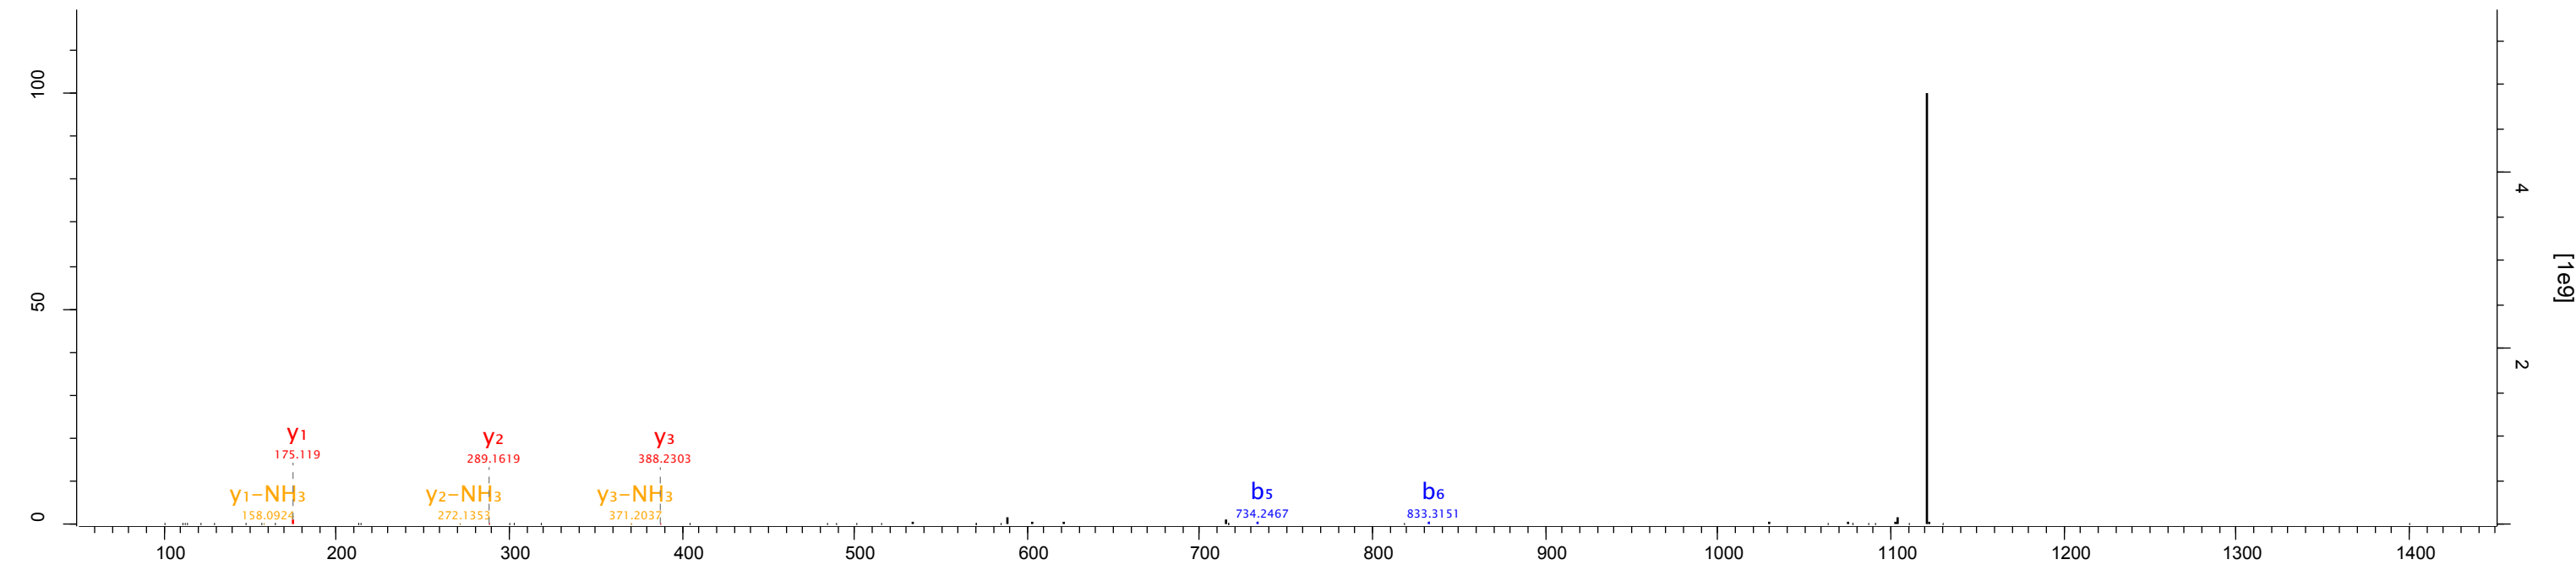

Raw file  
 20180707\_MaS\_A375SR\_ML\_proteome\_2\_02  
 Scan 15517 Method FTMS; HCD Score 59.61 m/z 374.22

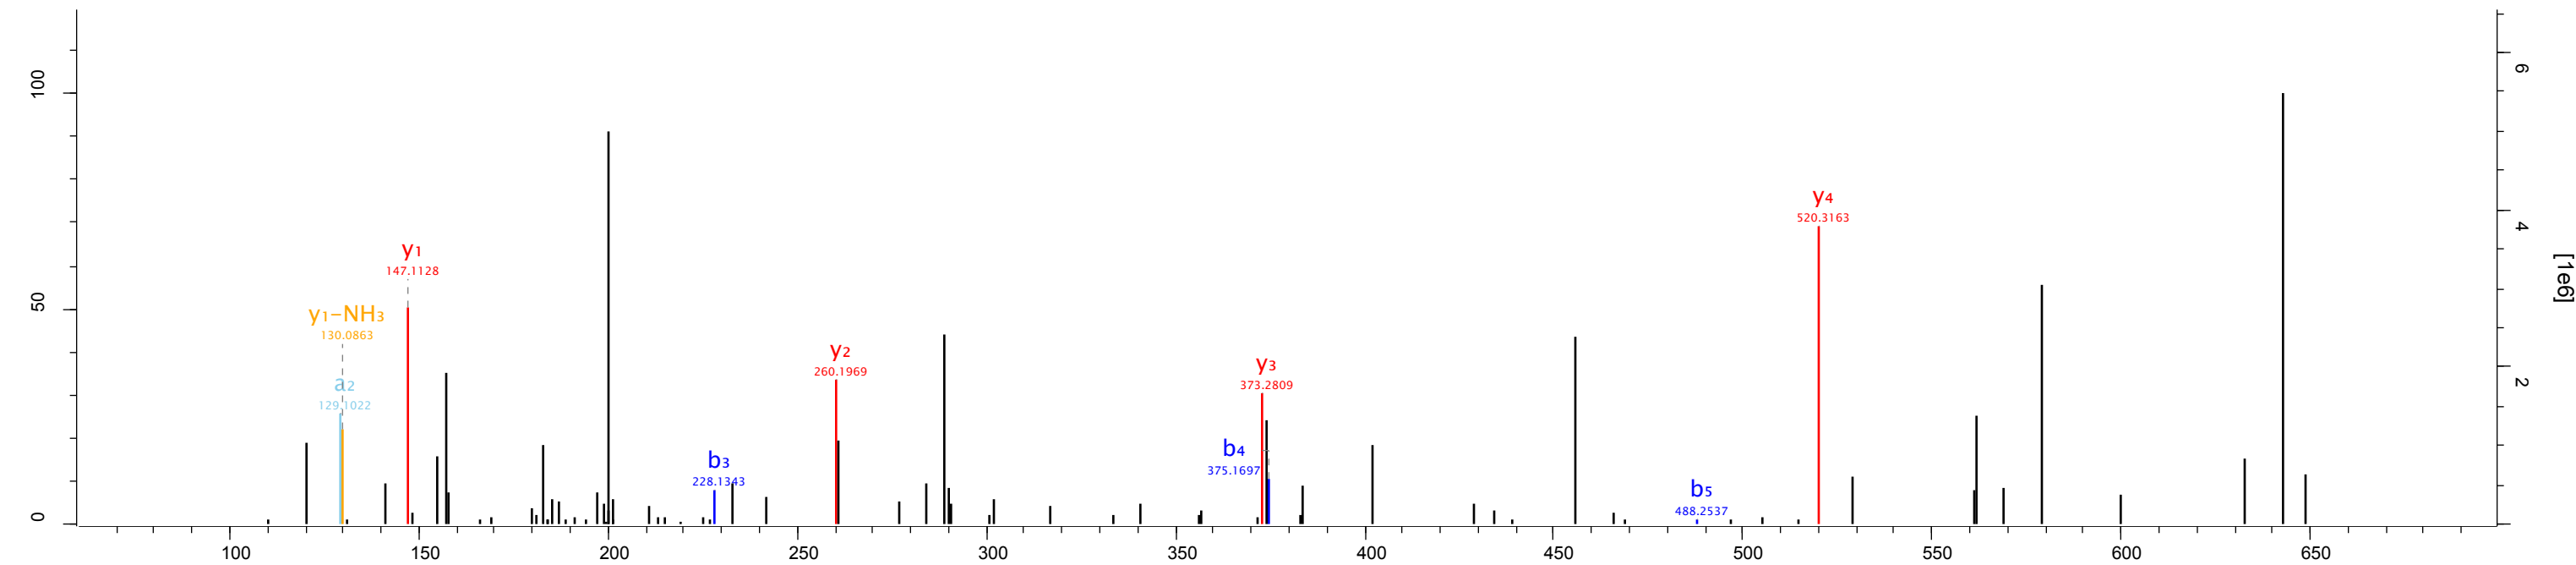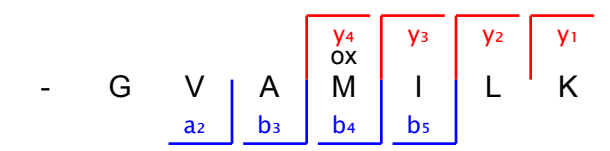

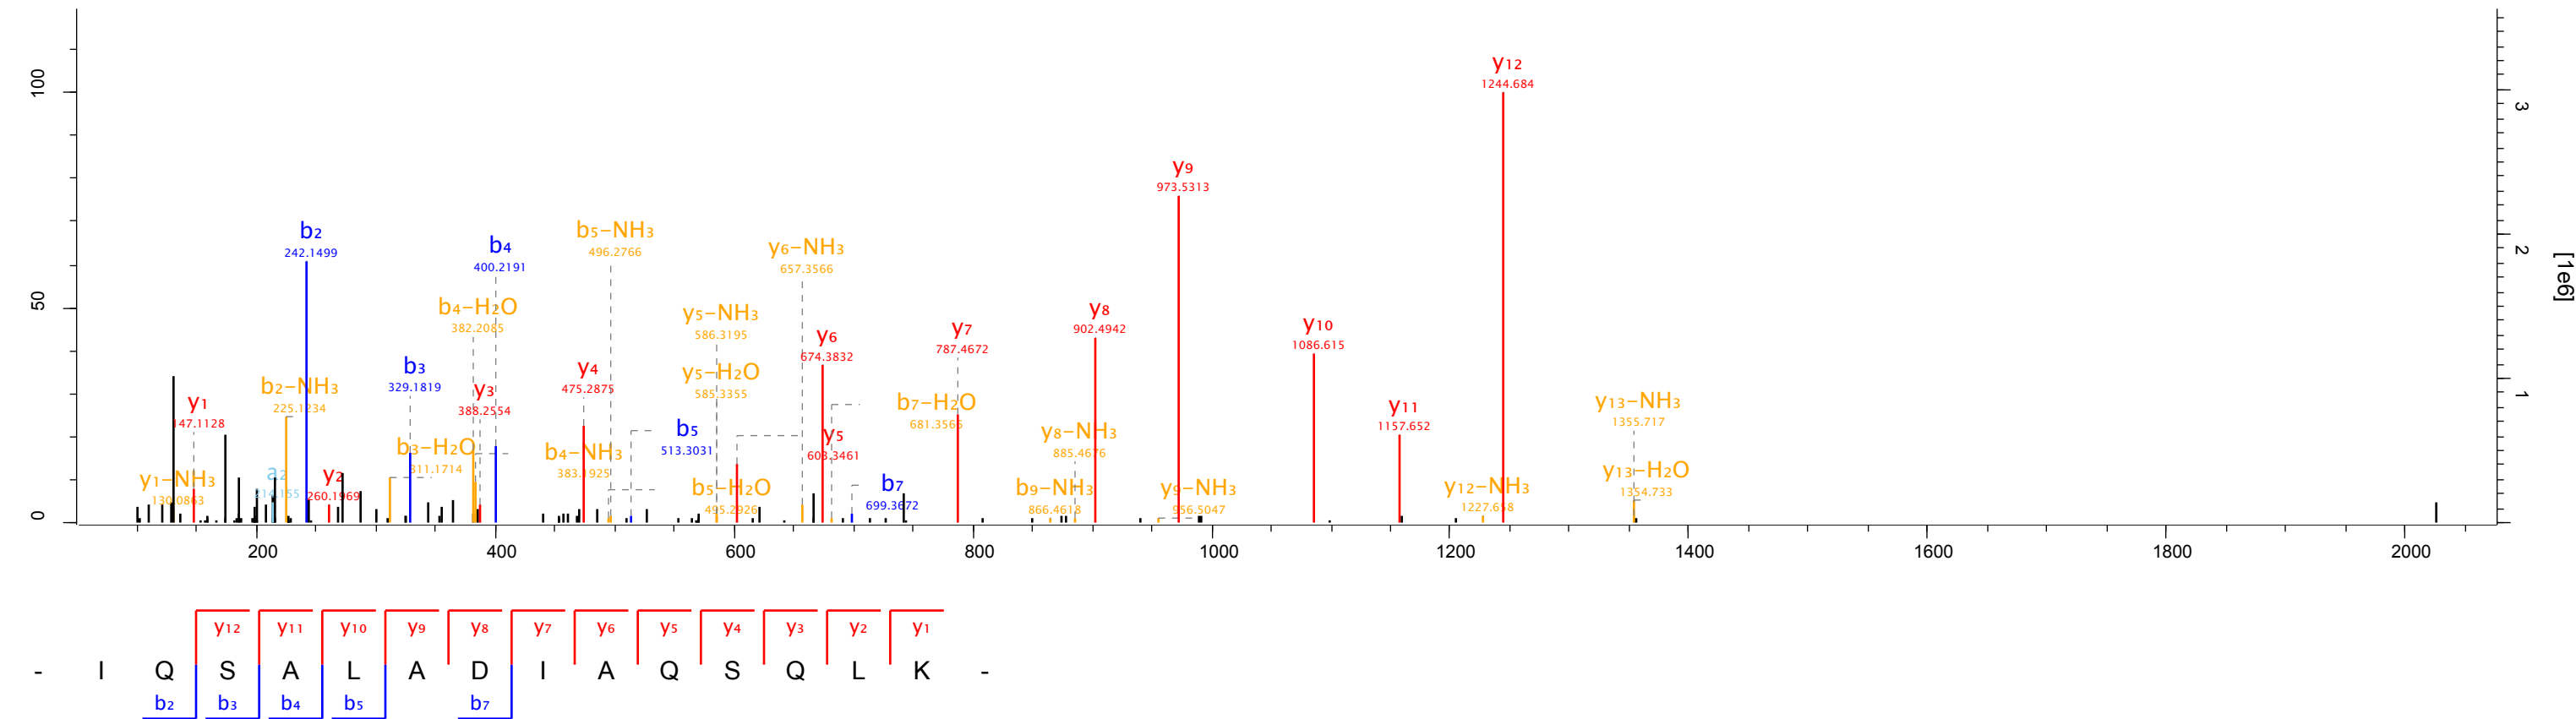

Raw file  
20180707\_MaS\_A375SR\_ML\_proteome\_2\_02

Scan 25137 Method FTMS; HCD Score 103.41 m/z 765.36 Gene names CNIH4

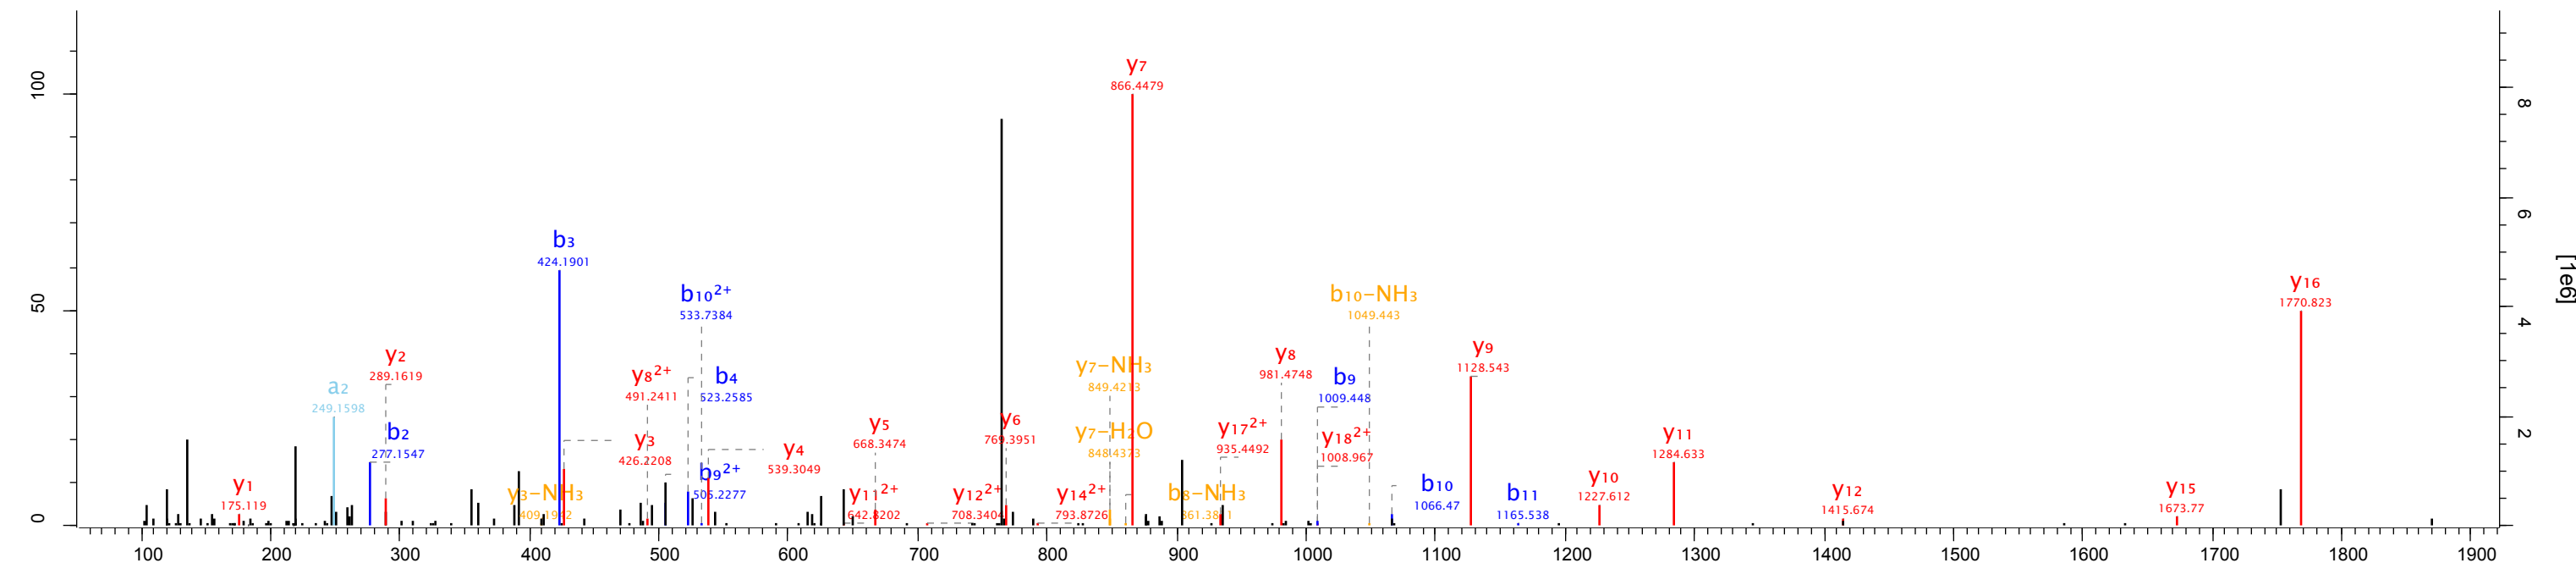

- Y I M V P S G N M G V F D P T E I H N R -

Fragmentation mapping:

- Red boxes (y-ions): y18<sup>2+</sup> (M), y17<sup>2+</sup> (V), y16 (P), y15 (S), y14<sup>2+</sup> (G), y12 (M), y11 (G), y10 (V), y9 (F), y8 (D), y7 (P), y6 (T), y5 (E), y4 (I), y3 (H), y2 (N), y1 (R)
- Blue boxes (b-ions): b2 (I), b3 (M), b4 (V), b9 (M), b10 (G), b11 (V)

Raw file  
20180707\_MaS\_A375SR\_ML\_proteome\_2\_02

Scan 26997 Method FTMS; HCD Score 103.9 m/z 760.03 Gene names CNIH4

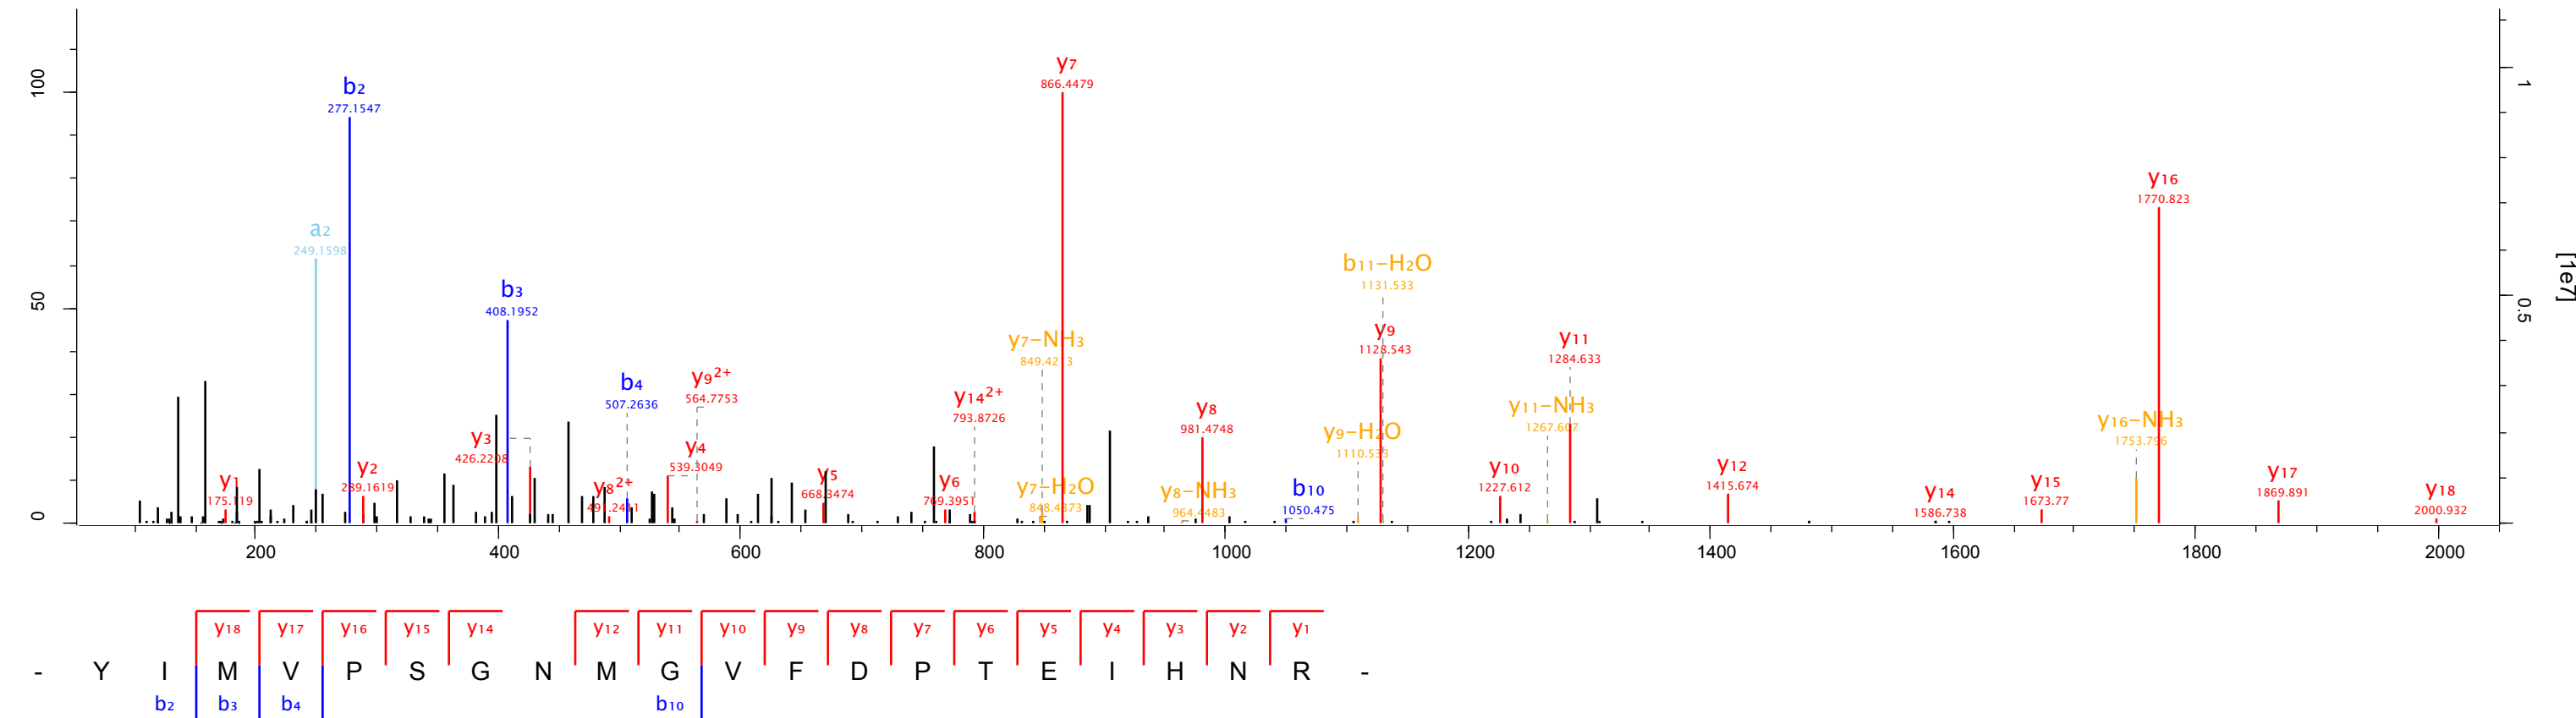



Raw file 20180707\_MaS\_A375SR\_ML\_proteome\_2\_02 Scan 2967 Method FTMS; HCD Score 52.49 m/z 353.21

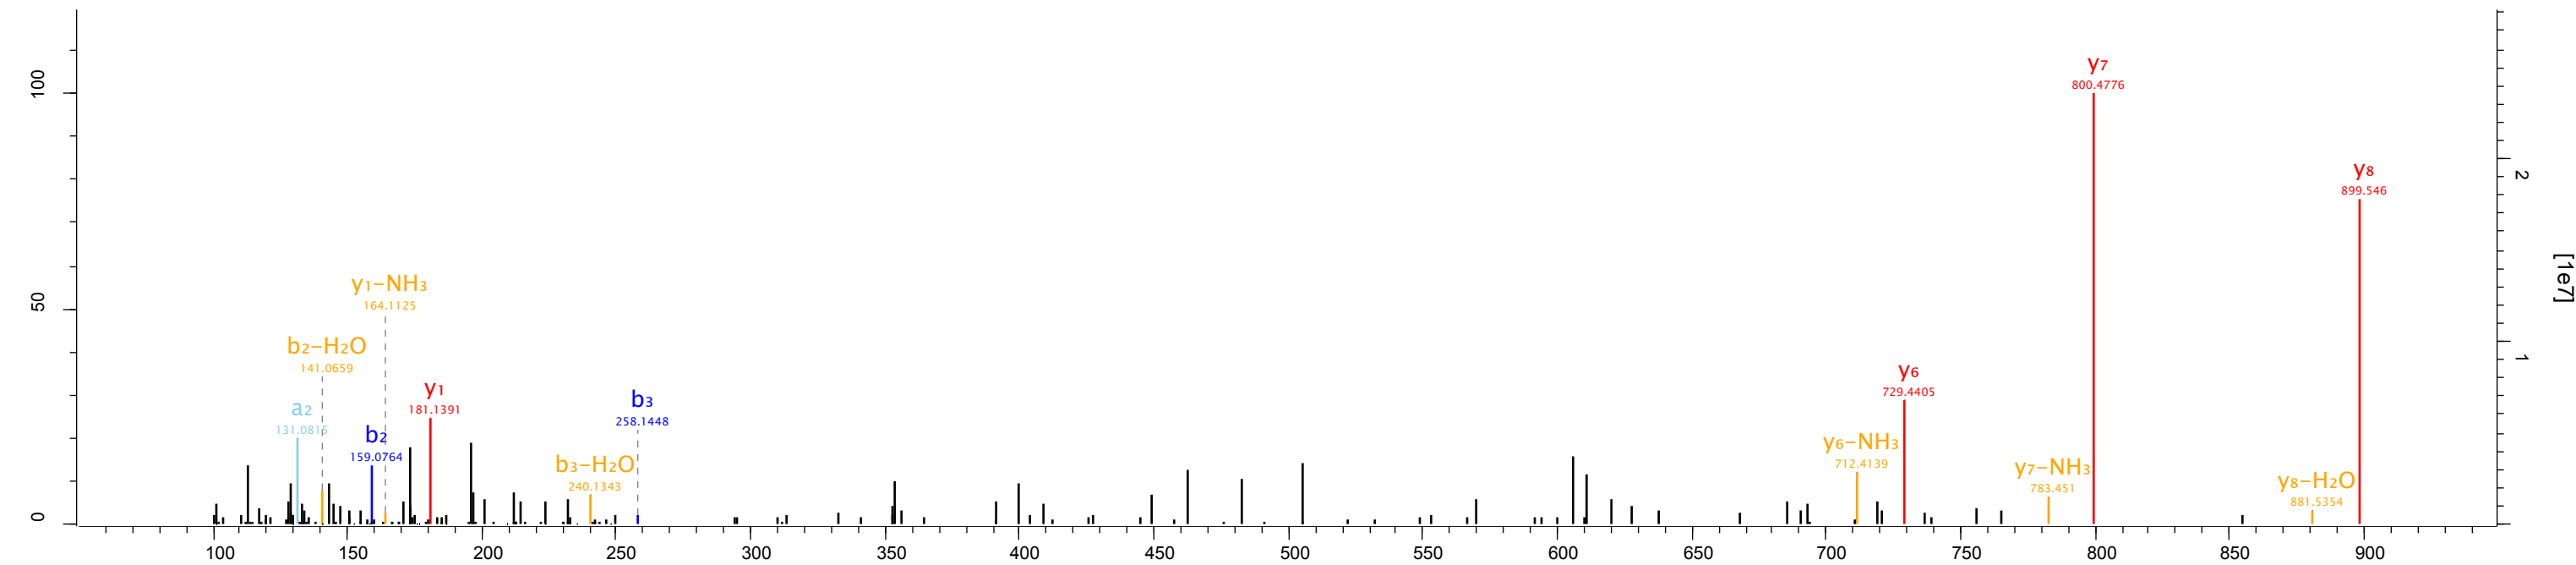

Raw file  
20180707\_MaS\_A375SR\_ML\_proteome\_2\_02

Scan 4227 Method FTMS; HCD Score 67.08 m/z 352.52 Gene names TYMP

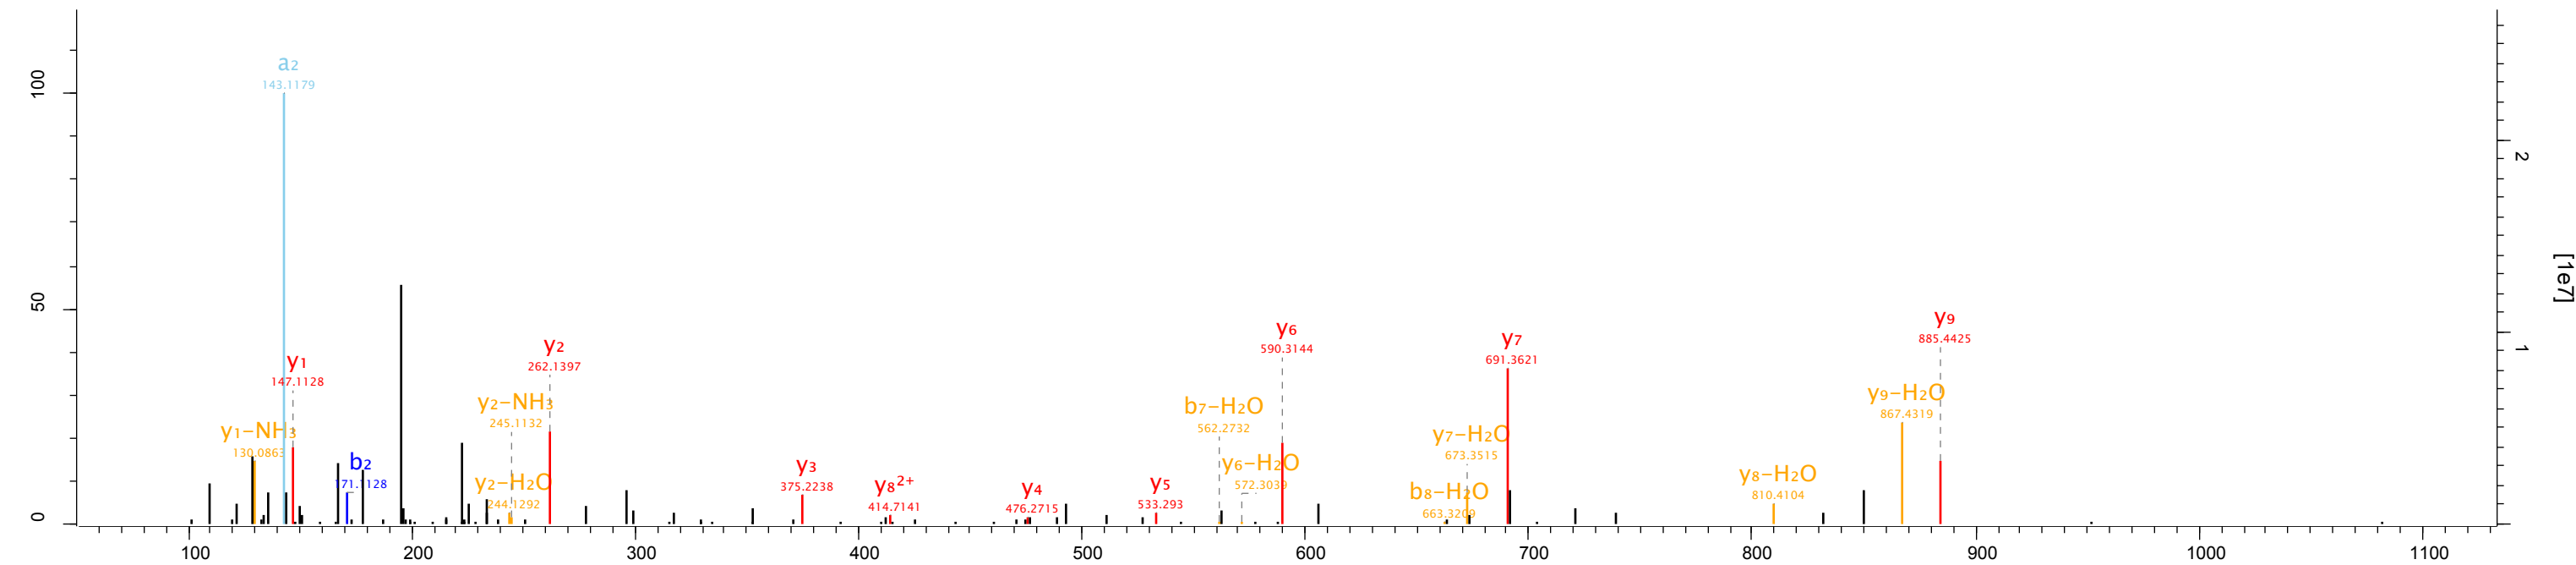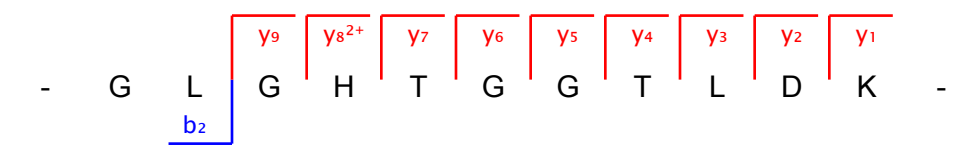

Raw file  
20180707\_MaS\_A375SR\_ML\_proteome\_2\_03

Scan 25827 Method FTMS; HCD Score 79.49 m/z 689.89 Gene names TMEM106A

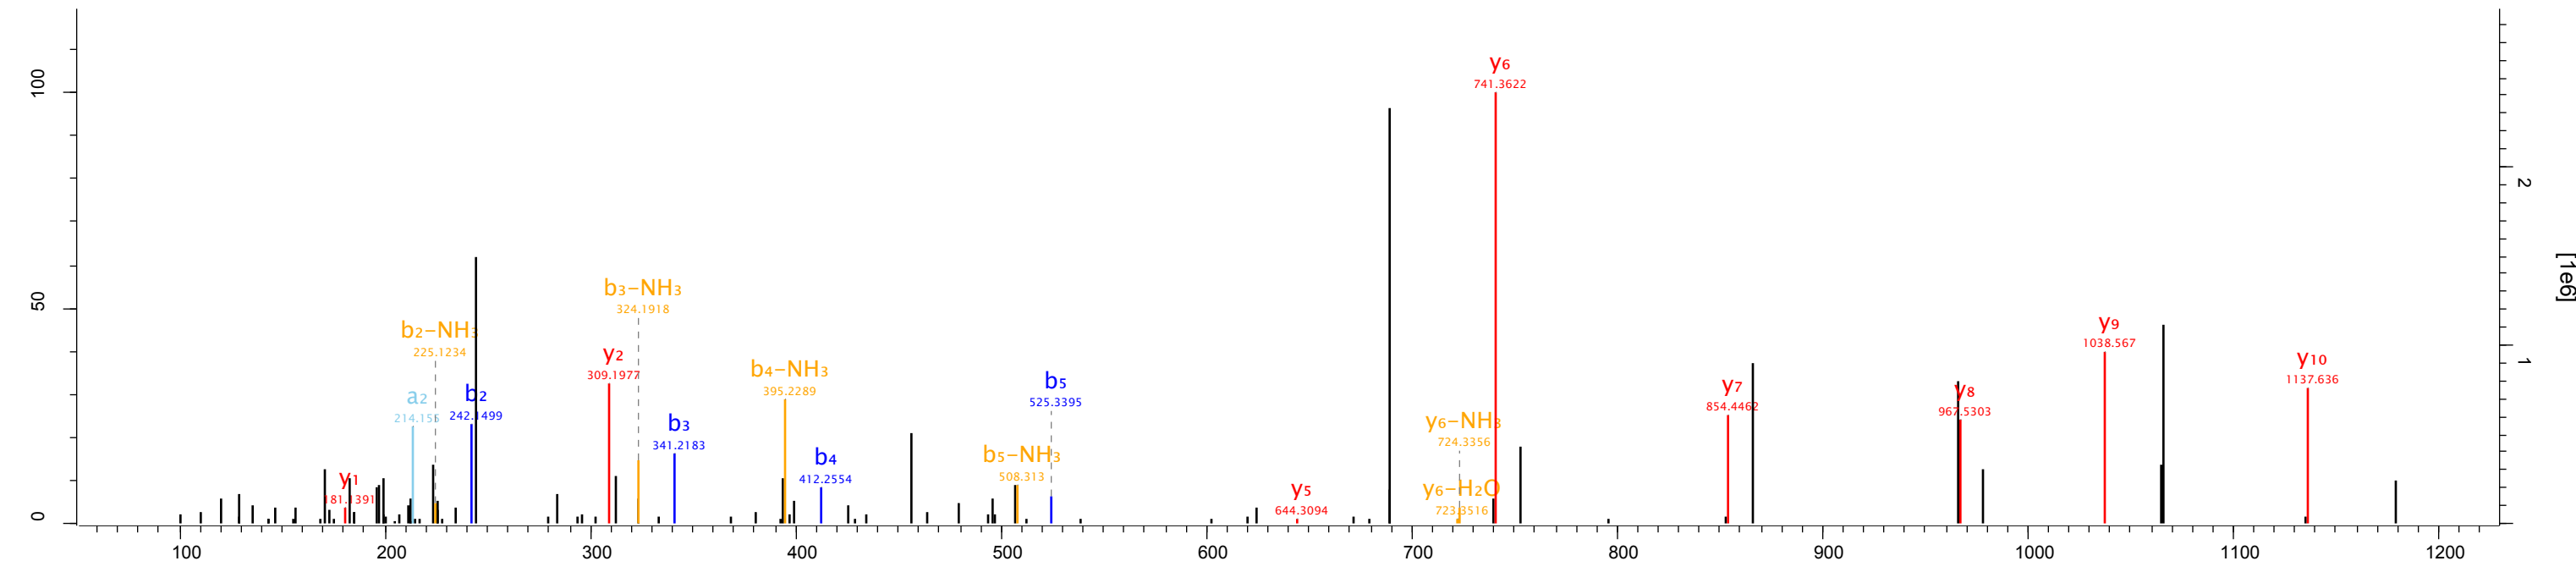

- Q L V A L I P Y G D Q R -

b<sub>2</sub> b<sub>3</sub> b<sub>4</sub> b<sub>5</sub> y<sub>10</sub> y<sub>9</sub> y<sub>8</sub> y<sub>7</sub> y<sub>6</sub> y<sub>5</sub> y<sub>2</sub> y<sub>1</sub>

Raw file  
20180707\_MaS\_A375SR\_ML\_proteome\_2\_03

Scan 27527 Method FTMS; HCD Score 116.6 m/z 762.04 Gene names CNIH4

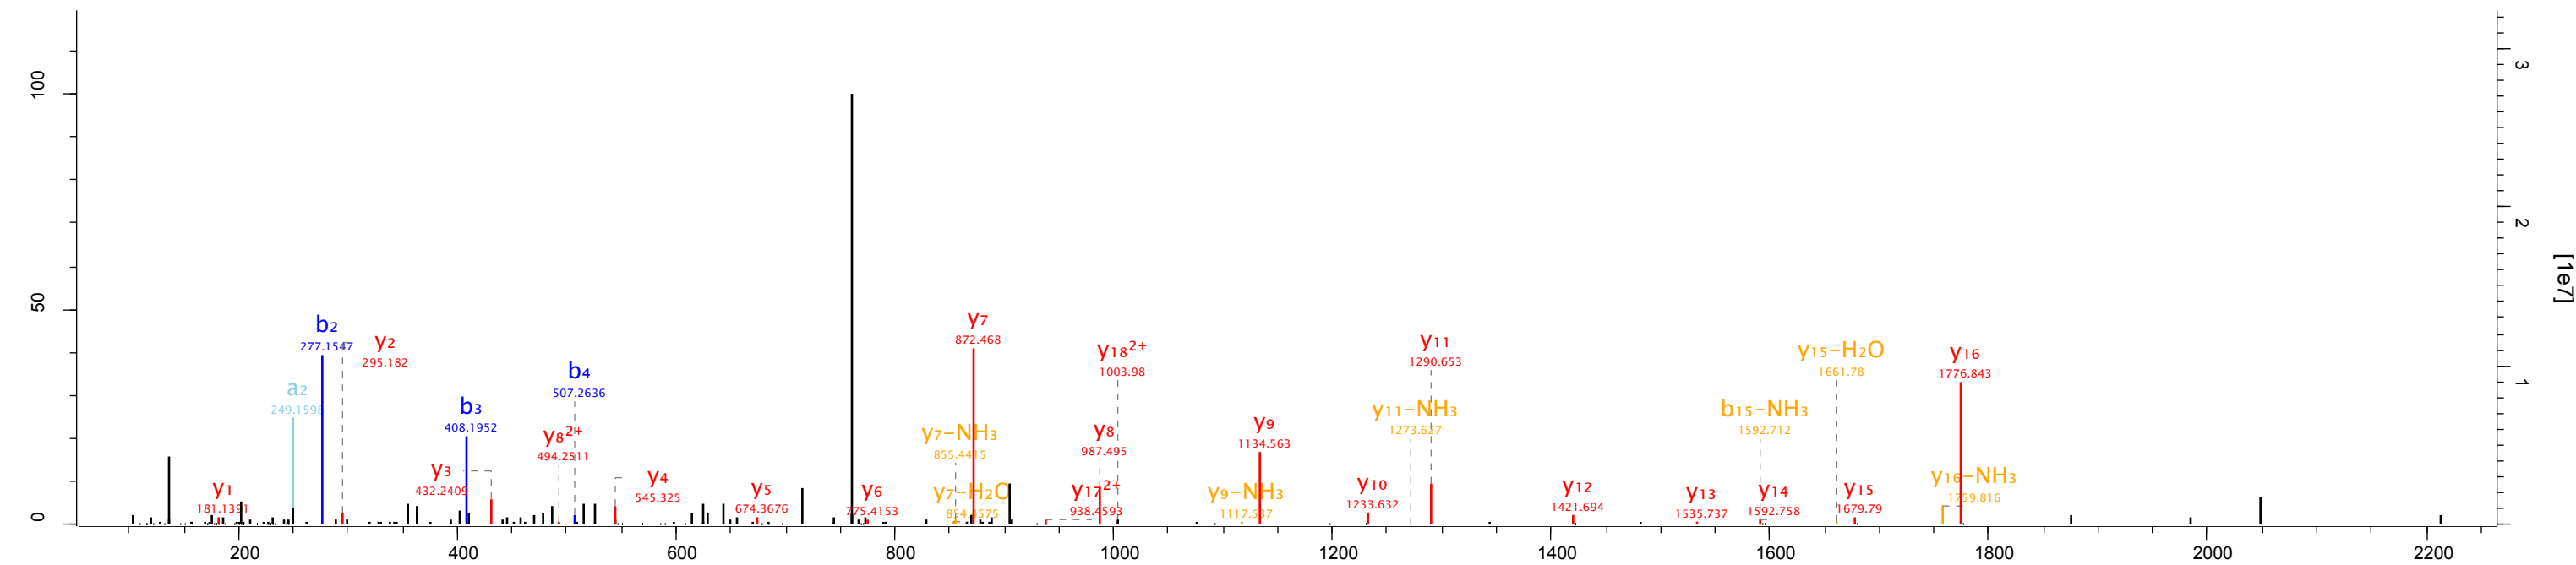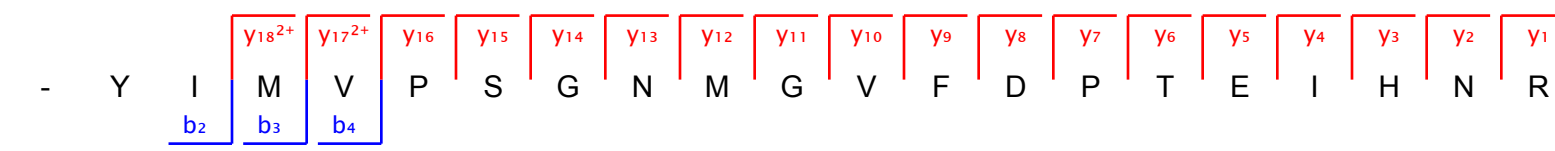

Raw file 20180707\_MaS\_A375SR\_ML\_proteome\_2\_03 Scan 4137 Method FTMS; HCD Score 66.19 m/z 576.29

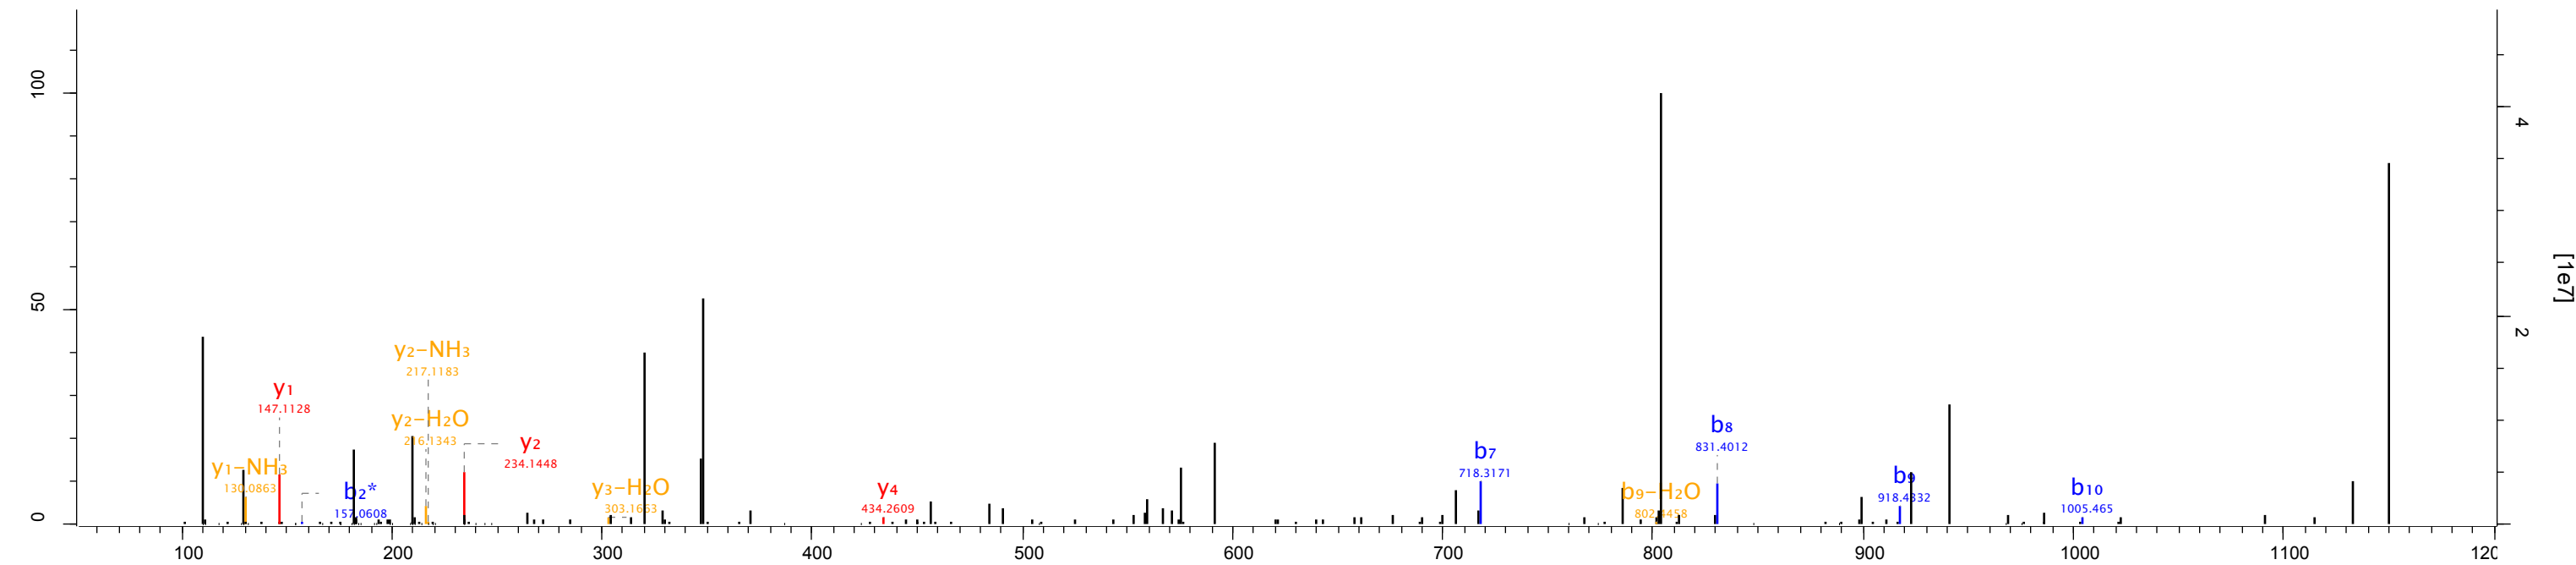

Raw file 20180707\_MaS\_A375SR\_ML\_proteome\_2\_04 Scan 23507 Method FTMS; HCD Score 72.61 m/z 504.28 Gene names PGM5

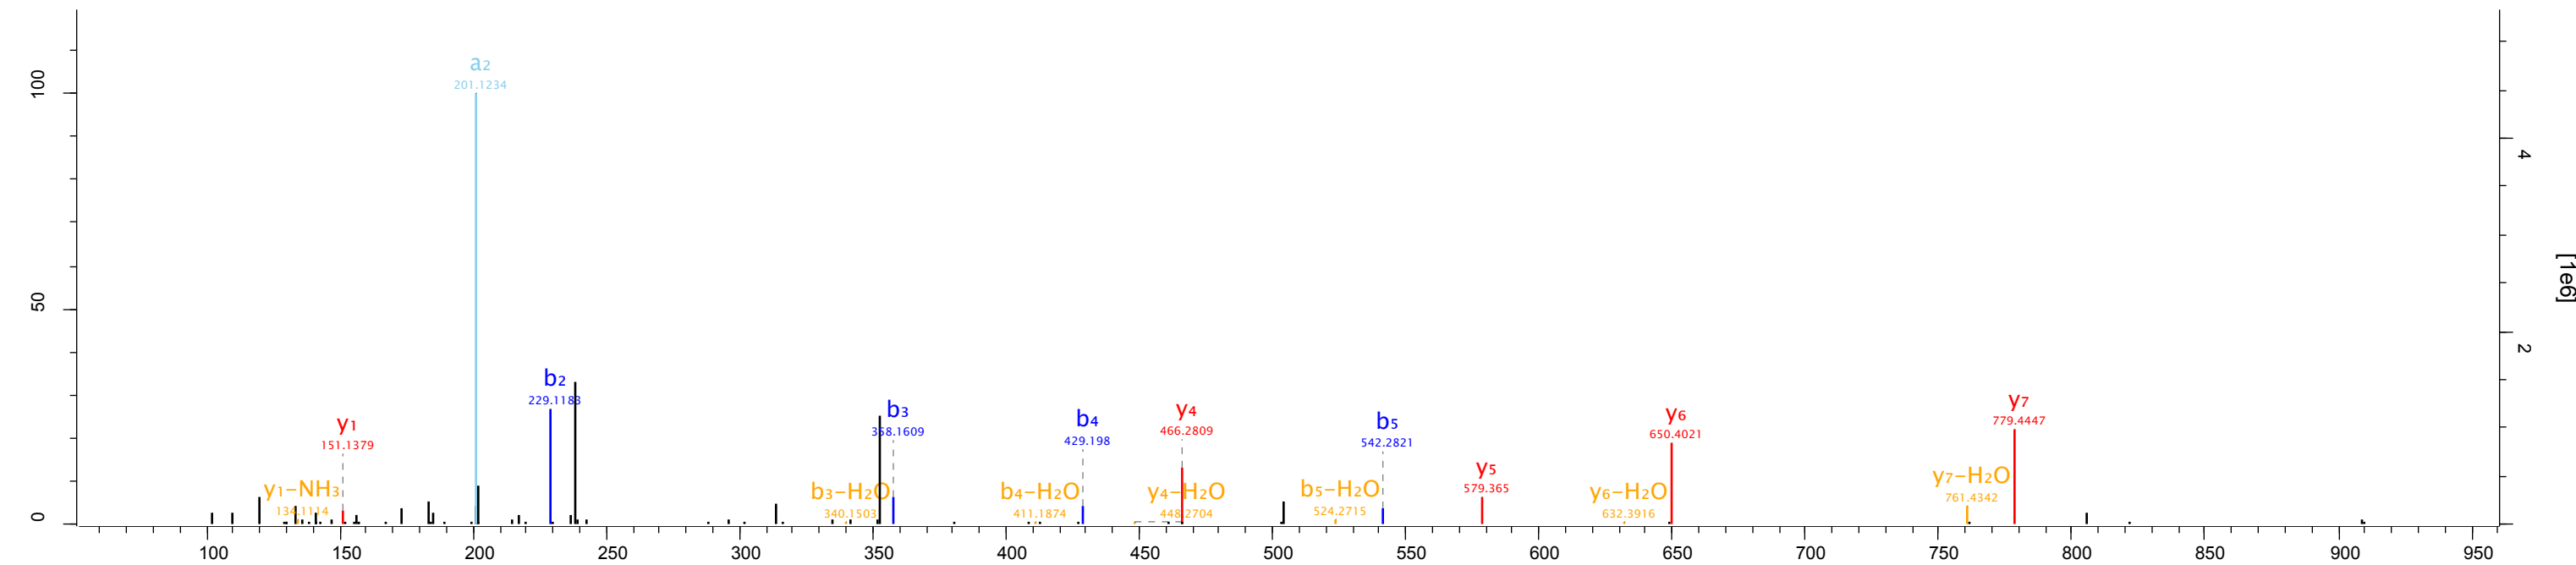

Raw file: 20180707\_MaS\_A375SR\_ML\_proteome\_2\_04  
 Scan: 3007 Method: FTMS; HCD Score: 83.53 m/z: 538.61 Gene names: MT-CO3

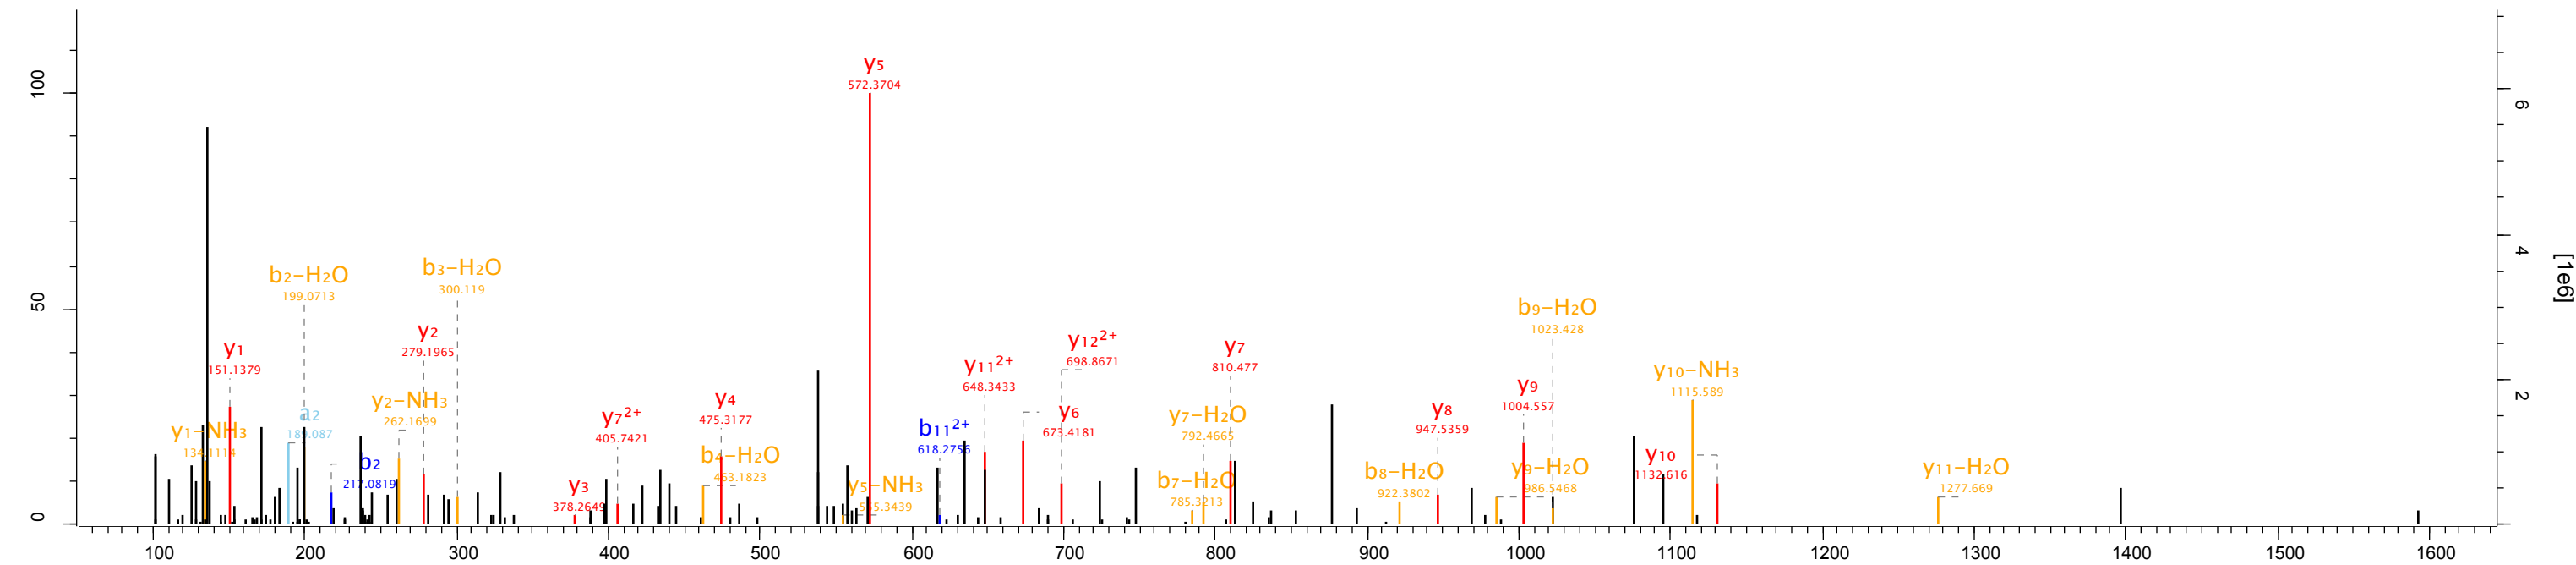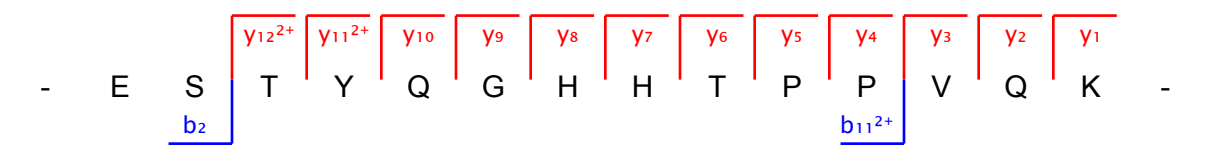

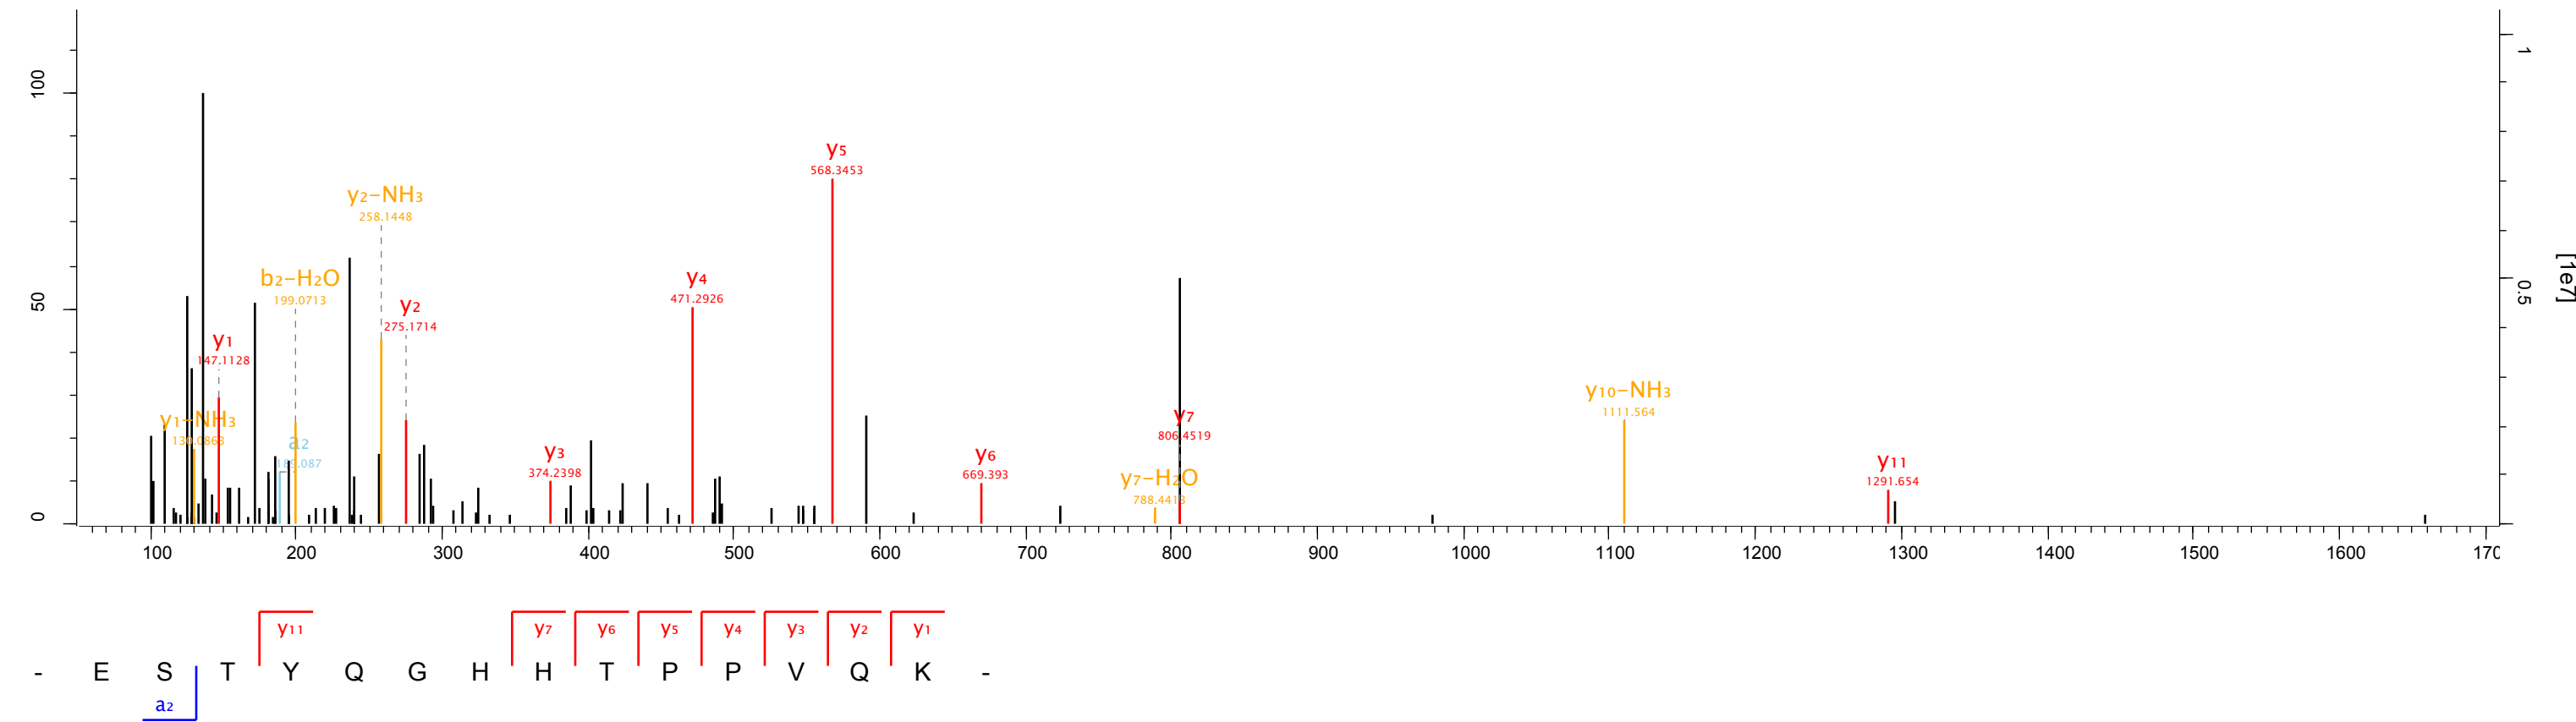



Raw file 20180707\_MaS\_A375SR\_ML\_proteome\_2\_05 Scan 28517 Method FTMS; HCD Score 90.15 m/z 570.82 Gene names MT-ND2

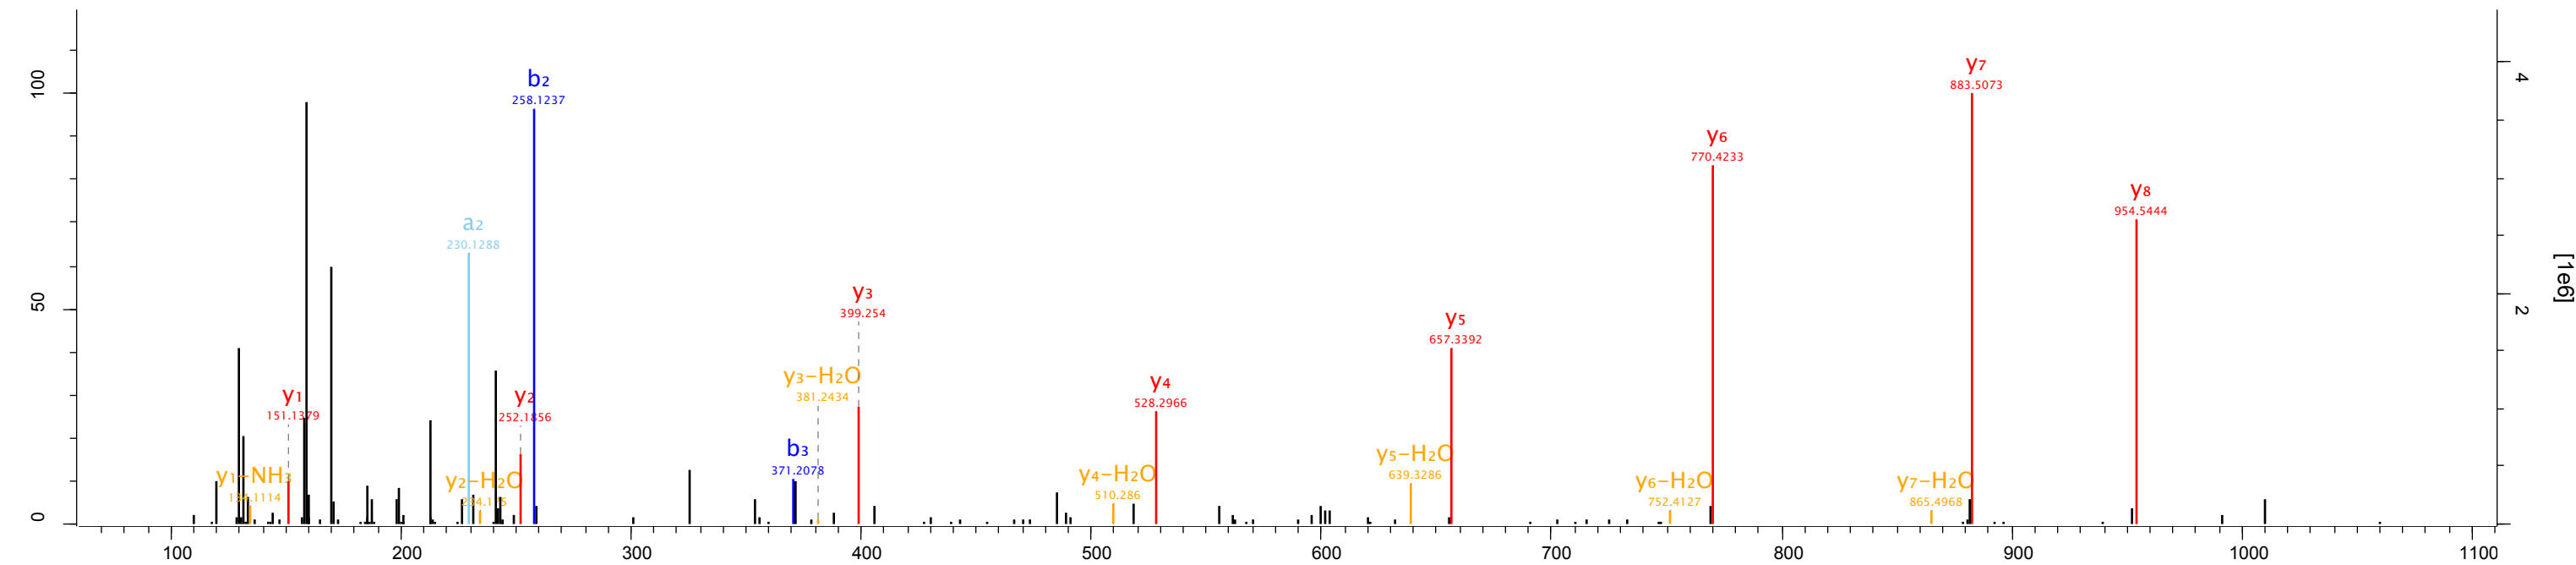

Raw file 20180707\_MaS\_A375SR\_ML\_proteome\_2\_05 Scan 3507 Method FTMS; HCD Score 18.83 m/z 402.95 Gene names MT-CO3

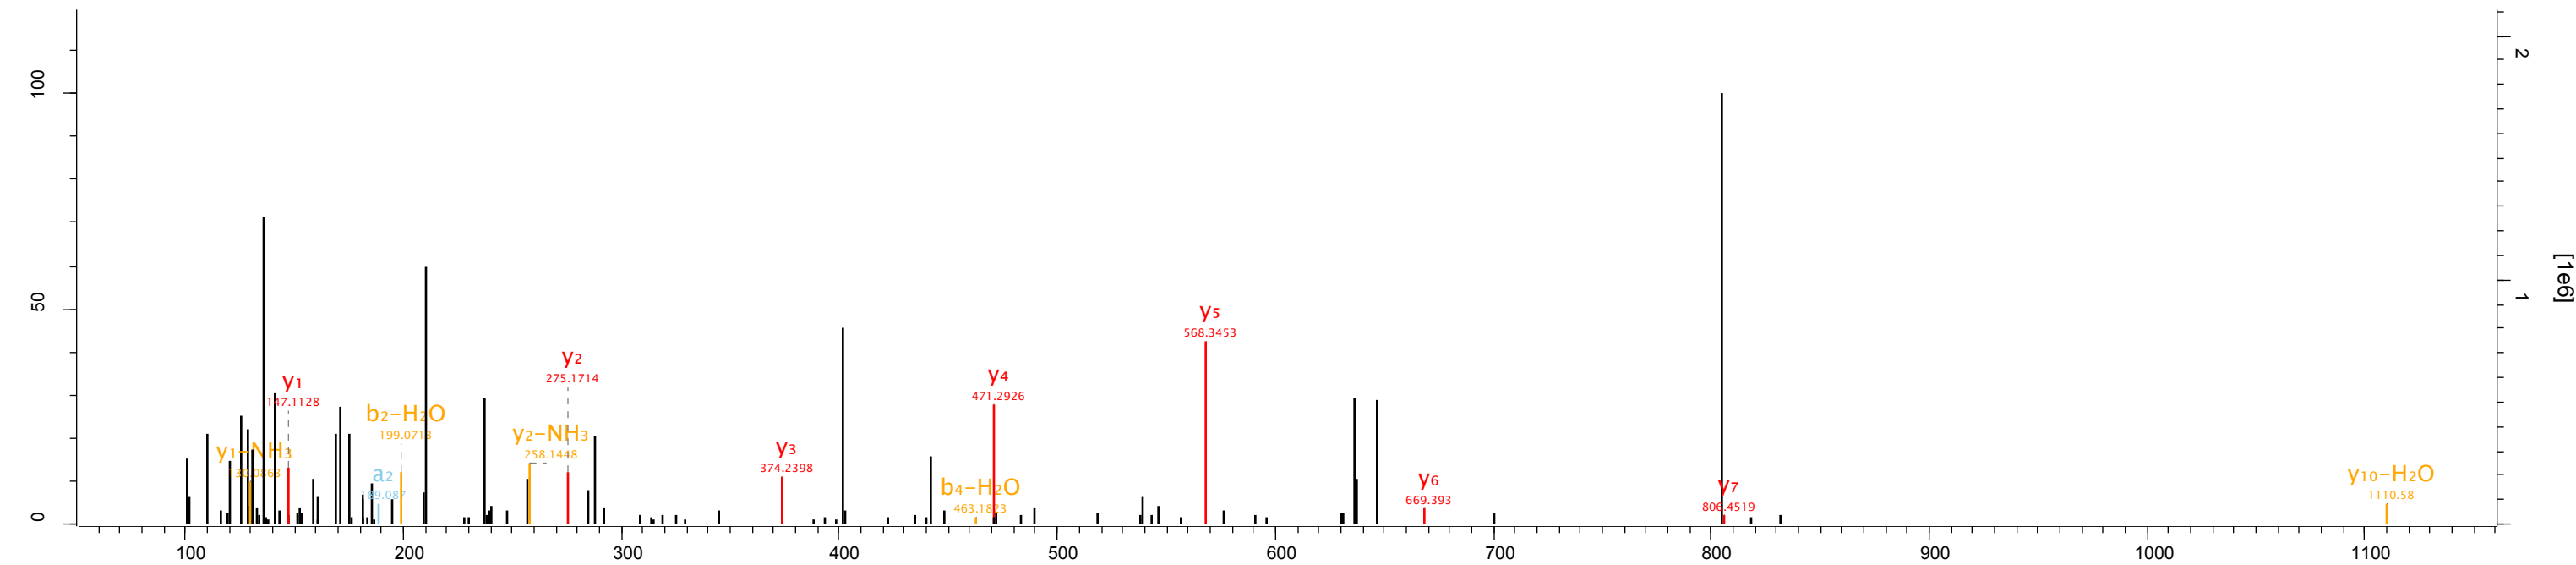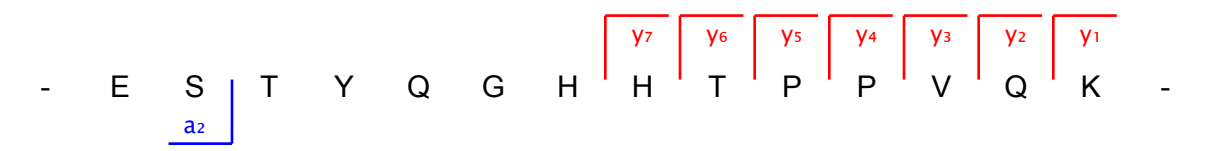

Raw file 20180707\_MaS\_A375SR\_ML\_proteome\_2\_06 Scan 11397 Method FTMS; HCD Score 78.32 m/z 899.91

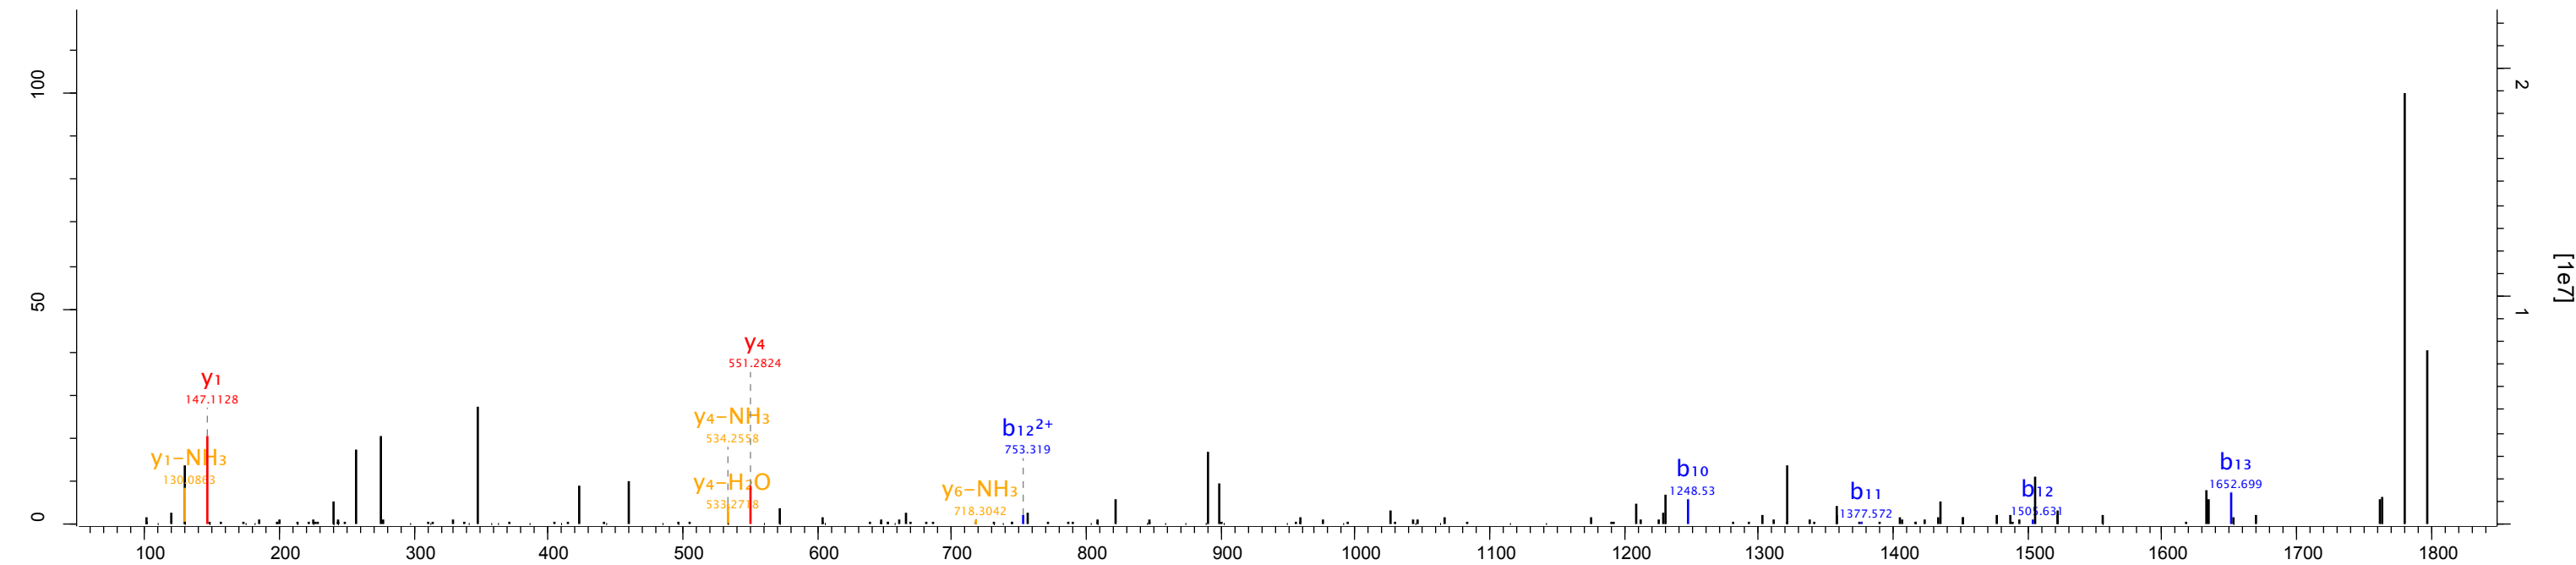

- R L I G Y S E F D S E Q F K -

ph

b<sub>10</sub> b<sub>11</sub> b<sub>12</sub> b<sub>13</sub> y<sub>4</sub> y<sub>1</sub>

Raw file: 20180707\_MaS\_A375SR\_ML\_proteome\_2\_07  
 Scan: 18097 Method: FTMS; HCD Score: 45.37 m/z: 512.73 Gene names: TMEM258

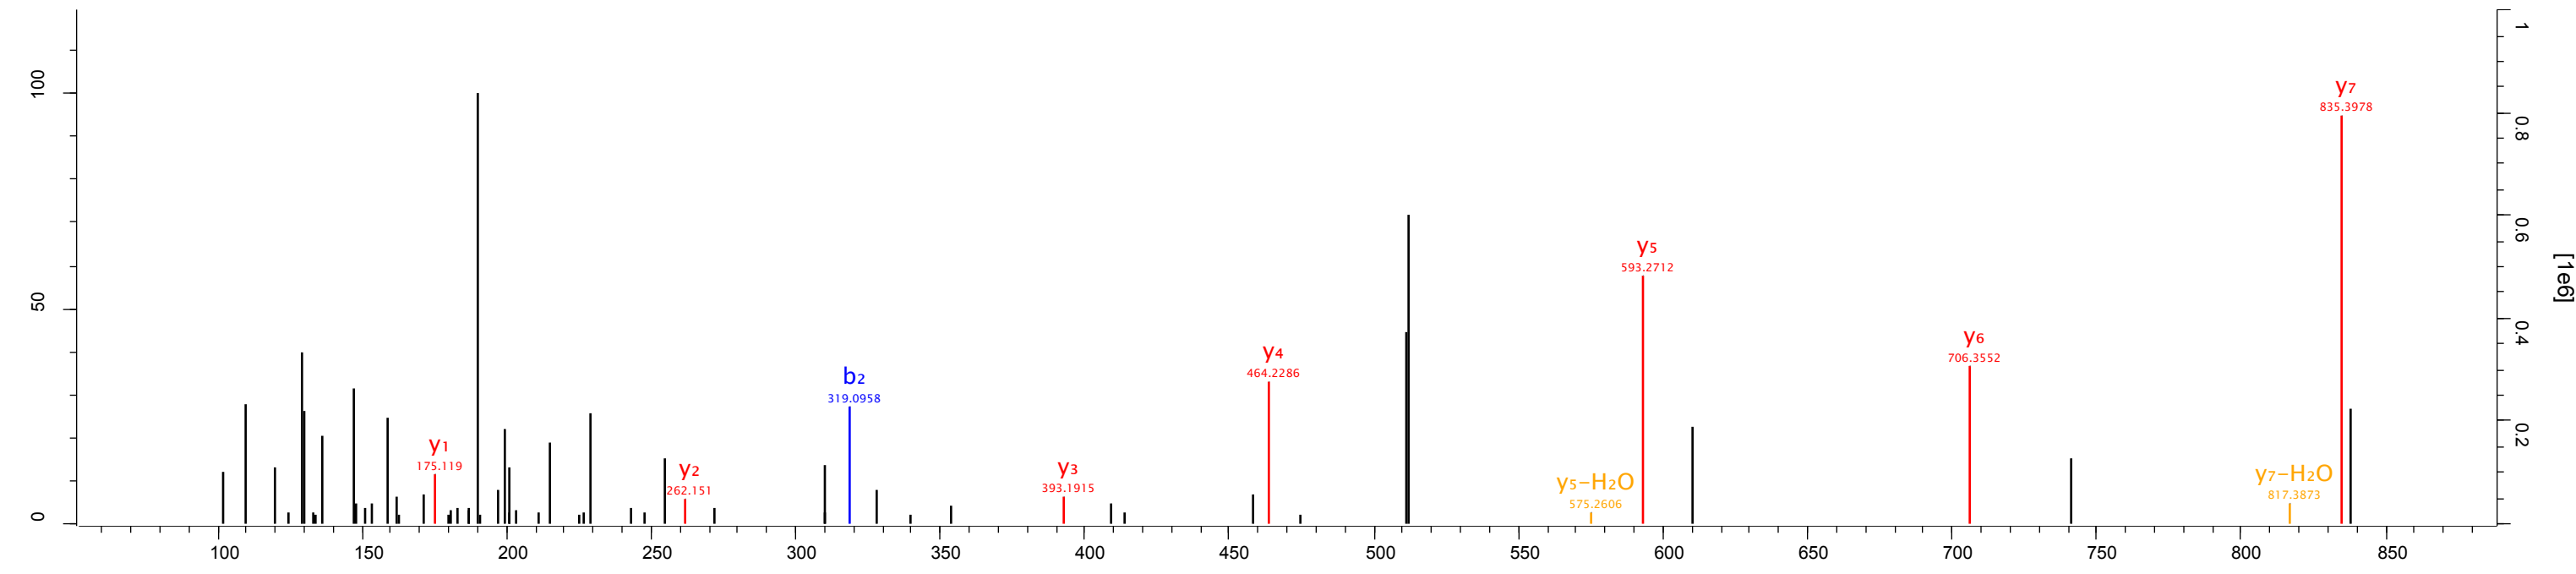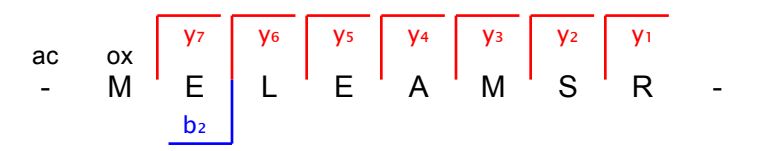

Raw file 20180707\_MaS\_A375SR\_ML\_proteome\_2\_10 Scan 15887 Method FTMS; HCD Score 42.24 m/z 625.73

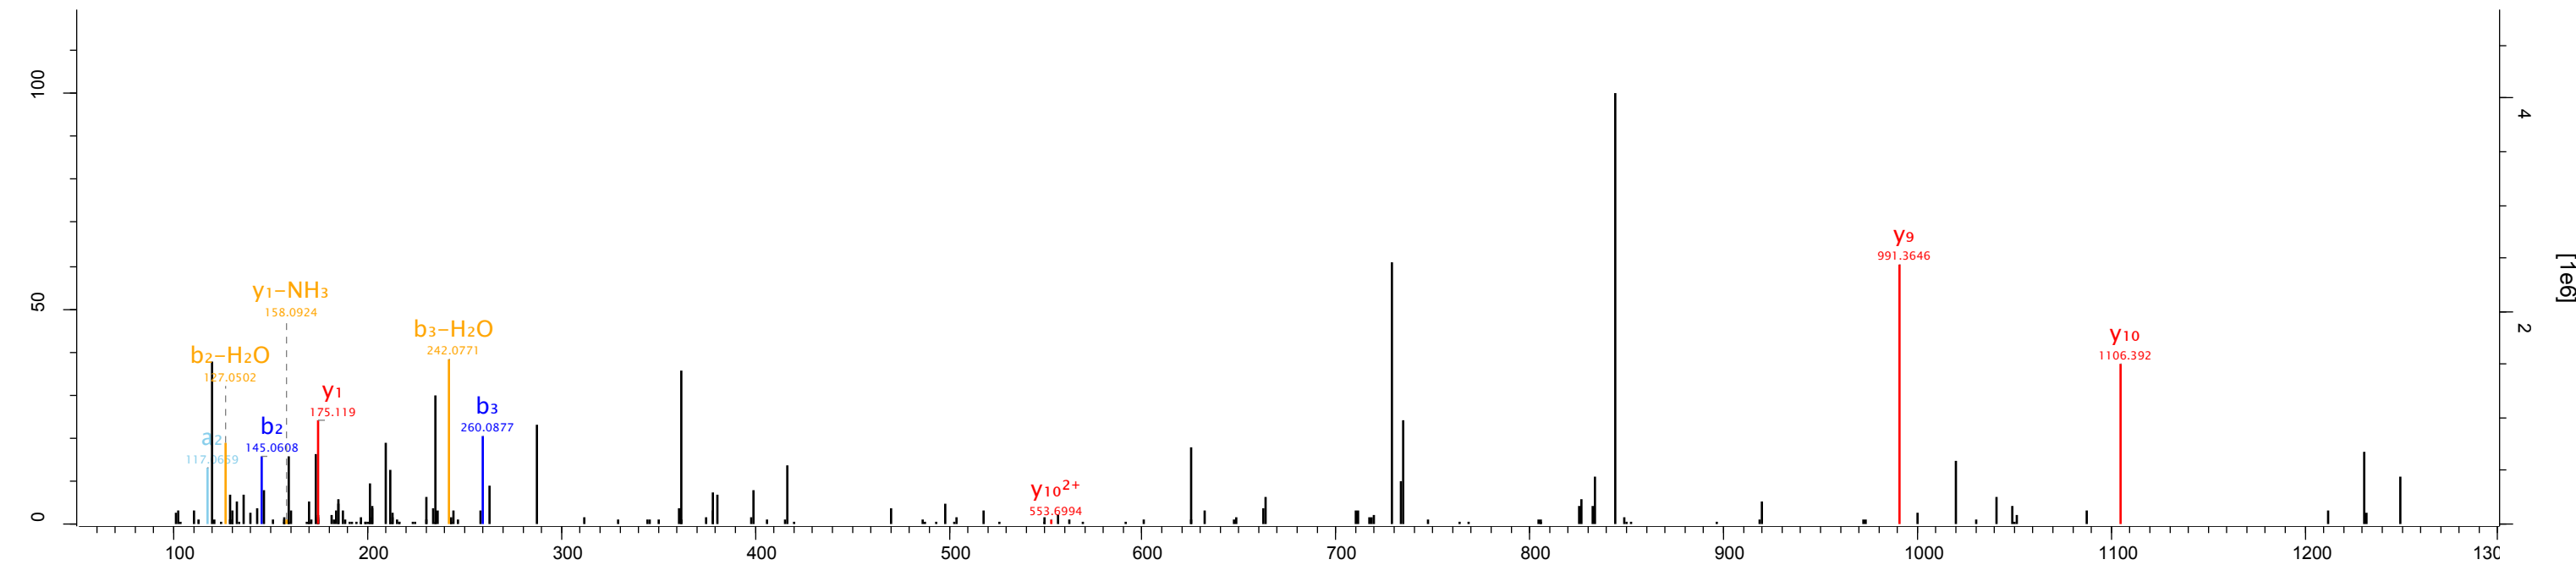

Raw file  
20180707\_MaS\_A375SR\_ML\_proteome\_2\_10

Scan 21677 Method FTMS; HCD Score 214.54 m/z 734.66 Gene names ELOF1

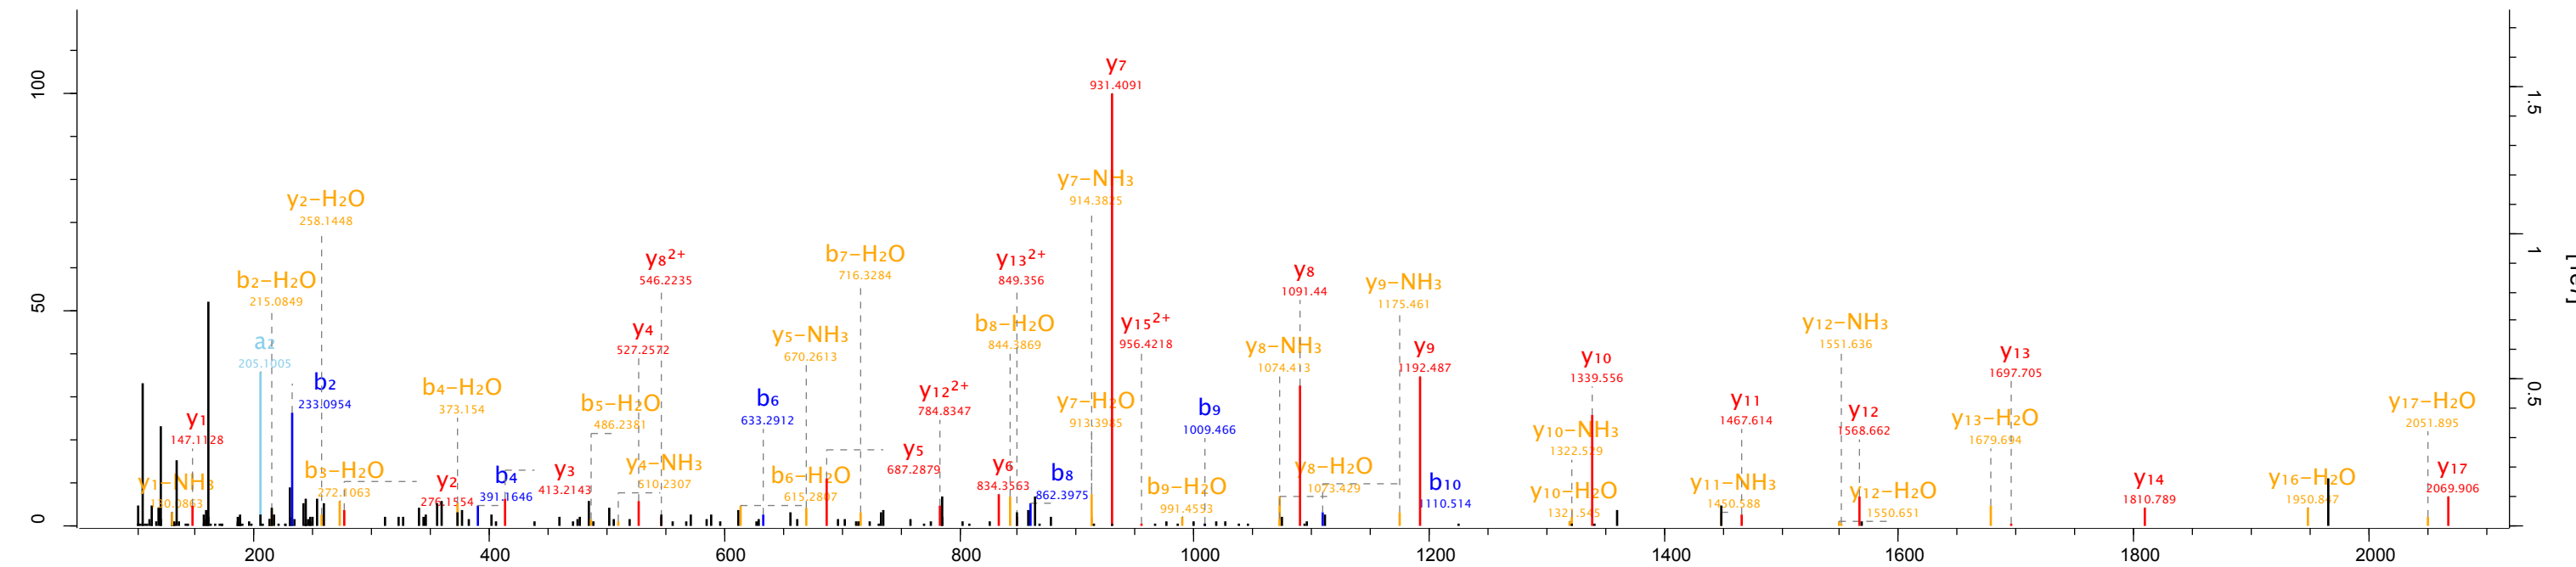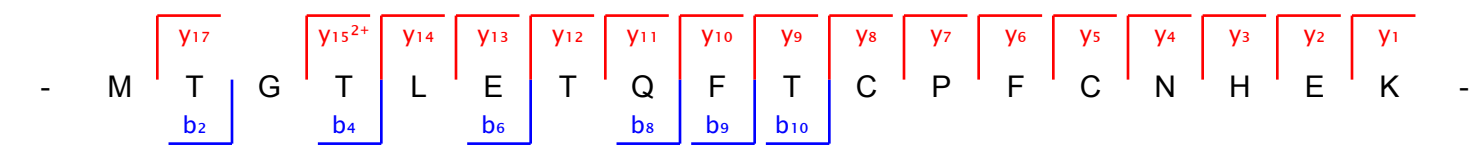

Raw file  
20180707\_MaS\_A375SR\_ML\_proteome\_2\_10

Scan 26967 Method FTMS; HCD Score 66.02 m/z 1039.46 Gene names RNF121

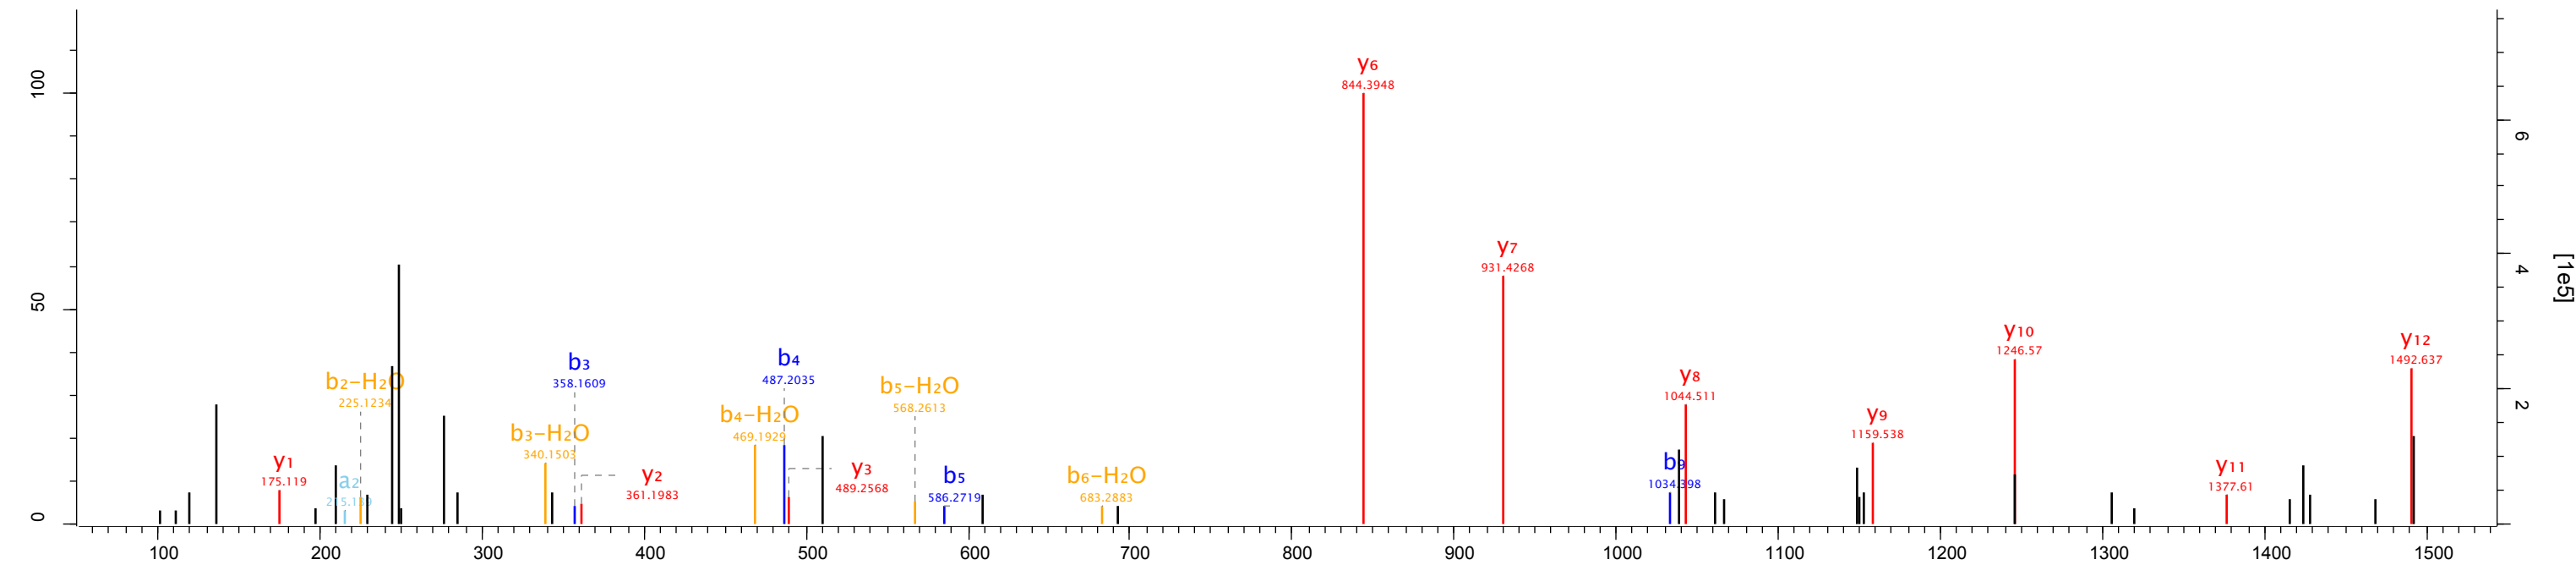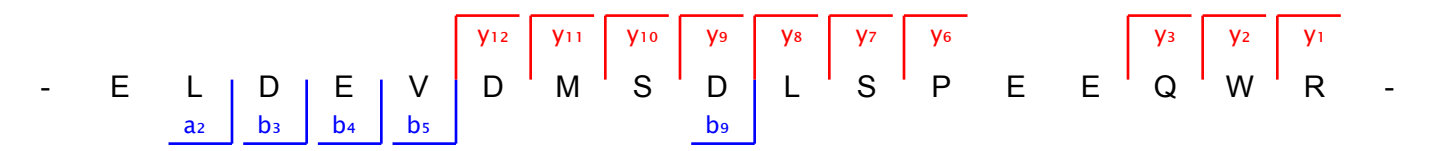

Raw file: 20180707\_MaS\_A375SR\_ML\_proteome\_2\_11  
 Scan: 12407    Method: FTMS; HCD    Score: 64.78    m/z: 442.23    Gene names: C1orf234

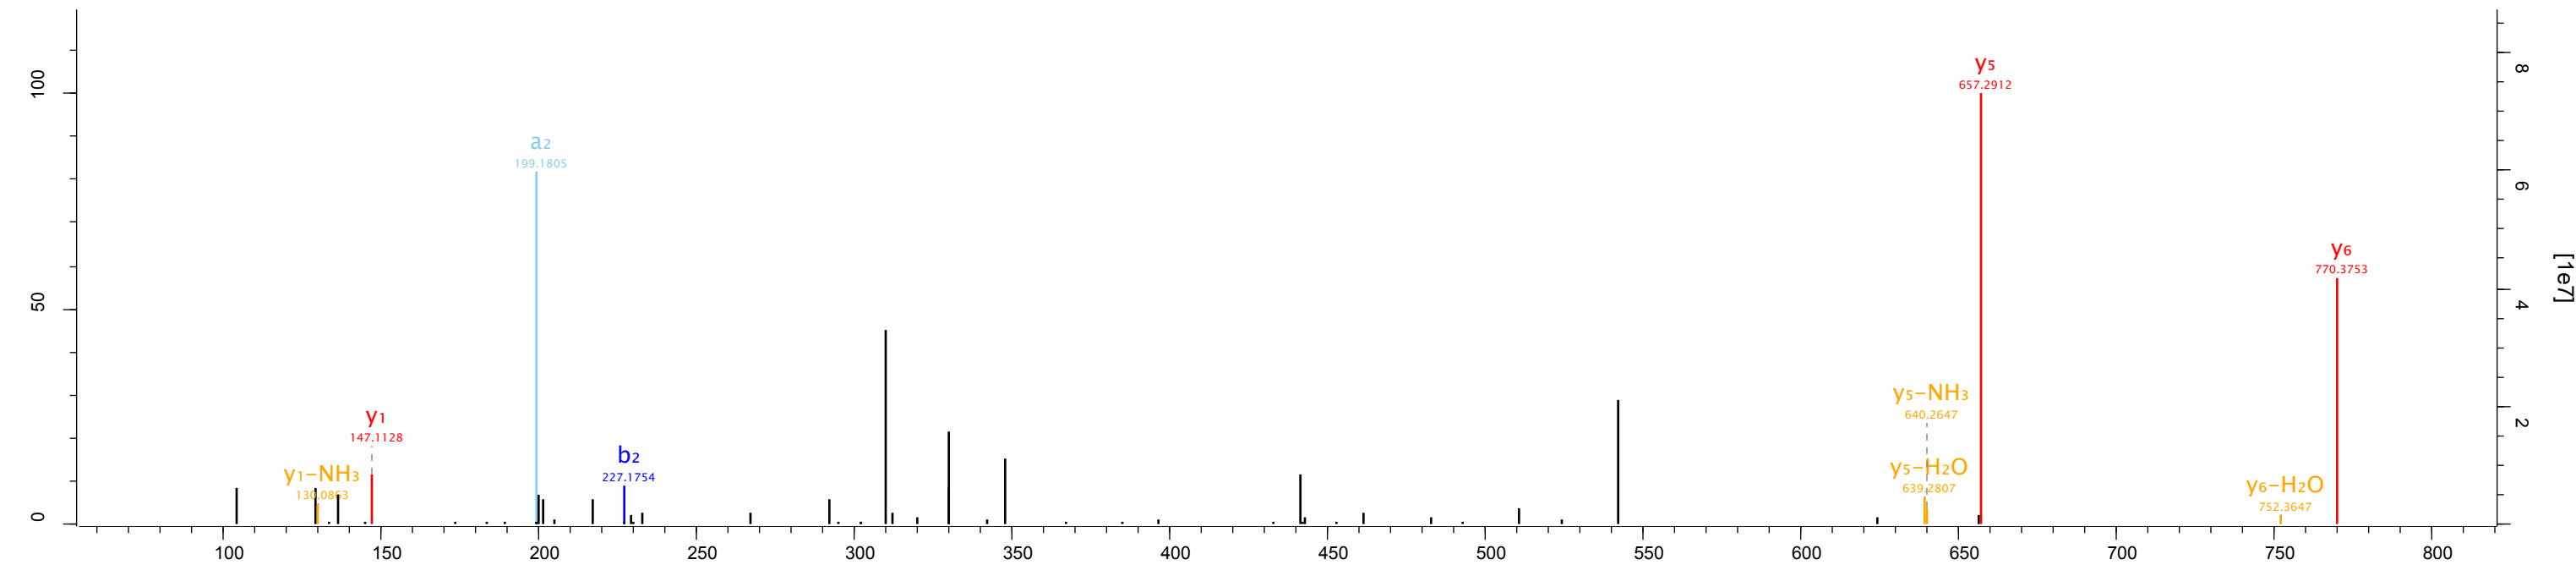



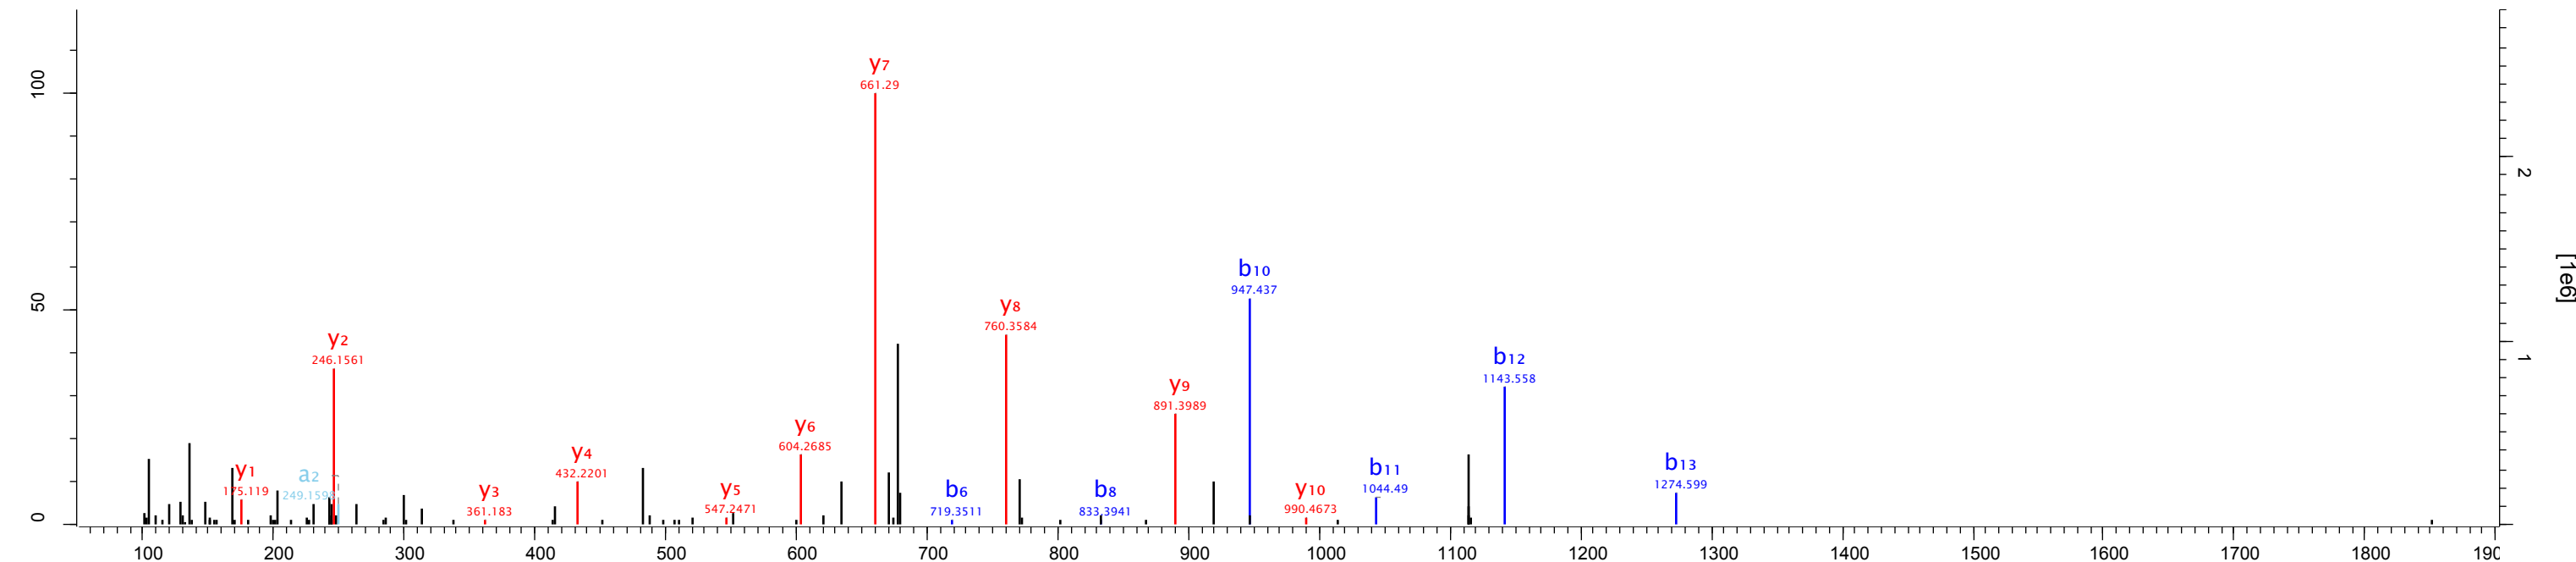

- L Y S H F A G G G P V M V G G D A D A R -

Fragmentation sites are indicated by brackets below the sequence:

- Blue brackets (b ions): a2 (Y-S), b6 (A-G), b8 (G-G), b10 (G-P), b11 (P-V), b12 (V-M), b13 (M-V)
- Red brackets (y ions): y10 (V-M), y9 (M-V), y8 (V-G), y7 (G-G), y6 (G-D), y5 (D-A), y4 (A-D), y3 (D-A), y2 (A-R), y1 (R)

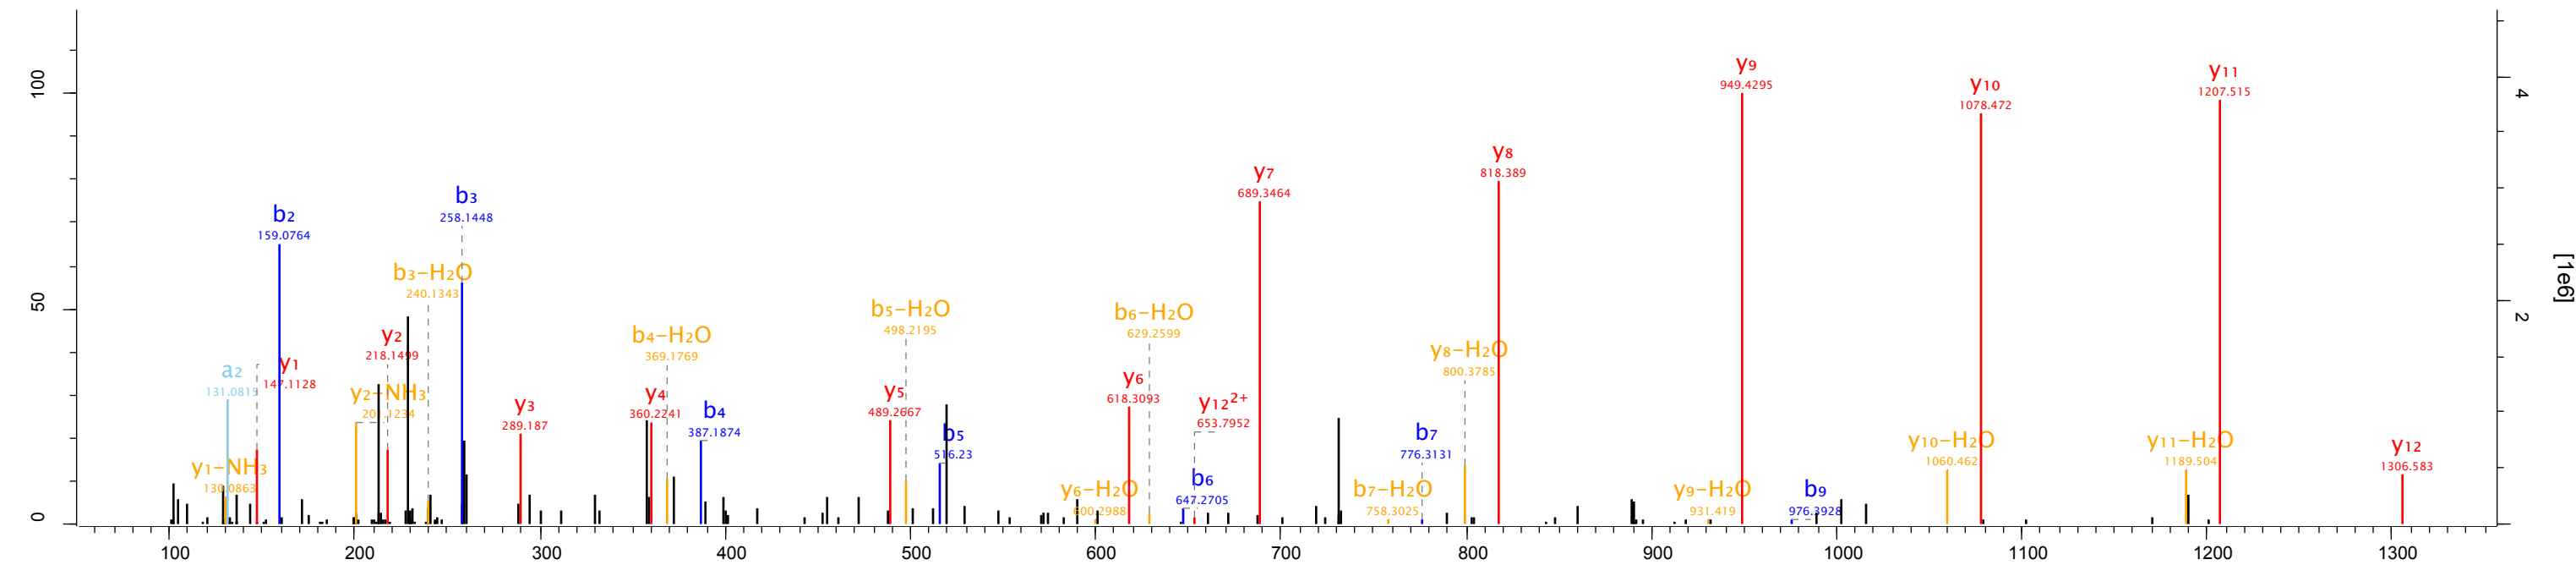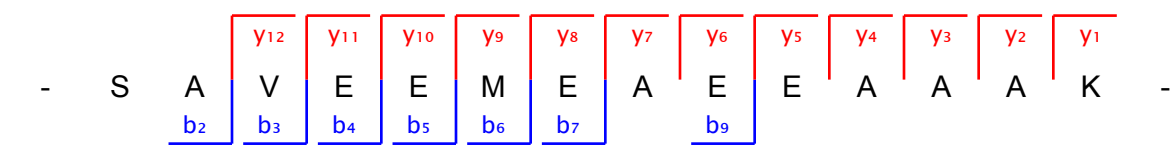

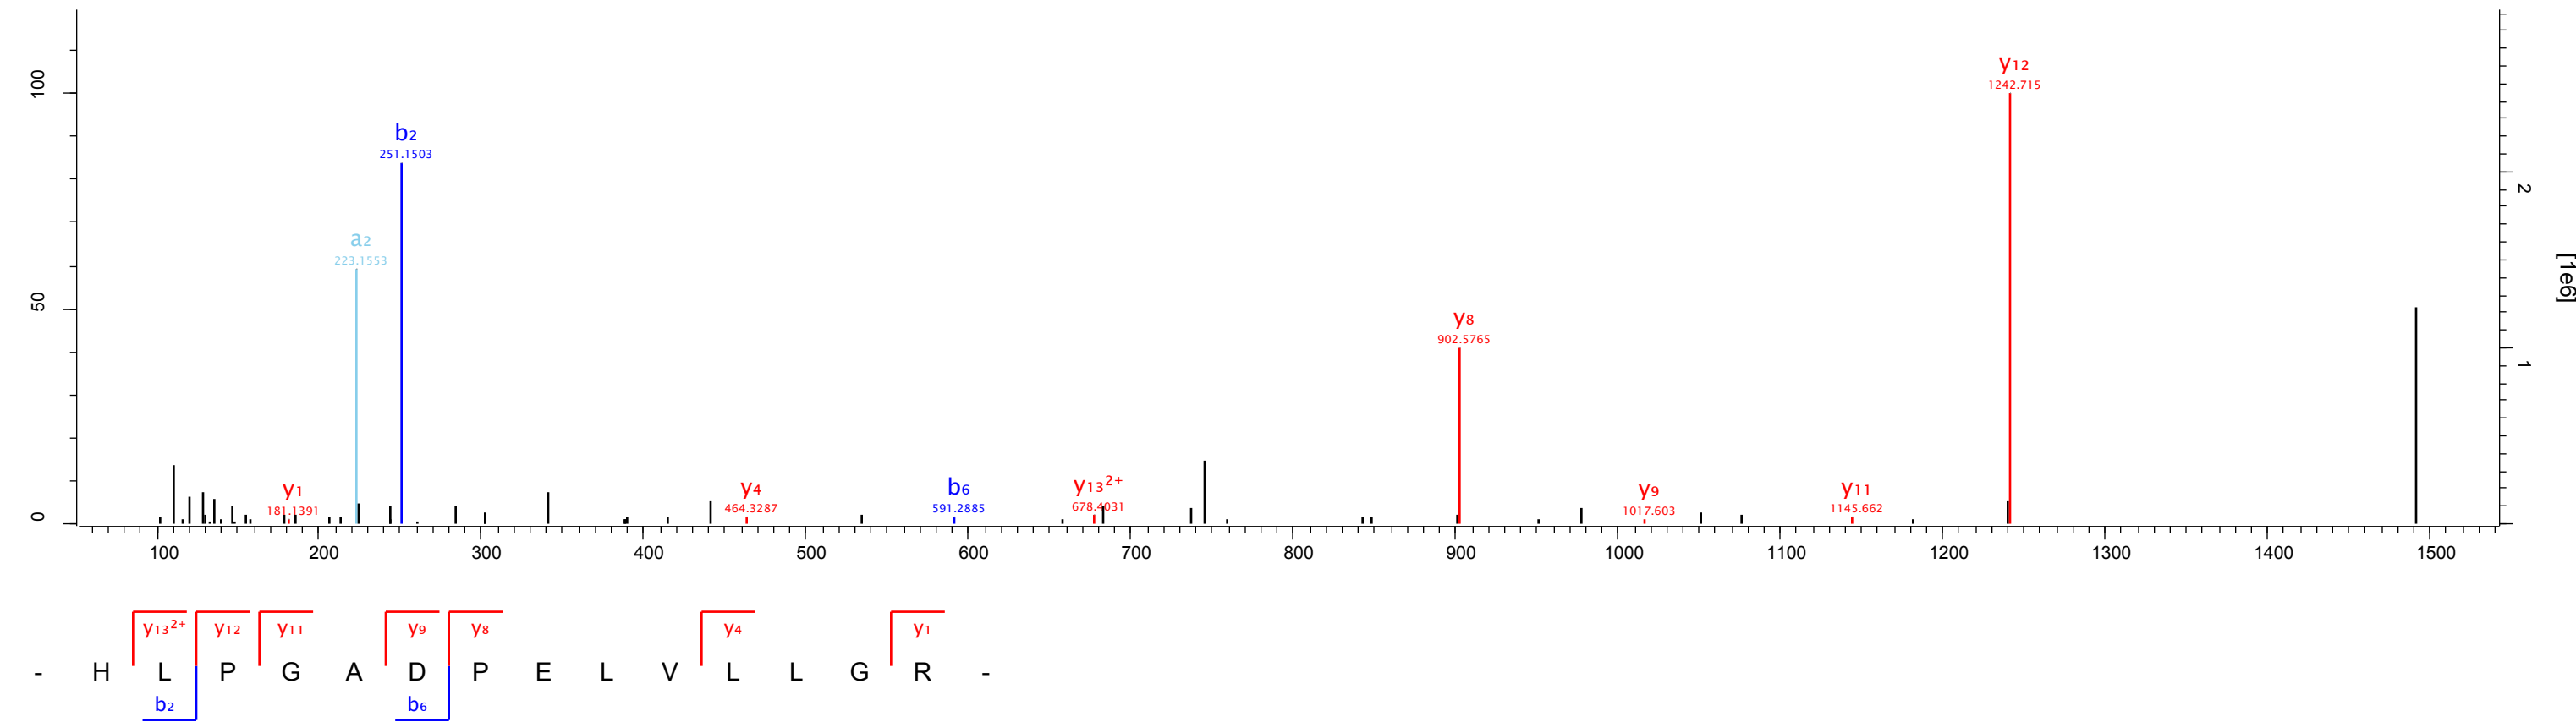

Raw file 20180707\_MaS\_A375SR\_ML\_proteome\_2\_14  
 Scan 25857 Method FTMS; HCD Score 83.09 m/z 860.95 Gene names IGFALS

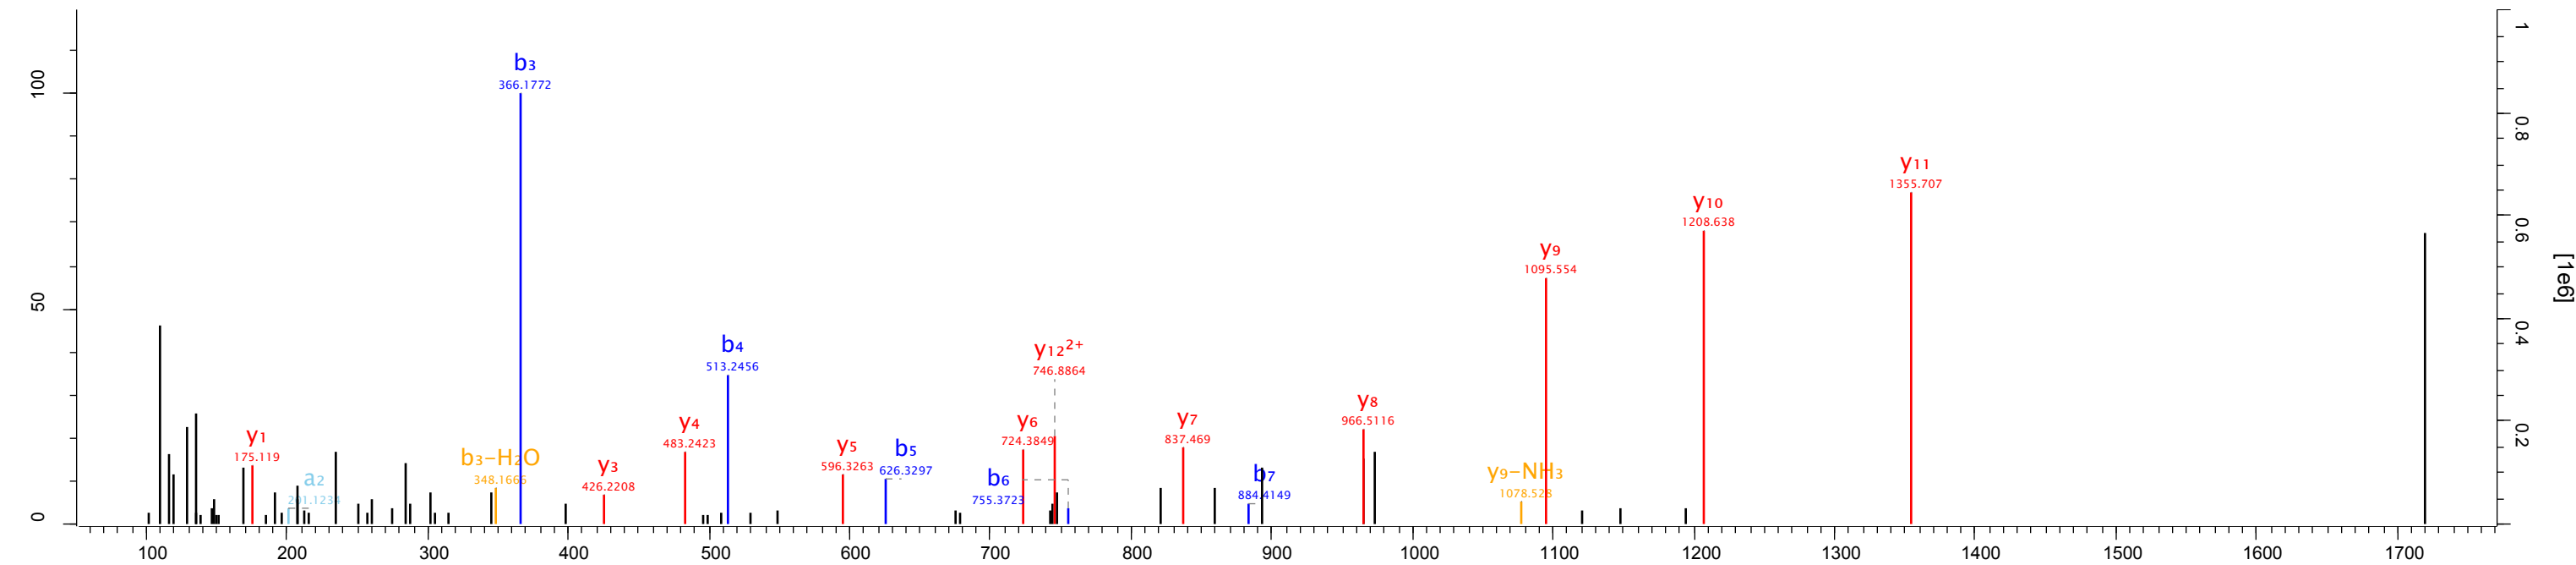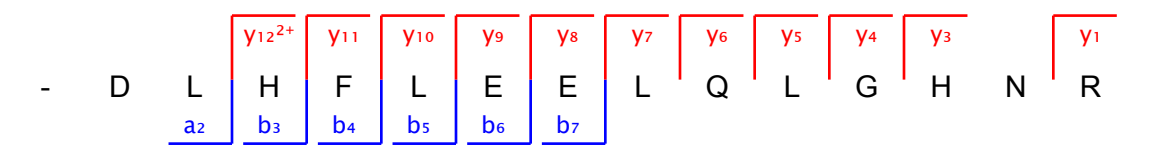

Raw file  
20180707\_MaS\_A375SR\_ML\_proteome\_2\_15

Scan 18277 Method FTMS; HCD Score 11.36 m/z 675.35 Gene names TMEM243

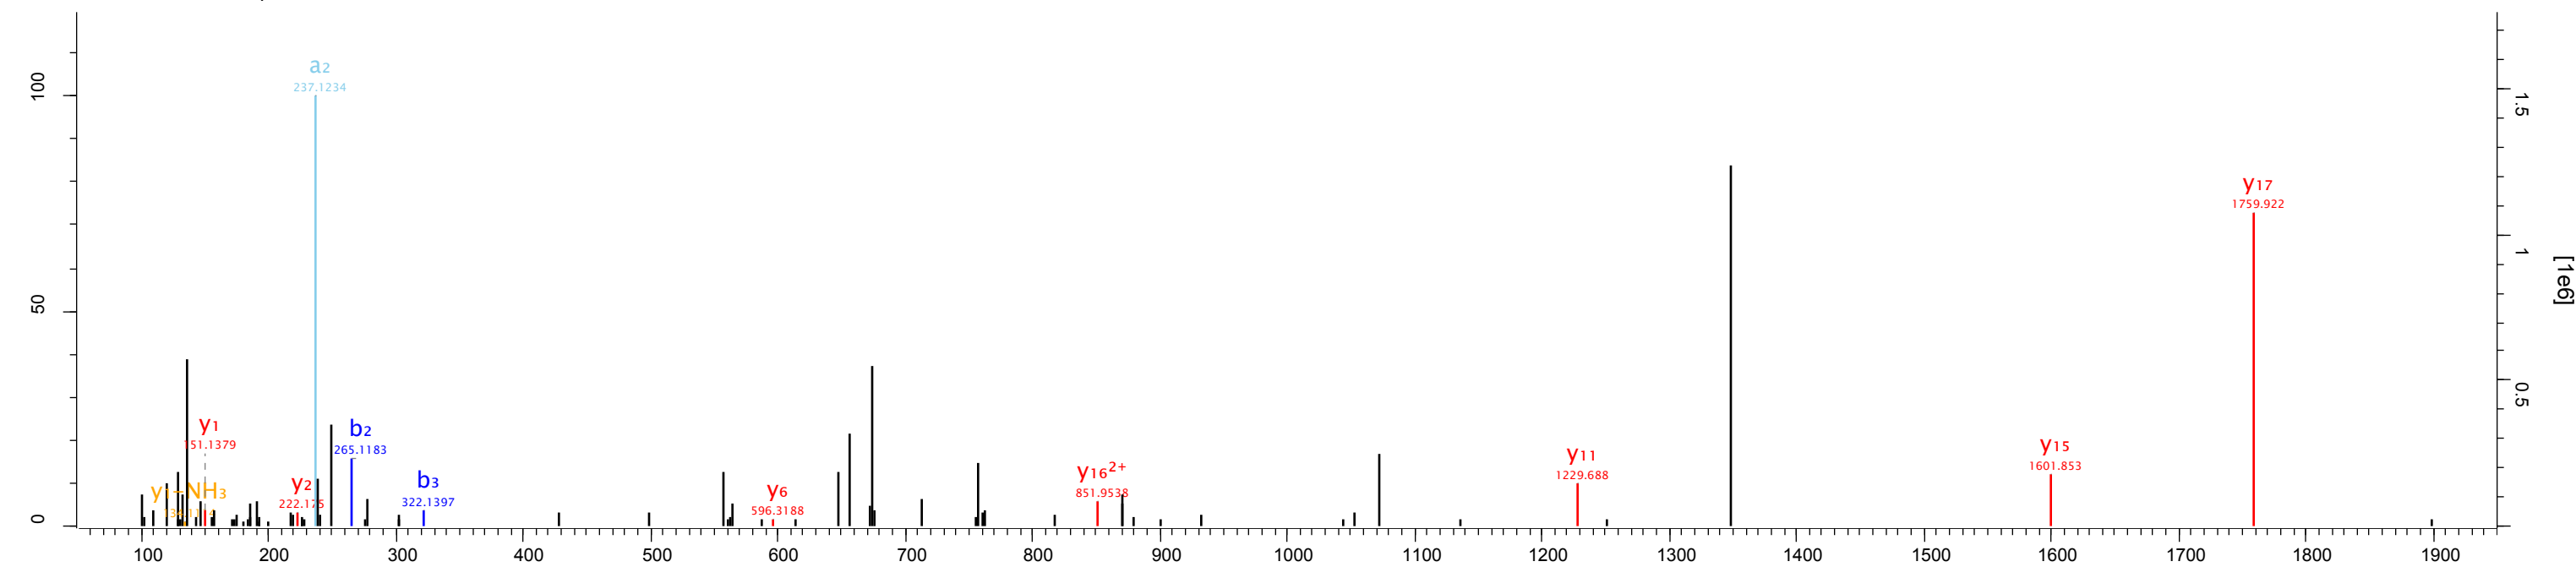

- T Y G T S G L D N R P L F G E T S A K -

Fragmentation mapping (b and y ions) is shown below the sequence:

- b<sub>2</sub> (blue) is associated with Y.
- b<sub>3</sub> (blue) is associated with G.
- y<sub>17</sub> (red) is associated with G.
- y<sub>16</sub><sup>2+</sup> (red) is associated with T.
- y<sub>15</sub> (red) is associated with S.
- y<sub>11</sub> (red) is associated with N.
- y<sub>6</sub> (red) is associated with G.
- y<sub>2</sub> (red) is associated with A.
- y<sub>1</sub> (red) is associated with K.

Raw file  
20180707\_MaS\_A375SR\_ML\_proteome\_2\_17

Scan 14677 Method FTMS; HCD Score 47.47 m/z 615.8 Gene names WSB2

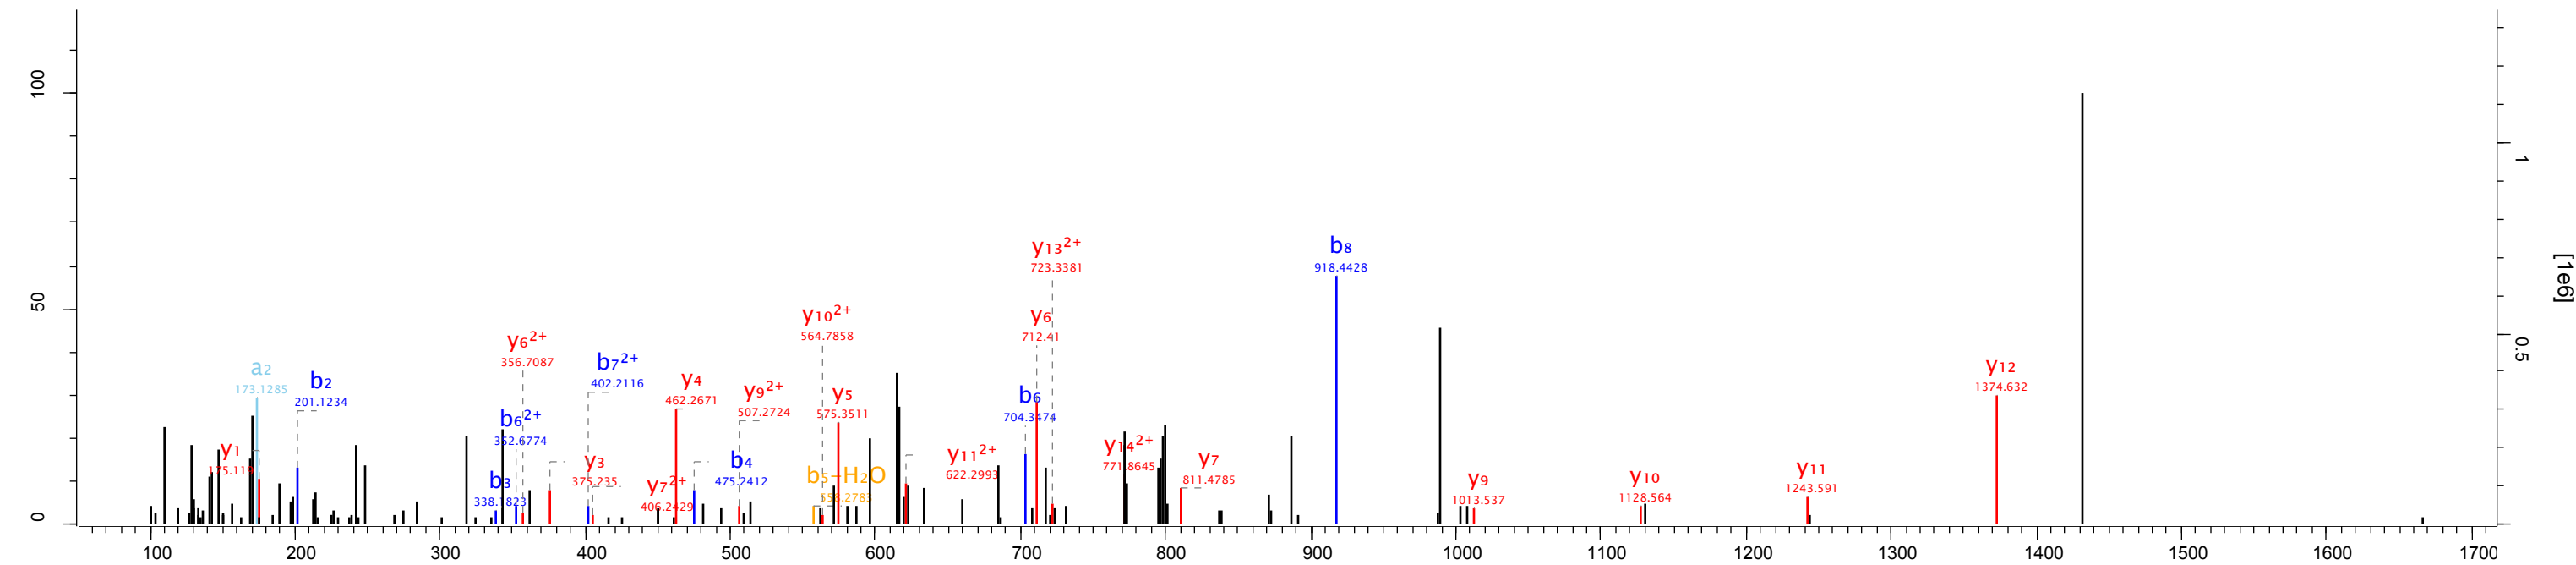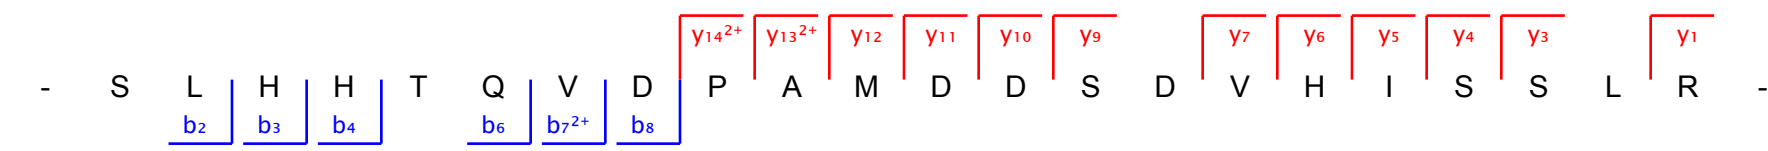

Raw file 20180707\_MaS\_A375SR\_ML\_proteome\_2\_17 Scan 17587 Method FTMS; HCD Score 89.7 m/z 485.27

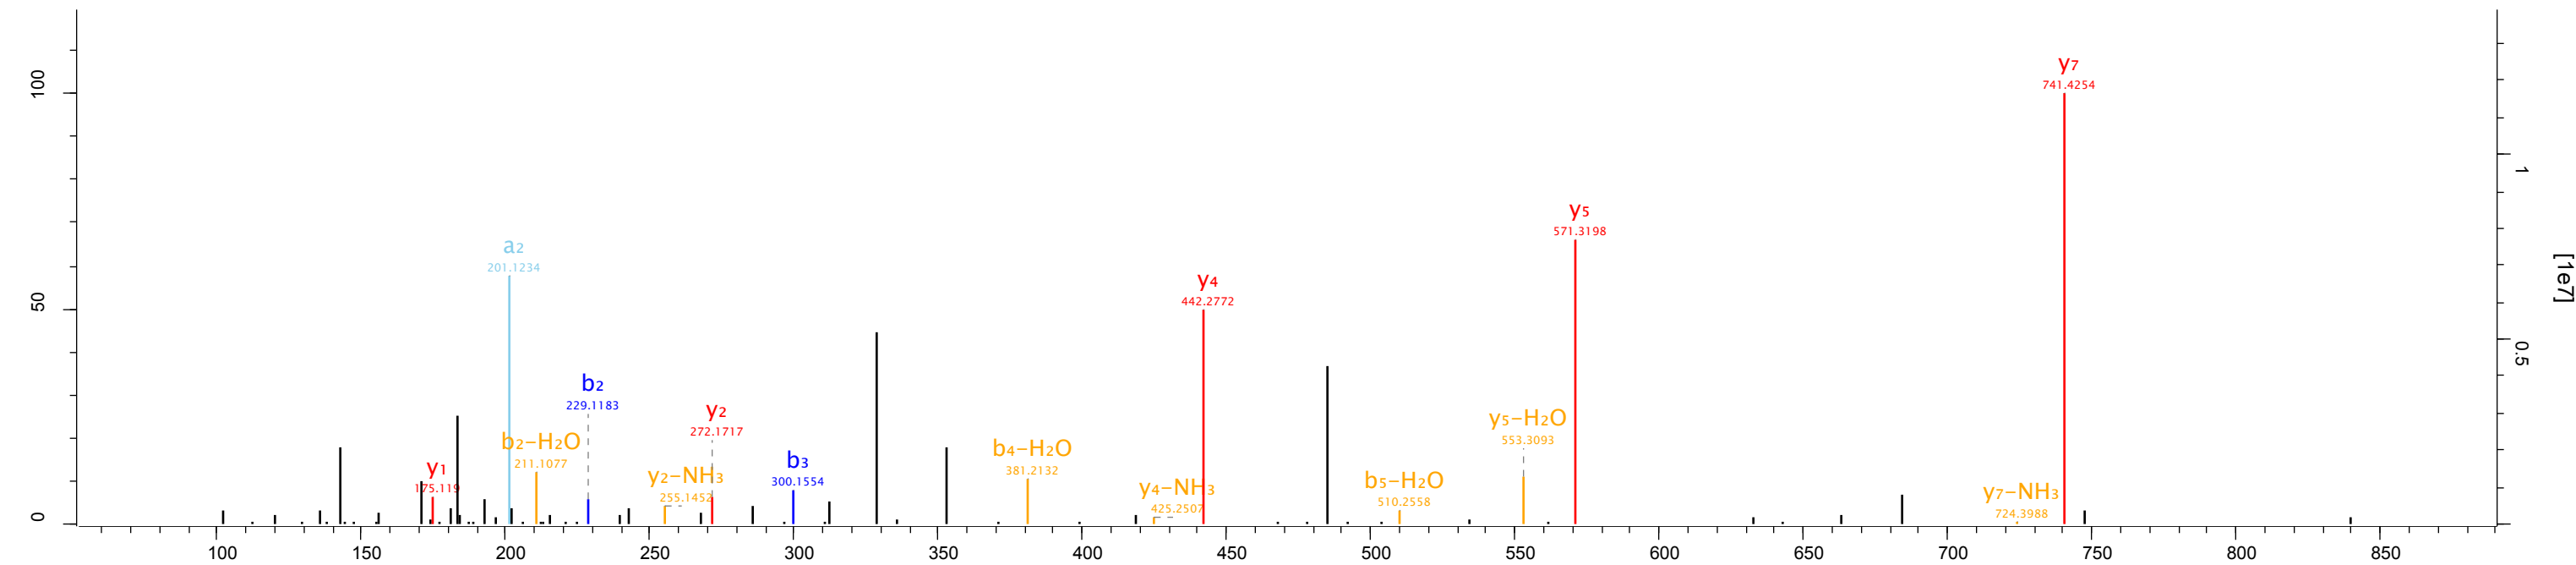

Raw file  
 20180707\_MaS\_A375SR\_ML\_proteome\_2\_17  
 Scan 23897 Method FTMS; HCD Score 74.84 m/z 614.84

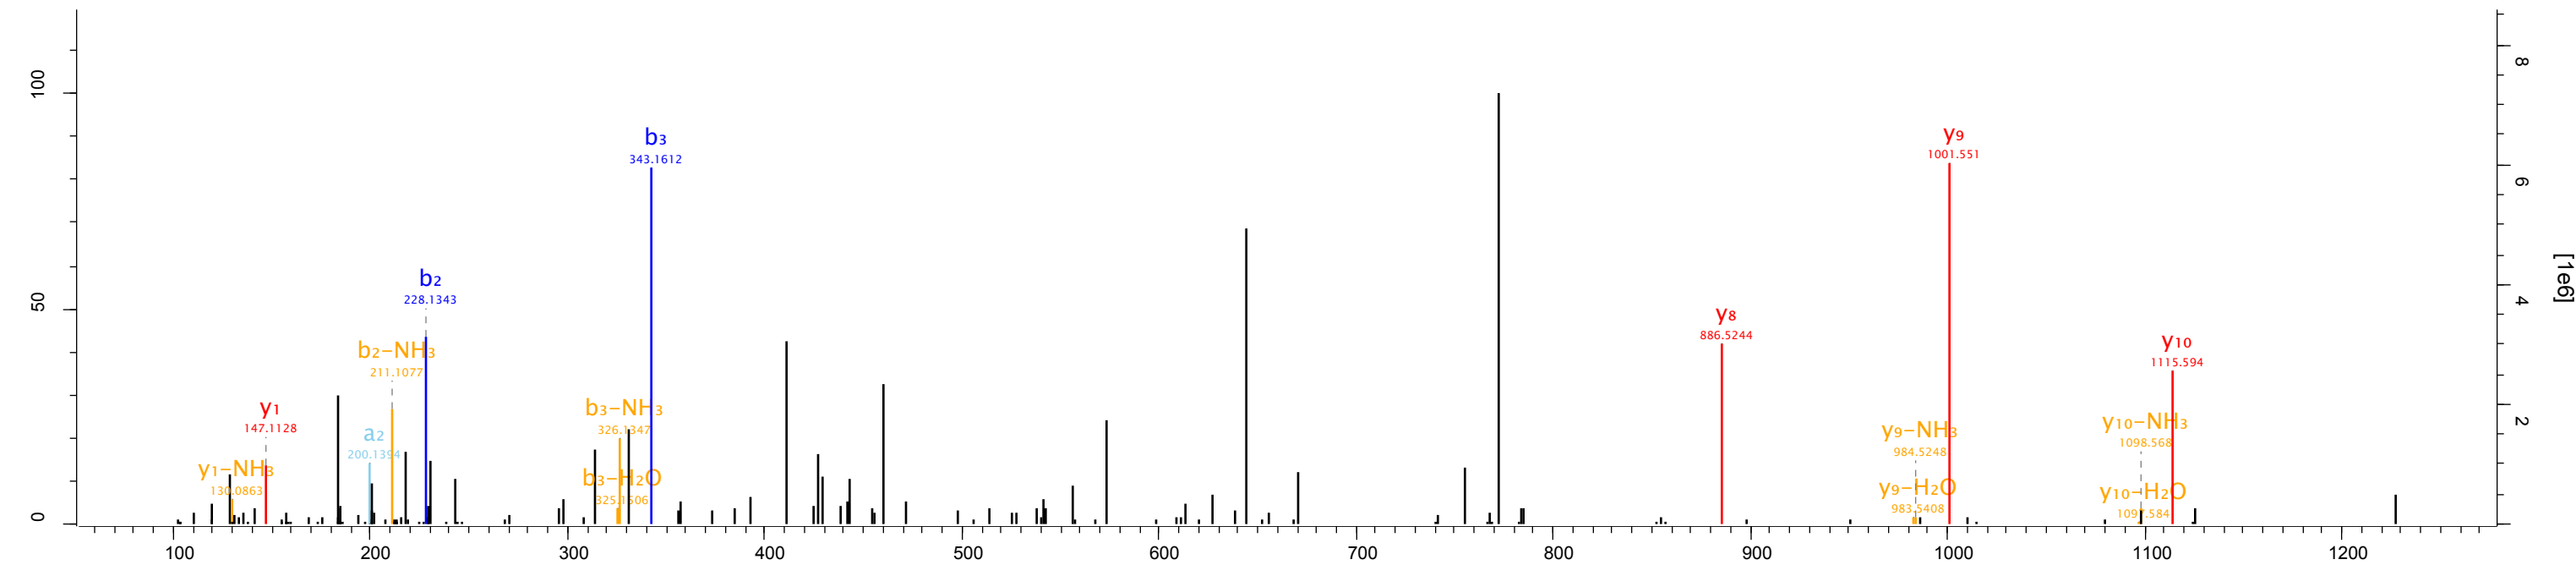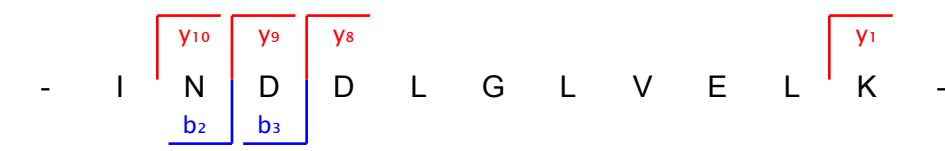



Raw file  
20180707\_MaS\_A375SR\_ML\_proteome\_2\_17

Scan 27207 Method FTMS; HCD Score 224.55 m/z 928.94 Gene names MAPK1IP1L

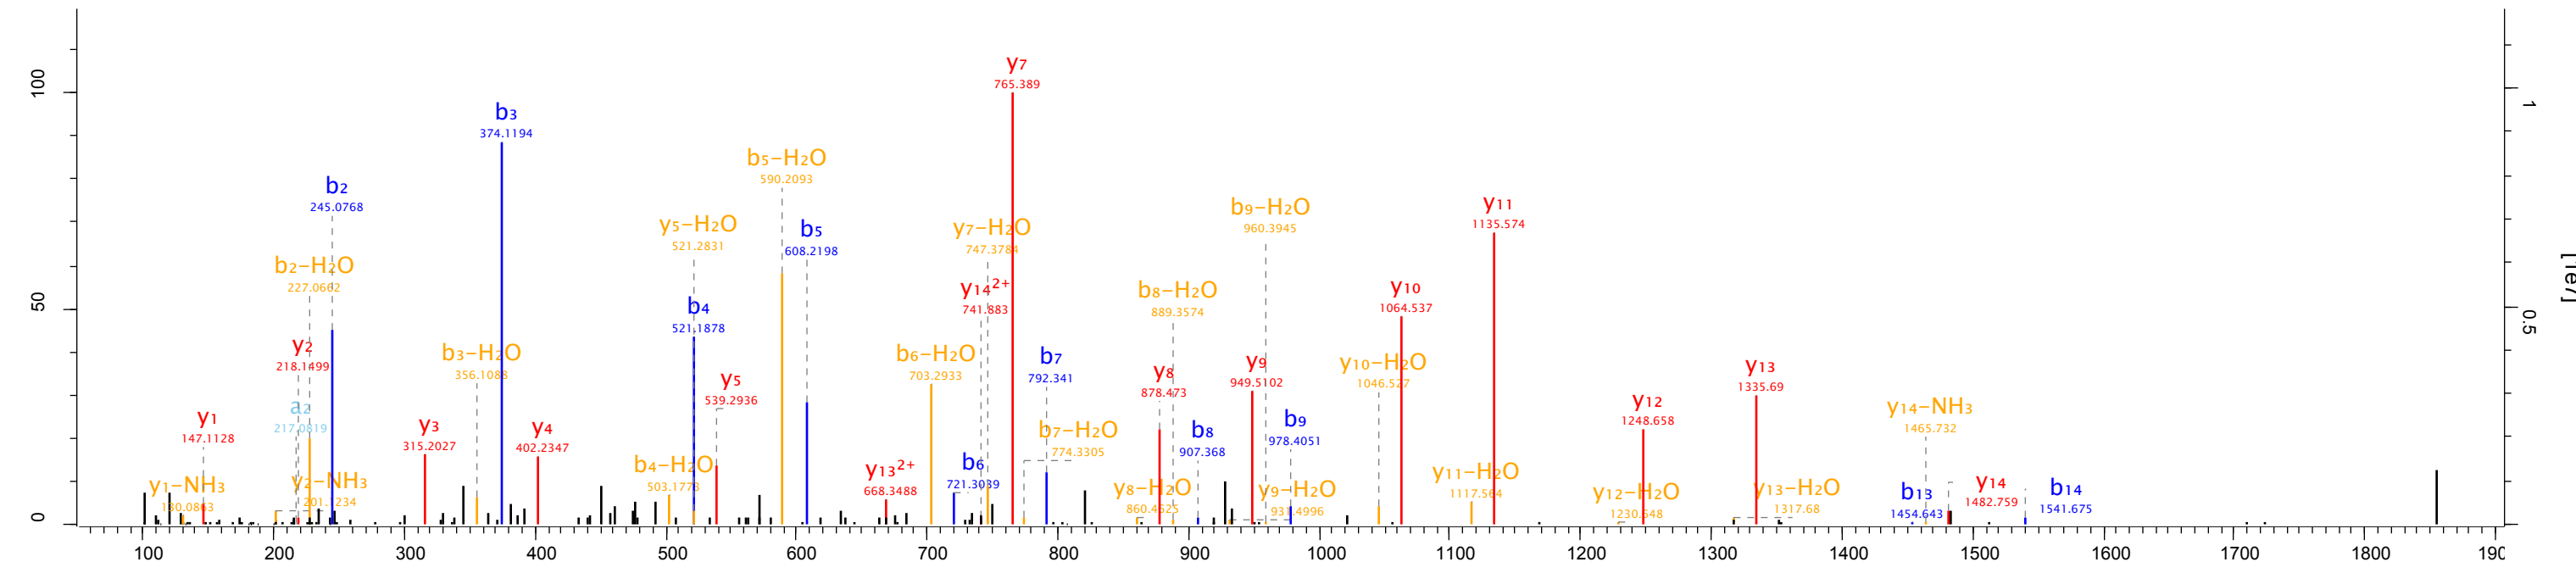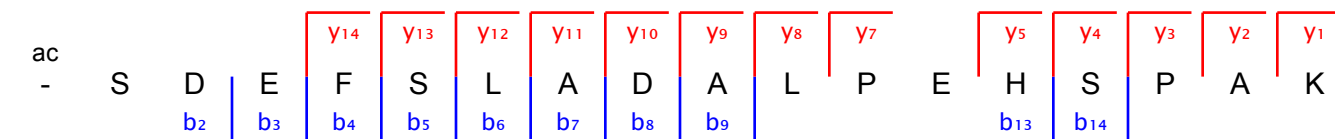

Raw file 20180707\_MaS\_A375SR\_ML\_proteome\_2\_18 Scan 15977 Method FTMS; HCD Score 52.48 m/z 557.3 Gene names IL4I1

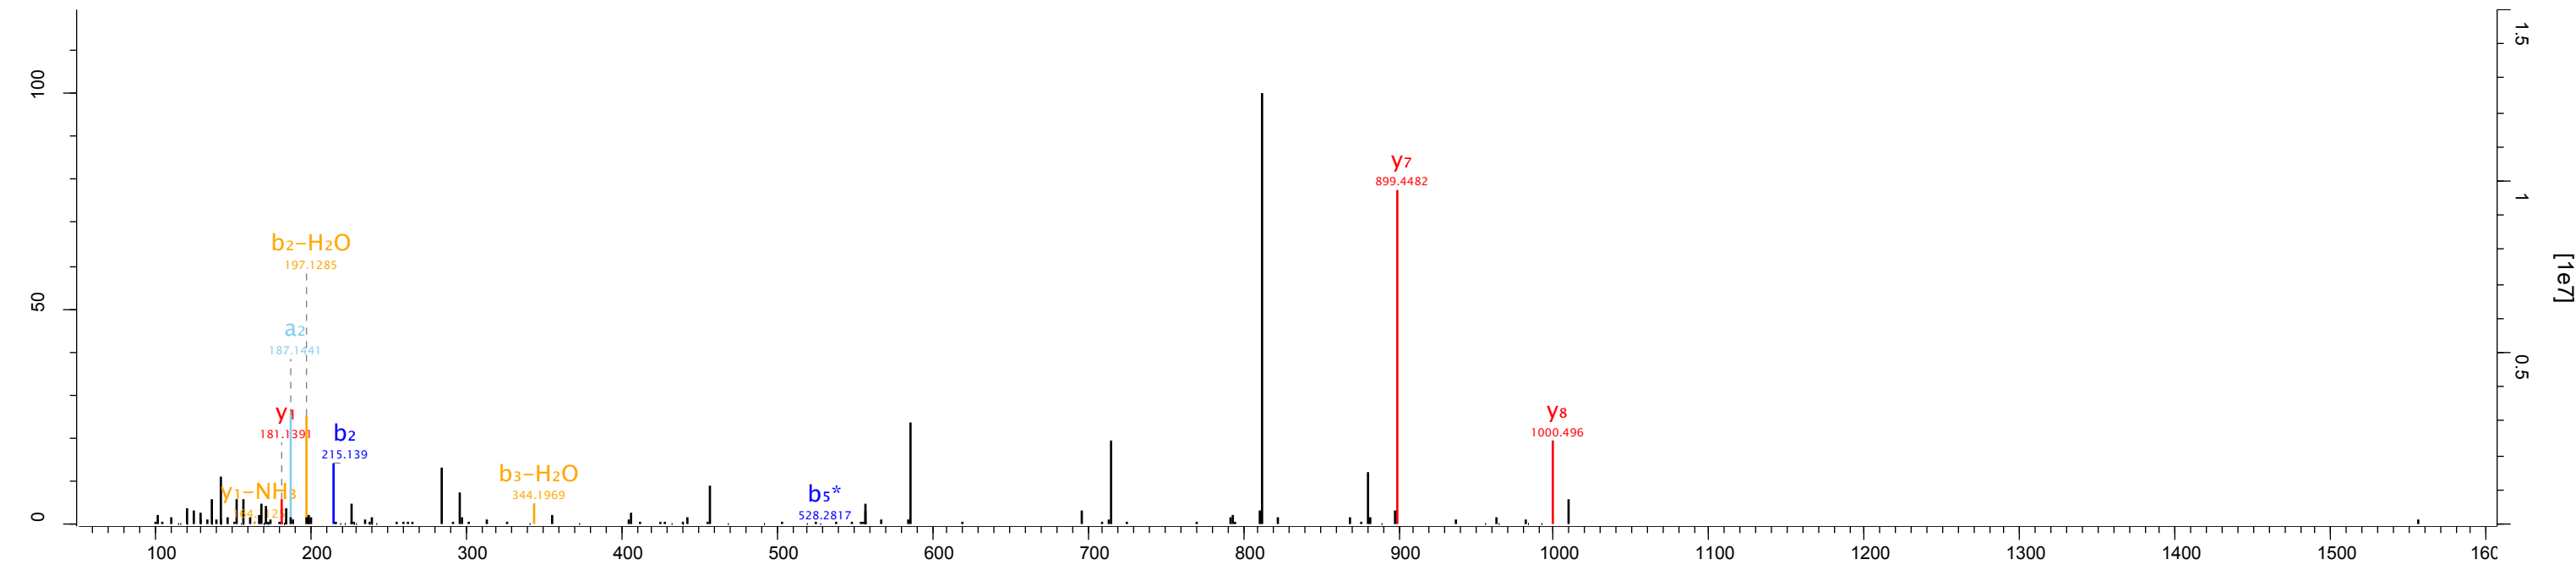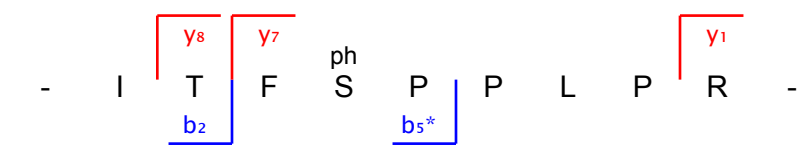

Raw file: 20180707\_MaS\_A375SR\_ML\_proteome\_2\_19  
 Scan: 12257 Method: FTMS; HCD Score: 79.23 m/z: 570.29 Gene names: DPT

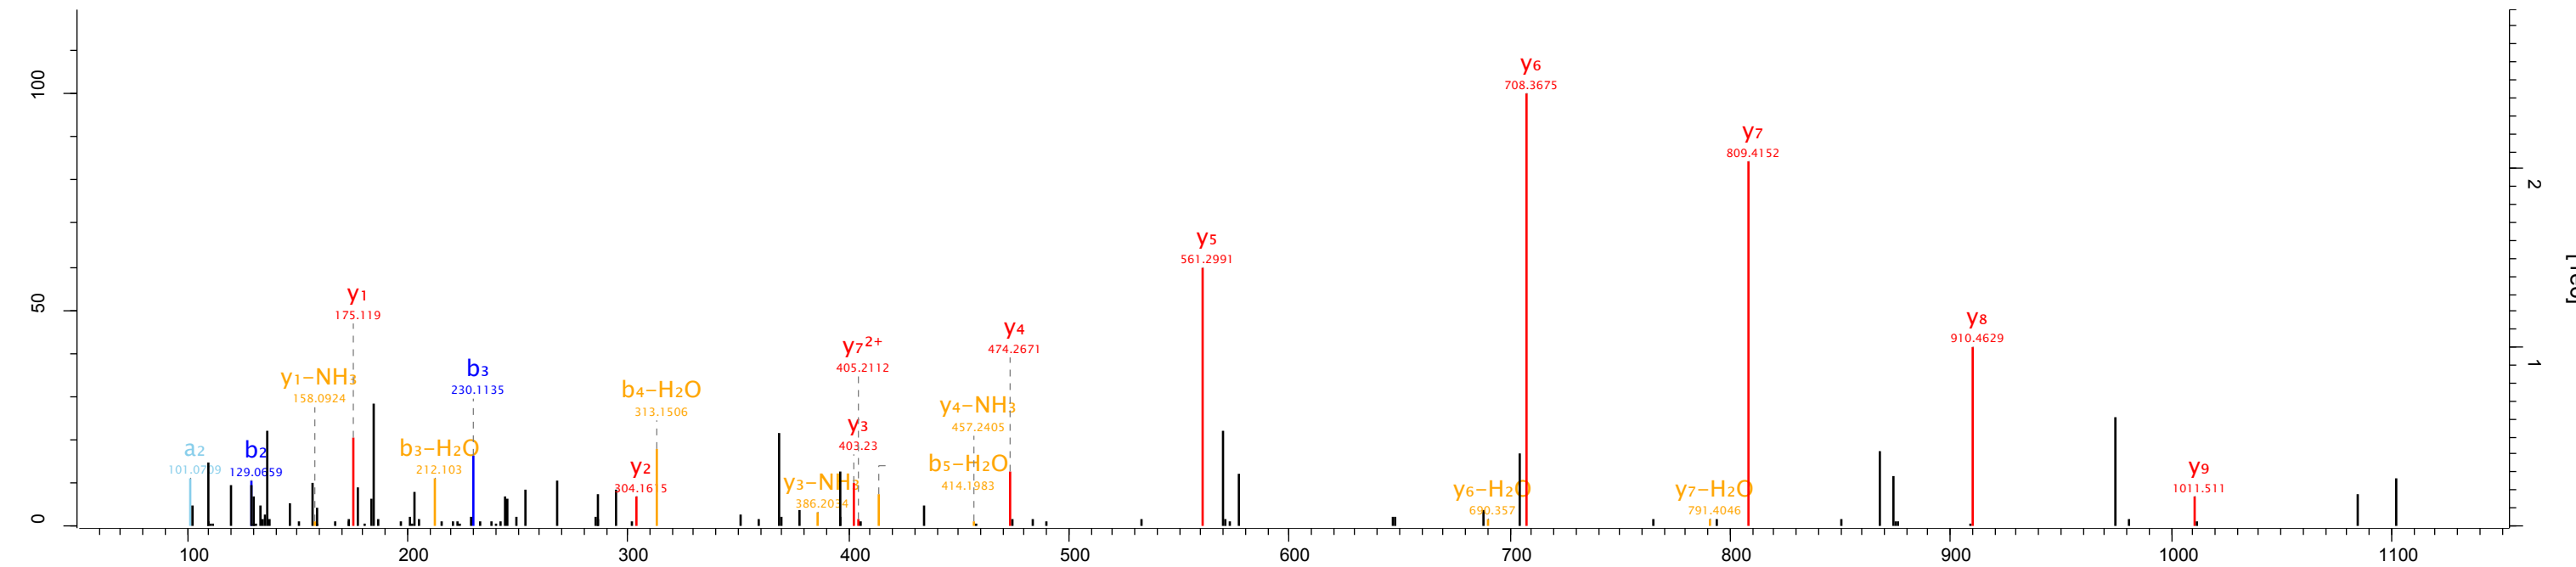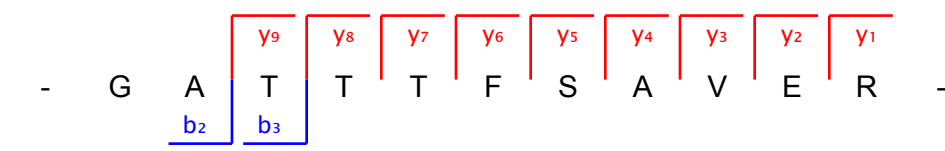

Raw file  
20180707\_MaS\_A375SR\_ML\_proteome\_2\_19

| Scan  | Method    | Score | m/z    | Gene names |
|-------|-----------|-------|--------|------------|
| 18537 | FTMS; HCD | 41.7  | 711.64 | LINC00614  |

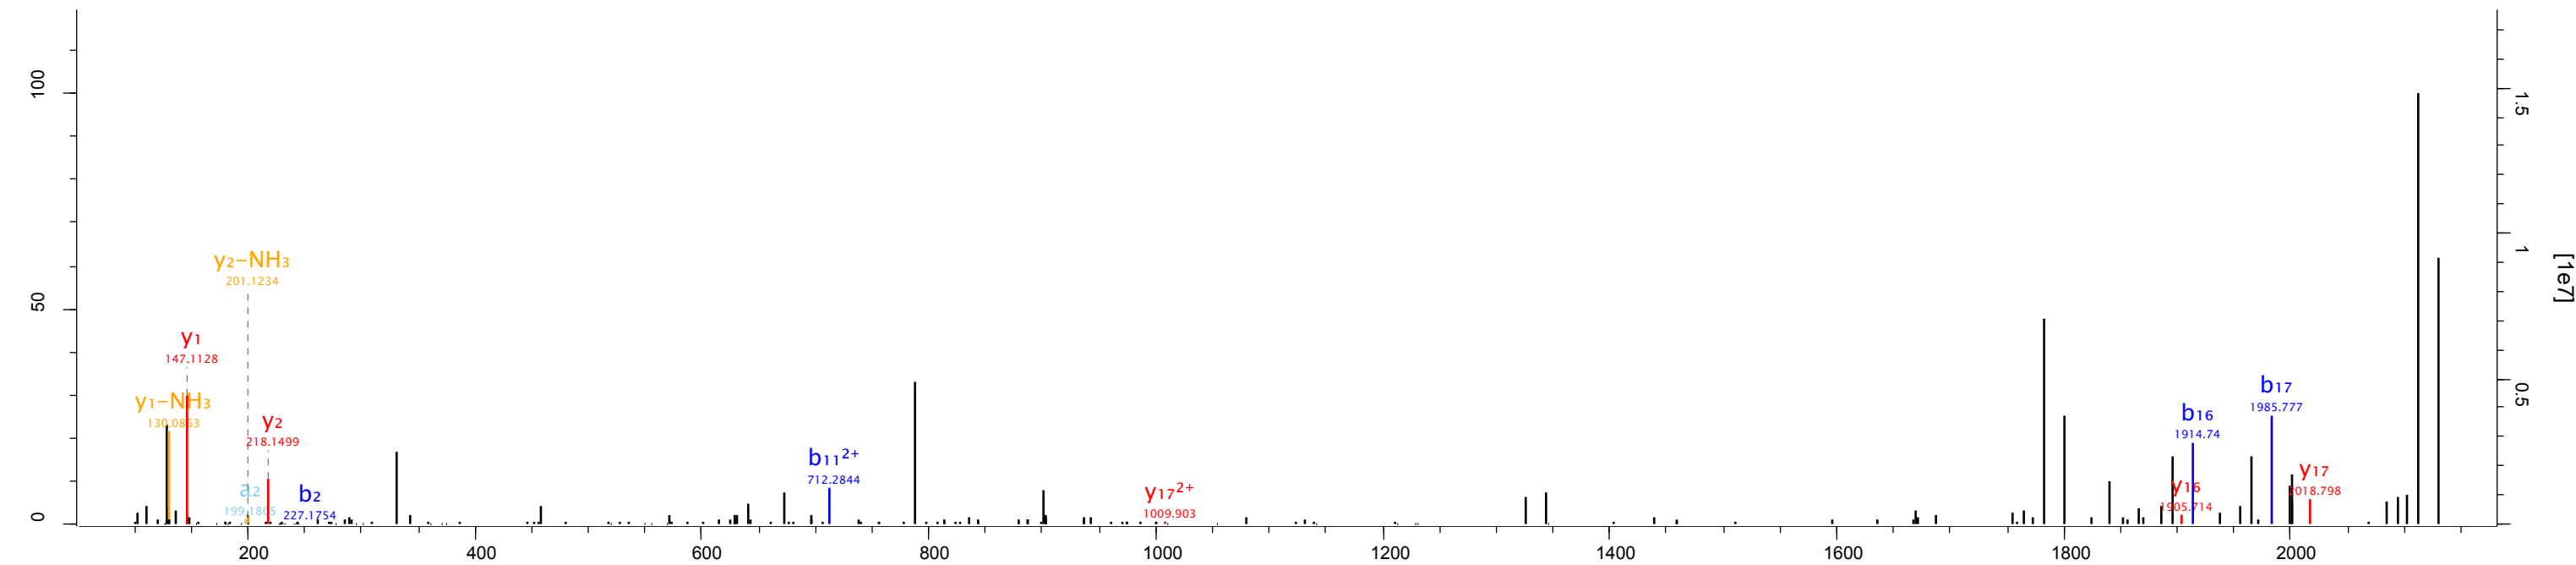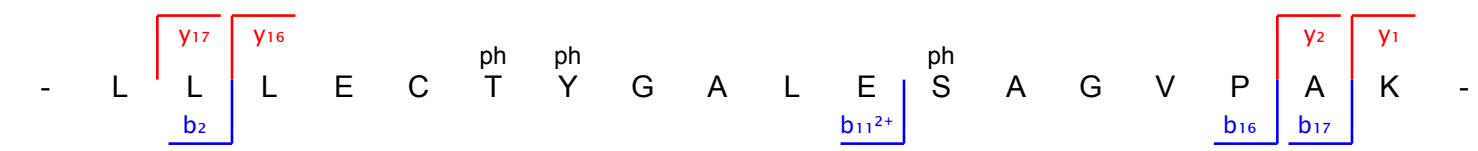

Raw file  
20180707\_MaS\_A375SR\_ML\_proteome\_2\_19

Scan 23227 Method FTMS; HCD Score 230.36 m/z 966.93 Gene names CCDC23

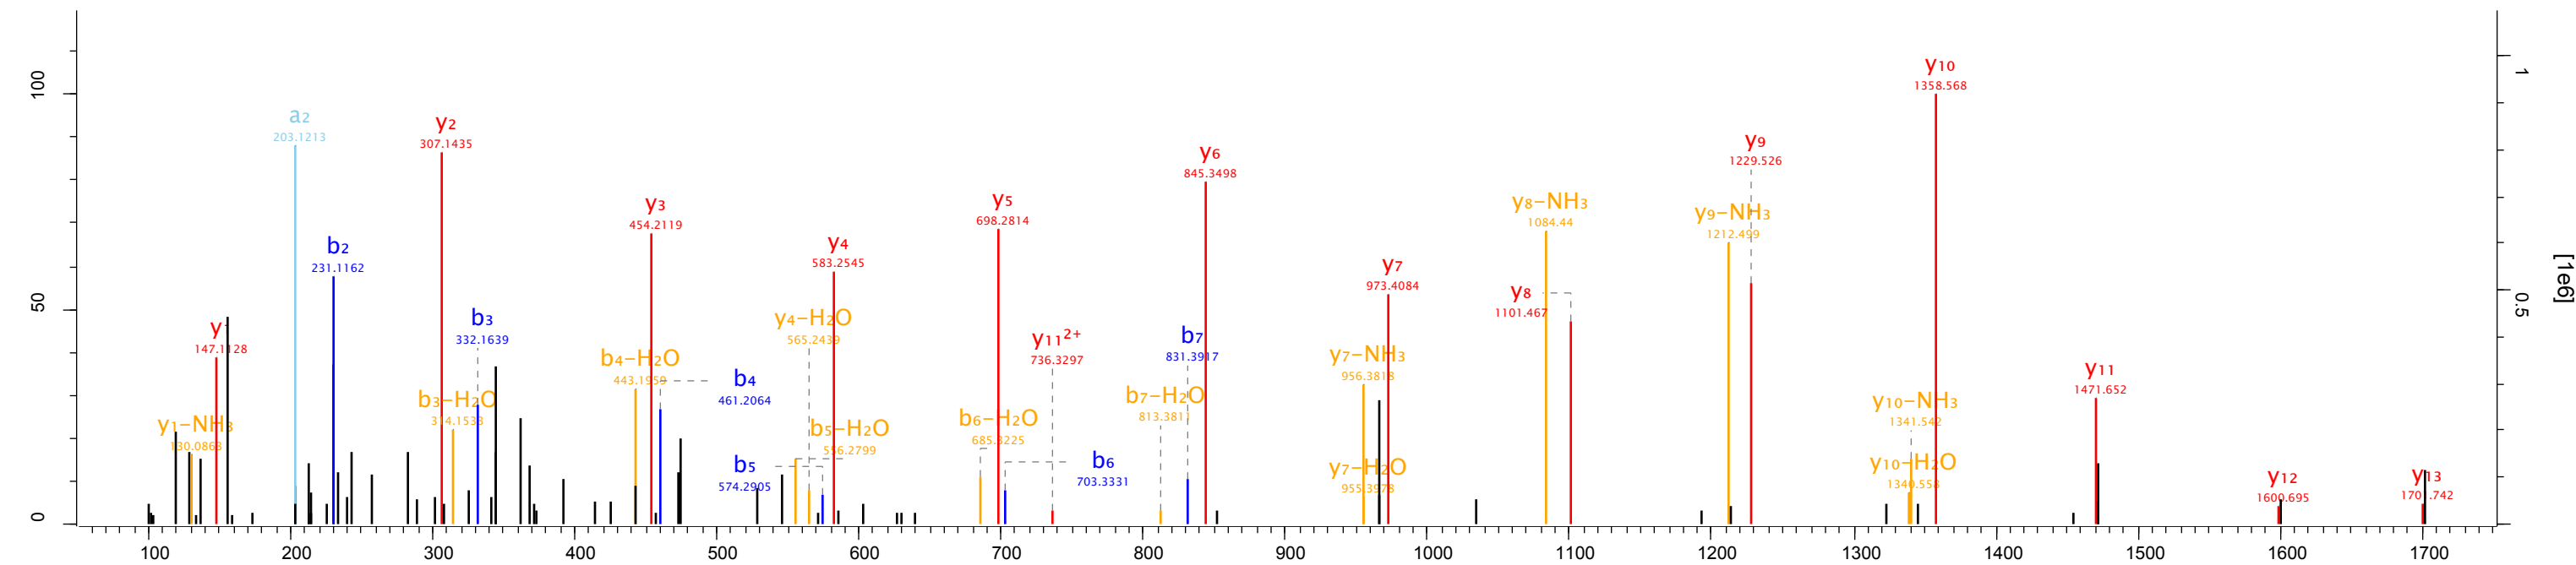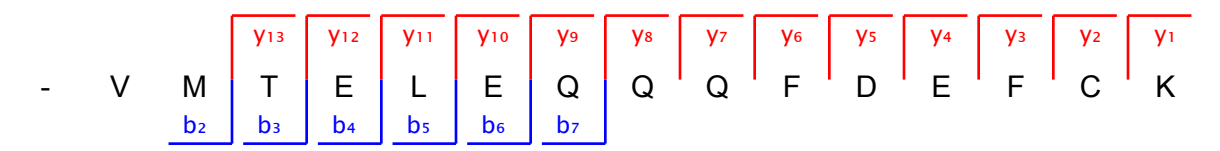

Raw file  
20180707\_MaS\_A375SR\_ML\_proteome\_2\_19

Scan 23587 Method FTMS; HCD Score 31.4 m/z 636.32 Gene names ATP6V0C

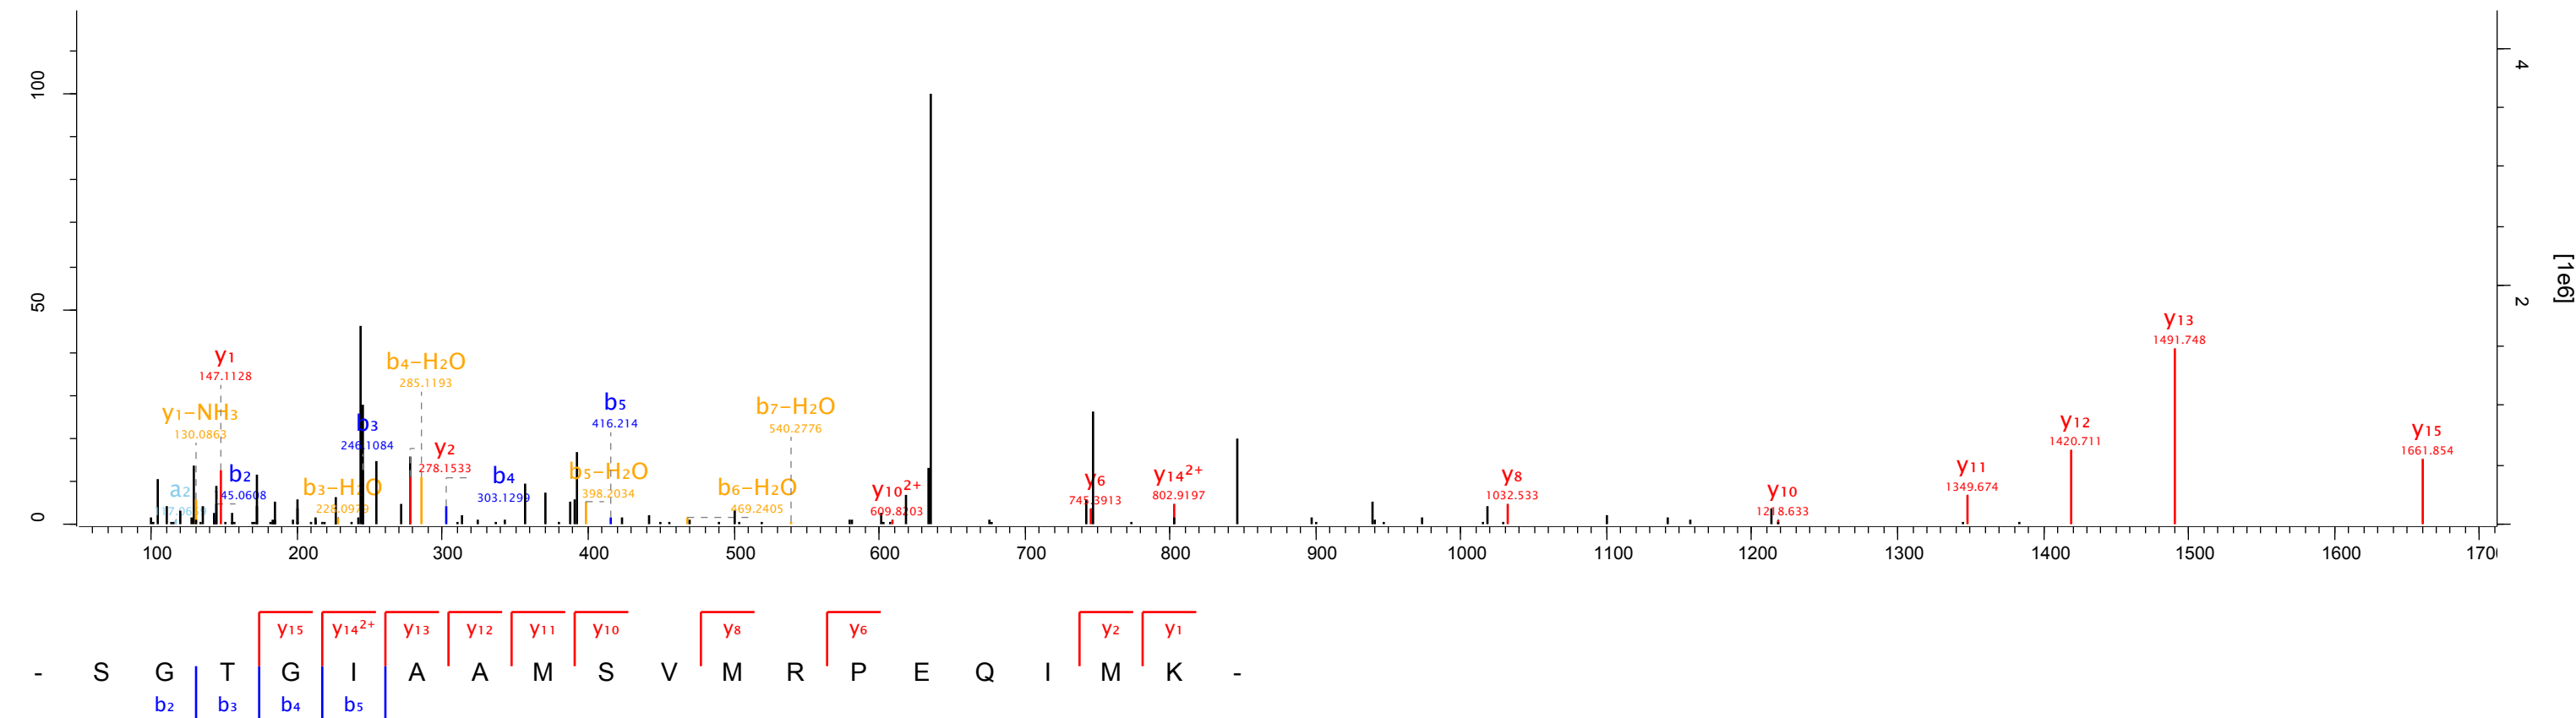

Raw file 20180707\_MaS\_A375SR\_ML\_proteome\_2\_20 Scan 22727 Method FTMS; HCD Score 103.13 m/z 868 Gene names KRTCAP2

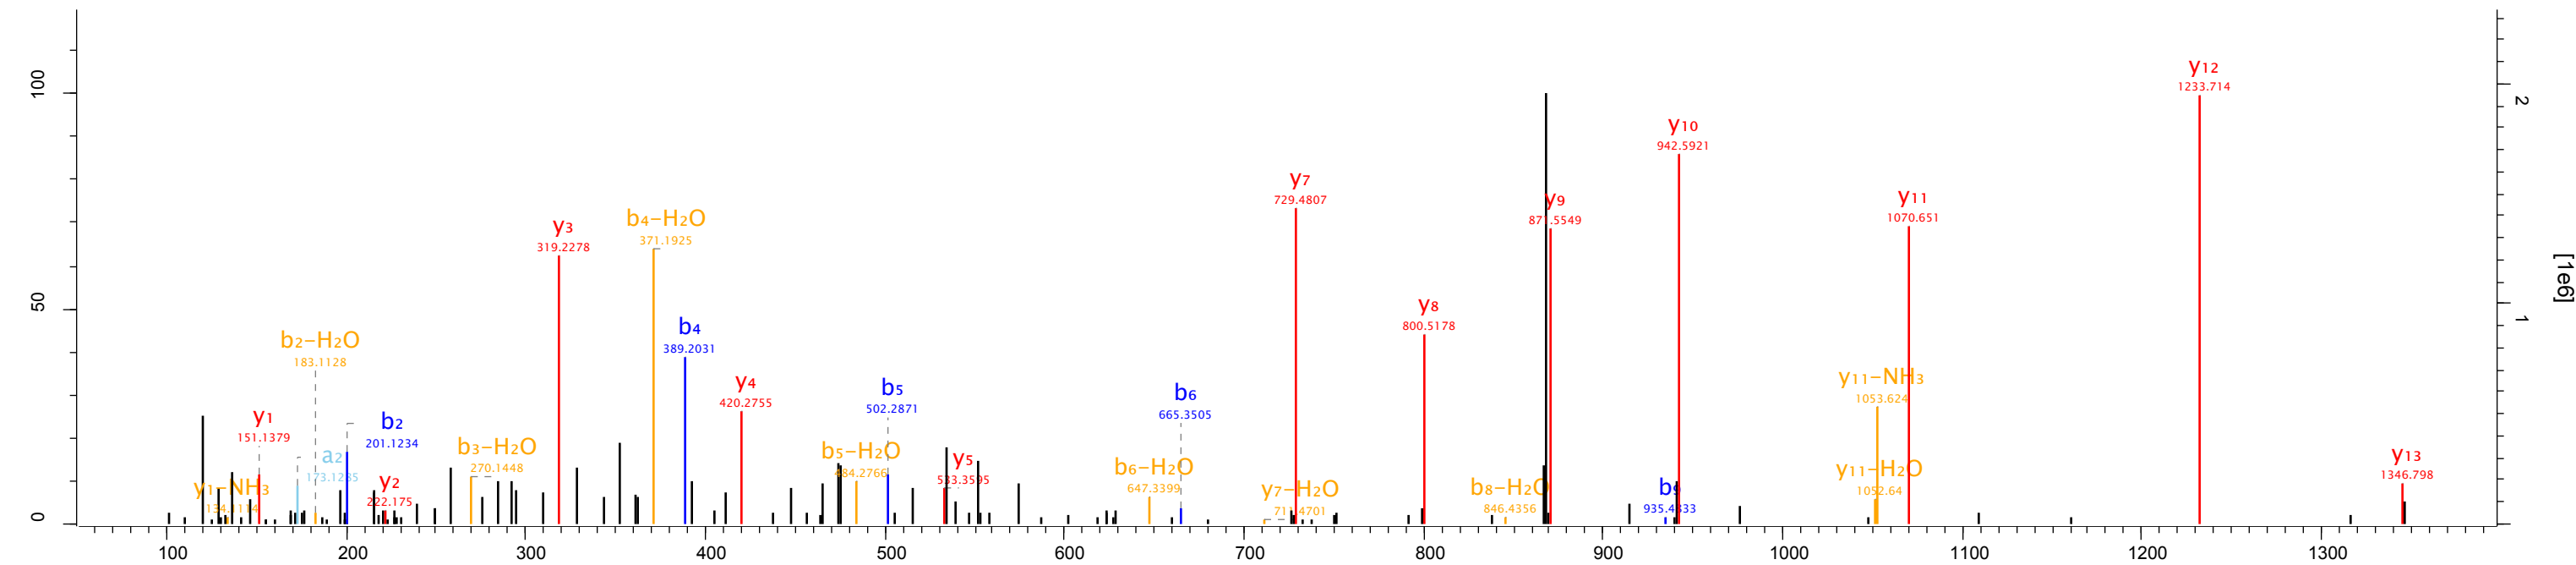

- I S S T L Y Q A A A P V L T P A K -

Fragmentation sites are indicated by brackets below the sequence:

- b<sub>2</sub> (under S)
- b<sub>4</sub> (under T)
- b<sub>5</sub> (under L)
- b<sub>6</sub> (under Y)
- b<sub>9</sub> (under A)
- y<sub>1</sub> (under K)
- y<sub>2</sub> (under A)
- y<sub>3</sub> (under P)
- y<sub>4</sub> (under A)
- y<sub>5</sub> (under L)
- y<sub>7</sub> (under P)
- y<sub>8</sub> (under A)
- y<sub>9</sub> (under A)
- y<sub>10</sub> (under A)
- y<sub>11</sub> (under Q)
- y<sub>12</sub> (under Y)
- y<sub>13</sub> (under L)

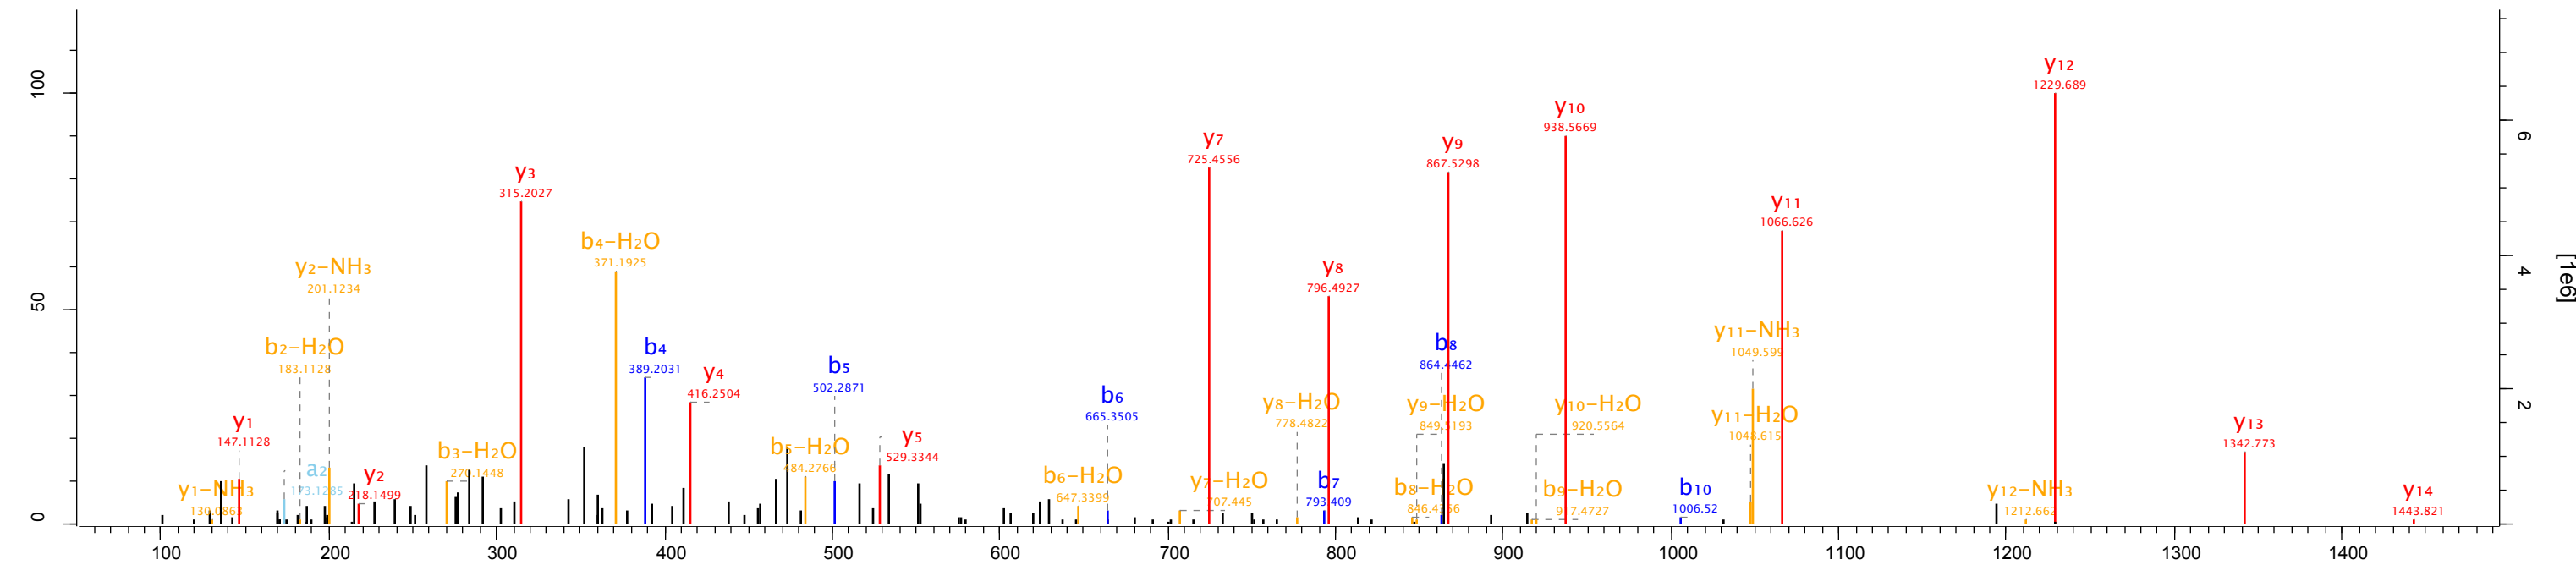

- I S S T L Y Q A A P V L T P A K -

Fragmentation sites are indicated by brackets below the sequence:

- Fragmentation sites for y ions (red brackets): y14, y13, y12, y11, y10, y9, y8, y7, y5, y4, y3, y2, y1.
- Fragmentation sites for b ions (blue brackets): b4, b5, b6, b7, b8, b10.



Raw file  
20180707\_MaS\_A375SR\_ML\_proteome\_2\_20

Scan 6197 Method FTMS; HCD Score 85.36 m/z 353.19 Gene names ART4

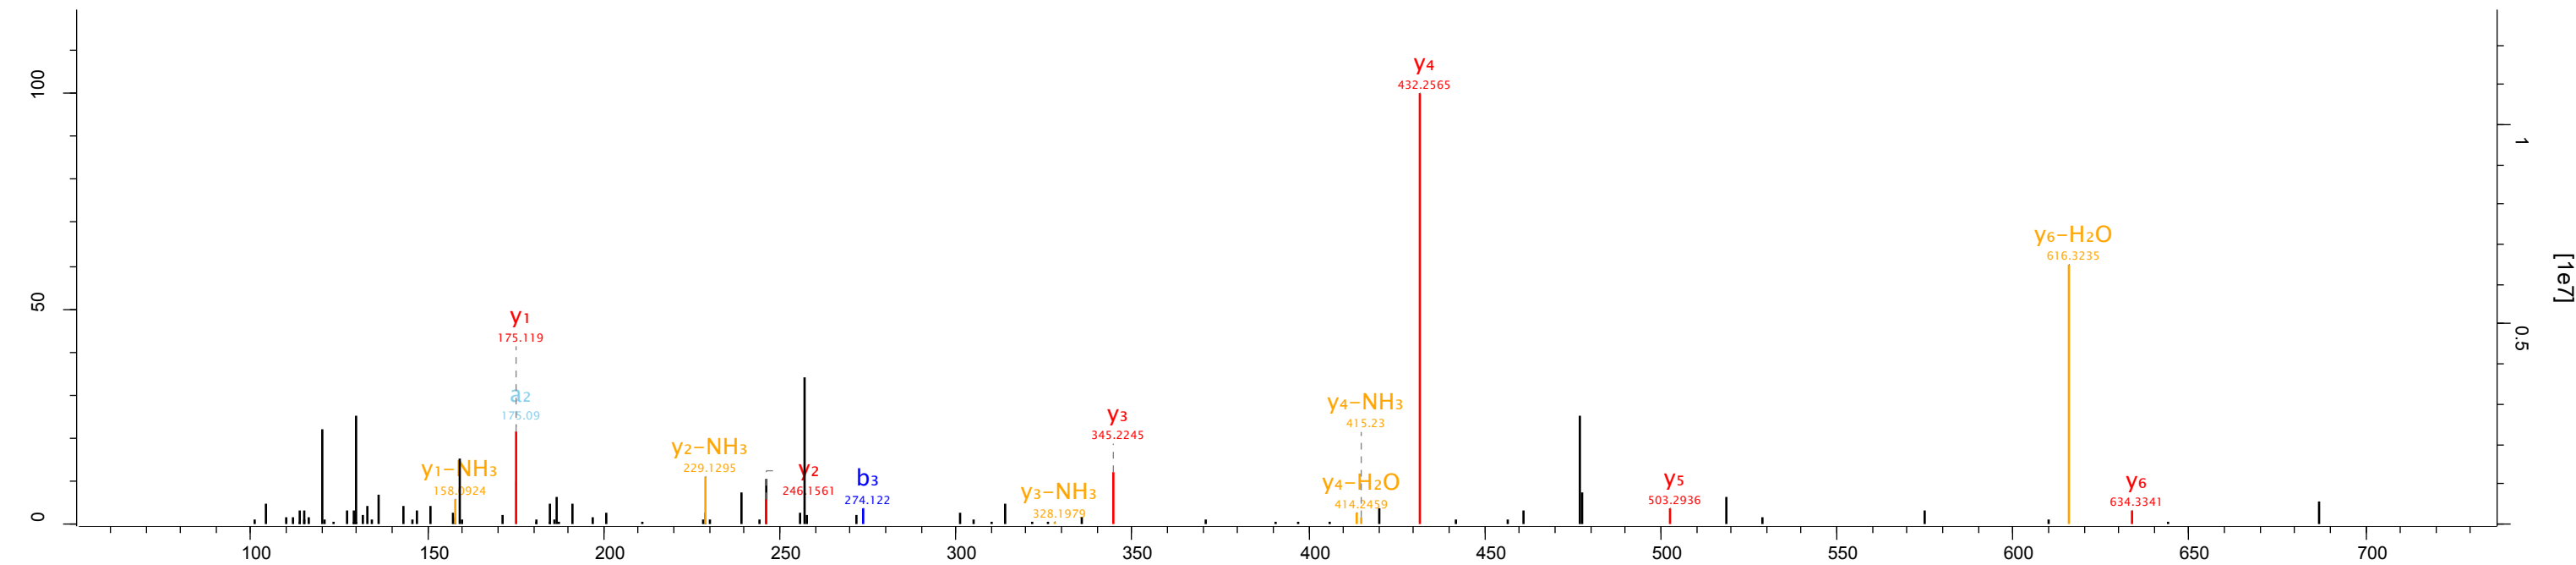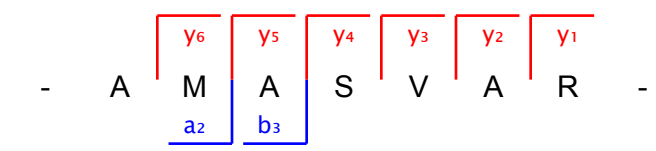

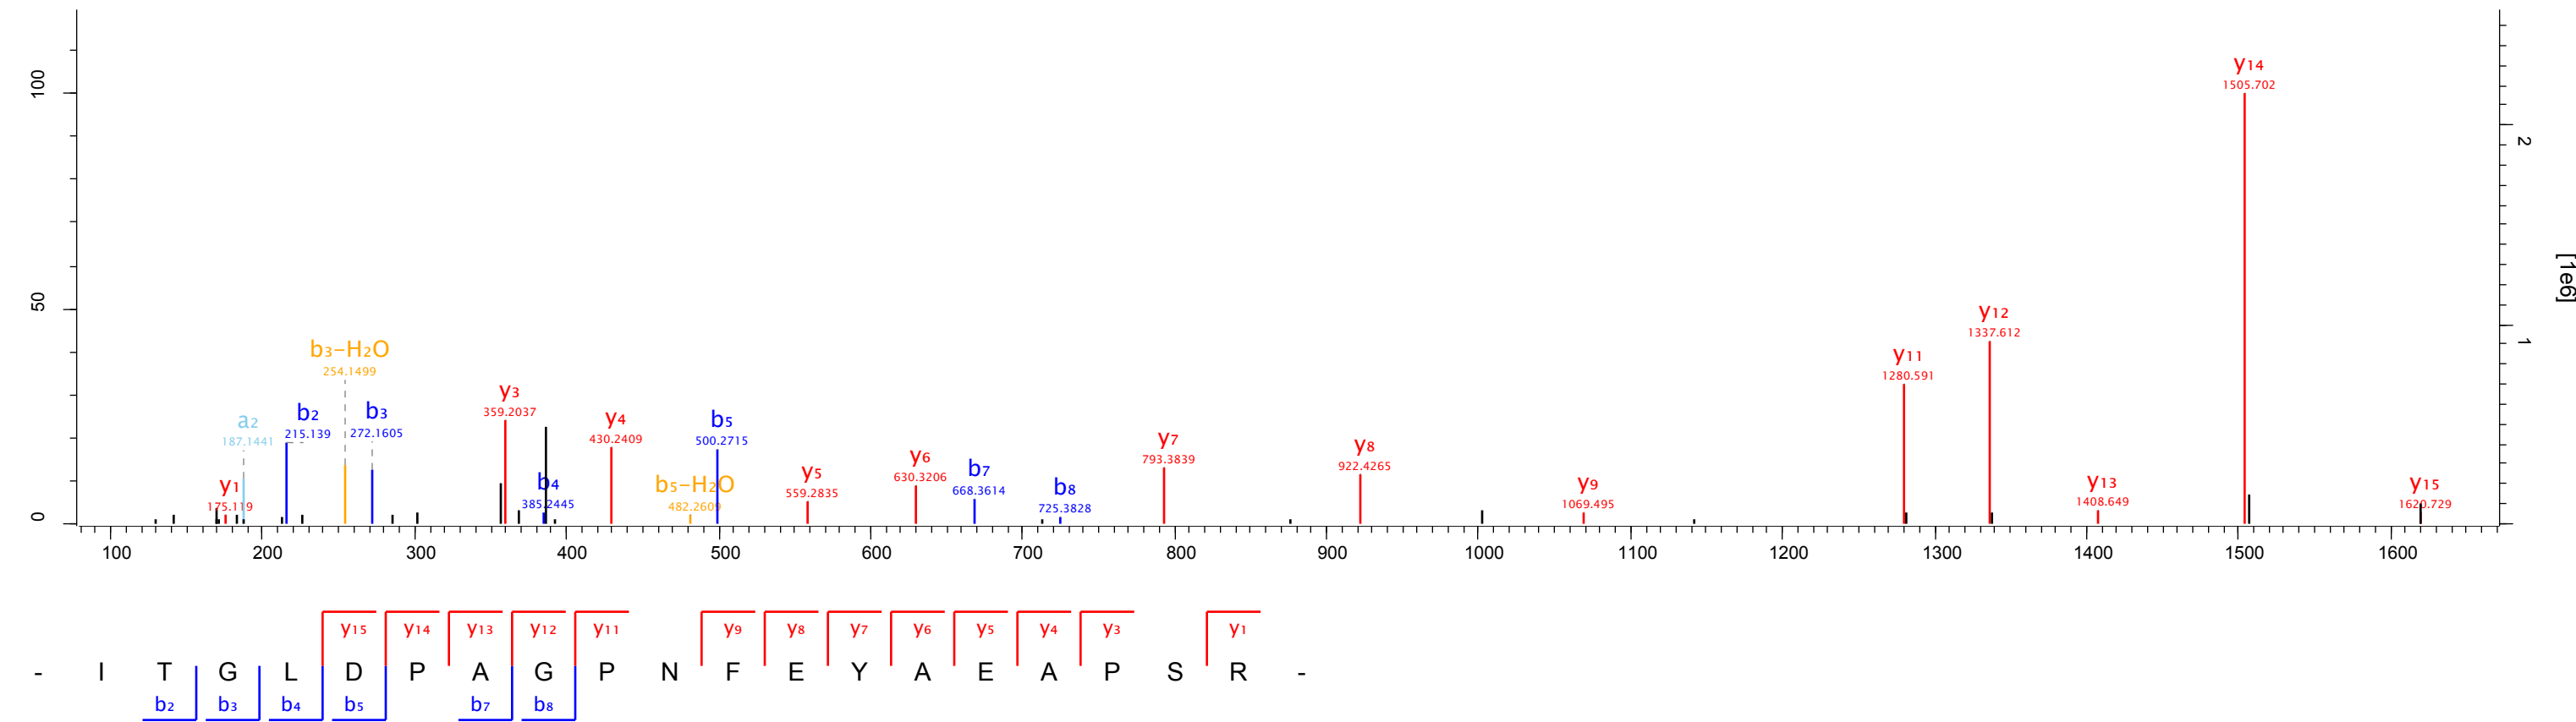

Raw file  
20180707\_MaS\_A375SR\_ML\_proteome\_2\_22

Scan 9187 Method FTMS; HCD Score 68.91 m/z 566.72 Gene names PSPHP1

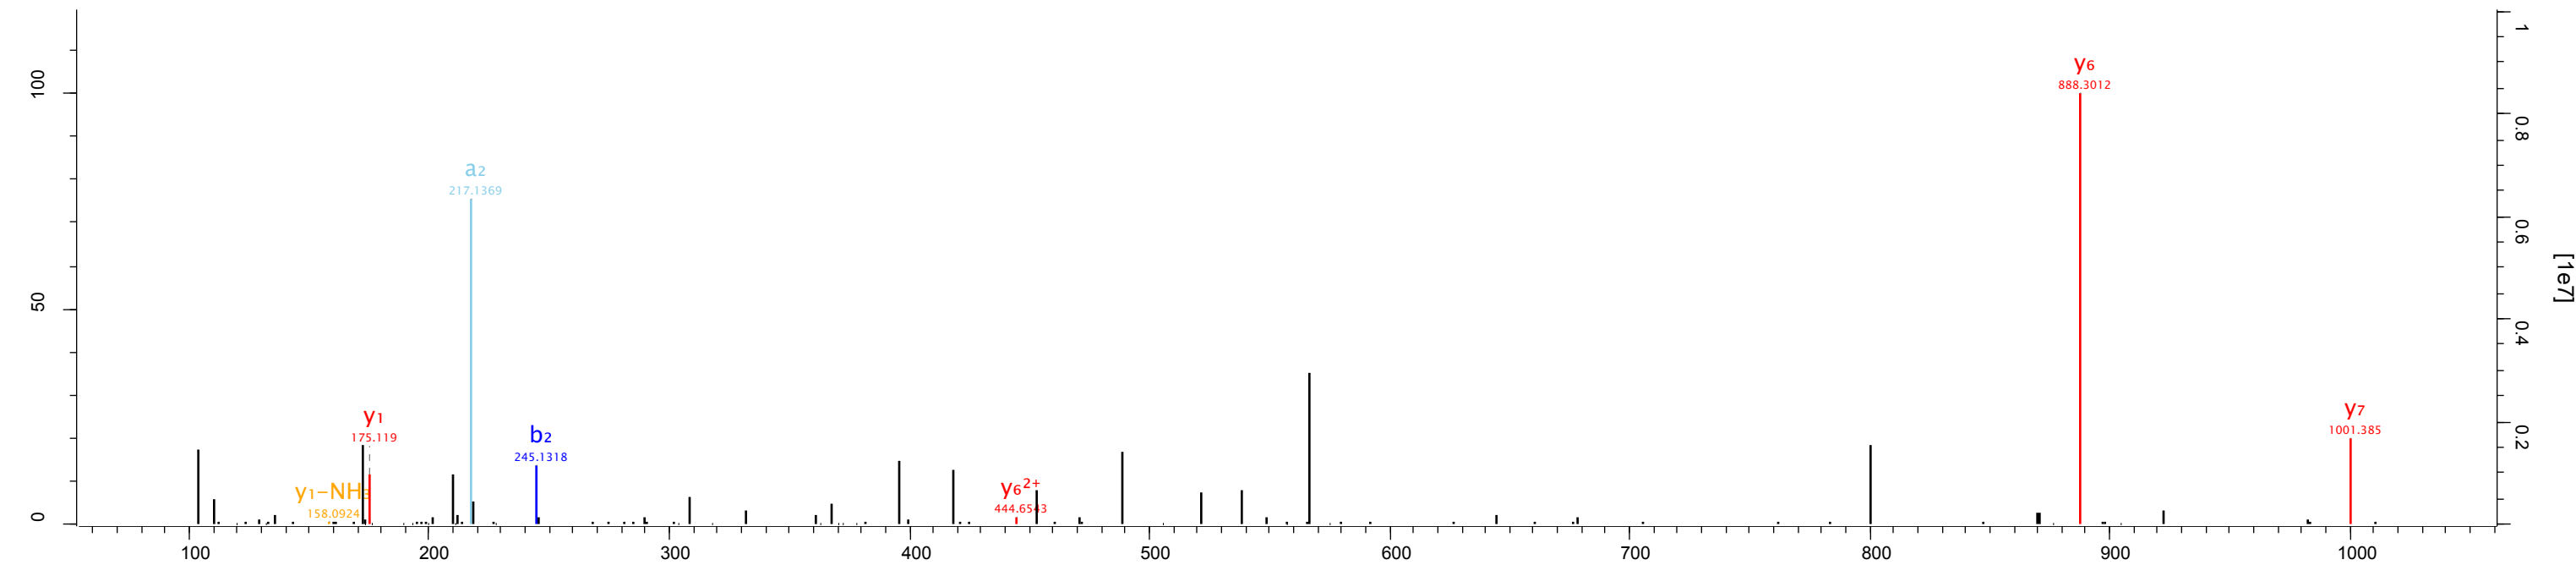

Raw file

20180707\_MaS\_A375SR\_ML\_proteome\_2\_22

| Scan | Method    | Score | m/z    | Gene names |
|------|-----------|-------|--------|------------|
| 9757 | FTMS; HCD | 69.26 | 597.69 | C20orf24   |

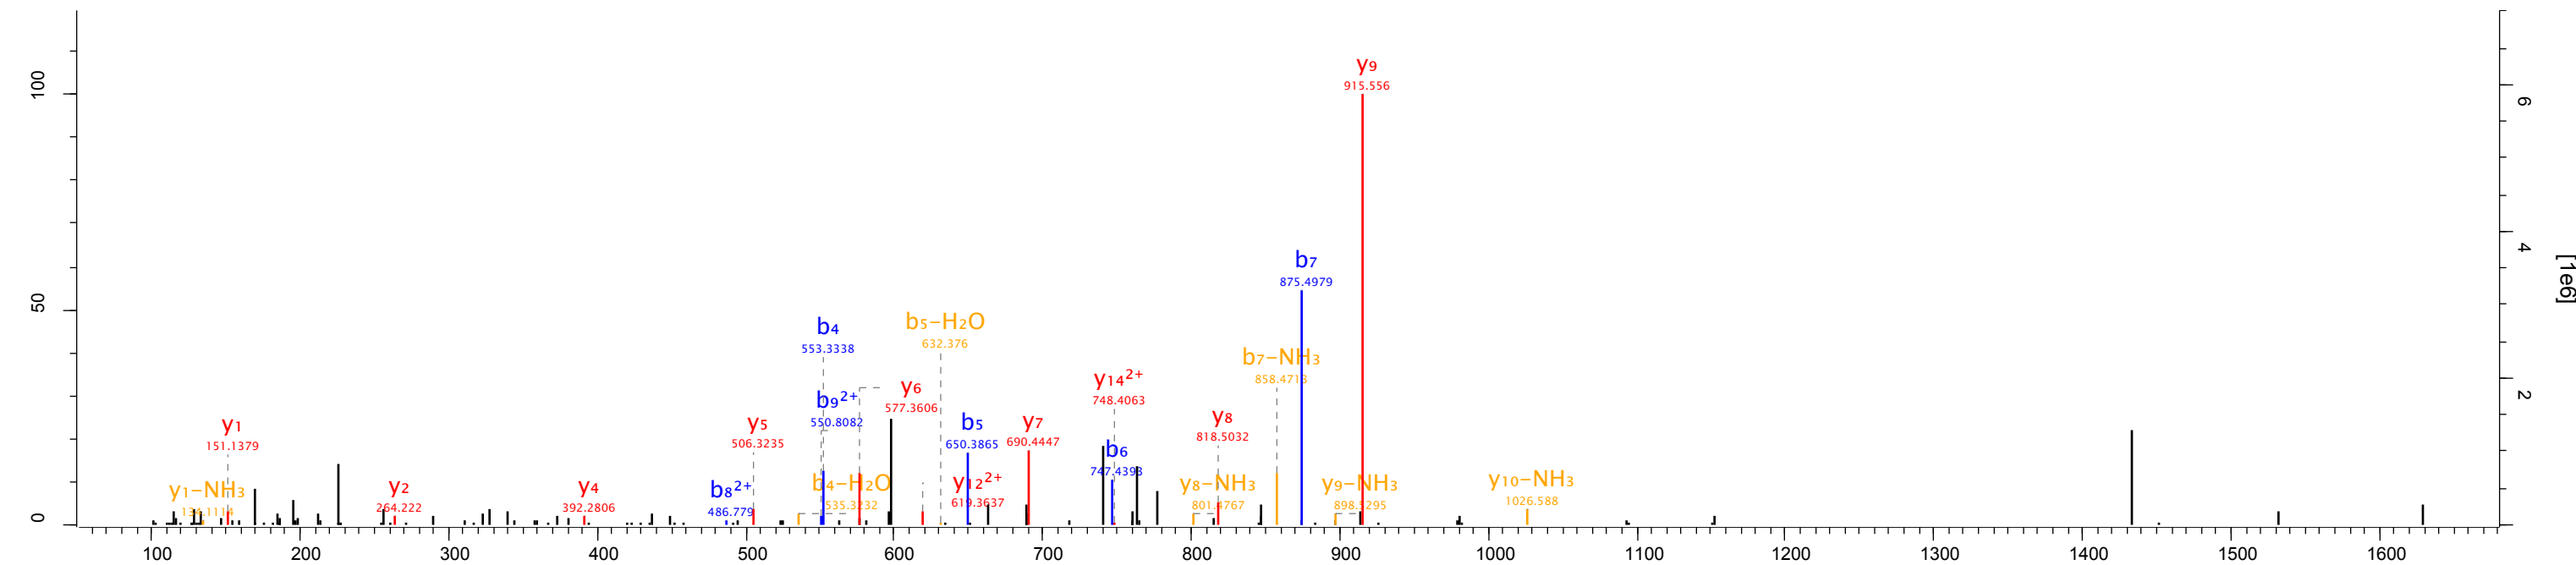

- R K E E P P Q P Q L A N G A L K -

y<sub>14</sub><sup>2+</sup>
y<sub>12</sub><sup>2+</sup>
y<sub>9</sub>
y<sub>8</sub>
y<sub>7</sub>
y<sub>6</sub>
y<sub>5</sub>
y<sub>4</sub>
y<sub>2</sub>
y<sub>1</sub>

b<sub>4</sub>
b<sub>5</sub>
b<sub>6</sub>
b<sub>7</sub>
b<sub>8</sub><sup>2+</sup>
b<sub>9</sub><sup>2+</sup>

Raw file 20180707\_MaS\_A375SR\_ML\_proteome\_2\_22  
 Scan 9887 Method FTMS; HCD Score 48.88 m/z 593 Gene names C20orf24

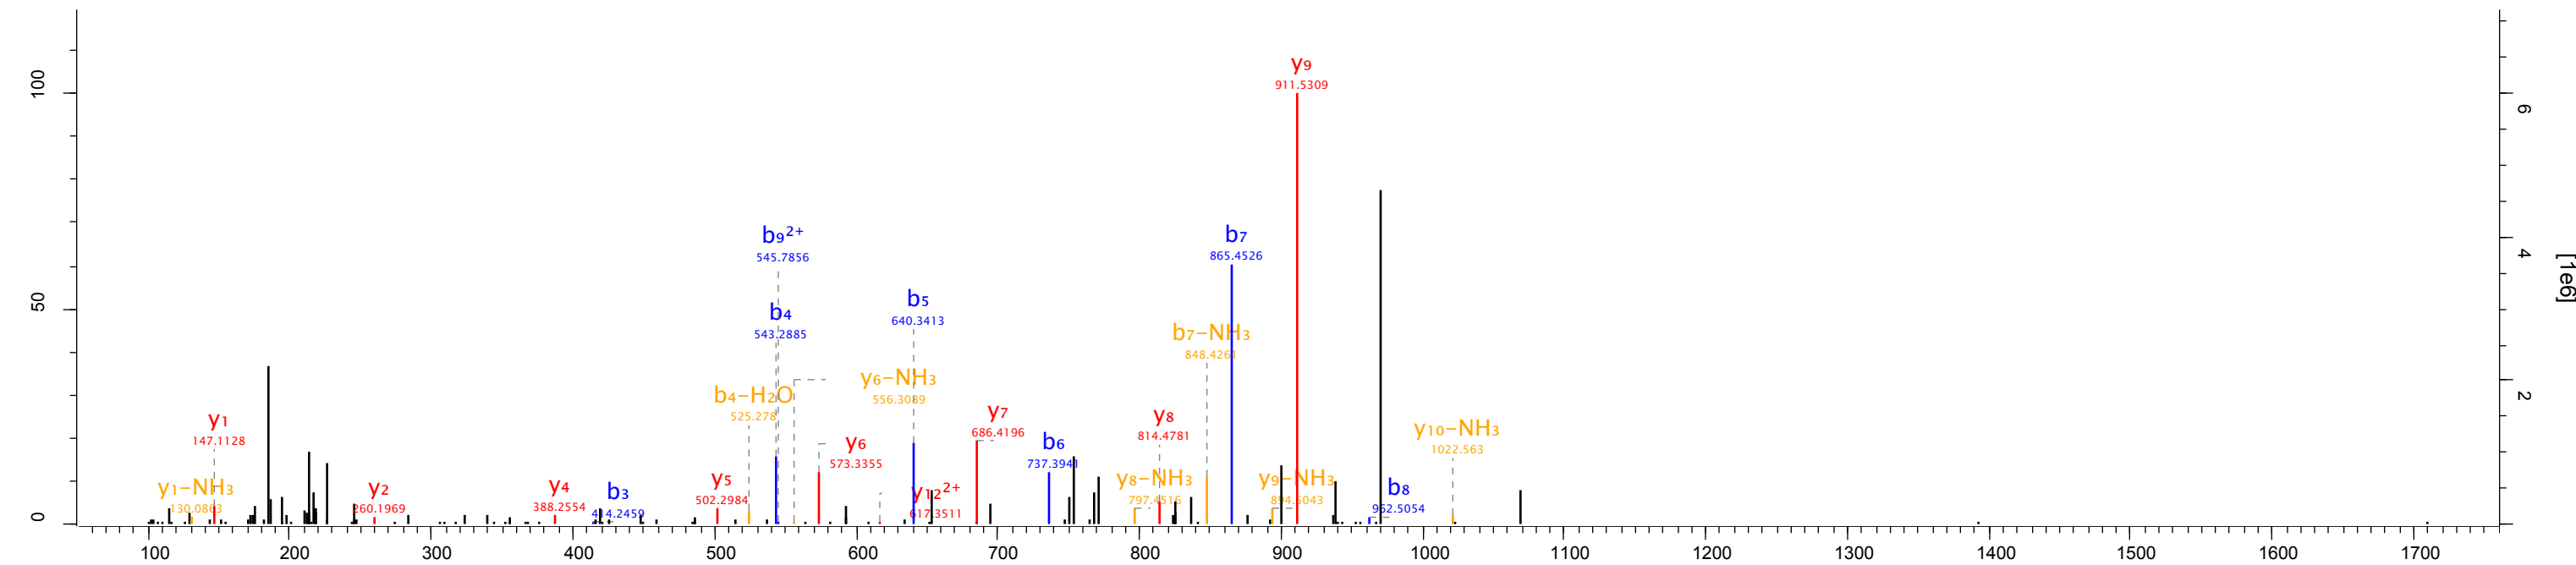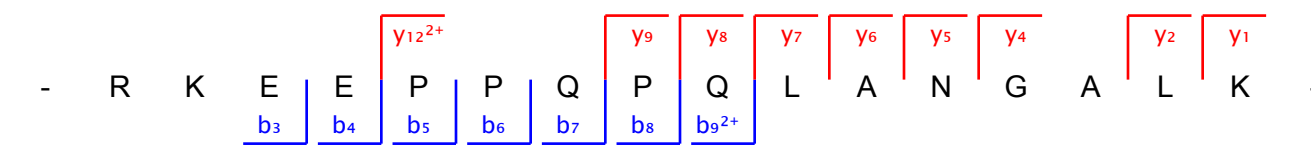

Raw file 20180707\_MaS\_A375SR\_ML\_proteome\_2\_23 Scan 29687 Method FTMS; HCD Score 69.72 m/z 624.81 Gene names TOR2A

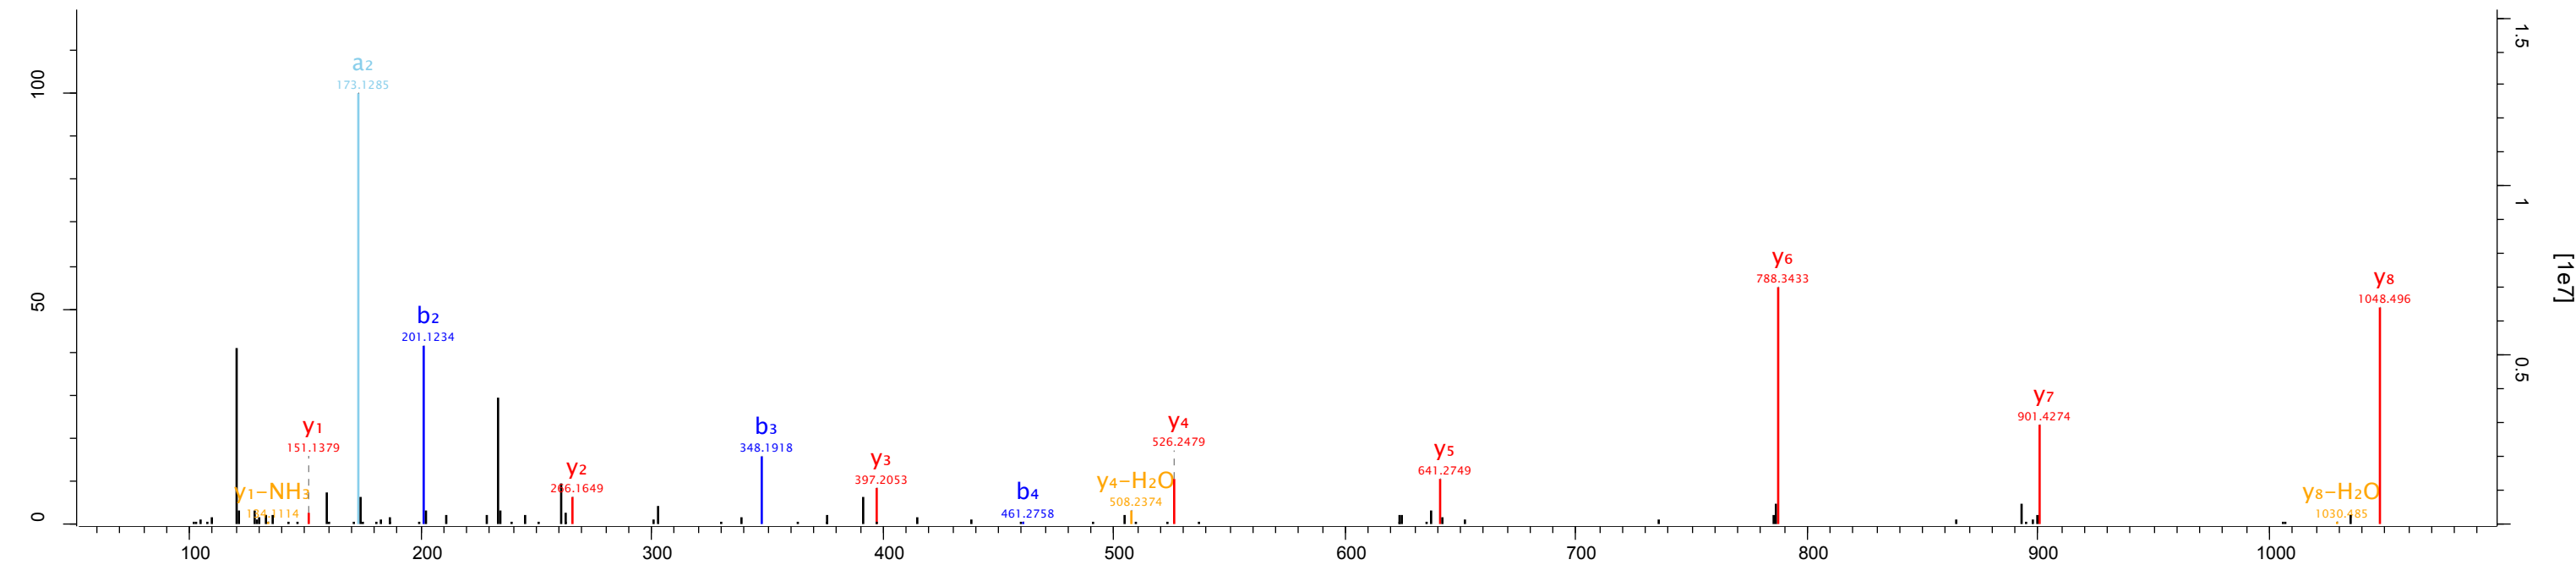

Raw file 20180707\_MaS\_A375SR\_ML\_proteome\_2\_23 Scan 9817 Method FTMS; HCD Score 91.27 m/z 491.28

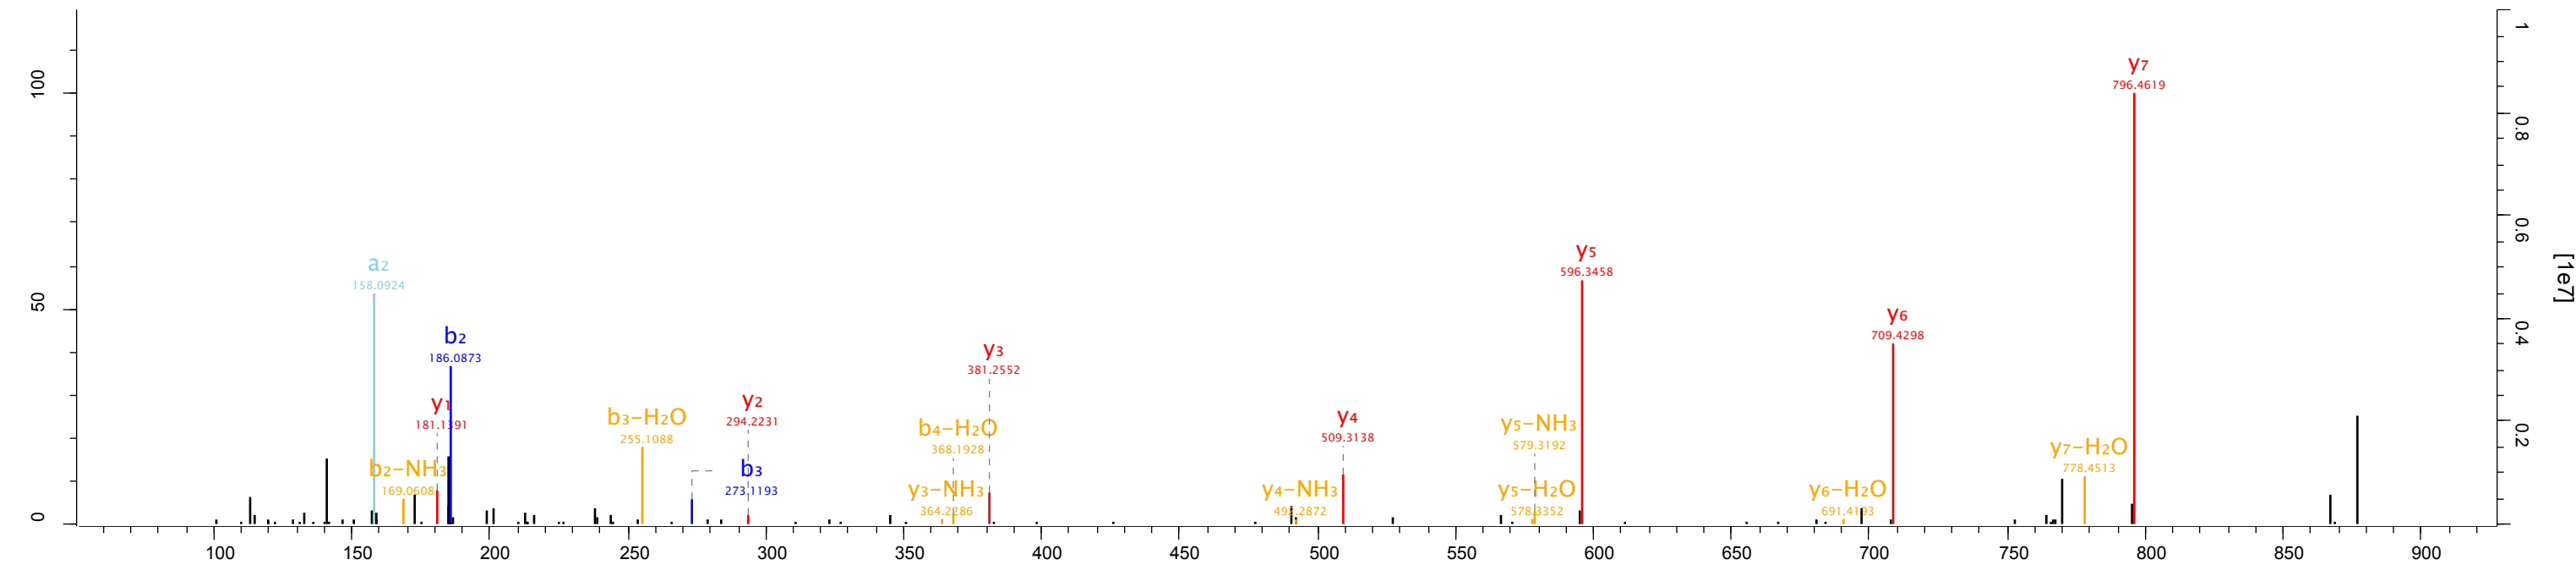

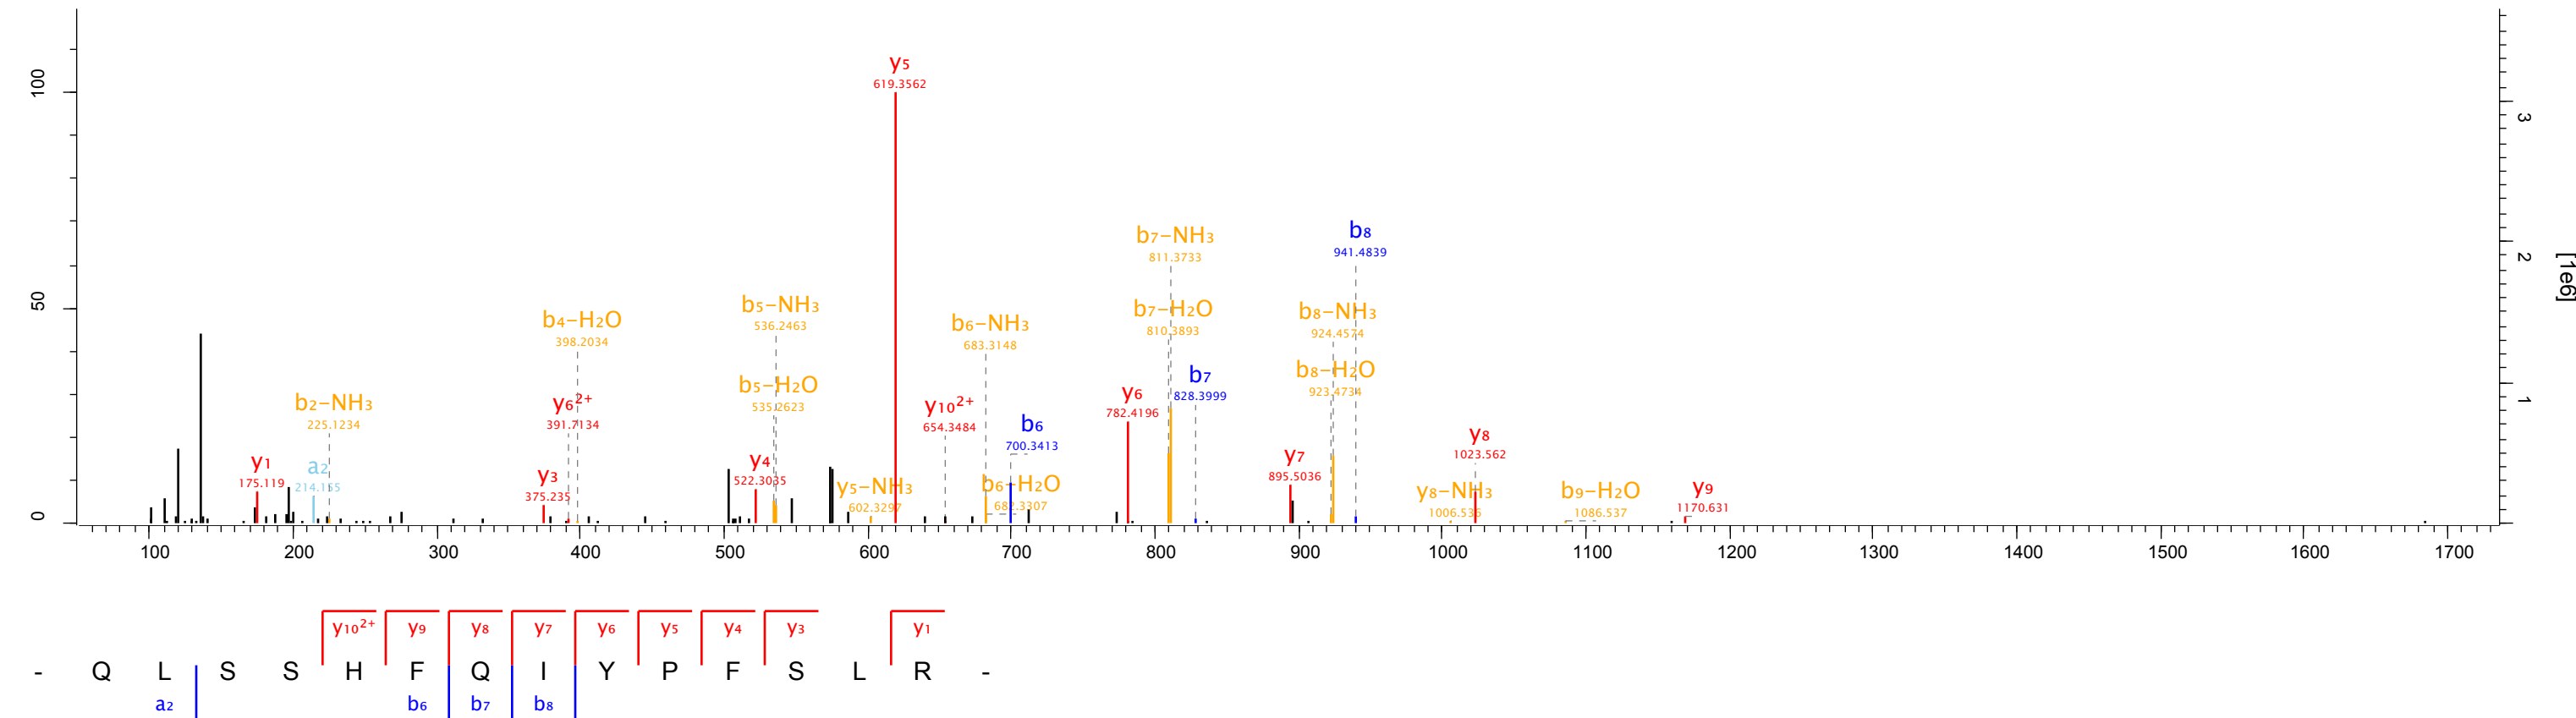



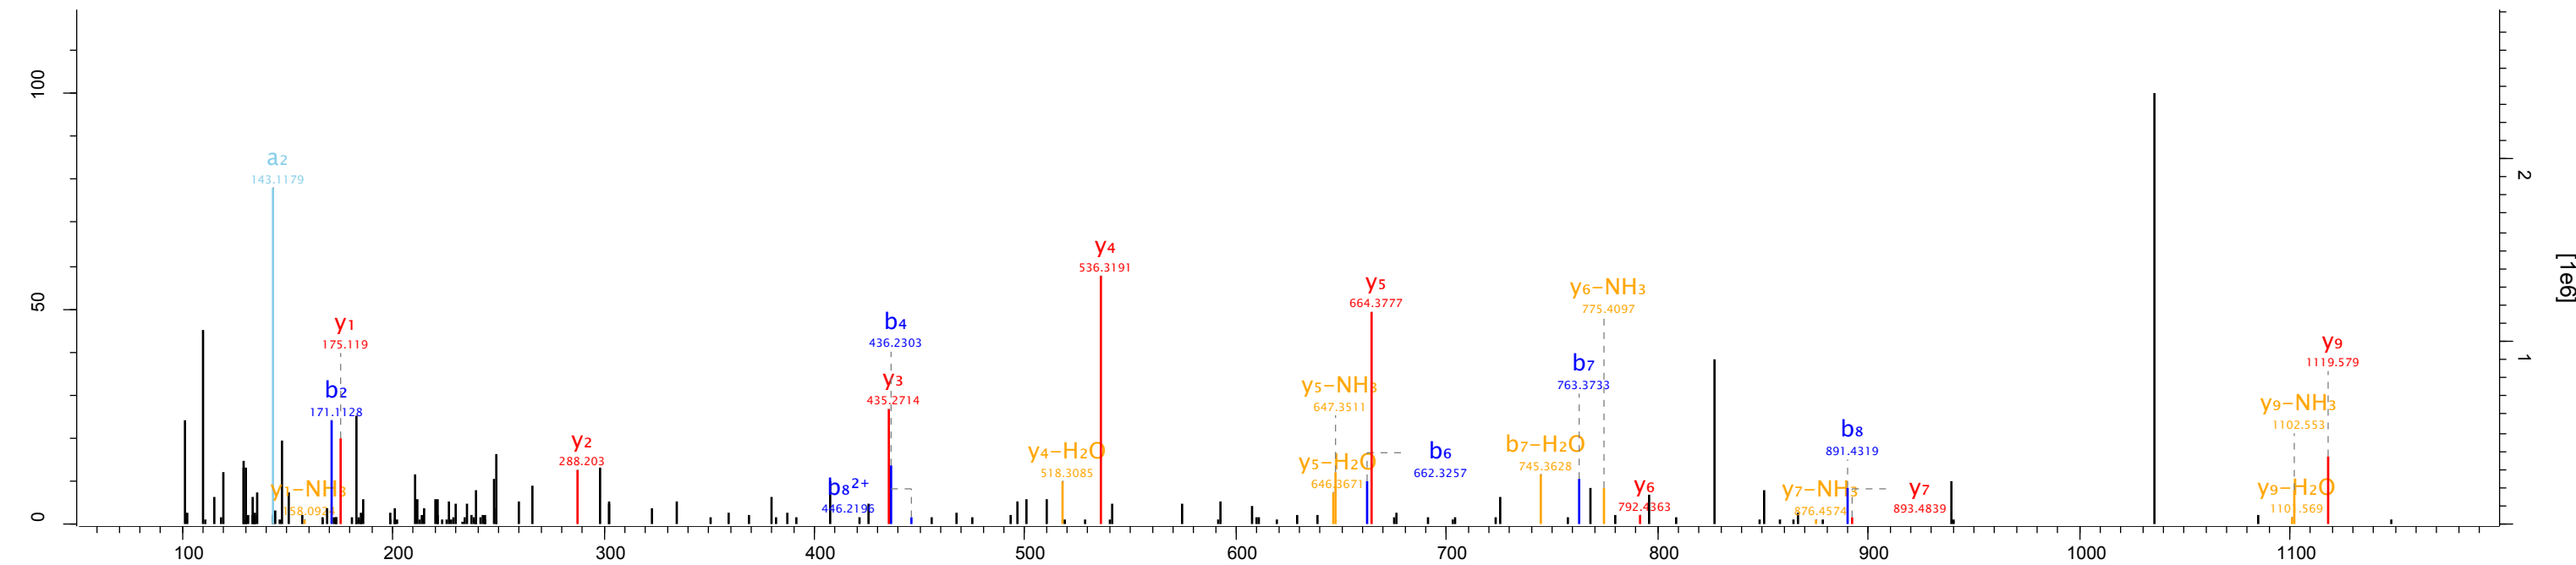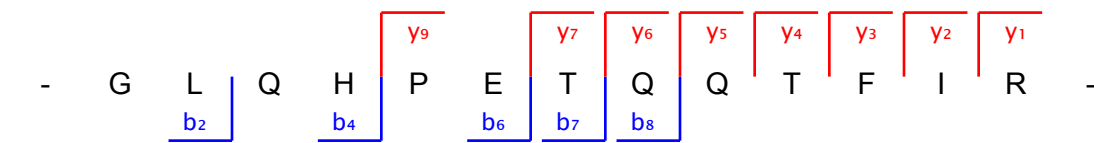

Raw file 20180707\_MaS\_A375SR\_ML\_proteome\_2\_26 Scan 17007 Method FTMS; HCD Score 57.16 m/z 688.81 Gene names F9

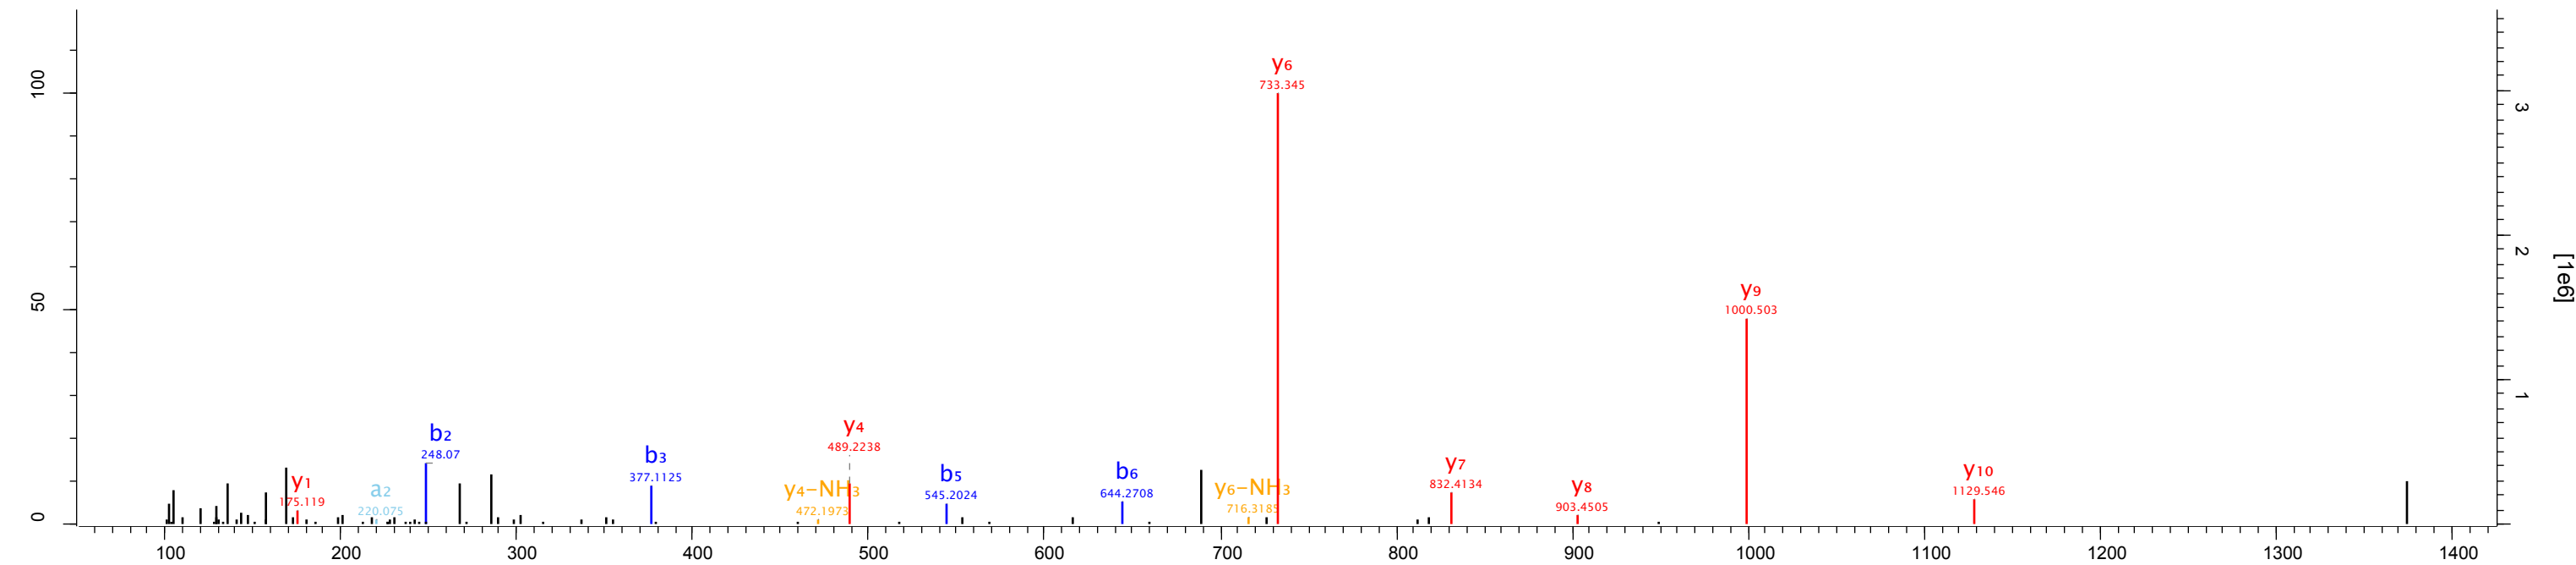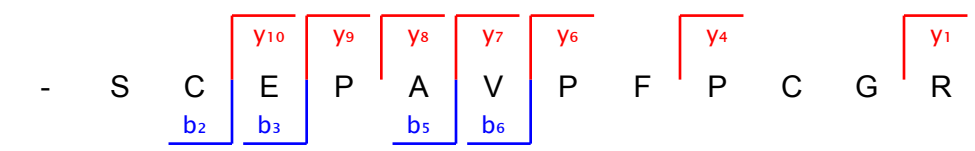

Raw file 20180707\_MaS\_A375SR\_ML\_proteome\_2\_26 Scan 4737 Method FTMS; HCD Score 104.82 m/z 522.31 Gene names VCPKMT

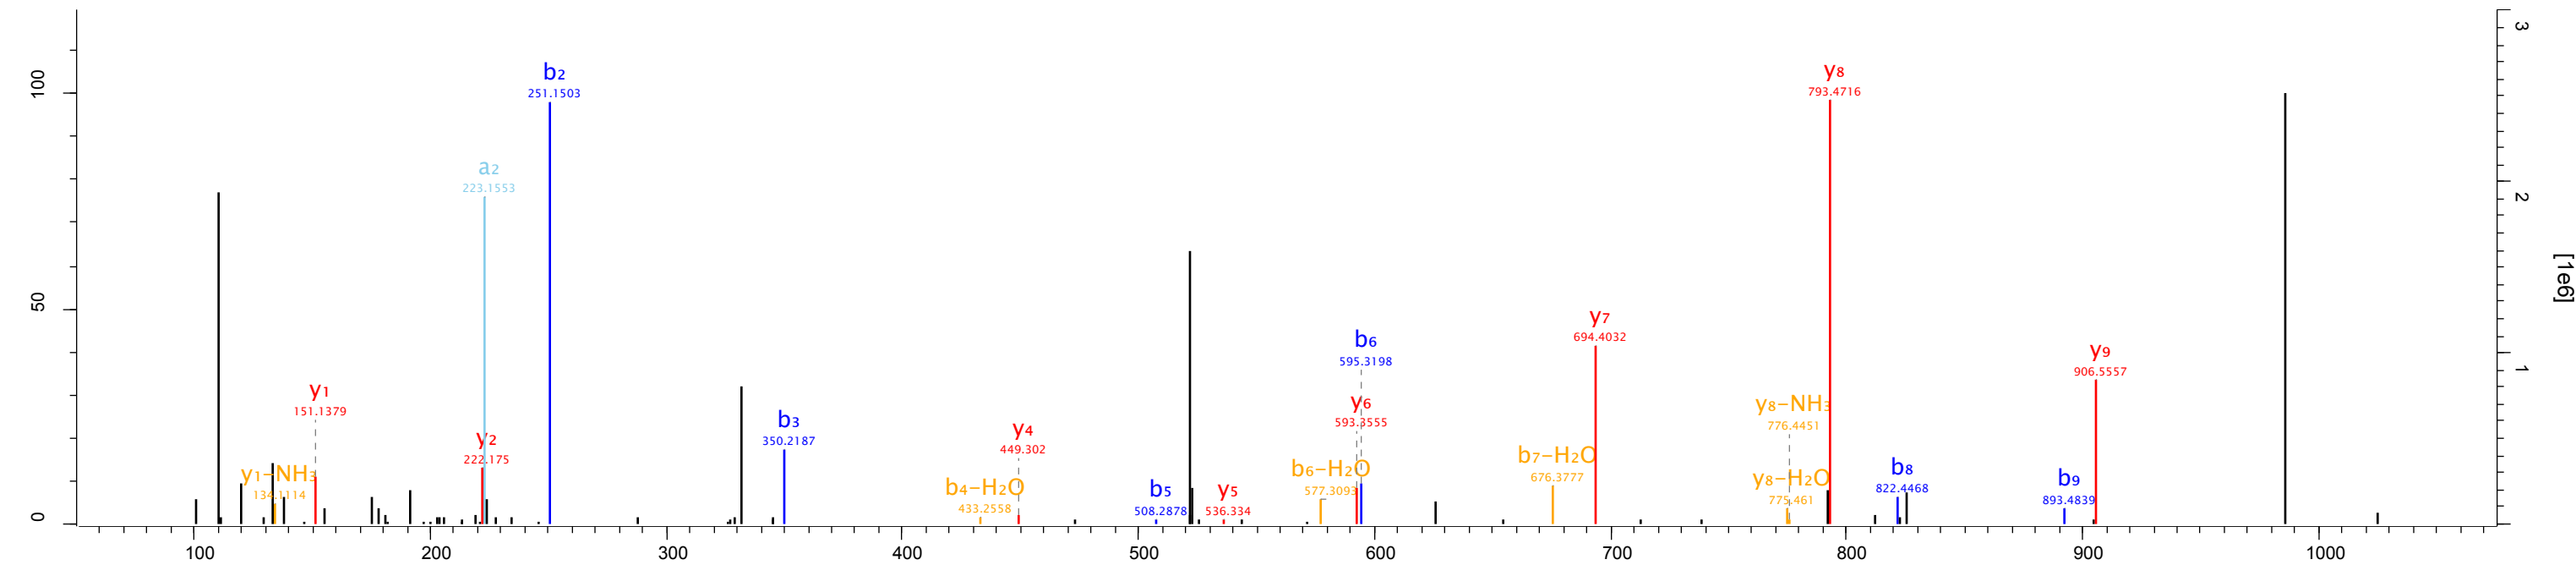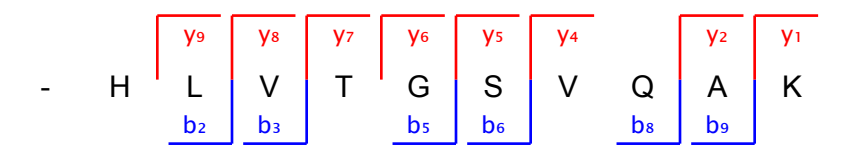

Raw file 20180707\_MaS\_A375SR\_ML\_proteome\_2\_27  
 Scan 2647 Method FTMS; HCD Score 44.72 m/z 361.19

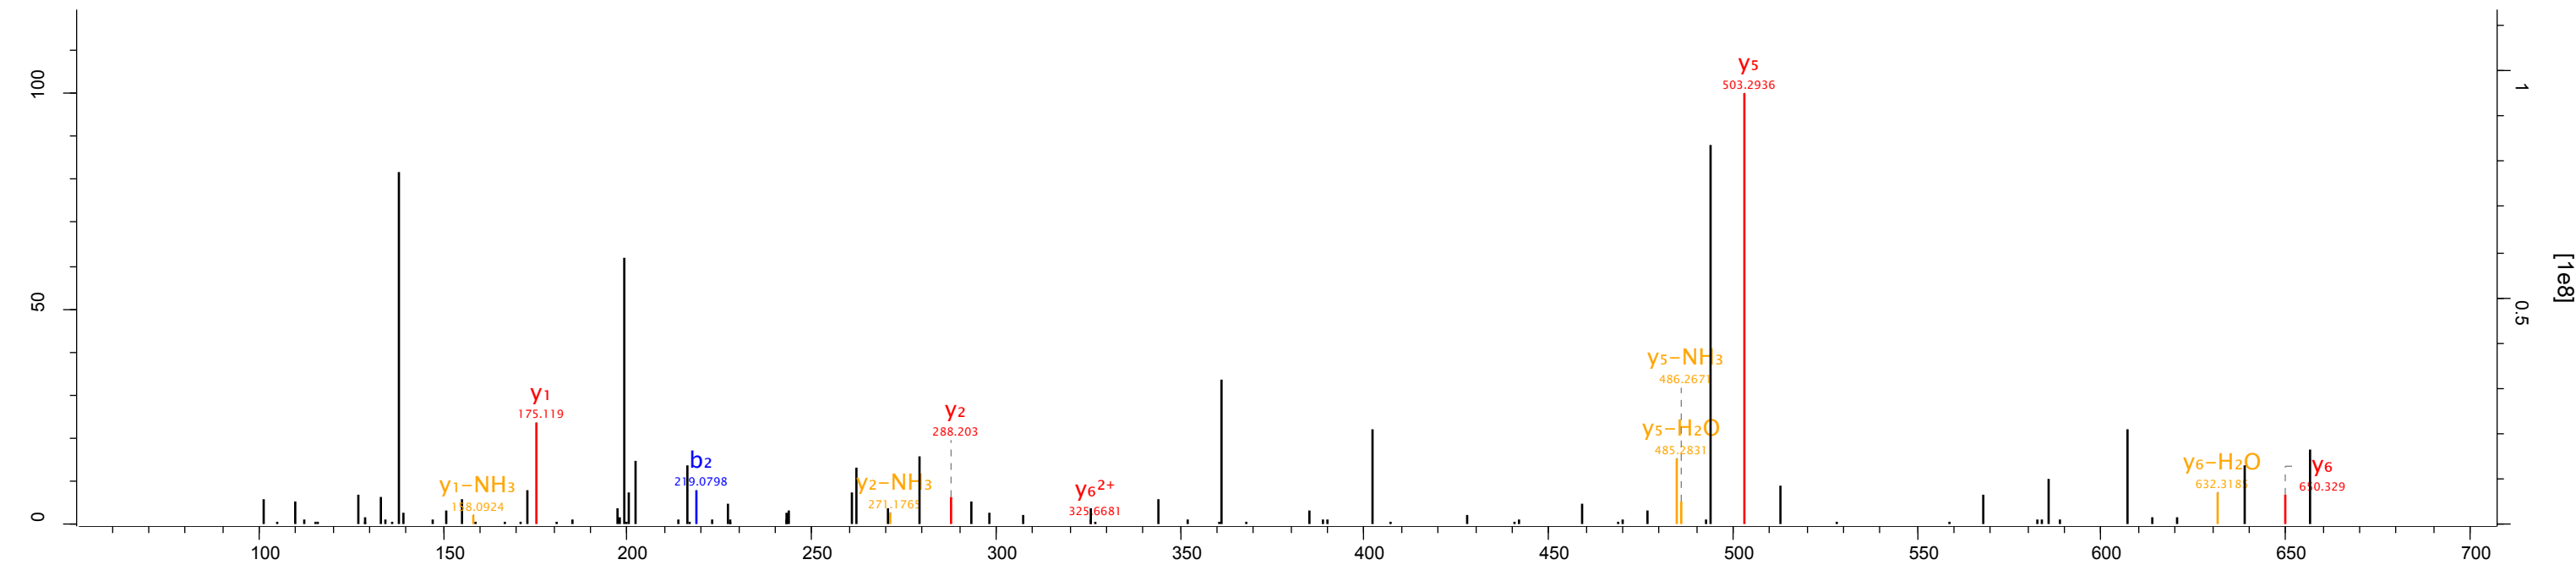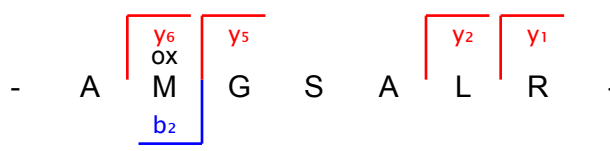

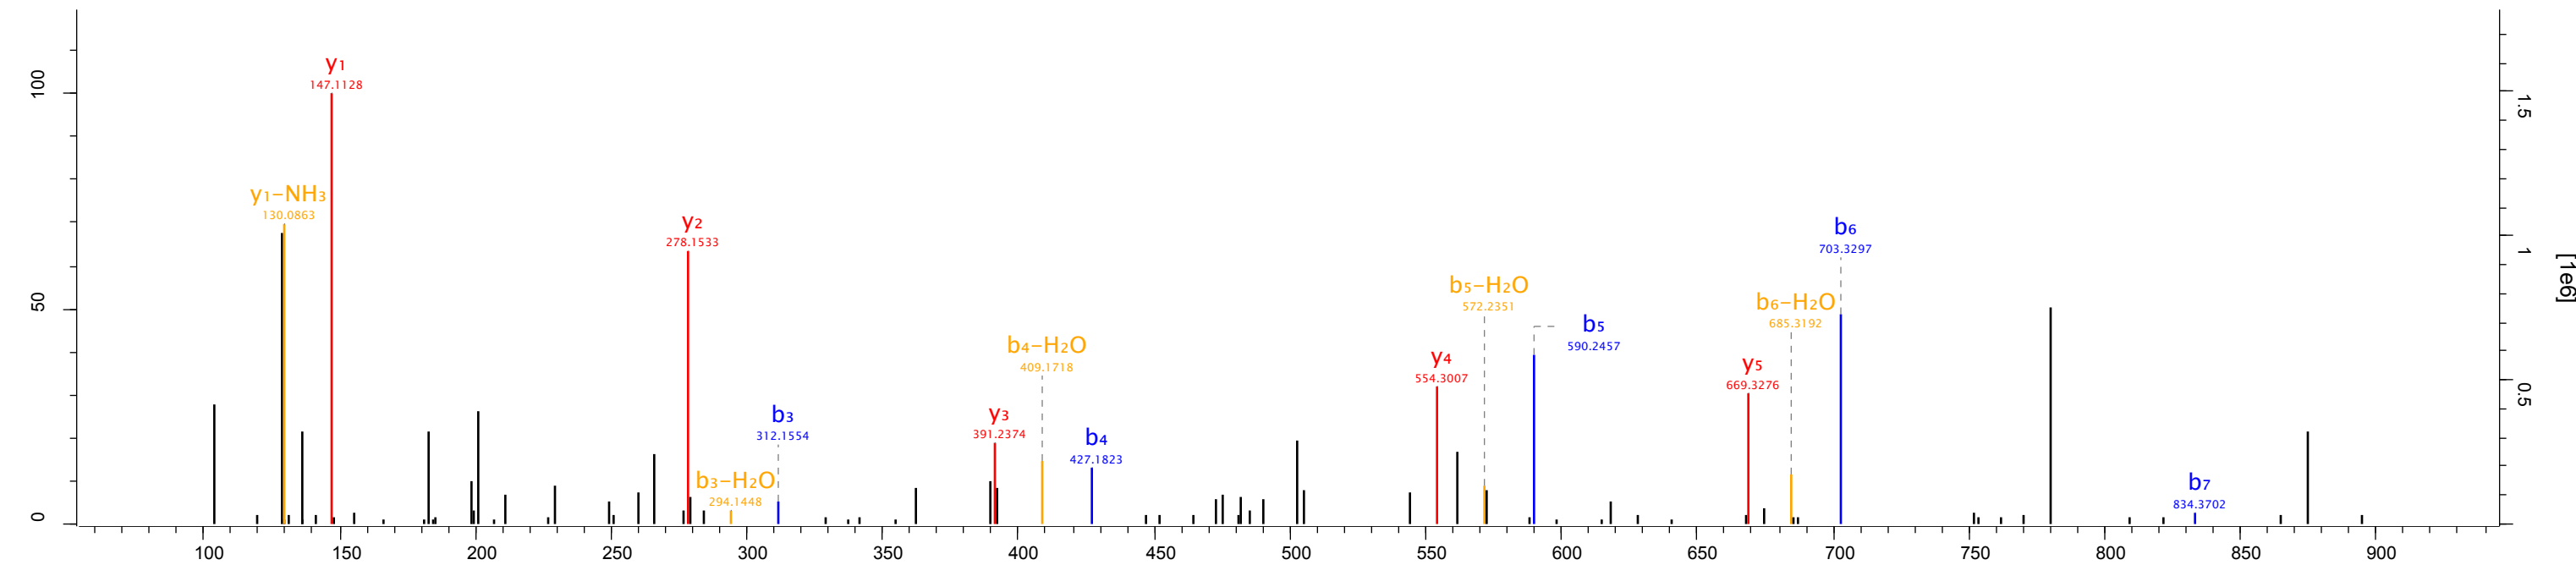

Raw file  
20180707\_MaS\_A375SR\_ML\_proteome\_2\_28

Scan 26627 Method FTMS; HCD Score 111.77 m/z 750.72 Gene names FGFR1

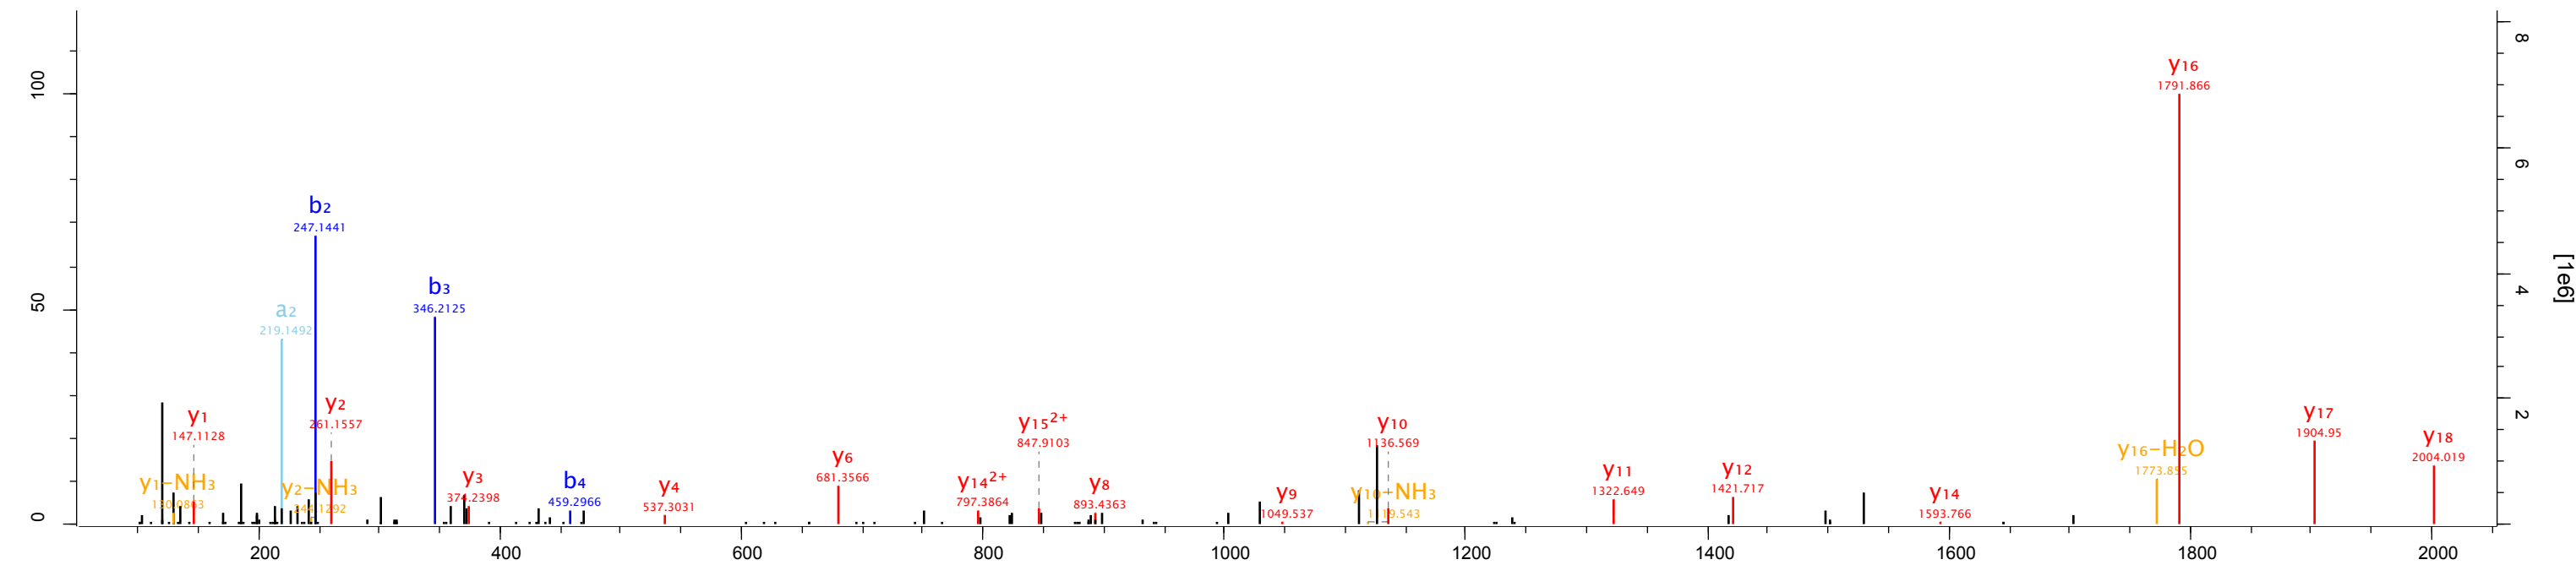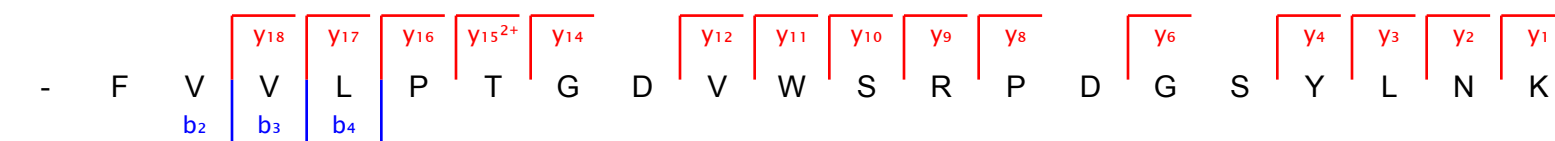

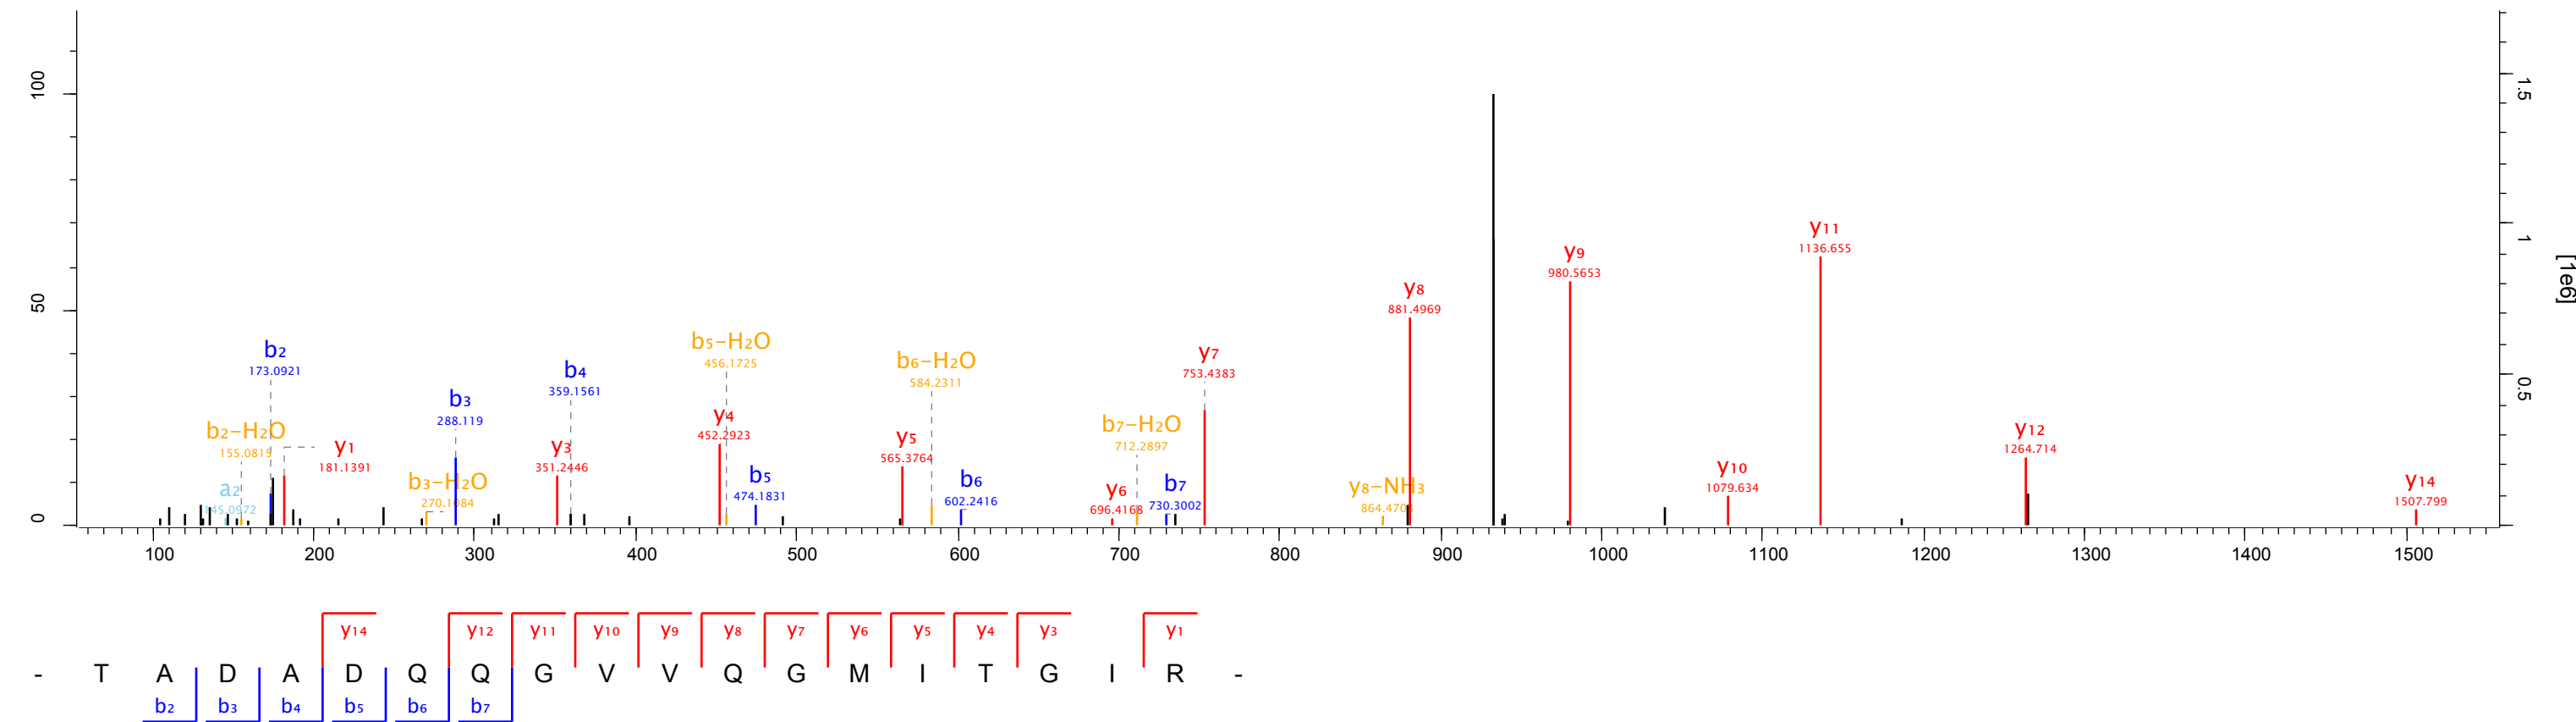

Raw file  
20180707\_MaS\_A375SR\_ML\_proteome\_2\_29

Scan 6457 Method FTMS; HCD Score 79.45 m/z 353.19

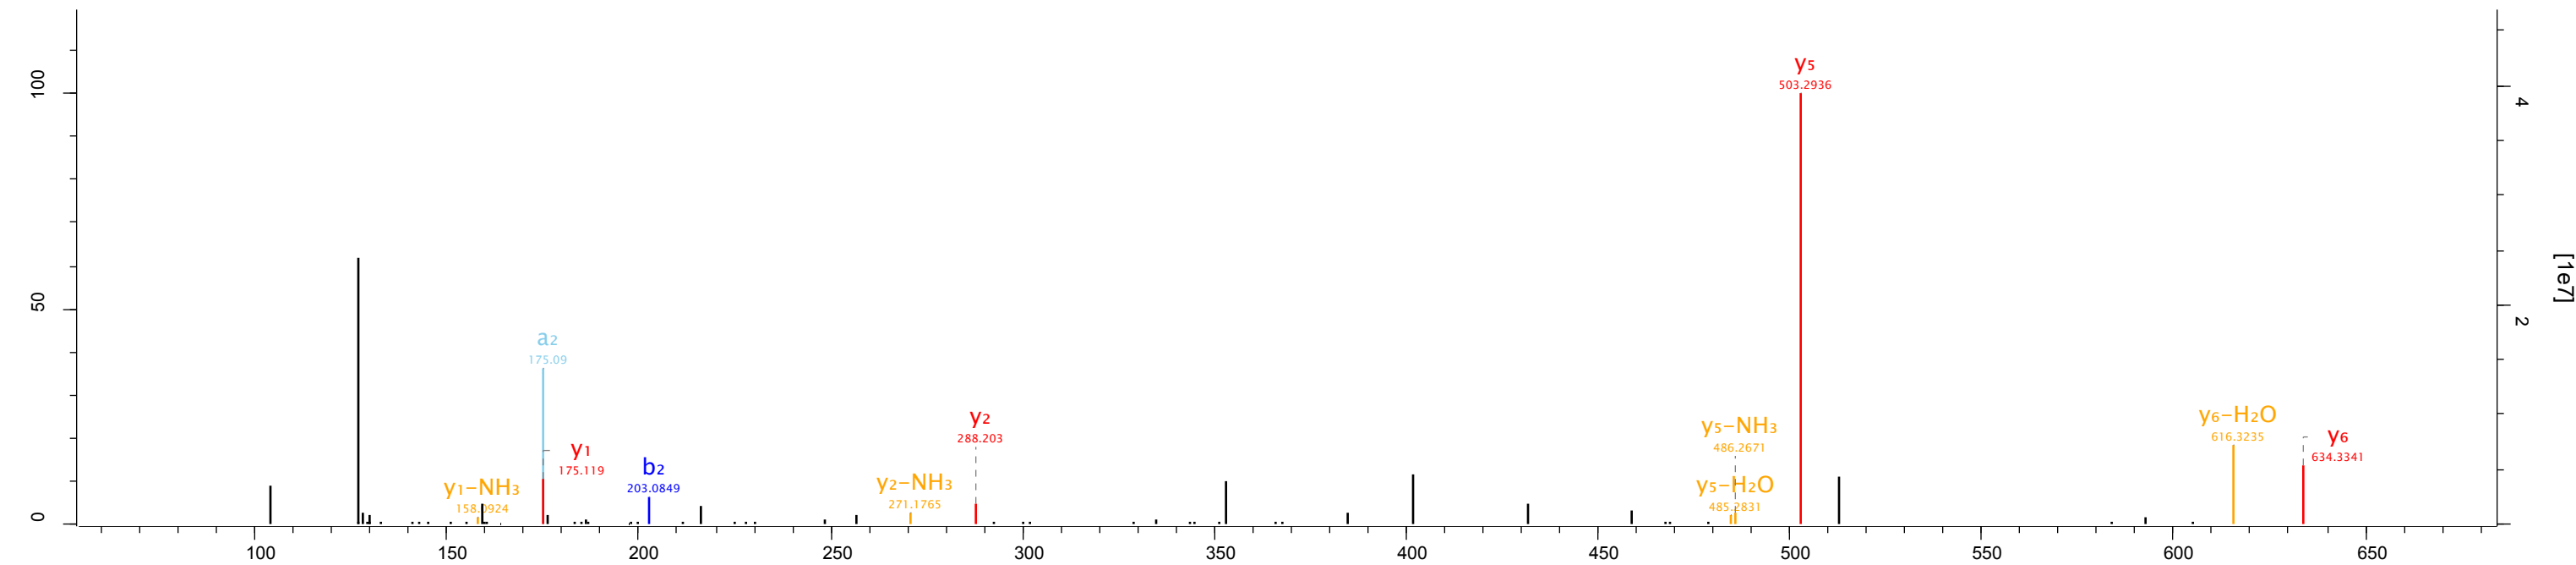



Raw file  
20180707\_MaS\_A375SR\_ML\_proteome\_2\_30

Scan 4057 Method FTMS; HCD Score 57.15 m/z 532.8

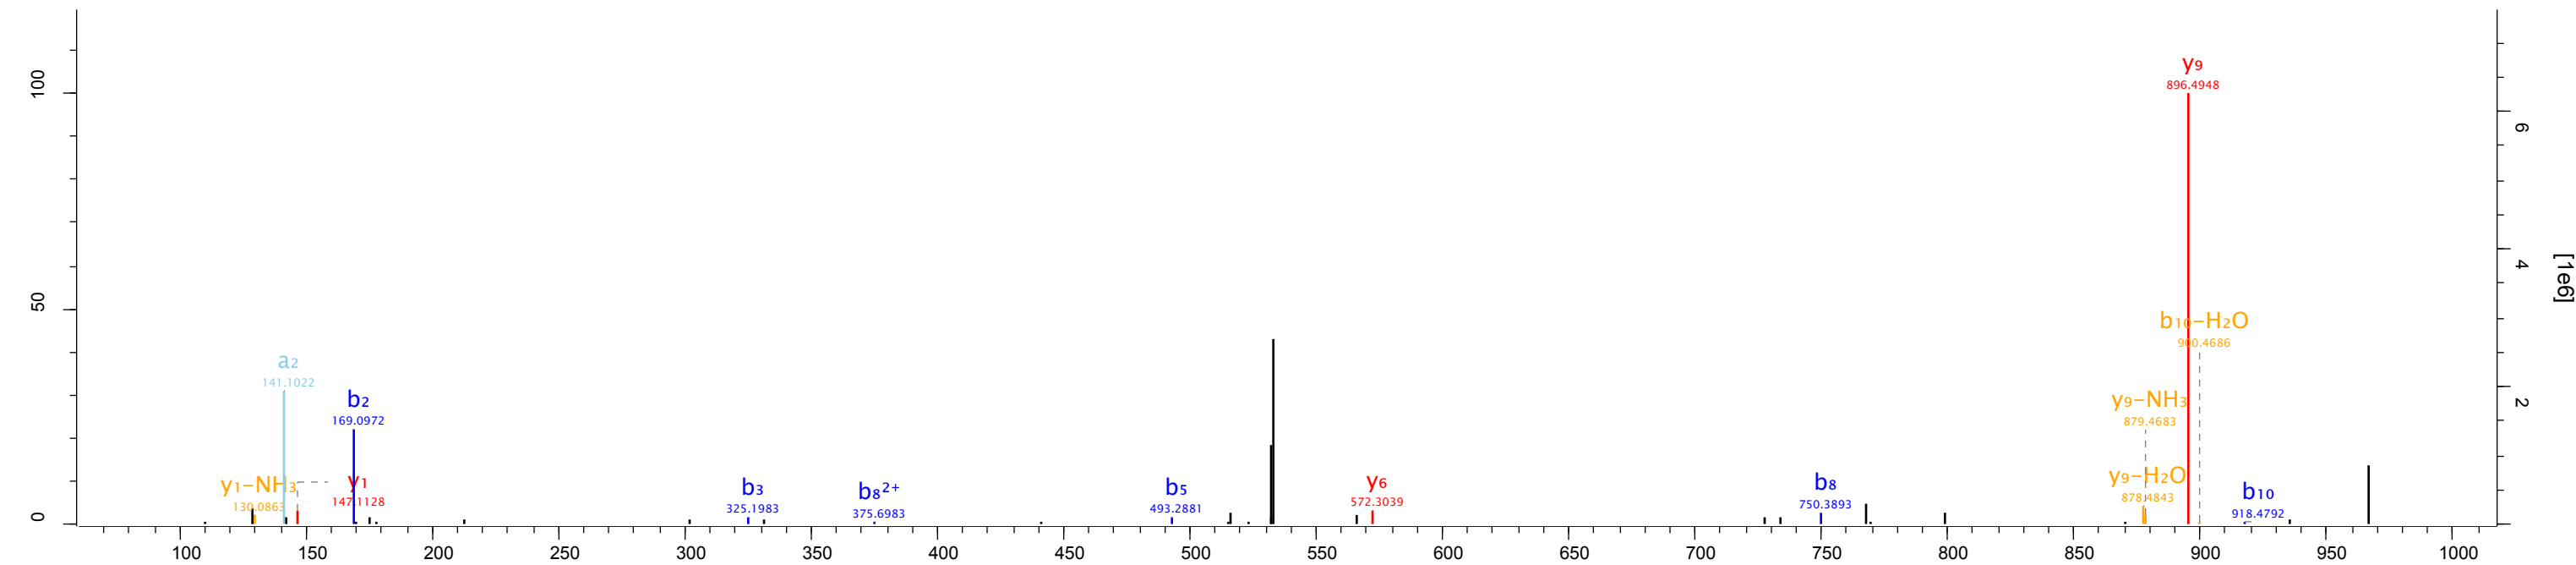

Raw file 20180707\_MaS\_A375SR\_ML\_proteome\_20 Scan 22137 Method FTMS; HCD Score 80.69 m/z 588.85 Gene names KATNAL2

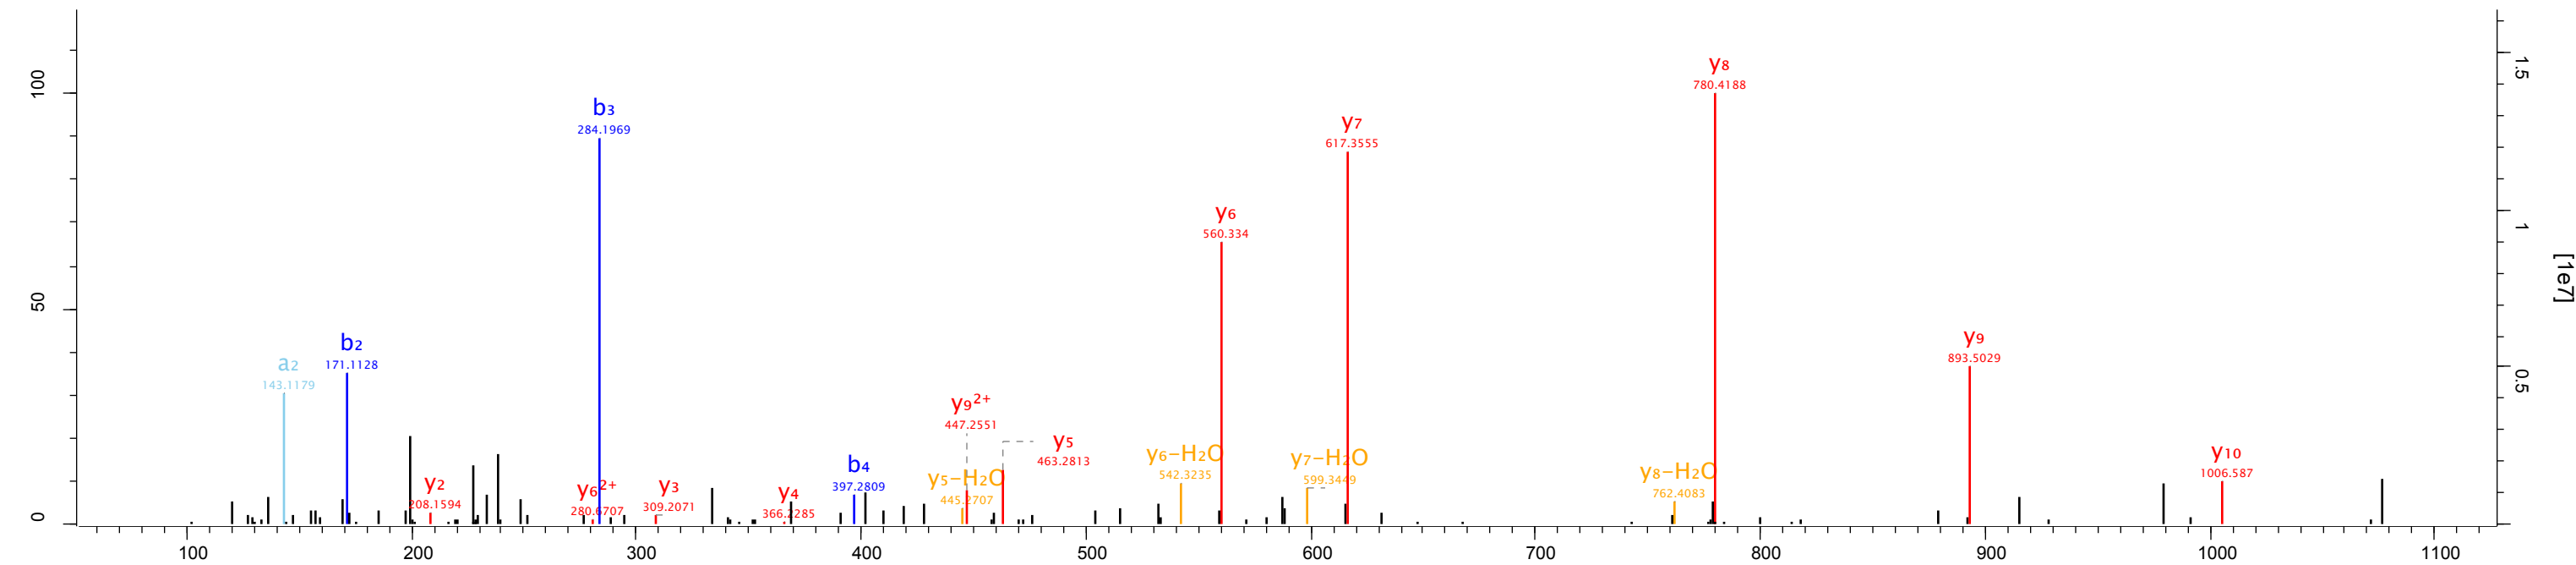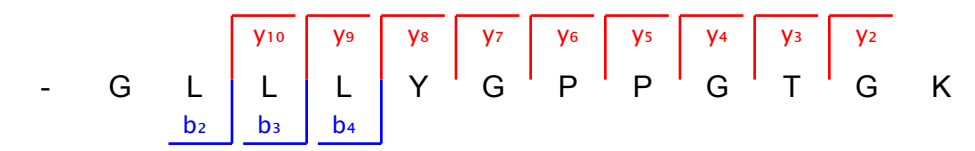

Raw file  
20180707\_MaS\_A375SR\_ML\_proteome\_21

Scan 25447 Method FTMS; HCD Score 169.89 m/z 705.87 Gene names SPP2

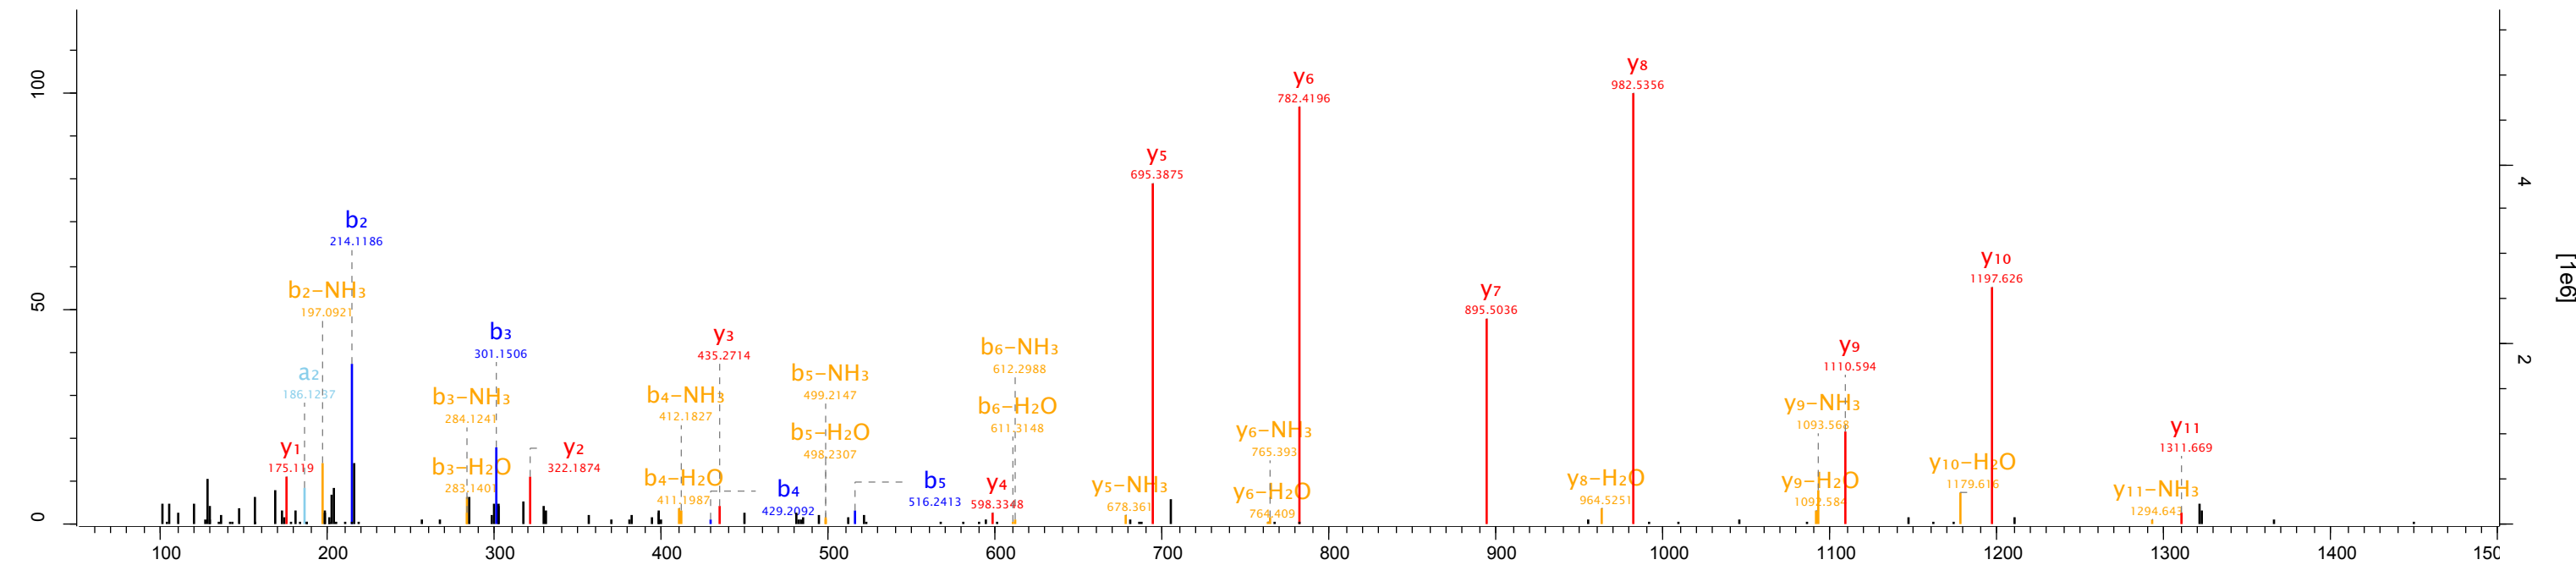

Raw file  
20180707\_MaS\_A375SR\_ML\_proteome\_22

Scan 21557 Method FTMS; HCD Score 49.54 m/z 959 Gene names ATP6V0C

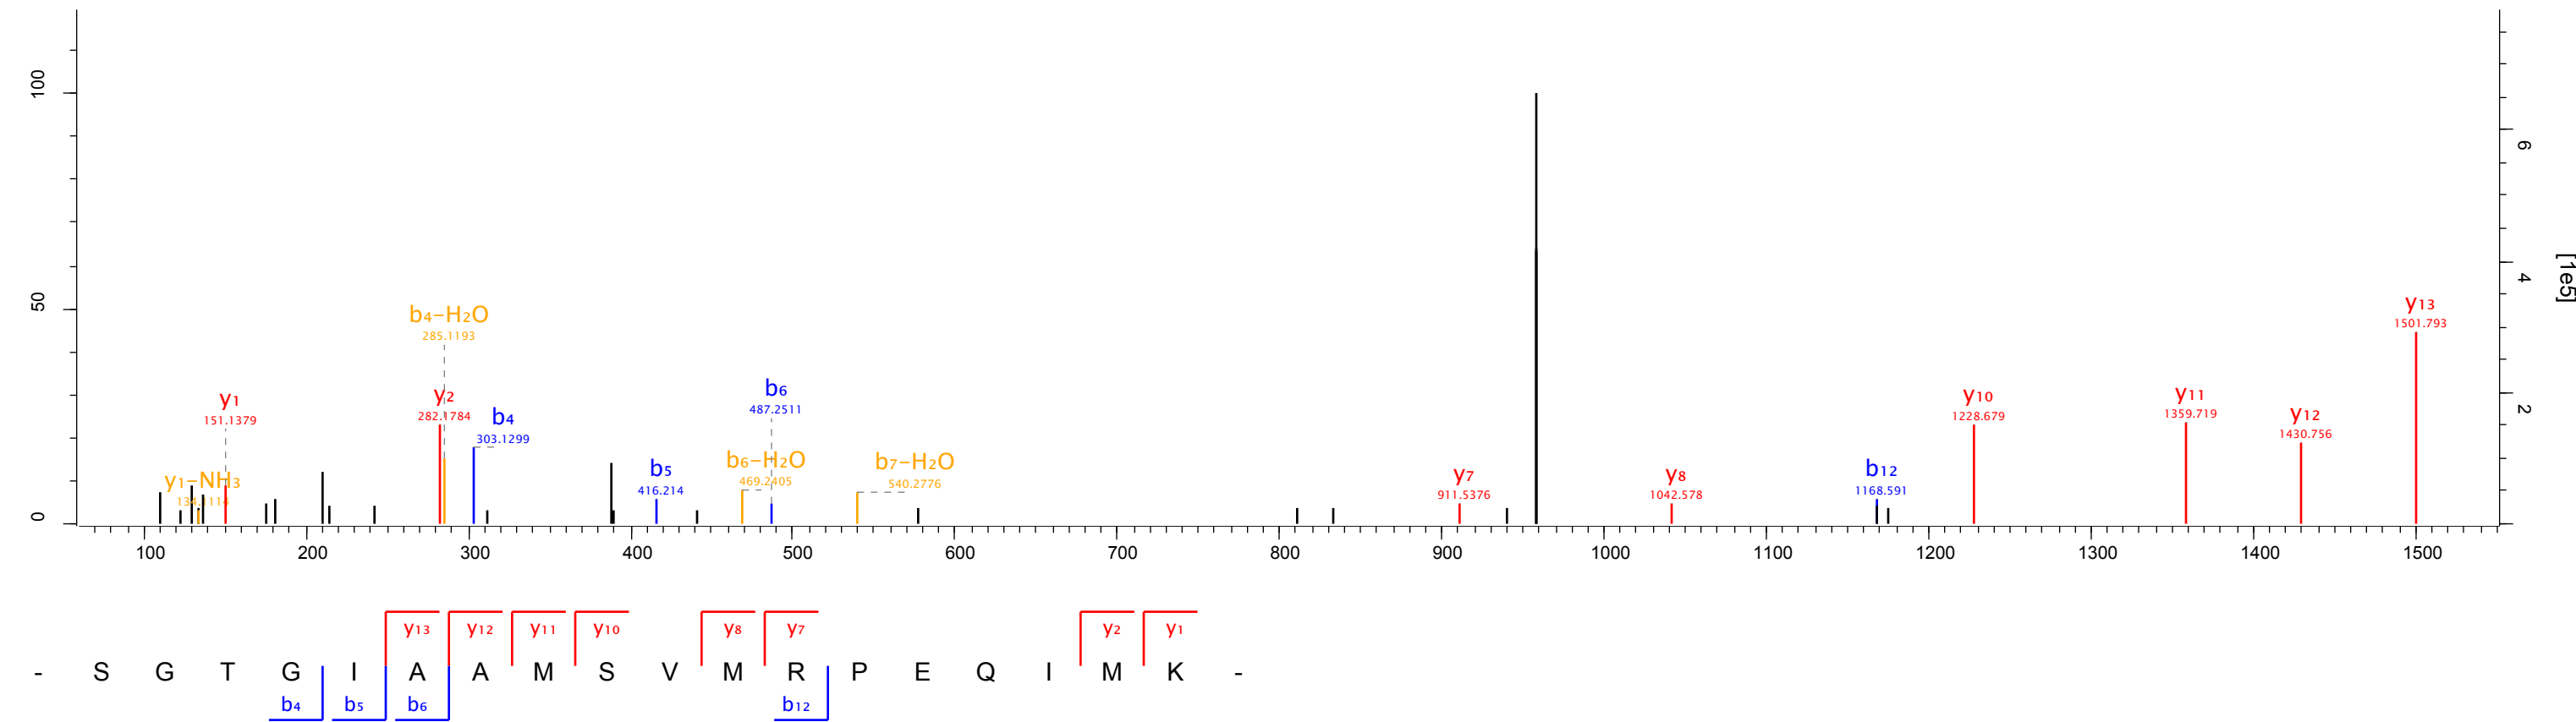

Raw file 20180707\_MaS\_A375SR\_ML\_proteome\_24 Scan 18947 Method FTMS; HCD Score 110.31 m/z 716.37 Gene names ZFAND3

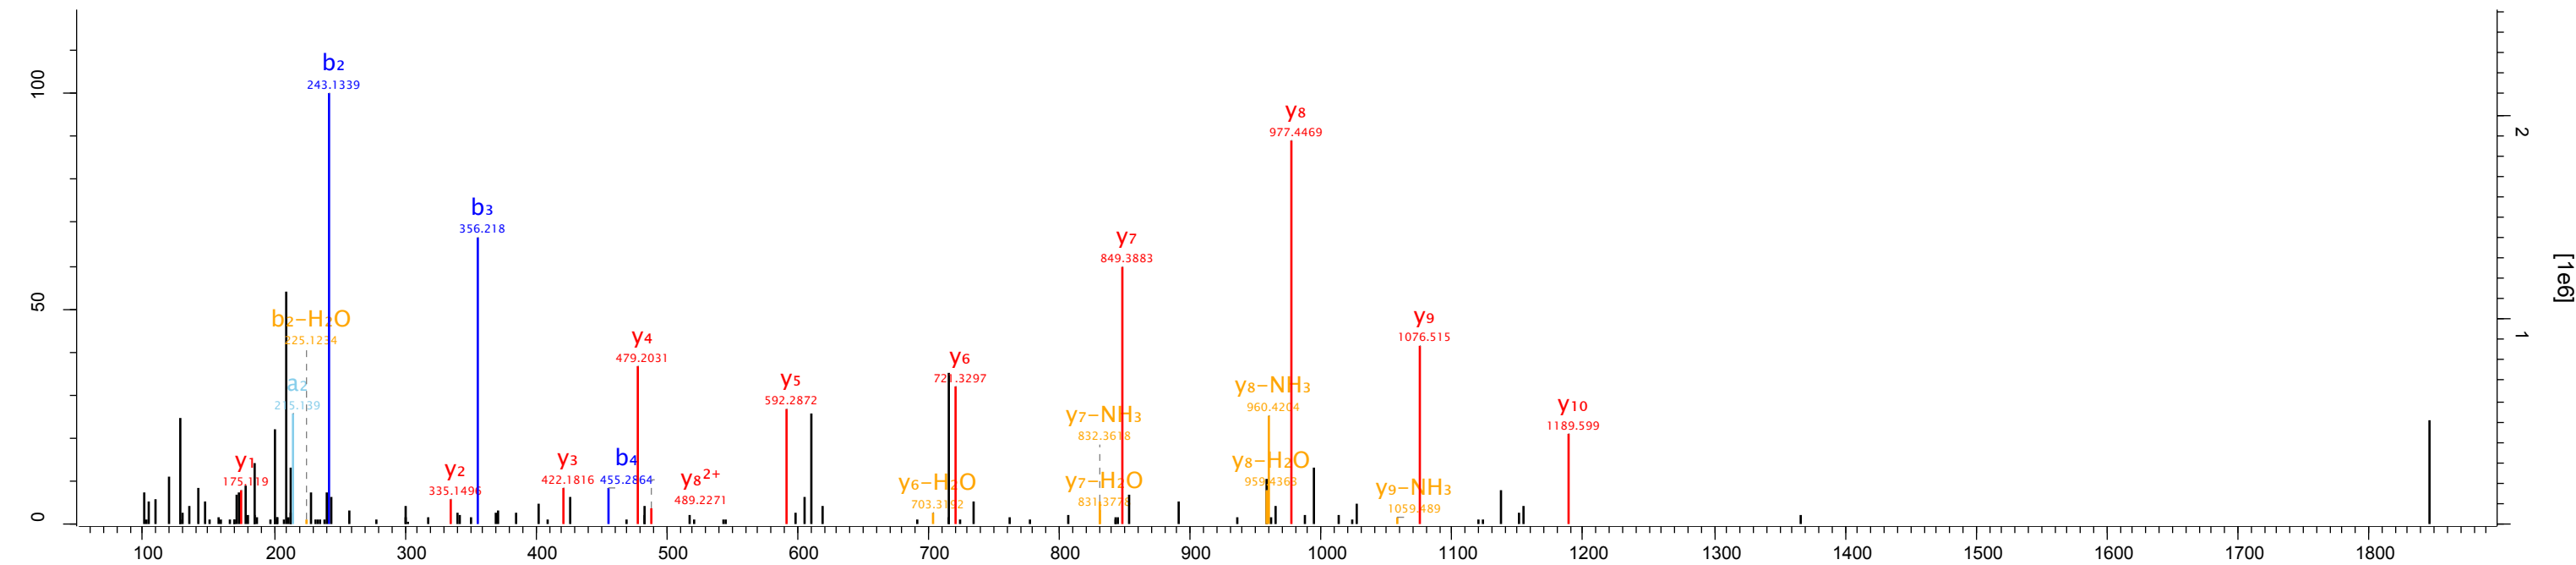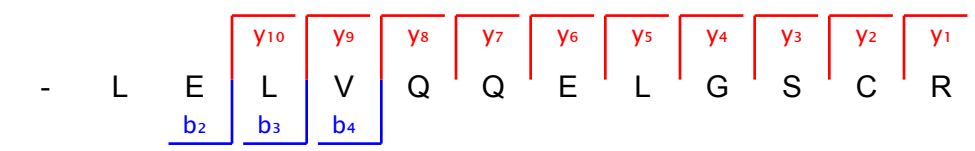

Raw file  
20180707\_MaS\_A375SR\_ML\_proteome\_24

Scan 8887 Method FTMS; HCD Score 57.28 m/z 566.72 Gene names PSPHP1

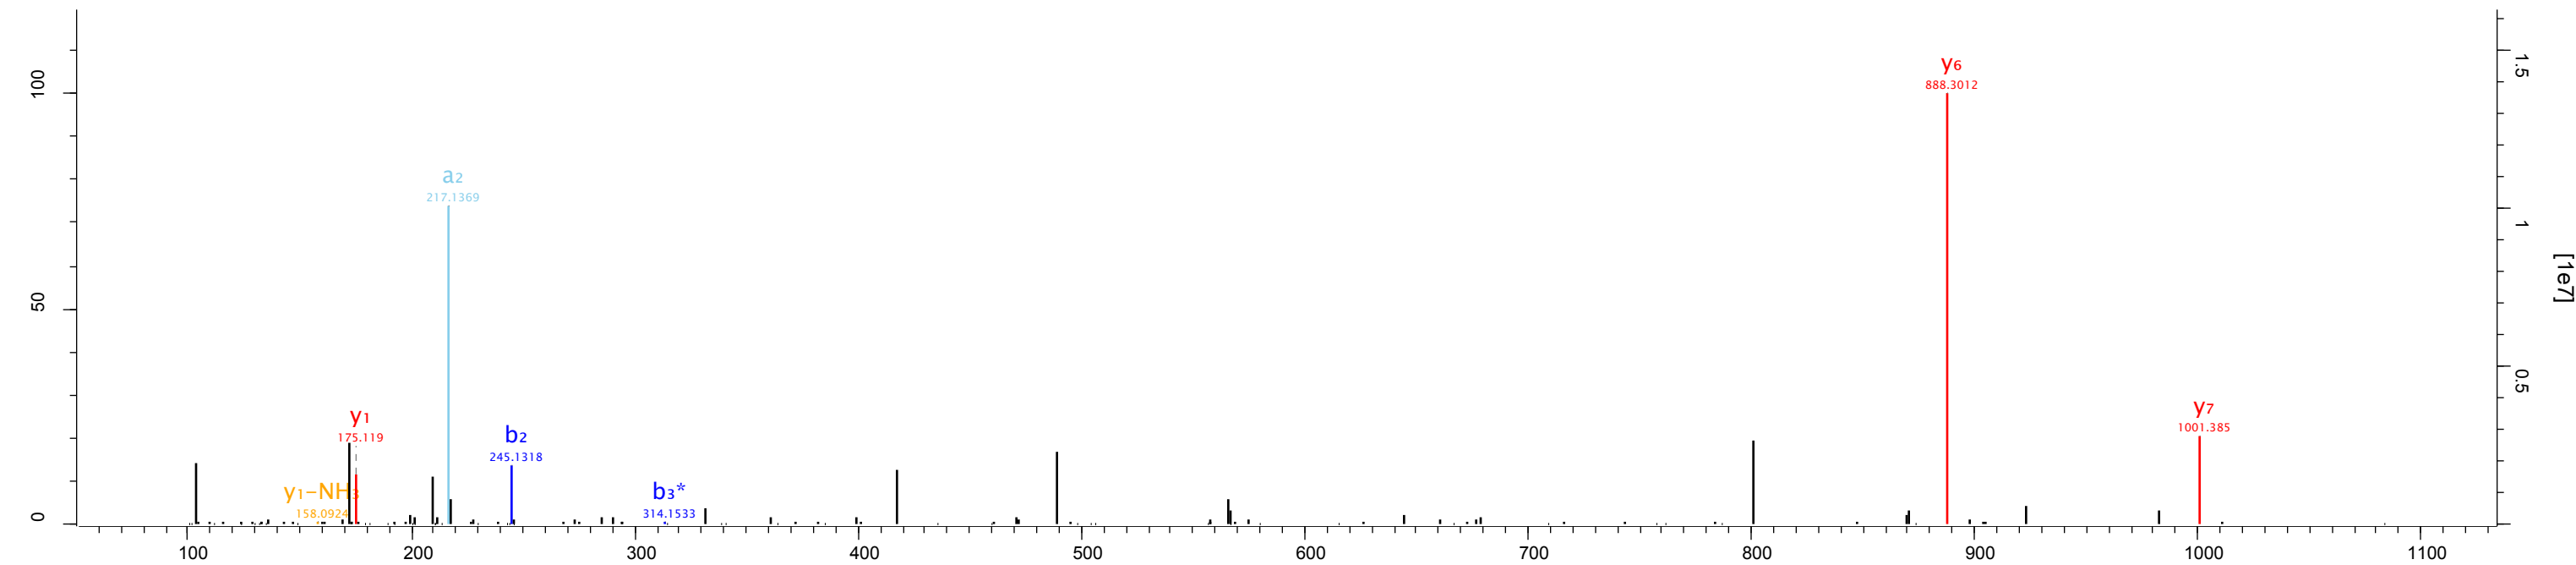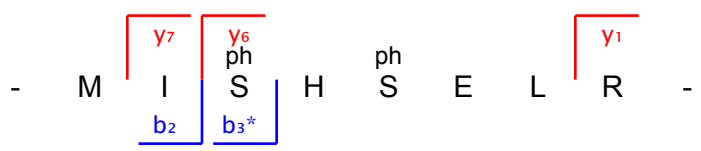

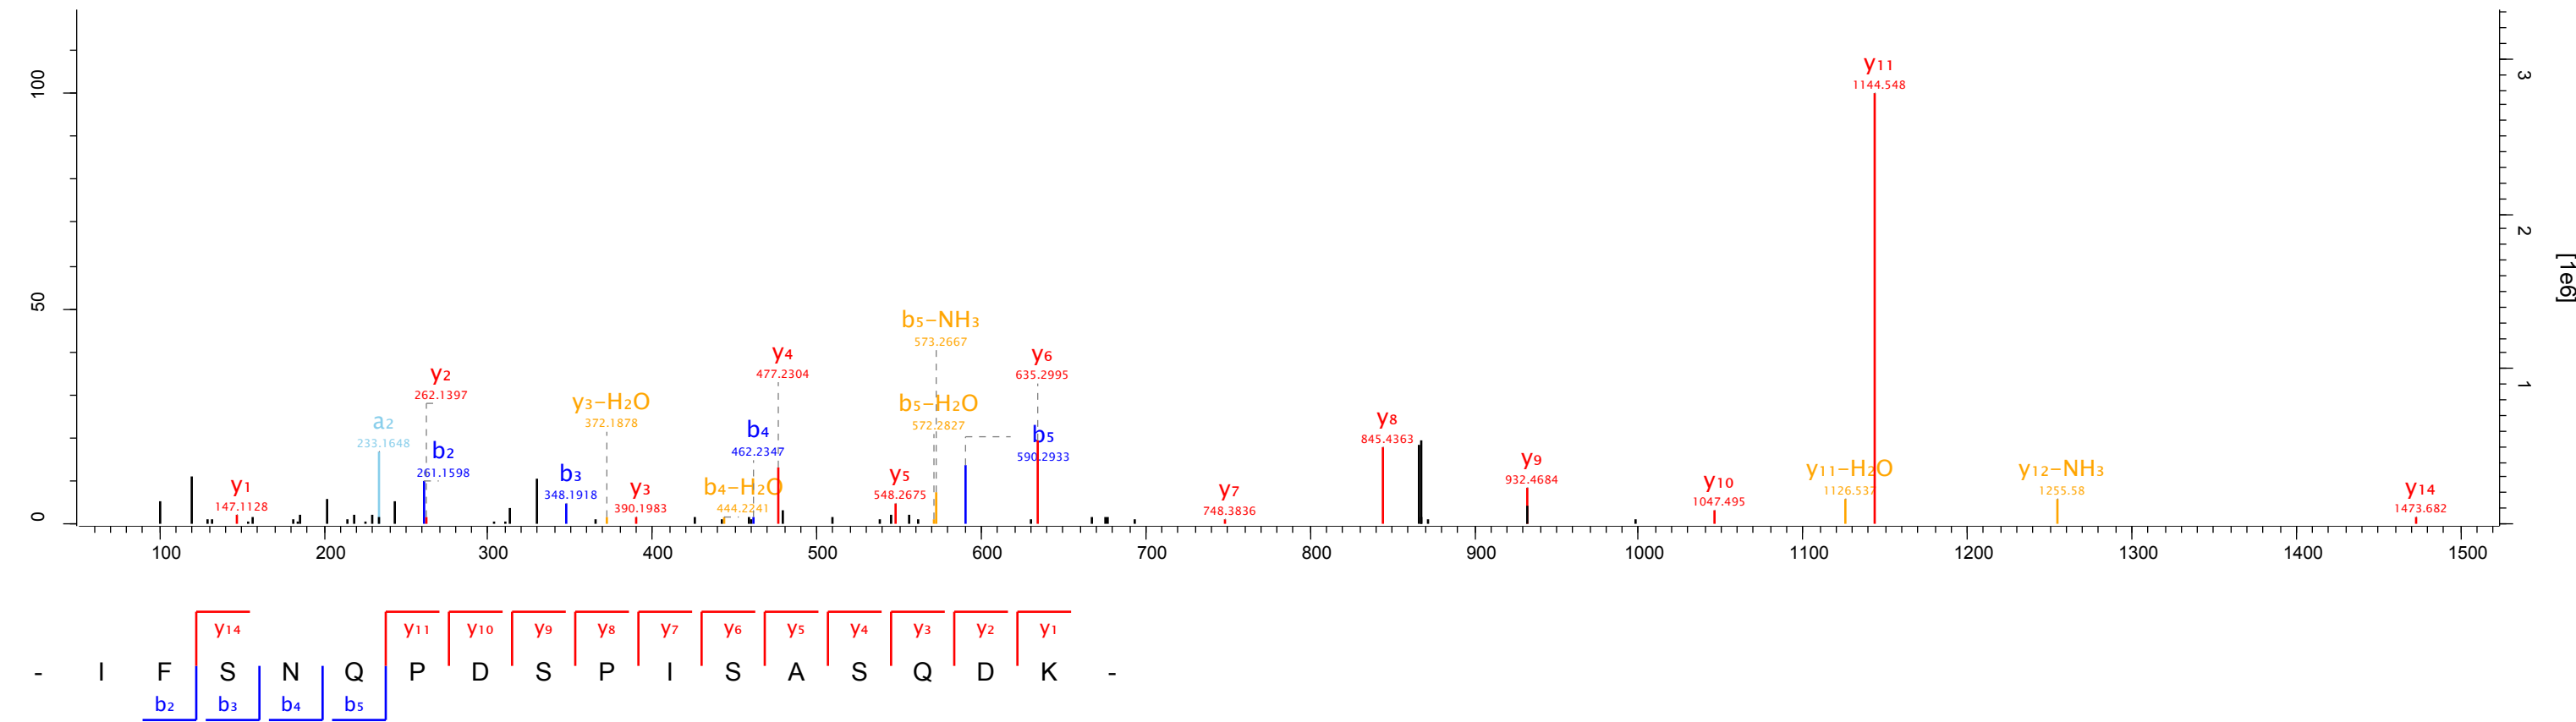

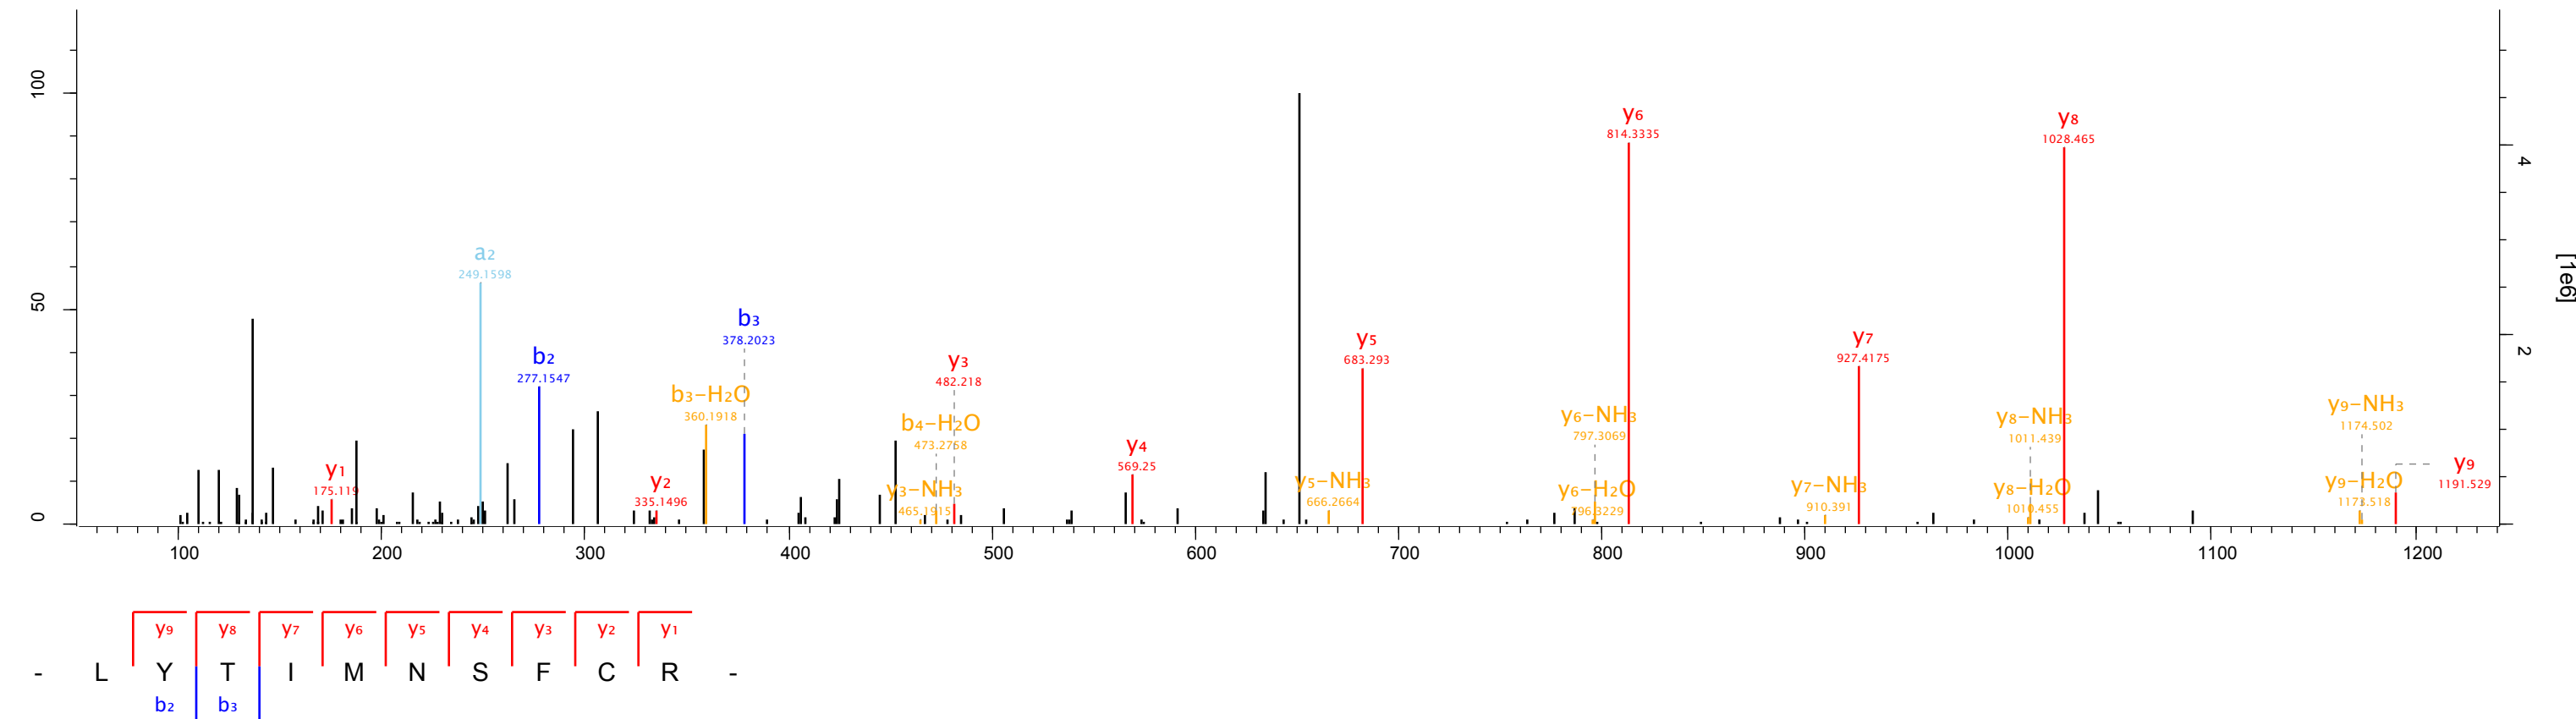



Raw file  
20180707\_MaS\_A375SR\_ML\_proteome\_26

Scan 27227 Method FTMS; HCD Score 174.59 m/z 864.96 Gene names EPT1

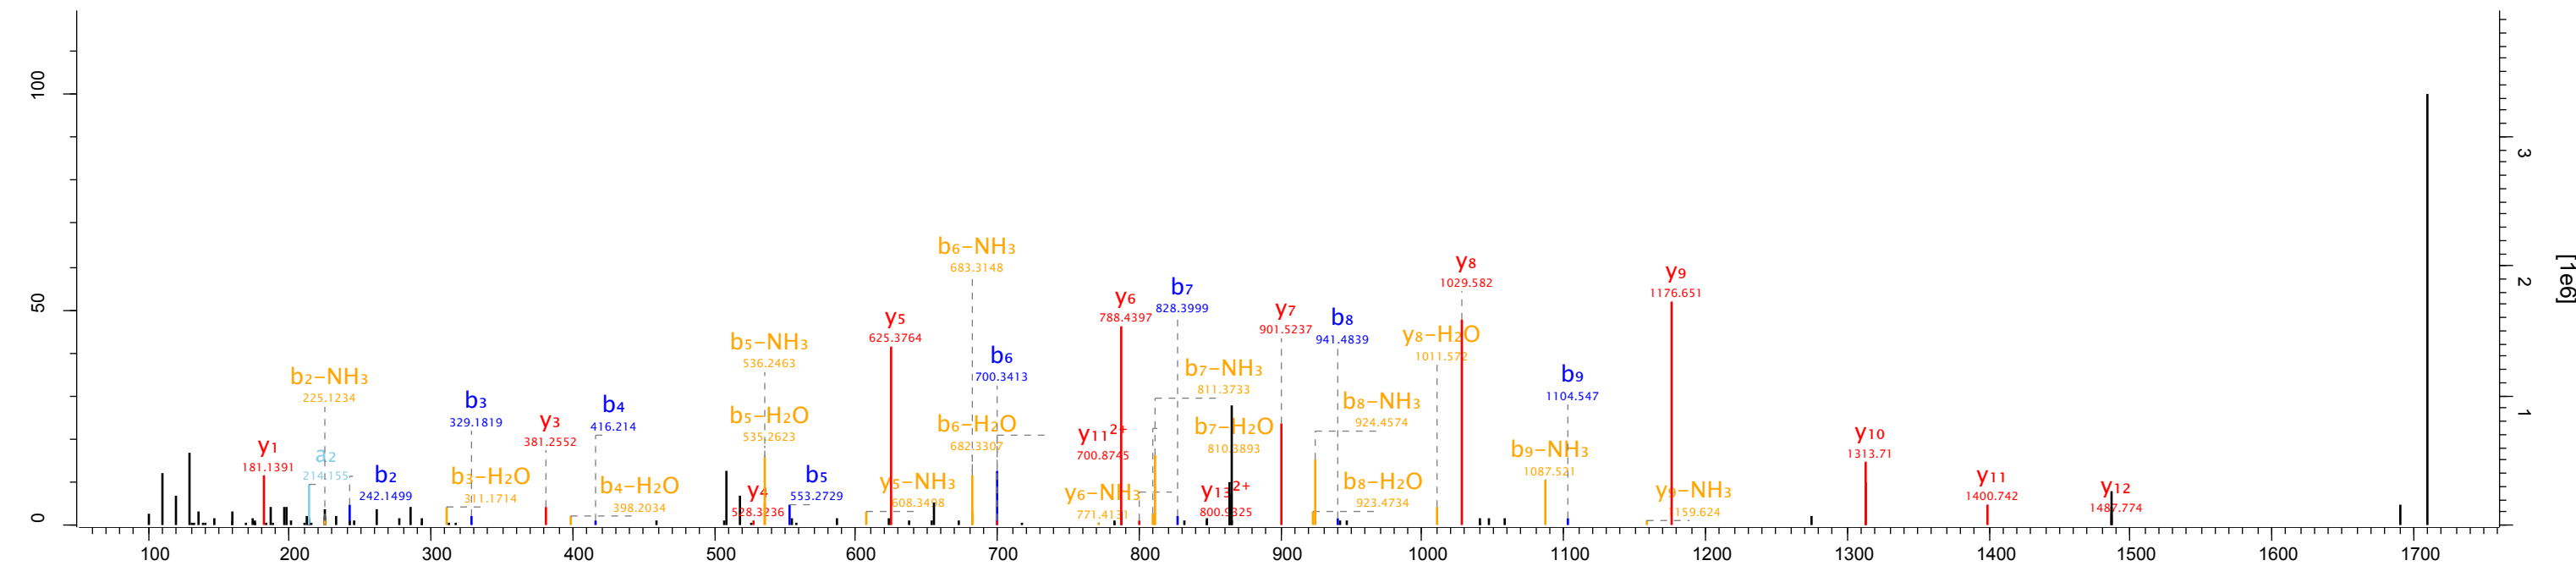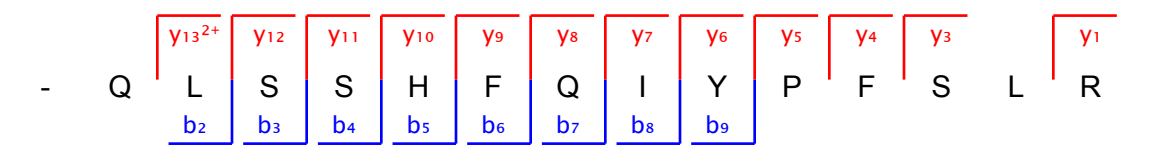

Raw file: 20180707\_MaS\_A375SR\_ML\_proteome\_27  
 Scan: 16057 Method: FTMS; HCD Score: 128.86 m/z: 436.58 Gene names: RPL39P5;RPL39

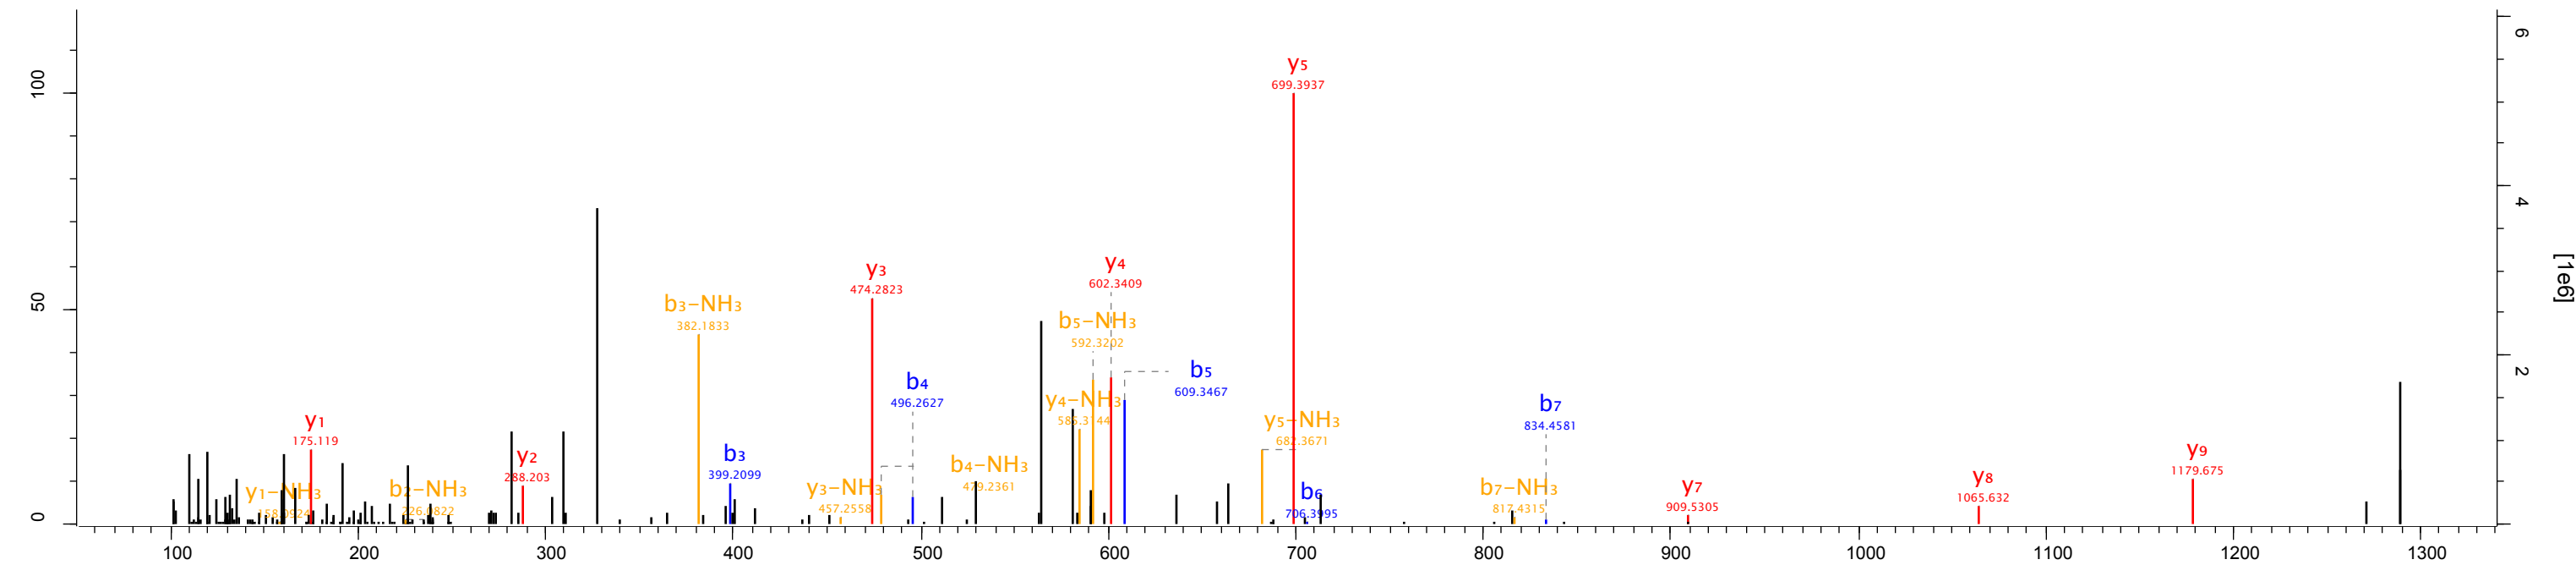

Raw file 20180707\_MaS\_A375SR\_ML\_proteome\_27 Scan 20407 Method FTMS; HCD Score 94.11 m/z 500.75

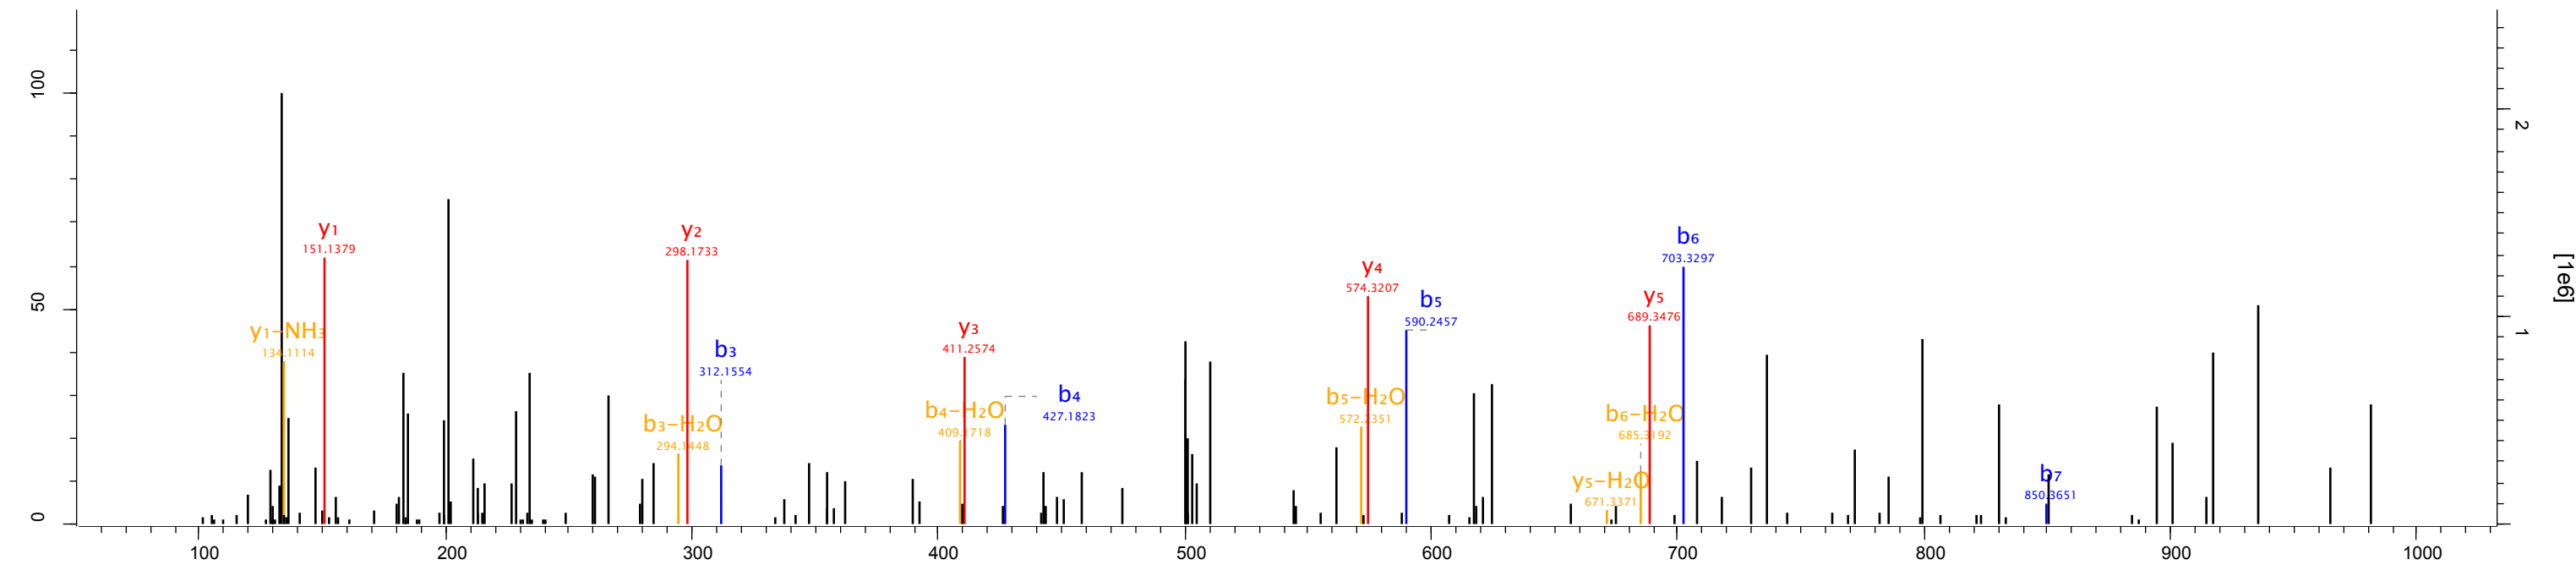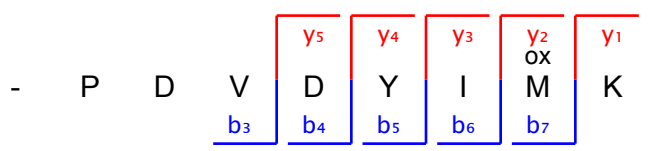

Raw file 20180707\_MaS\_A375SR\_ML\_proteome\_28 Scan 24817 Method FTMS; HCD Score 106.04 m/z 492.76

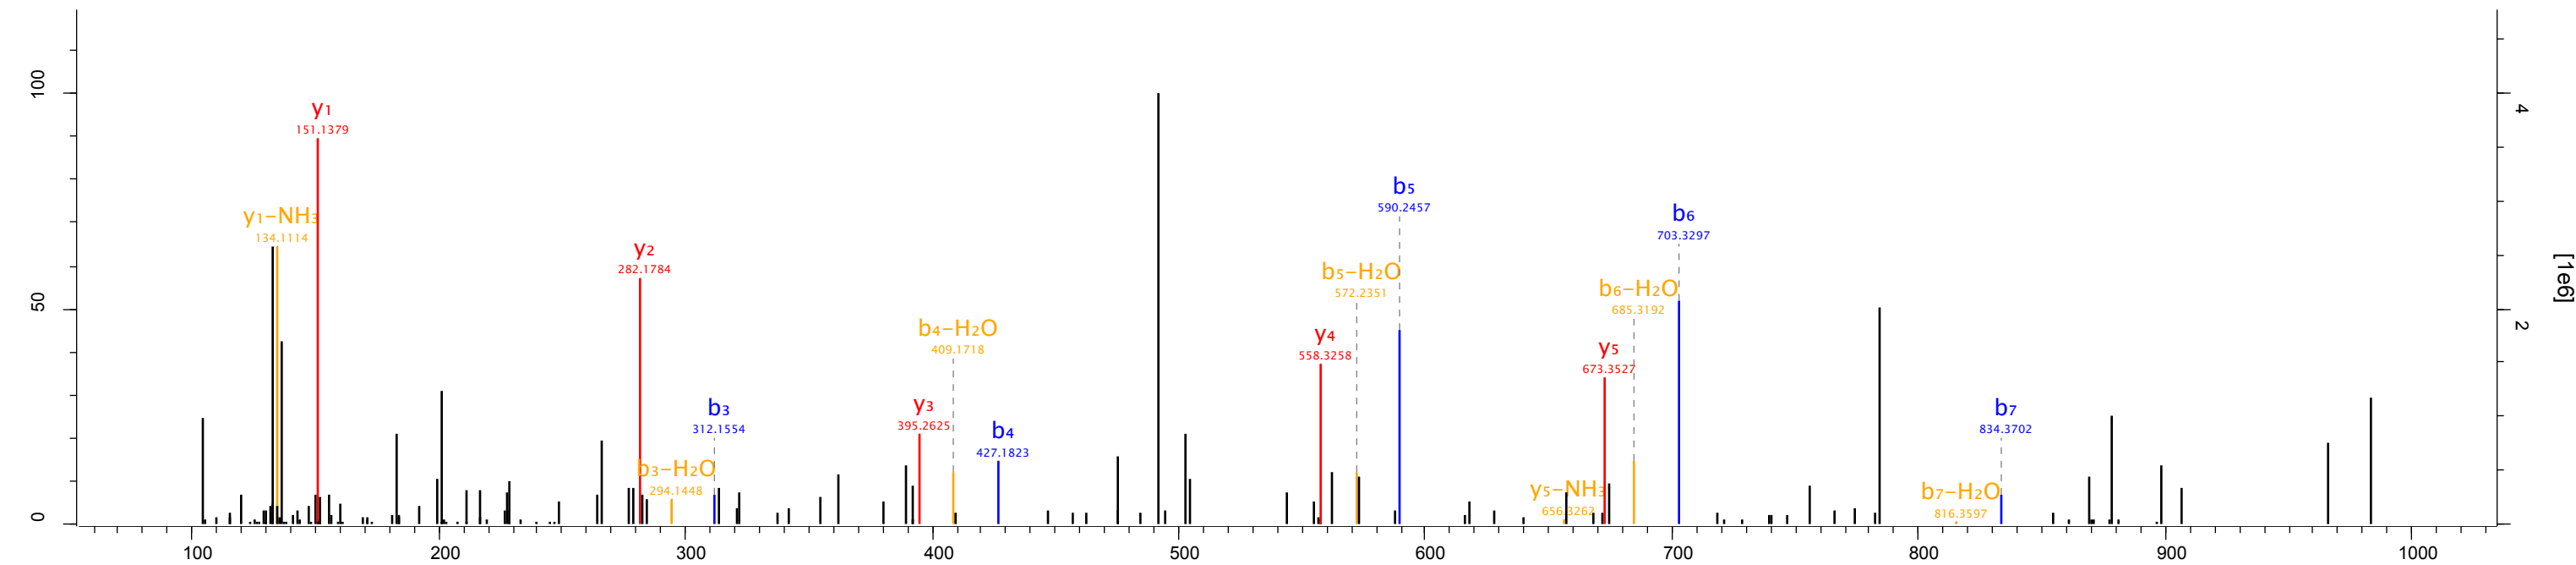

Raw file 20180707\_MaS\_A375SR\_ML\_proteome\_28 Scan 24827 Method FTMS; HCD Score 87.25 m/z 490.74

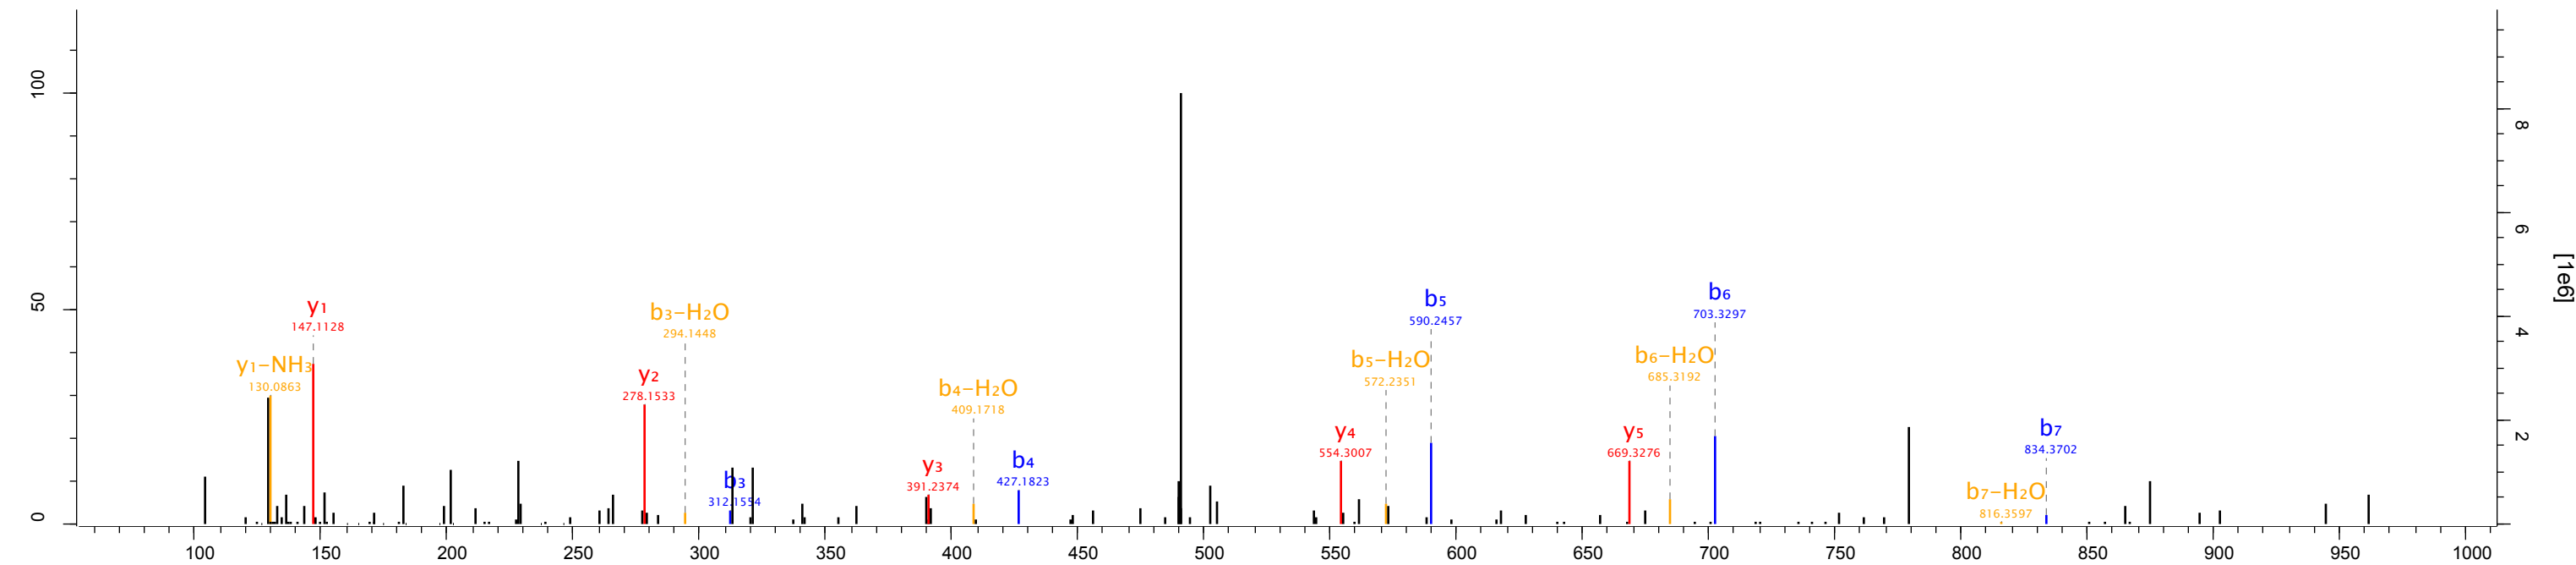

Raw file  
20180707\_MaS\_A375SR\_ML\_proteome\_29

Scan 17787 Method FTMS; HCD Score 59.2 m/z 670.82 Gene names RAB26

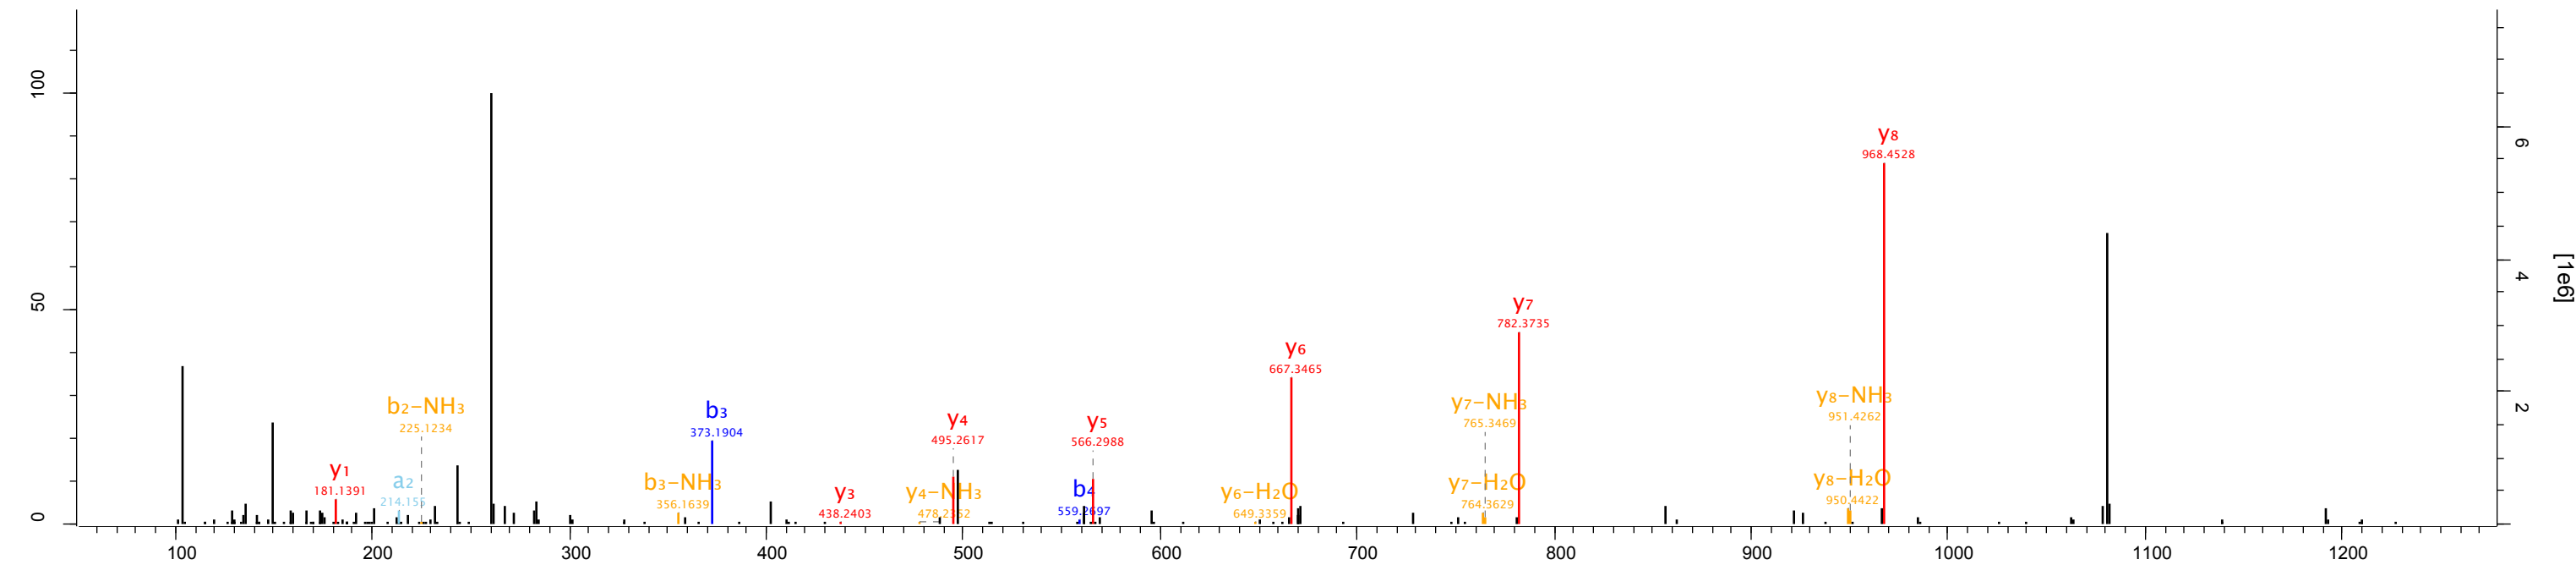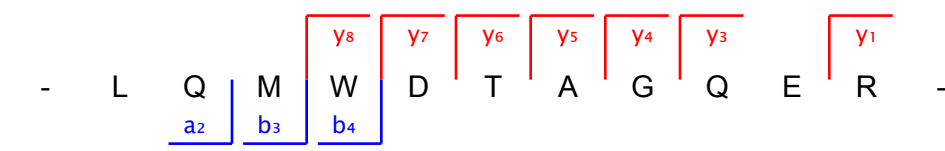

Raw file  
20180707\_MaS\_A375SR\_ML\_proteome\_29

Scan 3887 Method FTMS; HCD Score 40.73 m/z 355.53

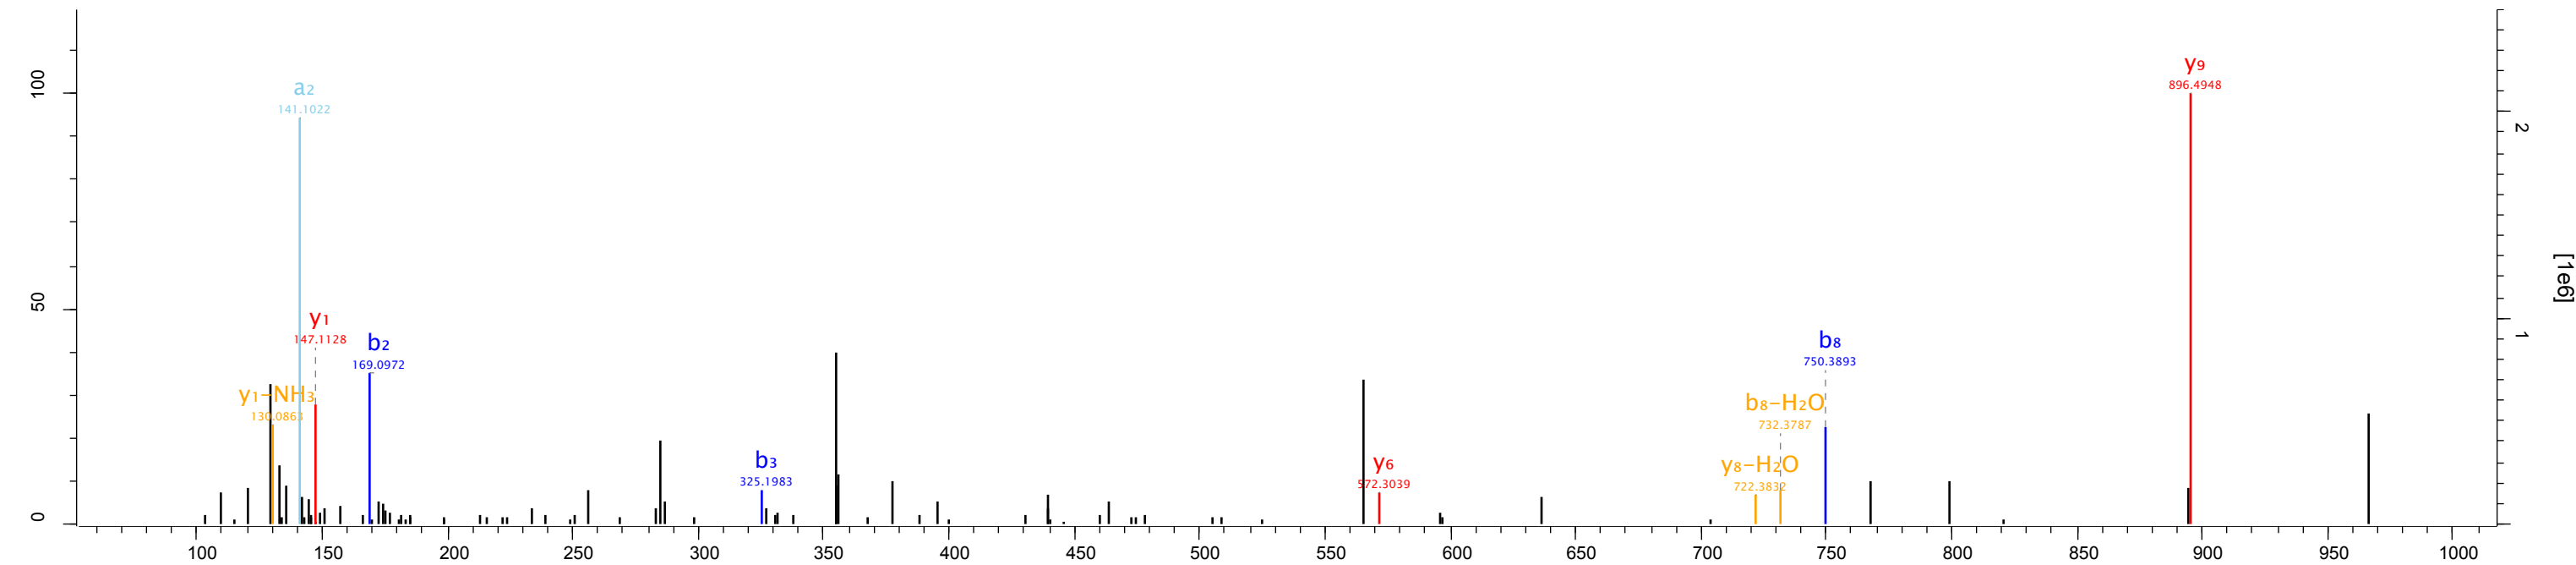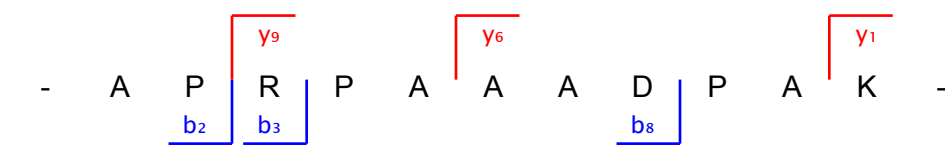

Raw file 20180707\_MaS\_A375SR\_ML\_proteome\_29 Scan 7697 Method FTMS; HCD Score 89.8 m/z 592.82

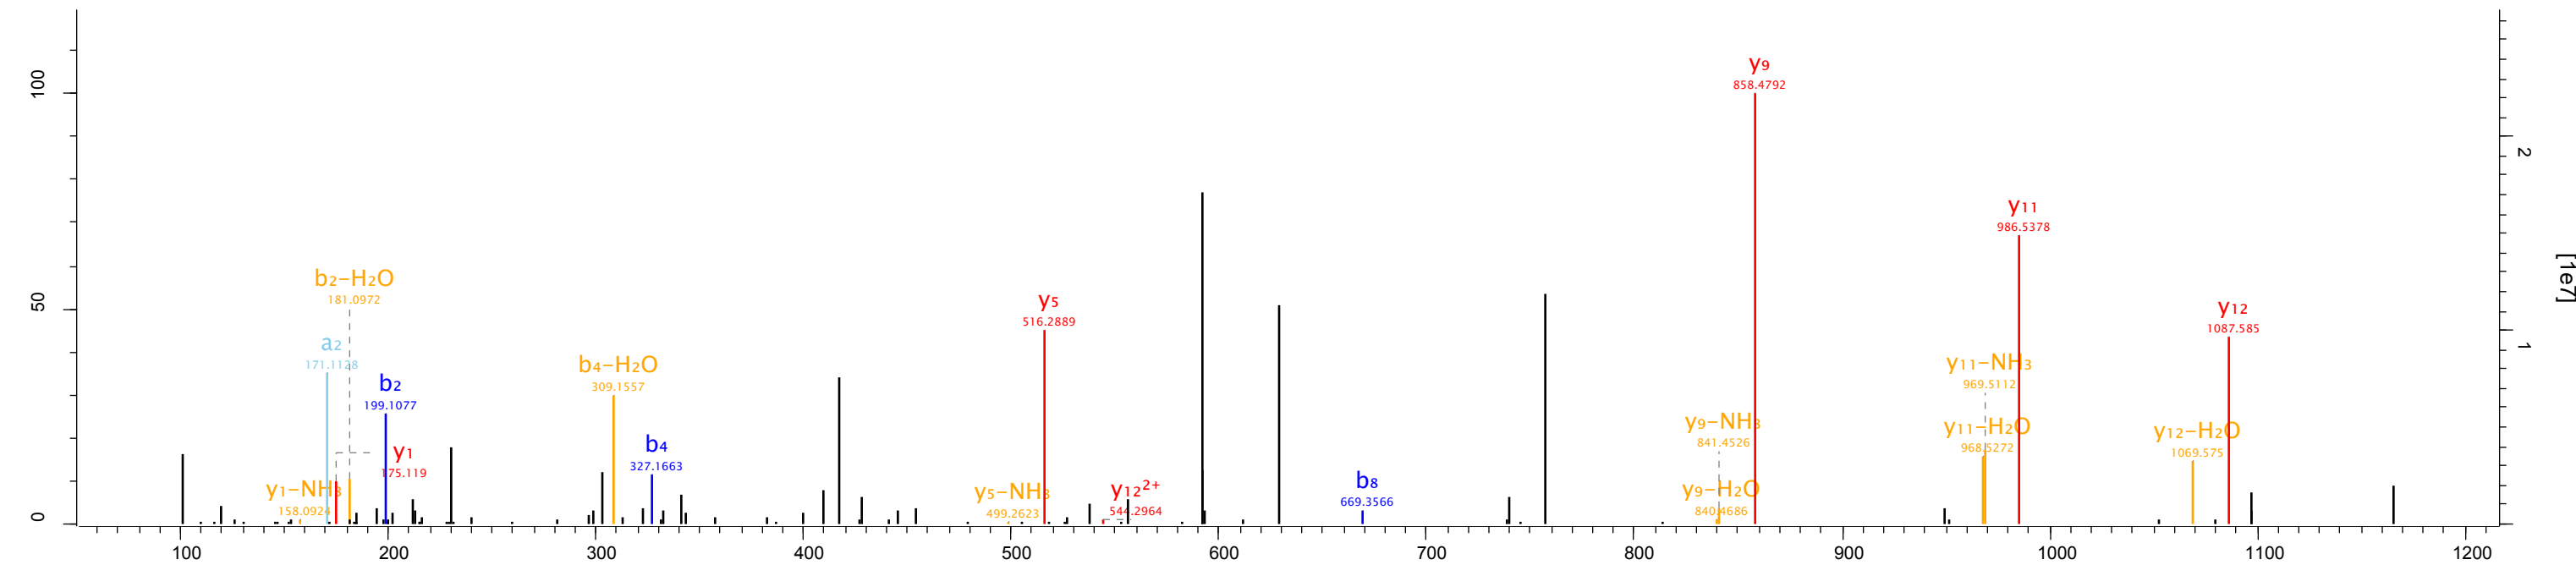



Raw file 20180707\_MaS\_A375SR\_ML\_proteome\_30 Scan 17347 Method FTMS; HCD Score 90.7 m/z 652.81 Gene names ZBTB48

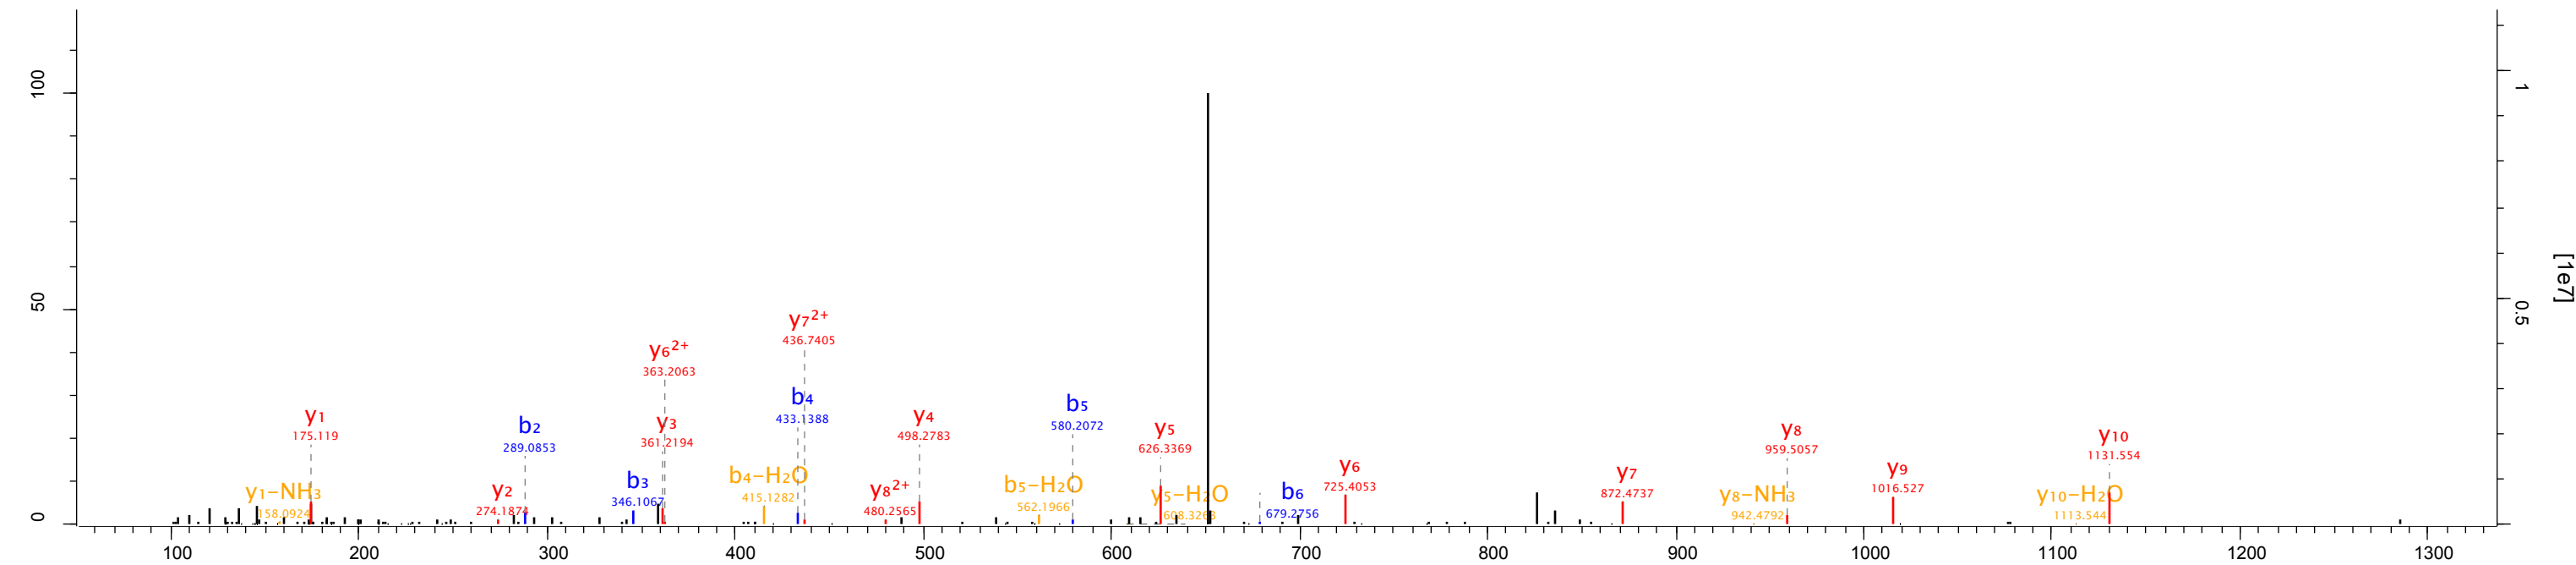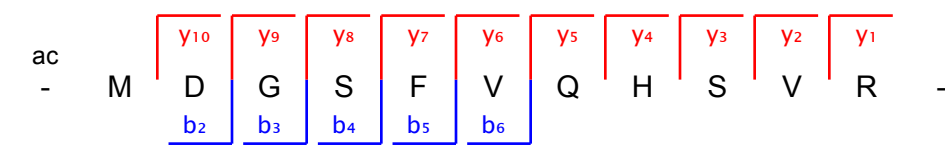

Raw file 20180707\_MaS\_A375SR\_ML\_proteome\_30 Scan 19647 Method FTMS; HCD Score 121.45 m/z 800.44 Gene names ZCCHC10

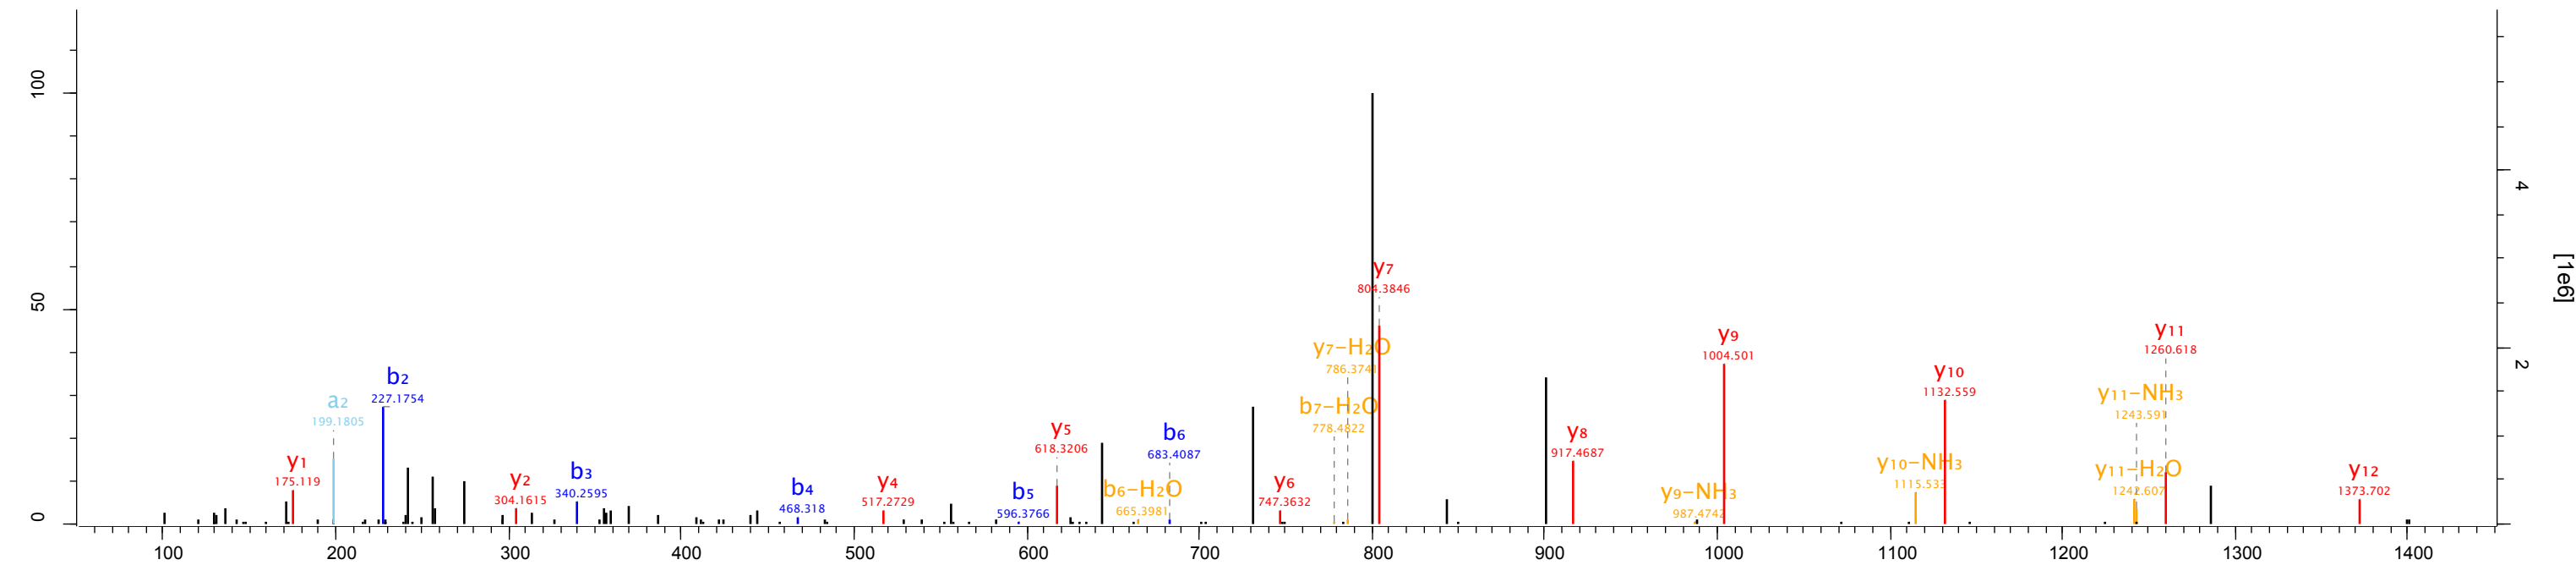

- L L L Q Q S I G E T N V E R -

b<sub>2</sub>
b<sub>3</sub>
b<sub>4</sub>
b<sub>5</sub>
b<sub>6</sub>
y<sub>1</sub>
y<sub>2</sub>
y<sub>4</sub>
y<sub>5</sub>
y<sub>6</sub>
y<sub>7</sub>
y<sub>8</sub>
y<sub>9</sub>
y<sub>10</sub>
y<sub>11</sub>
y<sub>12</sub>

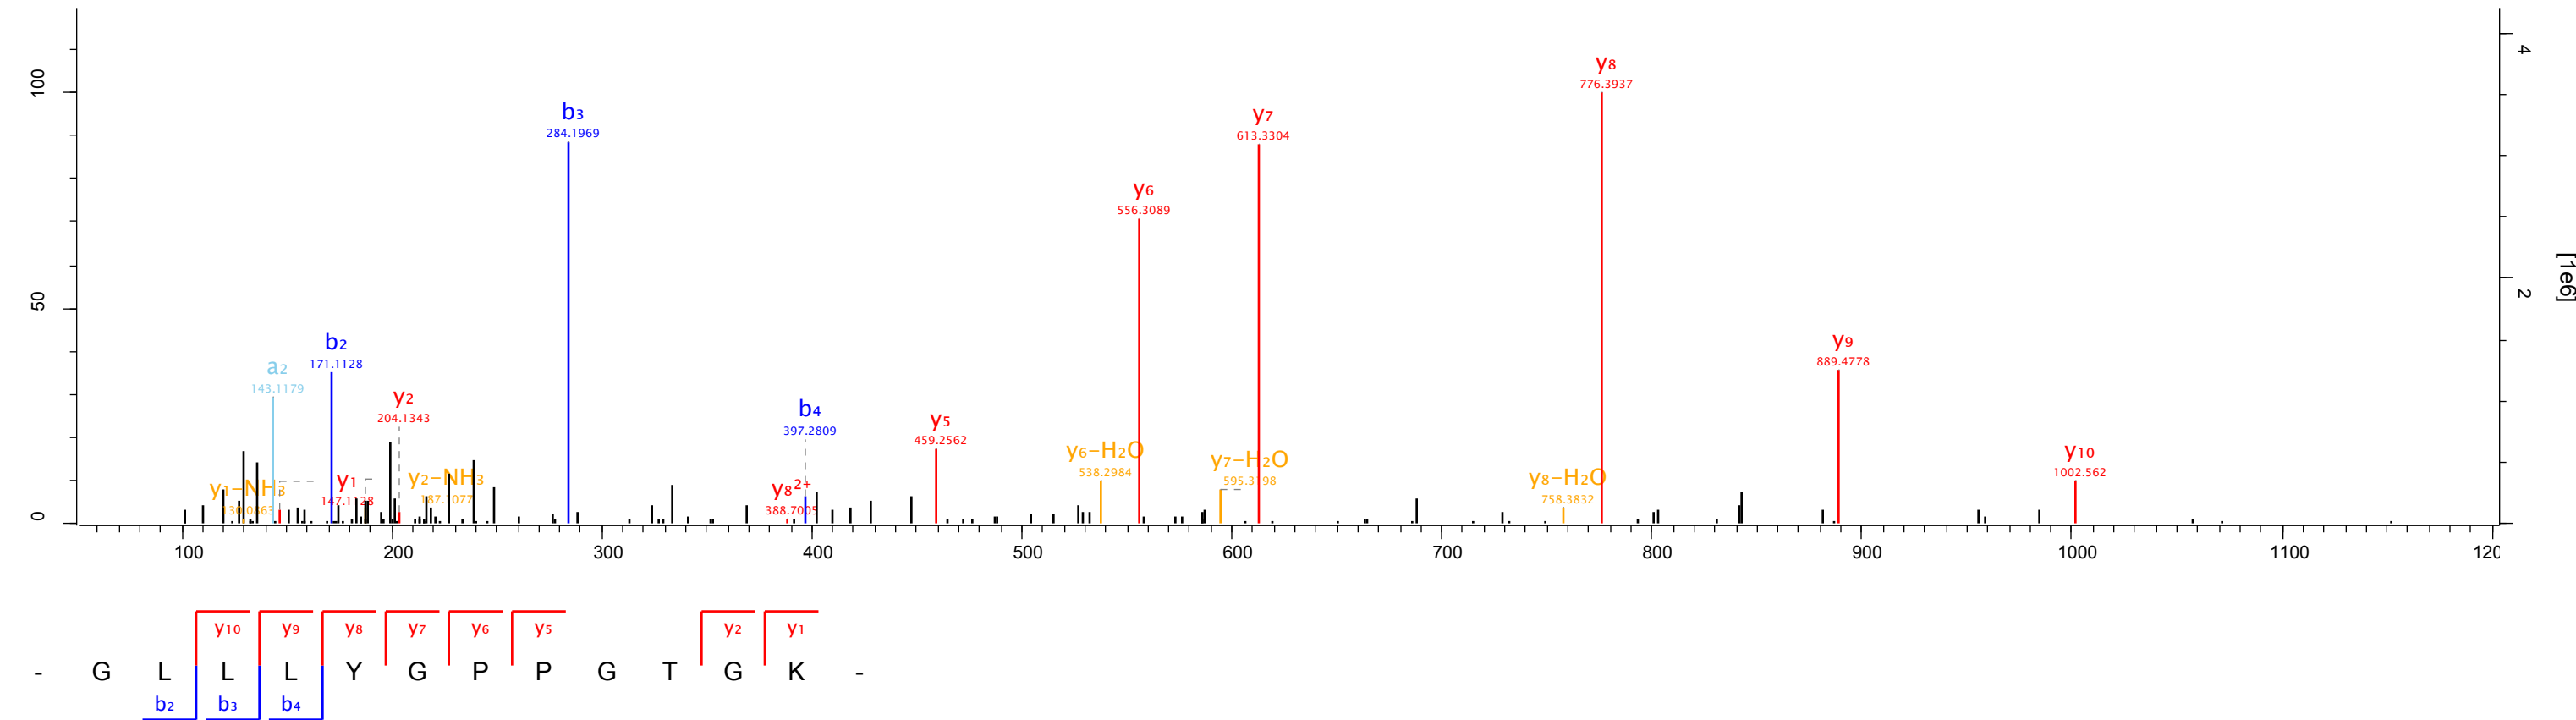

Raw file: 20150812\_A375SR\_Phospho\_BR1\_02  
 Scan: 14318 Method: FTMS; HCD Score: 83.79 m/z: 785.36 Gene names: PWWP2A

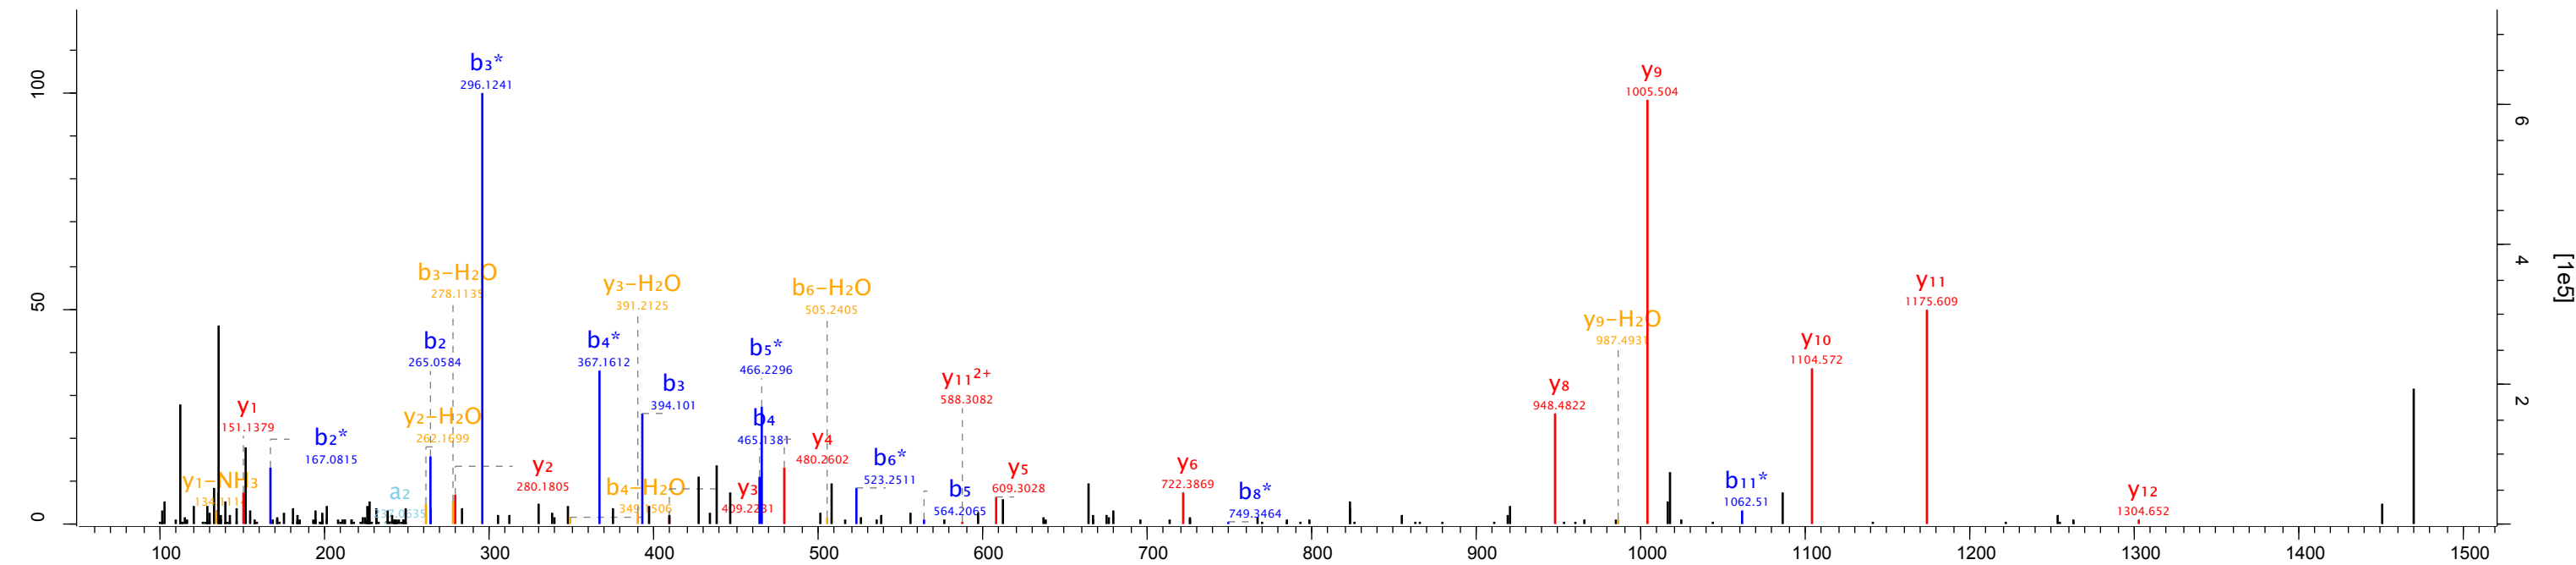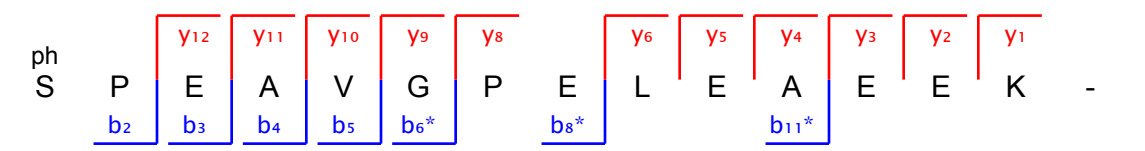

Raw file 20150812\_A375SR\_Phospho\_BR1\_02 Scan 17348 Method FTMS; HCD Score 58.12 m/z 860.8 Gene names C11orf96

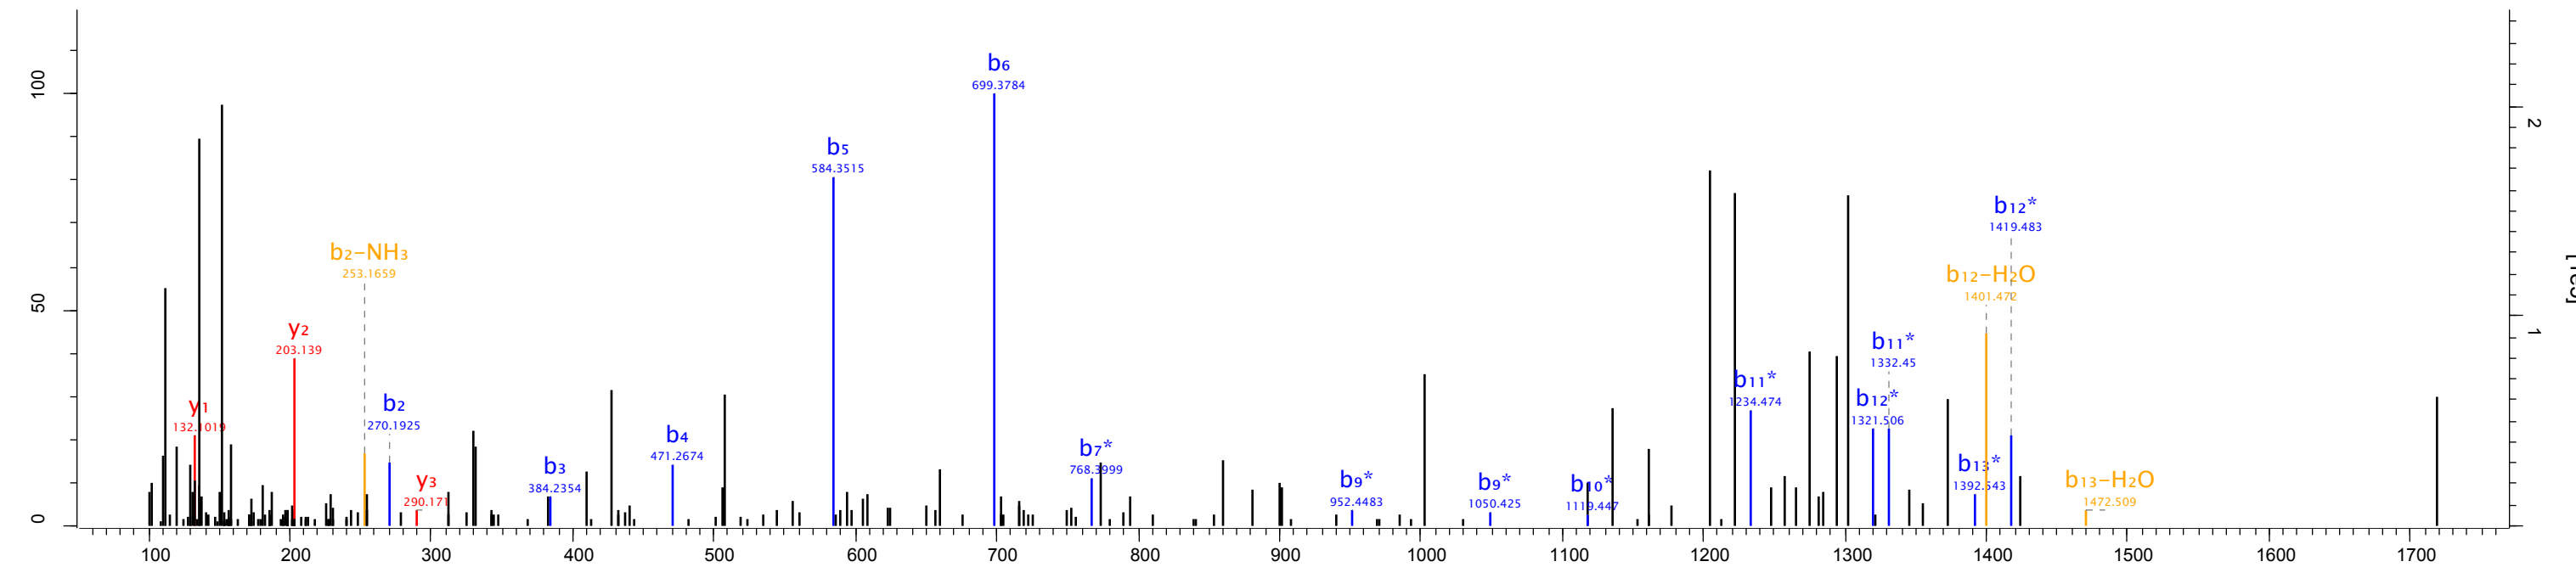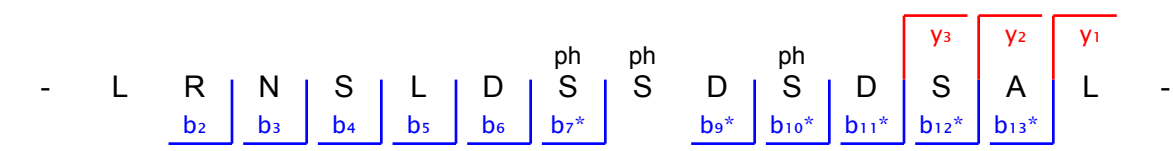

Raw file 20150812\_A375SR\_Phospho\_BR1\_03 Scan 14978 Method FTMS; HCD Score 120.64 m/z 782.84 Gene names PWWP2A

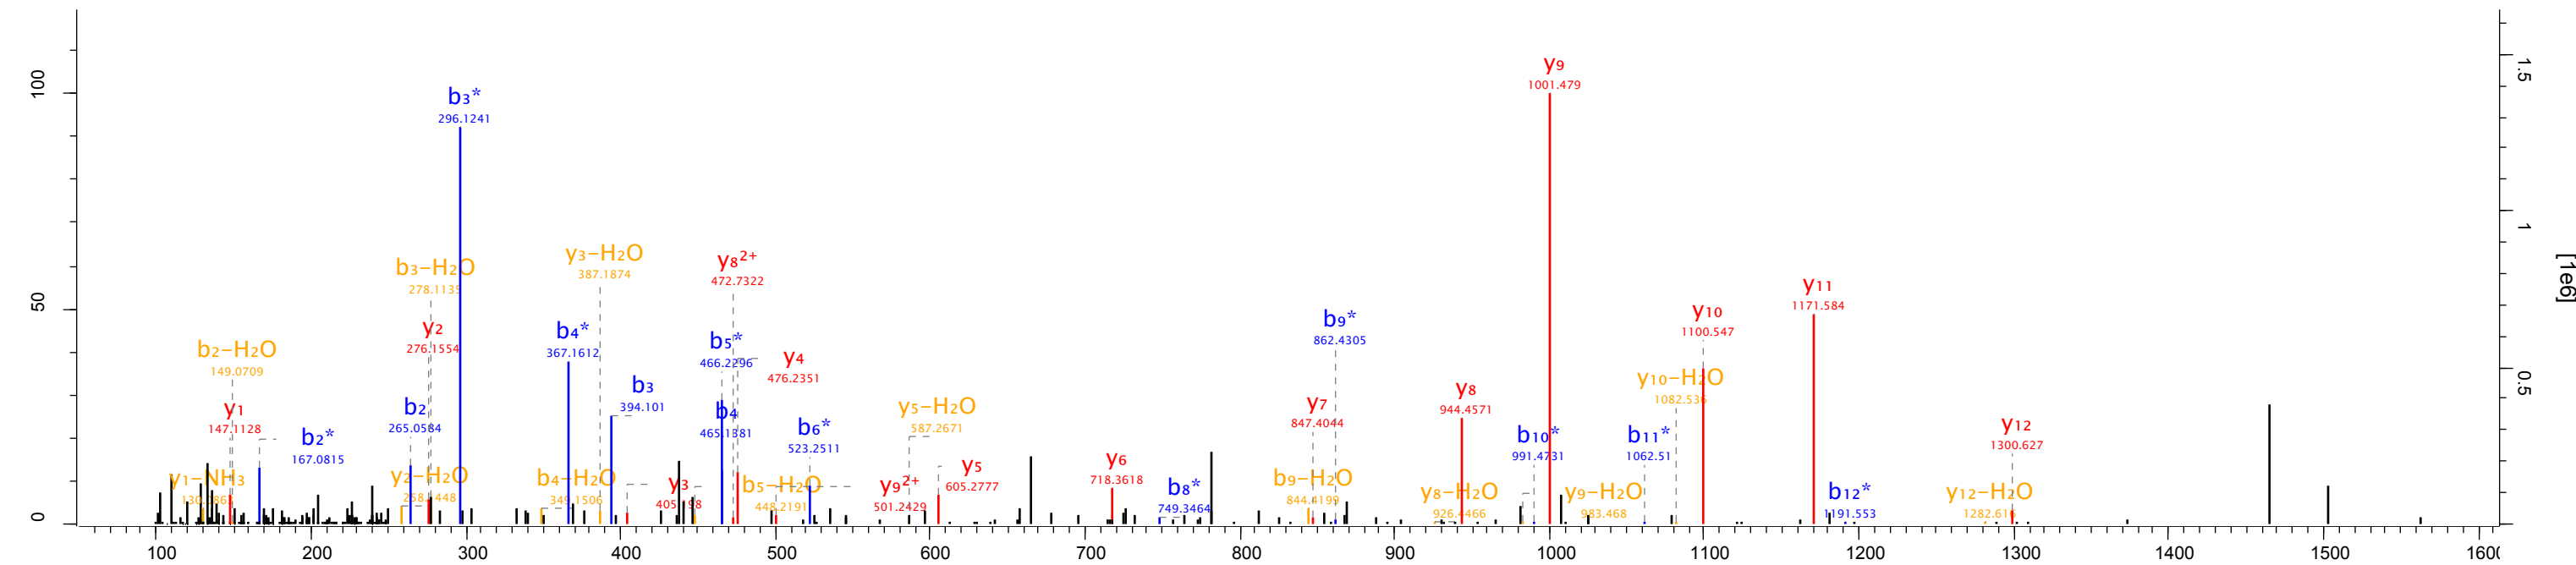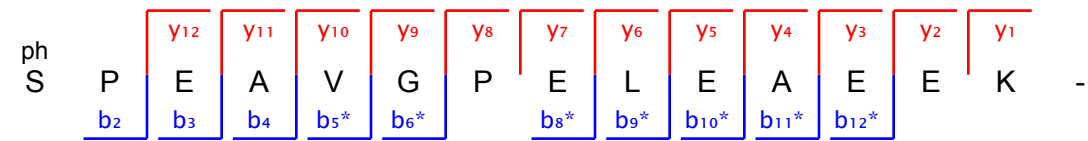

Raw file: 20150812\_A375SR\_Phospho\_BR1\_03  
 Scan: 7558 Method: FTMS; HCD Score: 64.24 m/z: 660.77 Gene names: GPSM3

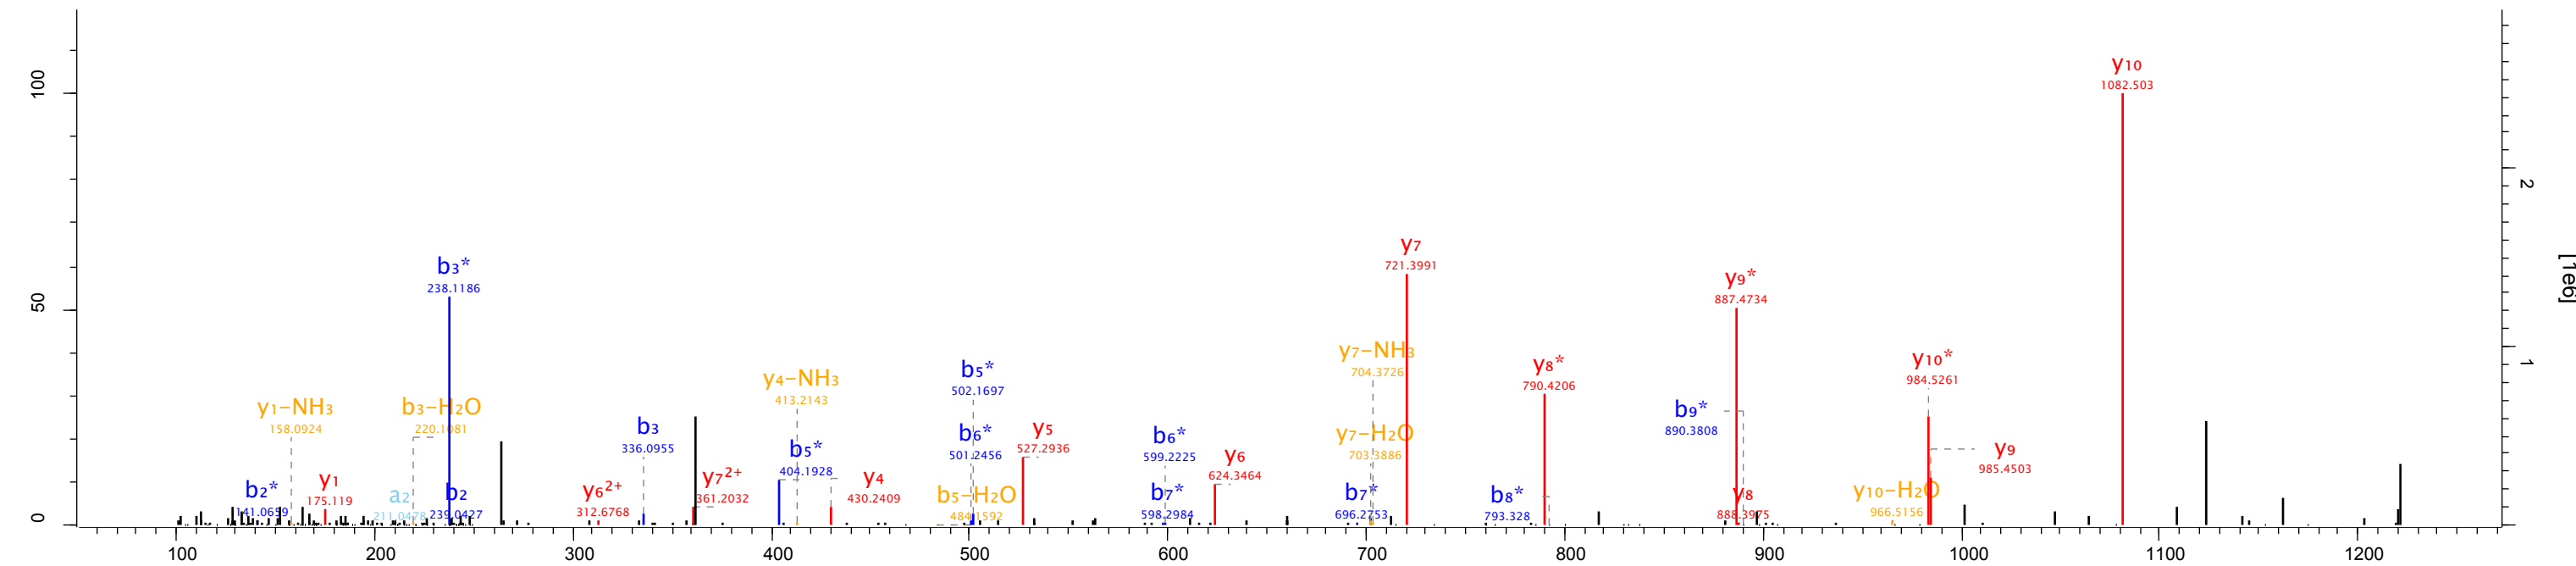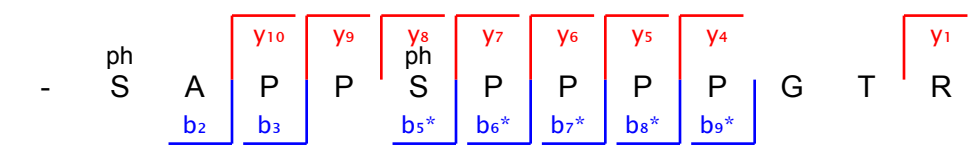

Raw file 20150812\_A375SR\_Phospho\_BR1\_04 Scan 13618 Method FTMS; HCD Score 54.83 m/z 559.96 Gene names MLLT3

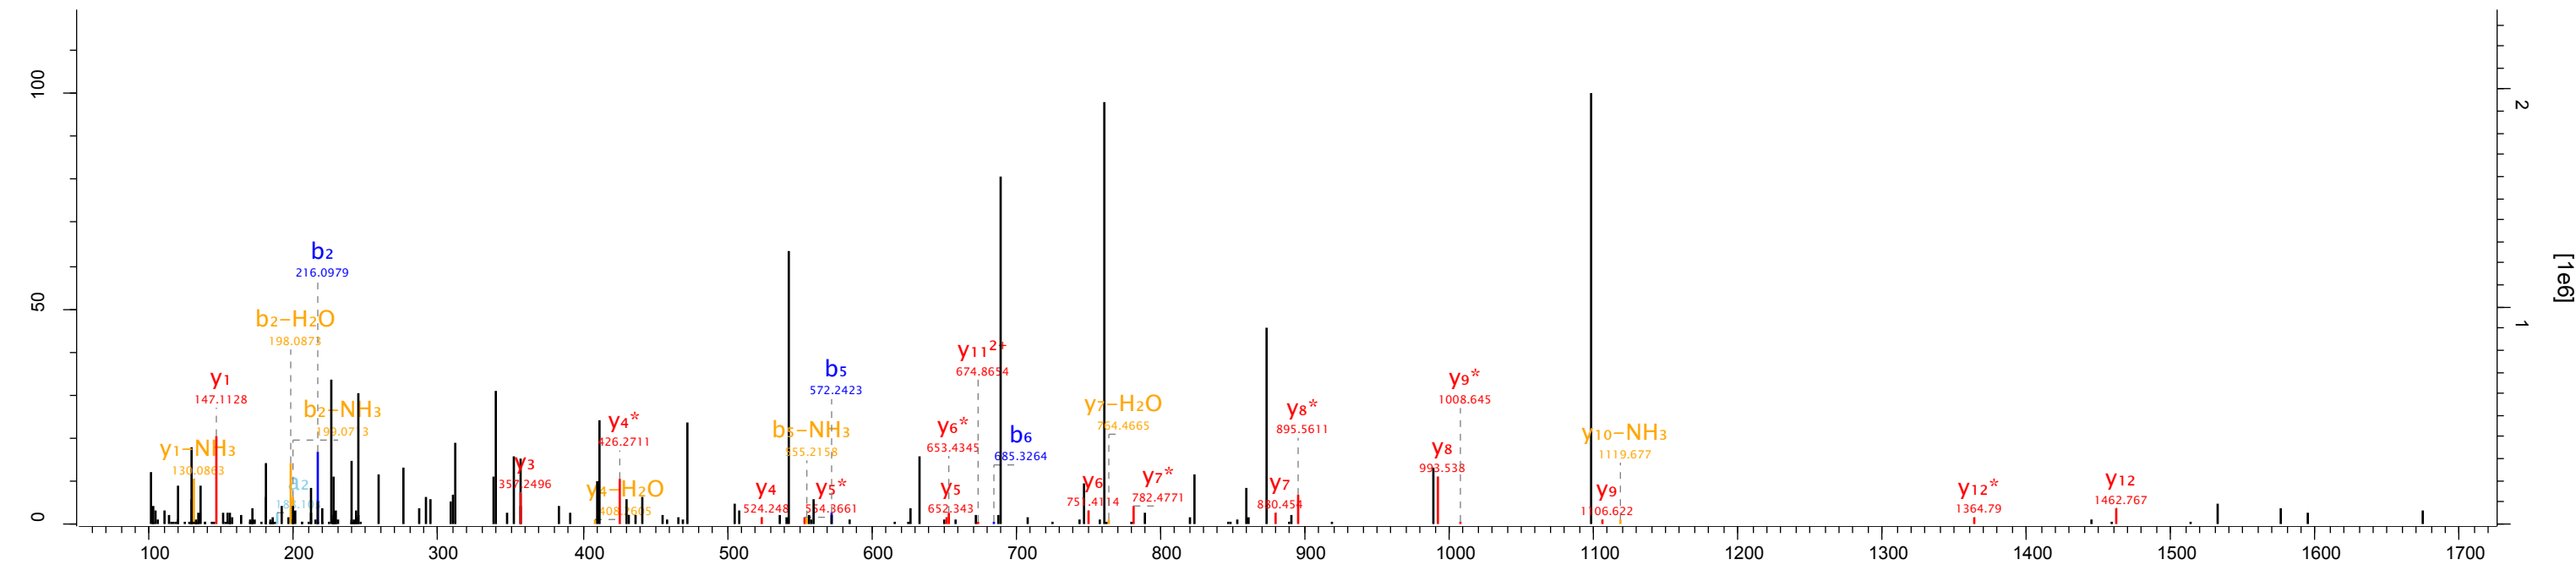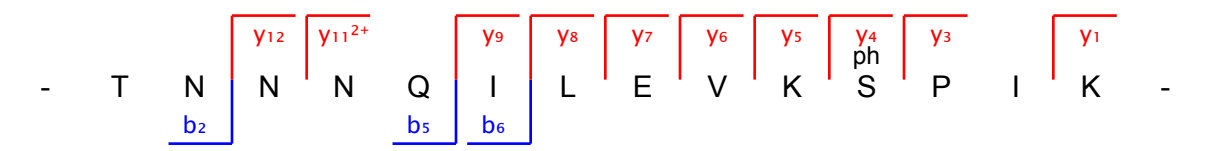



Raw file 20150812\_A375SR\_Phospho\_BR1\_04 Scan 21328 Method FTMS; HCD Score 42.71 m/z 752.35 Gene names KIAA2026

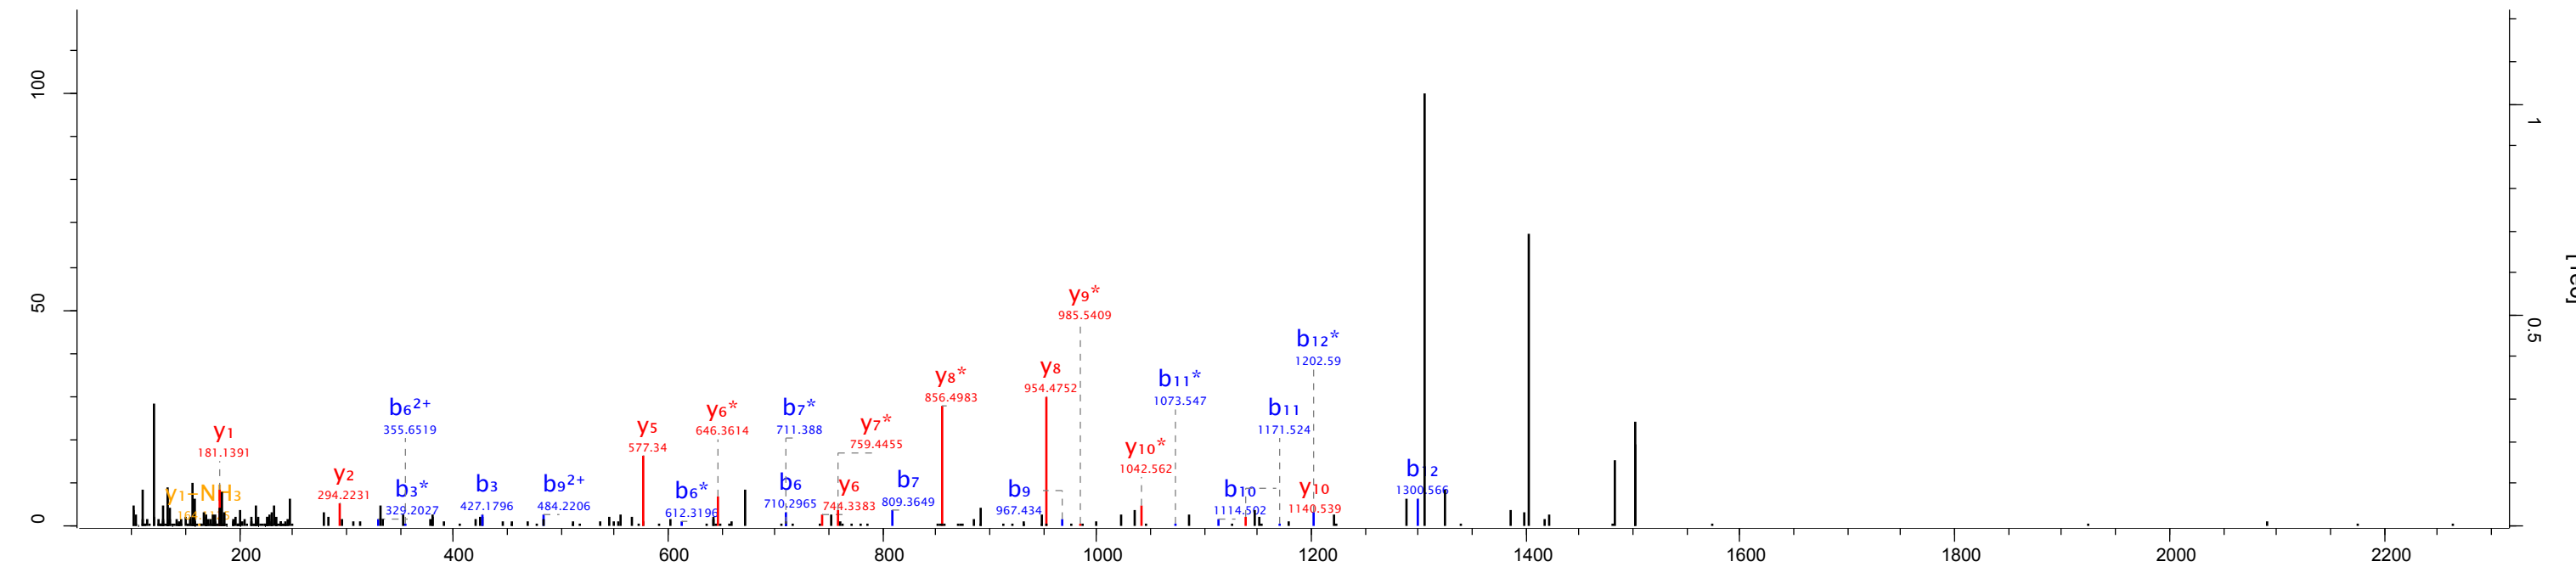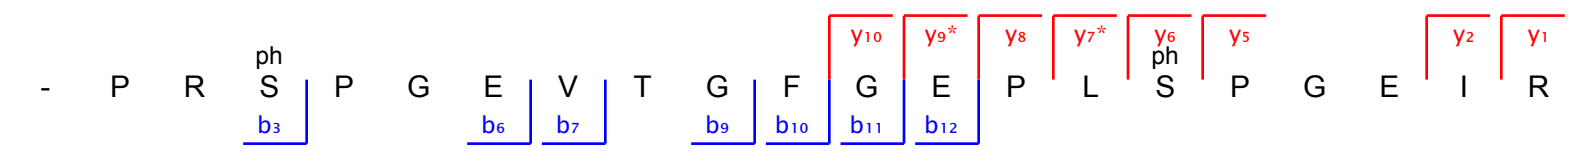

Raw file 20150812\_A375SR\_Phospho\_BR1\_05 Scan 11208 Method FTMS; HCD Score 100.11 m/z 693.35 Gene names ELK3

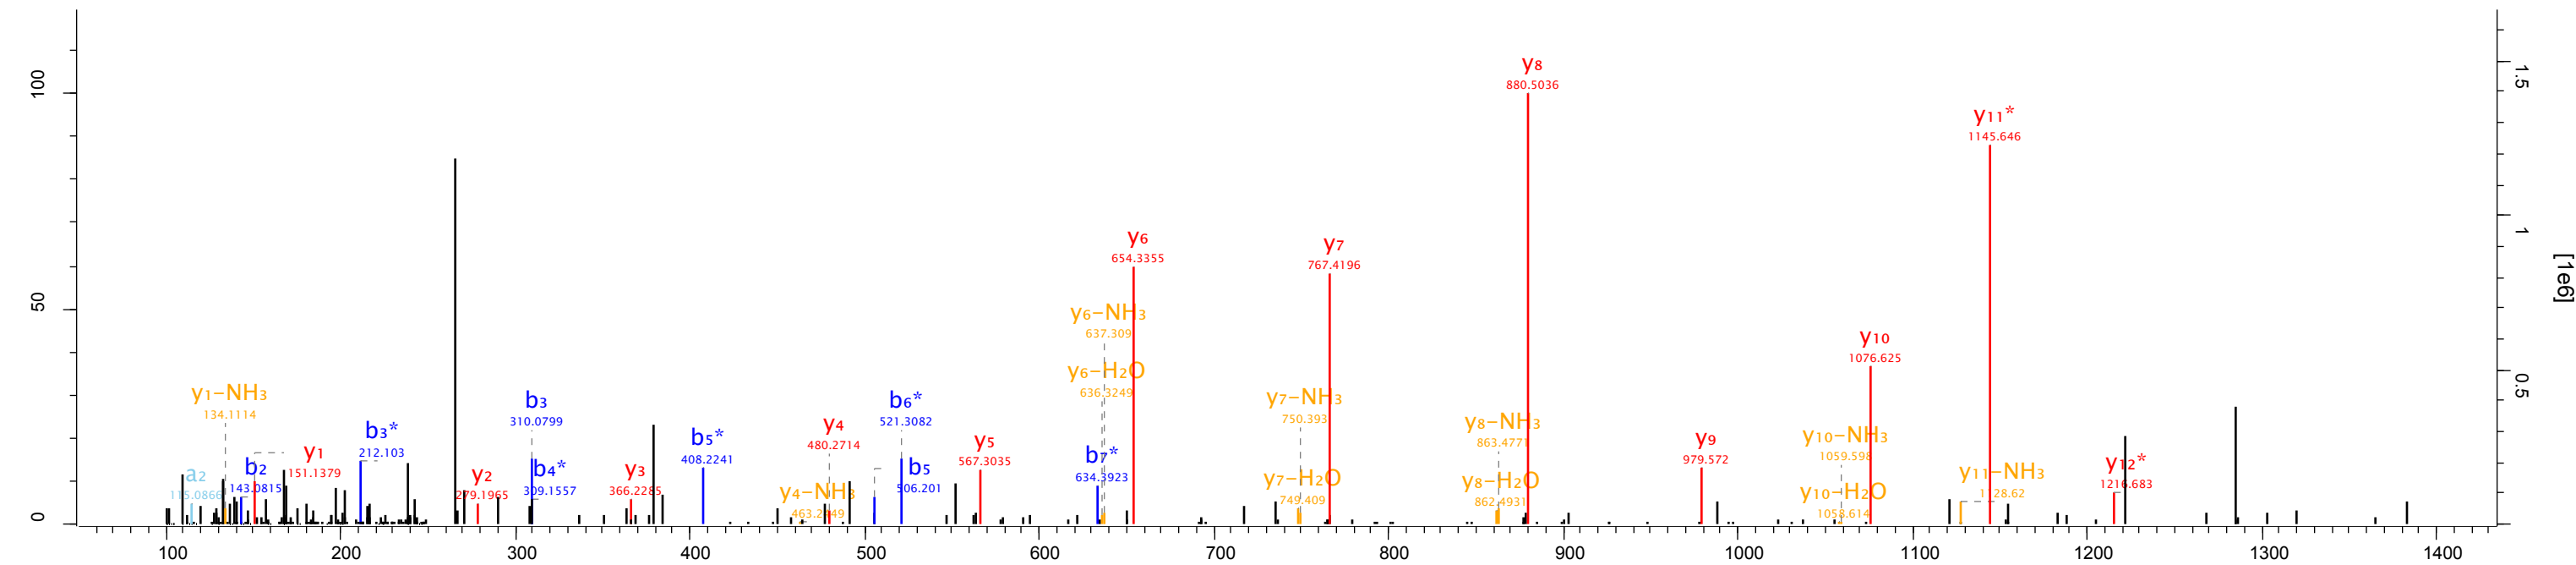

Raw file 20150812\_A375SR\_Phospho\_BR1\_05 Scan 13548 Method FTMS; HCD Score 90.58 m/z 560.29 Gene names MLLT3

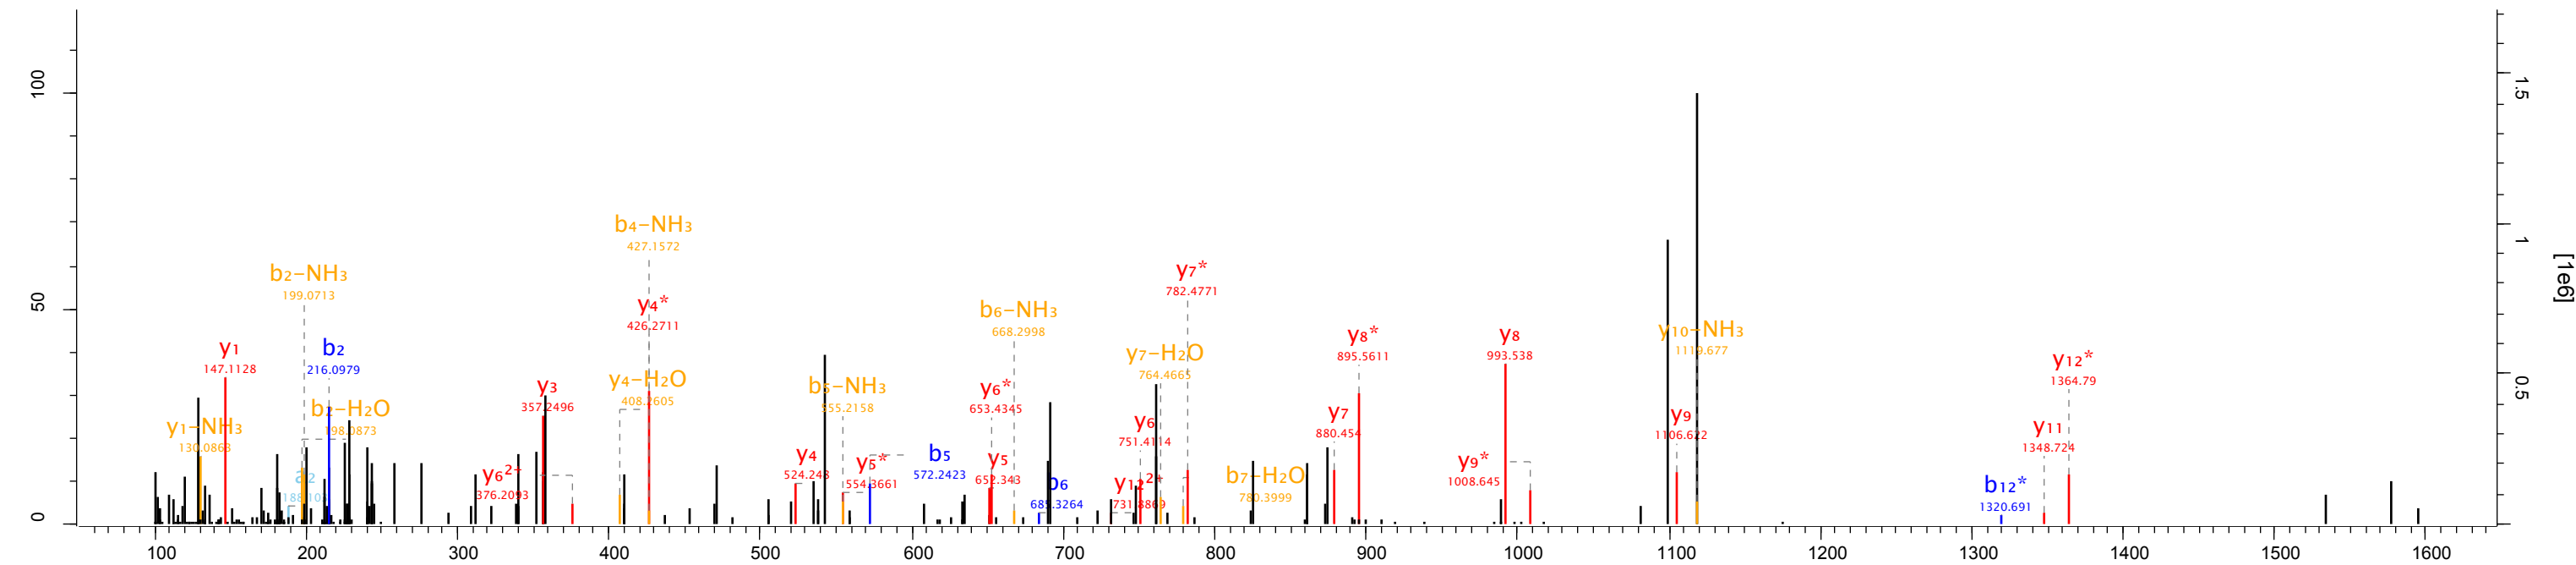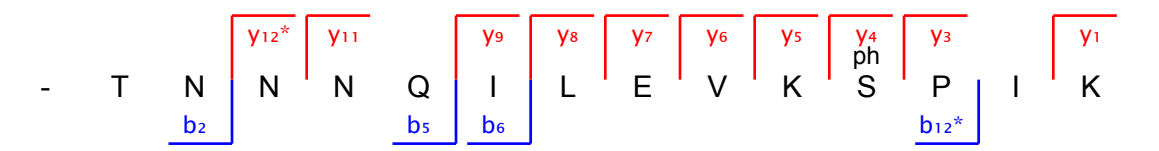

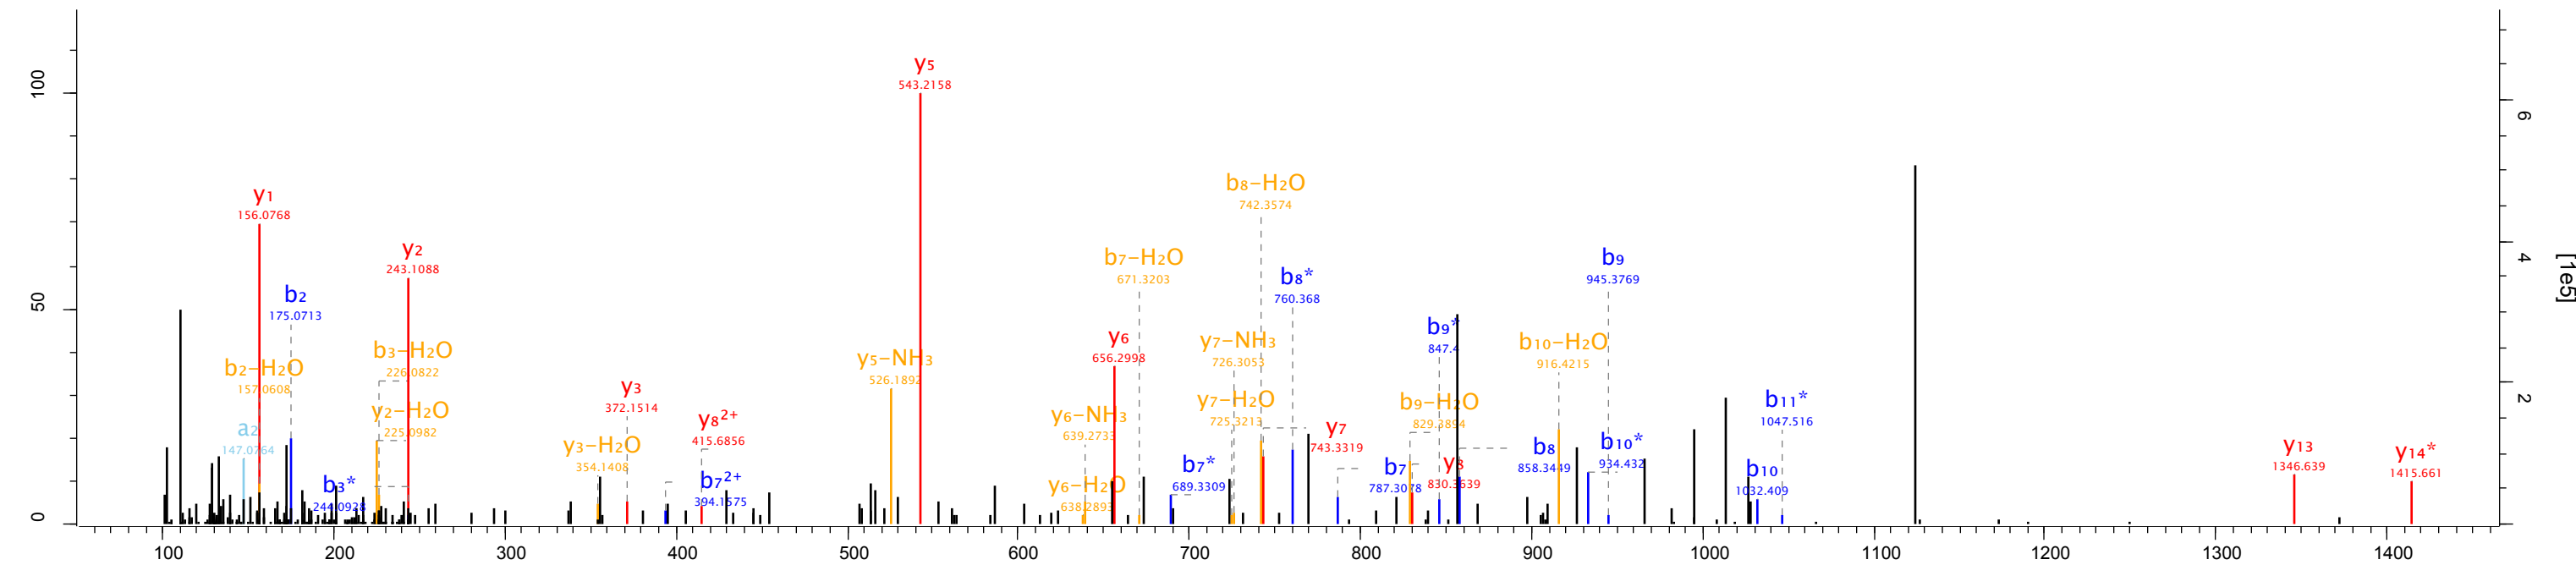

- S S S<sup>y14\*</sup> P R G E A S<sup>y8</sup> S<sup>y7</sup> L<sup>y6</sup> N G E<sup>y3</sup> S<sup>y2</sup> H<sup>y1</sup> -

b<sub>2</sub> b<sub>3</sub><sup>\*</sup> b<sub>7</sub> b<sub>8</sub> b<sub>9</sub> b<sub>10</sub> b<sub>11</sub><sup>\*</sup>

Raw file: 20150812\_A375SR\_Phospho\_BR1\_05  
 Scan: 6068 Method: FTMS; HCD Score: 164.94 m/z: 844.36 Gene names: YAF2

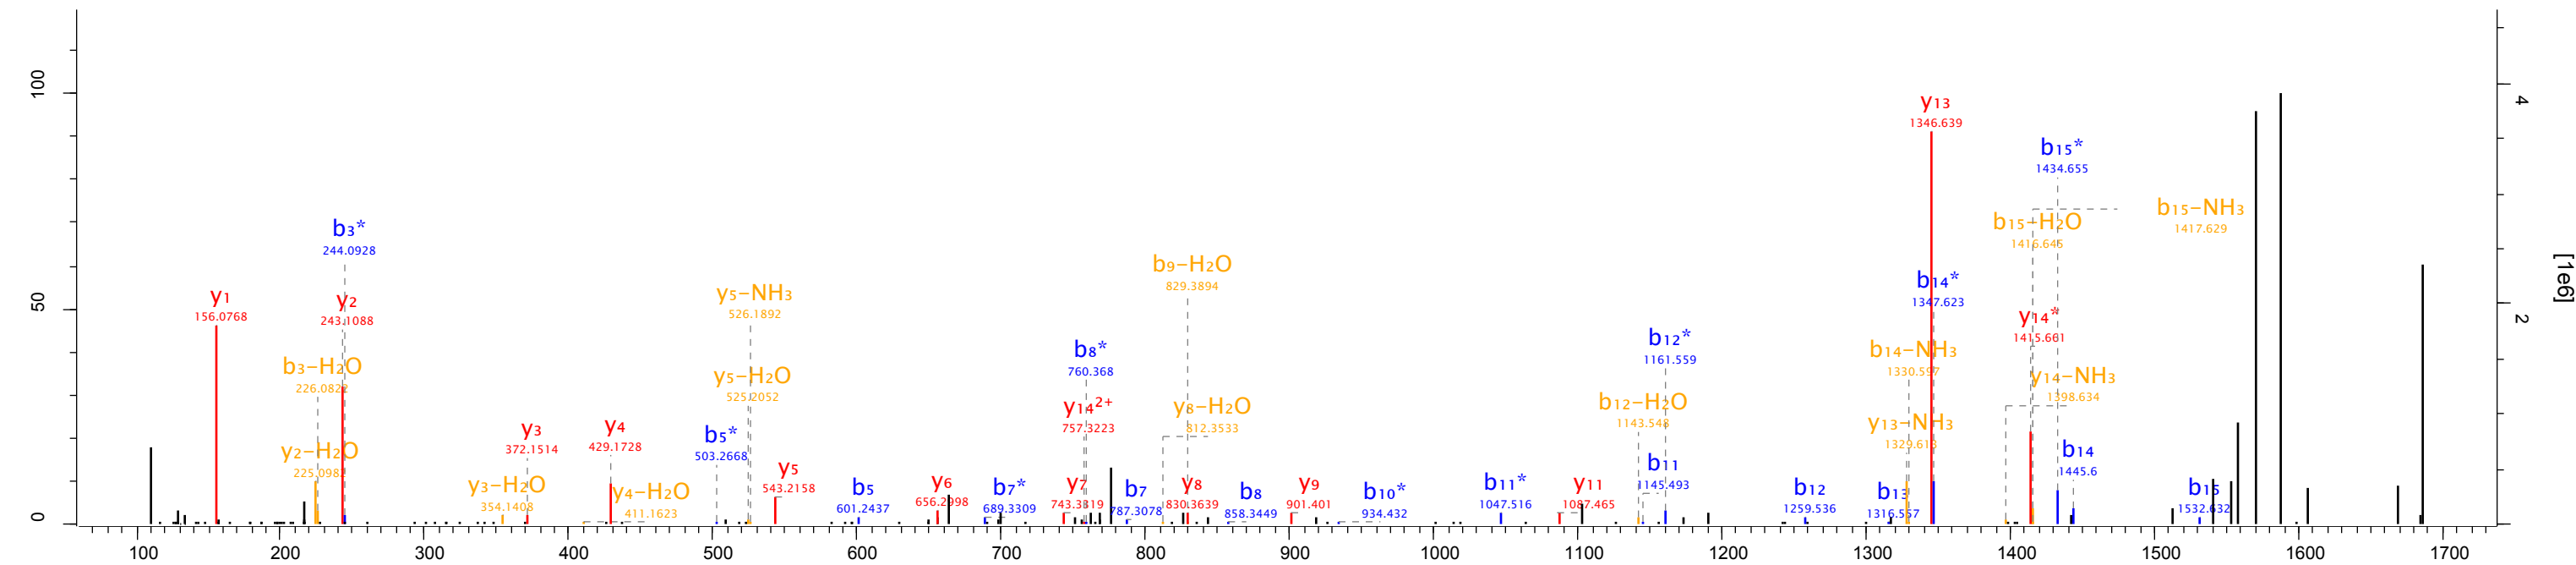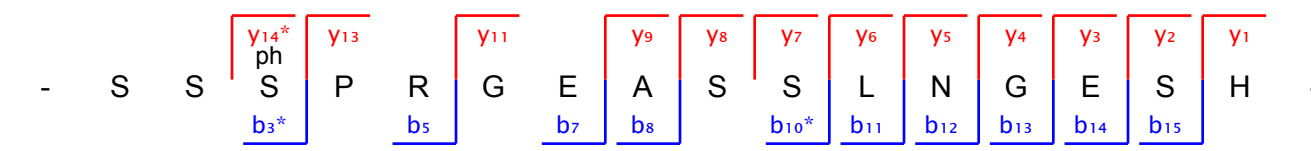

Raw file: 20150812\_A375SR\_Phospho\_BR1\_05  
 Scan: 8978 Method: FTMS; HCD Score: 100.27 m/z: 775.34 Gene names: GLI4

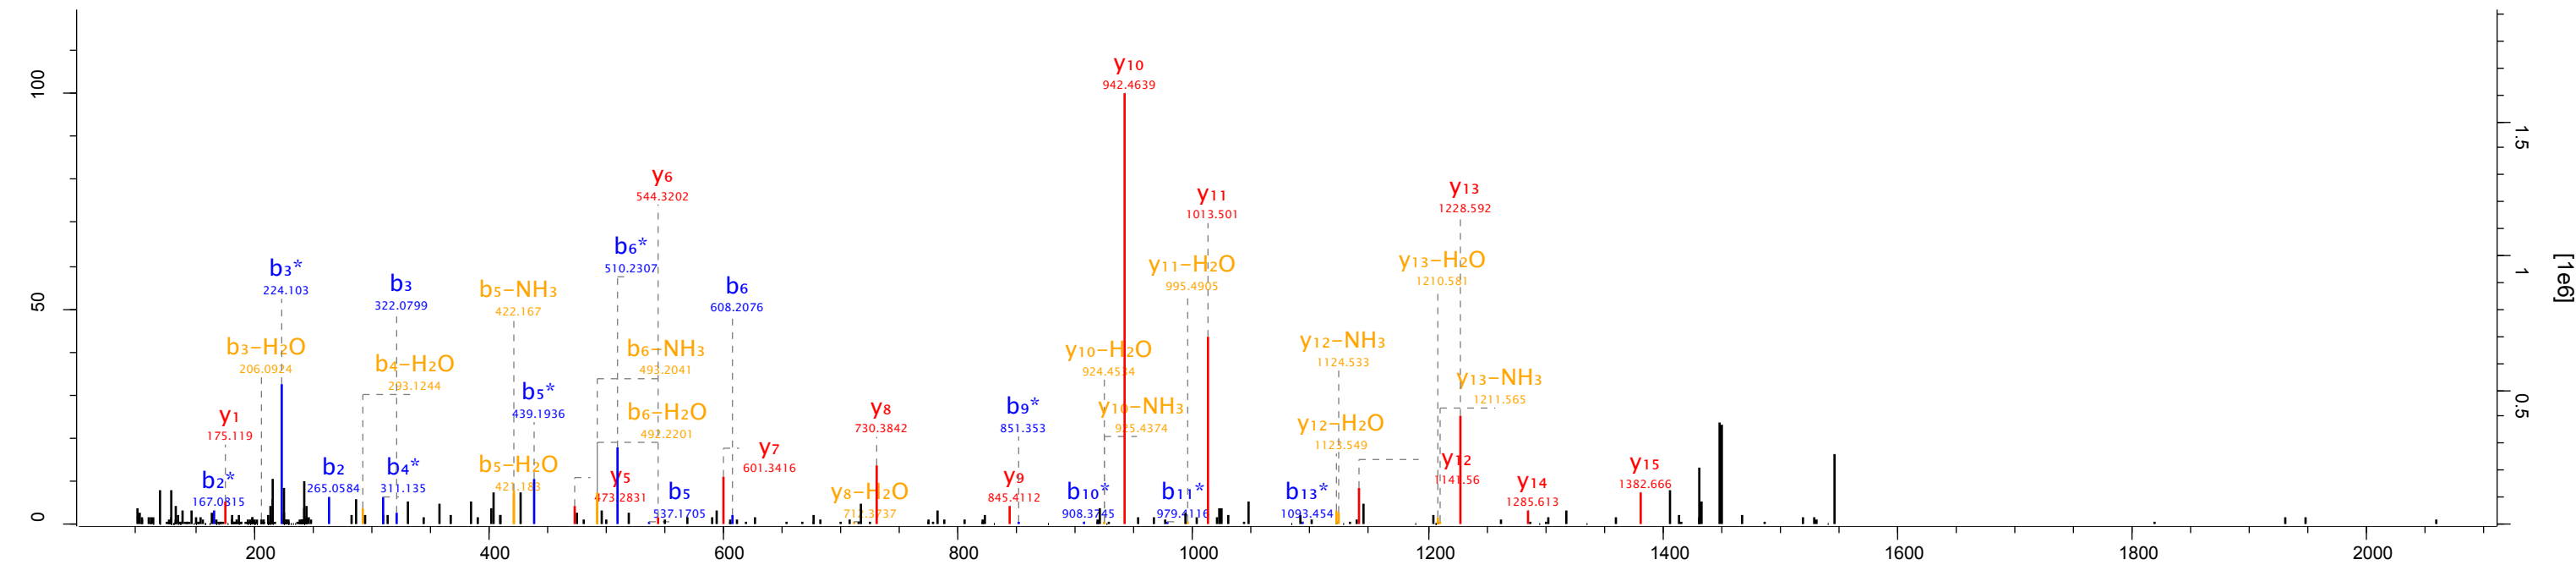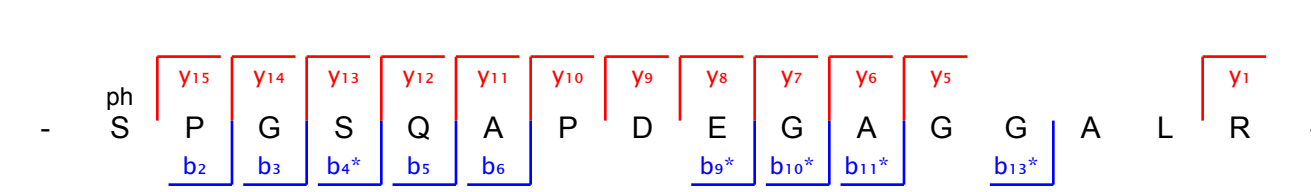

Raw file 20150812\_A375SR\_Phospho\_BR1\_06 Scan 13478 Method FTMS; HCD Score 71.08 m/z 556.27

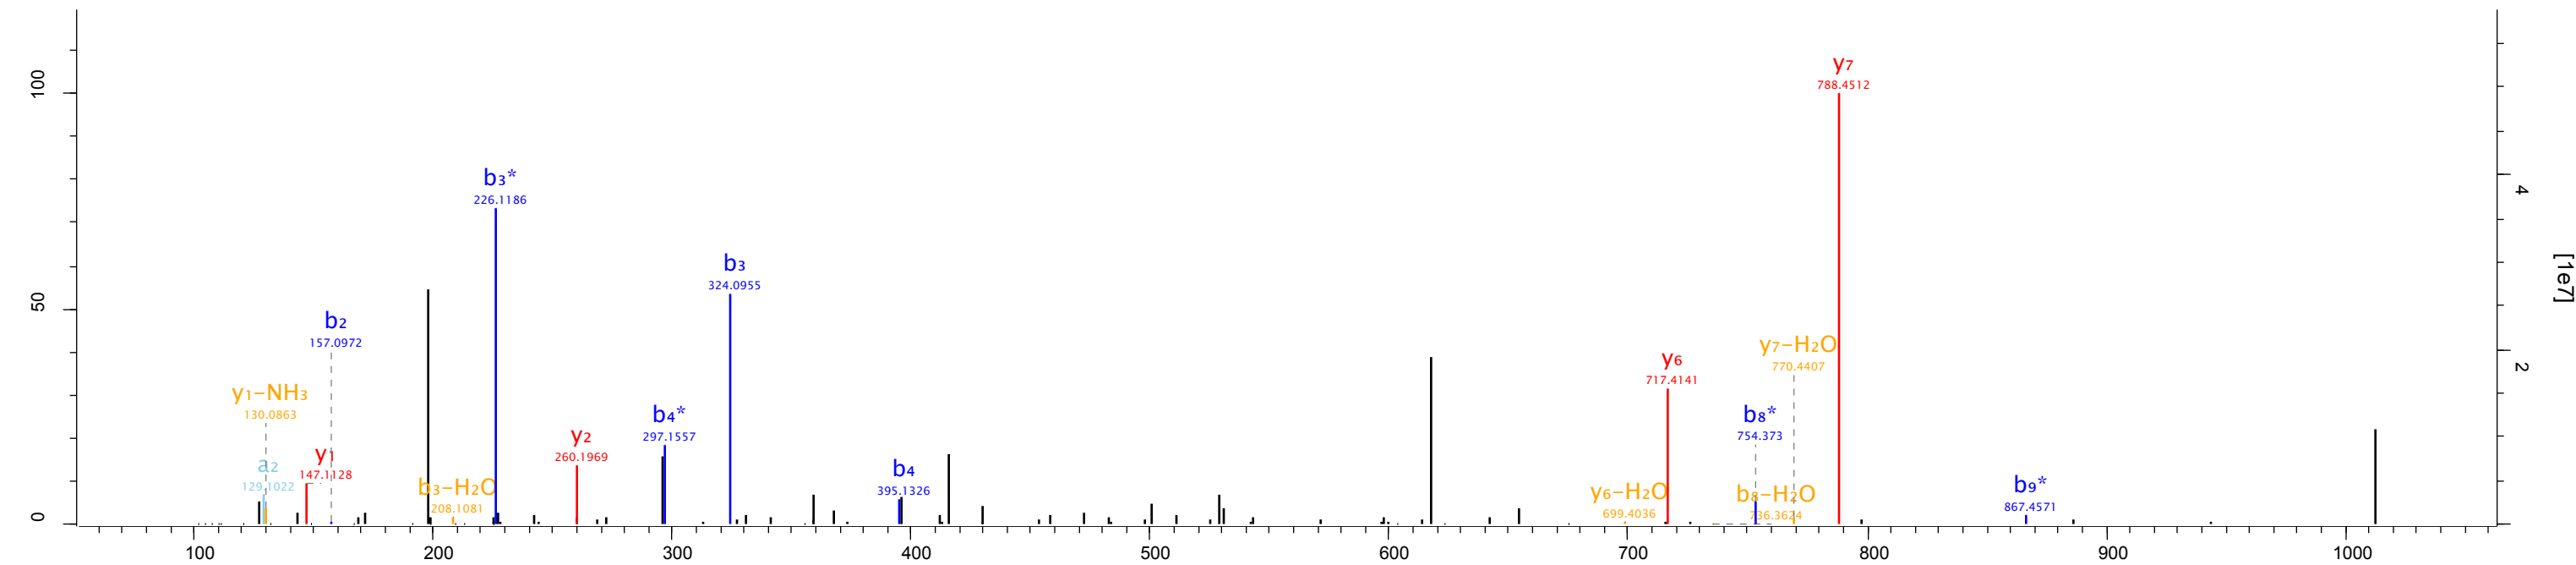

Raw file  
20150812\_A375SR\_Phospho\_BR1\_06

Scan 1418 Method FTMS; HCD Score 58.17 m/z 487.92

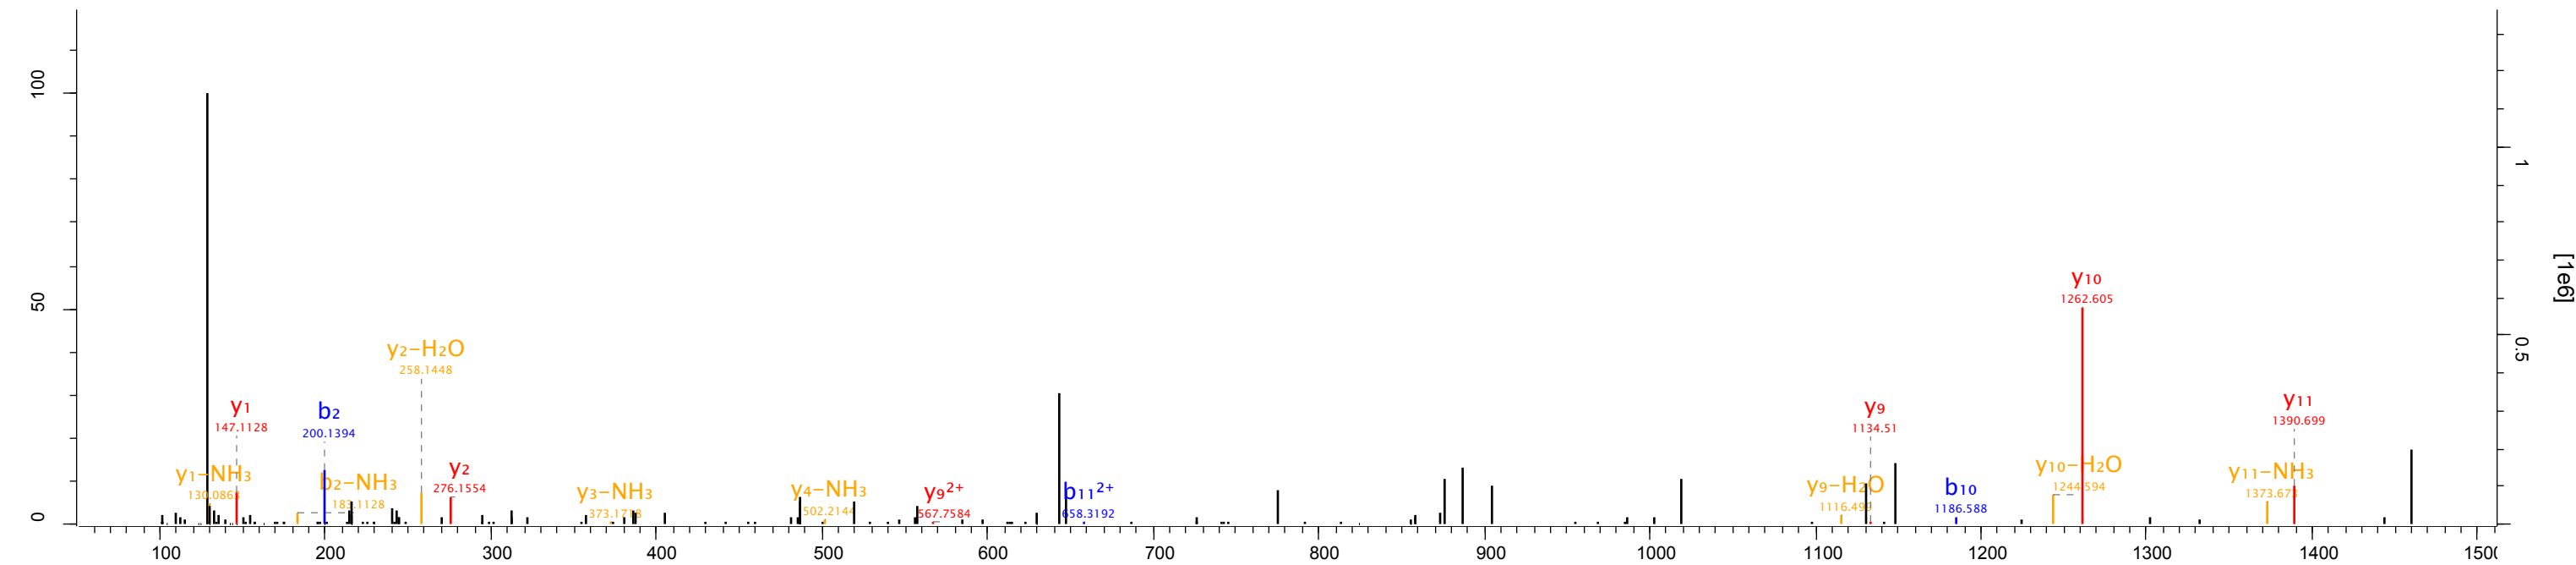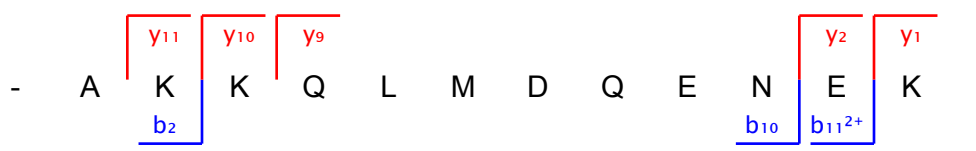



Raw file: 20150812\_A375SR\_Phospho\_BR1\_06  
 Scan: 14618 Method: FTMS; HCD Score: 148.94 m/z: 436.58 Gene names: RPL39P5;RPL39

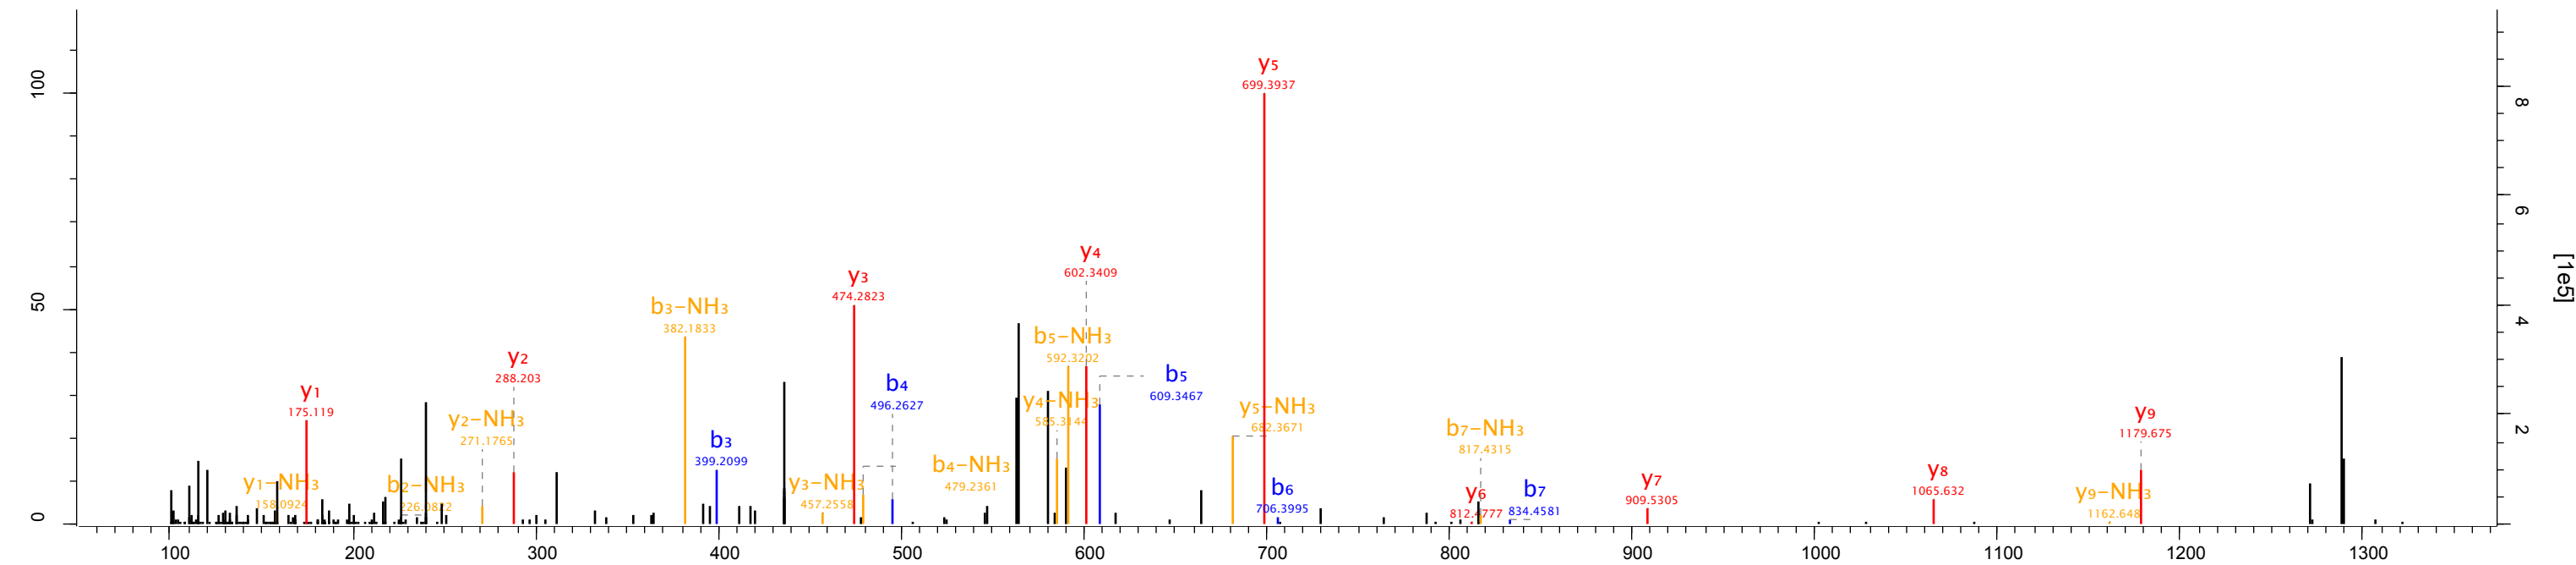

Raw file 20150812\_A375SR\_Phospho\_BR1\_06 Scan 14928 Method FTMS; HCD Score 41.09 m/z 866.9

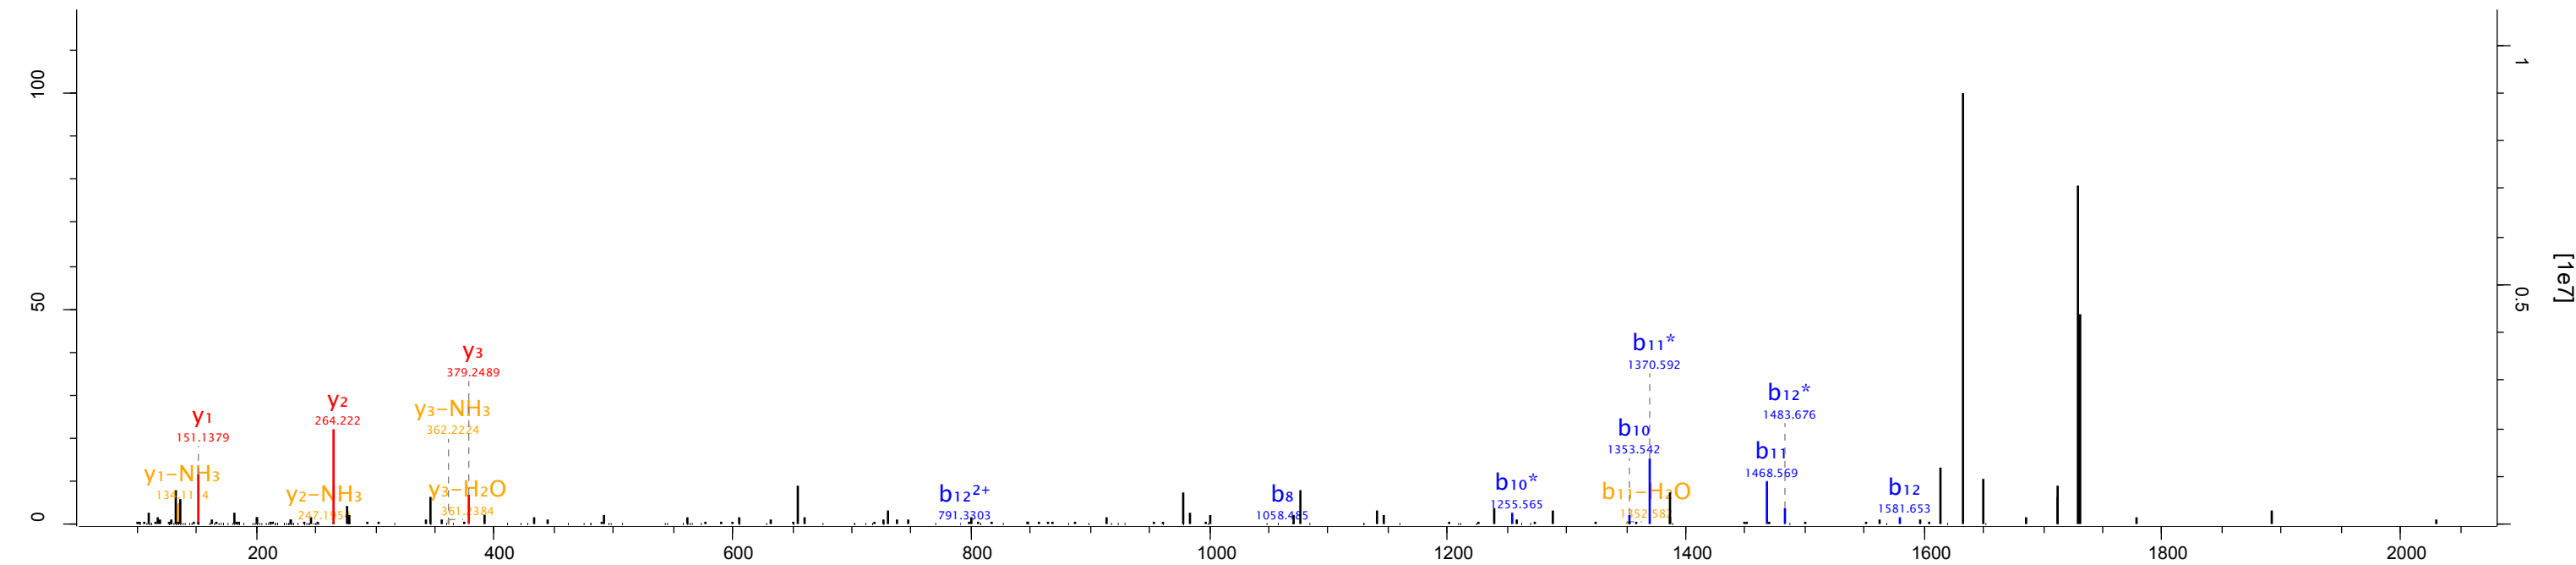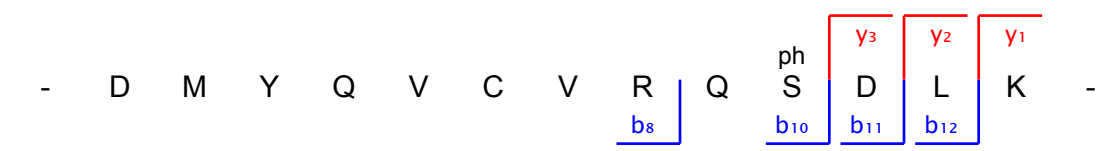

Raw file  
 20150812\_A375SR\_Phospho\_BR1\_06  
 Scan 20878 Method FTMS; HCD Score 56.91 m/z 822.95

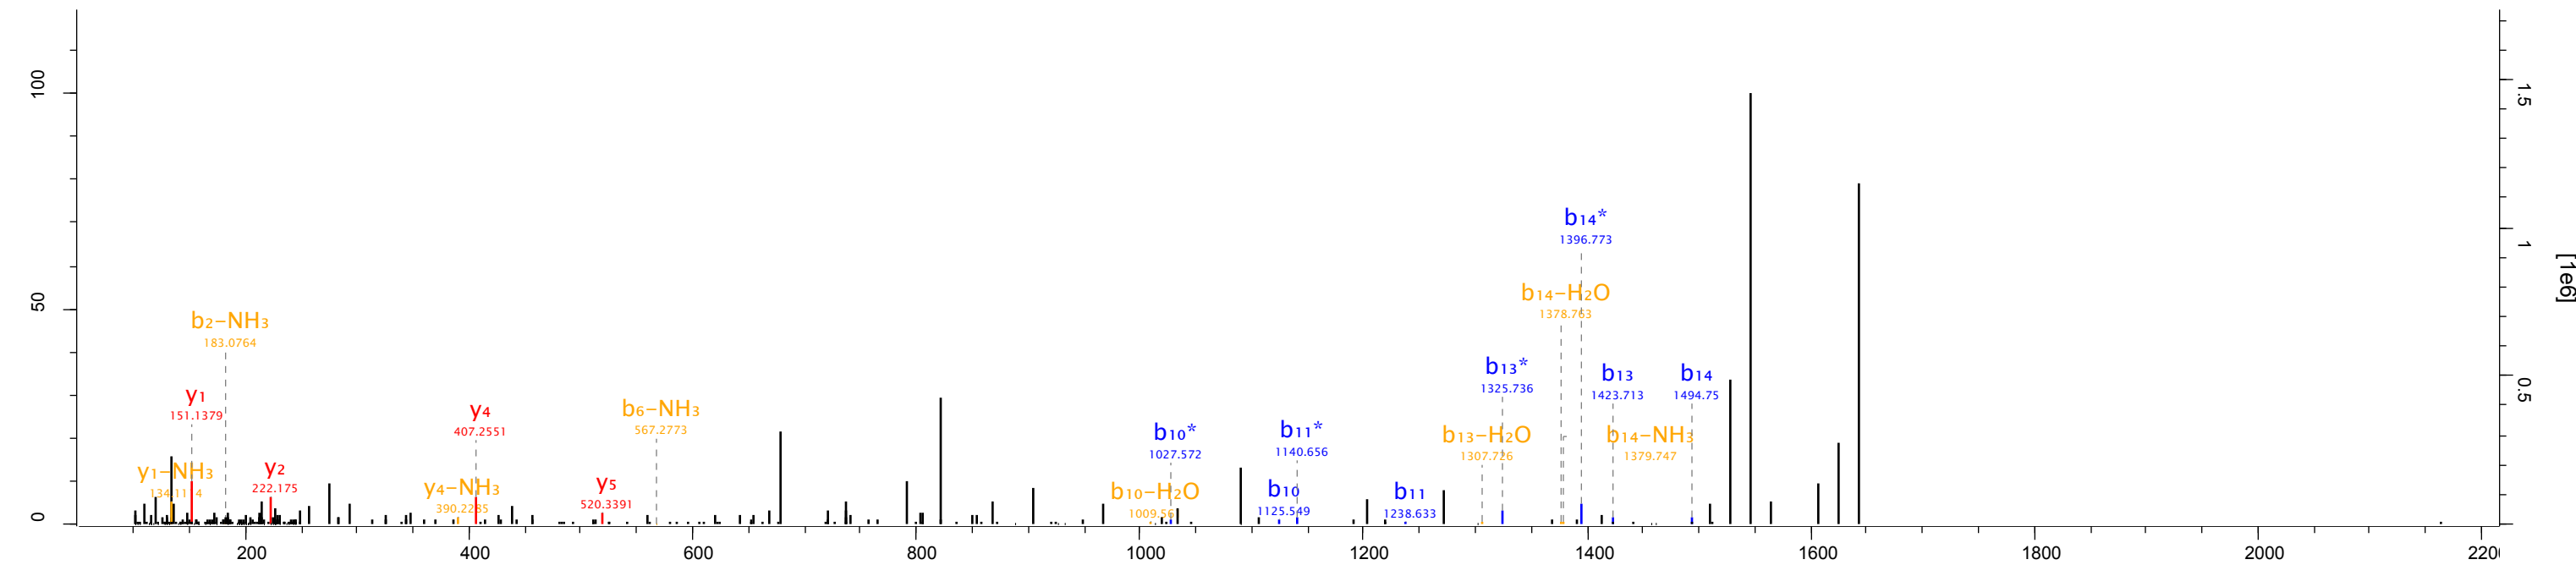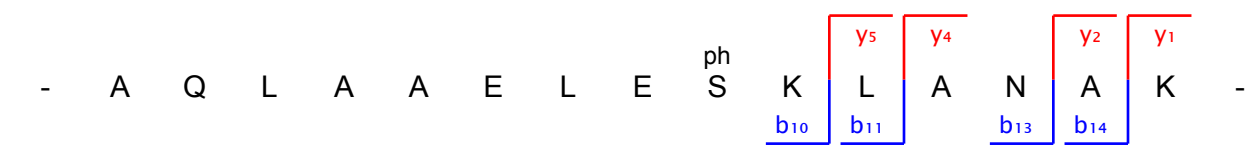

Raw file 20150812\_A375SR\_Phospho\_BR1\_07 Scan 18928 Method FTMS; HCD Score 61.96 m/z 658.81 Gene names ZFP36

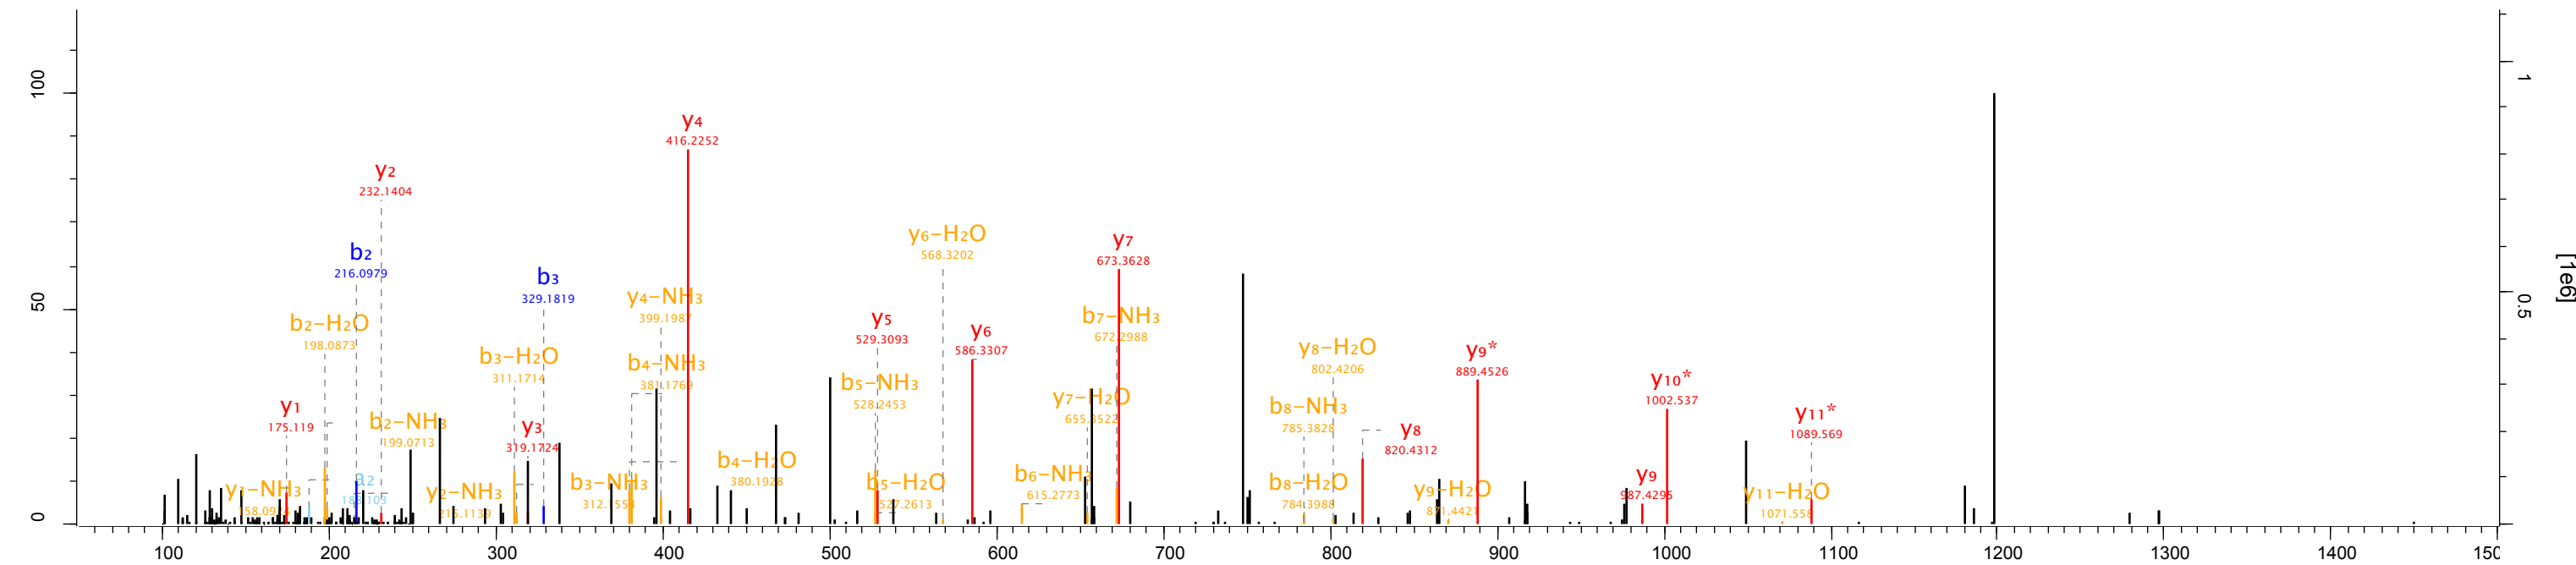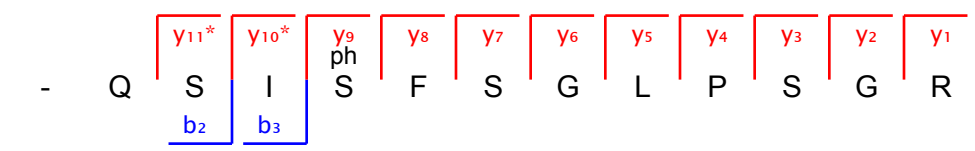

Raw file 20150812\_A375SR\_Phospho\_BR1\_07 Scan 22298 Method FTMS; HCD Score 85.27 m/z 751.83 Gene names CDC14A

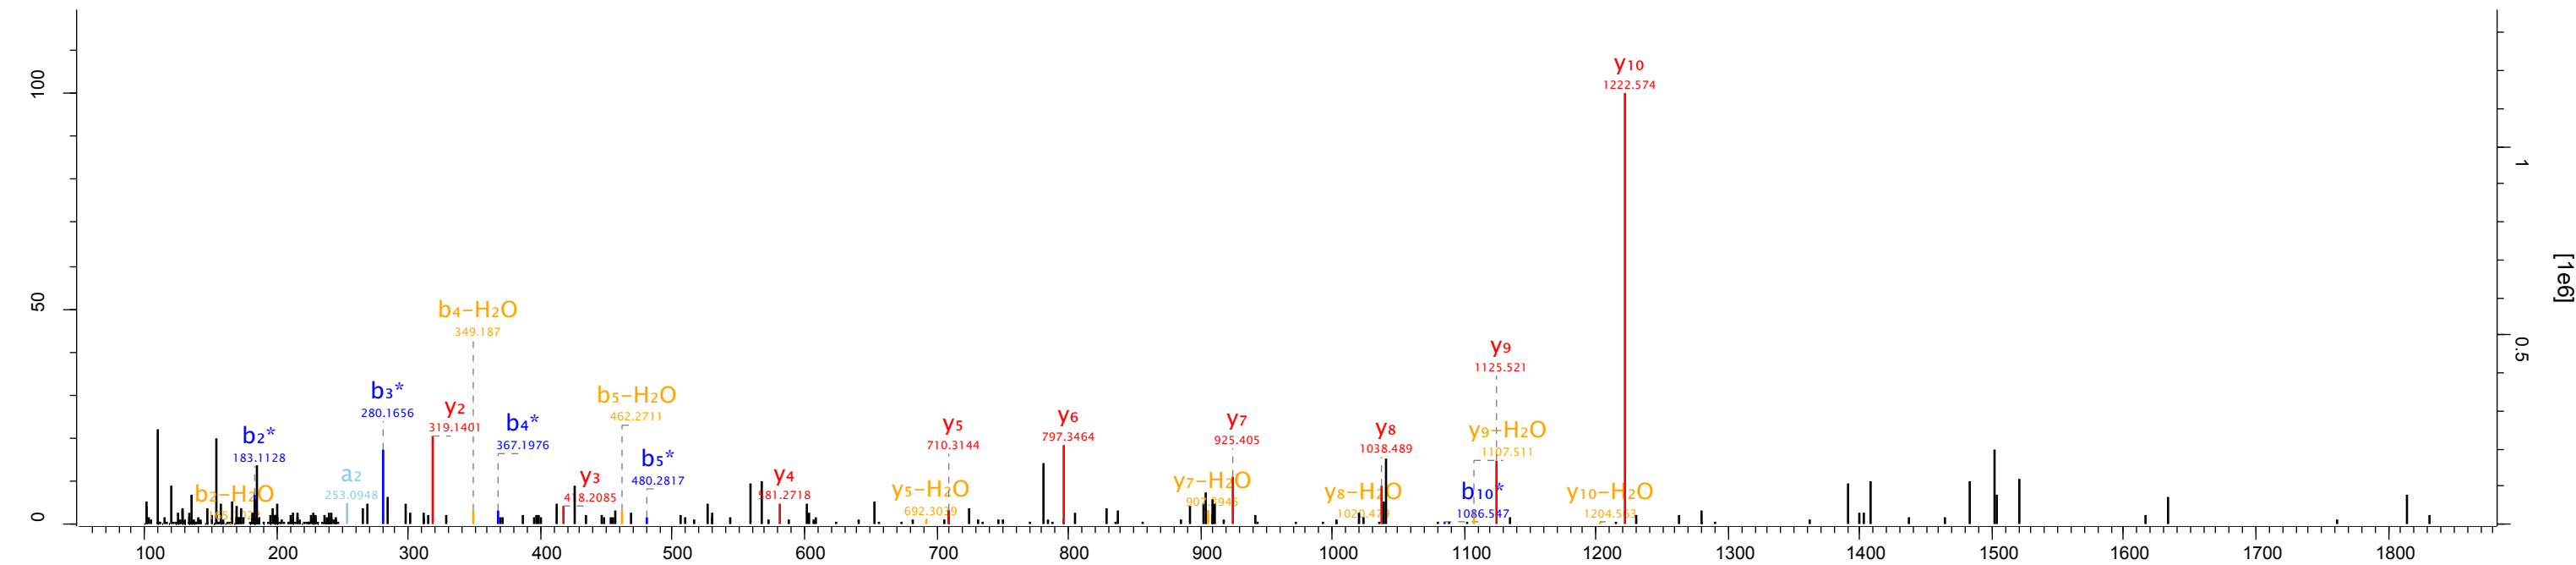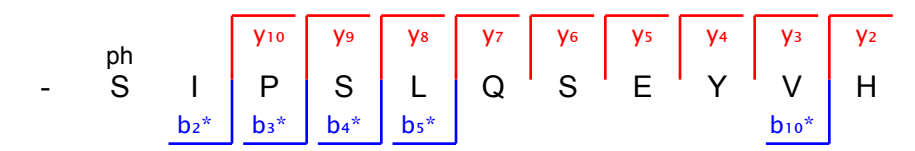

Raw file 20150812\_A375SR\_Phospho\_BR1\_08 Scan 13378 Method FTMS; HCD Score 76.02 m/z 839.43 Gene names MLLT3

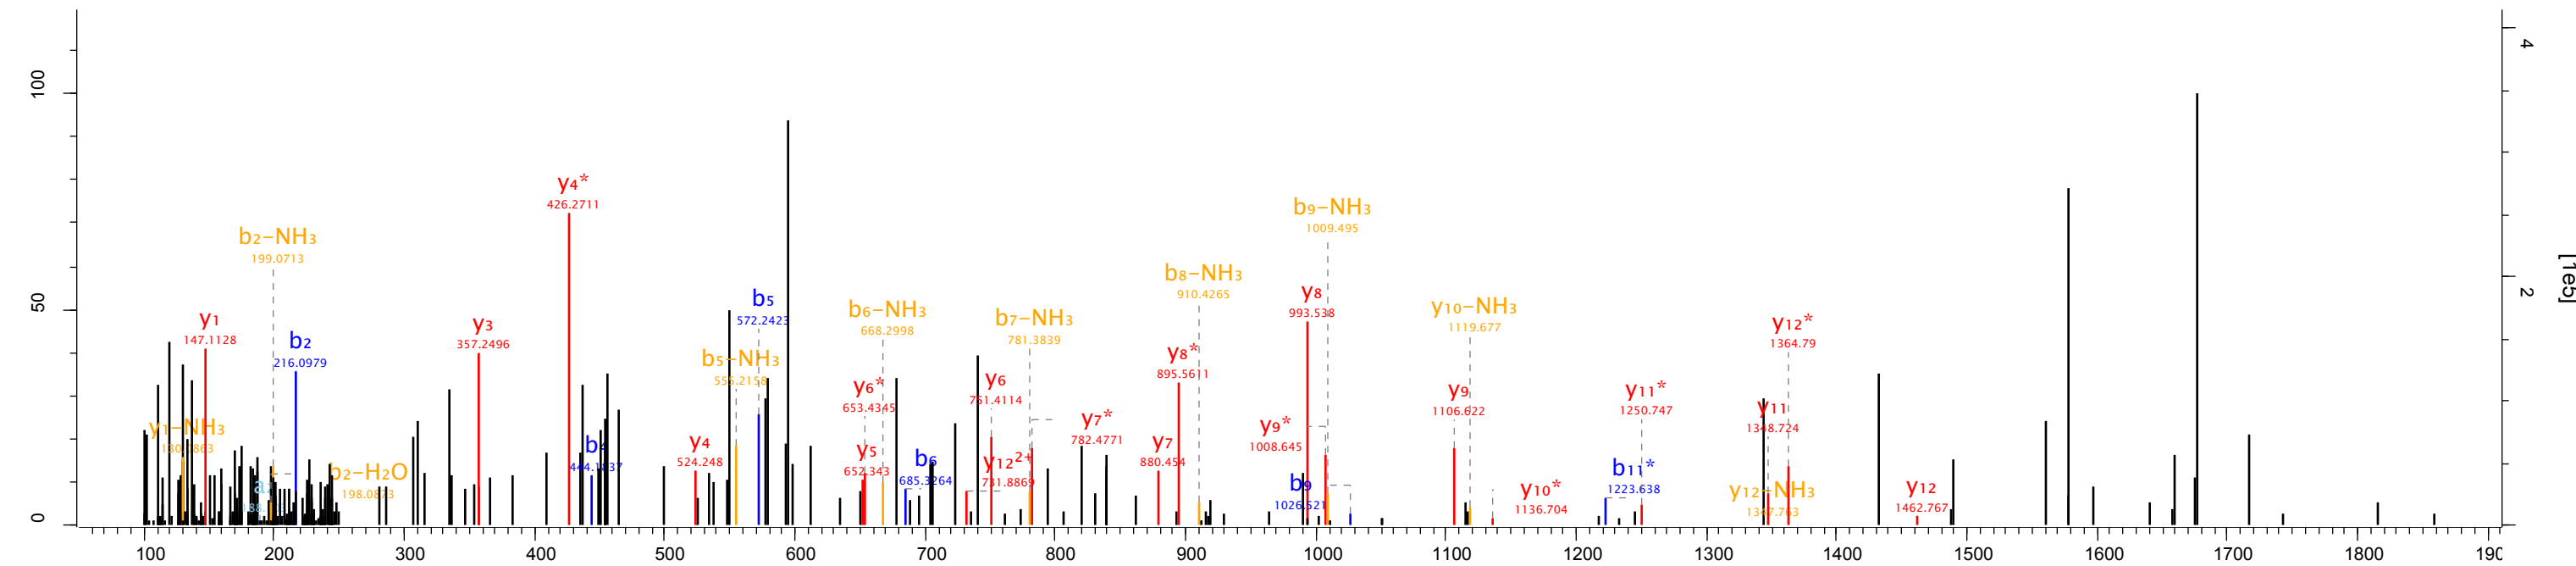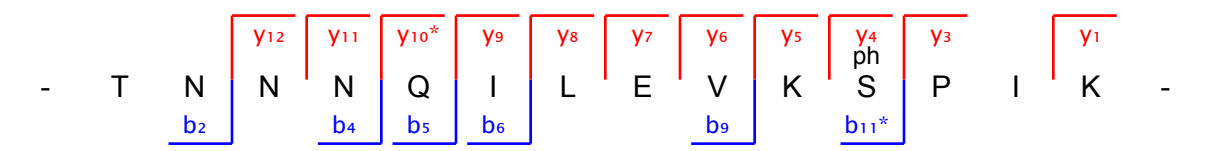

Raw file 20150812\_A375SR\_Phospho\_BR1\_08 Scan 17598 Method FTMS; HCD Score 45.08 m/z 866.4

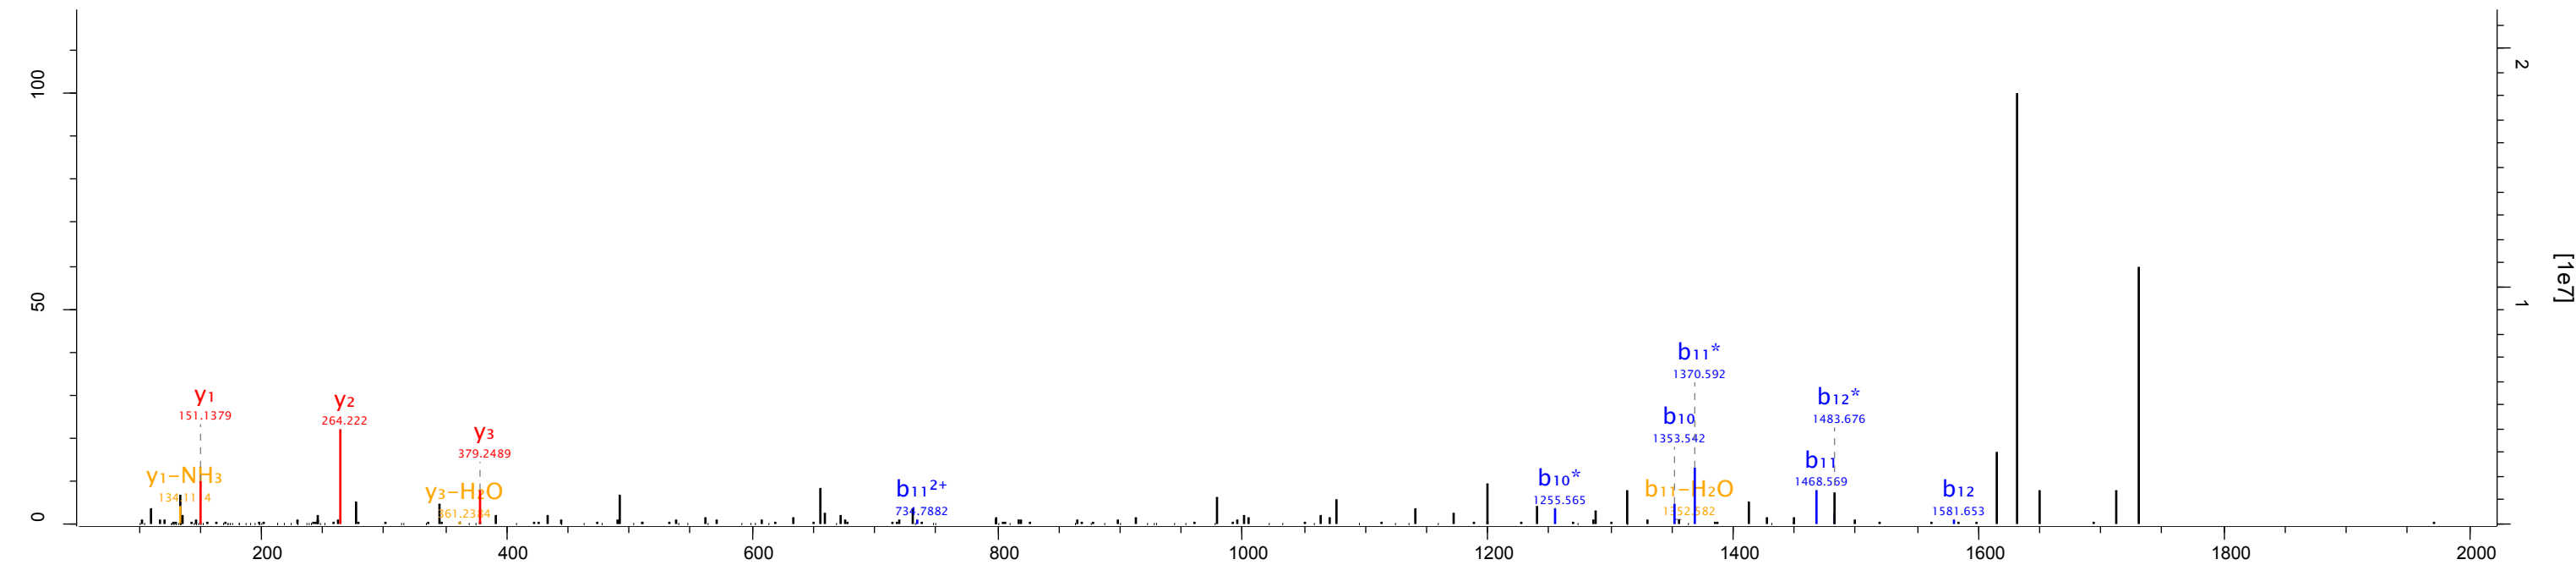

Raw file 20150812\_A375SR\_Phospho\_BR1\_09 Scan 13498 Method FTMS; HCD Score 85.73 m/z 660.39 Gene names RPL39P5;RPL39

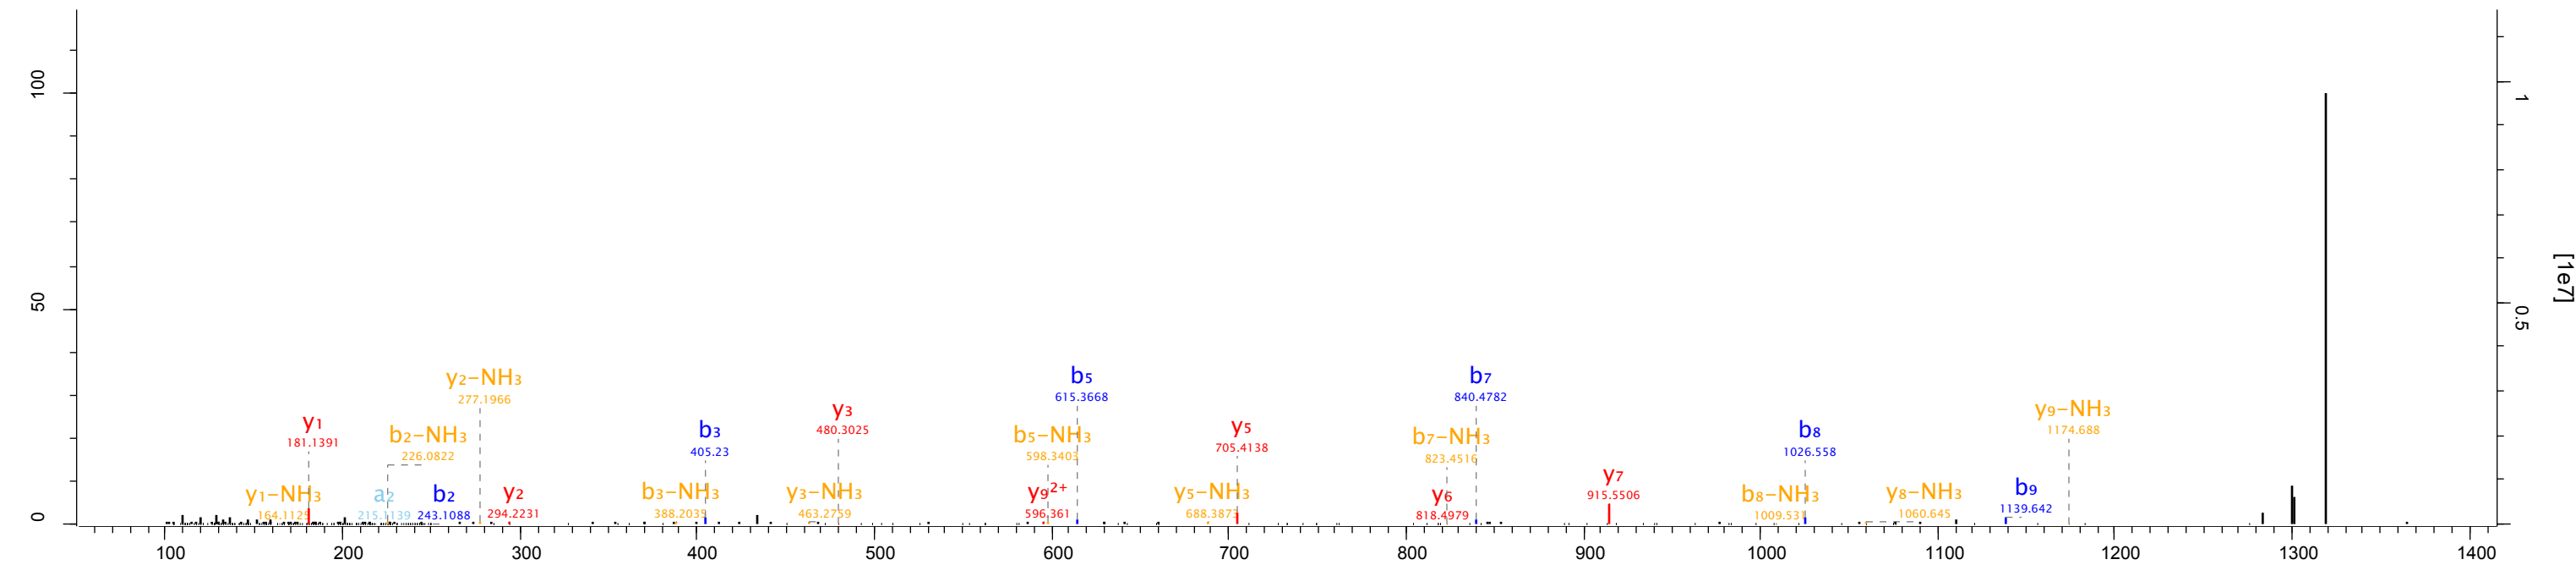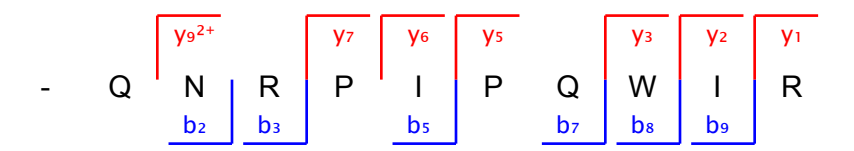



Raw file  
 20150812\_A375SR\_Phospho\_BR1\_09  
 Scan 22078 Method FTMS; HCD Score 187 m/z 928.94 Gene names MAPK11P1L

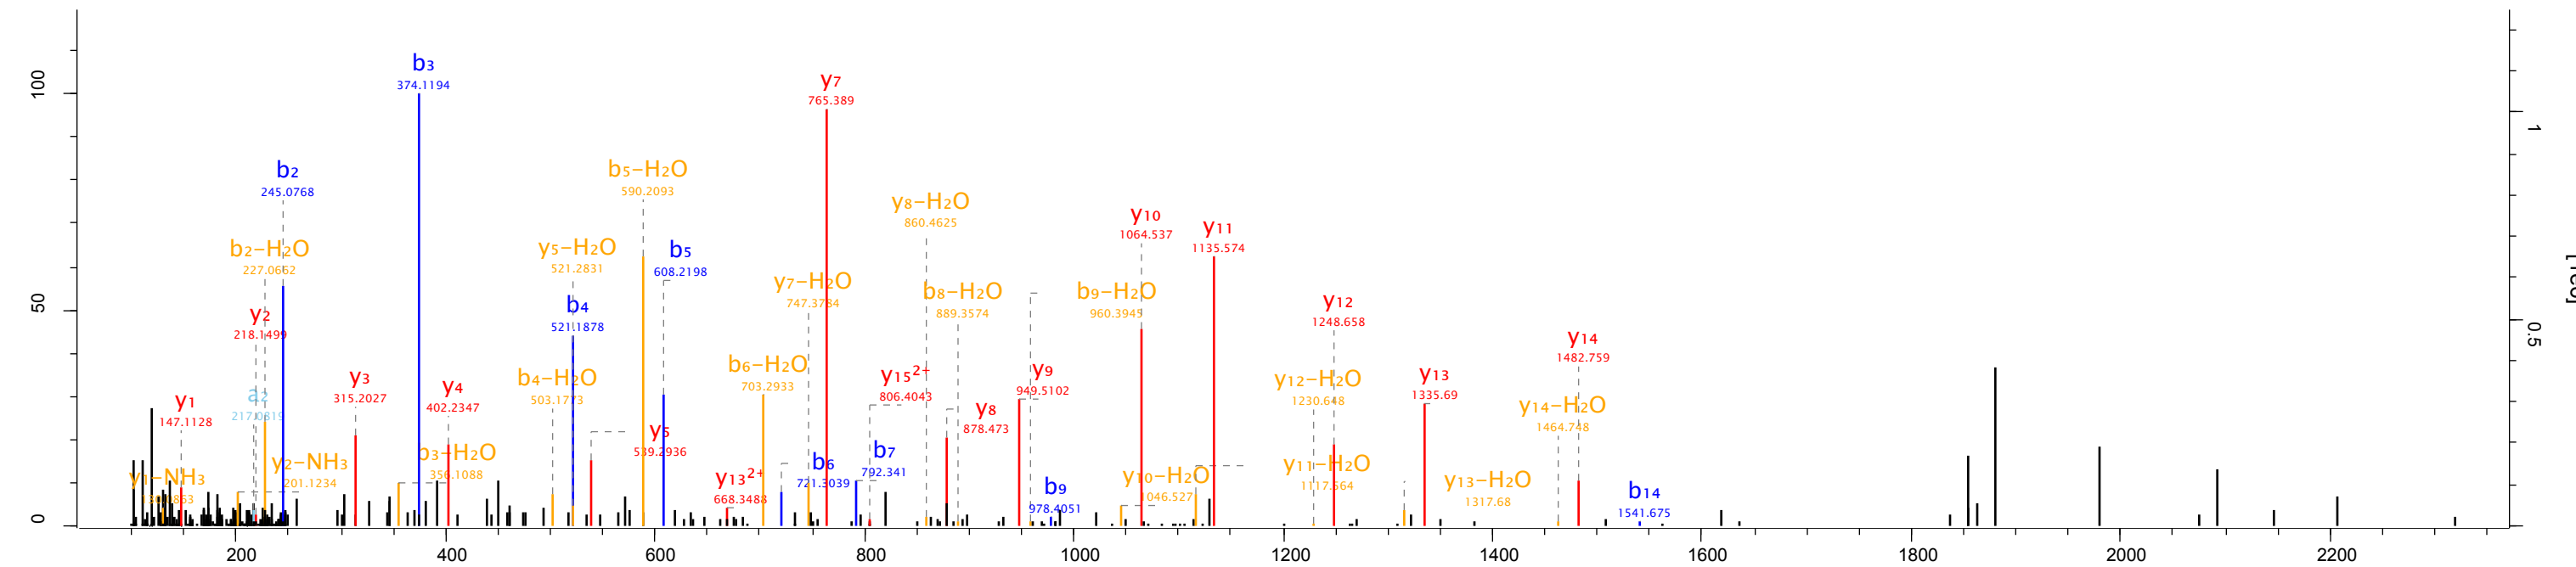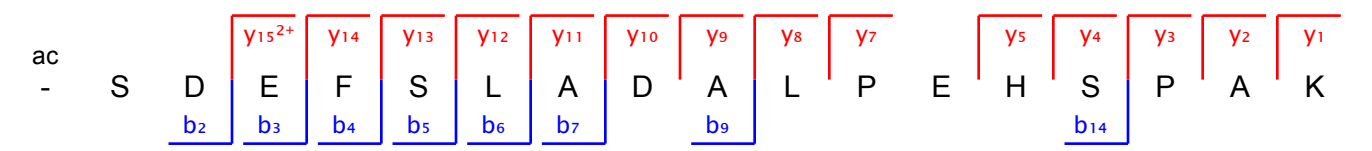

Raw file 20150812\_A375SR\_Phospho\_BR1\_10 Scan 12478 Method FTMS; HCD Score 61.53 m/z 558.29

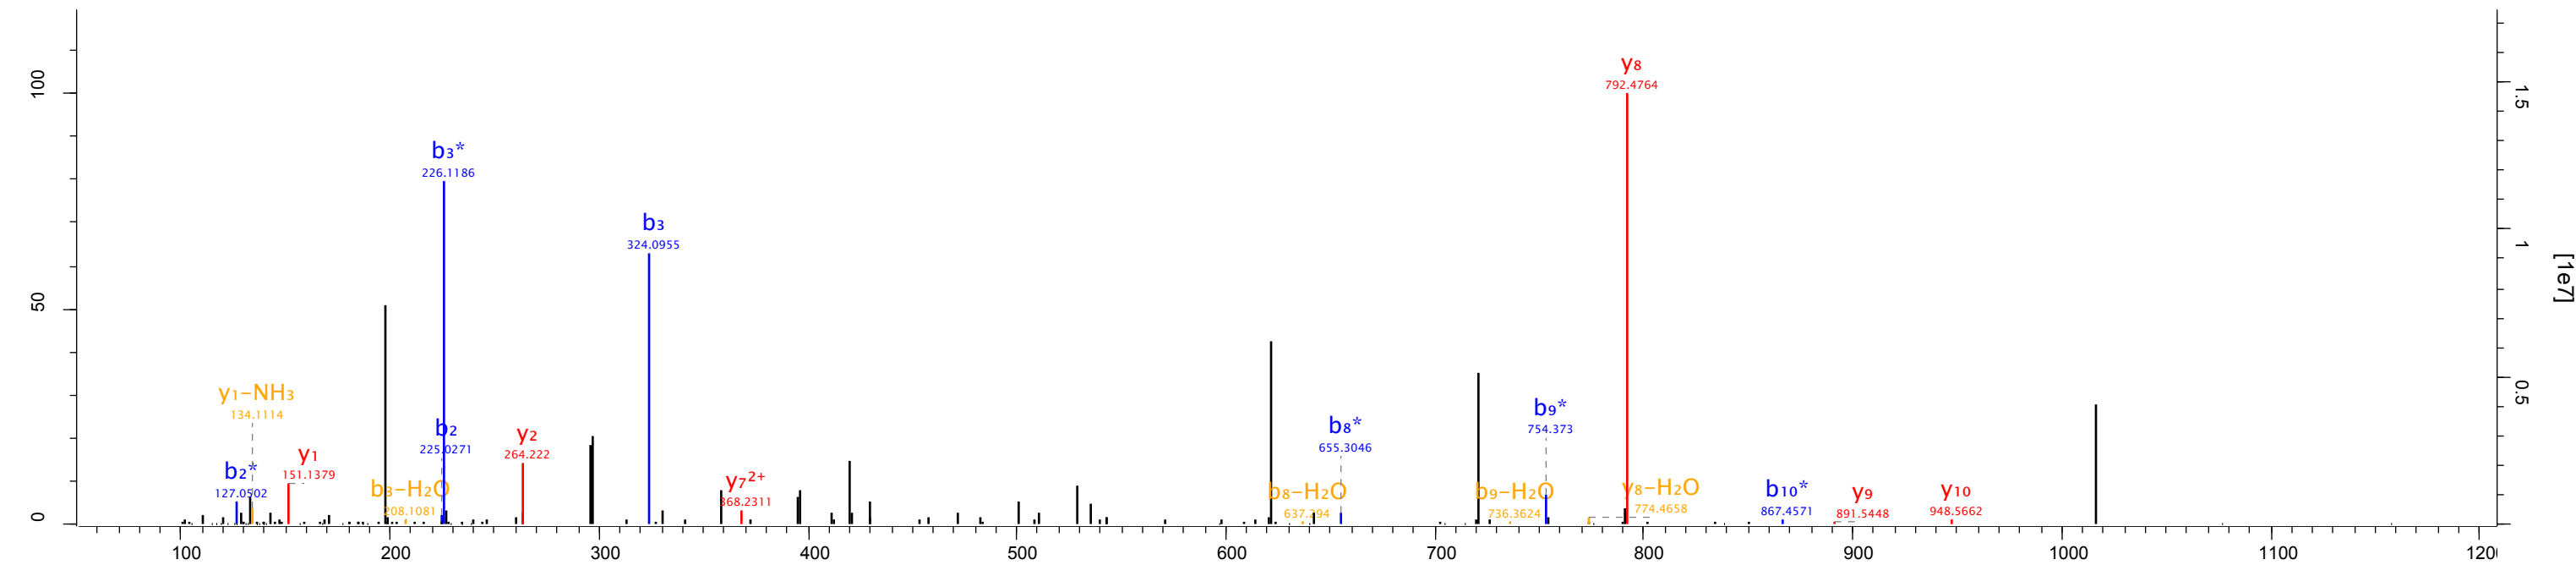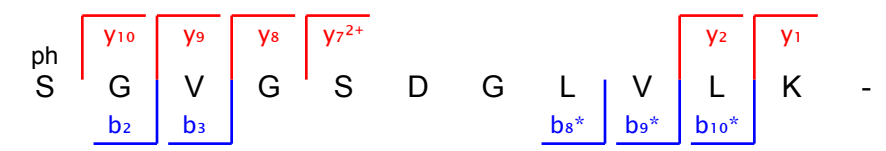

Raw file 20150812\_A375SR\_Phospho\_BR1\_10 Scan 24058 Method FTMS; HCD Score 211.17 m/z 970.44 Gene names MAPK1IP1L

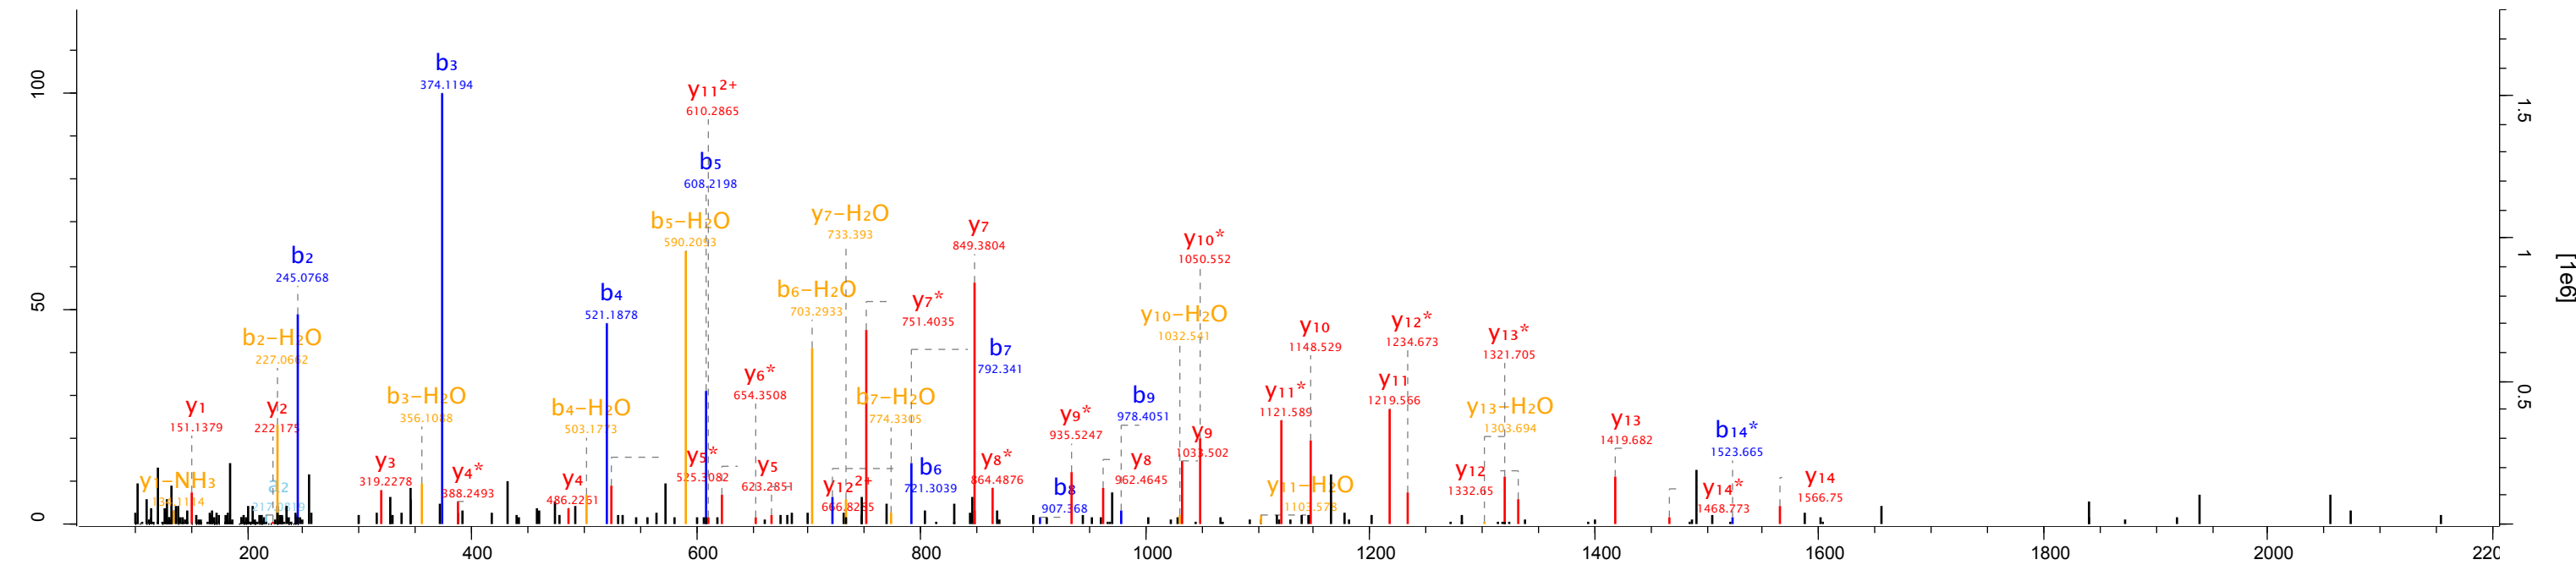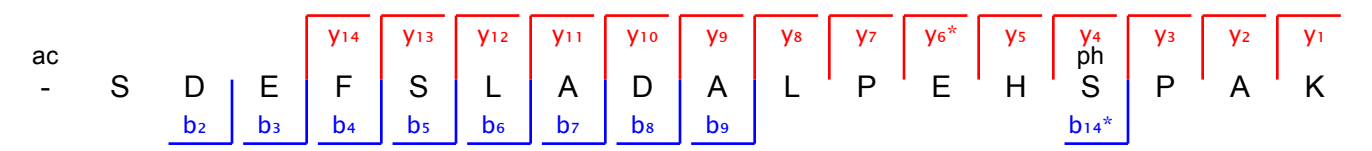

Raw file: 20150814\_A375SR\_Phospho\_BR2\_03  
 Scan: 24568 Method: FTMS; HCD Score: 146.18 m/z: 921.41 Gene names: MSANTD3

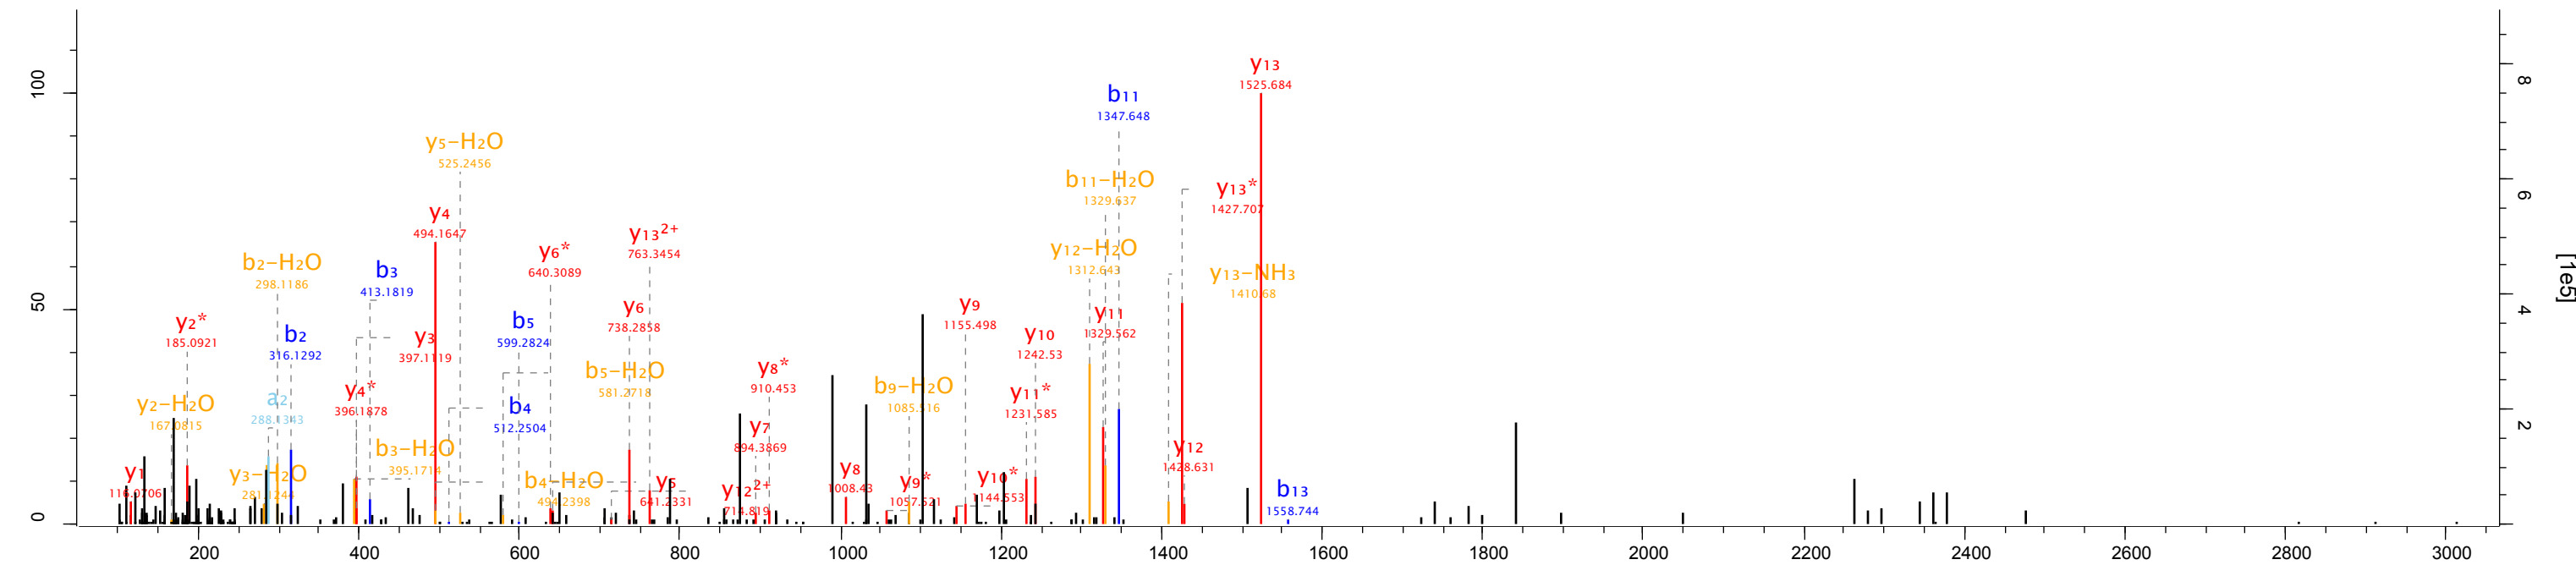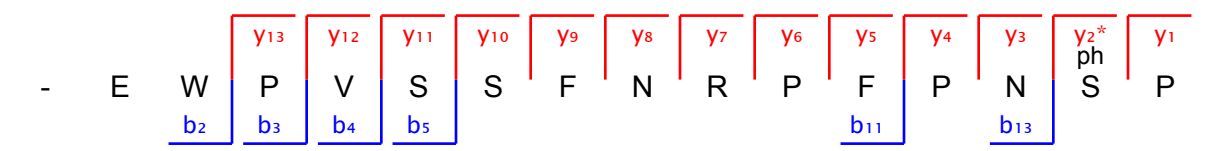

Raw file: 20150814\_A375SR\_Phospho\_BR2\_03  
 Scan: 7498 Method: FTMS; HCD Score: 49.66 m/z: 798.83 Gene names: AMER1

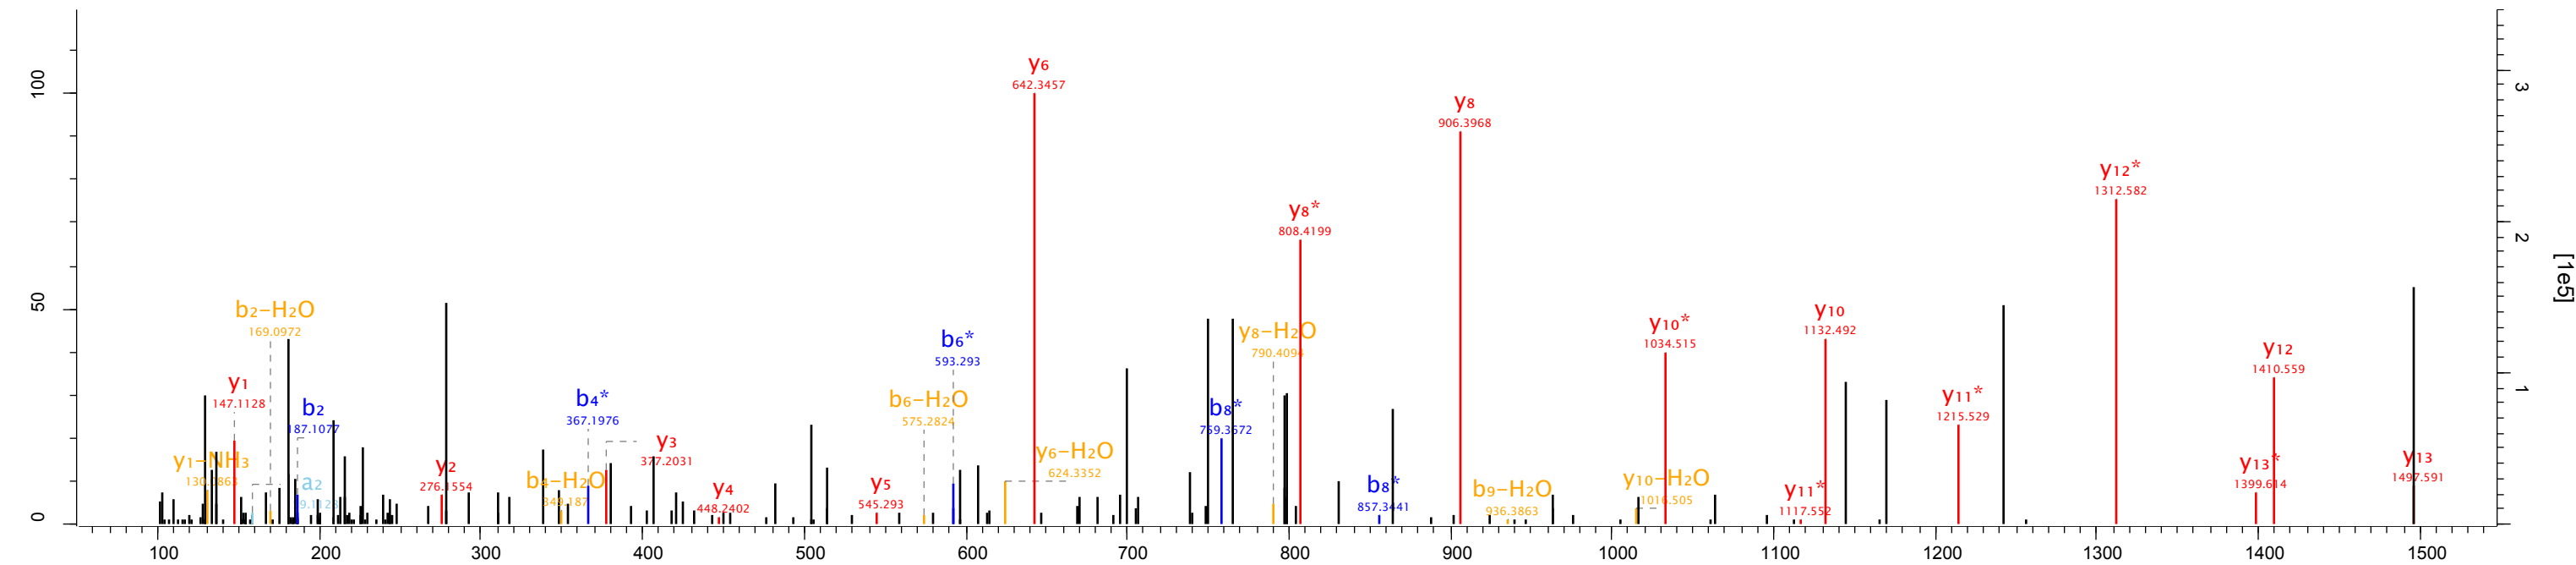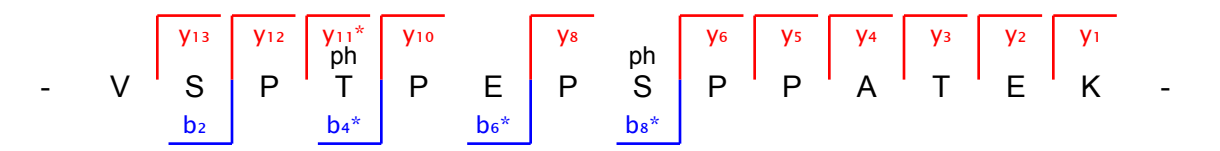

Raw file 20150814\_A375SR\_Phospho\_BR2\_03 Scan 9338 Method FTMS; HCD Score 76.32 m/z 587.76 Gene names PLEKHM1

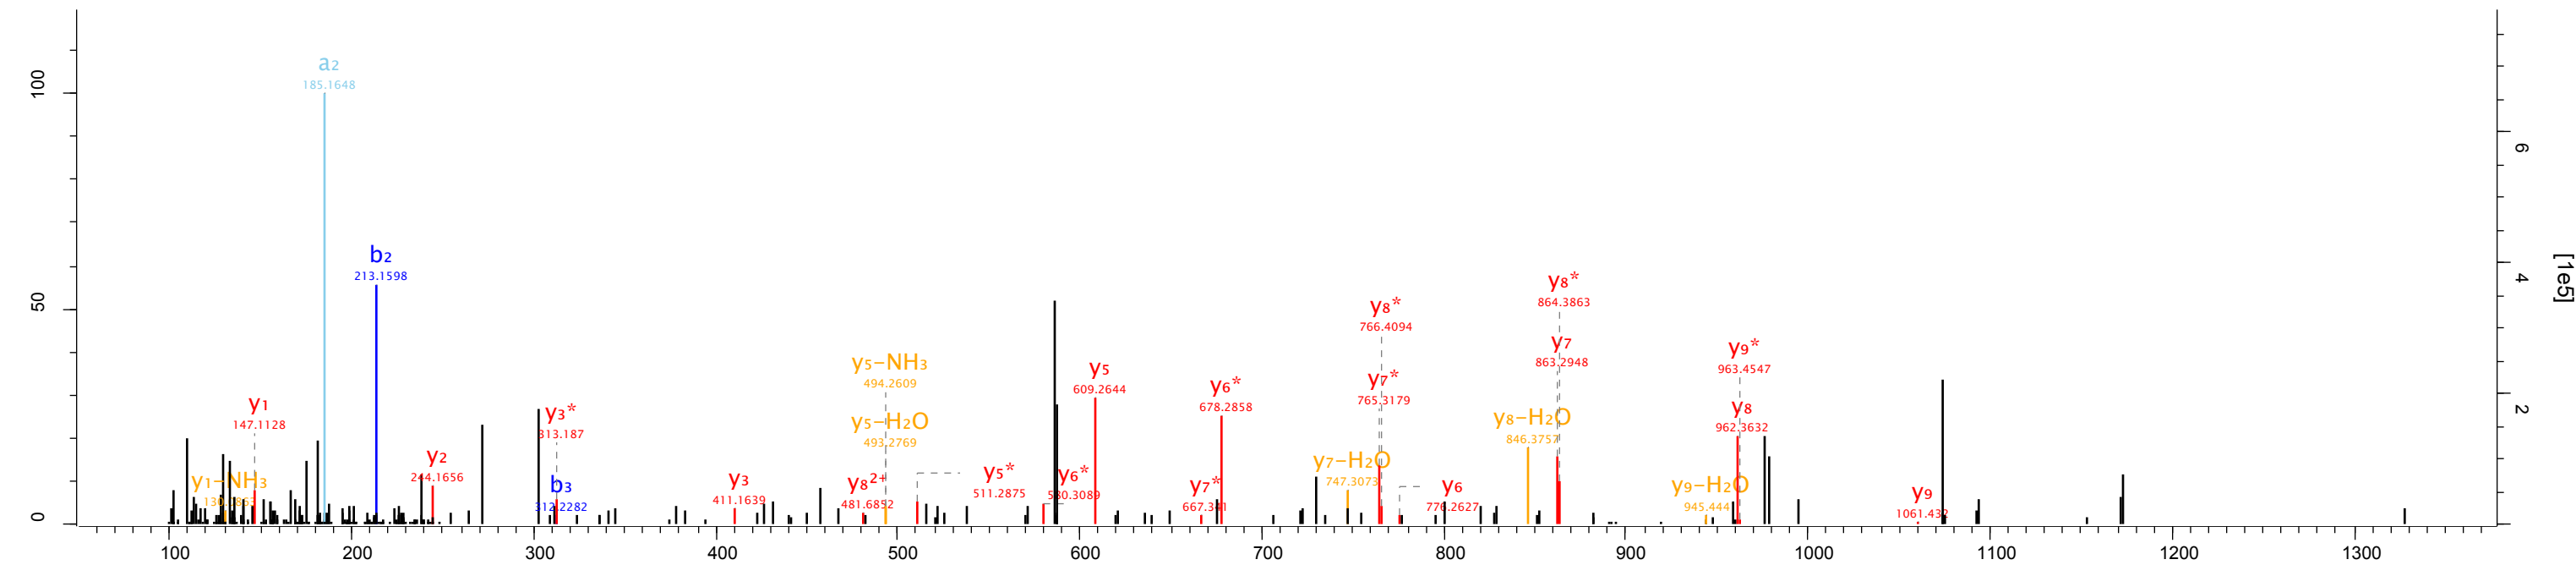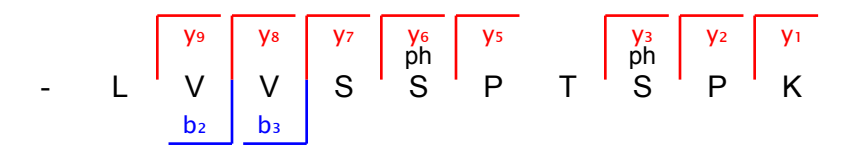

Raw file: 20150814\_A375SR\_Phospho\_BR2\_04  
 Scan: 10618 Method: FTMS; HCD Score: 140.96 m/z: 693.85 Gene names: ELK3

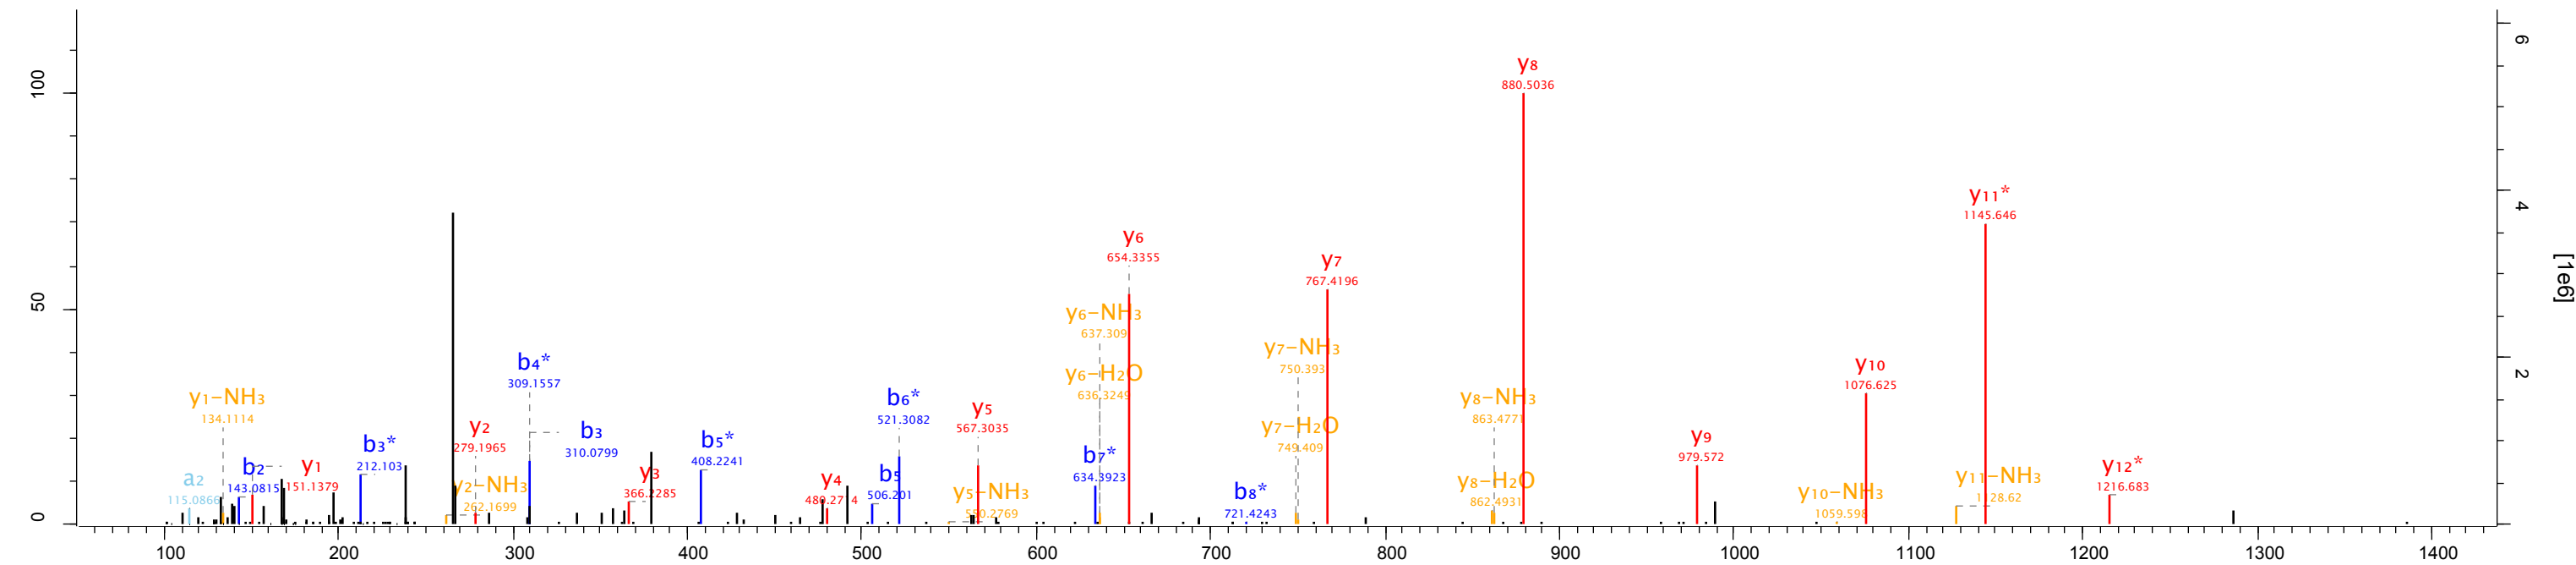

Raw file: 20150814\_A375SR\_Phospho\_BR2\_04  
 Scan: 11718 Method: FTMS; HCD Score: 85.45 m/z: 687.95

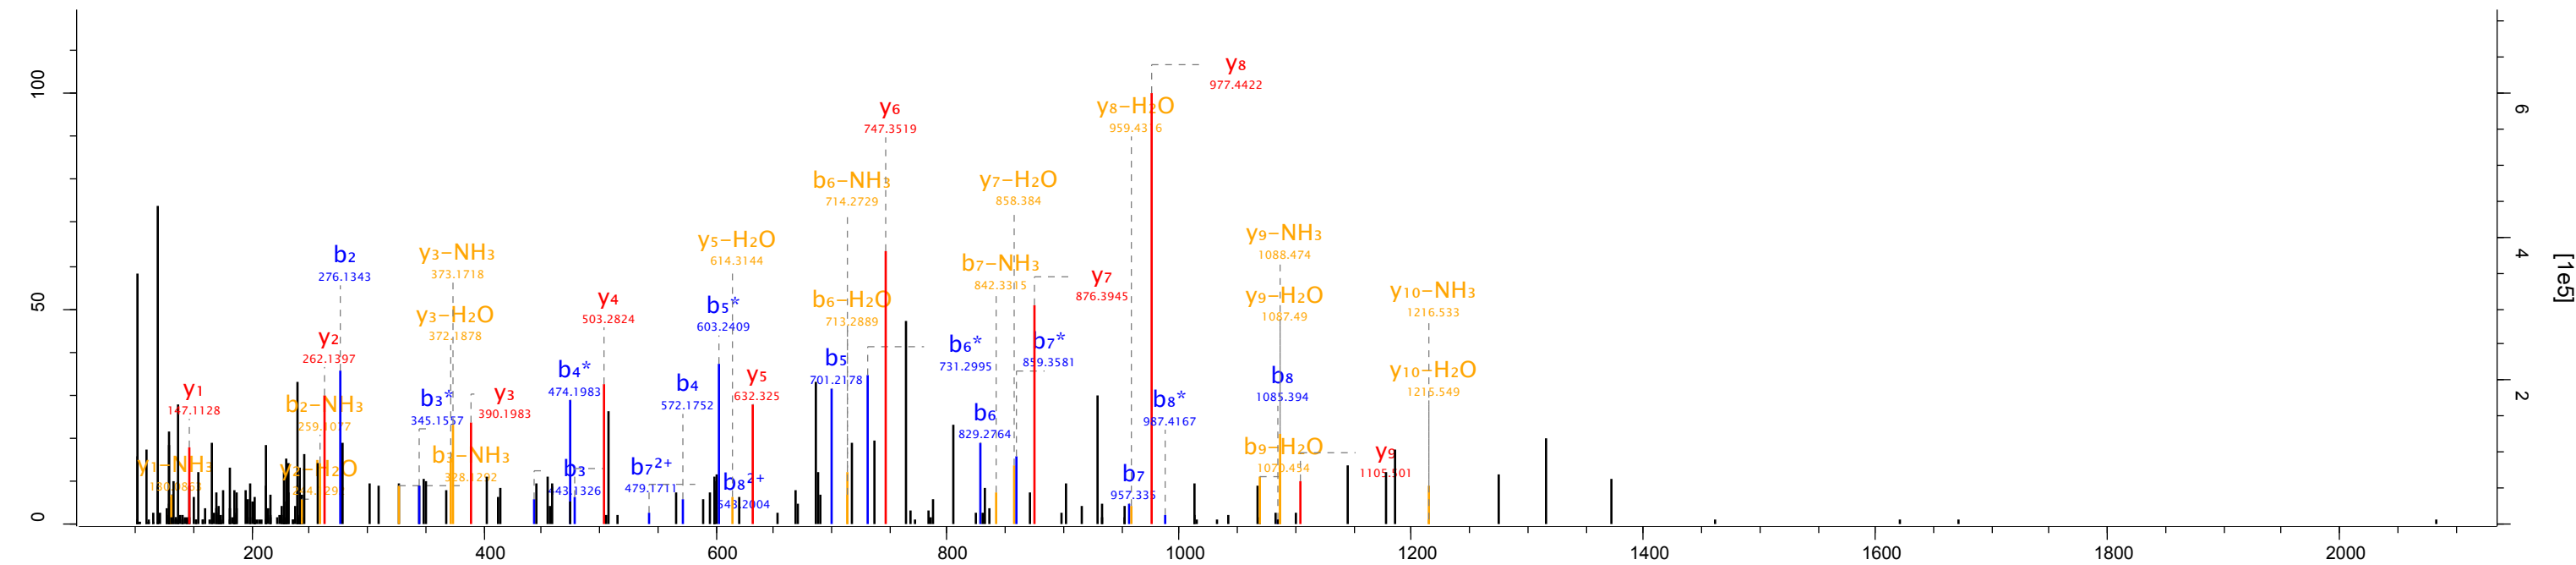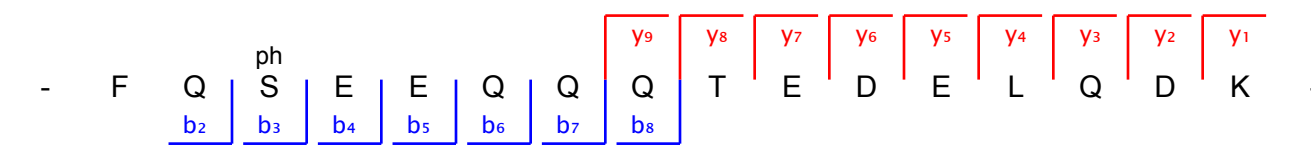



Raw file 20150814\_A375SR\_Phospho\_BR2\_04 Scan 13428 Method FTMS; HCD Score 72.49 m/z 784.86 Gene names PWWP2A

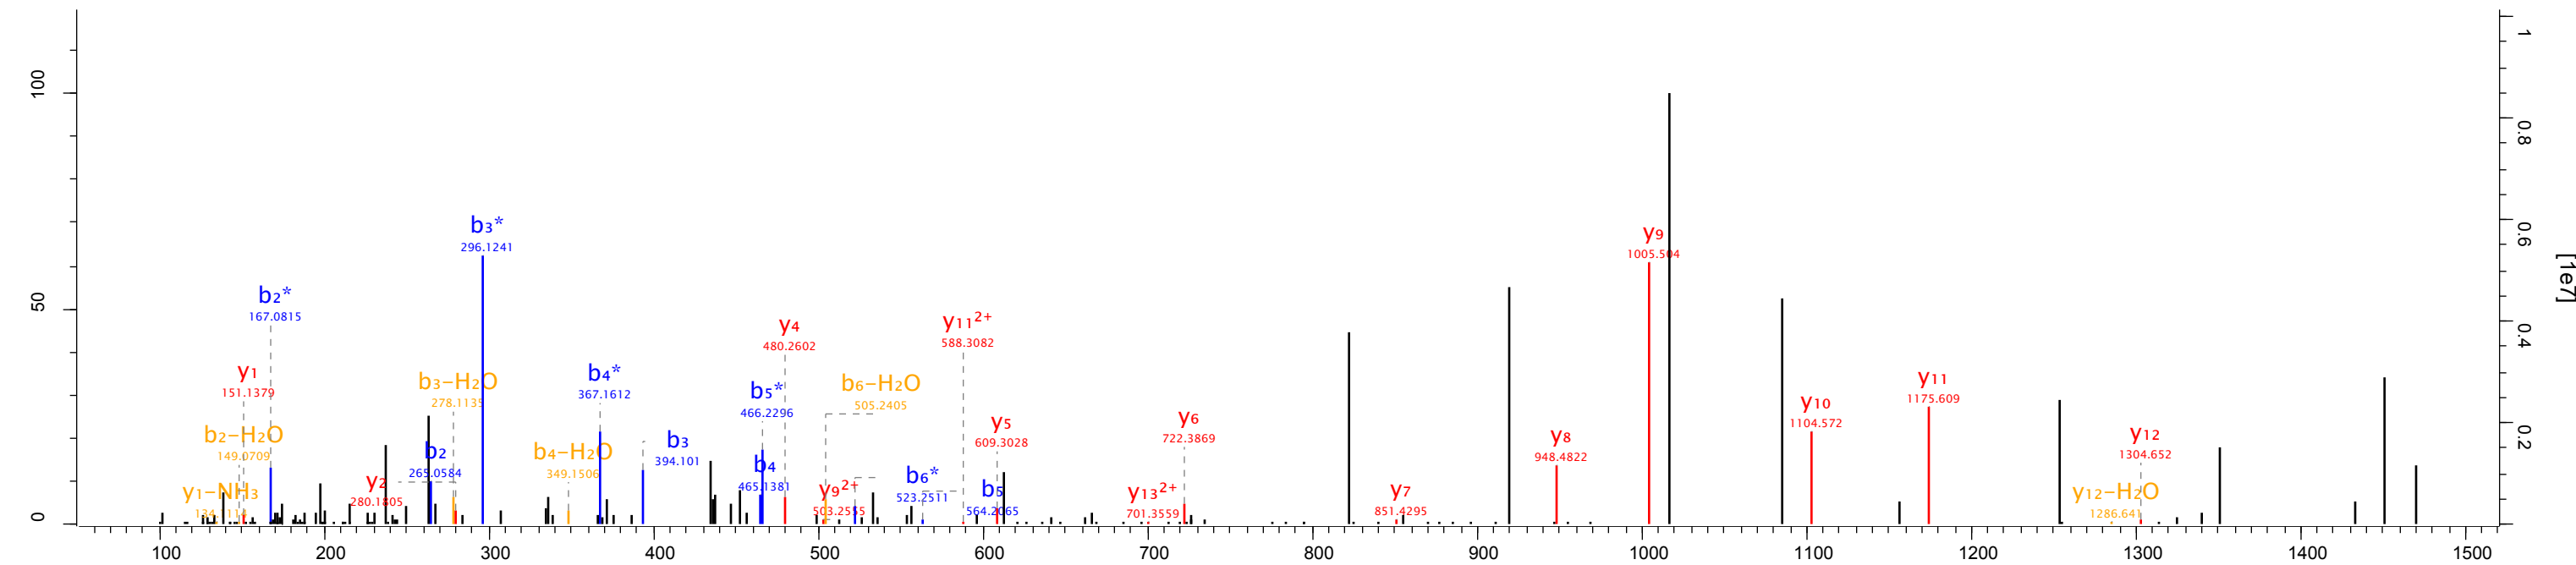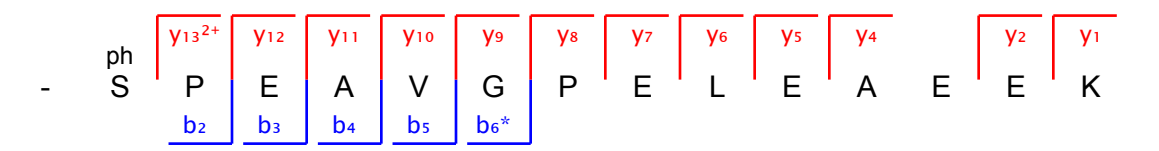

Raw file: 20150814\_A375SR\_Phospho\_BR2\_04  
 Scan: 19358 Method: FTMS; HCD Score: 70.41 m/z: 572.77 Gene names: CCDC125

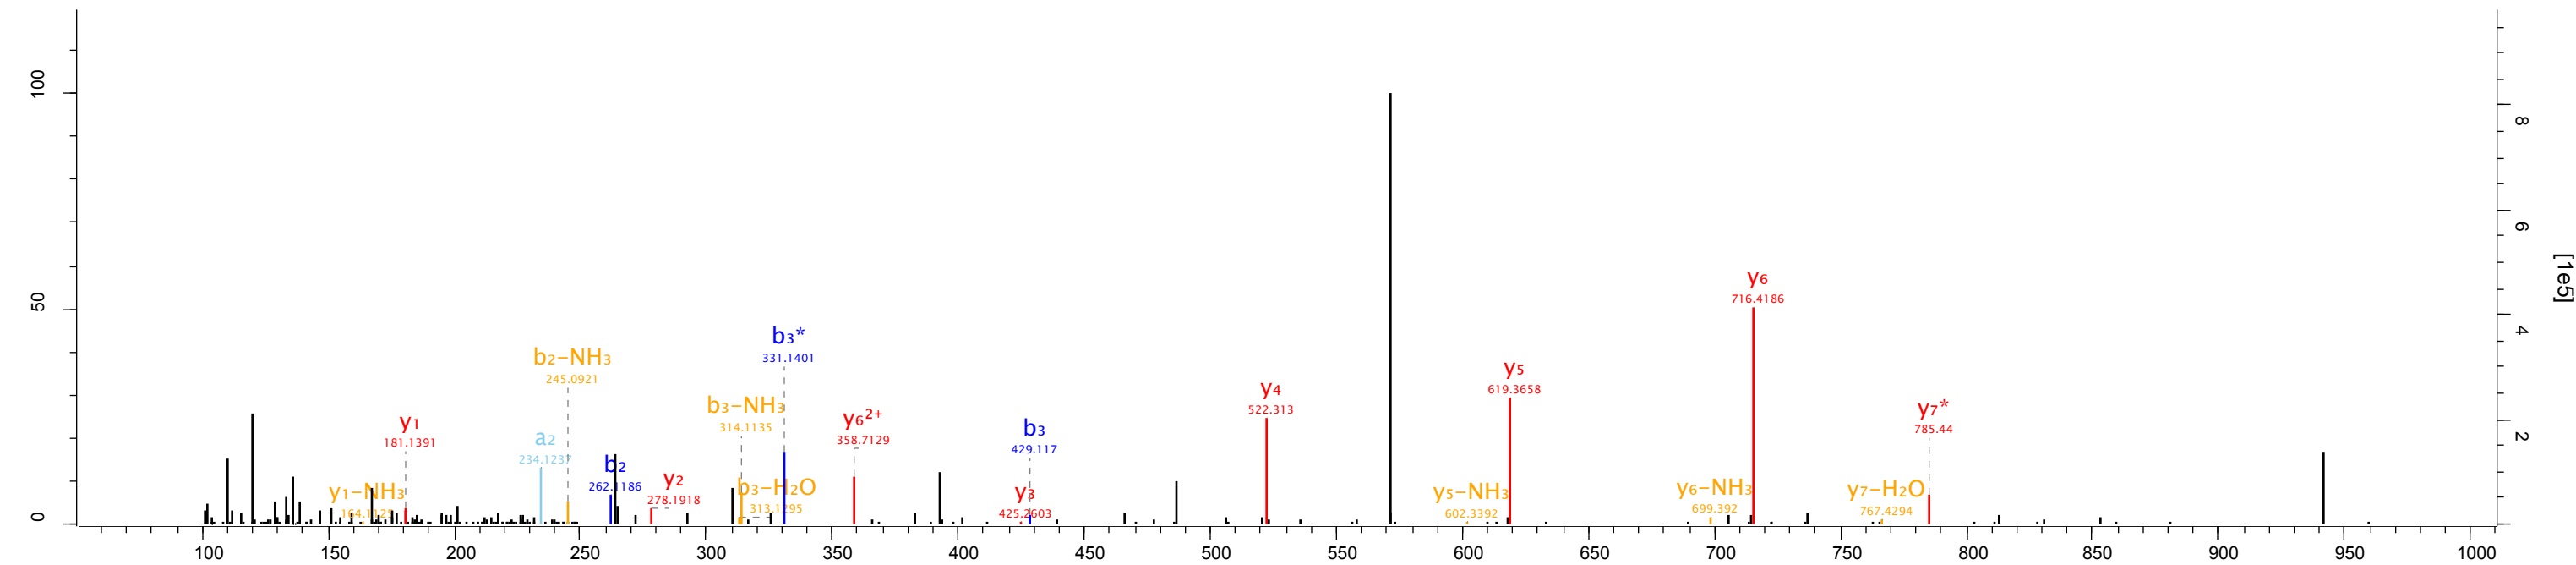

Raw file: 20150814\_A375SR\_Phospho\_BR2\_04  
 Scan: 21298 Method: FTMS; HCD Score: 76.47 m/z: 751.83 Gene names: CDC14A

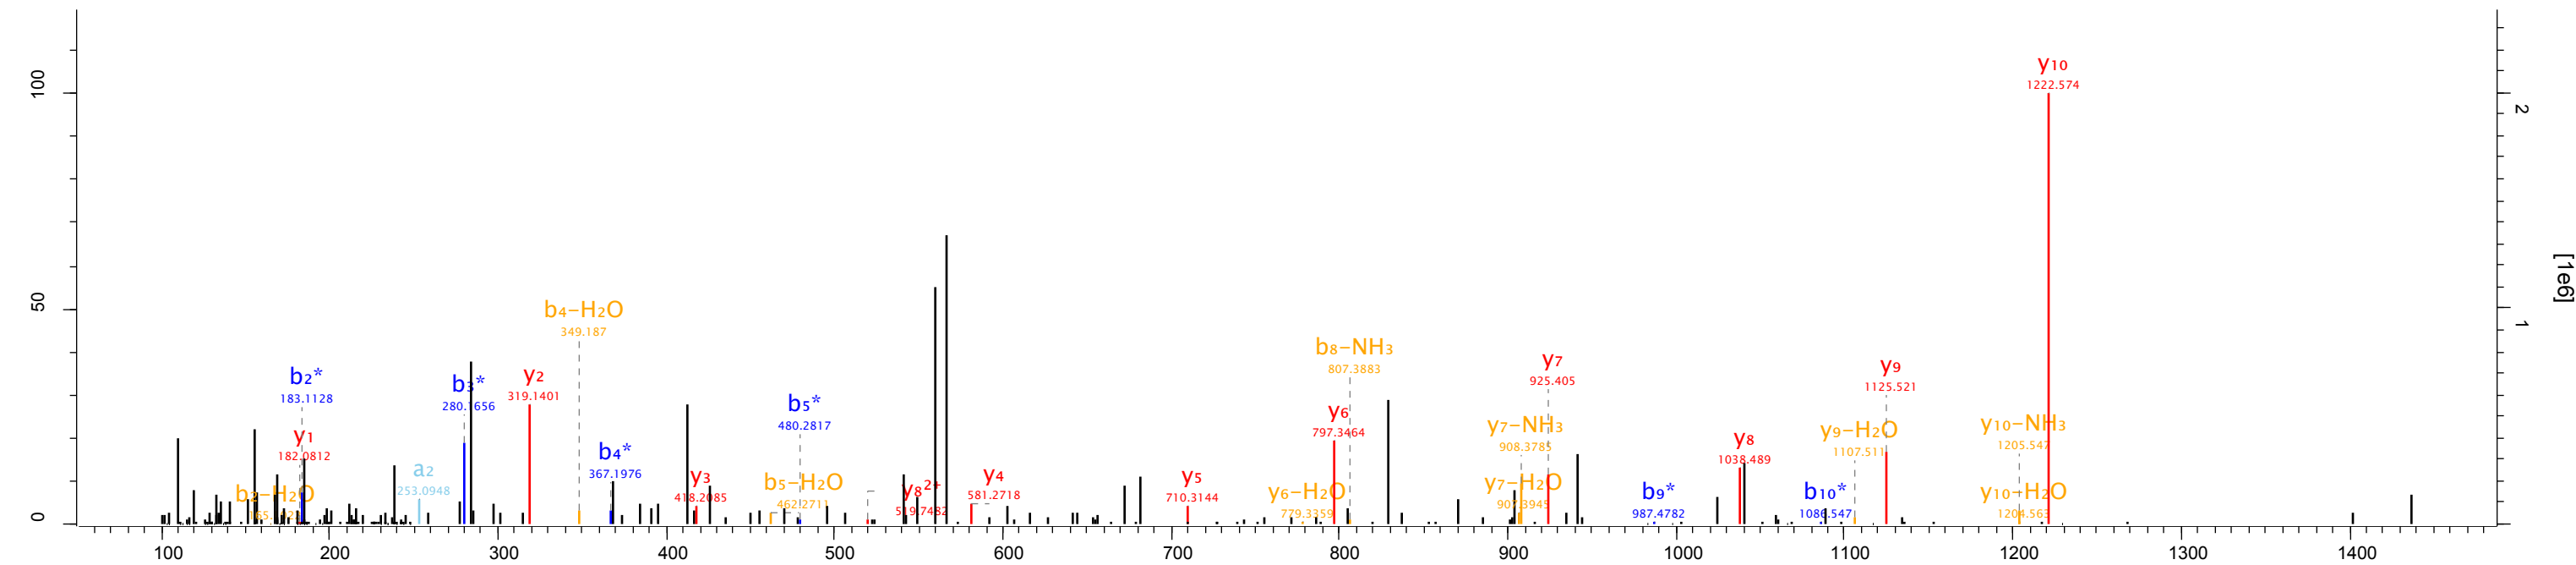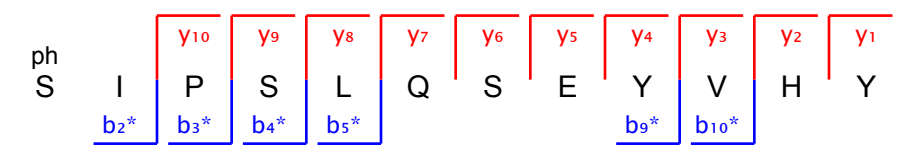

Raw file  
20150814\_A375SR\_Phospho\_BR2\_04

Scan 23798 Method FTMS; HCD Score 194.24 m/z 970.43 Gene names MAPK11P1L

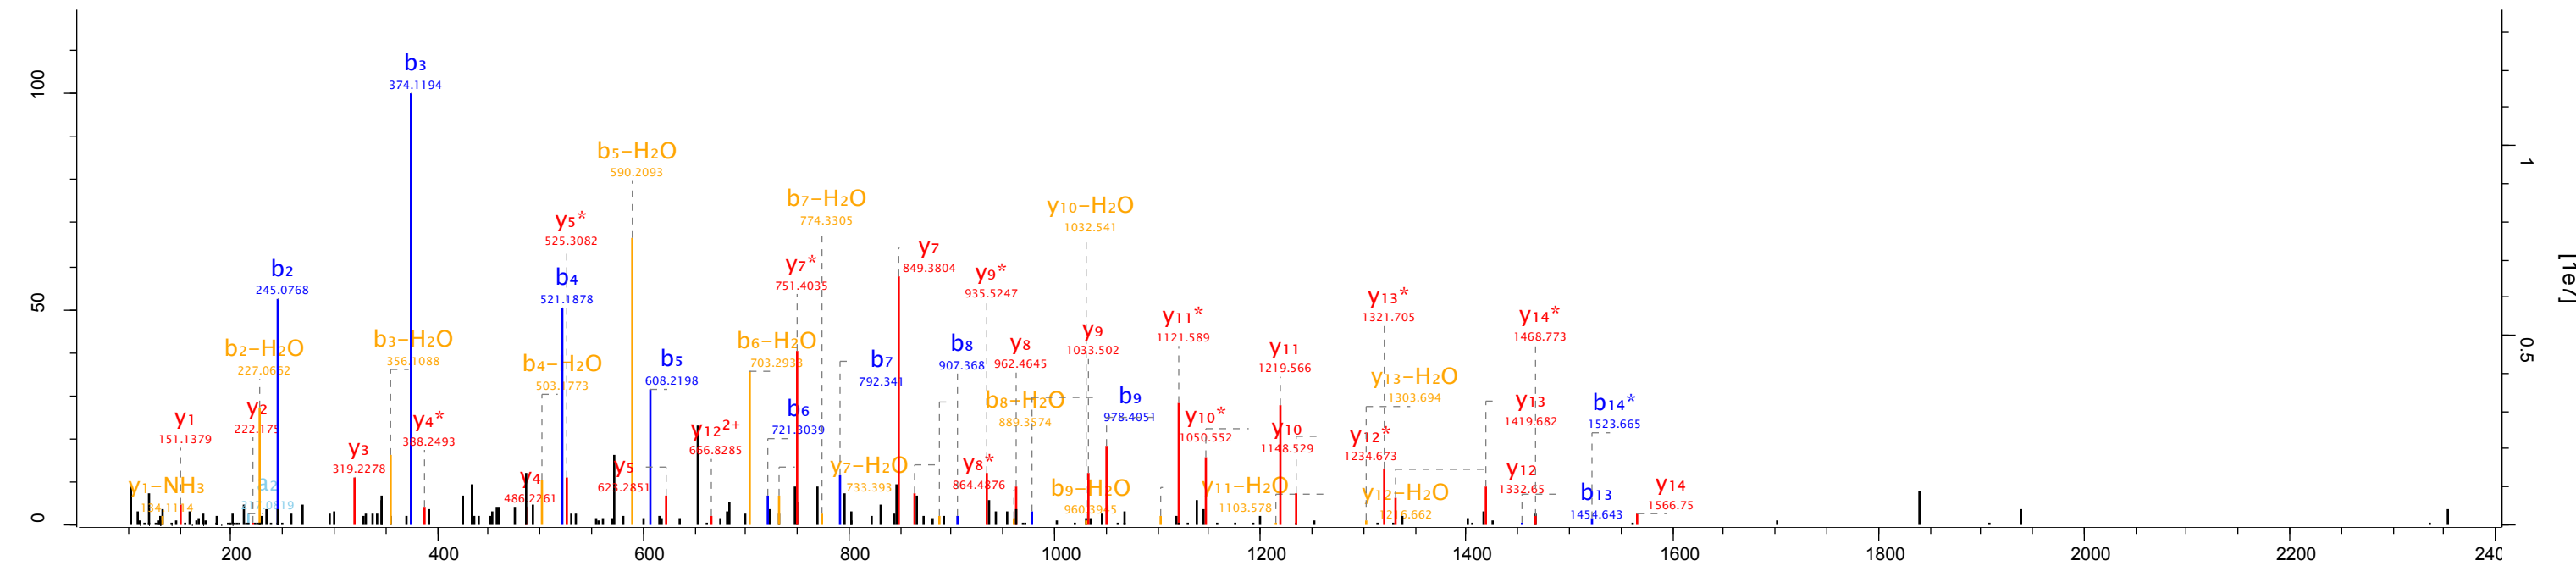

ac  
- S D E F S L A D A L P E H S P A K -  
b2 b3 b4 b5 b6 b7 b8 b9 b13 b14\*

Raw file 20150814\_A375SR\_Phospho\_BR2\_04 Scan 23838 Method FTMS; HCD Score 242.22 m/z 968.92 Gene names MAPK11P1L

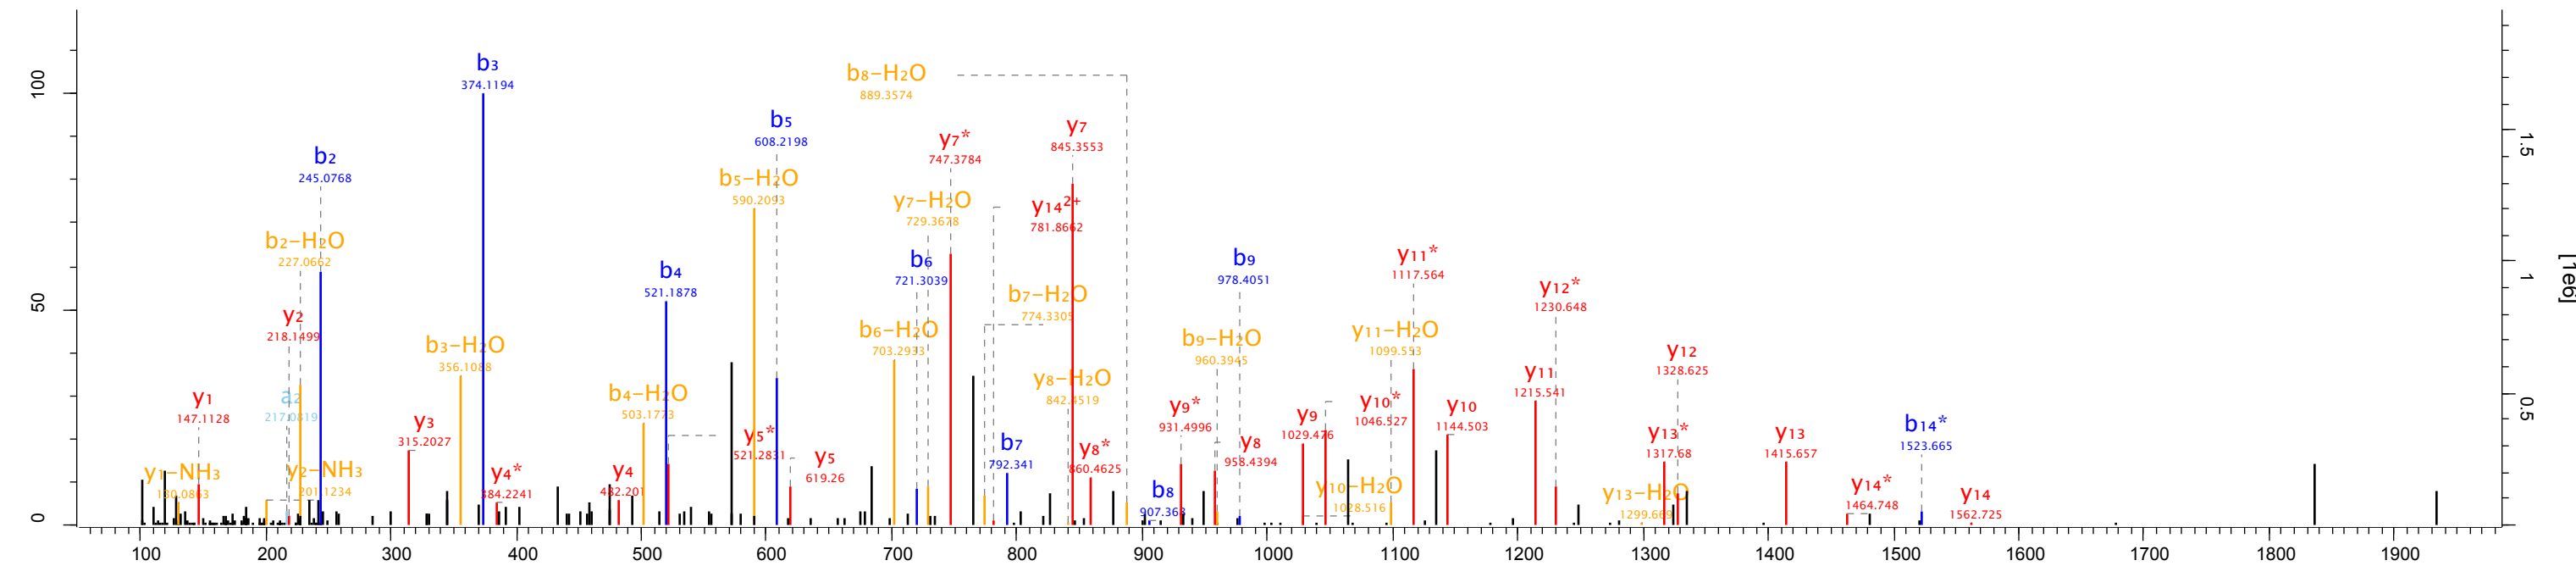

ac - S D E F S L A D A L P E H S P A K -

b2 b3 b4 b5 b6 b7 b8 b9 b14\*

y14 y13 y12 y11 y10 y9 y8 y7 y5 y4 ph y3 y2 y1

Raw file: 20150814\_A375SR\_Phospho\_BR2\_04  
 Scan: 24618 Method: FTMS; HCD Score: 126.29 m/z: 923.92 Gene names: MSANTD3

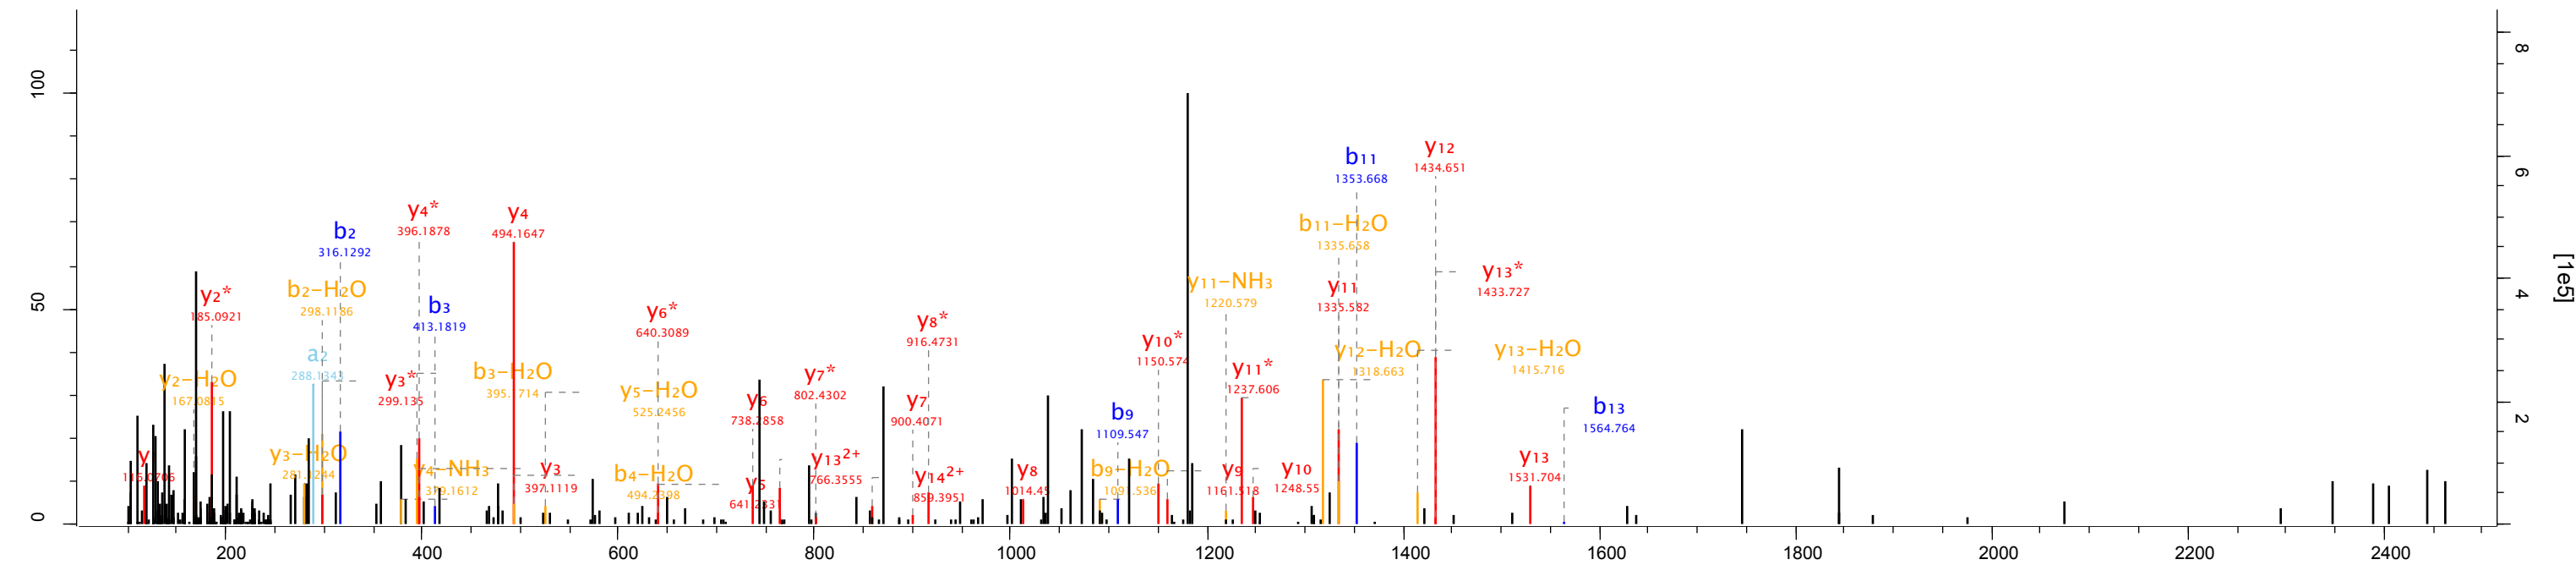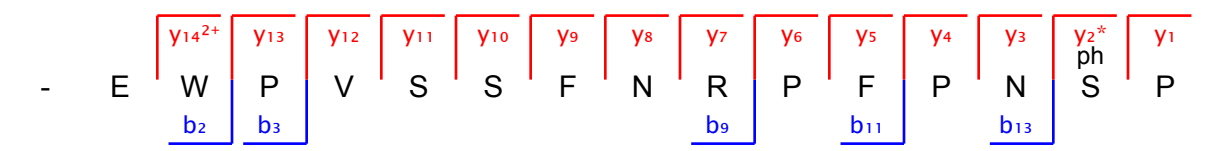

Raw file: 20150814\_A375SR\_Phospho\_BR2\_04  
 Scan: 28718 Method: FTMS; HCD Score: 204.67 m/z: 725.37 Gene names: SLC35C2

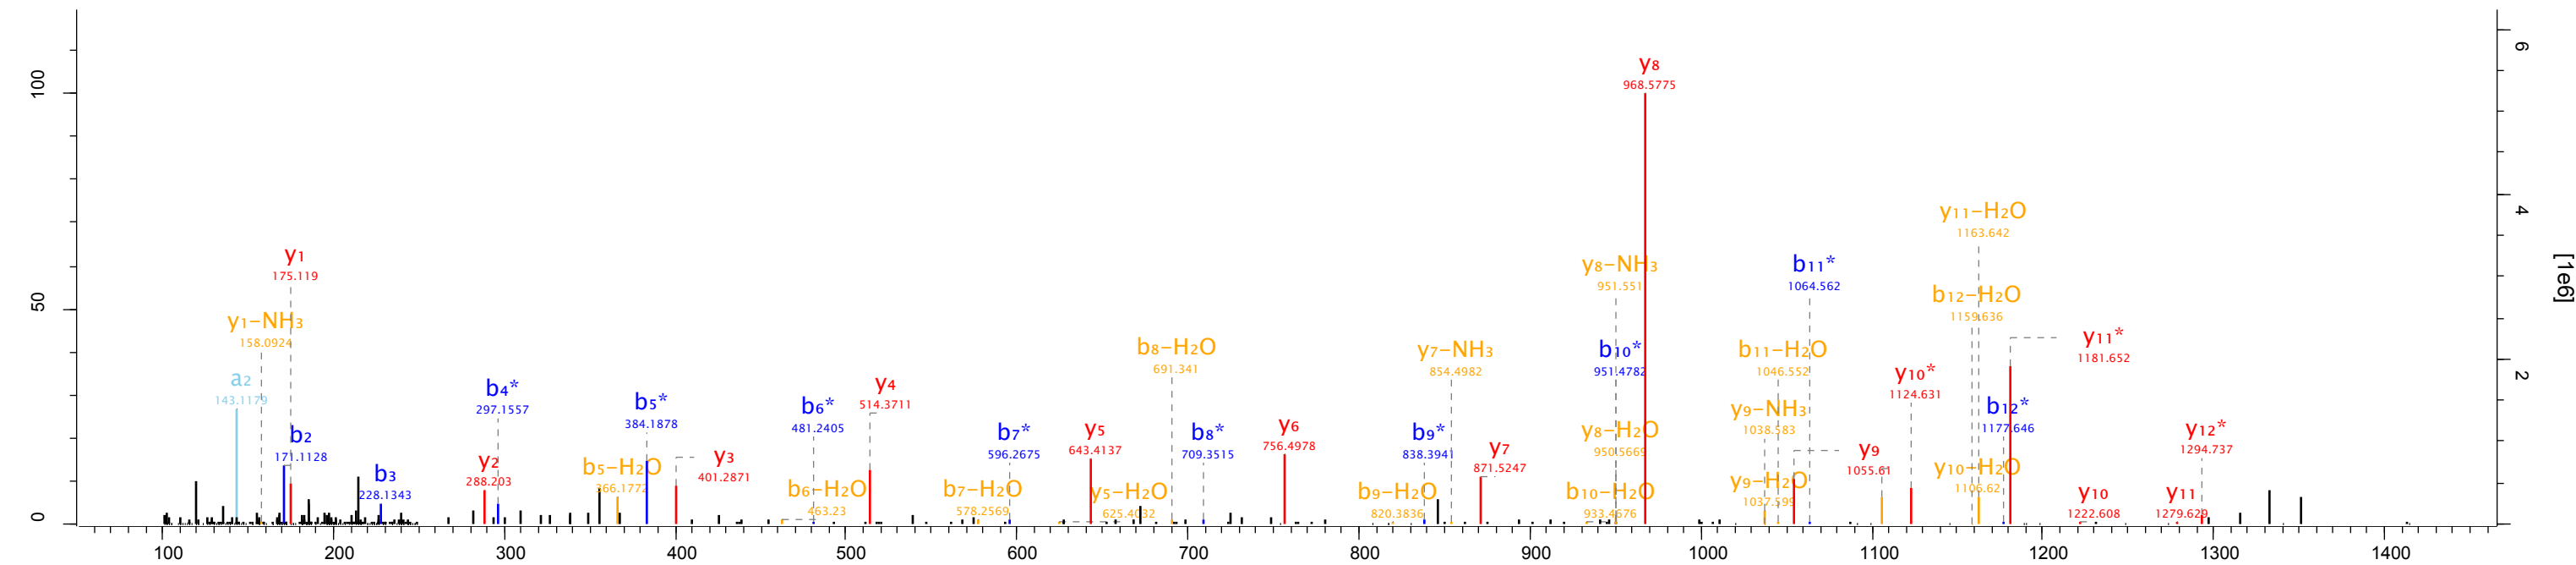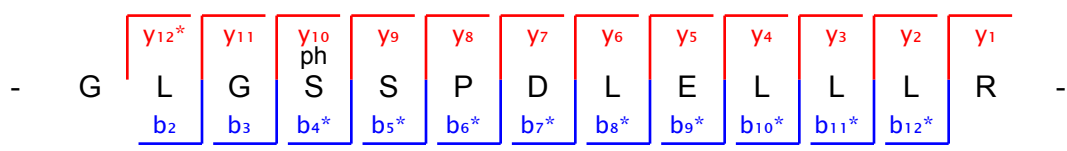

Raw file 20150814\_A375SR\_Phospho\_BR2\_05 Scan 11378 Method FTMS; HCD Score 162.86 m/z 655.82 Gene names PHACTR2

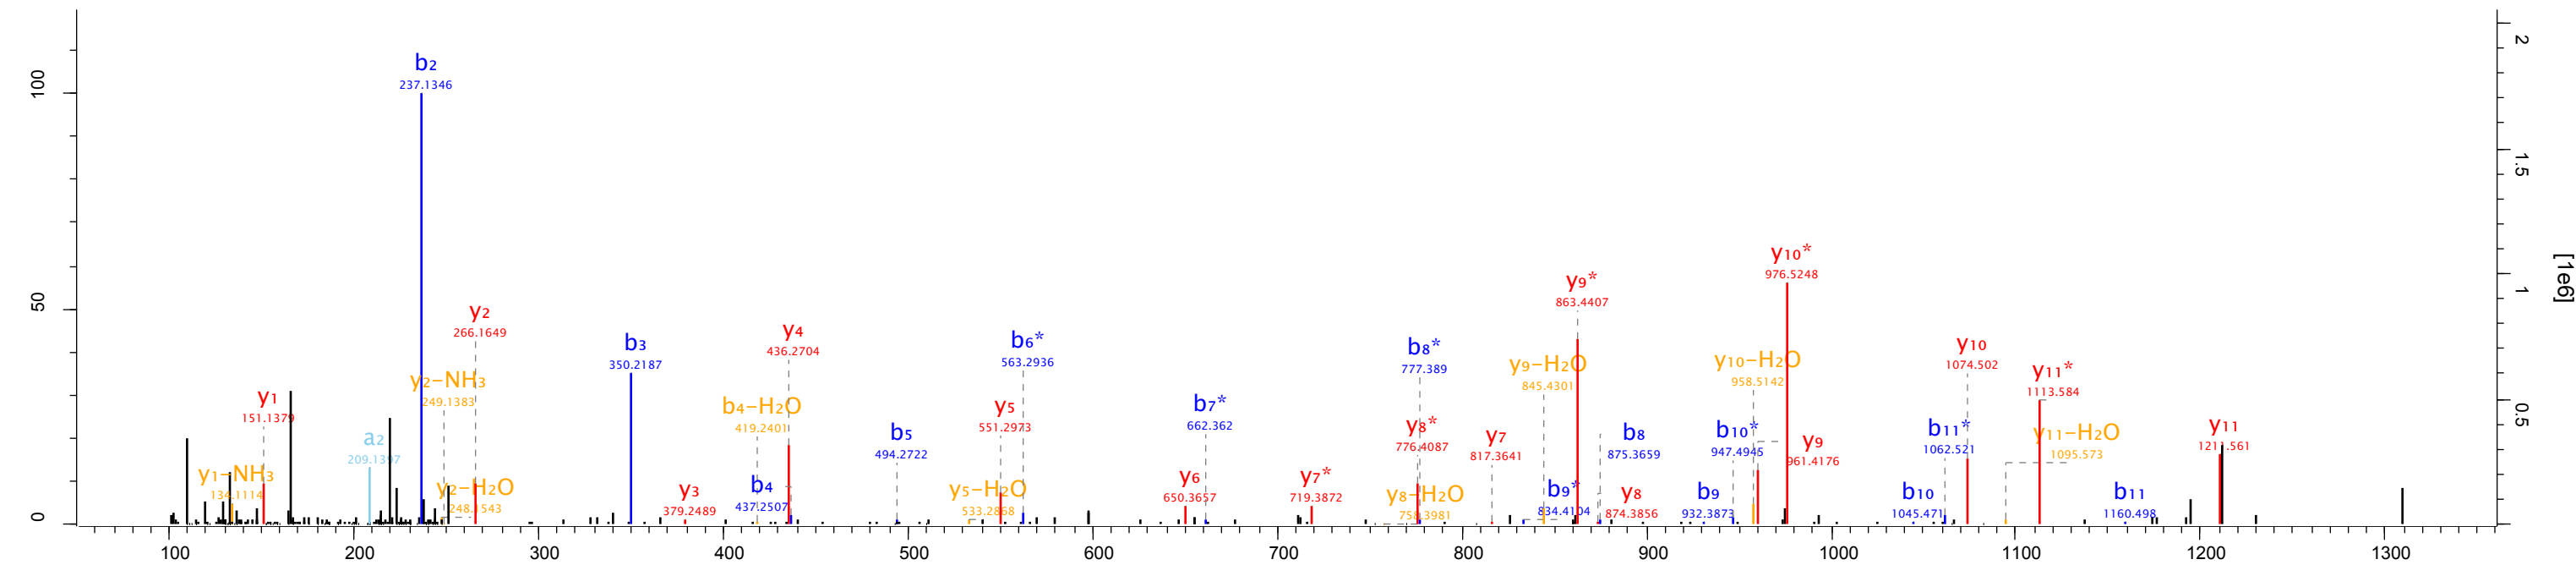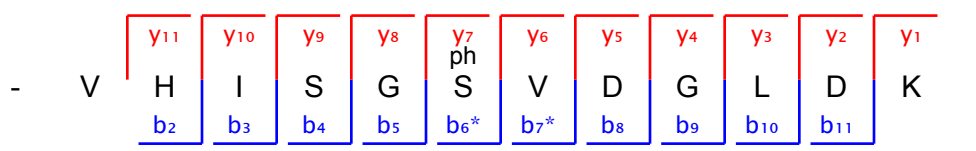



Raw file 20150814\_A375SR\_Phospho\_BR2\_05 Scan 24818 Method FTMS; HCD Score 157 m/z 924.42 Gene names MSANTD3

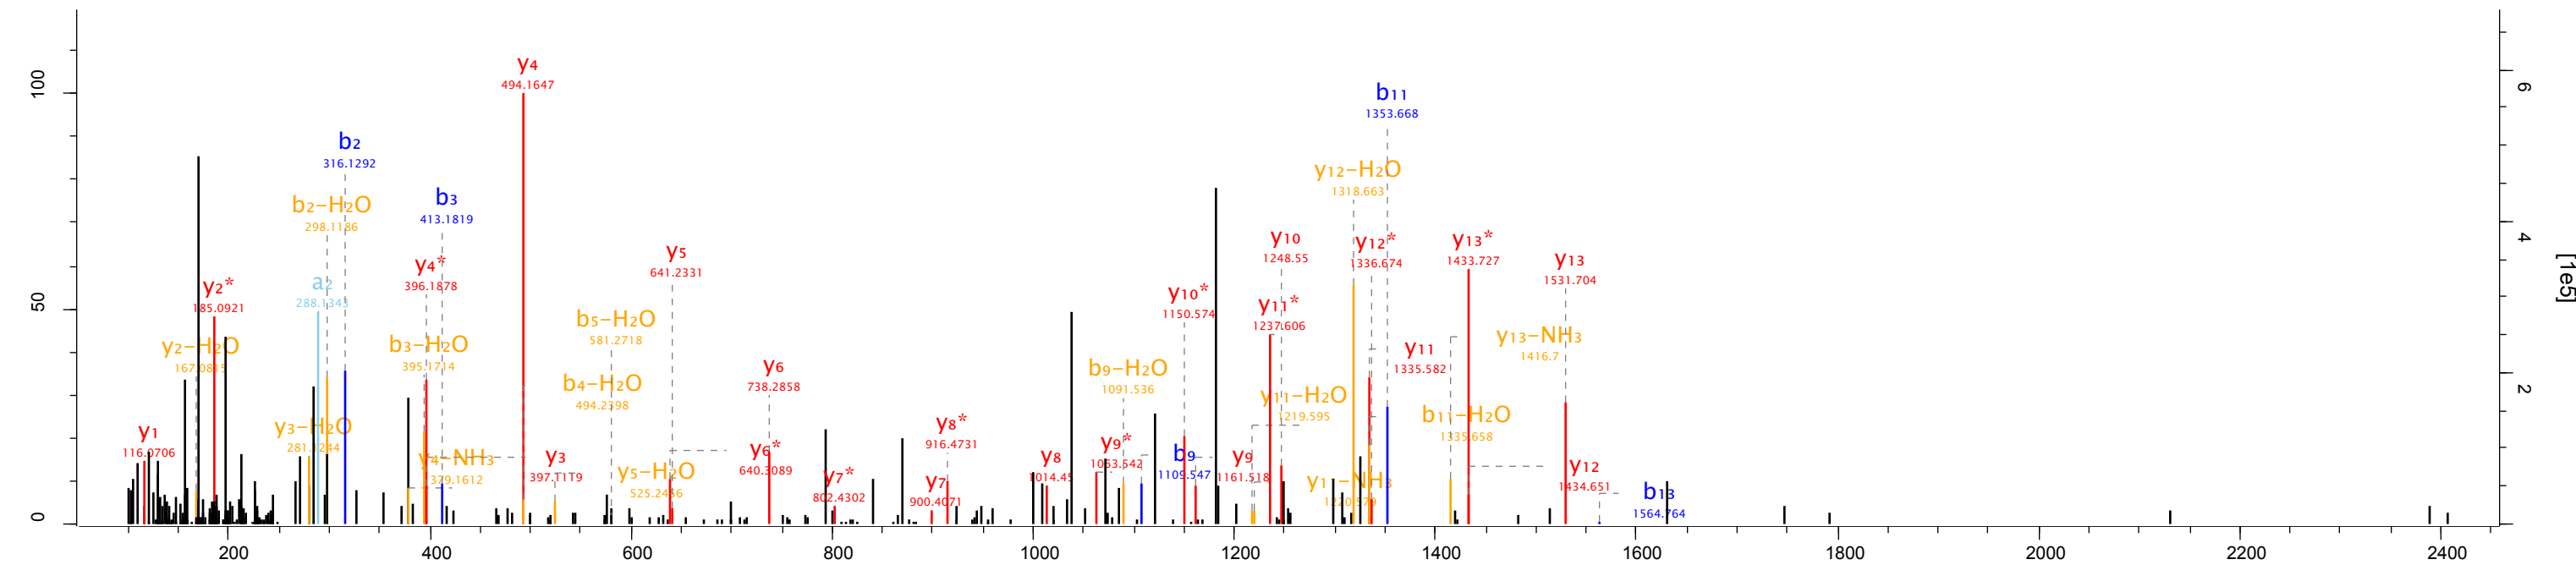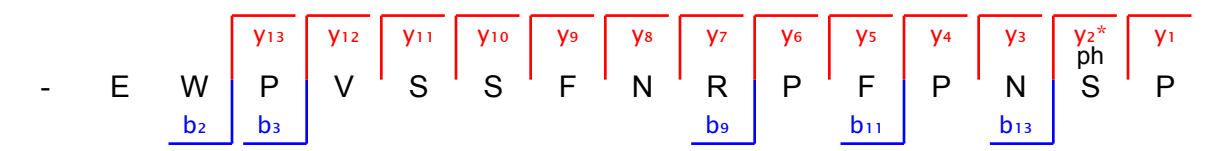

Raw file Scan Method Score m/z Gene names  
 20150814\_A375SR\_Phospho\_BR2\_06 11378 FTMS; HCD 122.75 691.34 ELK3

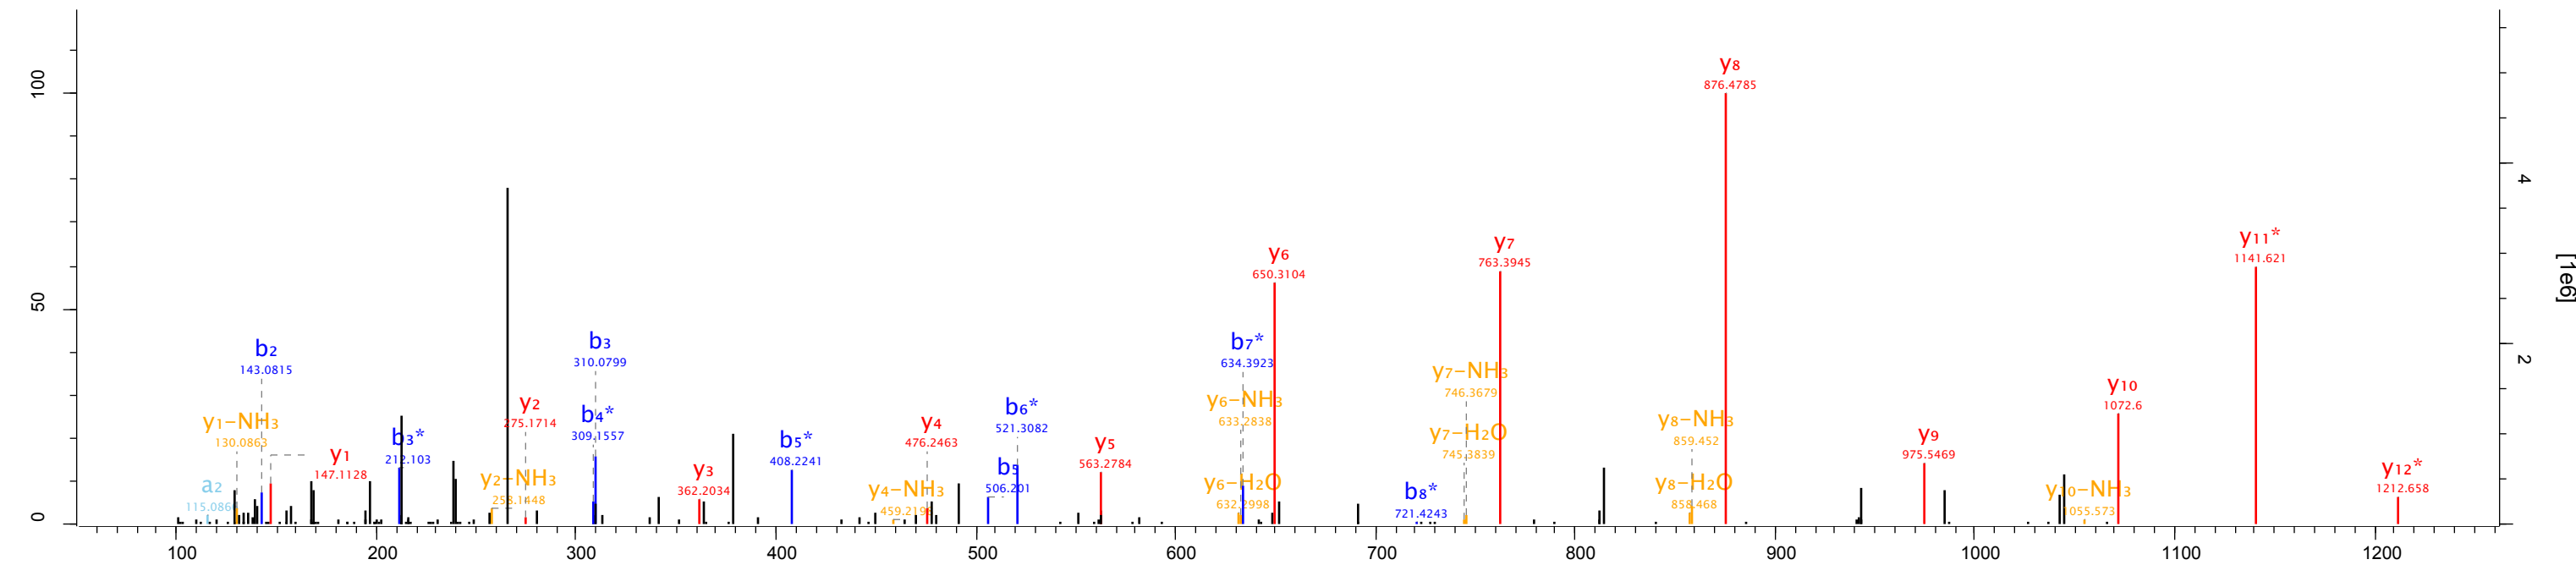

Raw file: 20150814\_A375SR\_Phospho\_BR2\_06  
 Scan: 27138 Method: FTMS; HCD Score: 57.83 m/z: 1001.5 Gene names: ZNF335

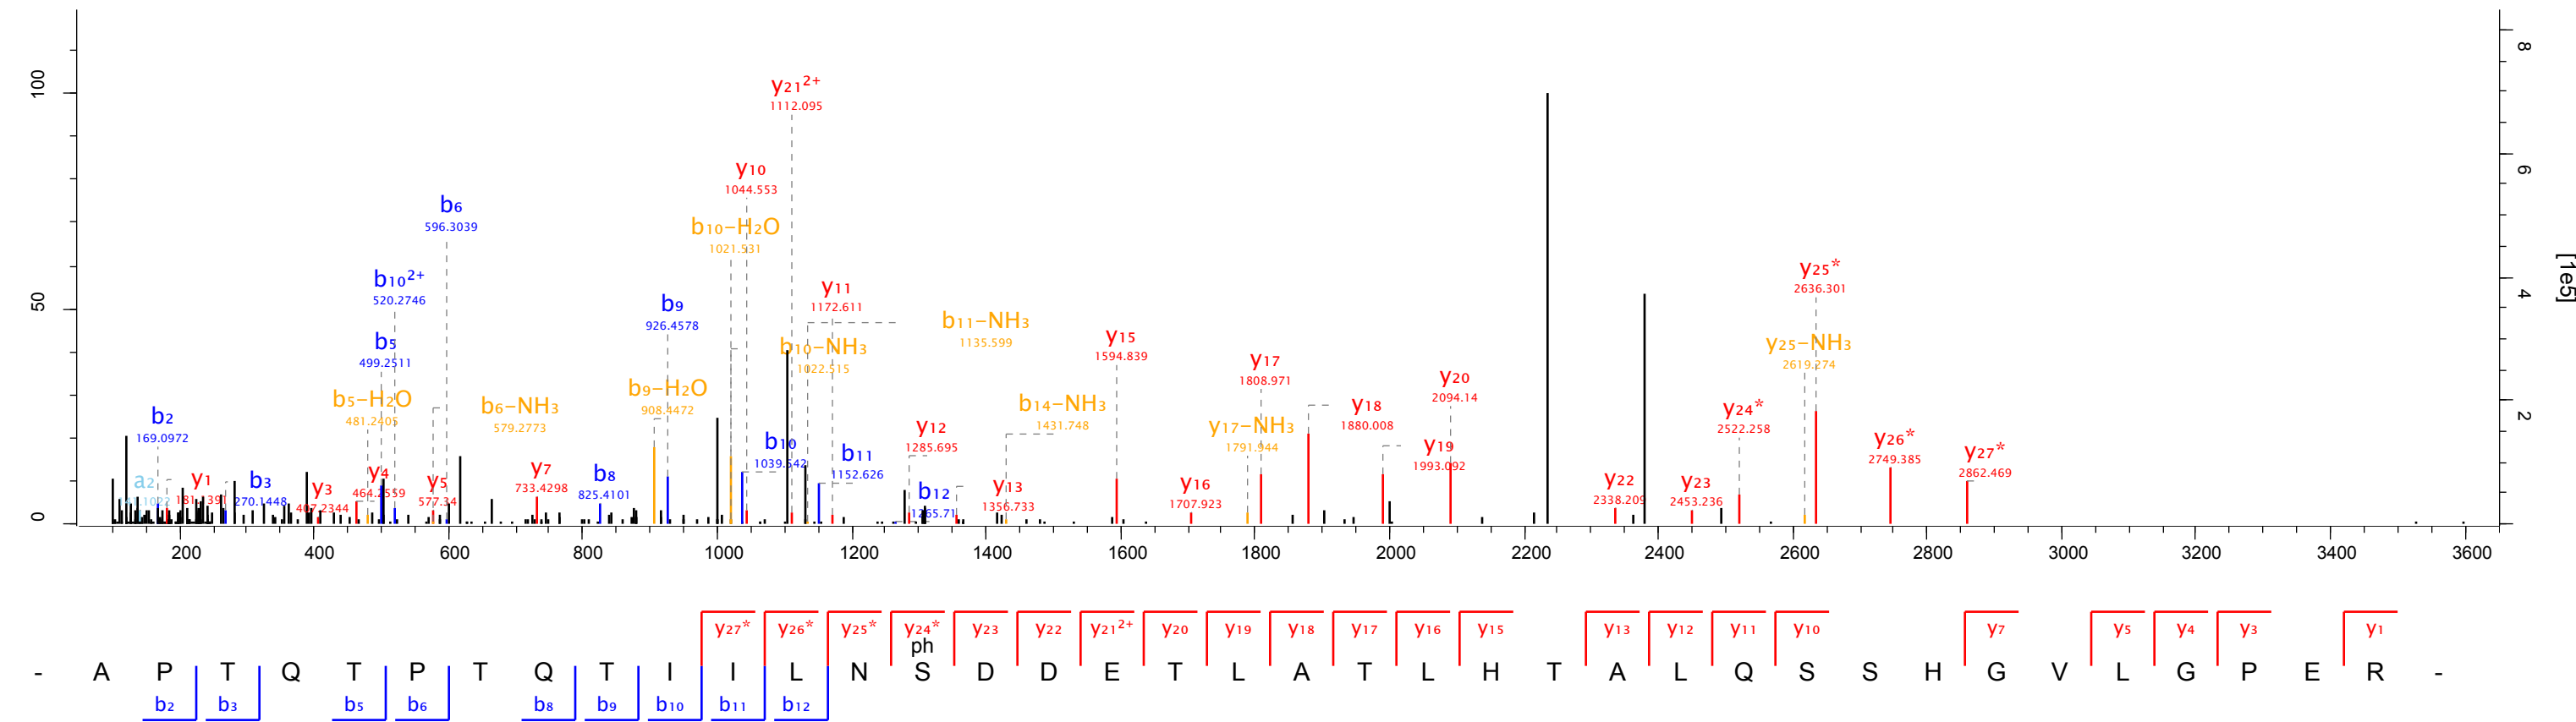

Raw file: 20150814\_A375SR\_Phospho\_BR2\_07  
 Scan: 13378 Method: FTMS; HCD Score: 83.47 m/z: 784.86 Gene names: PWWP2A

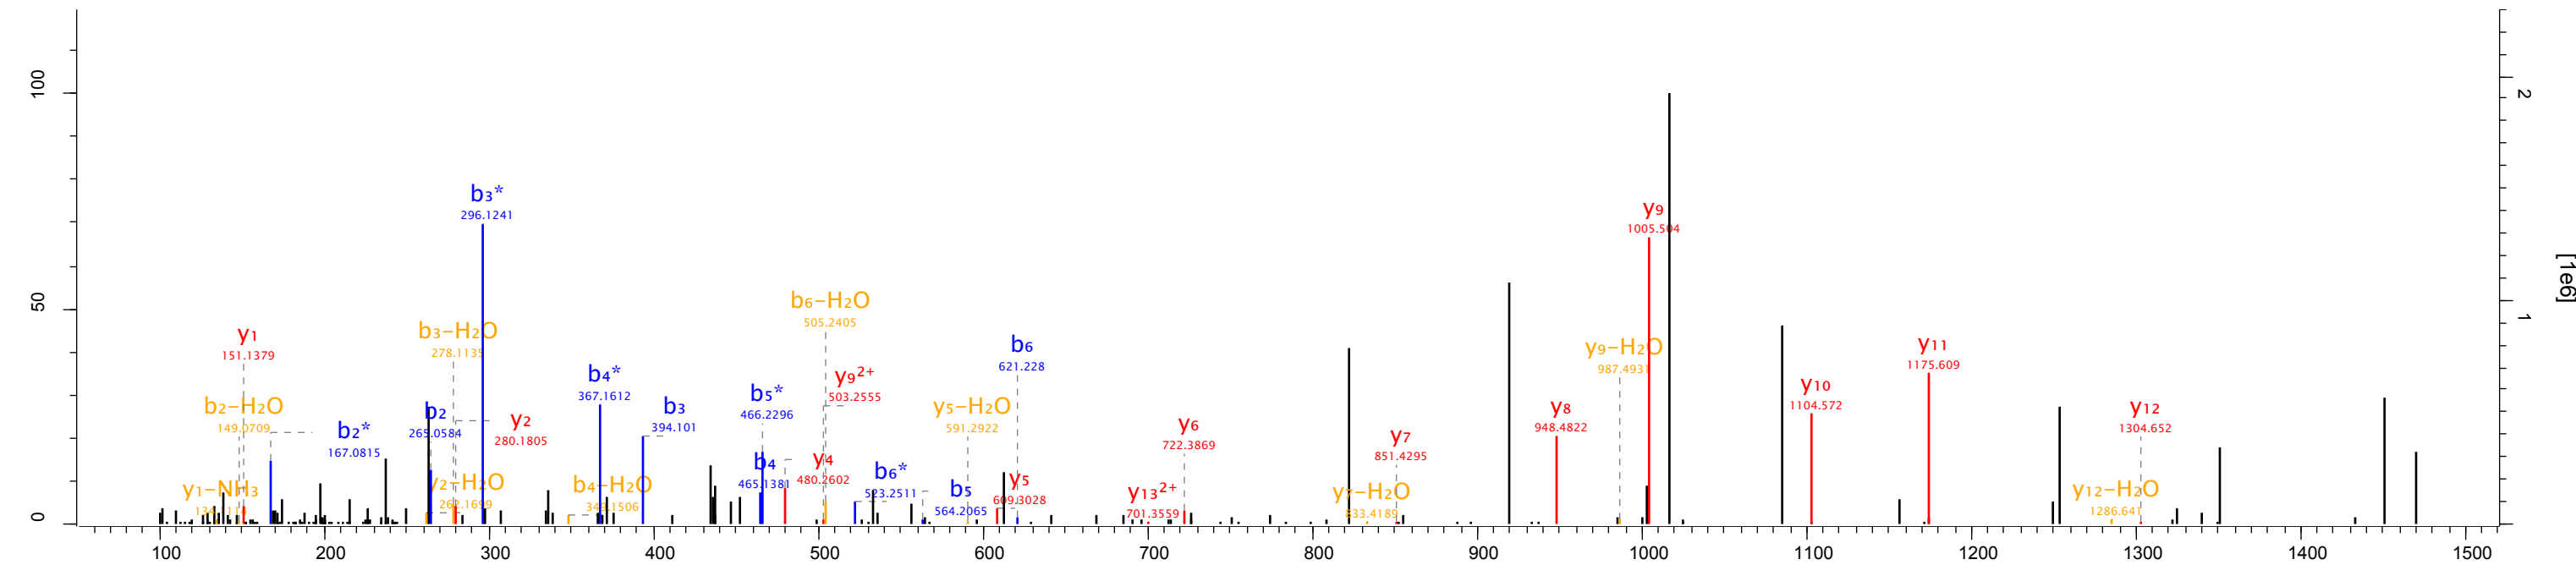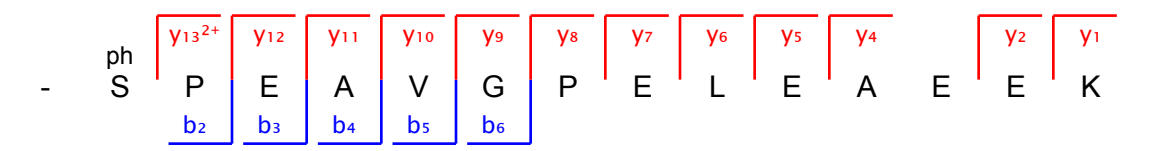

Raw file: 20150814\_A375SR\_Phospho\_BR2\_07  
 Scan: 16108 Method: FTMS; HCD Score: 54.78 m/z: 503.7 Gene names: MLF1

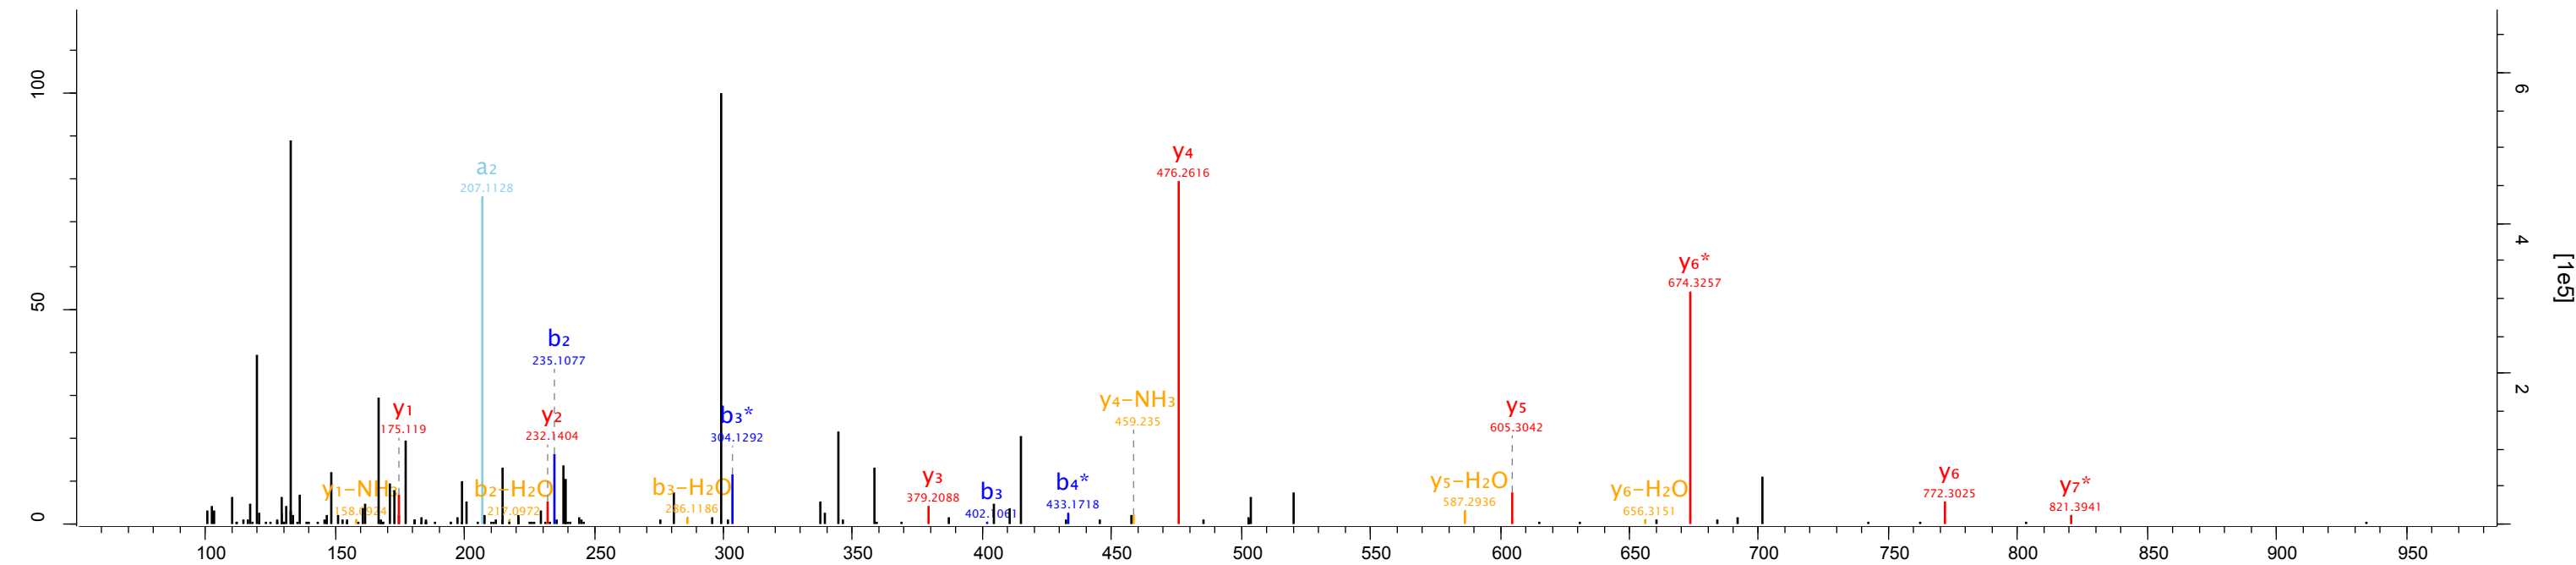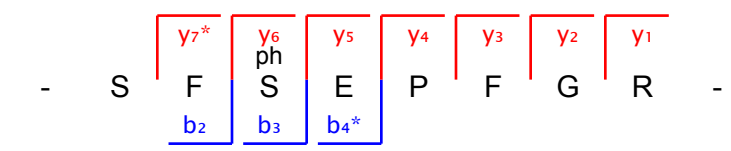

Raw file 20150814\_A375SR\_Phospho\_BR2\_07 Scan 20538 Method FTMS; HCD Score 58.48 m/z 781.42 Gene names ZNF579

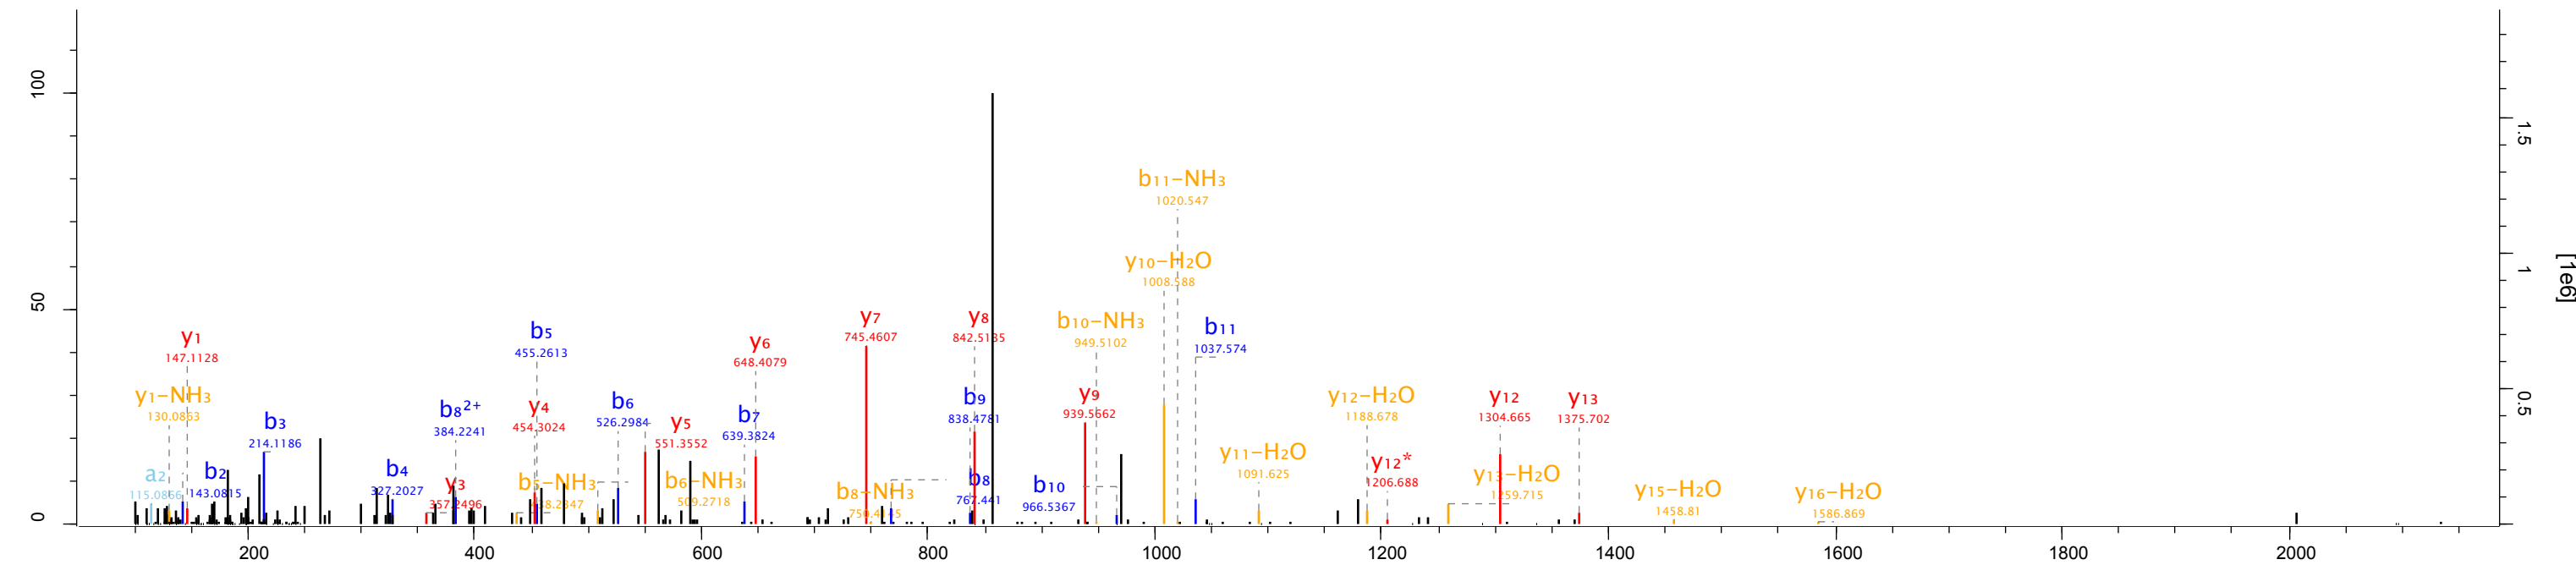

Raw file: 20150814\_A375SR\_Phospho\_BR2\_07  
 Scan: 21848 Method: FTMS; HCD Score: 168.09 m/z: 1100.17 Gene names: CEBPG

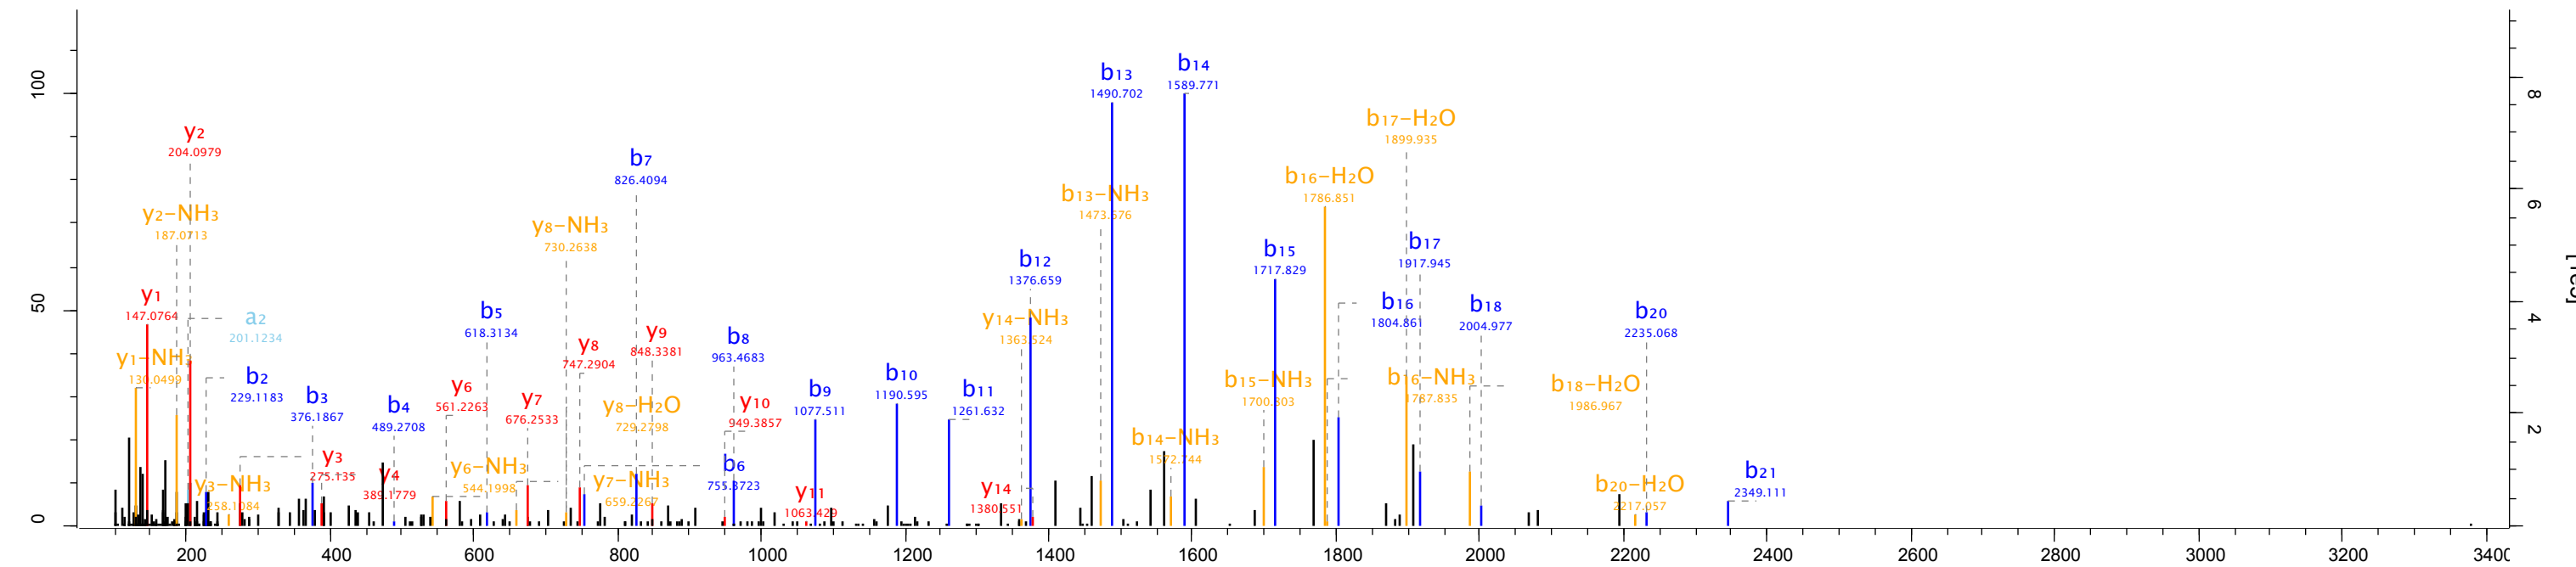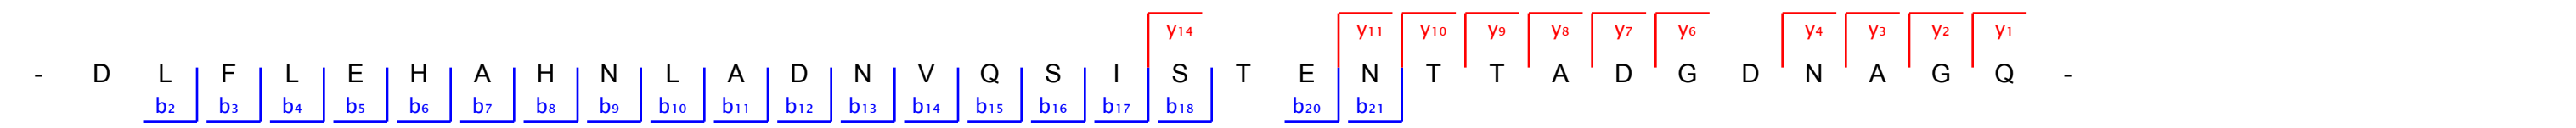

Raw file: 20150814\_A375SR\_Phospho\_BR2\_09  
 Scan: 11428 Method: FTMS; HCD Score: 114.01 m/z: 691.34 Gene names: ELK3

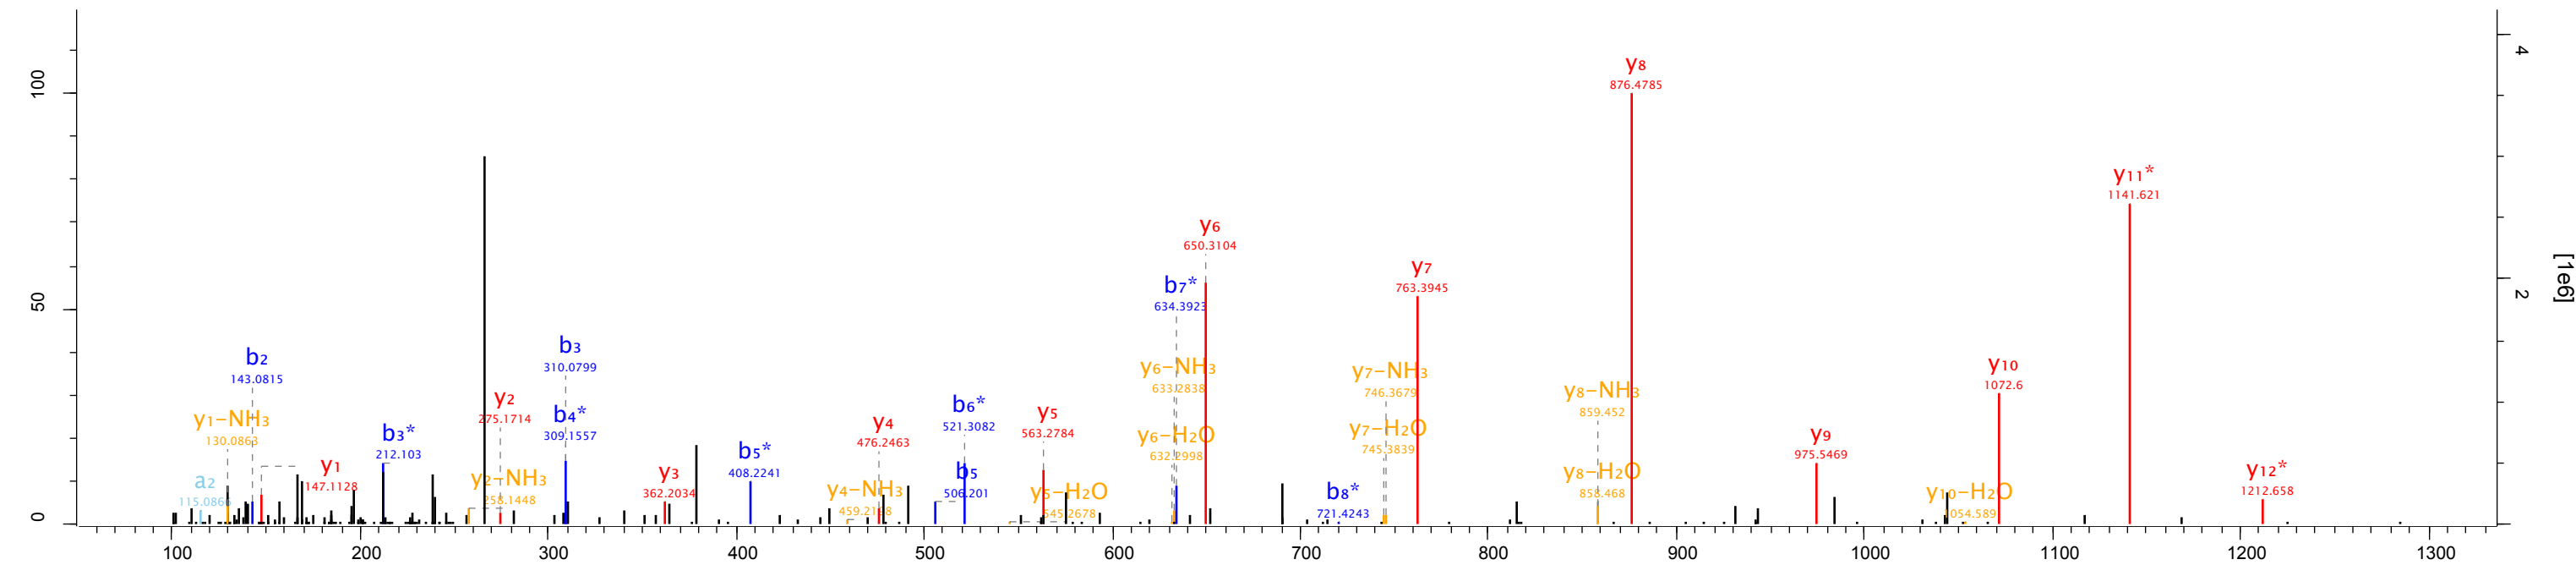



Raw file: 20150814\_A375SR\_Phospho\_BR2\_09  
 Scan: 14108 Method: FTMS; HCD Score: 172.59 m/z: 436.58 Gene names: RPL39P5;RPL39

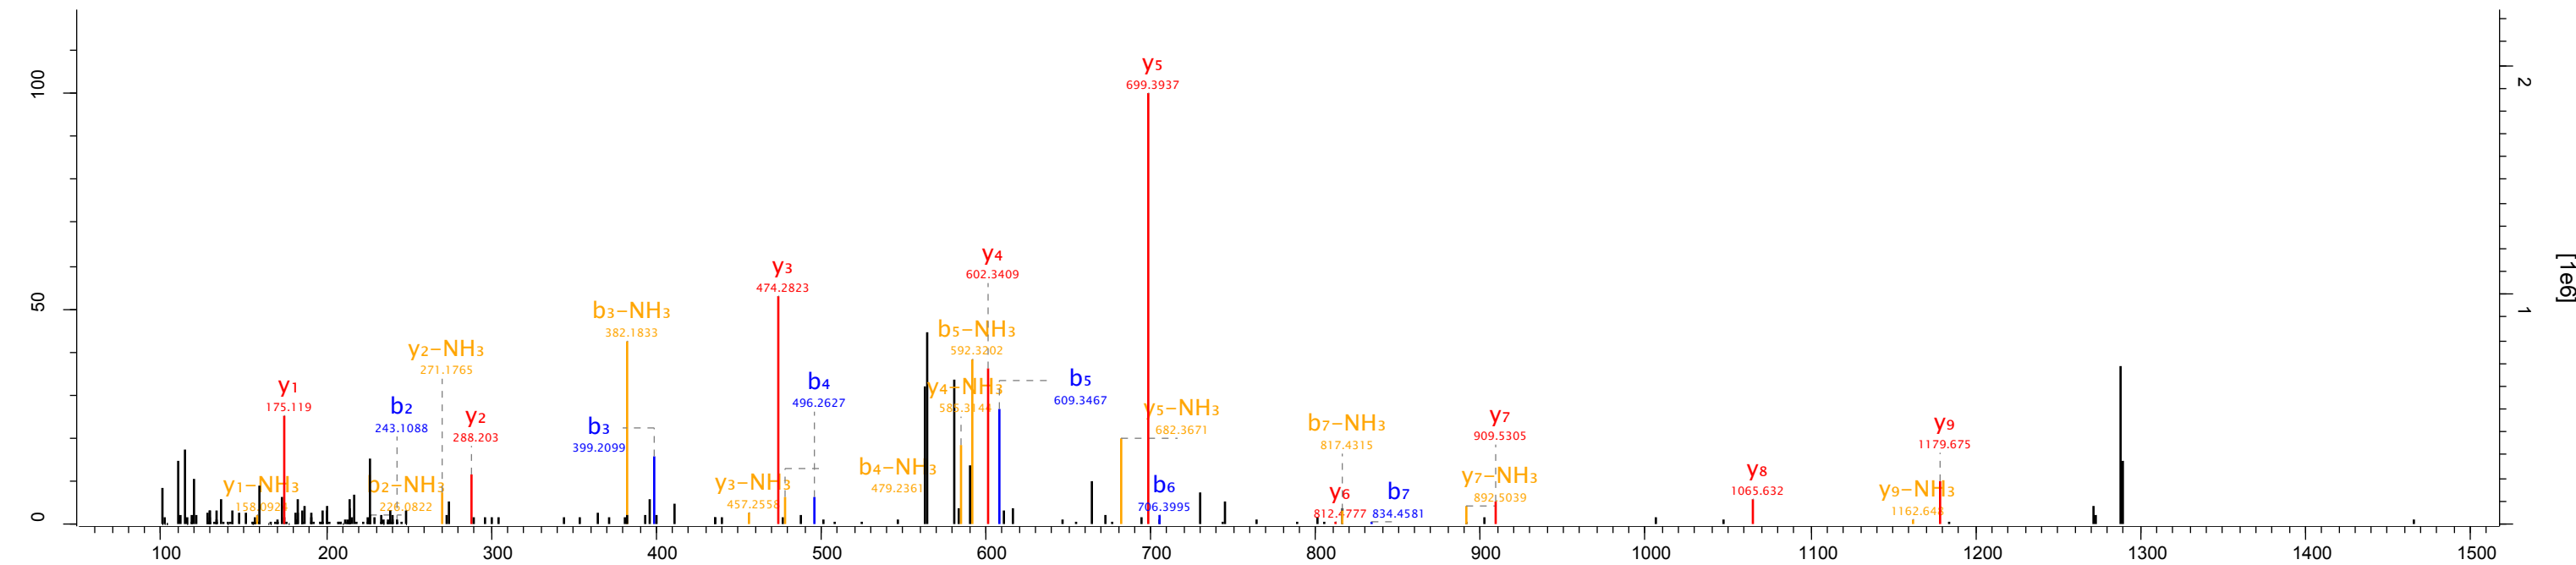

Raw file 20150814\_A375SR\_Phospho\_BR2\_10 Scan 12188 Method FTMS; HCD Score 62.34 m/z 556.27

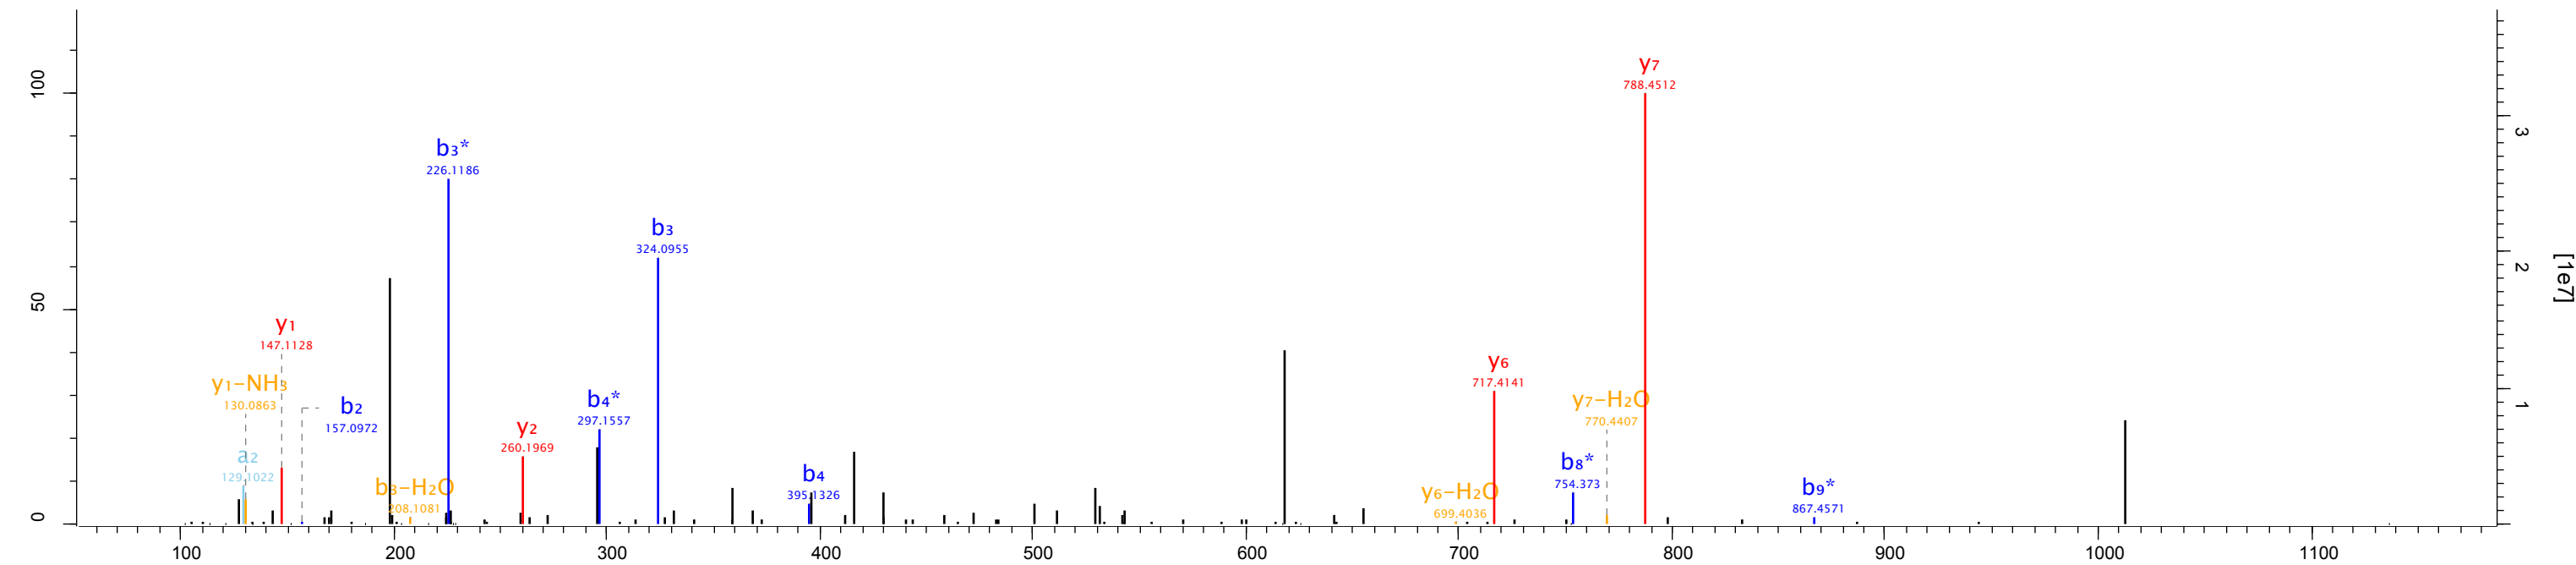

Raw file 20150814\_A375SR\_Phospho\_BR2\_10 Scan 5548 Method FTMS; HCD Score 83.78 m/z 432.75

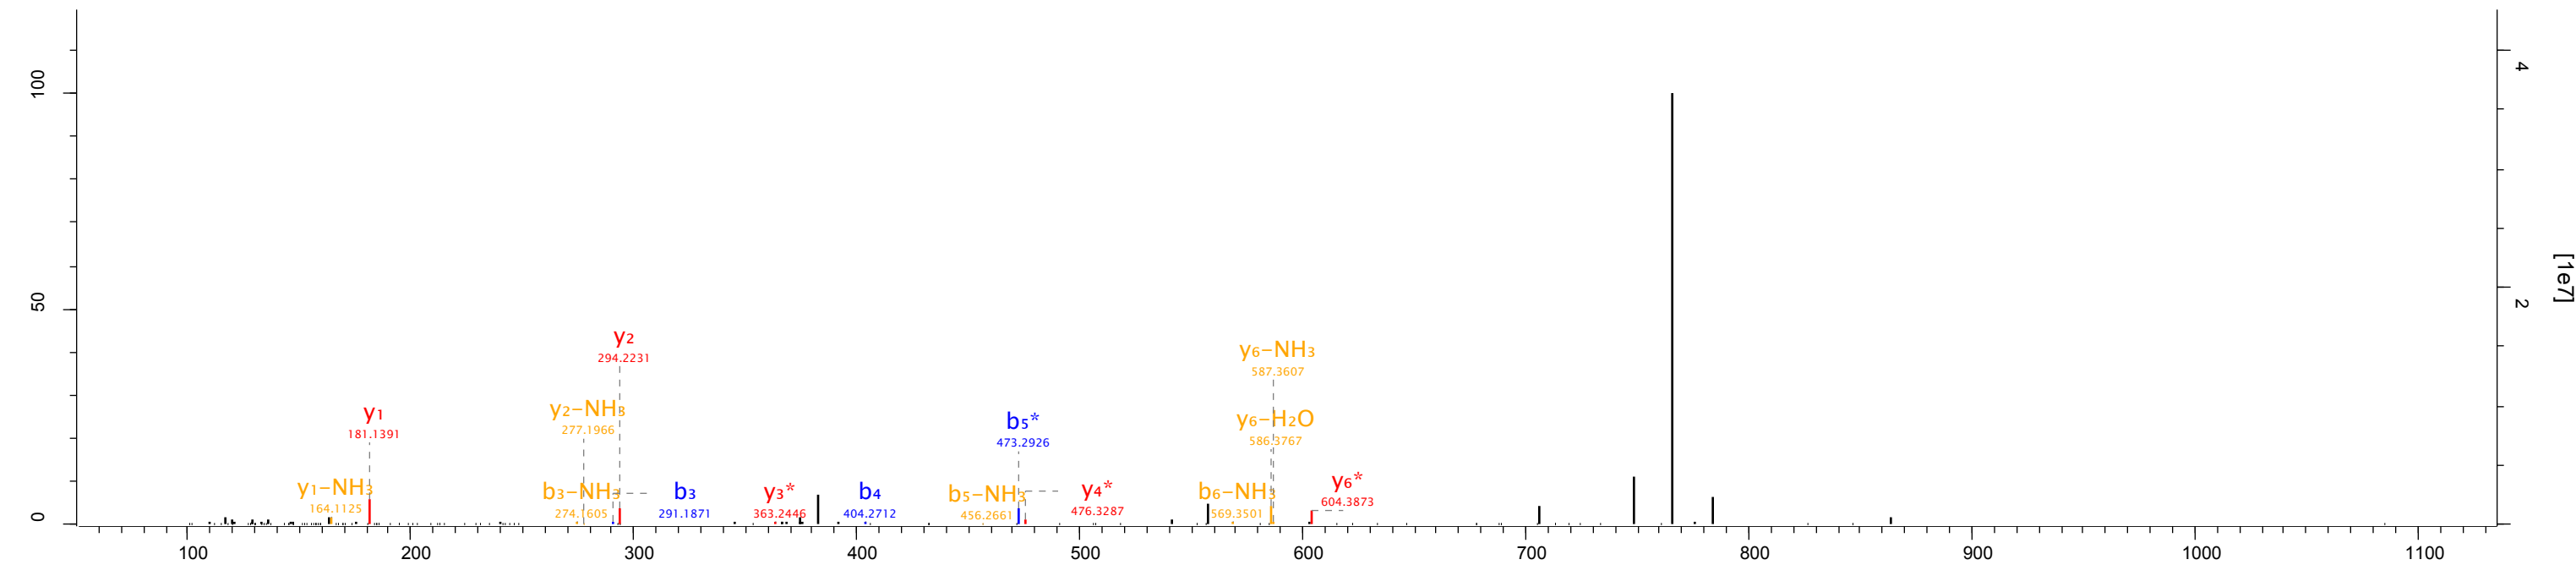

Raw file: 20150818\_A375SR-Proteome\_BR1  
 Scan: 56258 Method: FTMS; HCD Score: 64.82 m/z: 374.92 Gene names: BPI

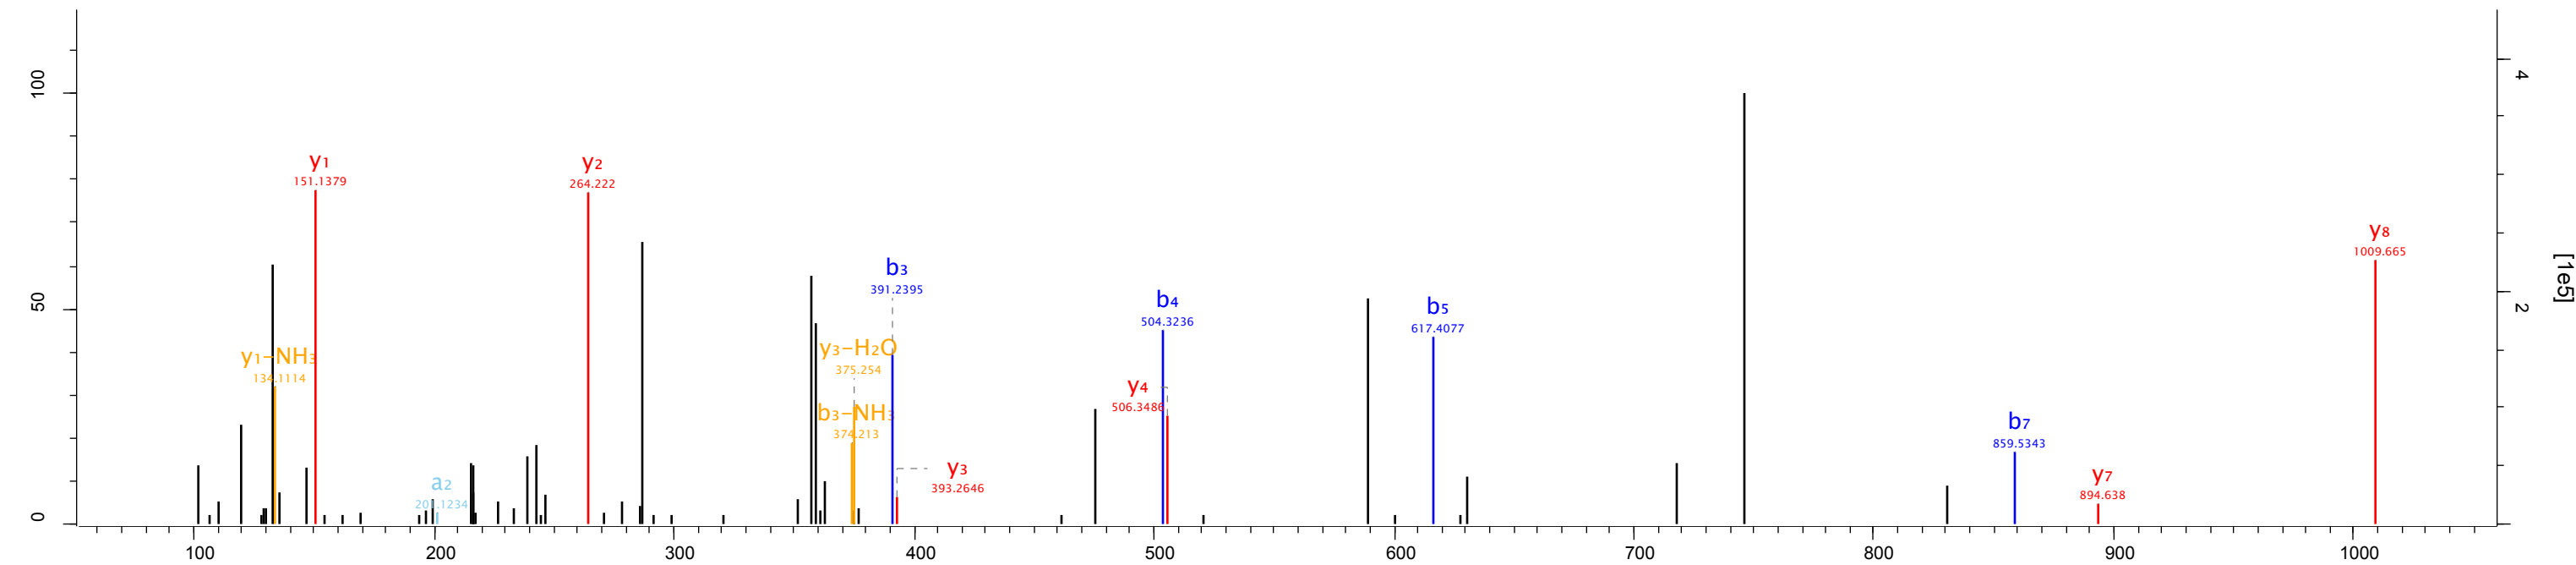

Raw file 20150818\_A375SR-Proteome\_BR1 Scan 67278 Method FTMS; HCD Score 67.17 m/z 438.77

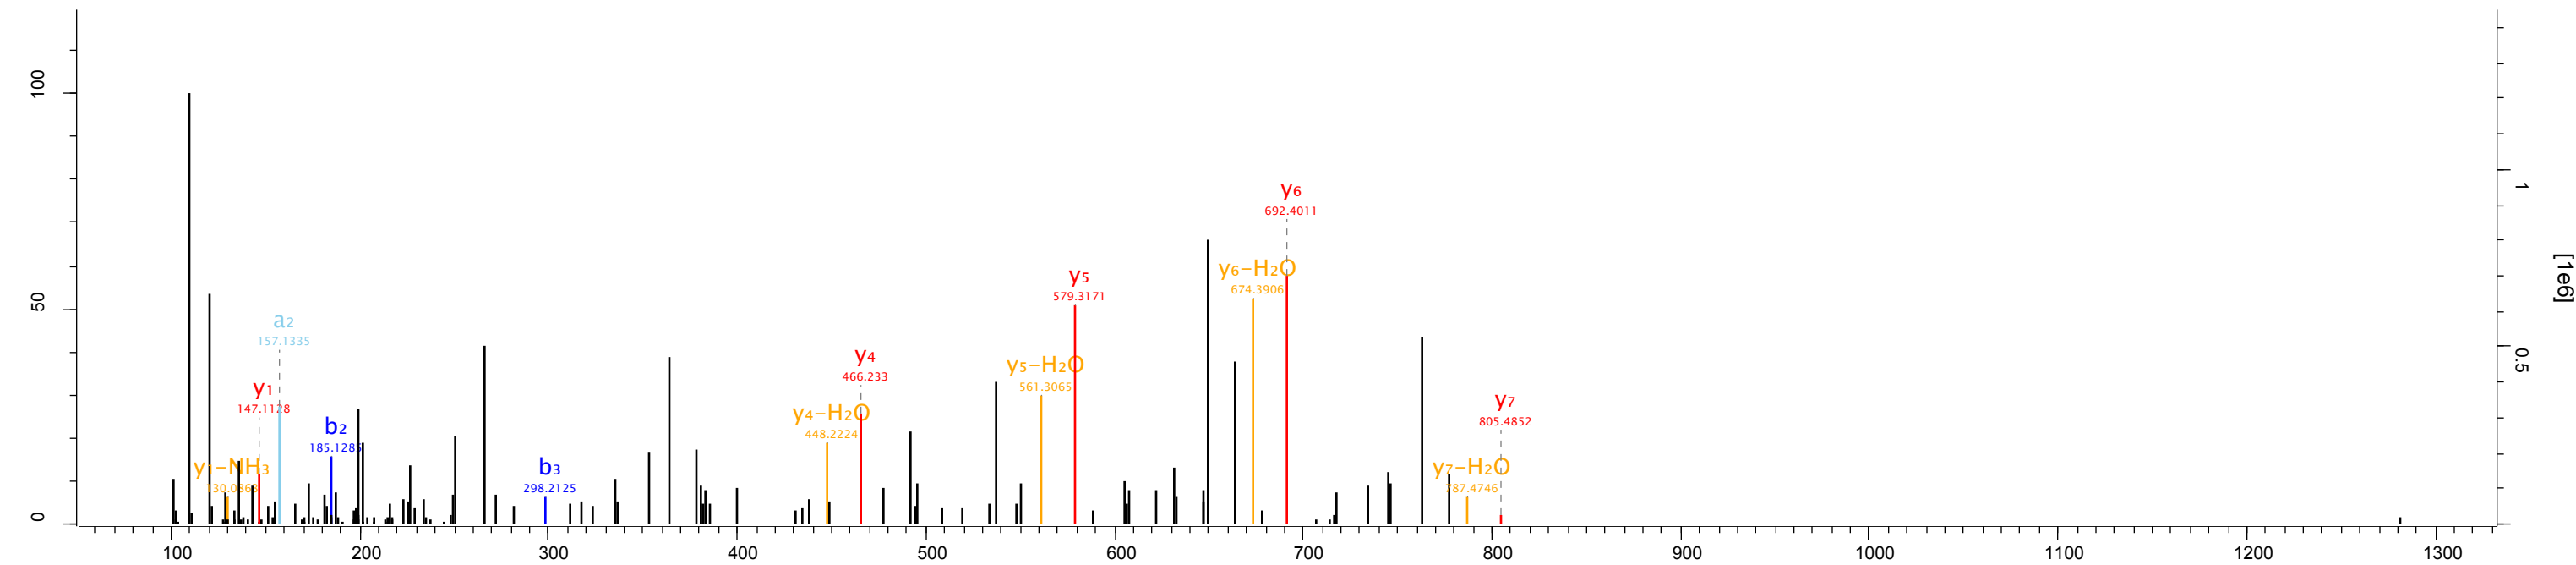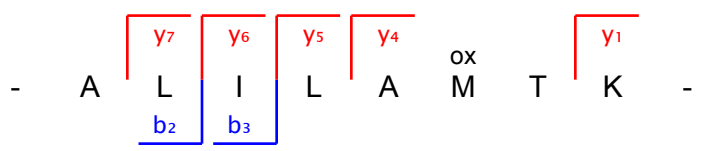

Raw file Scan Method Score m/z Gene names  
 20150818\_A375SR-Proteome\_BR1 67908 FTMS; HCD 24.42 639.67 ATP6V0C

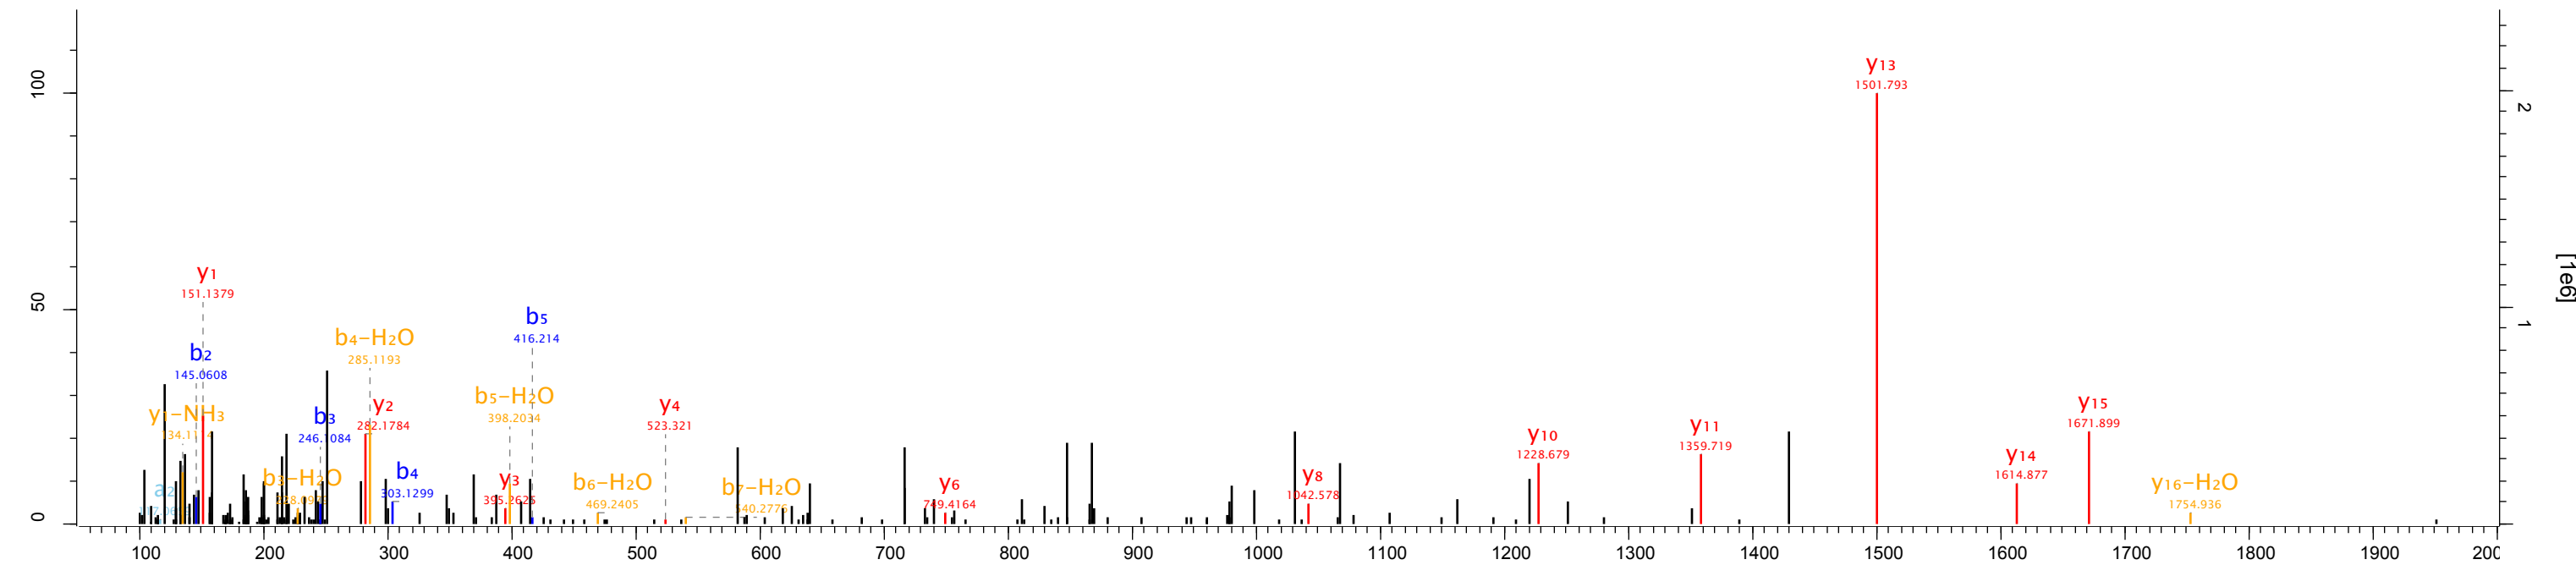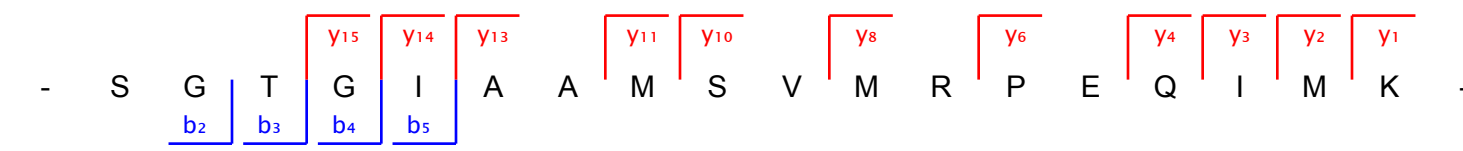

Raw file: 20150818\_A375SR-Proteome\_BR1  
 Scan: 72198 Method: FTMS; HCD Score: 87.15 m/z: 492.81 Gene names: STON2

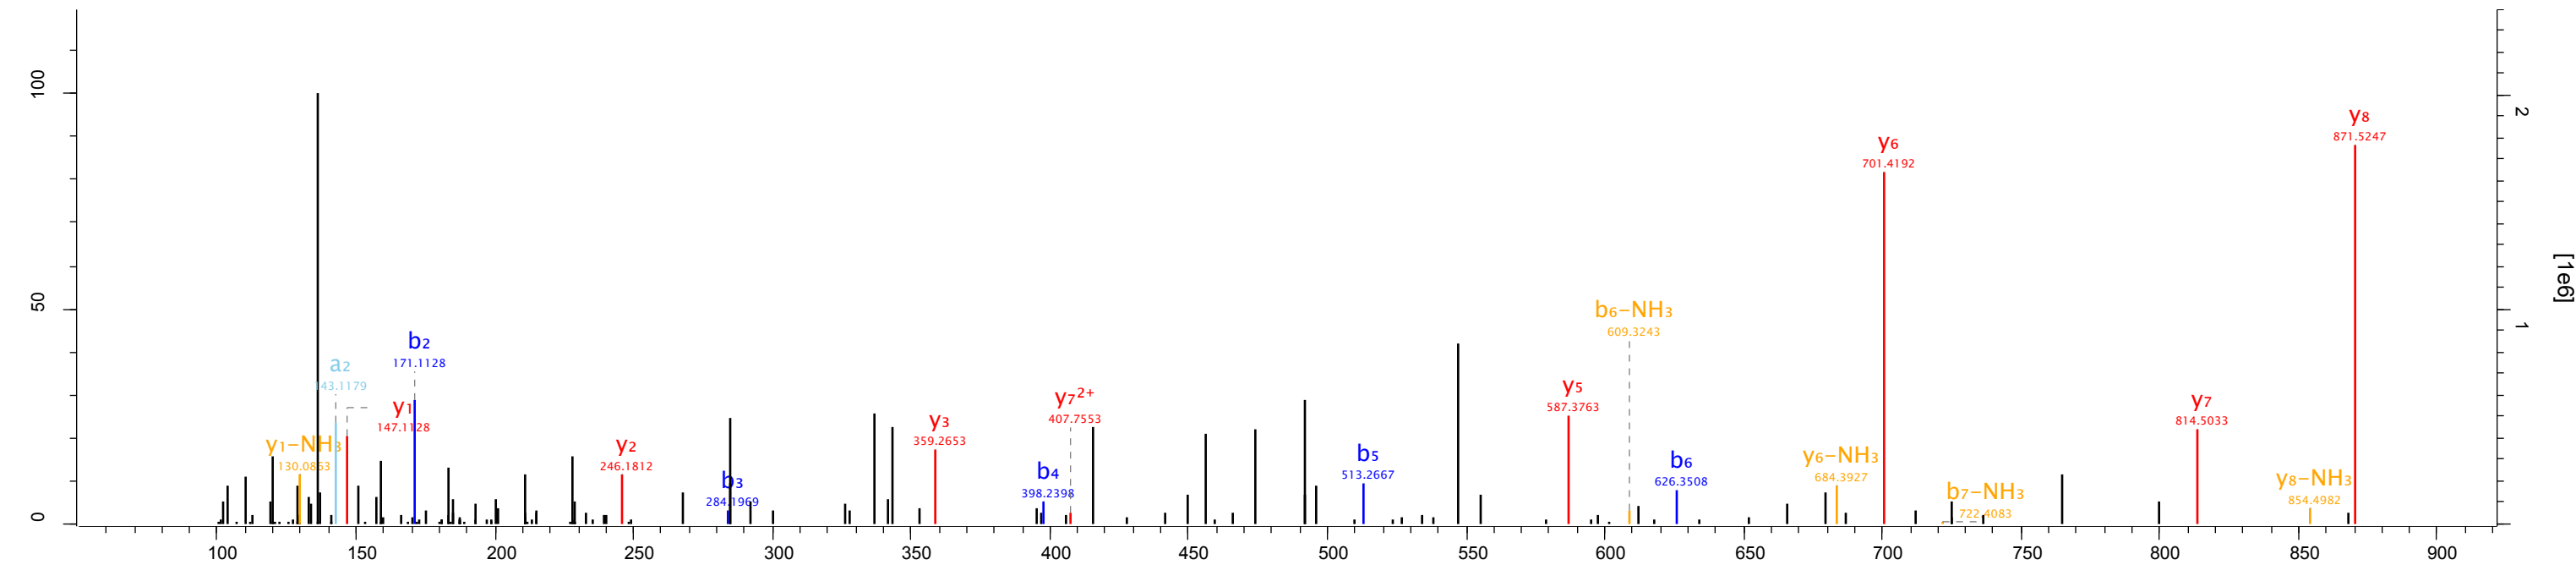

Raw file: 20150818\_A375SR-Proteome\_BR1  
 Scan: 92278 Method: FTMS; HCD Score: 38.58 m/z: 622.8 Gene names: TOR2A

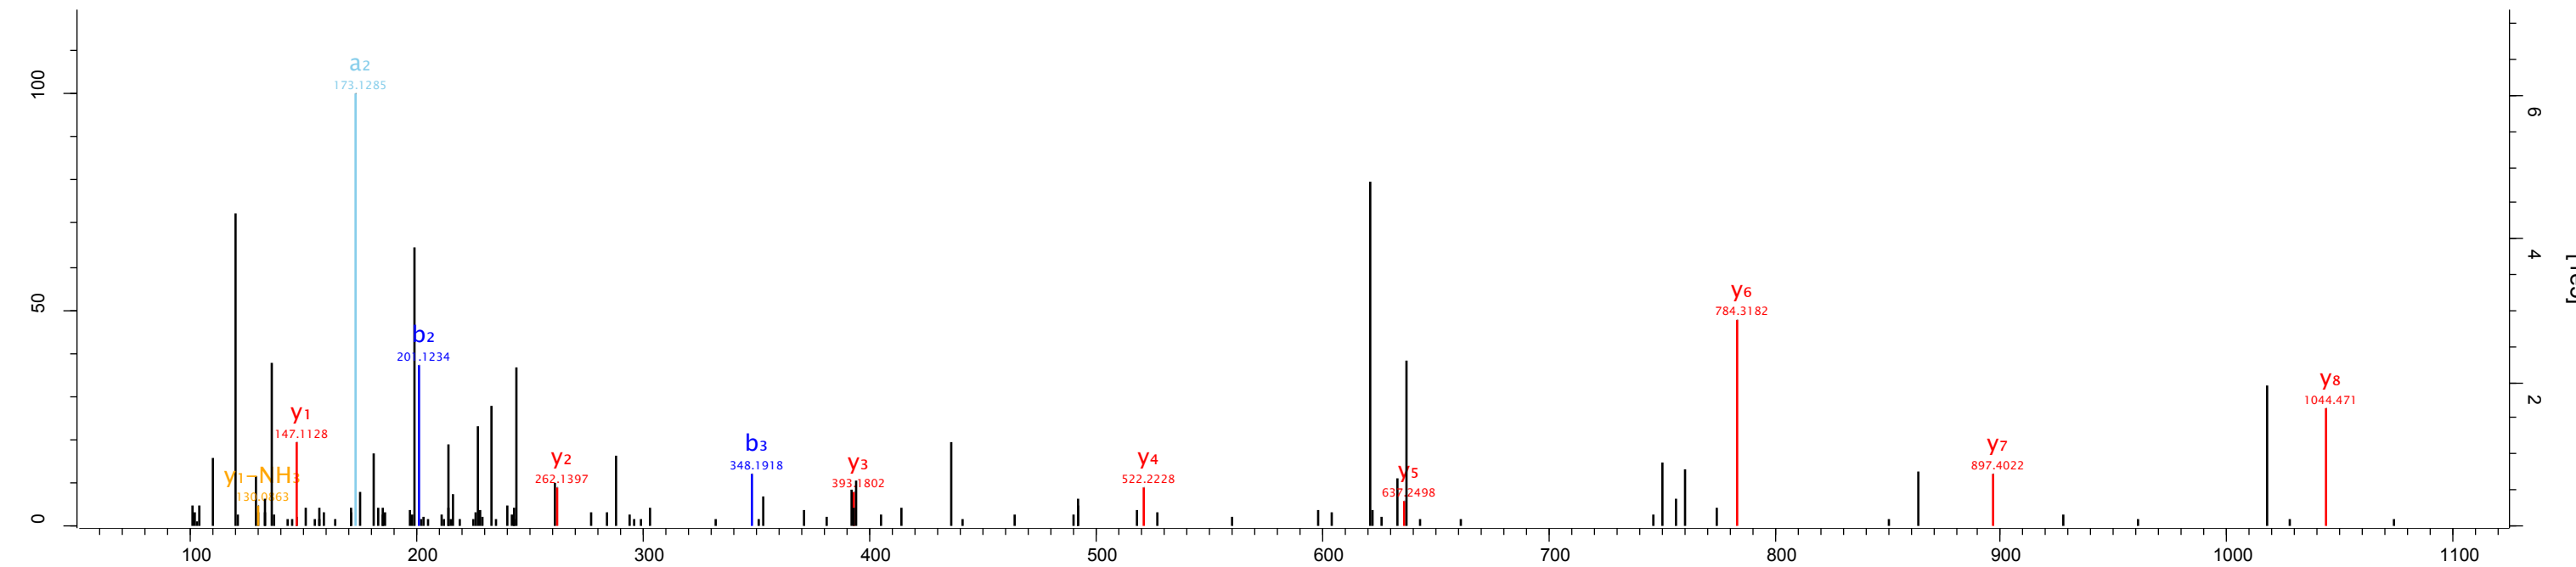



Raw file 20150818\_A375SR-Proteome\_BR2 Scan 114778 Method FTMS; HCD Score 56.2 m/z 715.91 Gene names UQCR11

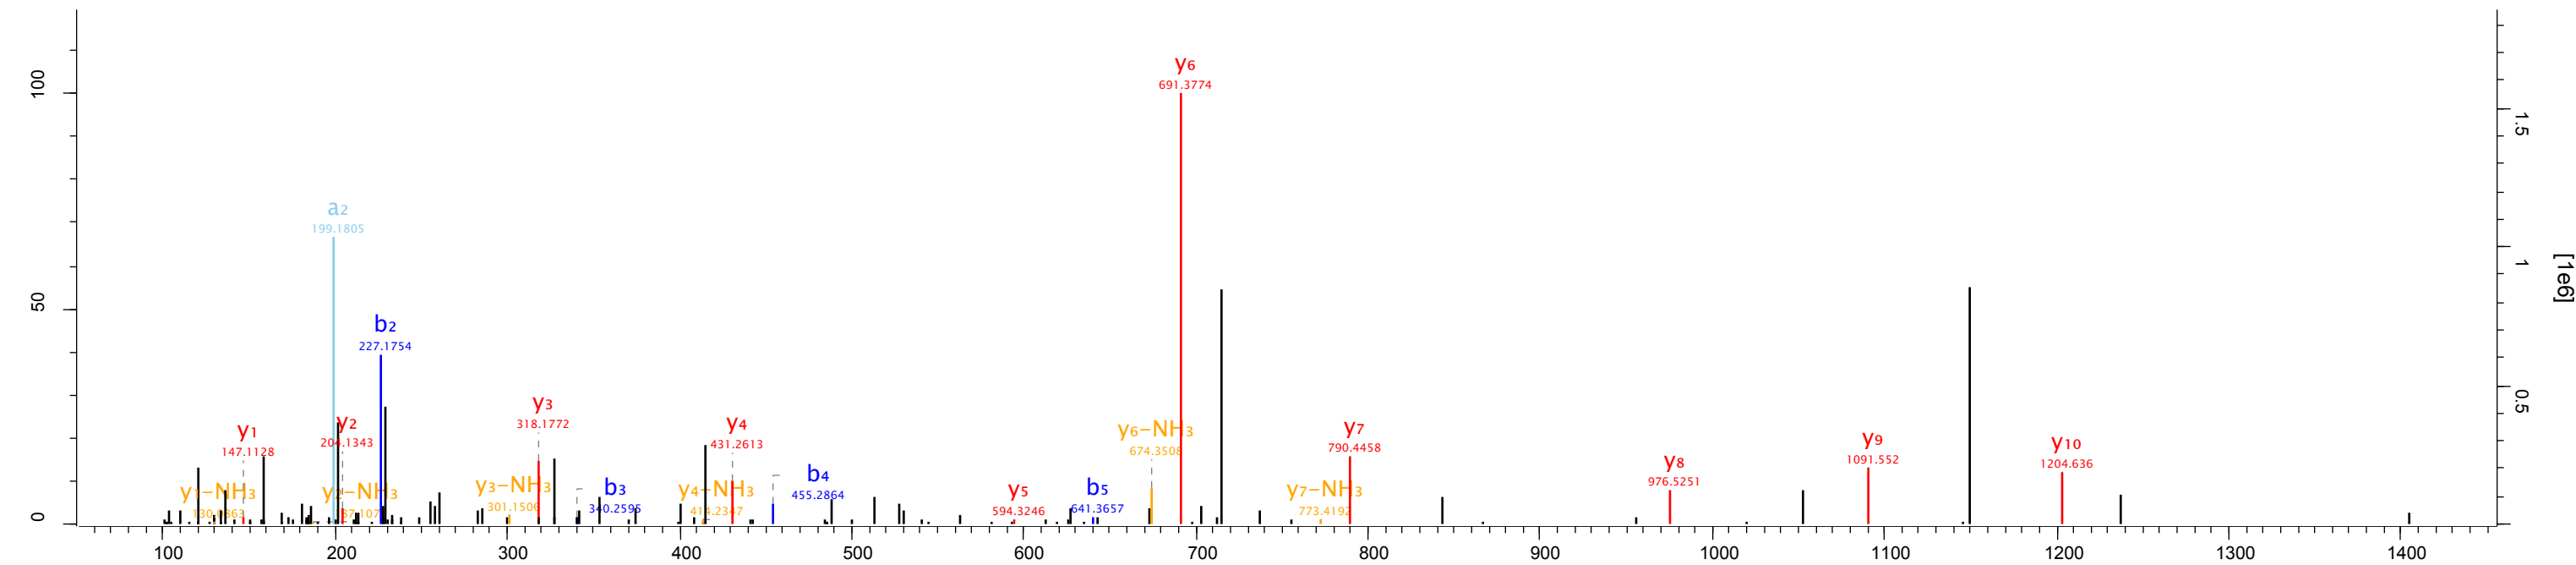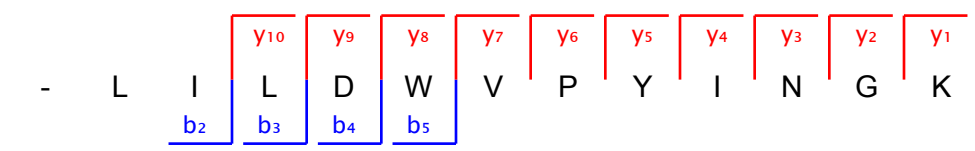

Raw file Scan Method Score m/z  
20150818\_A375SR-Proteome\_BR2 68468 FTMS; HCD 82.45 492.75

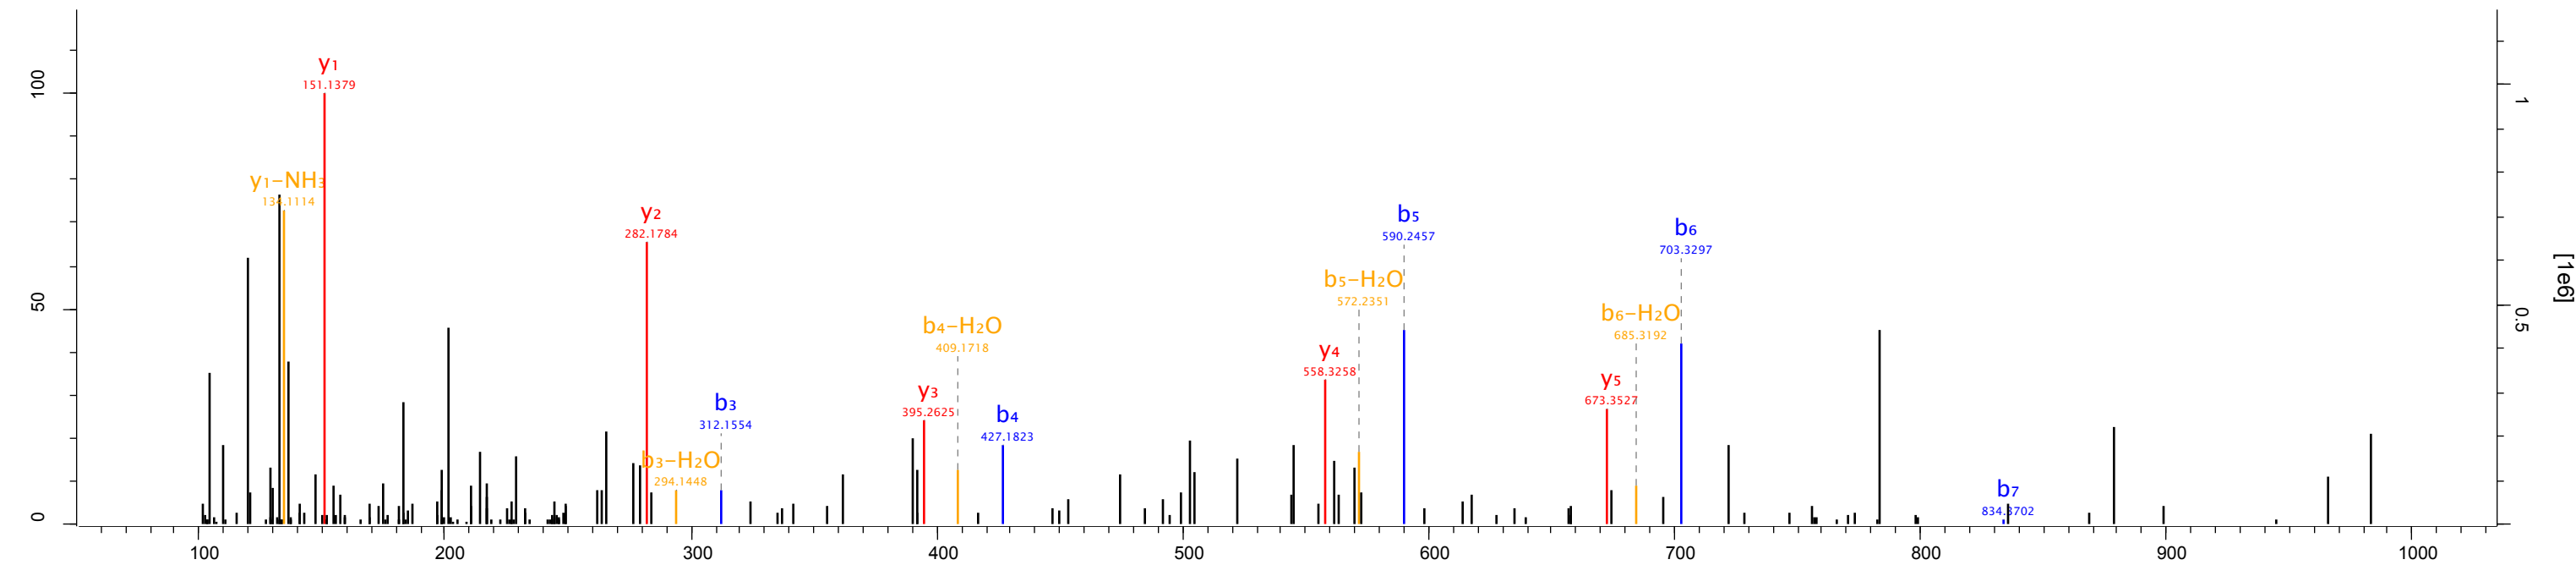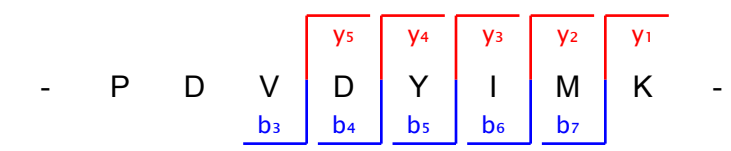

Raw file: 20150818\_A375SR-Proteome\_BR2  
 Scan: 71738 Method: FTMS; HCD Score: 28.53 m/z: 543.95 Gene names: SPPL2A

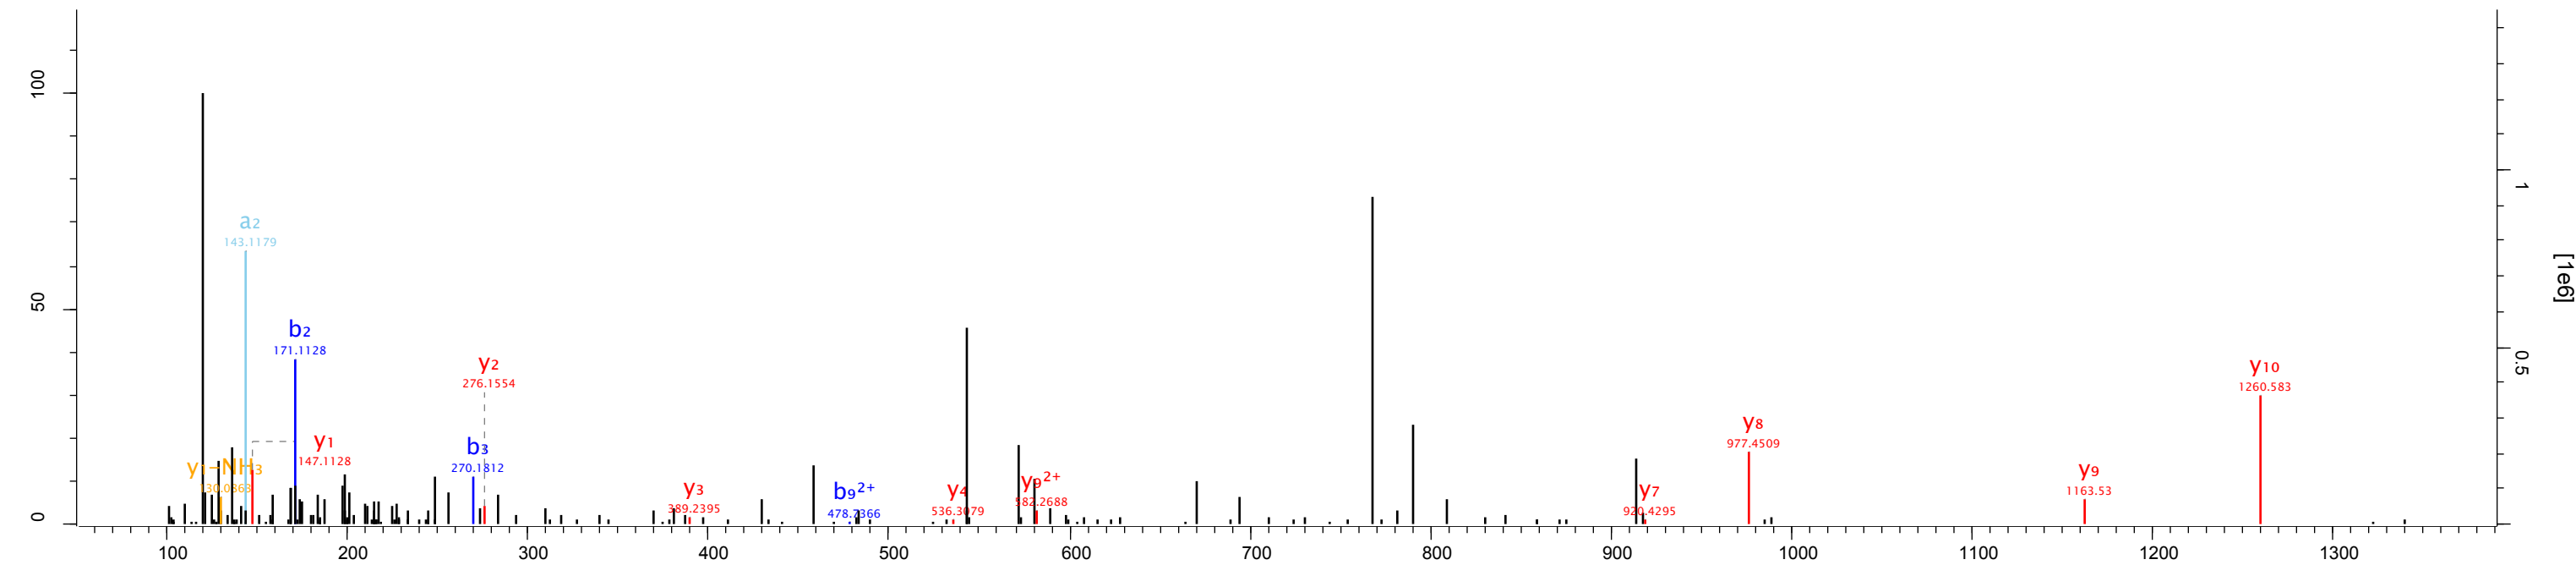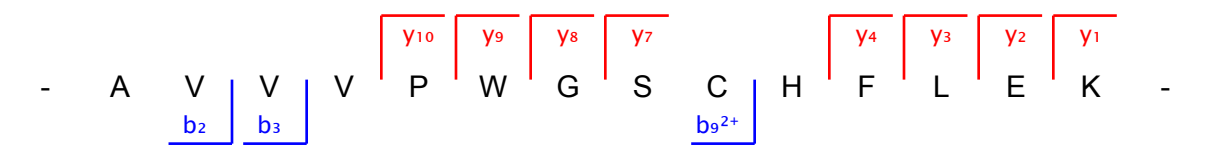

Raw file 20150822\_A375SR\_Phospho\_BR3\_04 Scan 23768 Method FTMS; HCD Score 177.08 m/z 970.93 Gene names MAPK1IP1L

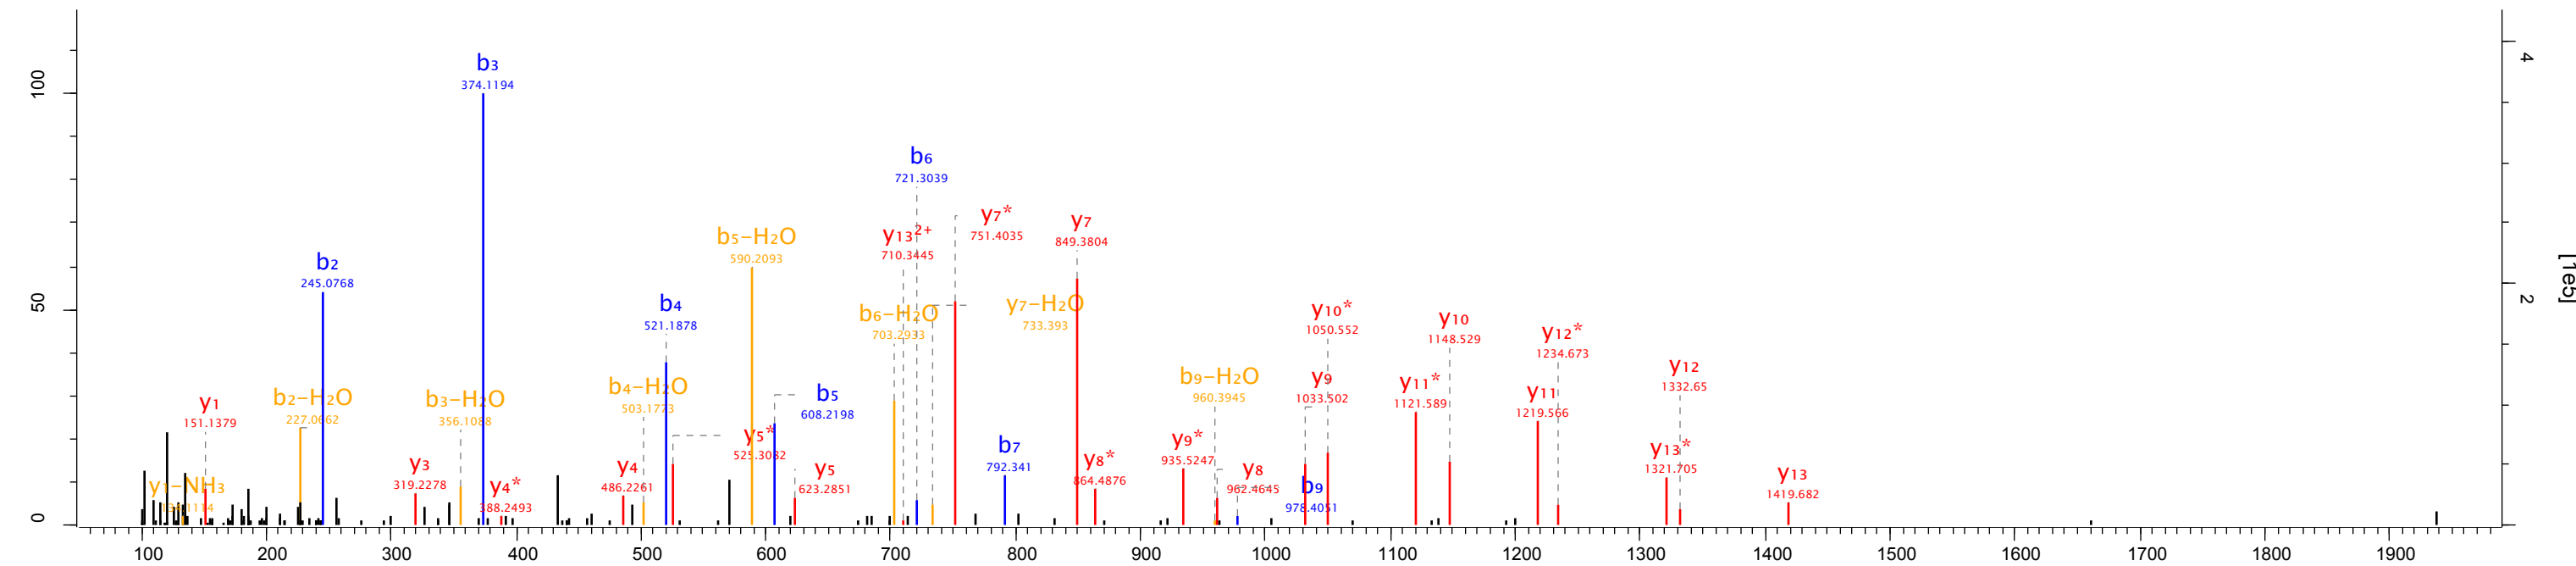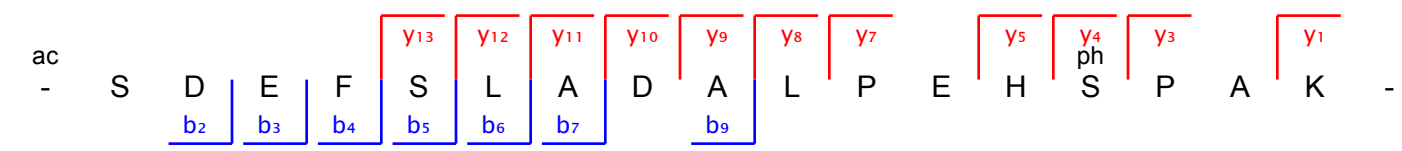

Raw file: 20150822\_A375SR\_Phospho\_BR3\_04  
 Scan: 9748 Method: FTMS; HCD Score: 104.21 m/z: 475.21 Gene names: GPR64

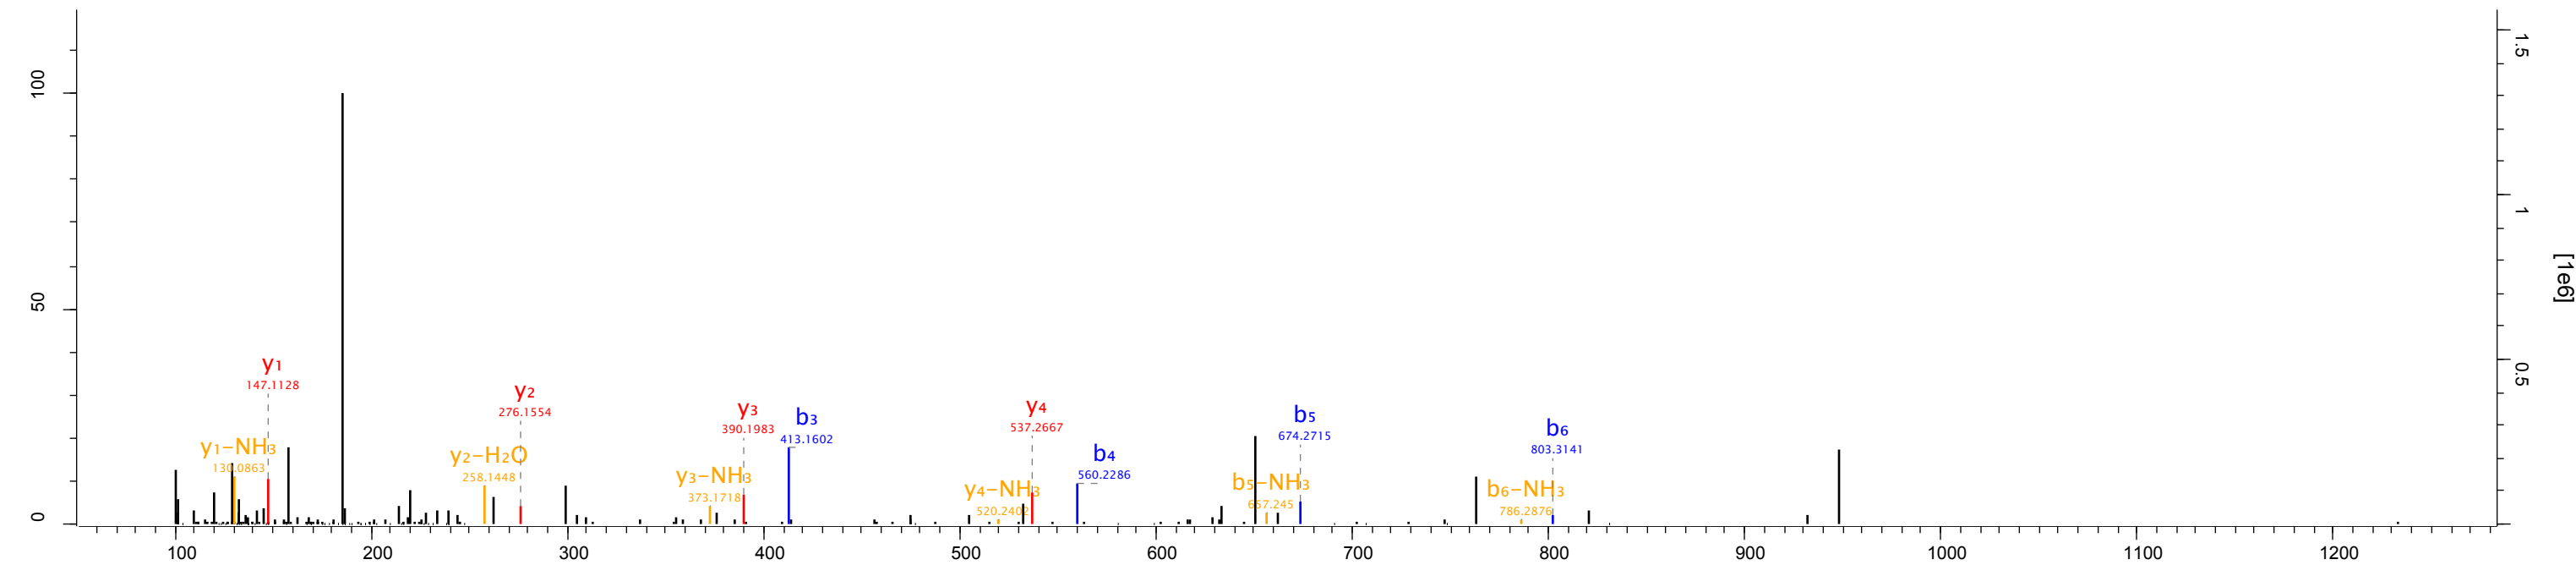

Raw file 20150822\_A375SR\_Phospho\_BR3\_05 Scan 10148 Method FTMS; HCD Score 87.75 m/z 475.21 Gene names GPR64

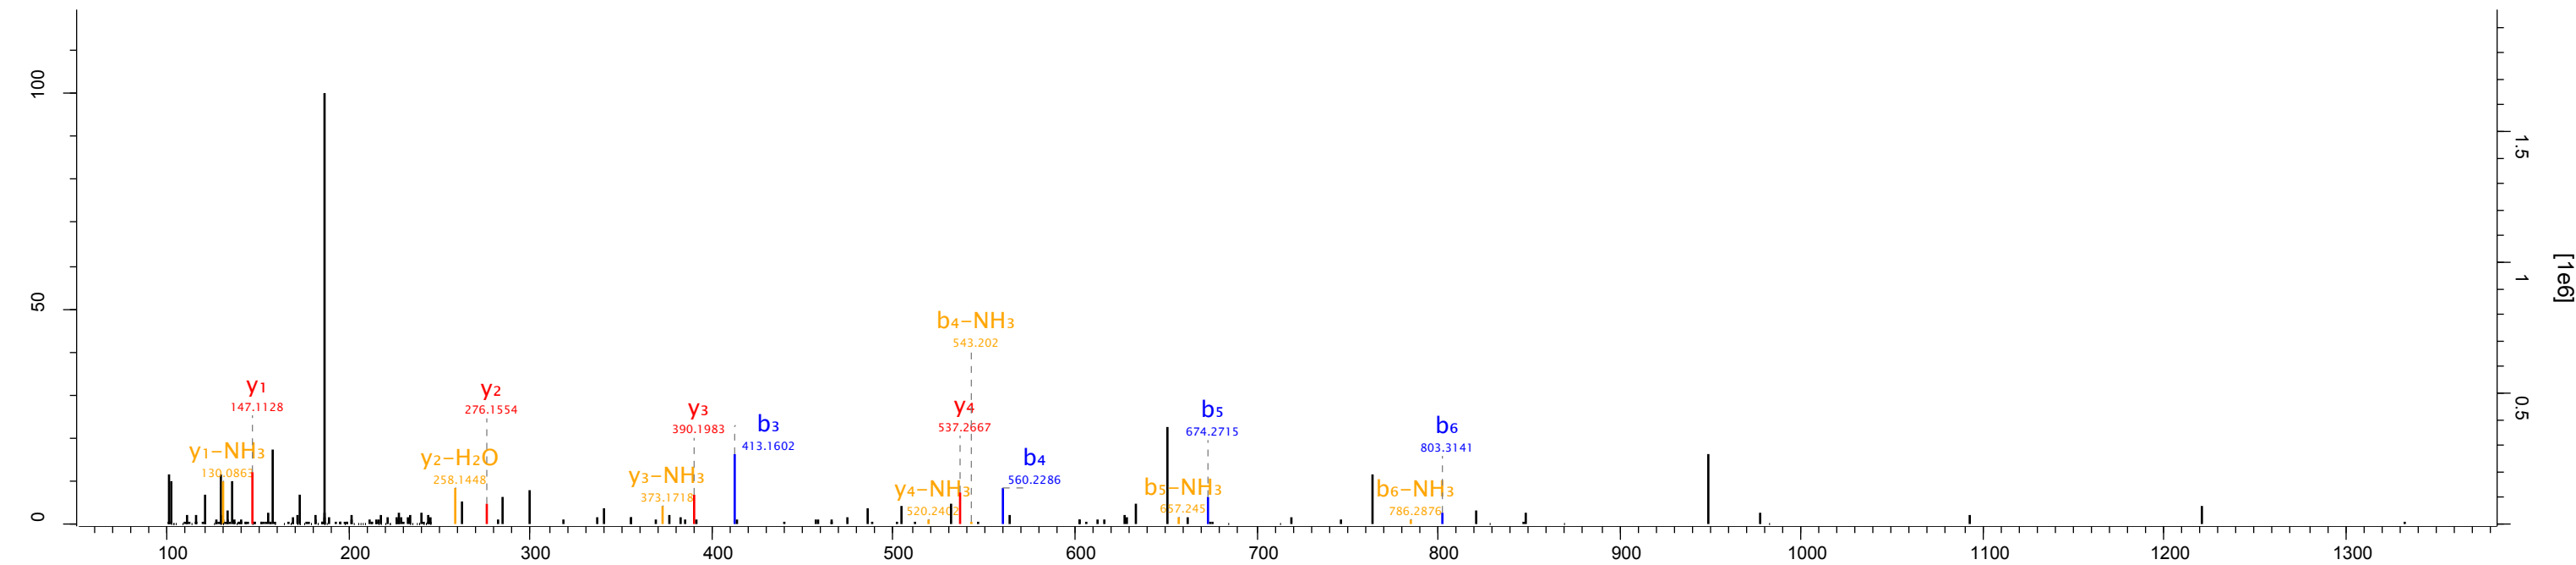

Raw file 20150822\_A375SR\_Phospho\_BR3\_05 Scan 6938 Method FTMS; HCD Score 43.59 m/z 548.61

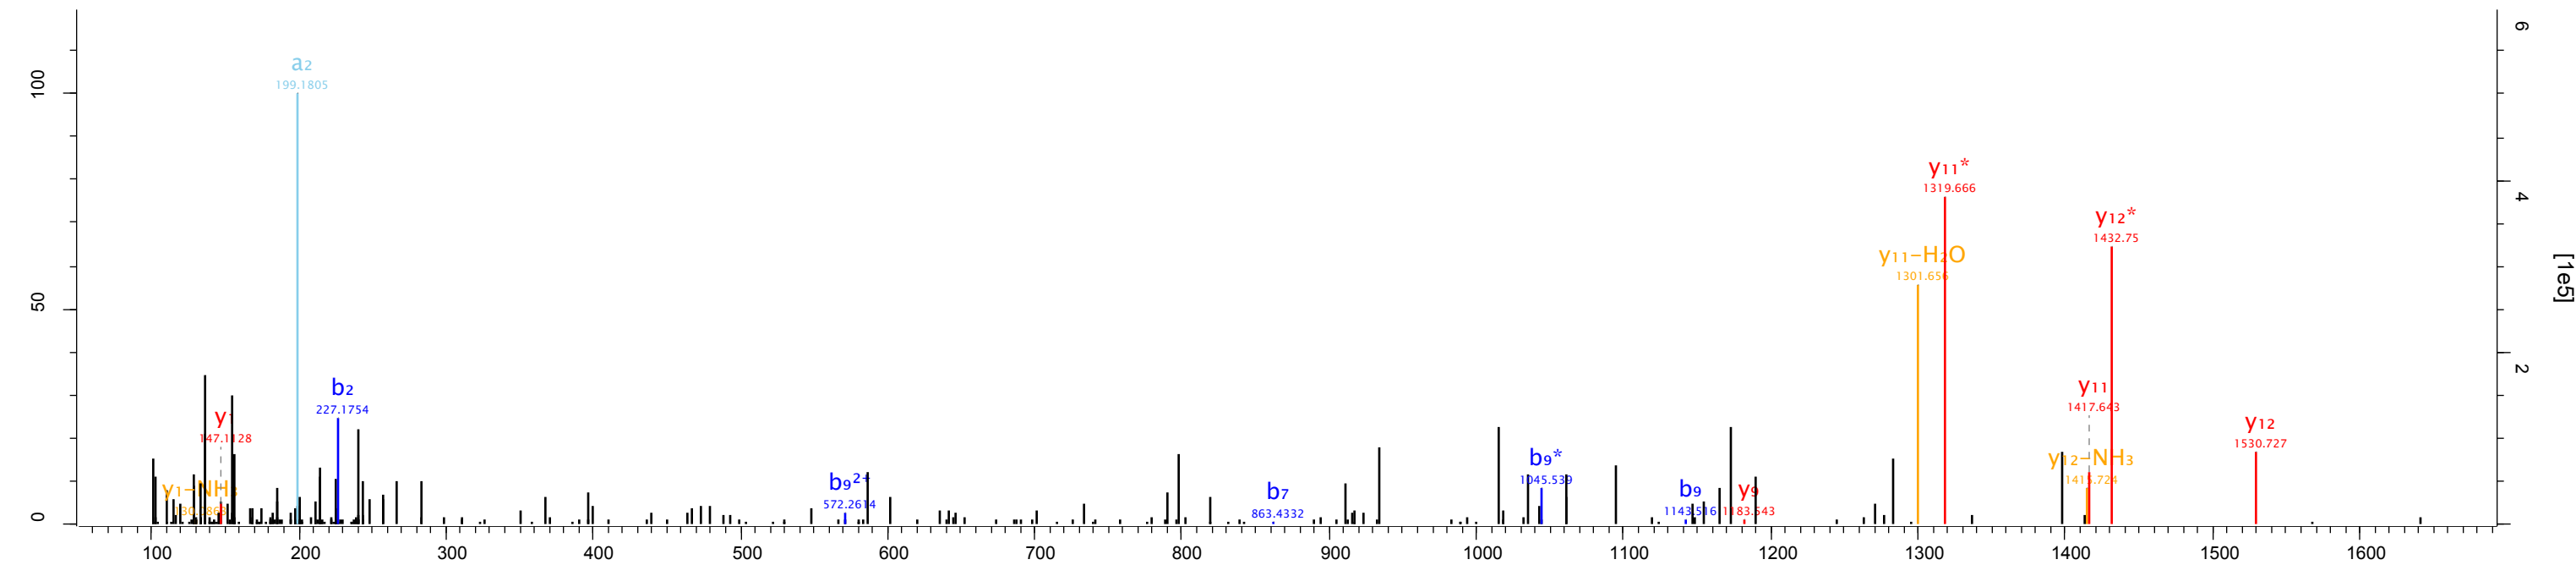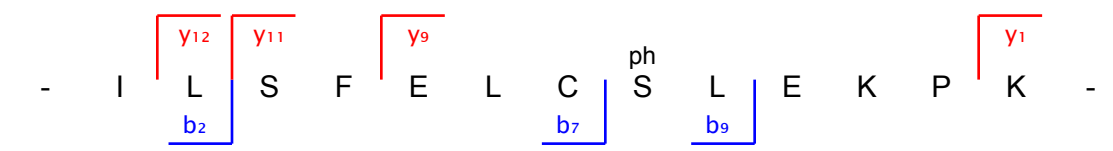

Raw file 20150822\_A375SR\_Phospho\_BR3\_07 Scan 5158 Method FTMS; HCD Score 44.54 m/z 530.24

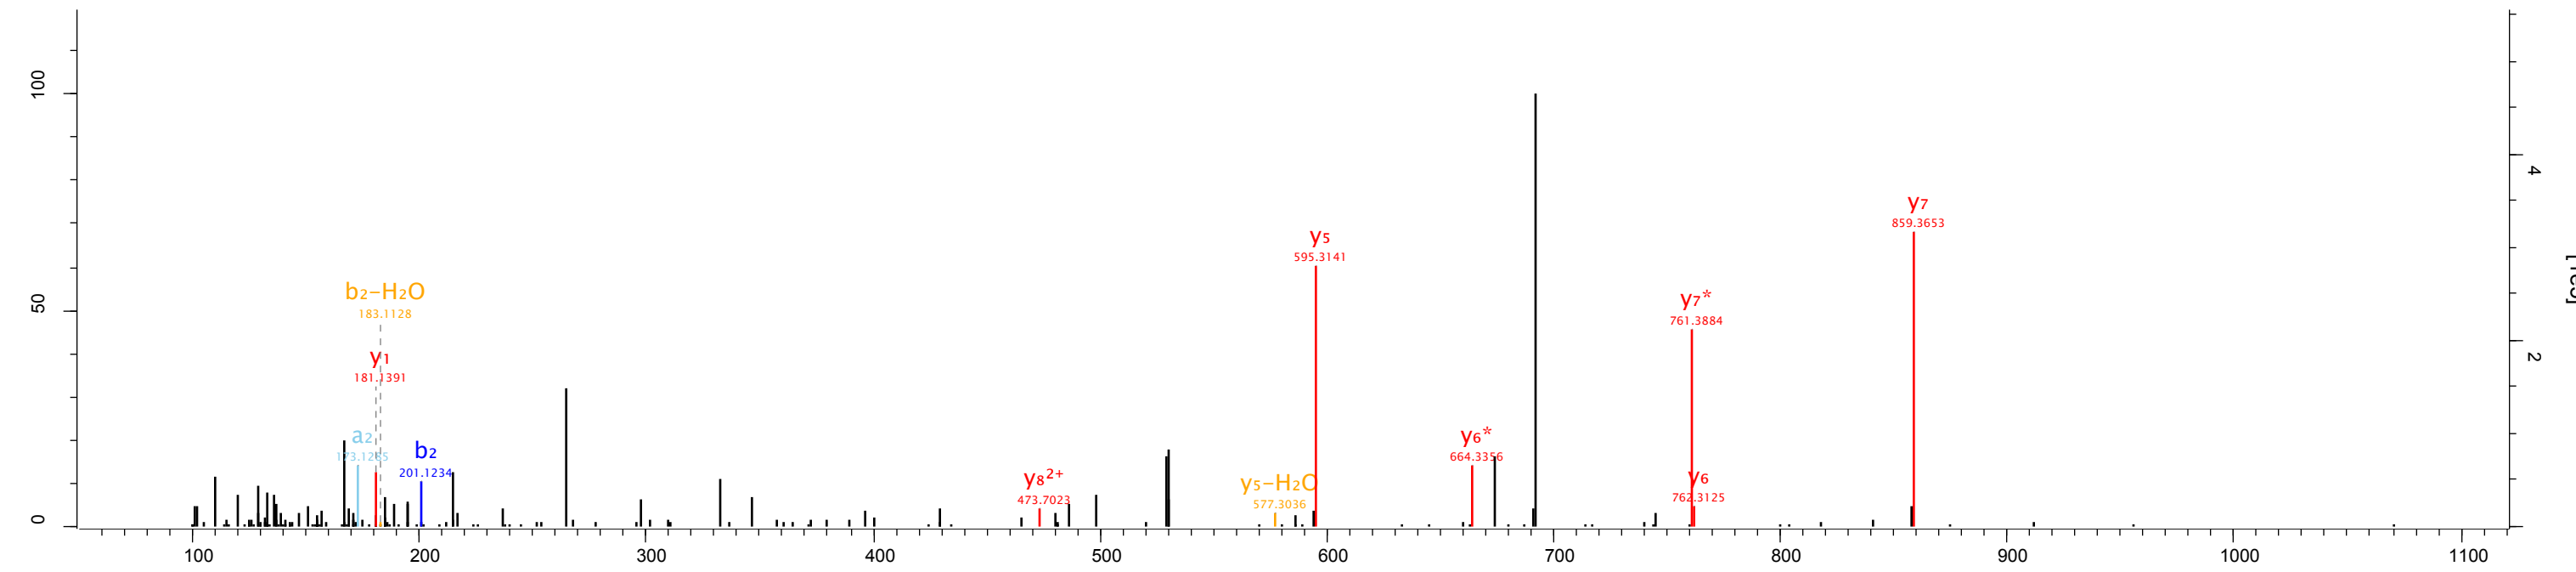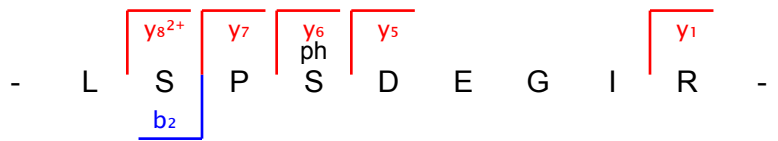



Raw file 20150822\_A375SR\_Phospho\_BR3\_09 Scan 10228 Method FTMS; HCD Score 95.35 m/z 477.23 Gene names GPR64

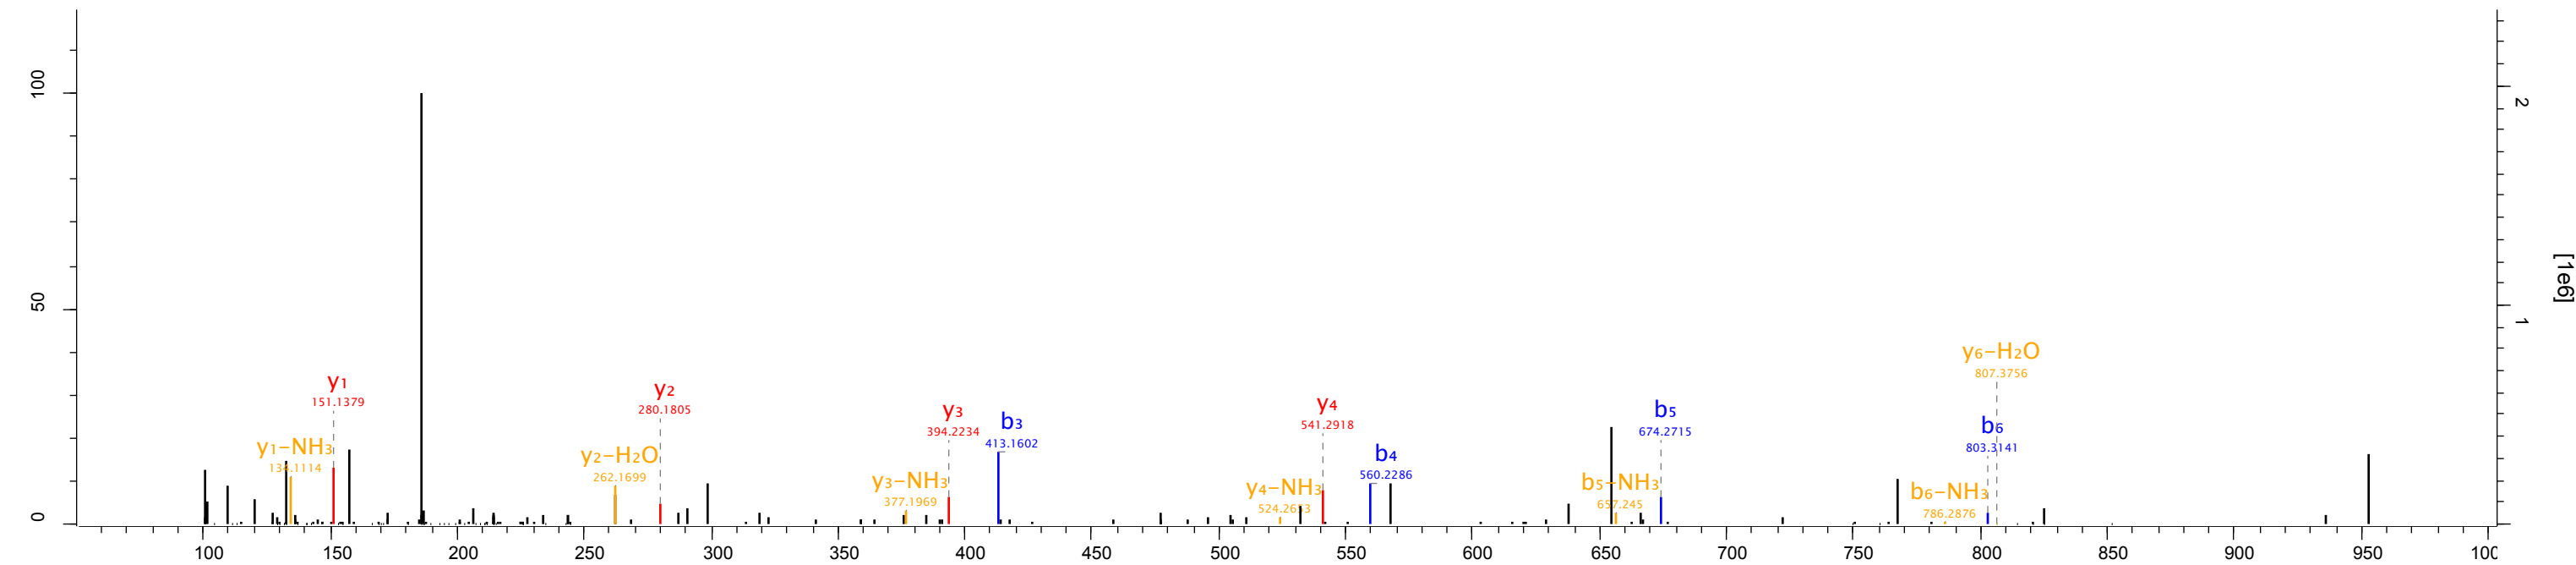

Raw file 20150822\_A375SR\_Phospho\_BR3\_10 Scan 17748 Method FTMS; HCD Score 45.08 m/z 861.37

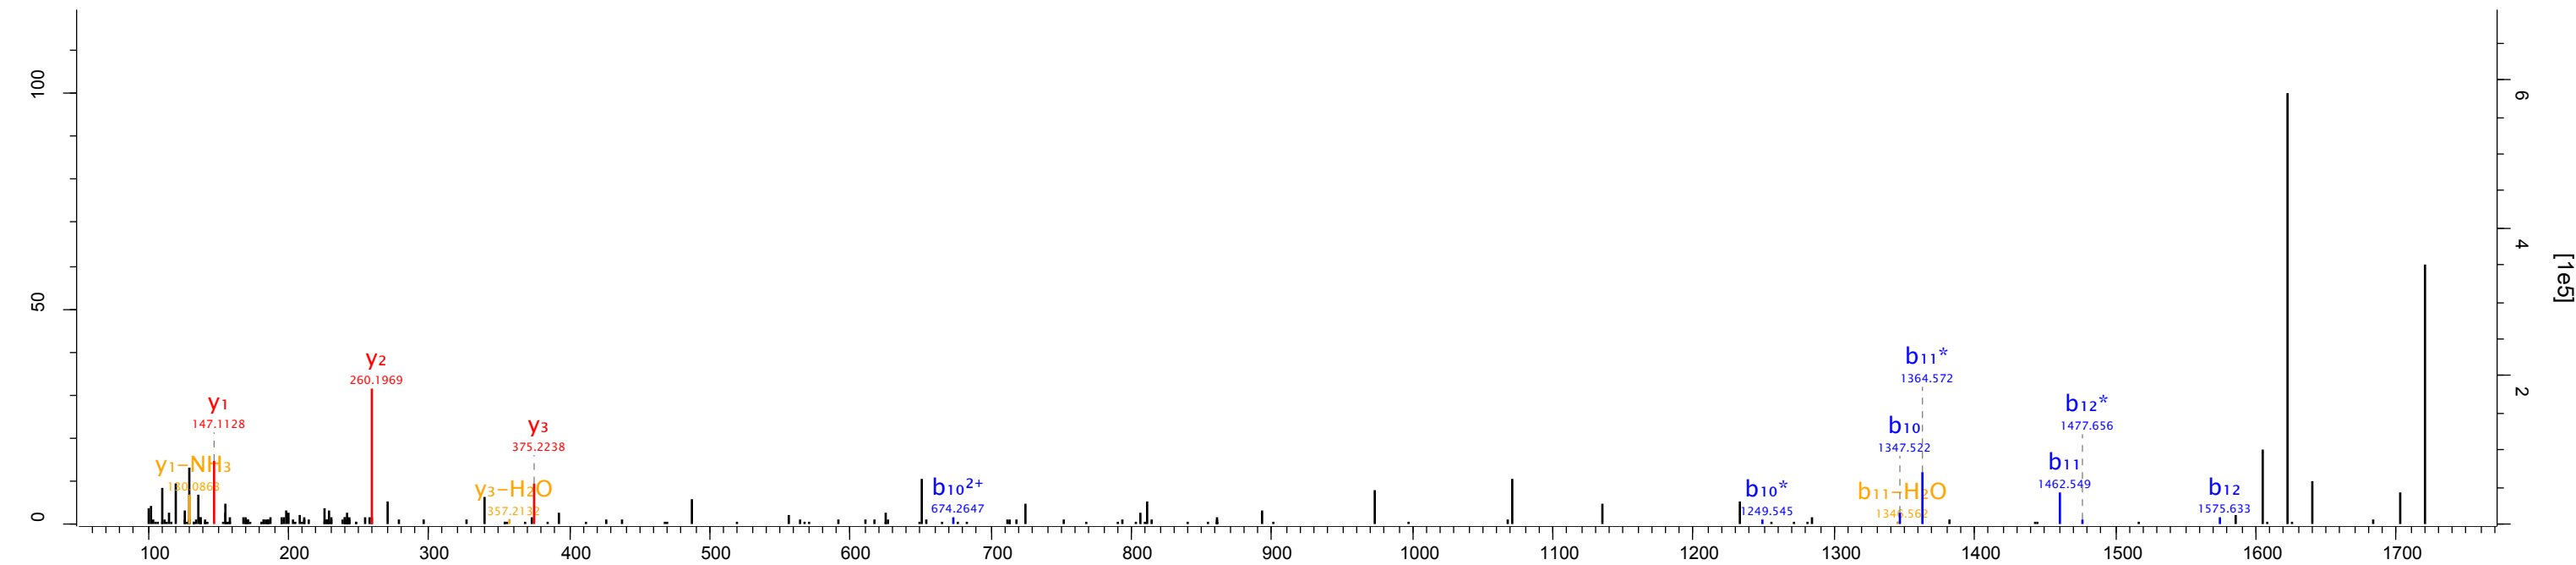

Raw file: 20150822\_A375SR-Proteome\_BR3  
 Scan: 75288 Method: FTMS; HCD Score: 68.85 m/z: 494.82 Gene names: STON2

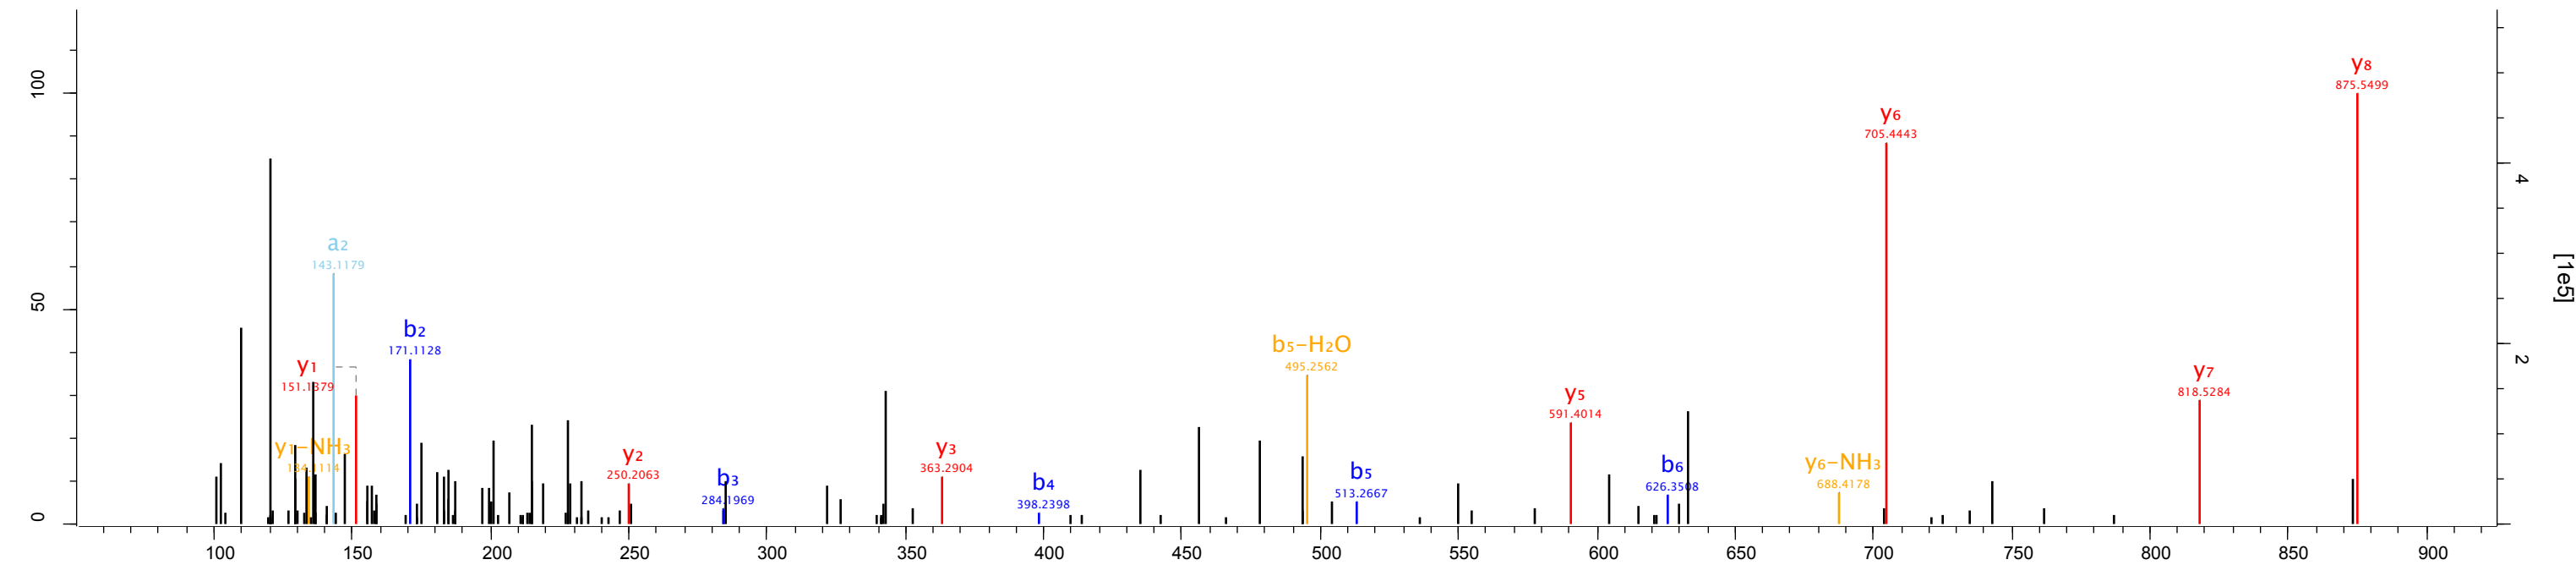

Raw file: 20150822\_A375SR-Proteome\_BR3  
 Scan: 83118 Method: FTMS; HCD Score: 70.12 m/z: 928.44 Gene names: MAPK1IP1L

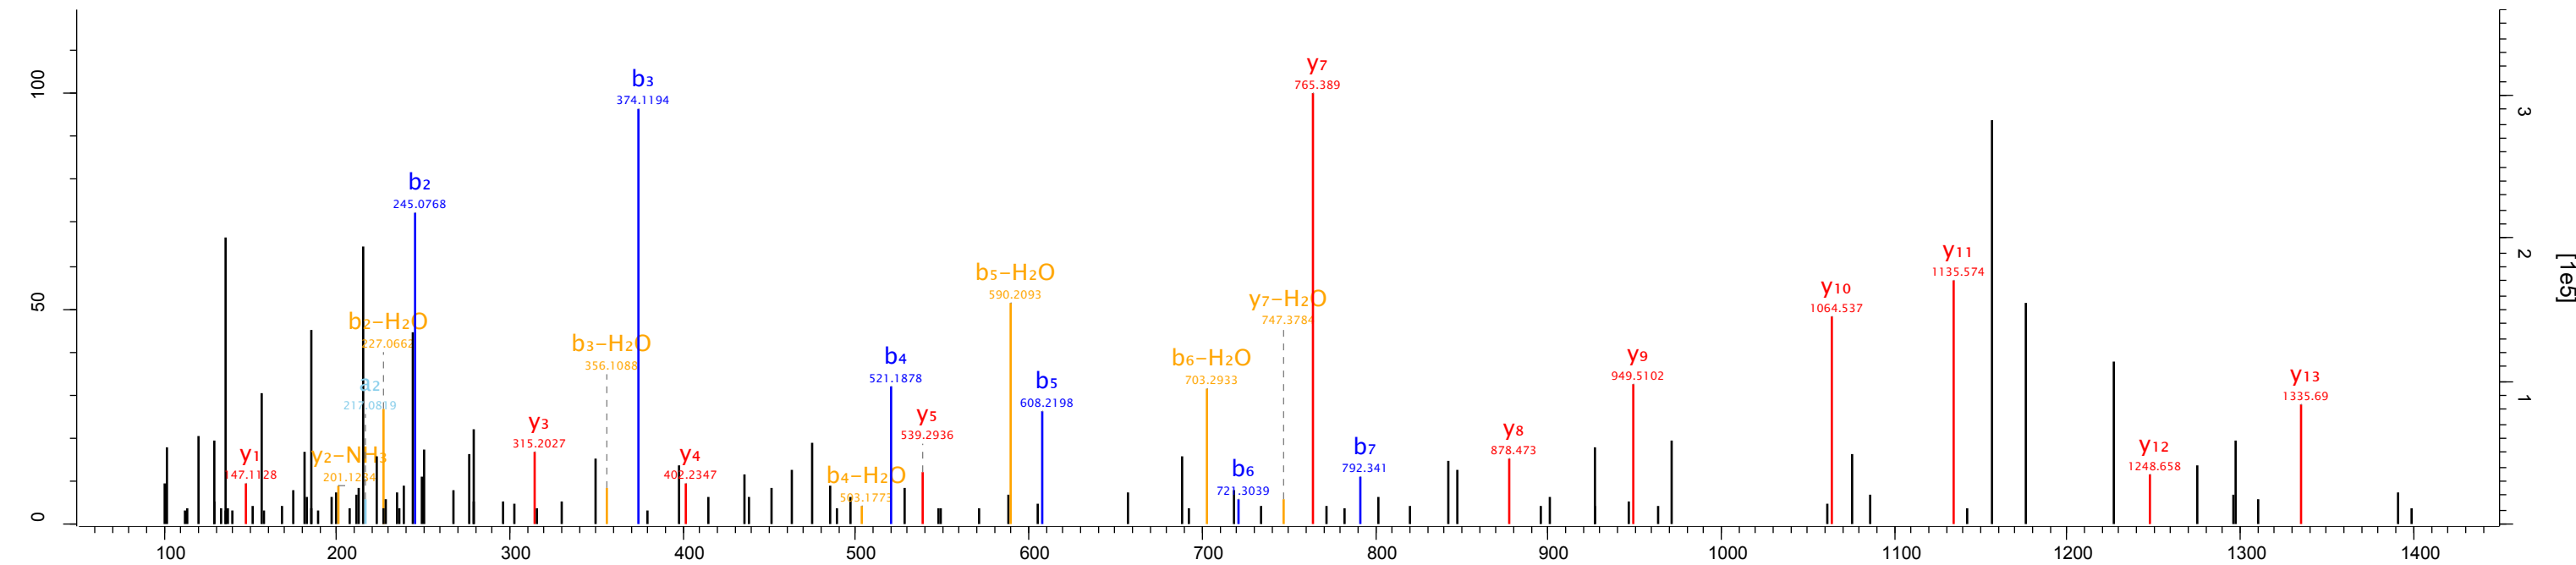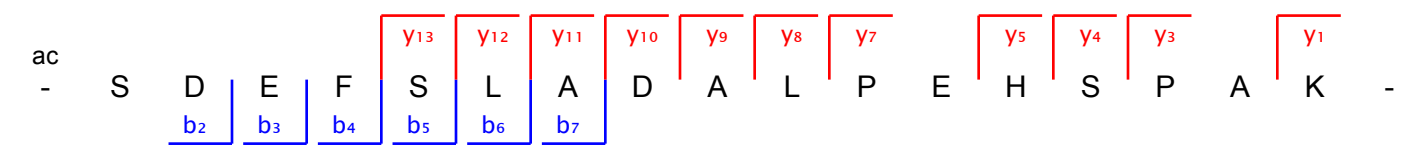

Raw file: 20150822\_A375SR-Proteome\_BR3  
 Scan: 83428 Method: FTMS; HCD Score: 130.29 m/z: 928.44 Gene names: MAPK11P1L

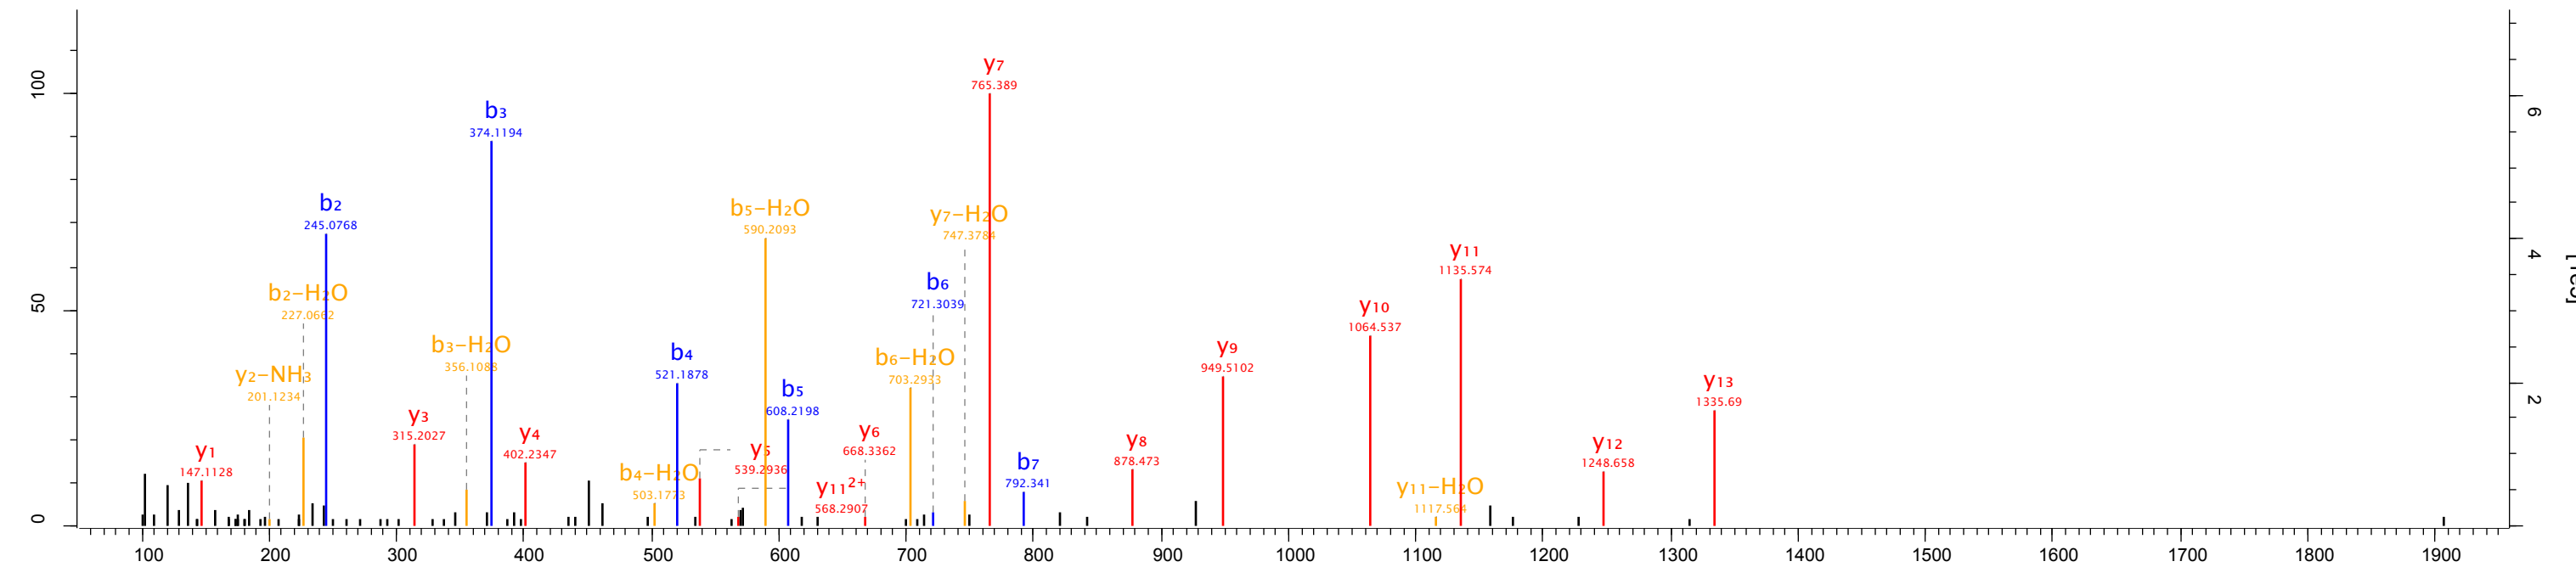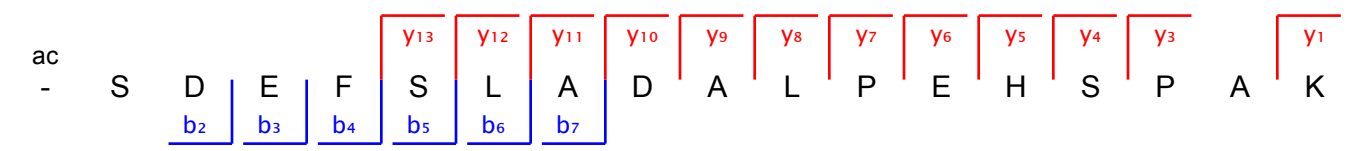

Raw file 20180707\_MaS\_A375SR\_LM\_proteome\_03 Scan 3308 Method FTMS; HCD Score 60.79 m/z 361.18

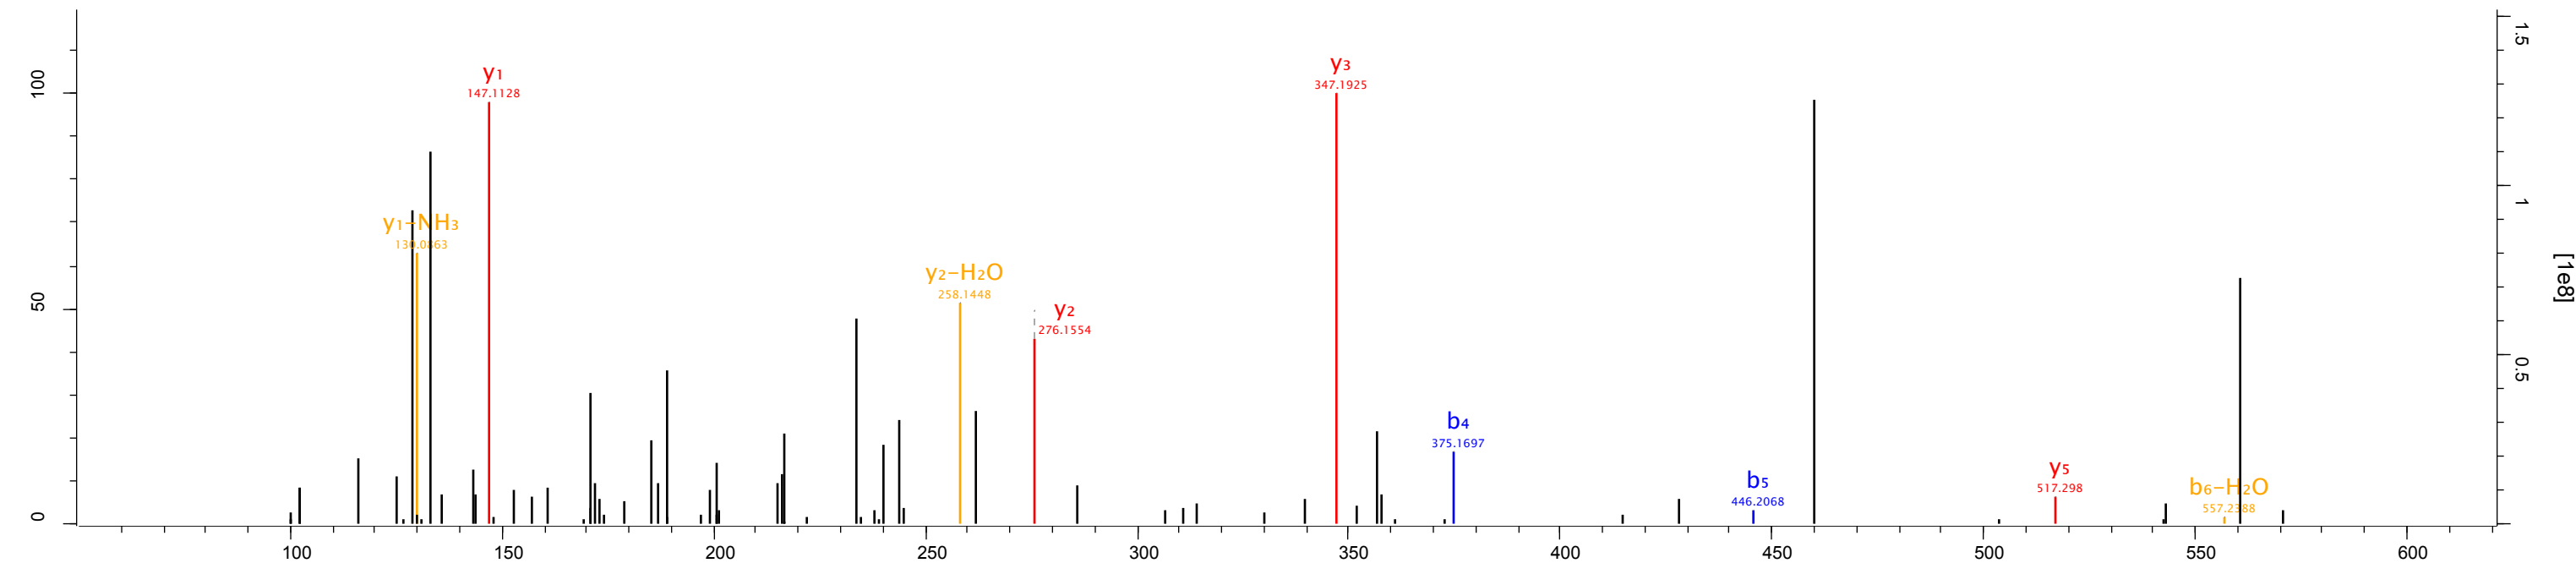

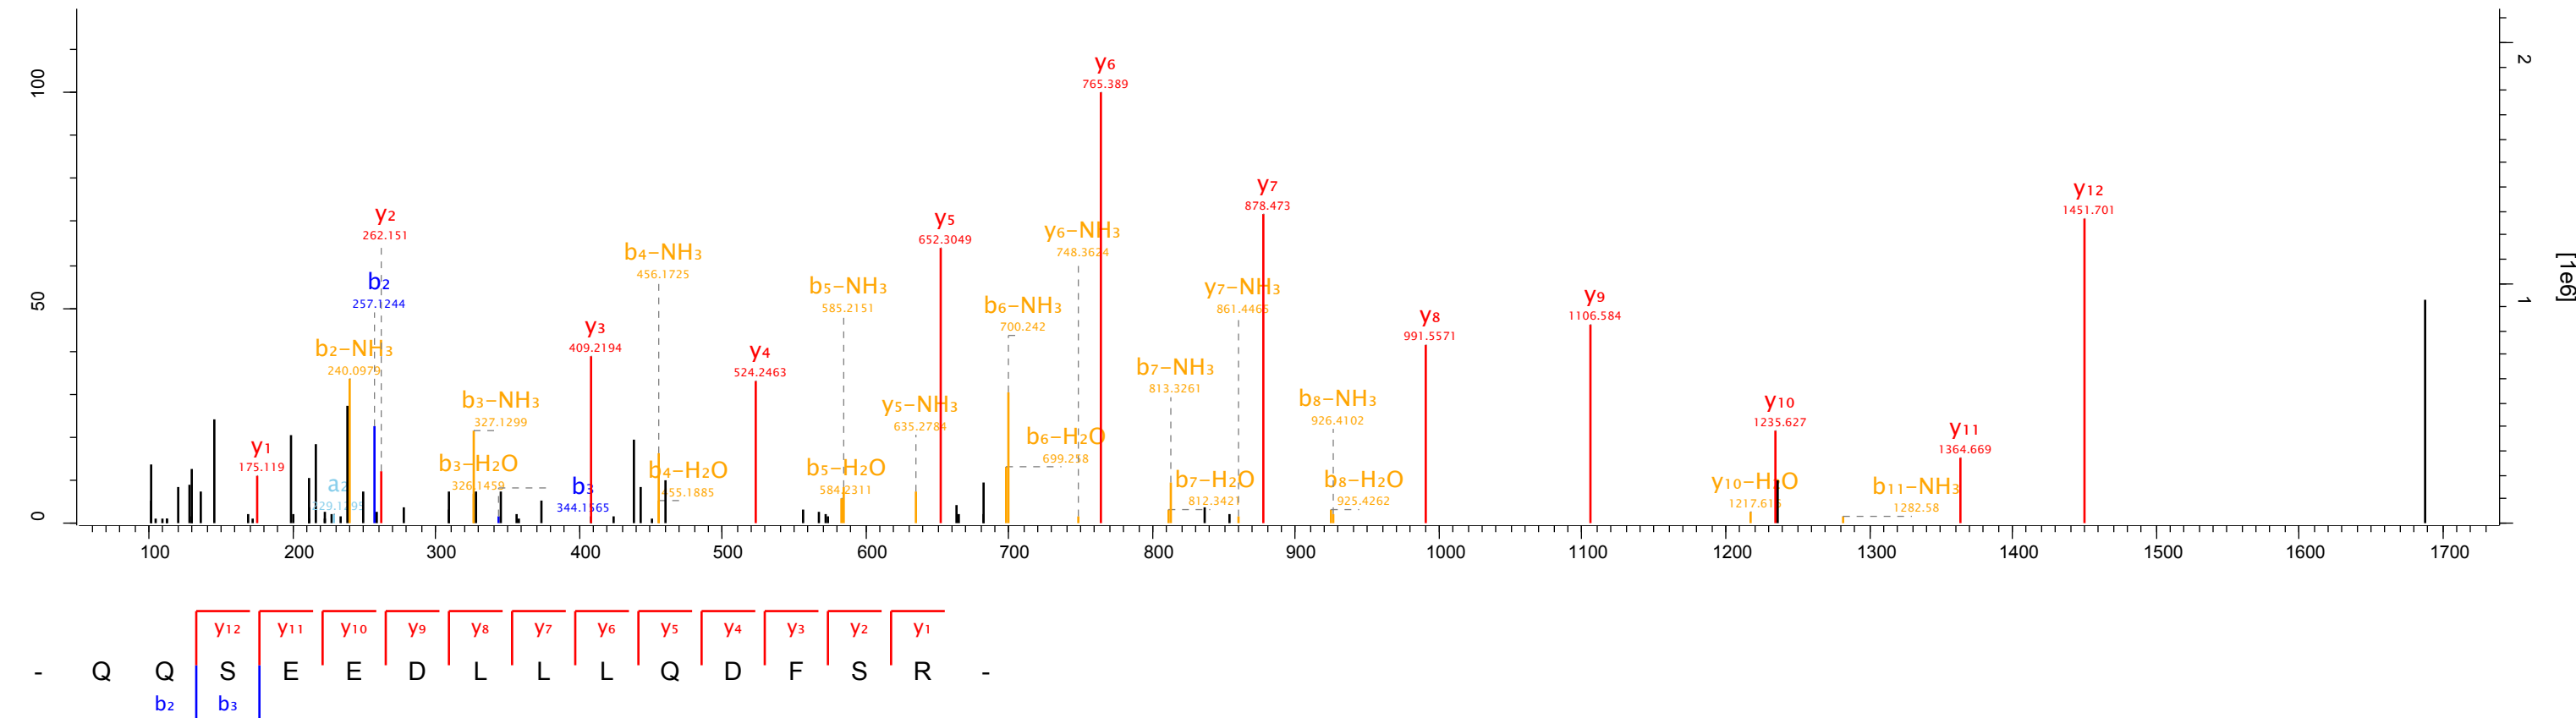

Raw file  
20180707\_MaS\_A375SR\_LM\_proteome\_07

Scan: 19688  
Method: FTMS; HCD  
Score: 43.08  
m/z: 506.77  
Gene names: SEPT3

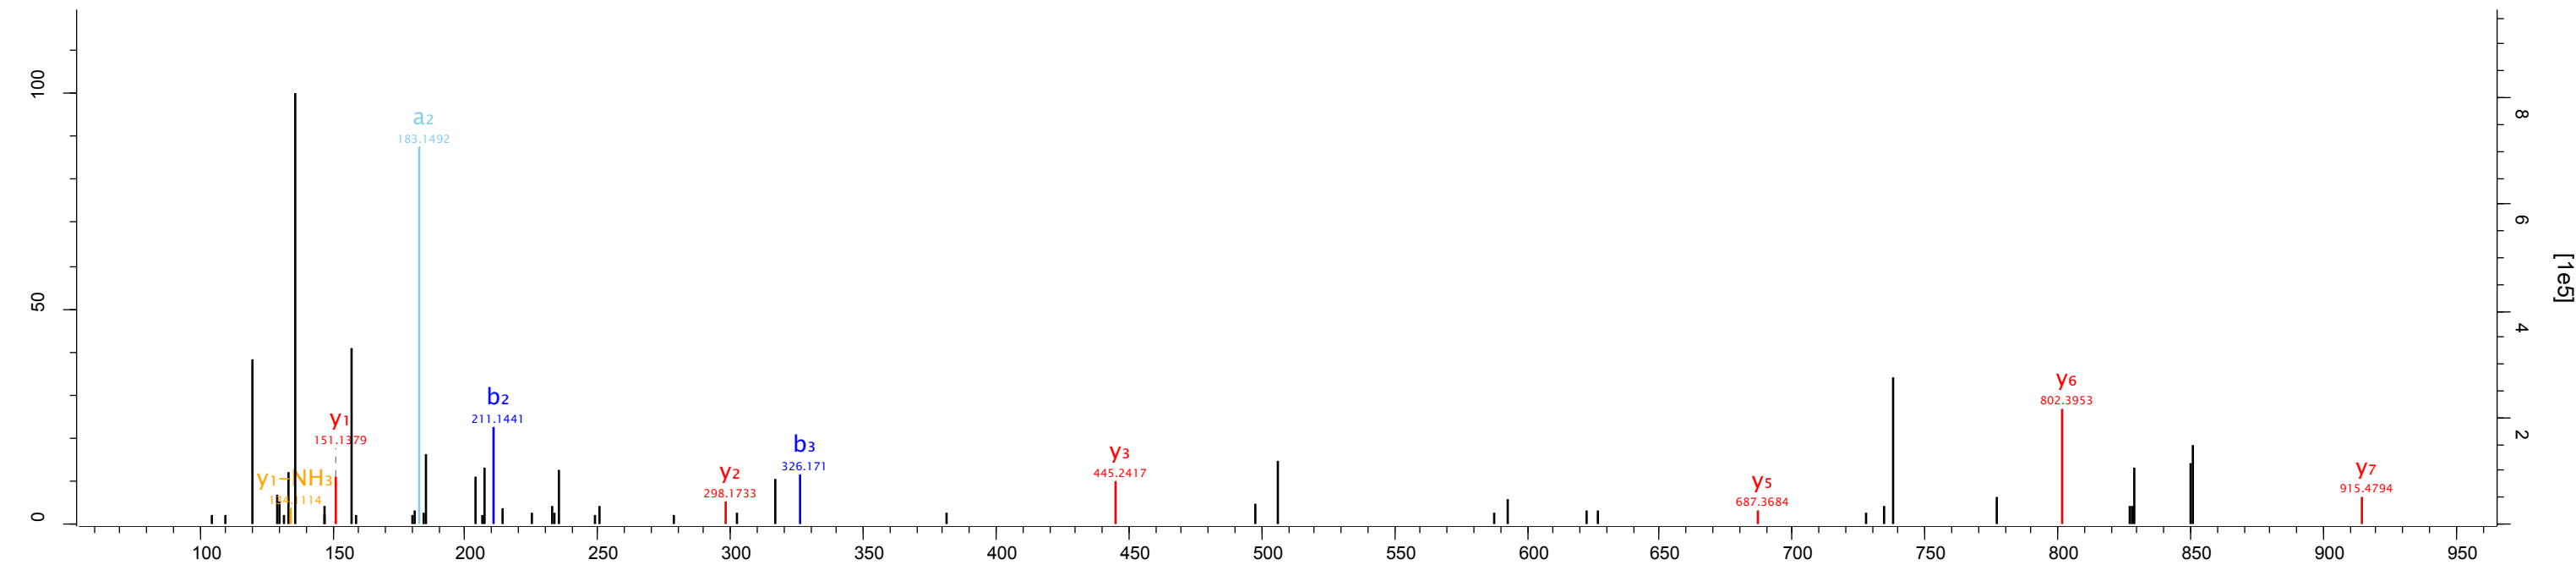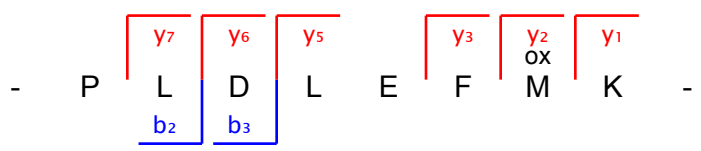



Raw file  
20180707\_MaS\_A375SR\_LM\_proteome\_07

Scan Method Score m/z Gene names  
26358 FTMS; HCD 16.47 937.17 C1orf85

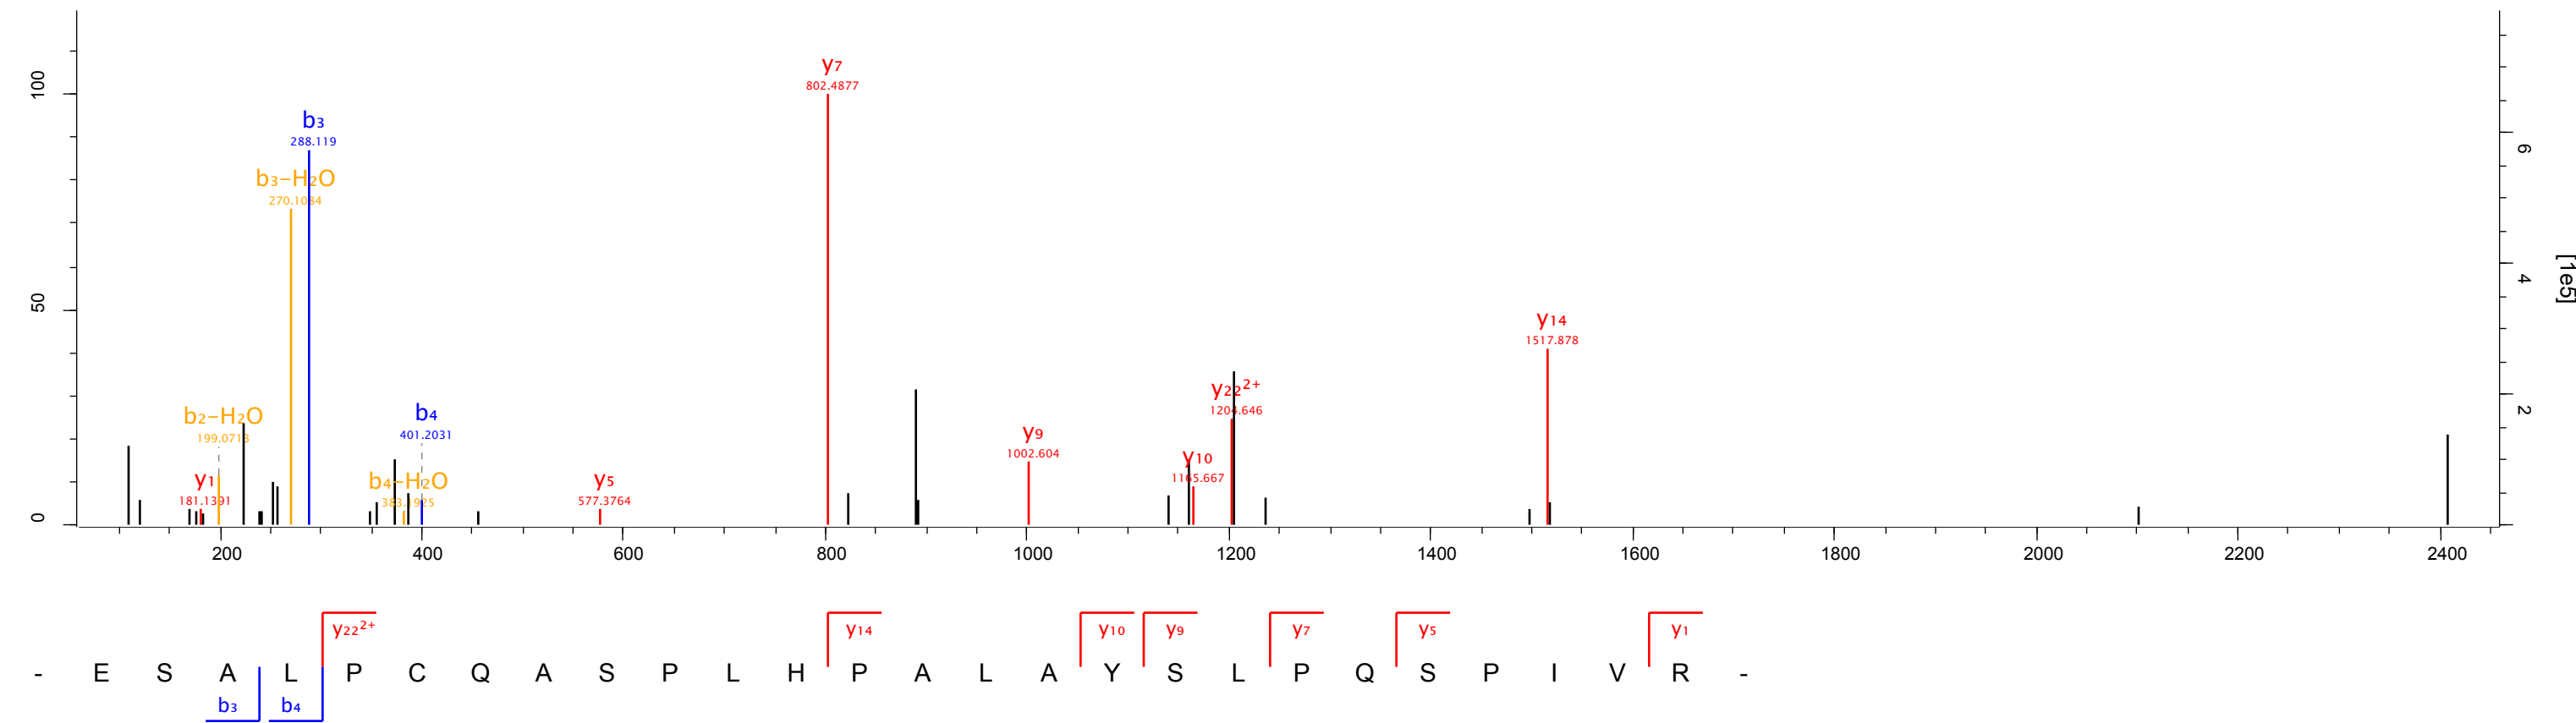

Raw file  
20180707\_MaS\_A375SR\_LM\_proteome\_07

Scan Method Score m/z Gene names  
26998 FTMS; HCD 31.91 571.95 SSR3

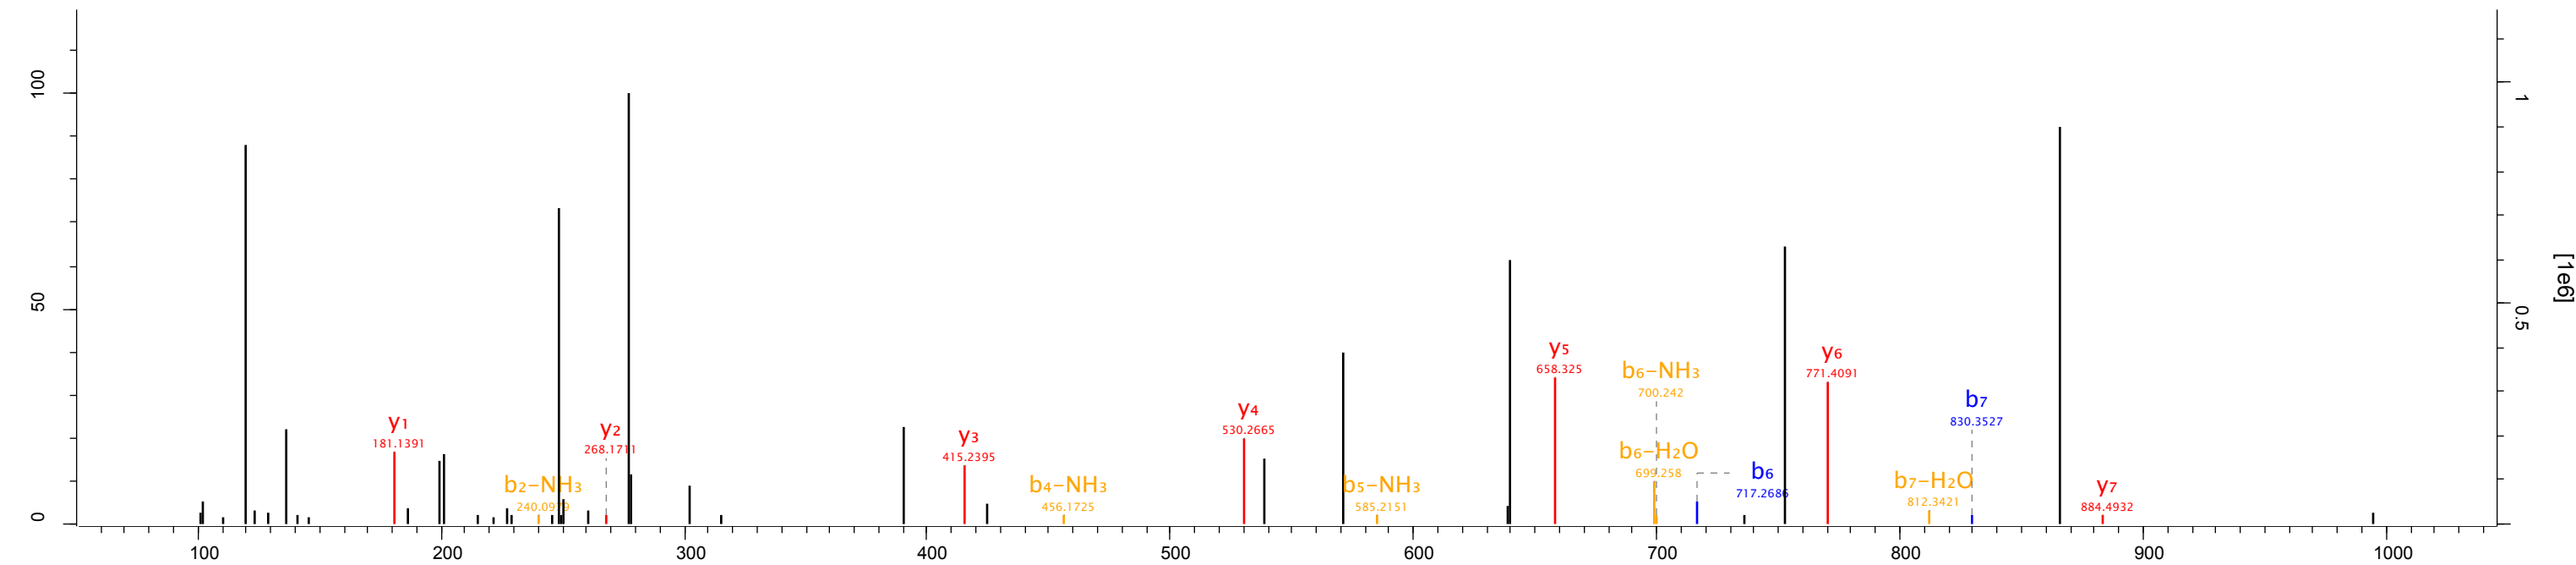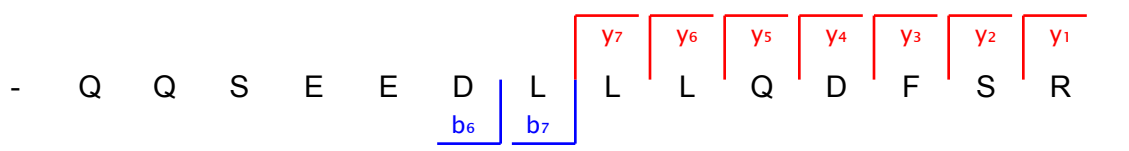

Raw file 20180707\_MaS\_A375SR\_LM\_proteome\_09 Scan 23038 Method FTMS; HCD Score 48.91 m/z 868.5 Gene names KRTCAP2

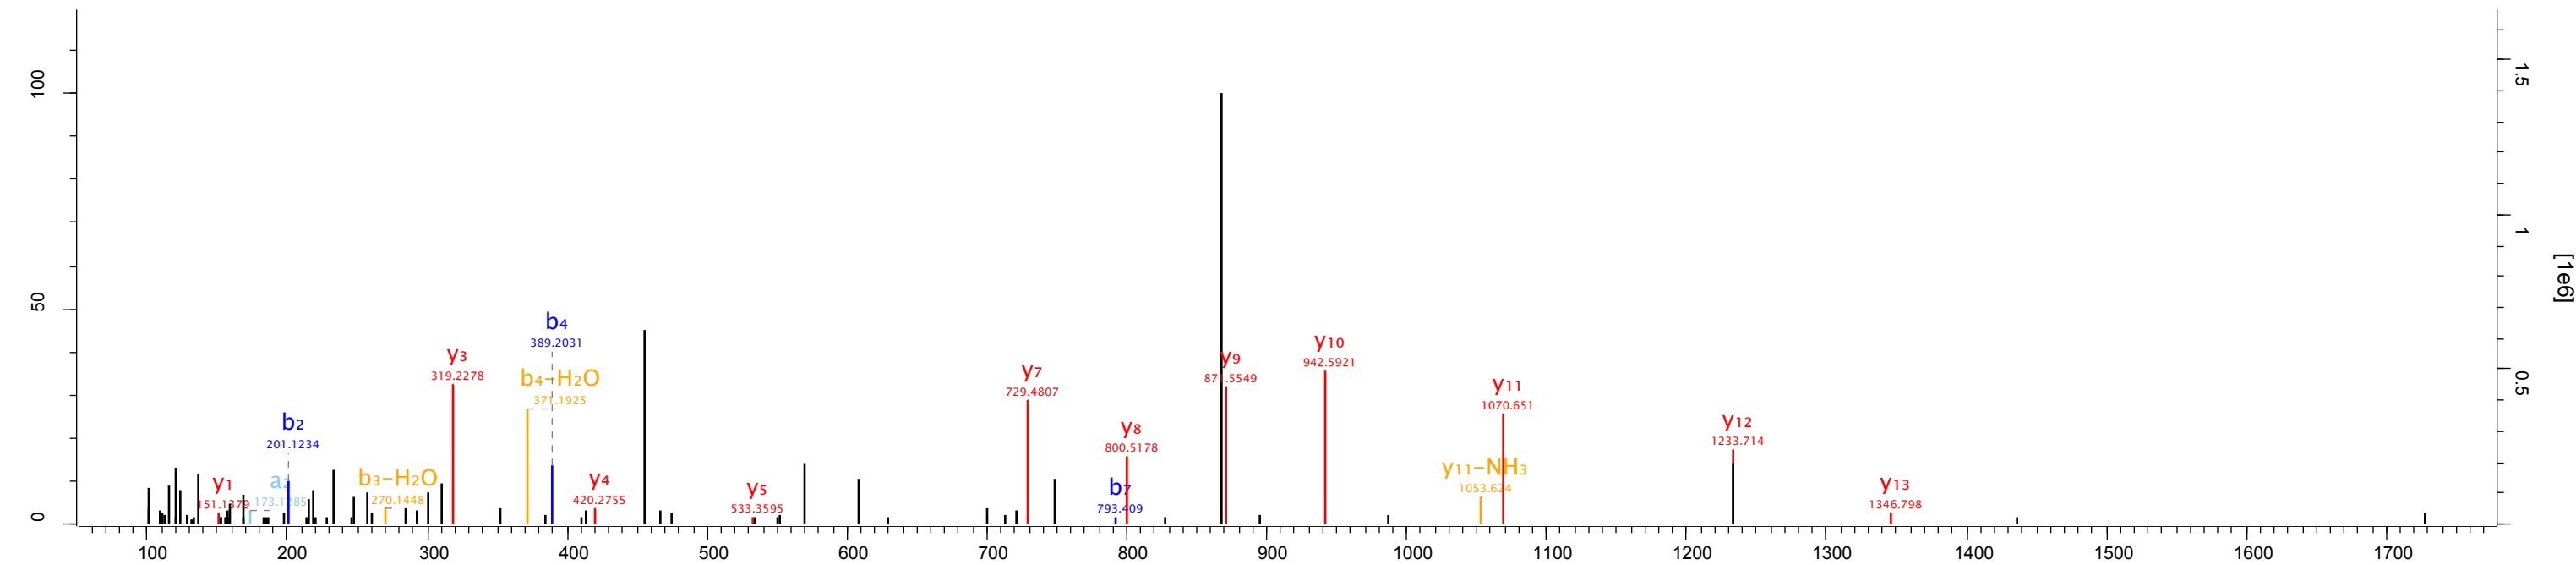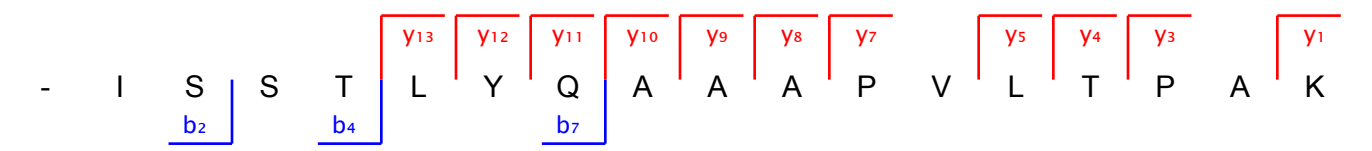

Raw file 20180707\_MaS\_A375SR\_LM\_proteome\_09 Scan 2478 Method FTMS; HCD Score 62.47 m/z 738.36

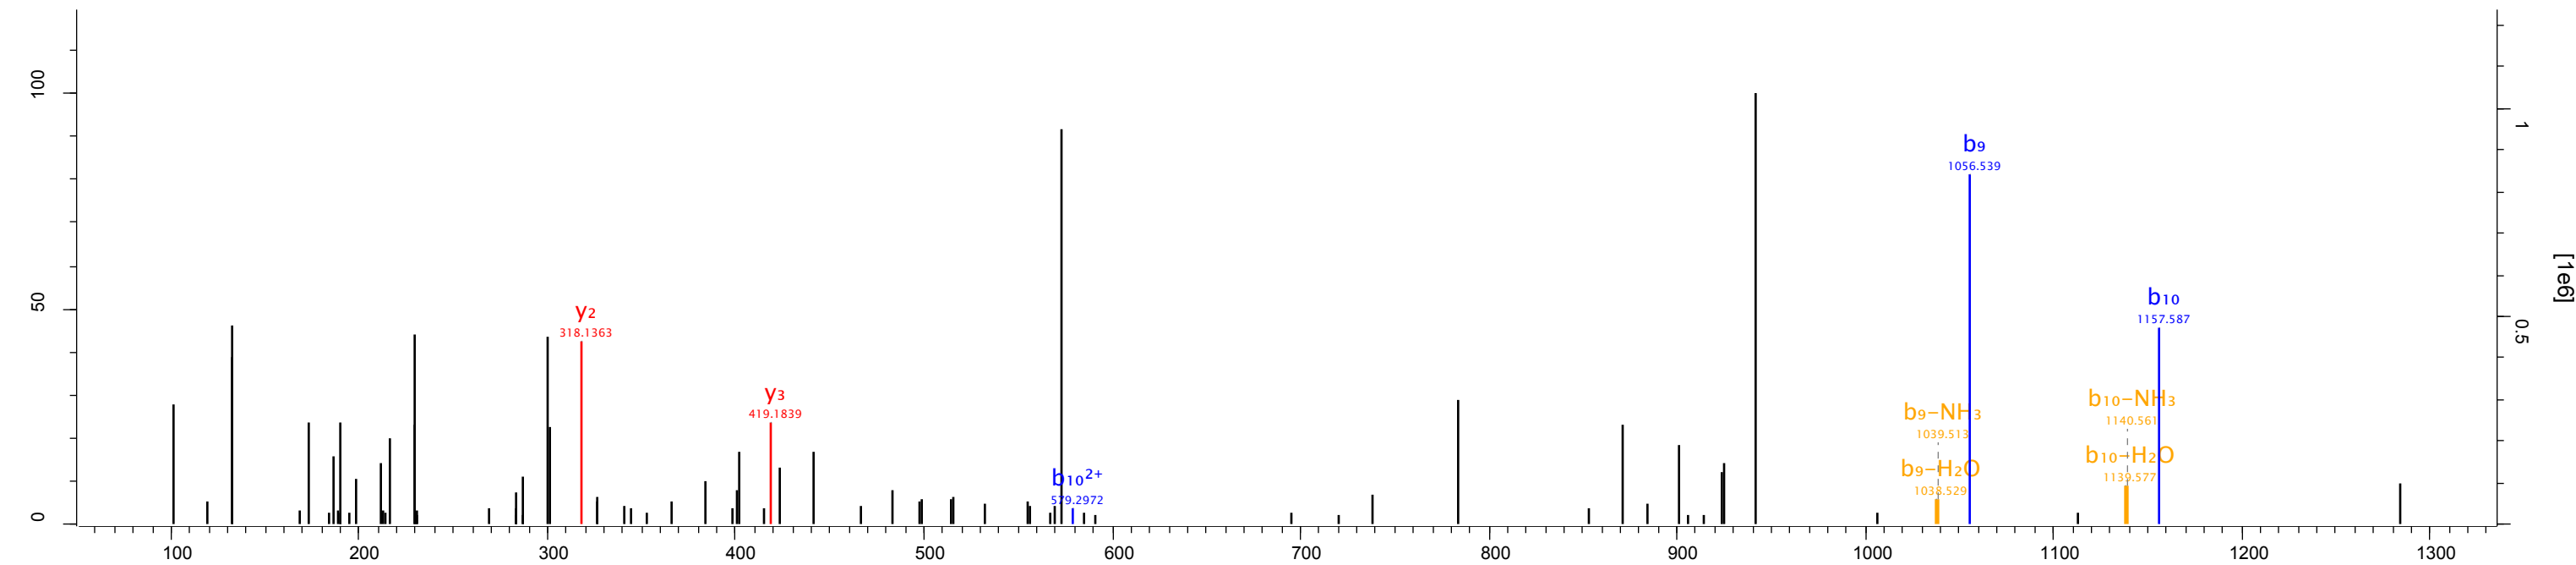

- M E L L Q I A Q E T S K -

Fragmentation mapping:

- $b_9$  (blue box) covers E and T.
- $b_{10}$  (blue box) covers T and S.
- $y_3$  (red box) covers T.
- $y_2$  (red box) covers S.

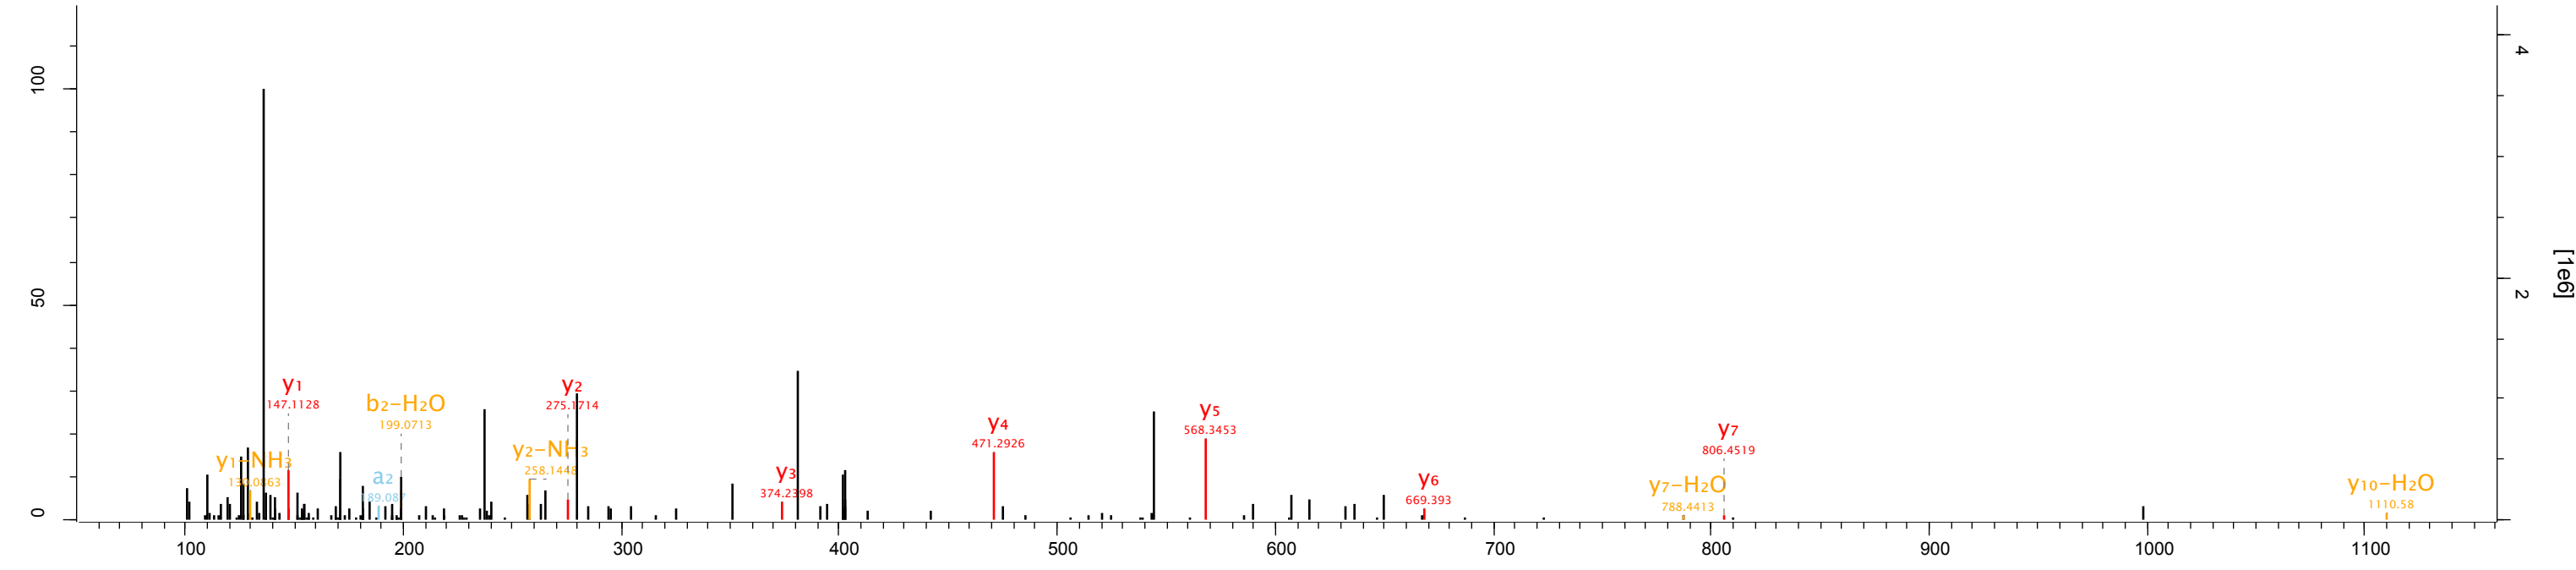

Raw file: 20180707\_MaS\_A375SR\_LM\_proteome\_18  
 Scan: 11598 Method: FTMS; HCD Score: 99.28 m/z: 610.8

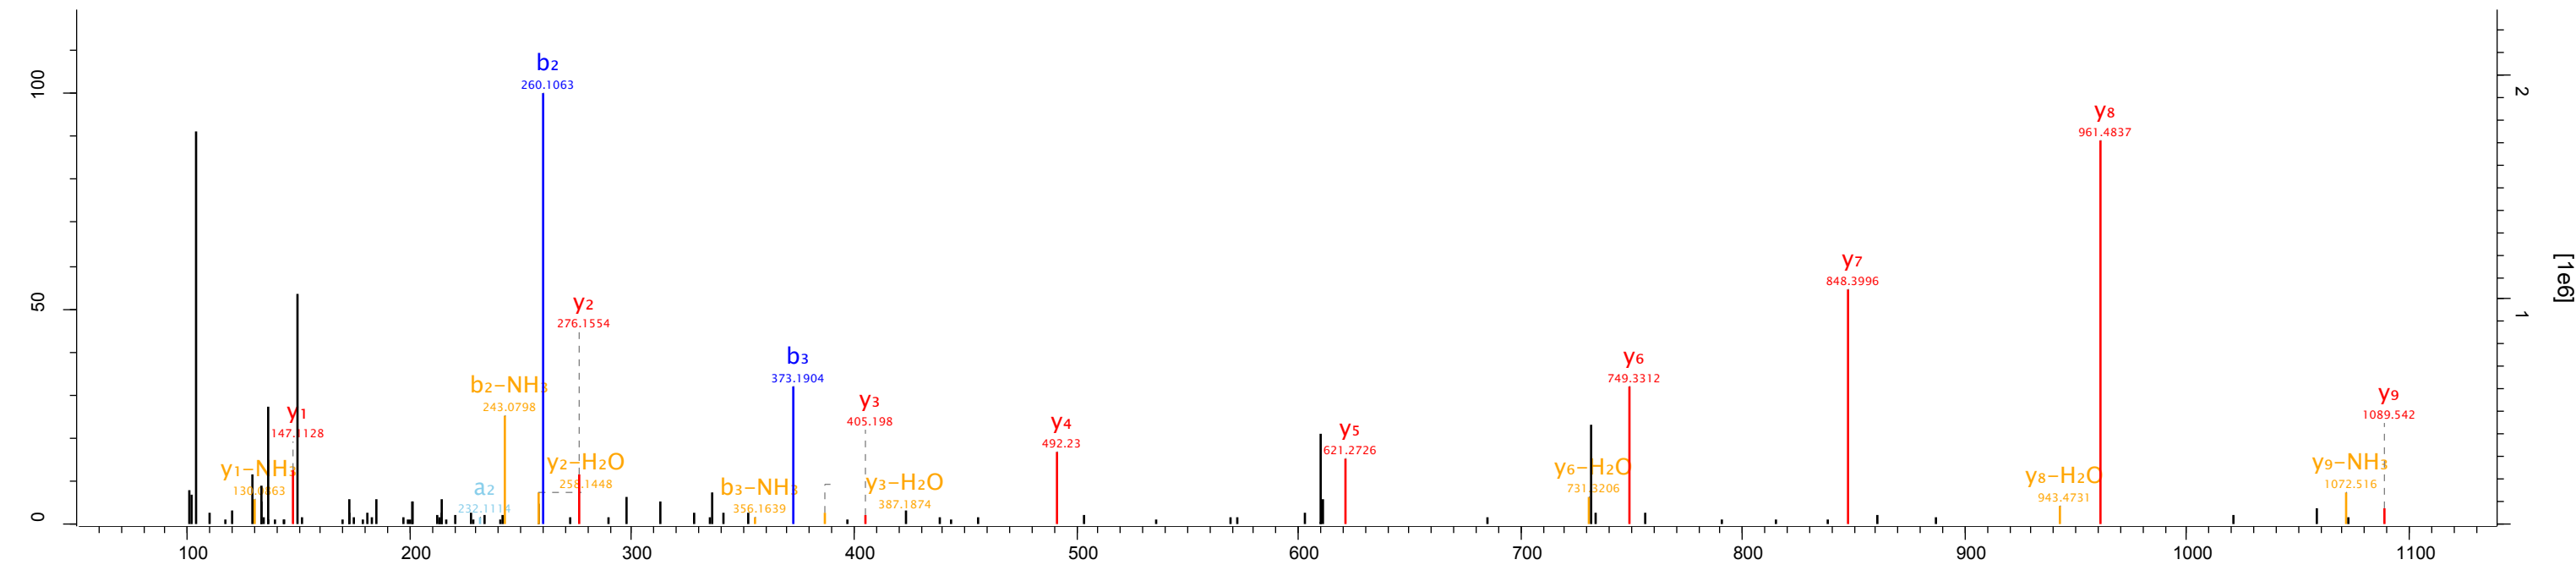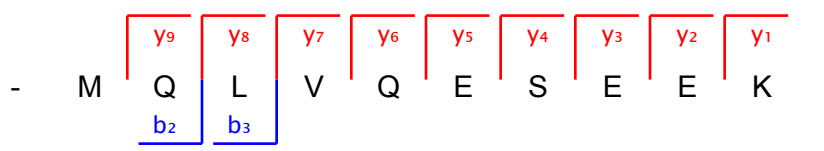

Raw file: 20180707\_MaS\_A375SR\_LM\_proteome\_18  
 Scan: 4728 Method: FTMS; HCD Score: 76.93 m/z: 560.27 Gene names: SFT2D2

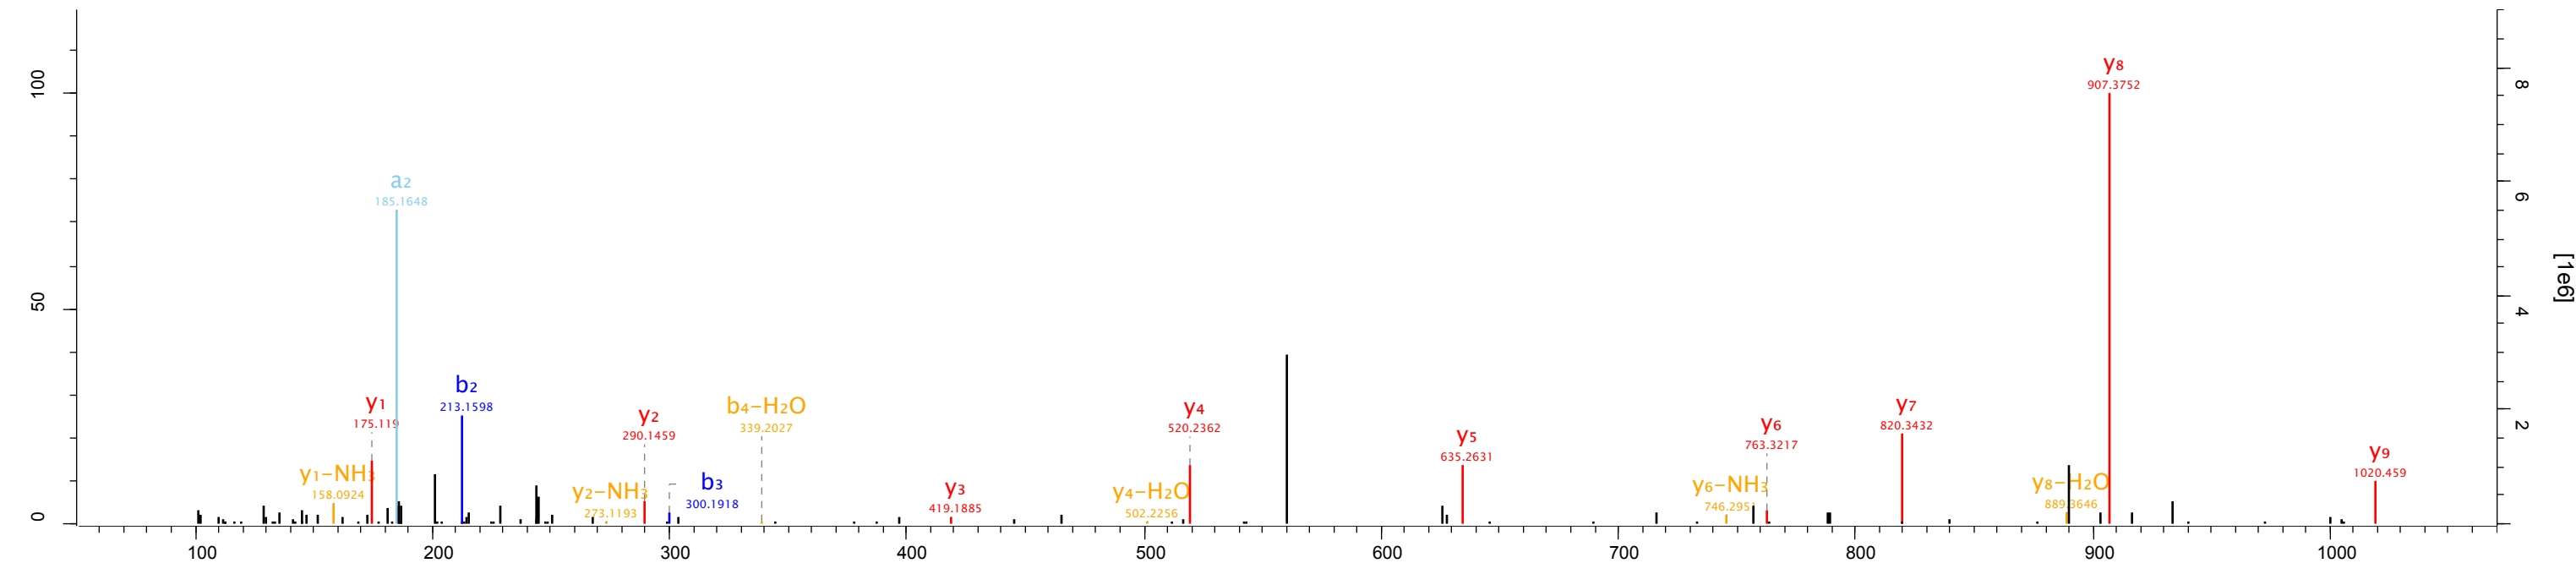

Raw file 20180707\_MaS\_A375SR\_LM\_proteome\_18 Scan 8658 Method FTMS; HCD Score 47.71 m/z 596.33

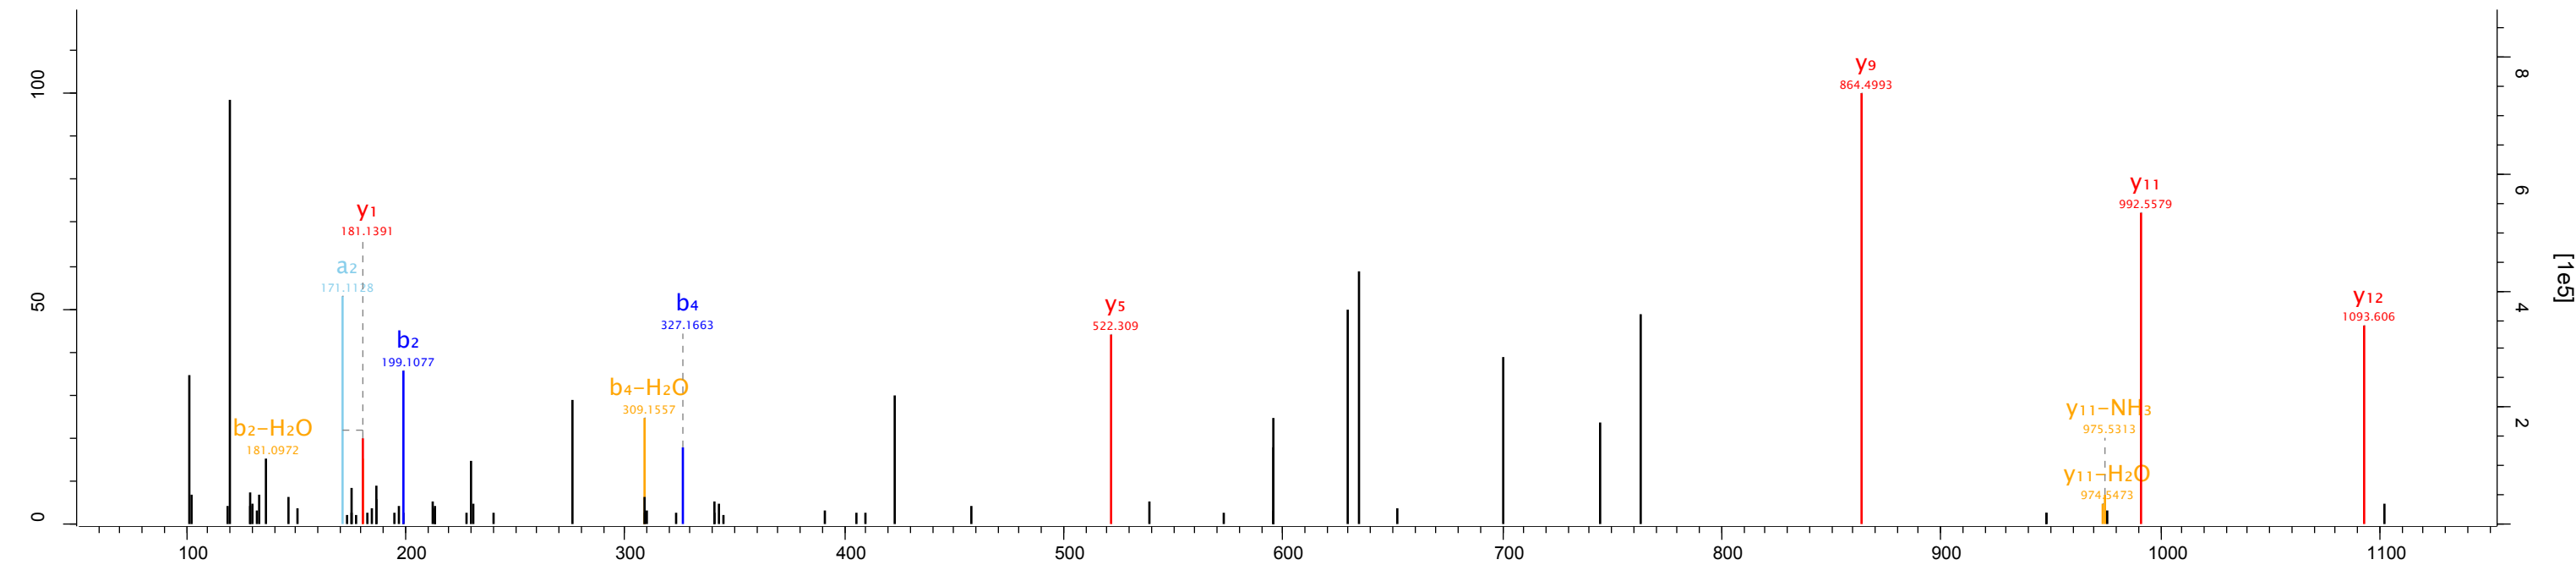



Raw file  
20180707\_MaS\_A375SR\_LM\_proteome\_21

Scan: 20158  
Method: FTMS; HCD  
Score: 76.22  
m/z: 504.76  
Gene names: SEPT3

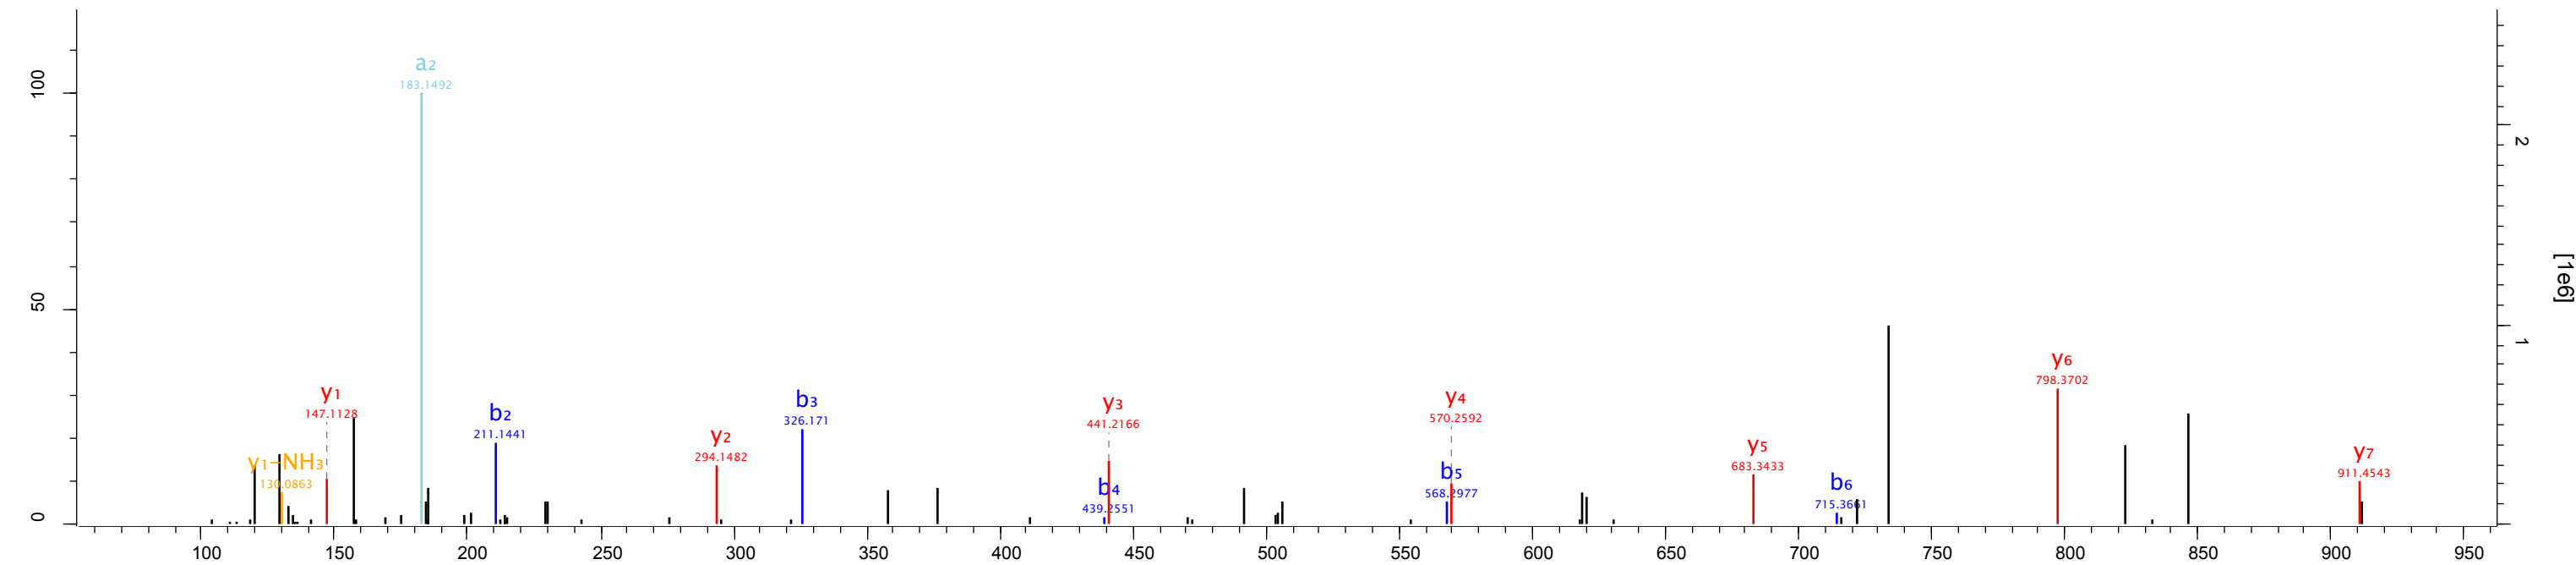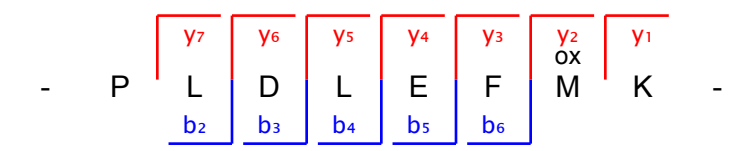

Raw file 20180707\_MaS\_A375SR\_LM\_proteome\_22 Scan 6848 Method FTMS; HCD Score 35.66 m/z 719.82 Gene names LEPROT

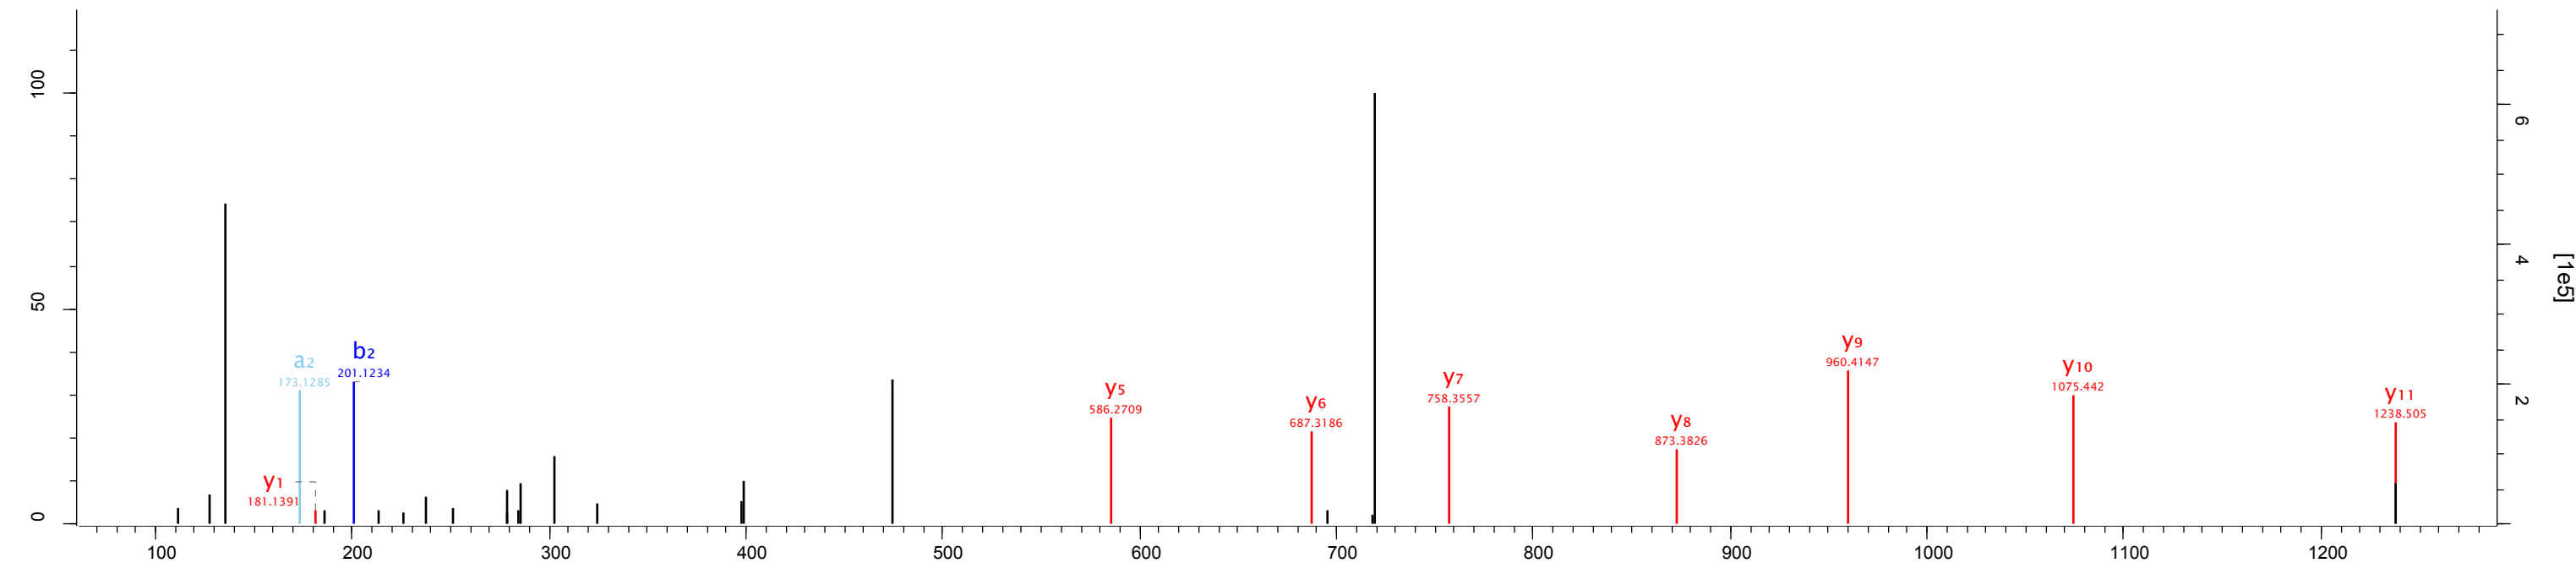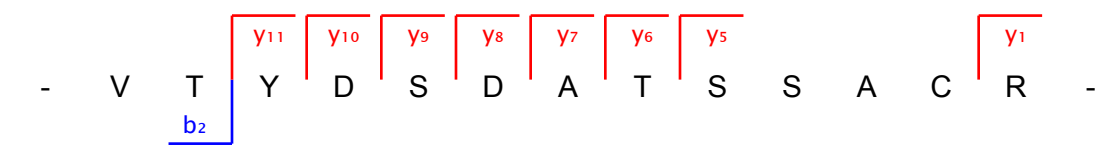

Raw file 20180707\_MaS\_A375SR\_LM\_proteome\_27 Scan 2908 Method FTMS; HCD Score 62 m/z 325.17

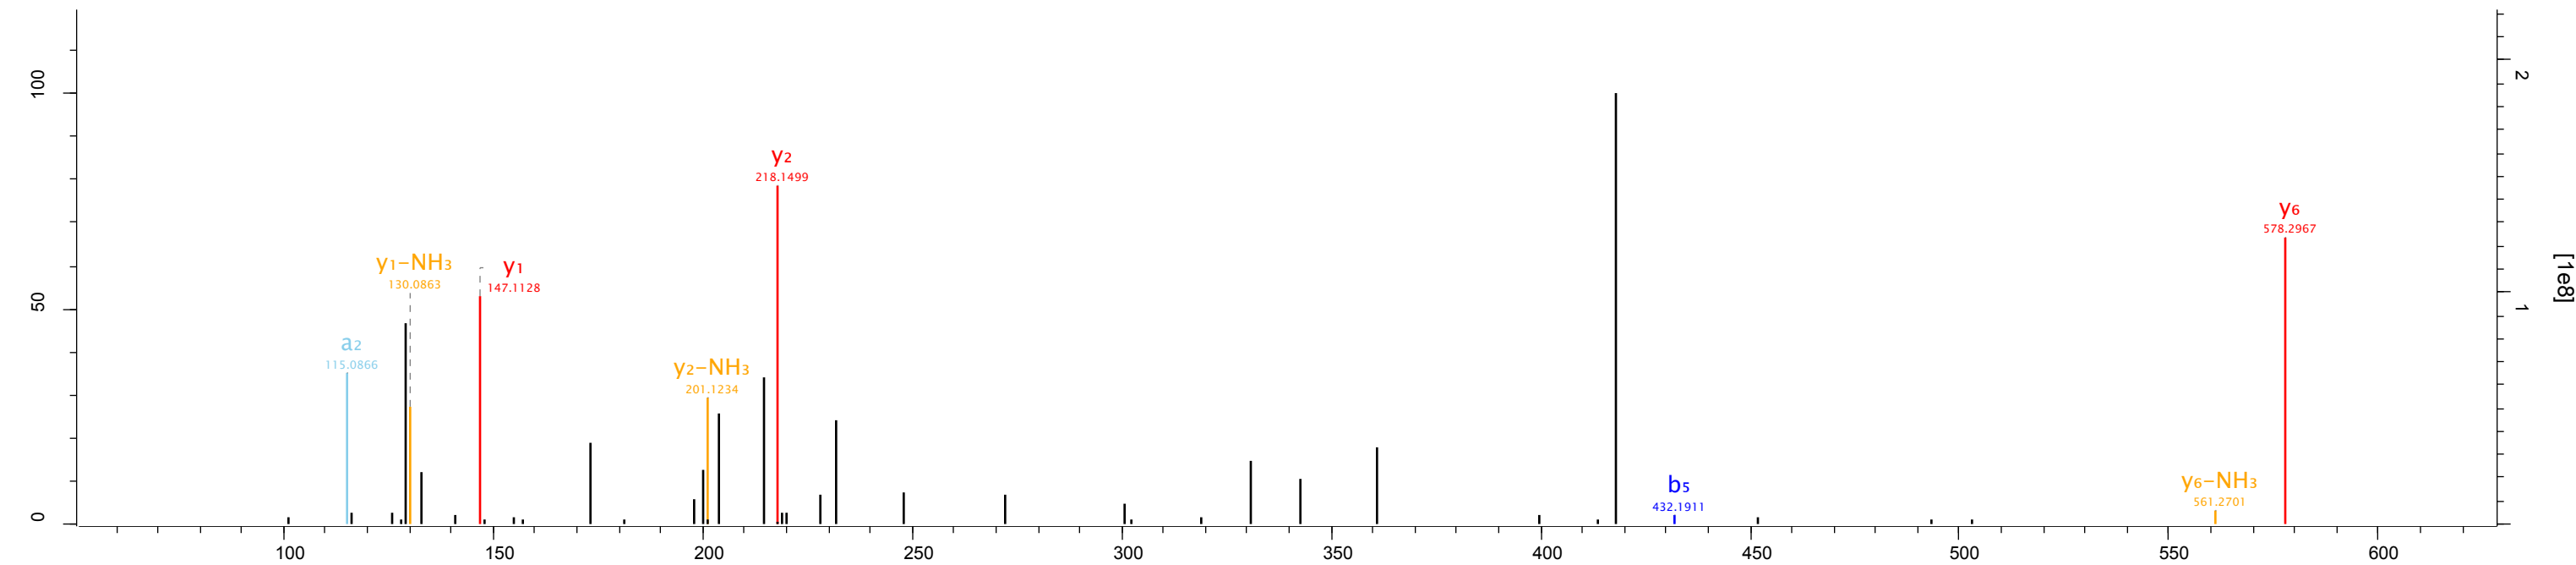

Raw file: 20180707\_MaS\_A375SR\_ML\_proteome\_01  
 Scan: 16538 Method: FTMS; HCD Score: 61.94 m/z: 672 Gene names: TMEM243

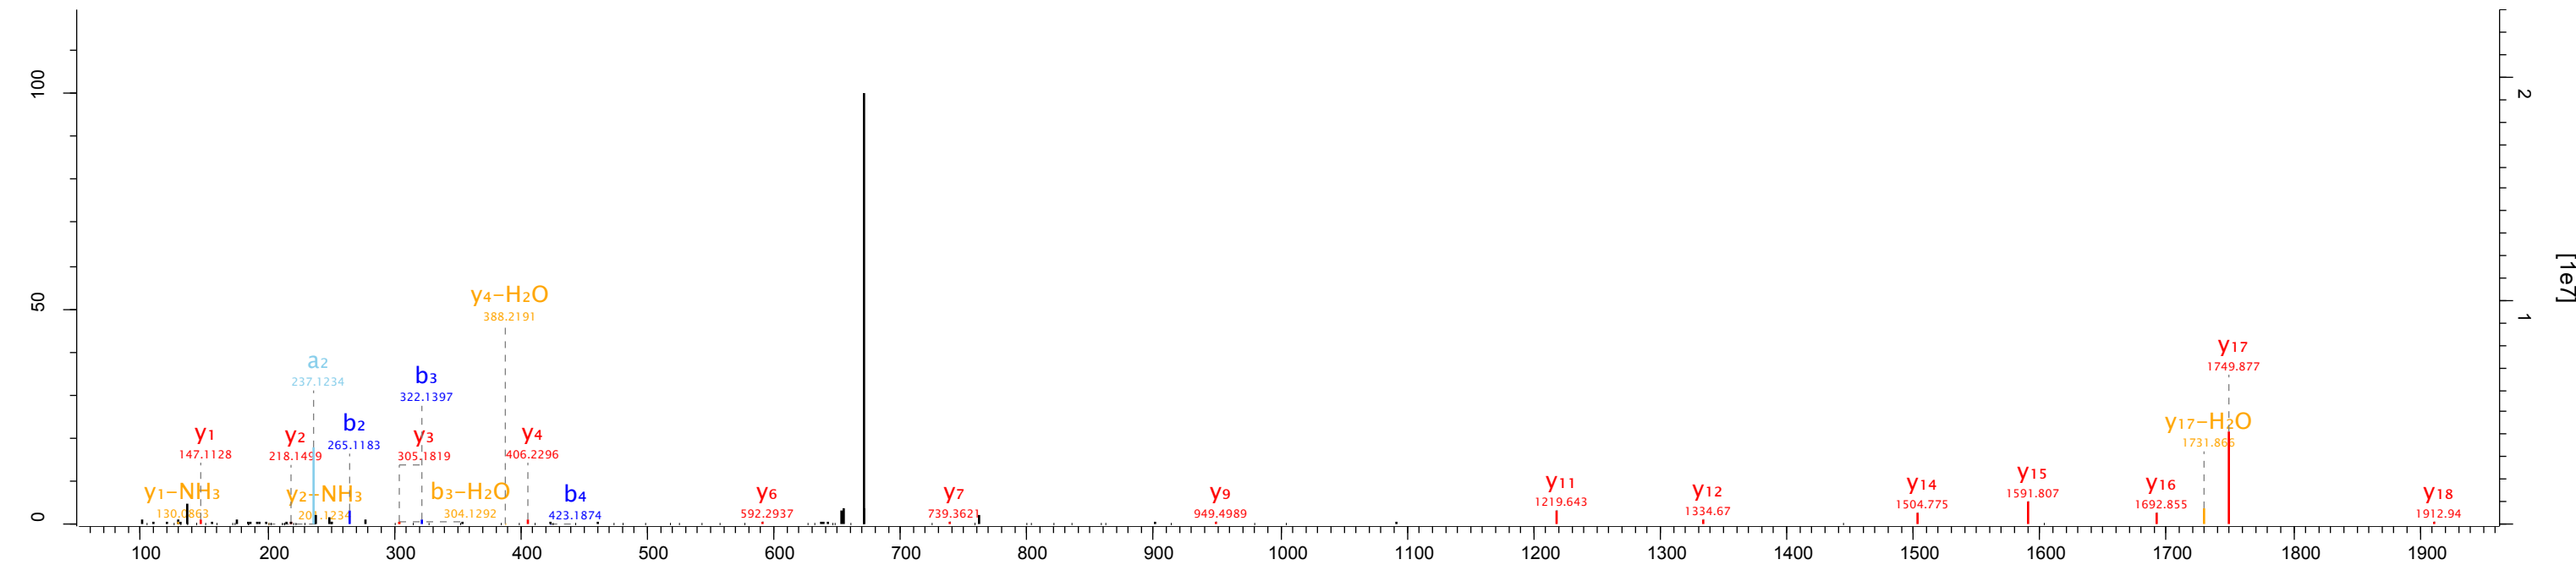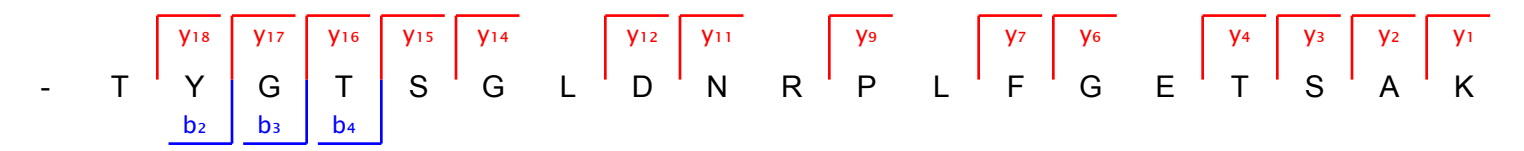

Raw file  
20180707\_MaS\_A375SR\_ML\_proteome\_01

Scan 24618 Method FTMS; HCD Score 66.64 m/z 741.05 Gene names CA8

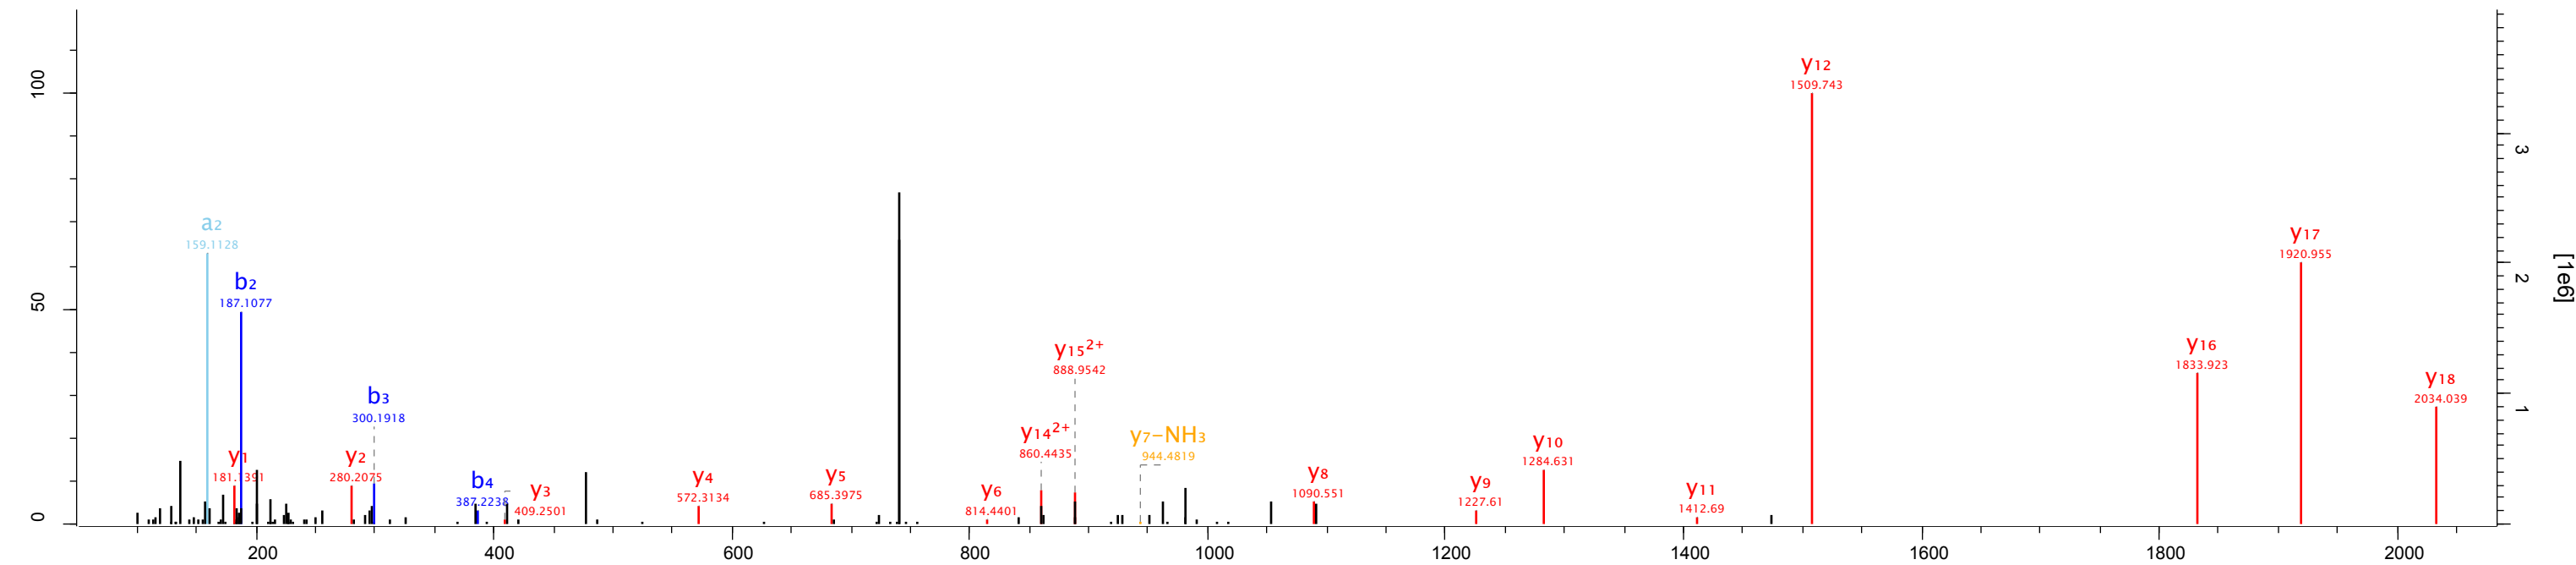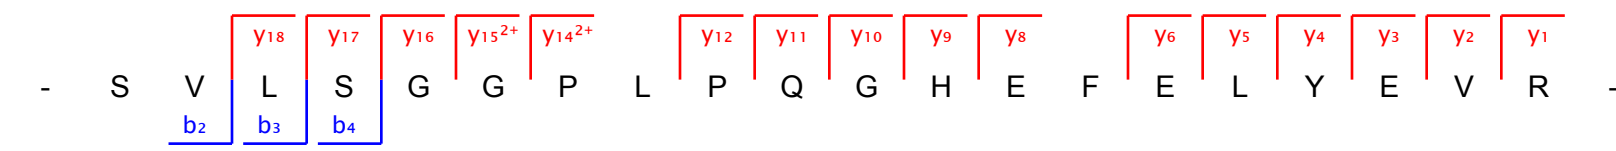

Raw file  
20180707\_MaS\_A375SR\_ML\_proteome\_01

Scan 27408 Method FTMS; HCD Score 68.97 m/z 854.9 Gene names TMEM248

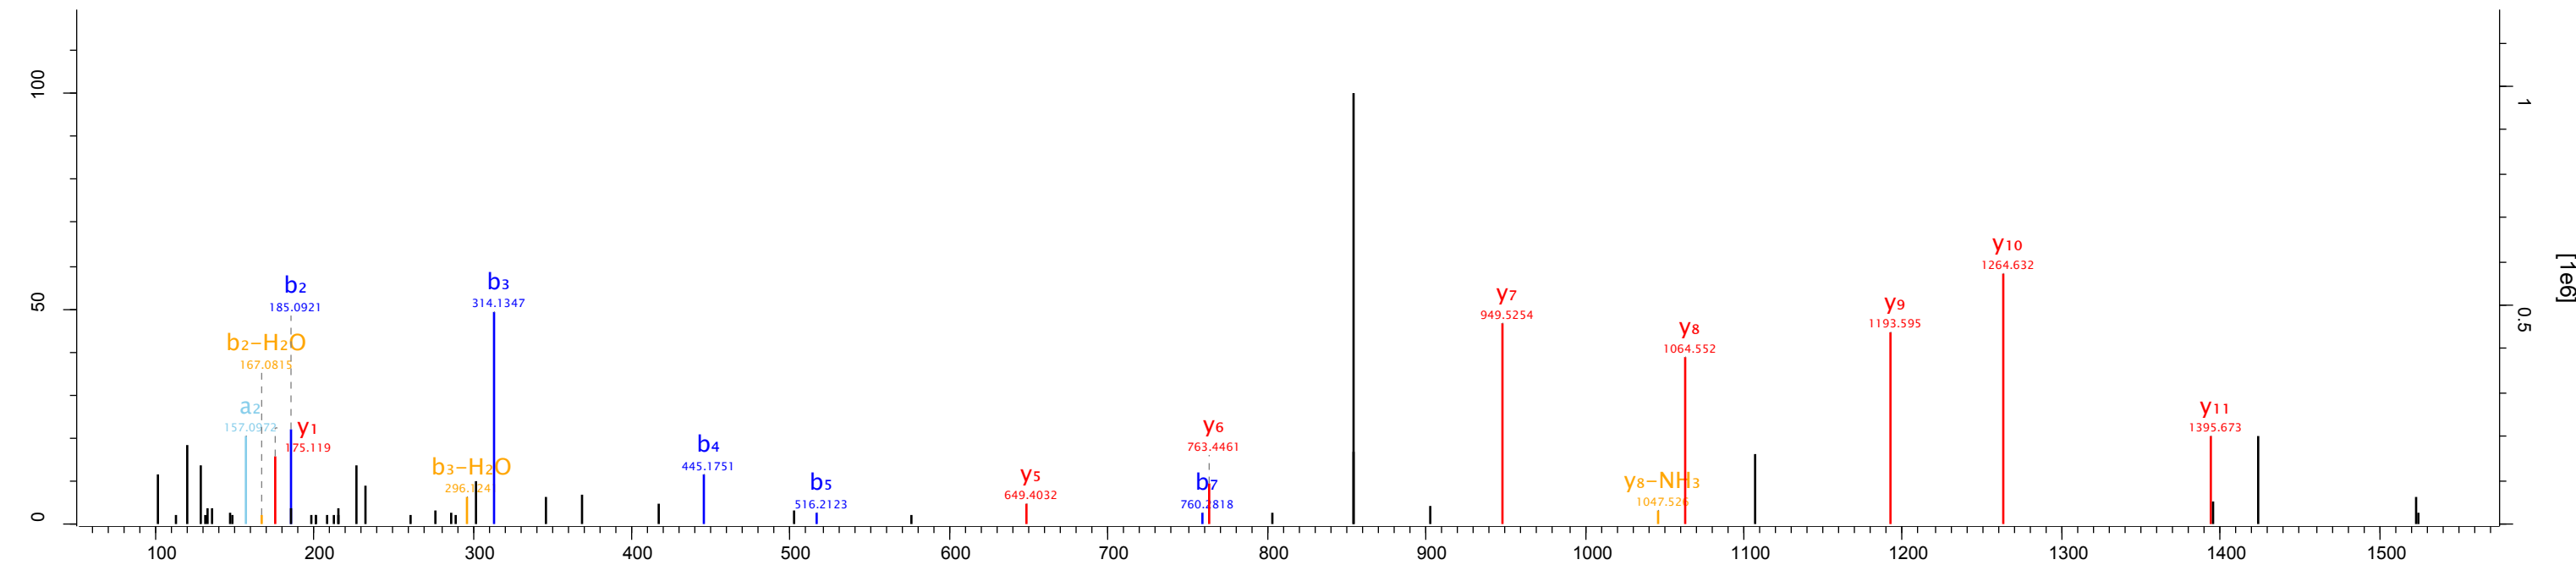

- S P E M A E D W N T F L L R -

Fragmentation mapping:  
- b2 (P) - b3 (E) - b4 (M) - b5 (A) - b7 (D) - y11 (M) - y10 (A) - y9 (E) - y8 (D) - y7 (W) - y6 (N) - y5 (T) - y1 (R)

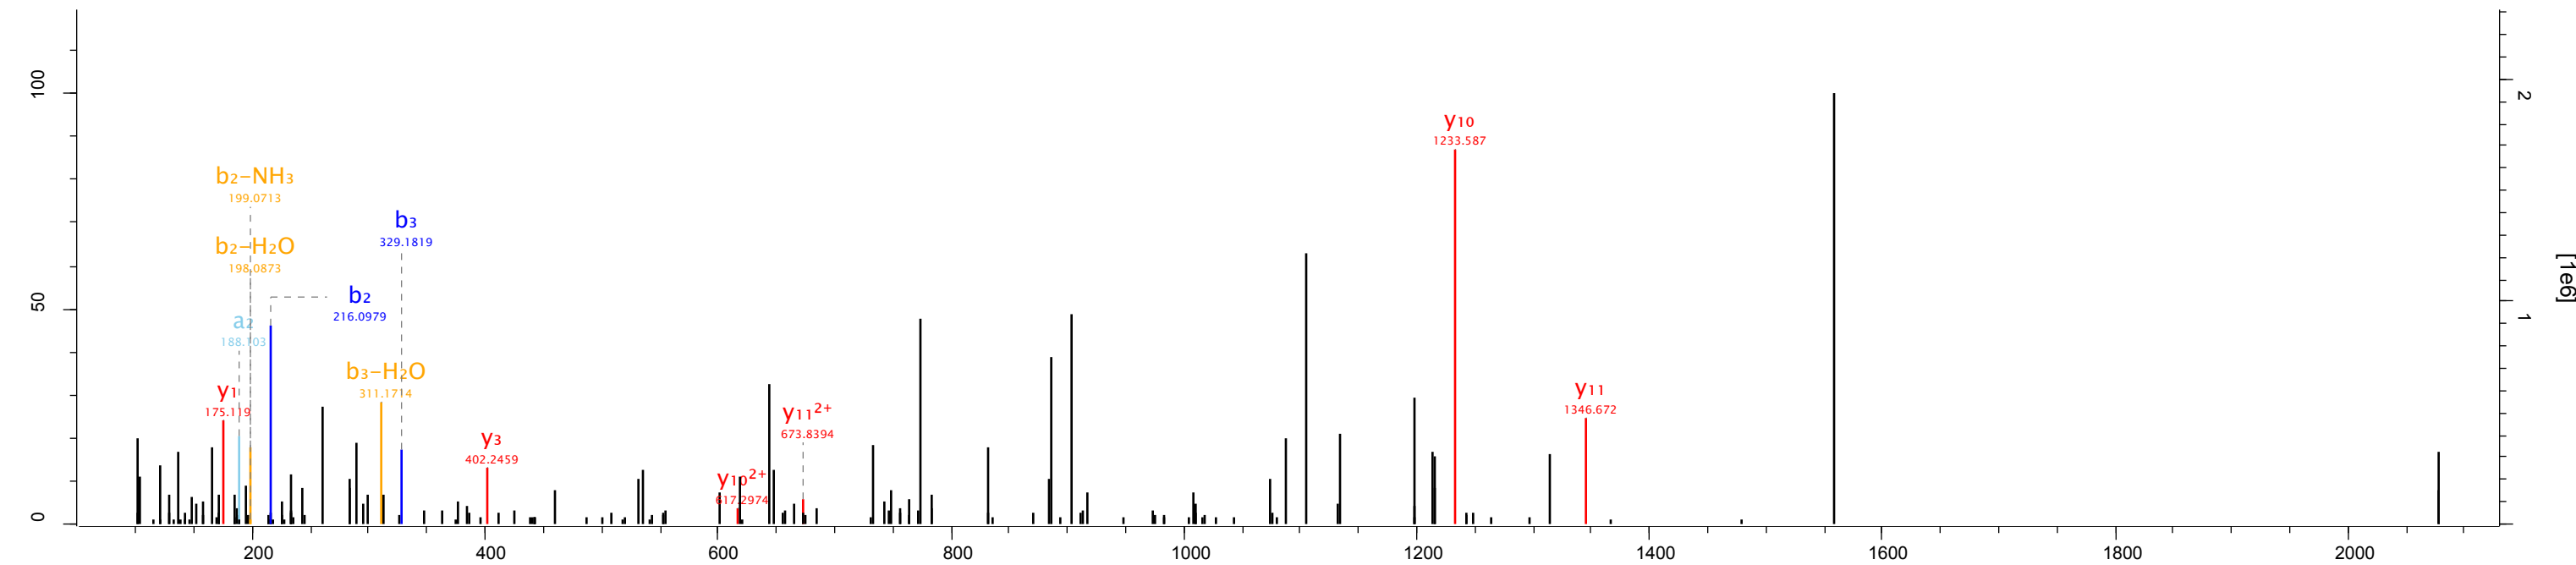

- S Q L D ph T L P P E V N L R -

Fragmentation sites are indicated by brackets below the sequence:

- Blue brackets: b<sub>2</sub> (under Q), b<sub>3</sub> (under L)
- Red brackets: y<sub>11</sub> (over L), y<sub>10</sub> (over D), y<sub>3</sub> (over N), y<sub>1</sub> (over R)

Raw file  
20180707\_MaS\_A375SR\_ML\_proteome\_02

Scan Method Score m/z Gene names  
9058 FTMS; HCD 107.59 421.21 PTGDS

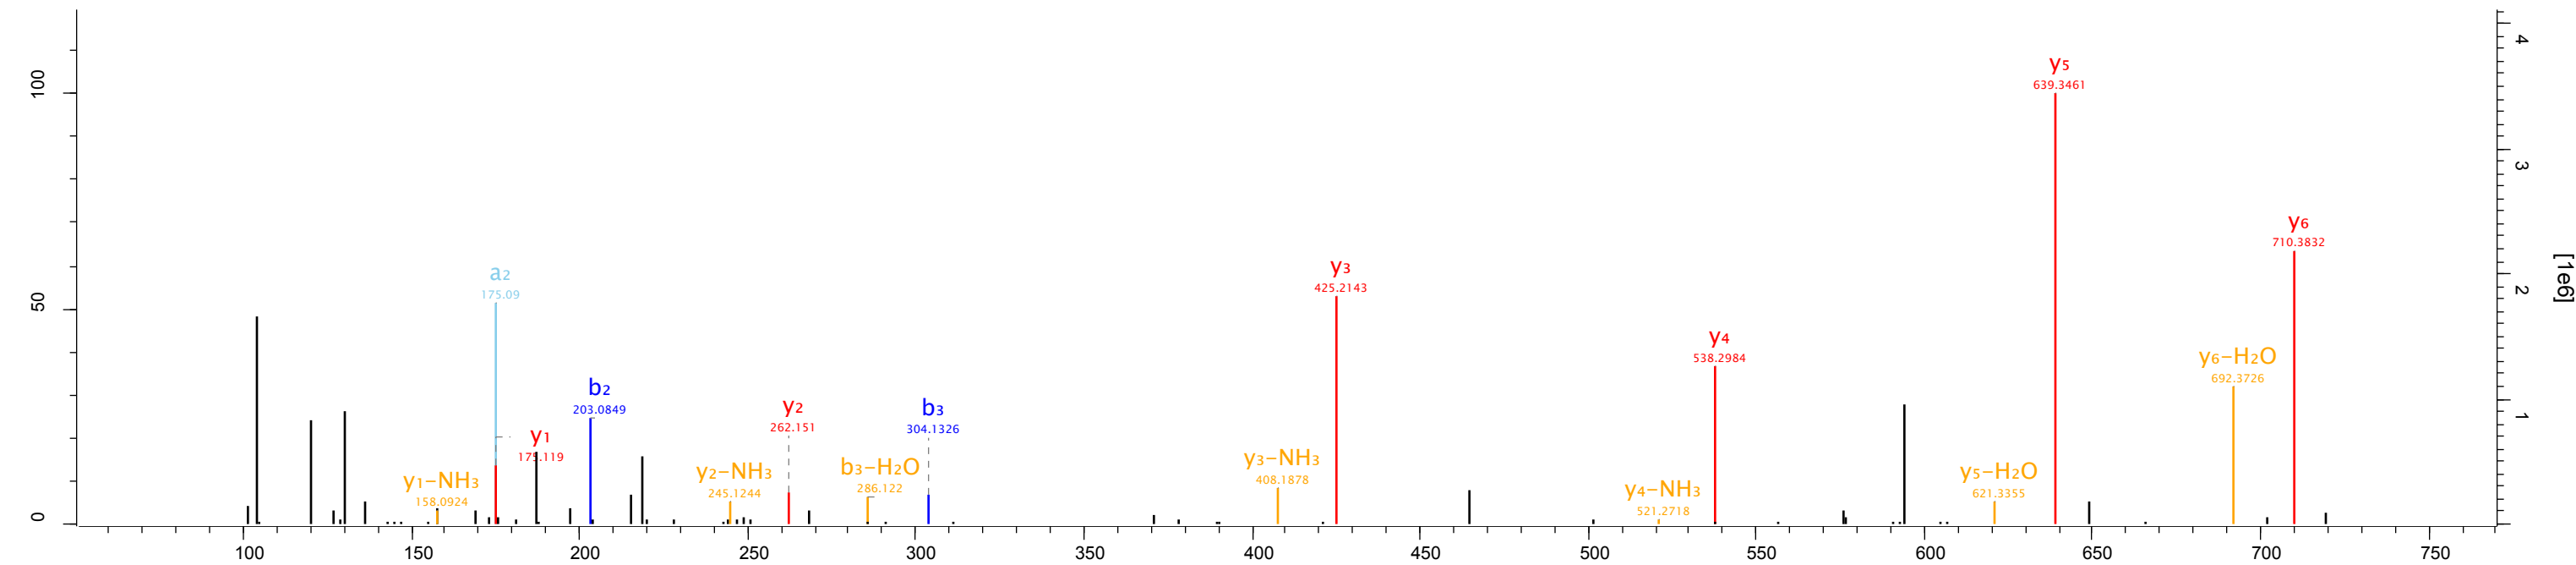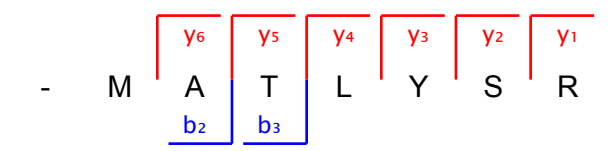



Raw file: 20180707\_MaS\_A375SR\_ML\_proteome\_03  
 Scan: 21198 Method: FTMS; HCD Score: 97.96 m/z: 498.29 Gene names: SELM

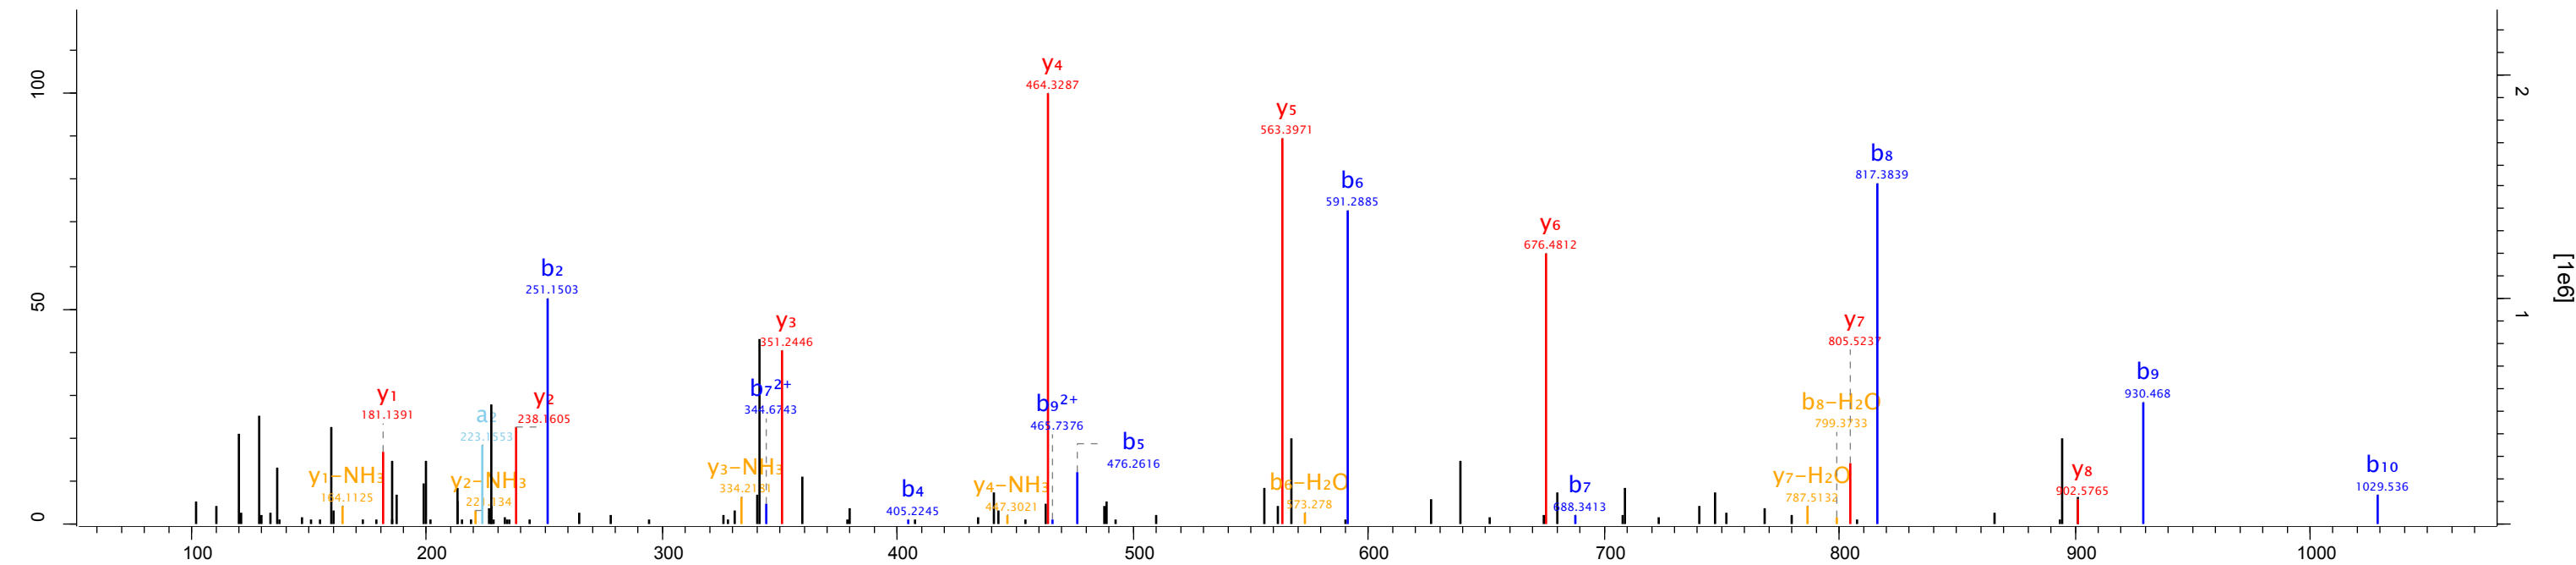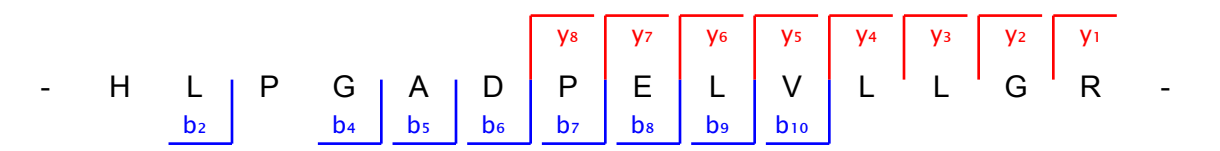

Raw file 20180707\_MaS\_A375SR\_ML\_proteome\_06 Scan 12378 Method FTMS; HCD Score 46.66 m/z 444.25 Gene names C1orf234

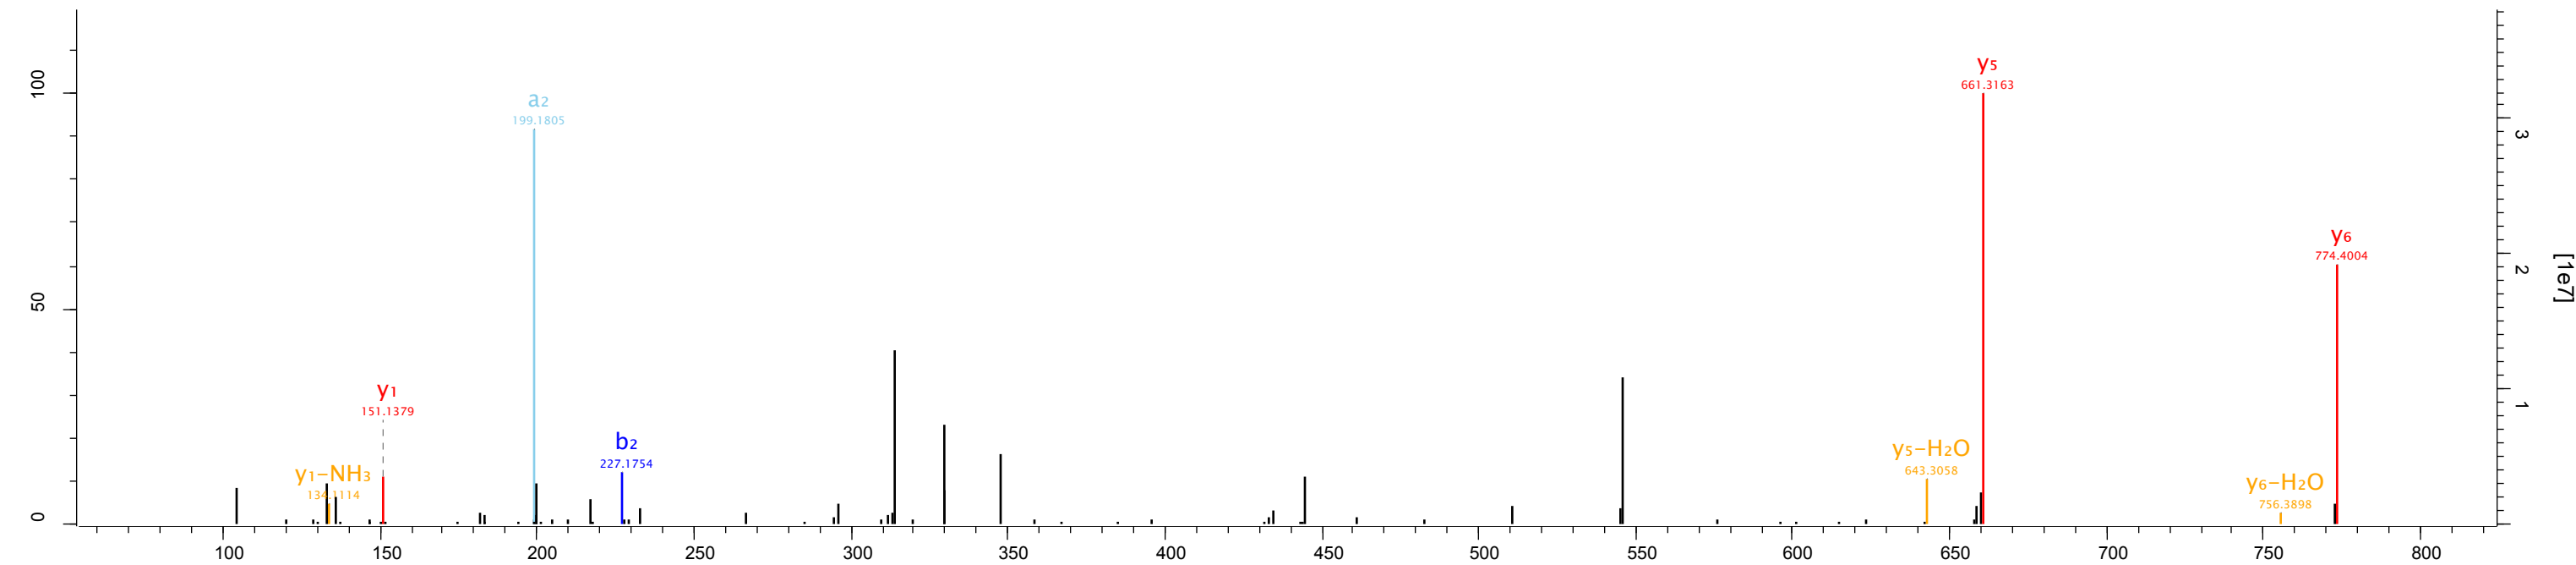

Raw file: 20180707\_MaS\_A375SR\_ML\_proteome\_06  
 Scan: 13128 Method: FTMS; HCD Score: 54.2 m/z: 838.4 Gene names: DNAH2

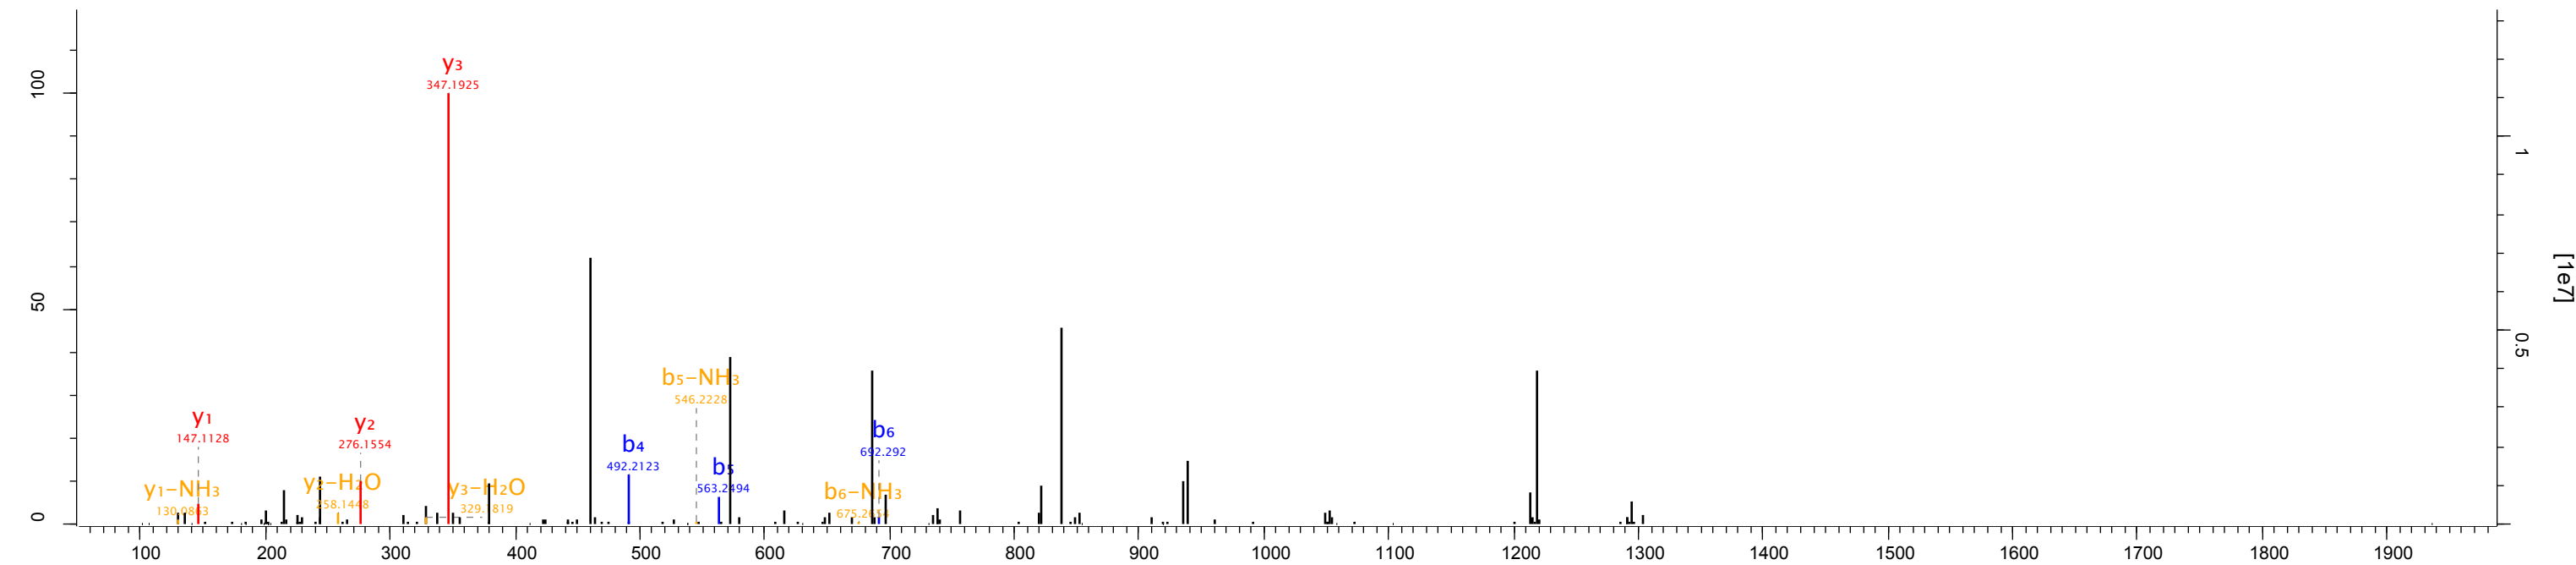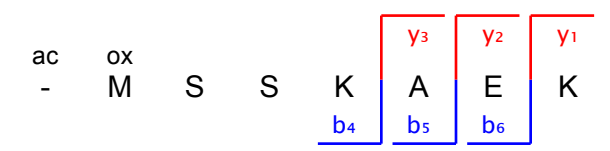

Raw file 20180707\_MaS\_A375SR\_ML\_proteome\_06 Scan 17308 Method FTMS; HCD Score 54.81 m/z 448.01 Gene names SLC35A3

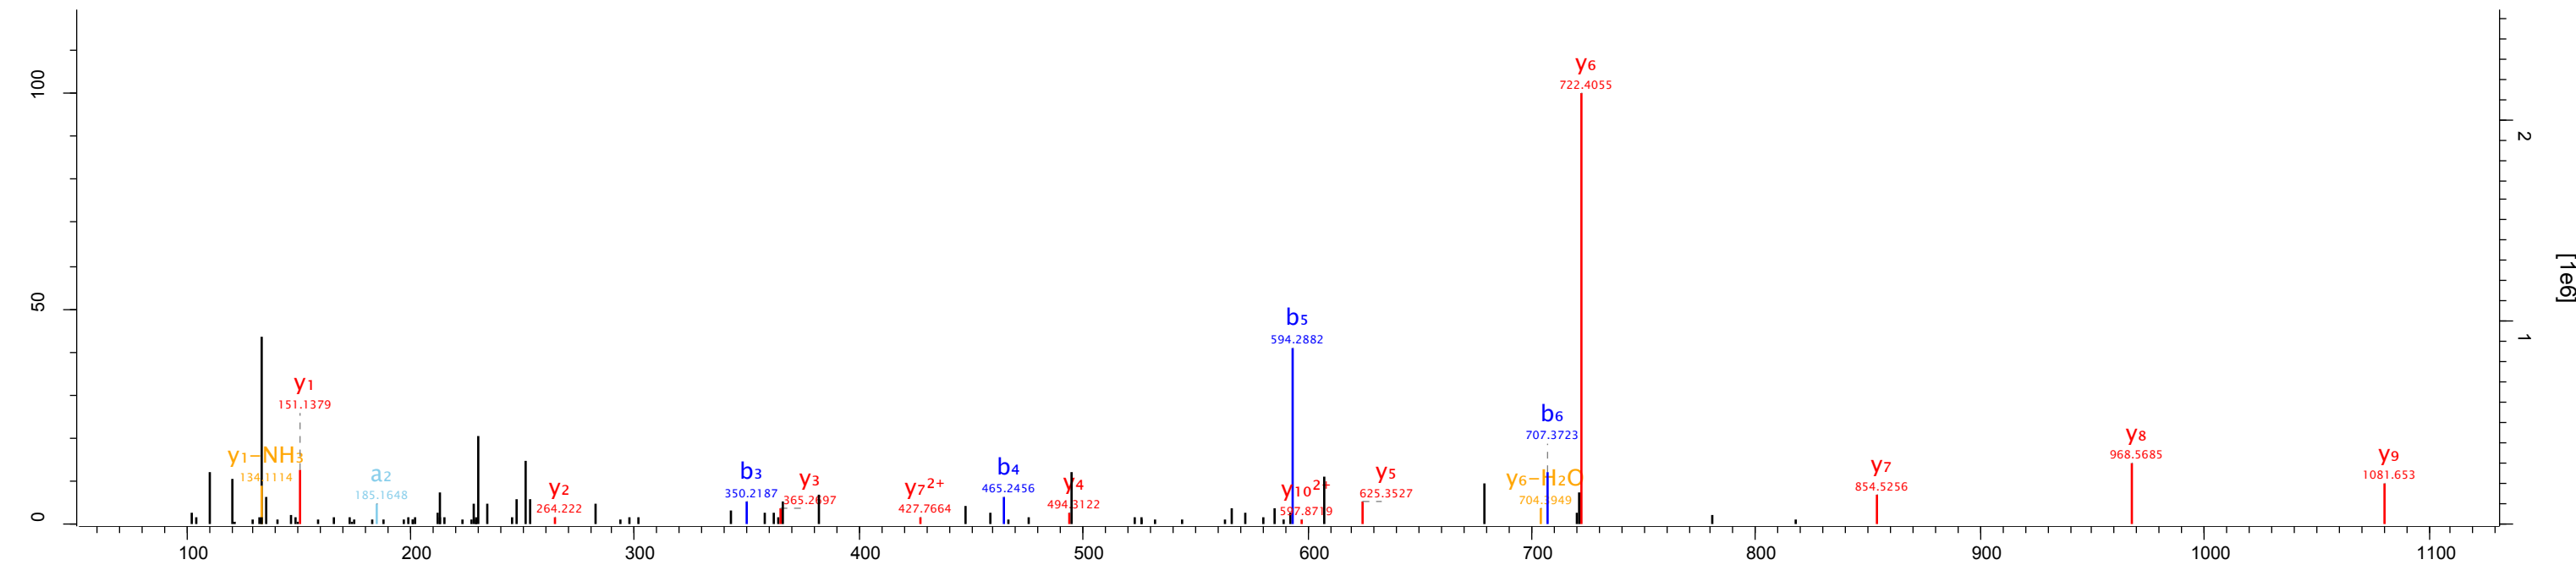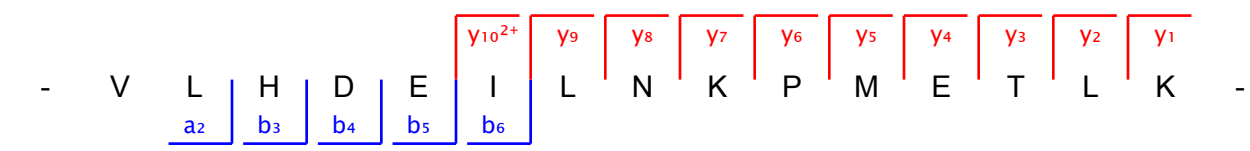

Raw file  
20180707\_MaS\_A375SR\_ML\_proteome\_06

Scan 25838 Method FTMS; HCD Score 71.56 m/z 528.6 Gene names SGK3

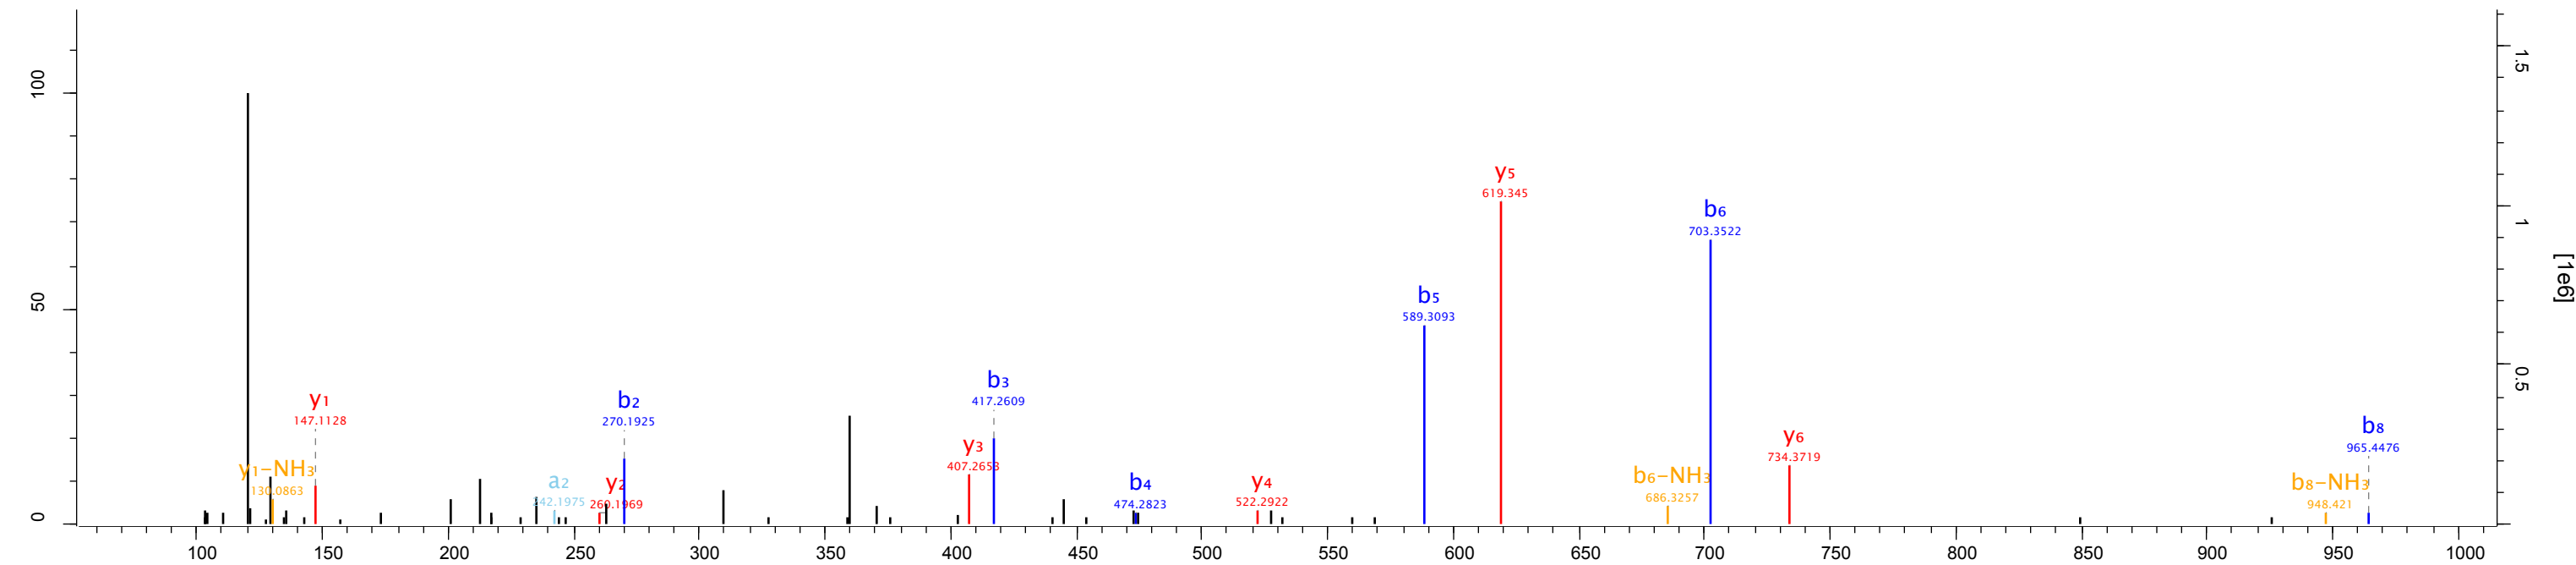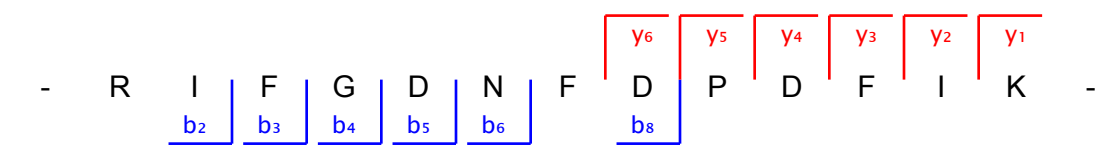

Raw file 20180707\_MaS\_A375SR\_ML\_proteome\_09 Scan 9288 Method FTMS; HCD Score 46.89 m/z 977.39

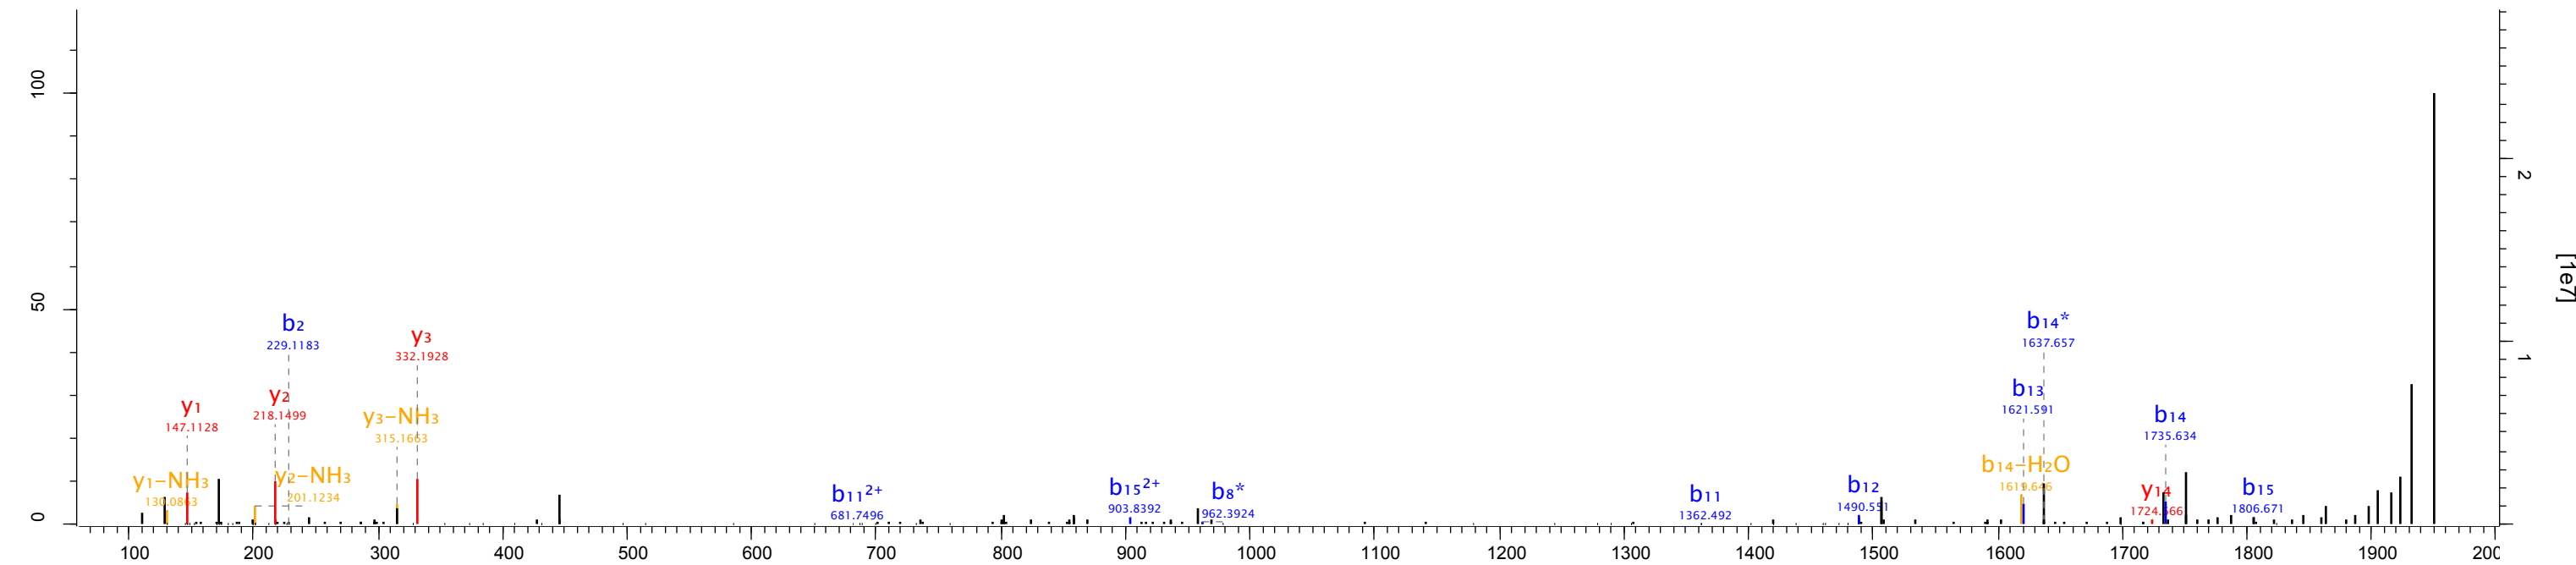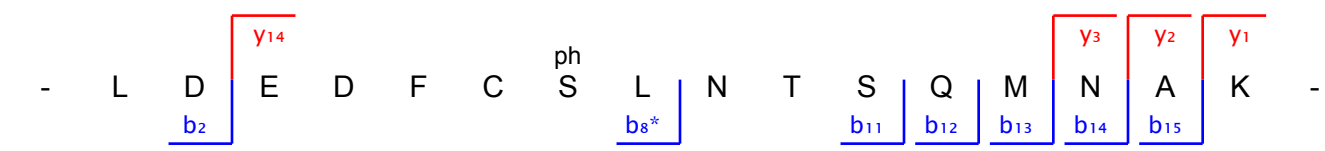

Raw file: 20180707\_MaS\_A375SR\_ML\_proteome\_10  
 Scan: 28708 Method: FTMS; HCD Score: 101.65 m/z: 570.82 Gene names: MT-ND2

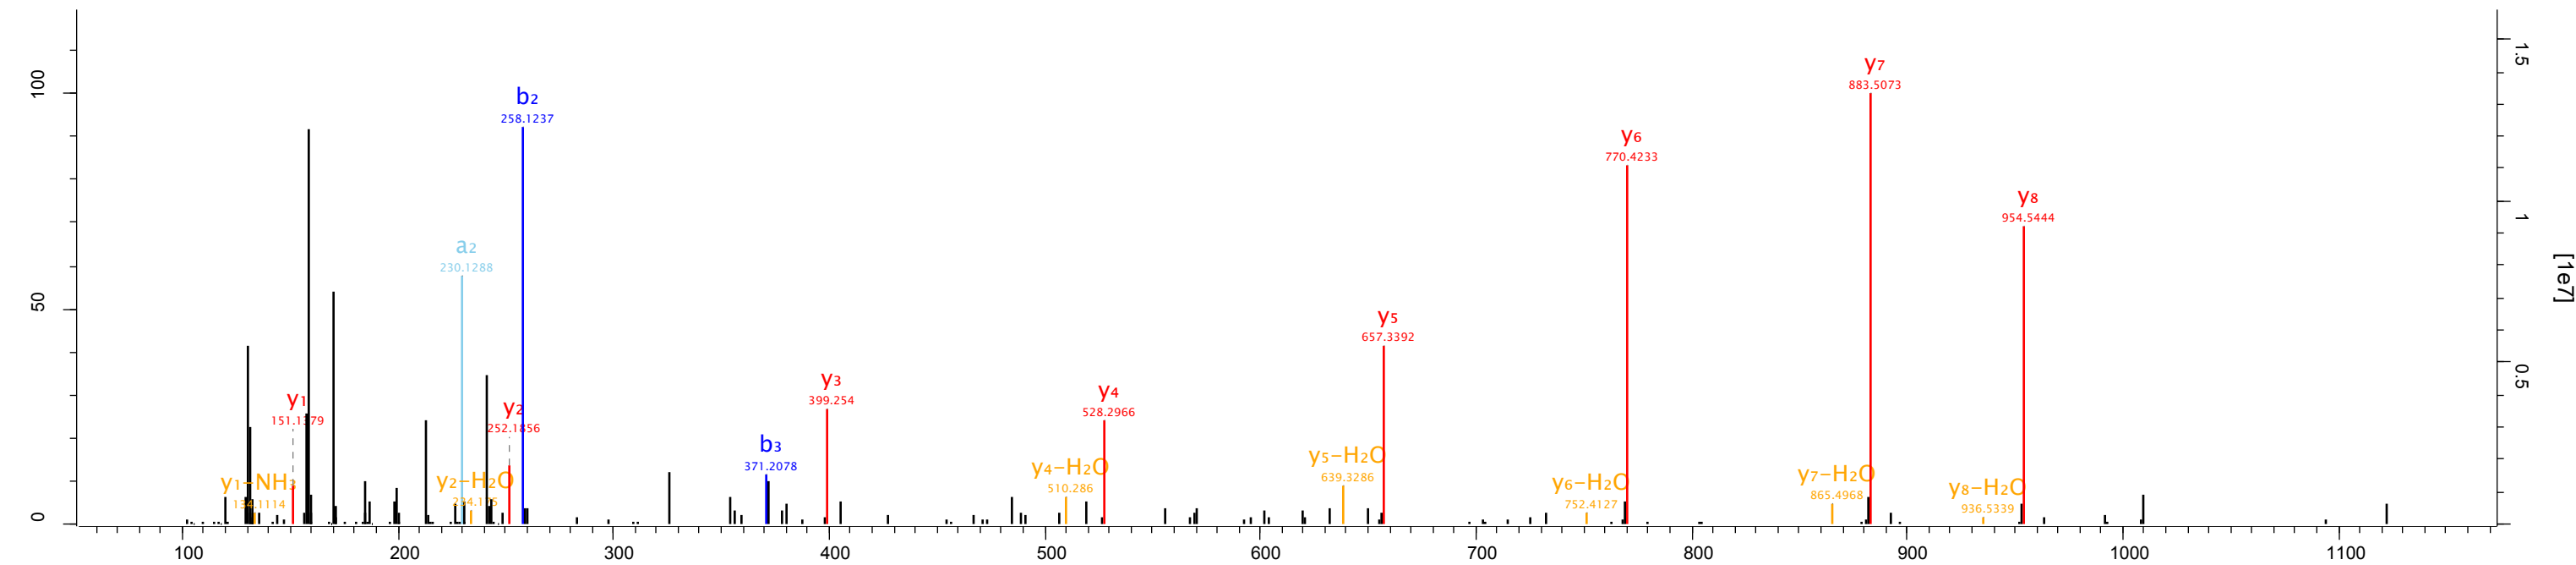

Raw file 20180707\_MaS\_A375SR\_ML\_proteome\_10 Scan 7588 Method FTMS; HCD Score 41.16 m/z 591.8

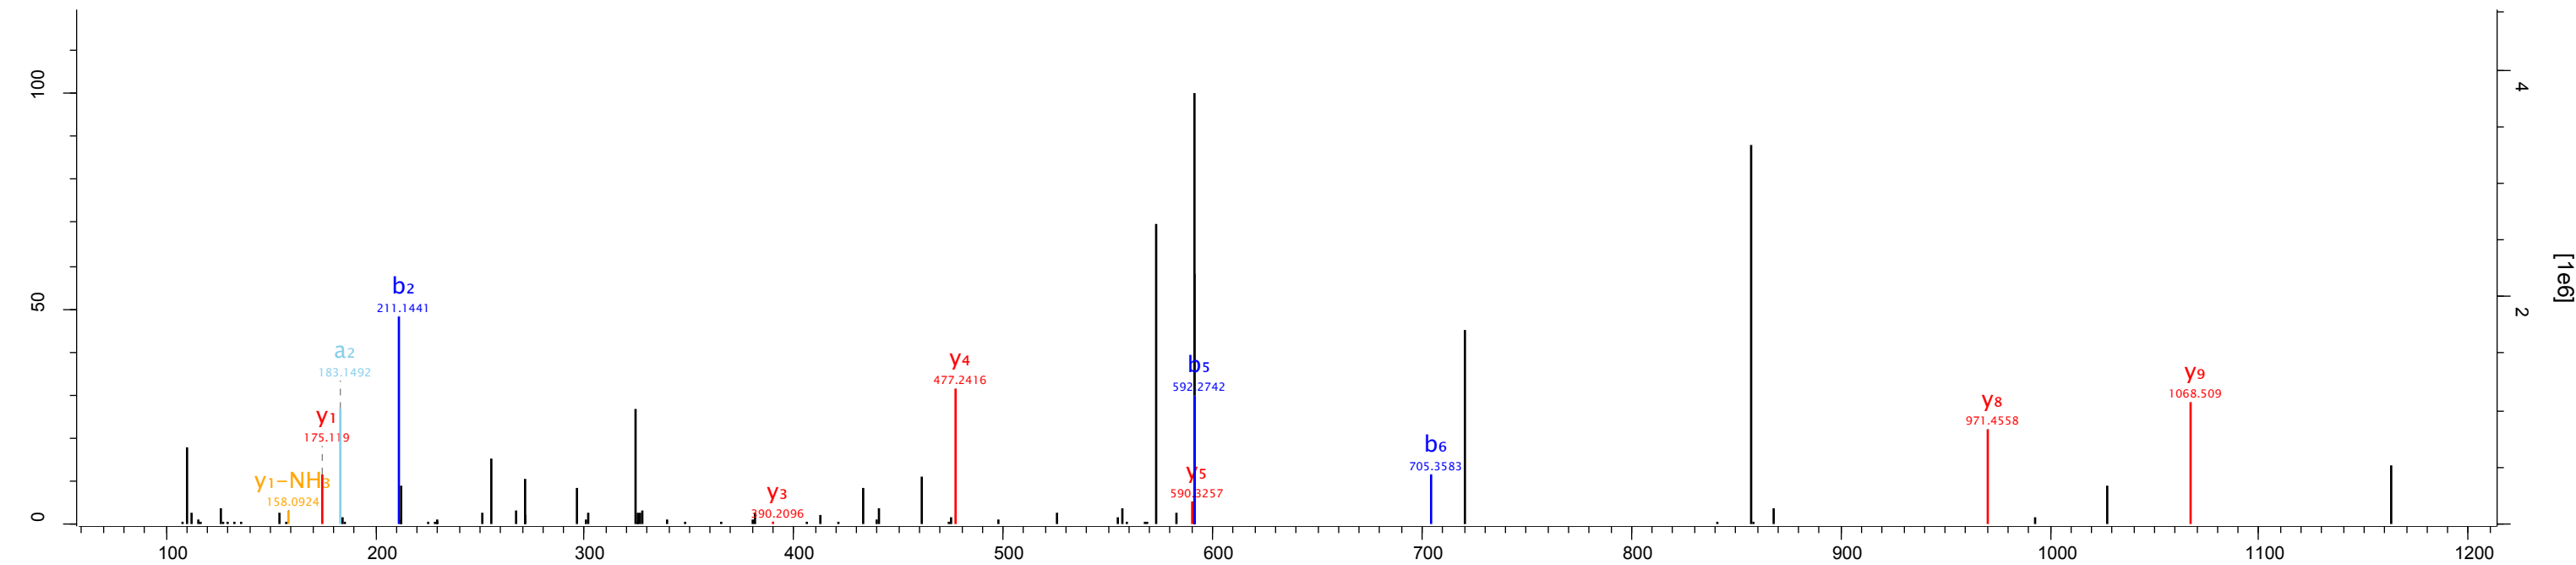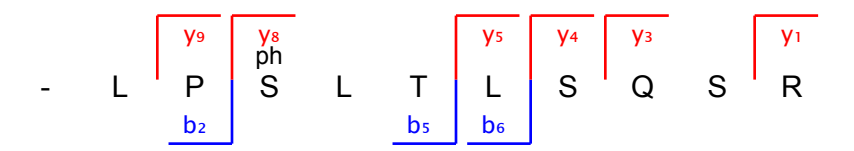



Raw file  
20180707\_MaS\_A375SR\_ML\_proteome\_11

Scan 27988 Method FTMS; HCD Score 70.06 m/z 533.32 Gene names CYB561

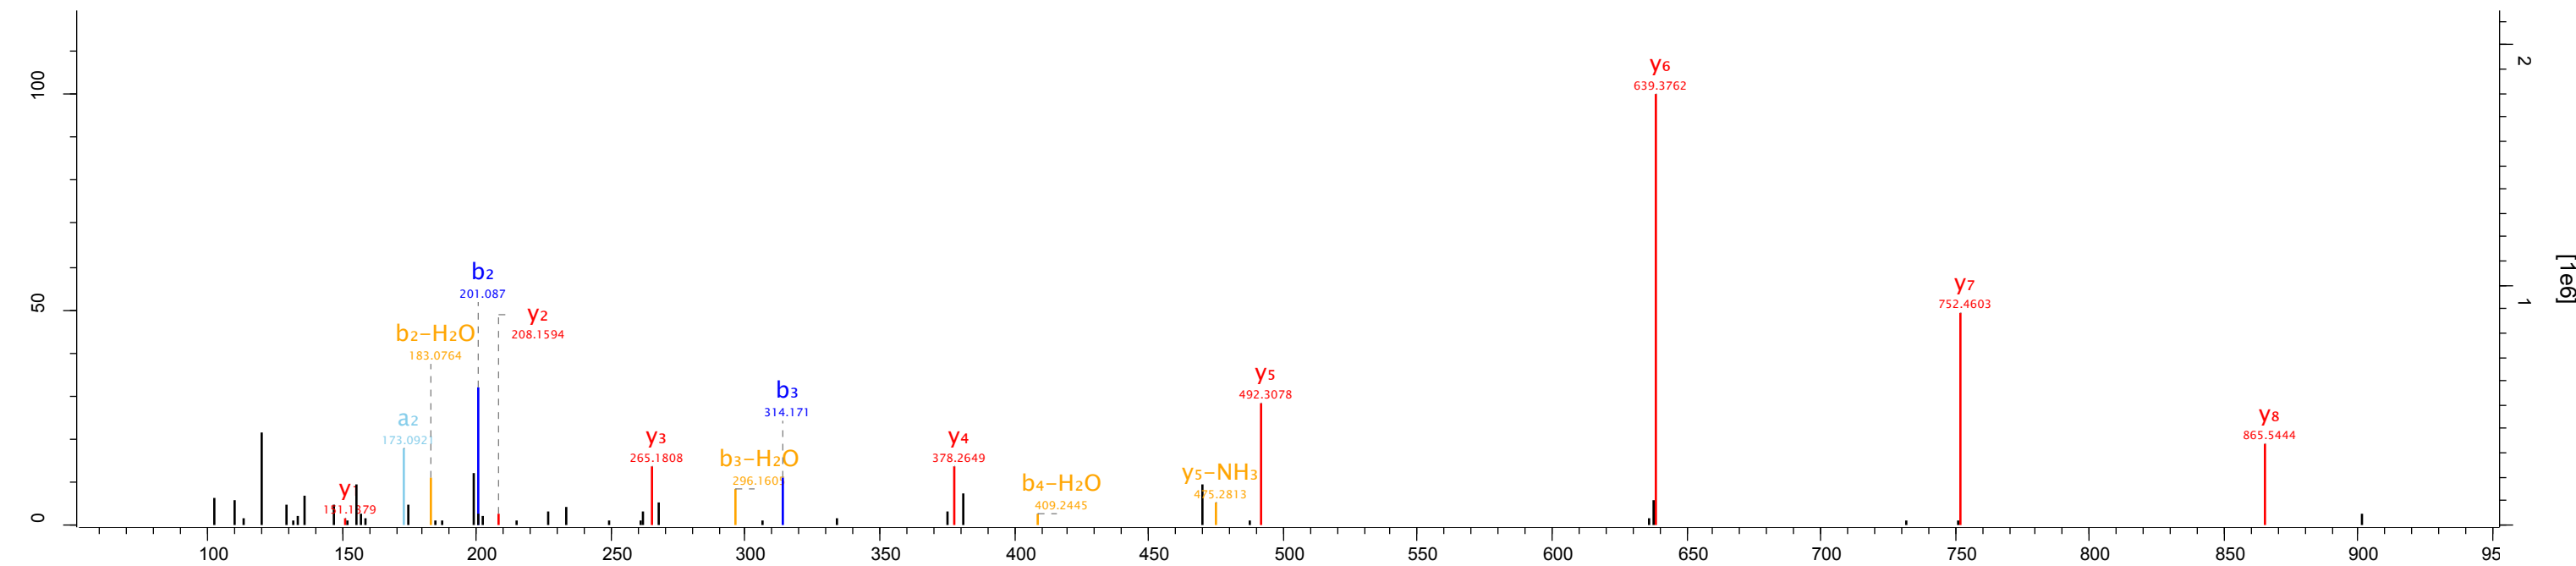

Raw file  
20180707\_MaS\_A375SR\_ML\_proteome\_11

Scan 28698 Method FTMS; HCD Score 65.37 m/z 857.92 Gene names SSR3

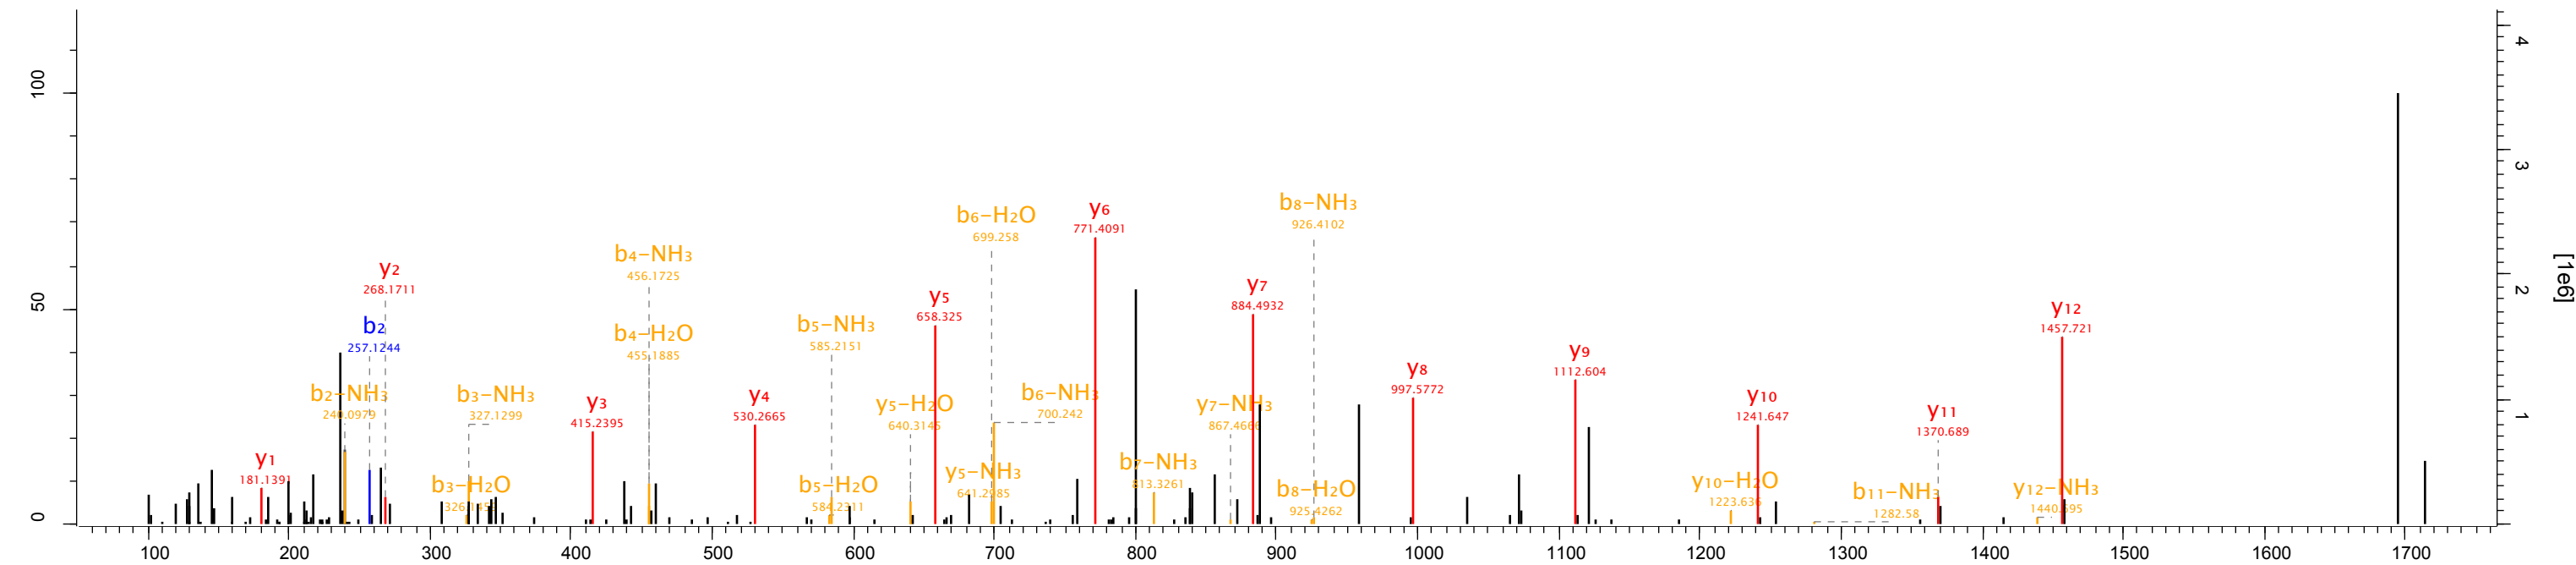

Raw file: 20180707\_MaS\_A375SR\_ML\_proteome\_11  
 Scan: 3308 Method: FTMS; HCD Score: 94.09 m/z: 538.61 Gene names: MT-CO3

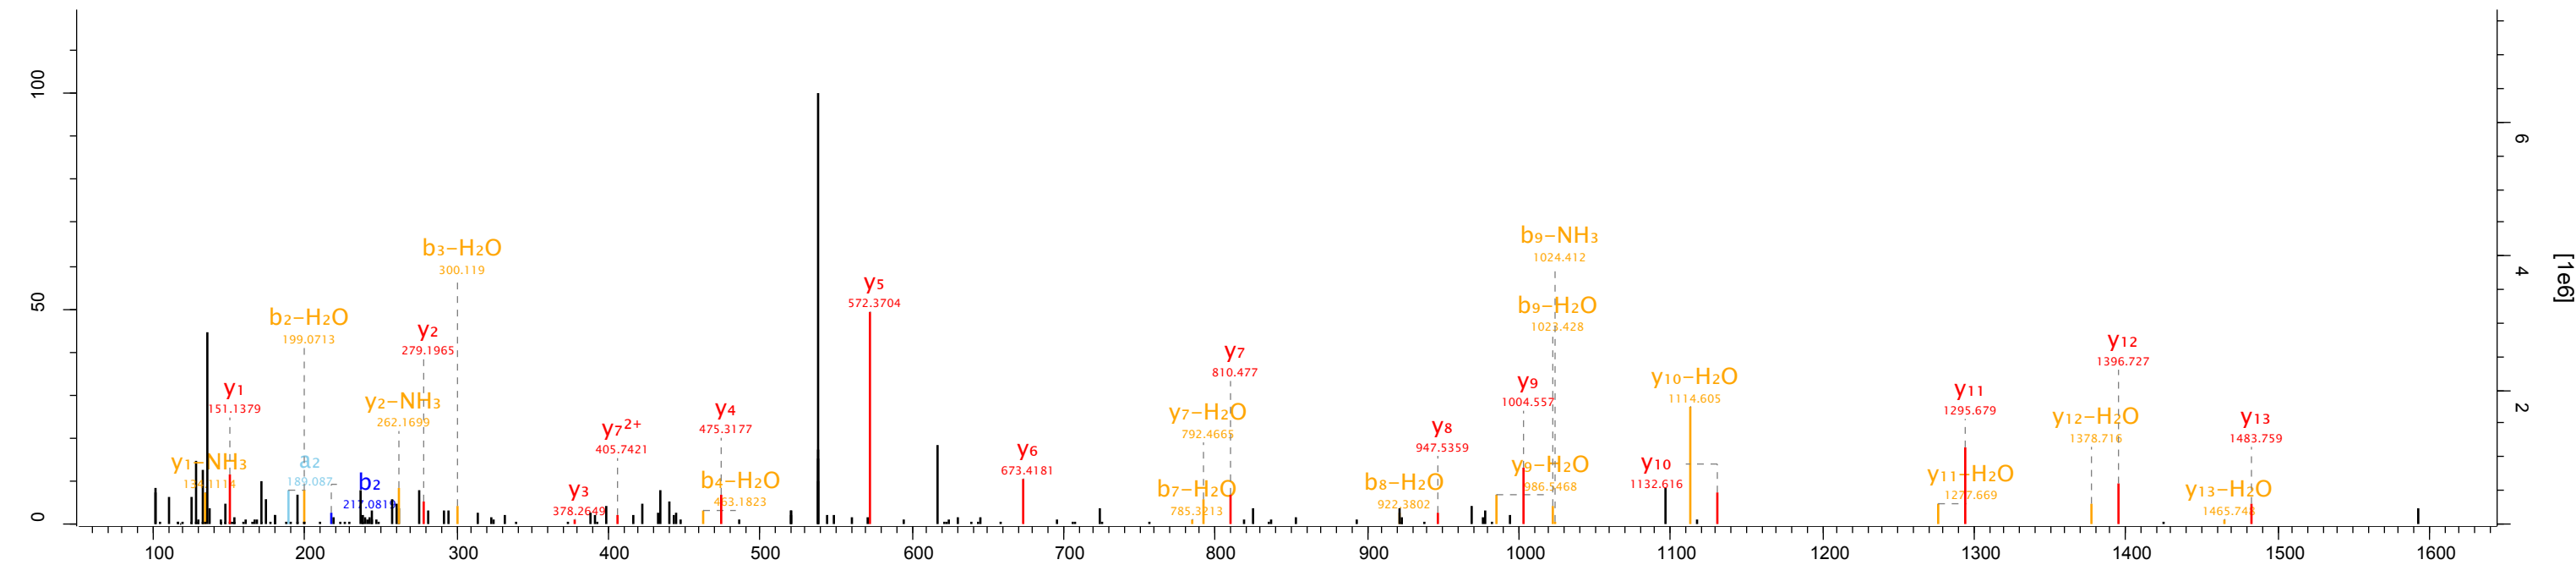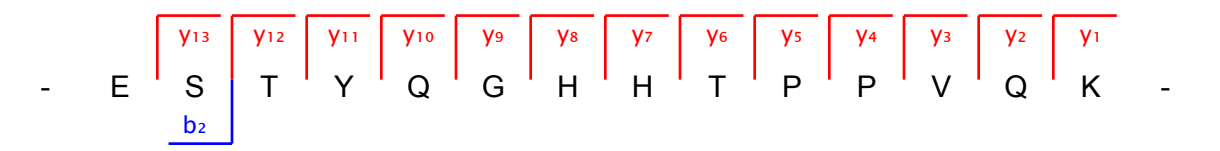

Raw file

20180707\_MaS\_A375SR\_ML\_proteome\_12

| Scan  | Method    | Score | m/z    |
|-------|-----------|-------|--------|
| 11058 | FTMS; HCD | 46.84 | 657.84 |

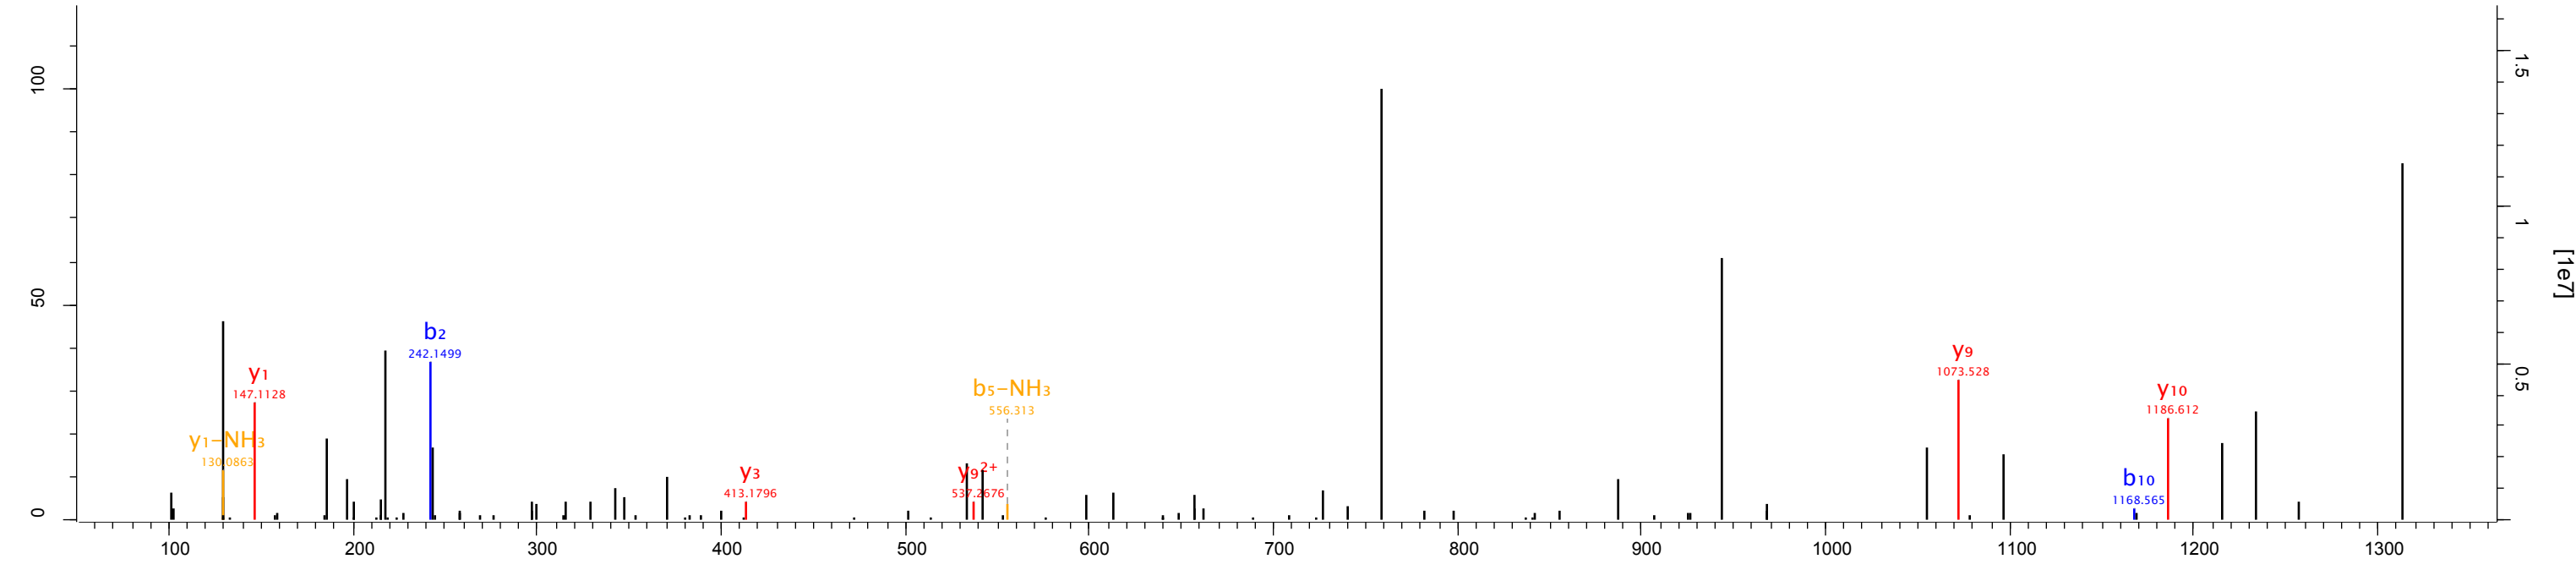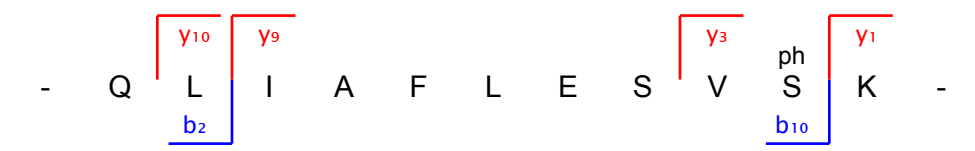

Raw file 20180707\_MaS\_A375SR\_ML\_proteome\_12 Scan 26468 Method FTMS; HCD Score 70.4 m/z 494.82 Gene names STON2

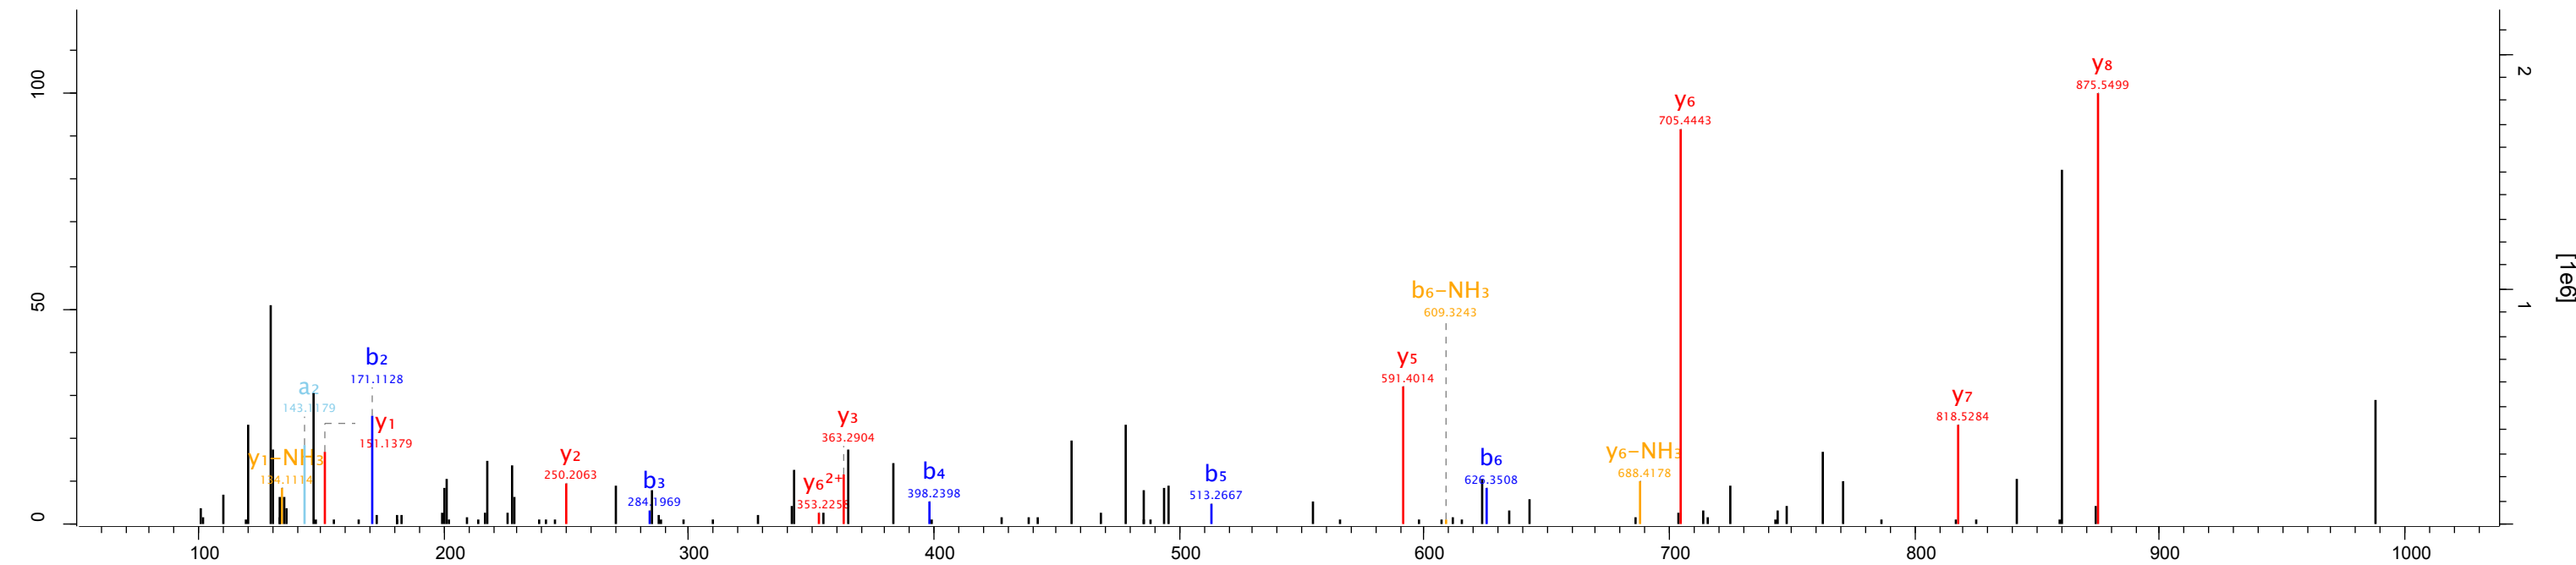

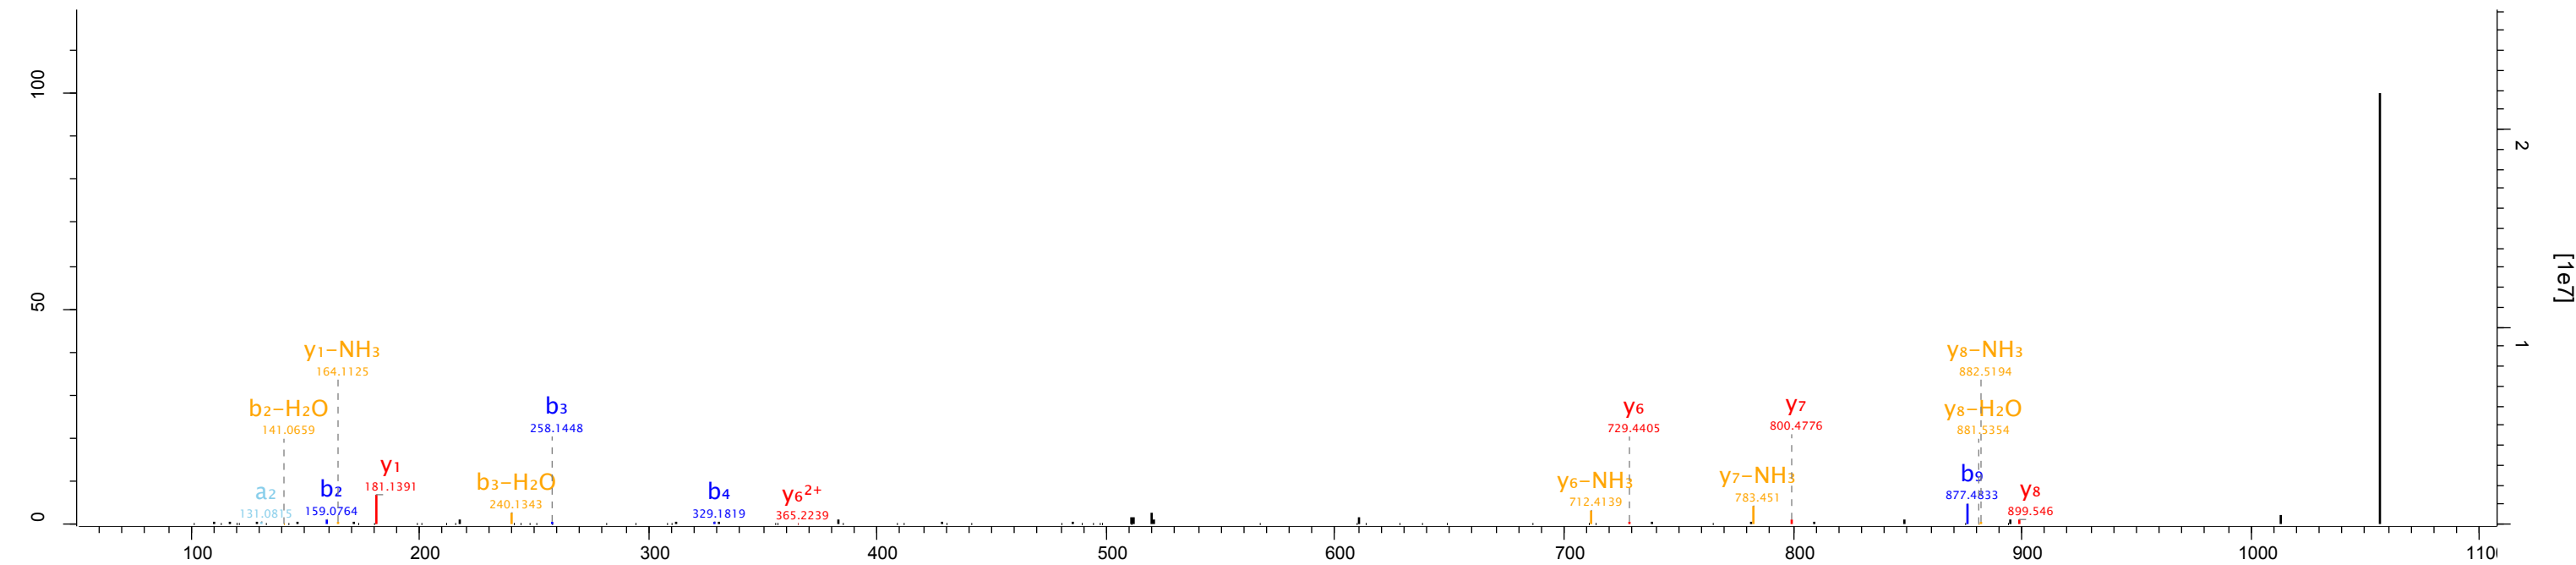

- A S V A L S G E R R -

Fragmentation mapping:  
- b2 (S) b3 (V) b4 (A) b9 (R)  
- y8 (V) y7 (A) y6 (L) y1 (R)

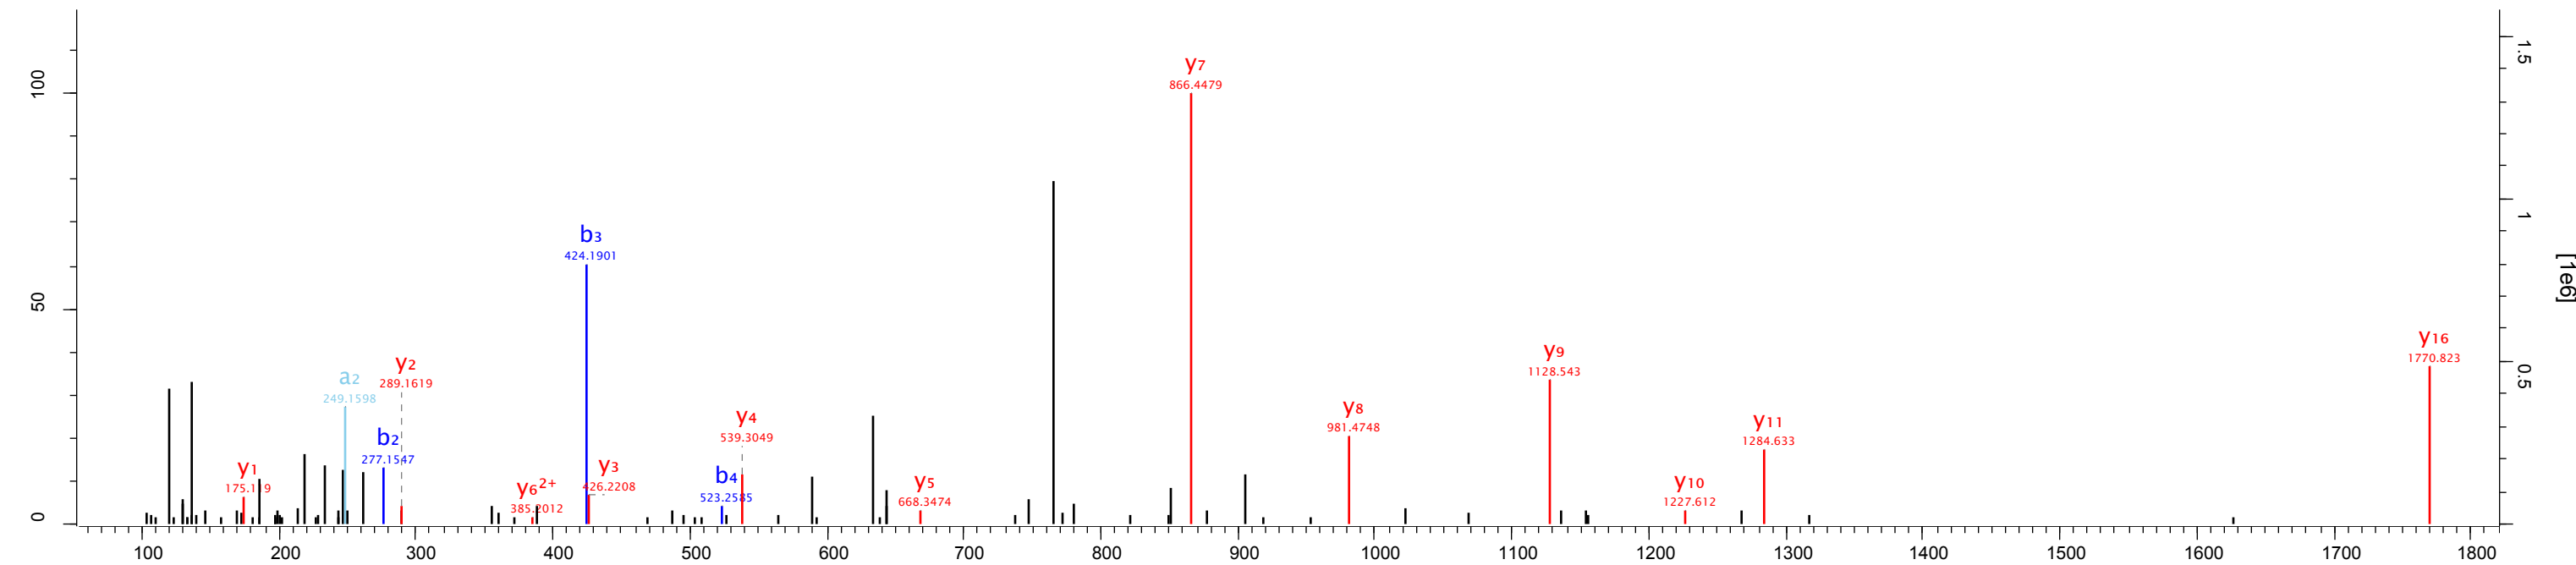

- Y I M<sup>ox</sup> V P S G N M G V F D P T E I H N R -

Fragmentation mapping (b and y ions) is shown below the sequence:

- b<sub>2</sub> (I-M)
- b<sub>3</sub> (M-oxM)
- b<sub>4</sub> (M-V)
- y<sub>16</sub> (V-P)
- y<sub>11</sub> (M-G)
- y<sub>10</sub> (G-V)
- y<sub>9</sub> (V-F)
- y<sub>8</sub> (F-D)
- y<sub>7</sub> (D-P)
- y<sub>6<sup>2+</sup></sub> (P-T)
- y<sub>5</sub> (T-E)
- y<sub>4</sub> (E-I)
- y<sub>3</sub> (I-H)
- y<sub>2</sub> (H-N)
- y<sub>1</sub> (N-R)

Raw file: 20180707\_MaS\_A375SR\_ML\_proteome\_14  
 Scan: 24738 Method: FTMS; HCD Score: 107.69 m/z: 507.74 Gene names: TMEM258

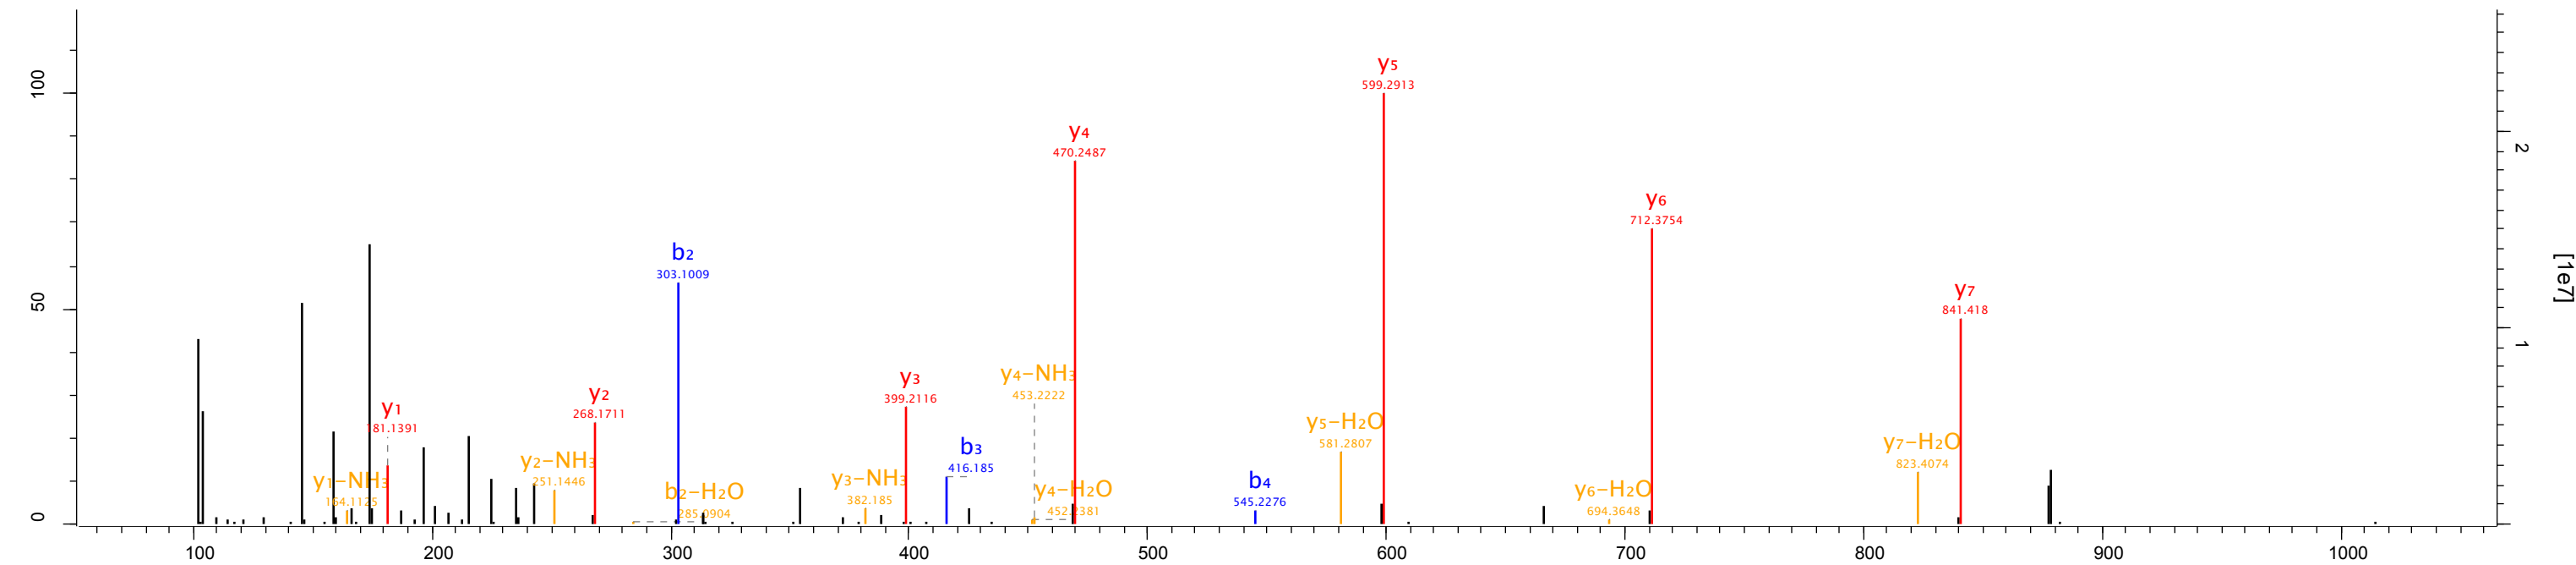



Raw file: 20180707\_MaS\_A375SR\_ML\_proteome\_14  
 Scan: 24758 Method: FTMS; HCD Score: 128.38 m/z: 504.73 Gene names: TMEM258

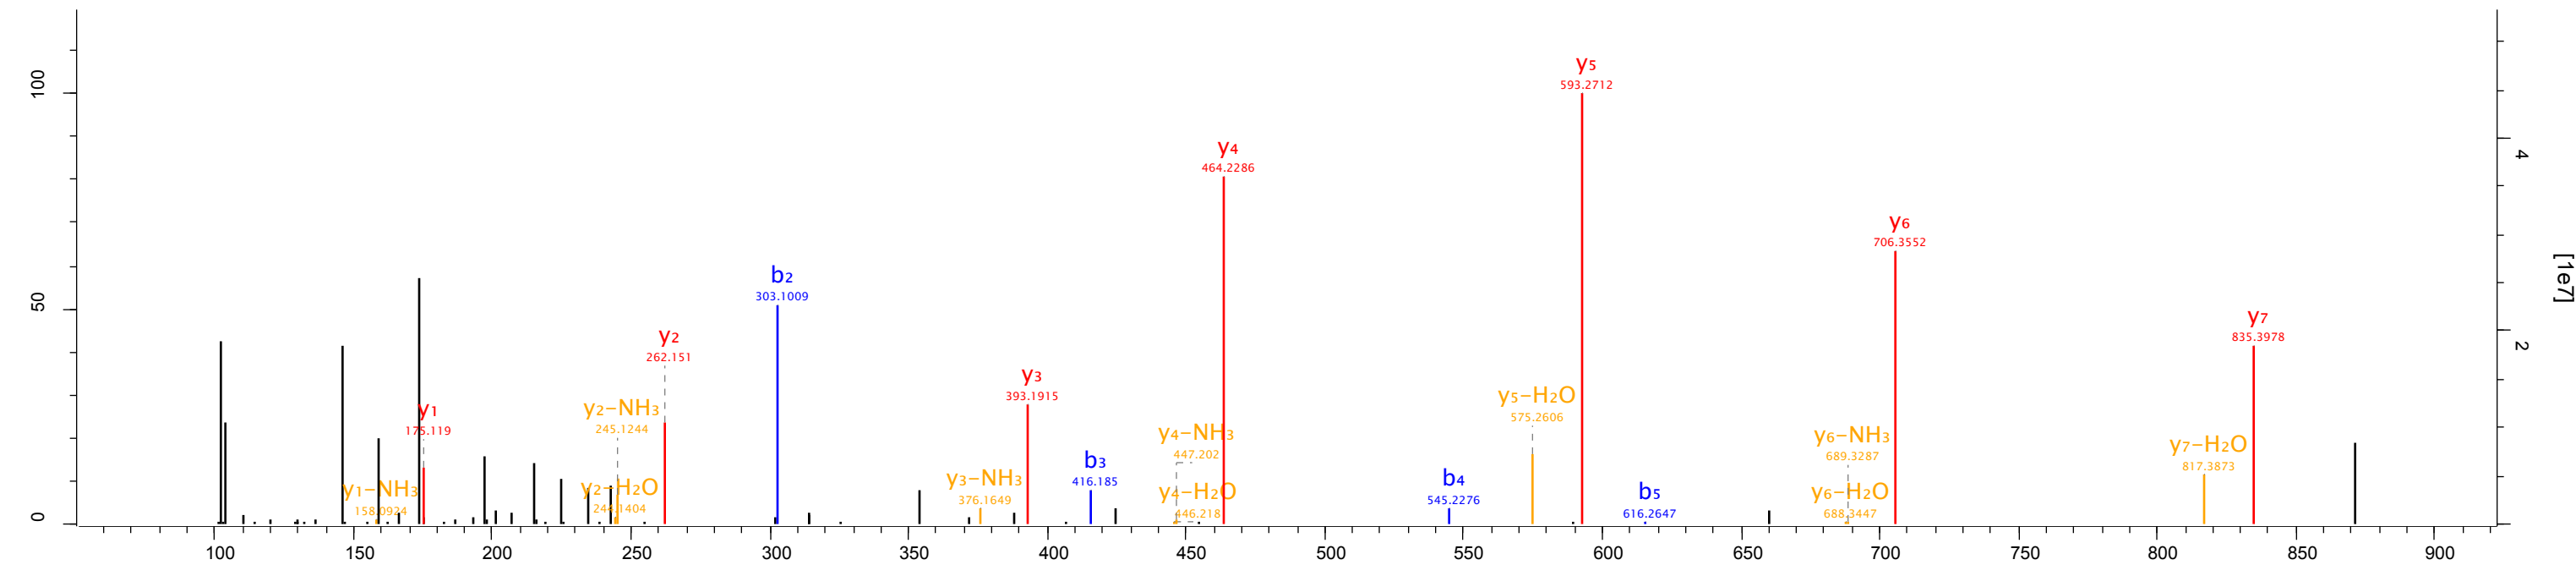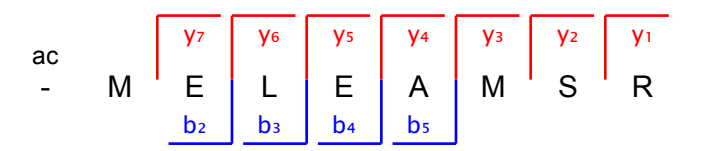

Raw file  
20180707\_MaS\_A375SR\_ML\_proteome\_16

Scan 16038 Method FTMS; HCD Score 53.45 m/z 818.88 Gene names RASEF

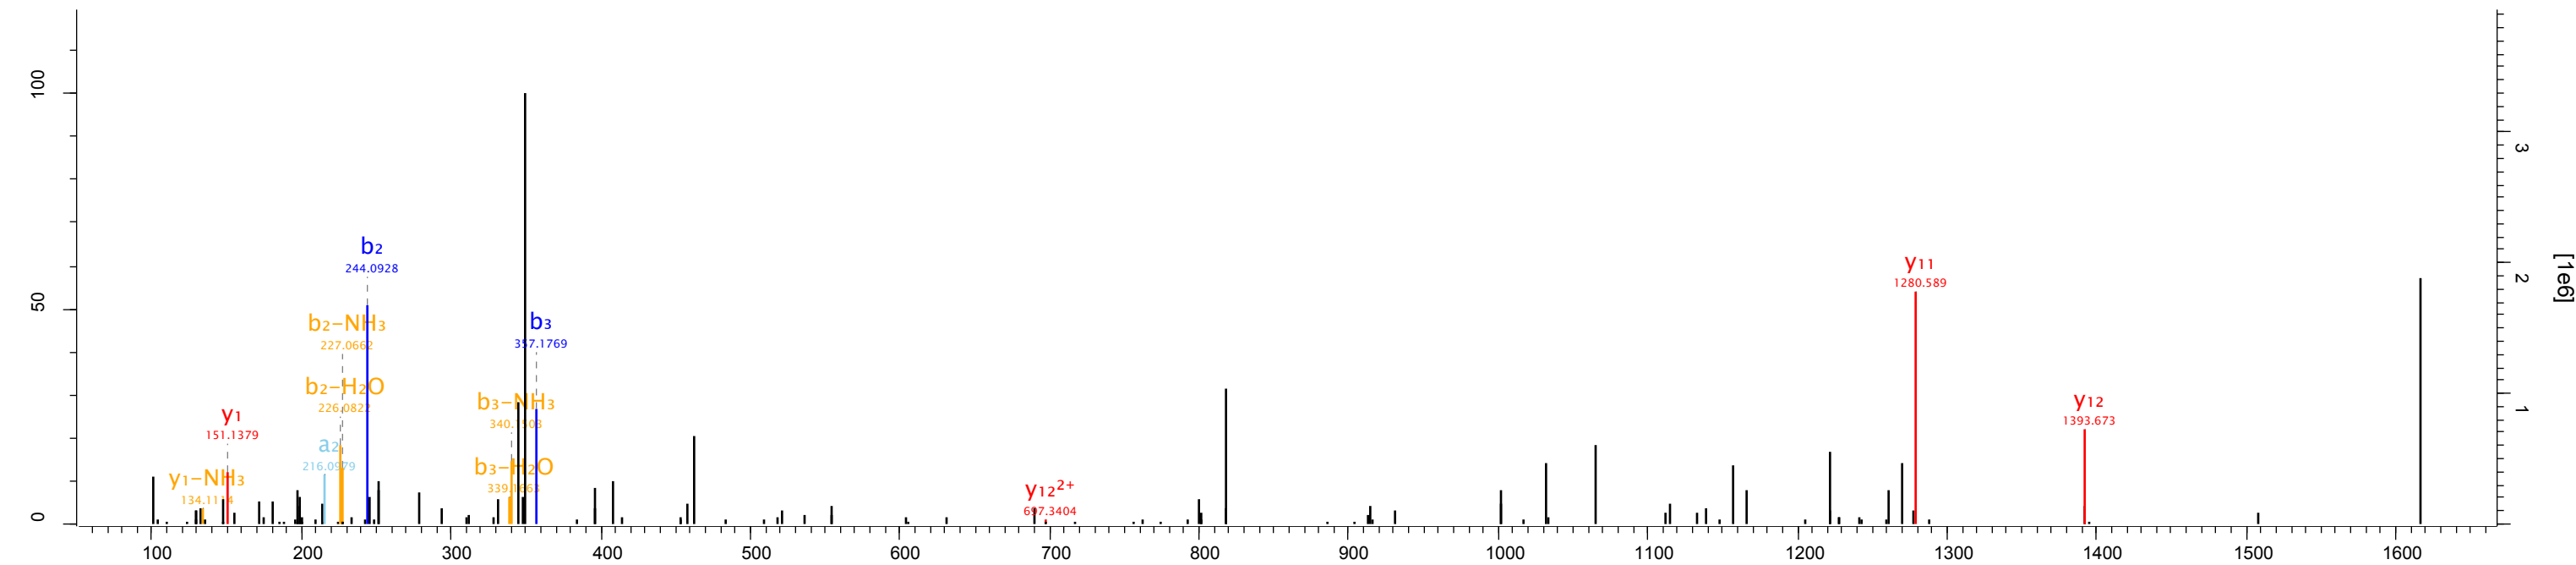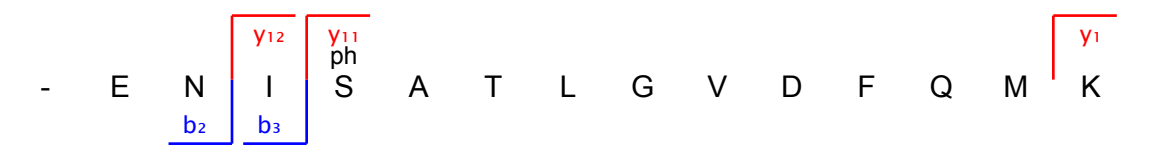

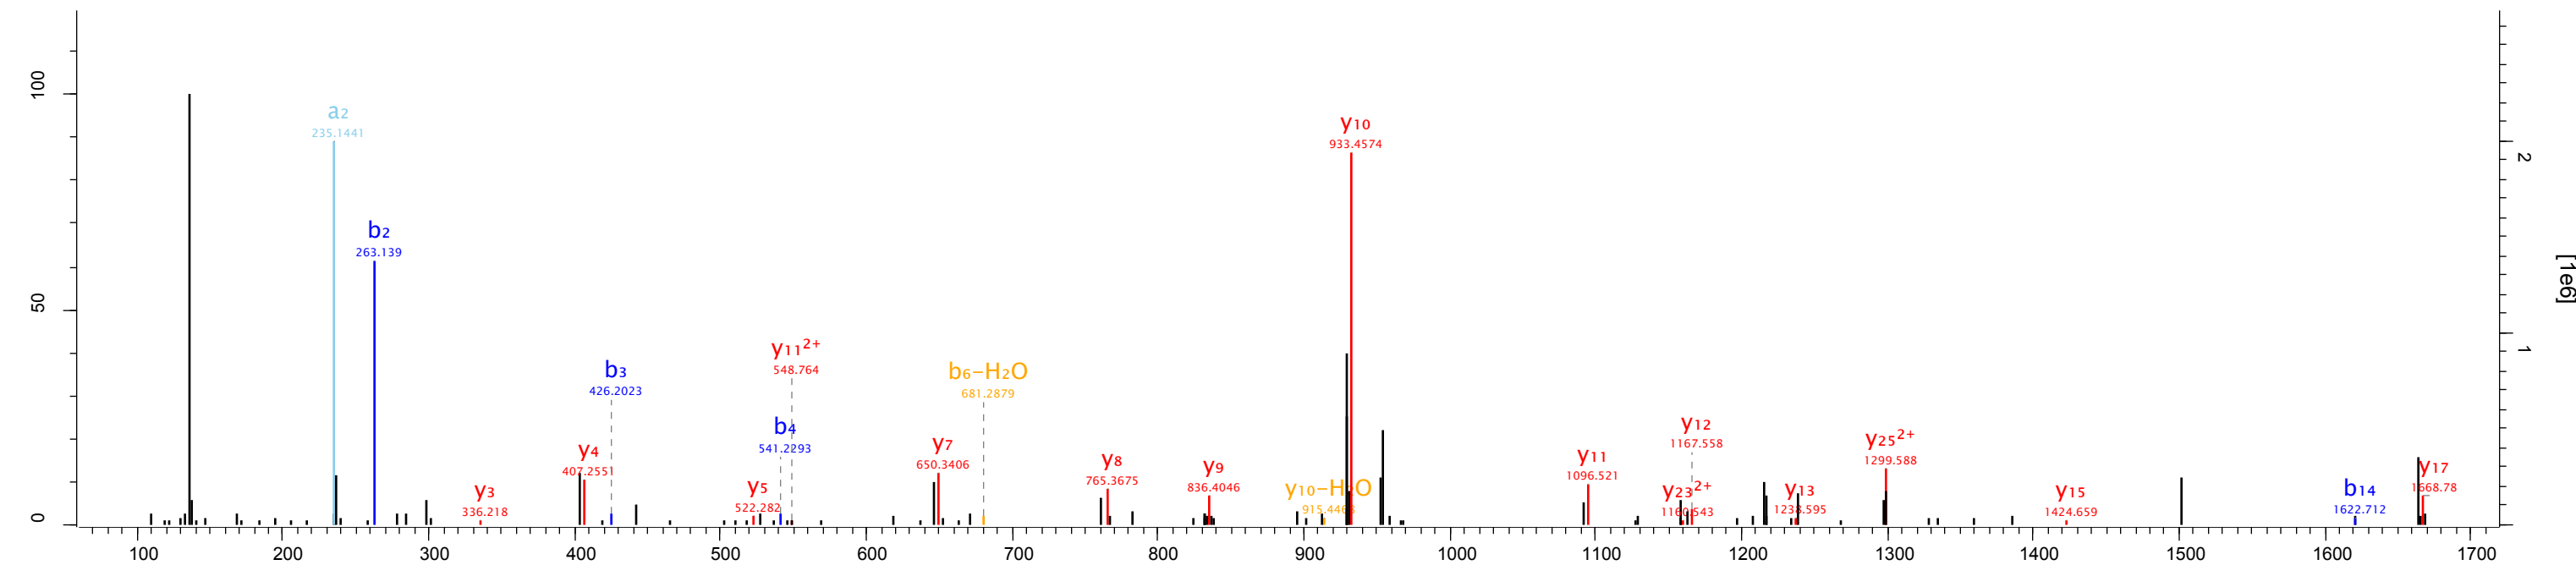

- V Y Y D G T V E Q H P F G E A A Y P A D G A D A G Q K -

Fragmentation labels (b and y ions) are shown below the sequence:

- b<sub>2</sub> (under Y)
- b<sub>3</sub> (under Y)
- b<sub>4</sub> (under D)
- b<sub>14</sub> (under E)
- y<sub>3</sub> (under G)
- y<sub>4</sub> (under D)
- y<sub>5</sub> (under A)
- y<sub>7</sub> (under G)
- y<sub>8</sub> (under A)
- y<sub>9</sub> (under Y)
- y<sub>10</sub> (under P)
- y<sub>11</sub> (under A)
- y<sub>12</sub> (under A)
- y<sub>13</sub> (under A)
- y<sub>15</sub> (under G)
- y<sub>17</sub> (under F)
- y<sub>23<sup>2+</sup></sub> (under Y)
- y<sub>25<sup>2+</sup></sub> (under Y)

Raw file  
20180707\_MaS\_A375SR\_ML\_proteome\_17

Scan: 28018  
Method: FTMS; HCD  
Score: 50.35  
m/z: 805.41  
Gene names: IQCK

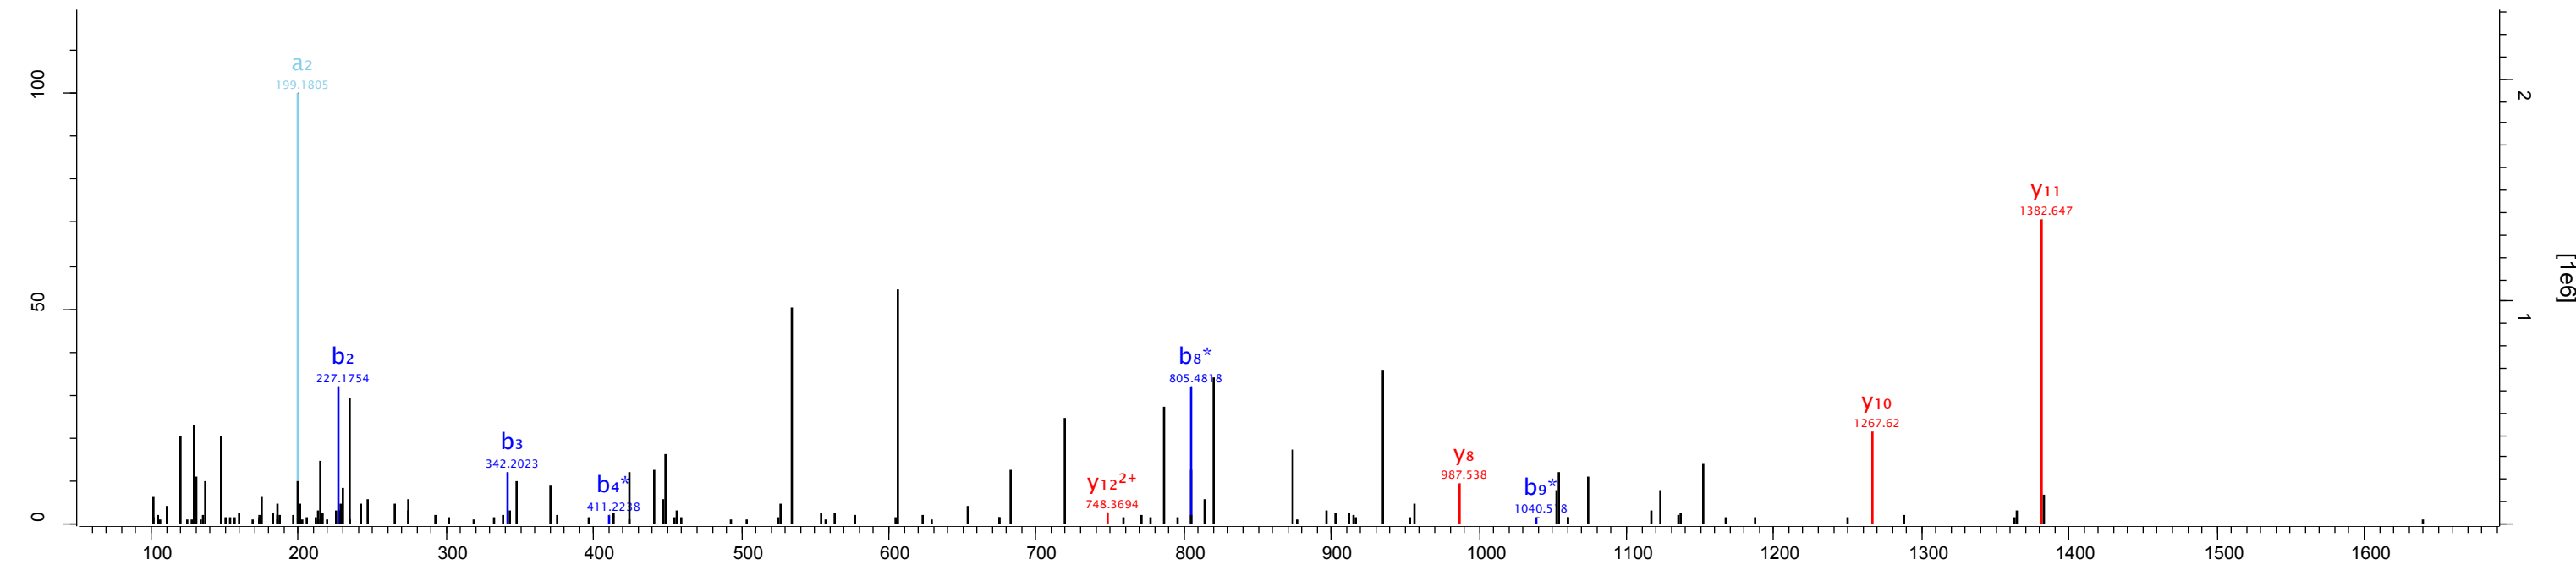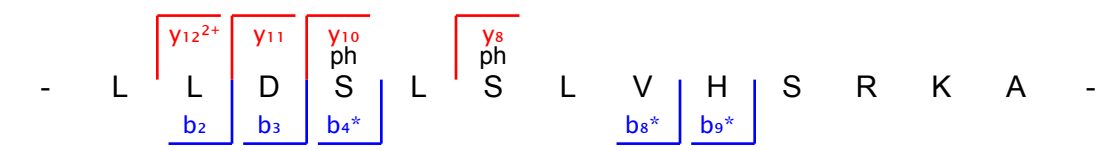

Raw file  
20180707\_MaS\_A375SR\_ML\_proteome\_18

Scan 18448 Method FTMS; HCD Score 110.89 m/z 953.1 Gene names C6orf120

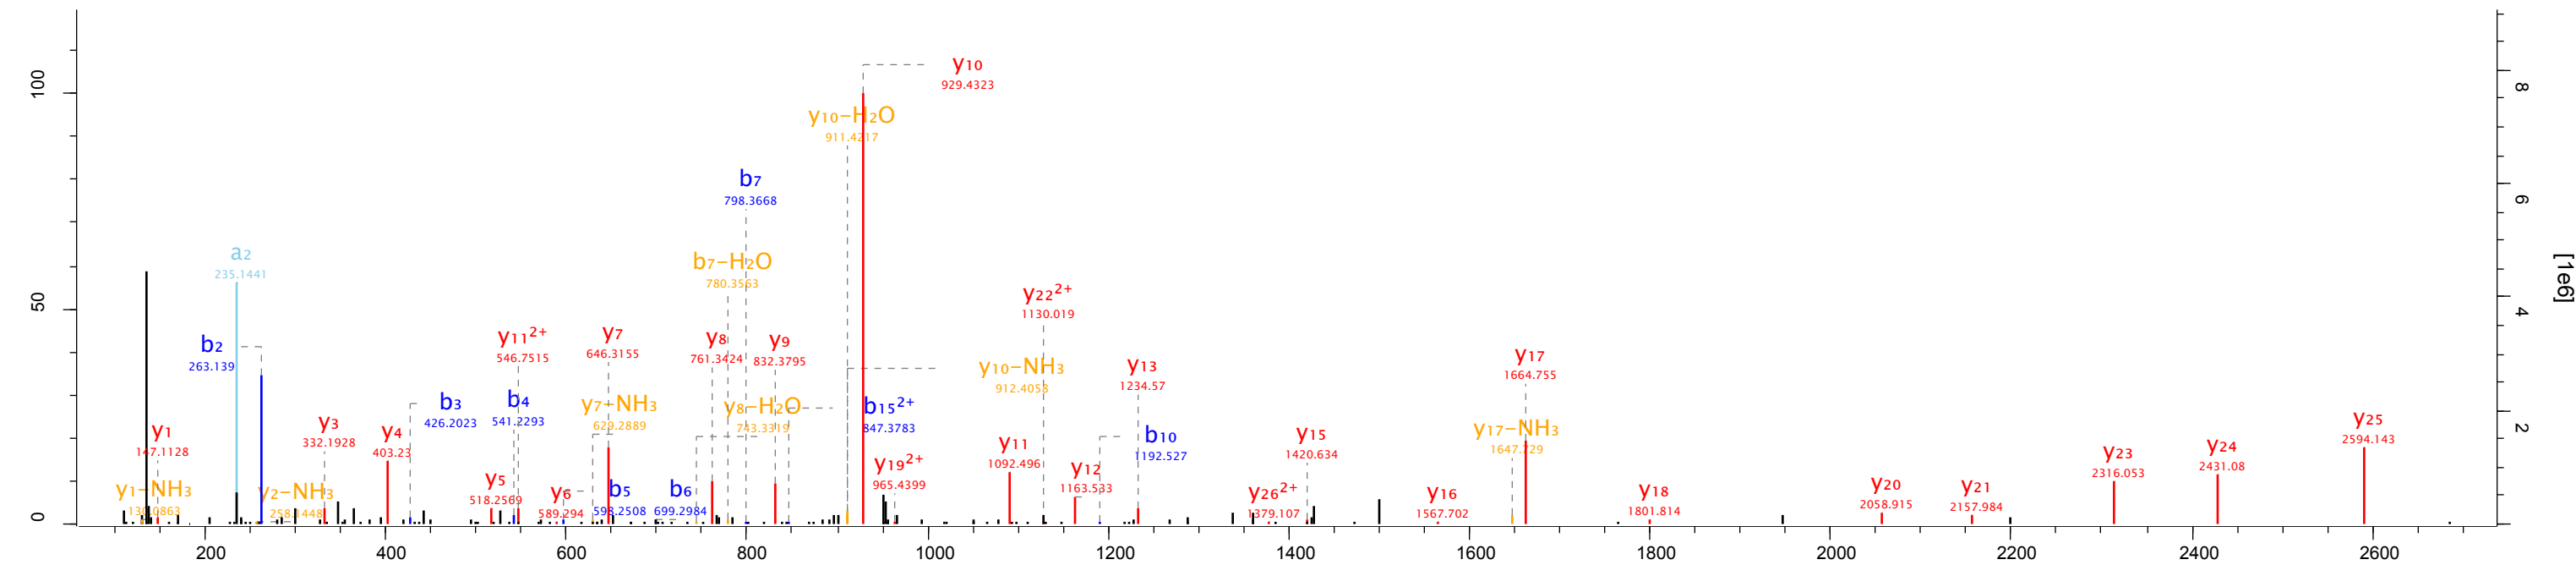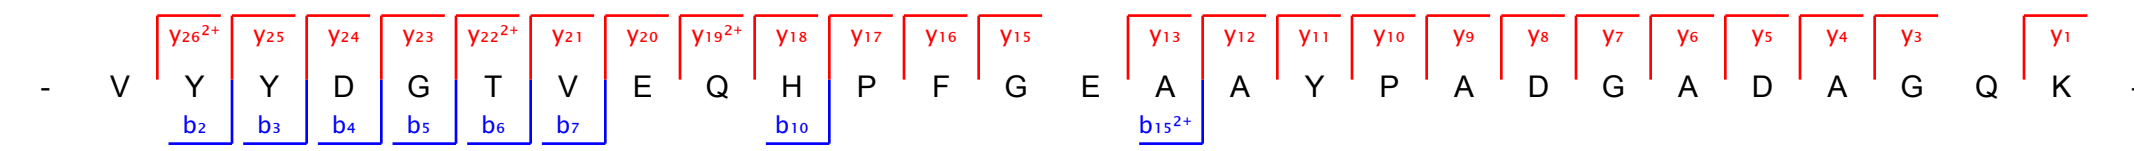

Raw file 20180707\_MaS\_A375SR\_ML\_proteome\_19 Scan 14078 Method FTMS; HCD Score 124.25 m/z 858.93 Gene names APOC3

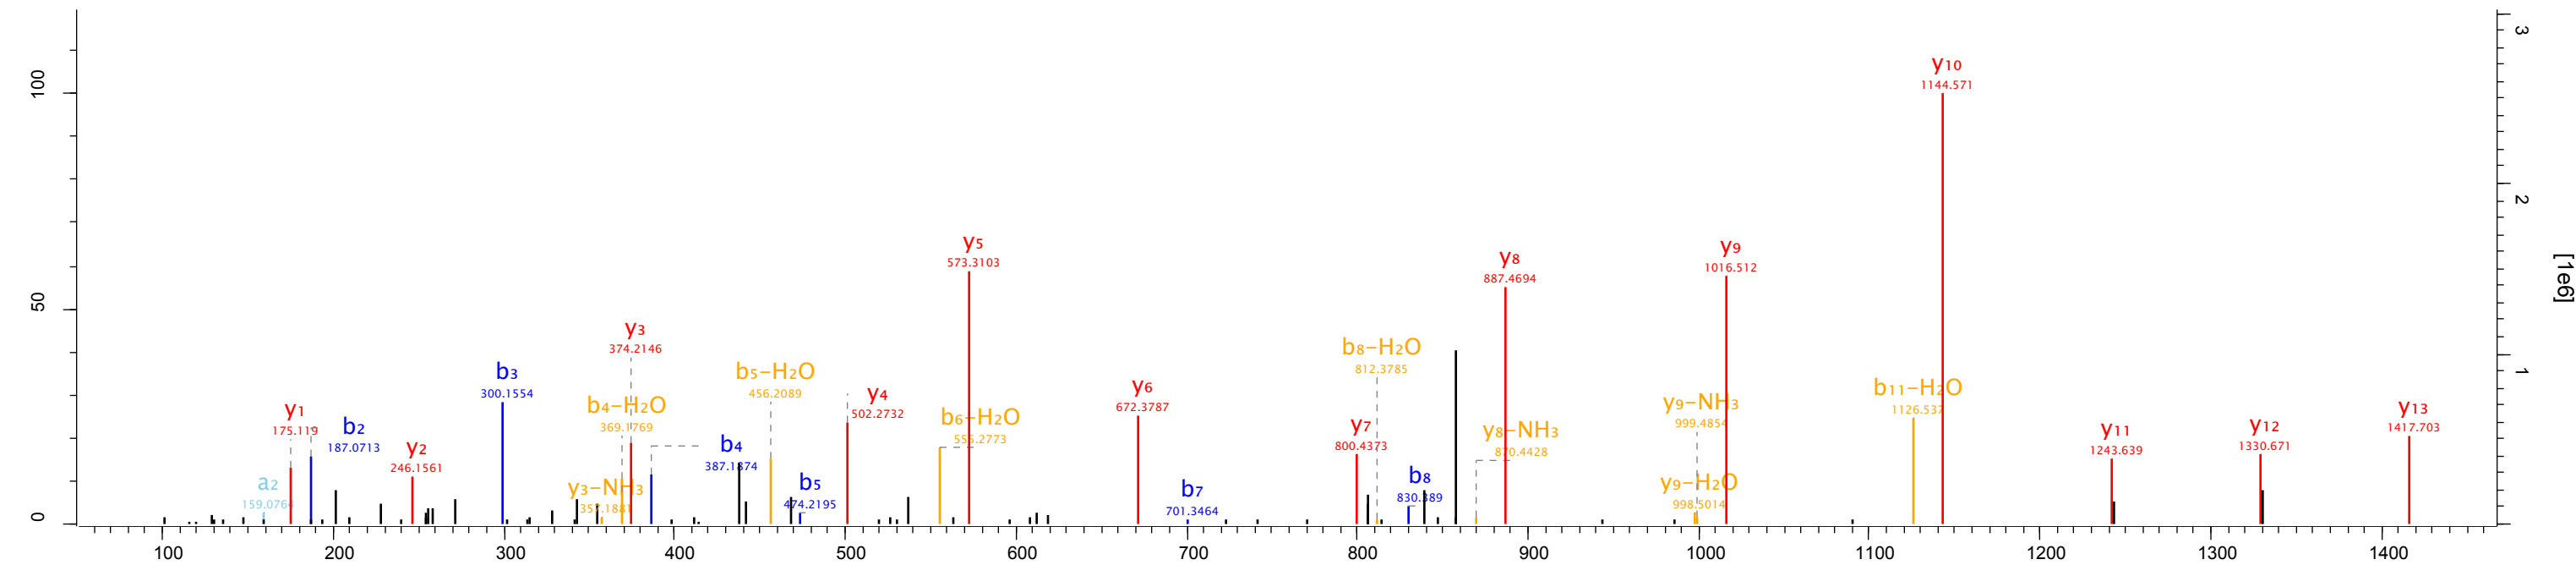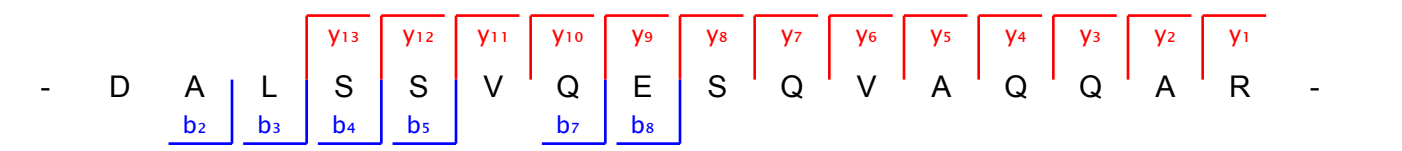

Raw file 20180707\_MaS\_A375SR\_ML\_proteome\_19 Scan 24108 Method FTMS; HCD Score 108.72 m/z 645.85 Gene names ANKRD2

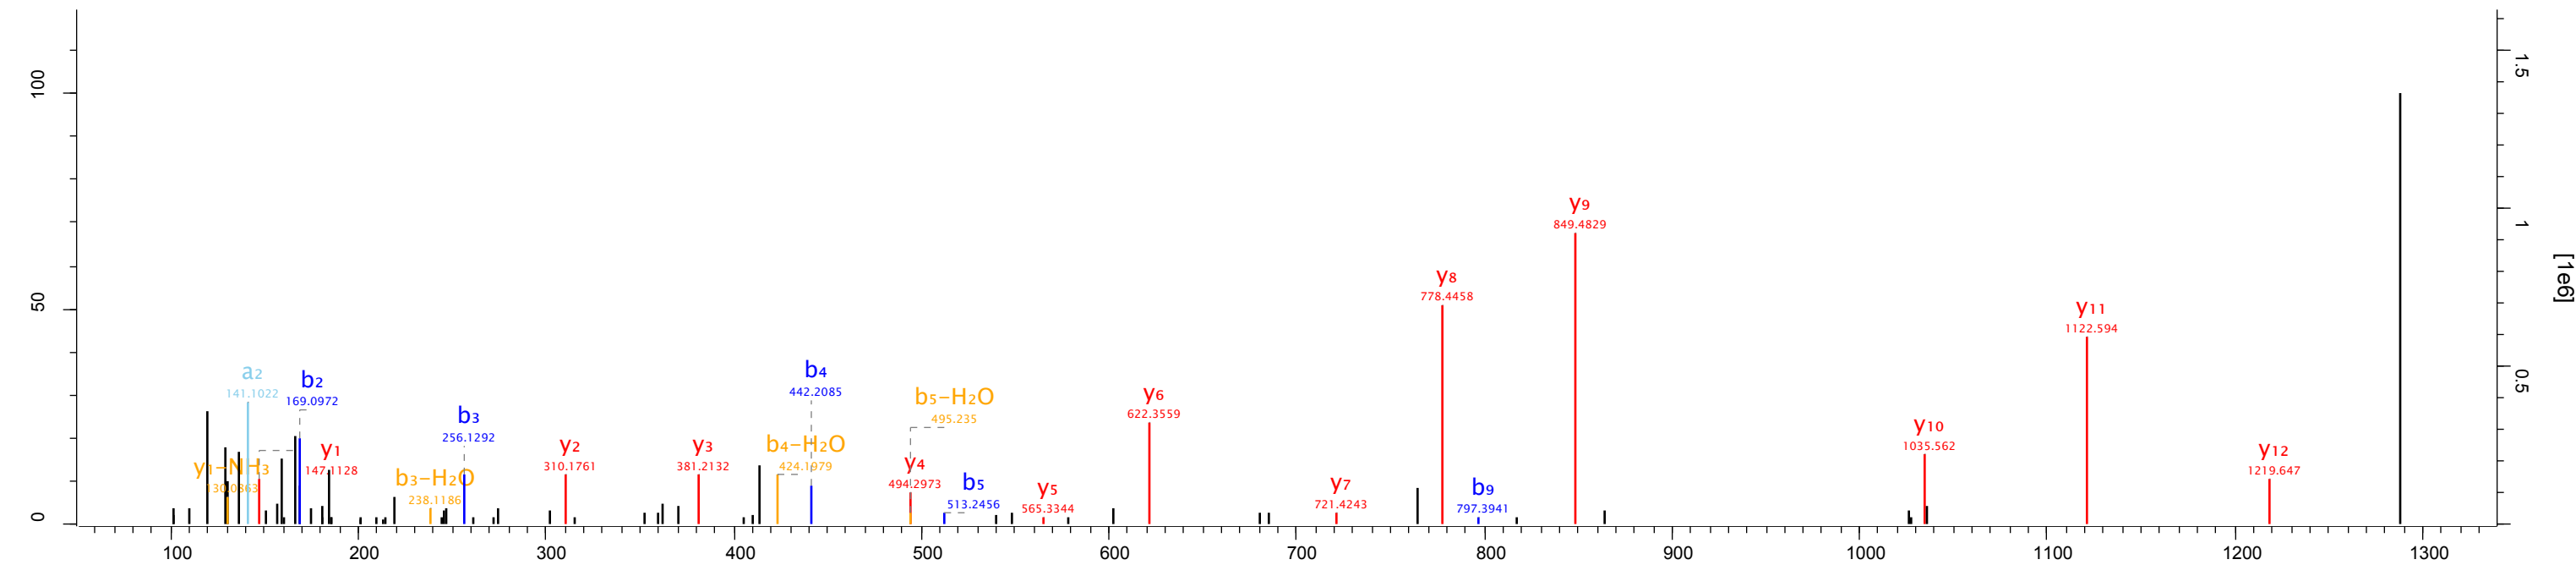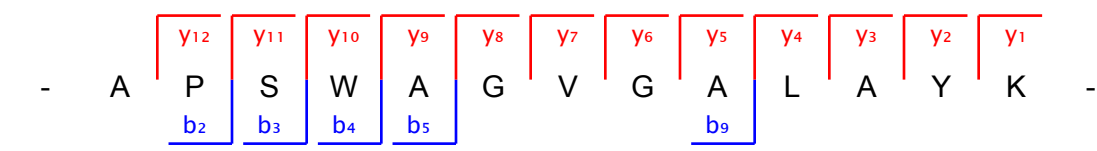

Raw file  
20180707\_MaS\_A375SR\_ML\_proteome\_19

Scan 24758 Method FTMS; HCD Score 74.79 m/z 817.43 Gene names SPPL2A

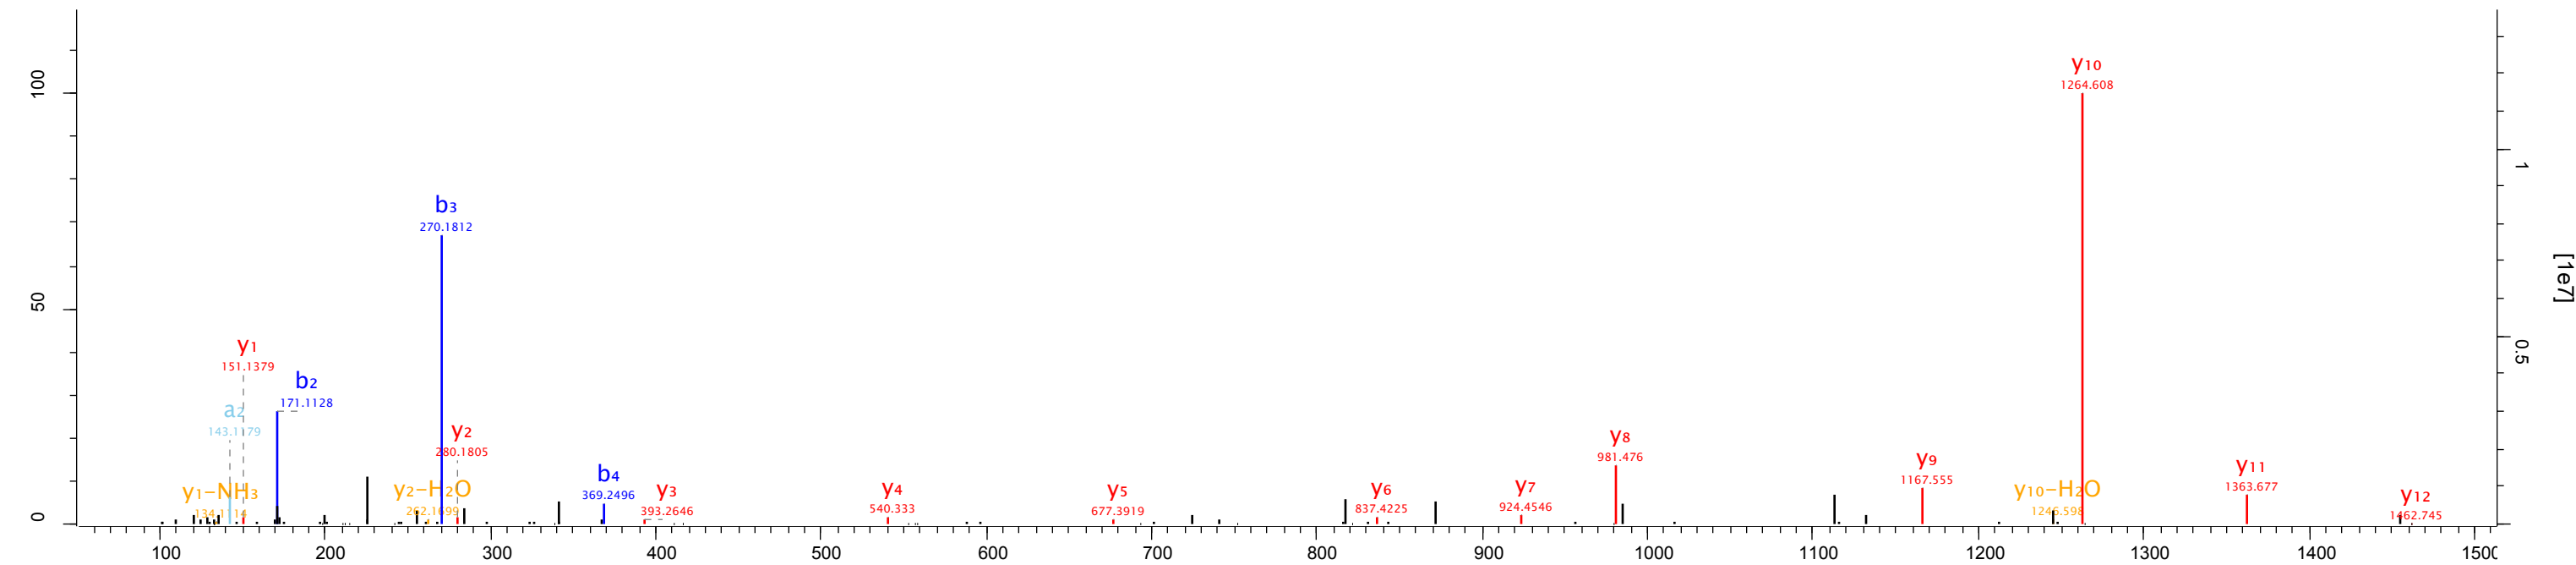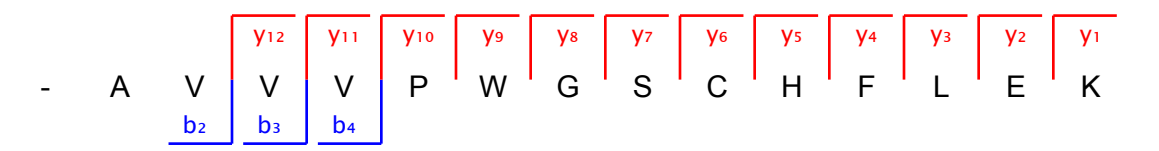



Raw file: 20180707\_MaS\_A375SR\_ML\_proteome\_19  
 Scan: 24838 Method: FTMS; HCD Score: 74.48 m/z: 543.61 Gene names: SPPL2A

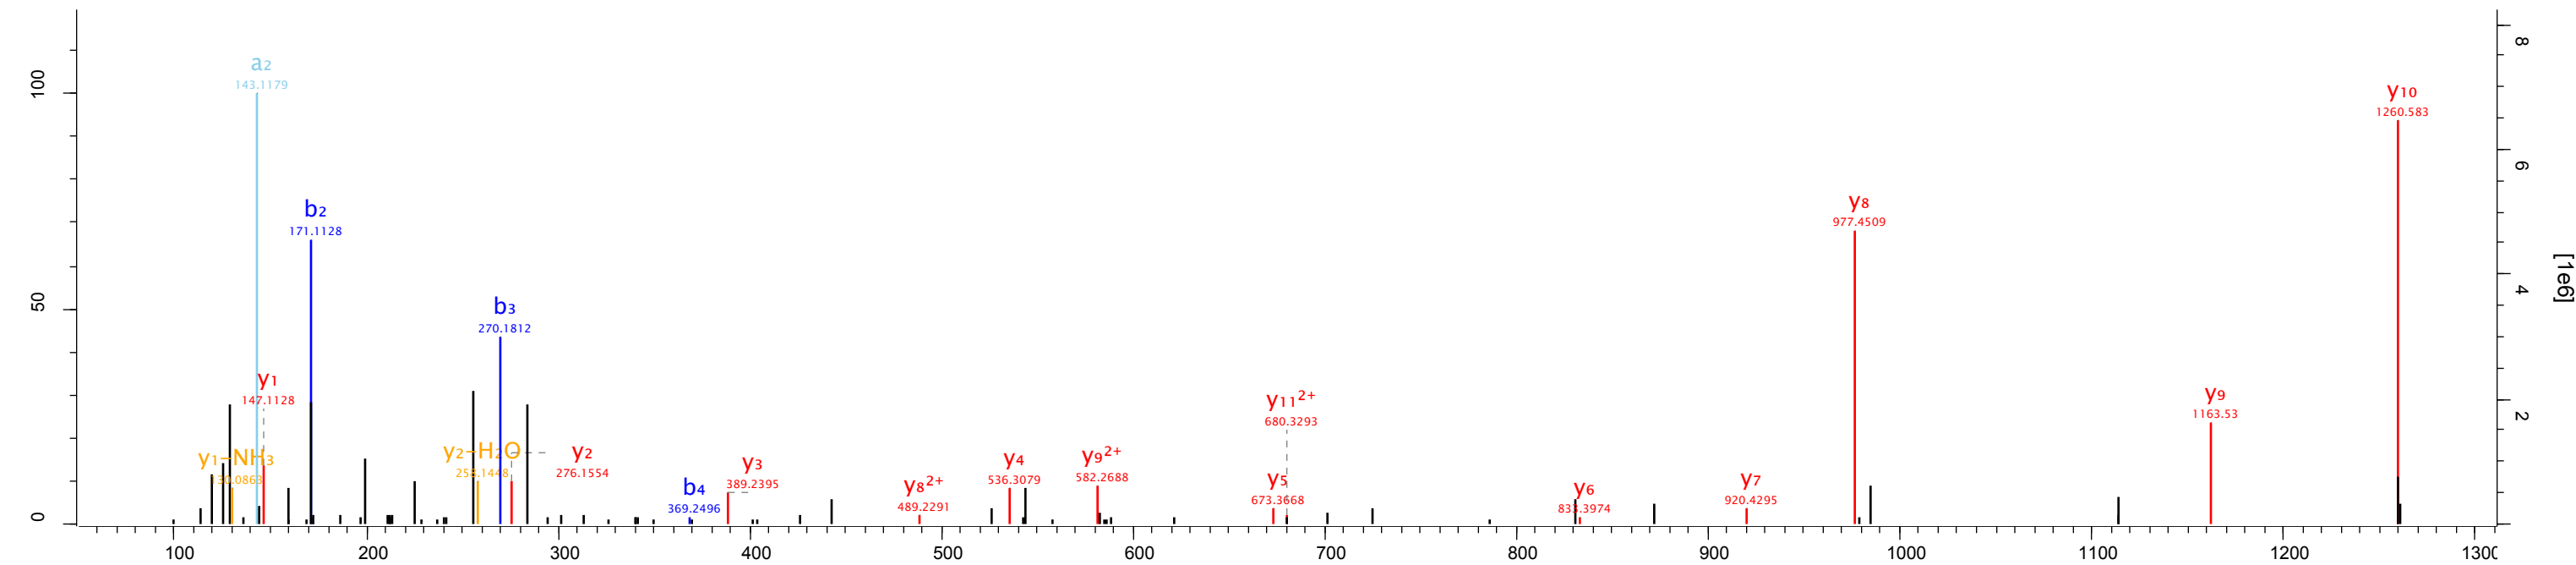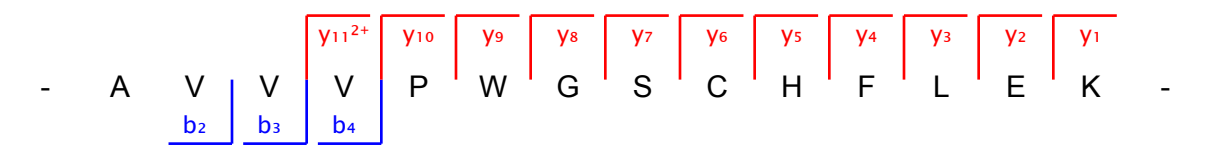

Raw file  
20180707\_MaS\_A375SR\_ML\_proteome\_19

Scan Method Score m/z Gene names  
8188 FTMS; HCD 72.59 651.66 LAGE3

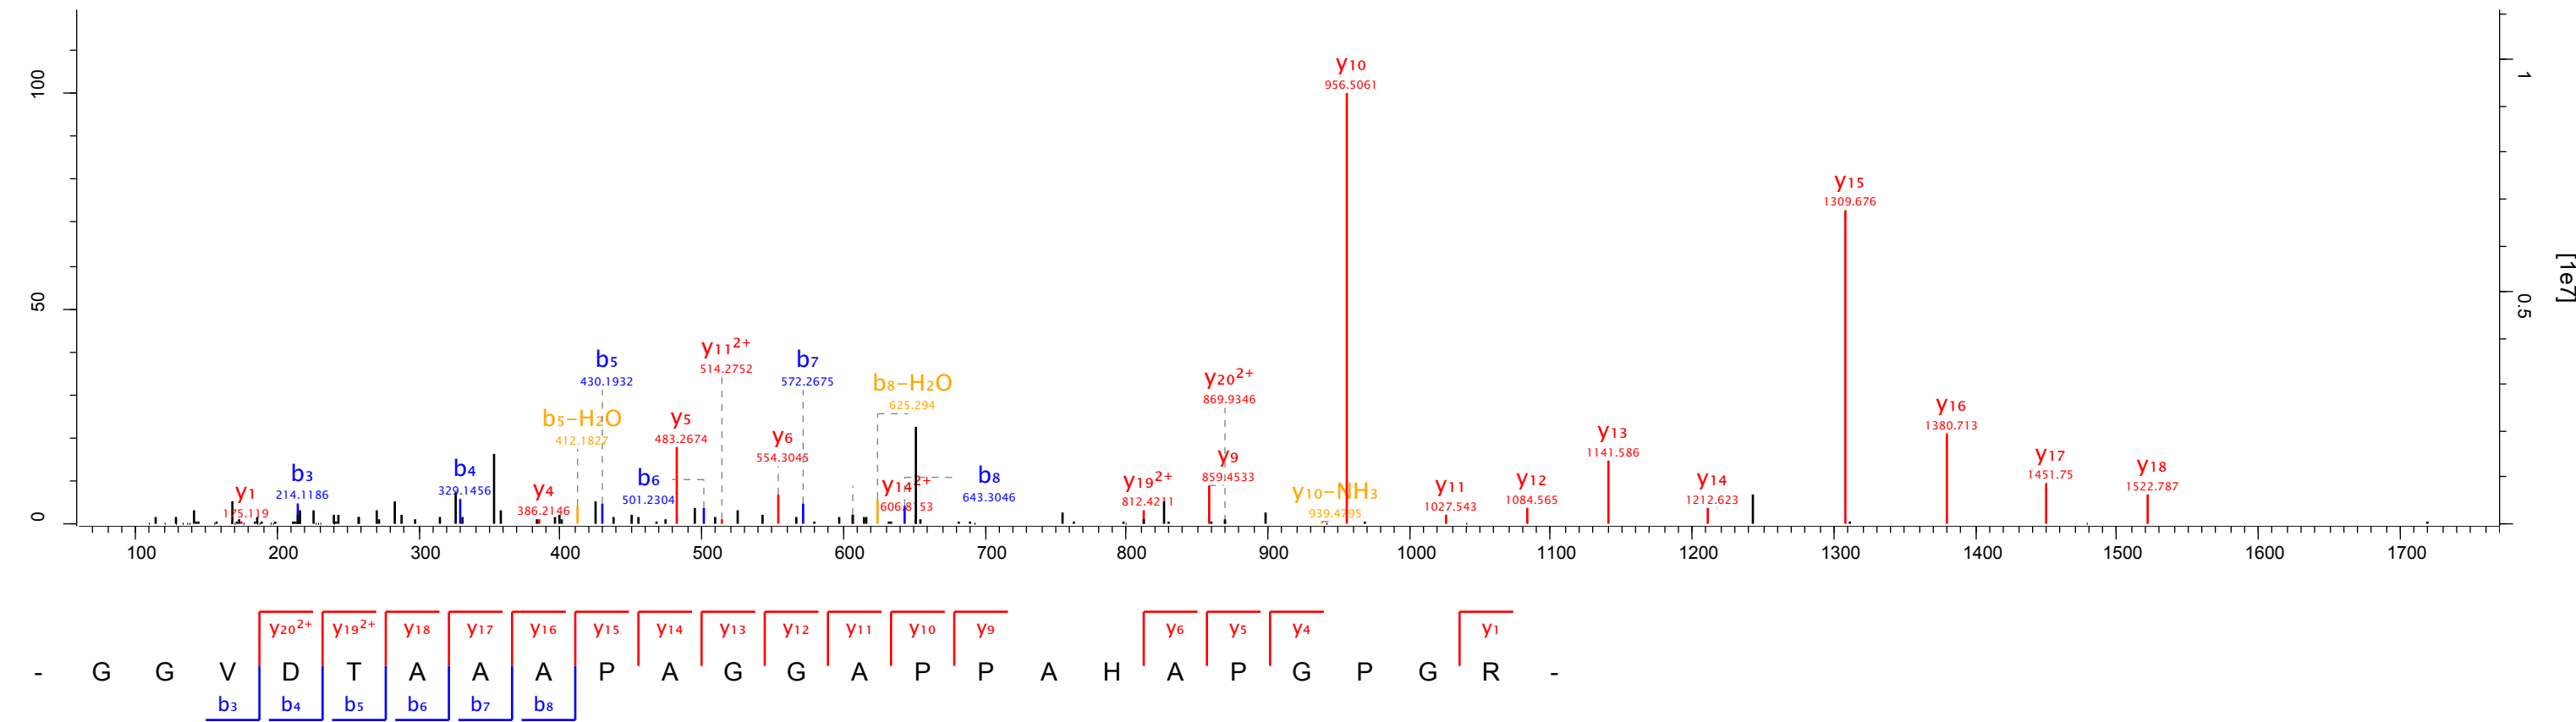

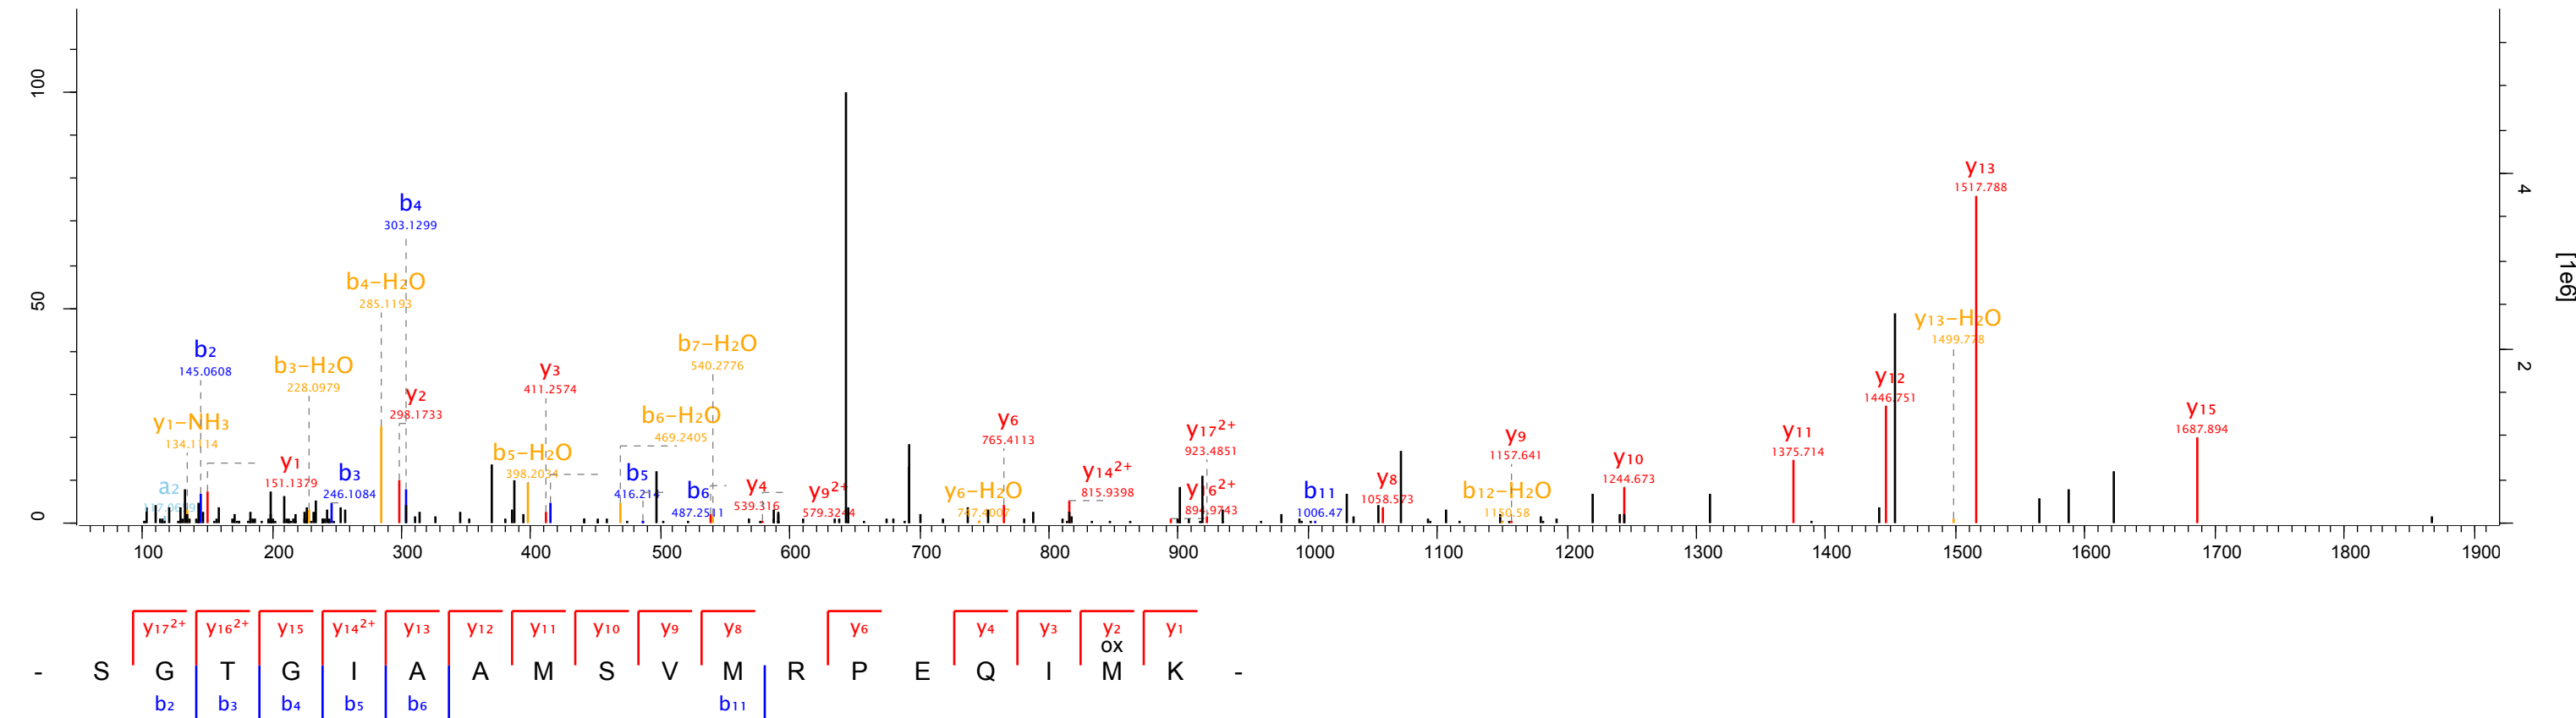

Raw file 20180707\_MaS\_A375SR\_ML\_proteome\_2\_02 Scan 2968 Method FTMS; HCD Score 87.26 m/z 529.31

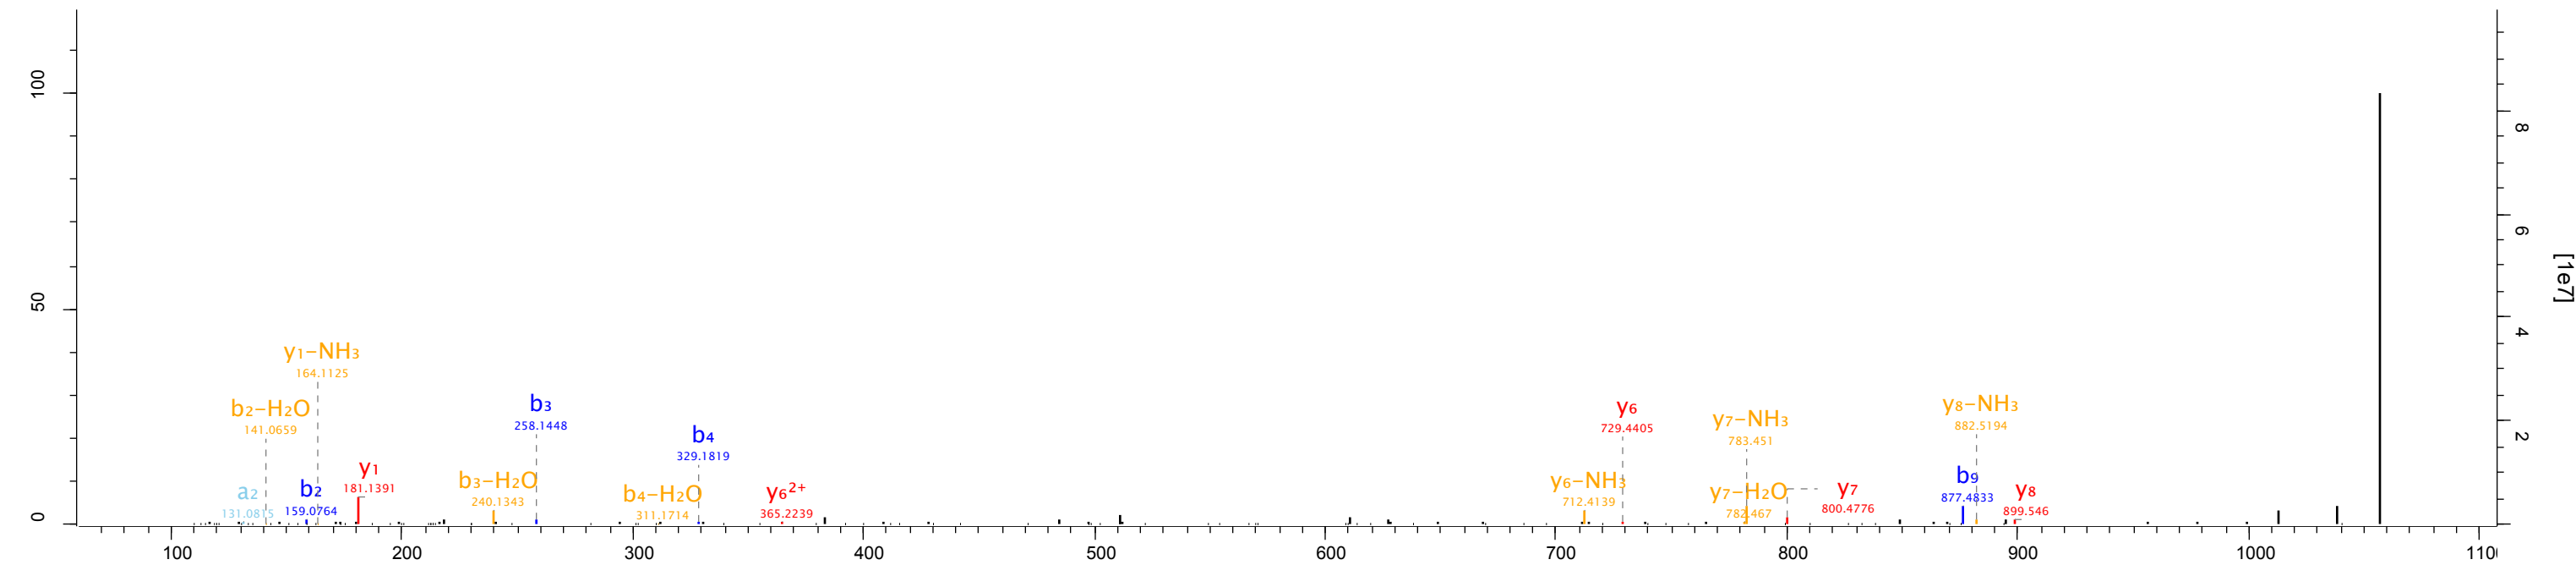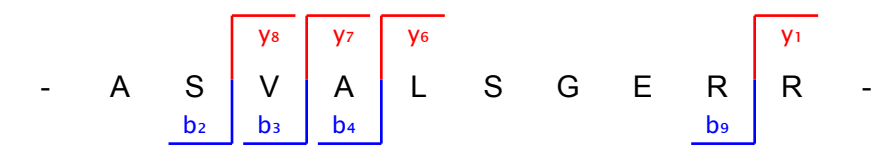

Raw file 20180707\_MaS\_A375SR\_ML\_proteome\_2\_02 Scan 2978 Method FTMS; HCD Score 88.5 m/z 523.29

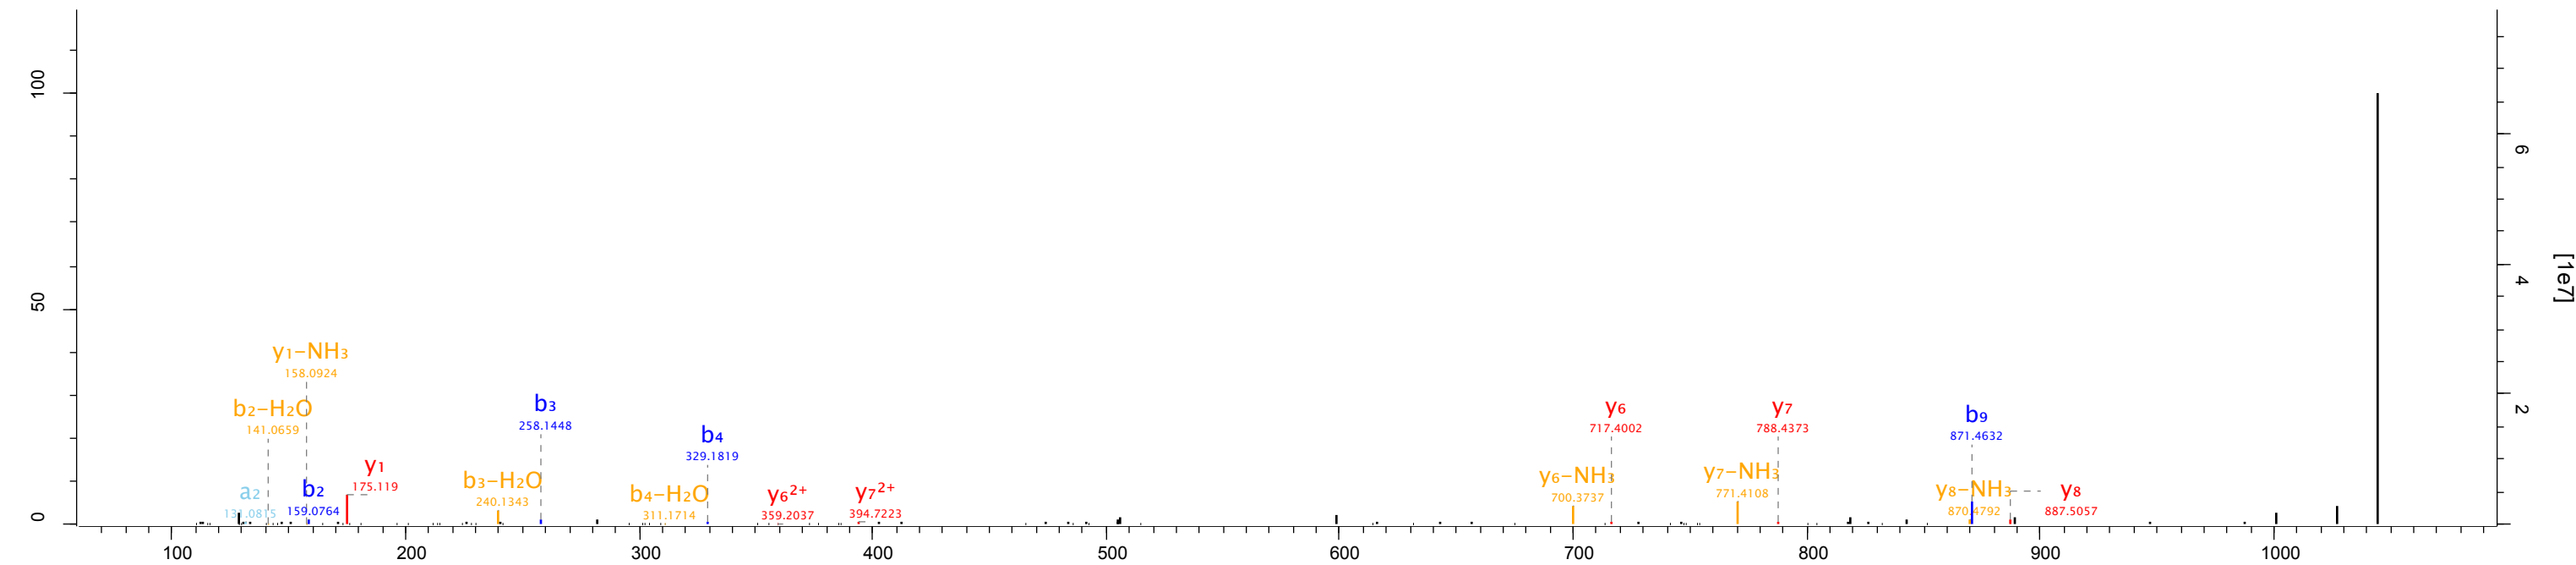

Raw file 20180707\_MaS\_A375SR\_ML\_proteome\_2\_03 Scan 15428 Method FTMS; HCD Score 47.22 m/z 585.63 Gene names MRPL42

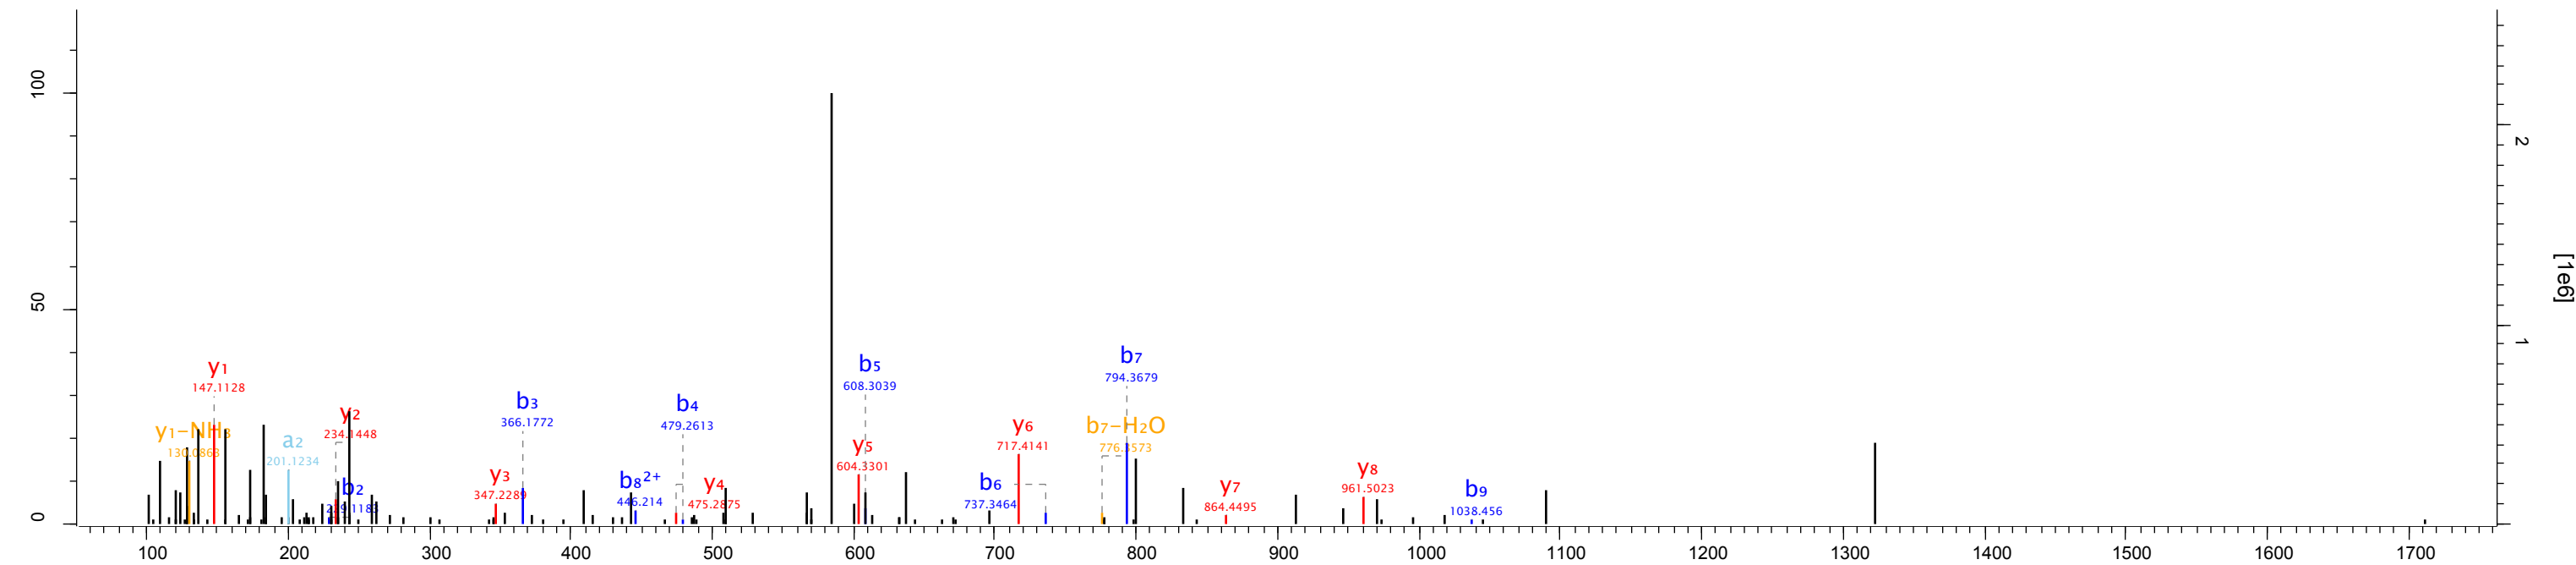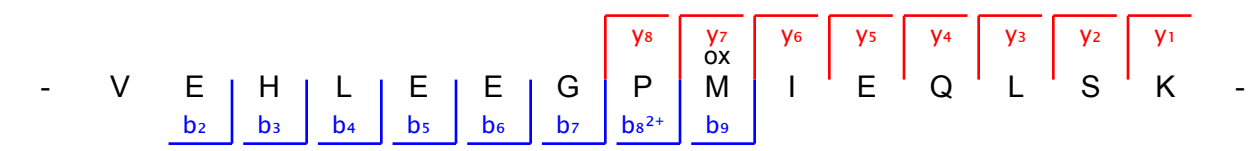

Raw file  
20180707\_MaS\_A375SR\_ML\_proteome\_2\_03

Scan 25308 Method FTMS; HCD Score 32.24 m/z 706.7 Gene names TMEM261

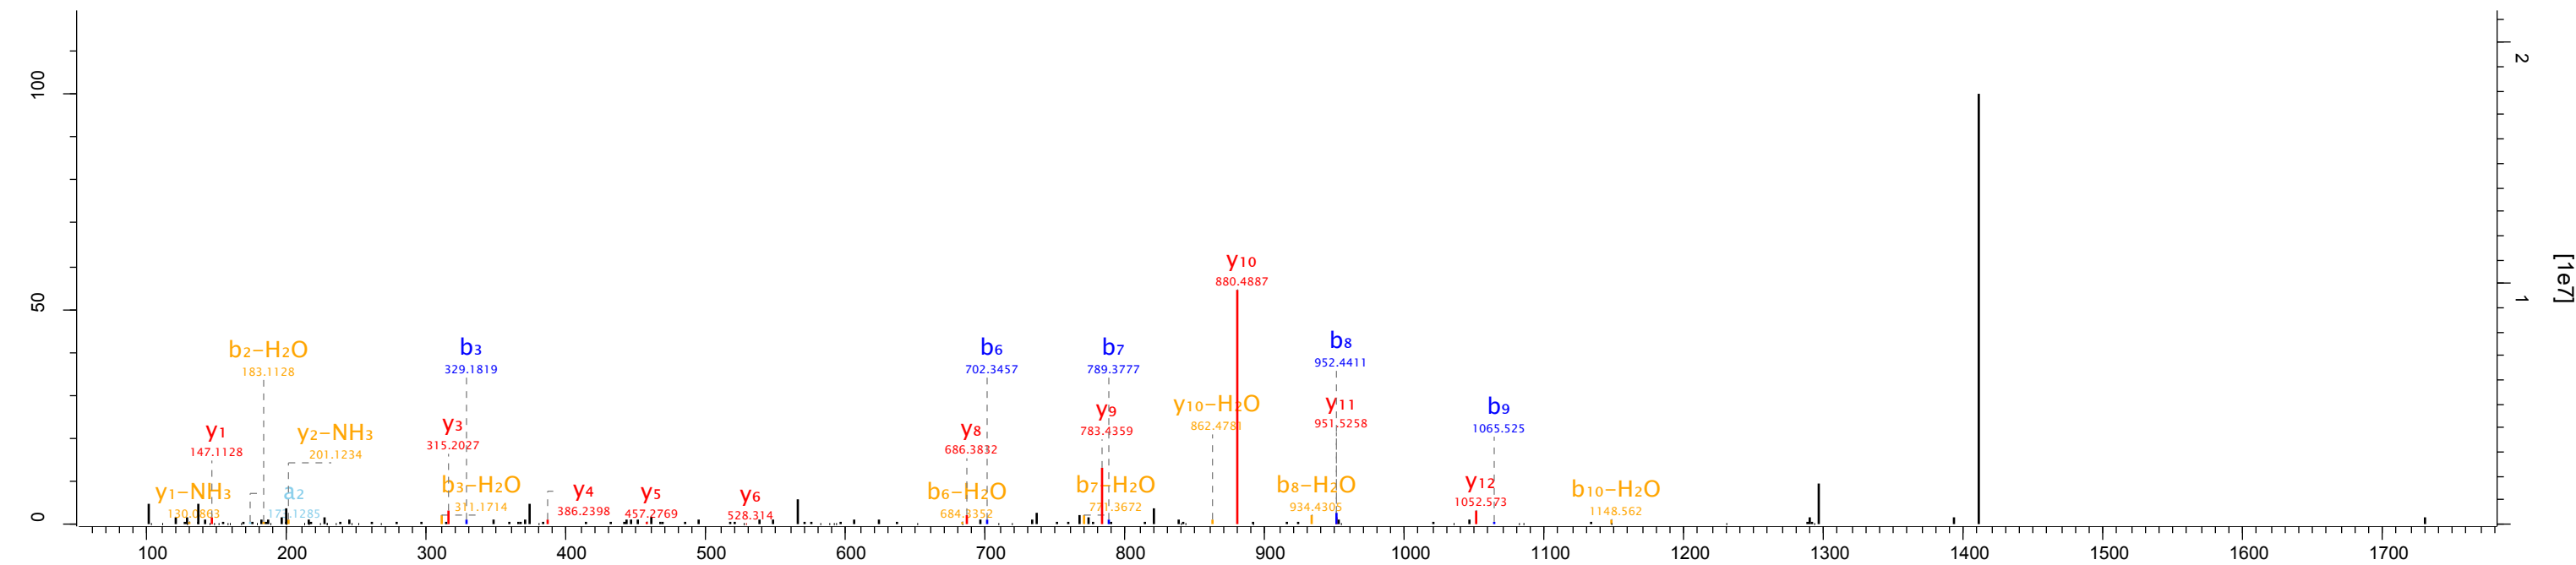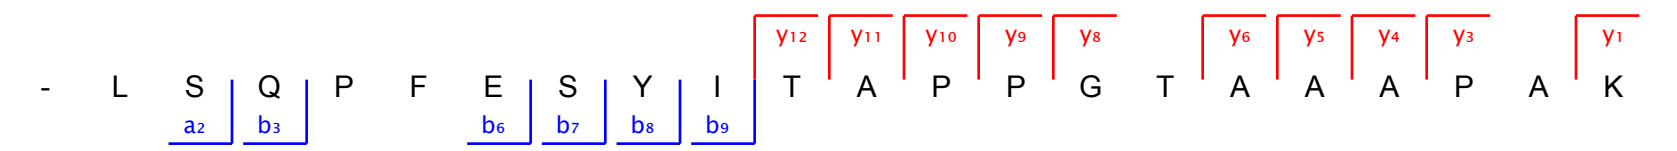

Raw file  
20180707\_MaS\_A375SR\_ML\_proteome\_2\_03

Scan 27548 Method FTMS; HCD Score 105.79 m/z 760.03 Gene names CNIH4

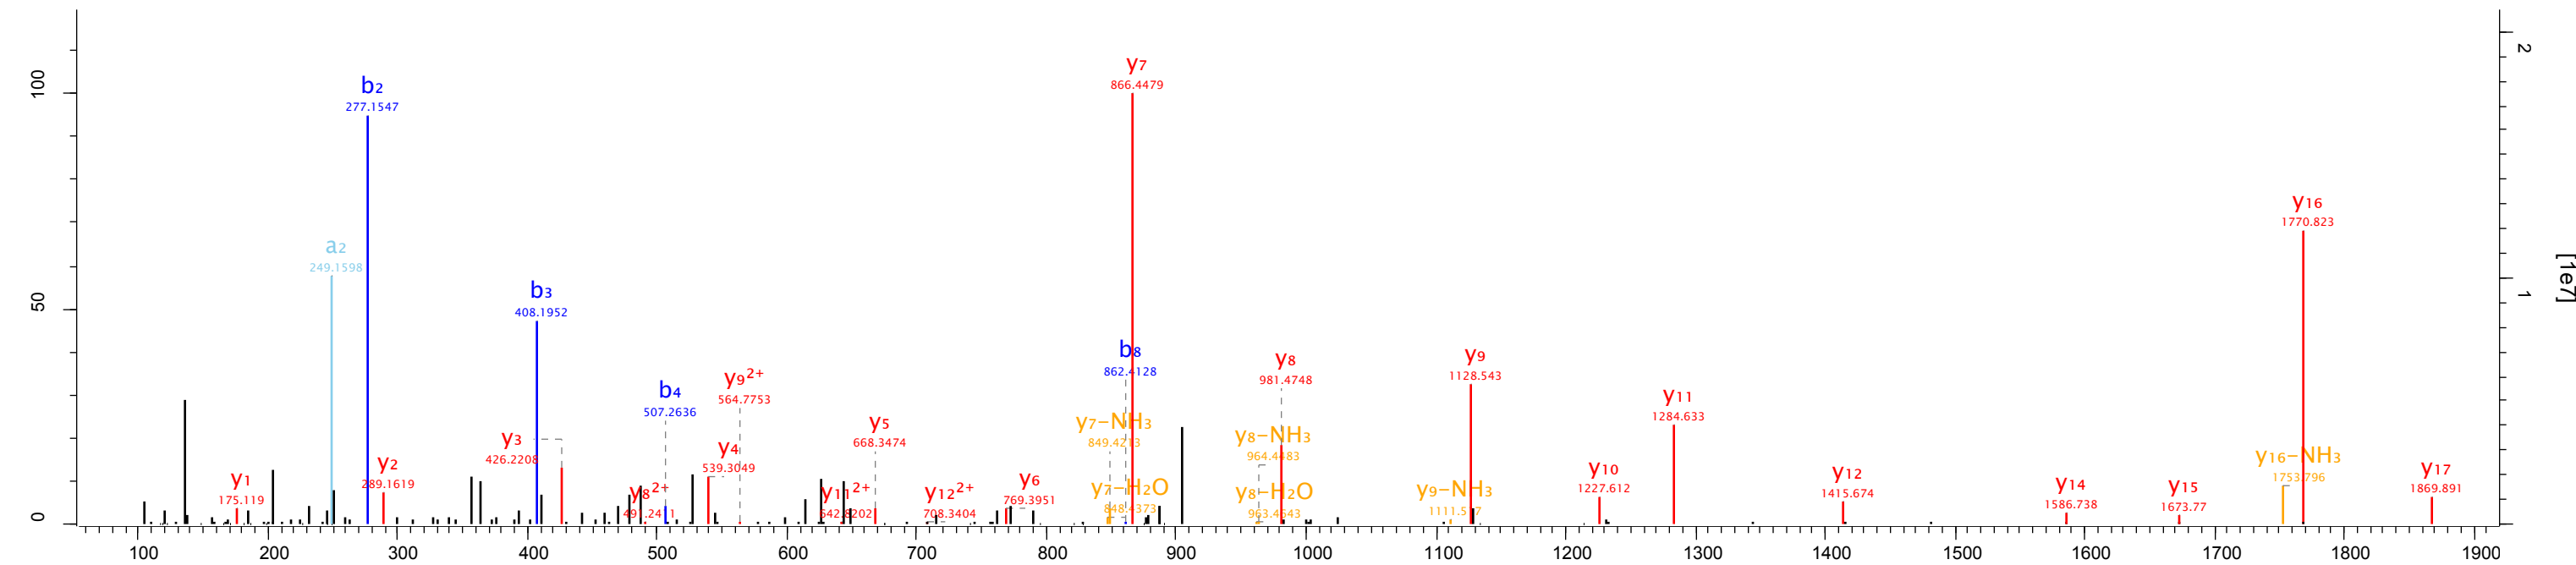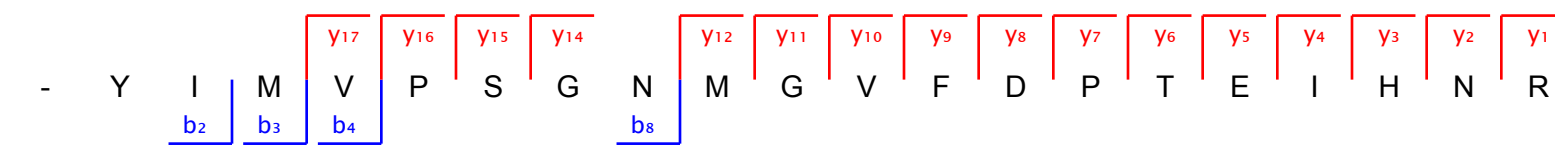



Raw file  
20180707\_MaS\_A375SR\_ML\_proteome\_2\_03

Scan 27568 Method FTMS; HCD Score 46.49 m/z 1139.05 Gene names CNIH4

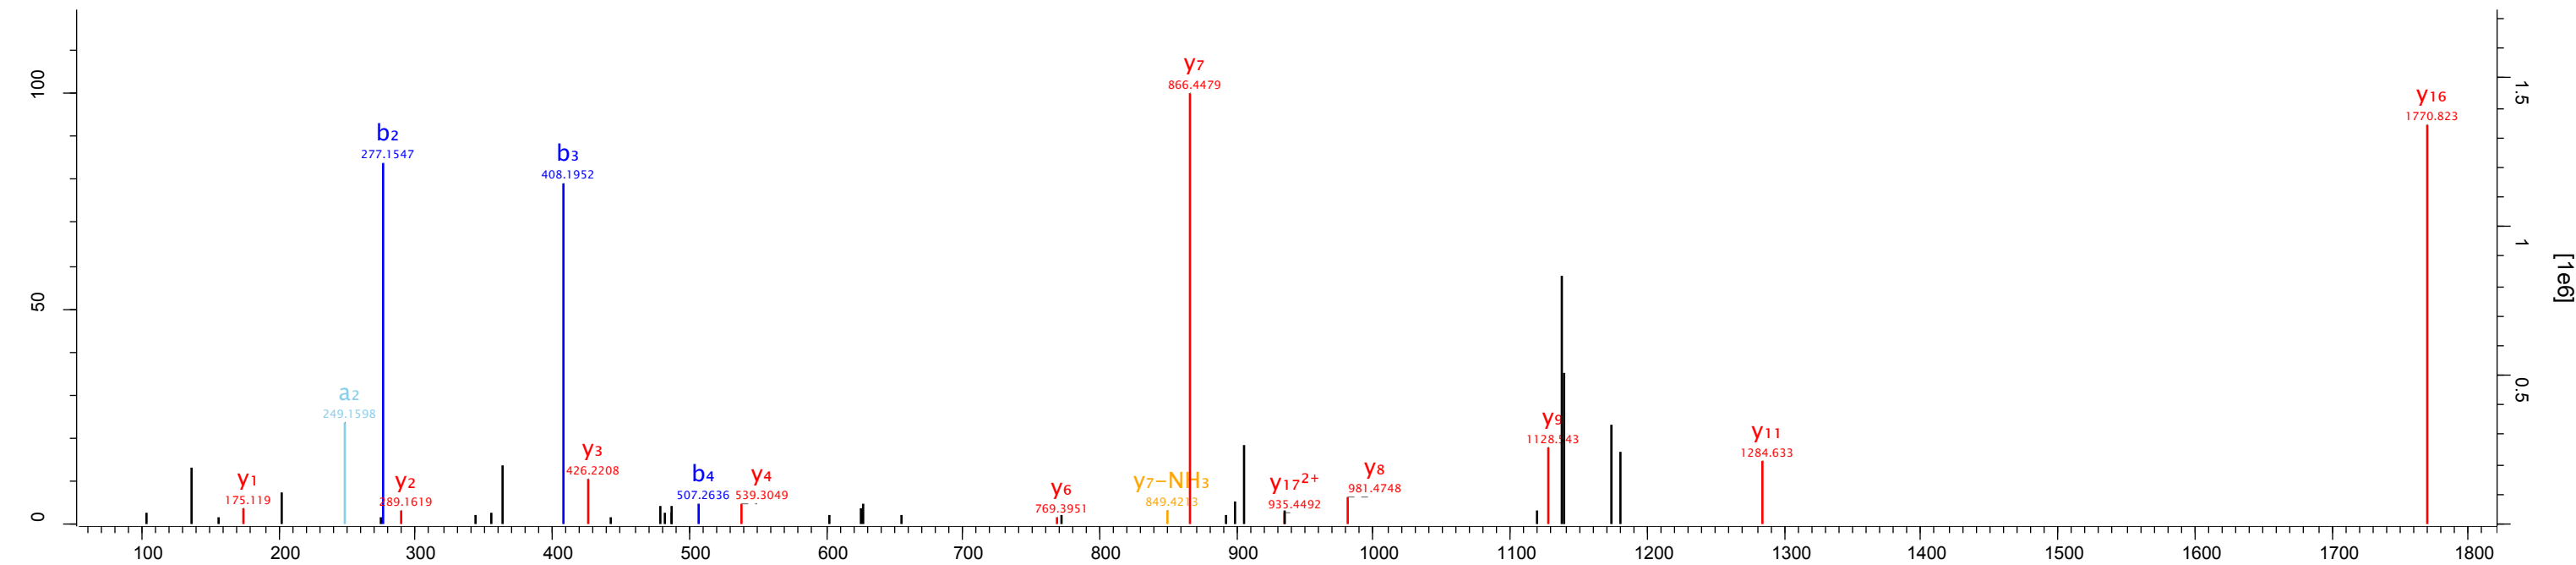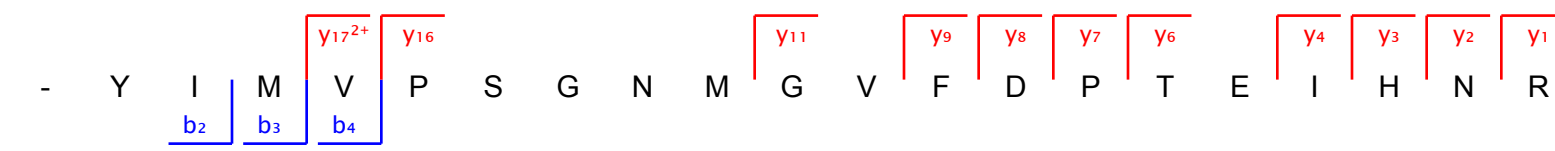

Raw file 20180707\_MaS\_A375SR\_ML\_proteome\_2\_04 Scan 11058 Method FTMS; HCD Score 56.2 m/z 719.31

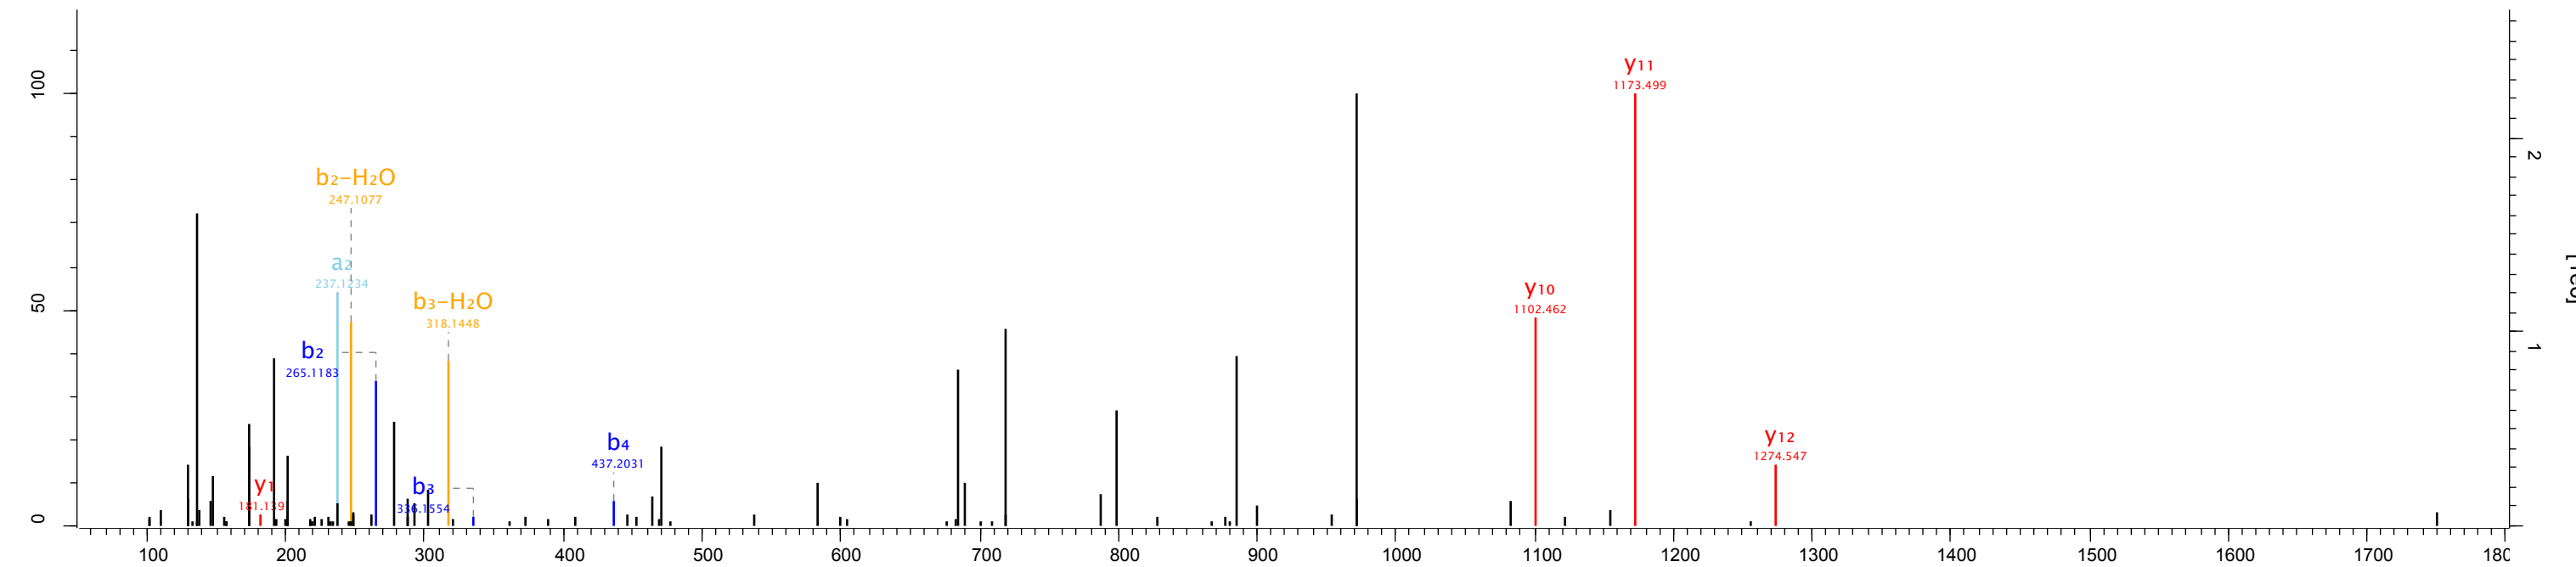

- Y T A T ph S G S D S G L H R -

b<sub>2</sub>
b<sub>3</sub>
b<sub>4</sub>

Raw file 20180707\_MaS\_A375SR\_ML\_proteome\_2\_04 Scan 17578 Method FTMS; HCD Score 83.63 m/z 758.42 Gene names ZMYM6

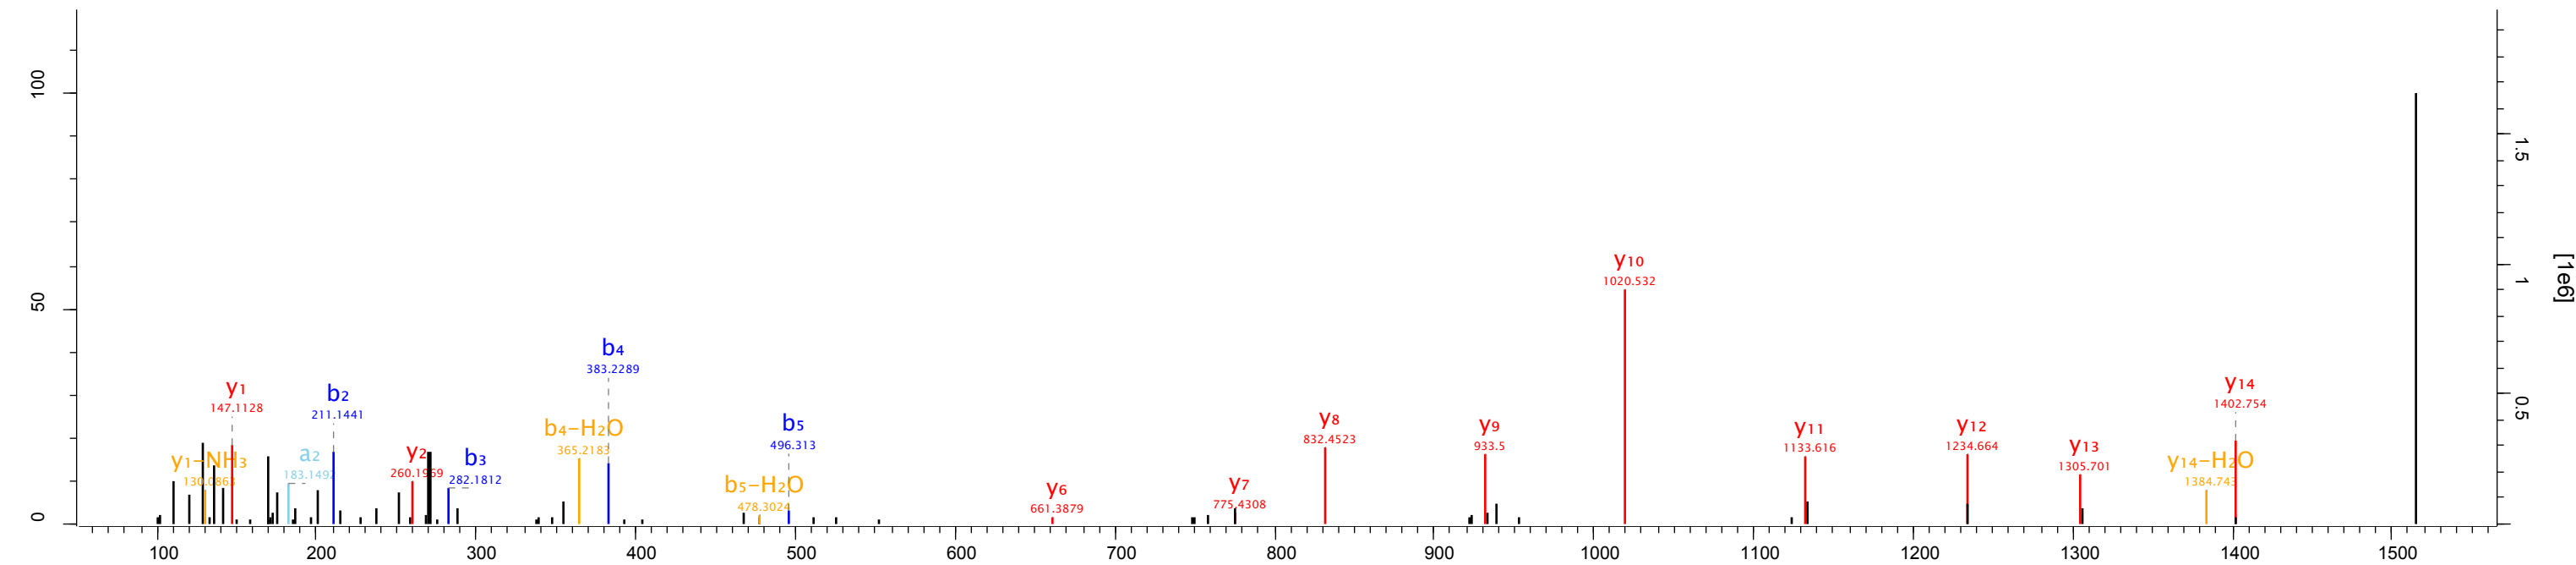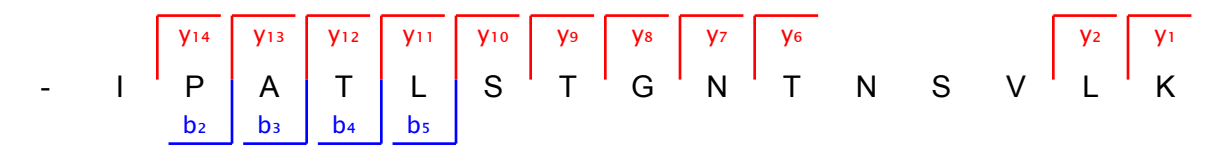

Raw file  
20180707\_MaS\_A375SR\_ML\_proteome\_2\_04

Scan 2448 Method FTMS; HCD Score 166.05 m/z 414.75 Gene names AZIN2

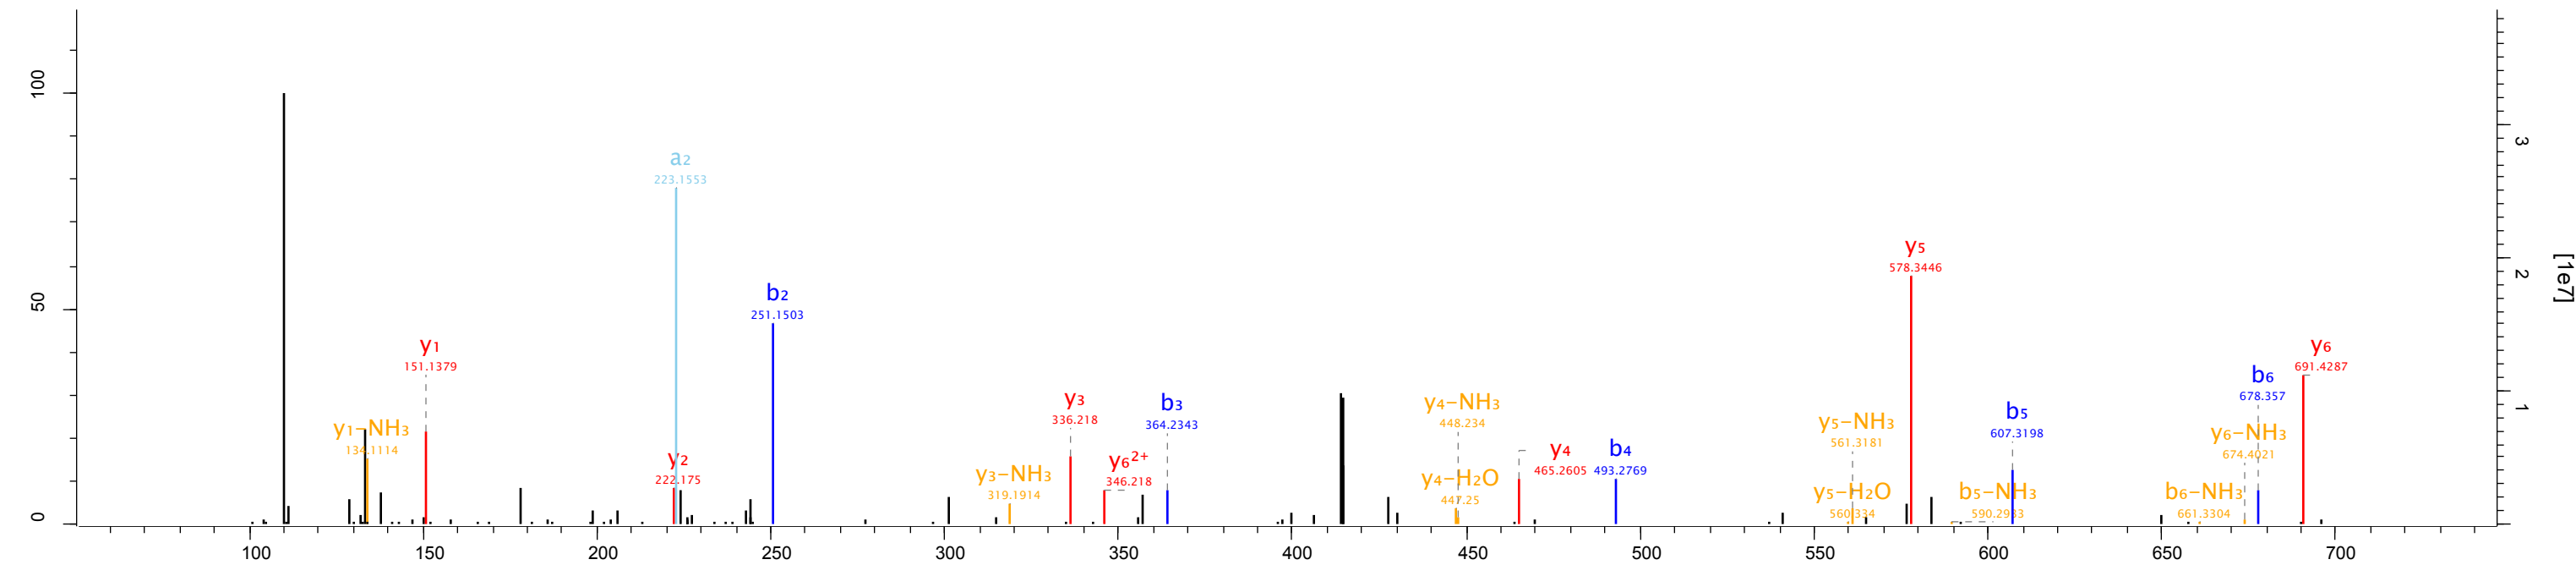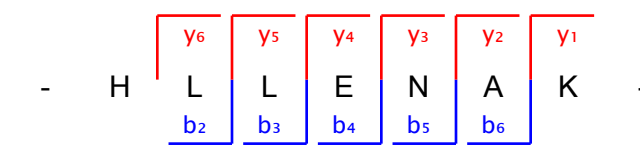

Raw file  
20180707\_MaS\_A375SR\_ML\_proteome\_2\_04

Scan 24918 Method FTMS; HCD Score 118.36 m/z 1059.55 Gene names TMEM261

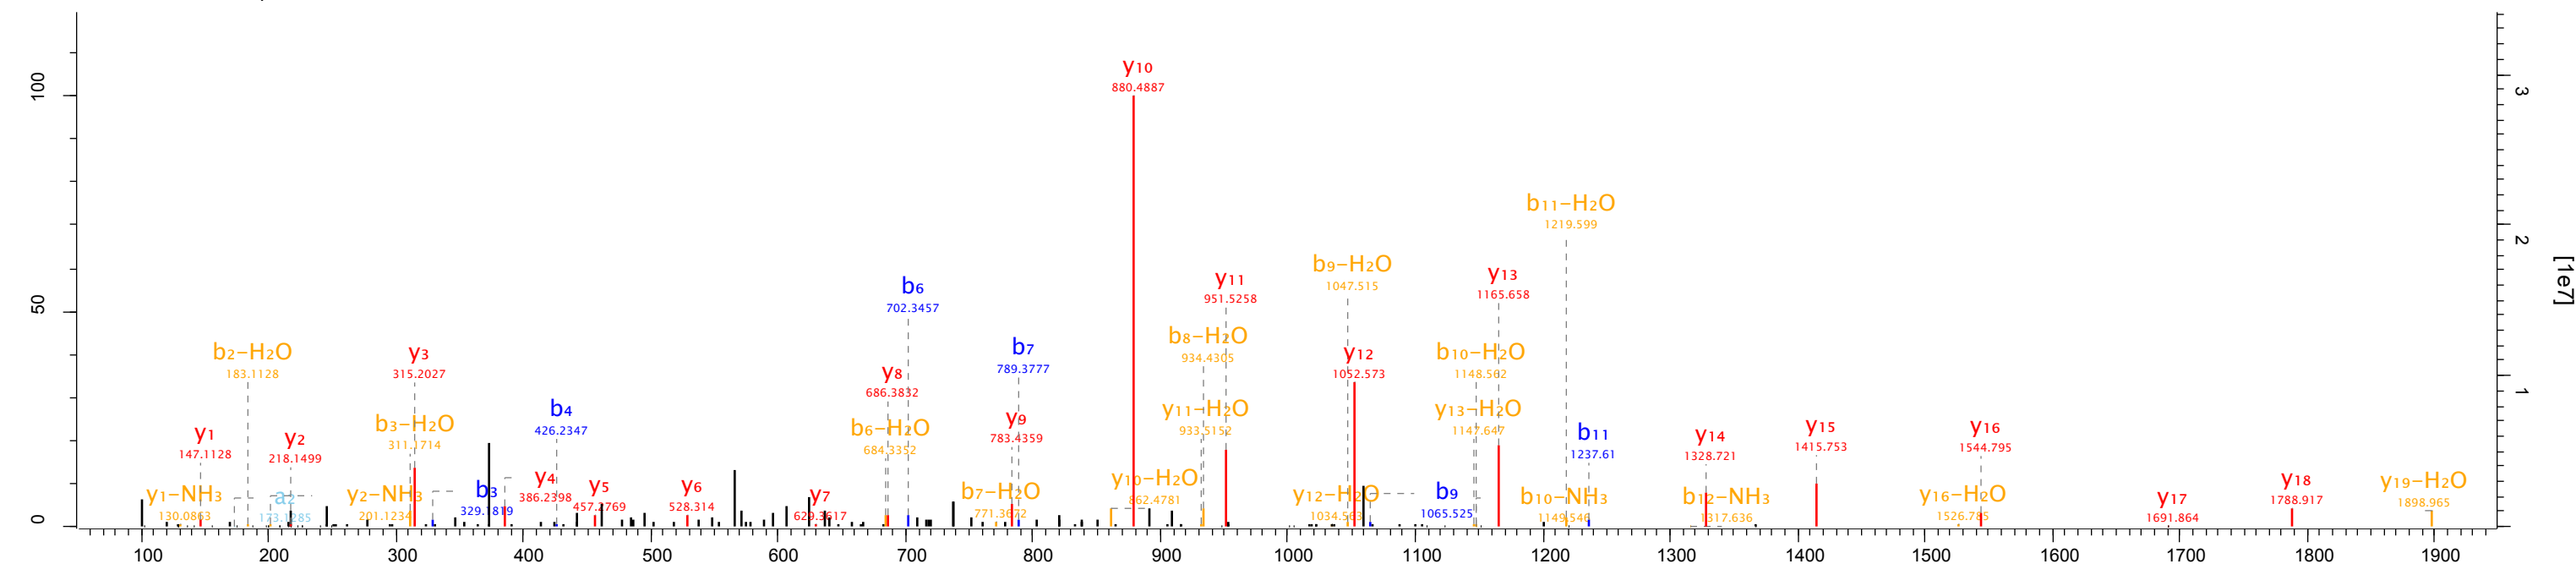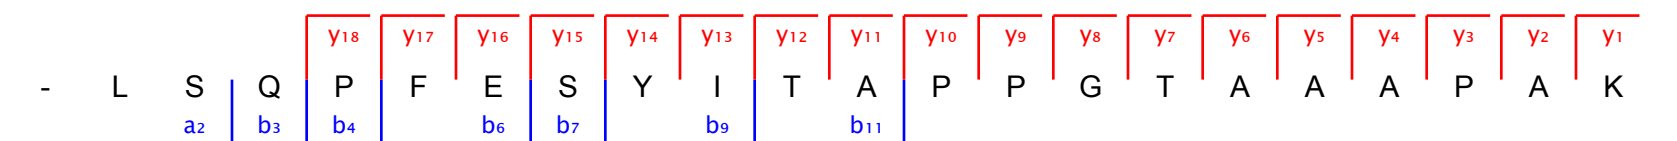

Raw file 20180707\_MaS\_A375SR\_ML\_proteome\_2\_04 Scan 24938 Method FTMS; HCD Score 44.11 m/z 706.7 Gene names TMEM261

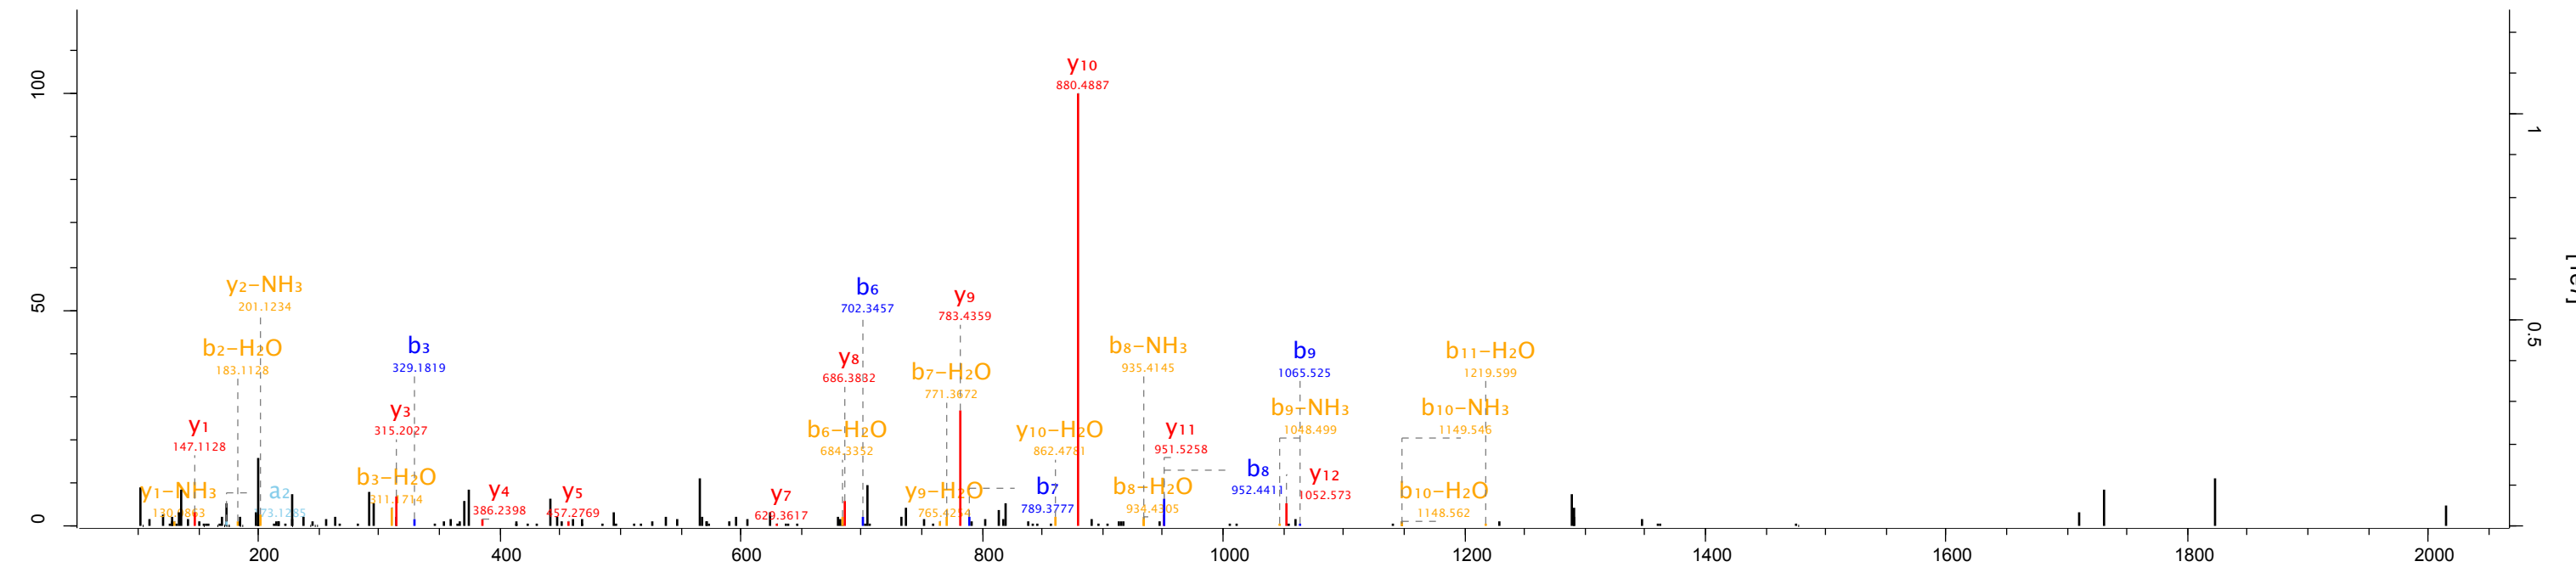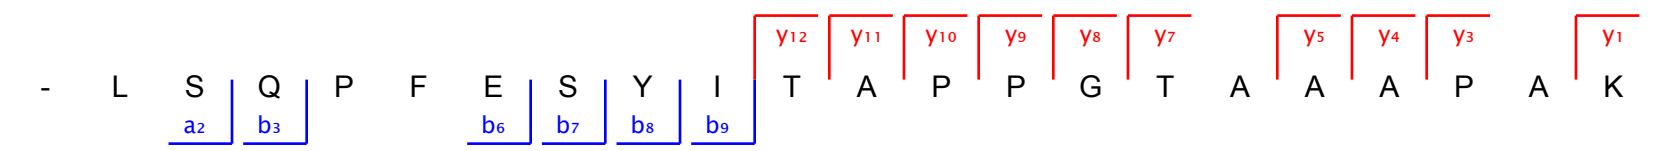

Raw file  
20180707\_MaS\_A375SR\_ML\_proteome\_2\_04

Scan 2588 Method FTMS; HCD Score 62.34 m/z 325.17

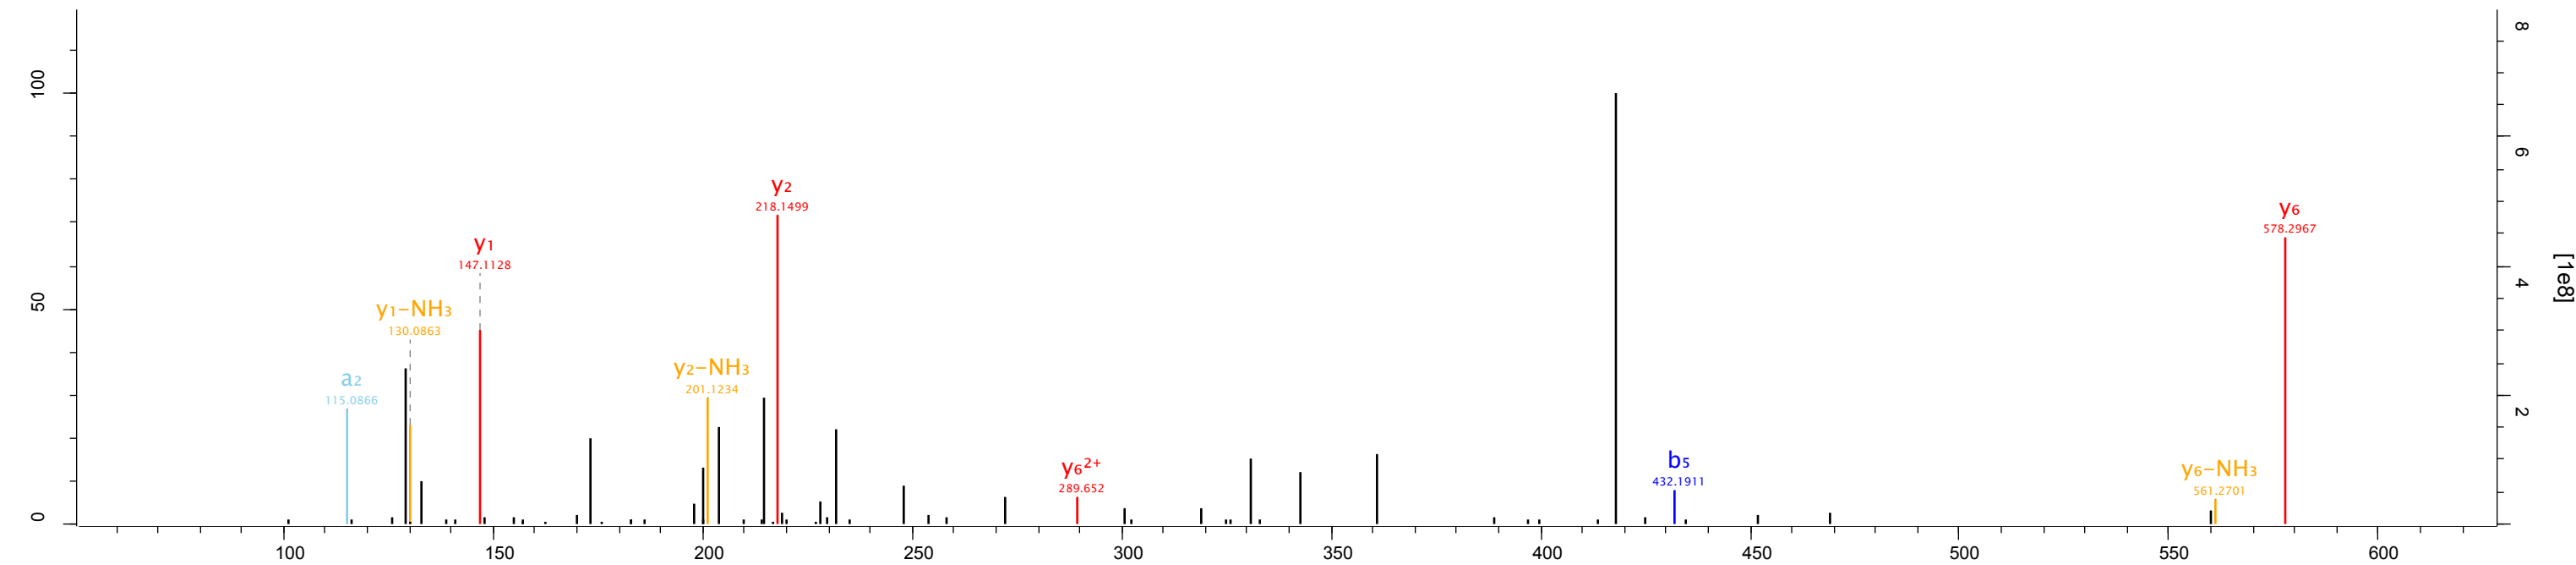

Raw file 20180707\_MaS\_A375SR\_ML\_proteome\_2\_04 Scan 2888 Method FTMS; HCD Score 113.62 m/z 361.51 Gene names TM4SF1

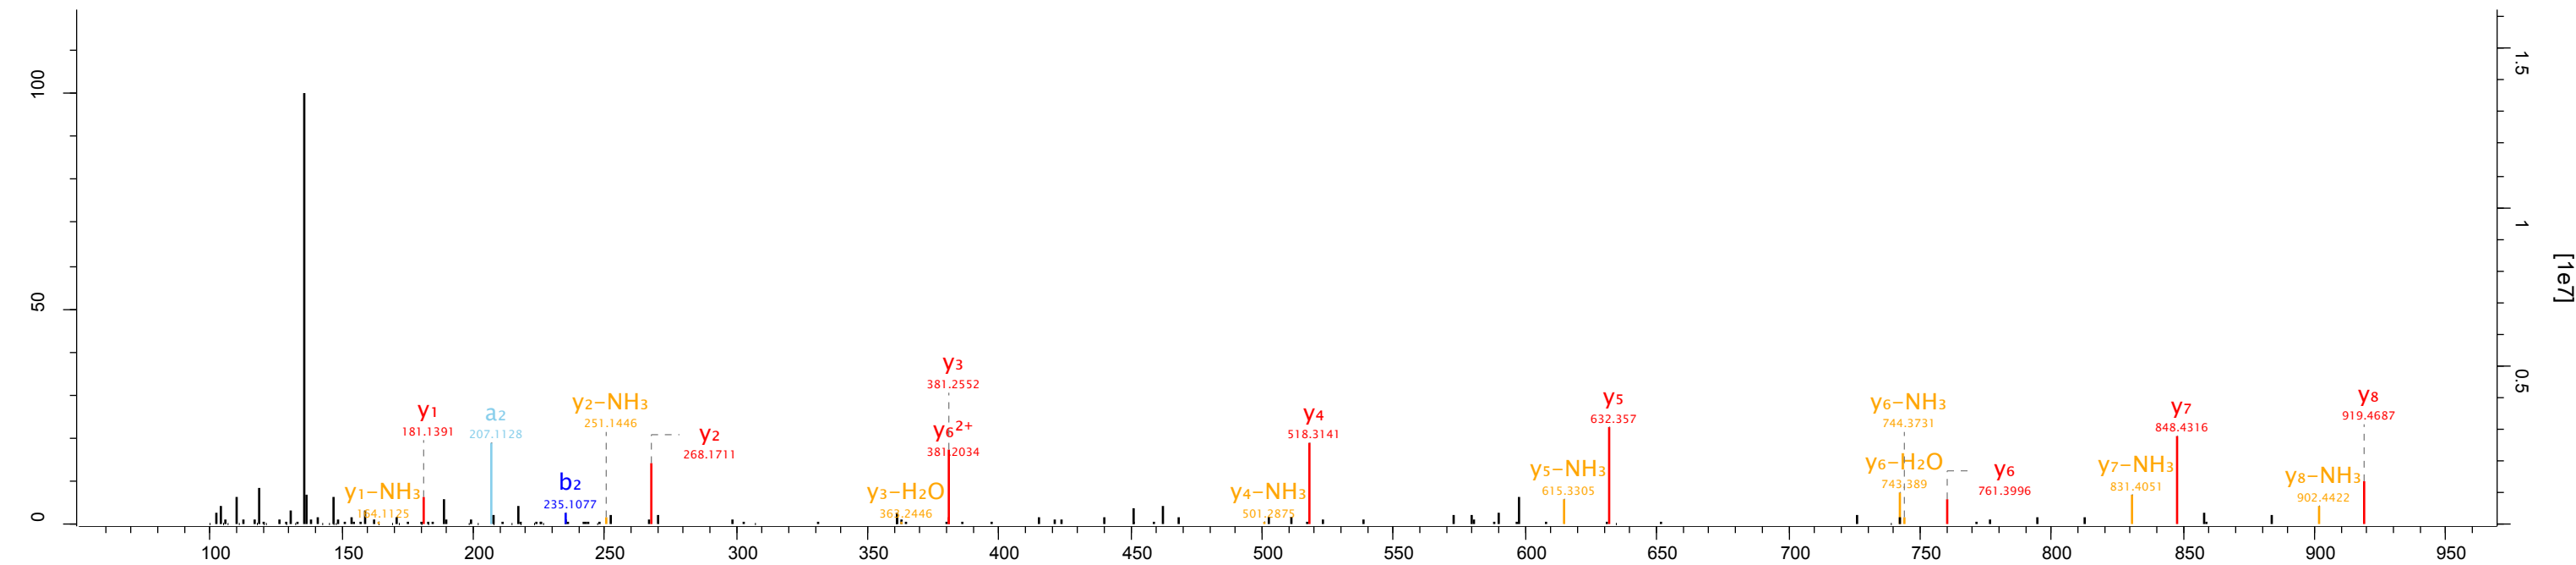



Raw file  
20180707\_MaS\_A375SR\_ML\_proteome\_2\_05

Scan 3368 Method FTMS; HCD Score 40.5 m/z 359.51 Gene names TM4SF1

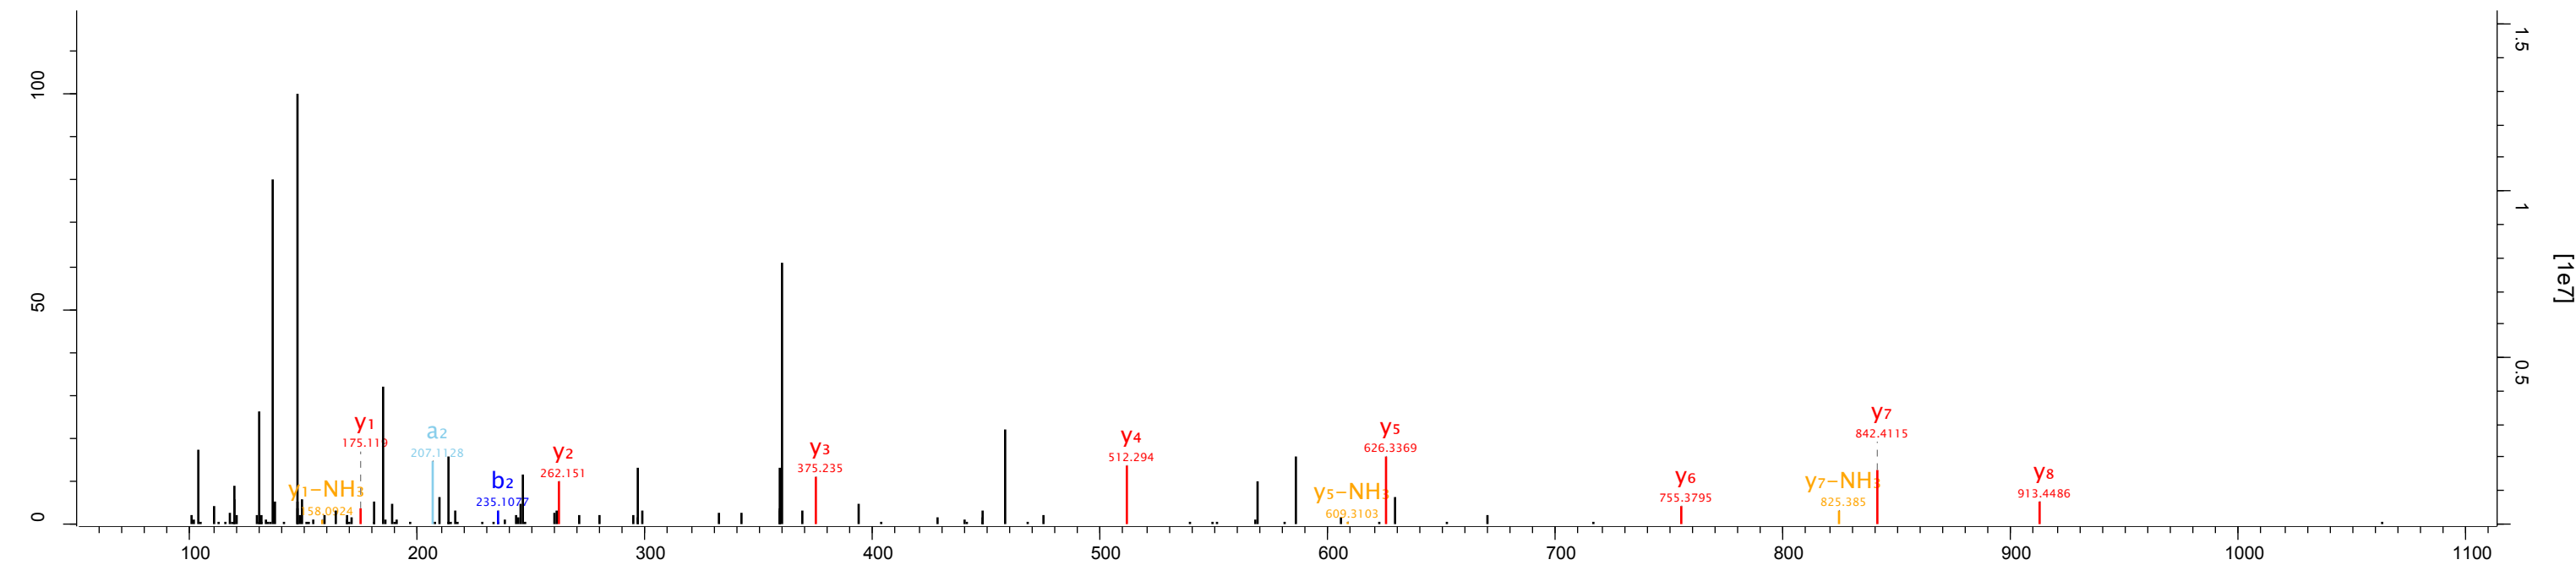

Raw file 20180707\_MaS\_A375SR\_ML\_proteome\_2\_06 Scan 10818 Method FTMS; HCD Score 83.61 m/z 442.2

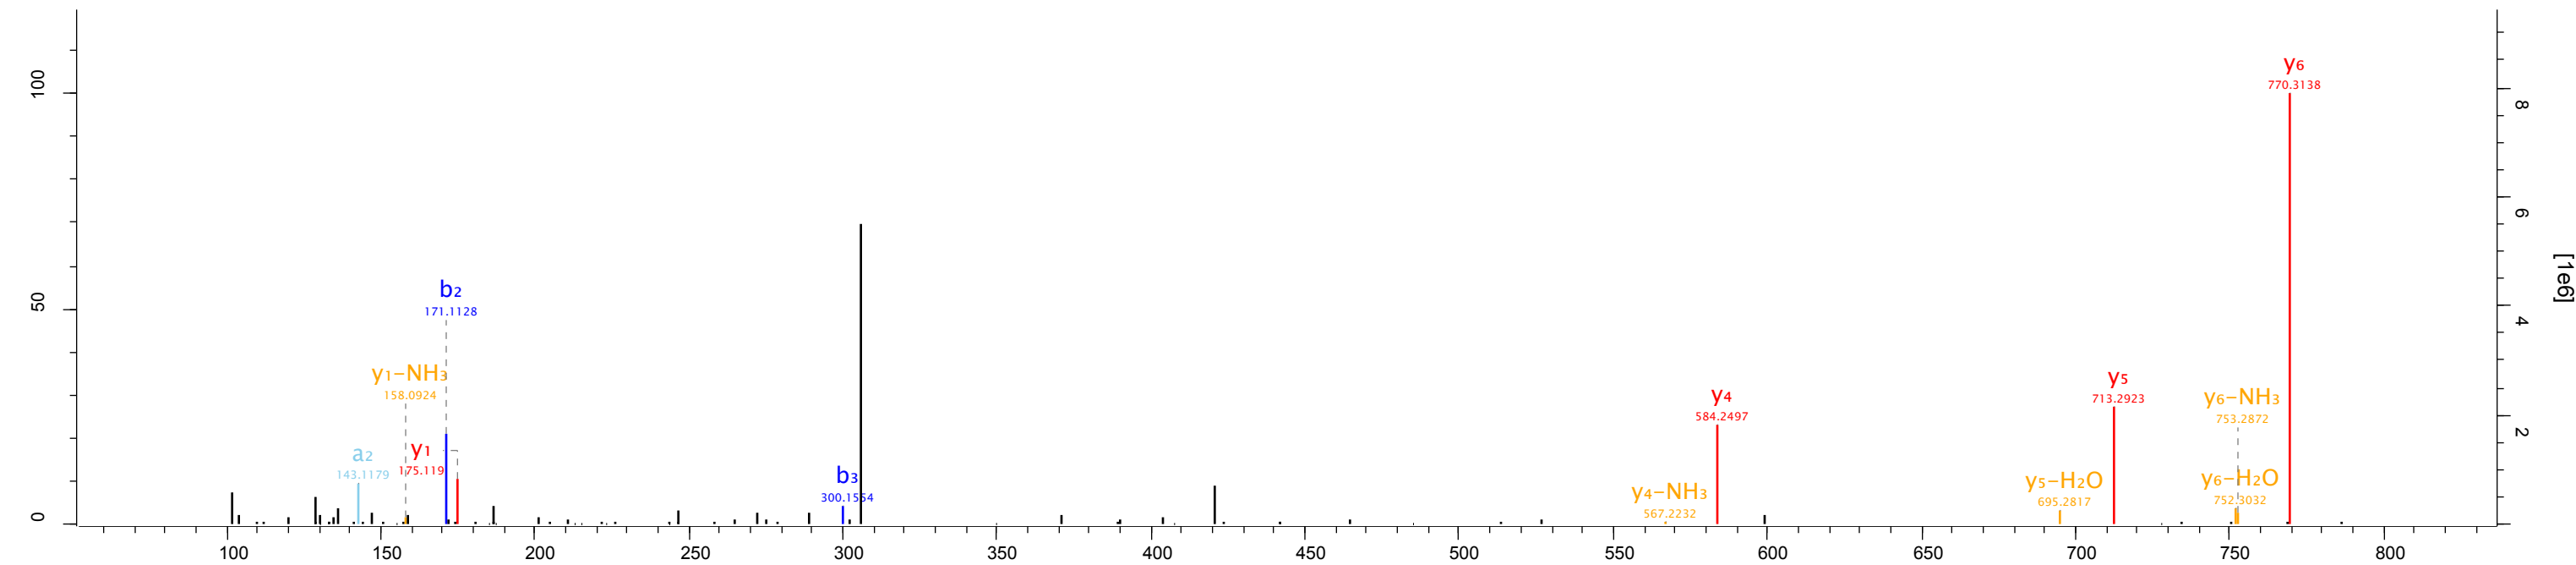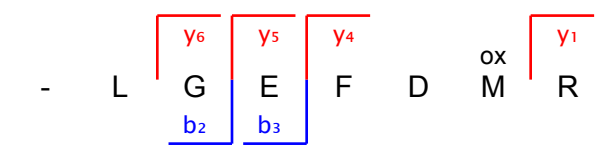

Raw file 20180707\_MaS\_A375SR\_ML\_proteome\_2\_06 Scan 7828 Method FTMS; HCD Score 58.74 m/z 594.31

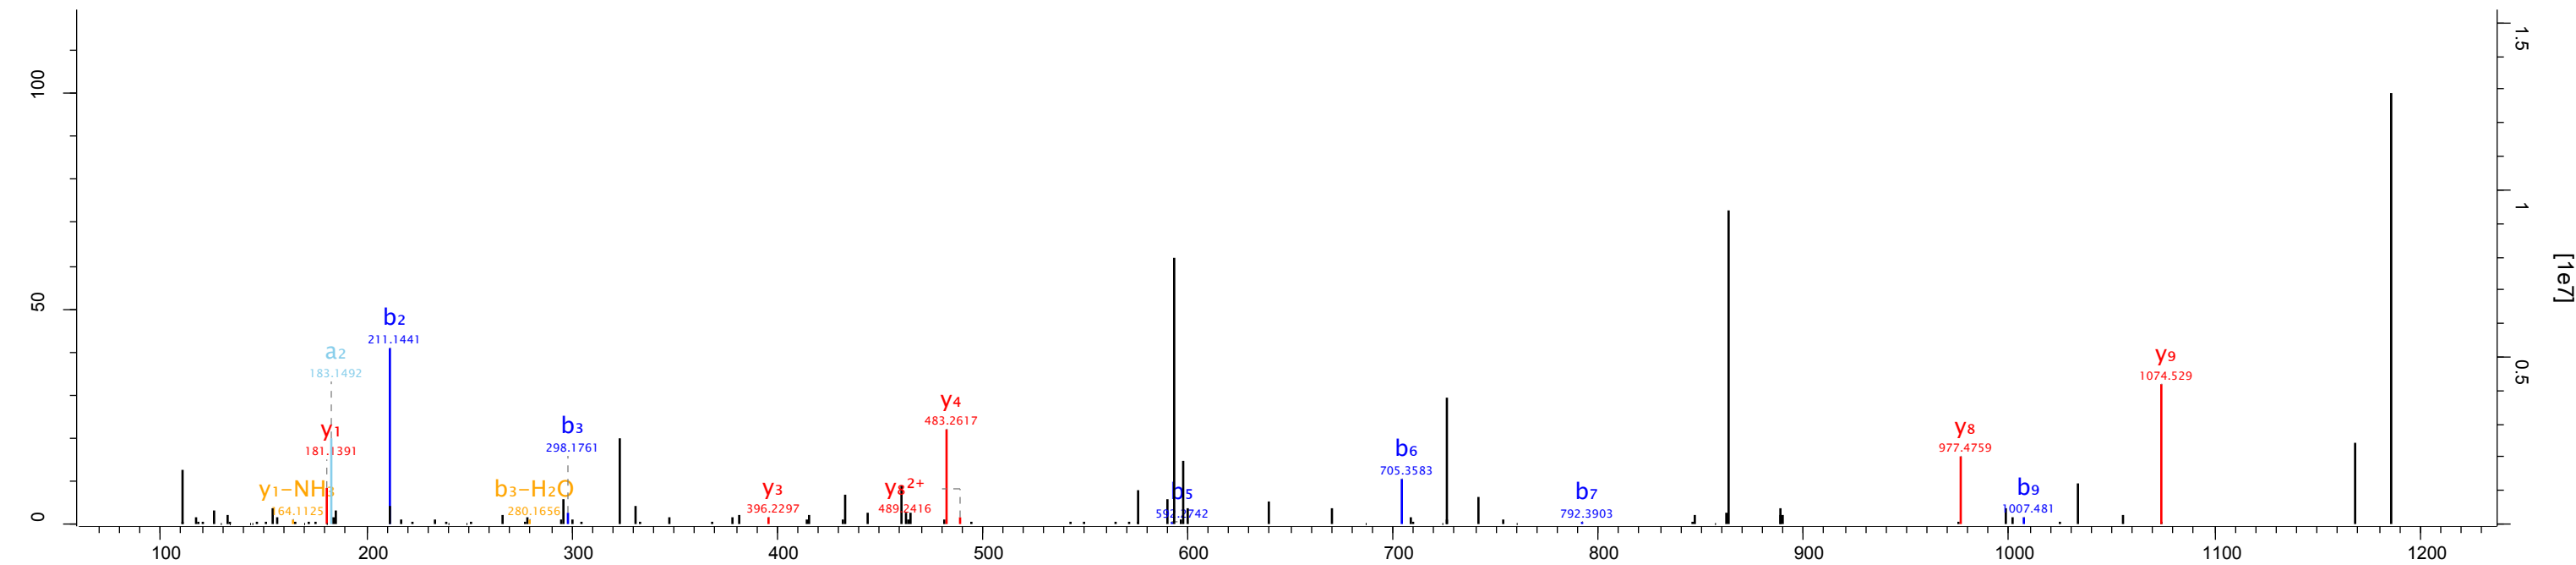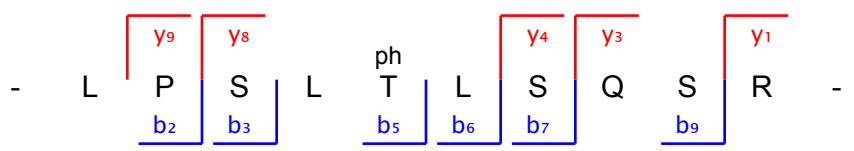



Raw file 20180707\_MaS\_A375SR\_ML\_proteome\_2\_08 Scan 22698 Method FTMS; HCD Score 62.06 m/z 577.3 Gene names B3GNT5

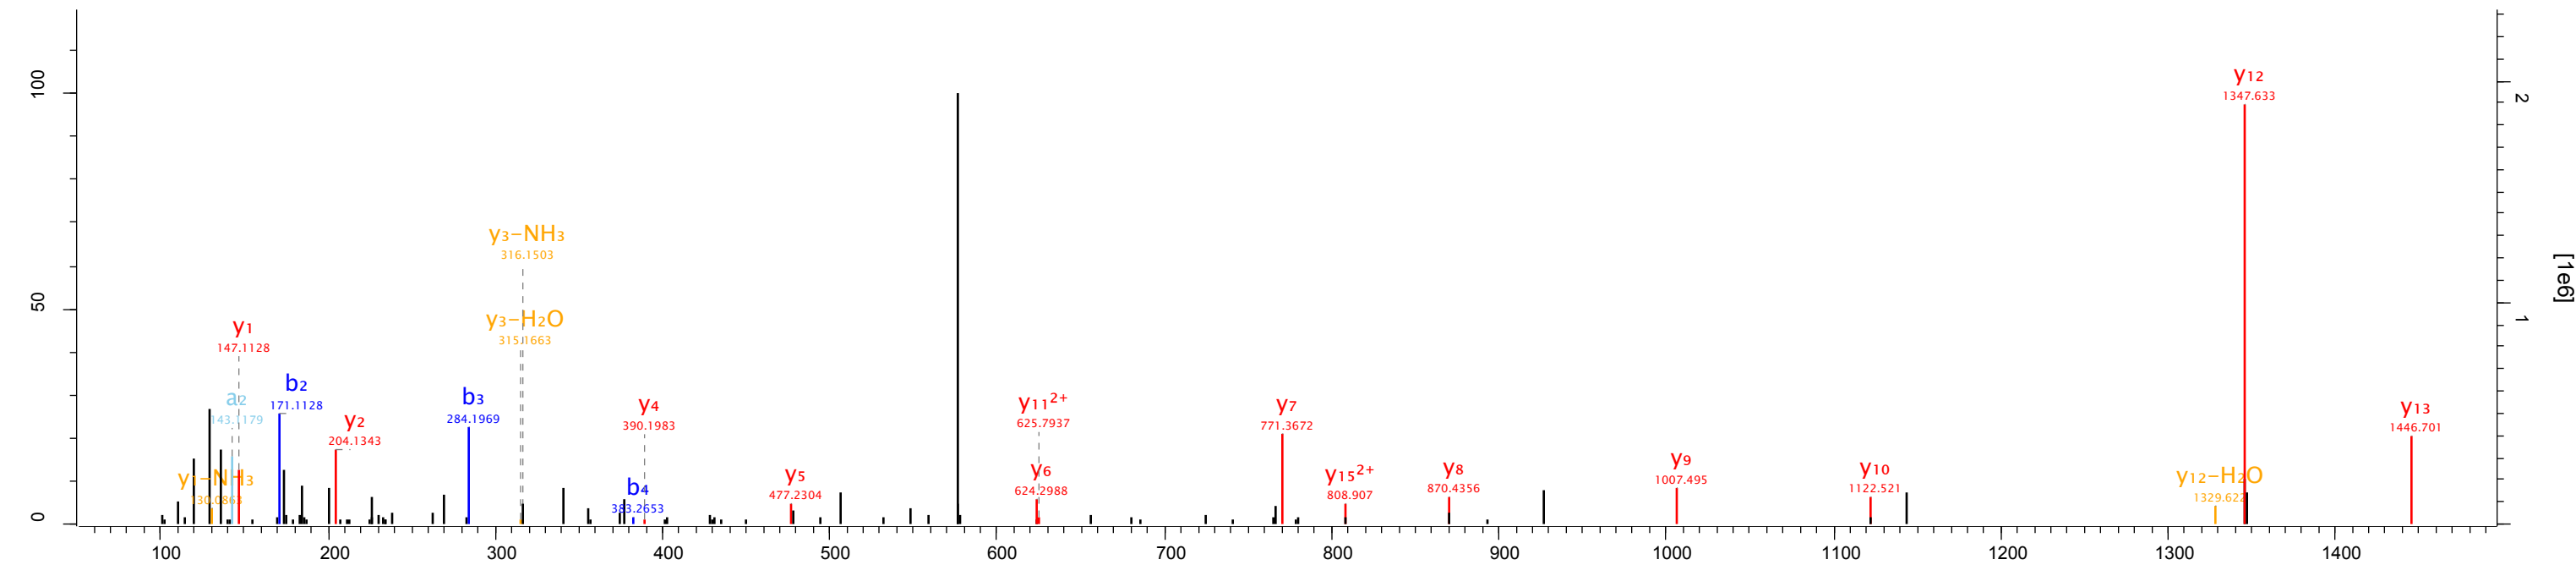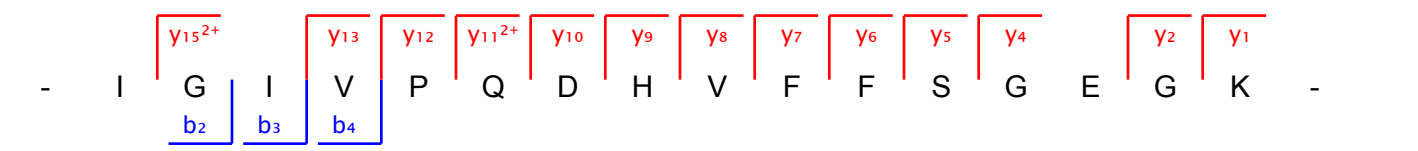

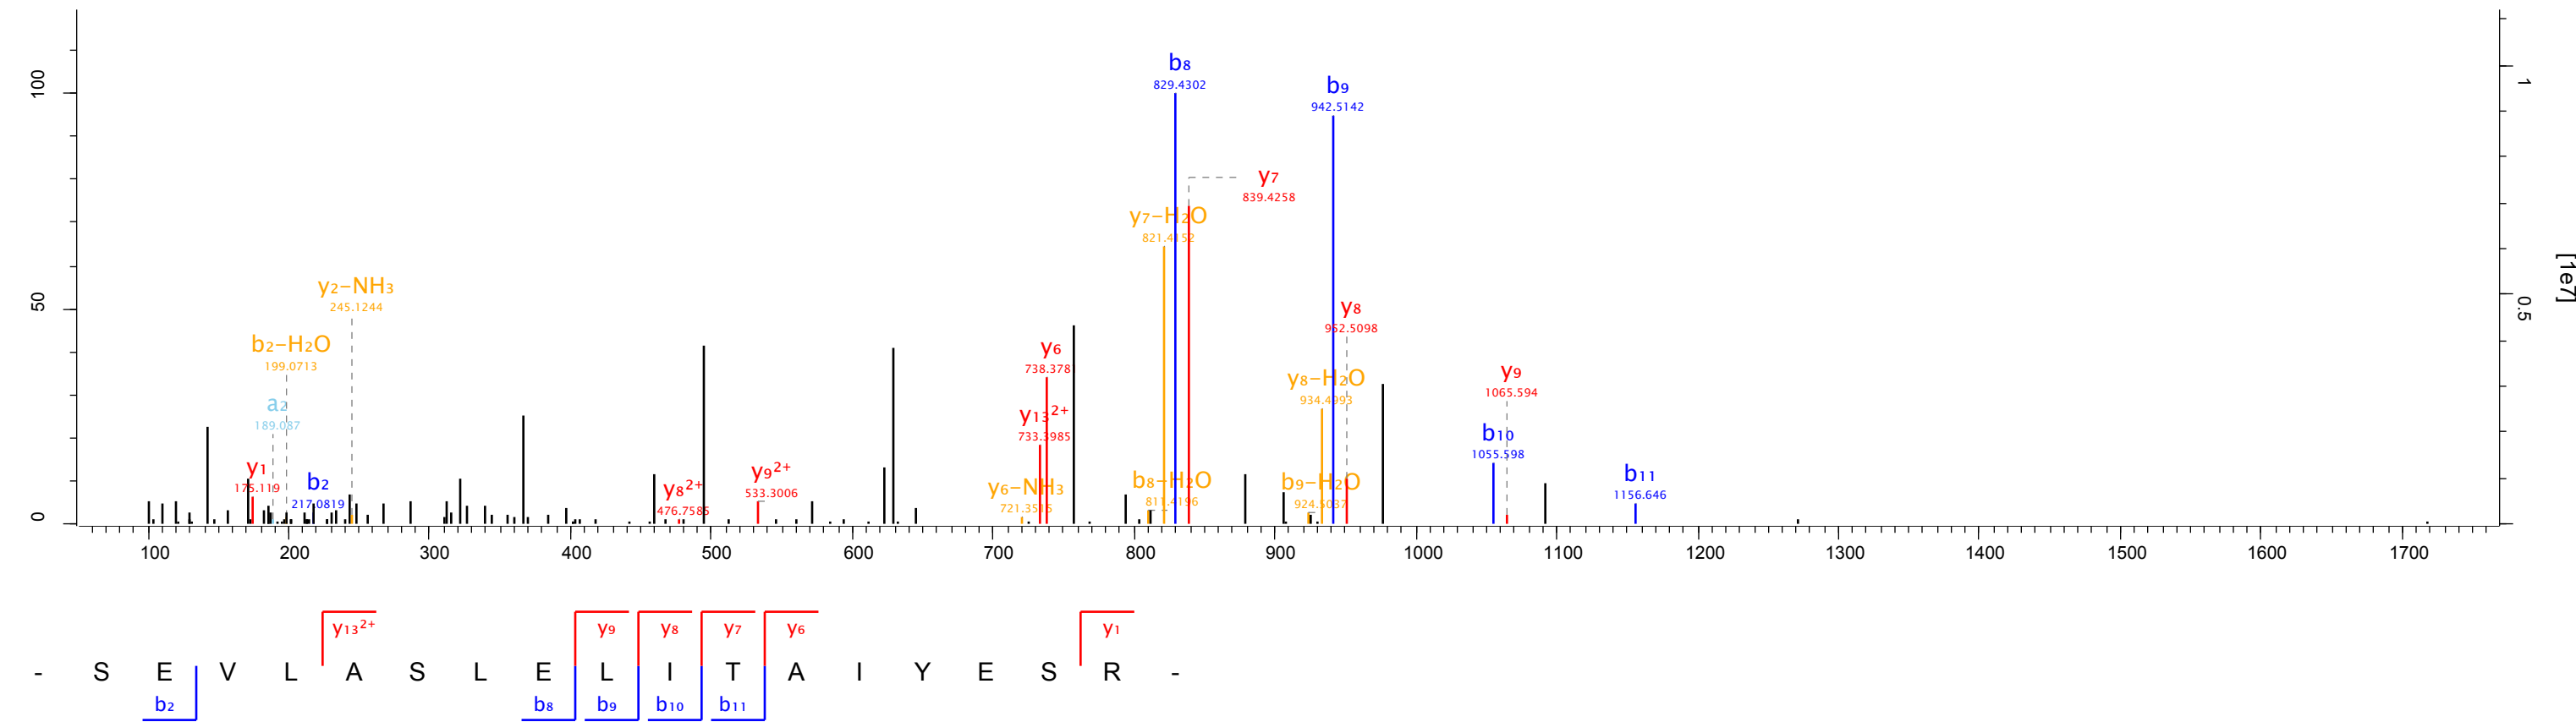

Raw file

20180707\_MaS\_A375SR\_ML\_proteome\_2\_09

| Scan  | Method    | Score | m/z    | Gene names |
|-------|-----------|-------|--------|------------|
| 14518 | FTMS; HCD | 64.76 | 491.22 | IL1F10     |

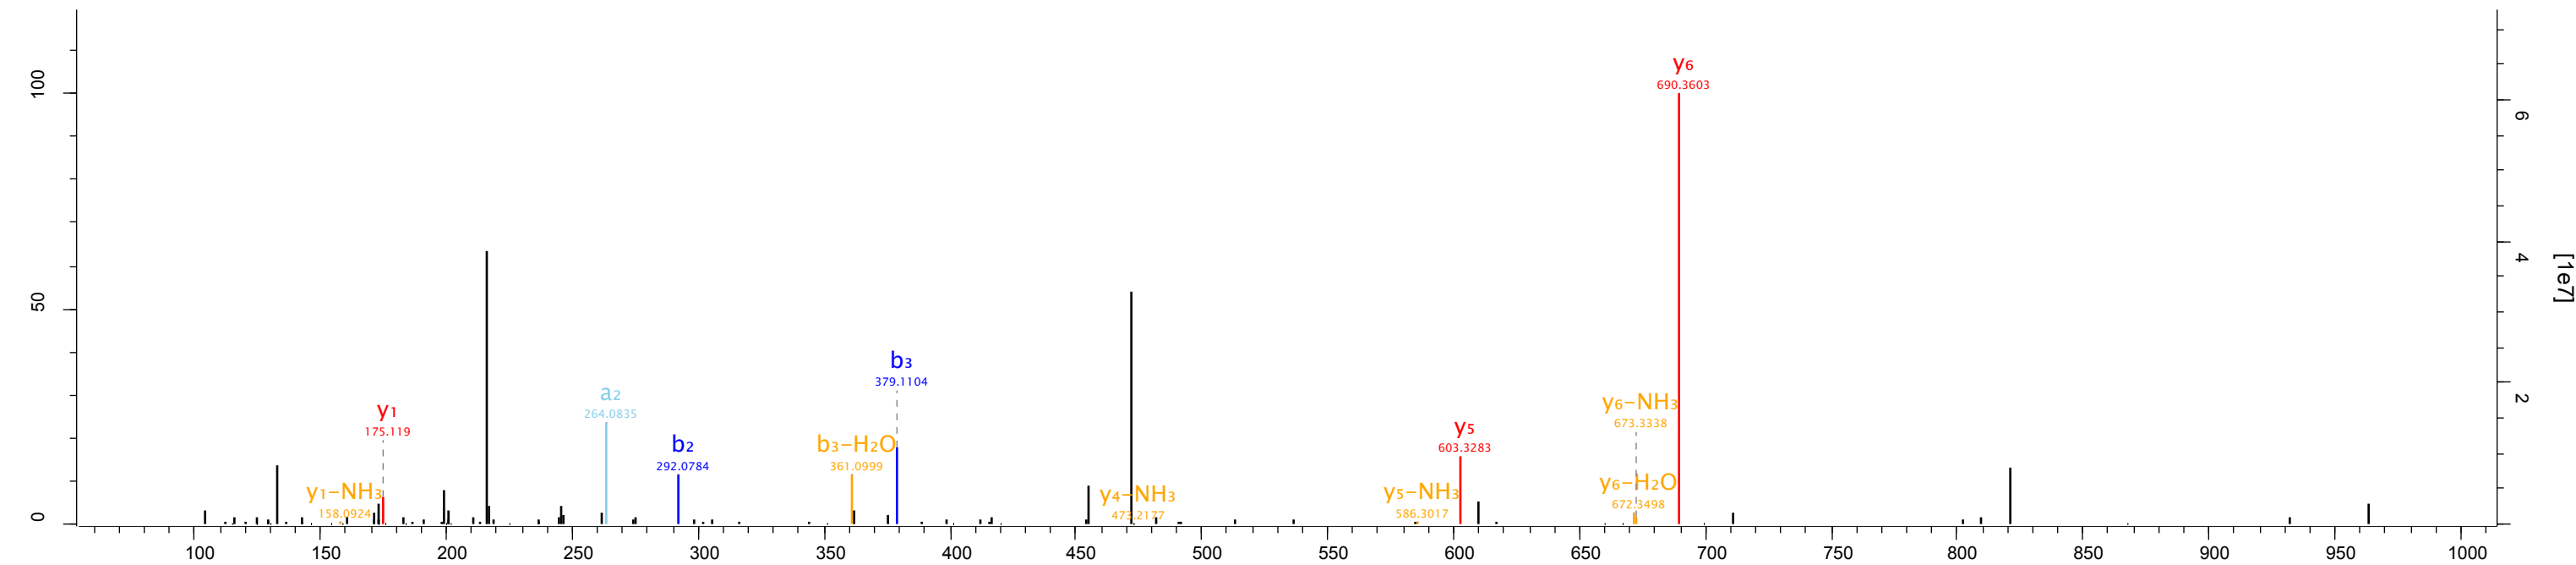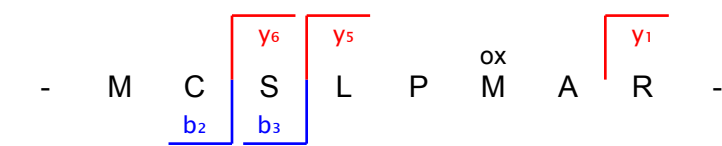

Raw file 20180707\_MaS\_A375SR\_ML\_proteome\_2\_09 Scan 15678 Method FTMS; HCD Score 41.23 m/z 452.75

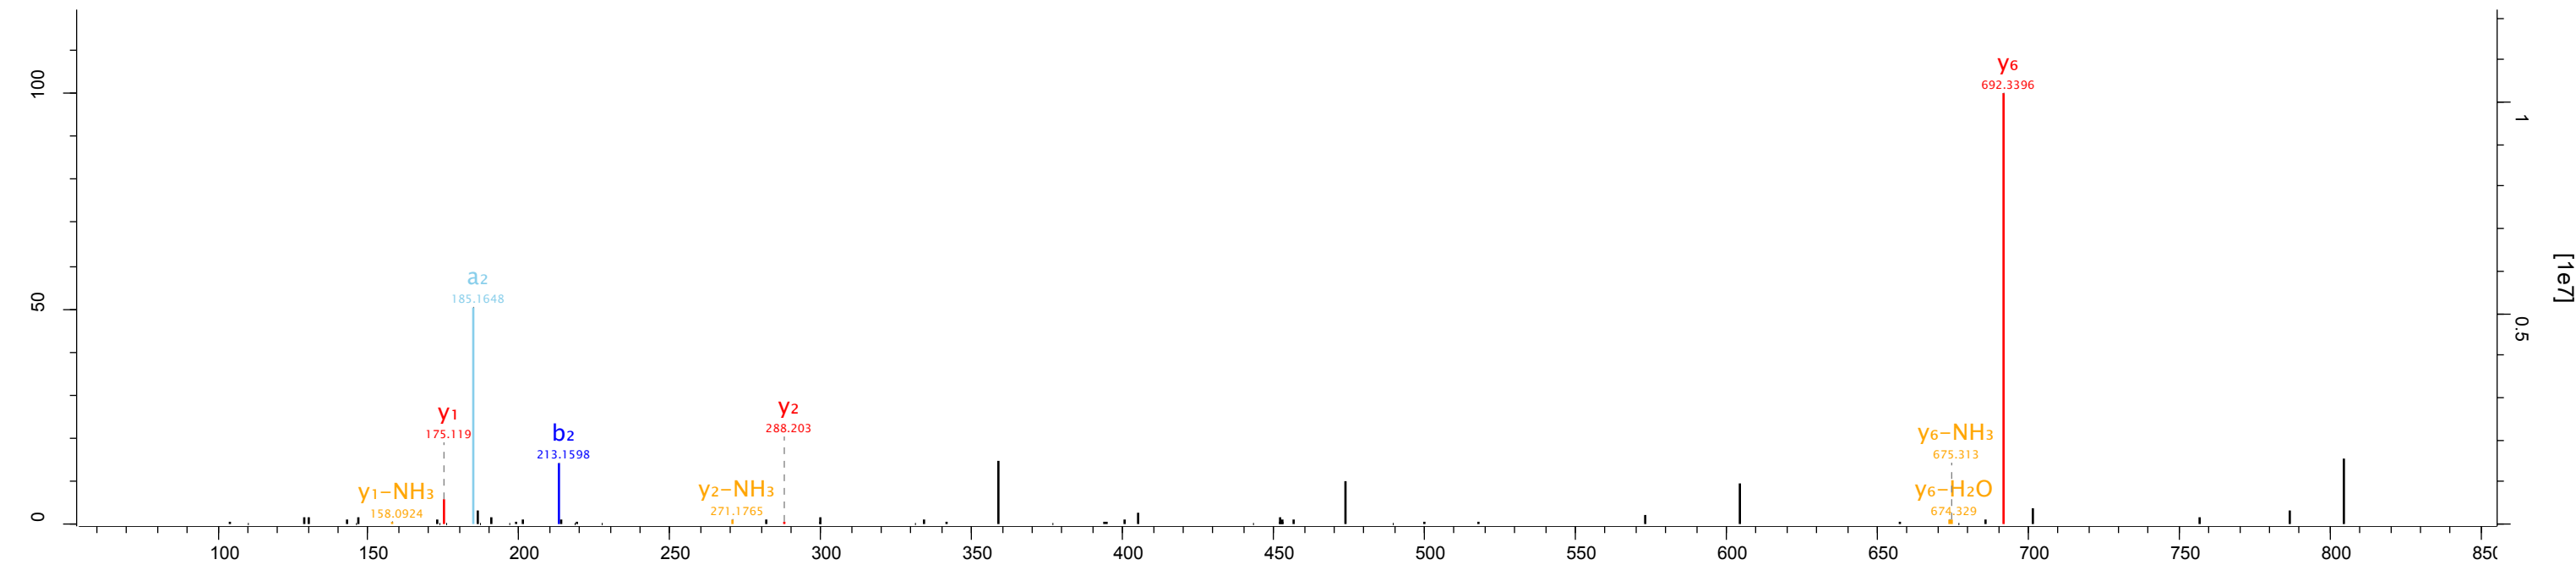



Raw file 20180707\_MaS\_A375SR\_ML\_proteome\_2\_09 Scan 15708 Method FTMS; HCD Score 41.23 m/z 455.76

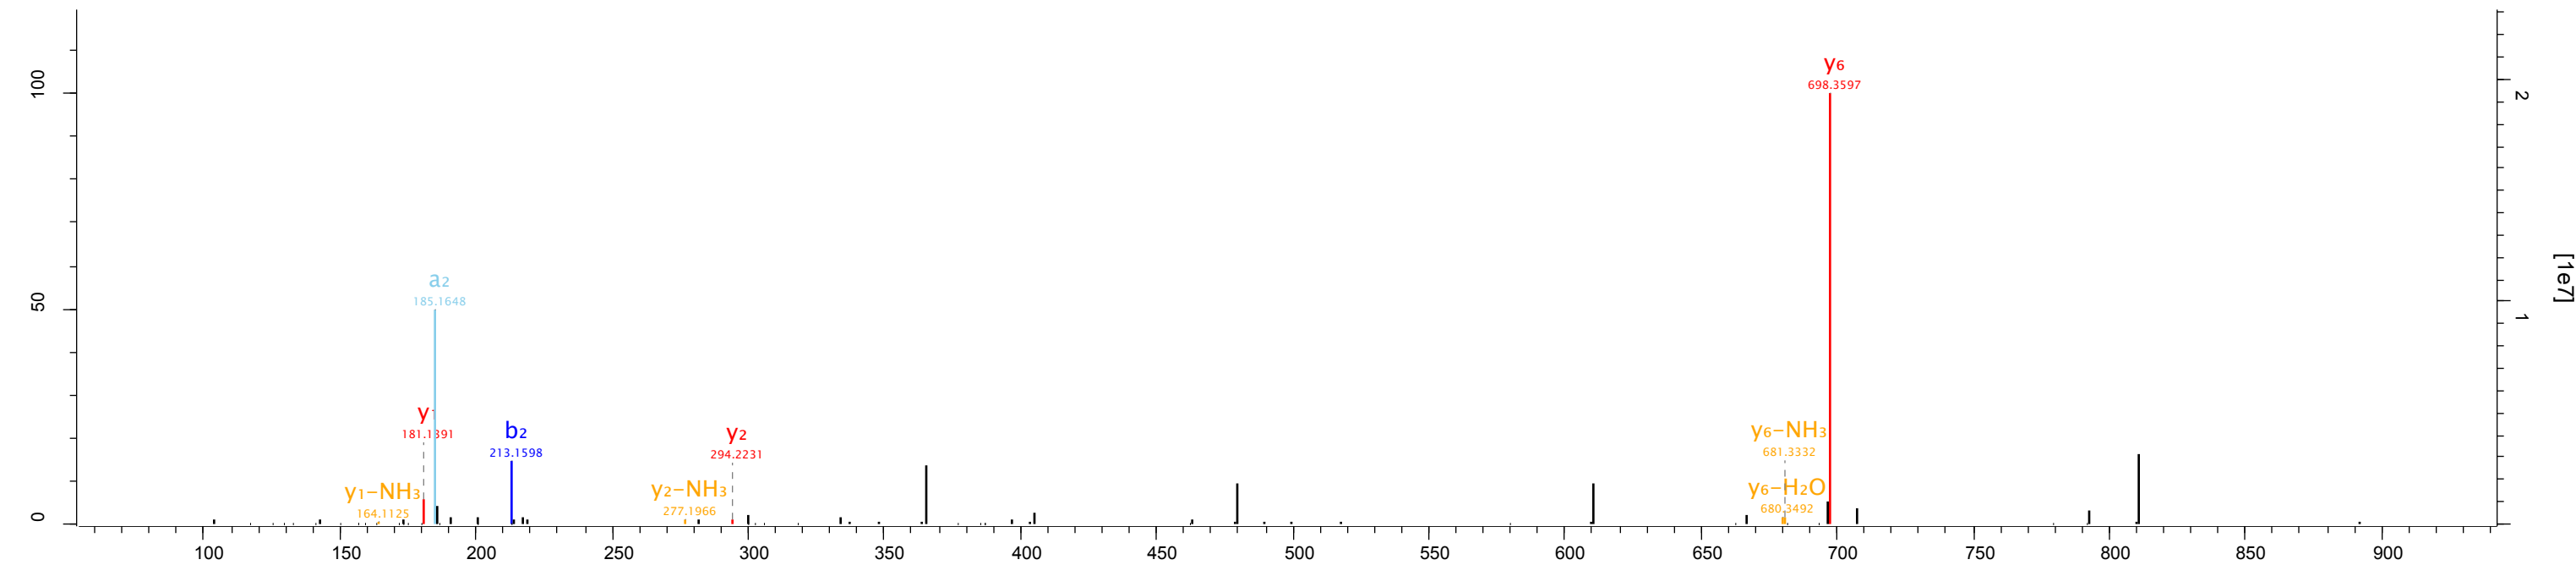

Raw file 20180707\_MaS\_A375SR\_ML\_proteome\_2\_10 Scan 12098 Method FTMS; HCD Score 74.14 m/z 563.61

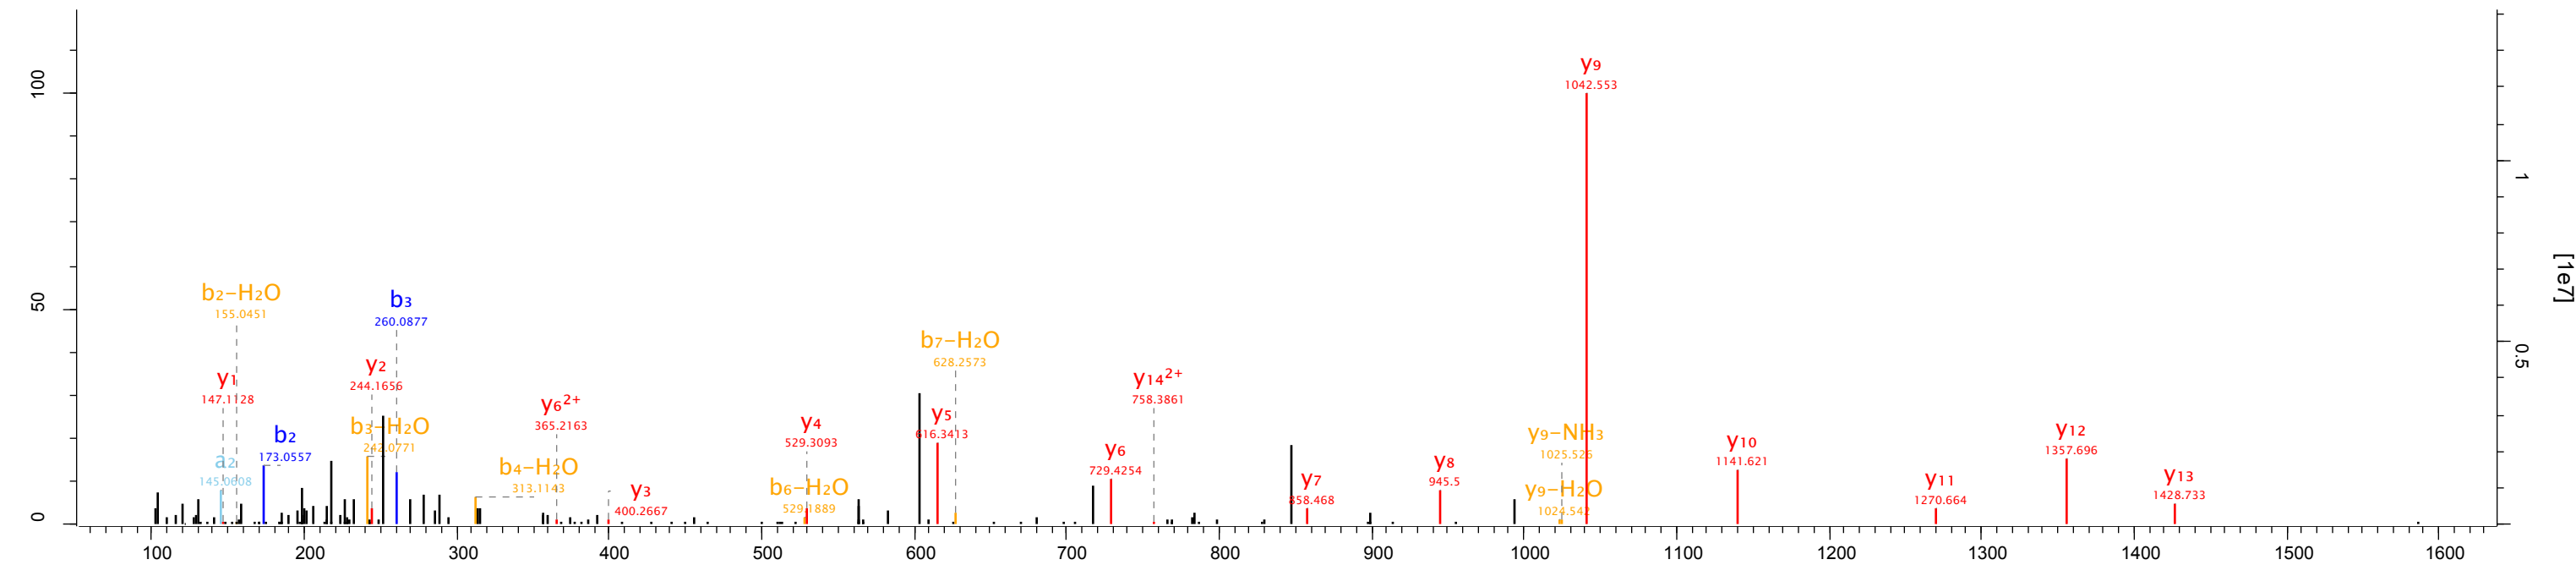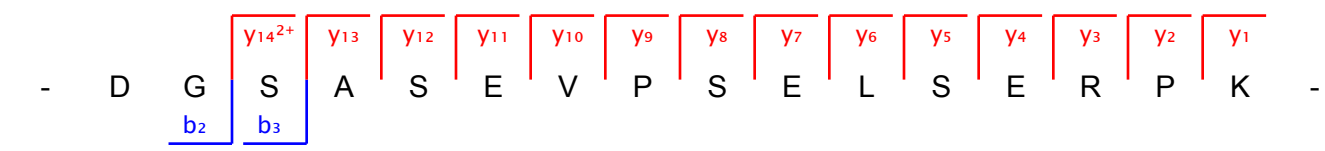

Raw file 20180707\_MaS\_A375SR\_ML\_proteome\_2\_10 Scan 17788 Method FTMS; HCD Score 50.83 m/z 774.66 Gene names ZNF485

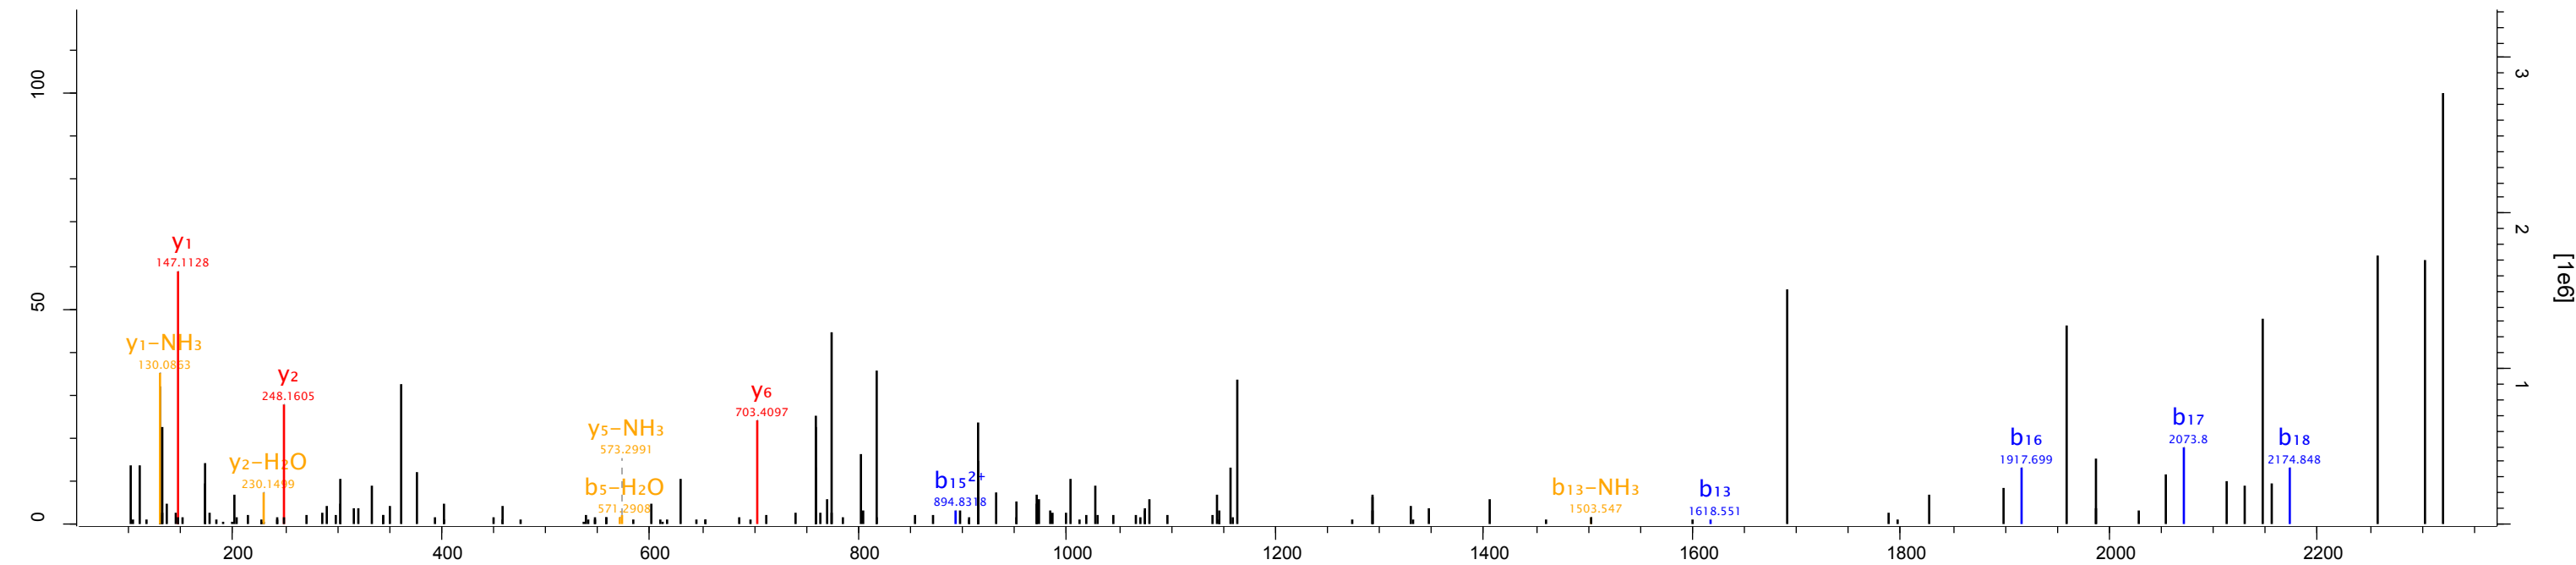

ac - ox M S A L K Q S T S E A S V L G E R T K -

Fragmentation mapping: b13 (V), b15 2+ (L), b16 (G), b17 (E), b18 (R), y6 (L), y2 (T), y1 (K)

Raw file  
20180707\_MaS\_A375SR\_ML\_proteome\_2\_11

Scan 12408 Method FTMS; HCD Score 52.68 m/z 444.25 Gene names C1orf234

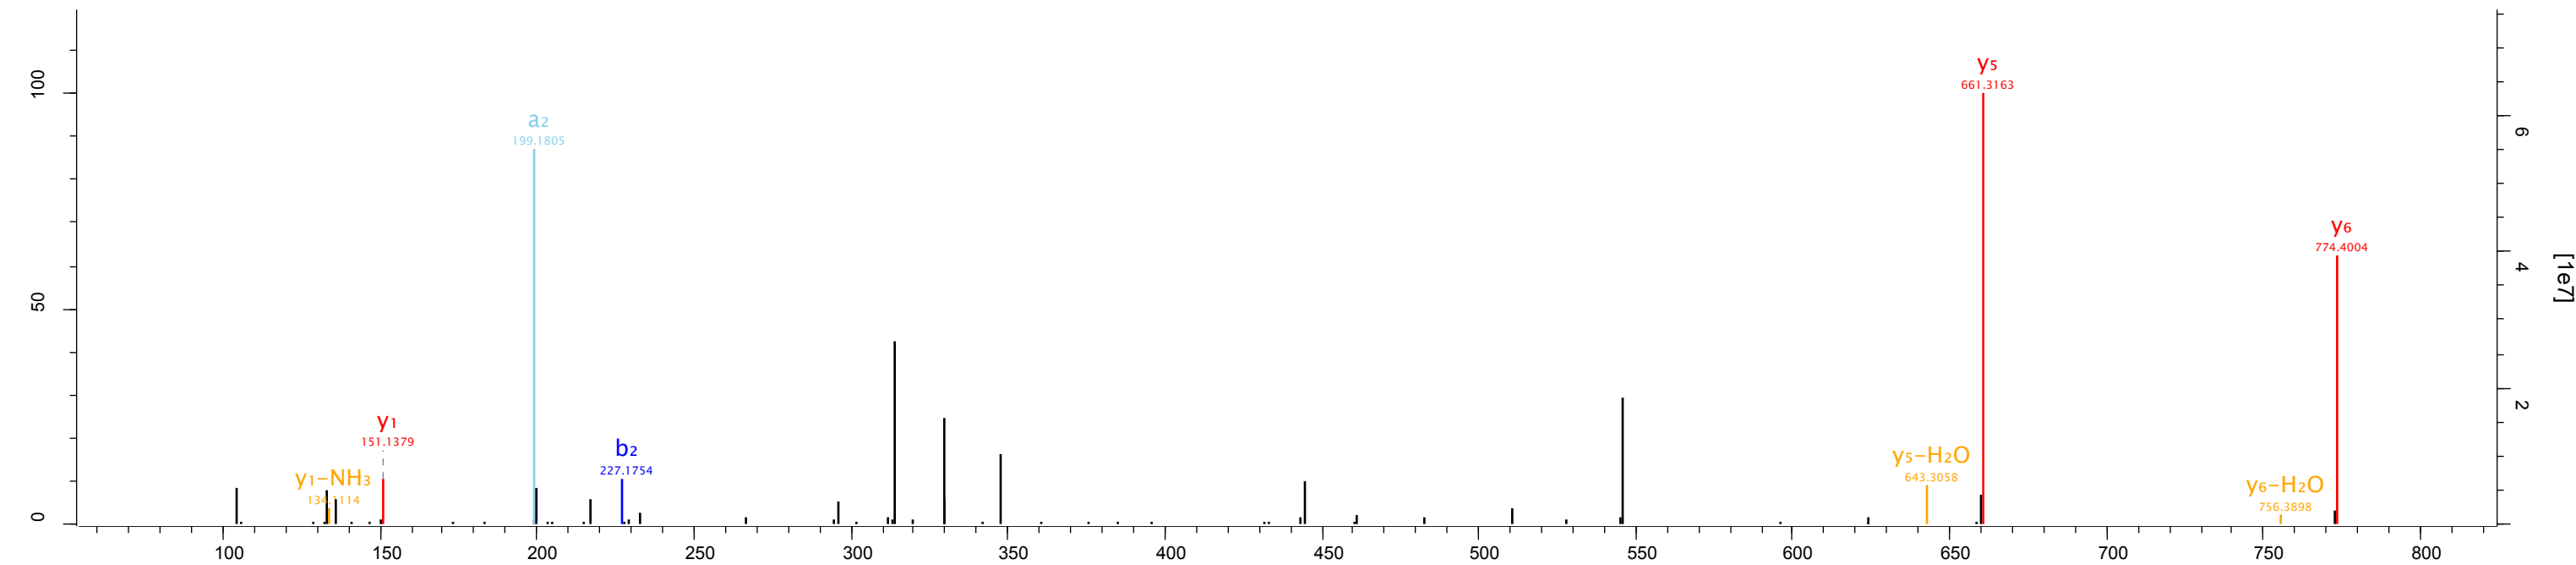

Raw file  
20180707\_MaS\_A375SR\_ML\_proteome\_2\_11

Scan 28108 Method FTMS; HCD Score 31.09 m/z 856.99 Gene names SSR3

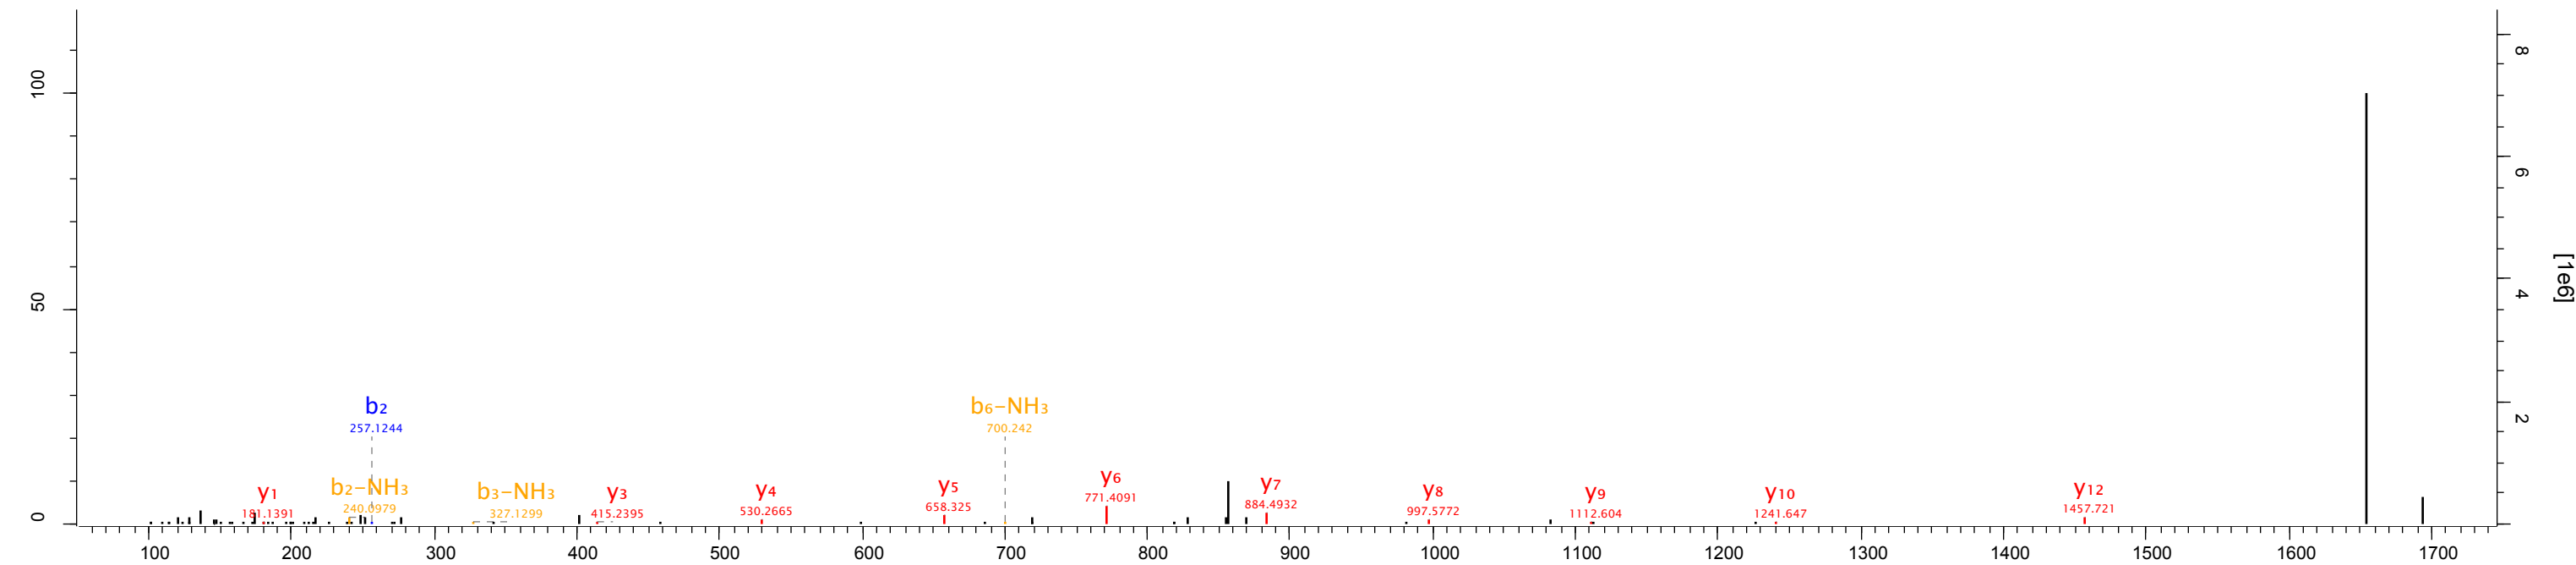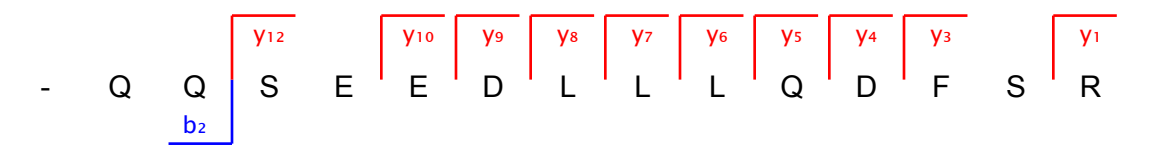

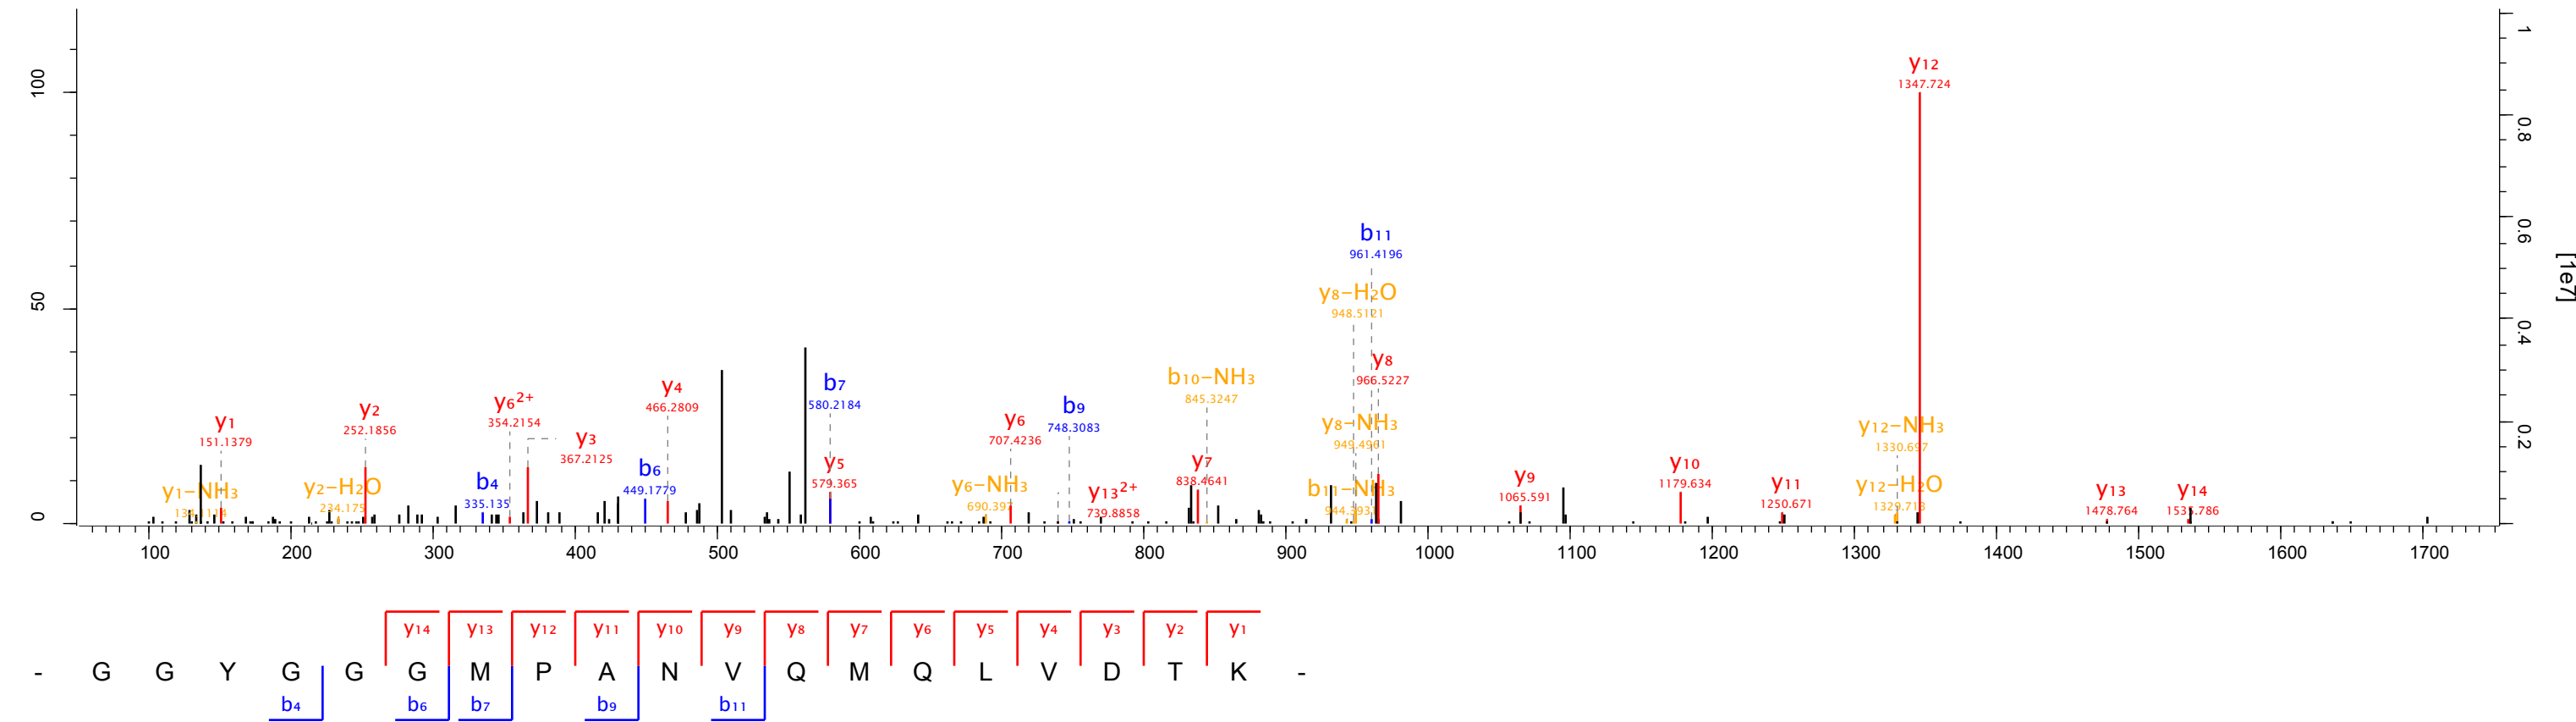

Raw file 20180707\_MaS\_A375SR\_ML\_proteome\_2\_12 Scan 28648 Method FTMS; HCD Score 94.49 m/z 865.92 Gene names FAM161A

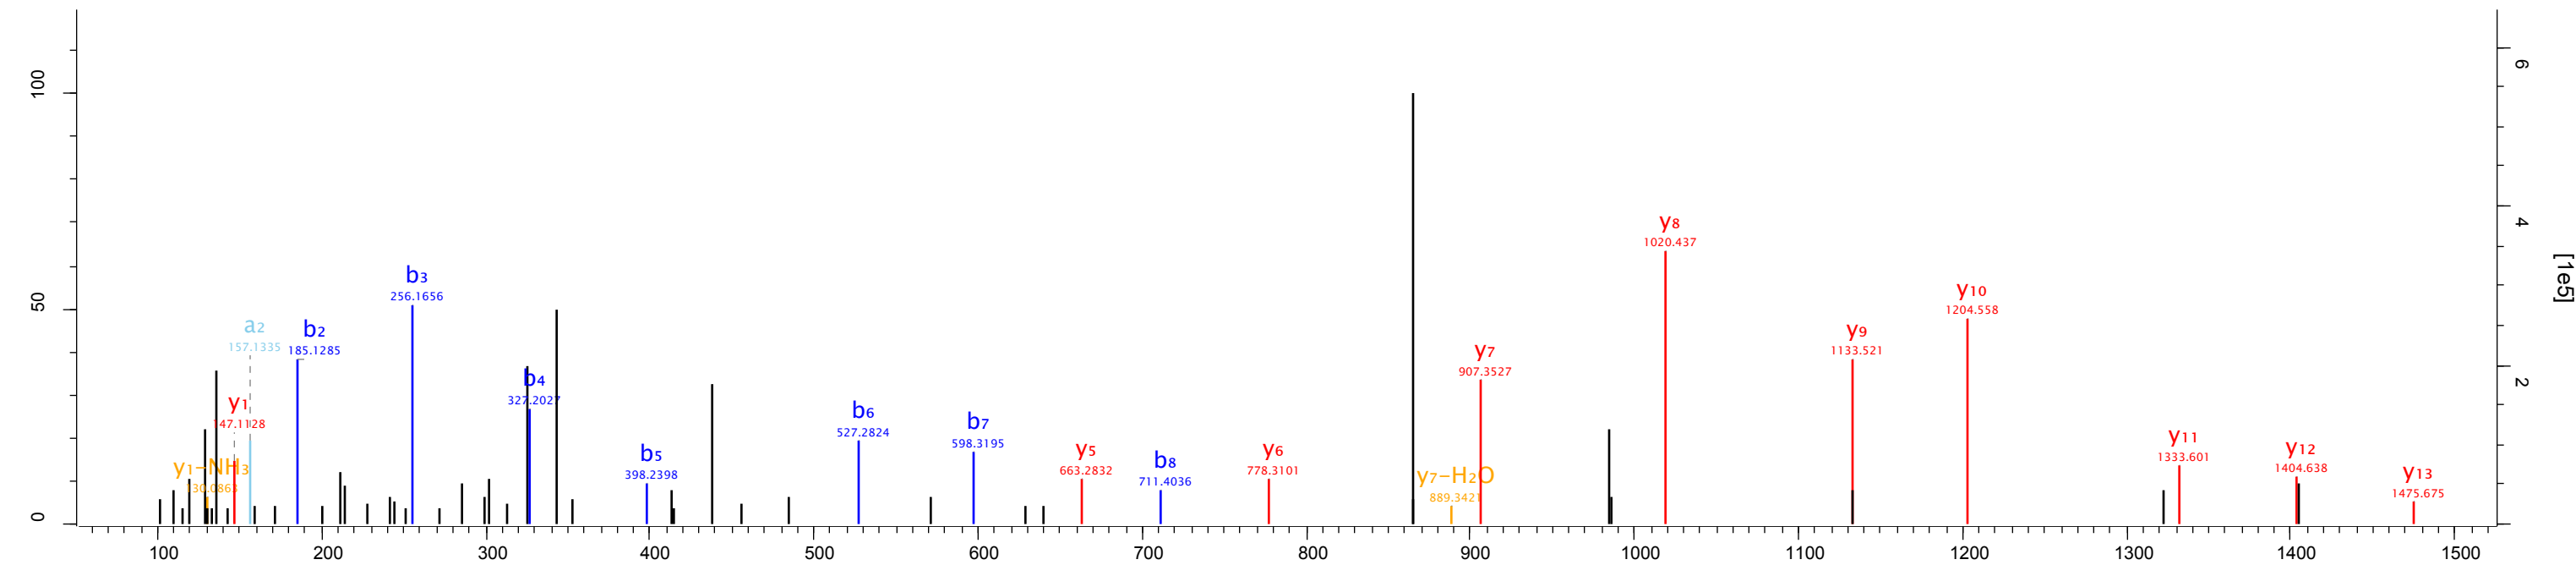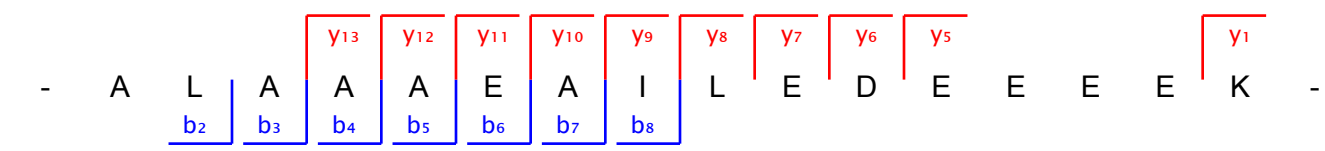

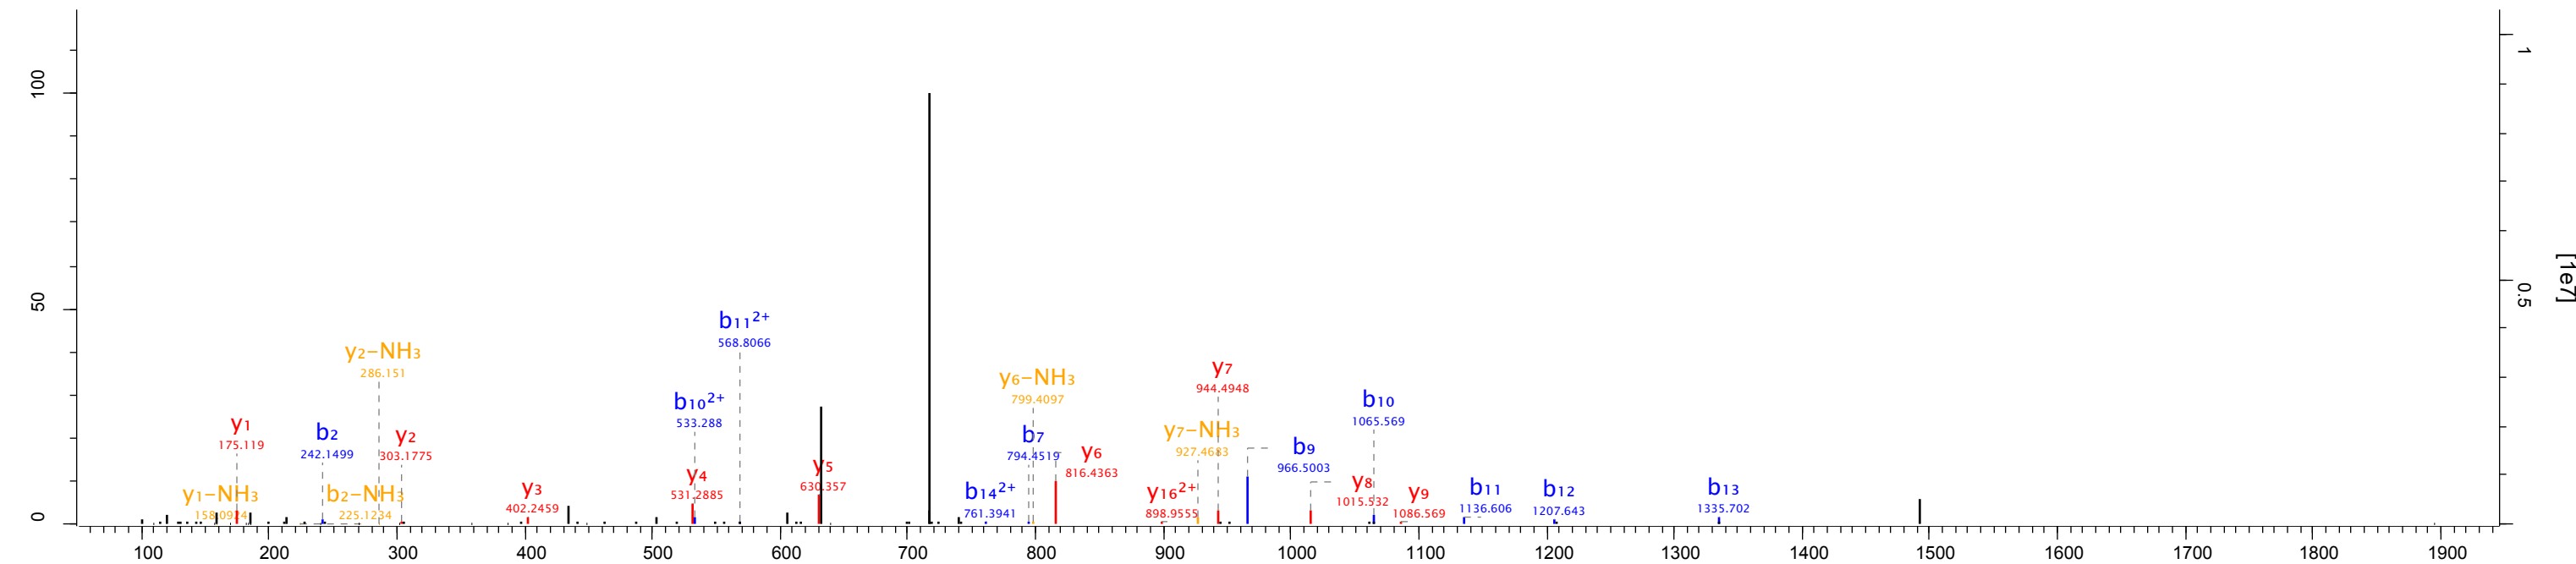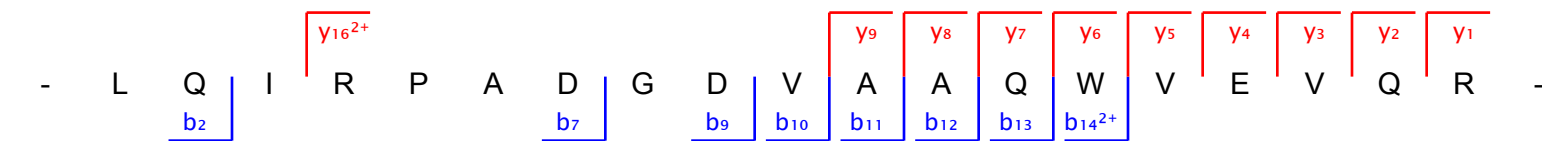



Raw file  
20180707\_MaS\_A375SR\_ML\_proteome\_2\_13

Scan 8128 Method FTMS; HCD Score 58.17 m/z 770.33 Gene names GOLGA8F;GOLGA8DP

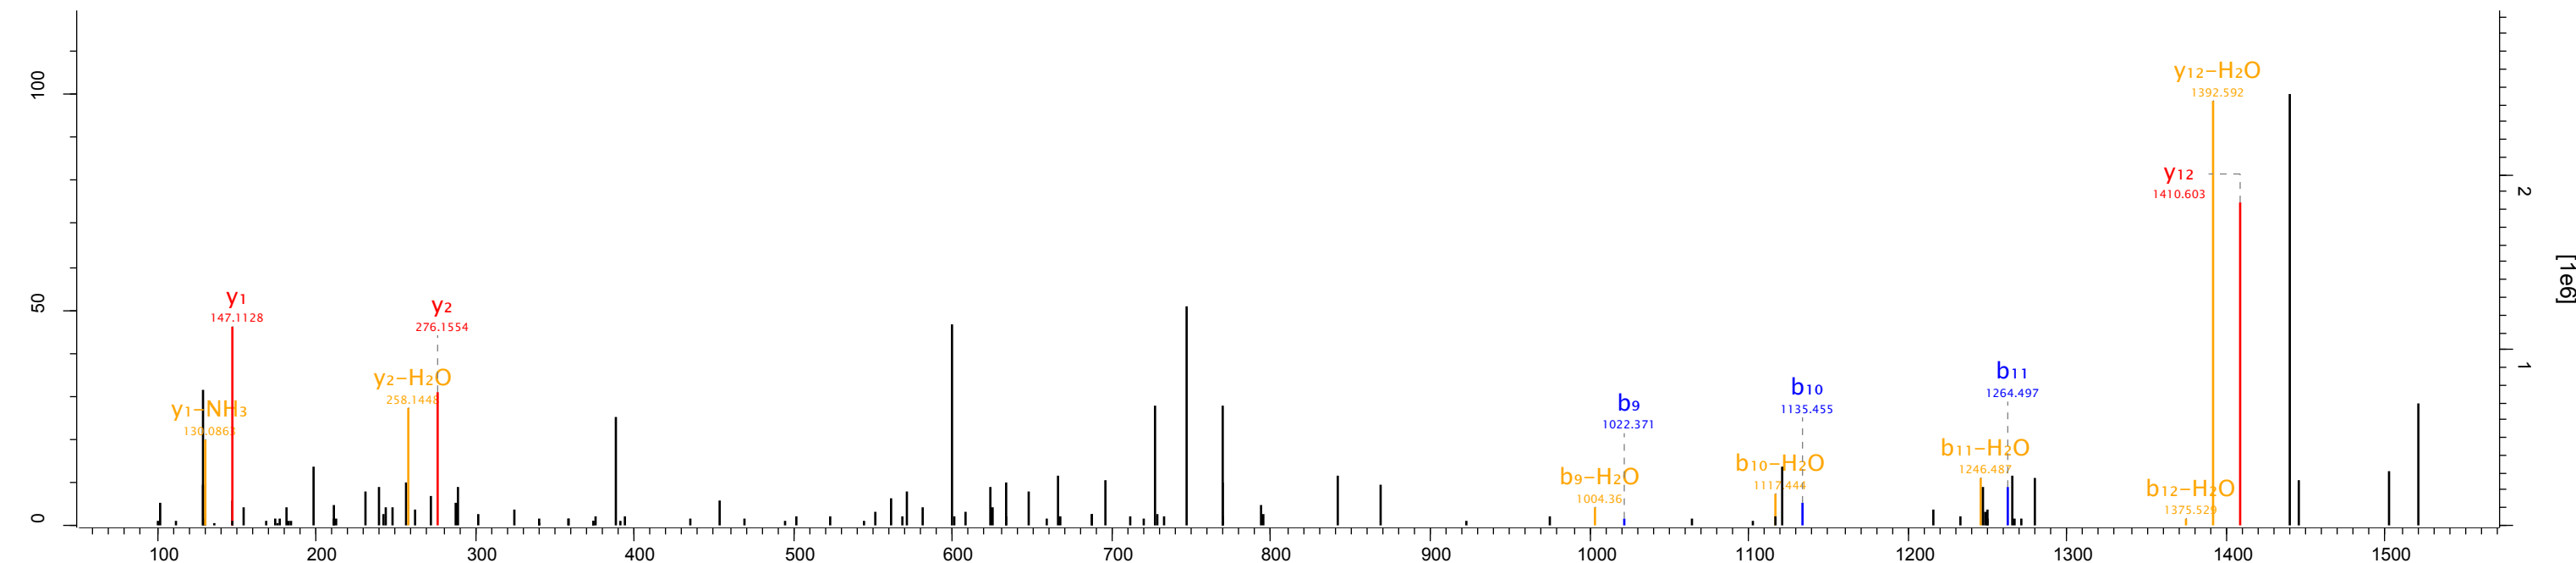

- E A M S G F M D H L E E K -

ox

y12

y2

y1

b9

b10

b11

Raw file  
20180707\_MaS\_A375SR\_ML\_proteome\_2\_14

Scan 17678 Method FTMS; HCD Score 47.08 m/z 1007.5 Gene names TMEM243

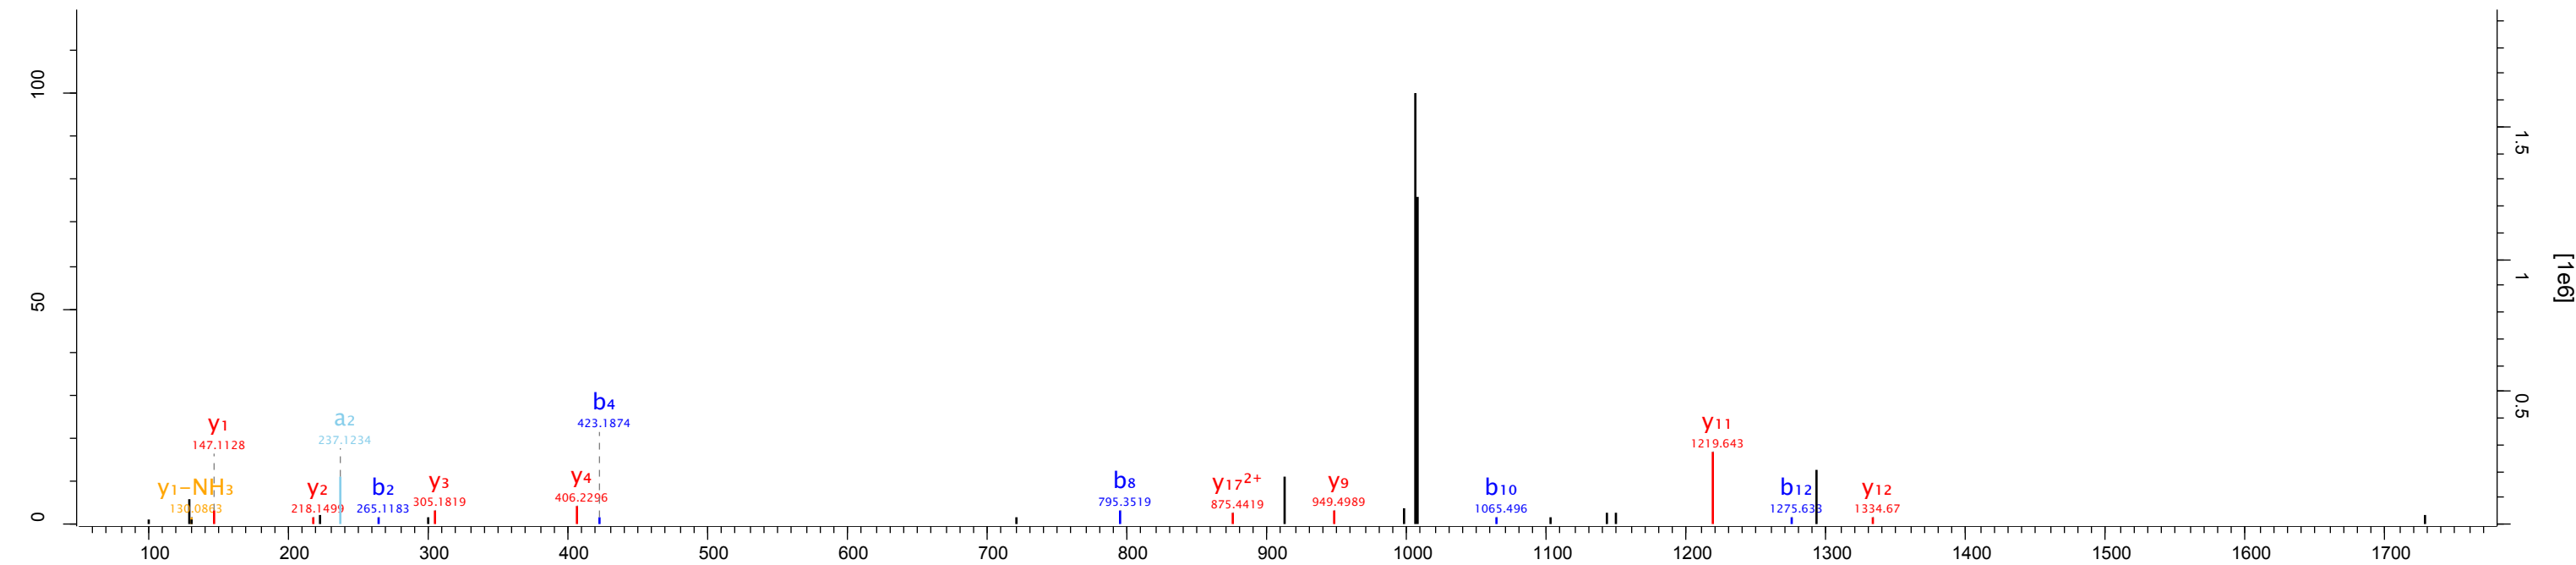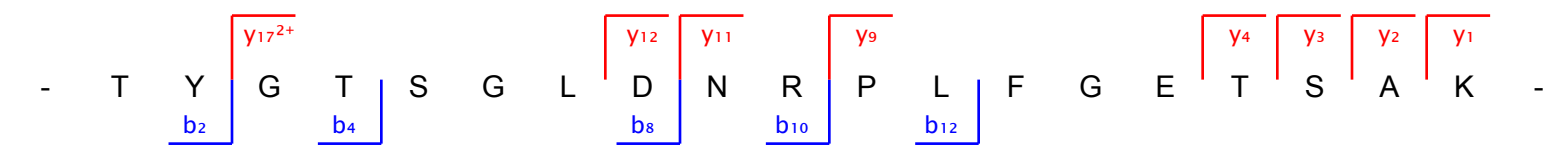

Raw file 20180707\_MaS\_A375SR\_ML\_proteome\_2\_15 Scan 15078 Method FTMS; HCD Score 58.71 m/z 679.99 Gene names ZMAT3

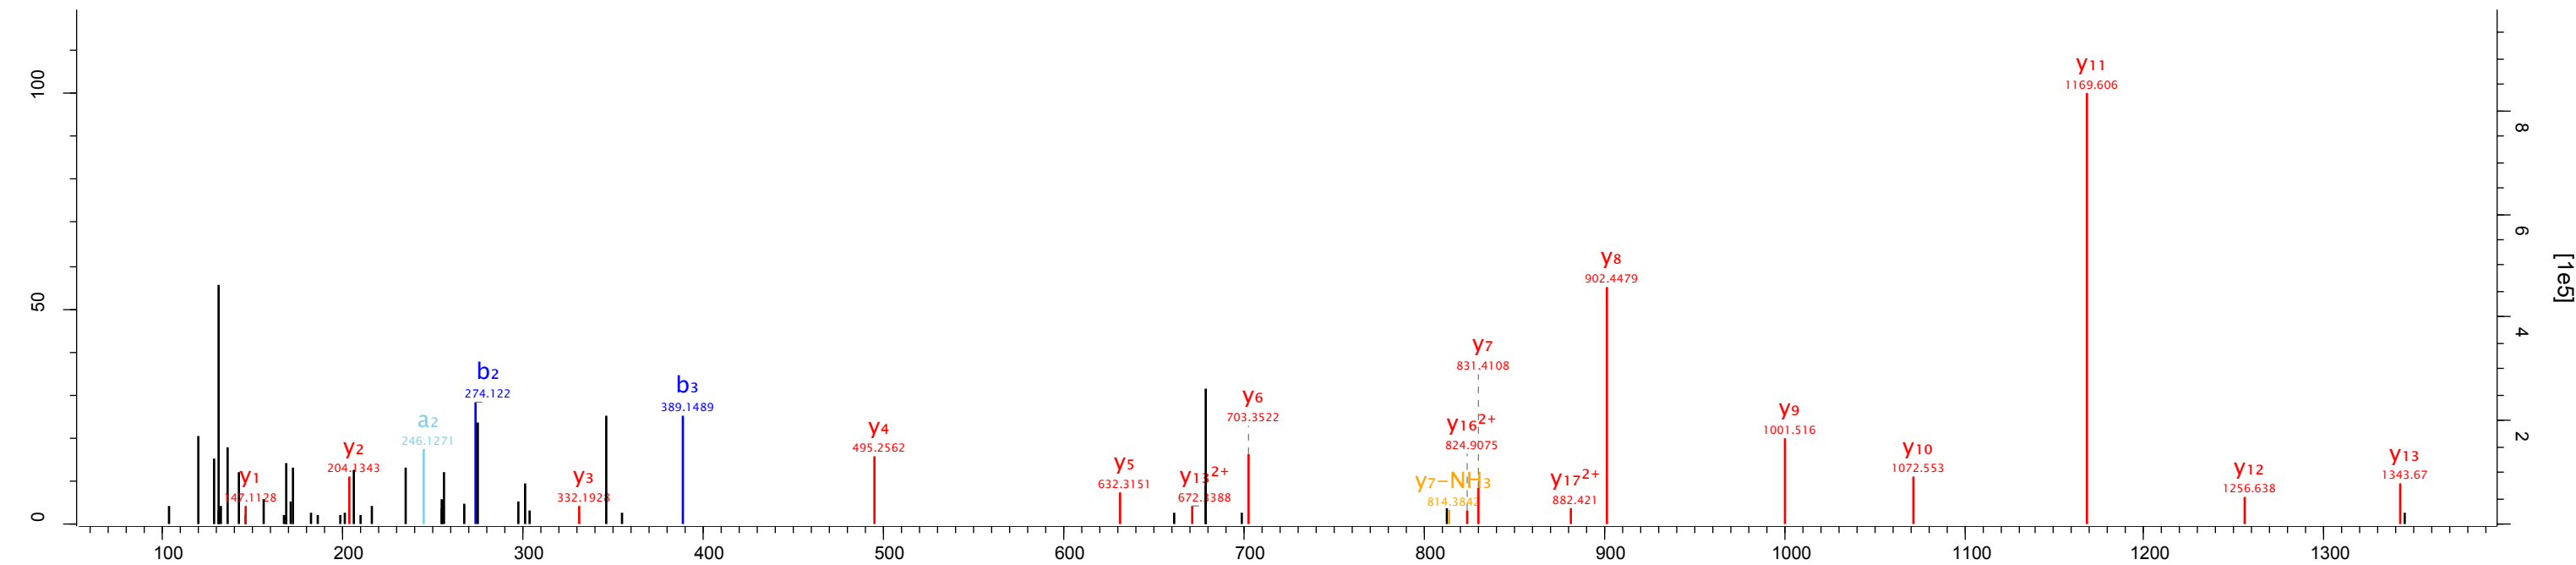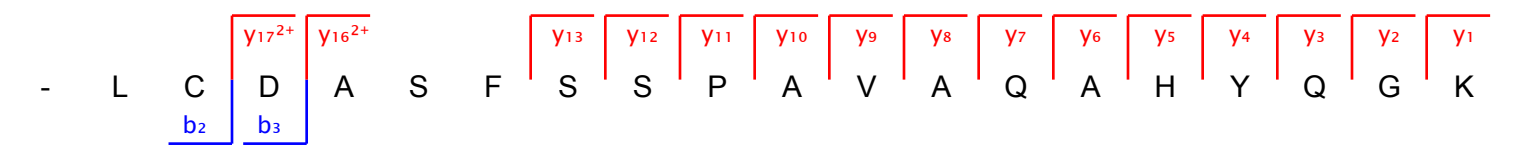

Raw file  
20180707\_MaS\_A375SR\_ML\_proteome\_2\_16

Scan 26448 Method FTMS; HCD Score 142.74 m/z 928.94 Gene names MAPK1IP1L

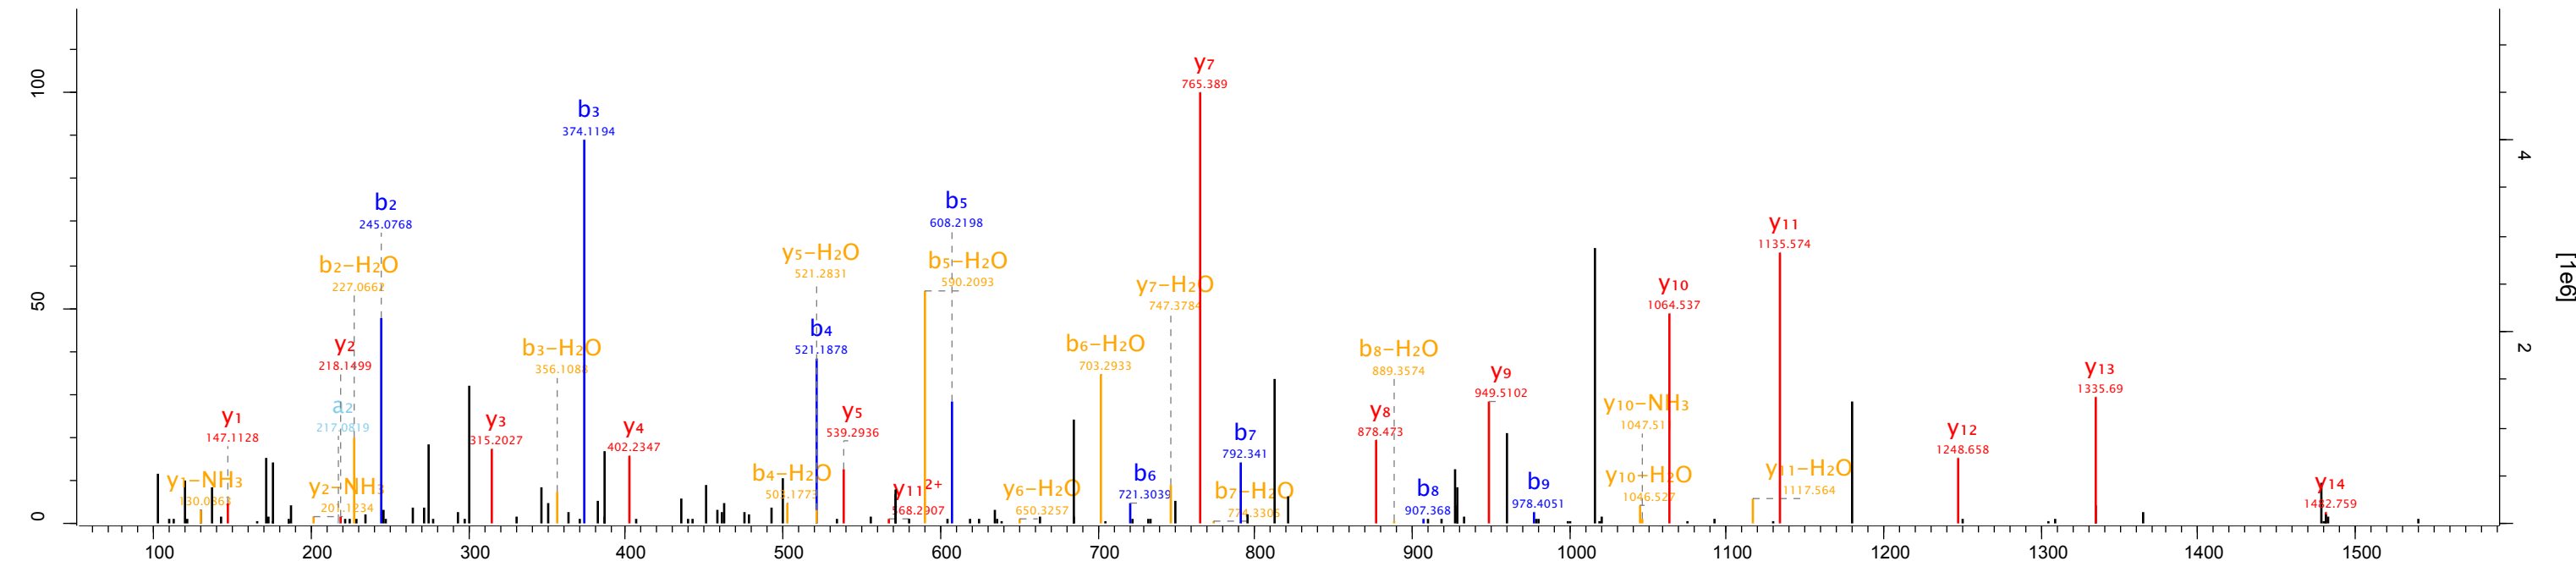

ac  
- S D E F S L A D A L P E H S P A K -  
b<sub>2</sub> b<sub>3</sub> b<sub>4</sub> b<sub>5</sub> b<sub>6</sub> b<sub>7</sub> b<sub>8</sub> b<sub>9</sub> y<sub>14</sub> y<sub>13</sub> y<sub>12</sub> y<sub>11</sub> y<sub>10</sub> y<sub>9</sub> y<sub>8</sub> y<sub>7</sub> y<sub>5</sub> y<sub>4</sub> y<sub>3</sub> y<sub>2</sub> y<sub>1</sub>

Raw file  
20180707\_MaS\_A375SR\_ML\_proteome\_2\_18

Scan 23578 Method FTMS; HCD Score 155.79 m/z 959.01 Gene names ATP6V0C

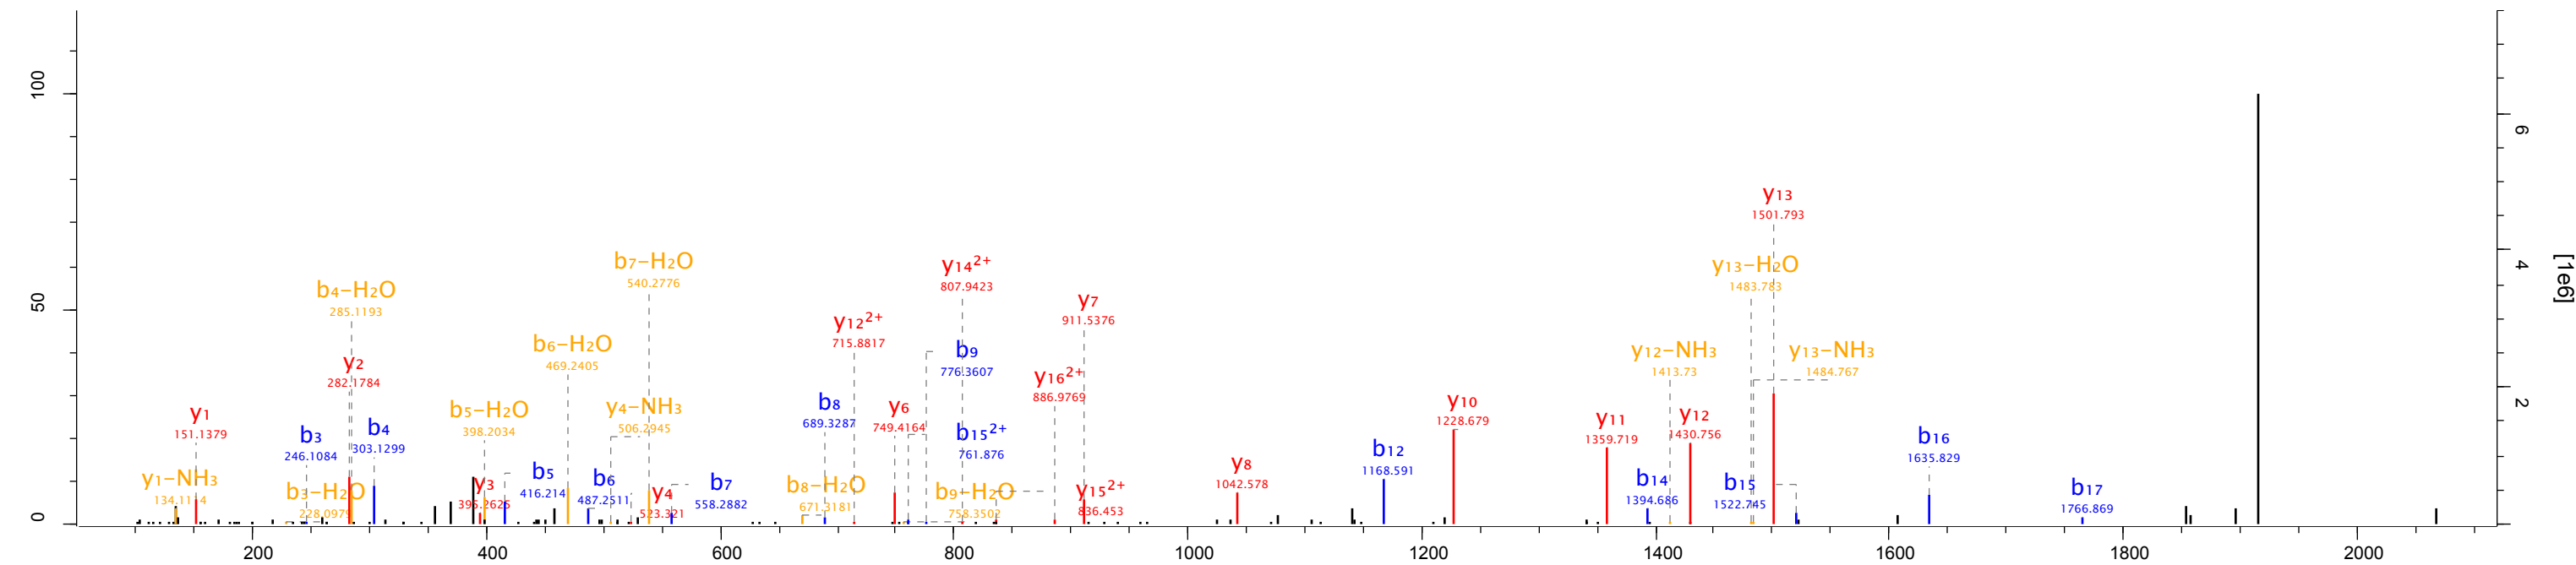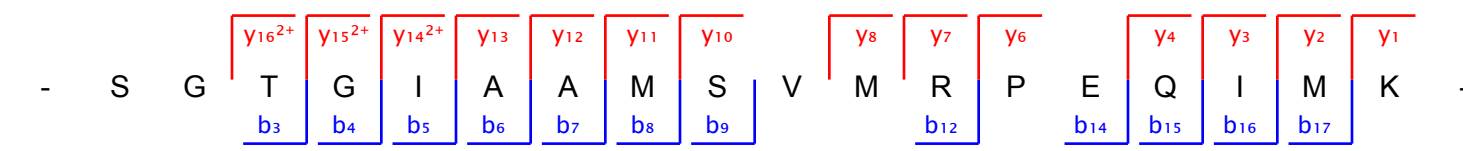

Raw file 20180707\_MaS\_A375SR\_ML\_proteome\_2\_18 Scan 25278 Method FTMS; HCD Score 81.57 m/z 685.82 Gene names PMEPA1

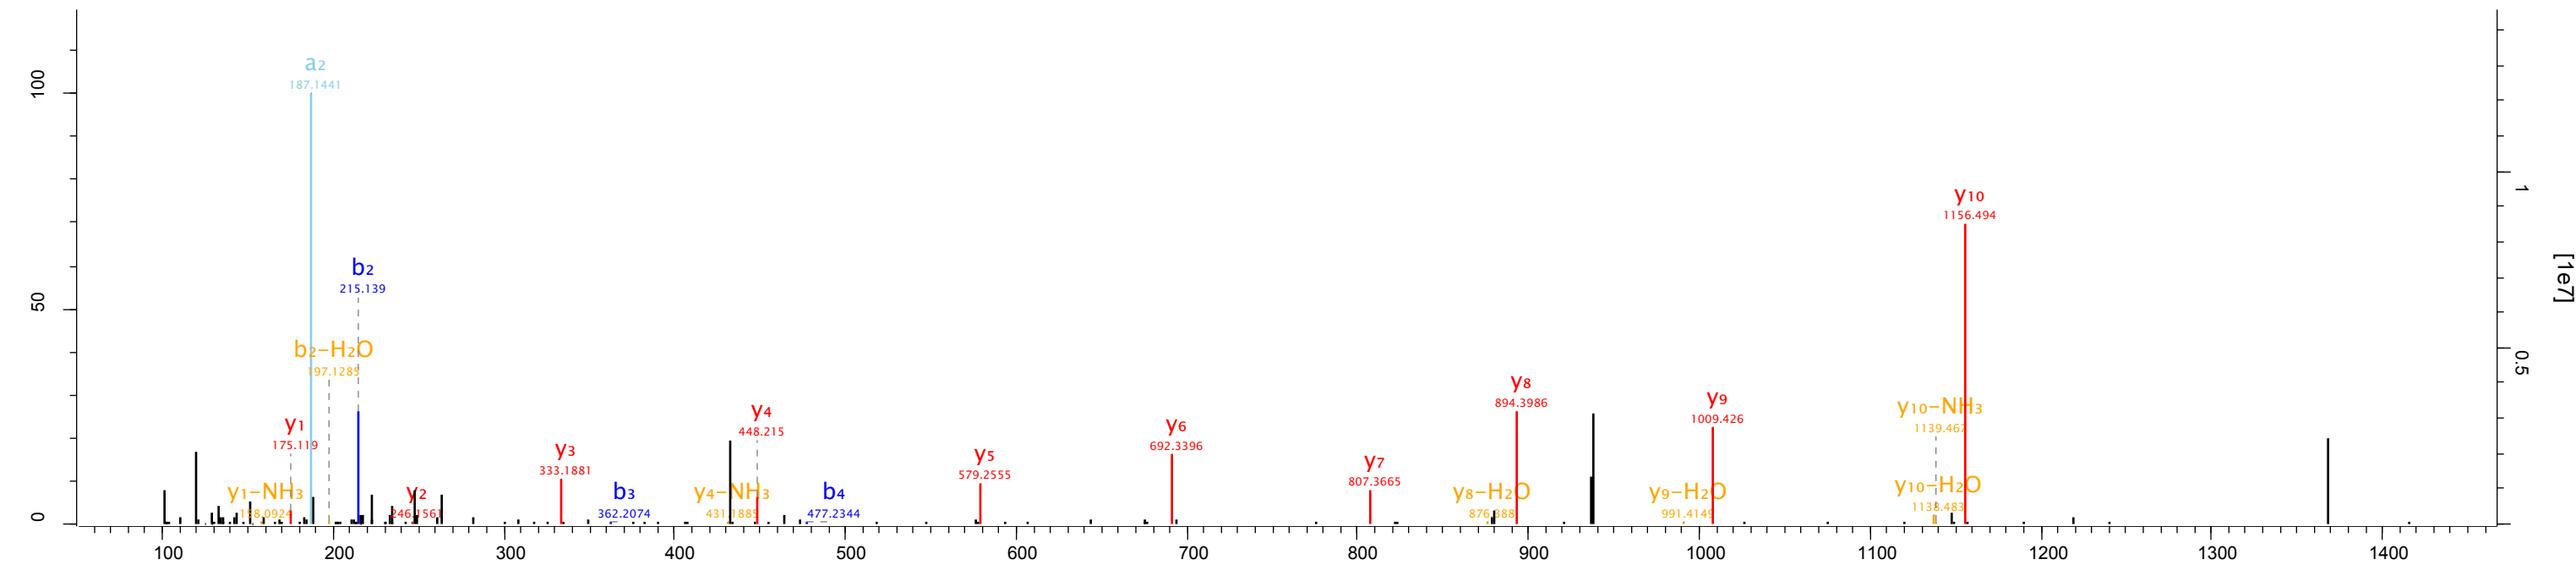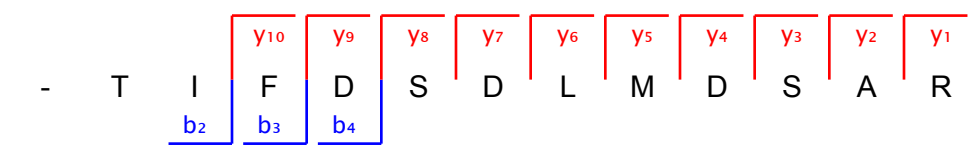

Raw file 20180707\_MaS\_A375SR\_ML\_proteome\_2\_19 Scan 22038 Method FTMS; HCD Score 72.29 m/z 586.84 Gene names KATNAL2

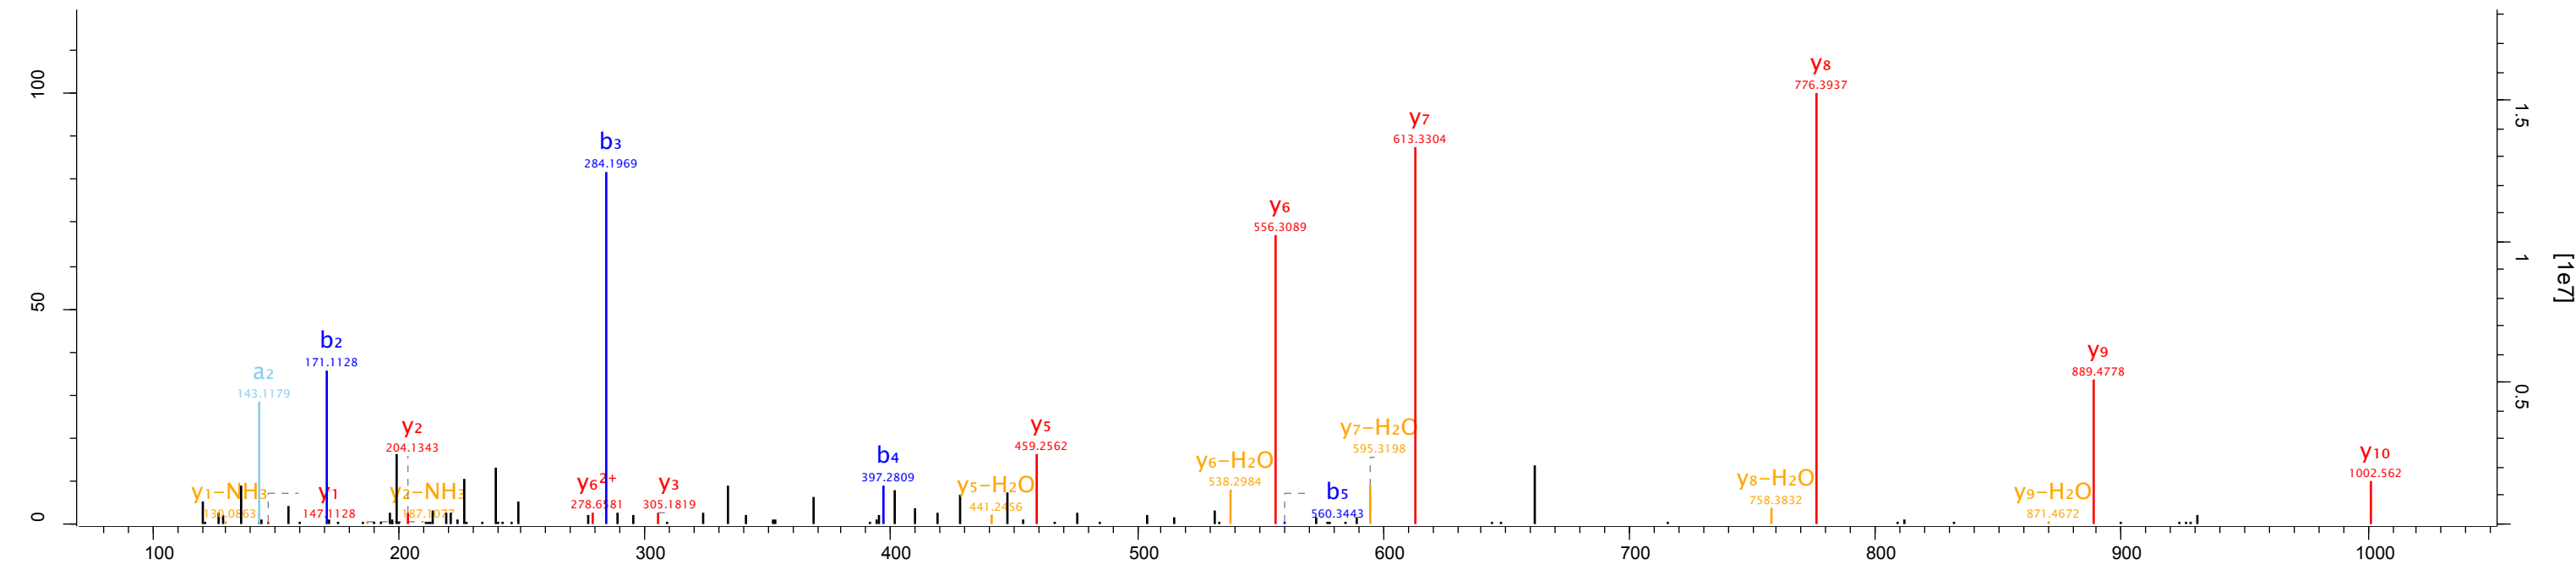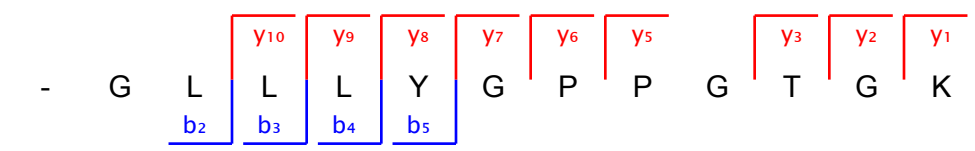

Raw file: 20180707\_MaS\_A375SR\_ML\_proteome\_2\_19  
 Scan: 23638 Method: FTMS; HCD Score: 79.49 m/z: 954.48 Gene names: ATP6V0C

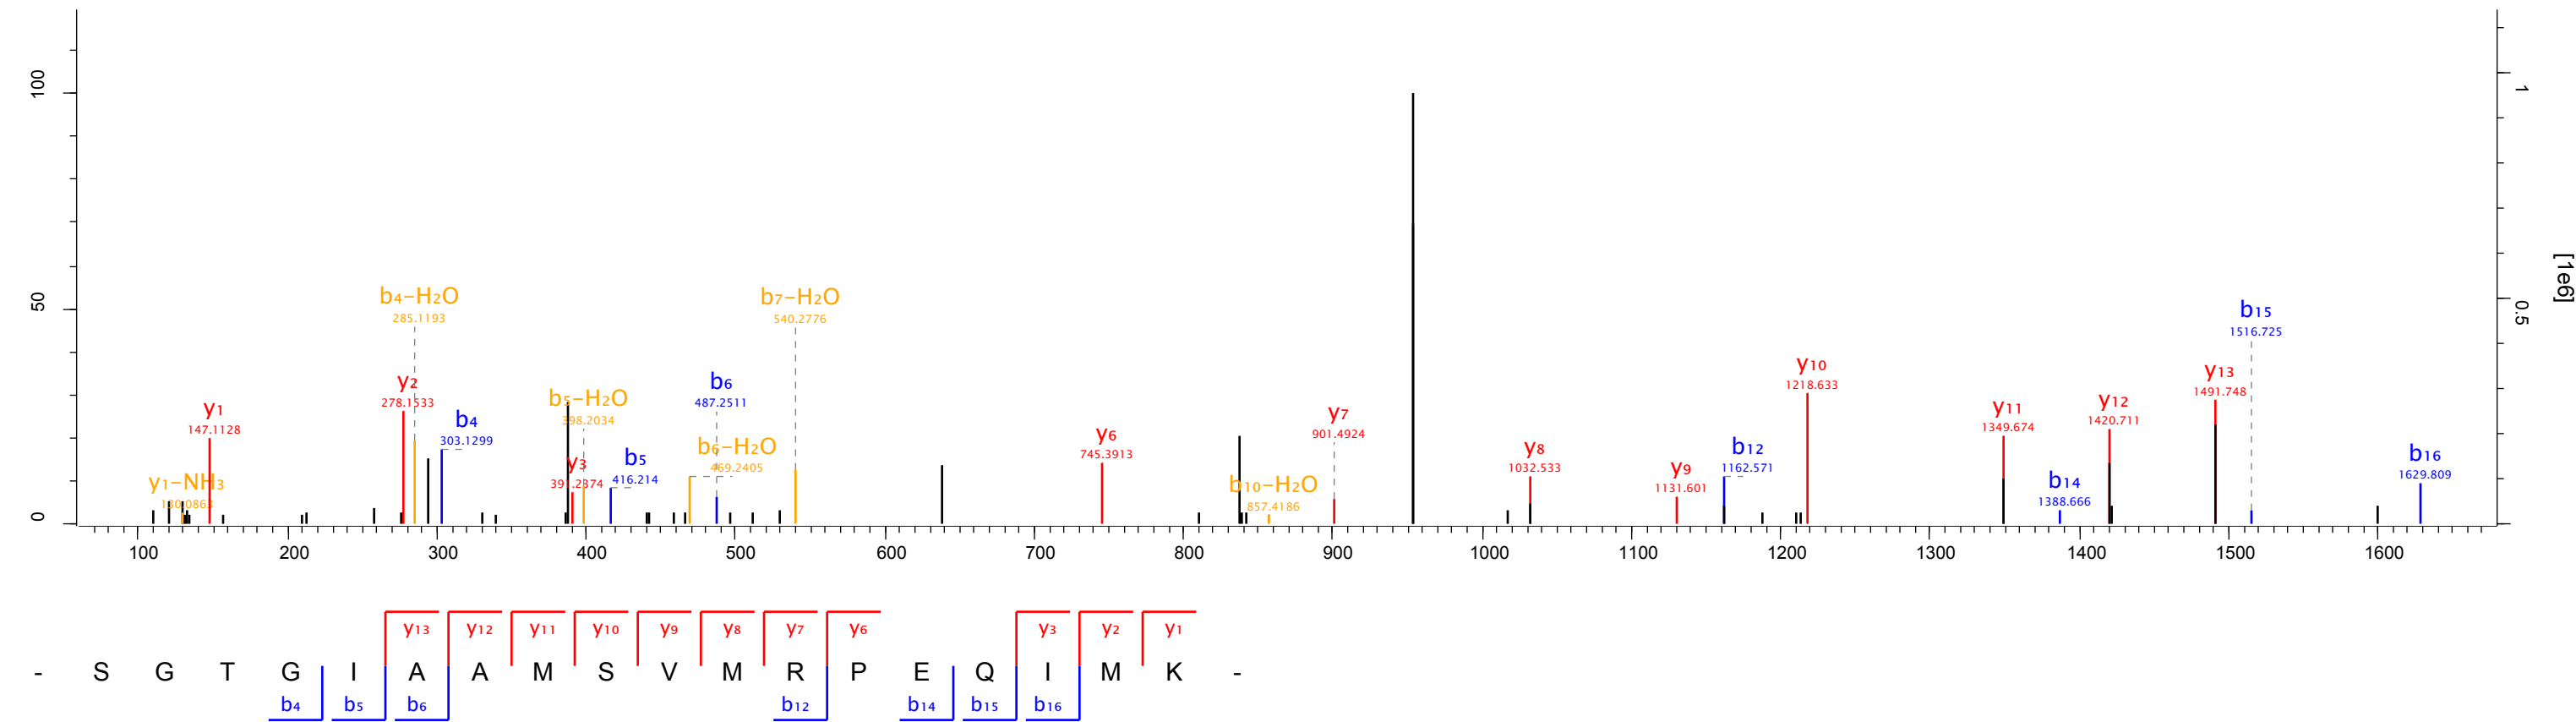



Raw file  
20180707\_MaS\_A375SR\_ML\_proteome\_2\_19

Scan 2548 Method FTMS; HCD Score 96.03 m/z 490.26 Gene names TIMM17A

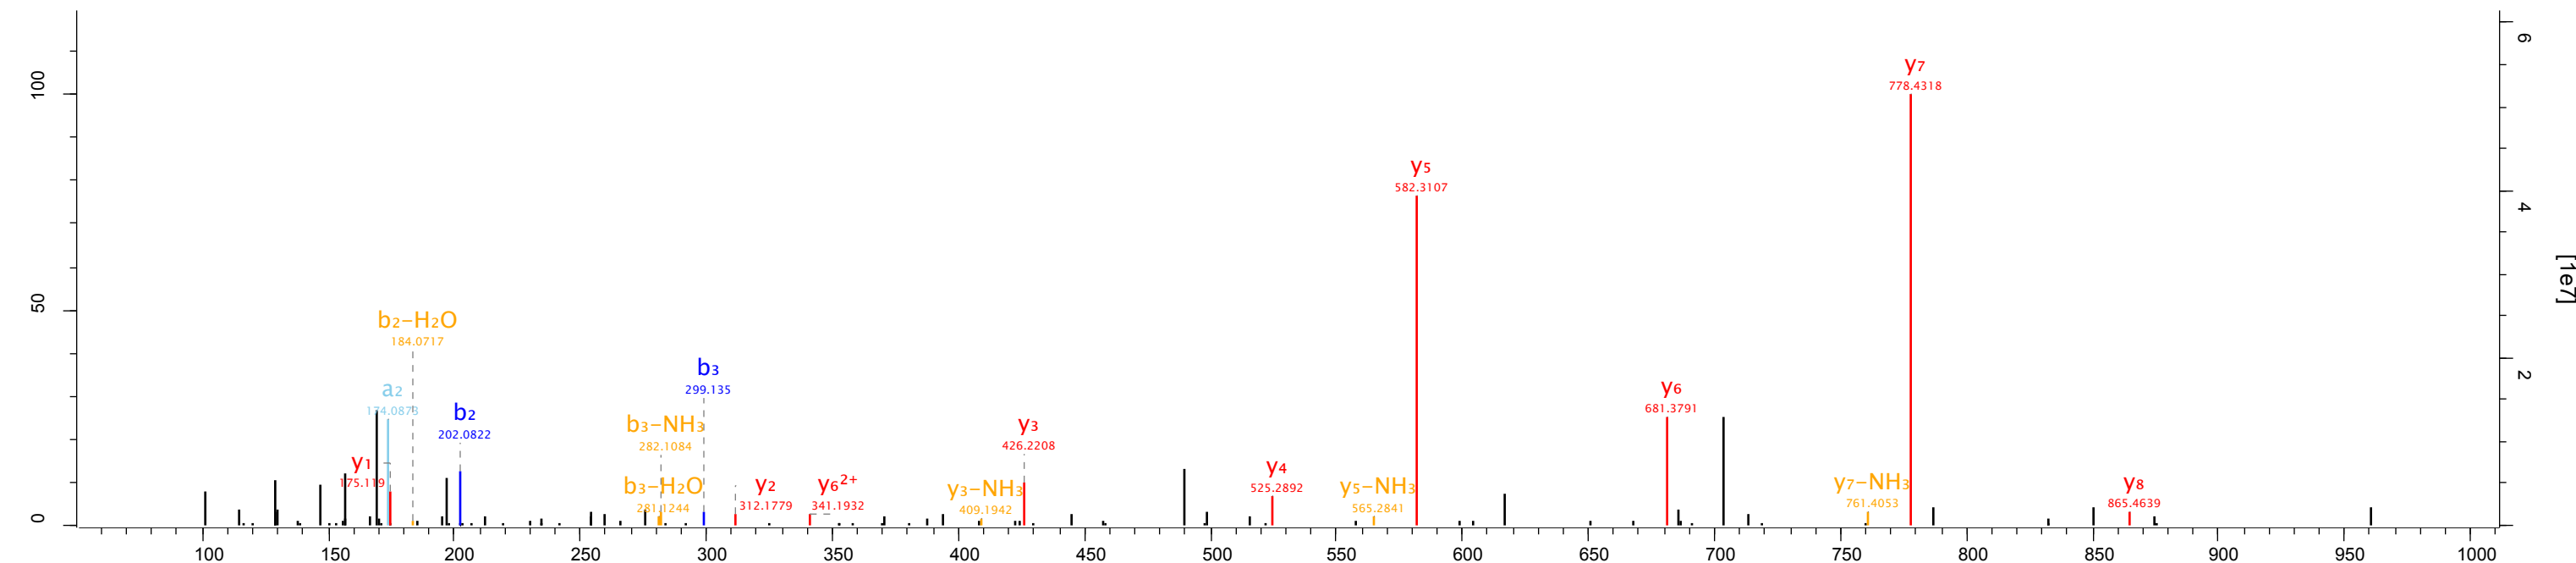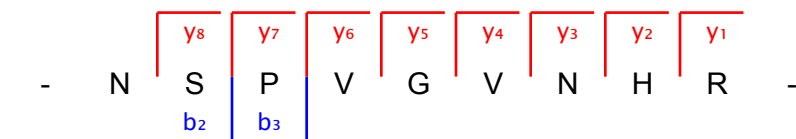

Raw file 20180707\_MaS\_A375SR\_ML\_proteome\_2\_20 Scan 21818 Method FTMS; HCD Score 28.75 m/z 639.67 Gene names ATP6V0C

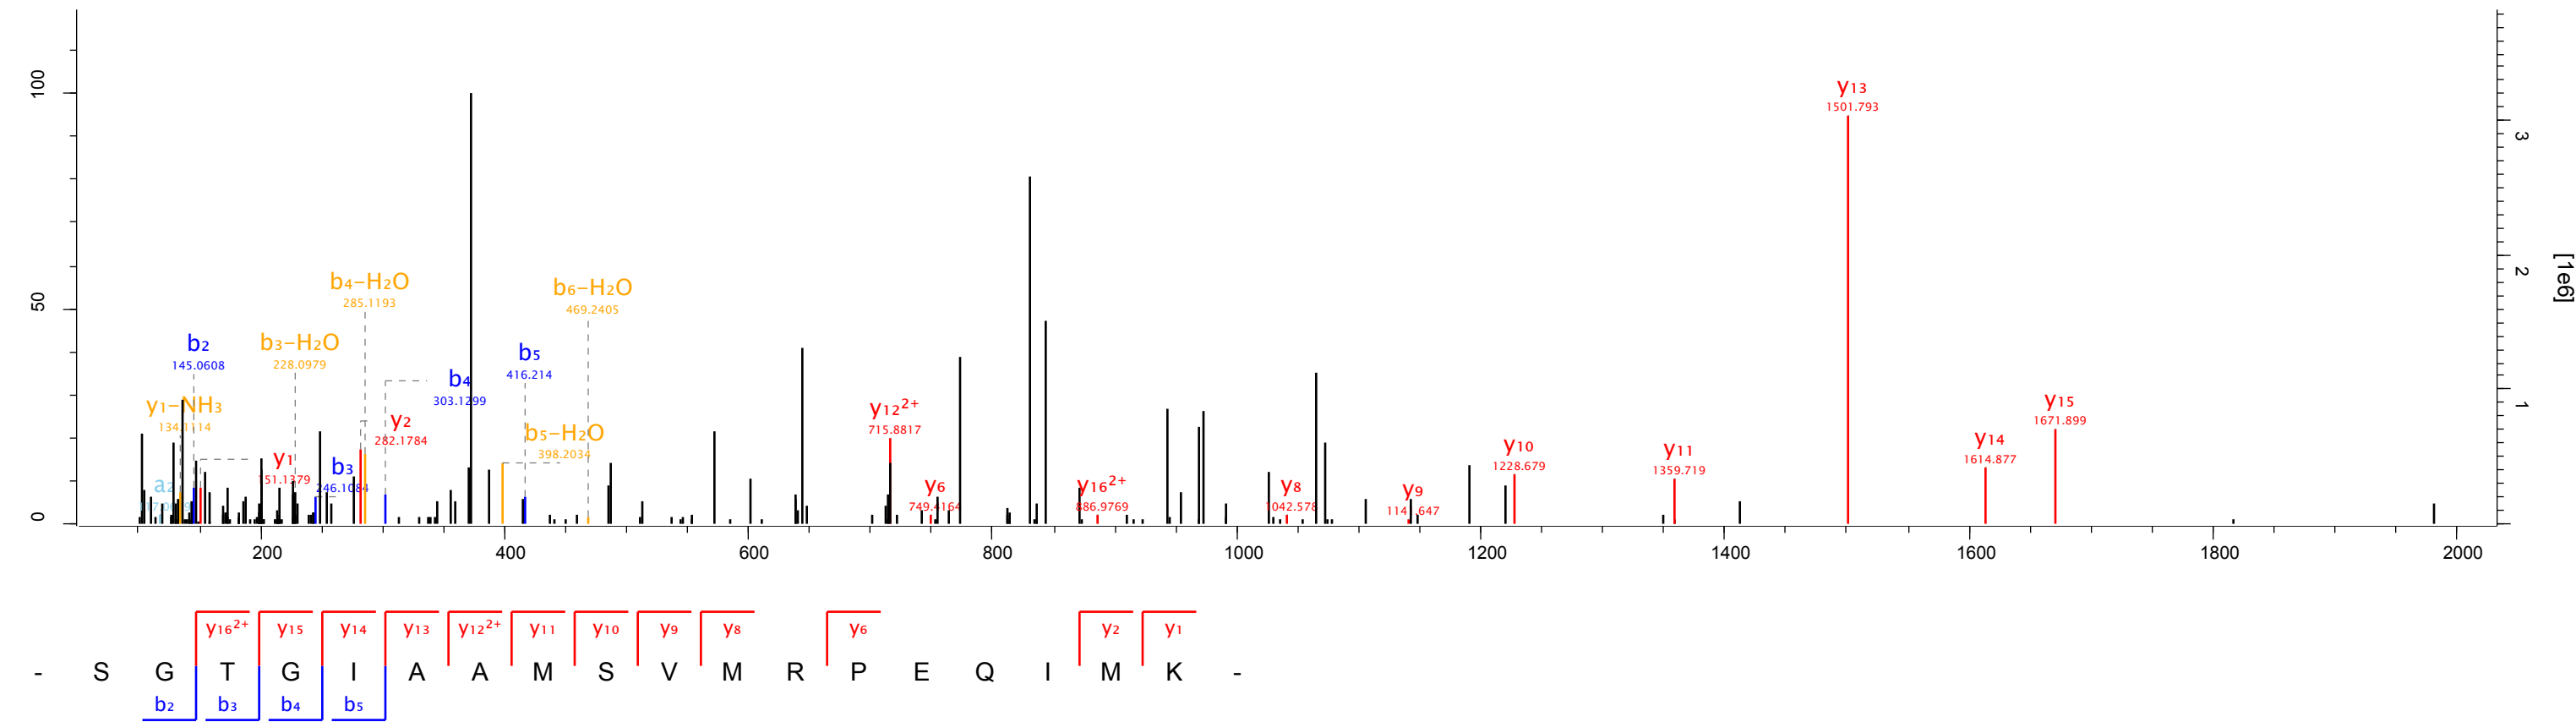

Raw file 20180707\_MaS\_A375SR\_ML\_proteome\_2\_21 Scan 24048 Method FTMS; HCD Score 89.37 m/z 636.32 Gene names ATP6V0C

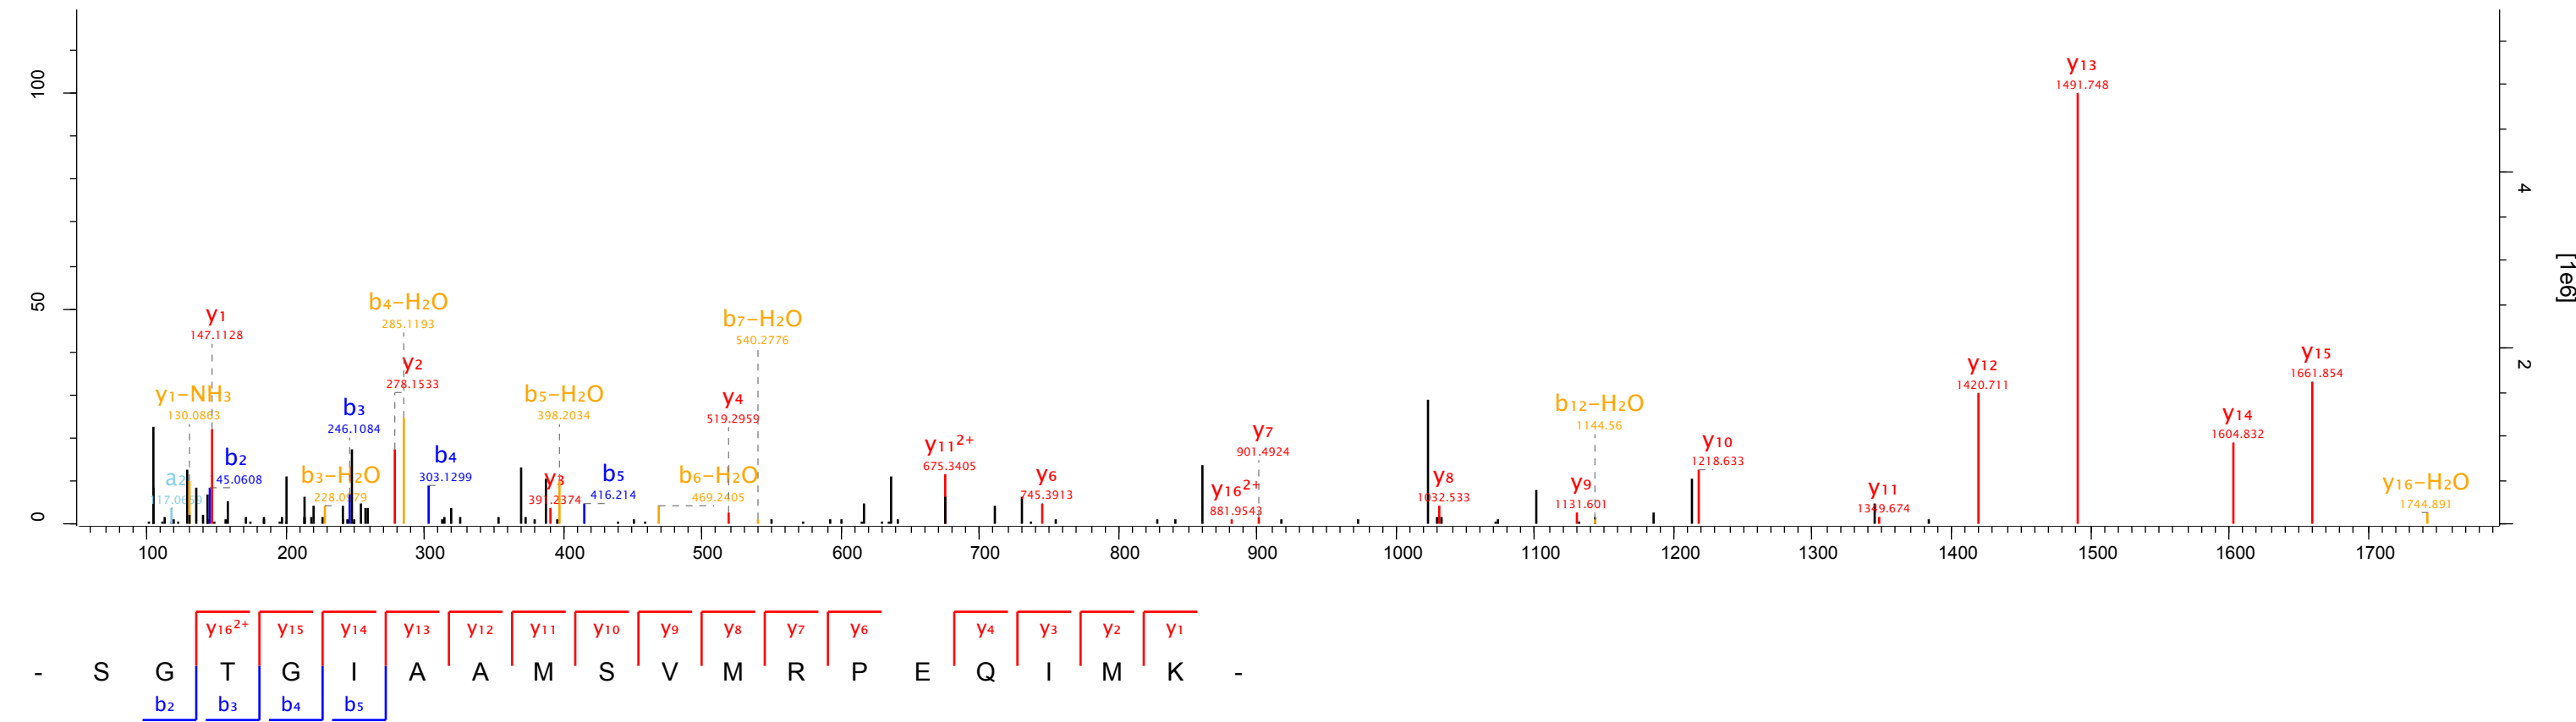

Raw file  
20180707\_MaS\_A375SR\_ML\_proteome\_2\_22

Scan 12788 Method FTMS; HCD Score 63.68 m/z 700.83 Gene names ODC1

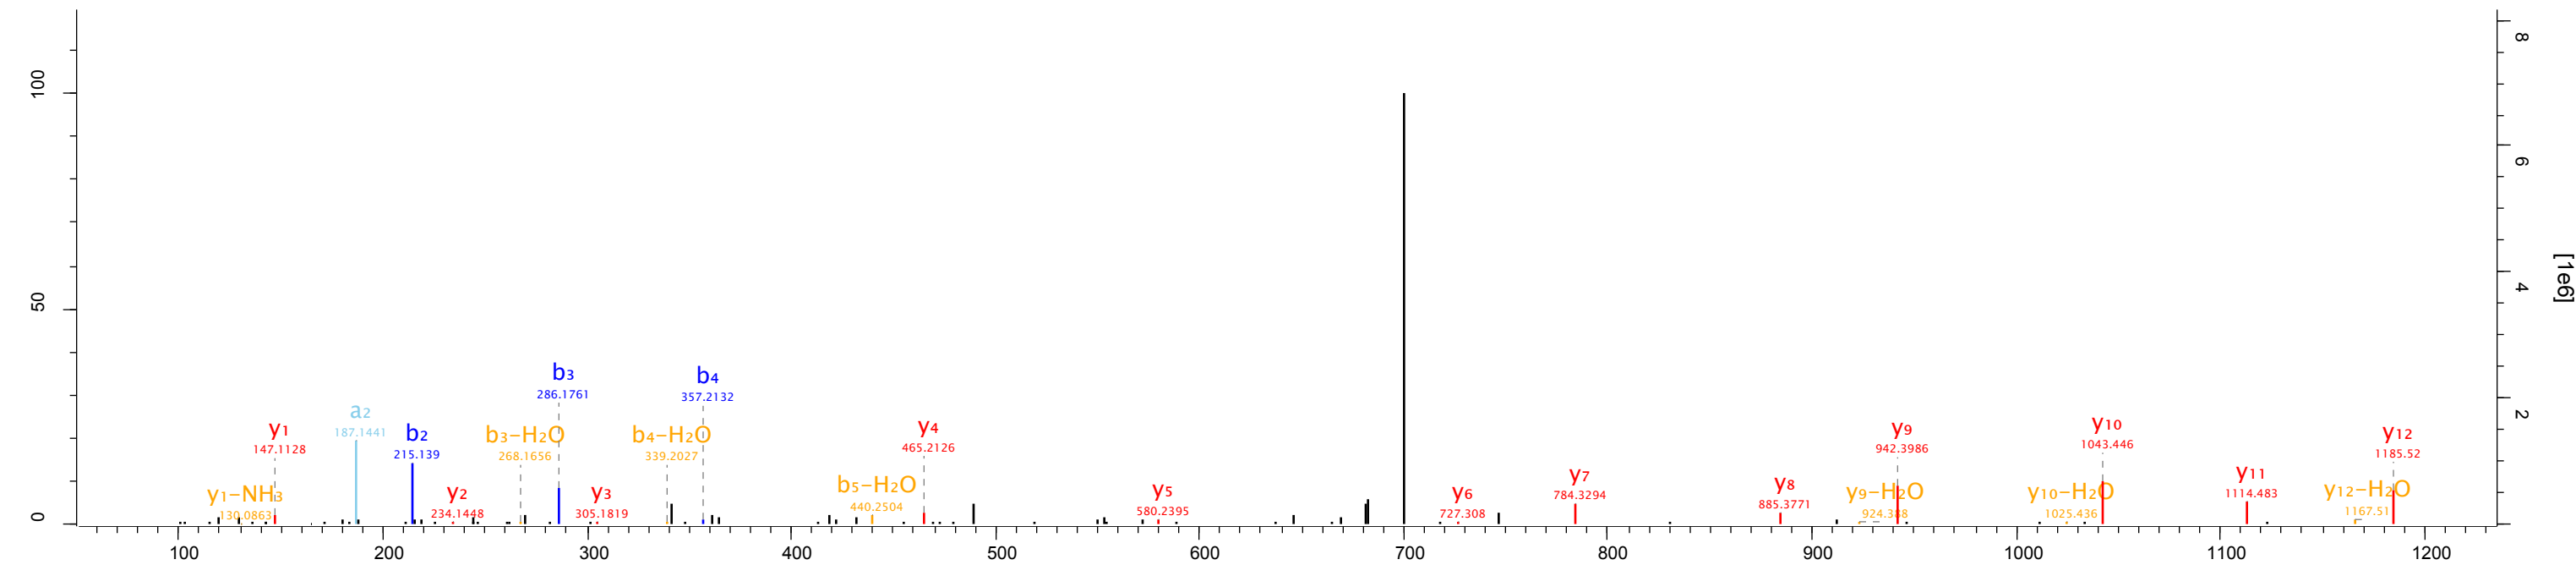

Raw file 20180707\_MaS\_A375SR\_ML\_proteome\_2\_22 Scan 18828 Method FTMS; HCD Score 27.26 m/z 483.97 Gene names TMEM39B

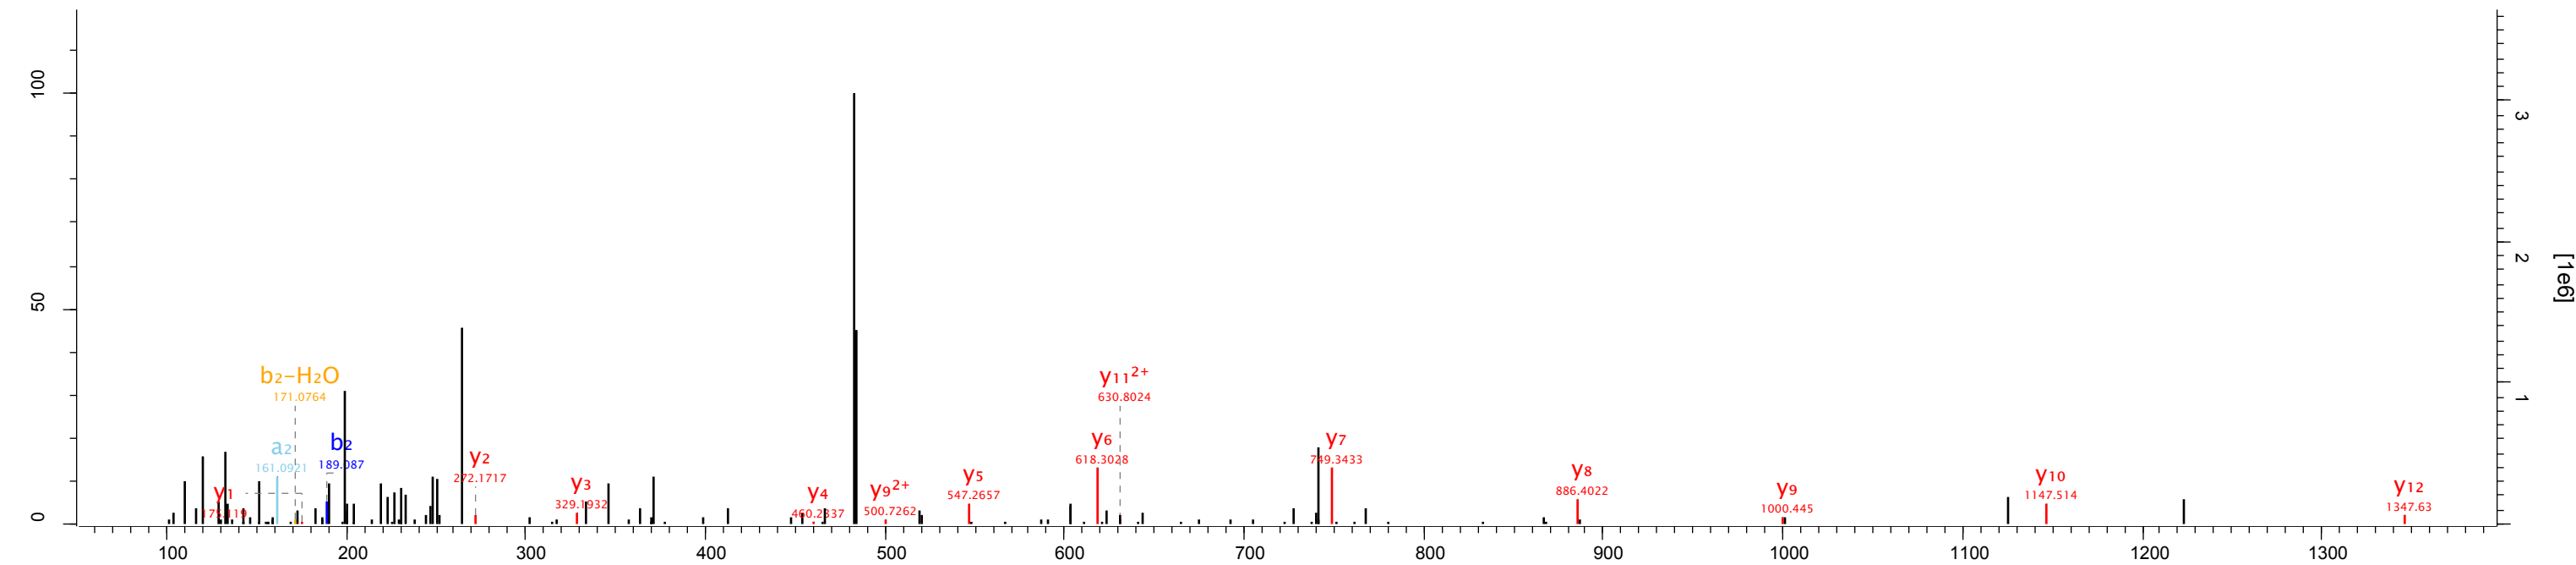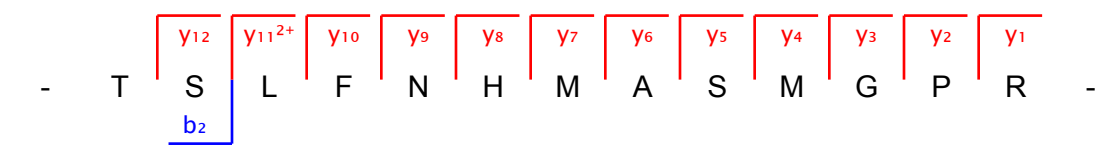

Raw file 20180707\_MaS\_A375SR\_ML\_proteome\_2\_22 Scan 23658 Method FTMS; HCD Score 76.68 m/z 515.3

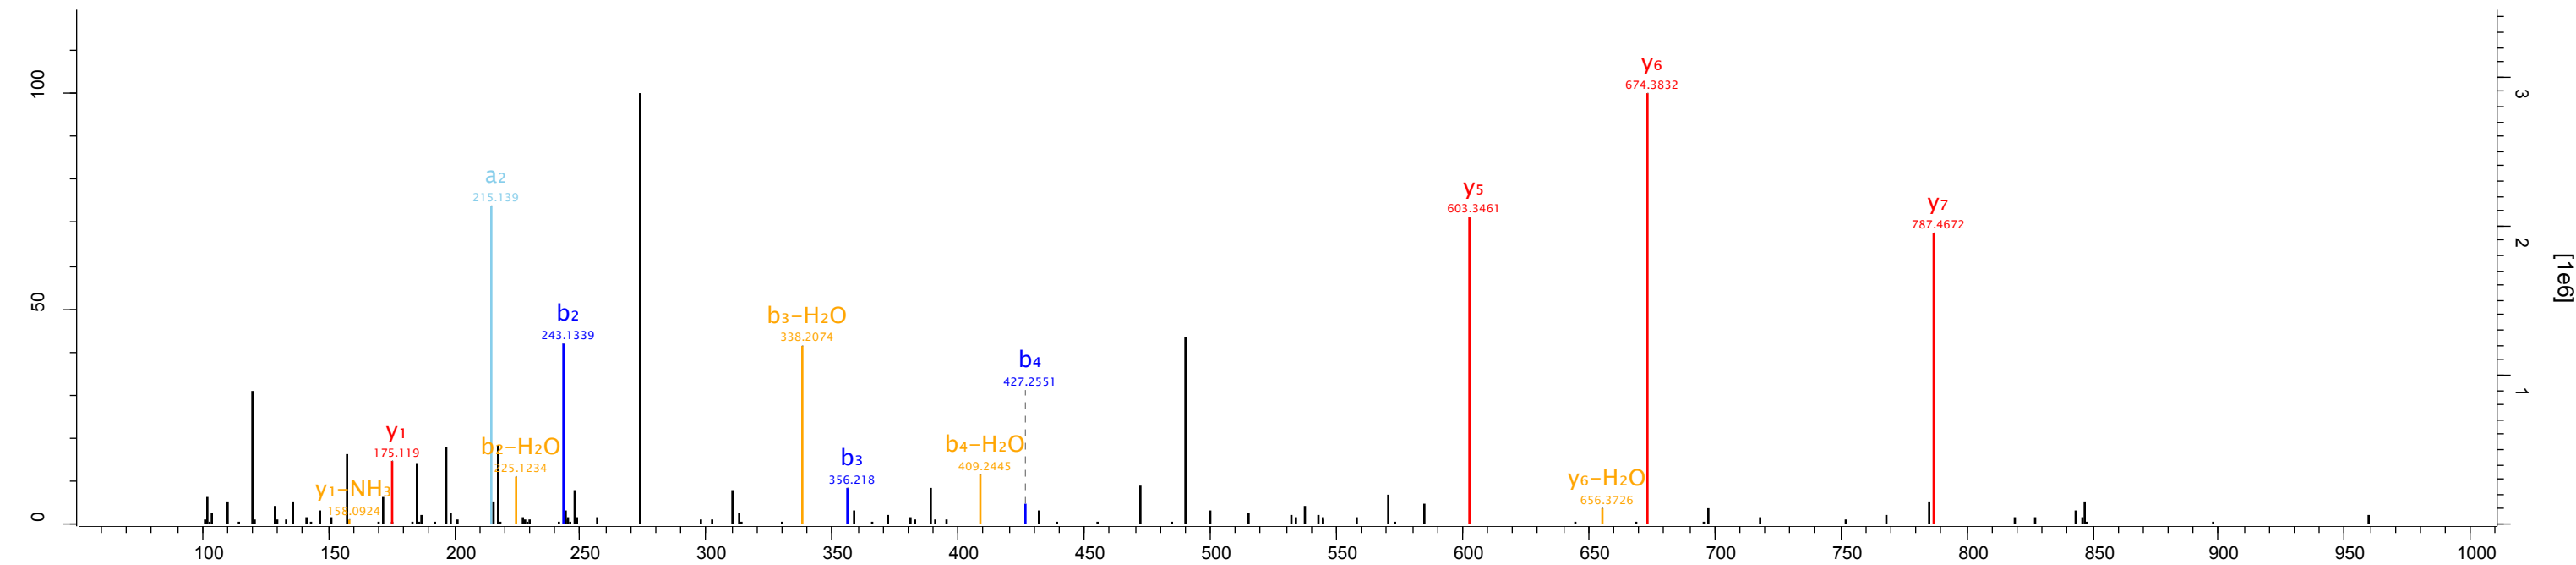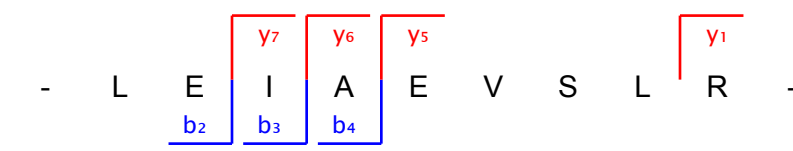

Raw file 20180707\_MaS\_A375SR\_ML\_proteome\_2\_22 Scan 6008 Method FTMS; HCD Score 79.45 m/z 353.19

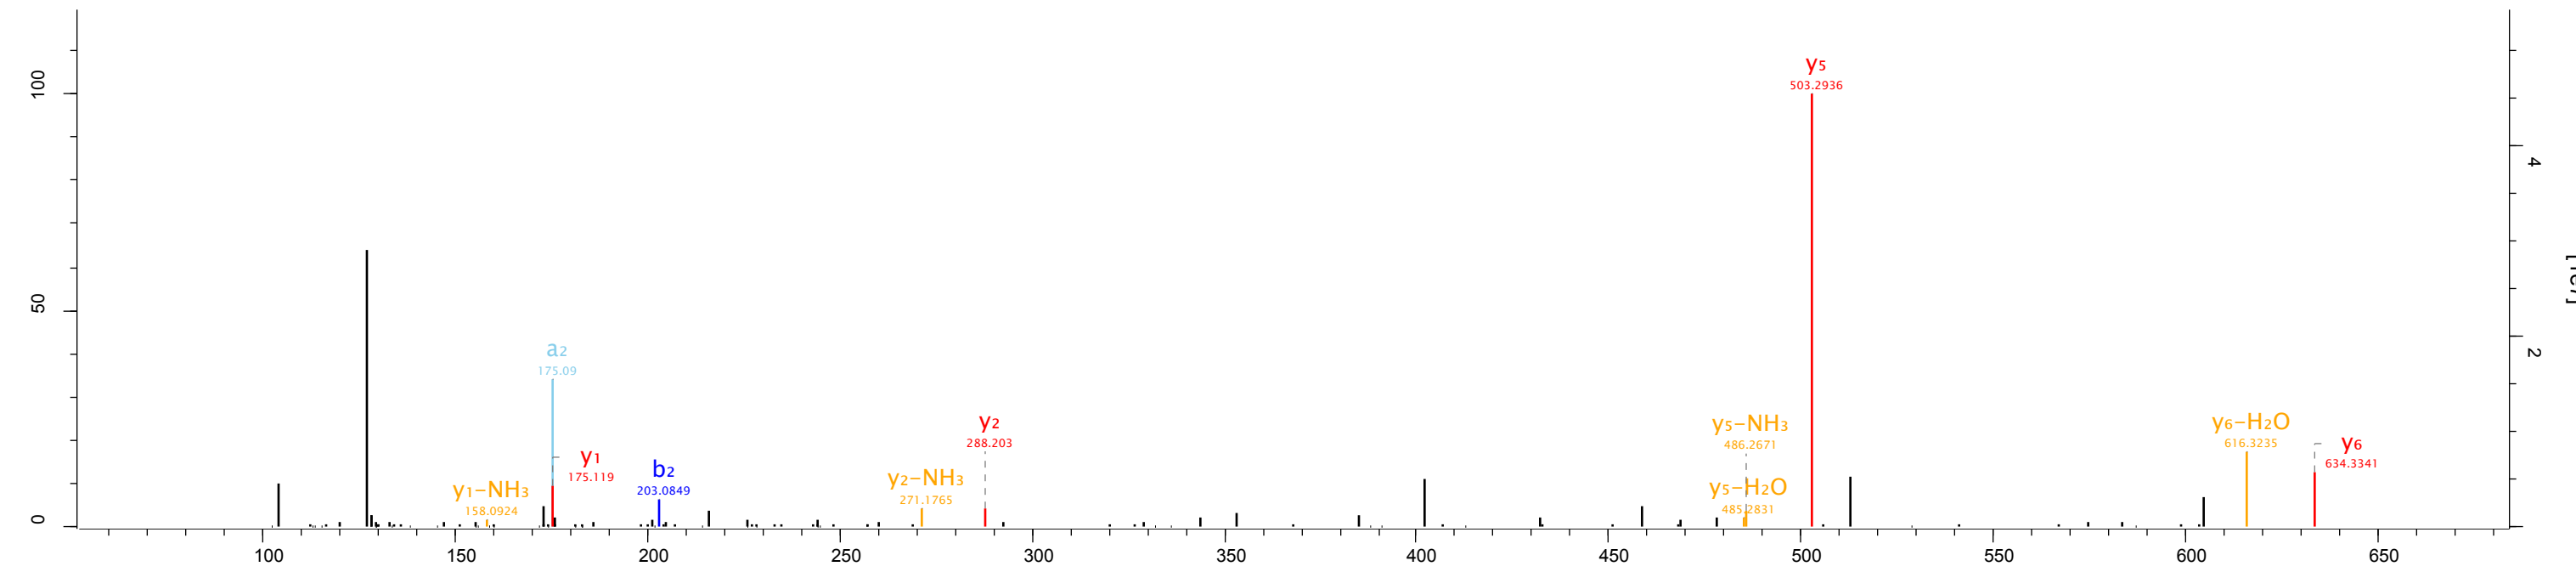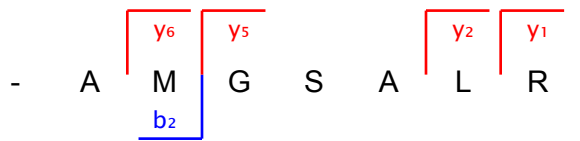

Raw file 20180707\_MaS\_A375SR\_ML\_proteome\_2\_23 Scan 9818 Method FTMS; HCD Score 128.86 m/z 488.26

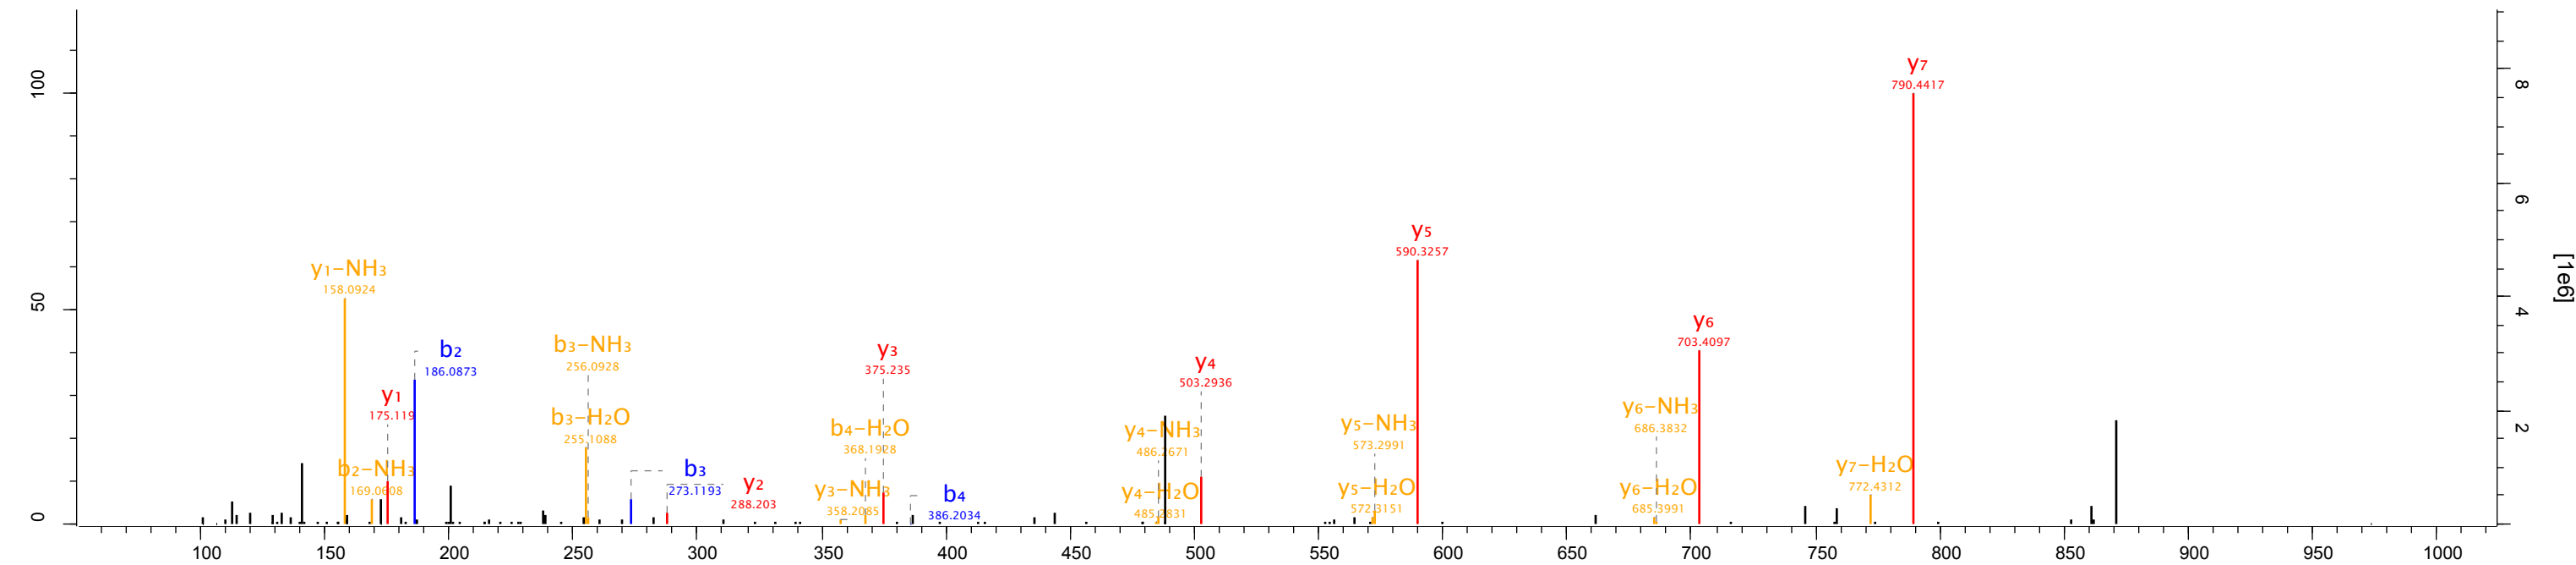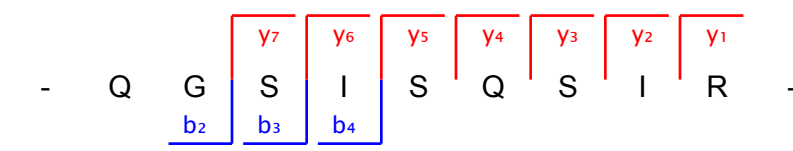



Raw file: 20180707\_MaS\_A375SR\_ML\_proteome\_2\_25  
 Scan: 10078 Method: FTMS; HCD Score: 68.04 m/z: 531.93 Gene names: PAX9

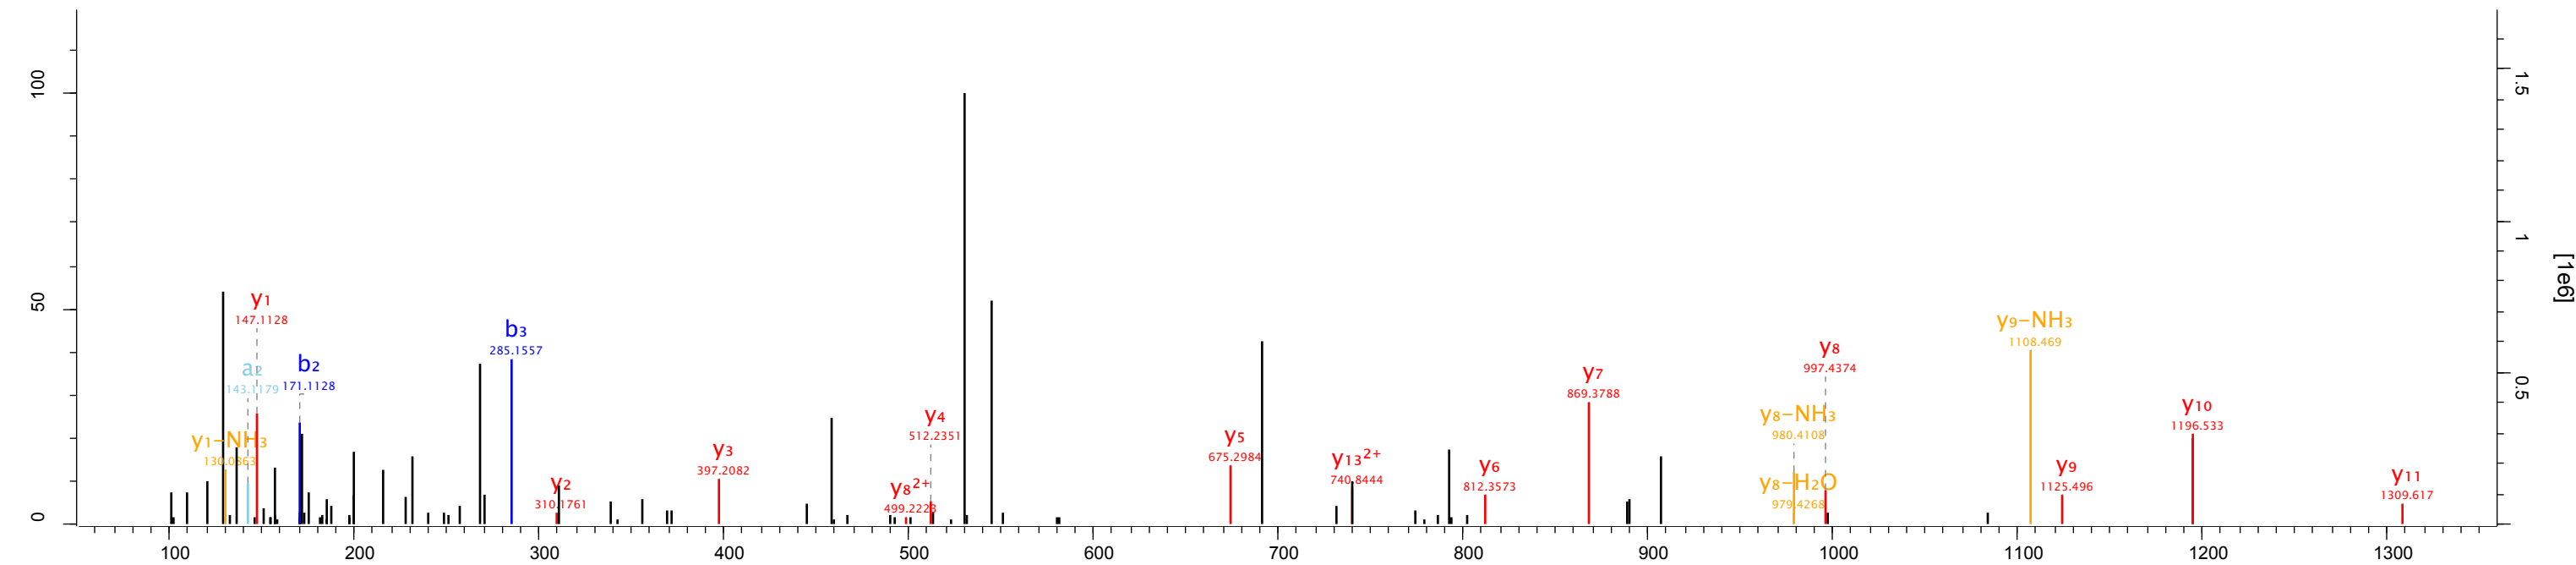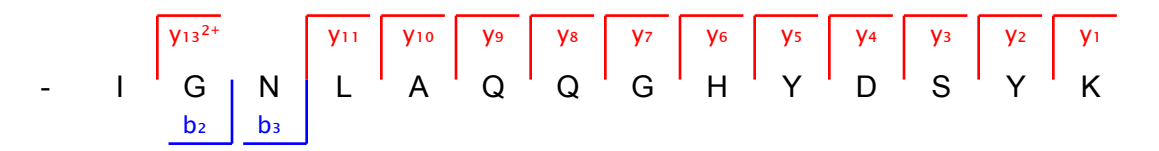

Raw file

20180707\_MaS\_A375SR\_ML\_proteome\_2\_25

Scan  
16208Method  
FTMS; HCDScore  
138.98m/z  
436.58Gene names  
RPL39P5;RPL39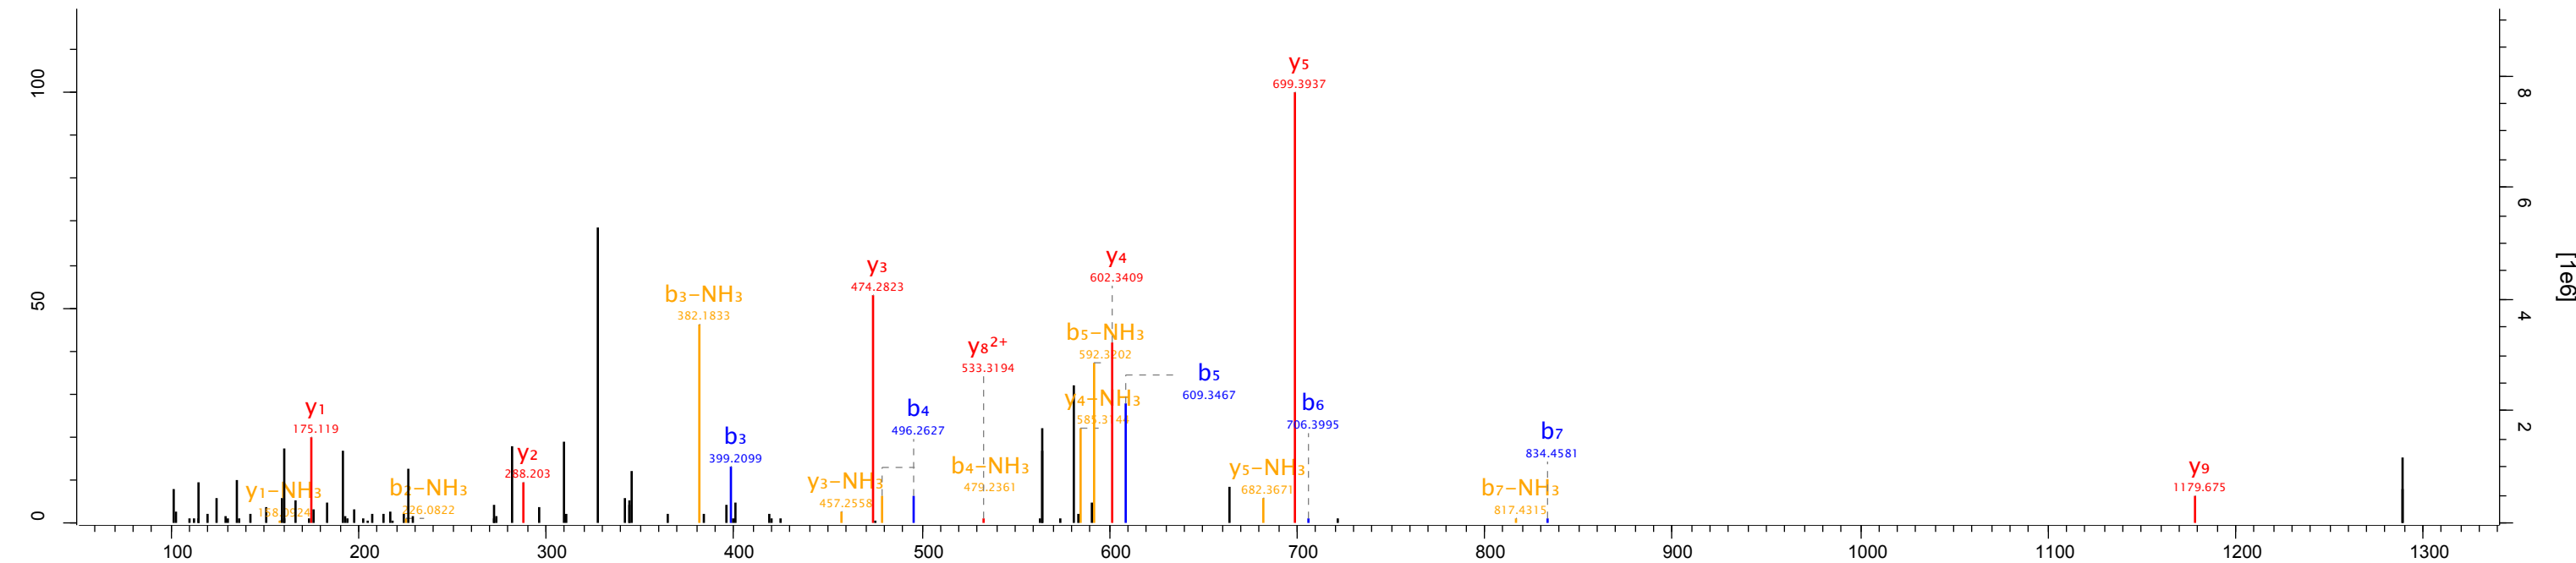

- Q N R P I P Q W I R -

b<sub>3</sub> b<sub>4</sub> b<sub>5</sub> b<sub>6</sub> b<sub>7</sub>

y<sub>9</sub> y<sub>8</sub><sup>2+</sup> y<sub>5</sub> y<sub>4</sub> y<sub>3</sub> y<sub>2</sub> y<sub>1</sub>

Raw file 20180707\_MaS\_A375SR\_ML\_proteome\_2\_27  
 Scan 11958 Method FTMS; HCD Score 205.83 m/z 536.8 Gene names ATP5S

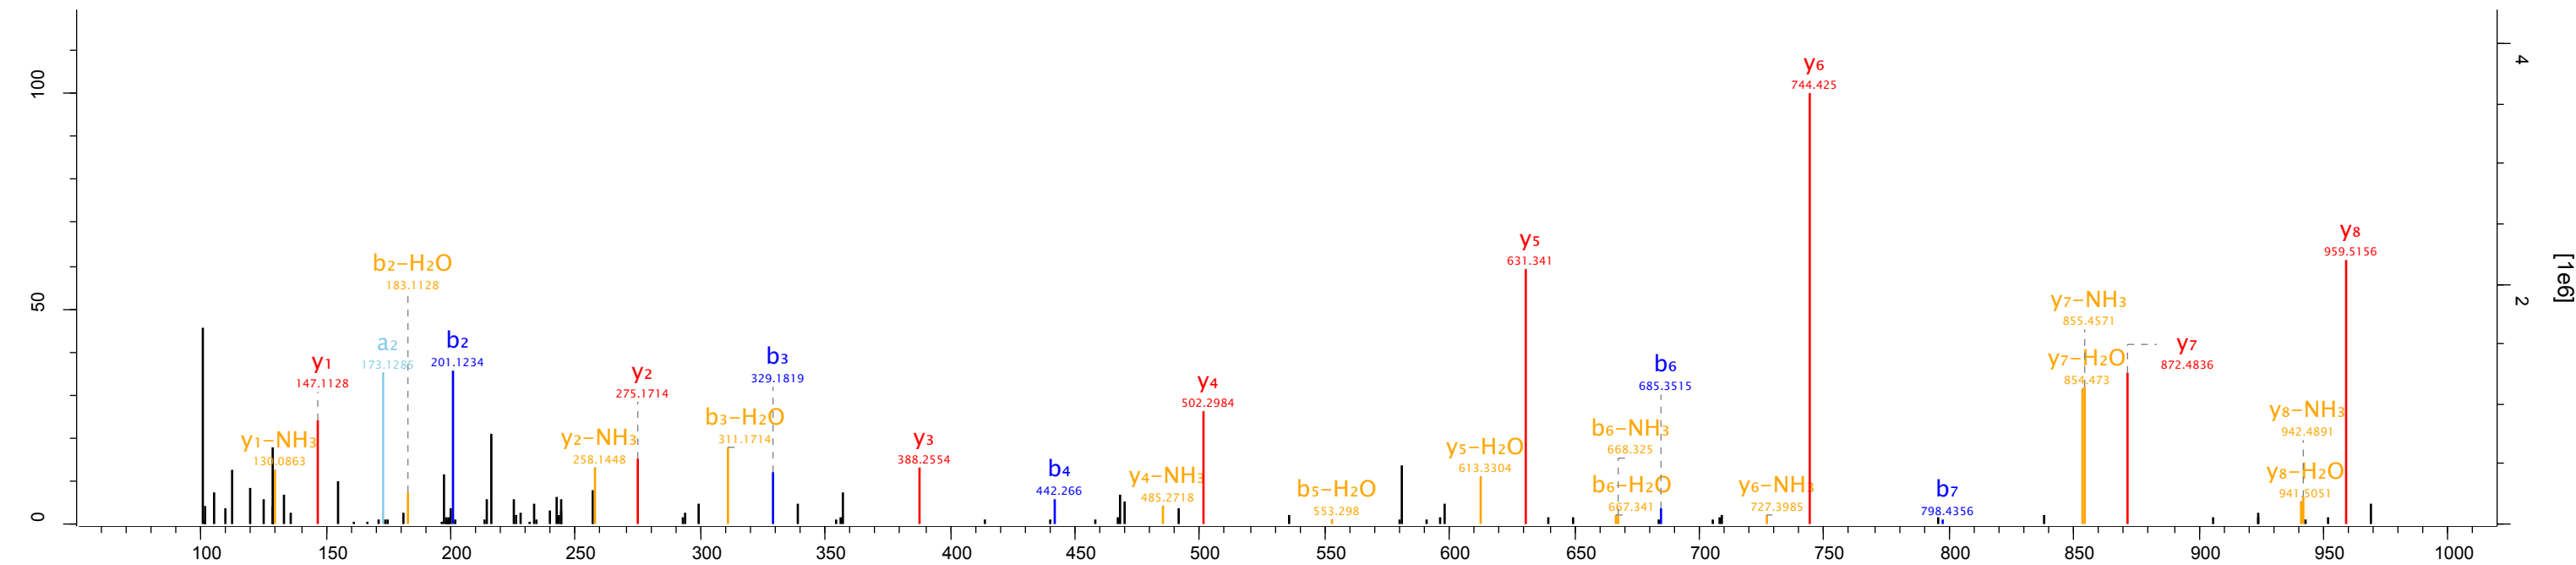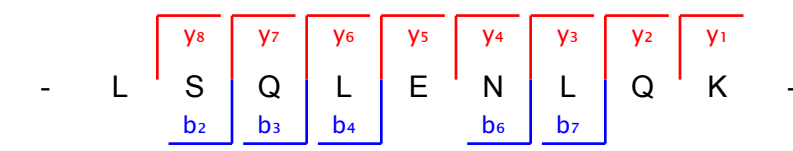

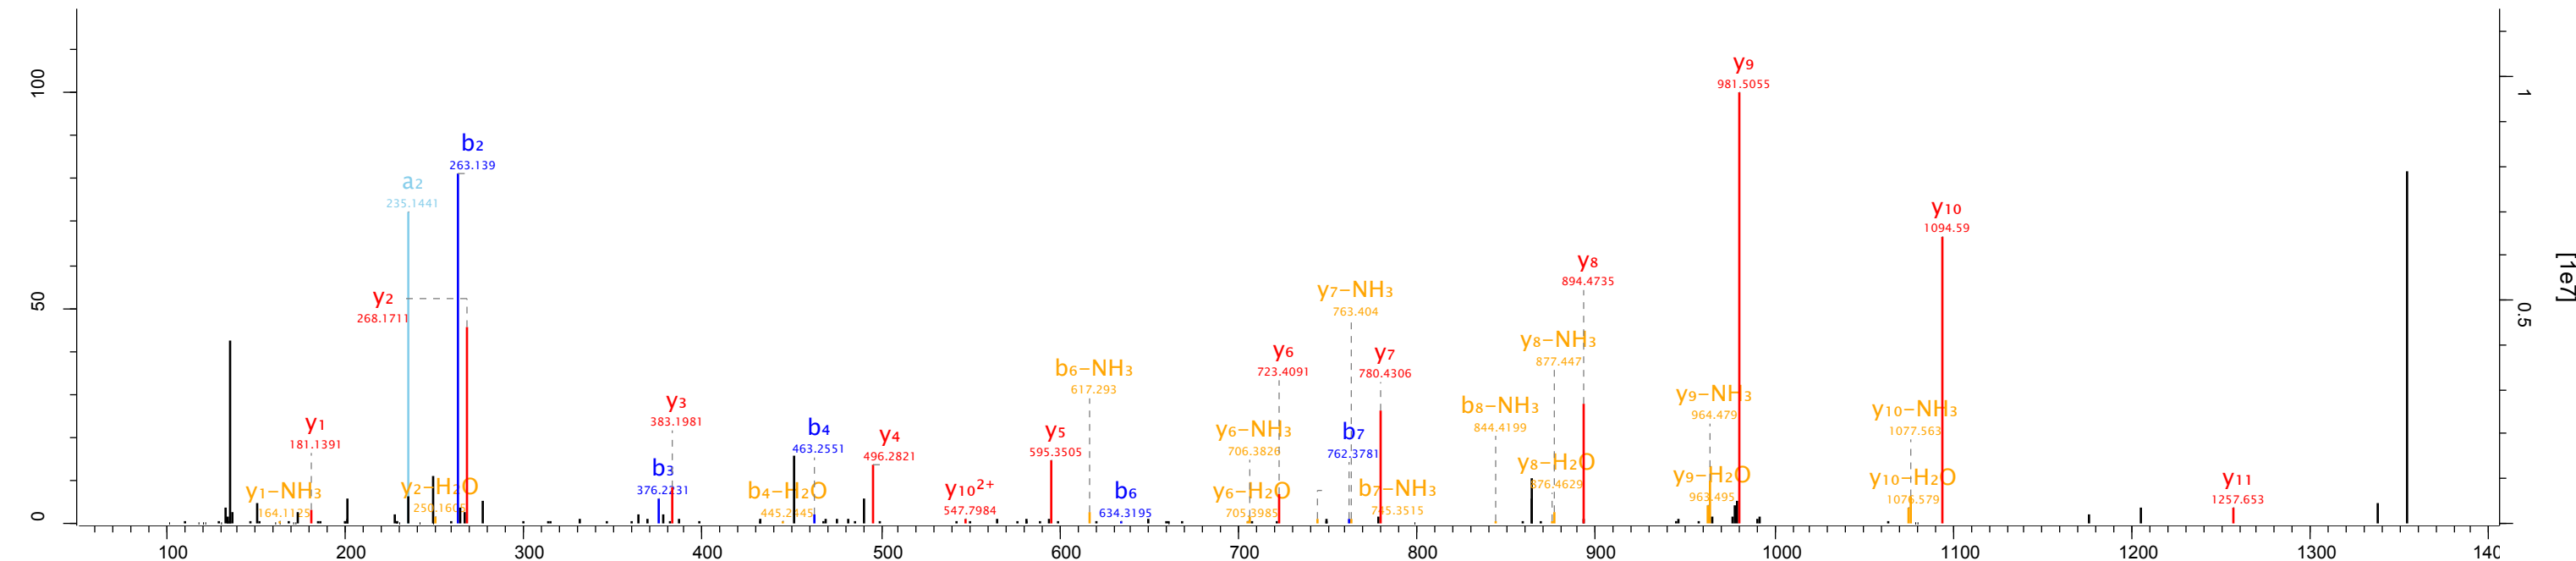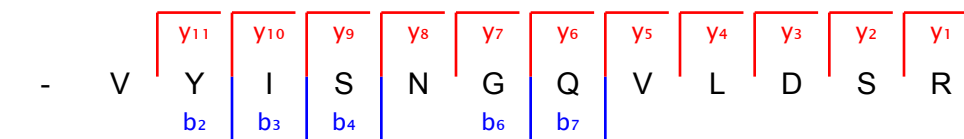

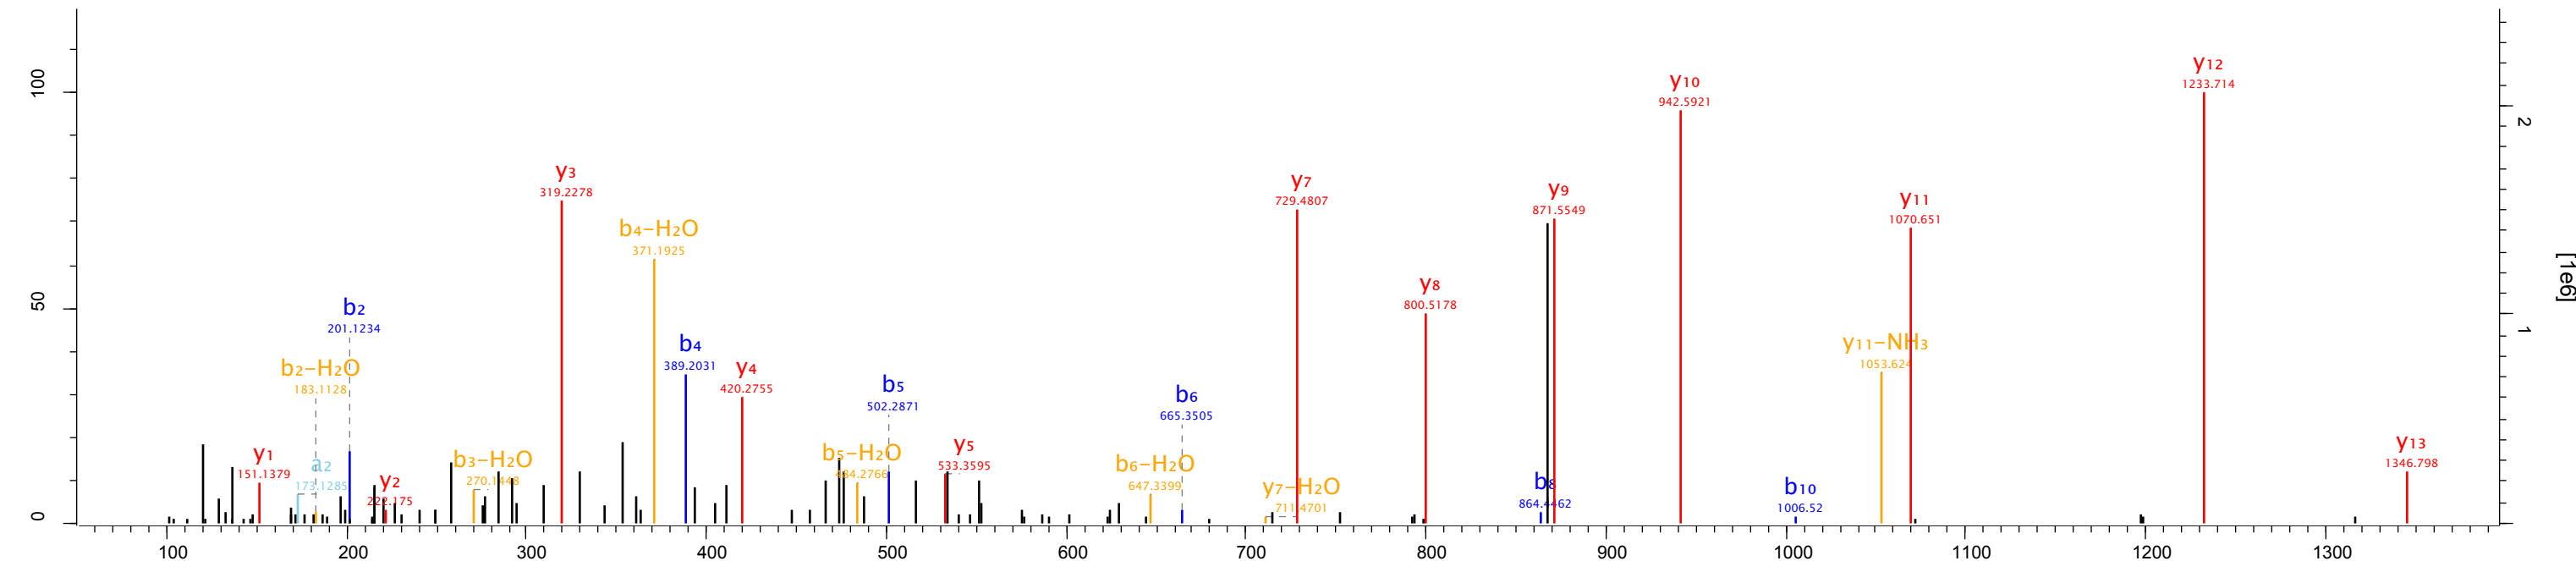

- I S S T L Y Q A A P V L T P A K -

Fragmentation scheme (b and y ions) shown below the sequence:

- b2: S
- b4: ST
- b5: STL
- b6: STLY
- b8: STLYQA
- b10: STLYQAAP
- y1: AK
- y2: AP
- y3: ATP
- y4: ATPL
- y5: ATPLV
- y7: APV
- y8: AAPV
- y9: AAPLV
- y10: AAPLVQ
- y11: AAPLVQY
- y12: AAPLVQYL
- y13: AAPLVQYLS

Raw file: 20180707\_MaS\_A375SR\_ML\_proteome\_2\_29  
 Scan: 7148 Method: FTMS; HCD Score: 96.03 m/z: 466.79 Gene names: FAM11A;TMEM185A;TMEM185B

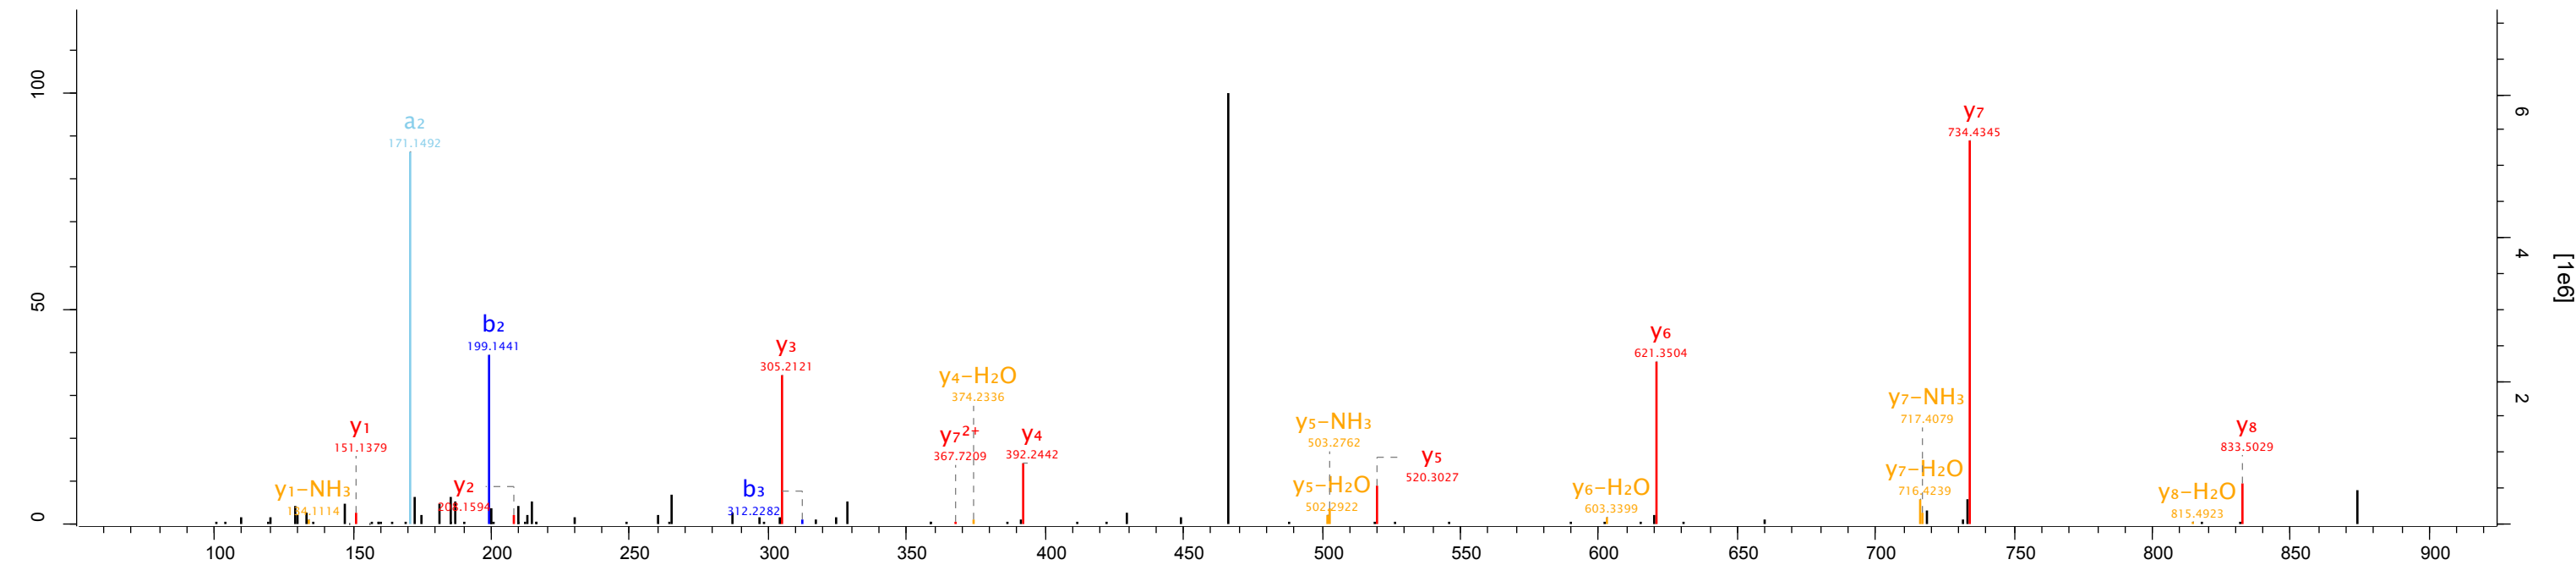

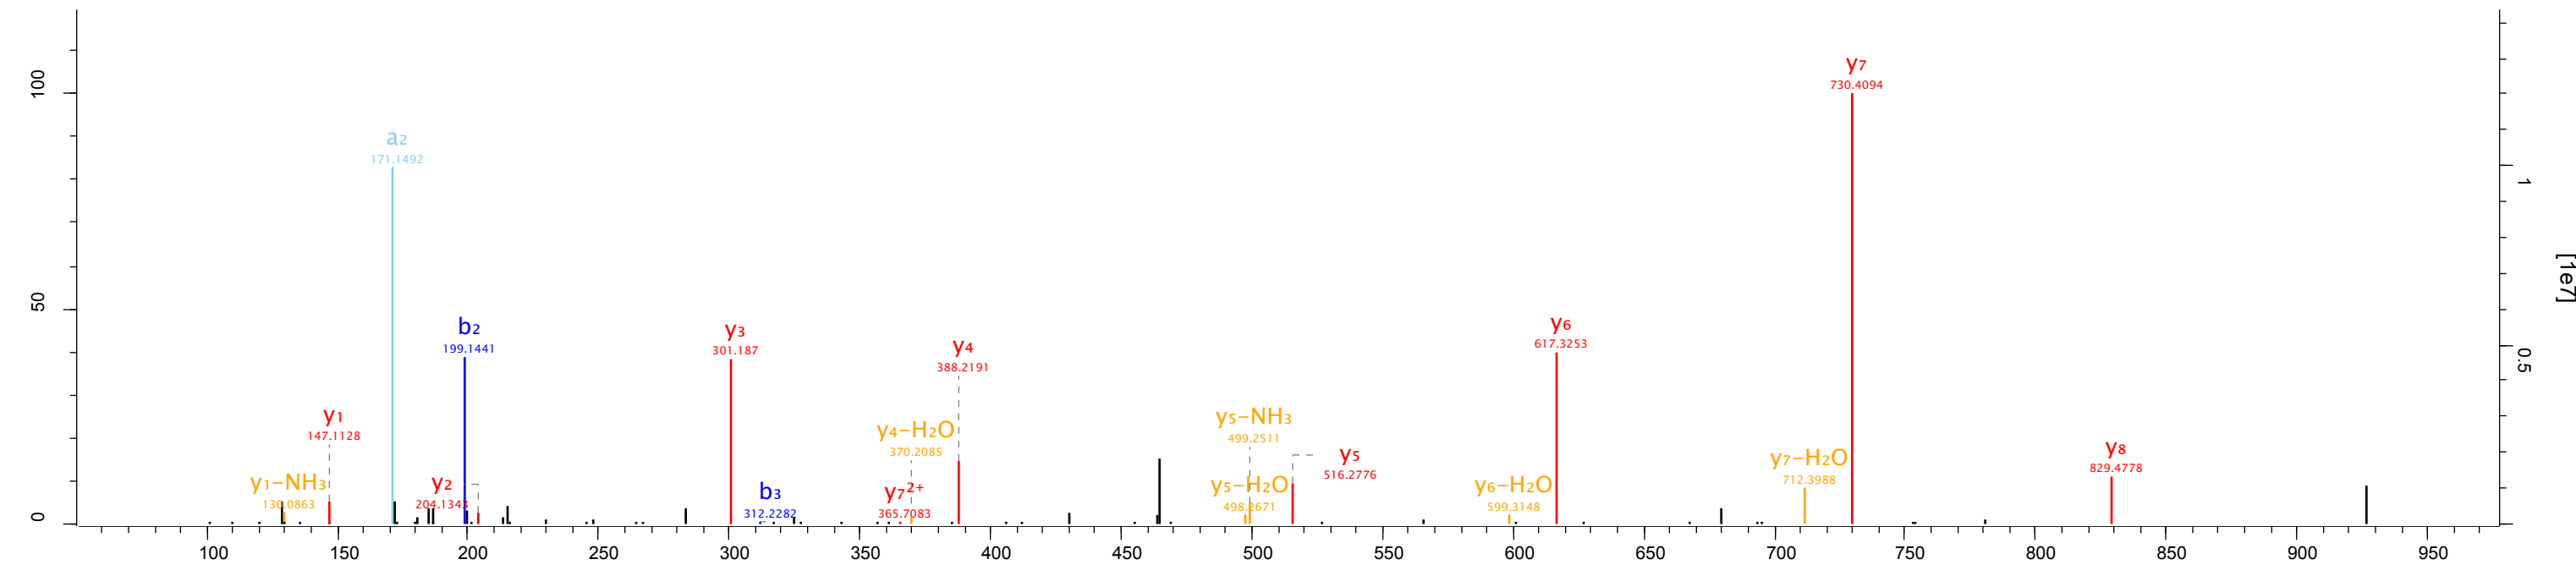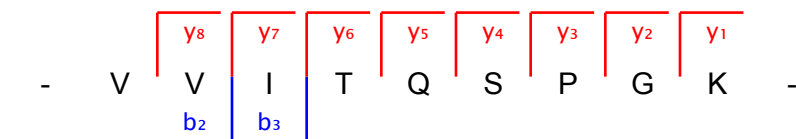

Raw file: 20180707\_MaS\_A375SR\_ML\_proteome\_2\_30  
 Scan: 12548 Method: FTMS; HCD Score: 145.46 m/z: 578.79 Gene names: TMEM254

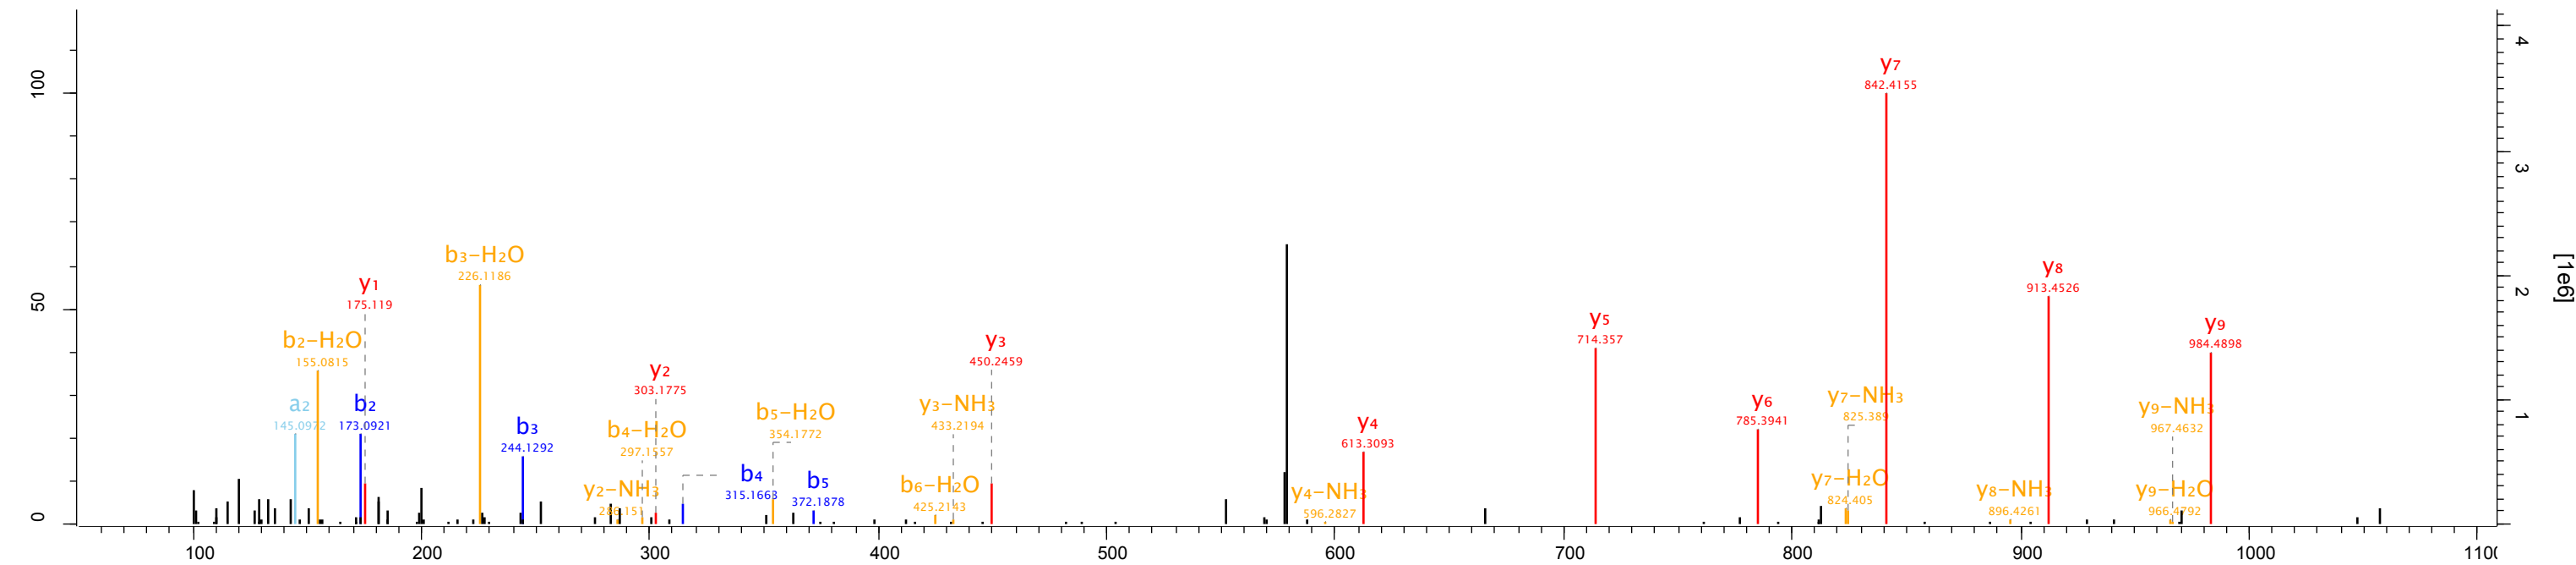



Raw file: 20180707\_MaS\_A375SR\_ML\_proteome\_20  
 Scan: 25488 Method: FTMS; HCD Score: 70.82 m/z: 543.8 Gene names: ACO1

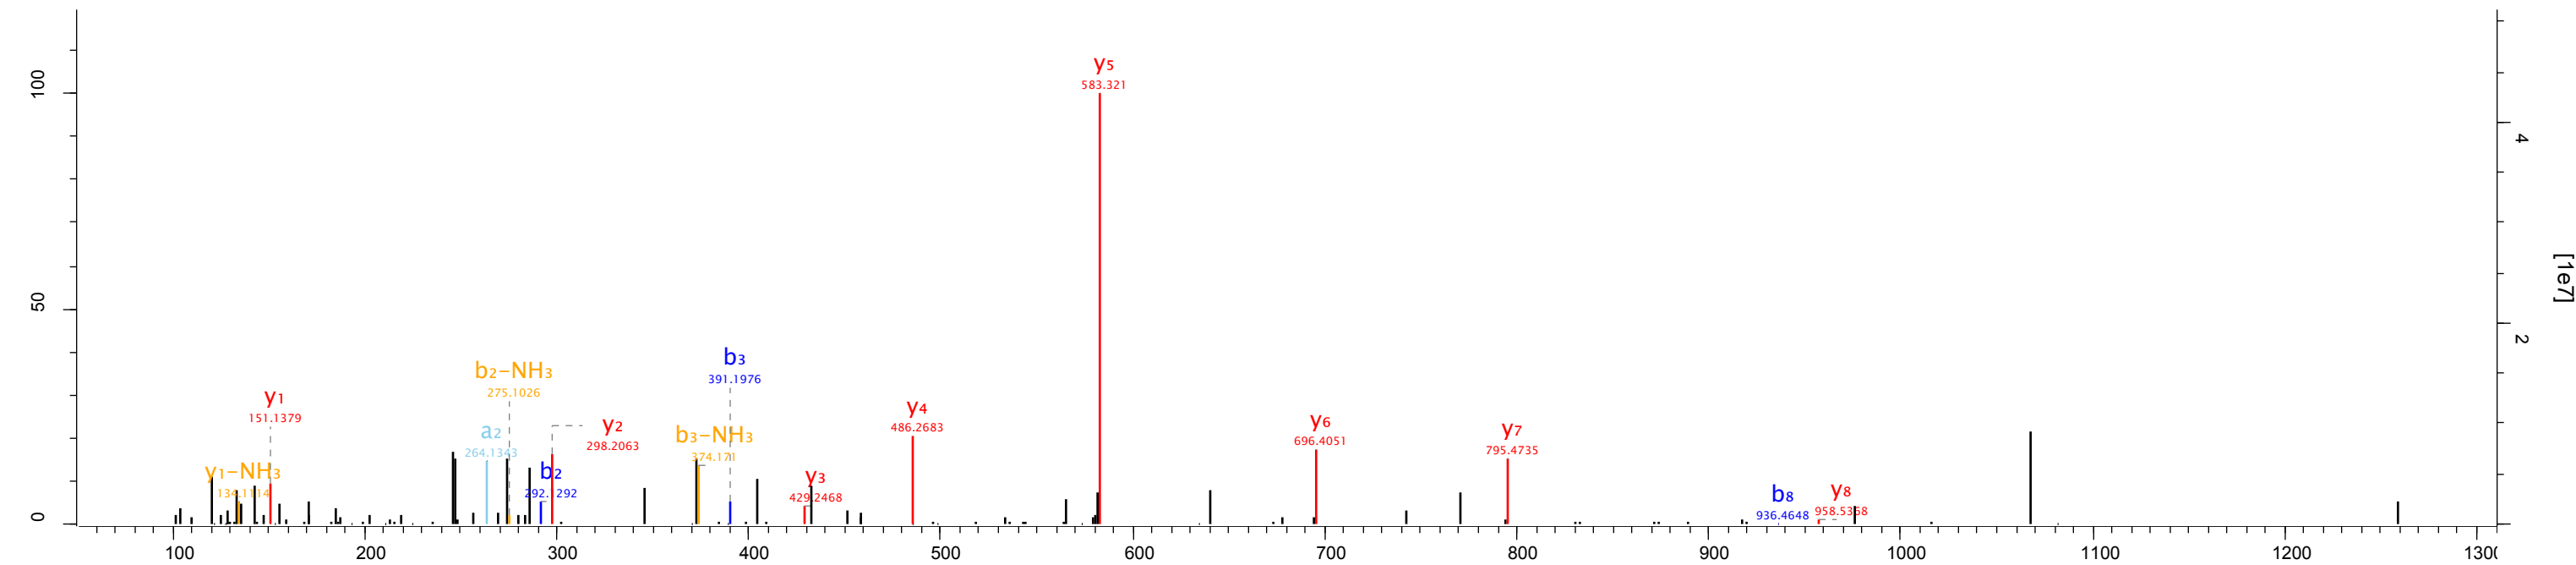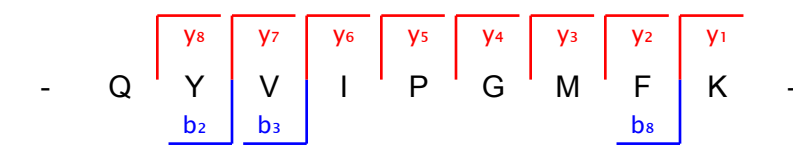

Raw file 20180707\_MaS\_A375SR\_ML\_proteome\_21 Scan 18388 Method FTMS; HCD Score 54.98 m/z 617.76

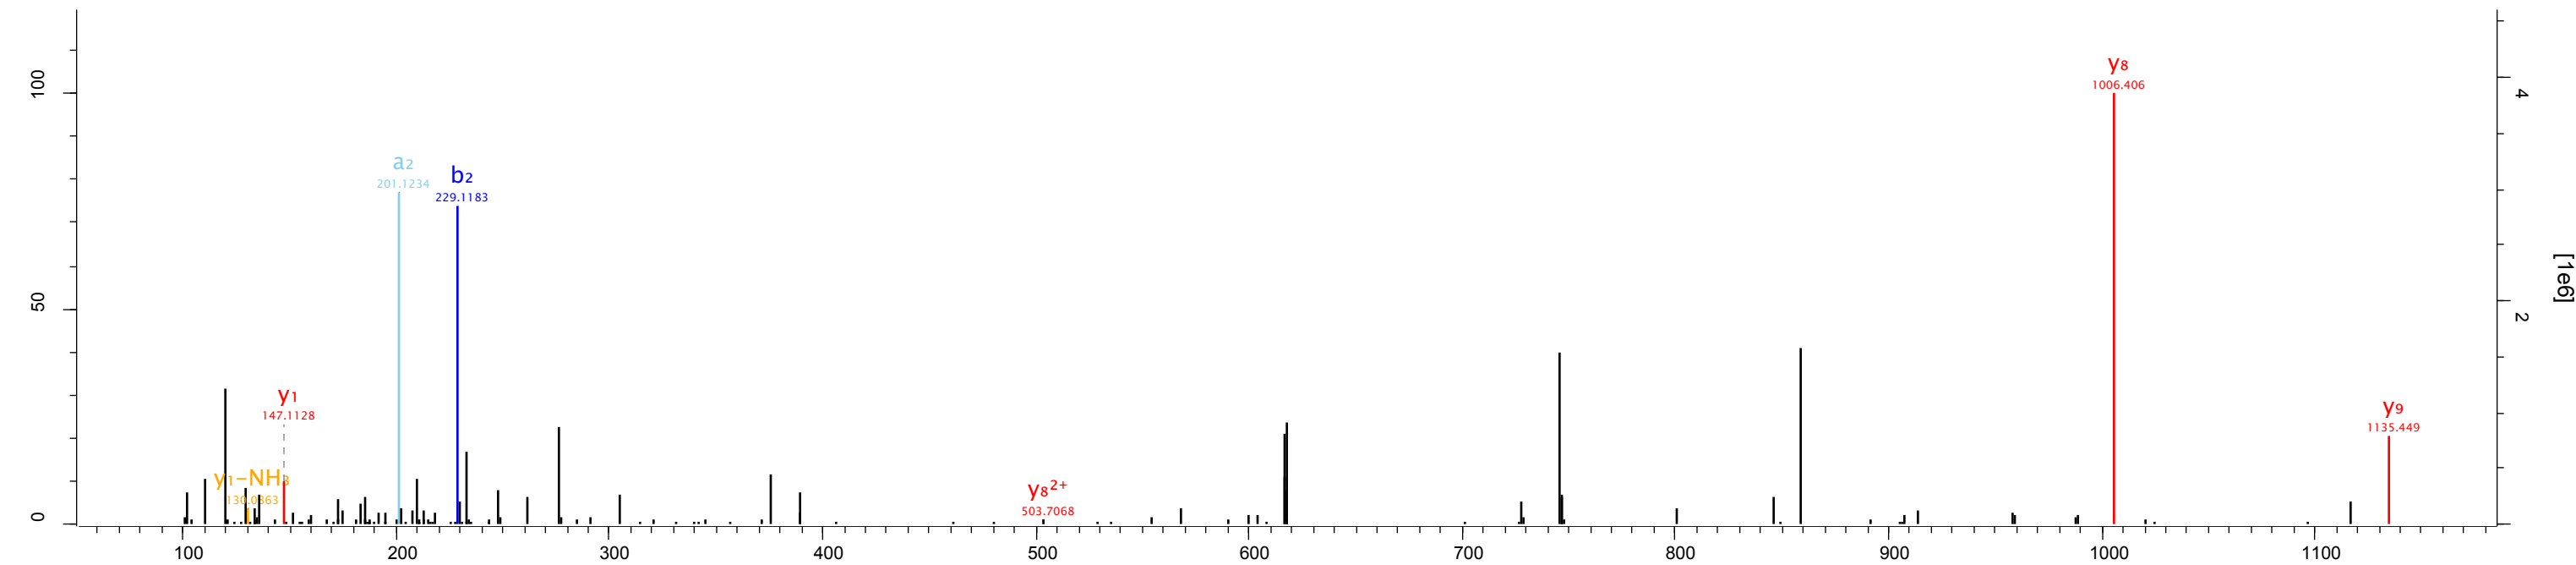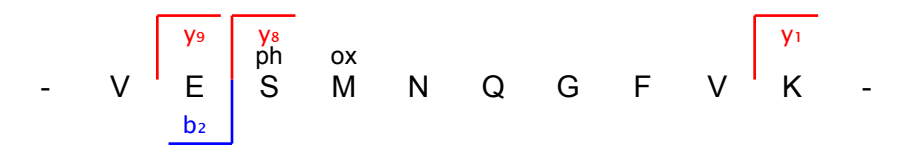

Raw file 20180707\_MaS\_A375SR\_ML\_proteome\_21 Scan 22078 Method FTMS; HCD Score 39.73 m/z 587.33 Gene names KATNAL2

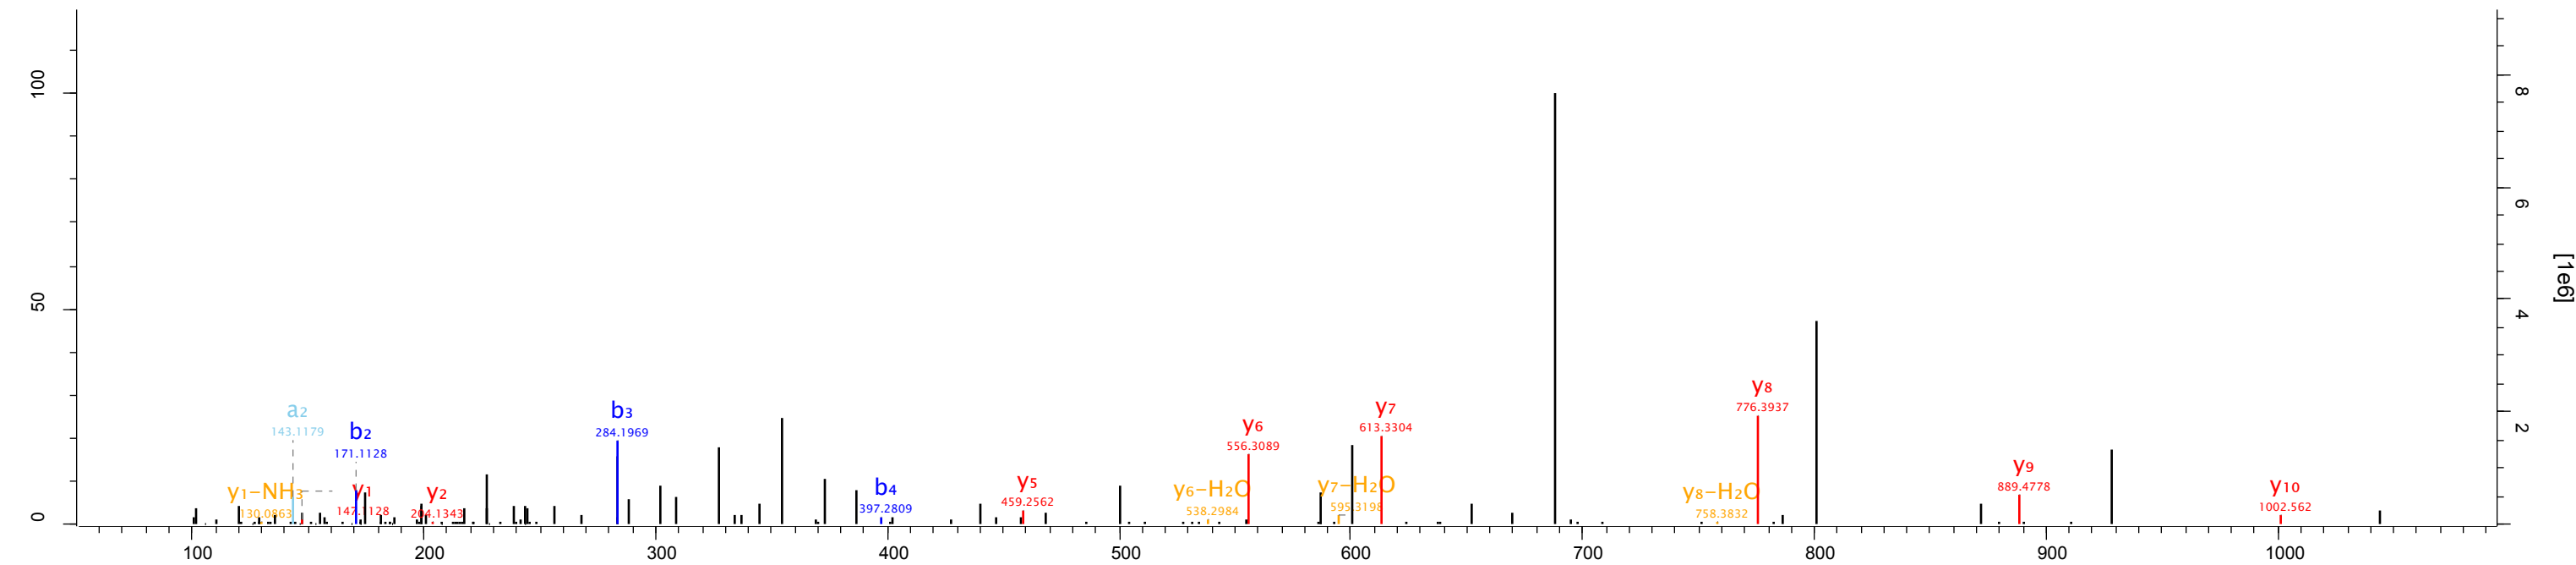

Raw file  
20180707\_MaS\_A375SR\_ML\_proteome\_23

Scan 22908 Method FTMS; HCD Score 38.78 m/z 865.99 Gene names KRTCAP2

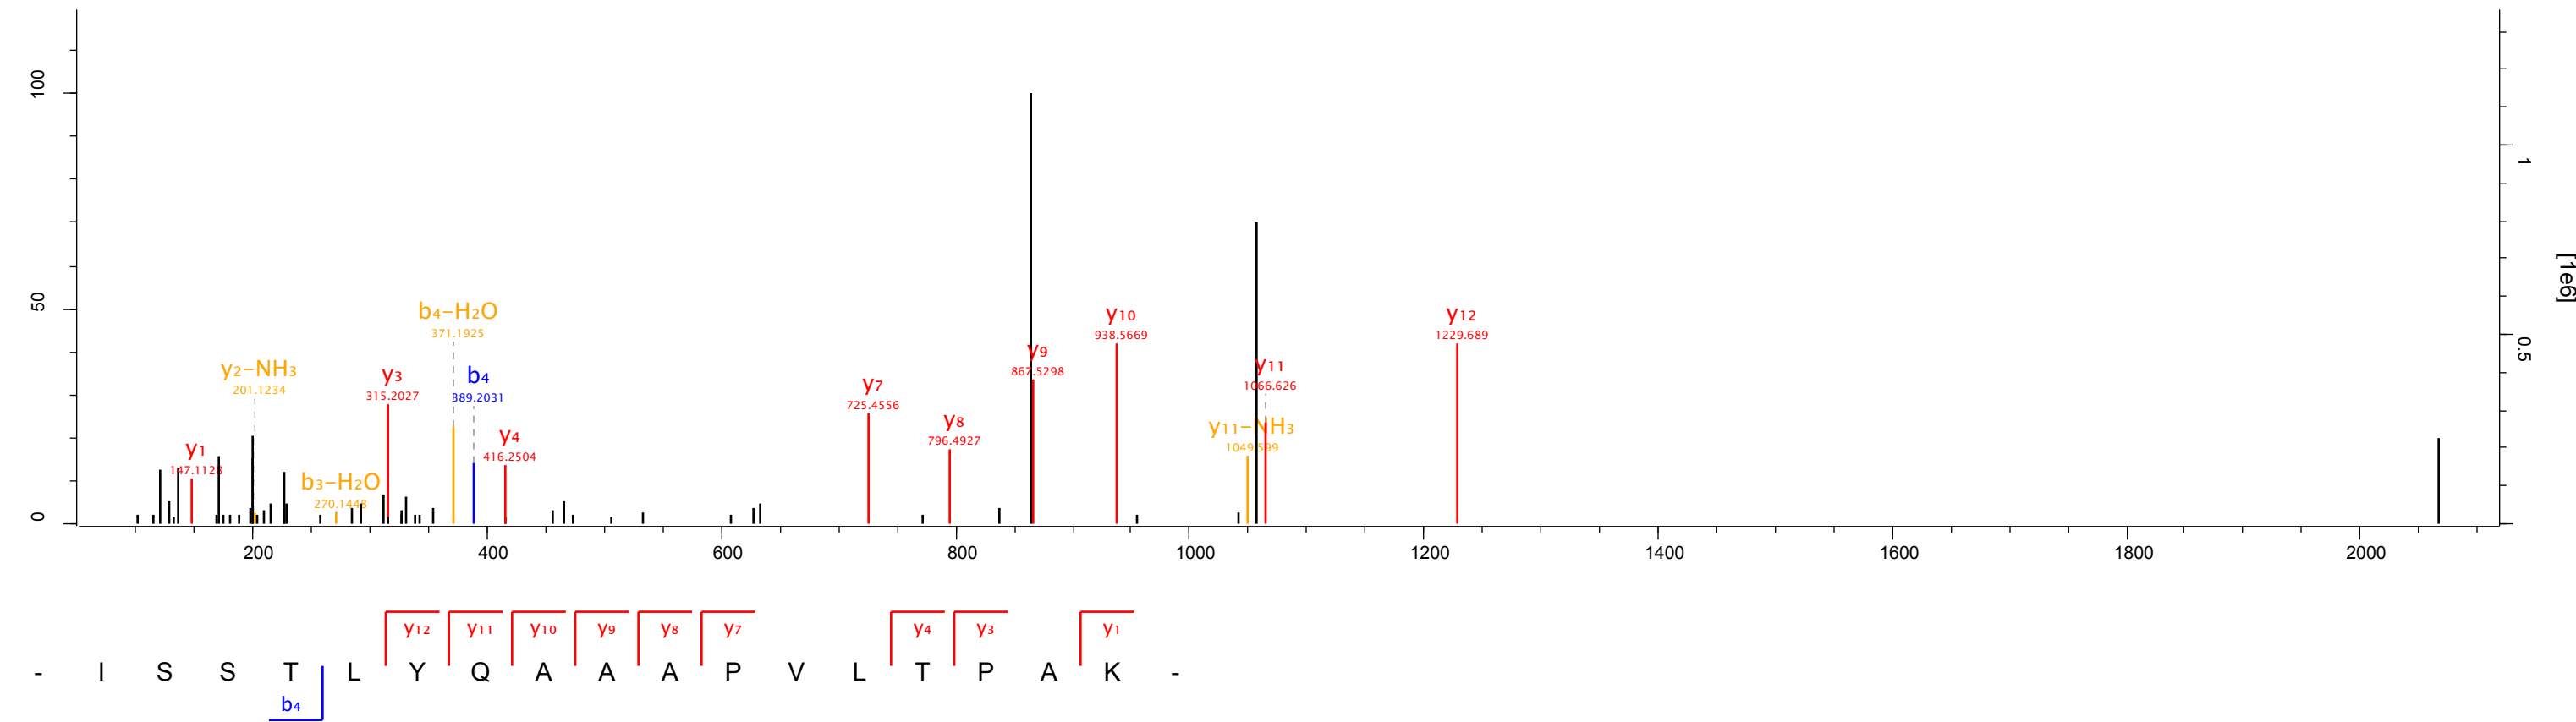

Raw file: 20180707\_MaS\_A375SR\_ML\_proteome\_24  
 Scan: 18418 Method: FTMS; HCD Score: 61.17 m/z: 483.97 Gene names: TMEM39B

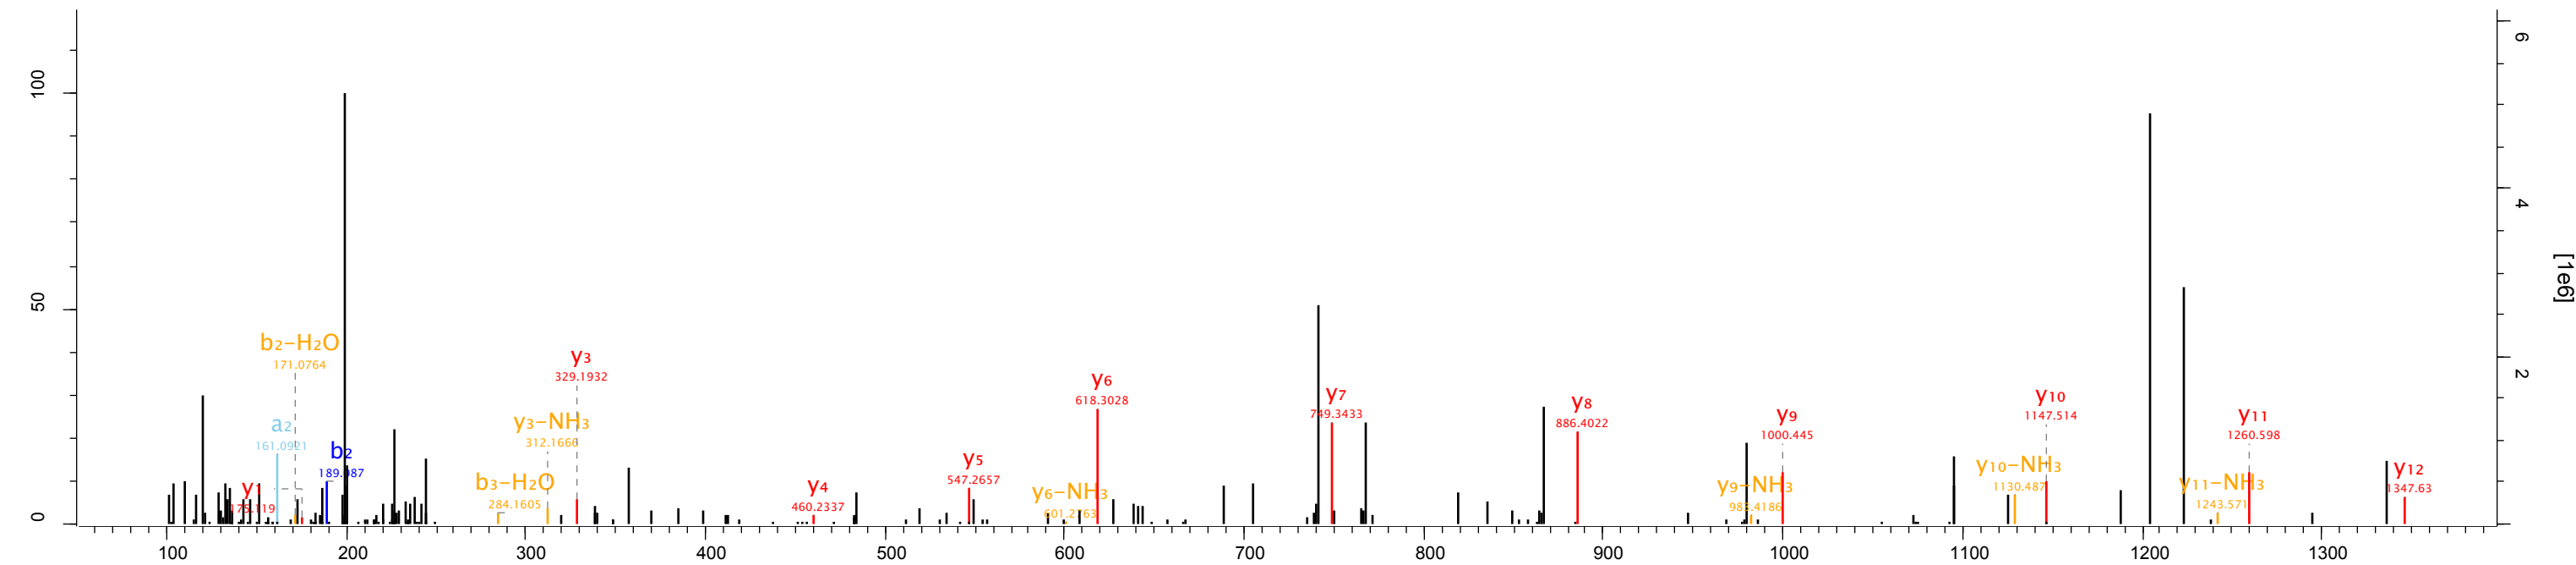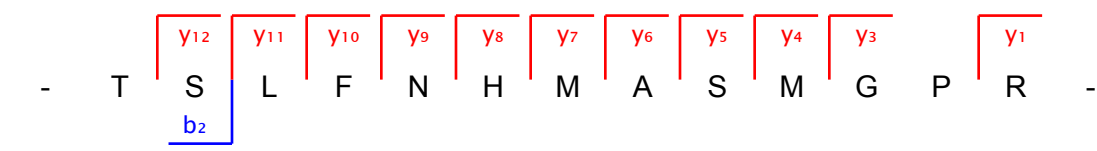

Raw file 20180707\_MaS\_A375SR\_ML\_proteome\_24 Scan 18478 Method FTMS; HCD Score 95.42 m/z 642.36 Gene names ALG14

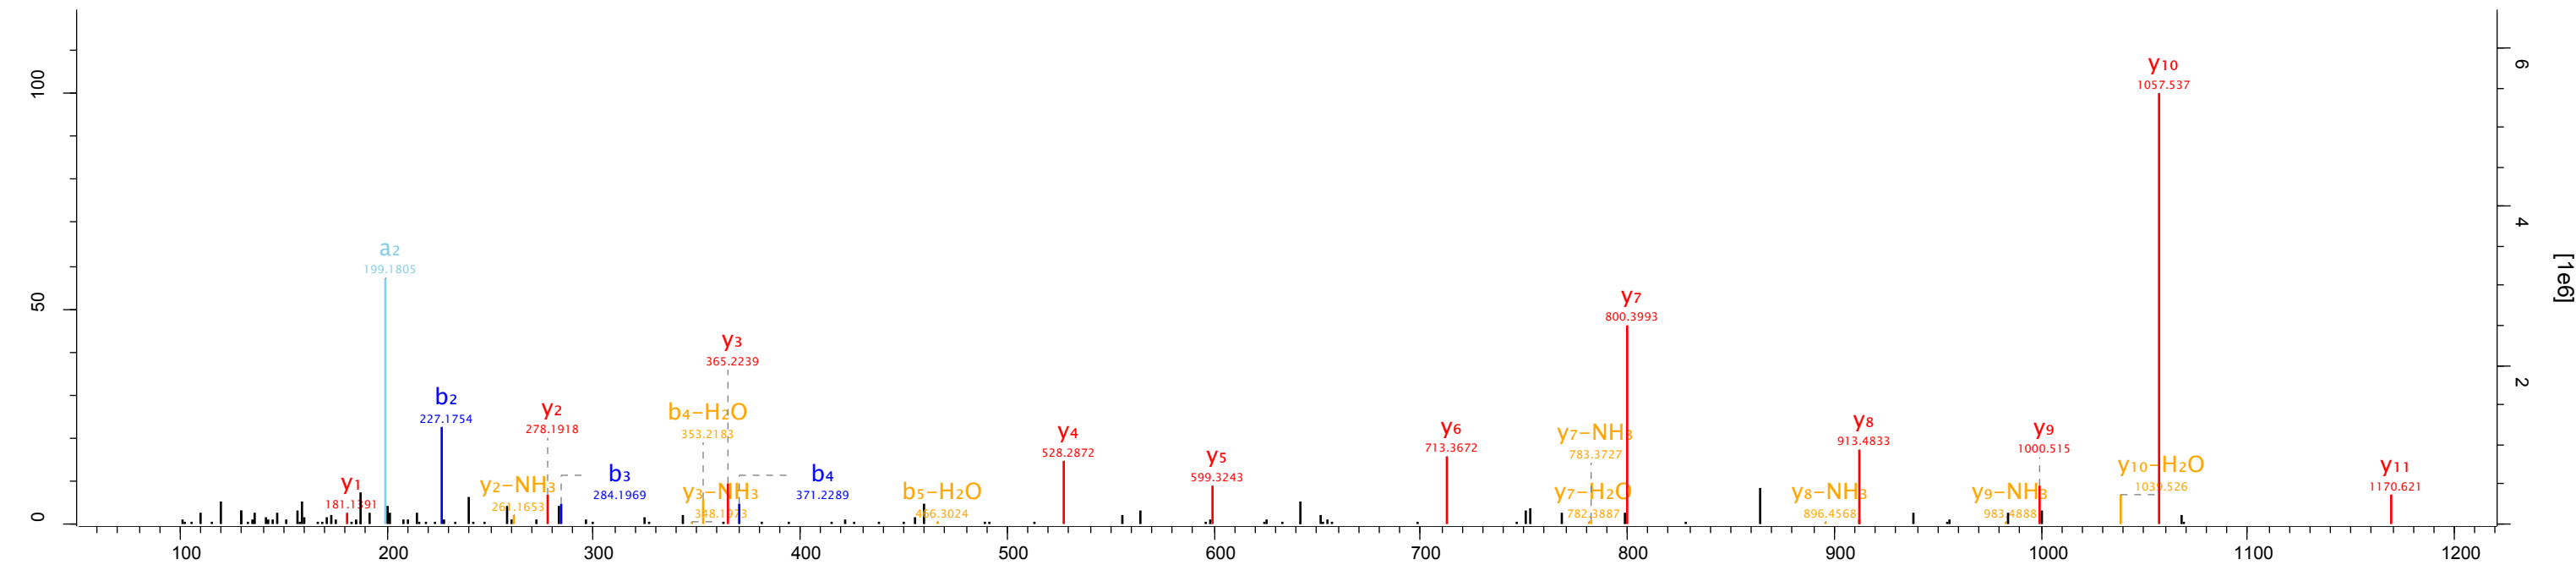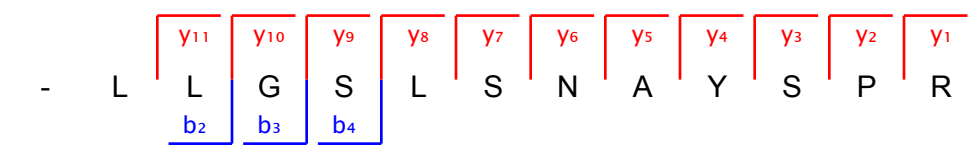

Raw file 20180707\_MaS\_A375SR\_ML\_proteome\_24 Scan 6148 Method FTMS; HCD Score 79.45 m/z 353.19

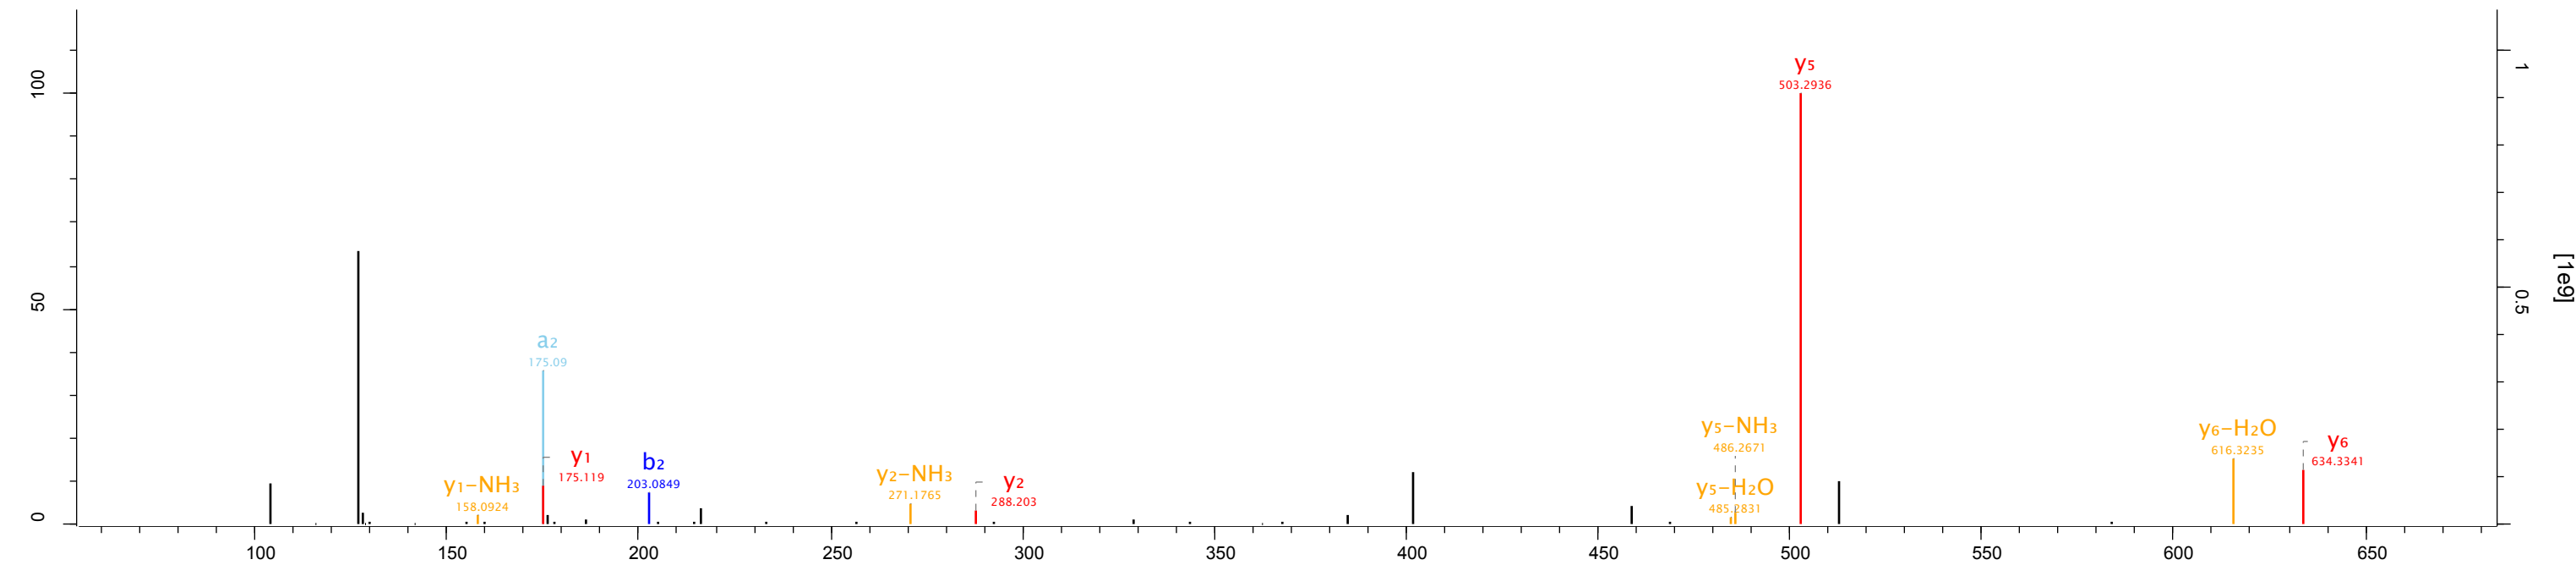

Raw file 20180707\_MaS\_A375SR\_ML\_proteome\_24 Scan 6468 Method FTMS; HCD Score 46.43 m/z 577.72 Gene names PSPHP1

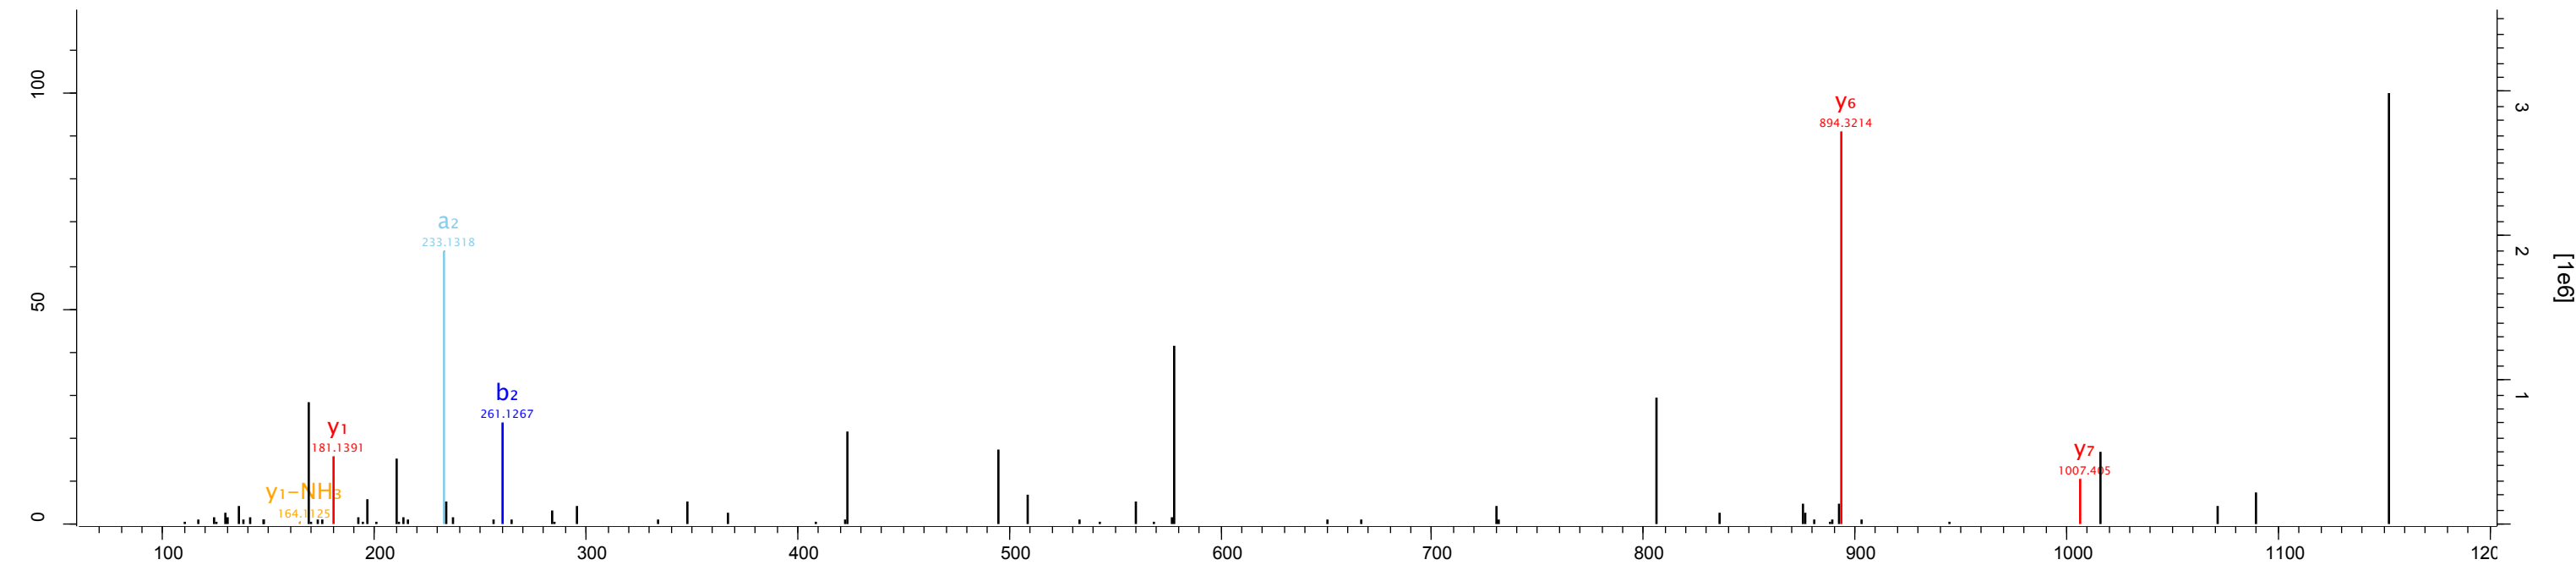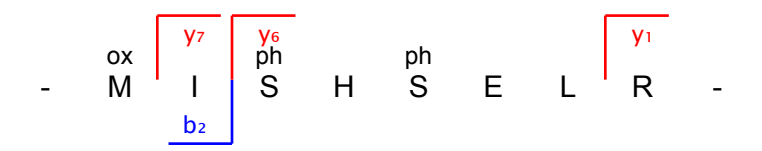



Raw file 20180707\_MaS\_A375SR\_ML\_proteome\_25 Scan 9718 Method FTMS; HCD Score 36.58 m/z 593 Gene names C20orf24

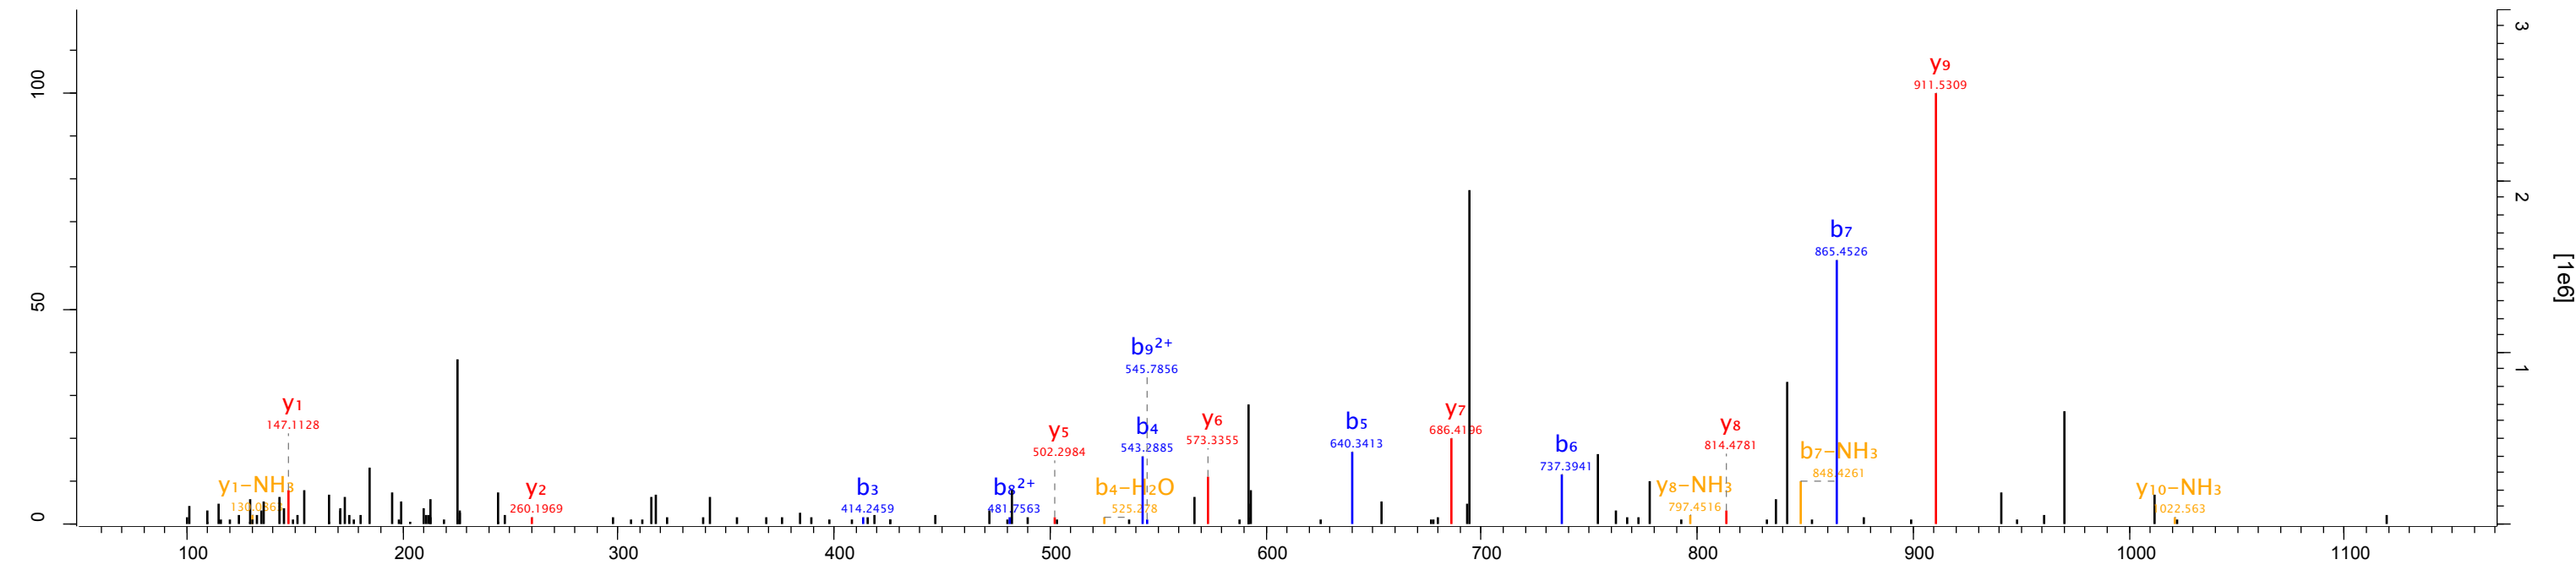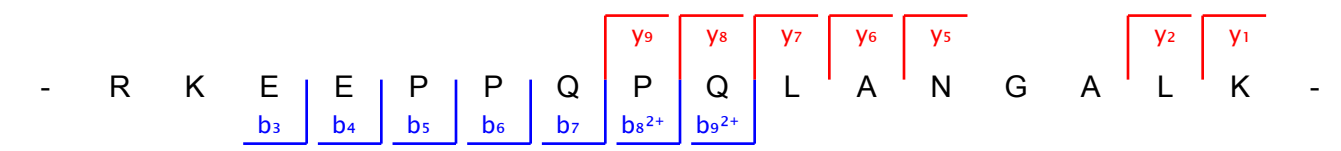

Raw file

20180707\_MaS\_A375SR\_ML\_proteome\_26

| Scan  | Method    | Score  | m/z    | Gene names |
|-------|-----------|--------|--------|------------|
| 18698 | FTMS; HCD | 109.83 | 704.38 | KCNN3      |

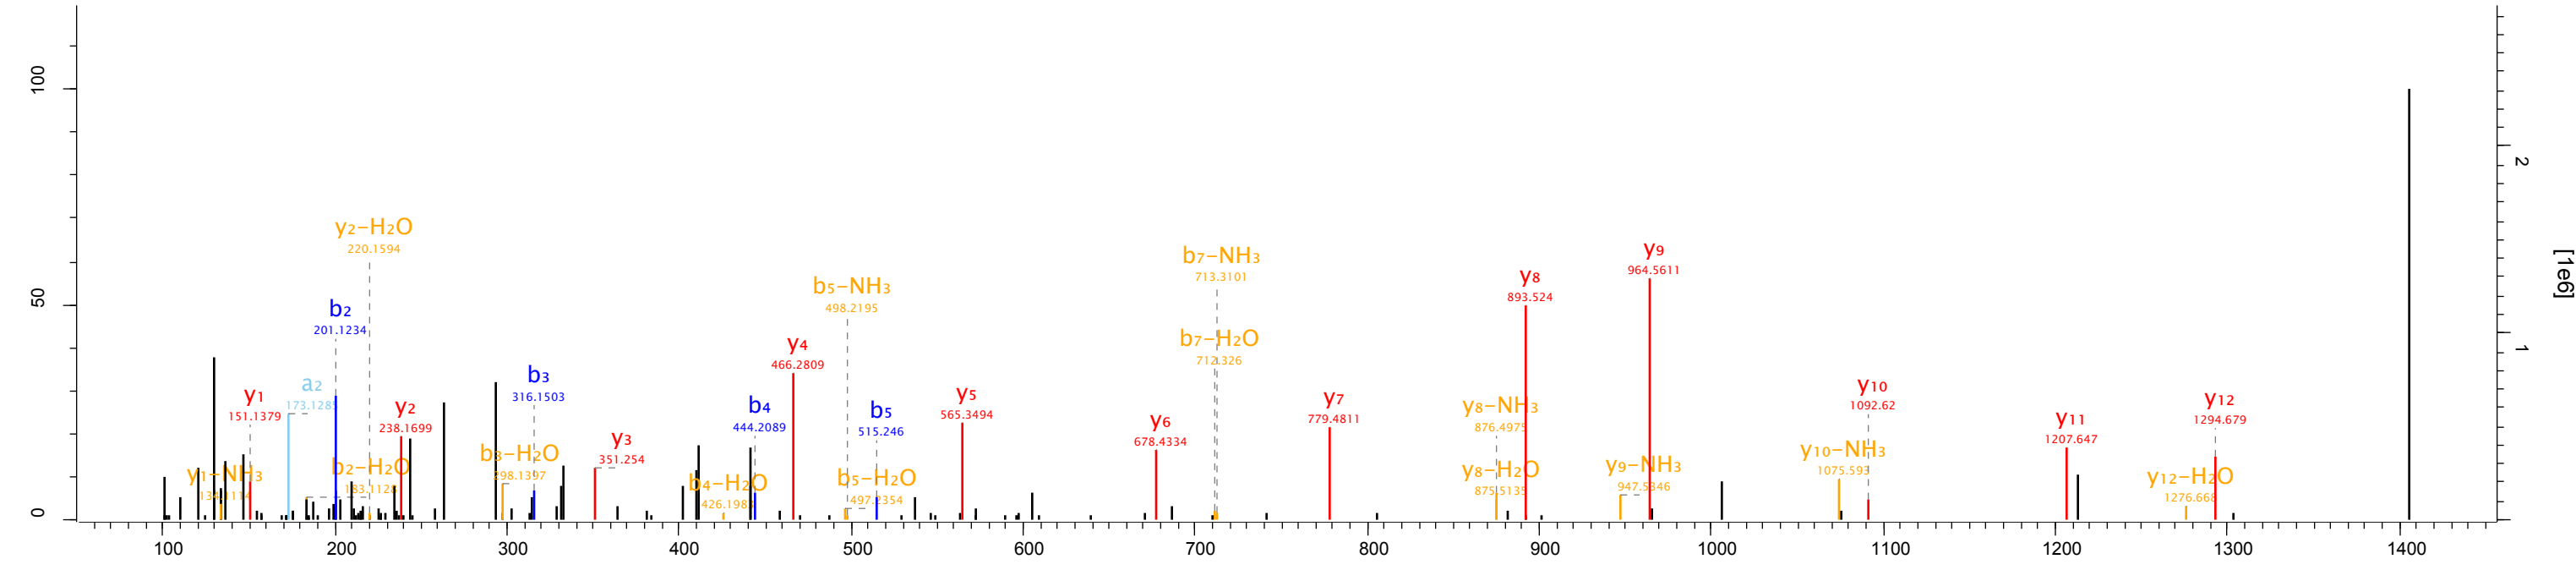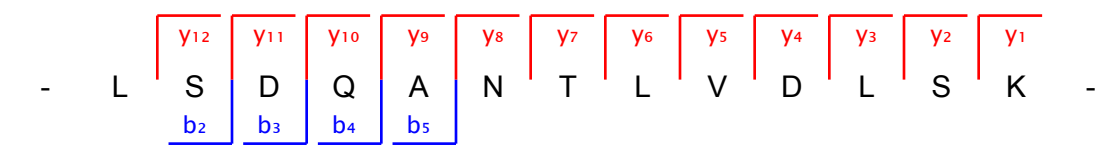

Raw file  
20180707\_MaS\_A375SR\_ML\_proteome\_26

Scan 24028 Method FTMS; HCD Score 92.86 m/z 684.84 Gene names PIGN

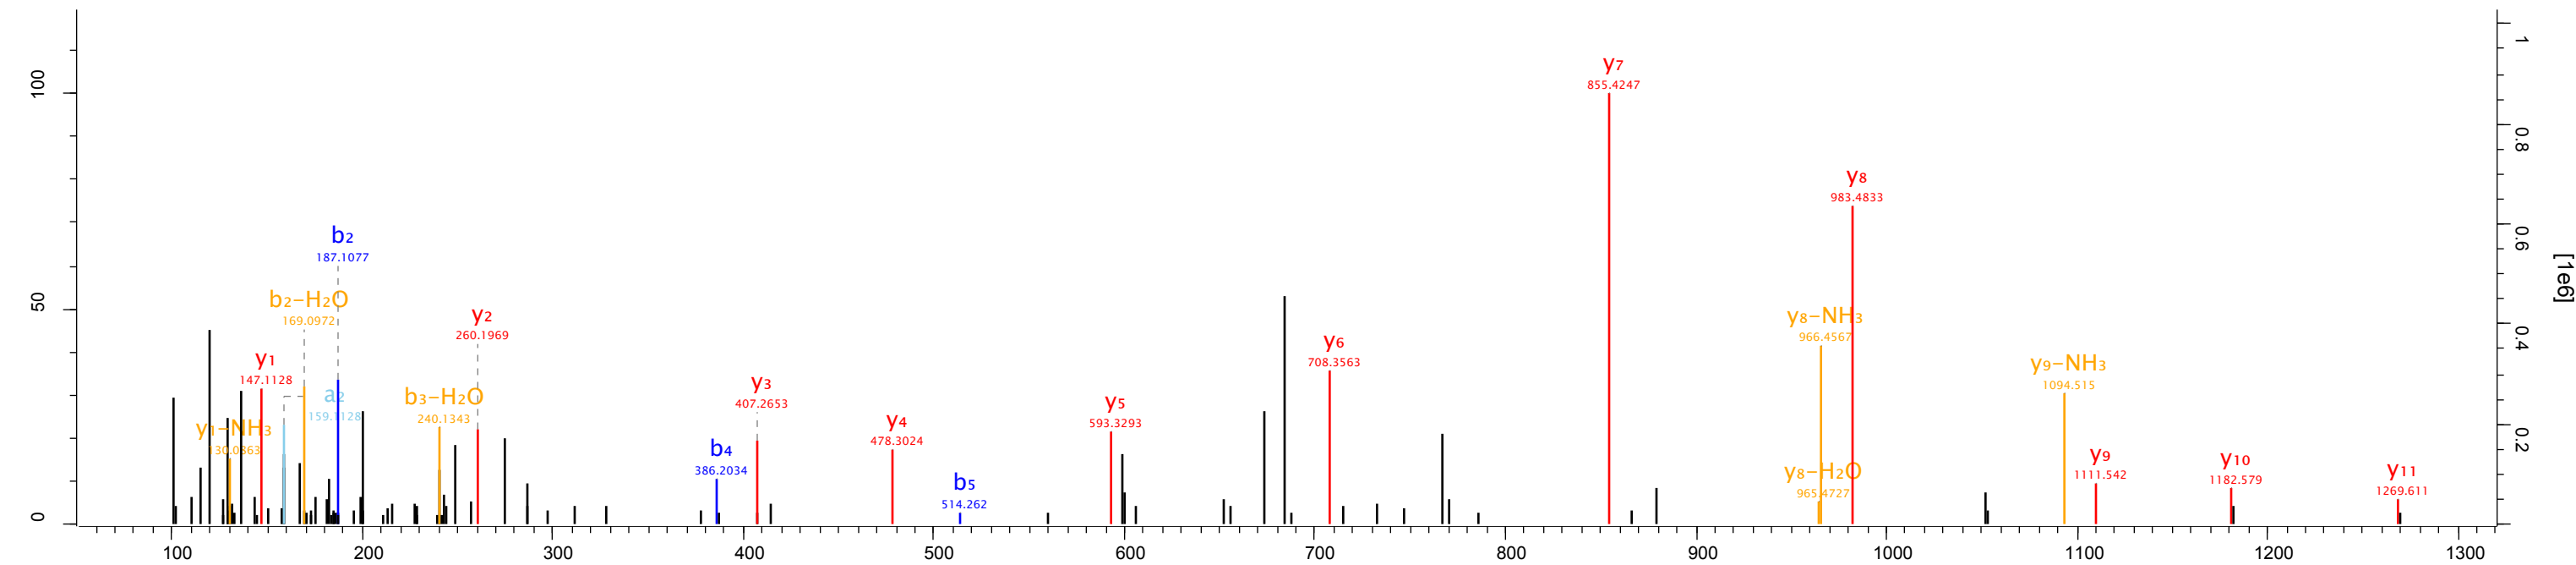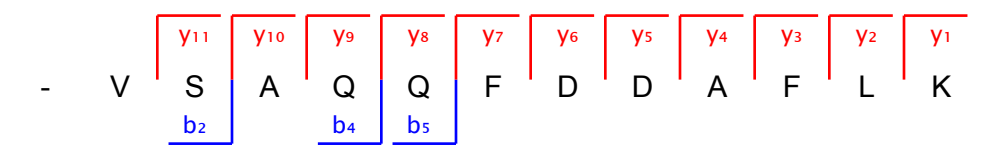

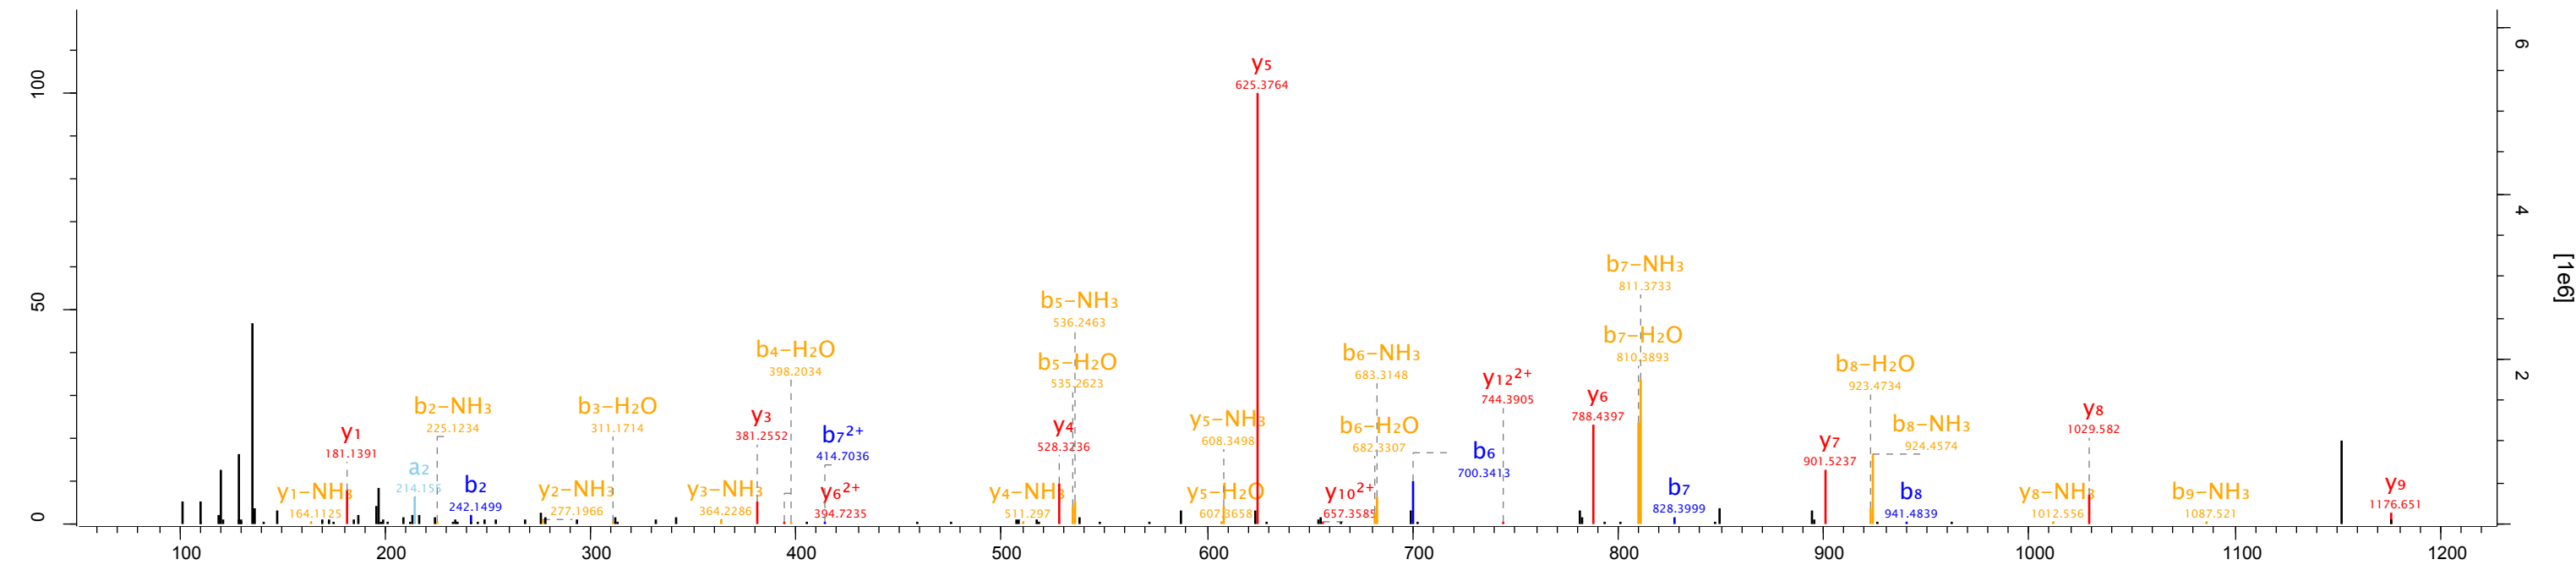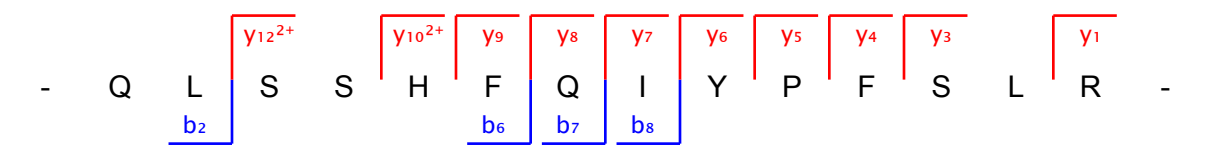

Raw file 20180707\_MaS\_A375SR\_ML\_proteome\_27 Scan 11888 Method FTMS; HCD Score 182.39 m/z 536.8 Gene names ATP5S

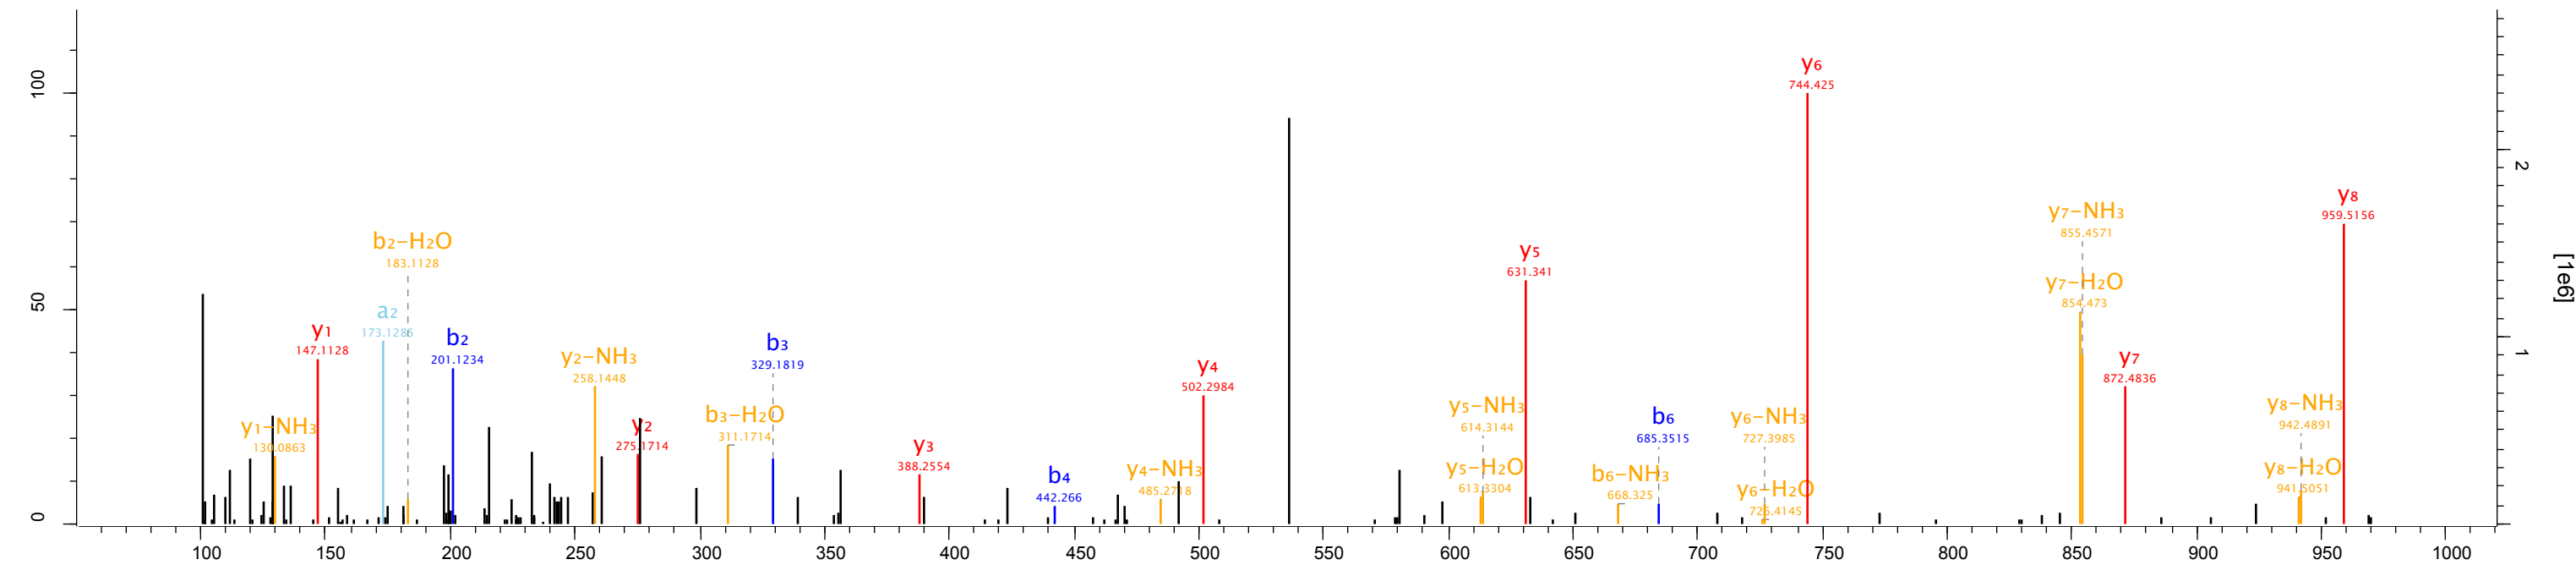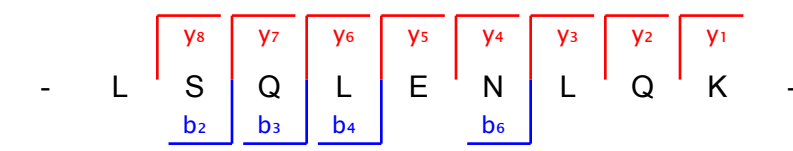

Raw file: 20180707\_MaS\_A375SR\_ML\_proteome\_27  
 Scan: 11898 Method: FTMS; HCD Score: 150.61 m/z: 538.82 Gene names: ATP5S

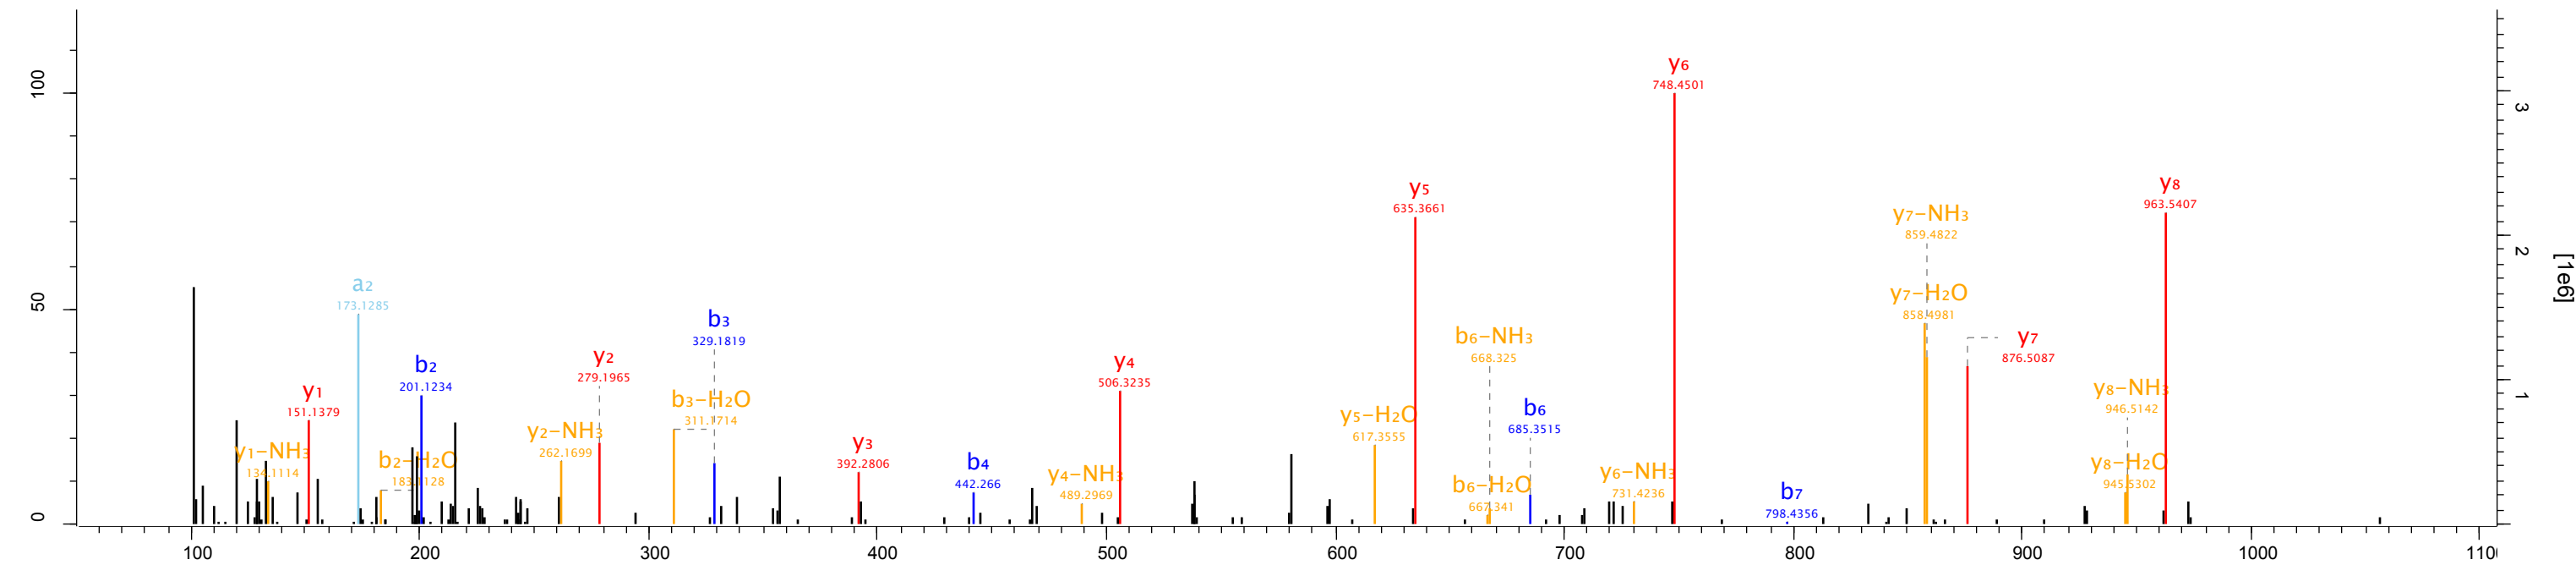

Raw file  
20180707\_MaS\_A375SR\_ML\_proteome\_27

Scan 7788 Method FTMS; HCD Score 48.28 m/z 576.29

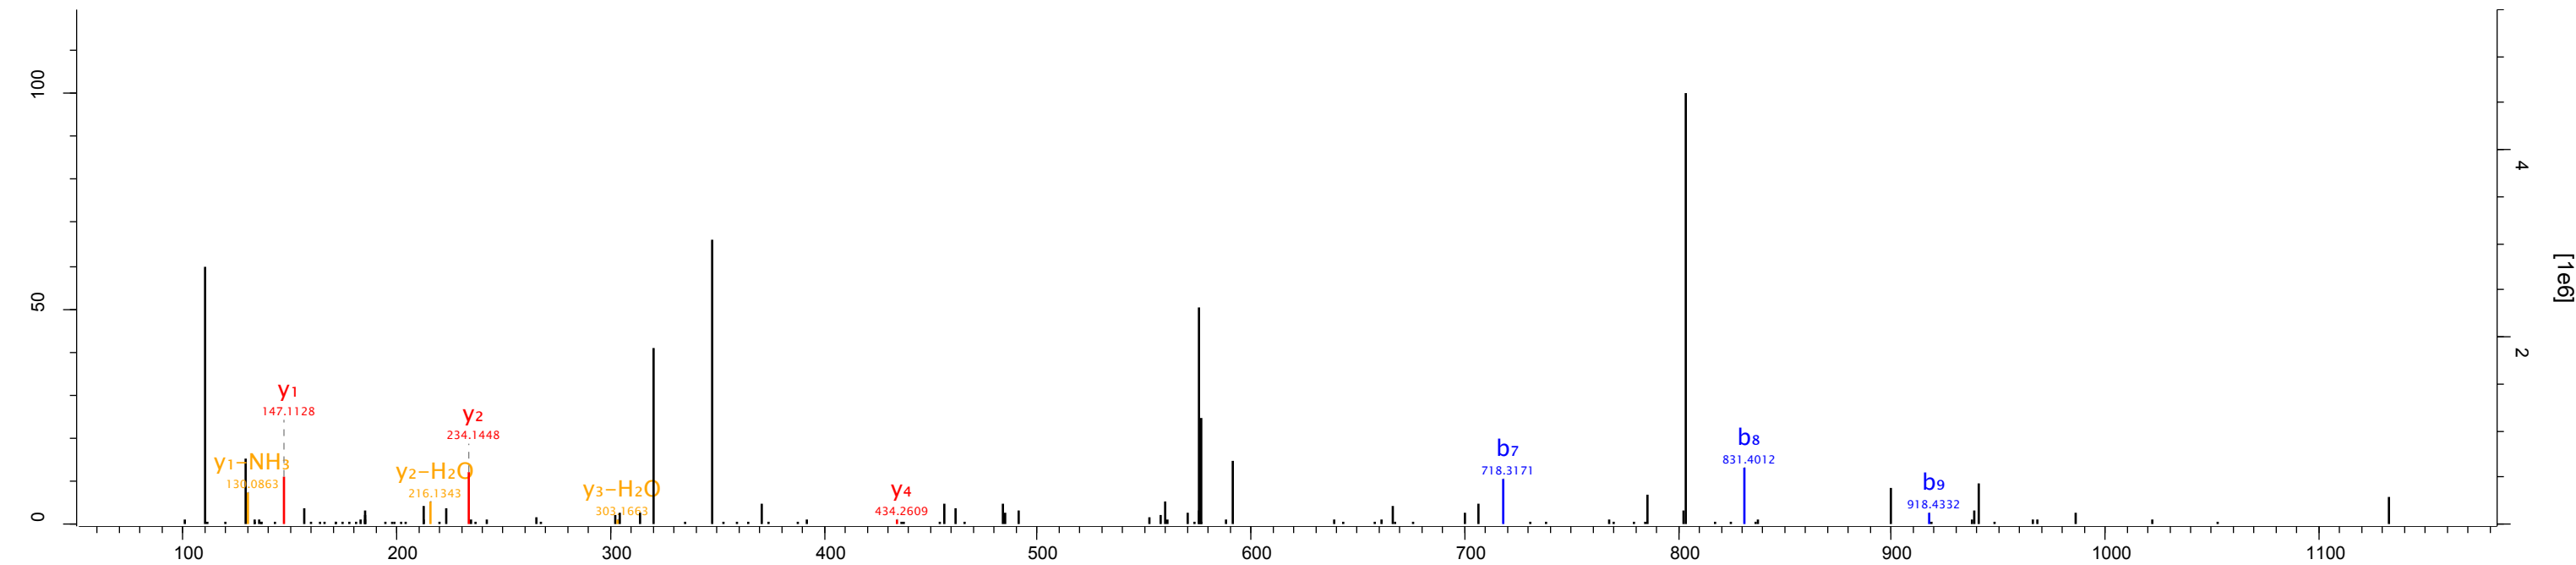

- ph S S G V I P P L S S K -

Fragmentation mapping:  
- b7 [P] b8 [L] b9 [S] y4 [L S] y2 [S] y1 [K] -

Raw file 20180707\_MaS\_A375SR\_ML\_proteome\_28 Scan 15408 Method FTMS; HCD Score 100.25 m/z 440.6 Gene names RPL39P5;RPL39

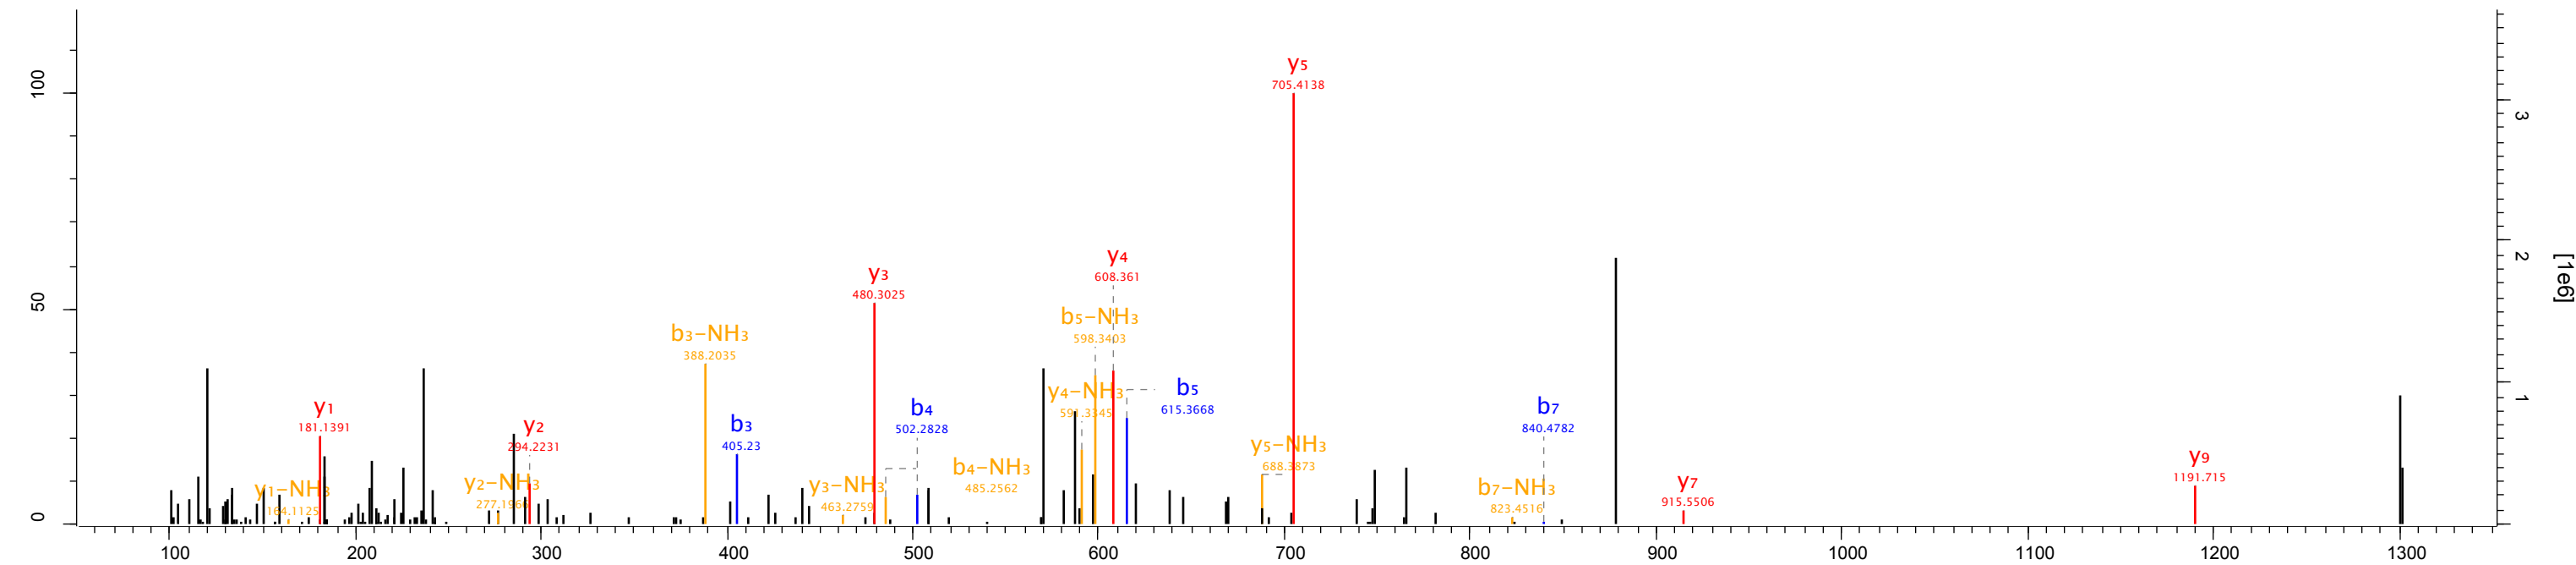



Raw file  
20180707\_MaS\_A375SR\_ML\_proteome\_28

Scan 7648 Method FTMS; HCD Score 47.89 m/z 576.29

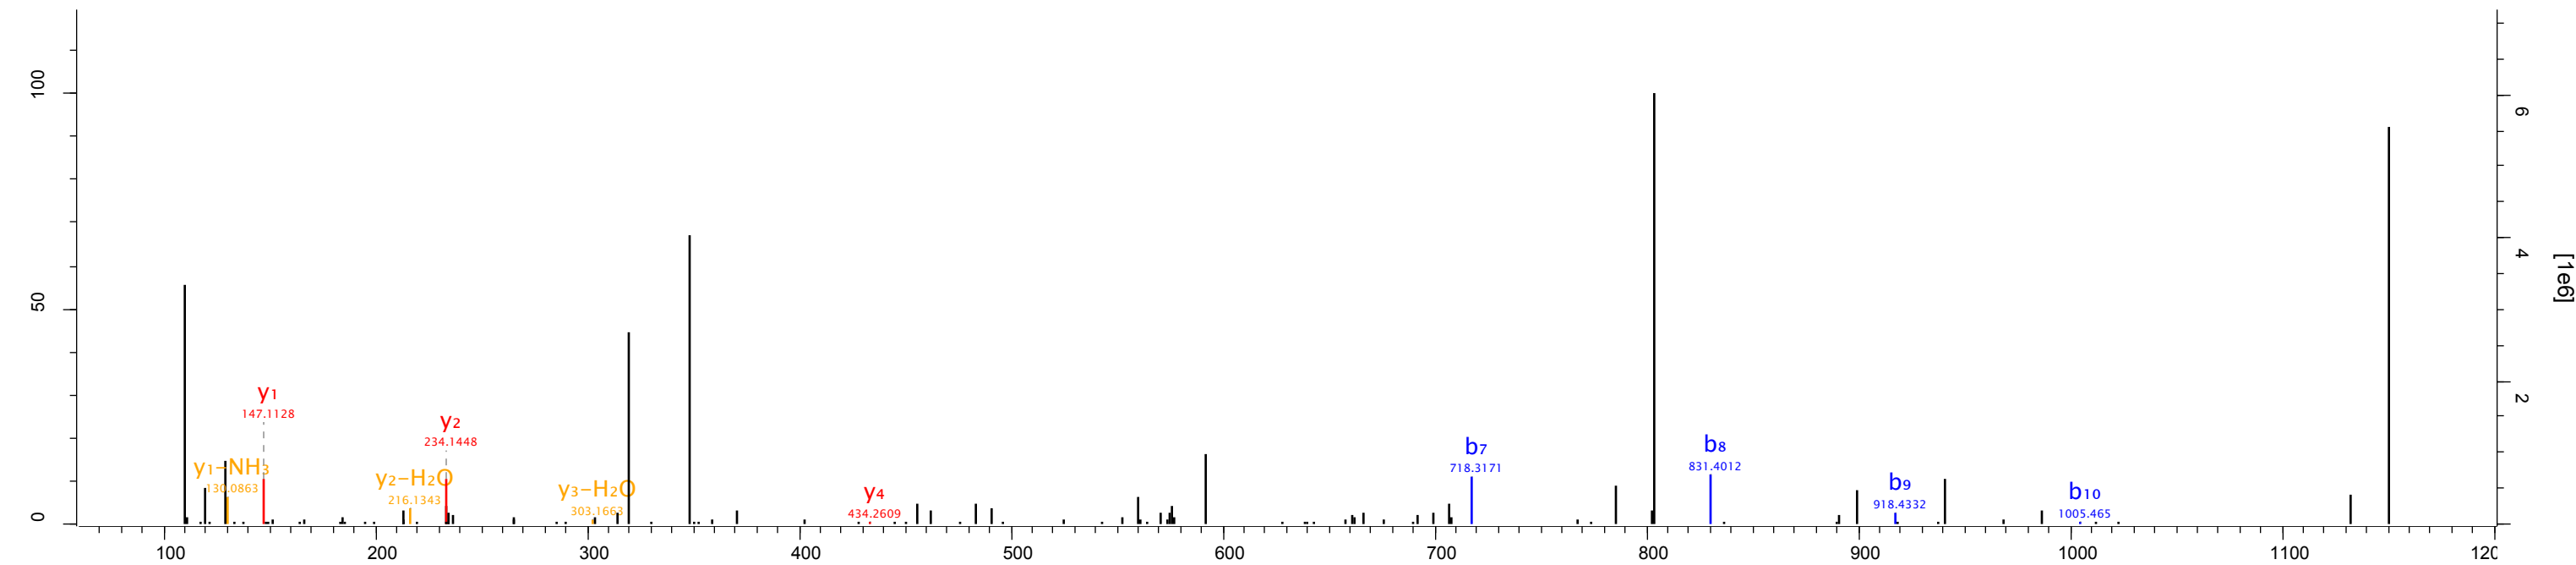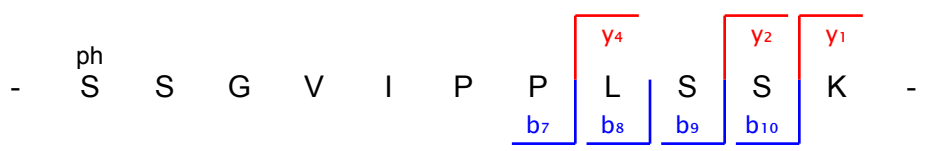

Raw file: 20180707\_MaS\_A375SR\_ML\_proteome\_29  
 Scan: 12788 Method: FTMS; HCD Score: 63.62 m/z: 637.34

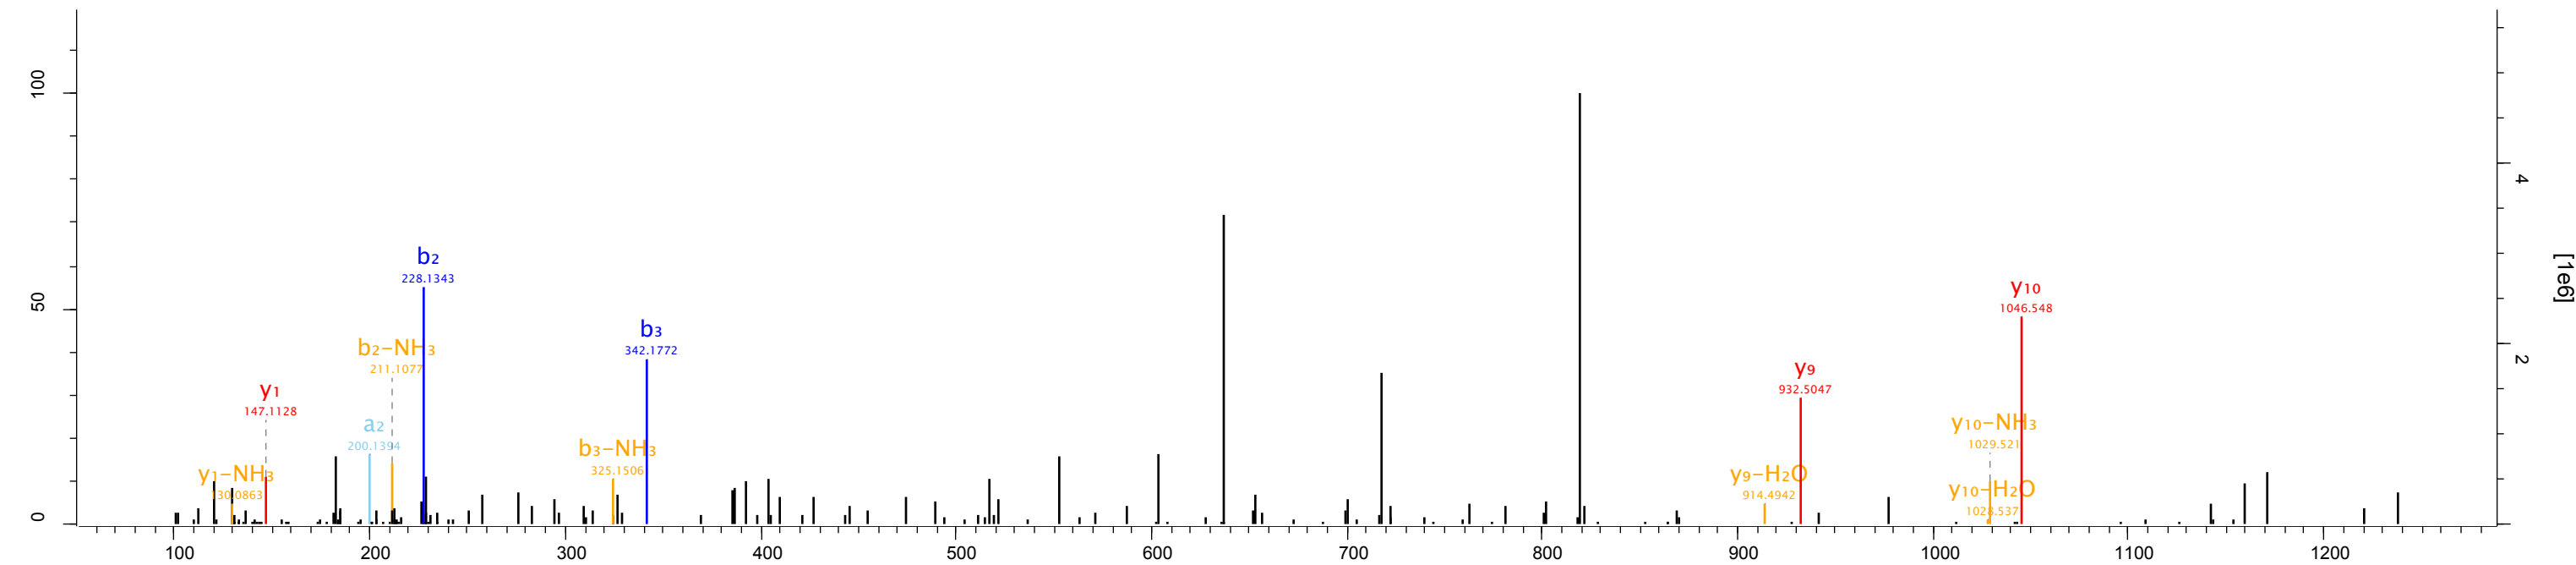

Raw file 20180707\_MaS\_A375SR\_ML\_proteome\_29 Scan 4628 Method FTMS; HCD Score 61.41 m/z 544.96 Gene names ZNF551

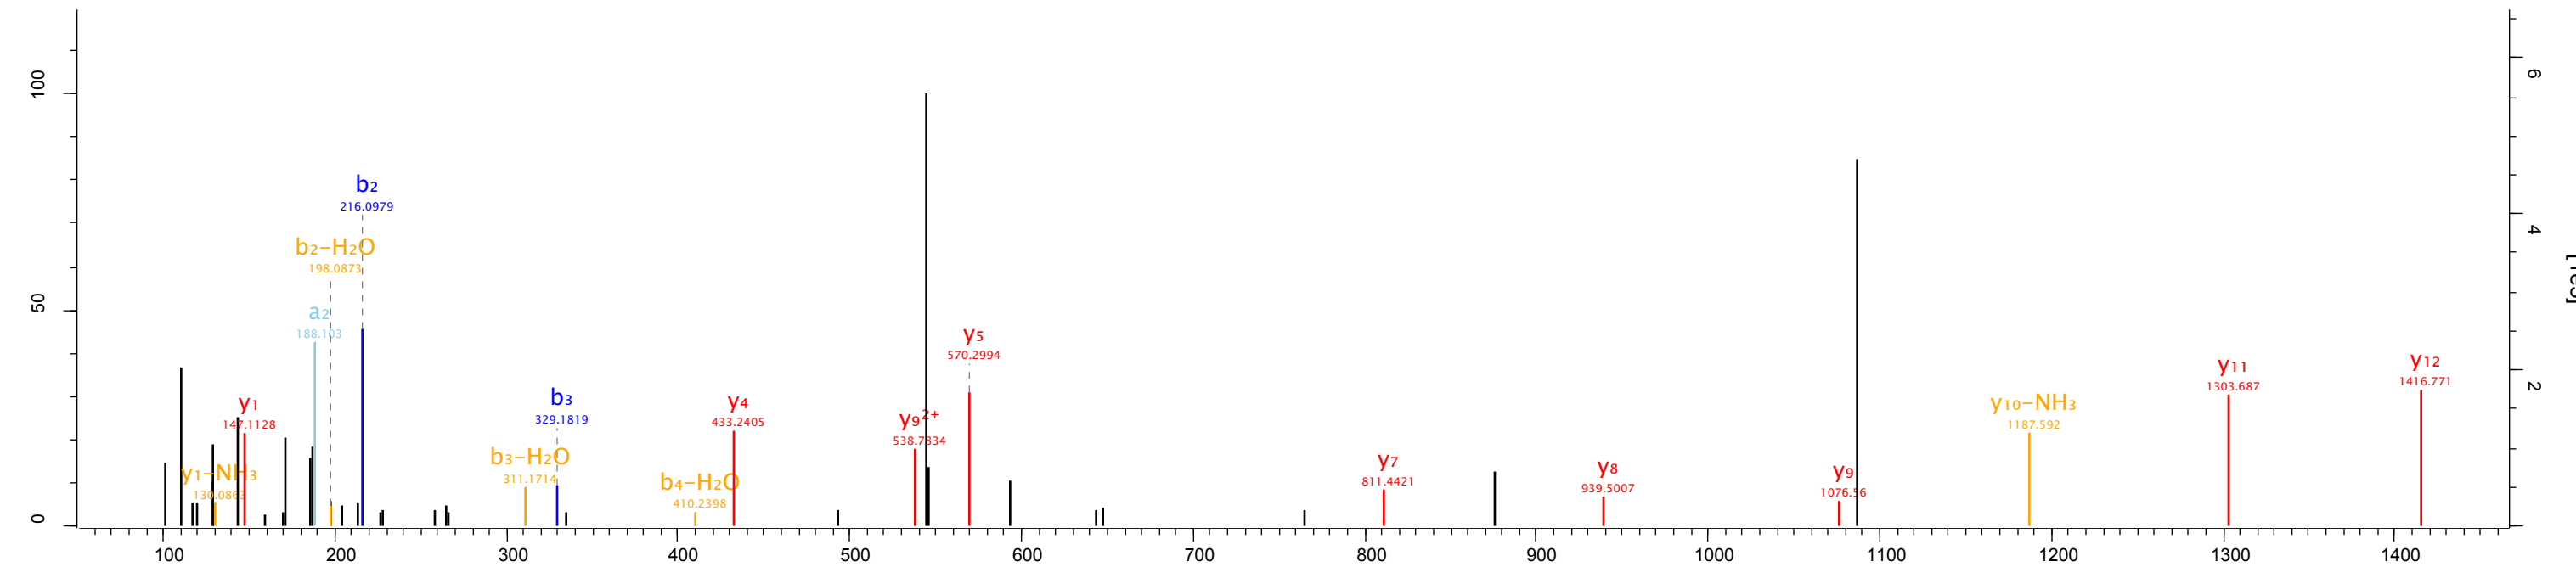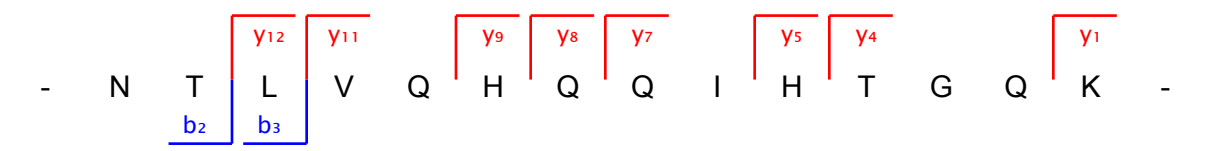

Raw file 20180707\_MaS\_A375SR\_ML\_proteome\_30 Scan 20548 Method FTMS; HCD Score 46.88 m/z 876.89

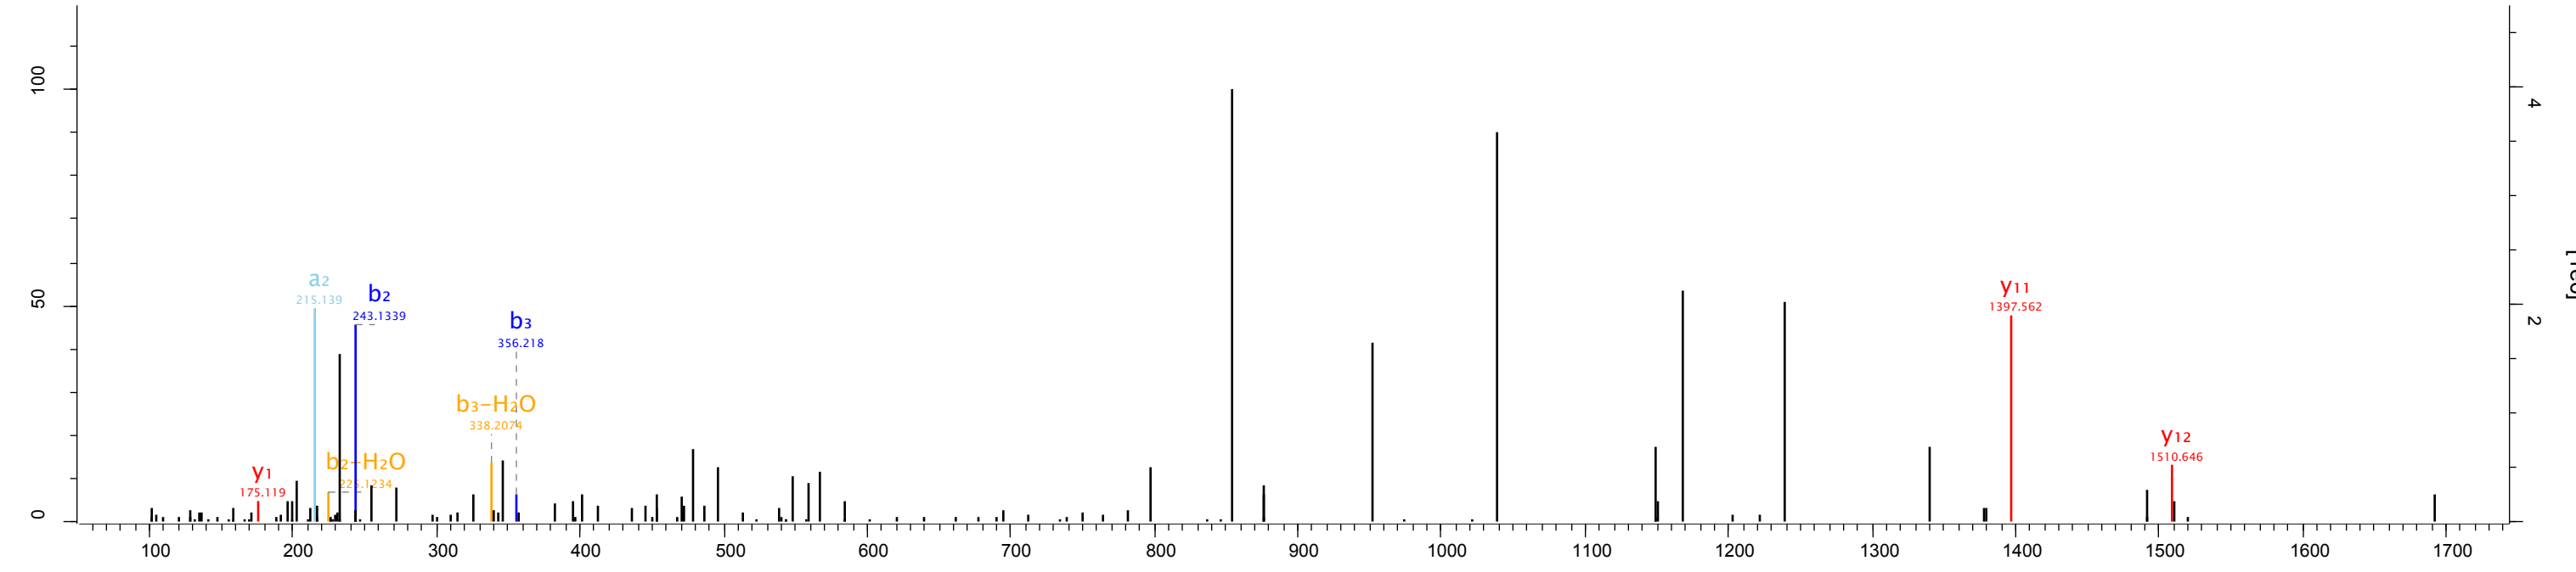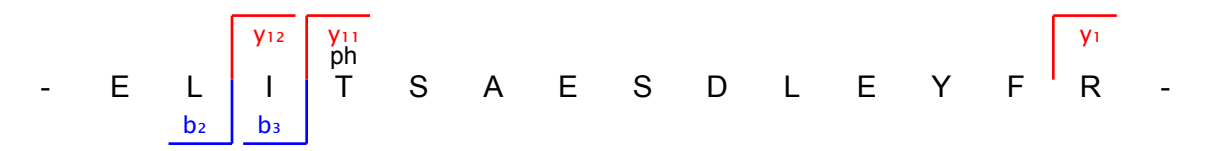

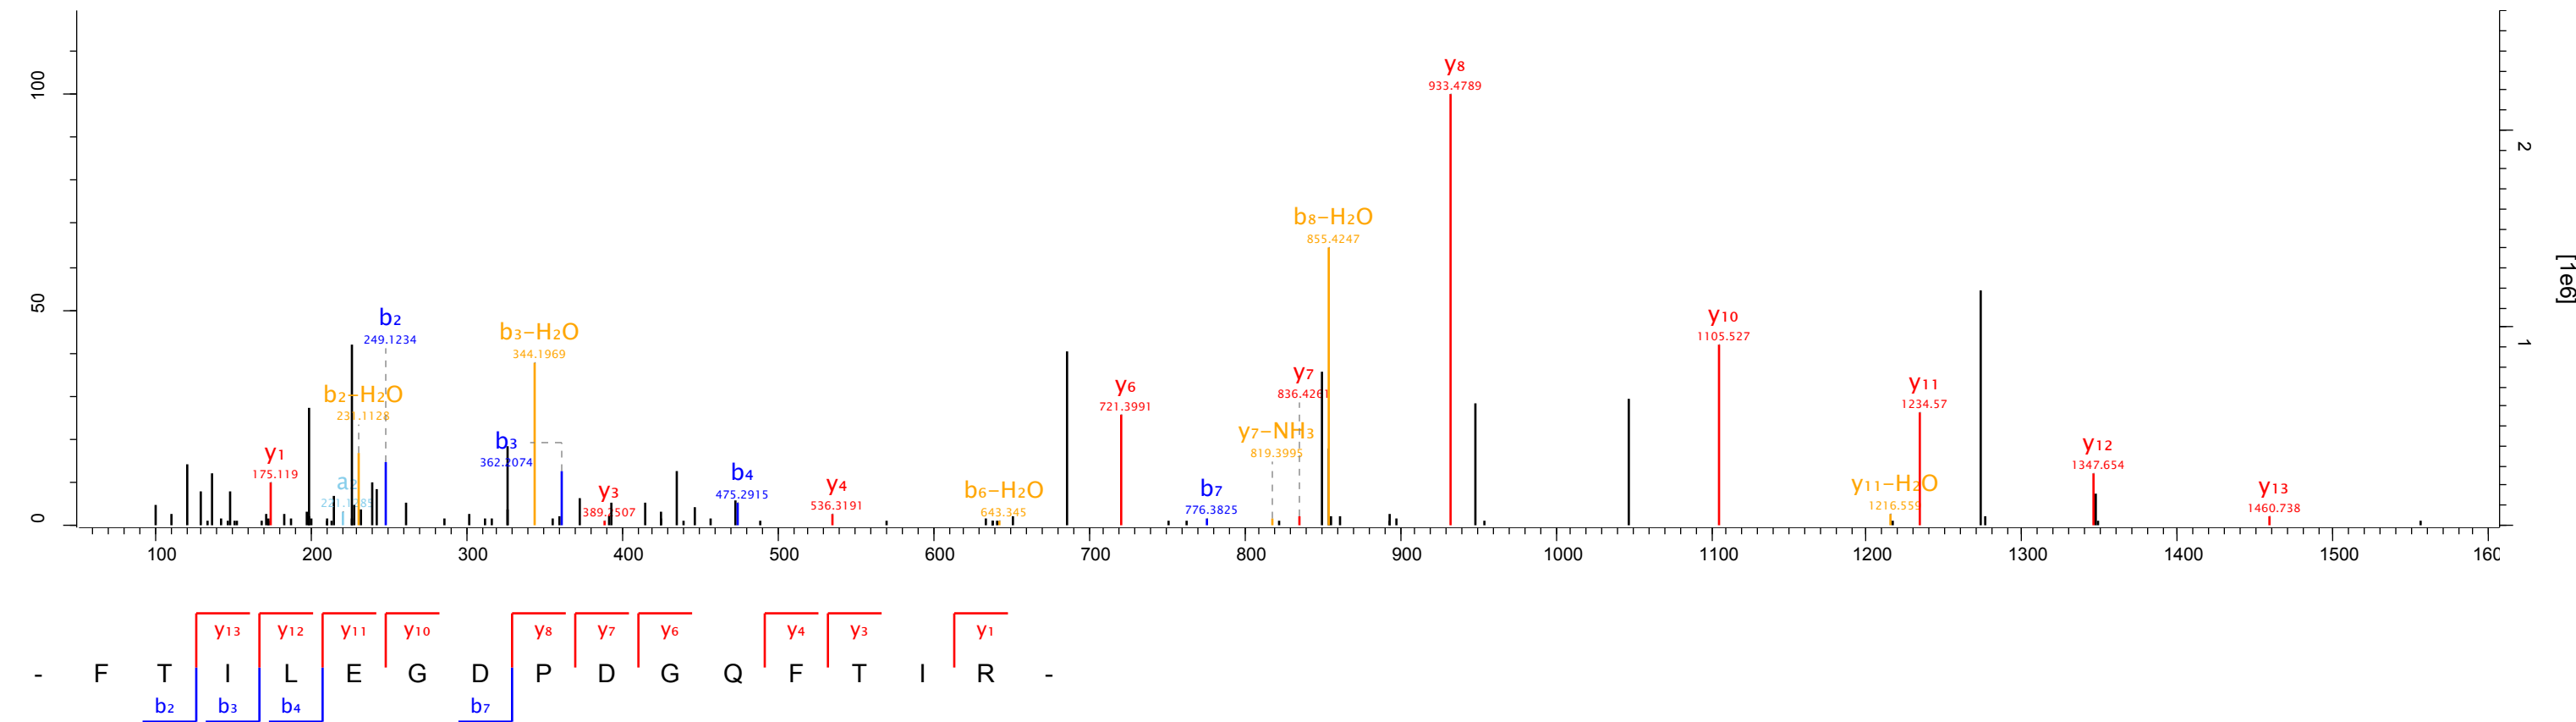

Raw file 20150812\_A375SR\_Phospho\_BR1\_01 Scan 9599 Method FTMS; HCD Score 41.42 m/z 772.26 Gene names KLF13

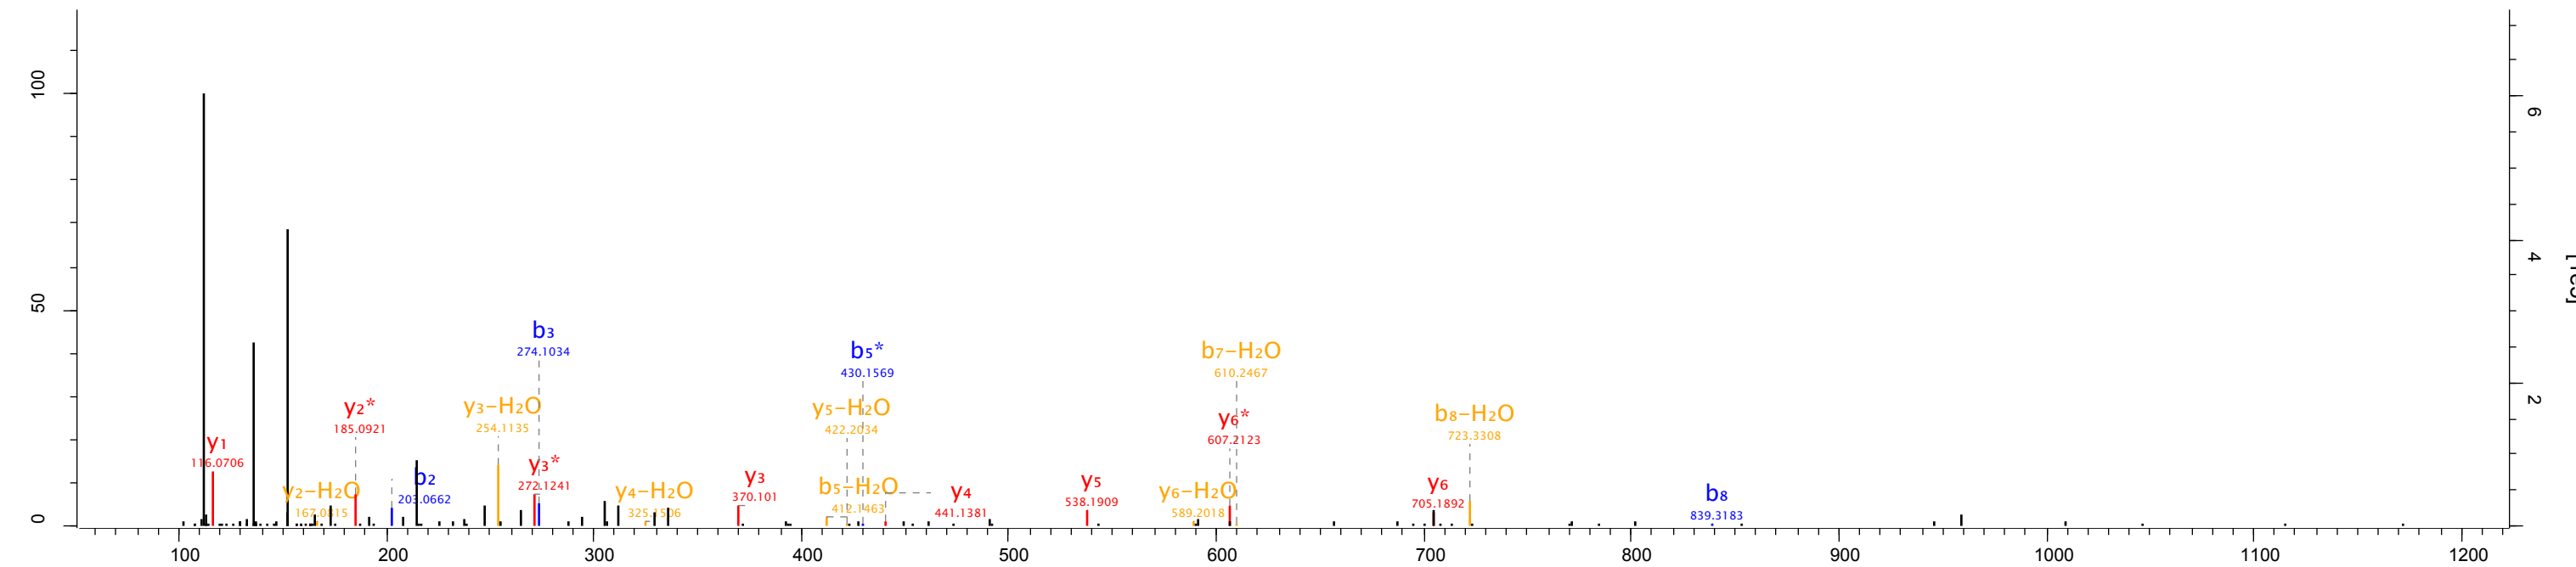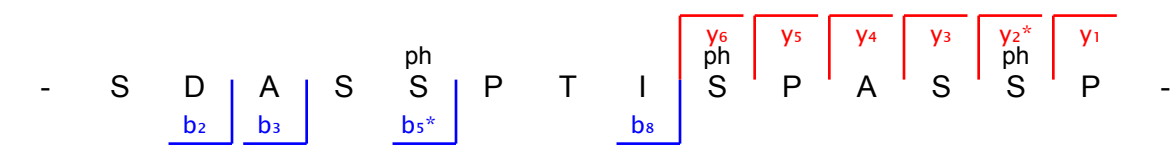

Raw file 20150812\_A375SR\_Phospho\_BR1\_02 Scan 18259 Method FTMS; HCD Score 107.24 m/z 995.94 Gene names TTC7B

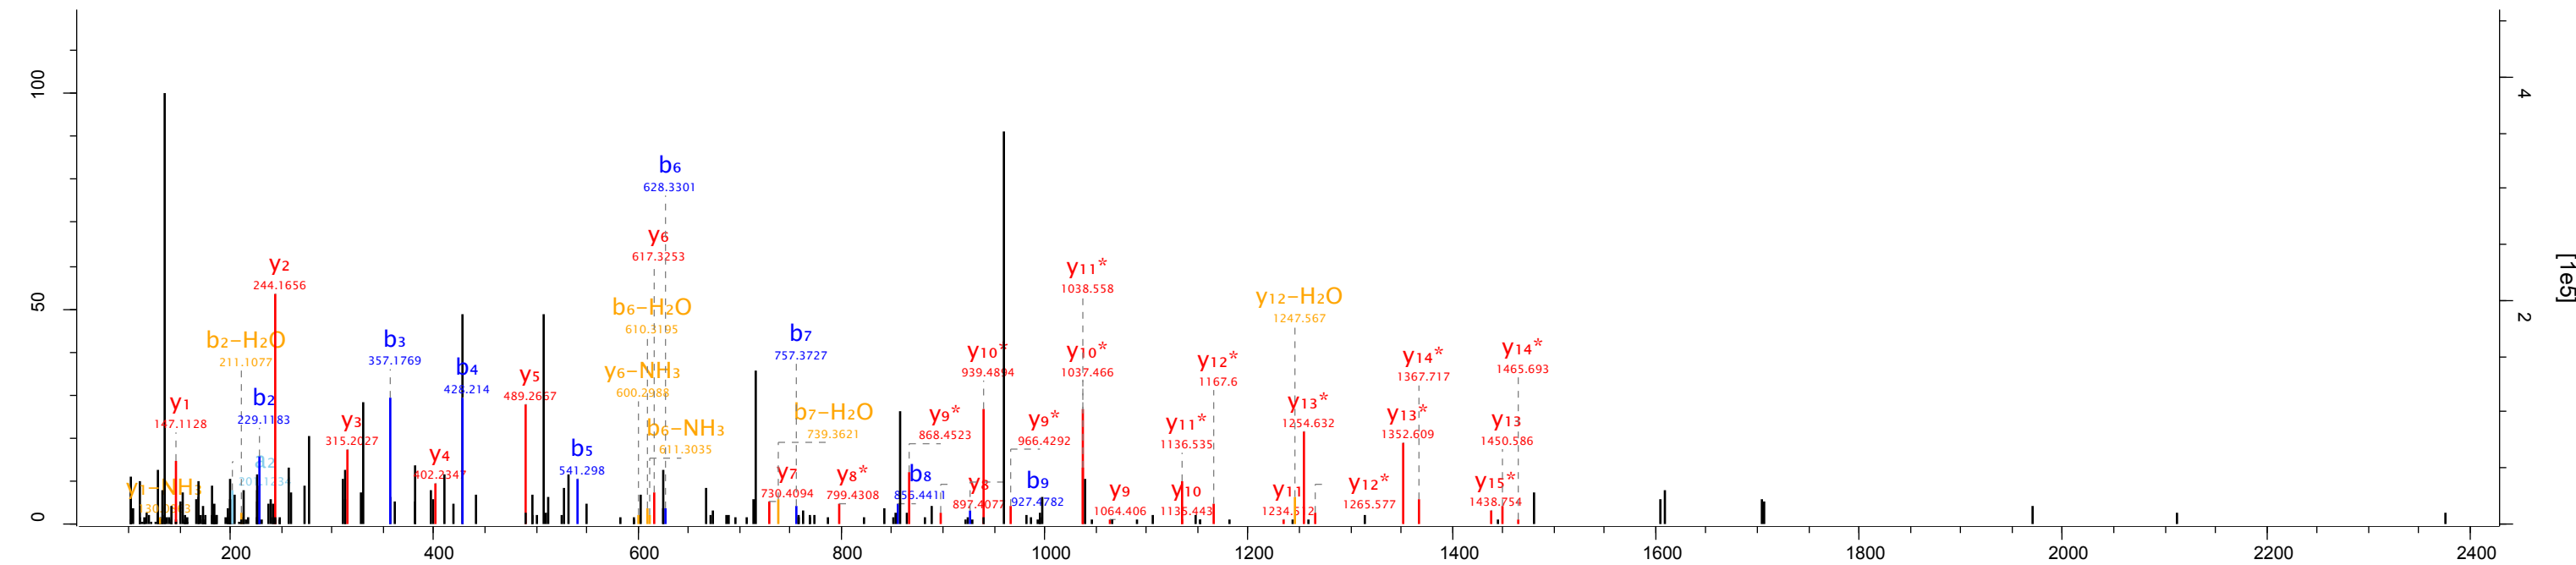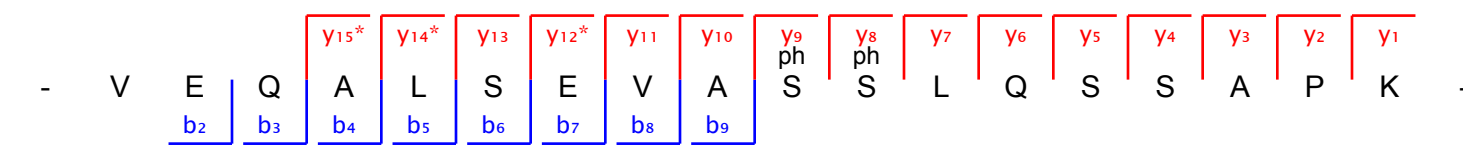





Raw file 20150812\_A375SR\_Phospho\_BR1\_02 Scan 6689 Method FTMS; HCD Score 46.16 m/z 574.24 Gene names OTOP3

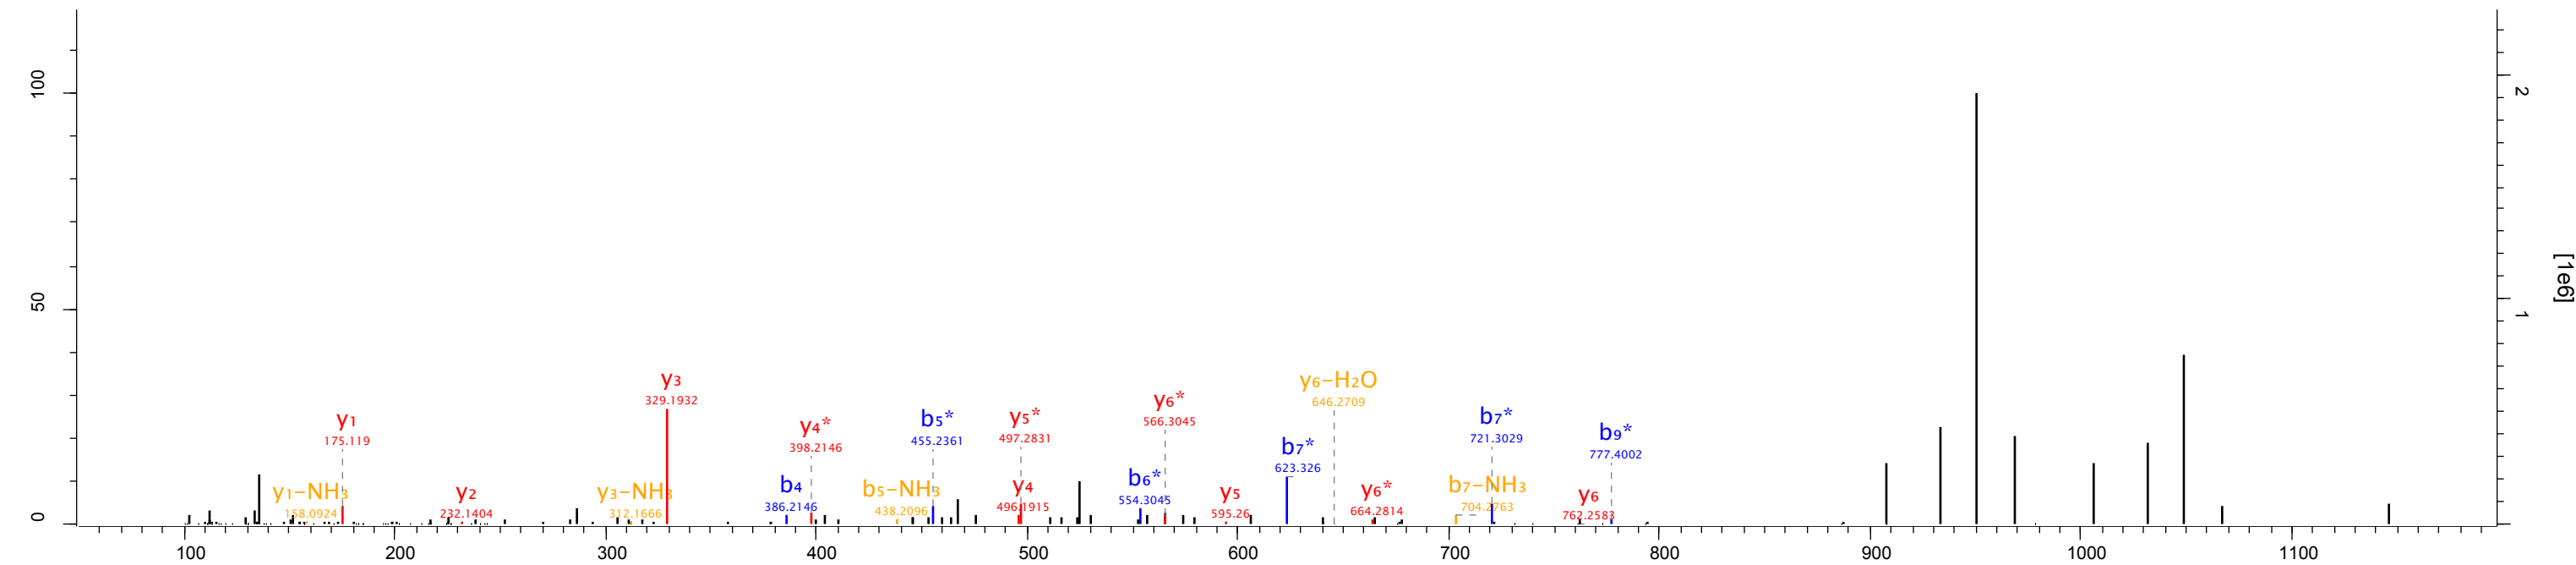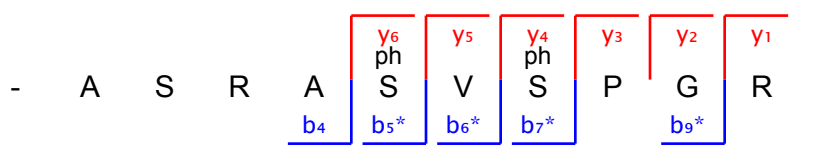

Raw file 20150812\_A375SR\_Phospho\_BR1\_03 Scan 11099 Method FTMS; HCD Score 79.61 m/z 589.77 Gene names PLEKHM1

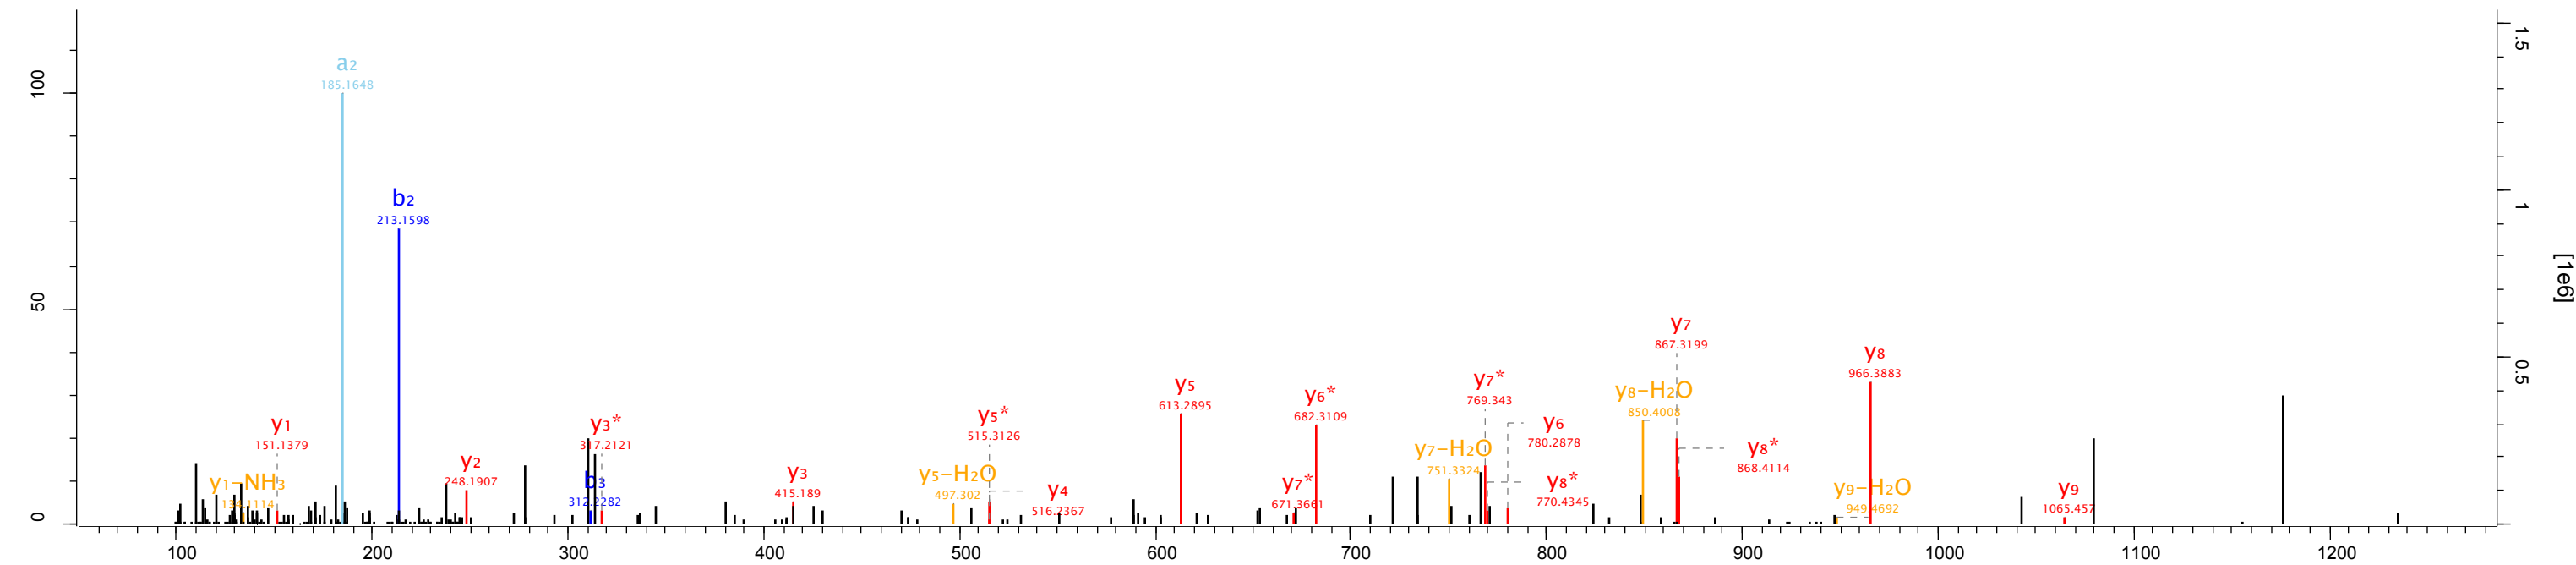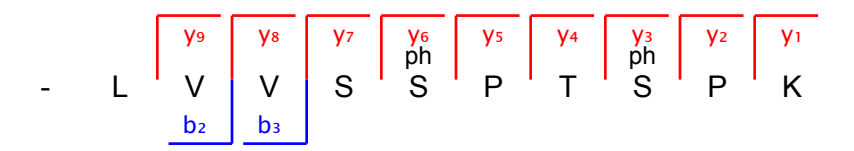

Raw file 20150812\_A375SR\_Phospho\_BR1\_03 Scan 14019 Method FTMS; HCD Score 64.12 m/z 556.27

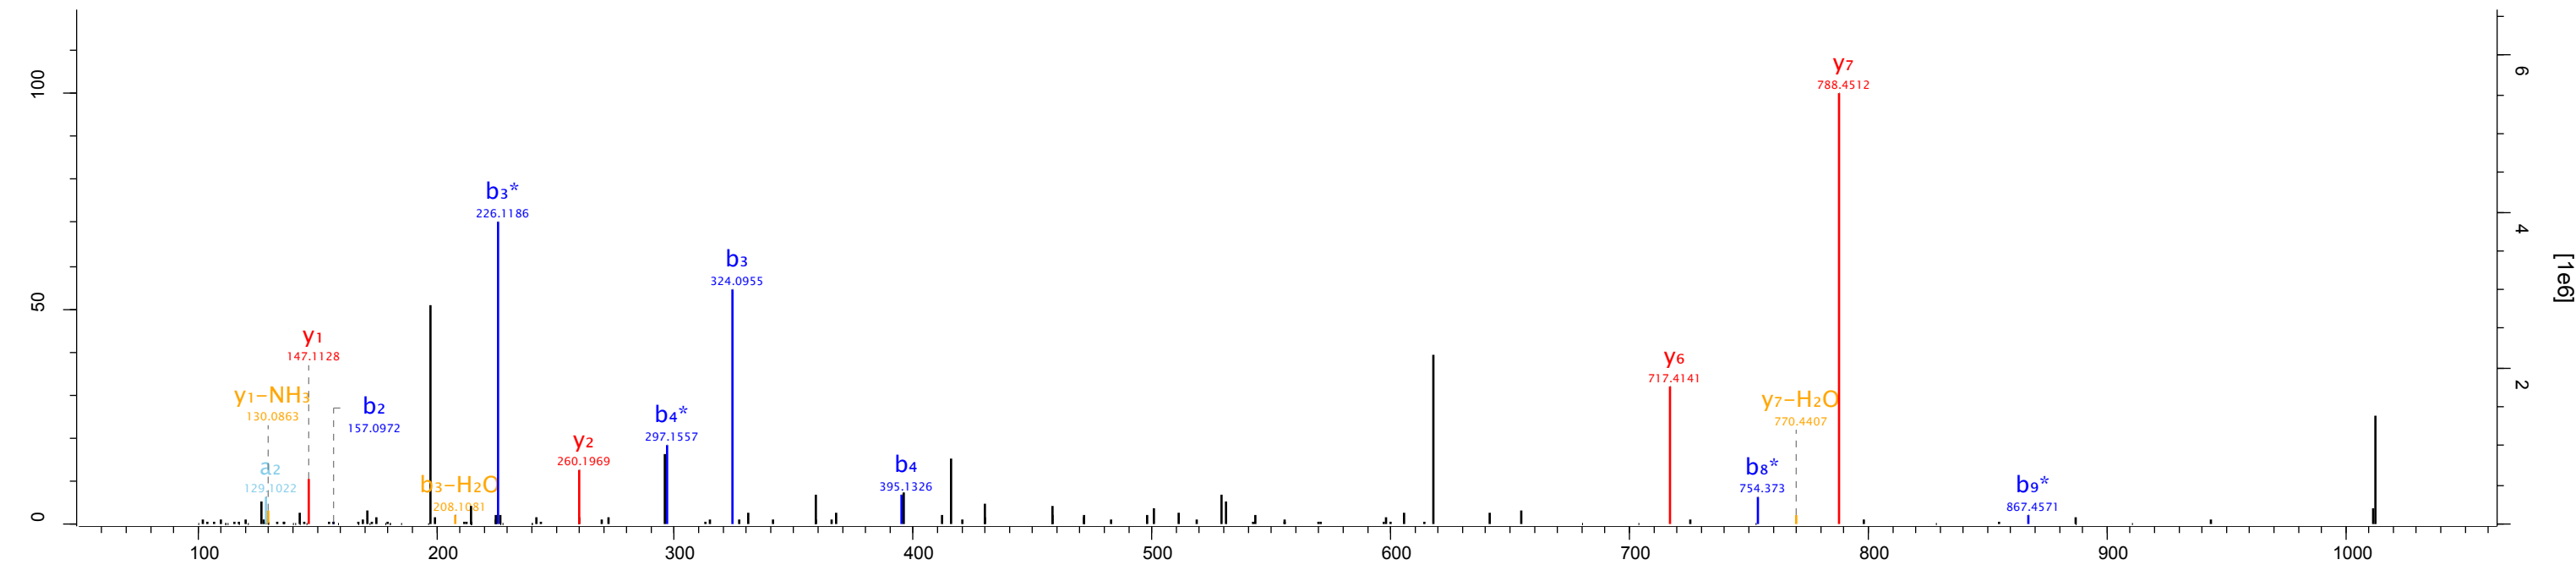

Raw file: 20150812\_A375SR\_Phospho\_BR1\_03  
 Scan: 7219 Method: FTMS; HCD Score: 117.48 m/z: 841.85 Gene names: YAF2

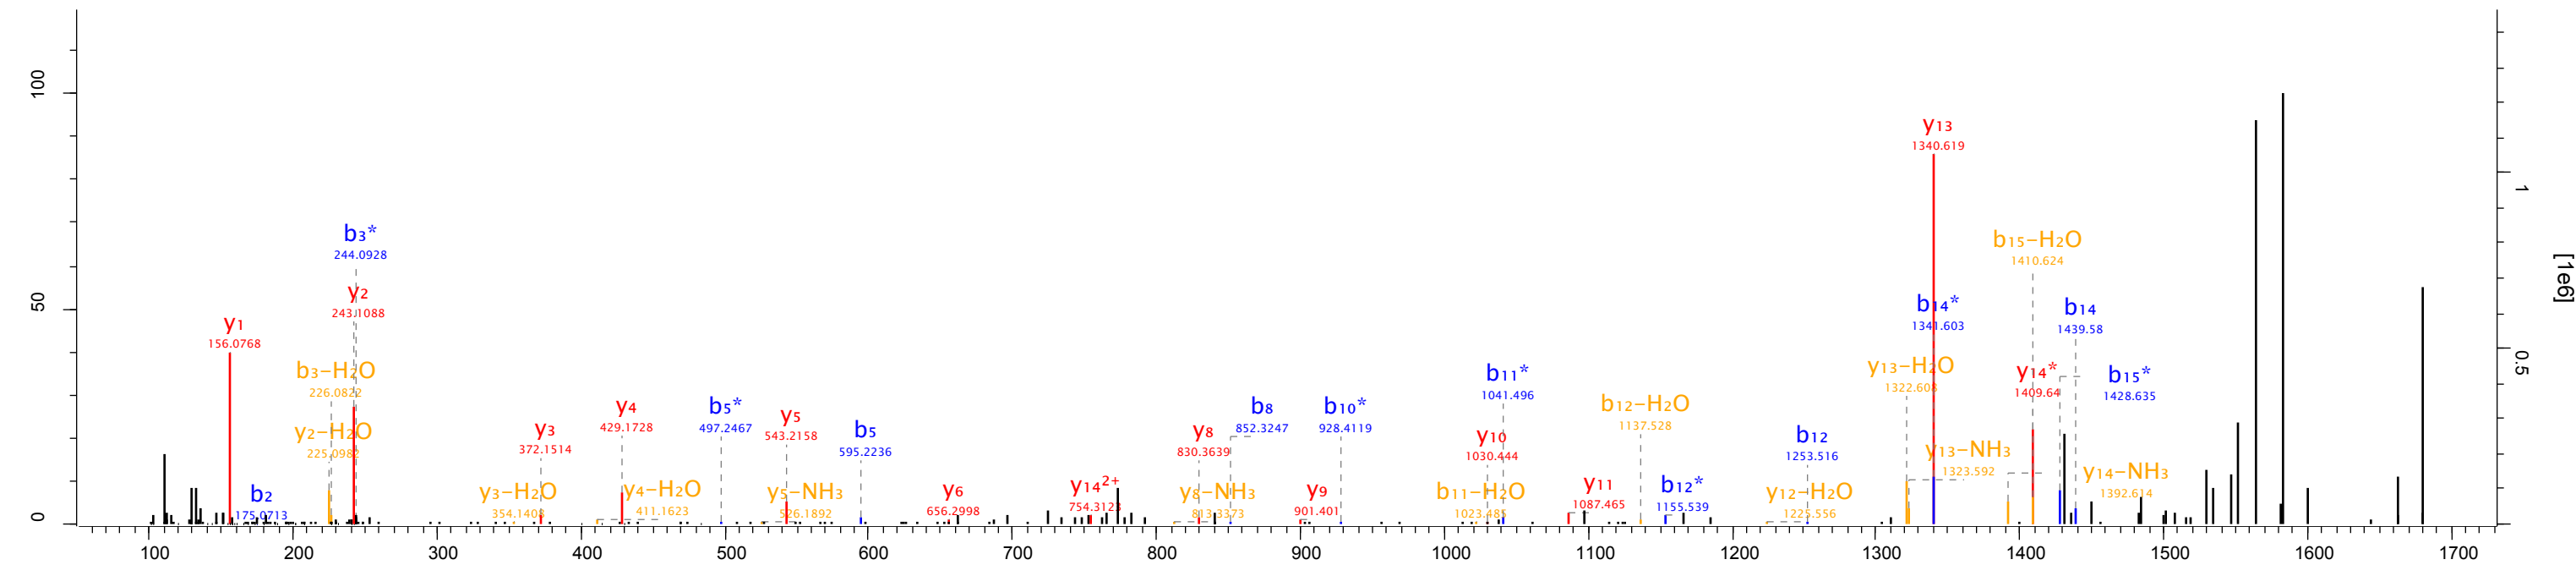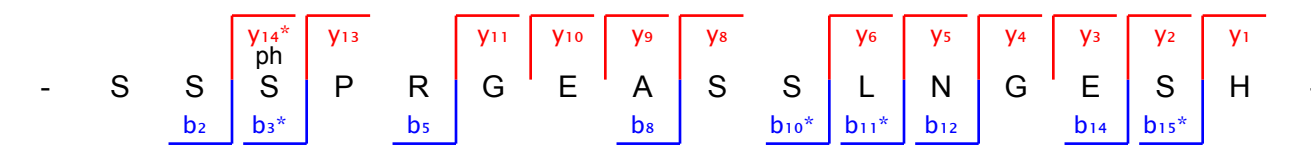

Raw file 20150812\_A375SR\_Phospho\_BR1\_04 Scan 16959 Method FTMS; HCD Score 66.78 m/z 851.4 Gene names ZNF395

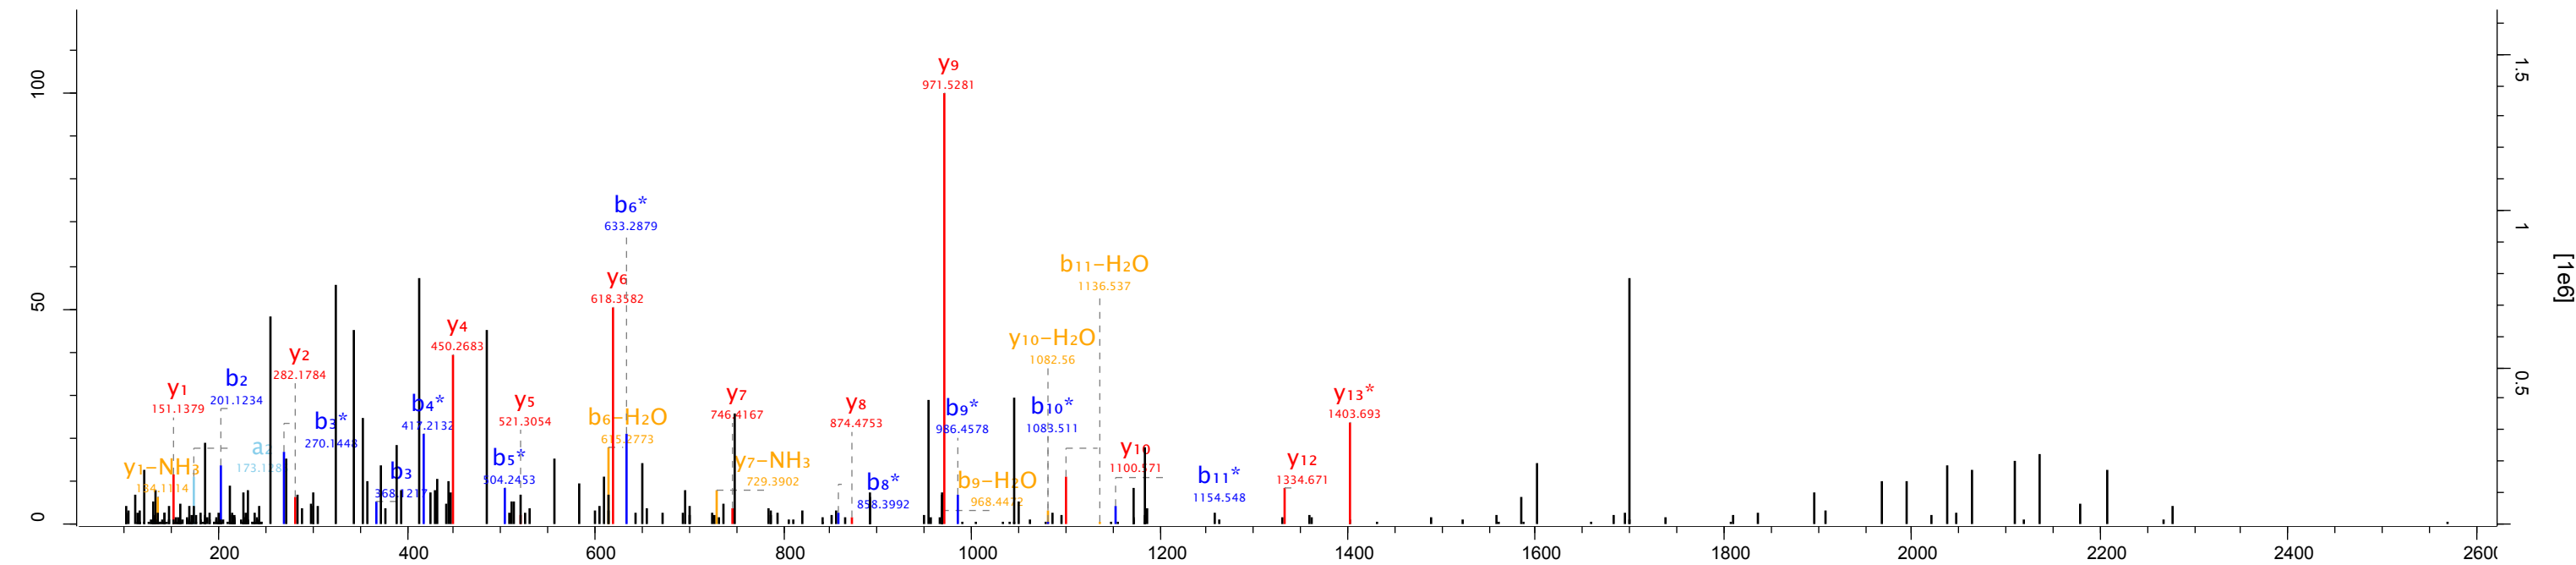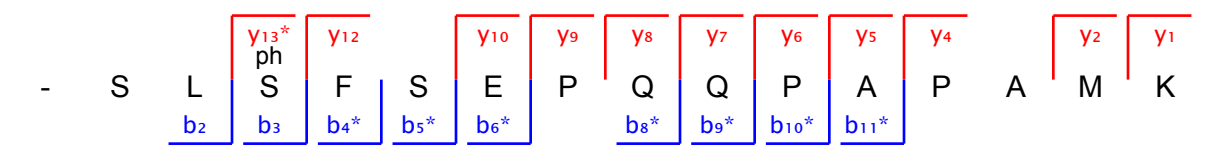

Raw file: 20150812\_A375SR\_Phospho\_BR1\_04  
 Scan: 6199 Method: FTMS; HCD Score: 111.31 m/z: 561.23 Gene names: YAF2

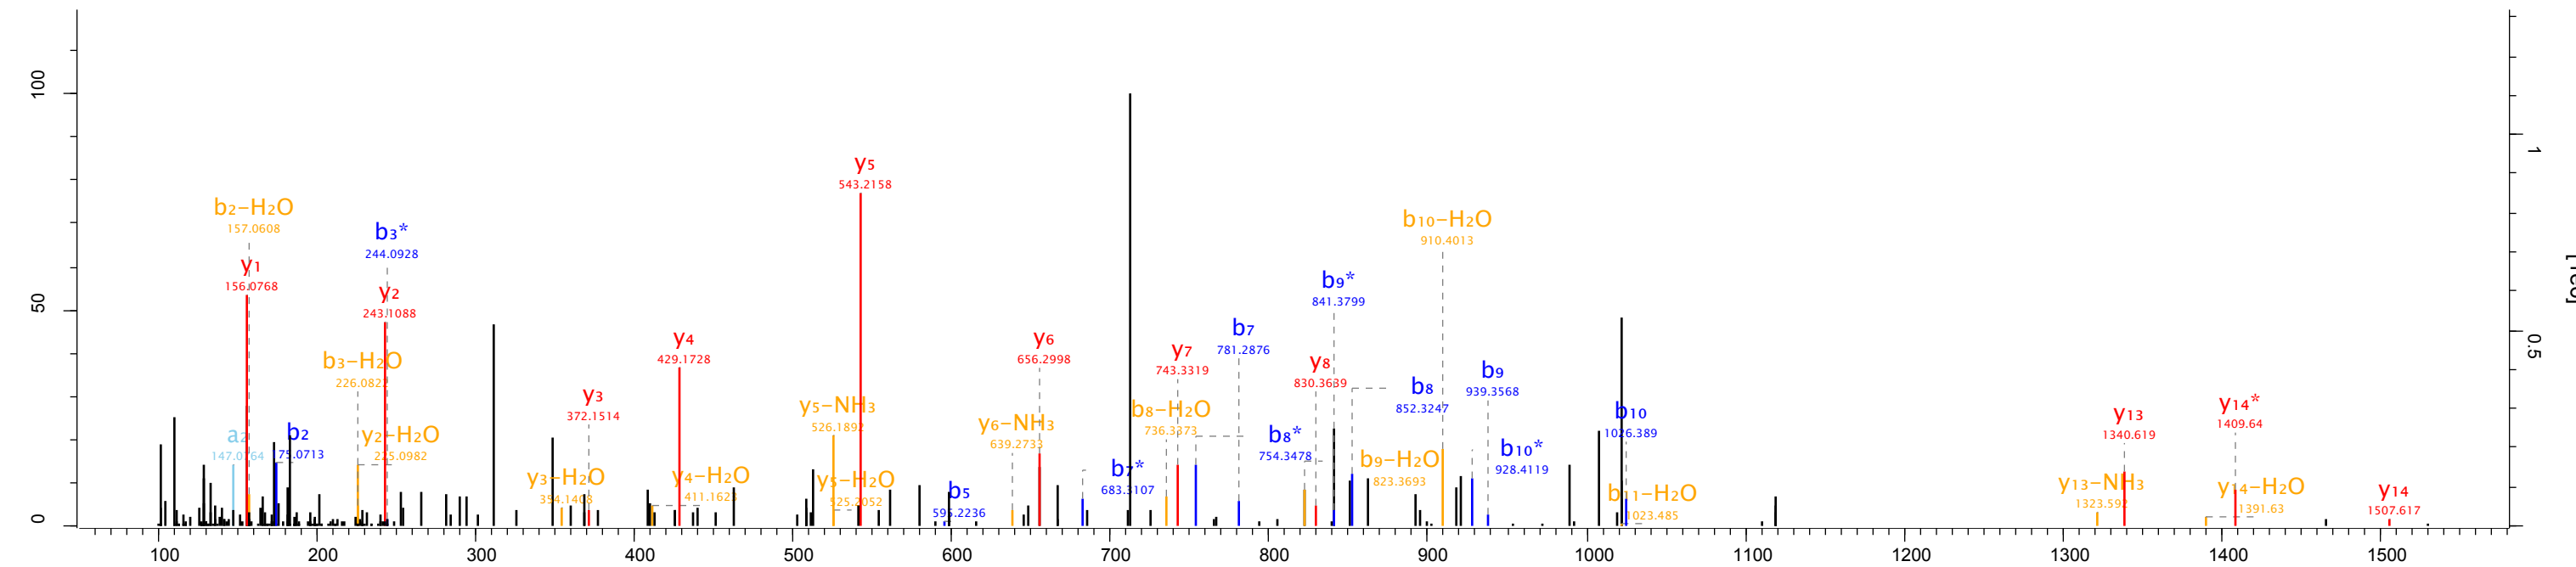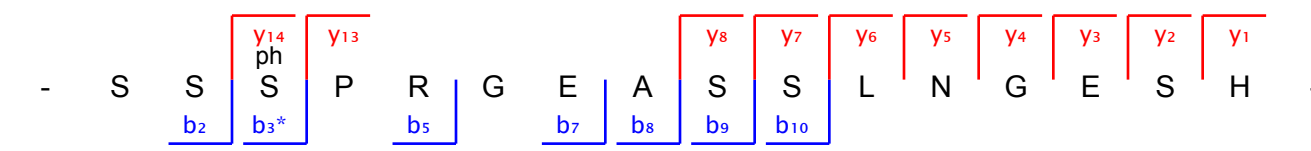

Raw file 20150812\_A375SR\_Phospho\_BR1\_05 Scan 11779 Method FTMS; HCD Score 89.44 m/z 653.81 Gene names PHACTR2

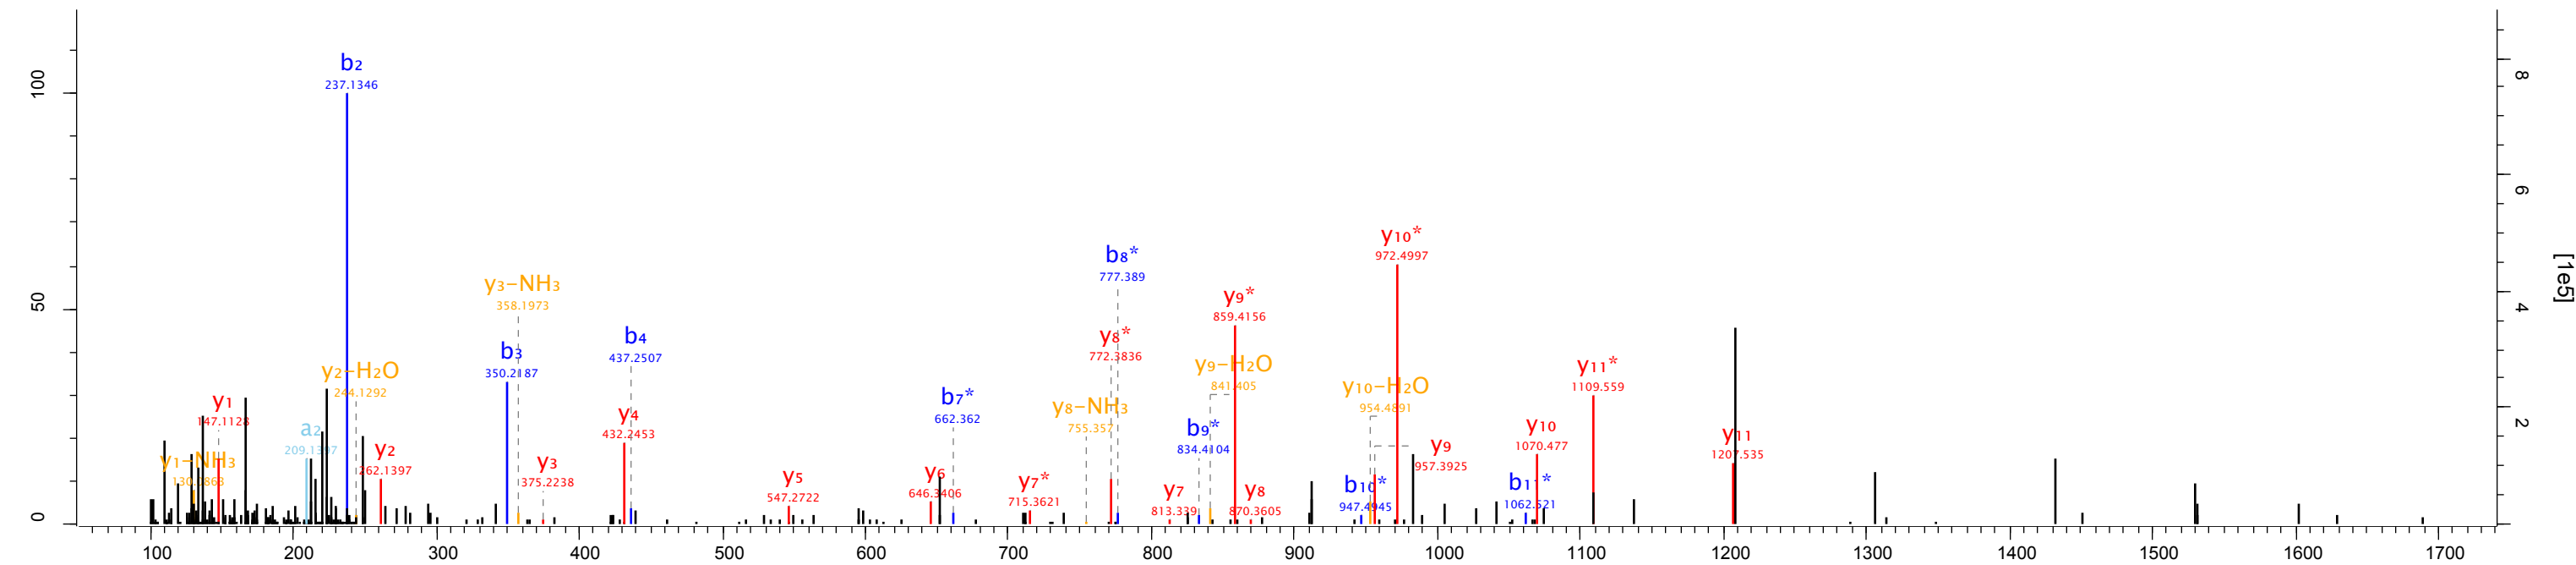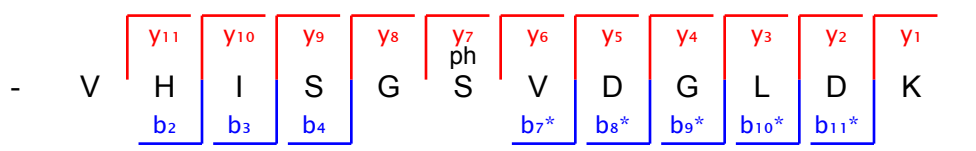

Raw file  
 20150812\_A375SR\_Phospho\_BR1\_05  
 Scan 21819 Method FTMS; HCD Score 83.09 m/z 751.83 Gene names CDC14A

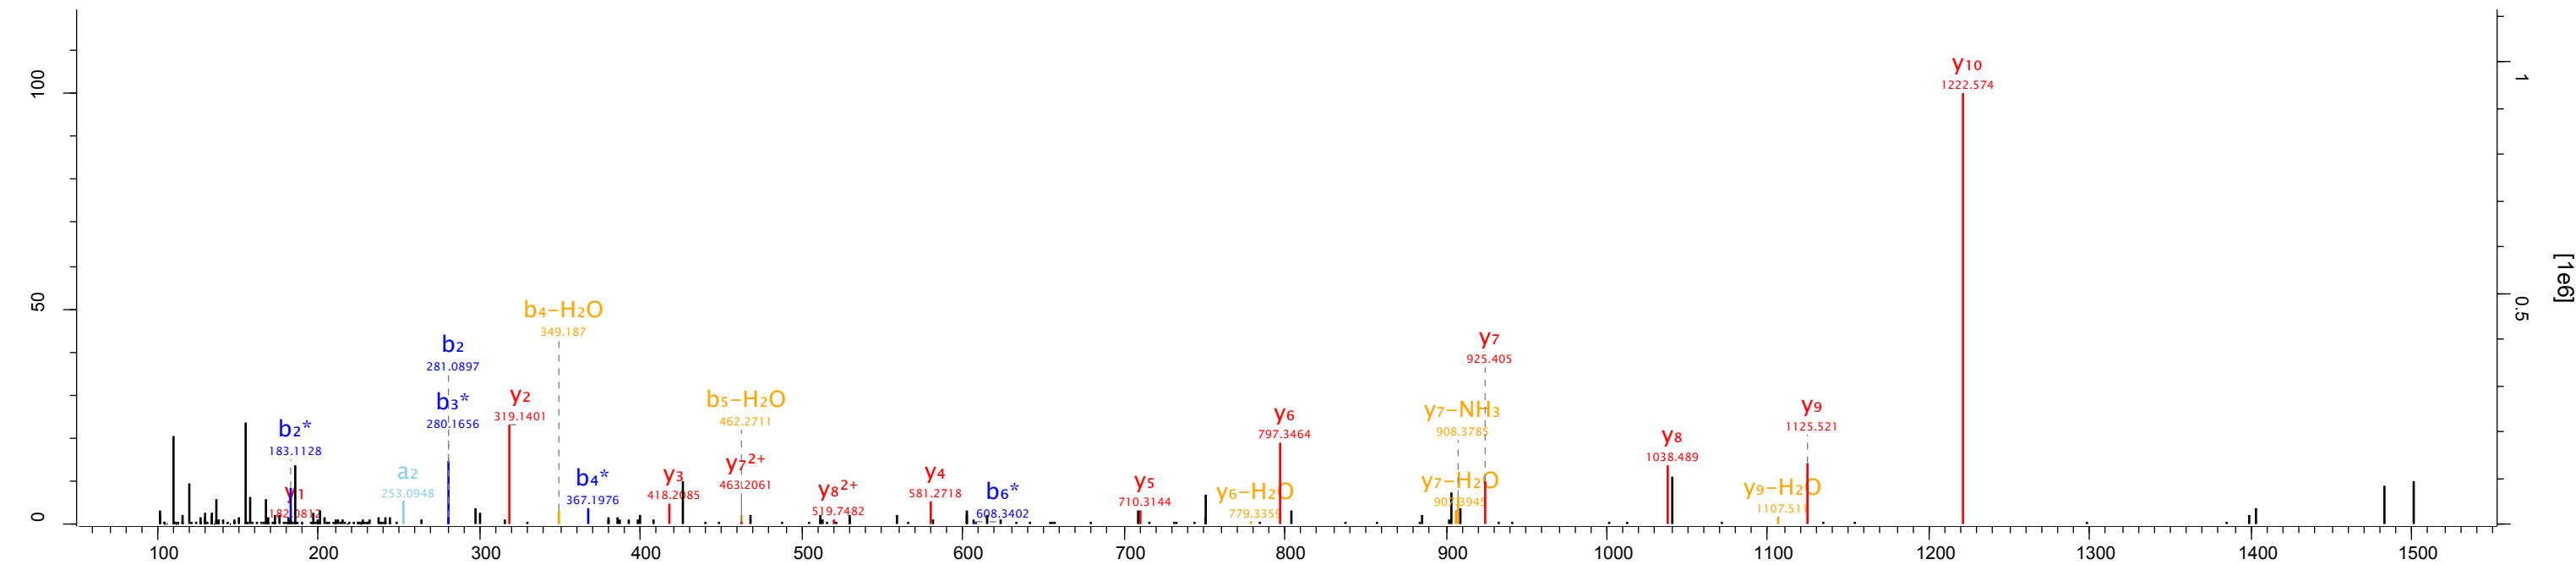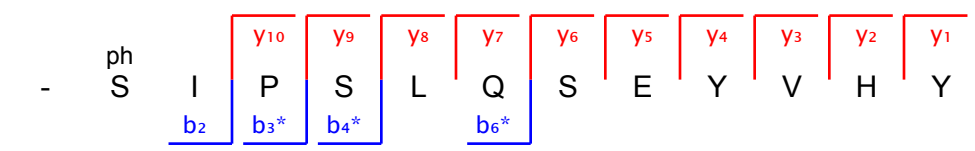



Raw file: 20150812\_A375SR\_Phospho\_BR1\_05  
 Scan: 9659 Method: FTMS; HCD Score: 45.99 m/z: 783.37 Gene names: CRYBB1

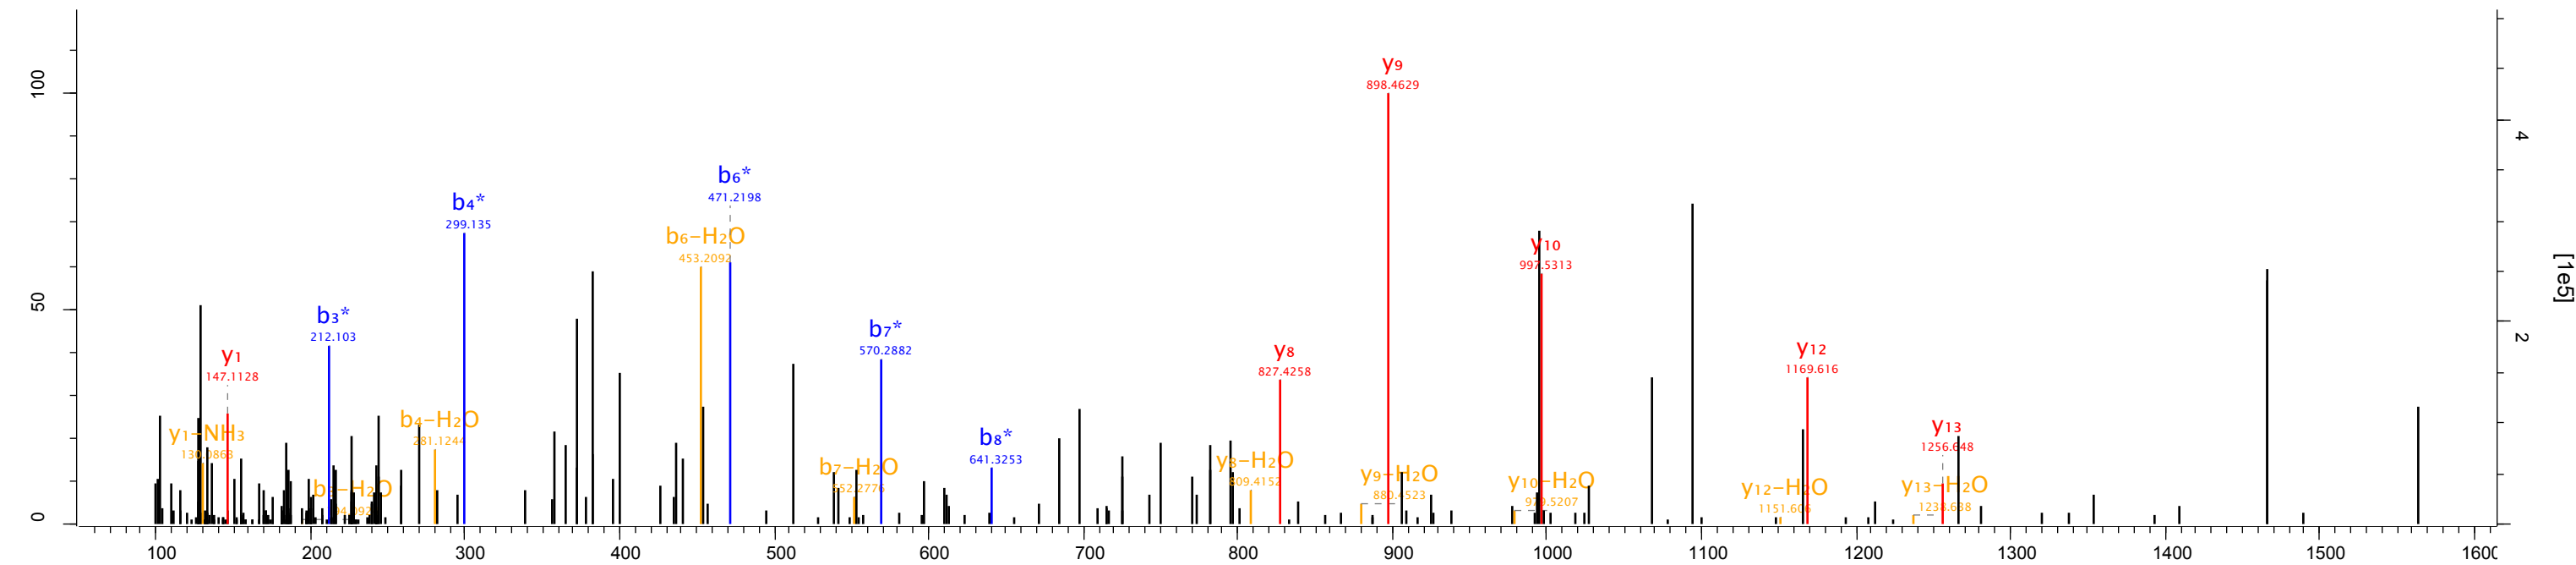

Raw file: 20150812\_A375SR\_Phospho\_BR1\_06  
 Scan: 11839 Method: FTMS; HCD Score: 142.19 m/z: 693.86 Gene names: ELK3

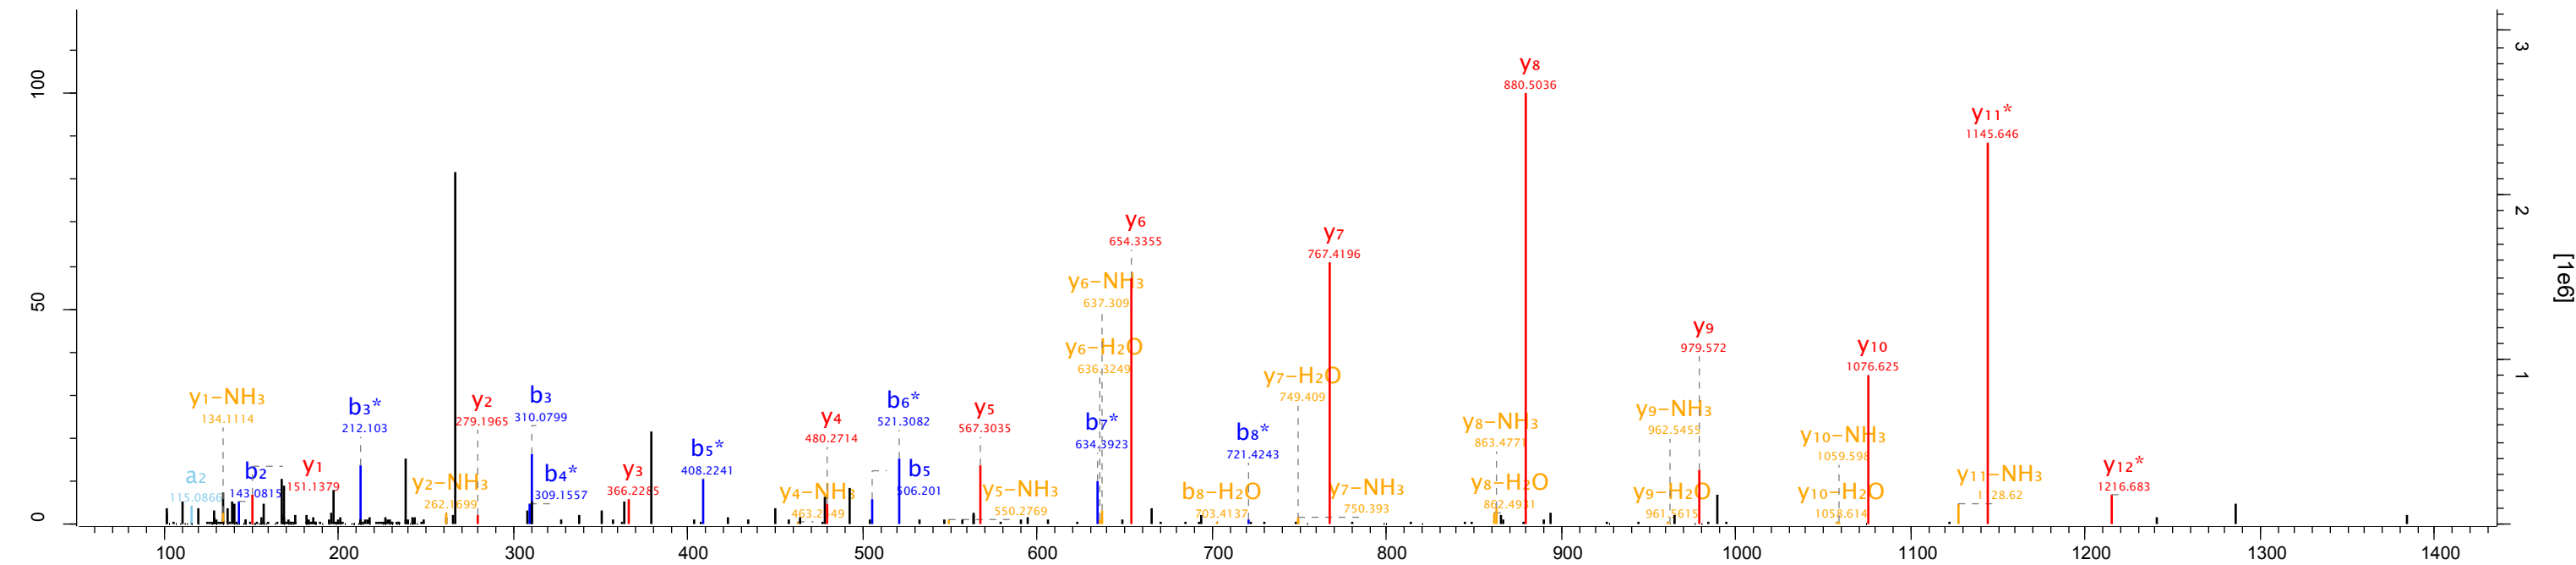

Raw file: 20150812\_A375SR\_Phospho\_BR1\_06  
 Scan: 22799 Method: FTMS; HCD Score: 47.38 m/z: 1100.17 Gene names: CEBPG

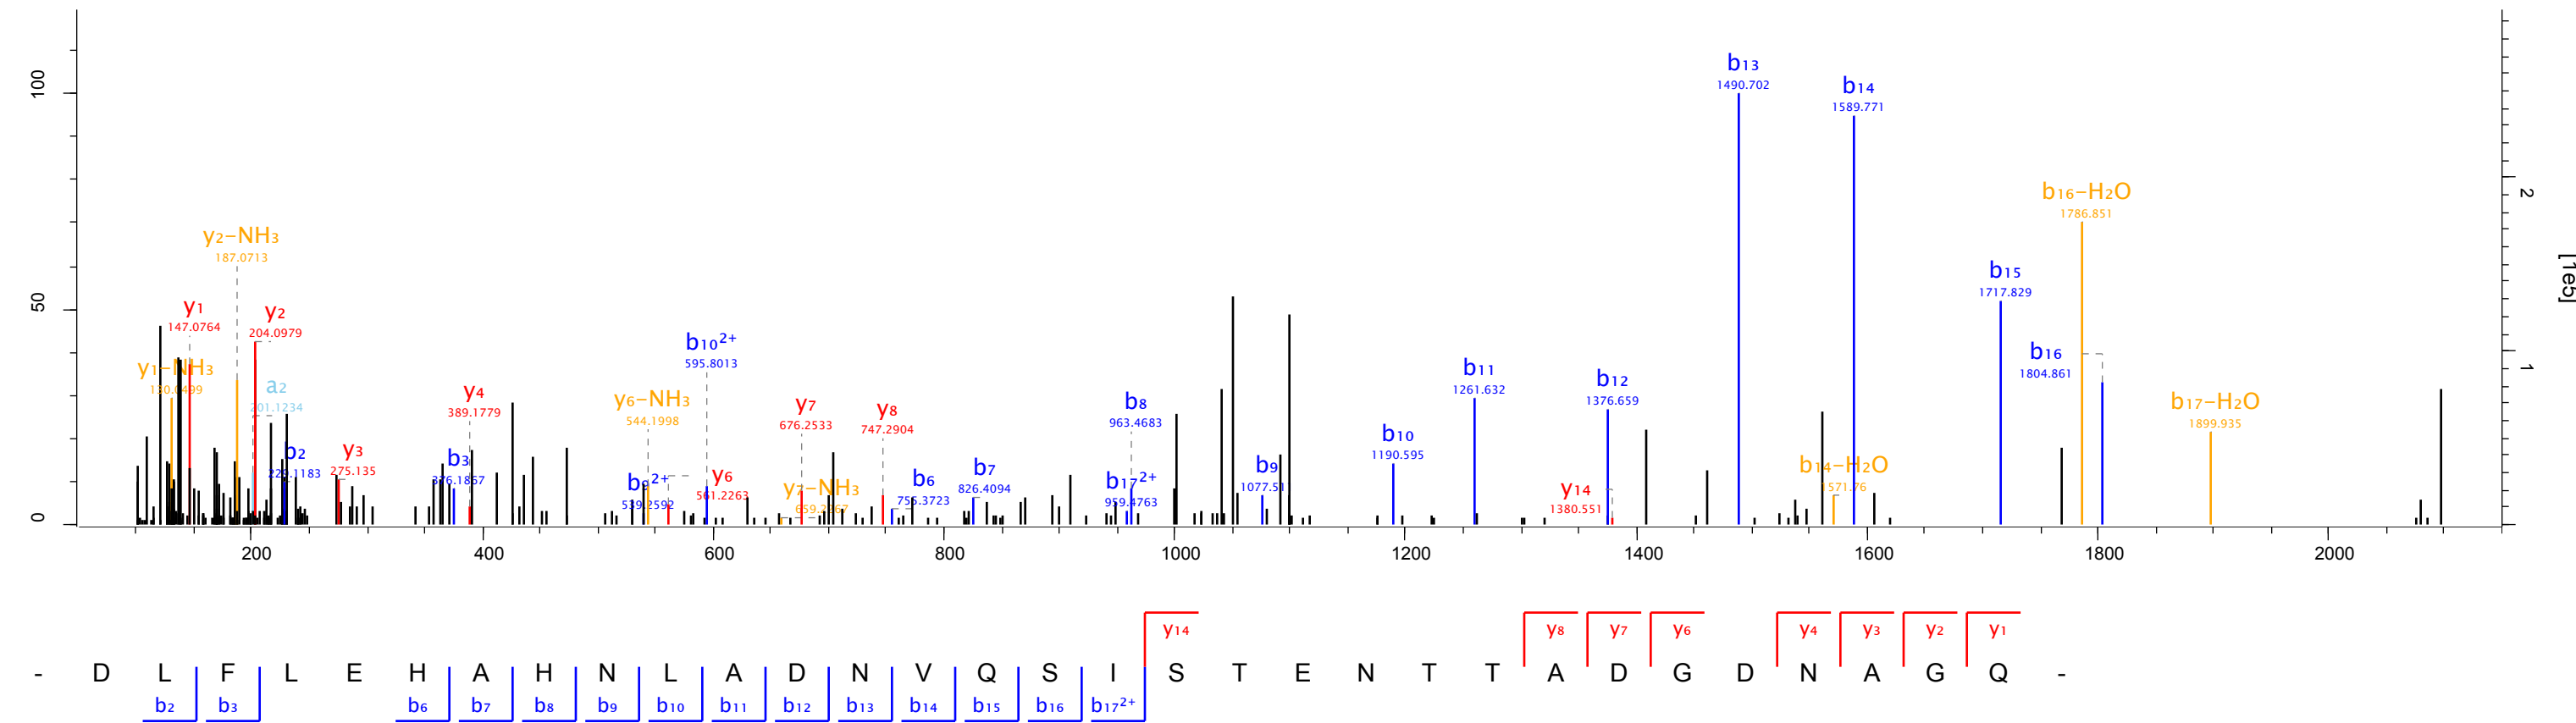

Raw file 20150812\_A375SR\_Phospho\_BR1\_06 Scan 24459 Method FTMS; HCD Score 211.87 m/z 970.44 Gene names MAPK11P1L

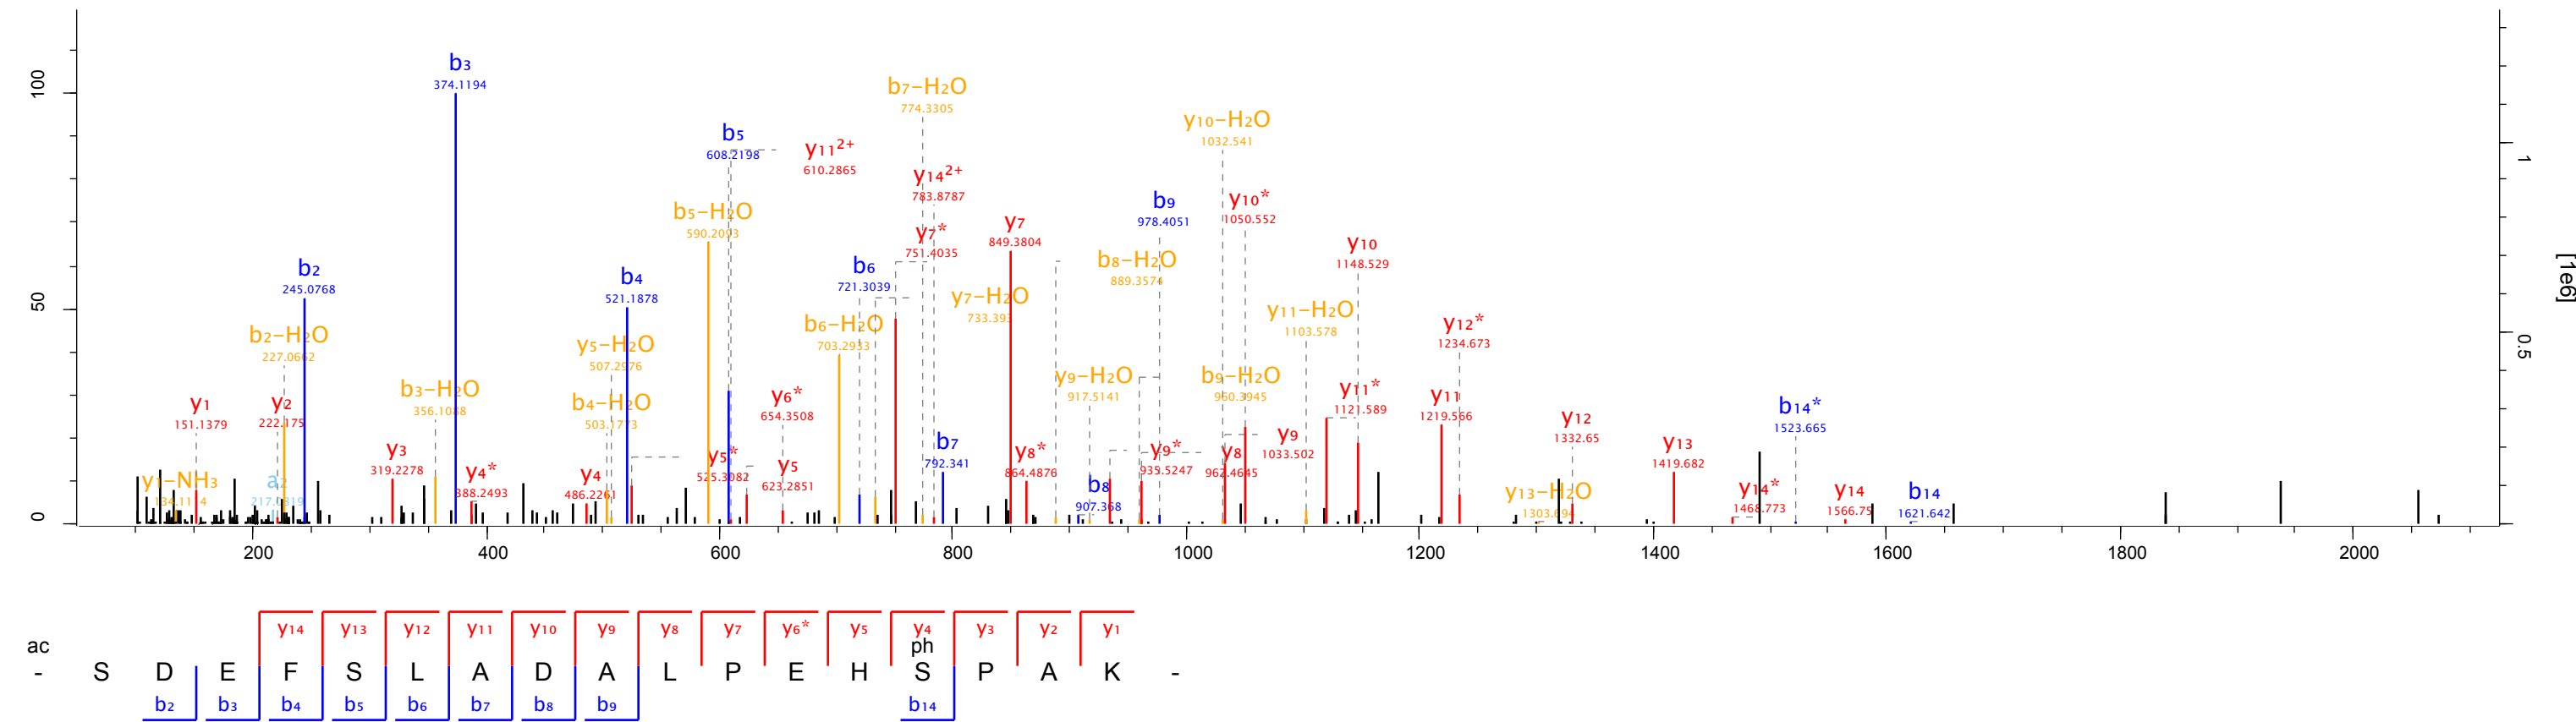

Raw file: 20150812\_A375SR\_Phospho\_BR1\_07  
 Scan: 14239 Method: FTMS; HCD Score: 166.61 m/z: 843.46 Gene names: MLLT3

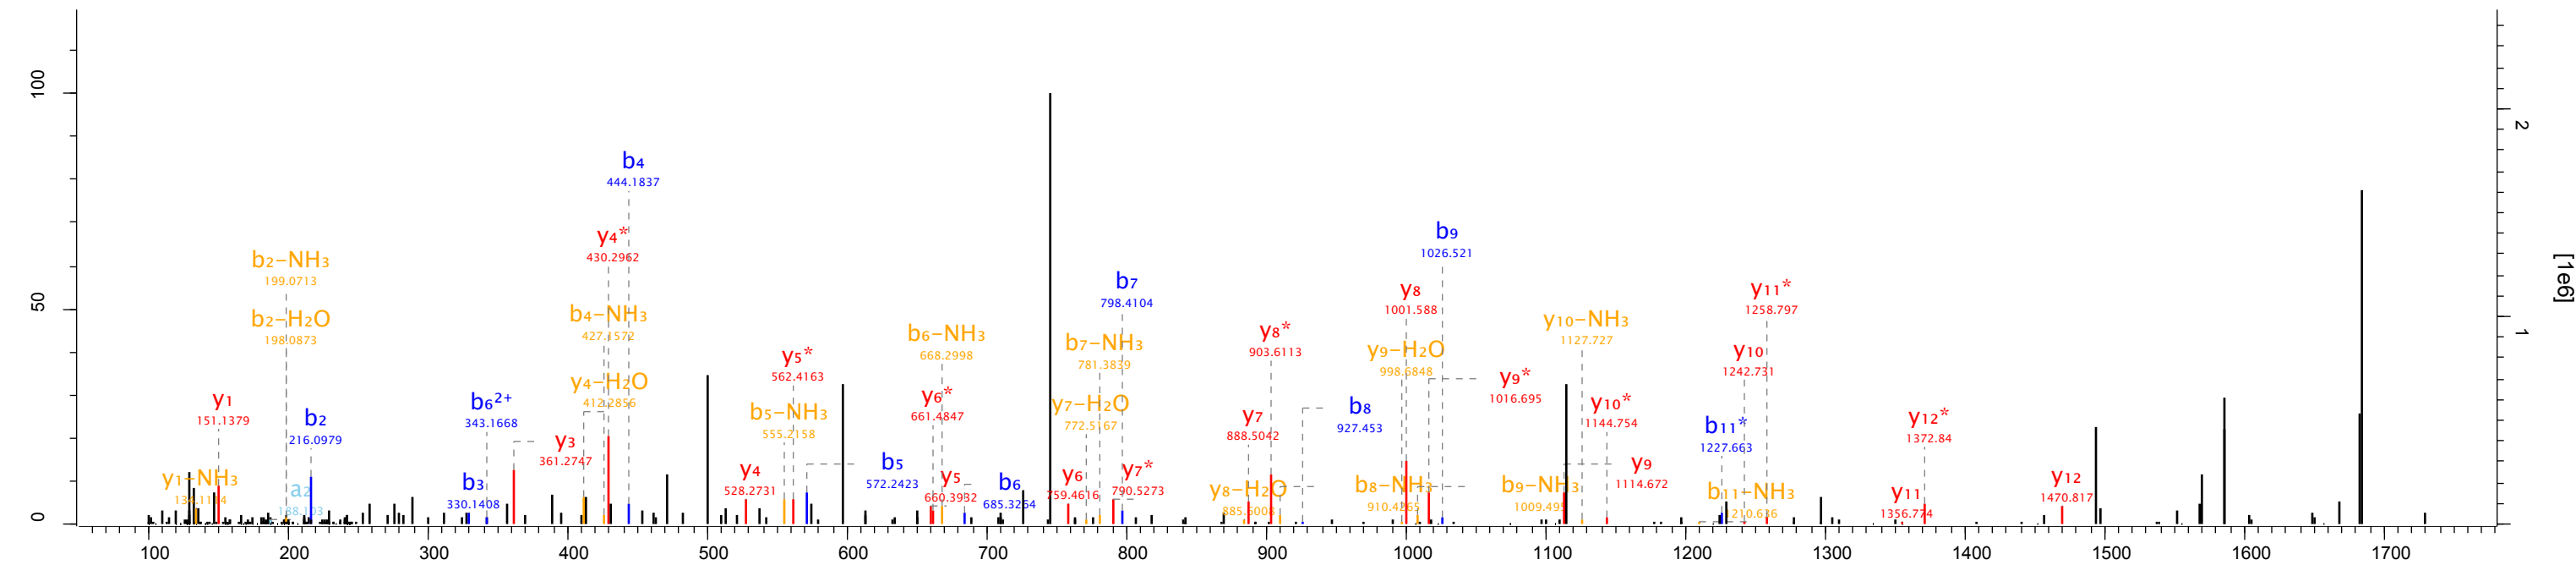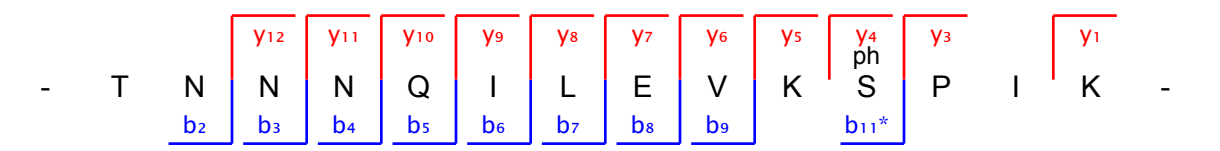

Raw file: 20150812\_A375SR\_Phospho\_BR1\_07  
 Scan: 15939 Method: FTMS; HCD Score: 162.65 m/z: 784.39 Gene names: PRICKLE1

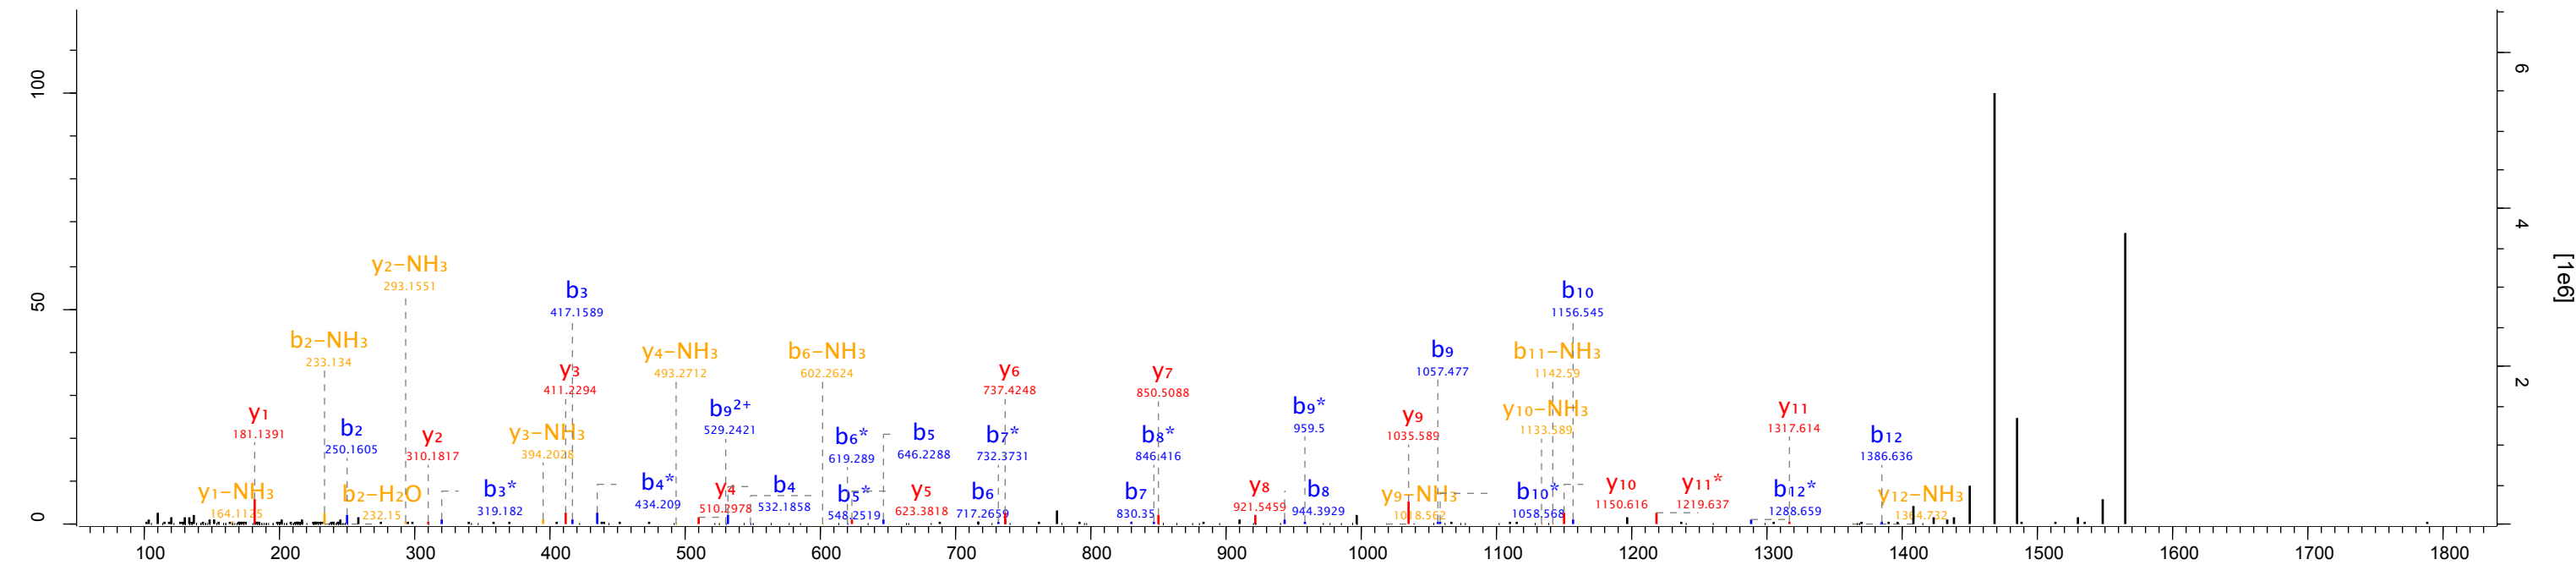

Raw file 20150812\_A375SR\_Phospho\_BR1\_07 Scan 16329 Method FTMS; HCD Score 57.53 m/z 580.25 Gene names LCT

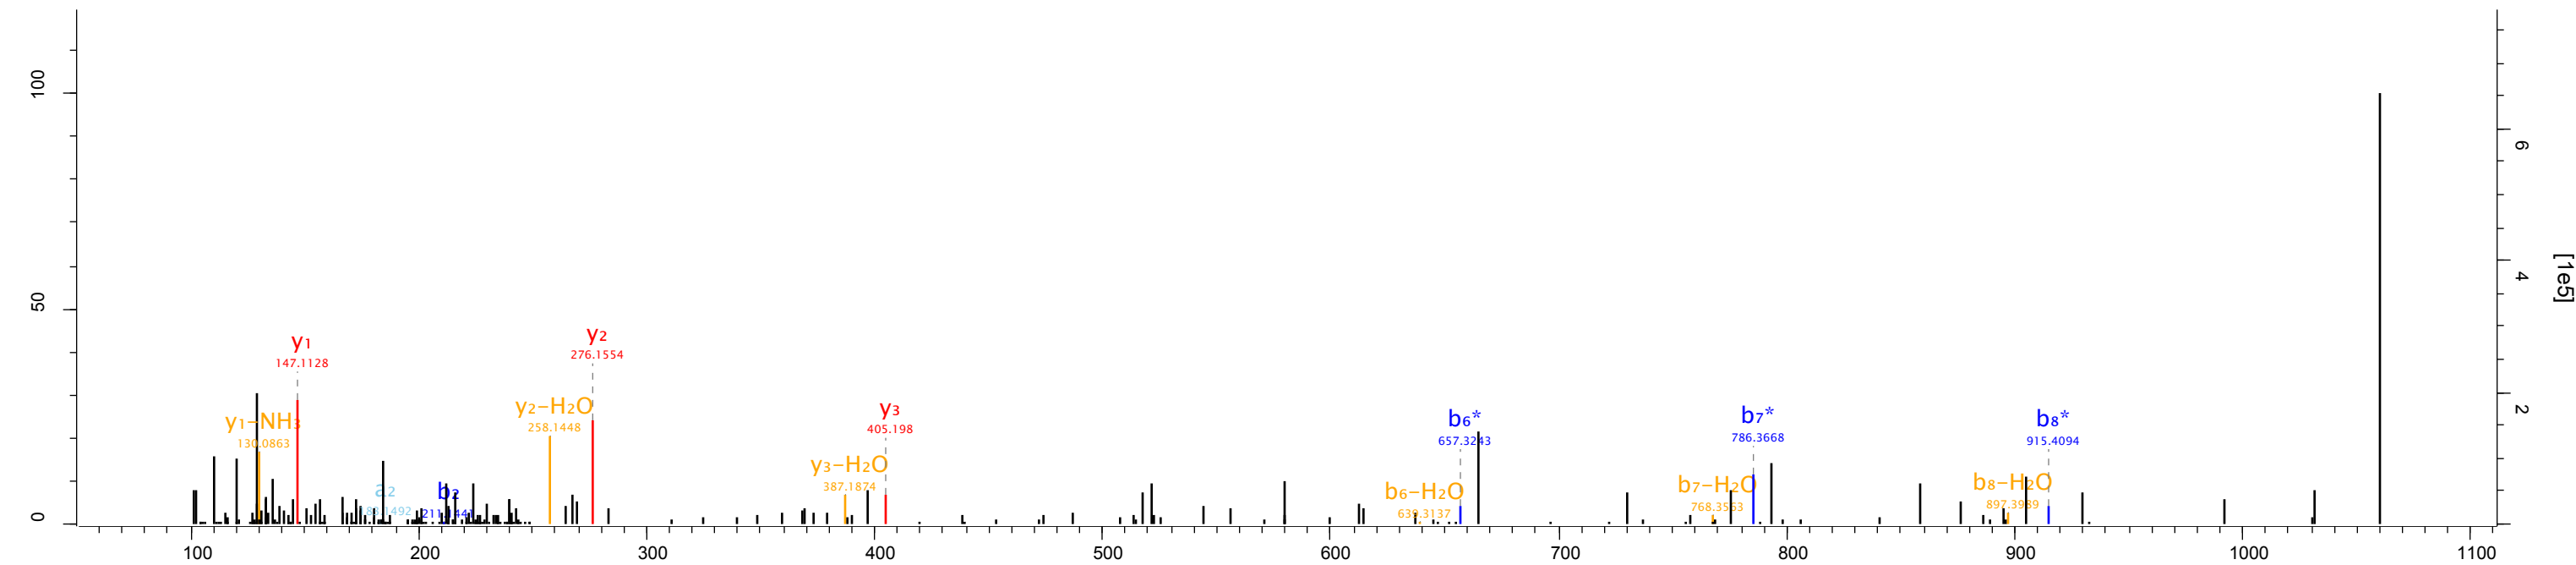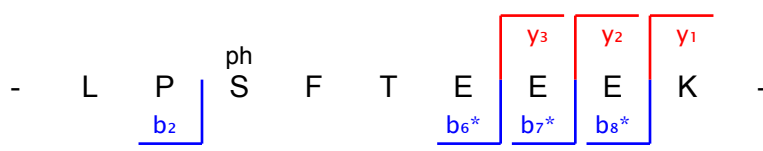

Raw file  
20150812\_A375SR\_Phospho\_BR1\_07  
Scan 7029 Method FTMS; HCD Score 51.95 m/z 432.75

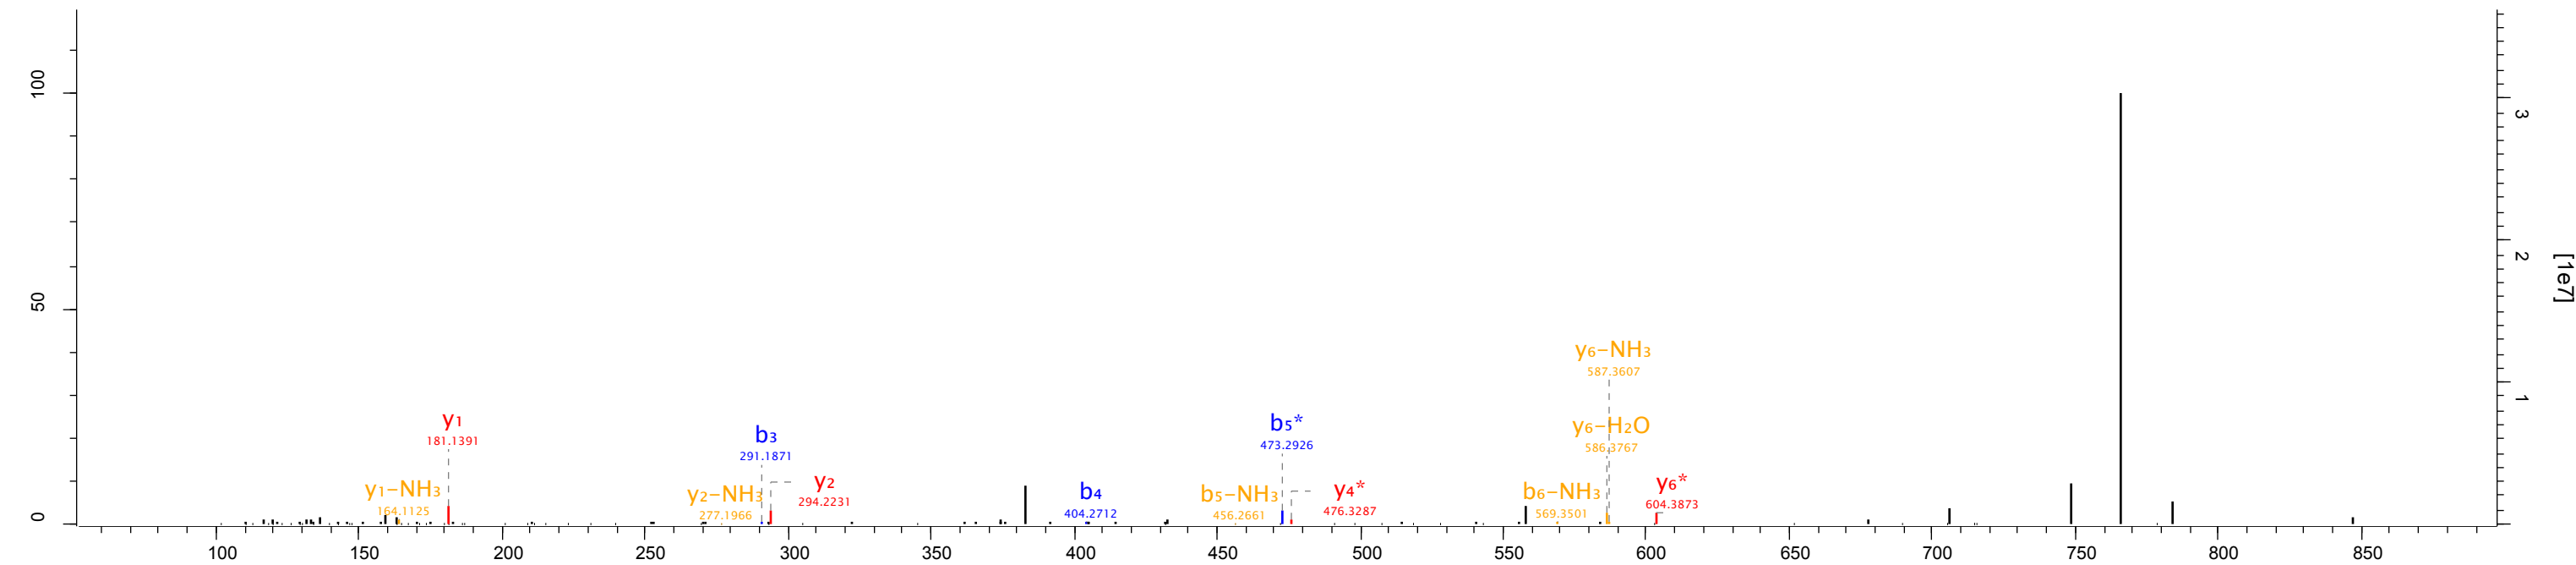



Raw file: 20150812\_A375SR\_Phospho\_BR1\_08  
 Scan: 22459 Method: FTMS; HCD Score: 128.03 m/z: 1100.17 Gene names: CEBPG

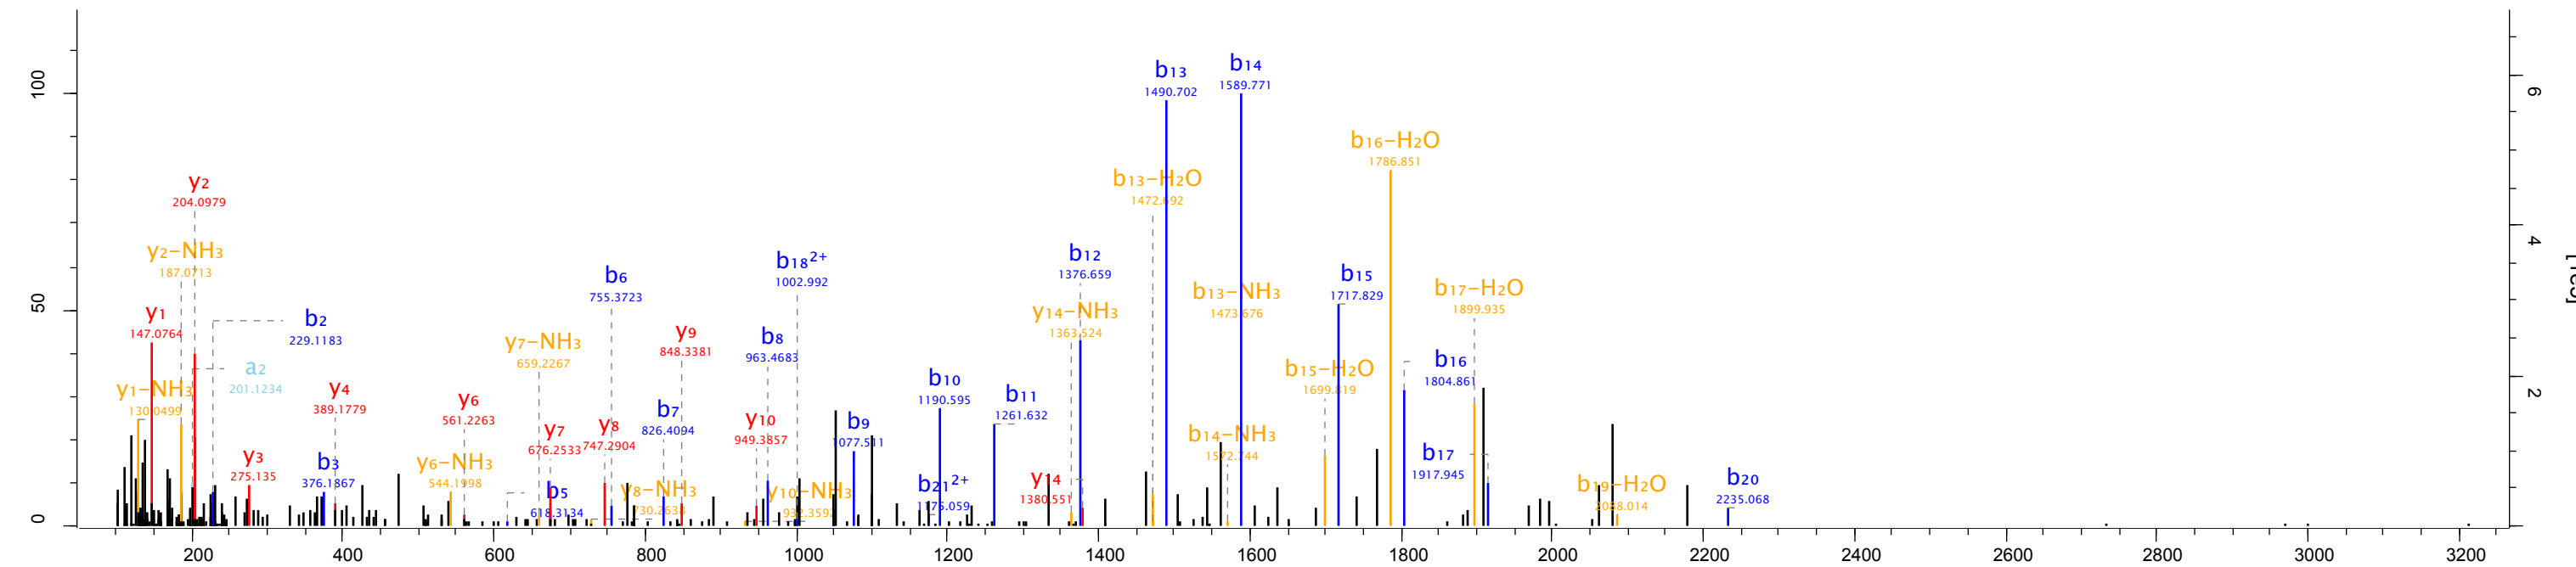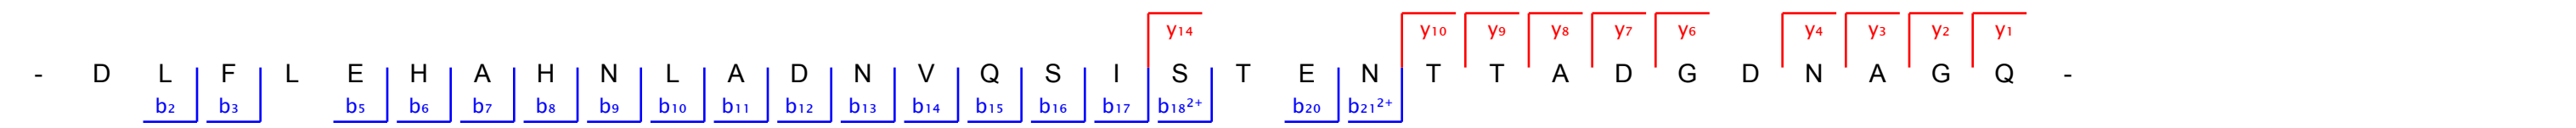

Raw file: 20150812\_A375SR\_Phospho\_BR1\_09  
 Scan: 13489 Method: FTMS; HCD Score: 144.77 m/z: 436.58 Gene names: RPL39P5;RPL39

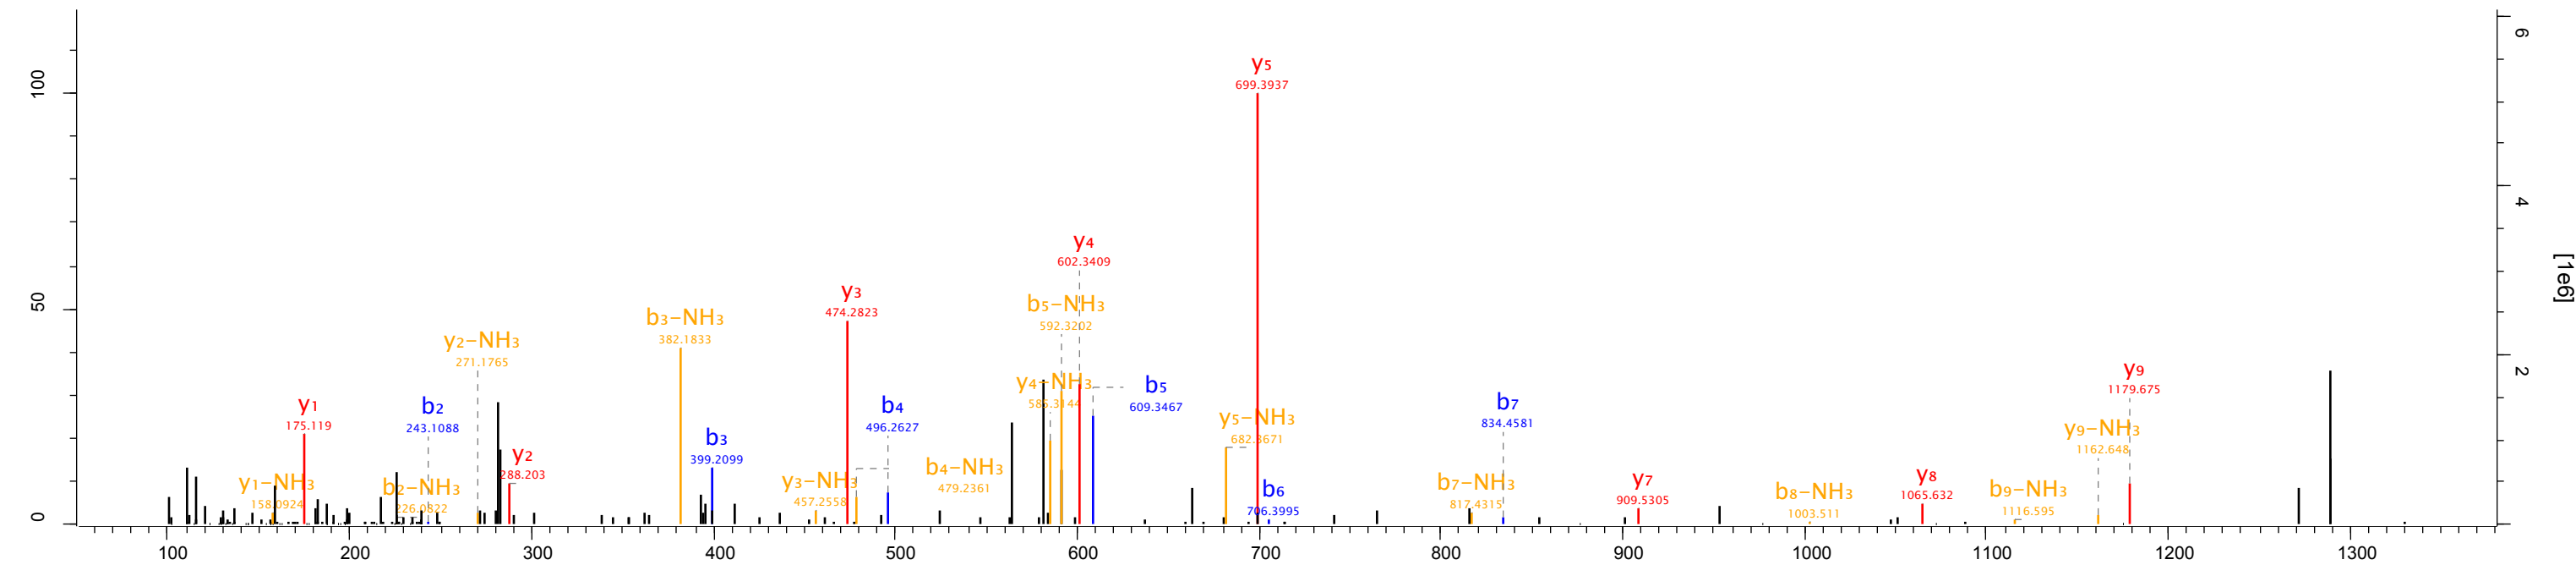

Raw file  
20150812\_A375SR\_Phospho\_BR1\_09

Scan 24029 Method FTMS; HCD Score 207.67 m/z 970.94 Gene names MAPK11P1L

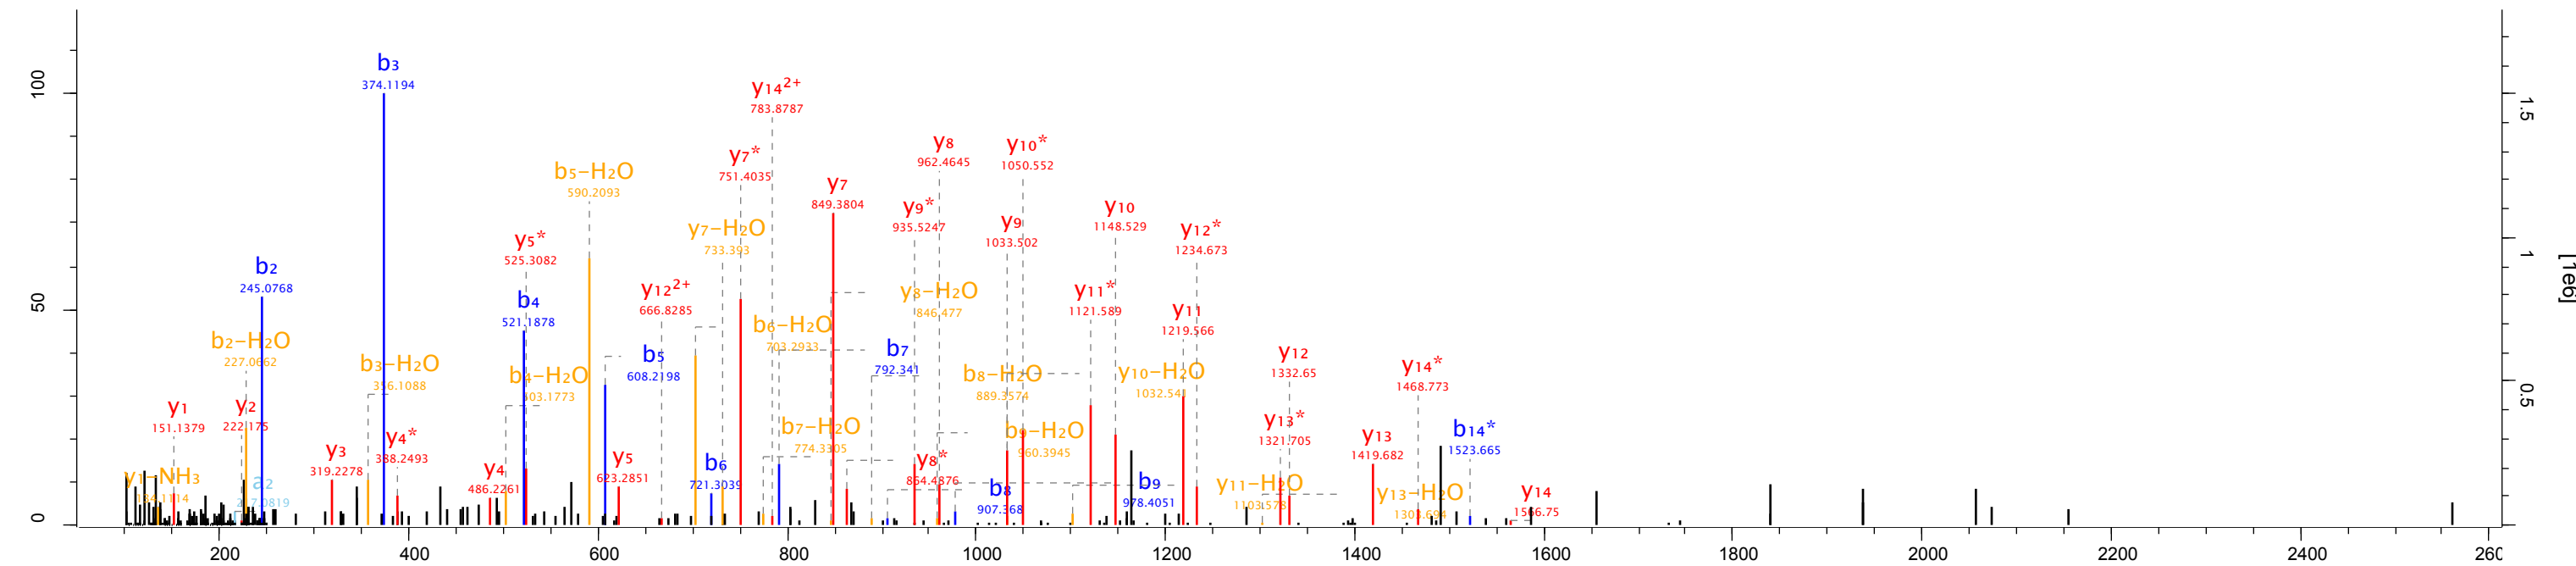

Raw file 20150812\_A375SR\_Phospho\_BR1\_09 Scan 24159 Method FTMS; HCD Score 267.22 m/z 968.42 Gene names MAPK11P1L

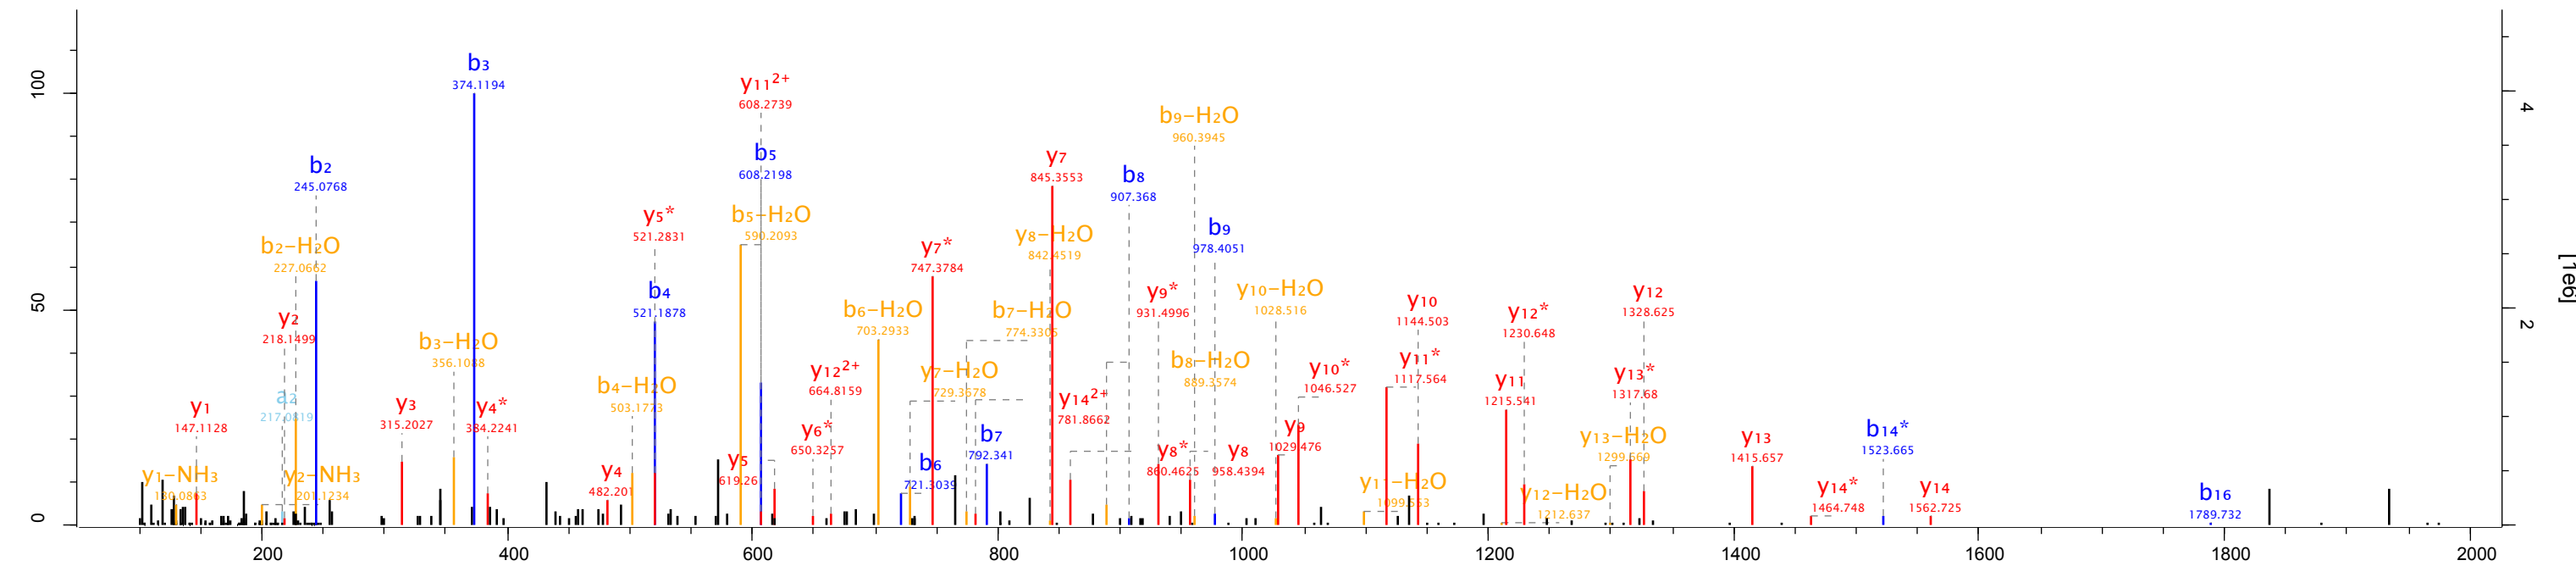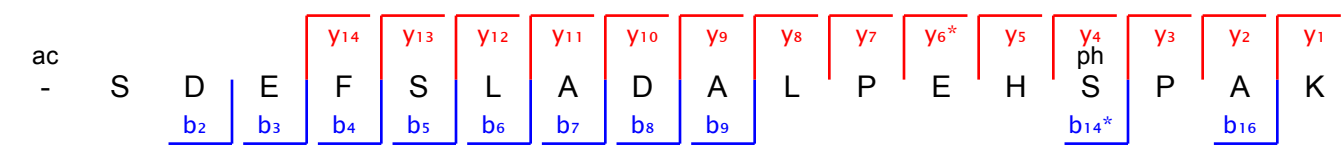

Raw file 20150812\_A375SR\_Phospho\_BR1\_10 Scan 13759 Method FTMS; HCD Score 159.79 m/z 436.58 Gene names RPL39P5;RPL39

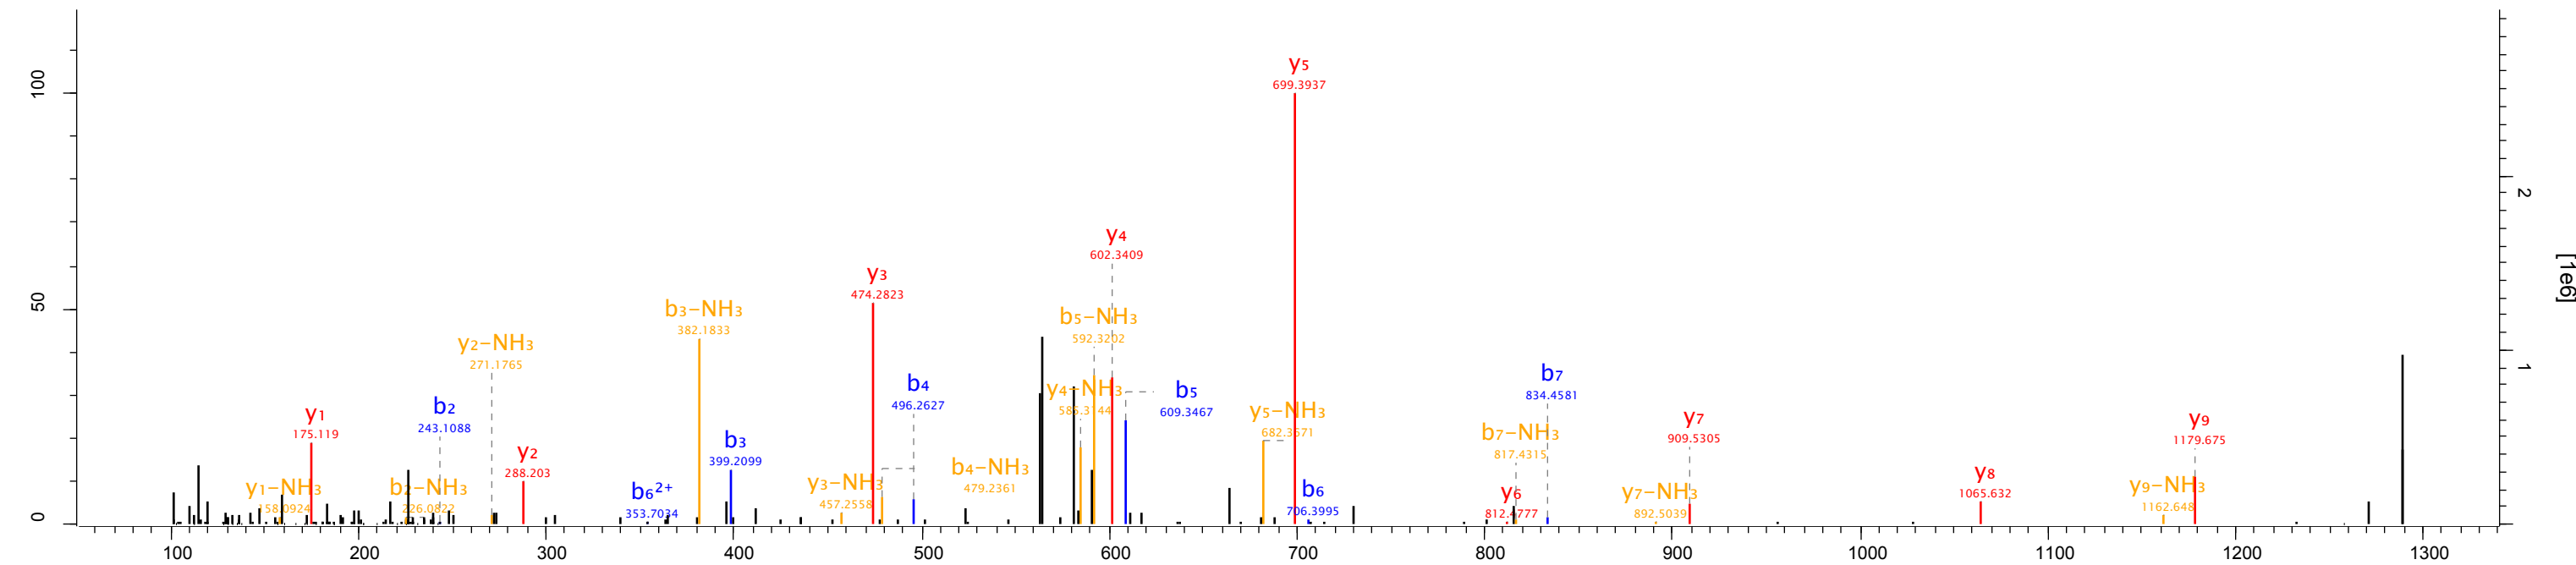

Raw file: 20150812\_A375SR\_Phospho\_BR1\_10  
 Scan: 13769 Method: FTMS; HCD Score: 162.88 m/z: 440.6 Gene names: RPL39P5;RPL39

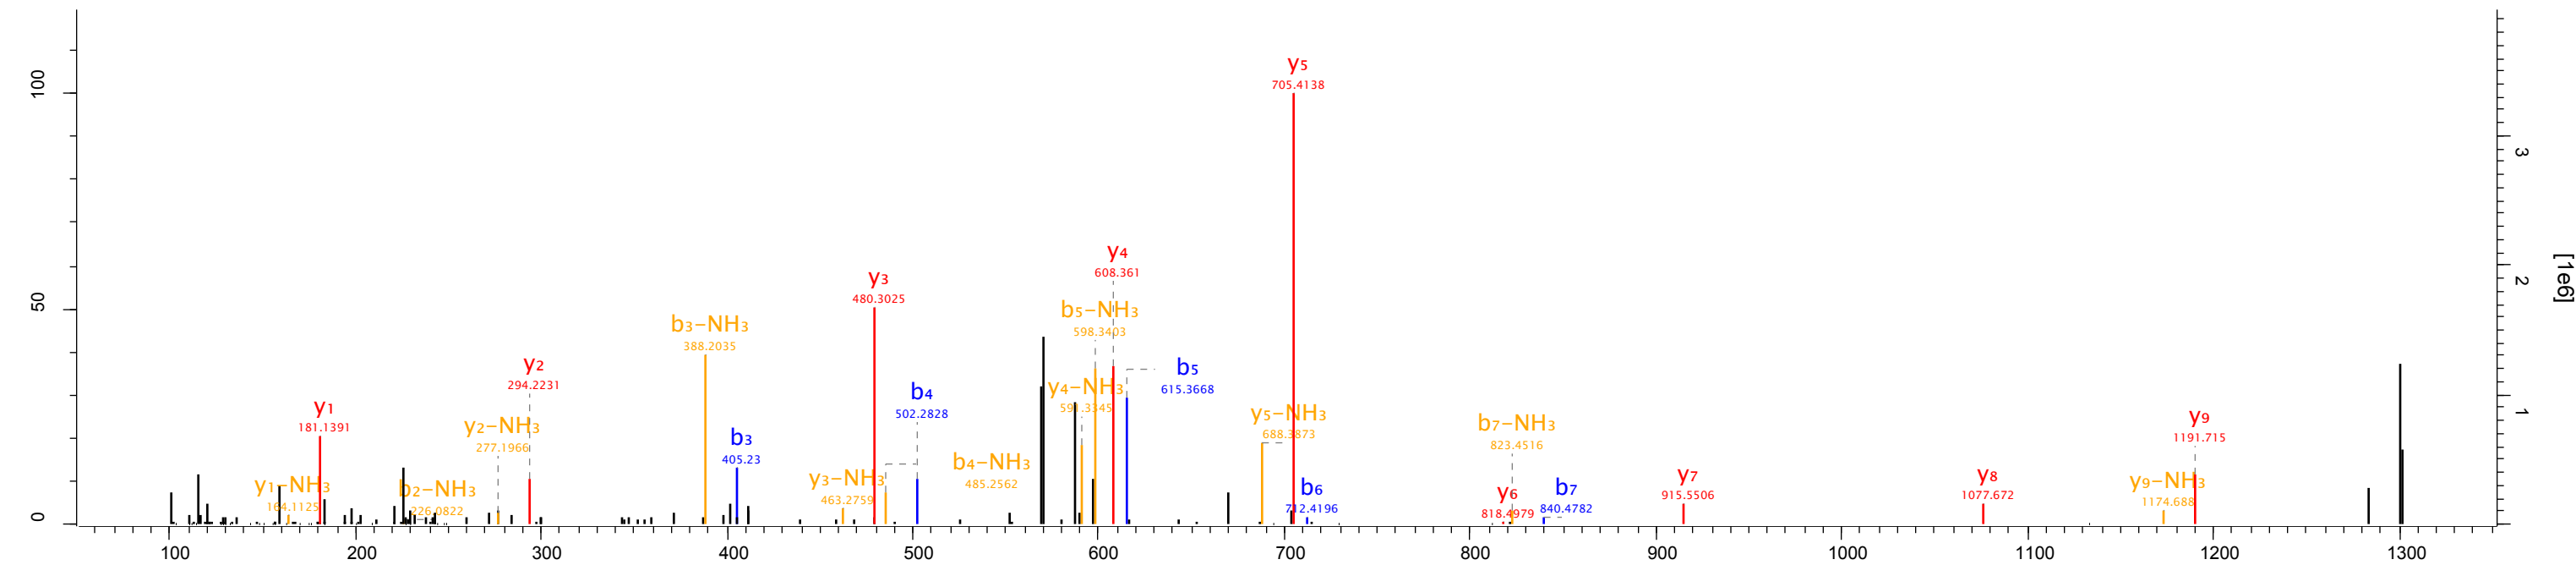

Raw file  
 20150812\_A375SR\_Phospho\_BR1\_10  
 Scan 4849 Method FTMS; HCD Score 40.77 m/z 527.23

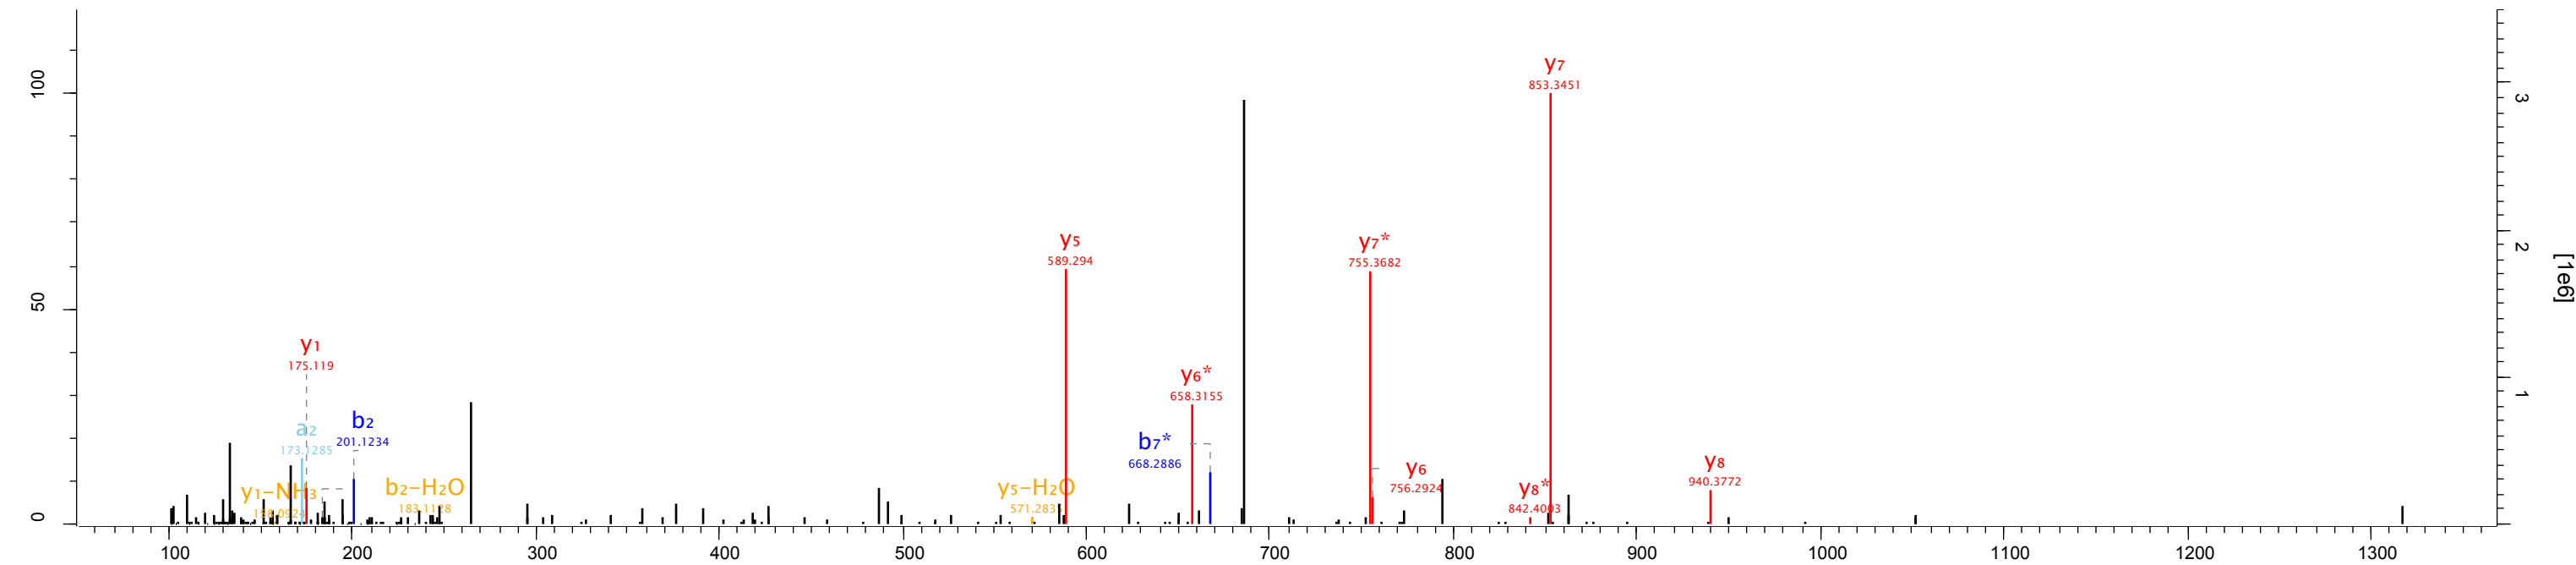

Raw file  
20150814\_A375SR\_Phospho\_BR2\_02

| Scan  | Method    | Score | m/z    | Gene names |
|-------|-----------|-------|--------|------------|
| 14899 | FTMS; HCD | 2.8   | 674.33 | FAM214B    |

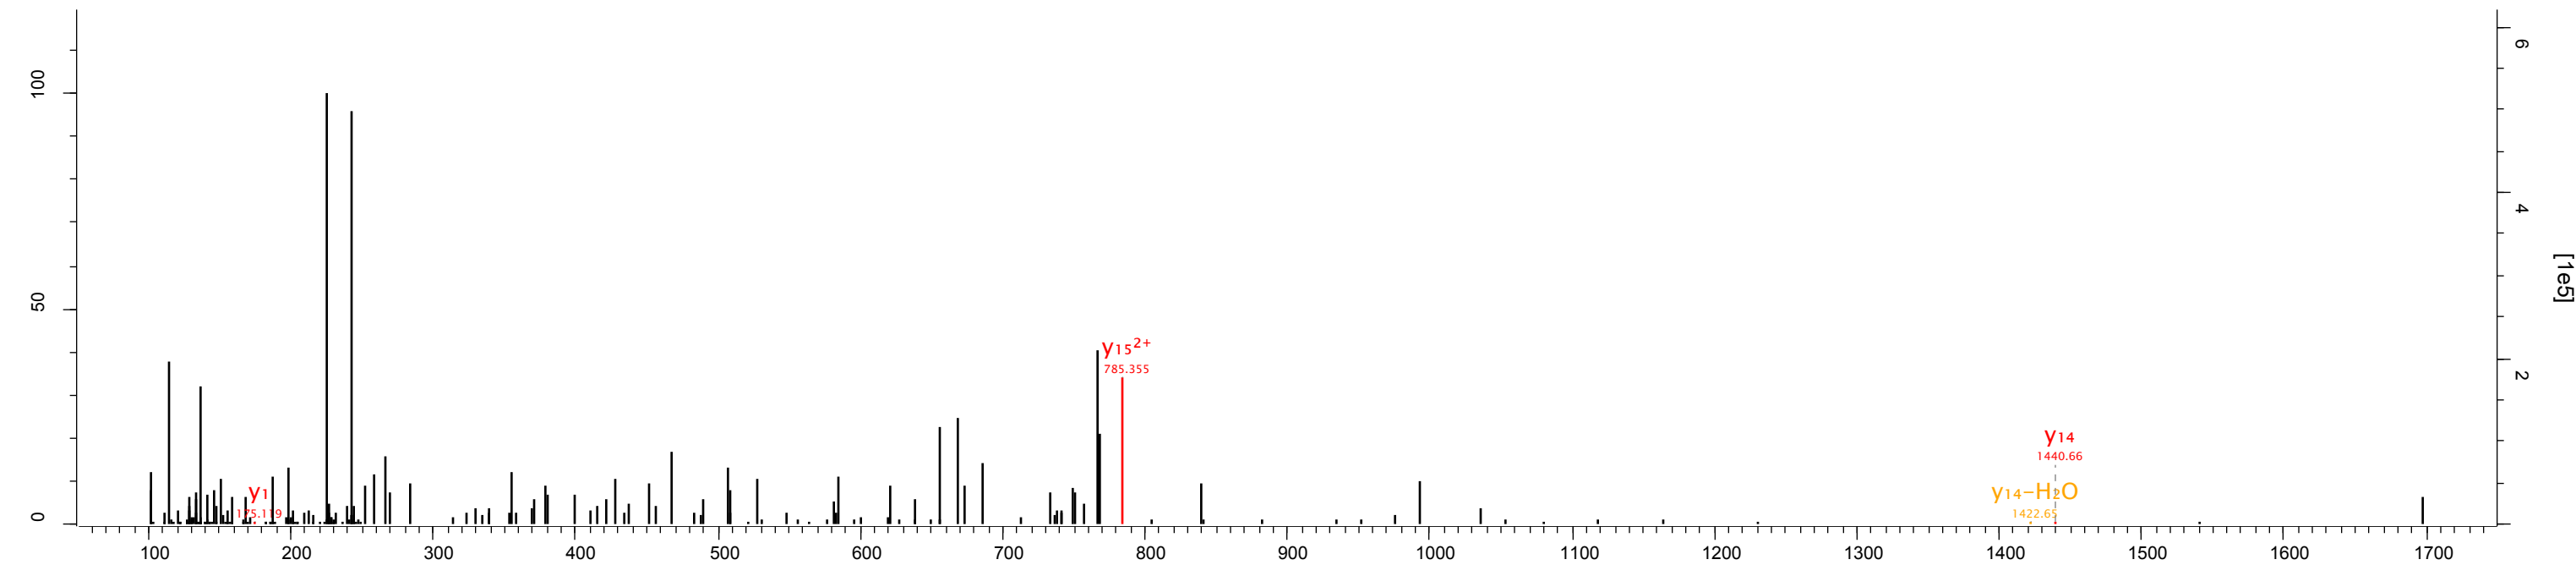

- L L P A G E A P D V S S E E E G P A P R -

Annotations:  $y_{15}^{2+}$  above E,  $y_{14}$  above A,  $y_1$  above R.



Raw file: 20150814\_A375SR\_Phospho\_BR2\_02  
 Scan: 7469 Method: FTMS; HCD Score: 84.3 m/z: 589.27 Gene names: E2F8

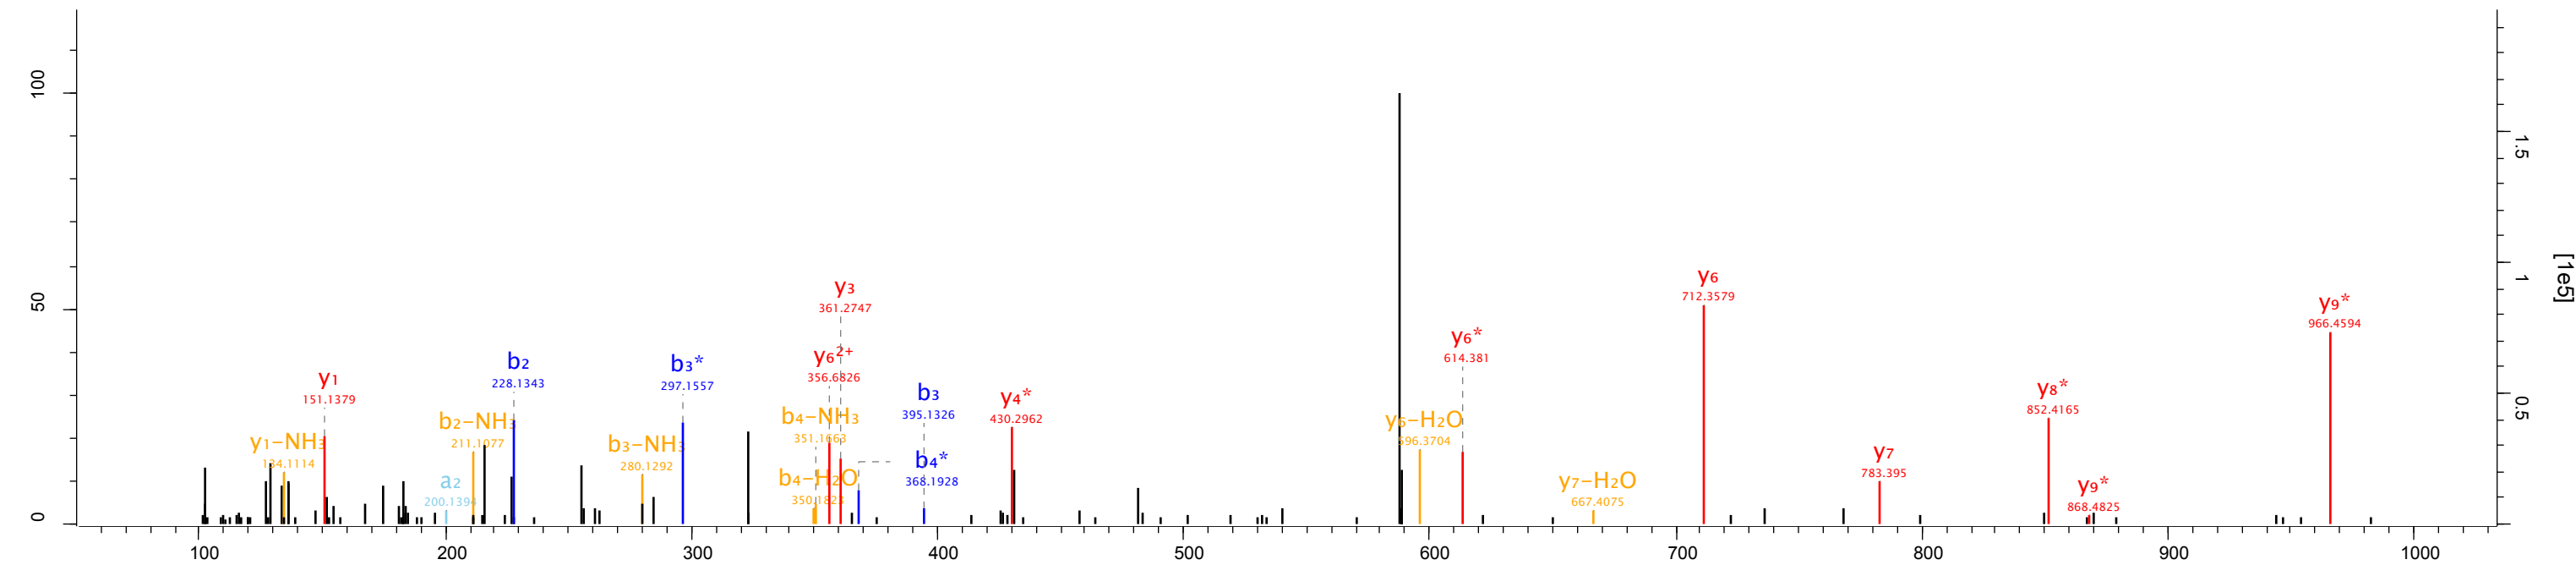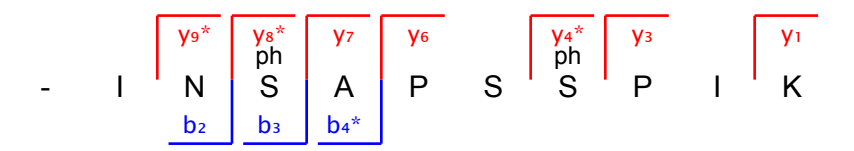

Raw file 20150814\_A375SR\_Phospho\_BR2\_02 Scan 9669 Method FTMS; HCD Score 47.62 m/z 587.76 Gene names PLEKHM1

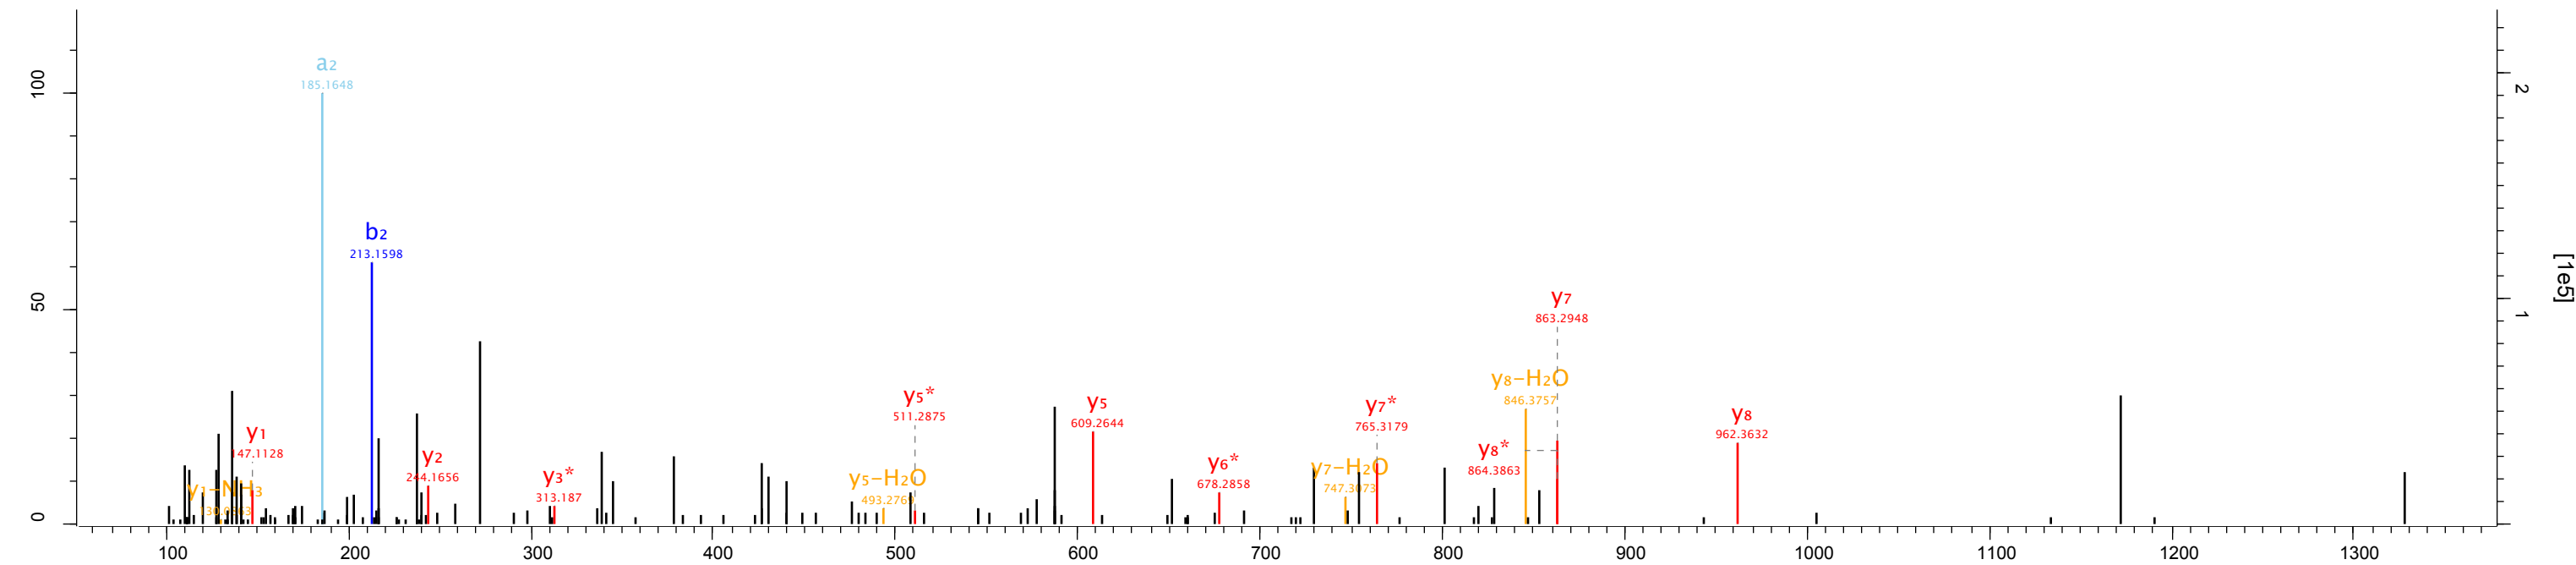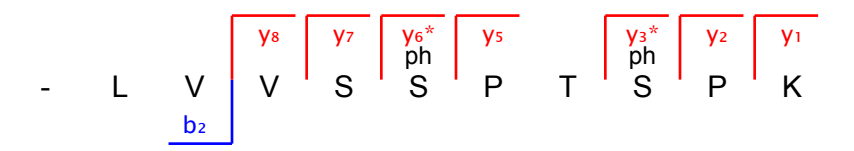

Raw file  
20150814\_A375SR\_Phospho\_BR2\_03

Scan Method Score m/z Gene names  
28639 FTMS; HCD 125.67 725.37 SLC35C2

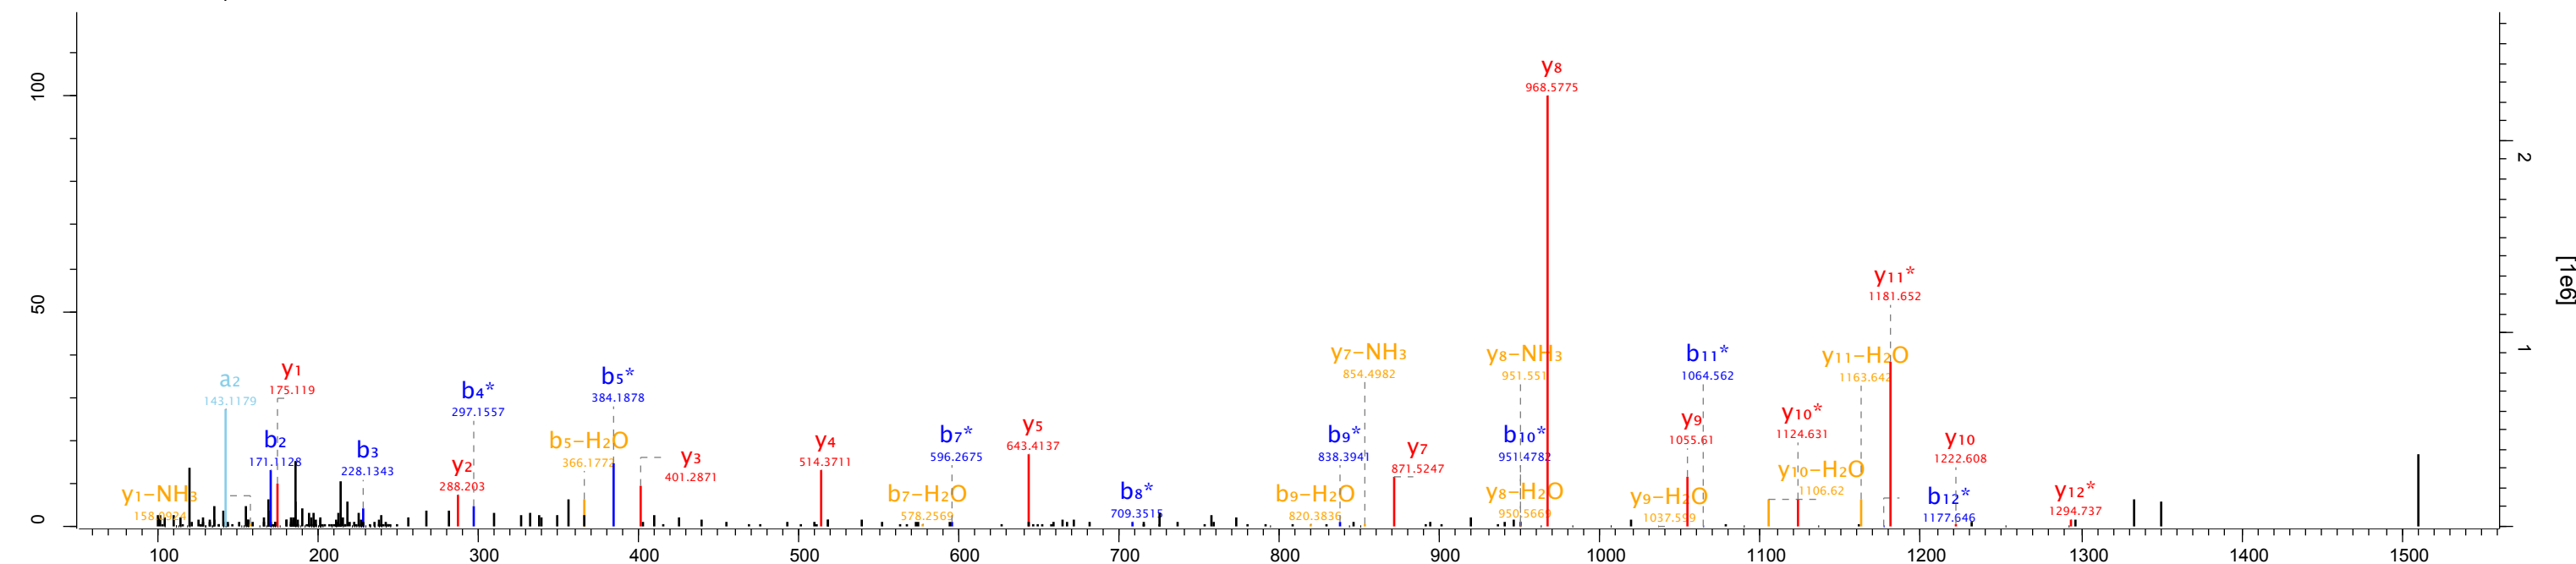

- G -  
L G S S P D L E L L L R -  
b2 b3 b4\* b5\* b7\* b8\* b9\* b10\* b11\* b12\*

Raw file: 20150814\_A375SR\_Phospho\_BR2\_03  
 Scan: 5639 Method: FTMS; HCD Score: 168.66 m/z: 844.35 Gene names: YAF2

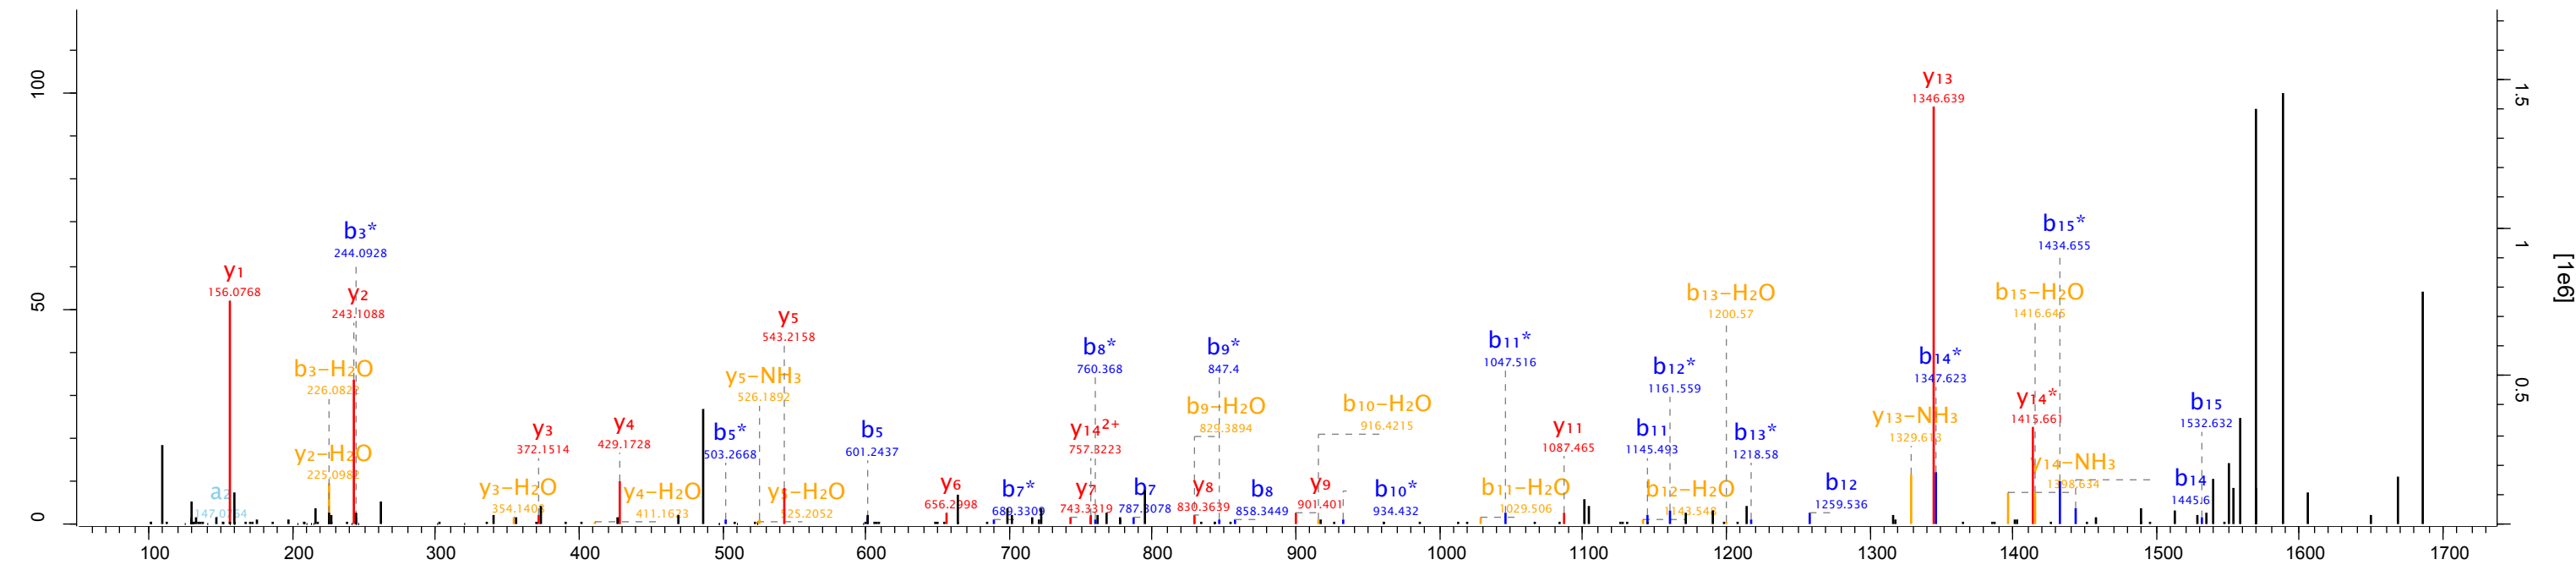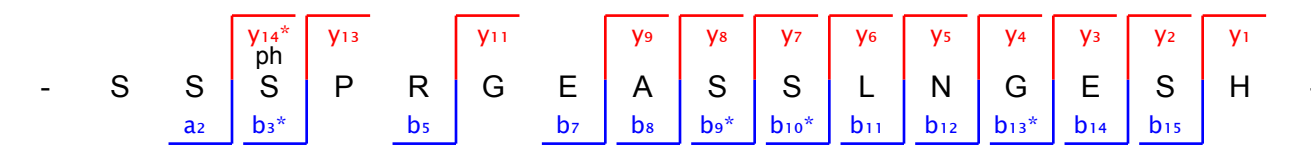

Raw file 20150814\_A375SR\_Phospho\_BR2\_04 Scan 17189 Method FTMS; HCD Score 57.29 m/z 861.37

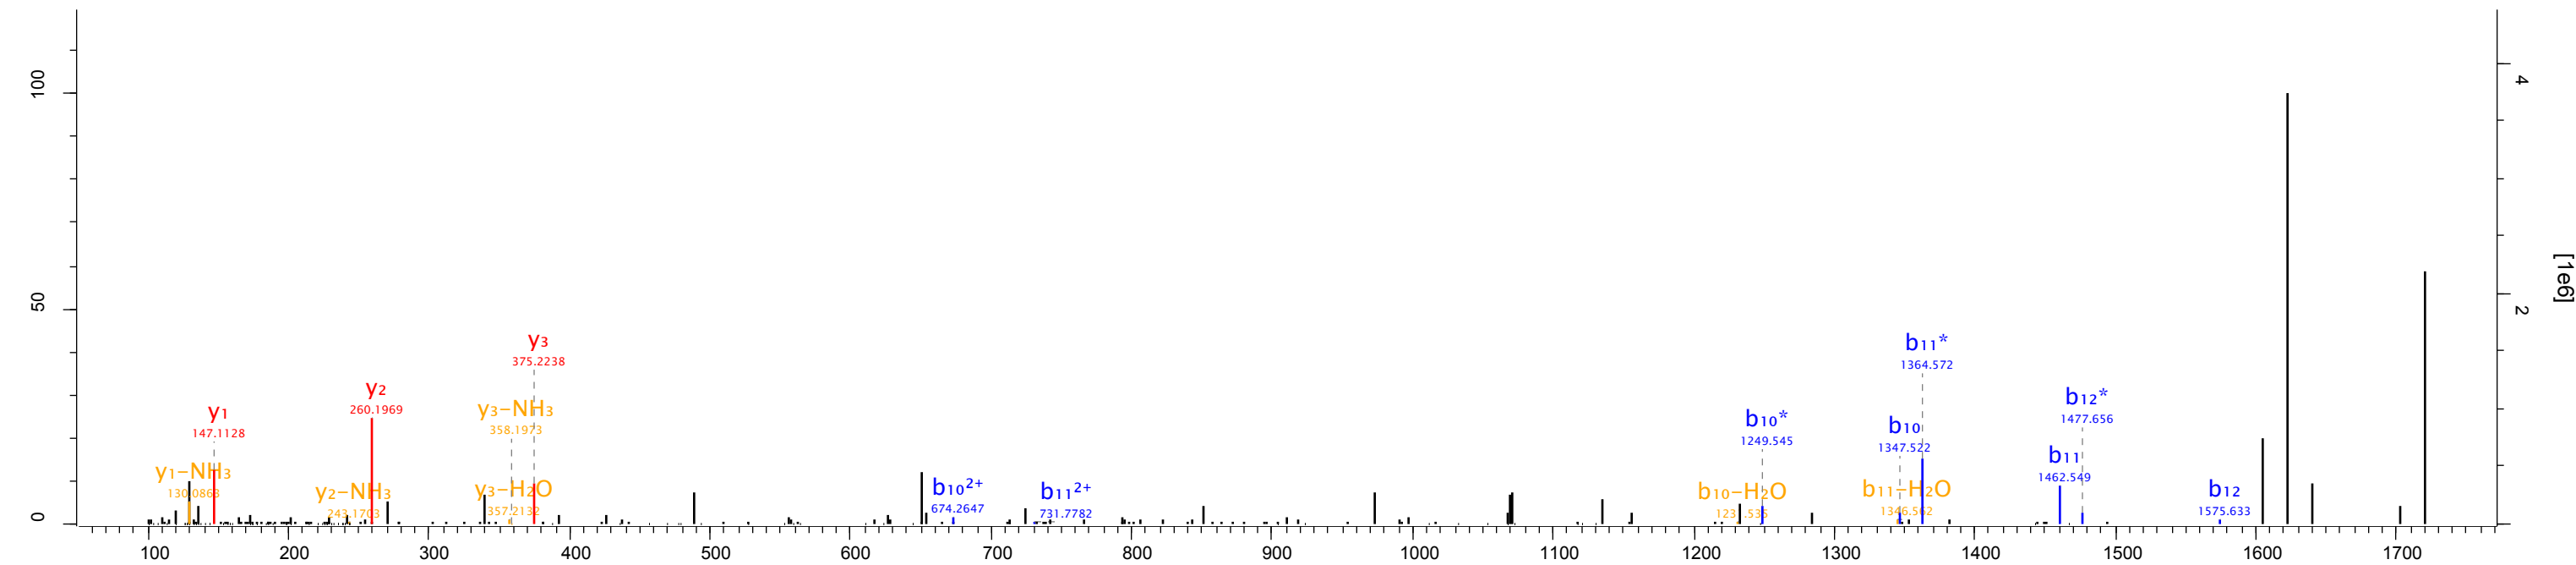

Raw file 20150814\_A375SR\_Phospho\_BR2\_04 Scan 20709 Method FTMS; HCD Score 63.87 m/z 781.08 Gene names ZNF579

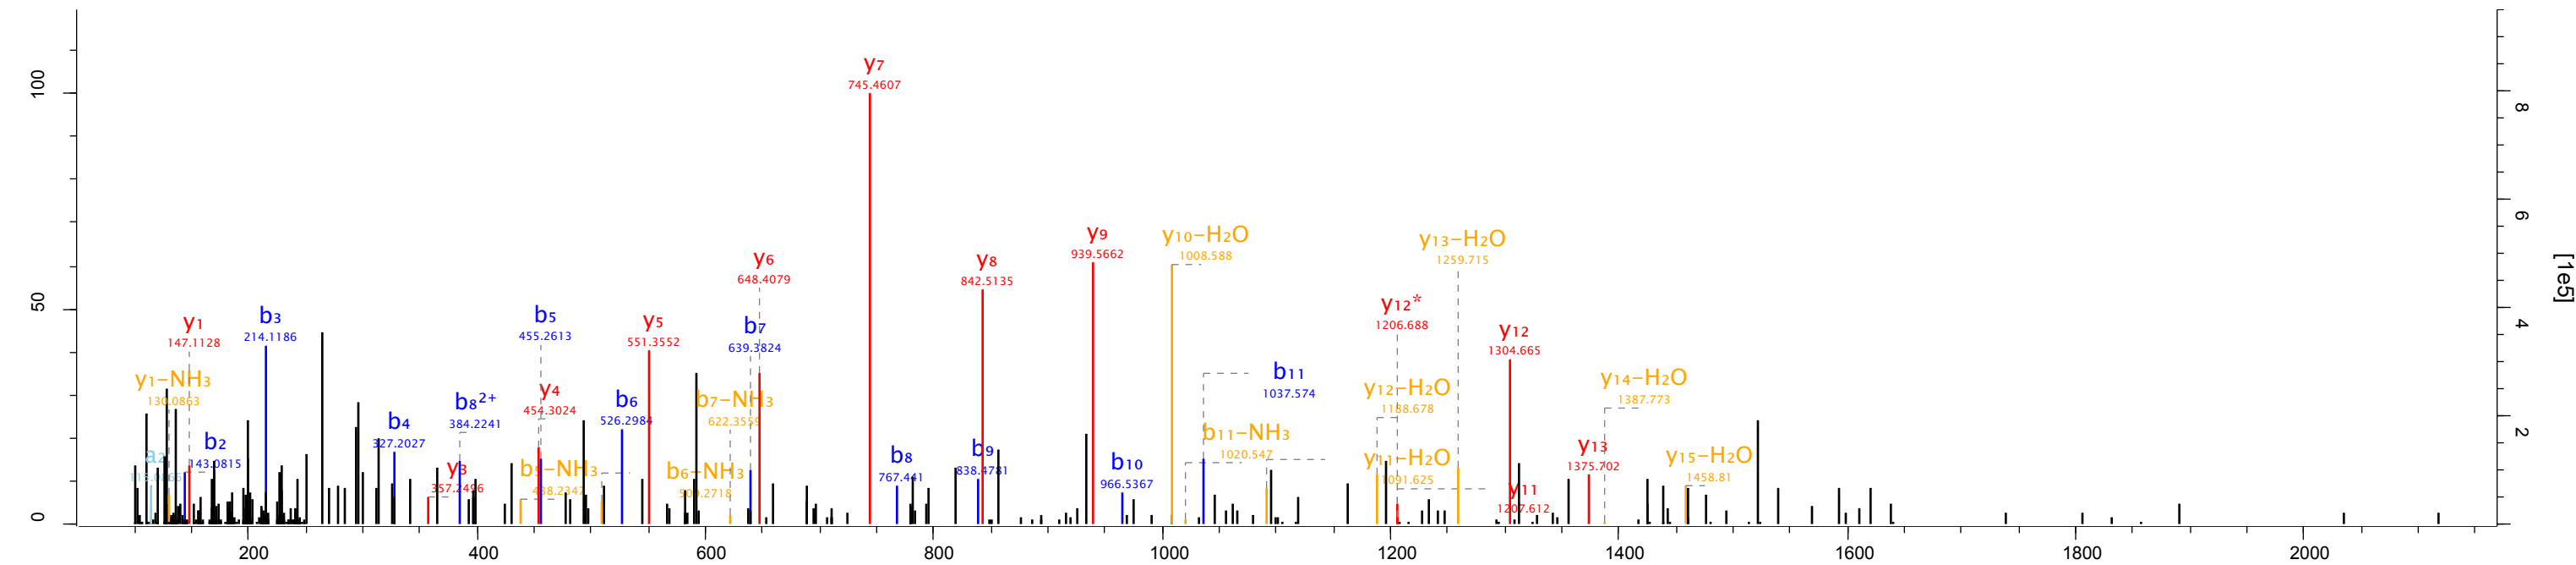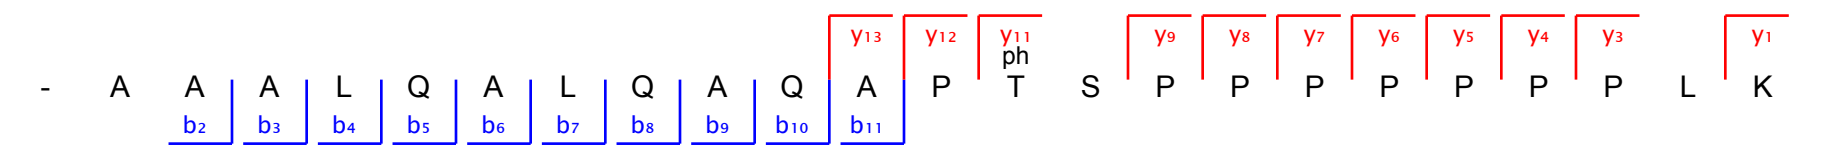

Raw file: 20150814\_A375SR\_Phospho\_BR2\_04  
 Scan: 5629 Method: FTMS; HCD Score: 57.03 m/z: 432.75

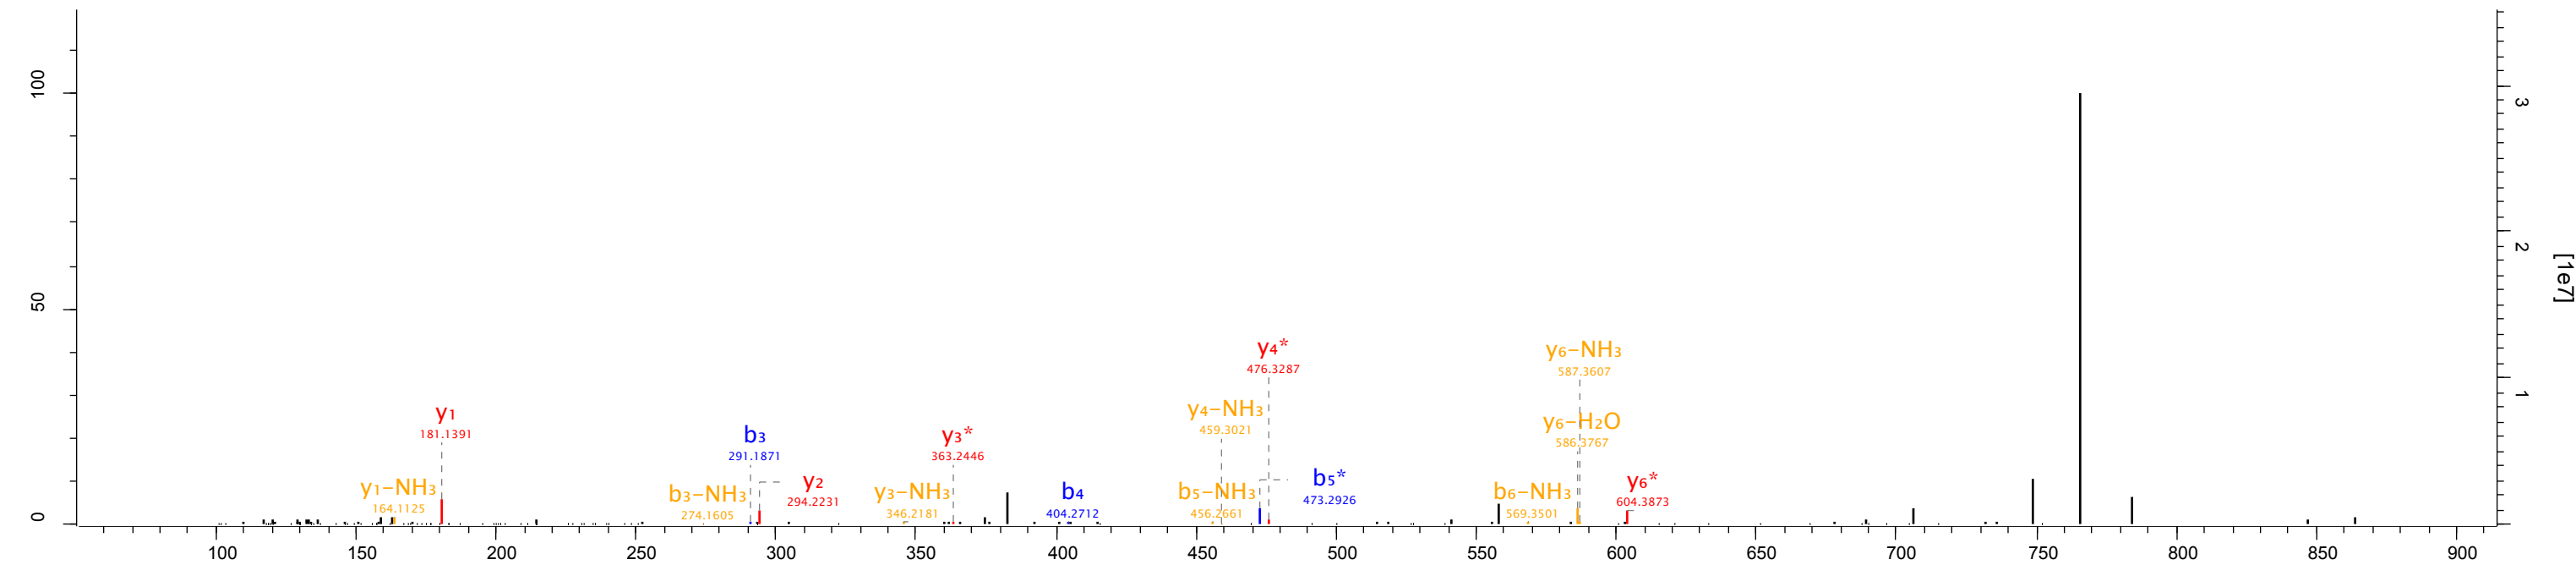

Raw file: 20150814\_A375SR\_Phospho\_BR2\_05  
 Scan: 16419 Method: FTMS; HCD Score: 89.83 m/z: 503.71 Gene names: MLF1

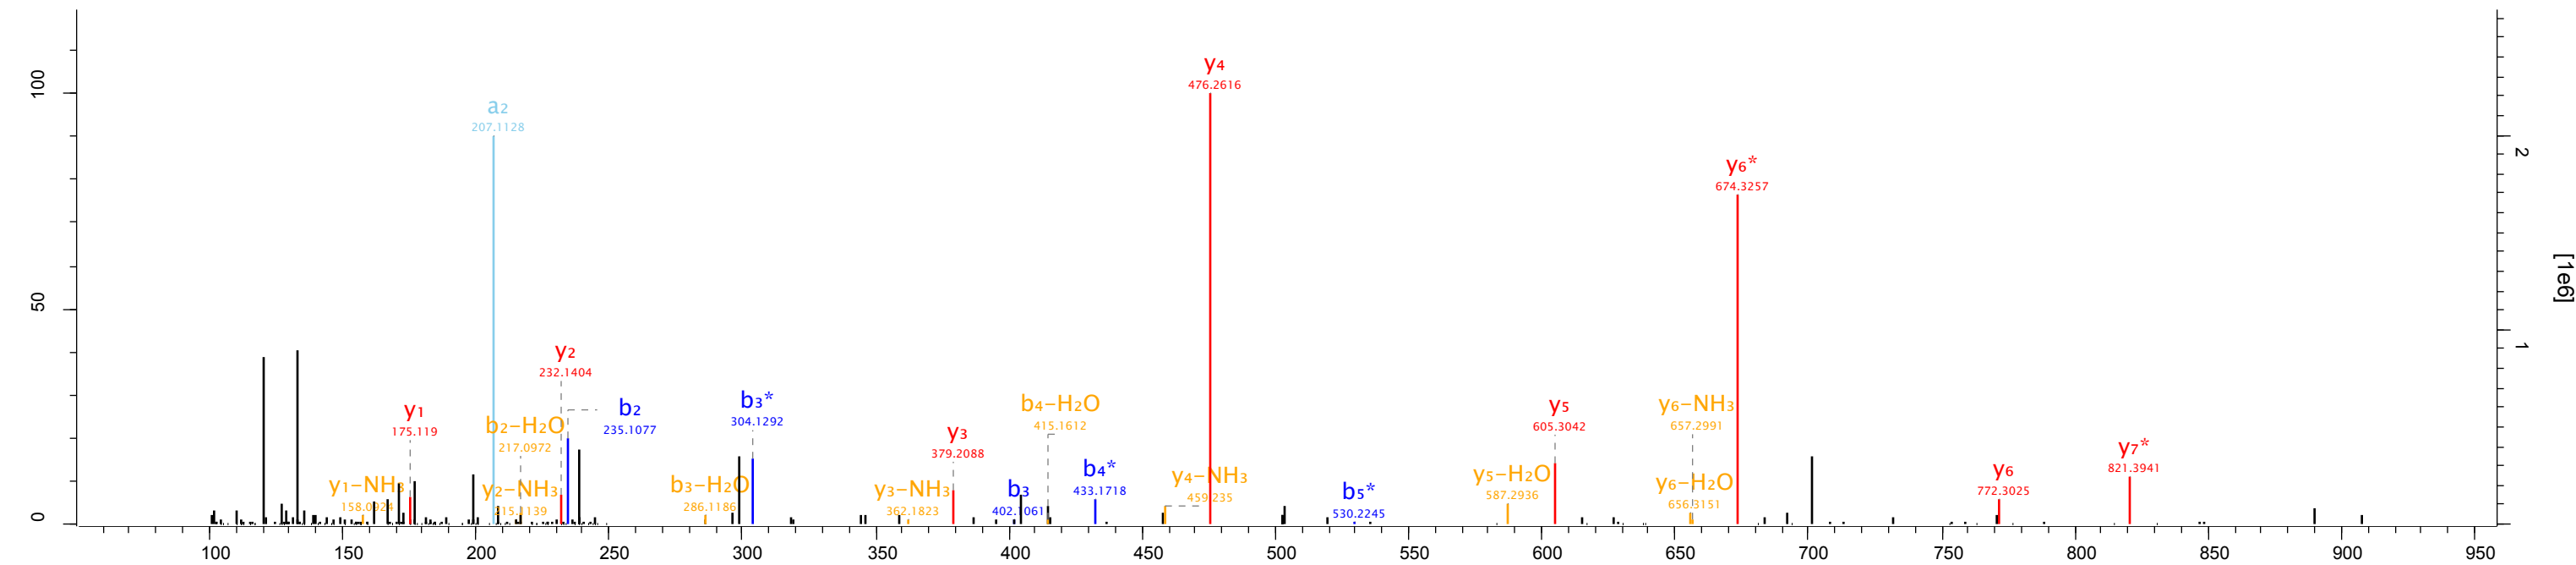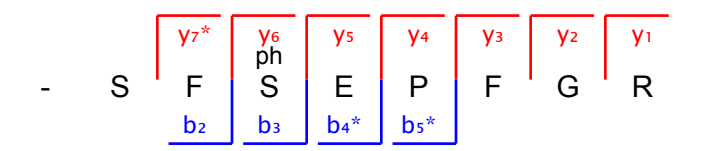



Raw file: 20150814\_A375SR\_Phospho\_BR2\_05  
 Scan: 19499 Method: FTMS; HCD Score: 66.27 m/z: 573.27 Gene names: CCDC125

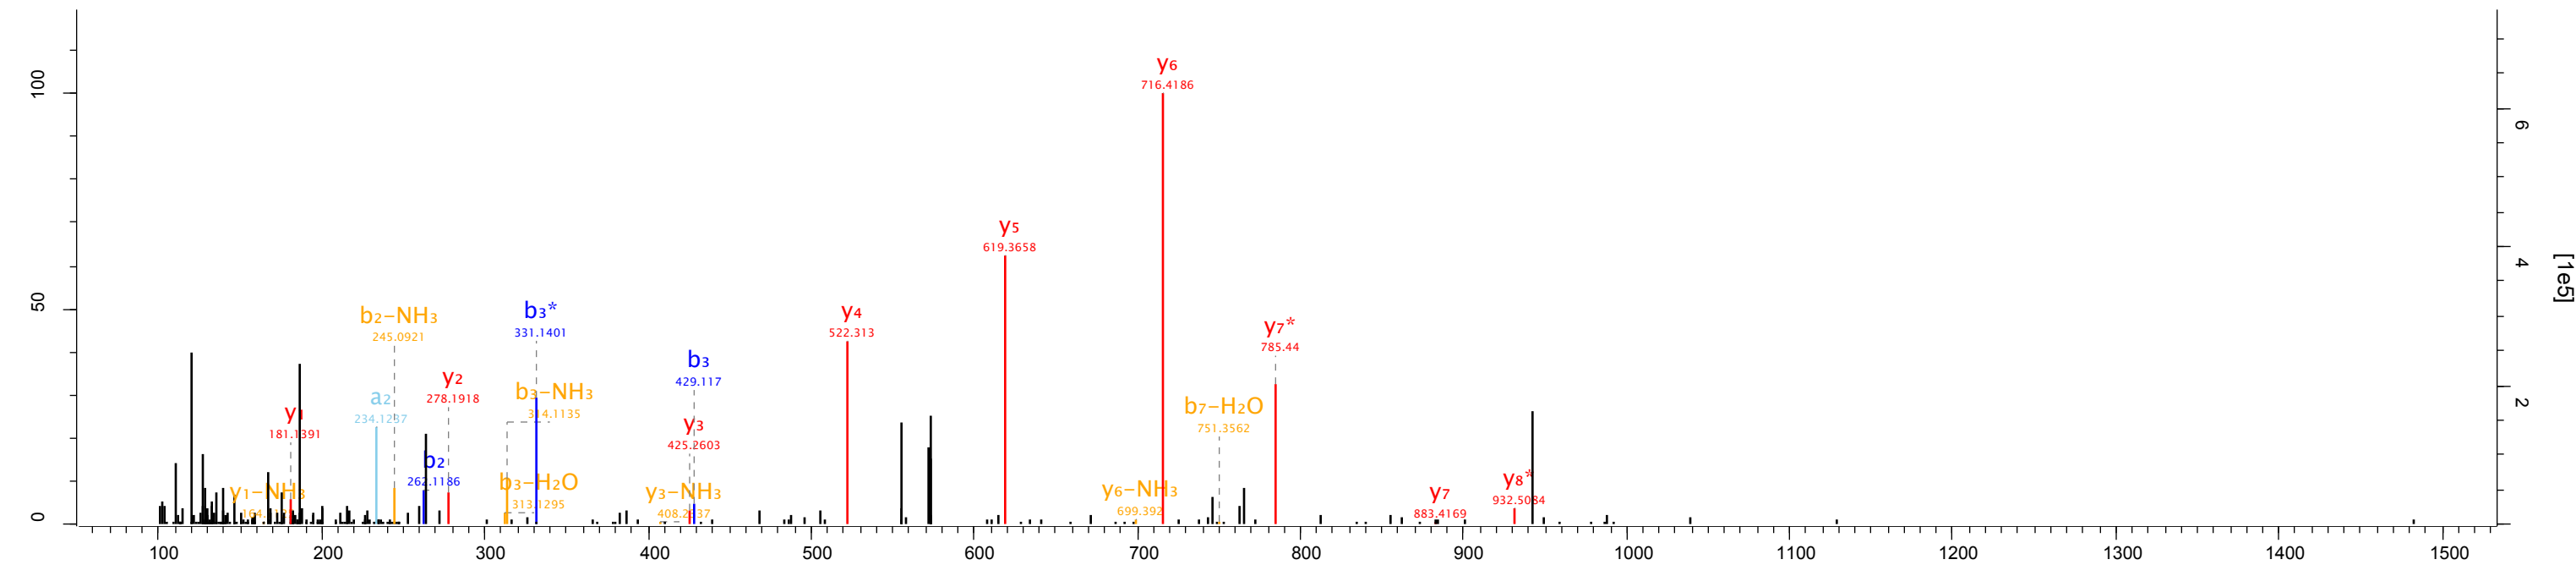

Raw file: 20150814\_A375SR\_Phospho\_BR2\_05  
 Scan: 20869 Method: FTMS; HCD Score: 67.5 m/z: 781.08 Gene names: ZNF579

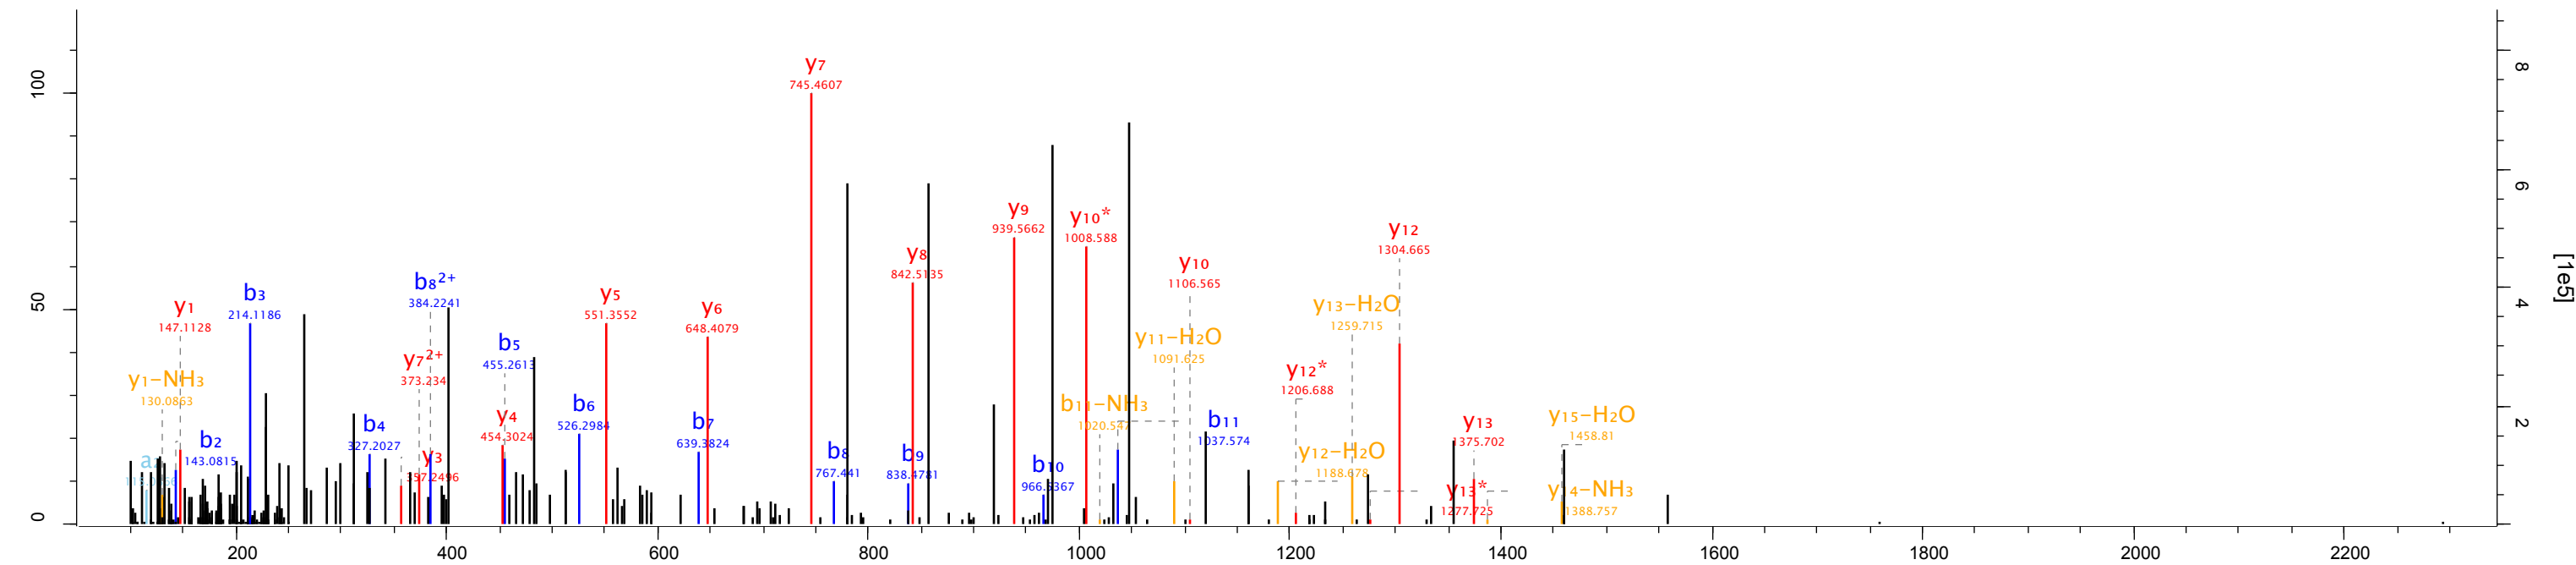

Raw file  
 20150814\_A375SR\_Phospho\_BR2\_05  
 Scan 27109 Method FTMS; HCD Score 124.2 m/z 896.9 Gene names ARHGAP31

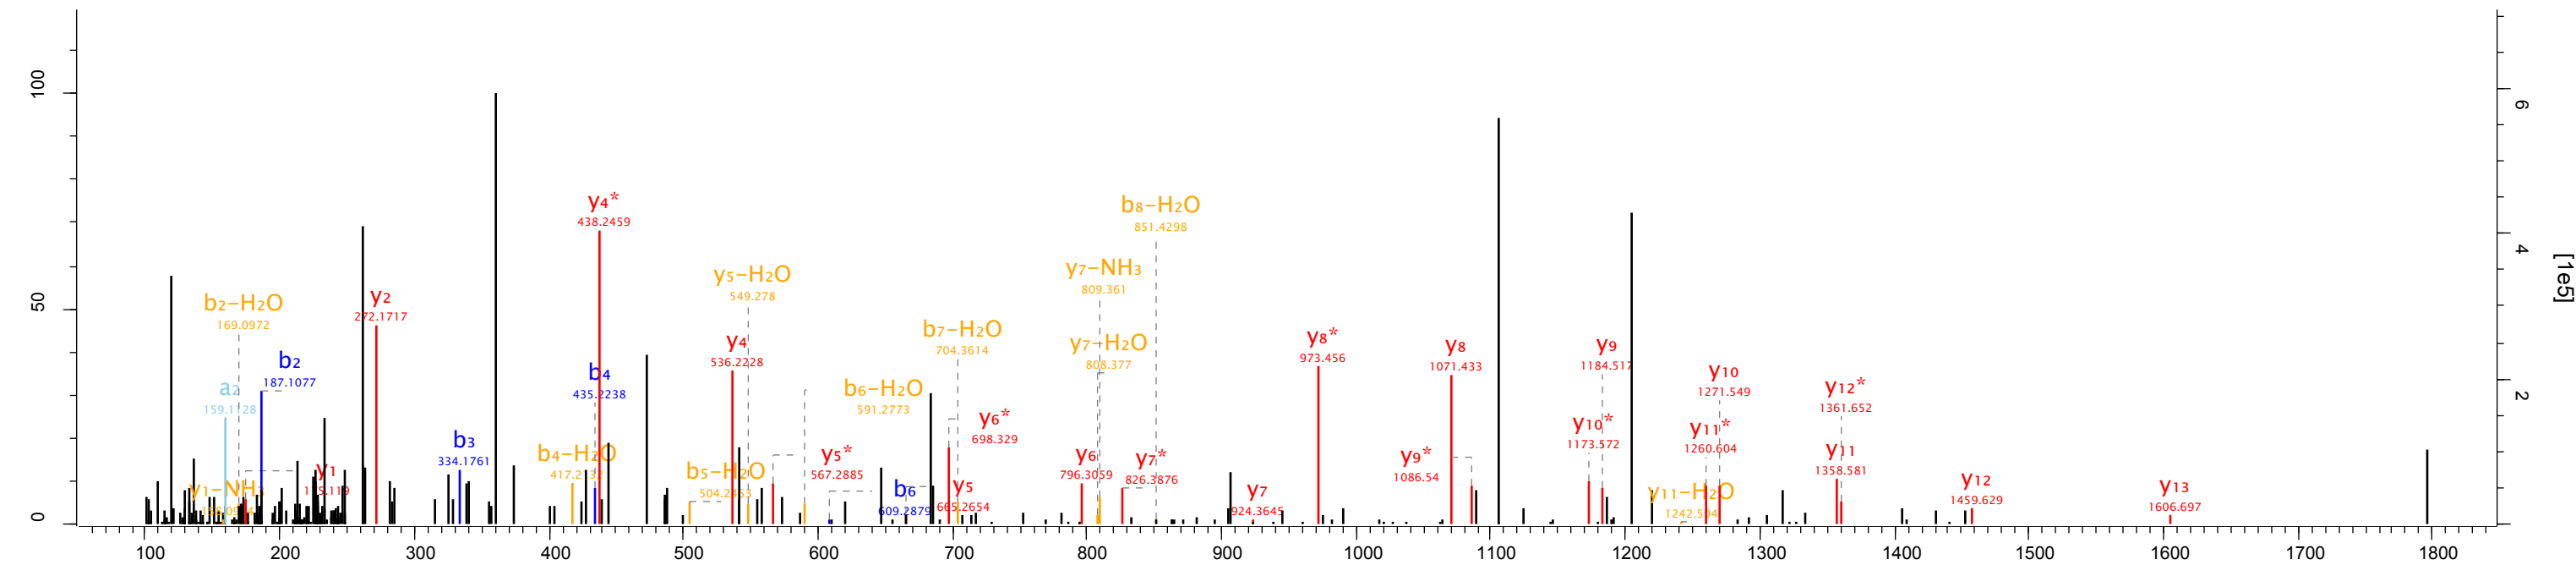

- S V F T S S L F Q M E P S P R -

Fragmentation mapping:

- b<sub>2</sub> (V-F)
- b<sub>3</sub> (F-T)
- b<sub>4</sub> (T-S)
- b<sub>6</sub> (S-S)
- y<sub>1</sub> (P-R)
- y<sub>2</sub> (S-P)
- y<sub>4</sub> (E-P)
- y<sub>5</sub> (M-E)
- y<sub>6</sub> (Q-M)
- y<sub>7</sub> (F-Q)
- y<sub>8</sub> (L-F)
- y<sub>9</sub> (S-L)
- y<sub>10</sub> (S-S)
- y<sub>11</sub> (S-T)
- y<sub>12</sub> (T-F)
- y<sub>13</sub> (F-V)

Raw file Scan Method Score m/z Gene names  
 20150814\_A375SR\_Phospho\_BR2\_05 28769 FTMS; HCD 130.23 725.37 SLC35C2

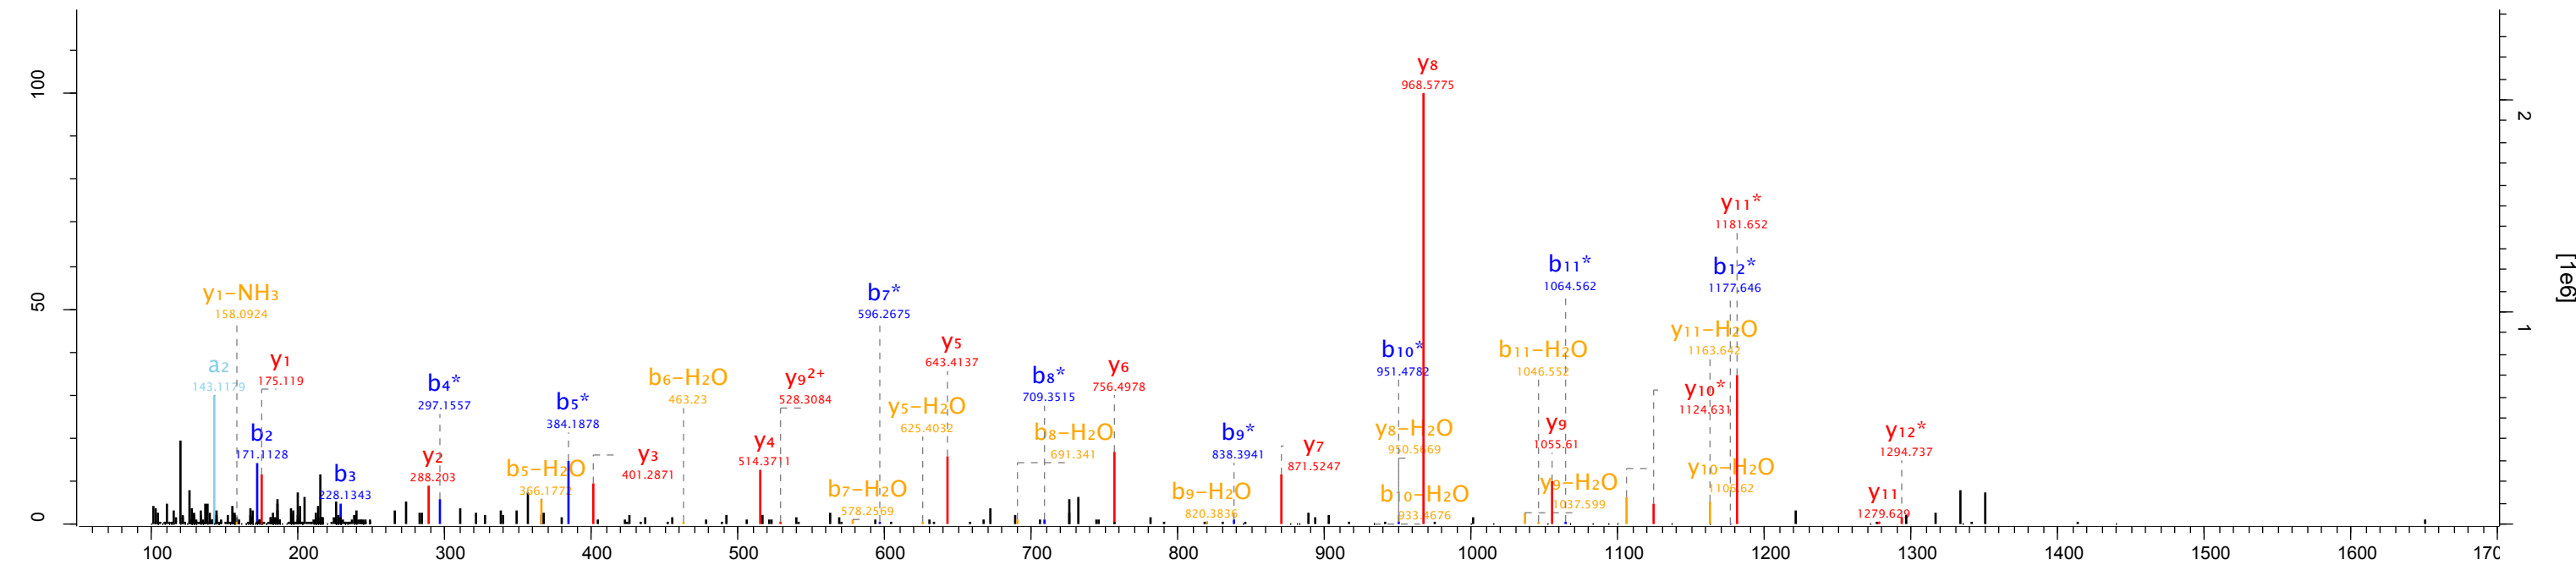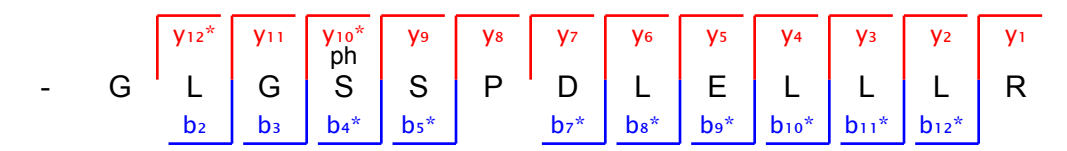

Raw file: 20150814\_A375SR\_Phospho\_BR2\_06  
 Scan: 21679 Method: FTMS; HCD Score: 62.04 m/z: 751.83 Gene names: CDC14A

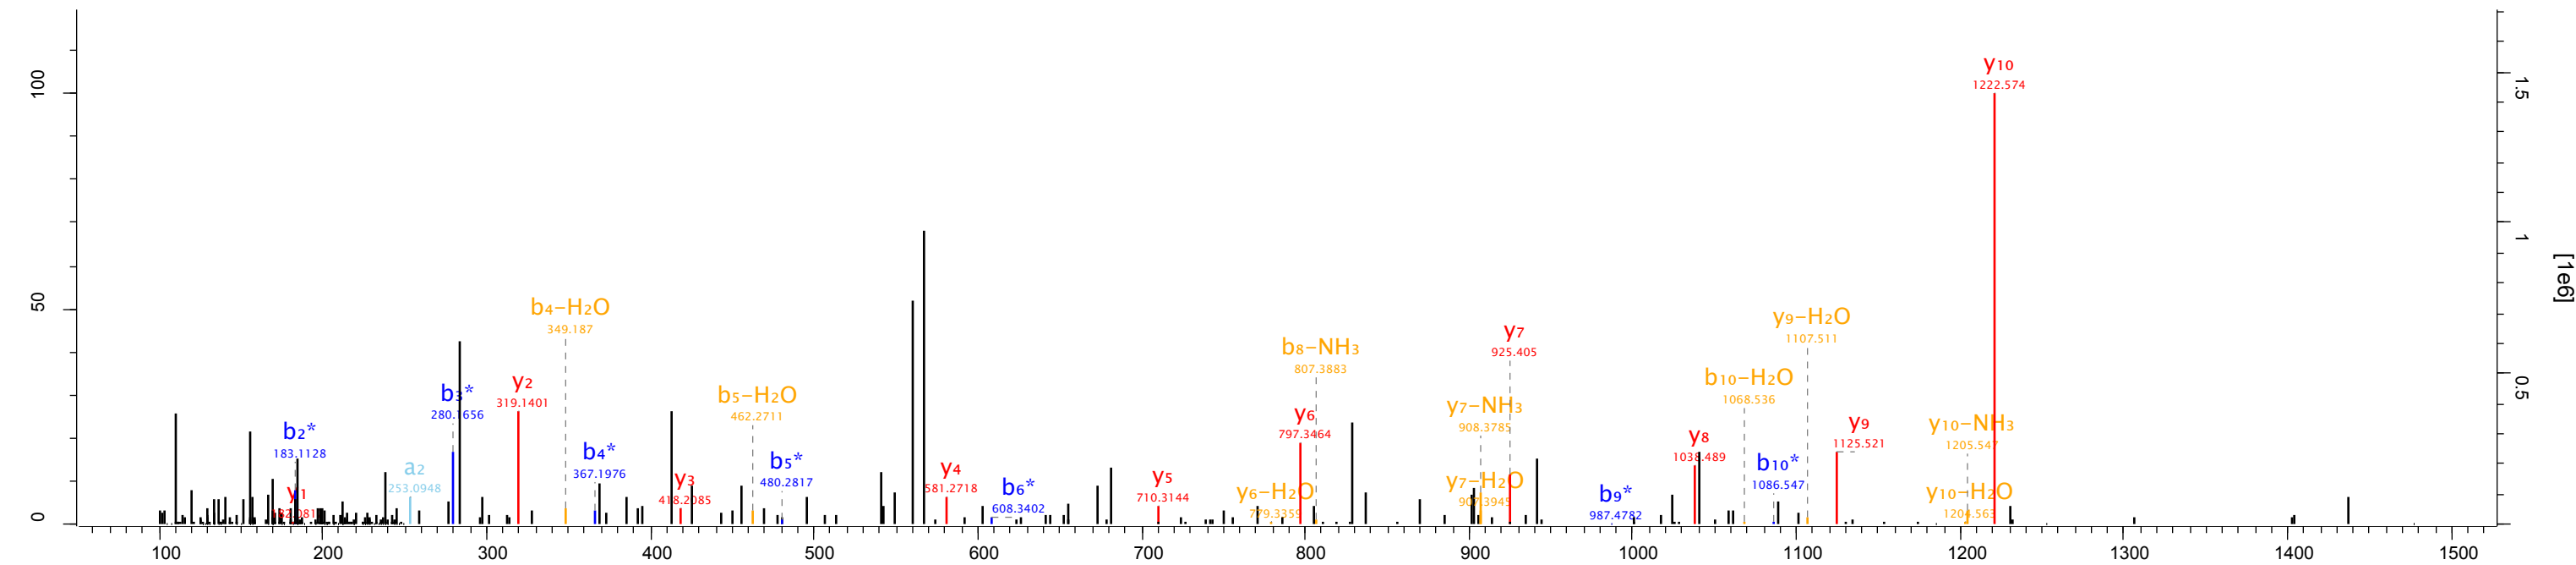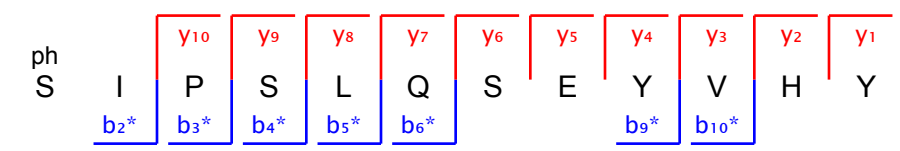

Raw file: 20150814\_A375SR\_Phospho\_BR2\_06  
 Scan: 28699 Method: FTMS; HCD Score: 166.04 m/z: 725.37 Gene names: SLC35C2

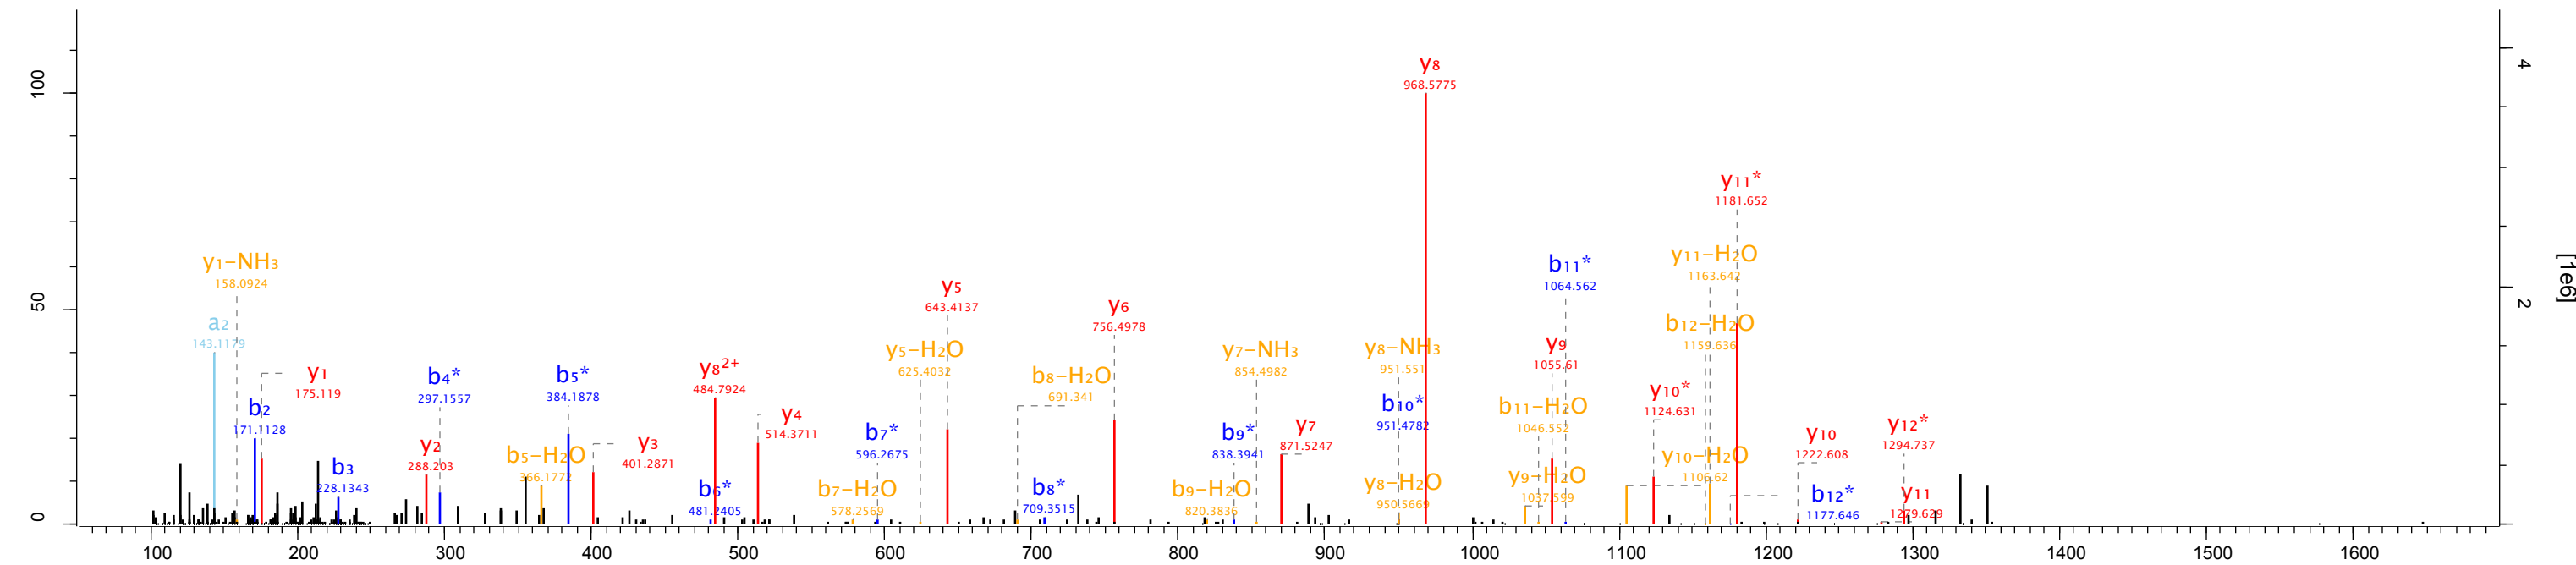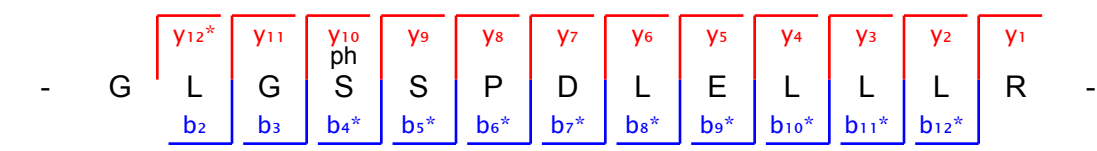

Raw file 20150814\_A375SR\_Phospho\_BR2\_07 Scan 11889 Method FTMS; HCD Score 45.28 m/z 754.87

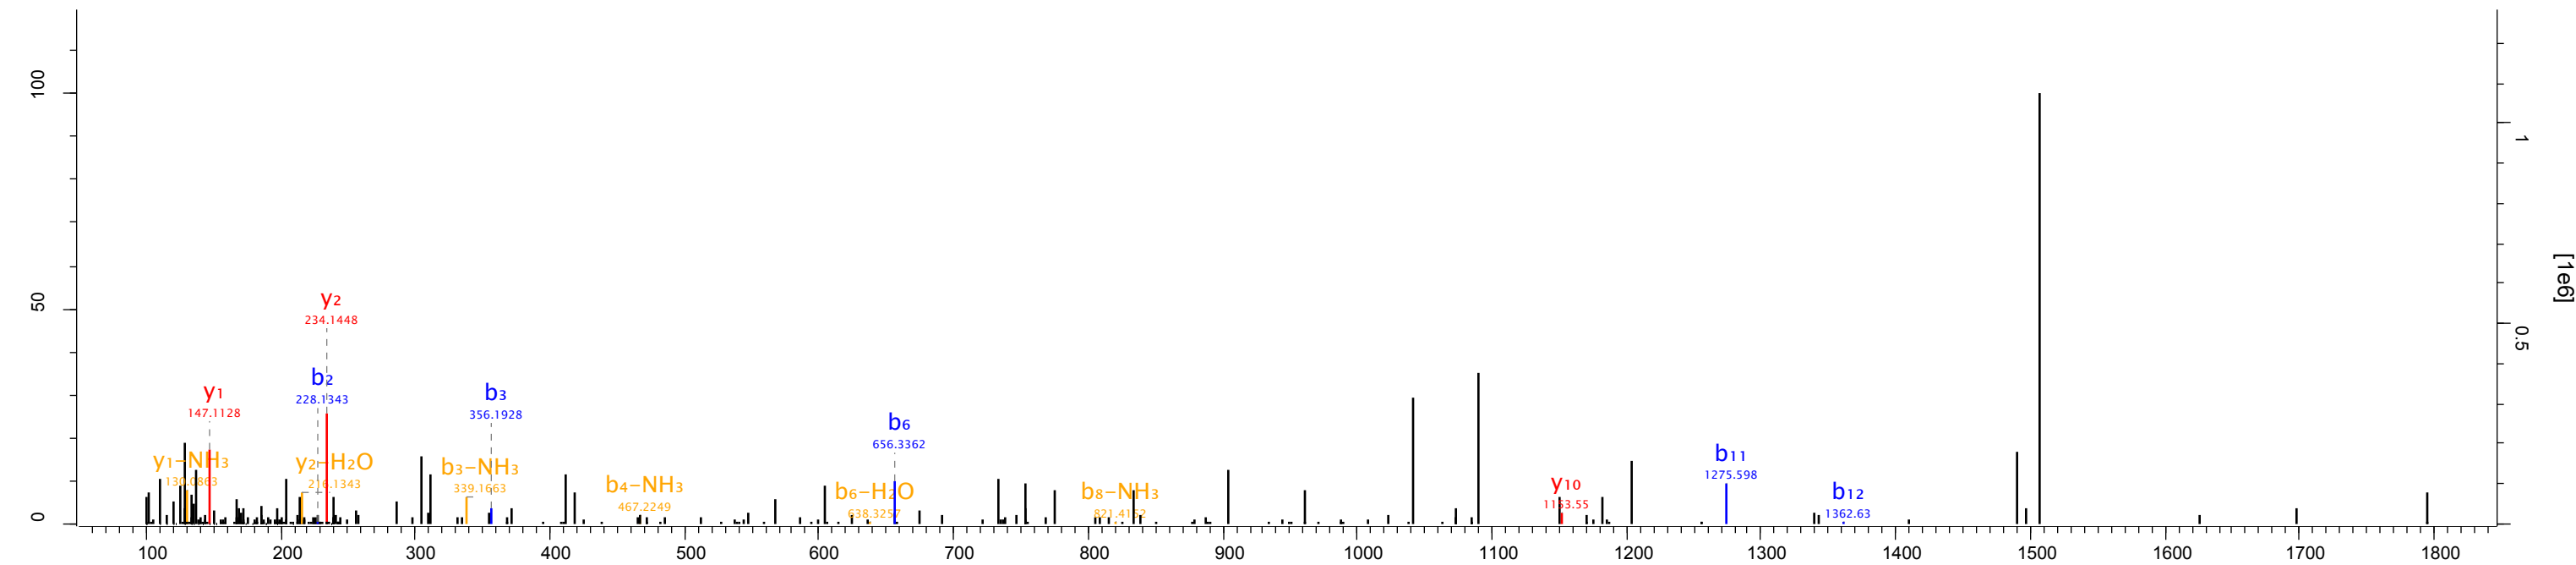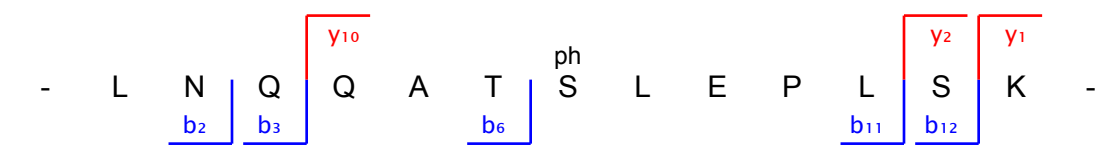

Raw file 20150814\_A375SR\_Phospho\_BR2\_07 Scan 5619 Method FTMS; HCD Score 68.46 m/z 432.75

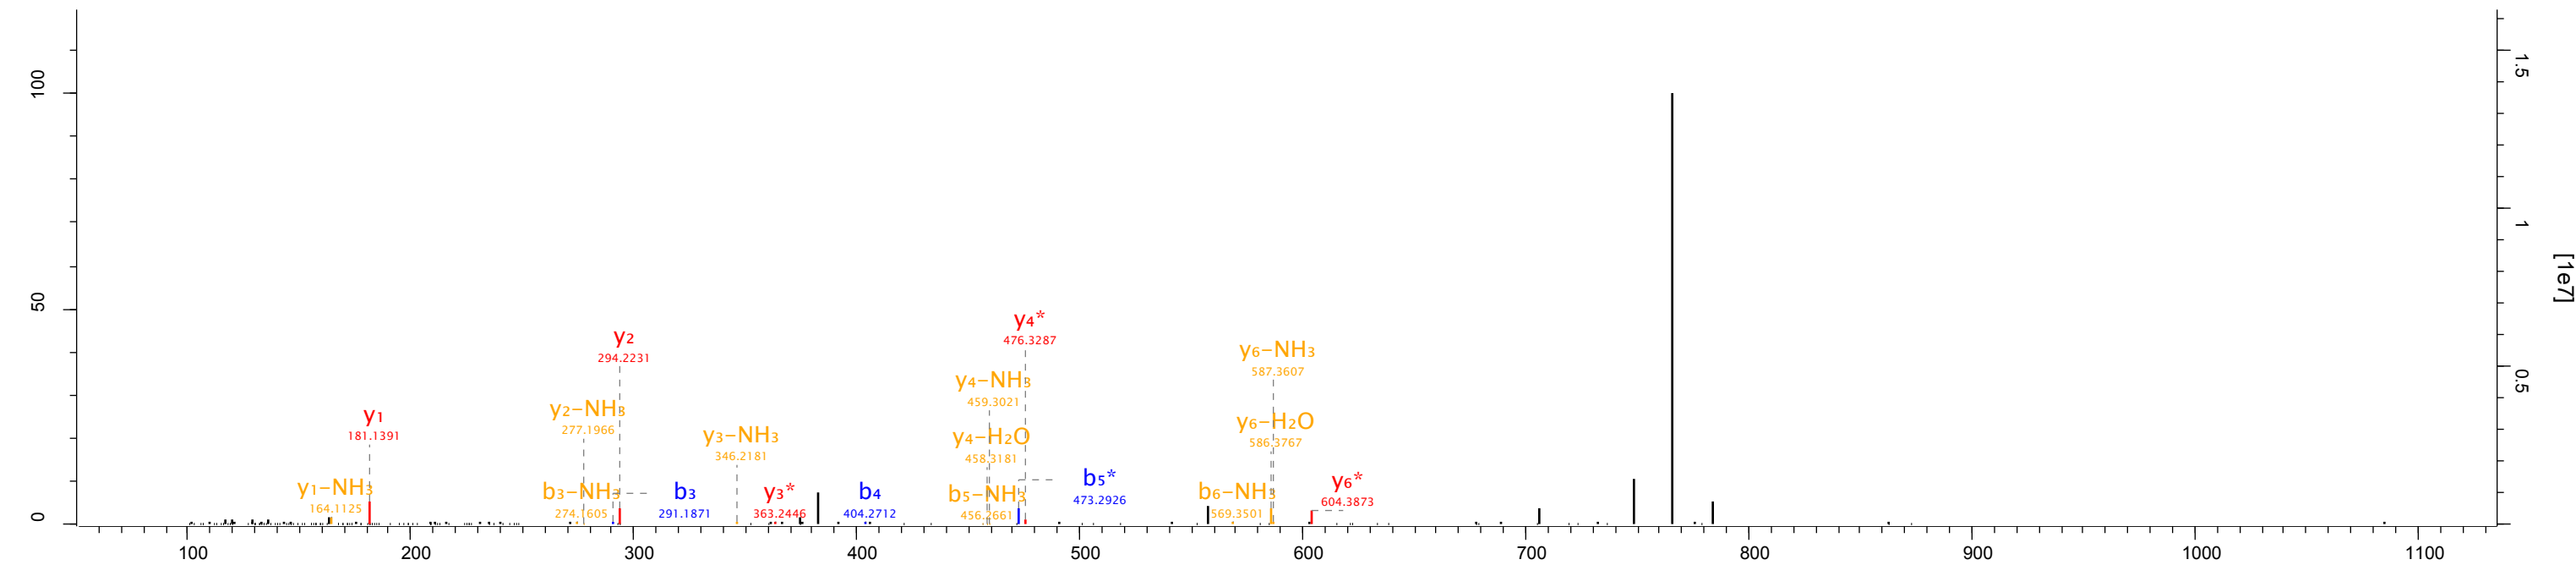



Raw file: 20150814\_A375SR\_Phospho\_BR2\_07  
 Scan: 6489 Method: FTMS; HCD Score: 57.35 m/z: 576.29

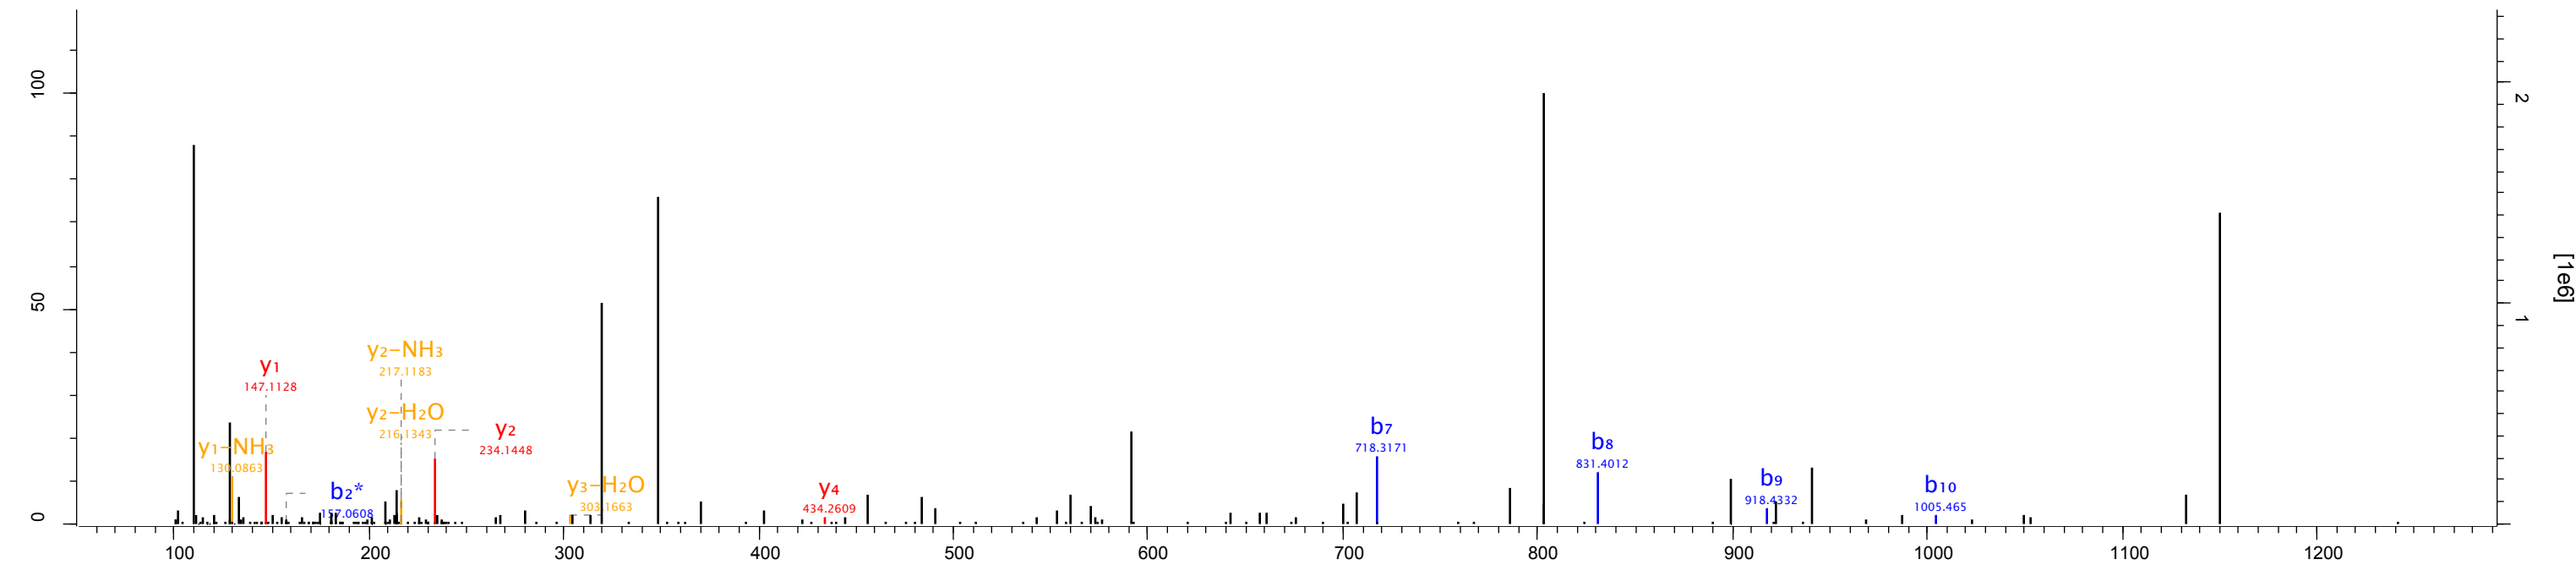

Raw file: 20150814\_A375SR\_Phospho\_BR2\_08  
 Scan: 24069 Method: FTMS; HCD Score: 88.09 m/z: 647.63 Gene names: MAPK11P1L

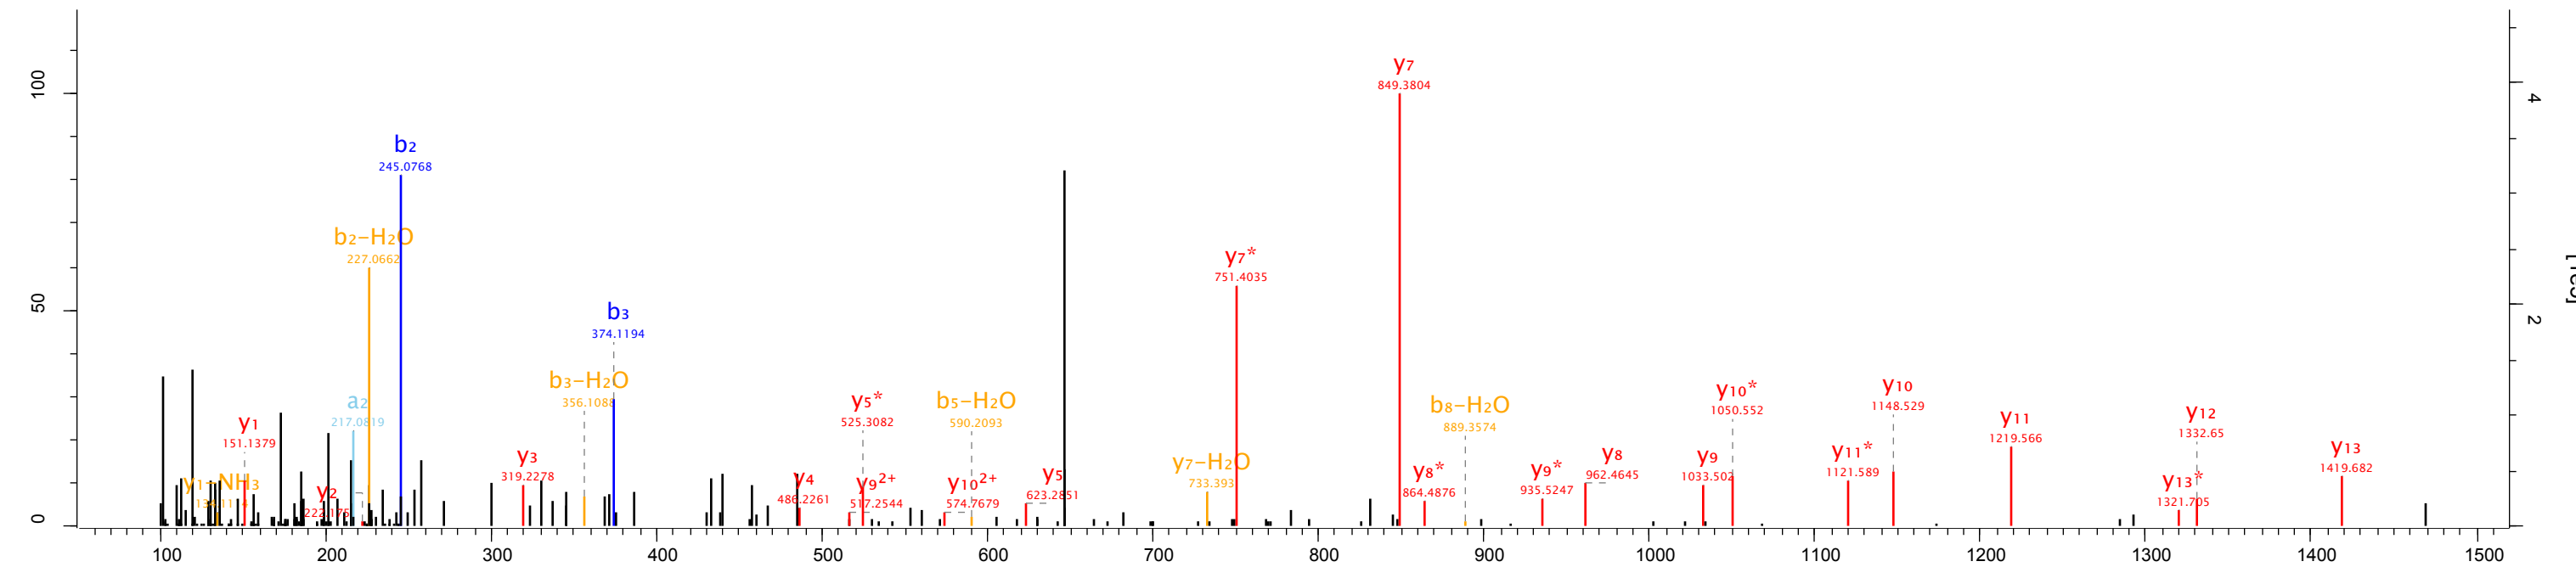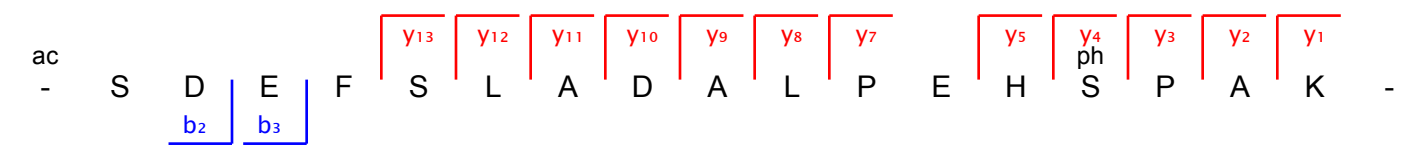

Raw file 20150814\_A375SR\_Phospho\_BR2\_08 Scan 7709 Method FTMS; HCD Score 70.09 m/z 676.82

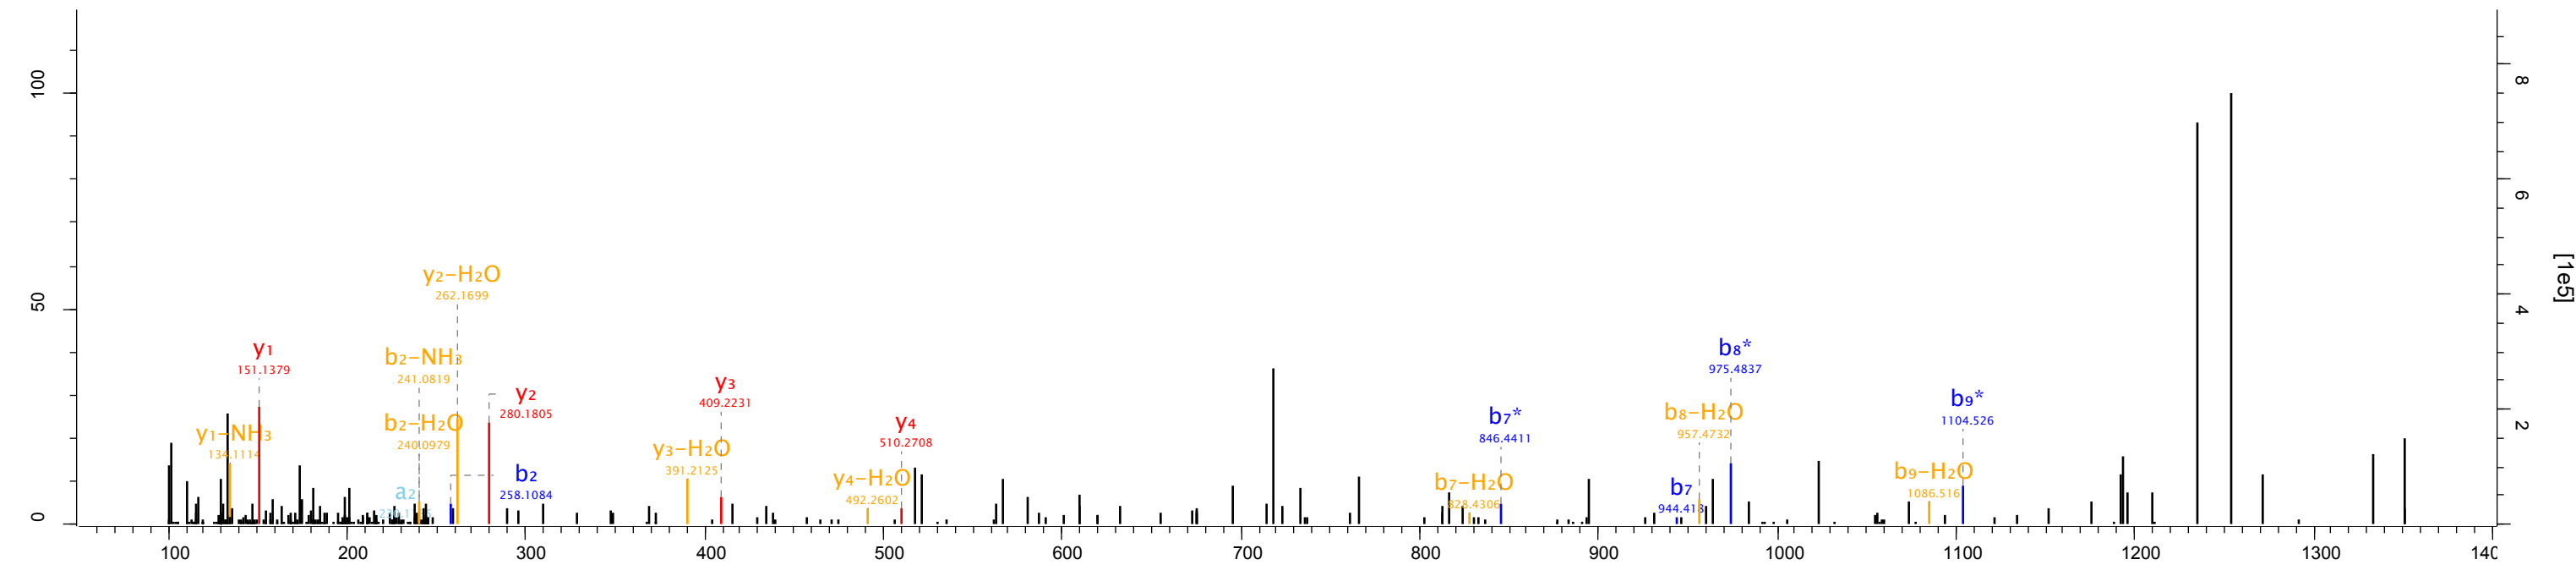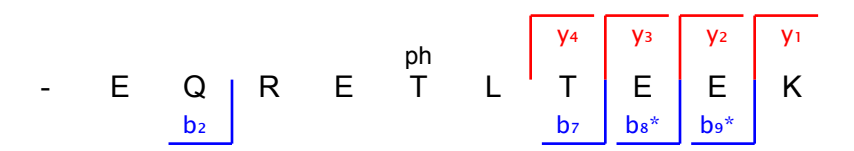

Raw file 20150814\_A375SR\_Phospho\_BR2\_09 Scan 21289 Method FTMS; HCD Score 44.34 m/z 781.41 Gene names ZNF579

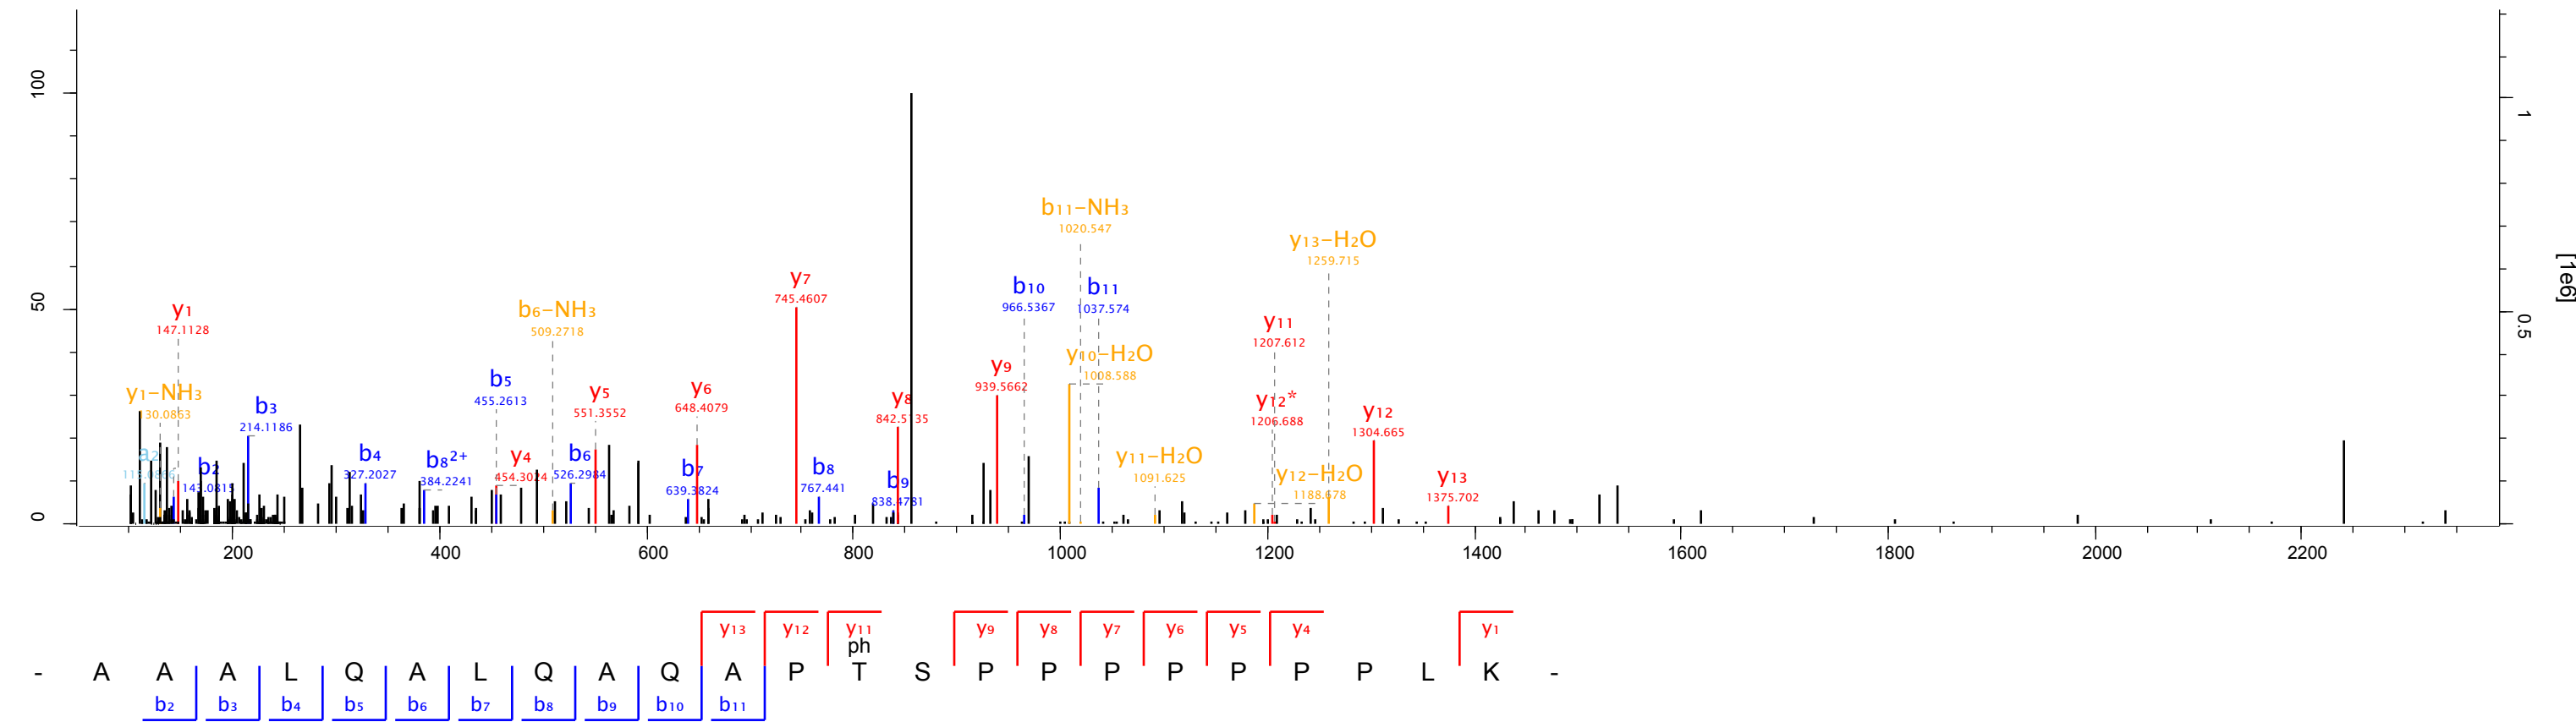

Raw file: 20150814\_A375SR\_Phospho\_BR2\_10  
 Scan: 10999 Method: FTMS; HCD Score: 76.15 m/z: 653.81 Gene names: PHACTR2

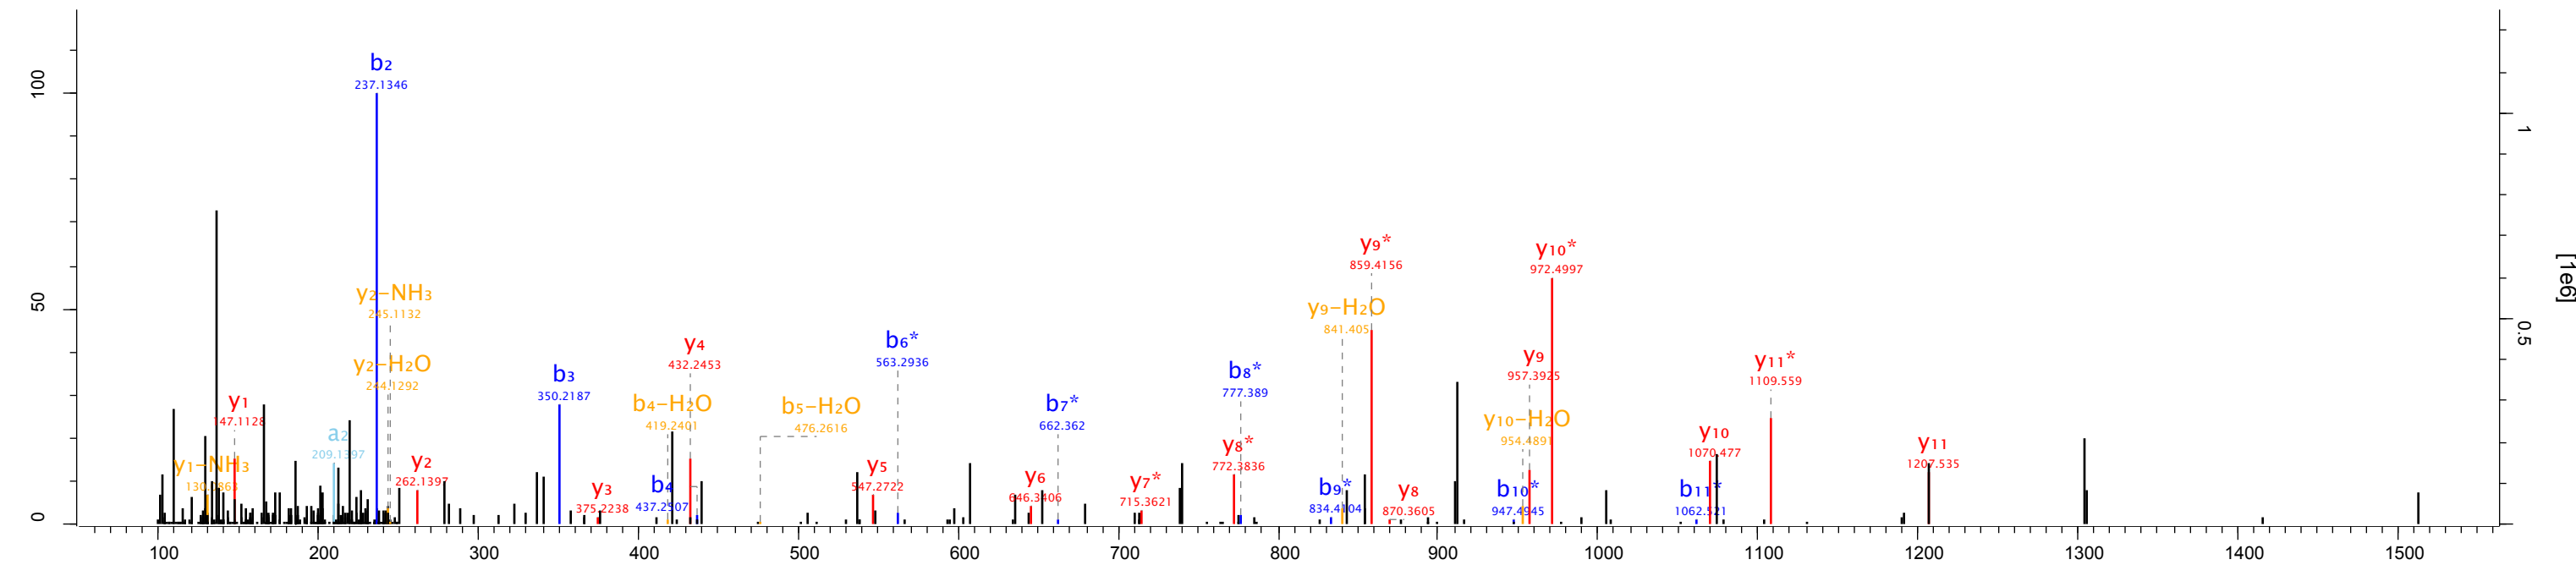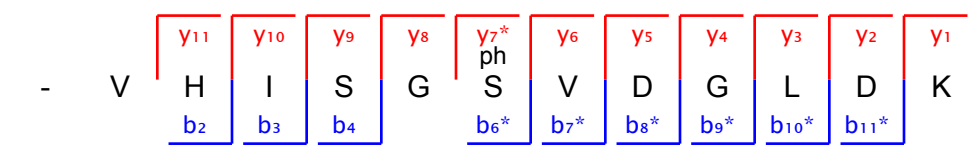

Raw file 20150814\_A375SR\_Phospho\_BR2\_10 Scan 4709 Method FTMS; HCD Score 40.48 m/z 527.23

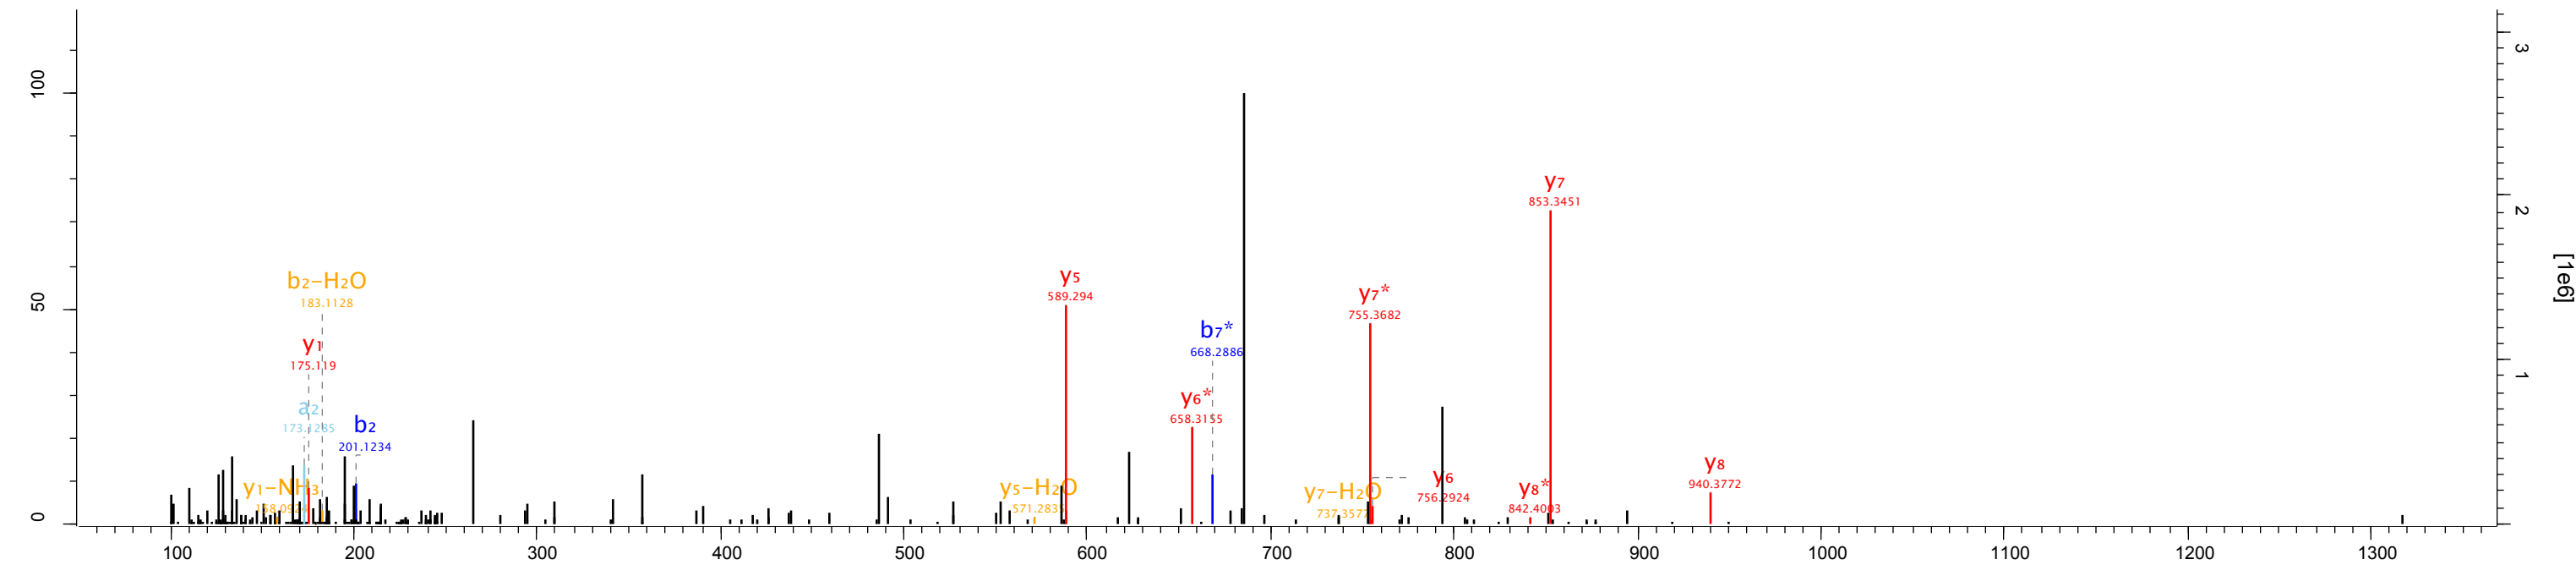

Raw file: 20150818\_A375SR-Proteome\_BR1  
 Scan: 5159 Method: FTMS; HCD Score: 52.25 m/z: 563.28 Gene names: SFT2D2

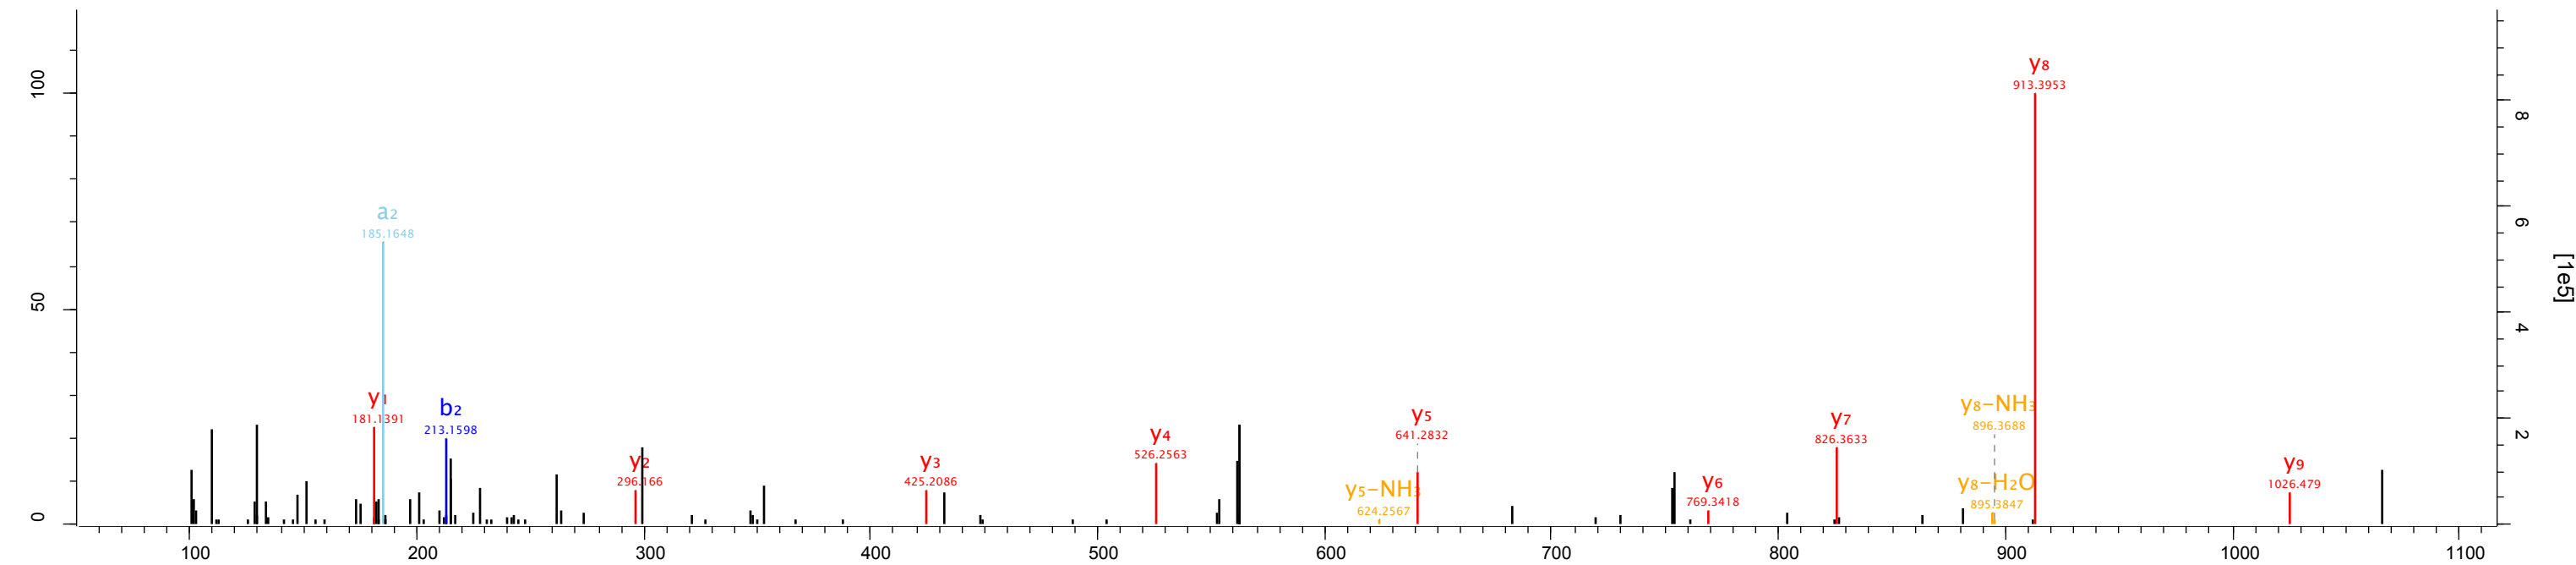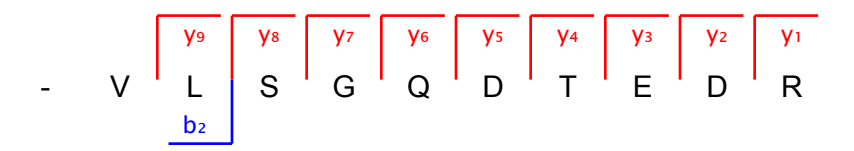

Raw file: 20150818\_A375SR-Proteome\_BR1  
 Scan: 71869 Method: FTMS; HCD Score: 50.19 m/z: 492.81 Gene names: STON2

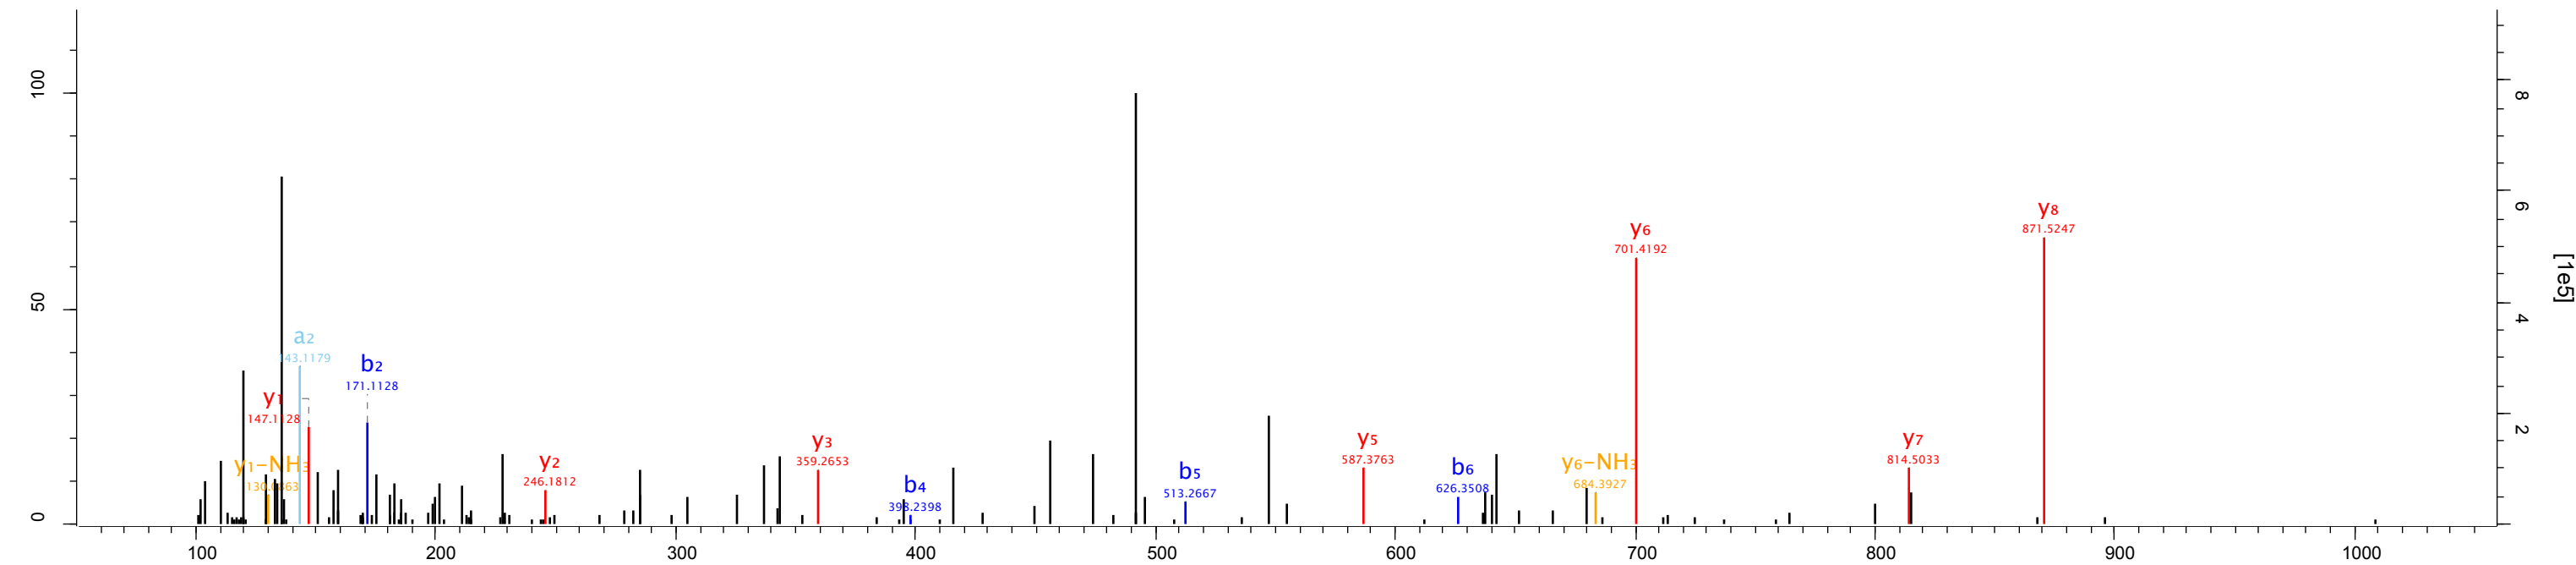



Raw file 20150818\_A375SR-Proteome\_BR2 Scan 37109 Method FTMS; HCD Score 49.85 m/z 485.27

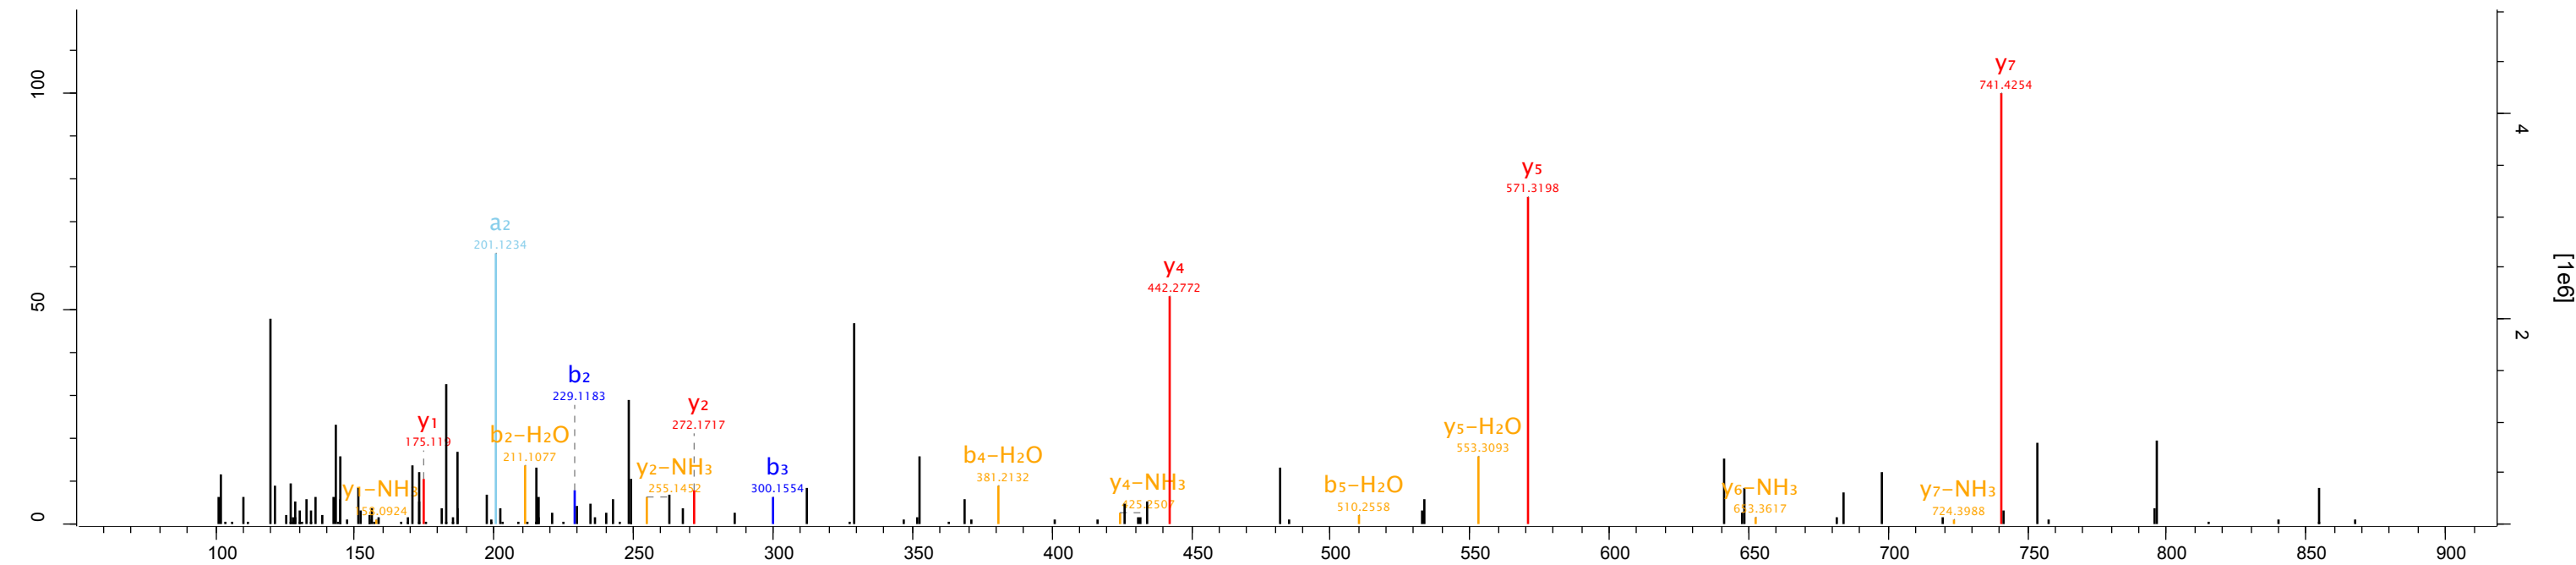

Raw file: 20150818\_A375SR-Proteome\_BR2  
 Scan: 37399 Method: FTMS; HCD Score: 134.05 m/z: 660.39 Gene names: RPL39P5;RPL39

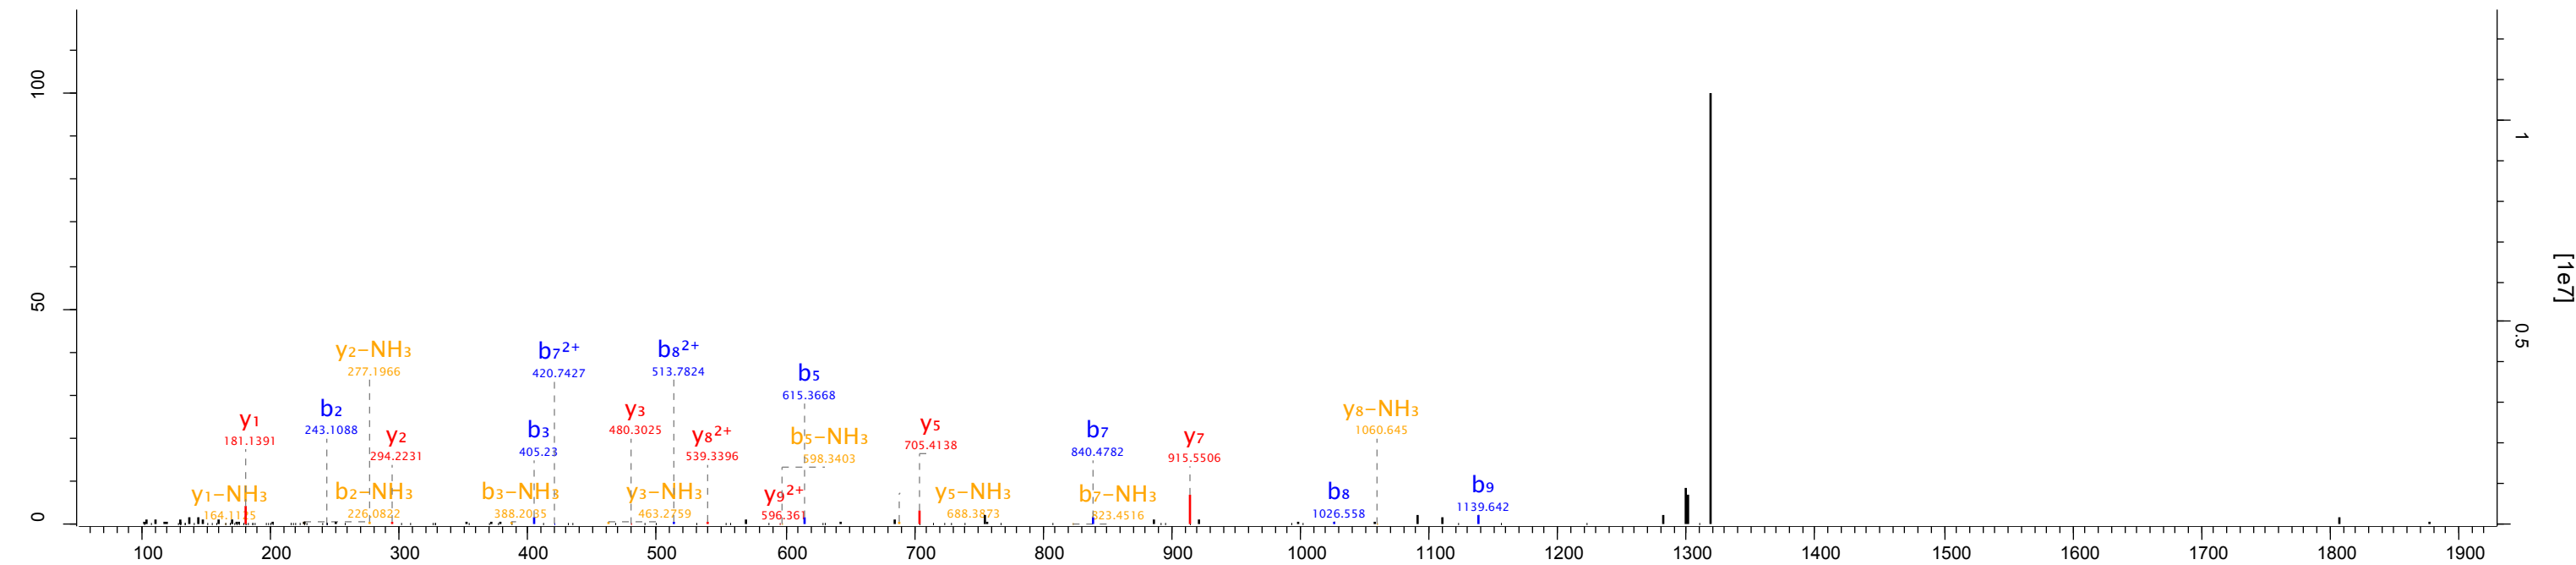

Raw file 20150818\_A375SR-Proteome\_BR2 Scan 4159 Method FTMS; HCD Score 52.73 m/z 540.28

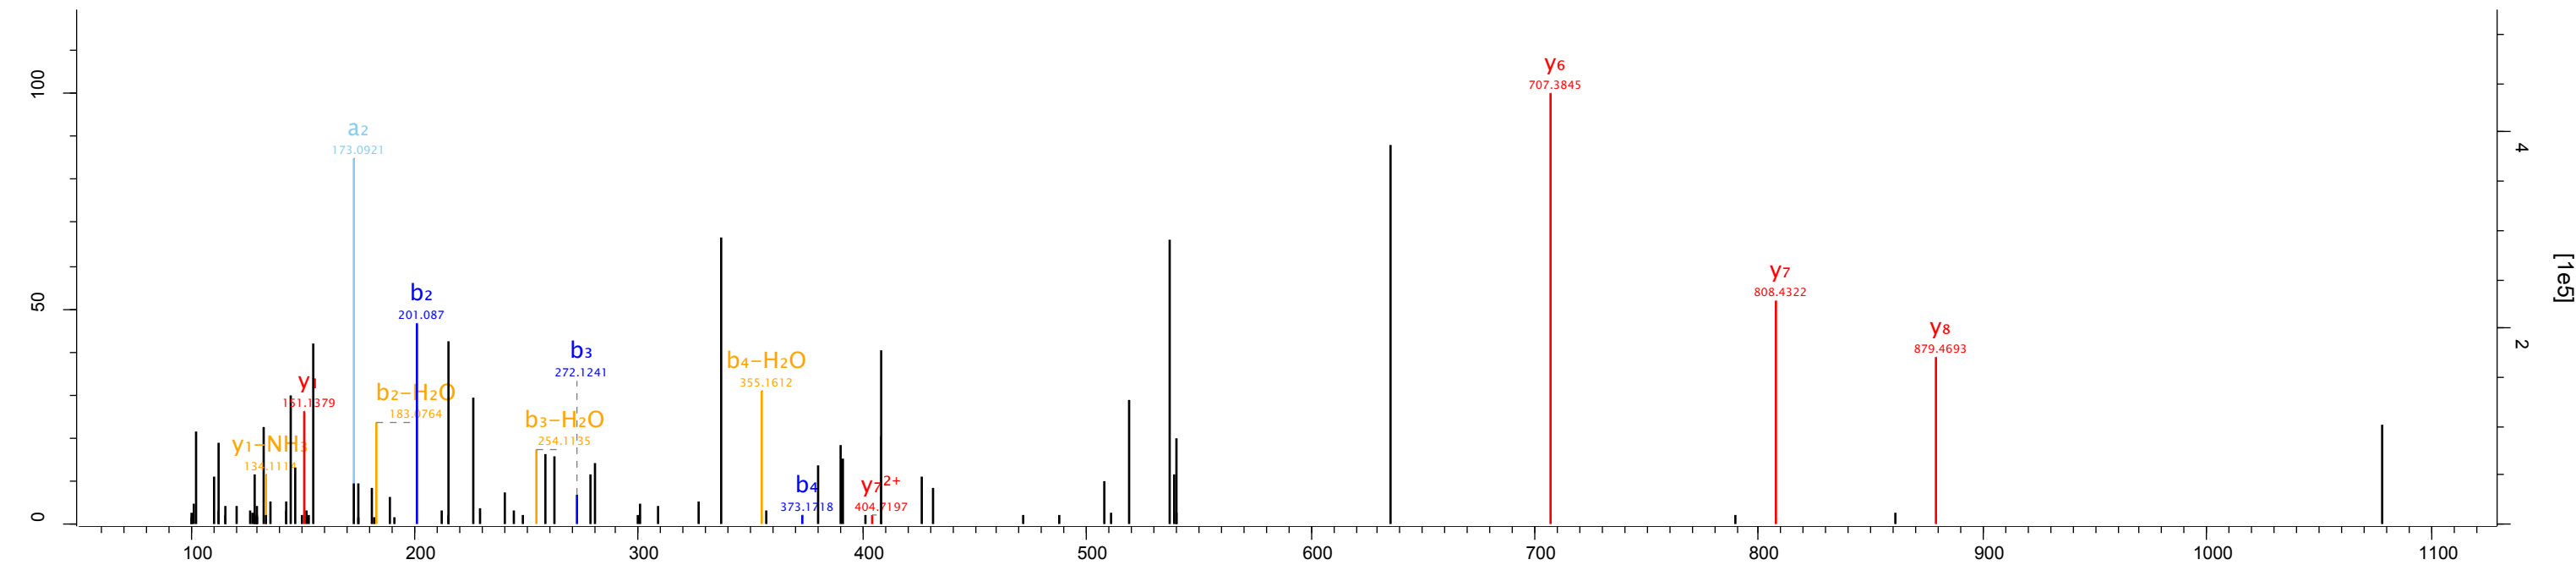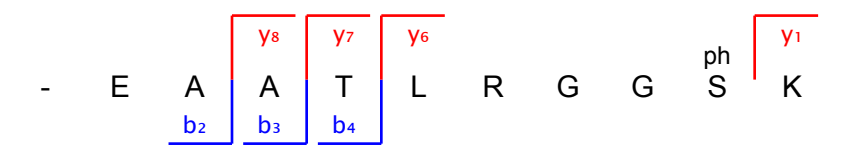

Raw file: 20150818\_A375SR-Proteome\_BR2  
 Scan: 52629 Method: FTMS; HCD Score: 61.11 m/z: 586.84 Gene names: KATNAL2

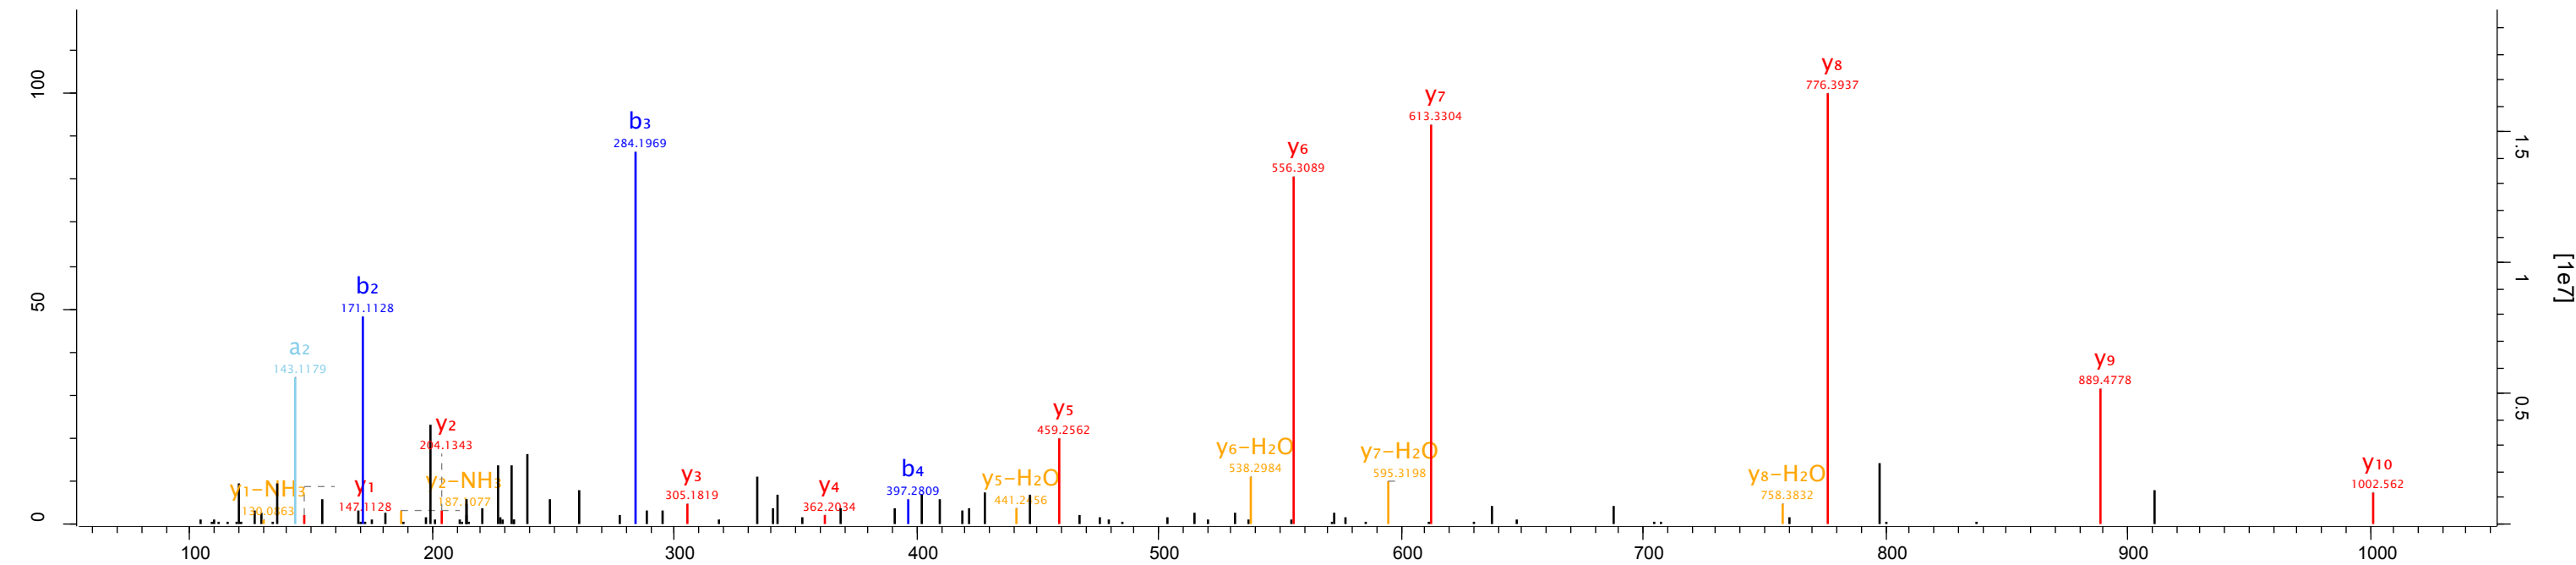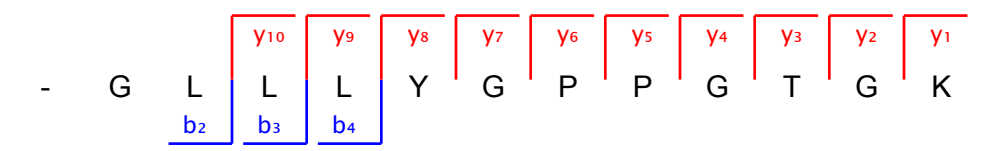

Raw file: 20150818\_A375SR-Proteome\_BR2  
 Scan: 83609 Method: FTMS; HCD Score: 43.59 m/z: 854.41 Gene names: SSR3

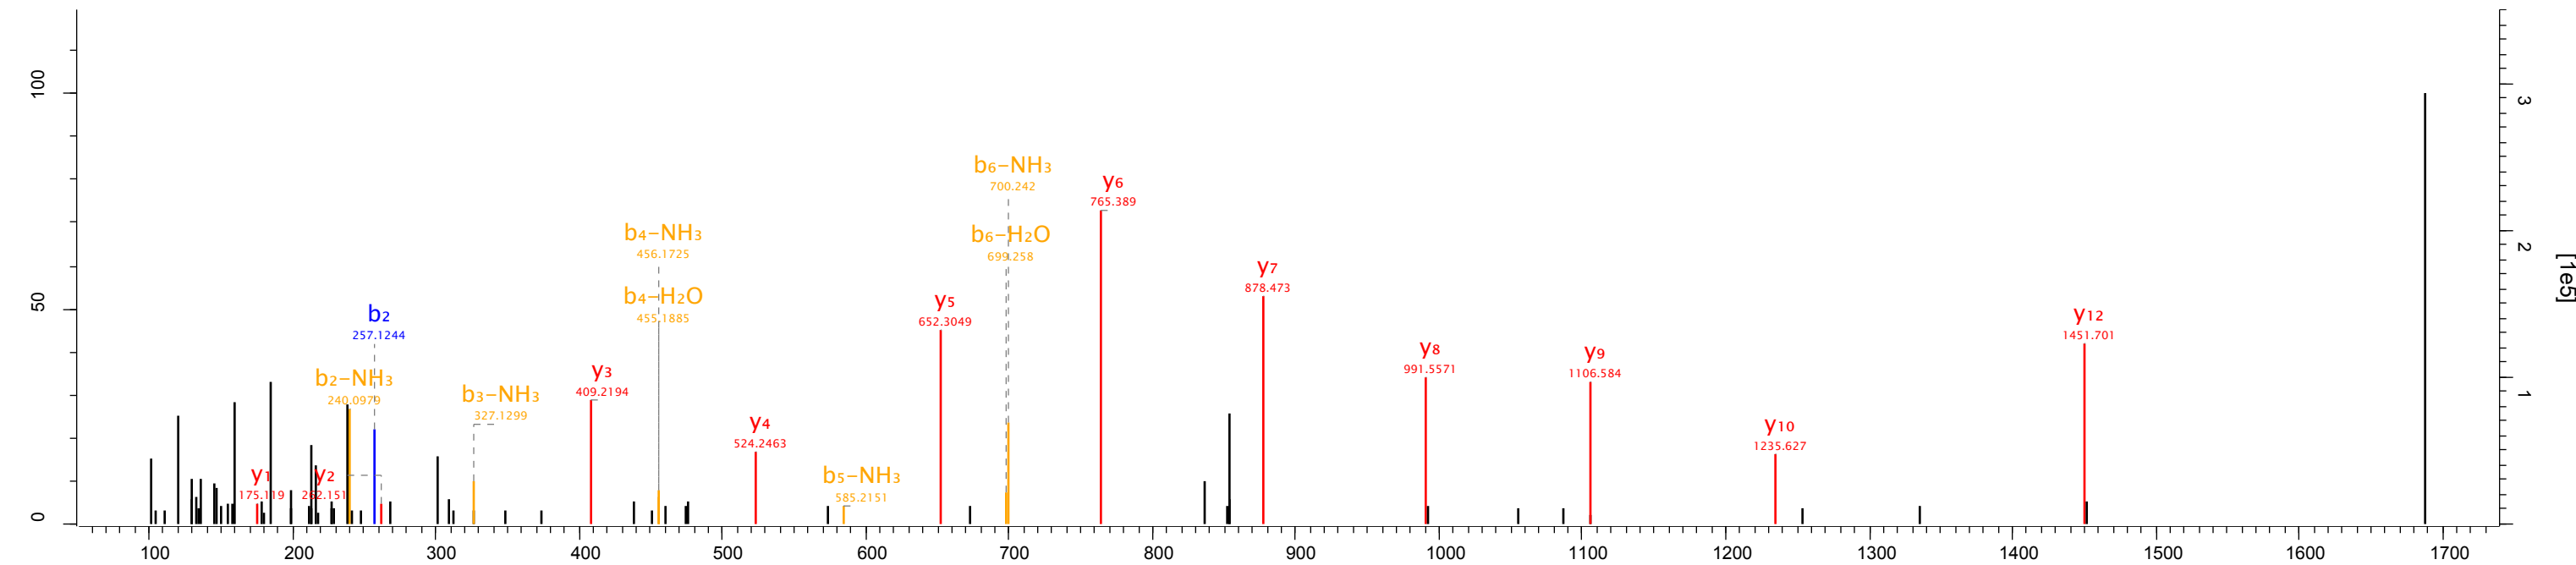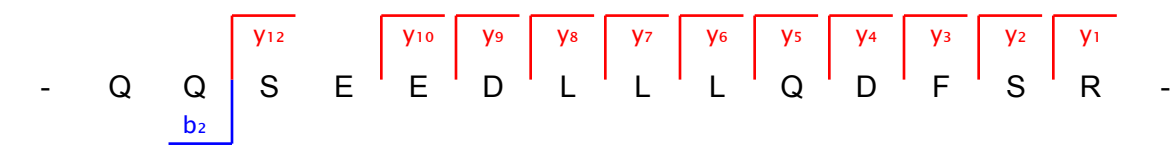

Raw file: 20150822\_A375SR\_Phospho\_BR3\_02  
 Scan: 5109 Method: FTMS; HCD Score: 48.91 m/z: 663.78 Gene names: GPSM3

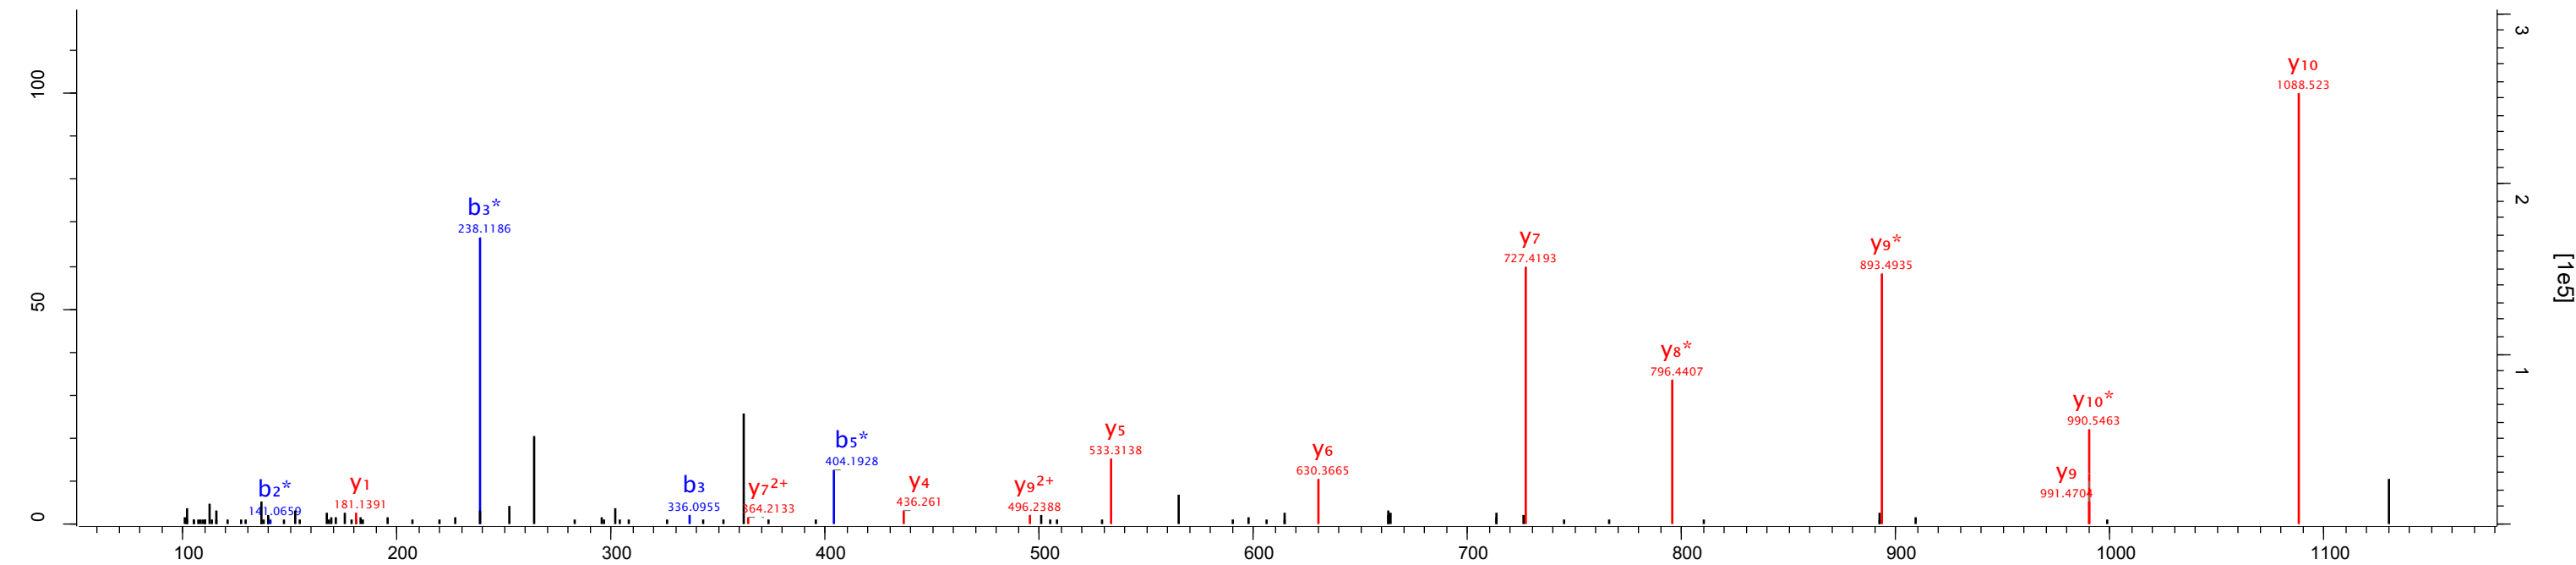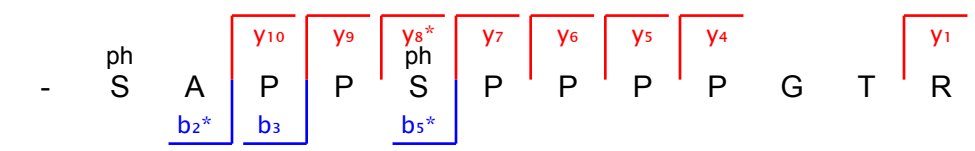

Raw file: 20150822\_A375SR\_Phospho\_BR3\_03  
 Scan: 8969 Method: FTMS; HCD Score: 75.11 m/z: 477.23 Gene names: GPR64

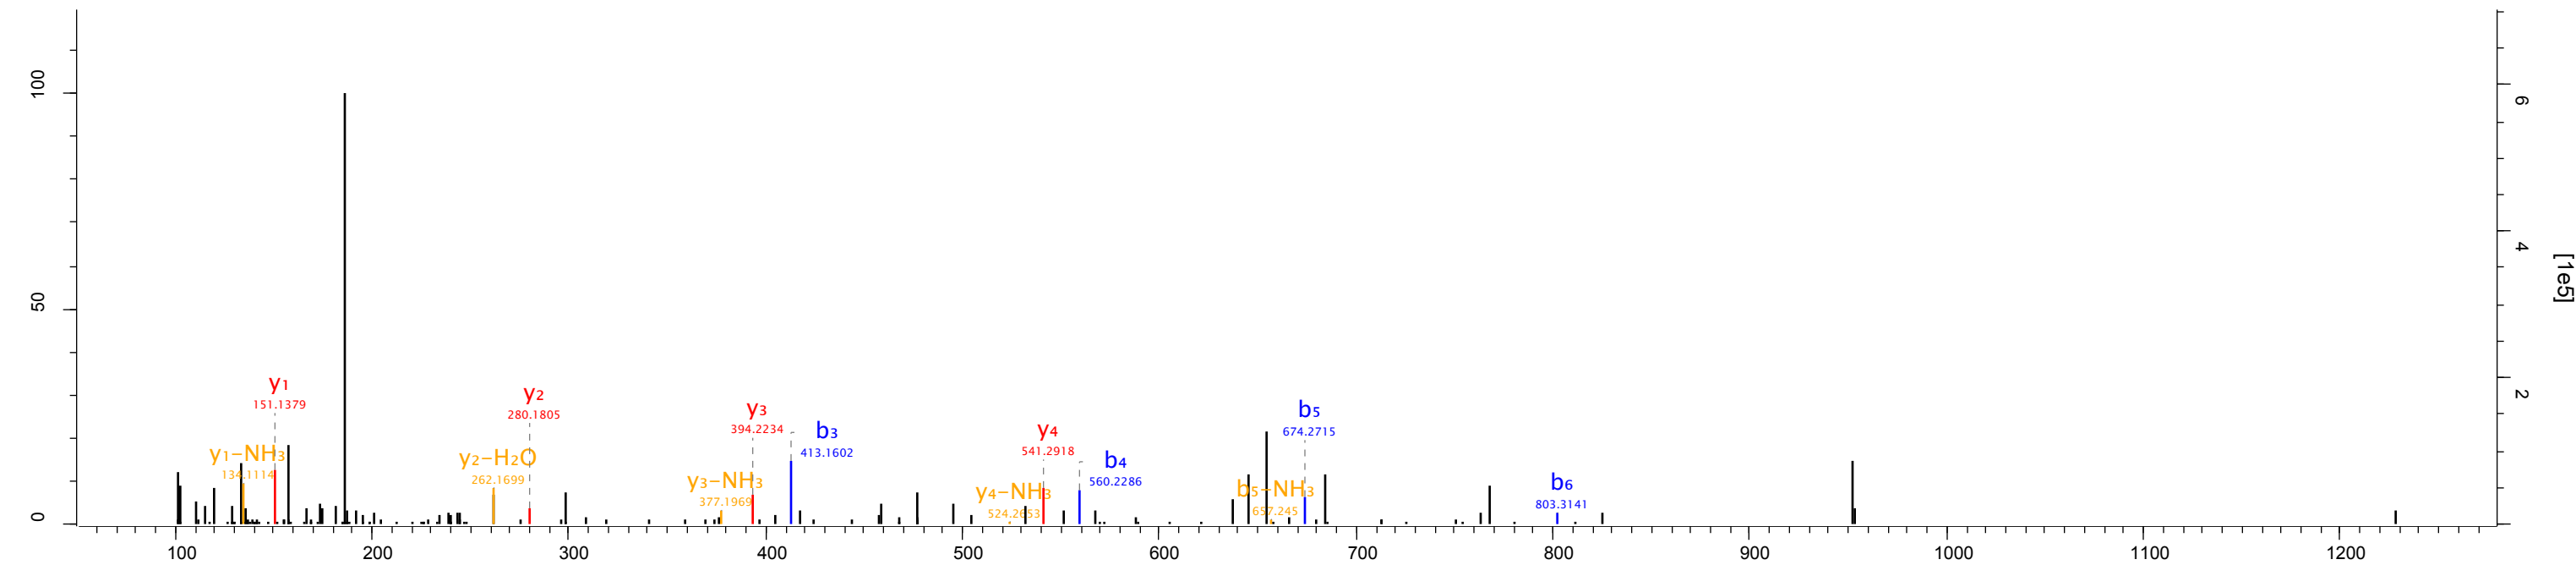

Raw file: 20150822\_A375SR\_Phospho\_BR3\_04  
 Scan: 10919 Method: FTMS; HCD Score: 53.56 m/z: 691.34 Gene names: ELK3

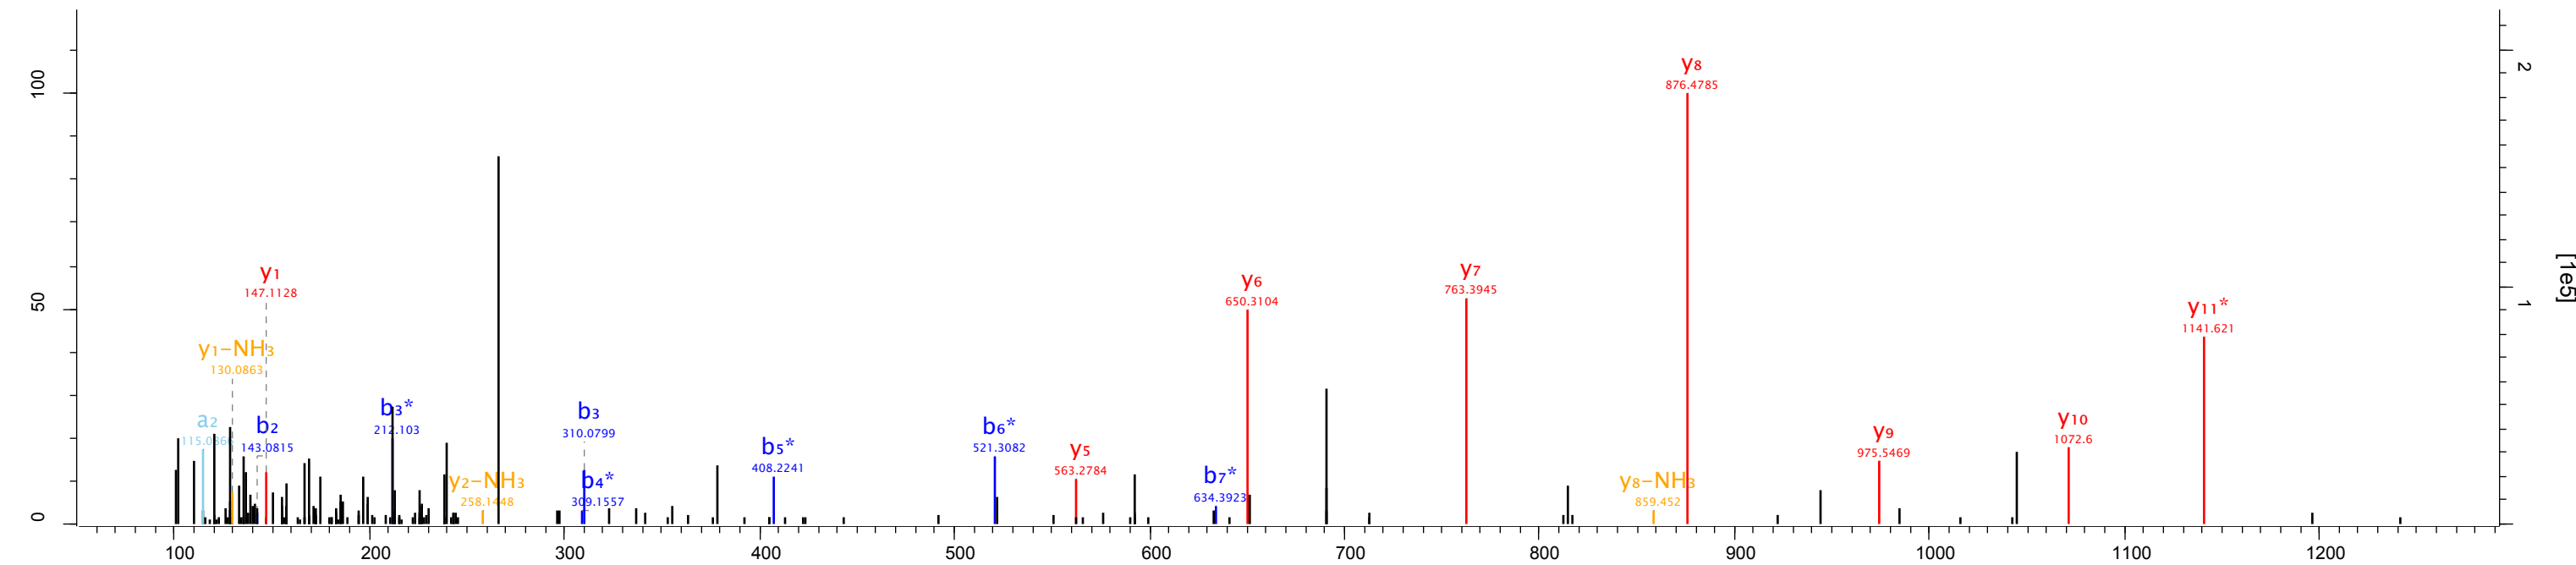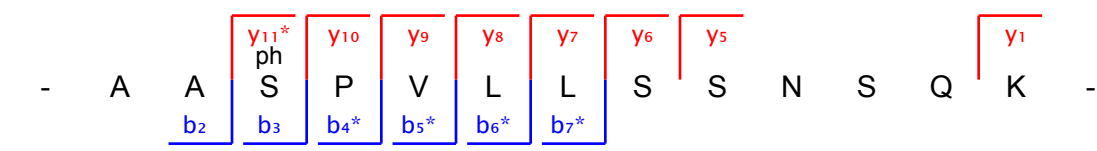



Raw file 20150822\_A375SR\_Phospho\_BR3\_04 Scan 9199 Method FTMS; HCD Score 44.35 m/z 558.79

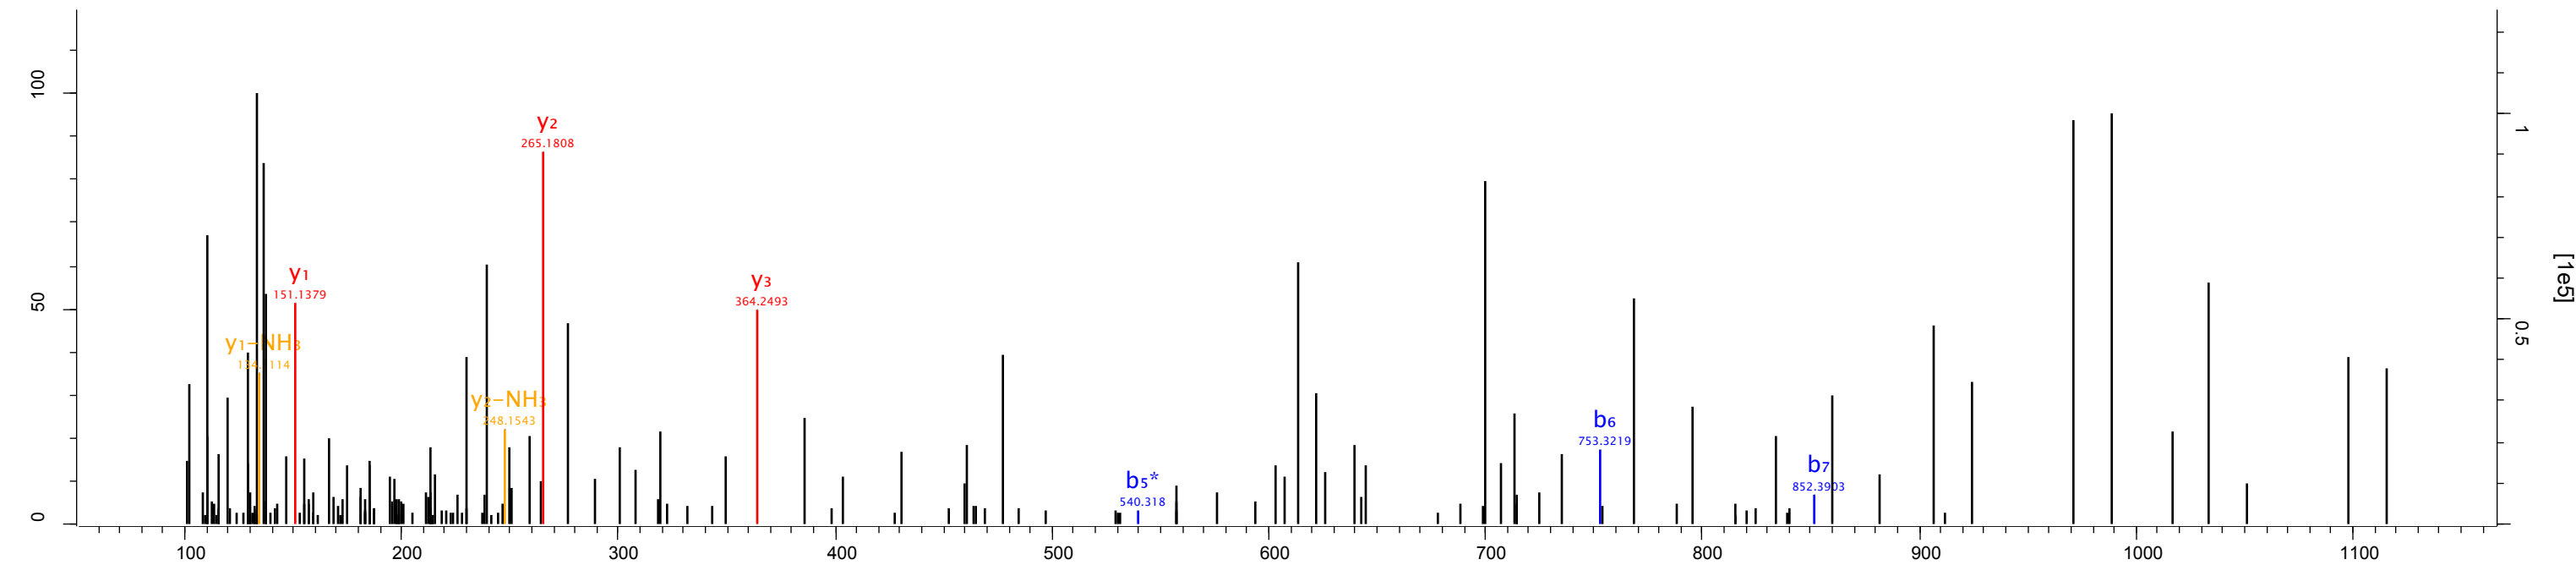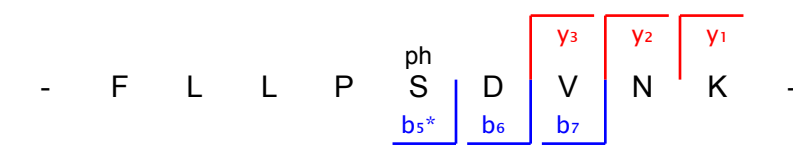

Raw file: 20150822\_A375SR\_Phospho\_BR3\_05  
 Scan: 5219 Method: FTMS; HCD Score: 44.61 m/z: 527.23

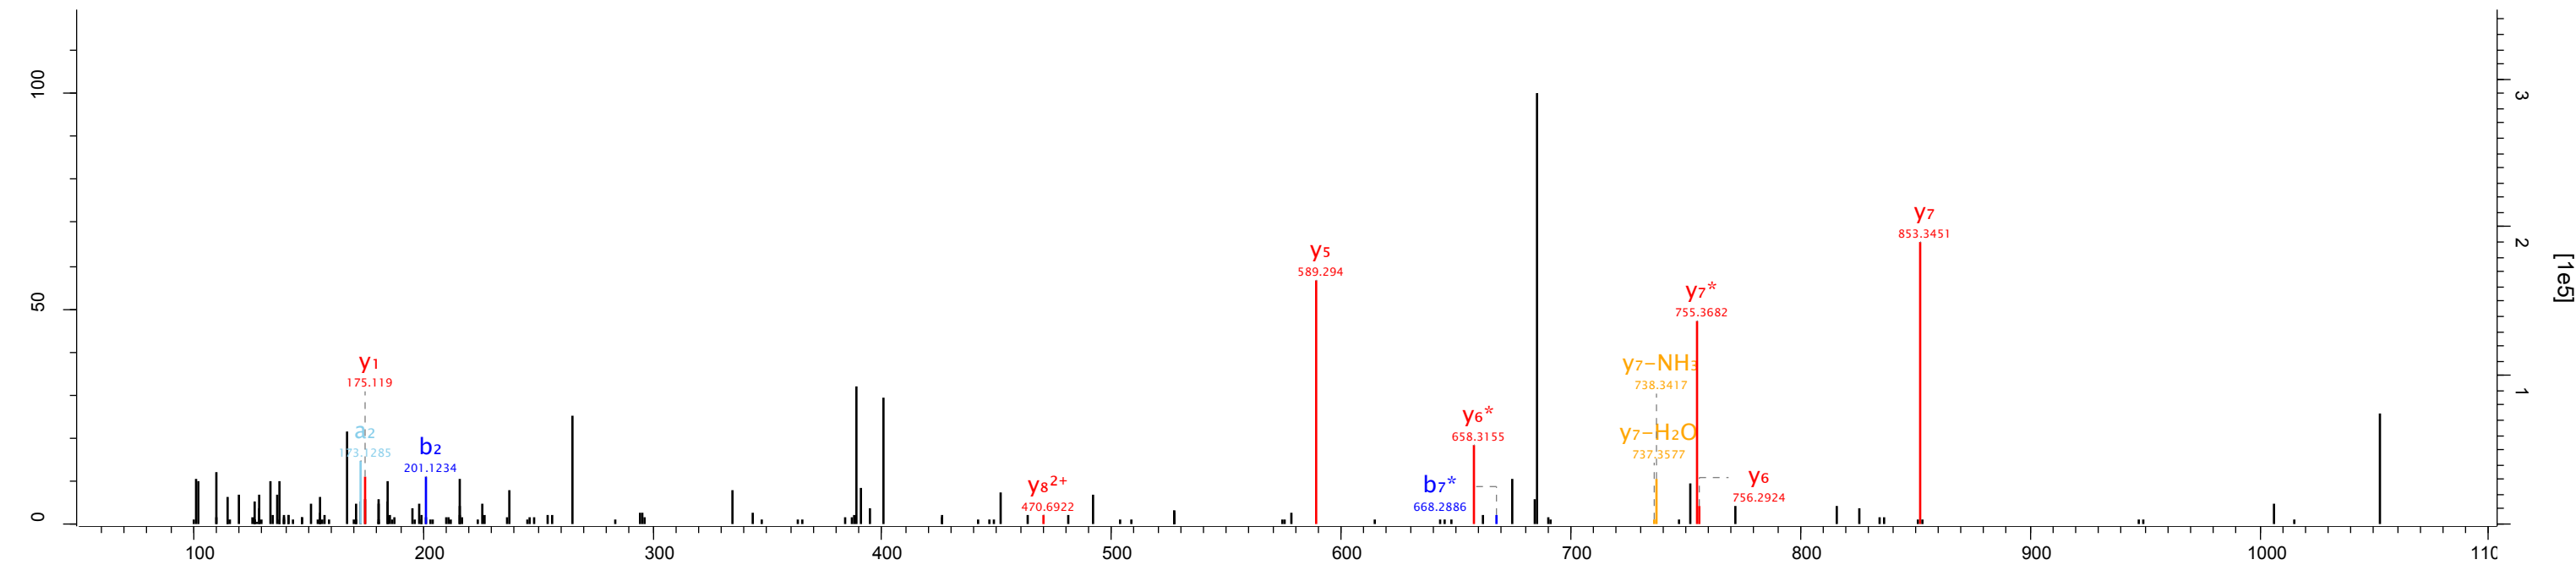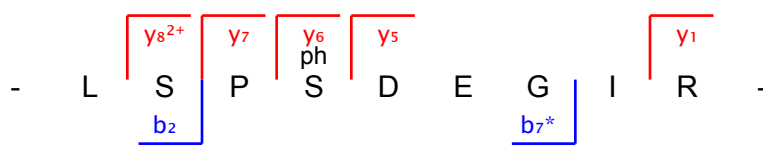

Raw file 20150822\_A375SR\_Phospho\_BR3\_07 Scan 5159 Method FTMS; HCD Score 50.79 m/z 527.23

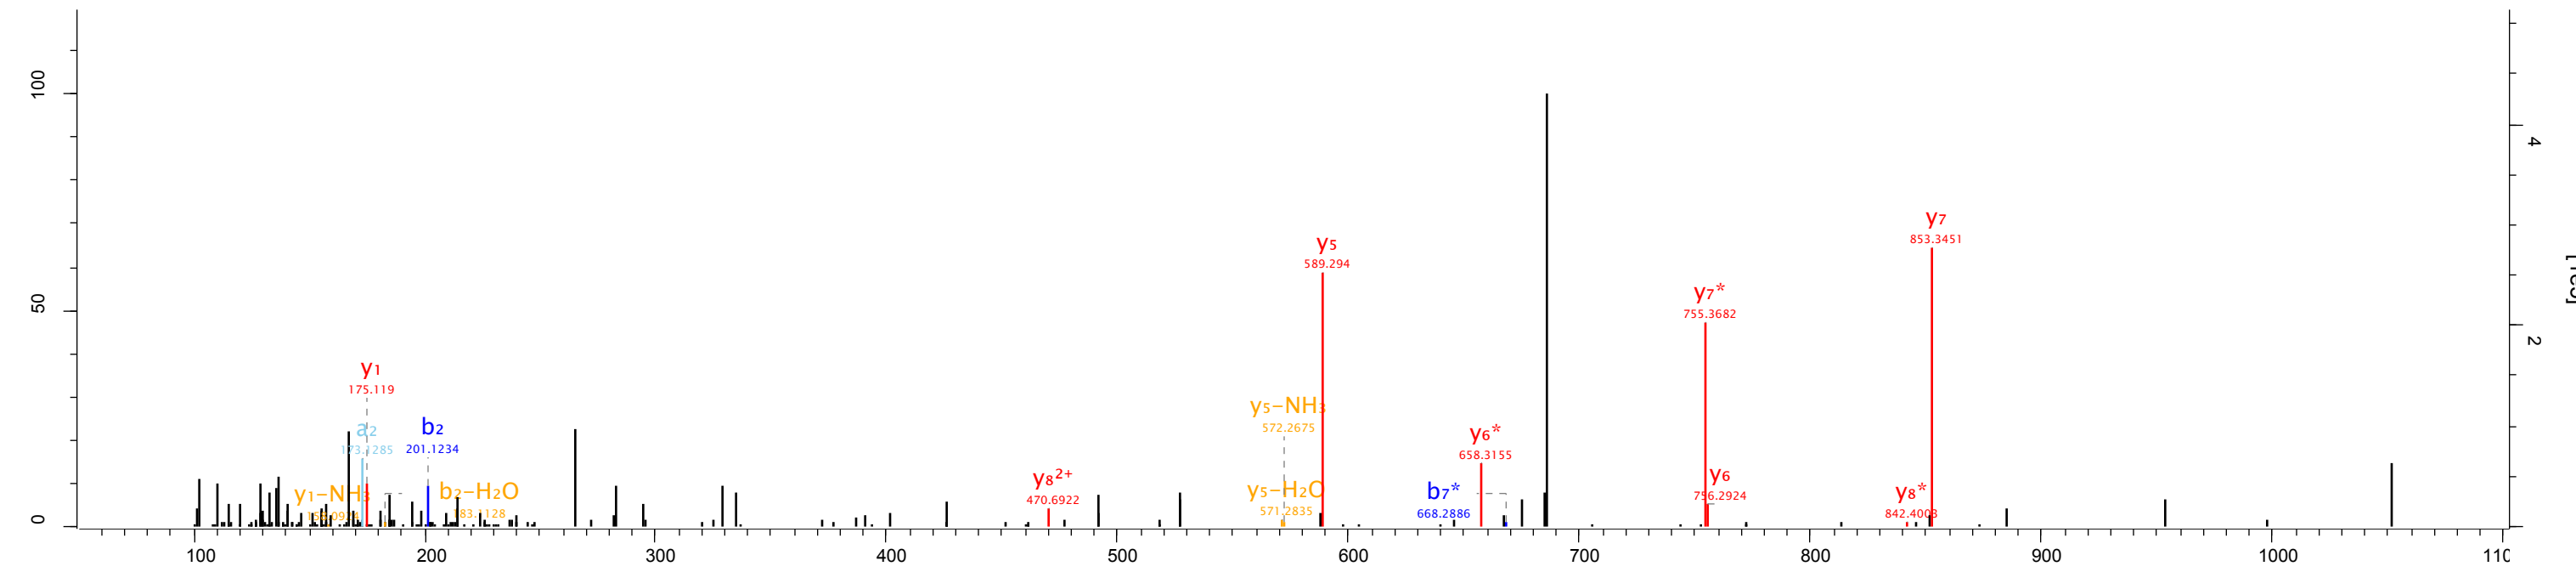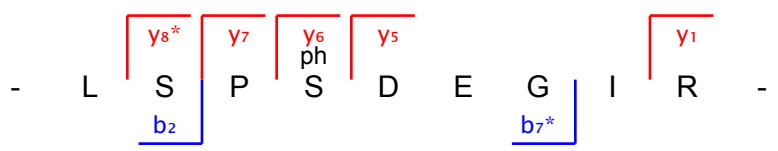

Raw file: 20150822\_A375SR\_Phospho\_BR3\_08  
 Scan: 11769 Method: FTMS; HCD Score: 60.54 m/z: 693.35 Gene names: ELK3

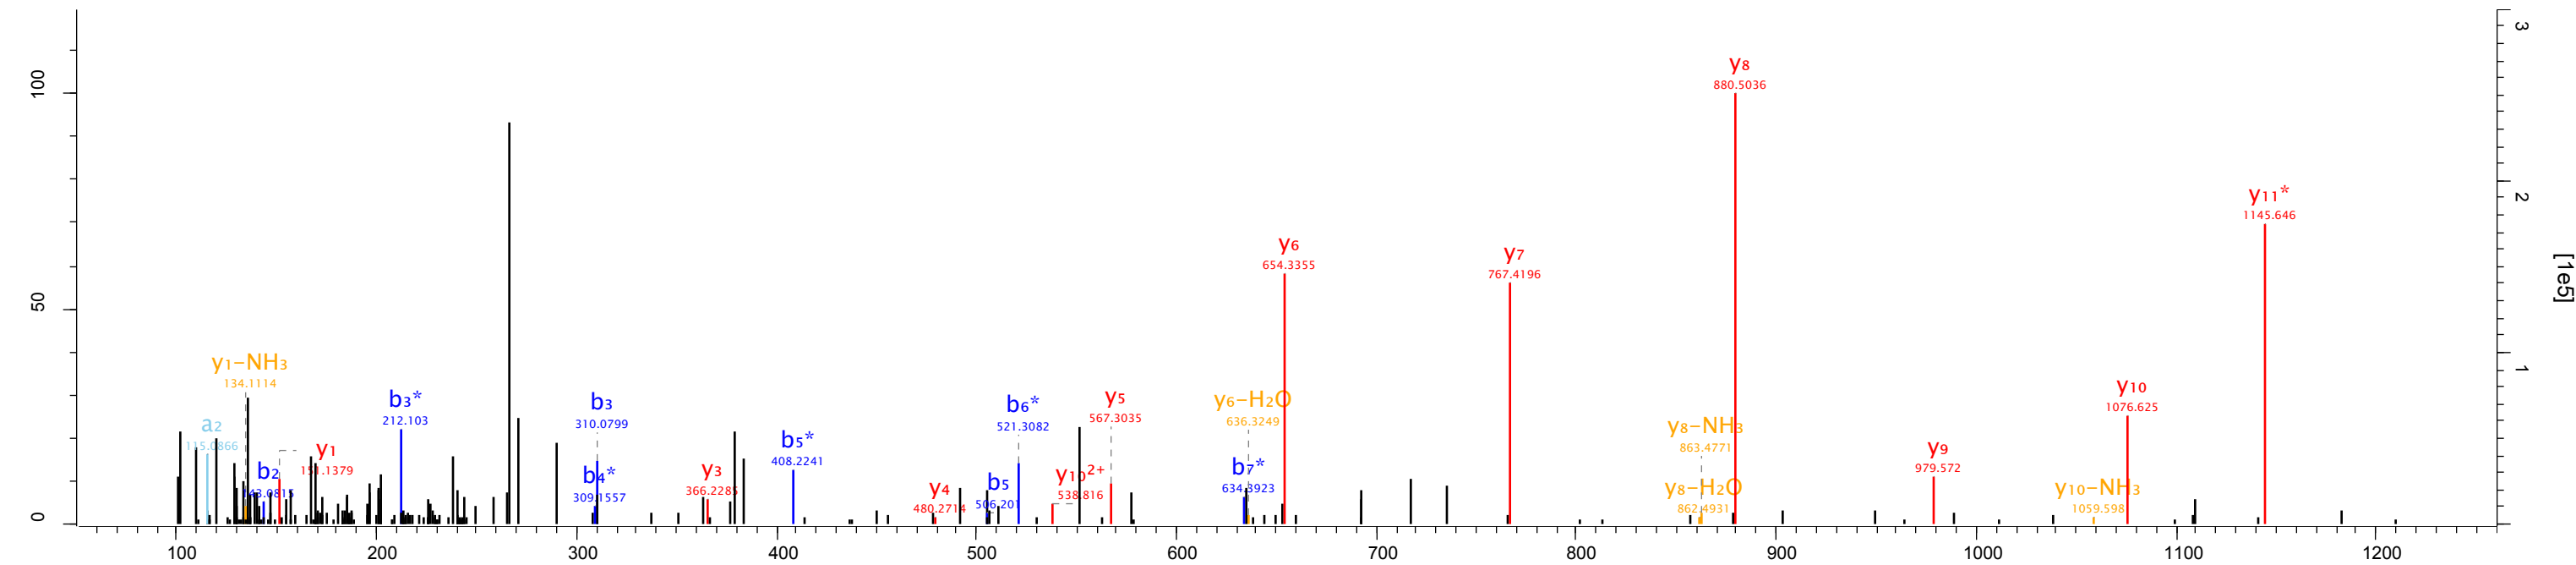

Raw file 20150822\_A375SR\_Phospho\_BR3\_08 Scan 14029 Method FTMS; HCD Score 55.44 m/z 562.64 Gene names MLLT3

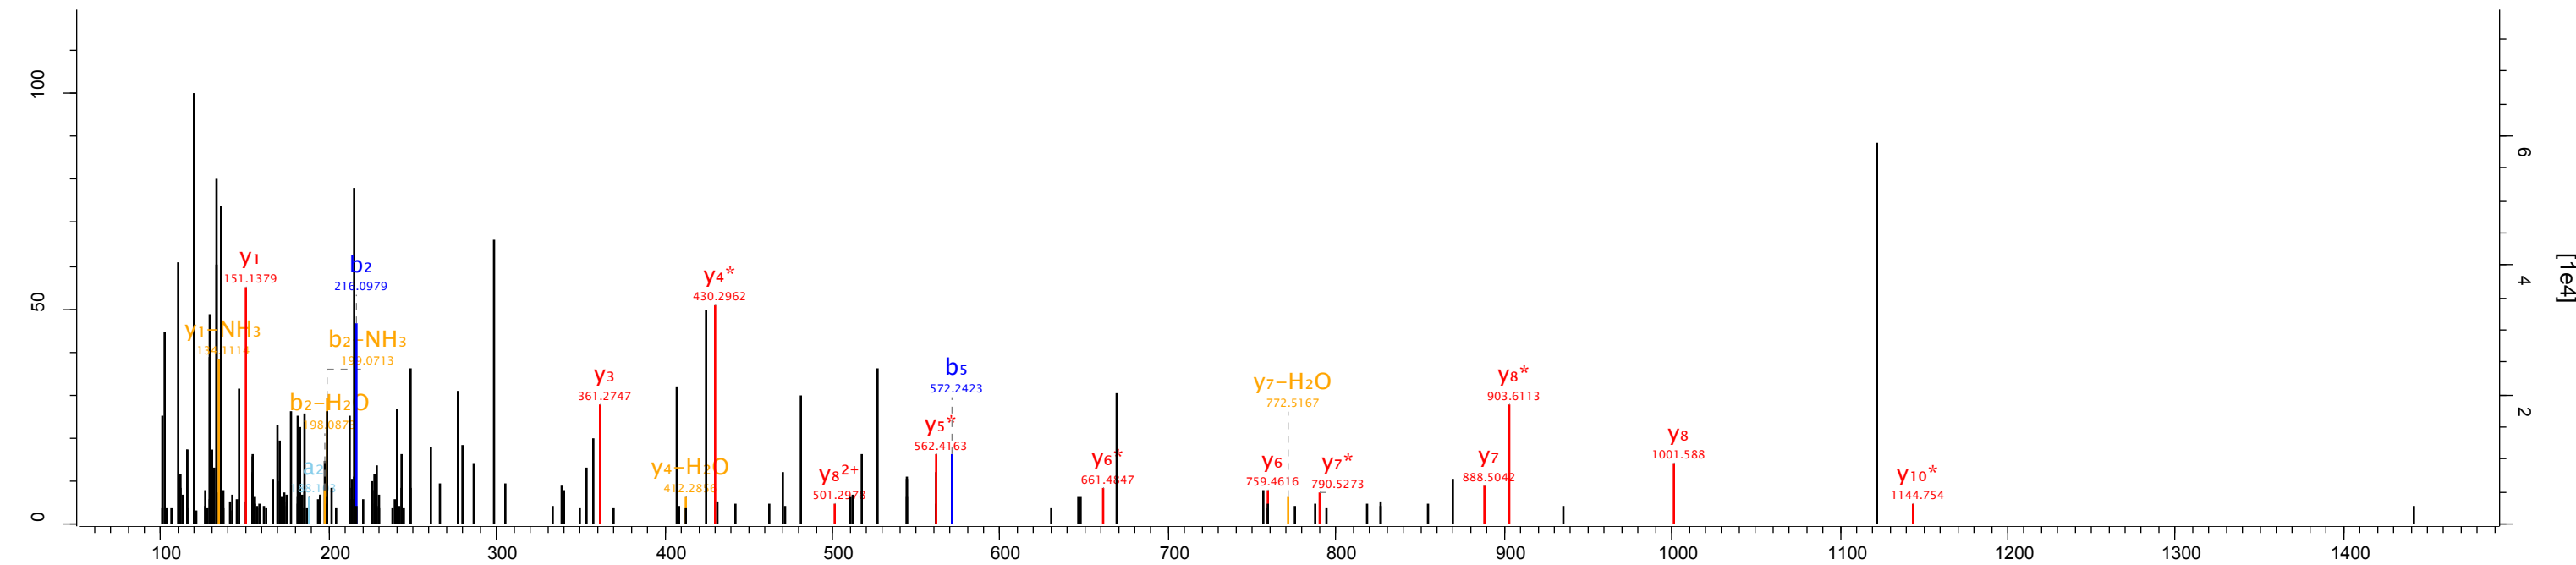

- T N N Q I L E V K S P I K -

Fragmentation regions are indicated by brackets below the amino acid sequence:

- Blue brackets: b<sub>2</sub> (under N), b<sub>5</sub> (under Q)
- Red brackets: y<sub>10</sub><sup>\*</sup> (under Q), y<sub>8</sub> (under L), y<sub>7</sub> (under E), y<sub>6</sub> (under V), y<sub>5</sub><sup>\*</sup> (under K), y<sub>4</sub><sup>\*</sup> (under S), y<sub>3</sub> (under P), y<sub>1</sub> (under I)

Raw file: 20150822\_A375SR\_Phospho\_BR3\_08  
 Scan: 14519 Method: FTMS; HCD Score: 56.12 m/z: 784.86 Gene names: PWWP2A

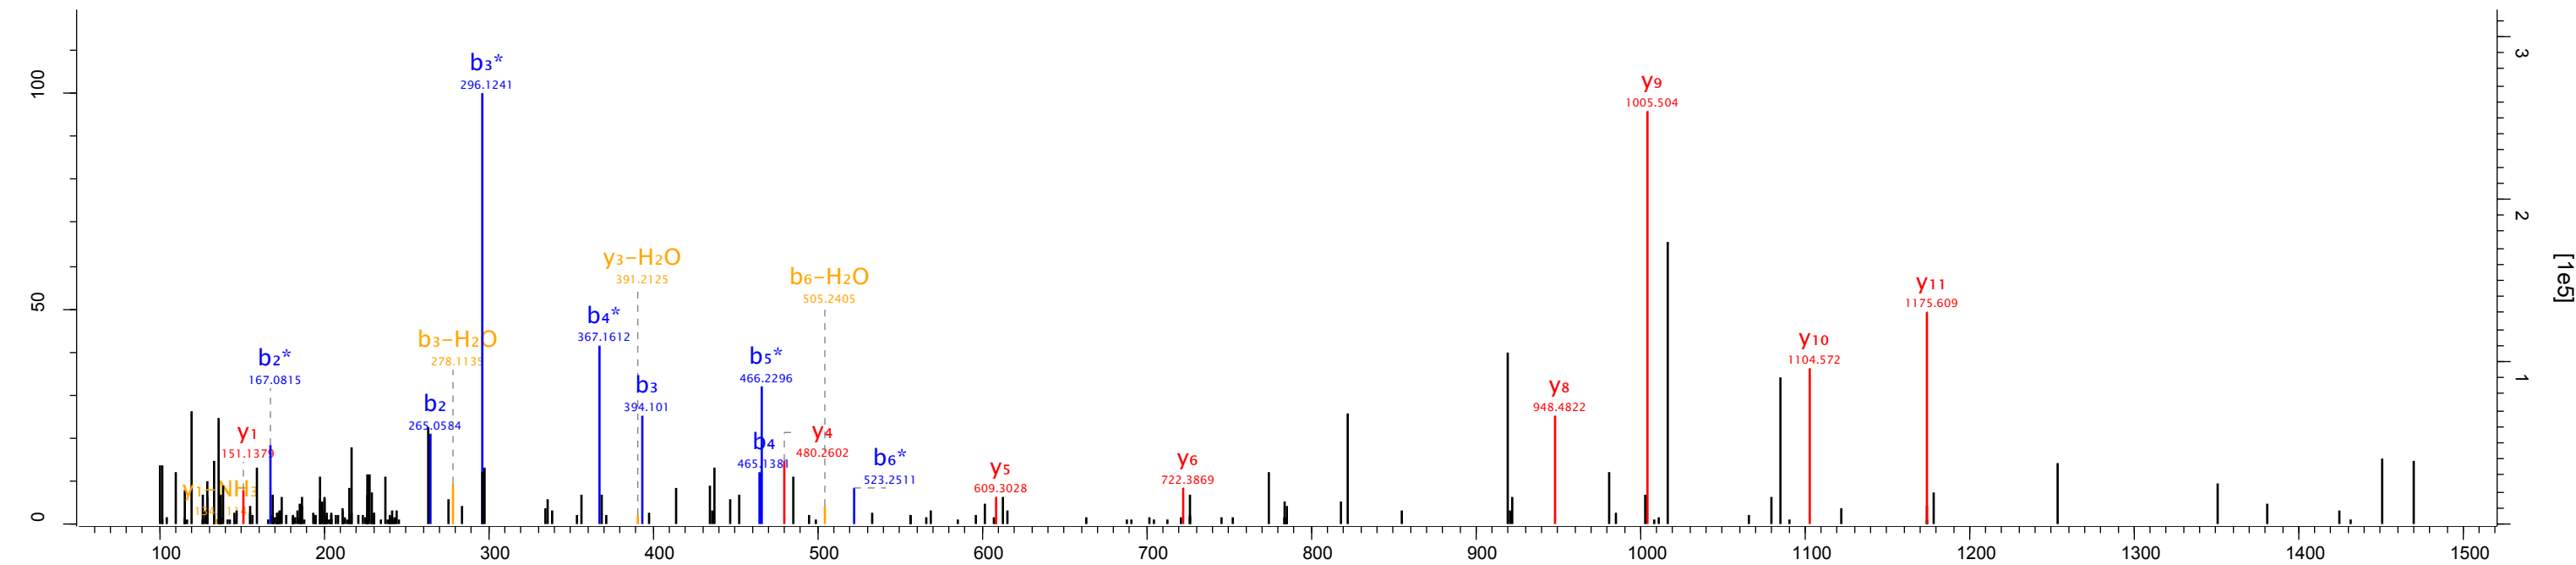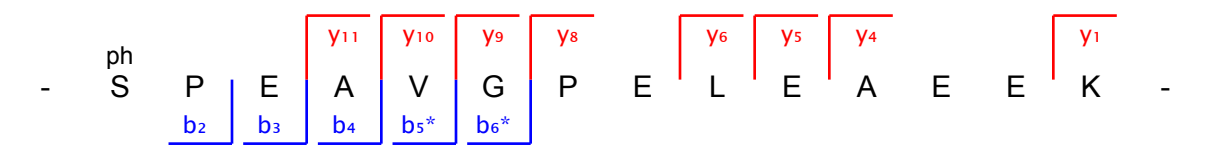

Raw file 20150822\_A375SR\_Phospho\_BR3\_10 Scan 13559 Method FTMS; HCD Score 42.31 m/z 866.39

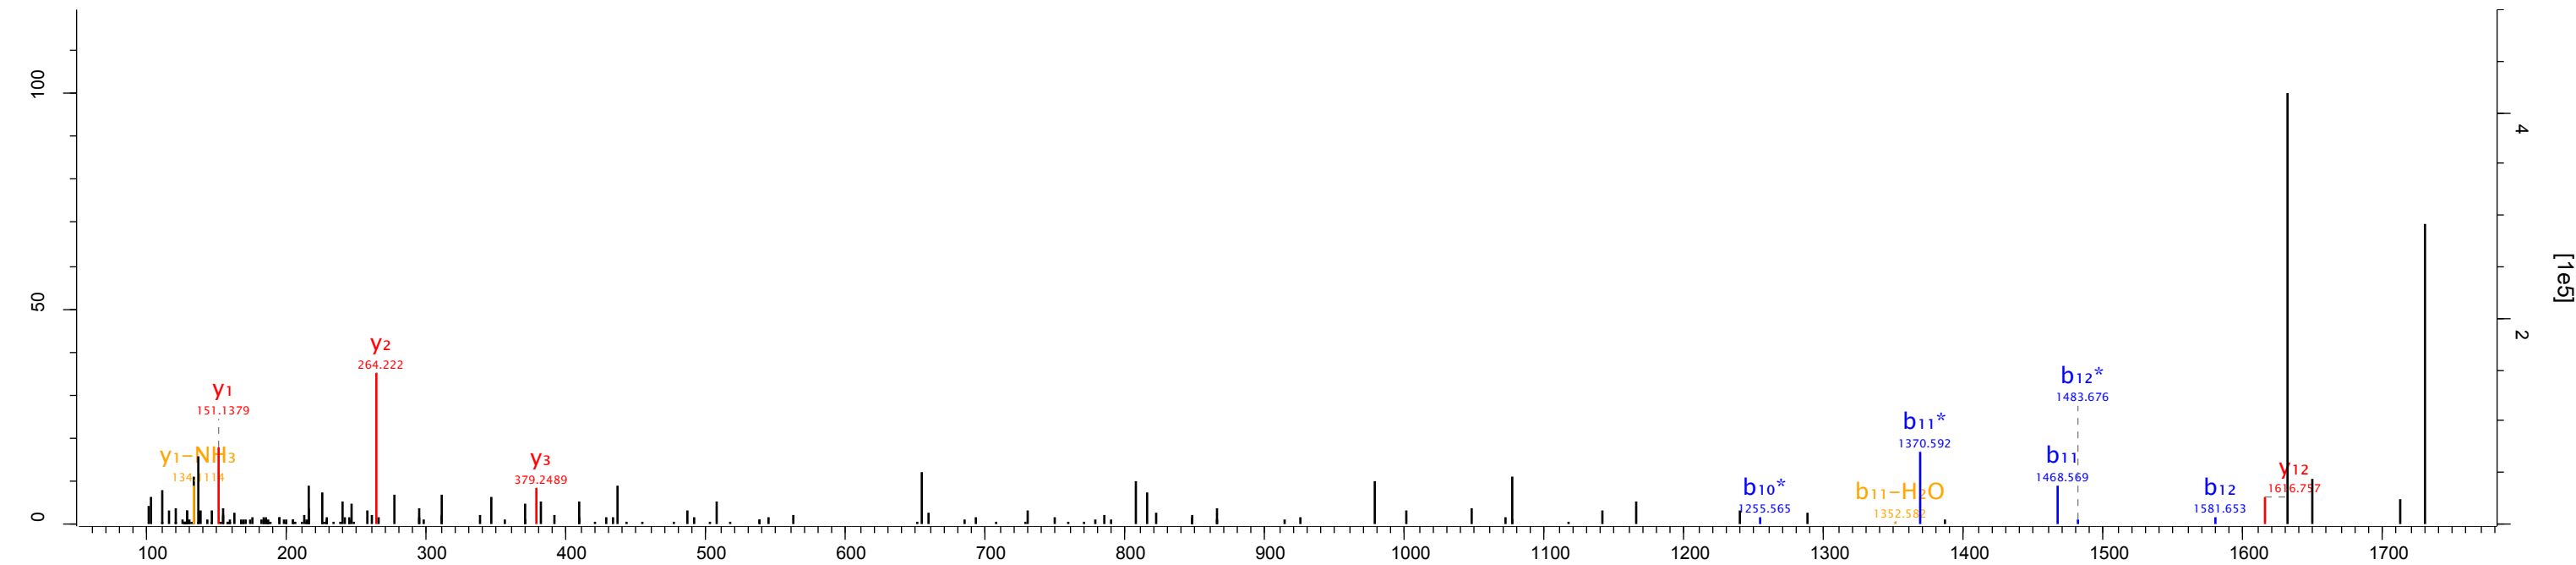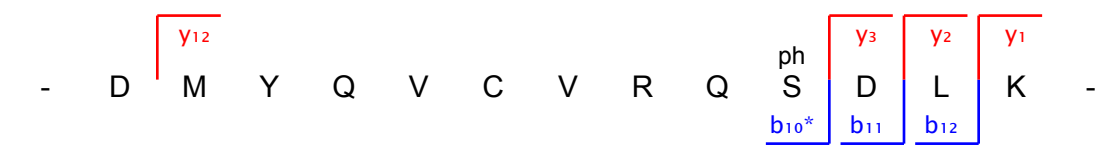

Raw file 20150822\_A375SR\_Phospho\_BR3\_10 Scan 23979 Method FTMS; HCD Score 112.64 m/z 970.44 Gene names MAPK11P1L

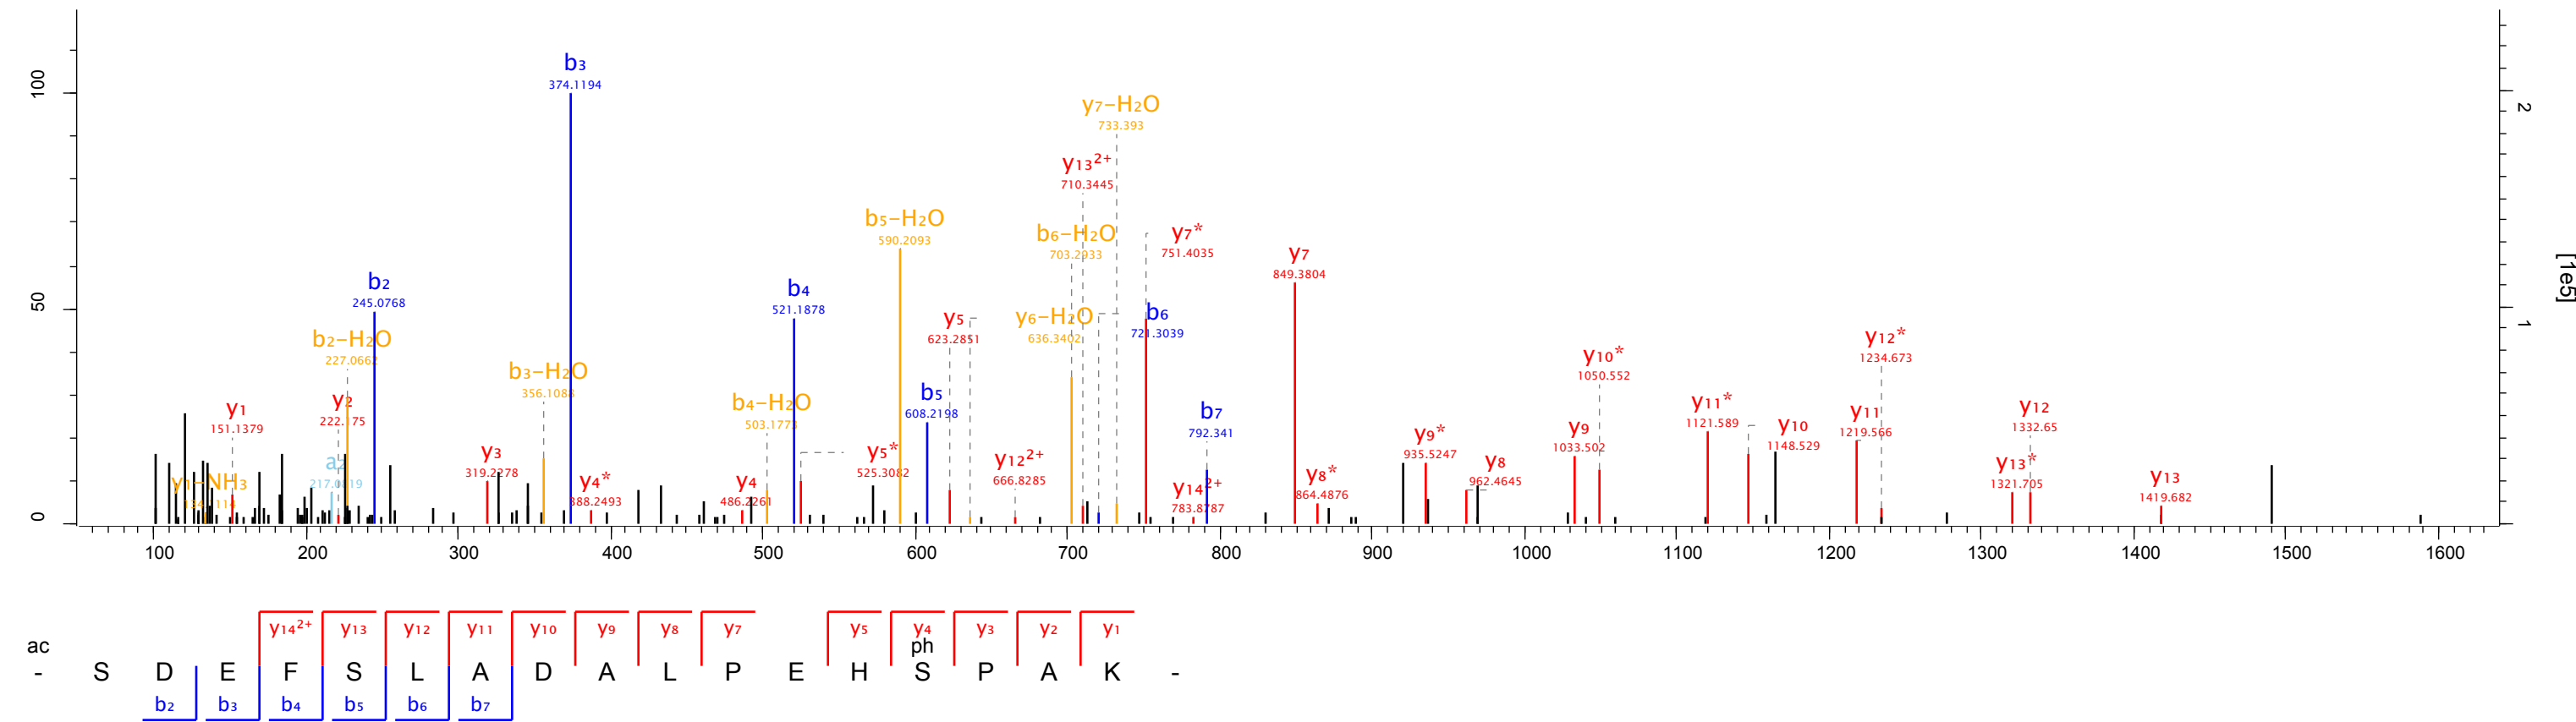



Raw file: 20150822\_A375SR-Proteome\_BR3  
 Scan: 57559 Method: FTMS; HCD Score: 62.69 m/z: 588.85 Gene names: KATNAL2

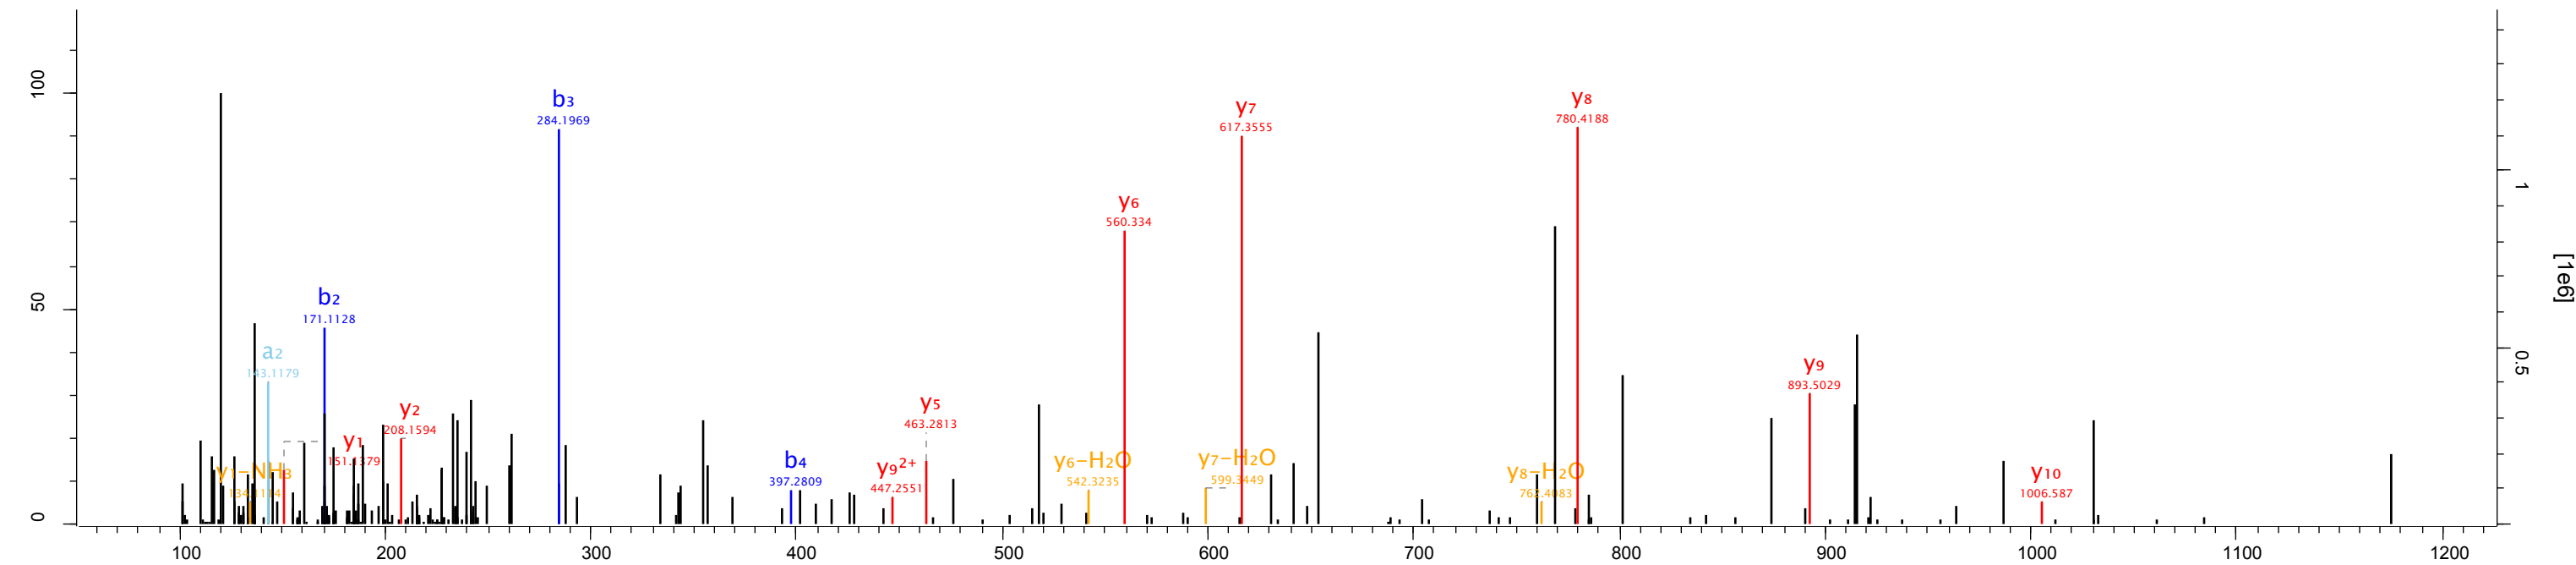

Raw file: 20150822\_A375SR-Proteome\_BR3  
 Scan: 71739 Method: FTMS; HCD Score: 35.63 m/z: 636.66 Gene names: ATP6V0C

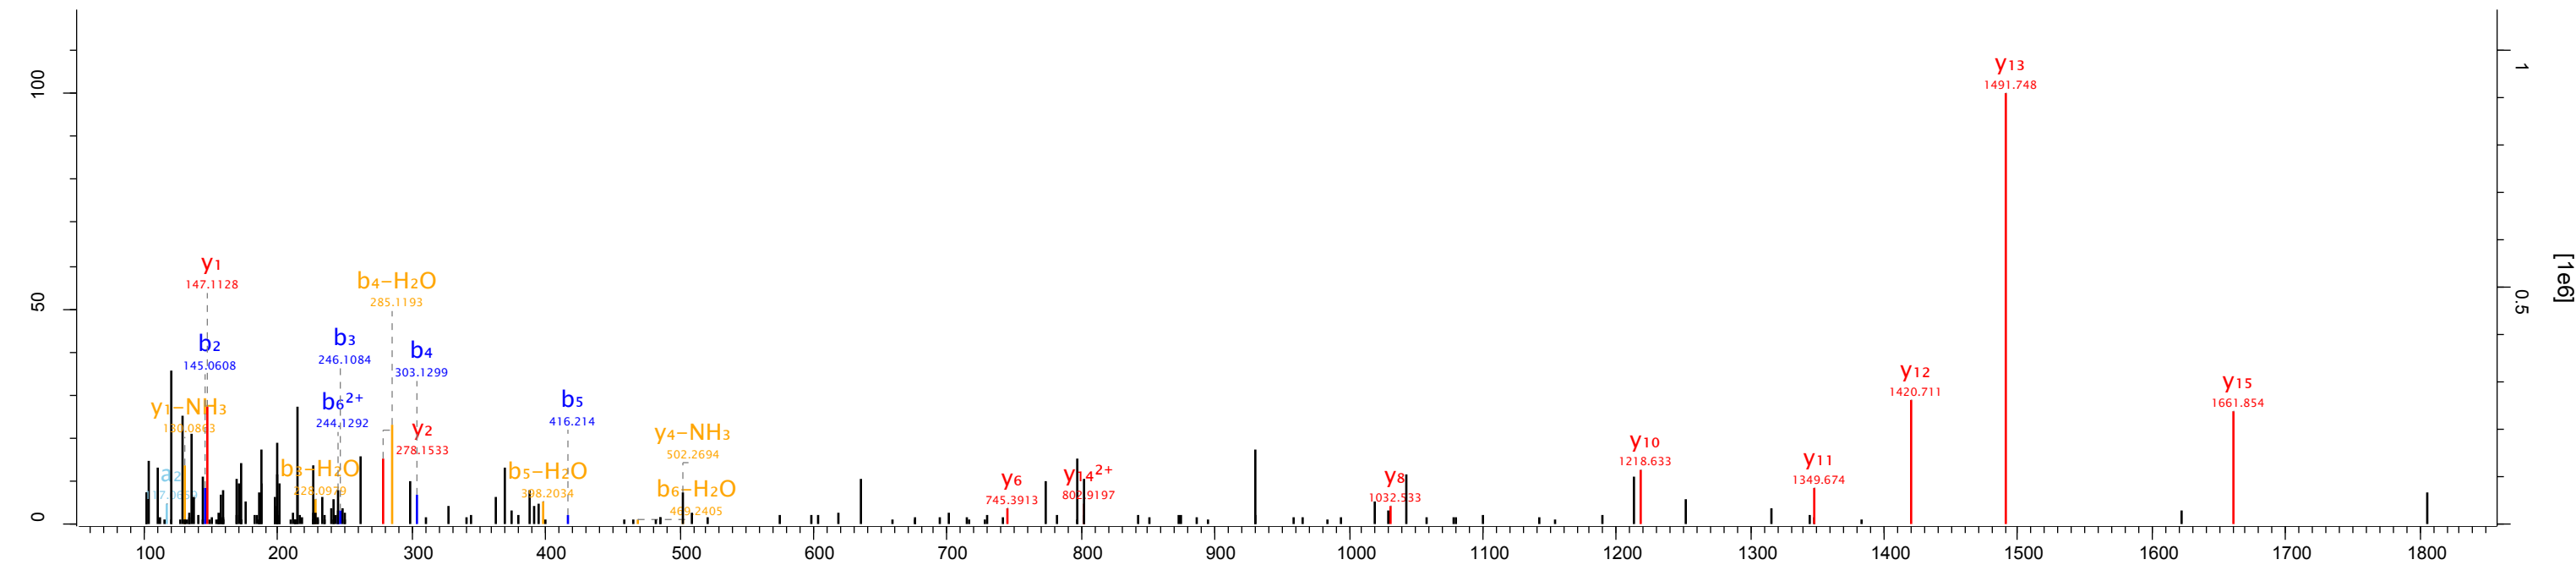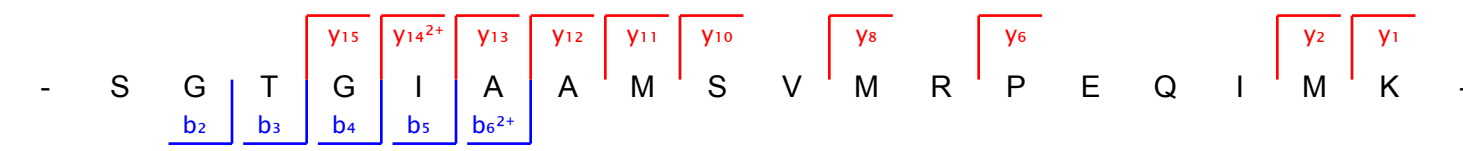

Raw file: 20150822\_A375SR-Proteome\_BR3  
 Scan: 75229 Method: FTMS; HCD Score: 60.06 m/z: 492.81 Gene names: STON2

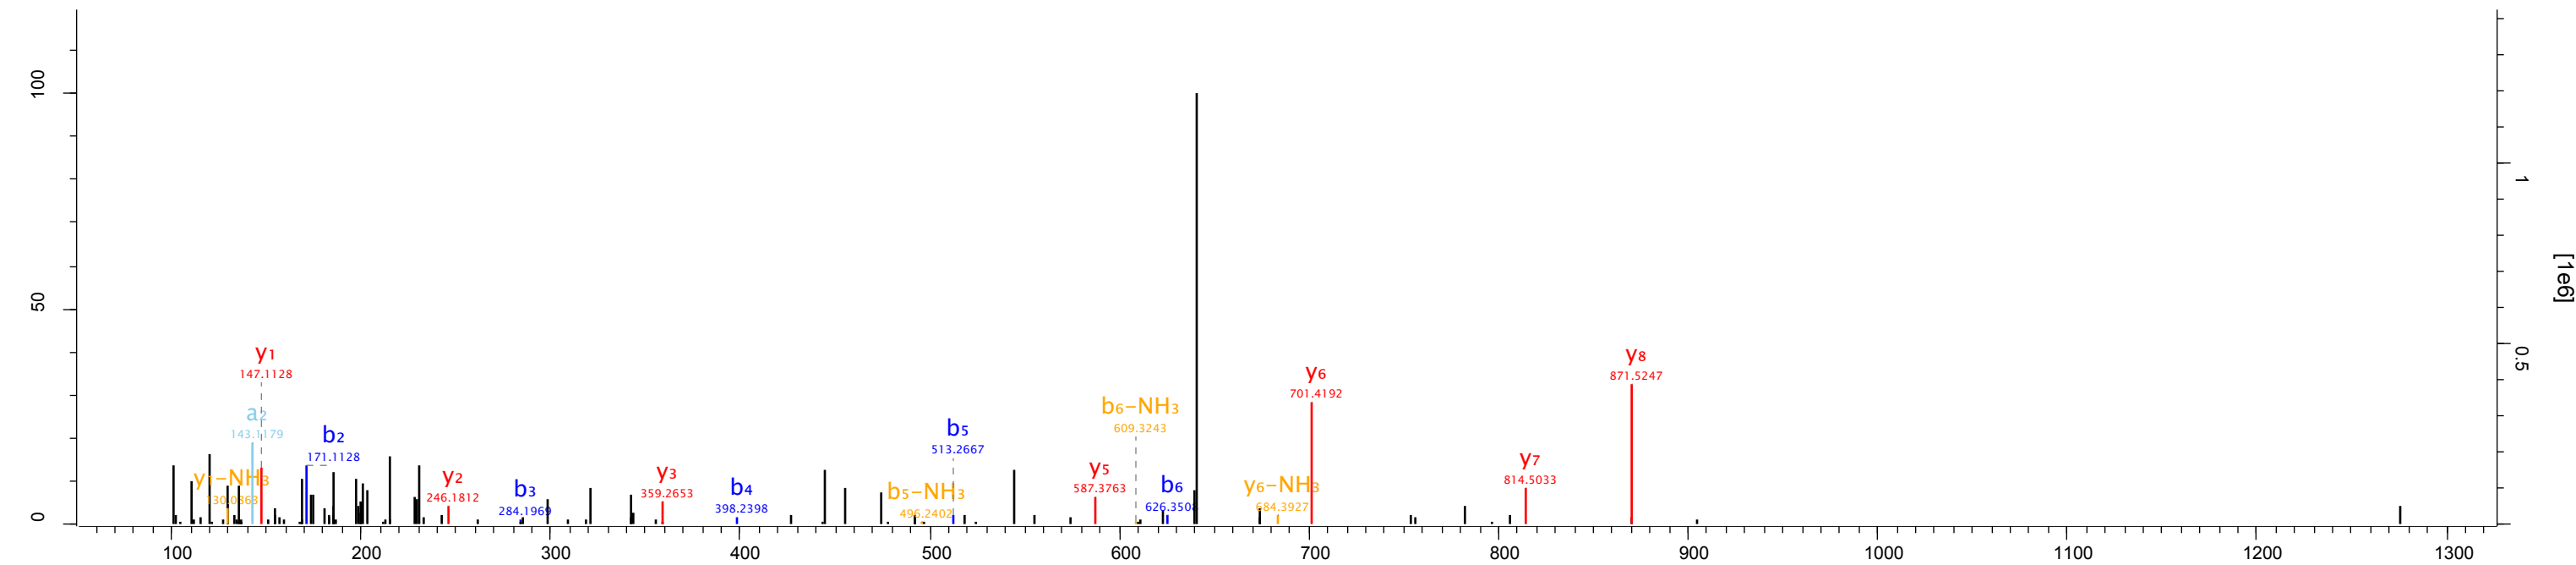

Raw file  
20180707\_MaS\_A375SR\_LM\_proteome\_01

Scan 20859 Method FTMS; HCD Score 64.52 m/z 743.42 Gene names MED21

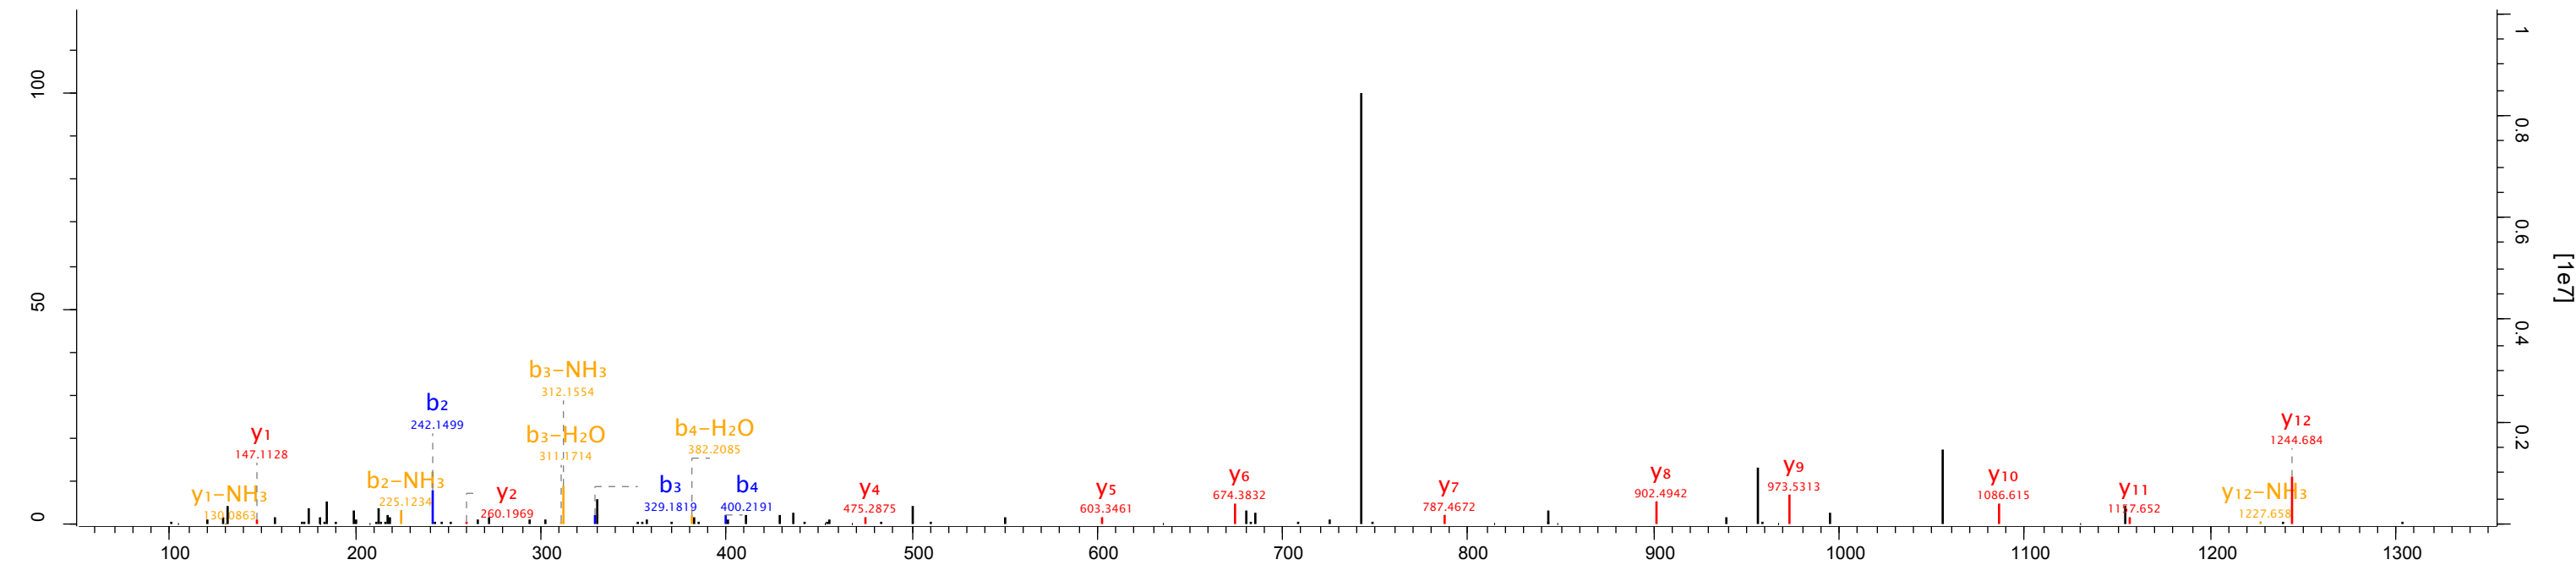

Raw file  
20180707\_MaS\_A375SR\_LM\_proteome\_02

| Scan  | Method    | Score | m/z     |
|-------|-----------|-------|---------|
| 16059 | FTMS; HCD | 77.75 | 1121.47 |

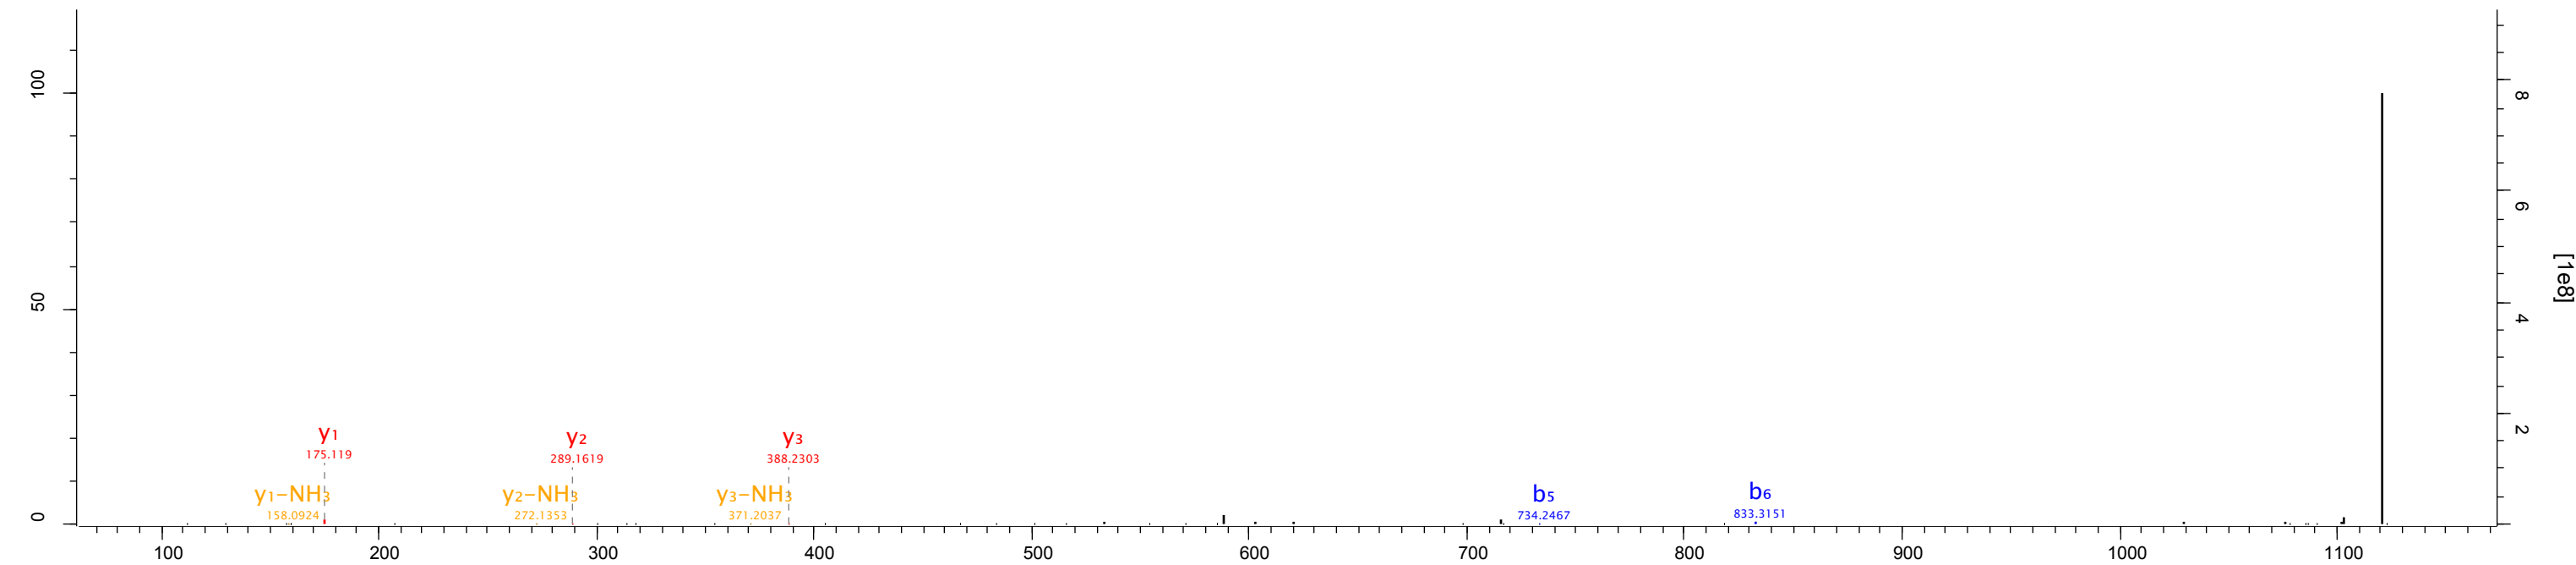

Raw file: 20180707\_MaS\_A375SR\_LM\_proteome\_03  
 Scan: 26369 Method: FTMS; HCD Score: 54.28 m/z: 1039.96 Gene names: RNF121

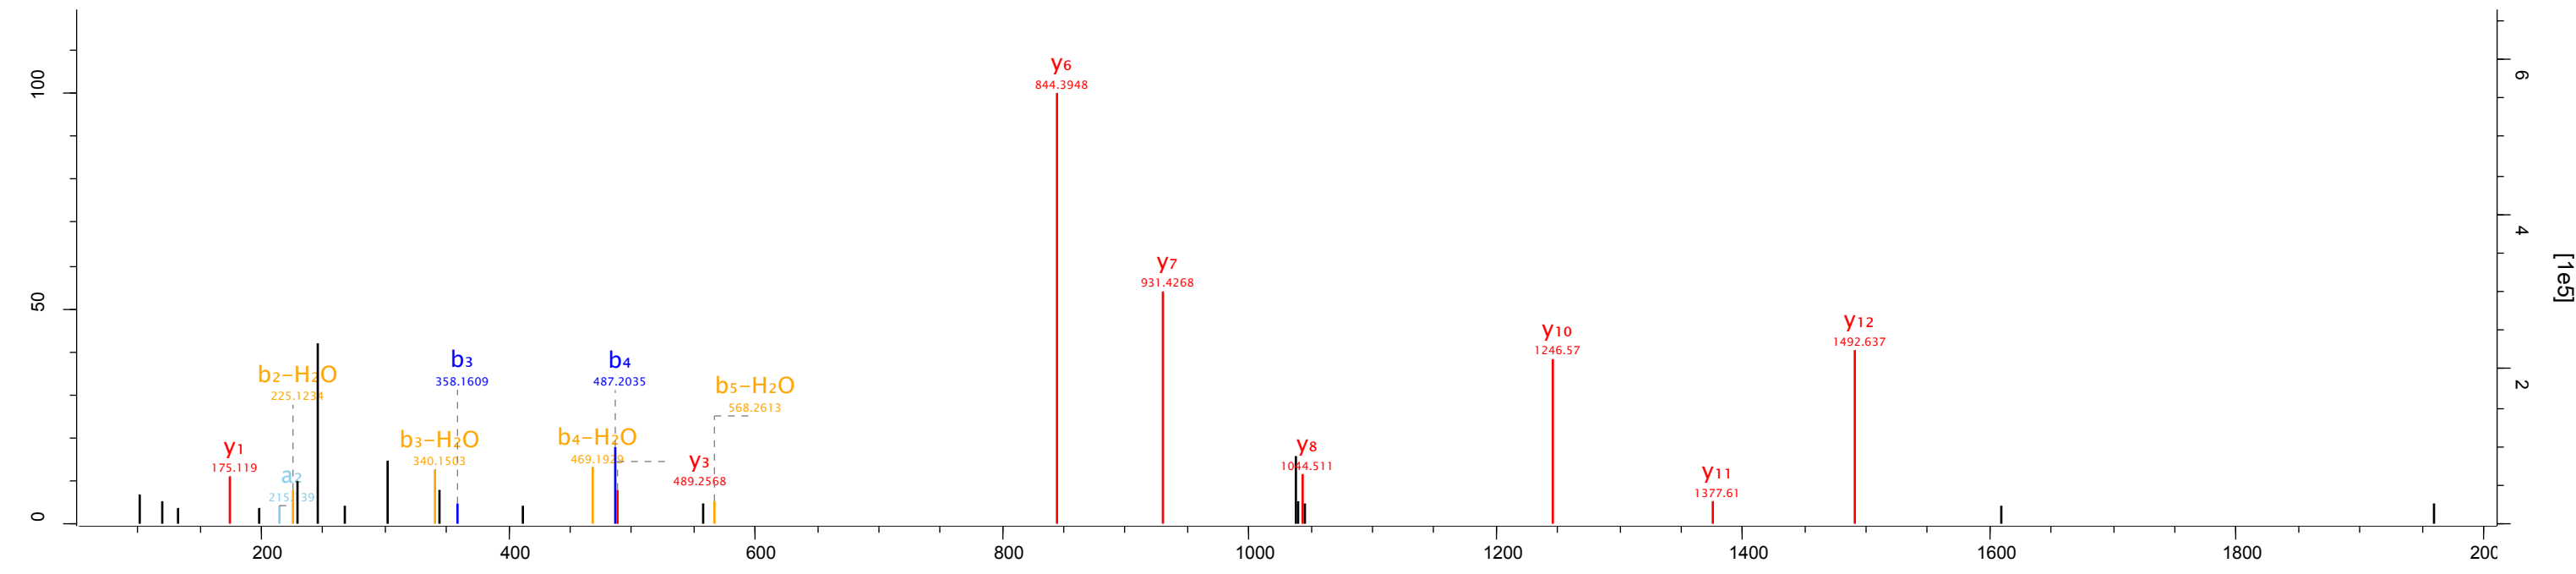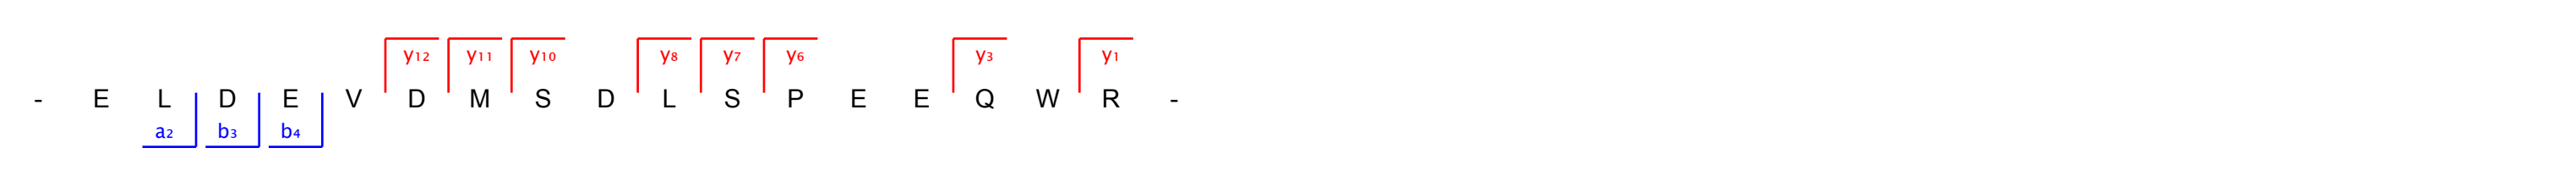

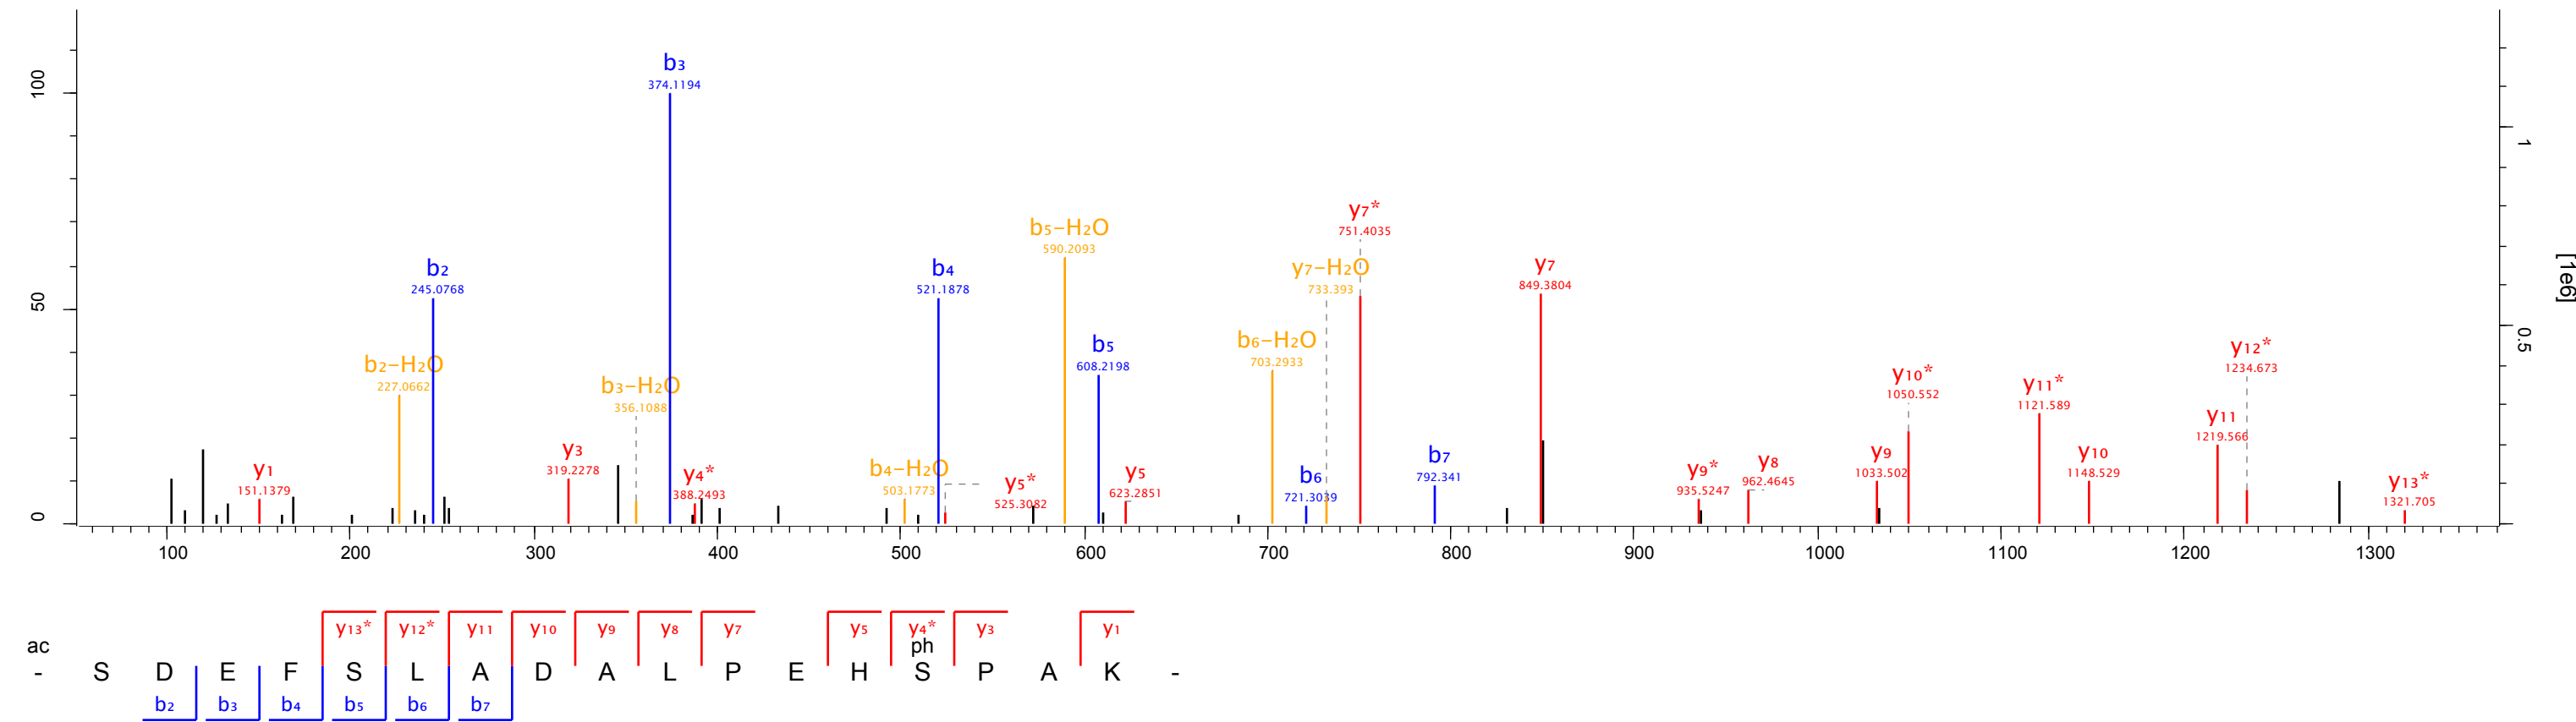

Raw file  
20180707\_MaS\_A375SR\_LM\_proteome\_06

Scan: 26169  
Method: FTMS; HCD  
Score: 29.58  
m/z: 881.47  
Gene names: MZT1

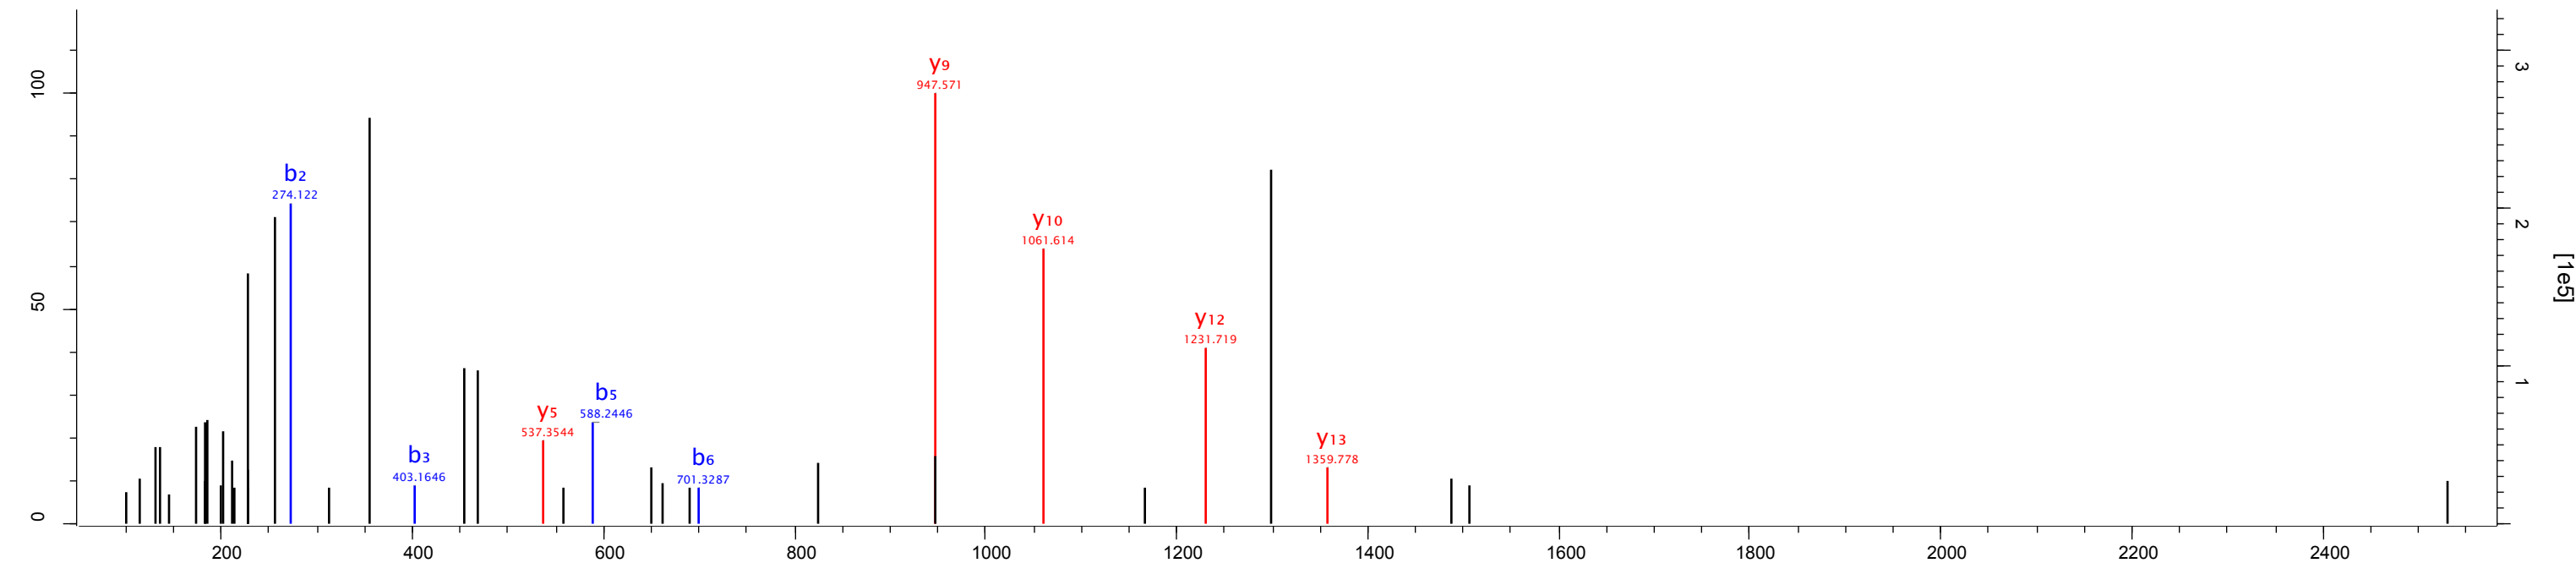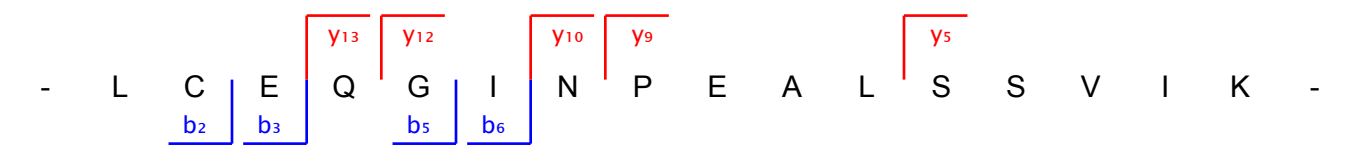



Raw file  
20180707\_MaS\_A375SR\_LM\_proteome\_07

Scan: 24659  
Method: FTMS; HCD  
Score: 62.55  
m/z: 498.77  
Gene names: SEPT3

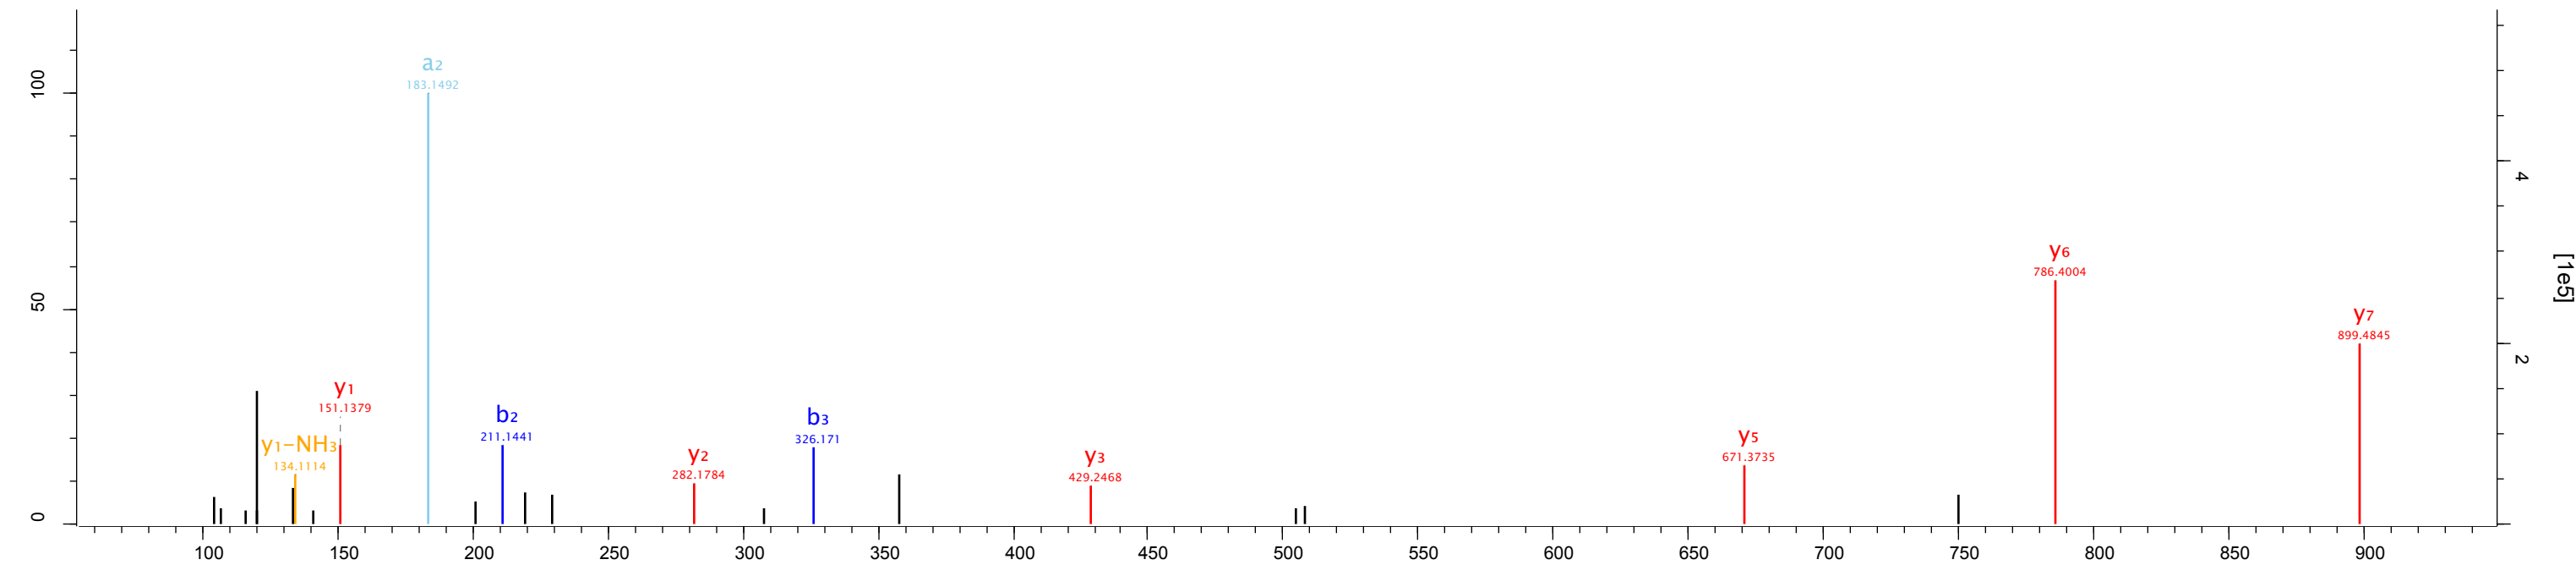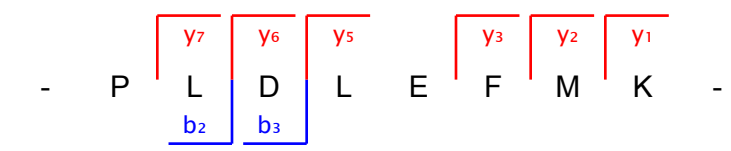

Raw file 20180707\_MaS\_A375SR\_LM\_proteome\_13 Scan 8849 Method FTMS; HCD Score 54.16 m/z 481.77 Gene names CAPN6

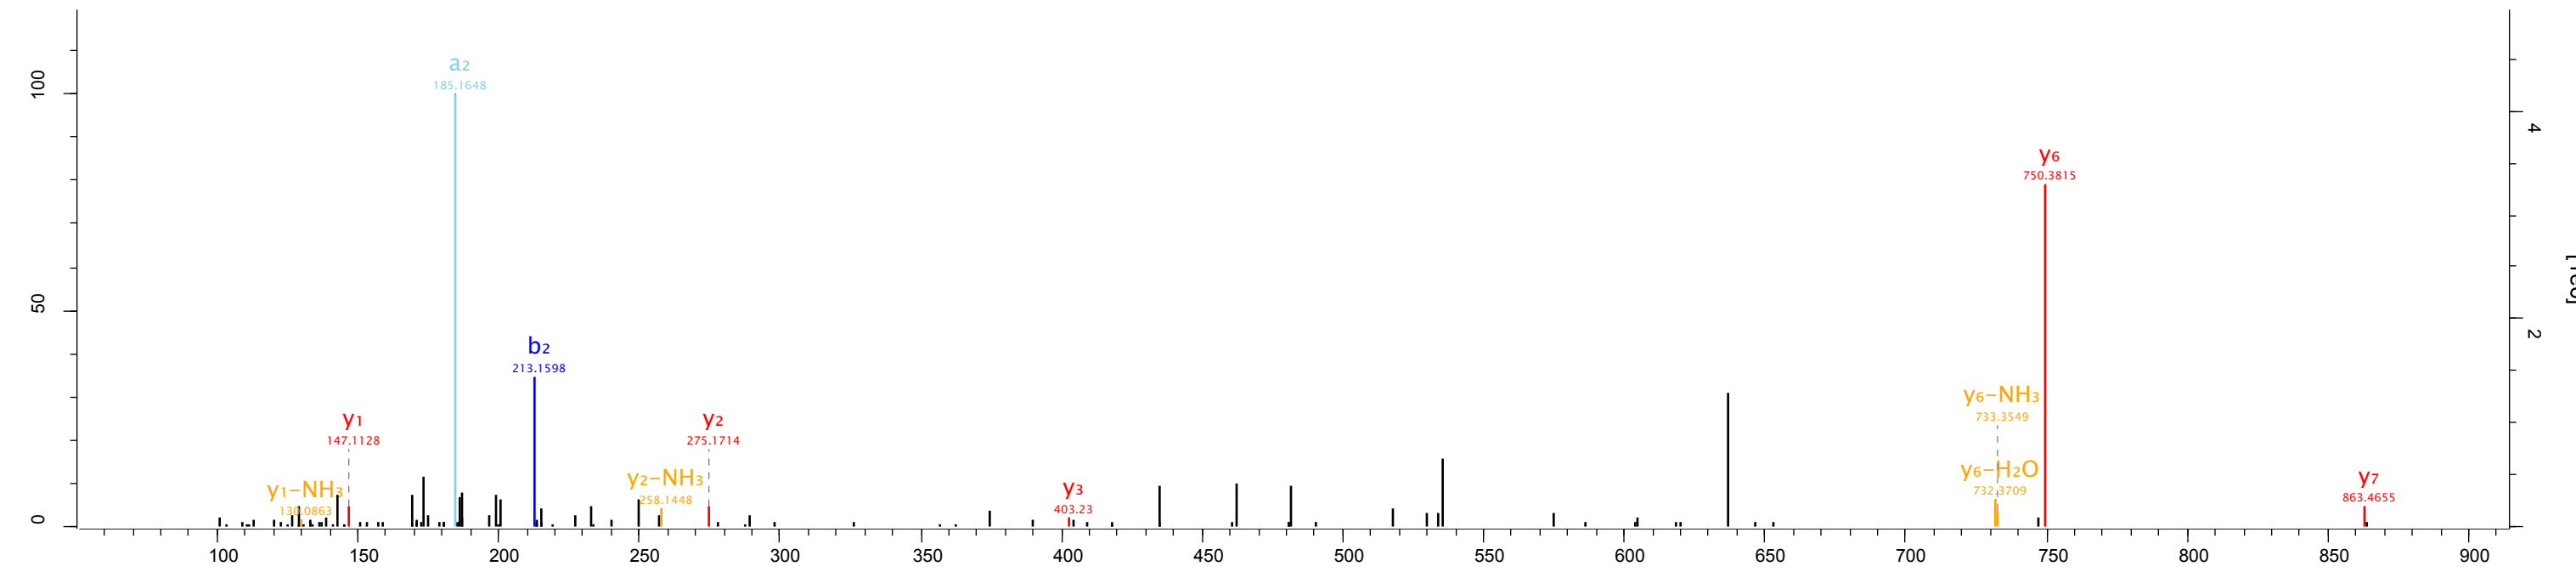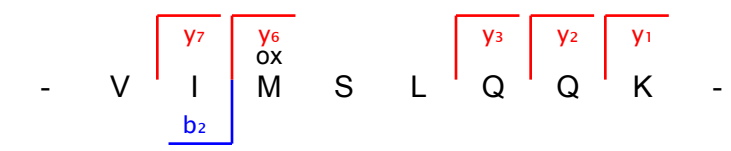

Raw file 20180707\_MaS\_A375SR\_LM\_proteome\_18 Scan 8649 Method FTMS; HCD Score 65.18 m/z 592.83

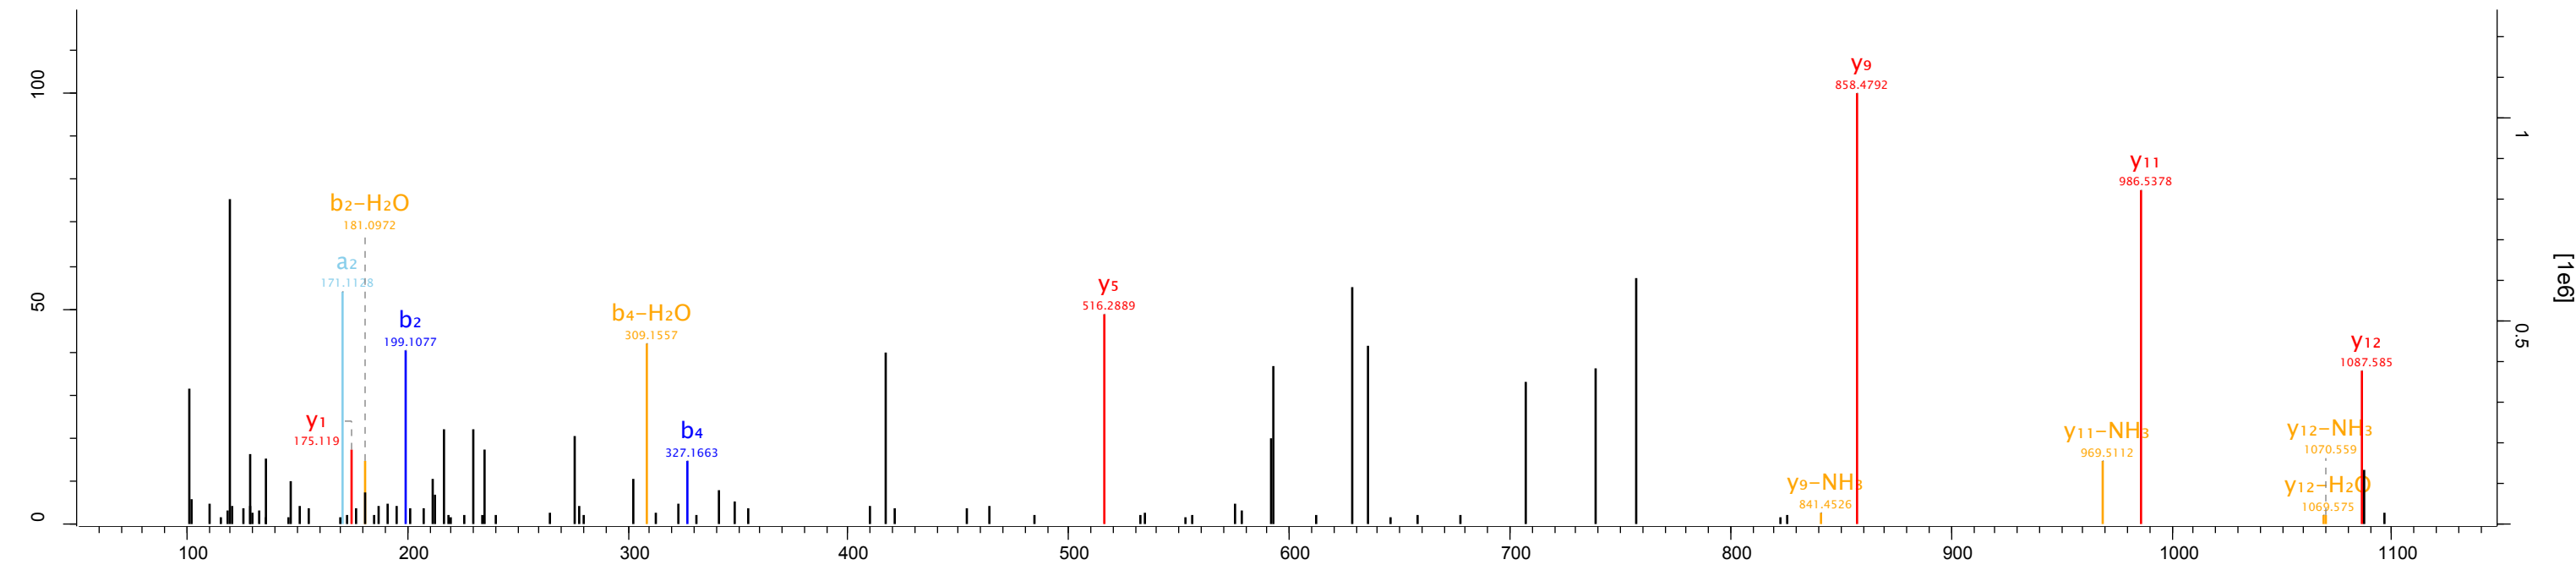

Raw file 20180707\_MaS\_A375SR\_LM\_proteome\_21 Scan 25089 Method FTMS; HCD Score 58.98 m/z 496.76 Gene names SEPT3

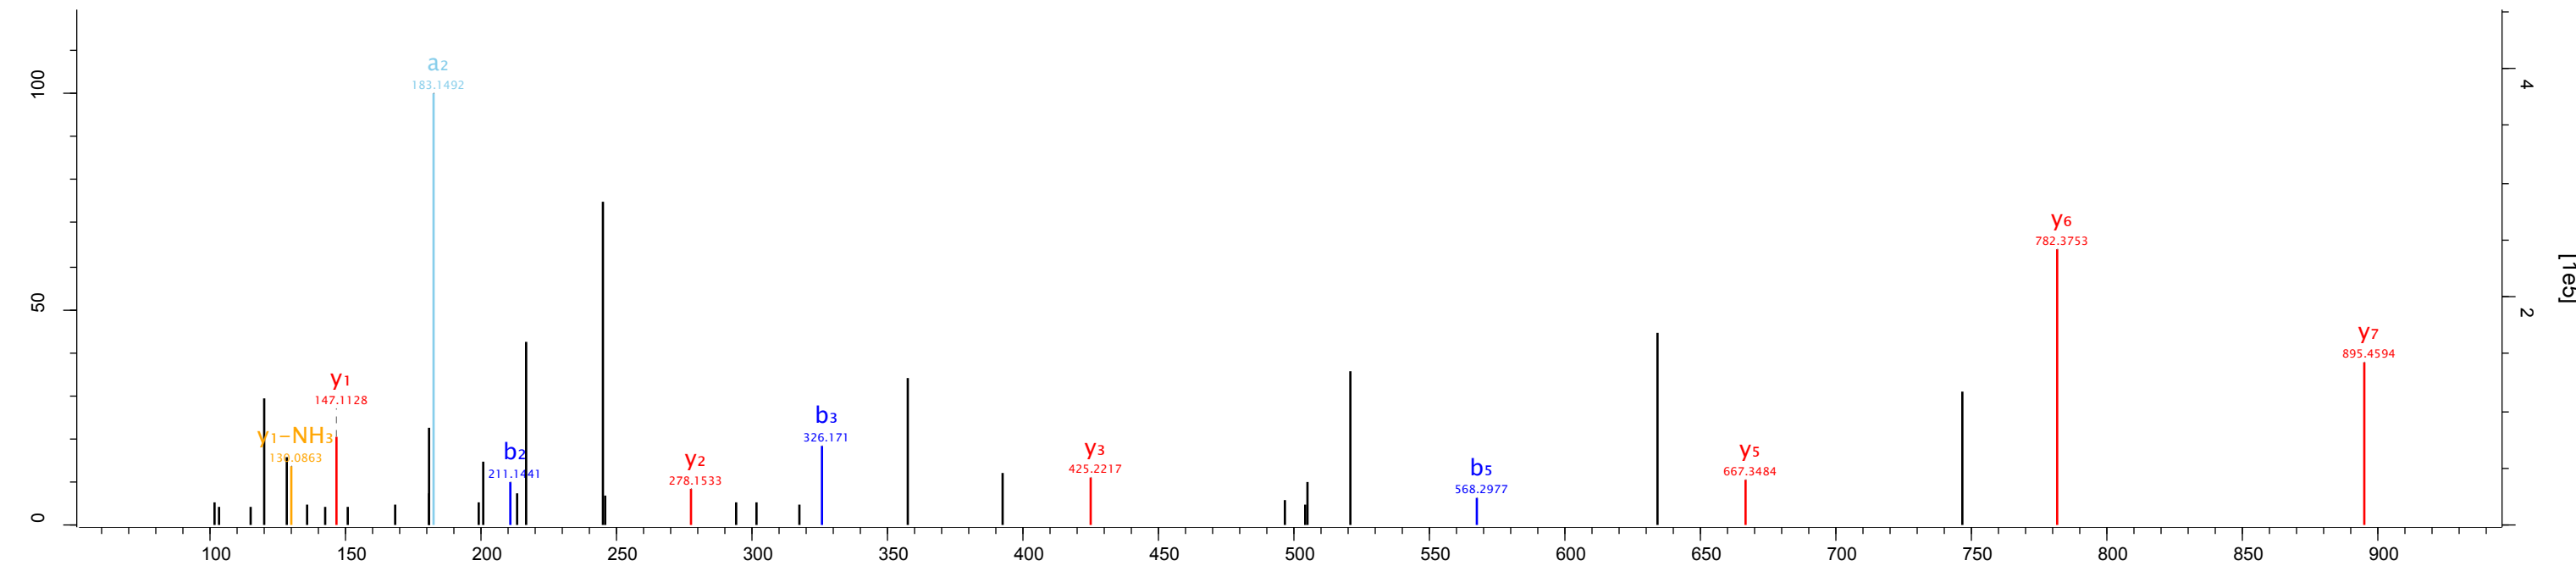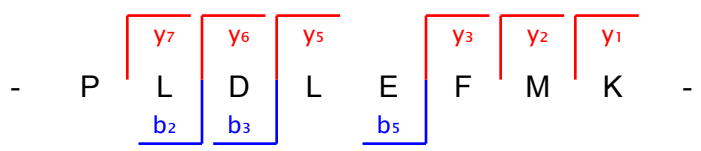

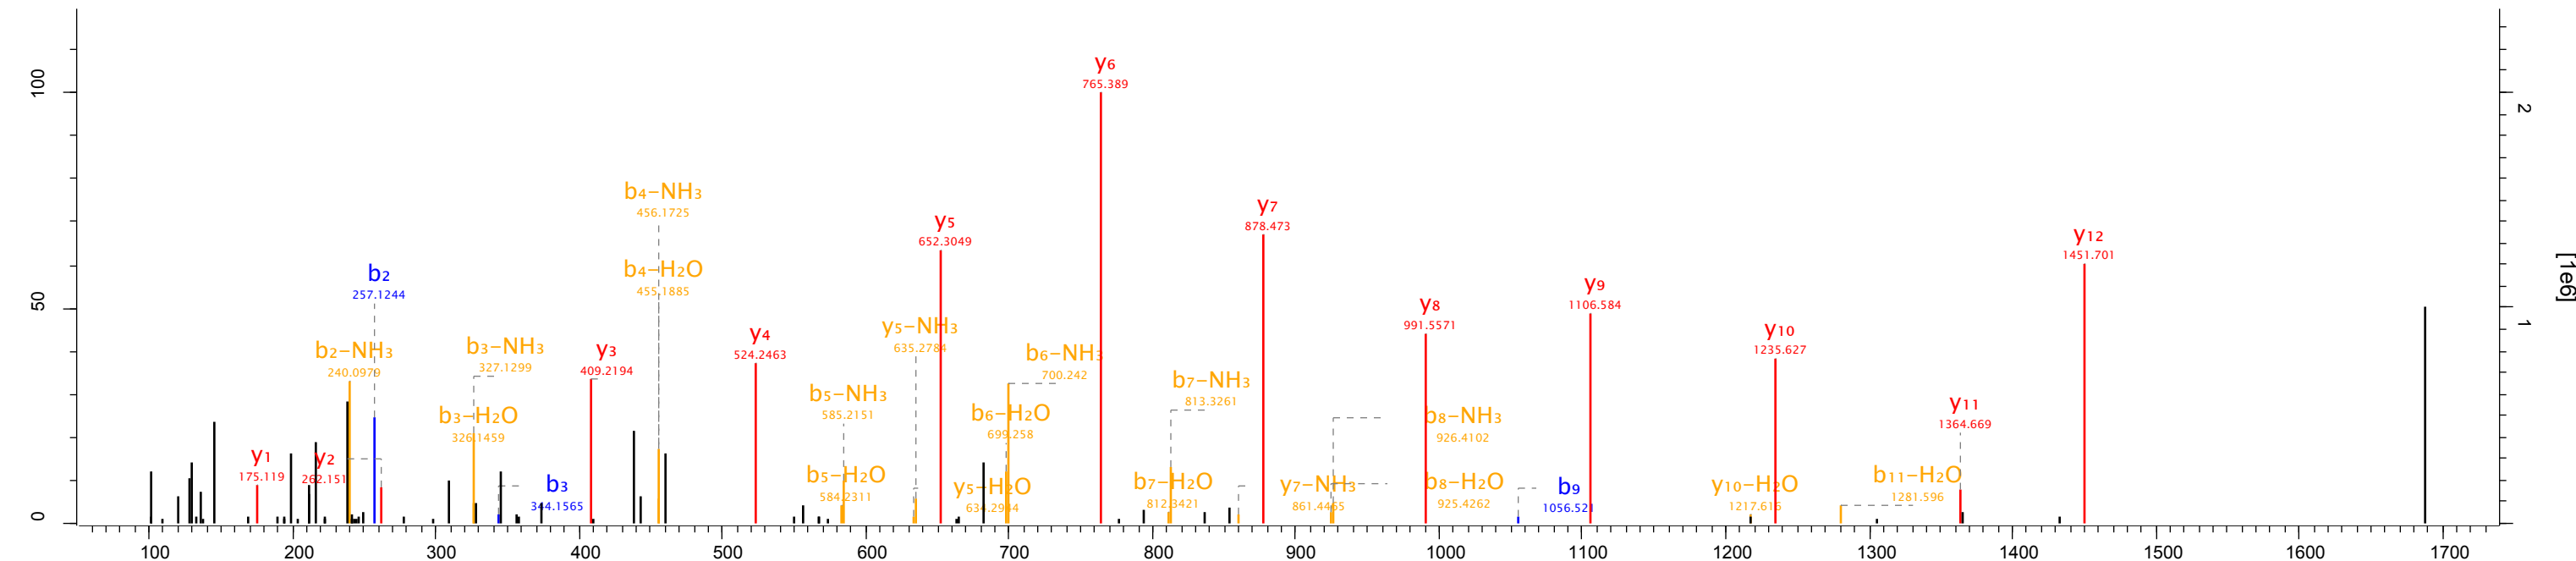

- Q Q S E E D L L L Q D F S R -  
b<sub>2</sub> b<sub>3</sub> b<sub>9</sub>

Raw file: 20180707\_MaS\_A375SR\_LM\_proteome\_24  
 Scan: 10909 Method: FTMS; HCD Score: 84.38 m/z: 813.39 Gene names: RNF115

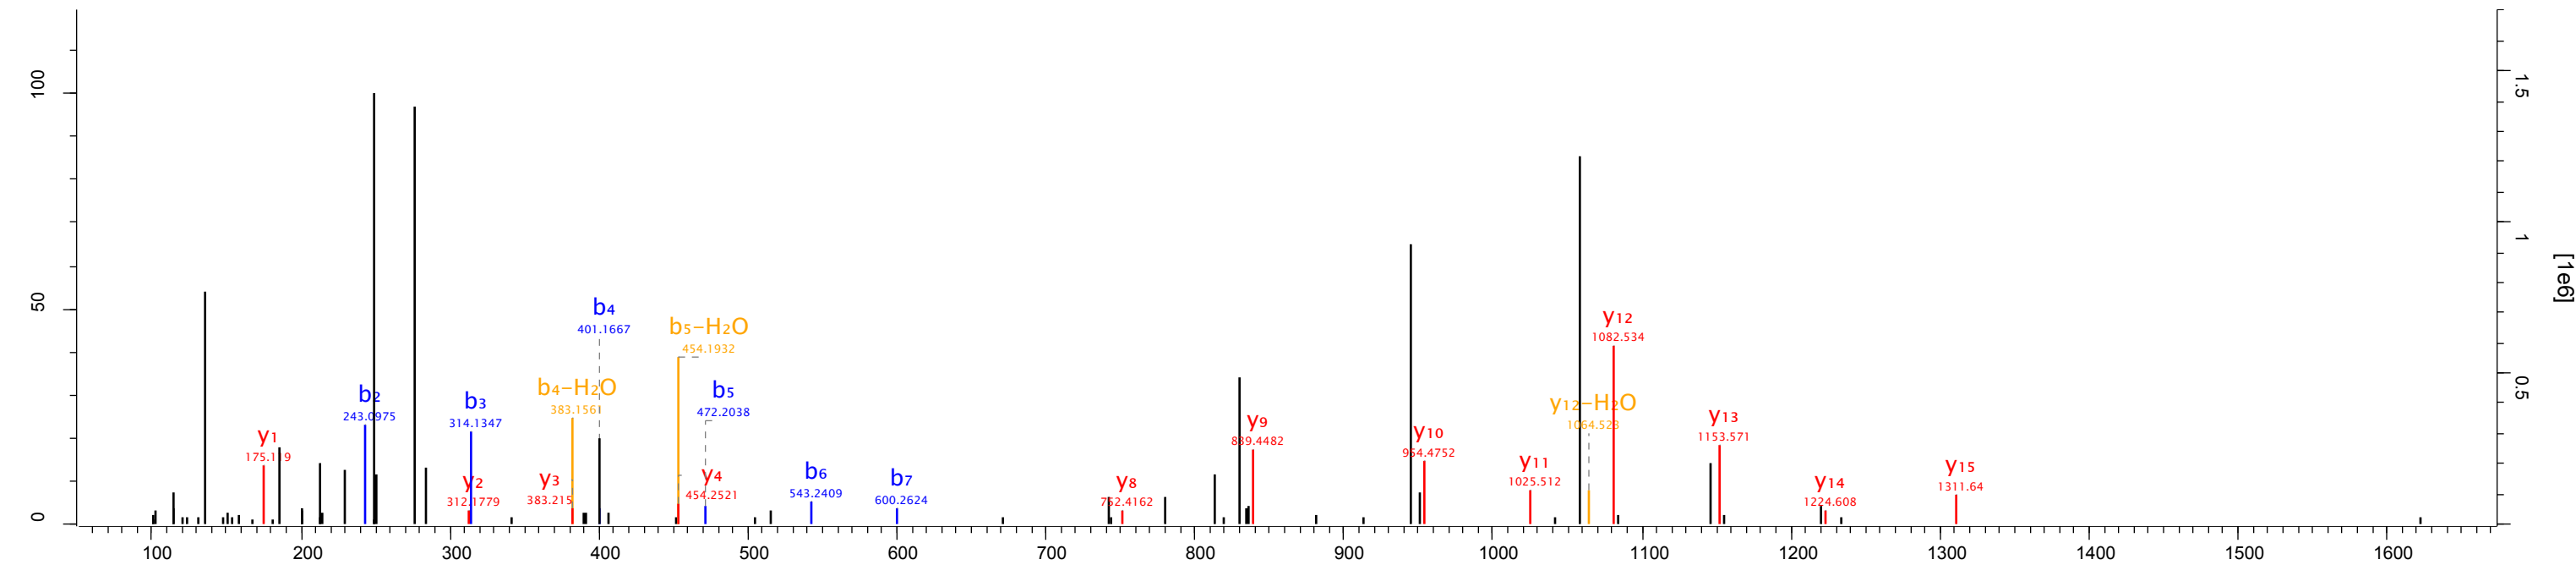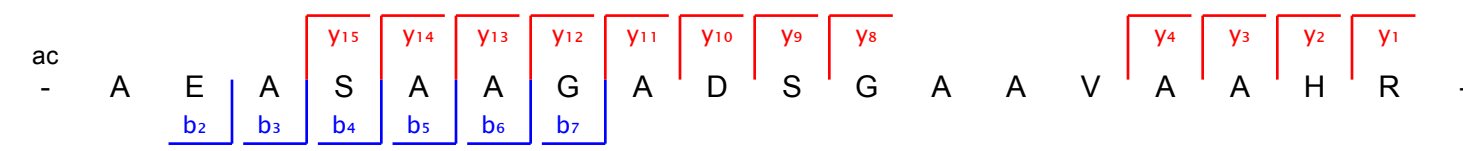

Raw file  
20180707\_MaS\_A375SR\_ML\_proteome\_01

Scan 10849 Method FTMS; HCD Score 81.38 m/z 431.23

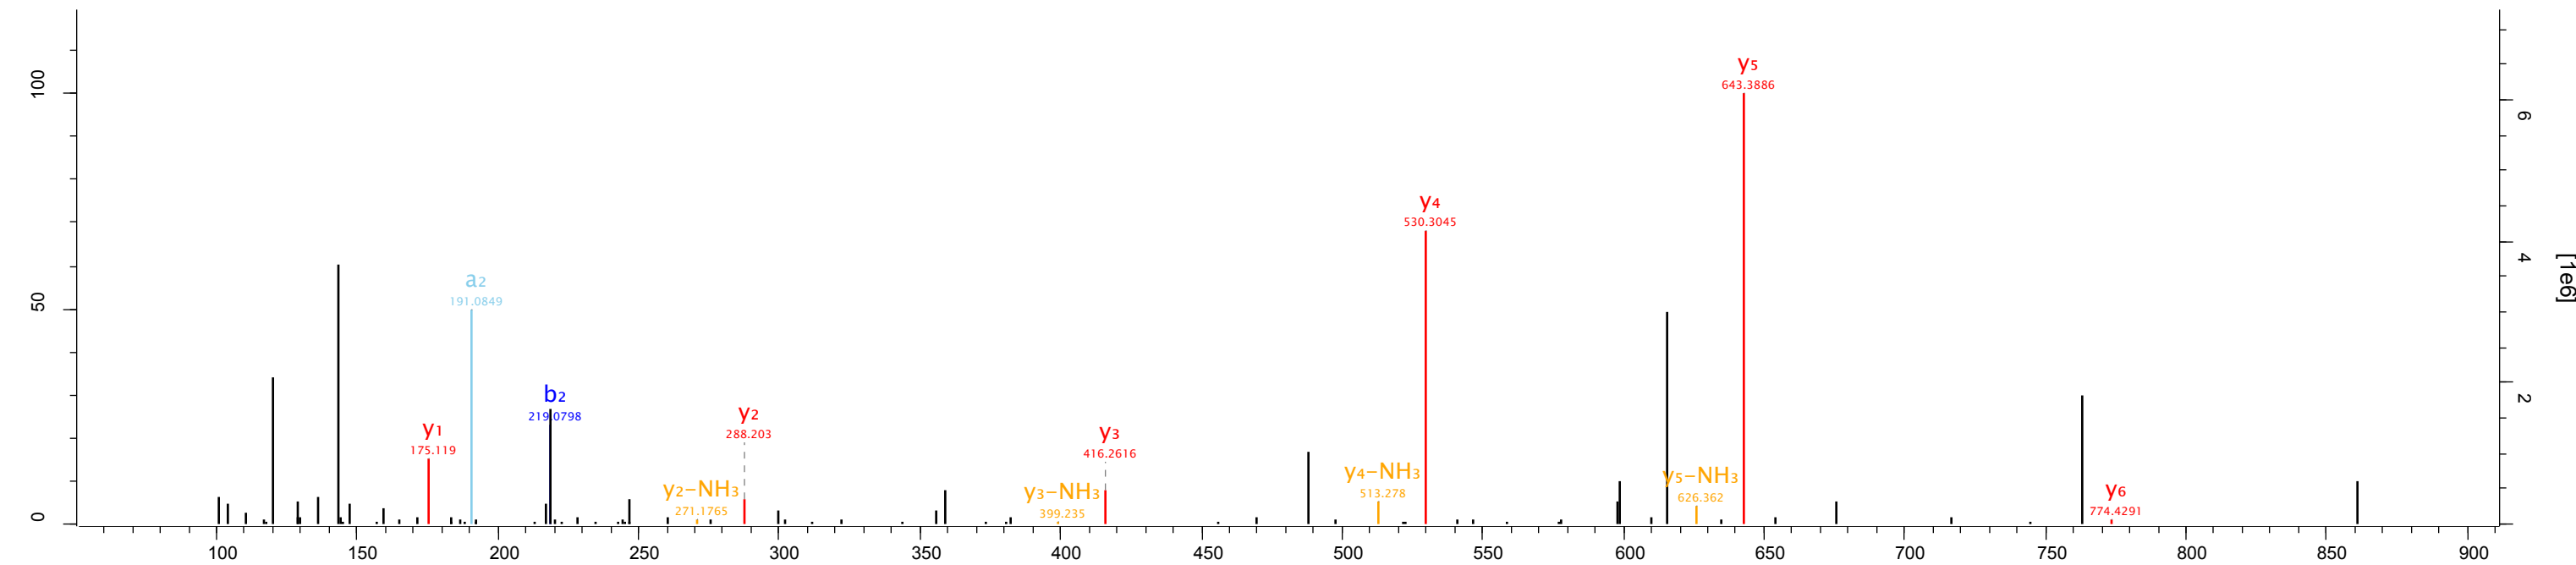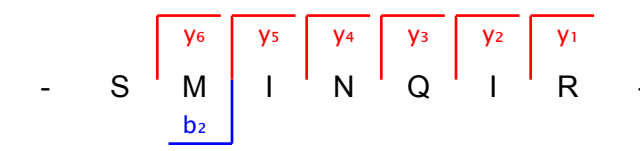

Raw file  
20180707\_MaS\_A375SR\_ML\_proteome\_01

Scan Method Score m/z Gene names  
21199 FTMS; HCD 58.25 613.63 RBM48

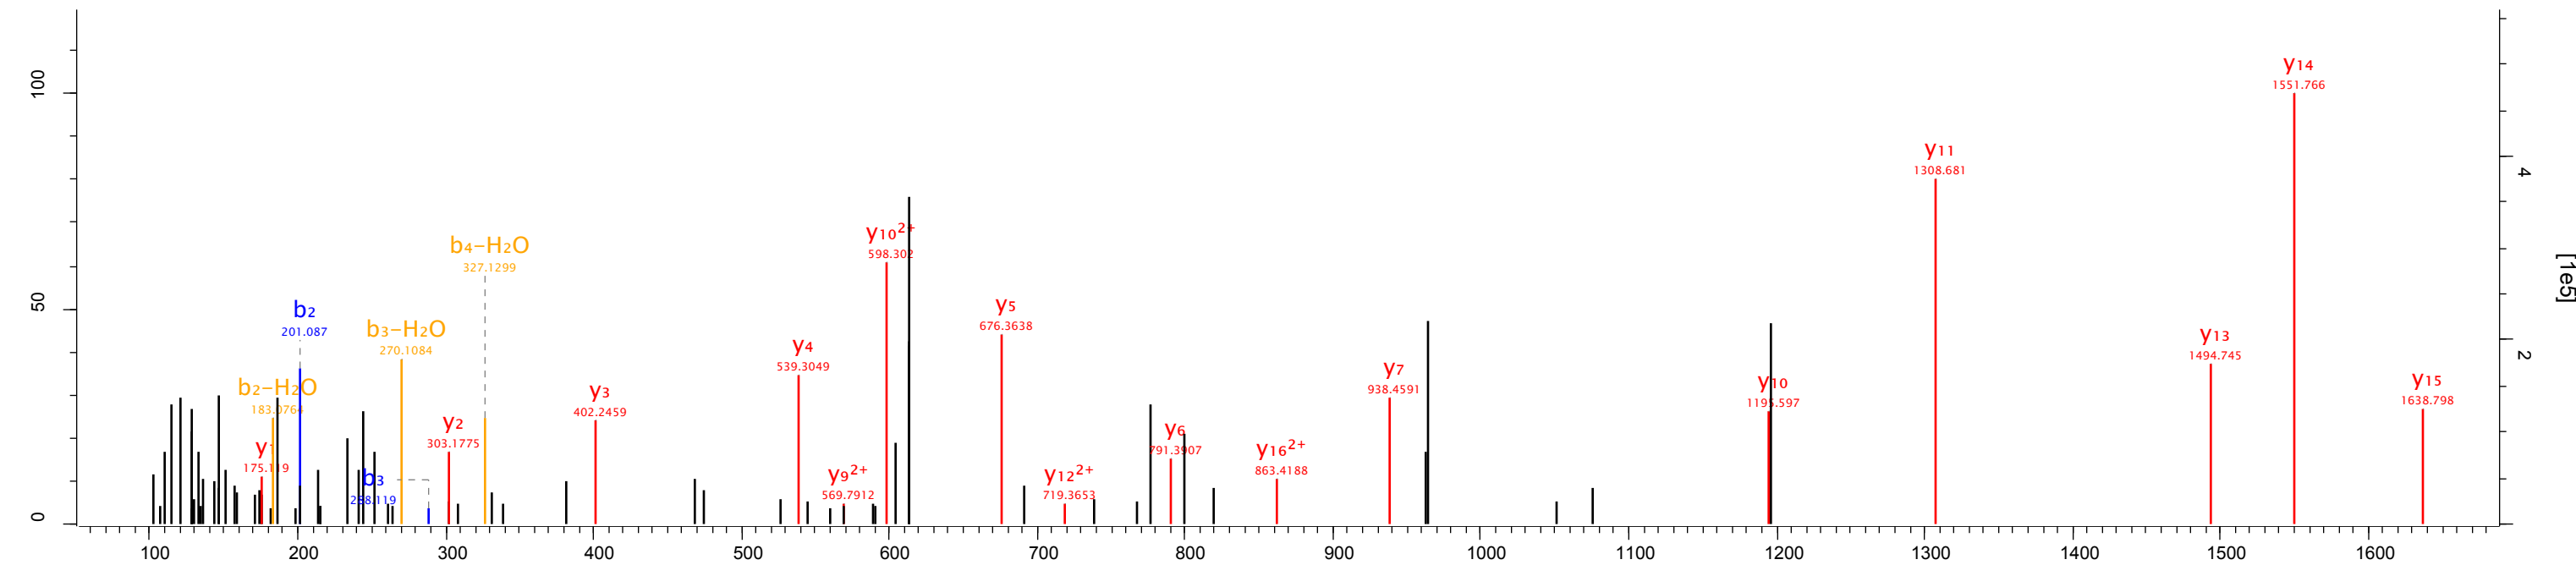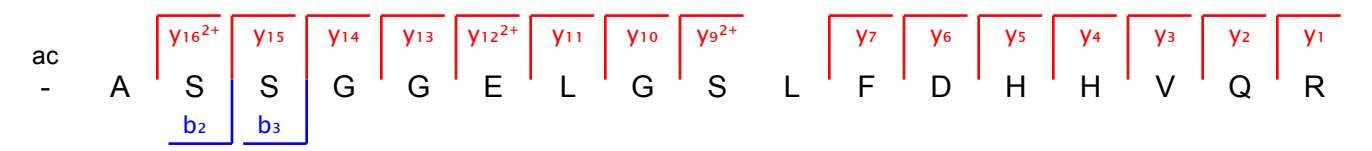



Raw file  
20180707\_MaS\_A375SR\_ML\_proteome\_01

Scan 23599 Method FTMS; HCD Score 47.73 m/z 936.97 Gene names SIRT7

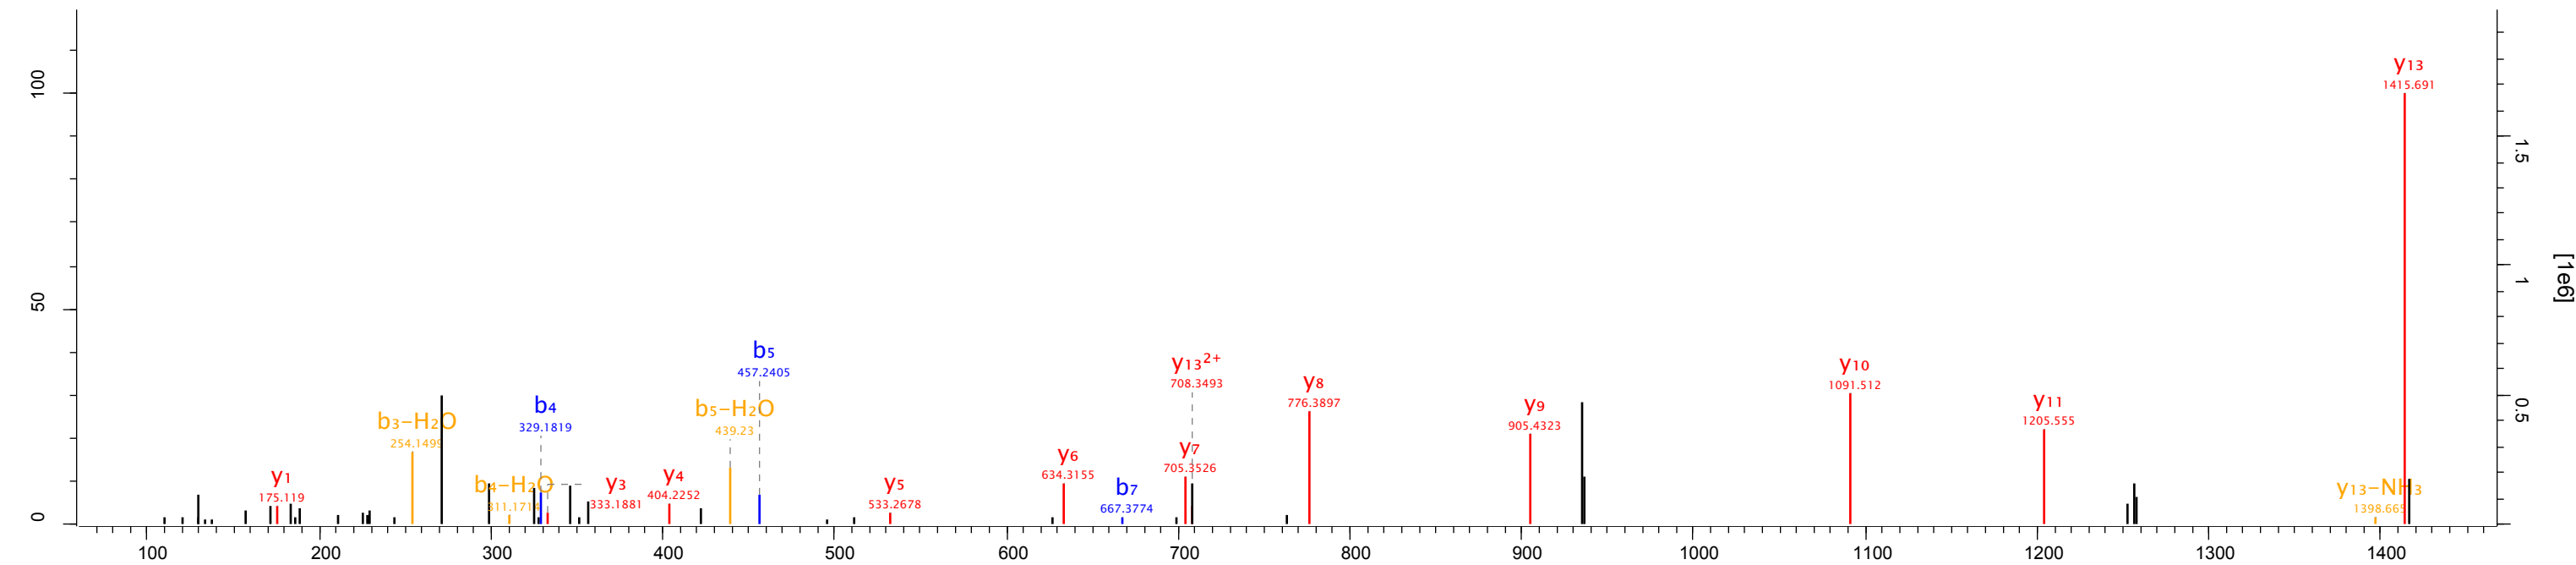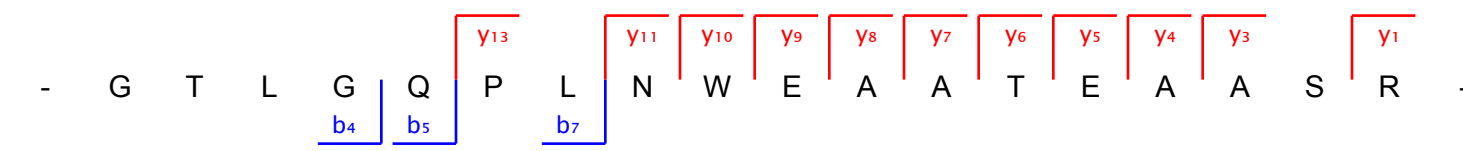

Raw file 20180707\_MaS\_A375SR\_ML\_proteome\_01 Scan 5859 Method FTMS; HCD Score 55.44 m/z 442.24

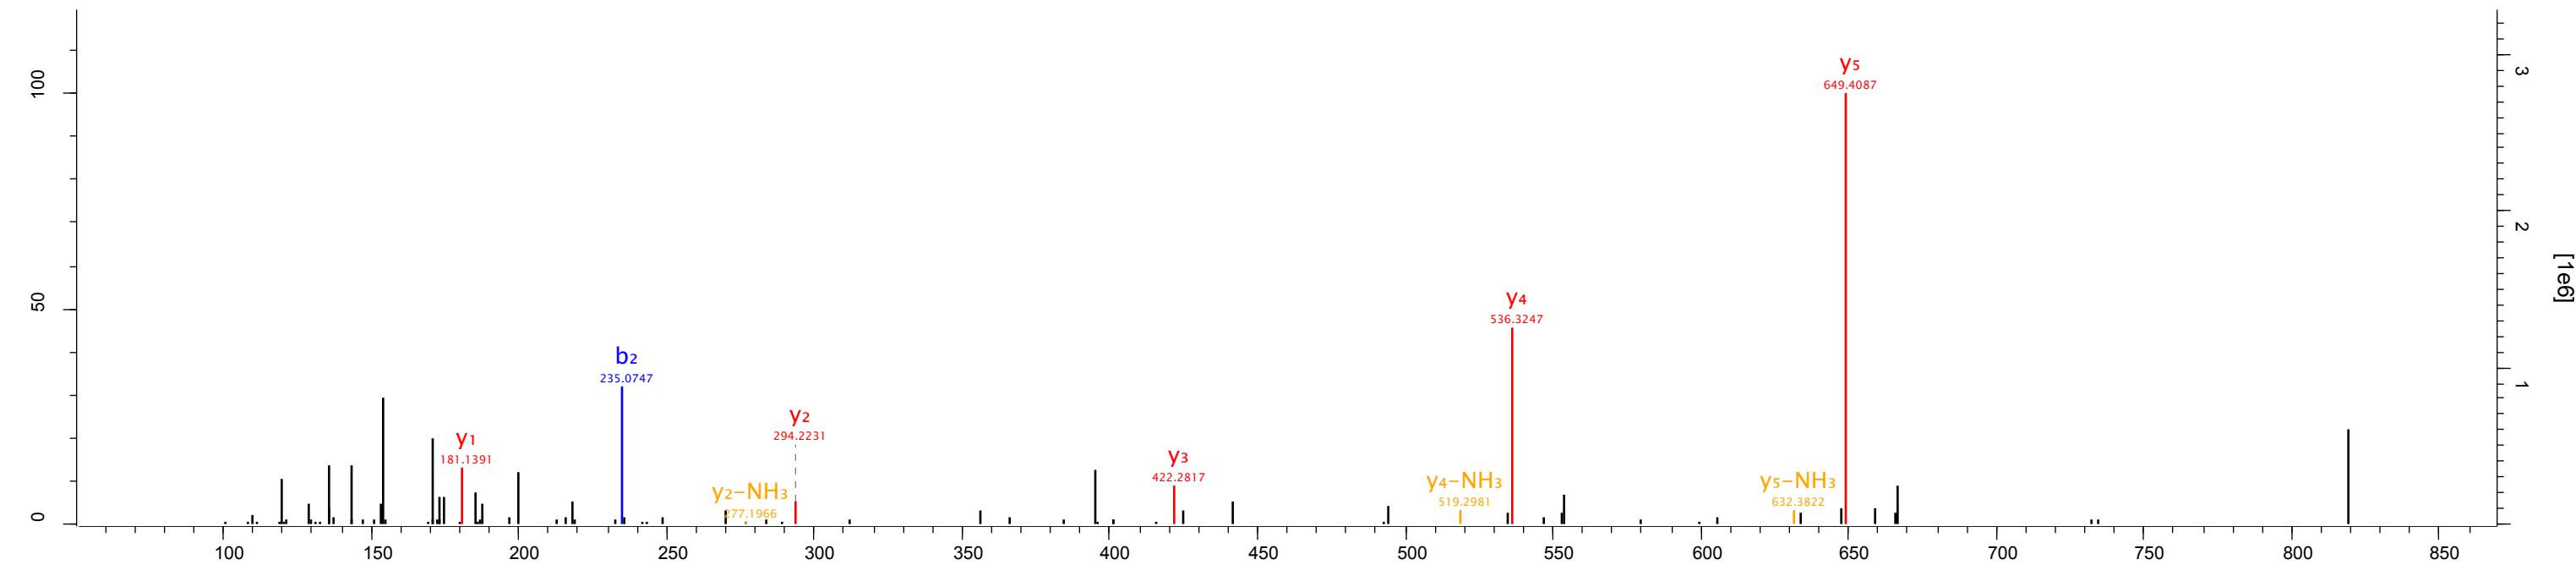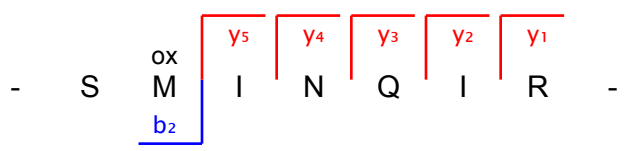

Raw file: 20180707\_MaS\_A375SR\_ML\_proteome\_02  
 Scan: 10899 Method: FTMS; HCD Score: 74.61 m/z: 650.84 Gene names: MEIS2;MEIS3;MEIS1;MEIS3P1

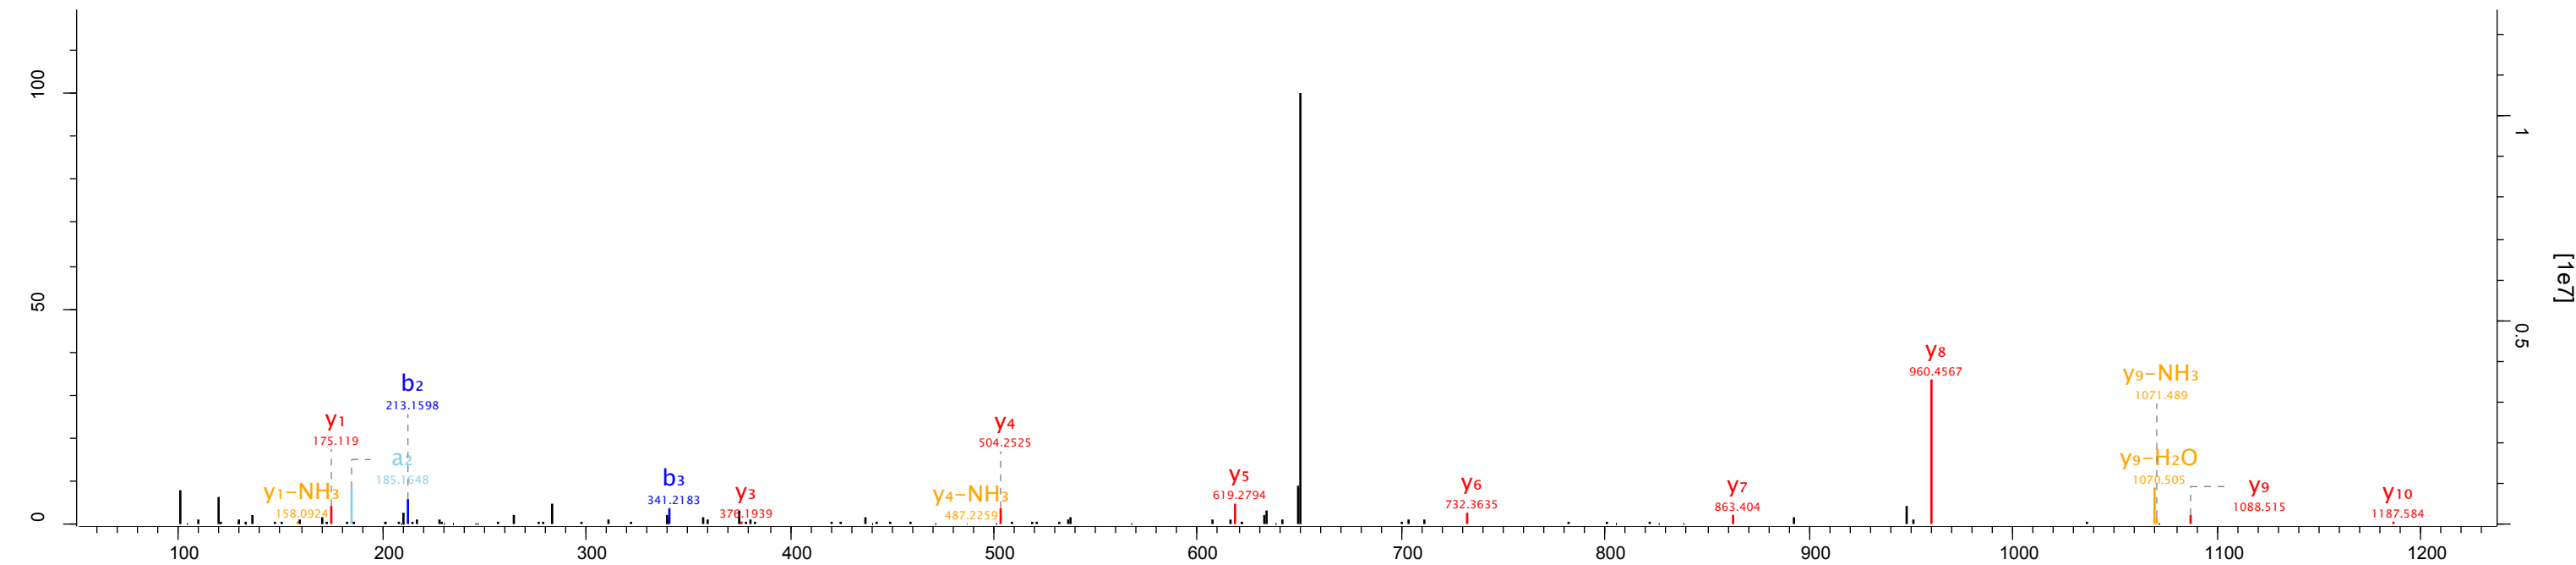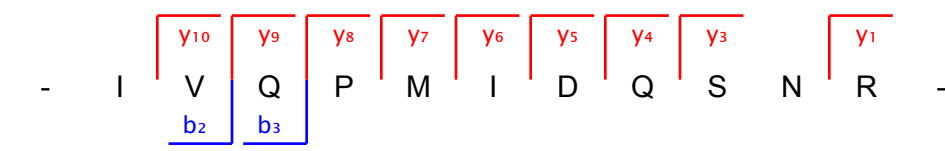

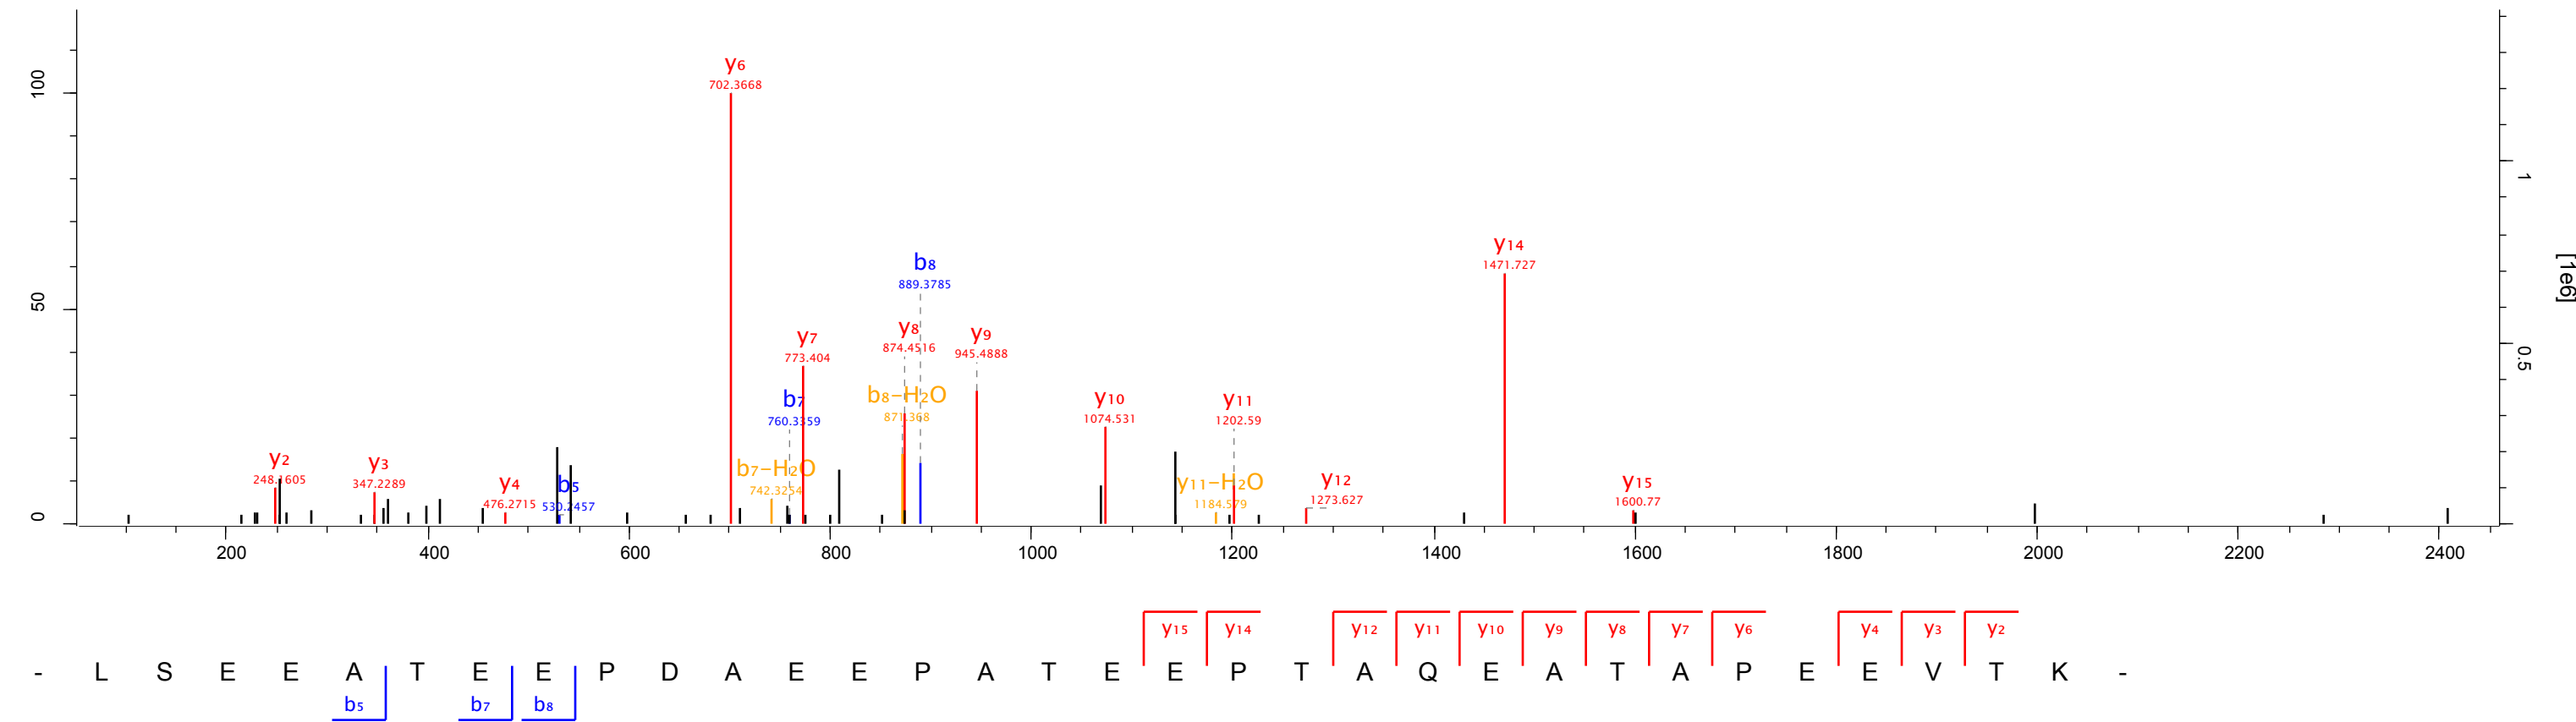

Raw file 20180707\_MaS\_A375SR\_ML\_proteome\_02 Scan 15689 Method FTMS; HCD Score 33.66 m/z 672 Gene names TMEM243

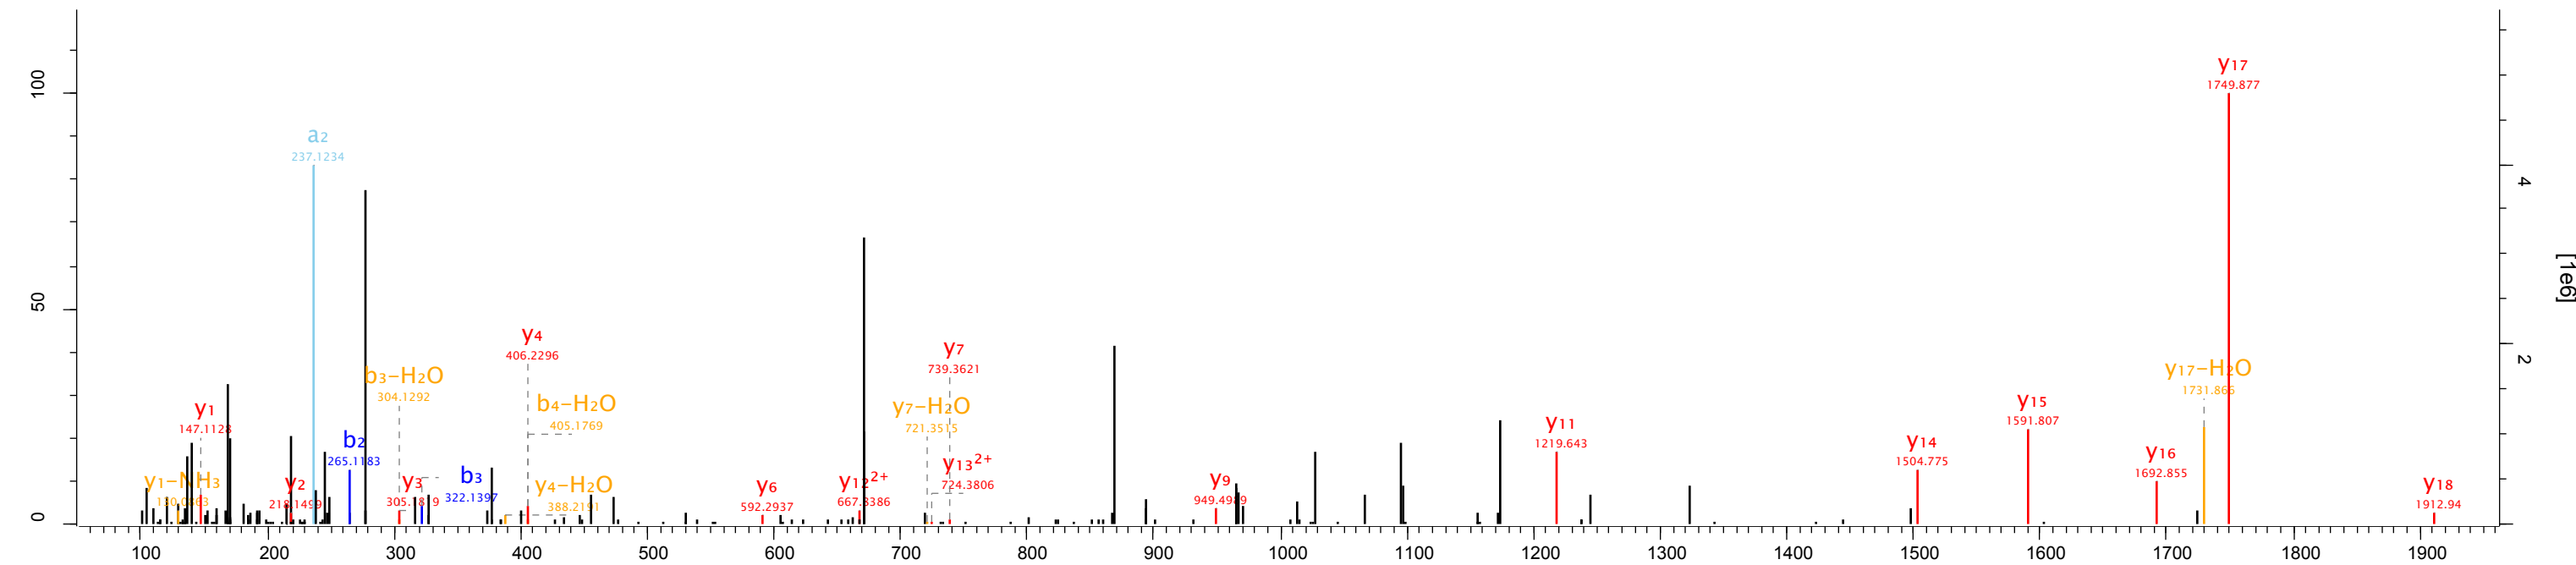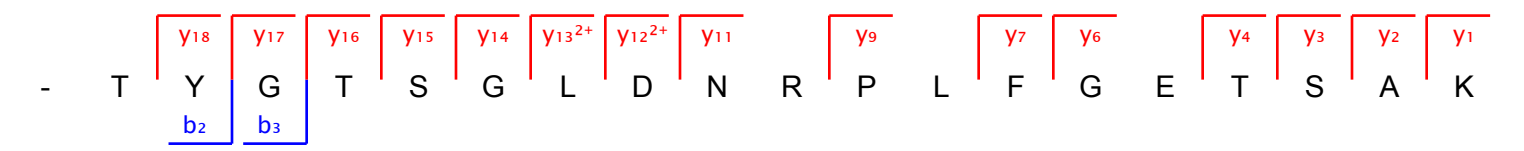

Raw file: 20180707\_MaS\_A375SR\_ML\_proteome\_03  
 Scan: 23679 Method: FTMS; HCD Score: 109.79 m/z: 830.41 Gene names: BCHE

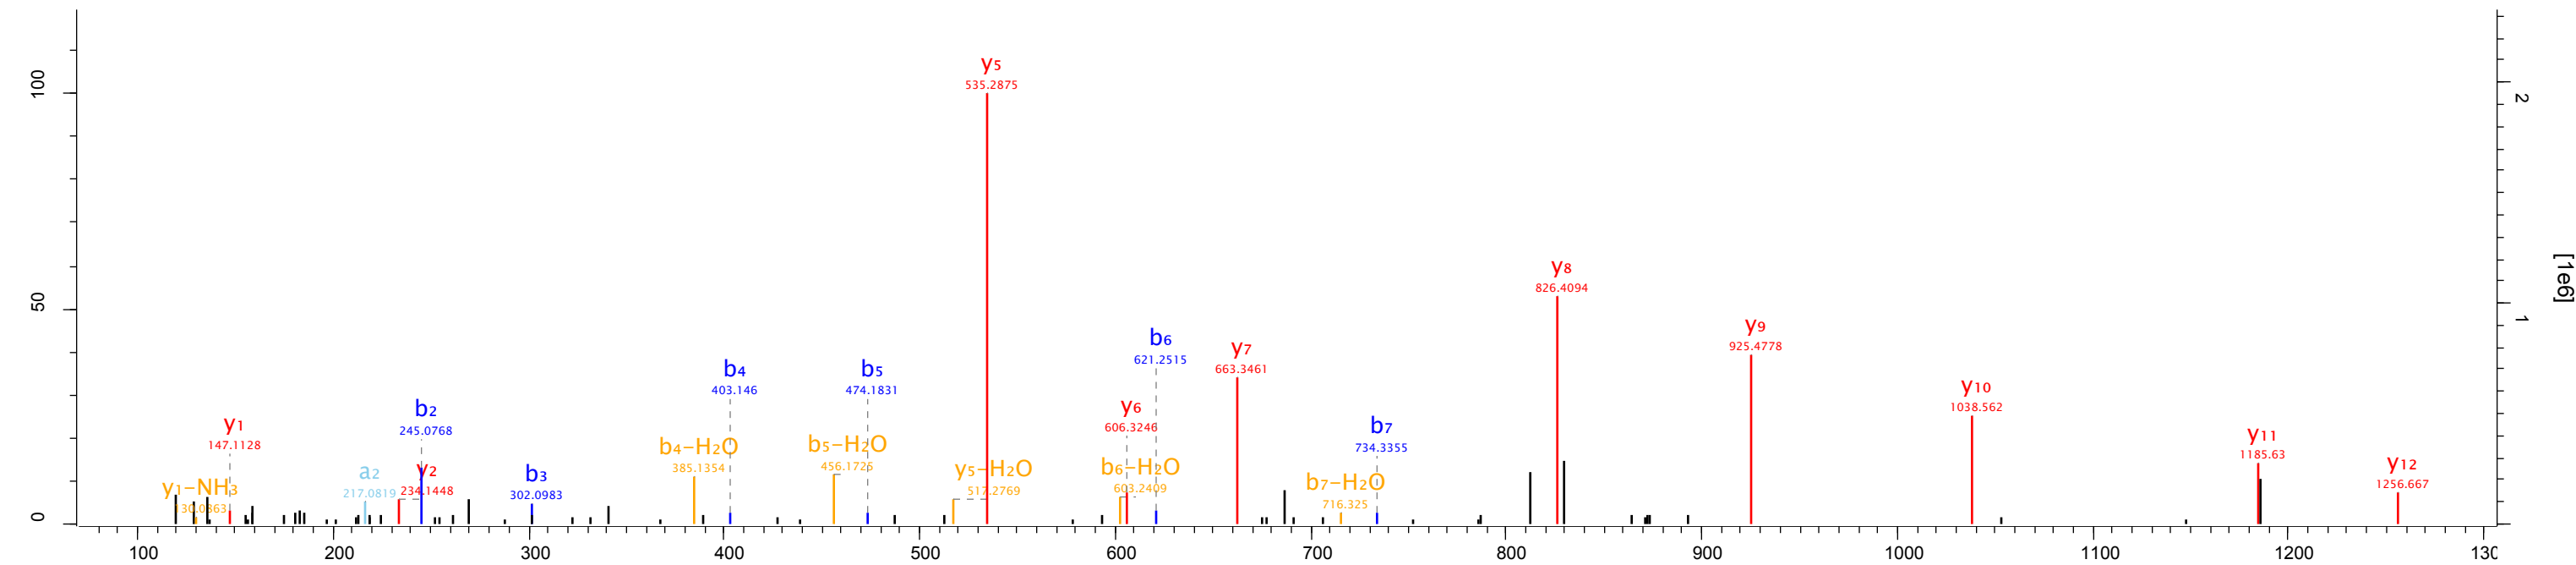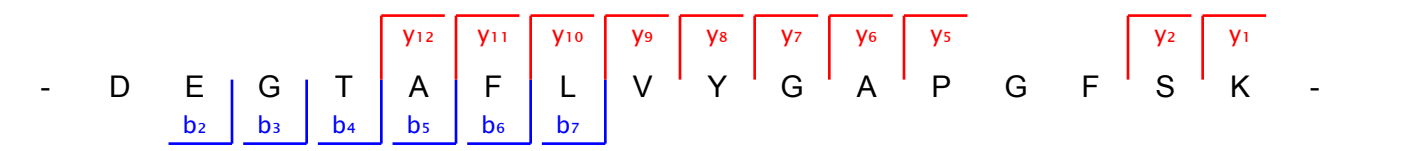

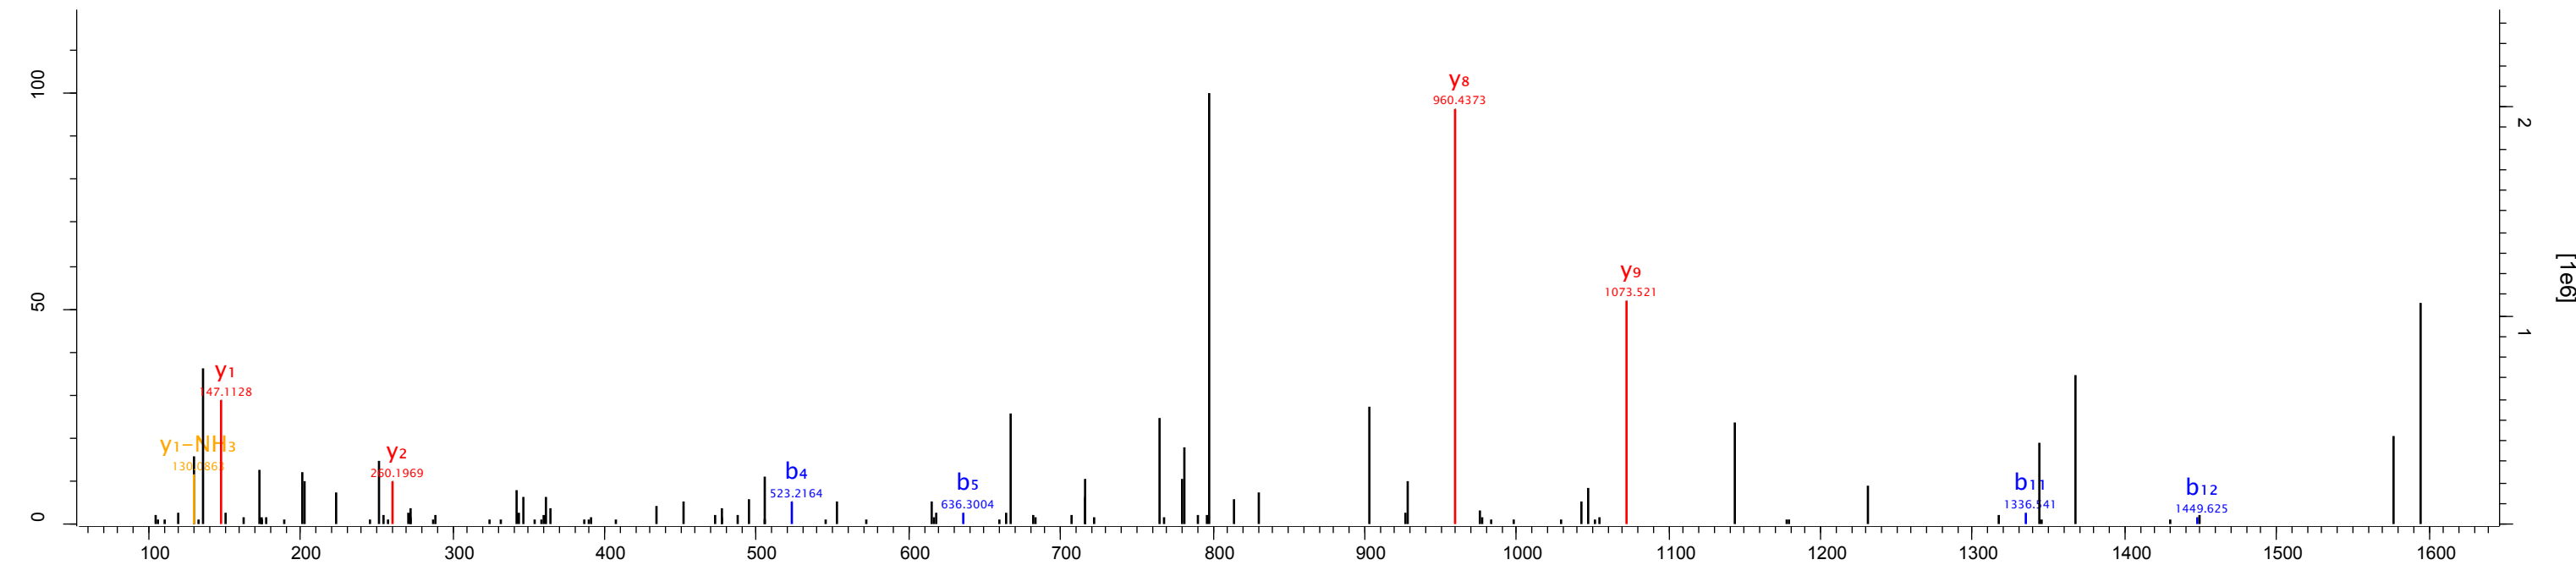

- S L I E L P H S A P M L K -

Fragmentation labels (b and y ions) are shown below the corresponding amino acids:

- $b_4$  (under E)
- $b_5$  (under L)
- $b_{11}$  (under M)
- $b_{12}$  (under L)
- $y_9$  (over E)
- $y_8$  (over P)
- $y_2$  (over L)
- $y_1$  (over K)

Raw file  
20180707\_MaS\_A375SR\_ML\_proteome\_04

Scan 22049 Method FTMS; HCD Score 99.28 m/z 603.32 Gene names MEF2BNB

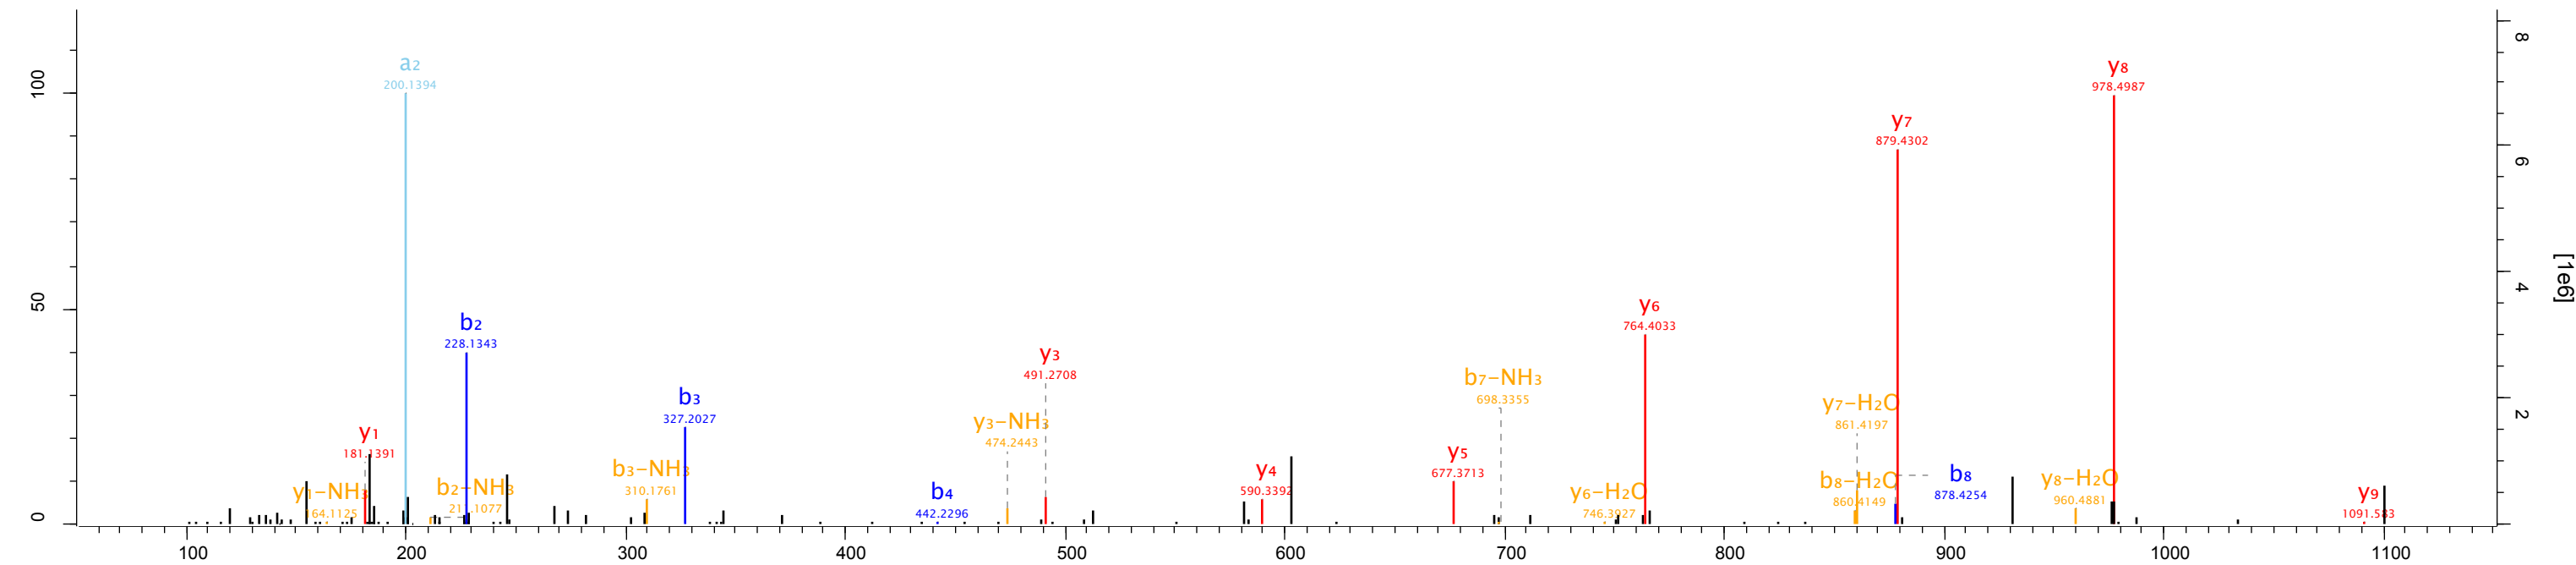



Raw file 20180707\_MaS\_A375SR\_ML\_proteome\_05 Scan 22139 Method FTMS; HCD Score 42.95 m/z 912.45

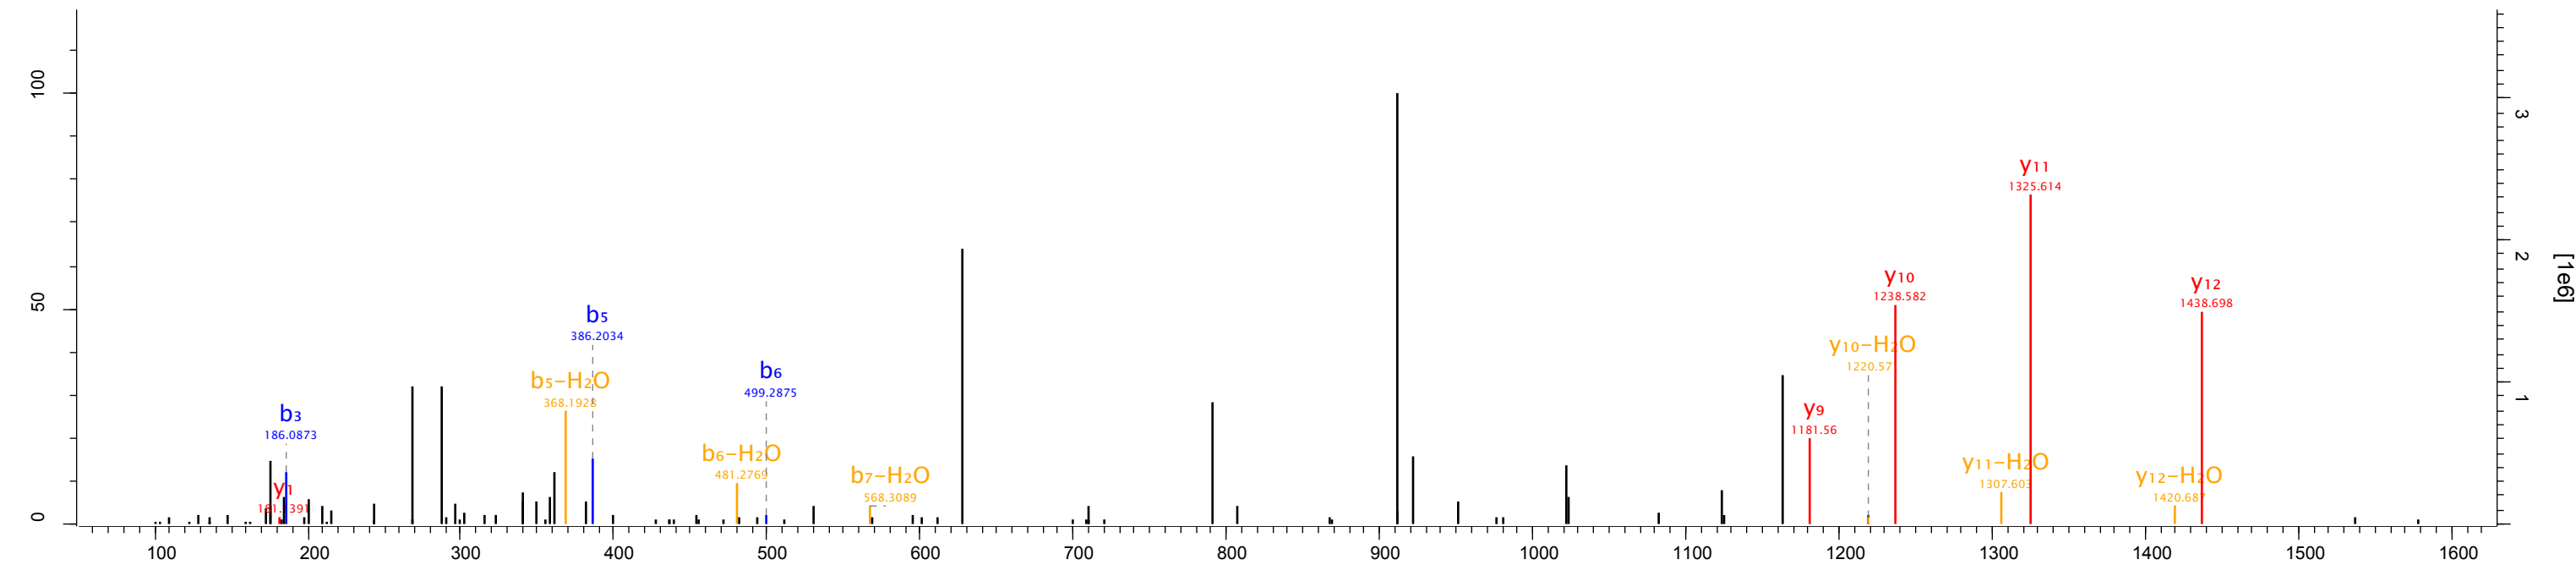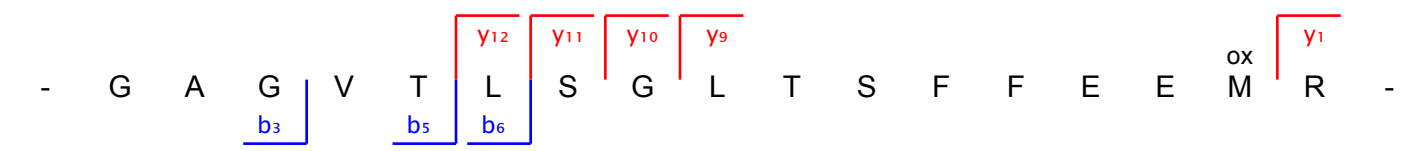

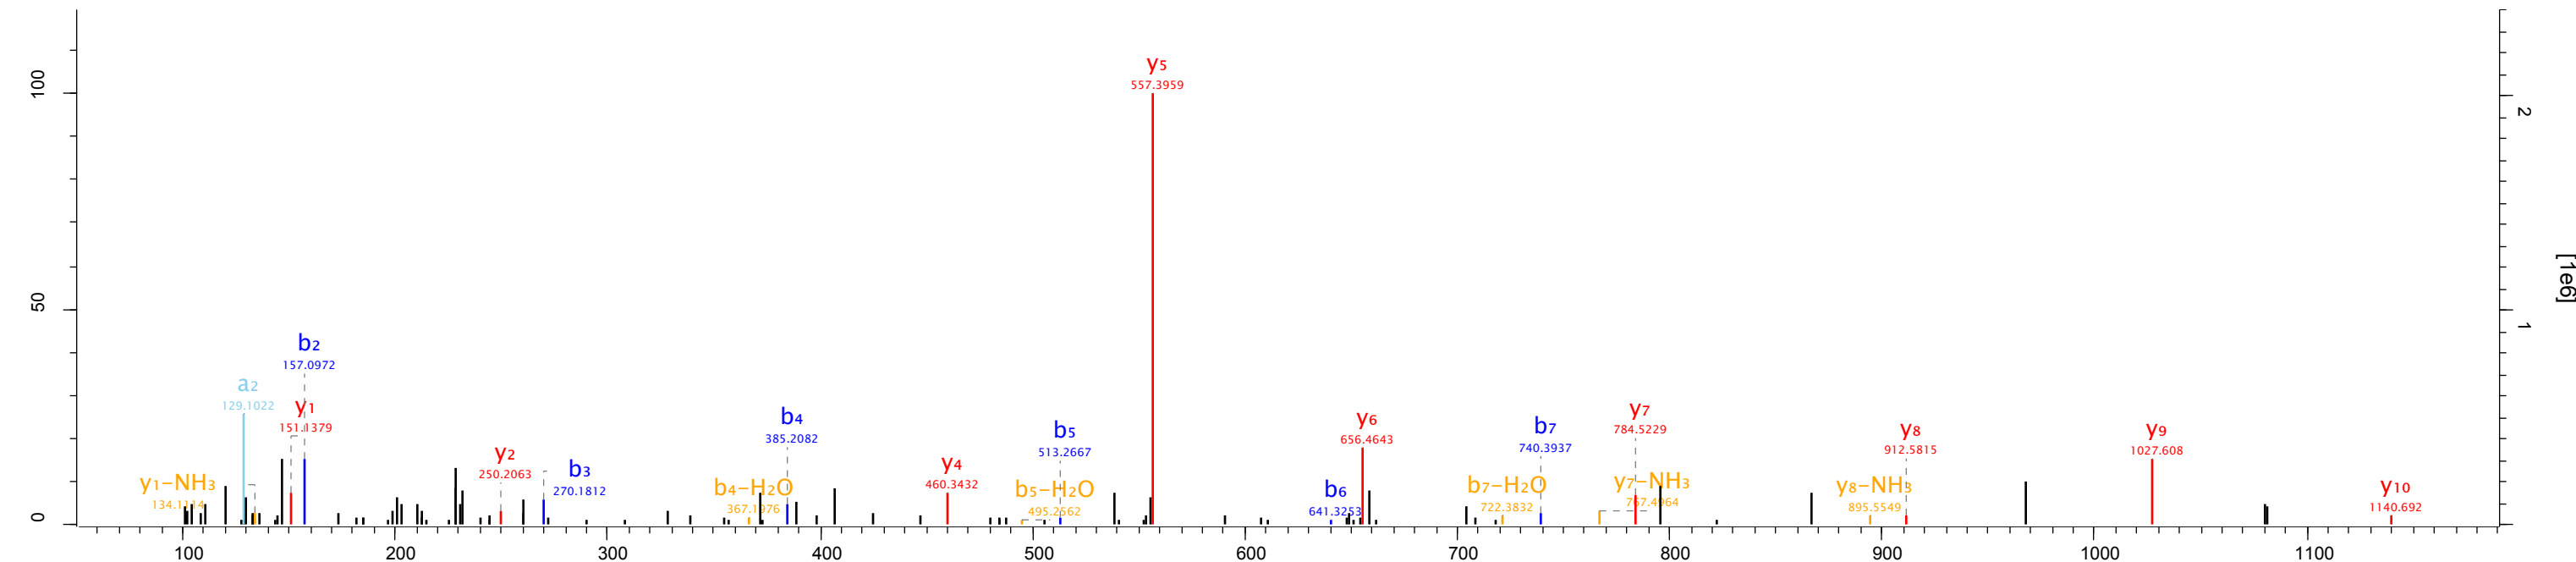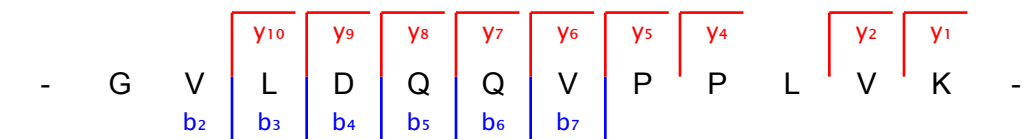

Raw file: 20180707\_MaS\_A375SR\_ML\_proteome\_06  
 Scan: 17289 Method: FTMS; HCD Score: 76.82 m/z: 597.01 Gene names: SLC35A3

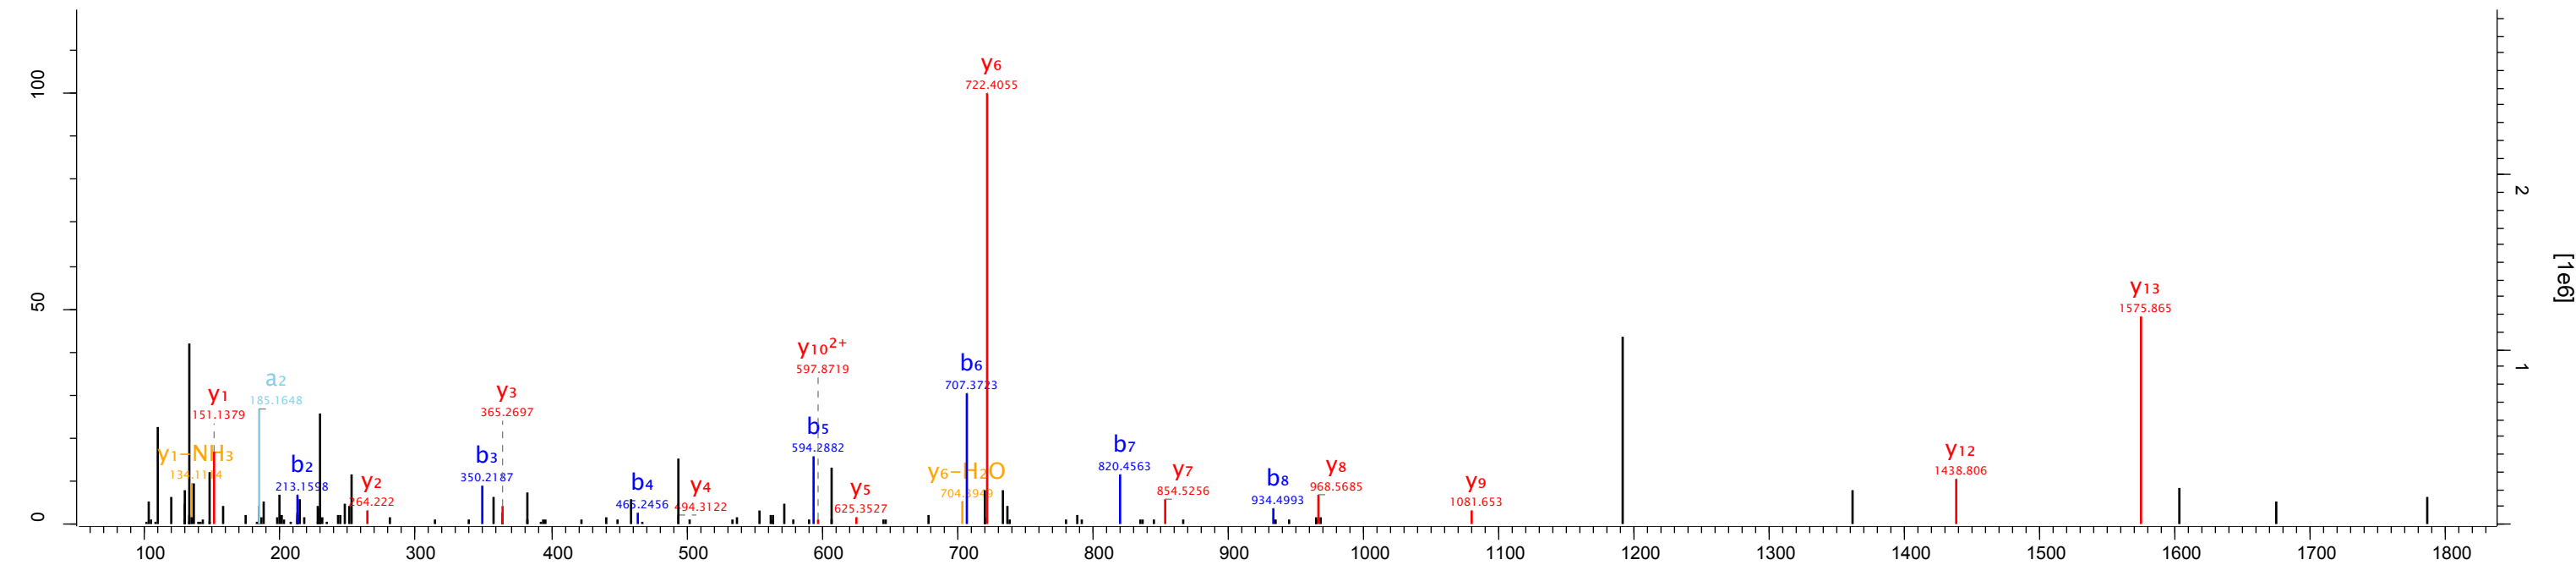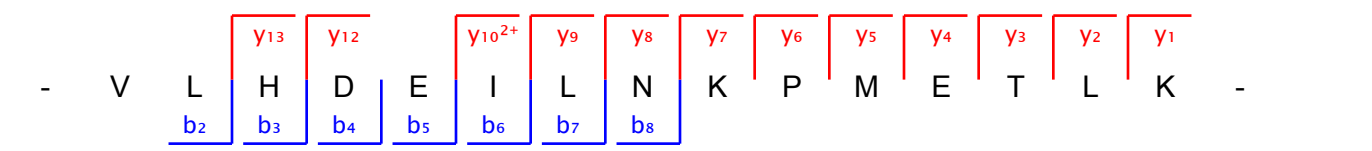

Raw file 20180707\_MaS\_A375SR\_ML\_proteome\_06 Scan 24929 Method FTMS; HCD Score 42.31 m/z 676.99 Gene names AIM1L

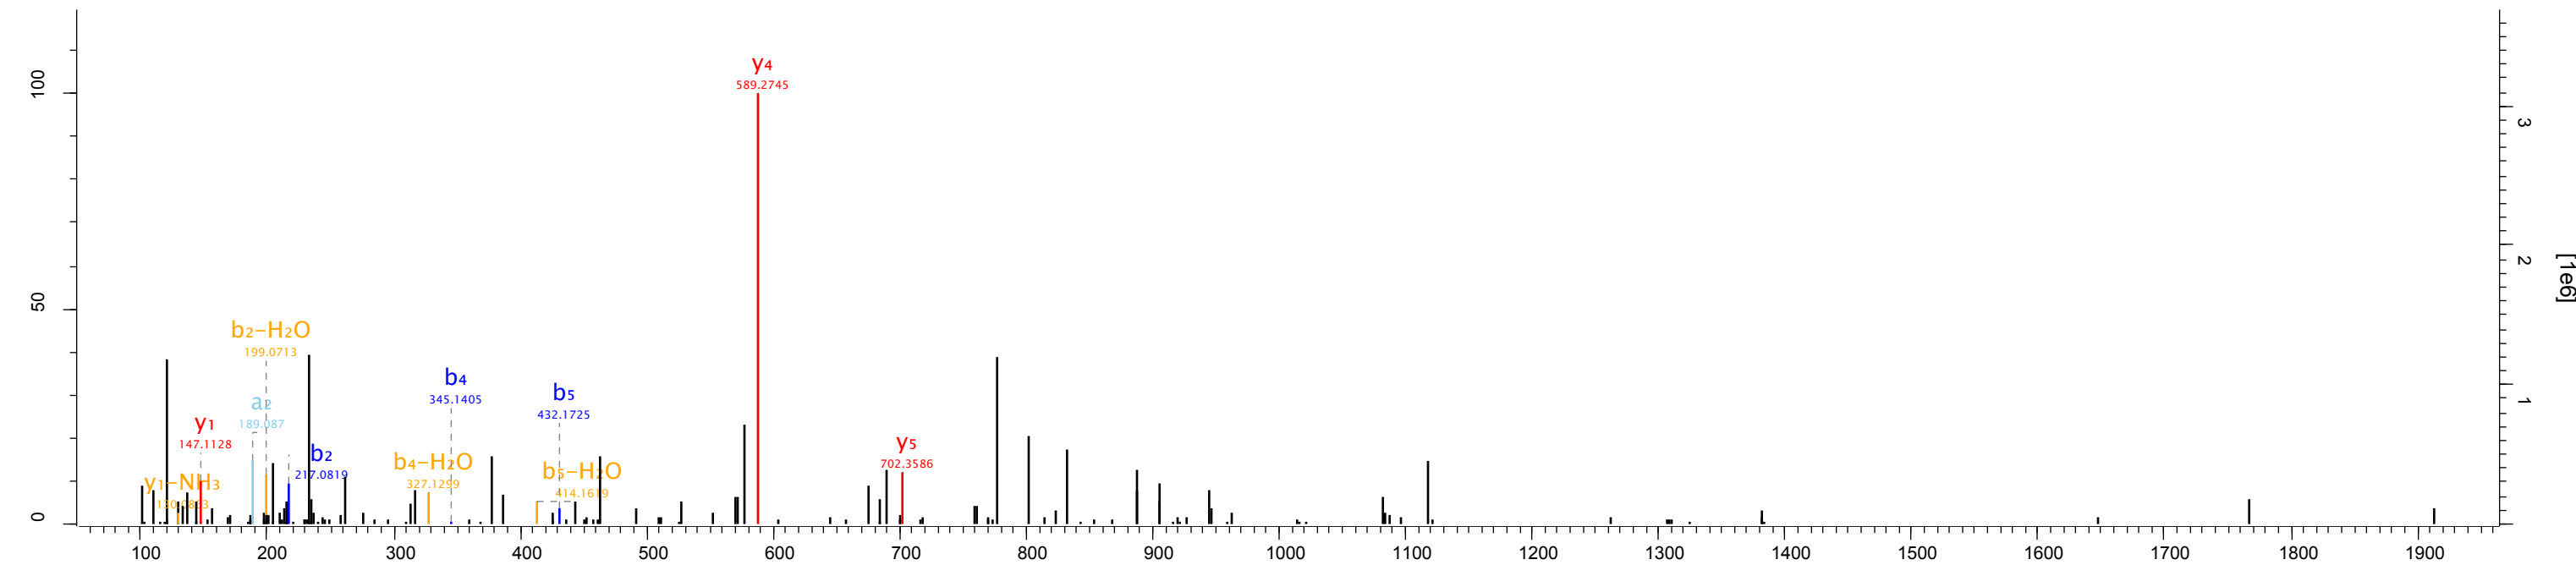

- D T A G S K N F Q S H G P I F S K K -

Fragmentation sites are indicated by brackets below the sequence: b2 (under T), b4 (under G), b5 (under S), y5 (under I), y4 (under F), and y1 (under K).

Raw file: 20180707\_MaS\_A375SR\_ML\_proteome\_06  
 Scan: 8989 Method: FTMS; HCD Score: 93.47 m/z: 357.54 Gene names: DACH2

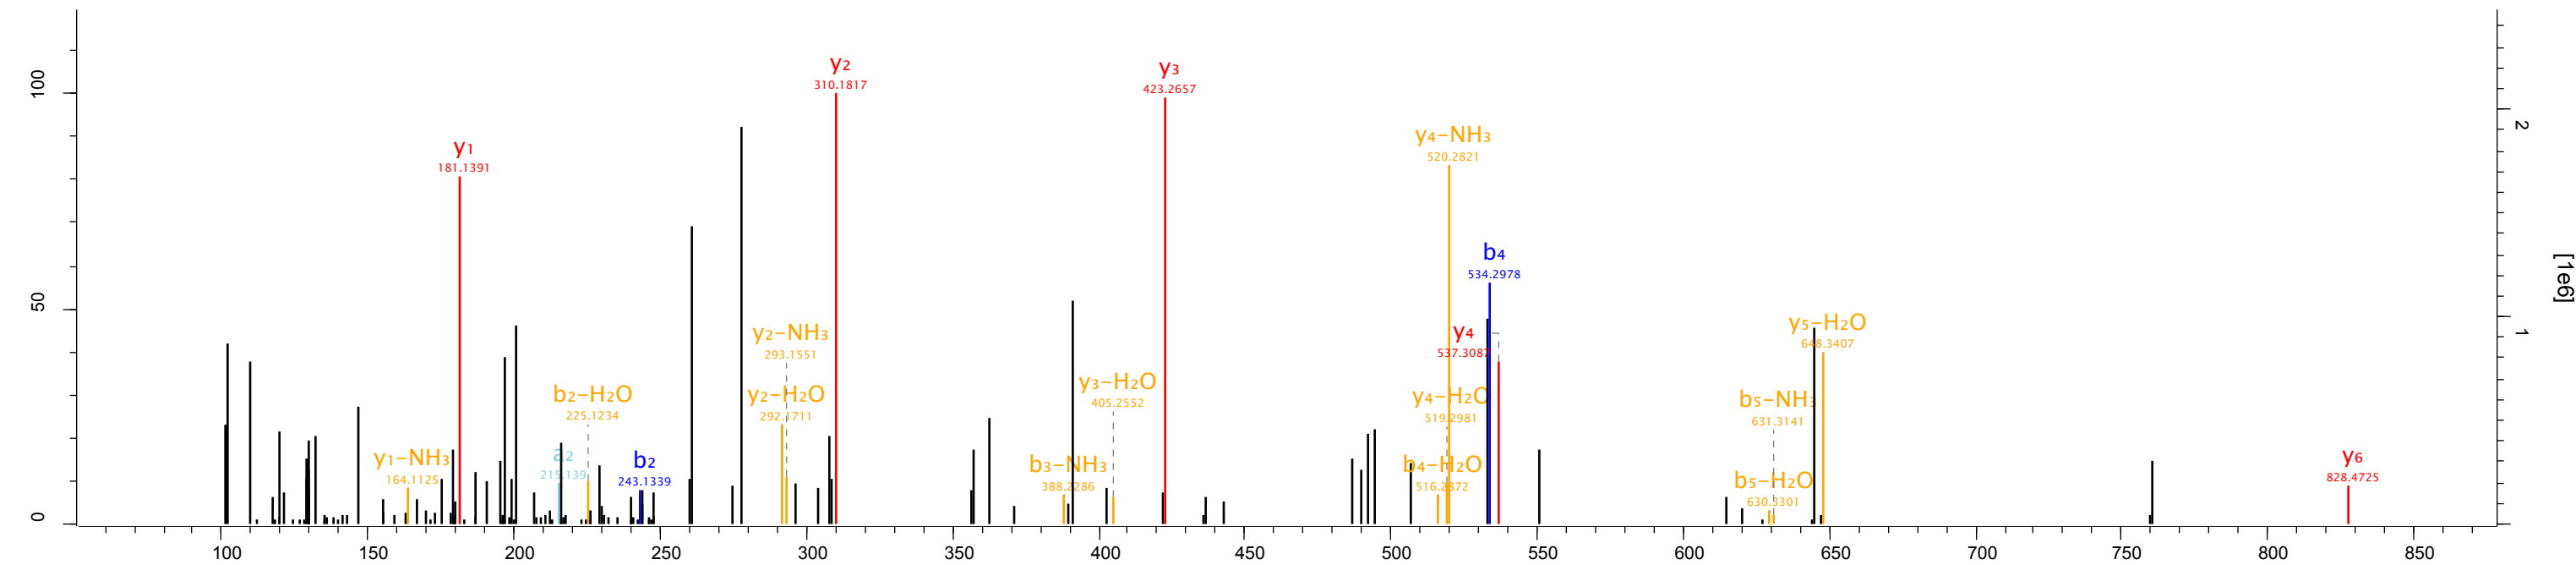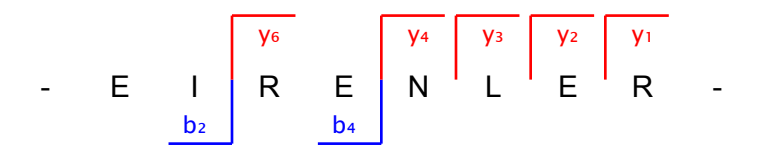

Raw file  
20180707\_MaS\_A375SR\_ML\_proteome\_08

Scan Method Score m/z Gene names  
25649 FTMS; HCD 26.75 500.93 DET1

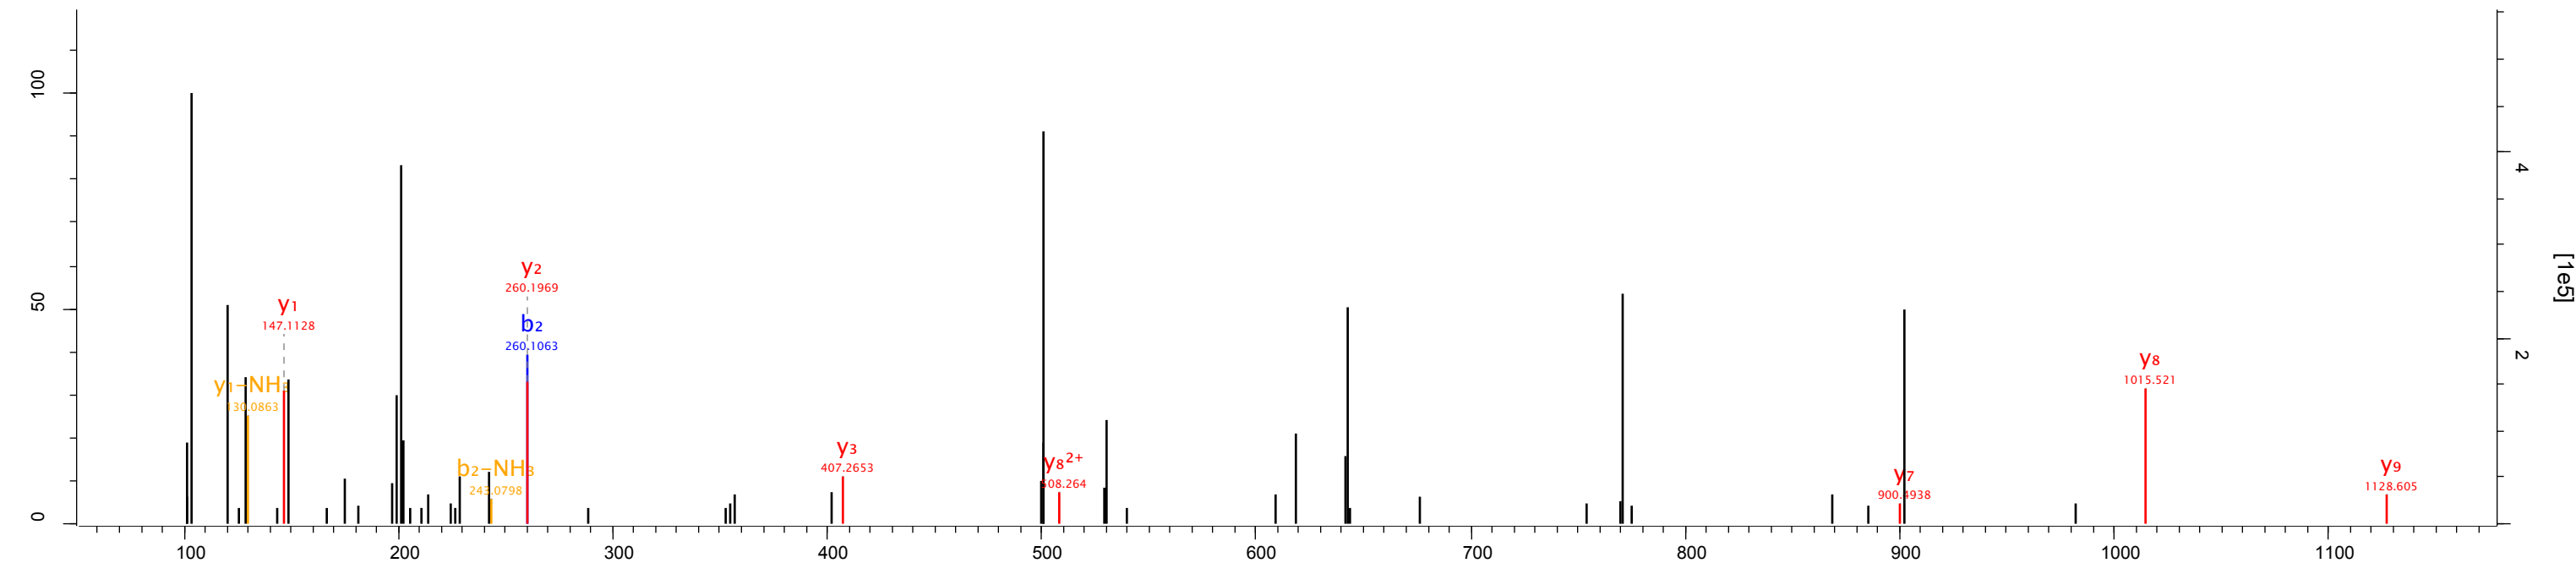

- M Q L L D E N H L F I K -

b<sub>2</sub> (under Q)

y<sub>9</sub> (over L), y<sub>8</sub> (over D), y<sub>7</sub> (over E)

y<sub>3</sub> (over F), y<sub>2</sub> (over I), y<sub>1</sub> (over K)

Raw file: 20180707\_MaS\_A375SR\_ML\_proteome\_09  
 Scan: 19899 Method: FTMS; HCD Score: 94.69 m/z: 630.33 Gene names: ITGA2B

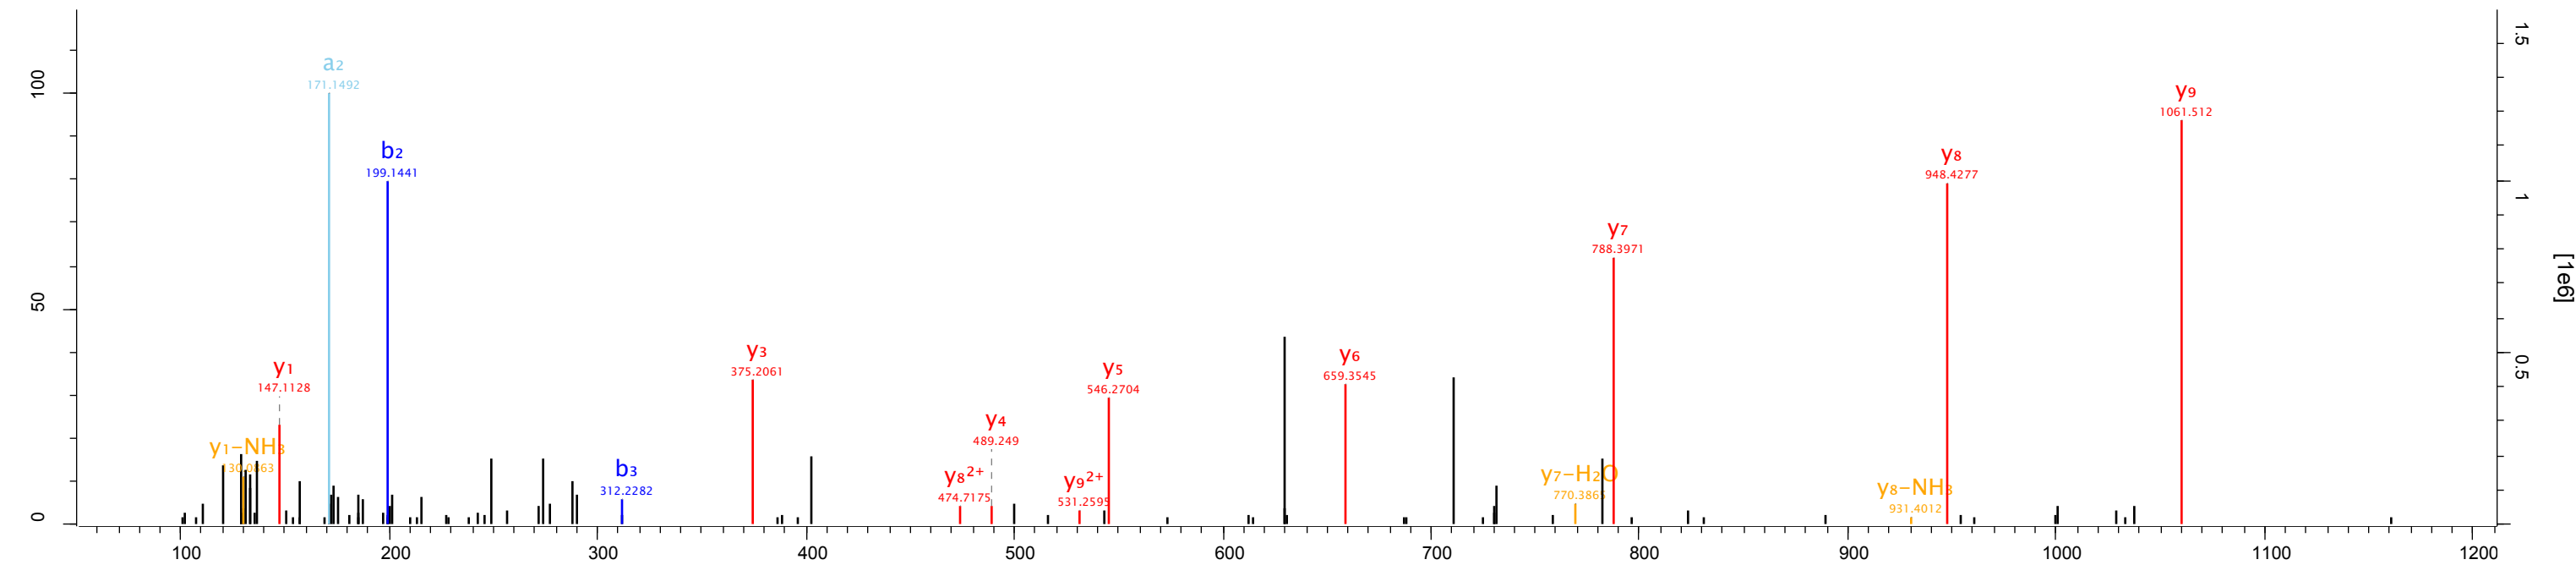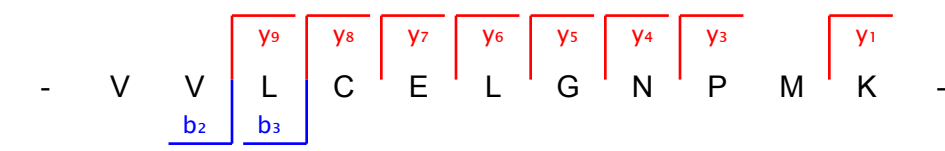

Raw file  
20180707\_MaS\_A375SR\_ML\_proteome\_11

Scan Method Score m/z Gene names  
18169 FTMS; HCD 59.25 702.84 HPX

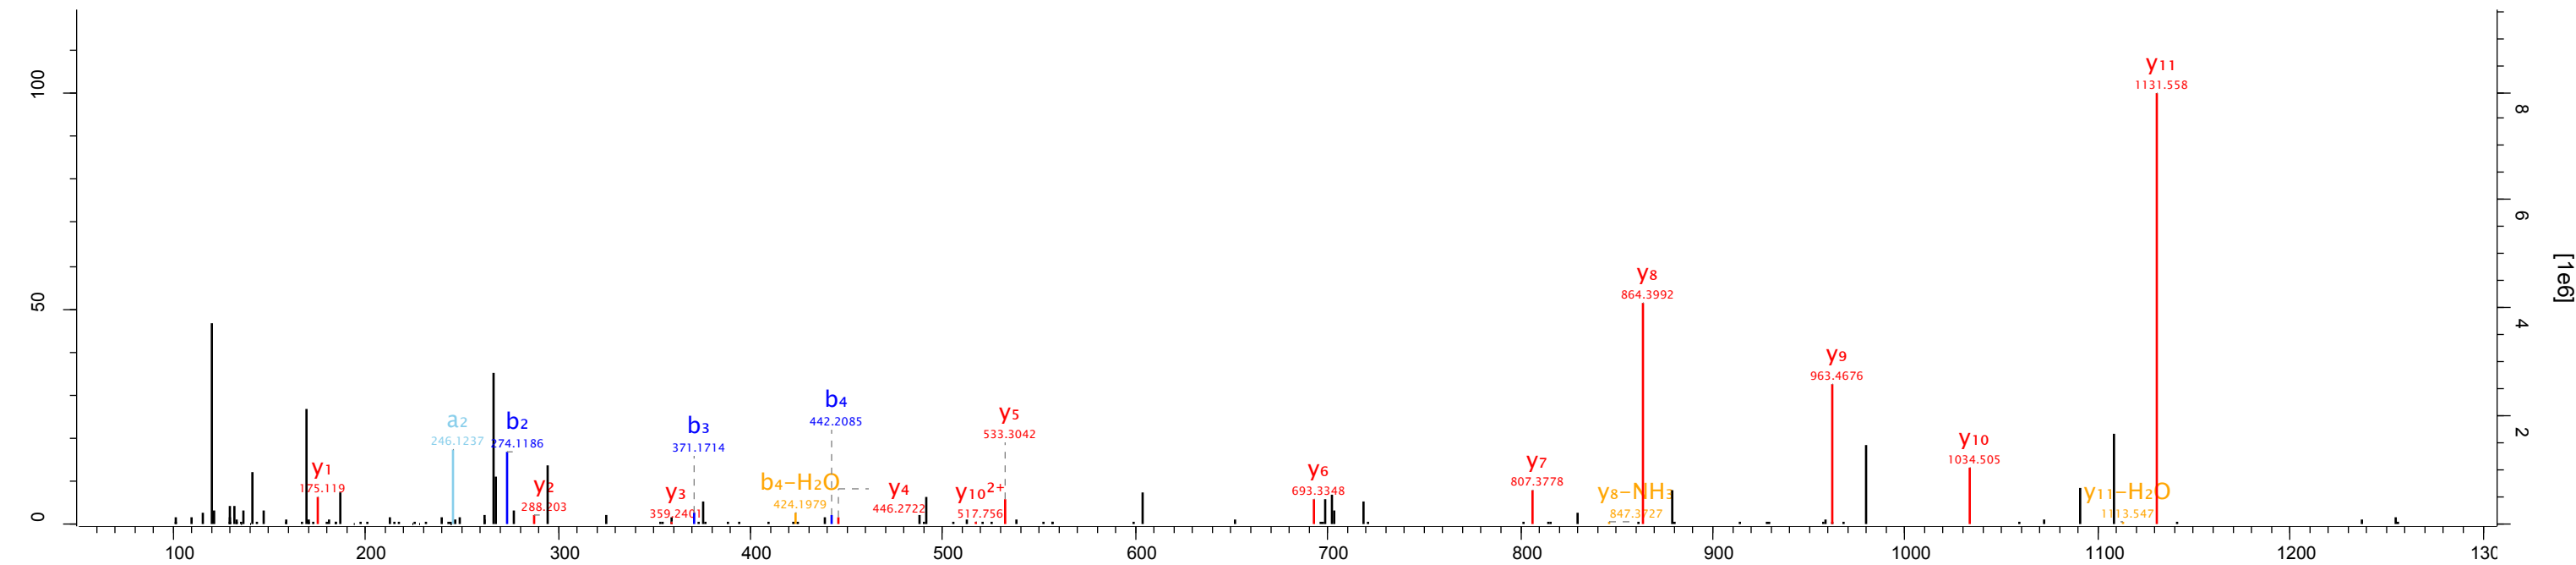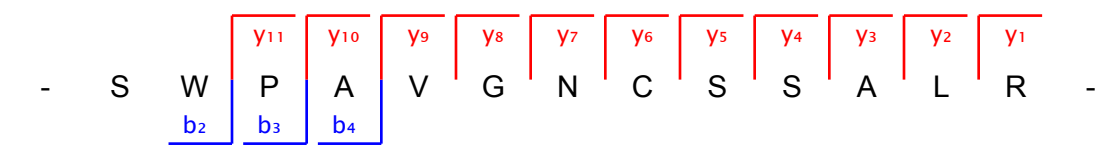



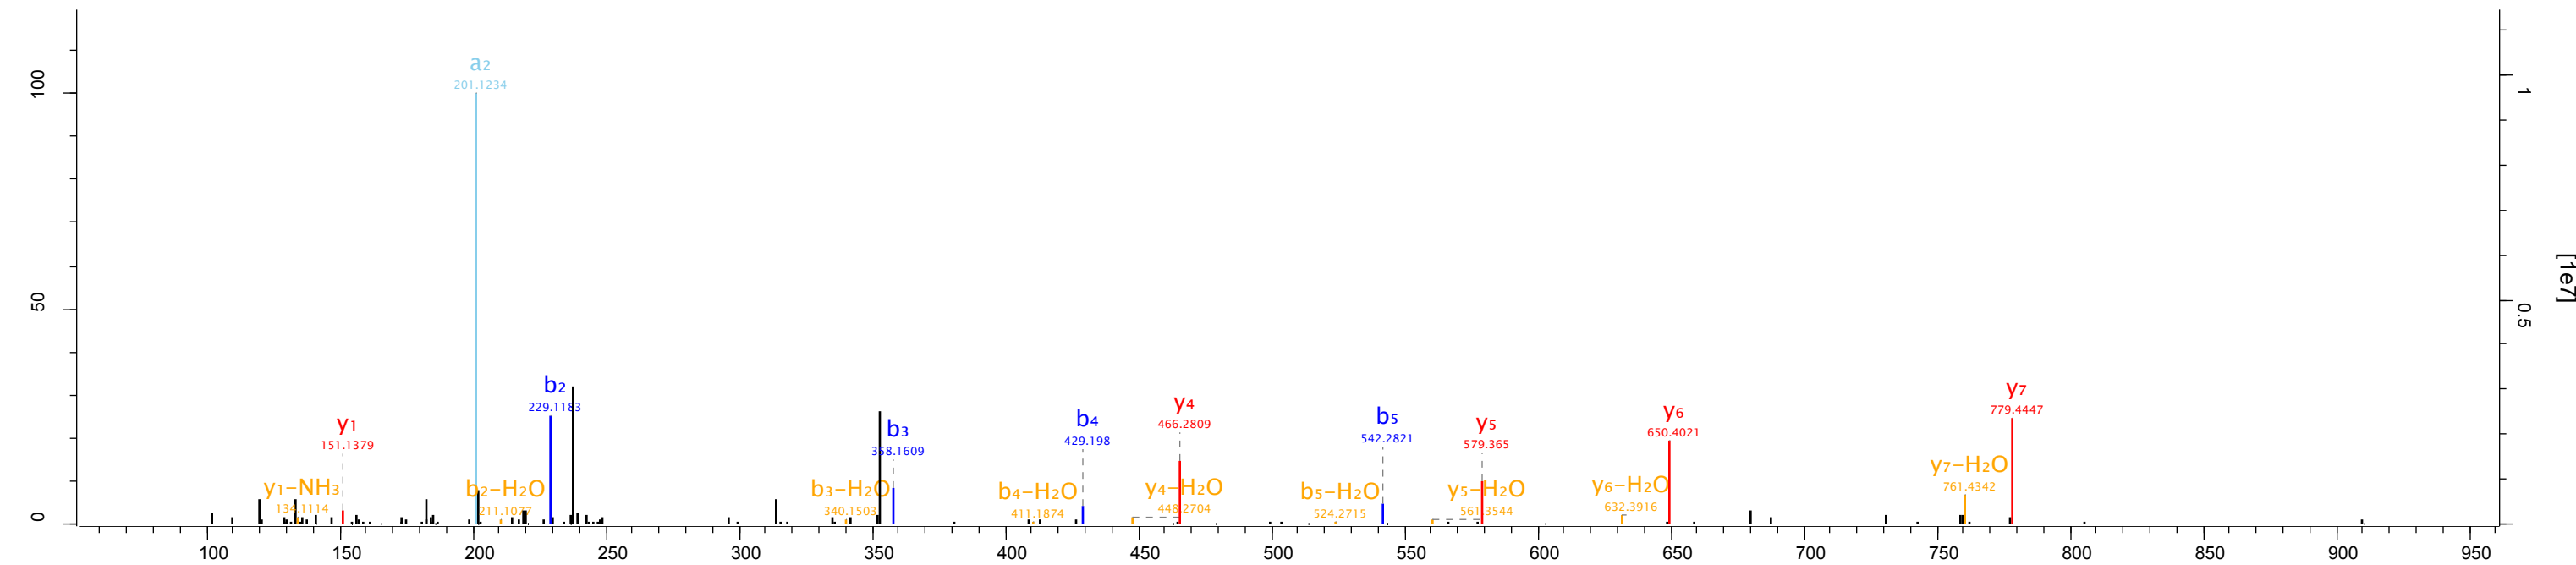

- D L E A L V T D K -

Fragmentation scheme showing b and y ions for the peptide sequence: D L E A L V T D K. The b ions (blue) are b2, b3, b4, and b5. The y ions (red) are y1, y4, y5, y6, and y7.

Raw file  
20180707\_MaS\_A375SR\_ML\_proteome\_11

Scan 25649 Method FTMS; HCD Score 25.61 m/z 706.37 Gene names TMEM261

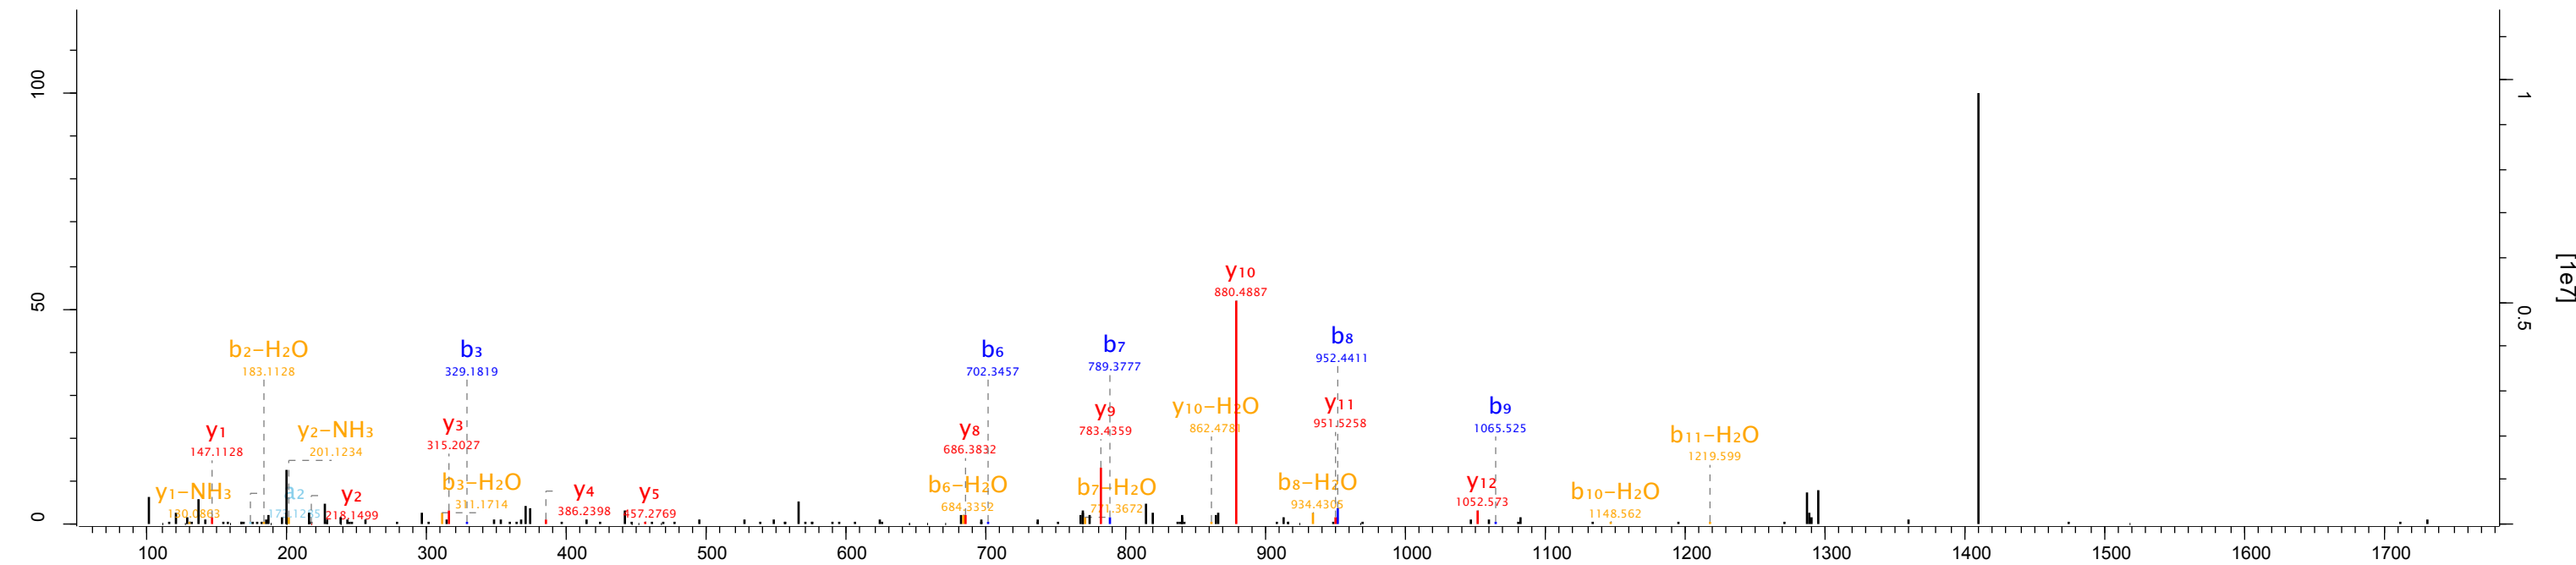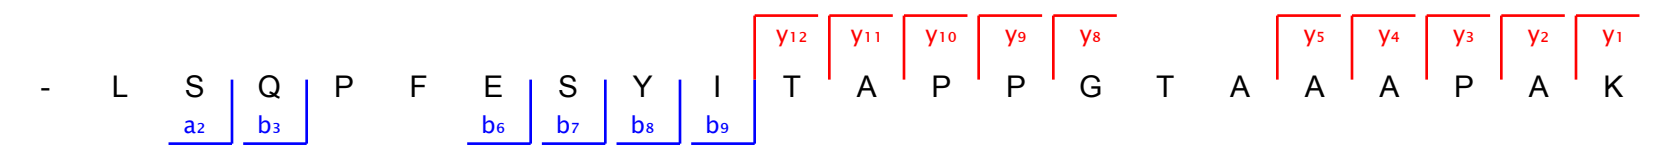

Raw file

20180707\_MaS\_A375SR\_ML\_proteome\_11

Scan 3159 Method FTMS; HCD Score 90.15 m/z 361.51 Gene names TM4SF1

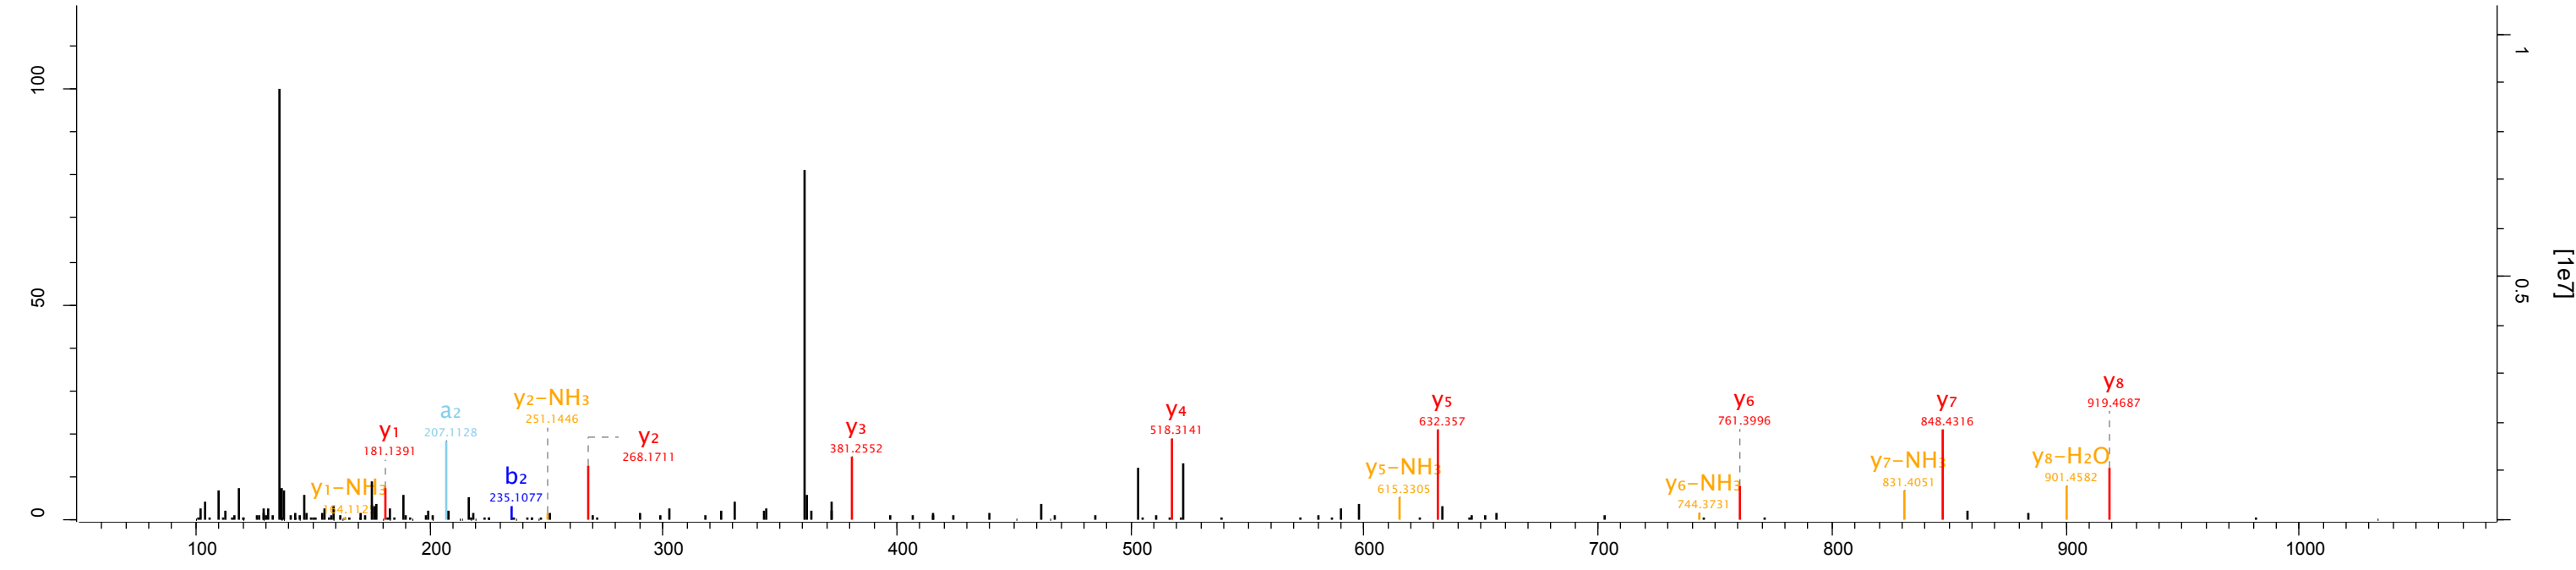

Raw file  
20180707\_MaS\_A375SR\_ML\_proteome\_12

Scan 8279 Method FTMS; HCD Score 48.28 m/z 576.29

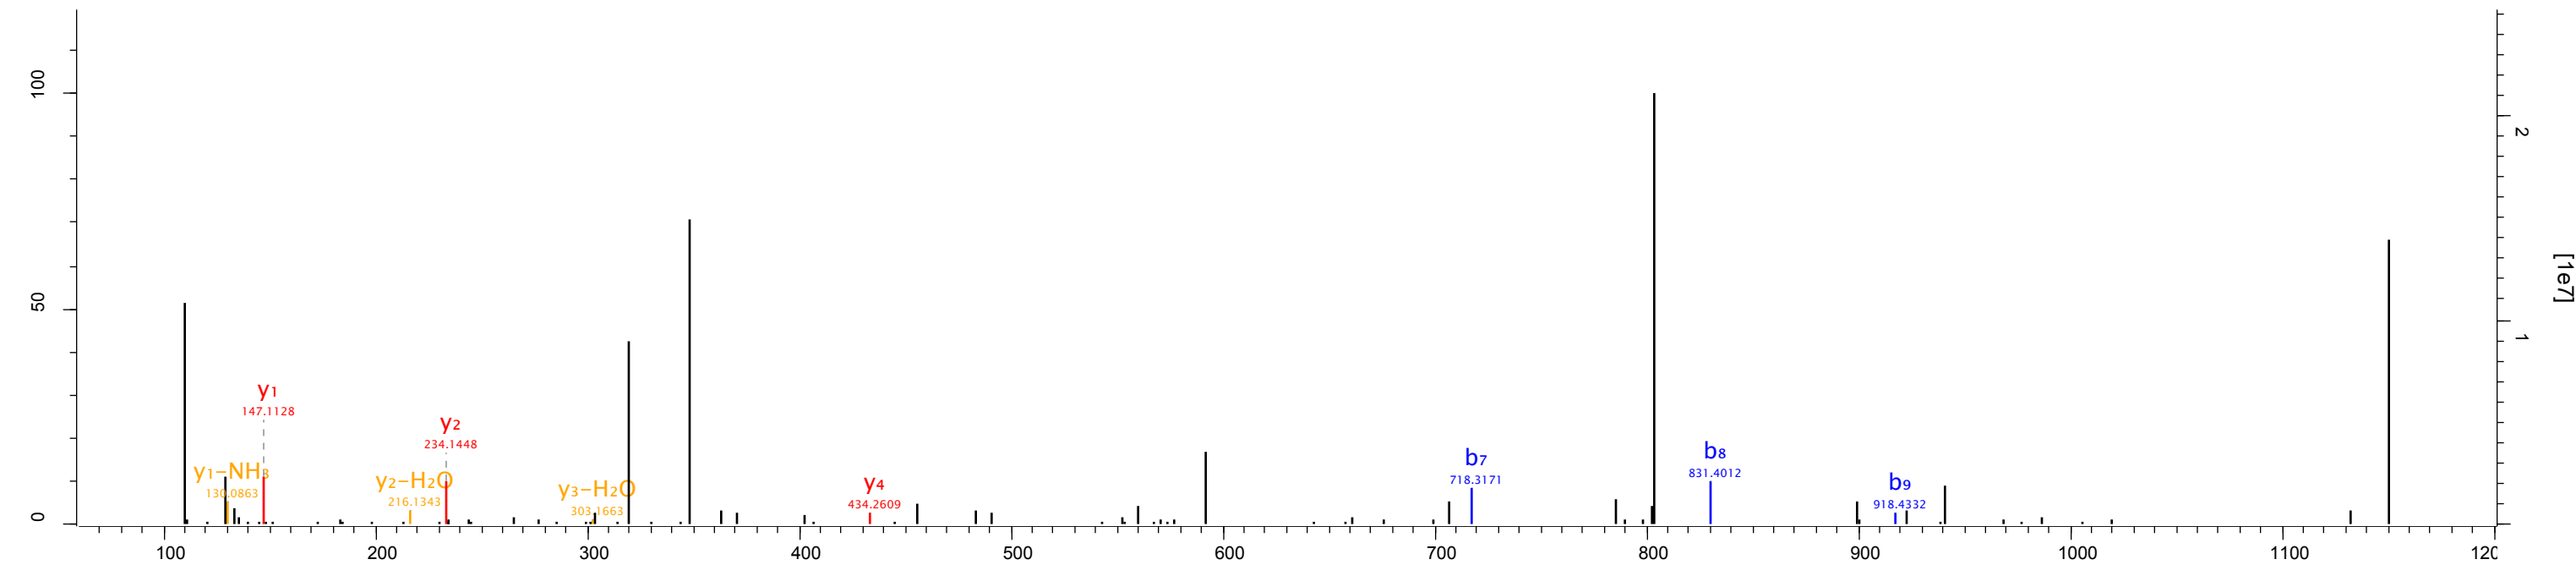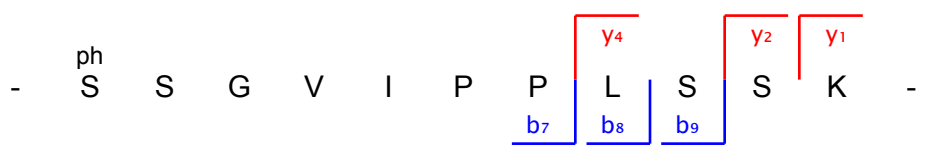

Raw file  
20180707\_MaS\_A375SR\_ML\_proteome\_13

Scan 25349 Method FTMS; HCD Score 114.55 m/z 765.36 Gene names CNIH4

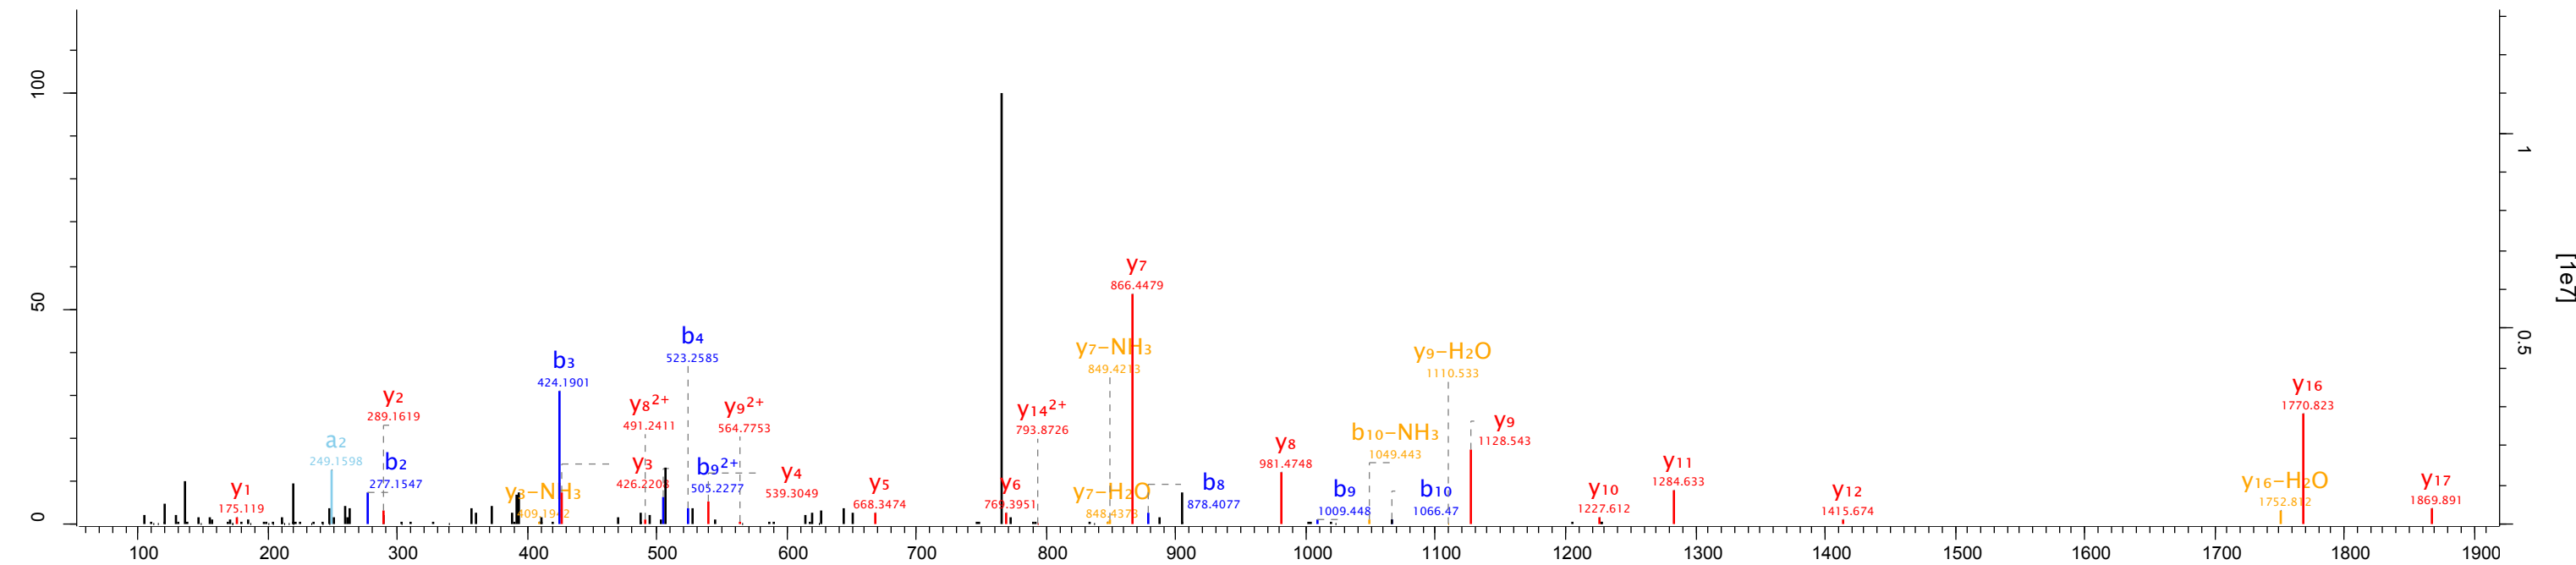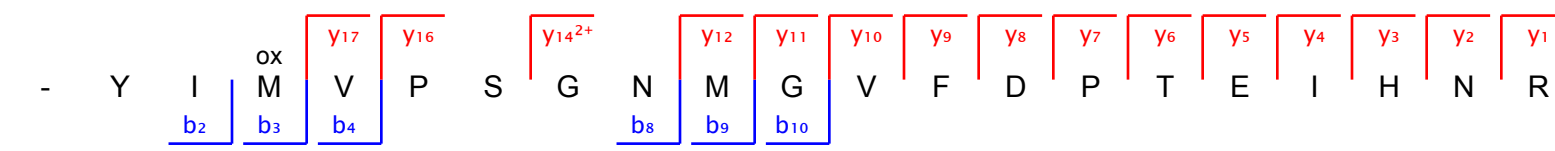

Raw file 20180707\_MaS\_A375SR\_ML\_proteome\_13 Scan 26269 Method FTMS; HCD Score 78.1 m/z 492.81 Gene names STON2

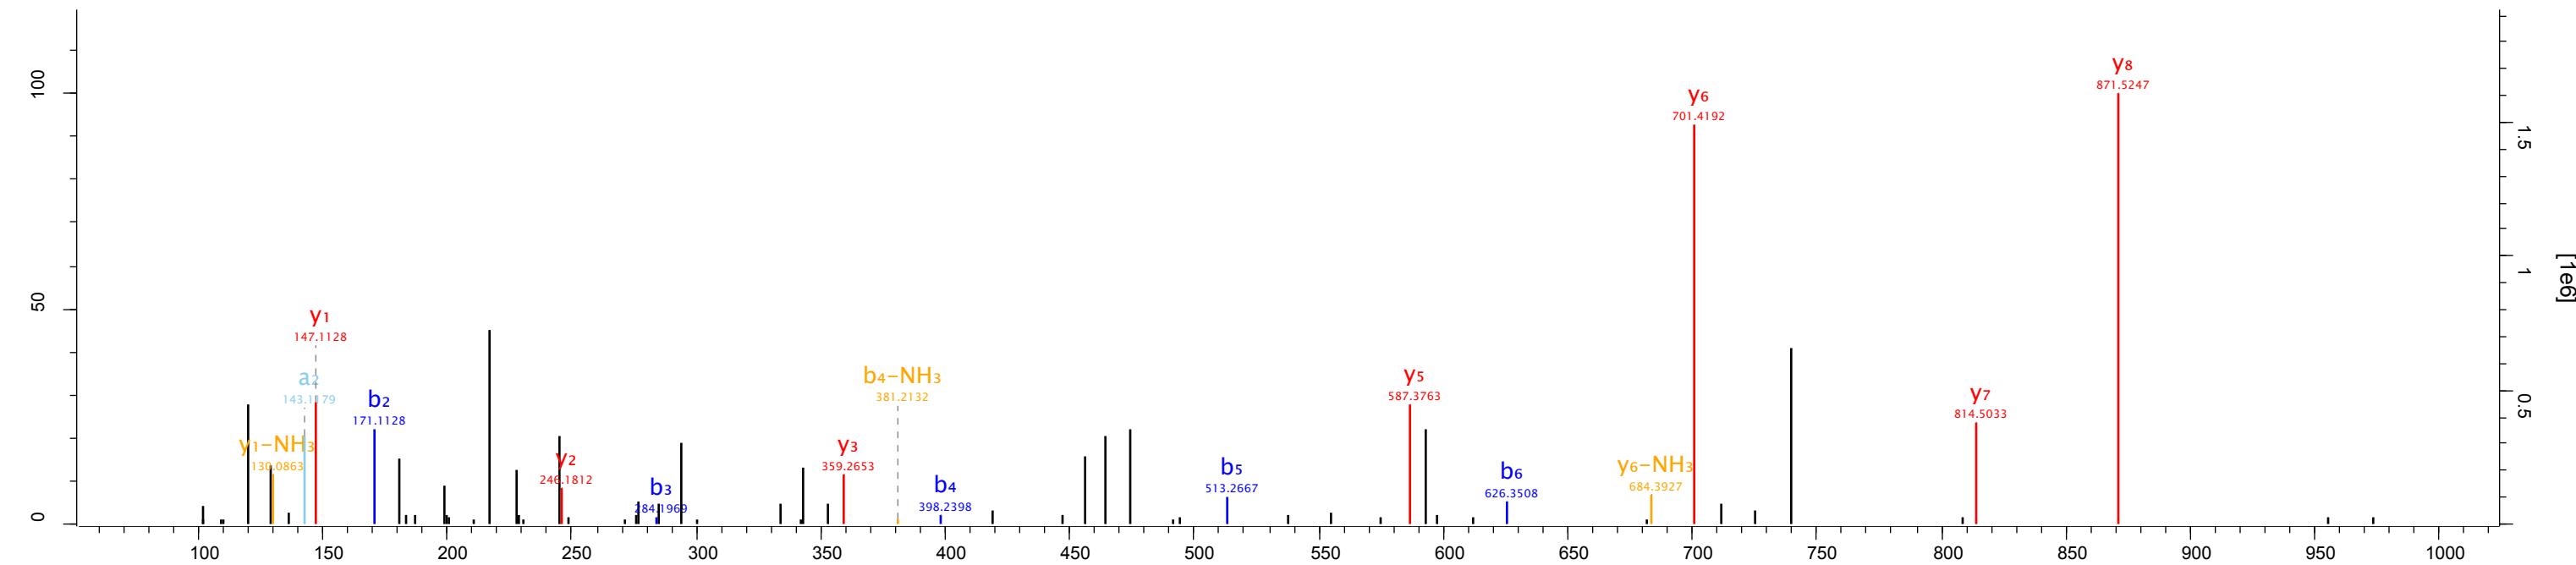

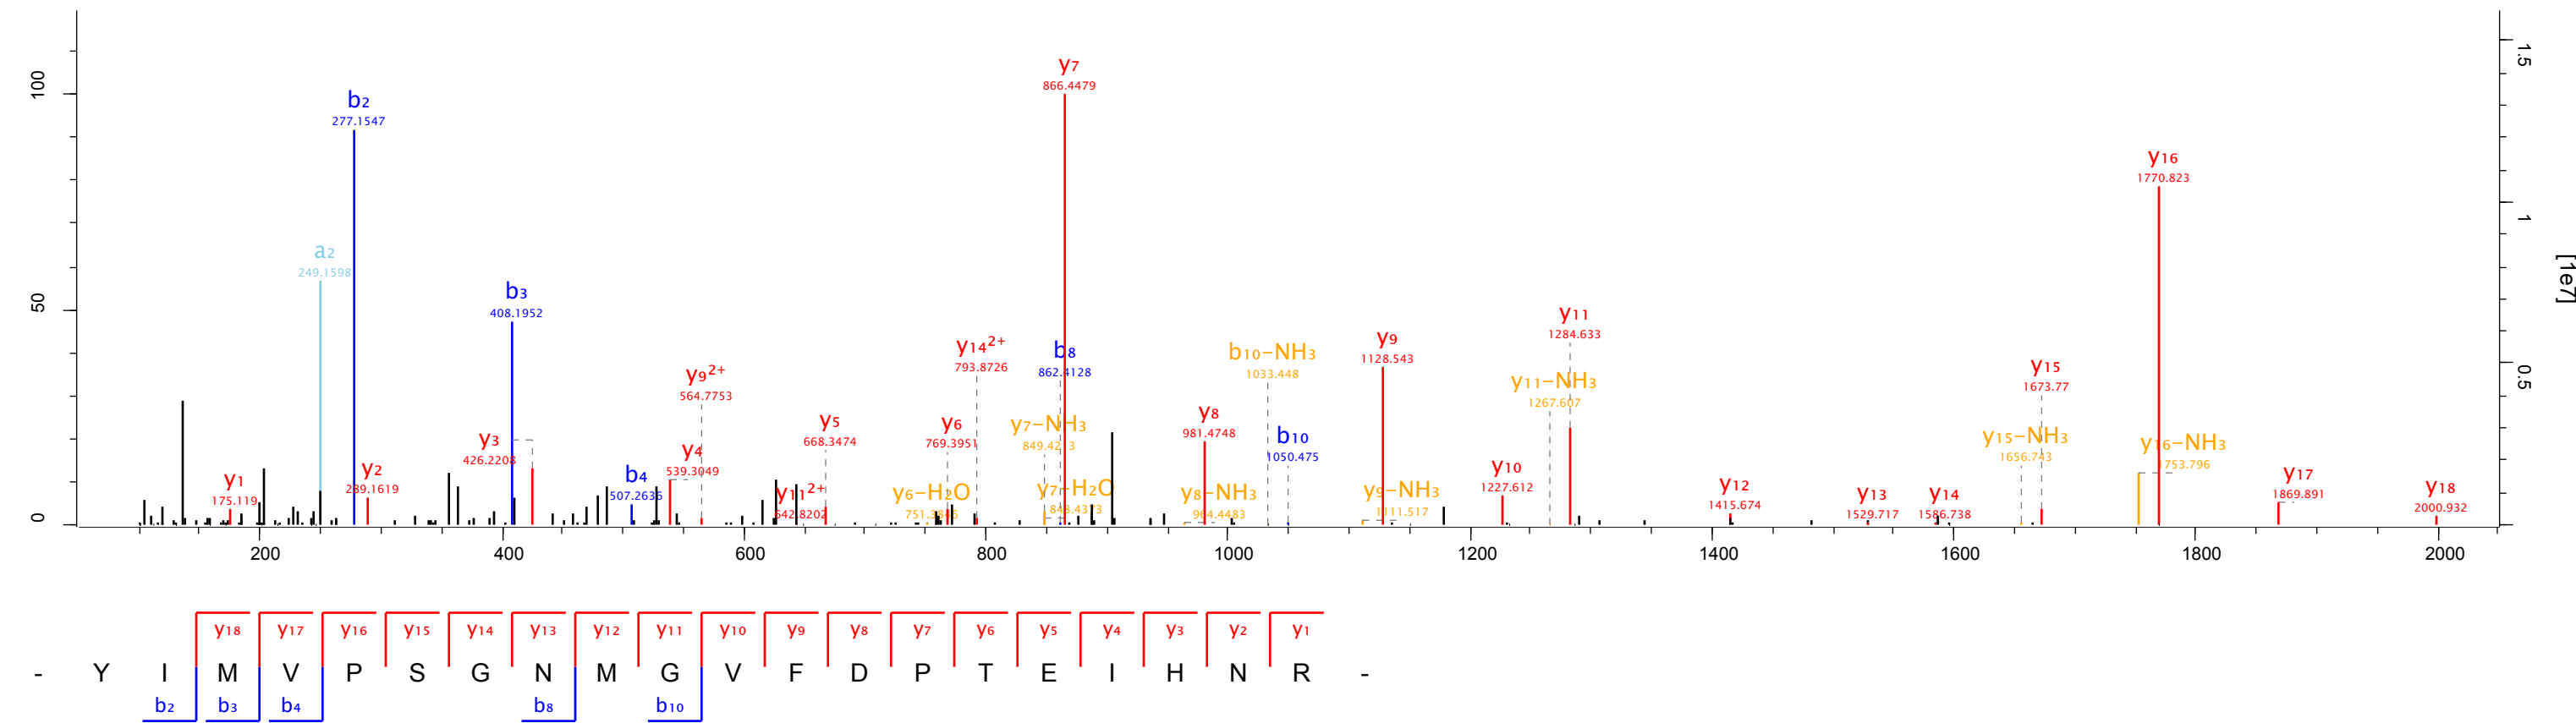

Raw file: 20180707\_MaS\_A375SR\_ML\_proteome\_14  
 Scan: 12909 Method: FTMS; HCD Score: 124.42 m/z: 662.84 Gene names: SLC9A7

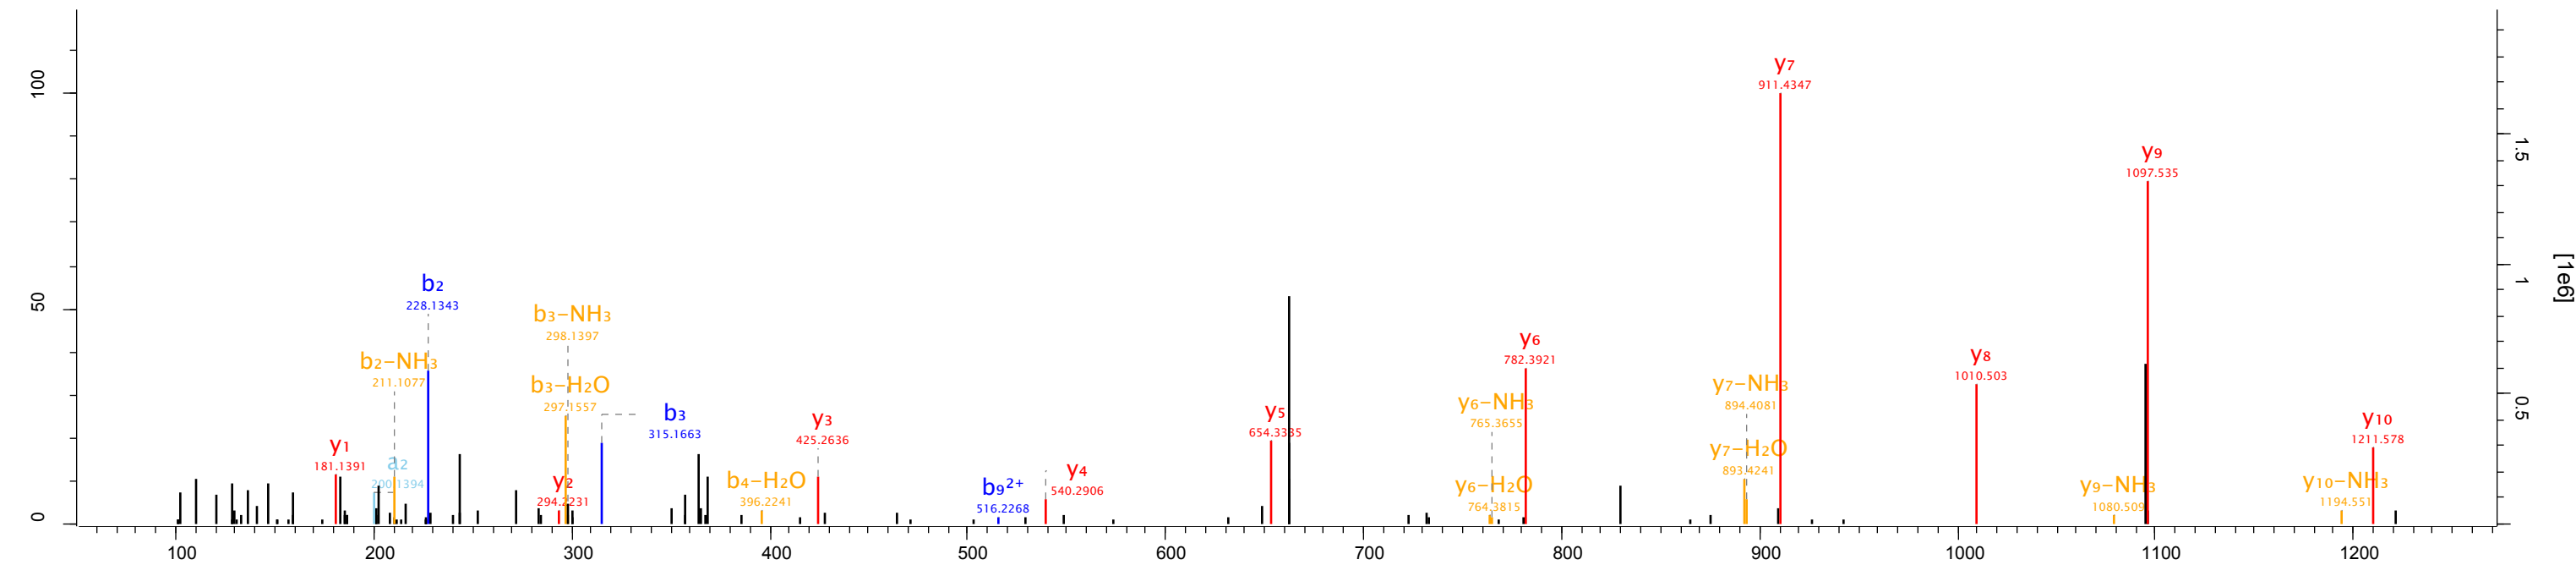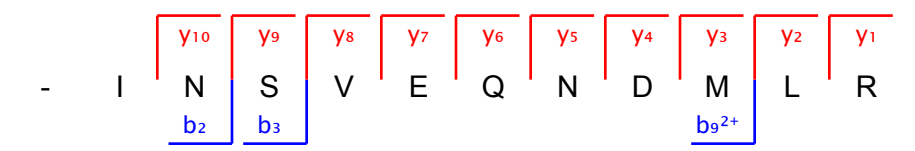



Raw file: 20180707\_MaS\_A375SR\_ML\_proteome\_14  
 Scan: 25629 Method: FTMS; HCD Score: 97.57 m/z: 492.81 Gene names: STON2

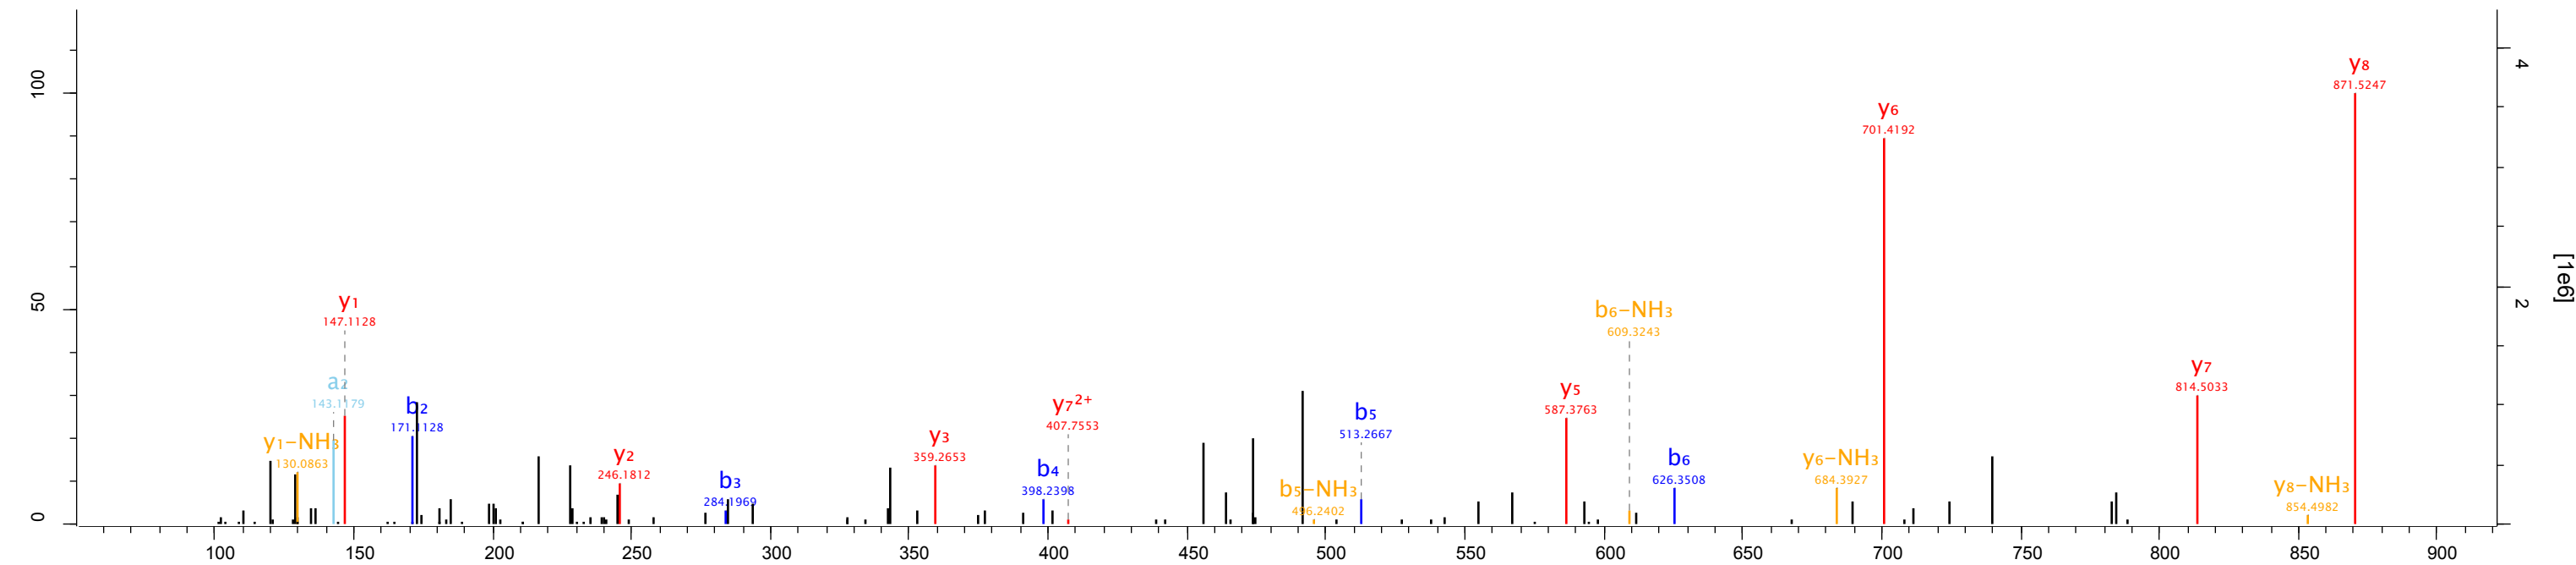

Raw file  
20180707\_MaS\_A375SR\_ML\_proteome\_14

Scan Method Score m/z Gene names  
26569 FTMS; HCD 107.75 757.07 OGFOD3

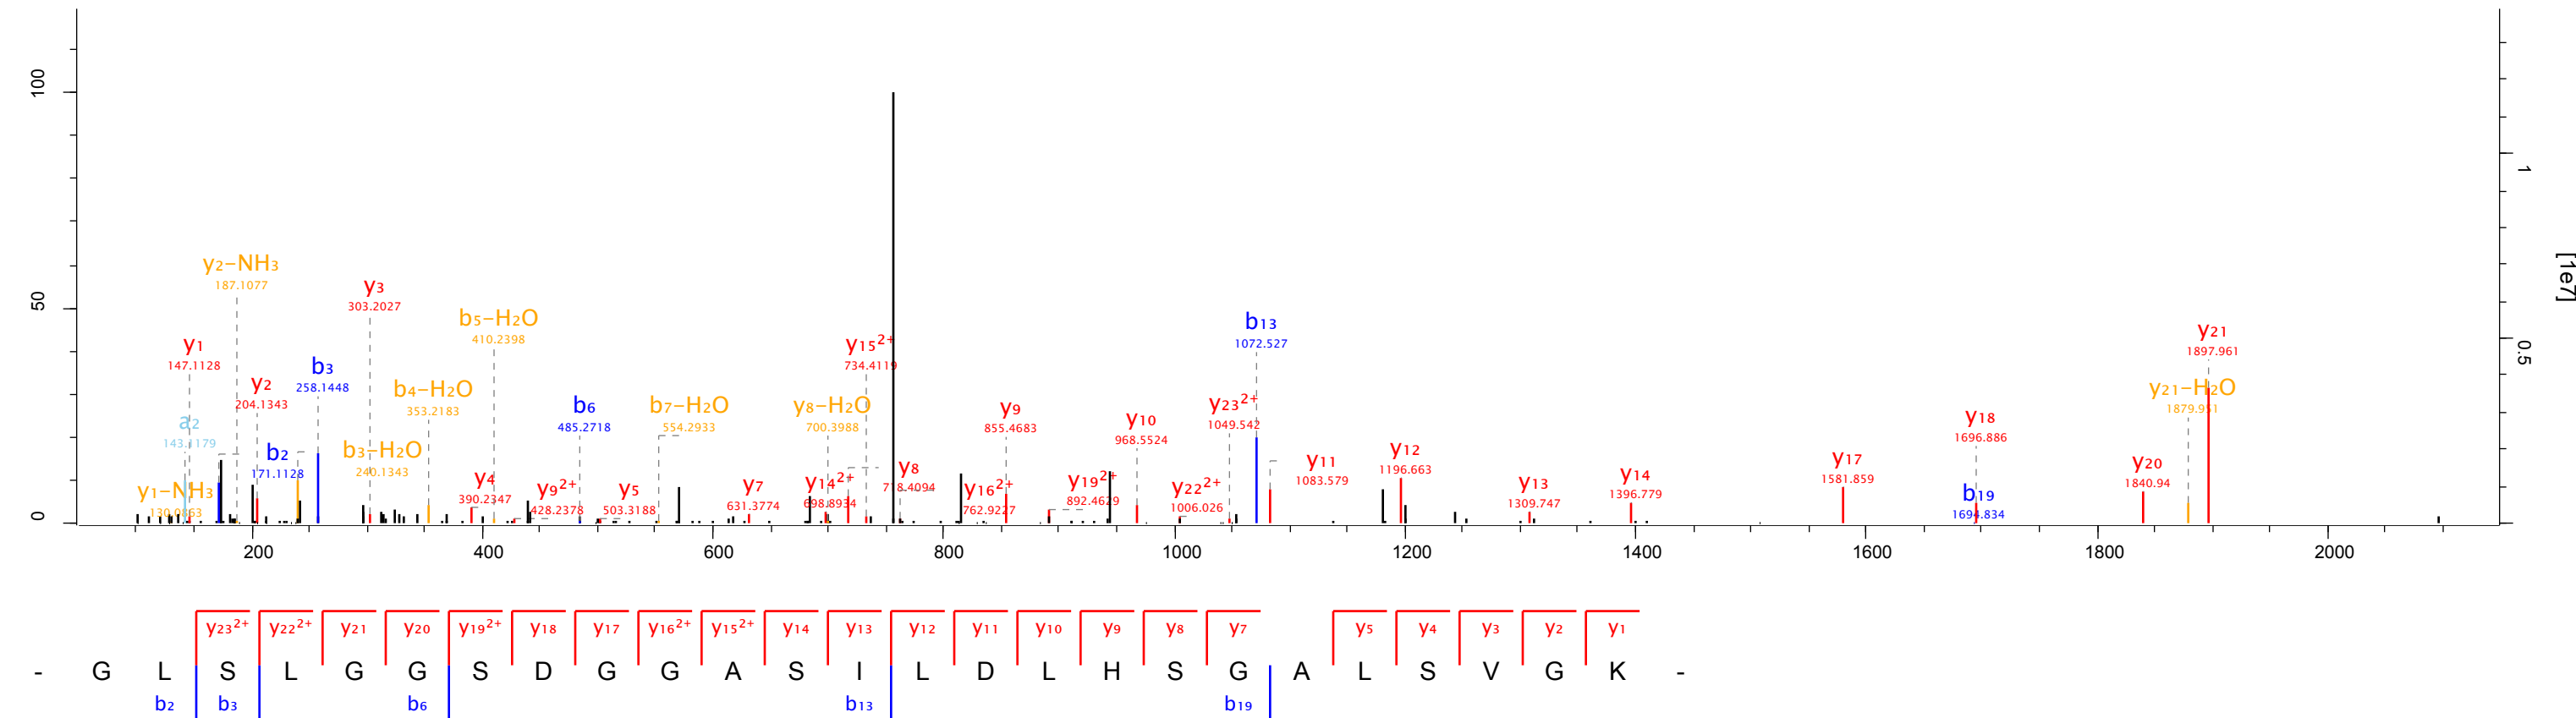

Raw file  
20180707\_MaS\_A375SR\_ML\_proteome\_14

Scan 4639 Method FTMS; HCD Score 70.41 m/z 353.2 Gene names MYBBP1A

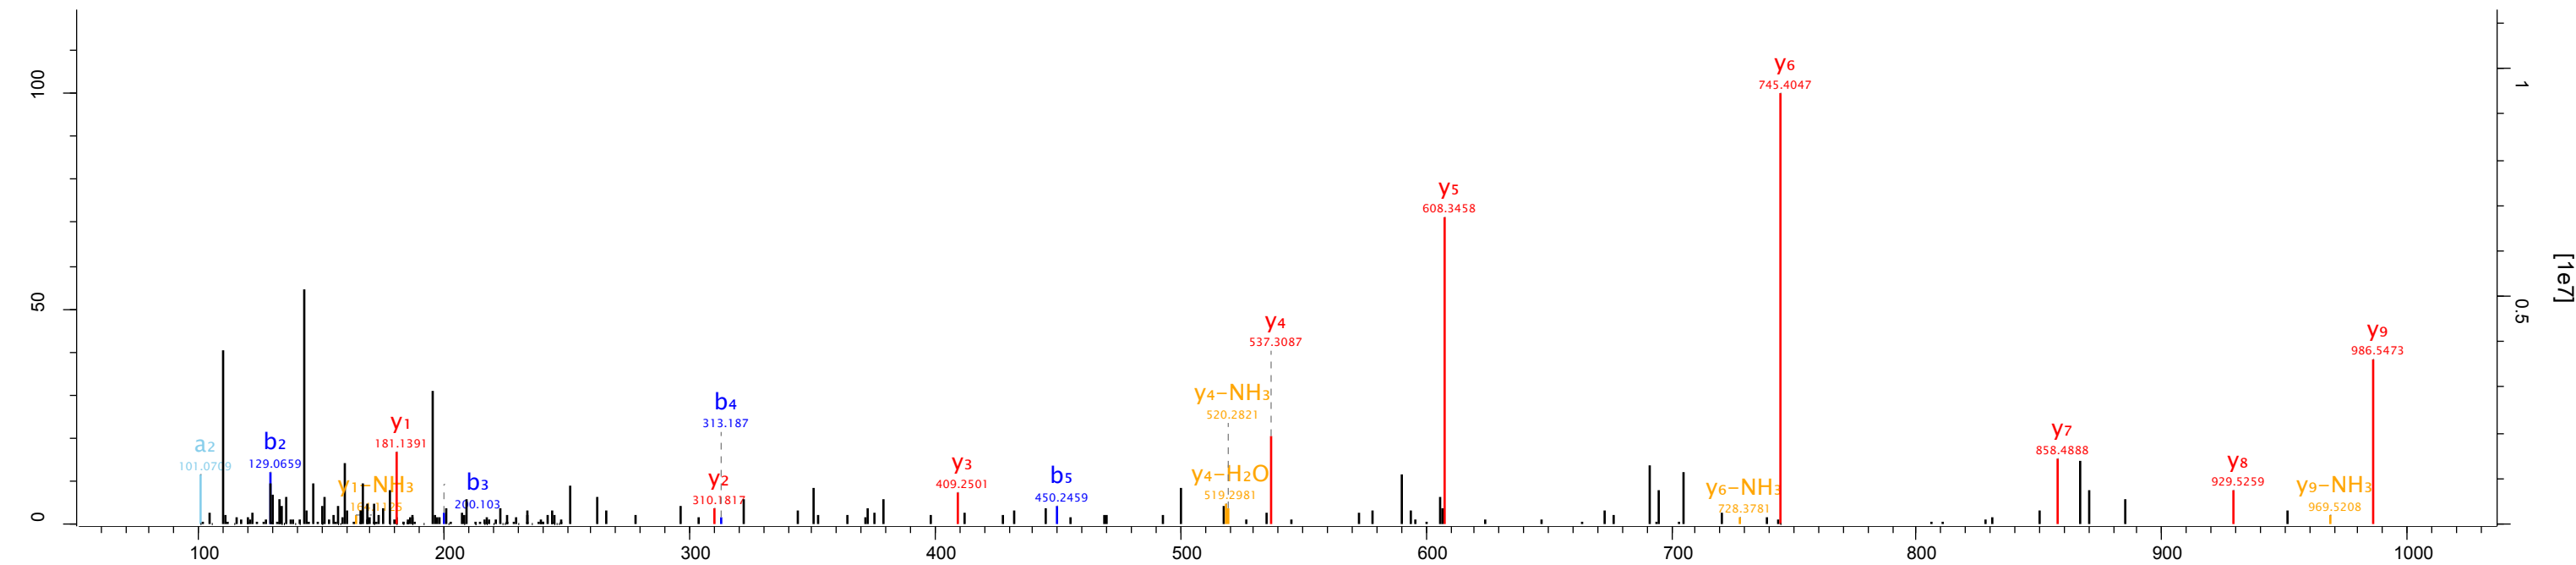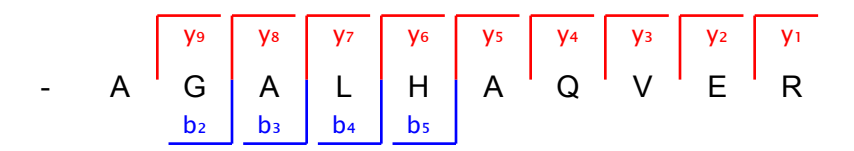

Raw file: 20180707\_MaS\_A375SR\_ML\_proteome\_16  
 Scan: 22569 Method: FTMS; HCD Score: 49.19 m/z: 748.86 Gene names: MT-ND6

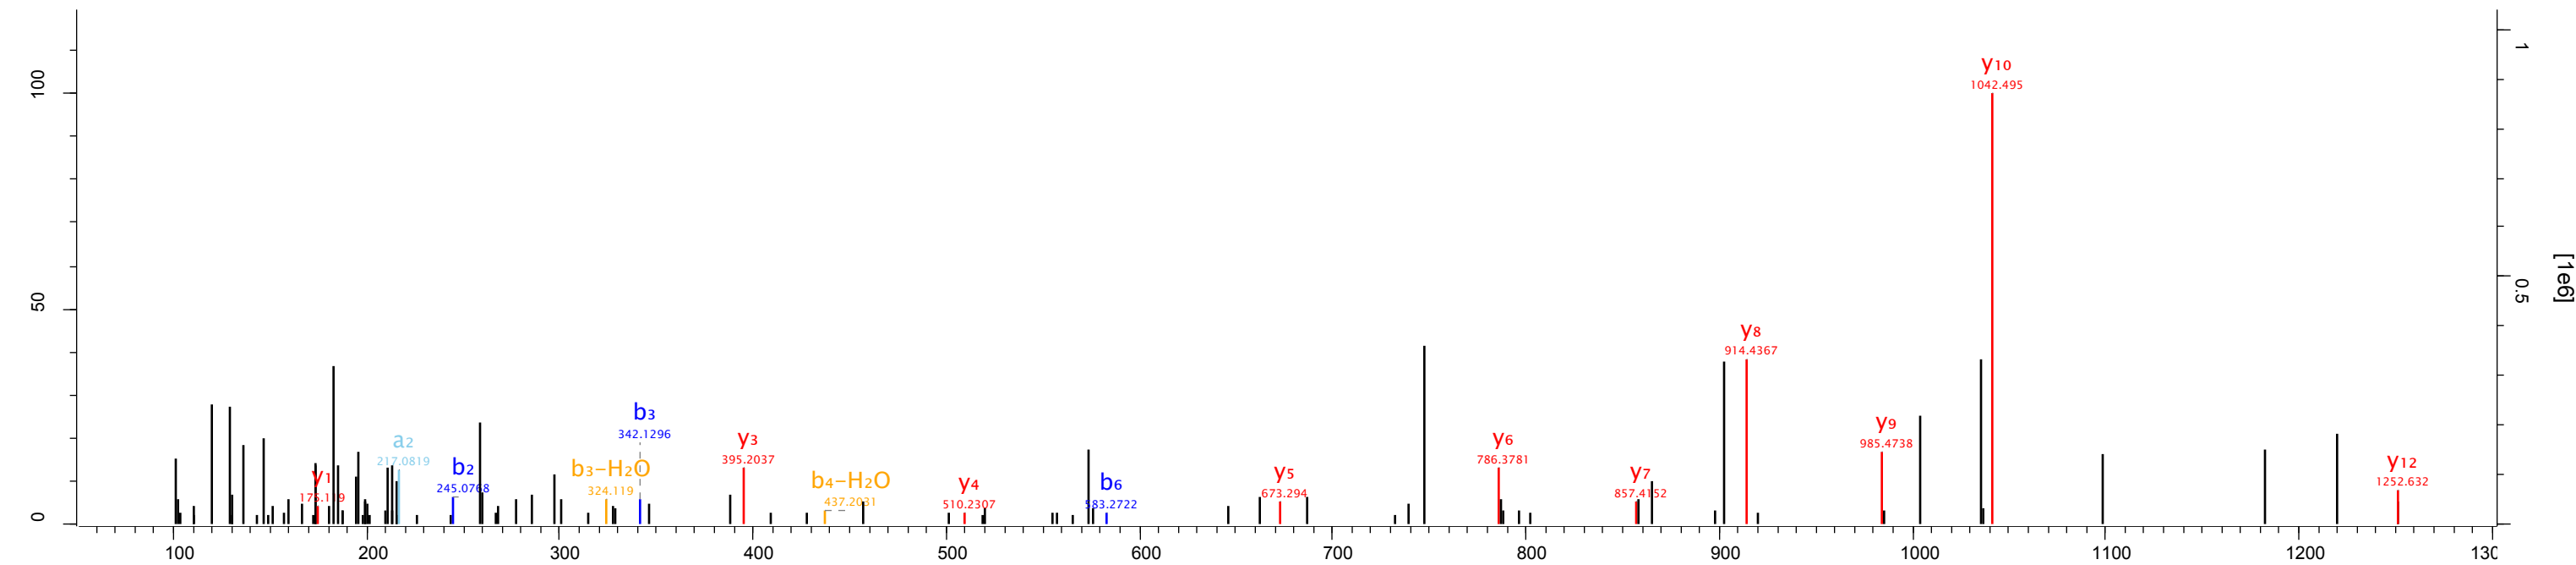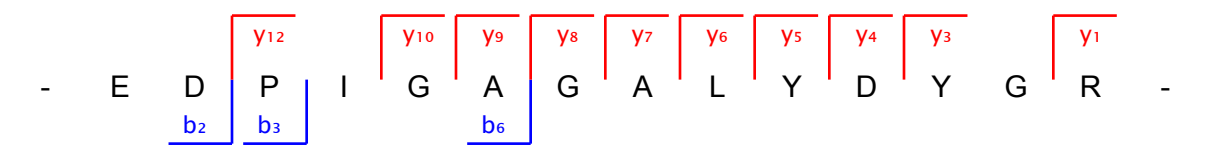

Raw file  
20180707\_MaS\_A375SR\_ML\_proteome\_16

Scan 24309 Method FTMS; HCD Score 74.03 m/z 735.03 Gene names UBALD1

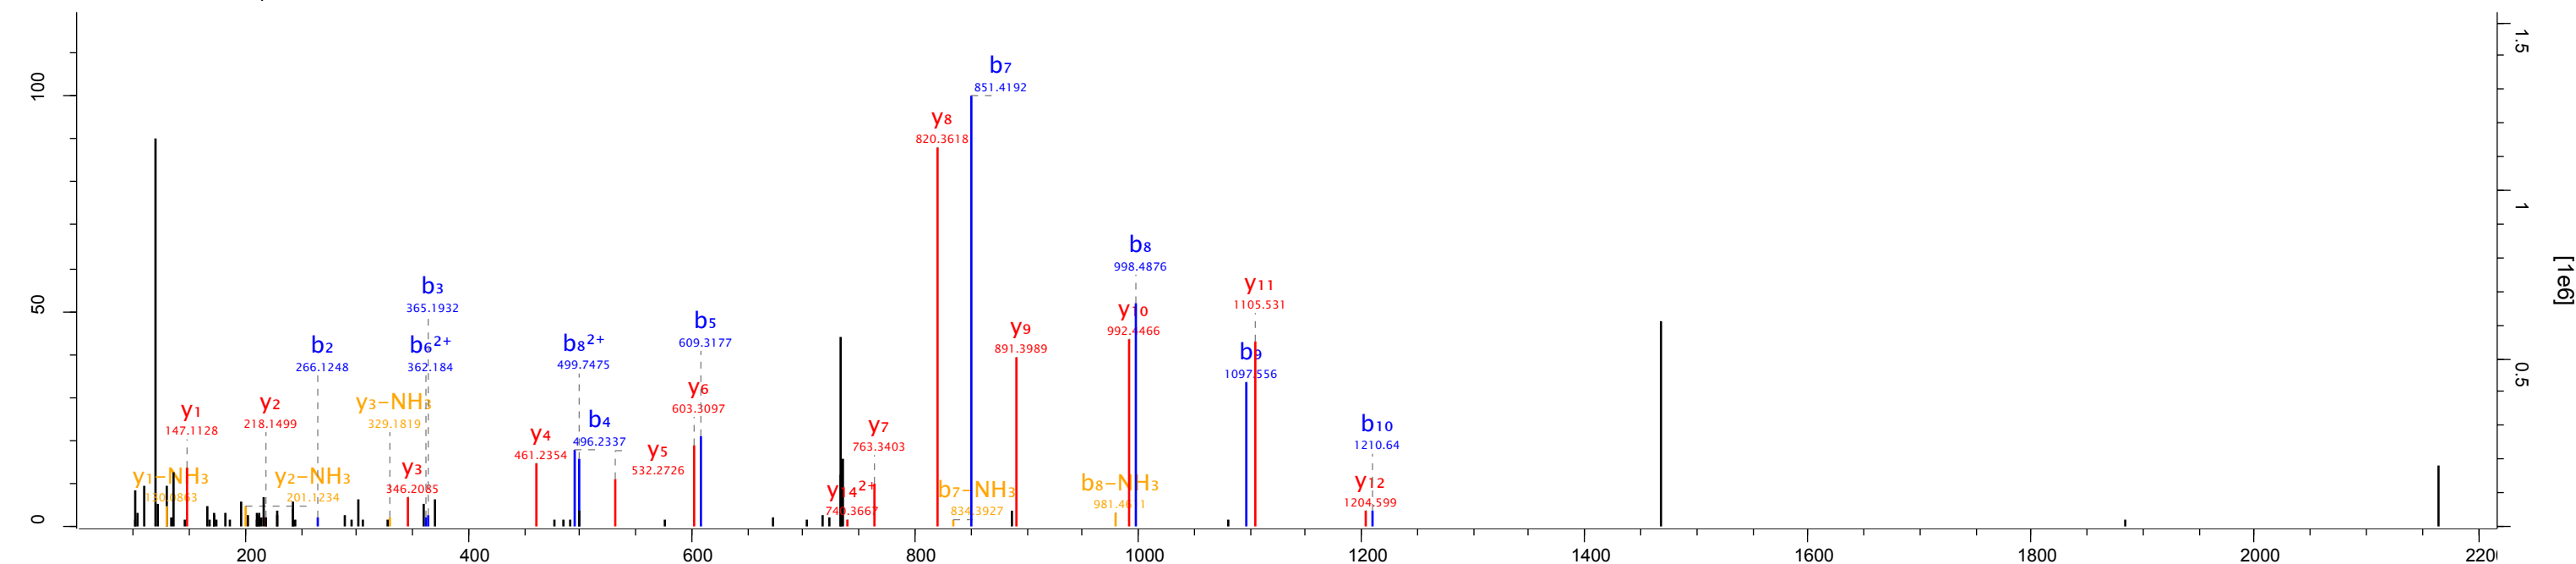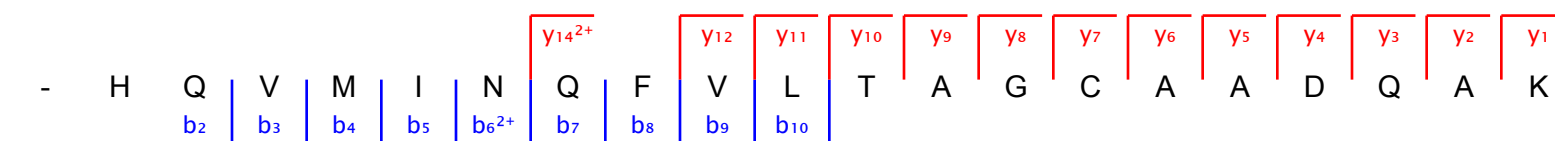

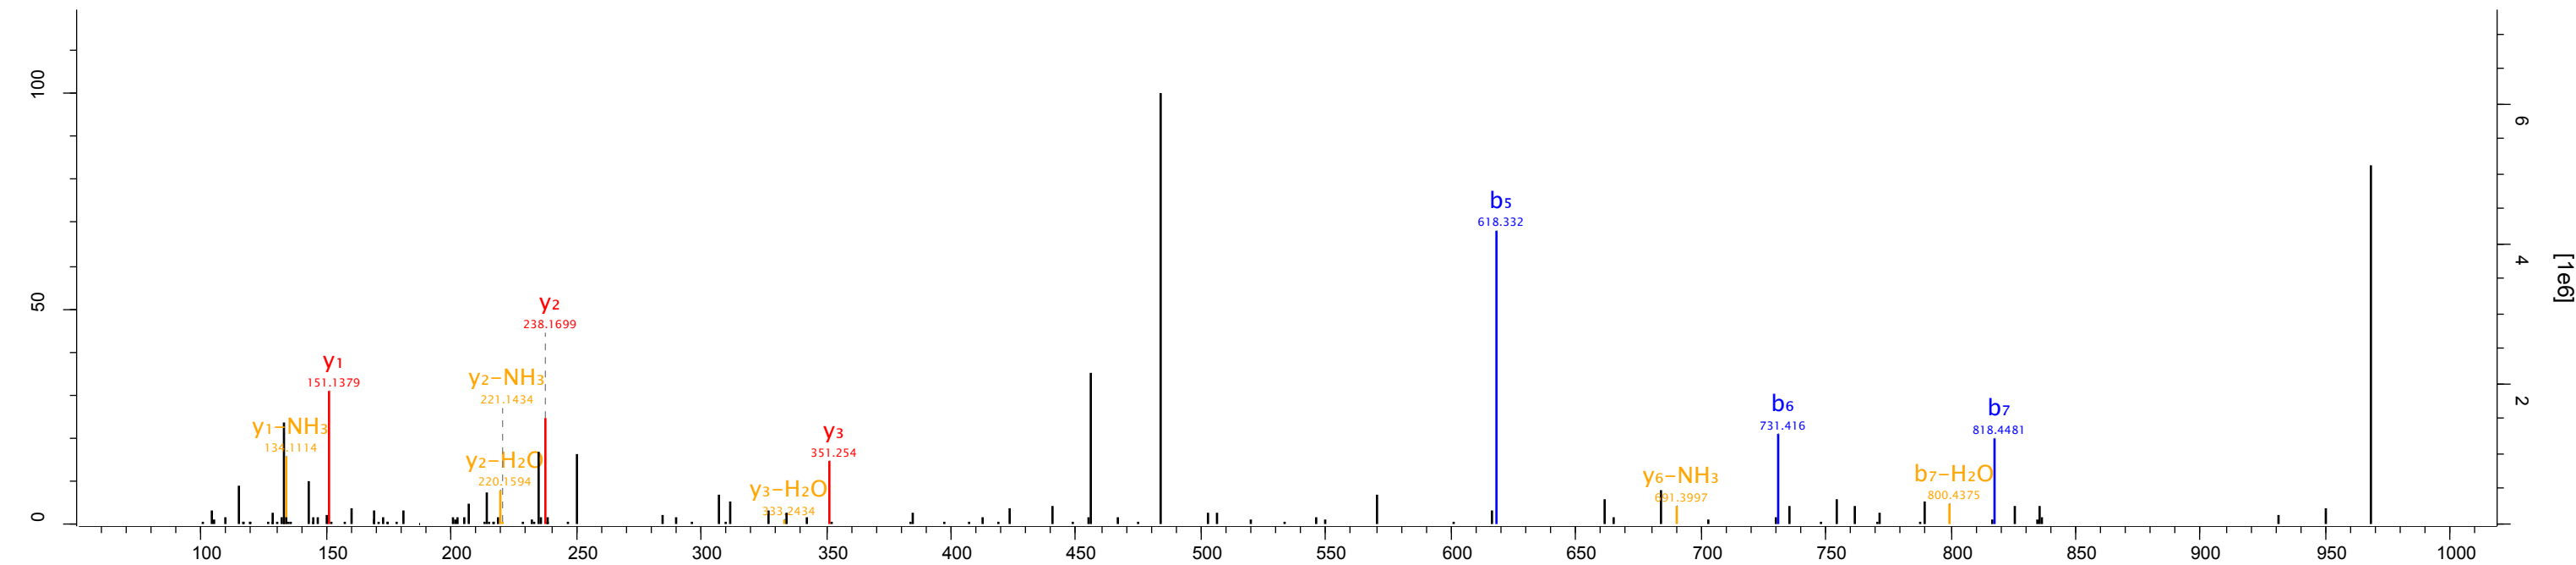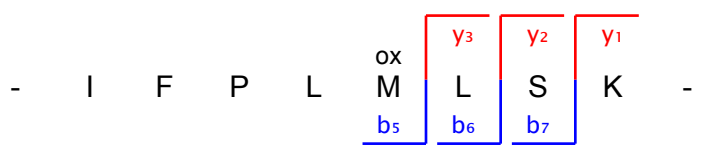

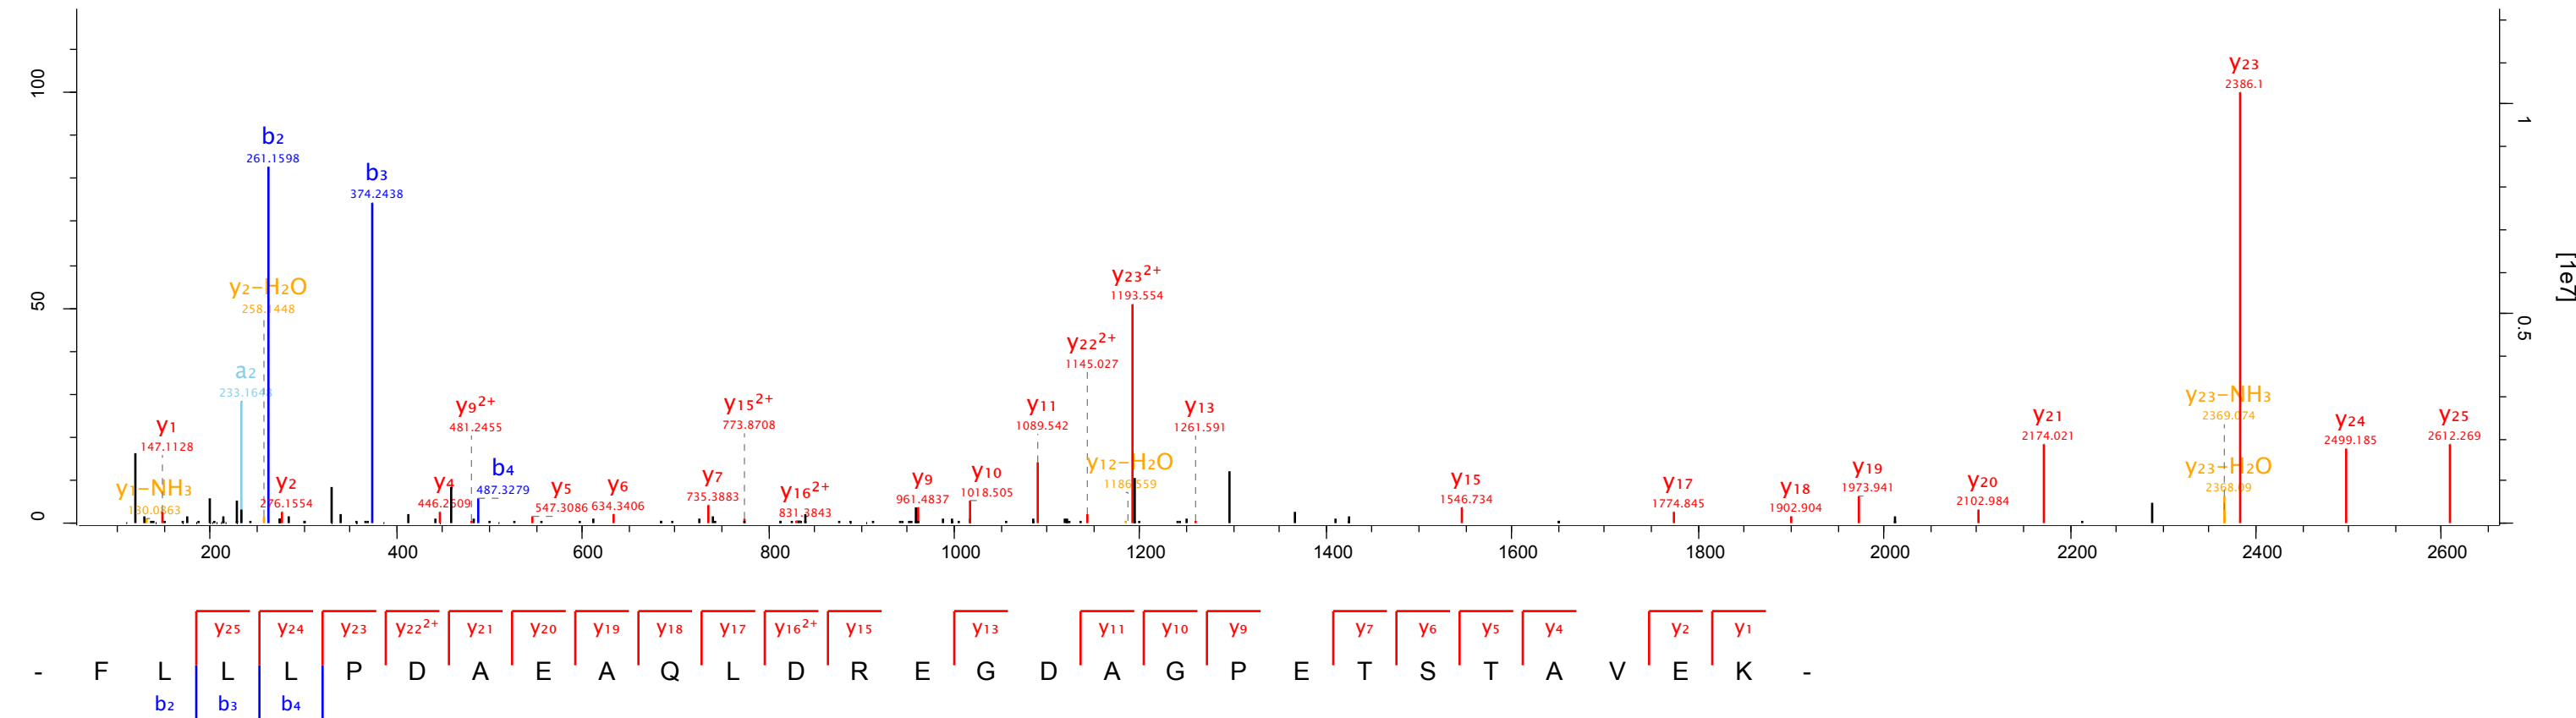

Raw file  
20180707\_MaS\_A375SR\_ML\_proteome\_19

Scan 12779 Method FTMS; HCD Score 57.59 m/z 557.25

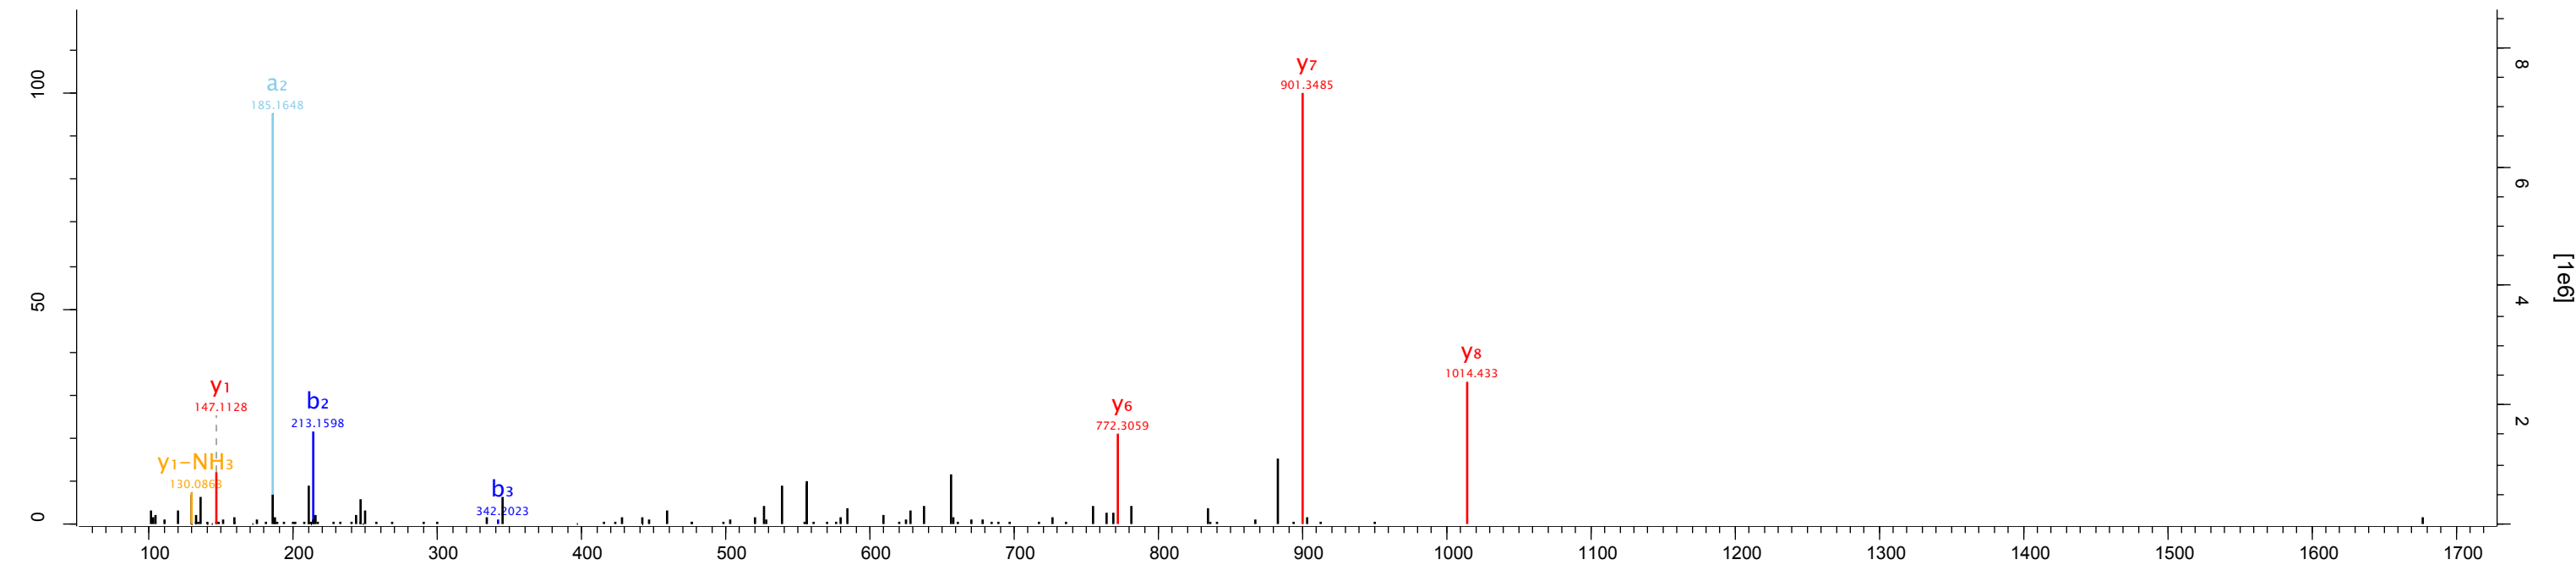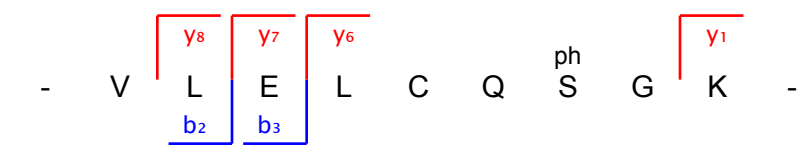



Raw file  
20180707\_MaS\_A375SR\_ML\_proteome\_2\_01

Scan 26179 Method FTMS; HCD Score 51.94 m/z 762.04 Gene names CNIH4

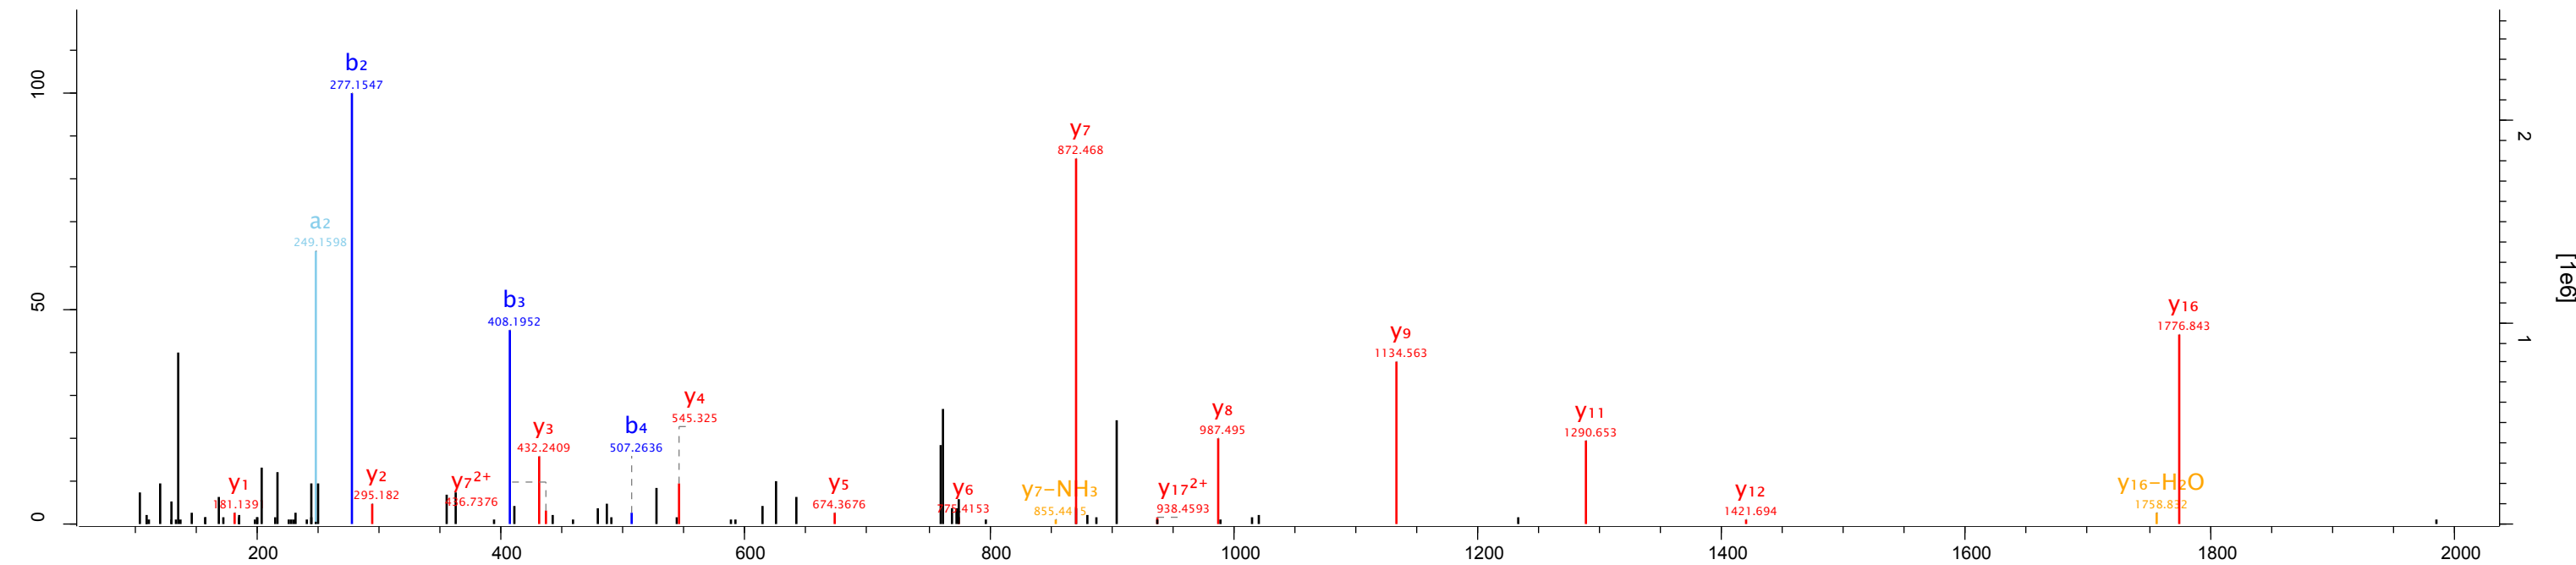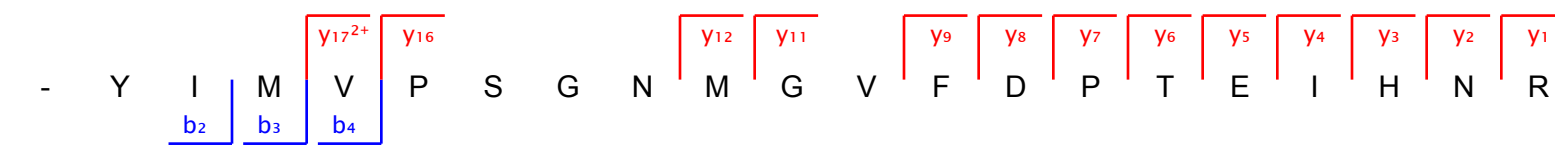

Raw file  
20180707\_MaS\_A375SR\_ML\_proteome\_2\_01

Scan 6139 Method FTMS; HCD Score 92.69 m/z 353.19

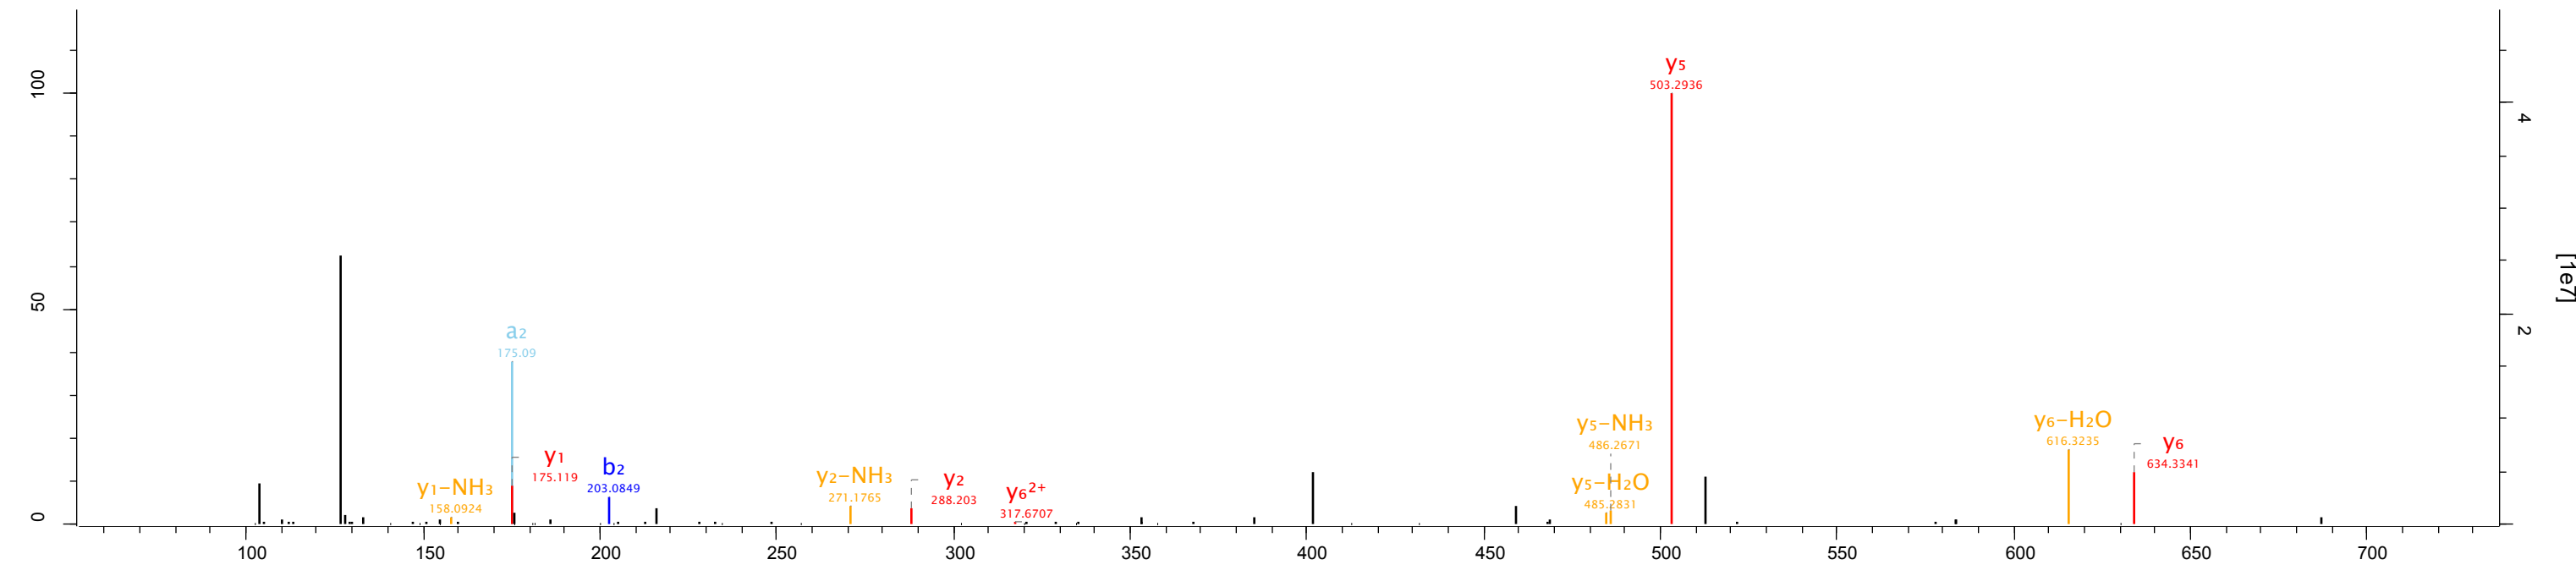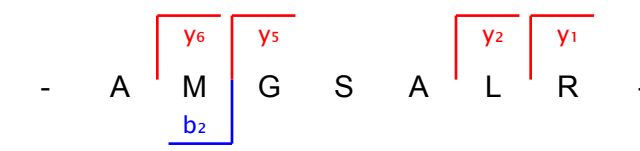

Raw file  
20180707\_MaS\_A375SR\_ML\_proteome\_2\_02

Scan 14039 Method FTMS; HCD Score 120.87 m/z 486.73 Gene names TMEM258

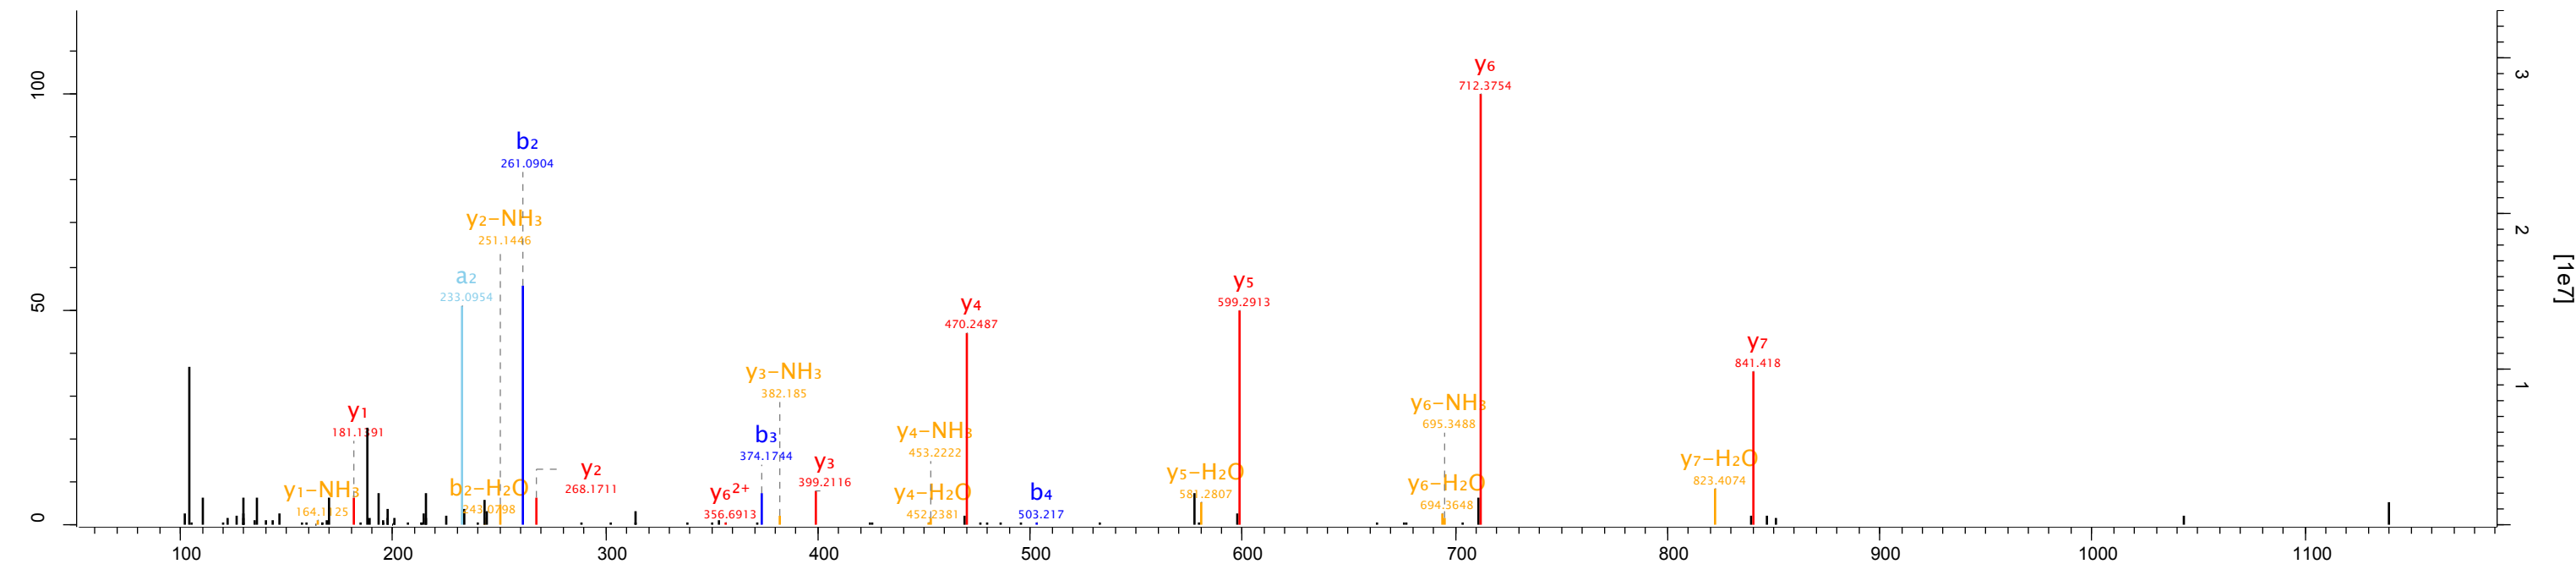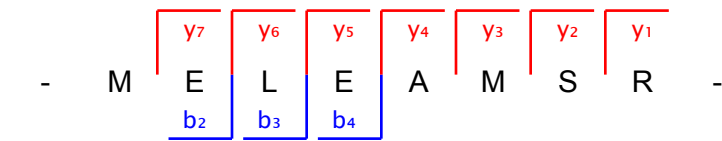

Raw file 20180707\_MaS\_A375SR\_ML\_proteome\_2\_03 Scan 4029 Method FTMS; HCD Score 81.77 m/z 578.81

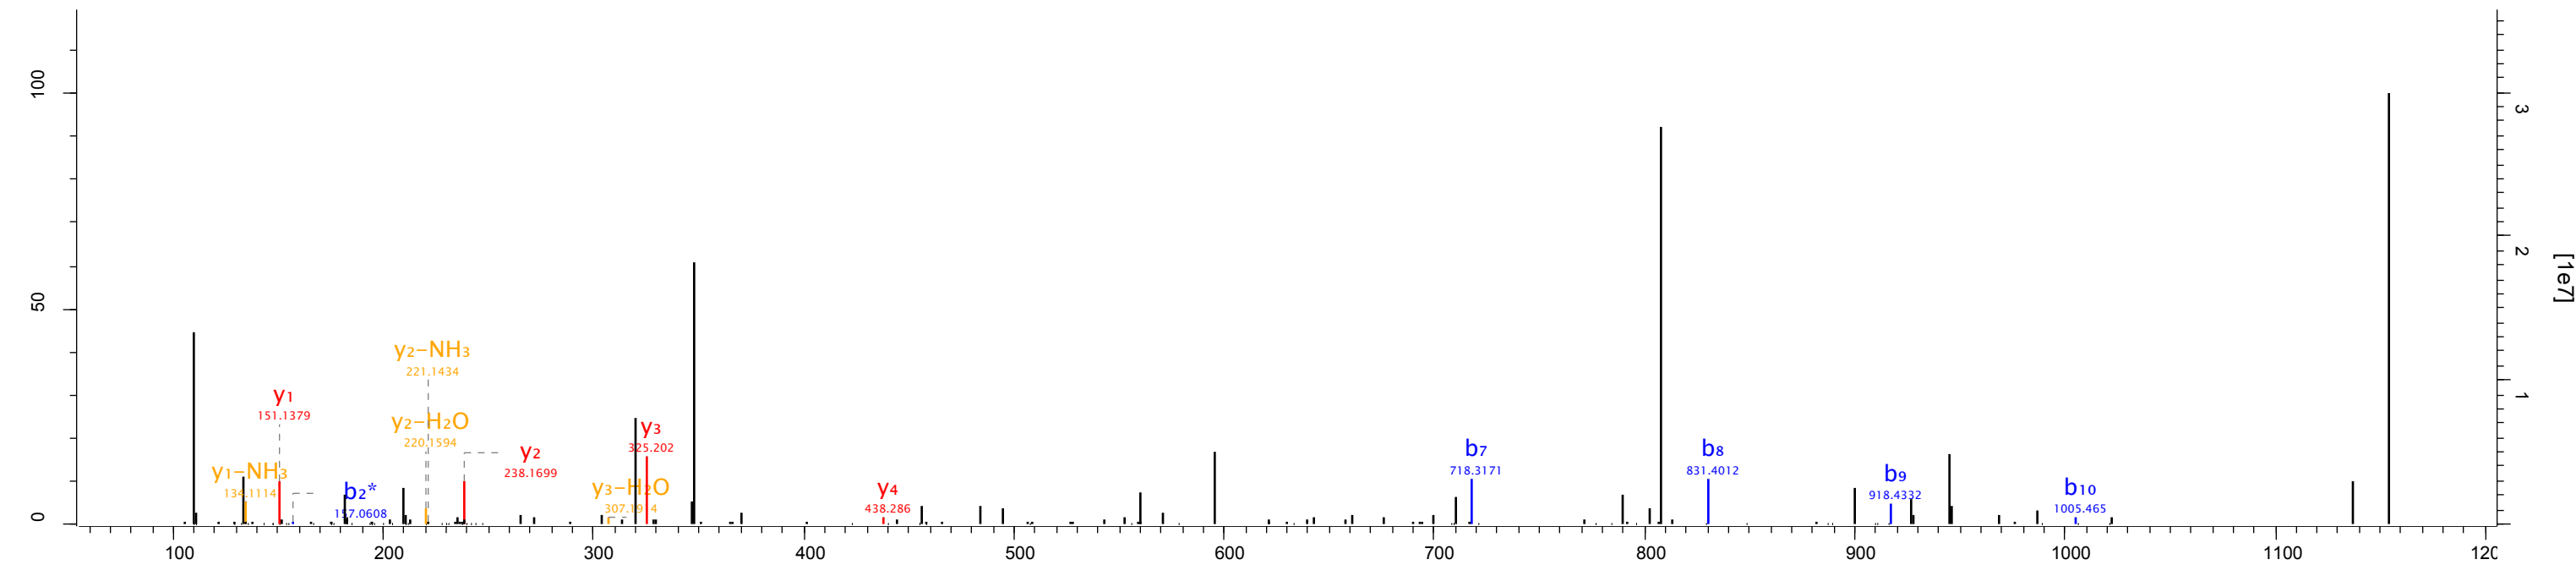

Raw file 20180707\_MaS\_A375SR\_ML\_proteome\_2\_04 Scan 13679 Method FTMS; HCD Score 52.86 m/z 691.34 Gene names ELK3

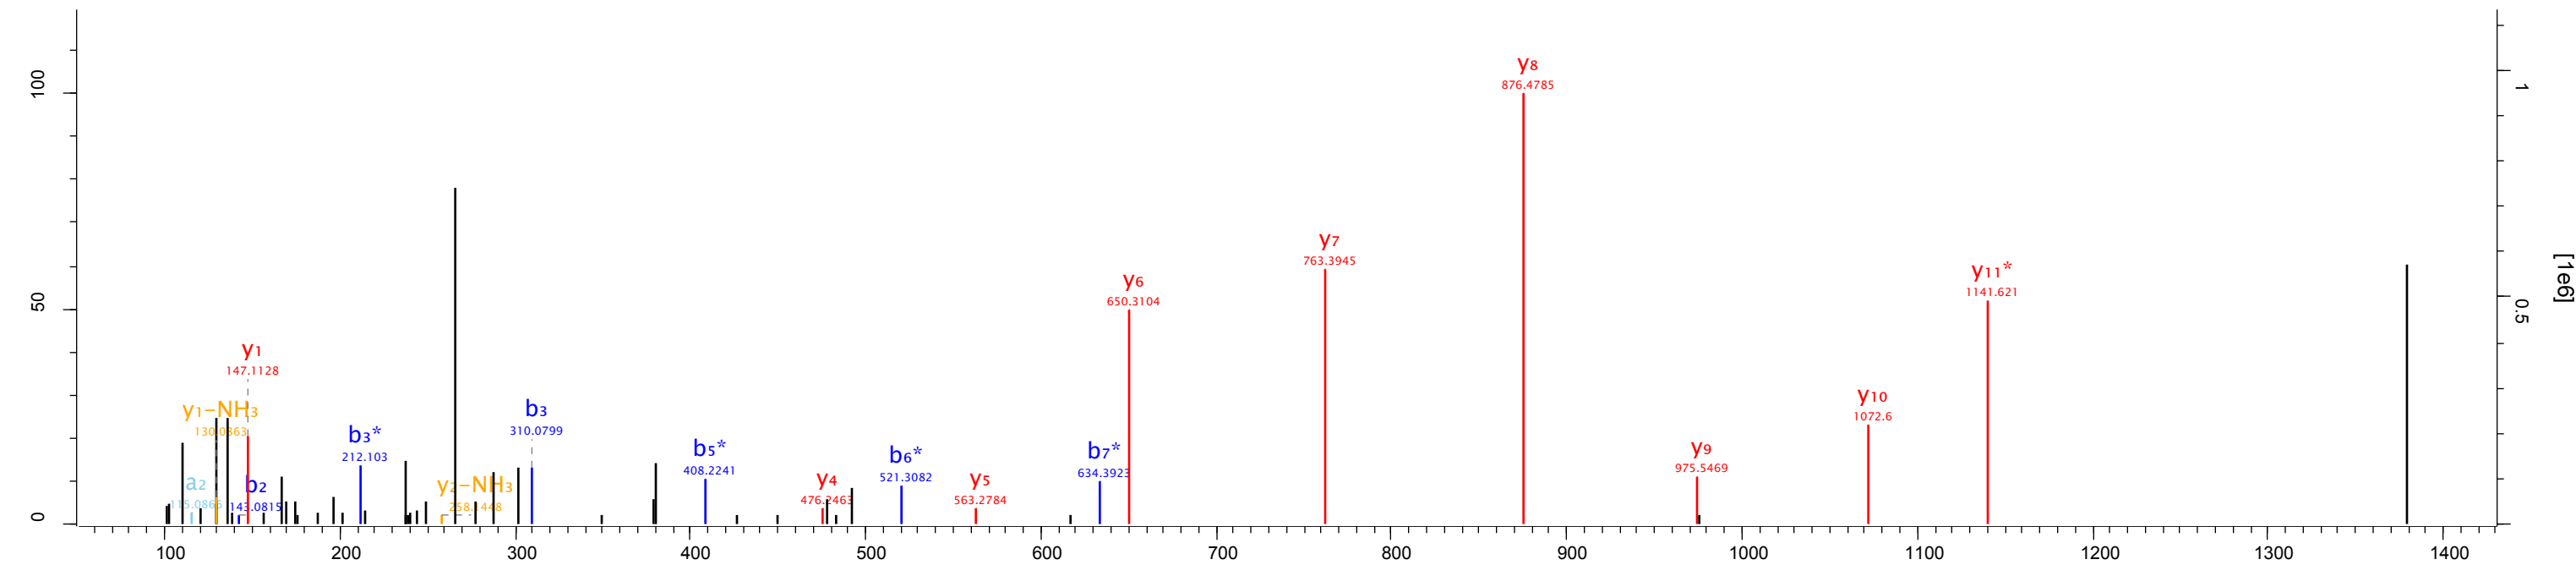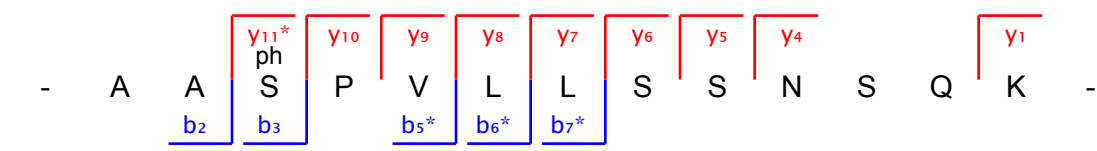

Raw file 20180707\_MaS\_A375SR\_ML\_proteome\_2\_04 Scan 15899 Method FTMS; HCD Score 49.3 m/z 650.34

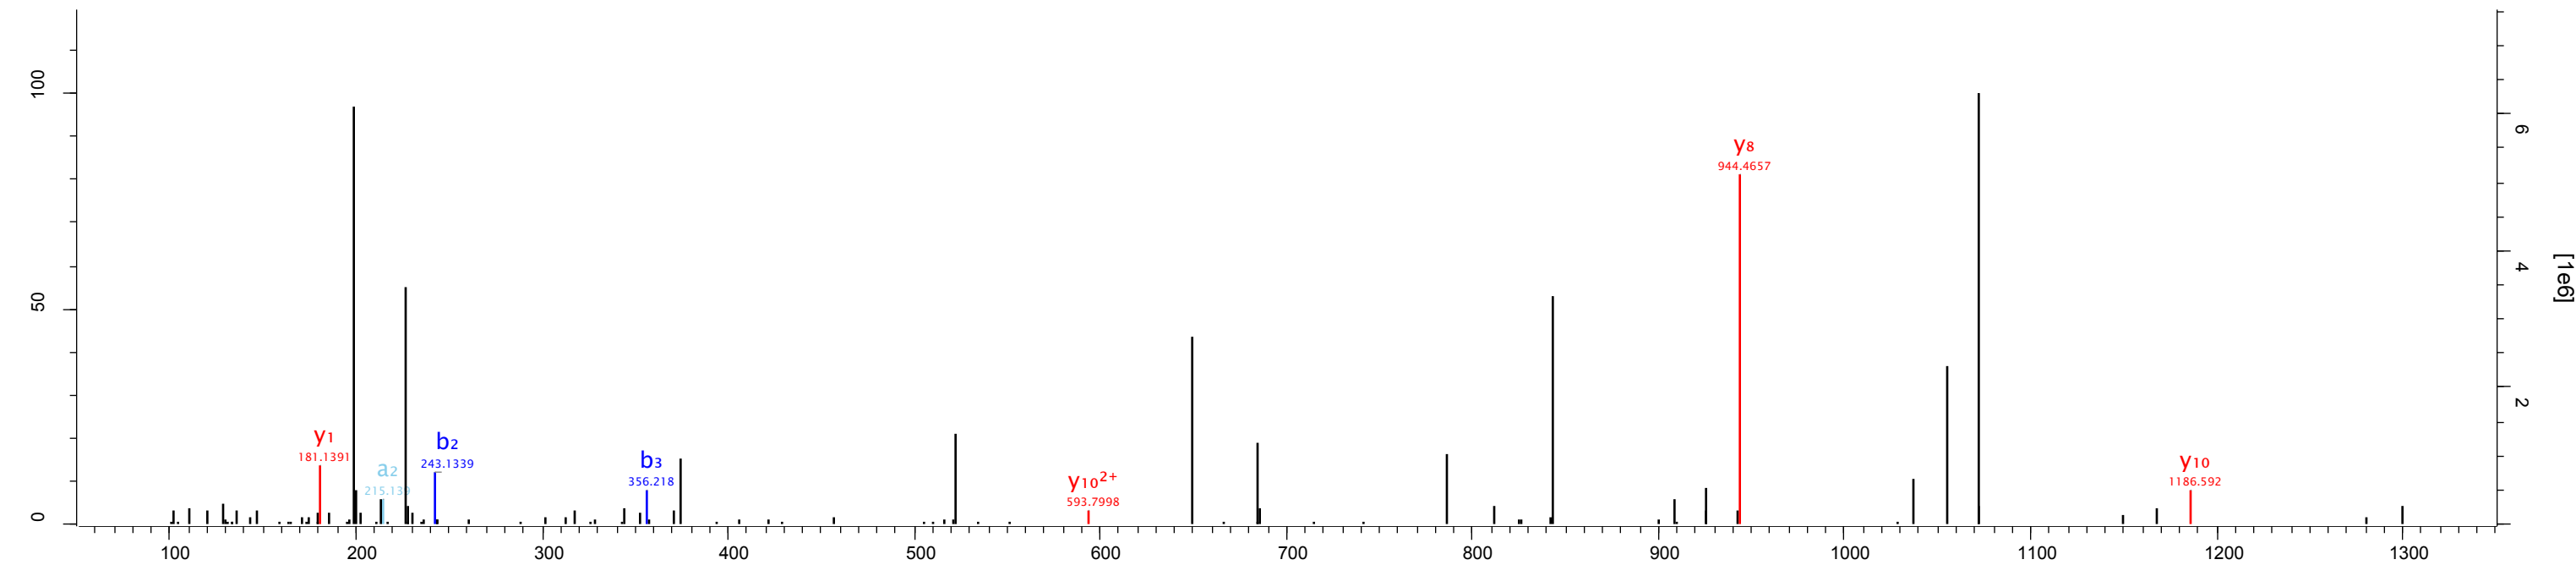

Raw file 20180707\_MaS\_A375SR\_ML\_proteome\_2\_04 Scan 16469 Method FTMS; HCD Score 106.14 m/z 902.96 Gene names C8orf37

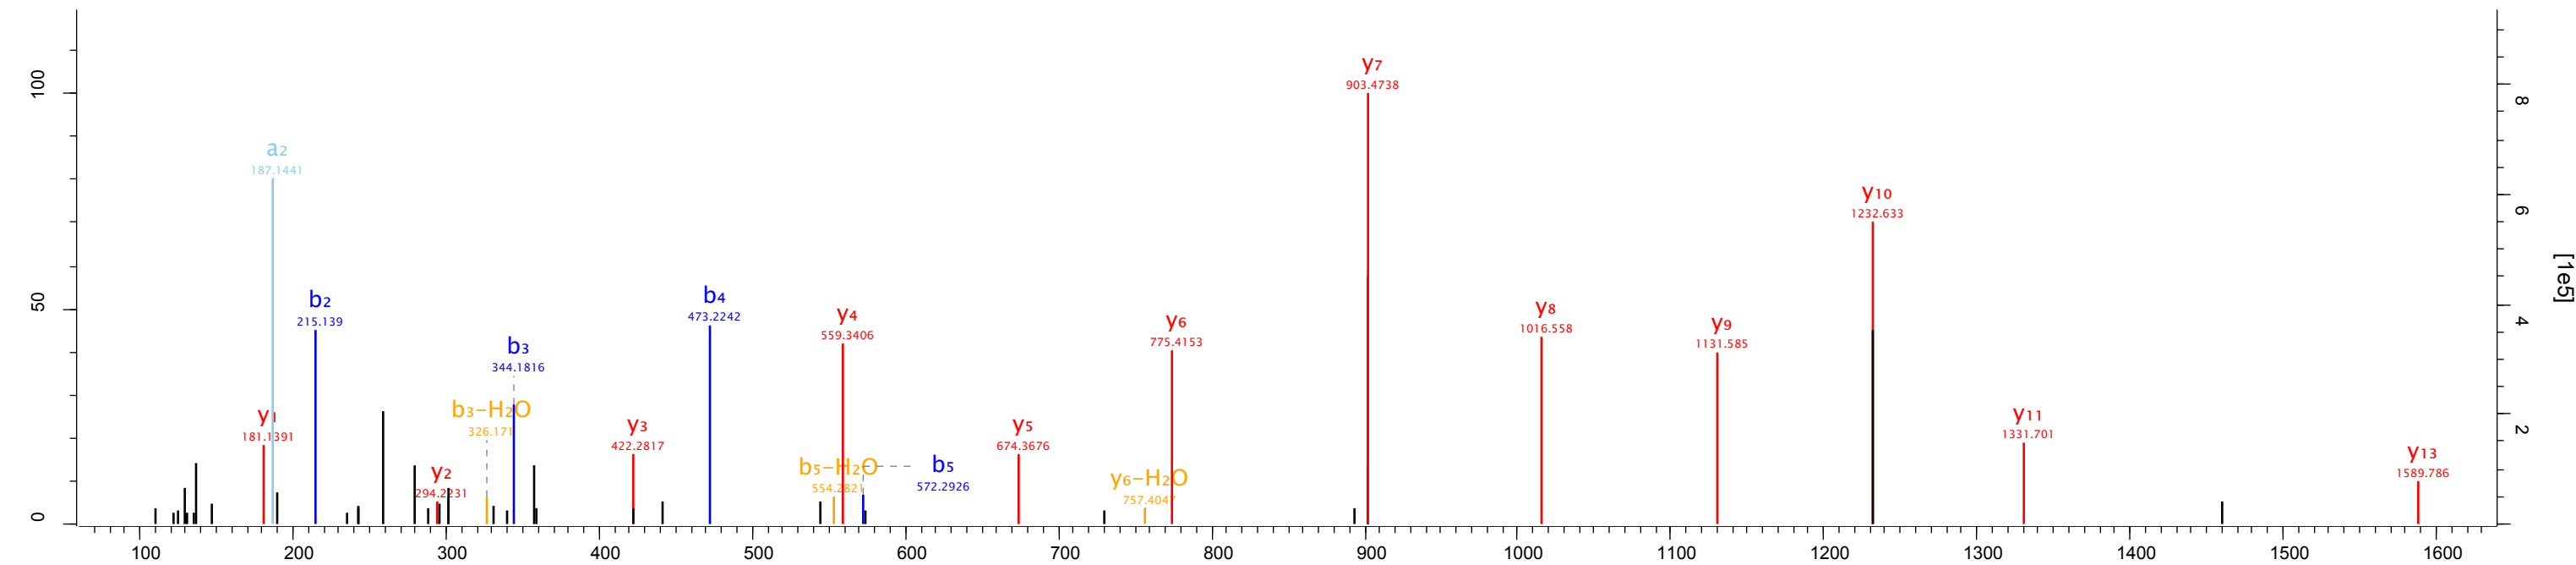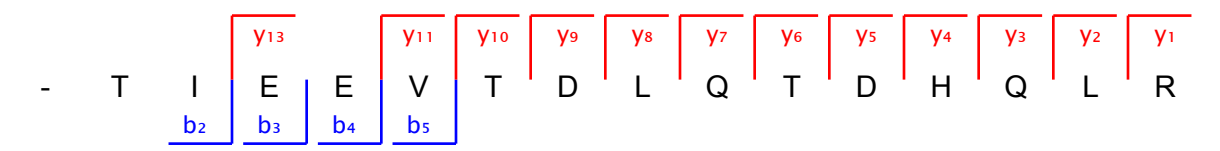

Raw file: 20180707\_MaS\_A375SR\_ML\_proteome\_2\_04  
 Scan: 3039 Method: FTMS; HCD Score: 145.81 m/z: 804.89 Gene names: MT-CO3

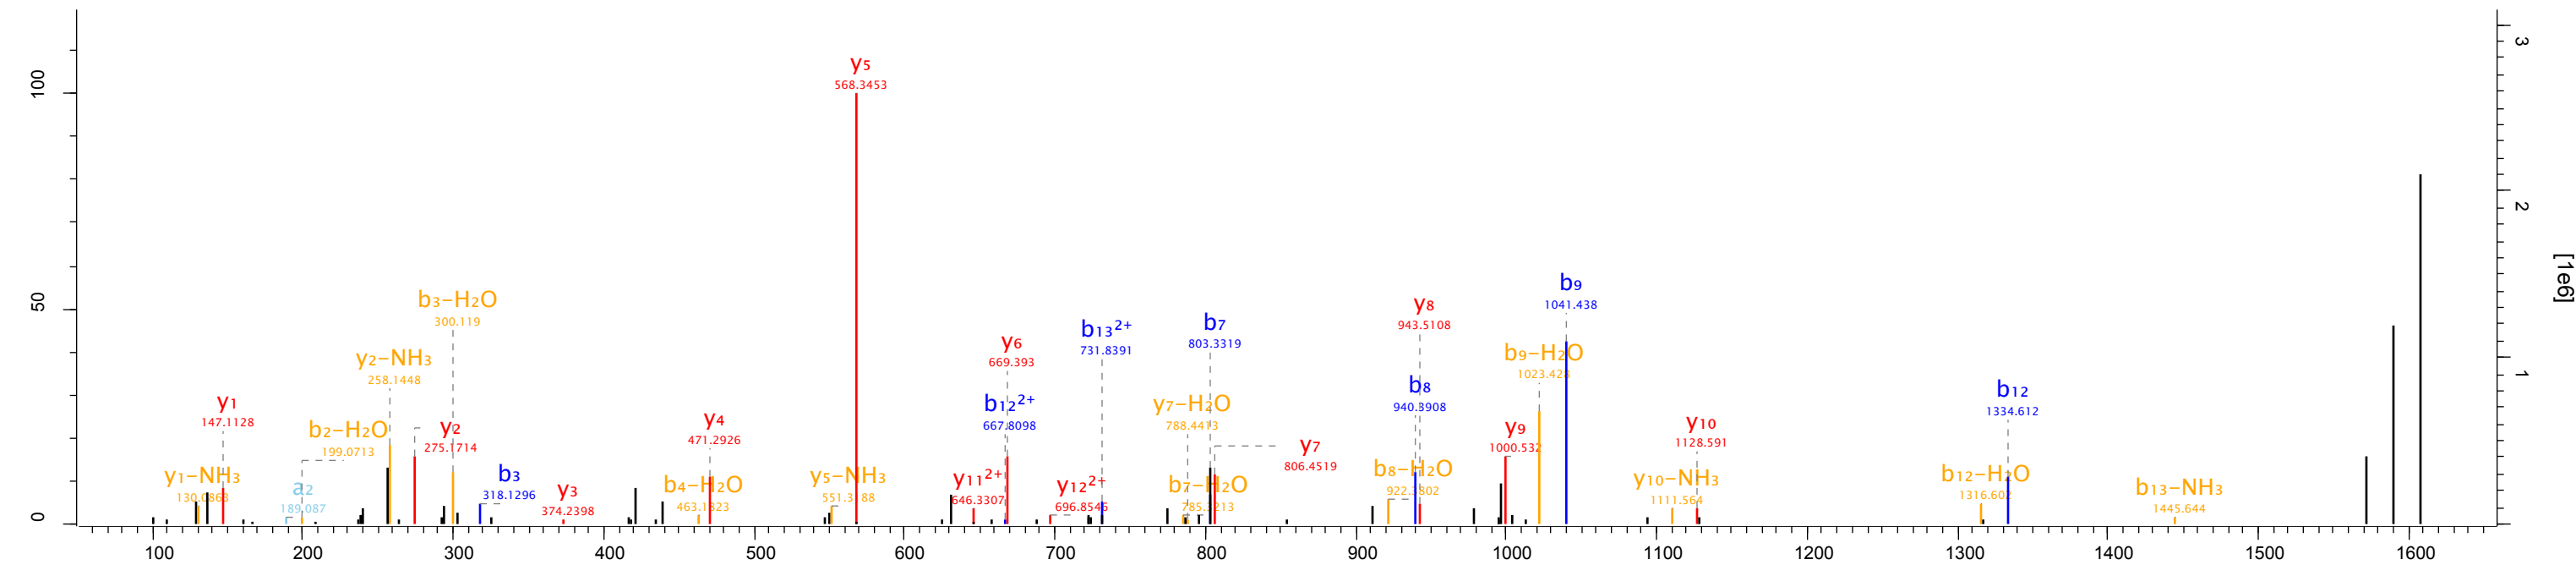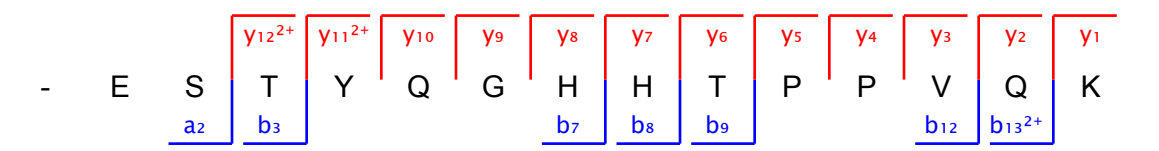



Raw file 20180707\_MaS\_A375SR\_ML\_proteome\_2\_04  
 Scan 5649 Method FTMS; HCD Score 66.69 m/z 328.2

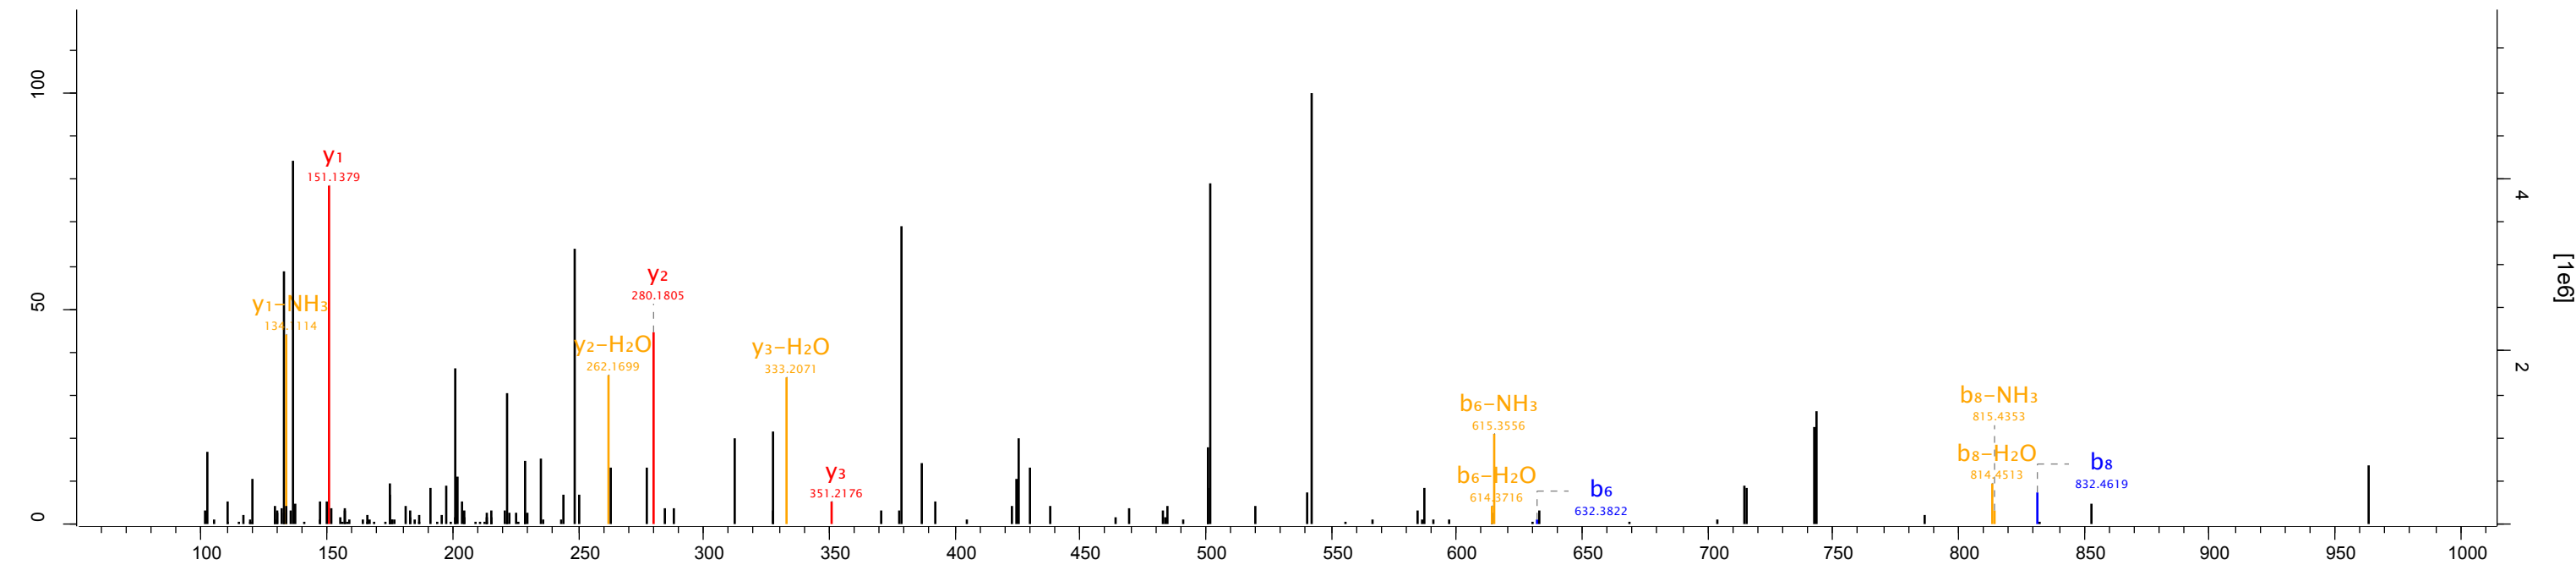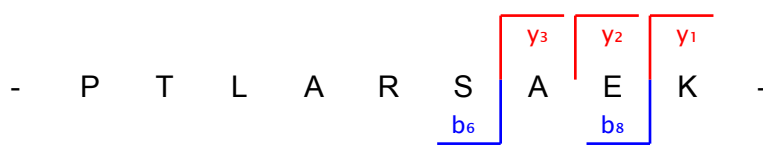

Raw file 20180707\_MaS\_A375SR\_ML\_proteome\_2\_05 Scan 21709 Method FTMS; HCD Score 67.98 m/z 468.75

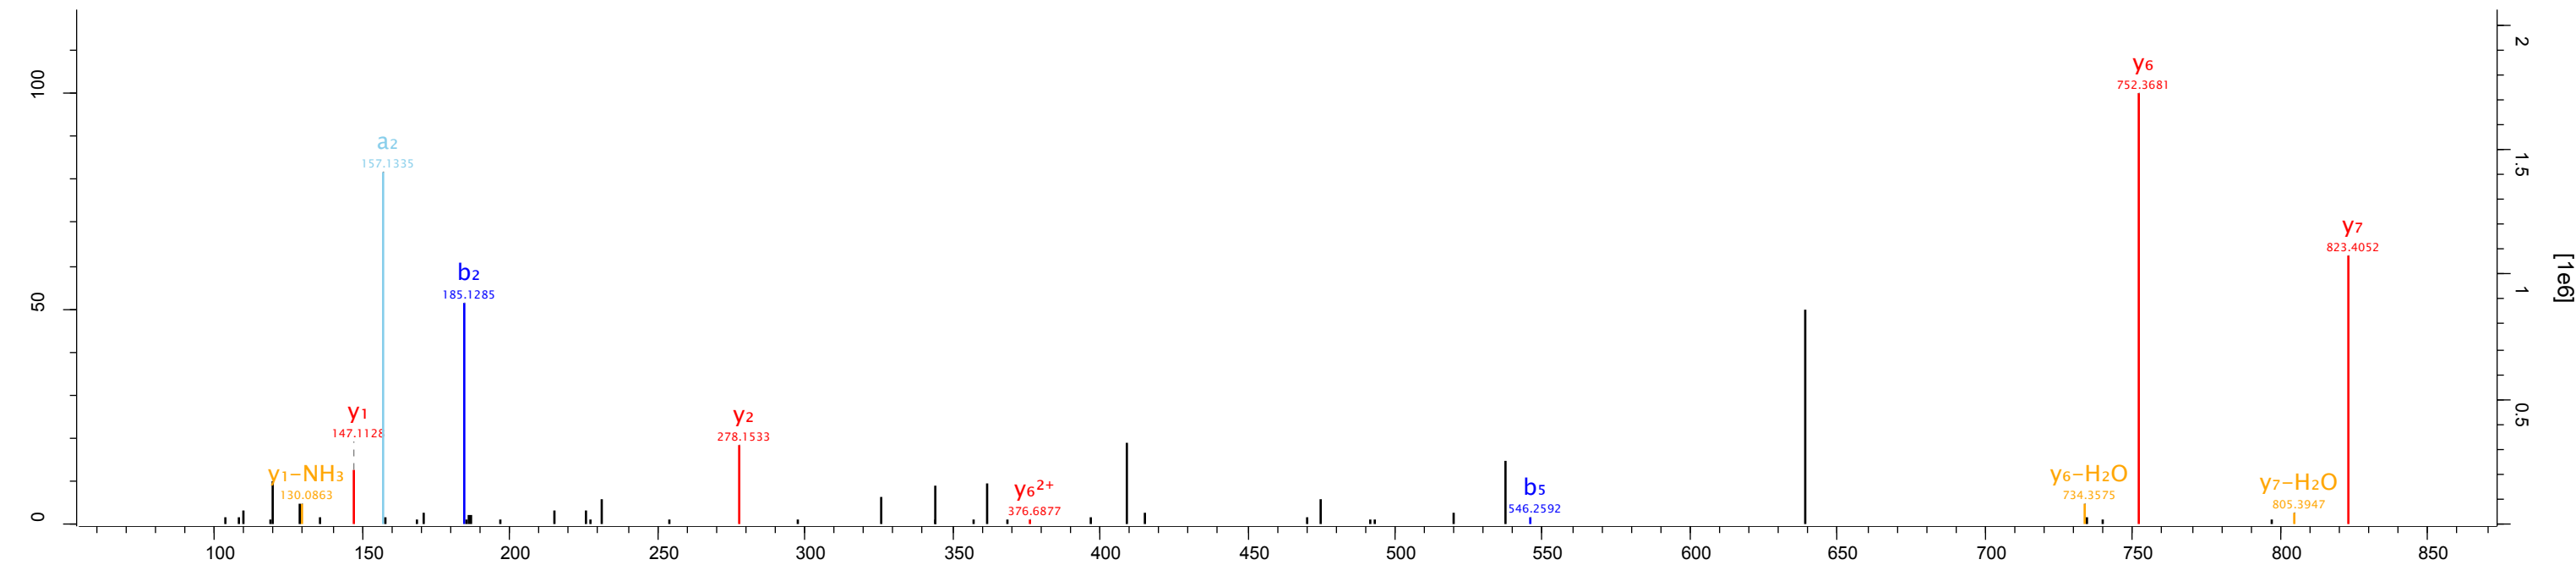

Raw file  
20180707\_MaS\_A375SR\_ML\_proteome\_2\_05

Scan 22129 Method FTMS; HCD Score 126.1 m/z 710.36 Gene names TMEM184C

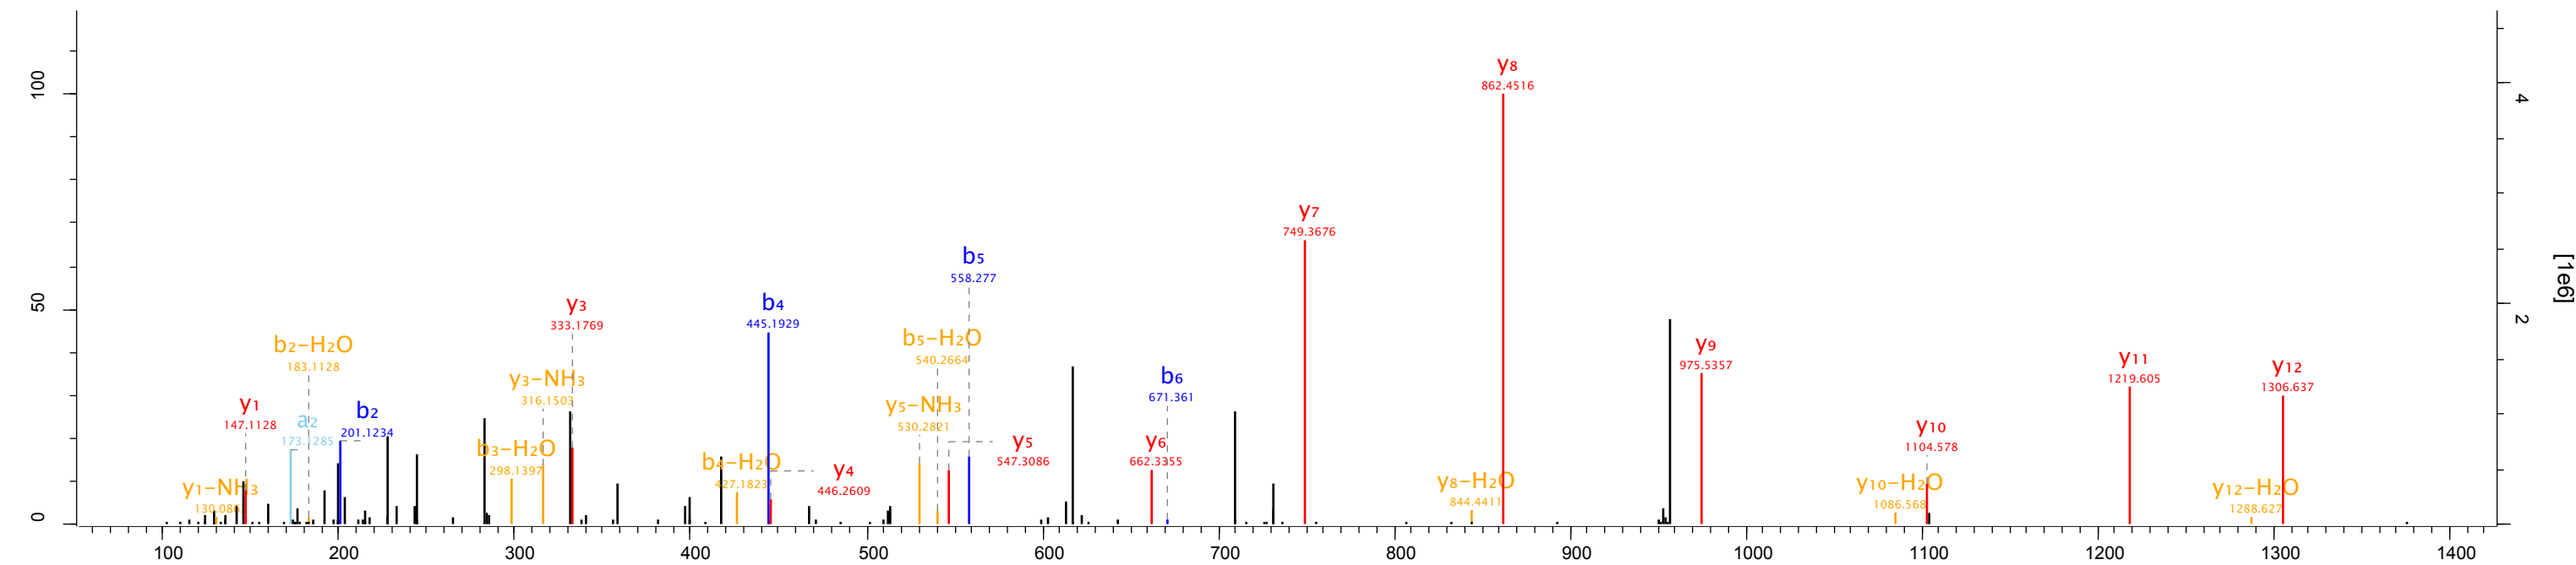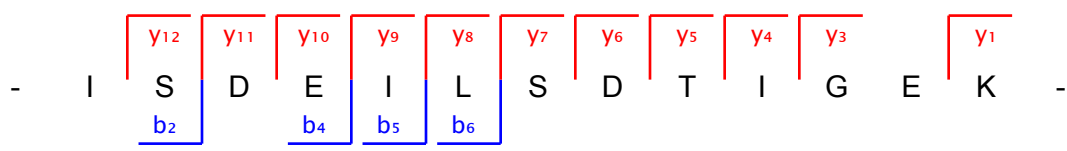

Raw file

20180707\_MaS\_A375SR\_ML\_proteome\_2\_05

Scan  
22749Method  
FTMS; HCDScore  
82.63m/z  
718.36Gene names  
DDO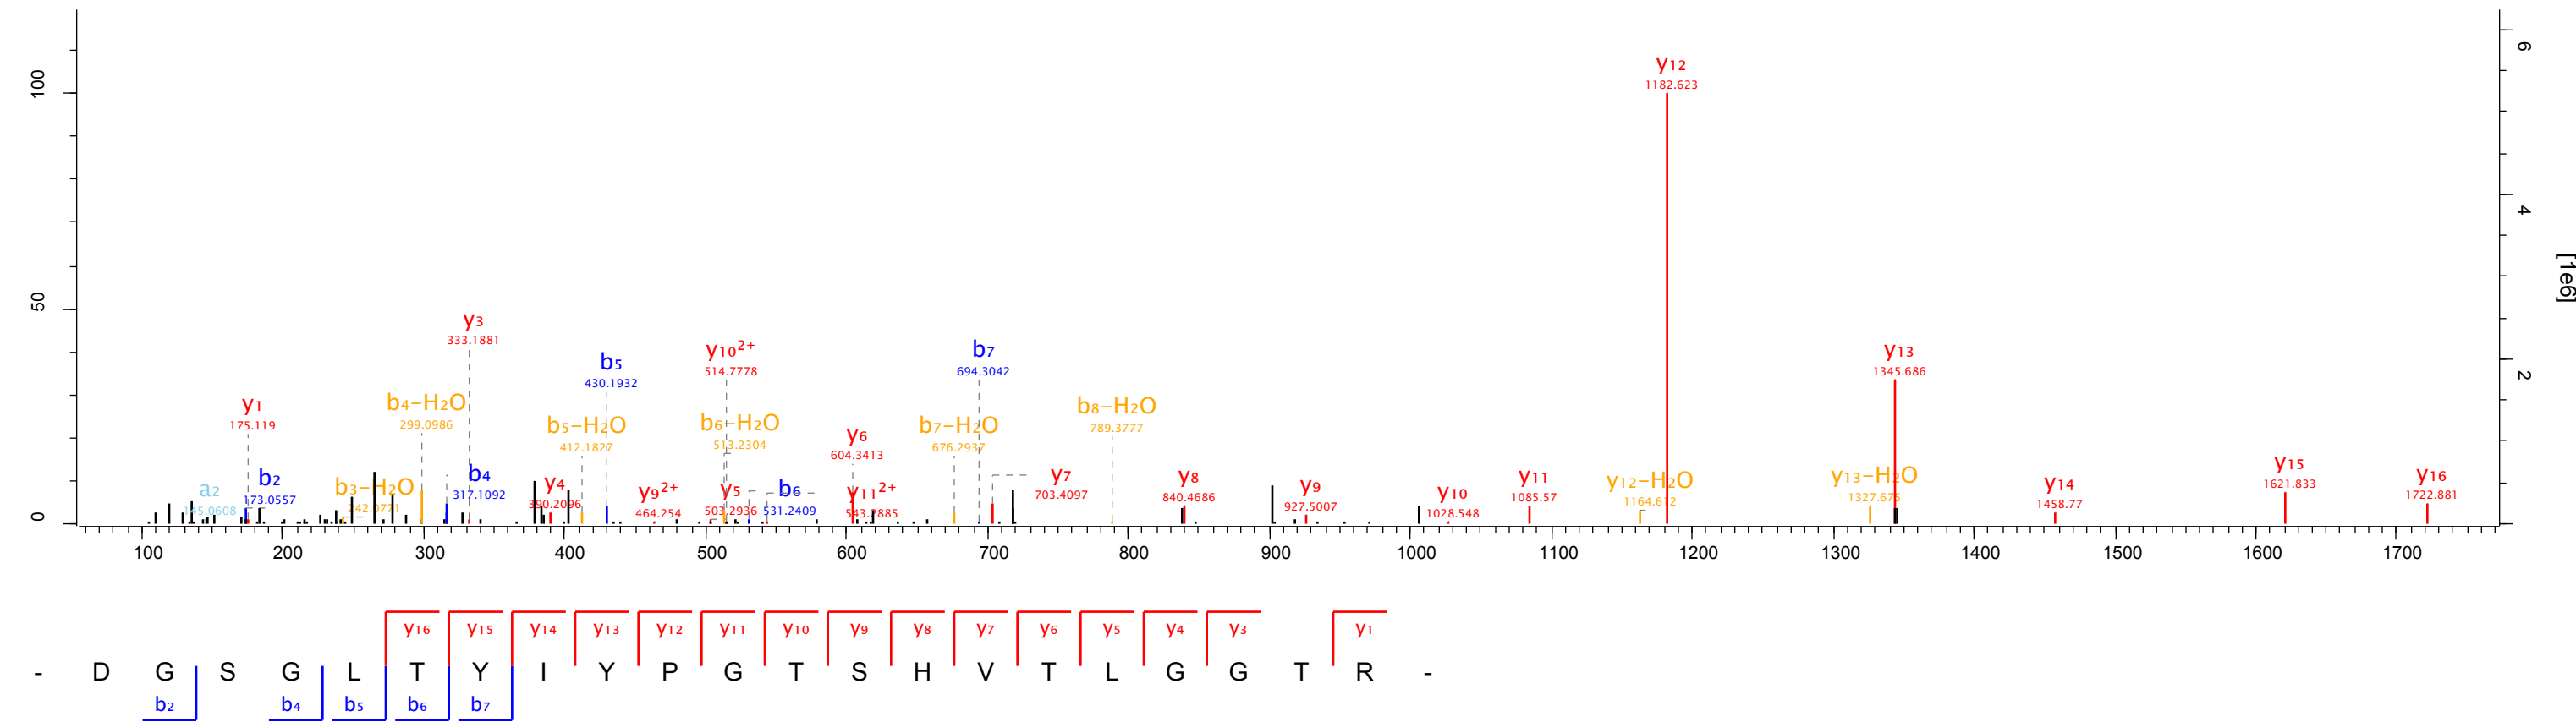

Raw file 20180707\_MaS\_A375SR\_ML\_proteome\_2\_05 Scan 23449 Method FTMS; HCD Score 45.6 m/z 502.27 Gene names PGM5

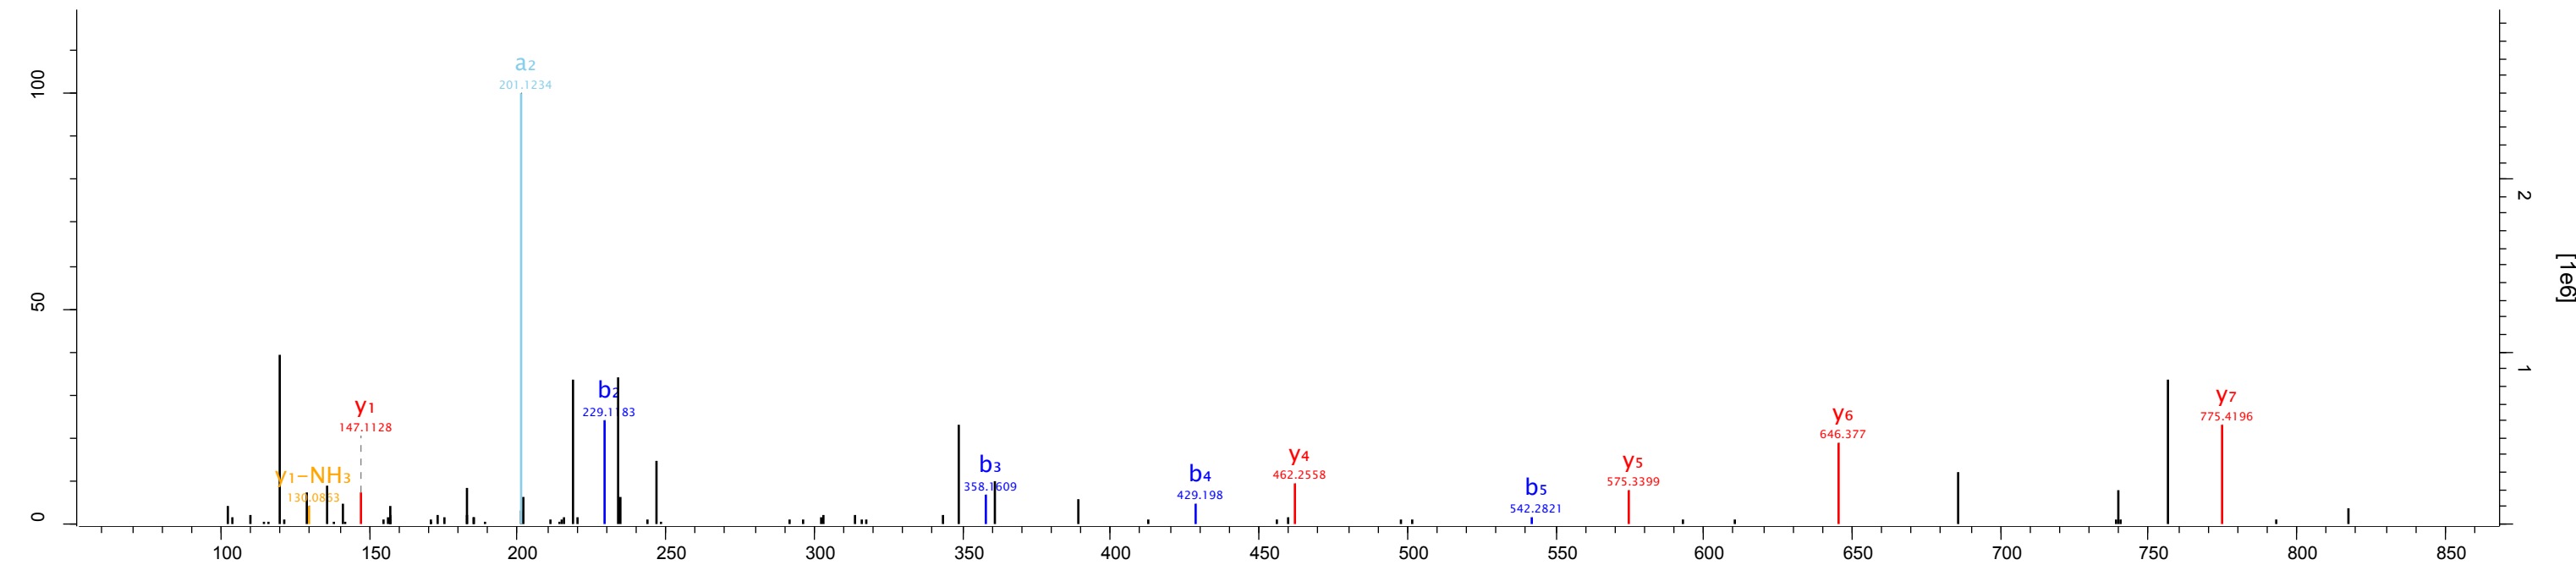

Raw file 20180707\_MaS\_A375SR\_ML\_proteome\_2\_05 Scan 25359 Method FTMS; HCD Score 67.52 m/z 798.93

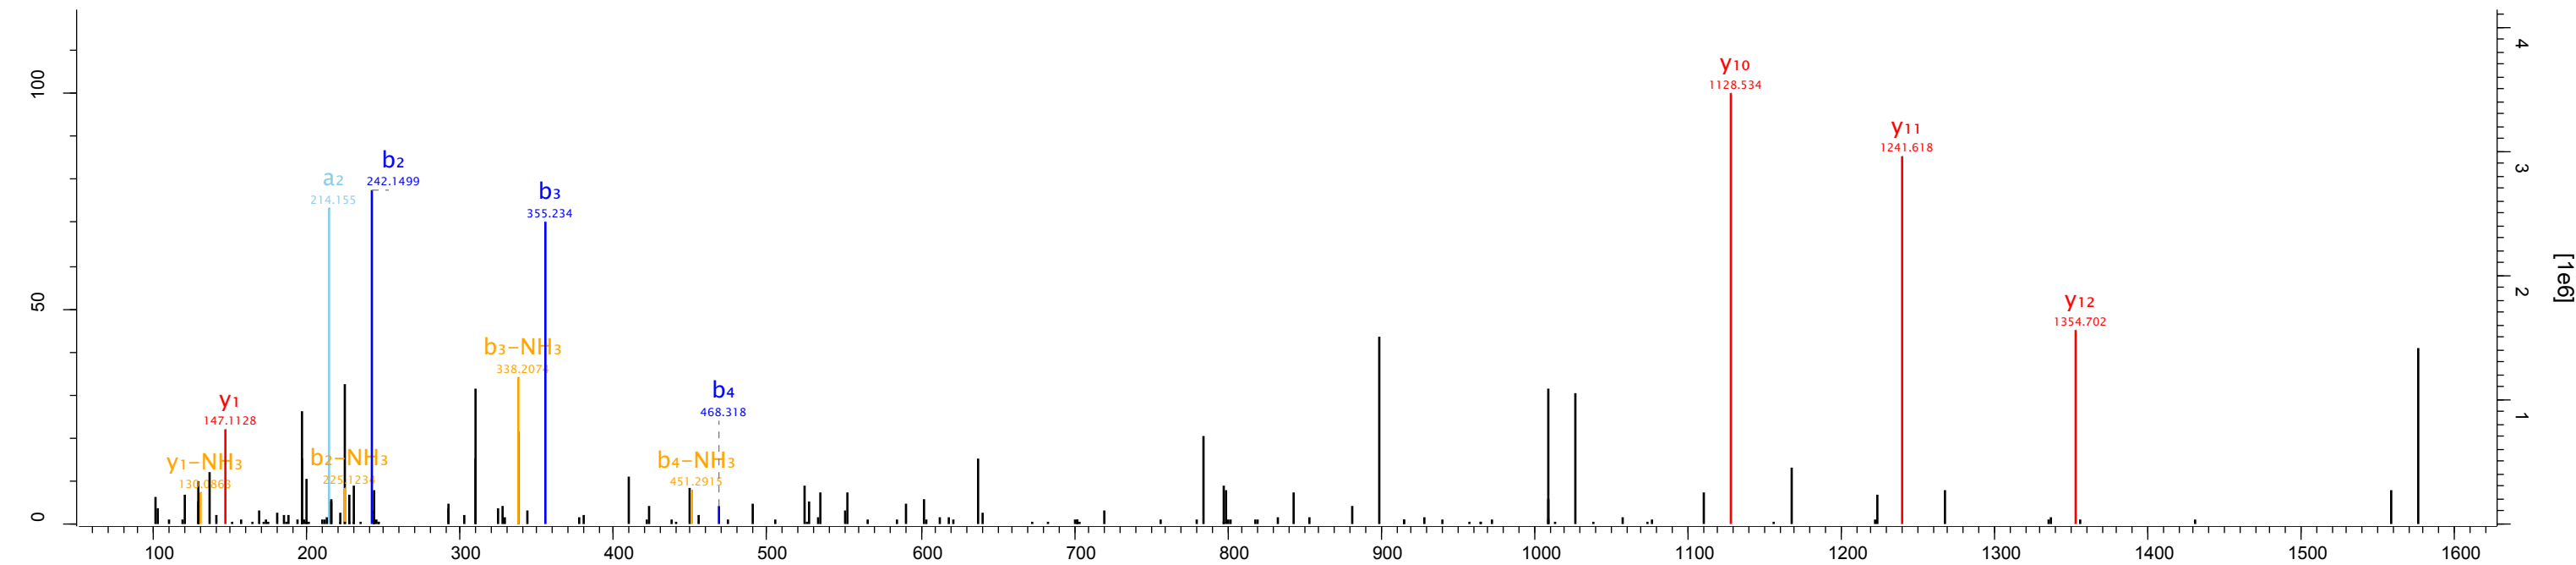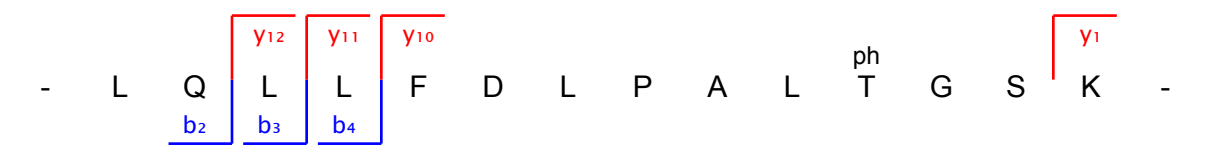

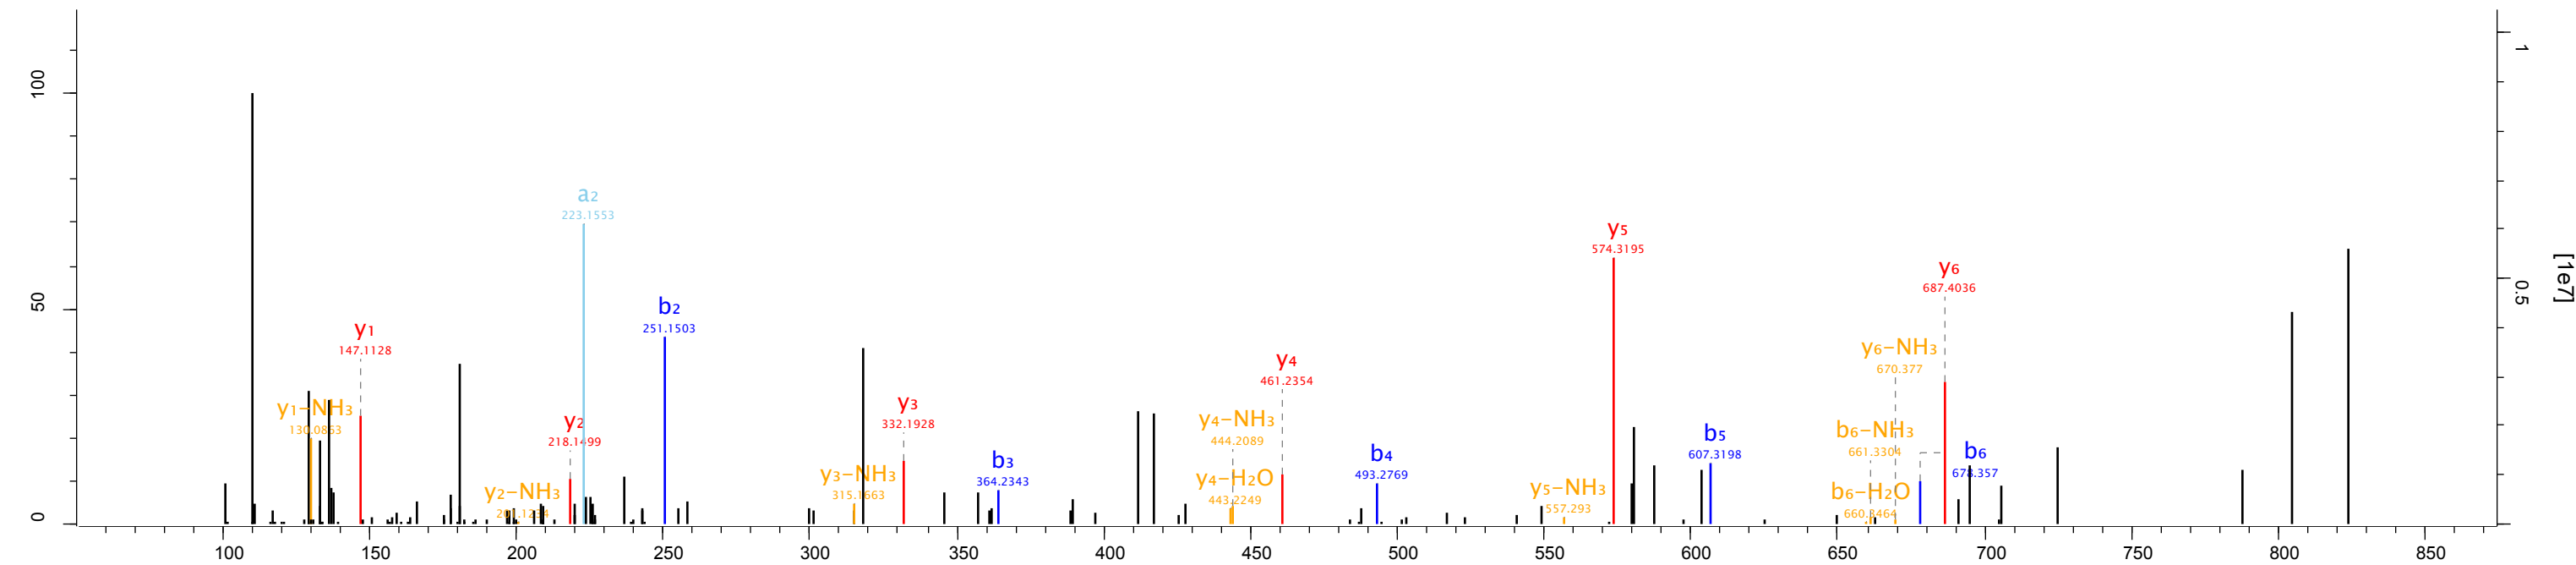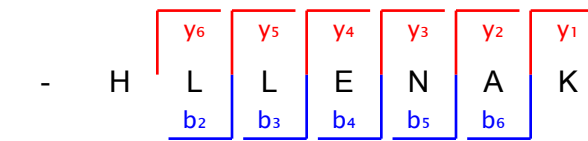

Raw file 20180707\_MaS\_A375SR\_ML\_proteome\_2\_05 Scan 8899 Method FTMS; HCD Score 61.59 m/z 555.8 Gene names POLR2F

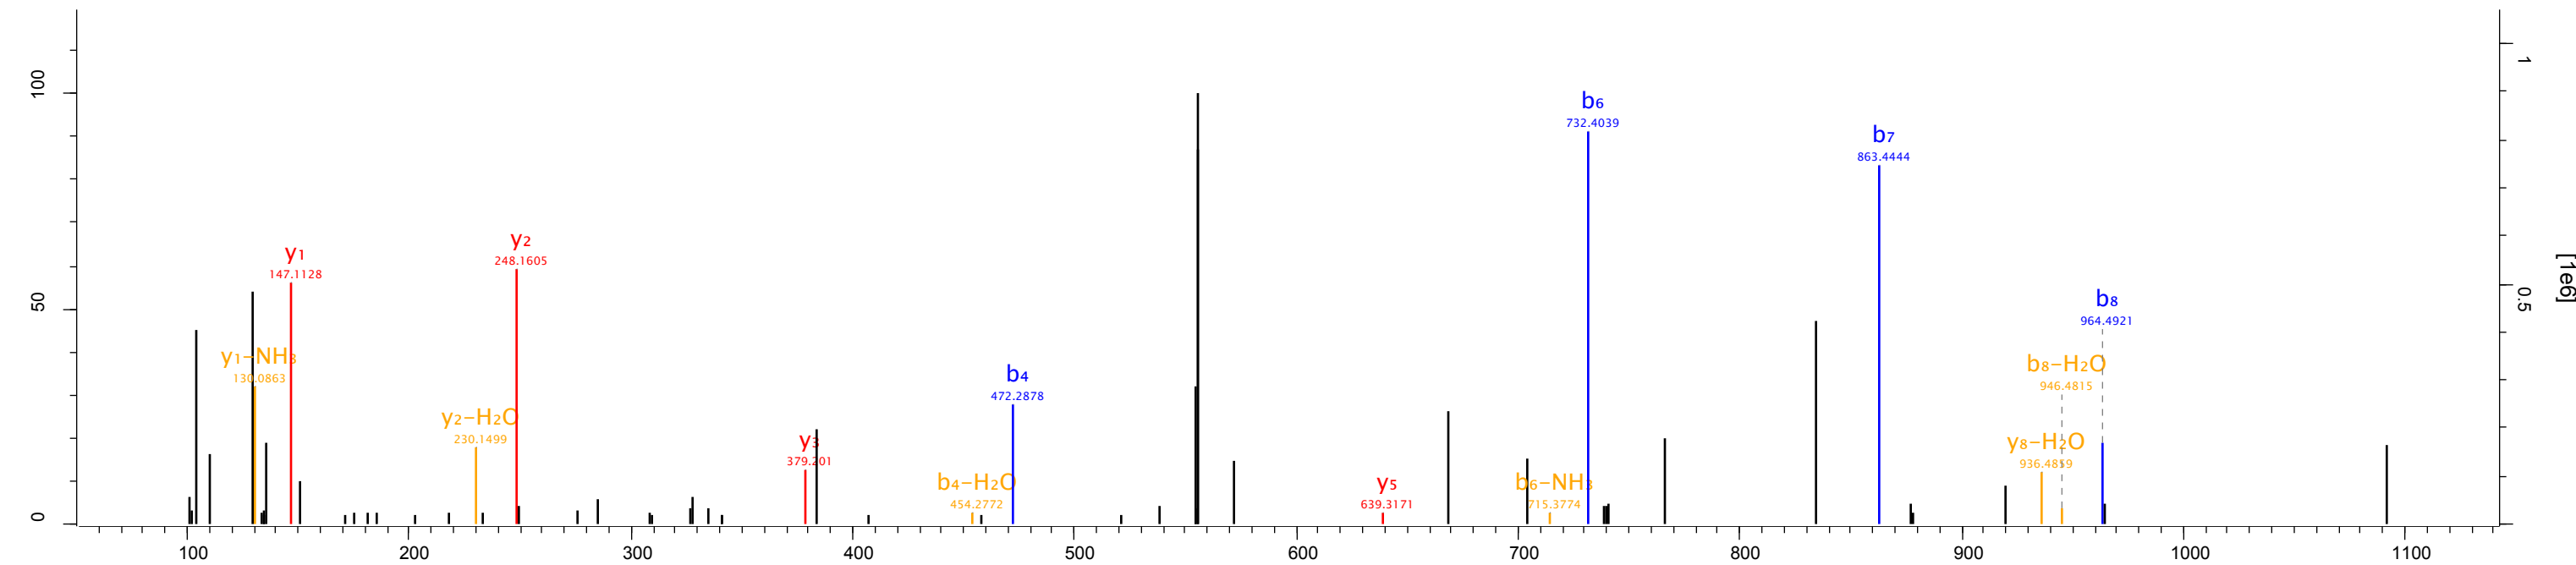



Raw file: 20180707\_MaS\_A375SR\_ML\_proteome\_2\_06  
 Scan: 10399 Method: FTMS; HCD Score: 160.64 m/z: 812.89 Gene names: RNF115

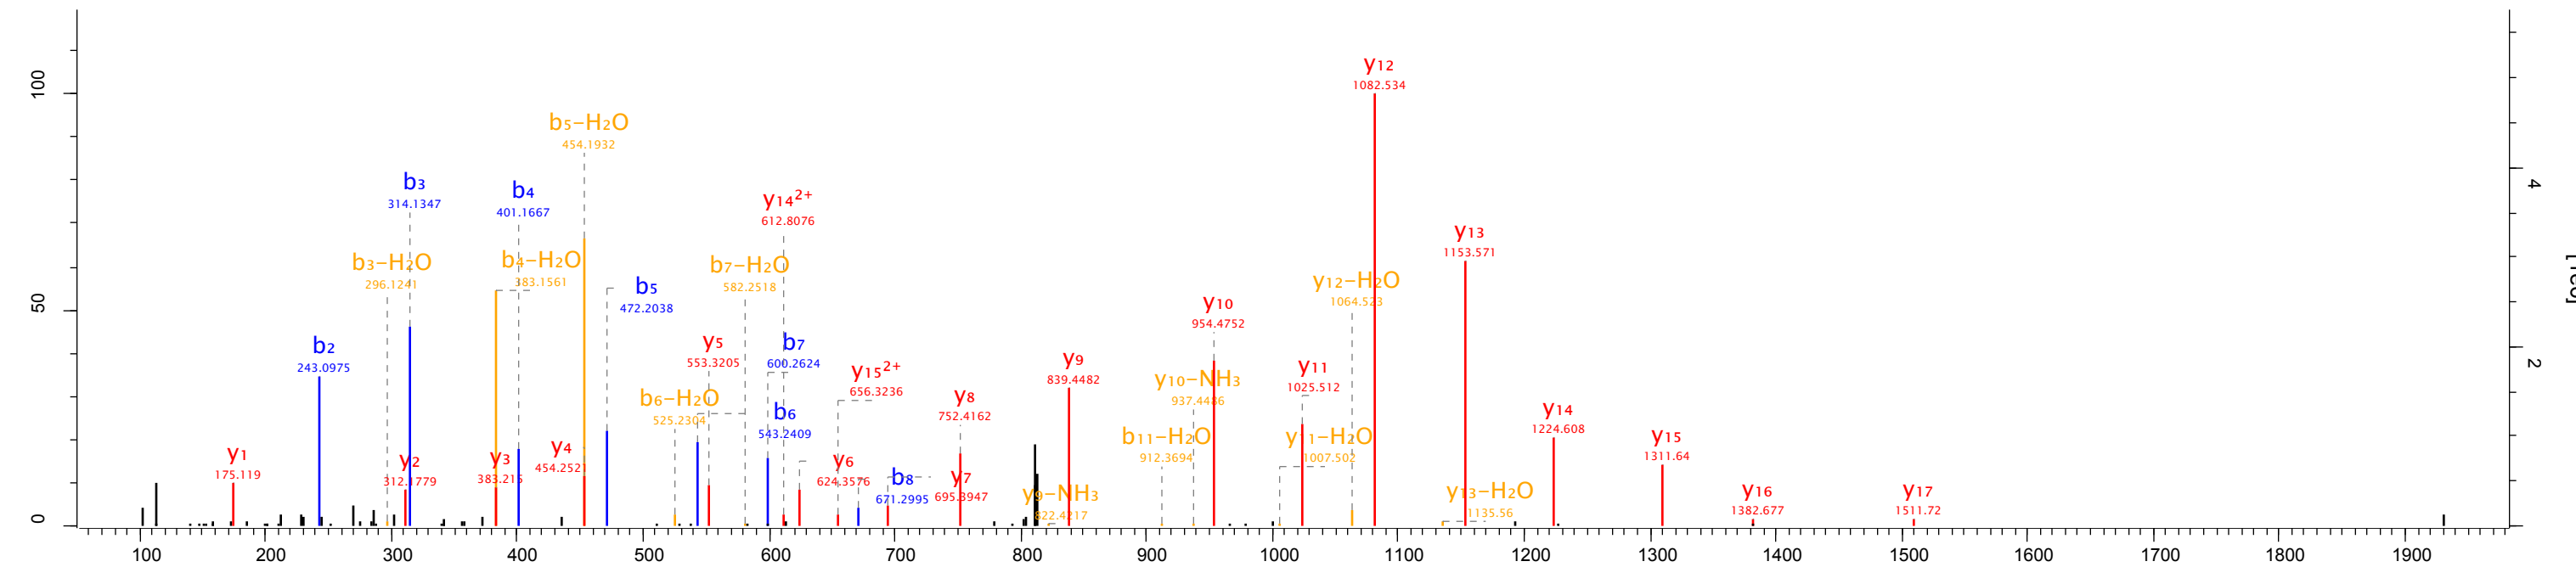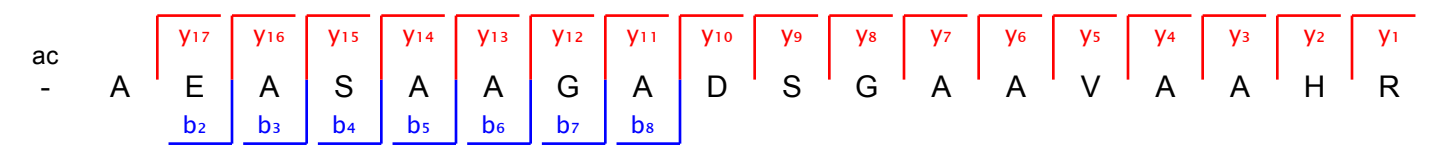

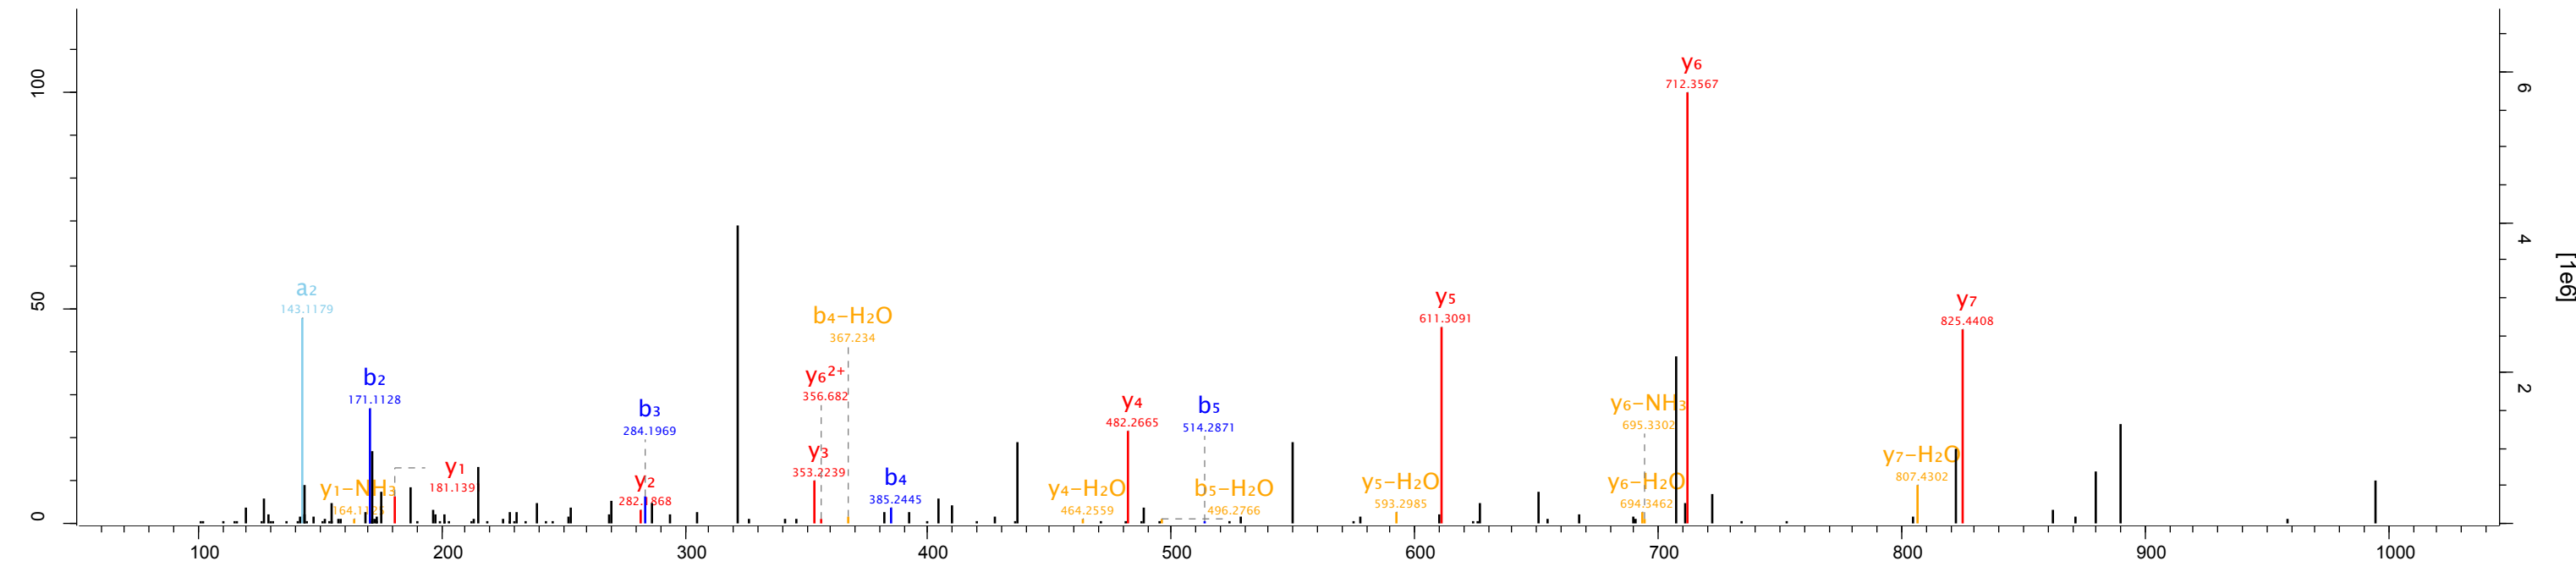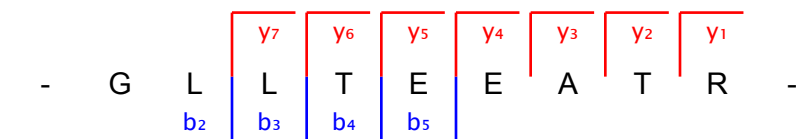

Raw file  
20180707\_MaS\_A375SR\_ML\_proteome\_2\_07

Scan 3309 Method FTMS; HCD Score 117.01 m/z 513.27 Gene names COX7B

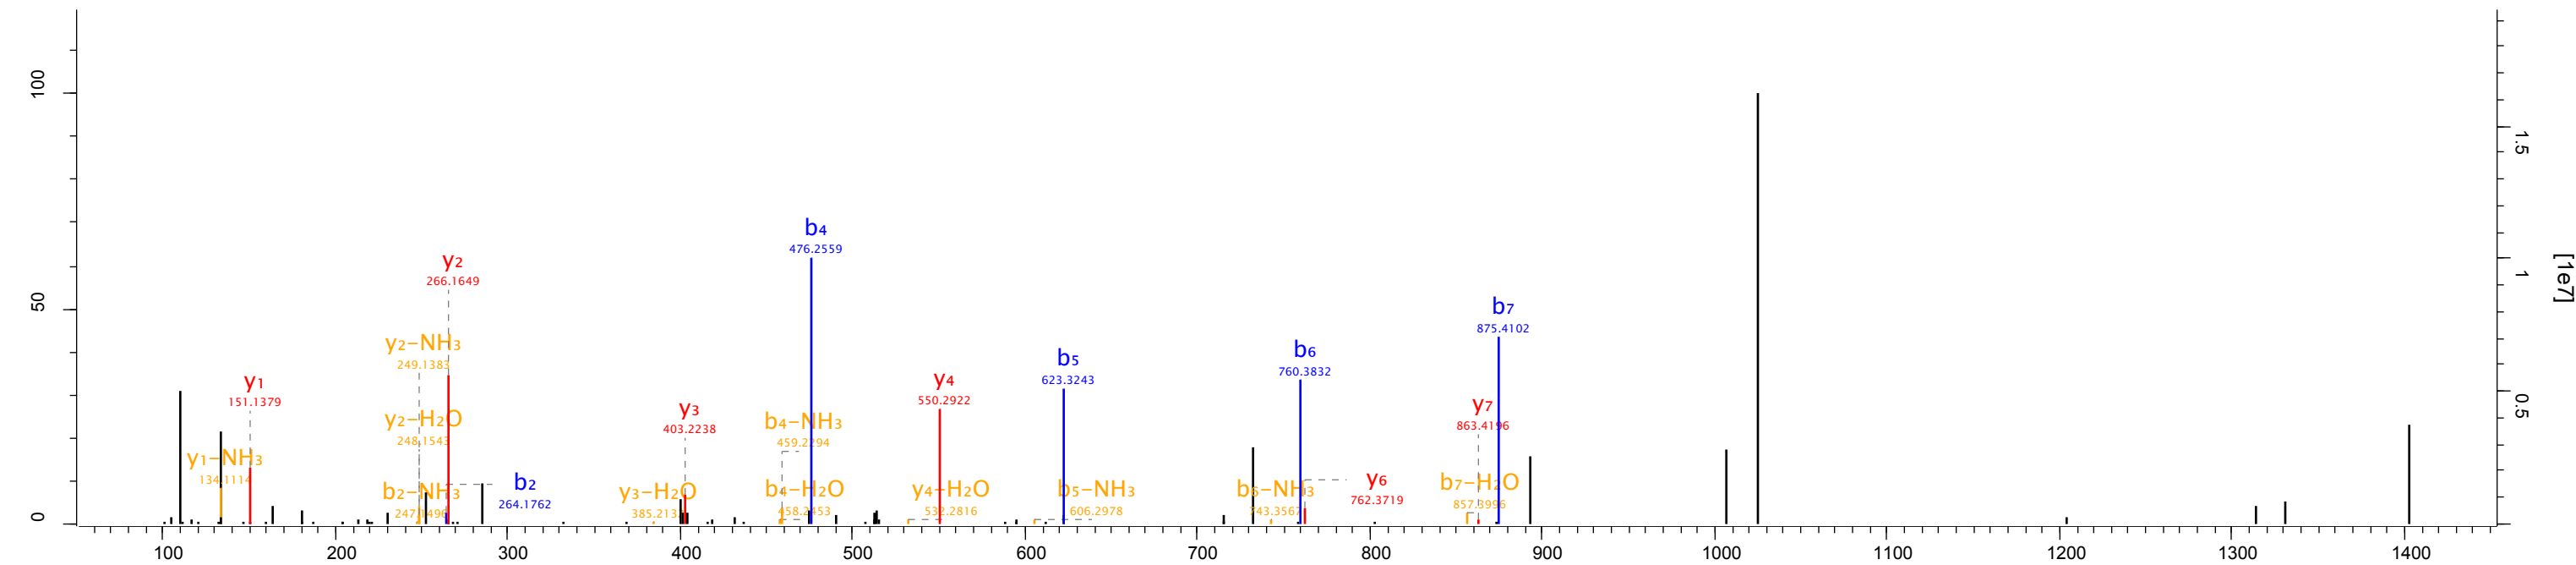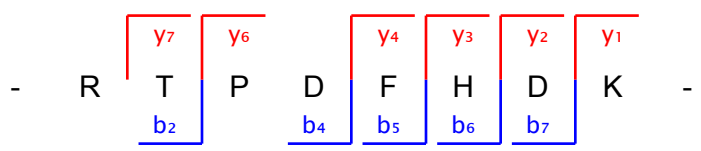

Raw file 20180707\_MaS\_A375SR\_ML\_proteome\_2\_08 Scan 27819 Method FTMS; HCD Score 105.58 m/z 857.42 Gene names SSR3

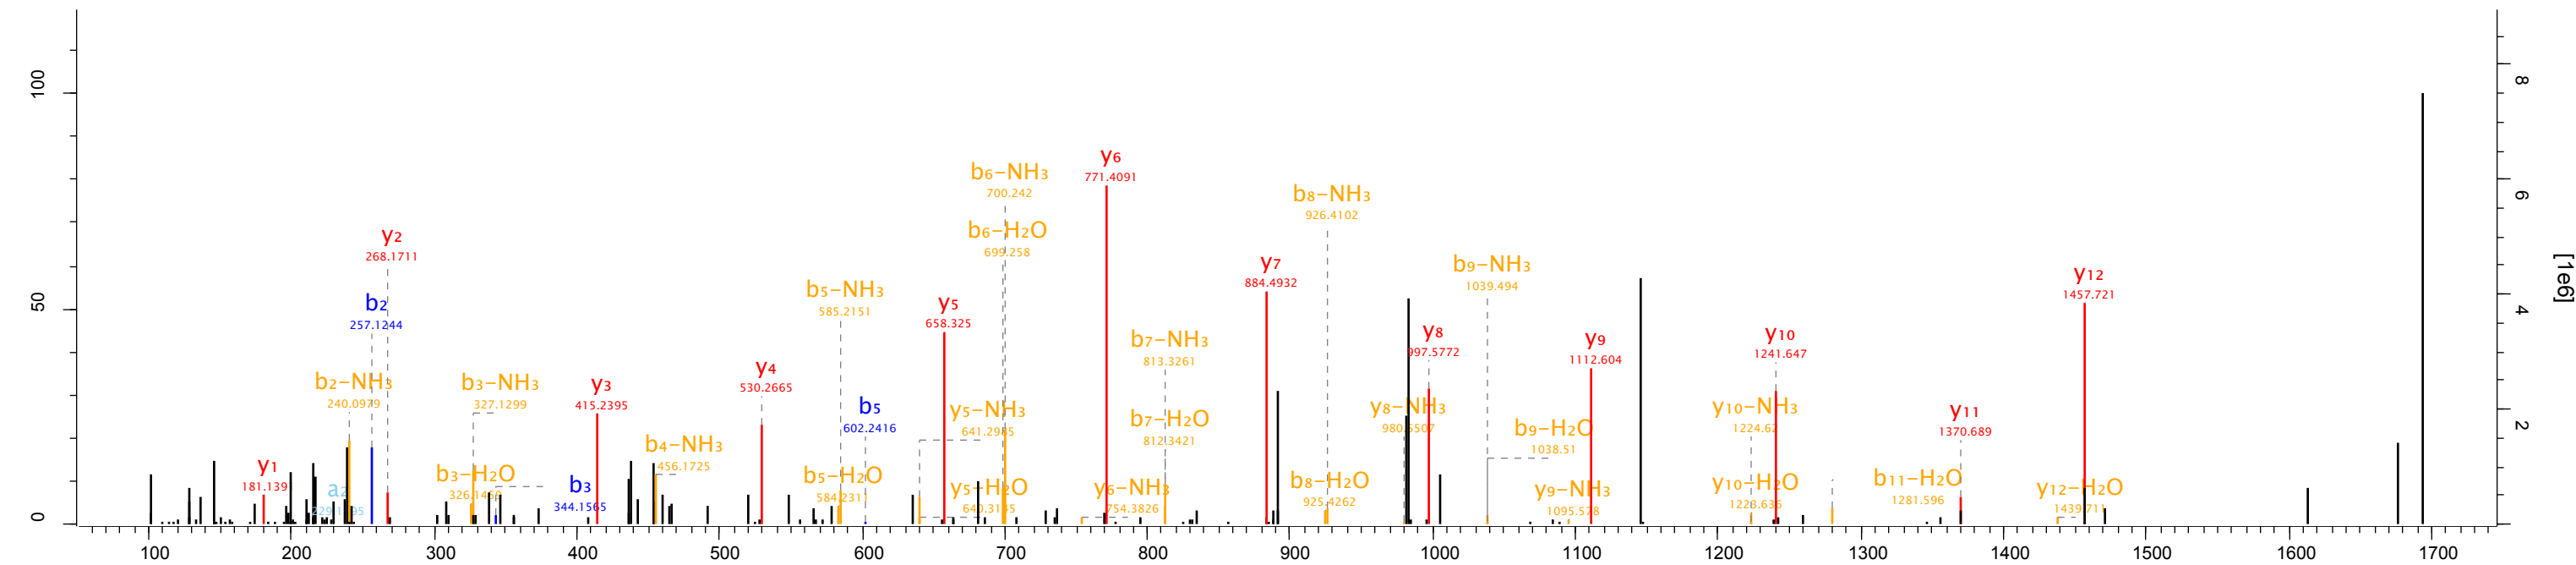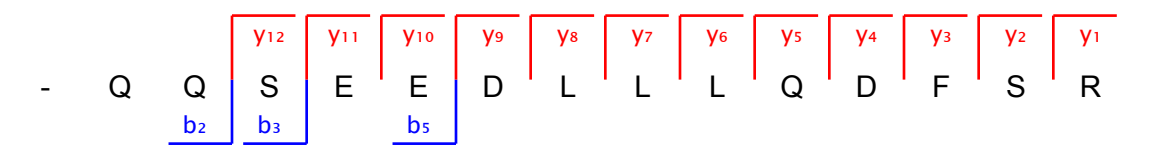

Raw file 20180707\_MaS\_A375SR\_ML\_proteome\_2\_08 Scan 6739 Method FTMS; HCD Score 61.41 m/z 716.81 Gene names LEPROT

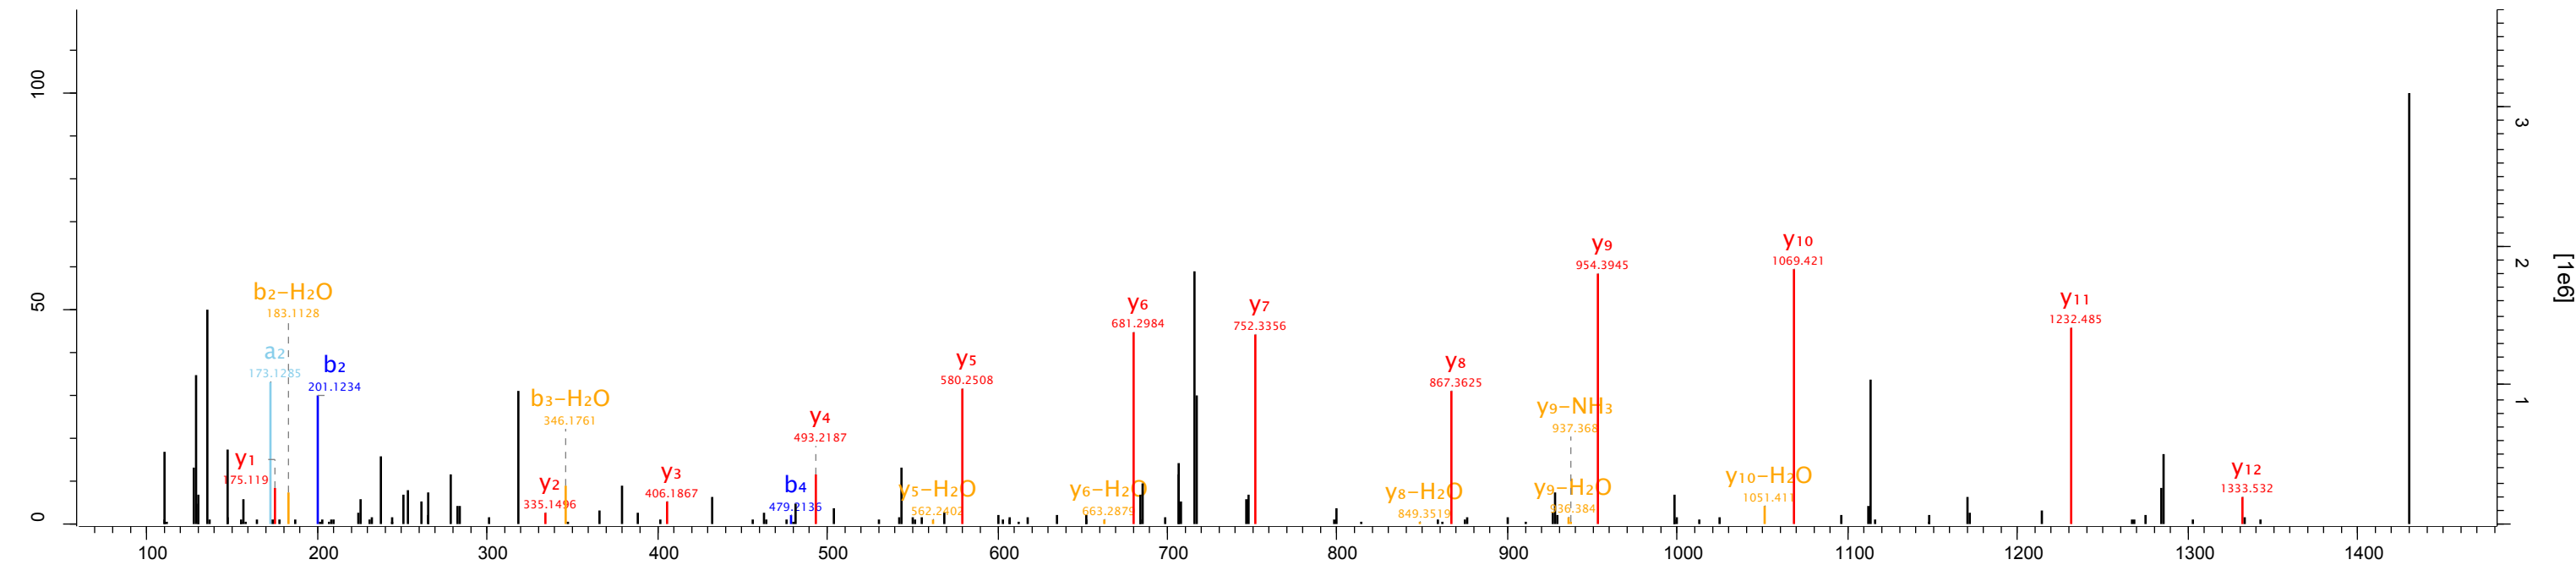

Raw file  
20180707\_MaS\_A375SR\_ML\_proteome\_2\_09

Scan 12559 Method FTMS; HCD Score 44.97 m/z 384.21 Gene names RASD1

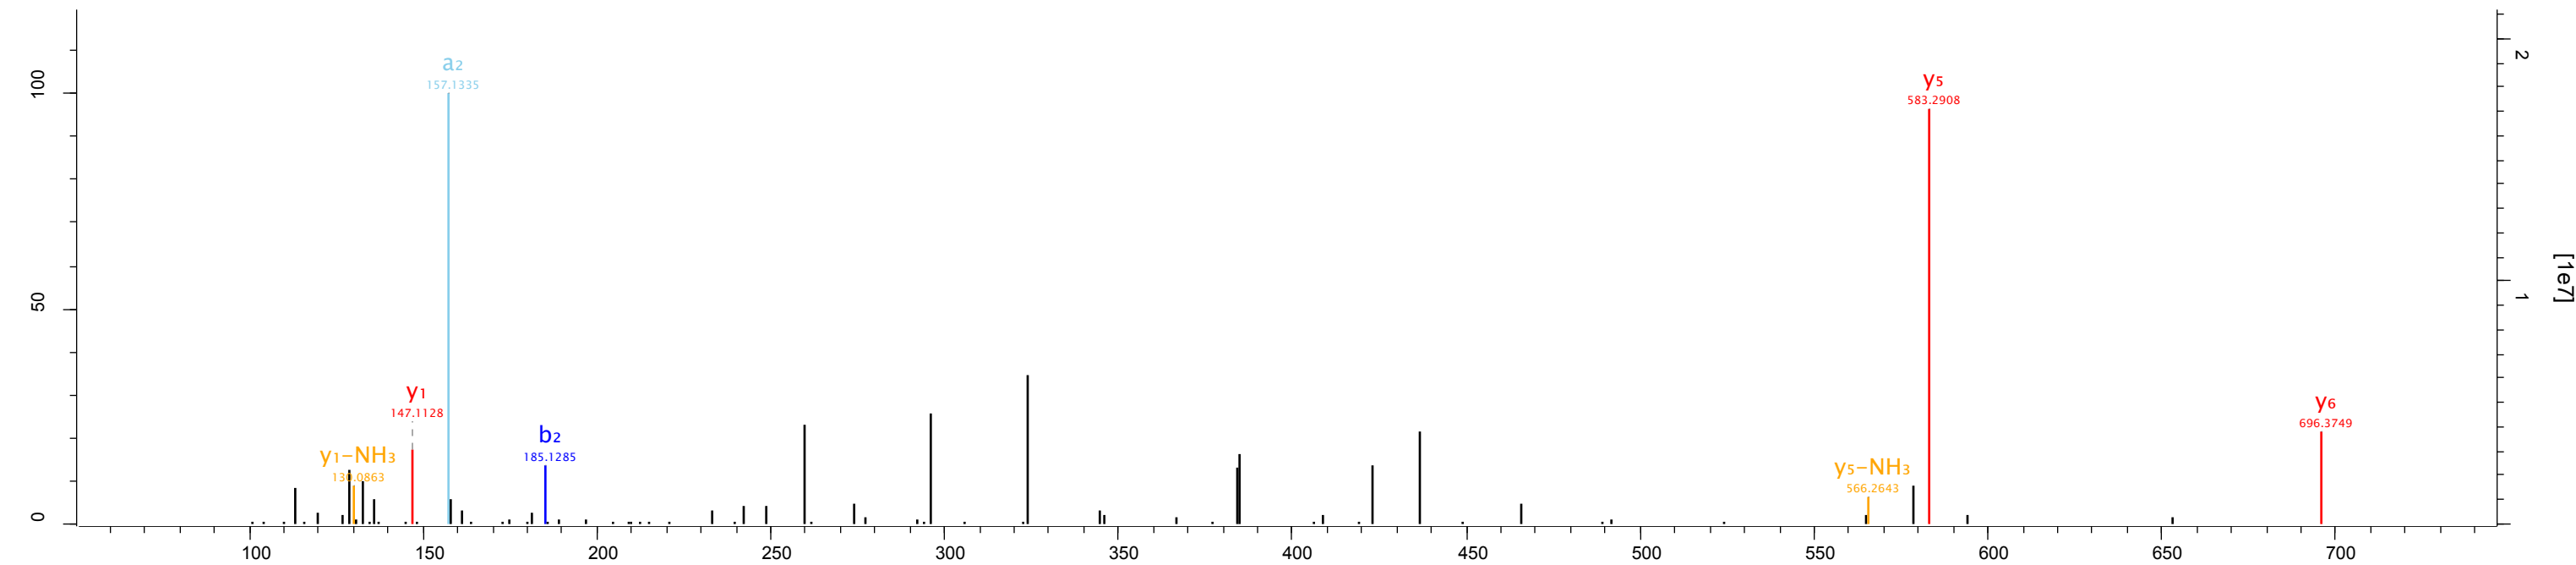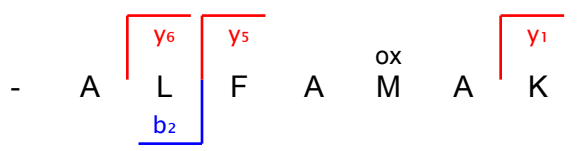

Raw file  
 20180707\_MaS\_A375SR\_ML\_proteome\_2\_09  
 Scan: 20859 Method: FTMS; HCD Score: 92.61 m/z: 643.34 Gene names: KLHL15

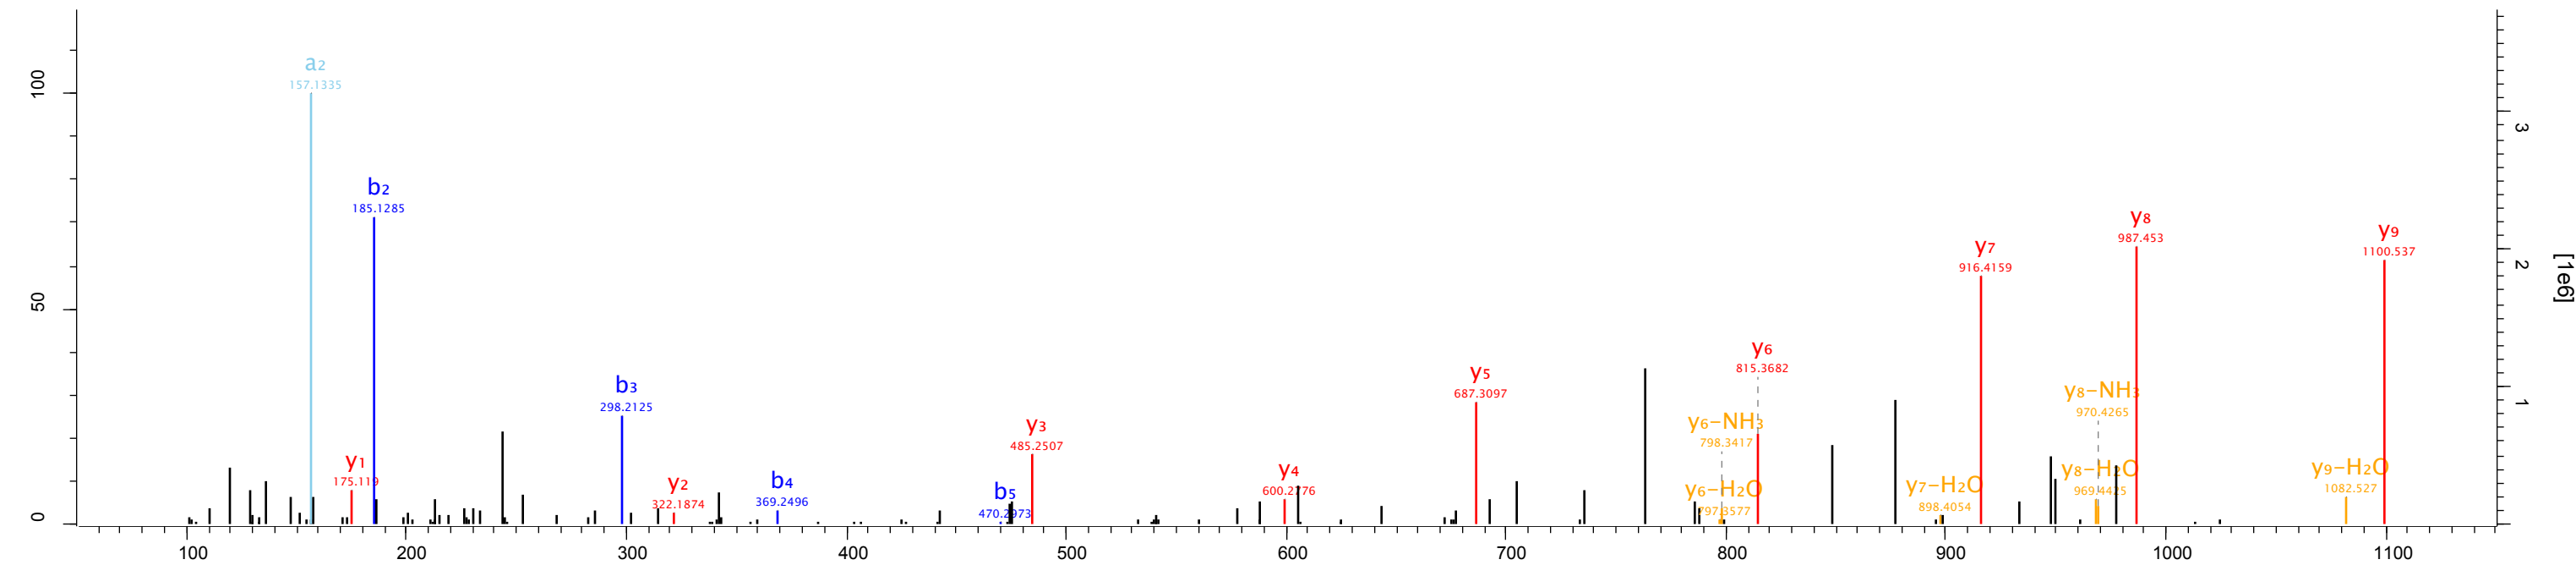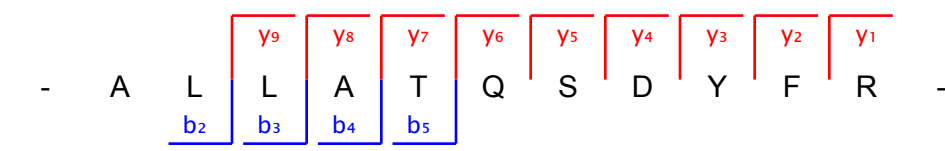

Raw file  
20180707\_MaS\_A375SR\_ML\_proteome\_2\_10

Scan 17719 Method FTMS; HCD Score 101.53 m/z 597.01 Gene names SLC35A3

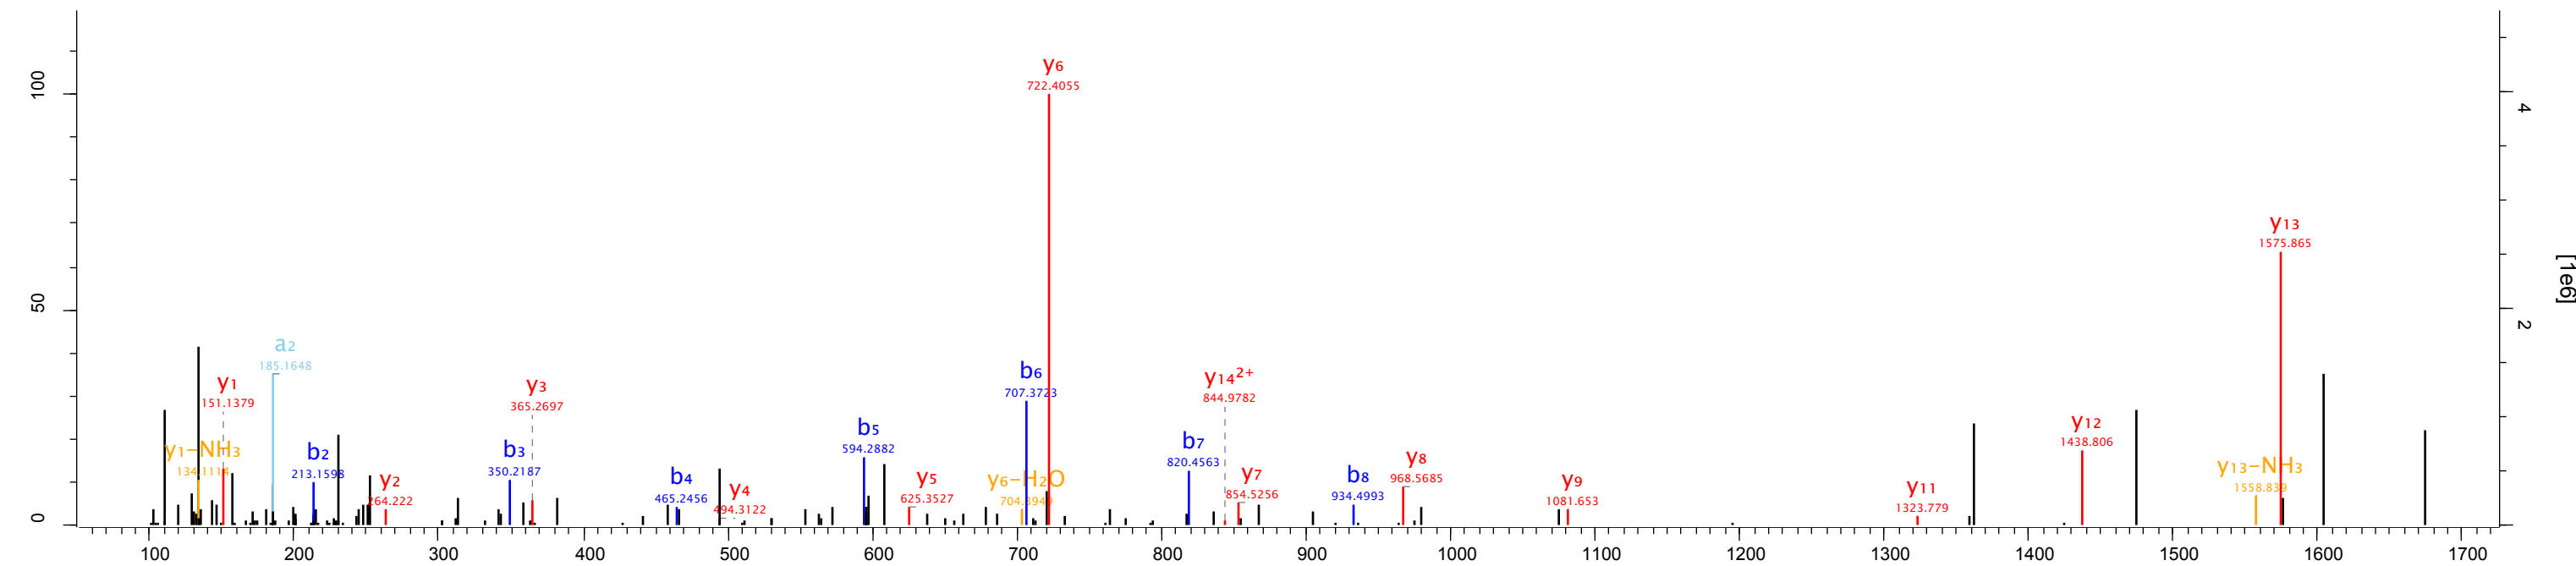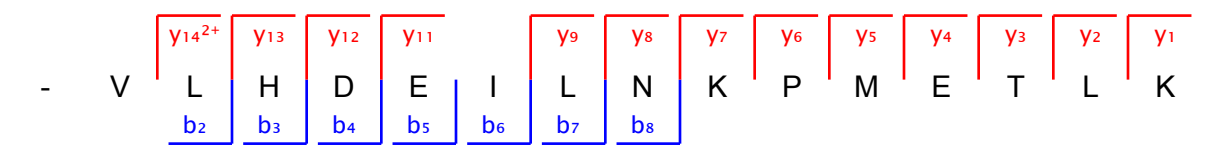



Raw file  
 20180707\_MaS\_A375SR\_ML\_proteome\_2\_10  
 Scan 25239 Method FTMS; HCD Score 52.58 m/z 609.34

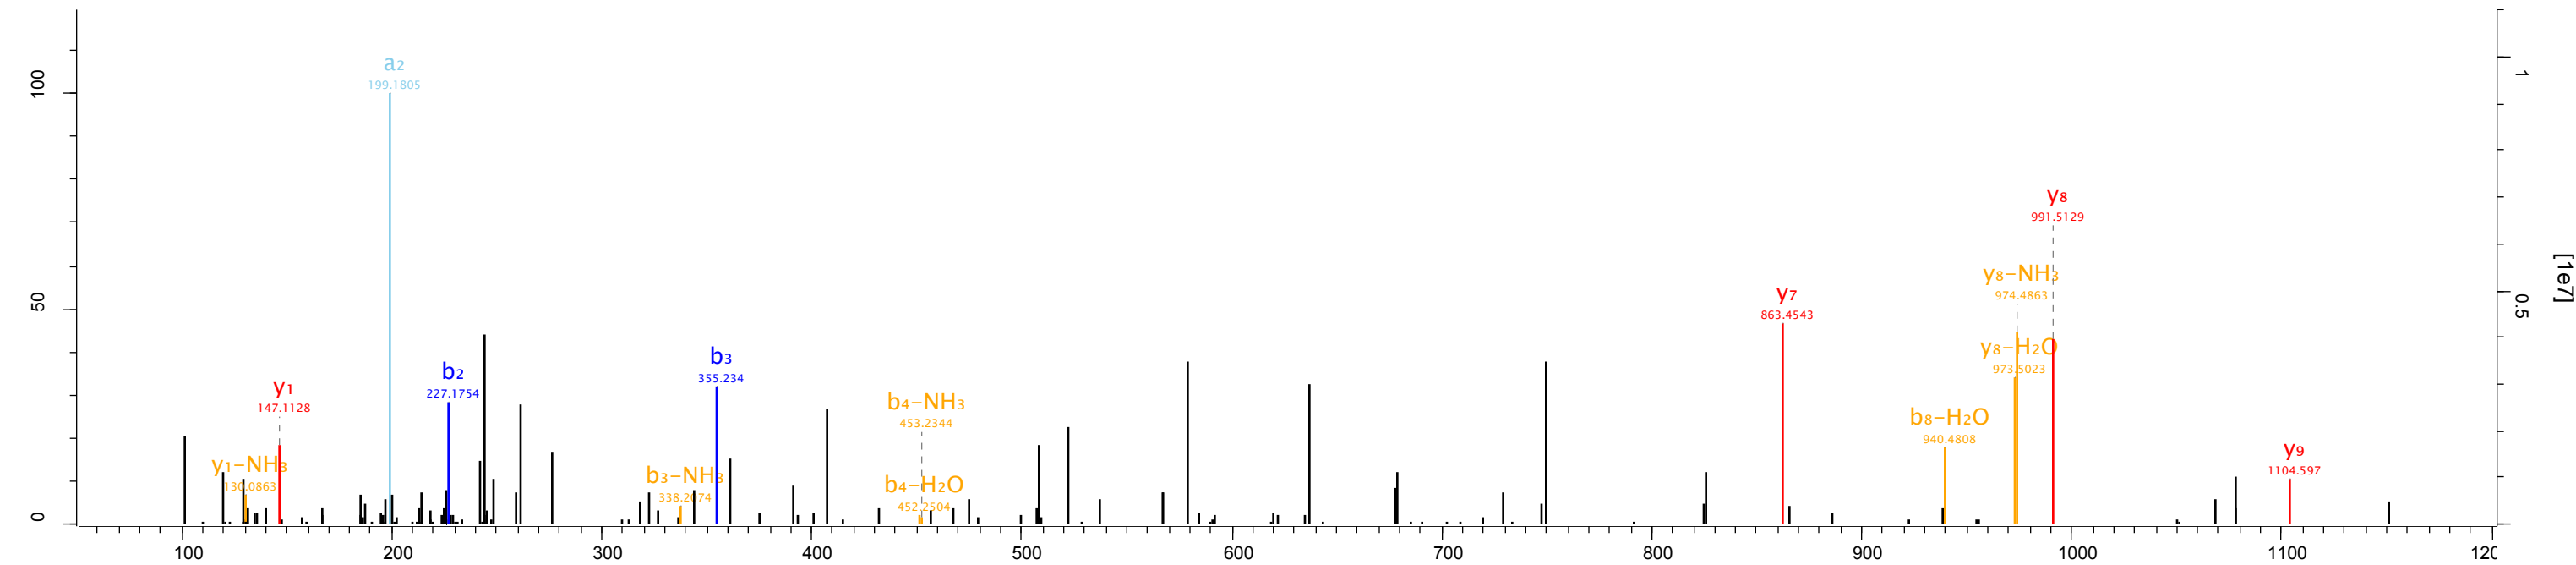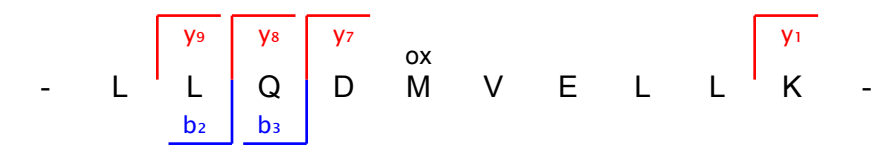

Raw file  
20180707\_MaS\_A375SR\_ML\_proteome\_2\_12

Scan 25769 Method FTMS; HCD Score 105.46 m/z 646.88 Gene names HFE

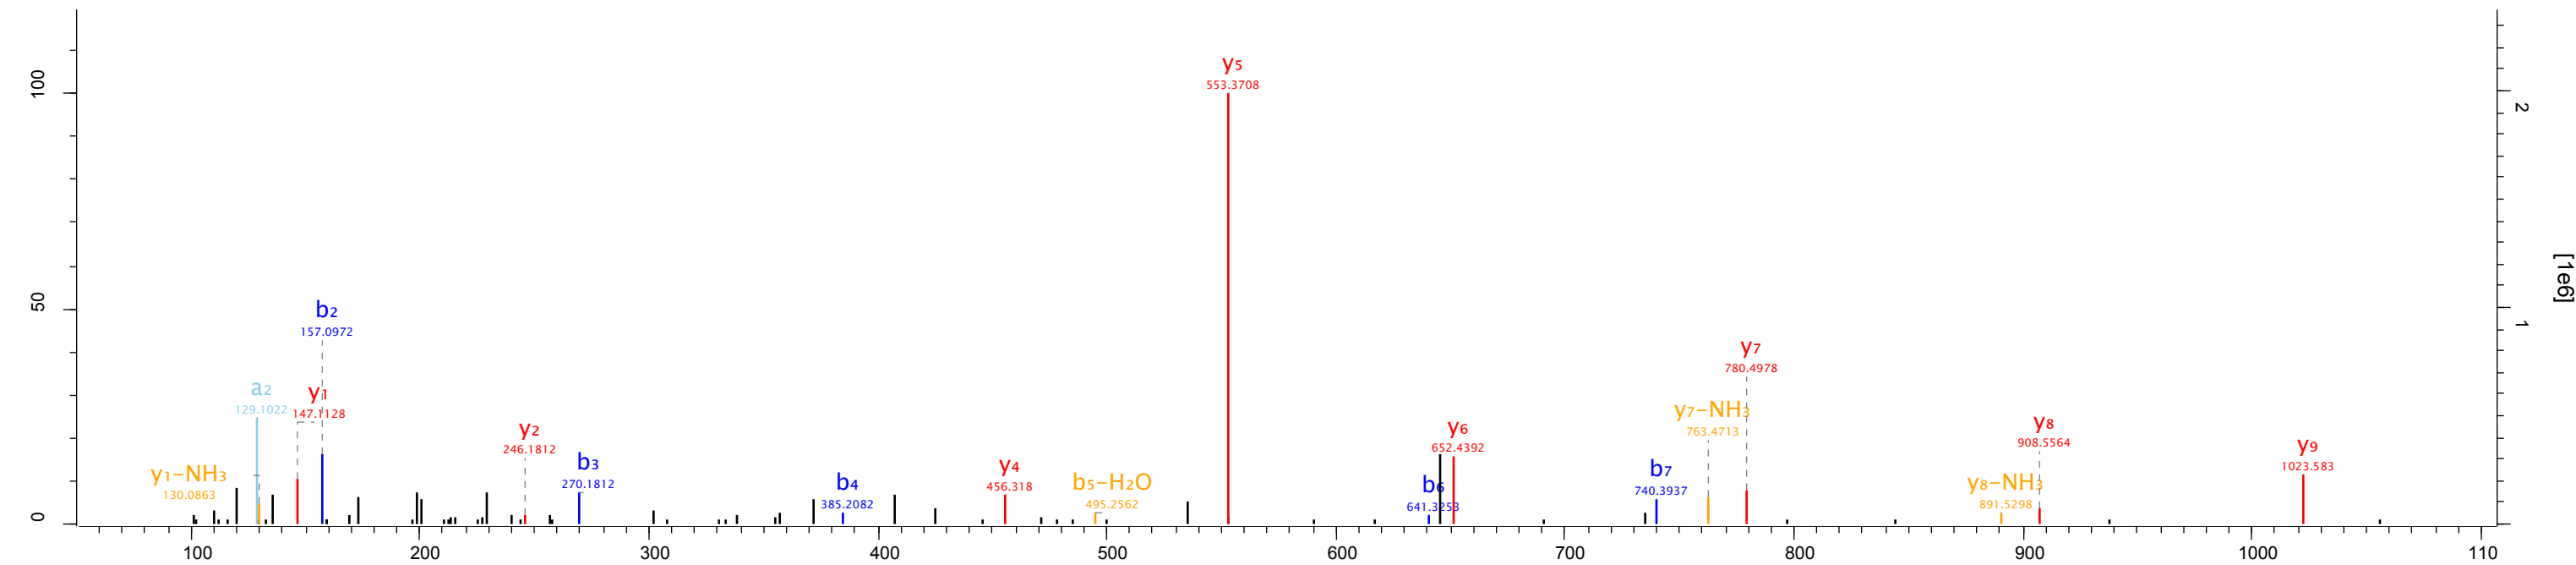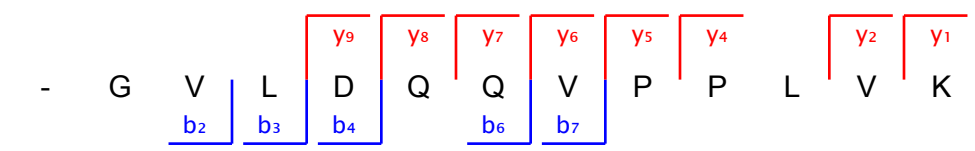

Raw file  
20180707\_MaS\_A375SR\_ML\_proteome\_2\_12

Scan 8489 Method FTMS; HCD Score 72.2 m/z 405.83 Gene names HIVEP3

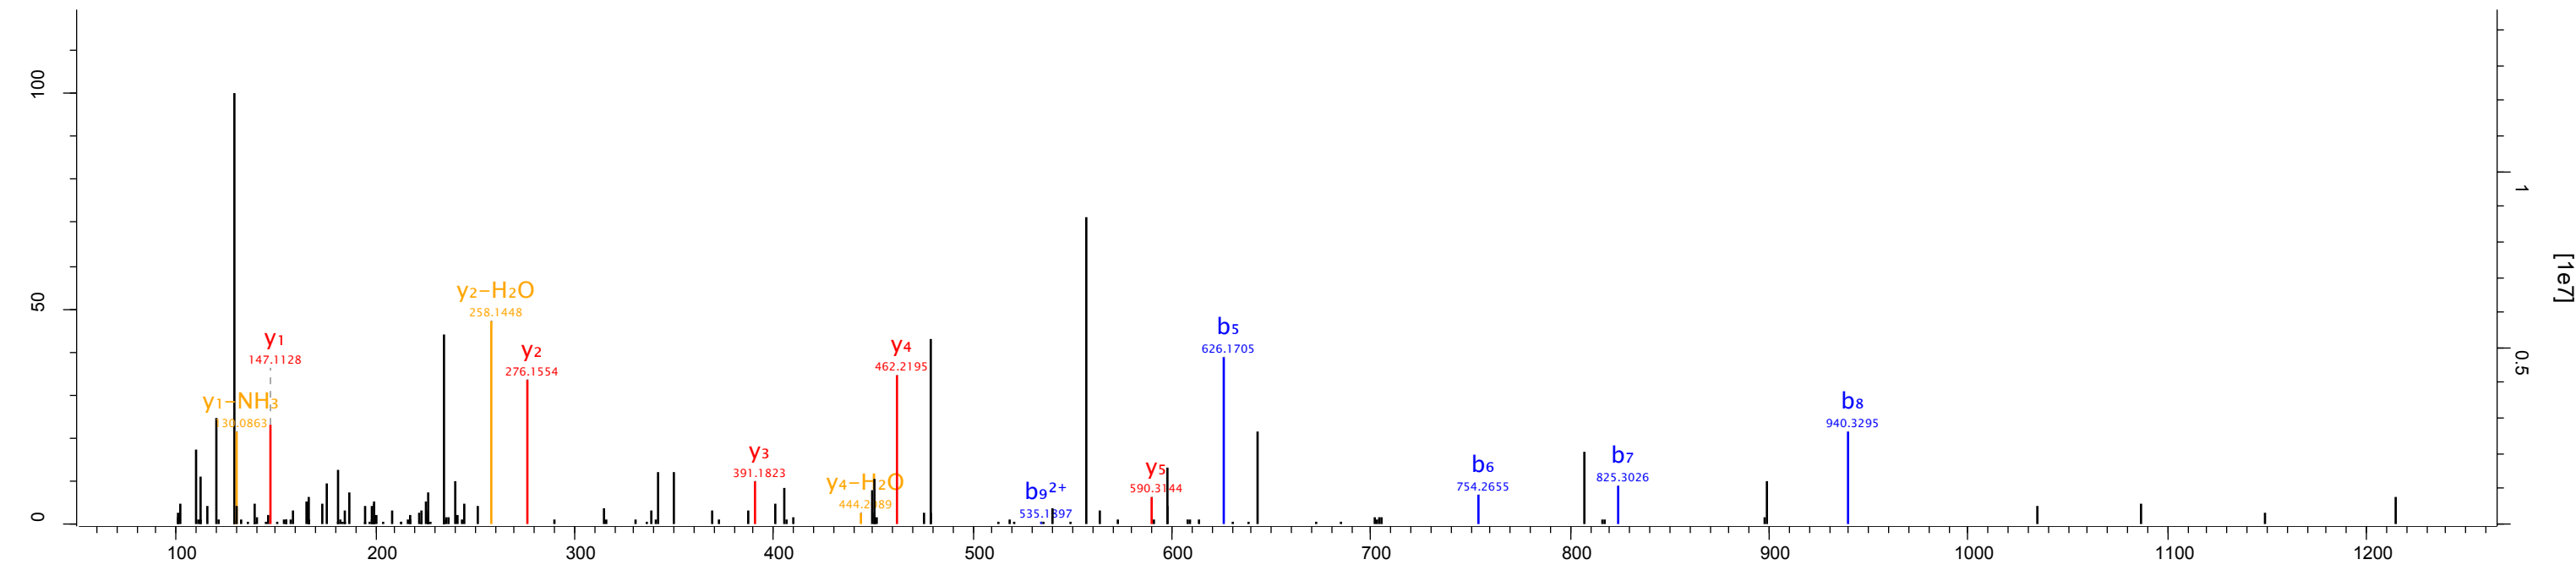

- E E E A -  
ph S  
b<sub>5</sub> b<sub>6</sub> b<sub>7</sub> b<sub>8</sub> b<sub>9</sub><sup>2+</sup> K  
y<sub>5</sub> y<sub>4</sub> y<sub>3</sub> y<sub>2</sub> y<sub>1</sub>  
K A D E K

Raw file  
20180707\_MaS\_A375SR\_ML\_proteome\_2\_13

Scan 9719 Method FTMS; HCD Score 101.72 m/z 361.19 Gene names ART4

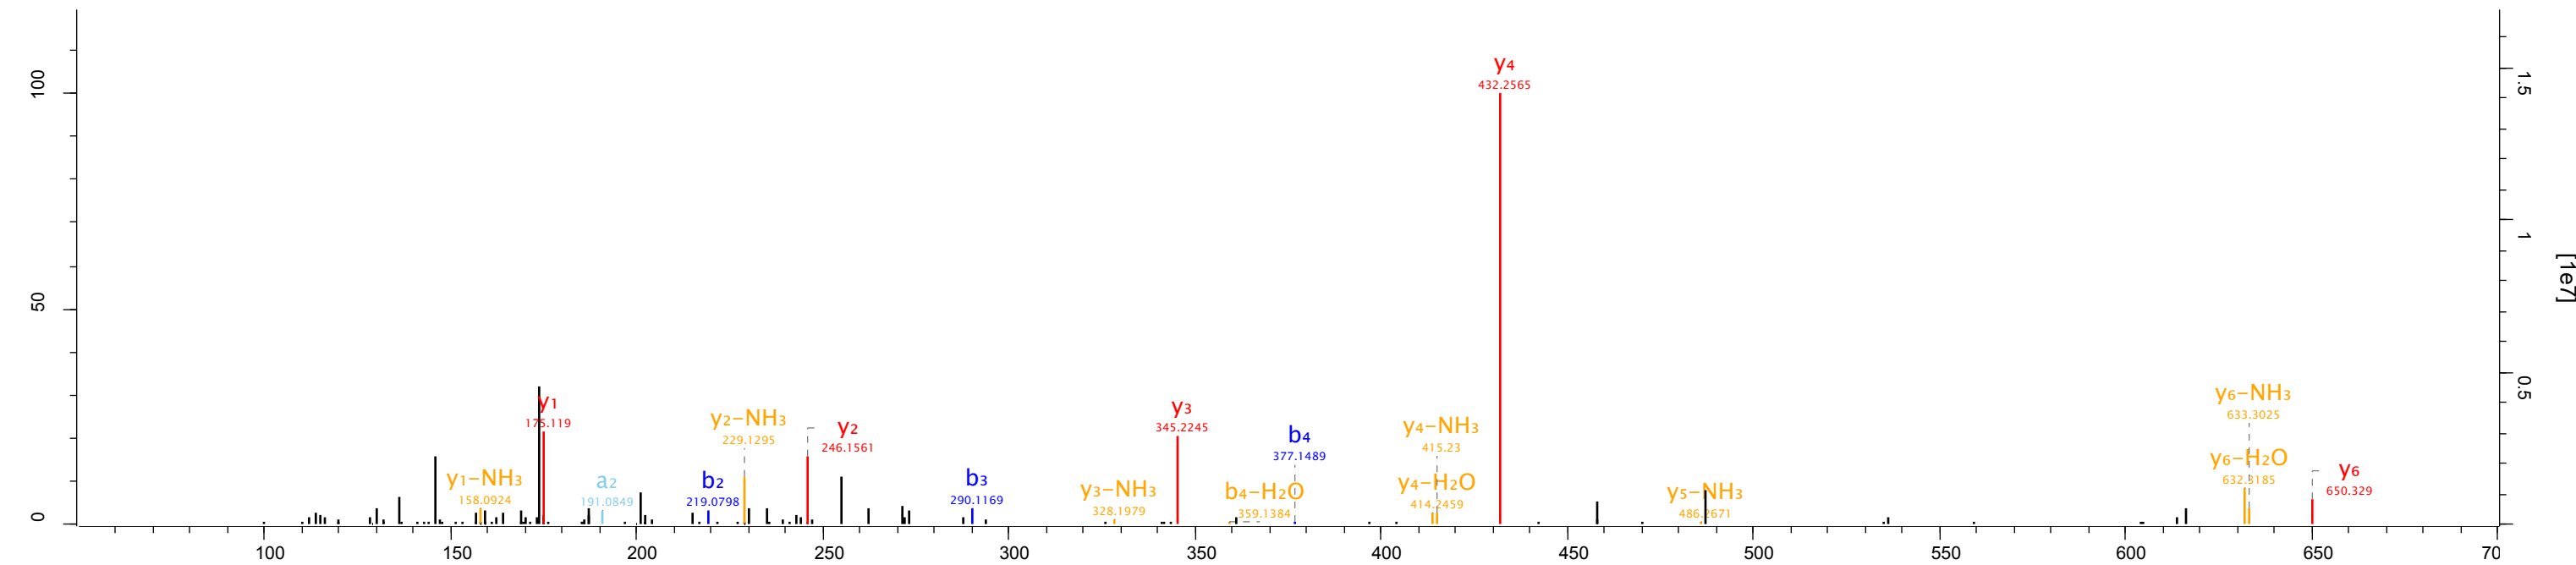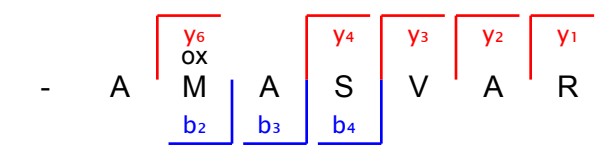

20180707\_MaS\_A375SR\_ML\_proteome\_2\_14

25789 FTMS; HCD 175.74 574.3 IGFALS

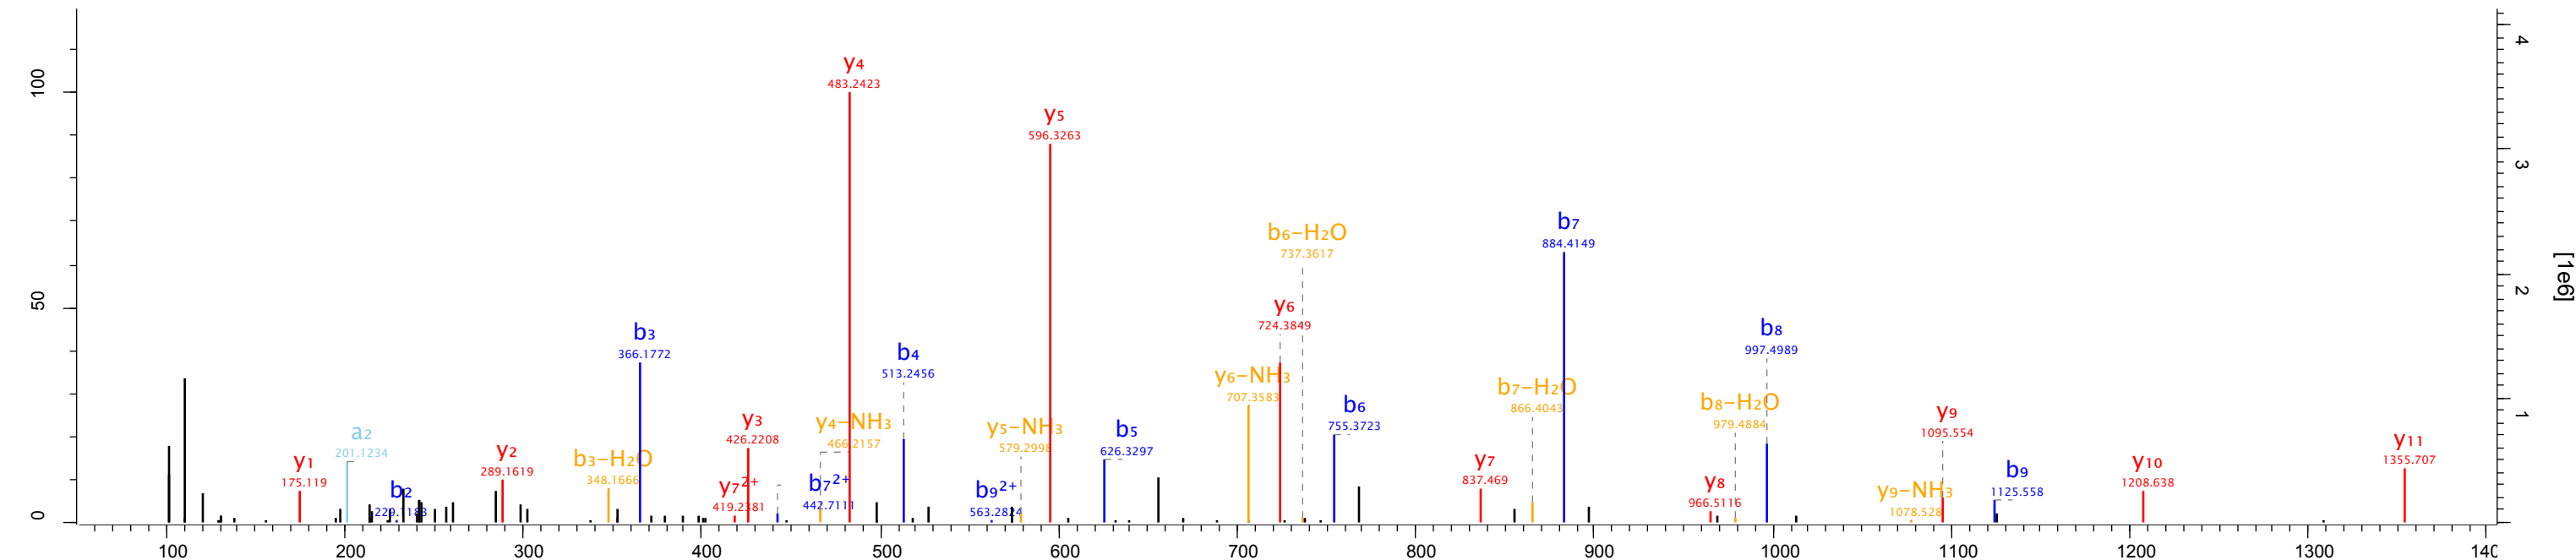

- D L H F L E E L Q L G H N R -

Fragmentation scheme showing b and y ions for the peptide sequence: D L H F L E E L Q L G H N R. The b ions are labeled b2 through b9, and the y ions are labeled y1 through y11.

Raw file: 20180707\_MaS\_A375SR\_ML\_proteome\_2\_15  
 Scan: 18289 Method: FTMS; HCD Score: 46.49 m/z: 672 Gene names: TMEM243

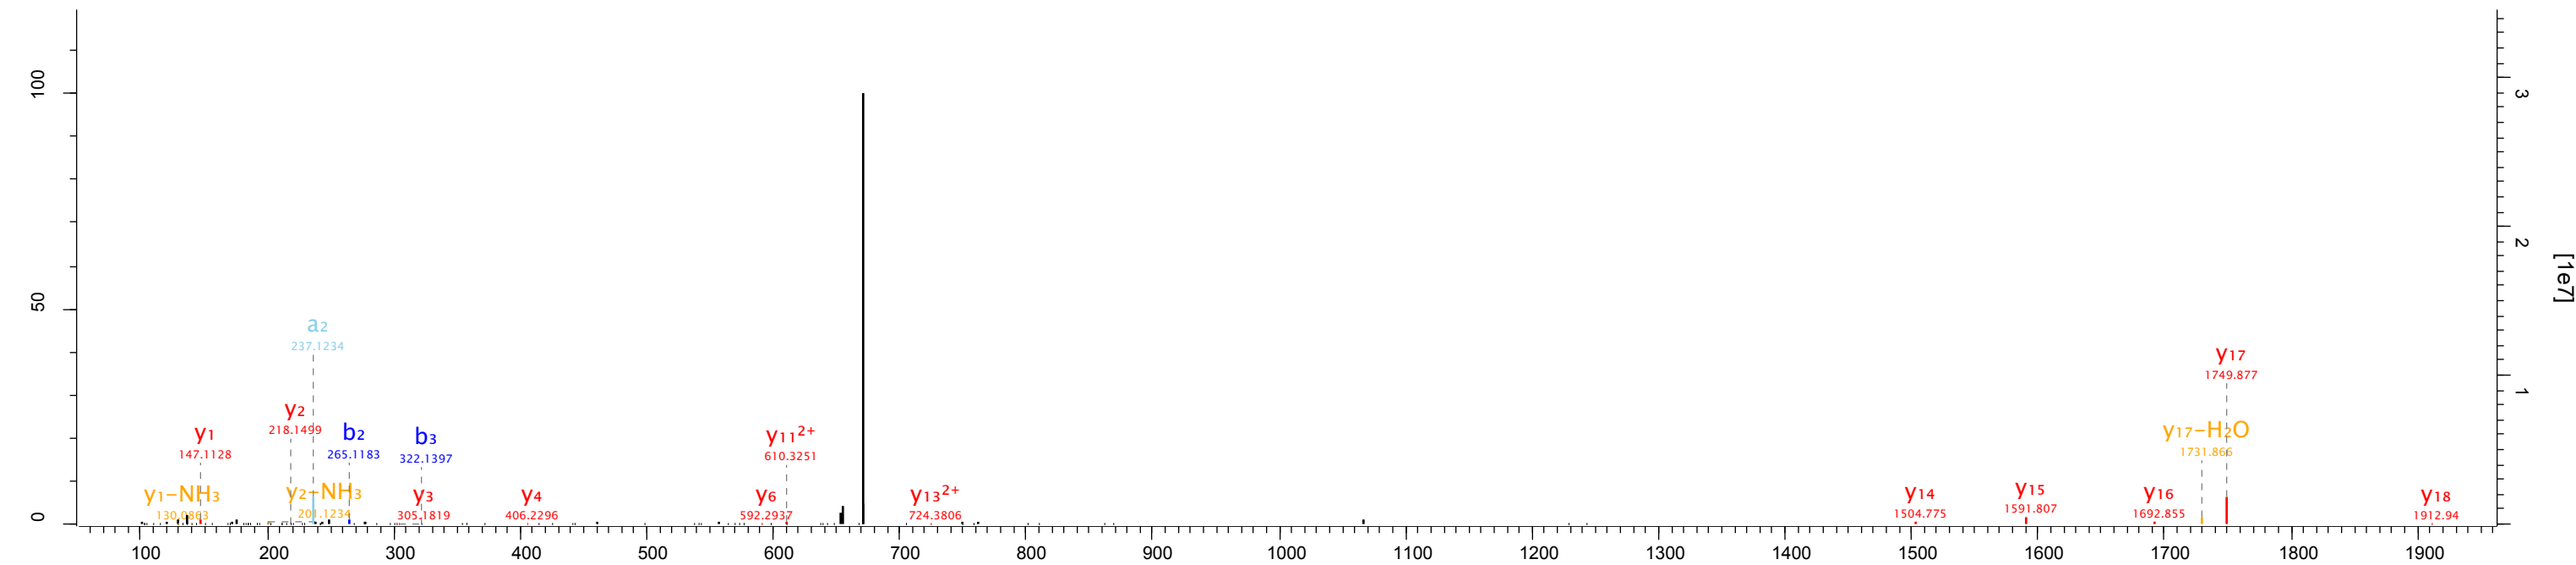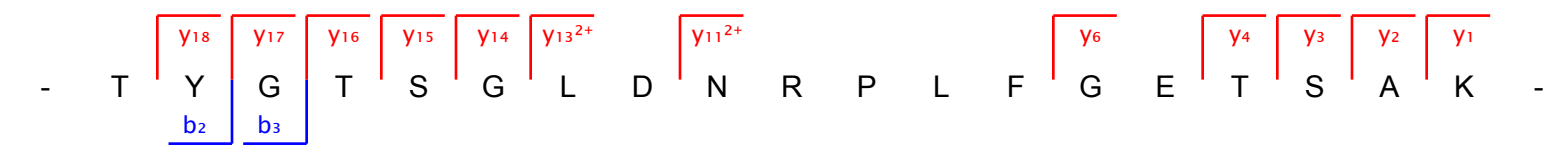

Raw file  
20180707\_MaS\_A375SR\_ML\_proteome\_2\_15

Scan 20309 Method FTMS; HCD Score 92.38 m/z 846.97 Gene names GRIK2

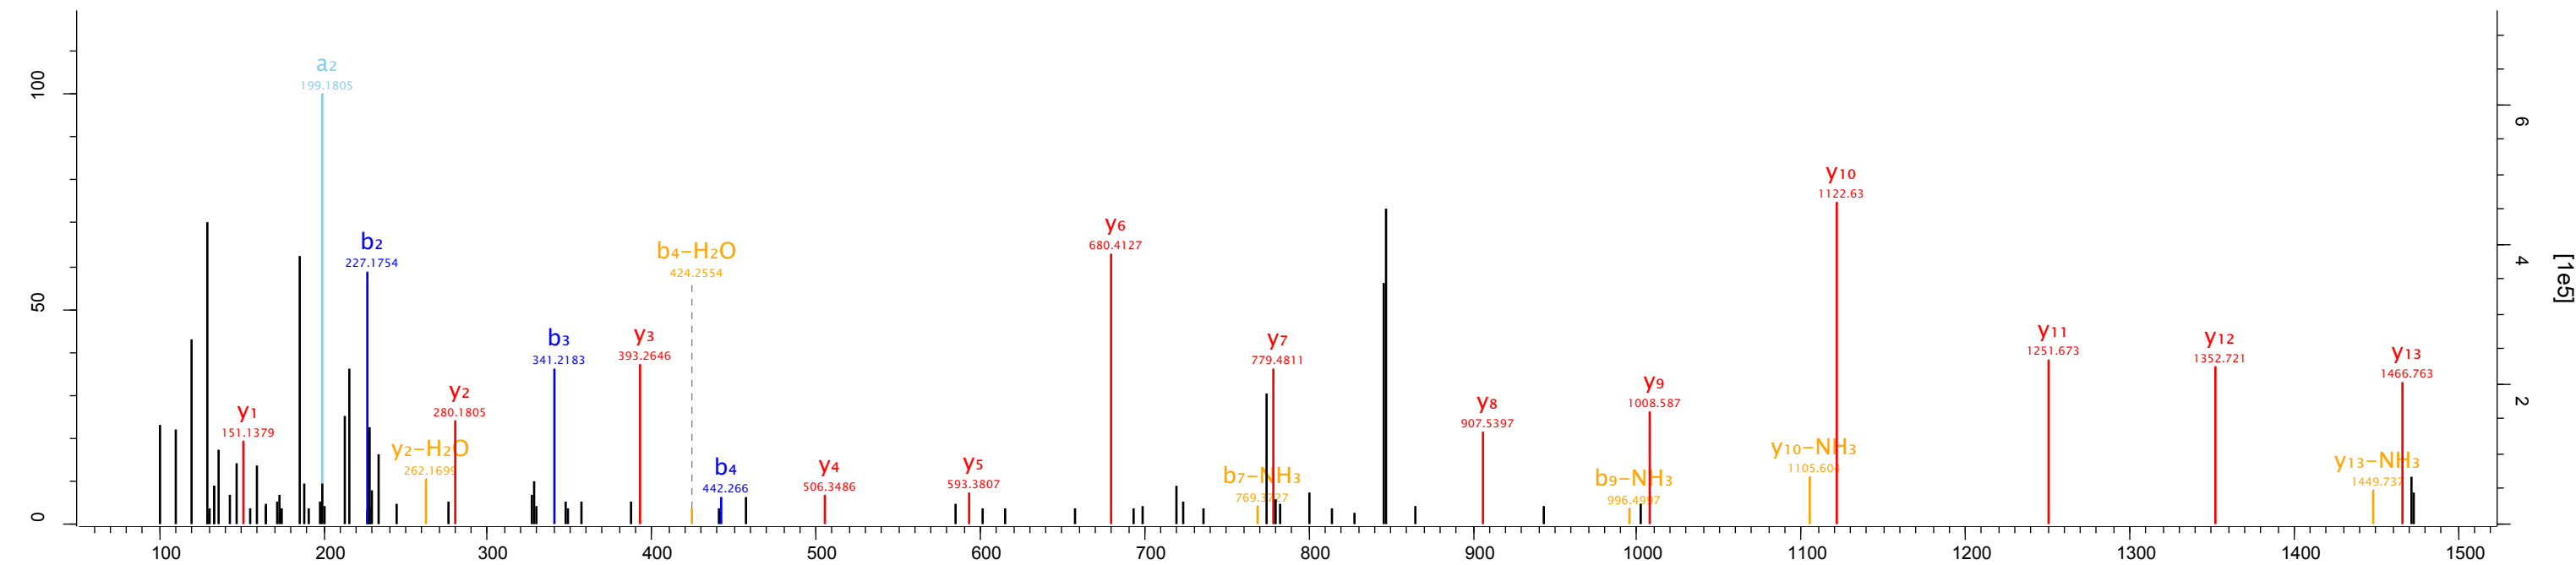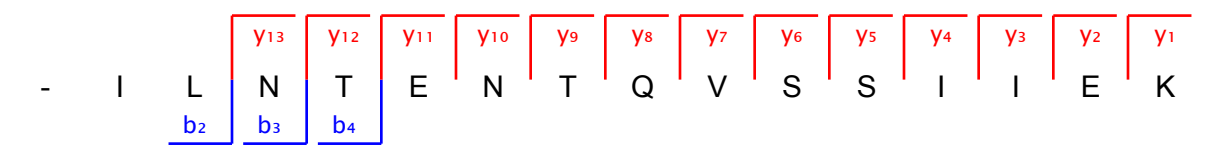

Raw file  
20180707\_MaS\_A375SR\_ML\_proteome\_2\_15

Scan 26509 Method FTMS; HCD Score 66.64 m/z 741.05 Gene names CA8

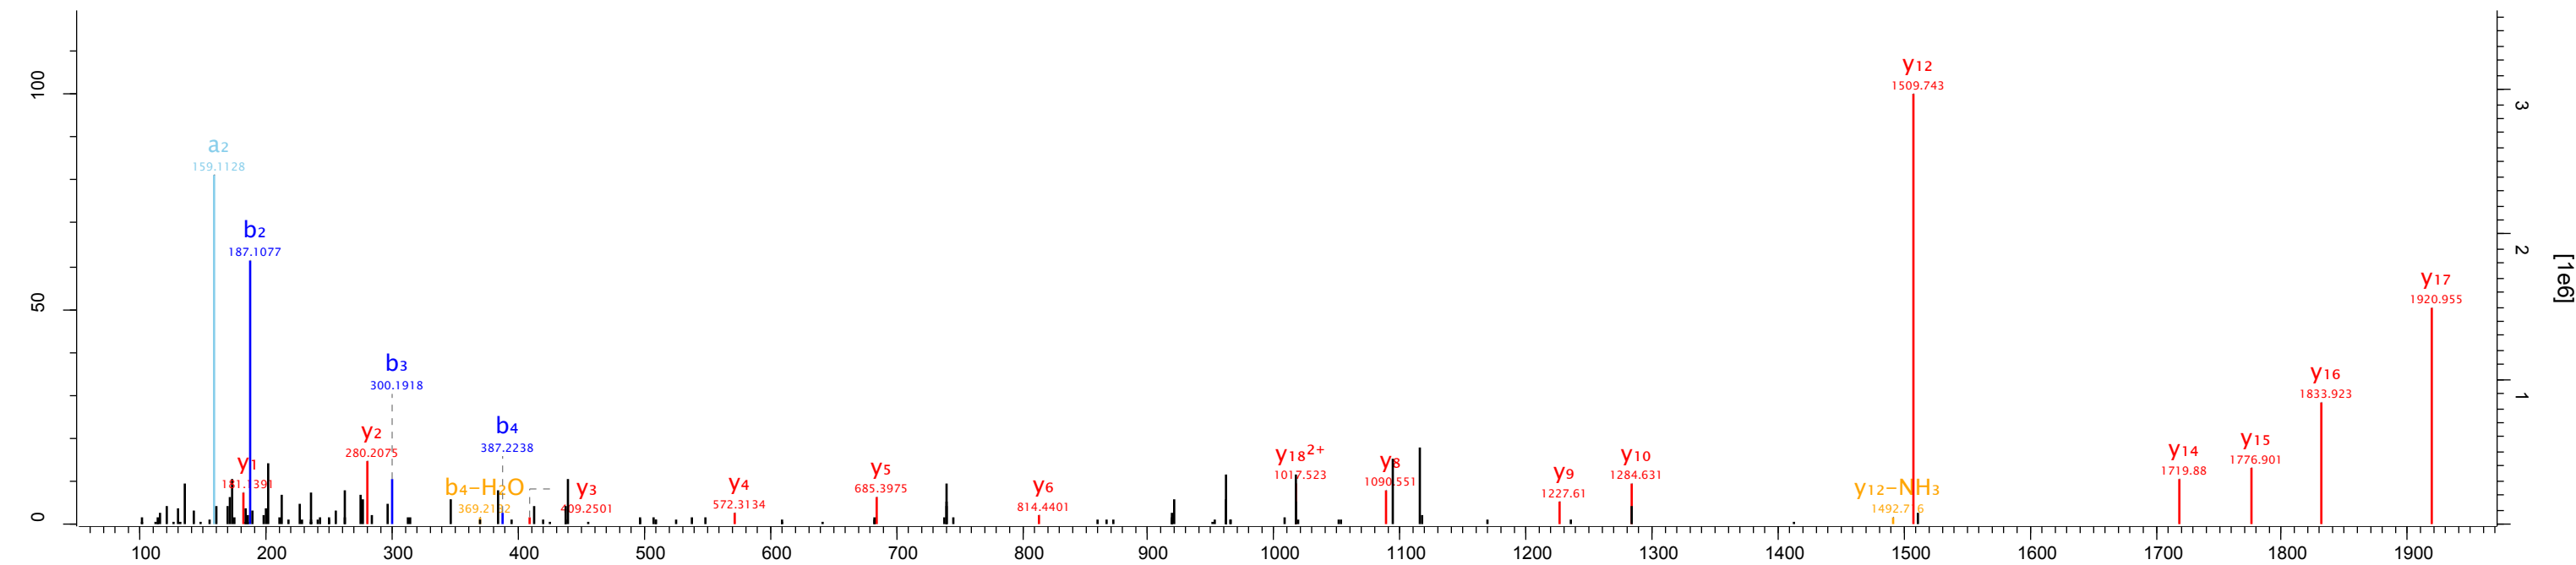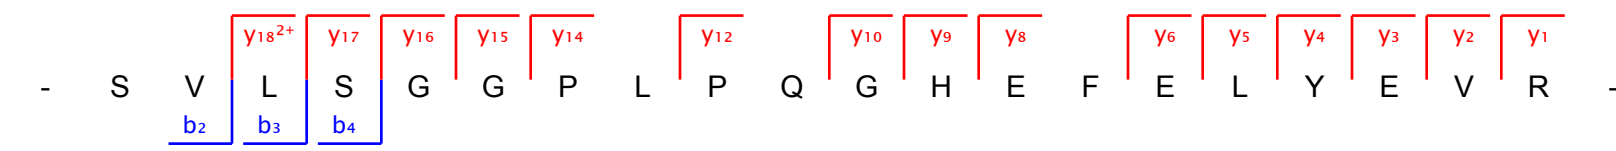



Raw file 20180707\_MaS\_A375SR\_ML\_proteome\_2\_15 Scan 6929 Method FTMS; HCD Score 86.09 m/z 439.23

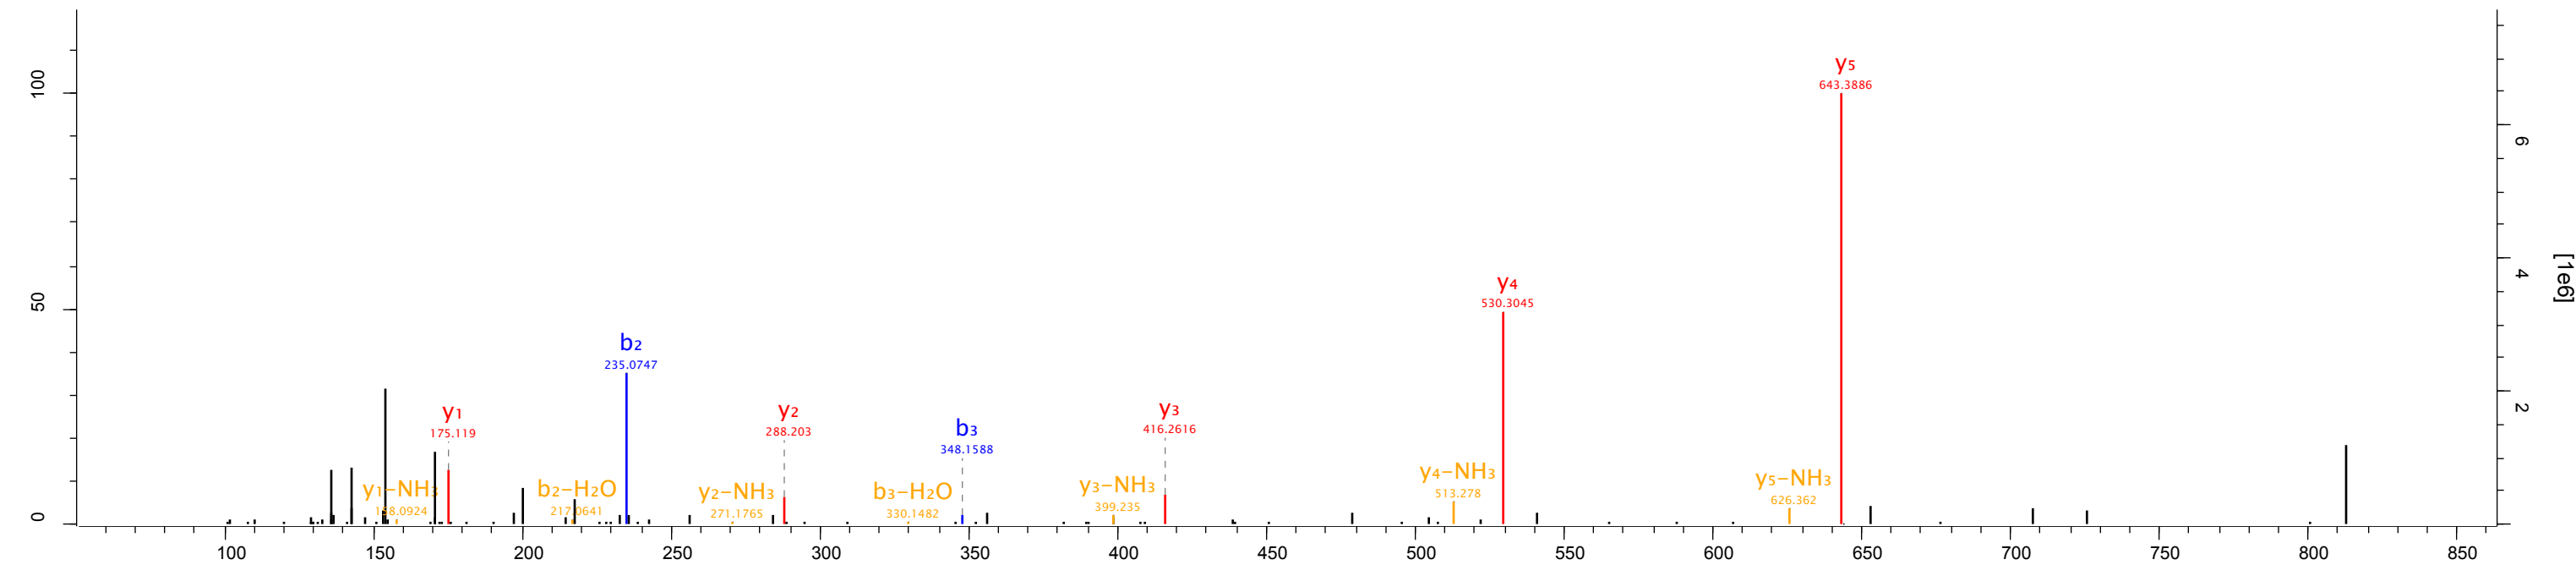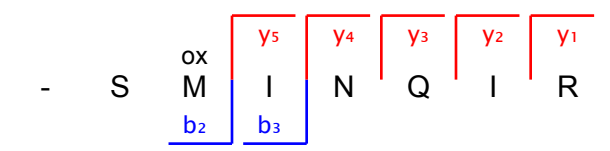

Raw file  
20180707\_MaS\_A375SR\_ML\_proteome\_2\_16

Scan 14999 Method FTMS; HCD Score 78.32 m/z 490.56 Gene names PIGX

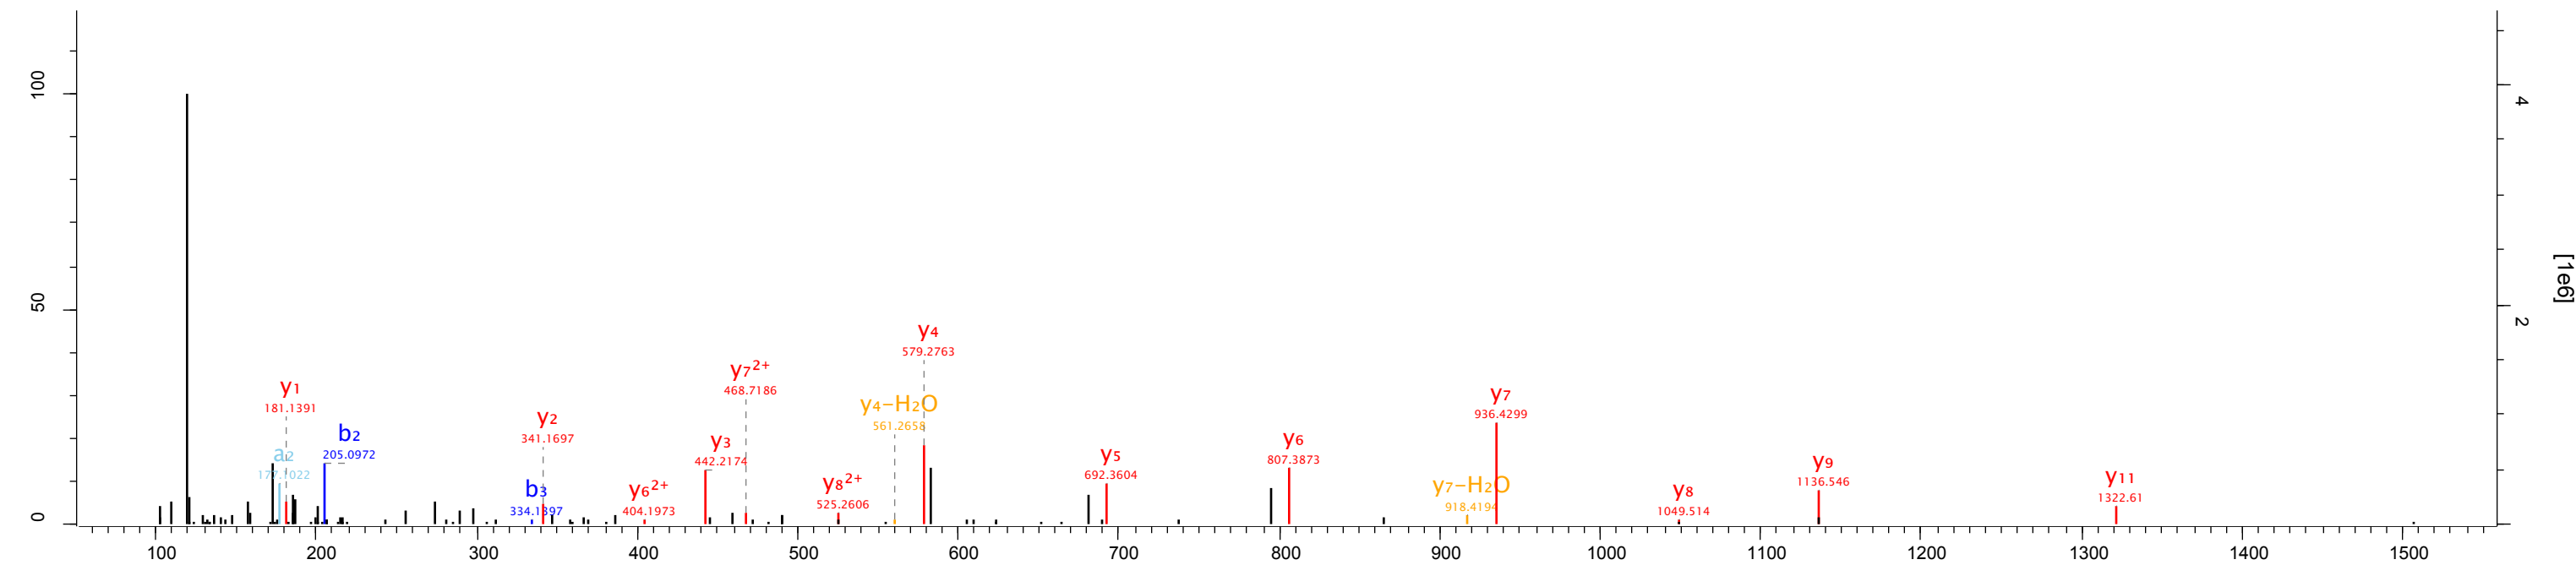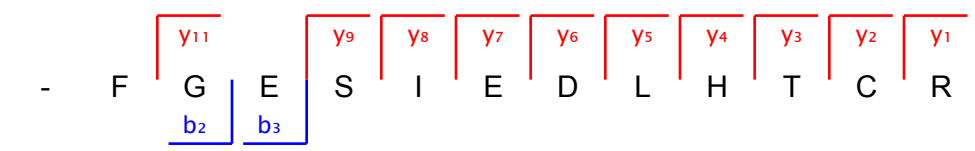

Raw file 20180707\_MaS\_A375SR\_ML\_proteome\_2\_16 Scan 23319 Method FTMS; HCD Score 36.22 m/z 550.64 Gene names PVRL1

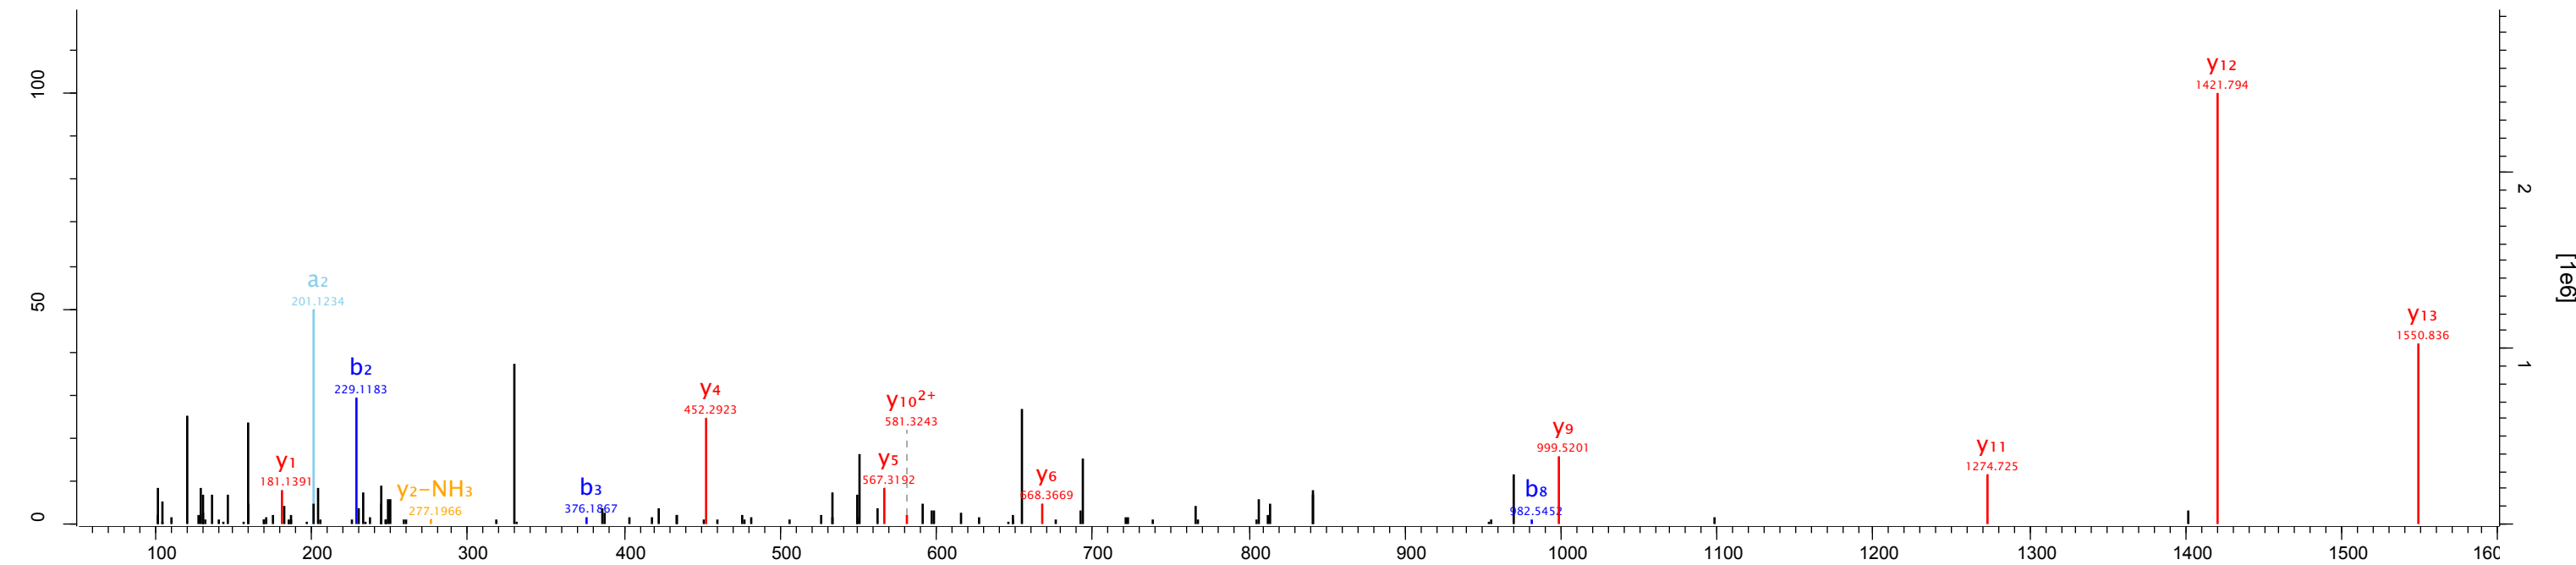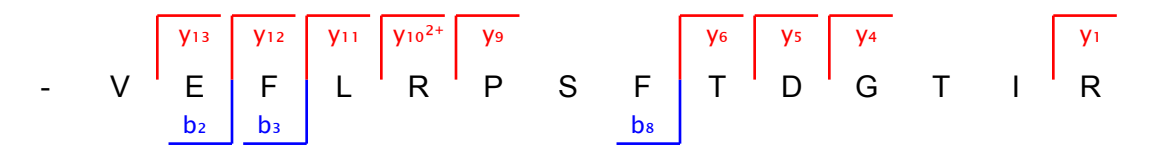

Raw file  
 20180707\_MaS\_A375SR\_ML\_proteome\_2\_17  
 Scan 2759 Method FTMS; HCD Score 51.04 m/z 325.17

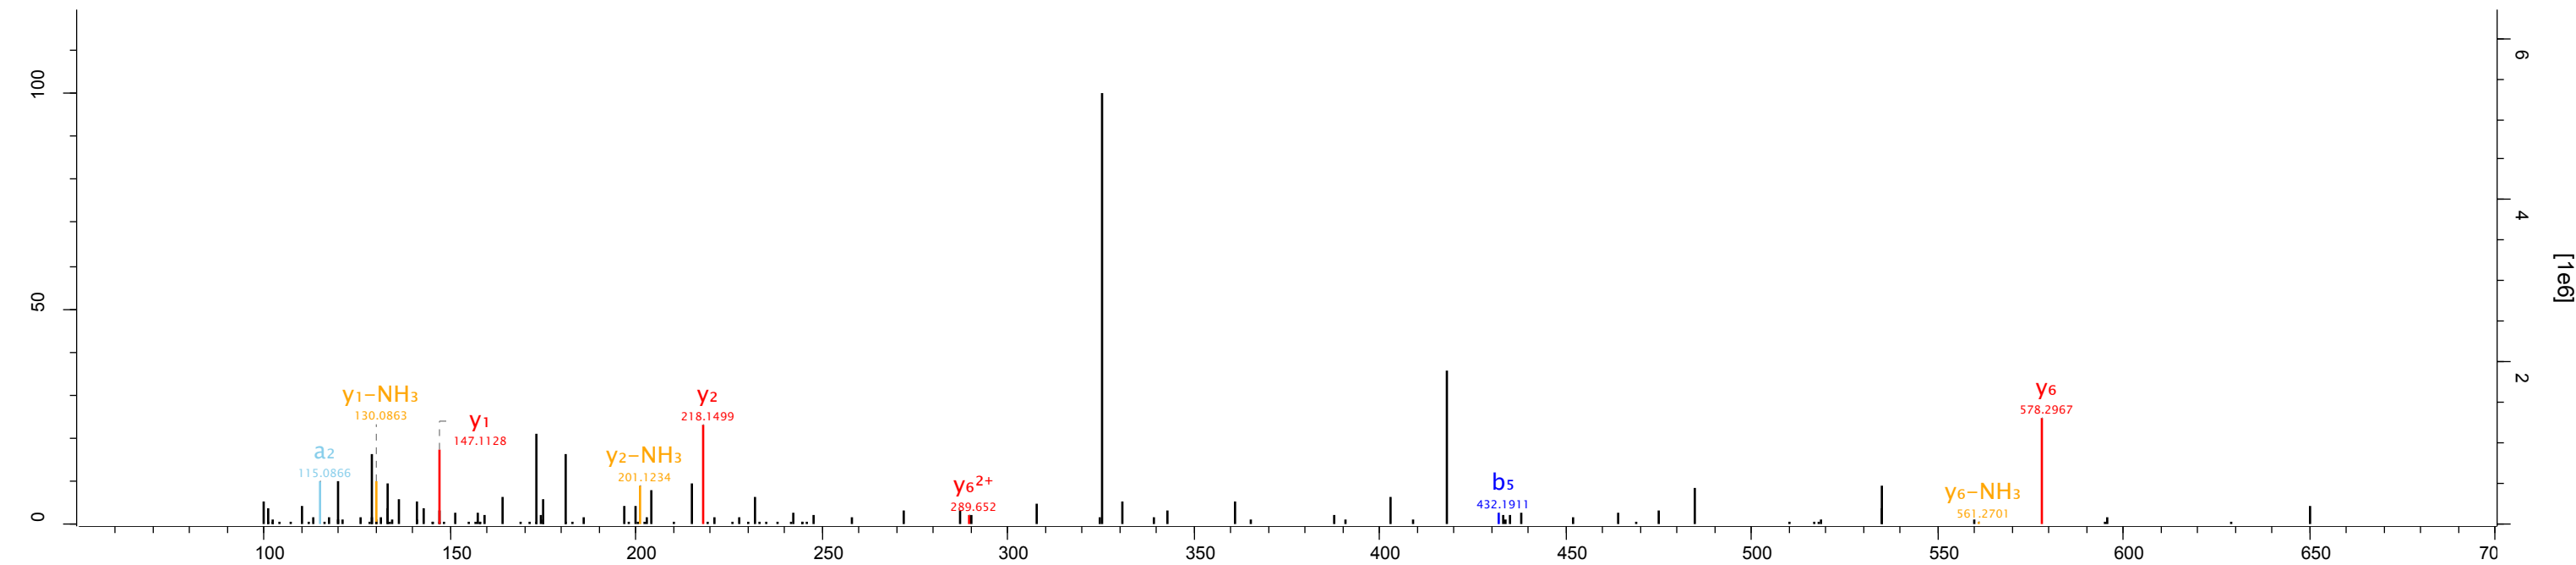

Raw file  
20180707\_MaS\_A375SR\_ML\_proteome\_2\_19

Scan 21819 Method FTMS; HCD Score 60.16 m/z 486.94 Gene names WFIKKN2

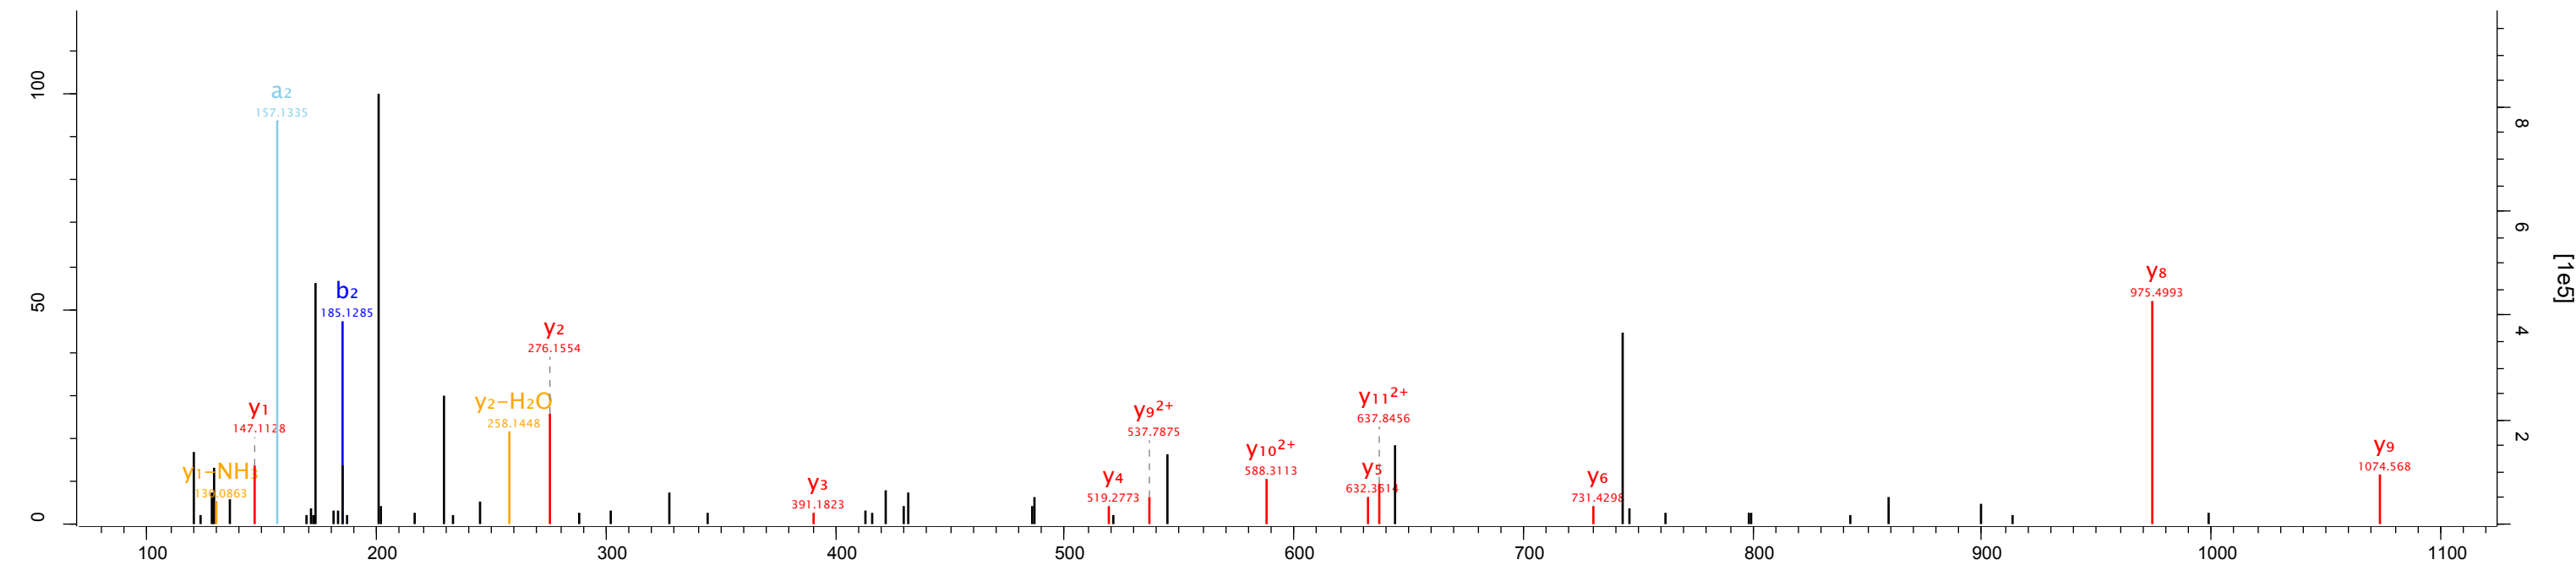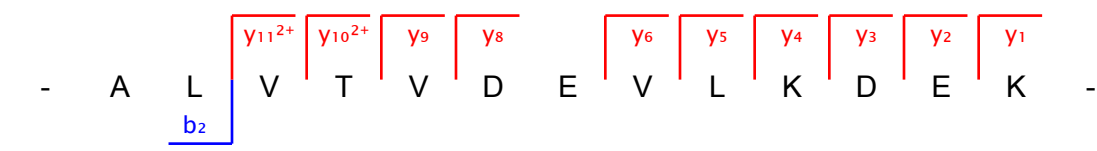

Raw file  
20180707\_MaS\_A375SR\_ML\_proteome\_2\_19

Scan 2549 Method FTMS; HCD Score 77.73 m/z 327.17 Gene names TIMM17A

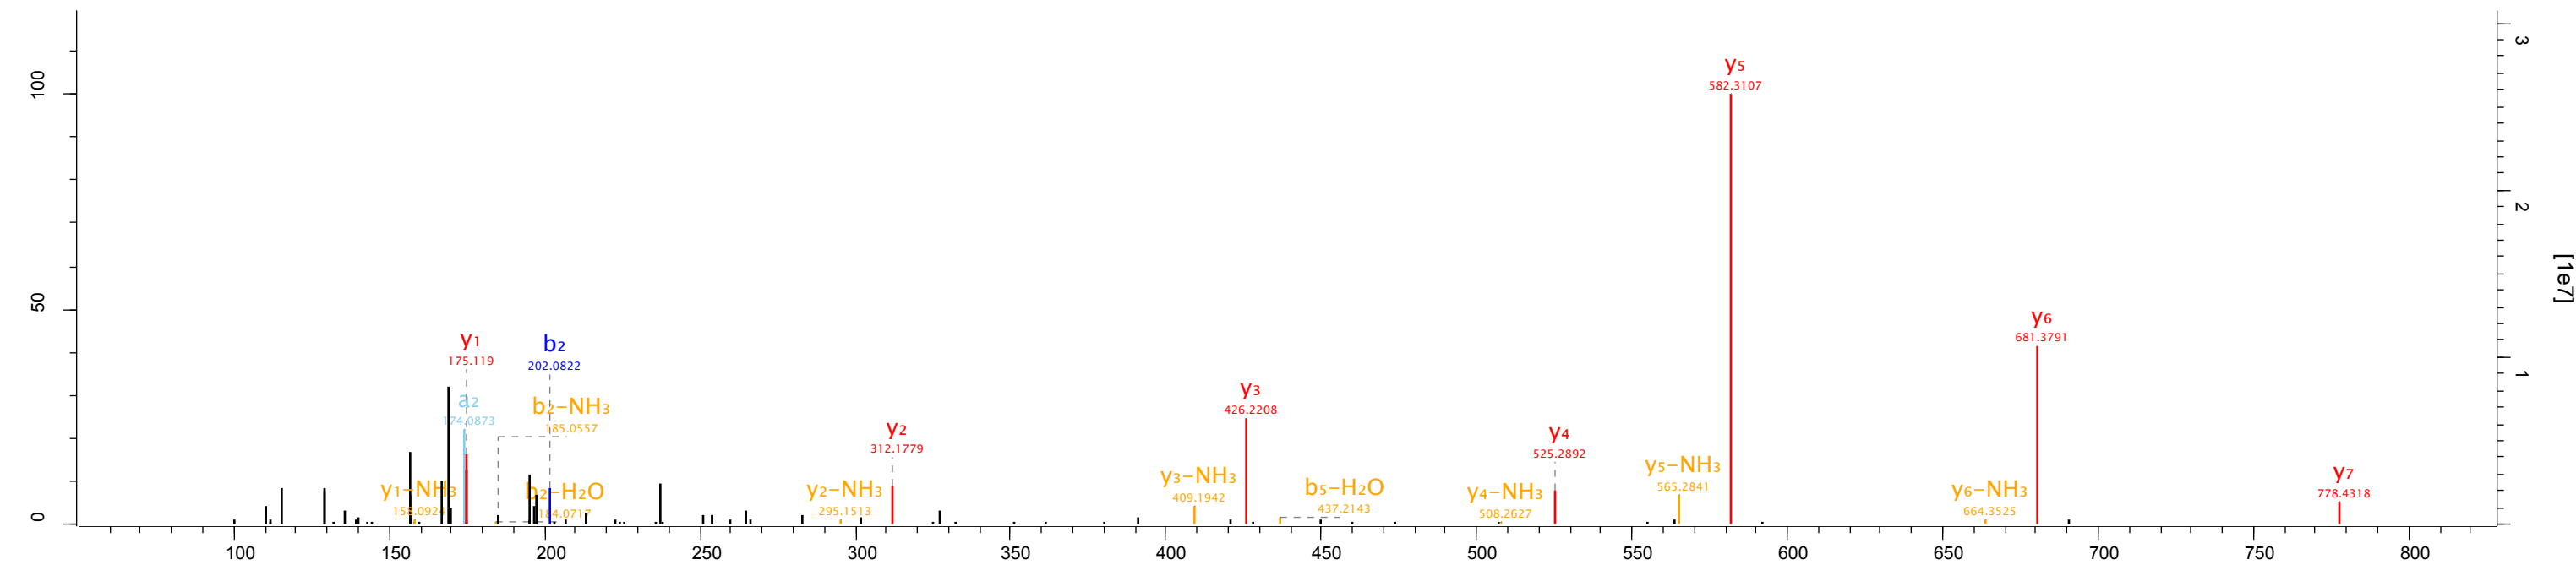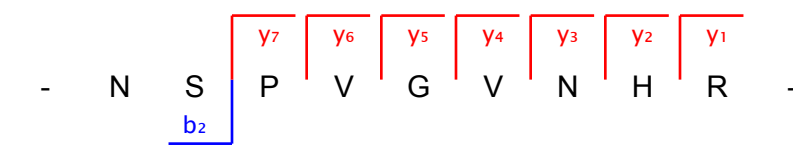

Raw file  
20180707\_MaS\_A375SR\_ML\_proteome\_2\_20

Scan 18909 Method FTMS; HCD Score 132.17 m/z 688.83 Gene names SMIM4

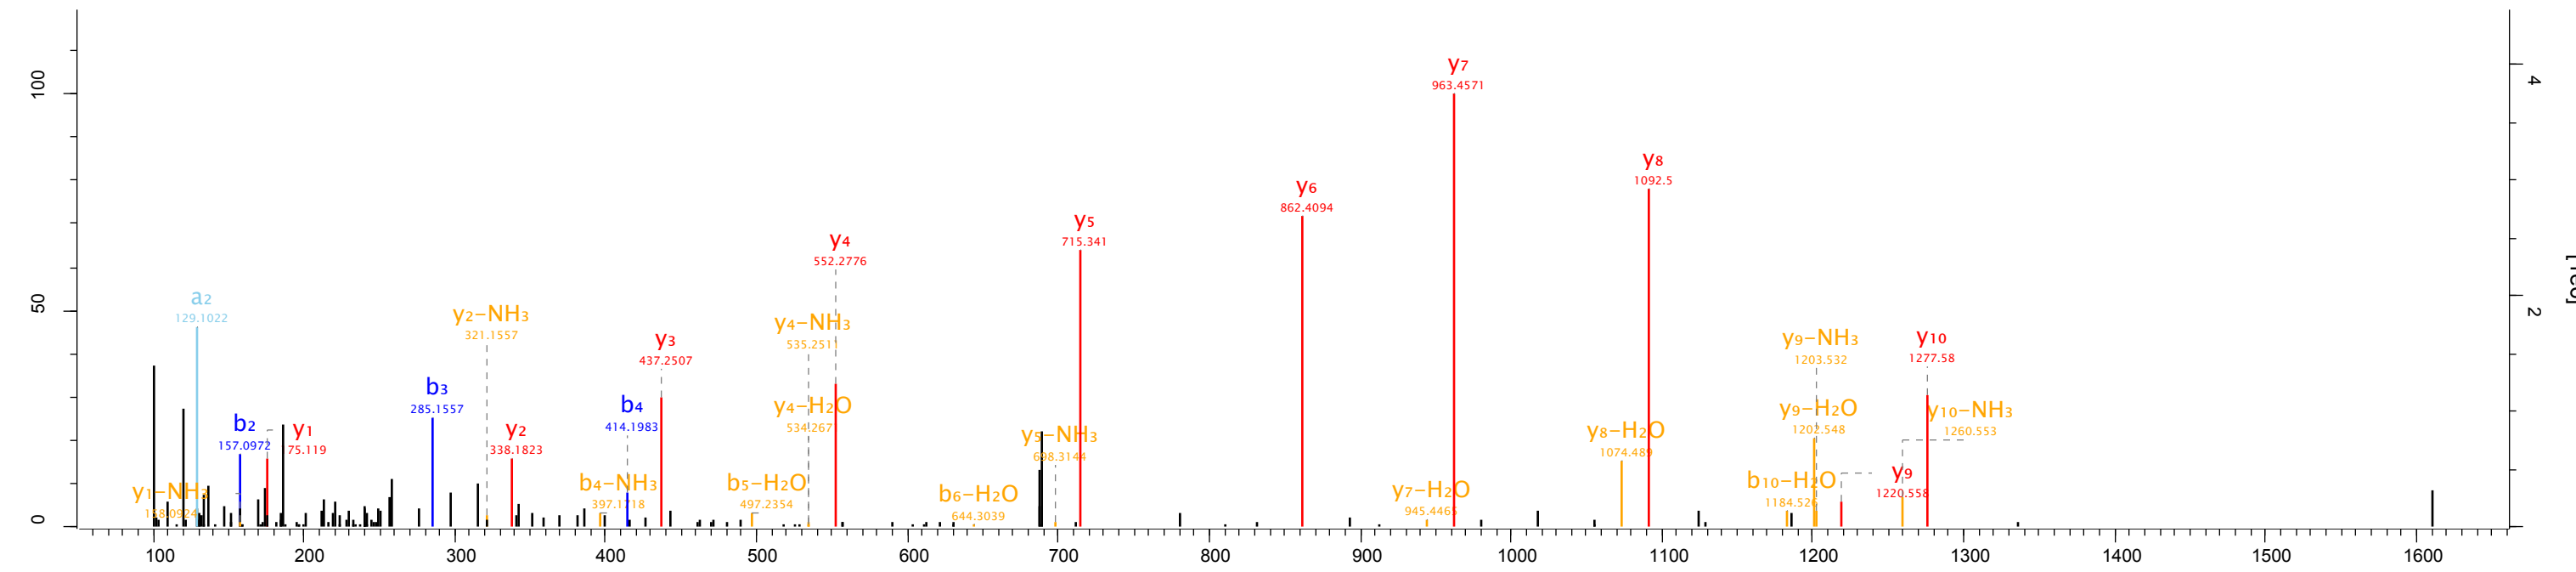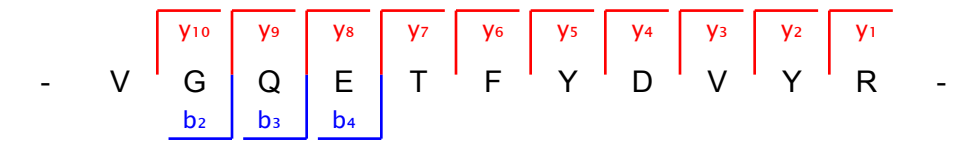

Raw file  
20180707\_MaS\_A375SR\_ML\_proteome\_2\_20

Scan 2819 Method FTMS; HCD Score 73.57 m/z 490.26 Gene names TIMM17A

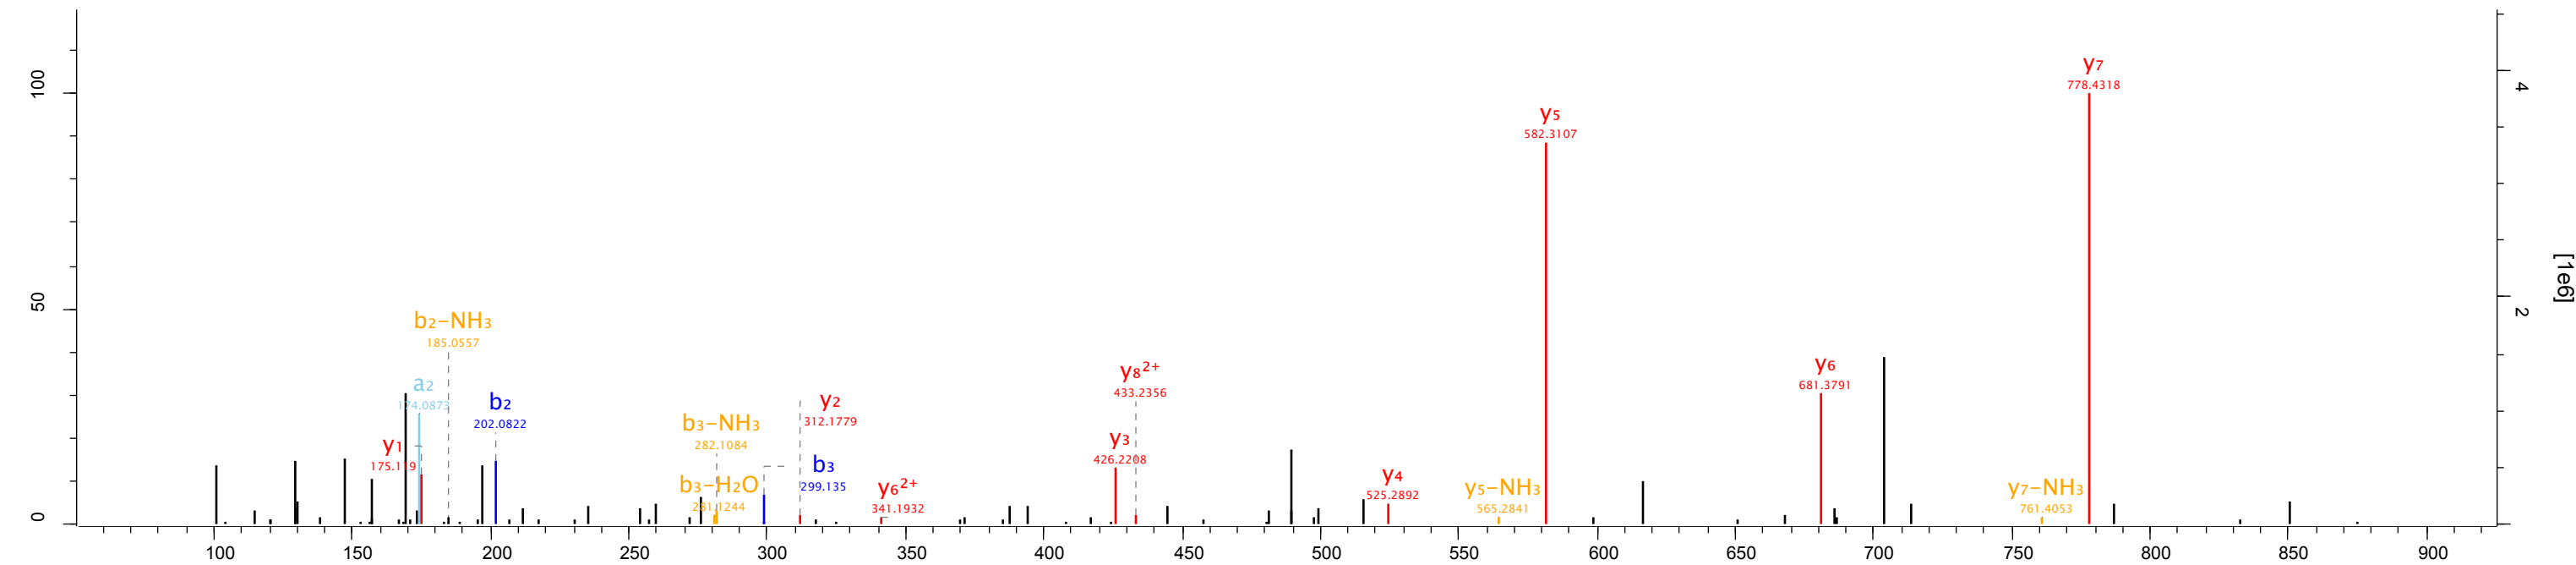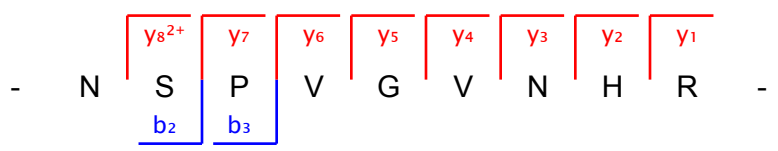



Raw file 20180707\_MaS\_A375SR\_ML\_proteome\_2\_21 Scan 13119 Method FTMS; HCD Score 47.71 m/z 810.84 Gene names OPN1SW

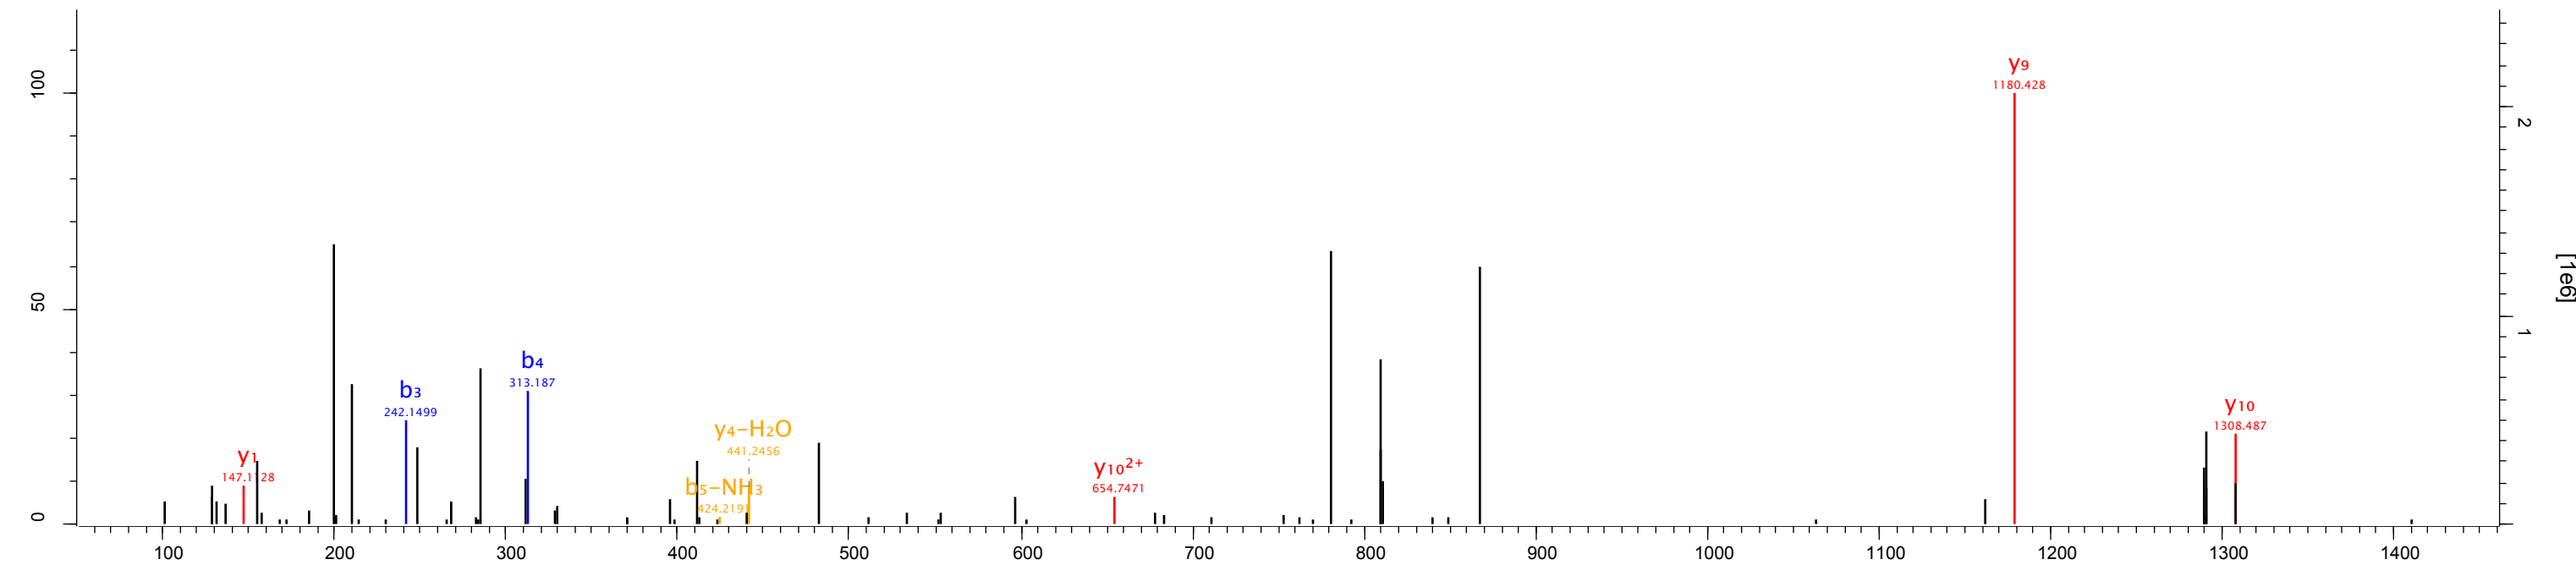

- A V A A Q Q Q E S A T T Q K -

Fragmentation labels:  $b_3$ ,  $b_4$ ,  $y_{10}$ ,  $y_9$ ,  $y_1$

Raw file 20180707\_MaS\_A375SR\_ML\_proteome\_2\_22 Scan 27489 Method FTMS; HCD Score 50.35 m/z 722.9

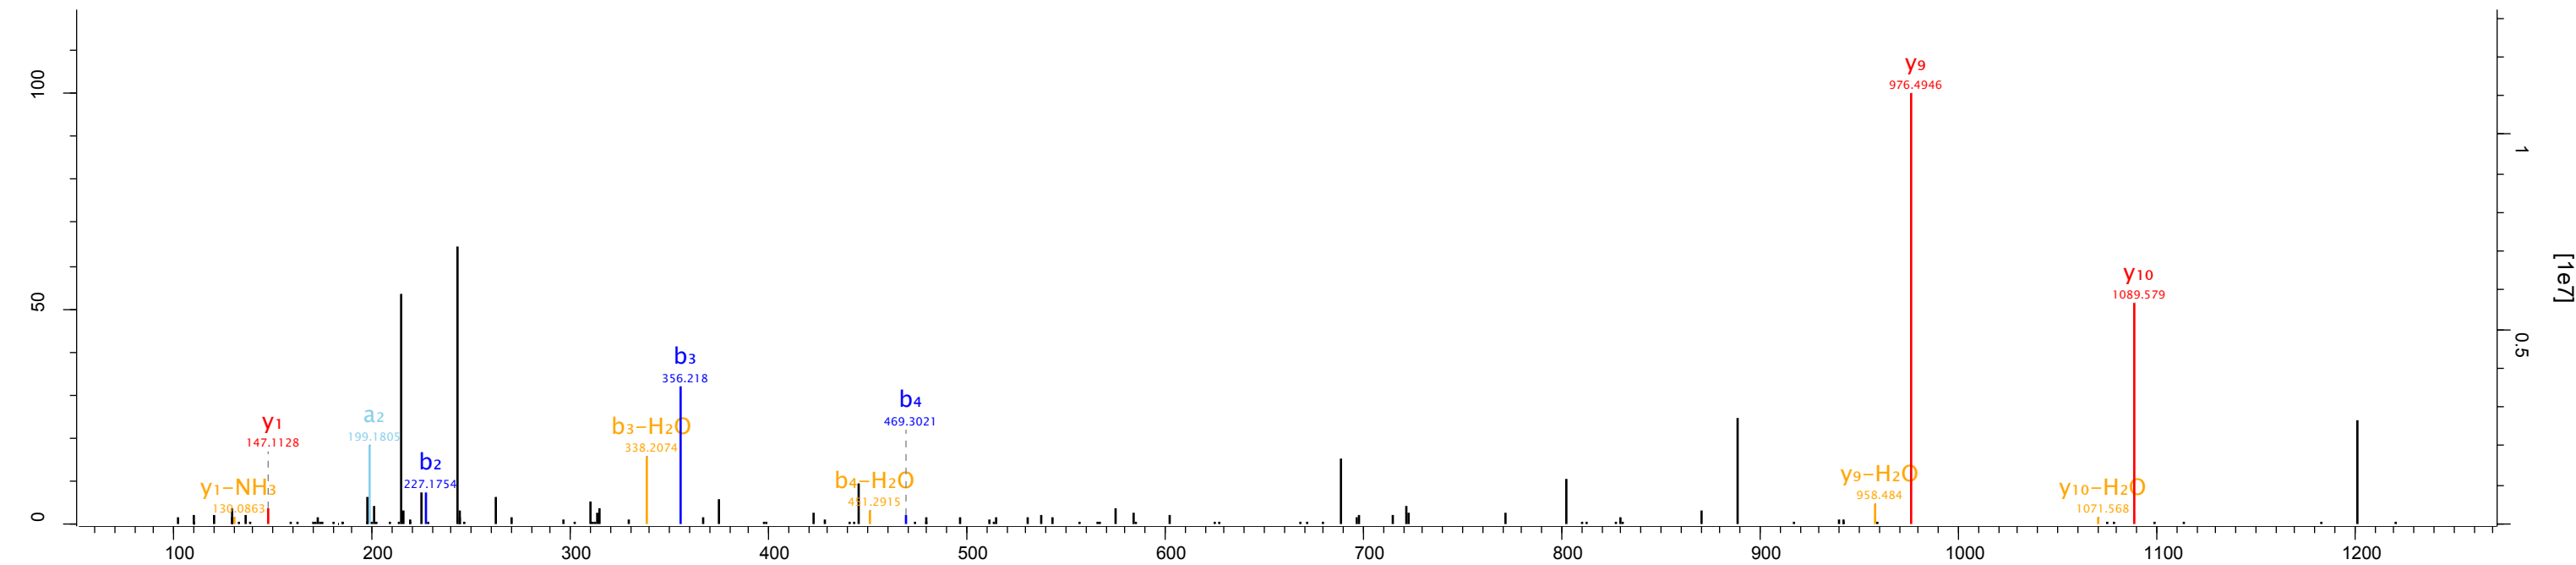

Raw file: 20180707\_MaS\_A375SR\_ML\_proteome\_2\_23  
 Scan: 16699 Method: FTMS; HCD Score: 140.83 m/z: 436.58 Gene names: RPL39P5;RPL39

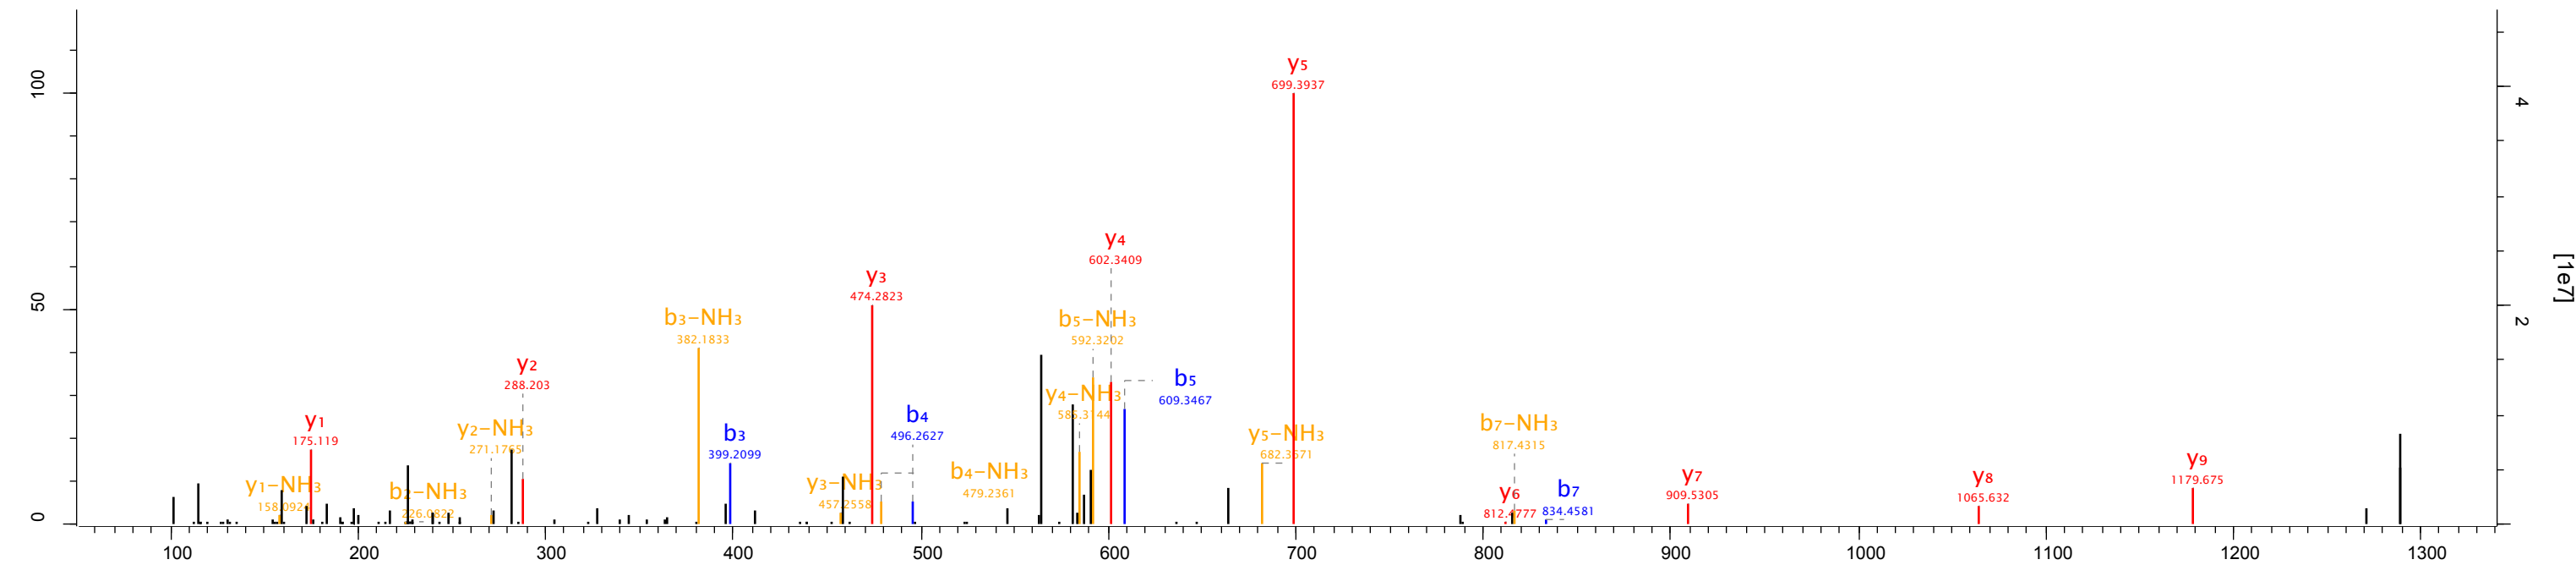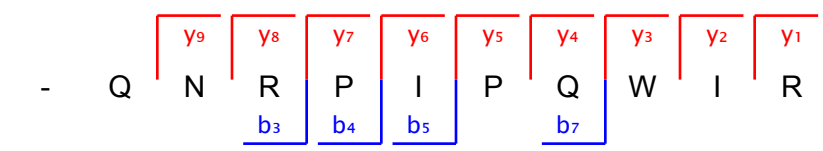

Raw file 20180707\_MaS\_A375SR\_ML\_proteome\_2\_23 Scan 23449 Method FTMS; HCD Score 61.11 m/z 829.36 Gene names HIF3A

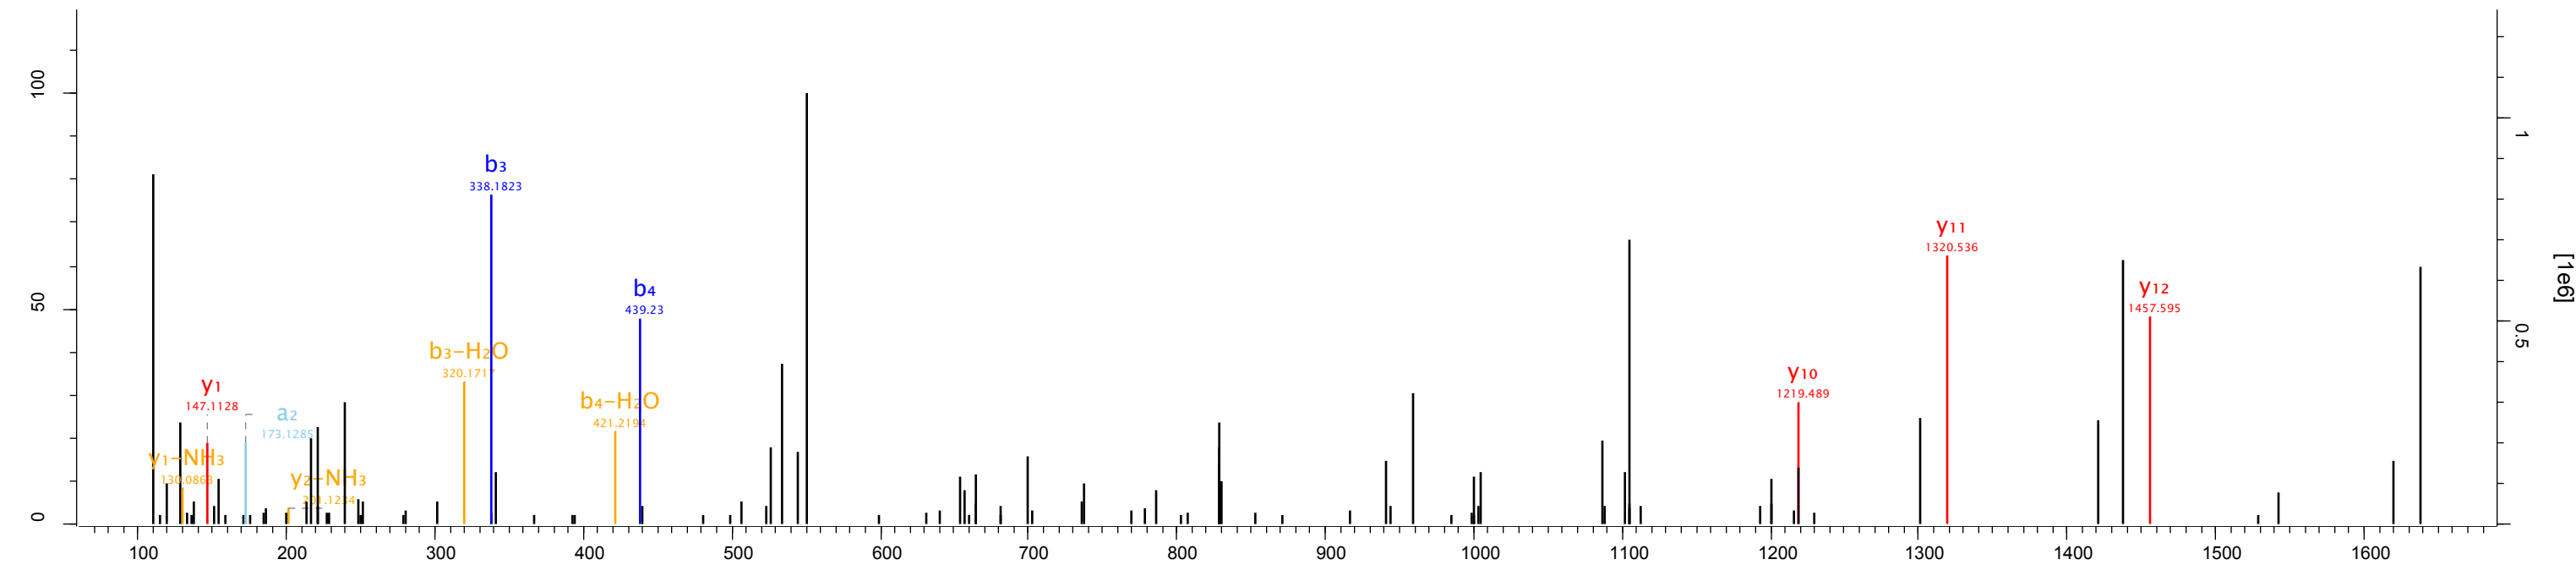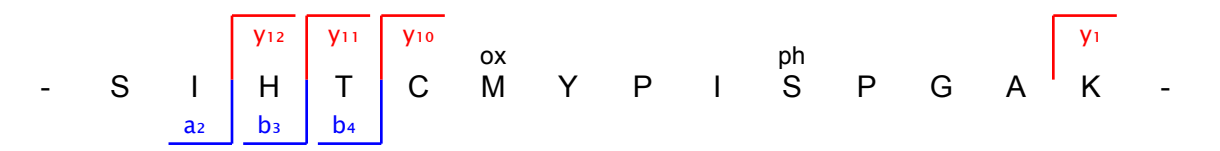

Raw file 20180707\_MaS\_A375SR\_ML\_proteome\_2\_23 Scan 27459 Method FTMS; HCD Score 54.26 m/z 630.8 Gene names TOR2A

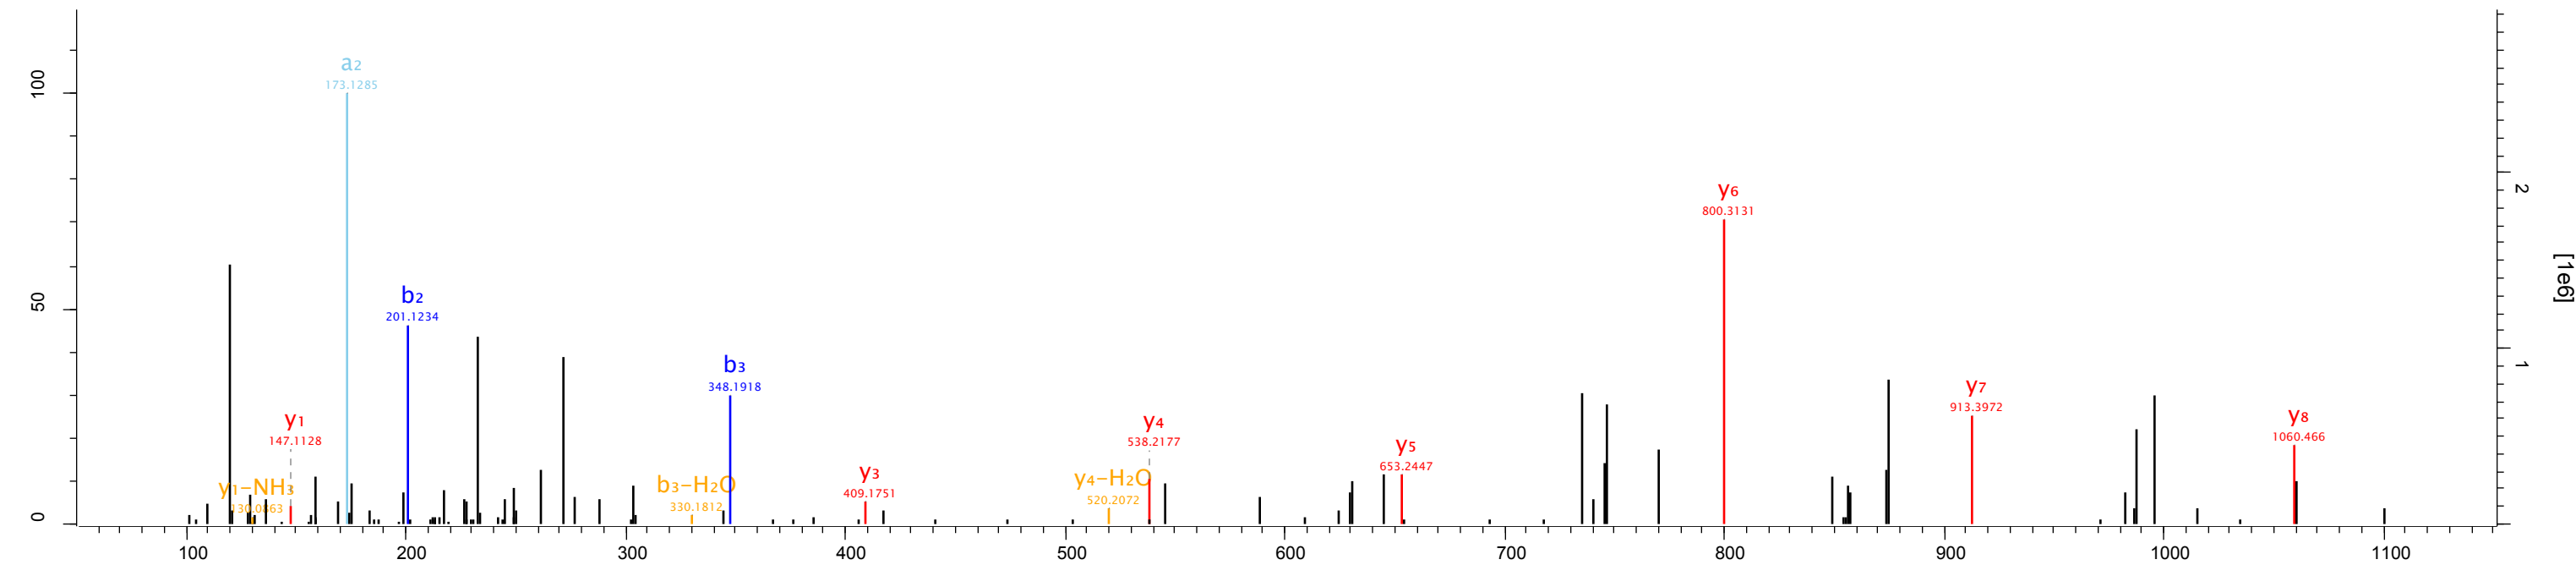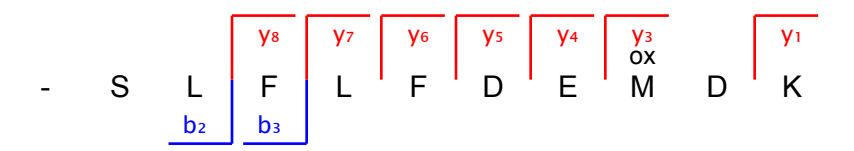

Raw file 20180707\_MaS\_A375SR\_ML\_proteome\_2\_26 Scan 12219 Method FTMS; HCD Score 63.62 m/z 637.34

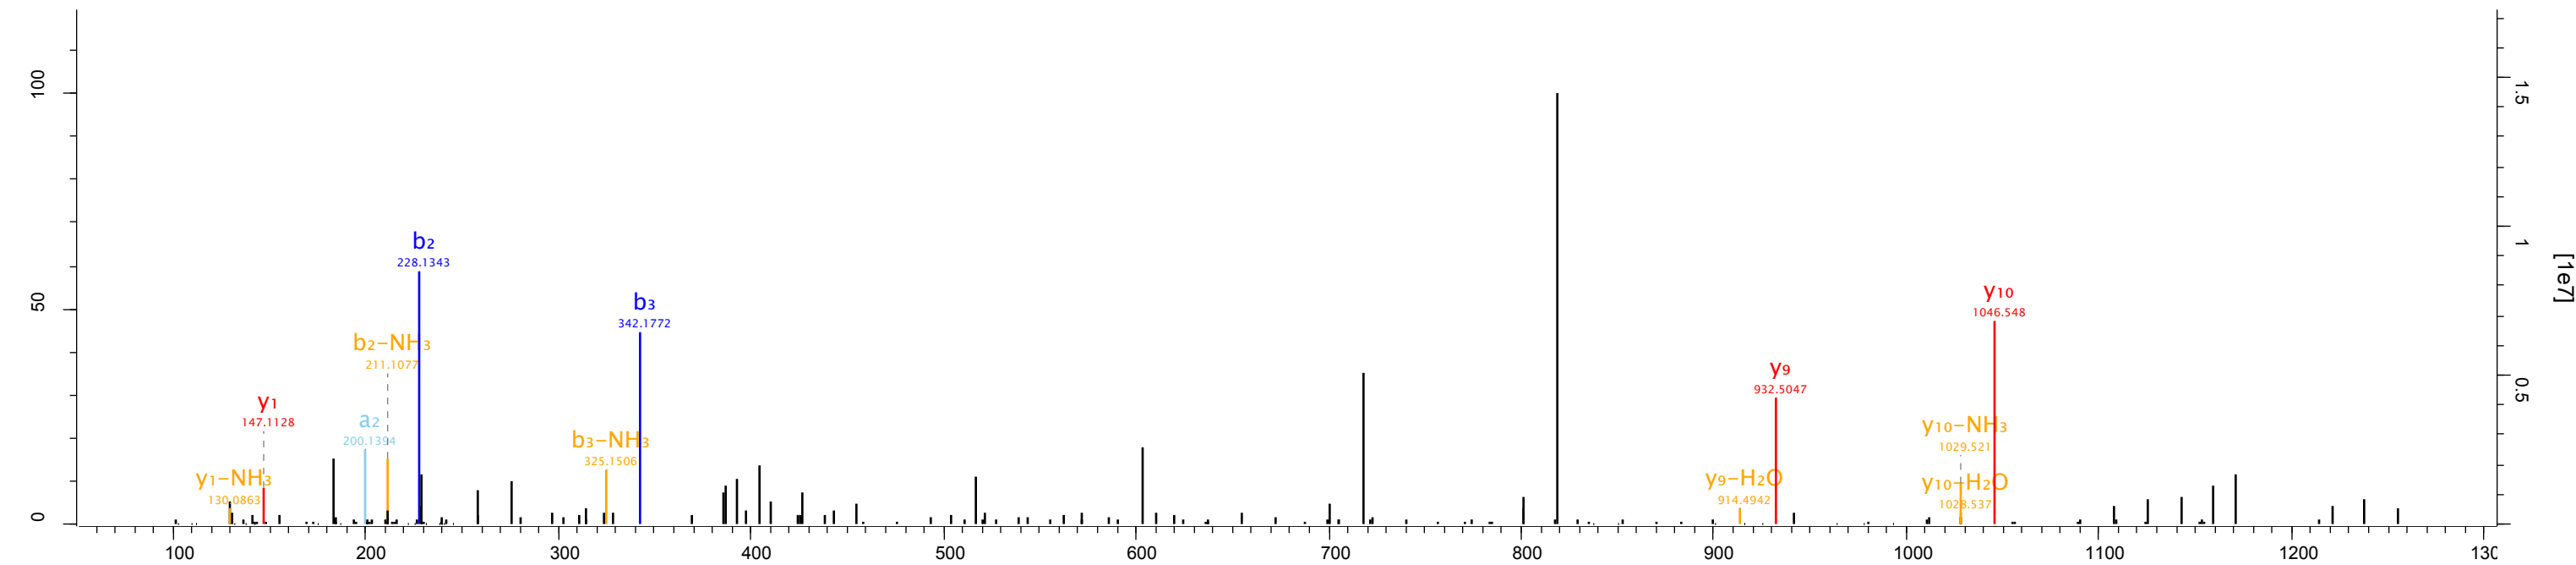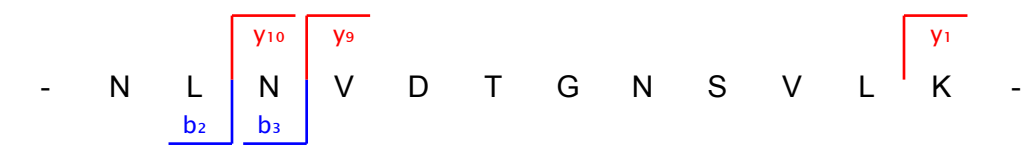

Raw file  
20180707\_MaS\_A375SR\_ML\_proteome\_2\_26

Scan 15489 Method FTMS; HCD Score 101.46 m/z 440.6 Gene names RPL39P5;RPL39

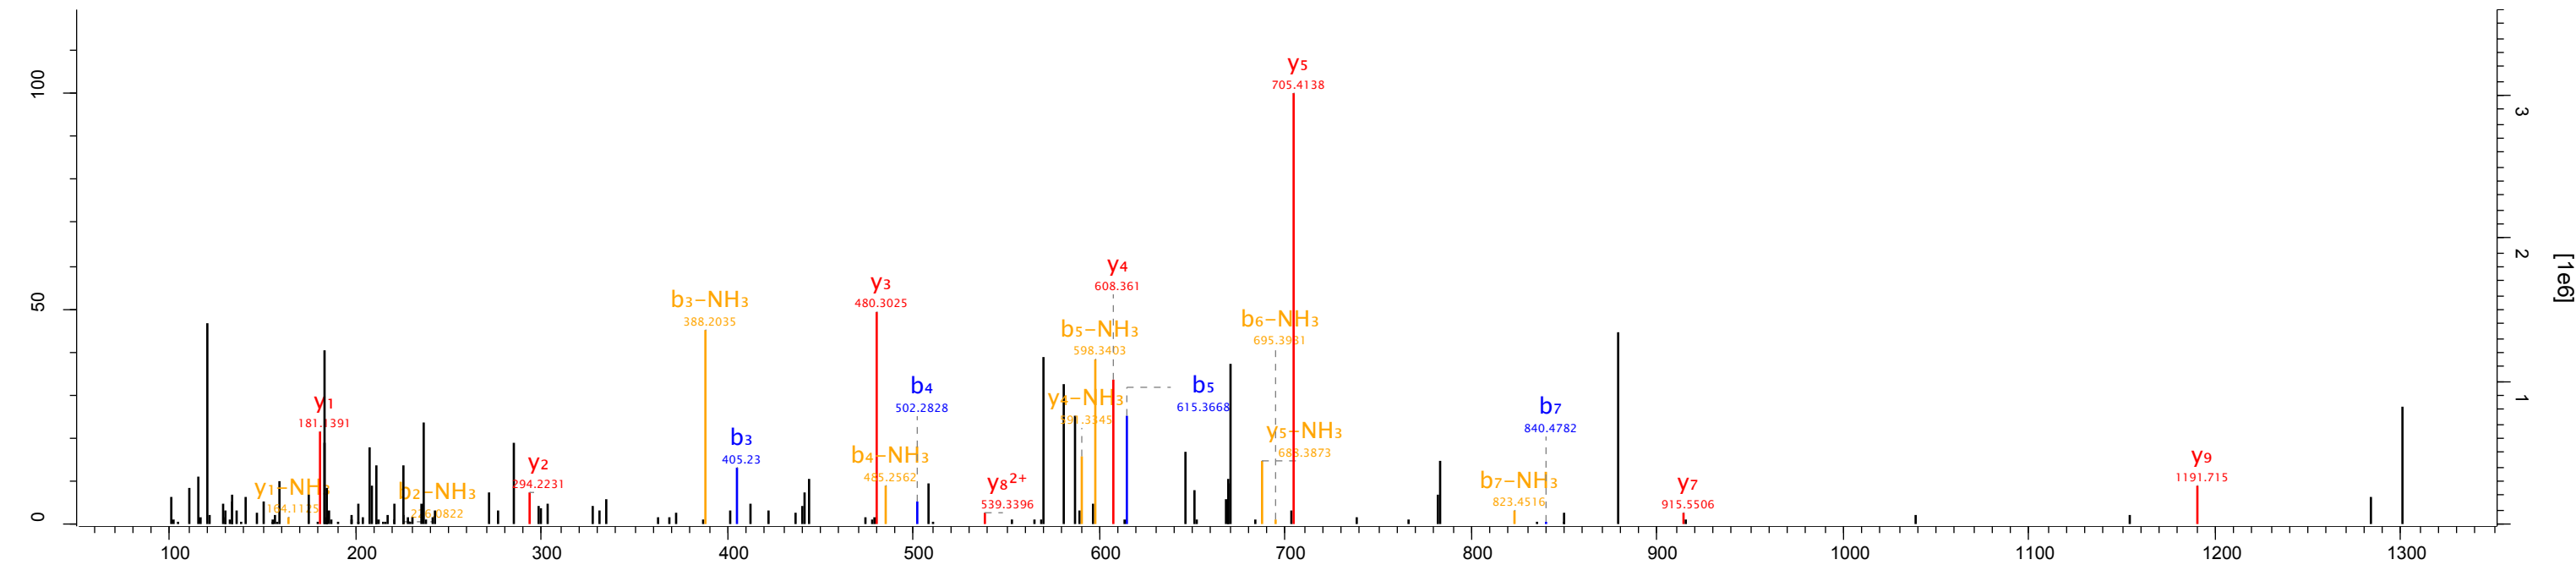

Raw file 20180707\_MaS\_A375SR\_ML\_proteome\_2\_26 Scan 17329 Method FTMS; HCD Score 51.76 m/z 669.34

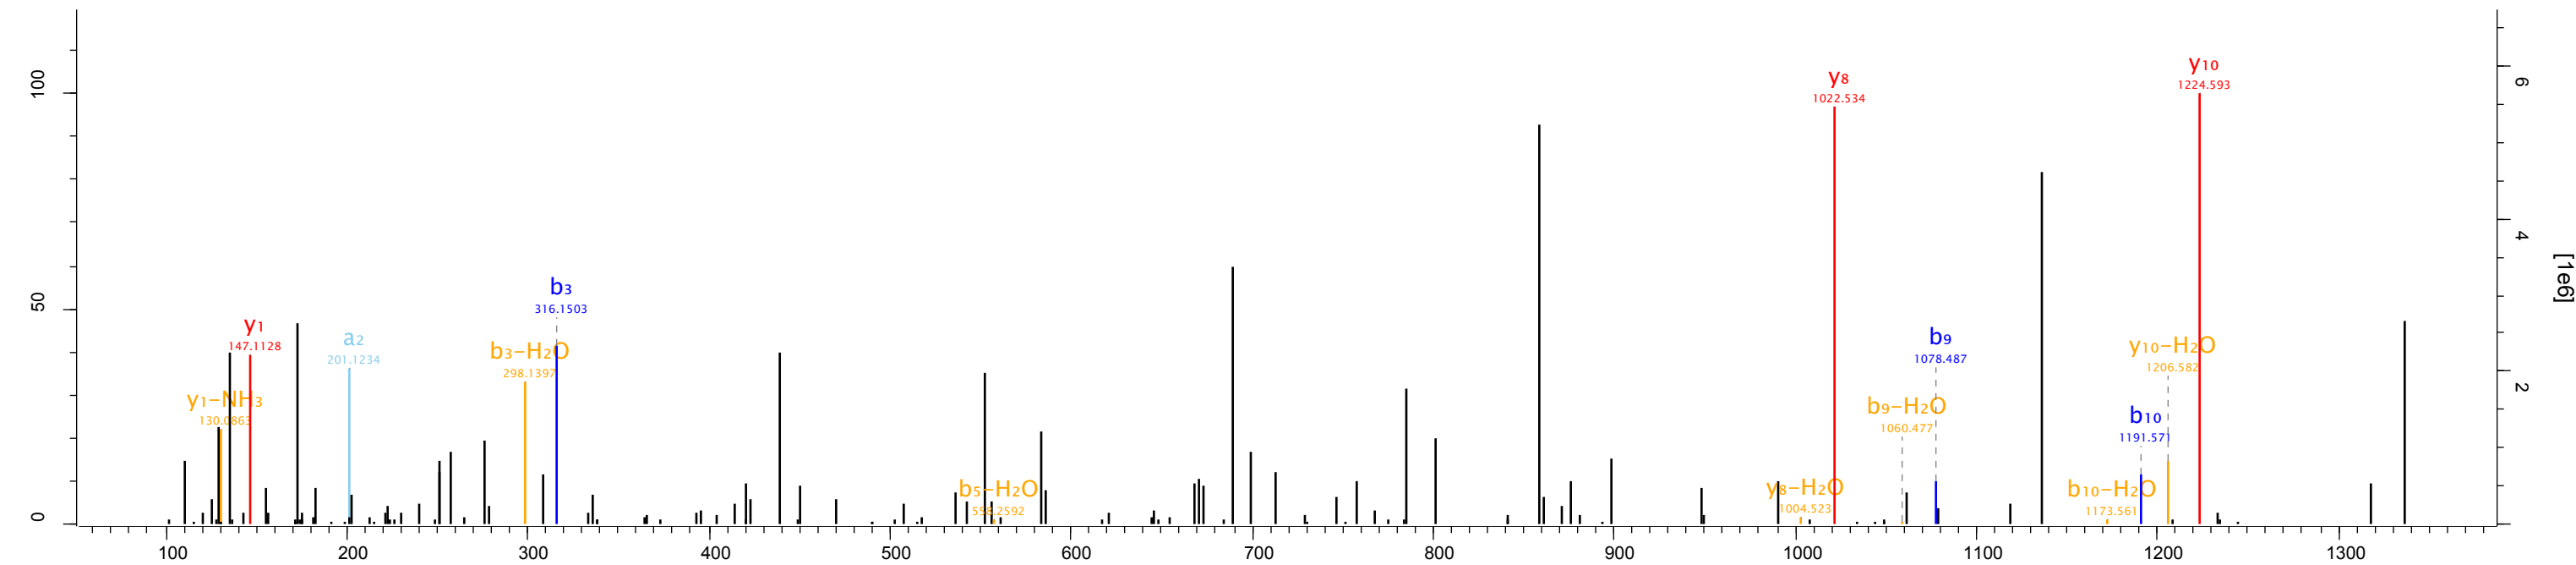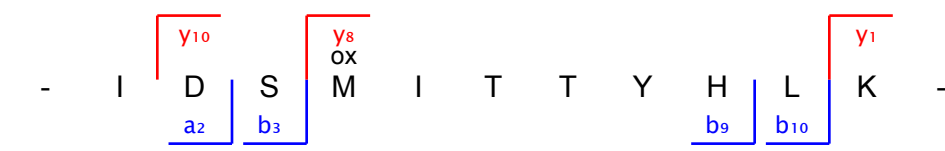



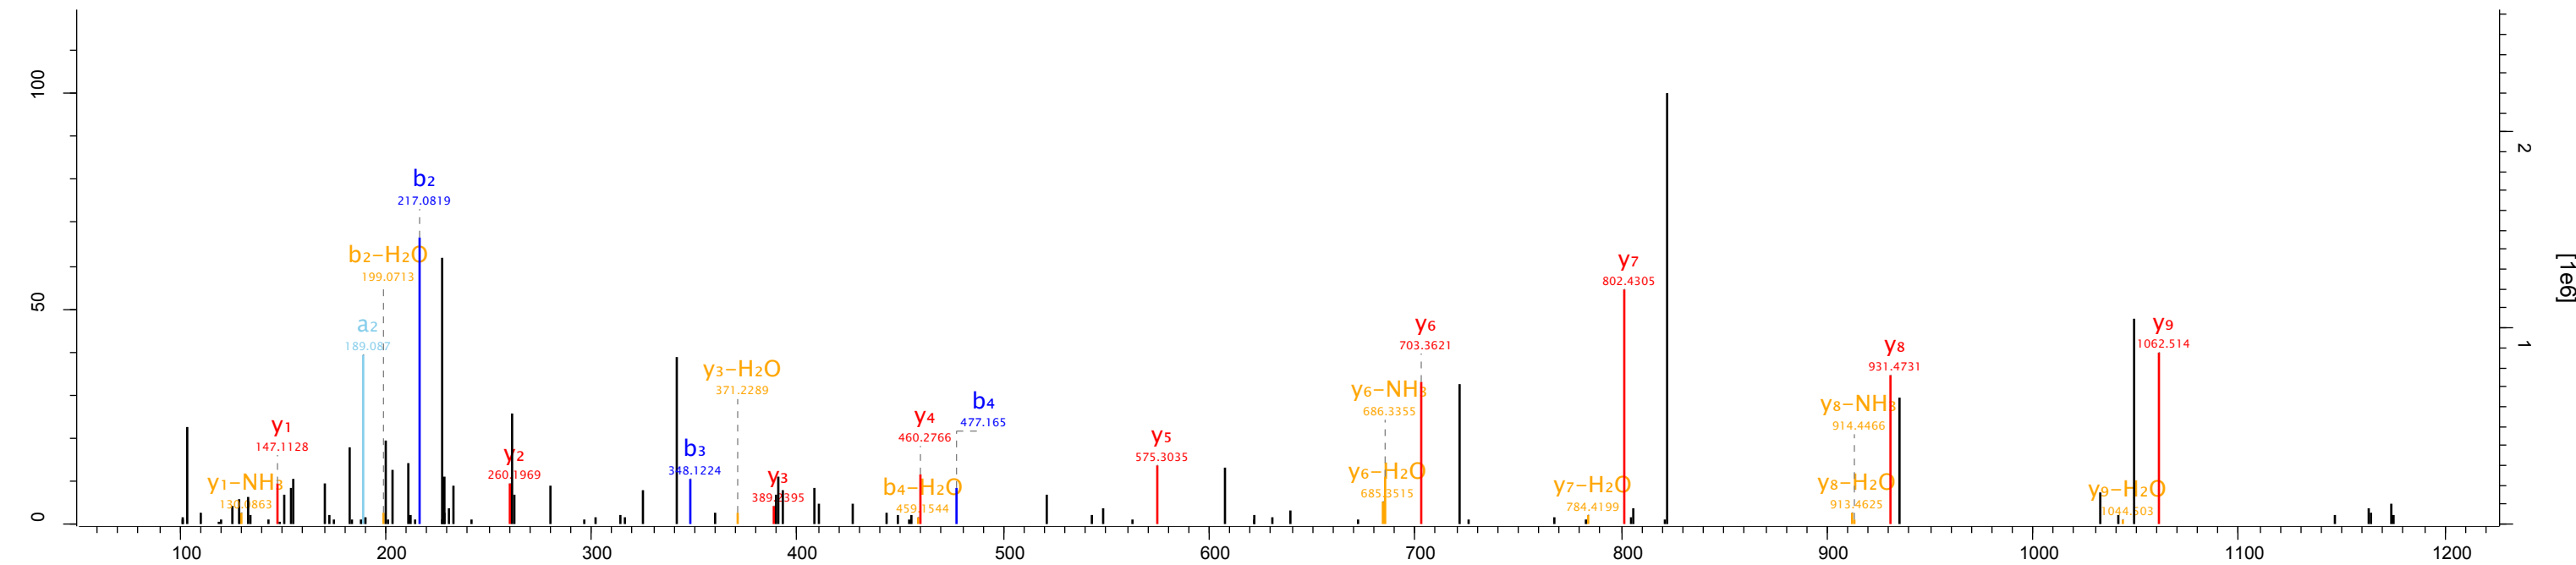

- S E M E V Q D A E L K -

b<sub>2</sub> b<sub>3</sub> b<sub>4</sub> y<sub>9</sub> y<sub>8</sub> y<sub>7</sub> y<sub>6</sub> y<sub>5</sub> y<sub>4</sub> y<sub>3</sub> y<sub>2</sub> y<sub>1</sub>

Raw file  
20180707\_MaS\_A375SR\_ML\_proteome\_2\_27

Scan 7789 Method FTMS; HCD Score 56.2 m/z 522.26

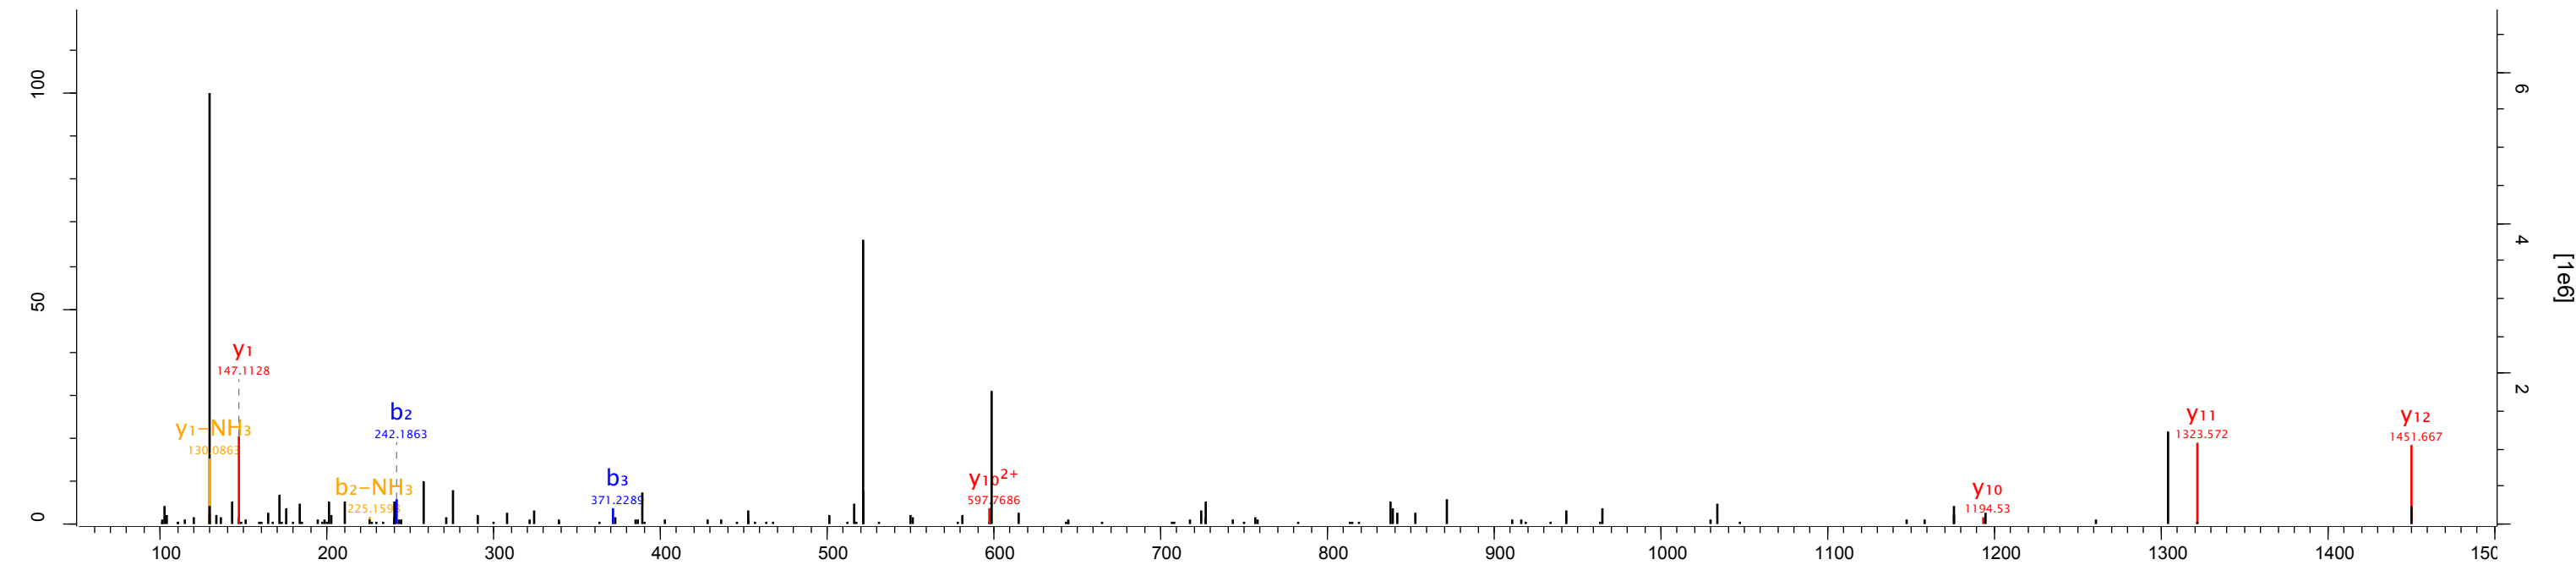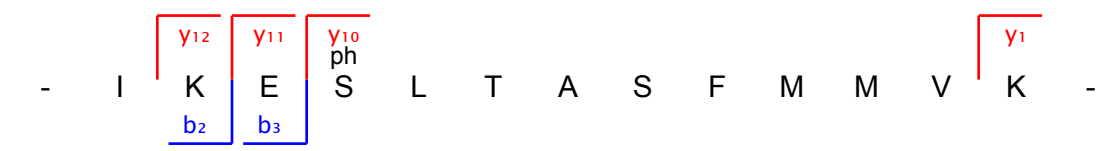

Raw file 20180707\_MaS\_A375SR\_ML\_proteome\_2\_28 Scan 16319 Method FTMS; HCD Score 57.86 m/z 562.28

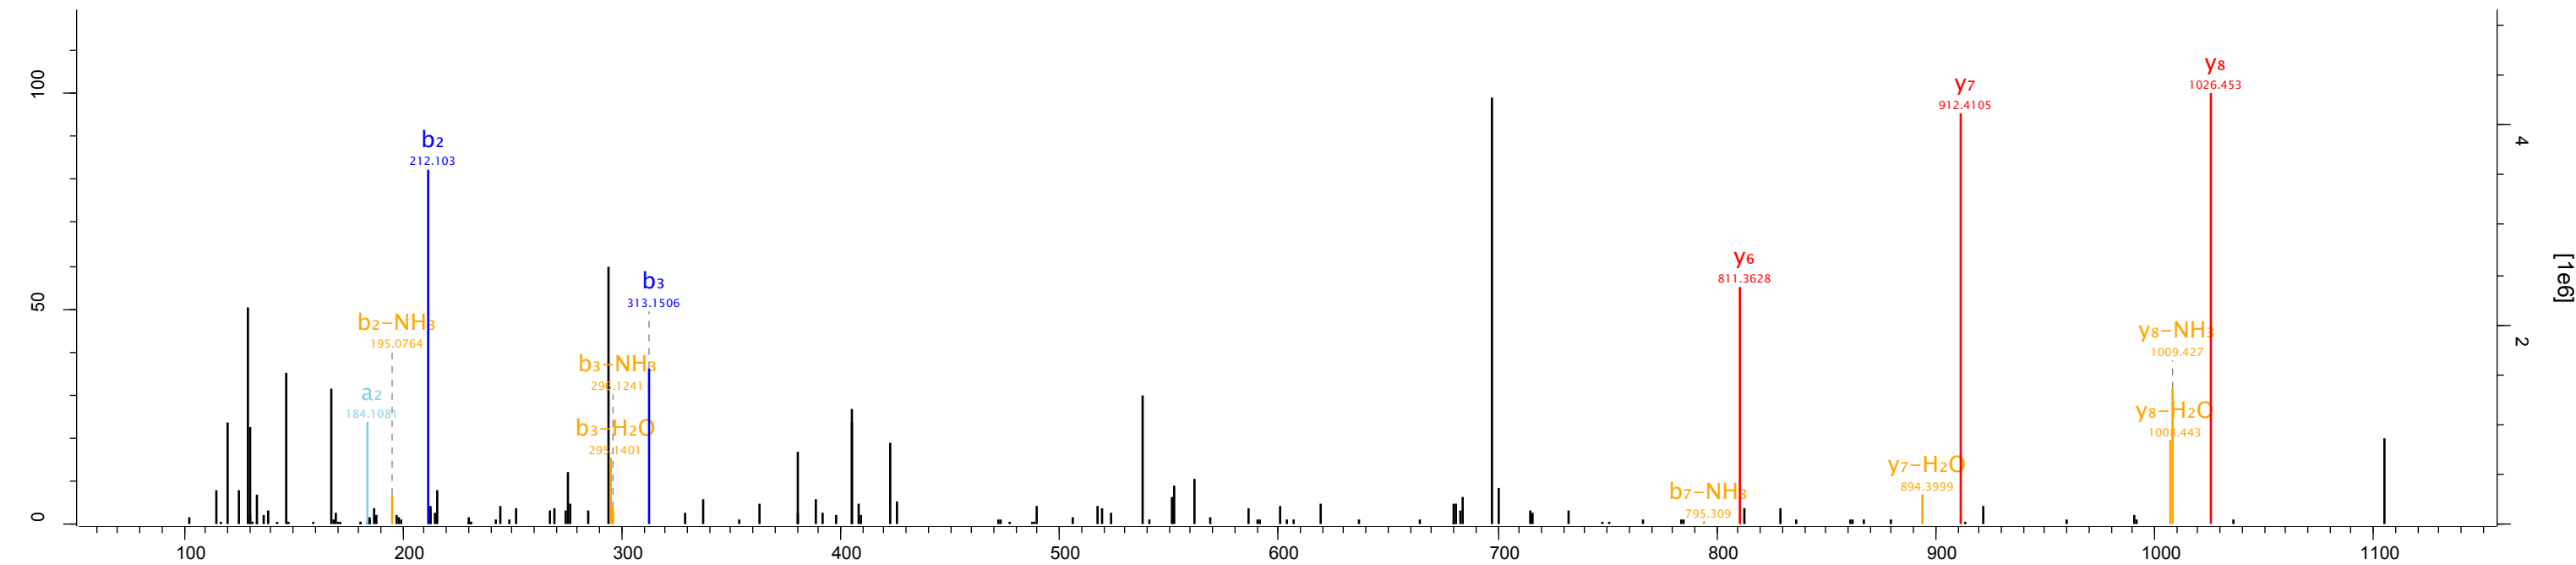

Raw file  
20180707\_MaS\_A375SR\_ML\_proteome\_2\_28

Scan 24439 Method FTMS; HCD Score 87.68 m/z 667.01 Gene names ACP5

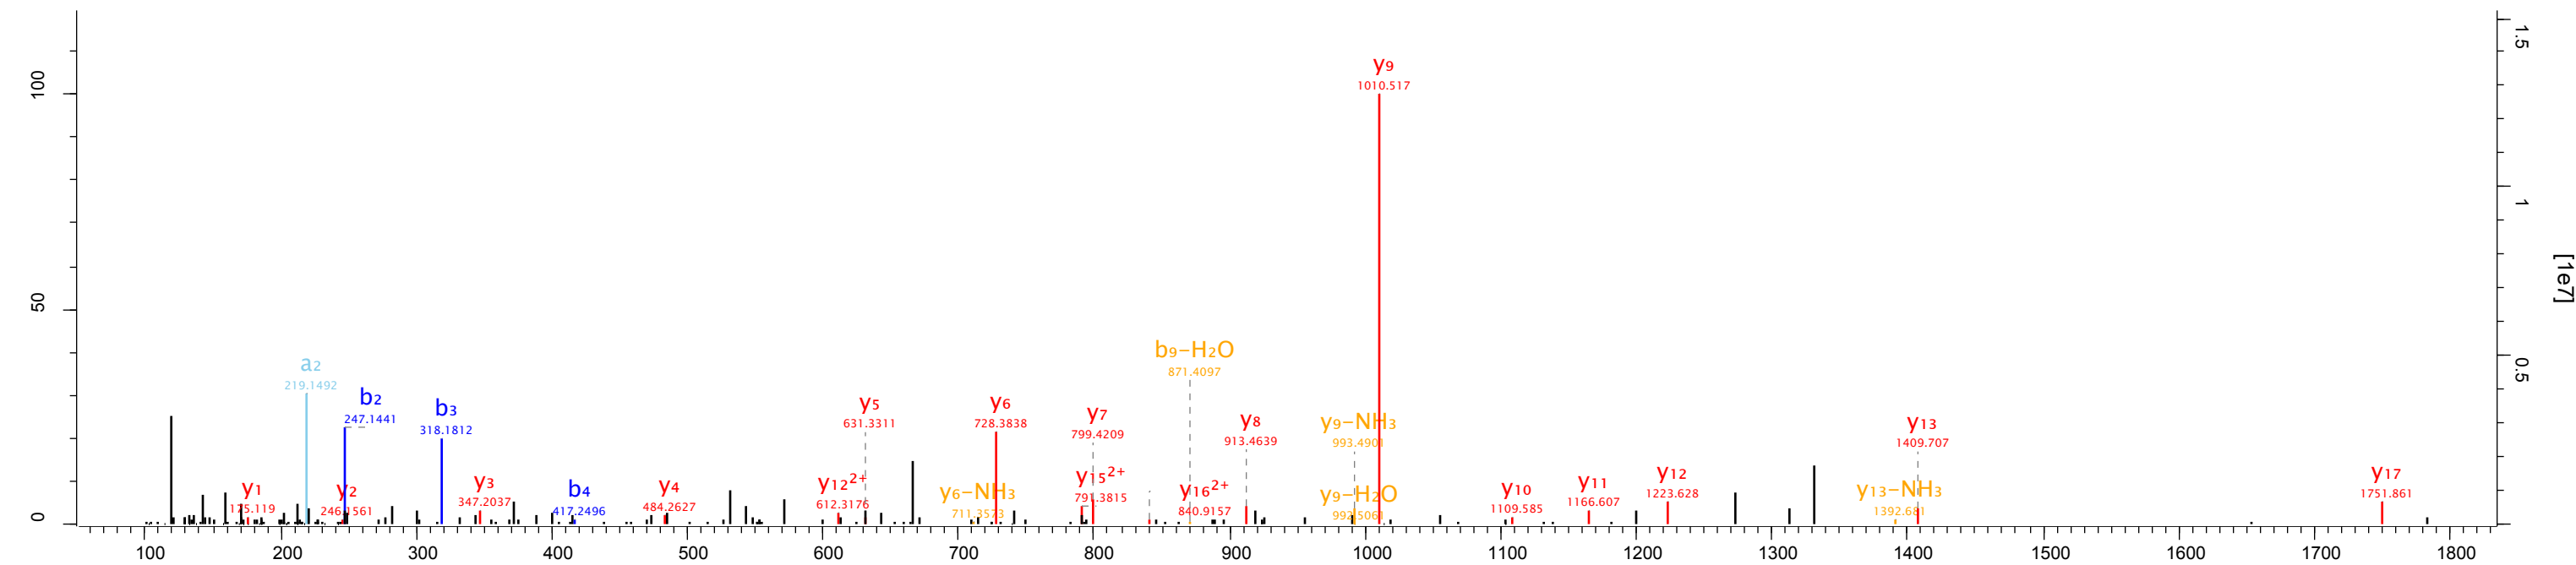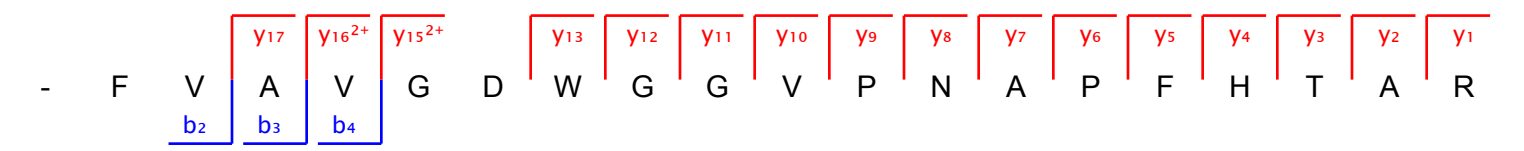

Raw file  
 20180707\_MaS\_A375SR\_ML\_proteome\_2\_28  
 Scan 3449 Method FTMS; HCD Score 85.53 m/z 568.24 Gene names MAP3K19

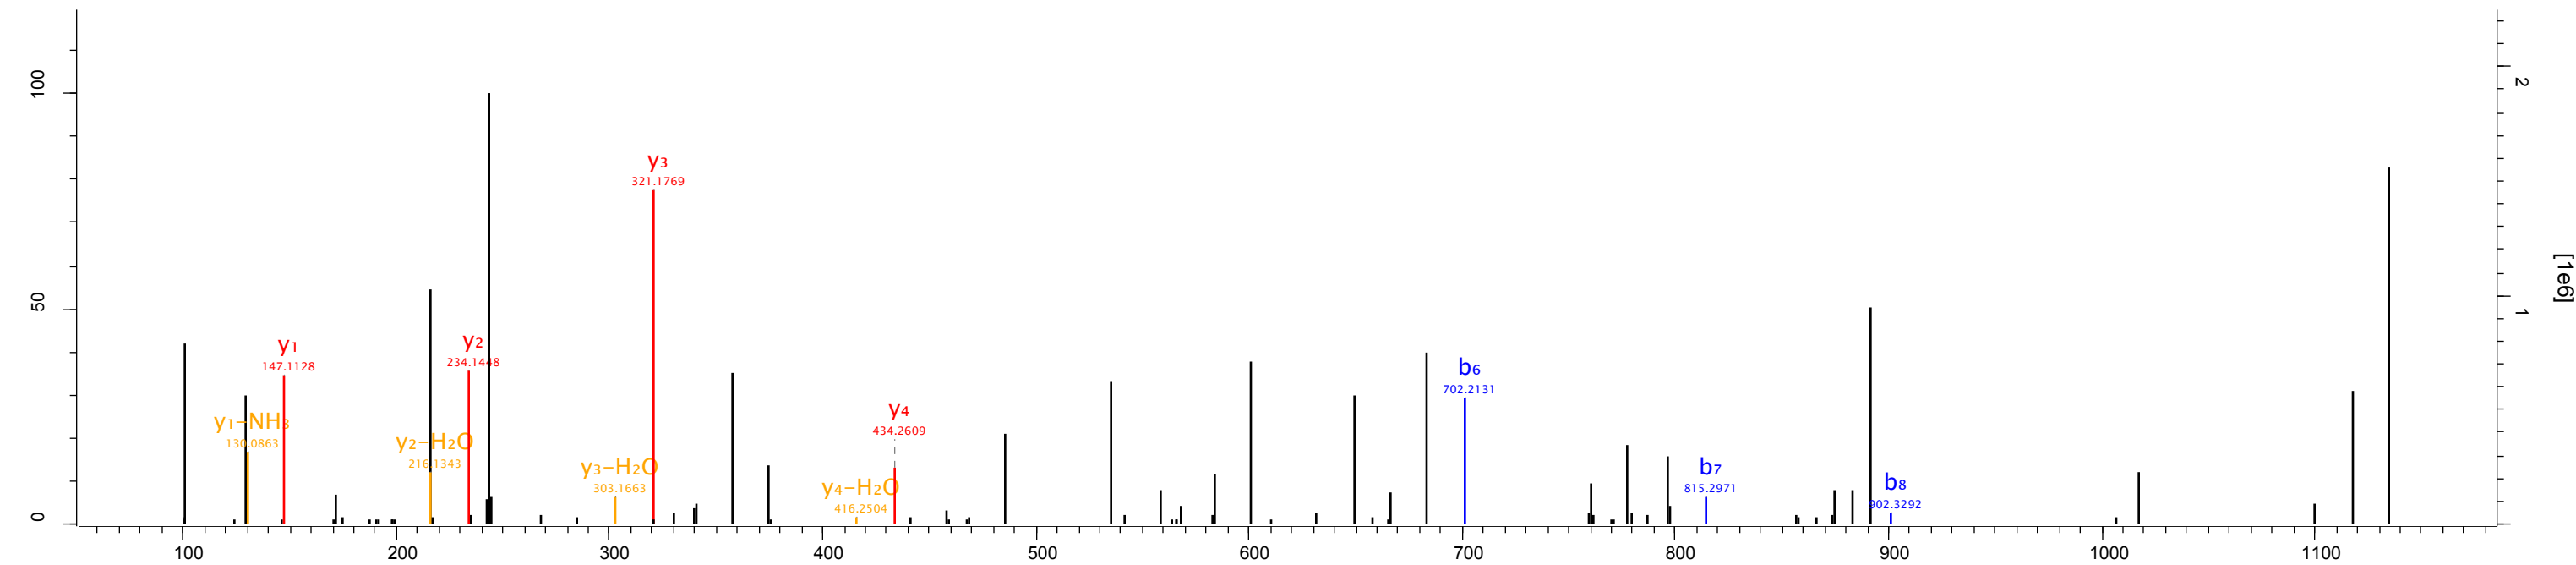

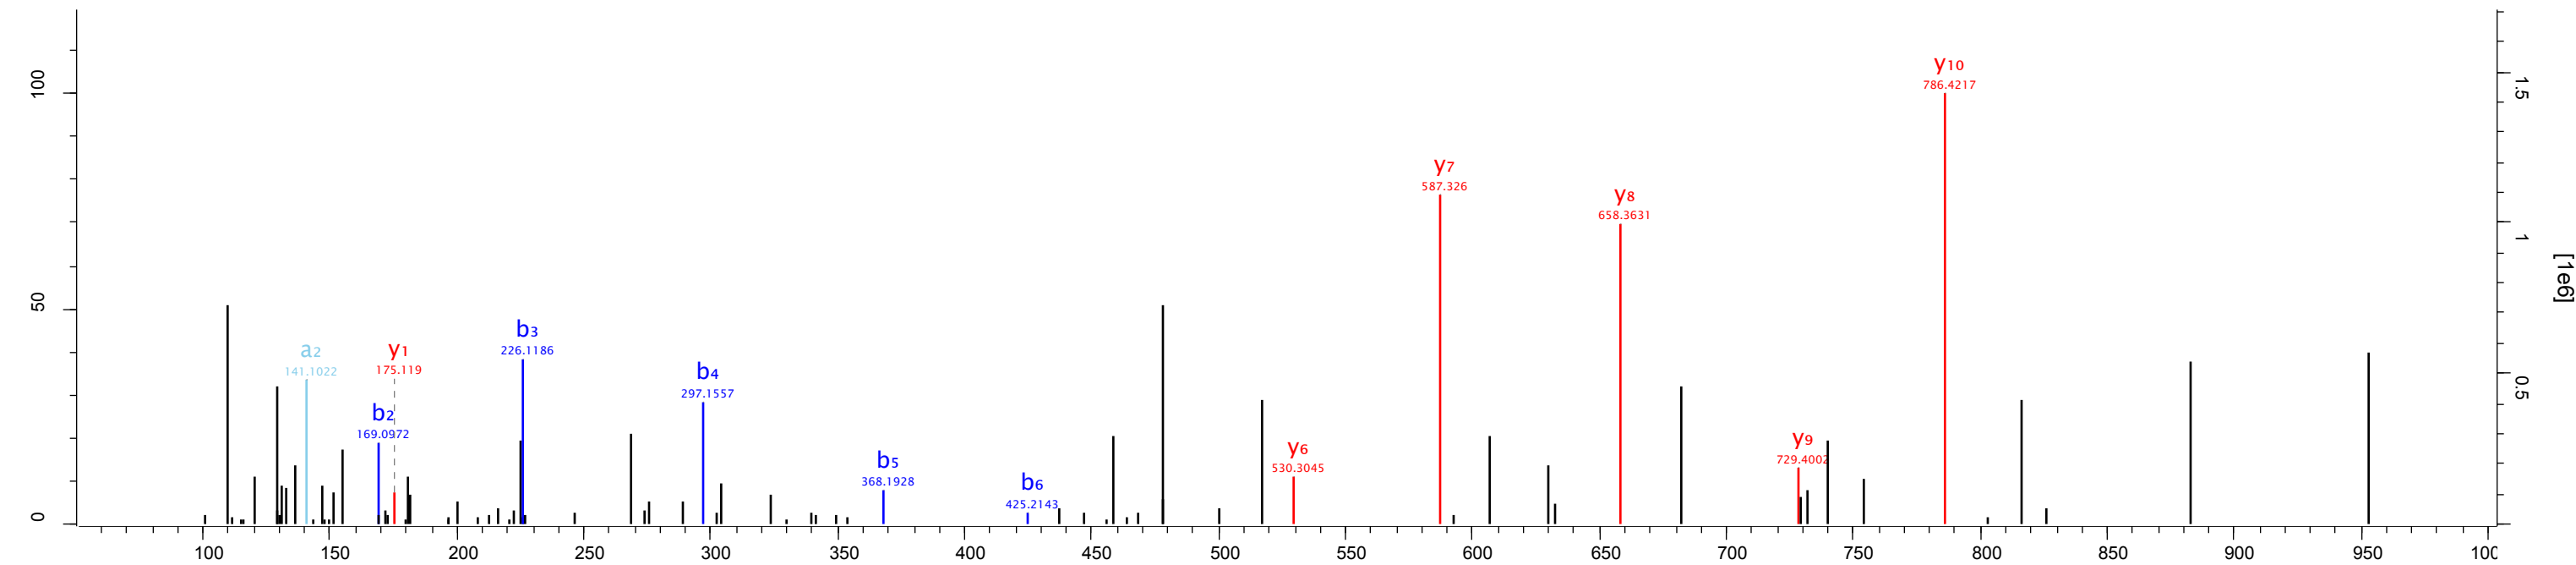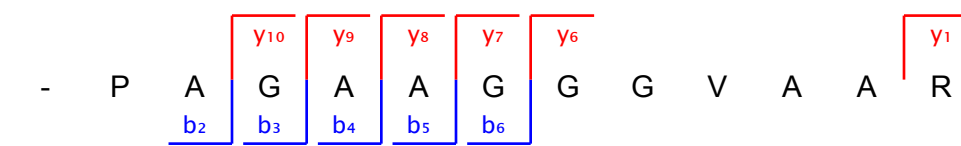

Raw file 20180707\_MaS\_A375SR\_ML\_proteome\_2\_30 Scan 24019 Method FTMS; HCD Score 60.33 m/z 636.66 Gene names ATP6V0C

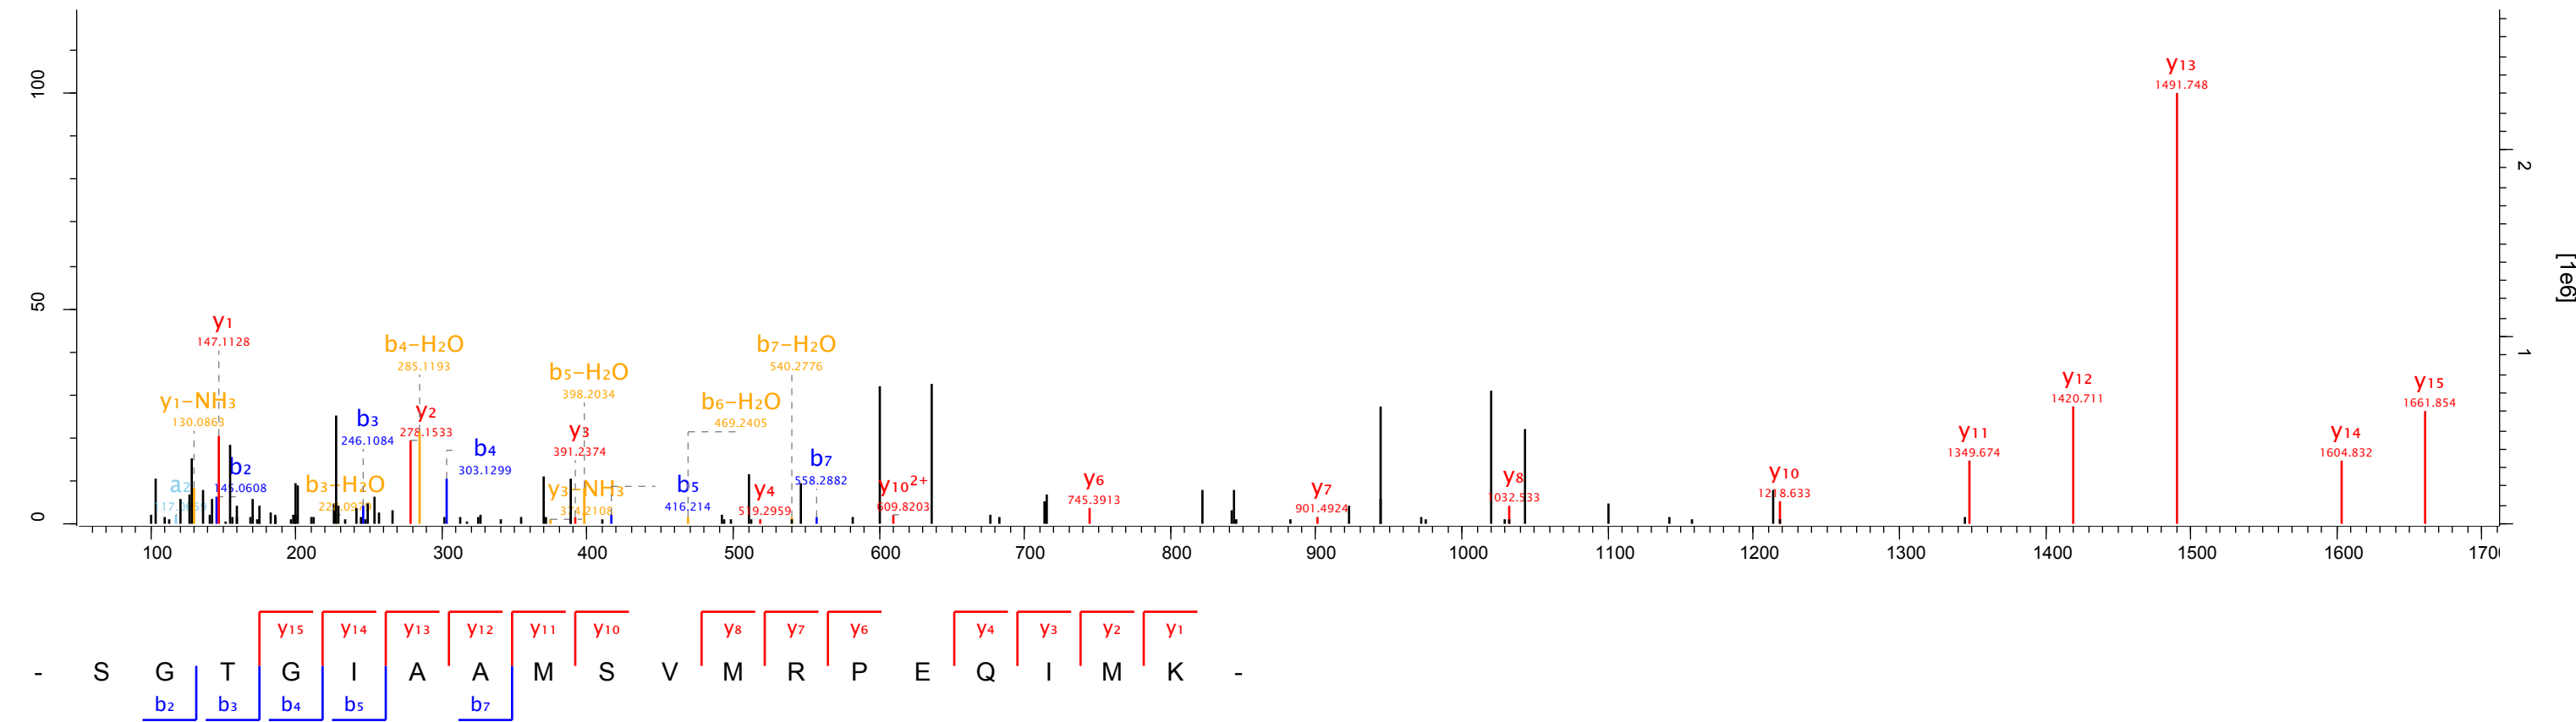

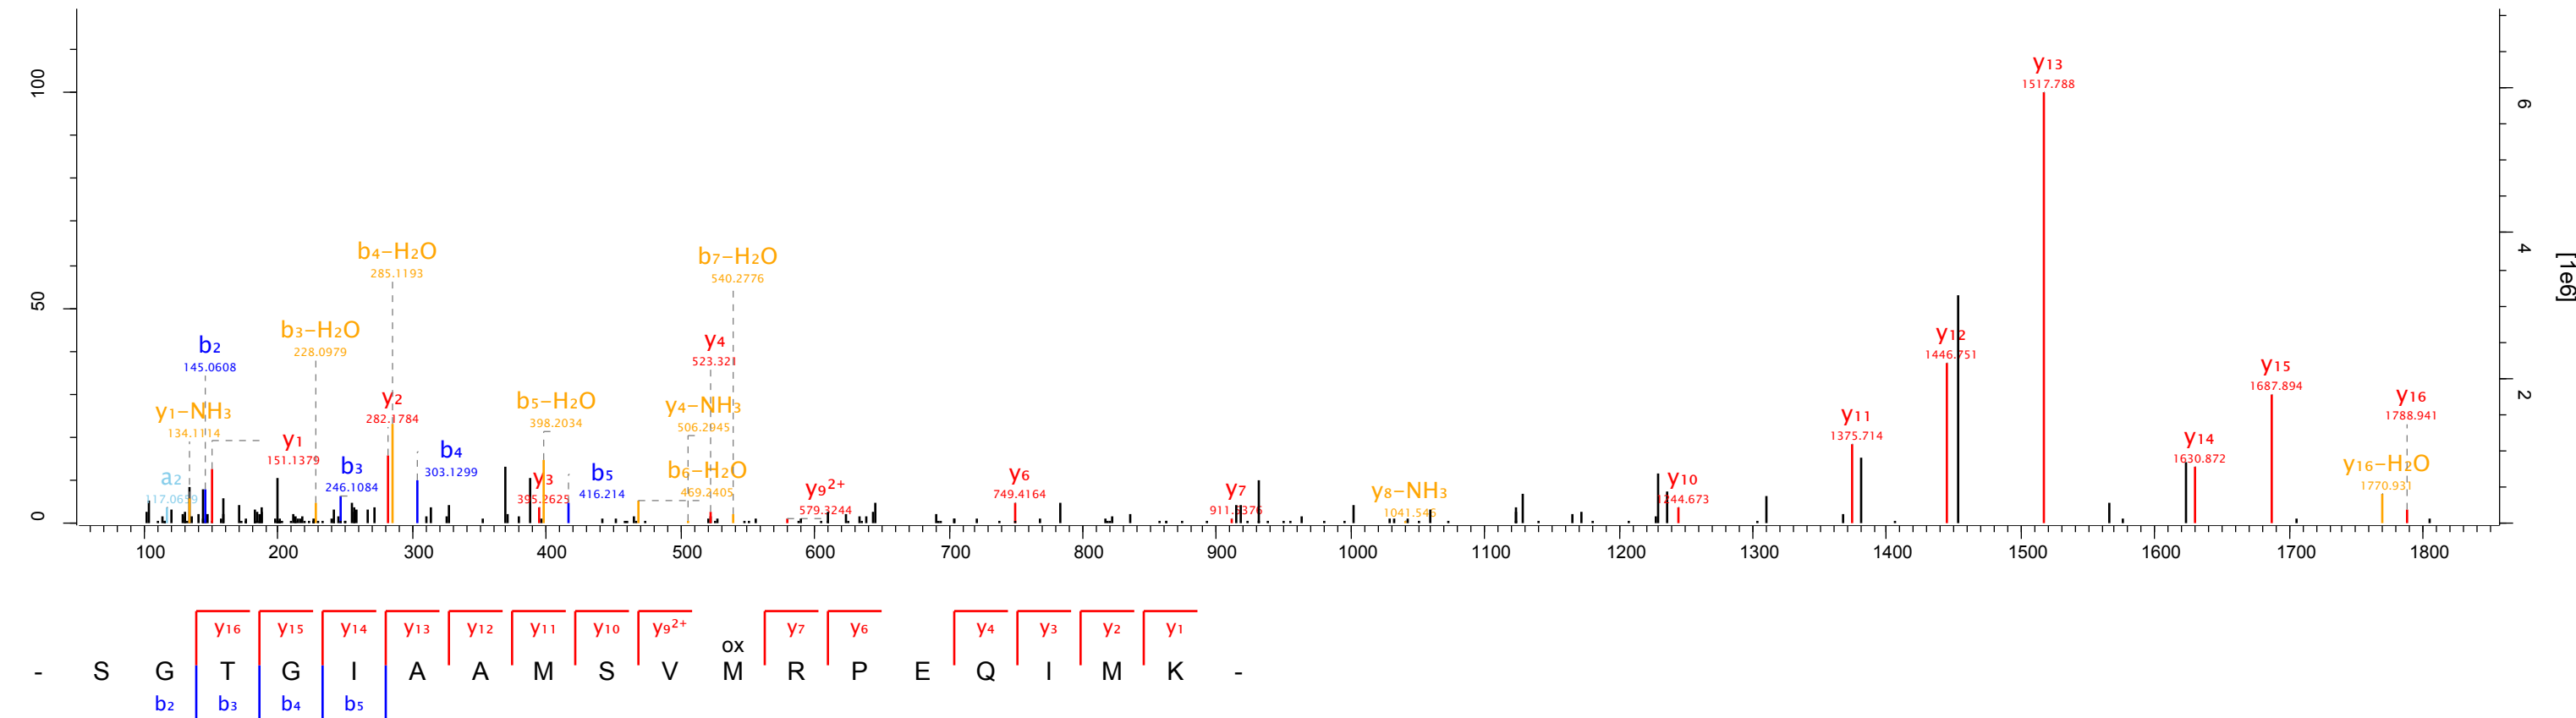



Raw file 20180707\_MaS\_A375SR\_ML\_proteome\_22 Scan 22549 Method FTMS; HCD Score 122.14 m/z 865.99 Gene names KRTCAP2

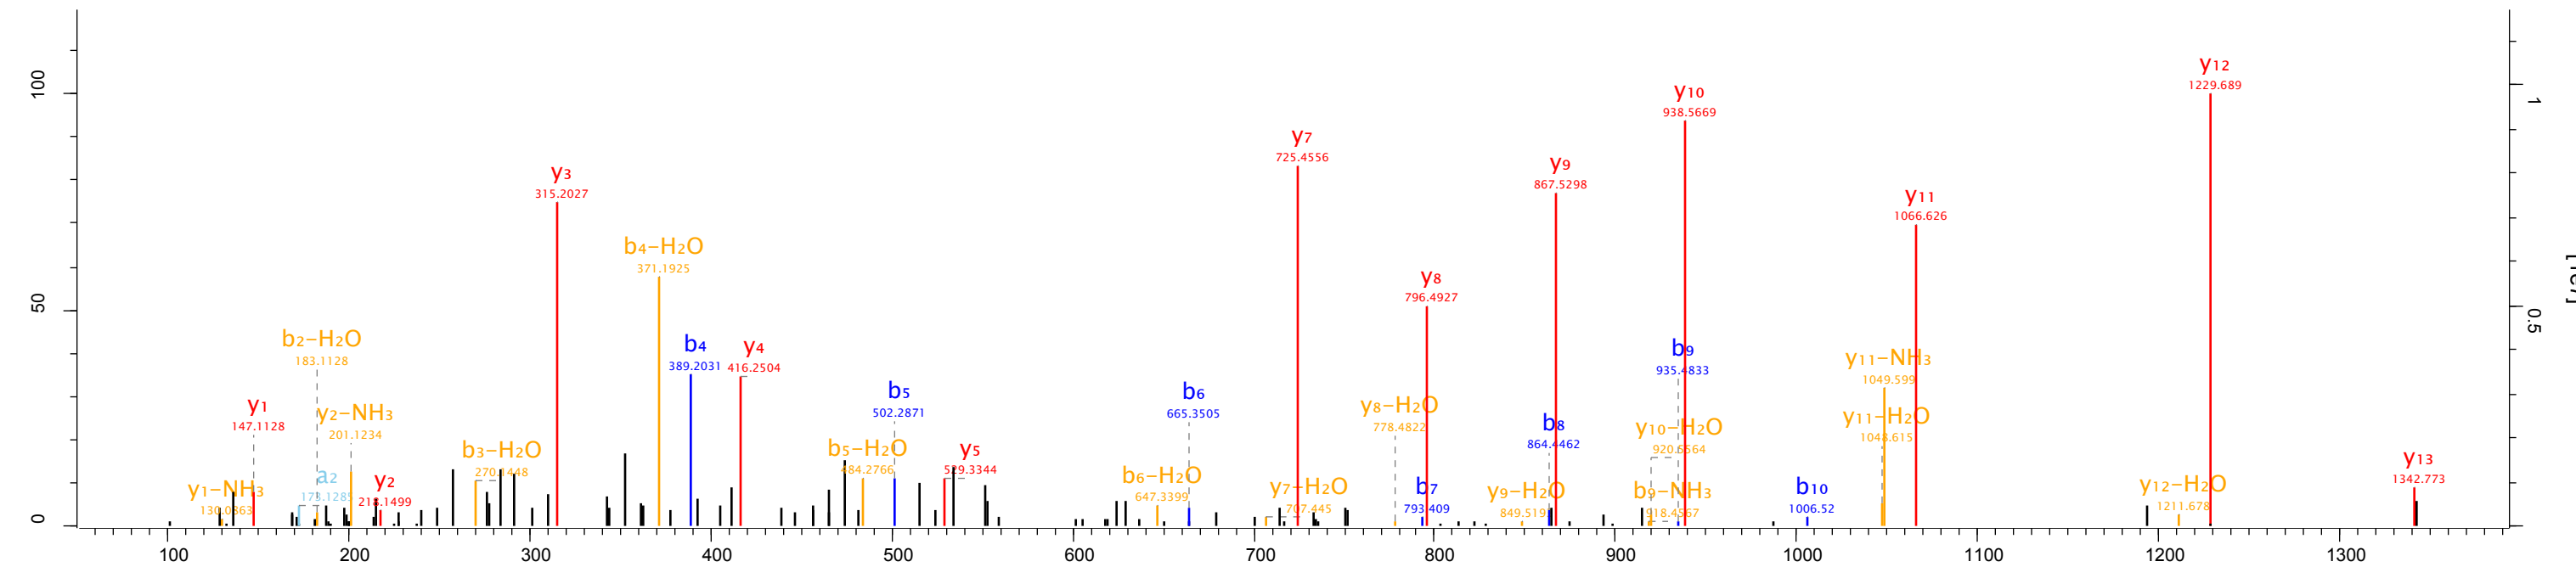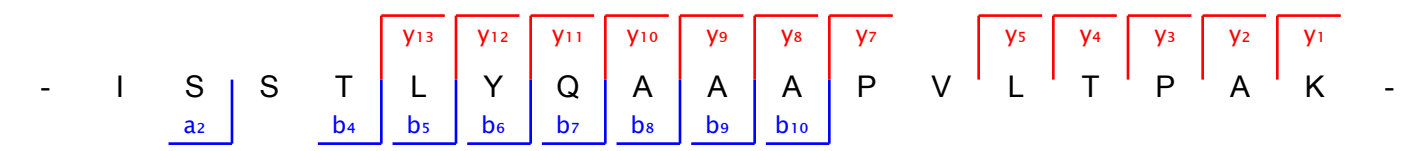

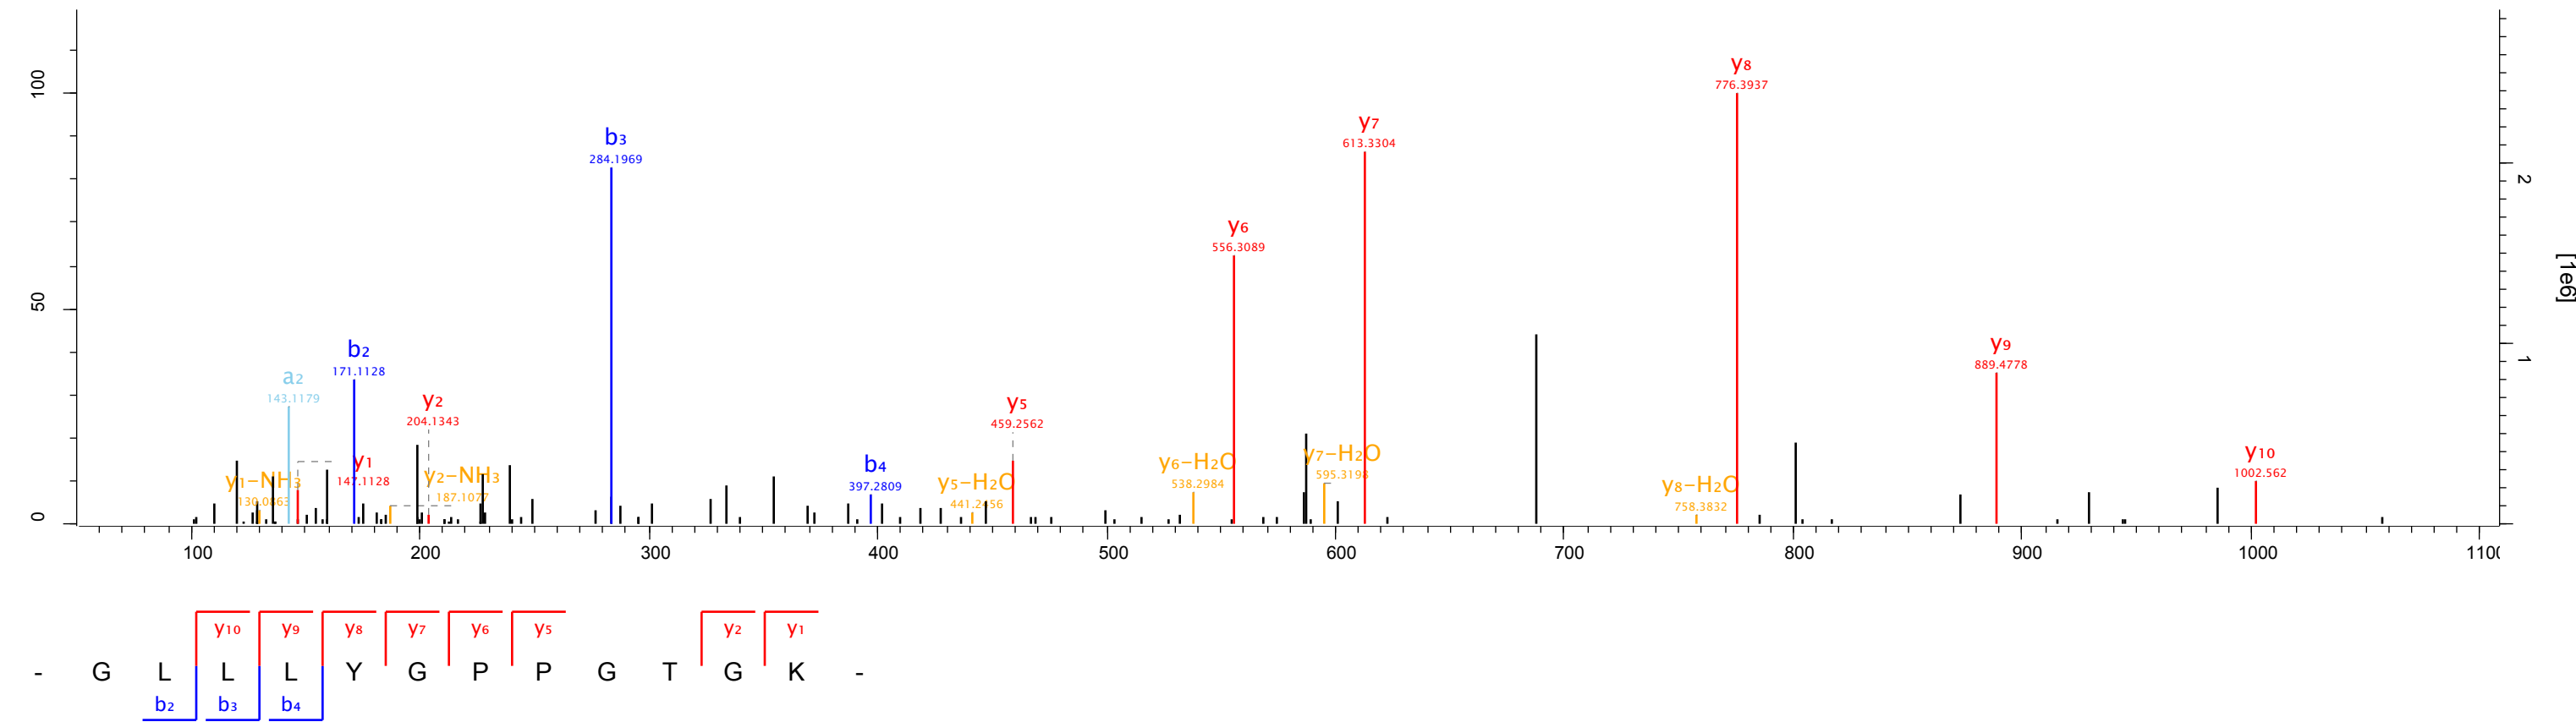

Raw file: 20180707\_MaS\_A375SR\_ML\_proteome\_23  
 Scan: 7239 Method: FTMS; HCD Score: 41.43 m/z: 486.23 Gene names: RIC3

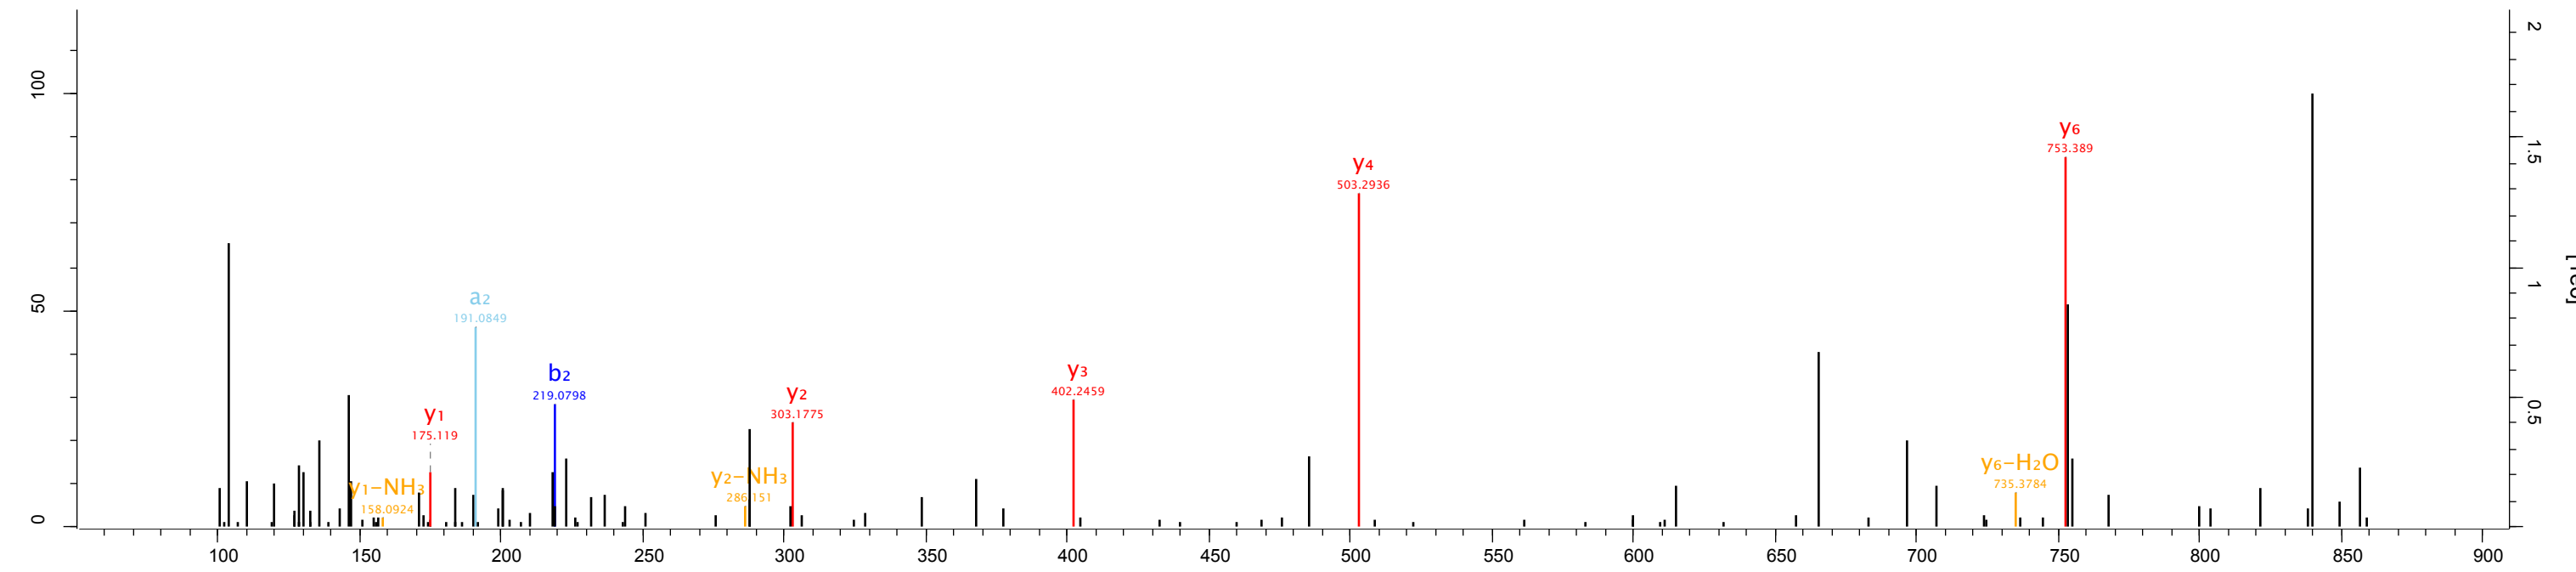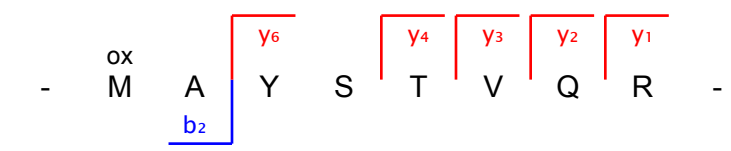

Raw file: 20180707\_MaS\_A375SR\_ML\_proteome\_23  
 Scan: 8129 Method: FTMS; HCD Score: 46.43 m/z: 566.72 Gene names: PSPHP1

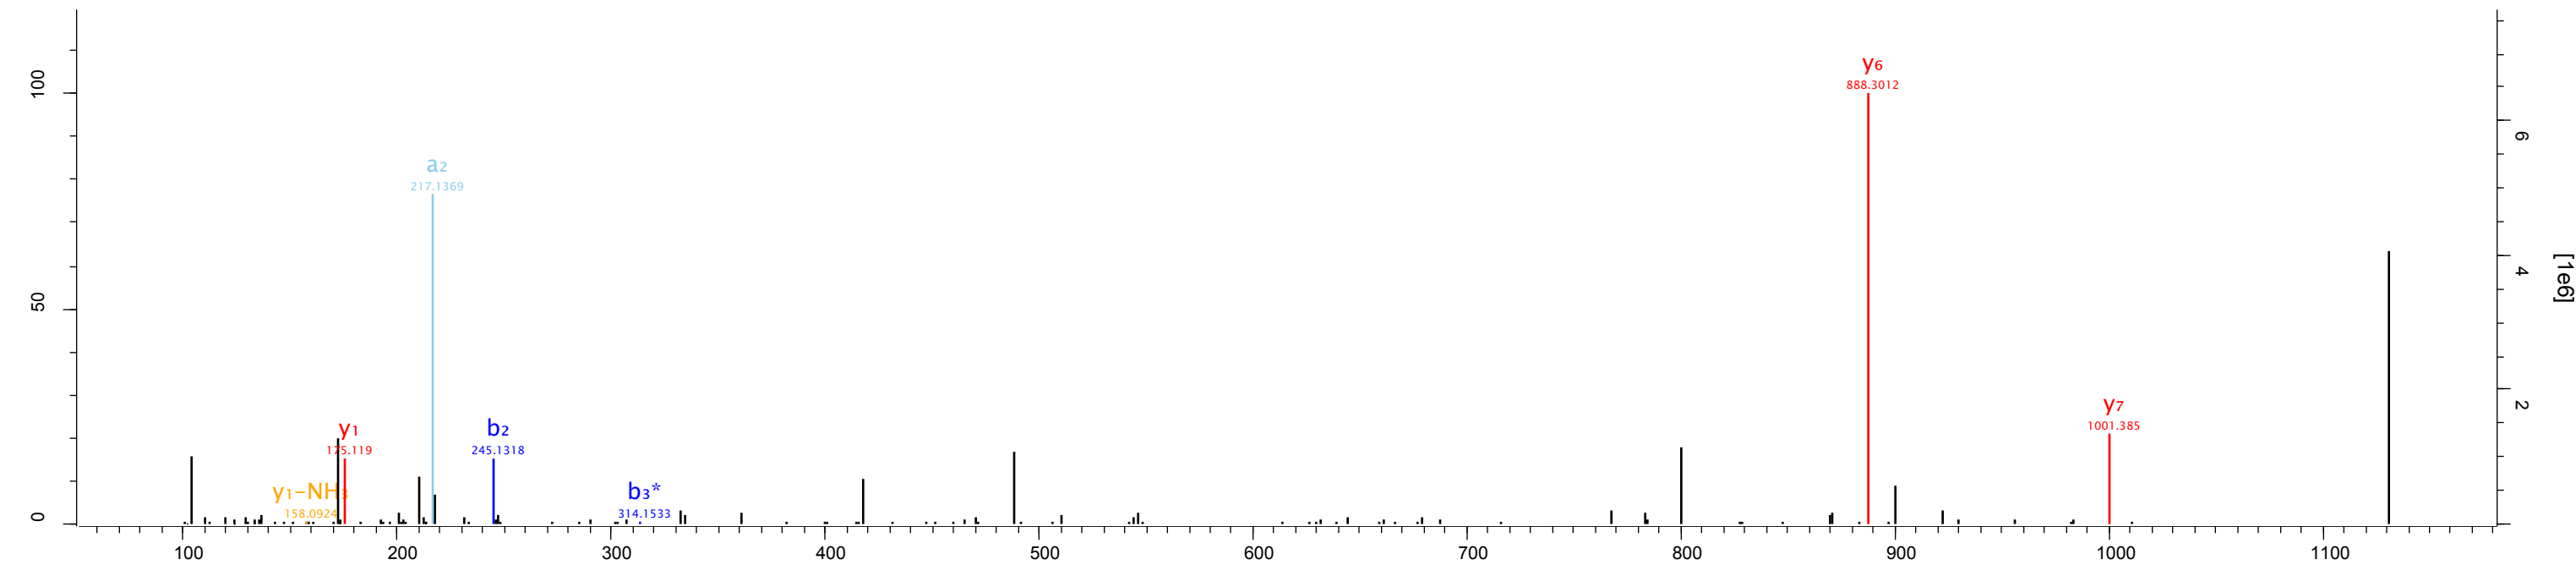

Raw file 20180707\_MaS\_A375SR\_ML\_proteome\_24 Scan 12399 Method FTMS; HCD Score 73.83 m/z 702.34 Gene names ODC1

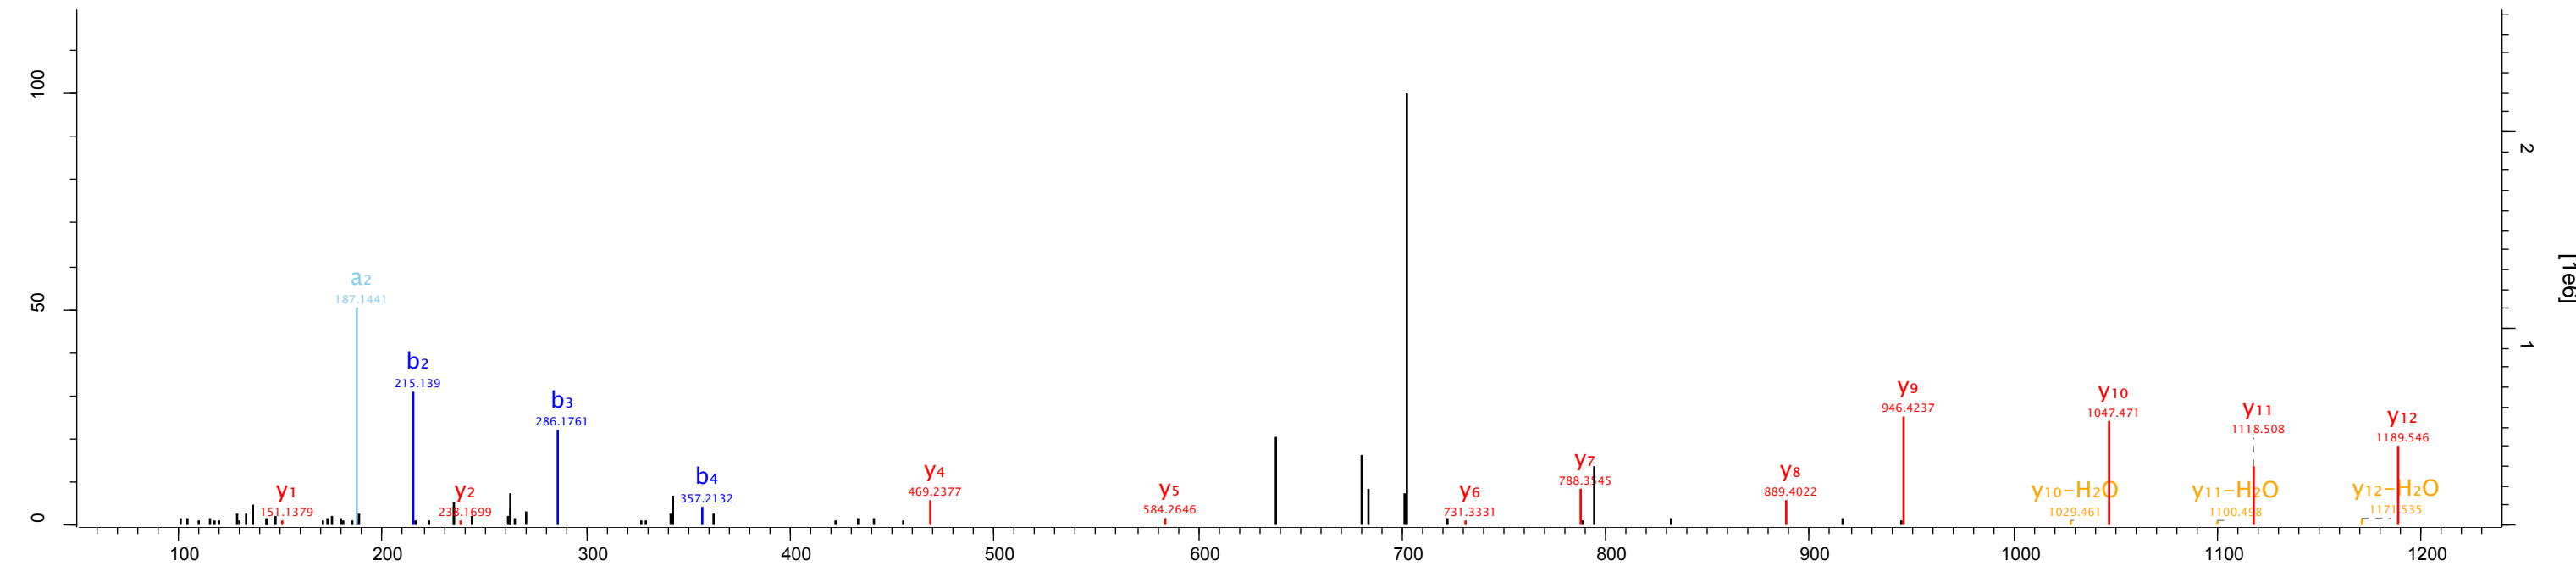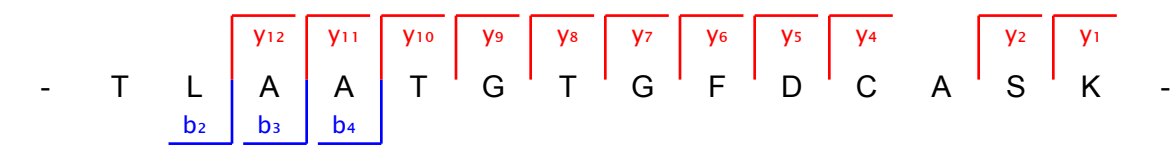

Raw file 20180707\_MaS\_A375SR\_ML\_proteome\_24 Scan 22859 Method FTMS; HCD Score 100.97 m/z 1003.49 Gene names LPL

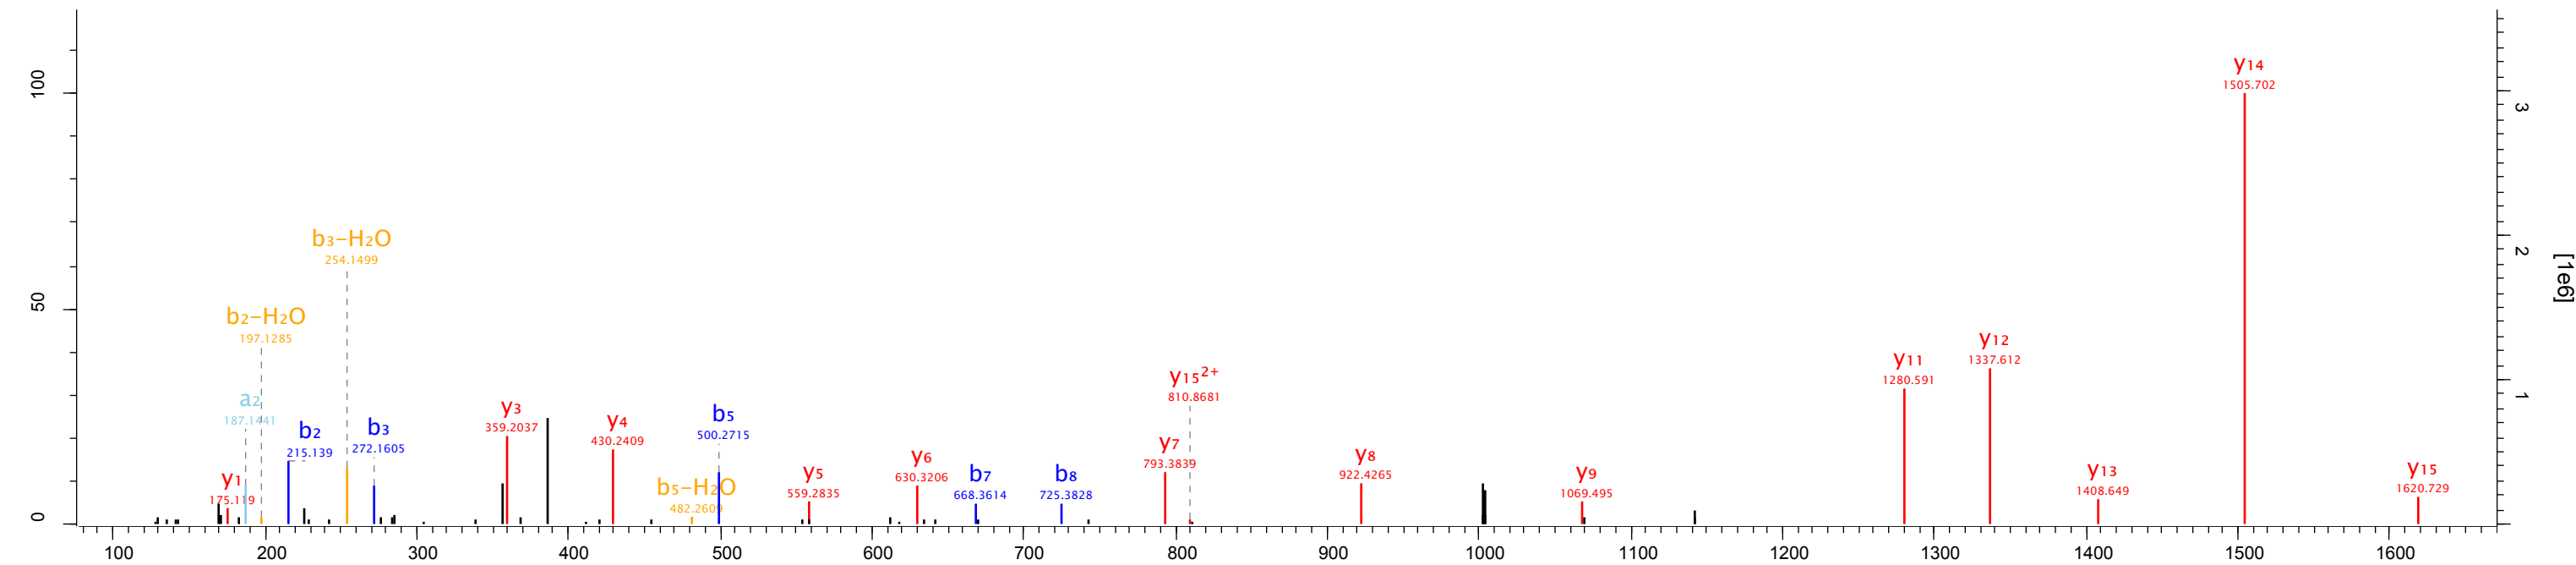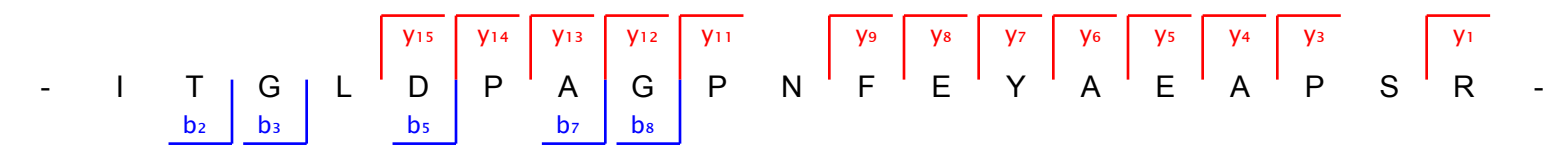

Raw file  
20180707\_MaS\_A375SR\_ML\_proteome\_25

Scan 22879 Method FTMS; HCD Score 27.71 m/z 600.98 Gene names BCDIN3D

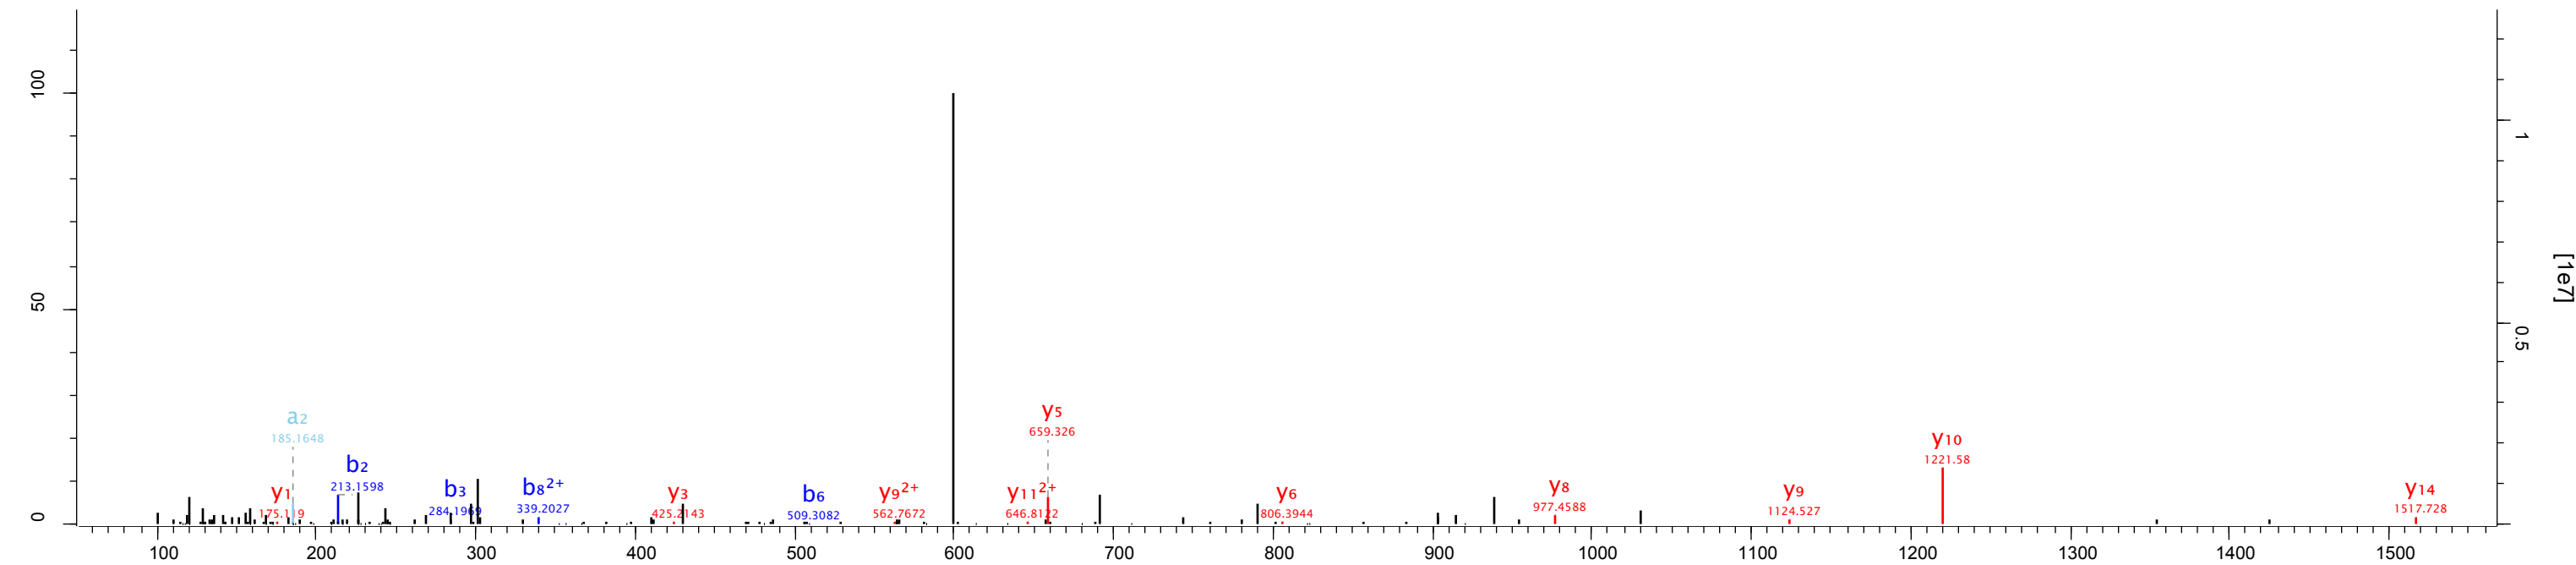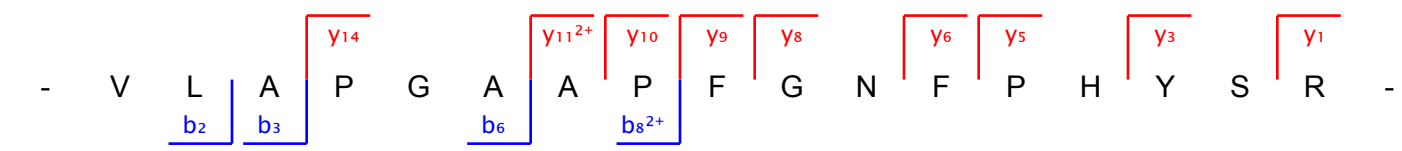

Raw file: 20180707\_MaS\_A375SR\_ML\_proteome\_26  
 Scan: 17329 Method: FTMS; HCD Score: 105.2 m/z: 688.81 Gene names: F9

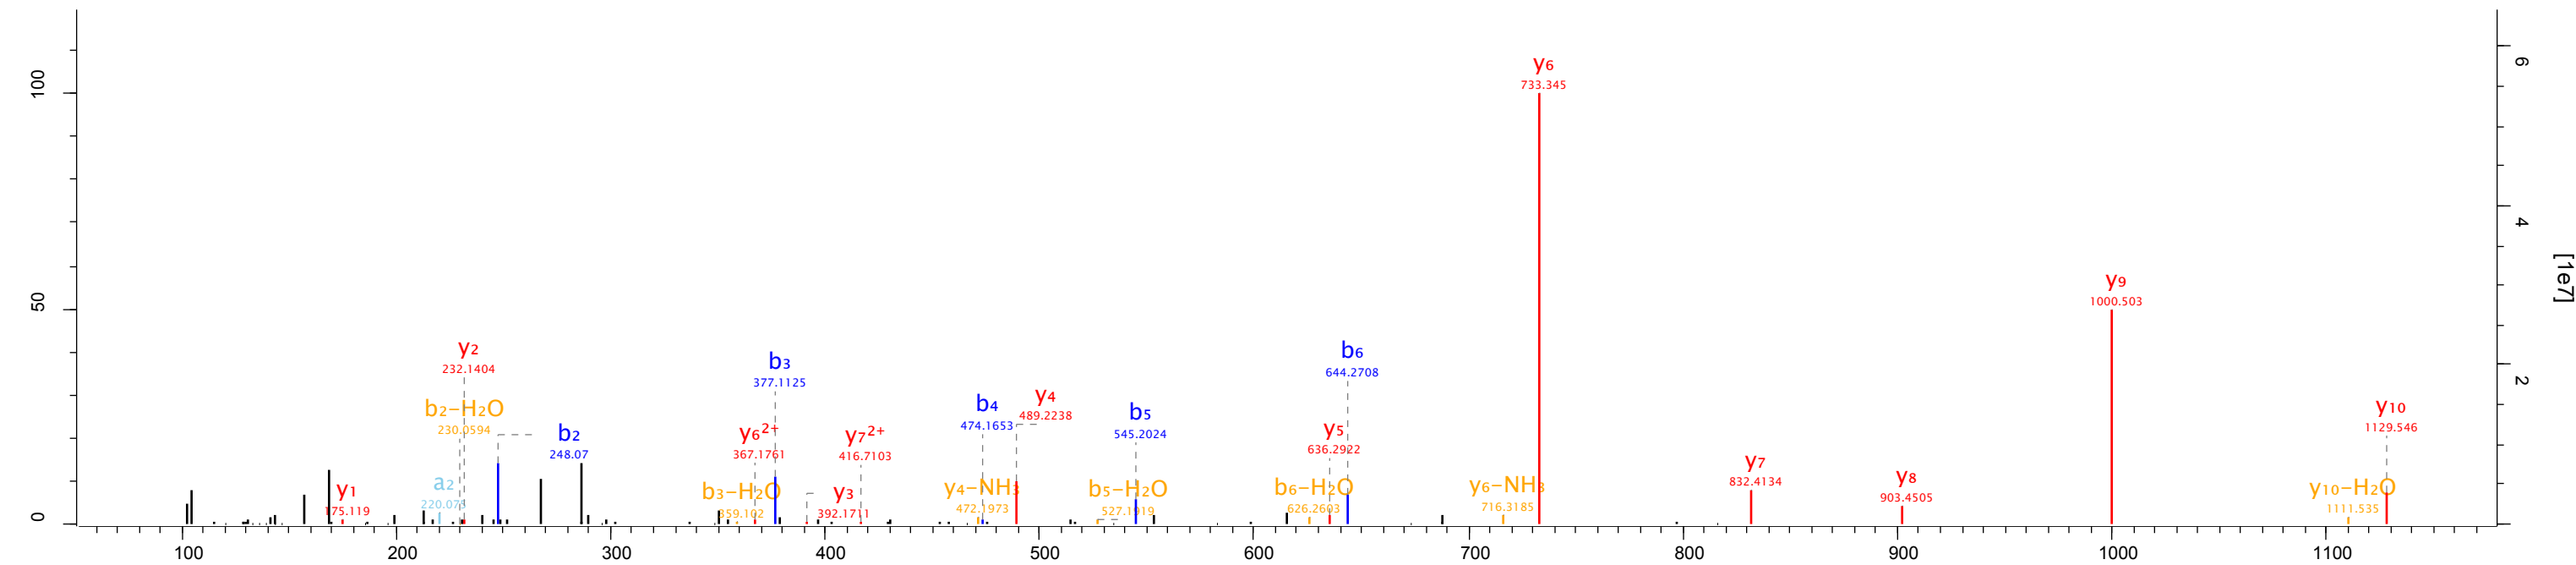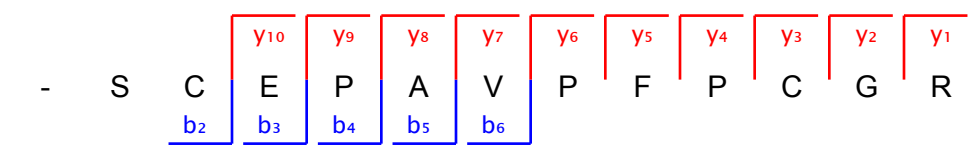



Raw file  
20180707\_MaS\_A375SR\_ML\_proteome\_26

Scan 27229 Method FTMS; HCD Score 155.57 m/z 862.45 Gene names EPT1

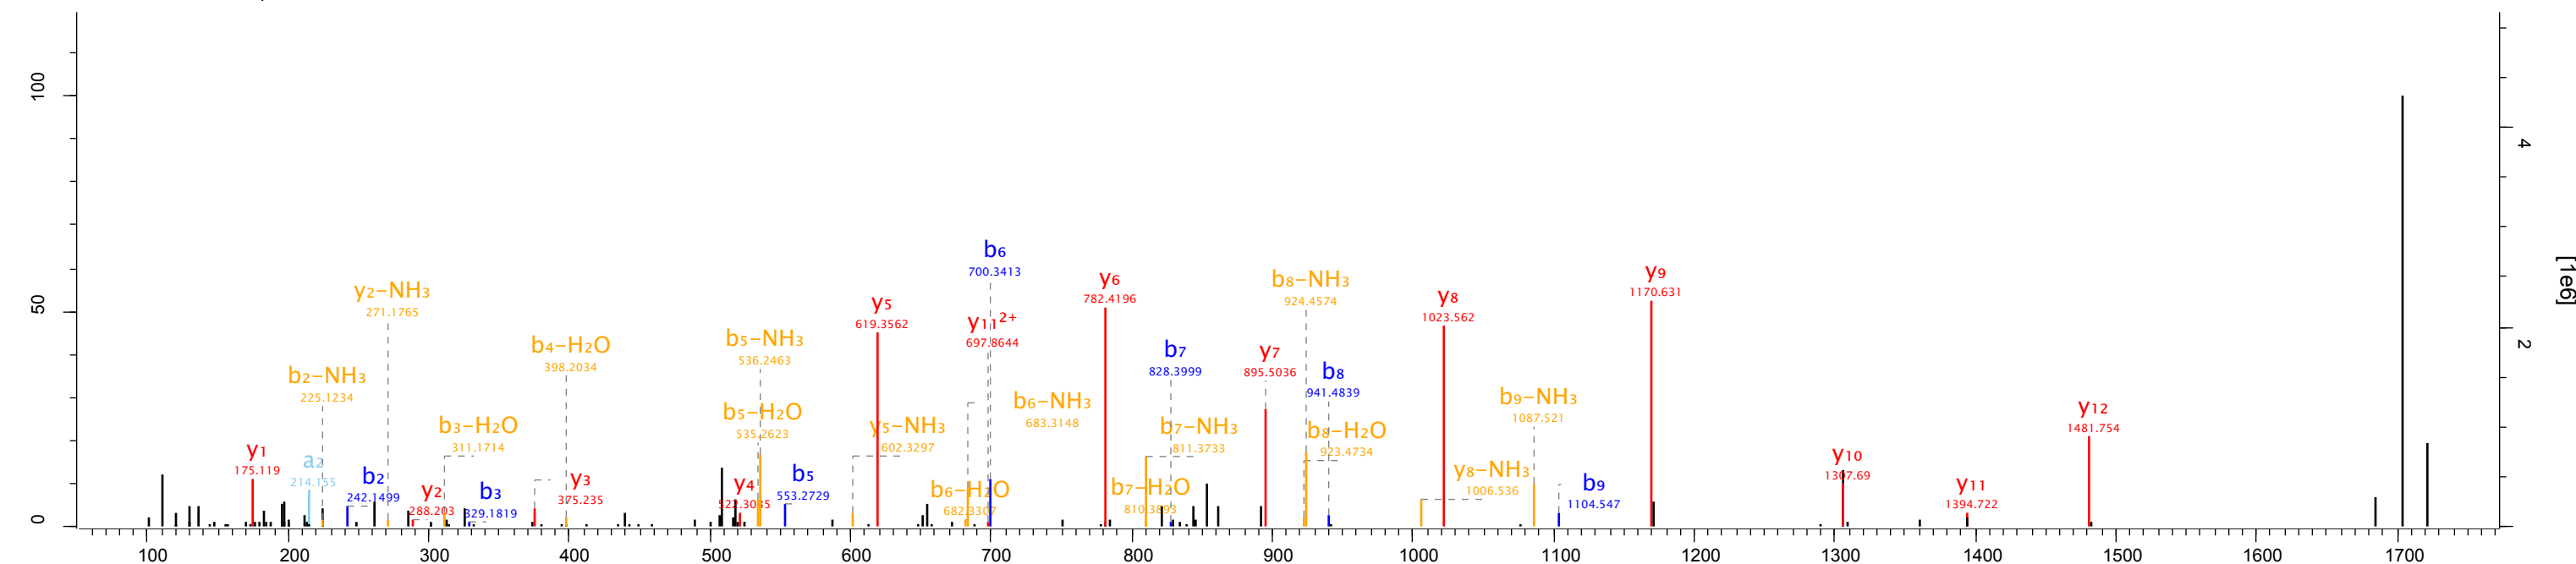

- Q L S S H F Q I Y P F S L R -

Fragmentation mapping:  
- Q L S S H F Q I Y P F S L R -  
b2 b3 b5 b6 b7 b8 b9

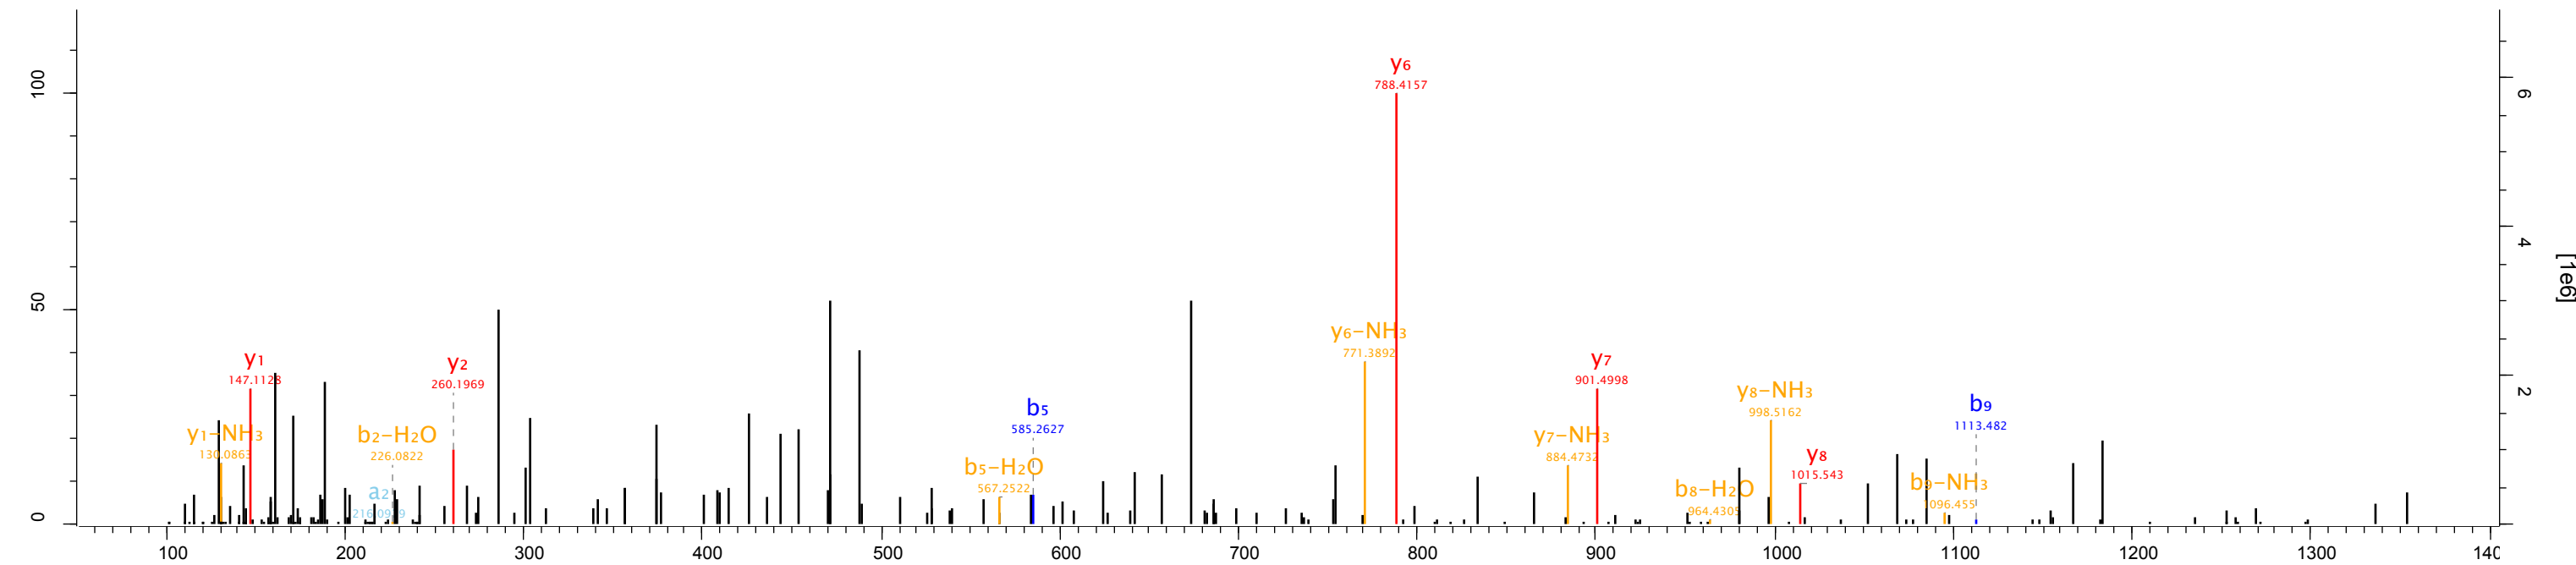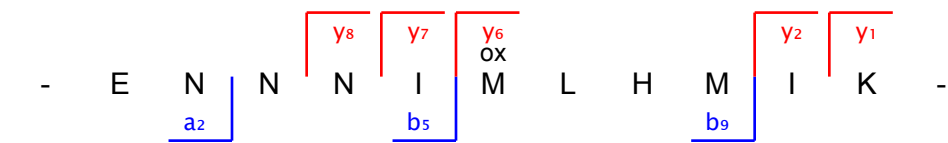

Raw file

20180707\_MaS\_A375SR\_ML\_proteome\_27

| Scan  | Method    | Score | m/z    | Gene names |
|-------|-----------|-------|--------|------------|
| 23689 | FTMS; HCD | 64.45 | 880.45 | SERTAD4    |

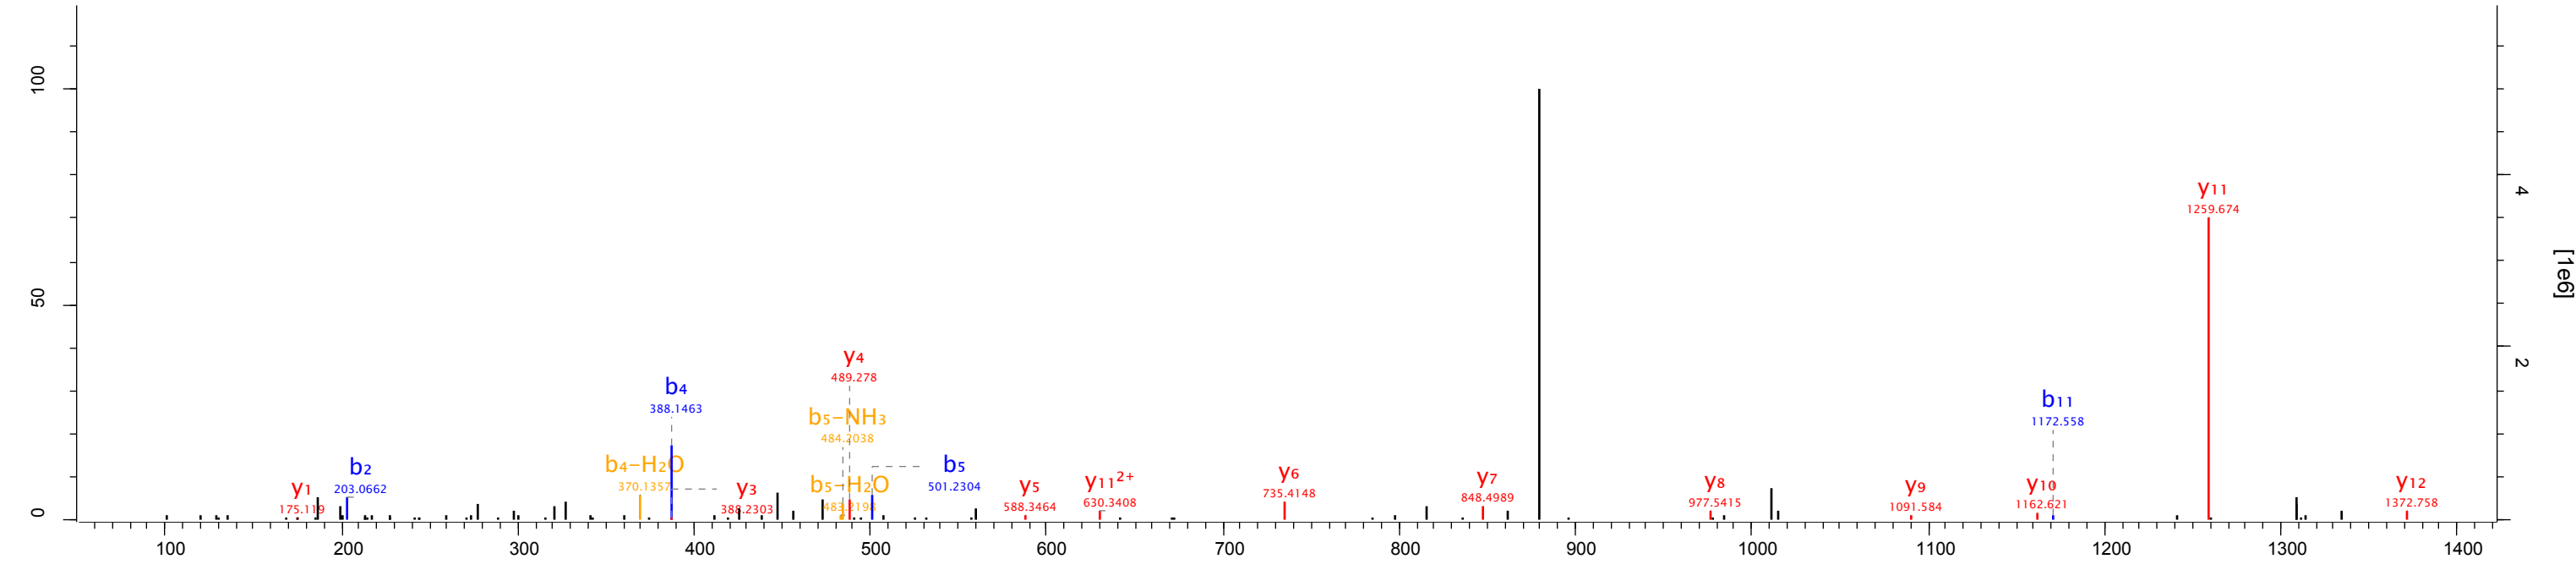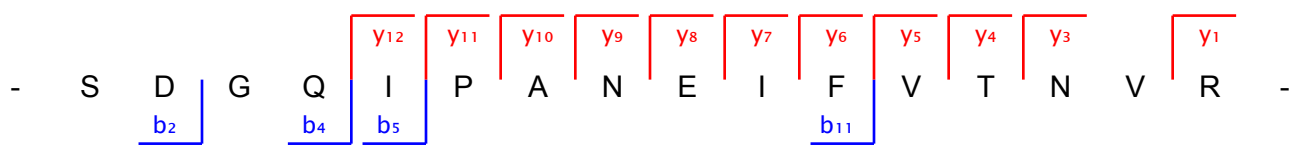

Raw file 20180707\_MaS\_A375SR\_ML\_proteome\_27 Scan 23829 Method FTMS; HCD Score 68.38 m/z 492.75

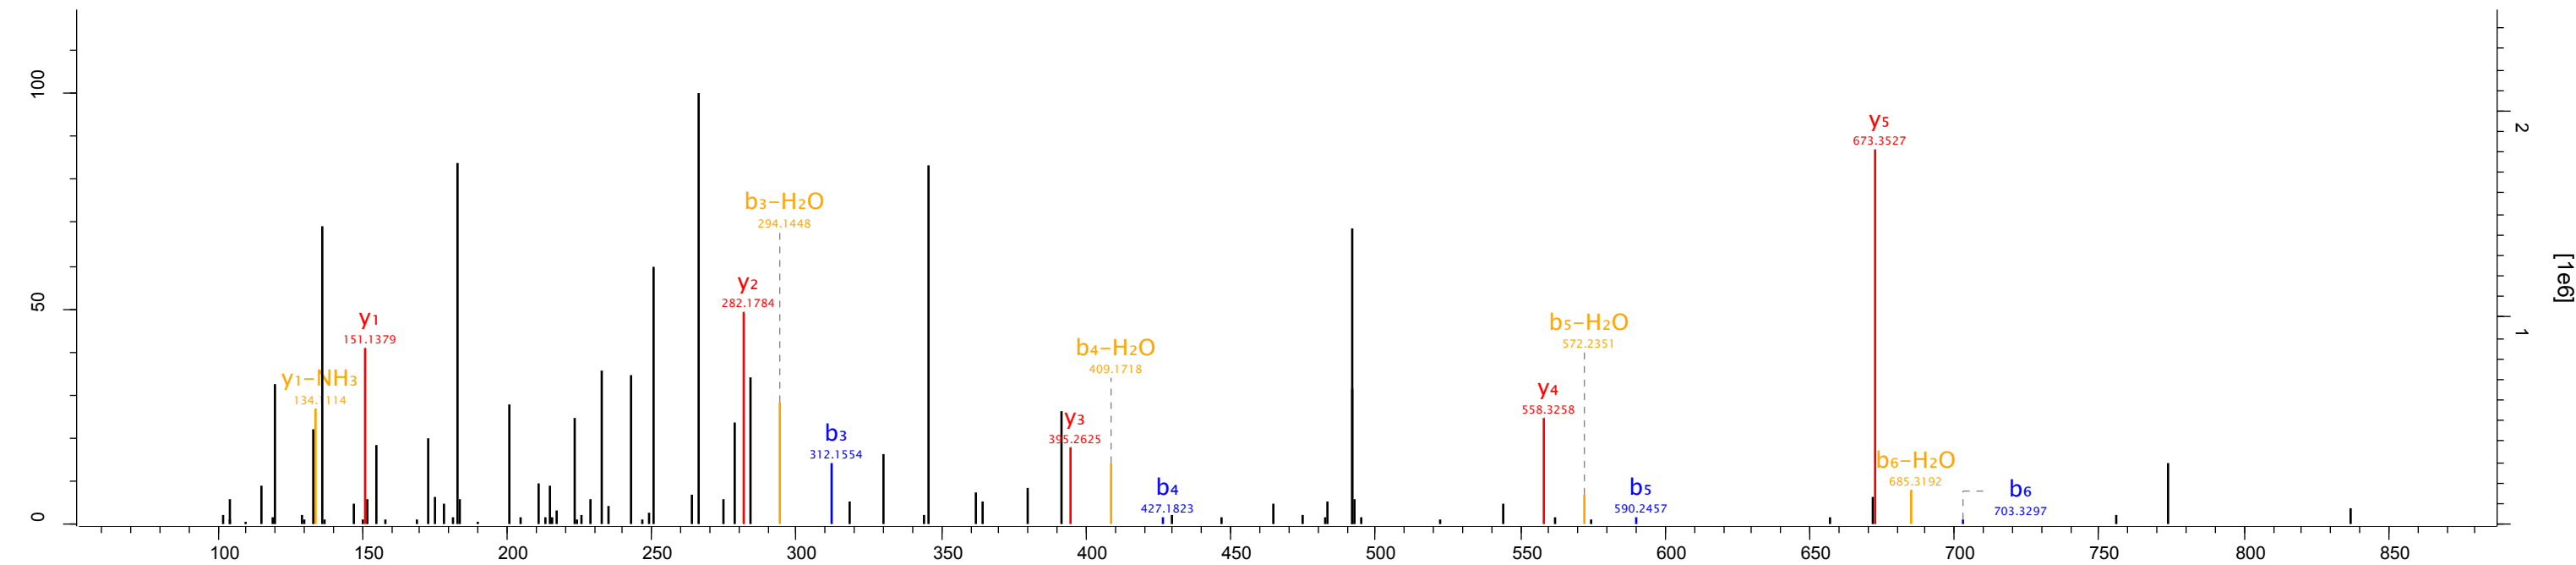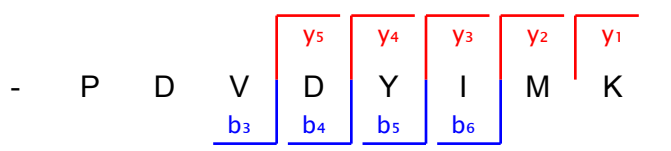

Raw file  
20180707\_MaS\_A375SR\_ML\_proteome\_27

| Scan  | Method    | Score  | m/z    |
|-------|-----------|--------|--------|
| 25479 | FTMS; HCD | 106.04 | 490.74 |

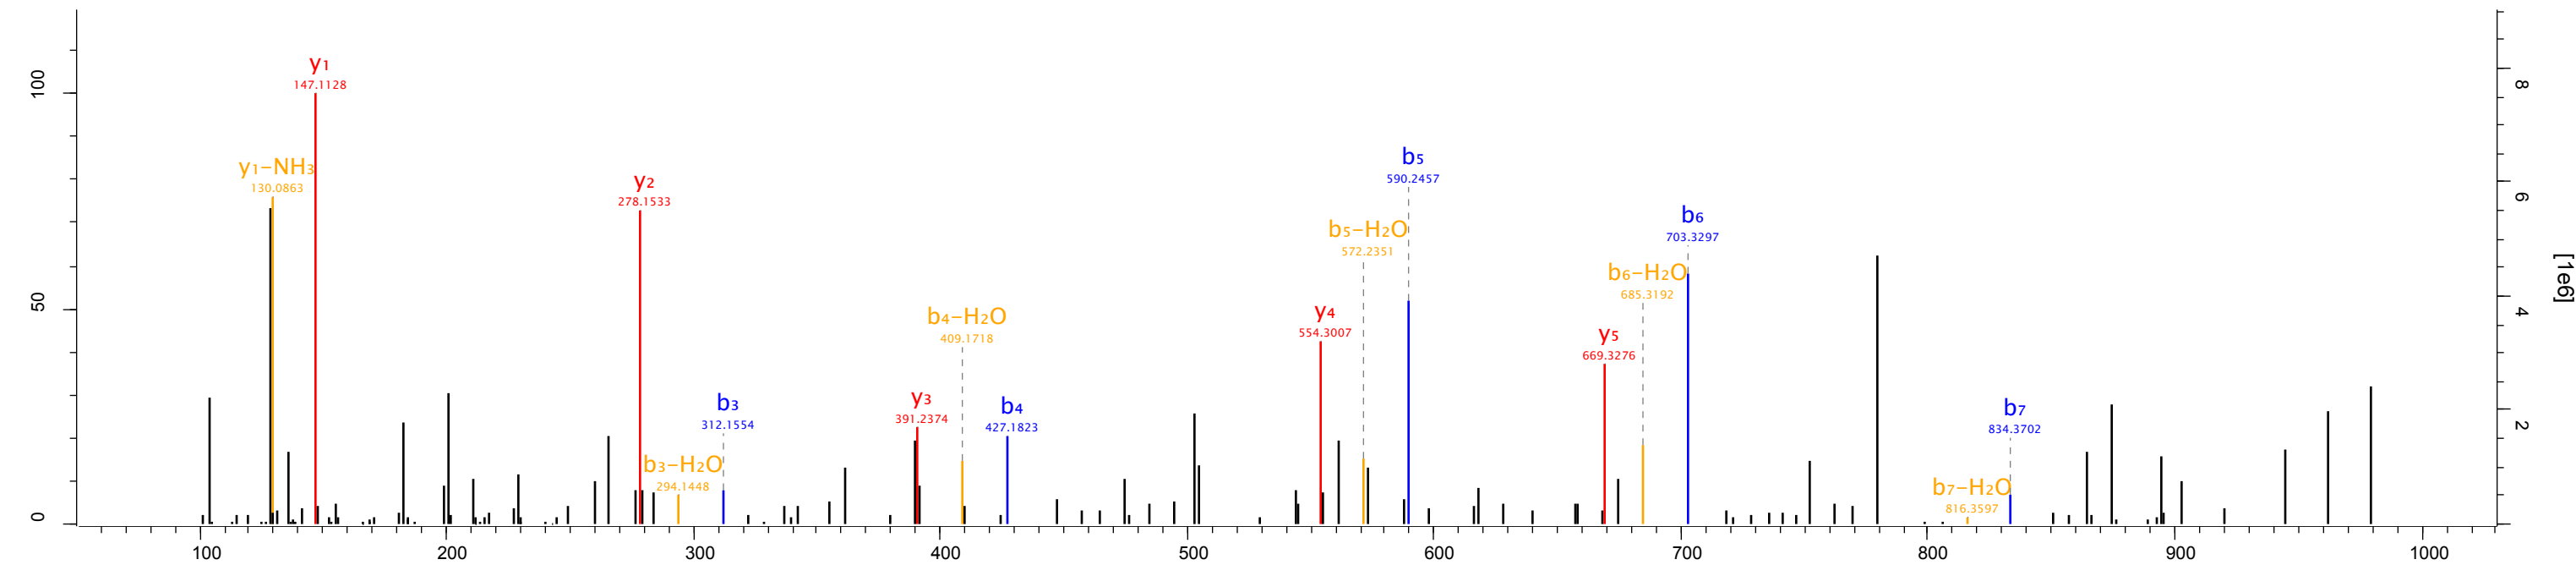

Raw file: 20180707\_MaS\_A375SR\_ML\_proteome\_27  
 Scan: 26279 Method: FTMS; HCD Score: 87.52 m/z: 876.43 Gene names: ZNF552;ZNF587B

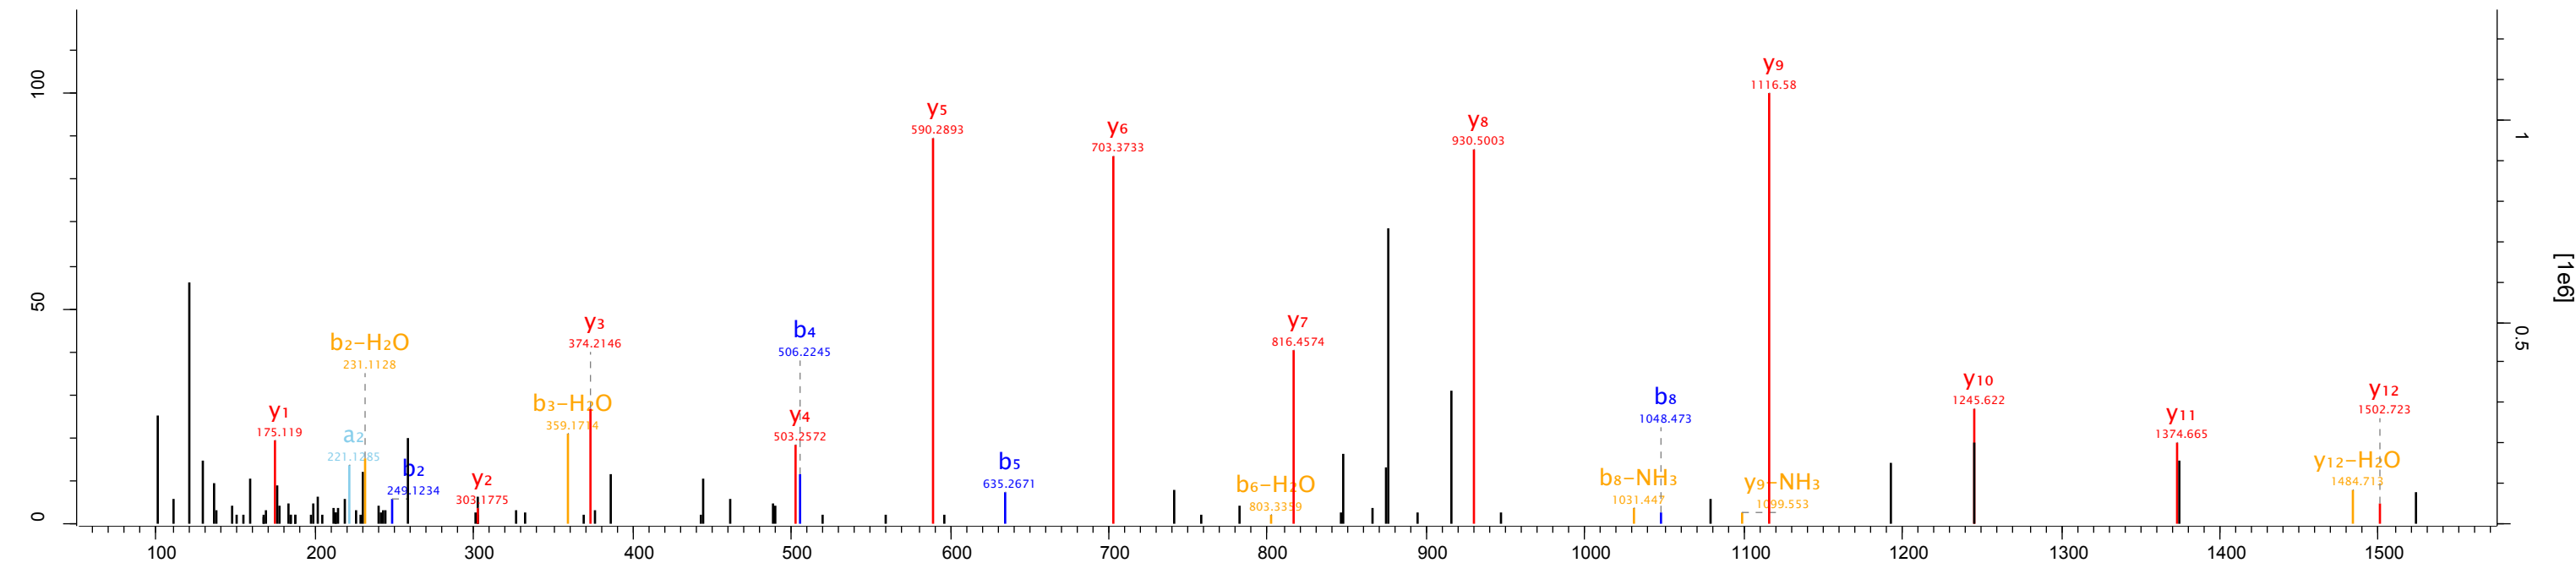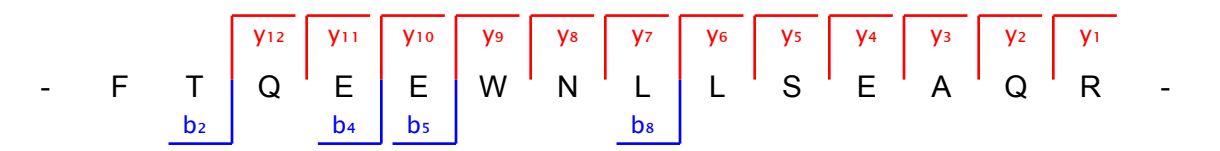

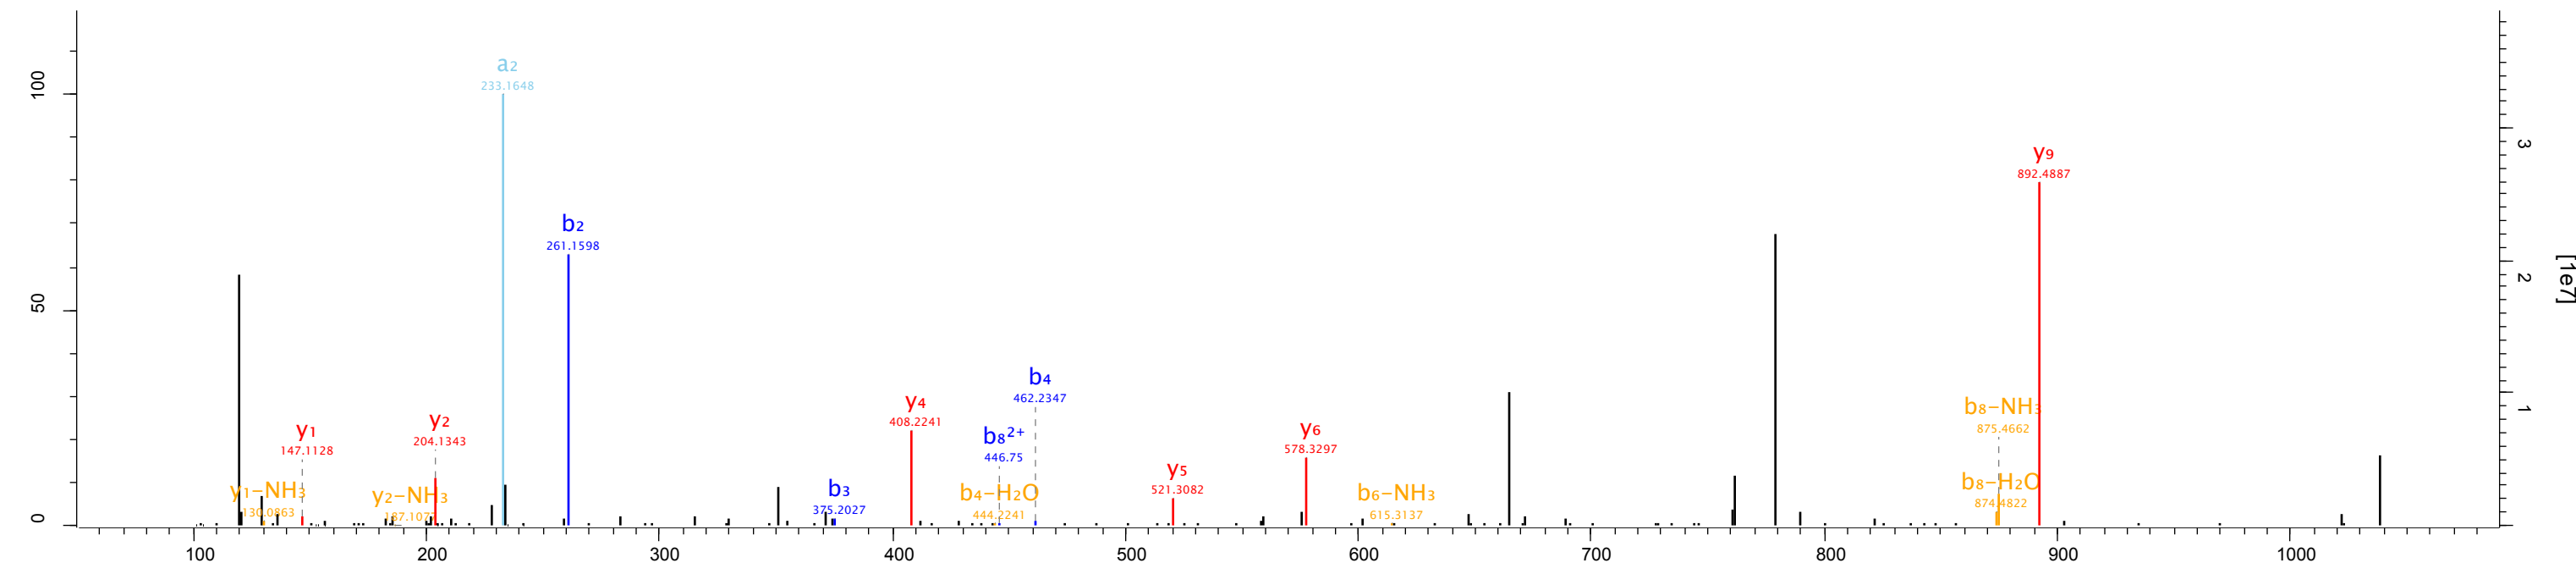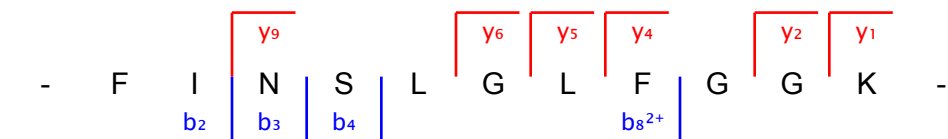

Raw file

20180707\_MaS\_A375SR\_ML\_proteome\_27

| Scan  | Method    | Score | m/z    | Gene names |
|-------|-----------|-------|--------|------------|
| 27389 | FTMS; HCD | 92.61 | 451.95 | LBP        |

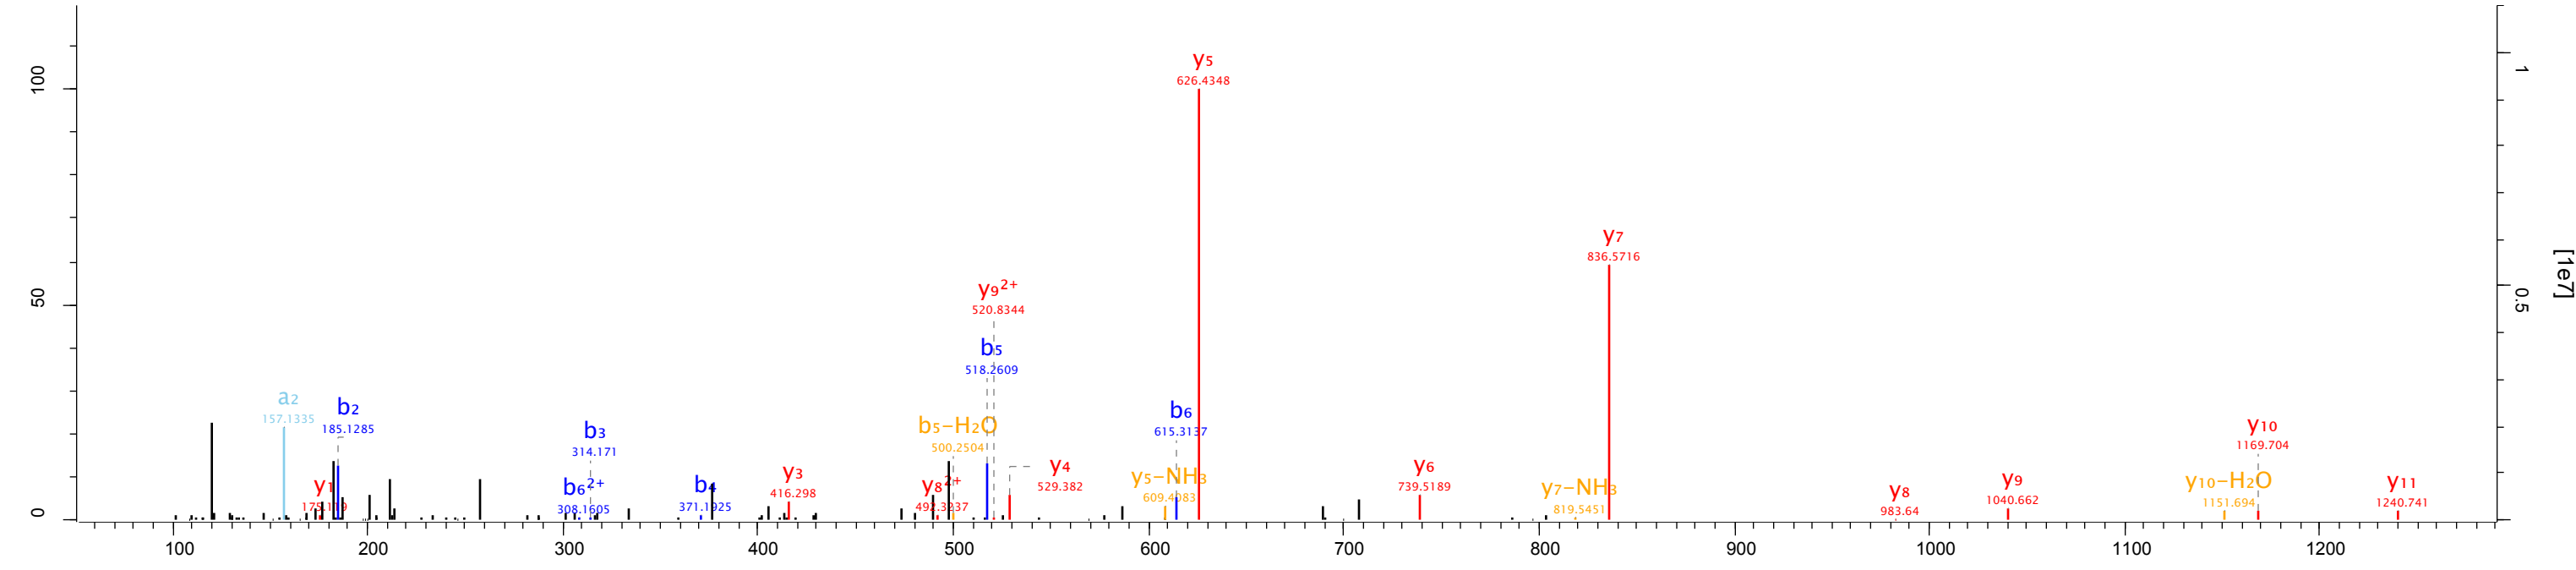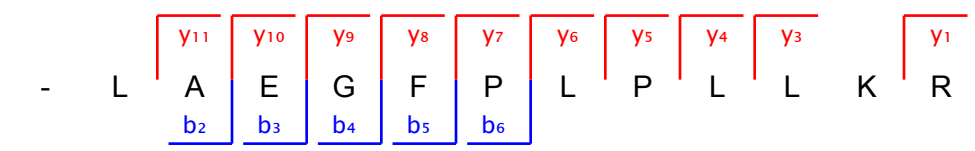



Raw file: 20180707\_MaS\_A375SR\_ML\_proteome\_29  
 Scan: 13639 Method: FTMS; HCD Score: 103.74 m/z: 507.29 Gene names: TBC1D30

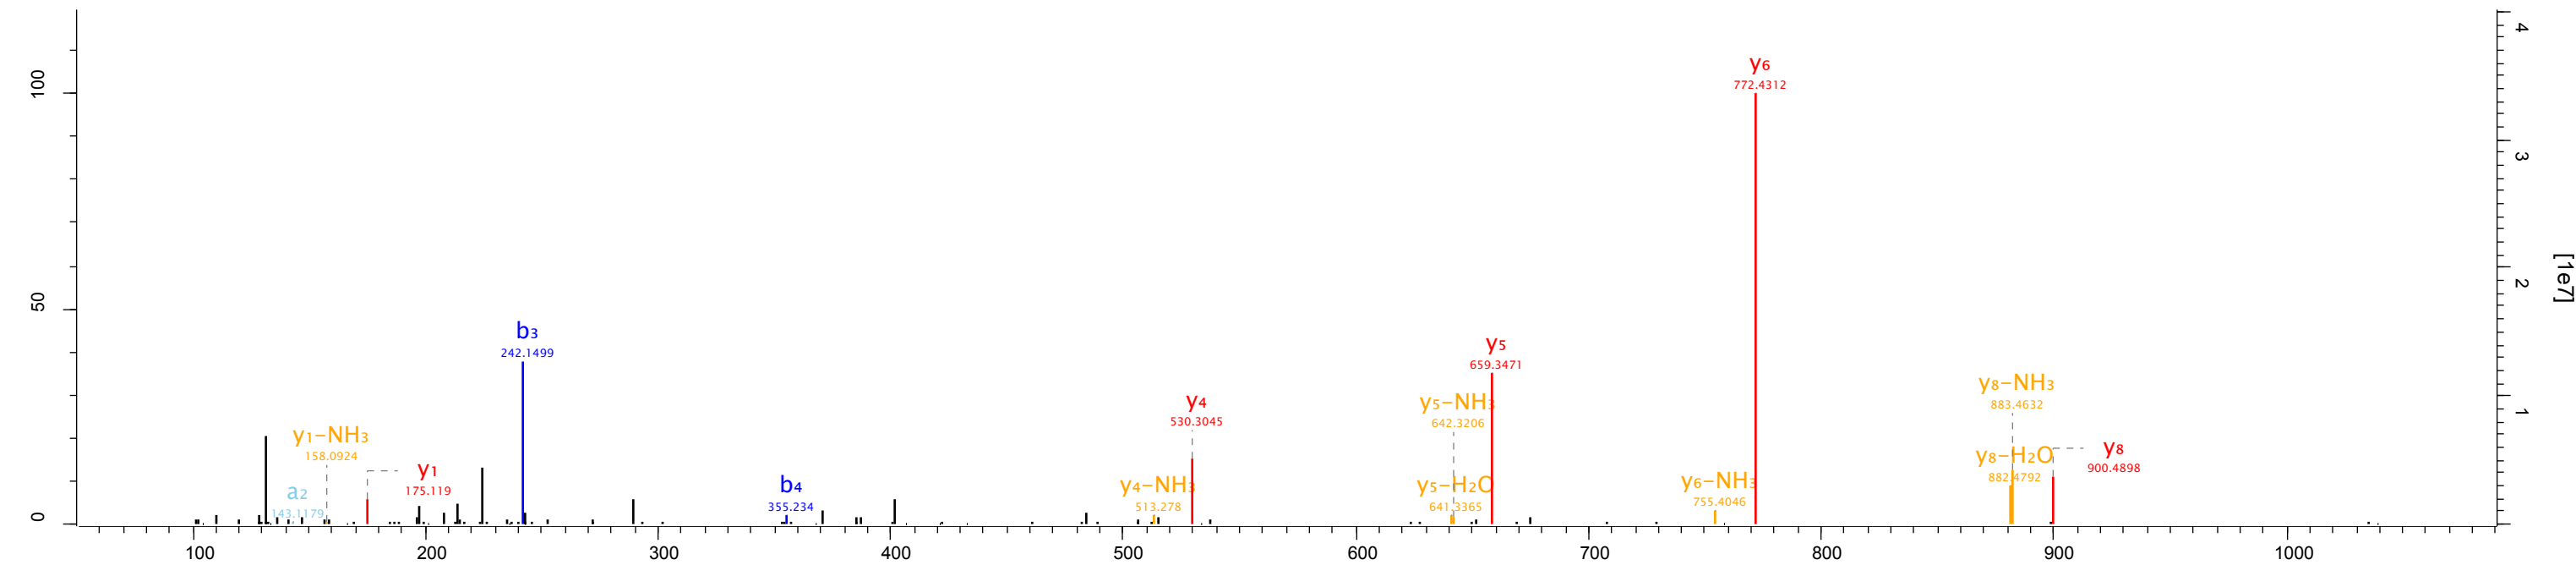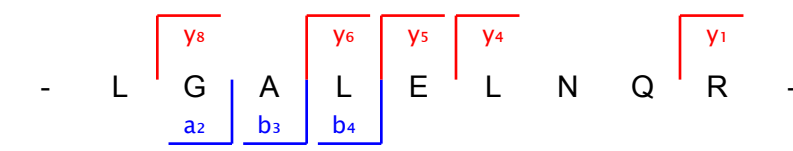

Raw file 20180707\_MaS\_A375SR\_ML\_proteome\_29 Scan 7719 Method FTMS; HCD Score 93.35 m/z 595.83

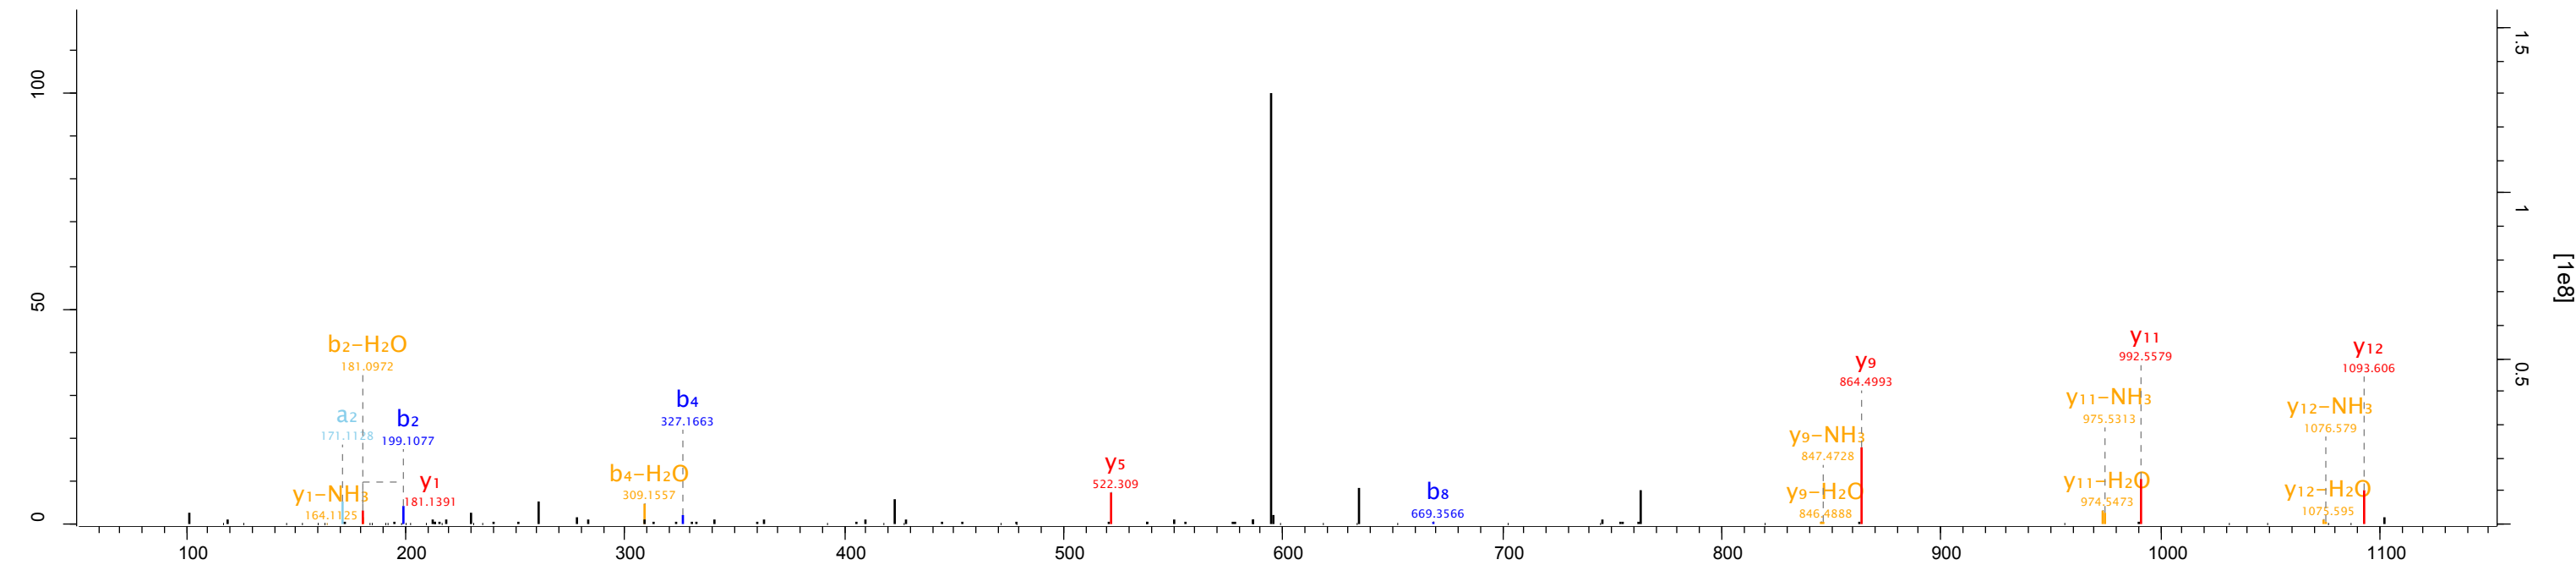

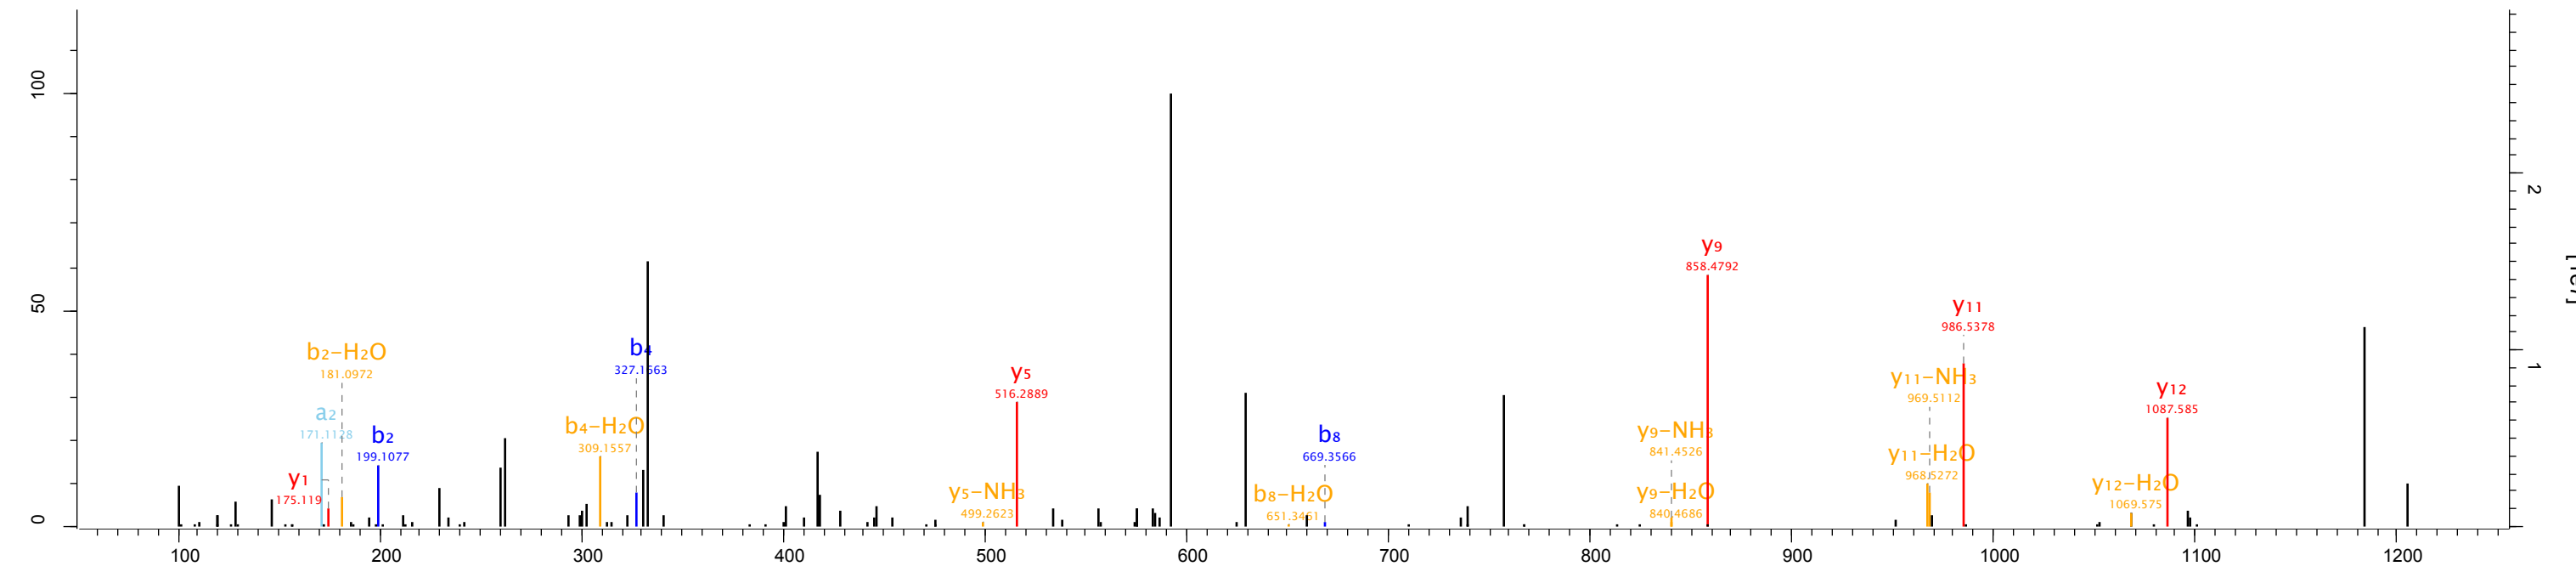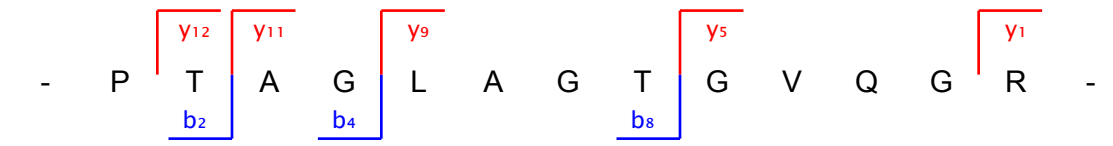

Supplement: 142829_1_supp_284402_pmrjzd.pdf [file 142829_1_supp_284402_pmrjzd.pdf]
