# Supplementary material
Source: PubMed Central journal article supplement (PMC6553926)

Raw file 20171215\_MaS\_33SR\_LMH\_phospho\_01 Scan 3720 Method FTMS; HCD Score 167.19 m/z 725.32 Gene names EPB41

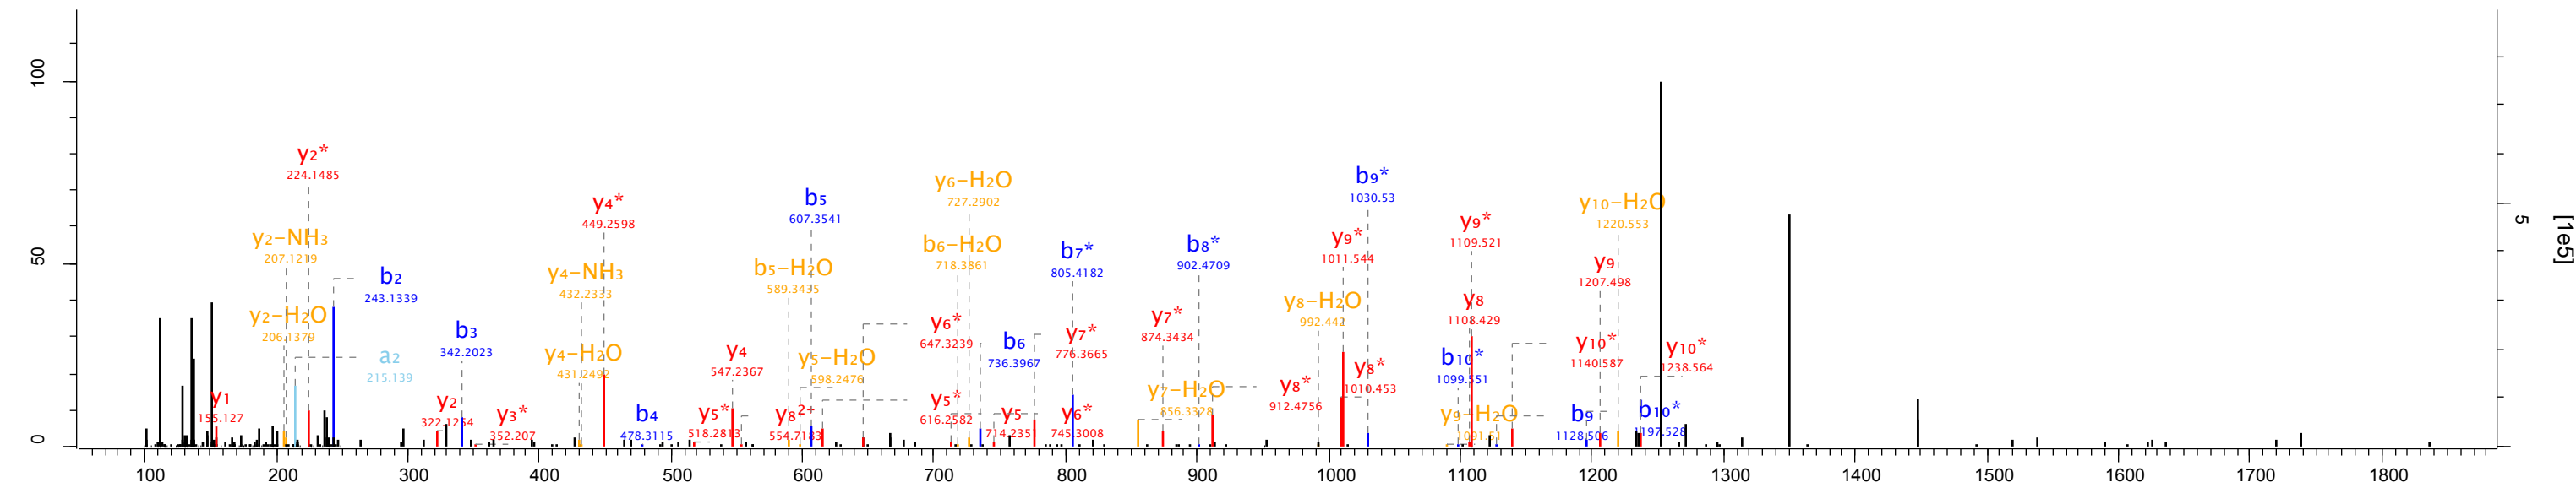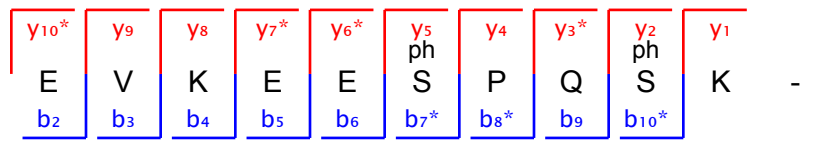

Raw file 20171215\_MaS\_33SR\_LMH\_phospho\_01 Scan 7770 Method FTMS; HCD Score 51.88 m/z 817.34 Gene names PI4KA

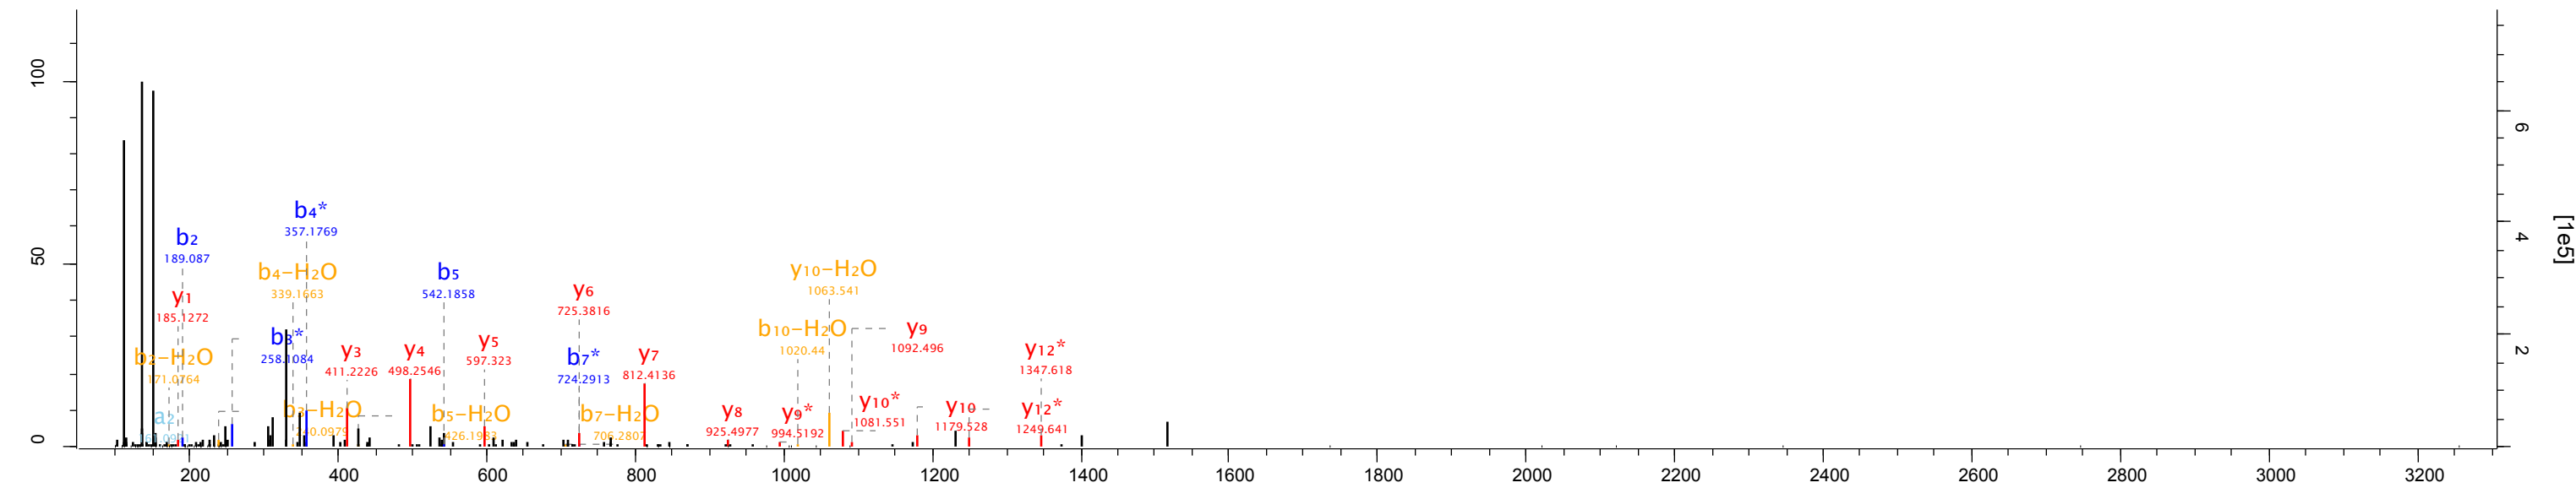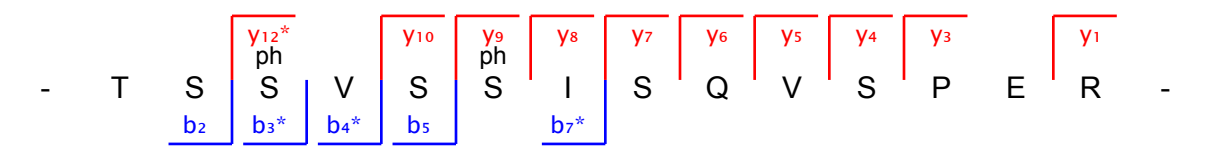

Raw file: 20171215\_MaS\_33SR\_LMH\_phospho\_02  
 Scan: 15430  
 Method: FTMS; HCD  
 Score: 259.44  
 m/z: 1020.93  
 Gene names: CDC42EP3

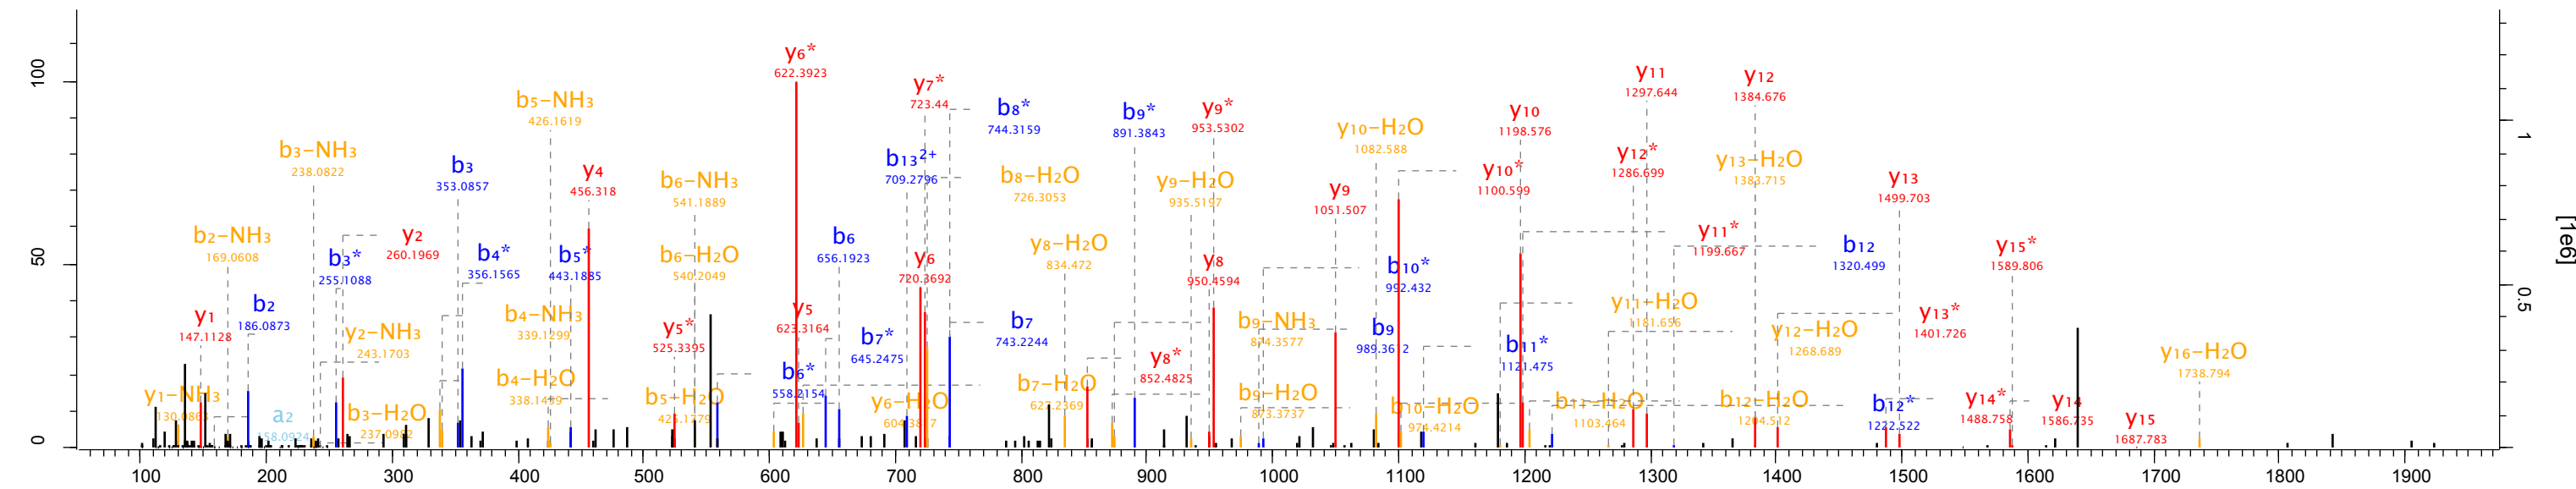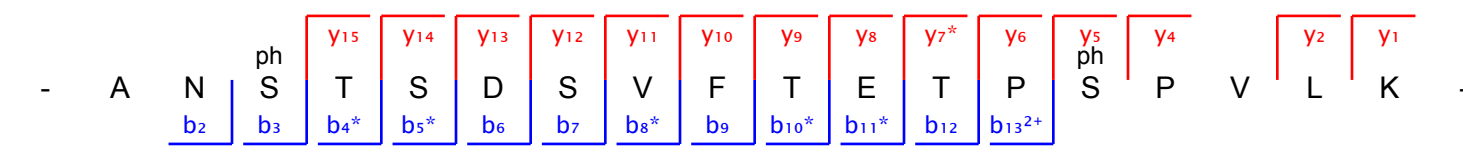

Raw file 20171215\_MaS\_33SR\_LMH\_phospho\_02 Scan 5720 Method FTMS; HCD Score 136.33 m/z 942.81 Gene names ARMCX3

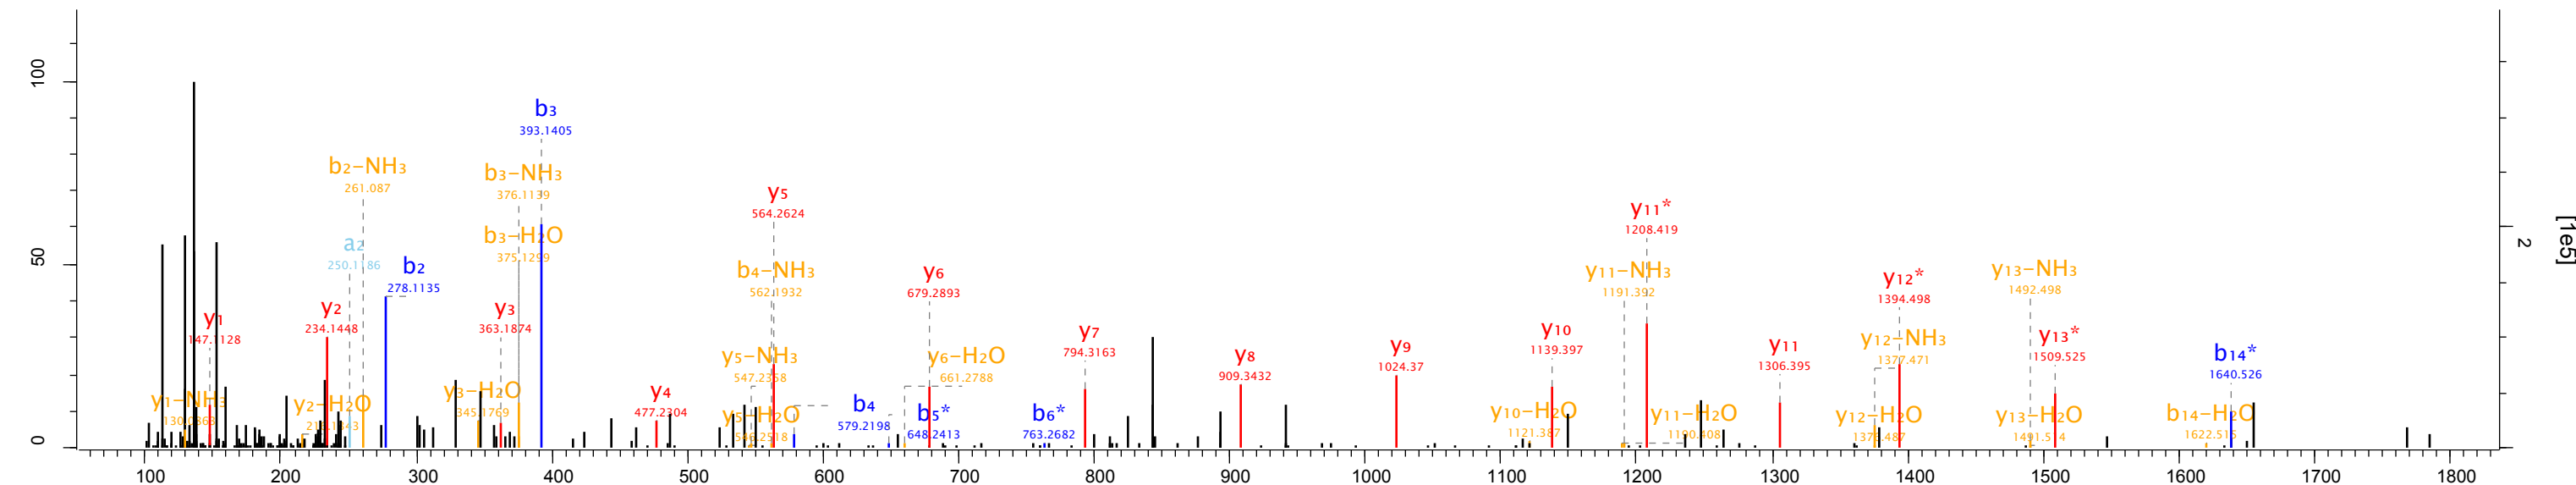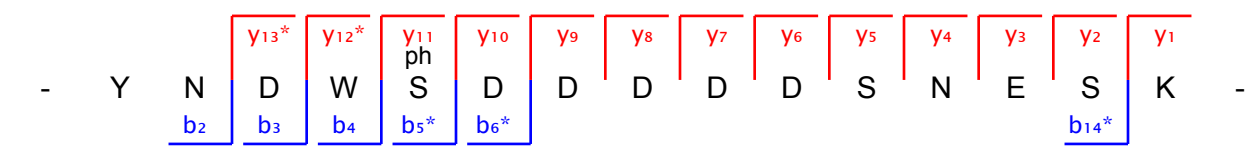

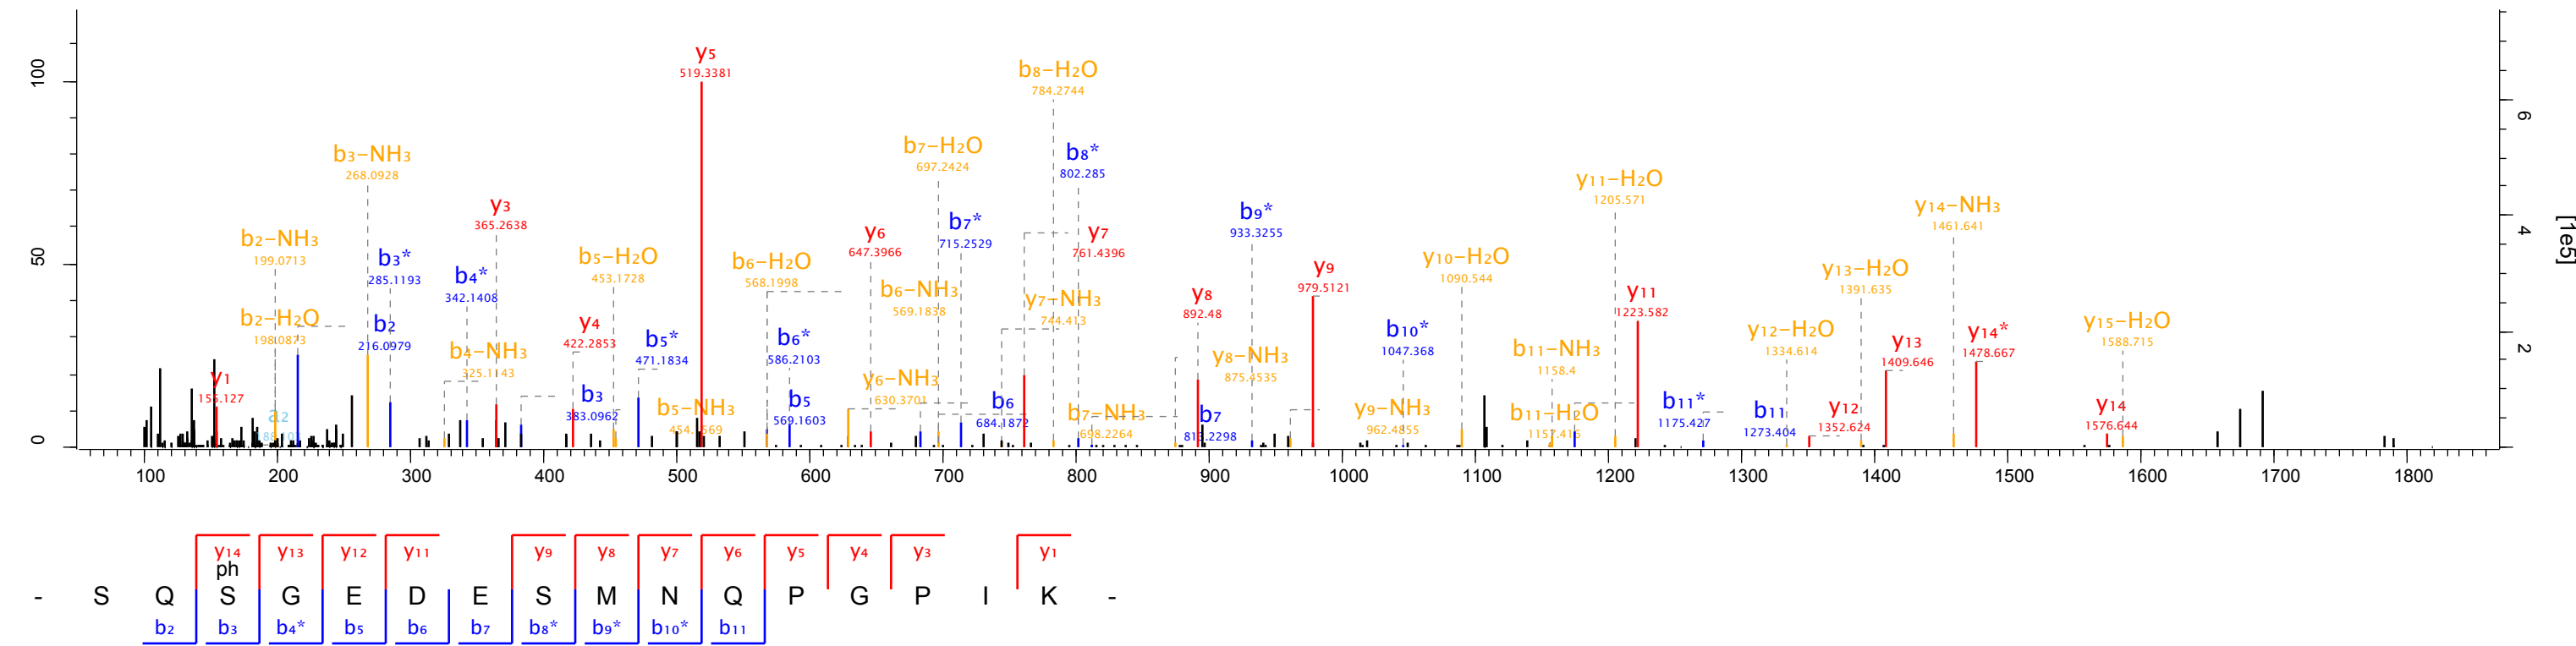



Raw file 20171215\_MaS\_33SR\_LMH\_phospho\_03 Scan 10760 Method FTMS; HCD Score 210.43 m/z 876.91 Gene names KDM5C

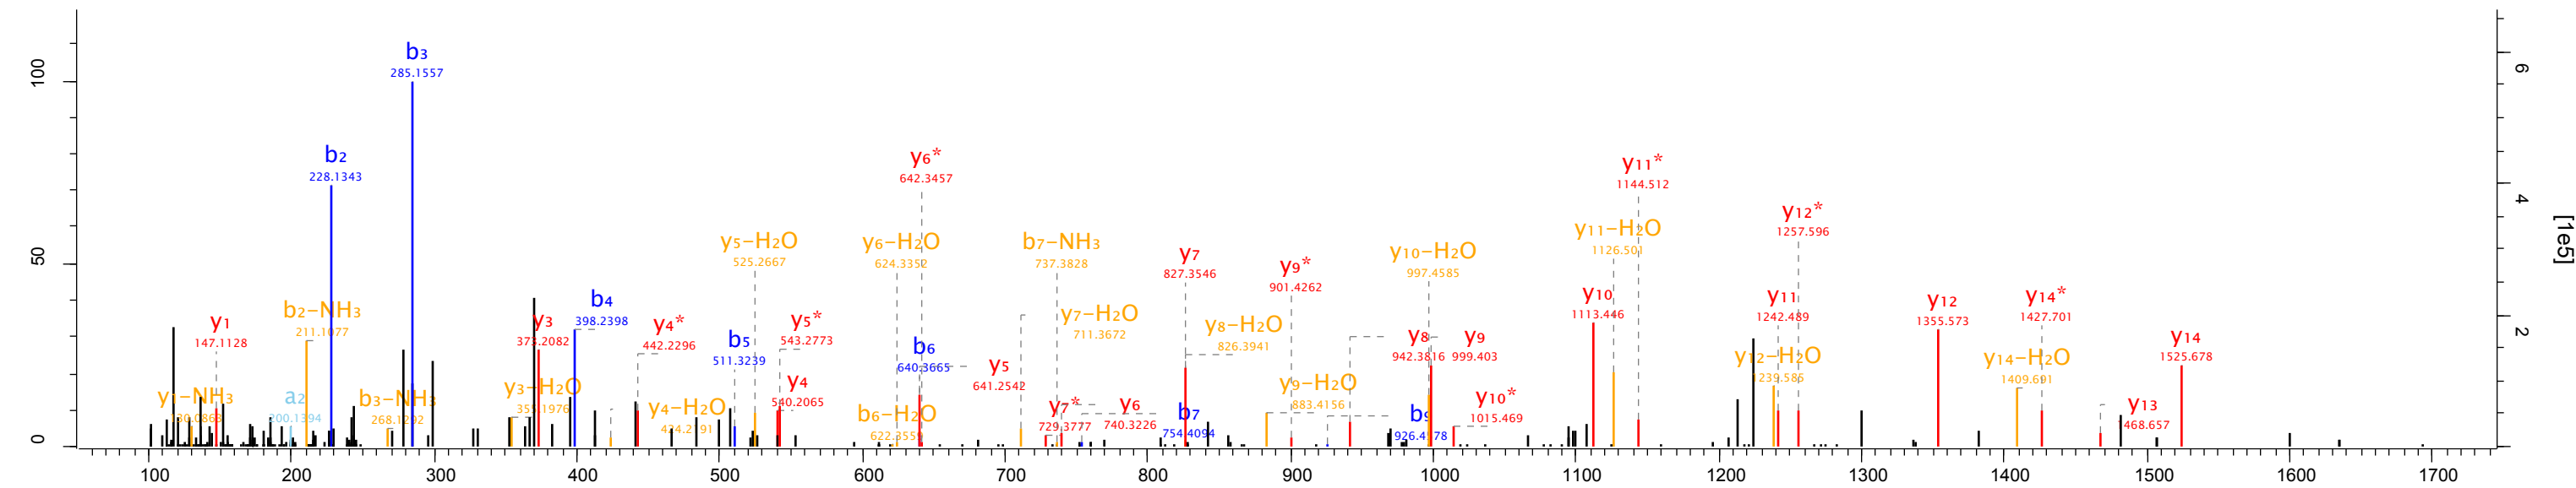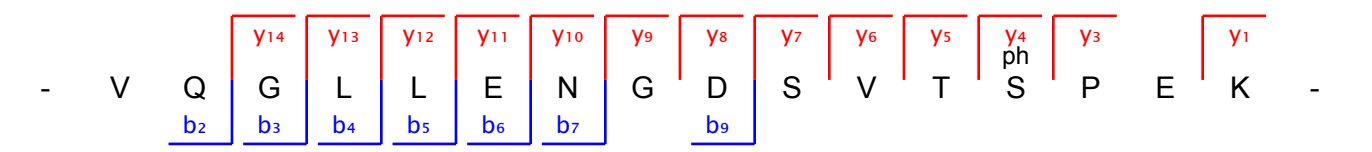

Raw file: 20171215\_MaS\_33SR\_LMH\_phospho\_03  
 Scan: 11800 Method: FTMS; HCD Score: 150.94 m/z: 920.44 Gene names: USP42

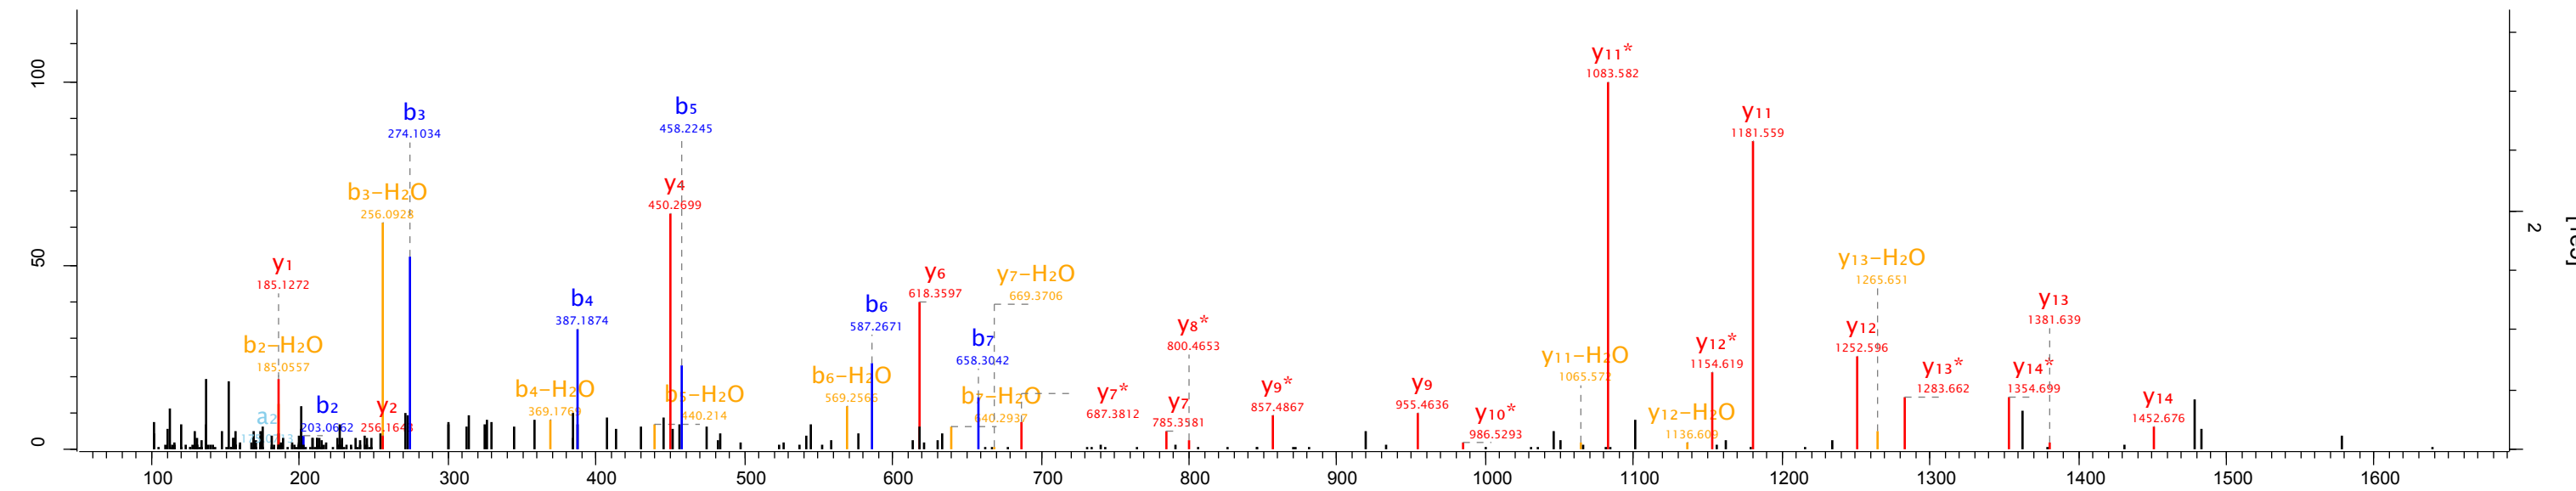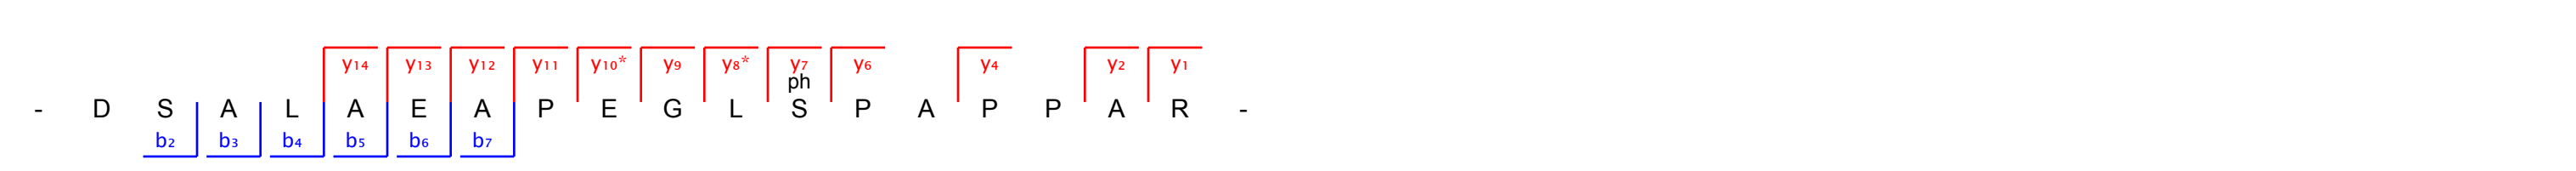



Raw file 20171215\_MaS\_33SR\_LMH\_phospho\_03 Scan 15630 Method FTMS; HCD Score 52.47 m/z 817.68 Gene names SAC3D1

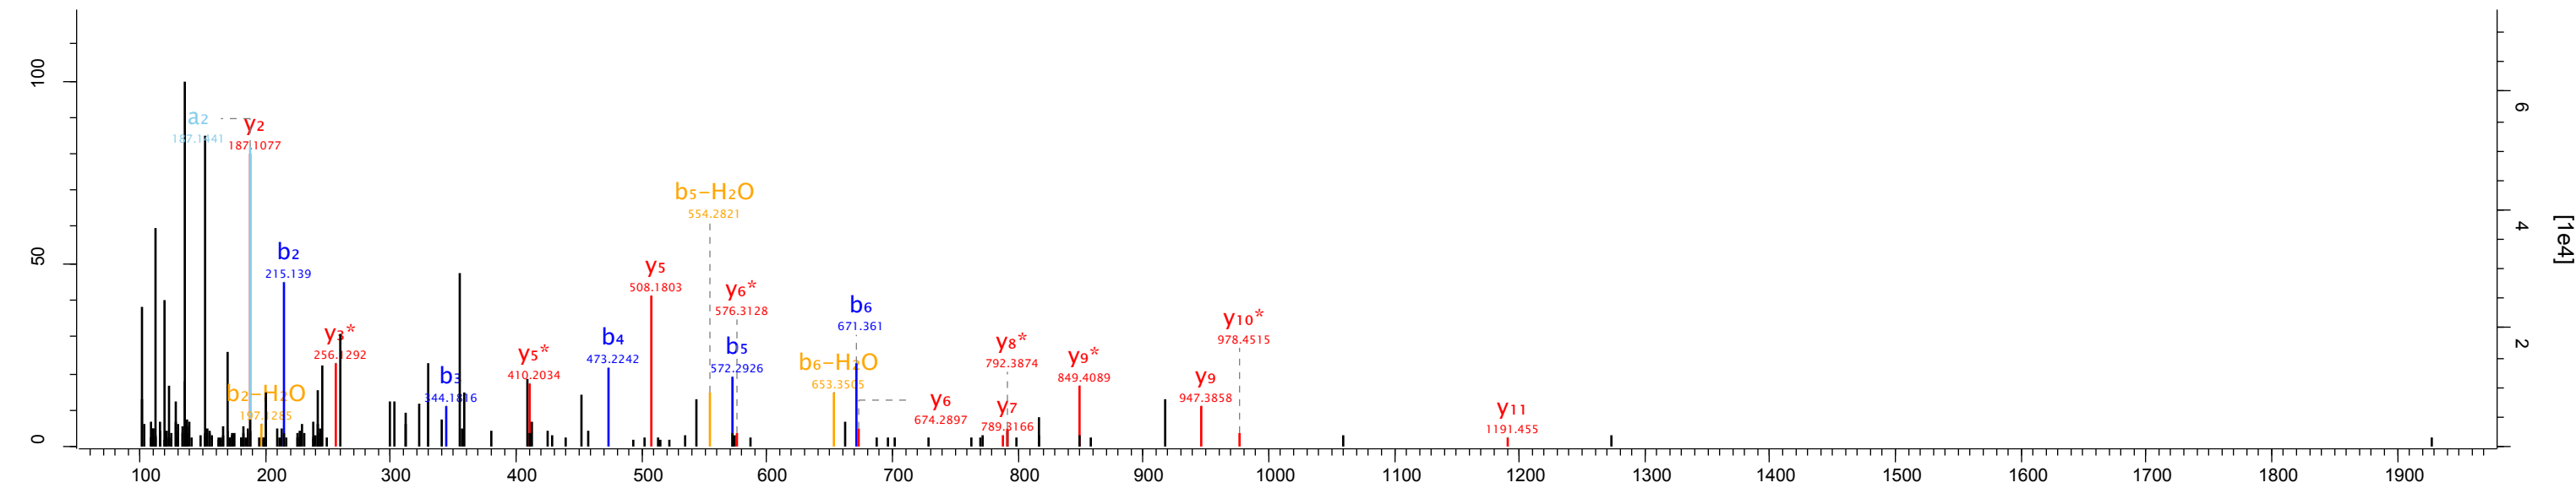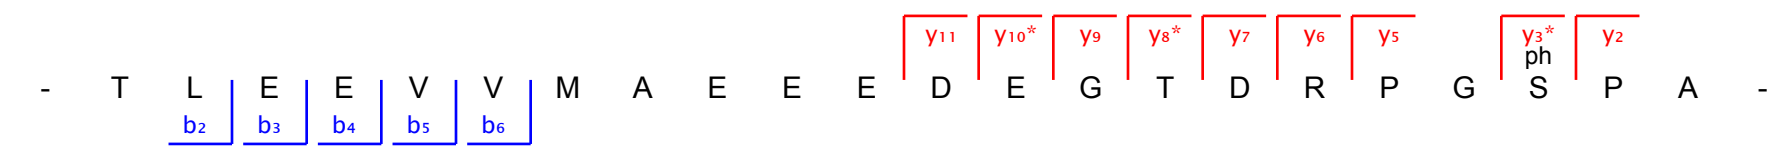

Raw file 20171215\_MaS\_33SR\_LMH\_phospho\_03 Scan 2310 Method FTMS; HCD Score 69.28 m/z 551.76

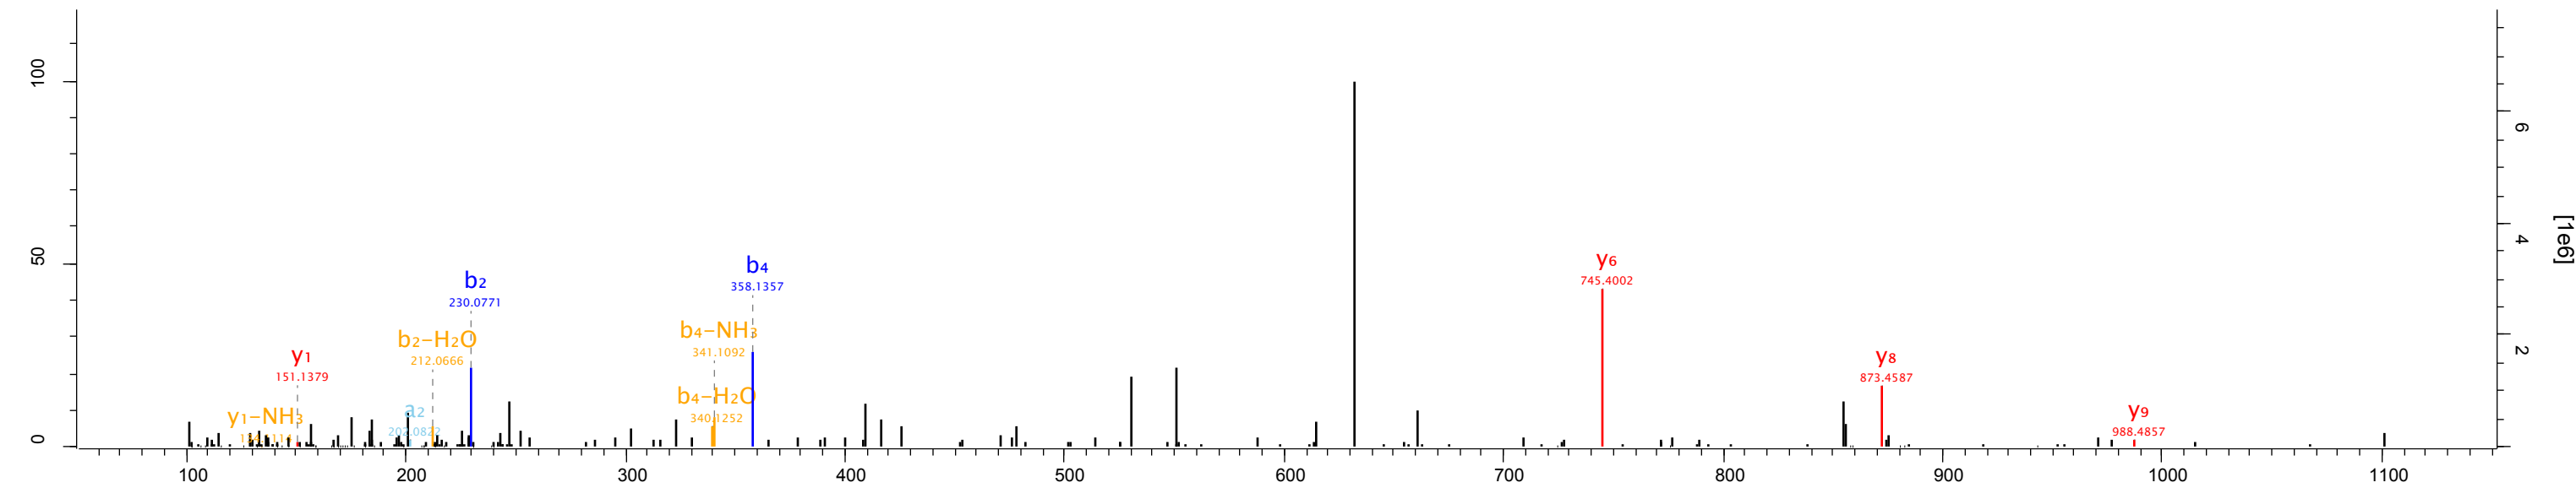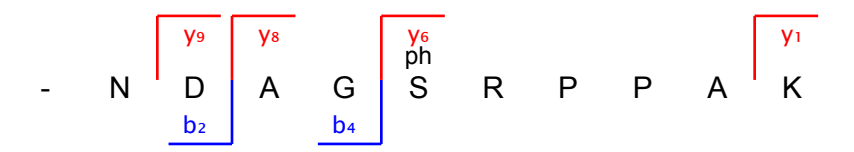

Raw file 20171215\_MaS\_33SR\_LMH\_phospho\_03 Scan 2950 Method FTMS; HCD Score 56.82 m/z 544.89 Gene names BCKDK

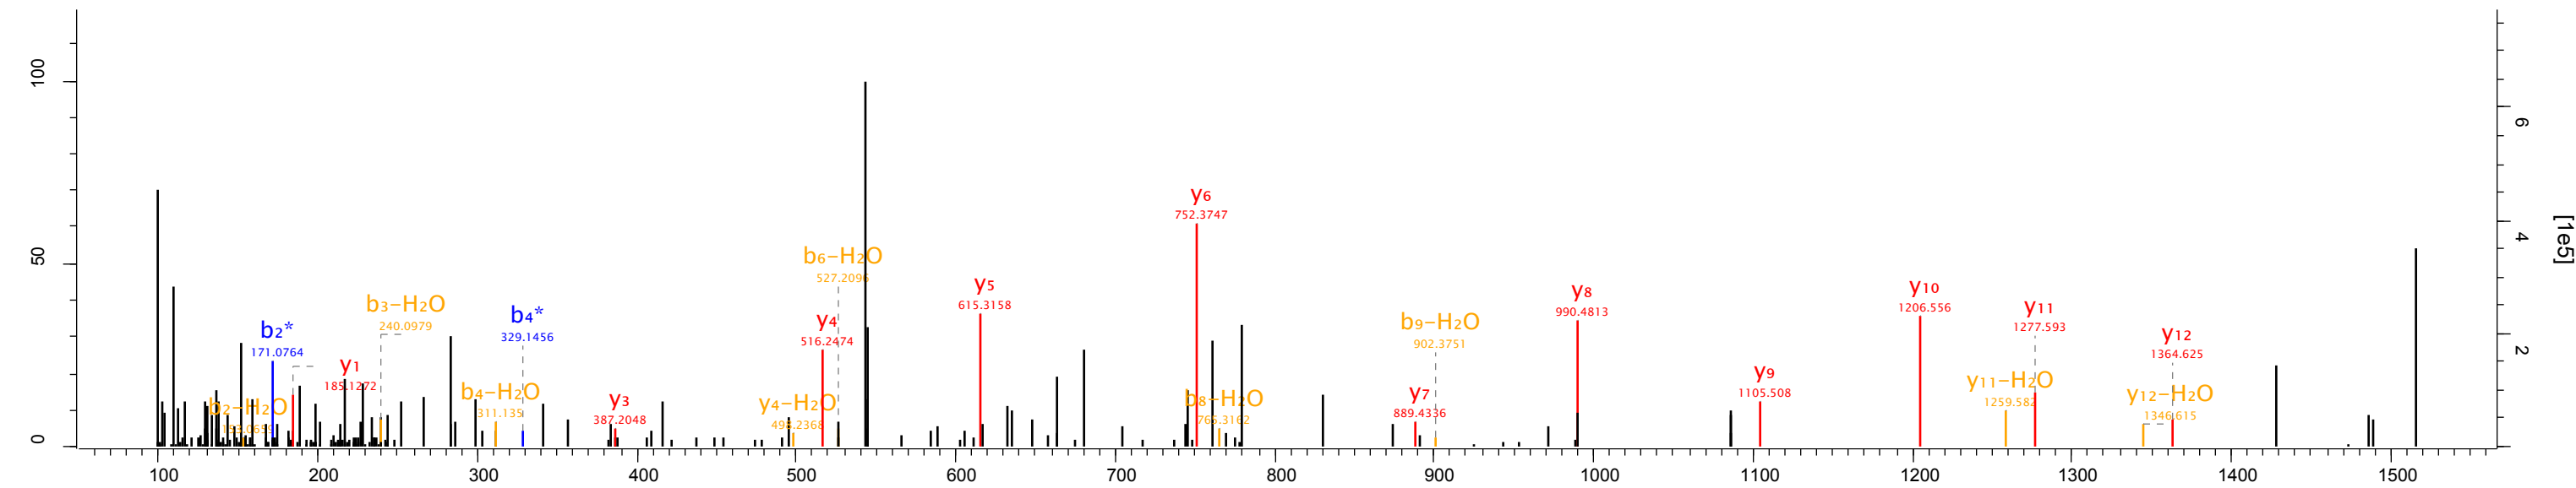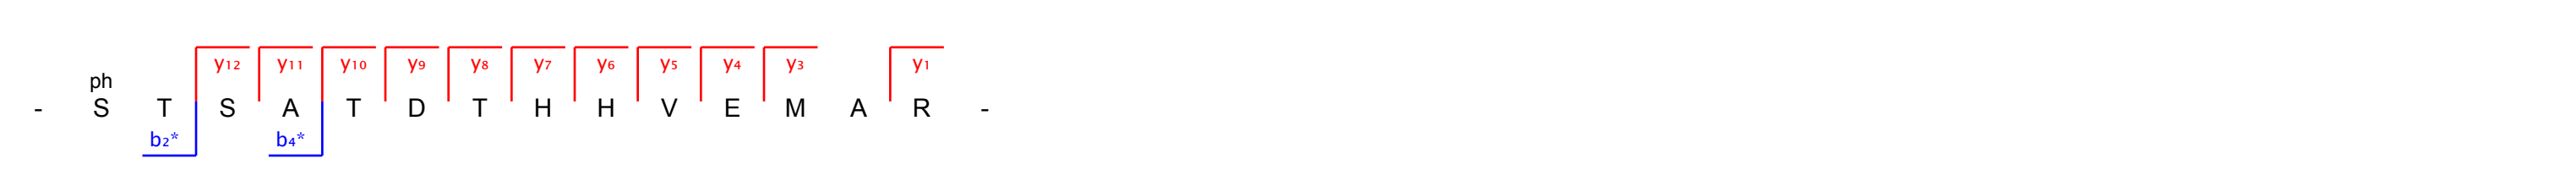

20171215\_MaS\_33SR\_LMH\_phospho\_03 5960 FTMS; HCD 47.04 560.75 ANKS3

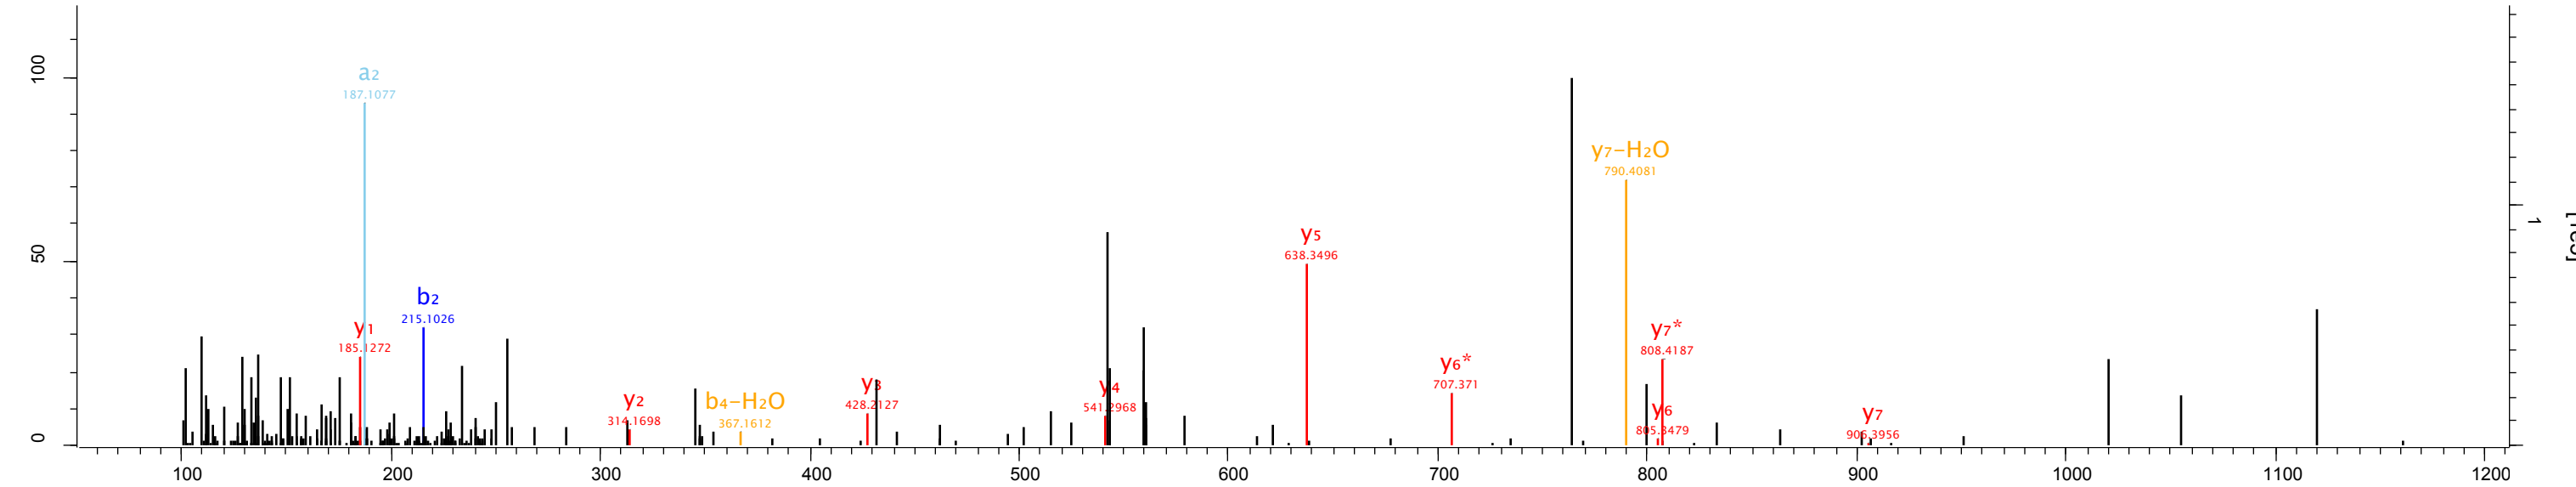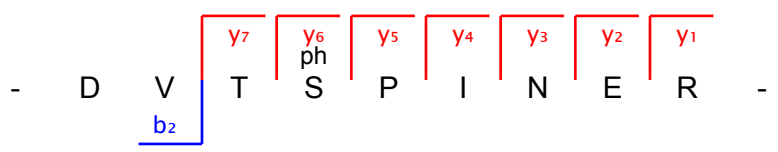

Raw file 20171215\_MaS\_33SR\_LMH\_phospho\_03 Scan 6480 Method FTMS; HCD Score 62.94 m/z 657.28 Gene names TRAPPC12

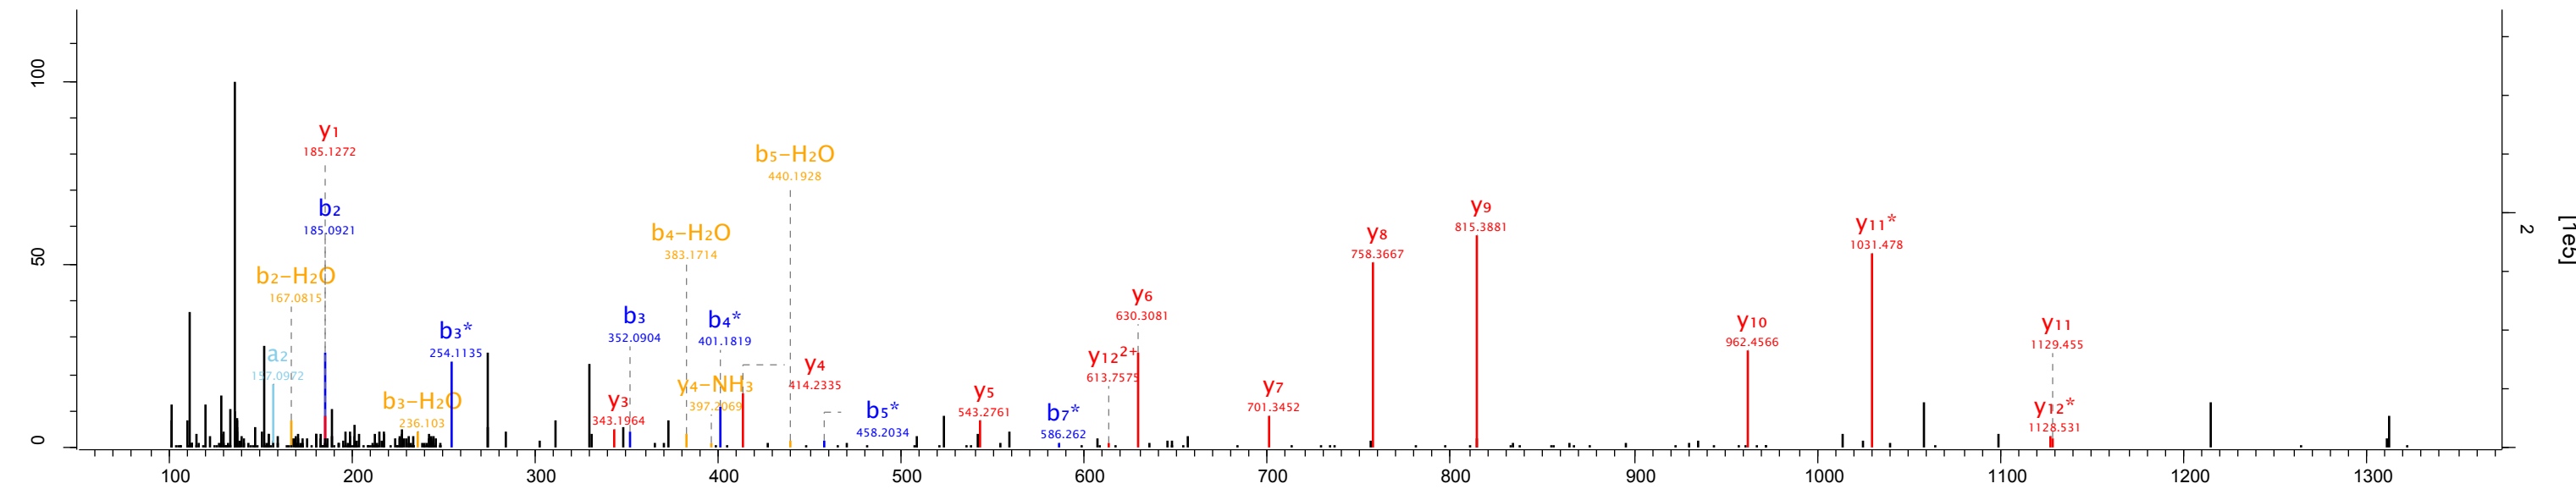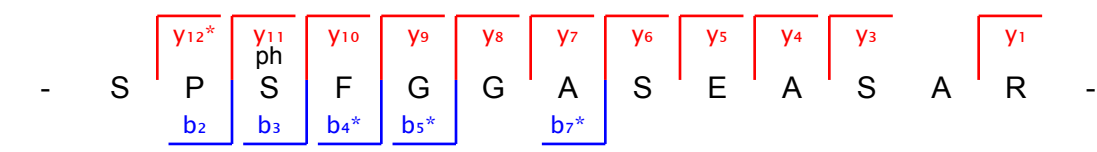

Raw file: 20171215\_MaS\_33SR\_LMH\_phospho\_03  
 Scan: 8460 Method: FTMS; HCD Score: 157.12 m/z: 1083.47 Gene names: CSNK1G3

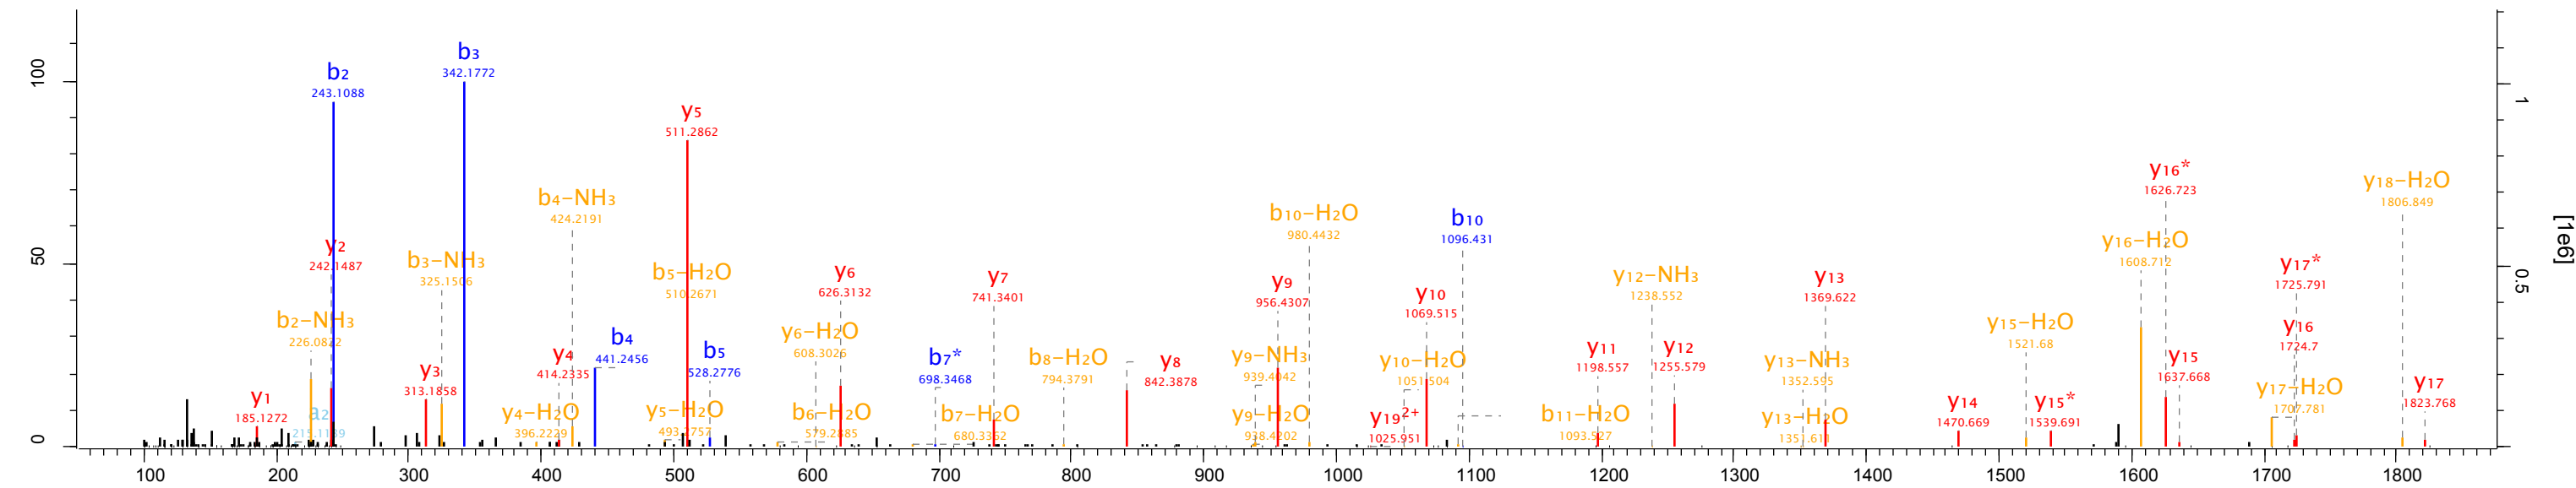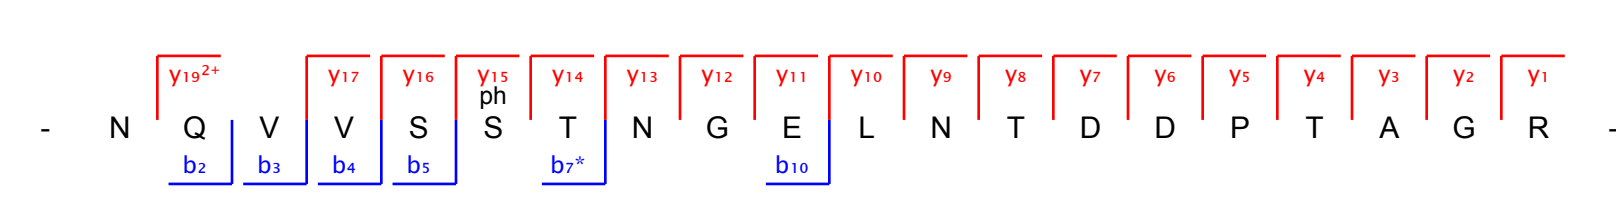

Raw file 20171215\_MaS\_33SR\_LMH\_phospho\_03 Scan 9820 Method FTMS; HCD Score 62.8 m/z 527.24 Gene names FAM53B

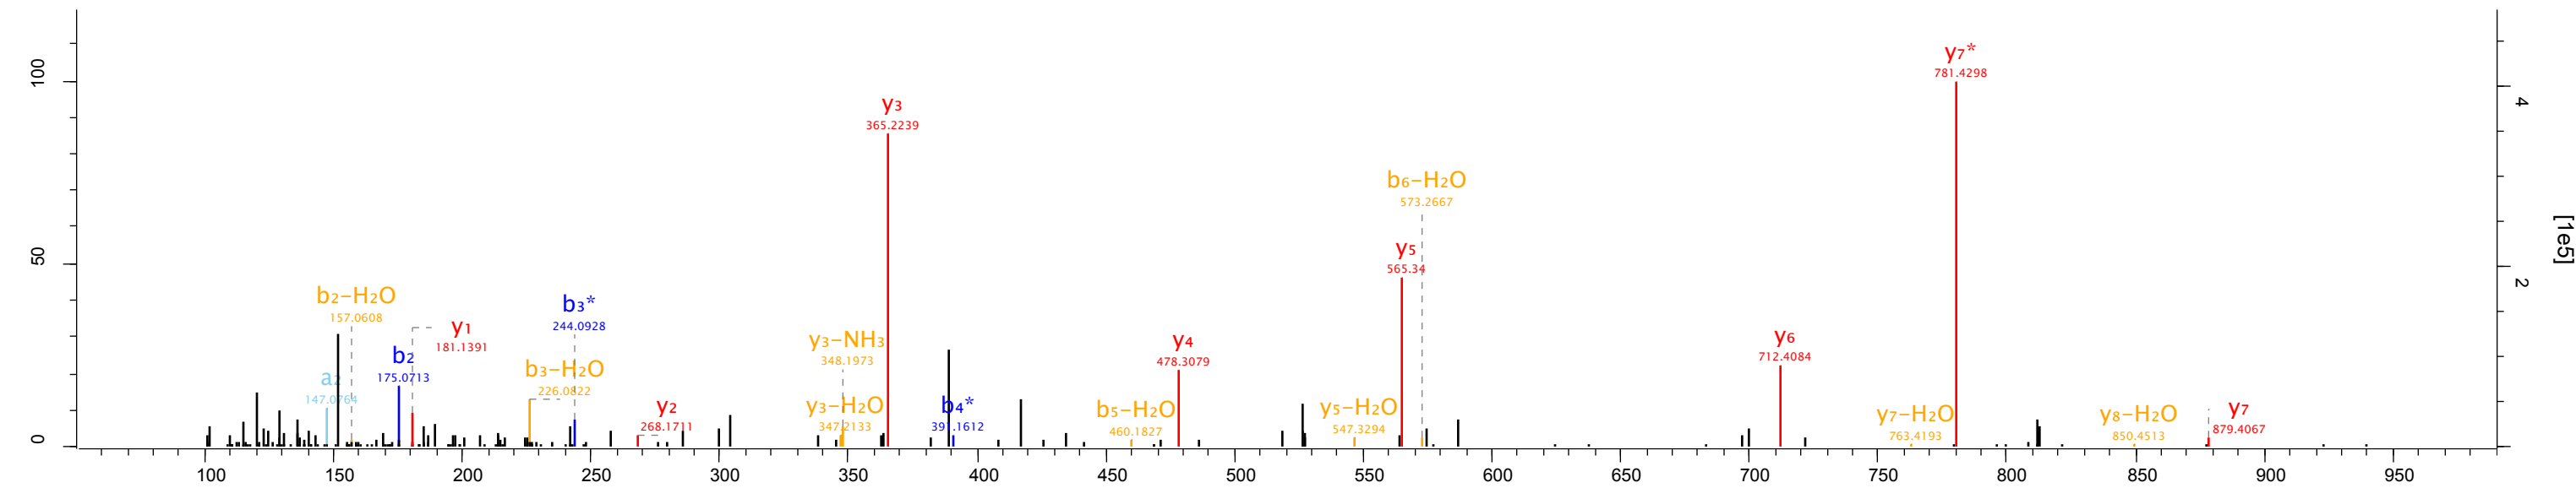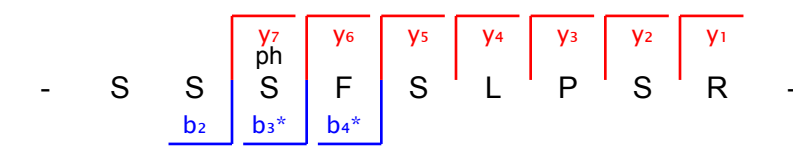

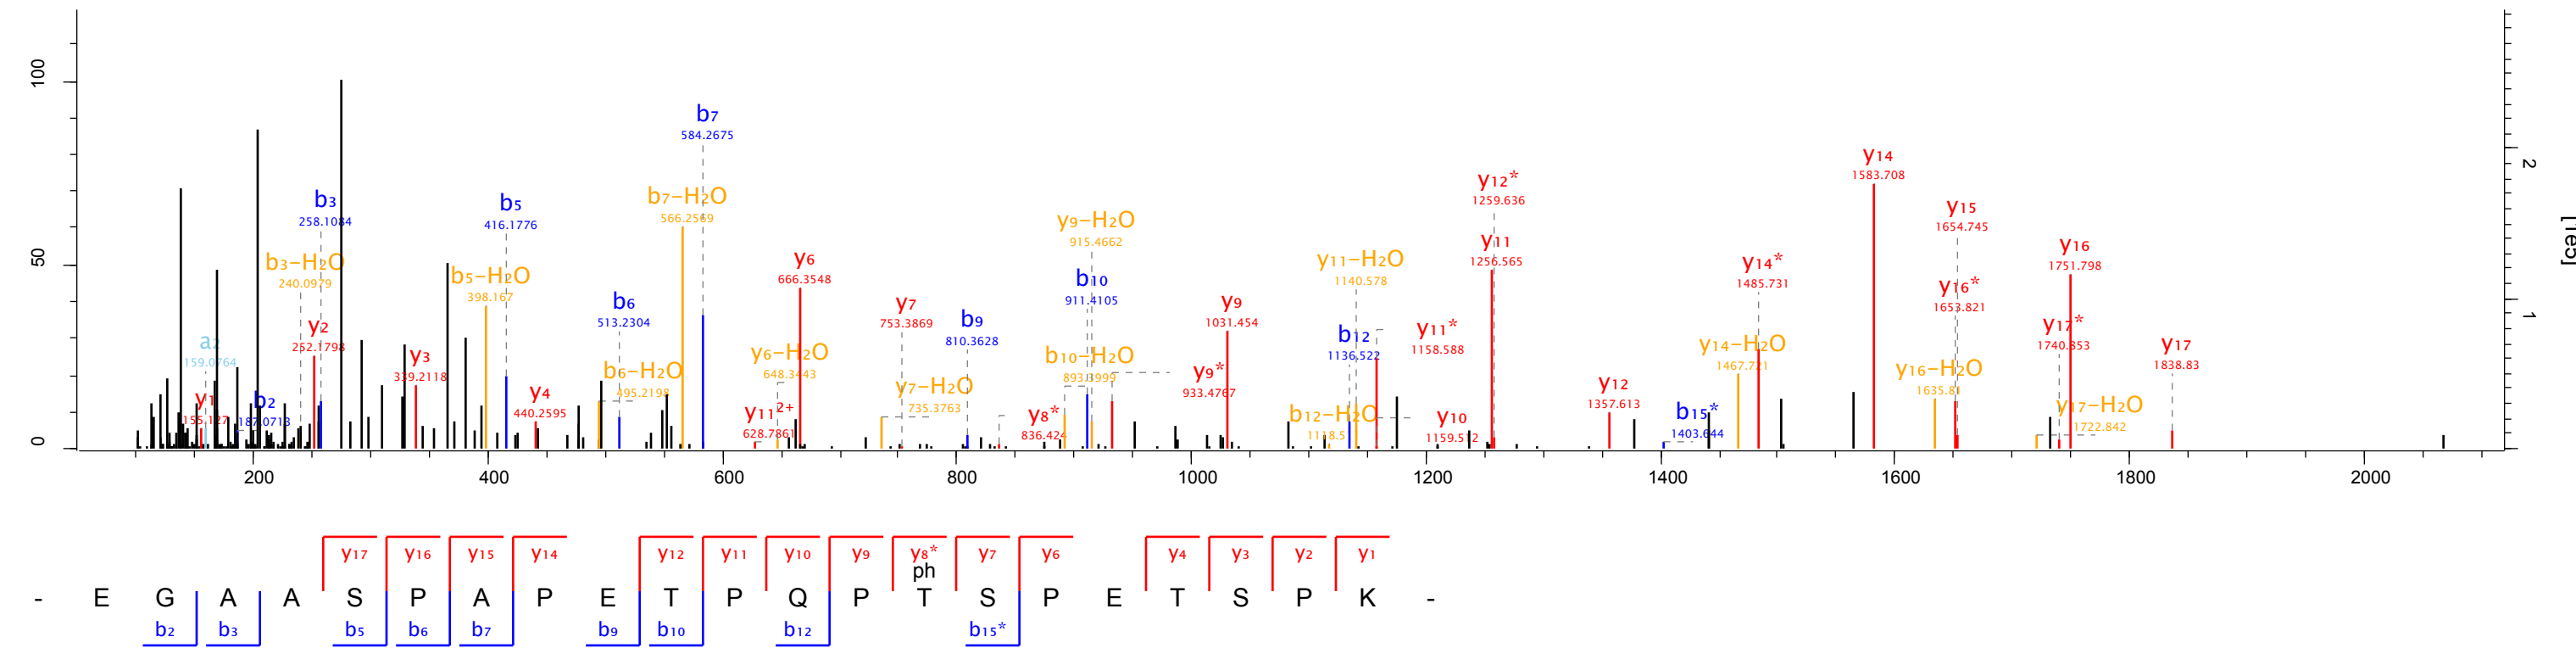



Raw file: 20171215\_MaS\_33SR\_LMH\_phospho\_06  
 Scan: 11810 Method: FTMS; HCD Score: 189.55 m/z: 741.85 Gene names: HJURP

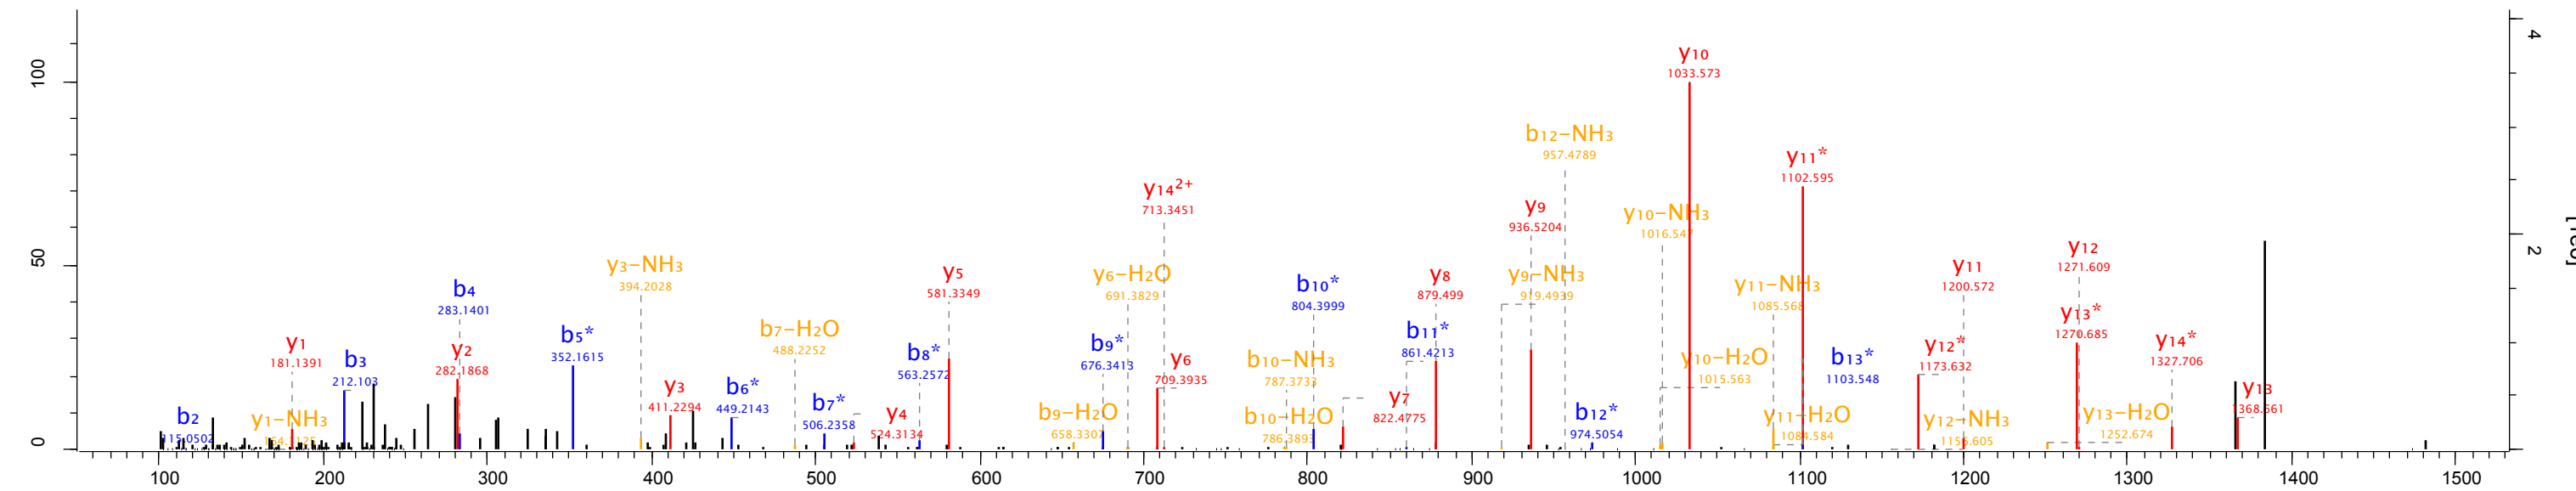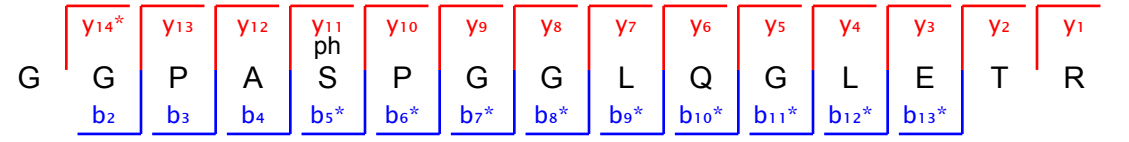

Raw file 20171215\_MaS\_33SR\_LMH\_phospho\_06 Scan 13560 Method FTMS; HCD Score 74.78 m/z 823.89 Gene names SIX4

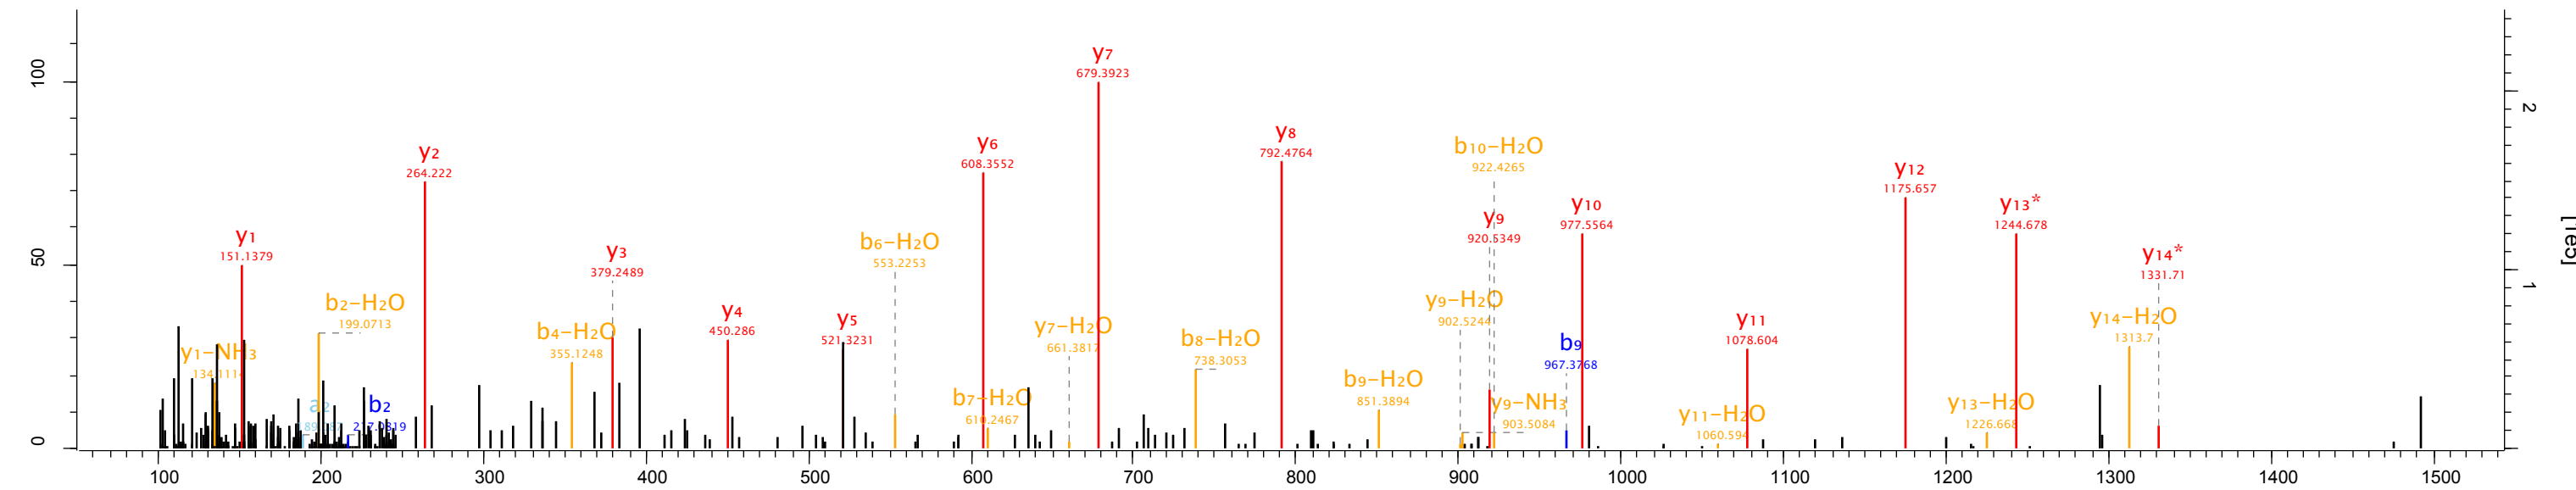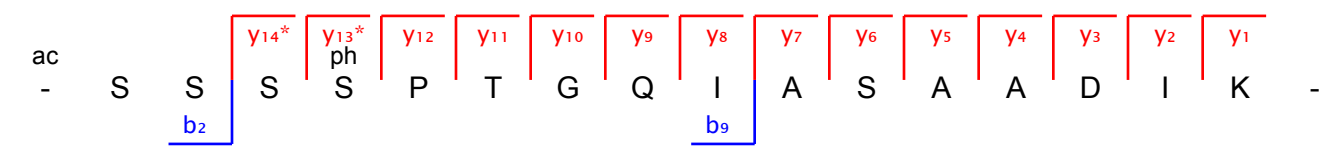

Raw file 20171215\_MaS\_33SR\_LMH\_phospho\_06 Scan 14420 Method FTMS; HCD Score 108.19 m/z 1045 Gene names USP6NL

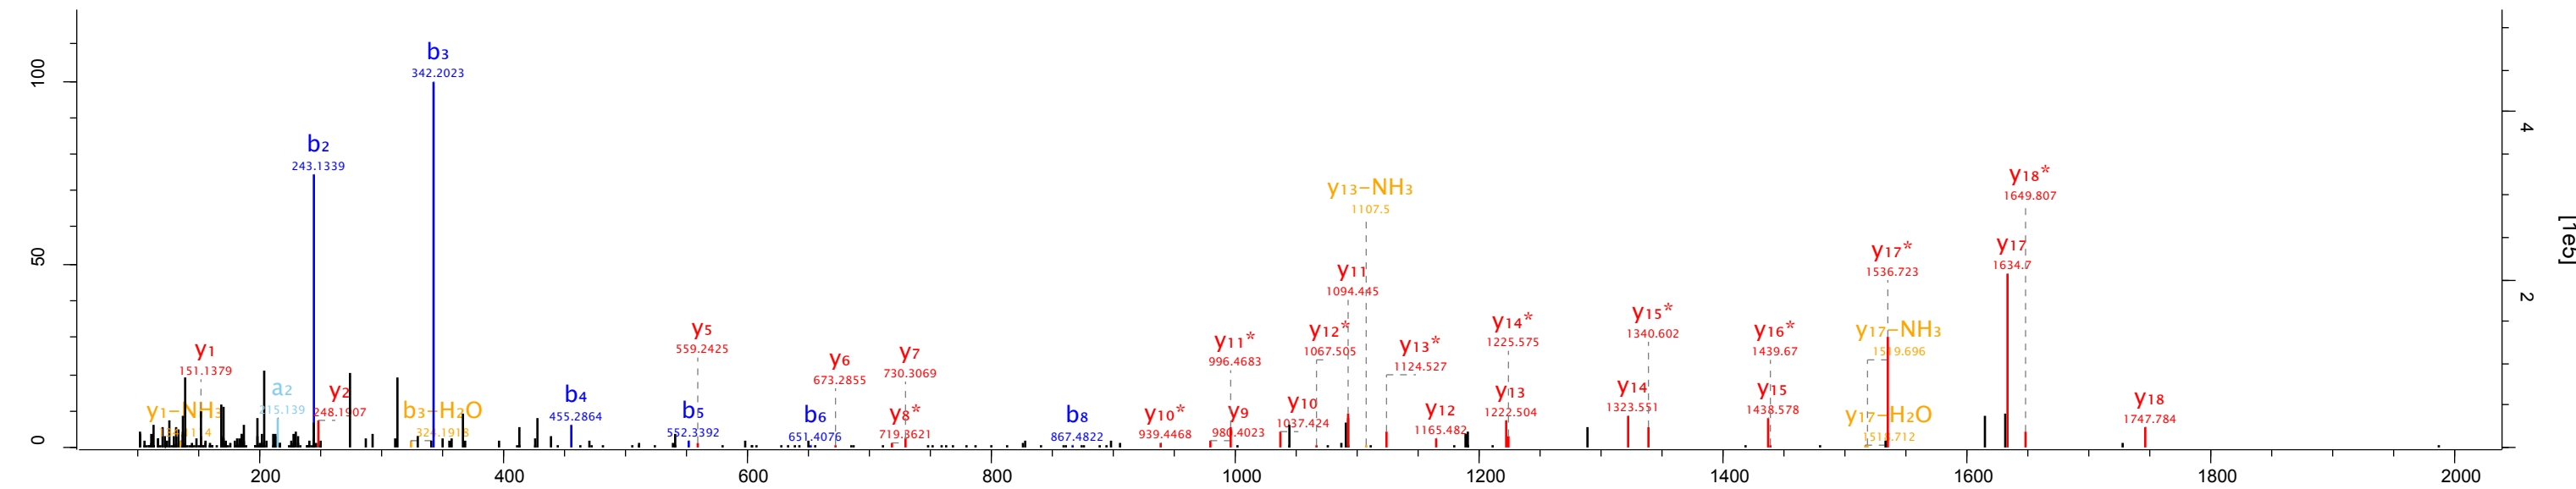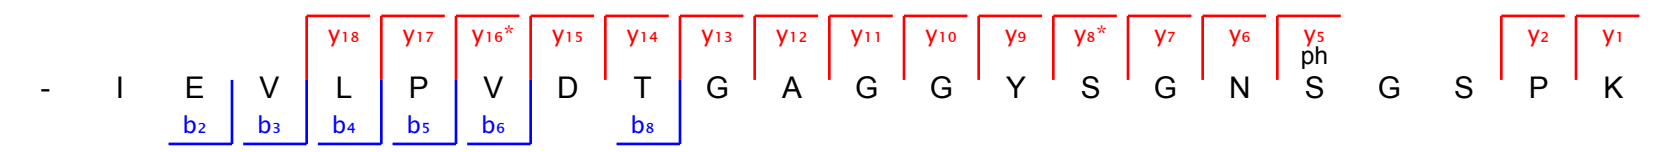

Raw file 20171215\_MaS\_33SR\_LMH\_phospho\_06 Scan 3710 Method FTMS; HCD Score 106.19 m/z 744.29 Gene names SERINC1

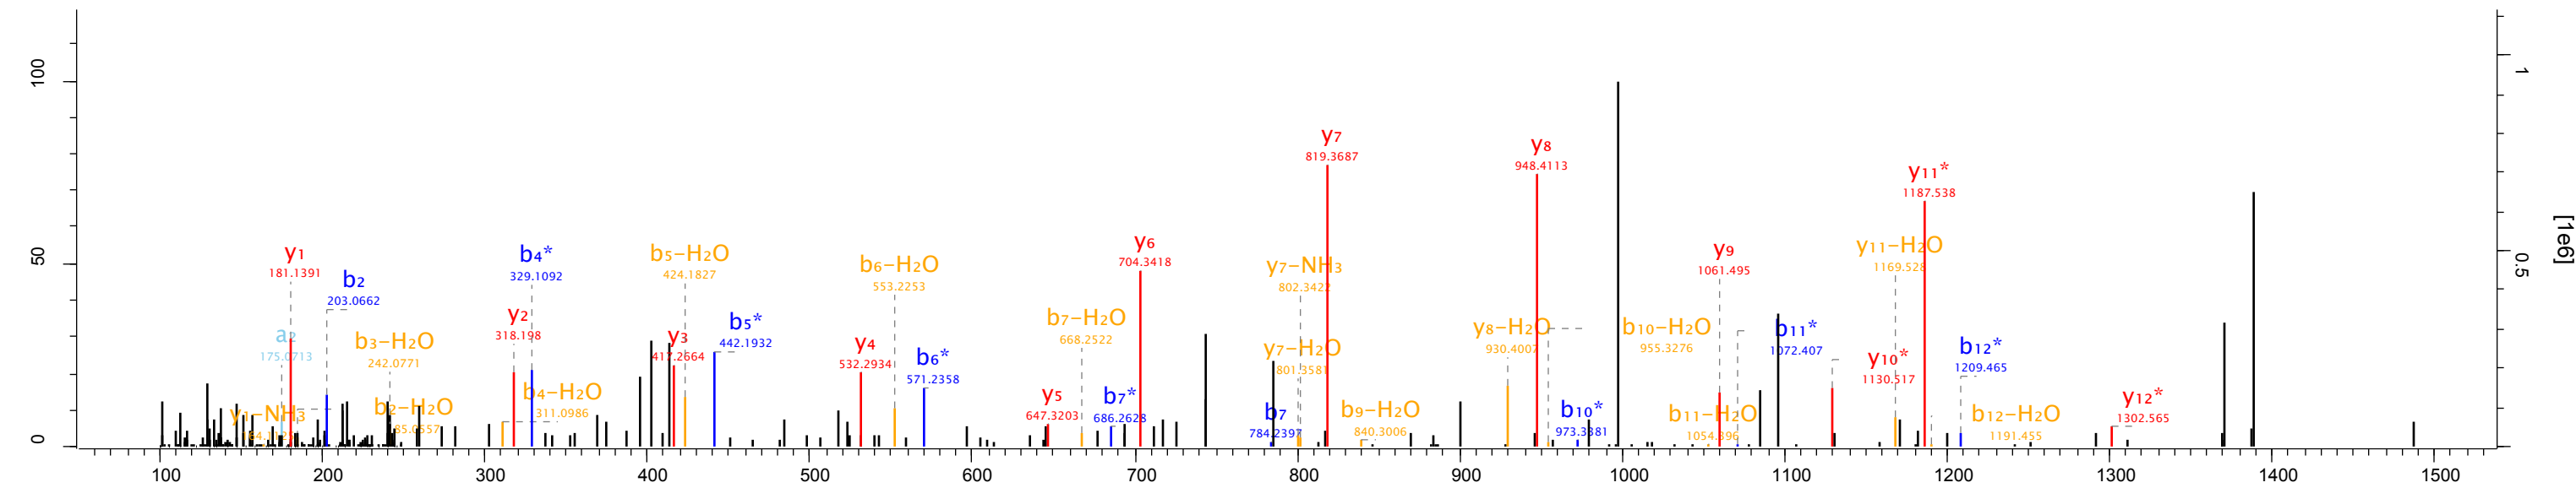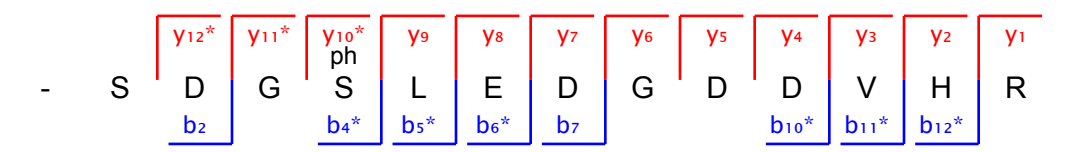

Raw file 20171215\_MaS\_33SR\_LMH\_phospho\_06 Scan 5040 Method FTMS; HCD Score 93.77 m/z 583.3 Gene names DBF4

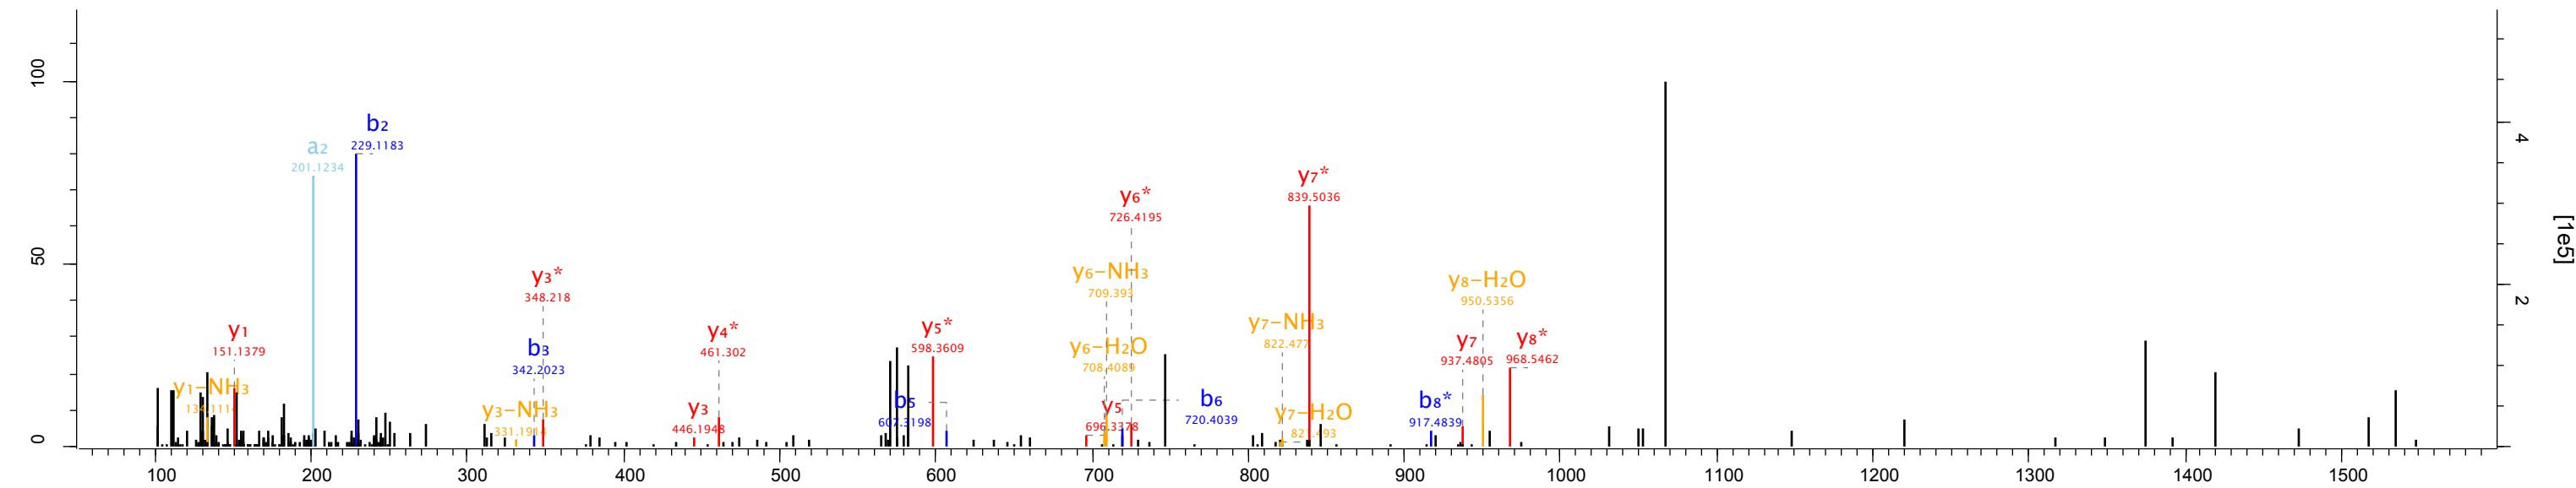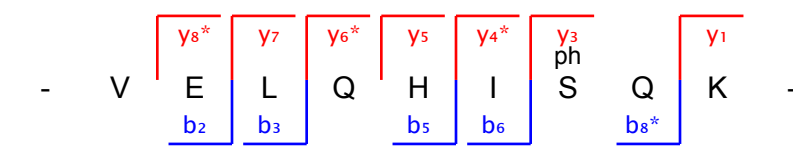

Raw file 20171215\_MaS\_33SR\_LMH\_phospho\_06 Scan 5740 Method FTMS; HCD Score 163.09 m/z 830.02 Gene names NFIL3

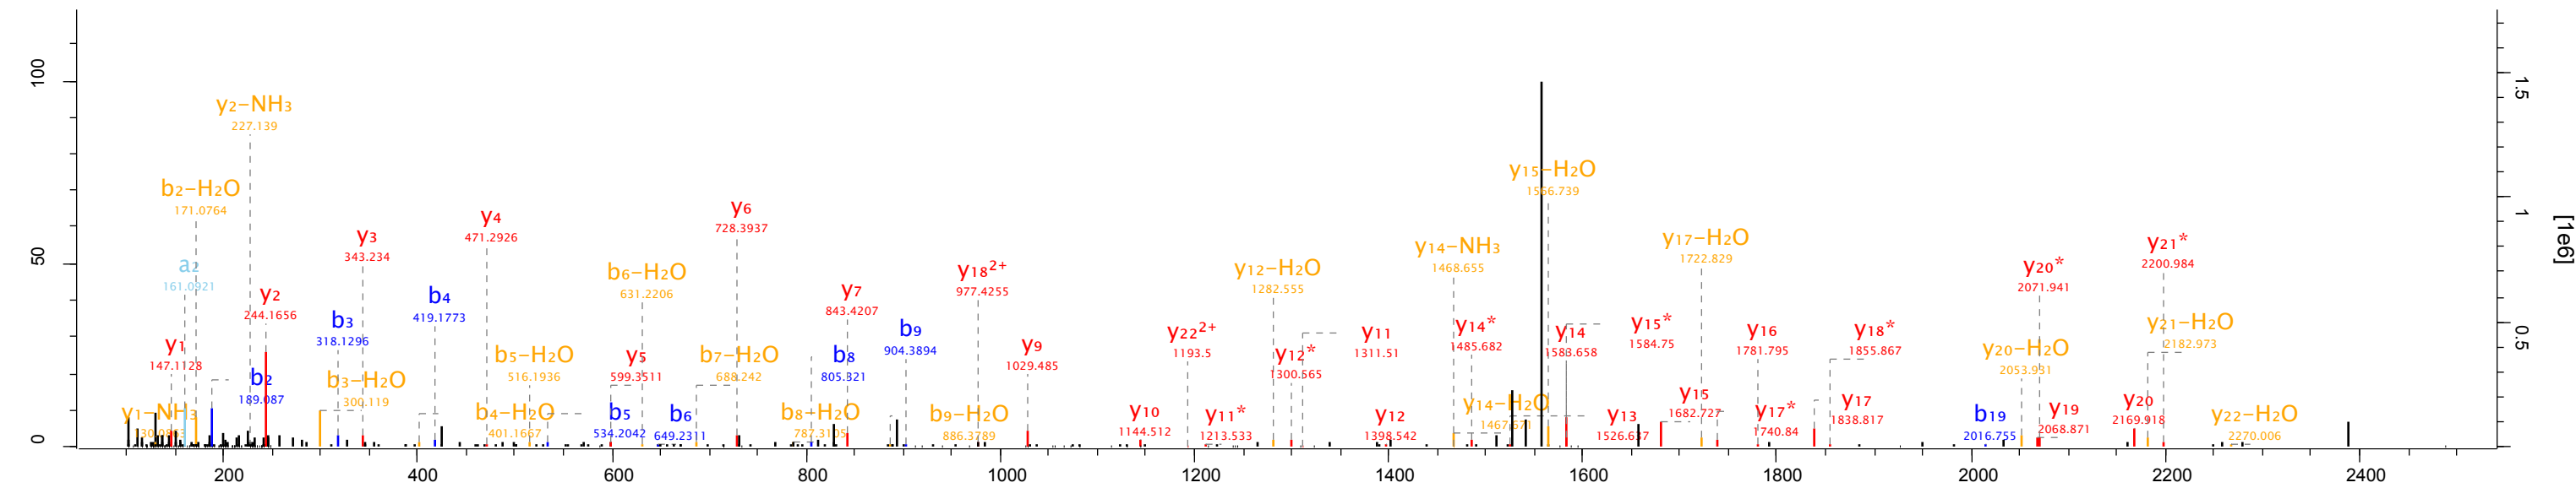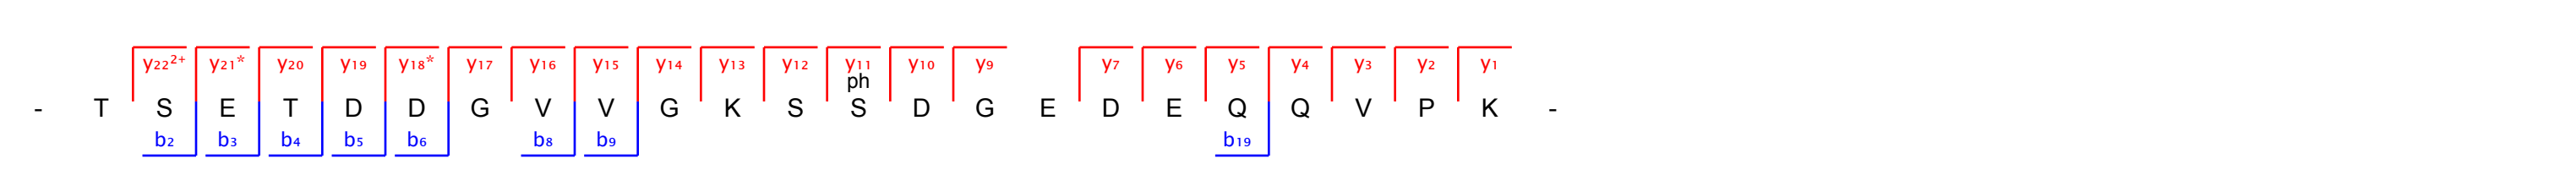

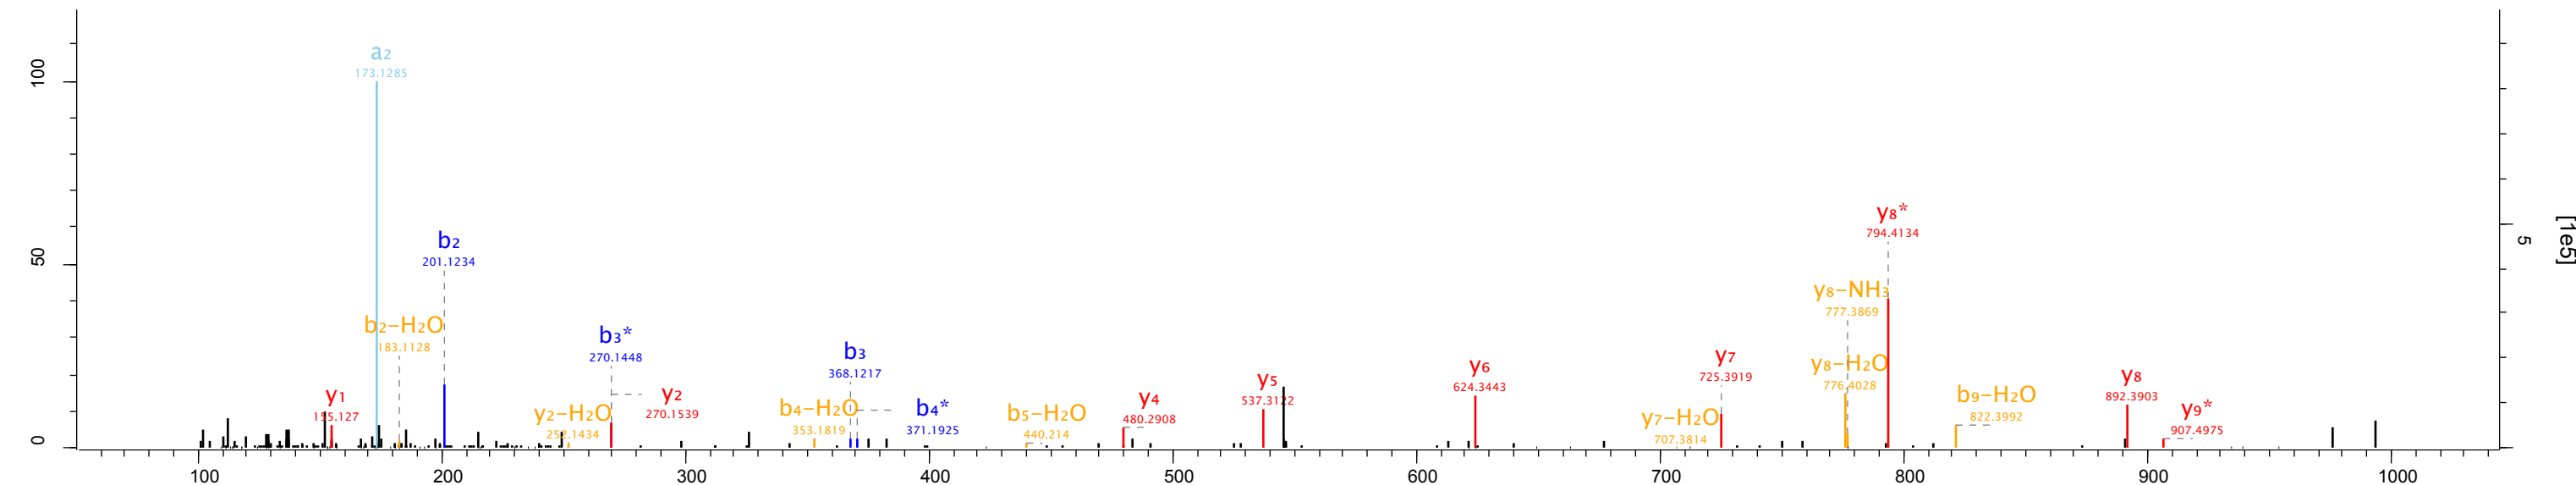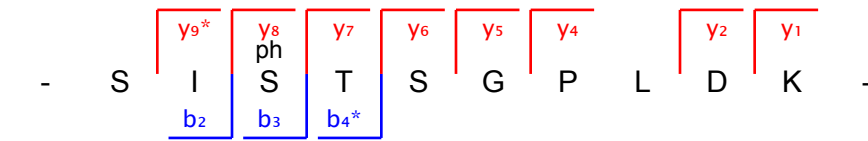

Raw file 20171215\_MaS\_33SR\_LMH\_phospho\_06 Scan 7860 Method FTMS; HCD Score 106.79 m/z 643.31 Gene names C11orf30;EMSY

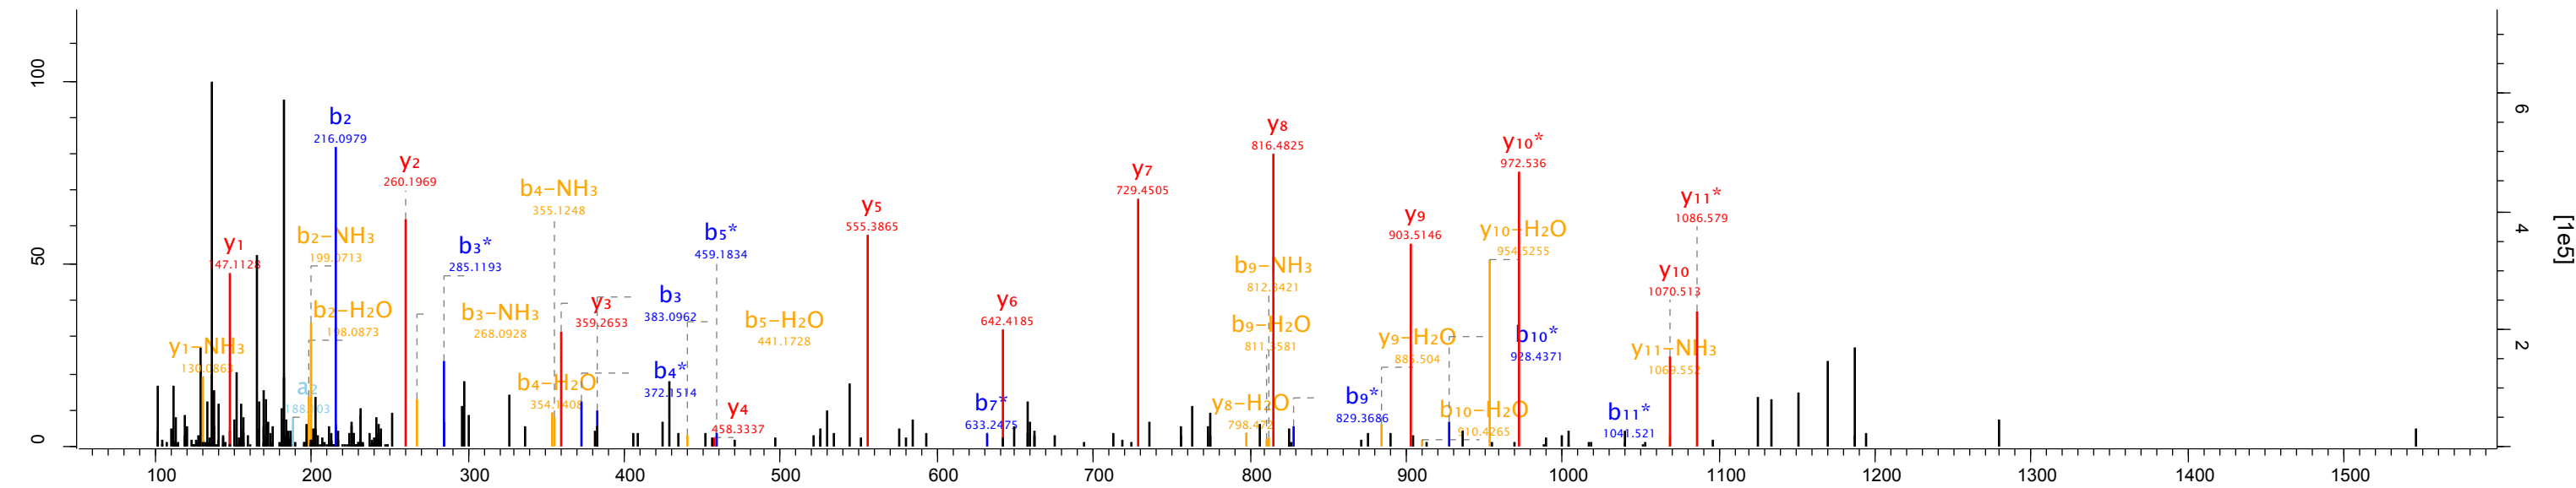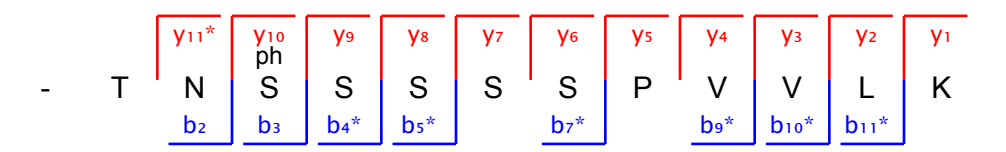



Raw file 20171215\_MaS\_33SR\_LMH\_phospho\_06 Scan 9090 Method FTMS; HCD Score 57.53 m/z 598.93 Gene names SH3BP4

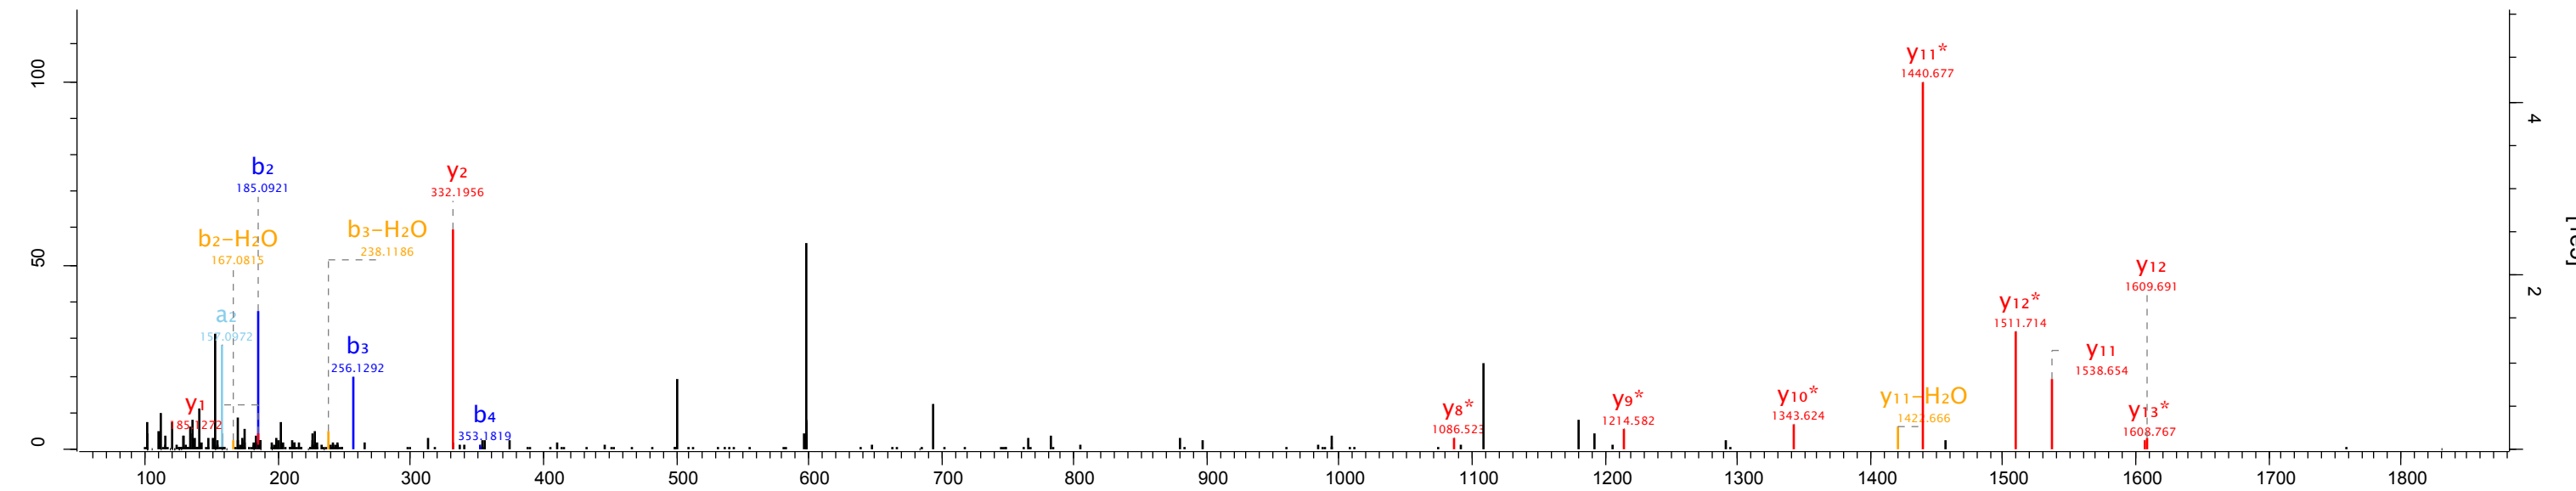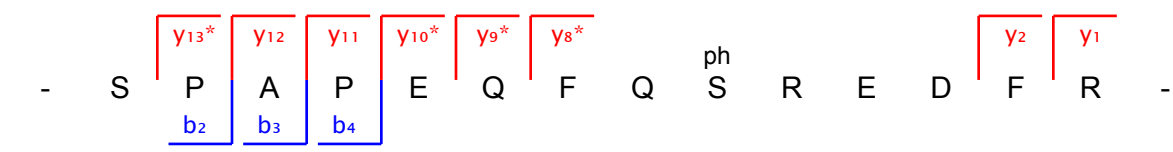

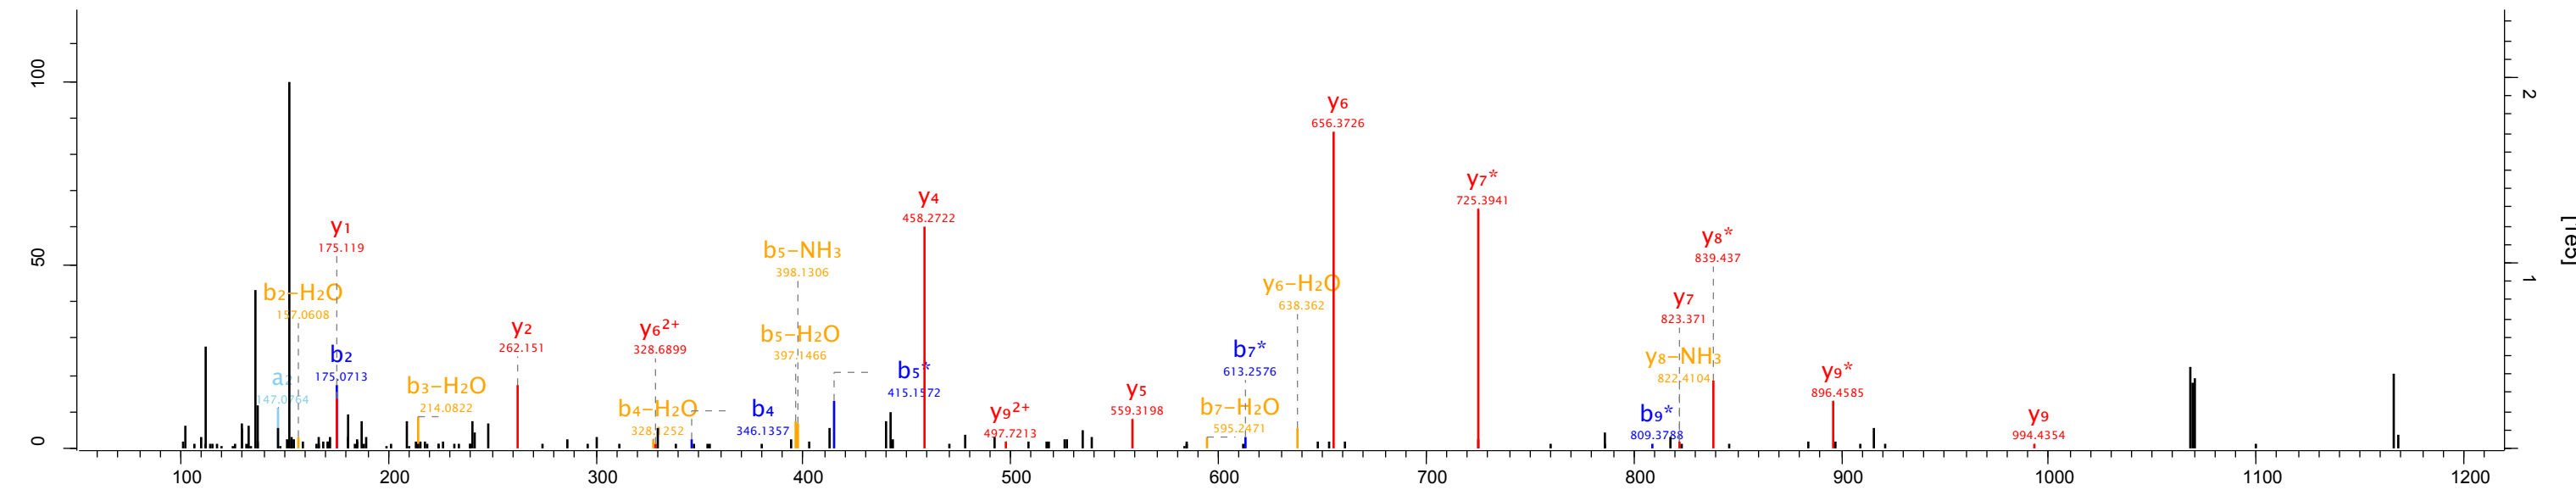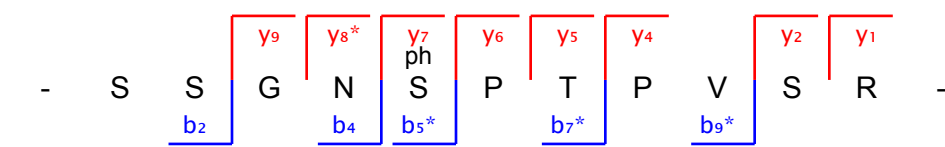

Raw file 20171215\_MaS\_33SR\_LMH\_phospho\_09 Scan 2240 Method FTMS; HCD Score 72.32 m/z 568.24 Gene names MAP3K19

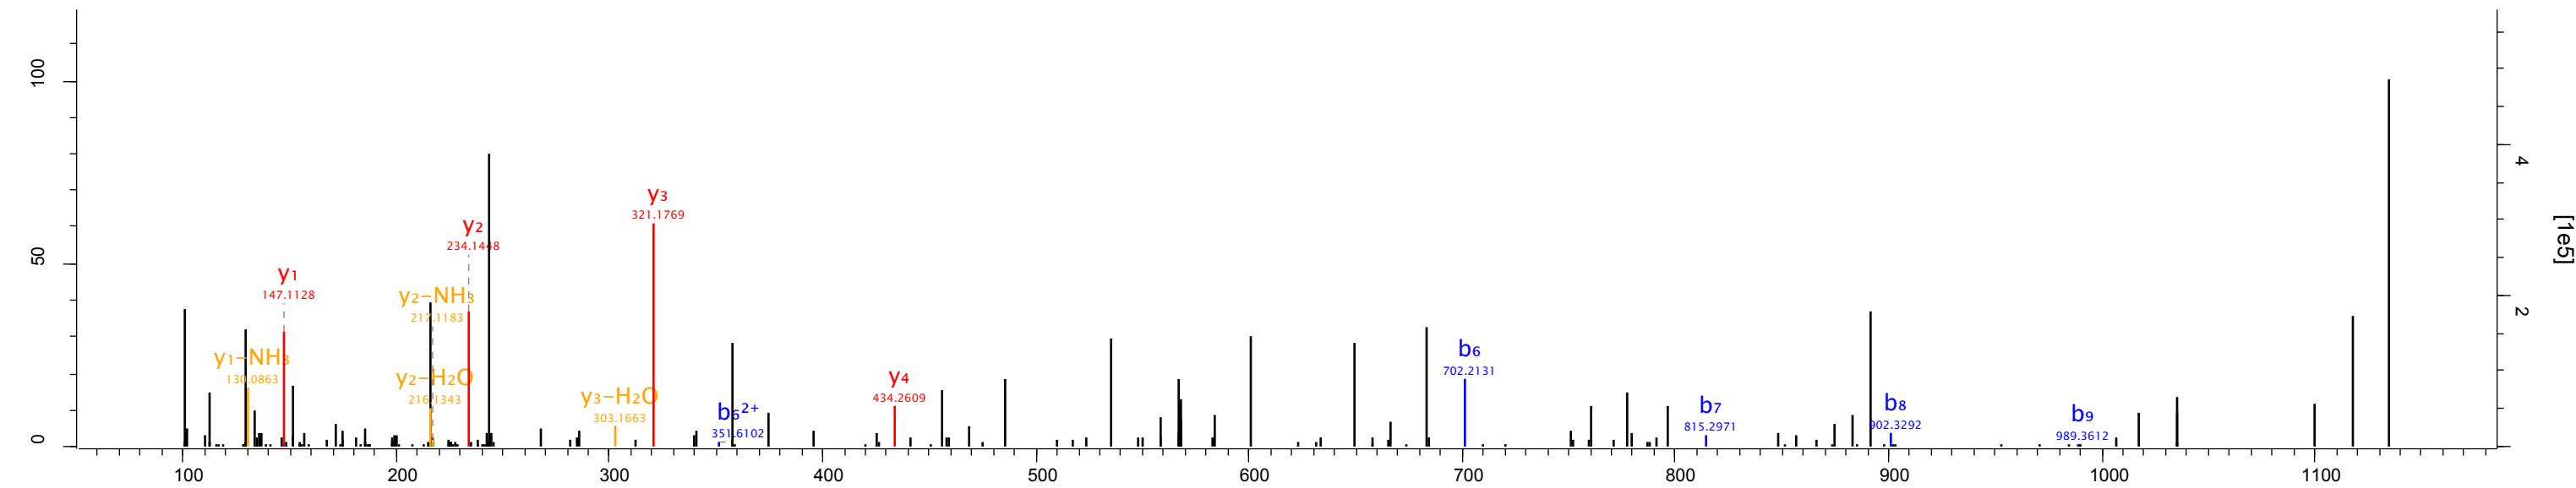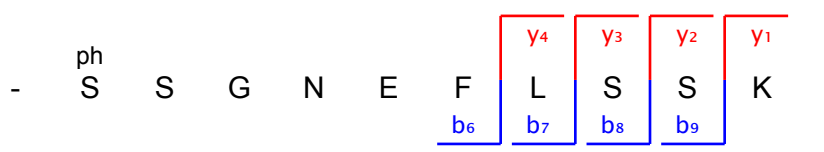

Raw file 20171215\_MaS\_33SR\_LMH\_phospho2\_01 Scan 5770 Method FTMS; HCD Score 108.5 m/z 913.41 Gene names TLE1

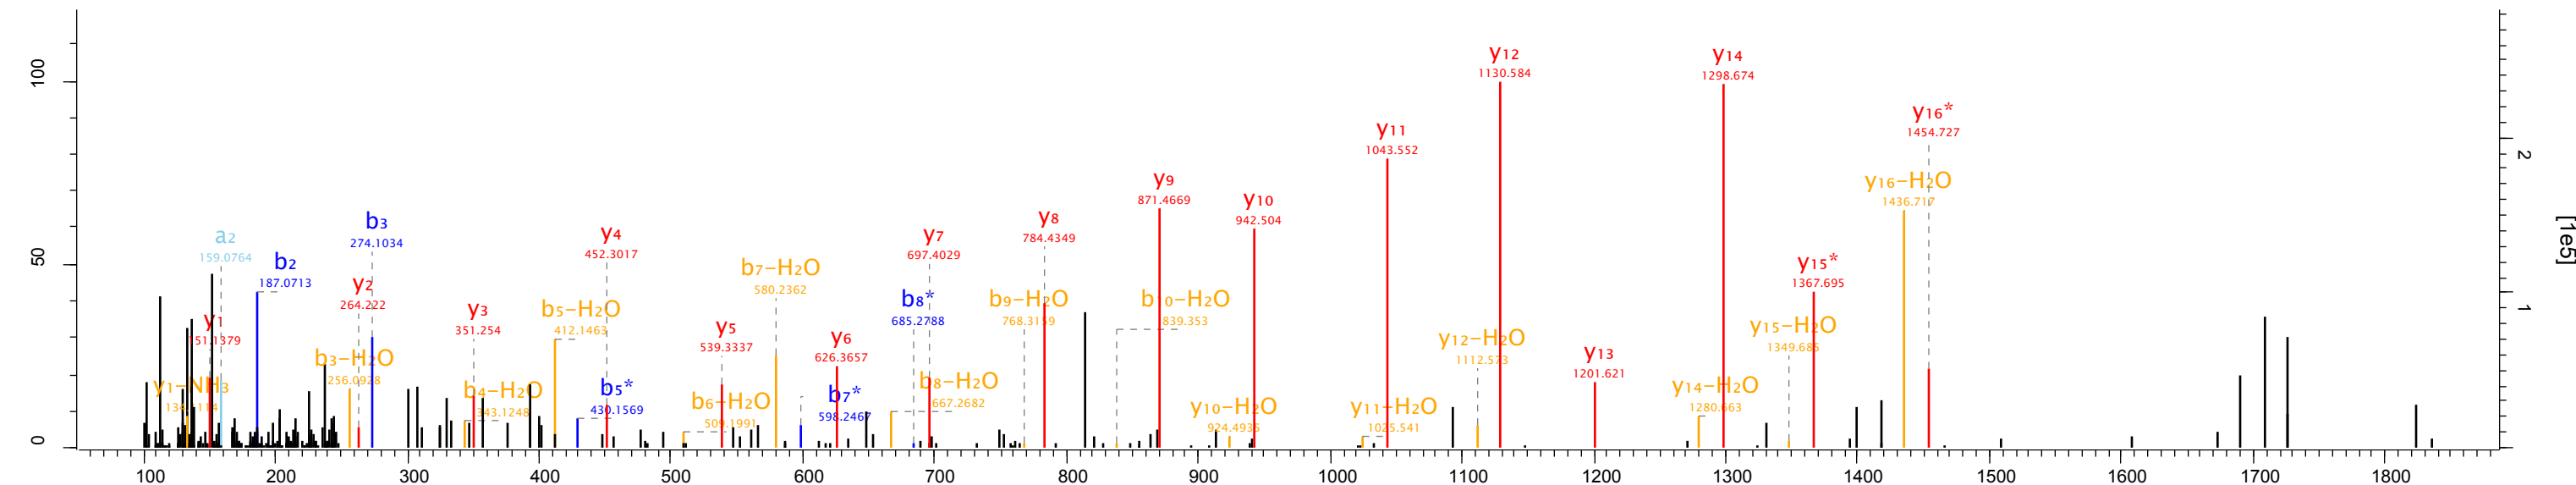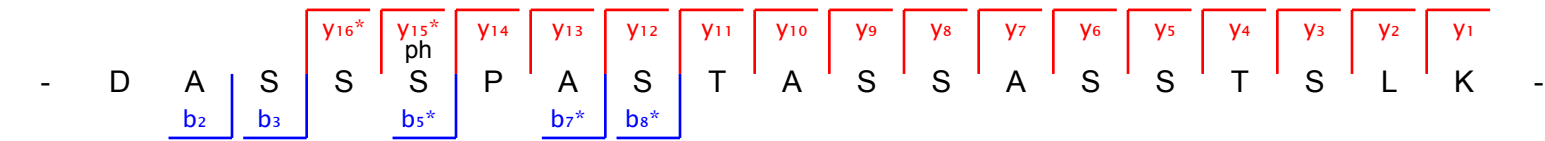

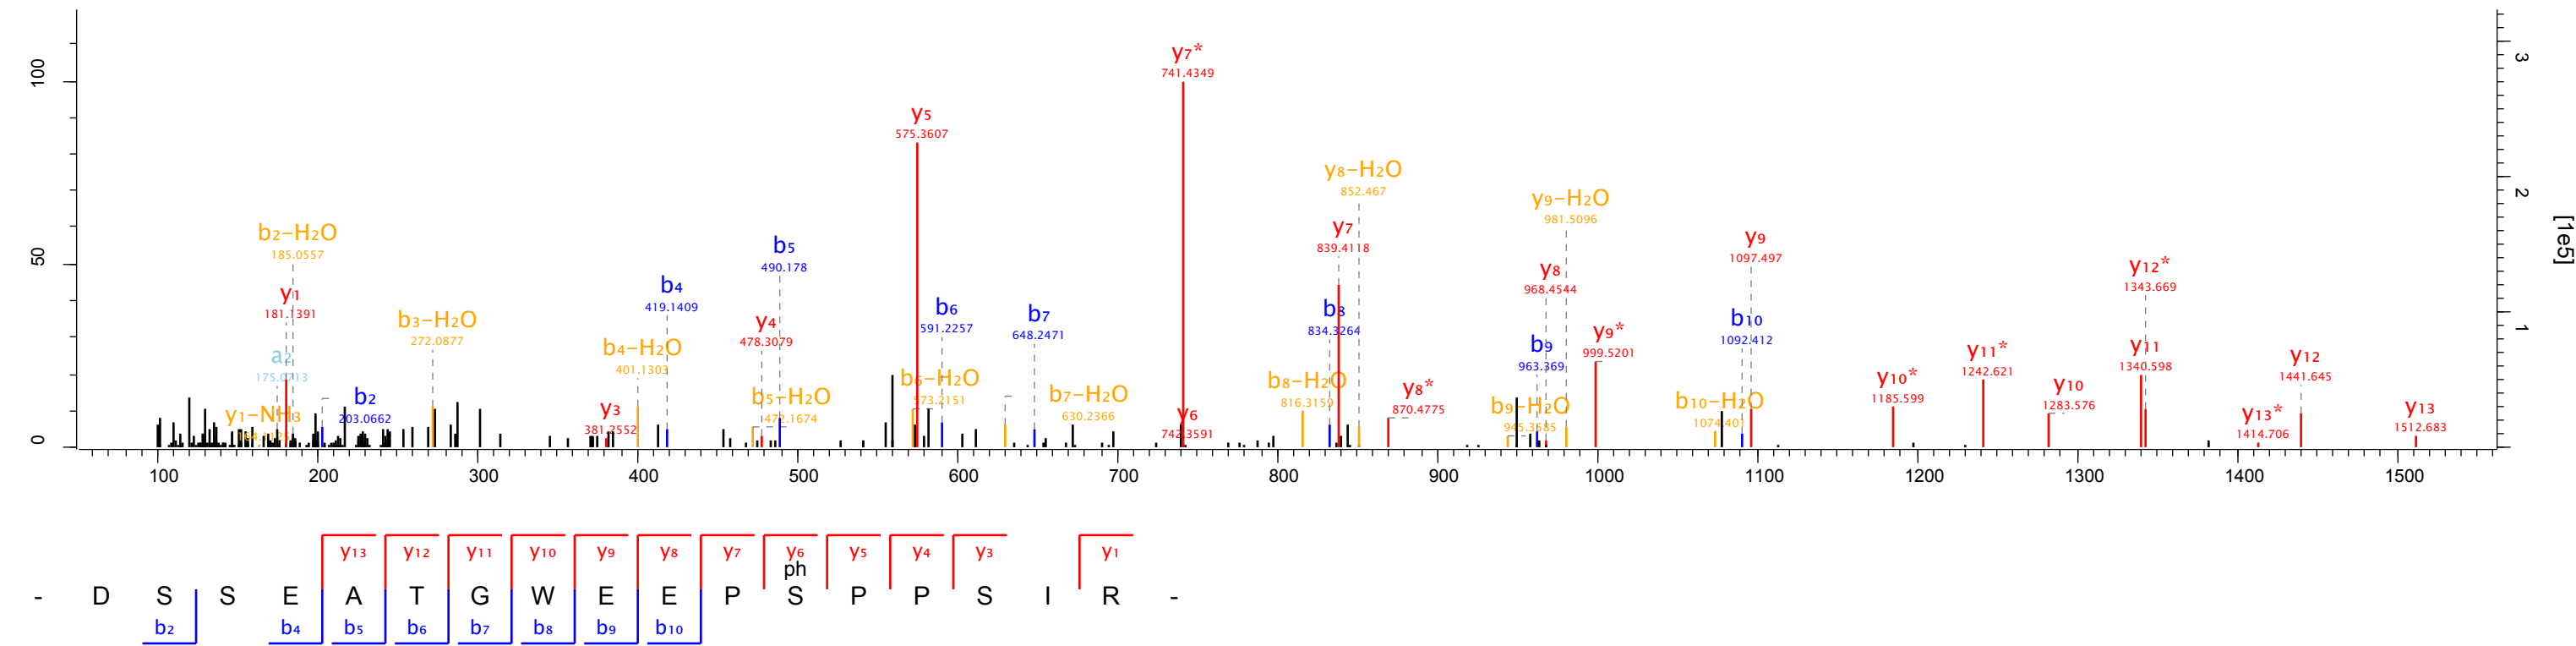

Raw file 20171215\_MaS\_33SR\_LMH\_phospho2\_02 Scan 3360 Method FTMS; HCD Score 142.27 m/z 809.9 Gene names PCIF1

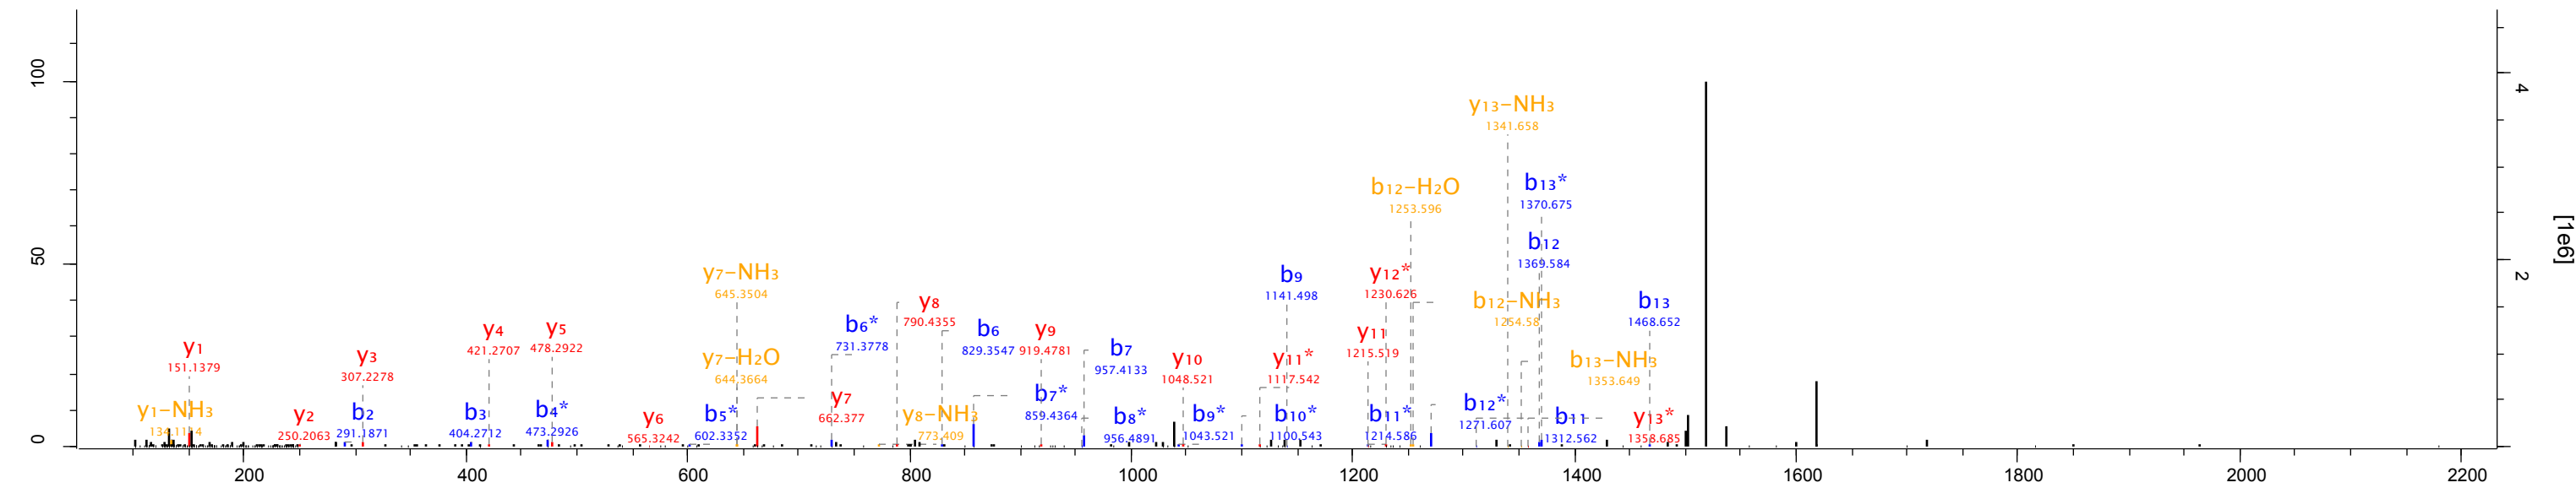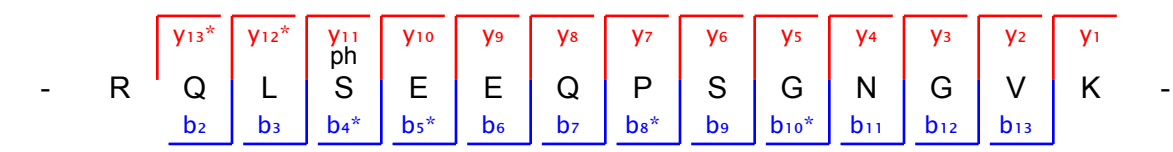

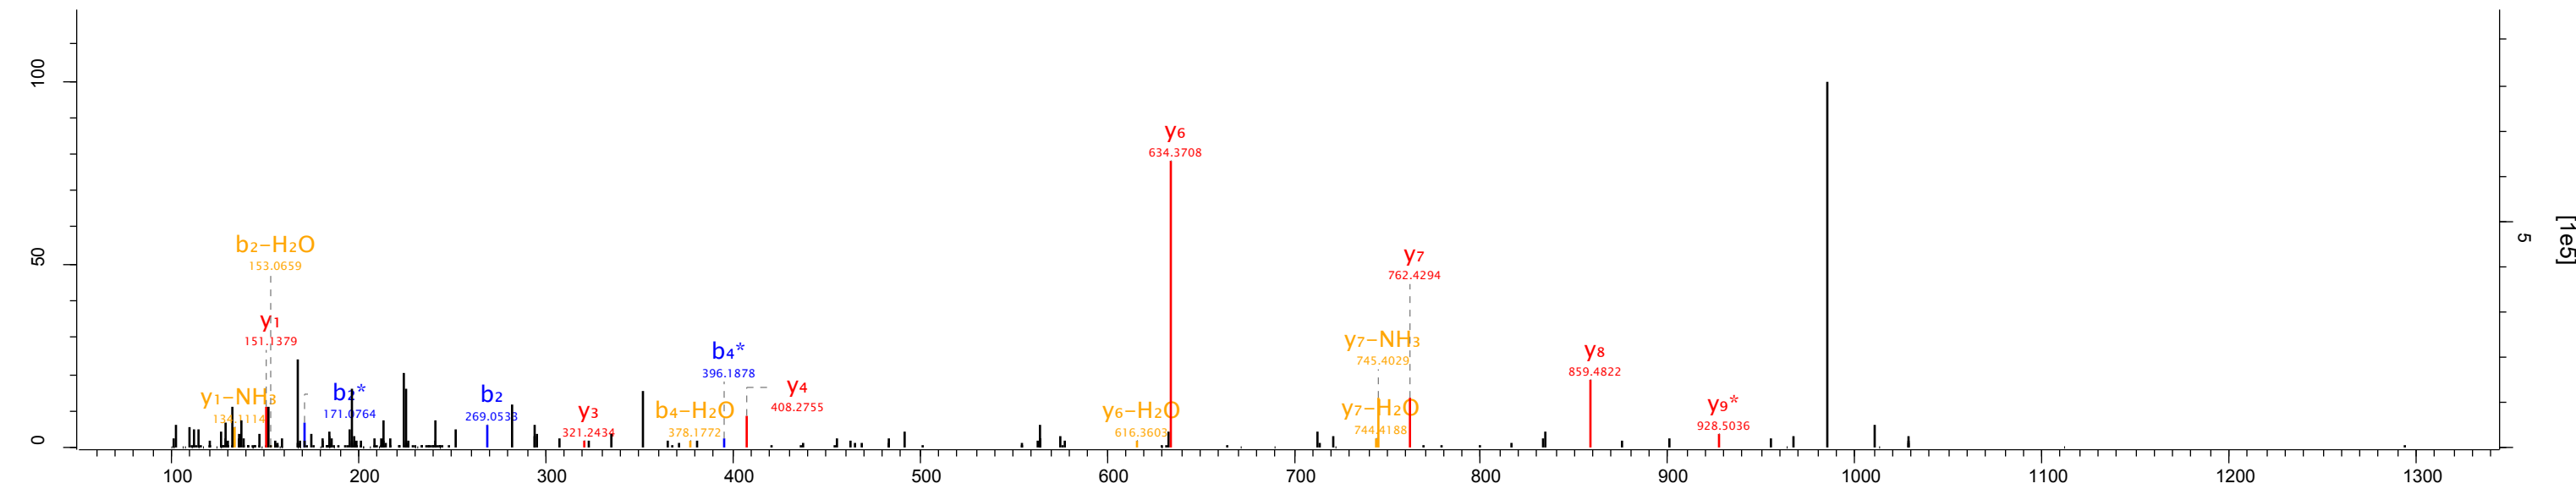

- T y<sub>9</sub>\*  
ph  
S y<sub>8</sub> P y<sub>7</sub>  
b<sub>2</sub> Q y<sub>6</sub> P E y<sub>4</sub> y<sub>3</sub> I y<sub>1</sub> K -  
b<sub>4</sub>\*

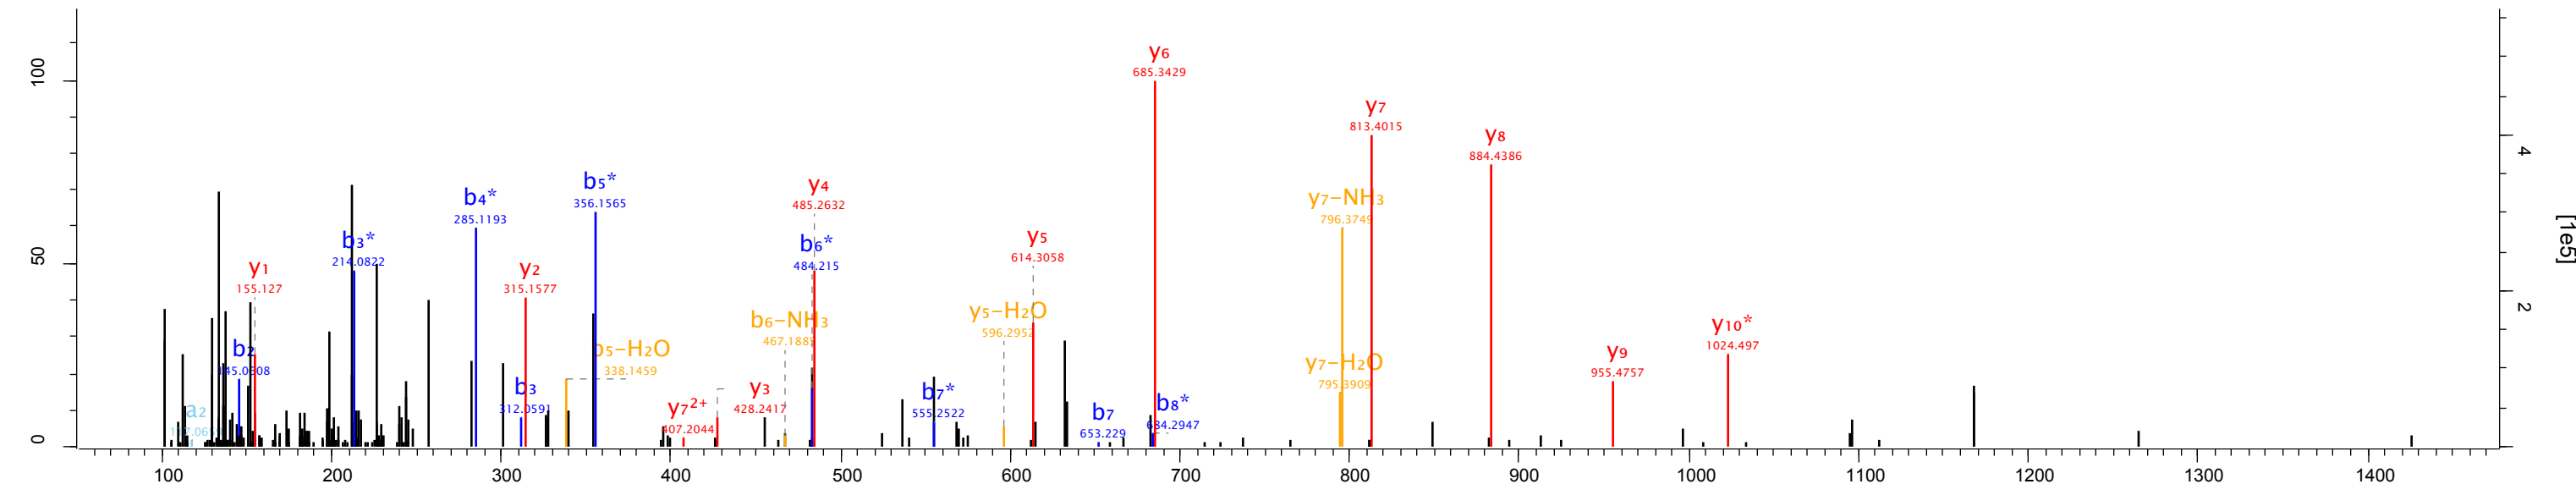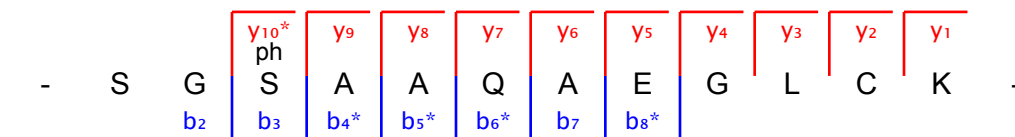



Raw file 20171215\_MaS\_33SR\_LMH\_phospho2\_03 Scan 10700 Method FTMS; HCD Score 86 m/z 902.4 Gene names FGD1

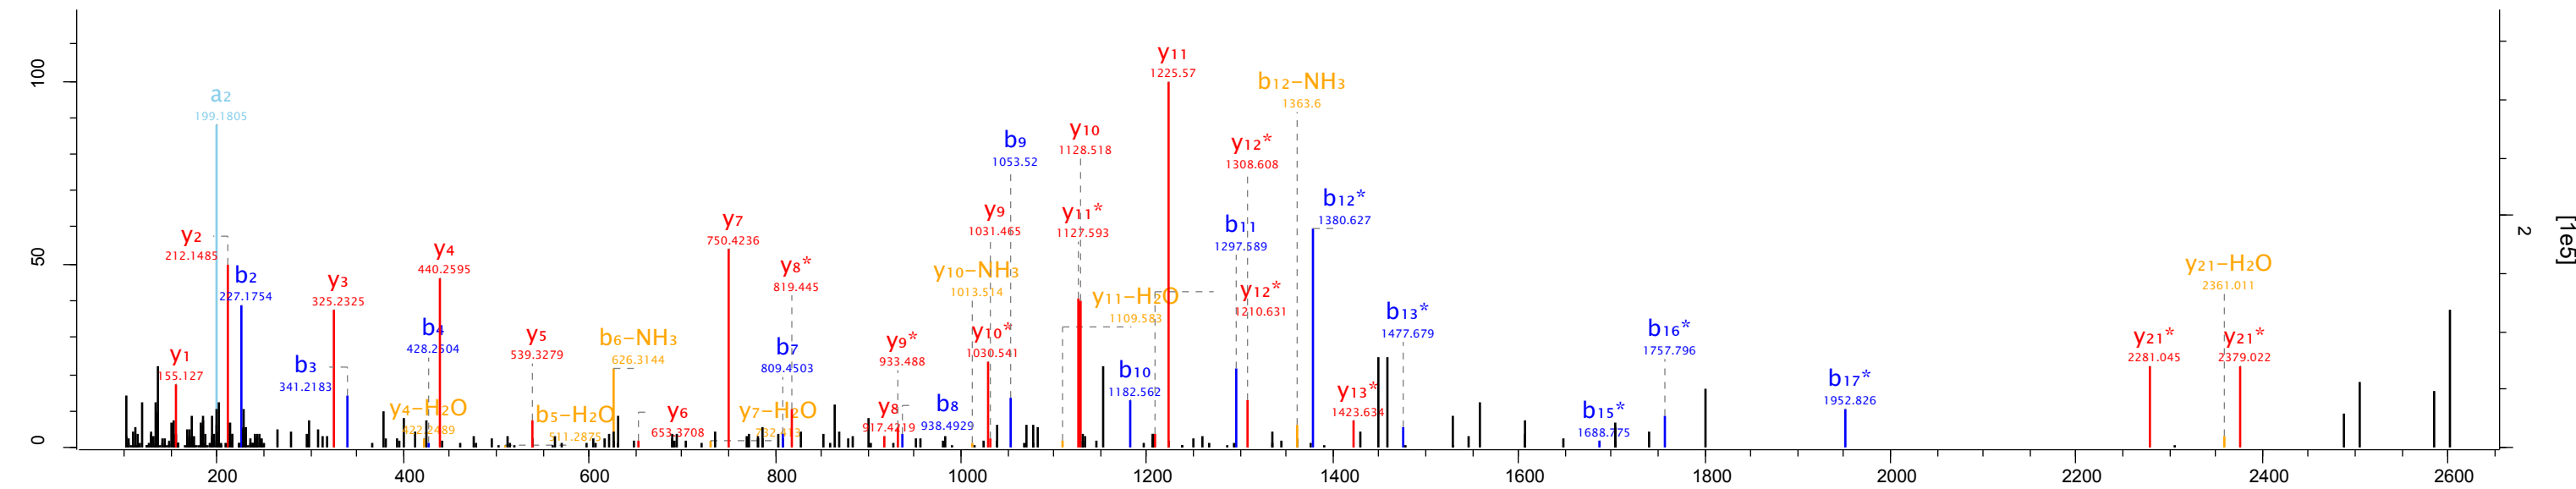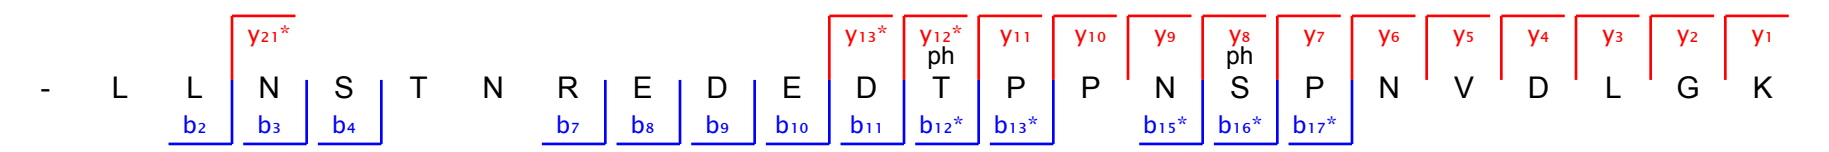

Raw file 20171215\_MaS\_33SR\_LMH\_phospho2\_03 Scan 11650 Method FTMS; HCD Score 215.45 m/z 938.4 Gene names ACD

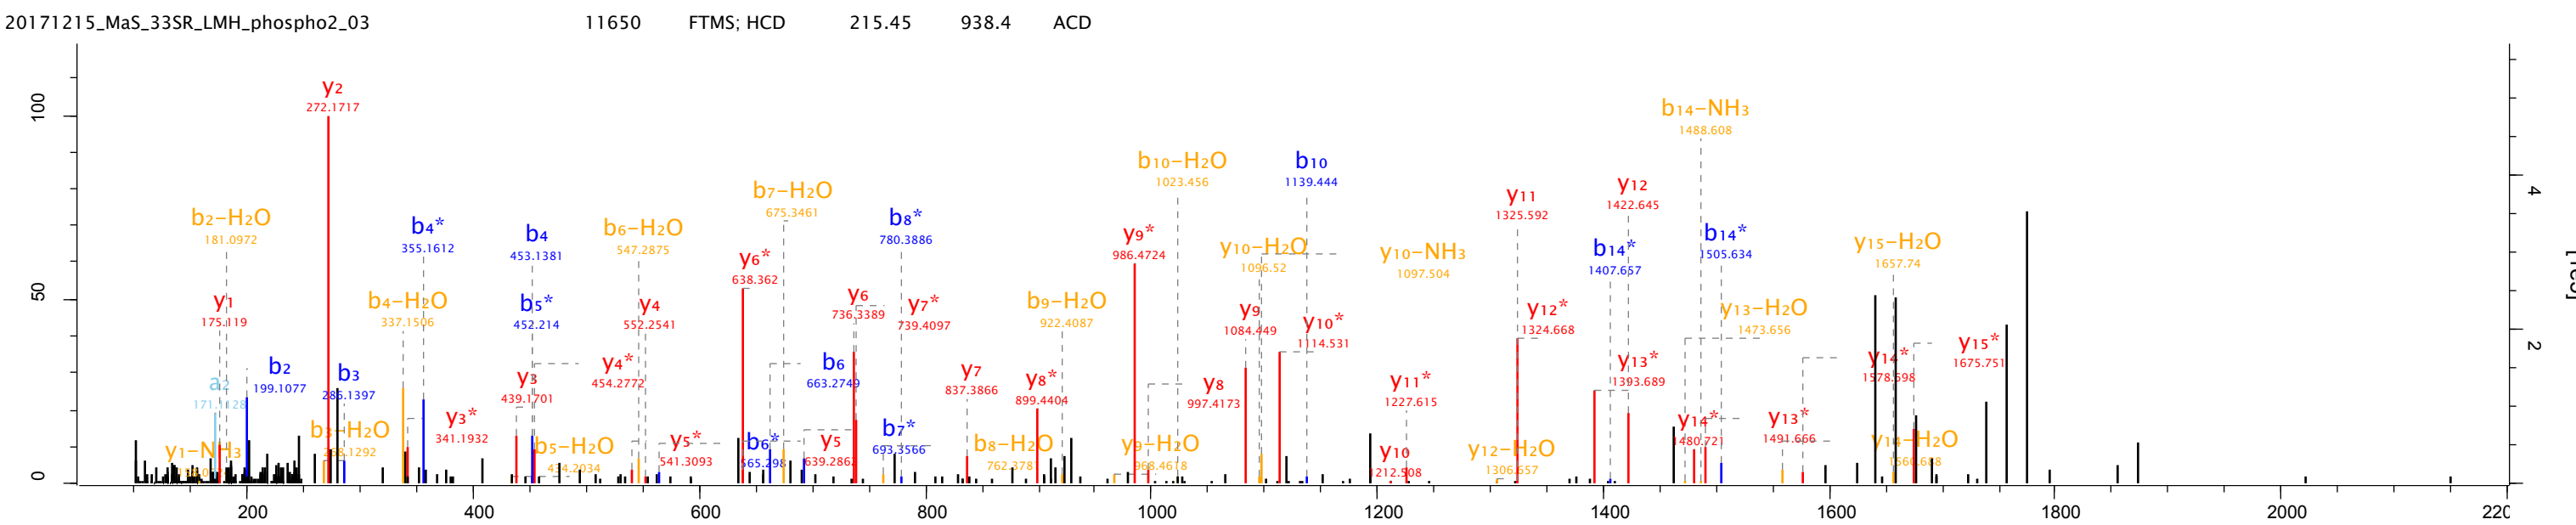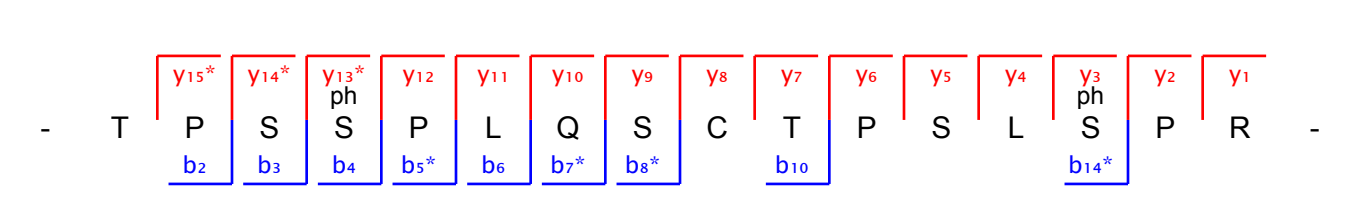

Raw file 20171215\_MaS\_33SR\_LMH\_phospho2\_03 Scan 12310 Method FTMS; HCD Score 233.93 m/z 954.72 Gene names PHF6

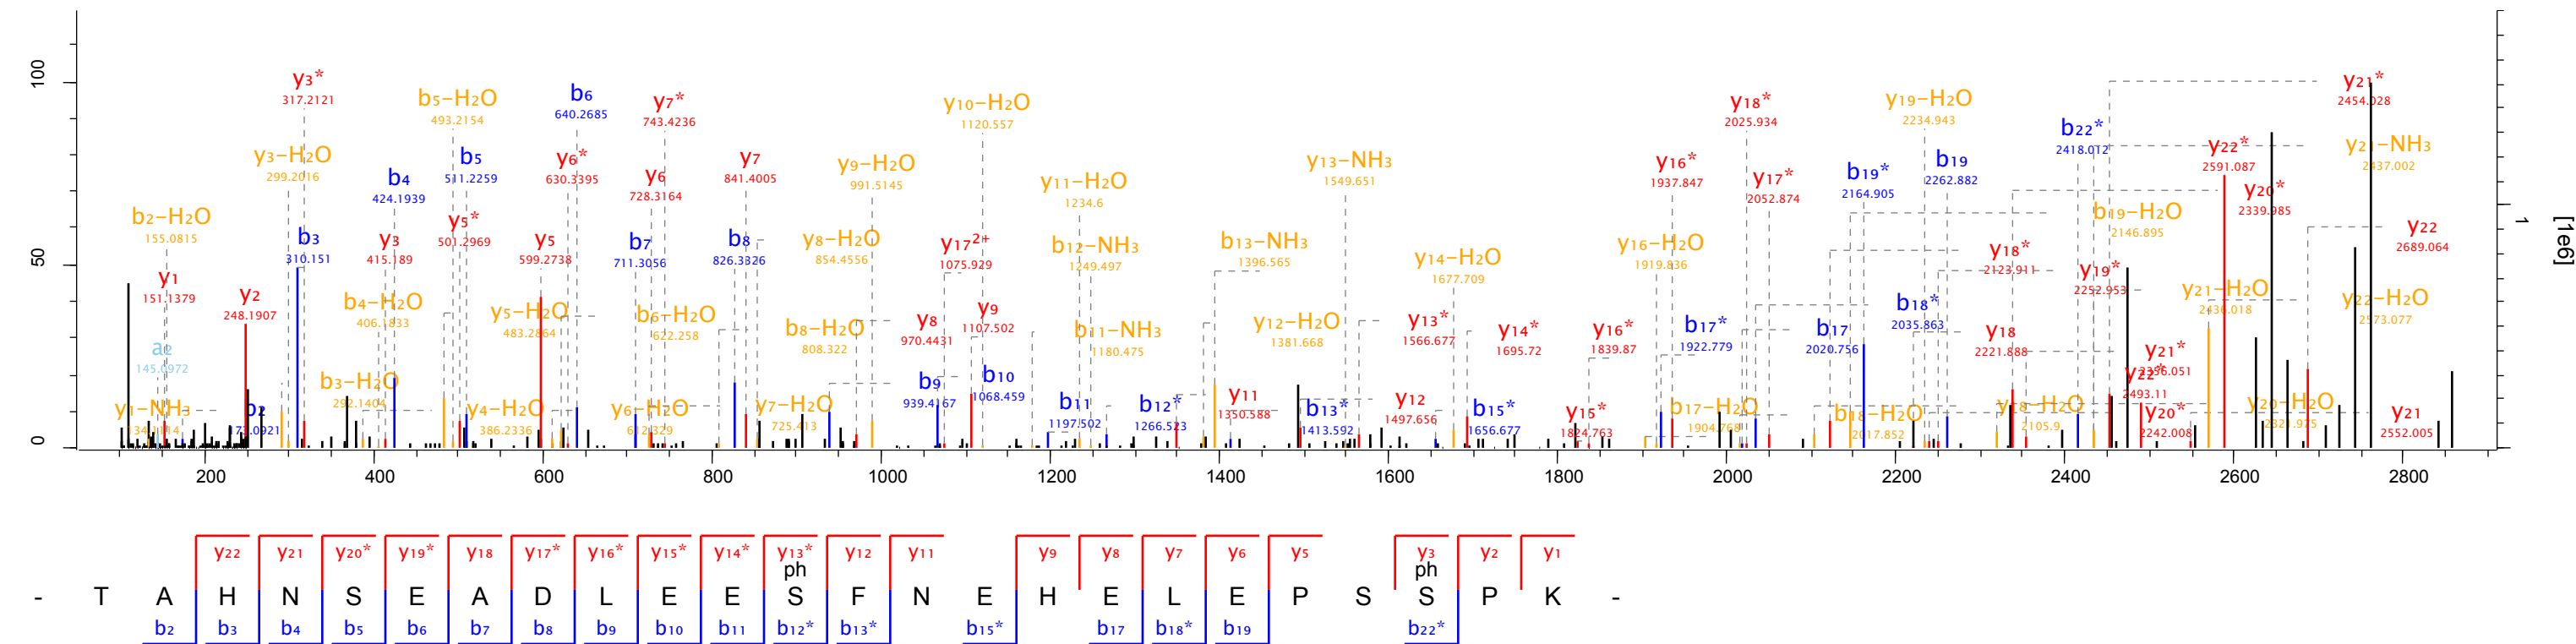

Raw file 20171215\_MaS\_33SR\_LMH\_phospho2\_03 Scan 13830 Method FTMS; HCD Score 204.47 m/z 824.68 Gene names SDCCAG3

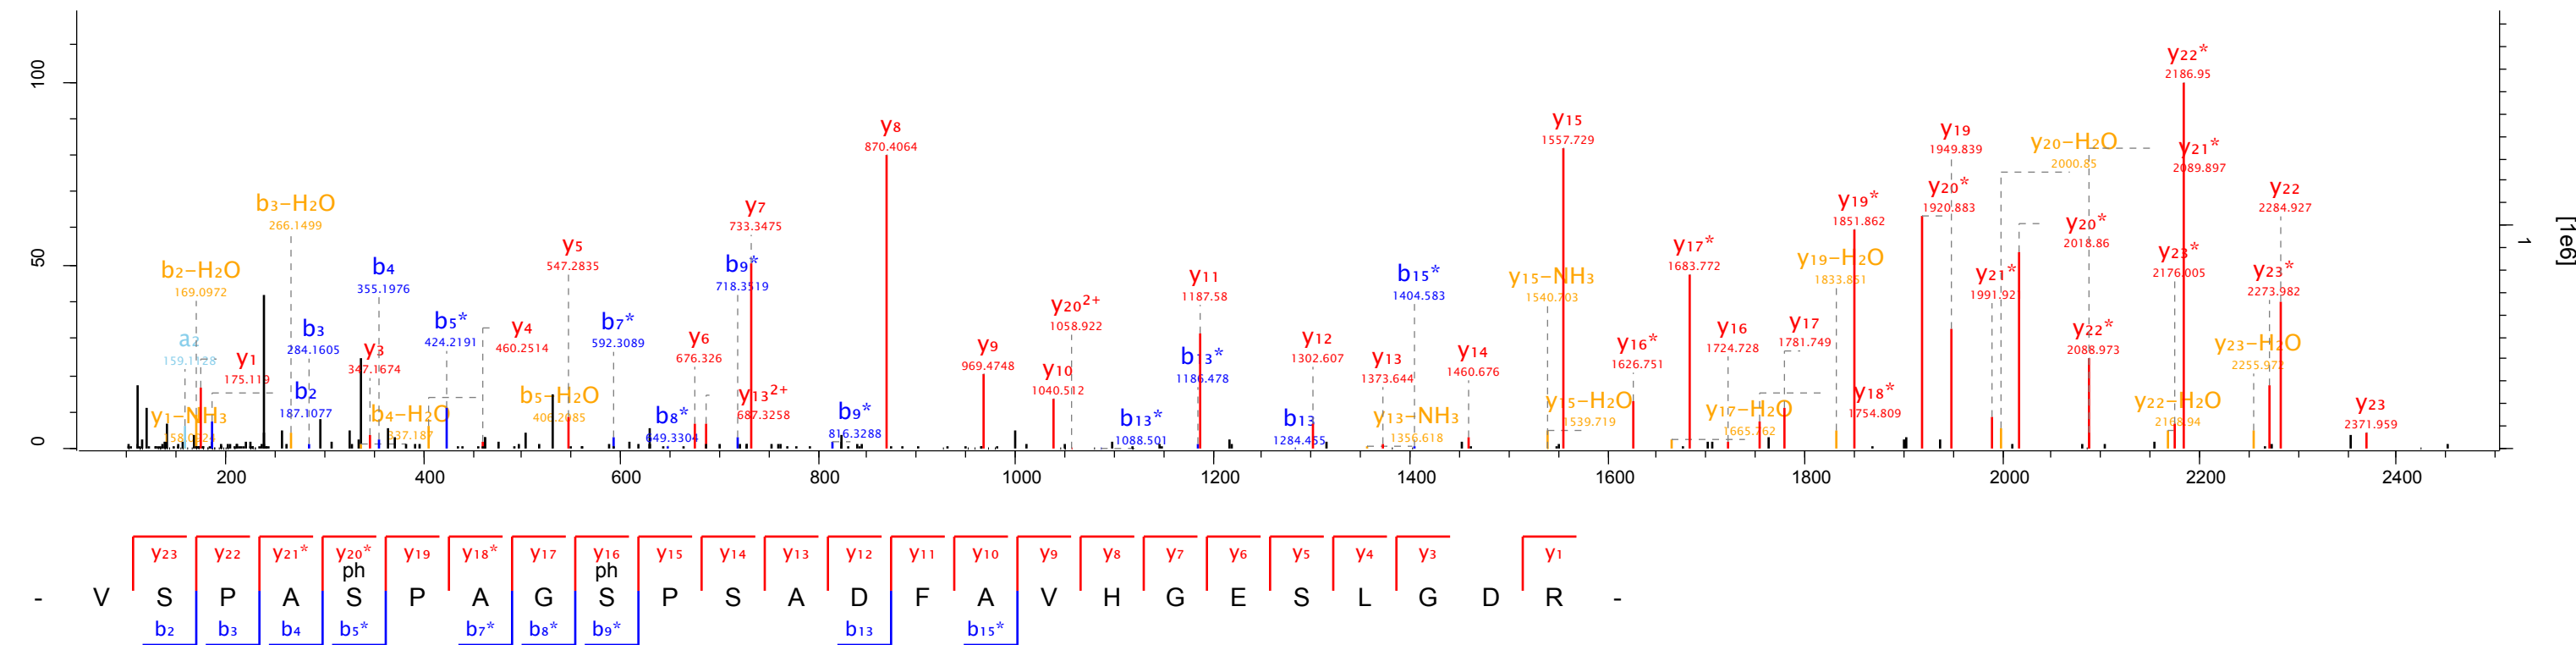

Raw file: 20171215\_MaS\_33SR\_LMH\_phospho2\_03  
 Scan: 18320 Method: FTMS; HCD Score: 208.66 m/z: 777.85 Gene names: RELB

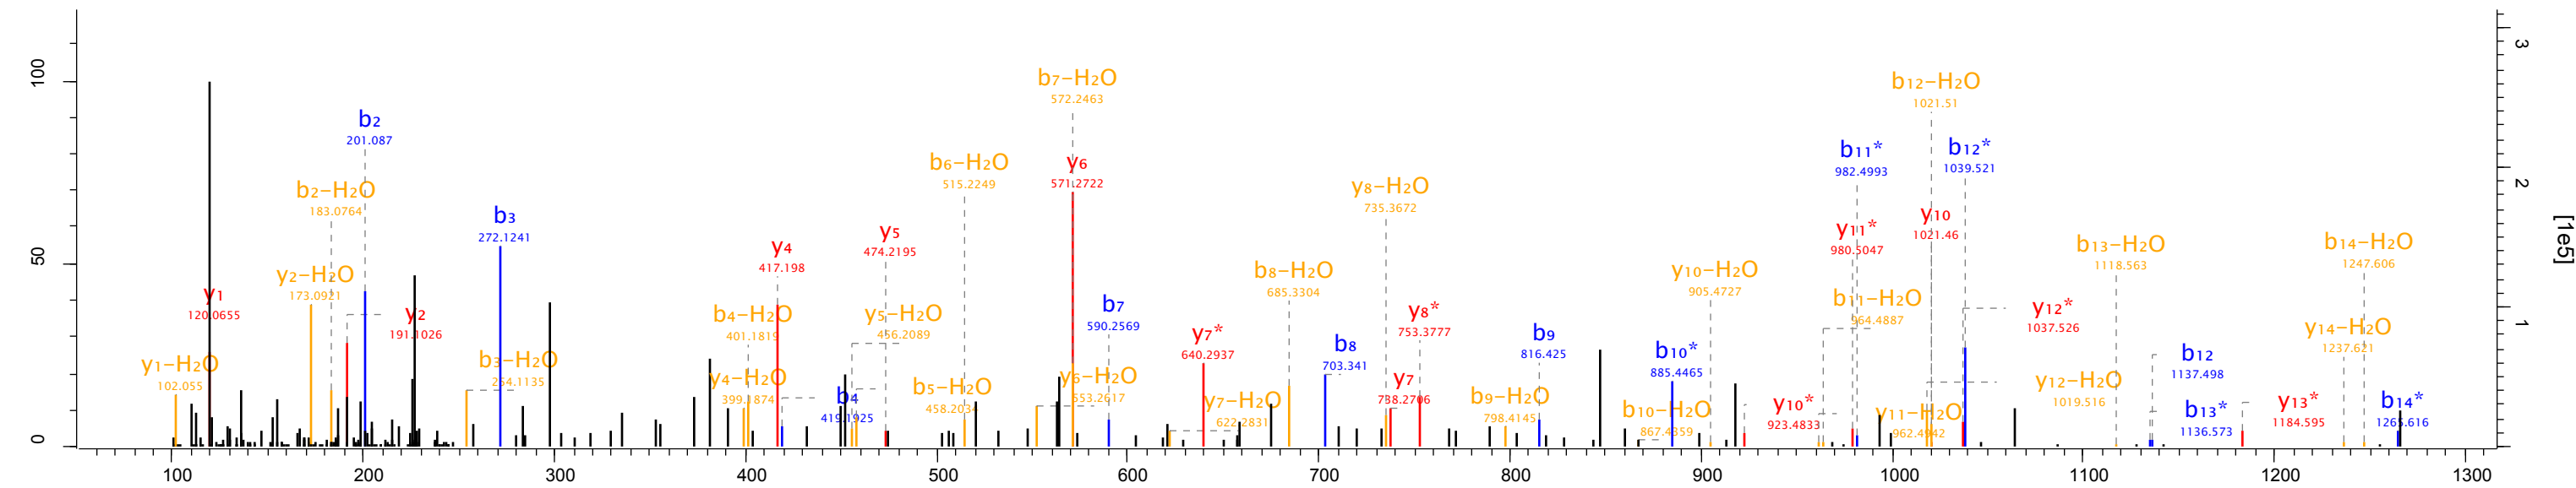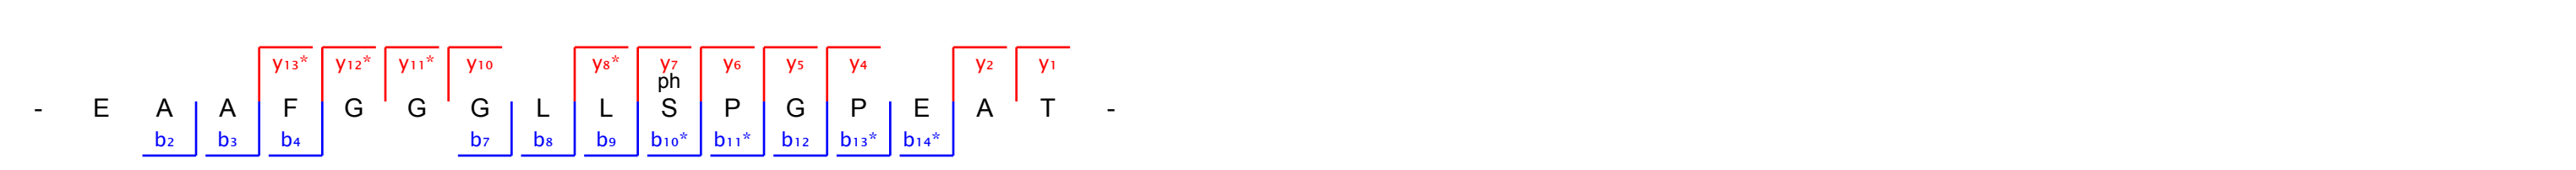

Raw file  
20171215\_MaS\_33SR\_LMH\_phospho2\_03

Scan 6190 Method FTMS; HCD Score 130.02 m/z 679.27 Gene names POC5

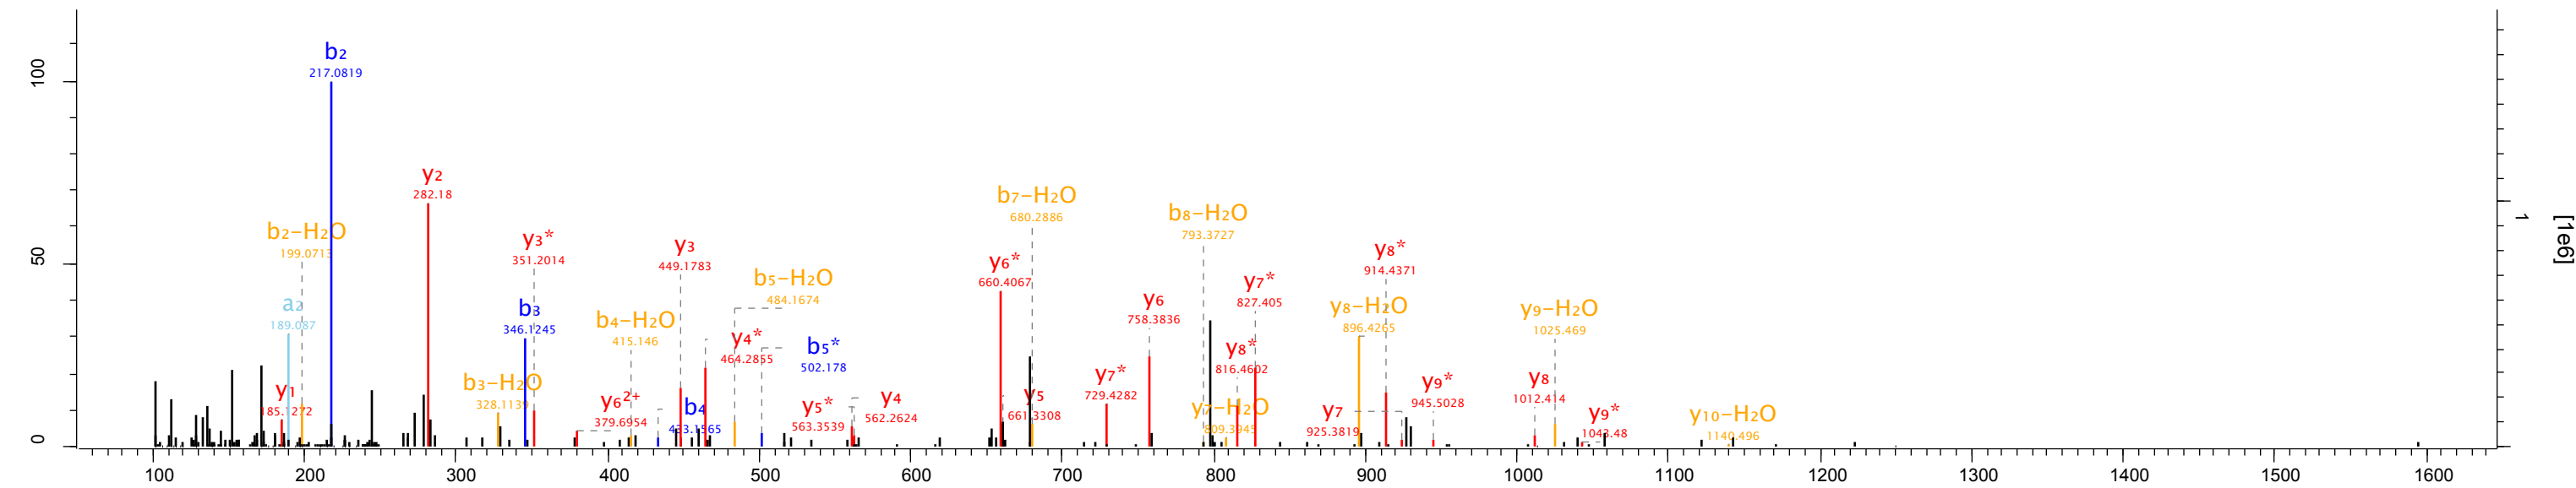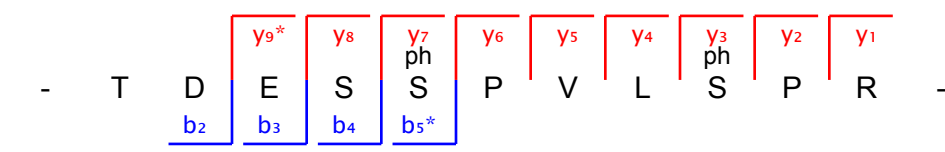

Raw file  
20171215\_MaS\_33SR\_LMH\_phospho2\_03

Scan Method Score m/z Gene names  
8480 FTMS; HCD 257.77 1255.51 BLOC1S3

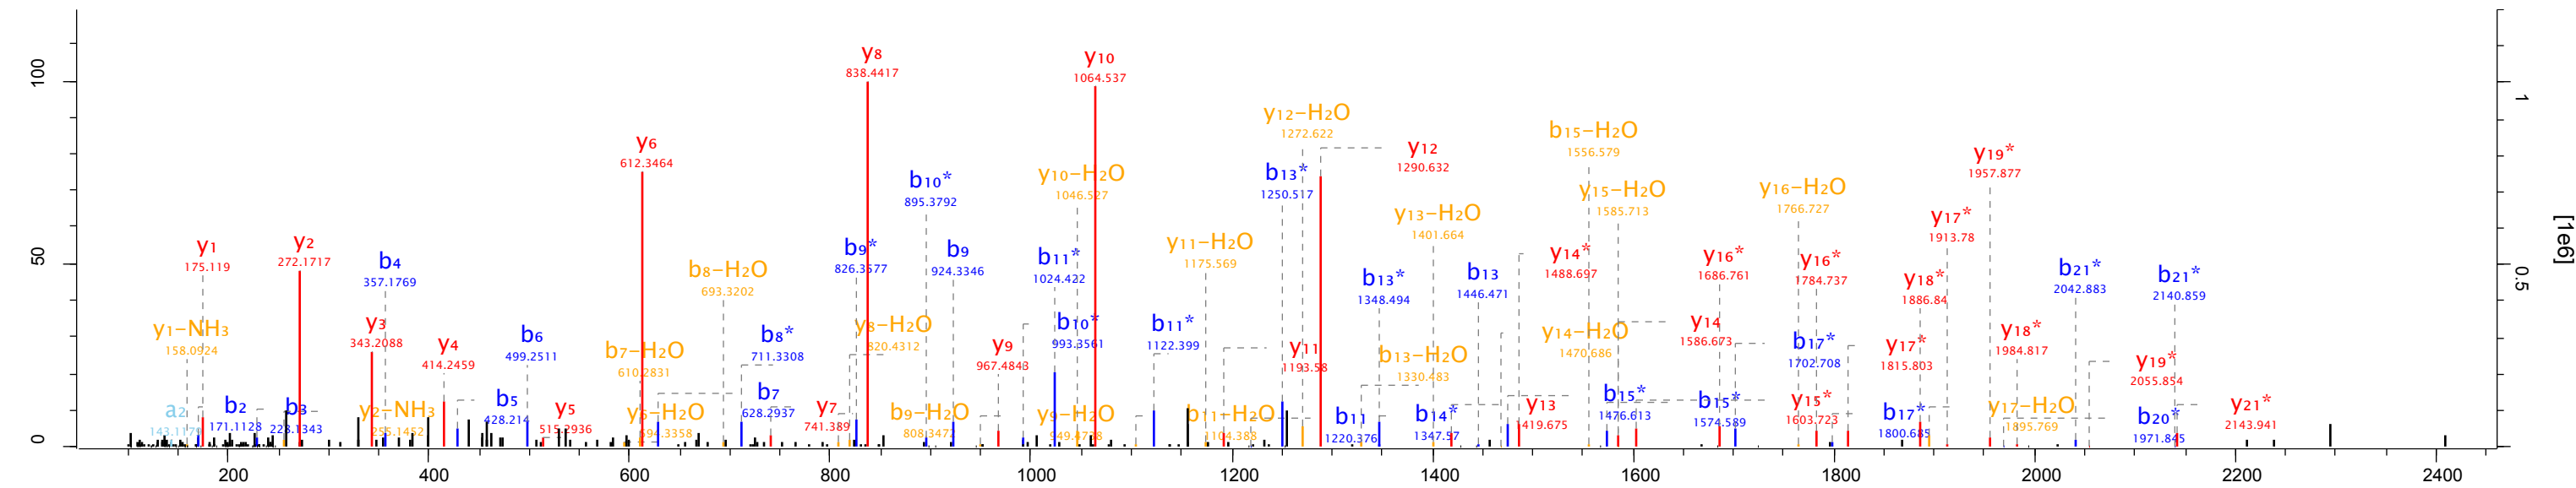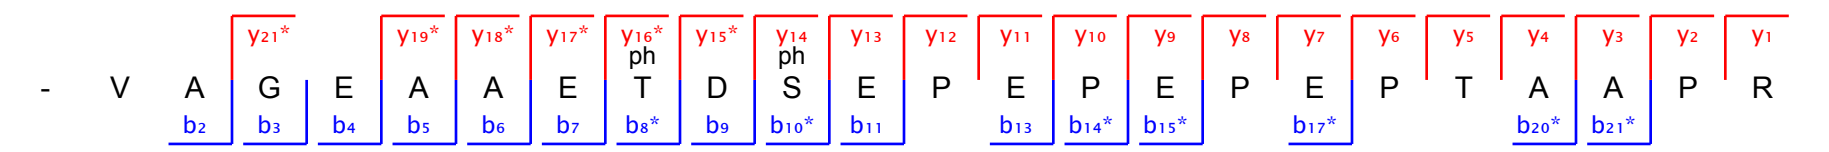

Raw file: 20171215\_MaS\_33SR\_LMH\_phospho2\_03  
 Scan: 8630 Method: FTMS; HCD Score: 149.93 m/z: 932.89 Gene names: MKL1; mkl1

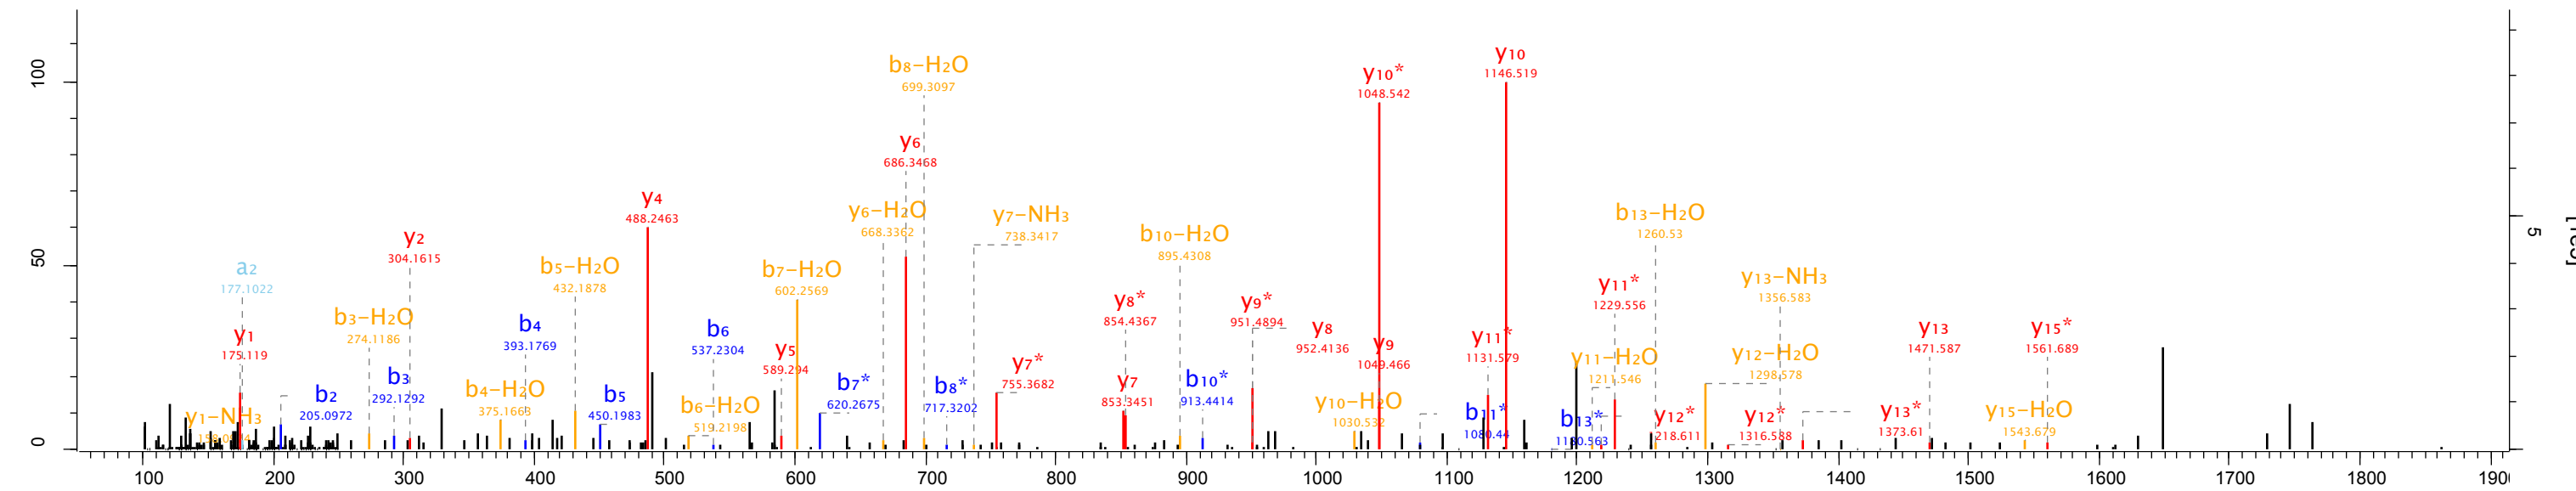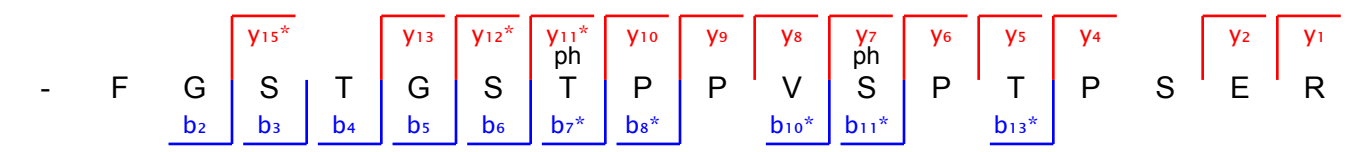



Raw file 20171215\_MaS\_33SR\_LMH\_phospho2\_03 Scan 8860 Method FTMS; HCD Score 47.22 m/z 728.3 Gene names CEP350

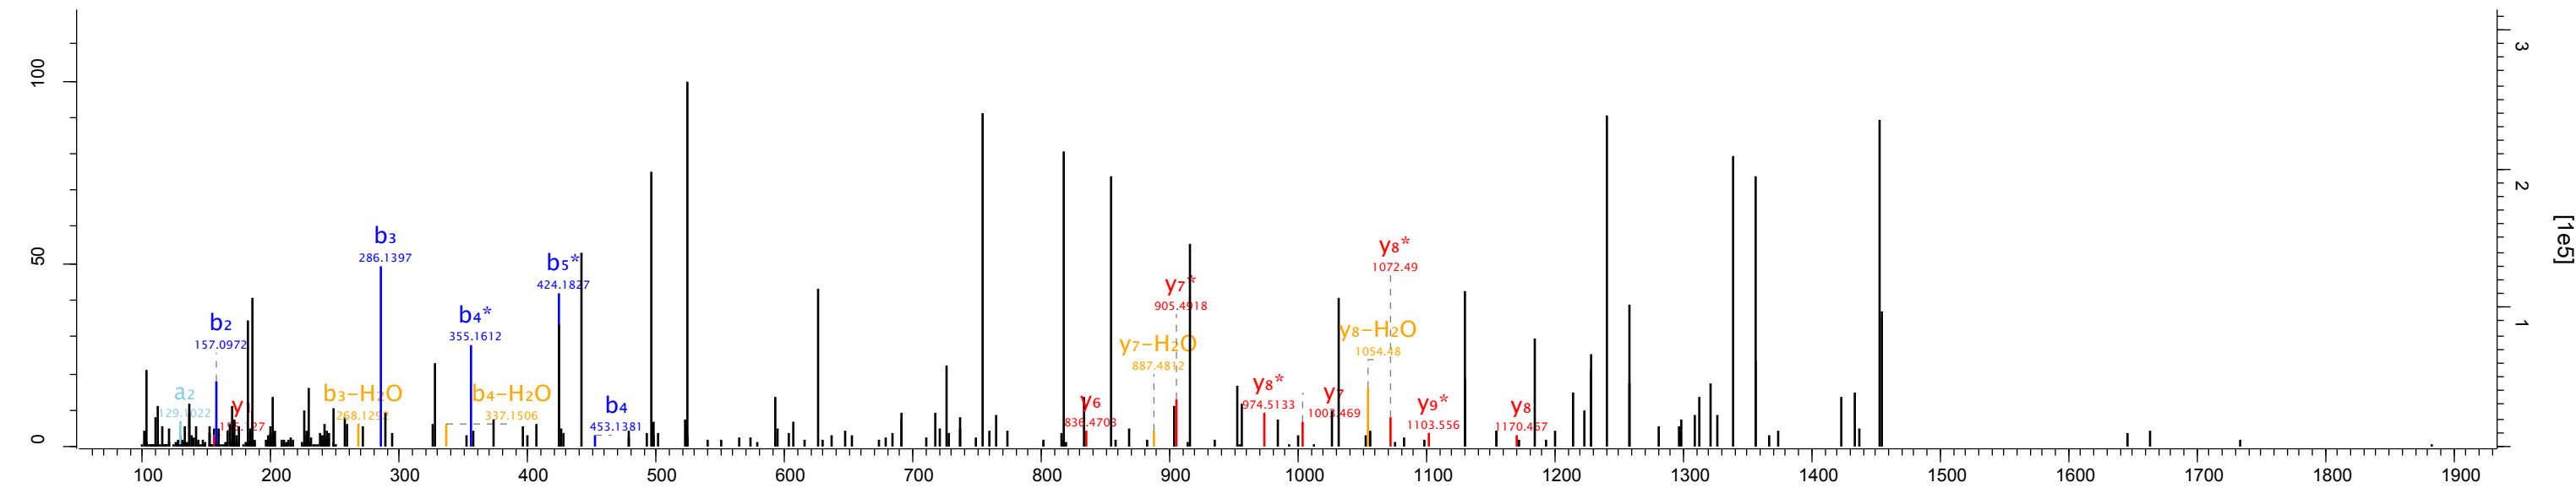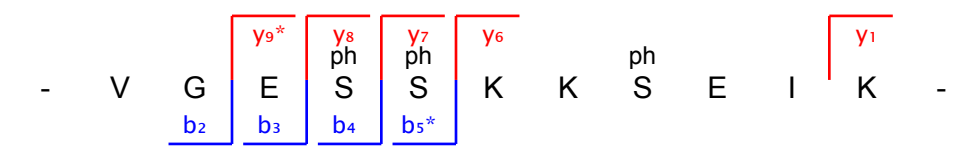

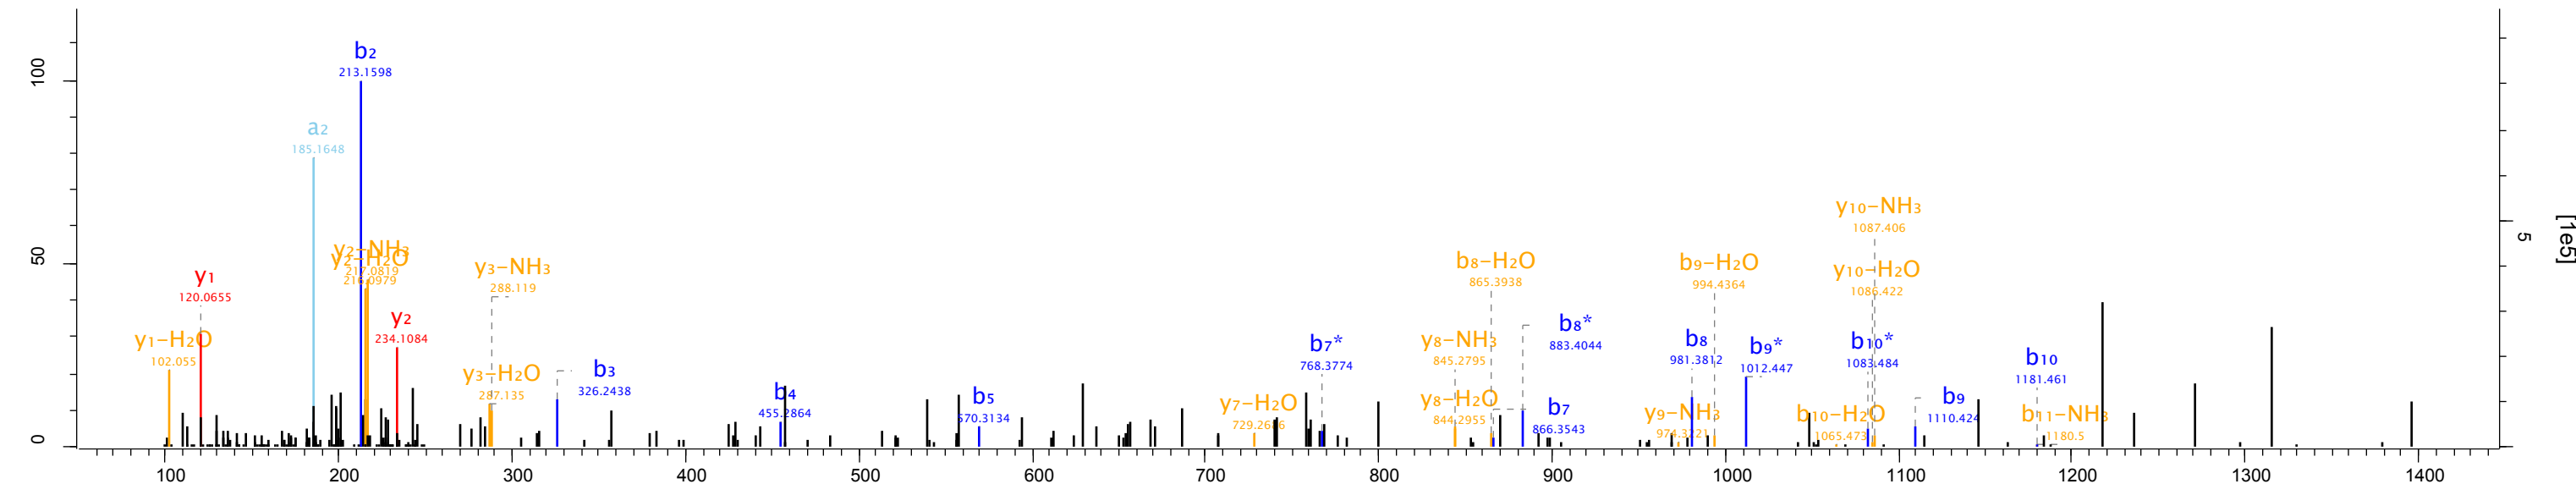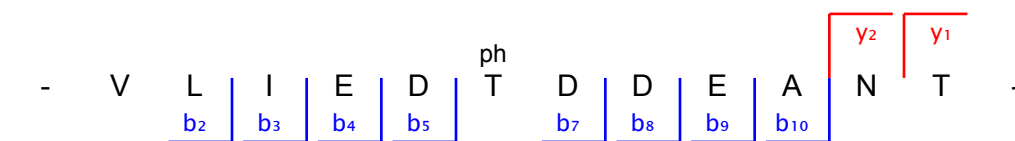

Raw file  
20171215\_MaS\_33SR\_LMH\_phospho2\_03

Scan 9820 Method FTMS; HCD Score 69.25 m/z 868.37 Gene names PHF12

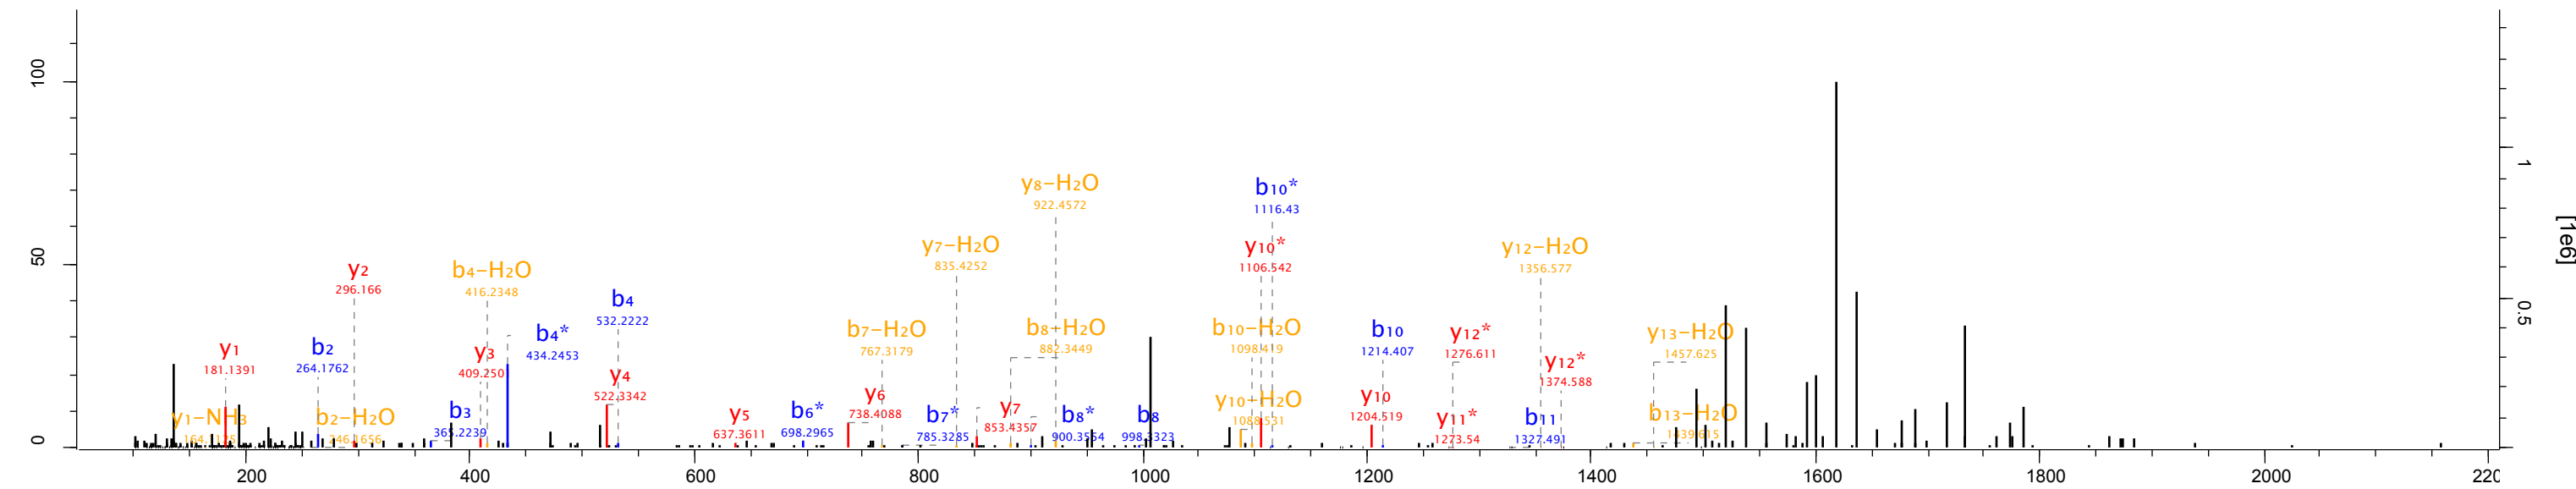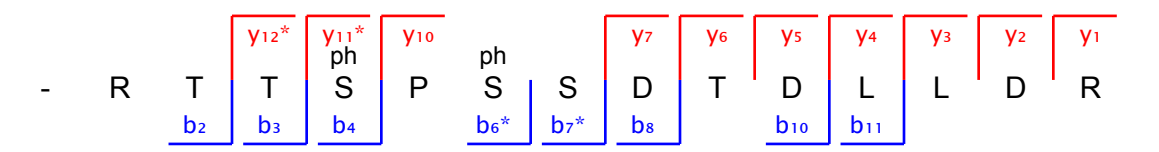

Raw file 20171215\_MaS\_33SR\_LMH\_phospho2\_04 Scan 5310 Method FTMS; HCD Score 82.22 m/z 801.82 Gene names FZR1

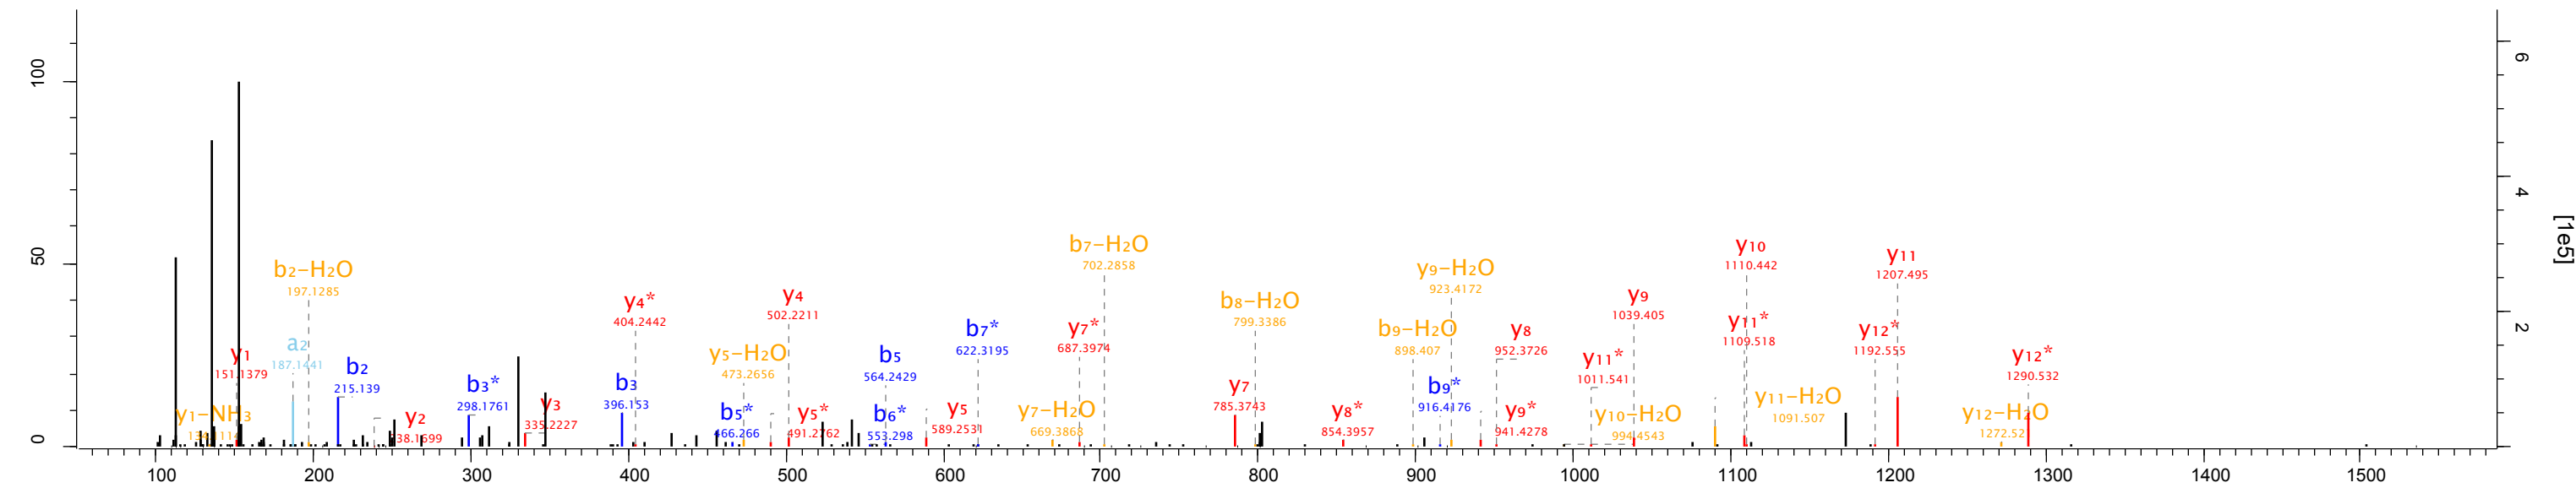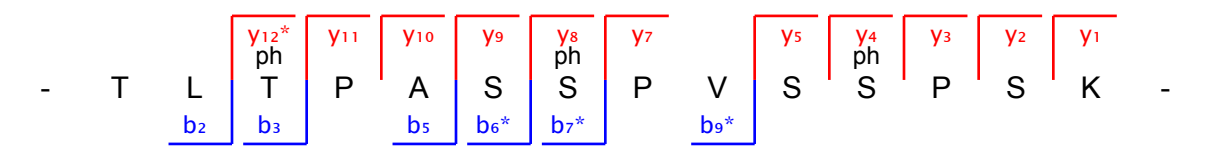

Raw file: 20171215\_MaS\_33SR\_LMH\_phospho2\_04  
 Scan: 5530 Method: FTMS; HCD Score: 62.19 m/z: 971.88 Gene names: ABCA2

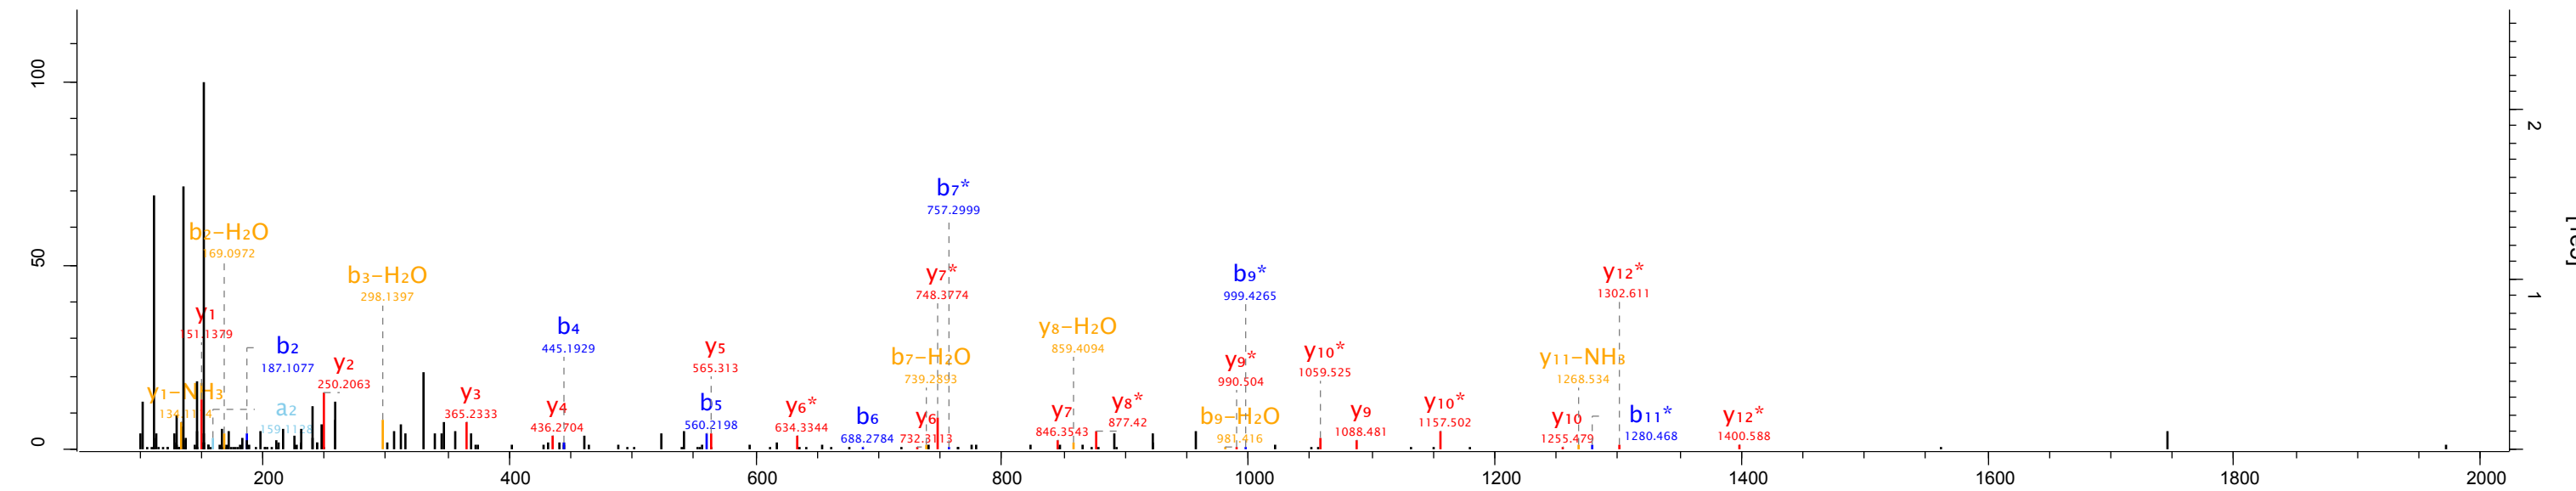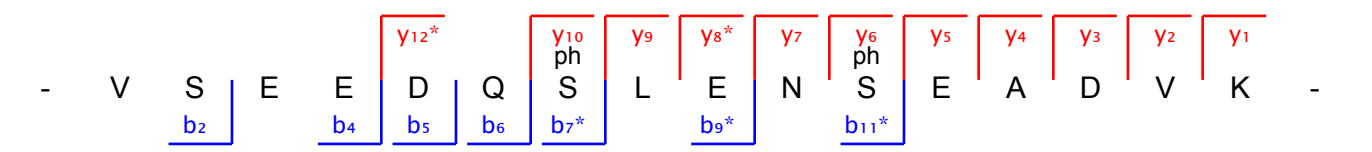

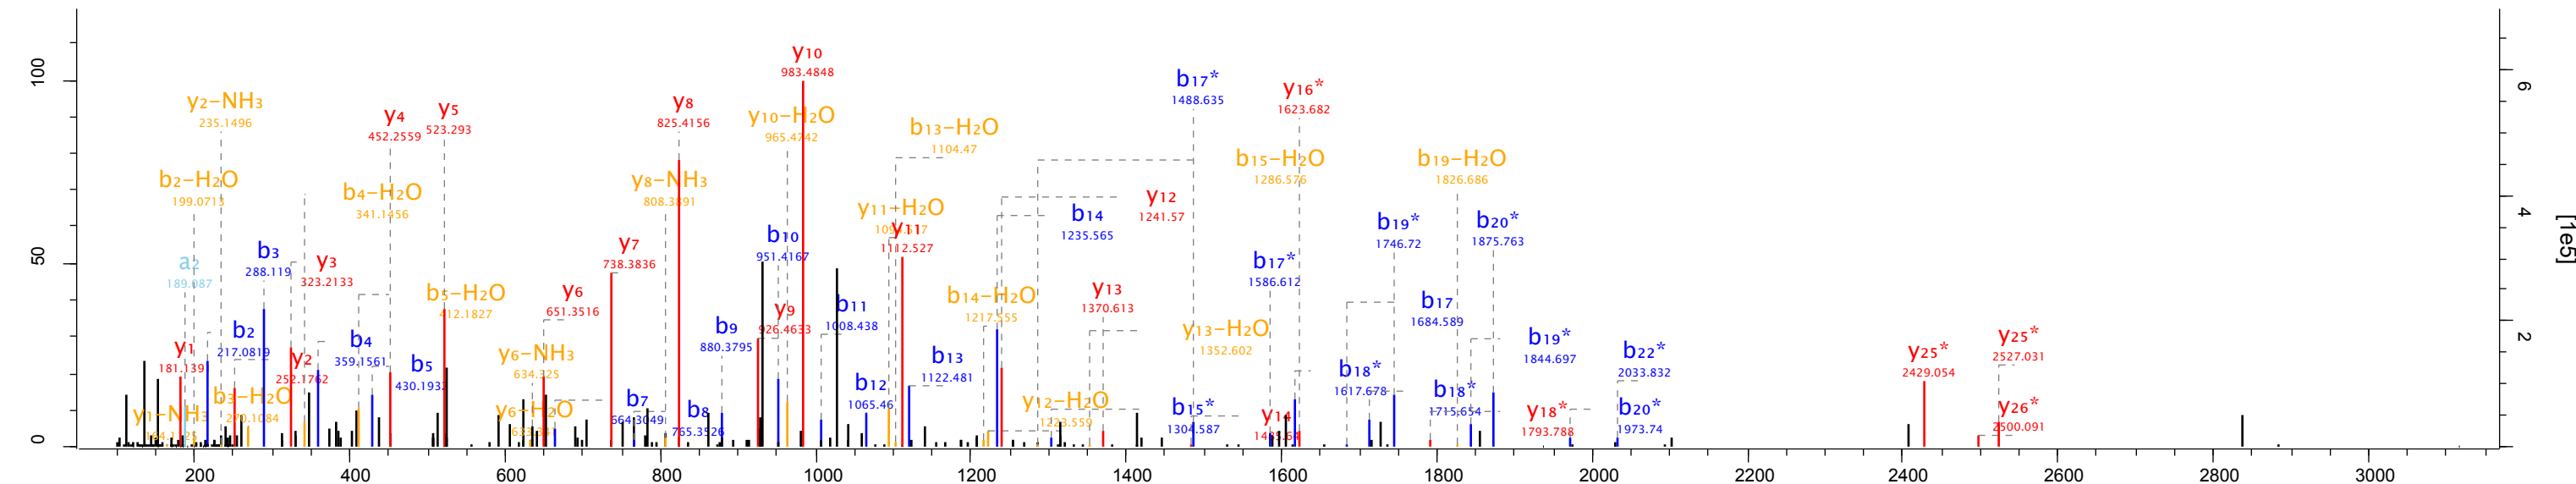

- S E A A A P H T D A G G G L ph S D E E E G T S S Q A E A A R -

b<sub>2</sub>
b<sub>3</sub>
b<sub>4</sub>
b<sub>5</sub>
y<sub>26</sub>\*
y<sub>25</sub>\*
b<sub>7</sub>
b<sub>8</sub>
b<sub>9</sub>
b<sub>10</sub>
b<sub>11</sub>
b<sub>12</sub>
b<sub>13</sub>
b<sub>14</sub>
b<sub>15</sub>\*
y<sub>18</sub>\*
y<sub>16</sub>\*
ph
y<sub>14</sub>
y<sub>13</sub>
y<sub>12</sub>
y<sub>11</sub>
y<sub>10</sub>
y<sub>9</sub>
y<sub>8</sub>
y<sub>7</sub>
y<sub>6</sub>
y<sub>5</sub>
y<sub>4</sub>
y<sub>3</sub>
y<sub>2</sub>
y<sub>1</sub>

Raw file: 20171215\_MaS\_33SR\_LMH\_proteome\_01  
 Scan: 109330 Method: FTMS; HCD Score: 86 m/z: 908.02 Gene names: CCNB1

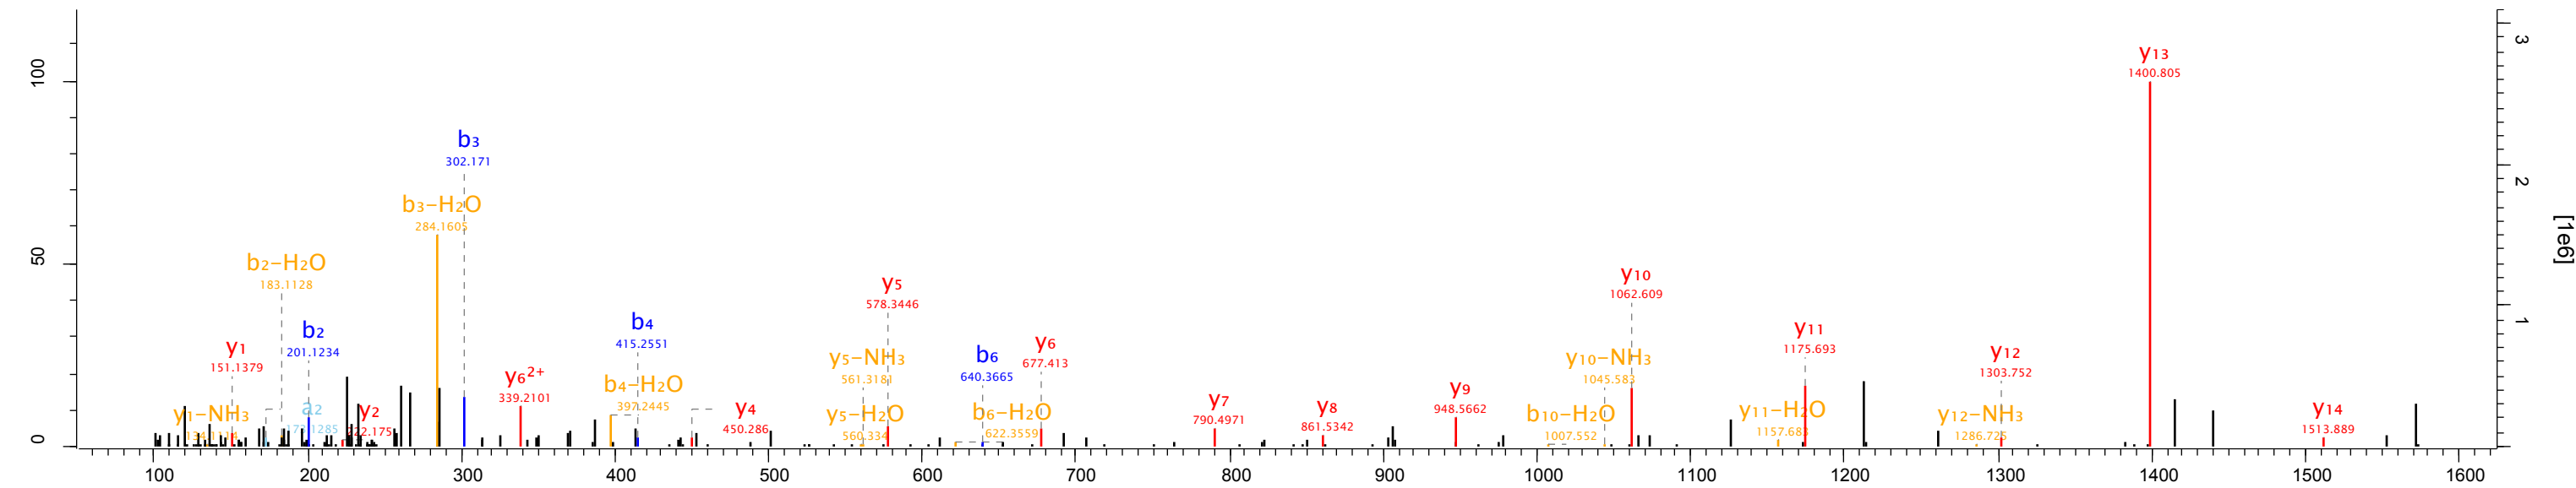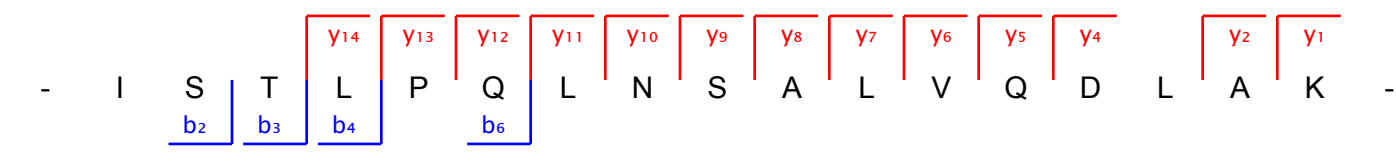

Raw file: 20171215\_MaS\_33SR\_LMH\_proteome\_01  
 Scan: 117120 Method: FTMS; HCD Score: 70.34 m/z: 787.07 Gene names: C18orf8

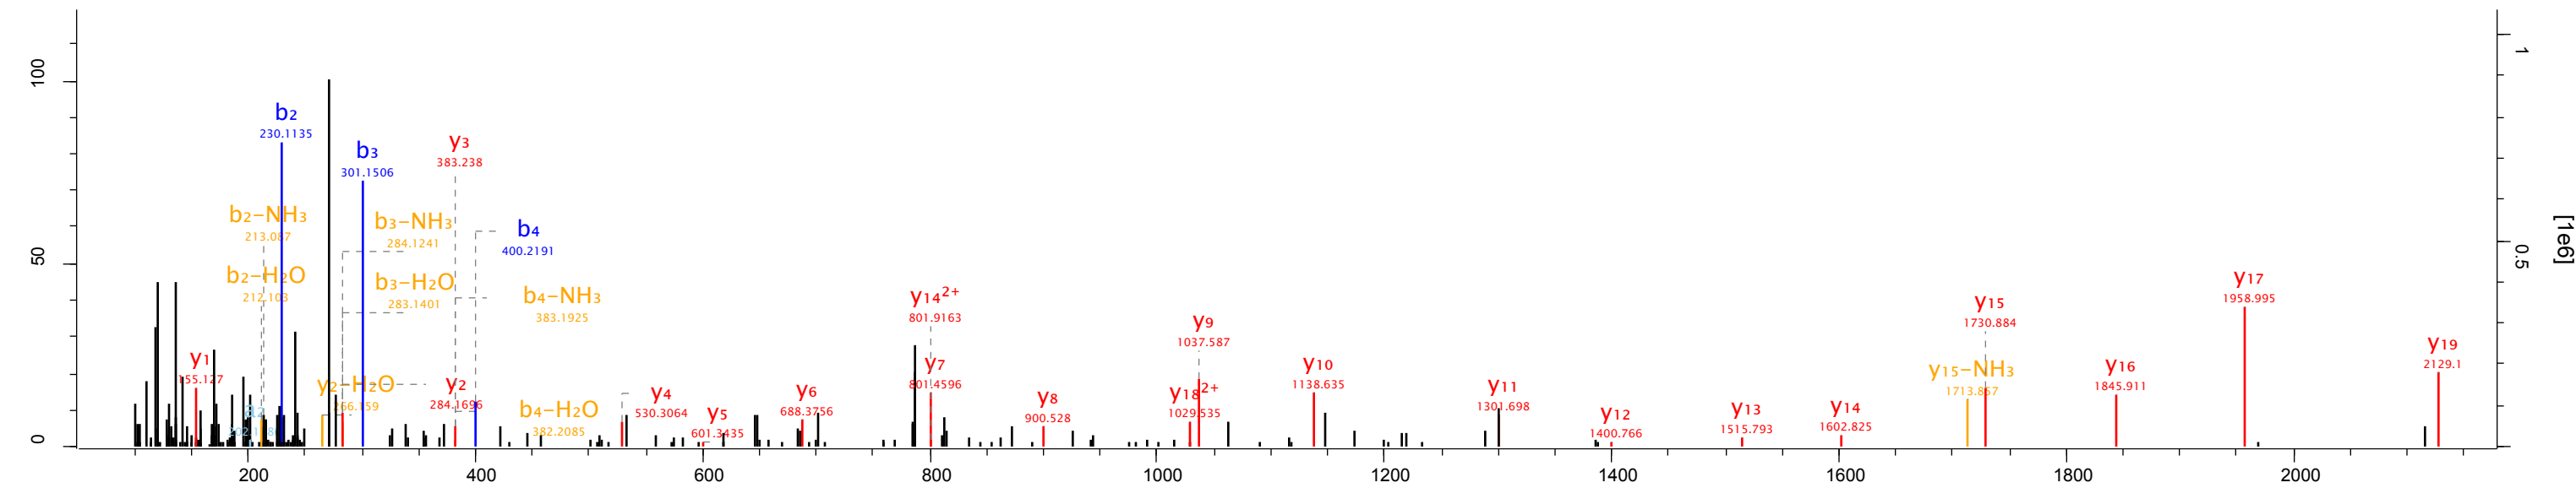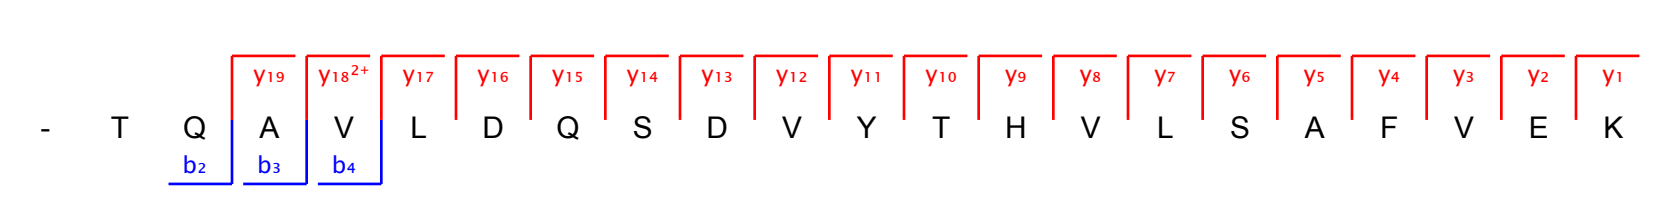



Raw file 20171215\_MaS\_33SR\_LMH\_proteome\_01 Scan 122030 Method FTMS; HCD Score 77.54 m/z 718.42 Gene names UQCR11

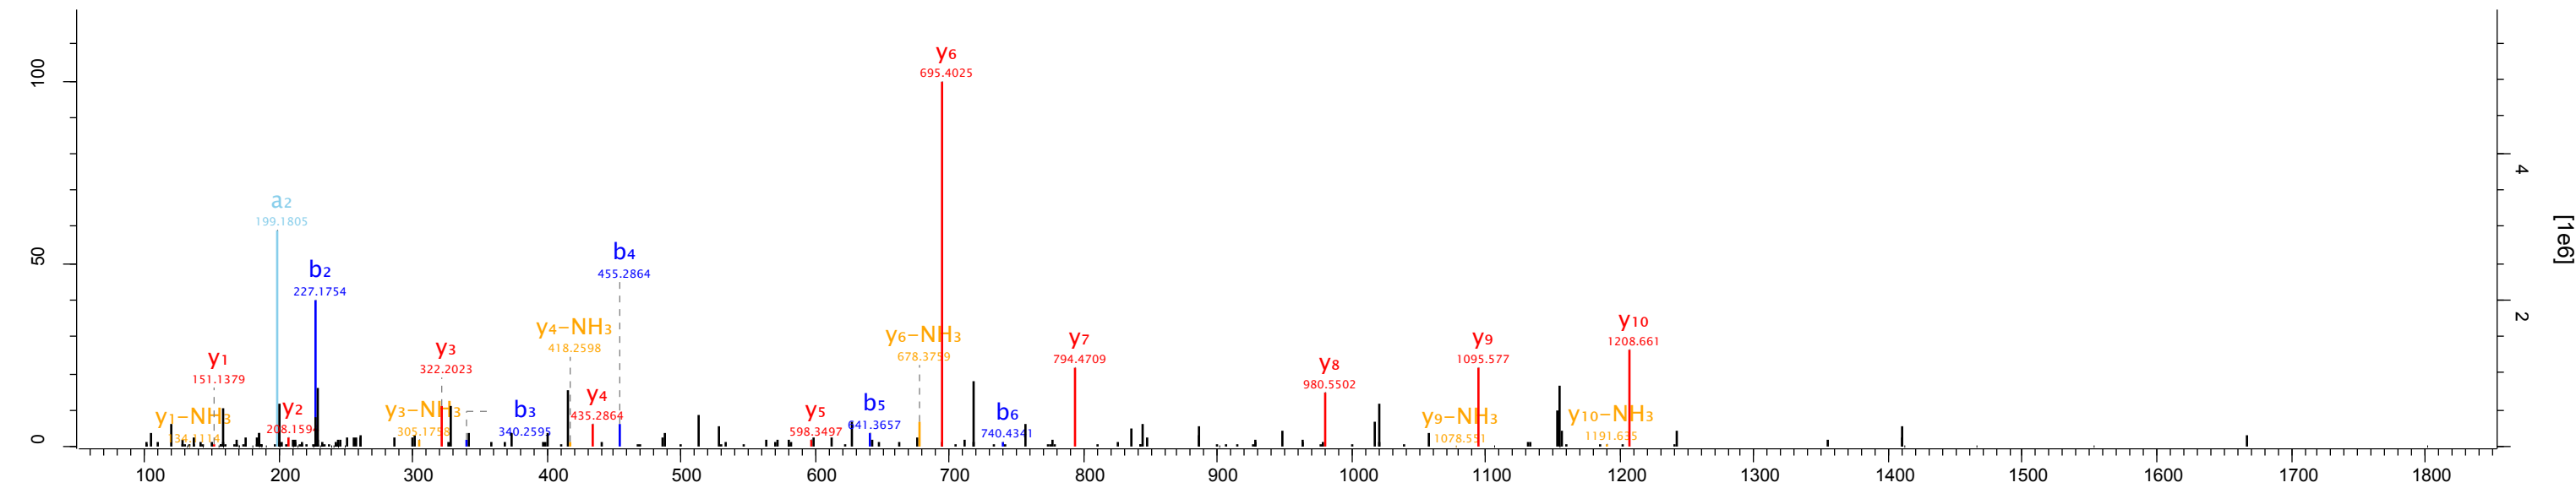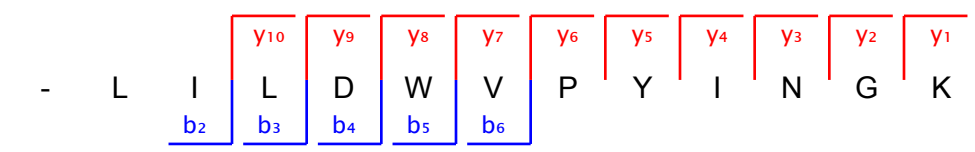

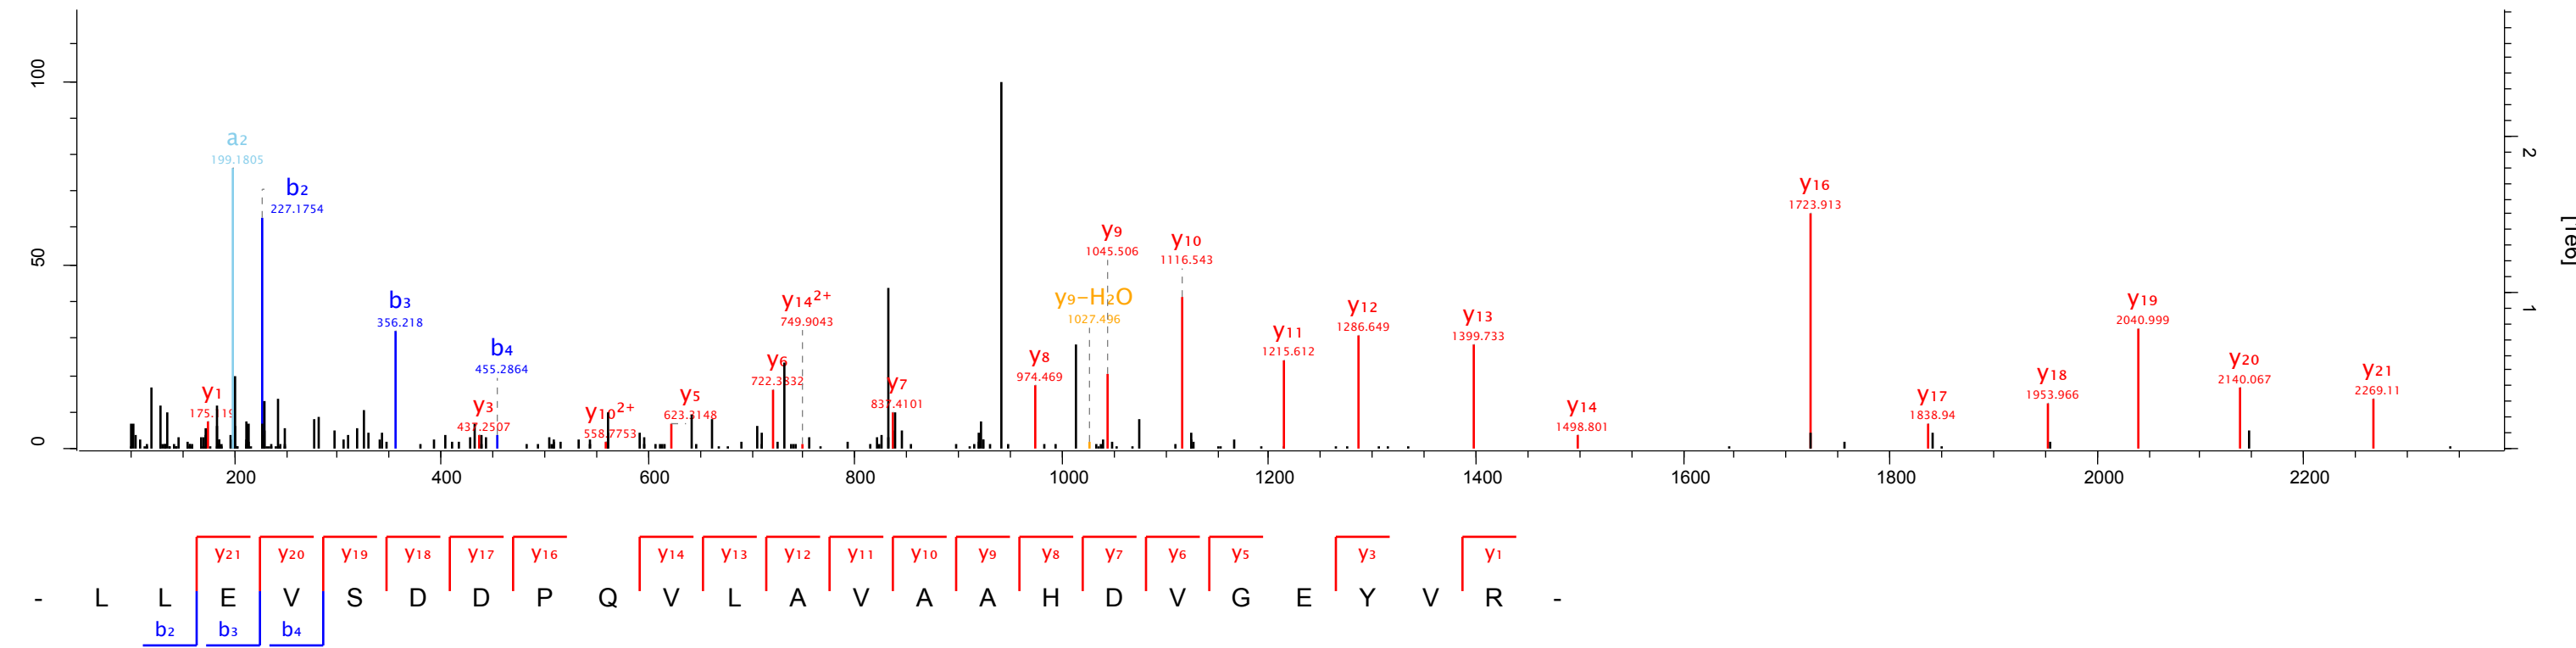

Raw file 20171215\_MaS\_33SR\_LMH\_proteome\_01 Scan 127560 Method FTMS; HCD Score 102.73 m/z 668.9 Gene names UACA

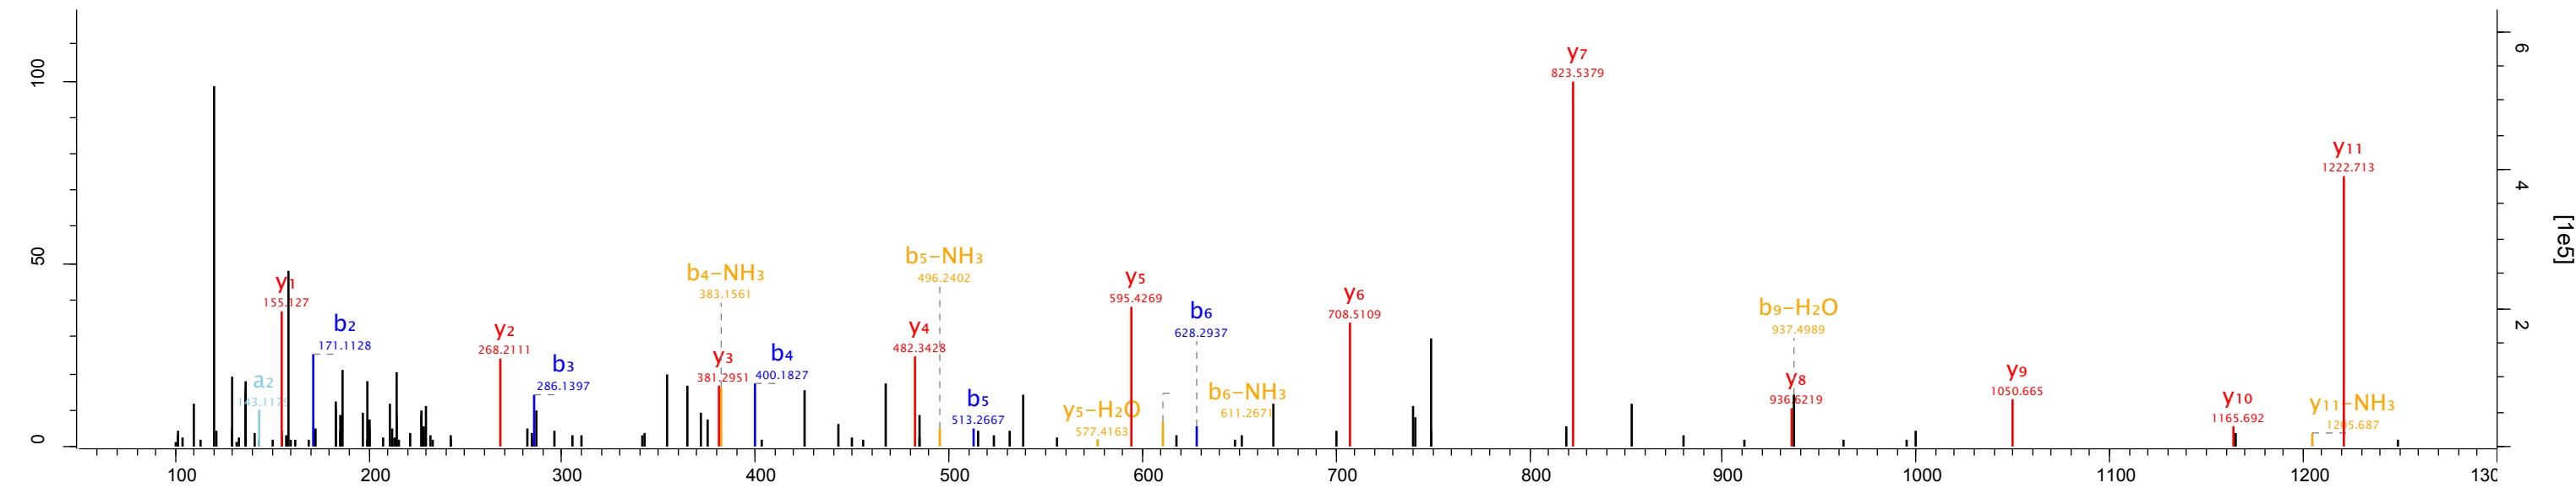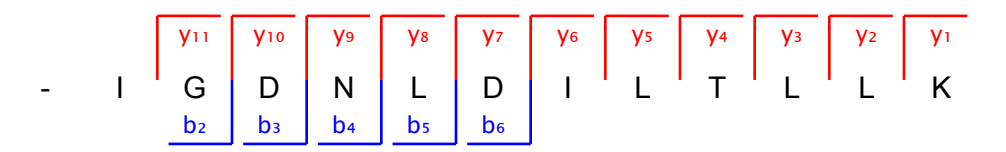

Raw file 20171215\_MaS\_33SR\_LMH\_proteome\_01 Scan 134510 Method FTMS; HCD Score 63.69 m/z 926.52 Gene names CYB5R1

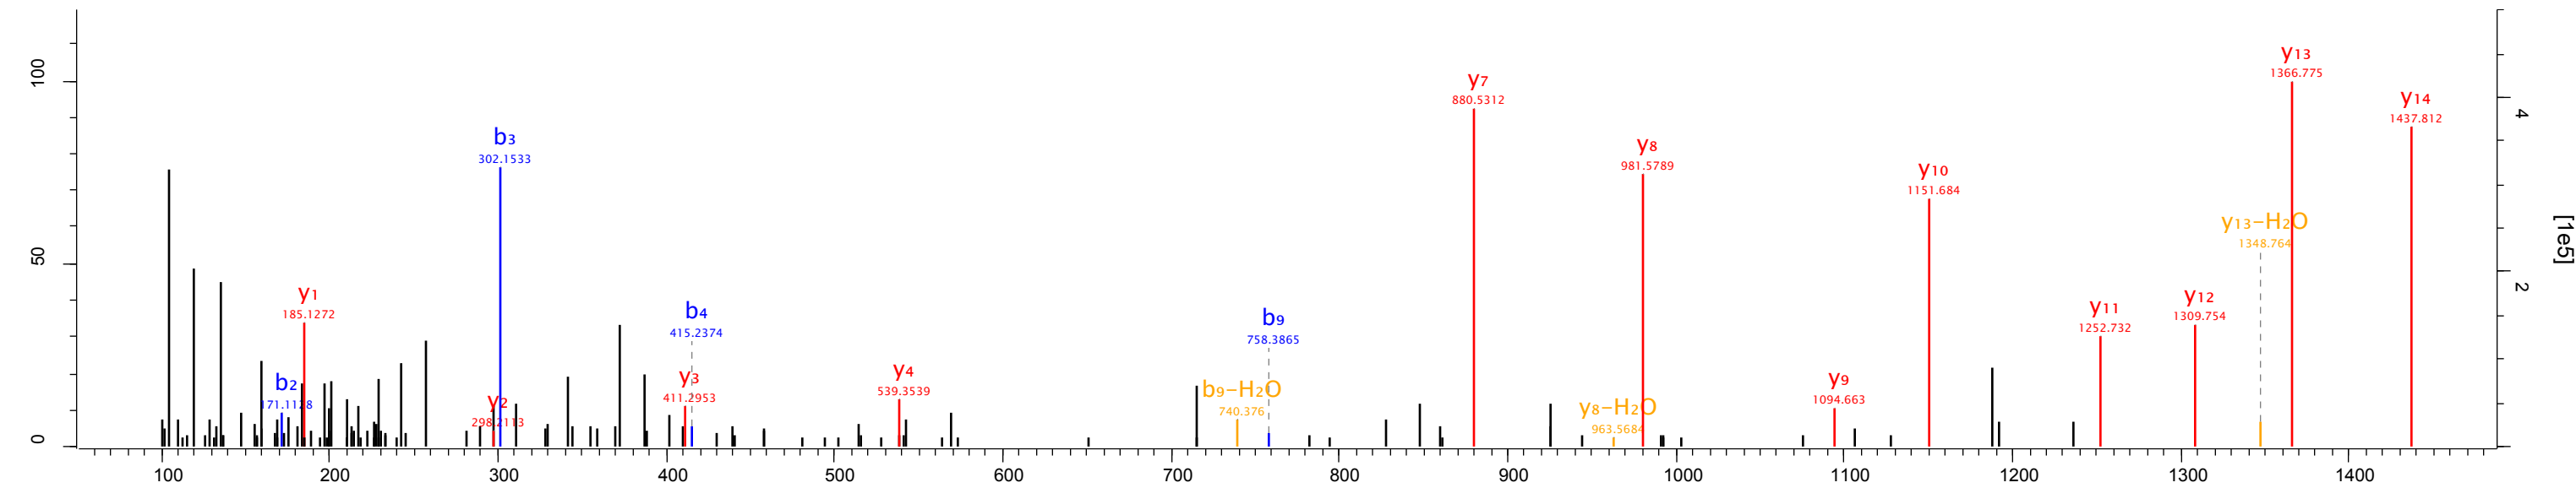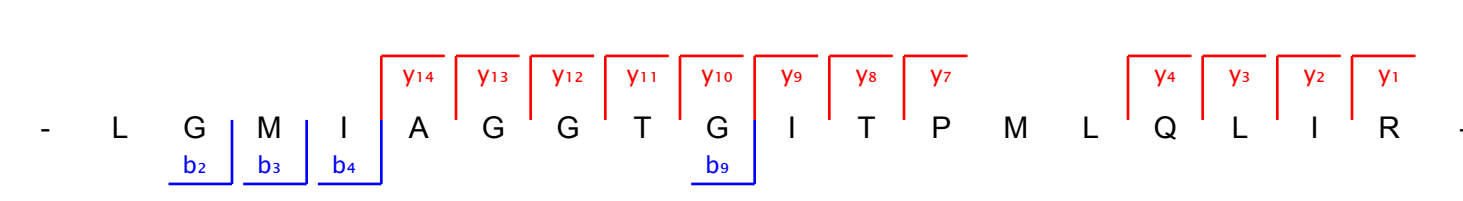

Raw file: 20171215\_MaS\_33SR\_LMH\_proteome\_01  
 Scan: 13700 Method: FTMS; HCD Score: 86.94 m/z: 763.87 Gene names: COA4

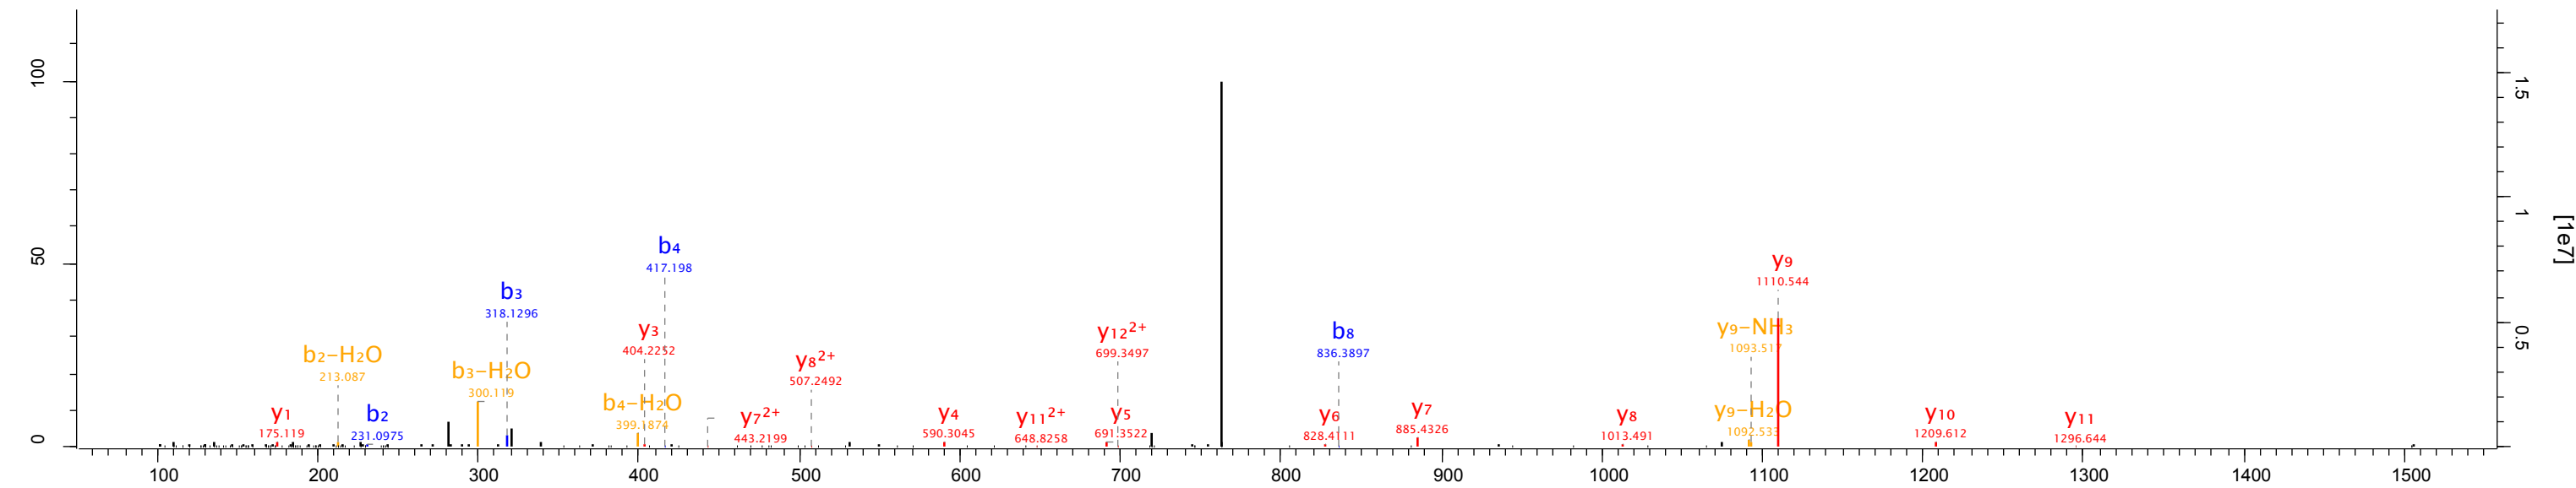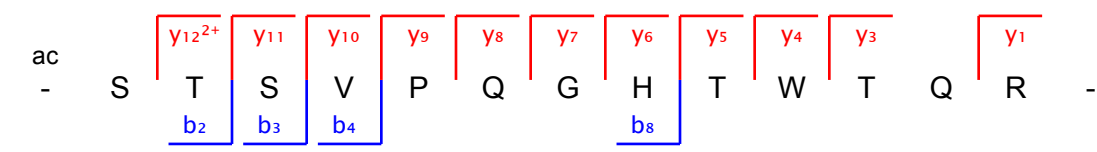

Raw file 20171215\_MaS\_33SR\_LMH\_proteome\_01 Scan 143260 Method FTMS; HCD Score 103.71 m/z 705.7 Gene names C3orf38

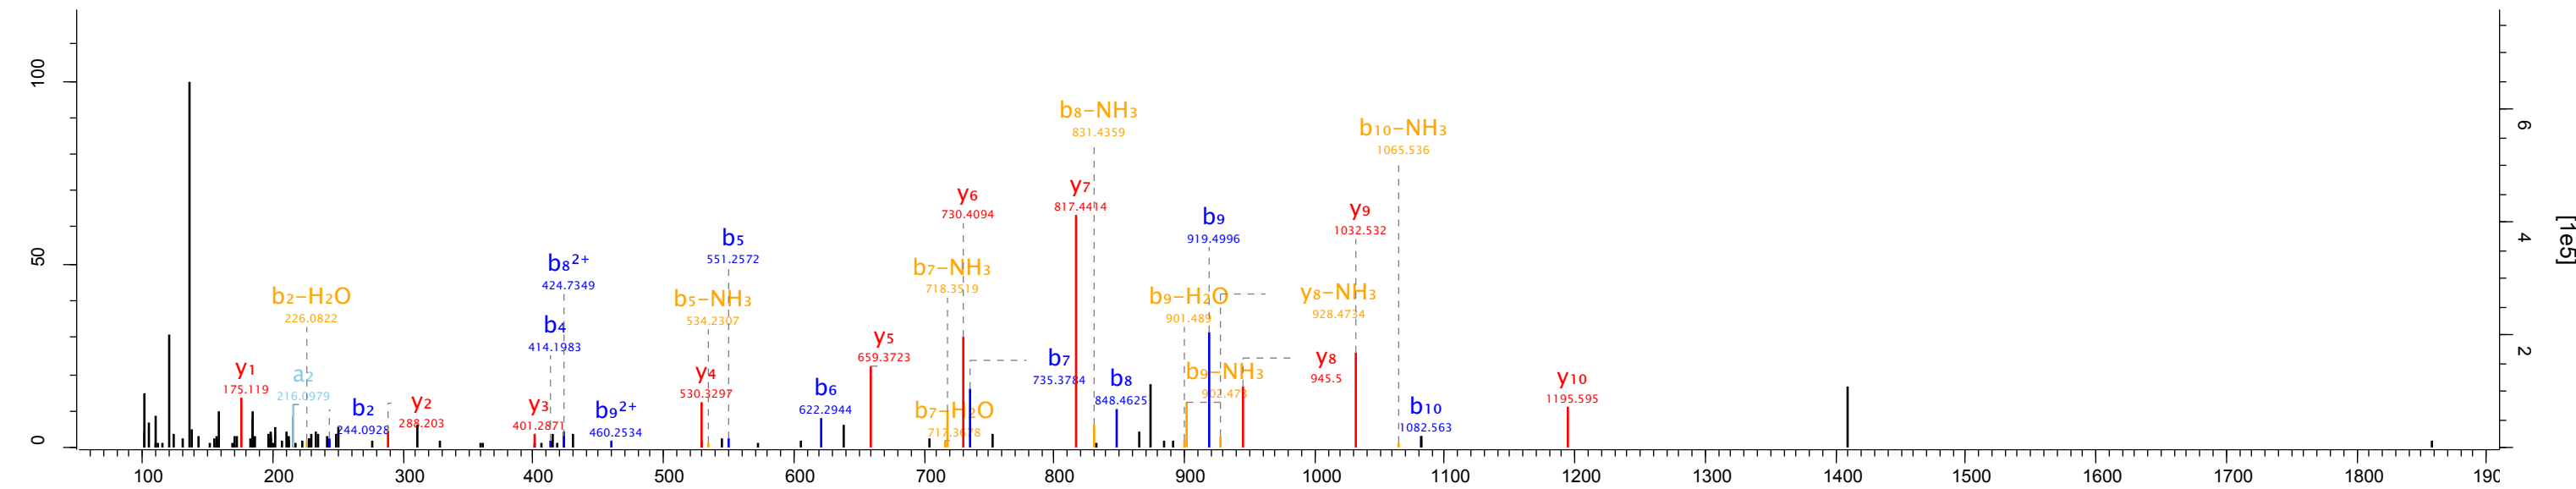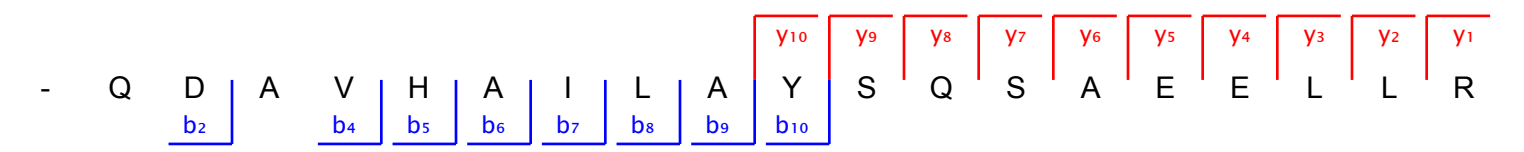

Raw file 20171215\_MaS\_33SR\_LMH\_proteome\_01 Scan 16550 Method FTMS; HCD Score 59.67 m/z 1065.98

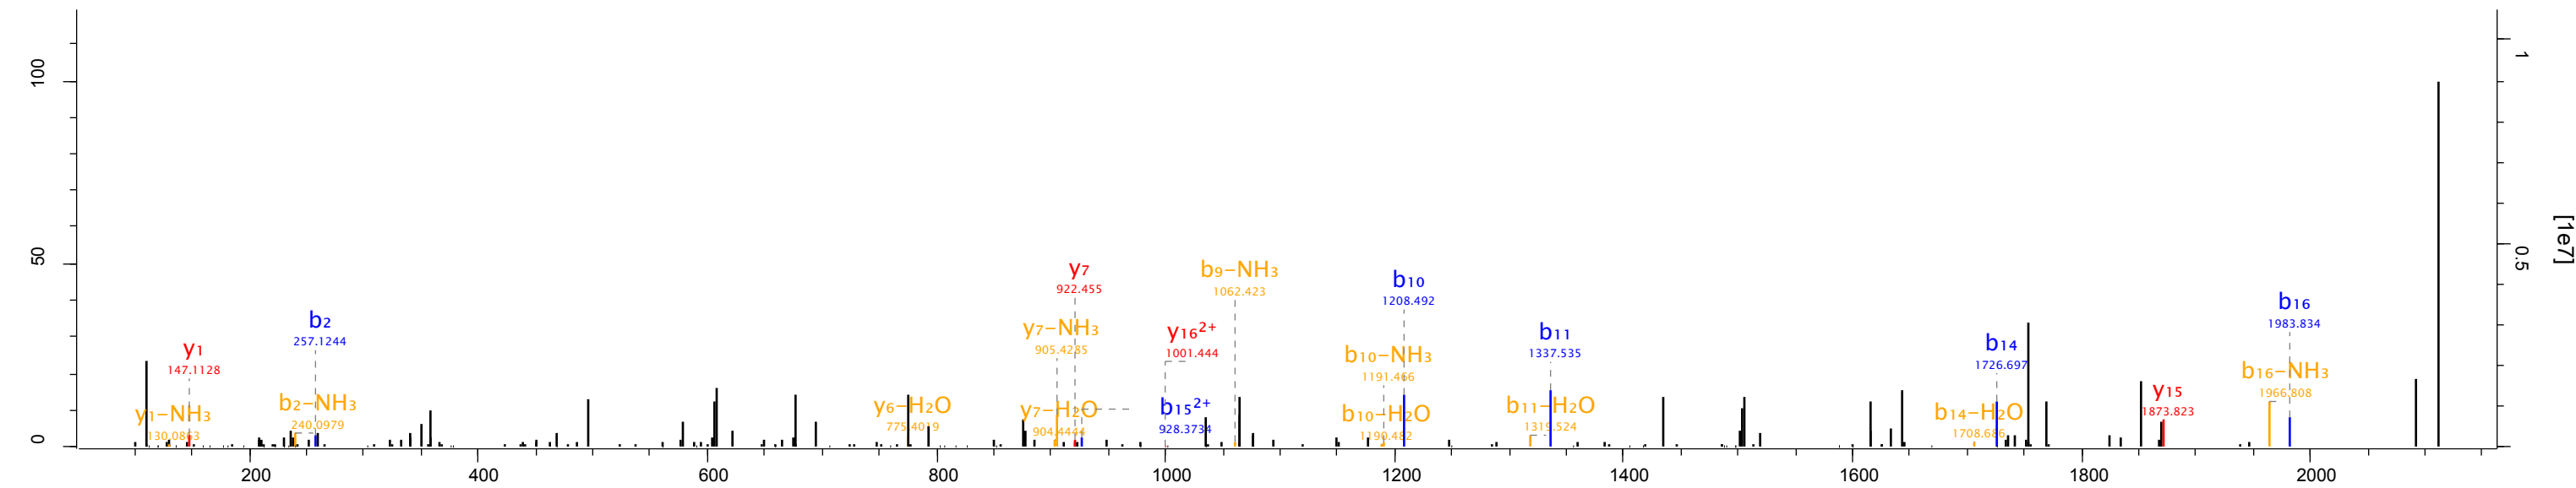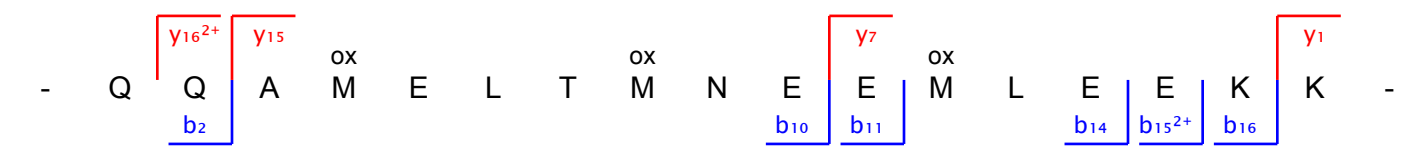

Raw file 20171215\_MaS\_33SR\_LMH\_proteome\_01 Scan 17020 Method FTMS; HCD Score 68.22 m/z 604.26 Gene names PLCG2

20171215\_MaS\_33SR\_LMH\_proteome\_01

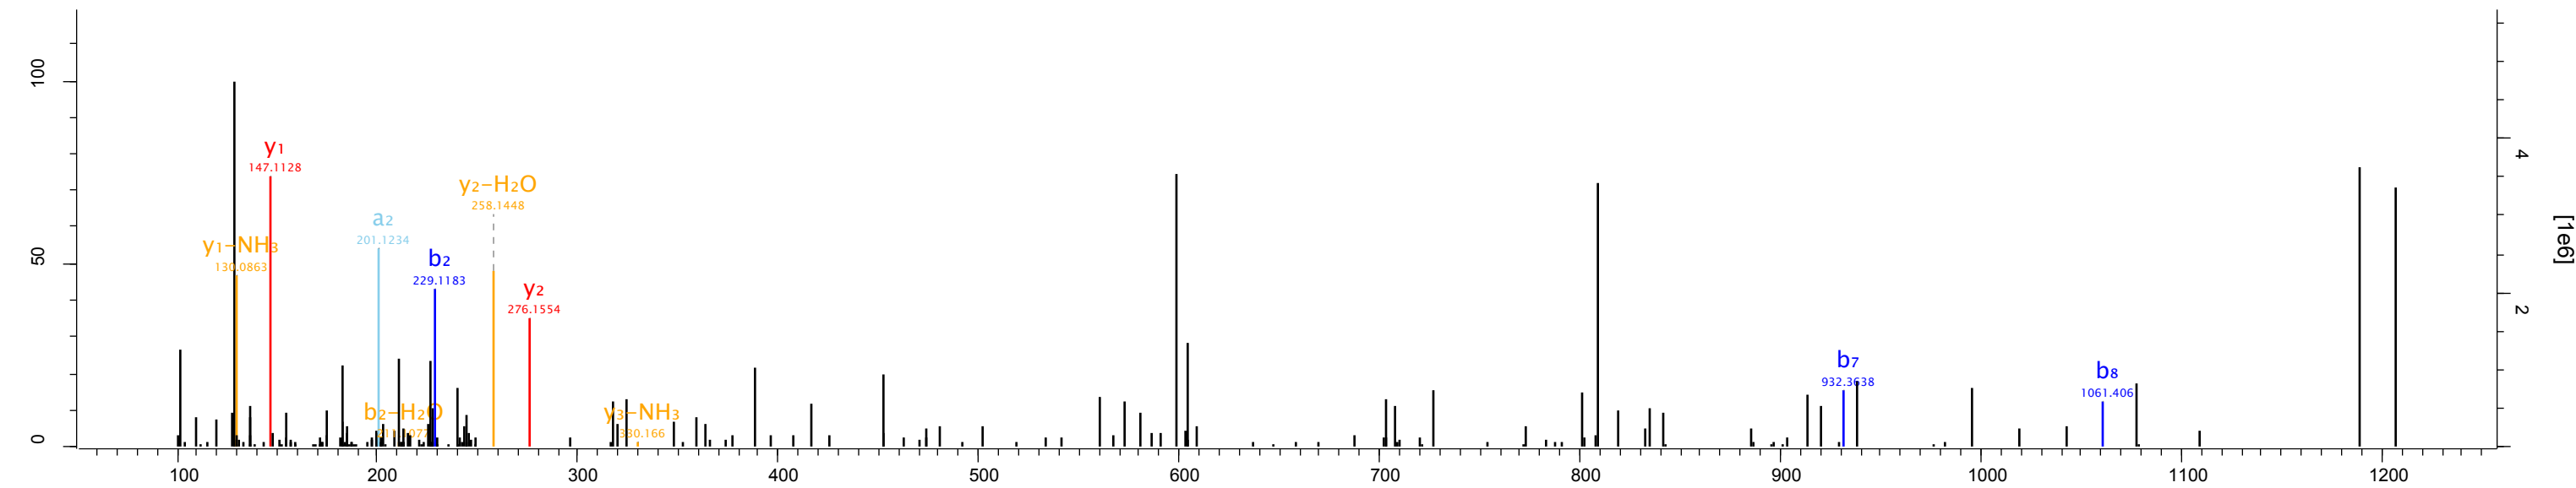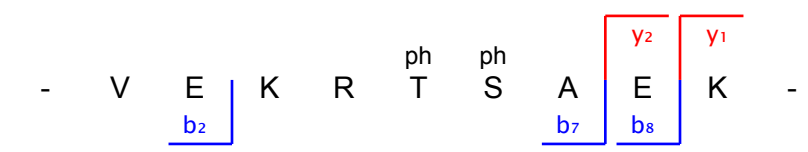



Raw file 20171215\_MaS\_33SR\_LMH\_proteome\_01 Scan 3030 Method FTMS; HCD Score 55.31 m/z 660.31

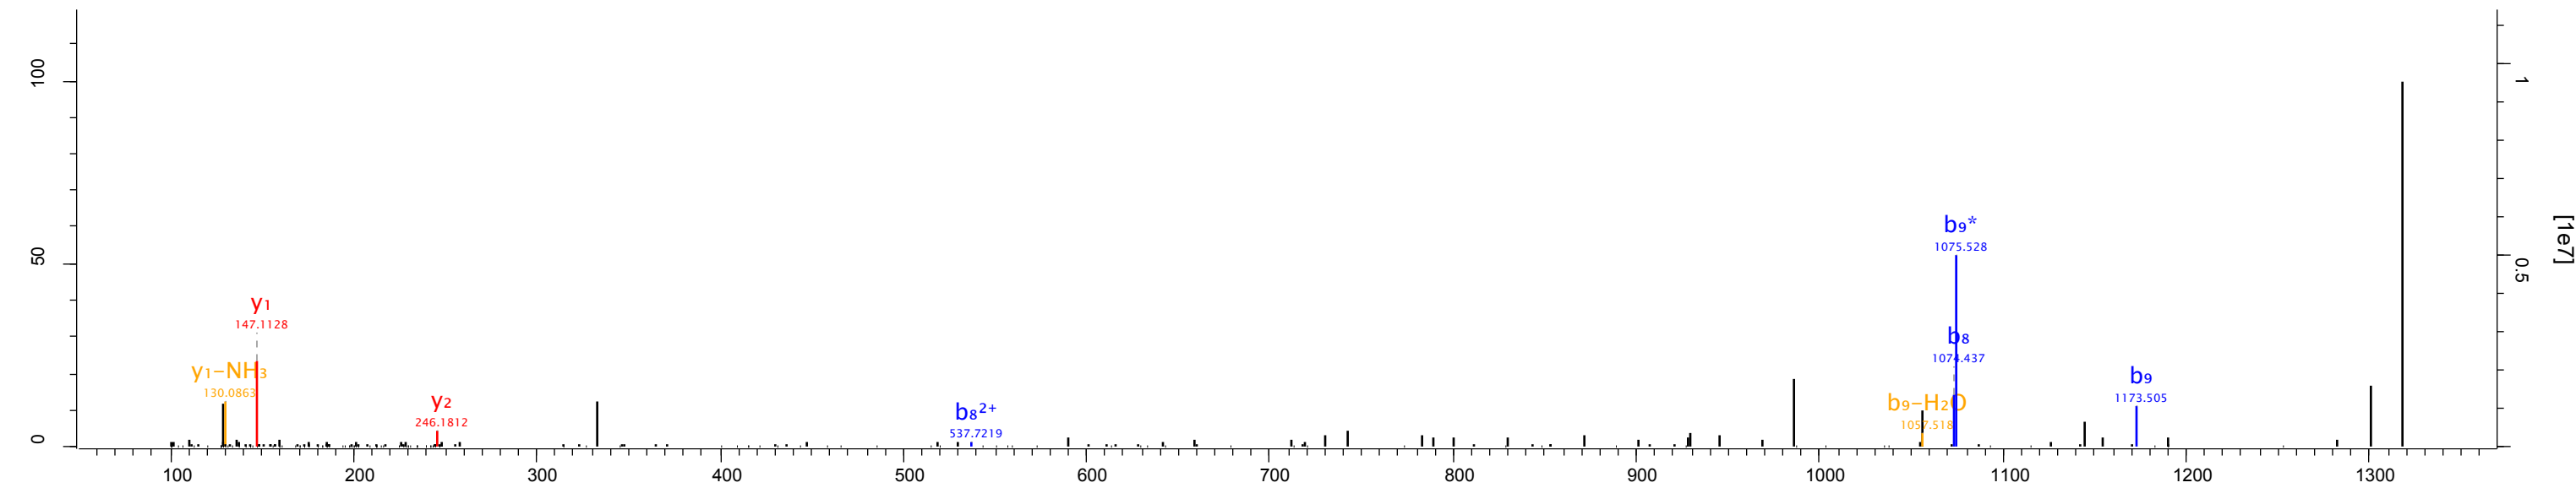

- Y L S S L P W ox M V K -  
b<sub>8</sub> y<sub>2</sub> y<sub>1</sub>  
b<sub>9</sub>

Raw file  
20171215\_MaS\_33SR\_LMH\_proteome\_01

Scan 5250 Method FTMS; HCD Score 51.28 m/z 630.82

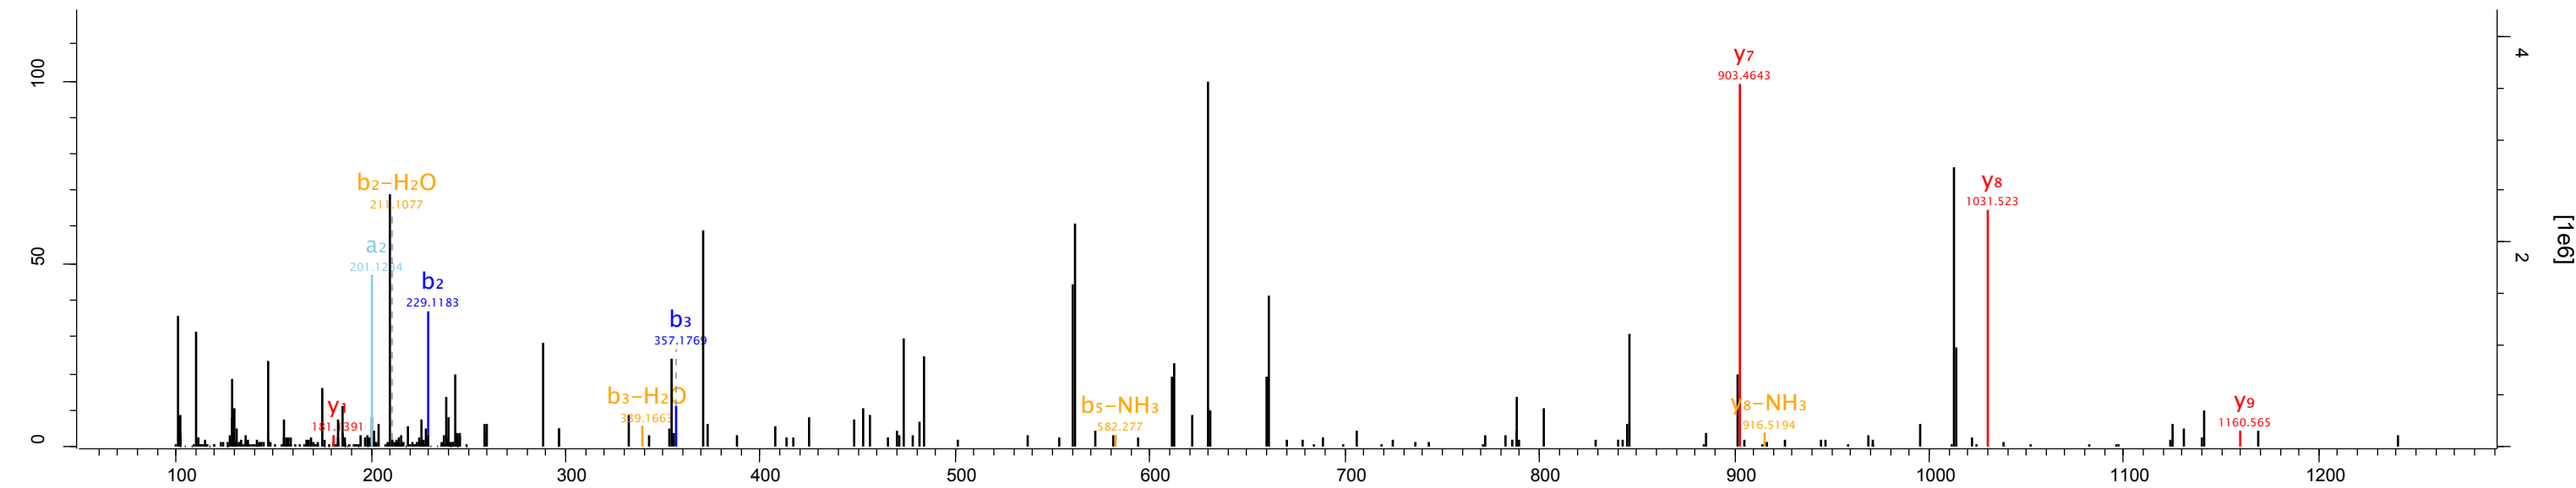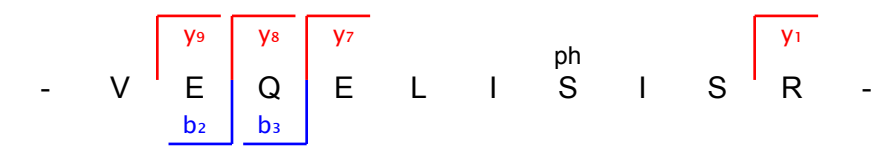

Raw file

20171215\_MaS\_33SR\_LMH\_proteome\_01

Scan 58500 Method FTMS; HCD Score 49.59 m/z 780.41 Gene names TBC1D24

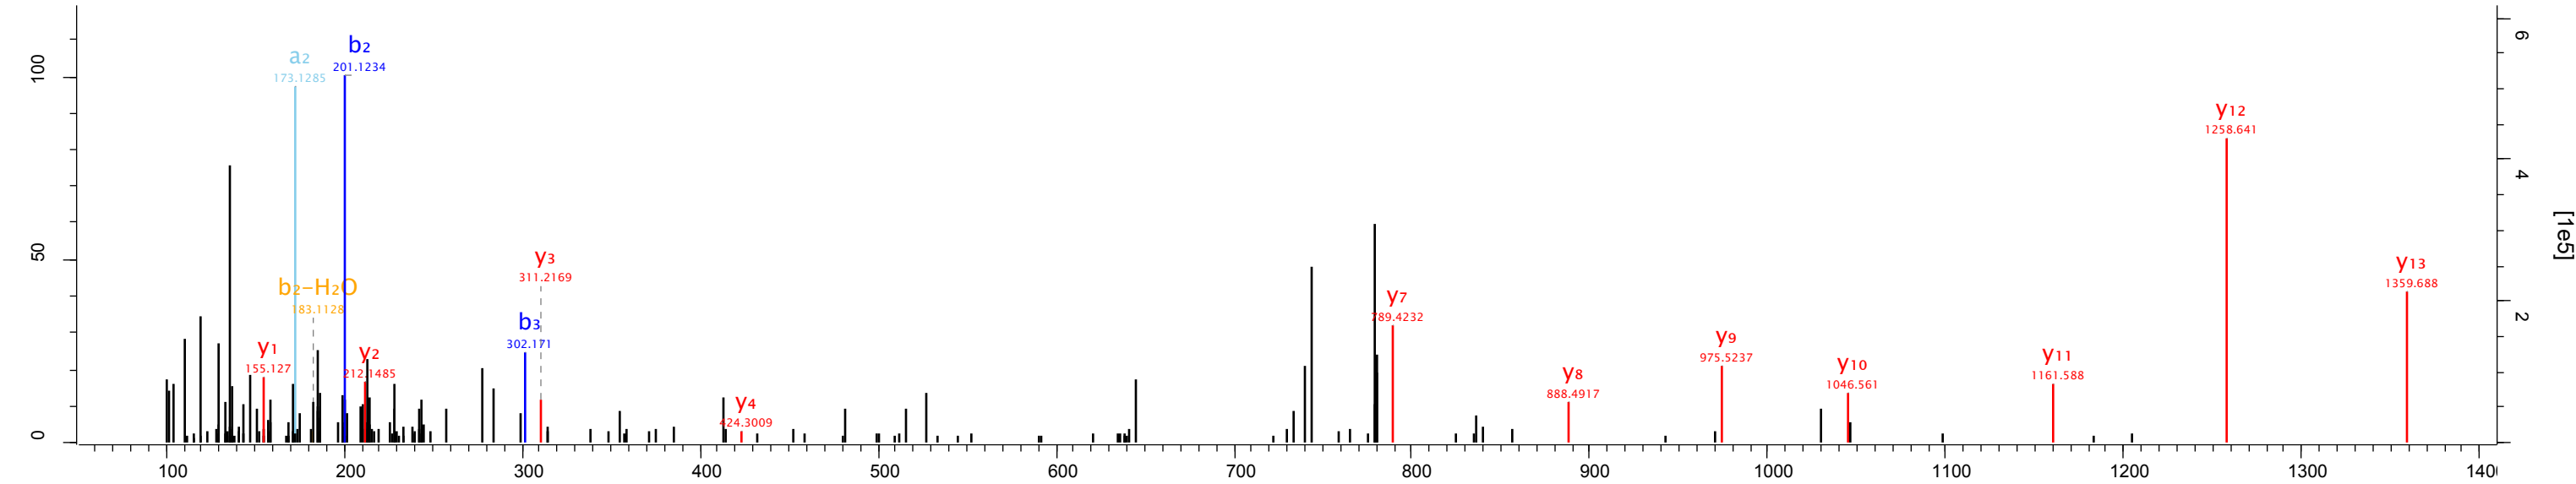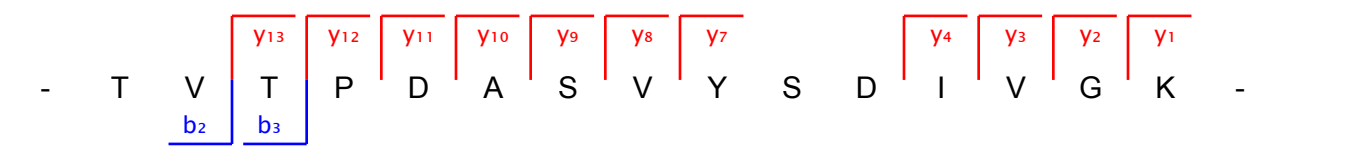

Raw file 20171215\_MaS\_33SR\_LMH\_proteome\_01 Scan 67430 Method FTMS; HCD Score 64.82 m/z 712.39 Gene names SPDYE5

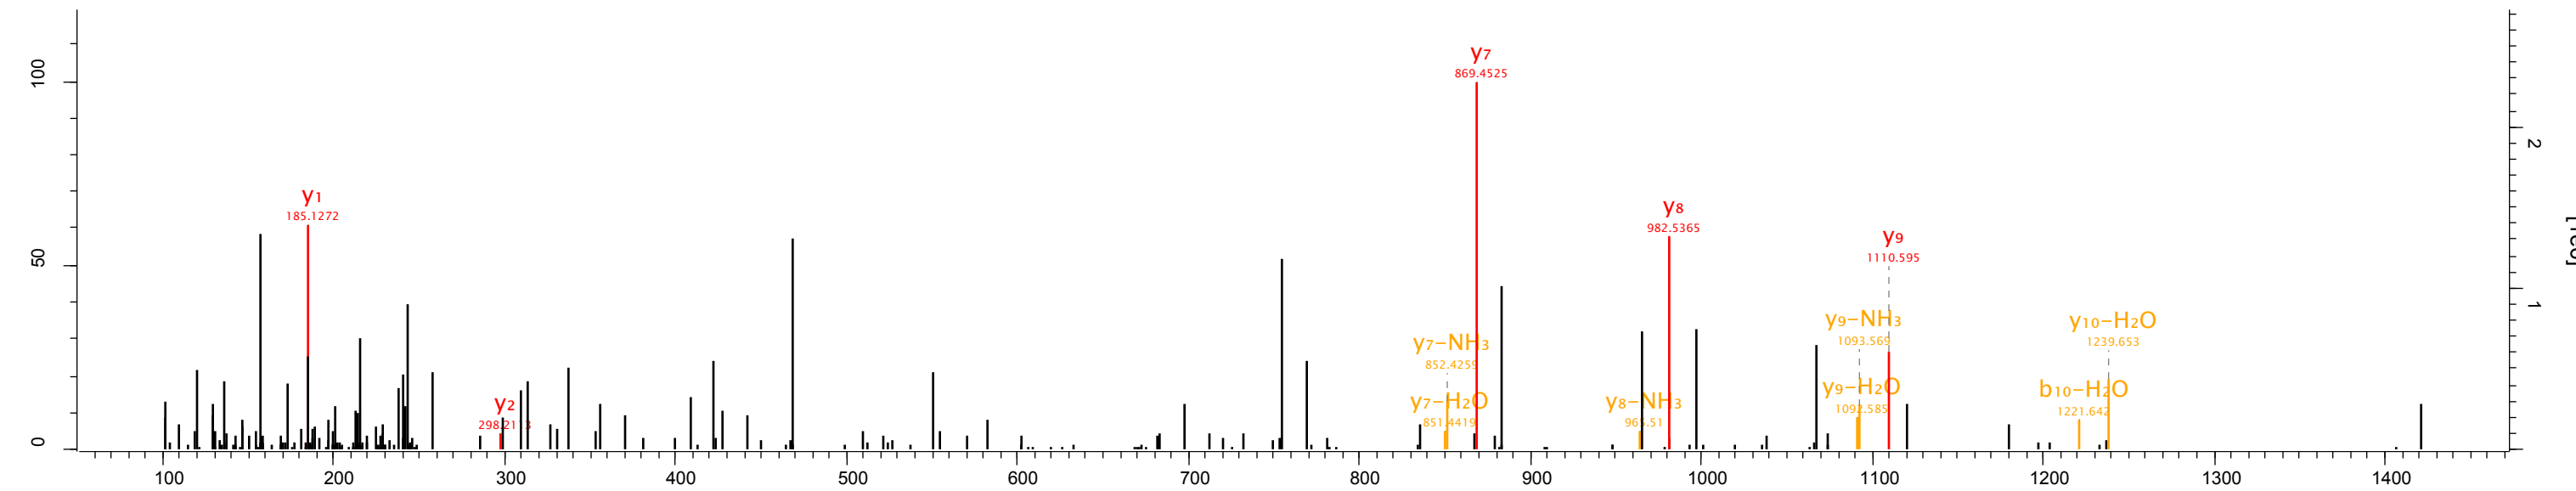

- R F Q L G R S M N L R -

ox

Red brackets above the sequence indicate the fragmentation sites for y9 (between Q and L), y8 (between L and G), y7 (between G and R), y2 (between L and R), and y1 (between R and -).

Raw file  
 20171215\_MaS\_33SR\_LMH\_proteome\_01  
 Scan 69750 Method FTMS; HCD Score 83.42 m/z 1004.51 Gene names IRAK1

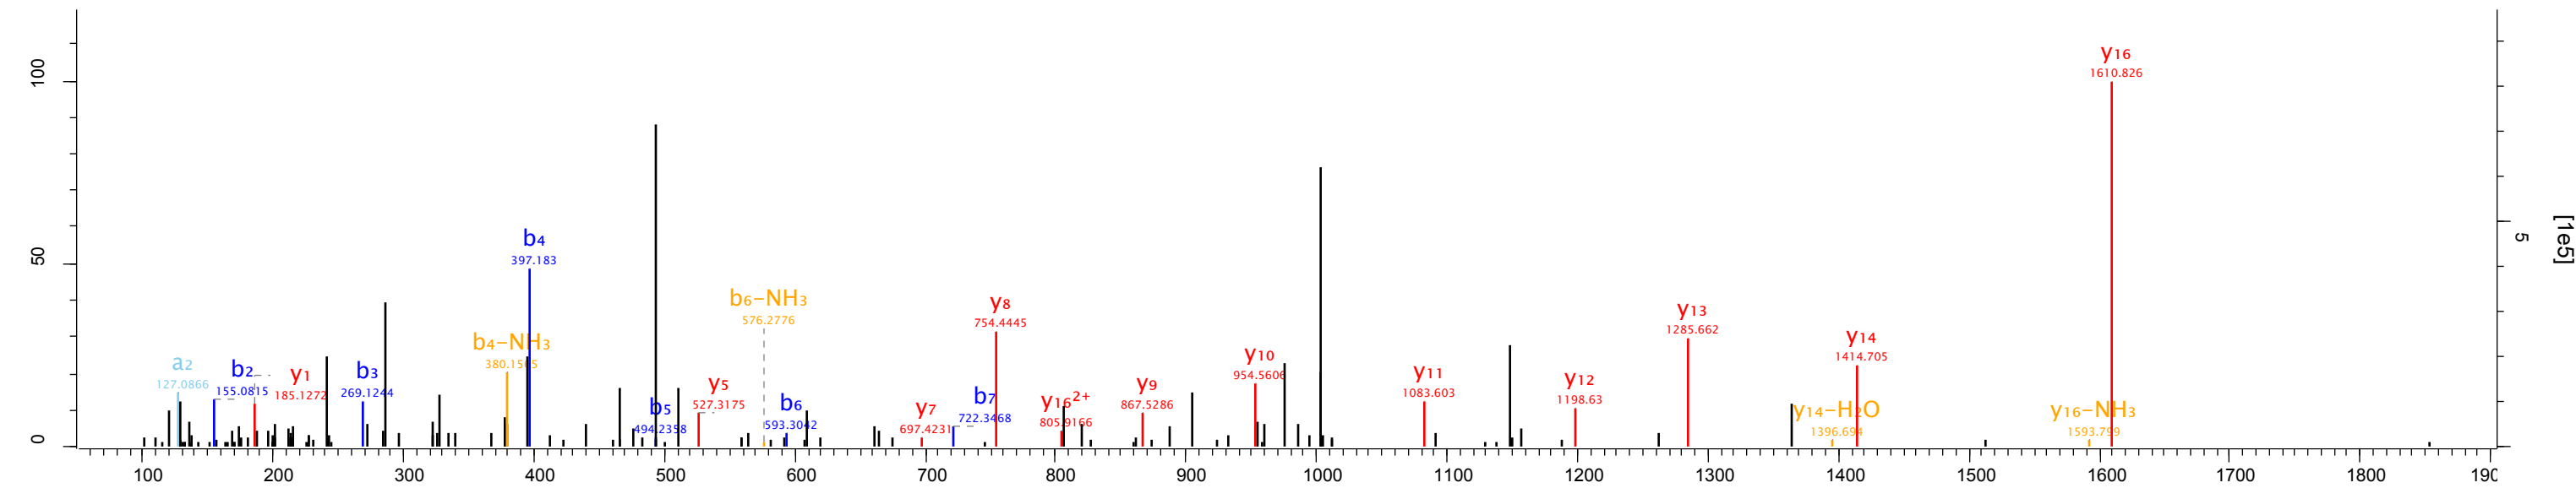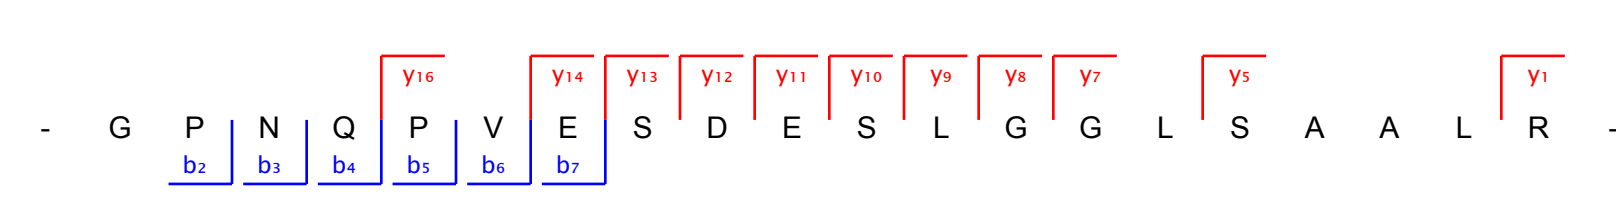

Raw file 20171215\_MaS\_33SR\_LMH\_proteome\_01 Scan 70380 Method FTMS; HCD Score 83.2 m/z 692.38 Gene names TARBP2

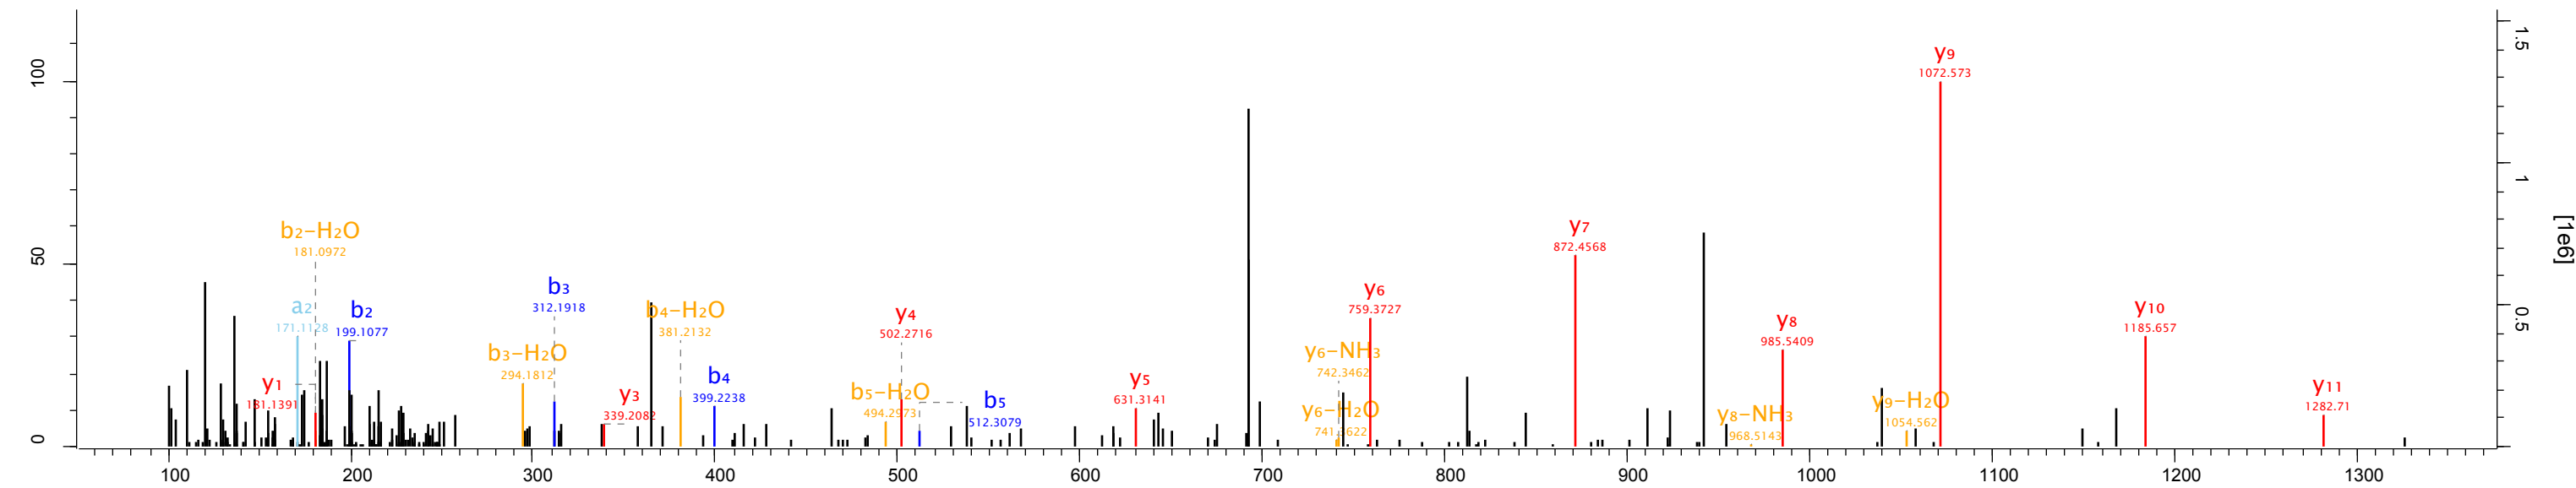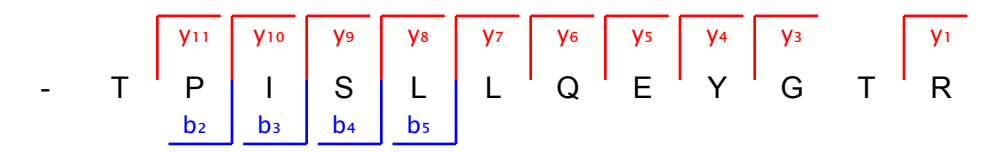

Raw file 20171215\_MaS\_33SR\_LMH\_proteome\_01 Scan 71690 Method FTMS; HCD Score 121.46 m/z 965.03 Gene names SNCA

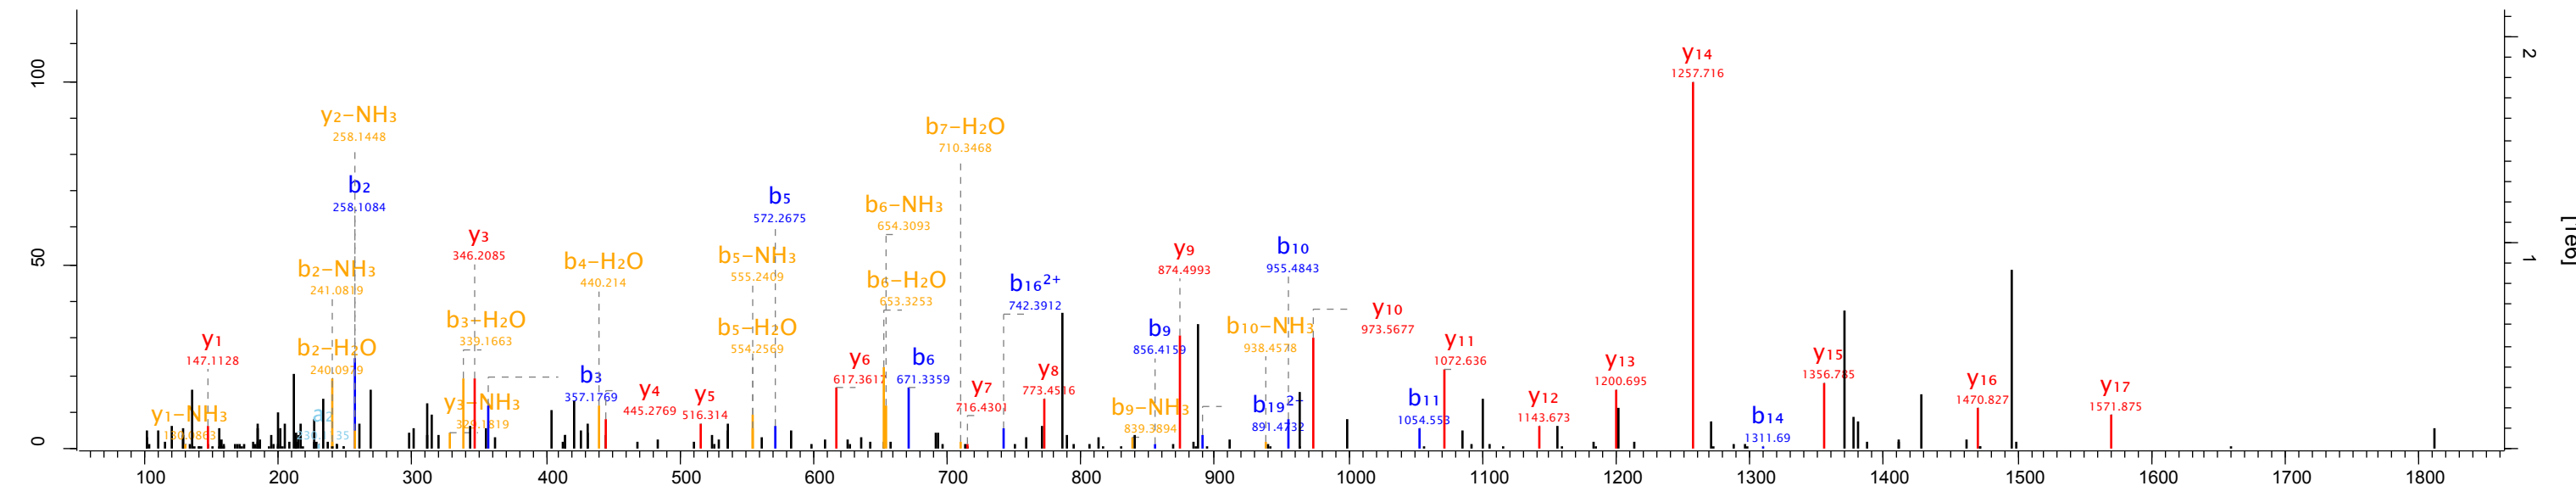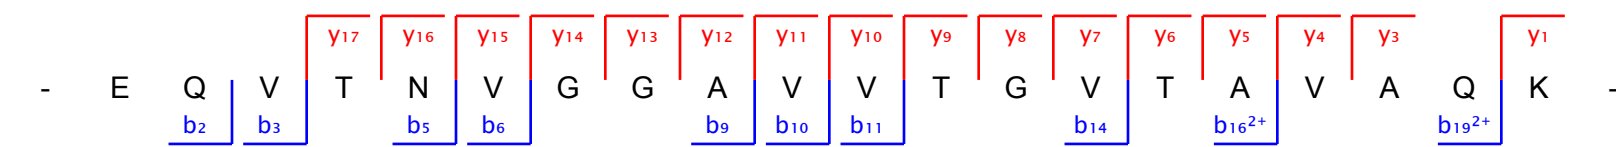

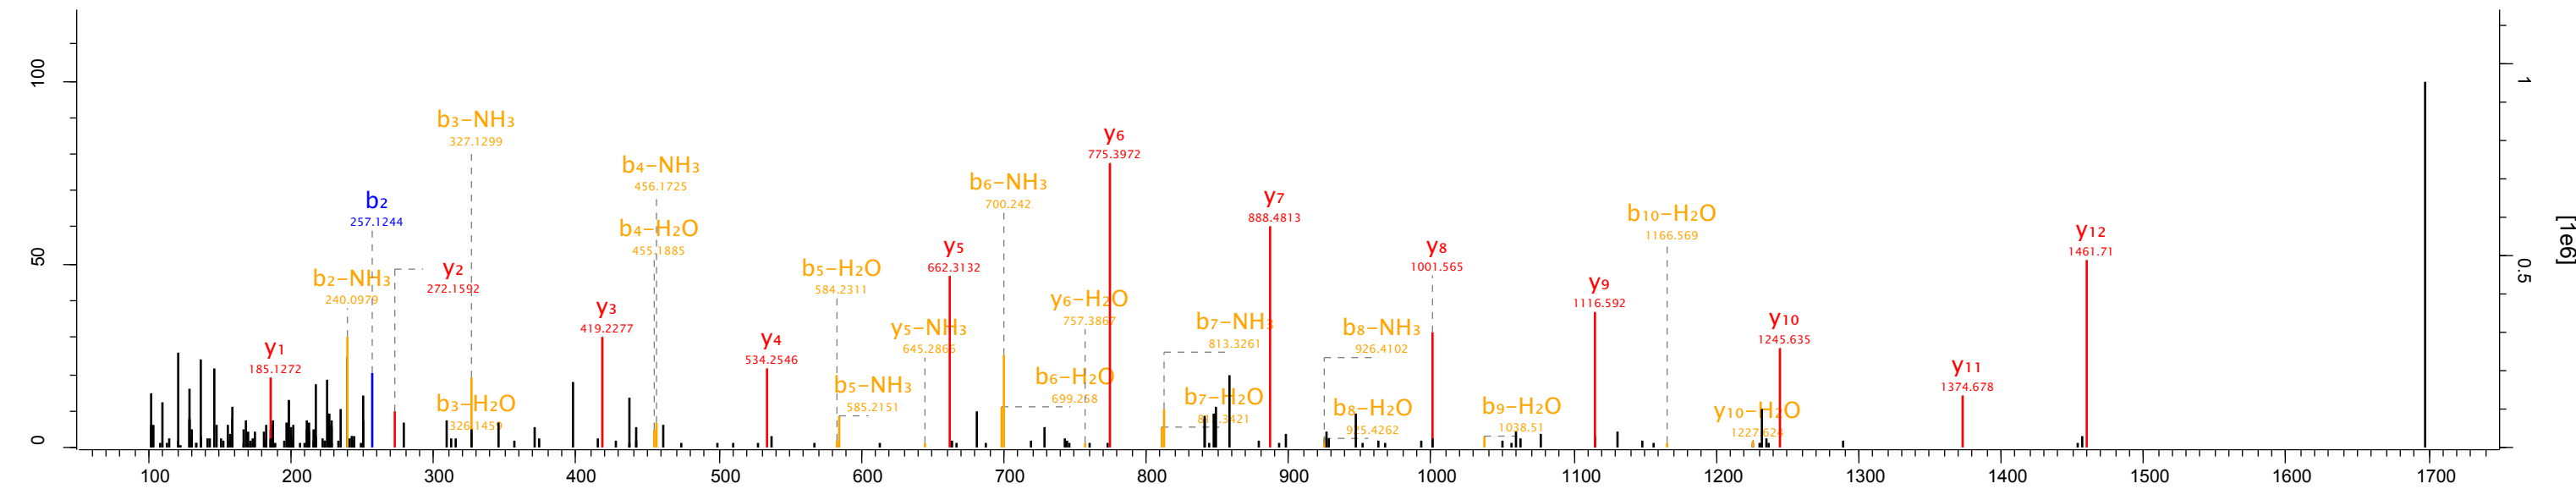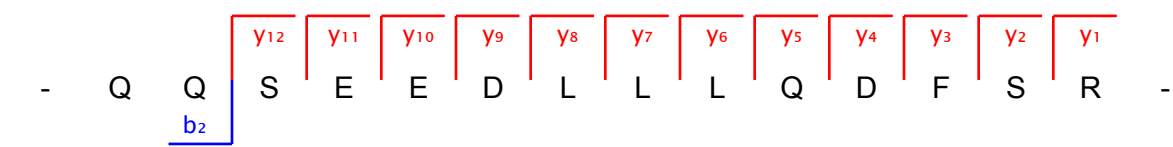



Raw file 20171215\_MaS\_33SR\_LMH\_proteome\_01 Scan 9620 Method FTMS; HCD Score 145.81 m/z 704.88 Gene names C11orf73

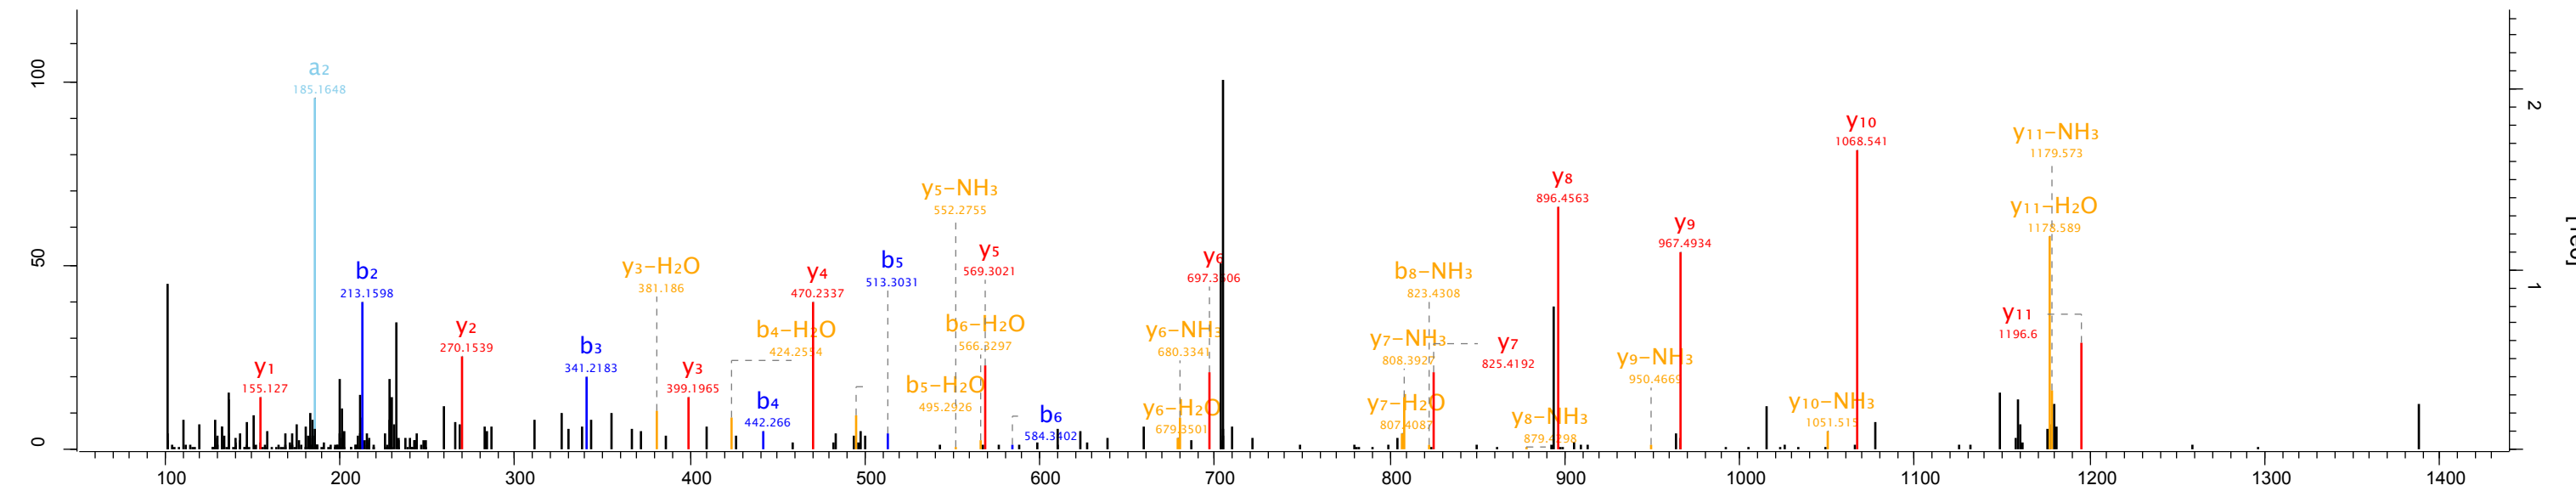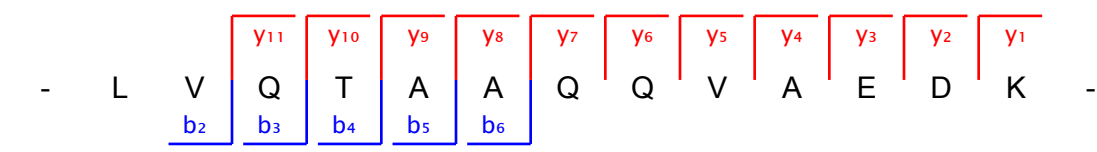

Raw file 20171215\_MaS\_33SR\_LMH\_proteome\_02 Scan 101990 Method FTMS; HCD Score 69.43 m/z 939.94 Gene names PAIP2

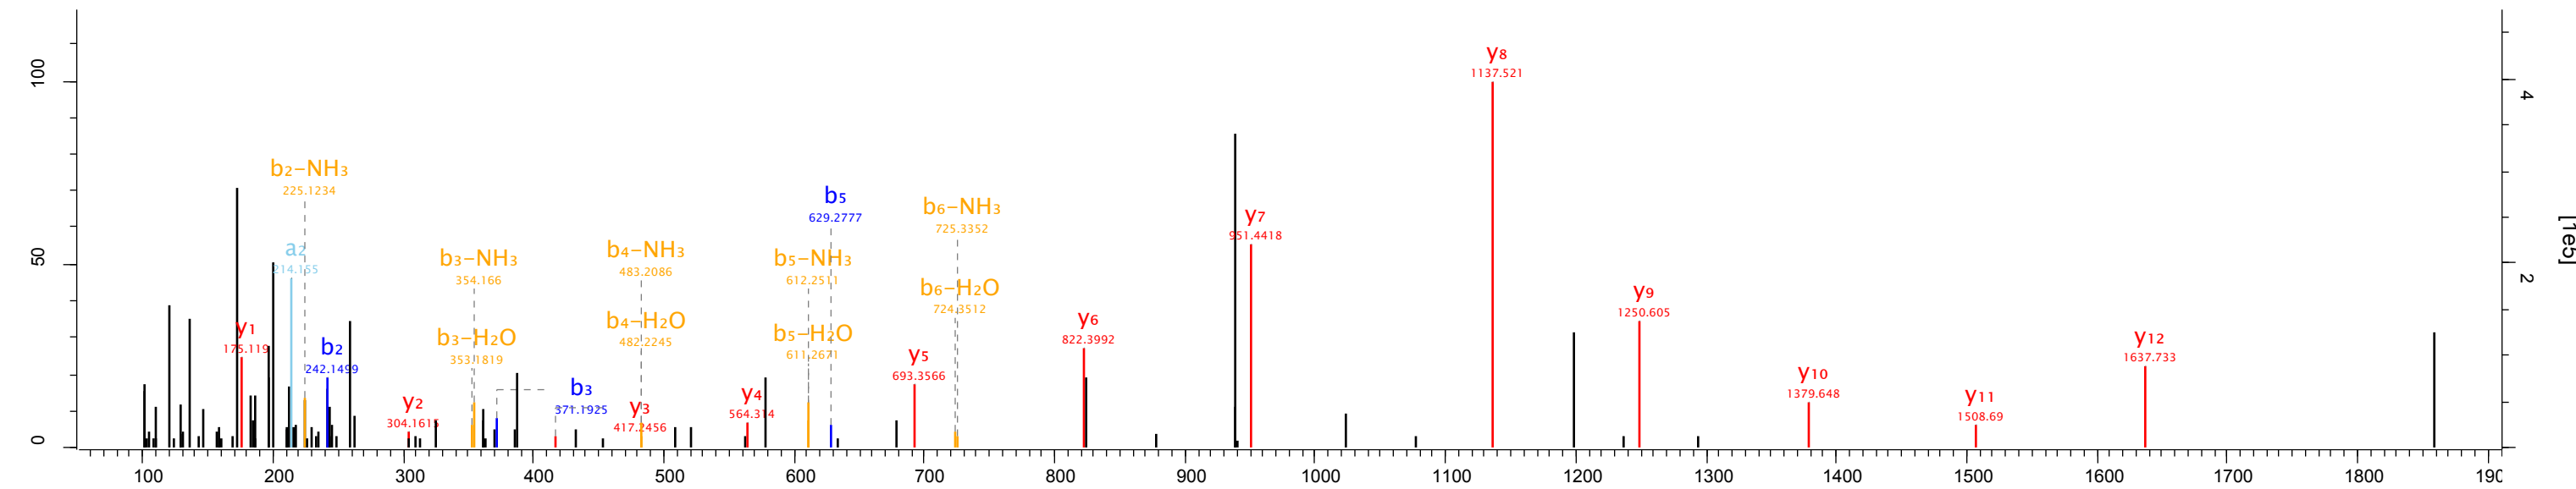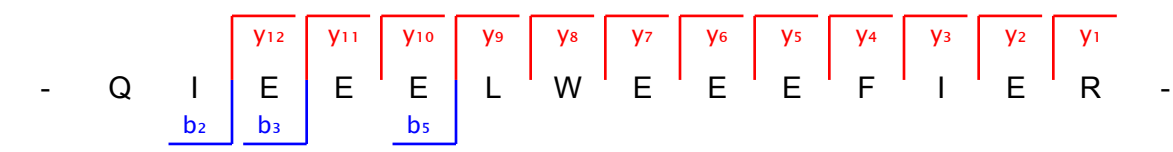

Raw file 20171215\_MaS\_33SR\_LMH\_proteome\_02 Scan 106670 Method FTMS; HCD Score 48.79 m/z 662.85 Gene names INTS4

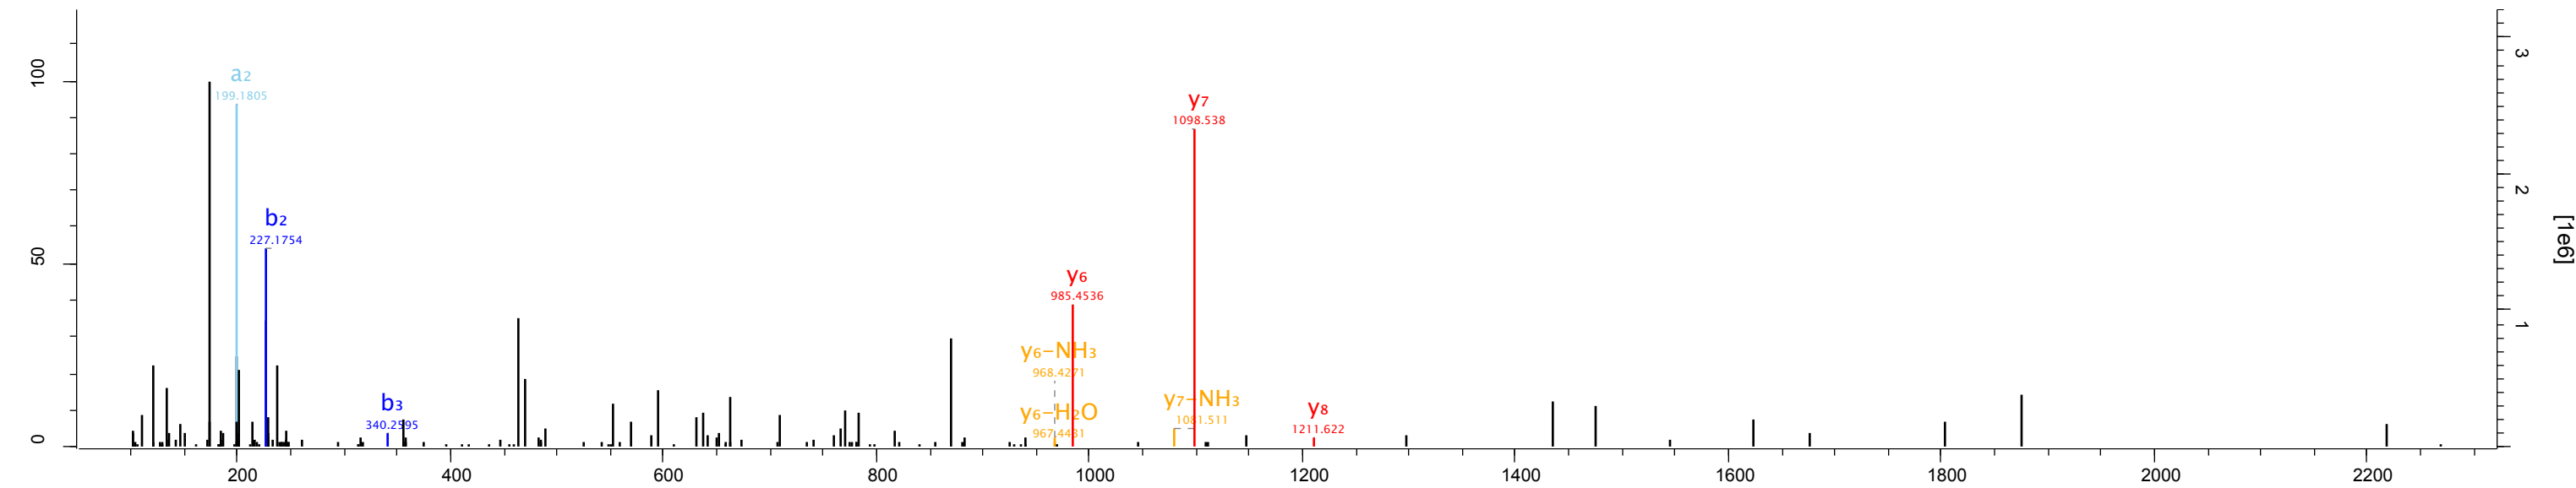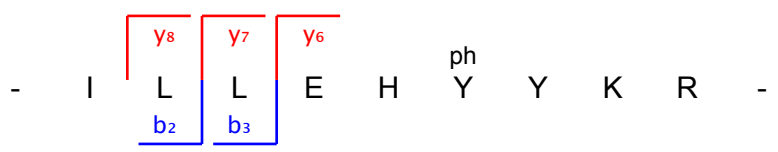

Raw file 20171215\_MaS\_33SR\_LMH\_proteome\_02 Scan 114180 Method FTMS; HCD Score 52.18 m/z 965.53 Gene names AGPAT9

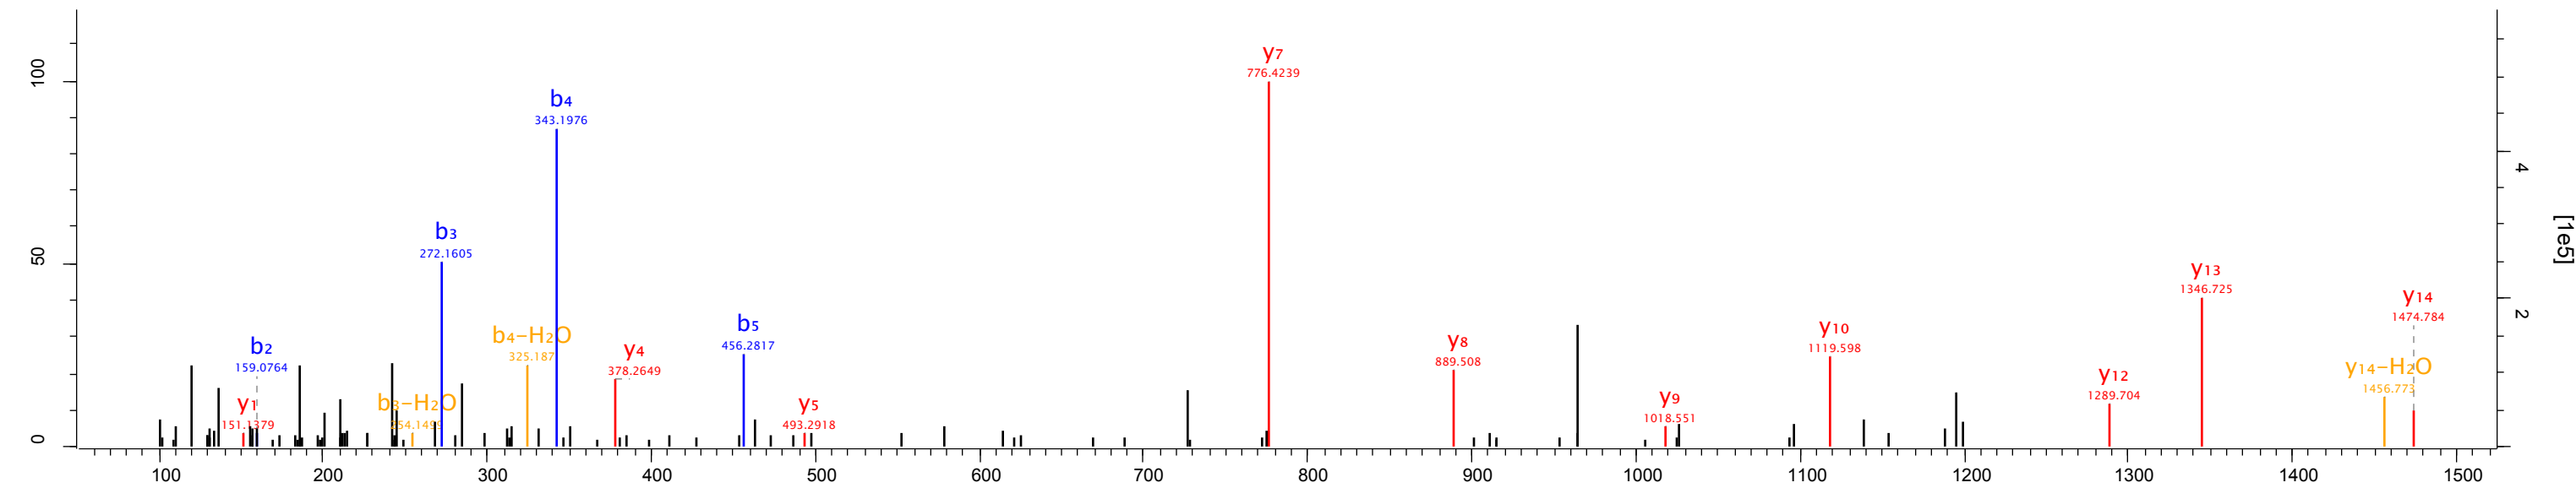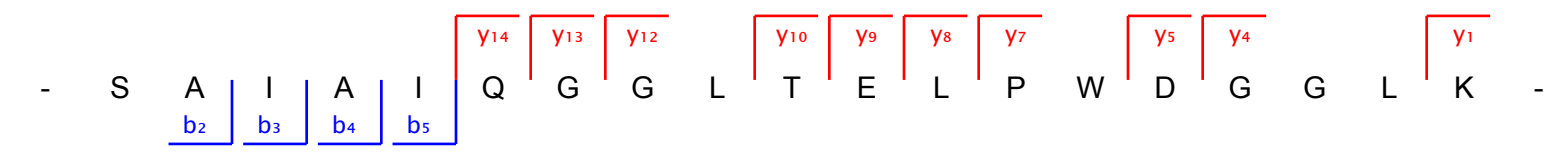

Raw file: 20171215\_MaS\_33SR\_LMH\_proteome\_02  
 Scan: 114450 Method: FTMS; HCD Score: 73.29 m/z: 968.15 Gene names: STX8

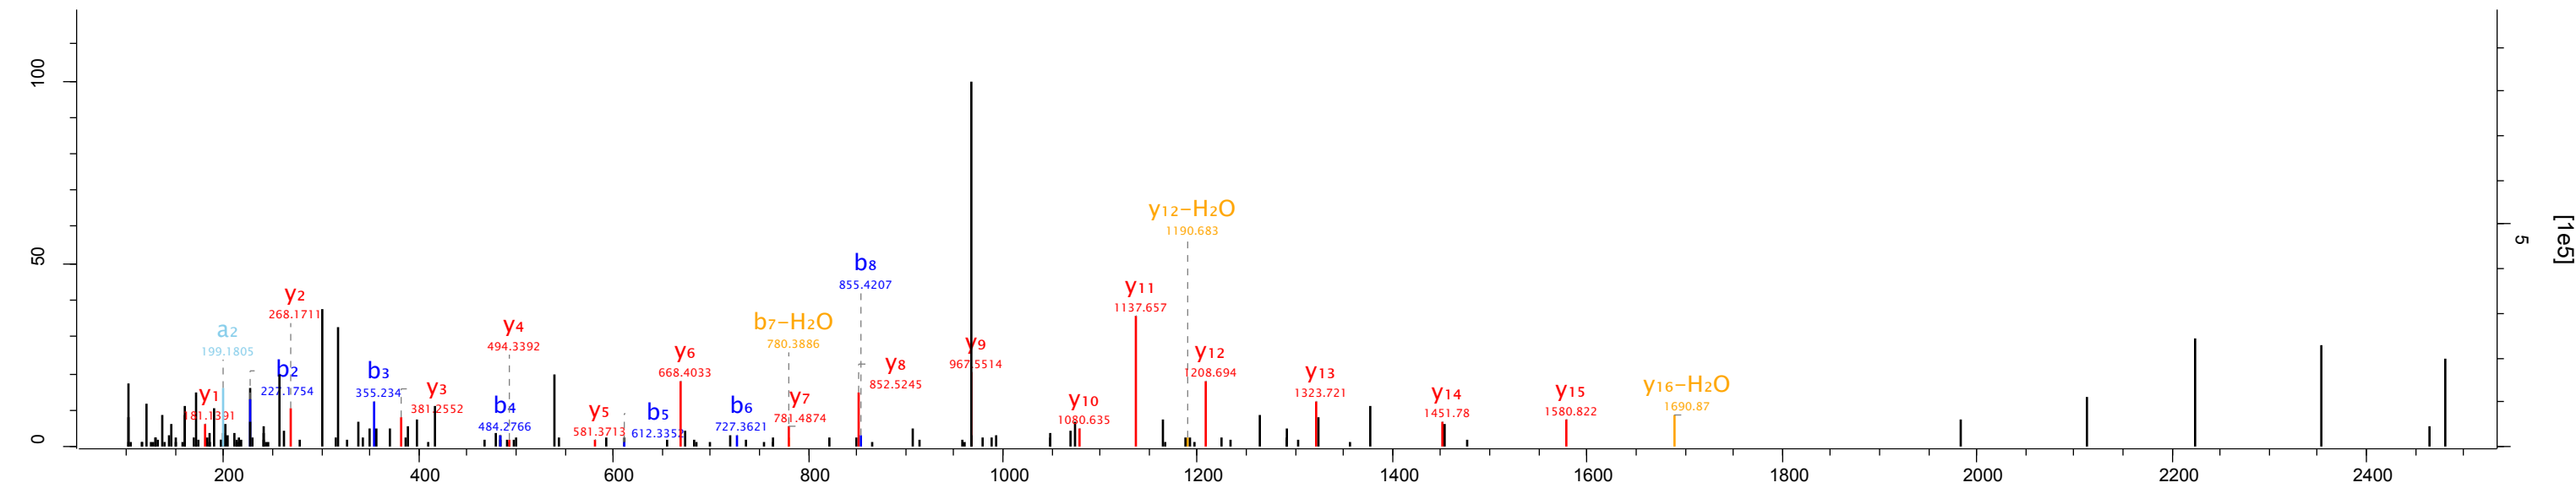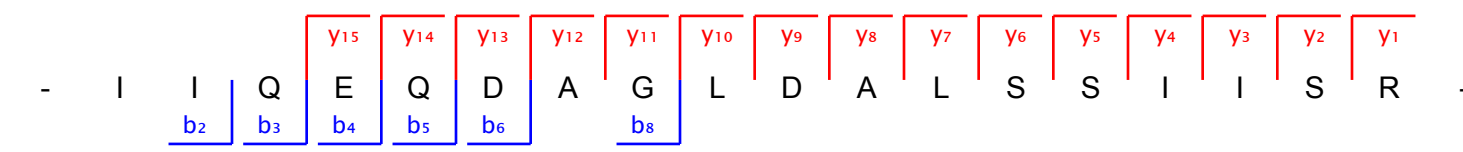

Raw file: 20171215\_MaS\_33SR\_LMH\_proteome\_02  
 Scan: 116720 Method: FTMS; HCD Score: 99.06 m/z: 1038.49 Gene names: WDFY1

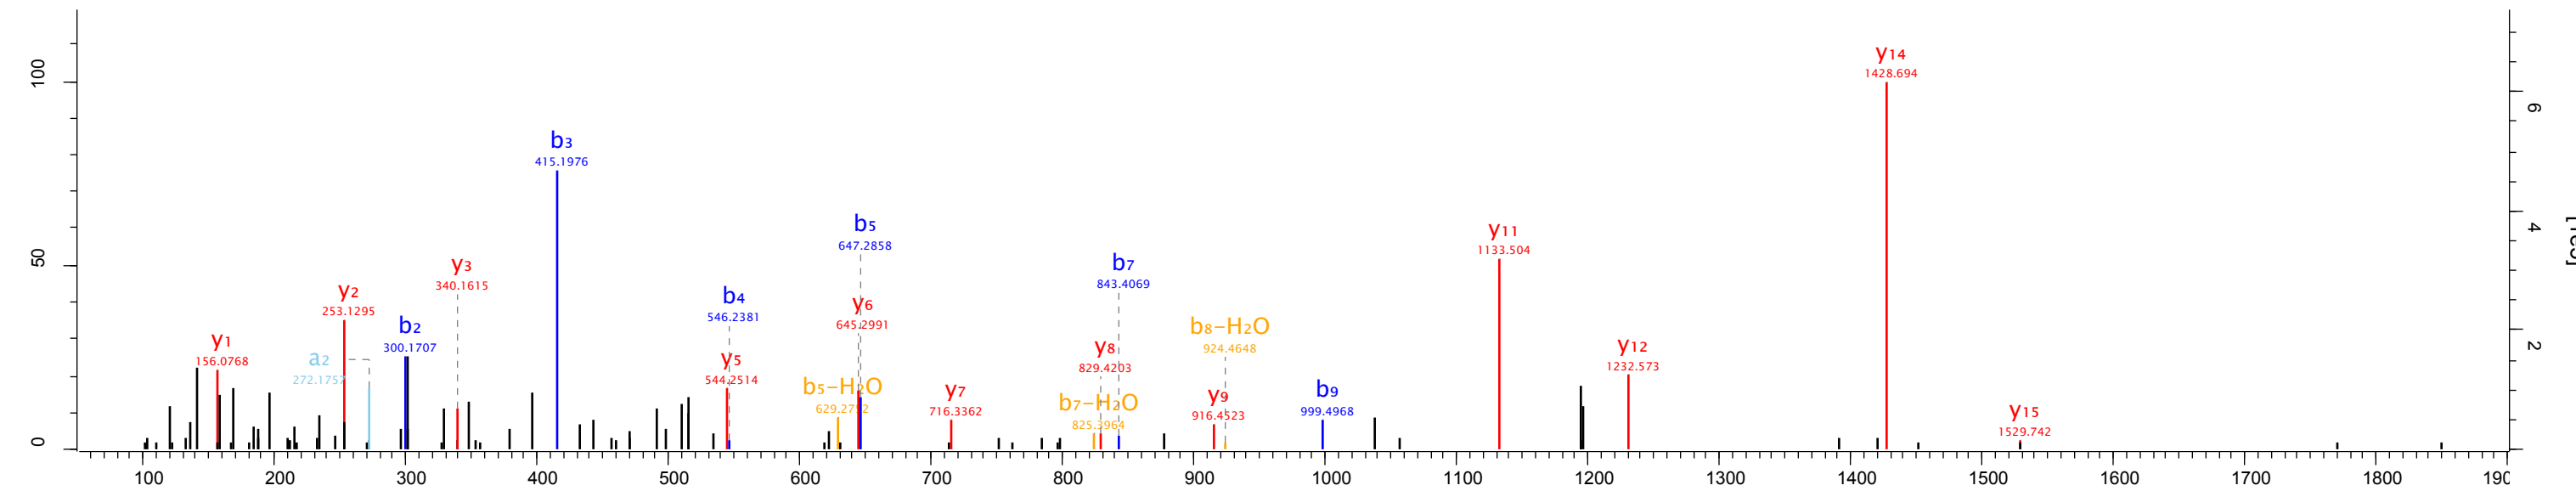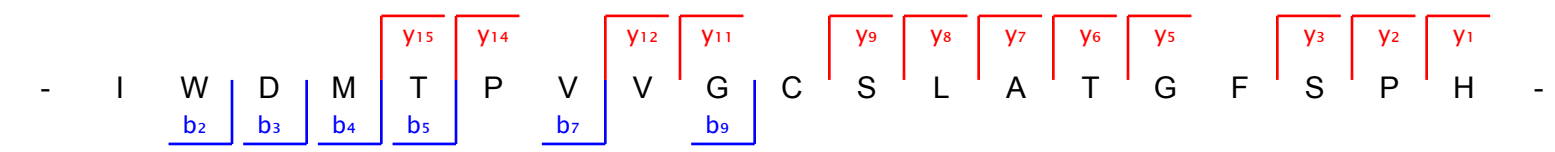

Raw file 20171215\_MaS\_33SR\_LMH\_proteome\_02 Scan 122380 Method FTMS; HCD Score 59.71 m/z 877.97 Gene names TRIM27

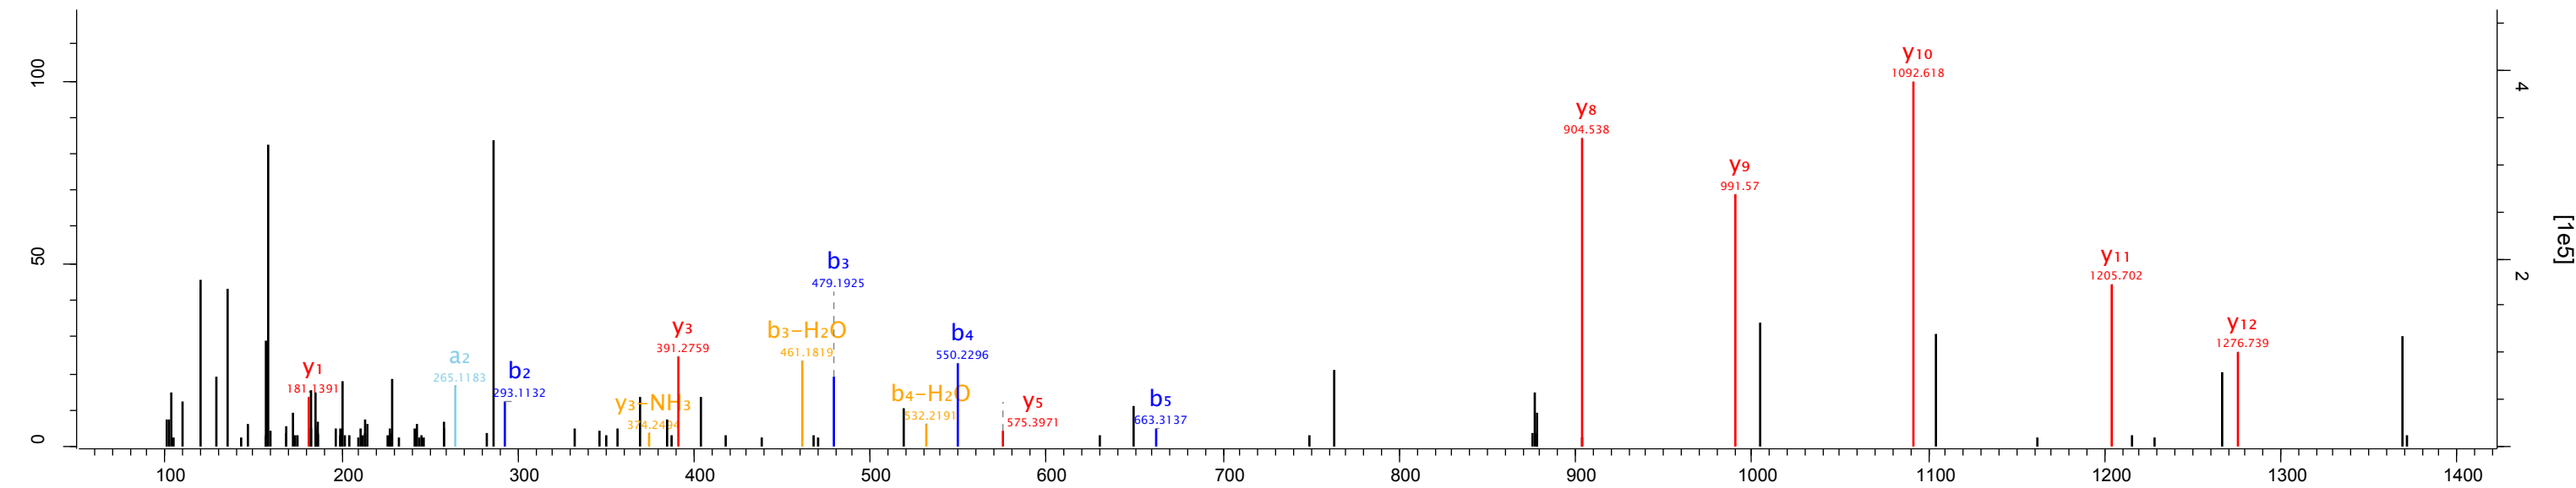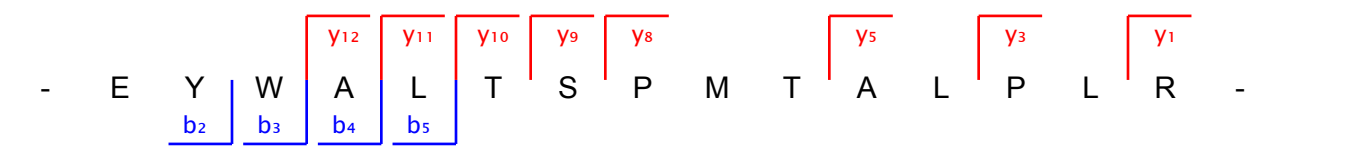

Raw file  
20171215\_MaS\_33SR\_LMH\_proteome\_02

Scan 123360 Method FTMS; HCD Score 46.36 m/z 733.09 Gene names B3GALTL

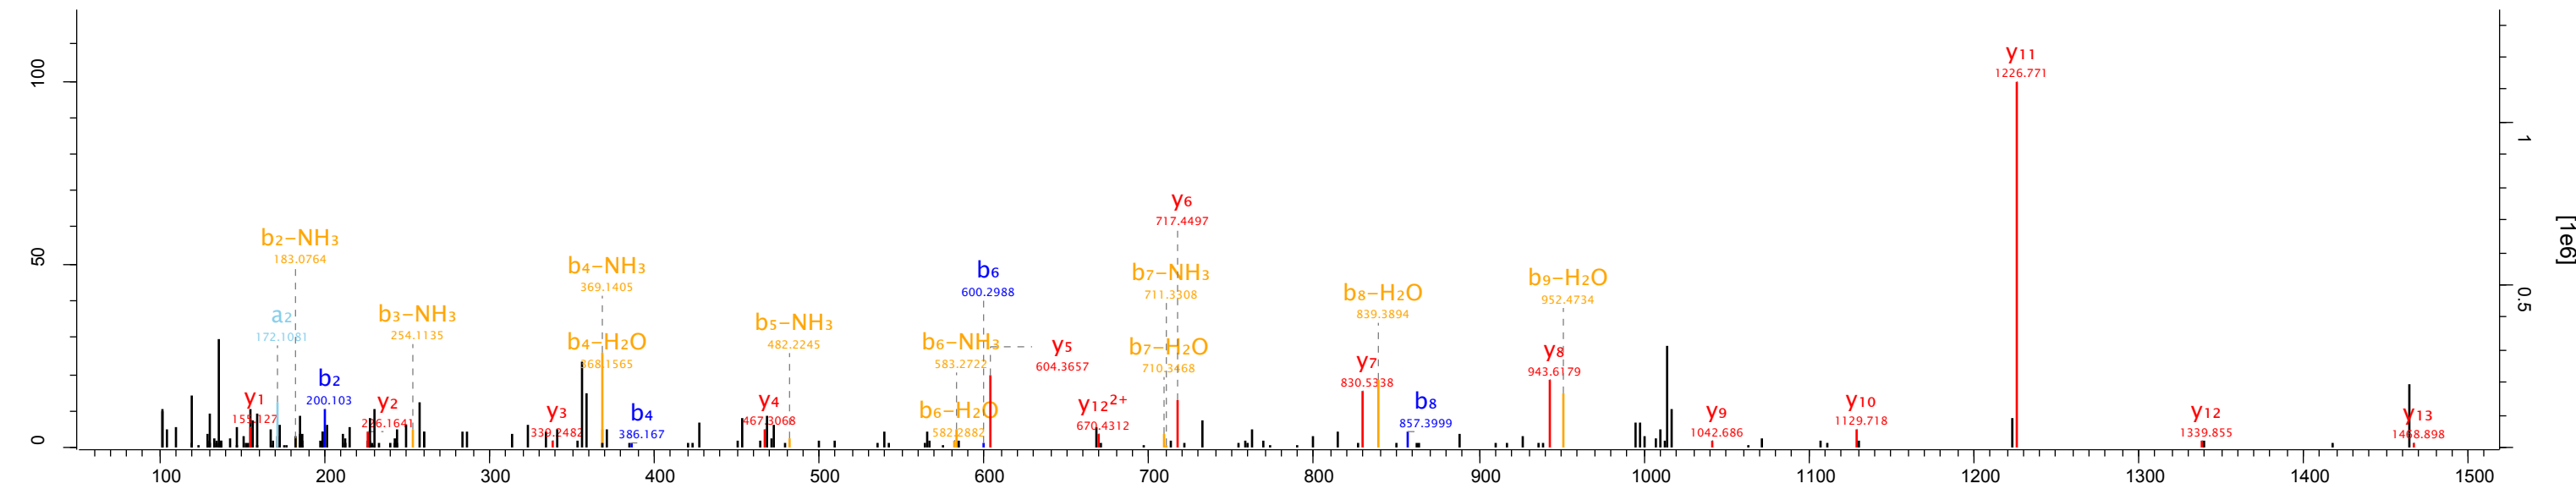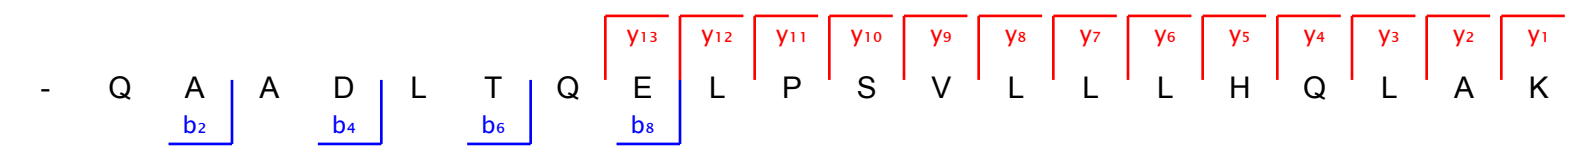



Raw file: 20171215\_MaS\_33SR\_LMH\_proteome\_02  
 Scan: 124430 Method: FTMS; HCD Score: 58.25 m/z: 750.74 Gene names: C5orf22

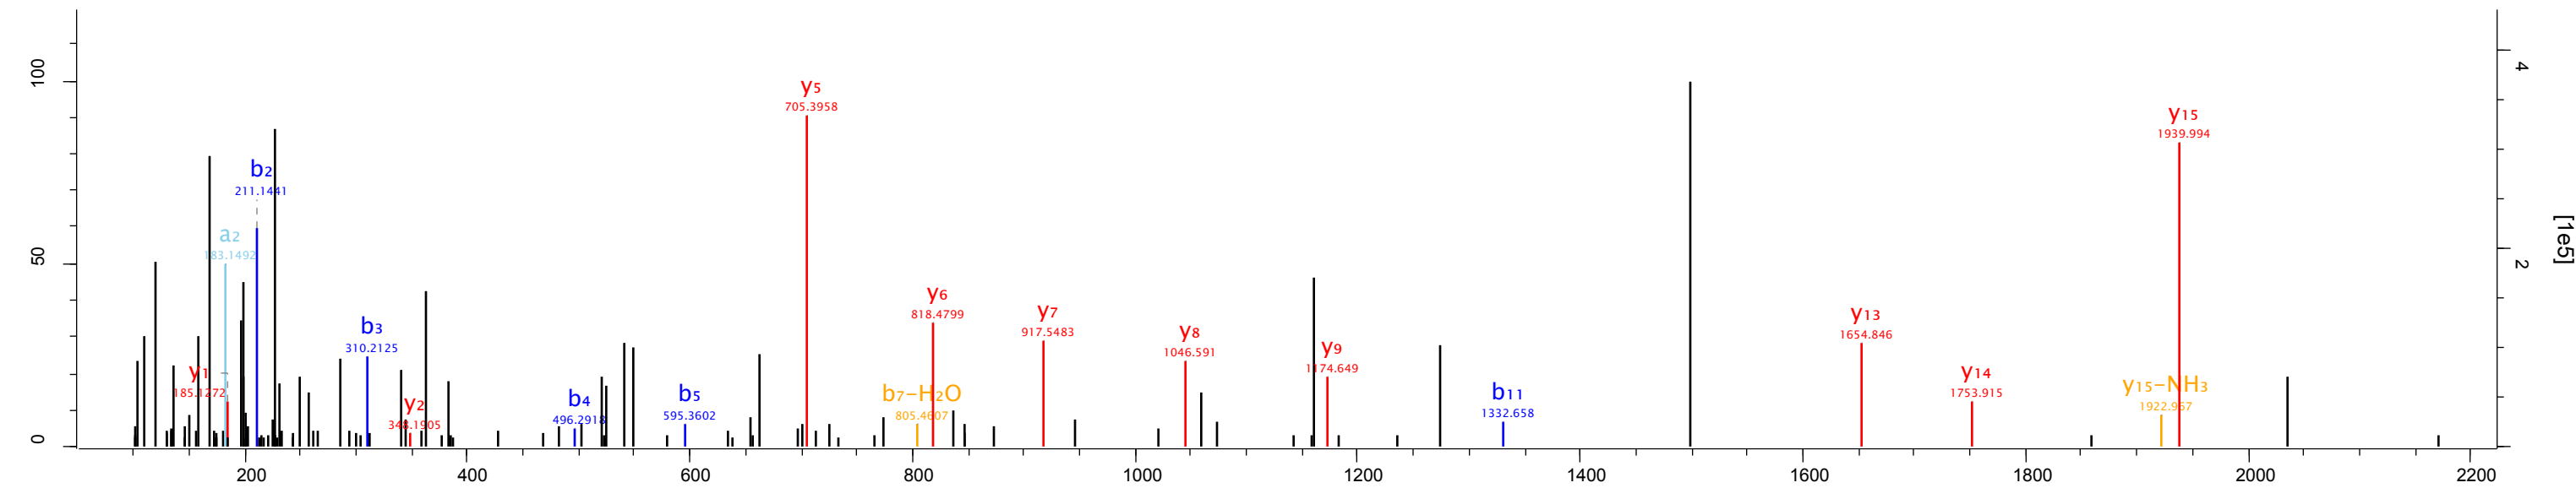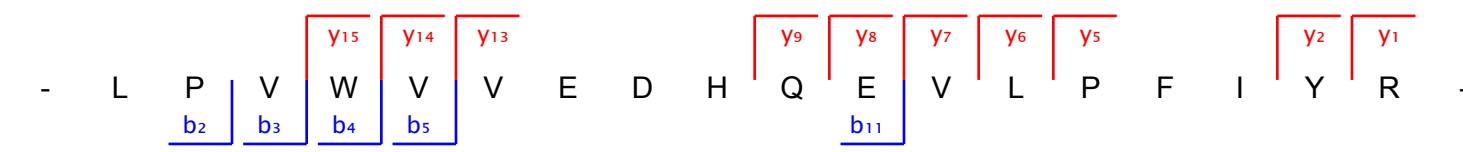

Raw file: 20171215\_MaS\_33SR\_LMH\_proteome\_02  
 Scan: 140100 Method: FTMS; HCD Score: 65.42 m/z: 699.71 Gene names: DYNLT1

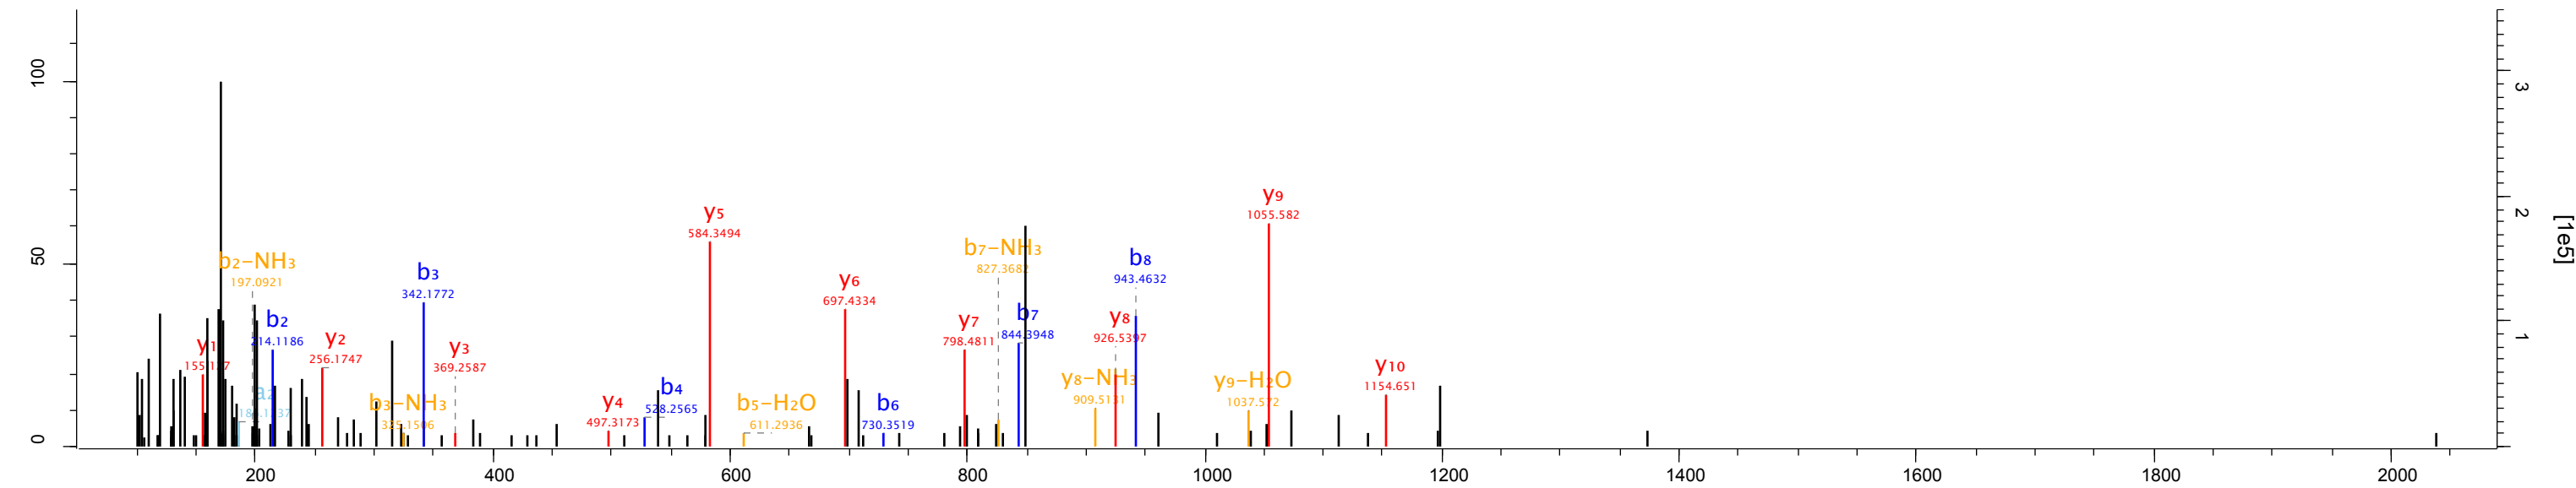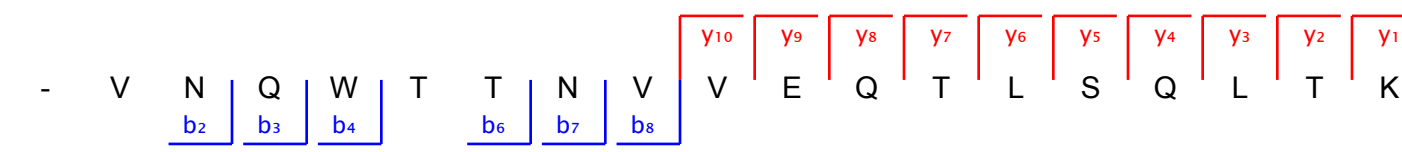

Raw file 20171215\_MaS\_33SR\_LMH\_proteome\_02 Scan 145090 Method FTMS; HCD Score 47.55 m/z 885.98 Gene names GOSR2

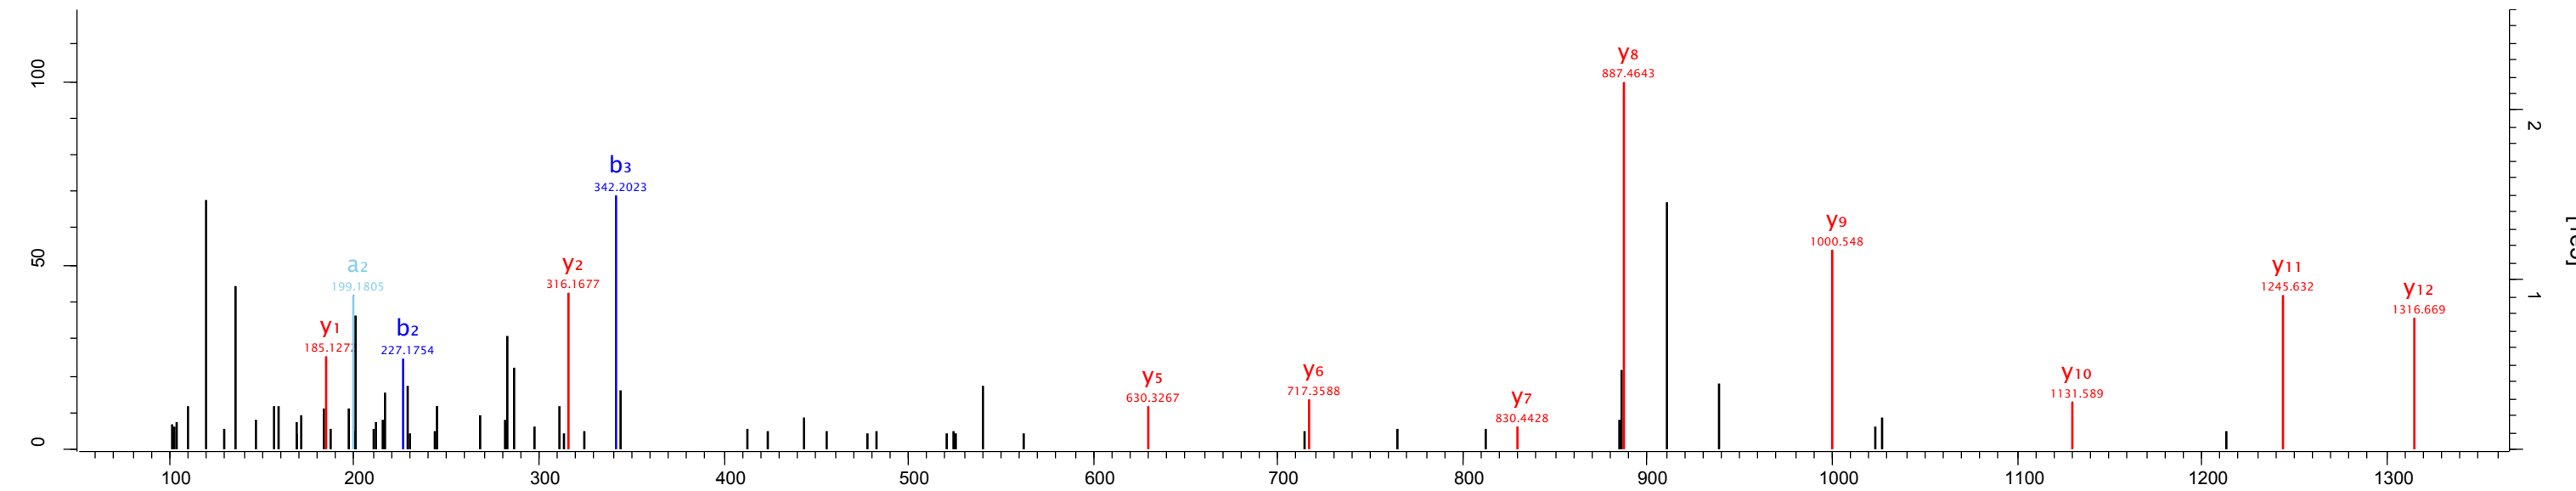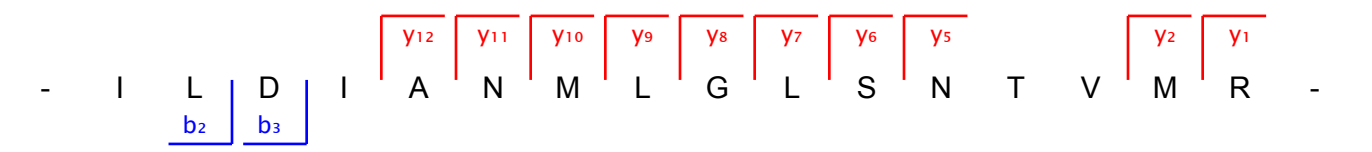

Raw file 20171215\_MaS\_33SR\_LMH\_proteome\_02 Scan 16090 Method FTMS; HCD Score 50.11 m/z 574.28

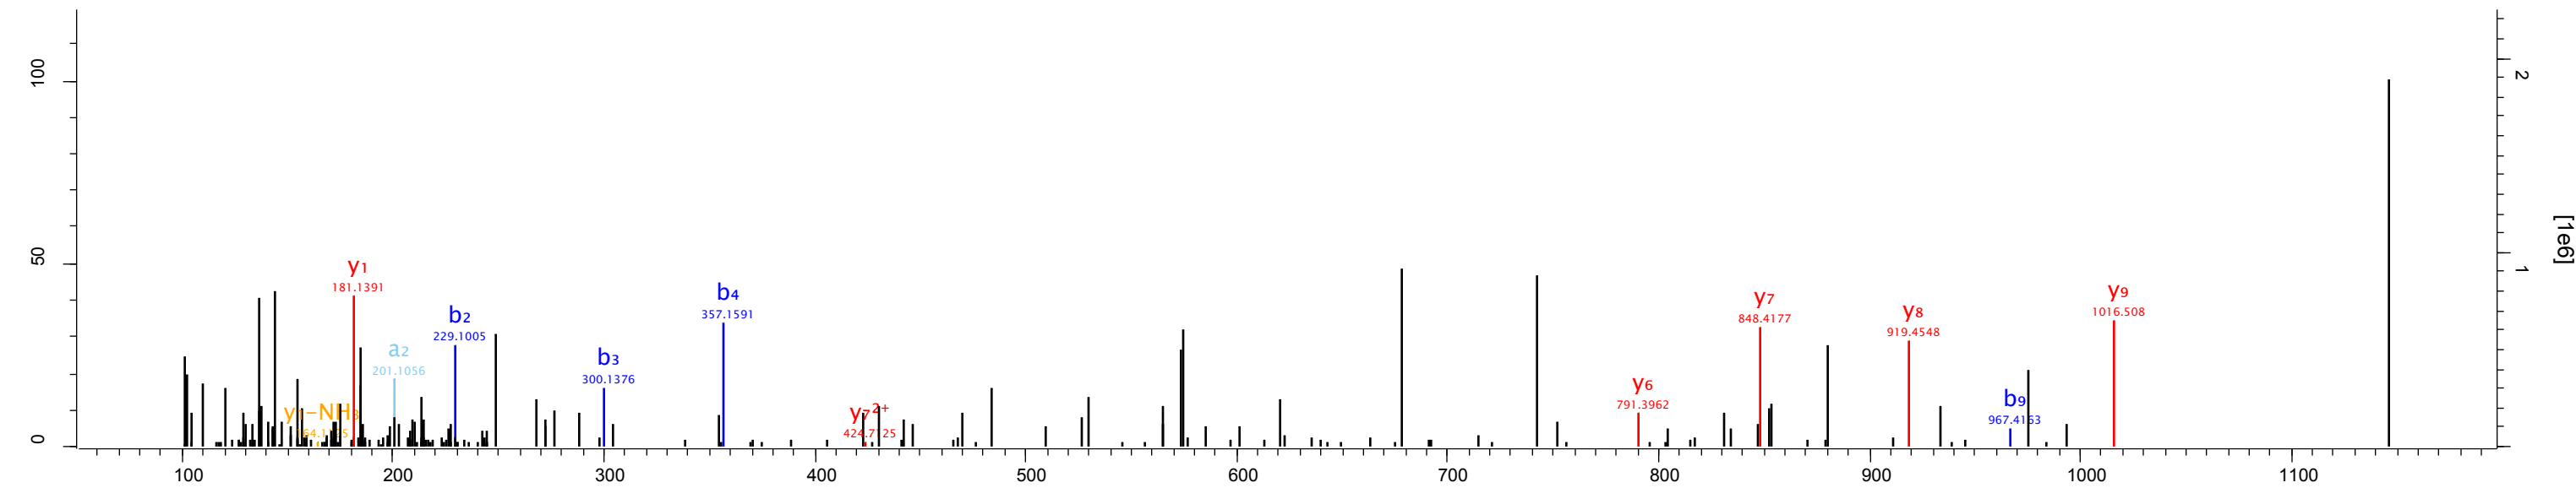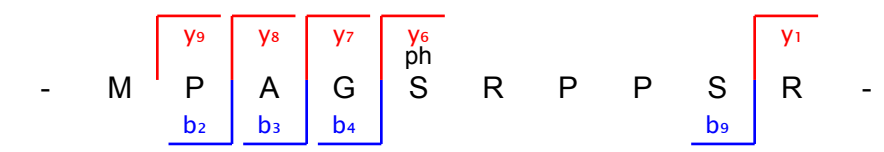

Raw file 20171215\_MaS\_33SR\_LMH\_proteome\_02 Scan 2540 Method FTMS; HCD Score 46.73 m/z 717.3 Gene names TNFSF10

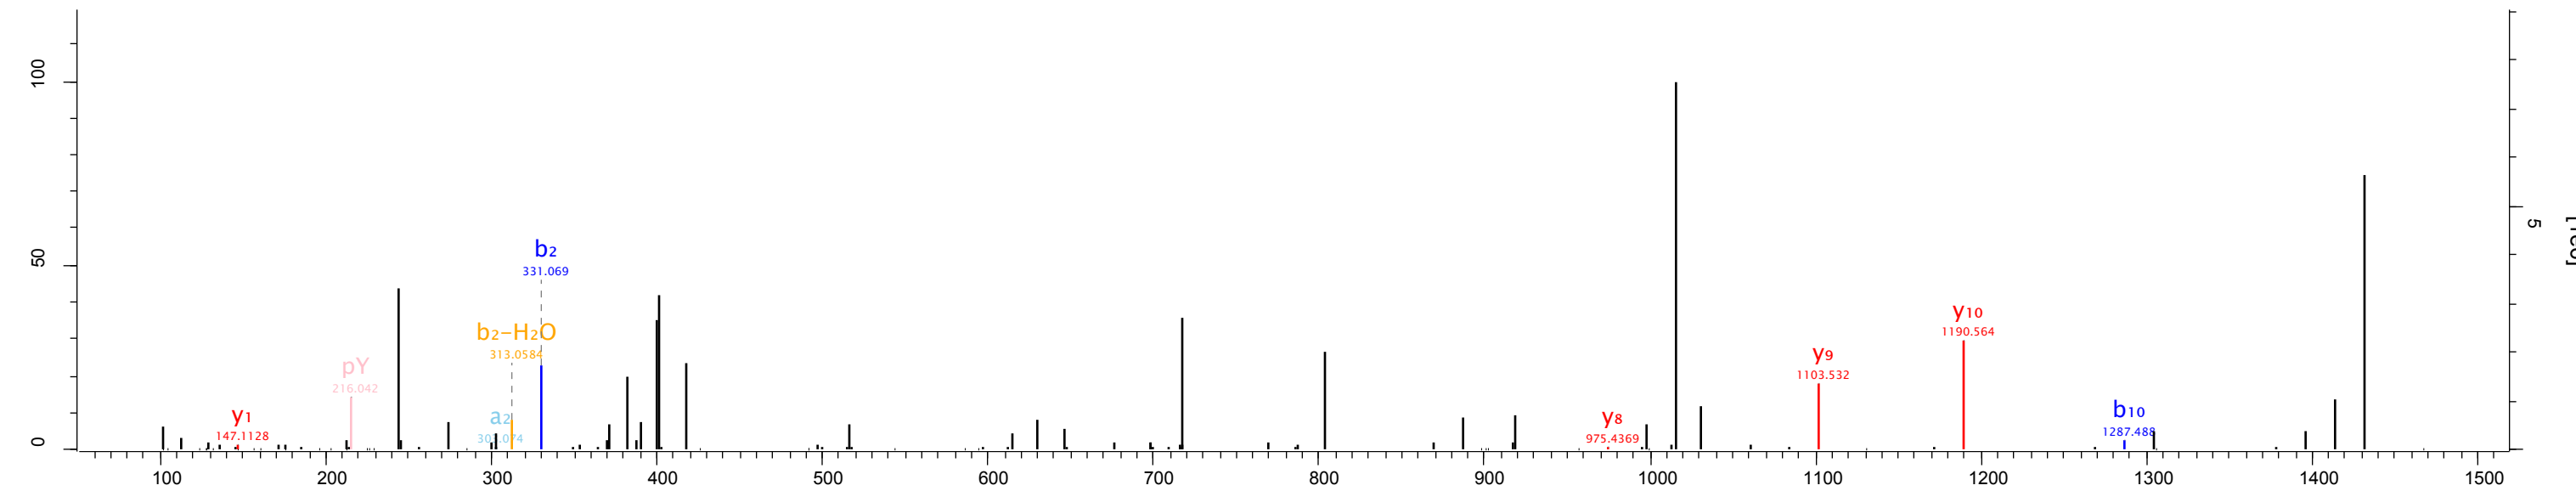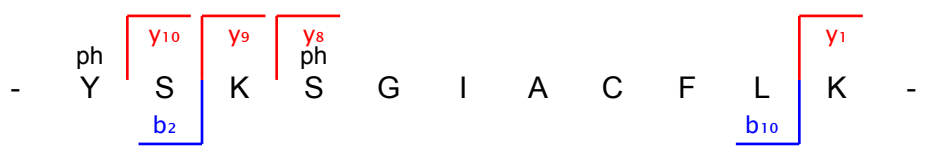

Raw file 20171215\_MaS\_33SR\_LMH\_proteome\_02 Scan 32510 Method FTMS; HCD Score 59.2 m/z 729.39

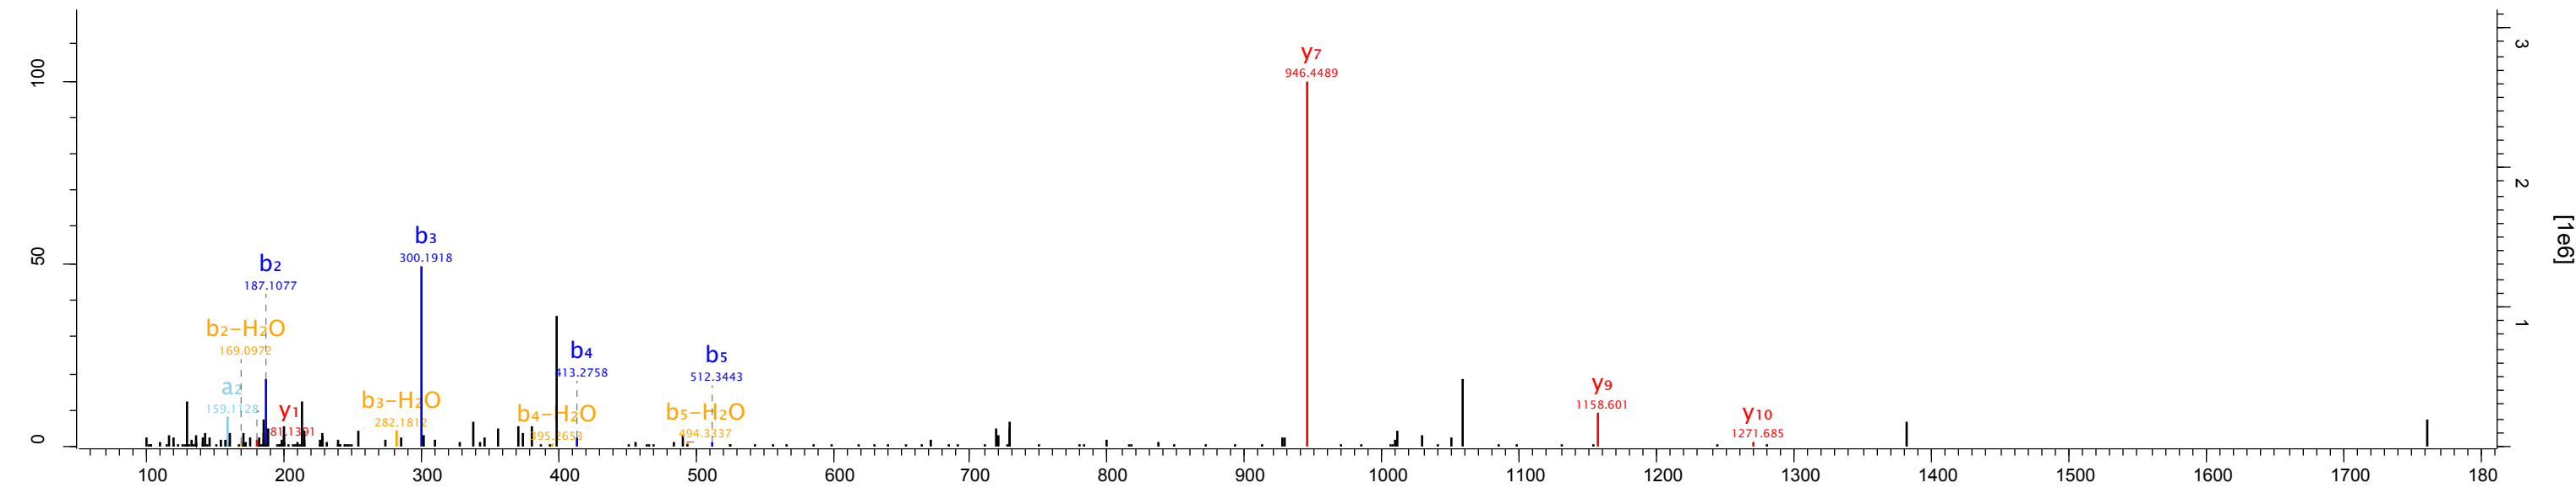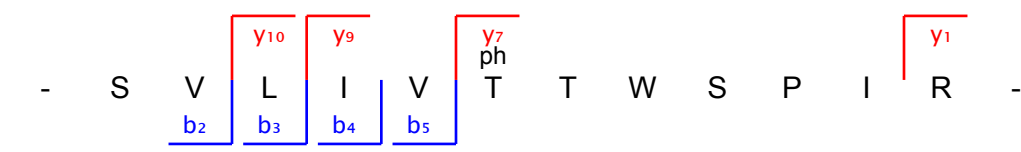

Raw file

20171215\_MaS\_33SR\_LMH\_proteome\_02

Scan 37210 Method FTMS; HCD Score 85.67 m/z 551.26 Gene names RPL35A

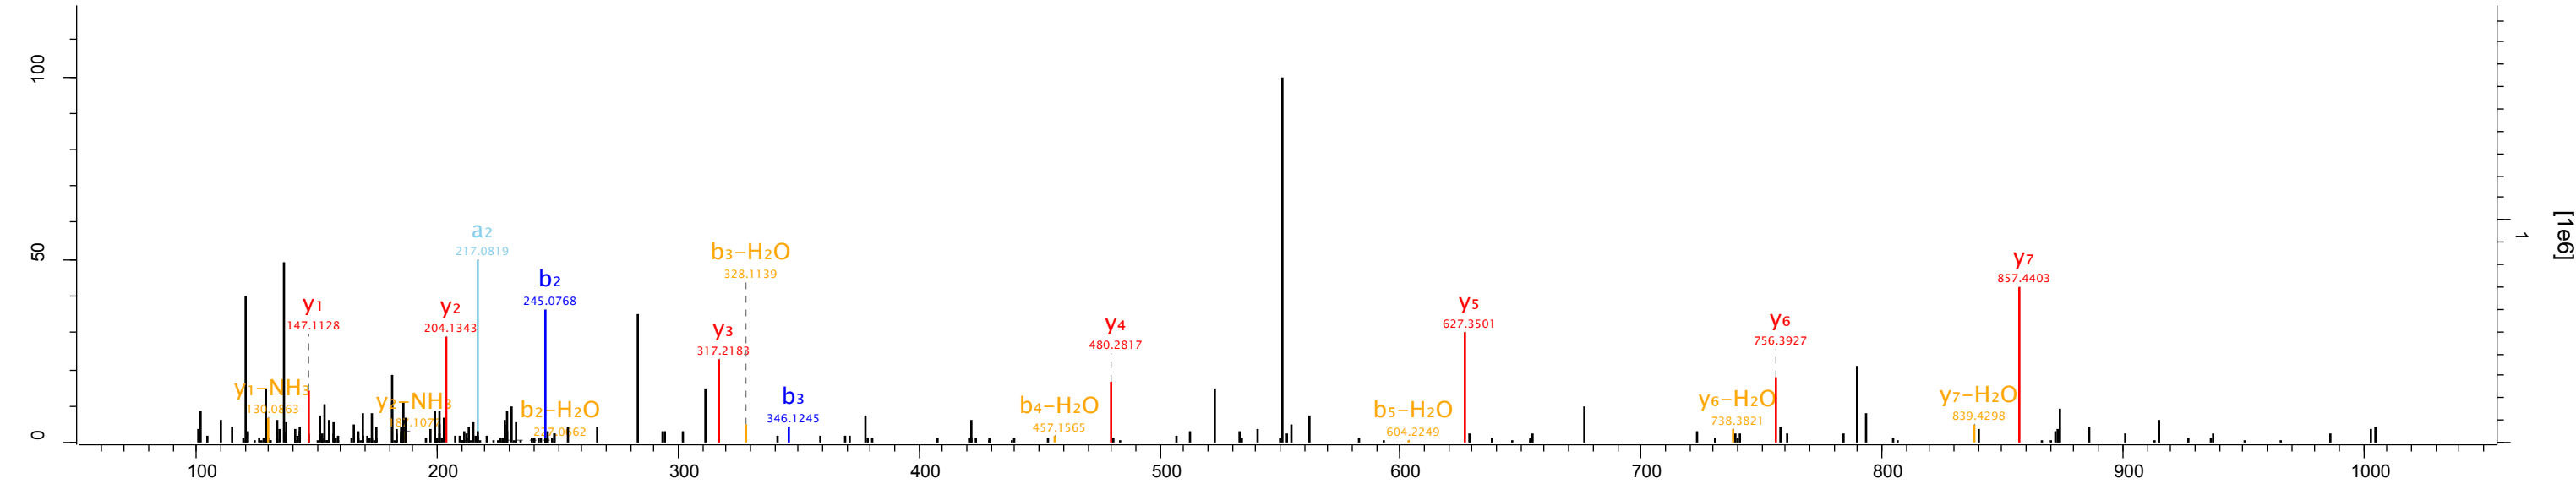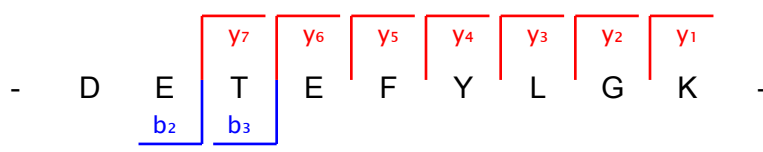

Raw file 20171215\_MaS\_33SR\_LMH\_proteome\_02 Scan 42900 Method FTMS; HCD Score 97.6 m/z 415.27

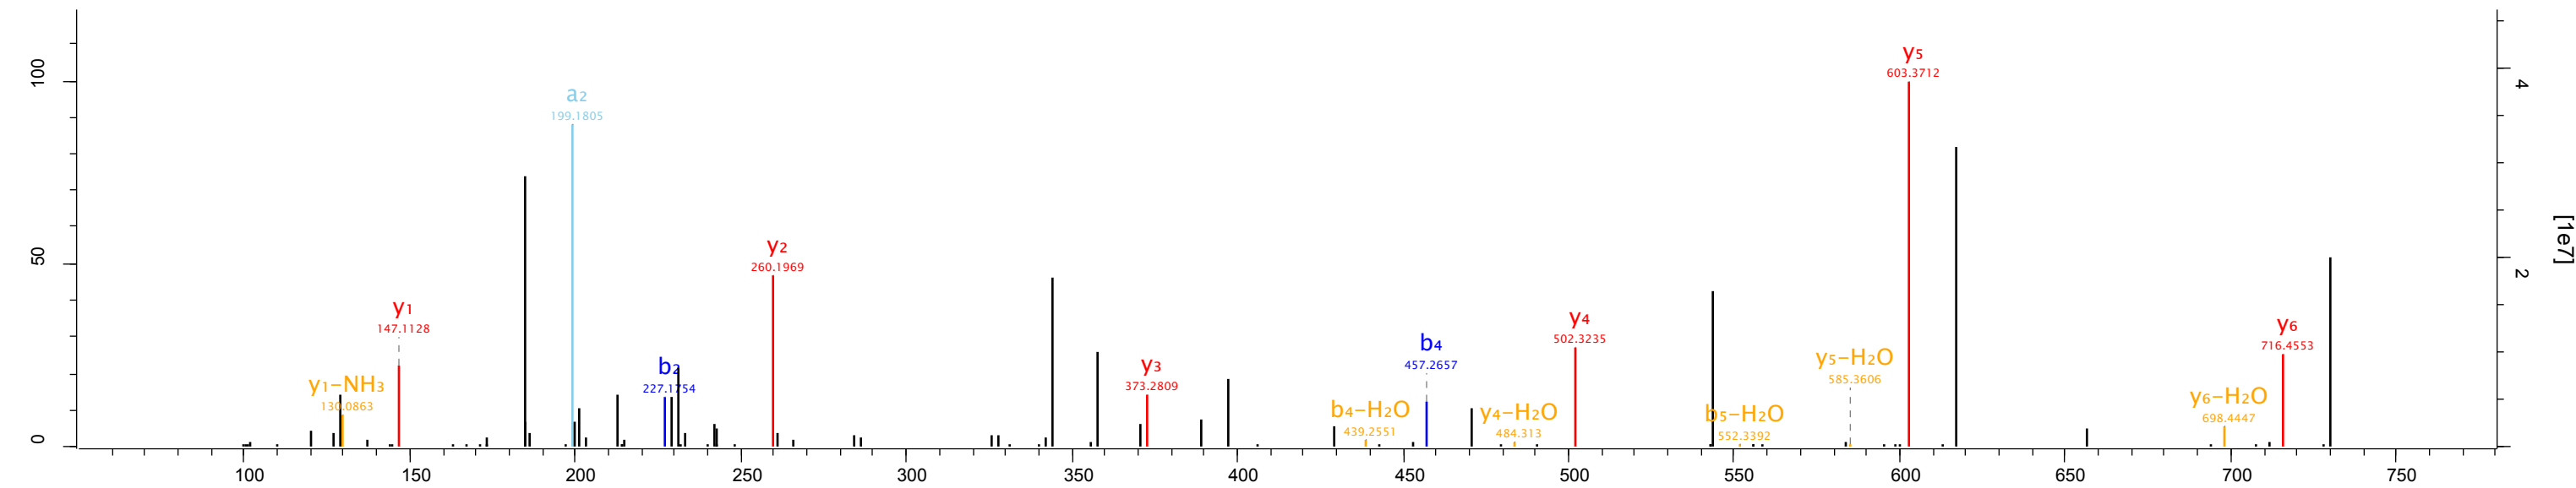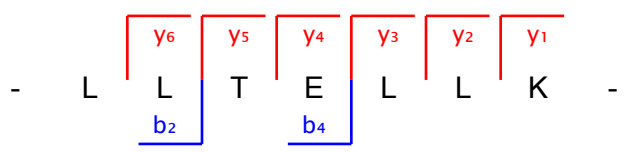



Raw file 20171215\_MaS\_33SR\_LMH\_proteome\_02 Scan 50660 Method FTMS; HCD Score 63.62 m/z 672.84

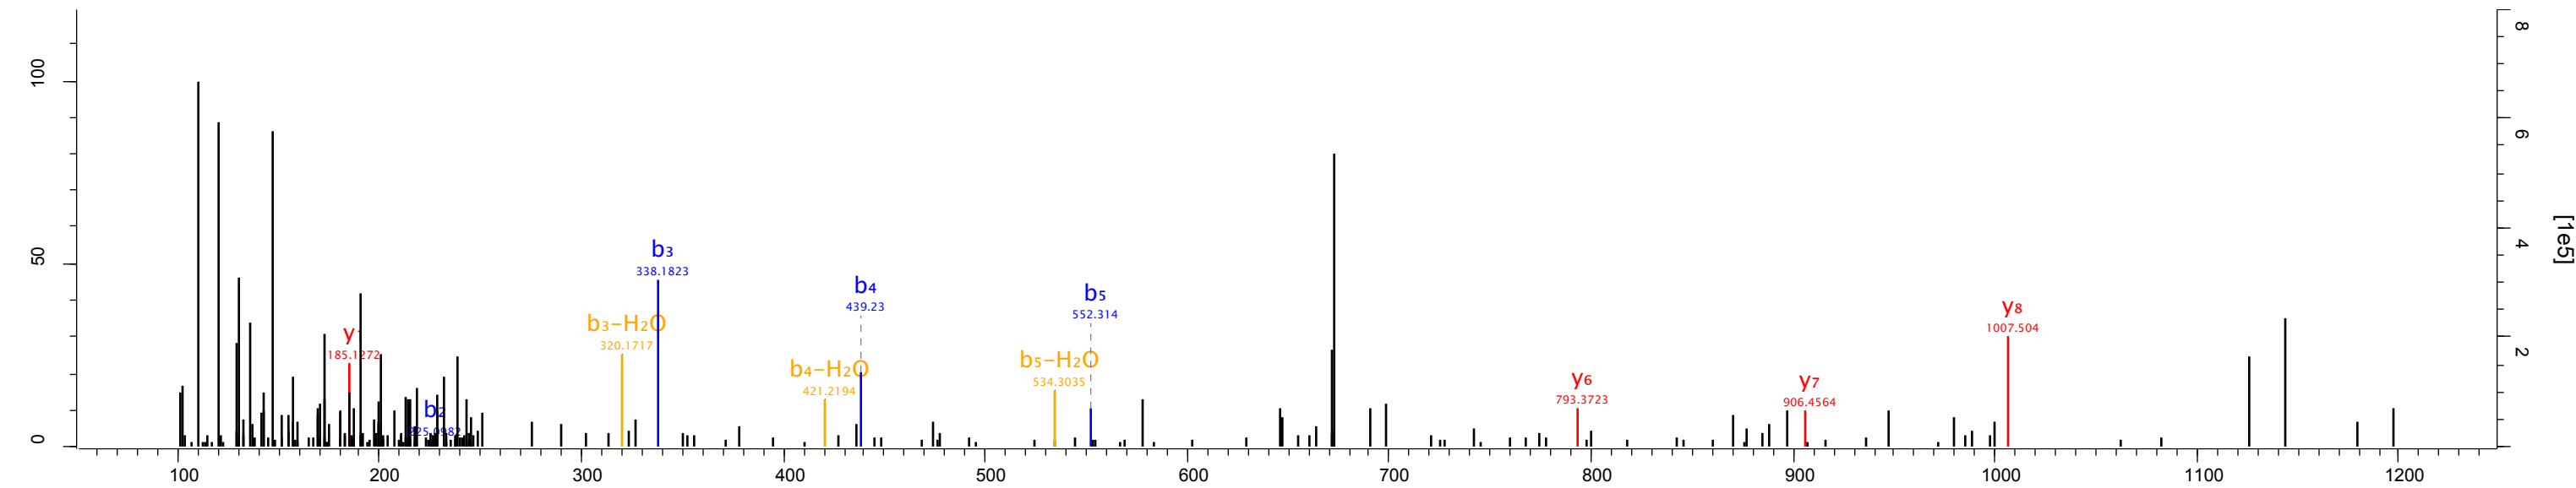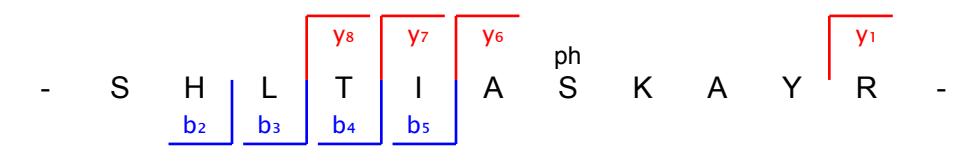

Raw file: 20171215\_MaS\_33SR\_LMH\_proteome\_02  
 Scan: 65990 Method: FTMS; HCD Score: 64.52 m/z: 747.93 Gene names: MED21

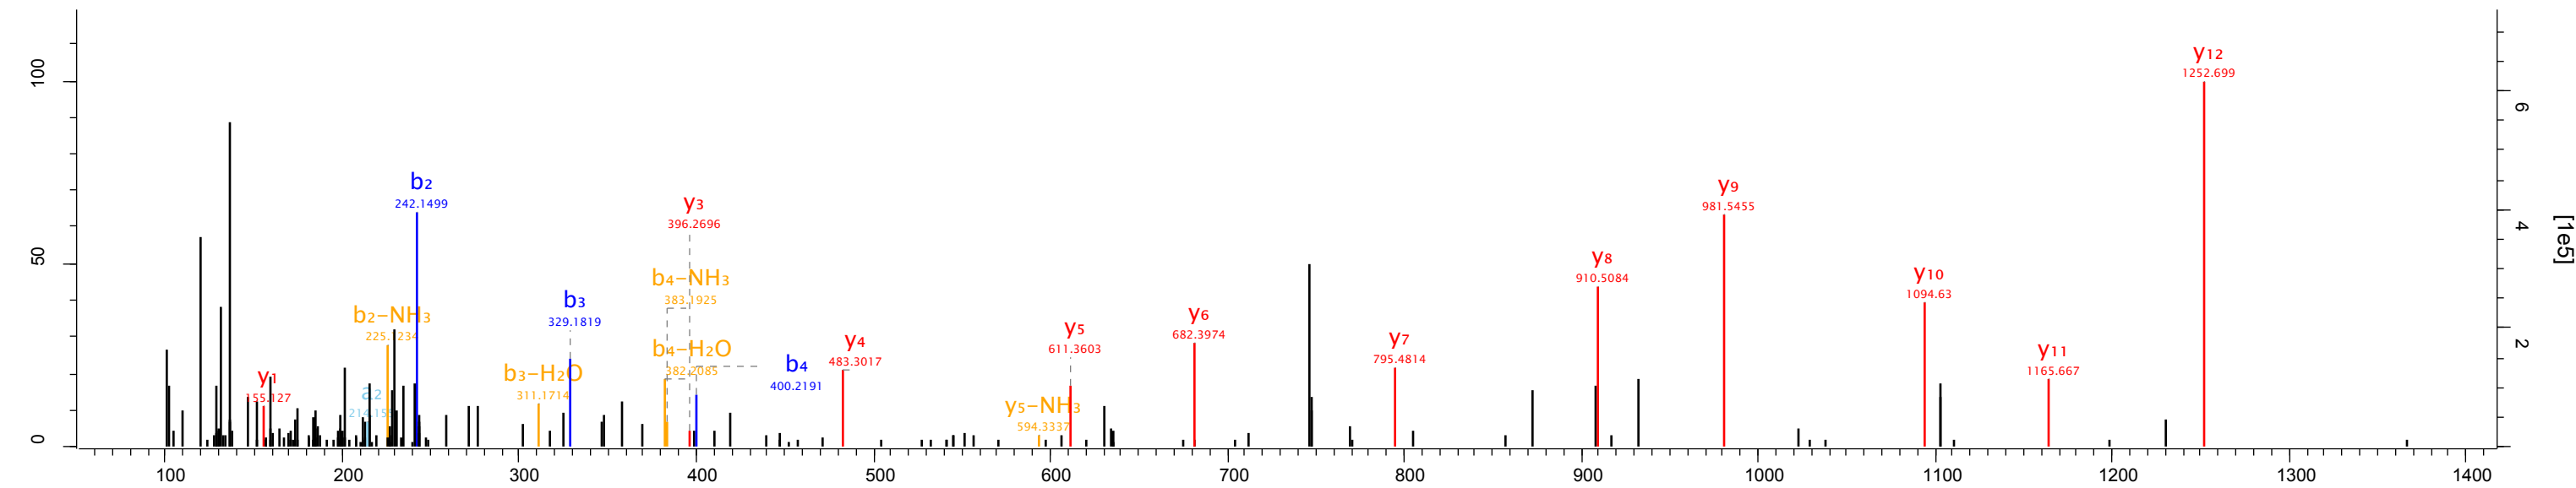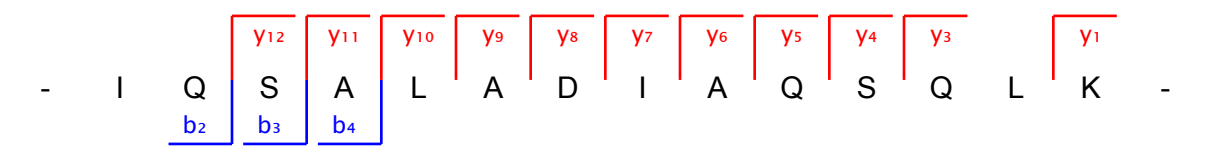

Raw file 20171215\_MaS\_33SR\_LMH\_proteome\_02 Scan 6860 Method FTMS; HCD Score 45.08 m/z 485.74 Gene names ZNF451

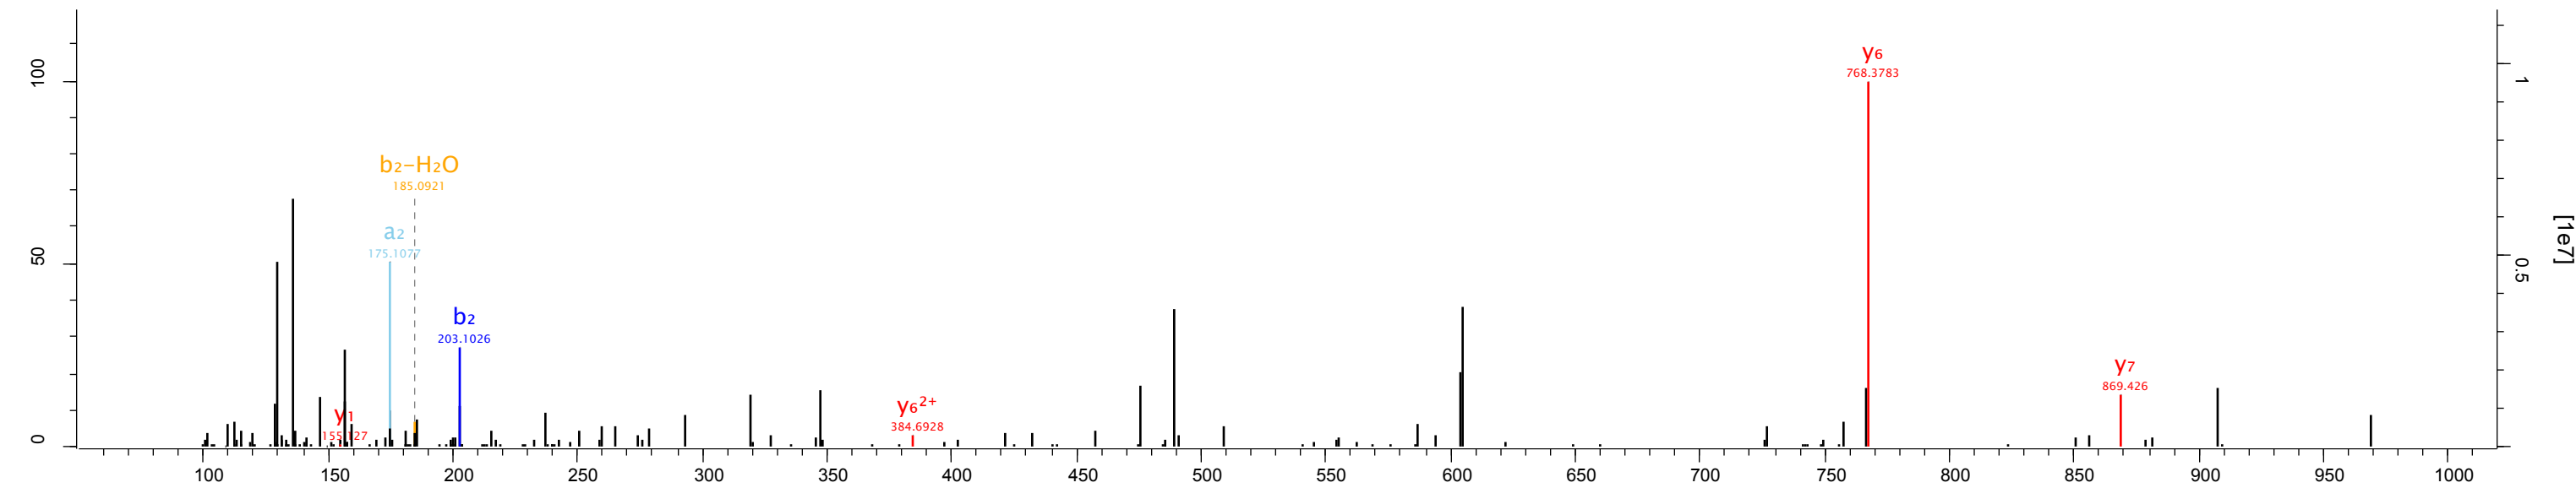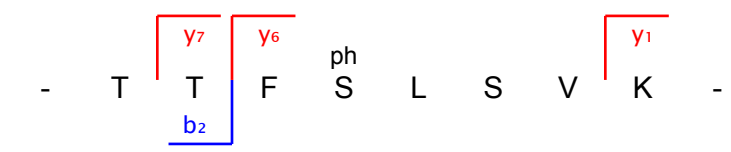

Raw file: 20171215\_MaS\_33SR\_LMH\_proteome\_02  
 Scan: 69310 Method: FTMS; HCD Score: 55.63 m/z: 721.03 Gene names: SCAMP1

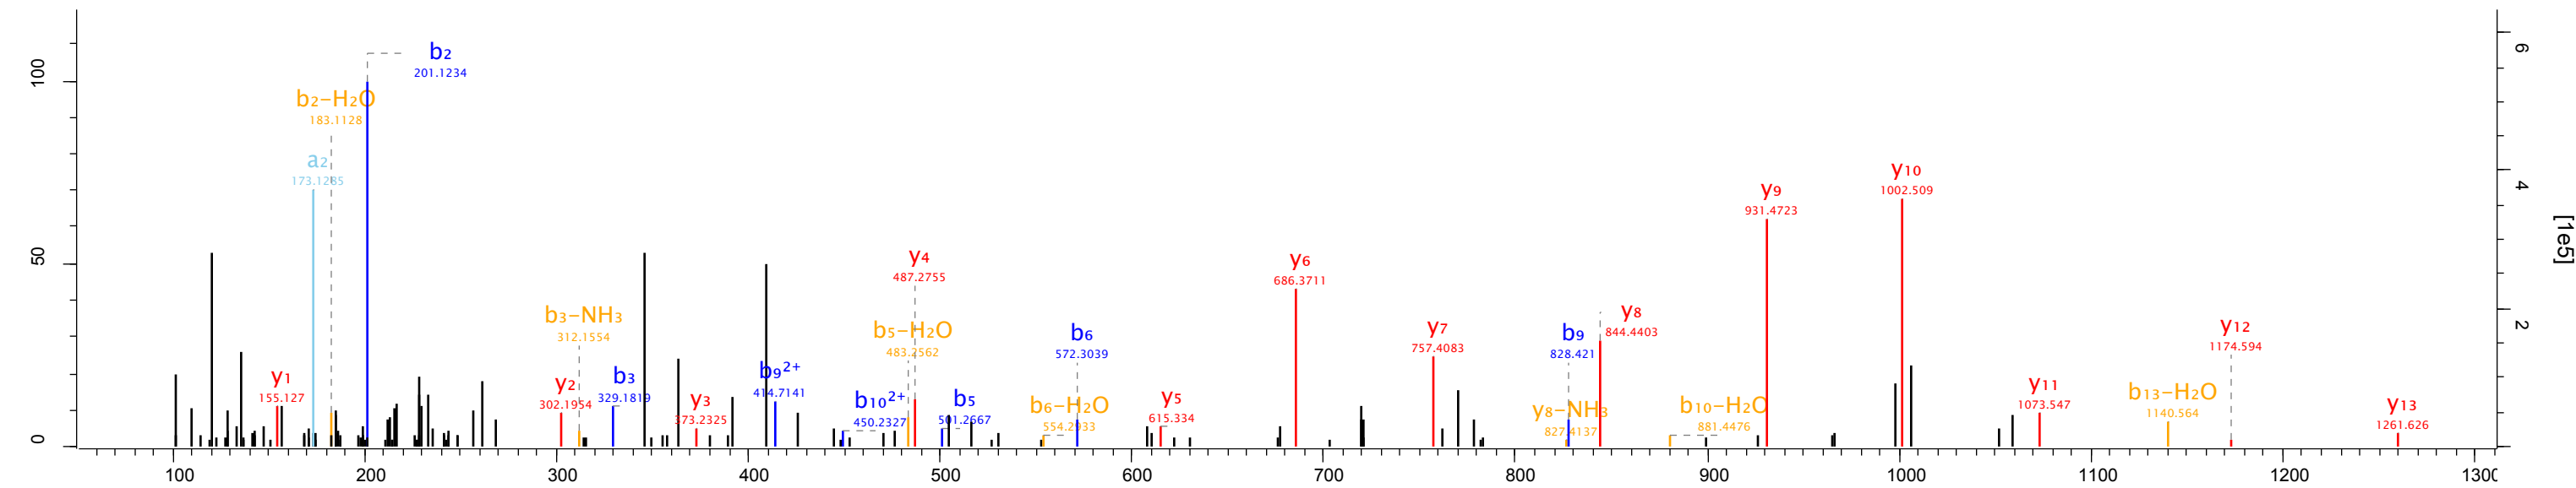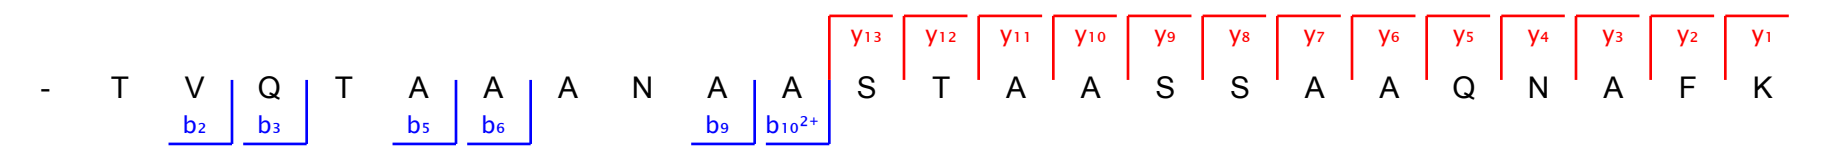

Raw file  
 20171215\_MaS\_33SR\_LMH\_proteome\_02  
 Scan 72620 Method FTMS; HCD Score 110.12 m/z 928.95 Gene names RGN

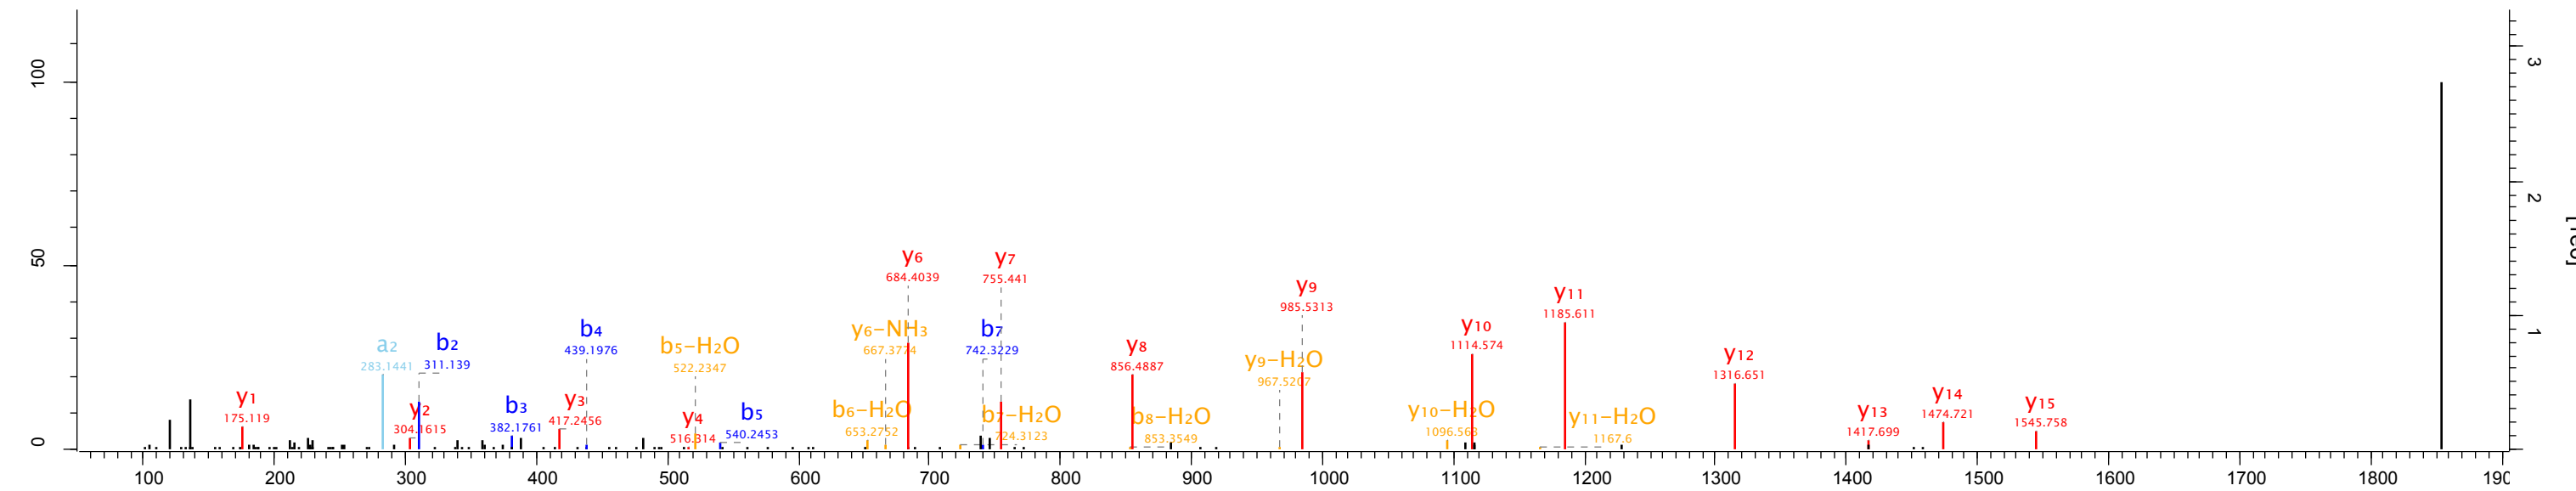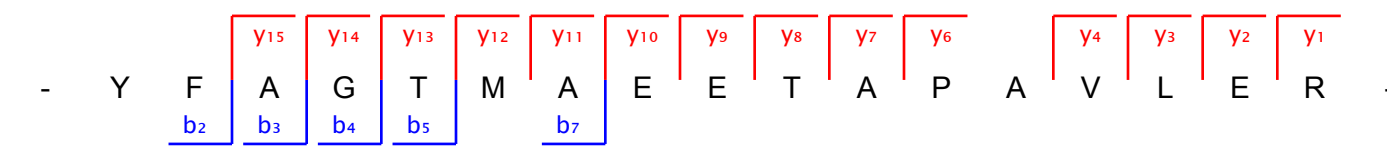

Raw file 20171215\_MaS\_33SR\_LMH\_proteome\_02 Scan 81820 Method FTMS; HCD Score 52.58 m/z 537.84 Gene names CYB5R4

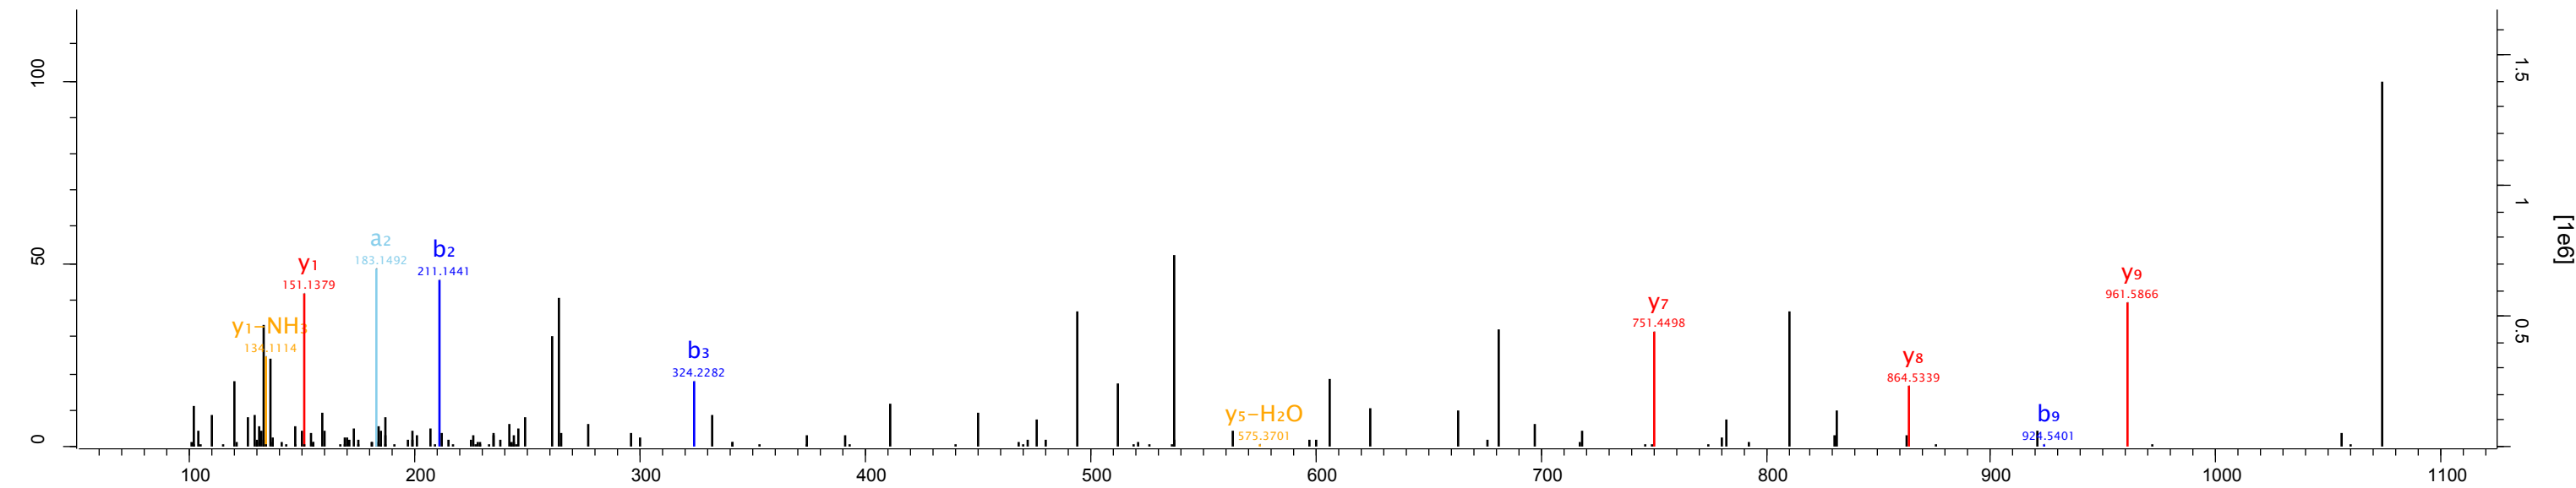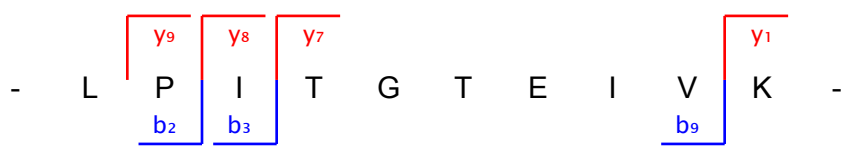

Raw file 20171215\_MaS\_33SR\_LMH\_proteome\_02 Scan 83750 Method FTMS; HCD Score 112.24 m/z 870.39 Gene names FAM192A

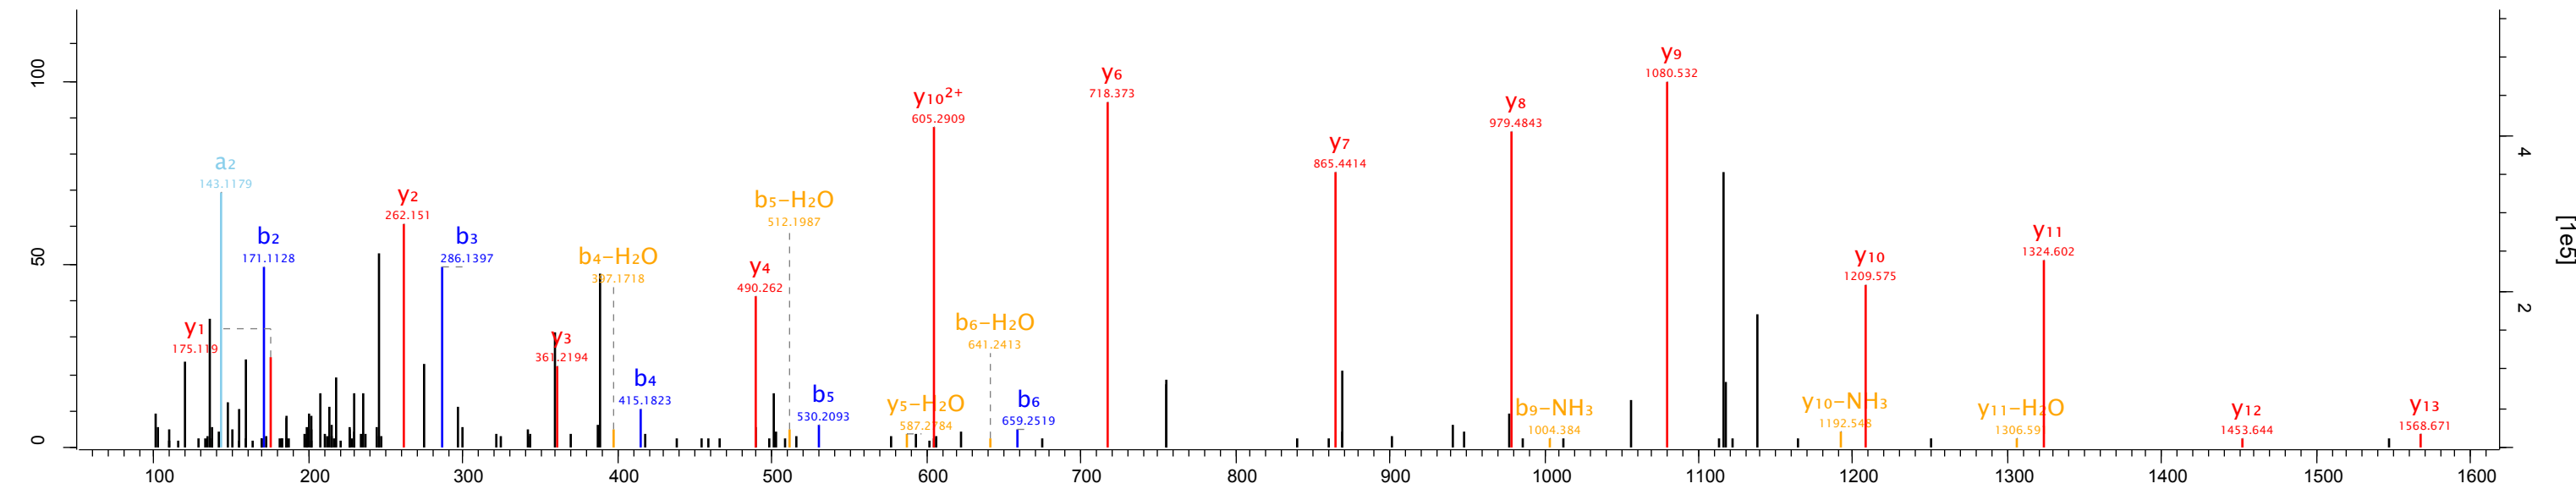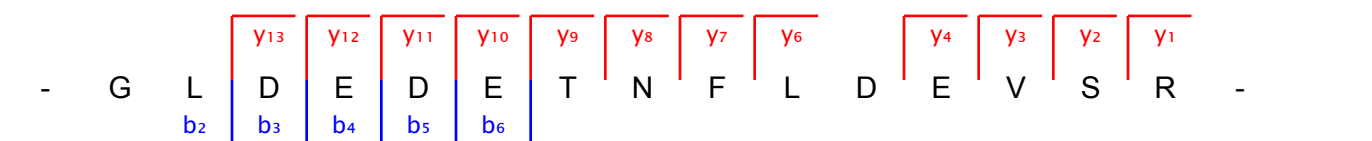

Raw file 20171215\_MaS\_33SR\_LMH\_phospho\_01 Scan 6351 Method FTMS; HCD Score 72.32 m/z 933.37 Gene names CBLB

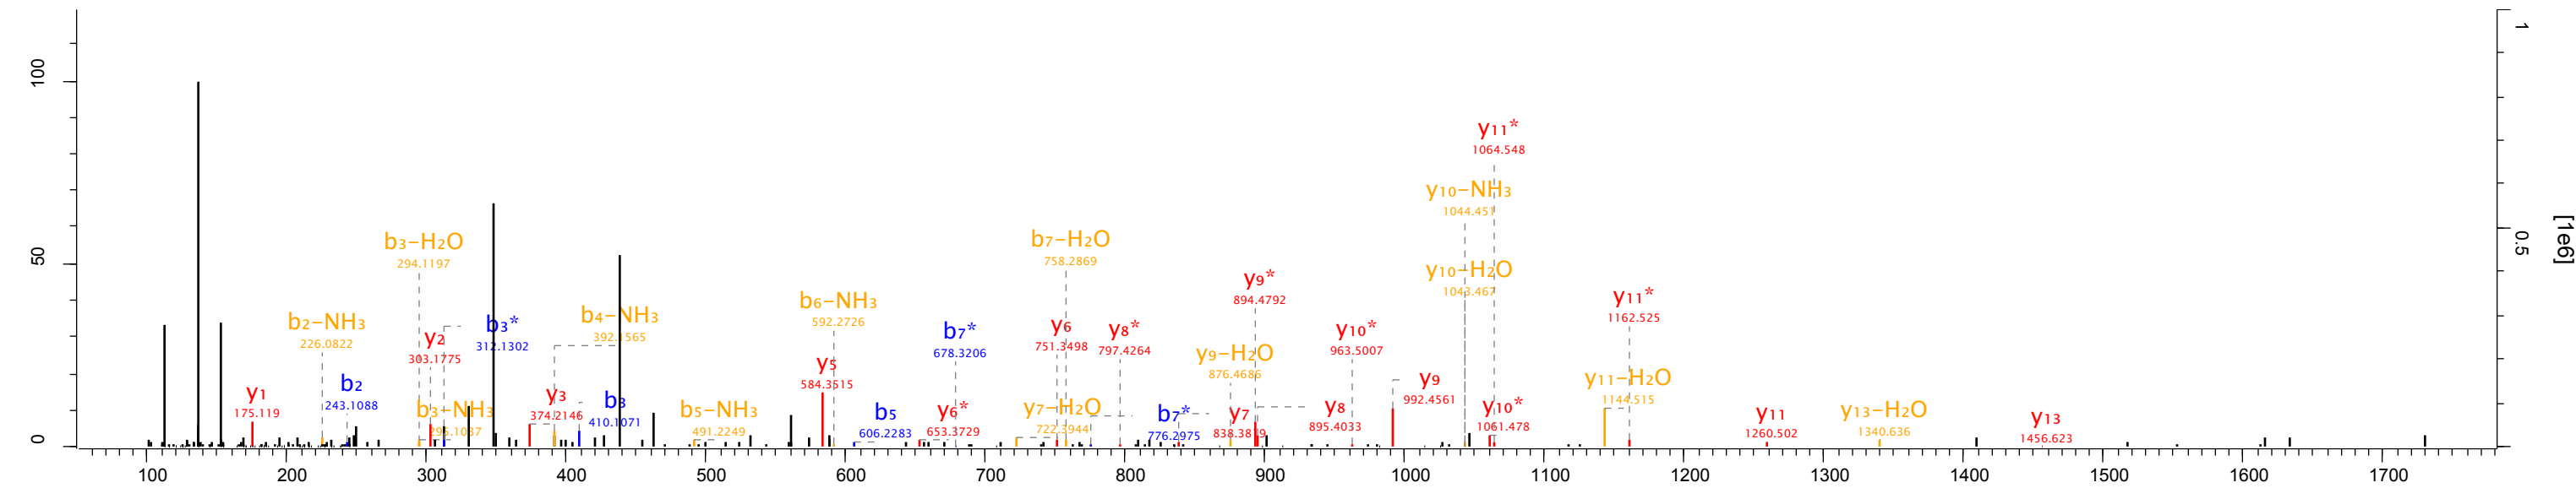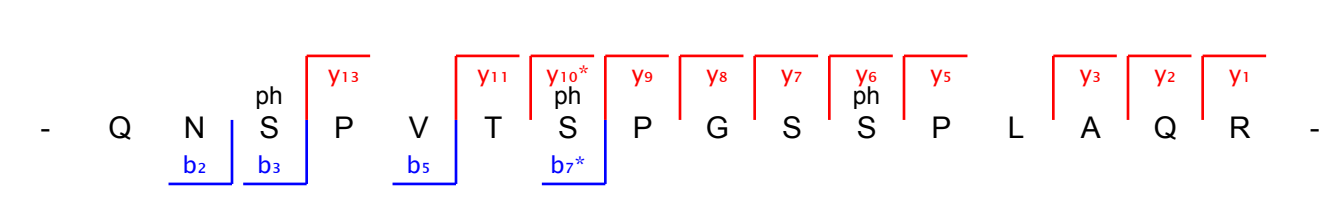



Raw file: 20171215\_MaS\_33SR\_LMH\_phospho\_03  
 Scan: 10061 Method: FTMS; HCD Score: 165.44 m/z: 782.84 Gene names: PWWP2A

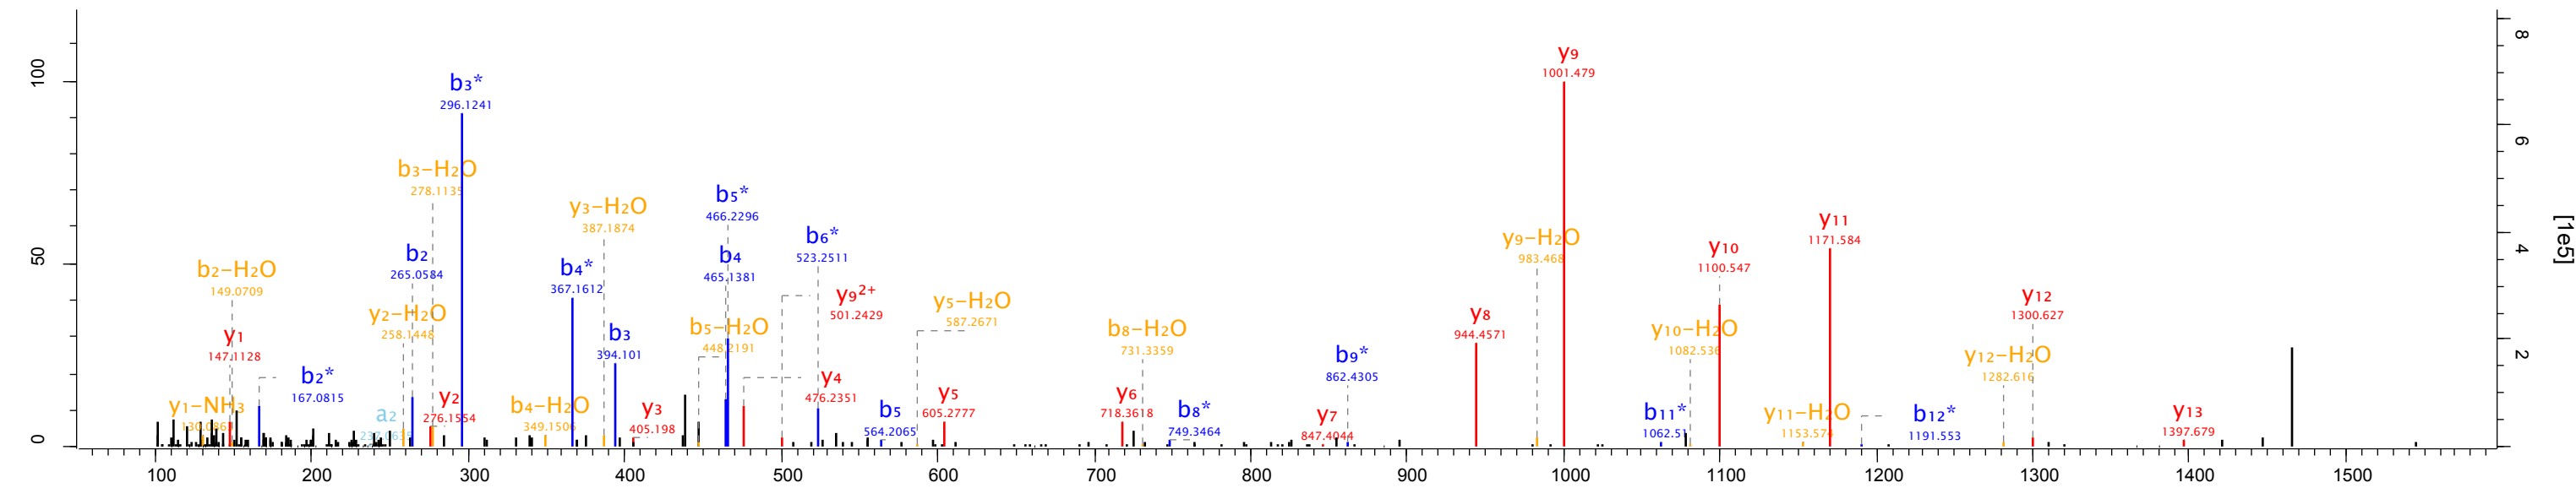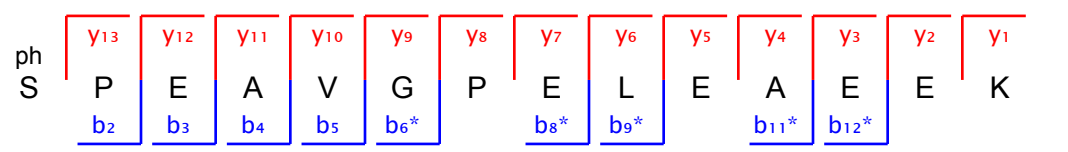

Raw file 20171215\_MaS\_33SR\_LMH\_phospho\_03 Scan 10541 Method FTMS; HCD Score 111.12 m/z 788.28 Gene names SORT1

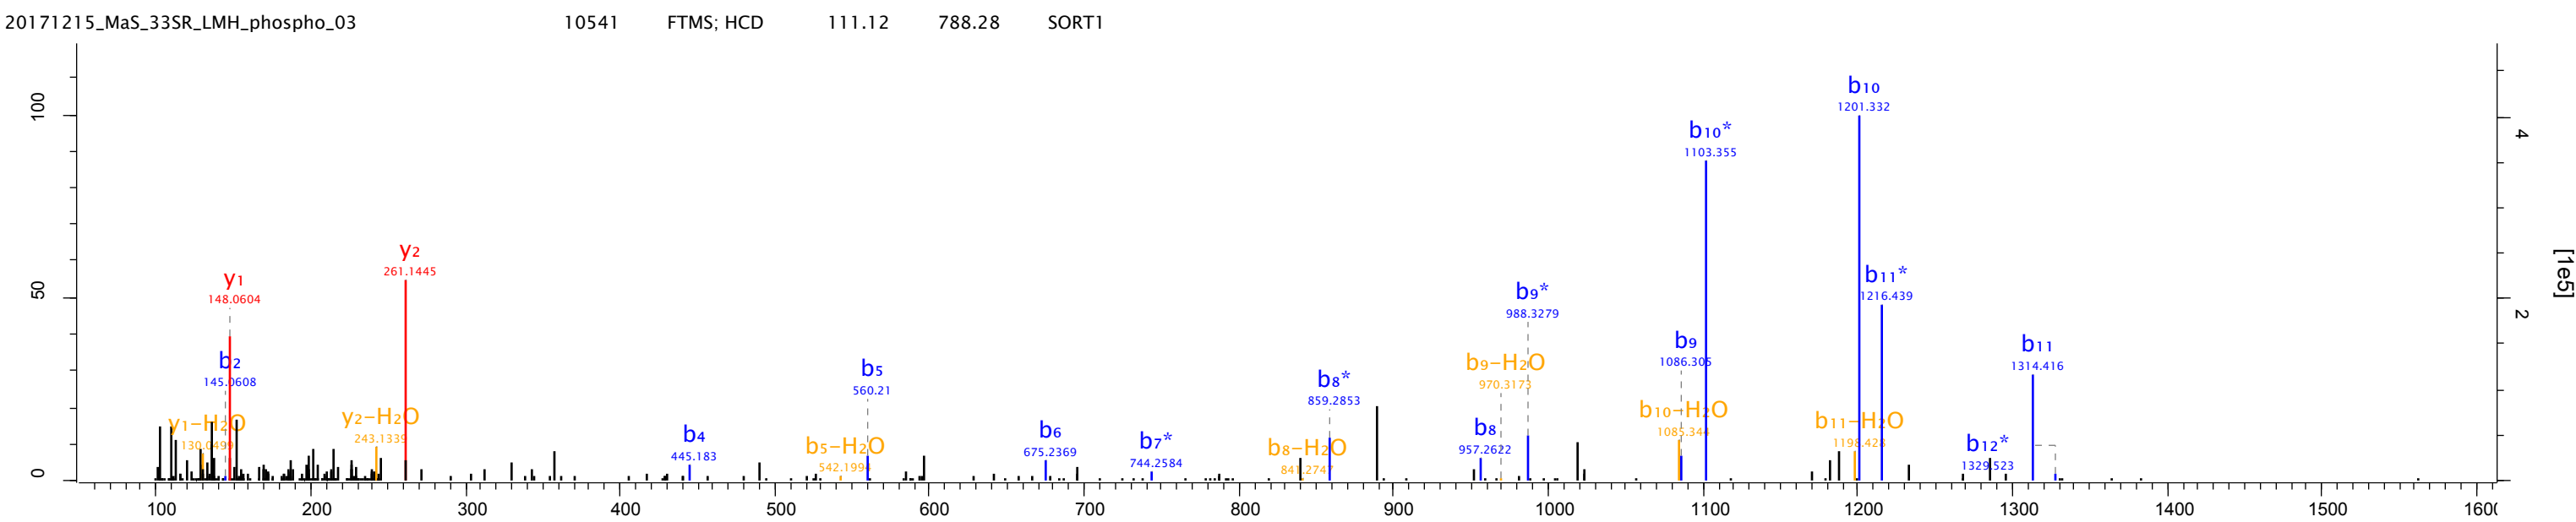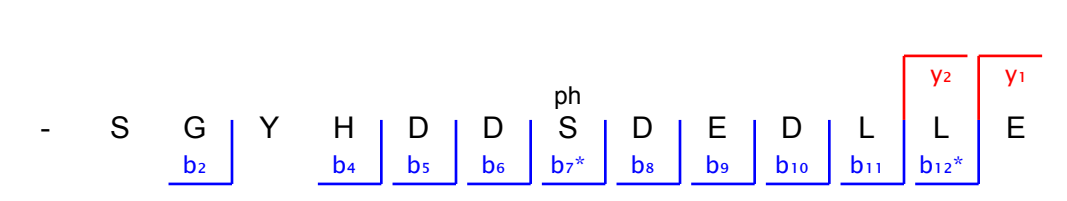

Raw file 20171215\_MaS\_33SR\_LMH\_phospho\_03 Scan 11901 Method FTMS; HCD Score 232.82 m/z 912.36 Gene names SP1

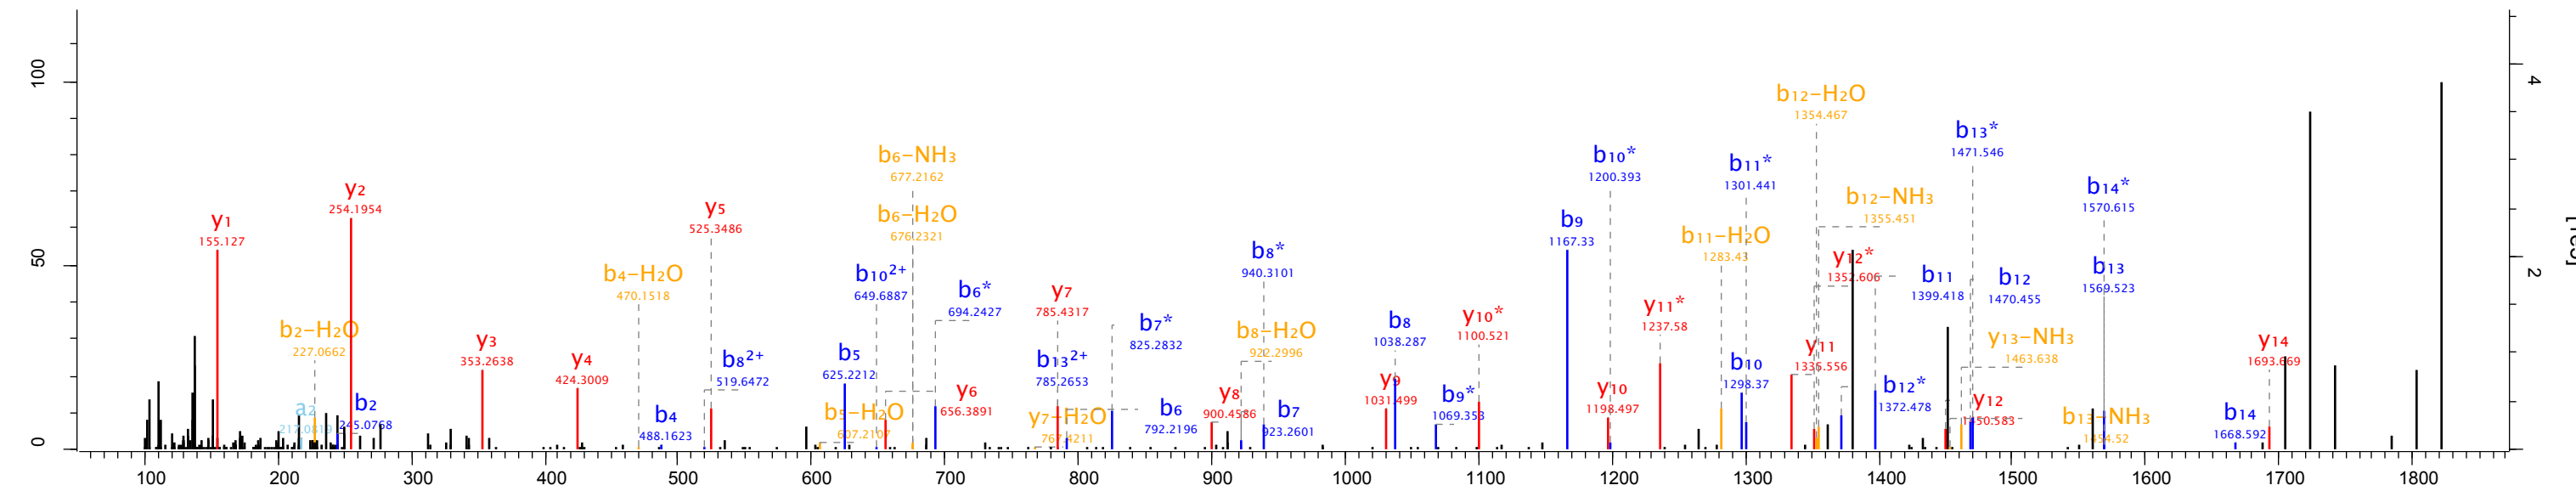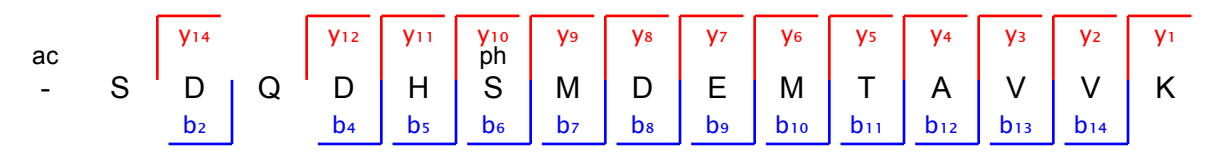

Raw file 20171215\_MaS\_33SR\_LMH\_phospho\_03 Scan 11961 Method FTMS; HCD Score 201.96 m/z 961.93 Gene names MTX3

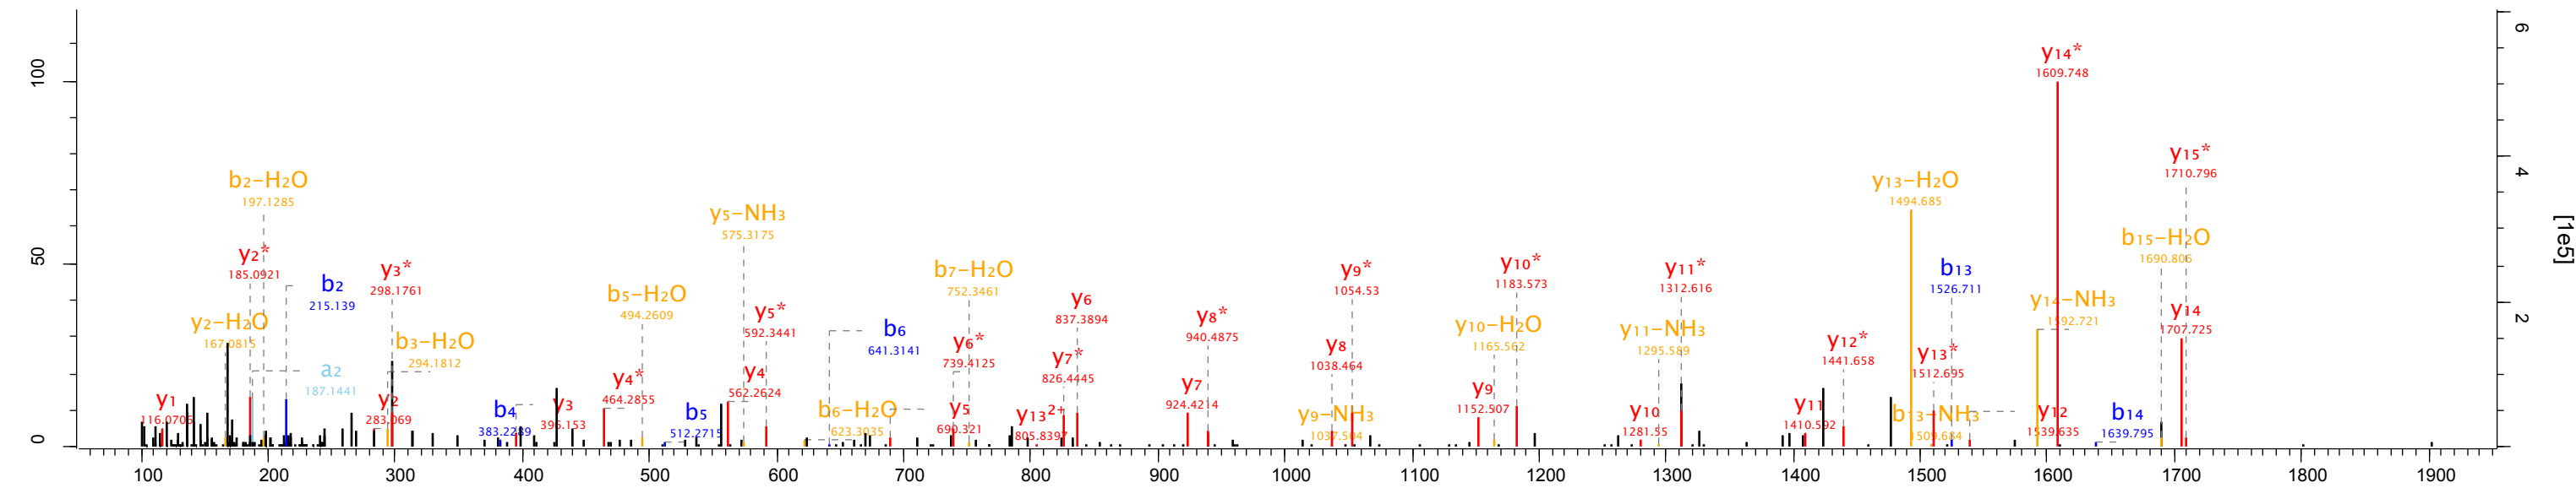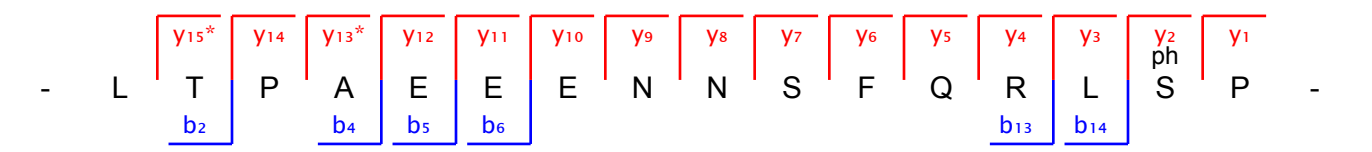

Raw file 20171215\_MaS\_33SR\_LMH\_phospho\_03 Scan 12281 Method FTMS; HCD Score 166.48 m/z 849.38 Gene names ZNF395

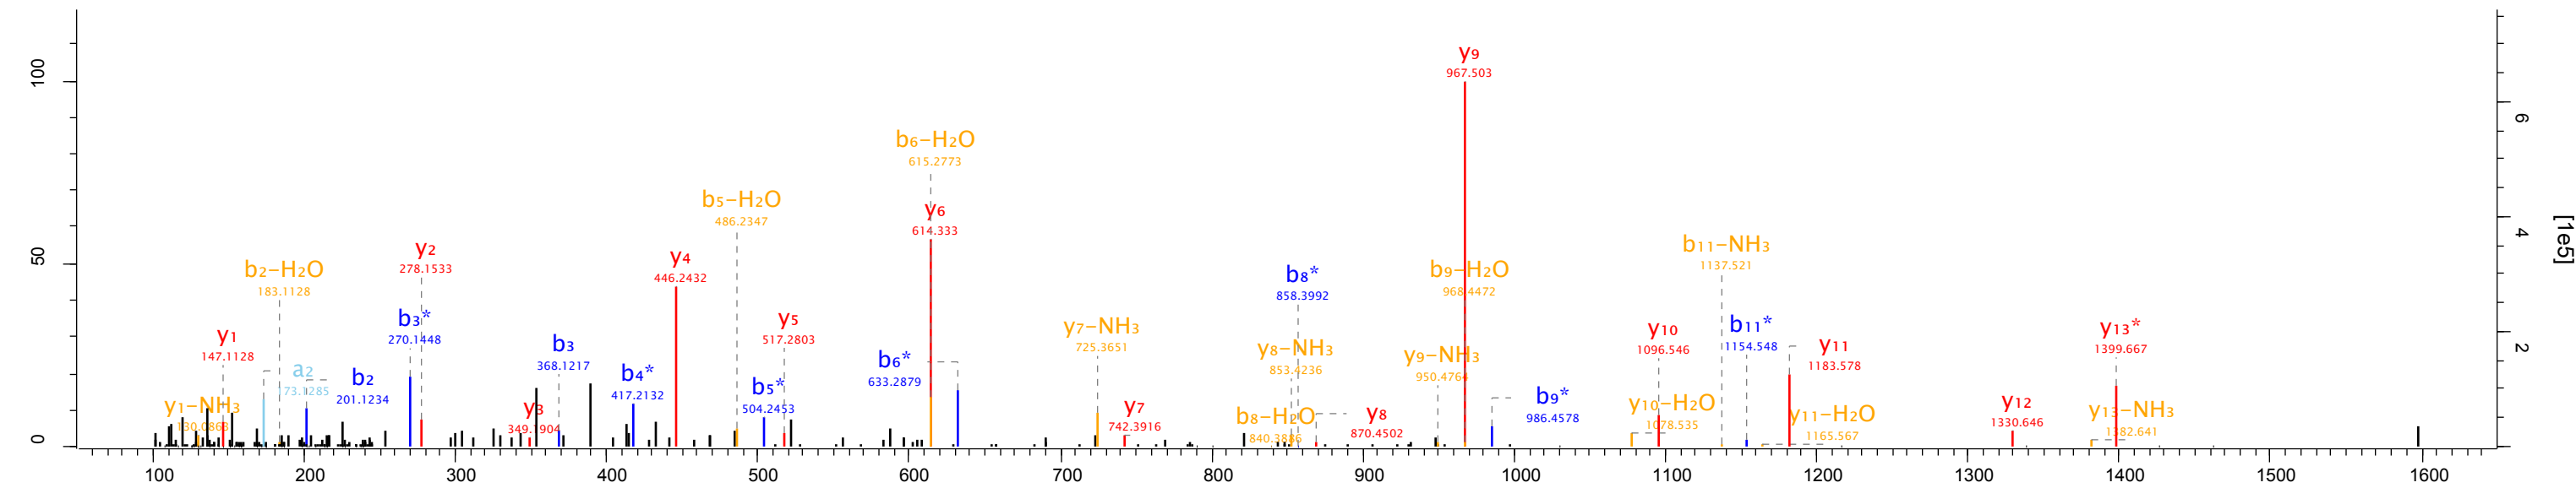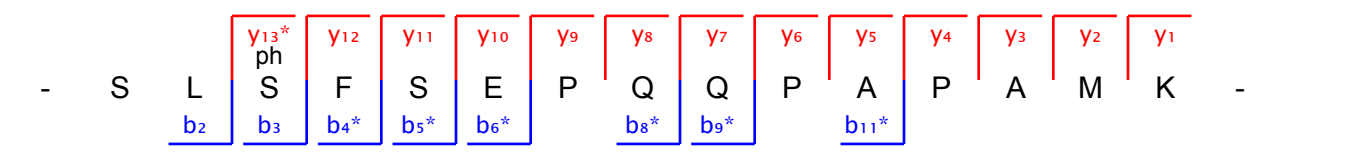

Raw file 20171215\_MaS\_33SR\_LMH\_phospho\_03 Scan 14221 Method FTMS; HCD Score 103.53 m/z 1197.01 Gene names FAM13A

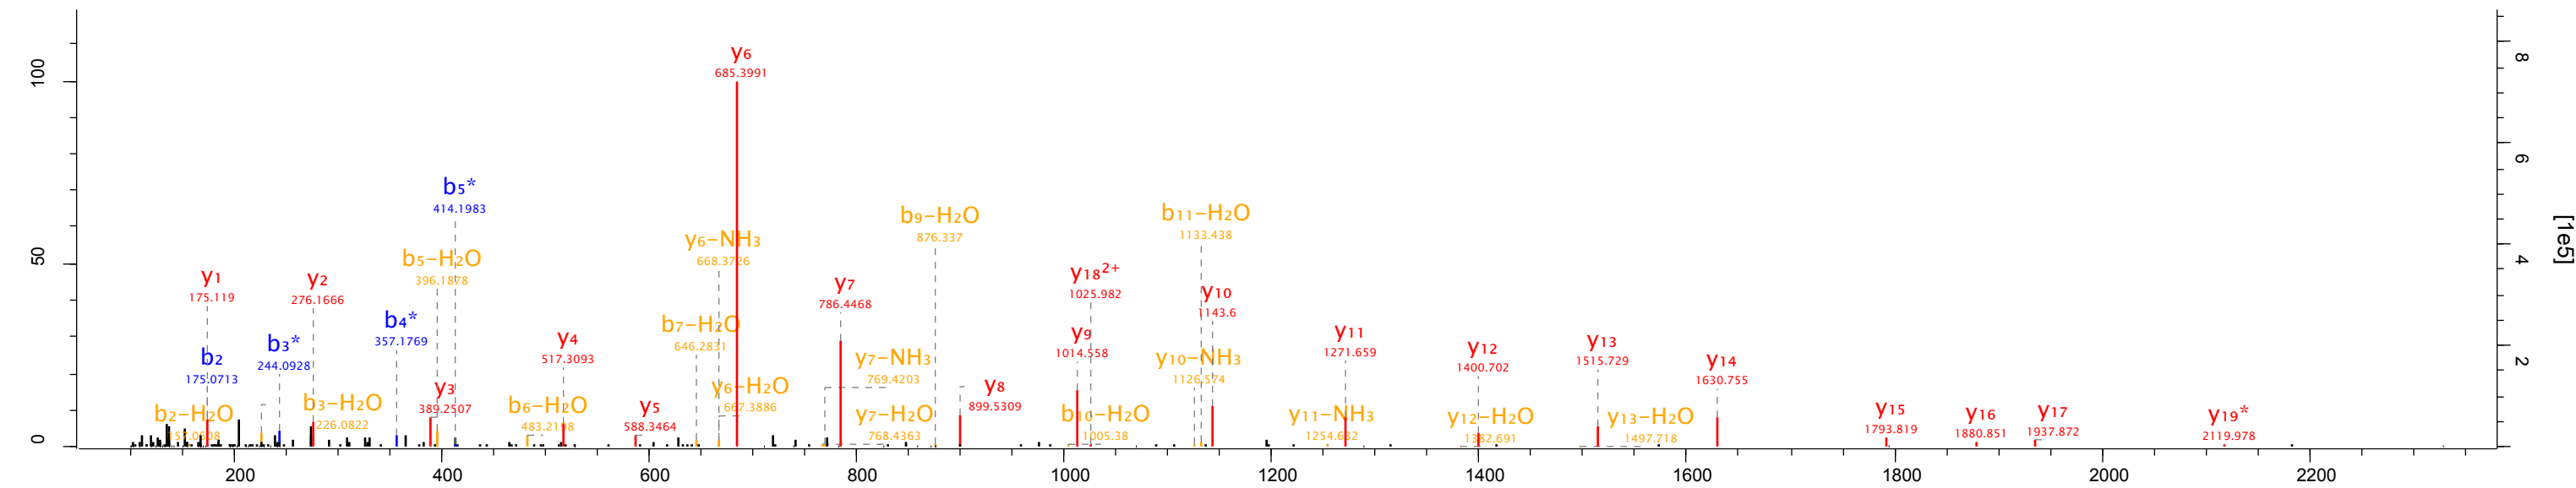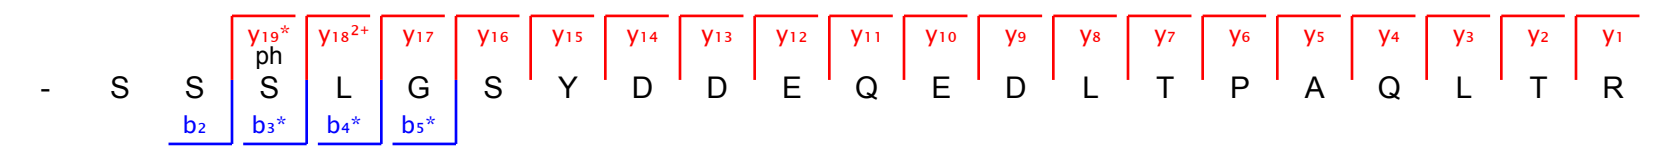

Raw file 20171215\_MaS\_33SR\_LMH\_phospho\_03 Scan 14231 Method FTMS; HCD Score 53.87 m/z 744.35

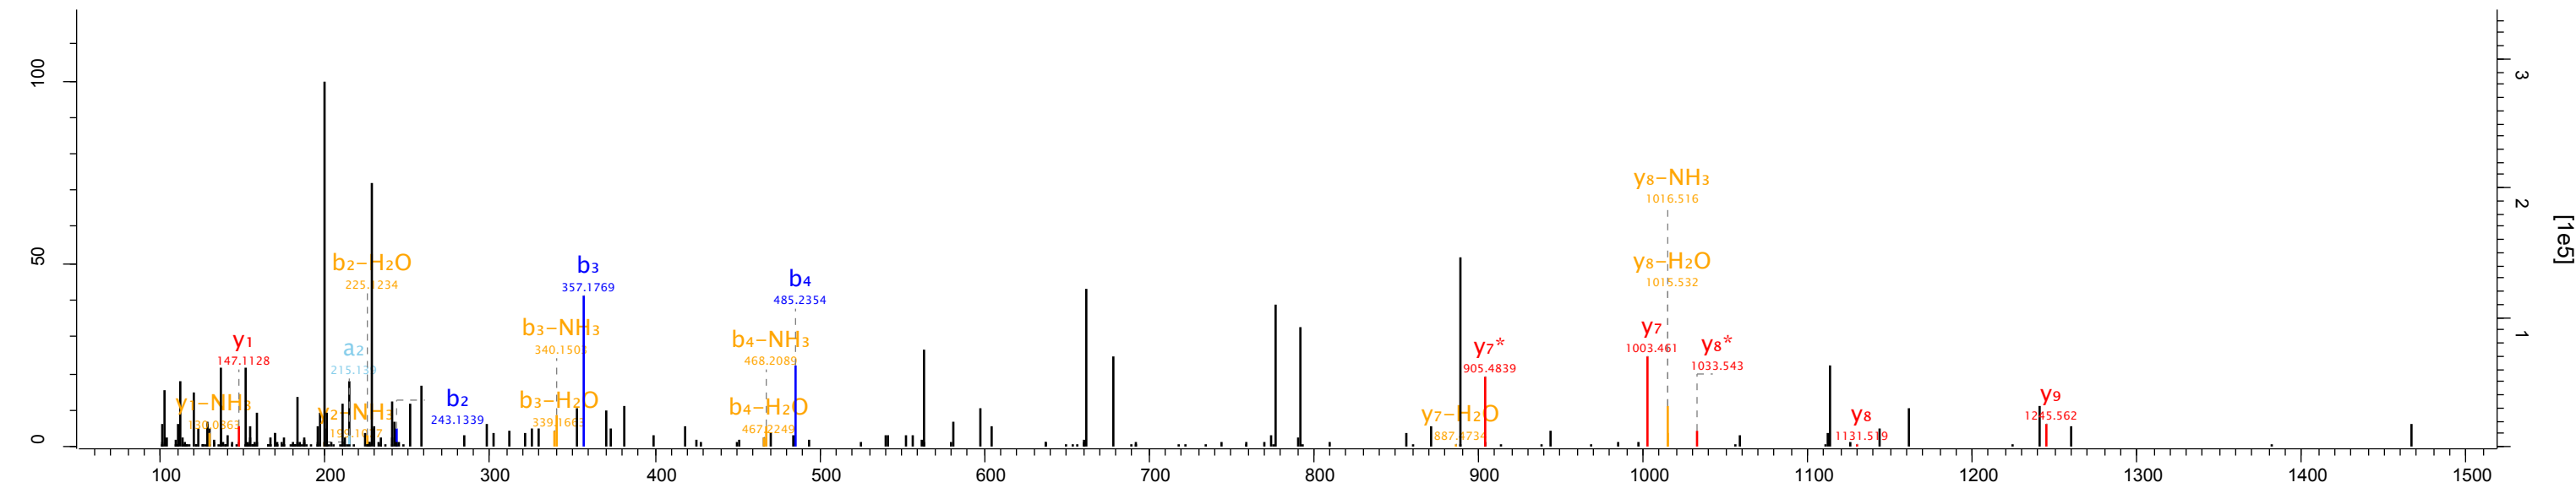

- I E N Q E Q I R Y S K -  
 b2 b3 b4 y9 y8 y7 y1

Raw file 20171215\_MaS\_33SR\_LMH\_phospho\_03 Scan 3591 Method FTMS; HCD Score 191.41 m/z 757.29 Gene names DHX57

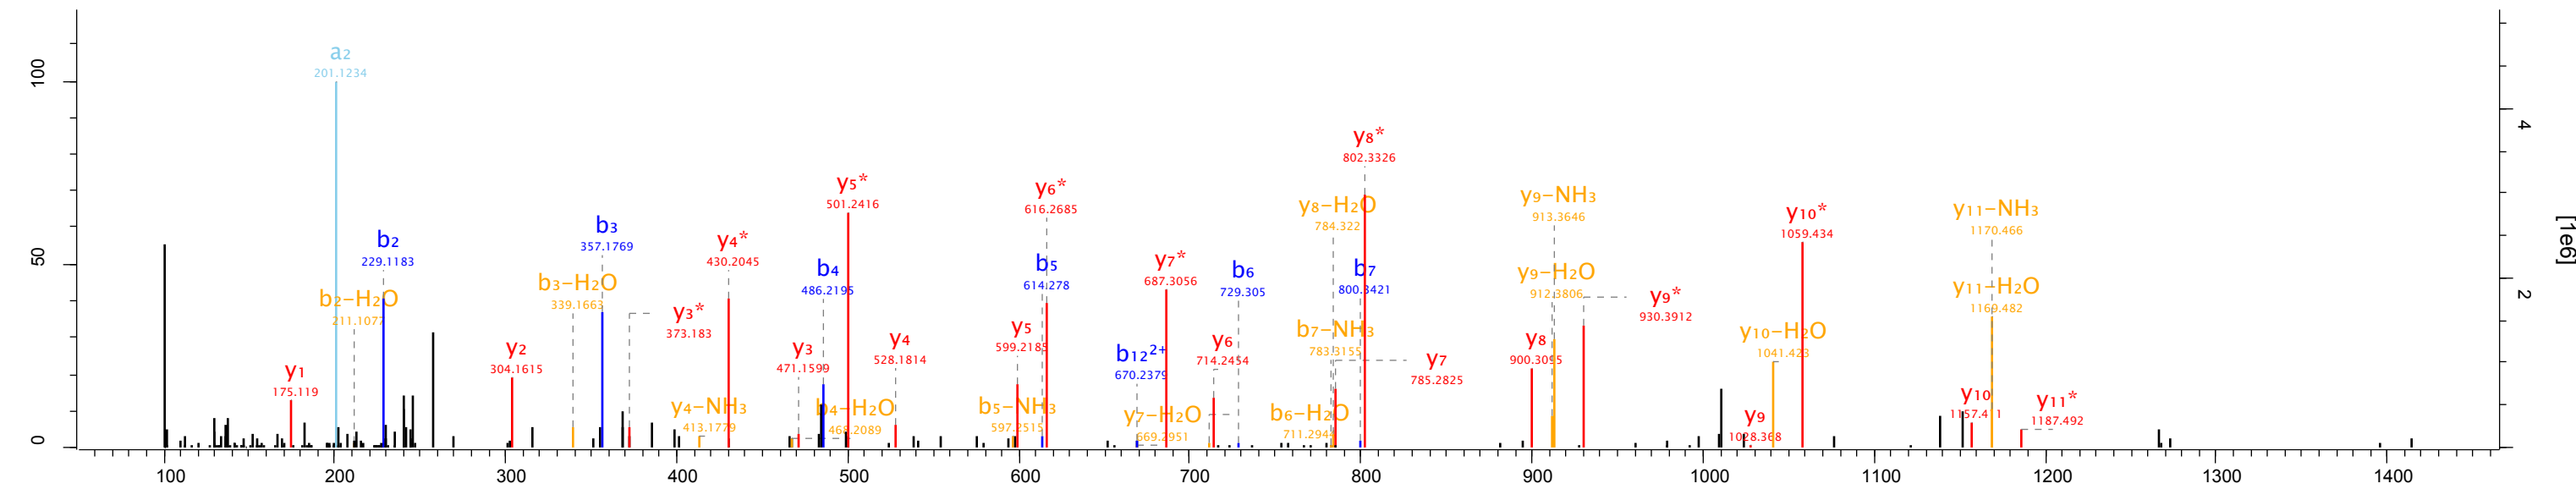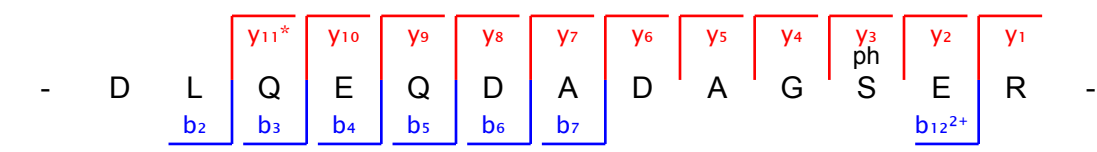



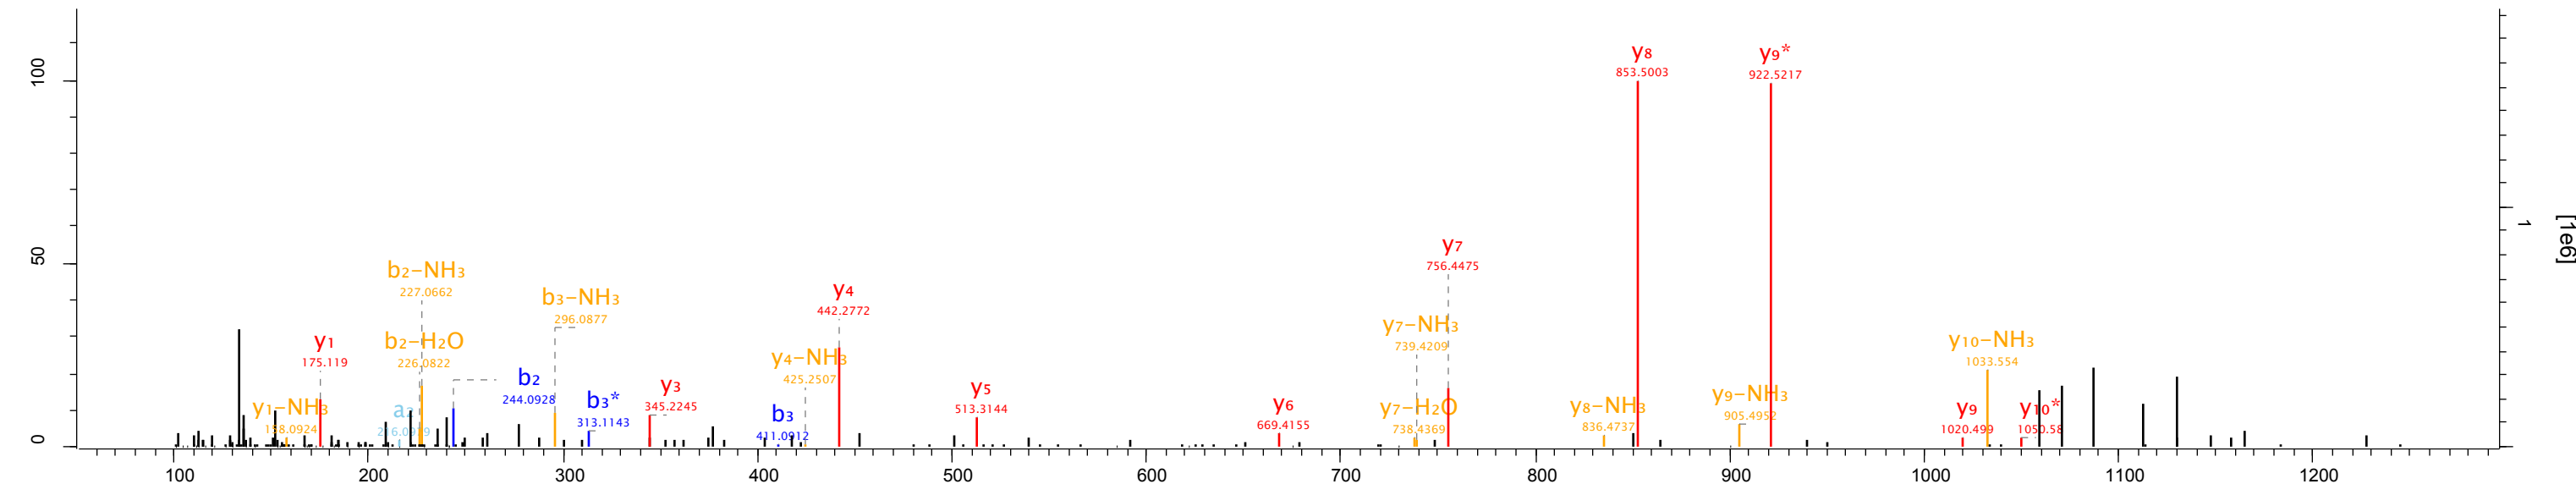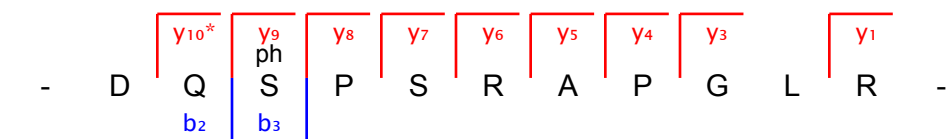

Raw file 20171215\_MaS\_33SR\_LMH\_phospho\_03 Scan 4841 Method FTMS; HCD Score 47.02 m/z 791.8 Gene names ING5

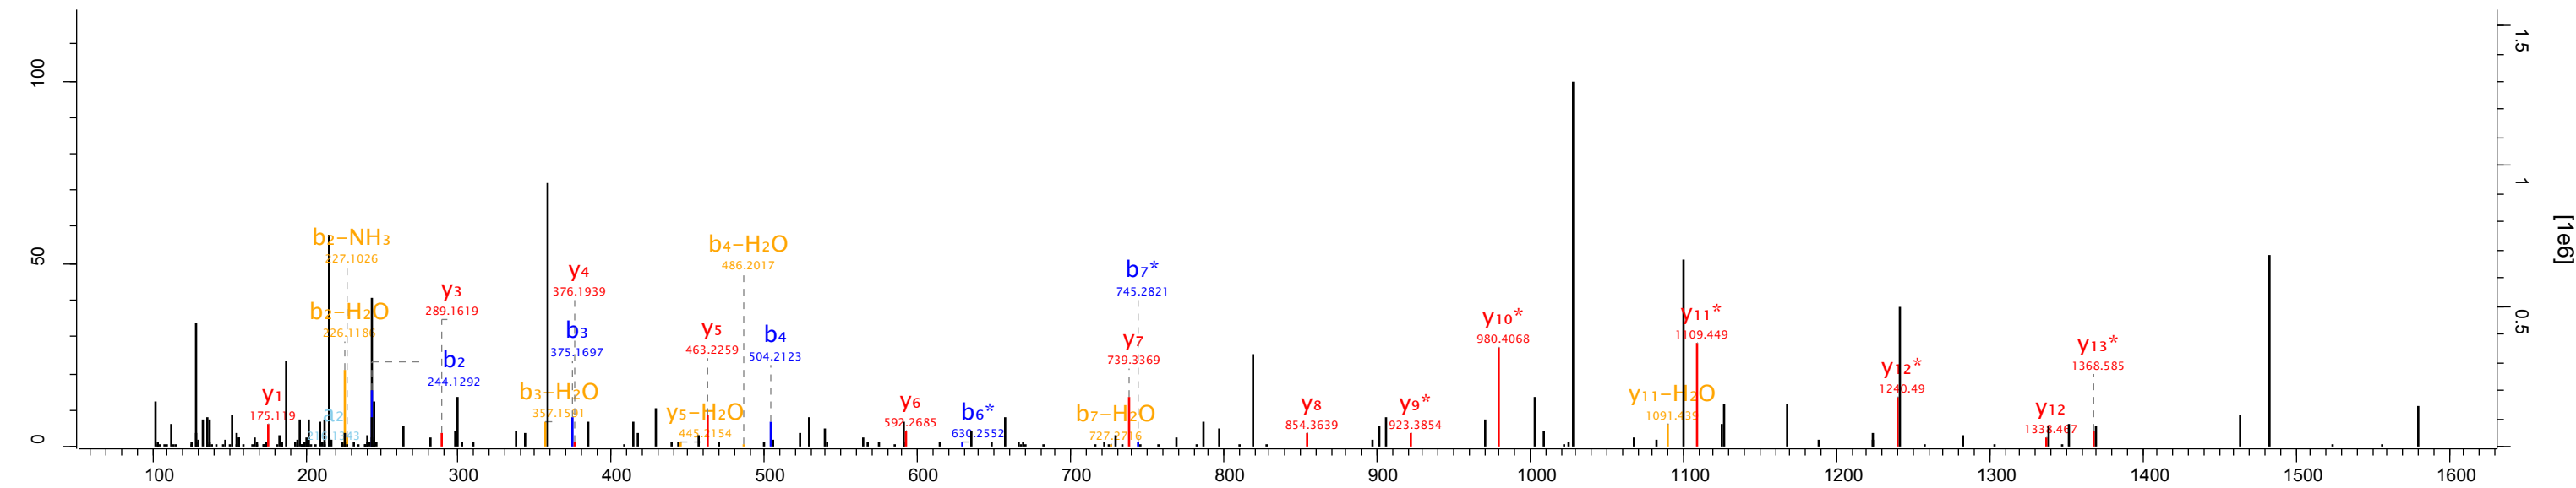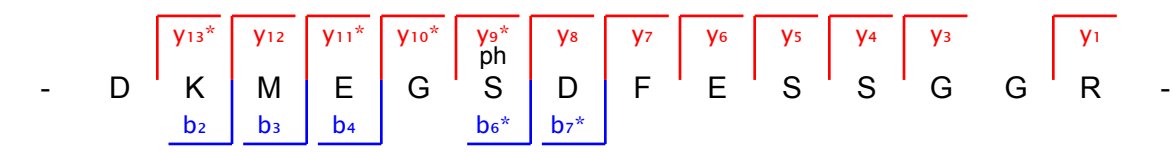

Raw file 20171215\_MaS\_33SR\_LMH\_phospho\_03 Scan 4871 Method FTMS; HCD Score 166.03 m/z 701.27 Gene names RABGAP1

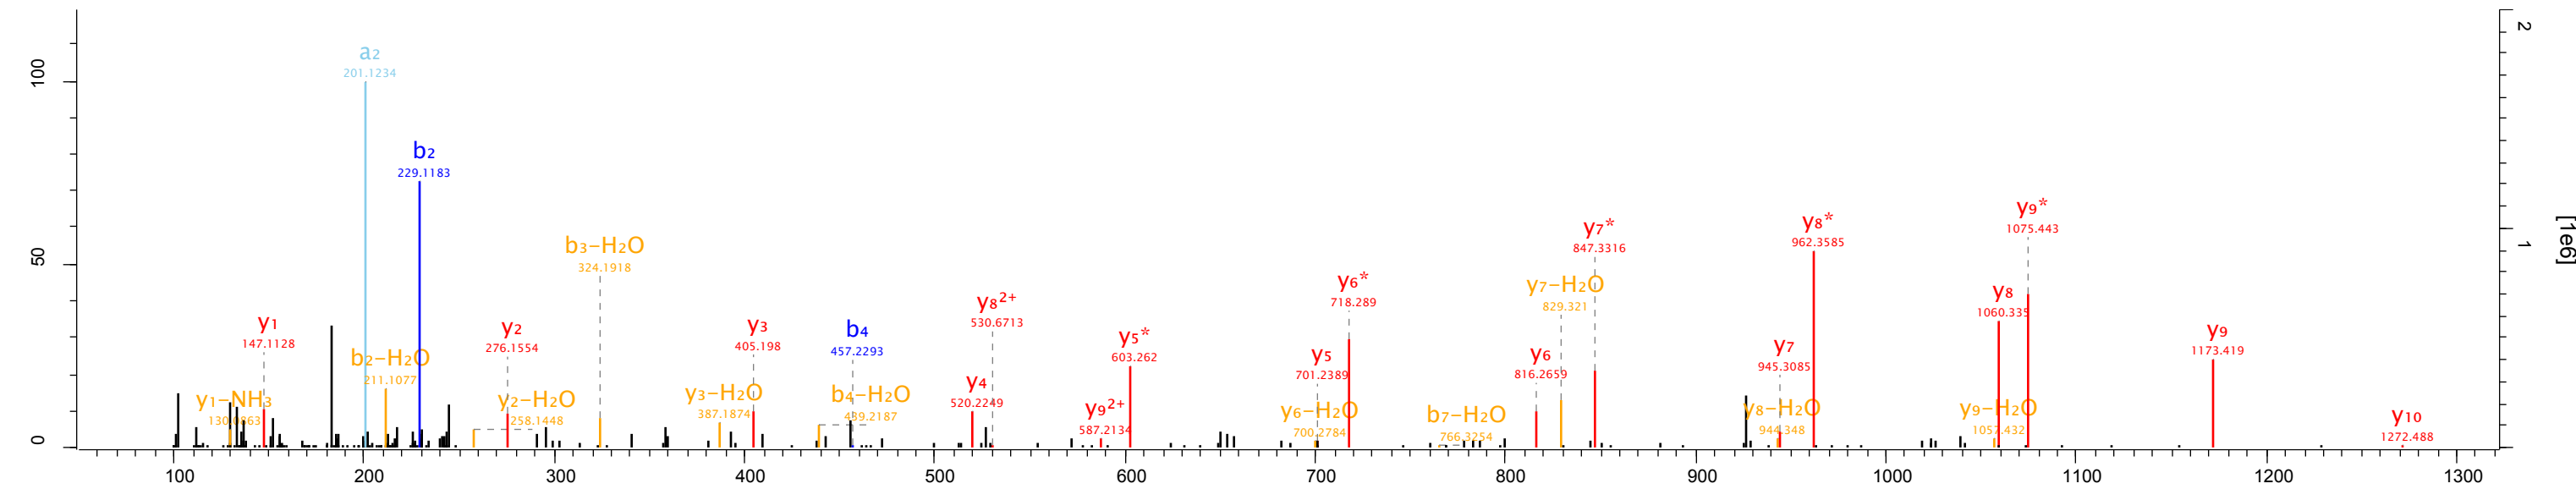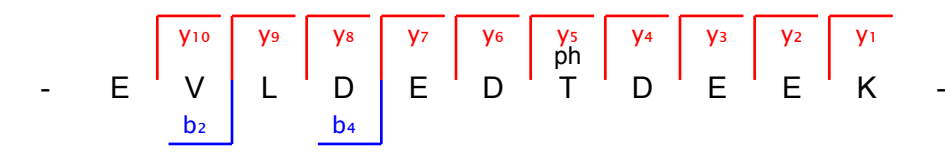

Raw file: 20171215\_MaS\_33SR\_LMH\_phospho\_03  
 Scan: 7121 Method: FTMS; HCD Score: 55.9 m/z: 567.26 Gene names: FUNDC2

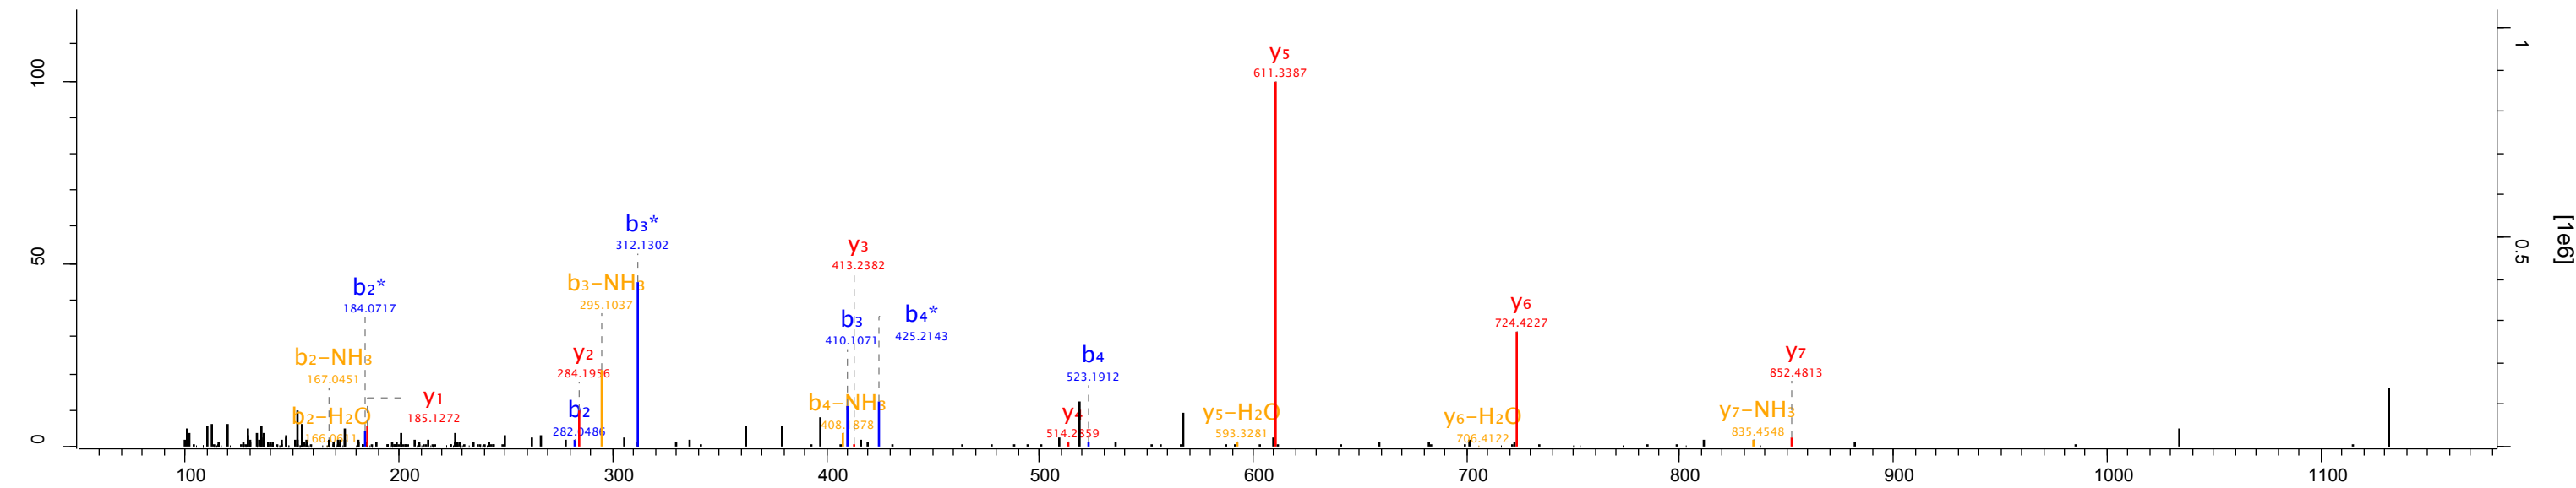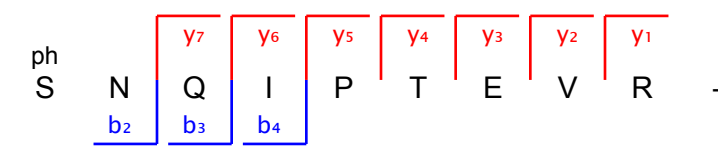

Raw file 20171215\_MaS\_33SR\_LMH\_phospho\_03 Scan 7511 Method FTMS; HCD Score 212.79 m/z 923.87 Gene names MDM2;mdm2

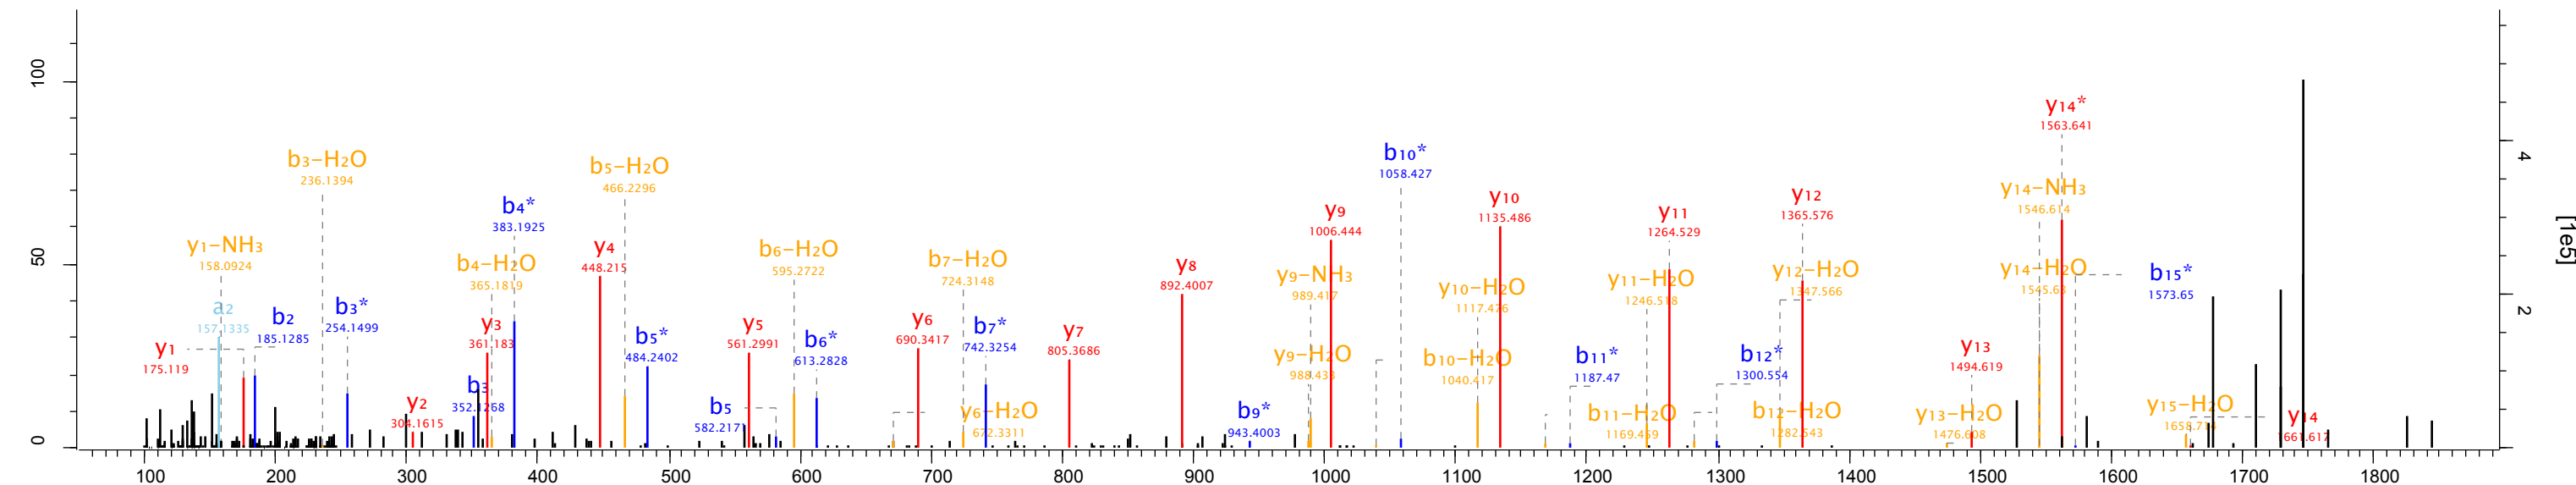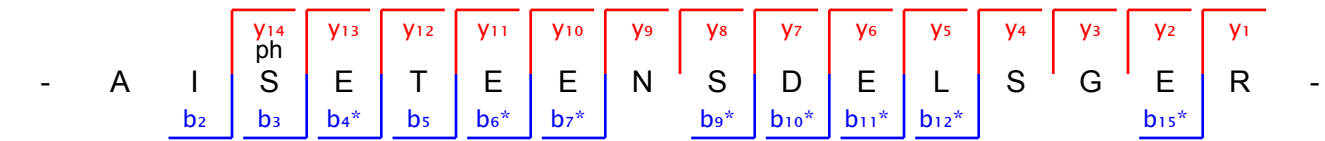

20171215\_MaS\_33SR\_LMH\_phospho\_03 7741 FTMS; HCD 295.78 1118.46 ZFAND5

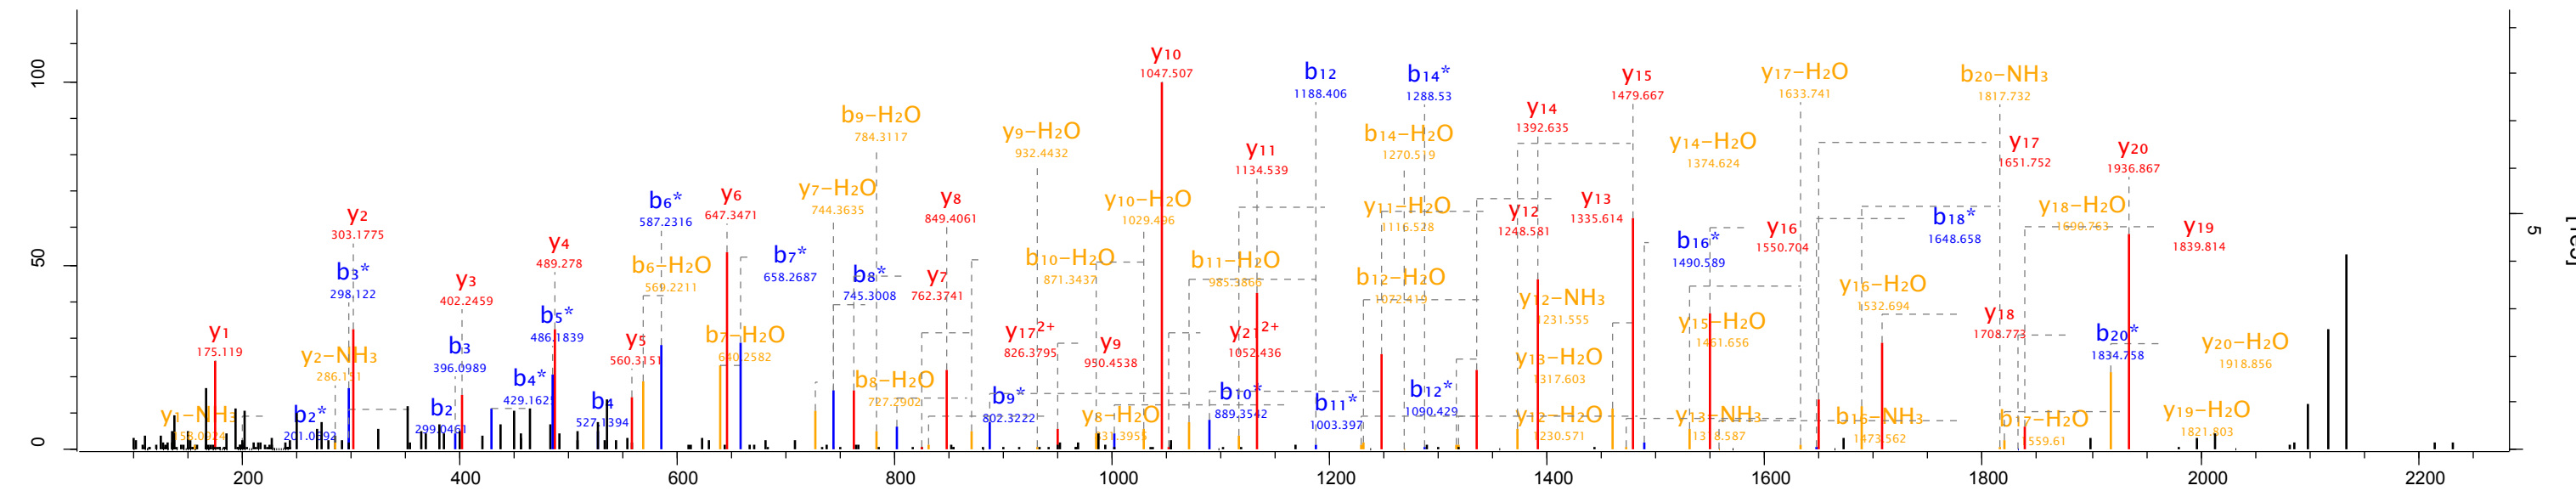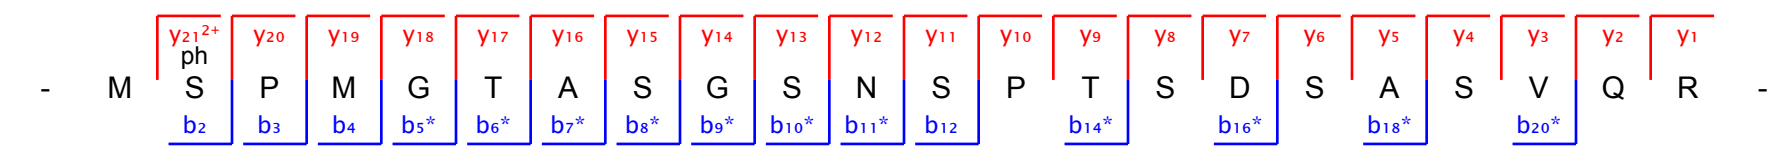

Raw file 20171215\_MaS\_33SR\_LMH\_phospho\_03 Scan 7771 Method FTMS; HCD Score 153.48 m/z 681.33 Gene names LOH12CR1

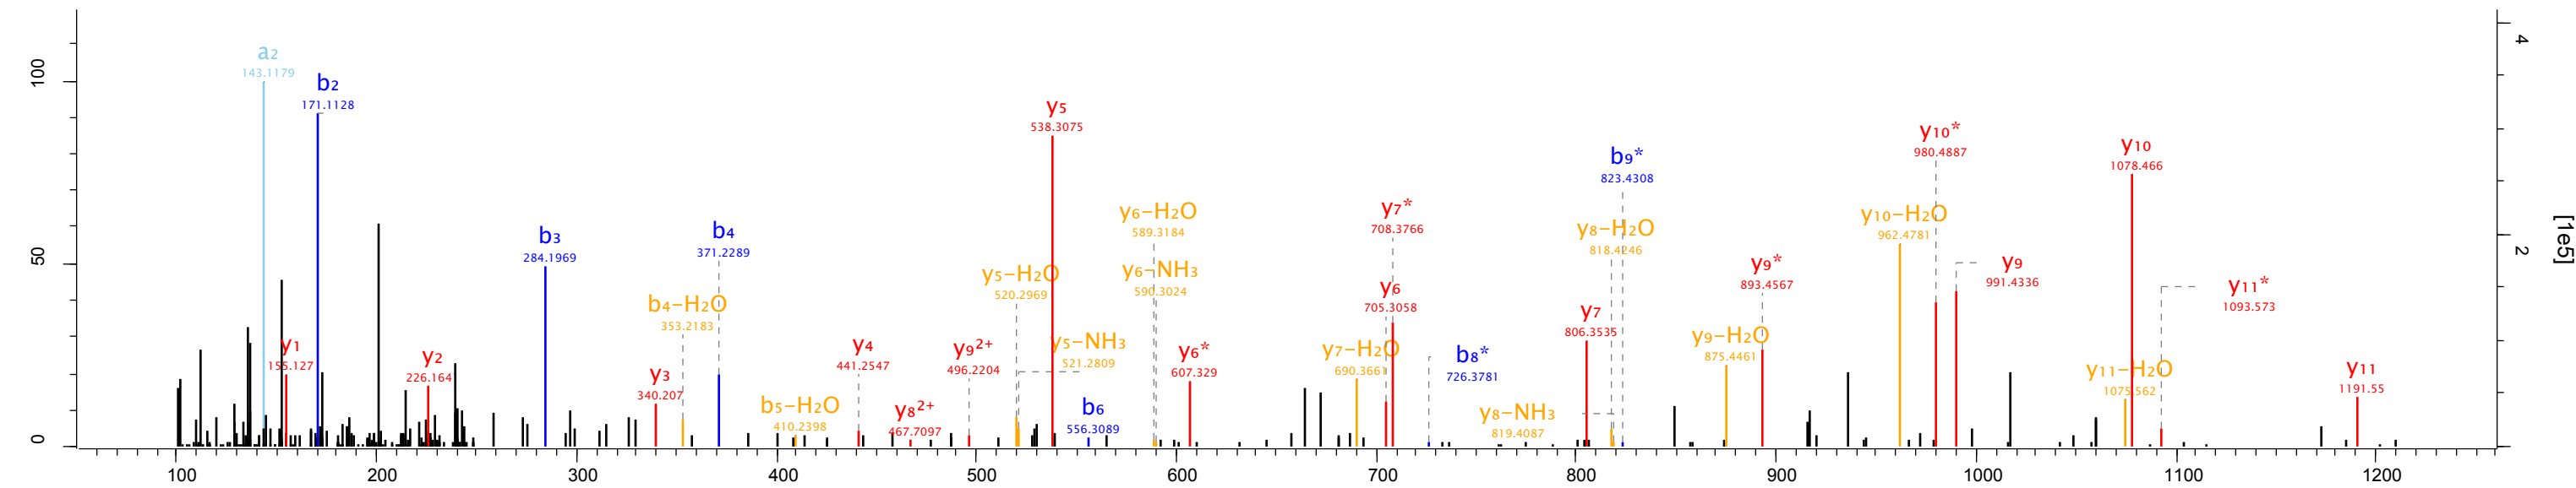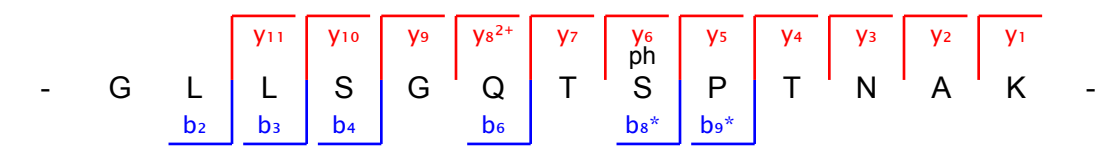

Raw file 20171215\_MaS\_33SR\_LMH\_phospho\_03 Scan 8671 Method FTMS; HCD Score 64.37 m/z 623.81 Gene names MAP3K11

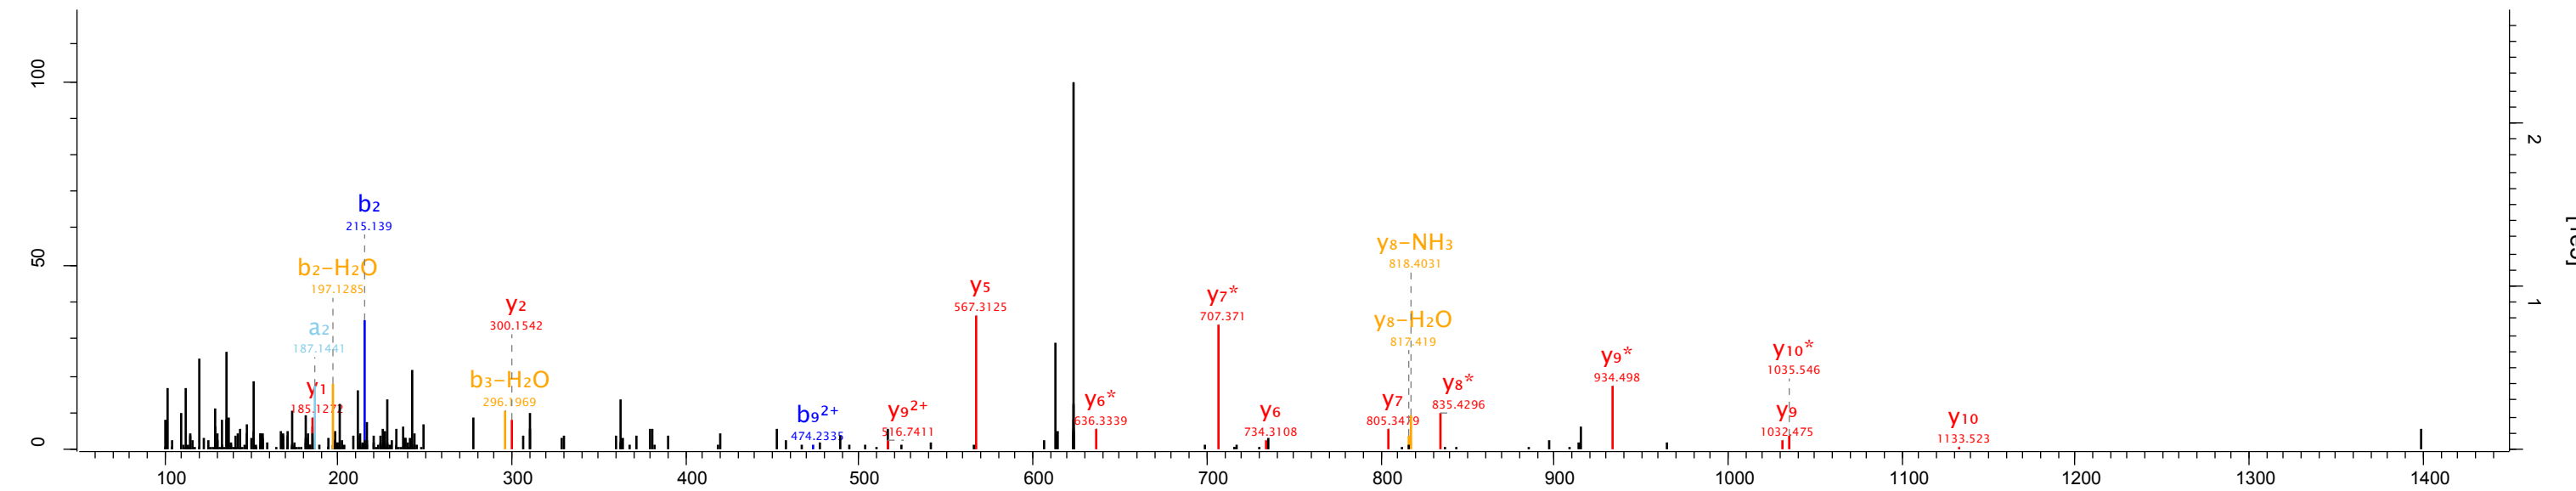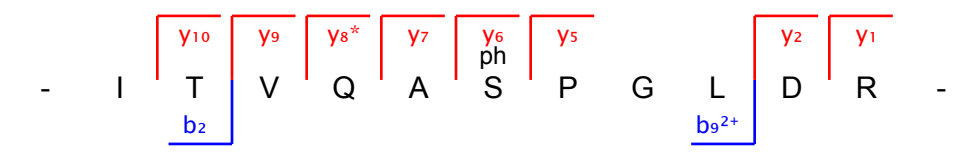



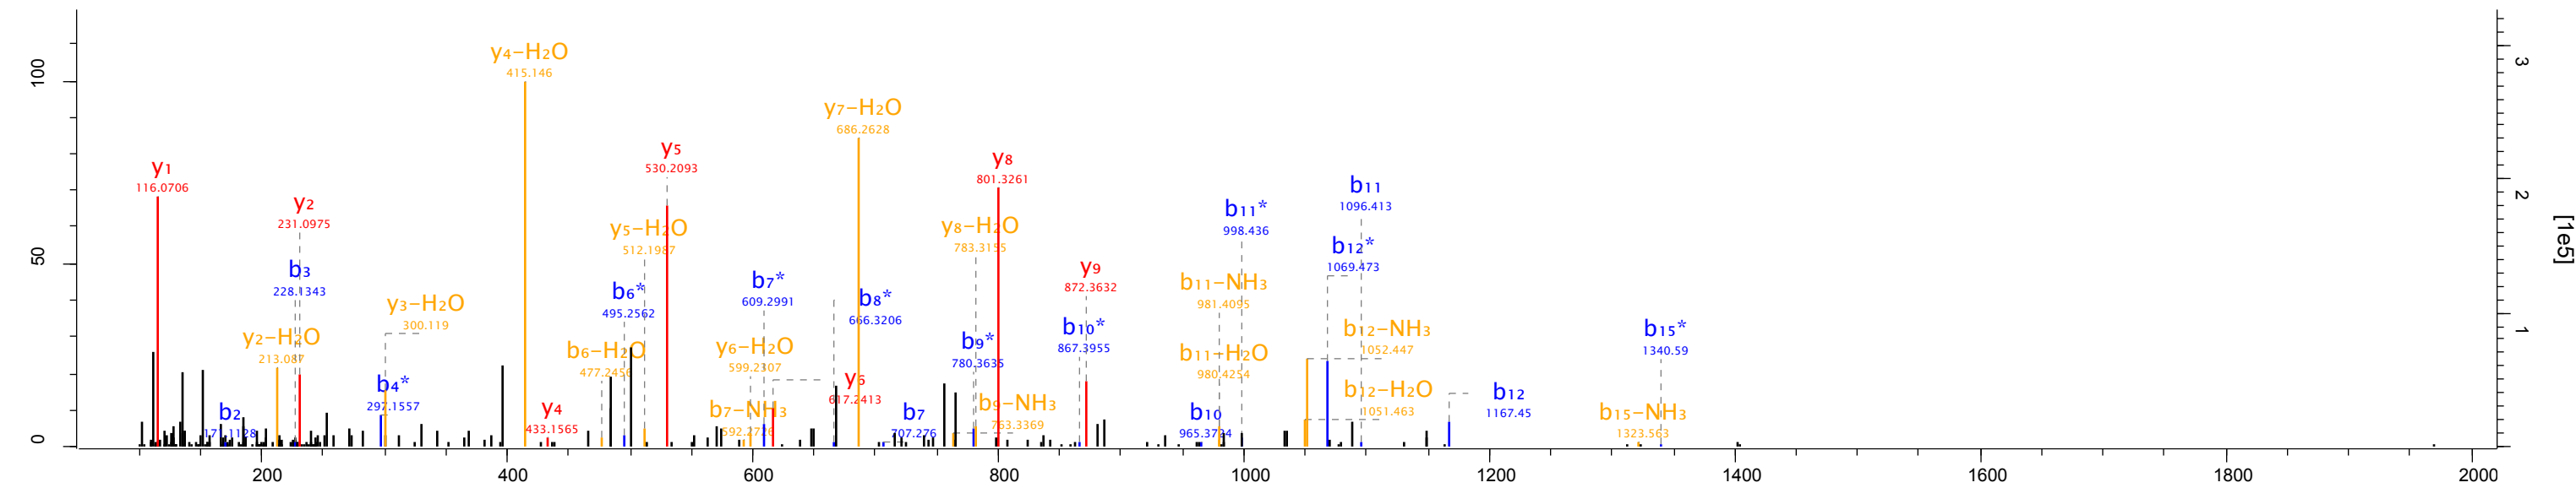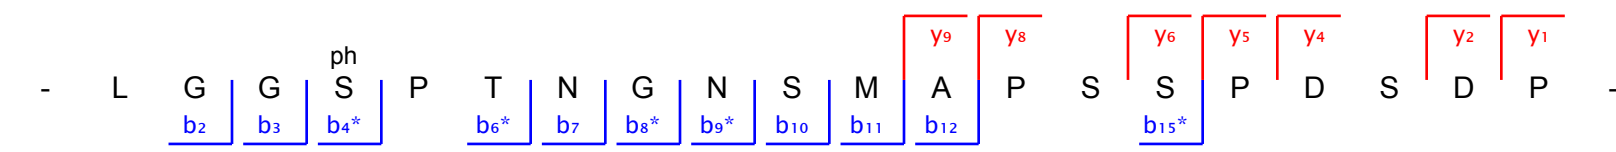

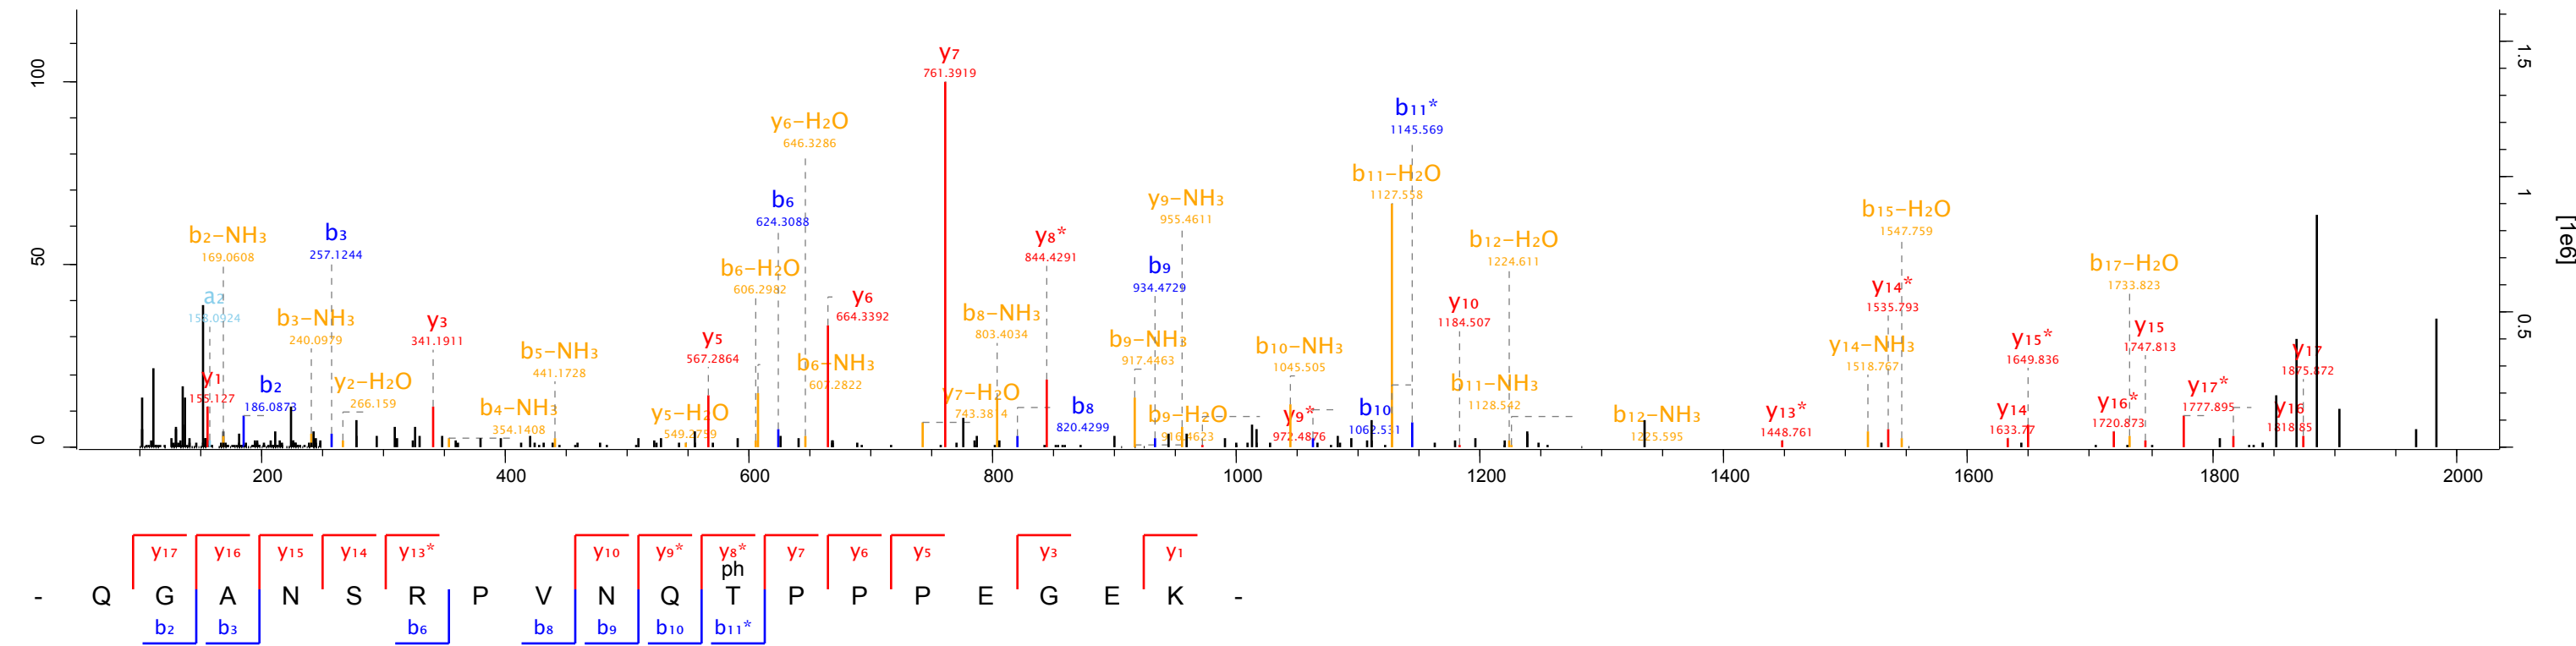

Raw file 20171215\_MaS\_33SR\_LMH\_phospho\_05 Scan 4651 Method FTMS; HCD Score 44.3 m/z 673.81 Gene names TAB3

20171215\_MaS\_33SR\_LMH\_phospho\_05

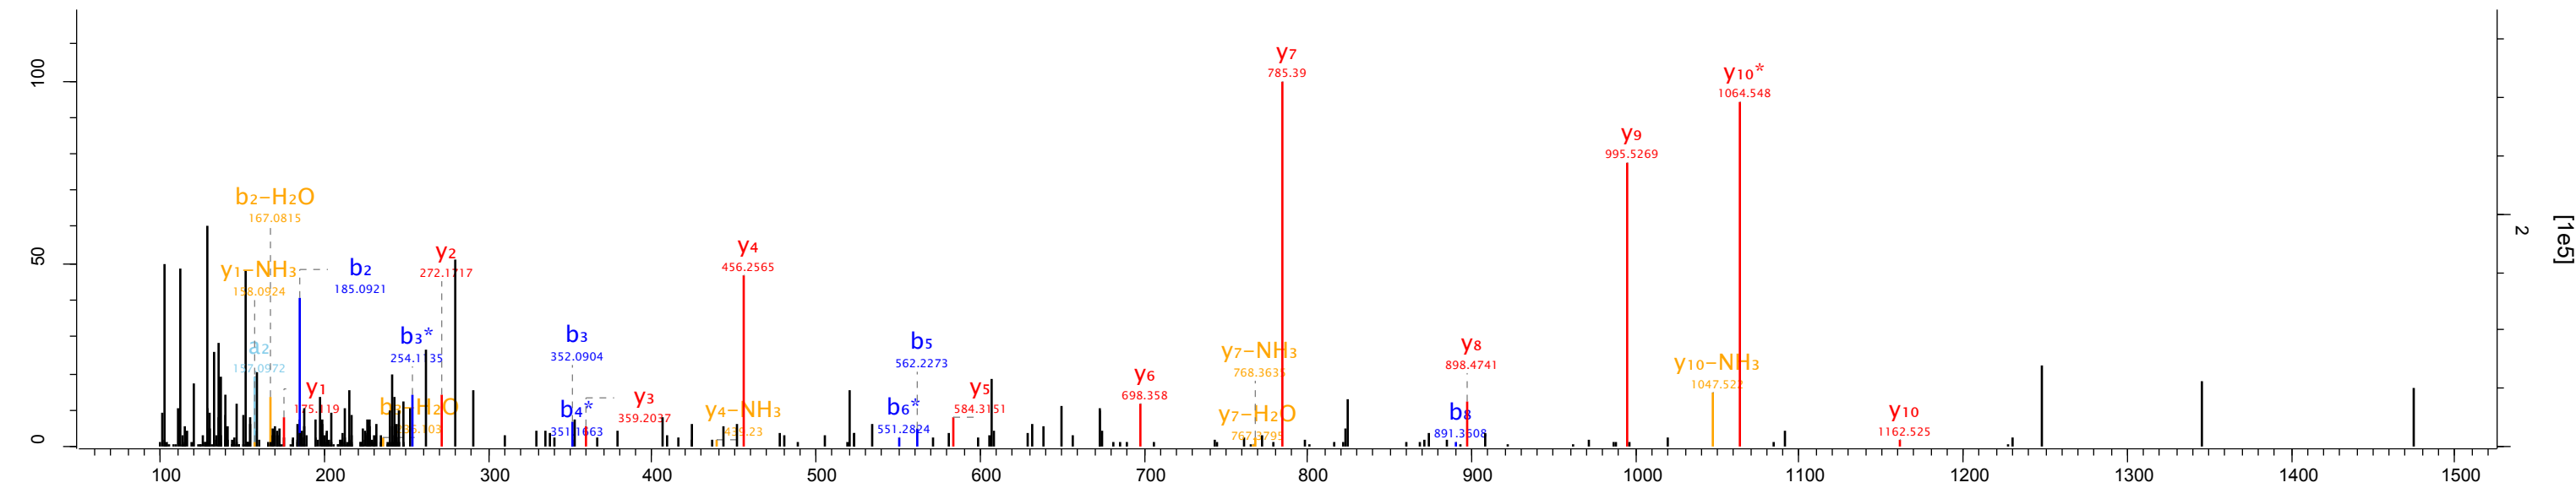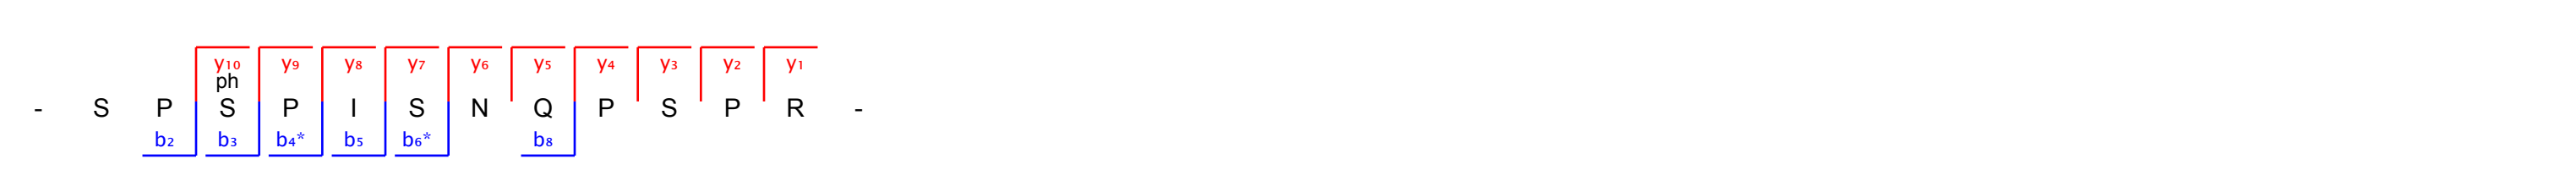

Raw file: 20171215\_MaS\_33SR\_LMH\_phospho\_06  
 Scan: 10351 Method: FTMS; HCD Score: 233.49 m/z: 911.86 Gene names: CDCA7L

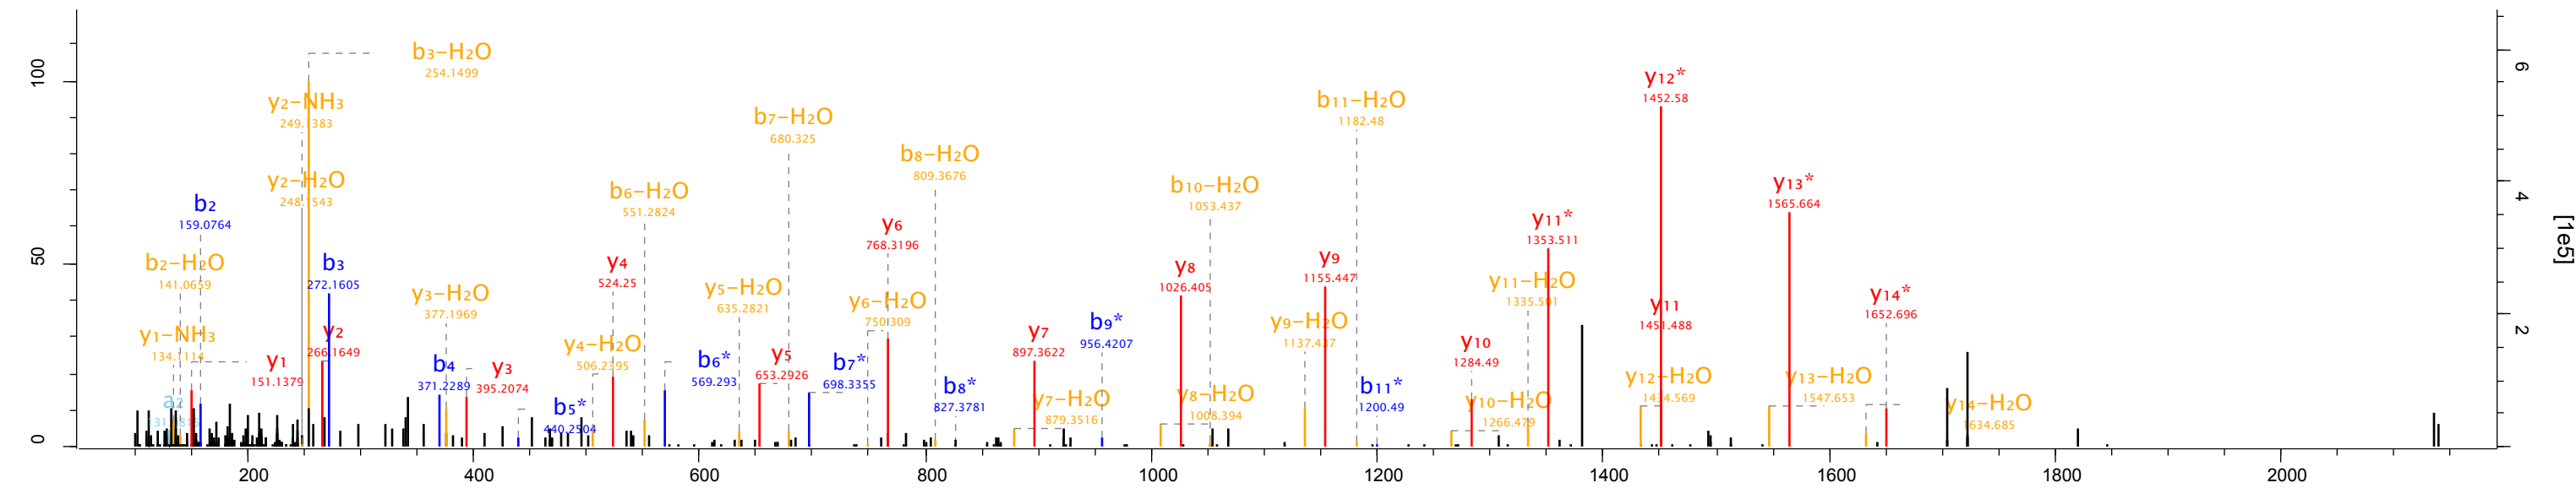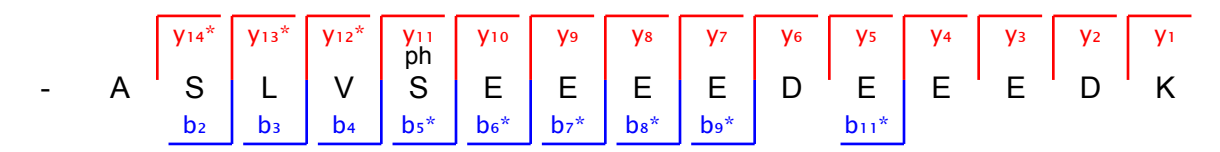

Raw file 20171215\_MaS\_33SR\_LMH\_phospho\_06 Scan 11941 Method FTMS; HCD Score 116.9 m/z 631.8 Gene names SOWAHC

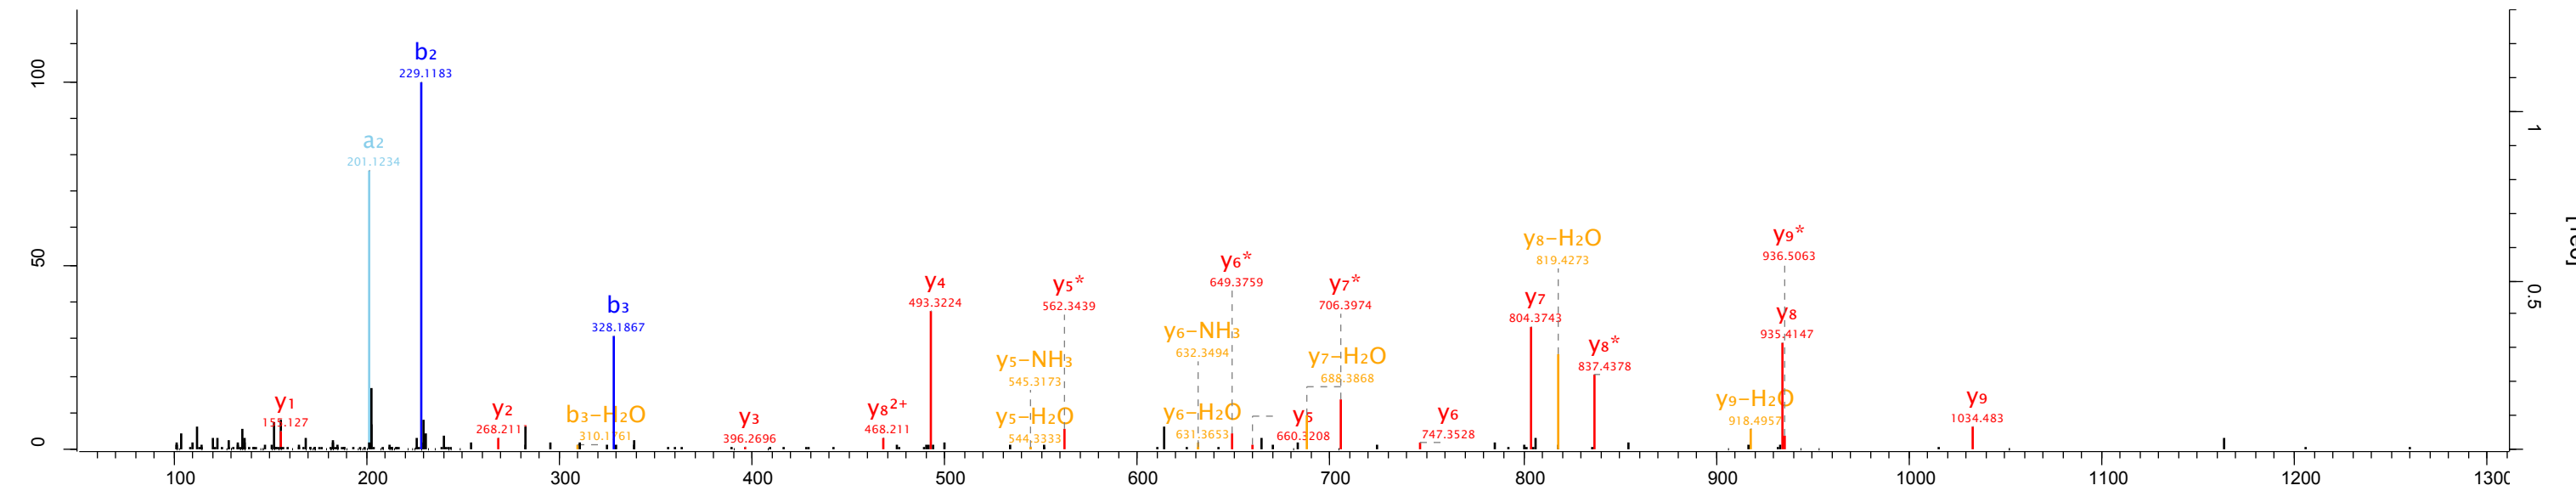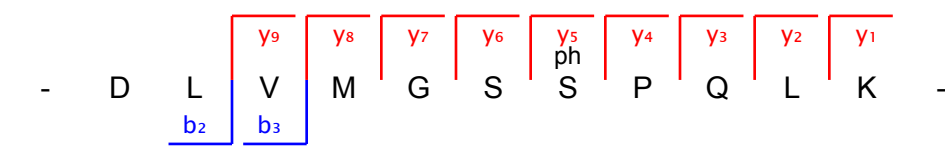

Raw file 20171215\_MaS\_33SR\_LMH\_phospho\_06 Scan 12461 Method FTMS; HCD Score 115.93 m/z 1043.84 Gene names PHLDA2

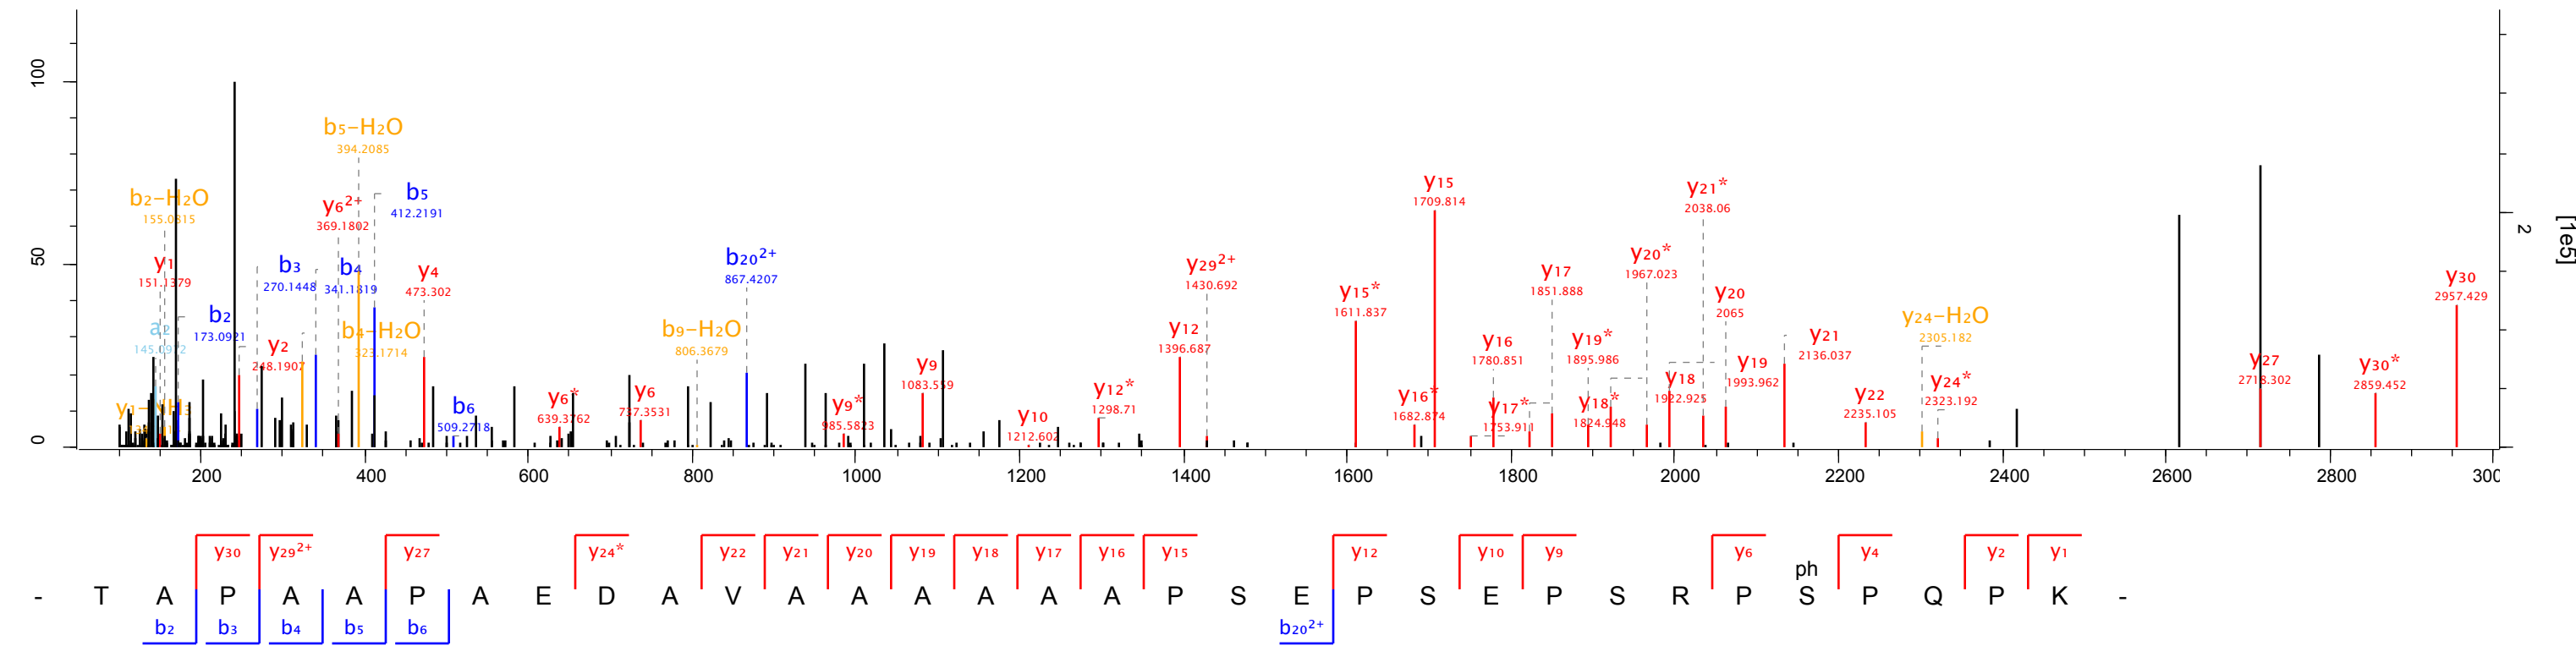

20171215\_MaS\_33SR\_LMH\_phospho\_06 13231 FTMS; HCD 217.84 906.11 NUFIP1

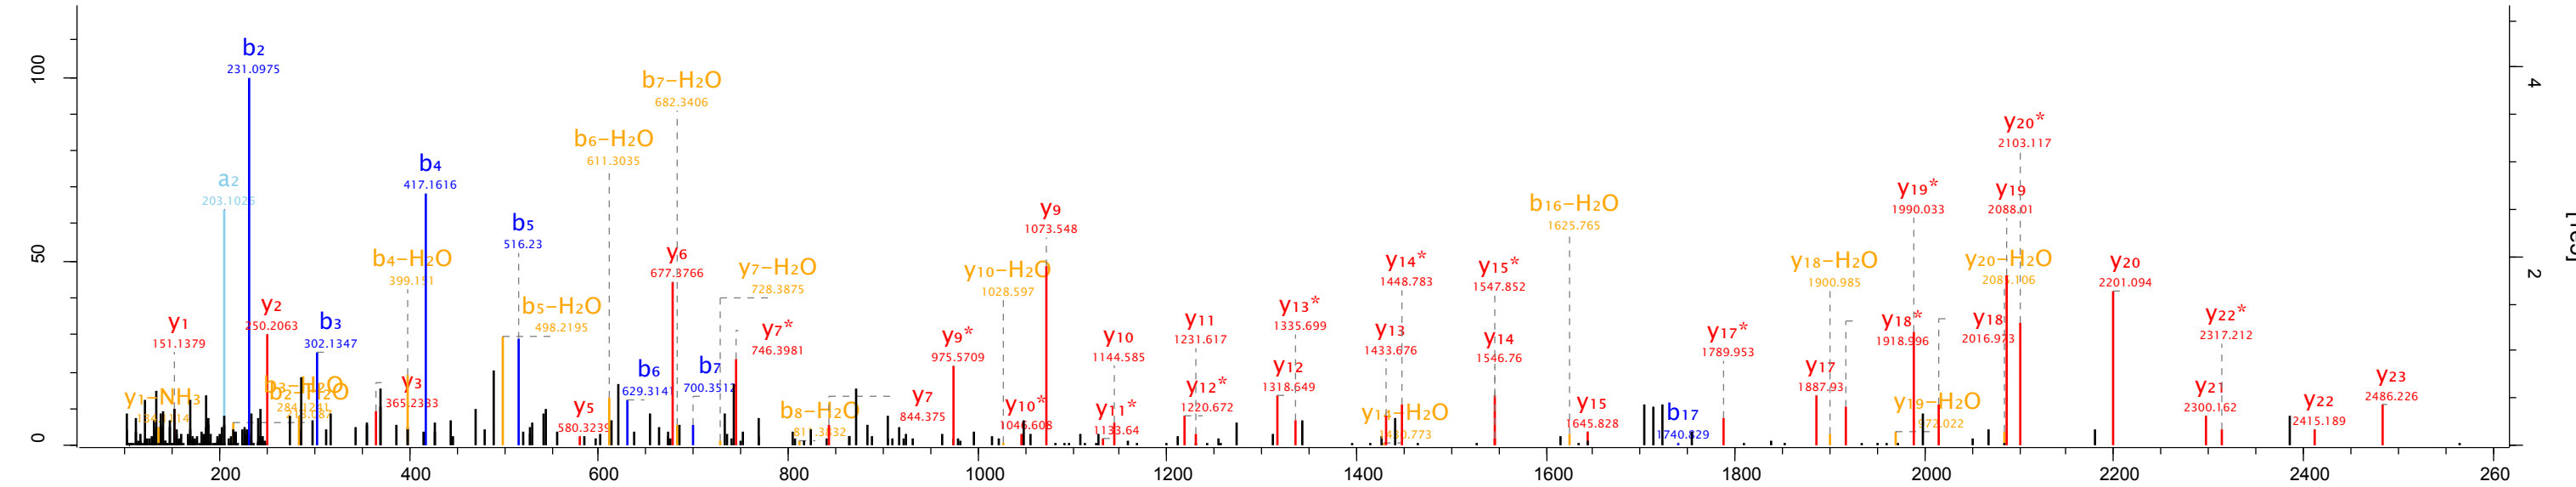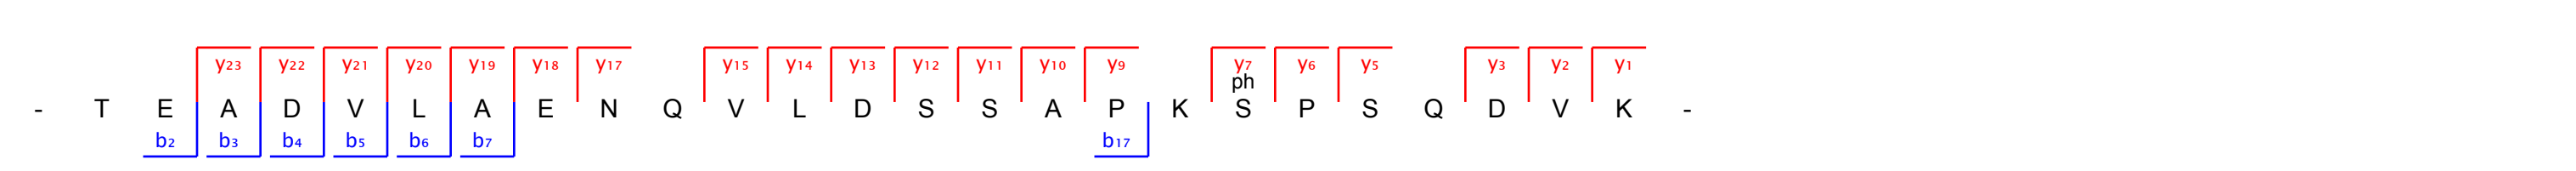

Raw file Scan Method Score m/z Gene names

20171215\_MaS\_33SR\_LMH\_phospho\_06 14991 FTMS; HCD 217.37 807.38 C12orf43

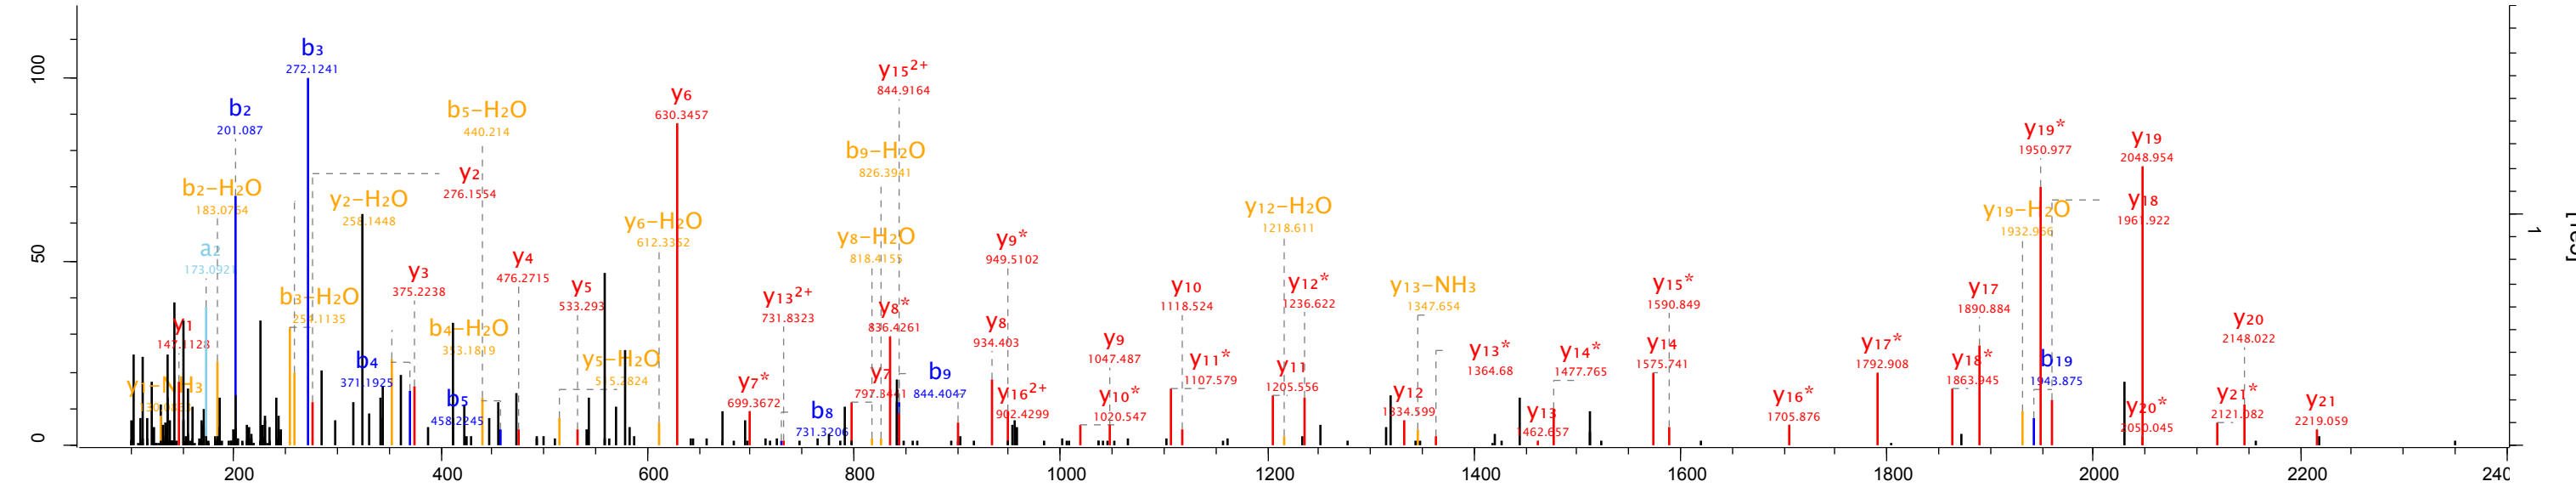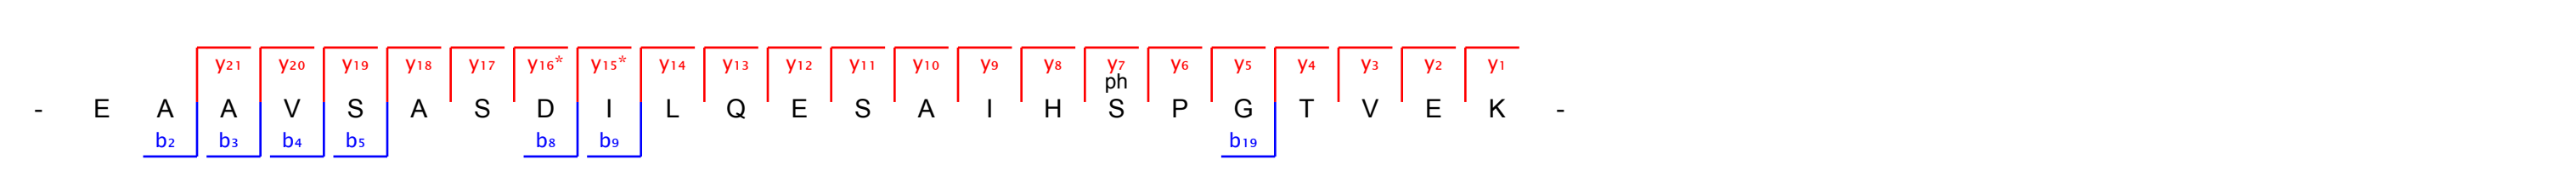



Raw file 20171215\_MaS\_33SR\_LMH\_phospho\_06 Scan 15191 Method FTMS; HCD Score 91.08 m/z 875.69 Gene names MAP3K2

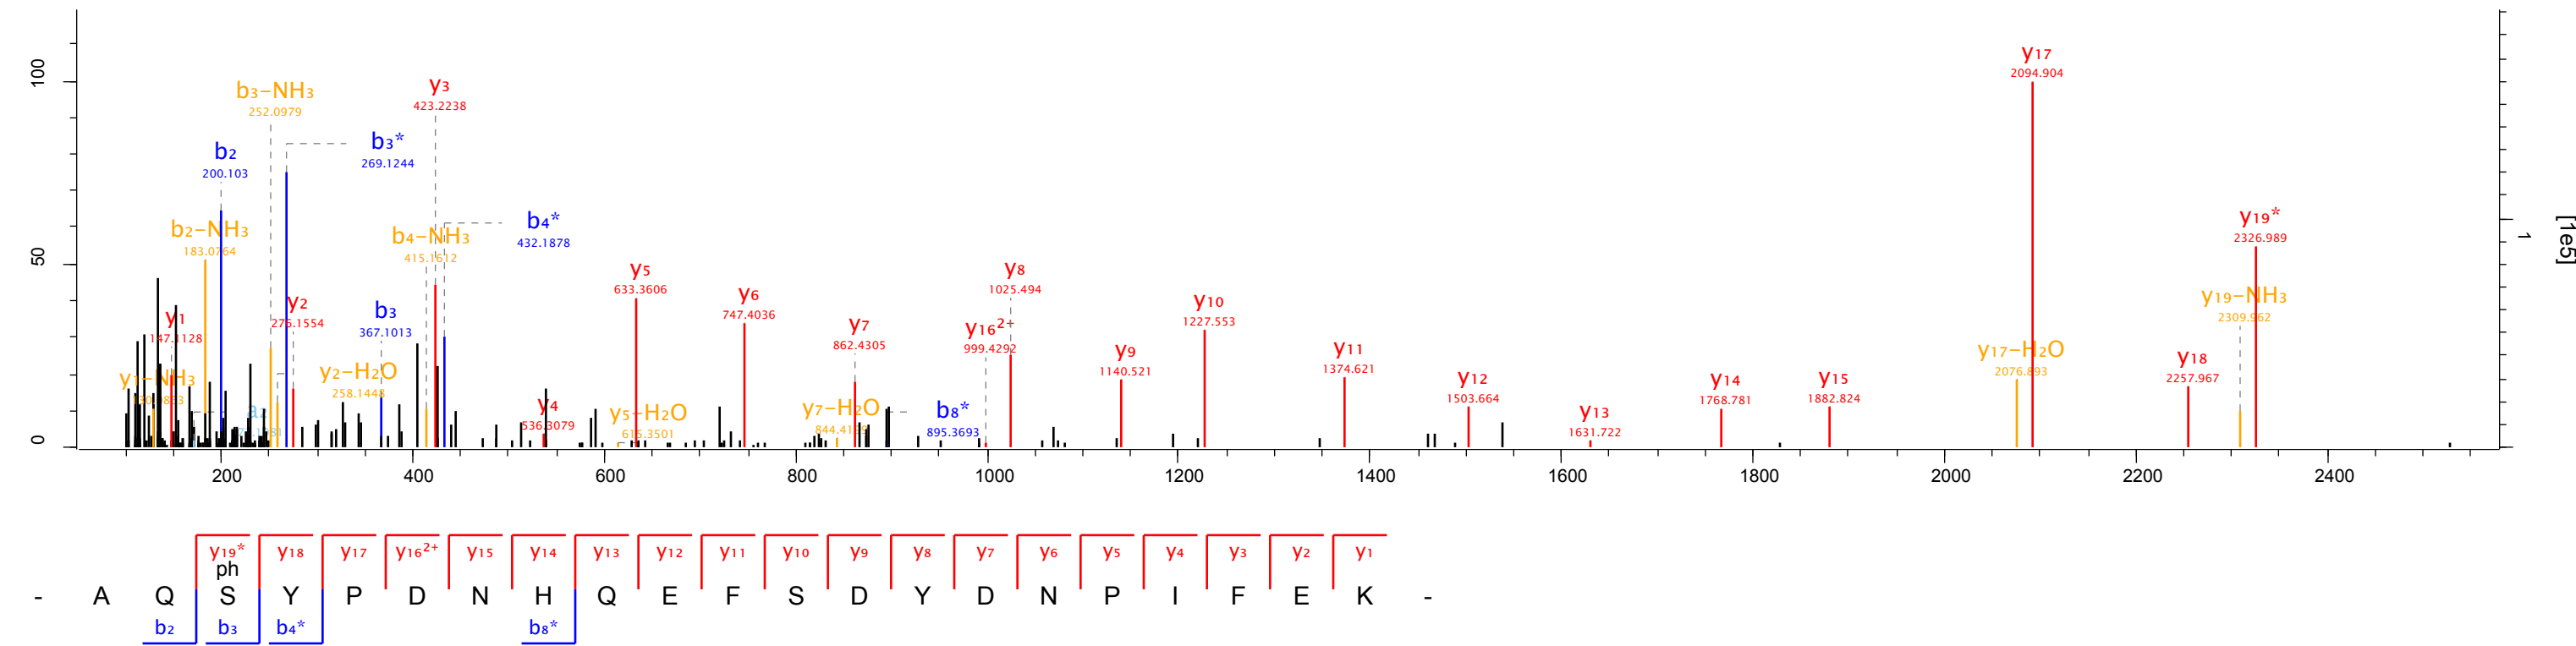

Raw file 20171215\_MaS\_33SR\_LMH\_phospho\_06 Scan 5631 Method FTMS; HCD Score 85.5 m/z 811.81 Gene names ERICH1

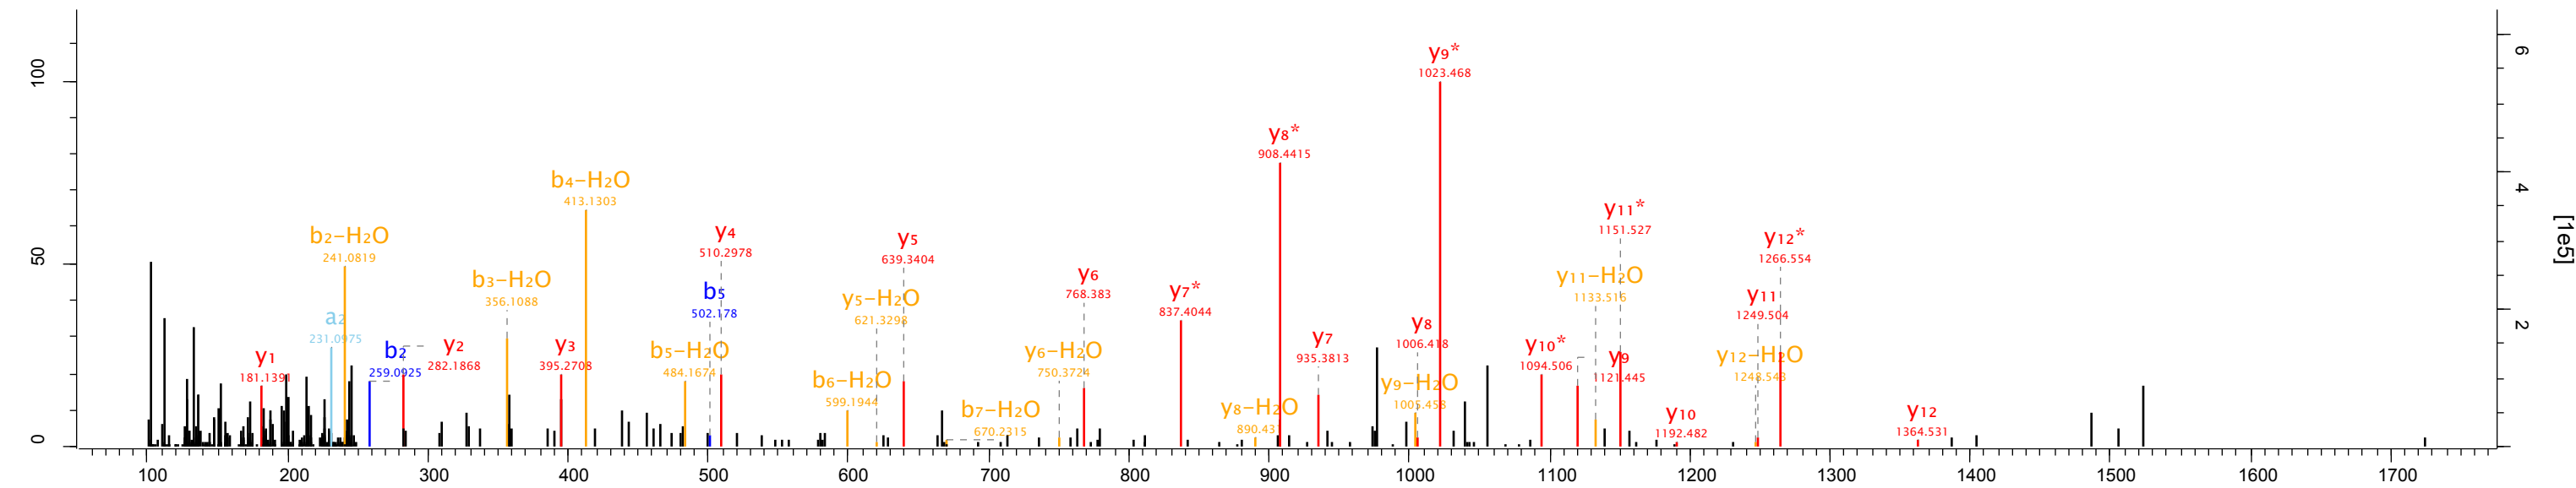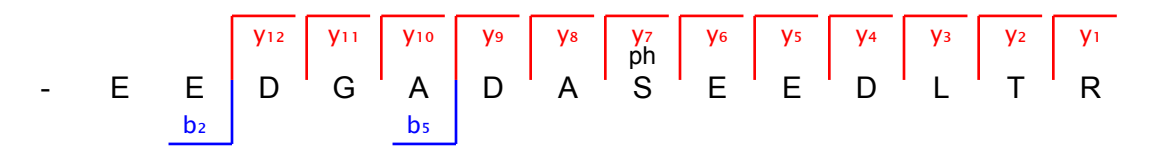

Raw file 20171215\_MaS\_33SR\_LMH\_phospho\_06 Scan 7241 Method FTMS; HCD Score 63.27 m/z 920.91

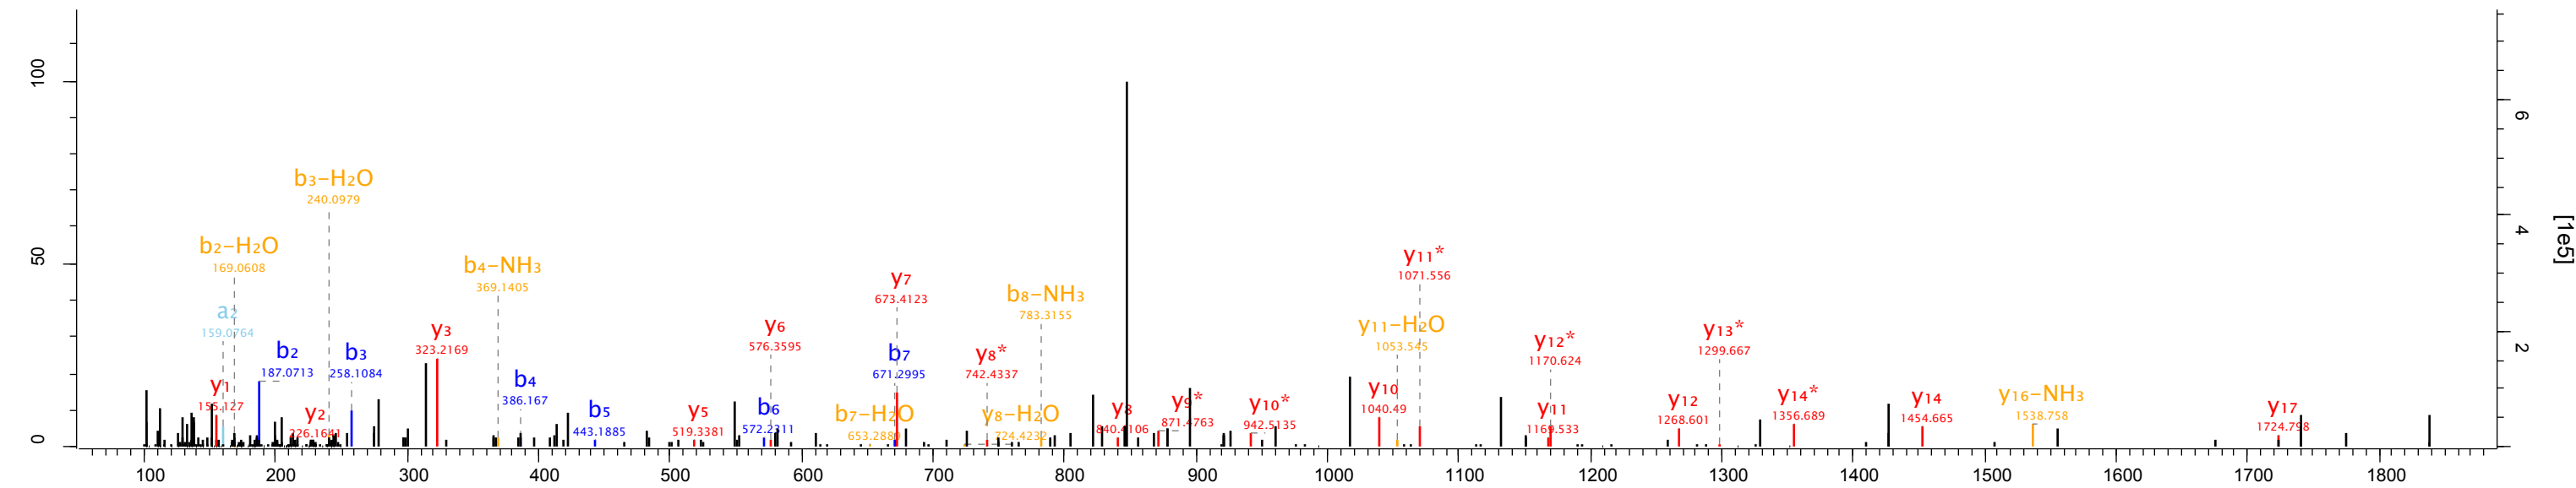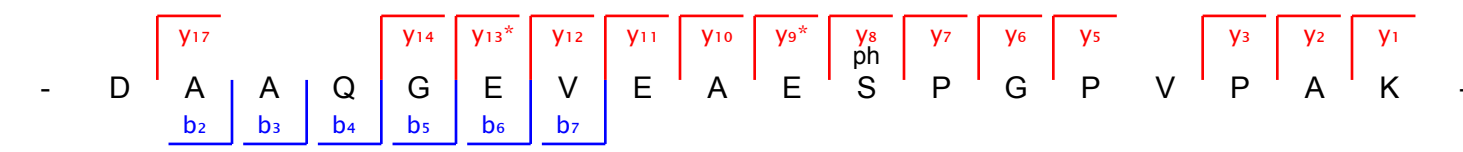

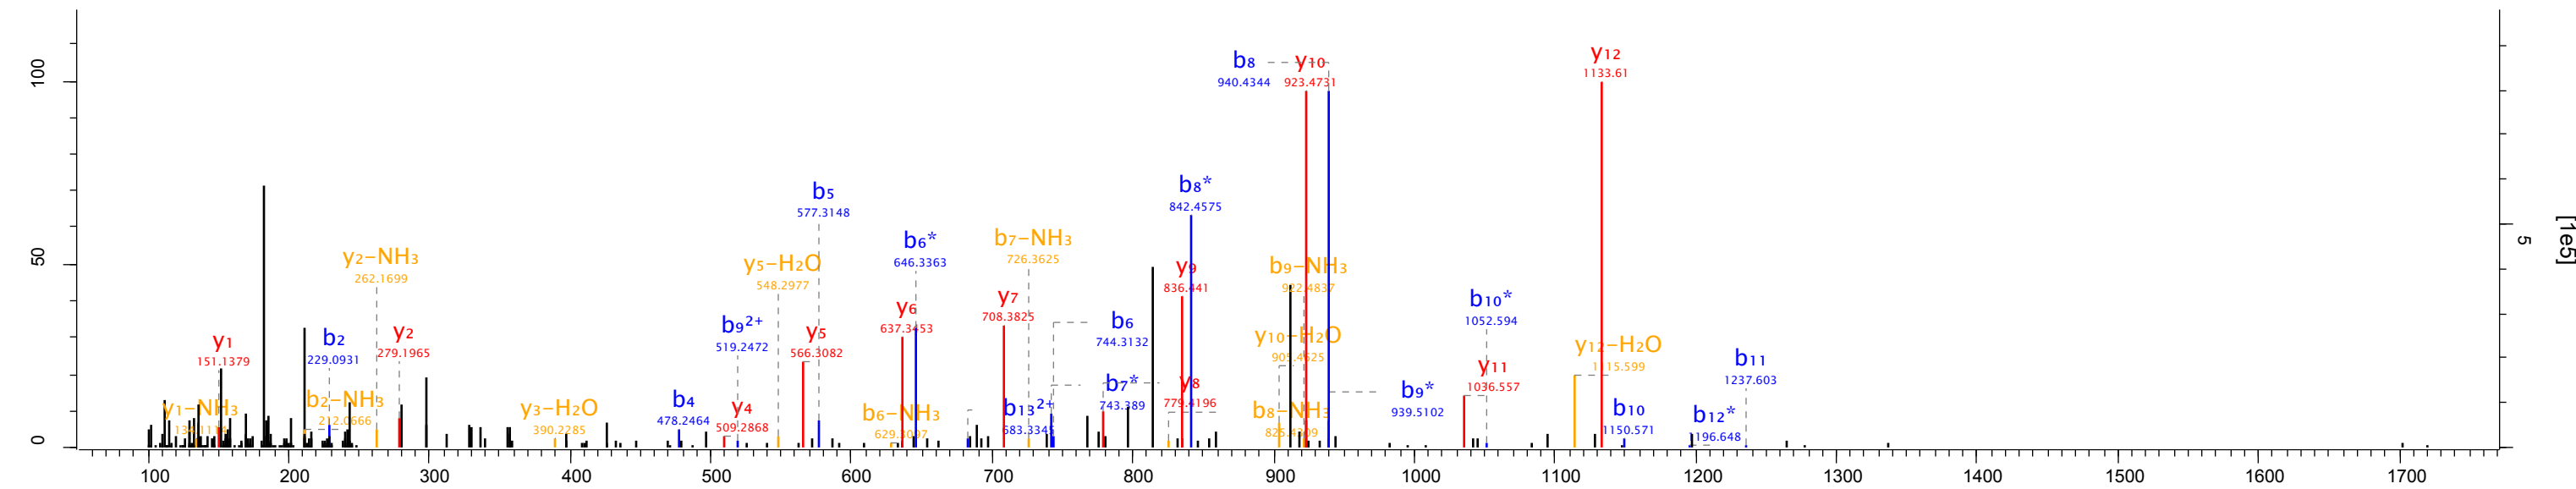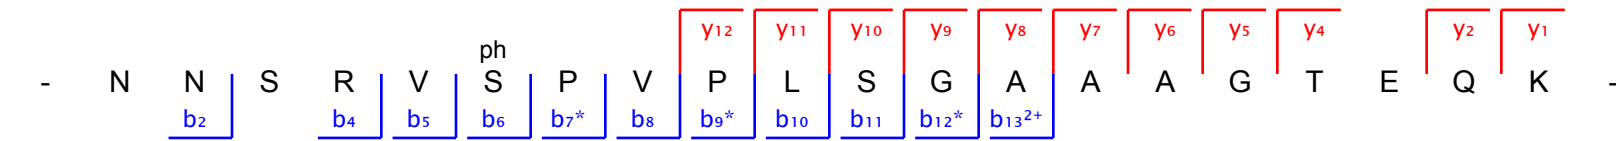

Raw file 20171215\_MaS\_33SR\_LMH\_phospho\_06 Scan 9001 Method FTMS; HCD Score 50.83 m/z 930.4 Gene names ZNF831

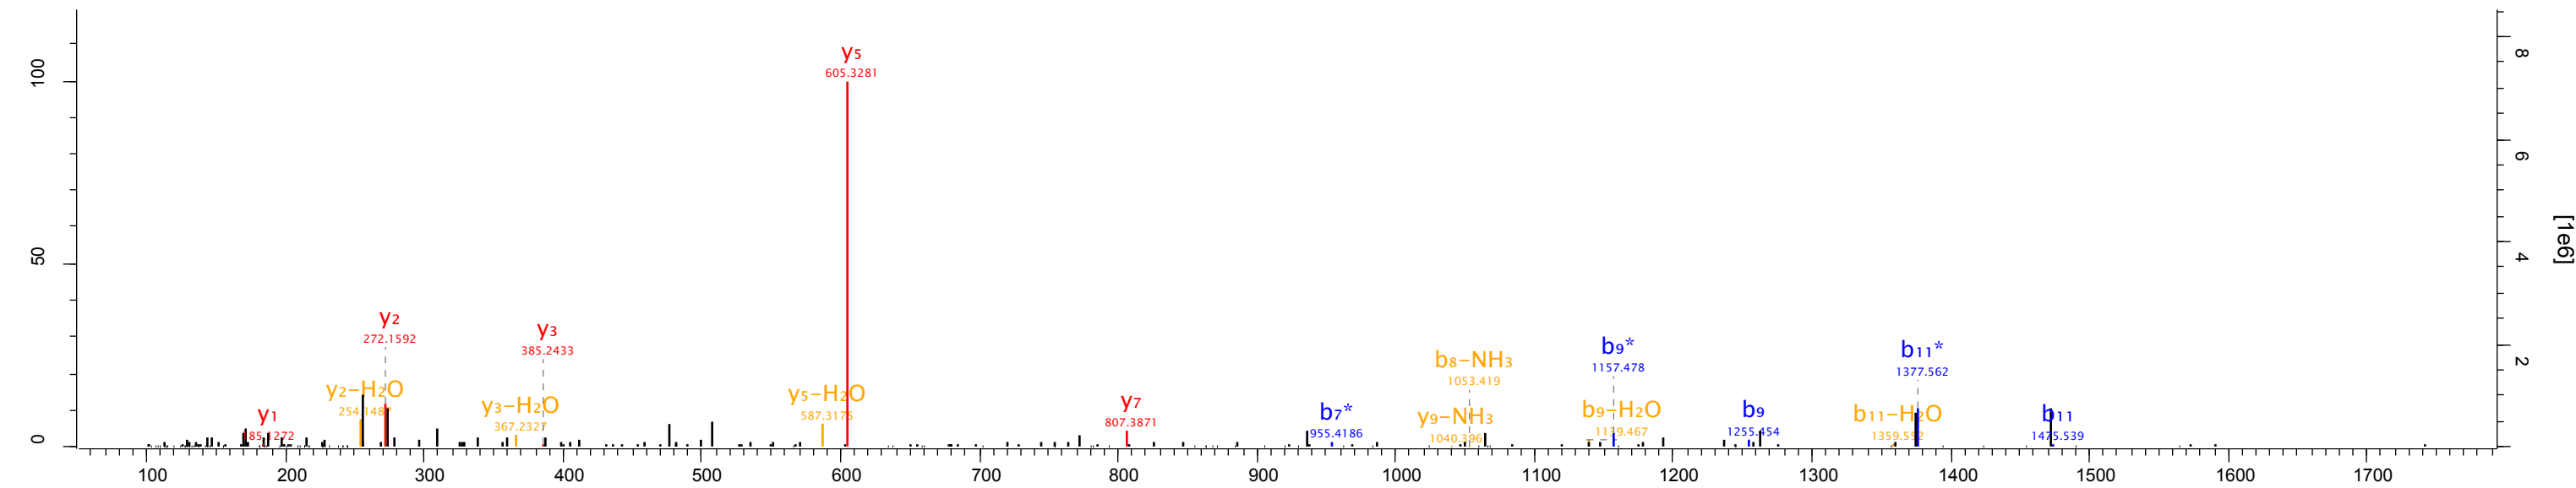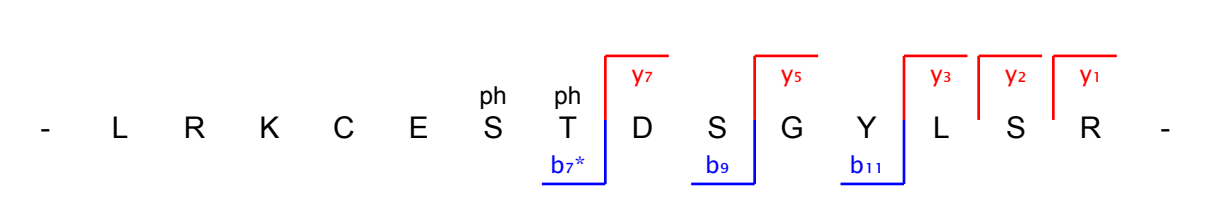

Raw file 20171215\_MaS\_33SR\_LMH\_phospho\_07 Scan 2251 Method FTMS; HCD Score 101.97 m/z 583.77 Gene names USP36

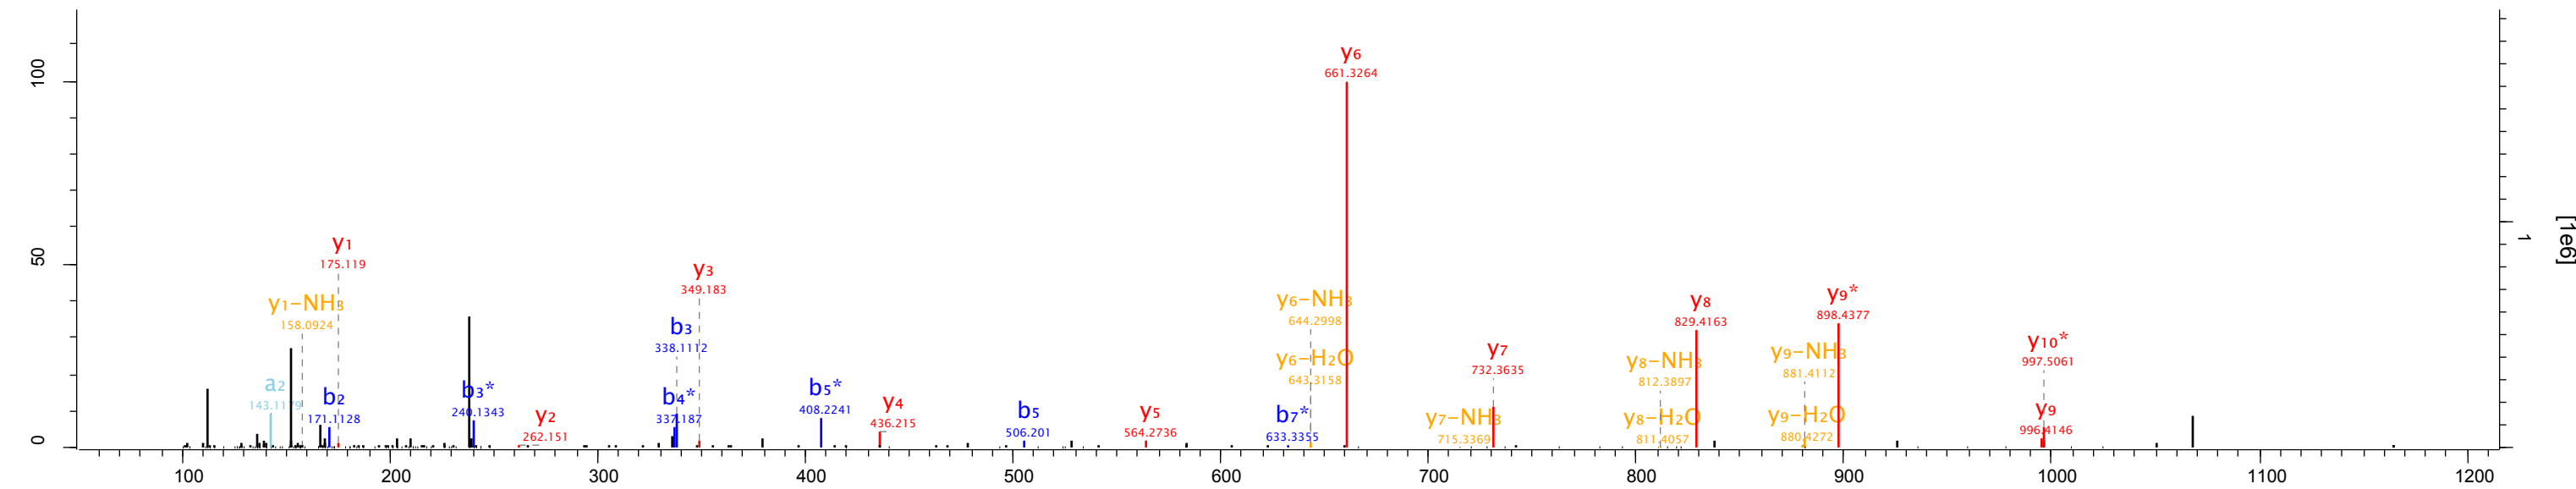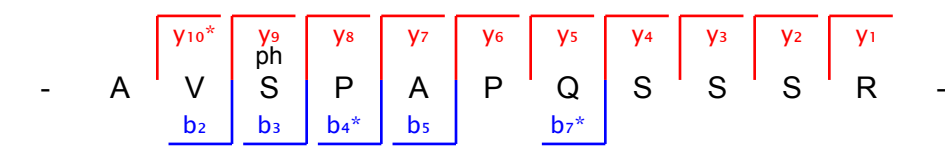

Raw file 20171215\_MaS\_33SR\_LMH\_phospho\_07 Scan 2391 Method FTMS; HCD Score 92.15 m/z 561.29 Gene names RRP36

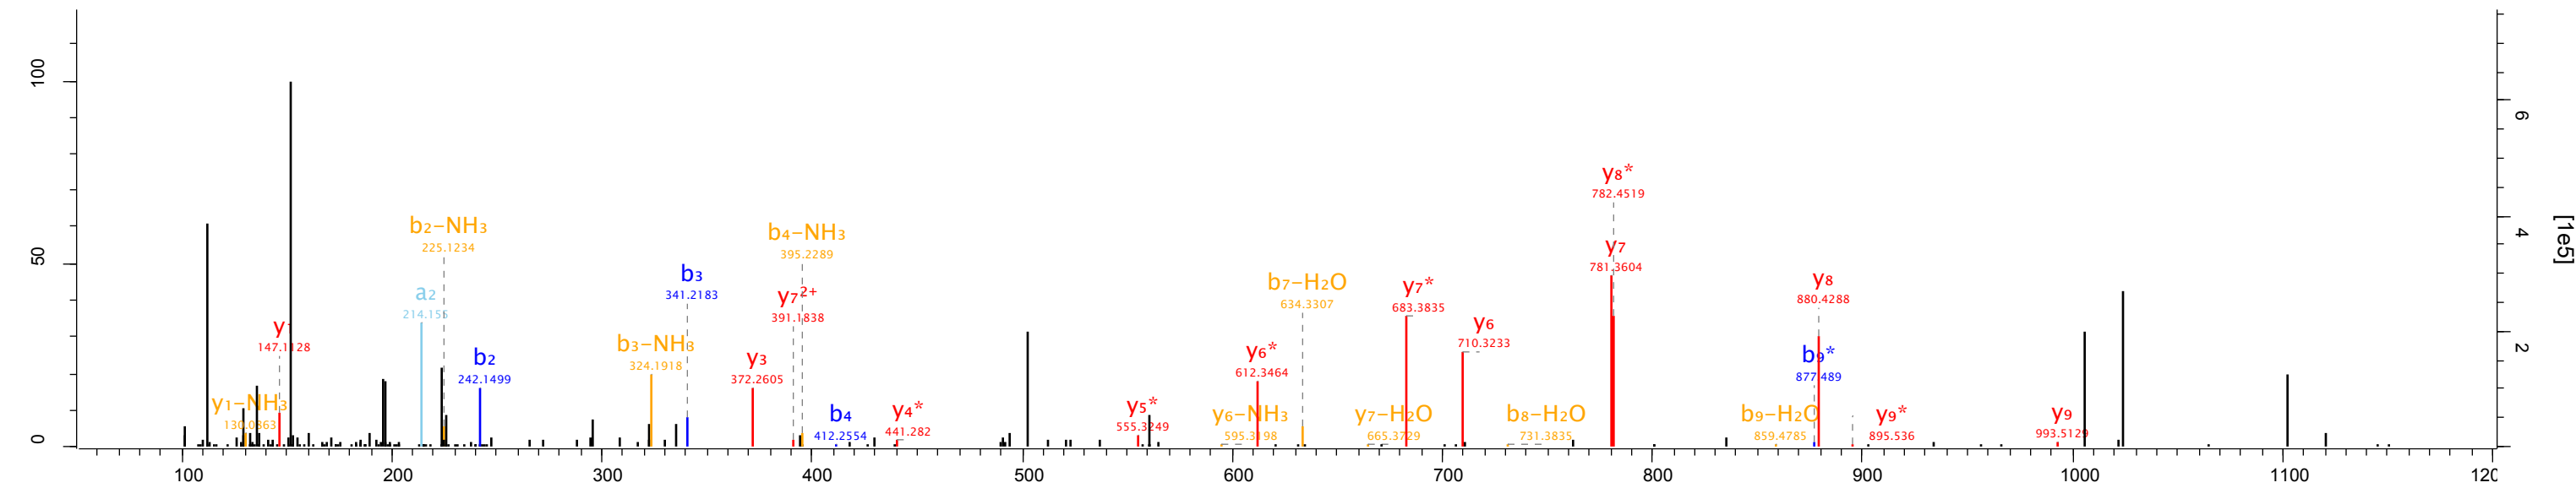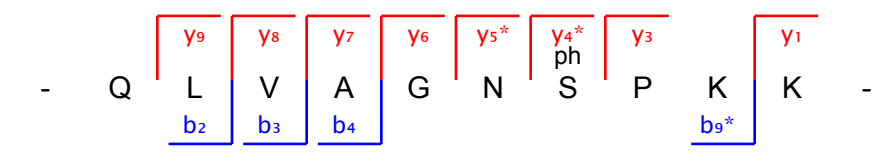

Raw file 20171215\_MaS\_33SR\_LMH\_phospho\_08 Scan 4531 Method FTMS; HCD Score 45.37 m/z 314.16 Gene names RAG1

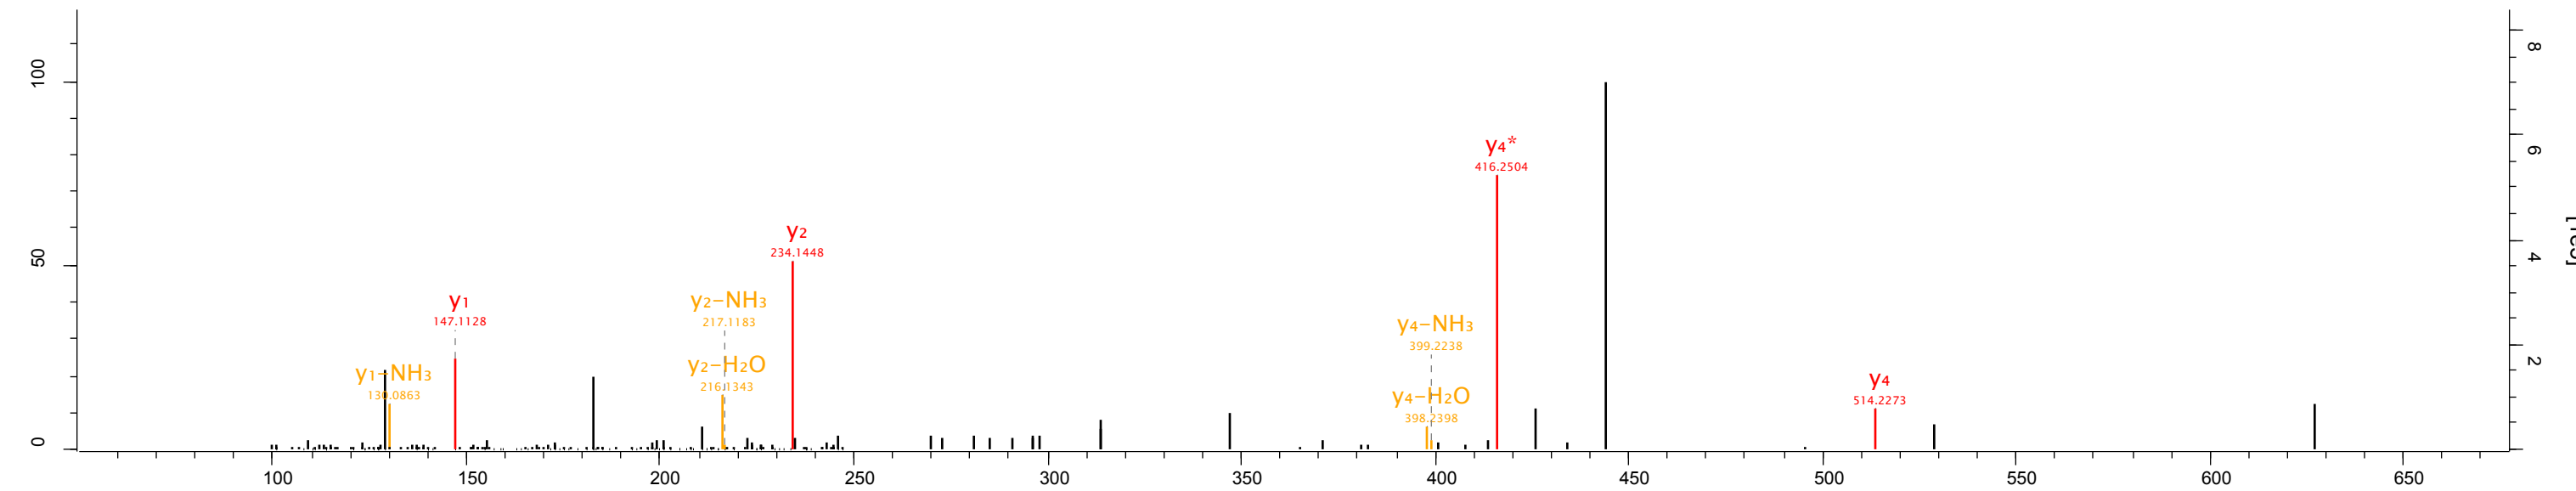

- A Q A R I S S K -

Fragmentation mapping: y4 covers I and S; y2 covers S; y1 covers K.



Raw file 20171215\_MaS\_33SR\_LMH\_phospho\_08 Scan 5461 Method FTMS; HCD Score 56.92 m/z 569.23 Gene names KIAA1468

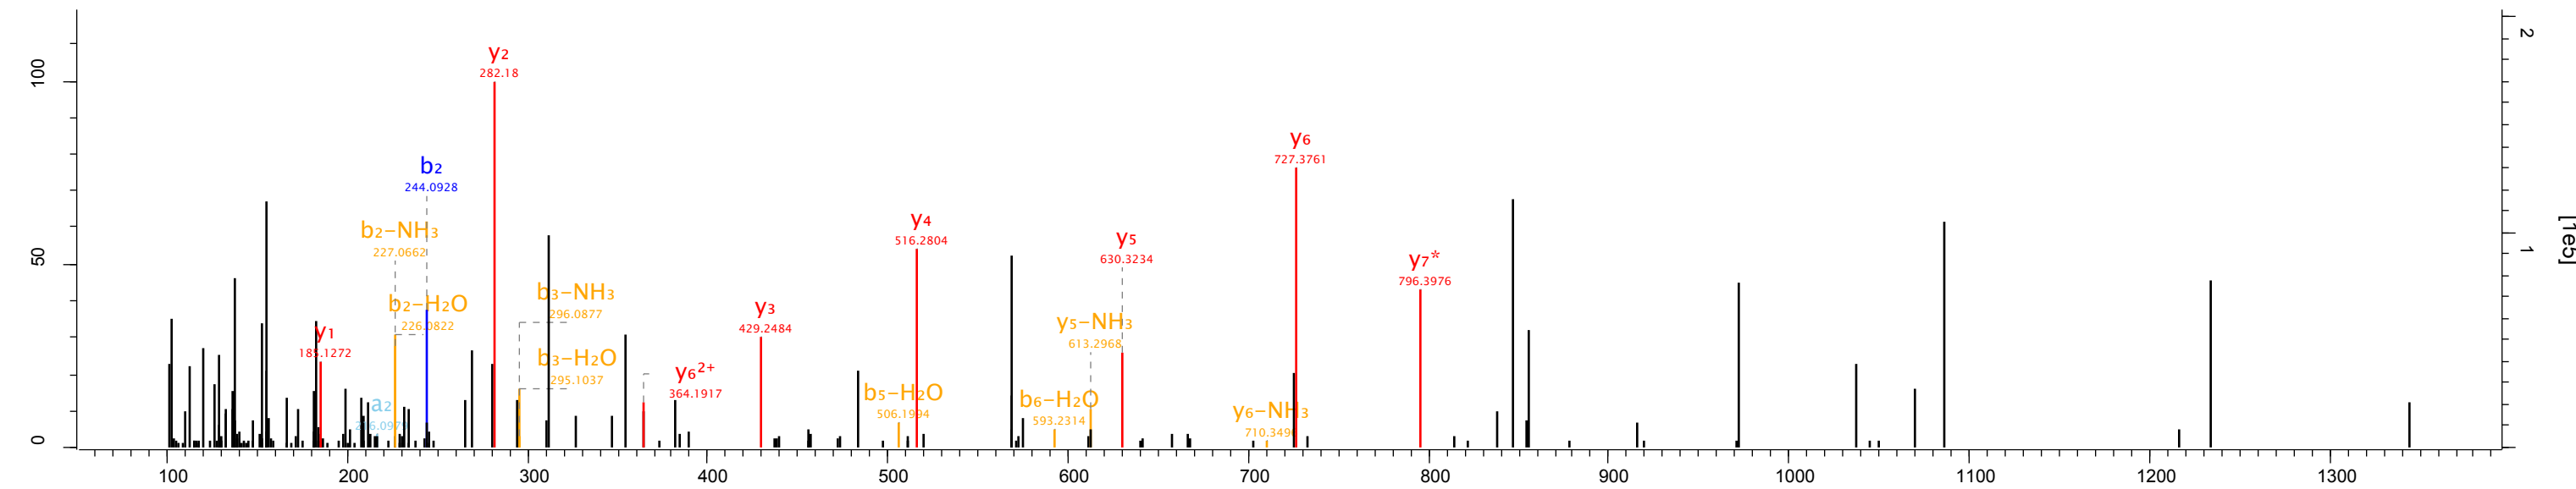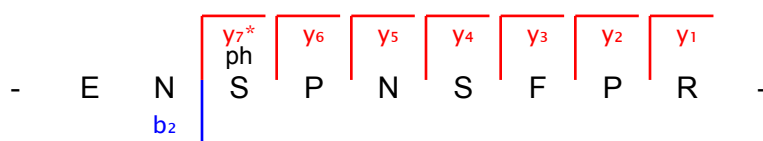

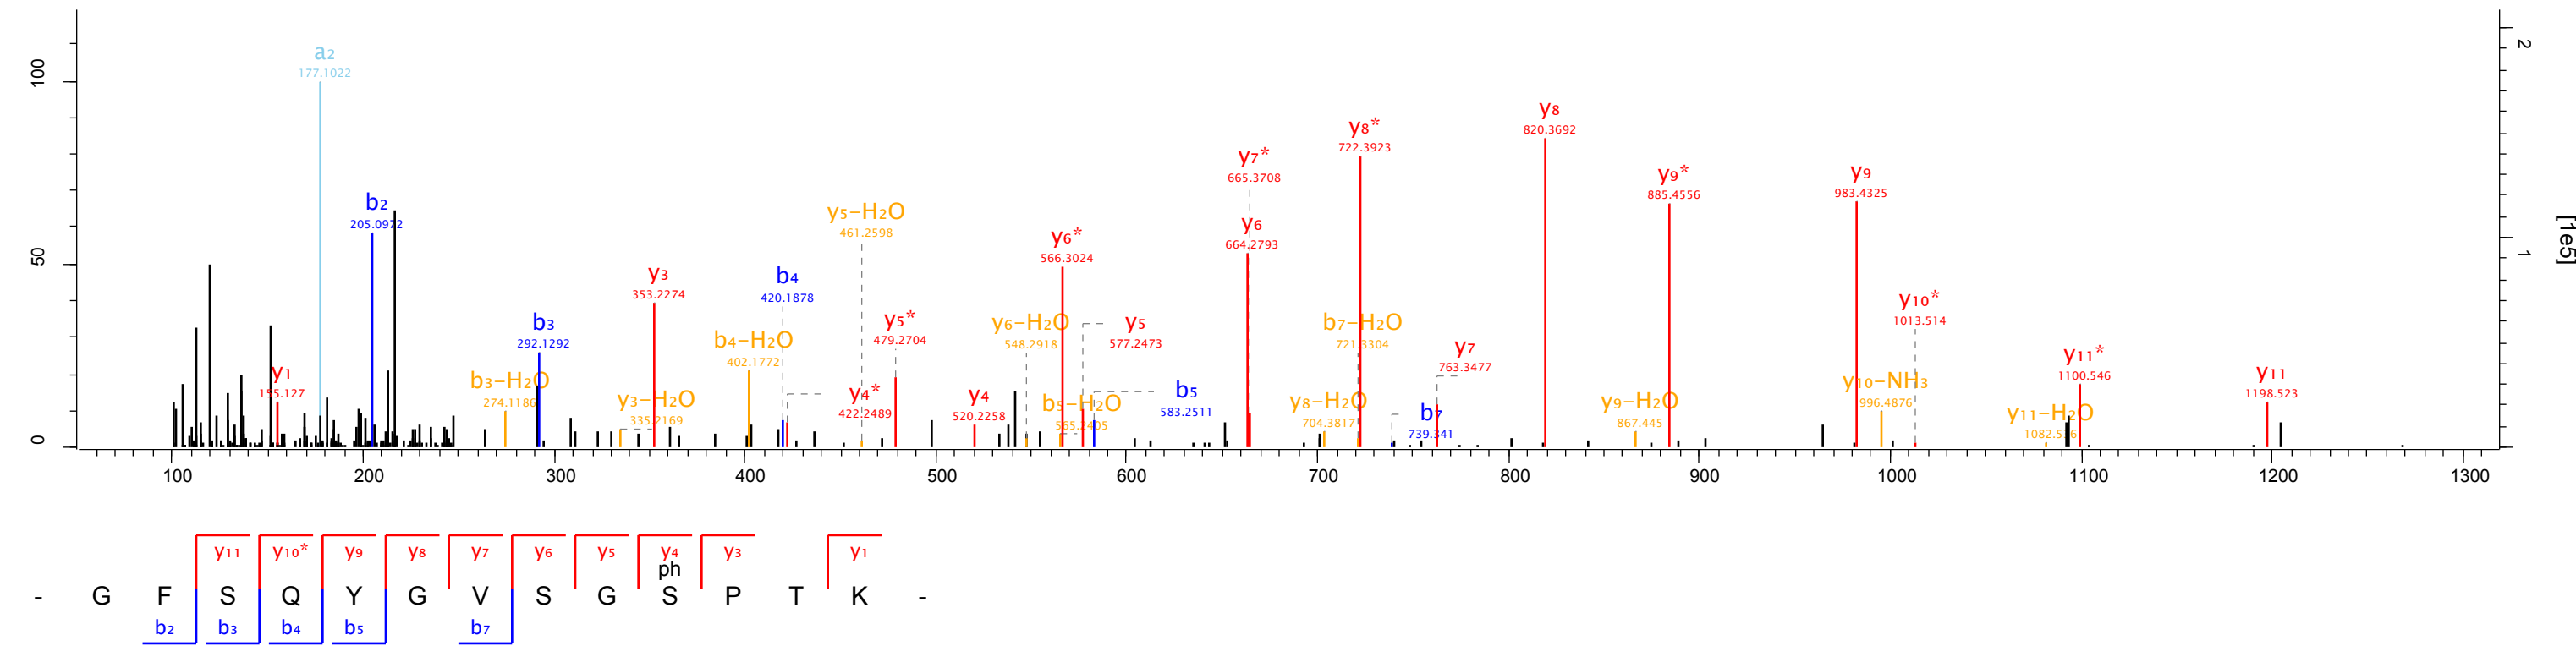

Raw file 20171215\_MaS\_33SR\_LMH\_phospho\_09 Scan 6051 Method FTMS; HCD Score 210.66 m/z 771.83 Gene names C9orf40

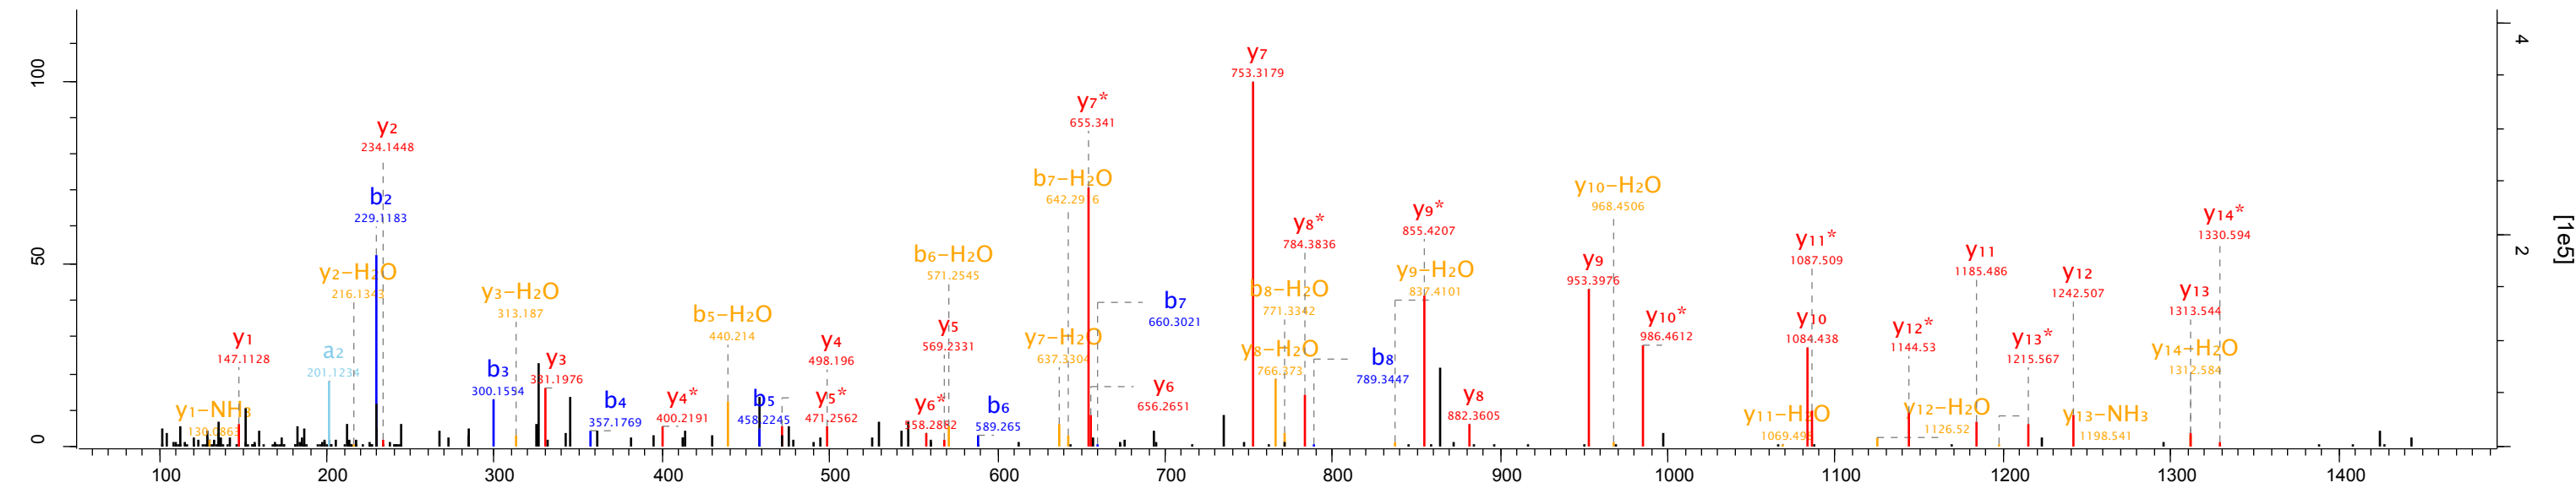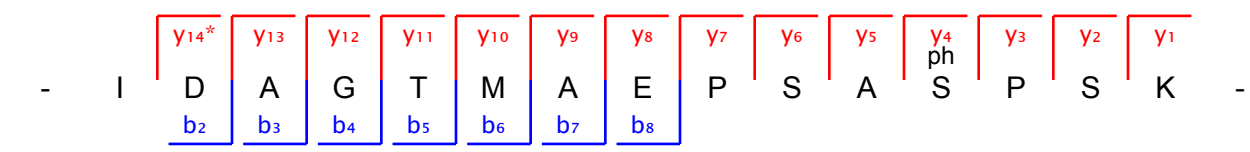

Raw file 20171215\_MaS\_33SR\_LMH\_phospho\_09 Scan 6241 Method FTMS; HCD Score 63.46 m/z 759.84 Gene names AMBRA1

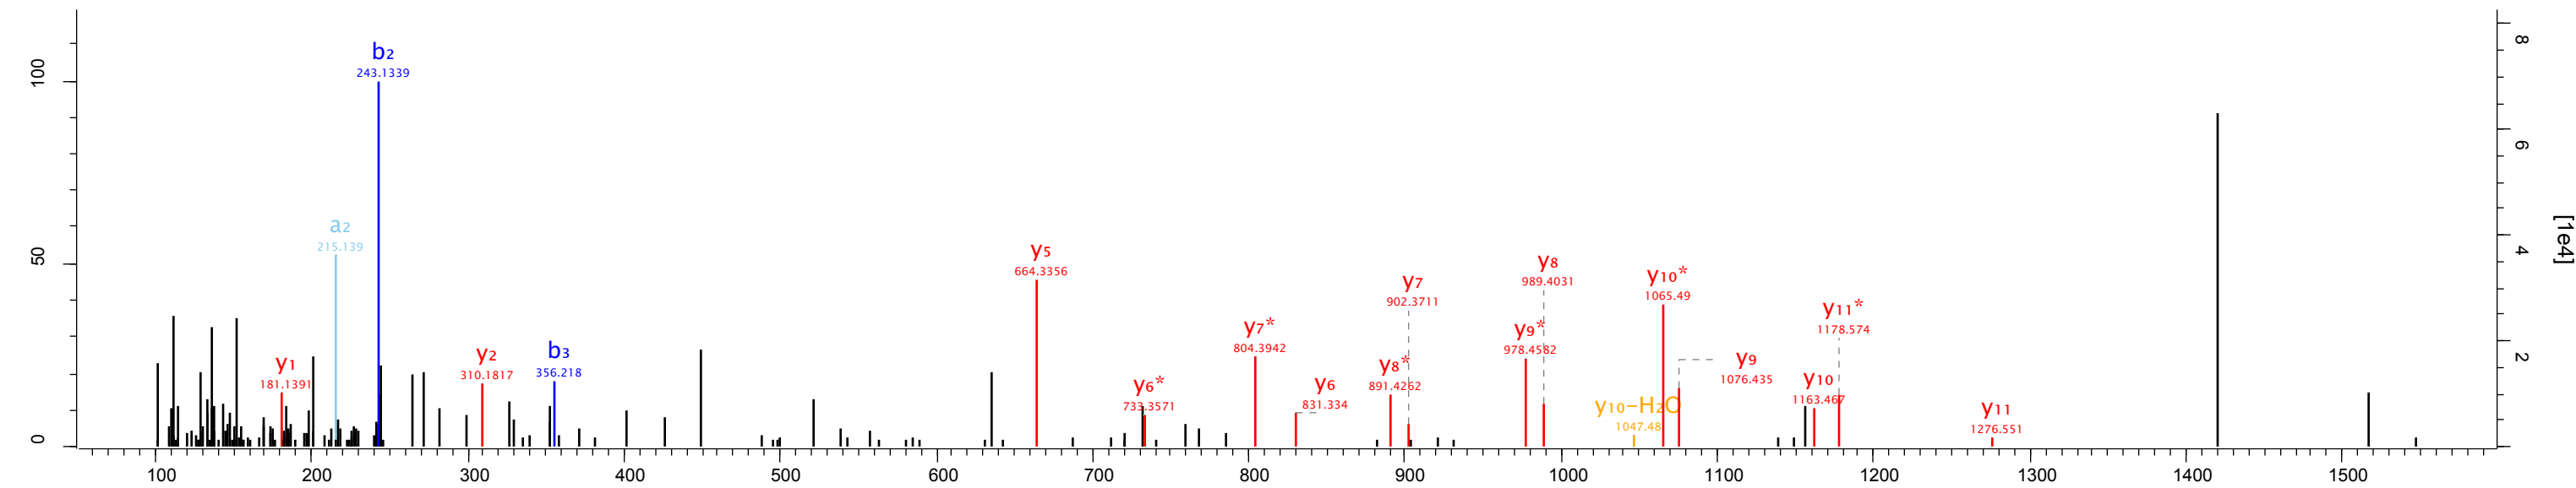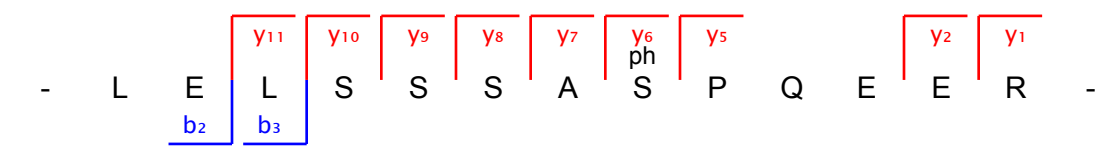

Raw file 20171215\_MaS\_33SR\_LMH\_phospho2\_01 Scan 2901 Method FTMS; HCD Score 62.66 m/z 759.3 Gene names SMG8

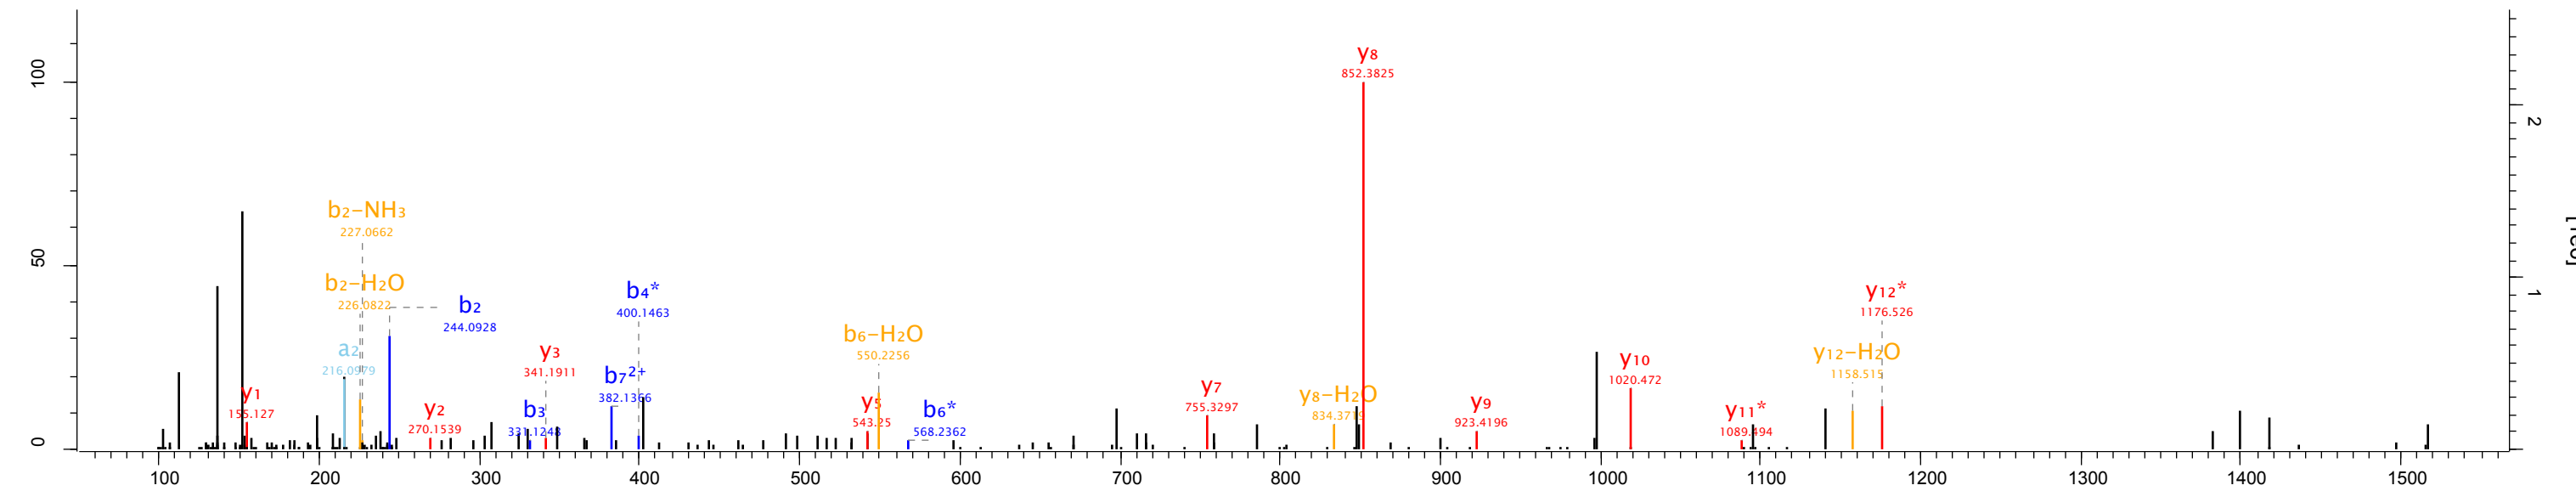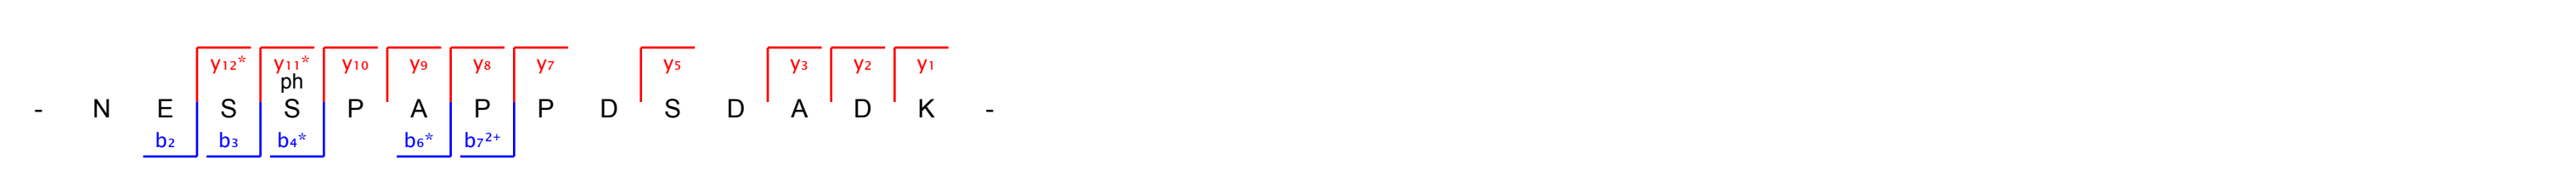

Raw file 20171215\_MaS\_33SR\_LMH\_phospho2\_01 Scan 5641 Method FTMS; HCD Score 98.18 m/z 891.9 Gene names CDC25B

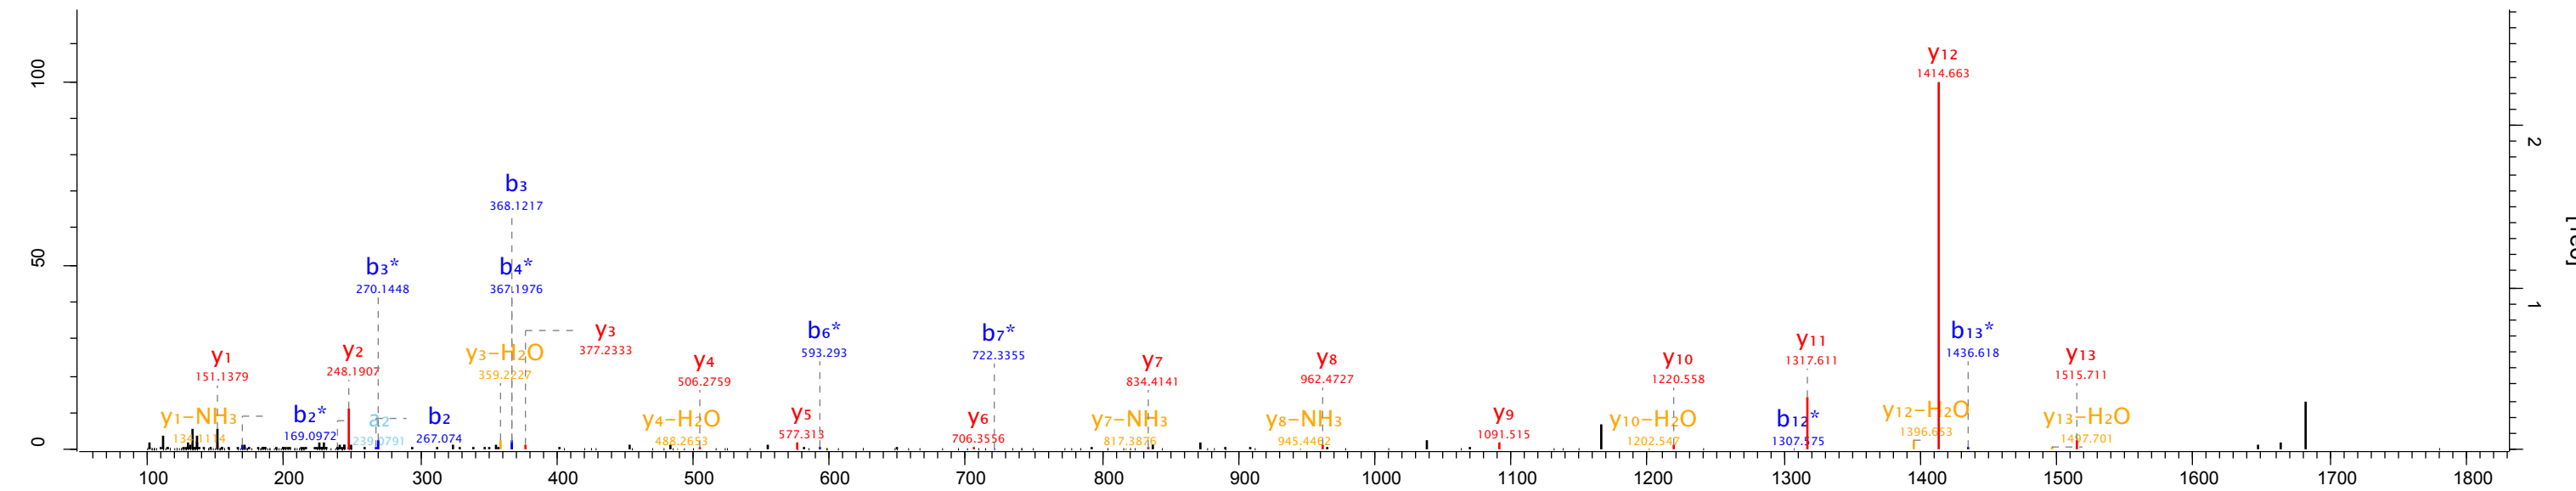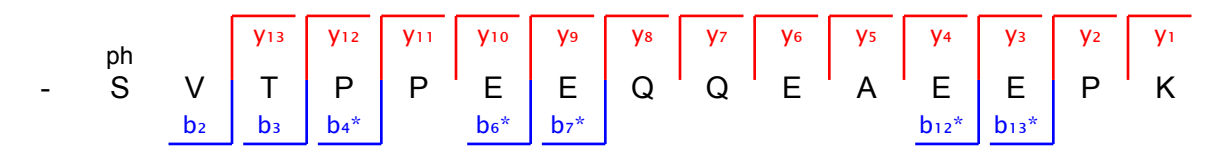

Raw file 20171215\_MaS\_33SR\_LMH\_phospho2\_01 Scan 5711 Method FTMS; HCD Score 66 m/z 609.8 Gene names PFKFB2

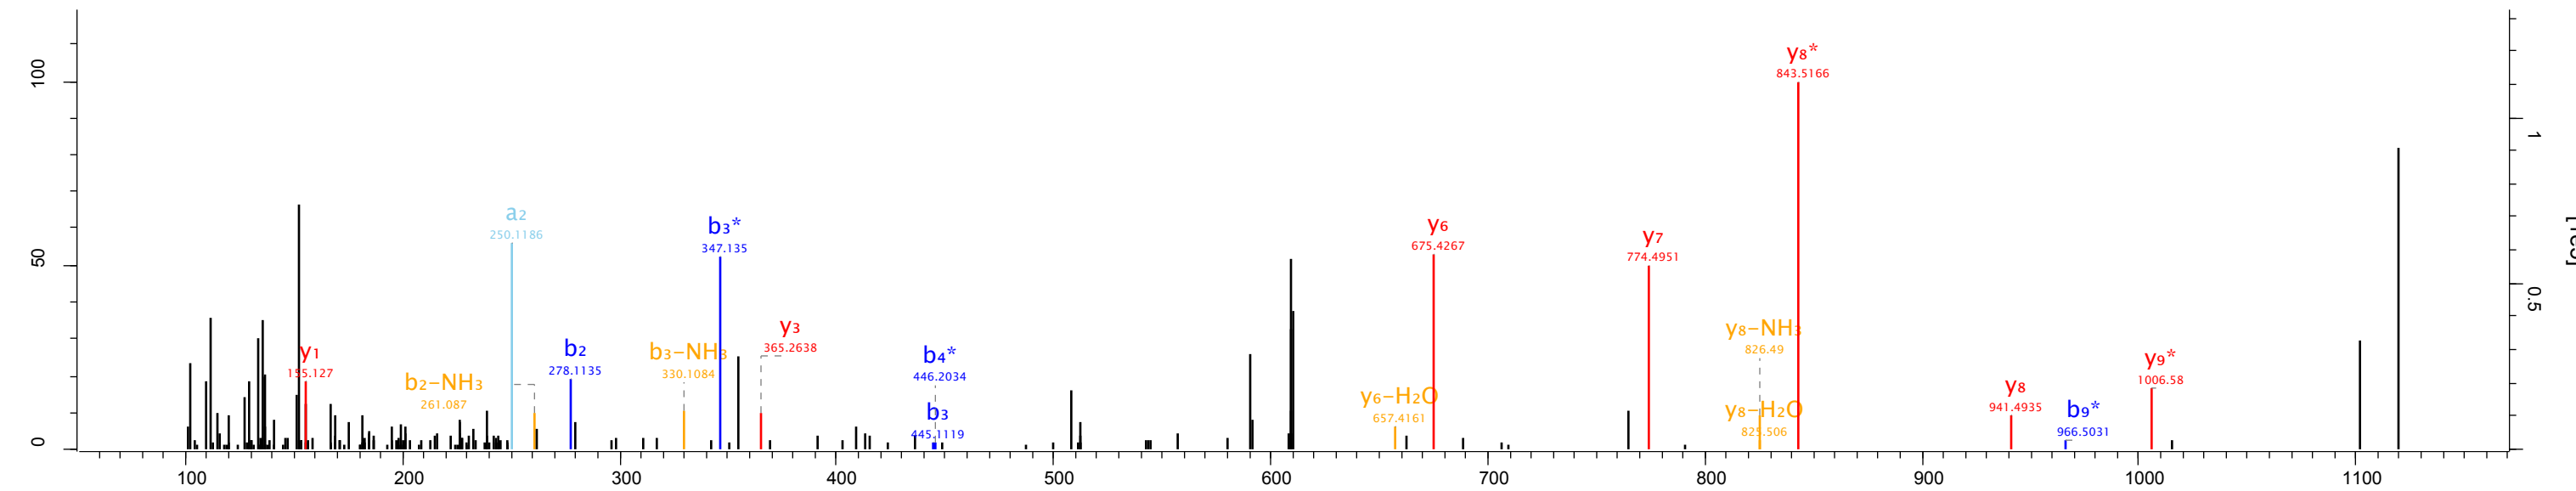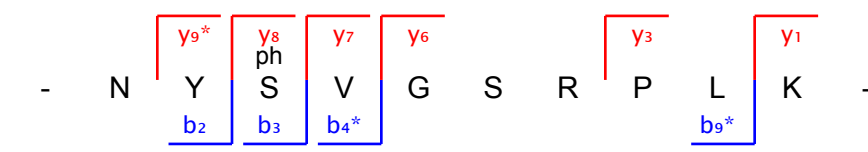

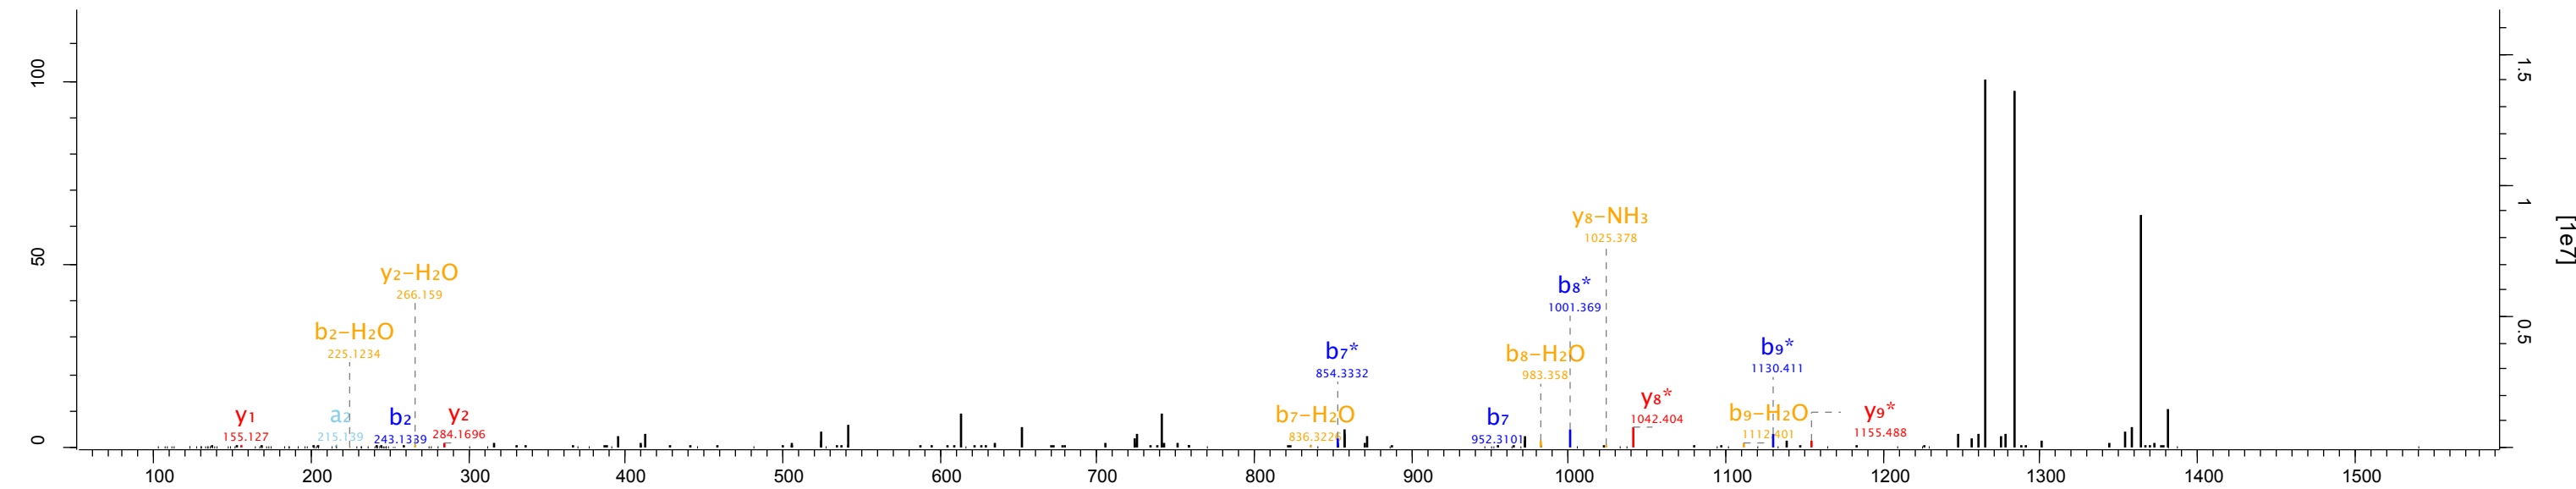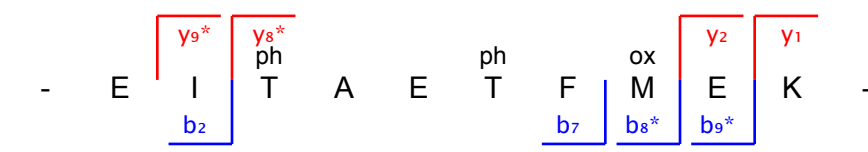



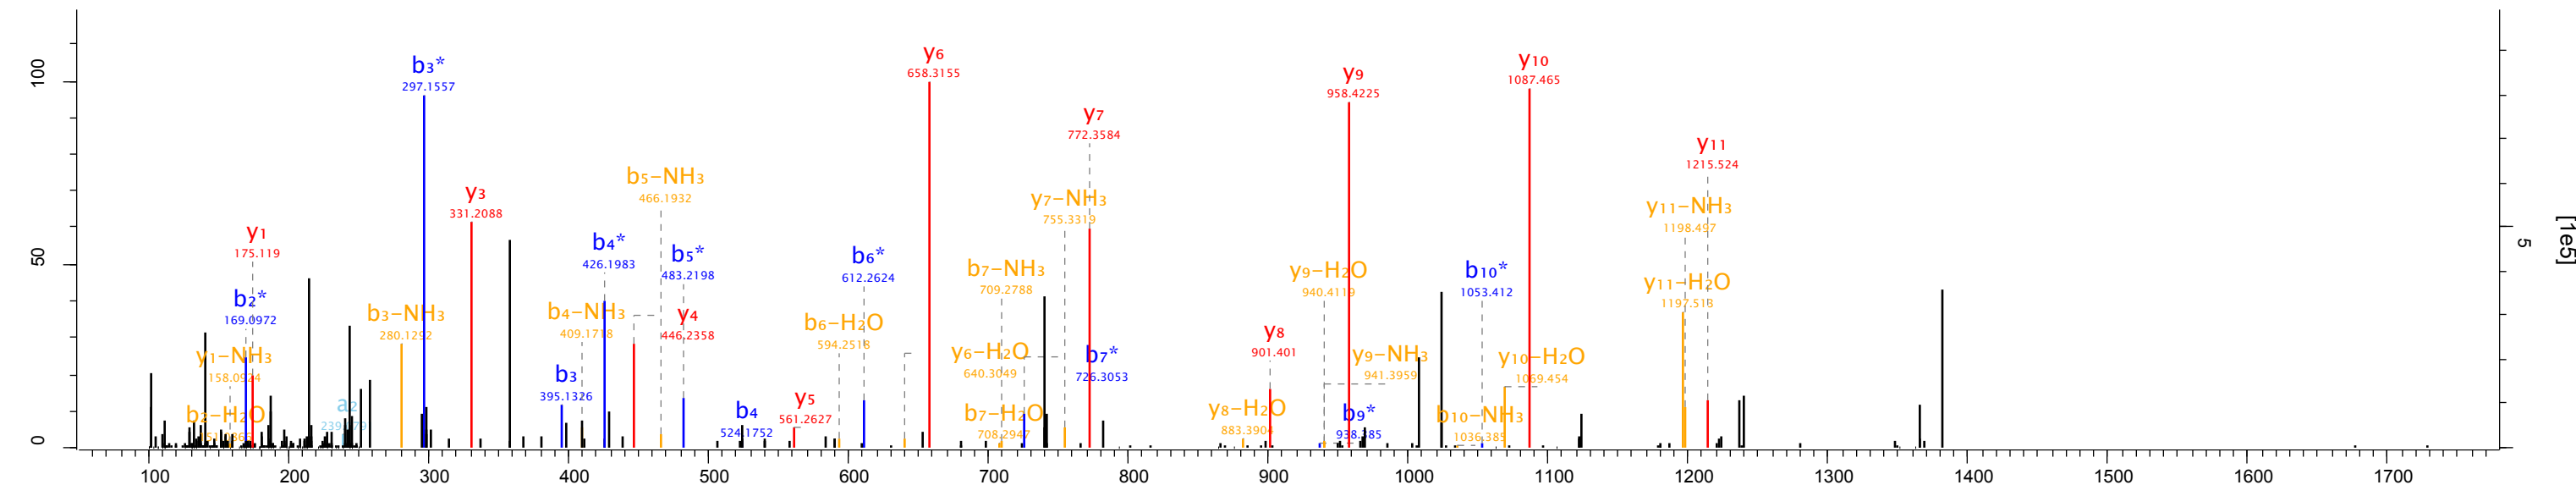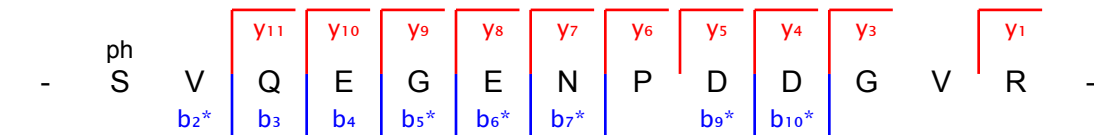

Raw file 20171215\_MaS\_33SR\_LMH\_phospho2\_02 Scan 4231 Method FTMS; HCD Score 145.25 m/z 493.23 Gene names UIMC1

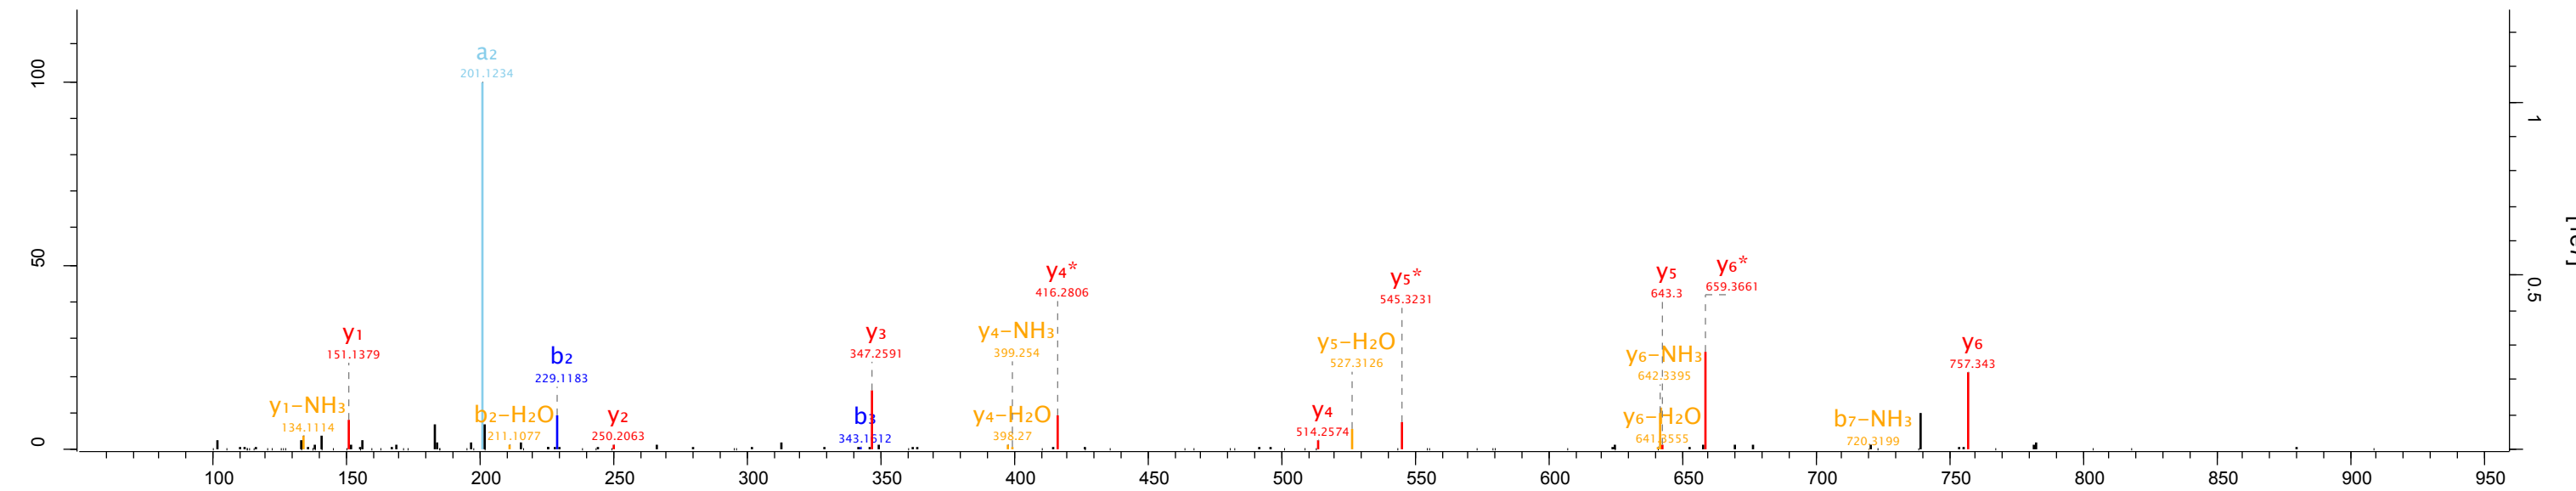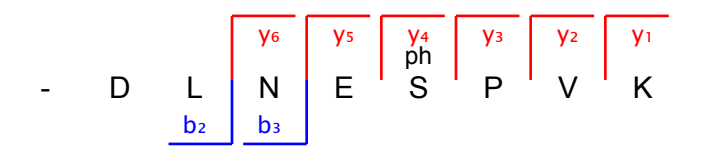

Raw file 20171215\_MaS\_33SR\_LMH\_phospho2\_02 Scan 4611 Method FTMS; HCD Score 41.58 m/z 606.28 Gene names BTBD2

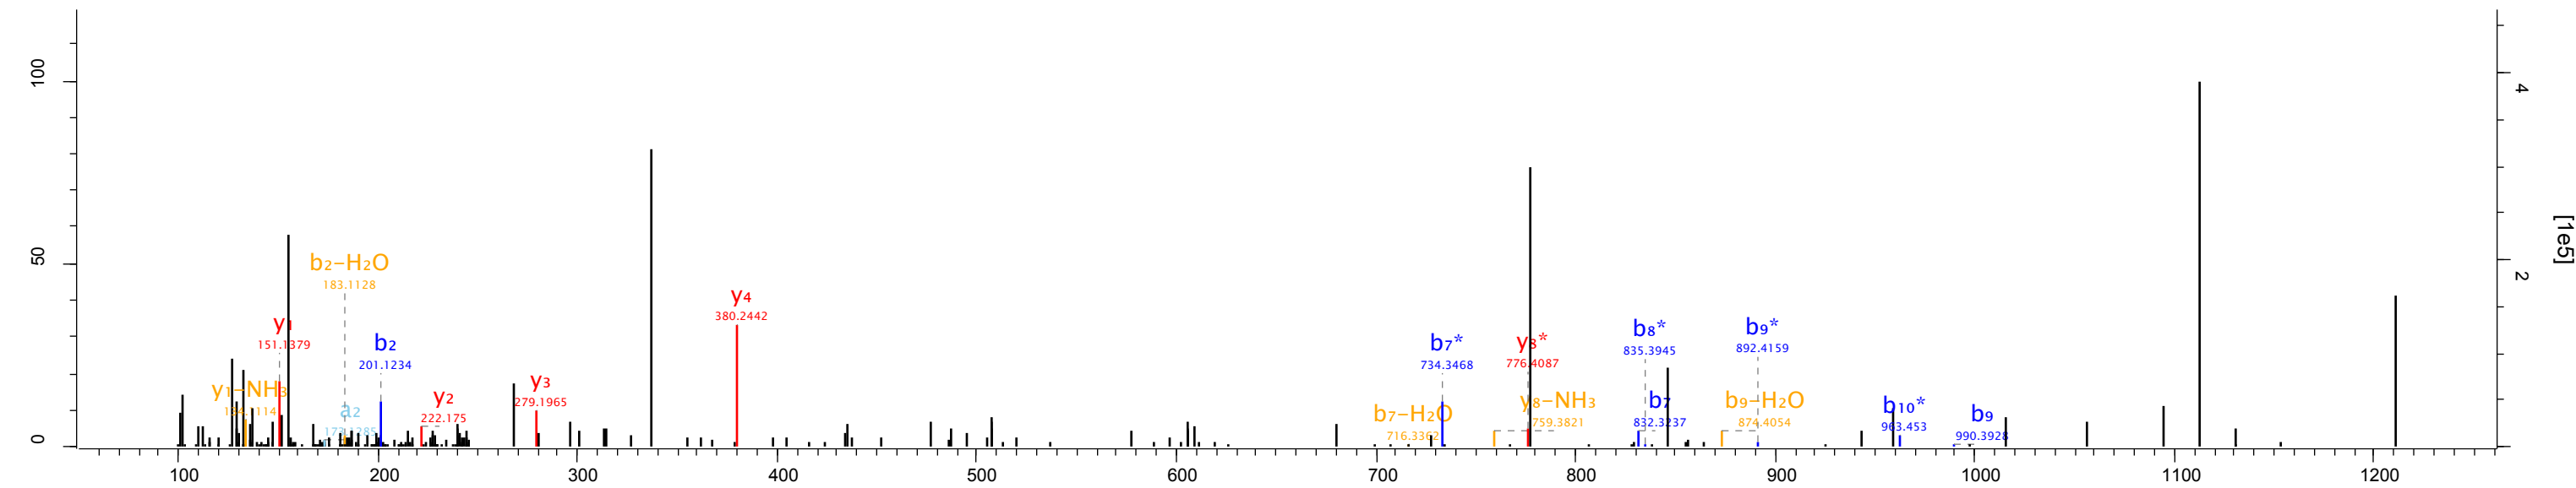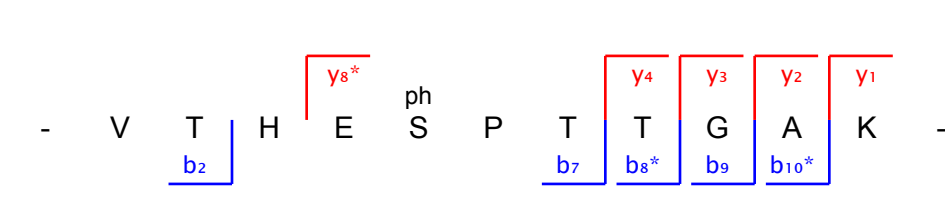

Raw file 20171215\_MaS\_33SR\_LMH\_phospho2\_02 Scan 9071 Method FTMS; HCD Score 64.12 m/z 556.27

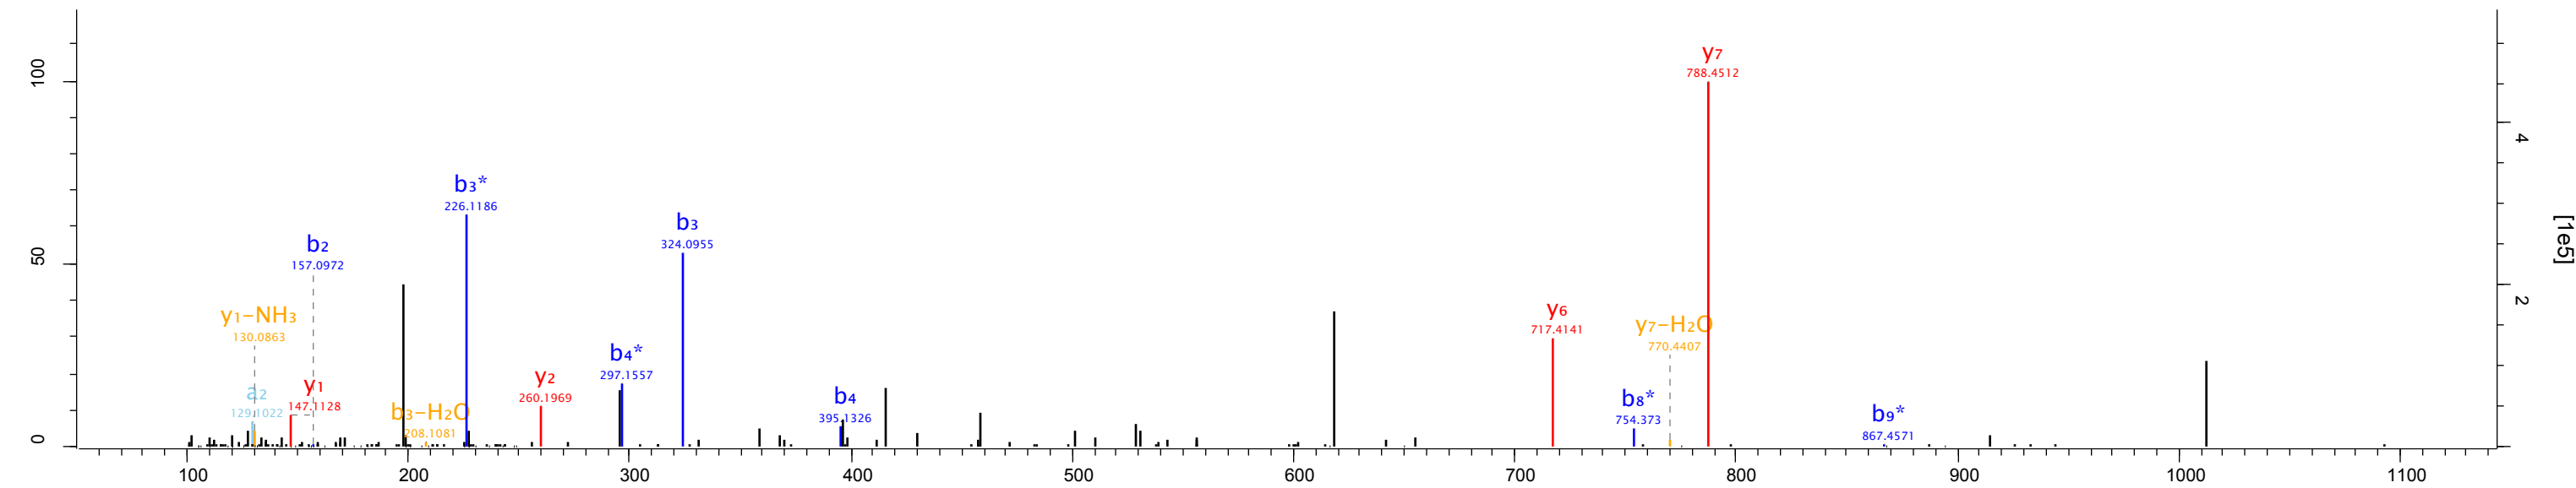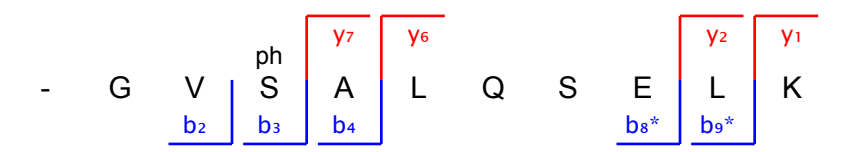

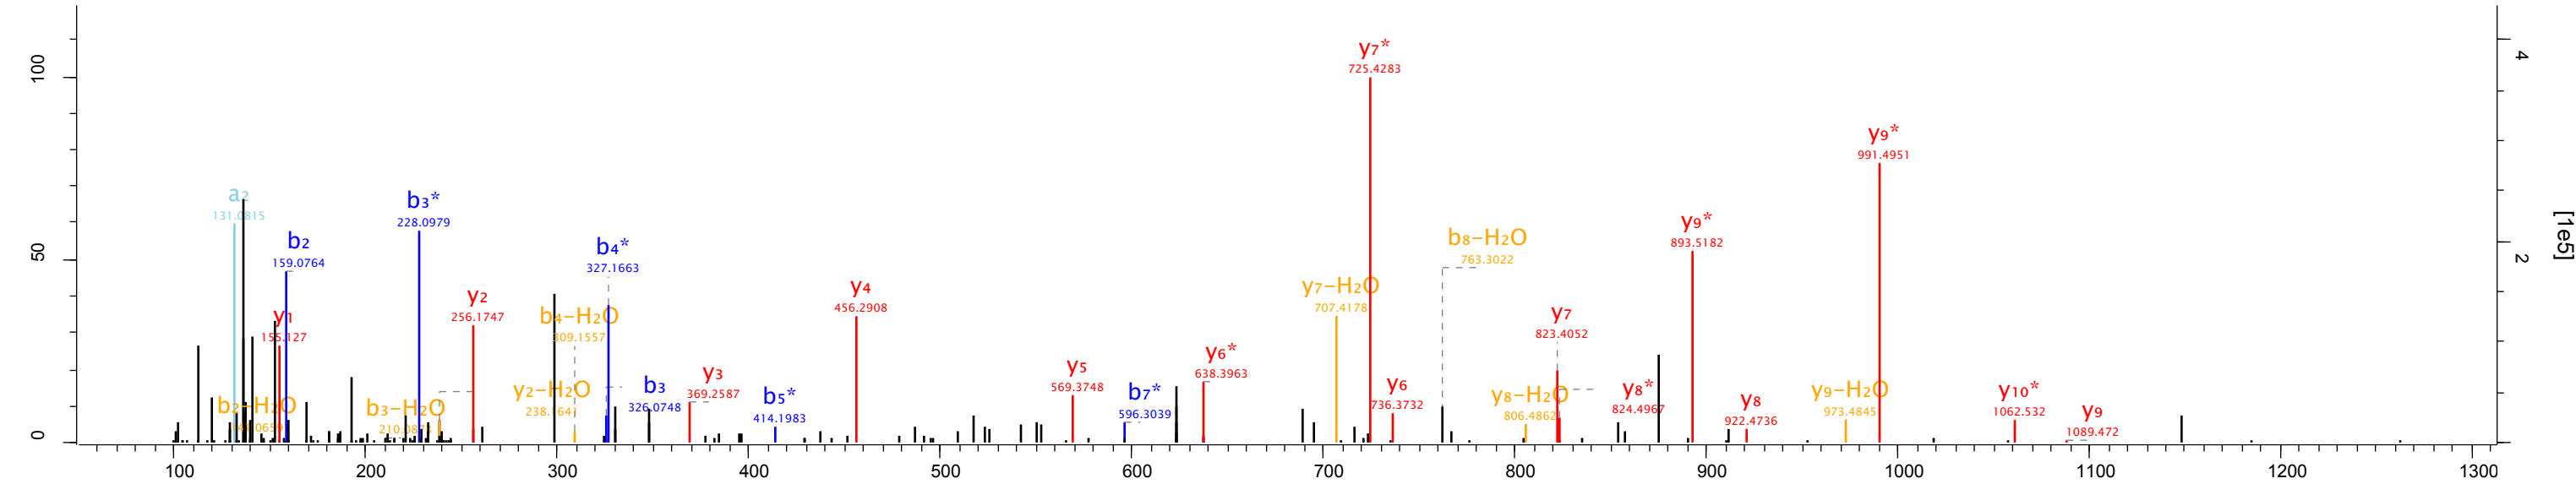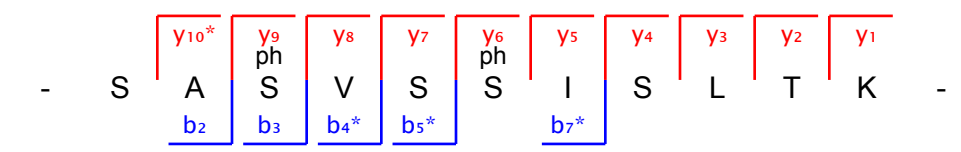

Raw file: 20171215\_MaS\_33SR\_LMH\_phospho2\_03  
 Scan: 10691 Method: FTMS; HCD Score: 236.35 m/z: 1185.01 Gene names: KANSL3

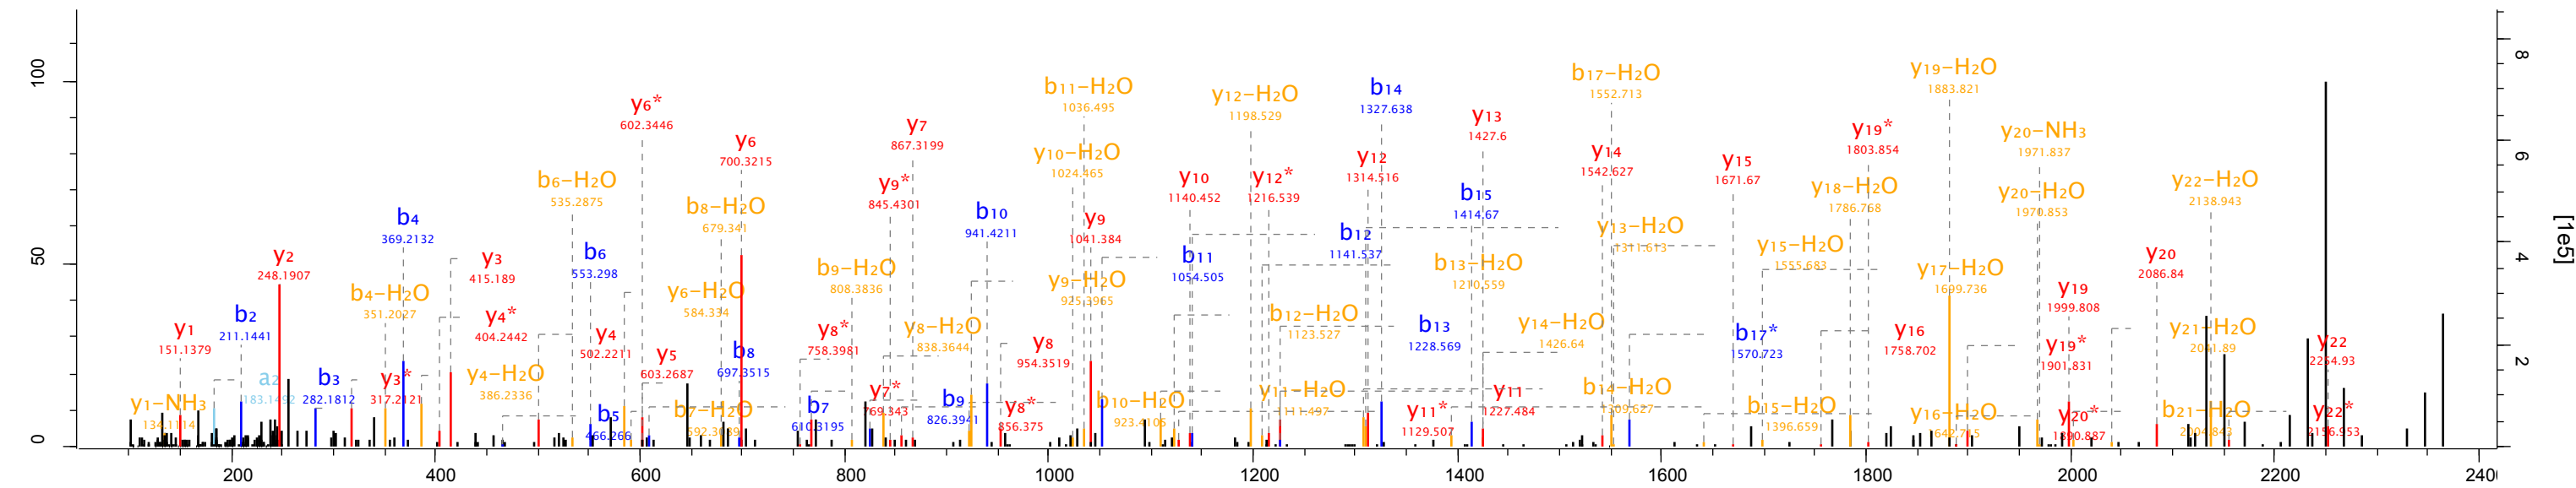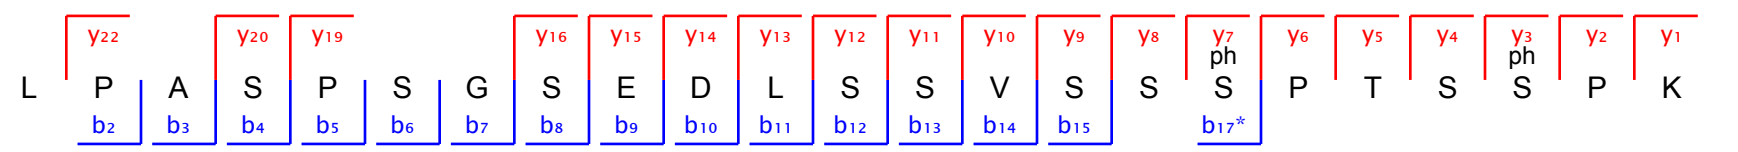

Raw file 20171215\_MaS\_33SR\_LMH\_phospho2\_03 Scan 16021 Method FTMS; HCD Score 55.18 m/z 1092.47 Gene names SPAG5

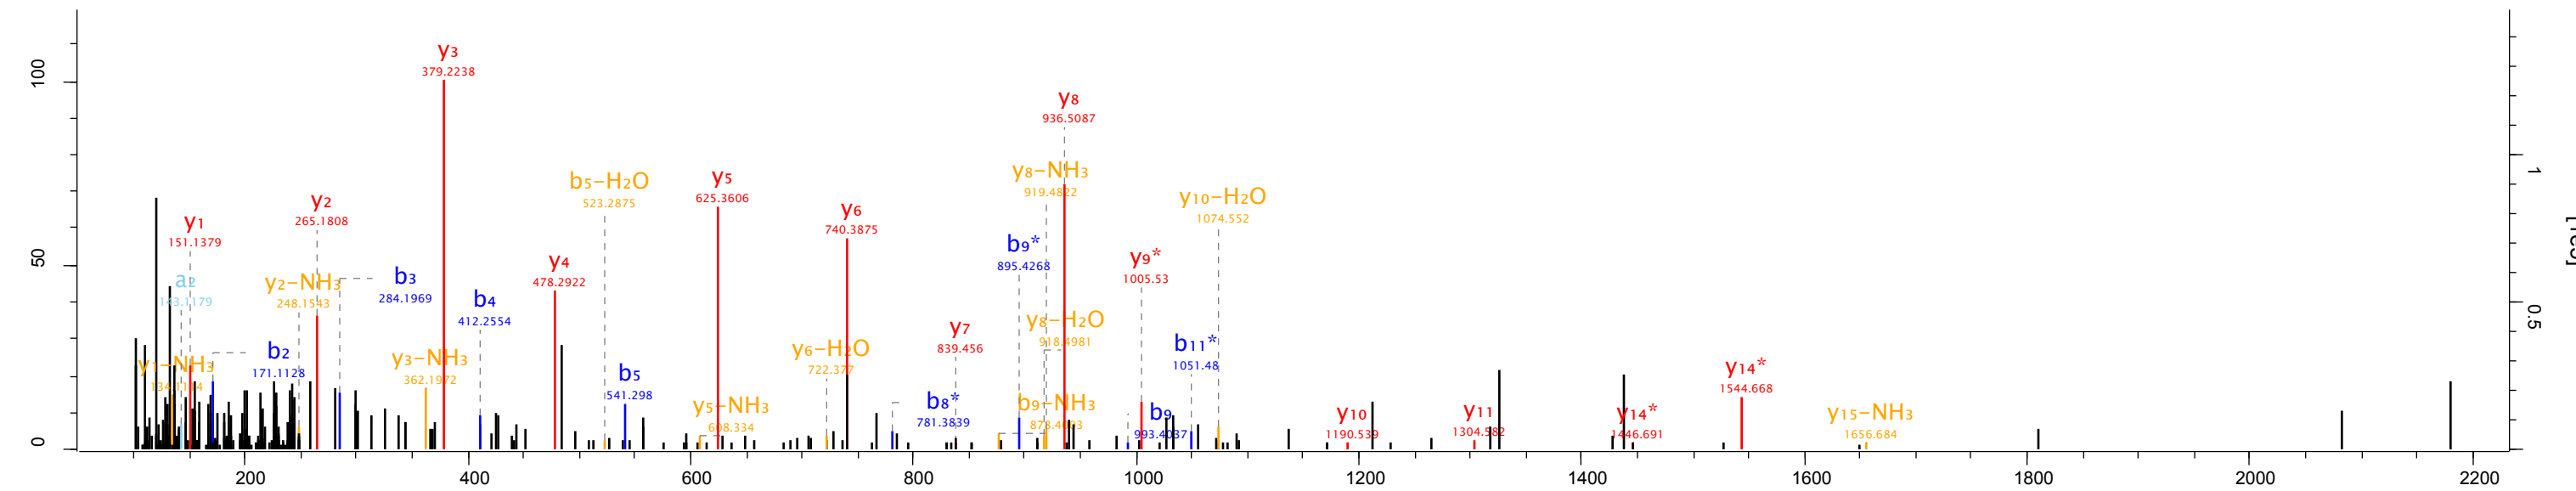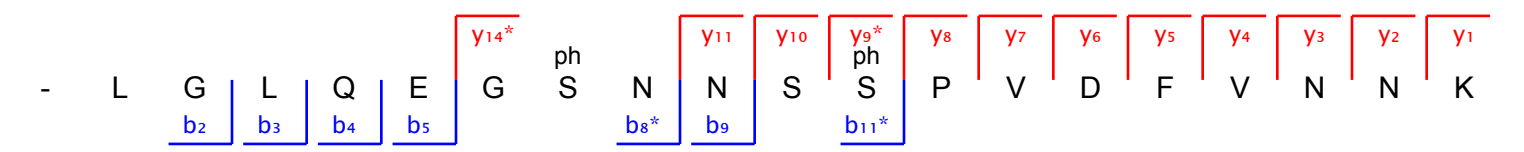

Raw file 20171215\_MaS\_33SR\_LMH\_phospho2\_03 Scan 4011 Method FTMS; HCD Score 70.44 m/z 604.75 Gene names PPP1R3D

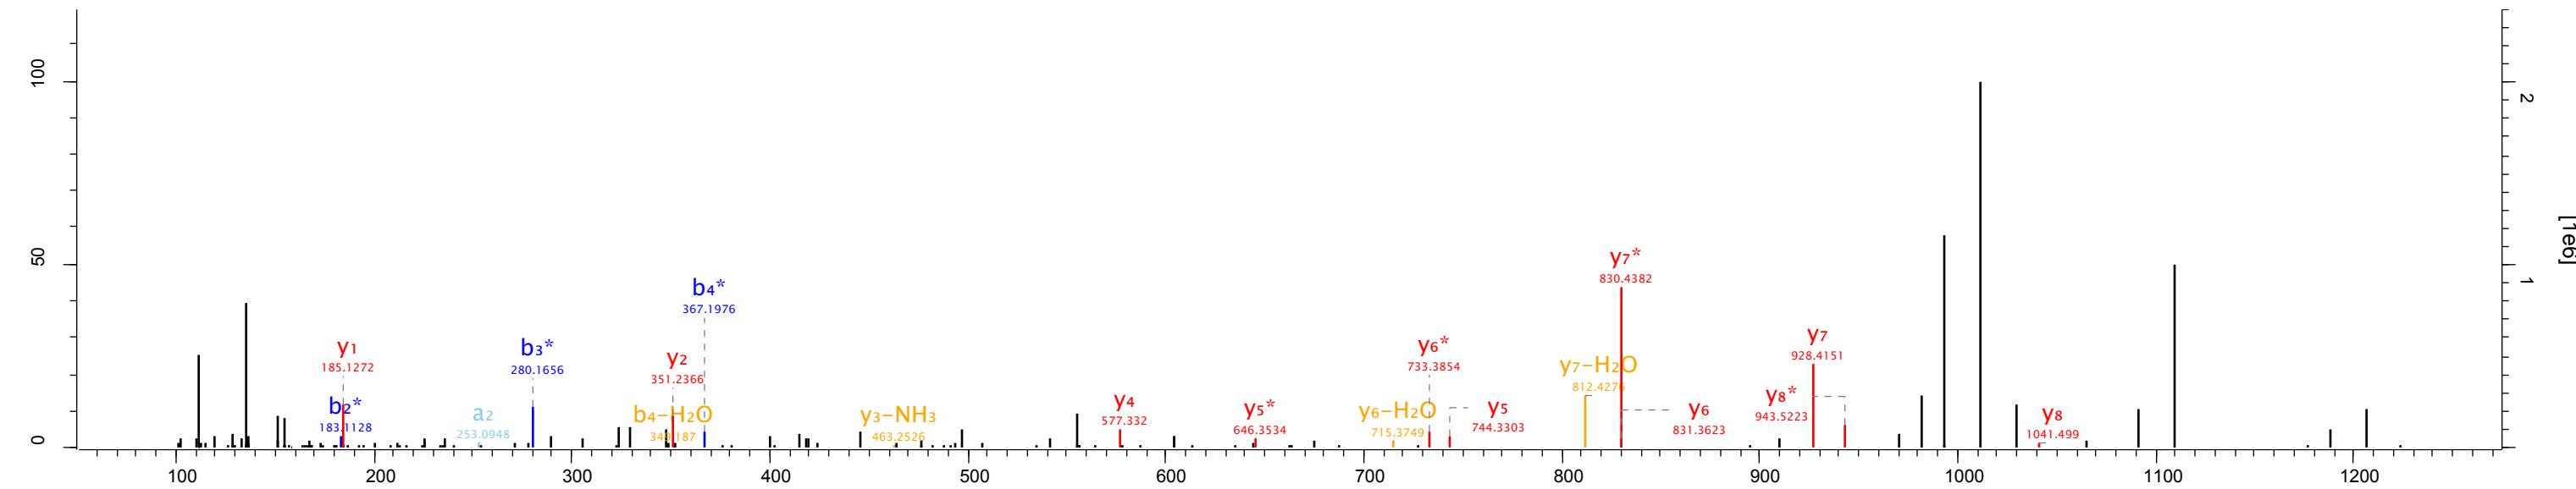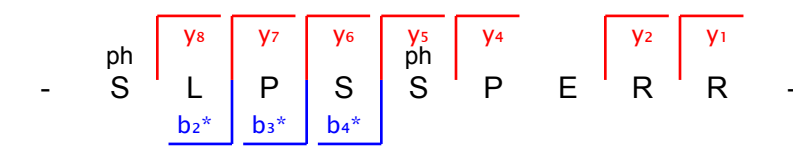



Raw file 20171215\_MaS\_33SR\_LMH\_phospho2\_03 Scan 7601 Method FTMS; HCD Score 174.81 m/z 828.36 Gene names SLC20A2

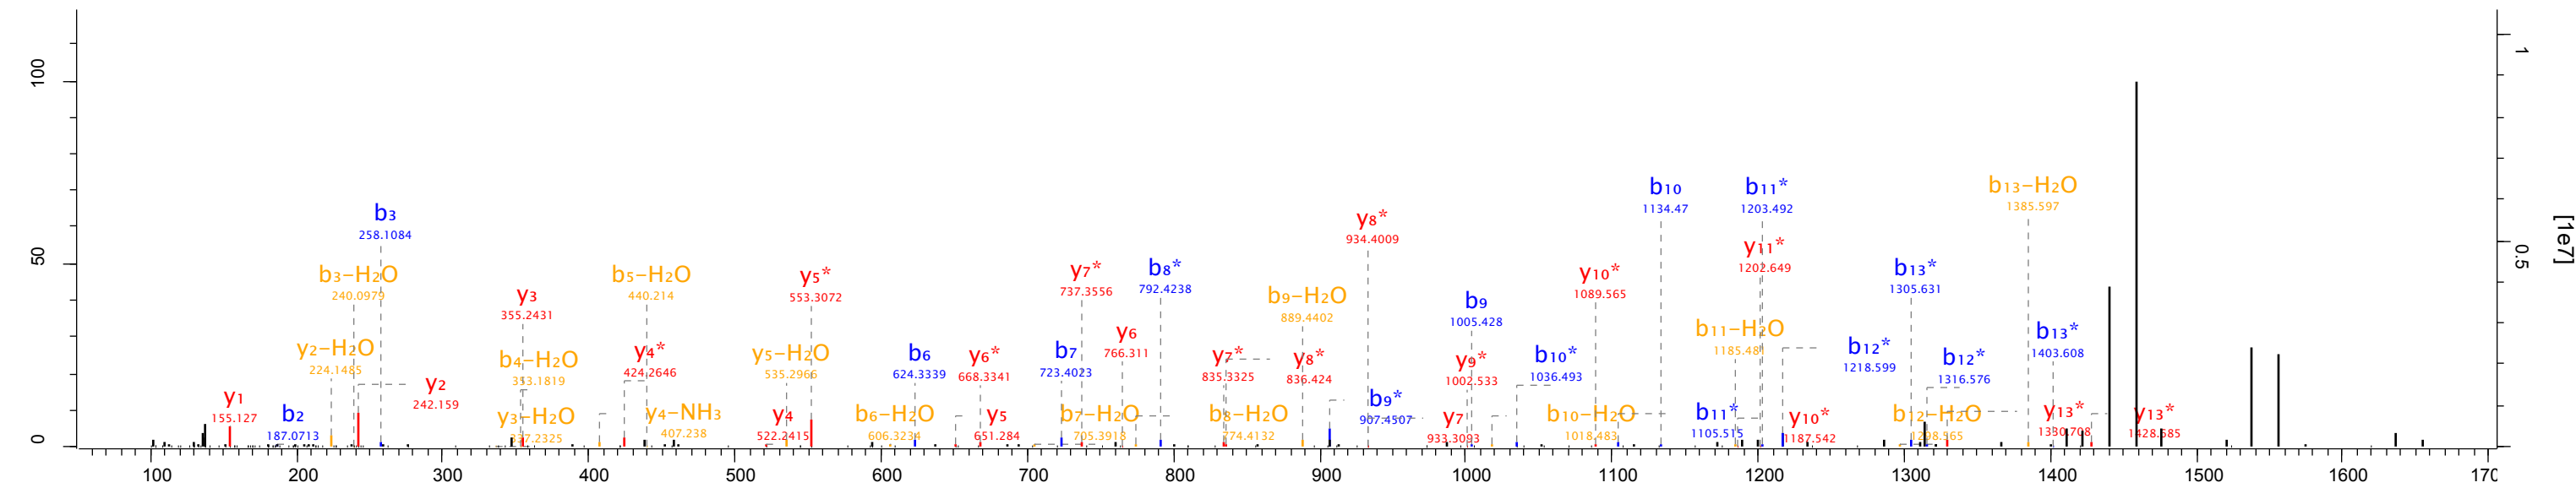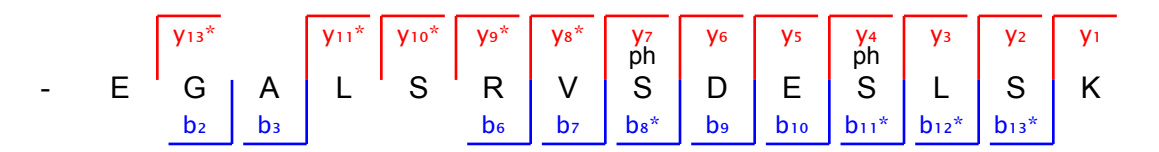

Raw file 20171215\_MaS\_33SR\_LMH\_phospho2\_03 Scan 9041 Method FTMS; HCD Score 234.64 m/z 1042.87 Gene names MAX

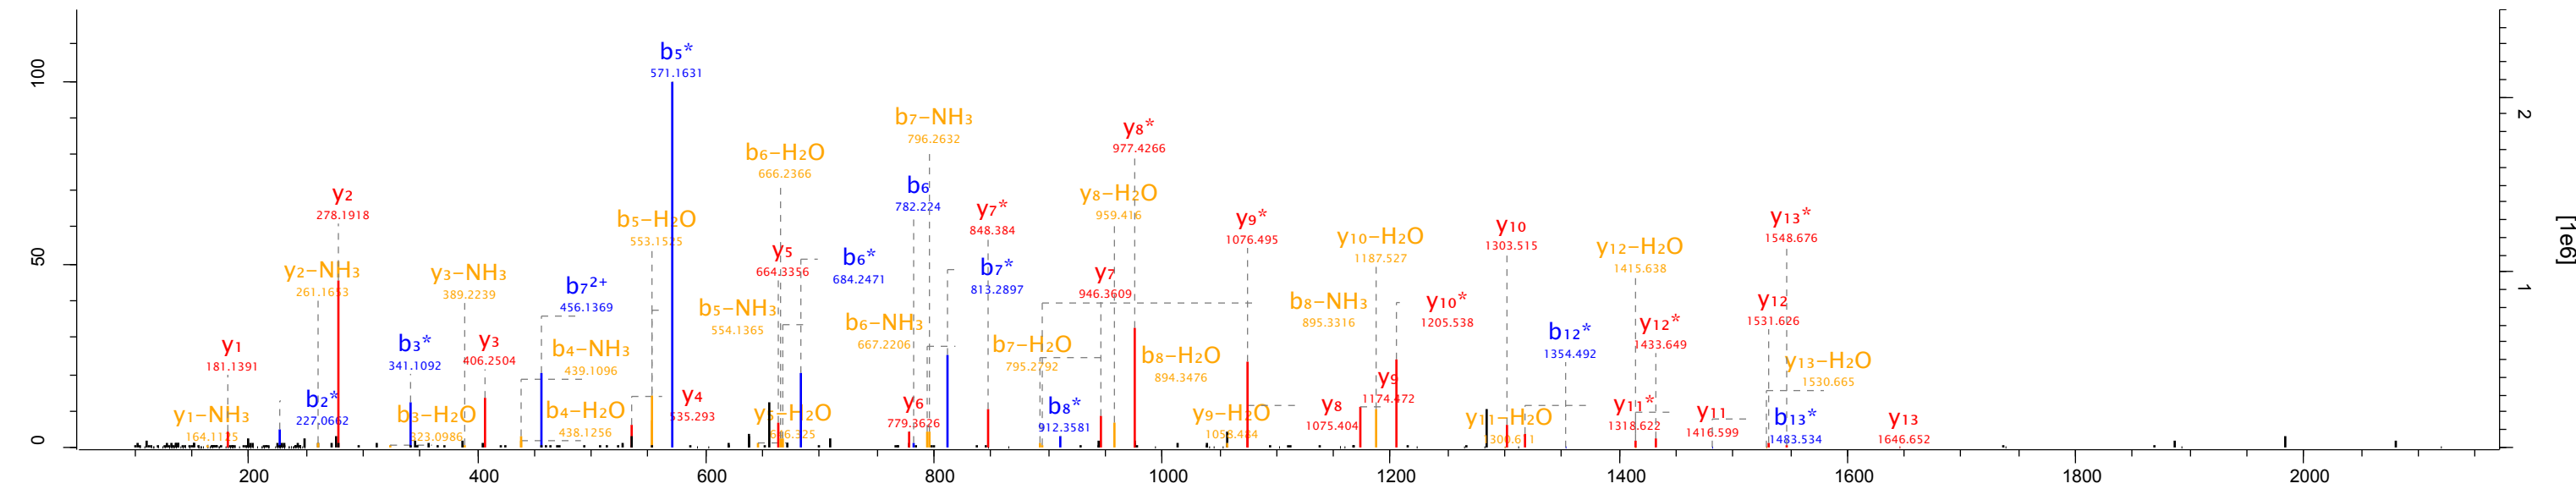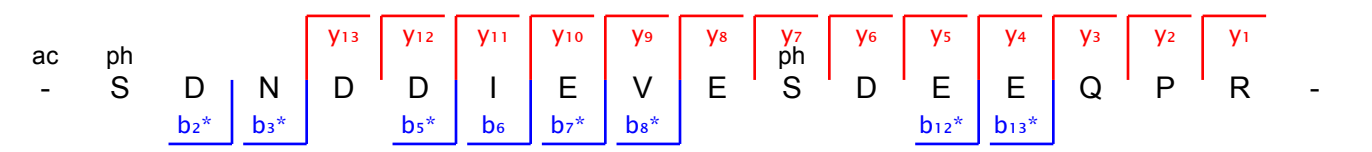

Raw file: 20171215\_MaS\_33SR\_LMH\_phospho2\_04  
 Scan: 4251 Method: FTMS; HCD Score: 108.97 m/z: 544.22 Gene names: STXBP5

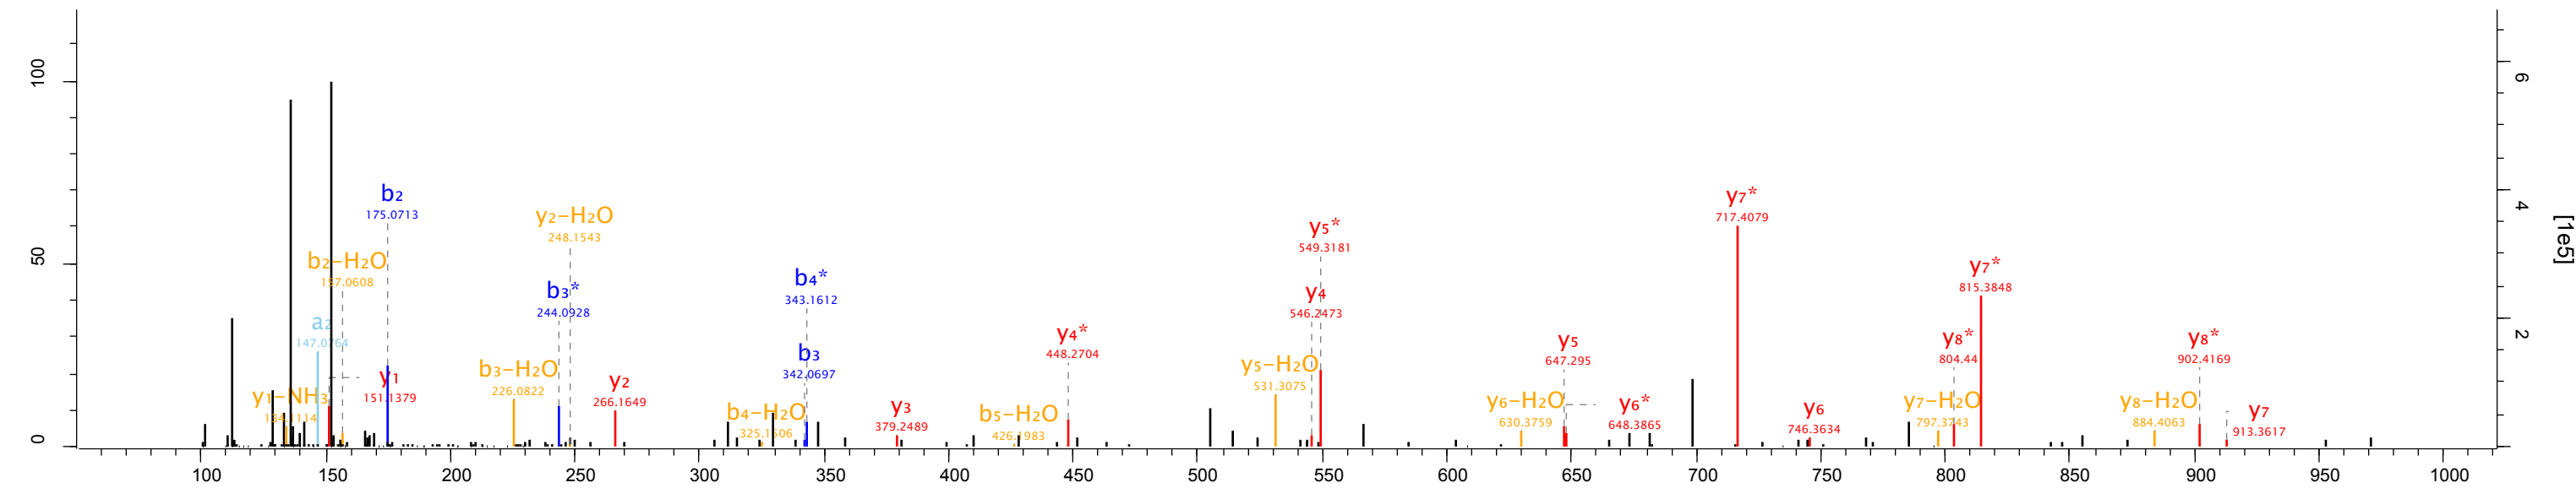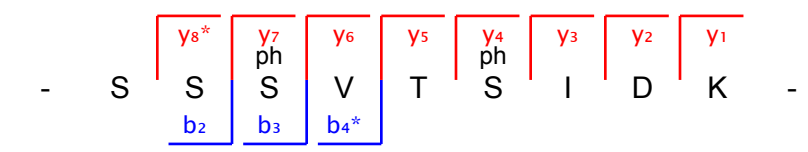

Raw file 20171215\_MaS\_33SR\_LMH\_phospho2\_05 Scan 2831 Method FTMS; HCD Score 123.05 m/z 1043.84 Gene names IFRD2

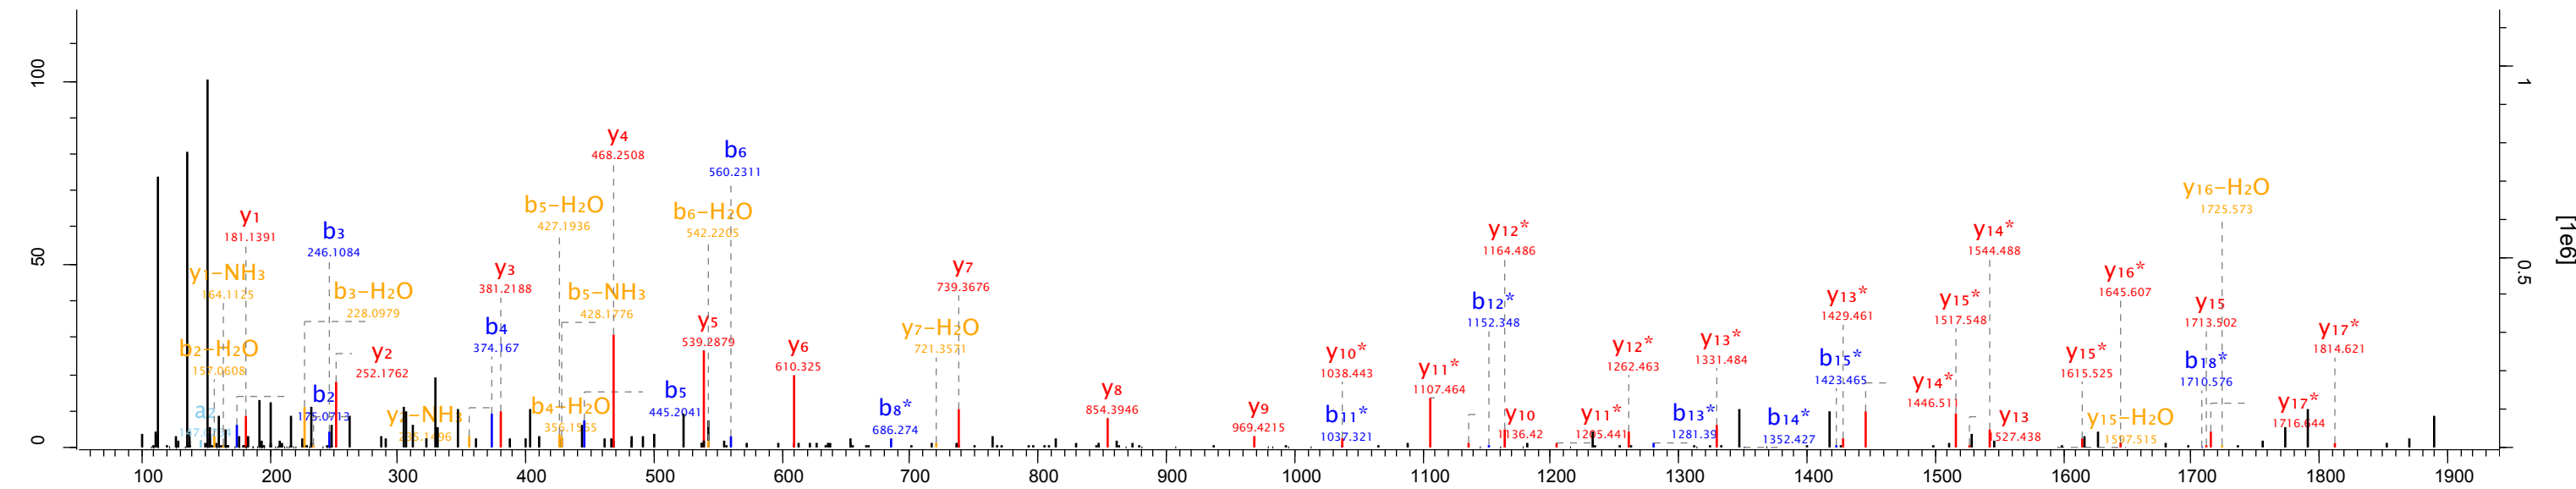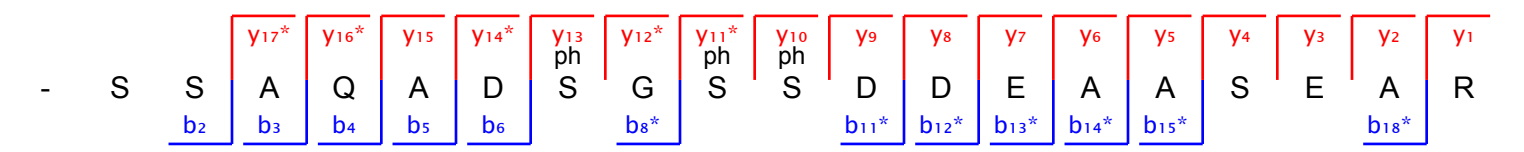

Raw file  
20171215\_MaS\_33SR\_LMH\_phospho2\_06

Scan 2641 Method FTMS; HCD Score 171.14 m/z 645.79 Gene names CEP131

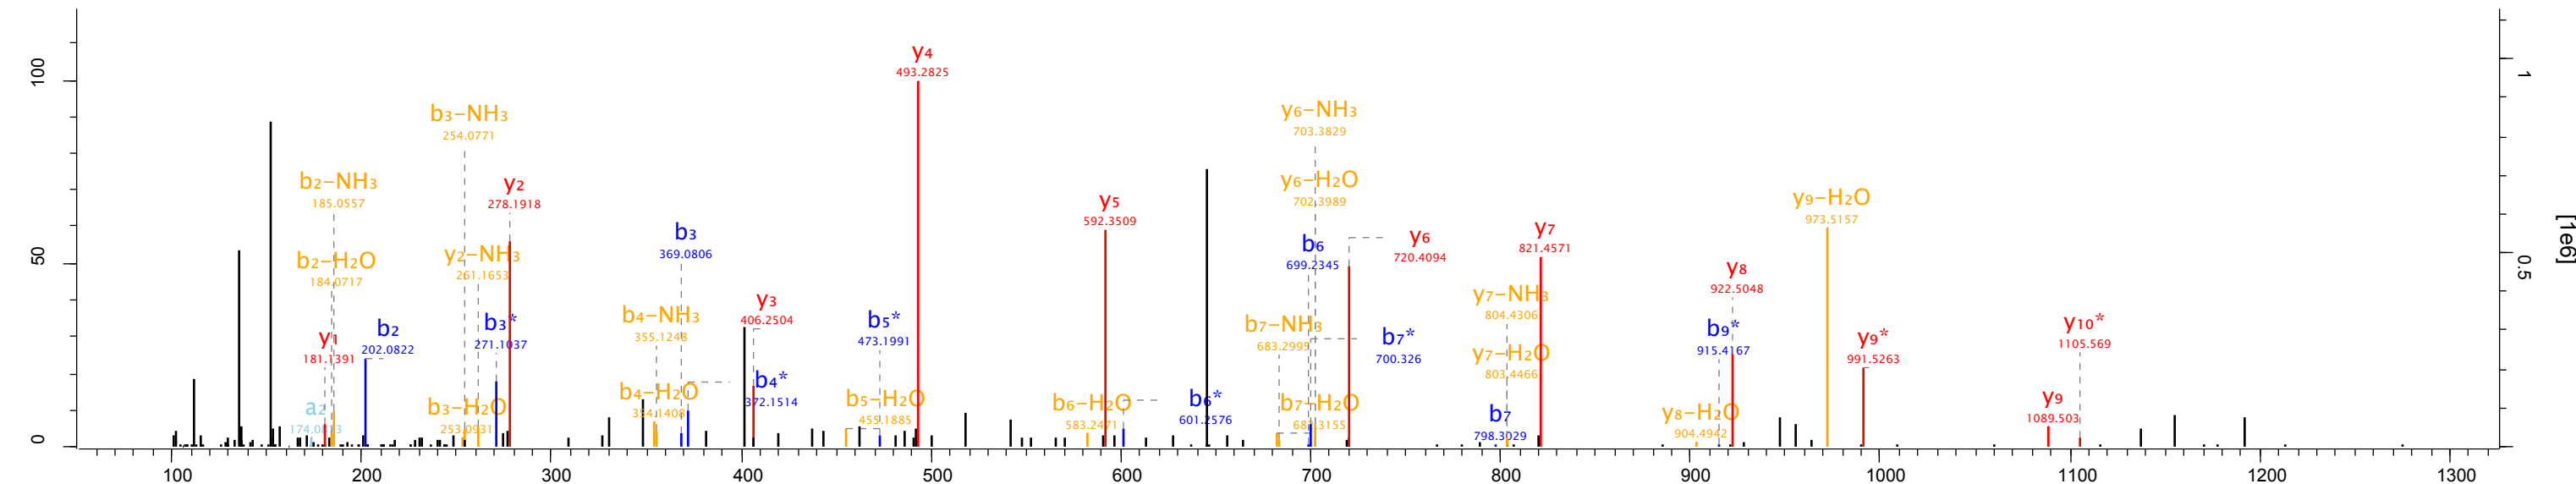

- S N S T T Q V S Q P R -

b<sub>2</sub> b<sub>3</sub> b<sub>4</sub>\* b<sub>5</sub>\* b<sub>6</sub> b<sub>7</sub> b<sub>9</sub>\*

y<sub>10</sub>\* y<sub>9</sub> ph y<sub>8</sub> y<sub>7</sub> y<sub>6</sub> y<sub>5</sub> y<sub>4</sub> y<sub>3</sub> y<sub>2</sub> y<sub>1</sub>

20171215\_MaS\_33SR\_LMH\_phospho2\_08 4761 FTMS; HCD 107.06 492.74 SGOL1

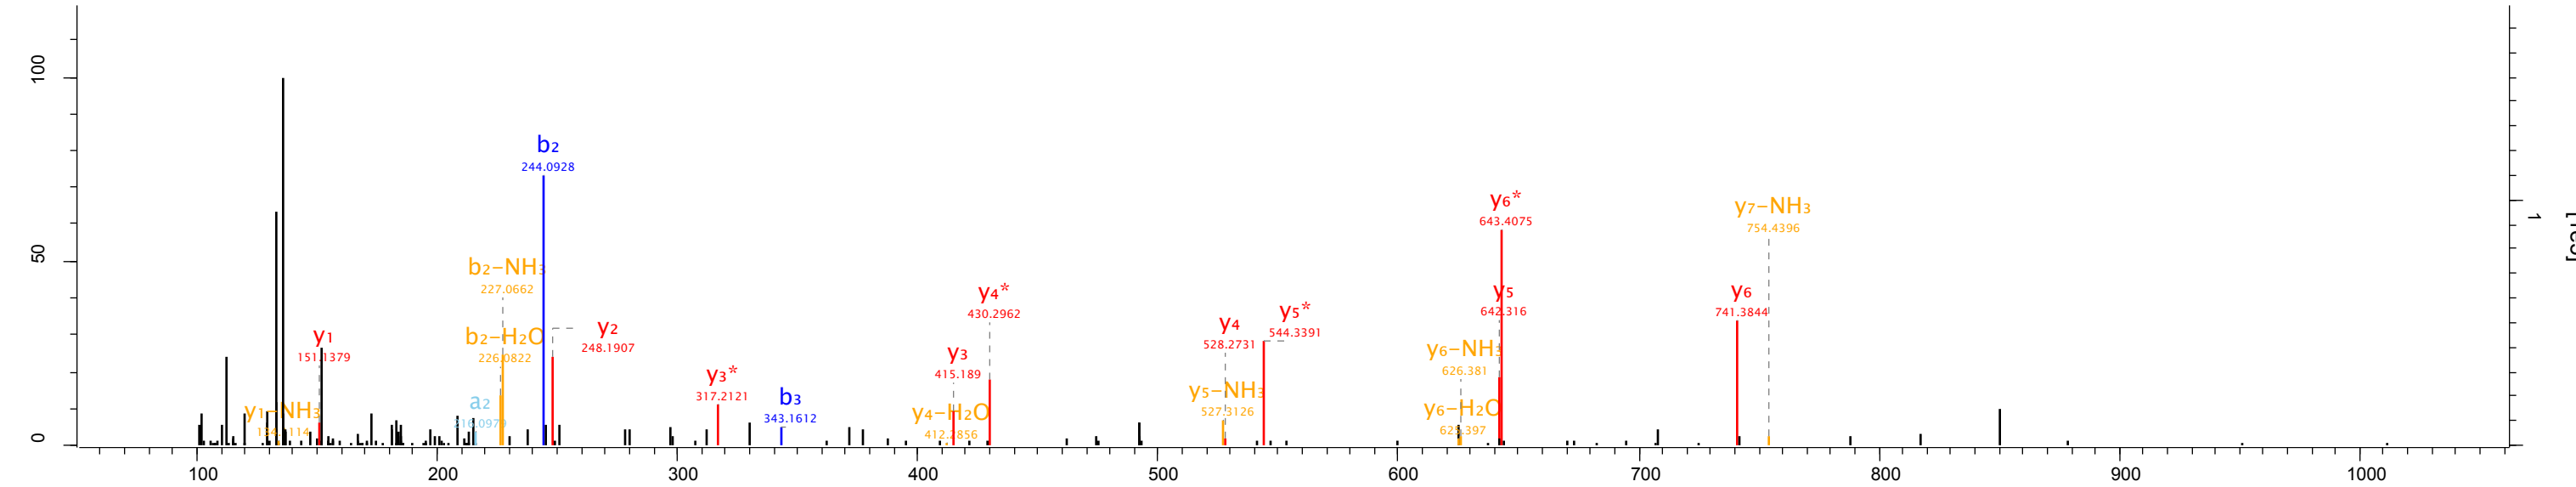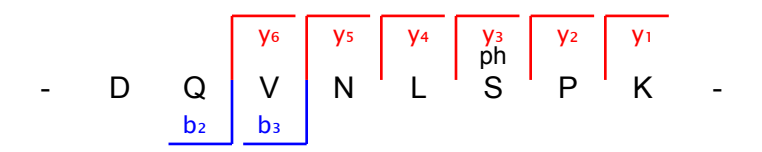

Raw file

20171215\_MaS\_33SR\_LMH\_phospho2\_09

| Scan | Method    | Score | m/z    | Gene names |
|------|-----------|-------|--------|------------|
| 2021 | FTMS; HCD | 41.94 | 610.75 | TADA3      |

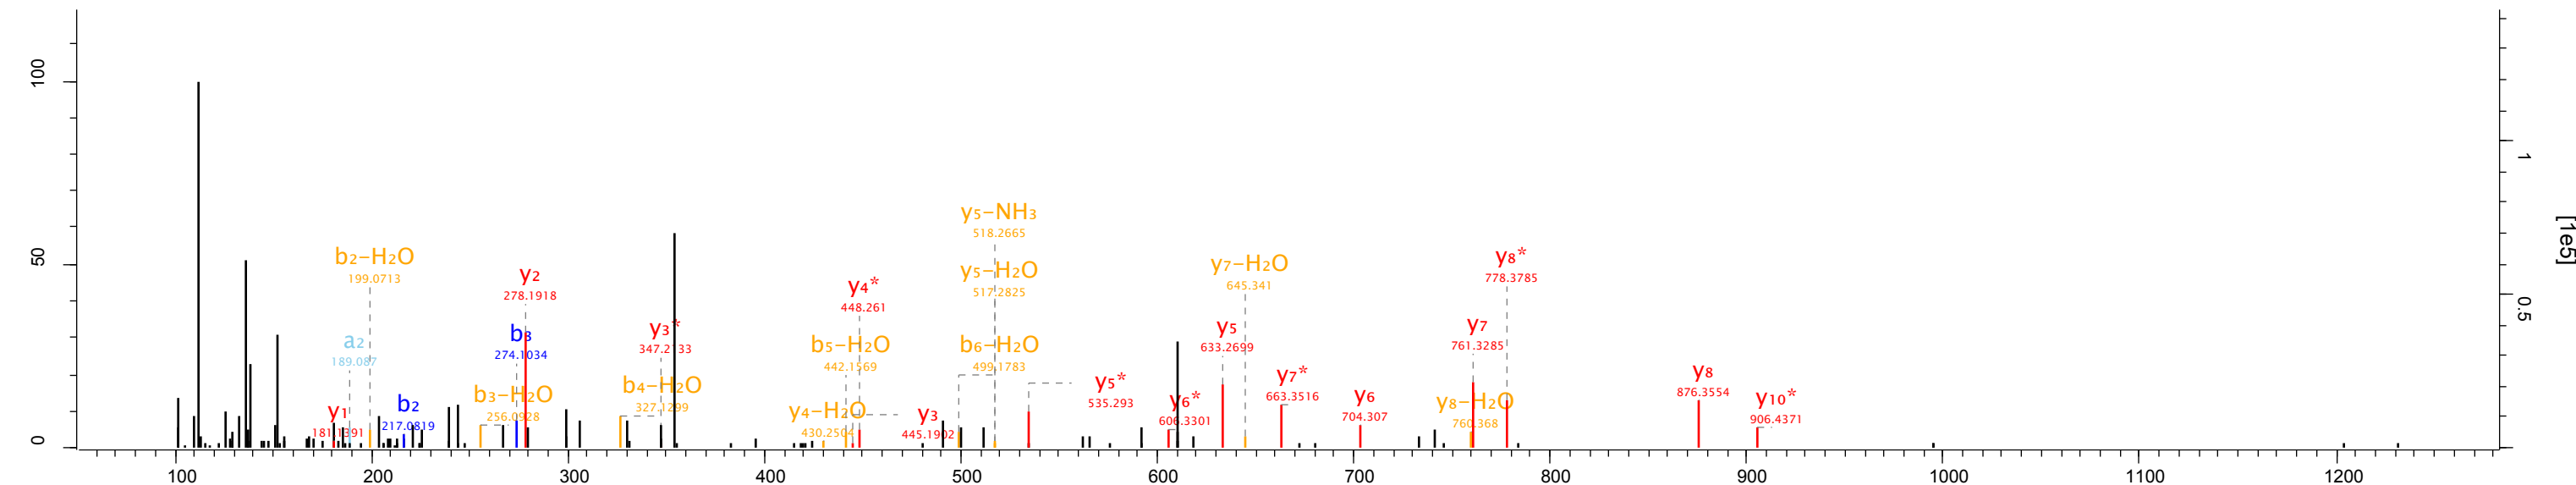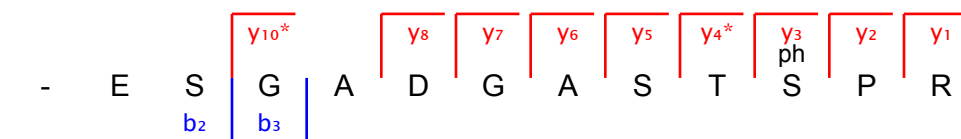

Raw file 20171215\_MaS\_33SR\_LMH\_phospho2\_09 Scan 5031 Method FTMS; HCD Score 79.47 m/z 828.34 Gene names ITSN1

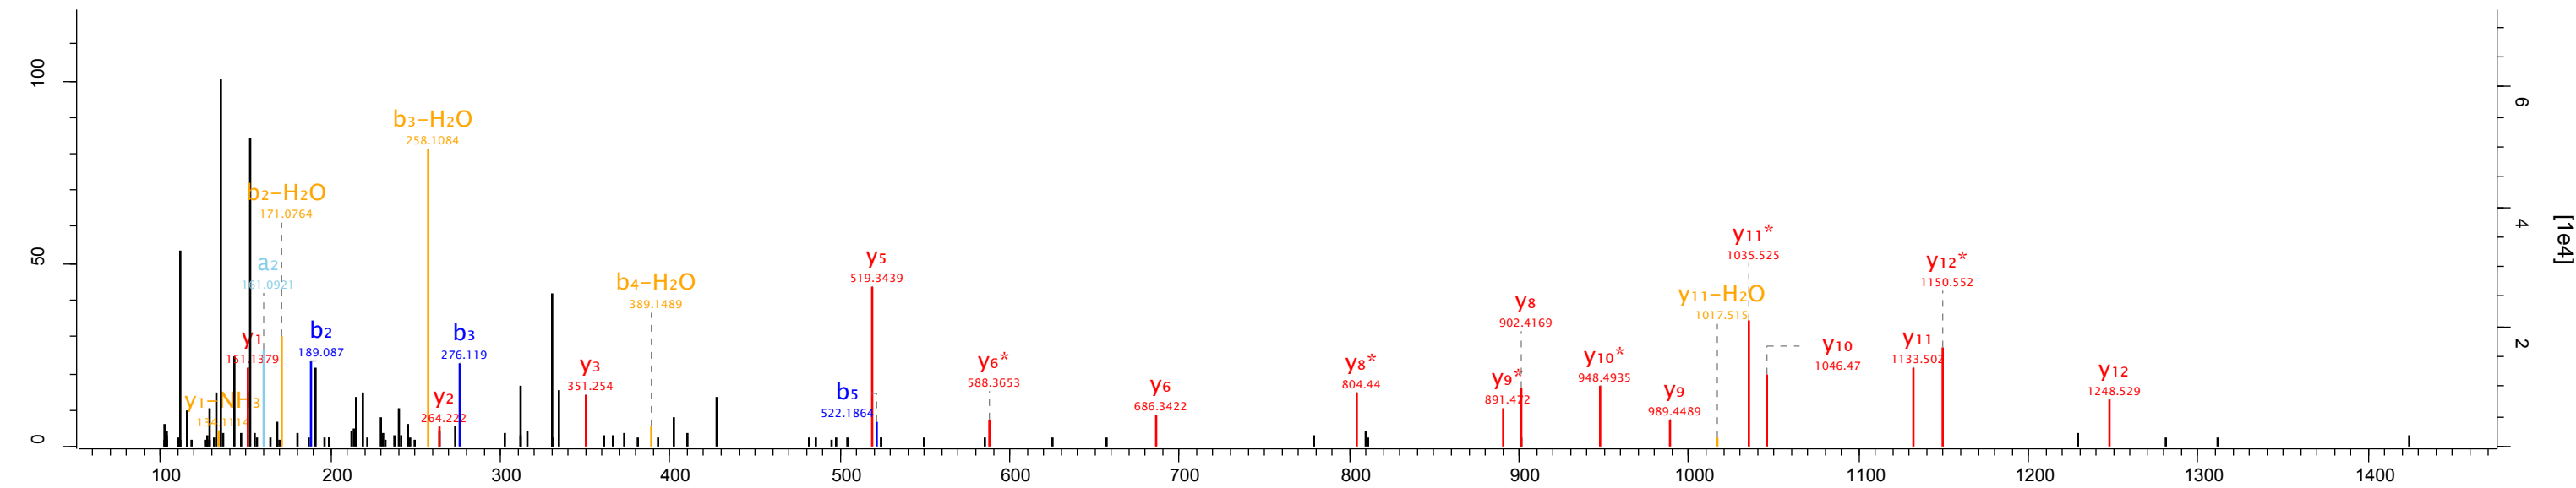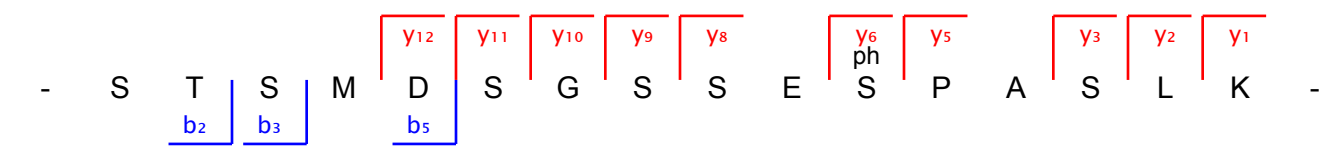



Raw file 20171215\_MaS\_33SR\_LMH\_proteome\_01 Scan 101441 Method FTMS; HCD Score 47.43 m/z 760.39

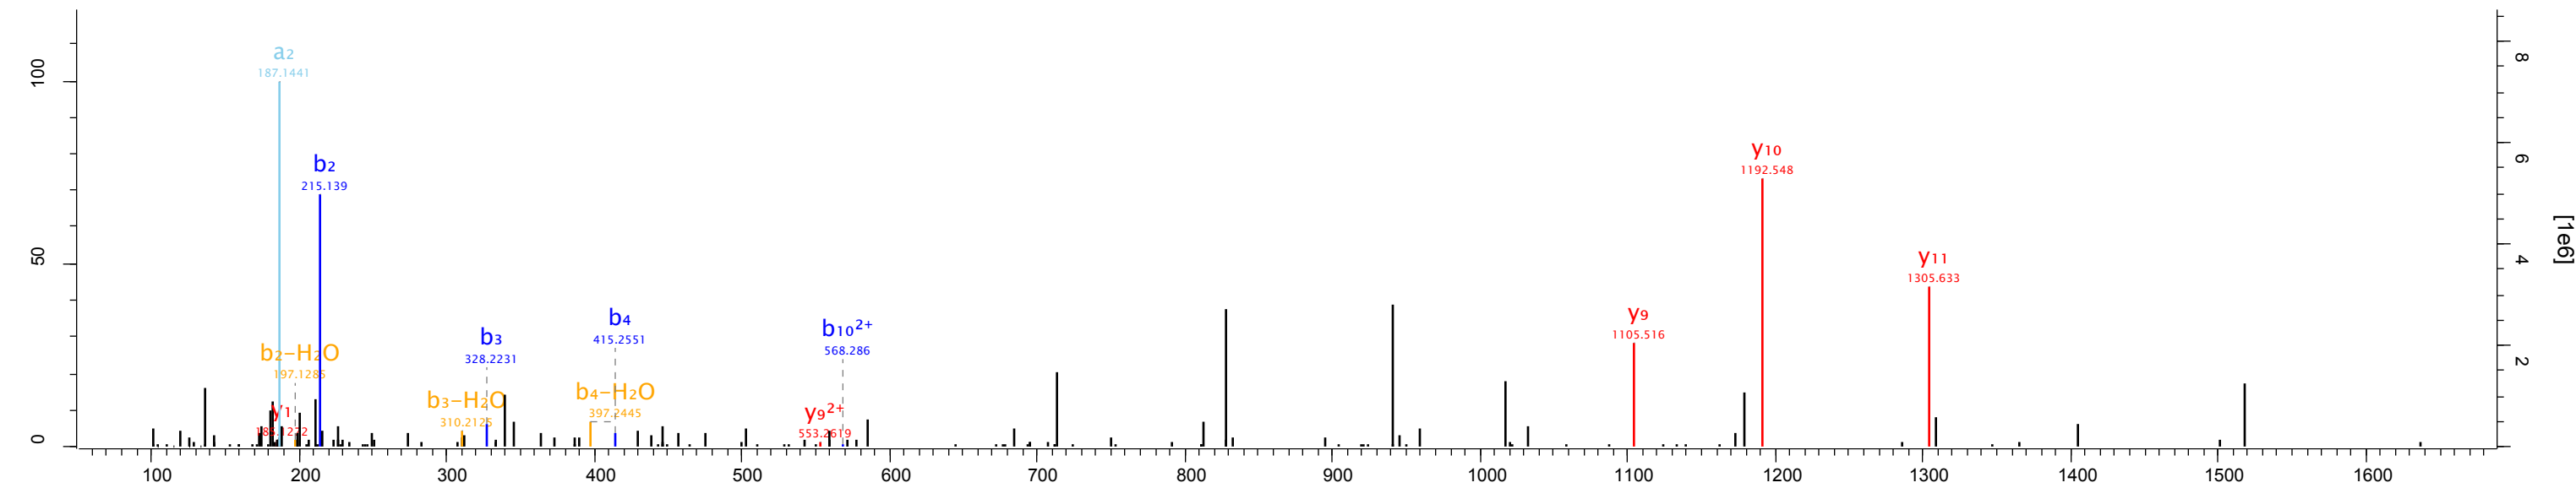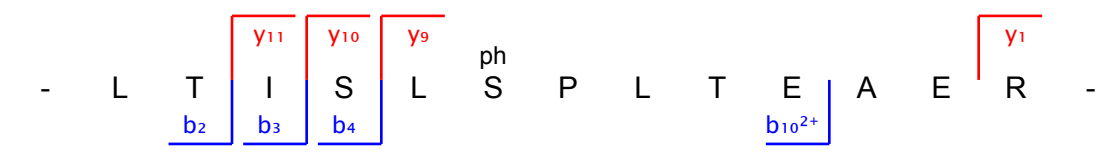

Raw file 20171215\_MaS\_33SR\_LMH\_proteome\_01 Scan 108261 Method FTMS; HCD Score 59.5 m/z 957.45 Gene names PIP4K2B

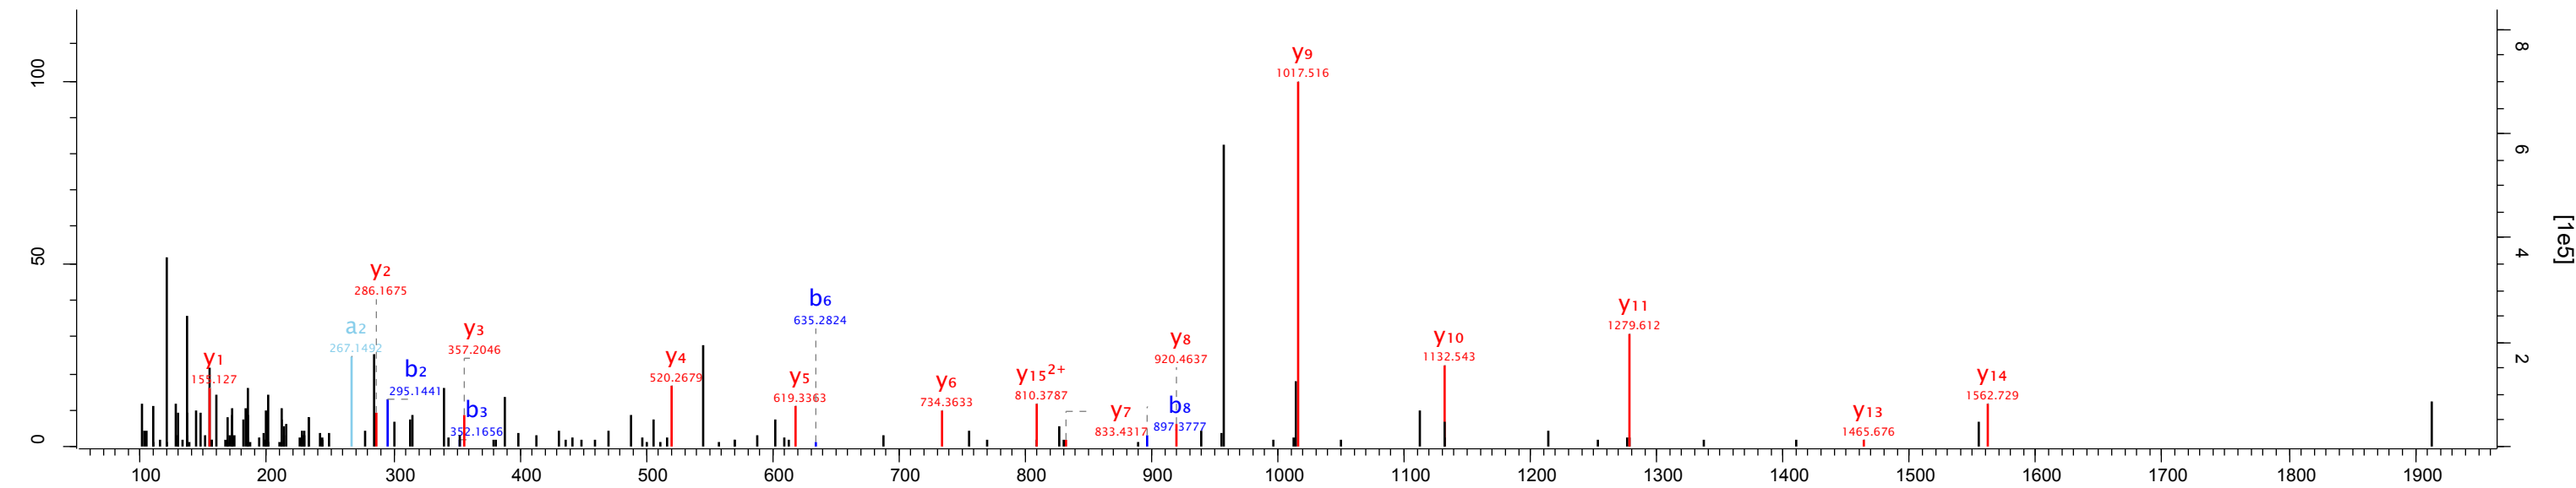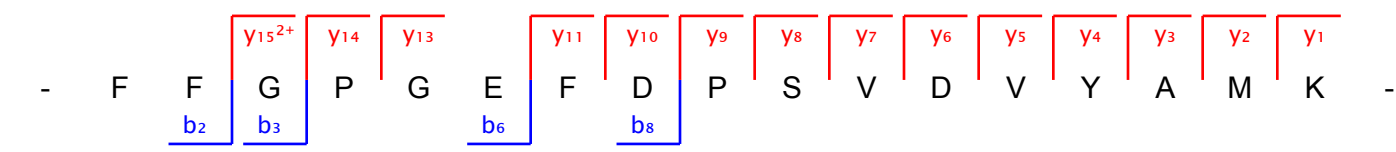

Raw file: 20171215\_MaS\_33SR\_LMH\_proteome\_01  
 Scan: 110331 Method: FTMS; HCD Score: 69.28 m/z: 651.33 Gene names: MRPS25

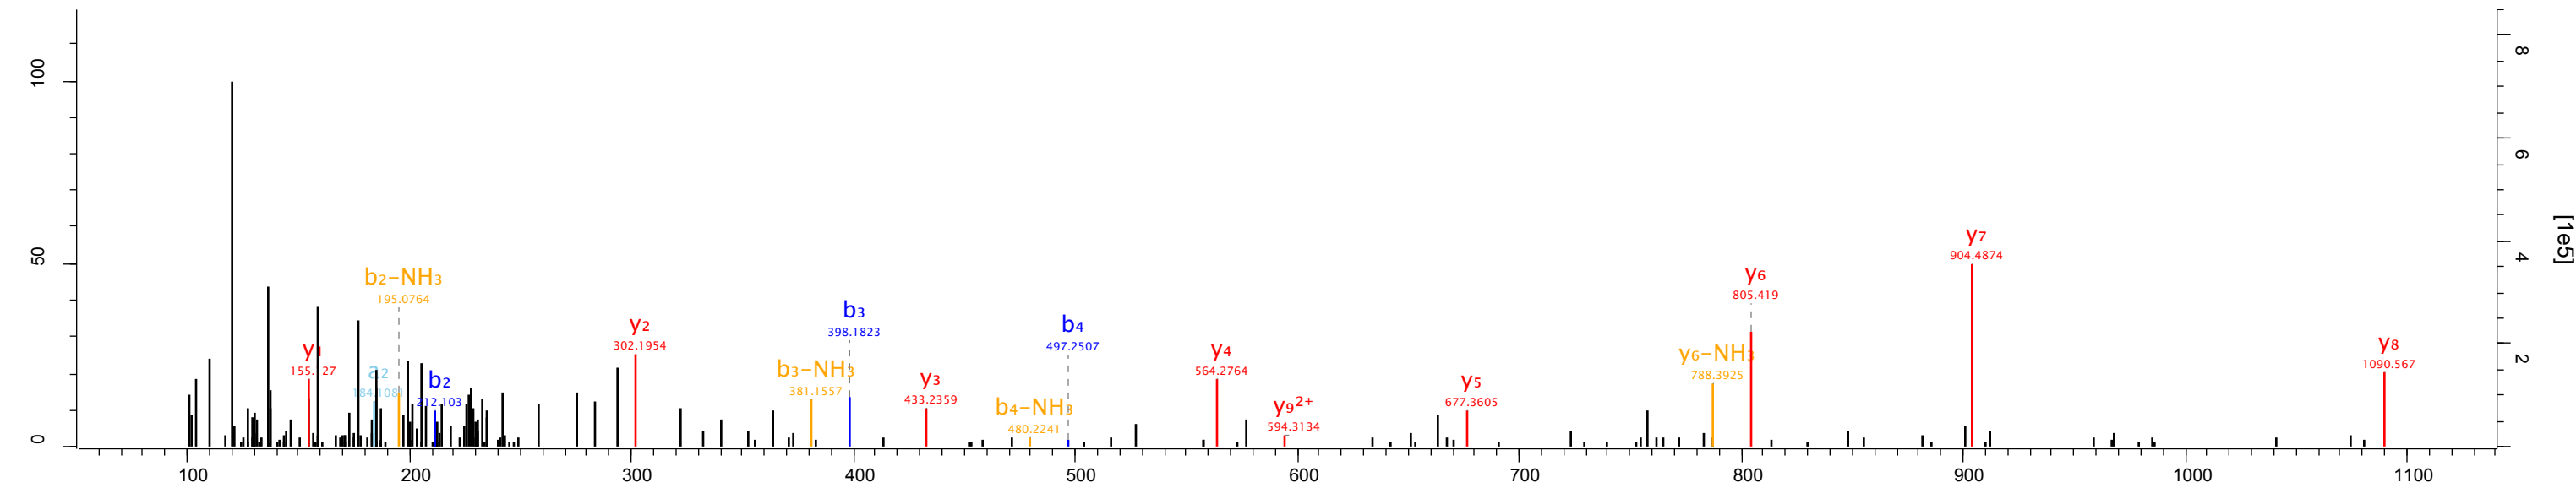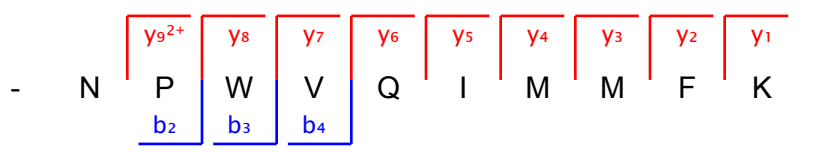

Raw file 20171215\_MaS\_33SR\_LMH\_proteome\_01 Scan 117851 Method FTMS; HCD Score 63.09 m/z 508.98 Gene names CCDC101

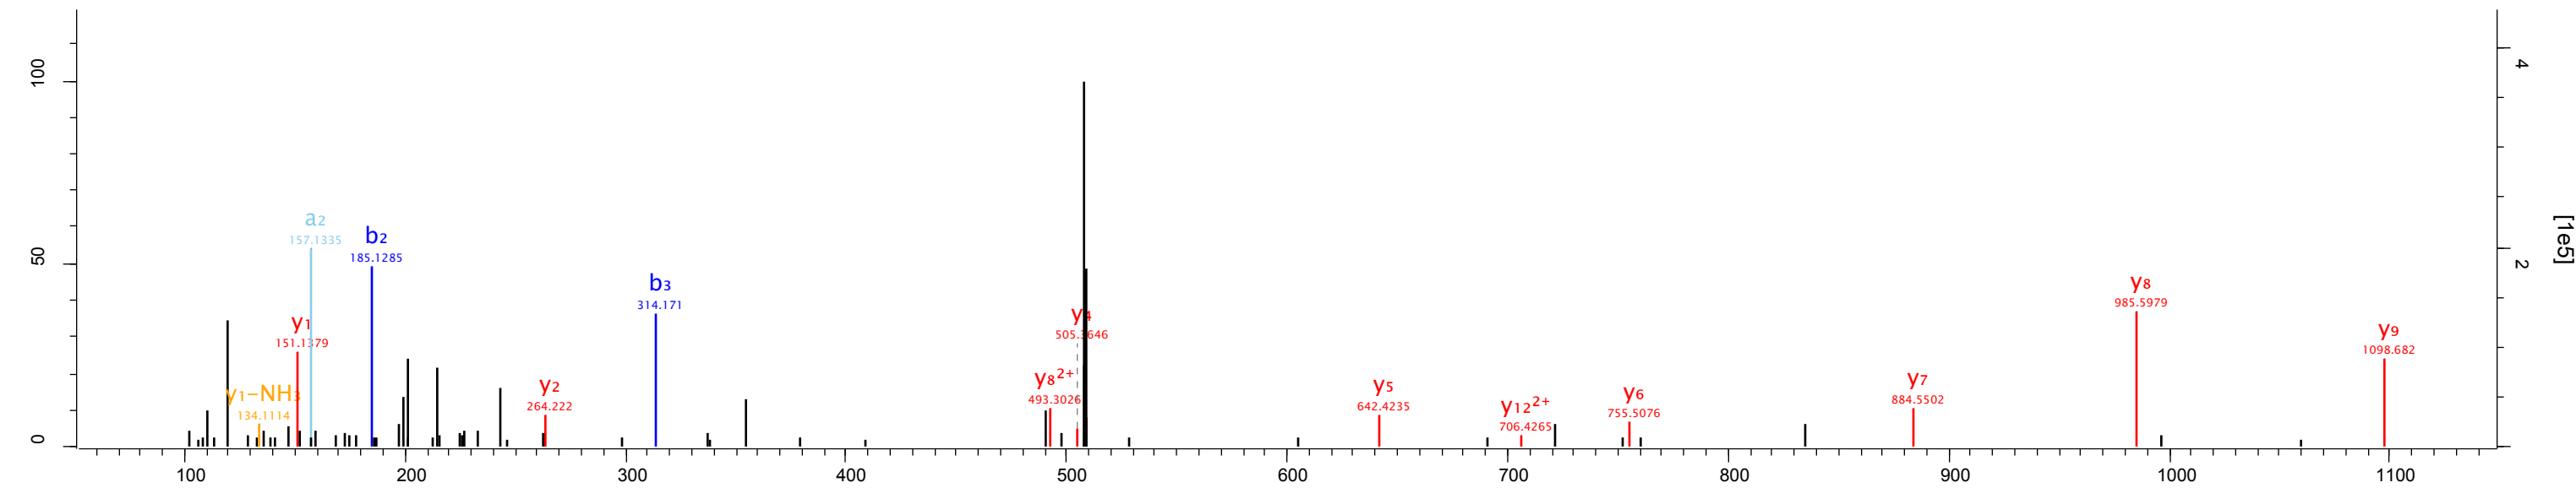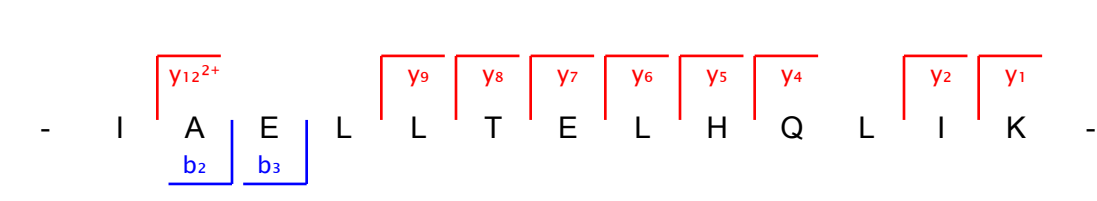

Raw file: 20171215\_MaS\_33SR\_LMH\_proteome\_01  
 Scan: 126271 Method: FTMS; HCD Score: 94.28 m/z: 979.06 Gene names: EPS8L2

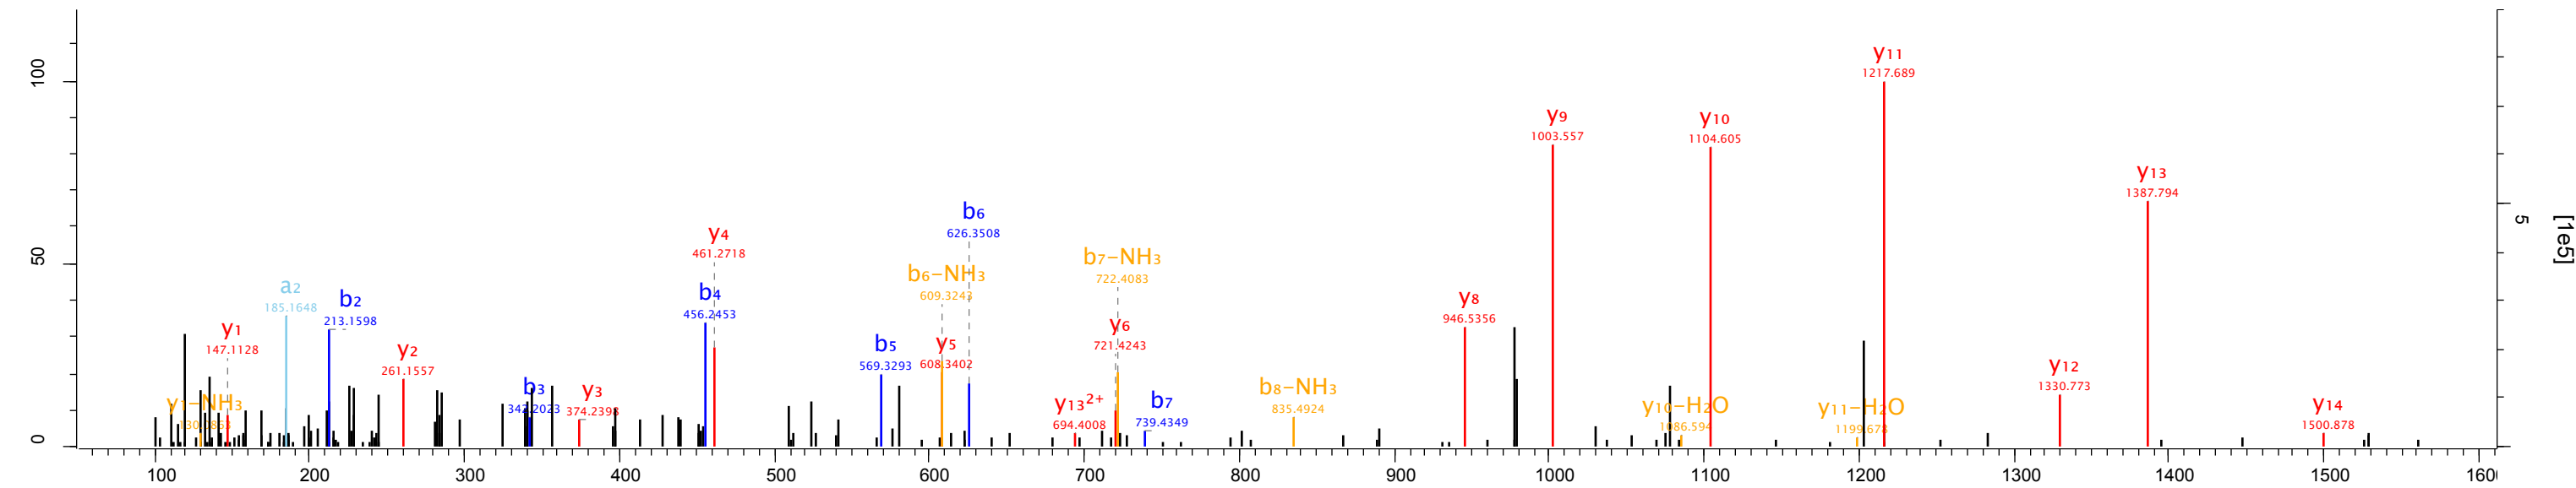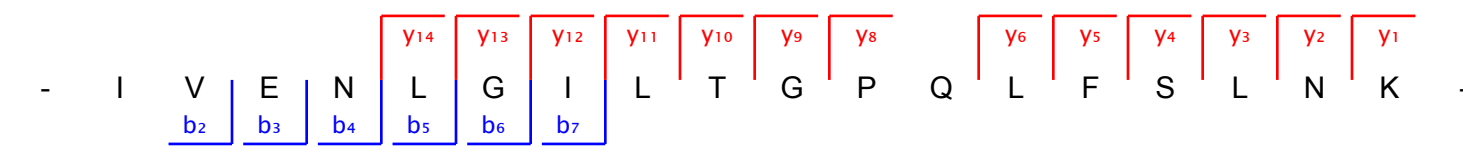

Raw file: 20171215\_MaS\_33SR\_LMH\_proteome\_01  
 Scan: 127021 Method: FTMS; HCD Score: 104.94 m/z: 894 Gene names: BAG1

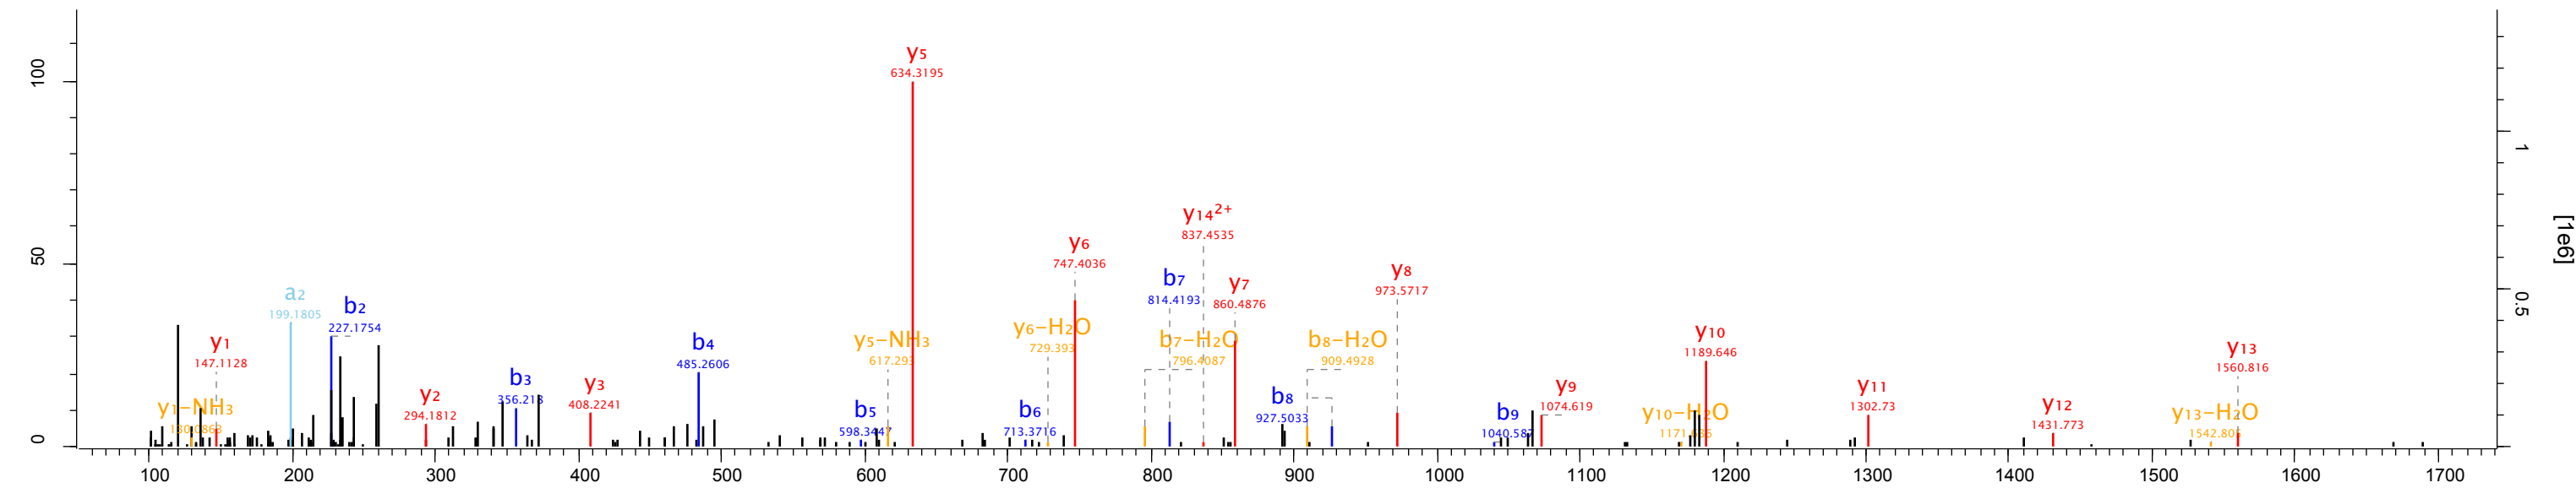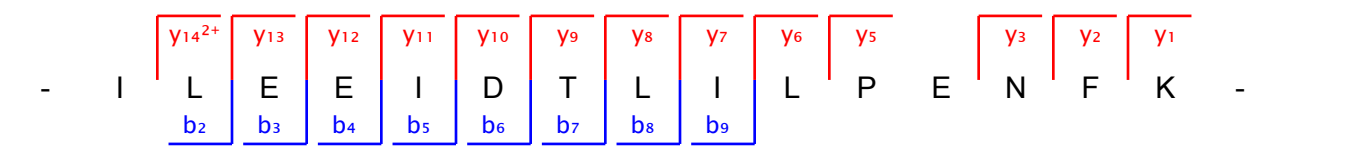

Raw file: 20171215\_MaS\_33SR\_LMH\_proteome\_01  
 Scan: 128921 Method: FTMS; HCD Score: 99.09 m/z: 1100.56 Gene names: ERI3

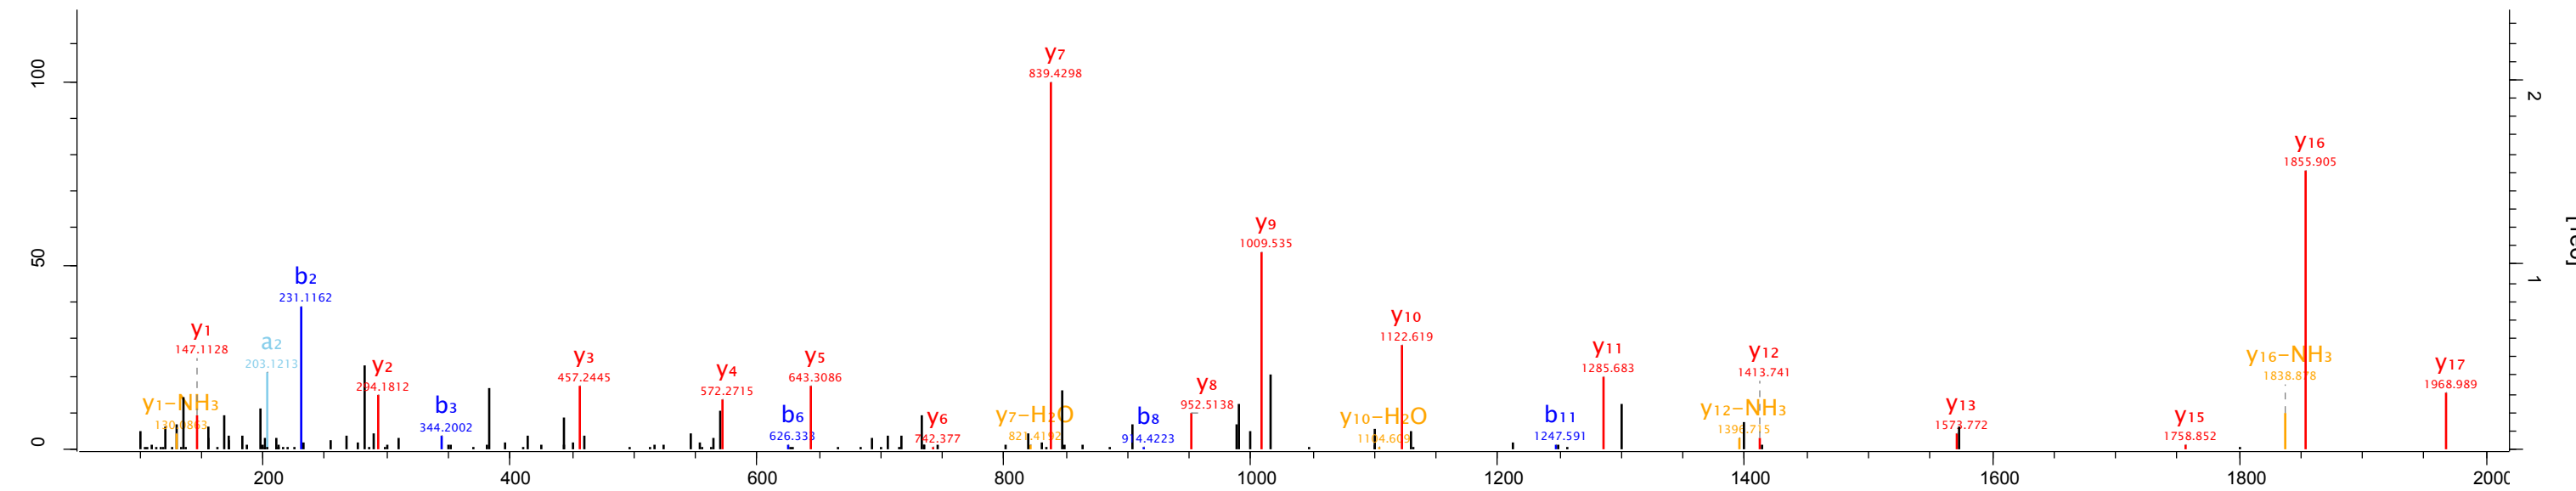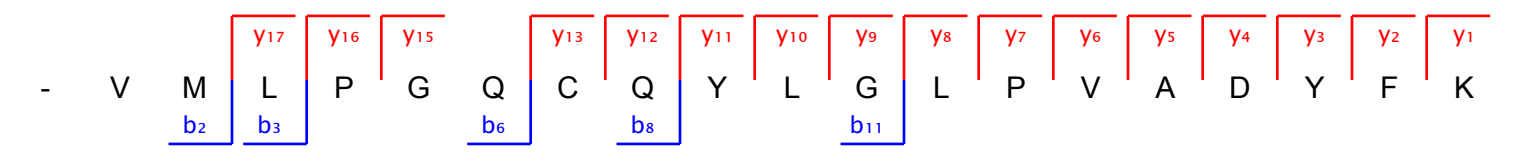

Raw file: 20171215\_MaS\_33SR\_LMH\_proteome\_01  
 Scan: 130931 Method: FTMS; HCD Score: 111.7 m/z: 938.47 Gene names: ASAH1

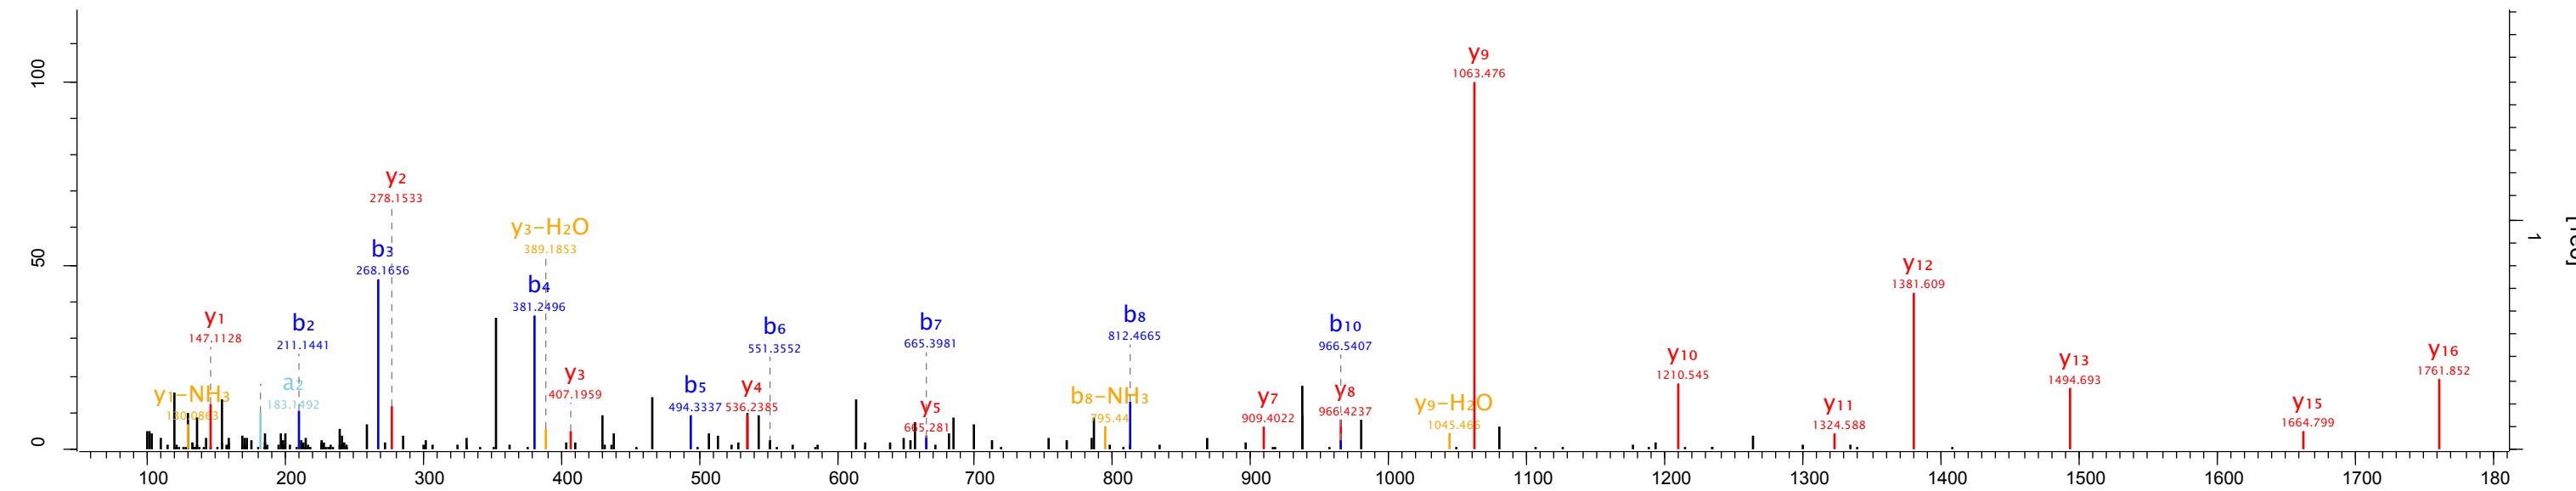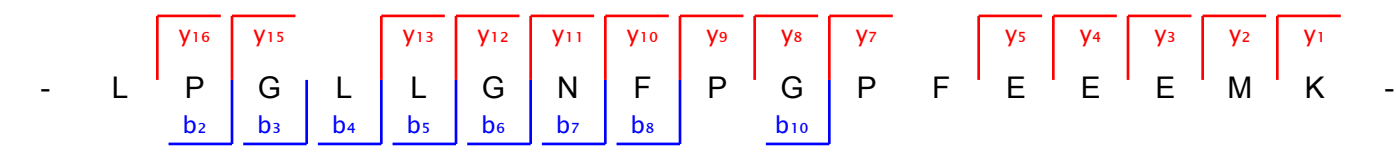



Raw file 20171215\_MaS\_33SR\_LMH\_proteome\_01 Scan 132161 Method FTMS; HCD Score 55.01 m/z 620.02 Gene names GIPC2

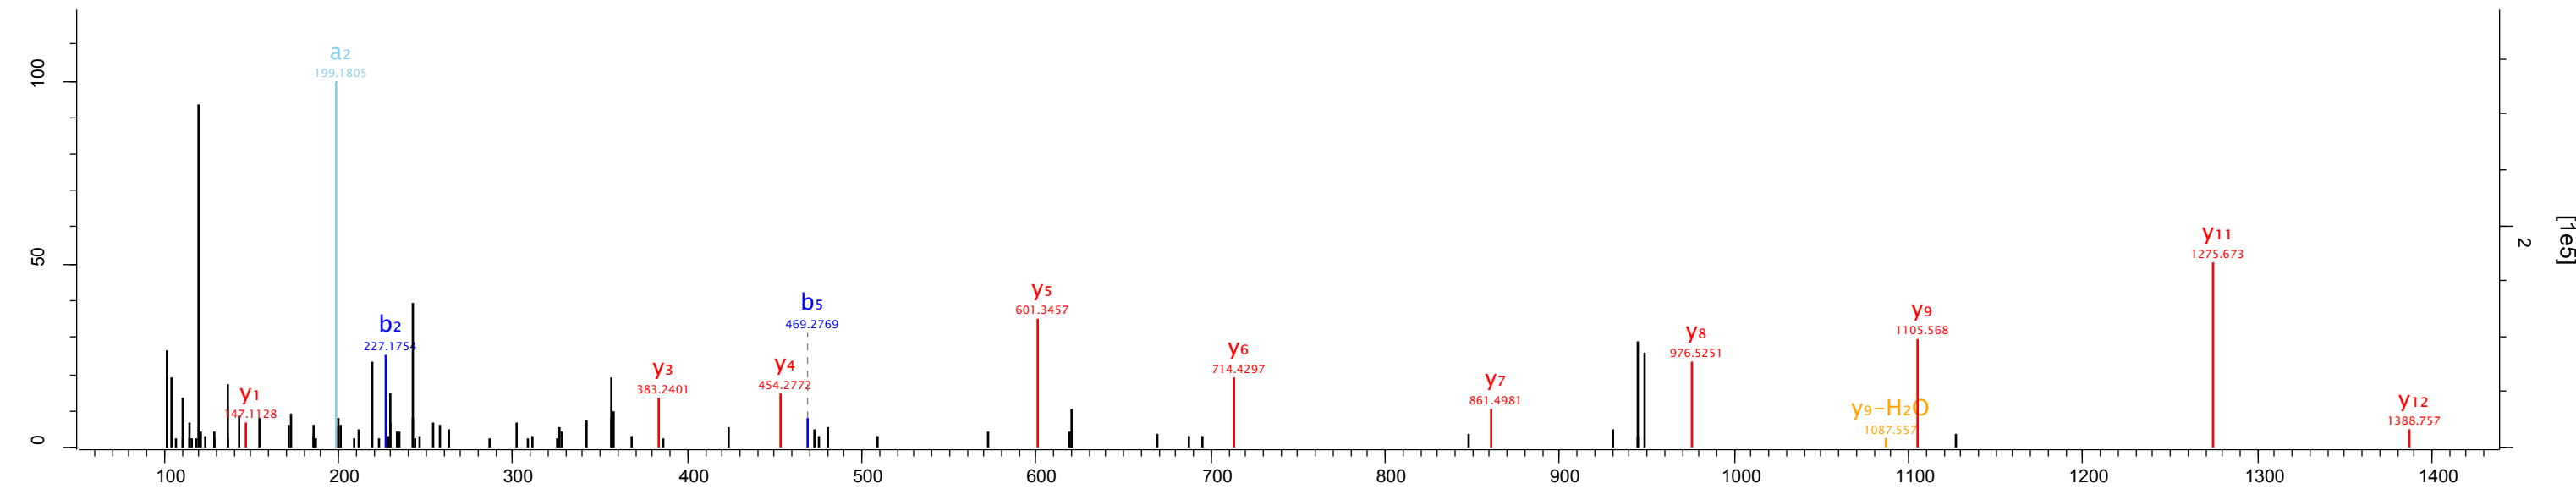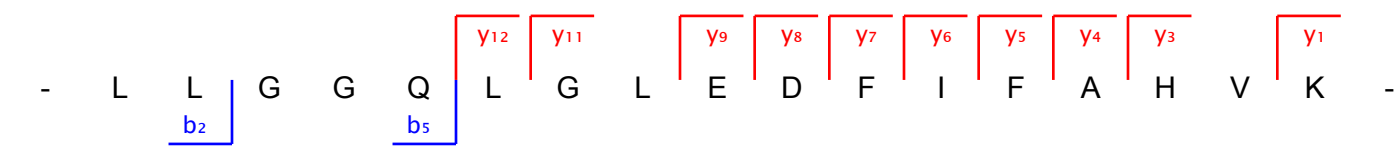

Raw file: 20171215\_MaS\_33SR\_LMH\_proteome\_01  
 Scan: 134081 Method: FTMS; HCD Score: 89.97 m/z: 1074.21 Gene names: OAS3

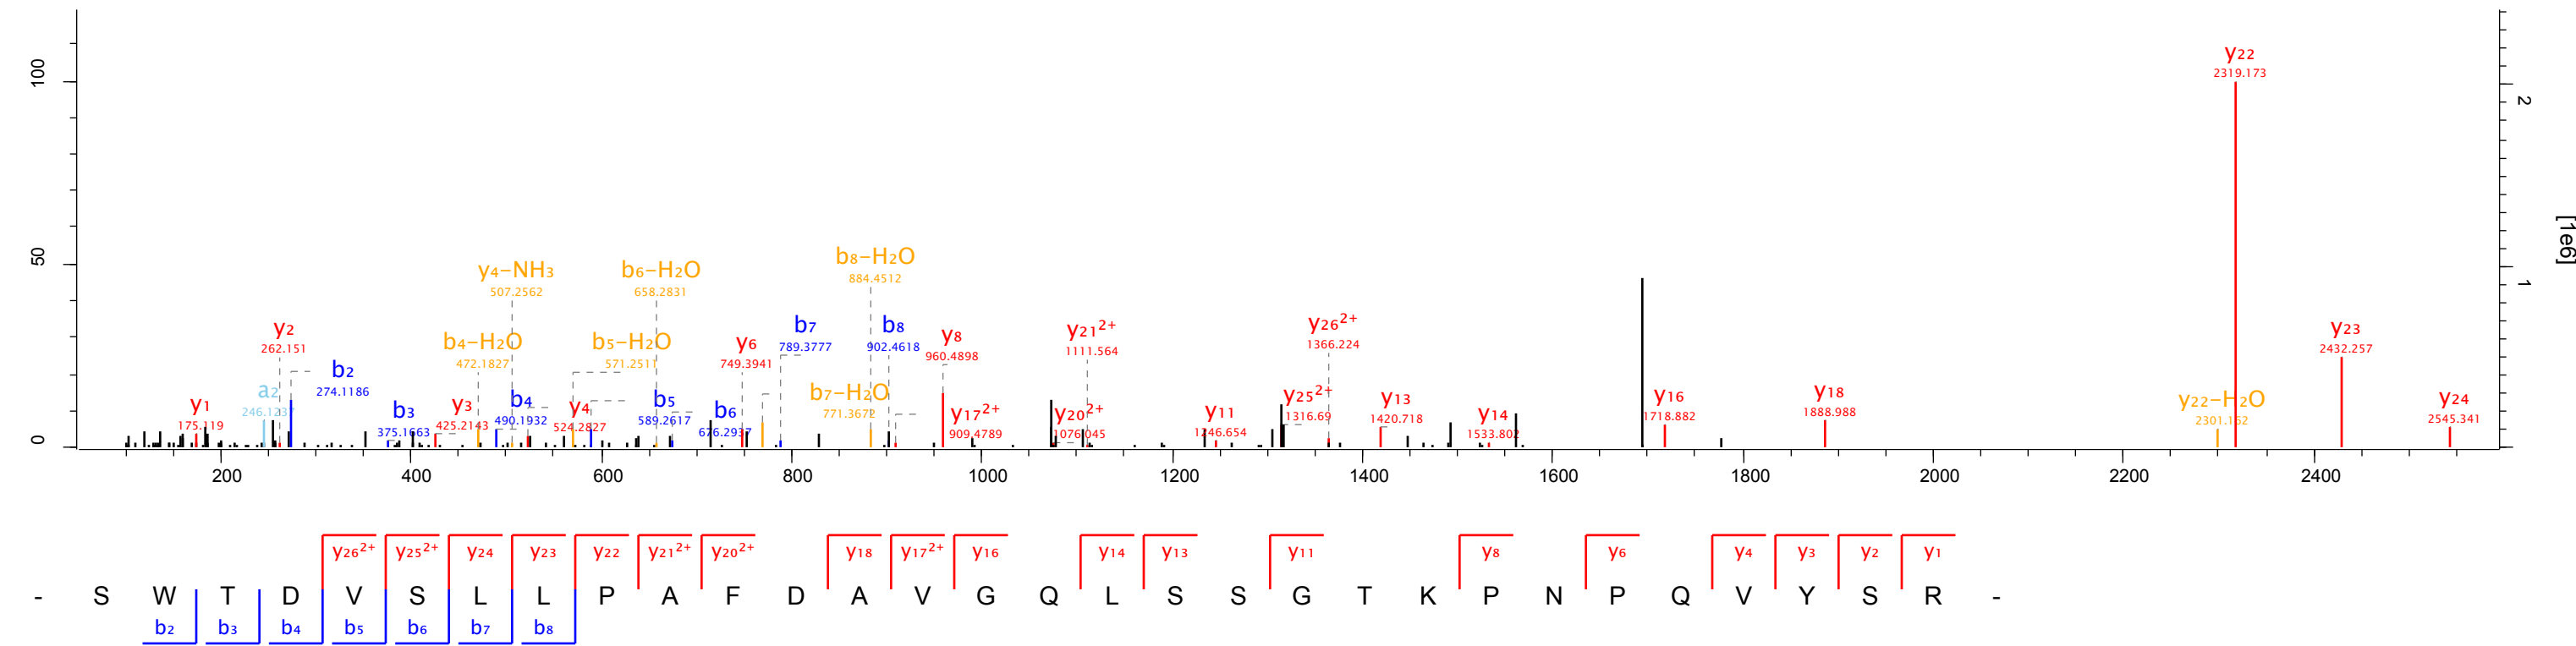

Raw file 20171215\_MaS\_33SR\_LMH\_proteome\_01 Scan 13431 Method FTMS; HCD Score 54.2 m/z 617.8 Gene names MYL1;MYL3

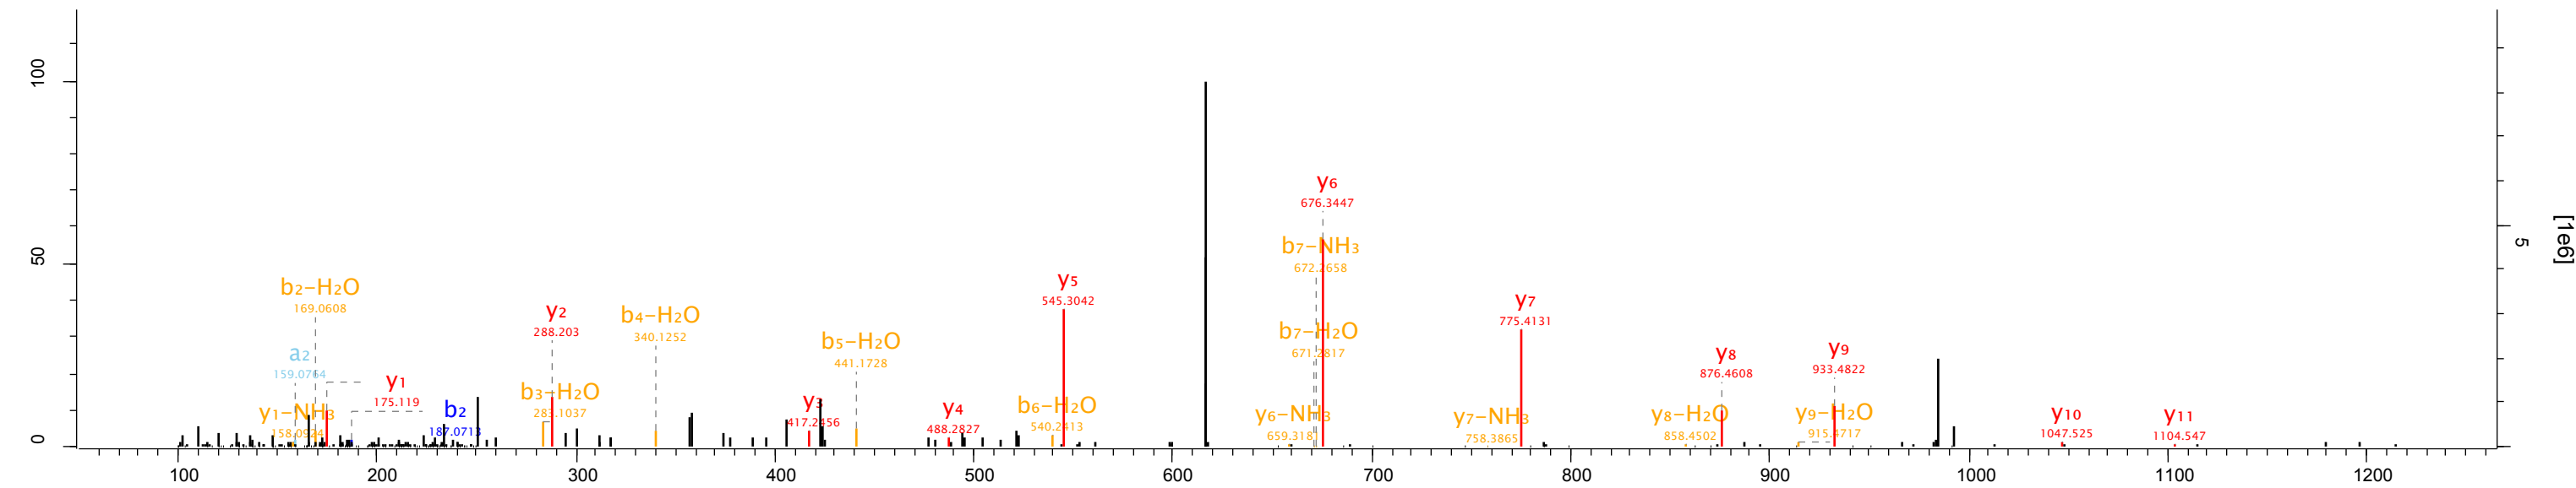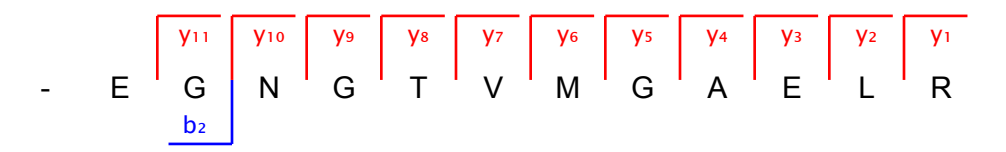

Raw file 20171215\_MaS\_33SR\_LMH\_proteome\_01 Scan 139881 Method FTMS; HCD Score 44.63 m/z 892.5 Gene names WASL

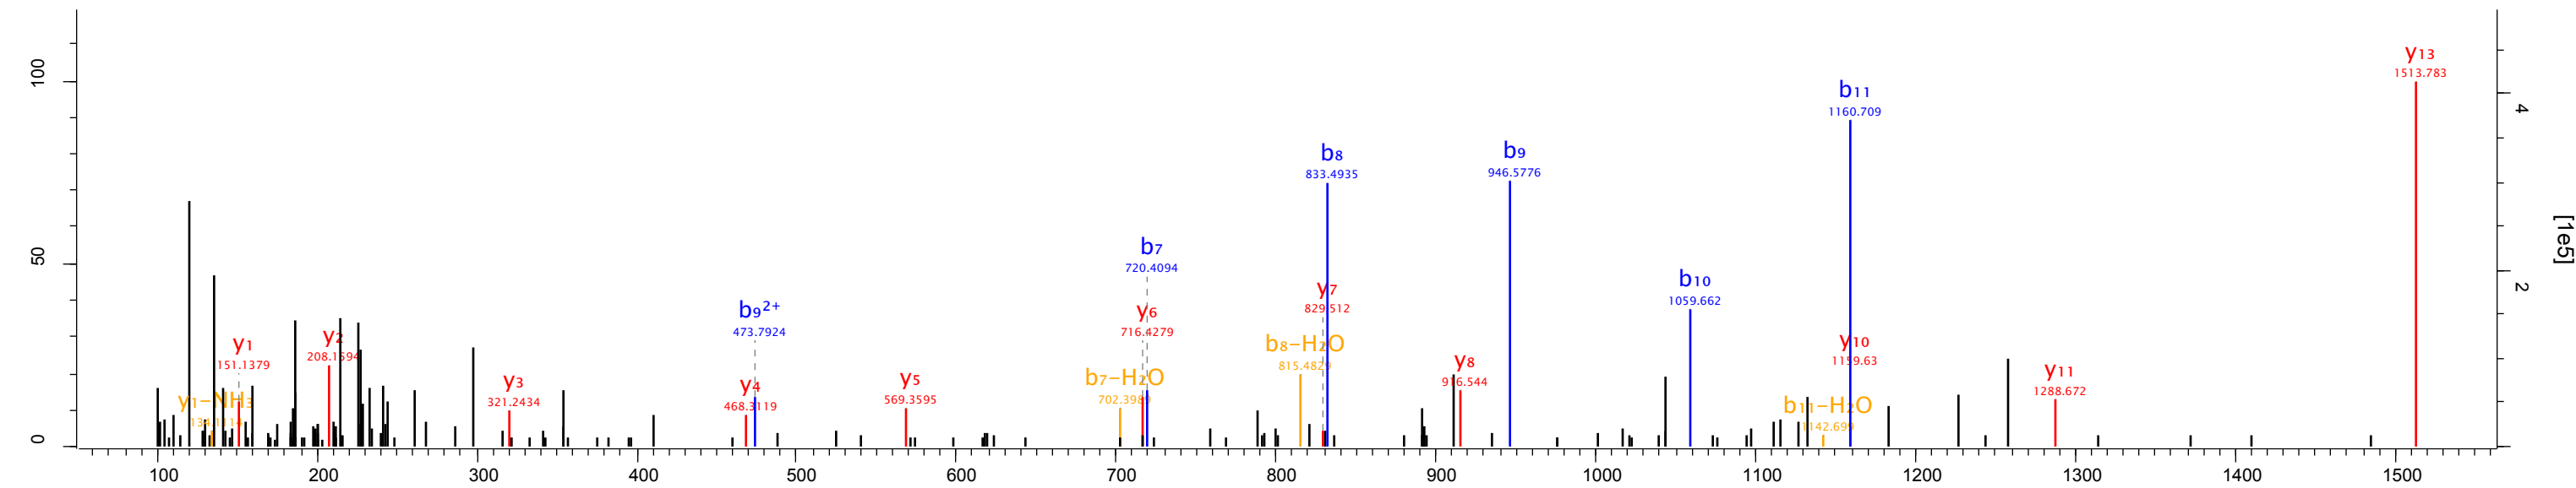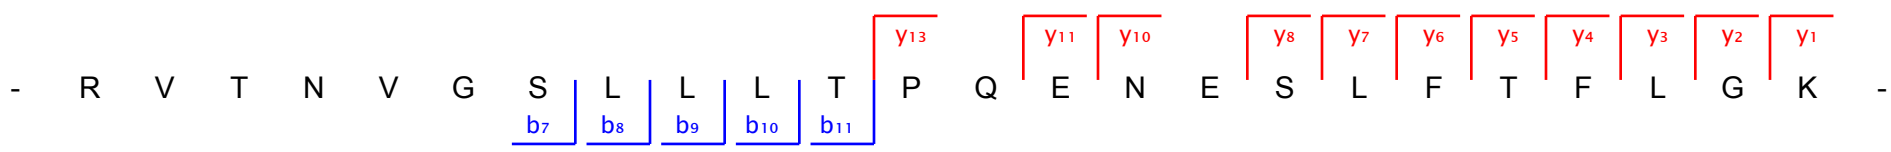

Raw file 20171215\_MaS\_33SR\_LMH\_proteome\_01 Scan 19001 Method FTMS; HCD Score 171.78 m/z 852.44 Gene names ATP5F1

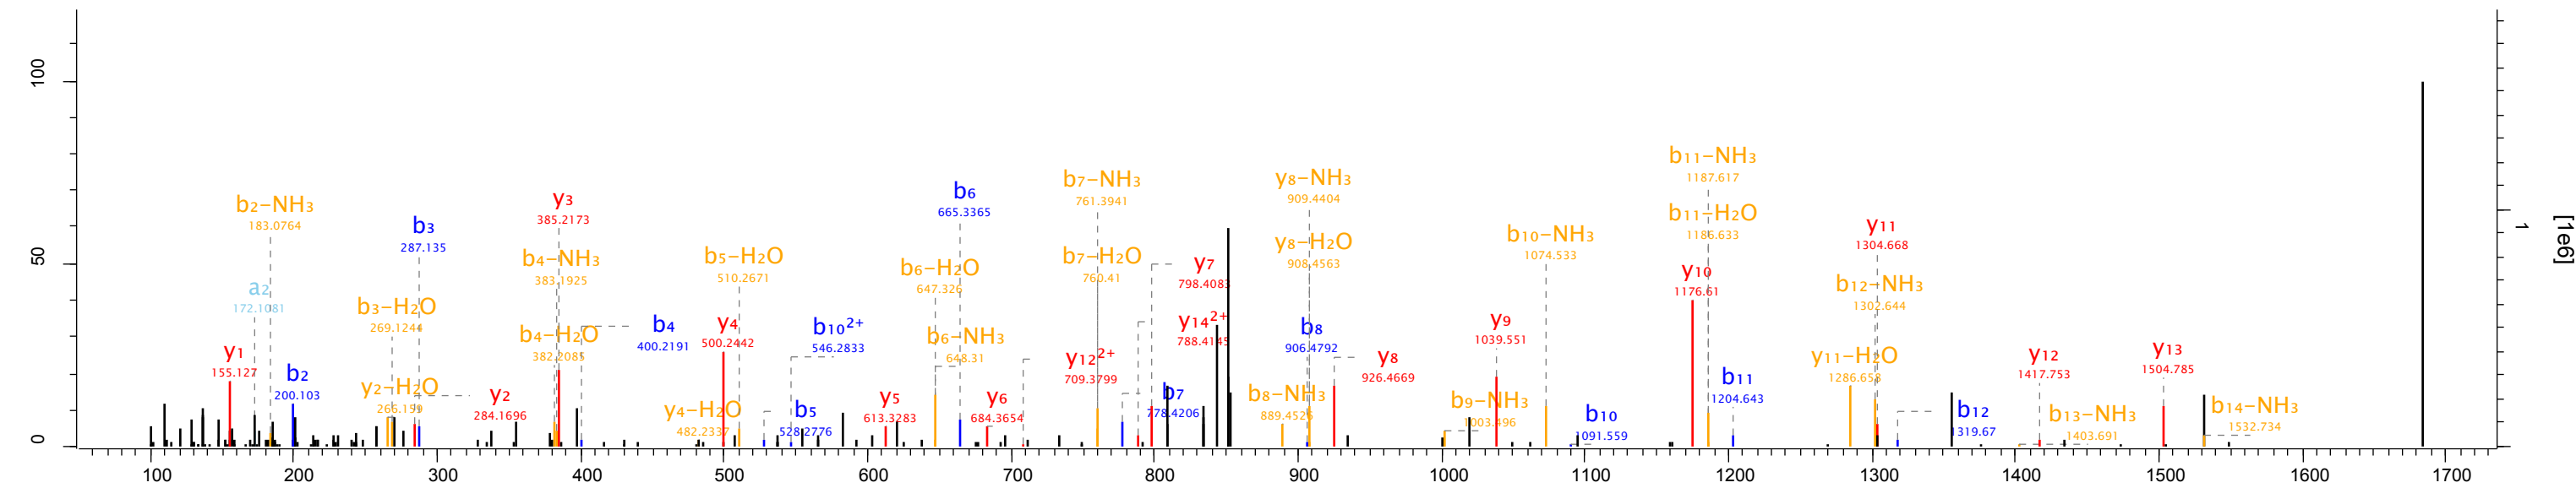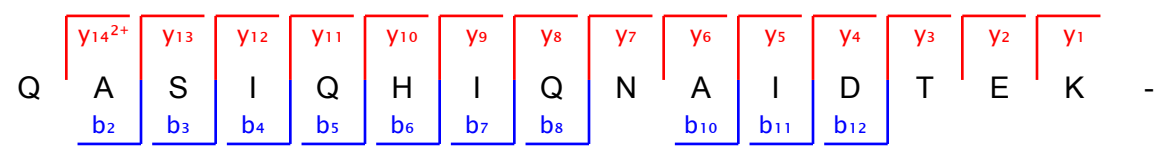

Raw file 20171215\_MaS\_33SR\_LMH\_proteome\_01 Scan 3731 Method FTMS; HCD Score 48.42 m/z 471.23 Gene names DGAT2L6

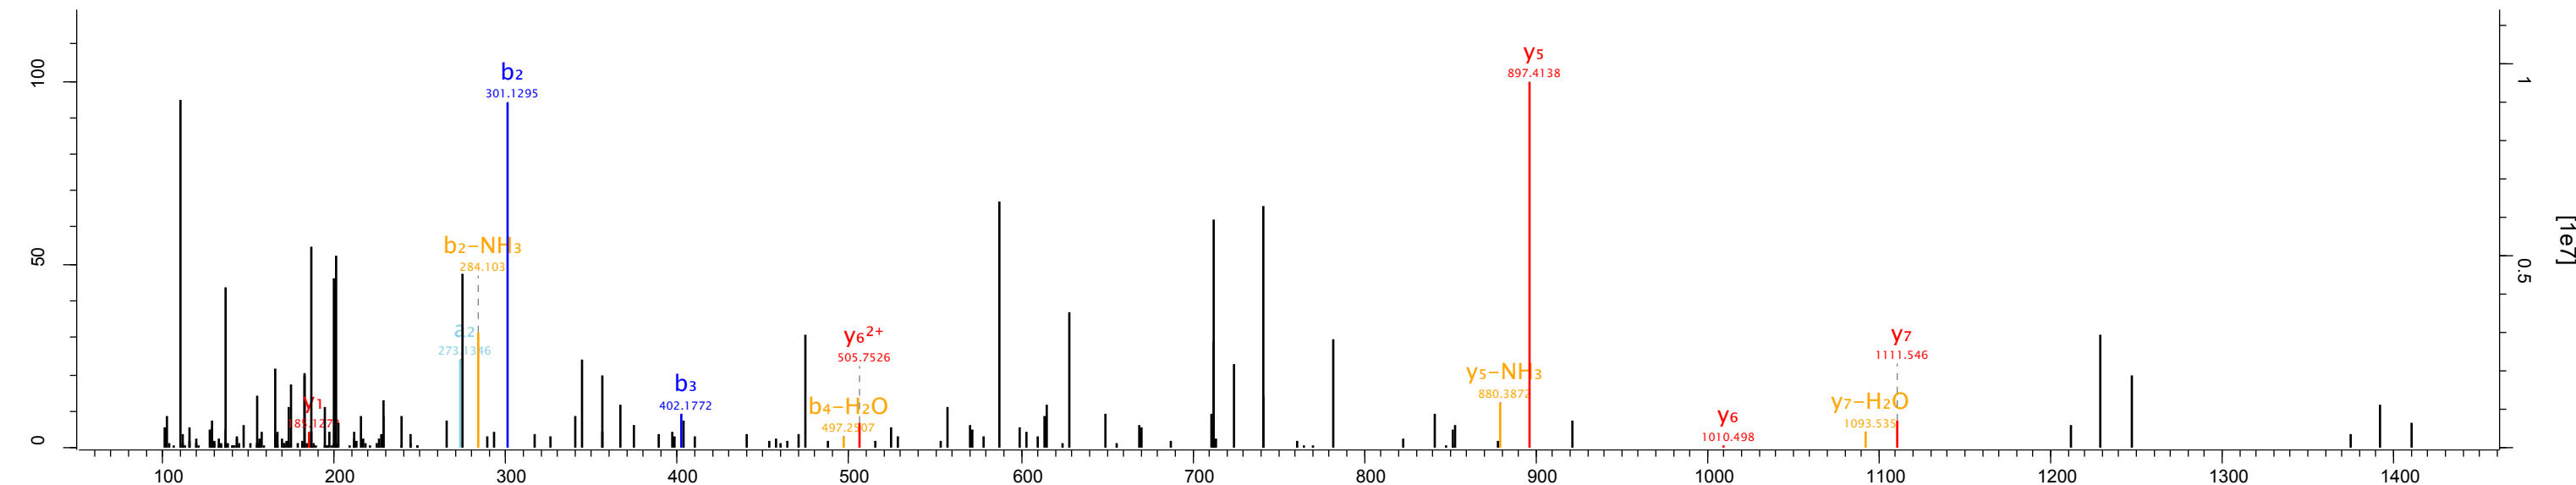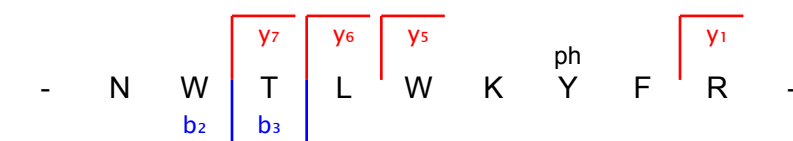

Raw file 20171215\_MaS\_33SR\_LMH\_proteome\_01 Scan 3791 Method FTMS; HCD Score 67.21 m/z 735.84

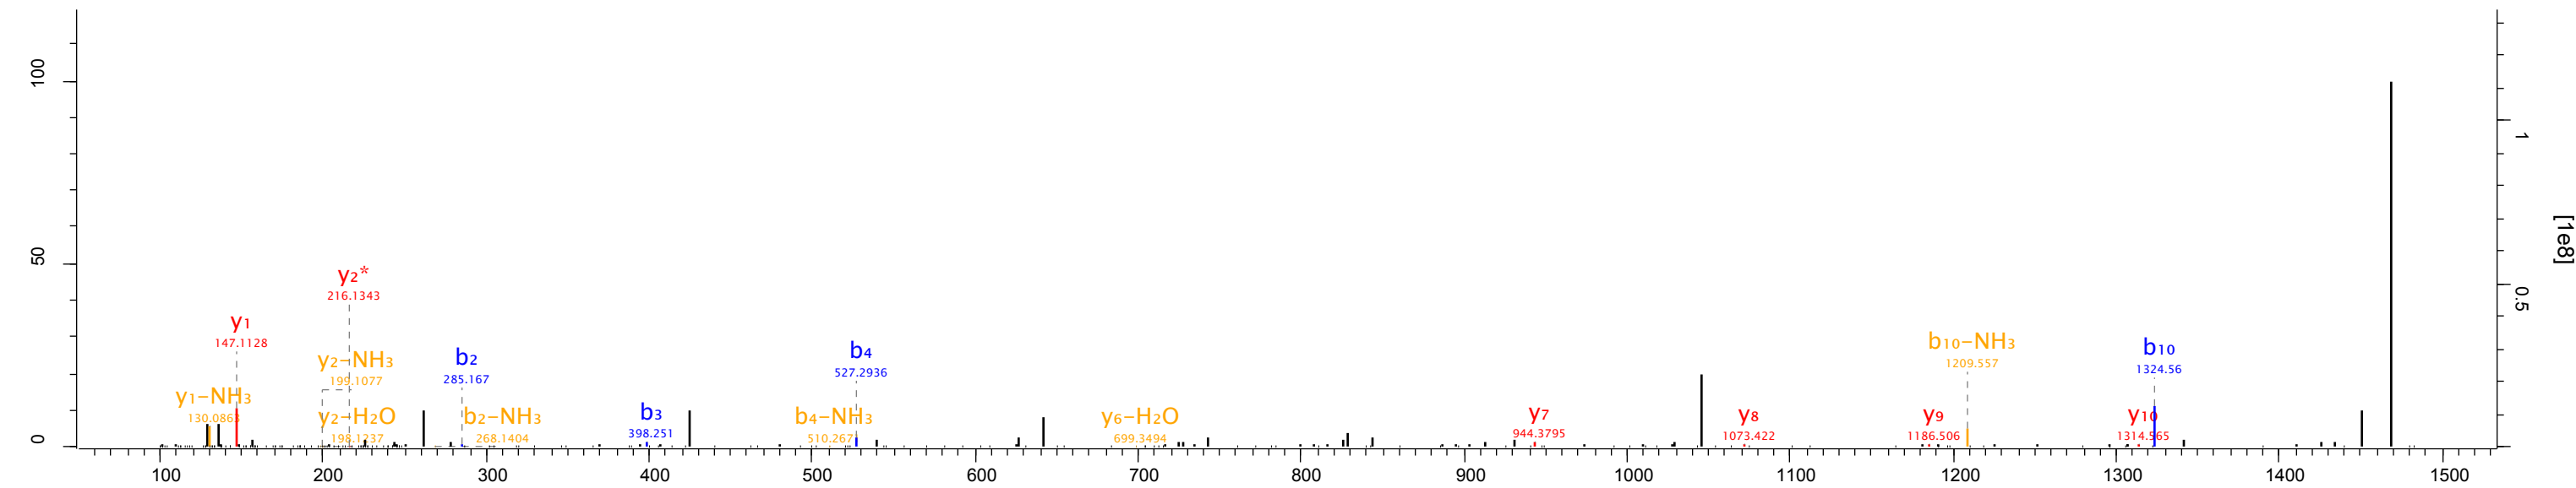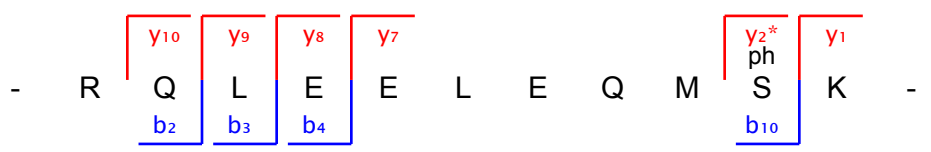

Raw file  
20171215\_MaS\_33SR\_LMH\_proteome\_01

Scan 61391 Method FTMS; HCD Score 118.72 m/z 1088.55 Gene names ATXN7L3B

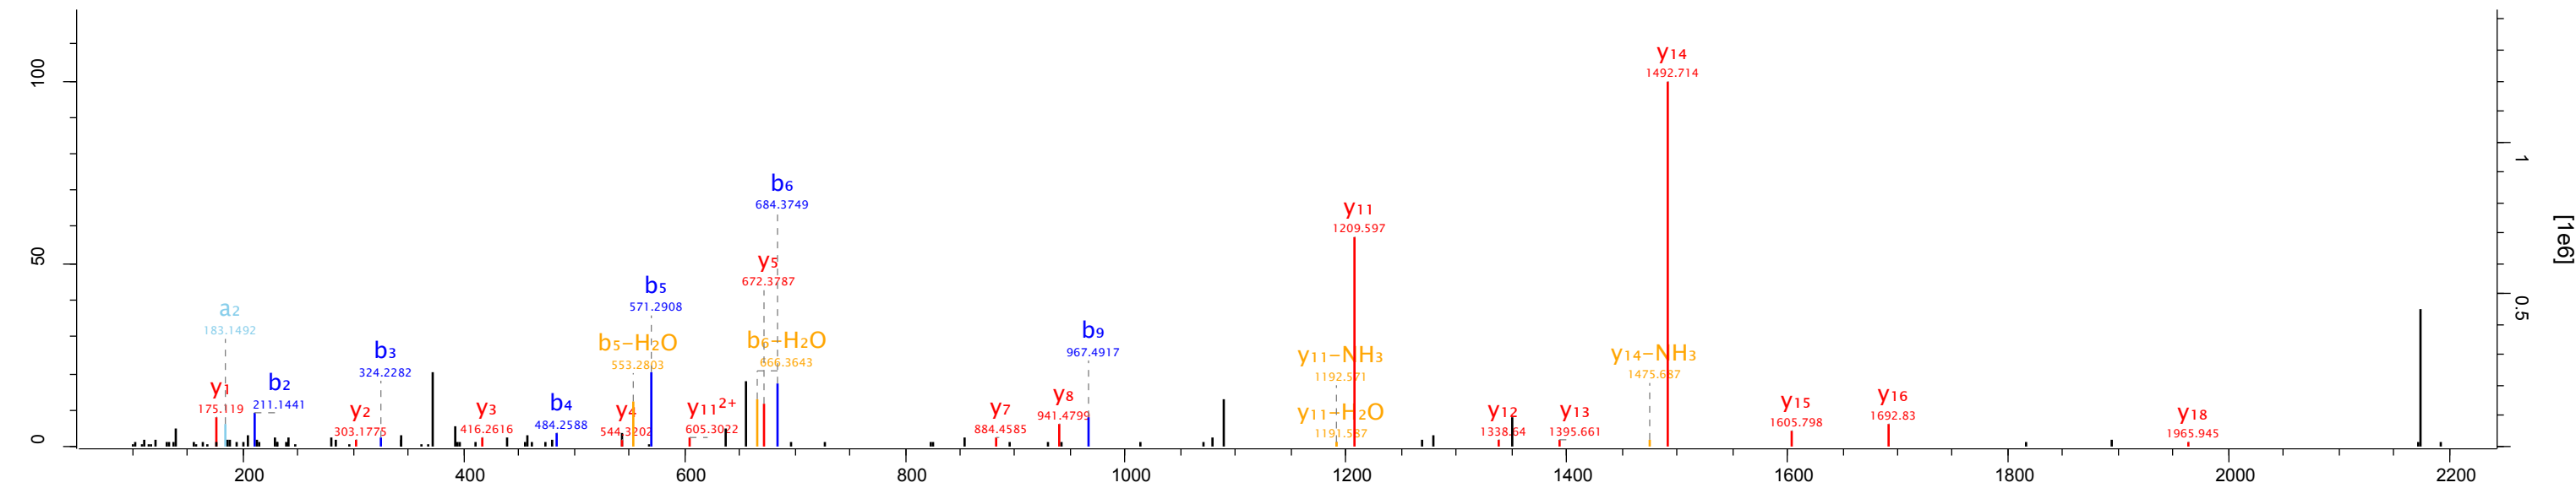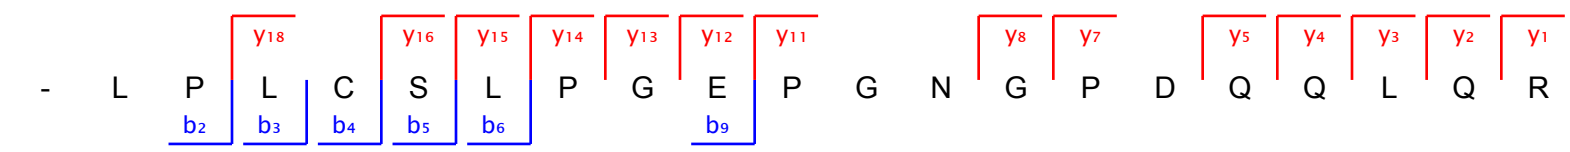



Raw file

20171215\_MaS\_33SR\_LMH\_proteome\_01

| Scan  | Method    | Score | m/z    | Gene names |
|-------|-----------|-------|--------|------------|
| 62491 | FTMS; HCD | 48.47 | 893.47 | FAM81B     |

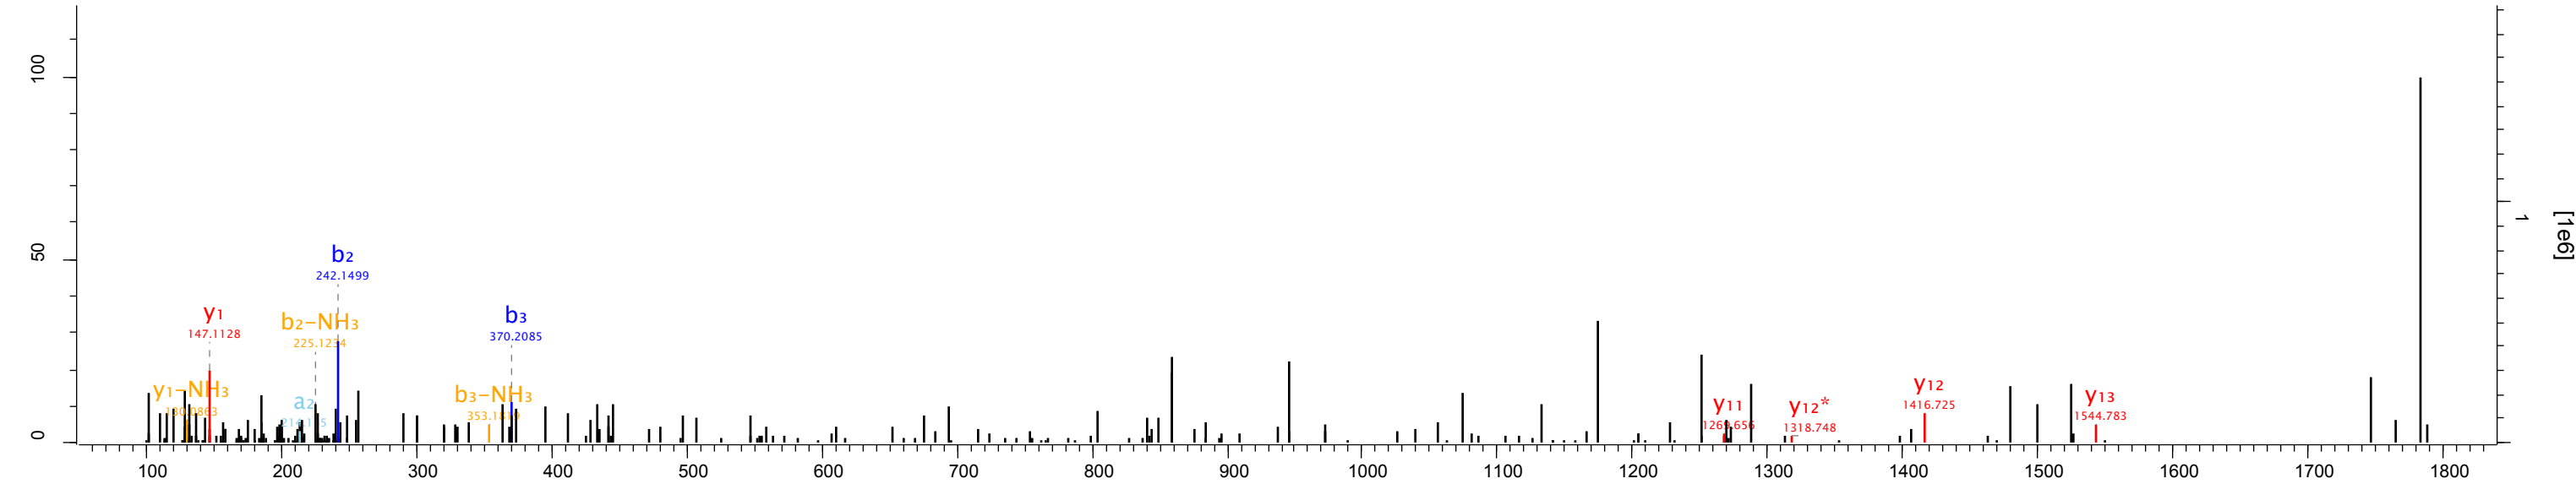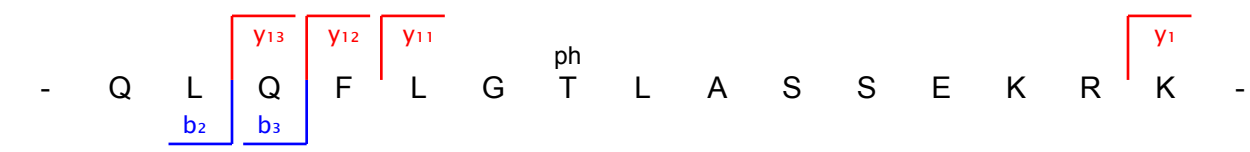

Raw file: 20171215\_MaS\_33SR\_LMH\_proteome\_01  
 Scan: 65301 Method: FTMS; HCD Score: 68.41 m/z: 1101.54 Gene names: FAM107B

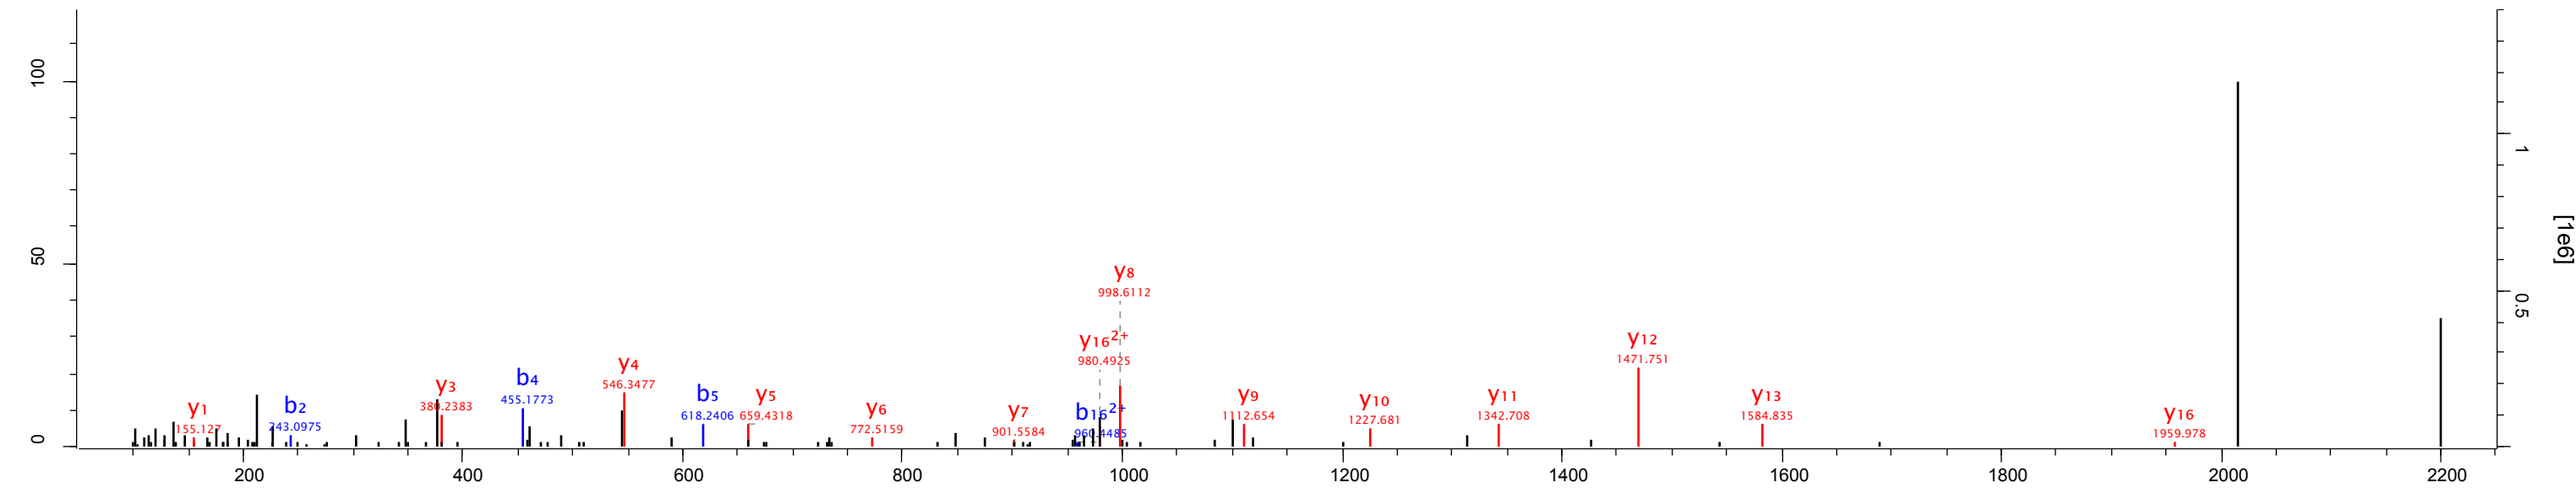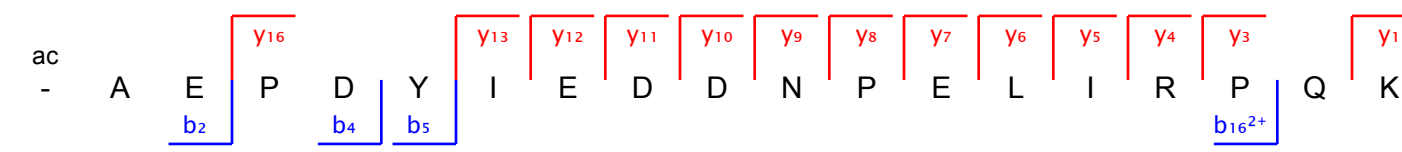

Raw file 20171215\_MaS\_33SR\_LMH\_proteome\_01 Scan 6821 Method FTMS; HCD Score 36.03 m/z 634.3

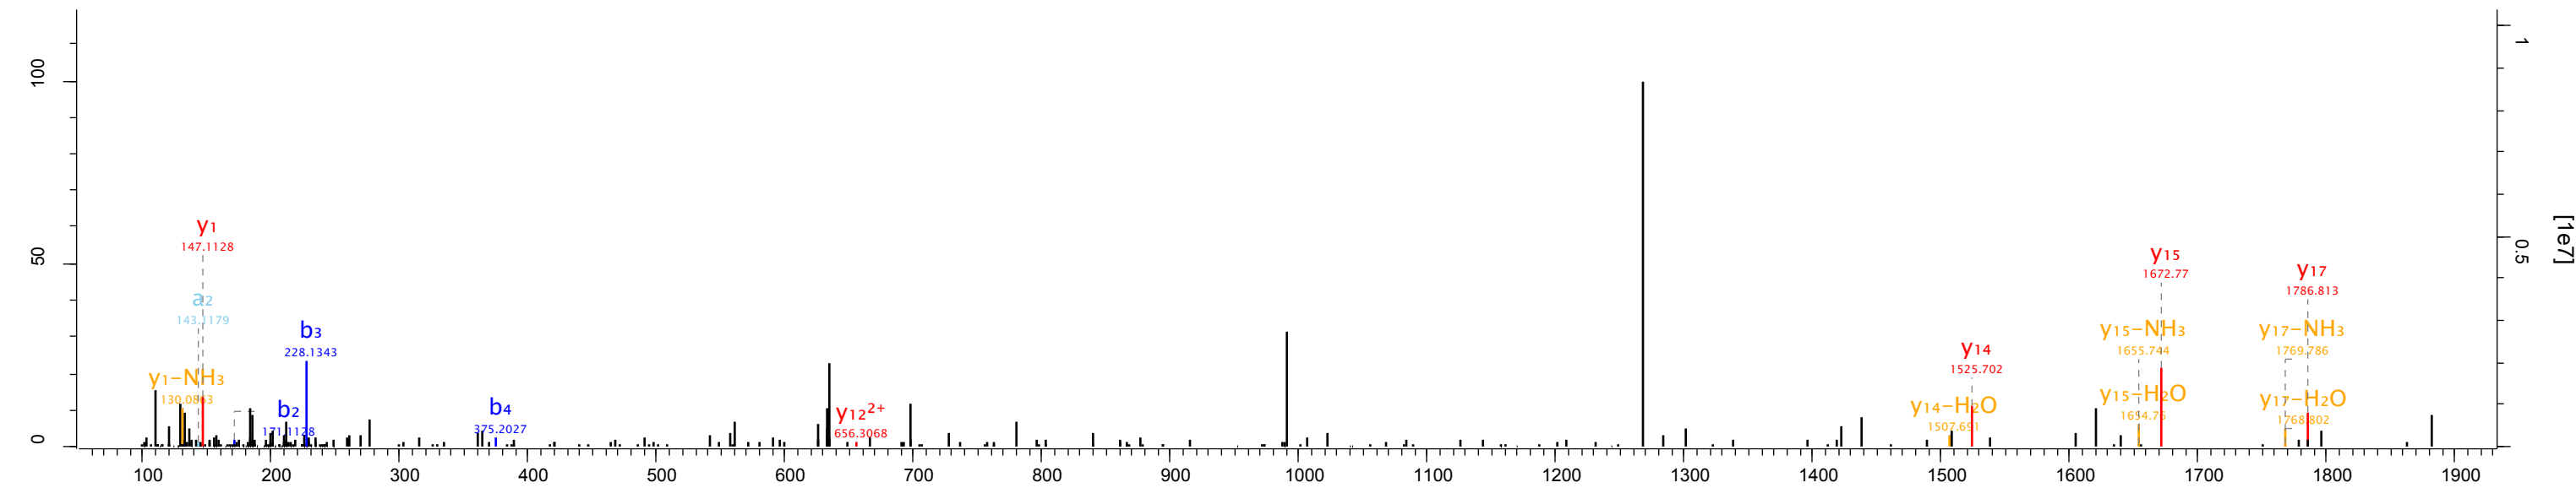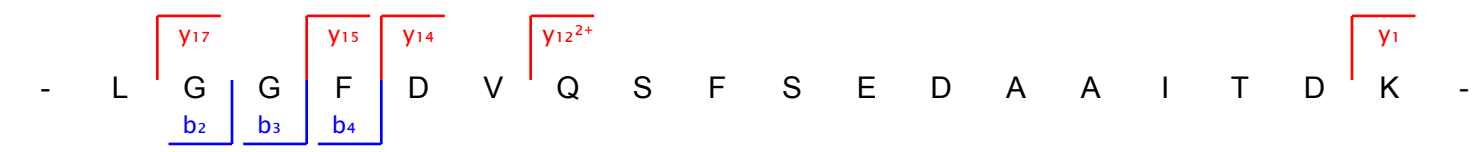

Raw file: 20171215\_MaS\_33SR\_LMH\_proteome\_01  
 Scan: 71101 Method: FTMS; HCD Score: 113.23 m/z: 908.78 Gene names: CDK2AP1

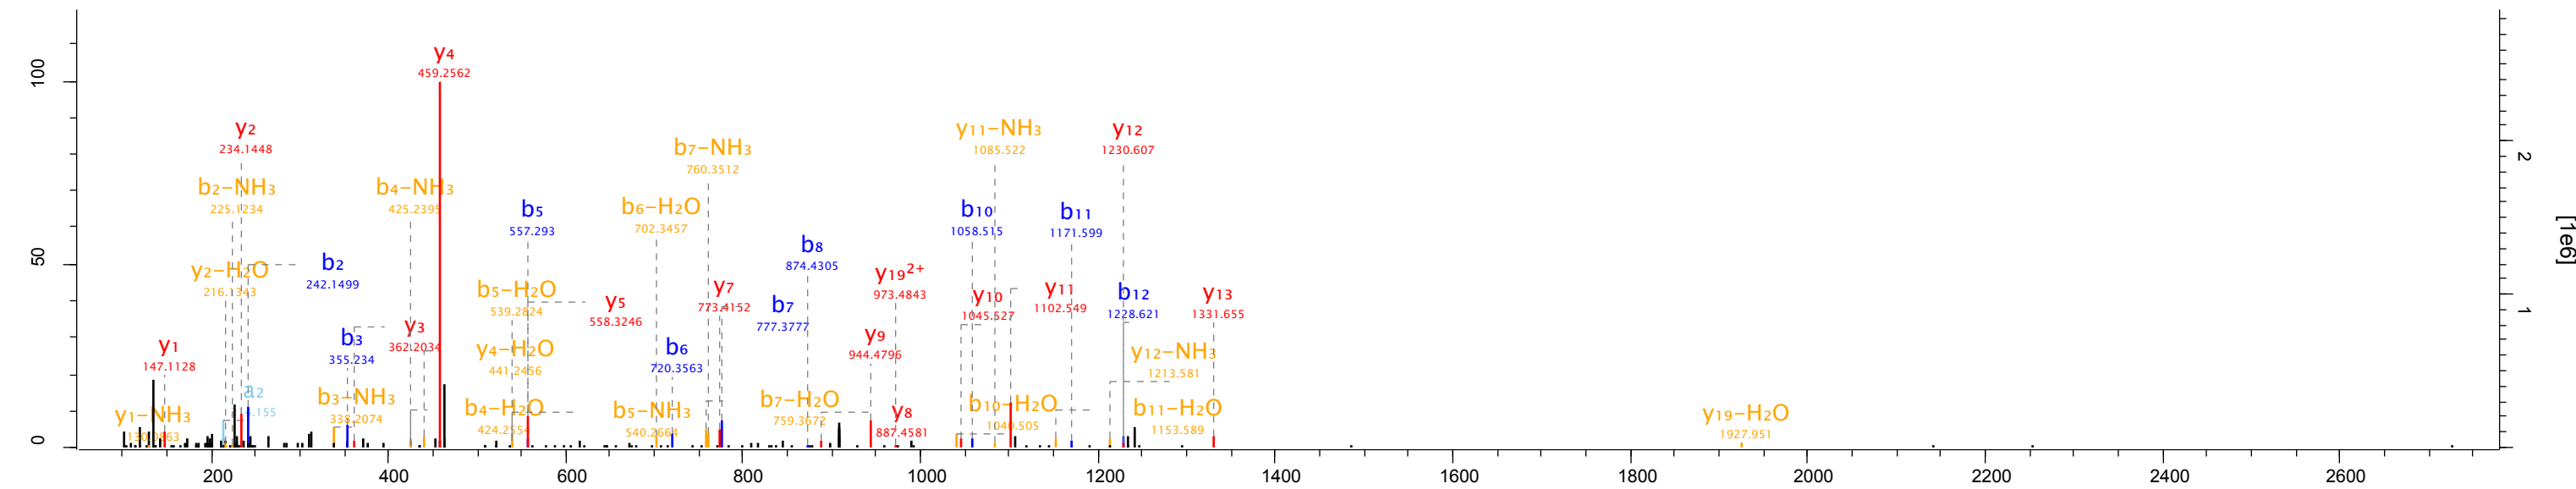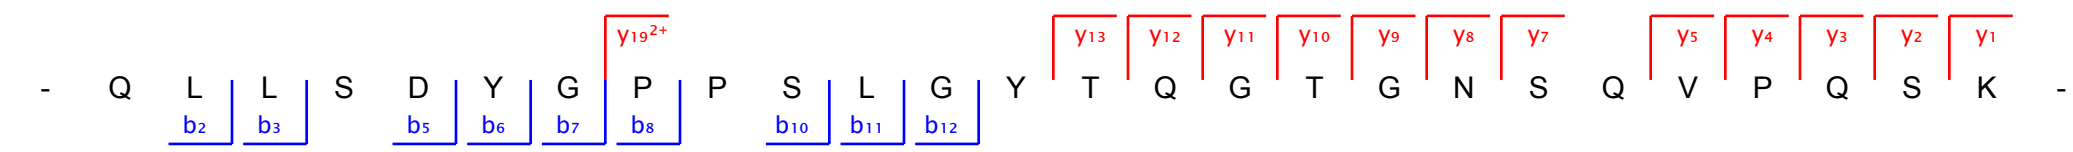

20171215\_MaS\_33SR\_LMH\_proteome\_01 73121 FTMS; HCD 80.69 752.87 AGA

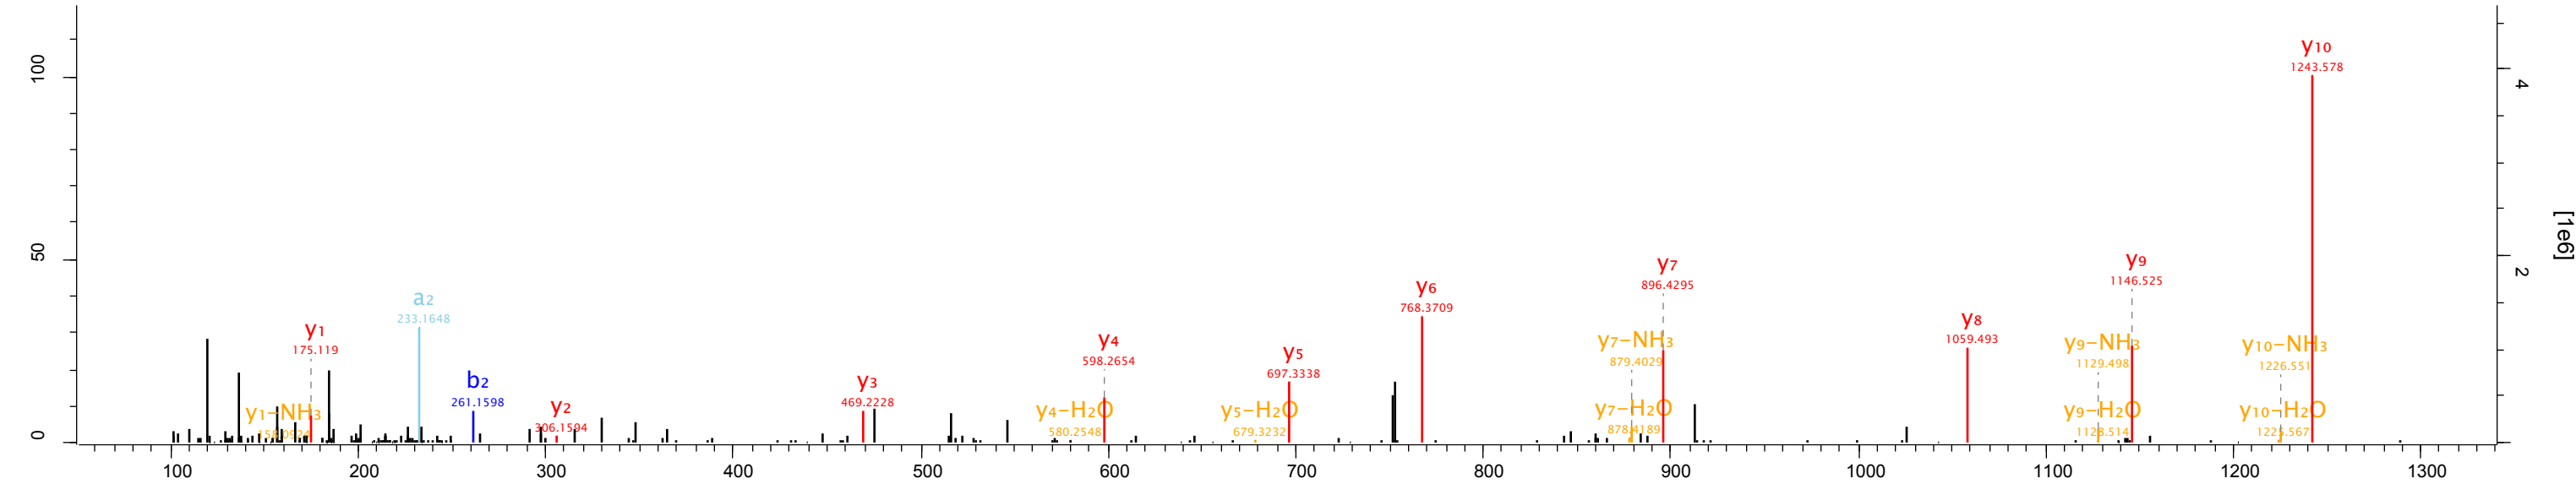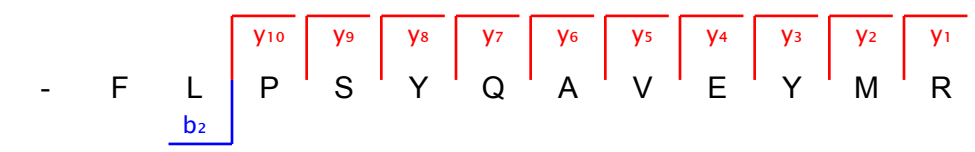

Raw file 20171215\_MaS\_33SR\_LMH\_proteome\_01 Scan 7421 Method FTMS; HCD Score 52.68 m/z 434.71

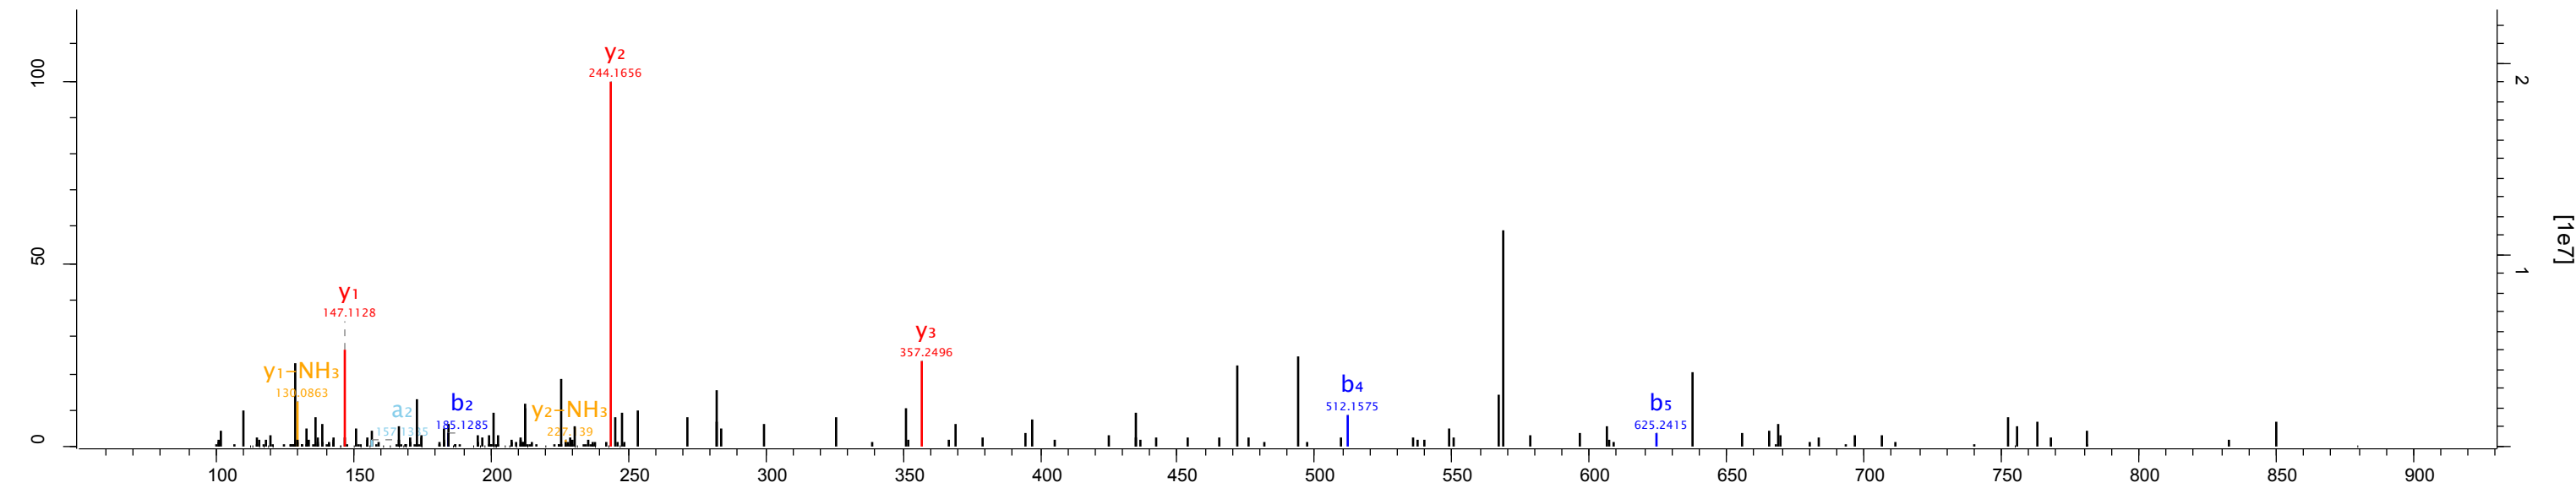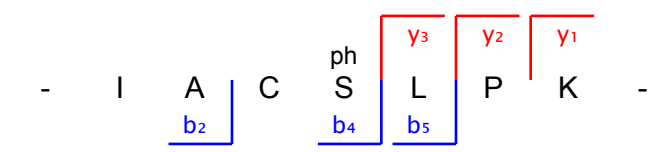

Raw file 20171215\_MaS\_33SR\_LMH\_proteome\_01 Scan 75751 Method FTMS; HCD Score 128.88 m/z 1151.55 Gene names AGTRAP

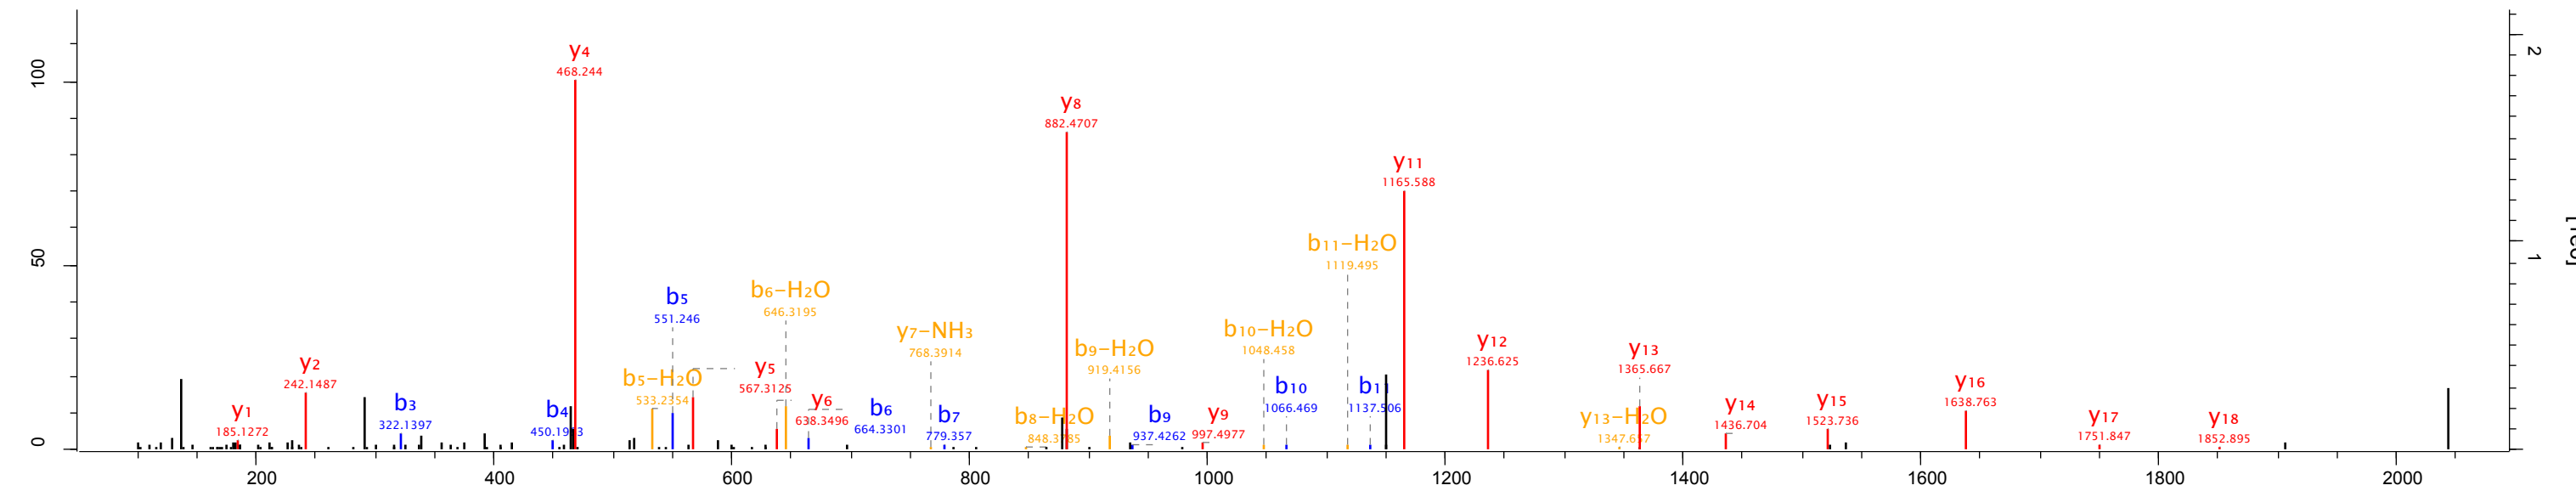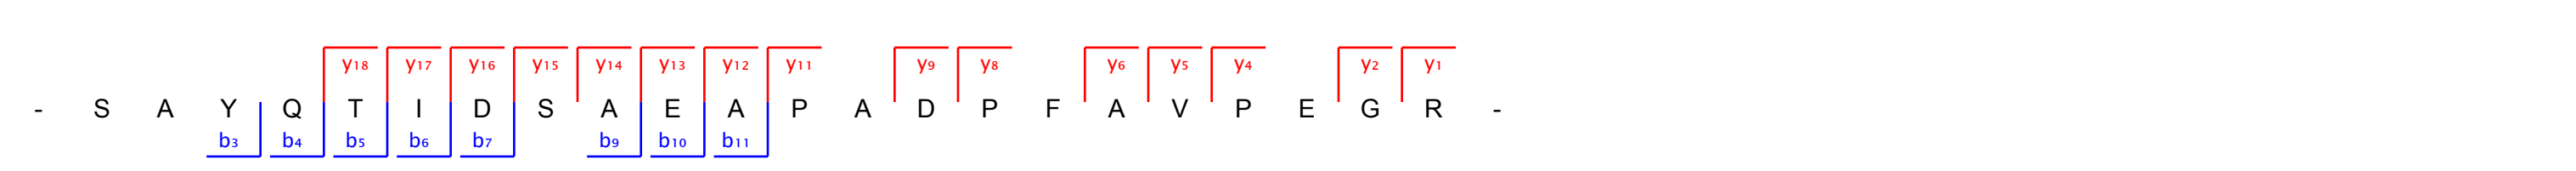

Raw file: 20171215\_MaS\_33SR\_LMH\_proteome\_01  
 Scan: 96731 Method: FTMS; HCD Score: 93.37 m/z: 775.39 Gene names: UBAP1

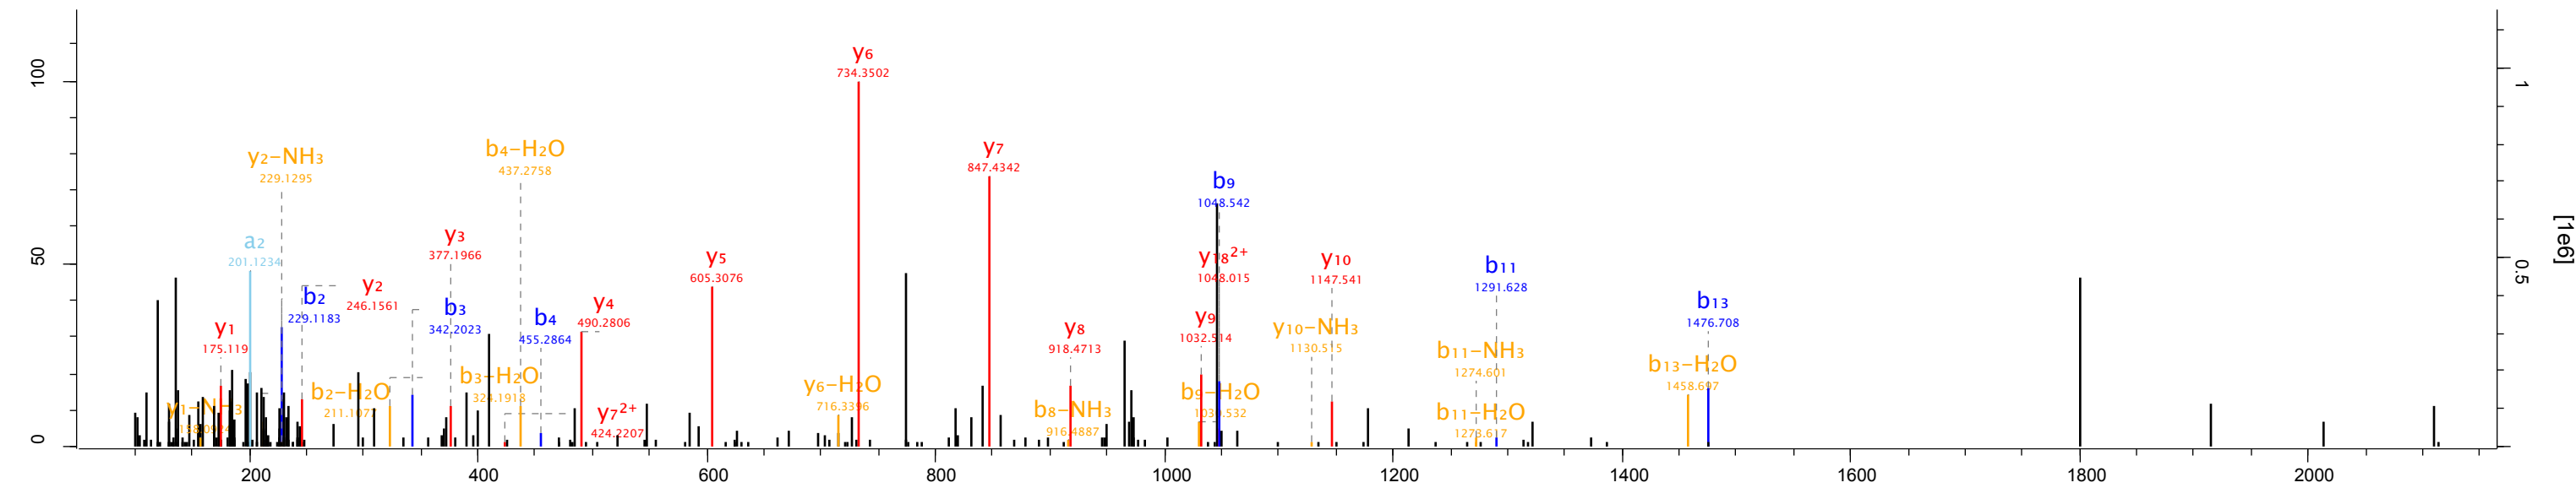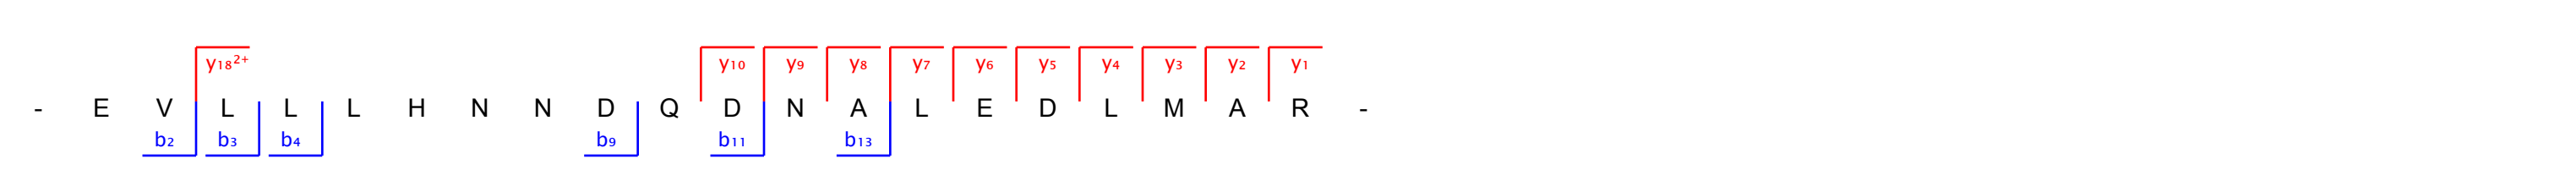



Raw file 20171215\_MaS\_33SR\_LMH\_proteome\_02 Scan 104521 Method FTMS; HCD Score 70.09 m/z 655.36 Gene names PRCP

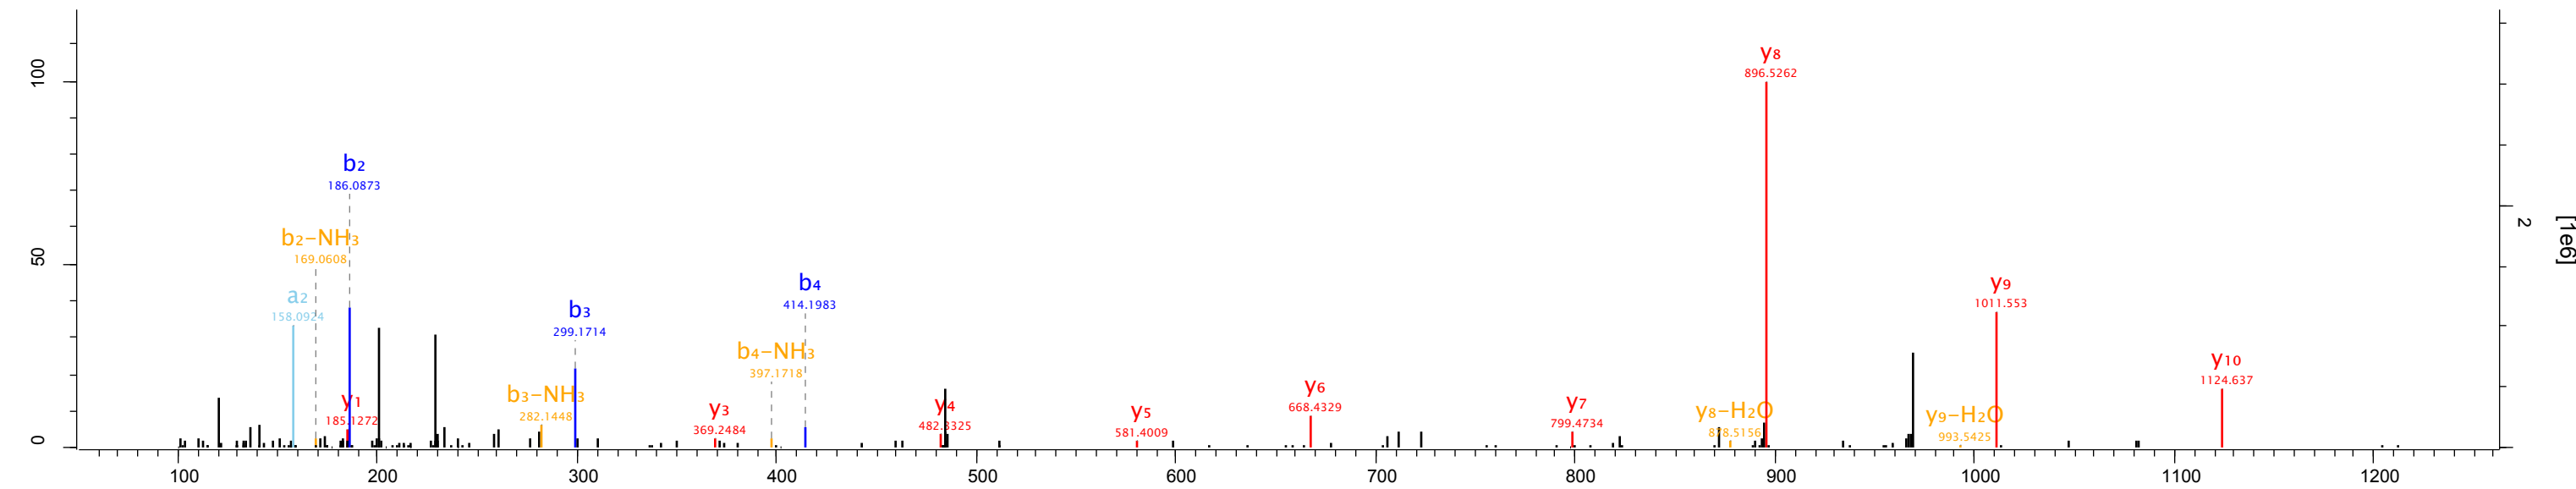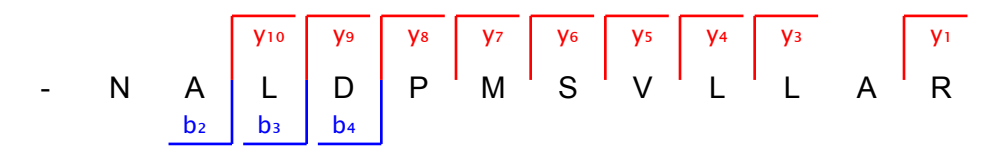

Raw file: 20171215\_MaS\_33SR\_LMH\_proteome\_02  
 Scan: 105671 Method: FTMS; HCD Score: 78.81 m/z: 821.43 Gene names: ZC3H7B

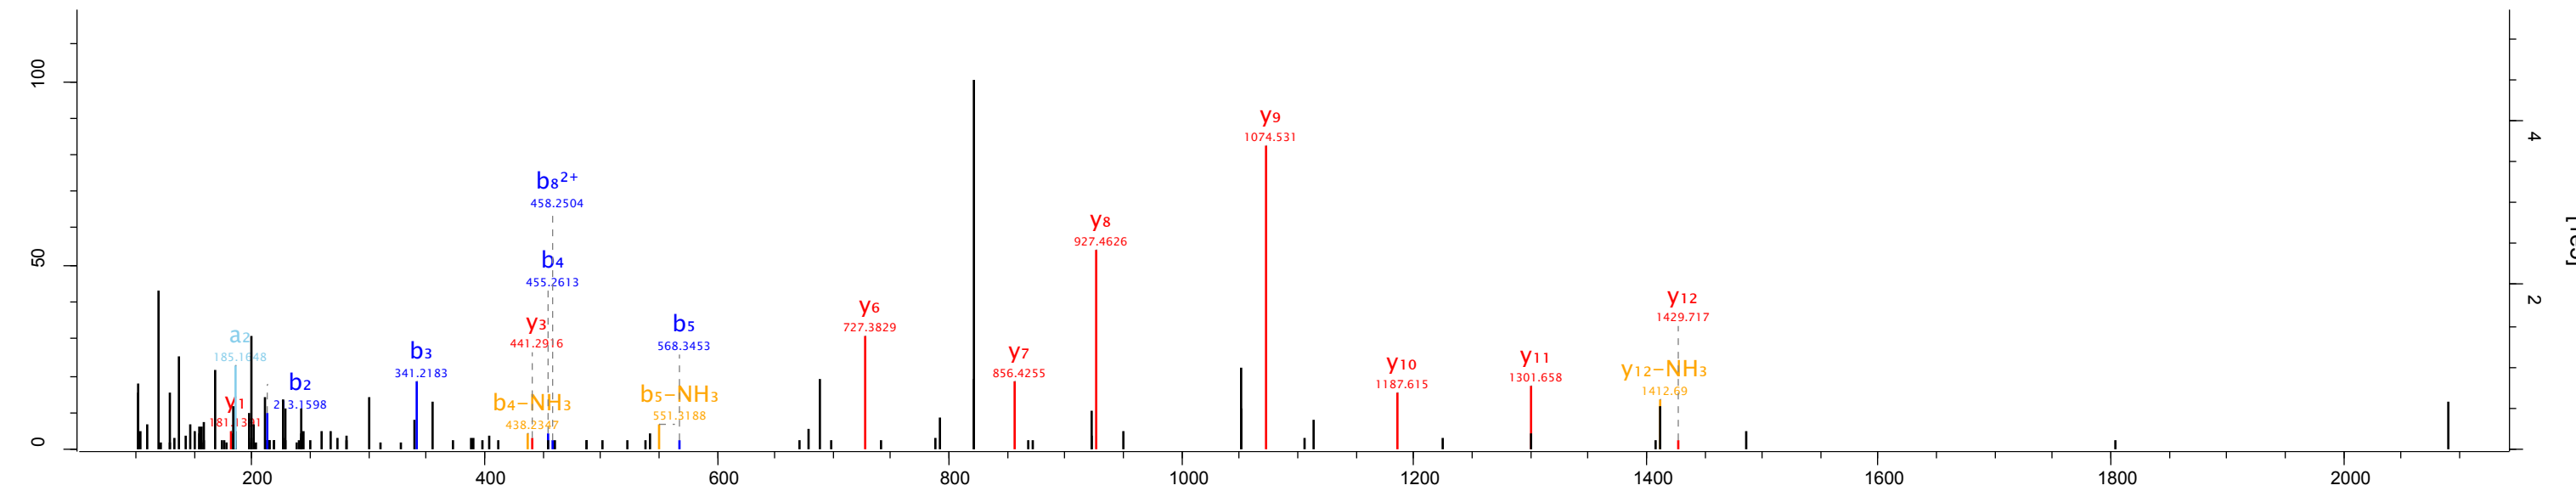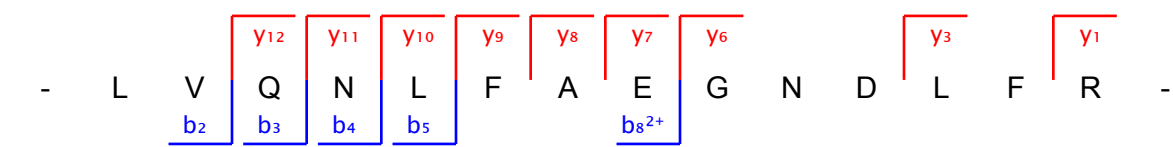

Raw file

20171215\_MaS\_33SR\_LMH\_proteome\_02

| Scan   | Method    | Score | m/z | Gene names              |
|--------|-----------|-------|-----|-------------------------|
| 110991 | FTMS; HCD | 91.66 | 981 | SULT1A4;SULT1A1;SULT1A3 |

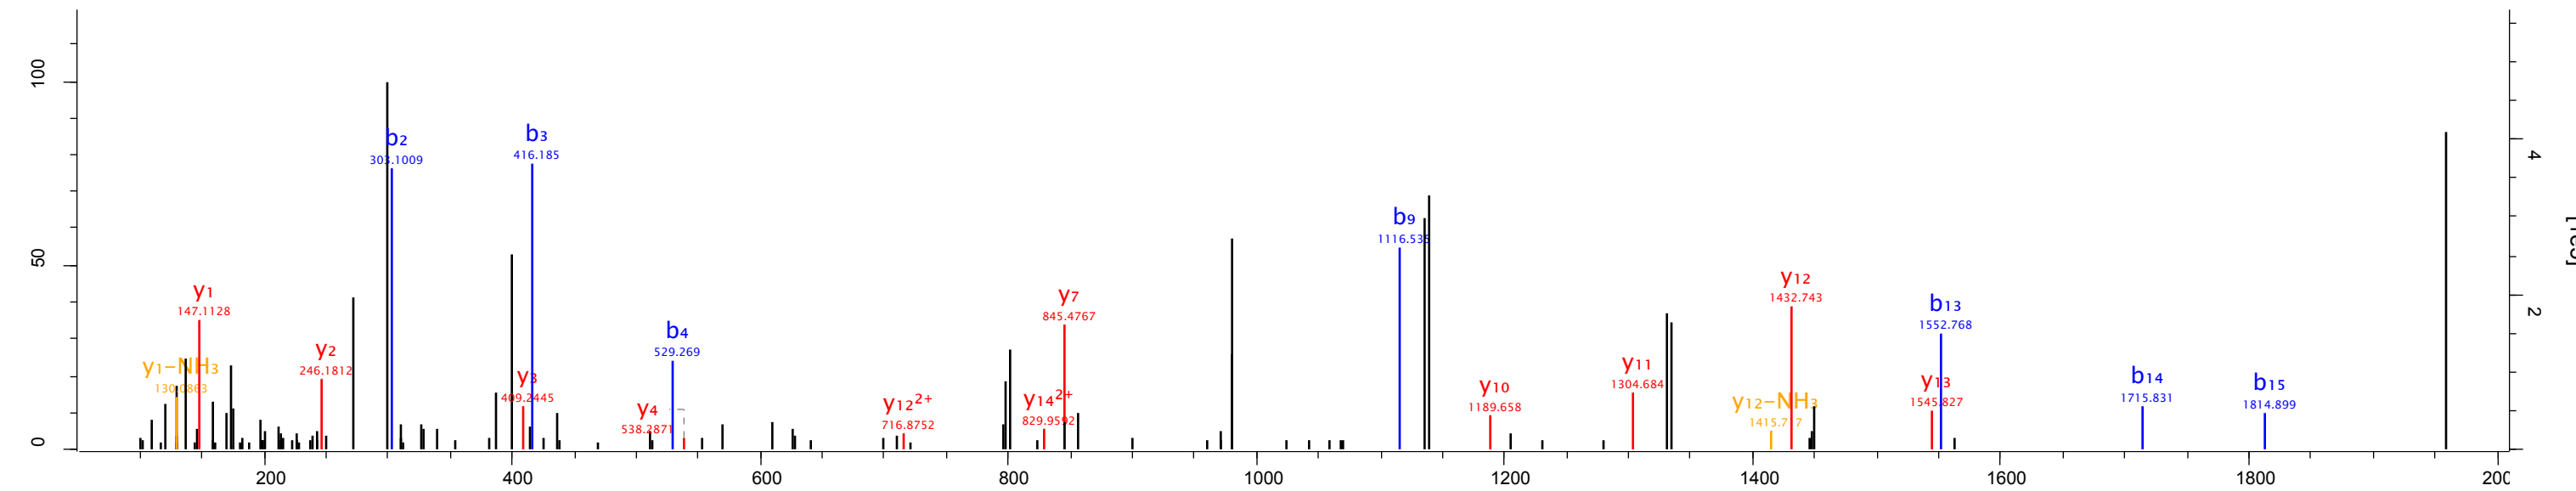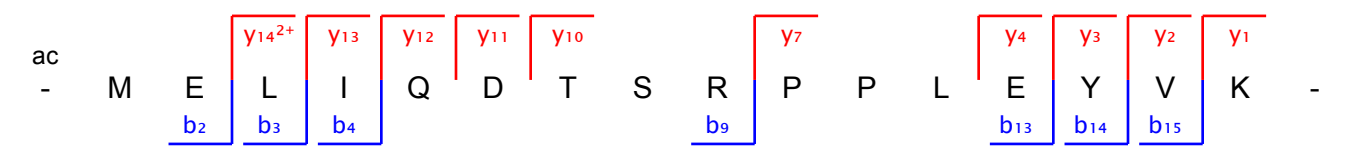

Raw file: 20171215\_MaS\_33SR\_LMH\_proteome\_02  
 Scan: 116711 Method: FTMS; HCD Score: 77.9 m/z: 1030.49 Gene names: MKLN1

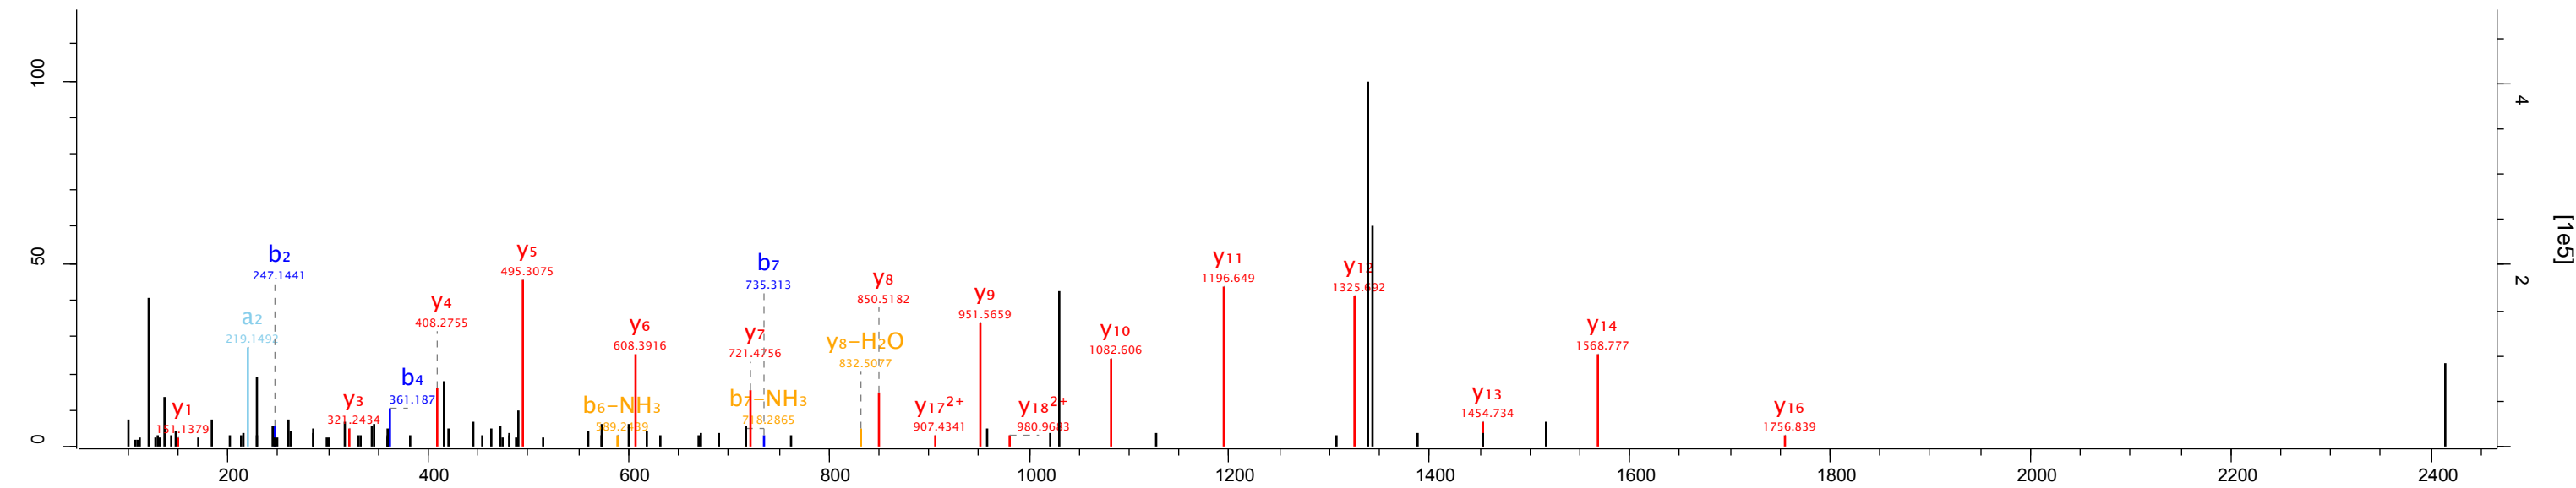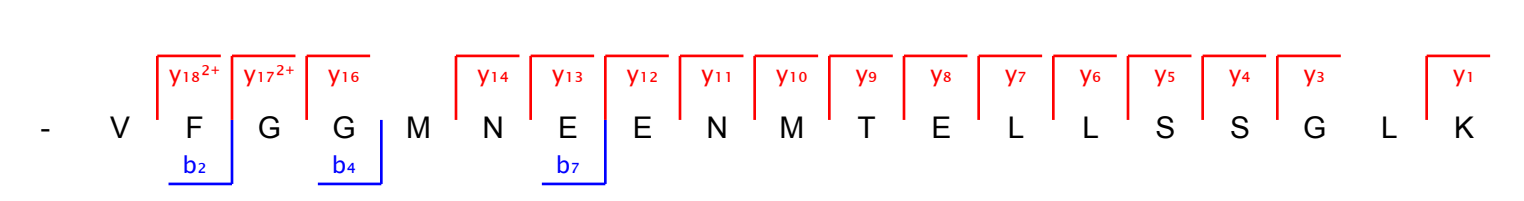

Raw file 20171215\_MaS\_33SR\_LMH\_proteome\_02 Scan 118151 Method FTMS; HCD Score 93.65 m/z 806.45 Gene names GTF2E1

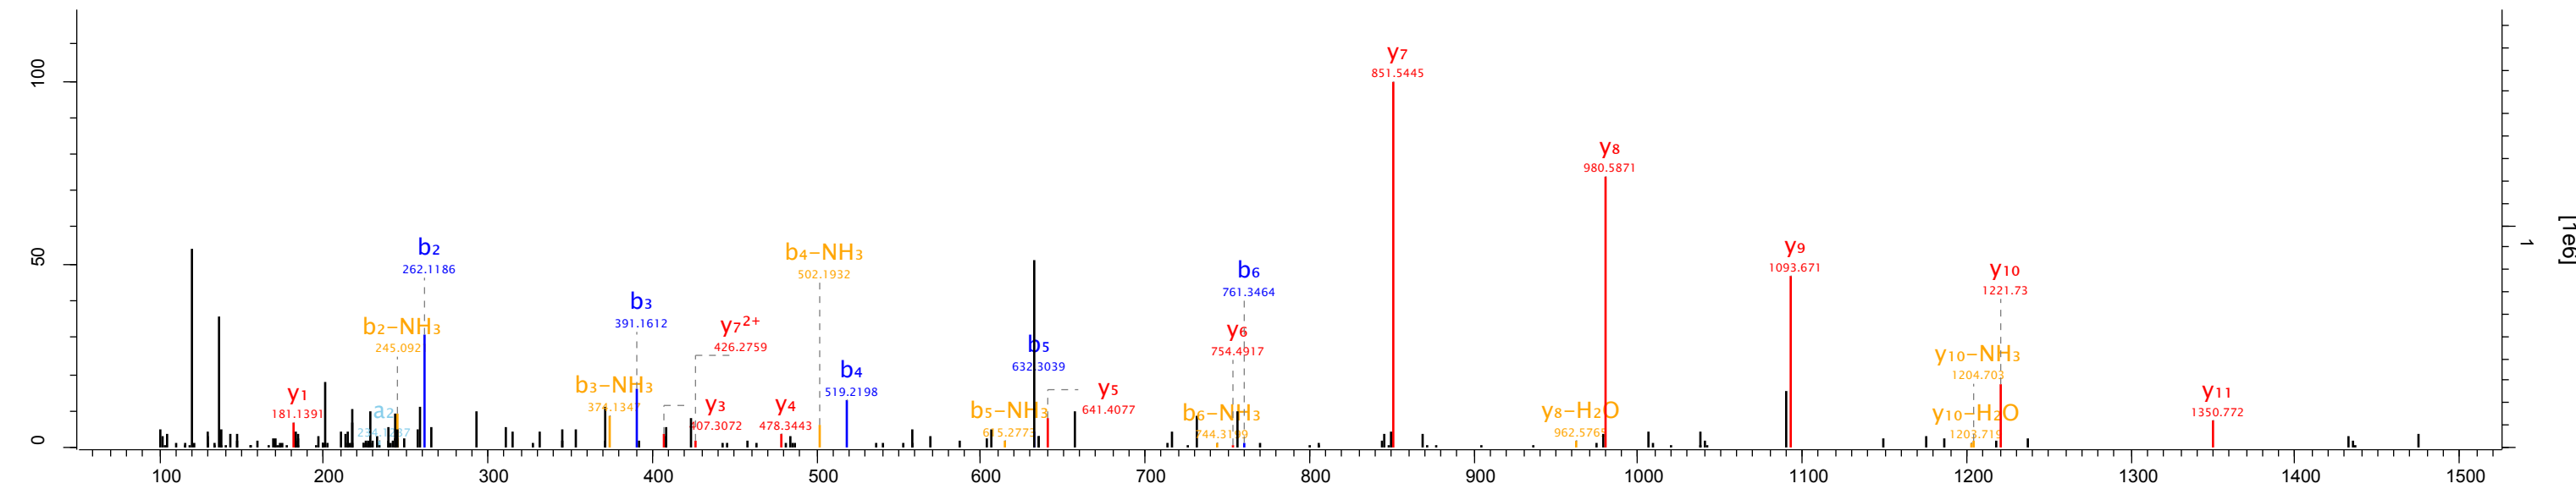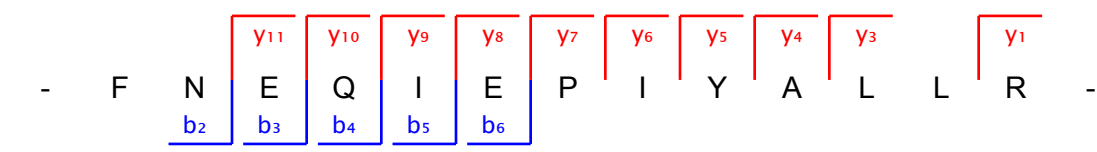

Raw file 20171215\_MaS\_33SR\_LMH\_proteome\_02 Scan 137561 Method FTMS; HCD Score 60.76 m/z 1098.56 Gene names MRPS18C

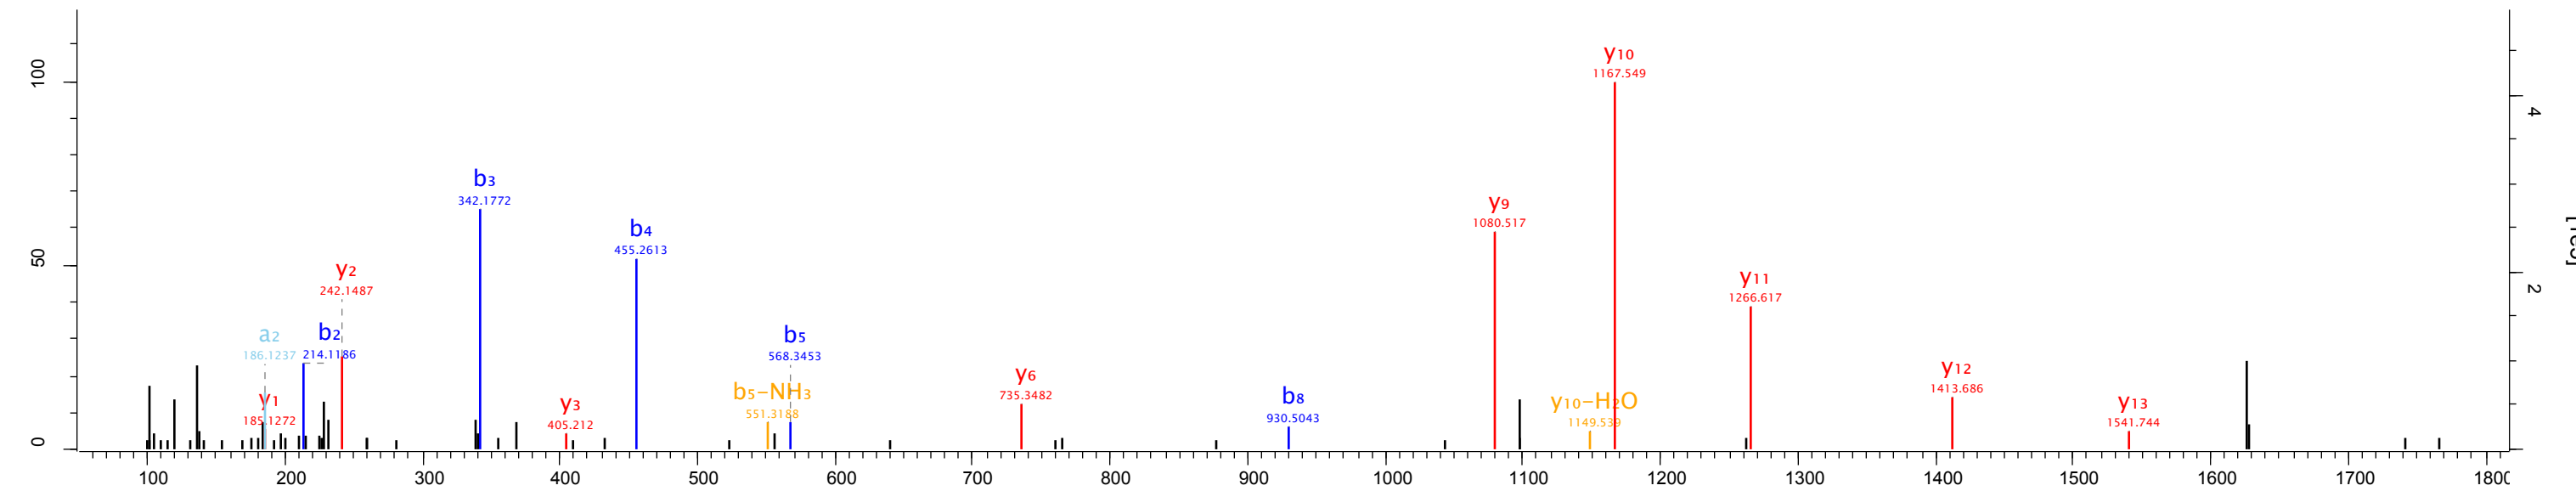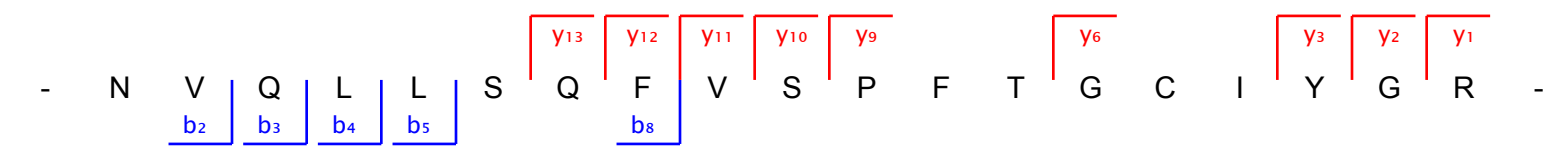

Raw file 20171215\_MaS\_33SR\_LMH\_proteome\_02 Scan 22131 Method FTMS; HCD Score 62.47 m/z 676.85

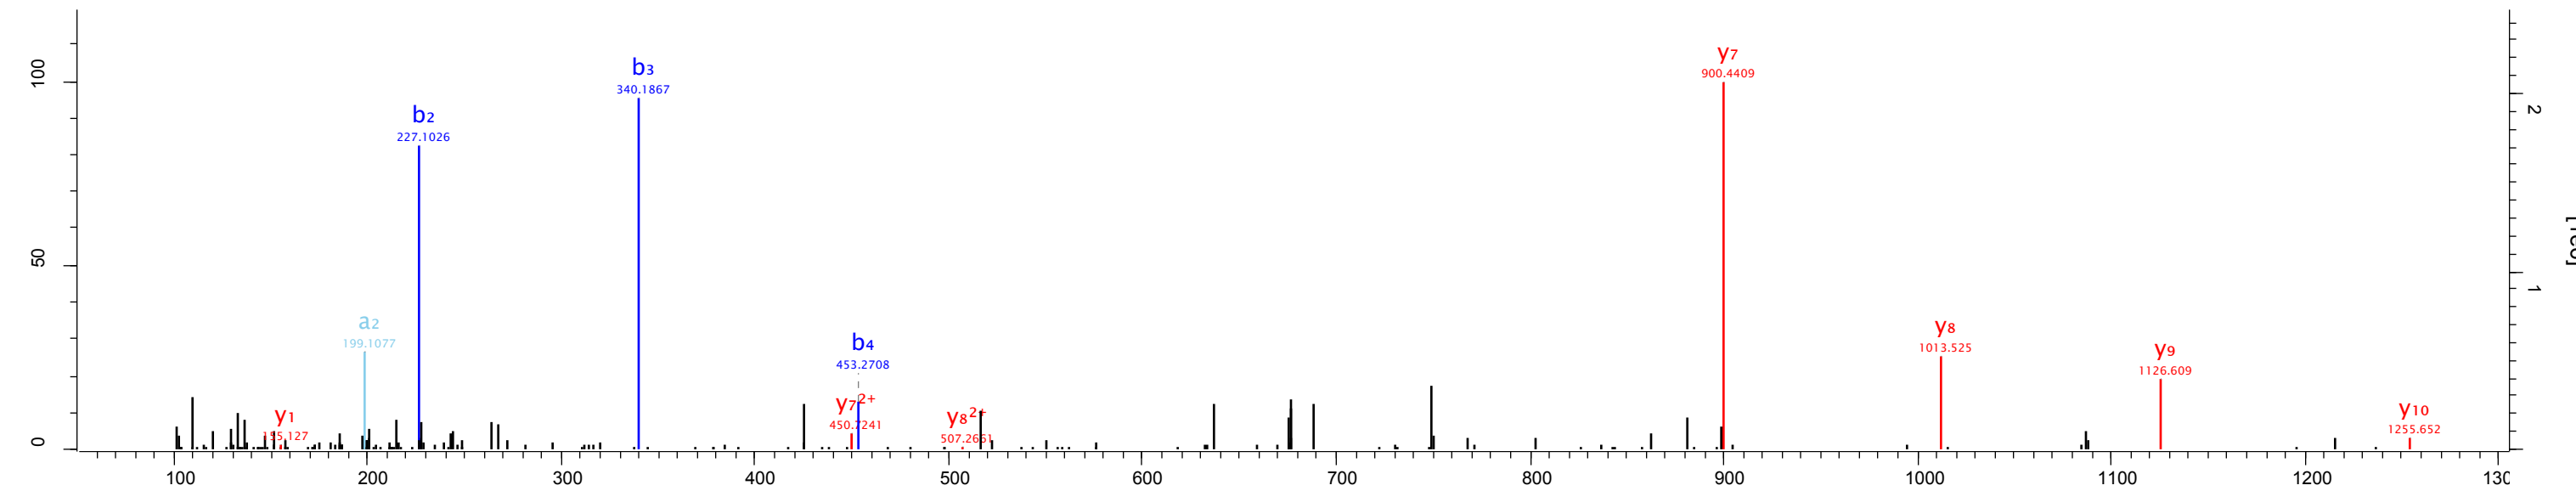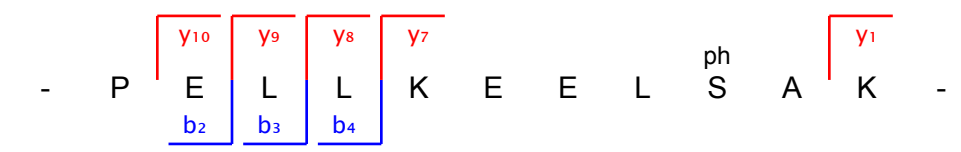

Raw file 20171215\_MaS\_33SR\_LMH\_proteome\_02 Scan 23081 Method FTMS; HCD Score 84.74 m/z 445.78

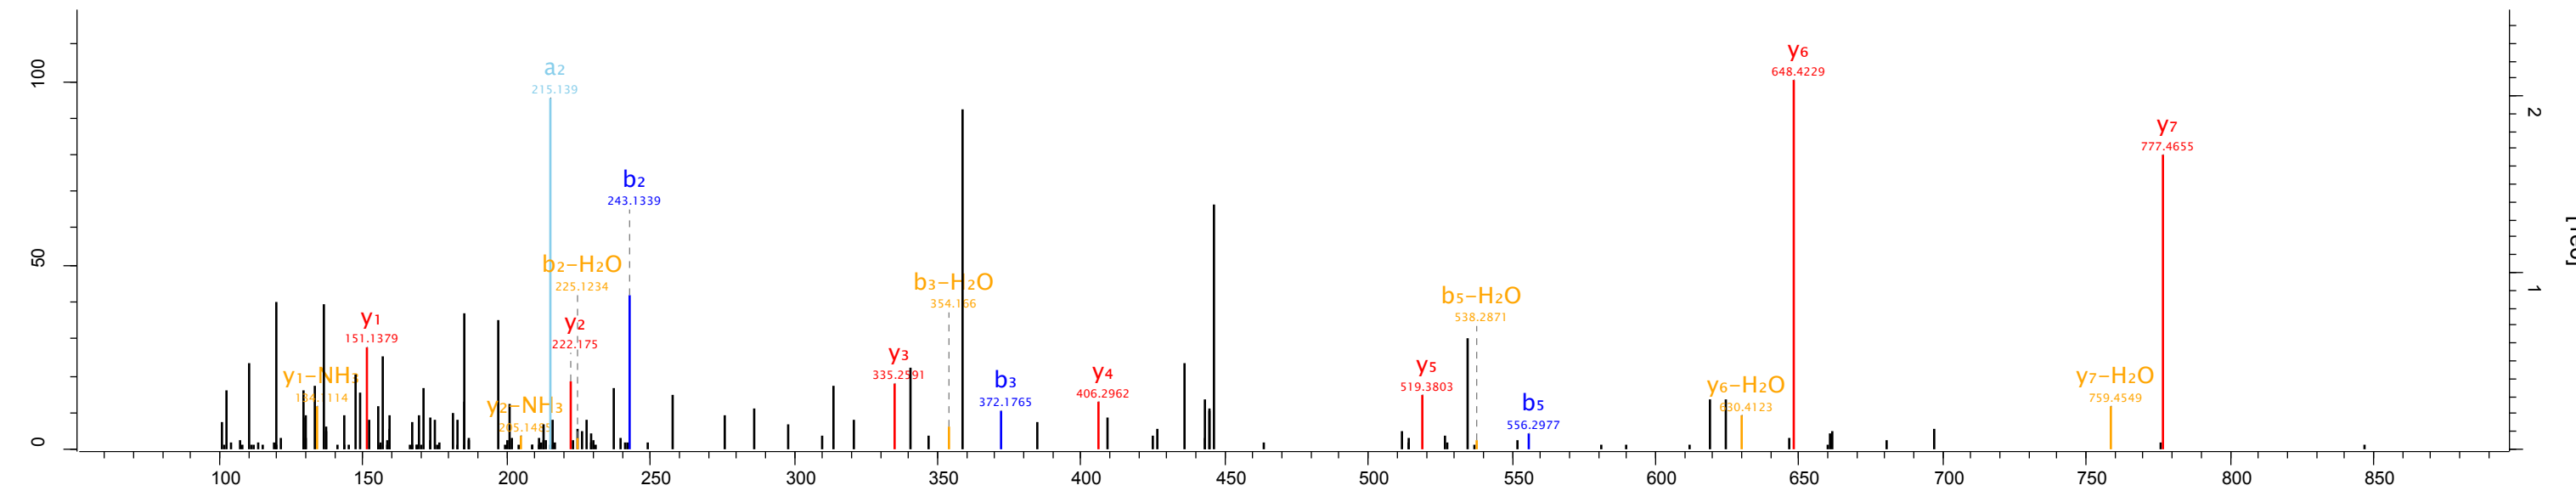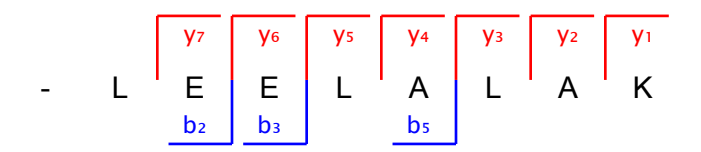



Raw file

20171215\_MaS\_33SR\_LMH\_proteome\_02

| Scan  | Method    | Score | m/z    | Gene names |
|-------|-----------|-------|--------|------------|
| 24311 | FTMS; HCD | 48.28 | 594.31 | CMC1       |

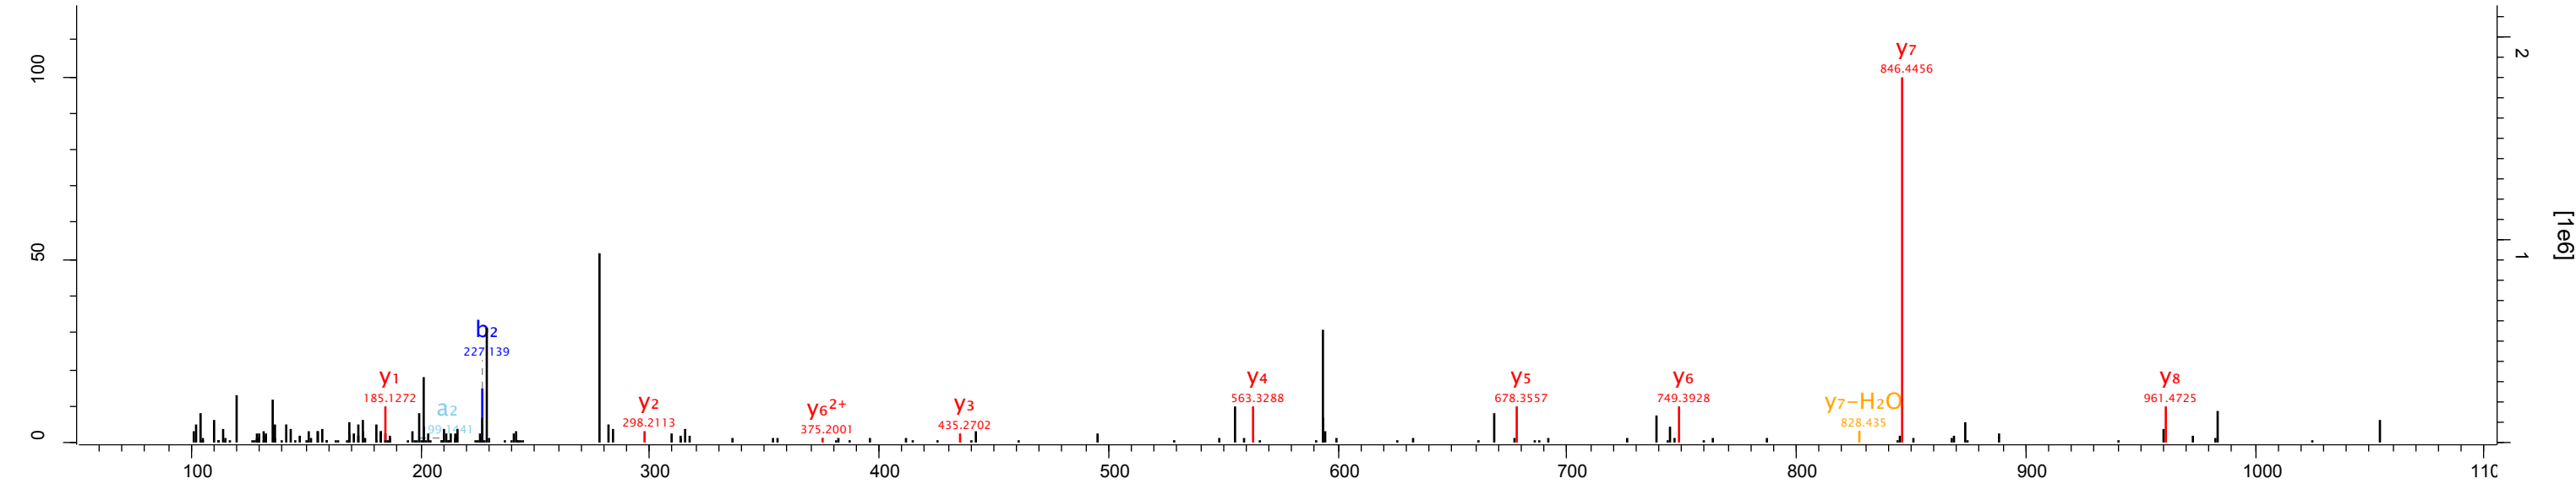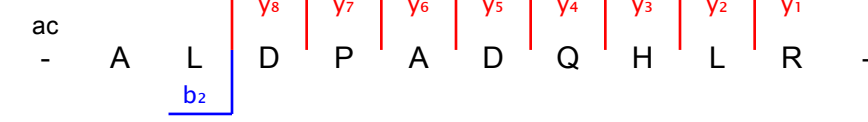

Raw file 20171215\_MaS\_33SR\_LMH\_proteome\_02 Scan 2941 Method FTMS; HCD Score 99.92 m/z 366.18

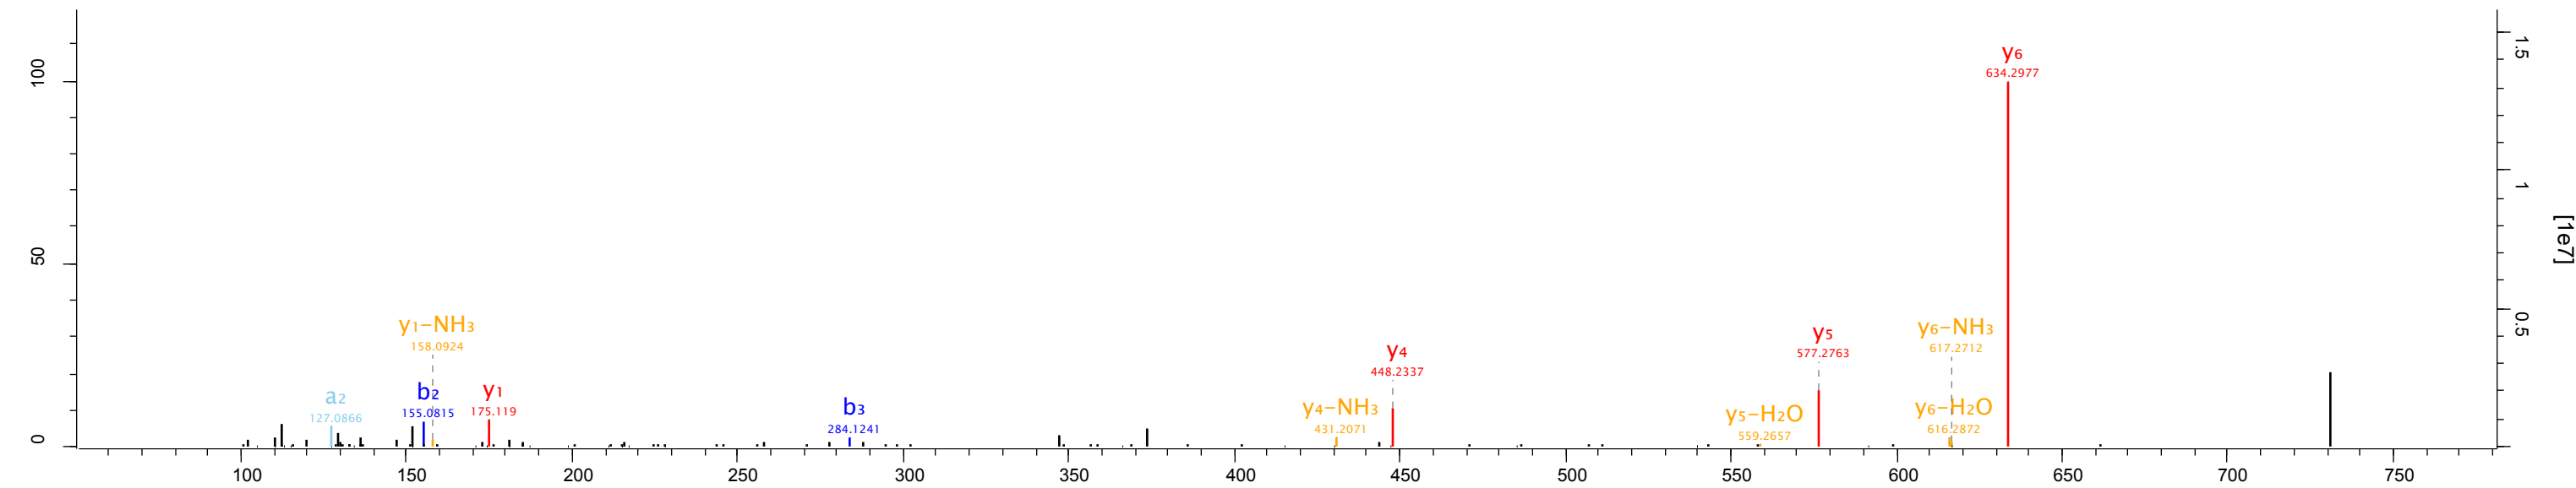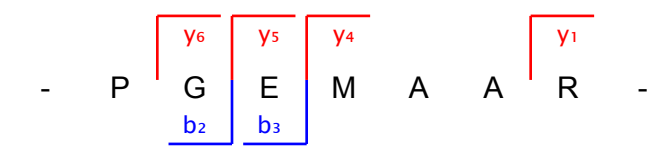

Raw file: 20171215\_MaS\_33SR\_LMH\_proteome\_02  
 Scan: 43741 Method: FTMS; HCD Score: 110.08 m/z: 644.38 Gene names: NOP10

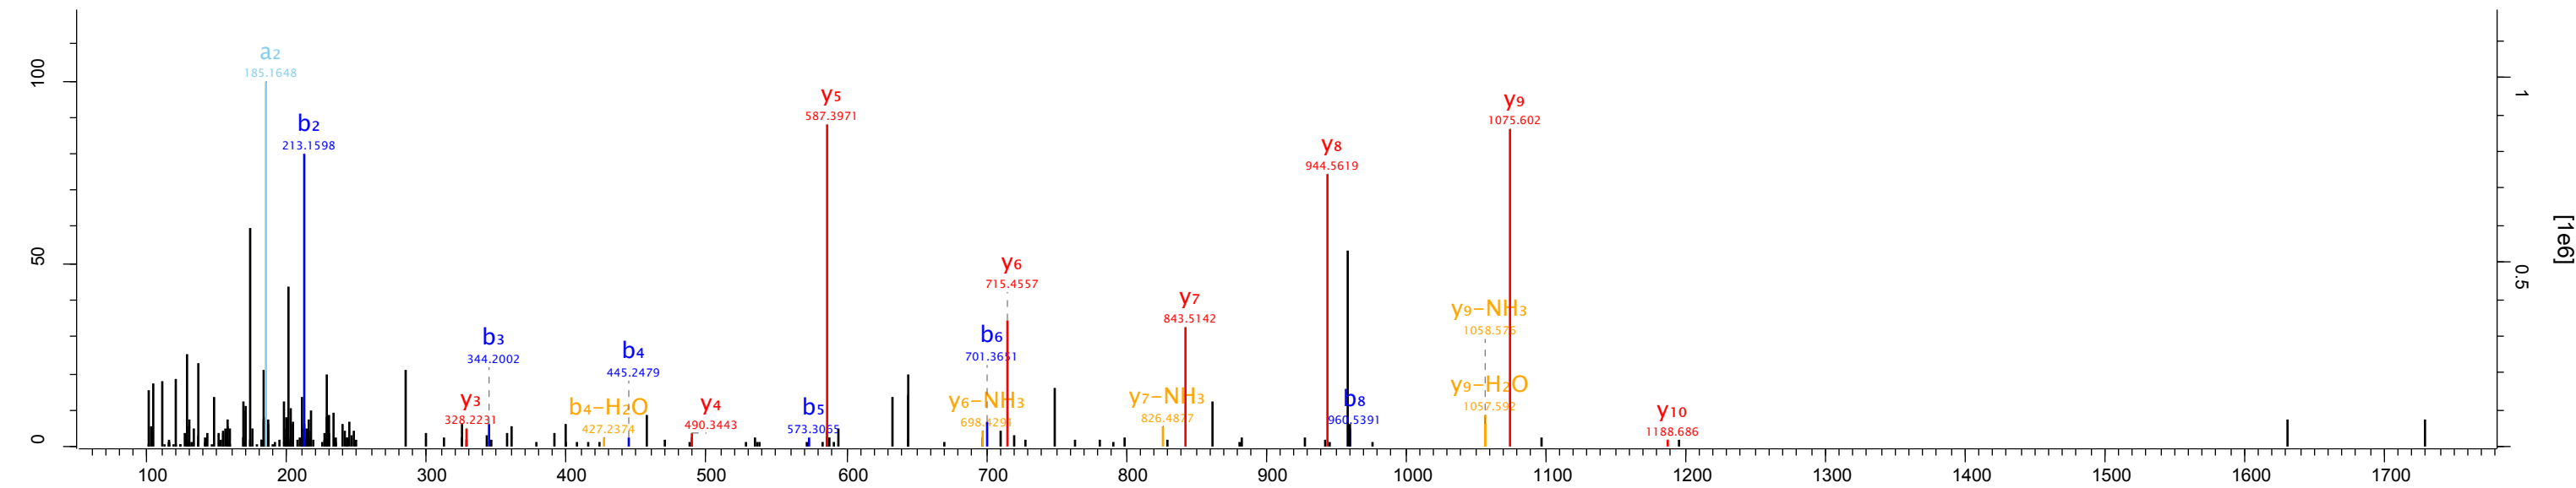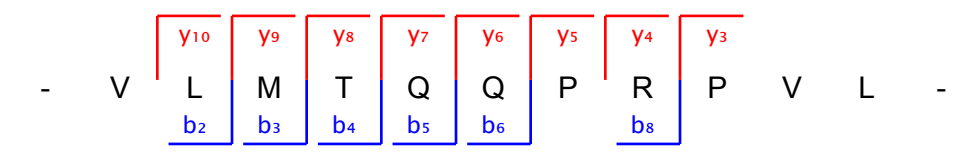

Raw file: 20171215\_MaS\_33SR\_LMH\_proteome\_02  
 Scan: 48531 Method: FTMS; HCD Score: 51.77 m/z: 971.93 Gene names: TEX33

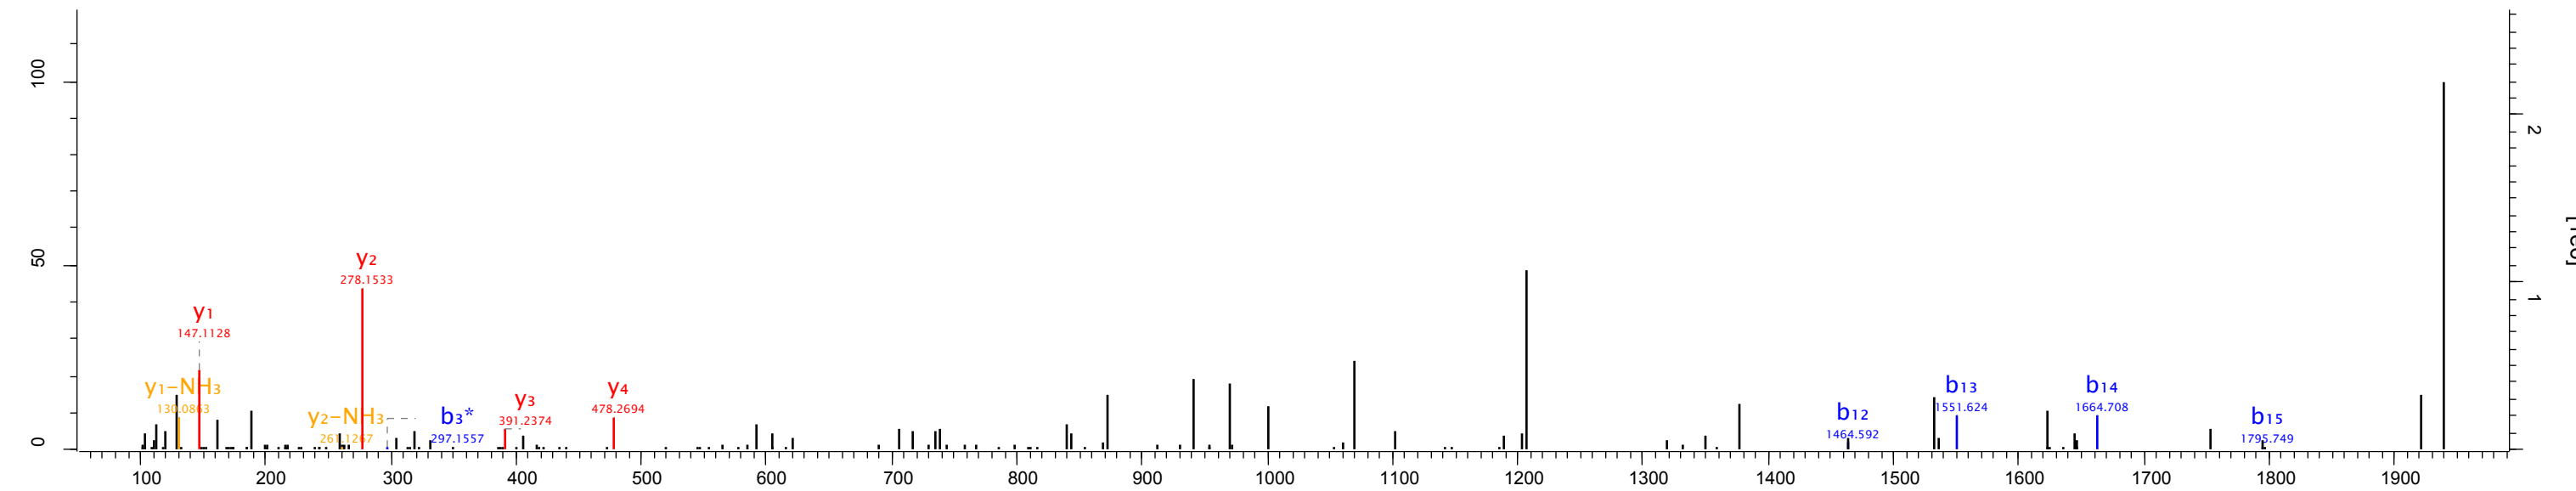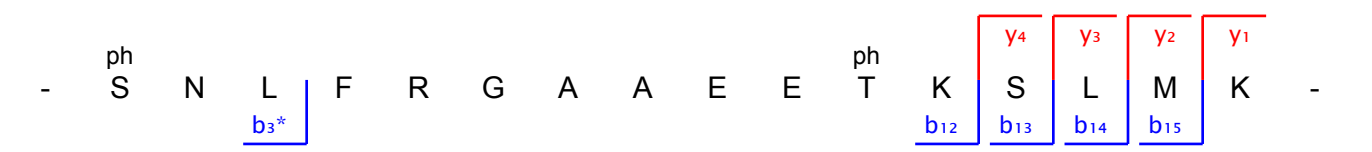

Raw file 20171215\_MaS\_33SR\_LMH\_proteome\_02 Scan 70221 Method FTMS; HCD Score 55.69 m/z 991 Gene names WASH6P;WASH3P;WASH2P;WASH1

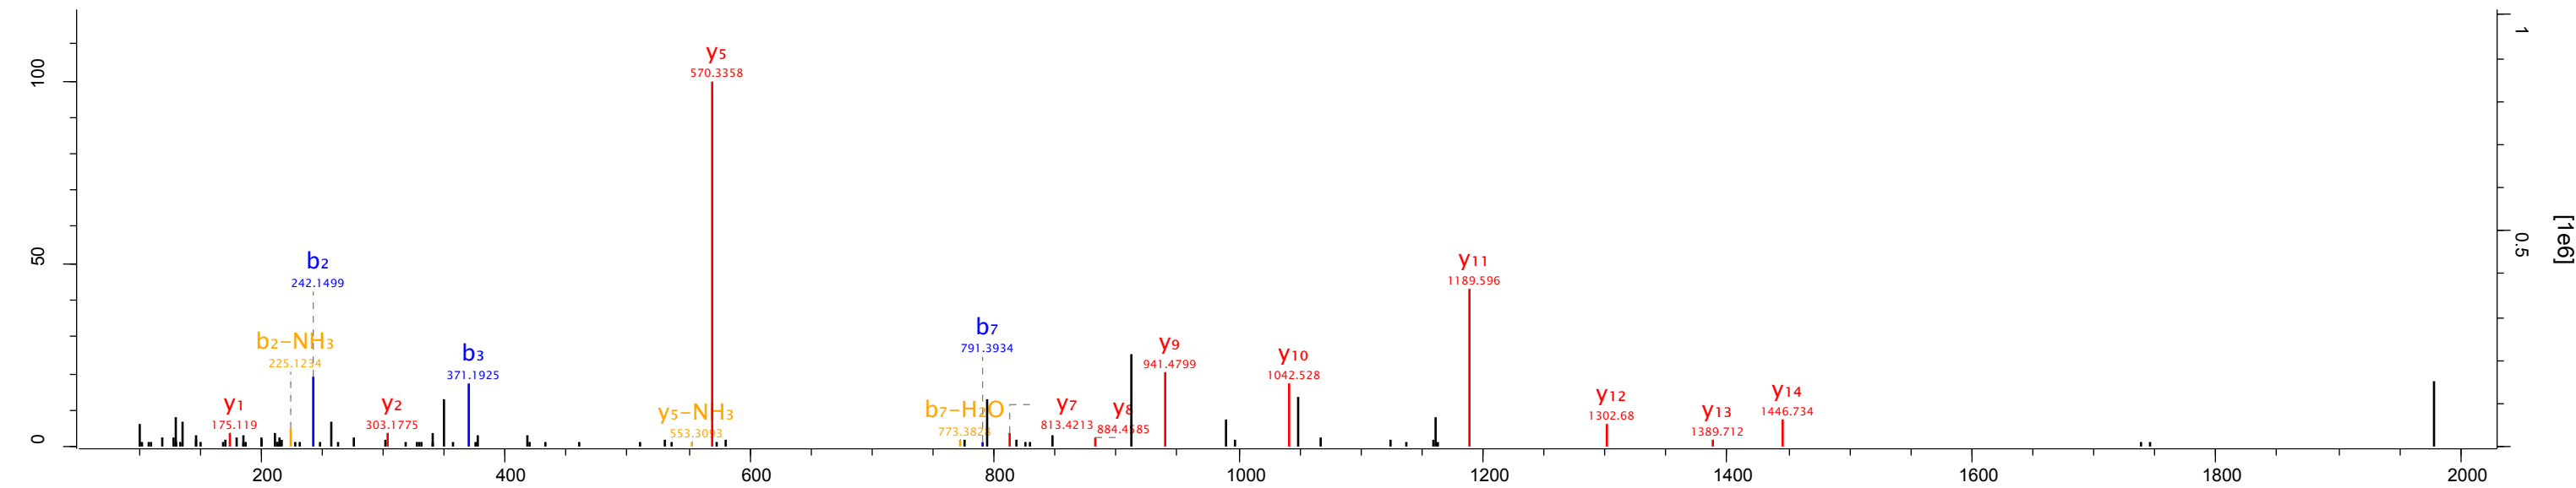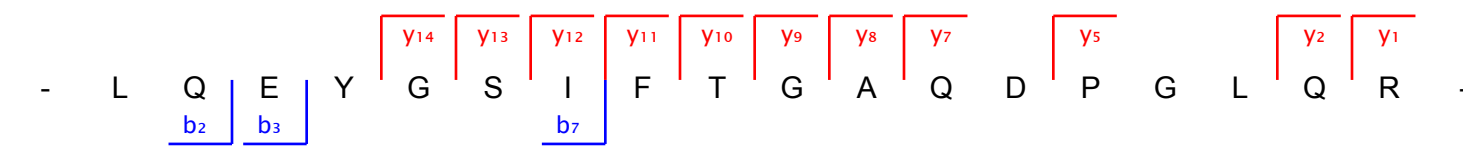

Raw file 20171215\_MaS\_33SR\_LMH\_proteome\_02 Scan 70251 Method FTMS; HCD Score 80.62 m/z 677.86 Gene names RER1

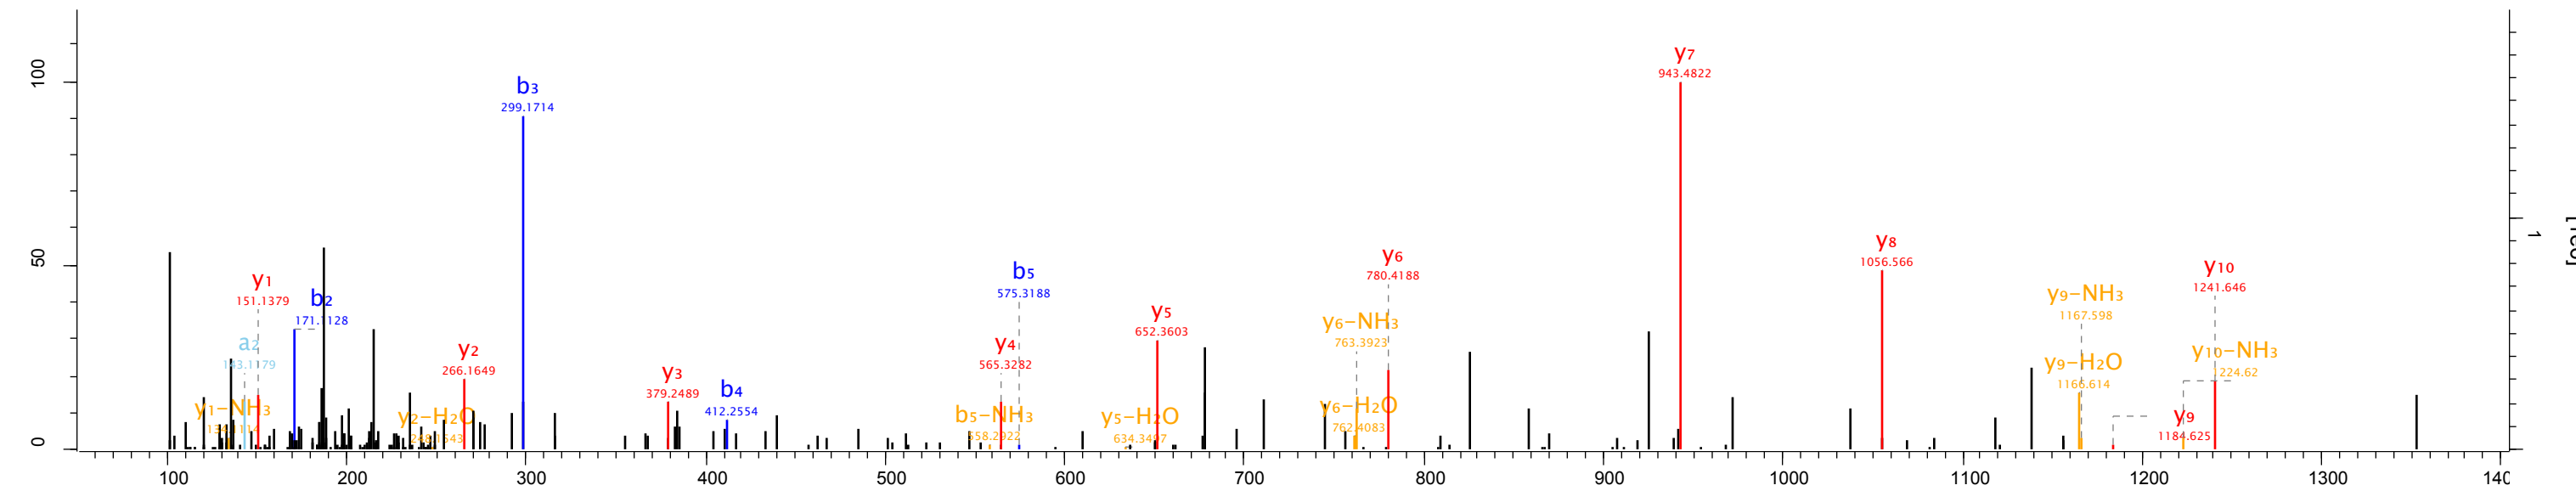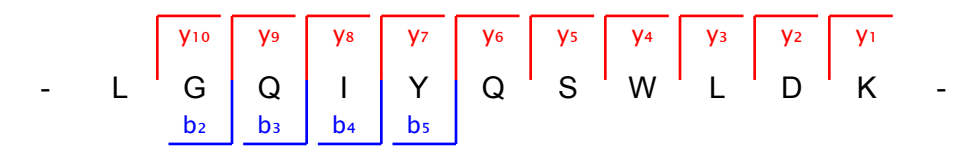

Raw file 20171215\_MaS\_33SR\_LMH\_proteome\_02 Scan 71841 Method FTMS; HCD Score 72.33 m/z 503.8 Gene names EC12

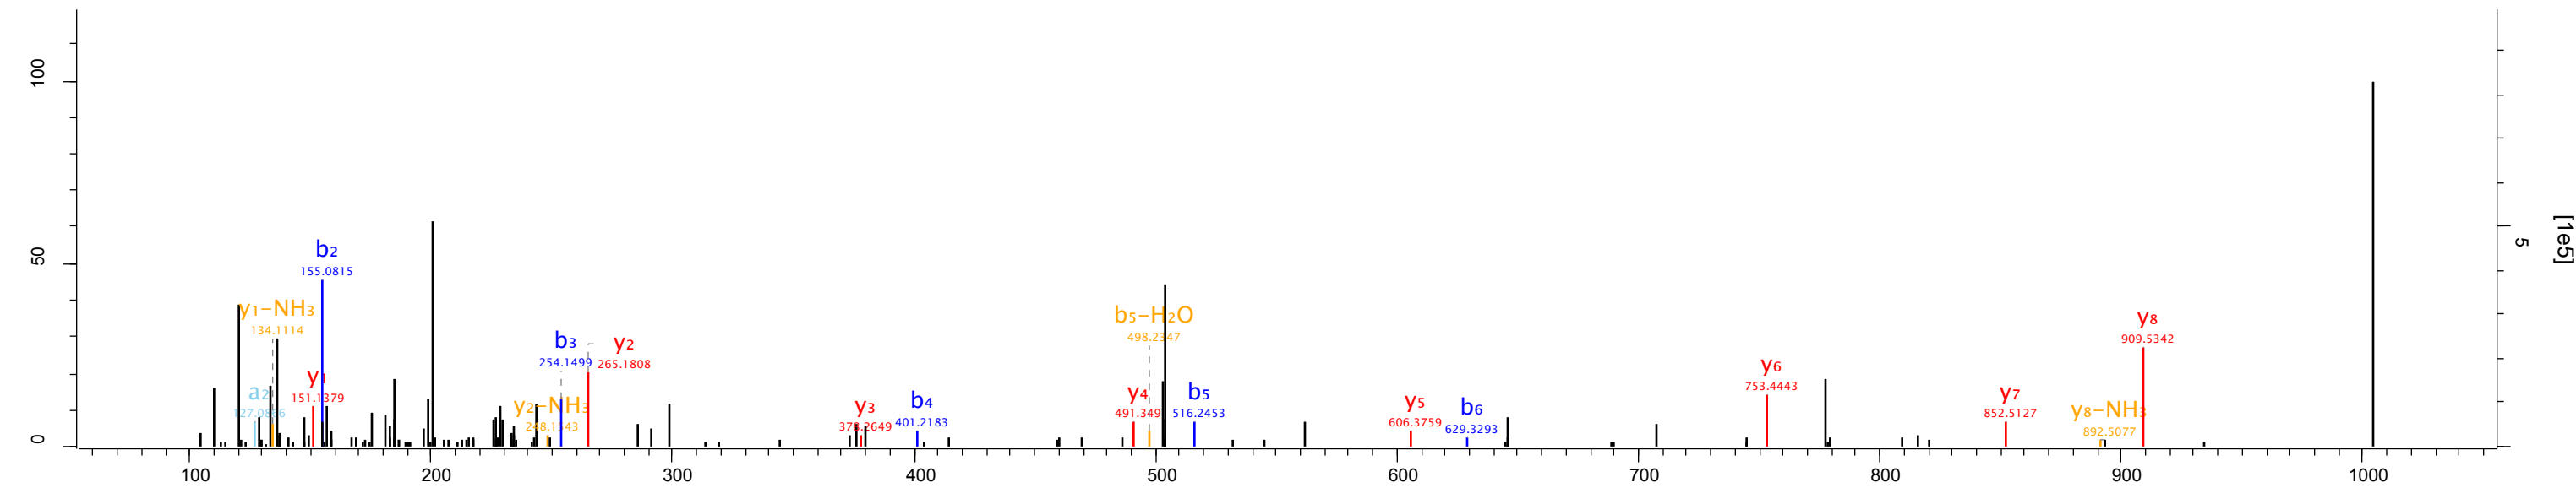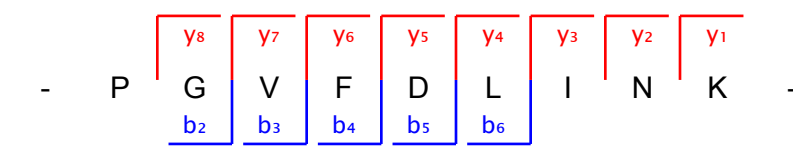

20171215\_MaS\_33SR\_LMH\_proteome\_02 72301 FTMS; HCD 62.2 692.37 KDELC2

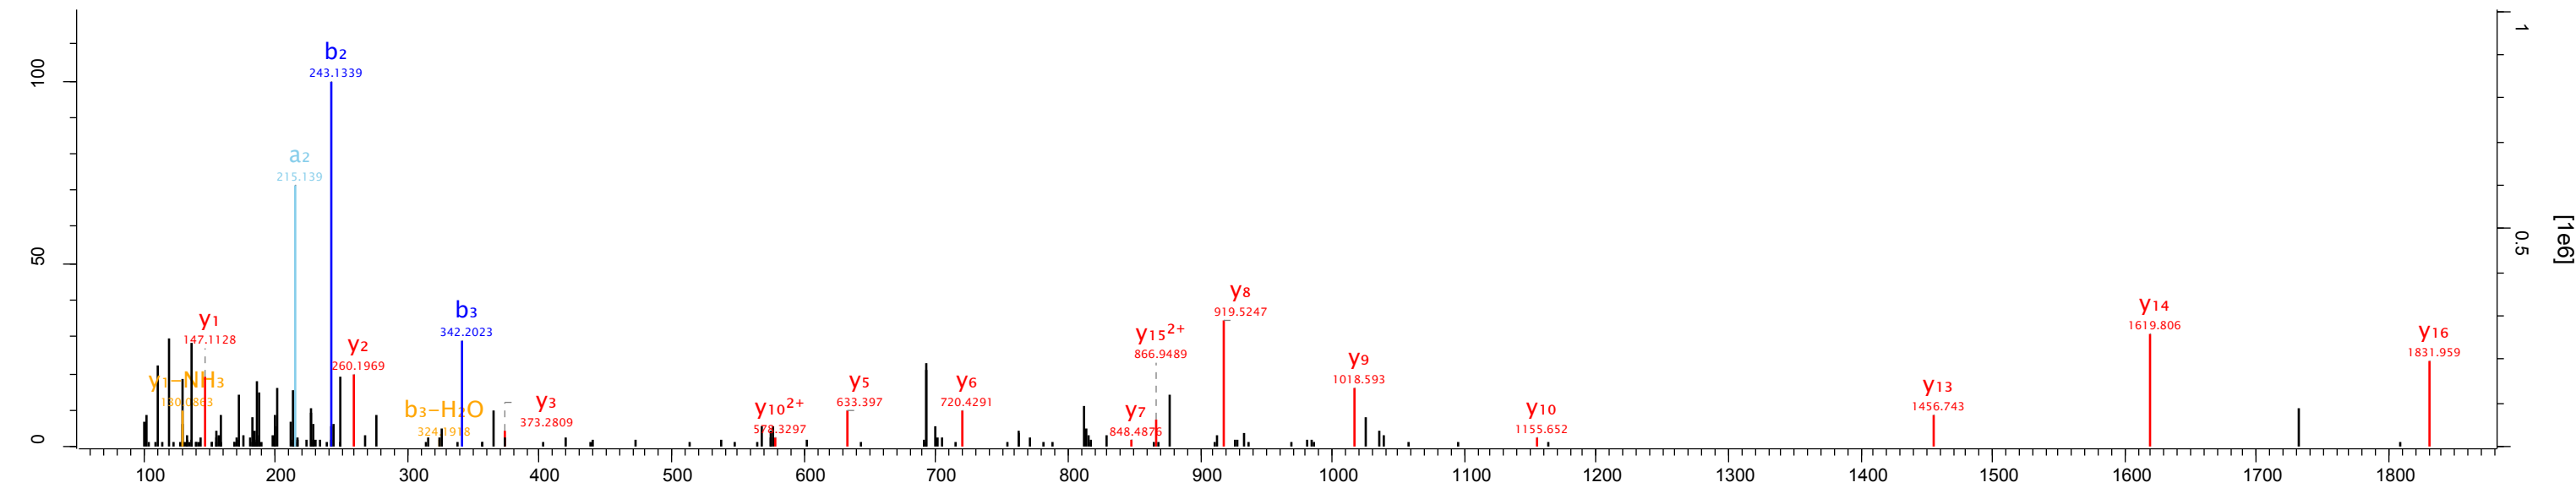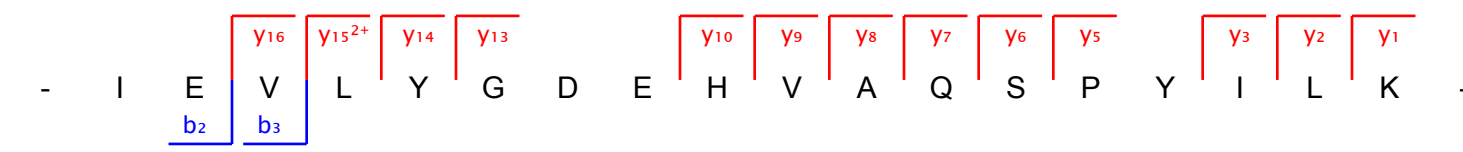



Raw file: 20171215\_MaS\_33SR\_LMH\_proteome\_02  
 Scan: 74251 Method: FTMS; HCD Score: 66.99 m/z: 697.38 Gene names: SWAP70

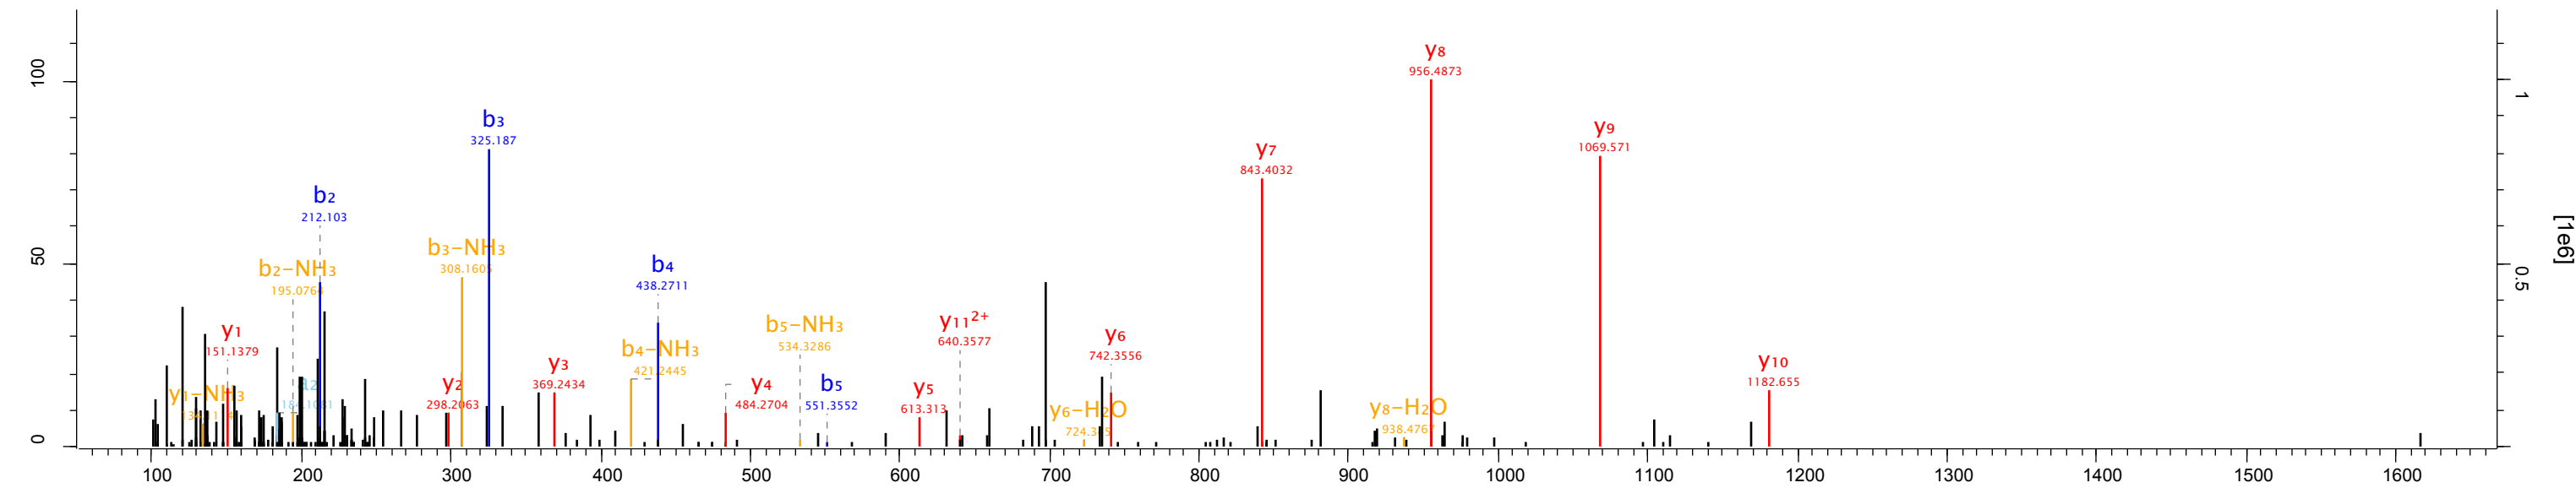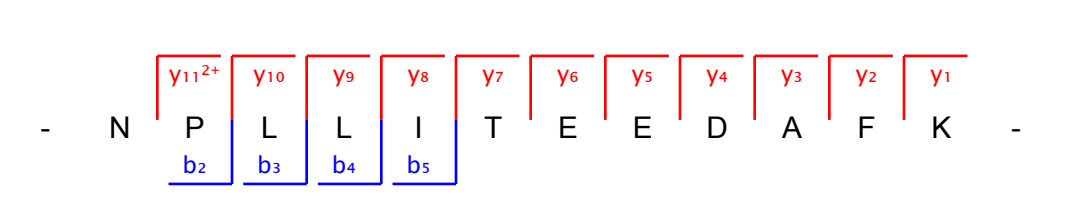

Raw file 20171215\_MaS\_33SR\_LMH\_proteome\_02 Scan 79901 Method FTMS; HCD Score 68.75 m/z 832.4 Gene names GLRX5

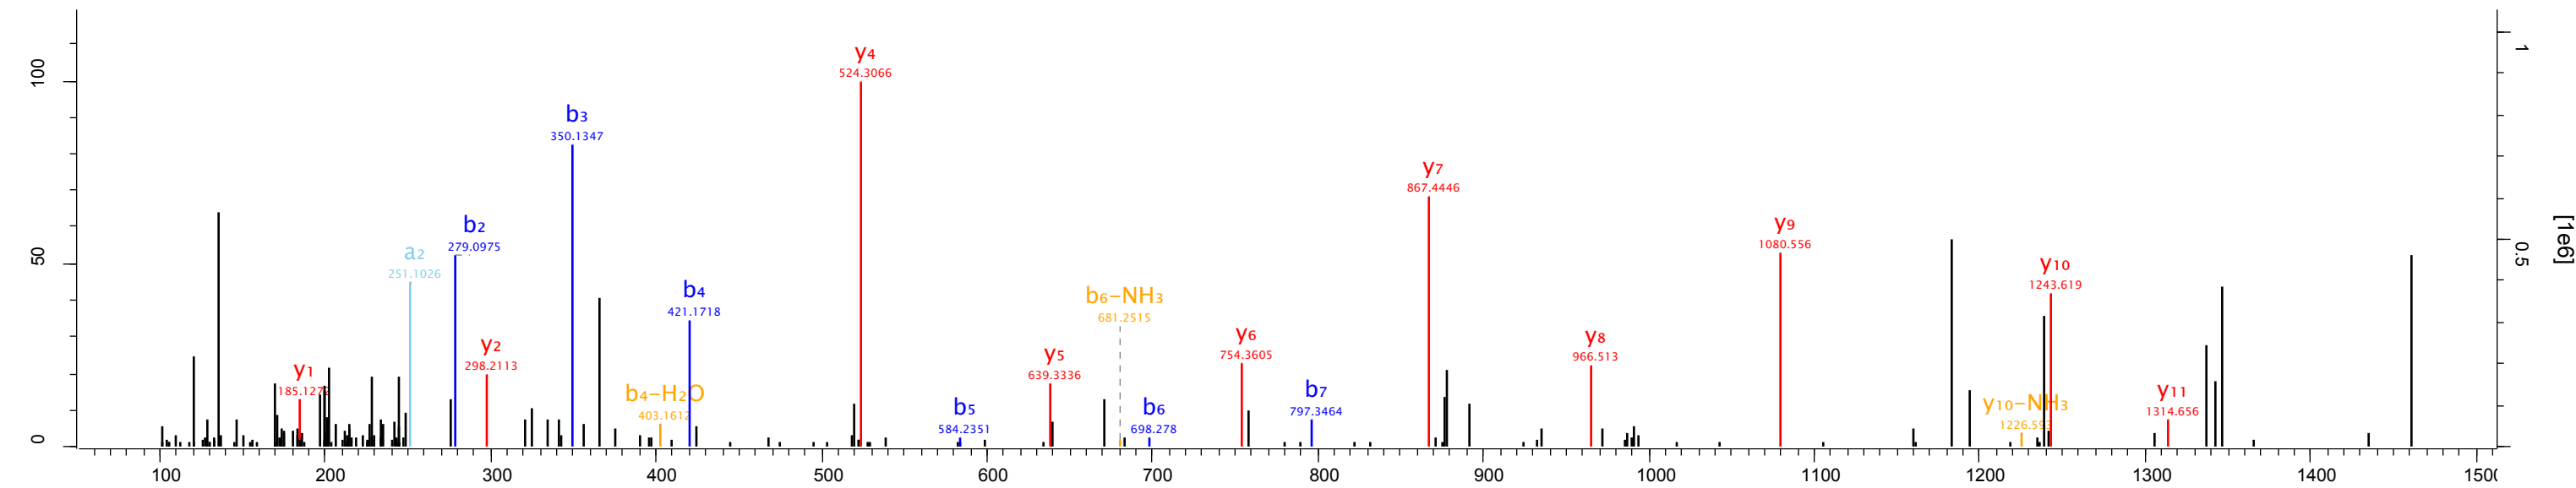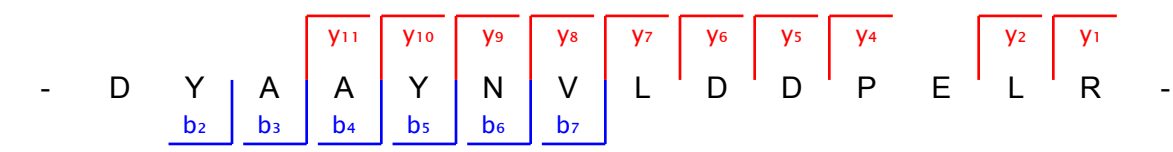

20171215\_MaS\_33SR\_LMH\_proteome\_02 84121 FTMS; HCD 70.44 725.87 MPG

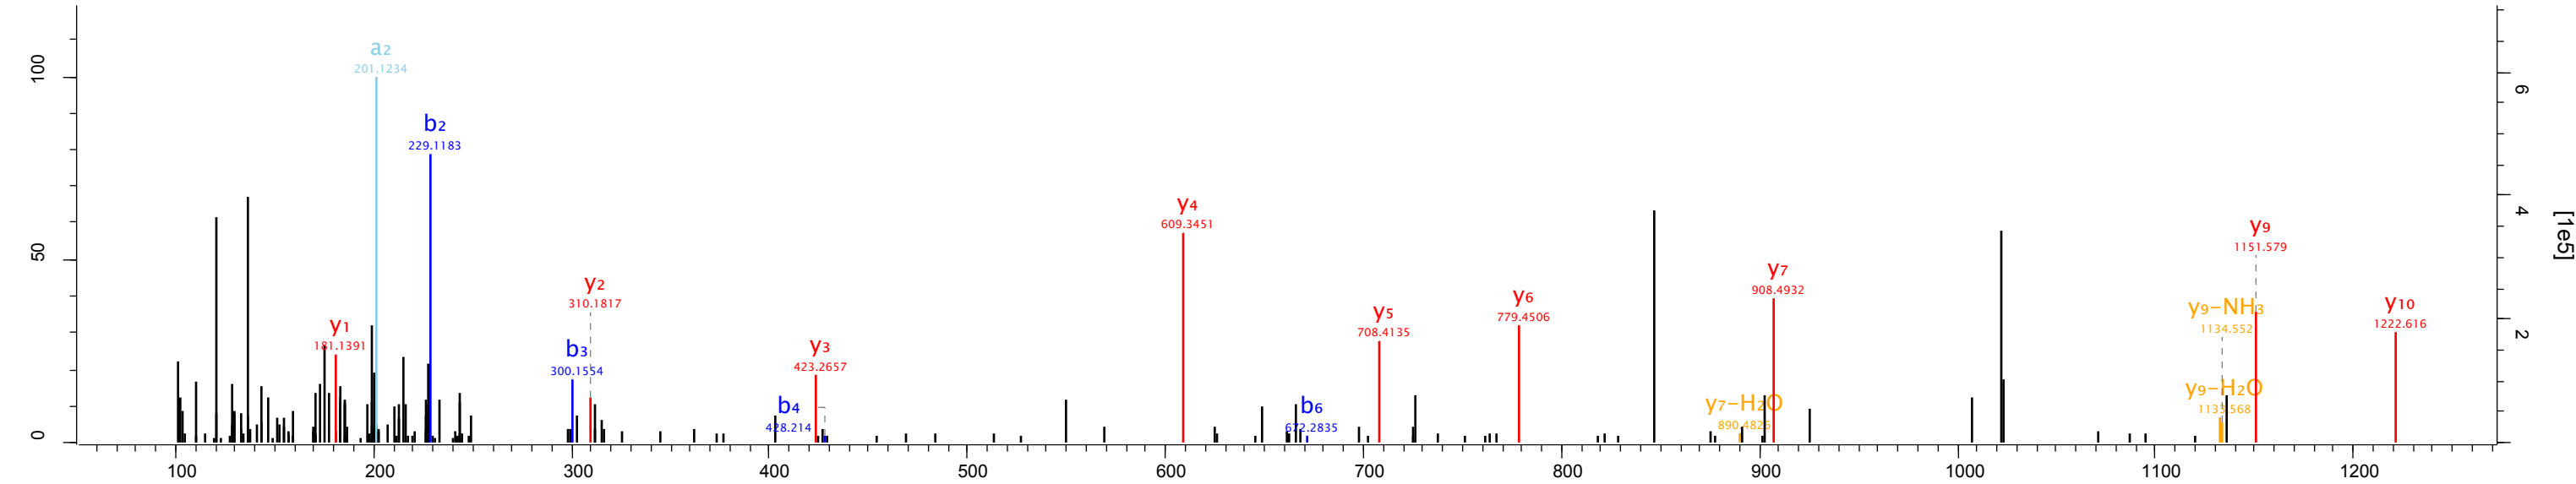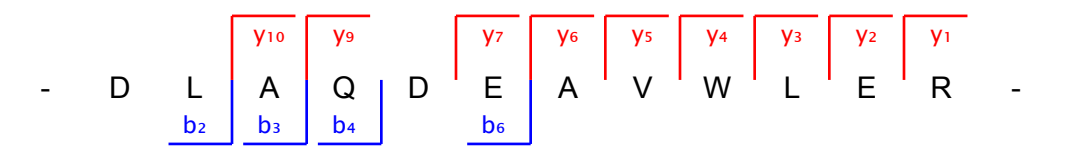

Raw file 20171215\_MaS\_33SR\_LMH\_proteome\_02 Scan 85161 Method FTMS; HCD Score 85.36 m/z 966.5 Gene names TIMM23;TIMM23B

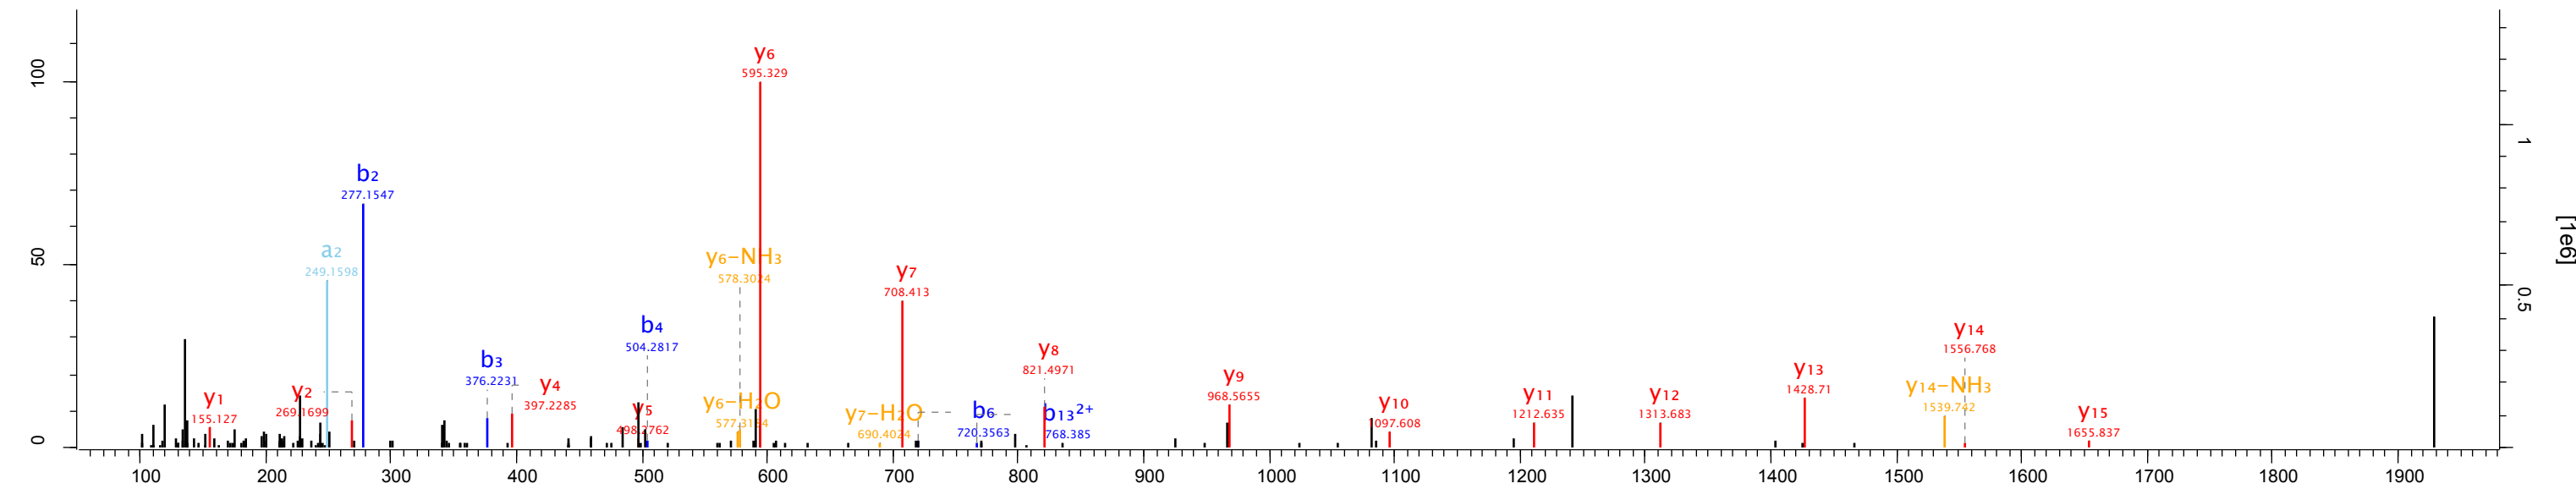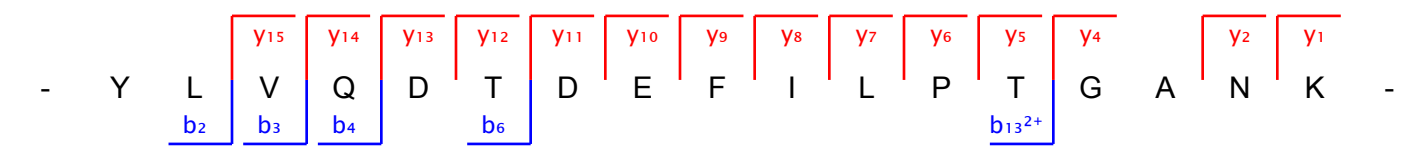

Raw file: 20171215\_MaS\_33SR\_LMH\_proteome\_02  
 Scan: 86341 Method: FTMS; HCD Score: 69.03 m/z: 732.35 Gene names: ATP6V1F

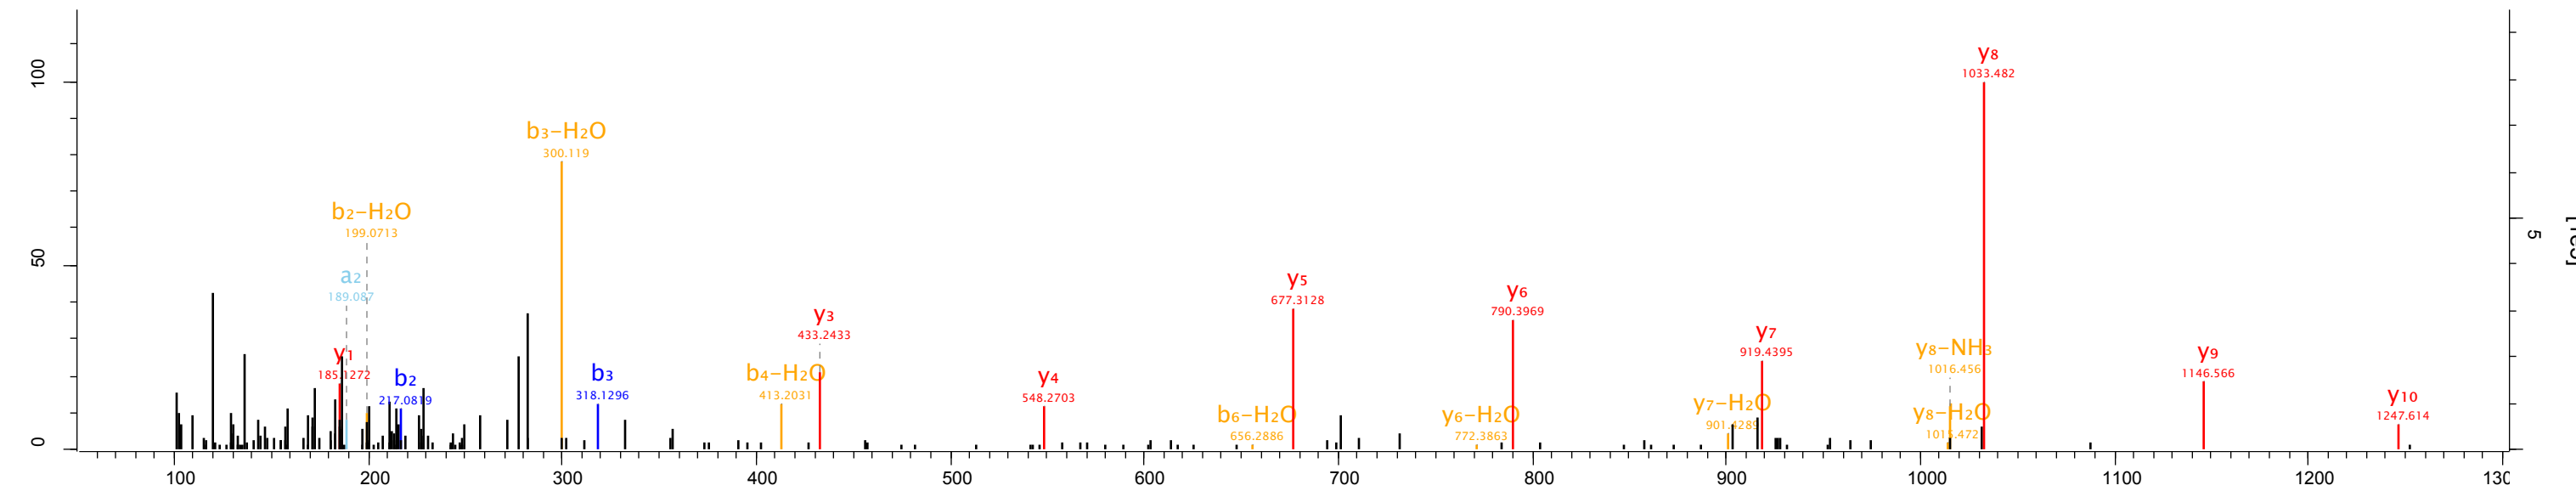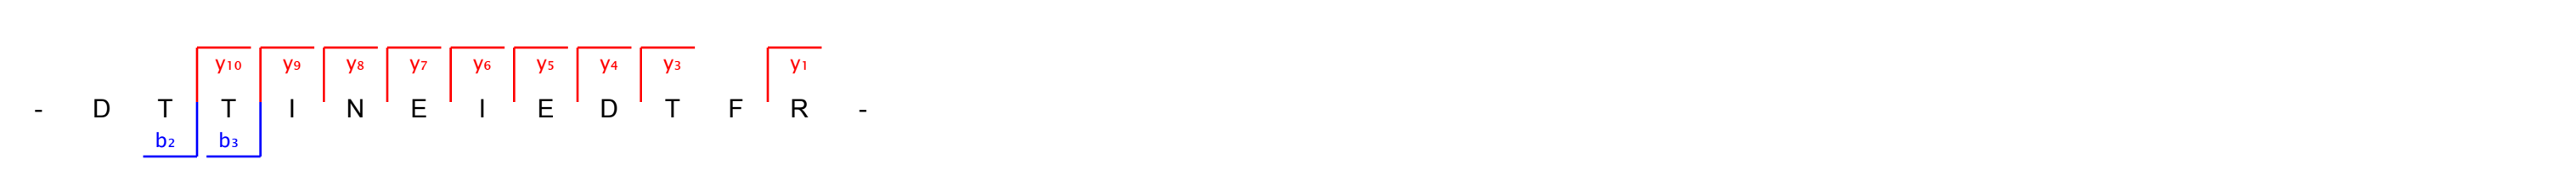

Raw file

20171215\_MaS\_33SR\_LMH\_proteome\_02

Scan 92841 Method FTMS; HCD Score 58.89 m/z 855.89 Gene names POLR21

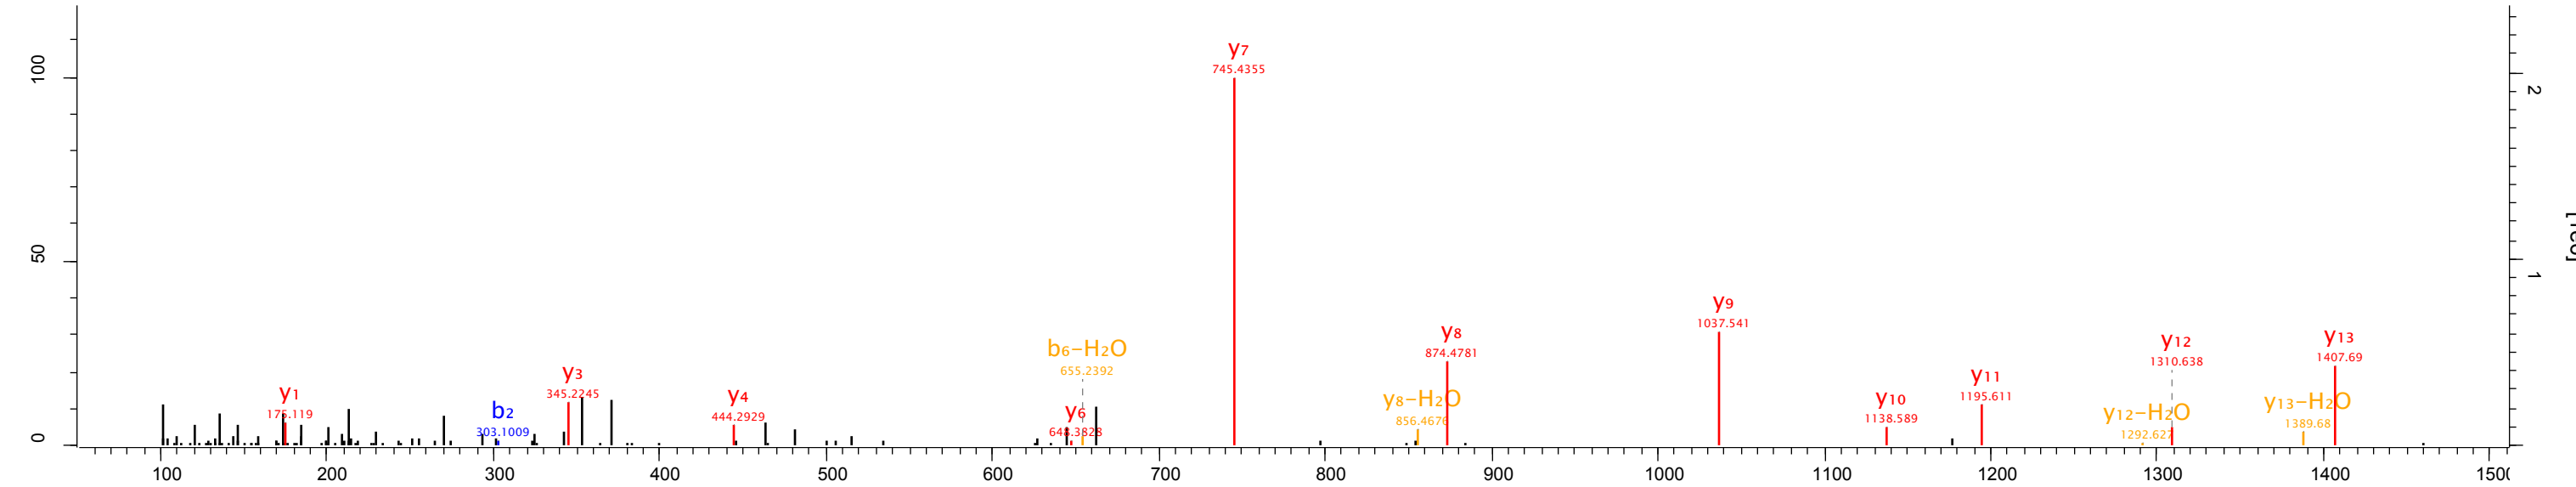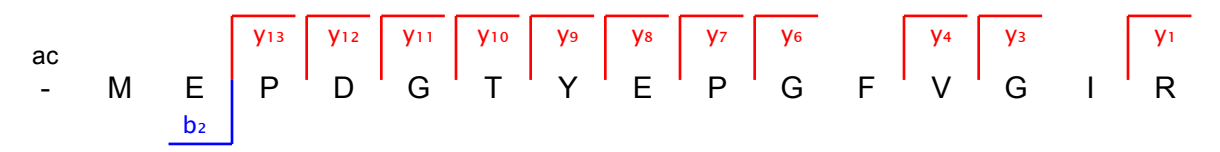

Raw file

20171215\_MaS\_33SR\_LMH\_proteome\_02

Scan 98091 Method FTMS; HCD Score 87.65 m/z 797.95 Gene names MVB12A

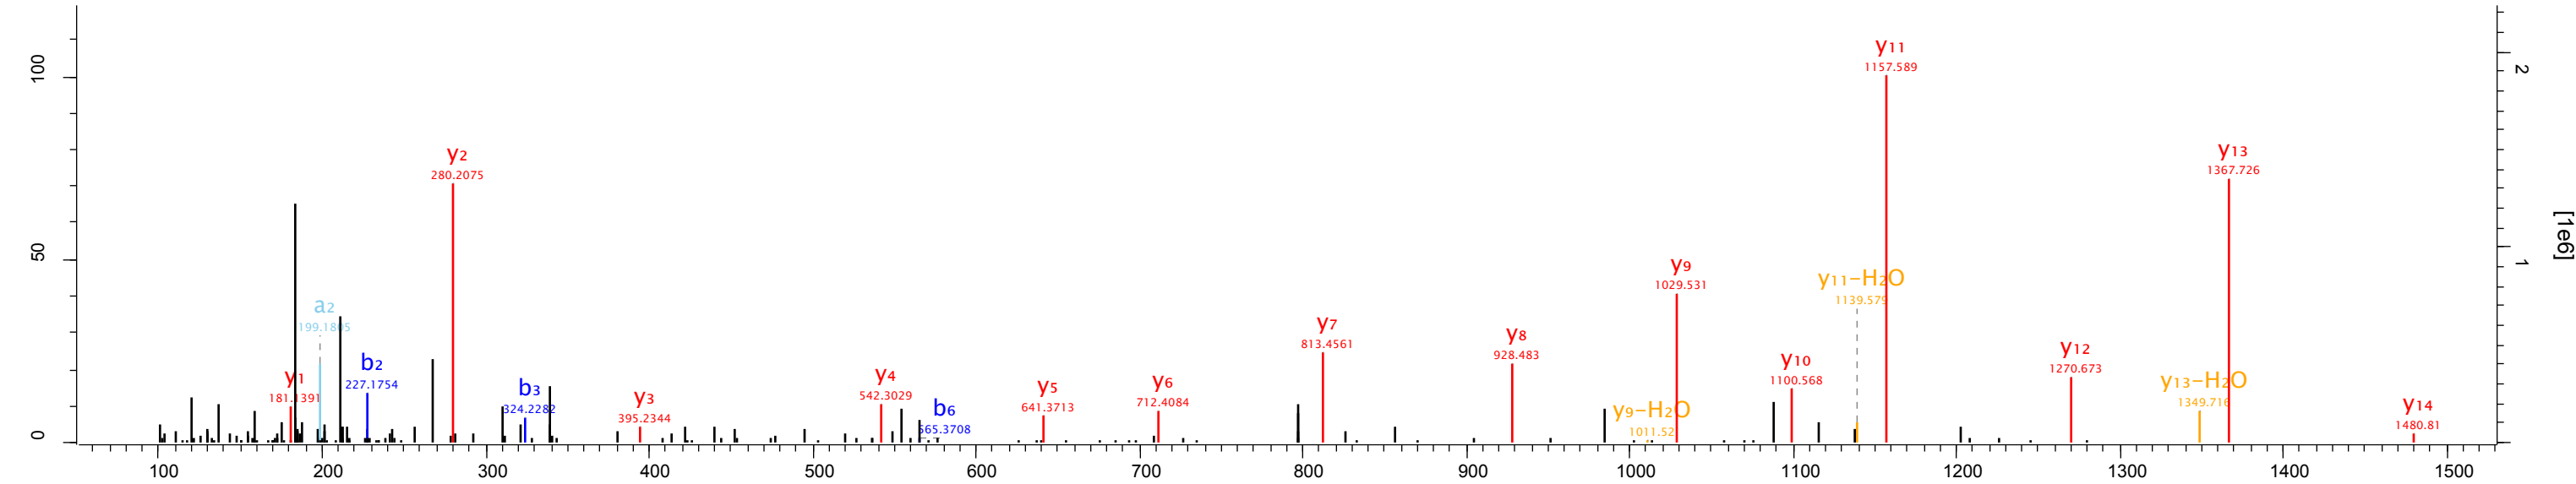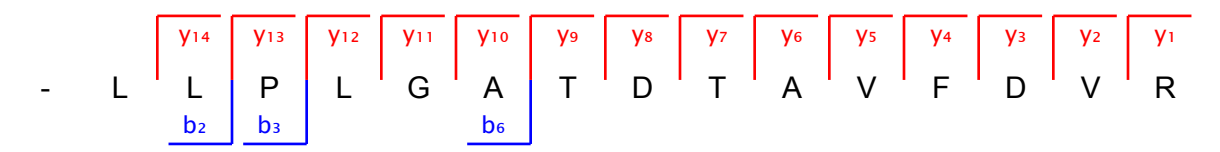

Raw file 20171215\_MaS\_33SR\_LMH\_phospho\_01 Scan 8142 Method FTMS; HCD Score 109.12 m/z 926.8 Gene names PDCL

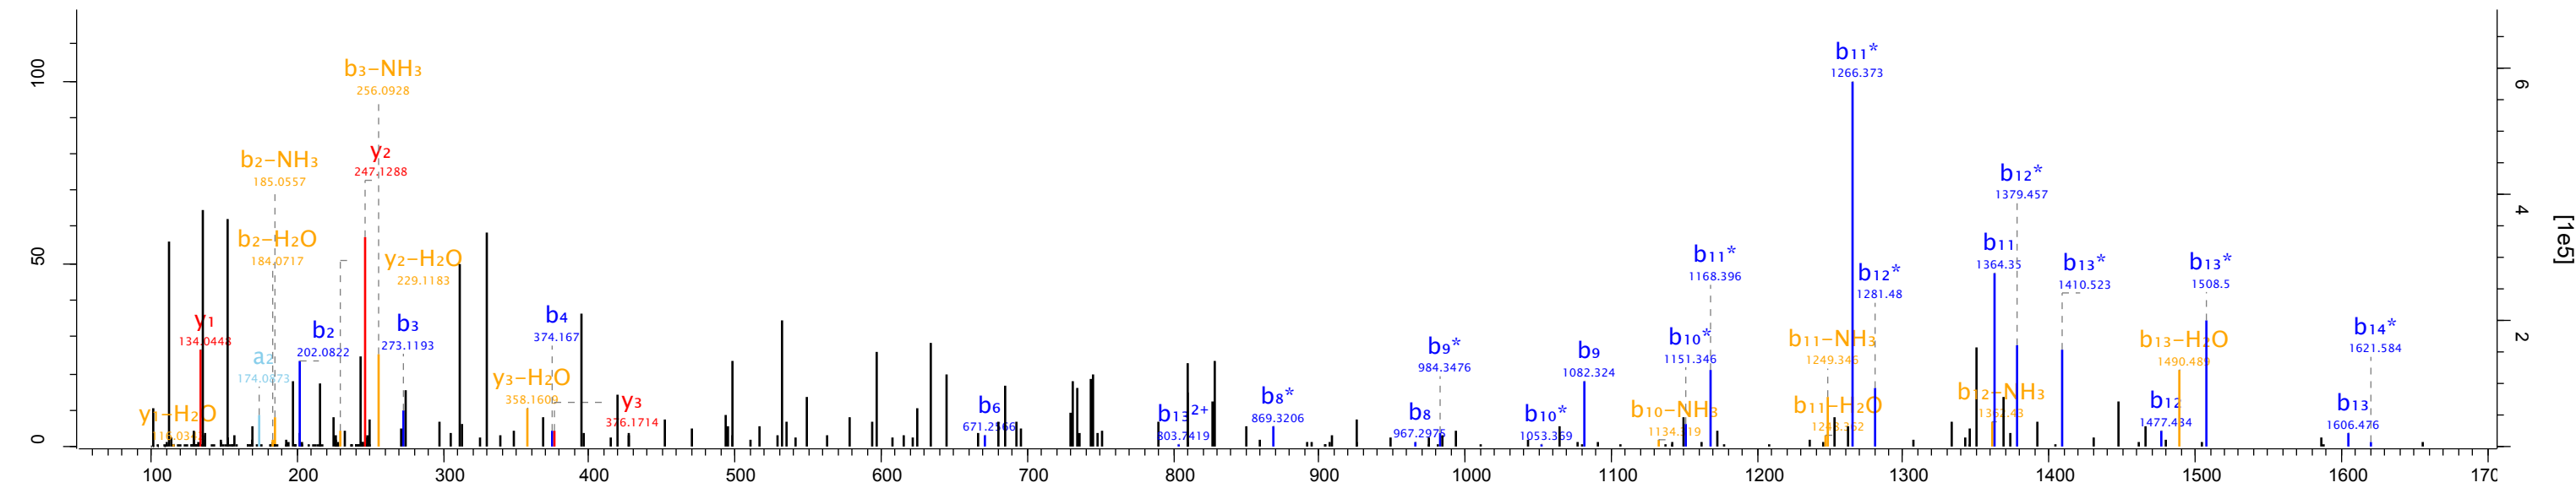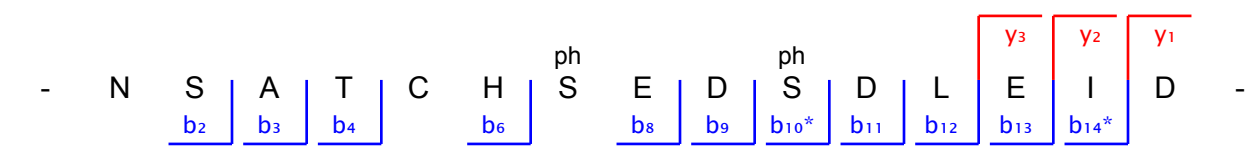



Raw file 20171215\_MaS\_33SR\_LMH\_phospho\_02 Scan 14352 Method FTMS; HCD Score 82.64 m/z 1039.44 Gene names LRCH1

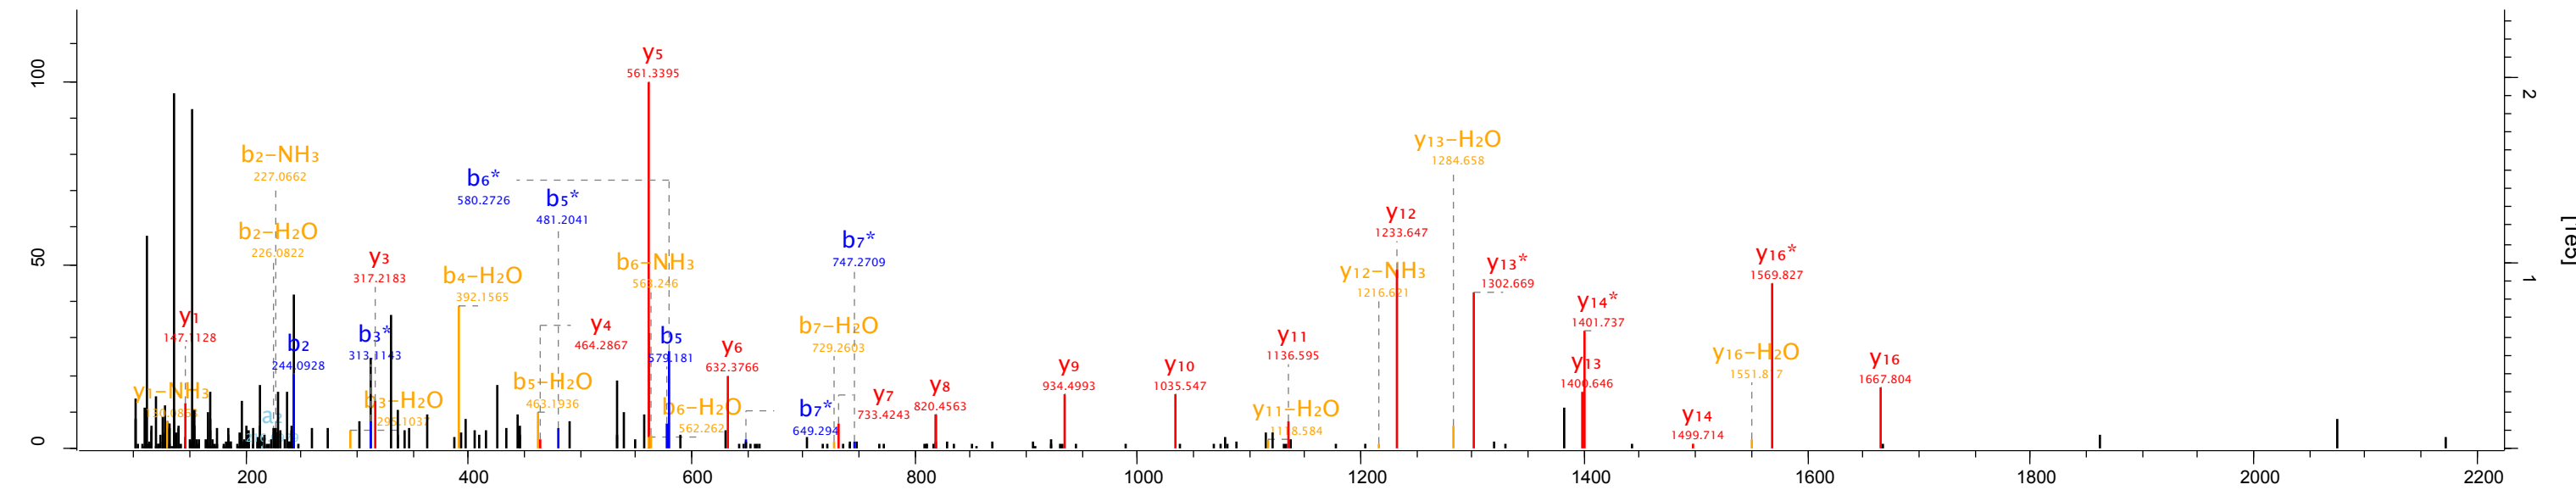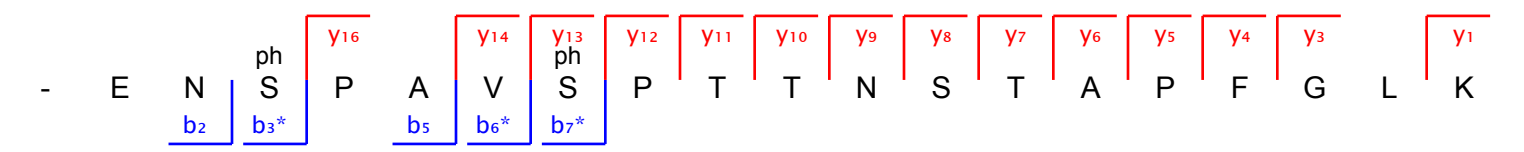

Raw file 20171215\_MaS\_33SR\_LMH\_phospho\_02 Scan 15172 Method FTMS; HCD Score 123.55 m/z 879.37 Gene names CRAMP1L

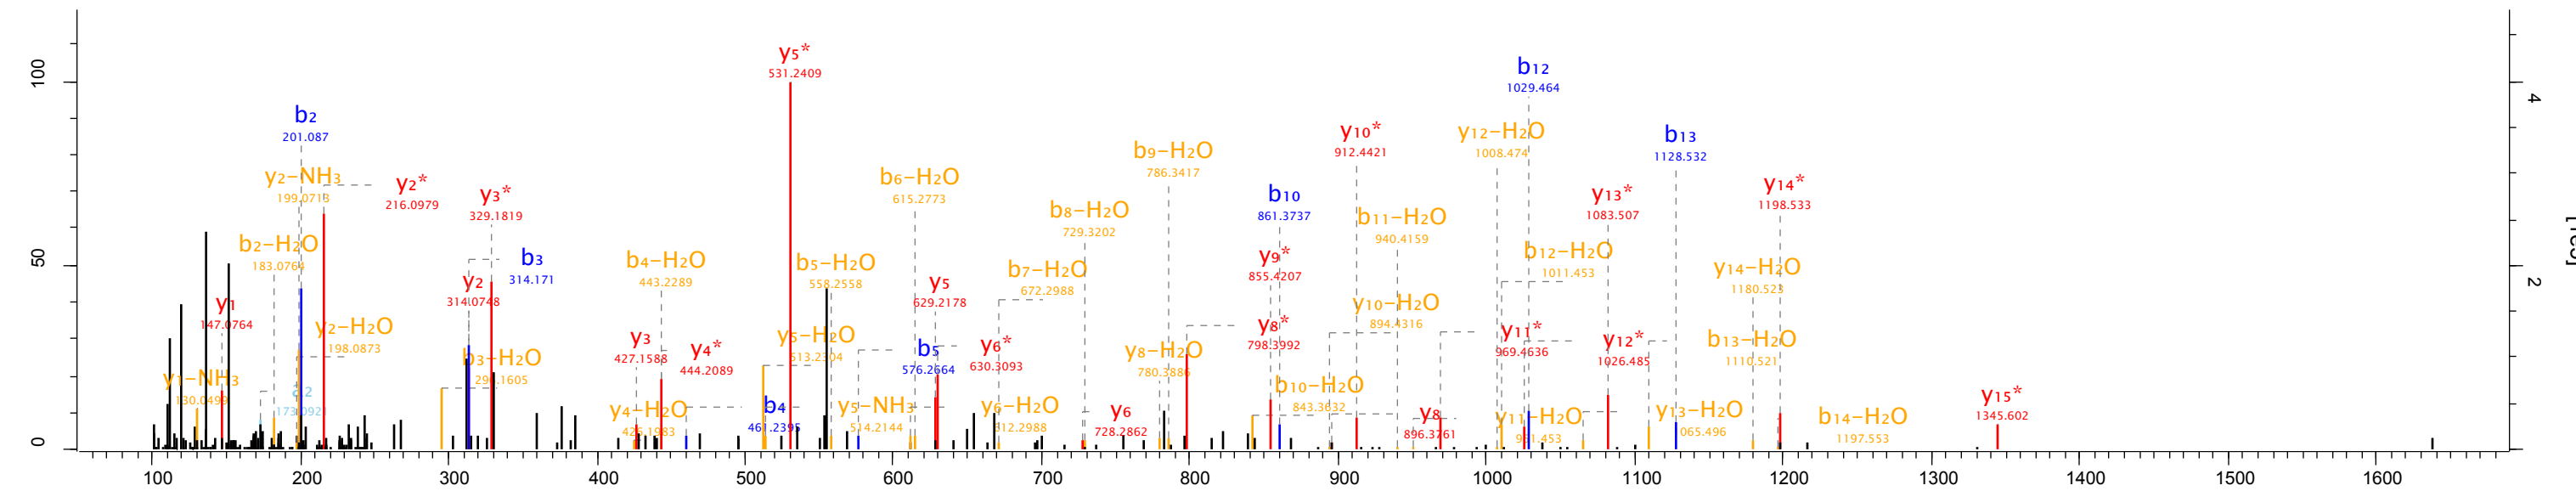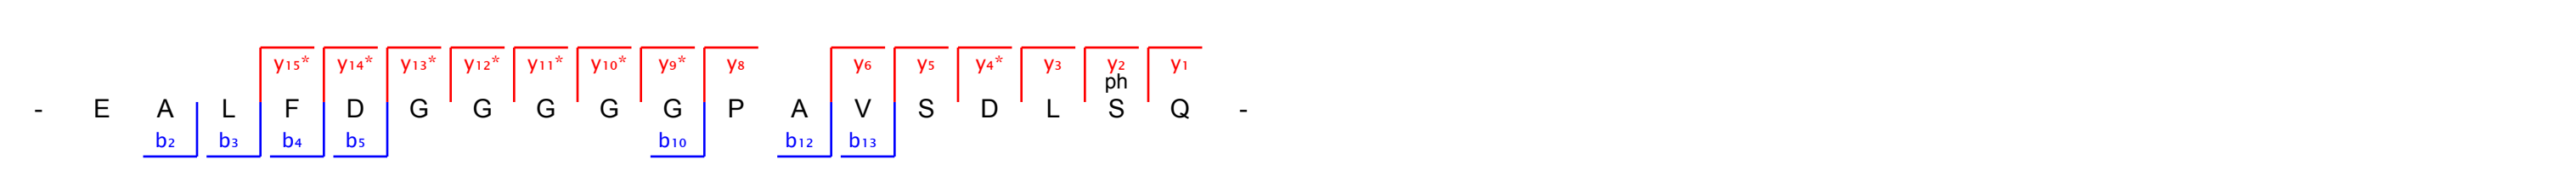

20171215\_MaS\_33SR\_LMH\_phospho\_03 11252 FTMS; HCD 173.01 970.9 ATXN7L3

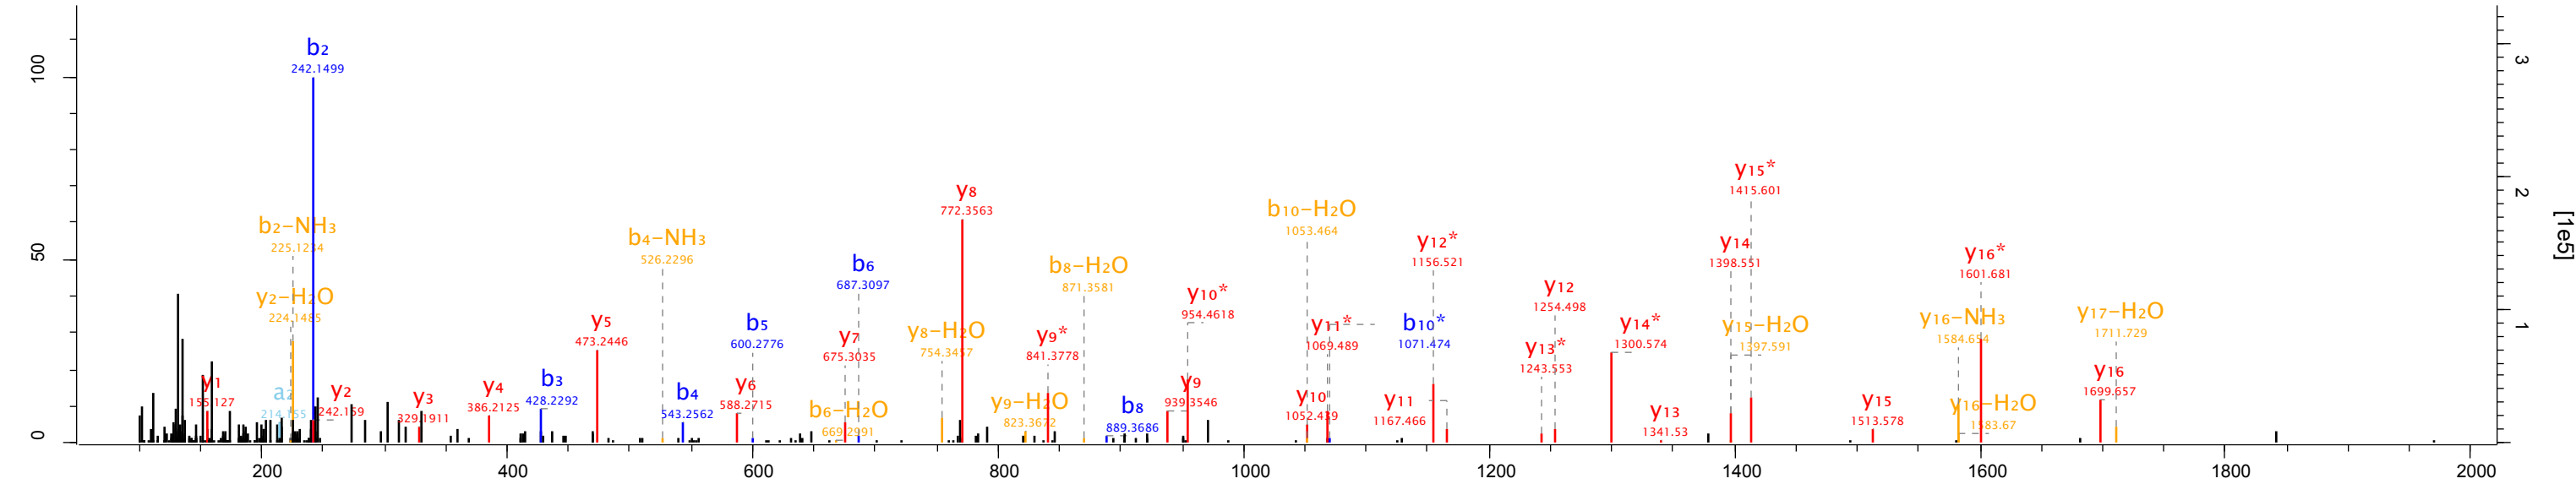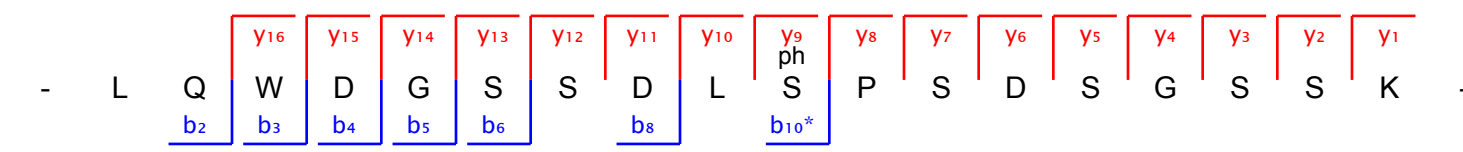

Raw file 20171215\_MaS\_33SR\_LMH\_phospho\_03 Scan 11612 Method FTMS; HCD Score 122.78 m/z 634.29 Gene names TSC22D4

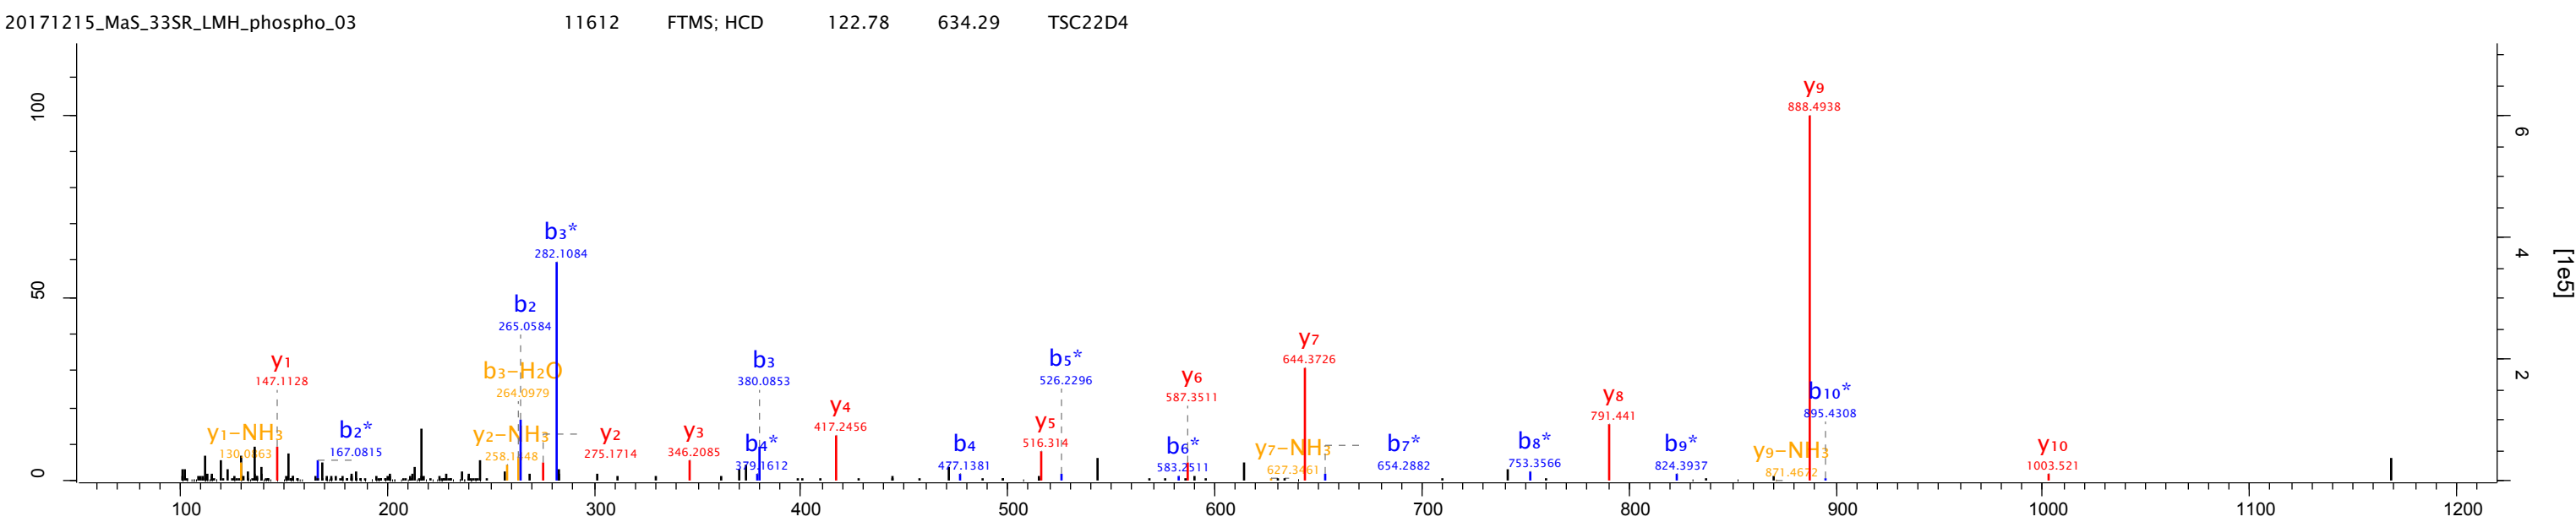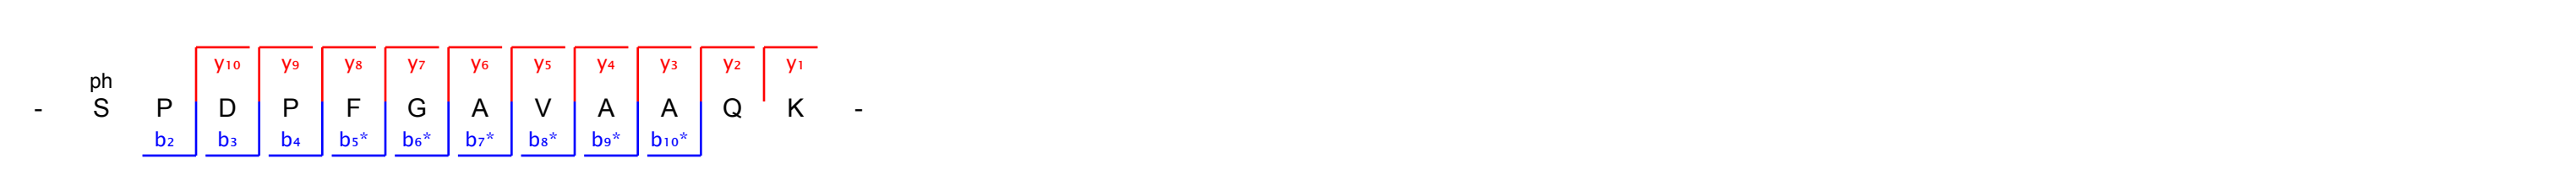

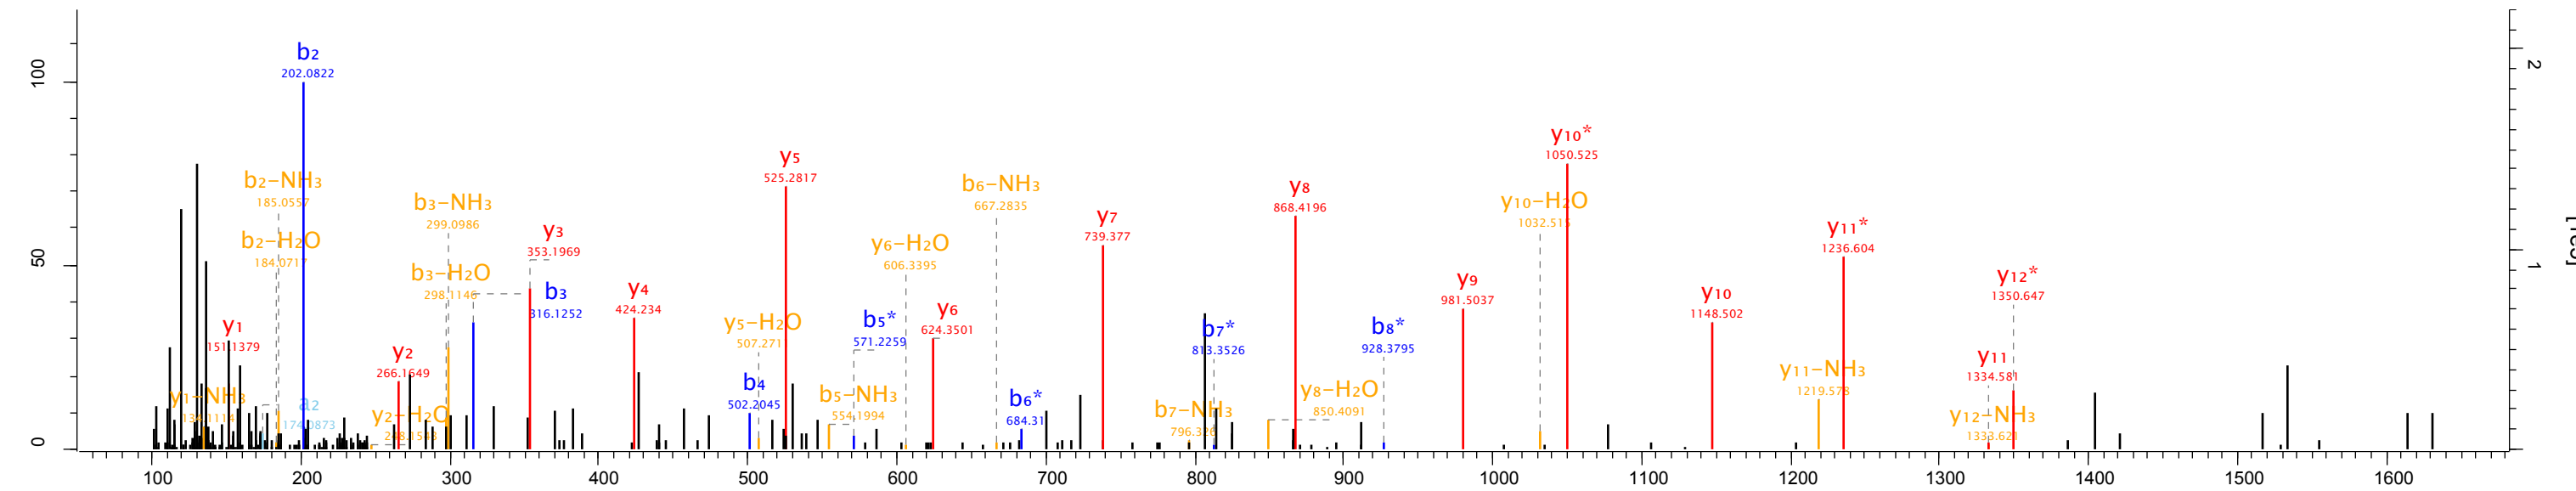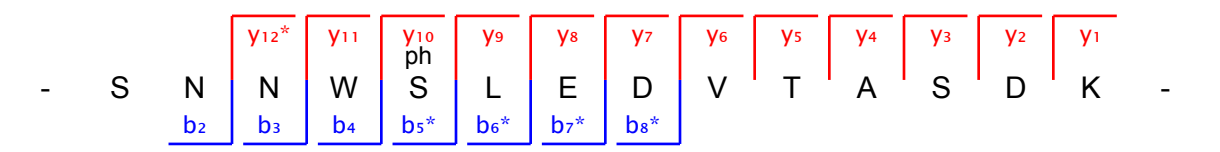

Raw file 20171215\_MaS\_33SR\_LMH\_phospho\_03 Scan 2412 Method FTMS; HCD Score 98.93 m/z 689.79 Gene names C7orf43

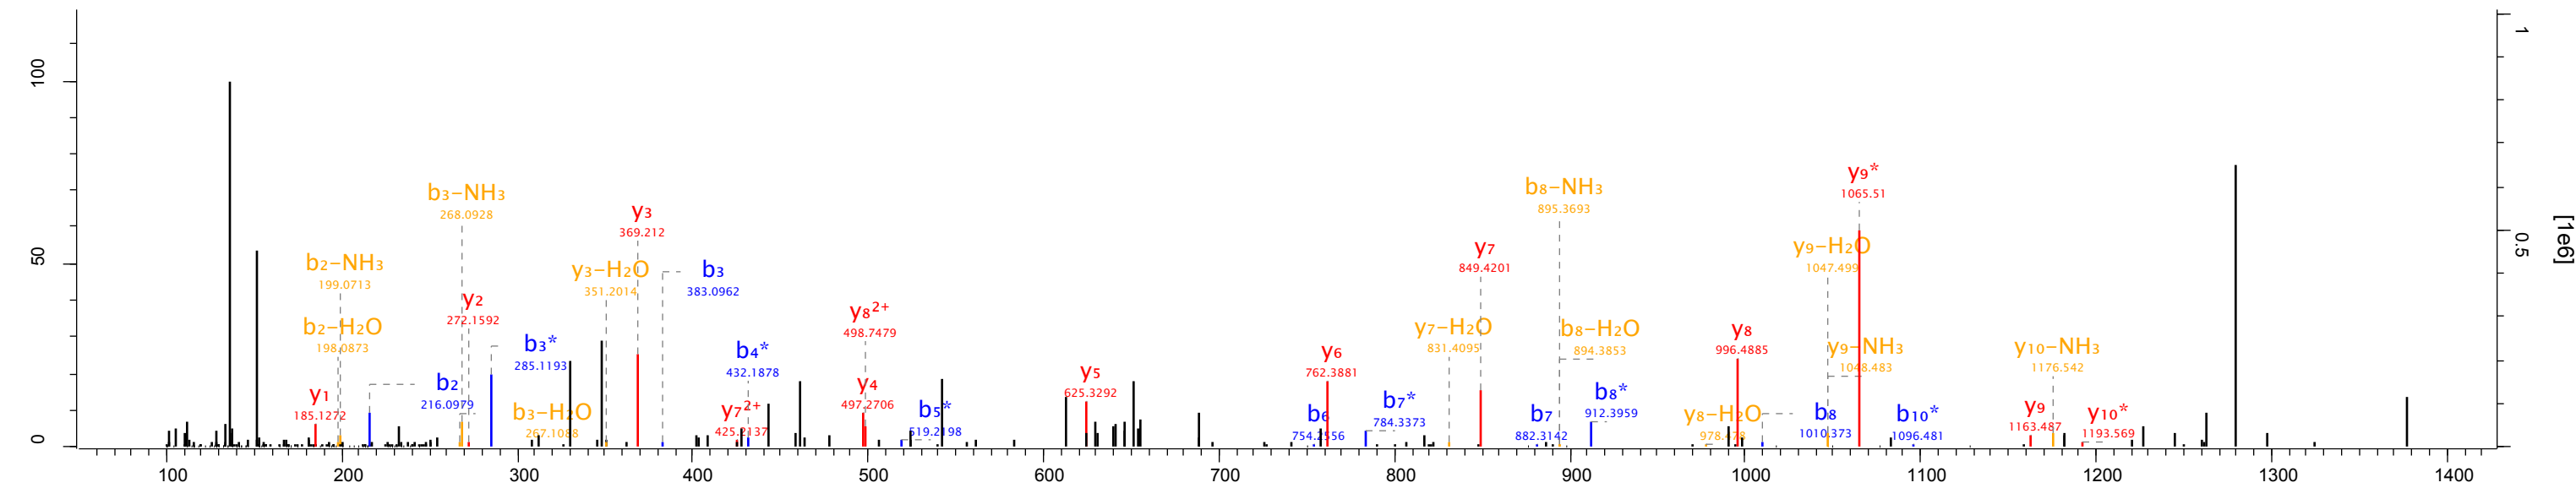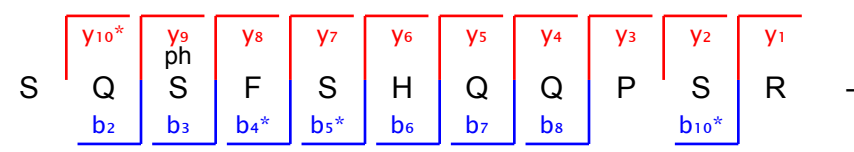

Raw file 20171215\_MaS\_33SR\_LMH\_phospho\_03 Scan 4252 Method FTMS; HCD Score 69.37 m/z 507.25 Gene names NCAPH2

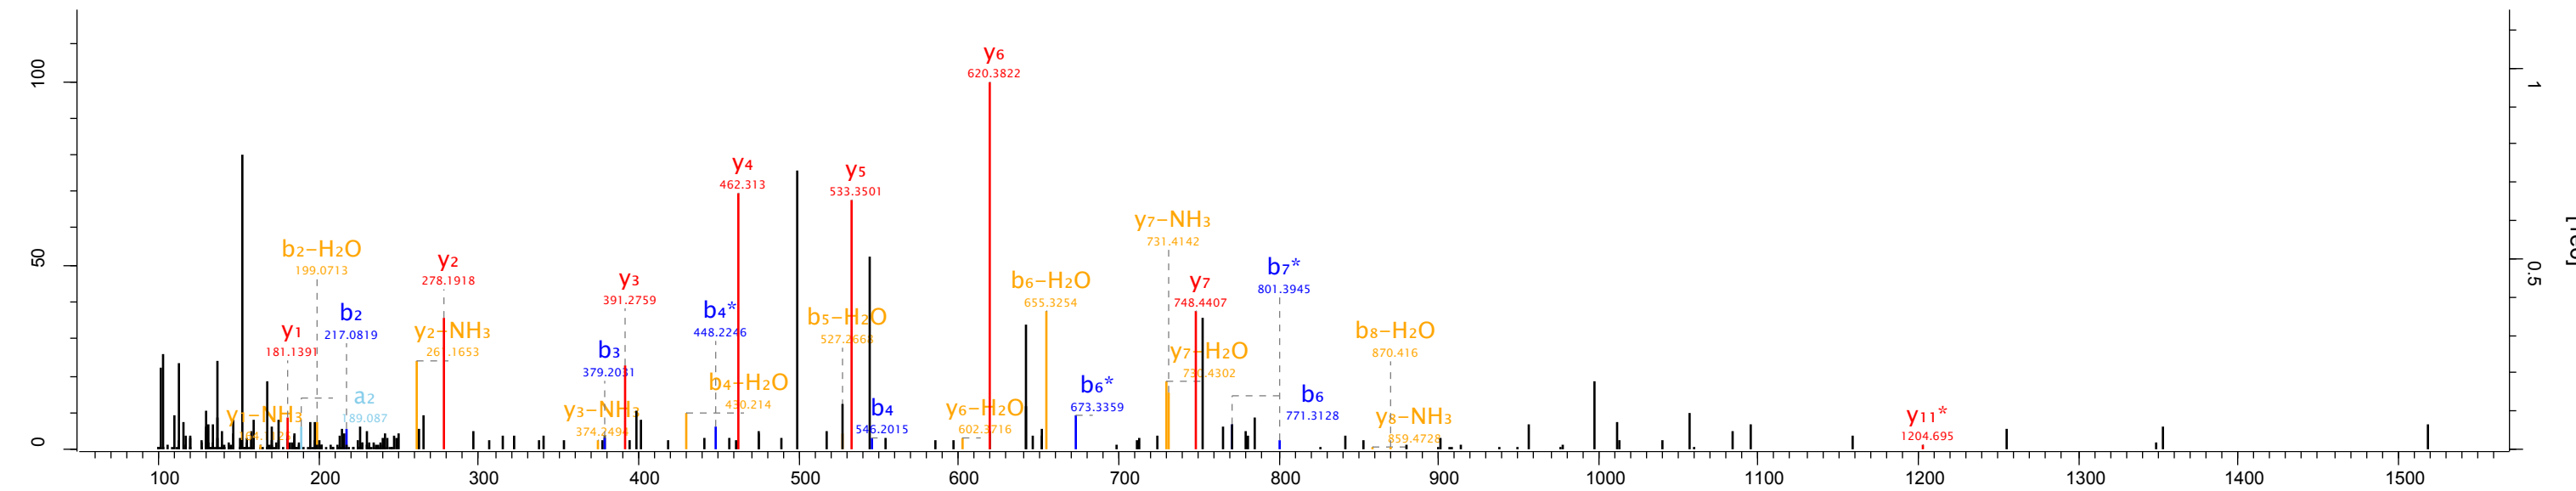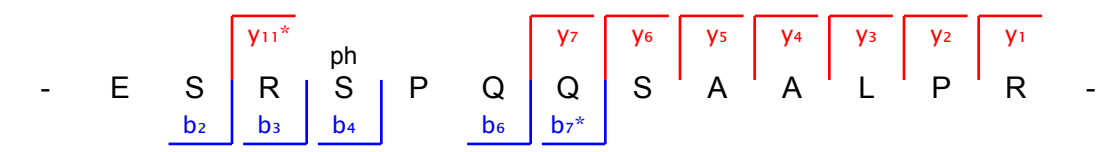

Raw file 20171215\_MaS\_33SR\_LMH\_phospho\_03 Scan 5092 Method FTMS; HCD Score 100.92 m/z 484.23 Gene names SETD2

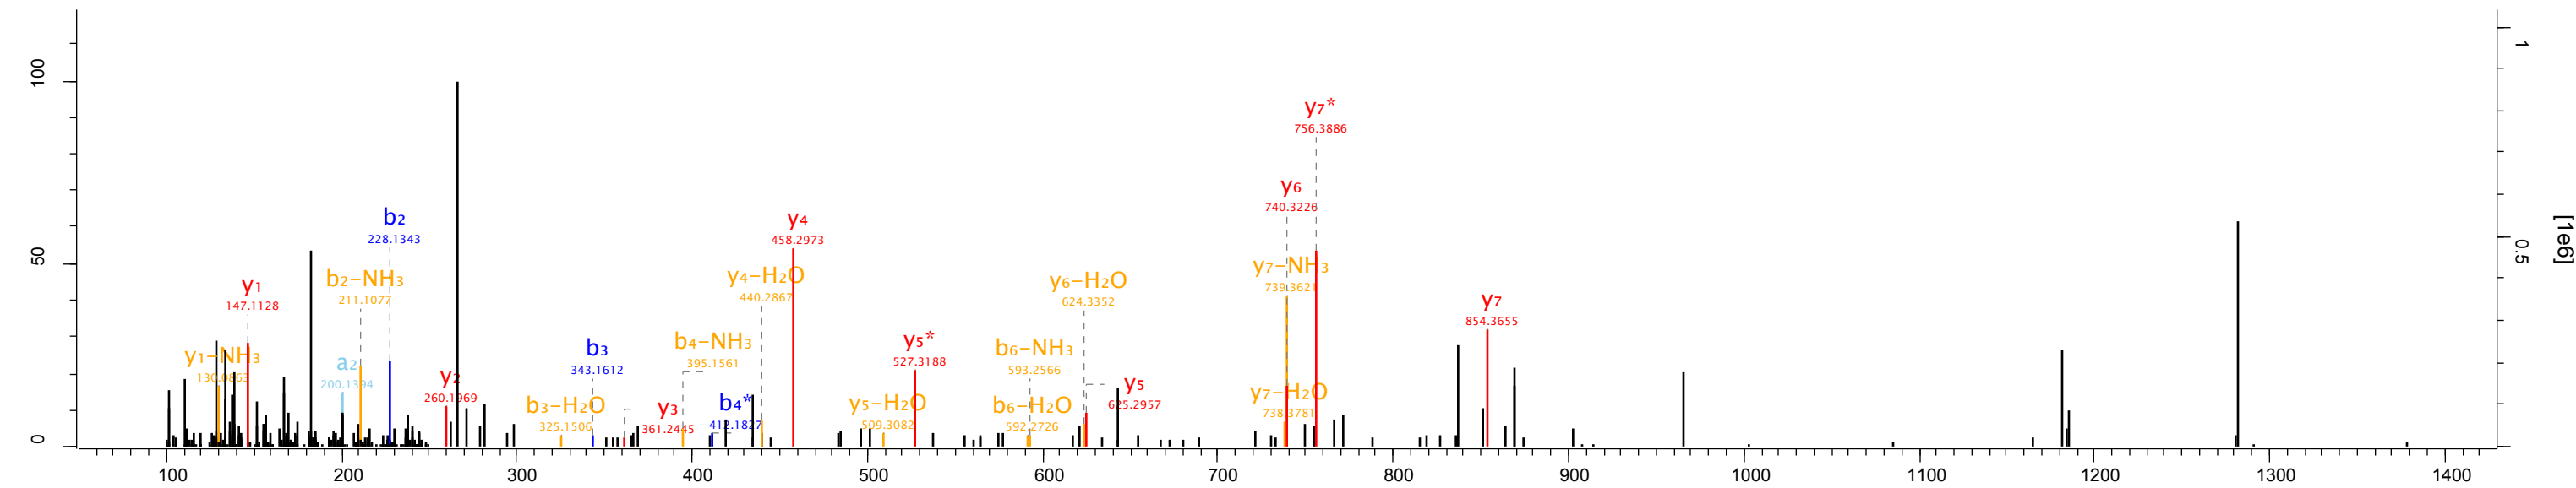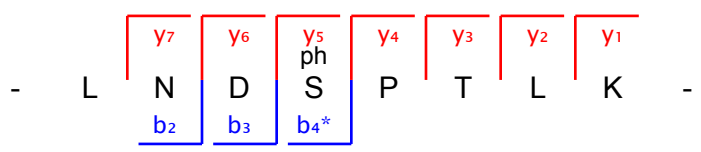



Raw file 20171215\_MaS\_33SR\_LMH\_phospho\_03 Scan 8682 Method FTMS; HCD Score 67.1 m/z 628.81 Gene names CRTC3

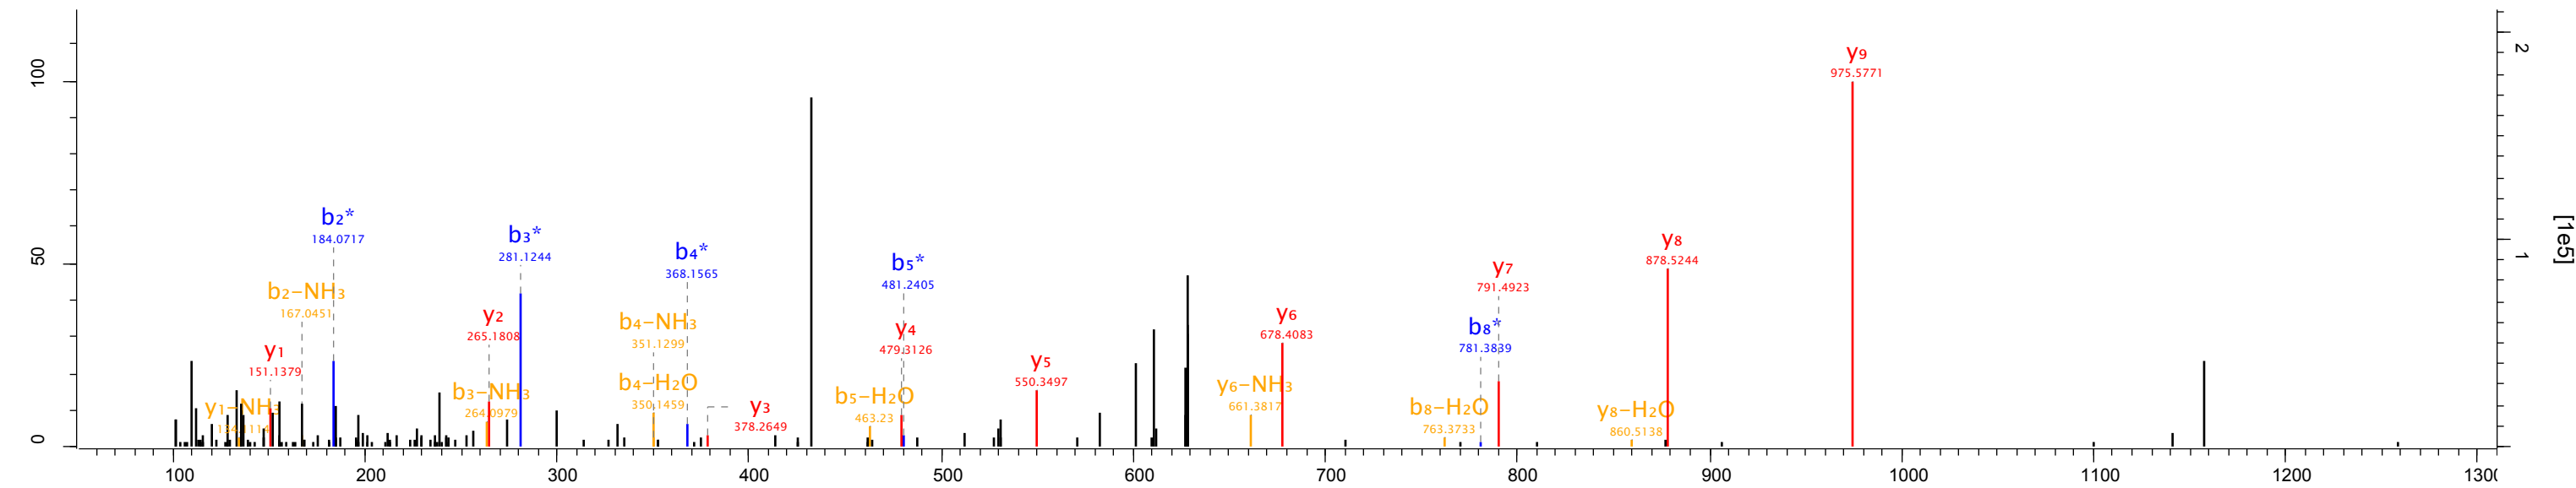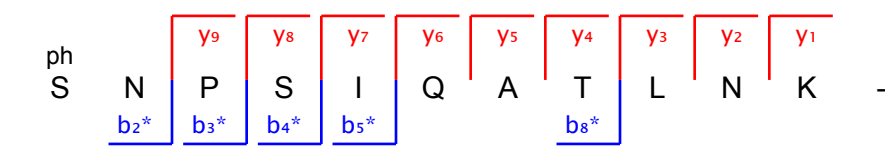

Raw file 20171215\_MaS\_33SR\_LMH\_phospho\_03 Scan 8702 Method FTMS; HCD Score 282.72 m/z 818.88 Gene names HEATR6

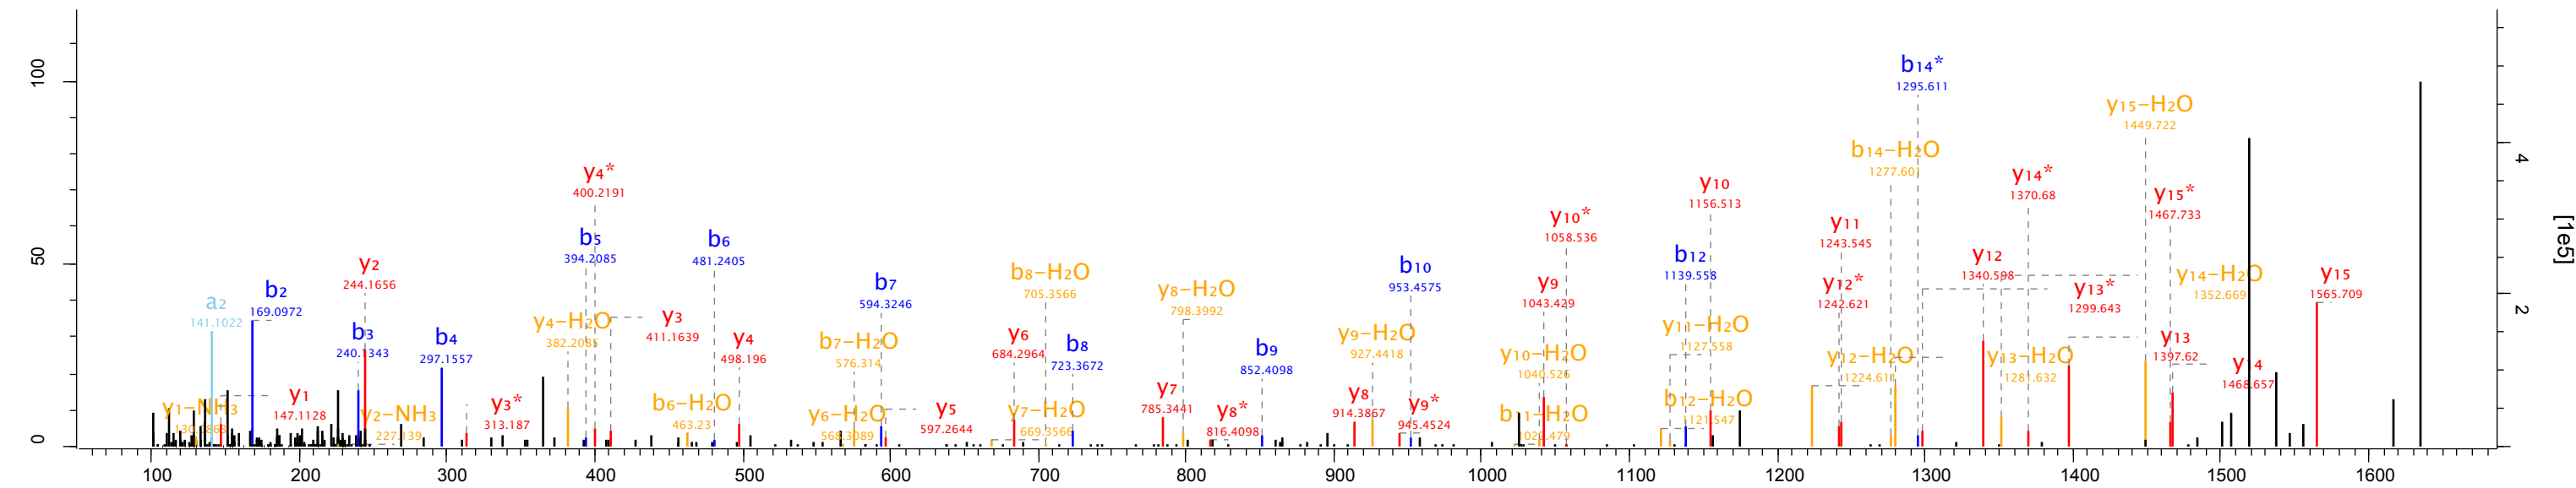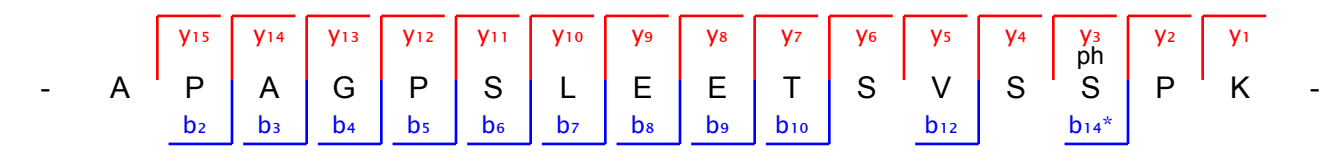

Raw file 20171215\_MaS\_33SR\_LMH\_phospho\_03 Scan 9982 Method FTMS; HCD Score 130.21 m/z 820.04 Gene names MYEF2

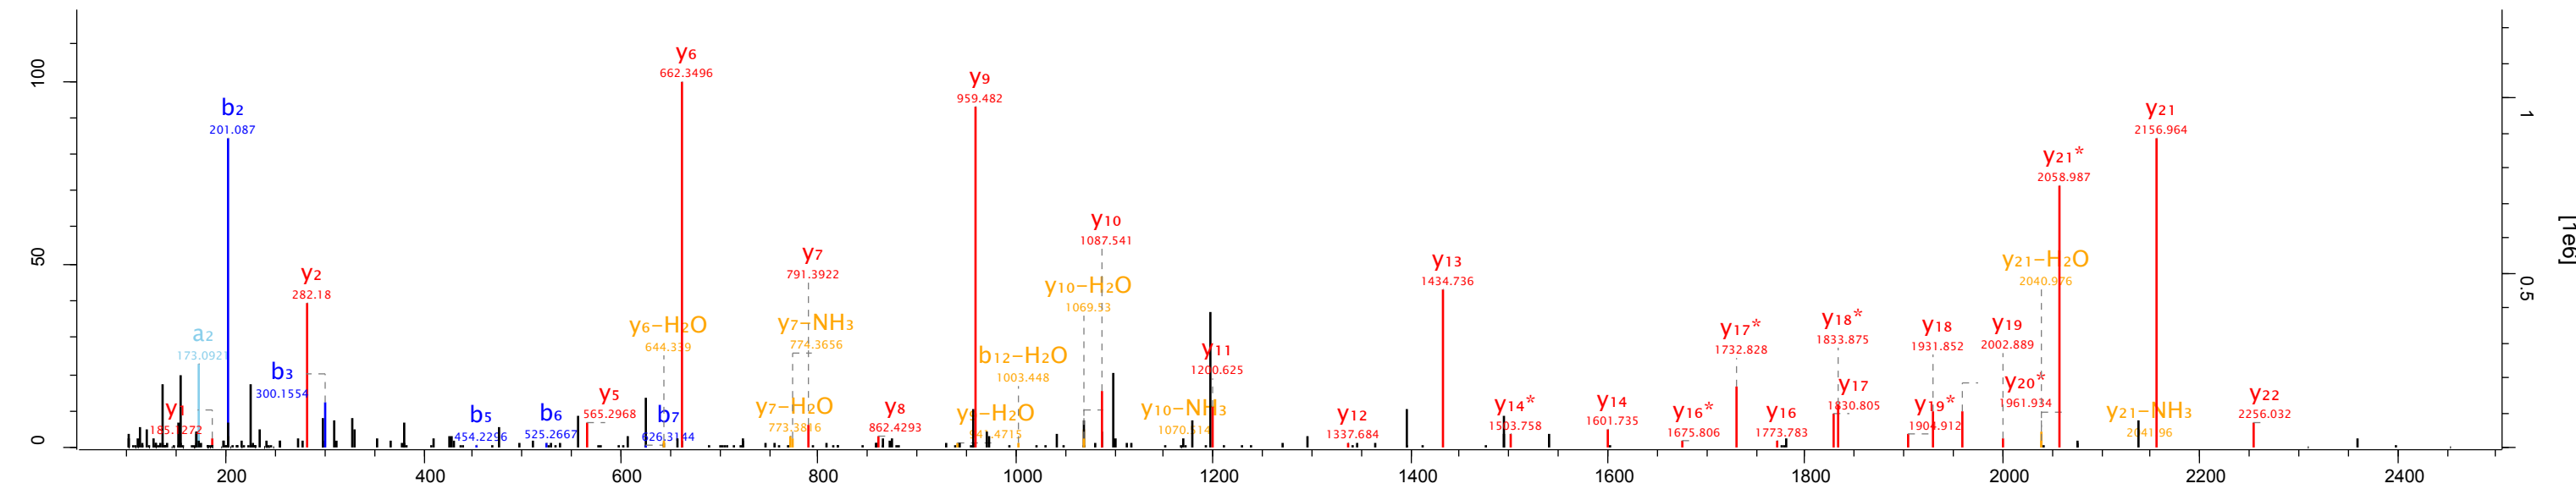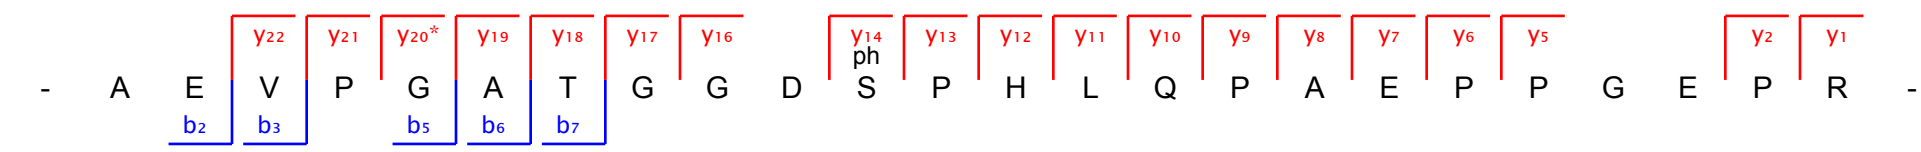

Raw file 20171215\_MaS\_33SR\_LMH\_phospho\_06 Scan 10412 Method FTMS; HCD Score 92.61 m/z 559.96 Gene names MLLT3

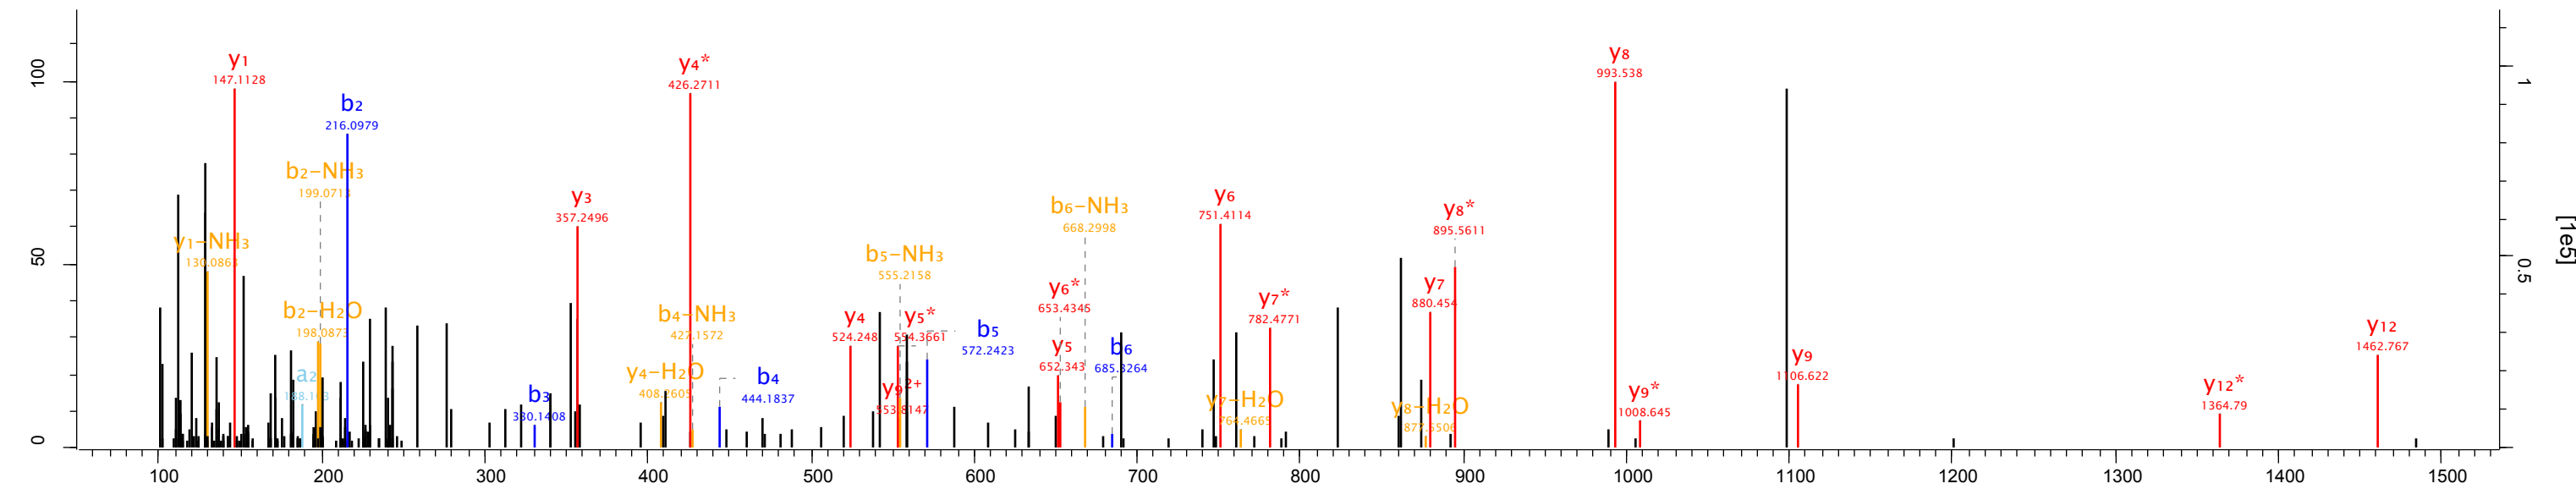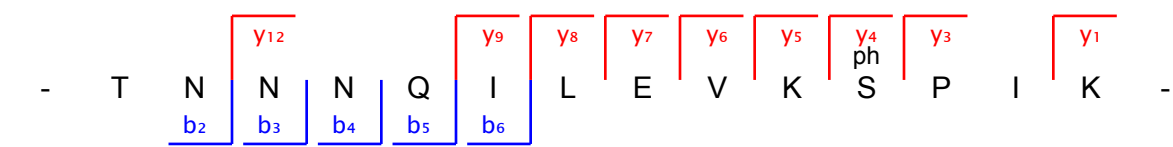

Raw file 20171215\_MaS\_33SR\_LMH\_phospho\_06 Scan 11462 Method FTMS; HCD Score 159.98 m/z 715.32 Gene names ATG16L1

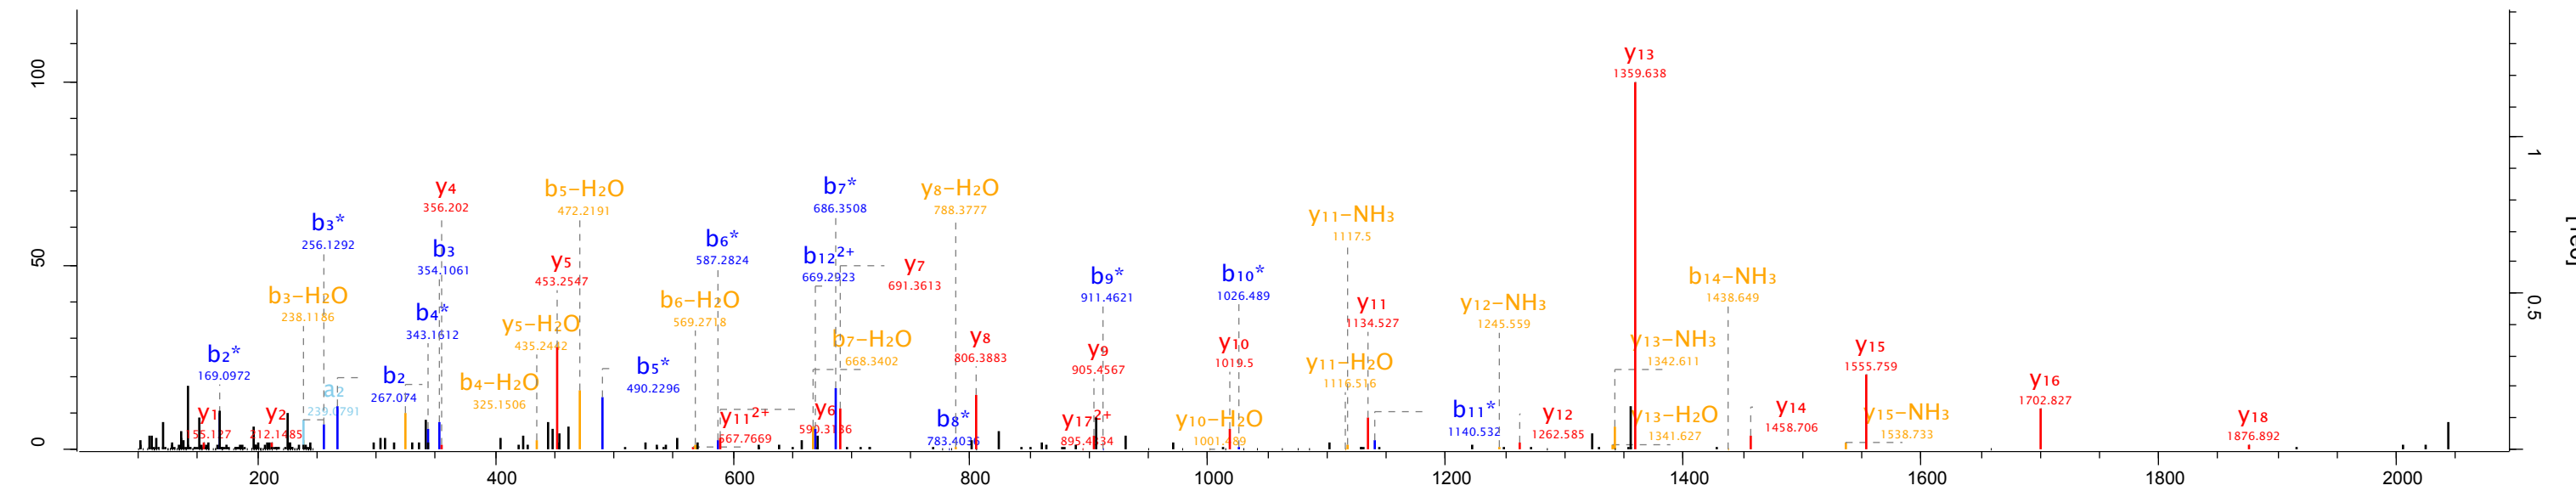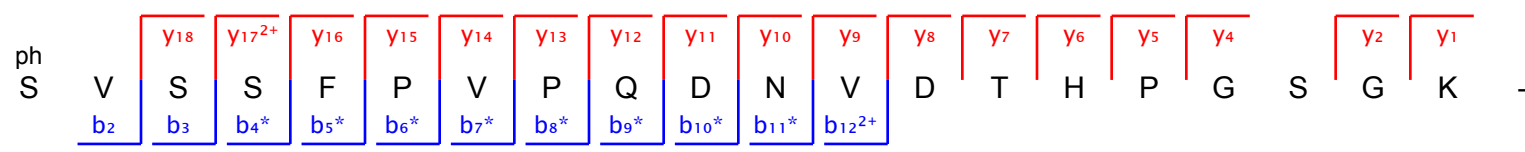

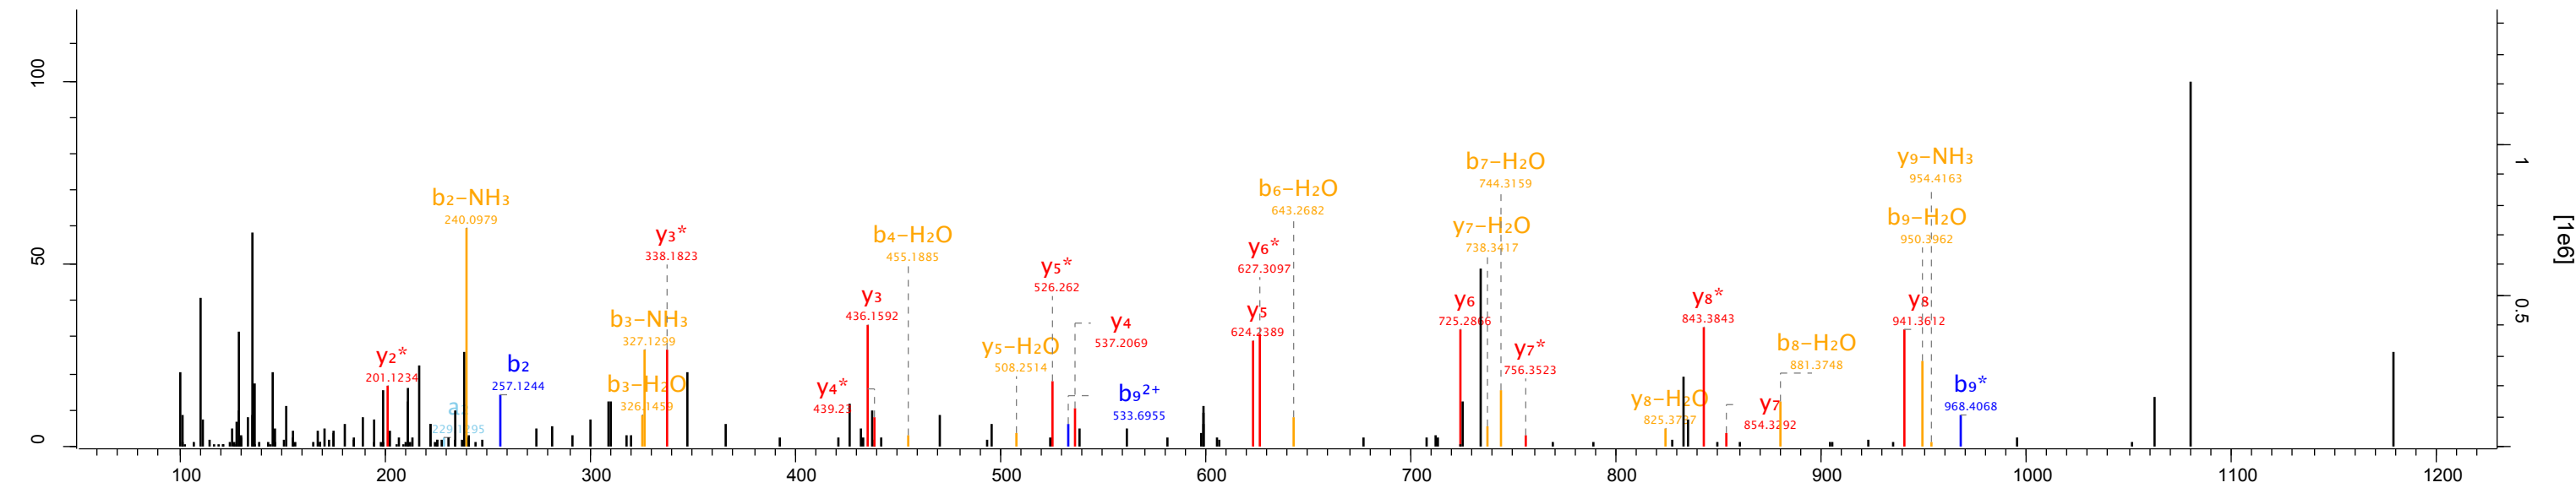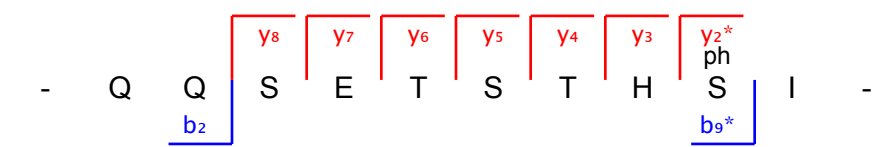

Raw file 20171215\_MaS\_33SR\_LMH\_phospho\_06 Scan 4202 Method FTMS; HCD Score 94.8 m/z 775.01 Gene names TCEAL4

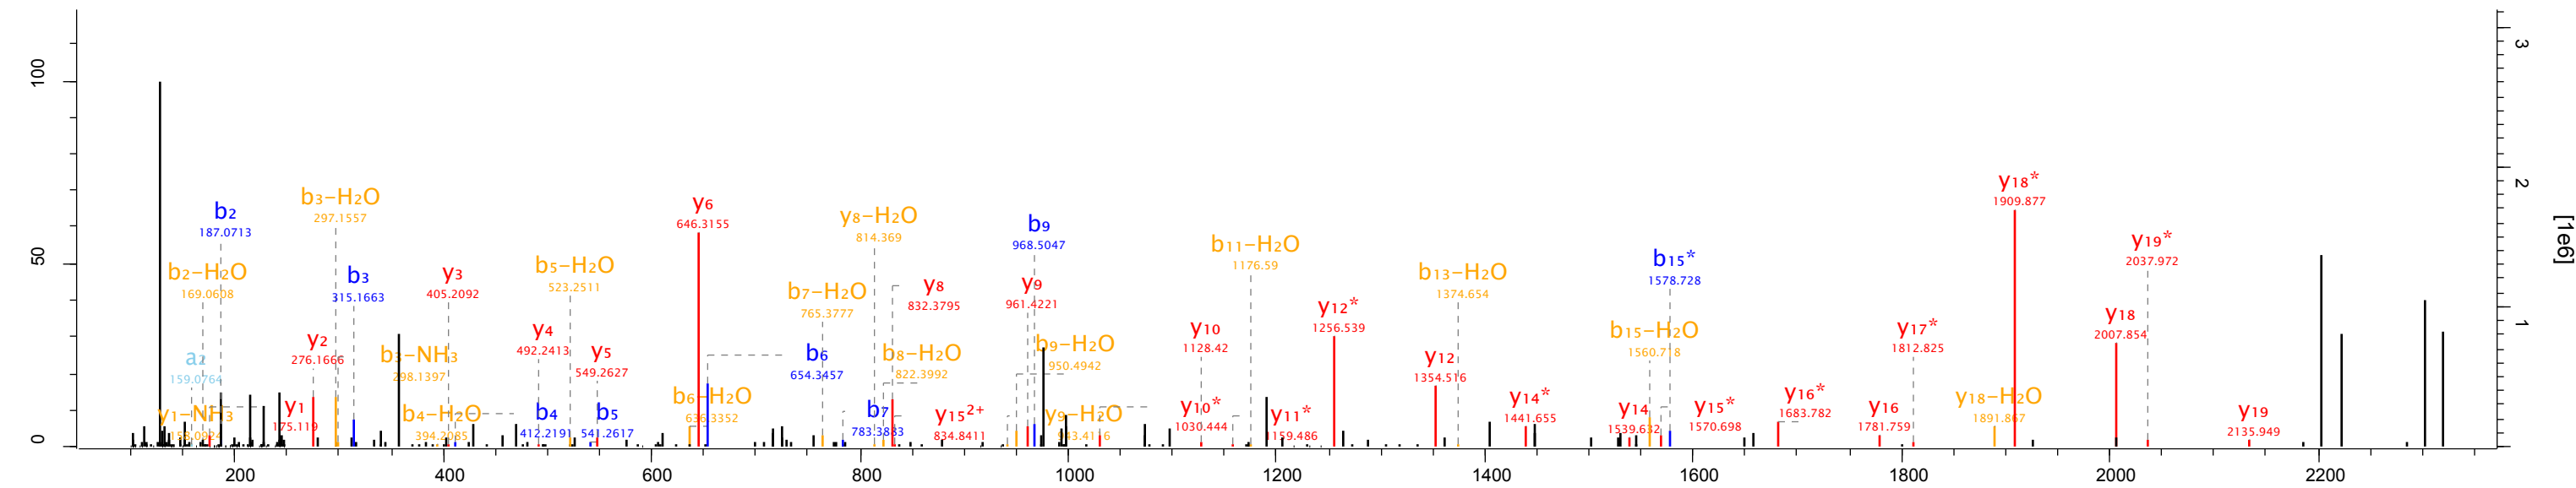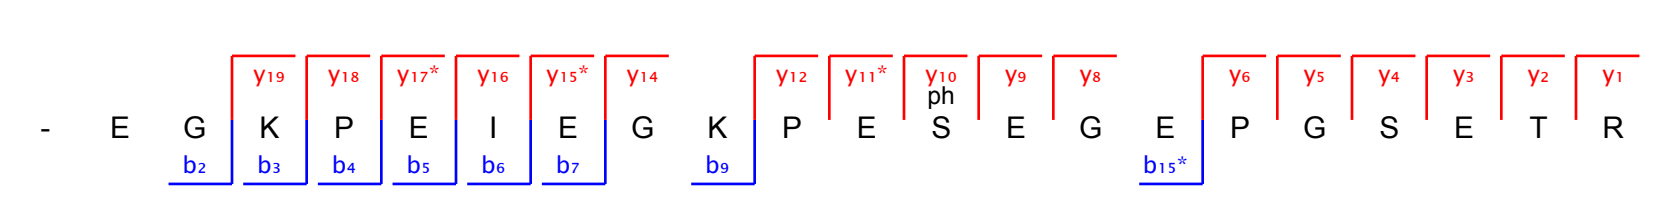

Raw file 20171215\_MaS\_33SR\_LMH\_phospho\_06 Scan 4872 Method FTMS; HCD Score 81.64 m/z 547.72 Gene names PLEKHF2

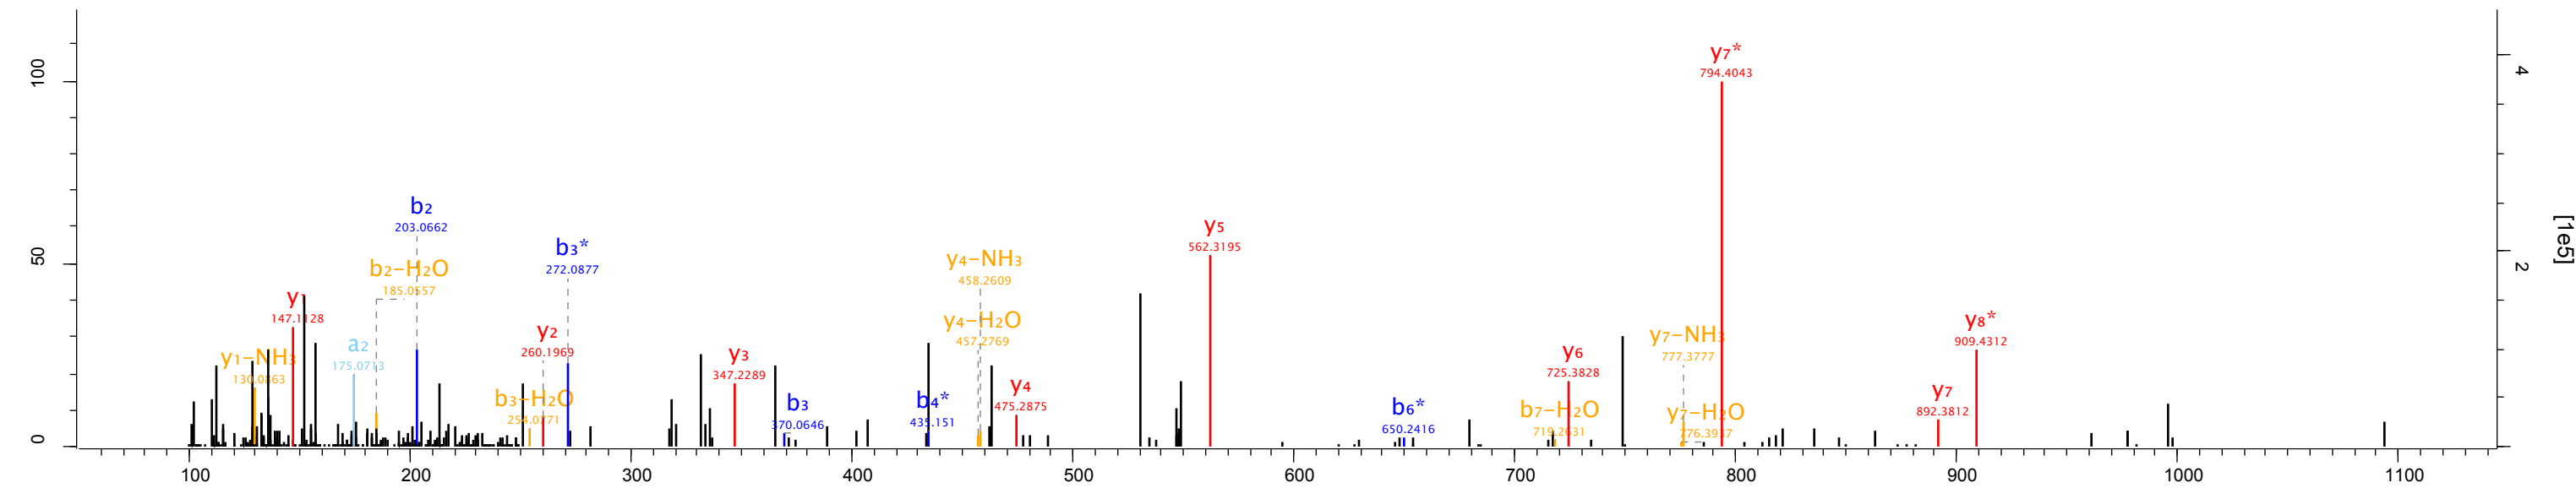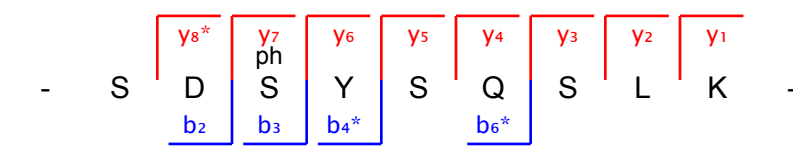



Raw file 20171215\_MaS\_33SR\_LMH\_phospho\_06 Scan 5452 Method FTMS; HCD Score 110.98 m/z 837.88 Gene names TRIM3

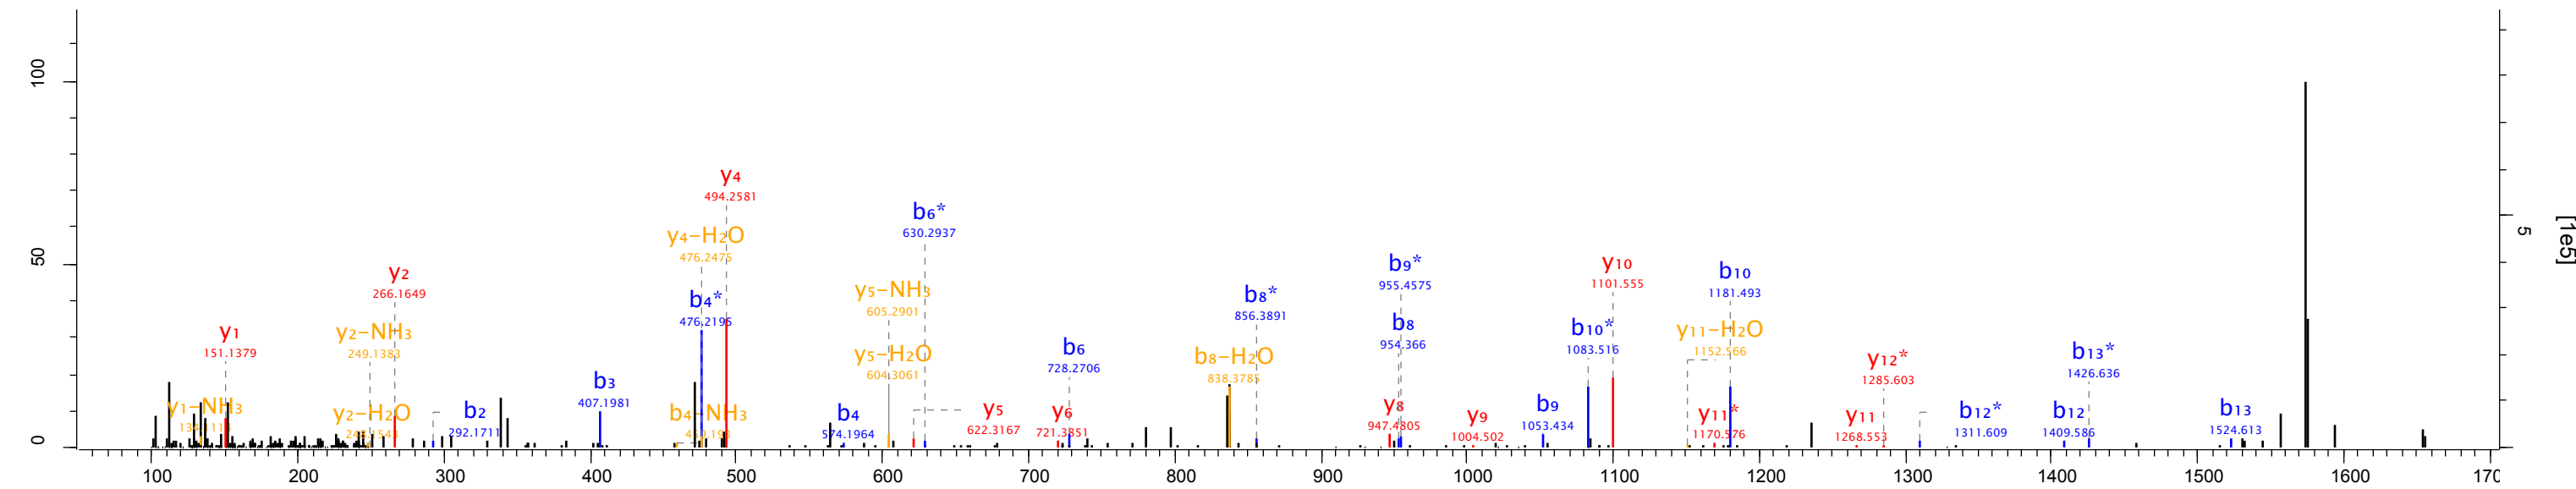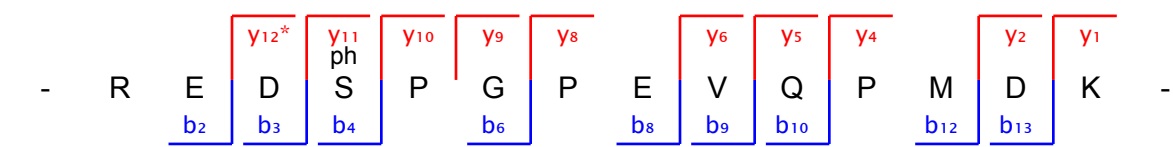

Raw file 20171215\_MaS\_33SR\_LMH\_phospho\_06 Scan 8282 Method FTMS; HCD Score 140.59 m/z 726.32 Gene names PGRMC2

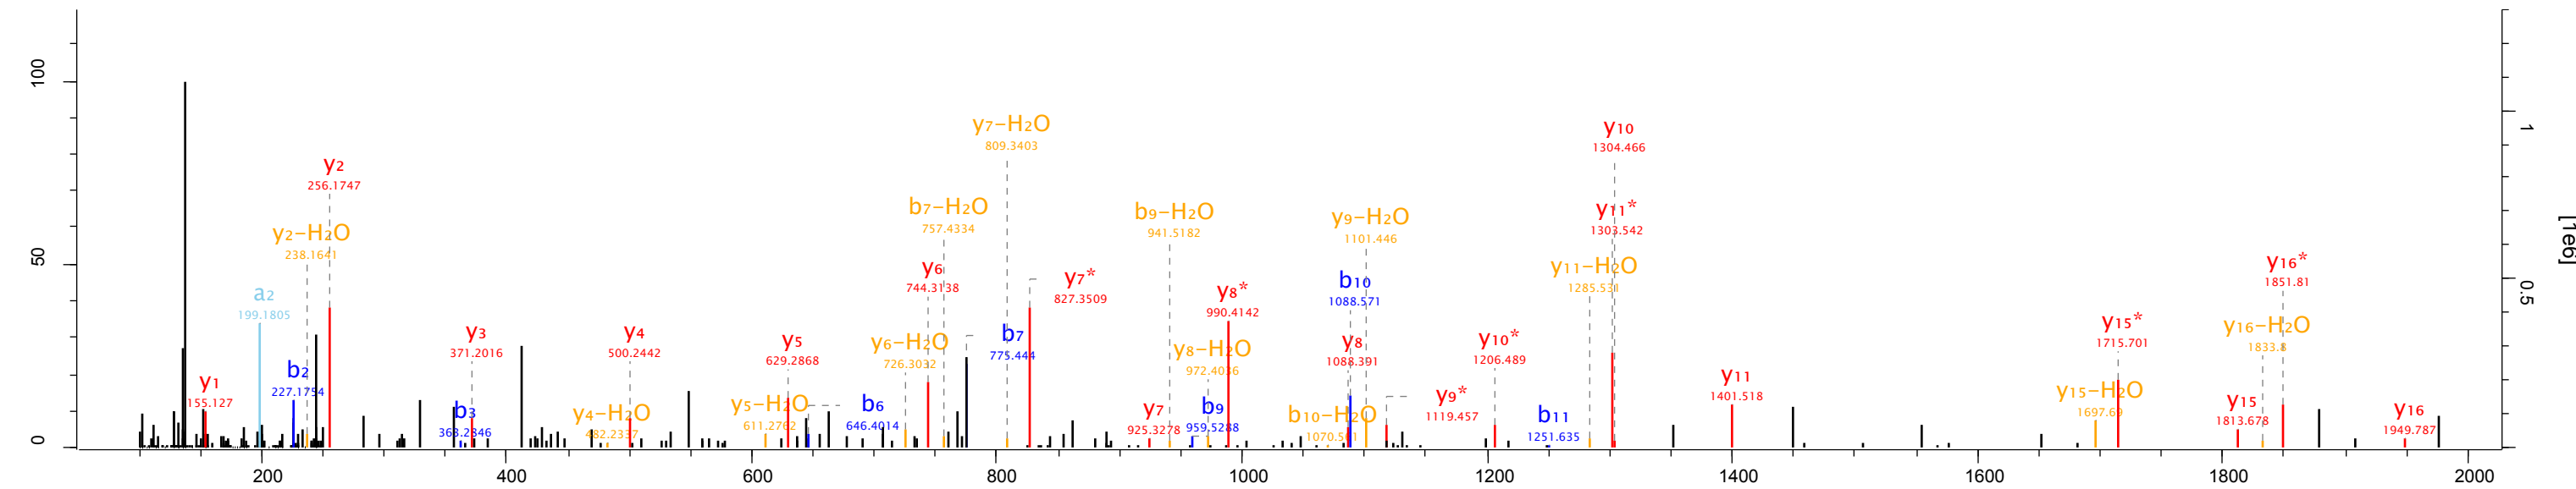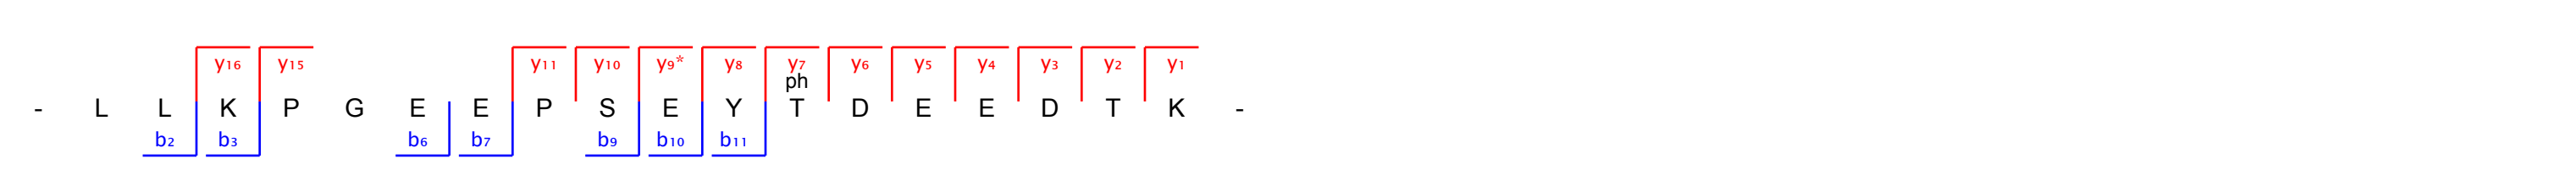

Raw file 20171215\_MaS\_33SR\_LMH\_phospho\_06 Scan 8722 Method FTMS; HCD Score 278.01 m/z 749.83 Gene names C2orf44

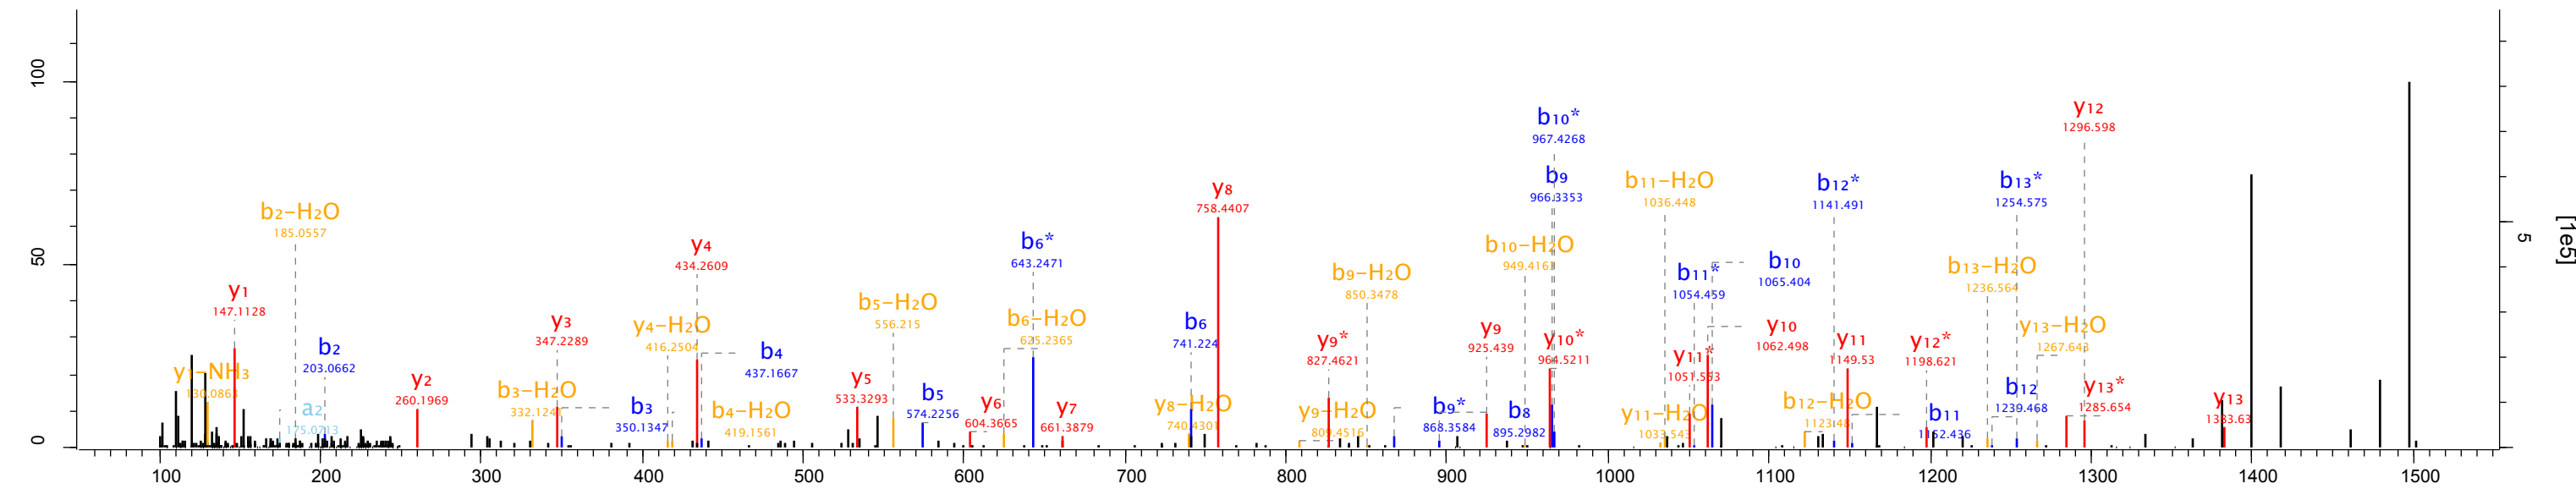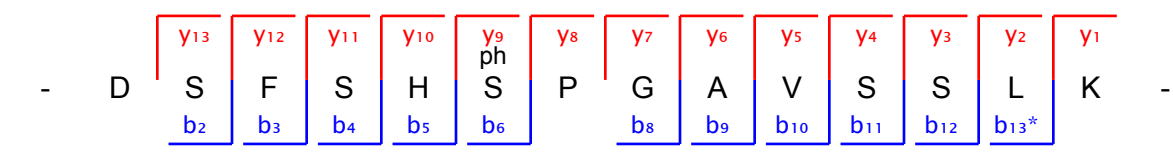

Raw file 20171215\_MaS\_33SR\_LMH\_phospho\_06 Scan 9512 Method FTMS; HCD Score 153.56 m/z 880.86 Gene names DLG1

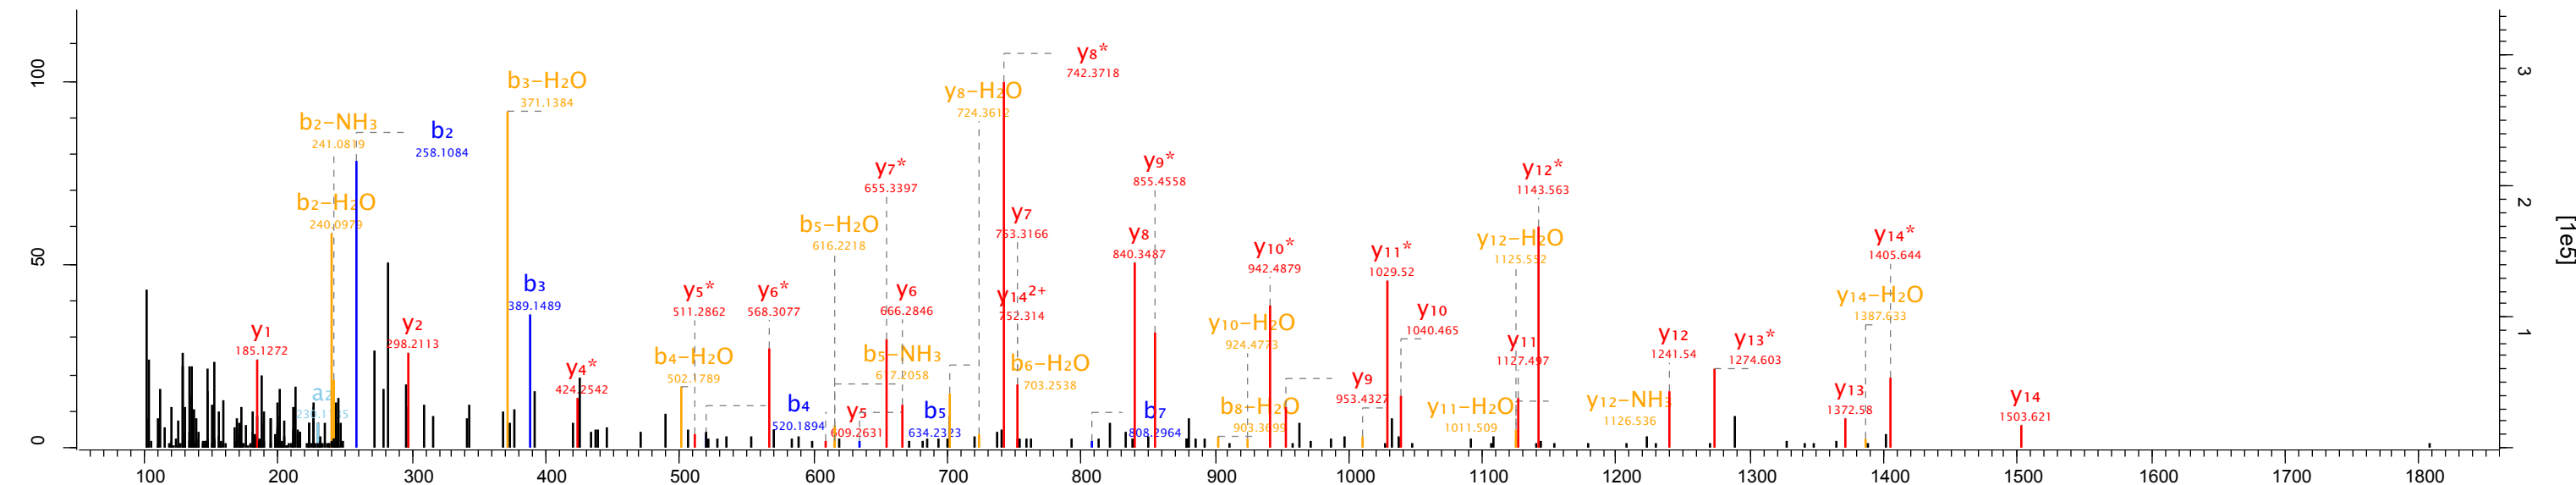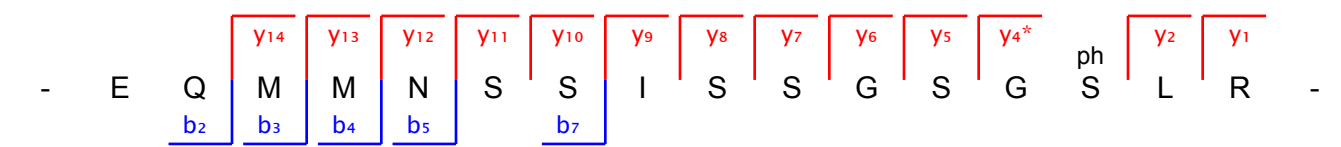

Raw file 20171215\_MaS\_33SR\_LMH\_phospho\_09 Scan 4272 Method FTMS; HCD Score 74.78 m/z 705.8 Gene names ARHGEF40

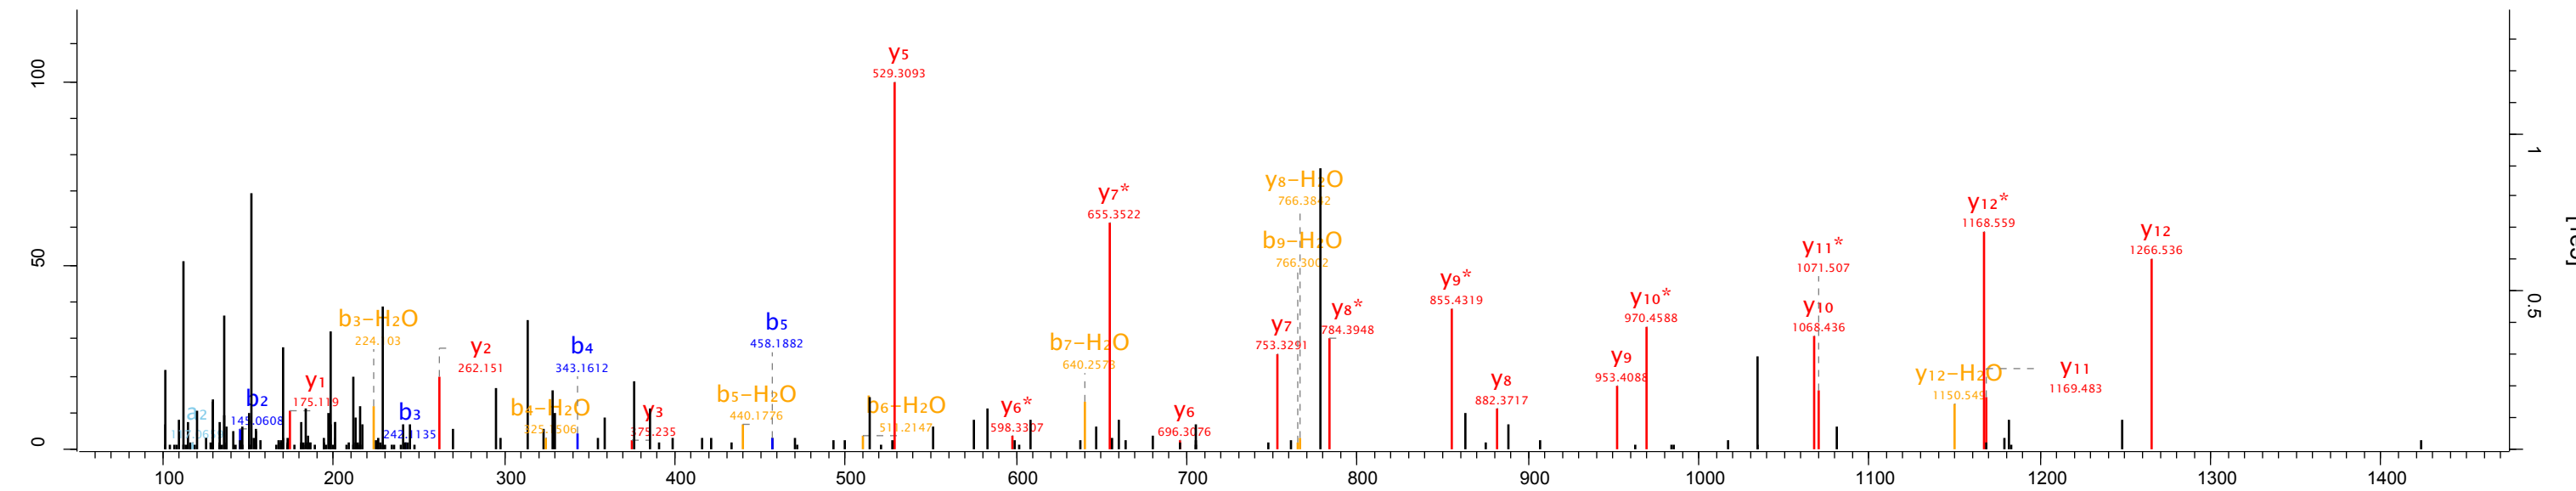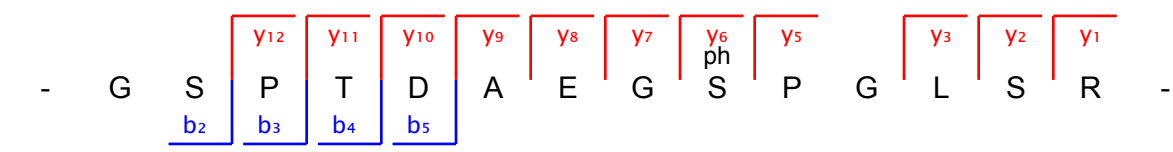

Raw file 20171215\_MaS\_33SR\_LMH\_phospho2\_01 Scan 8692 Method FTMS; HCD Score 120.29 m/z 617.29

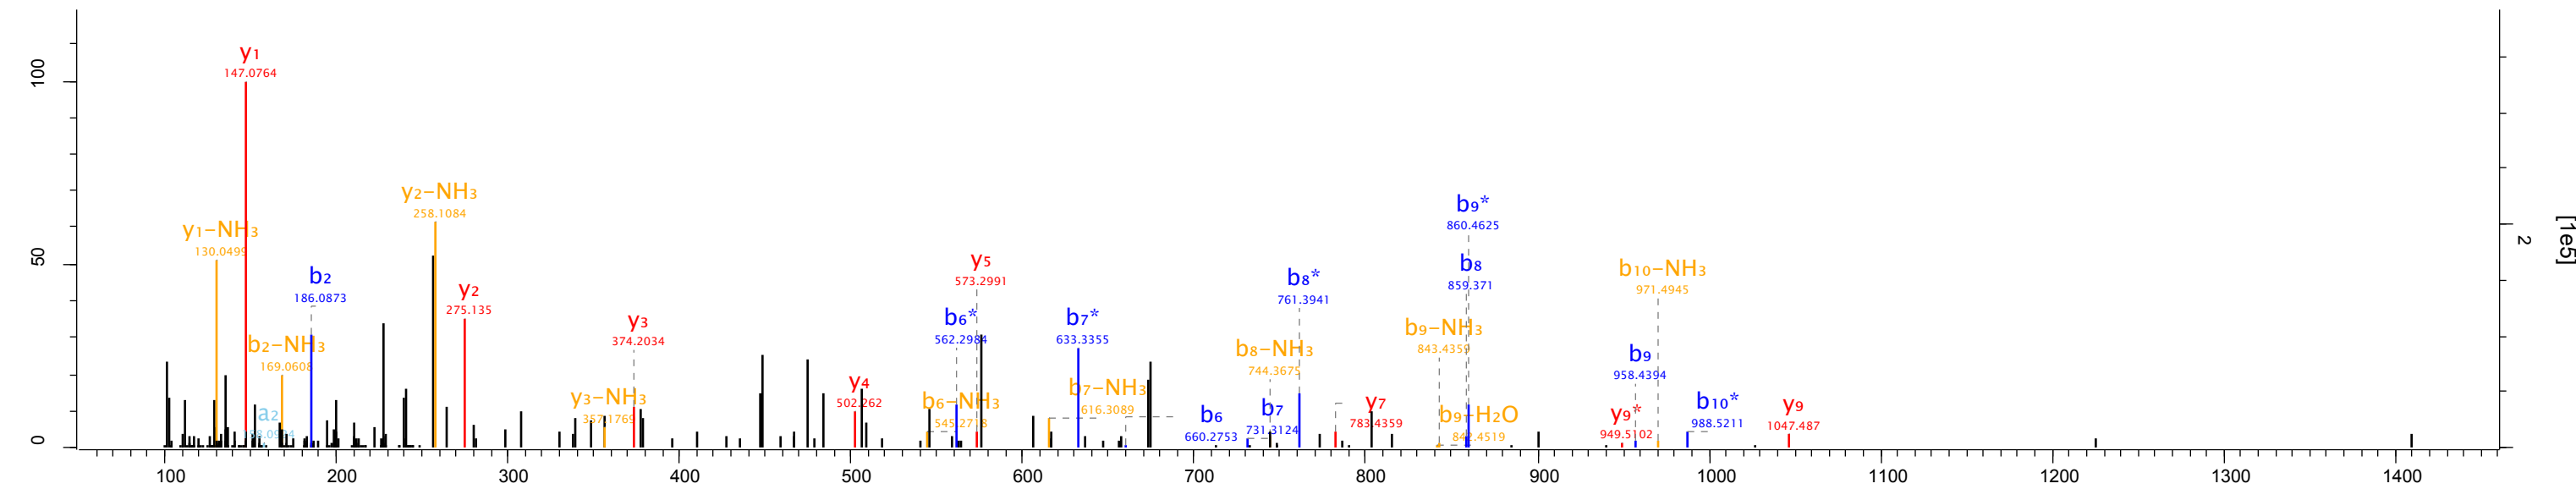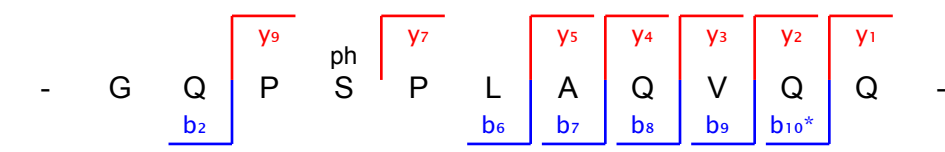

Raw file 20171215\_MaS\_33SR\_LMH\_phospho2\_02 Scan 12252 Method FTMS; HCD Score 205.21 m/z 687.64 Gene names USP8

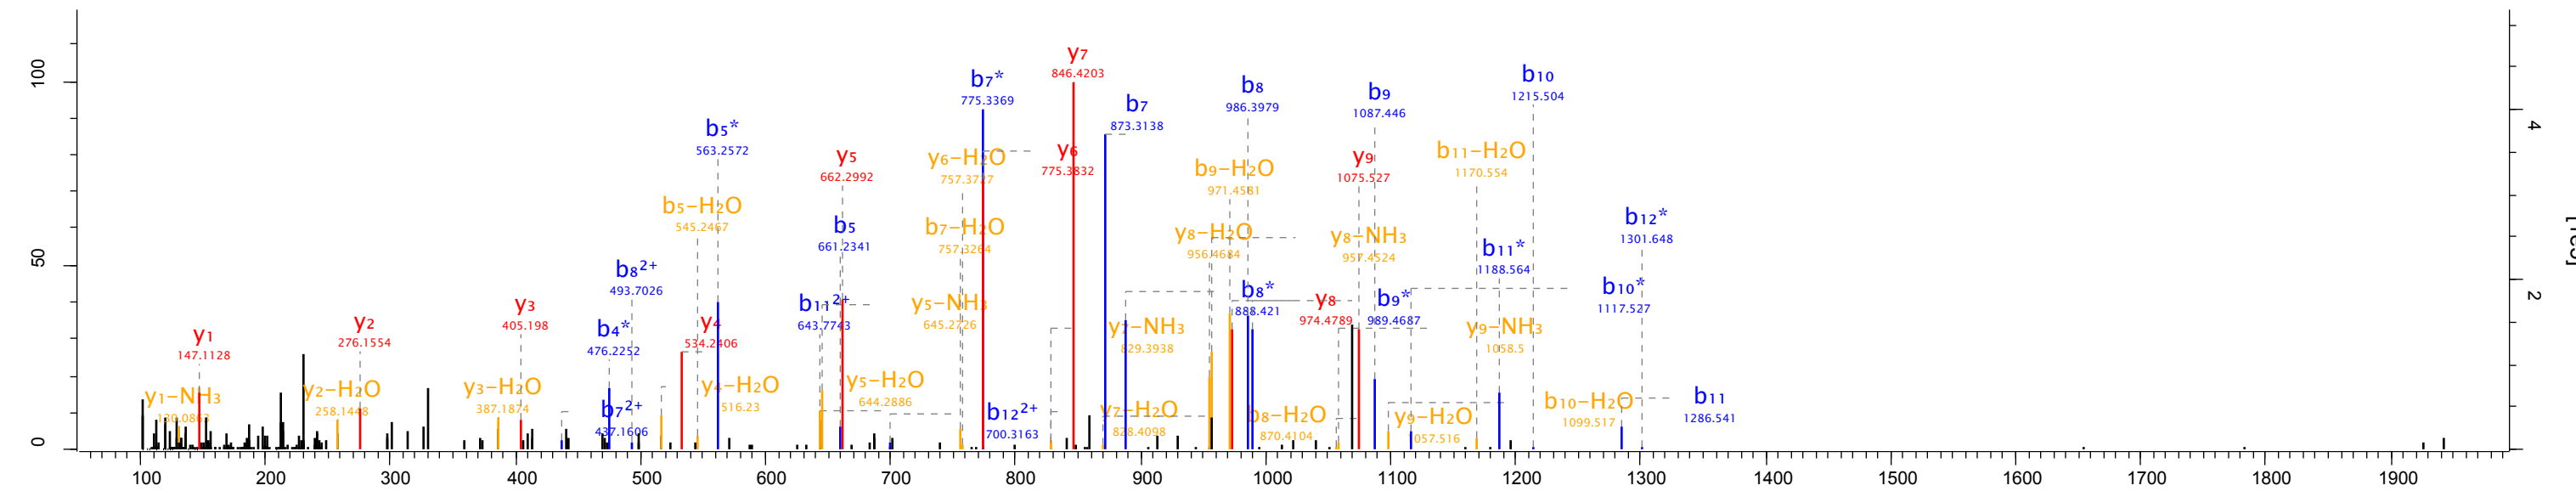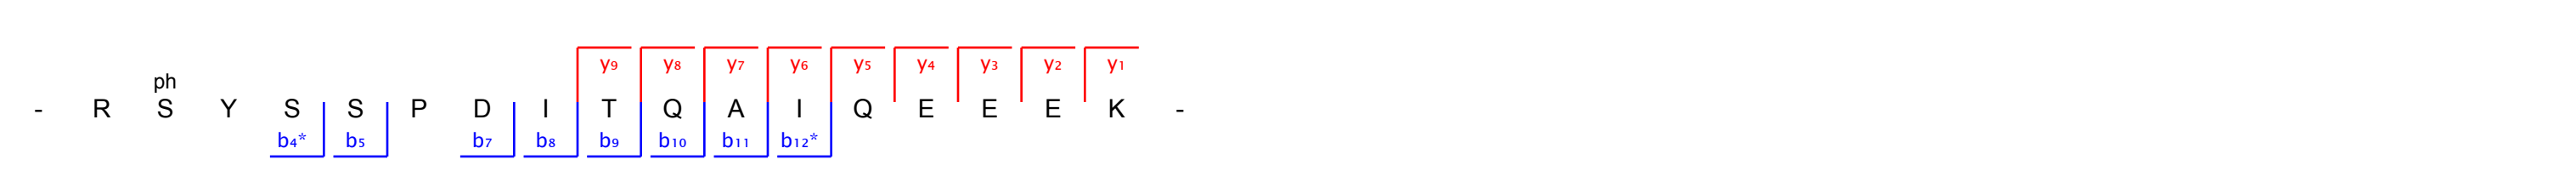

Raw file 20171215\_MaS\_33SR\_LMH\_phospho2\_02 Scan 14292 Method FTMS; HCD Score 140.81 m/z 844.87 Gene names GINS2

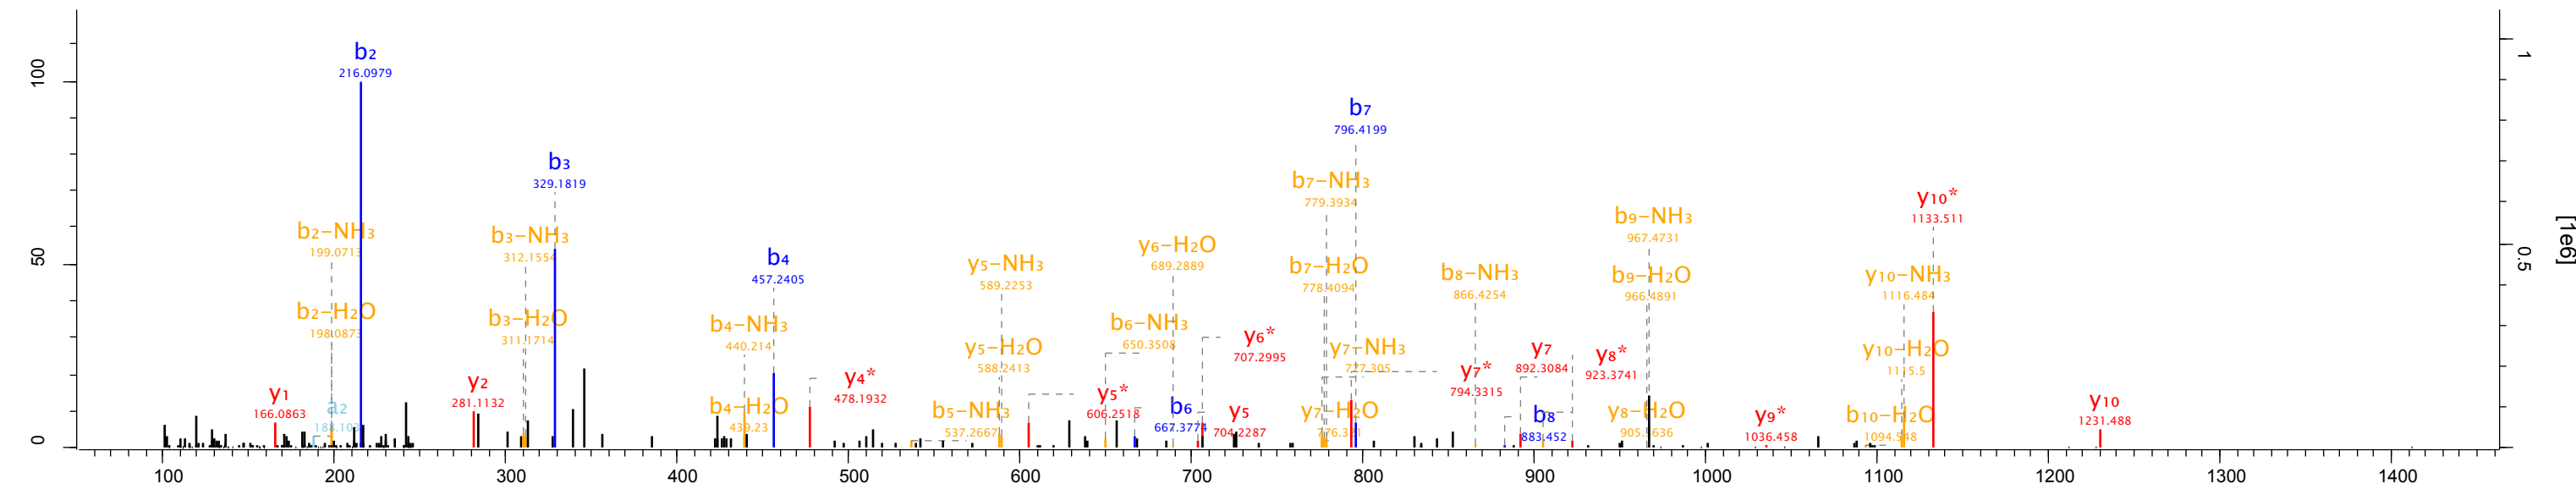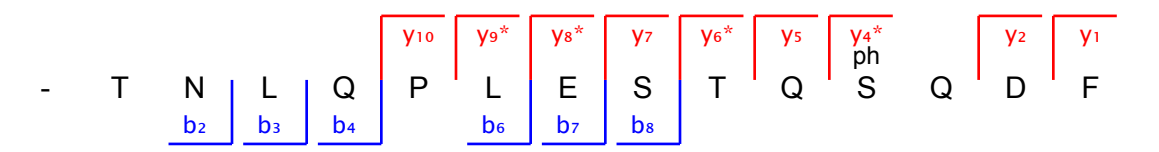



Raw file 20171215\_MaS\_33SR\_LMH\_phospho2\_02 Scan 4362 Method FTMS; HCD Score 49.84 m/z 537.73 Gene names DMXL1

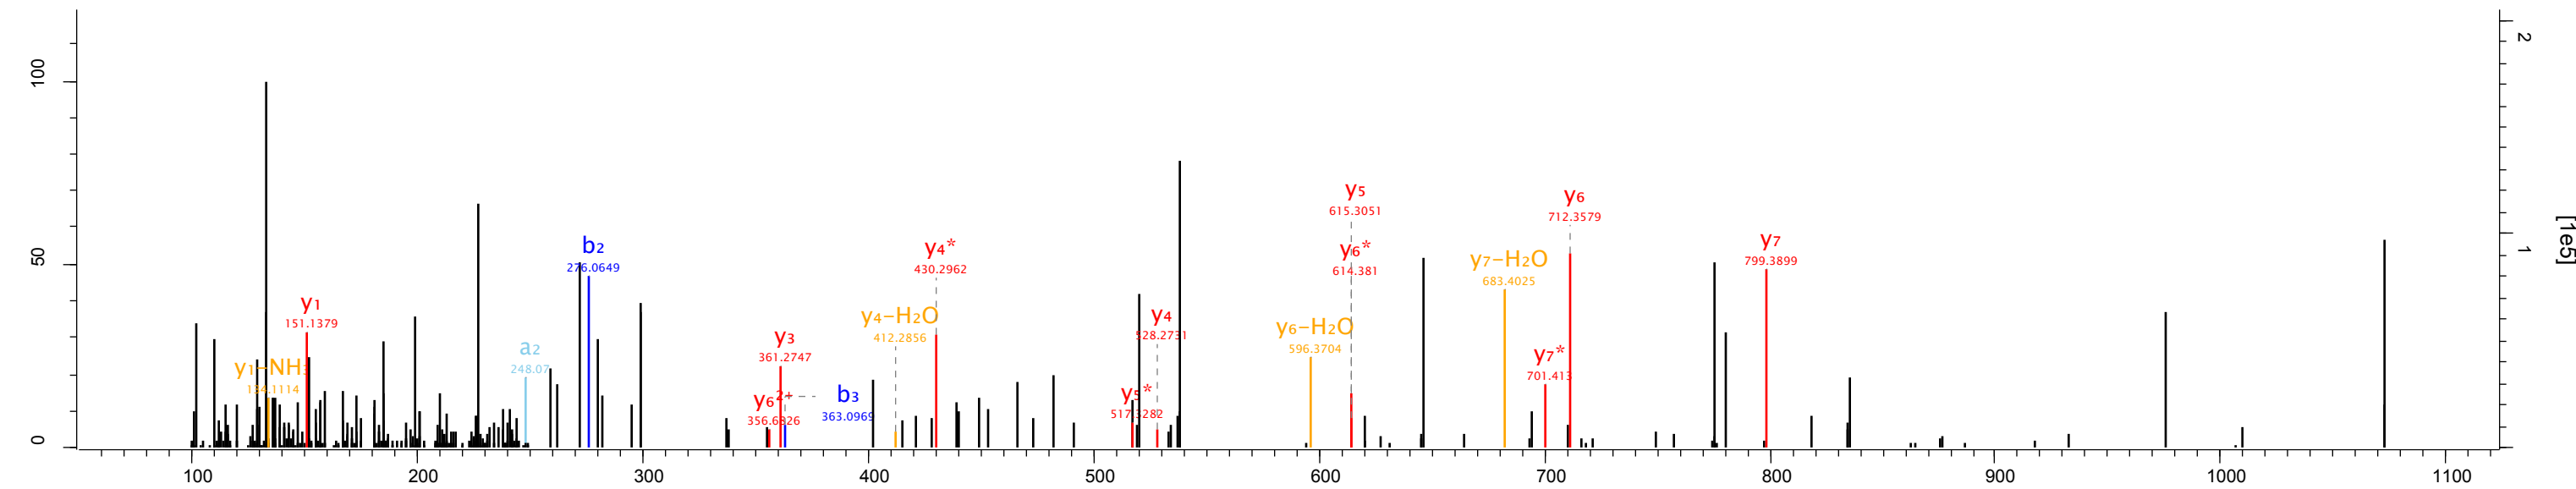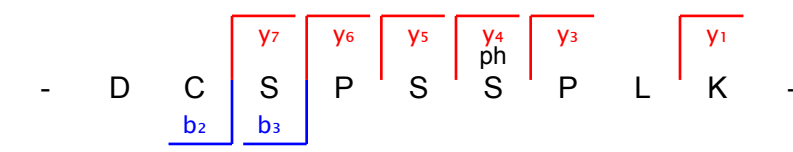

Raw file 20171215\_MaS\_33SR\_LMH\_phospho2\_02 Scan 5172 Method FTMS; HCD Score 50.11 m/z 410.18

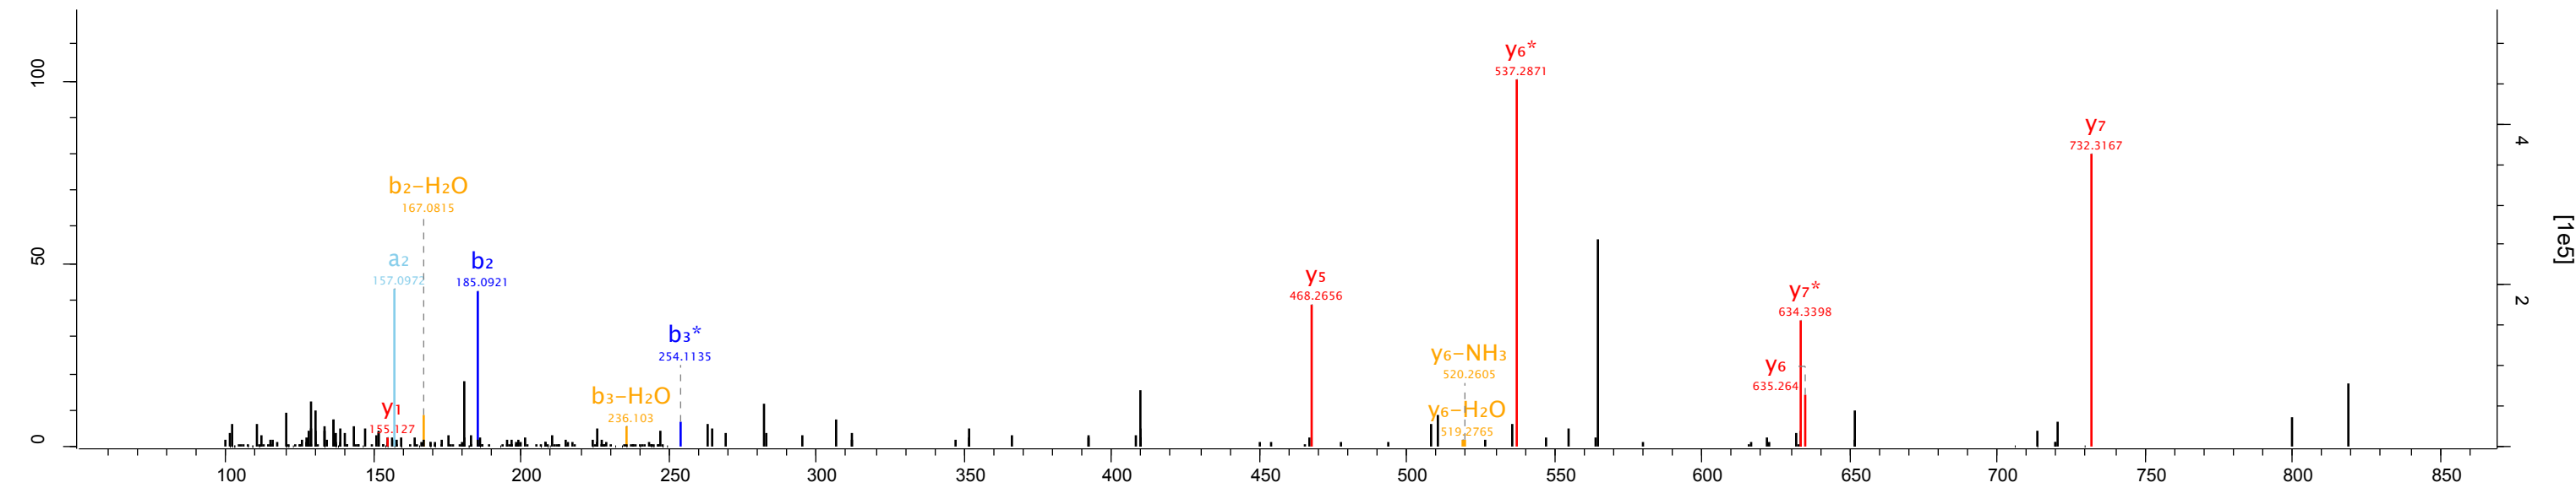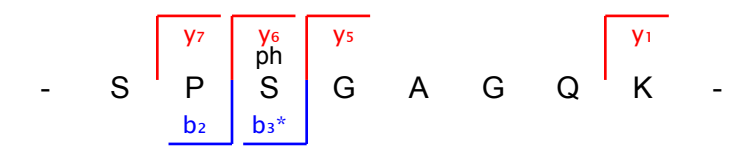

Raw file 20171215\_MaS\_33SR\_LMH\_phospho2\_02 Scan 6112 Method FTMS; HCD Score 78.61 m/z 654.28 Gene names TFPI2

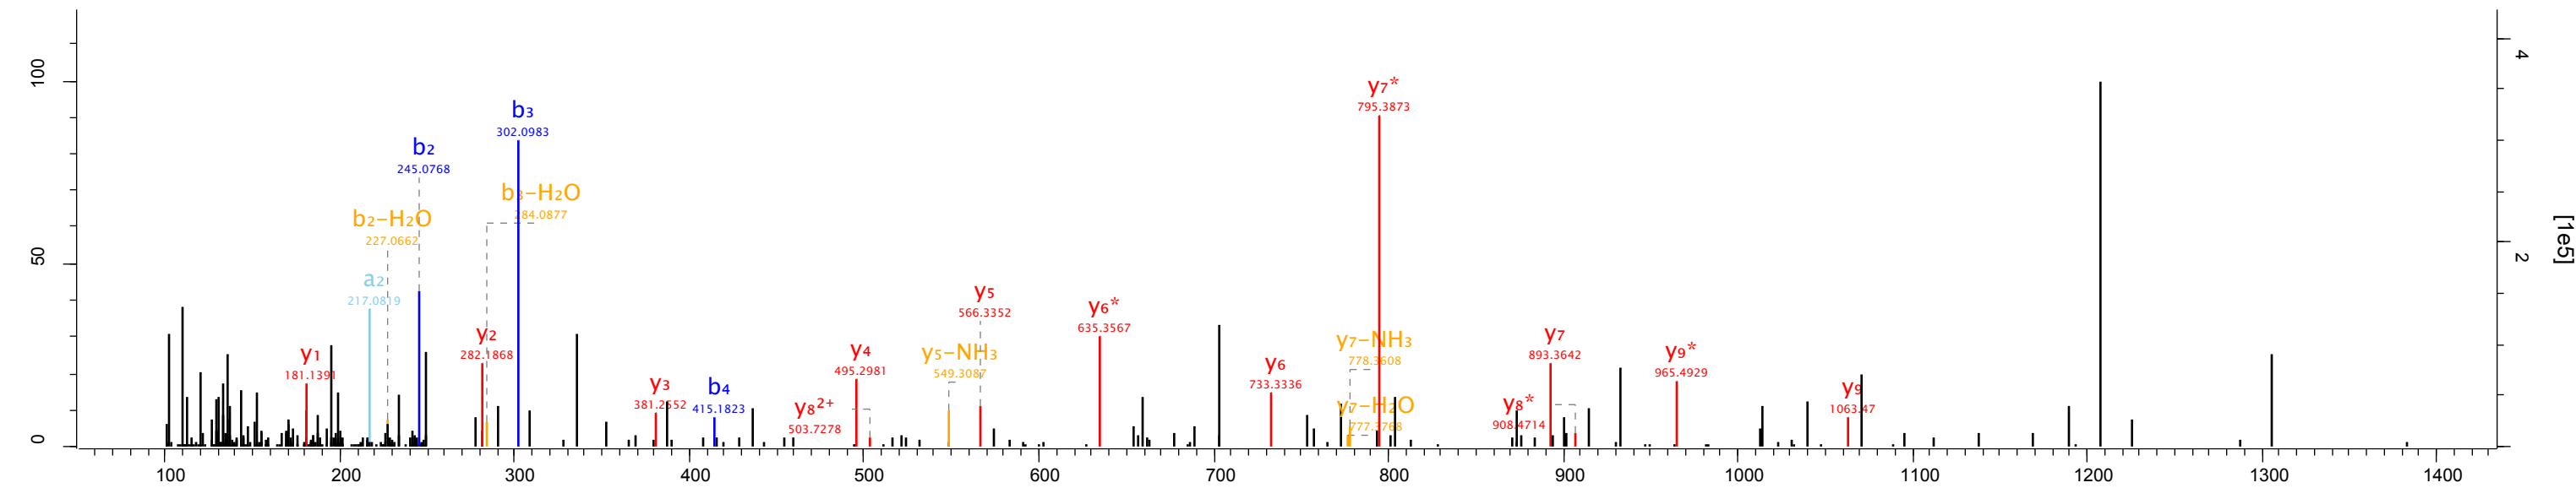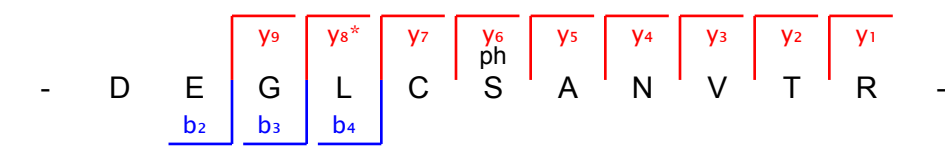

Raw file  
 20171215\_MaS\_33SR\_LMH\_phospho2\_02  
 Scan 8262 Method FTMS; HCD Score 49.1 m/z 502.76

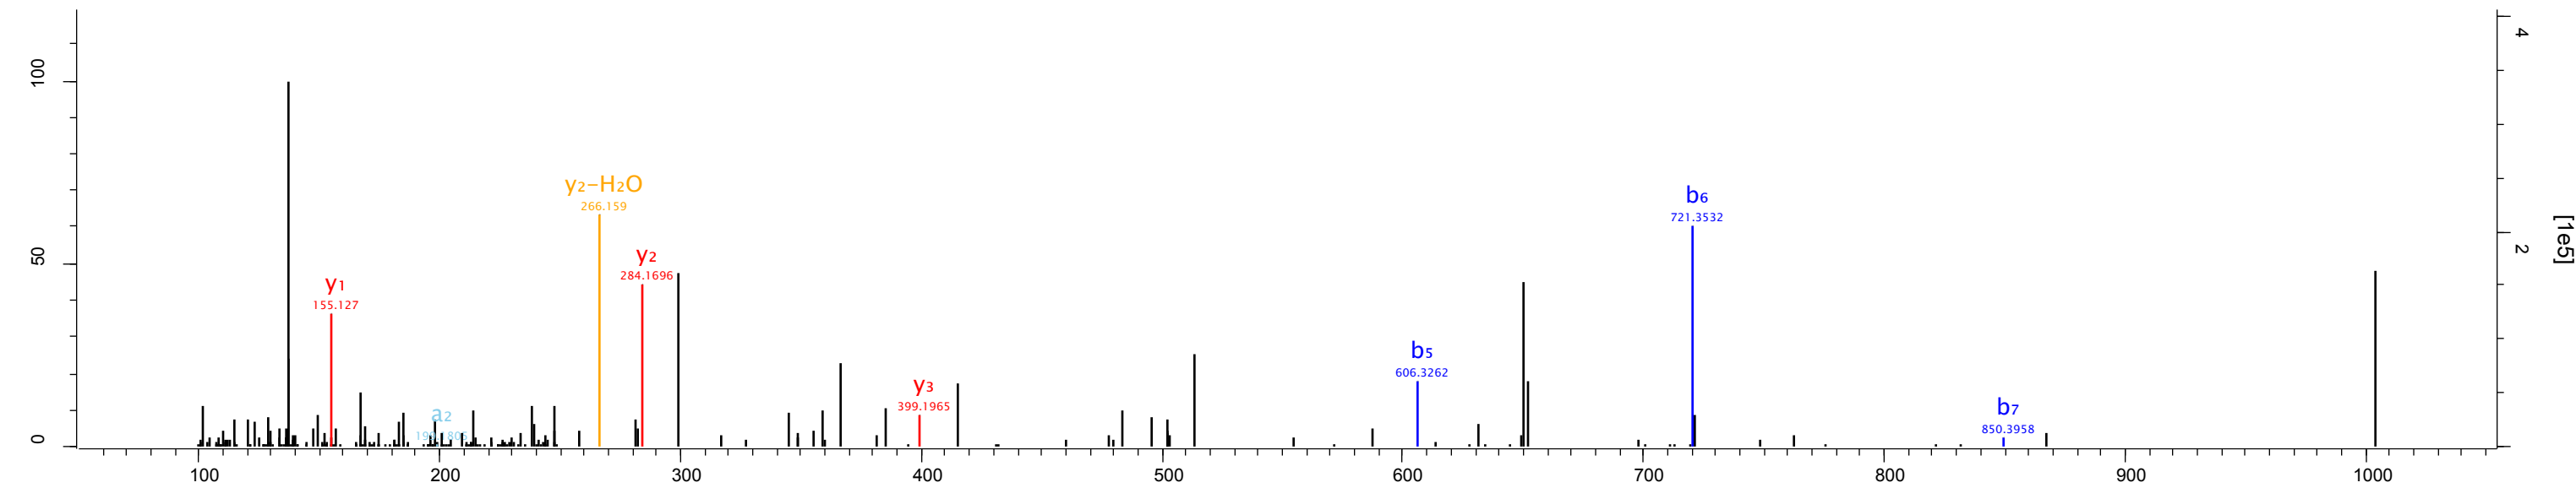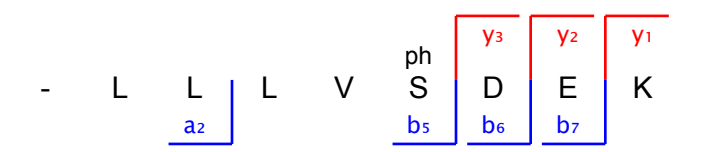

Raw file: 20171215\_MaS\_33SR\_LMH\_phospho2\_03  
 Scan: 10522 Method: FTMS; HCD Score: 179.21 m/z: 650.28 Gene names: LATS1

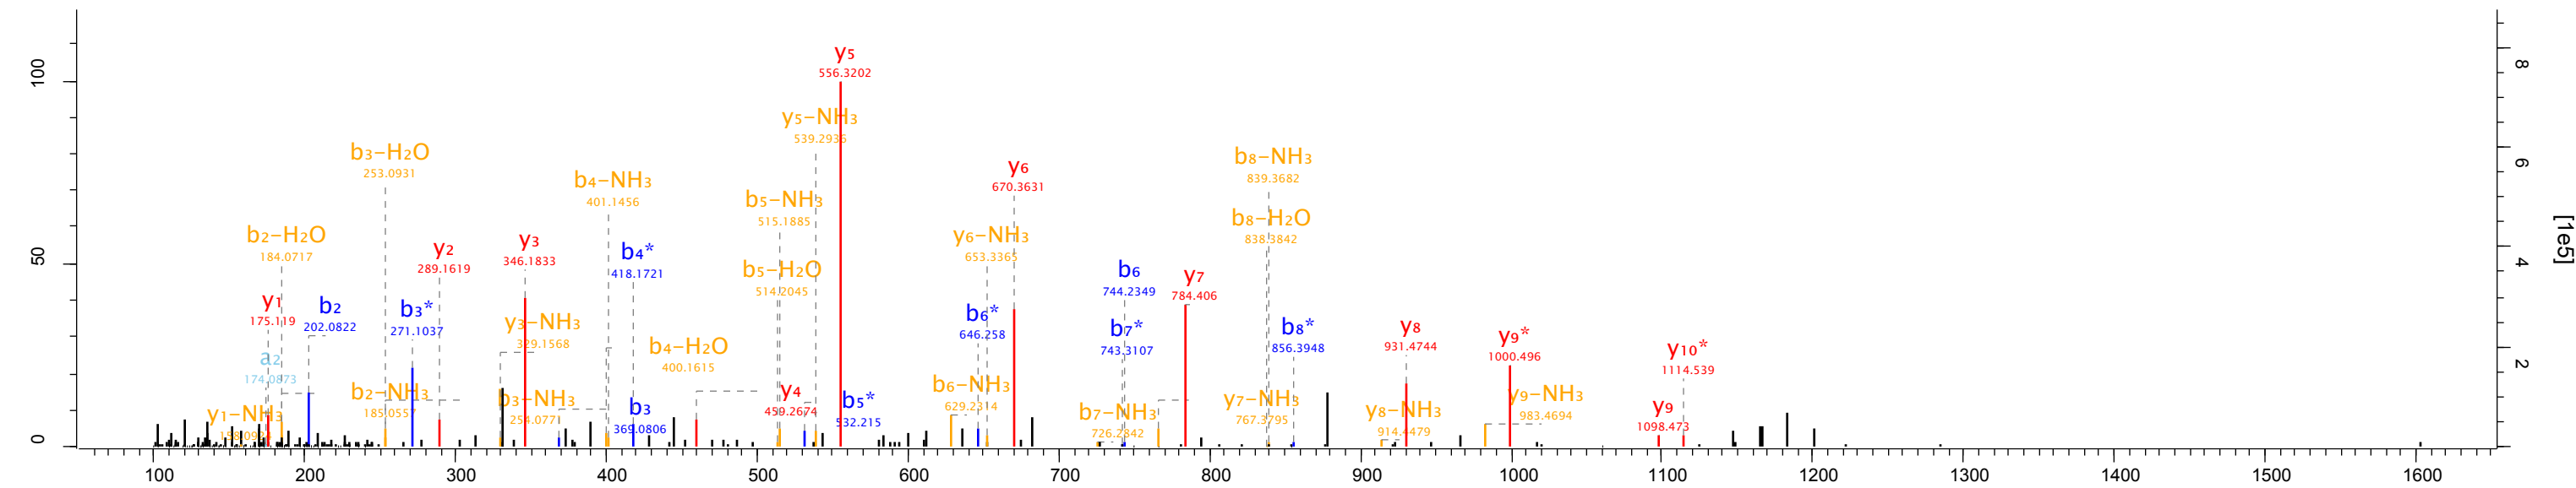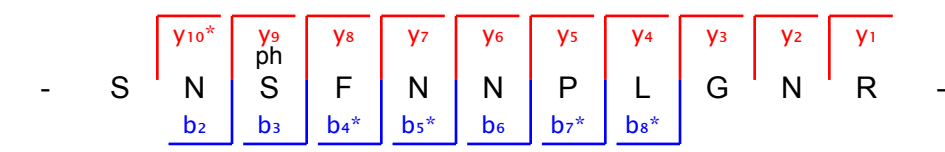

Raw file 20171215\_MaS\_33SR\_LMH\_phospho2\_03 Scan 12342 Method FTMS; HCD Score 217.02 m/z 1100.97 Gene names TRIM32

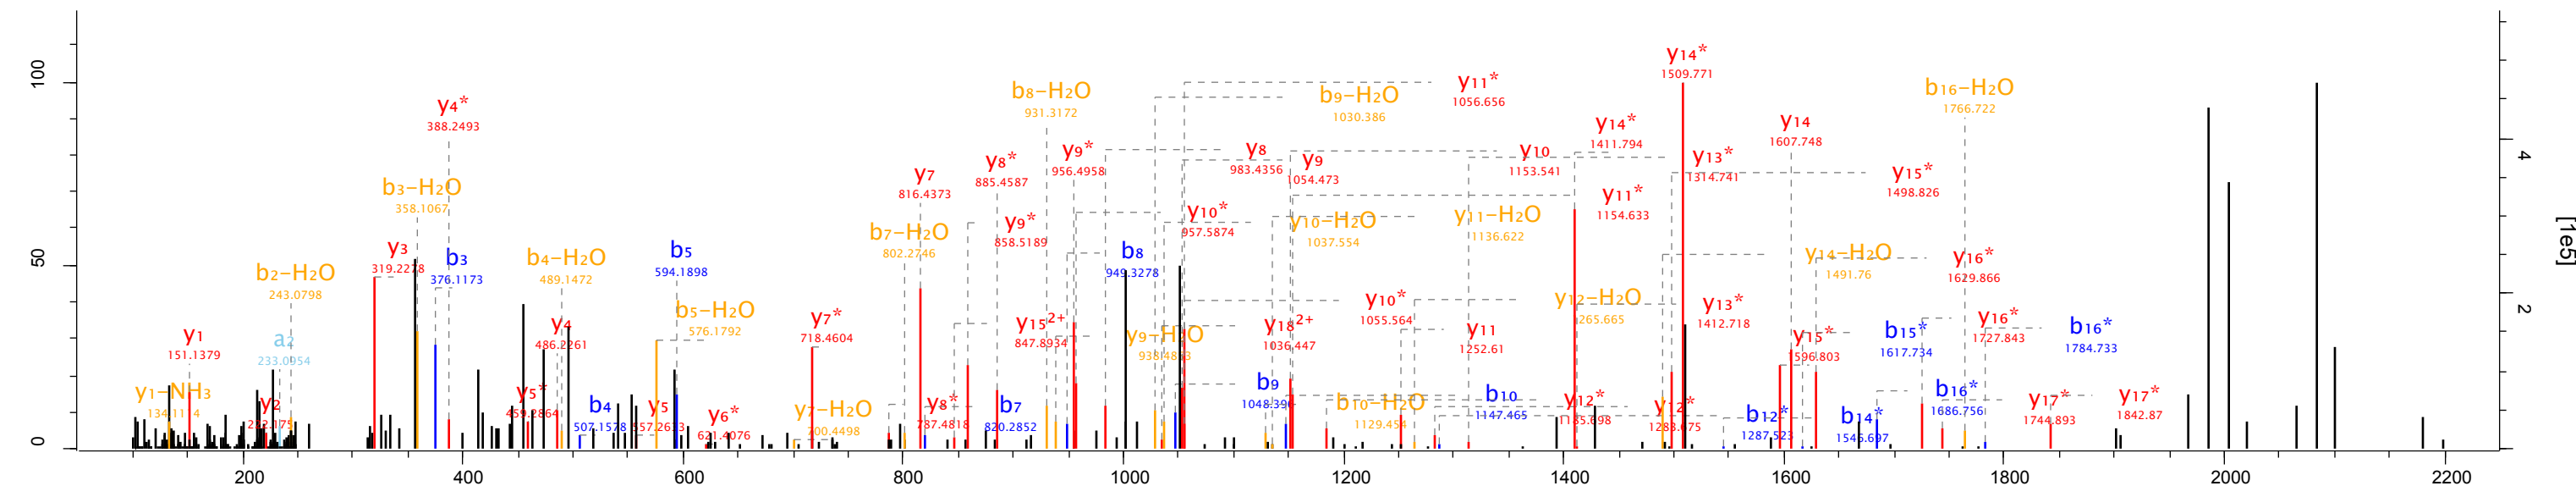

- E M D M S P E E V V A S P R A S P A K -

y<sub>18</sub><sup>2+</sup>
y<sub>17</sub><sup>\*</sup>
y<sub>16</sub><sup>\*</sup>
y<sub>15</sub><sup>\*</sup>
y<sub>14</sub>
y<sub>13</sub><sup>\*</sup>
y<sub>12</sub><sup>\*</sup>
y<sub>11</sub>
y<sub>10</sub>
y<sub>9</sub>
y<sub>8</sub>
y<sub>7</sub>
y<sub>6</sub><sup>\*</sup>
y<sub>5</sub>
y<sub>4</sub>
y<sub>3</sub>
y<sub>2</sub>
y<sub>1</sub>

a<sub>2</sub>
b<sub>3</sub>
b<sub>4</sub>
b<sub>5</sub>
b<sub>7</sub>
b<sub>8</sub>
b<sub>9</sub>
b<sub>10</sub>
b<sub>12</sub><sup>\*</sup>
b<sub>14</sub><sup>\*</sup>
b<sub>15</sub><sup>\*</sup>
b<sub>16</sub><sup>\*</sup>

Raw file 20171215\_MaS\_33SR\_LMH\_phospho2\_03 Scan 14052 Method FTMS; HCD Score 164.13 m/z 1172.47 Gene names RFFL

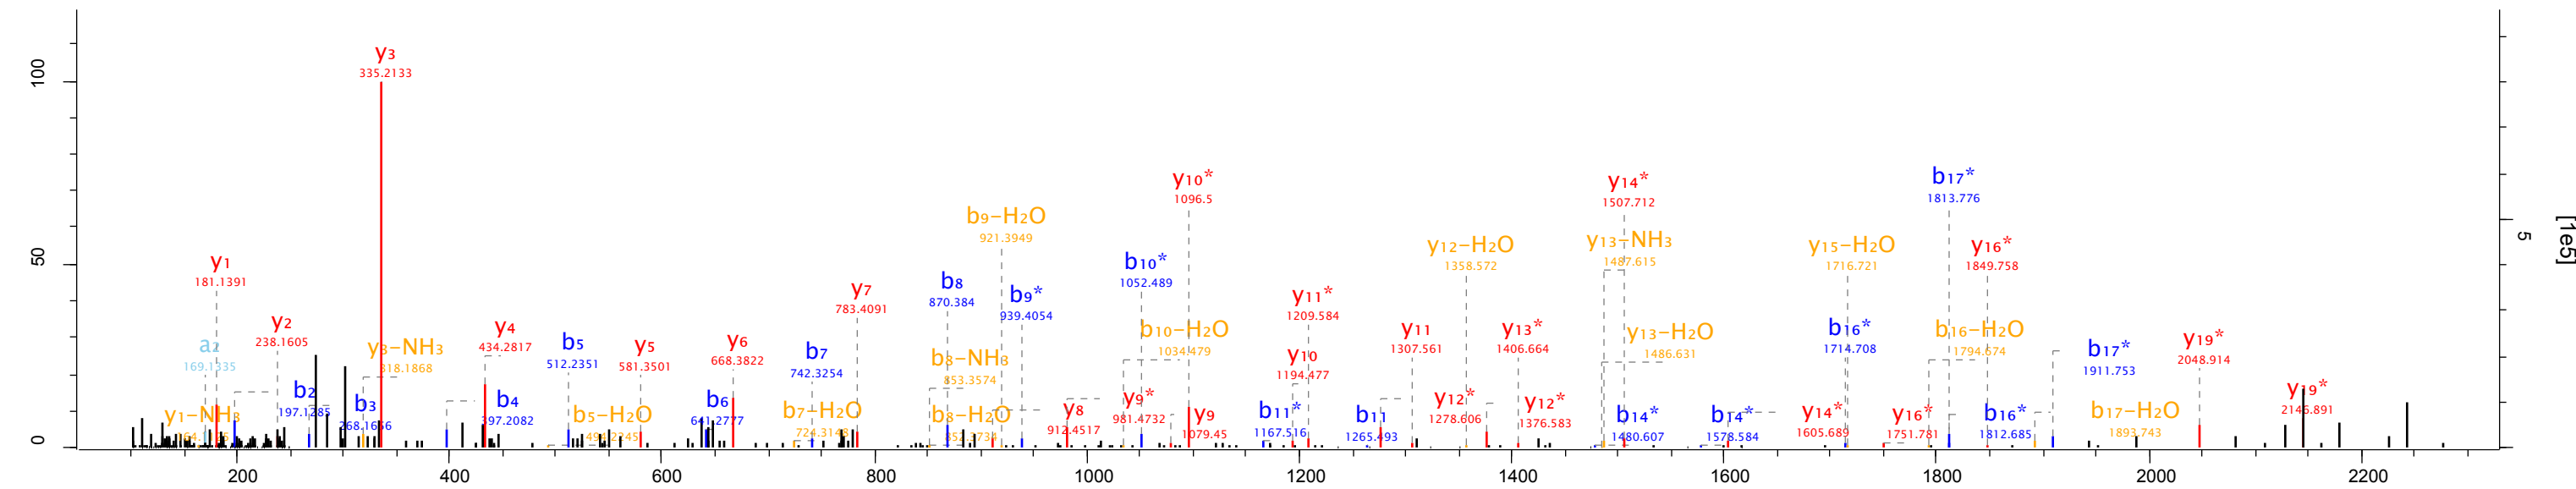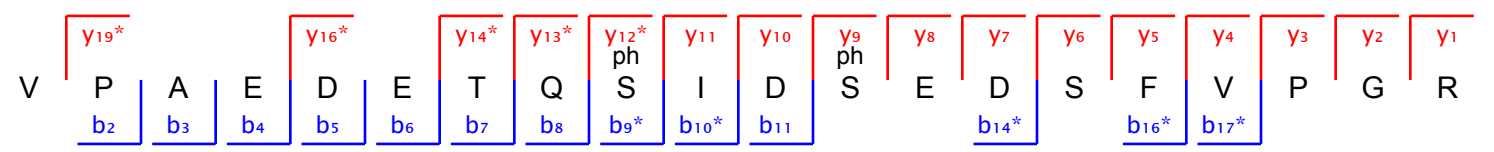

Raw file: 20171215\_MaS\_33SR\_LMH\_phospho2\_03  
 Scan: 16722 Method: FTMS; HCD Score: 115.88 m/z: 1101.93 Gene names: UCKL1

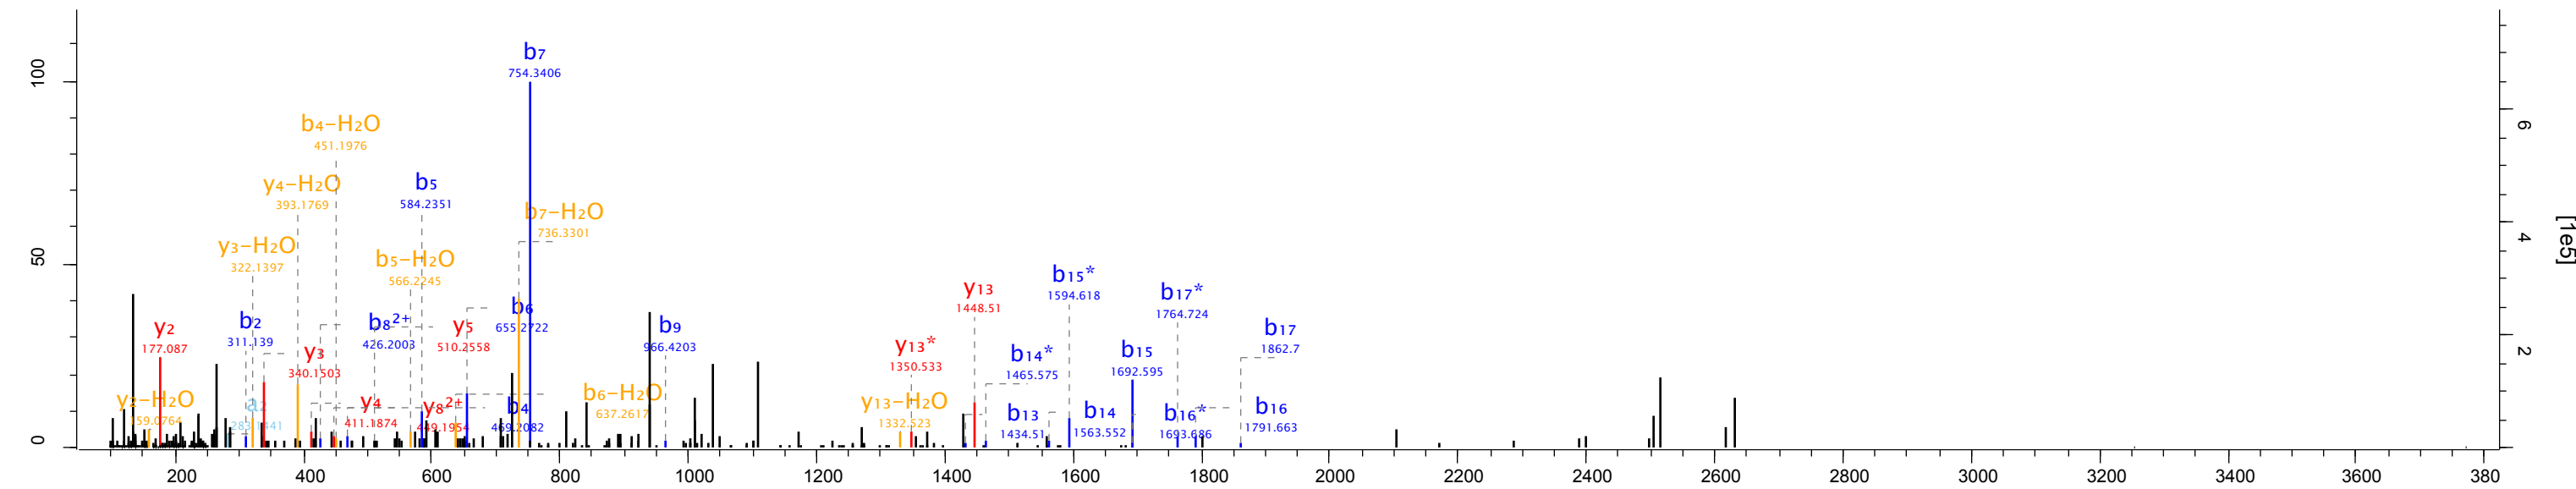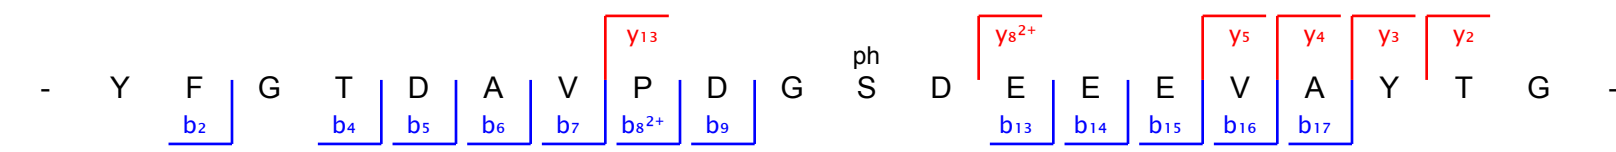



Raw file: 20171215\_MaS\_33SR\_LMH\_phospho2\_03  
 Scan: 4042 Method: FTMS; HCD Score: 60.62 m/z: 473.24 Gene names: ZNF592

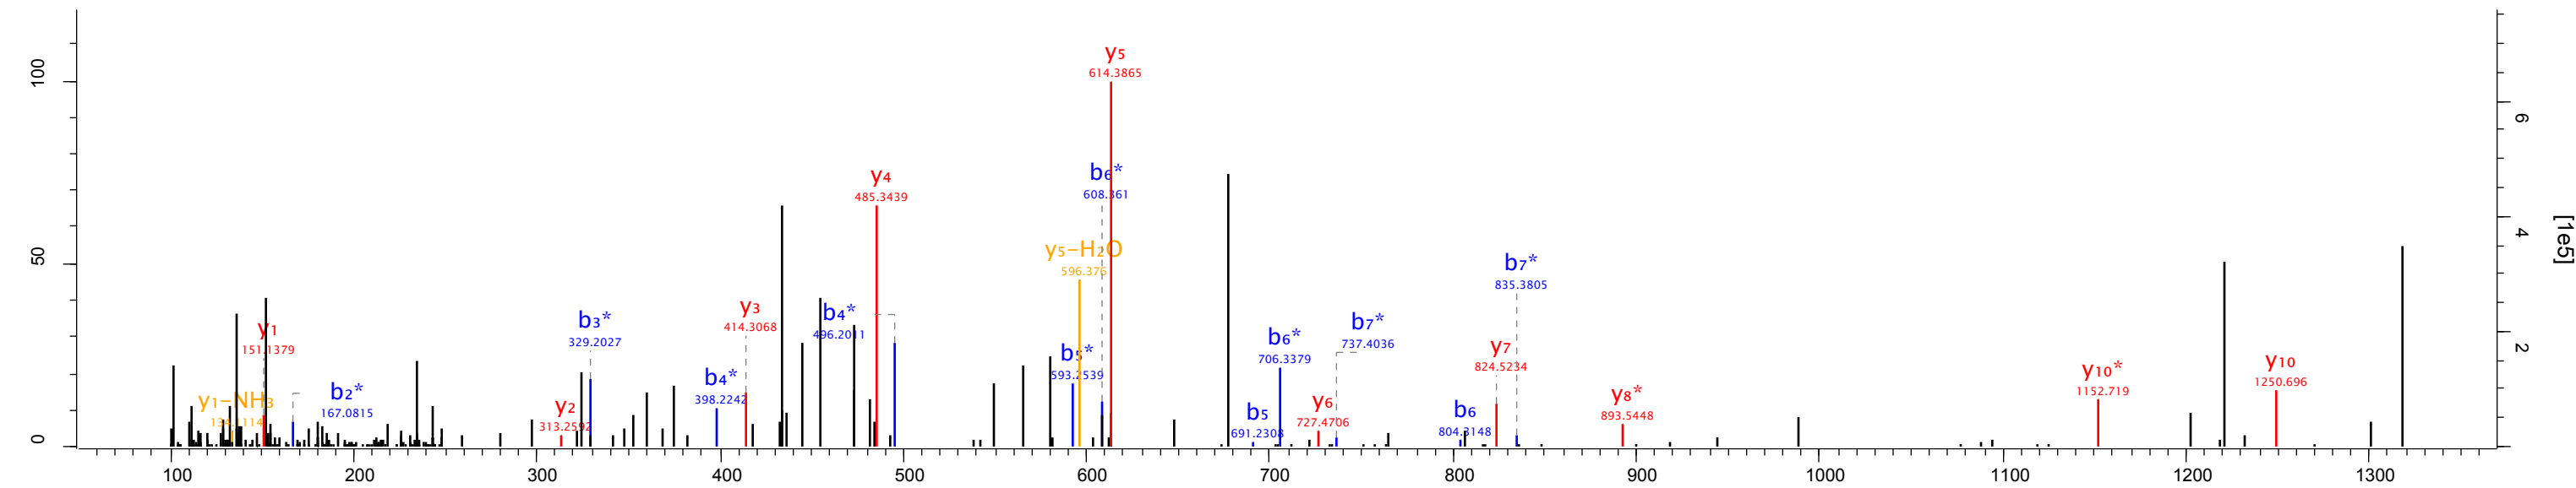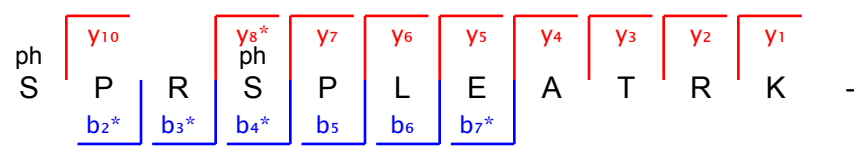

20171215\_MaS\_33SR\_LMH\_phospho2\_04 2892 FTMS; HCD 101.53 707.23 MADD

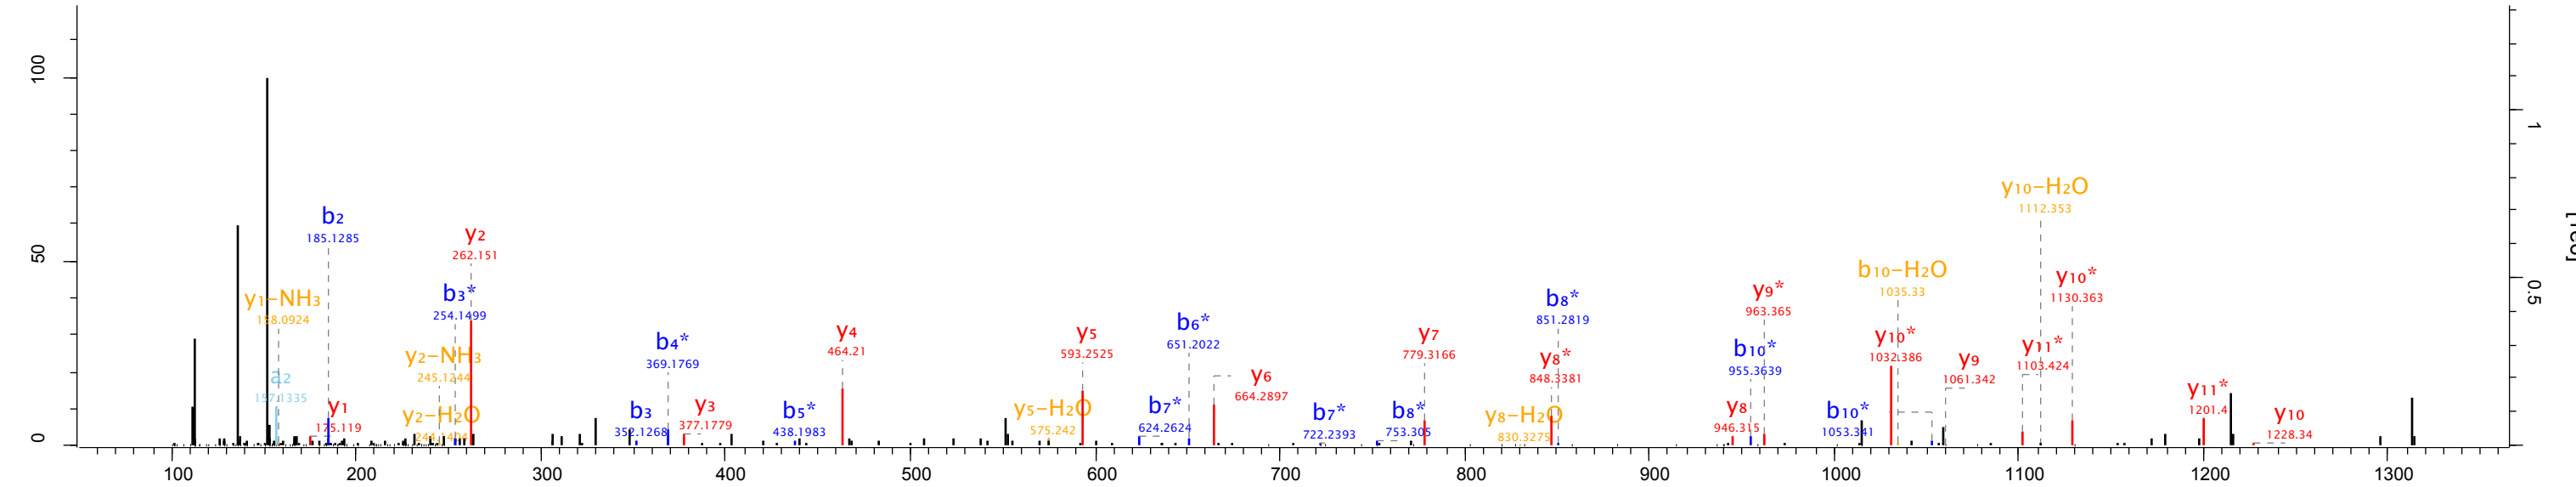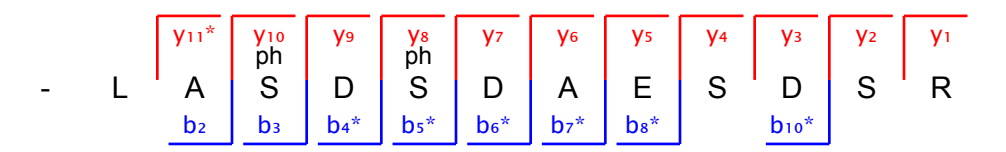

Raw file 20171215\_MaS\_33SR\_LMH\_phospho2\_04 Scan 5052 Method FTMS; HCD Score 80.6 m/z 734.25 Gene names ARHGAP30

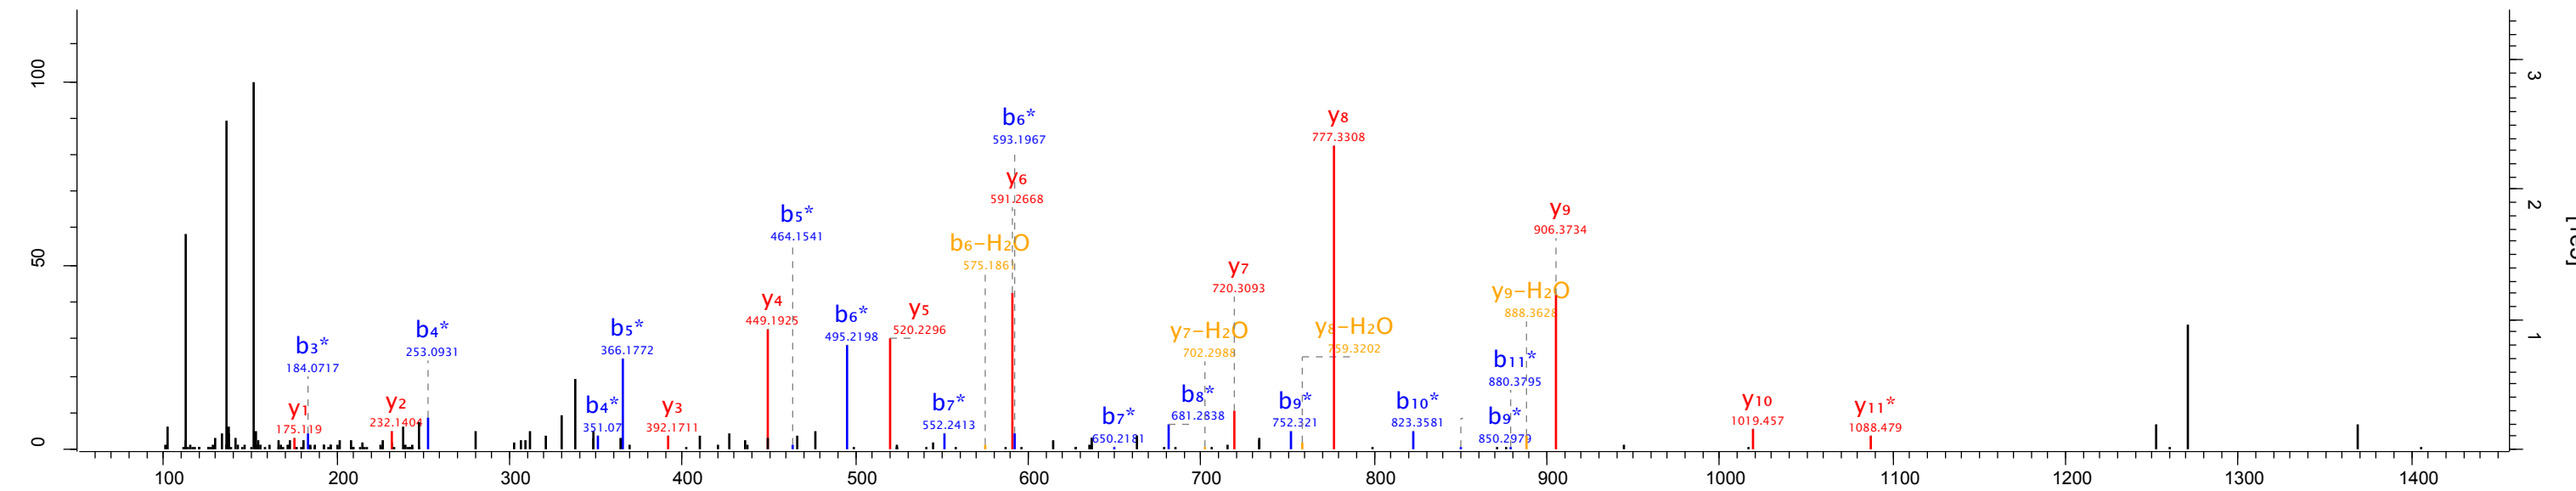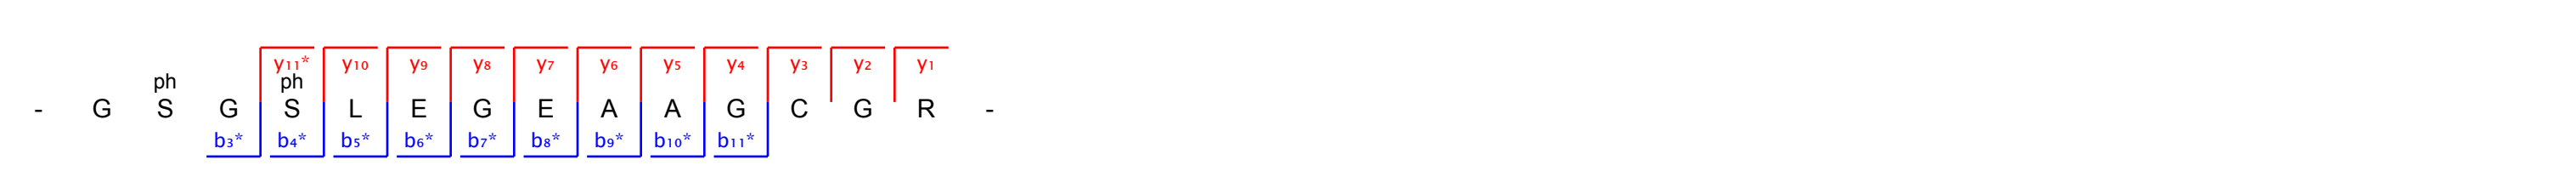

Raw file  
20171215\_MaS\_33SR\_LMH\_phospho2\_06

Scan 2372 Method FTMS; HCD Score 205.52 m/z 819.31 Gene names USP16

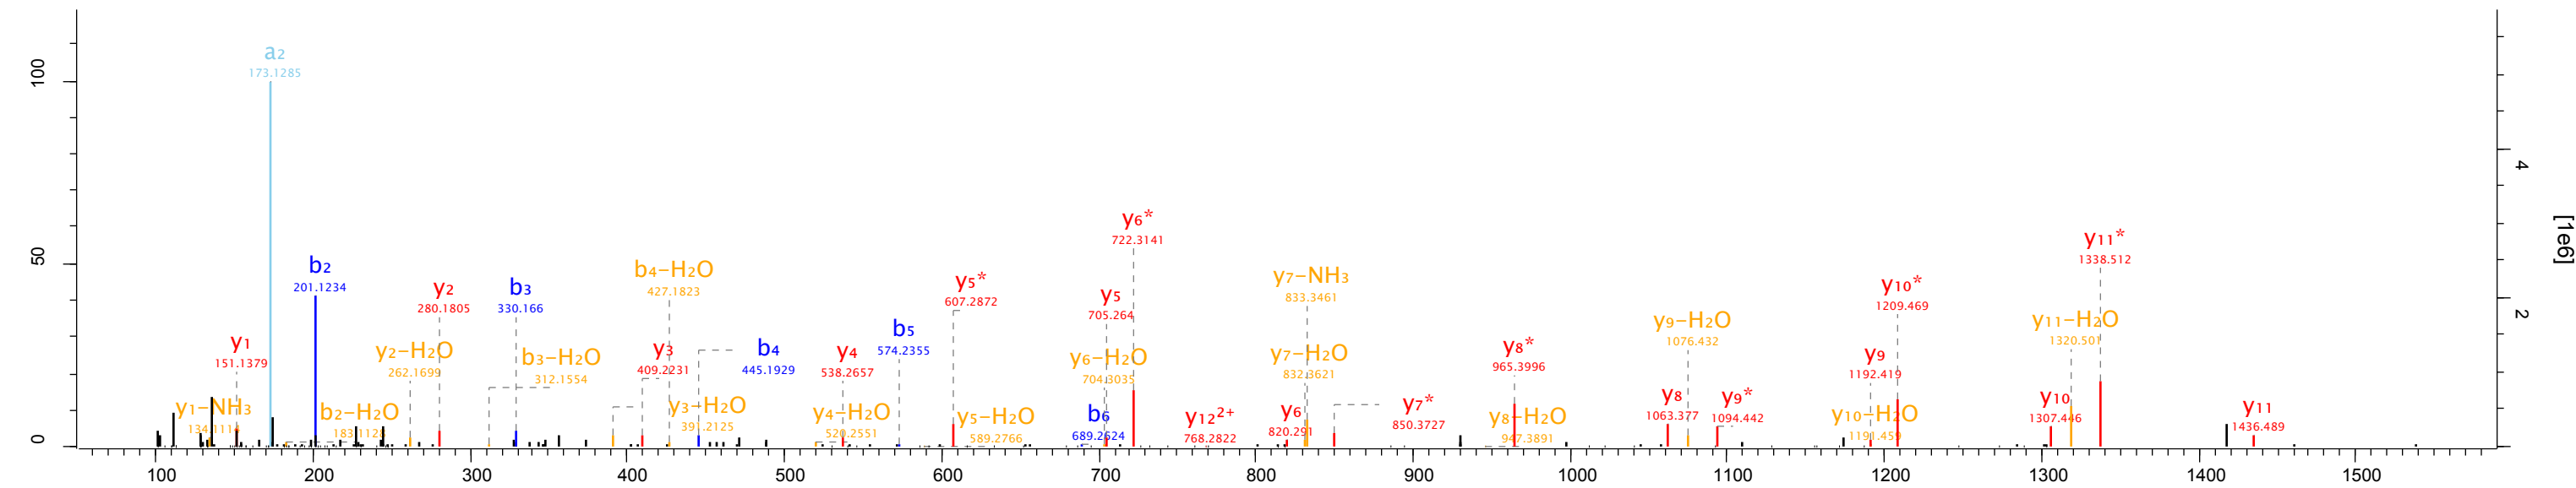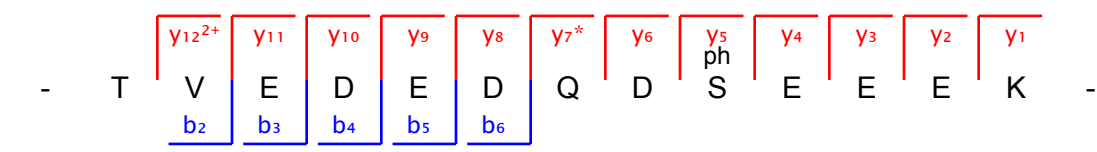

Raw file: 20171215\_MaS\_33SR\_LMH\_proteome\_01  
 Scan: 102672 Method: FTMS; HCD Score: 49.59 m/z: 631.67 Gene names: MPHOSPH6

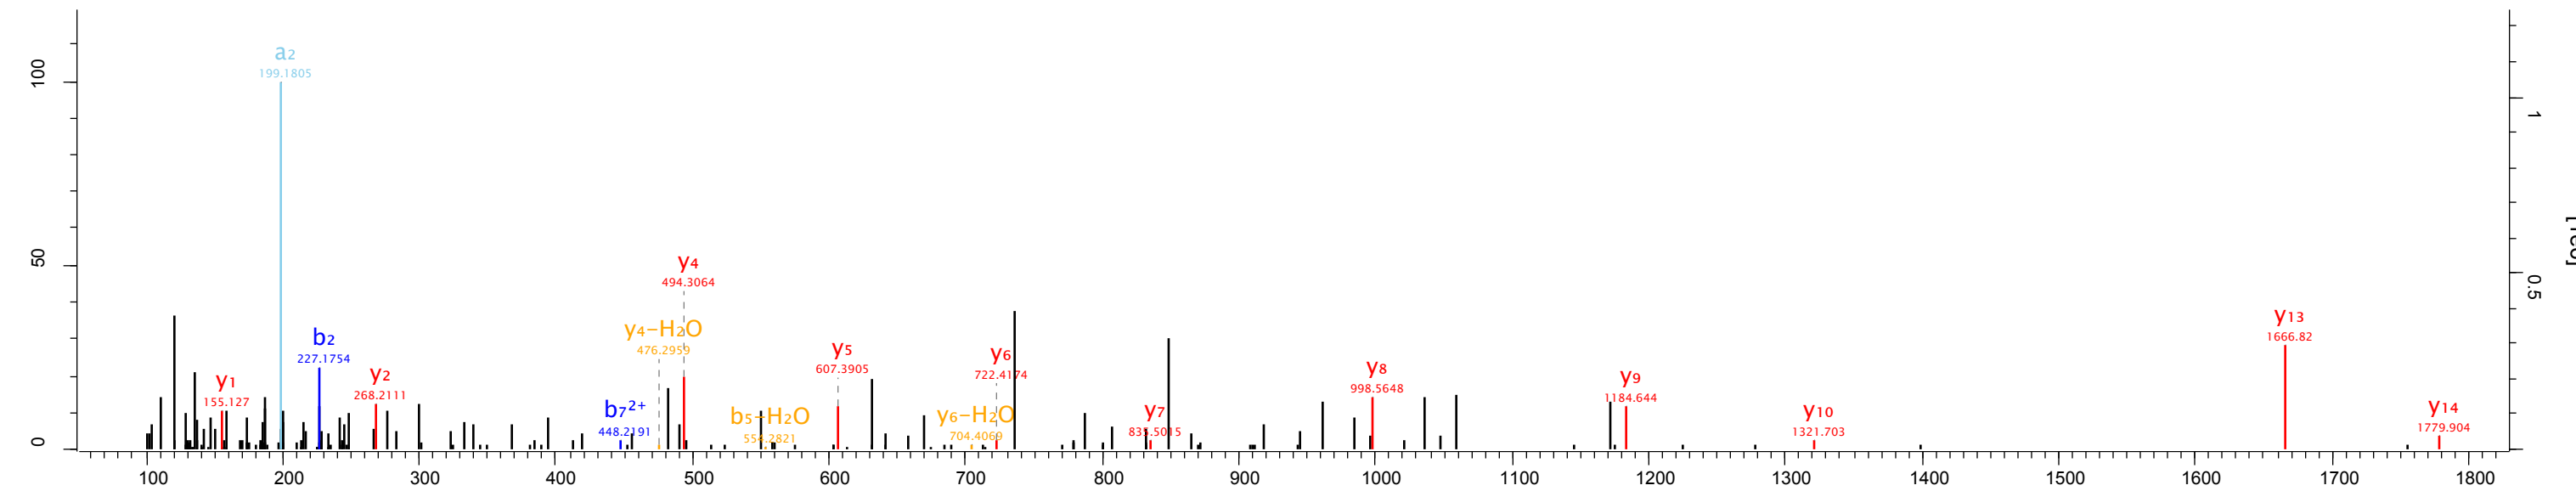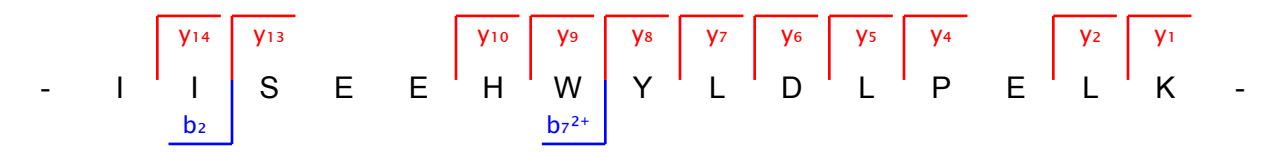

Raw file: 20171215\_MaS\_33SR\_LMH\_proteome\_01  
 Scan: 118852 Method: FTMS; HCD Score: 86.8 m/z: 764.39 Gene names: LCMT1

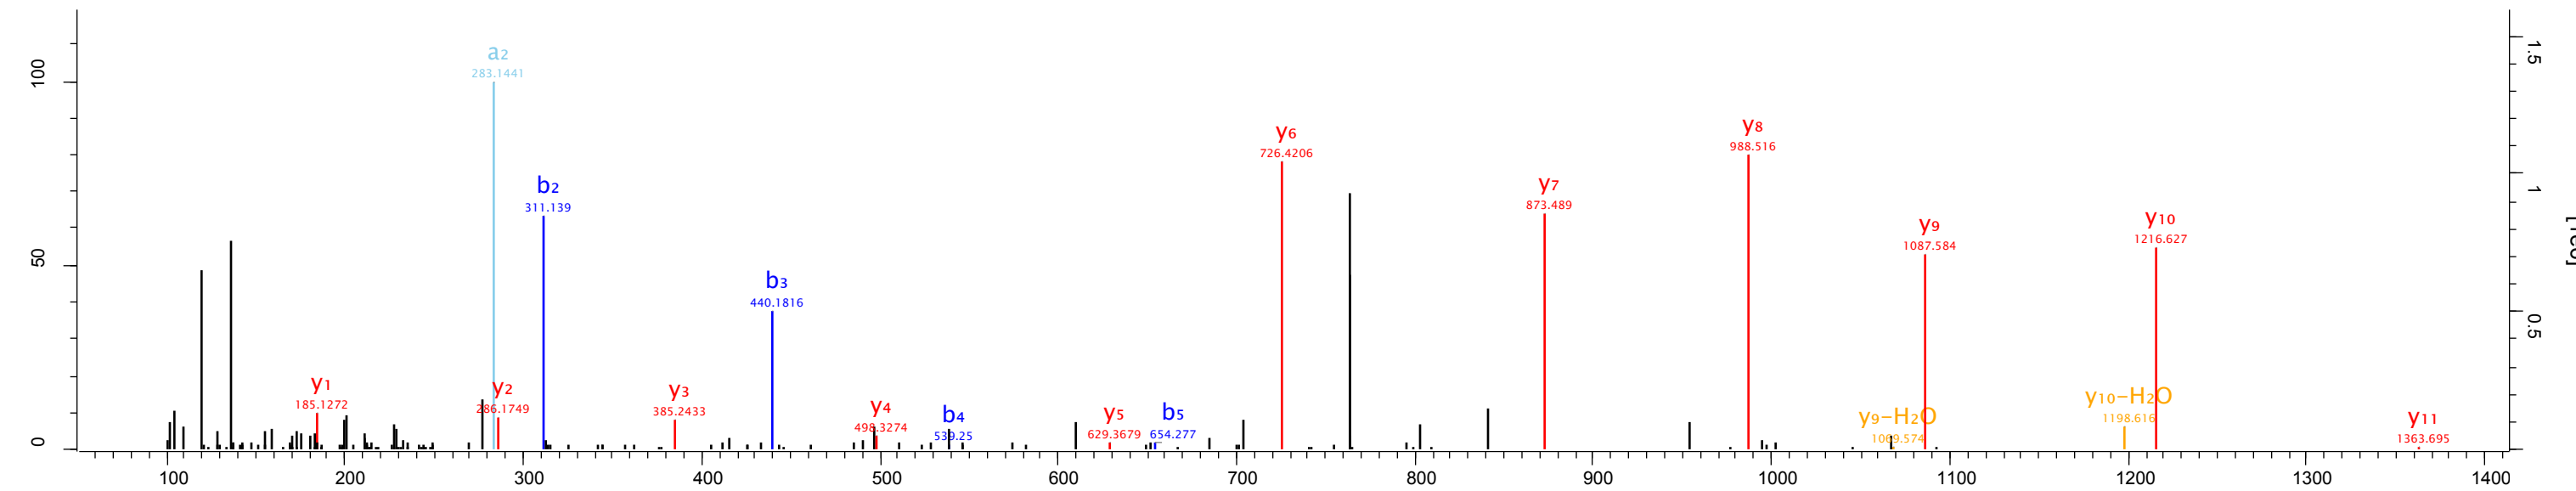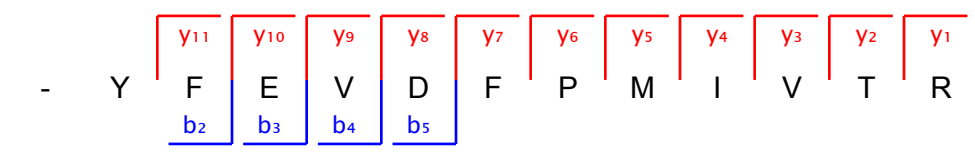

Raw file: 20171215\_MaS\_33SR\_LMH\_proteome\_01  
 Scan: 123712 Method: FTMS; HCD Score: 100.02 m/z: 920.03 Gene names: OCIAD1

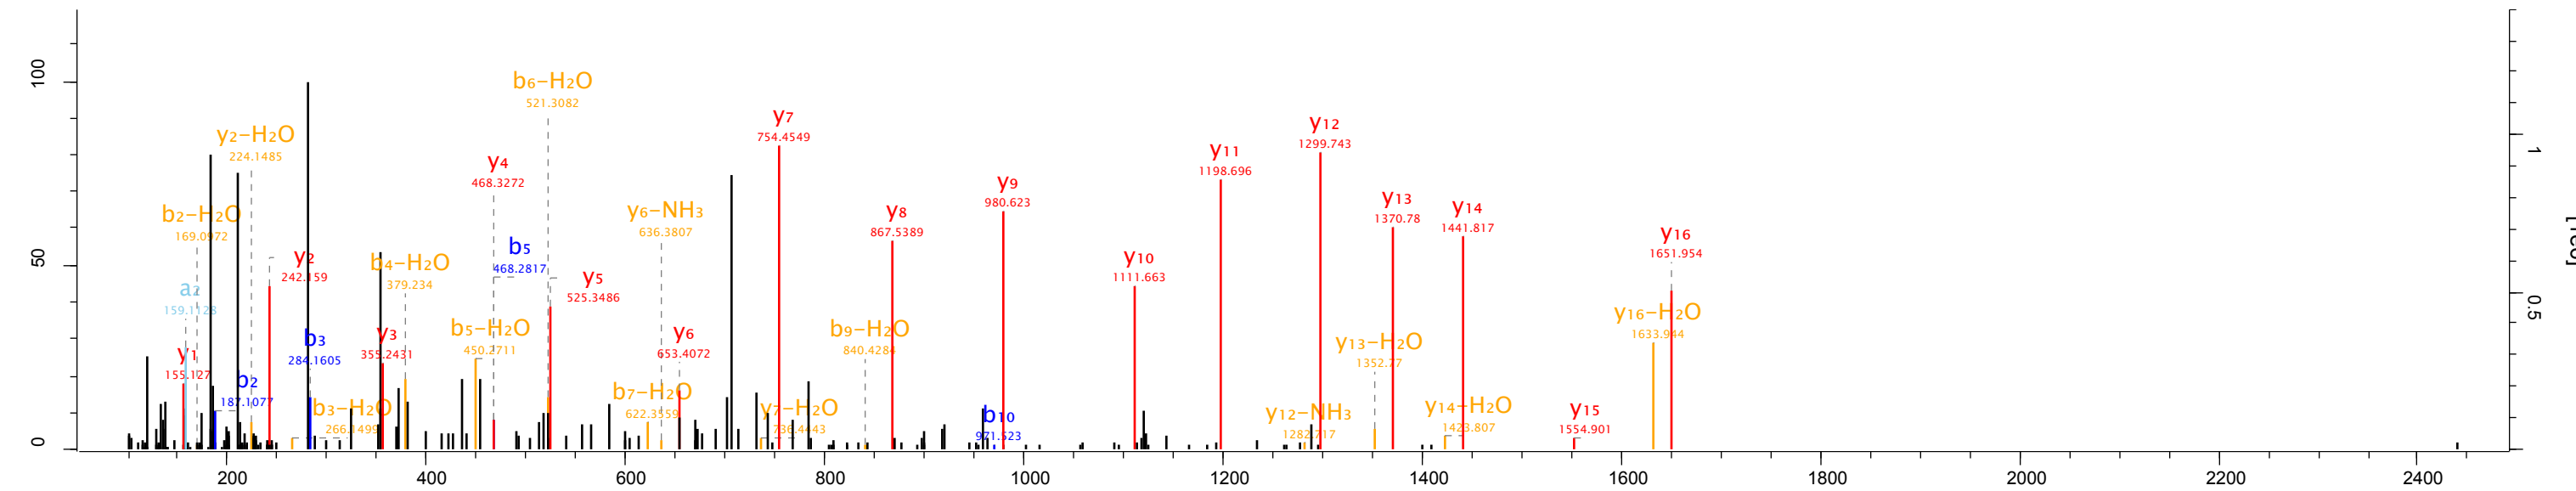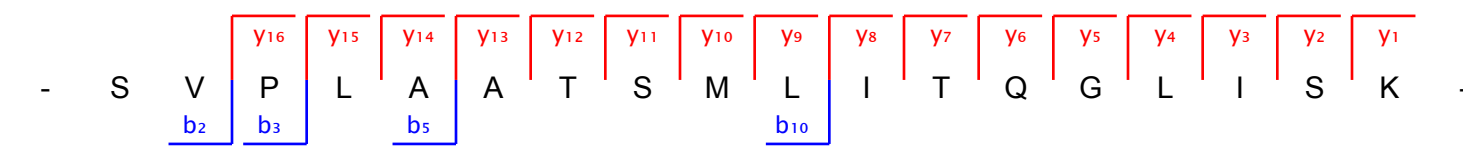

Raw file: 20171215\_MaS\_33SR\_LMH\_proteome\_01  
 Scan: 125952 Method: FTMS; HCD Score: 74.14 m/z: 836.47 Gene names: POMP

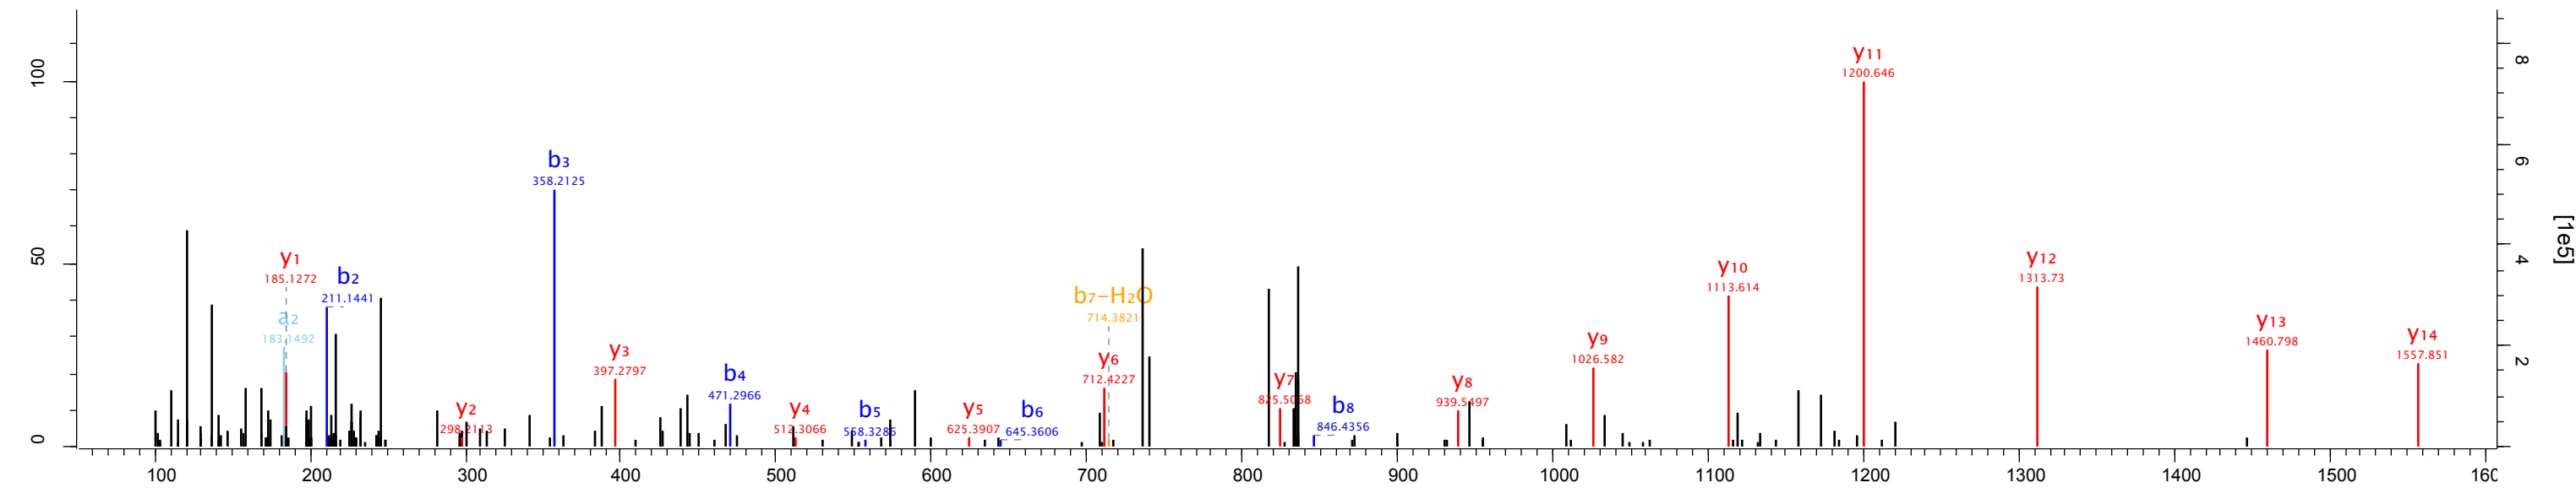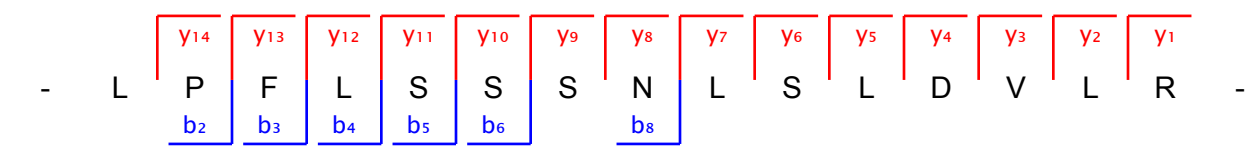



Raw file 20171215\_MaS\_33SR\_LMH\_proteome\_01 Scan 127102 Method FTMS; HCD Score 58.08 m/z 621.37 Gene names LCMT2

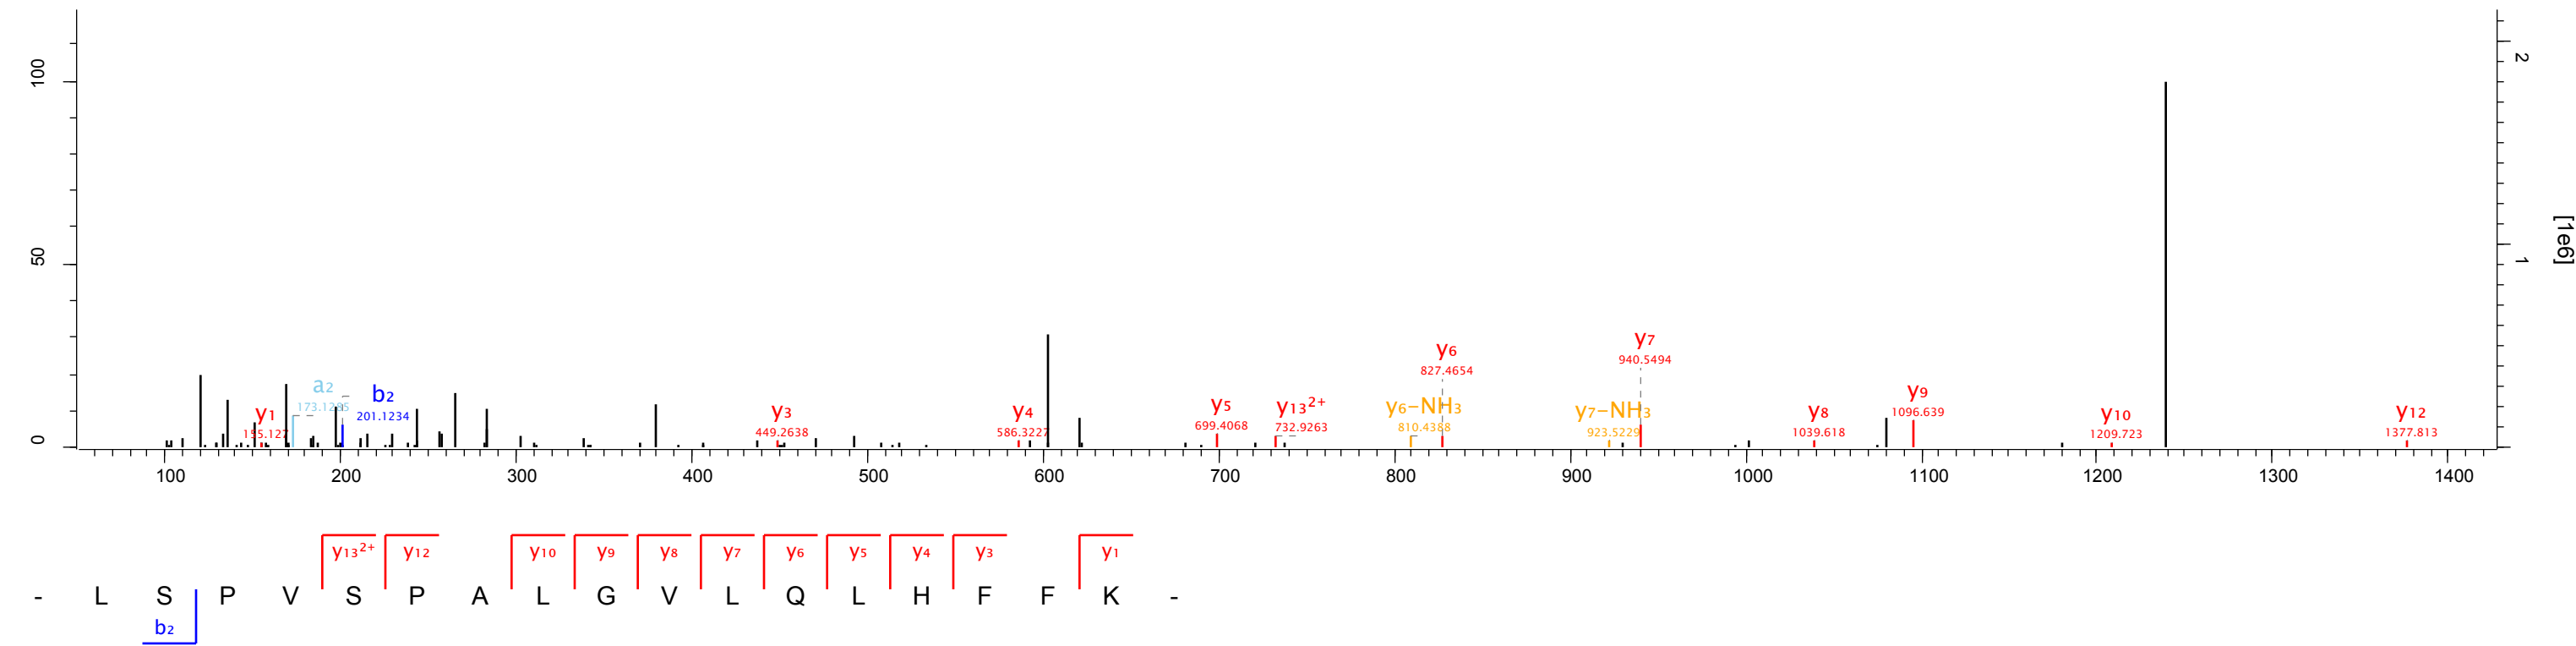

- L S P V S P A L G V L Q L H F F K -

Raw file: 20171215\_MaS\_33SR\_LMH\_proteome\_01  
 Scan: 13112 Method: FTMS; HCD Score: 74.61 m/z: 666.81 Gene names: HM13

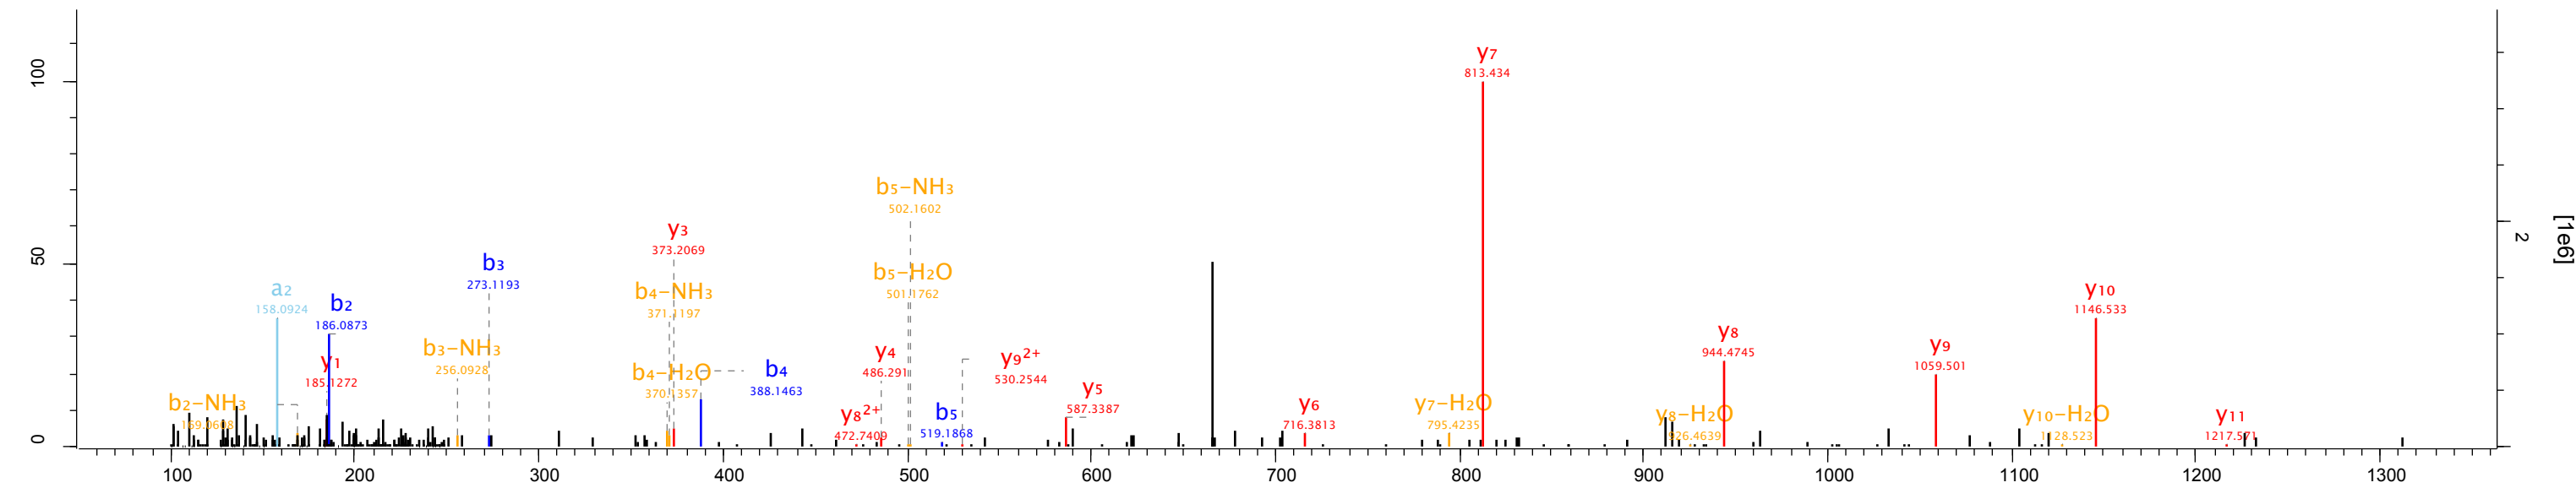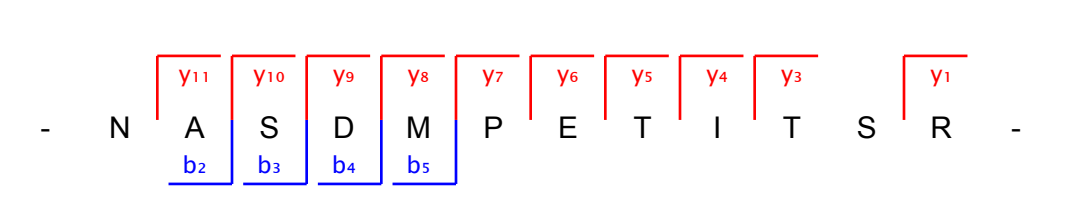

Raw file: 20171215\_MaS\_33SR\_LMH\_proteome\_01  
 Scan: 132552 Method: FTMS; HCD Score: 46.99 m/z: 791.95 Gene names: ARHGEF16

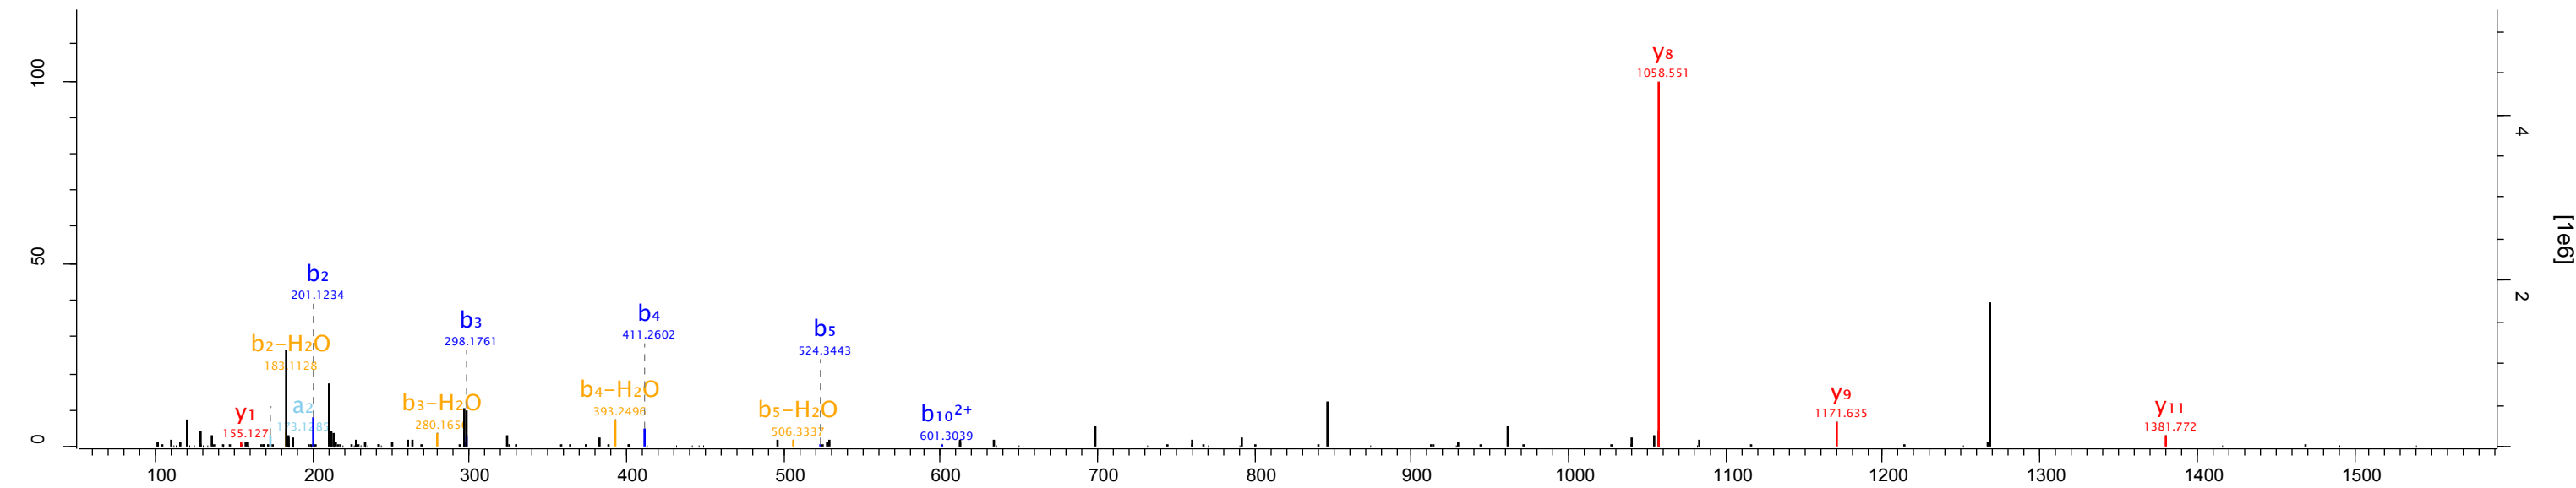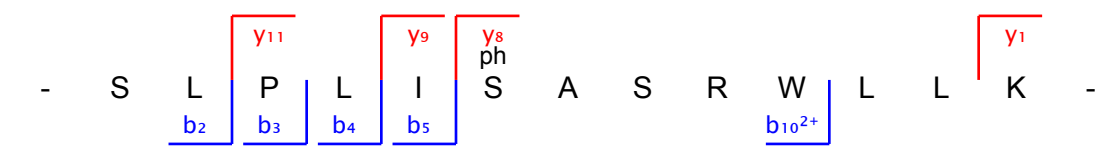

Raw file 20171215\_MaS\_33SR\_LMH\_proteome\_01 Scan 150182 Method FTMS; HCD Score 67.23 m/z 738.93 Gene names MRPL44

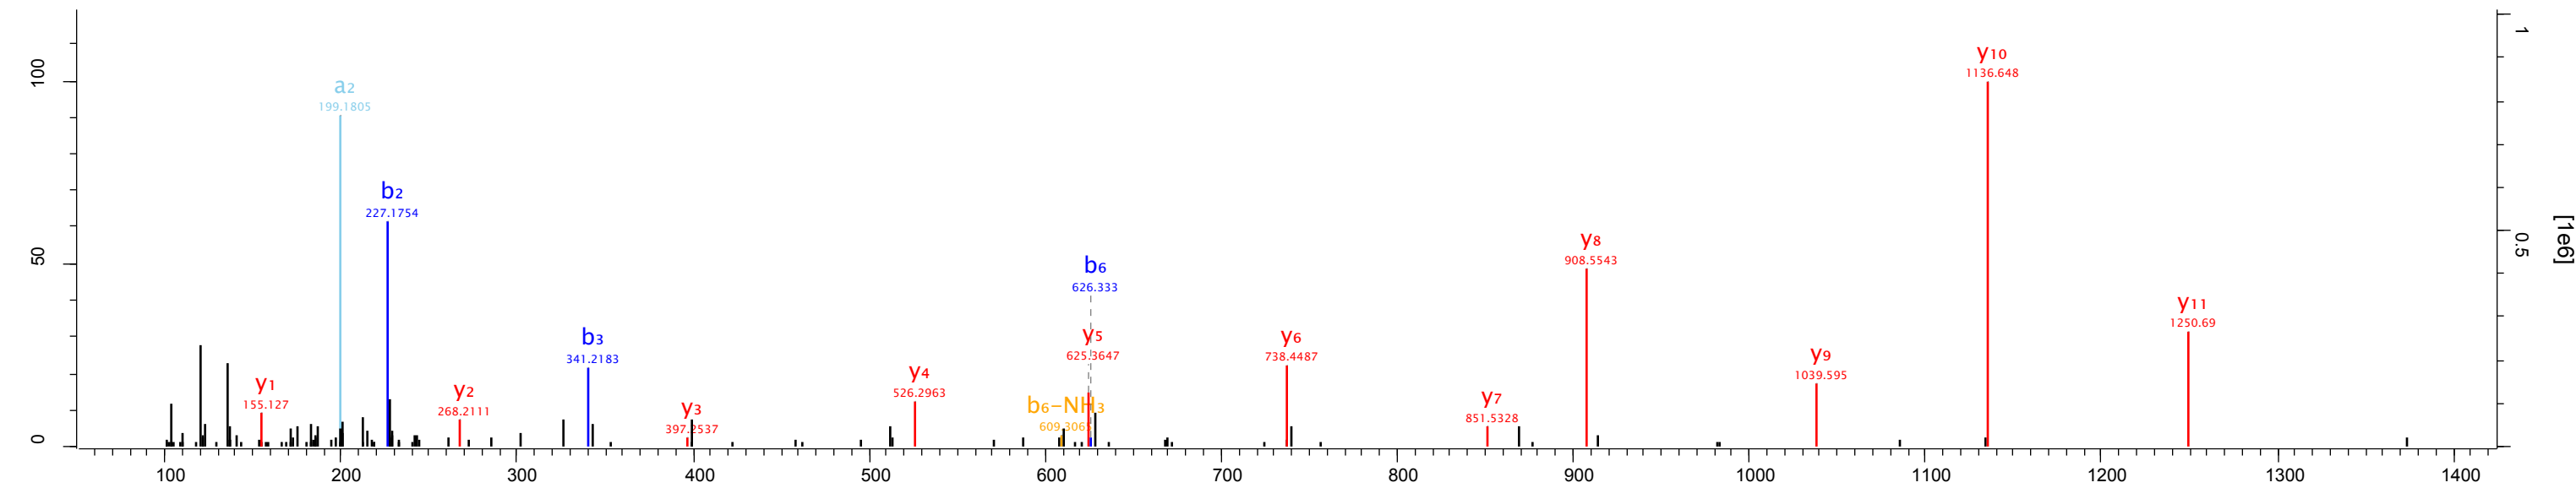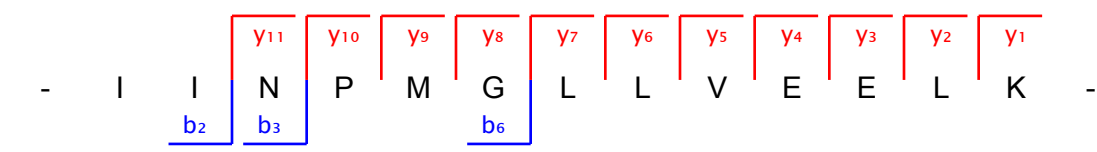

Raw file: 20171215\_MaS\_33SR\_LMH\_proteome\_01  
 Scan: 52532 Method: FTMS; HCD Score: 64.12 m/z: 620.33 Gene names: ARFIP2

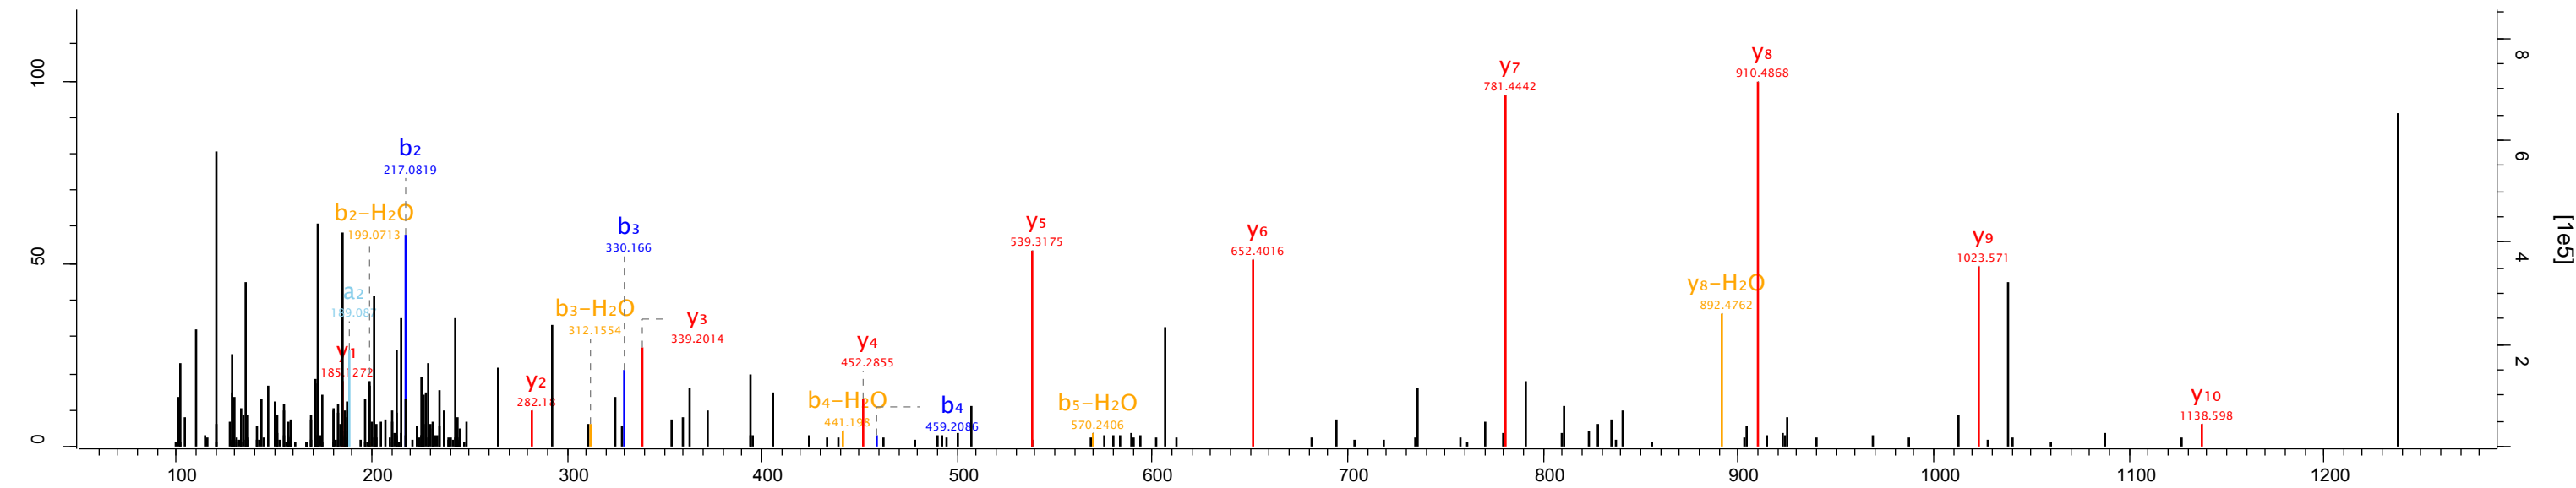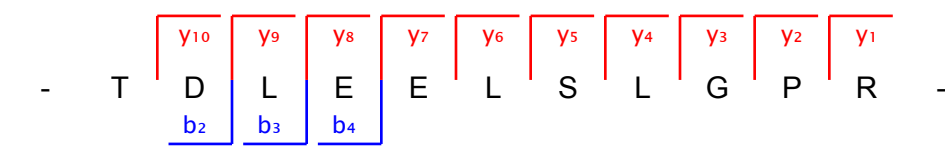

Raw file 20171215\_MaS\_33SR\_LMH\_proteome\_01 Scan 5672 Method FTMS; HCD Score 77.54 m/z 592.82

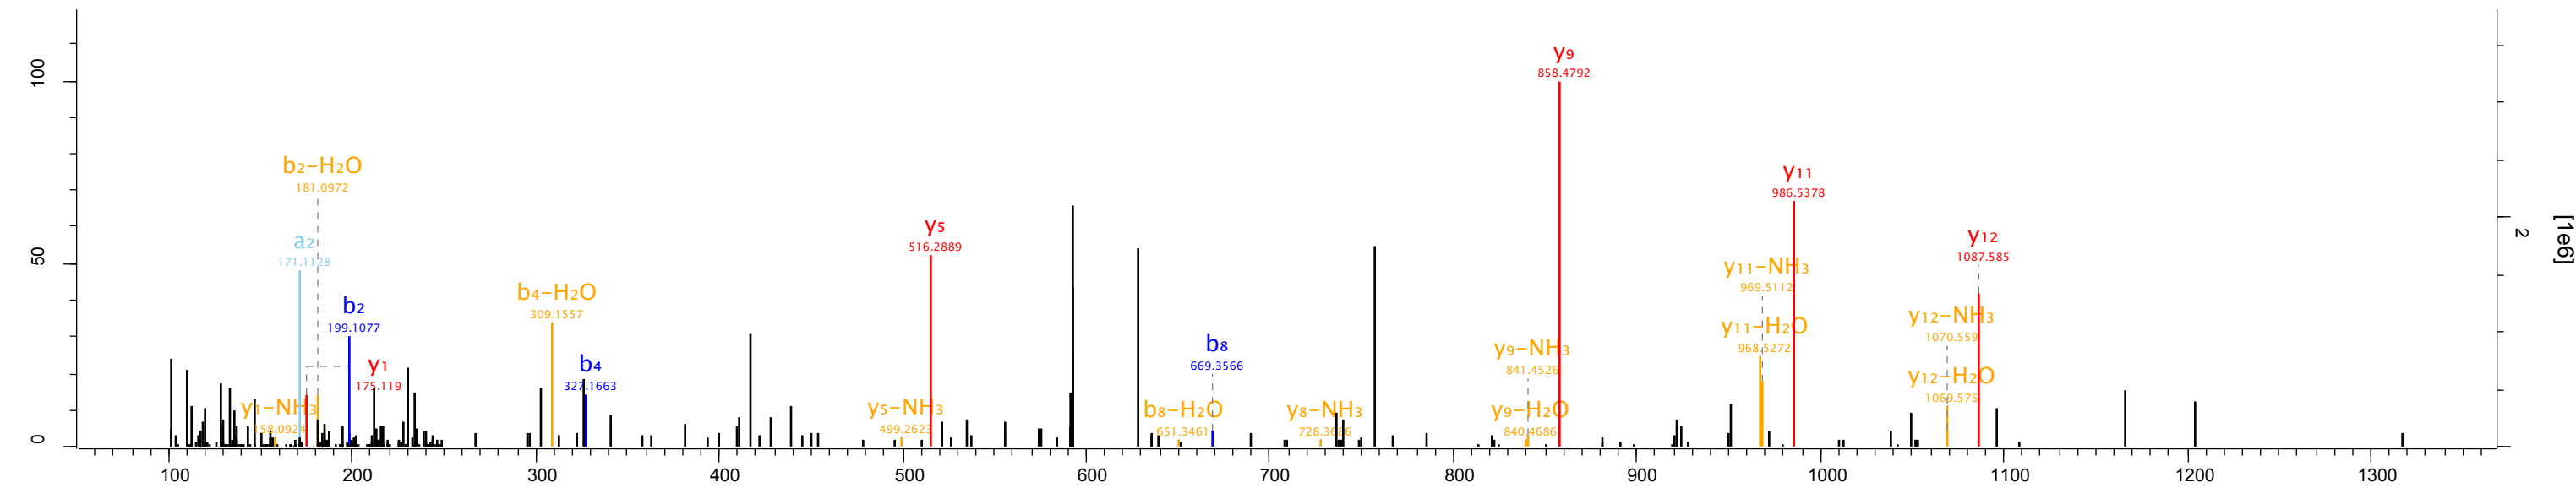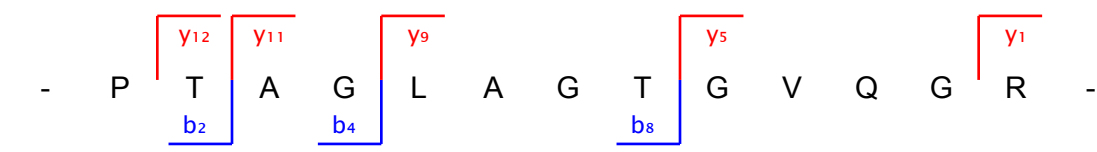

Raw file 20171215\_MaS\_33SR\_LMH\_proteome\_01 Scan 57882 Method FTMS; HCD Score 84.33 m/z 1132.58 Gene names MYADM

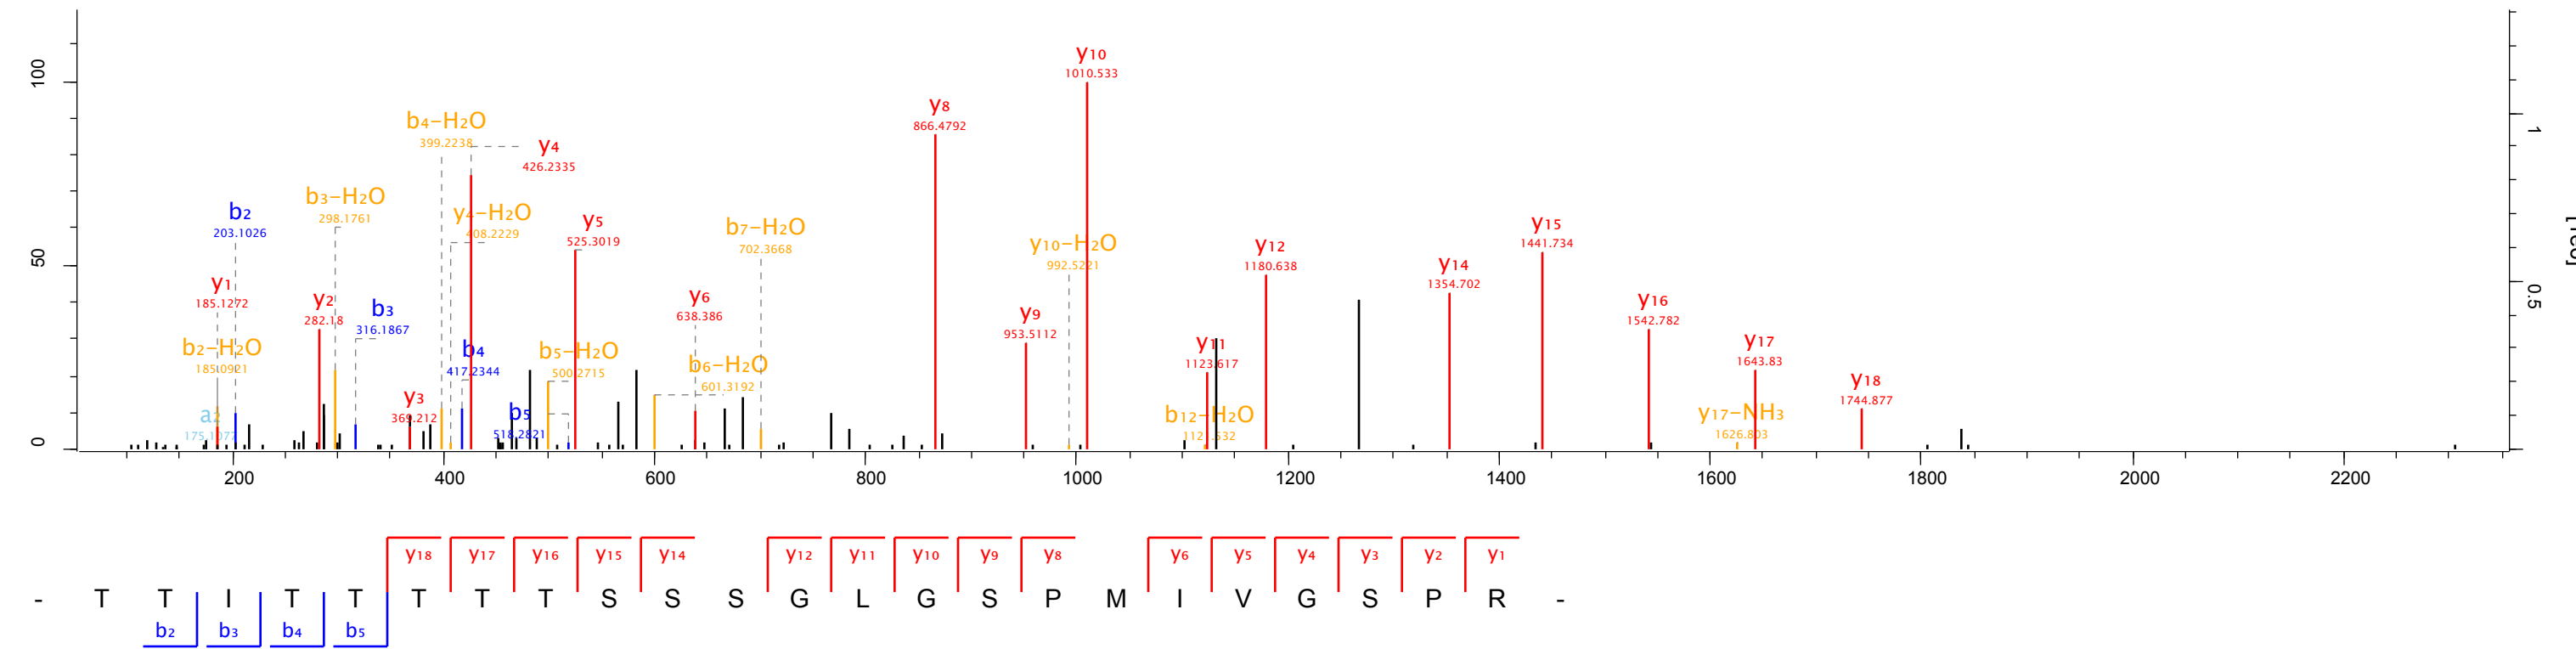

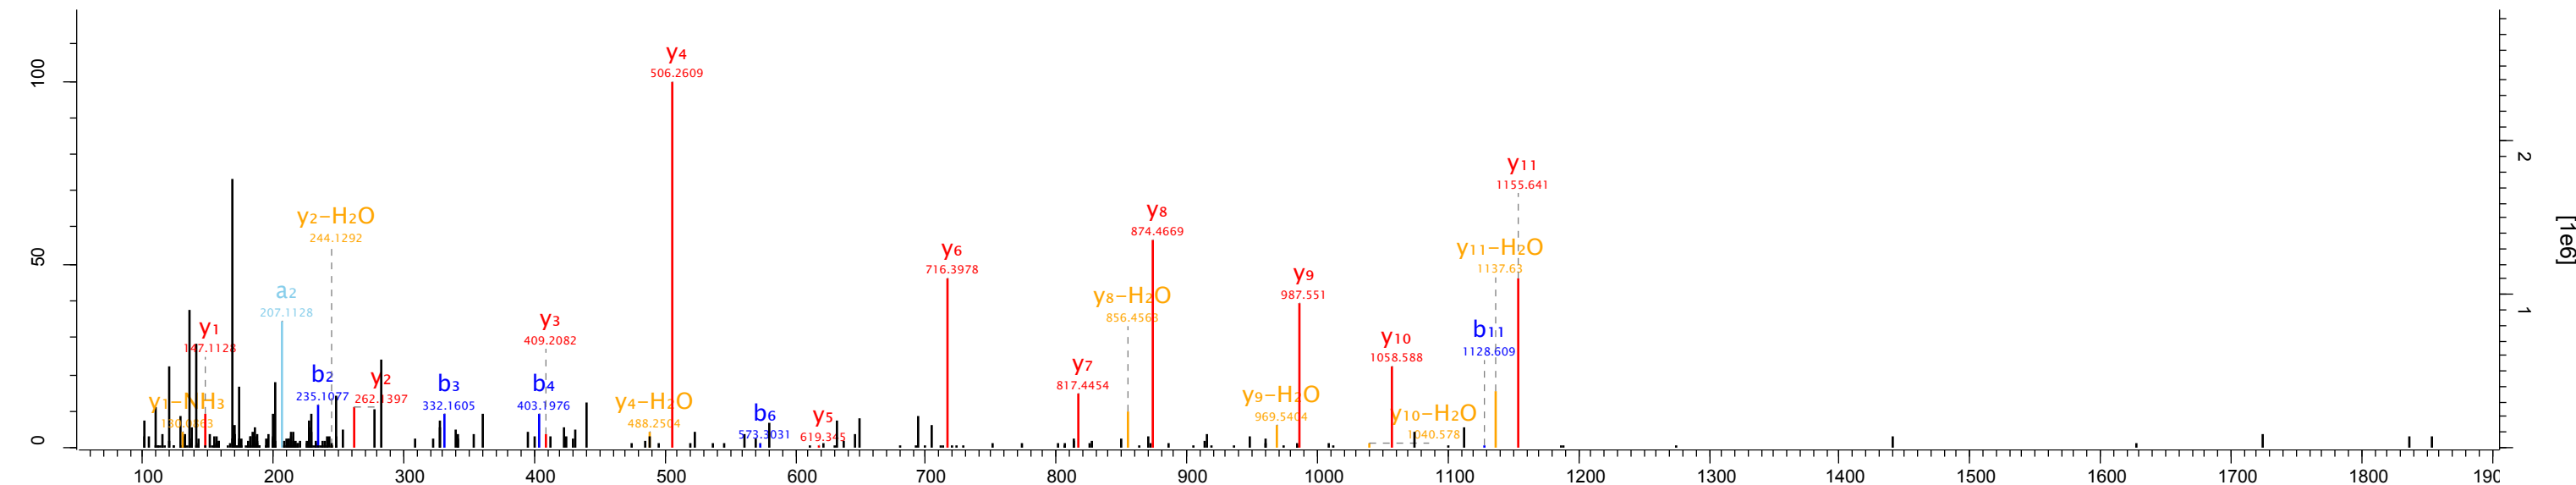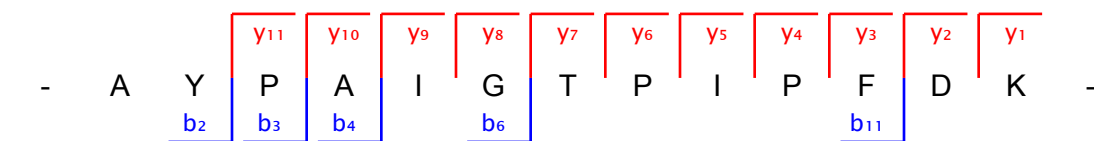



Raw file

20171215\_MaS\_33SR\_LMH\_proteome\_01

Scan 75222 Method FTMS; HCD Score 72.15 m/z 655.37 Gene names CCDC53

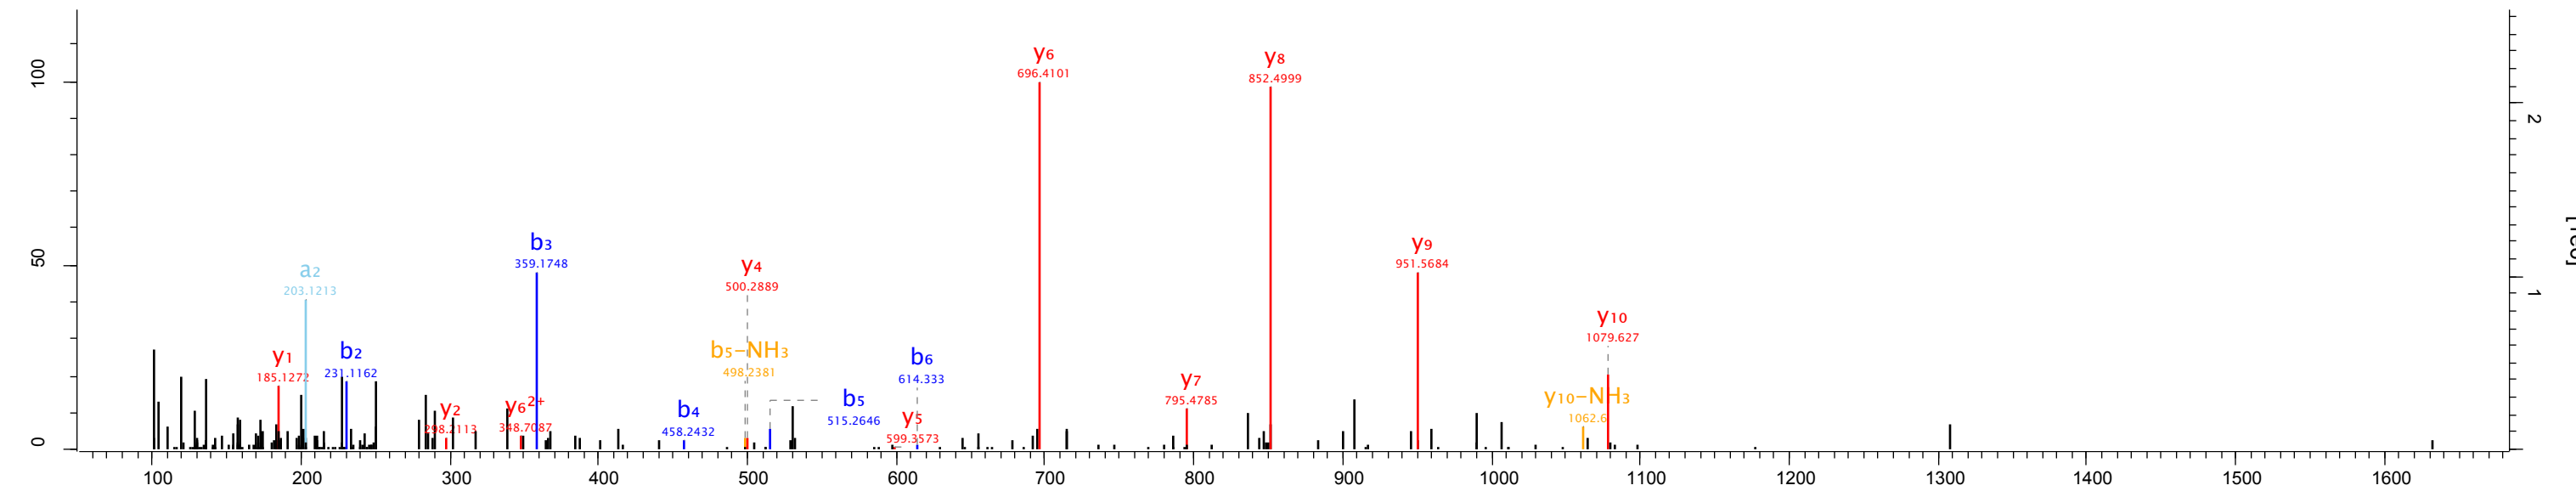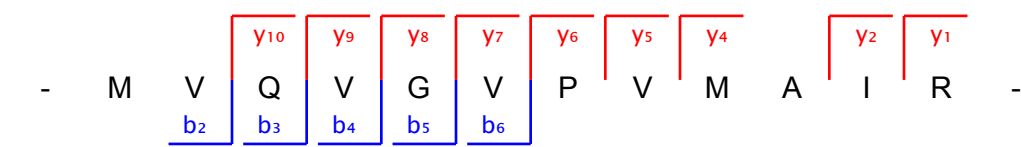

Raw file 20171215\_MaS\_33SR\_LMH\_proteome\_01 Scan 75832 Method FTMS; HCD Score 58.37 m/z 881.47 Gene names MED9

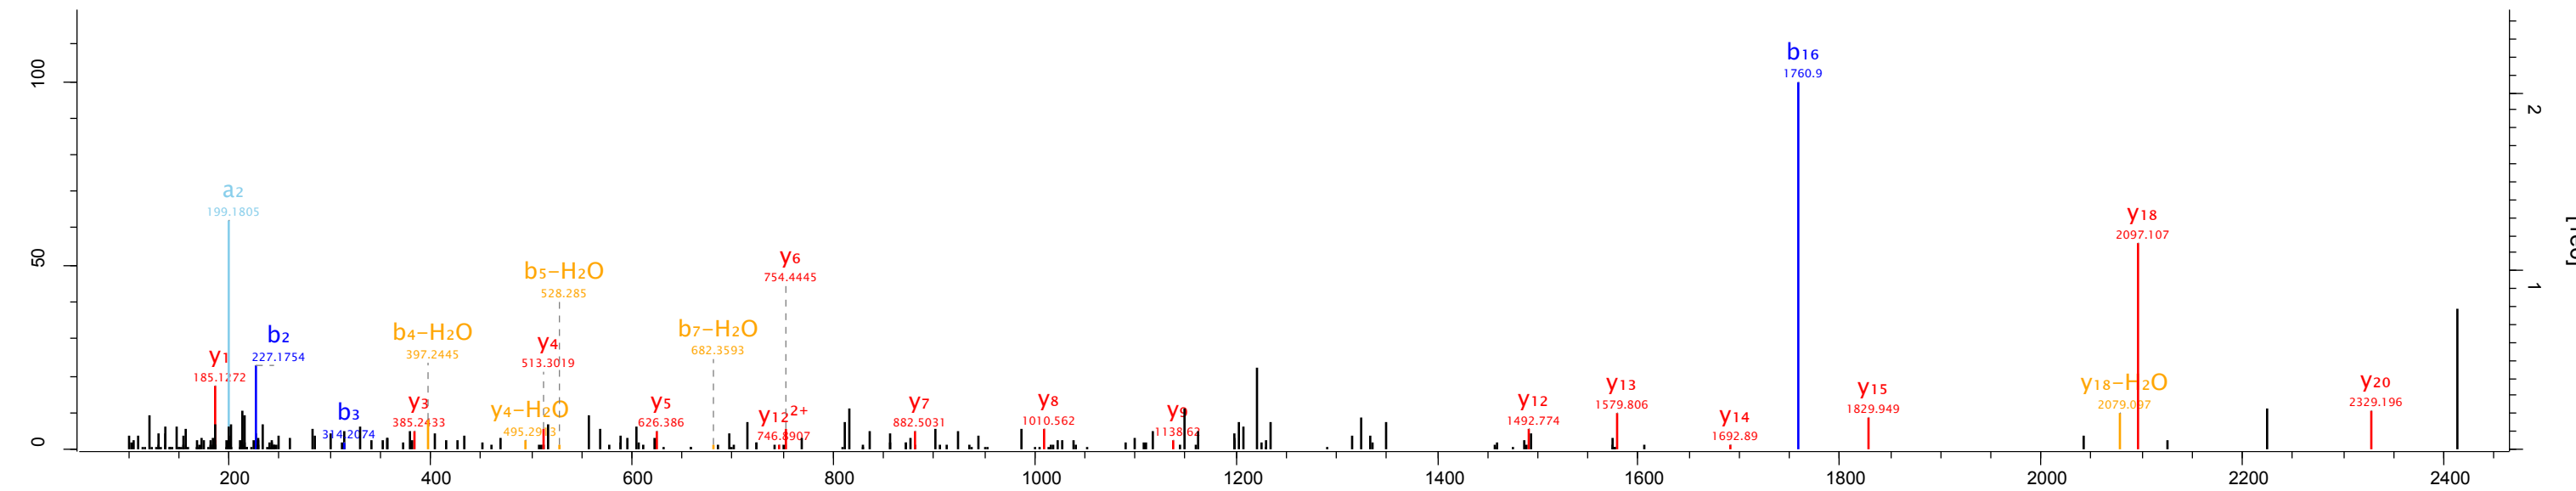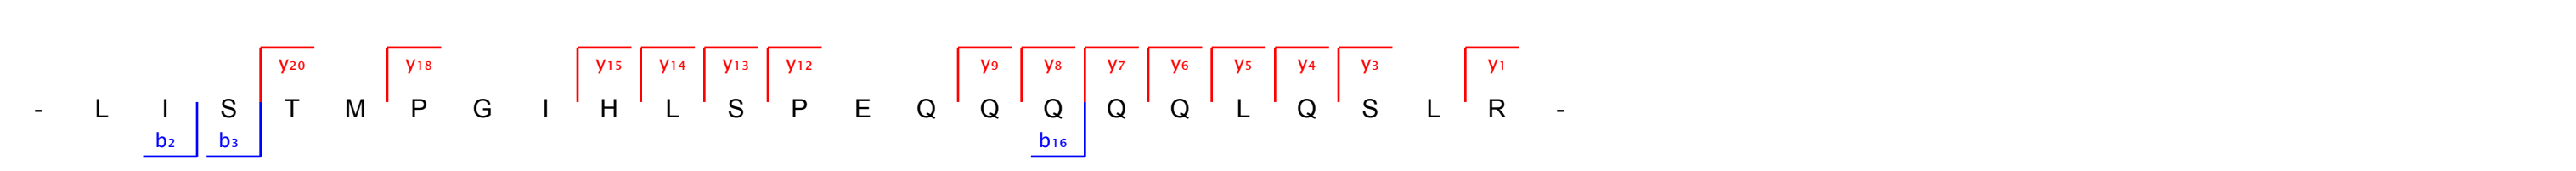

Raw file 20171215\_MaS\_33SR\_LMH\_proteome\_01 Scan 76732 Method FTMS; HCD Score 55.18 m/z 765.4 Gene names TBCC

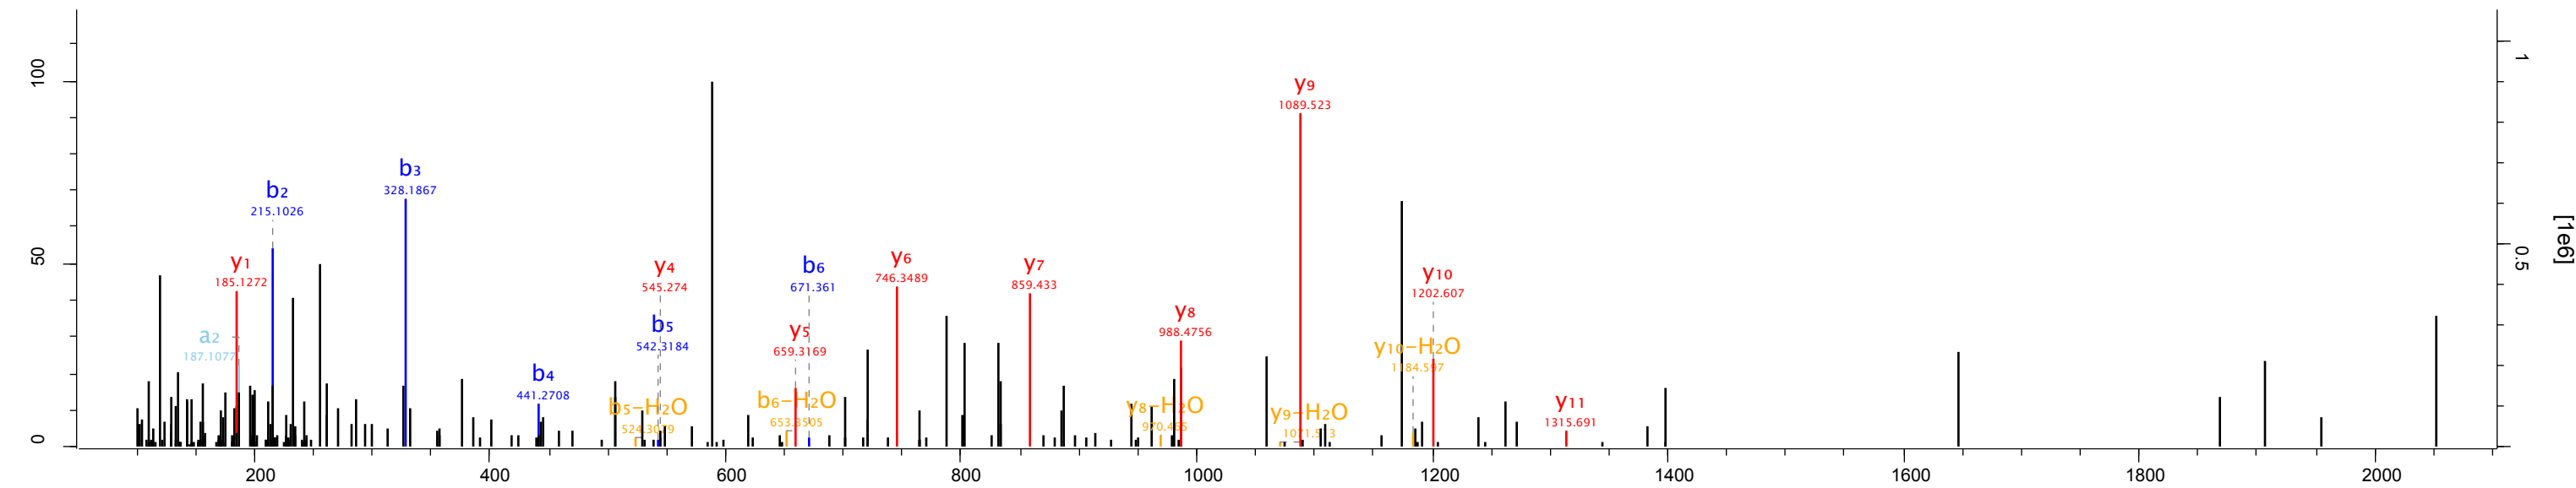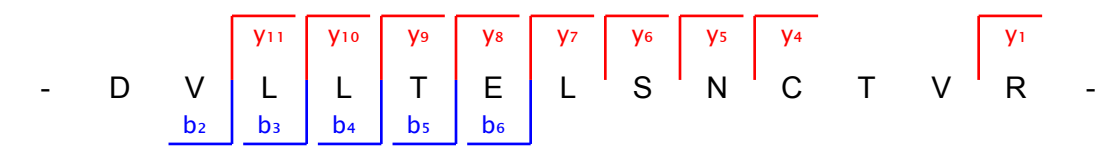

Raw file

20171215\_MaS\_33SR\_LMH\_proteome\_01

Scan 81302 Method FTMS; HCD Score 76.06 m/z 385.22 Gene names VPS33A

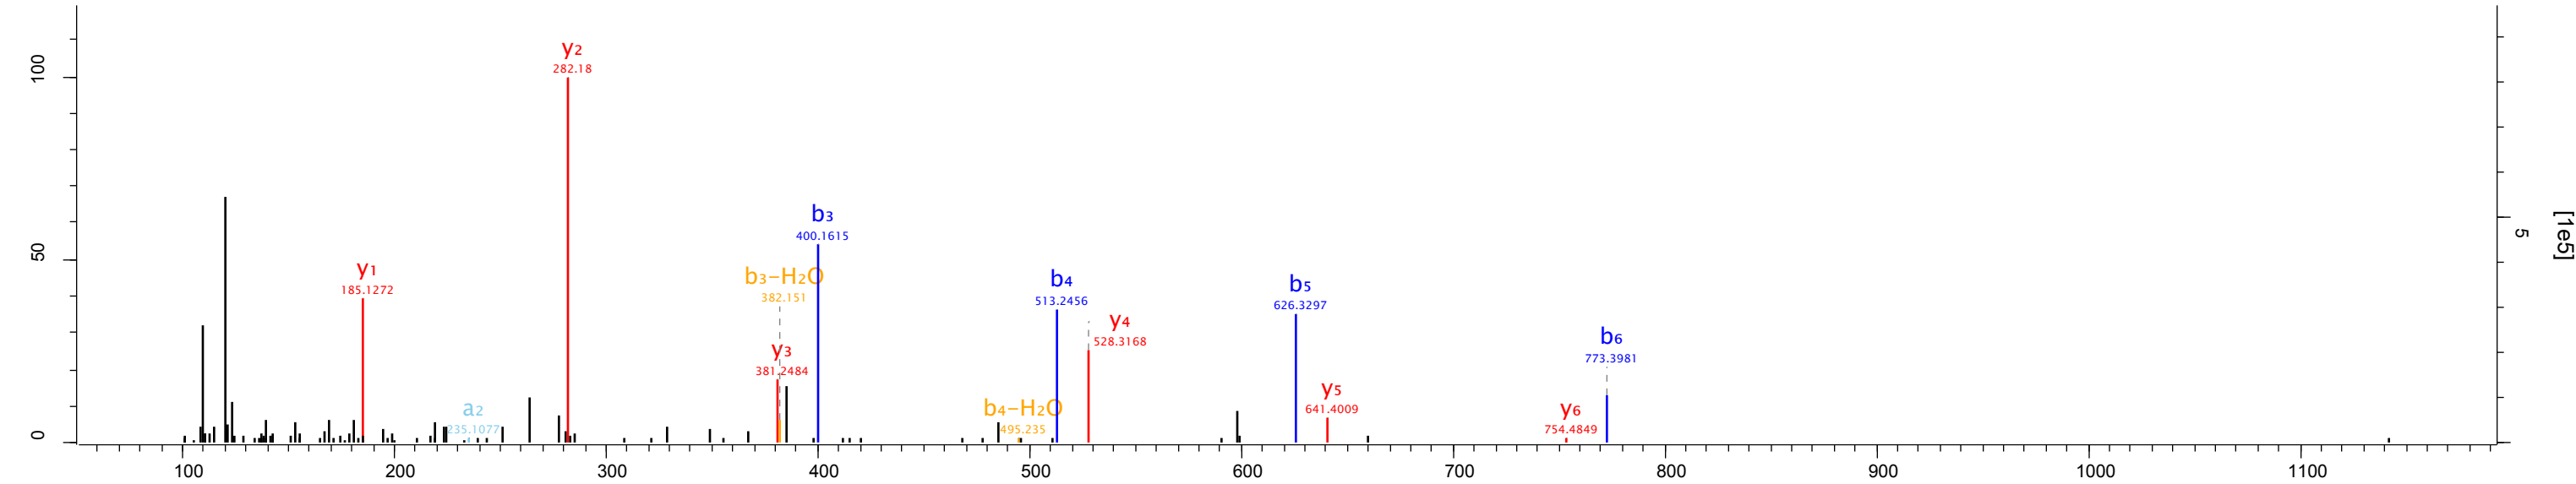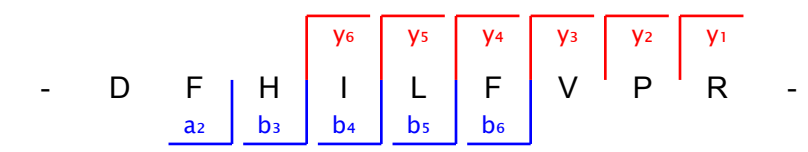

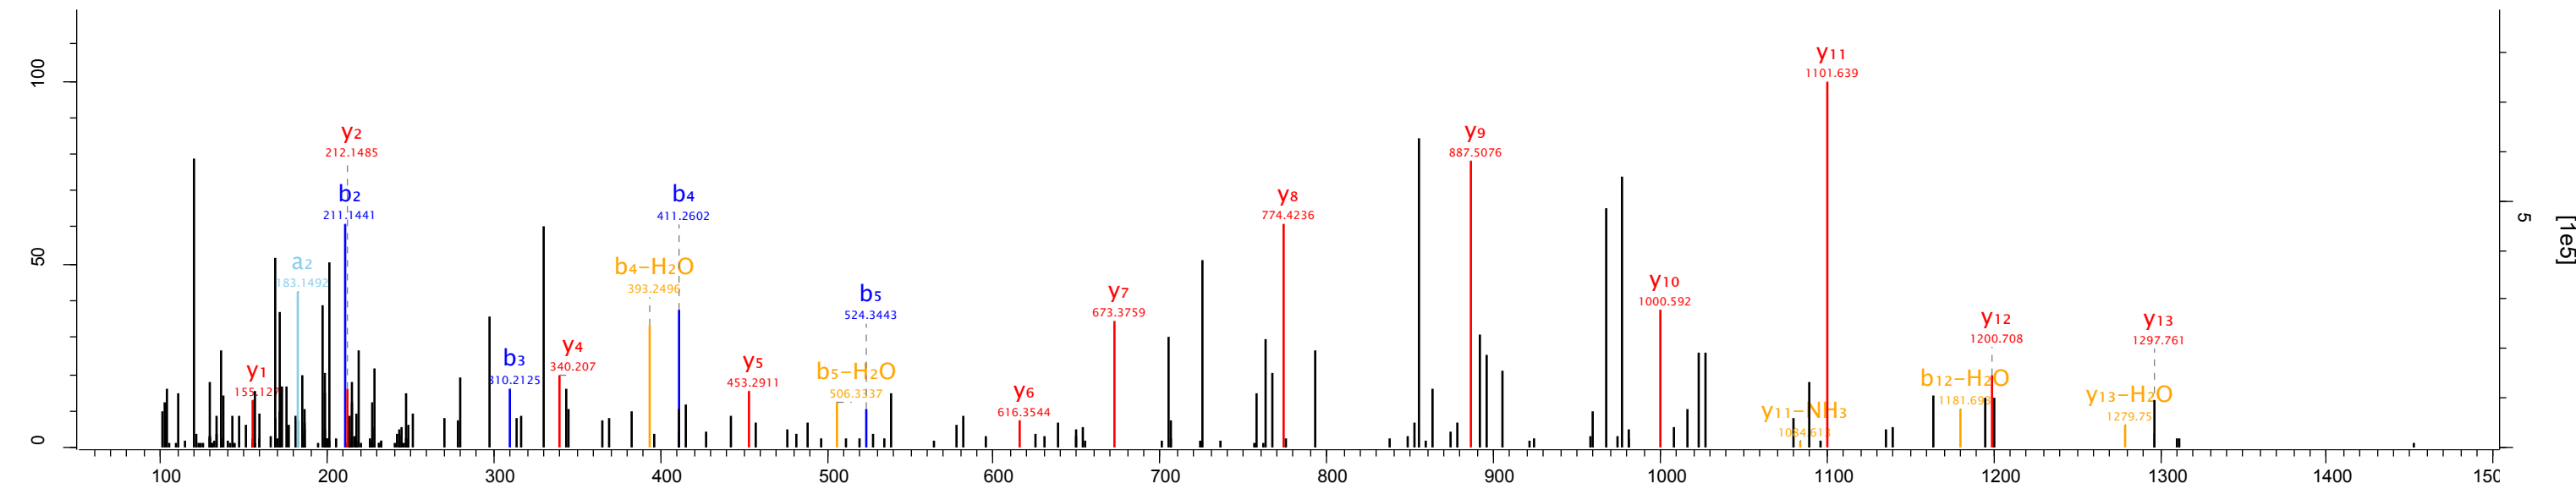

- I P V T I I T G Y L G A G K -

Fragmentation mapping:

- Red boxes: y13 (I), y12 (V), y11 (T), y10 (I), y9 (I), y8 (T), y7 (G), y6 (Y), y5 (L), y4 (G), y2 (G), y1 (K)
- Blue boxes: b2 (P), b3 (V), b4 (T), b5 (I)

Raw file  
20171215\_MaS\_33SR\_LMH\_proteome\_01

Scan 95472 Method FTMS; HCD Score 64.82 m/z 583.85 Gene names PDDC1

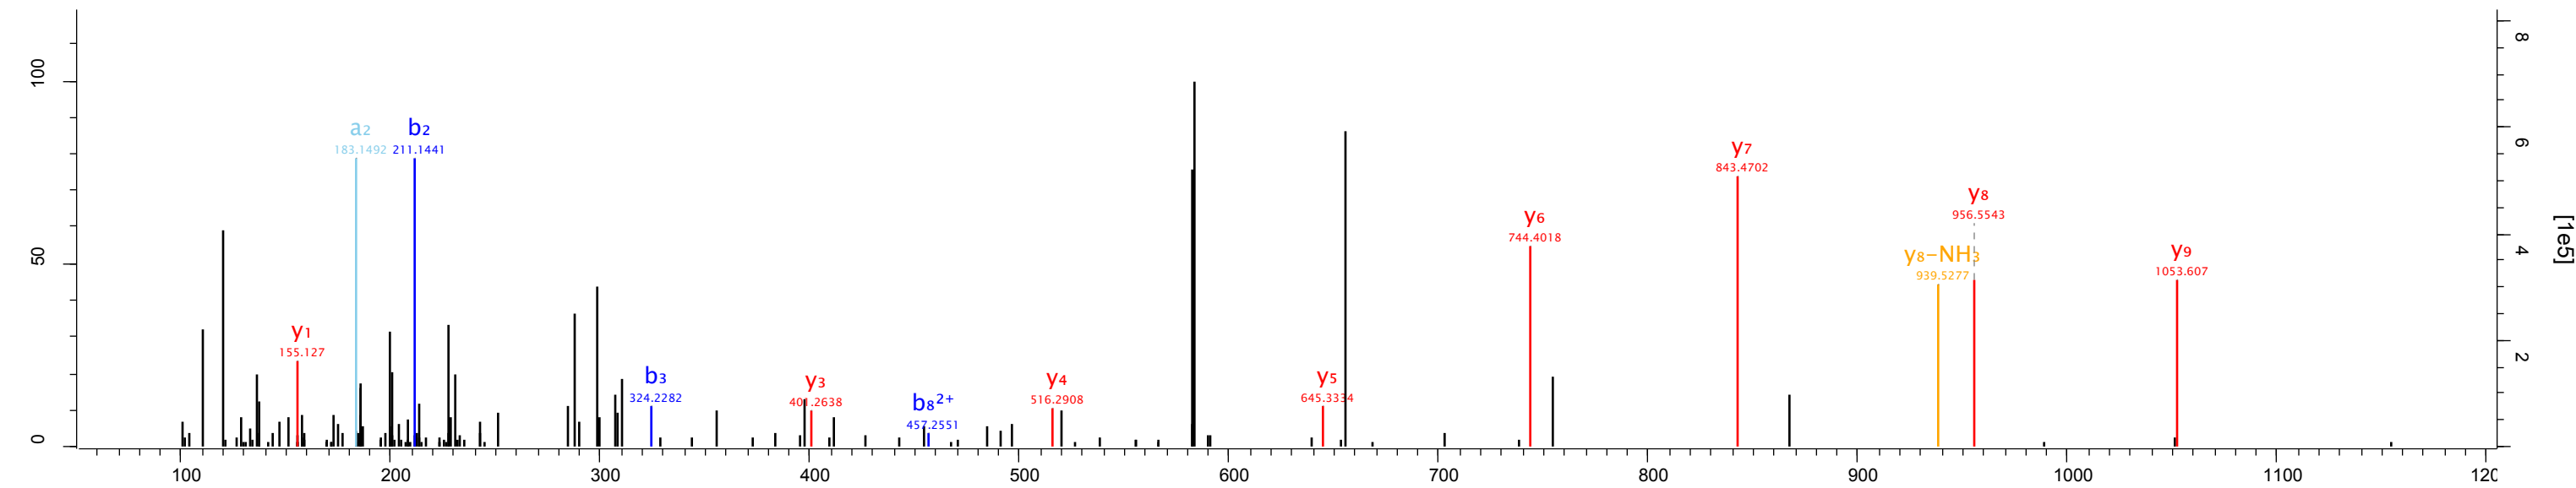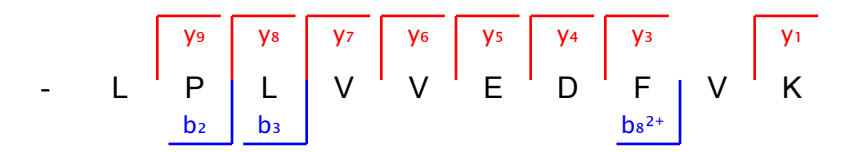

Raw file 20171215\_MaS\_33SR\_LMH\_proteome\_01 Scan 99282 Method FTMS; HCD Score 58.89 m/z 726.39 Gene names ANAPC4

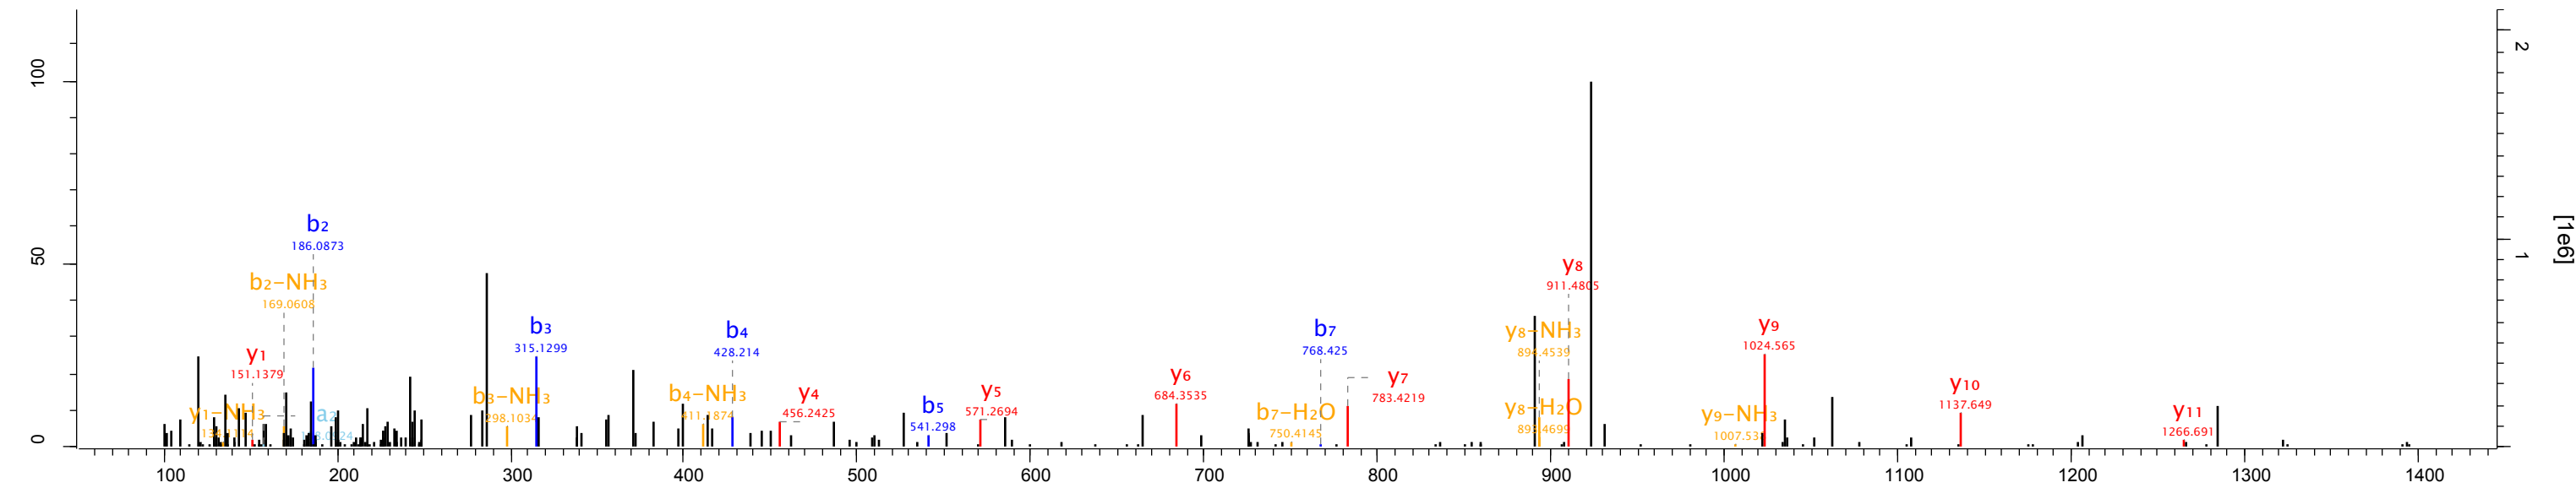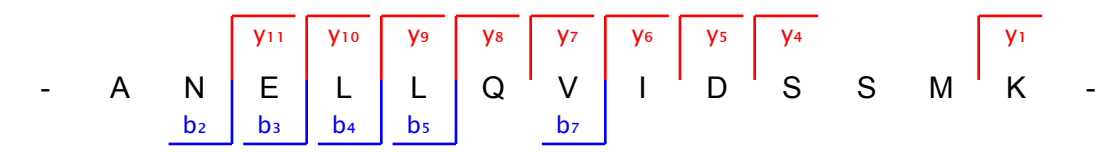

Raw file 20171215\_MaS\_33SR\_LMH\_proteome\_02 Scan 10172 Method FTMS; HCD Score 57.59 m/z 529.77

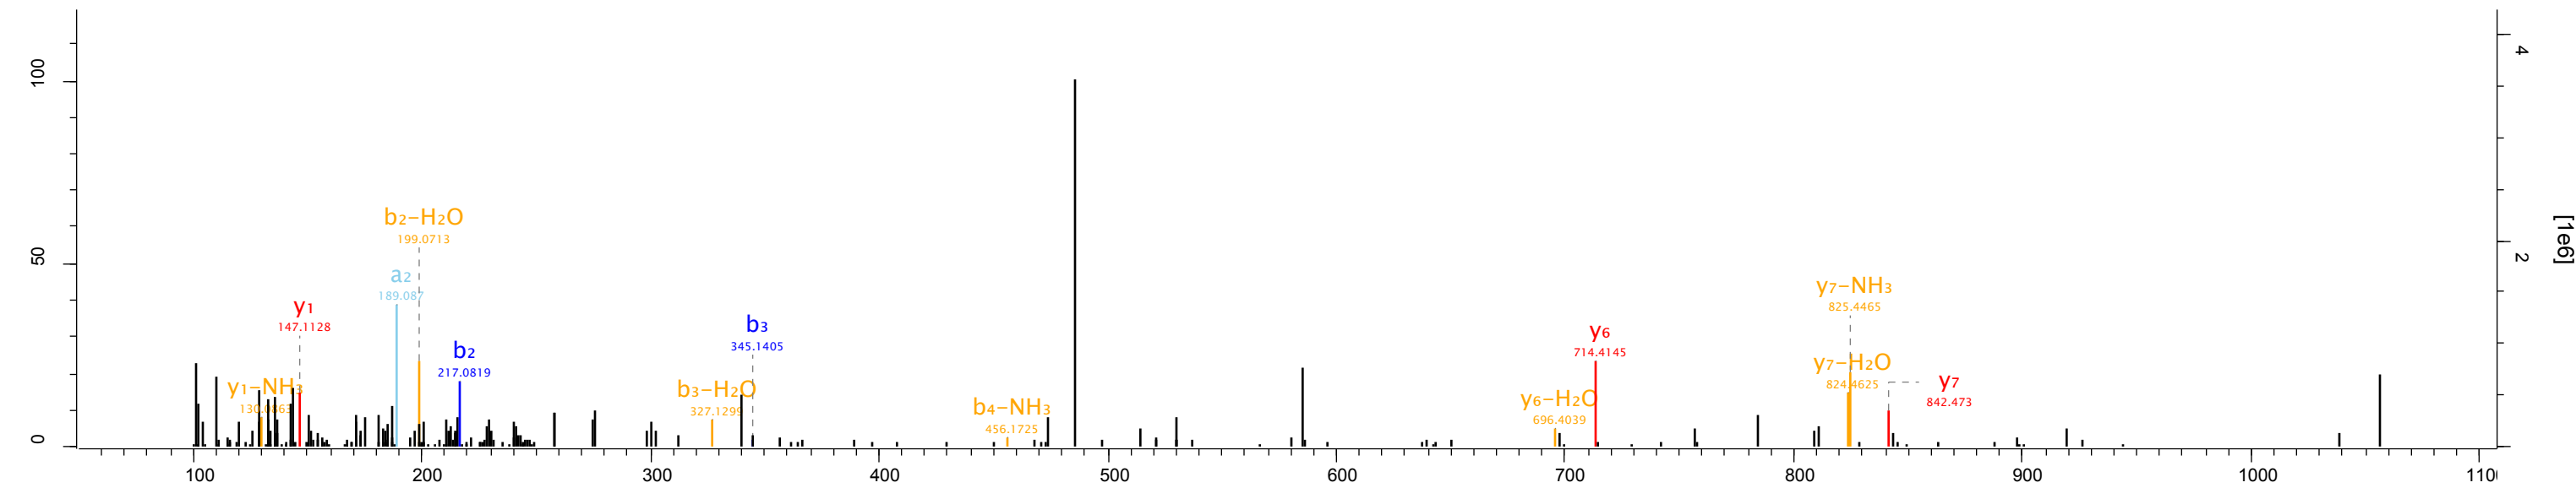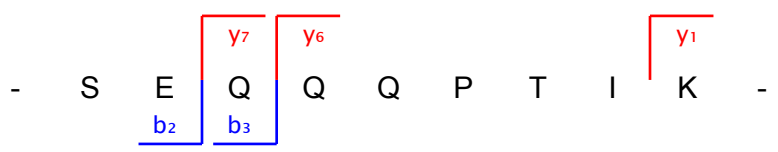



Raw file  
20171215\_MaS\_33SR\_LMH\_proteome\_02

Scan 102342 Method FTMS; HCD Score 70.99 m/z 976.02 Gene names MRPL11

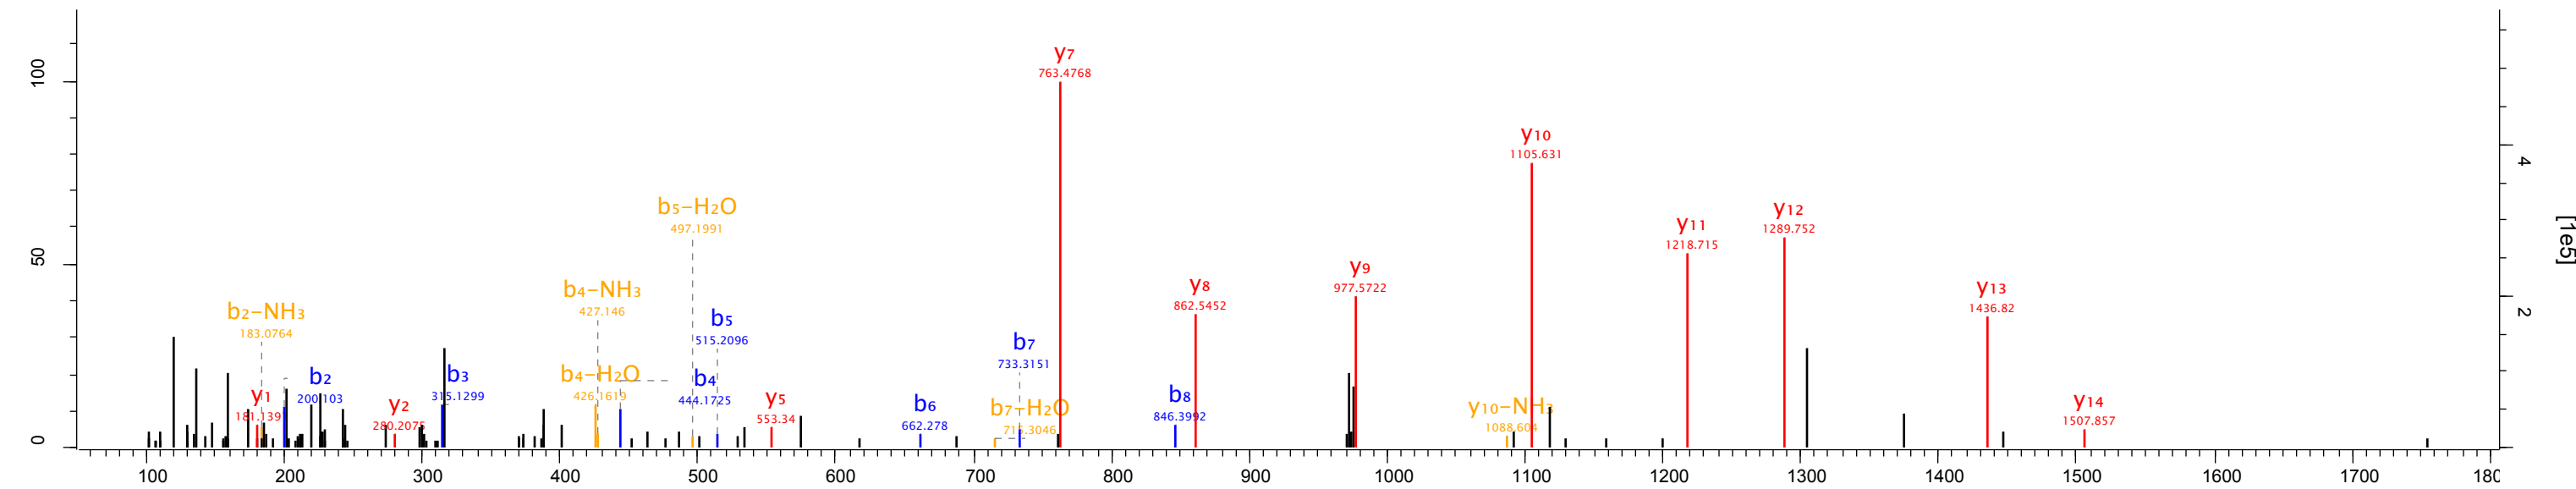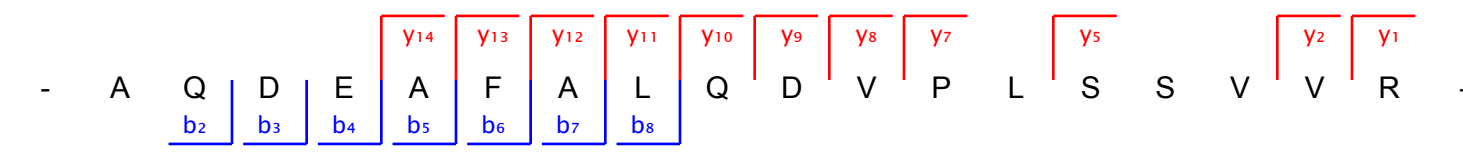

Raw file 20171215\_MaS\_33SR\_LMH\_proteome\_02 Scan 10252 Method FTMS; HCD Score 83.65 m/z 467.24 Gene names INO80D

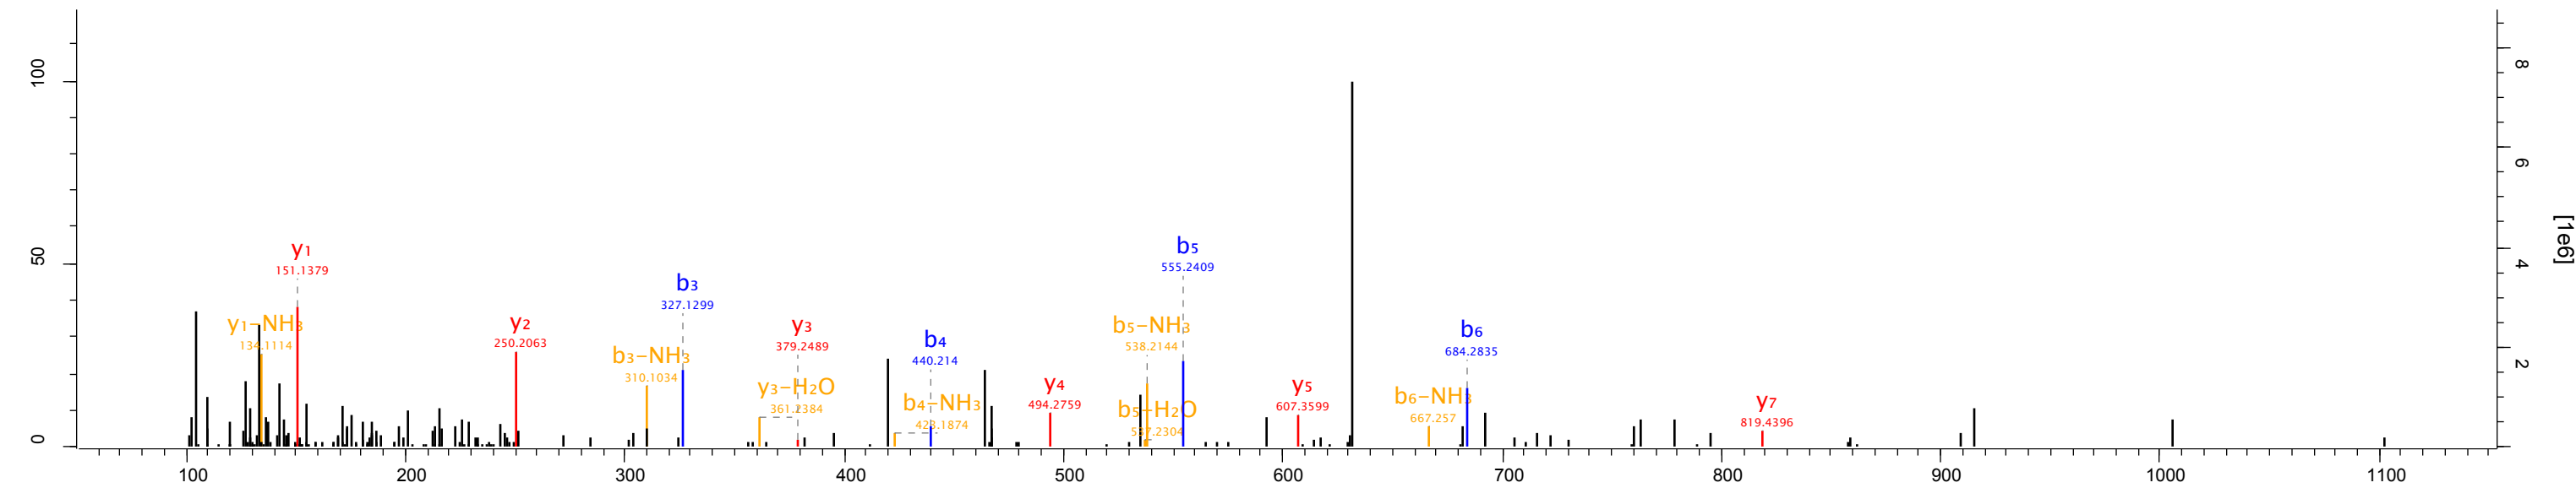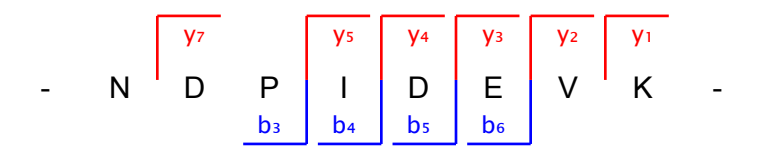

Raw file 20171215\_MaS\_33SR\_LMH\_proteome\_02 Scan 109802 Method FTMS; HCD Score 50.97 m/z 797.93 Gene names ACAD9

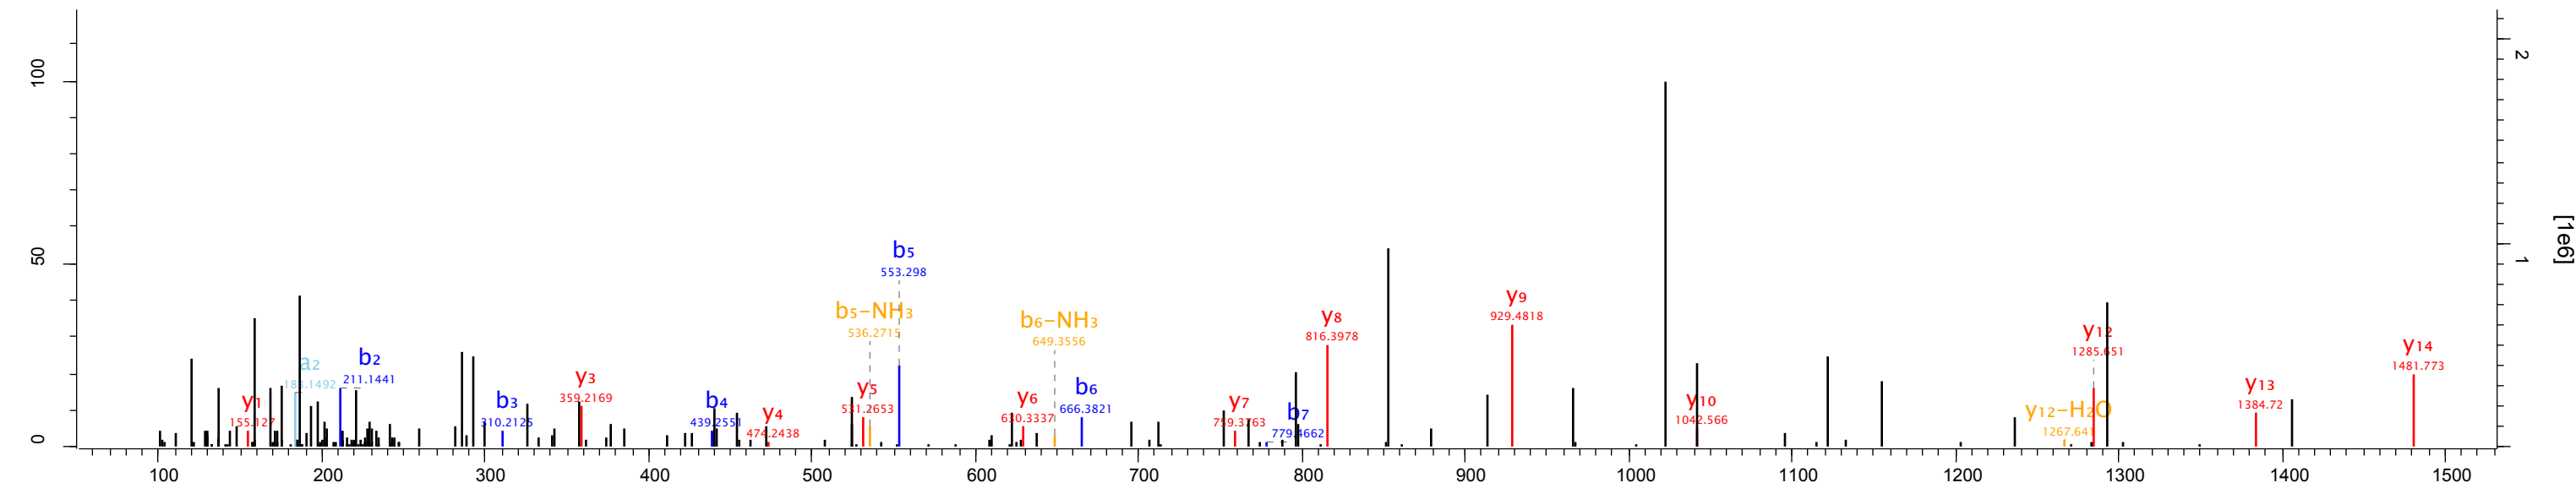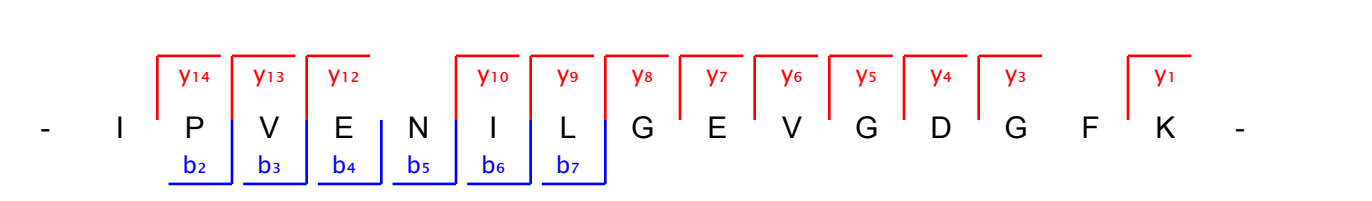

Raw file: 20171215\_MaS\_33SR\_LMH\_proteome\_02  
 Scan: 120152 Method: FTMS; HCD Score: 66.22 m/z: 889.98 Gene names: CCDC94

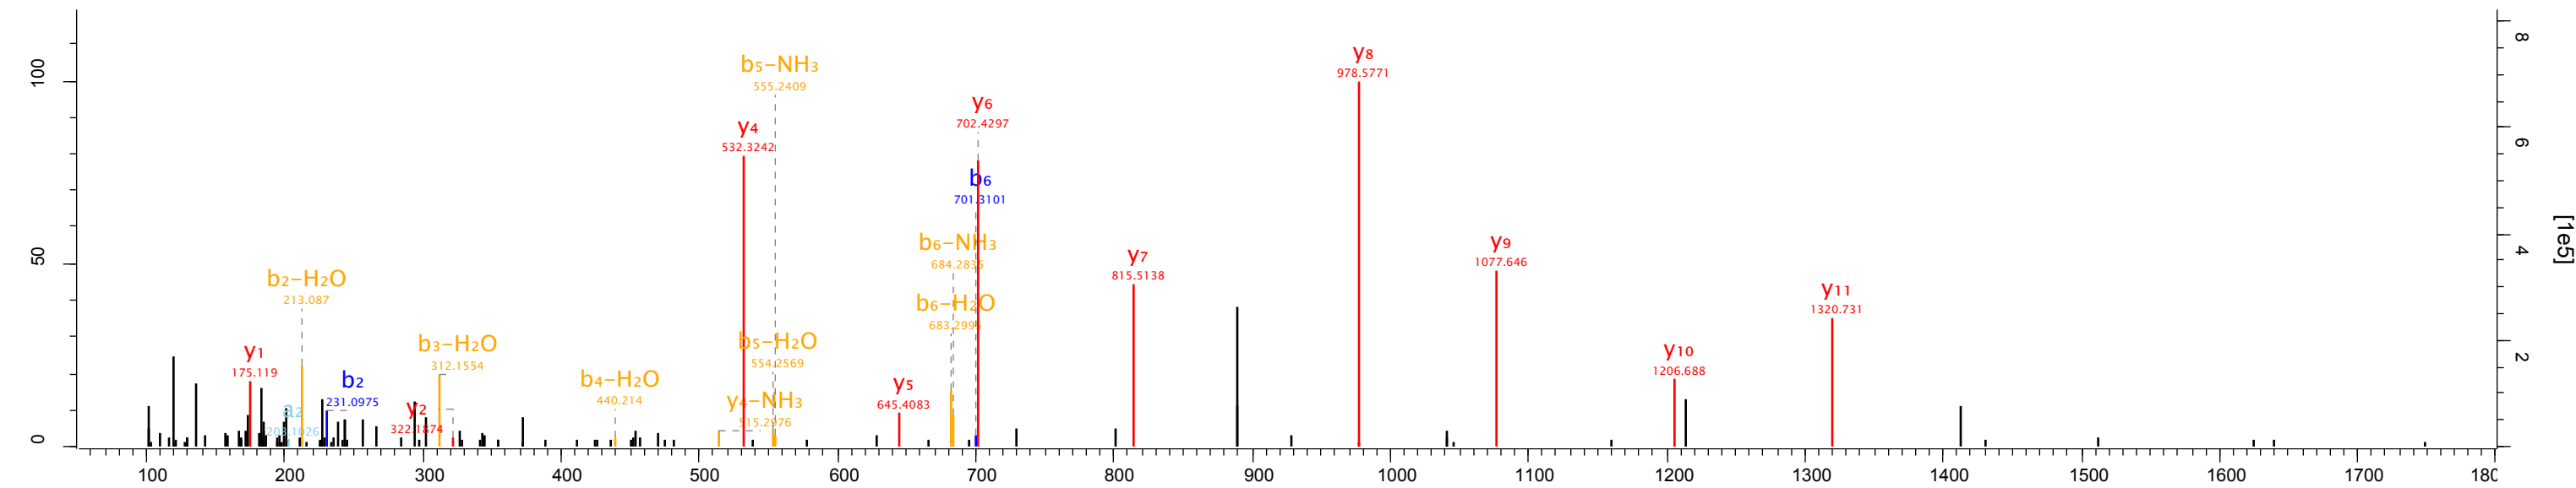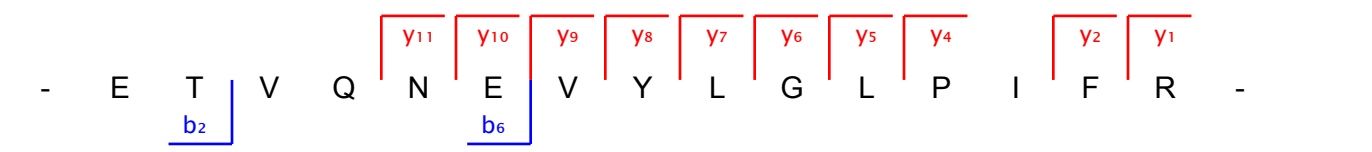

Raw file 20171215\_MaS\_33SR\_LMH\_proteome\_02 Scan 125622 Method FTMS; HCD Score 44.24 m/z 1103.06 Gene names FSD1

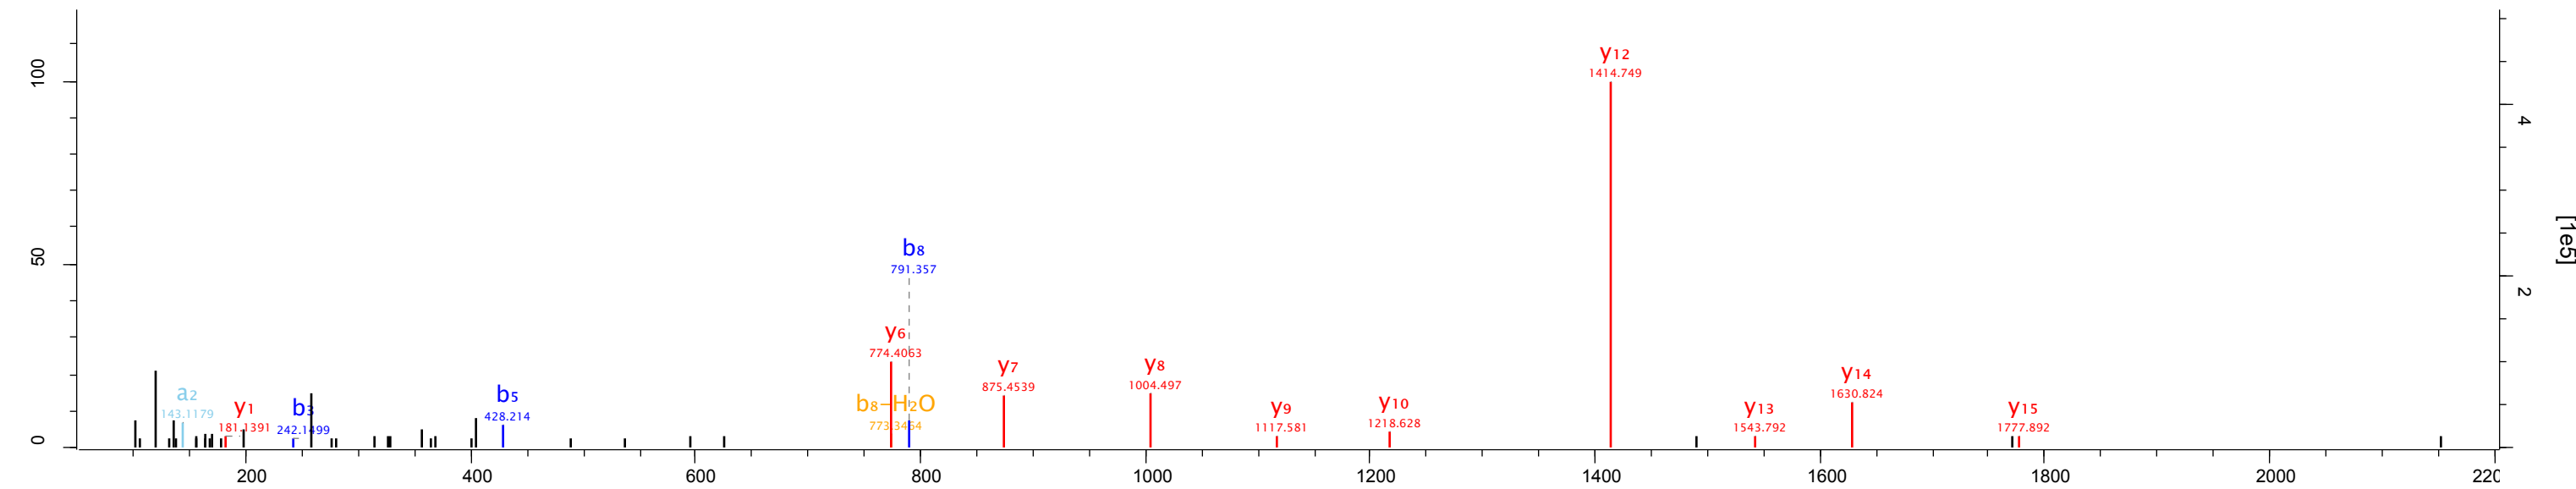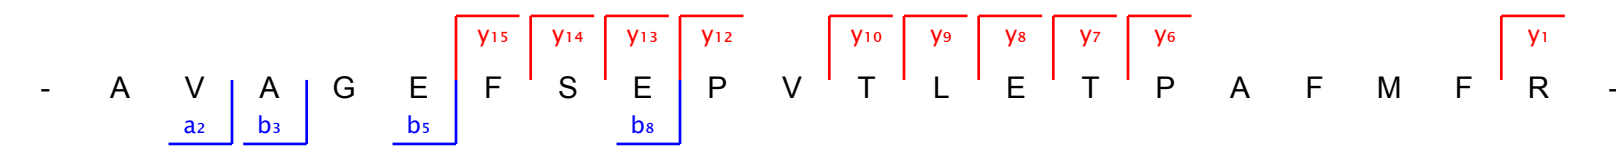

Raw file 20171215\_MaS\_33SR\_LMH\_proteome\_02 Scan 12572 Method FTMS; HCD Score 80.31 m/z 669.34

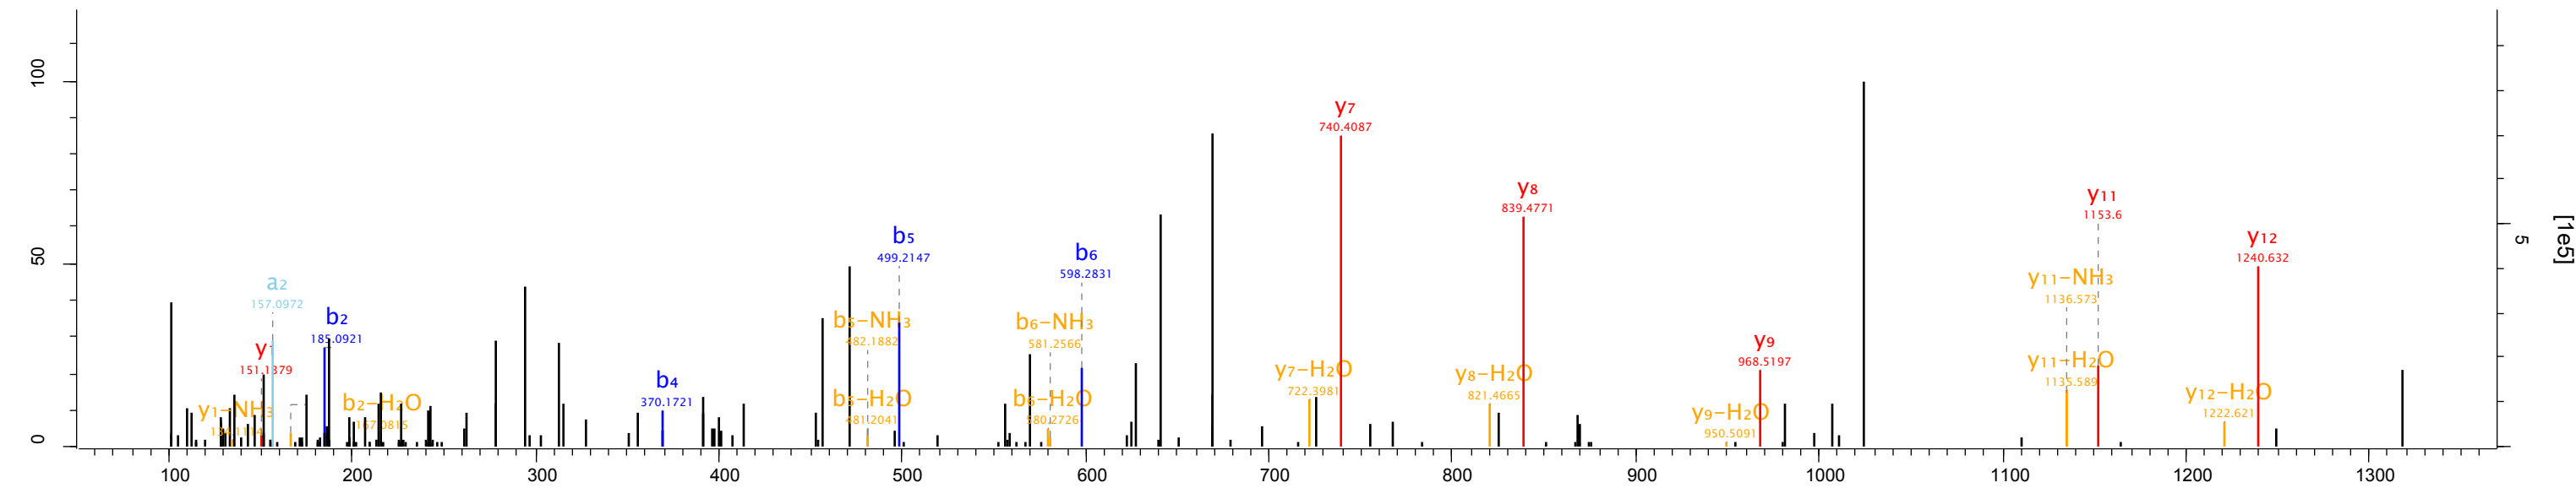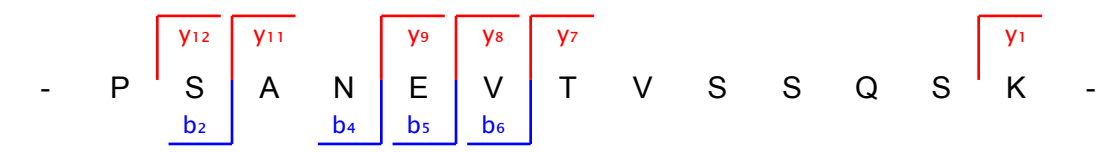

Raw file 20171215\_MaS\_33SR\_LMH\_proteome\_02 Scan 125842 Method FTMS; HCD Score 56.29 m/z 868.44 Gene names CDKN2C

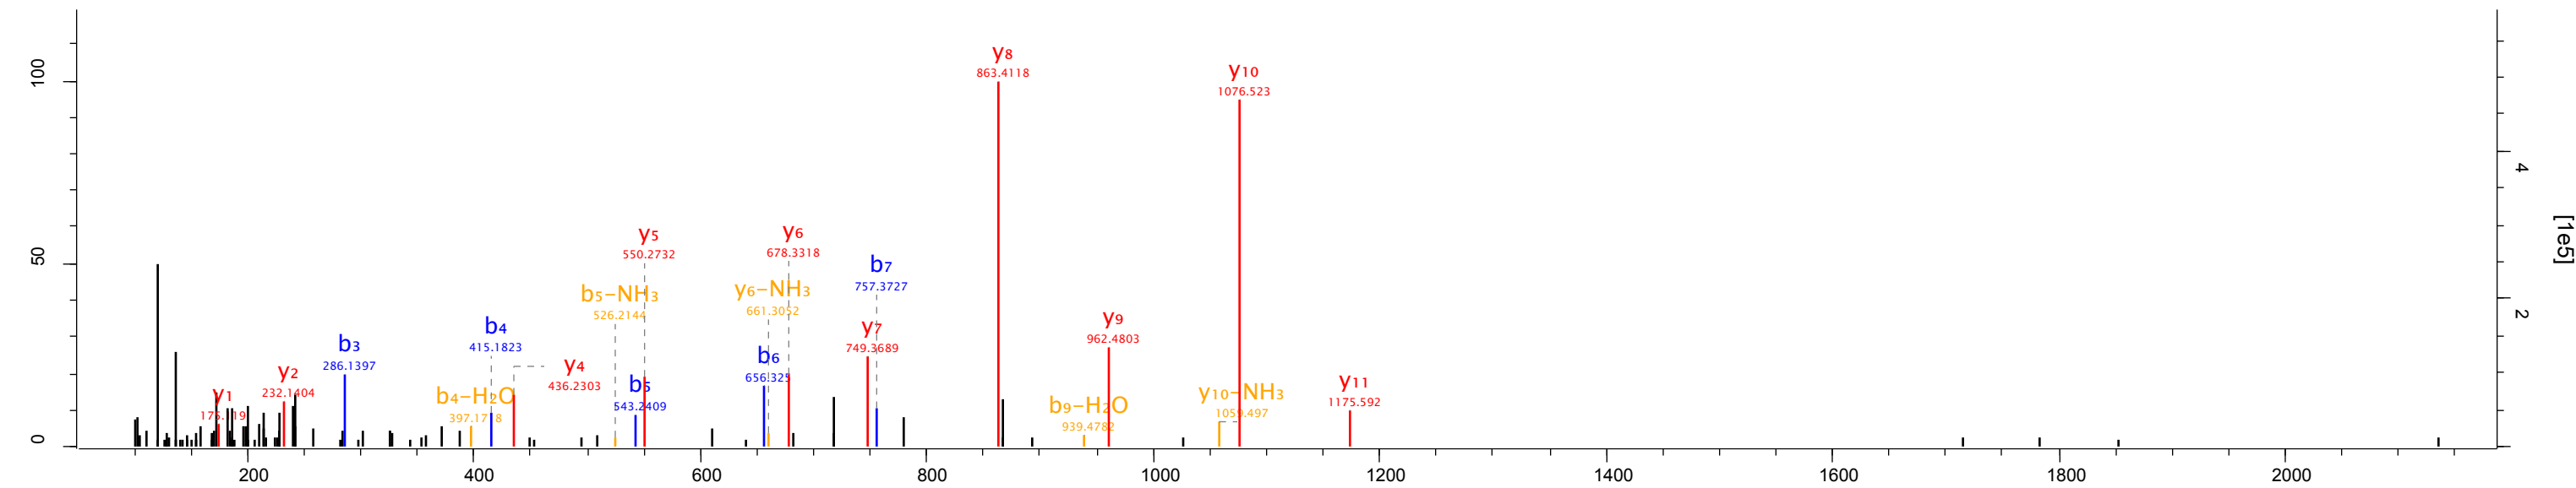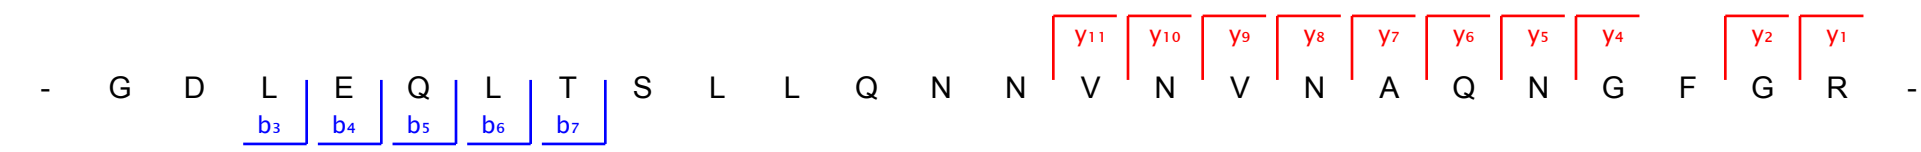

Raw file  
20171215\_MaS\_33SR\_LMH\_proteome\_02

Scan 134562 Method FTMS; HCD Score 47.68 m/z 698.69 Gene names ISOC2

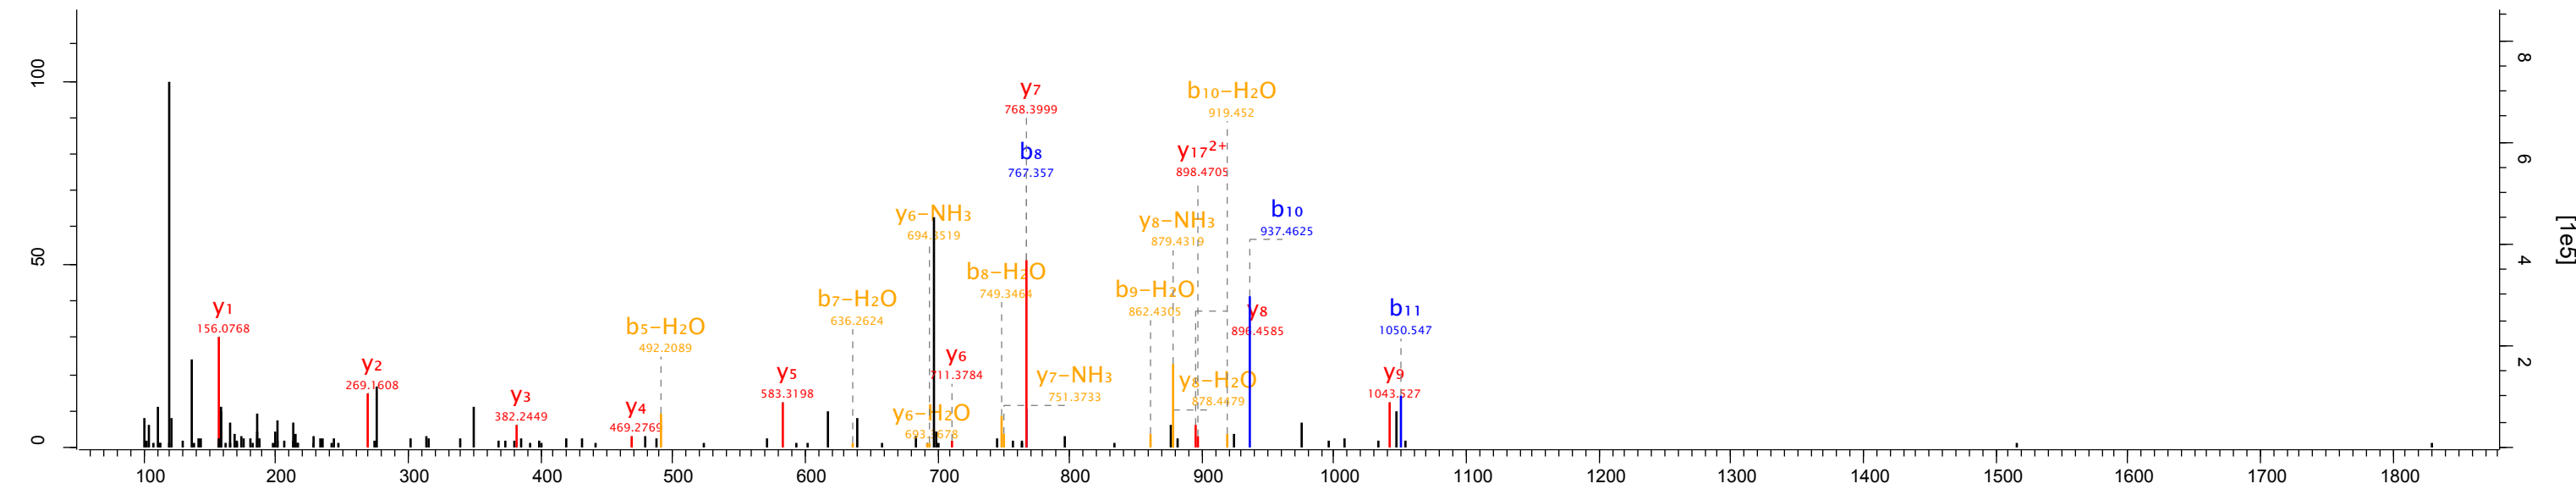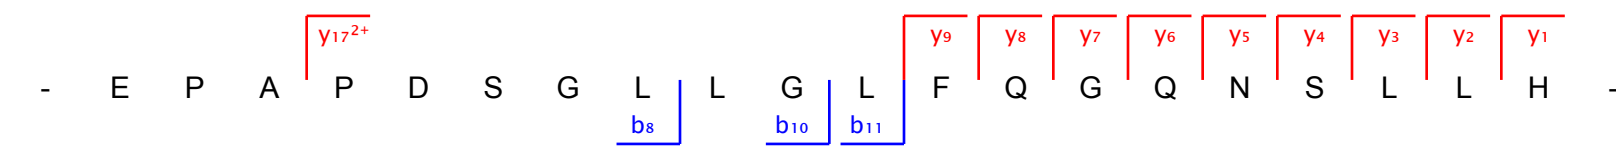



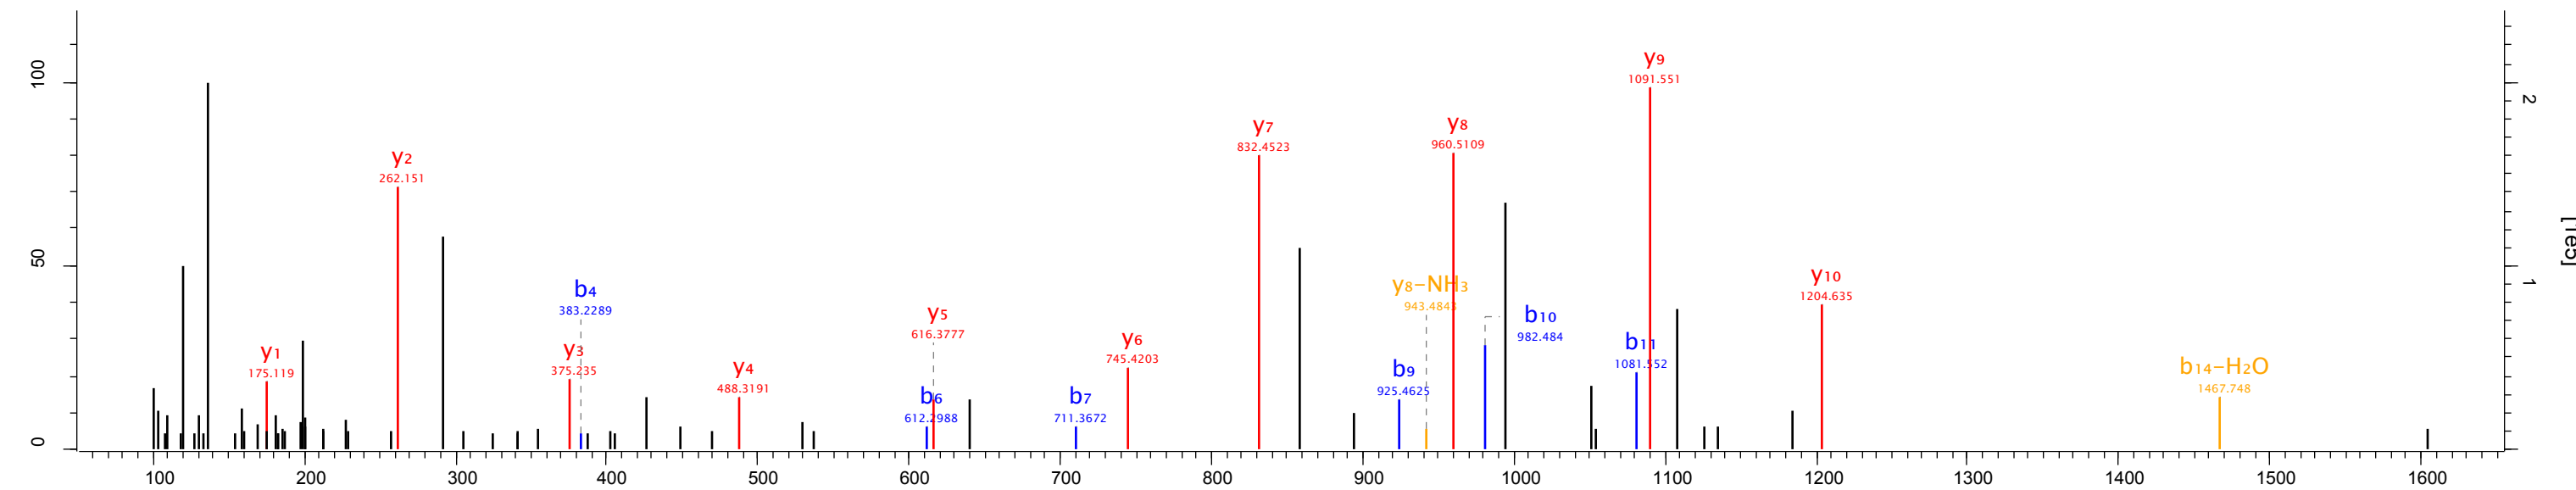

- V S P V N D V D V G V Y Q L M Q S E Q L L S R -

b<sub>4</sub>
b<sub>6</sub>
b<sub>7</sub>
b<sub>9</sub>
b<sub>10</sub>
b<sub>11</sub>
y<sub>10</sub>
y<sub>9</sub>
y<sub>8</sub>
y<sub>7</sub>
y<sub>6</sub>
y<sub>5</sub>
y<sub>4</sub>
y<sub>3</sub>
y<sub>2</sub>
y<sub>1</sub>

Raw file 20171215\_MaS\_33SR\_LMH\_proteome\_02 Scan 17882 Method FTMS; HCD Score 48.42 m/z 556.77 Gene names C2orf16

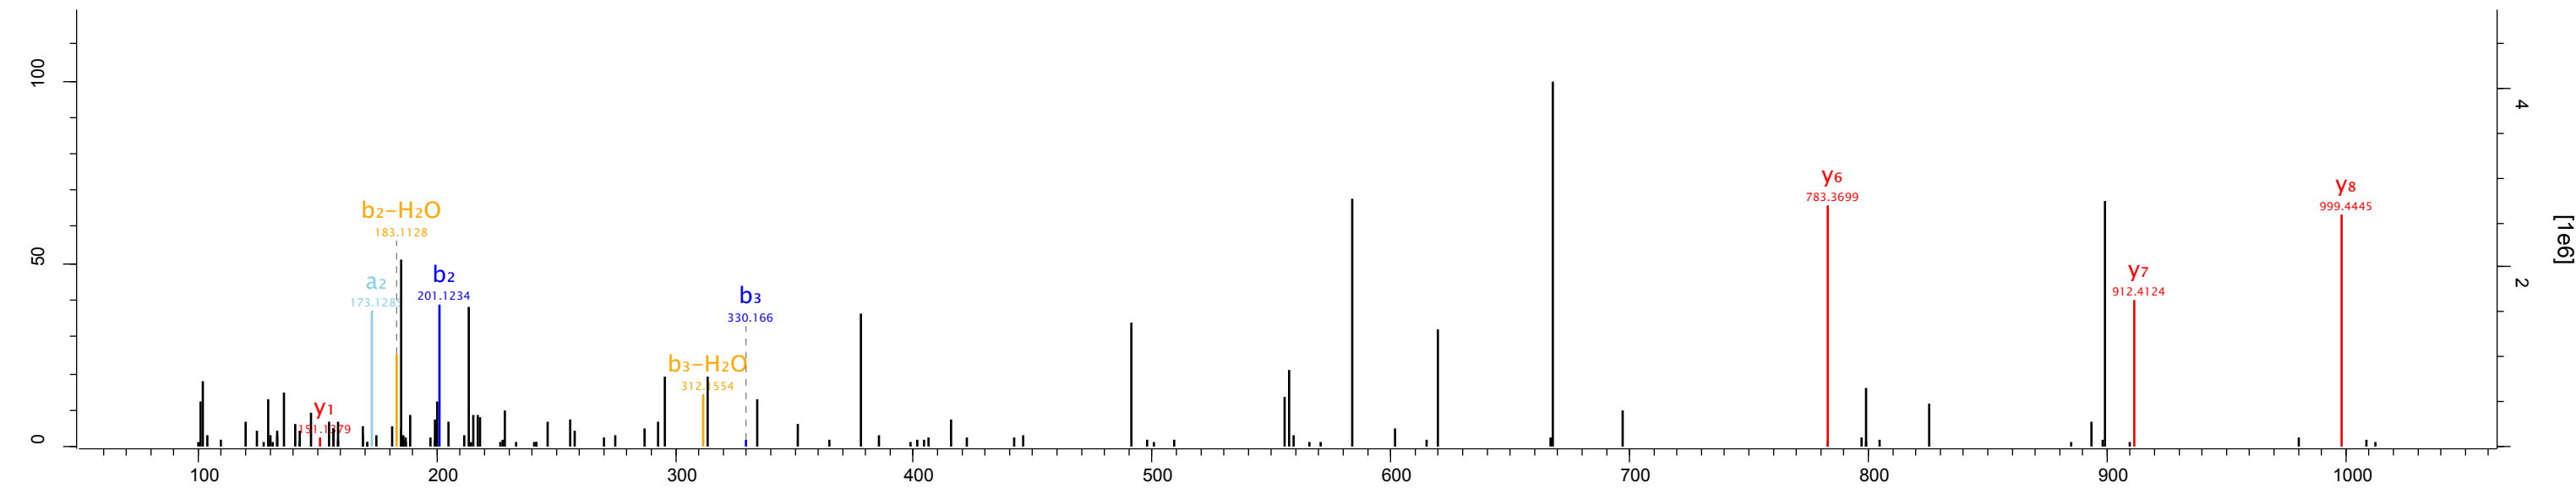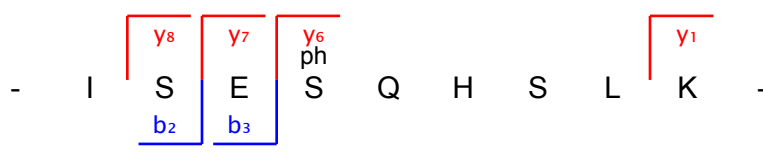

Raw file: 20171215\_MaS\_33SR\_LMH\_proteome\_02  
 Scan: 34082 Method: FTMS; HCD Score: 91.32 m/z: 874.92 Gene names: LIMD2

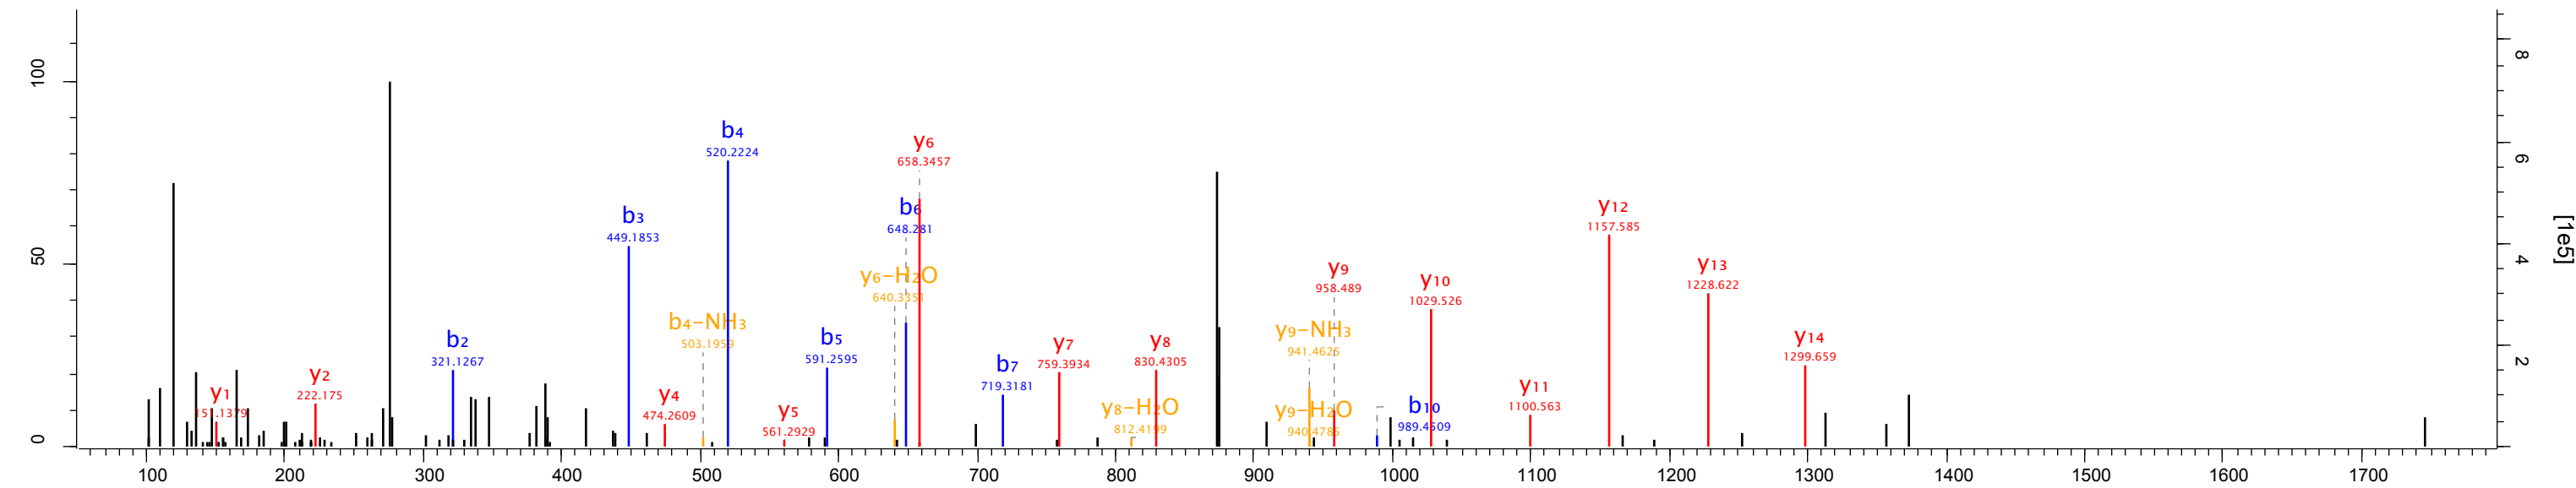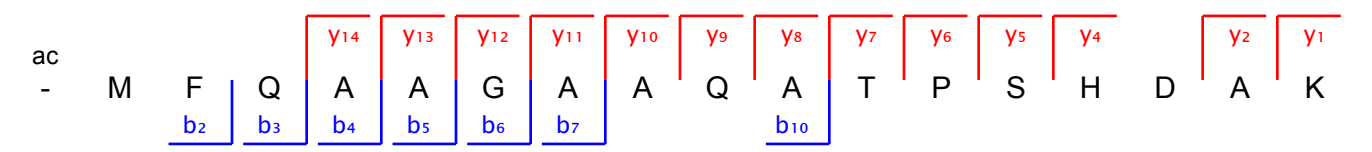

Raw file: 20171215\_MaS\_33SR\_LMH\_proteome\_02  
 Scan: 44302 Method: FTMS; HCD Score: 54.9 m/z: 717.37 Gene names: CARS2

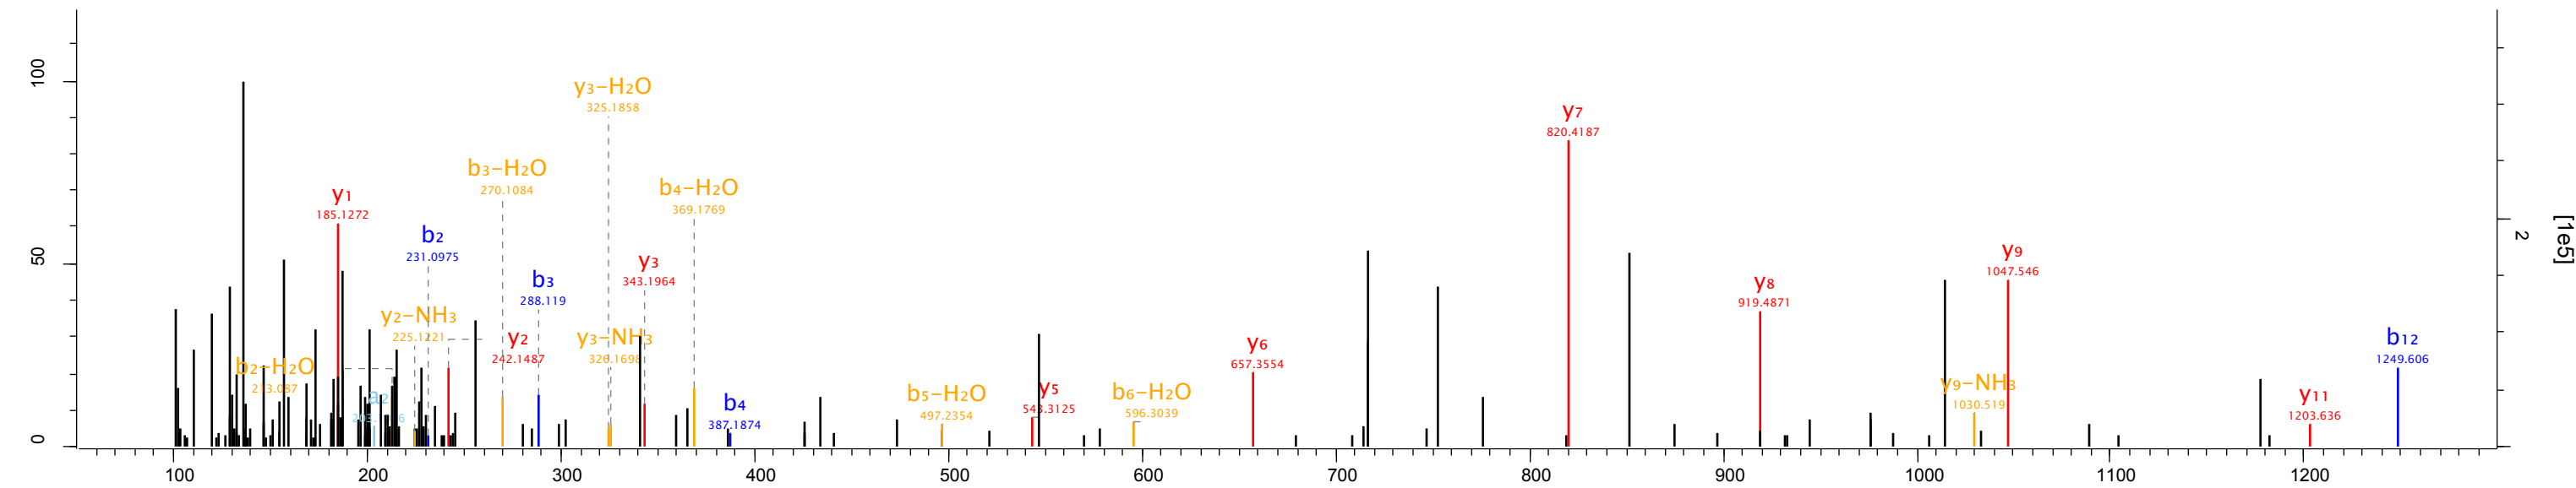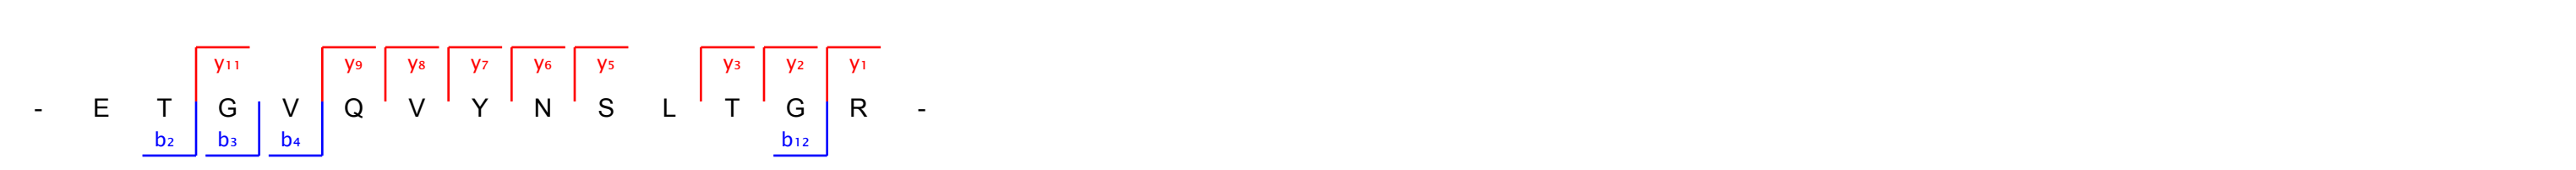

Raw file 20171215\_MaS\_33SR\_LMH\_proteome\_02 Scan 6312 Method FTMS; HCD Score 71.18 m/z 629.82

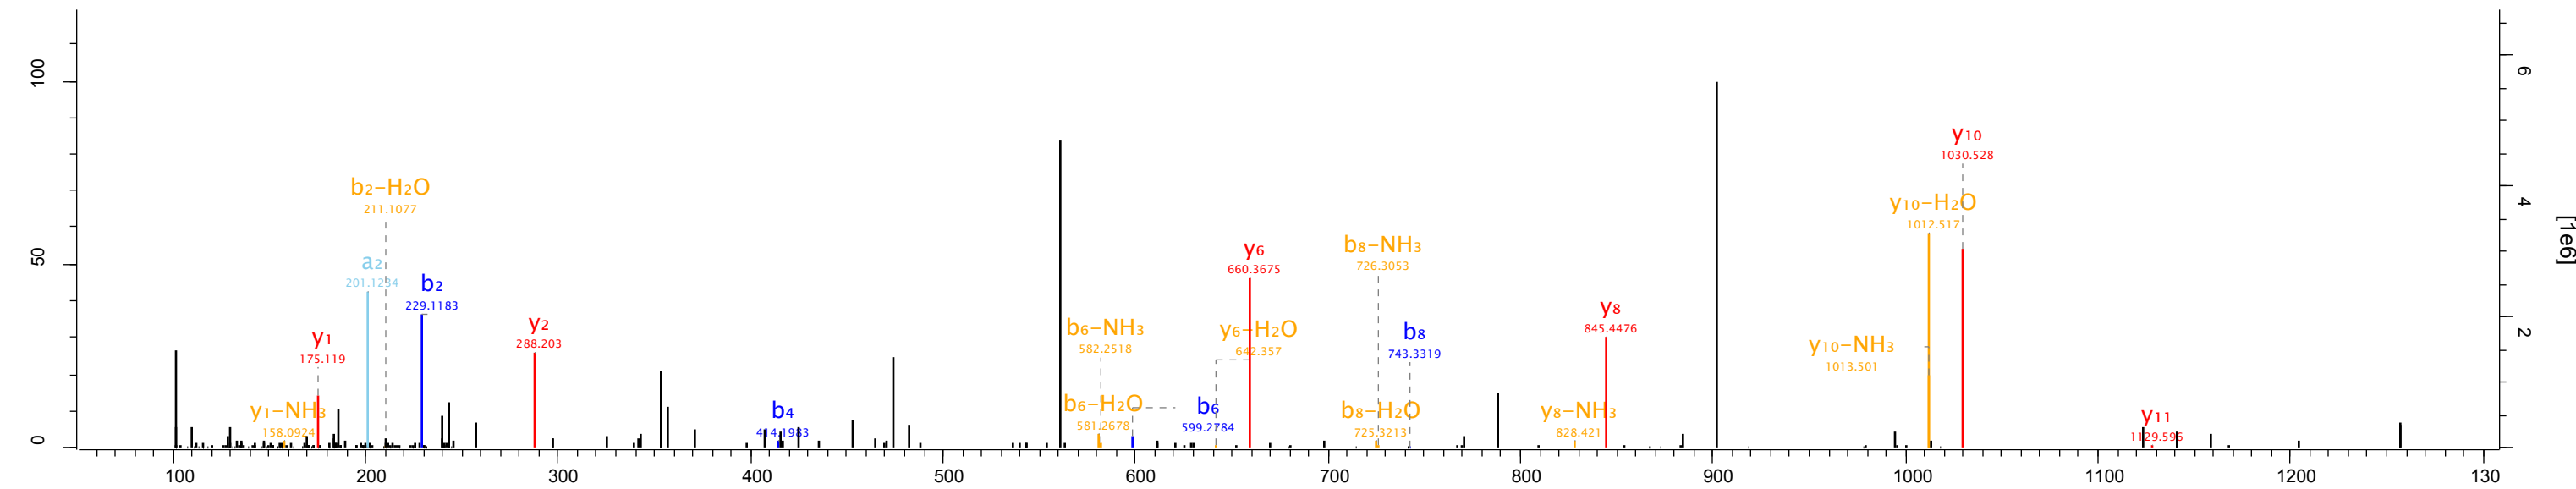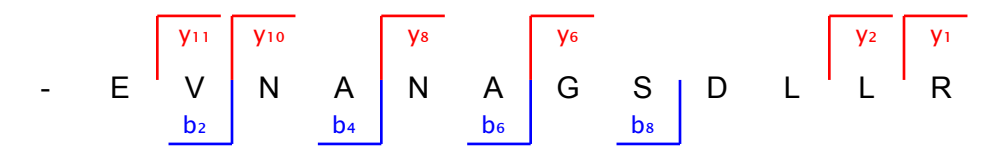

Raw file

20171215\_MaS\_33SR\_LMH\_proteome\_02

| Scan  | Method    | Score | m/z    | Gene names |
|-------|-----------|-------|--------|------------|
| 82792 | FTMS; HCD | 46.35 | 648.88 | ASCC1      |

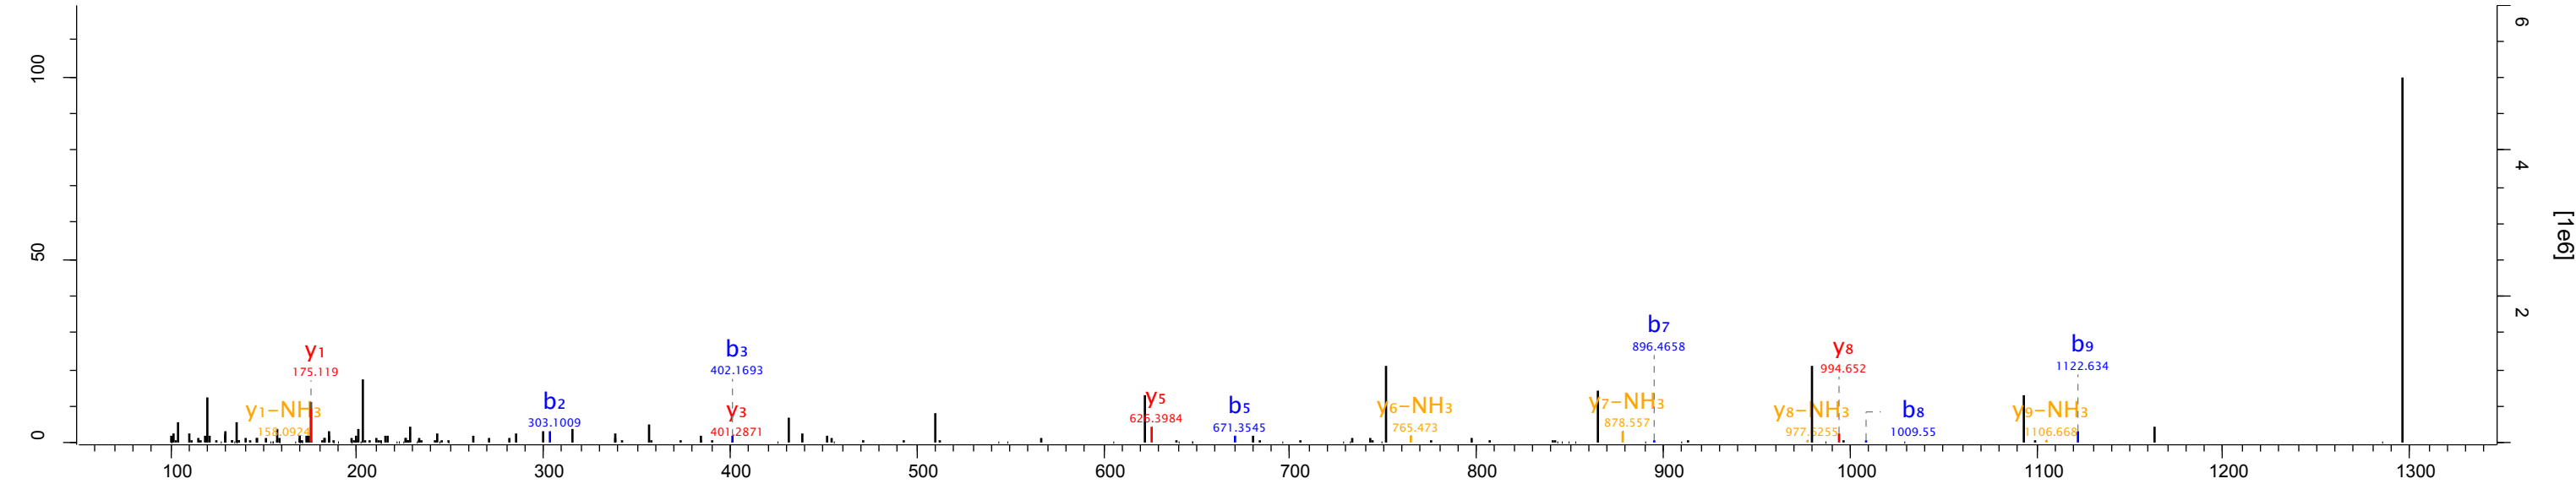

ac

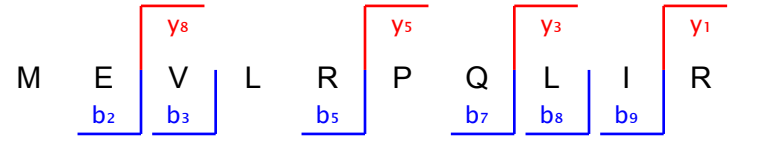

Raw file 20171215\_MaS\_33SR\_LMH\_proteome\_02 Scan 83252 Method FTMS; HCD Score 95.57 m/z 909.47 Gene names PLK1

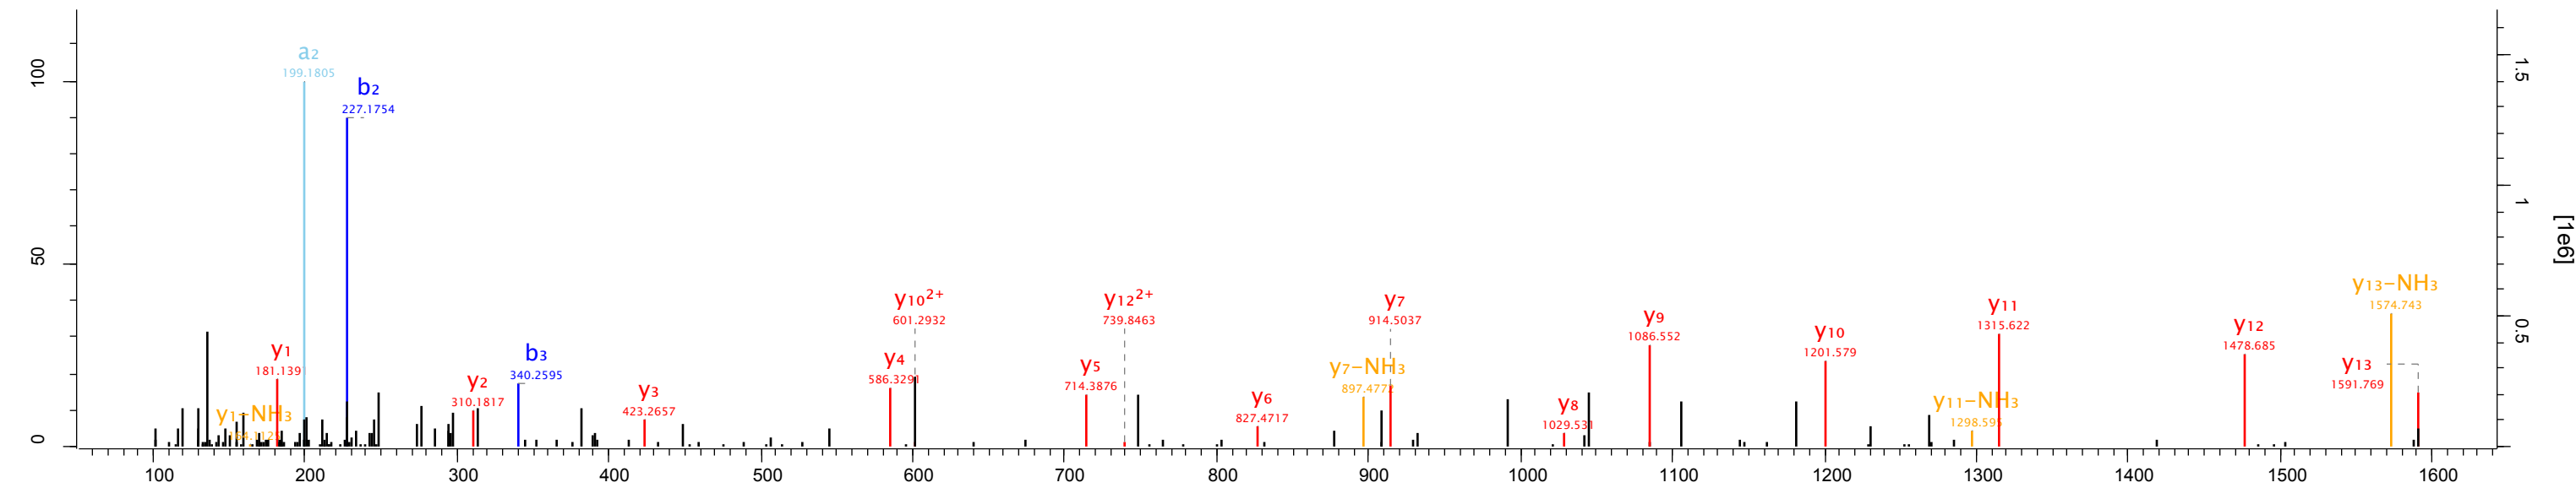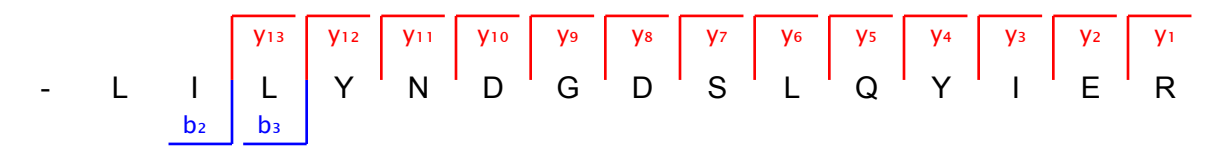

Raw file: 20171215\_MaS\_33SR\_LMH\_proteome\_02  
 Scan: 93652 Method: FTMS; HCD Score: 80.69 m/z: 453.25 Gene names: ERCC1

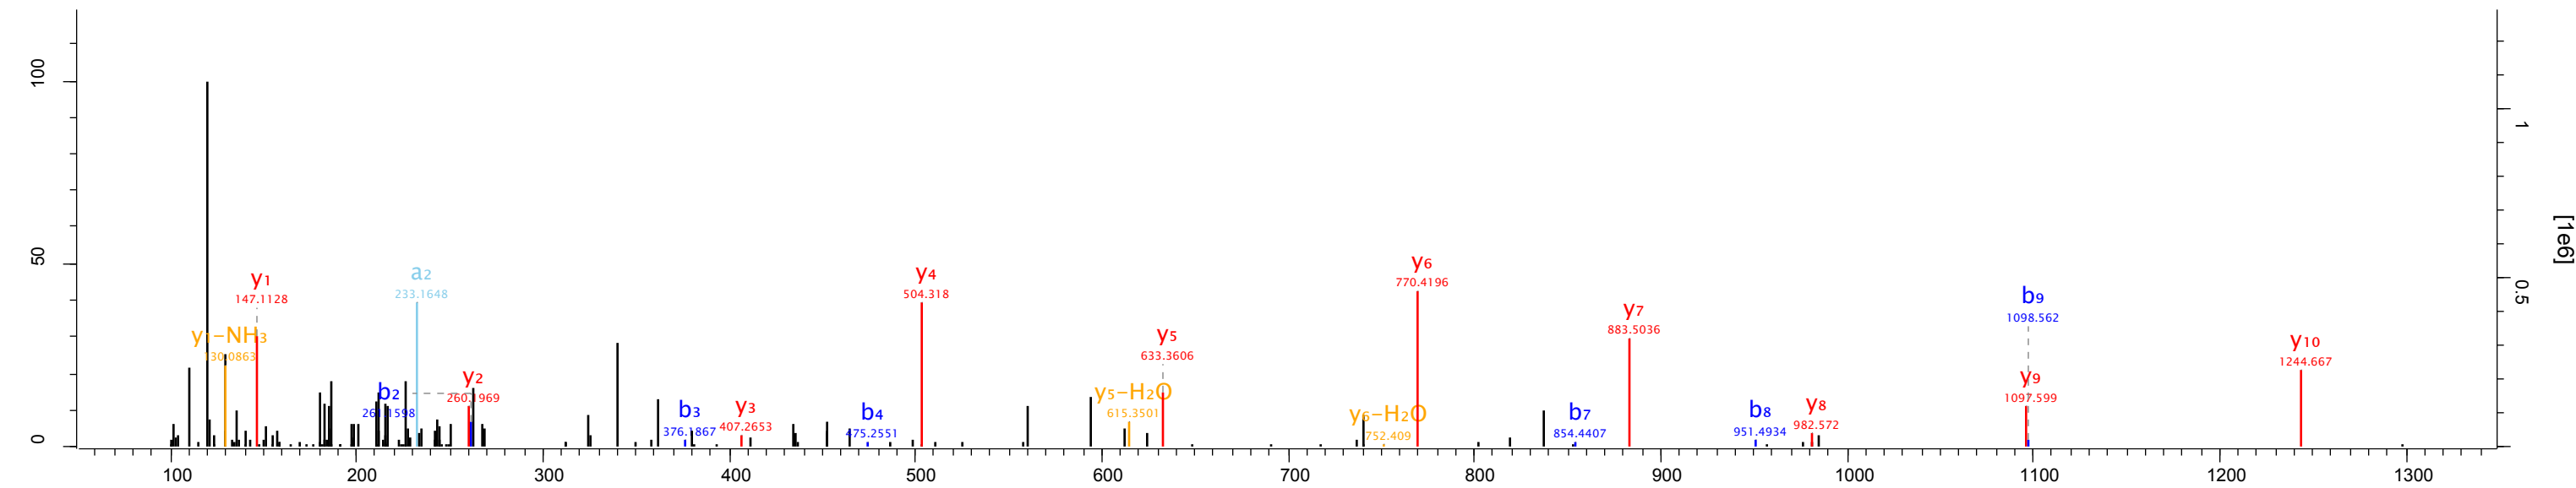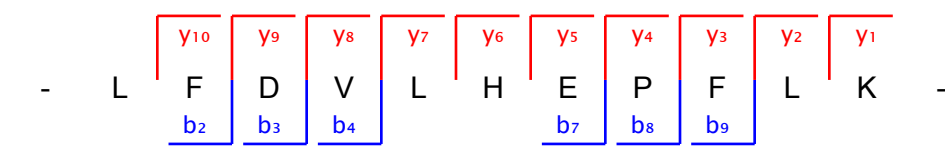



Raw file: 20171215\_MaS\_33SR\_LMH\_proteome\_02  
 Scan: 94402 Method: FTMS; HCD Score: 99.07 m/z: 770.89 Gene names: PRRC1

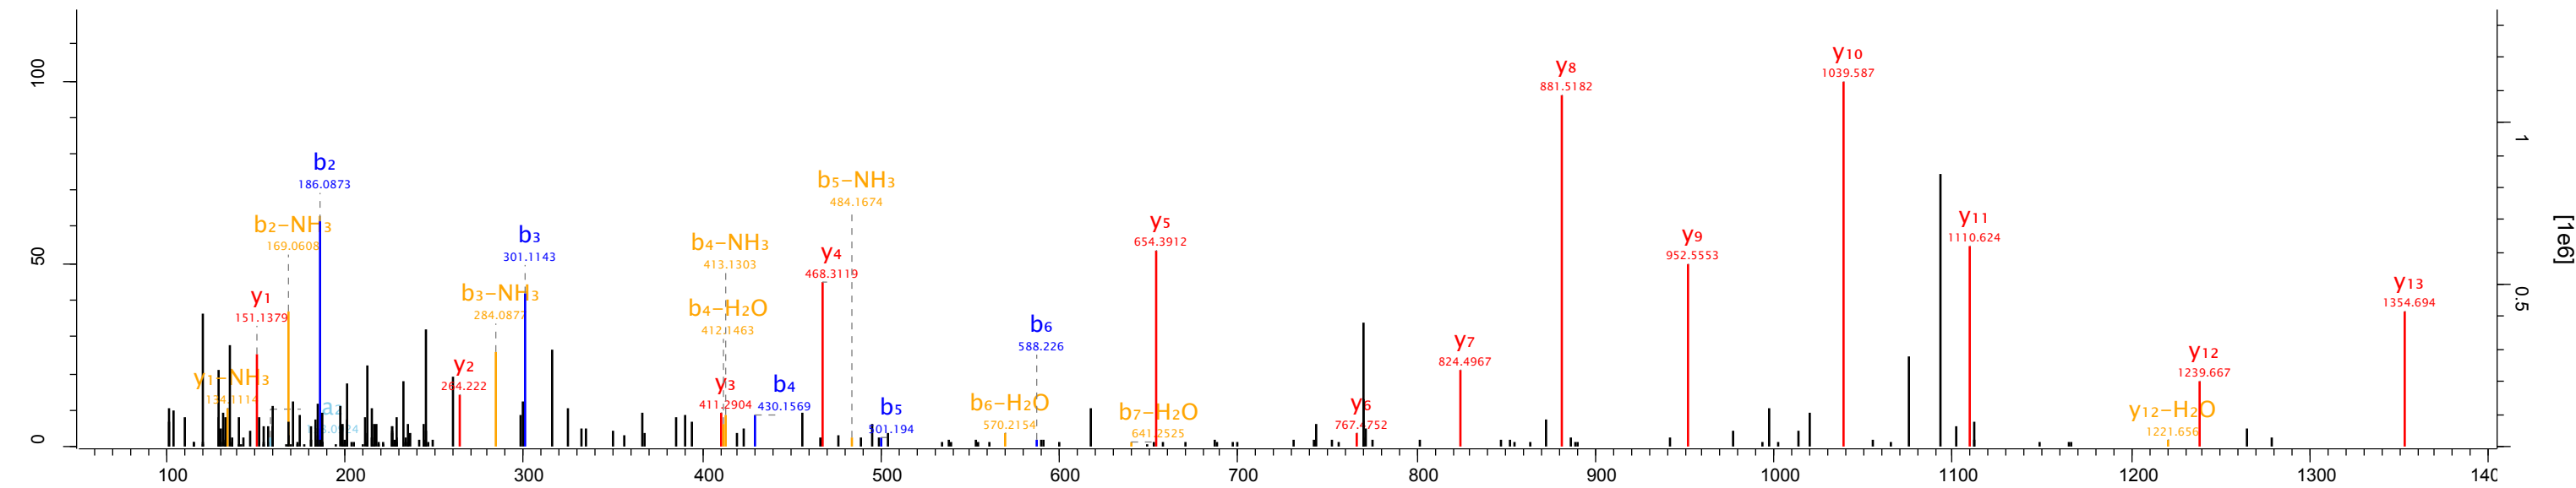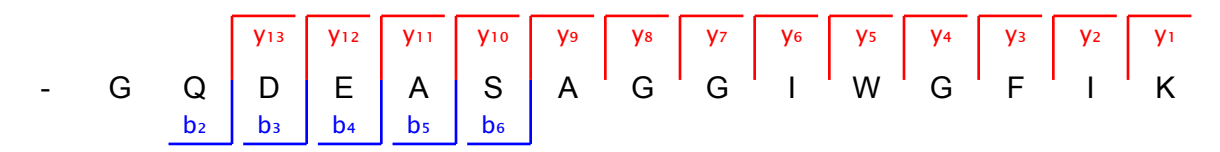

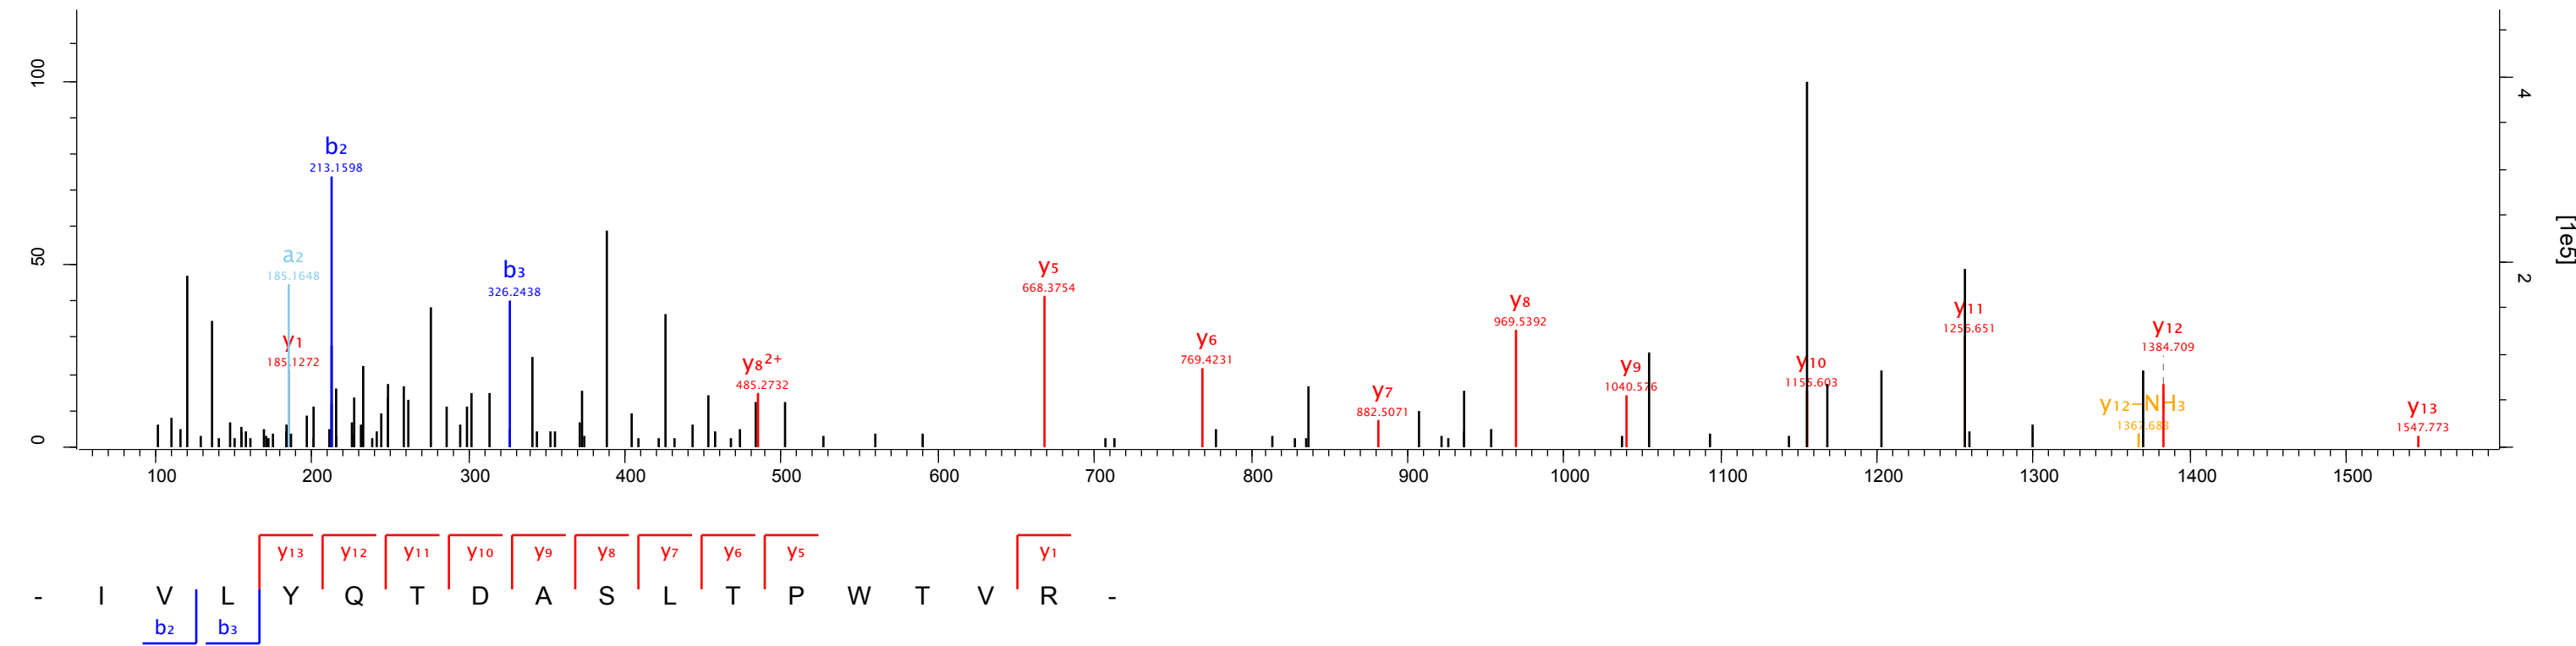

Raw file 20171215\_MaS\_33SR\_LMH\_phospho\_02 Scan 11213 Method FTMS; HCD Score 151.1 m/z 694.29 Gene names DGCR14

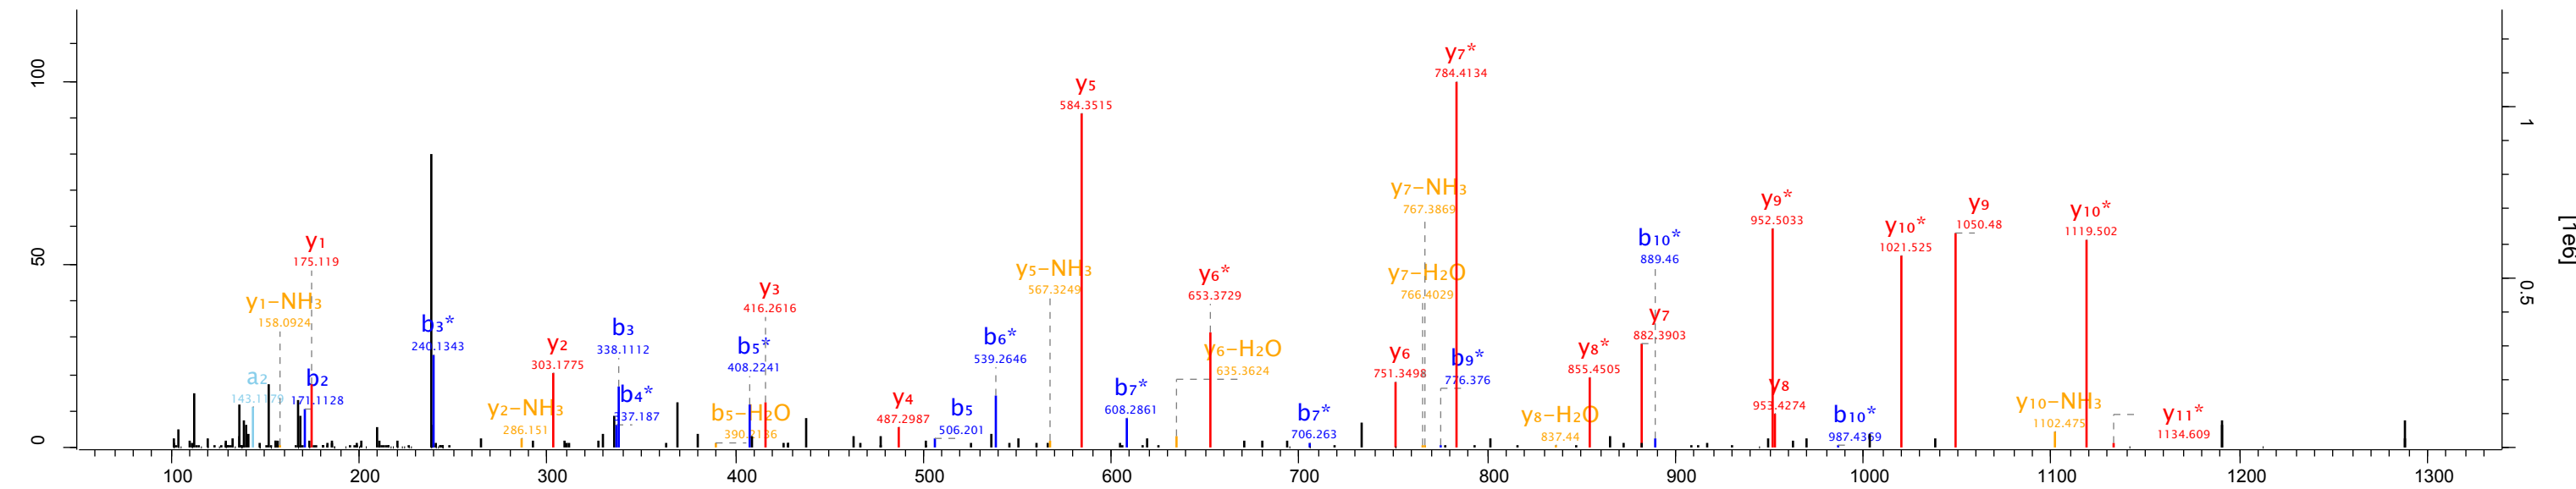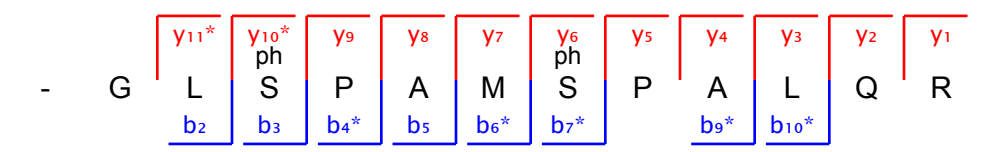

Raw file 20171215\_MaS\_33SR\_LMH\_phospho\_02 Scan 11893 Method FTMS; HCD Score 67.56 m/z 749.33 Gene names LIMD1

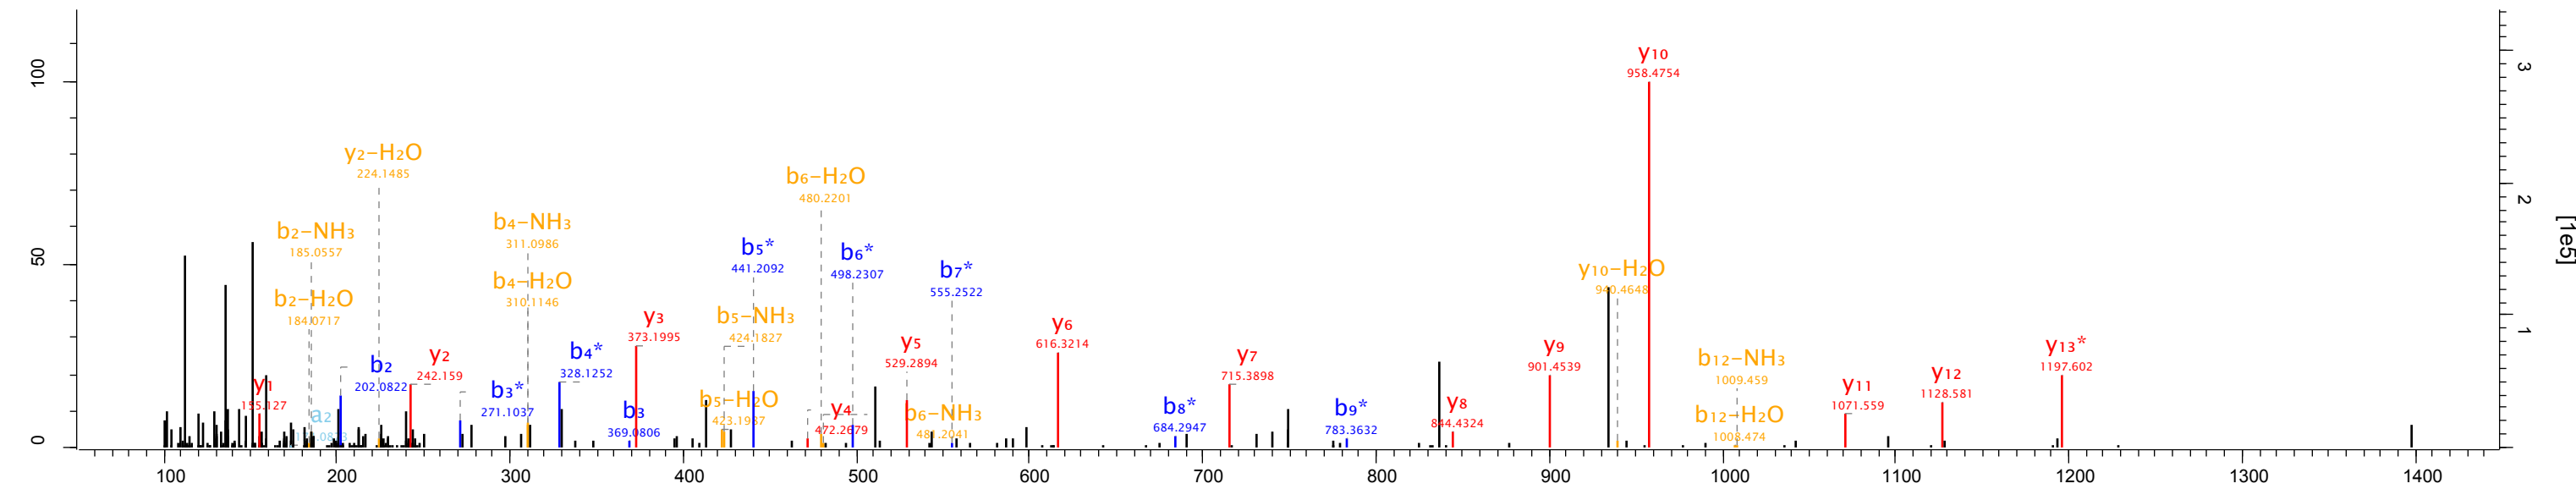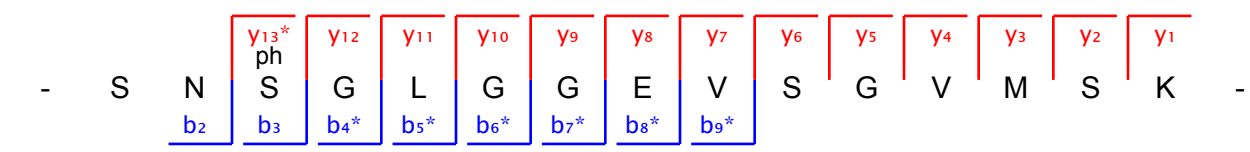

Raw file 20171215\_MaS\_33SR\_LMH\_phospho\_02 Scan 2643 Method FTMS; HCD Score 40.29 m/z 546.76 Gene names ZDHHC8

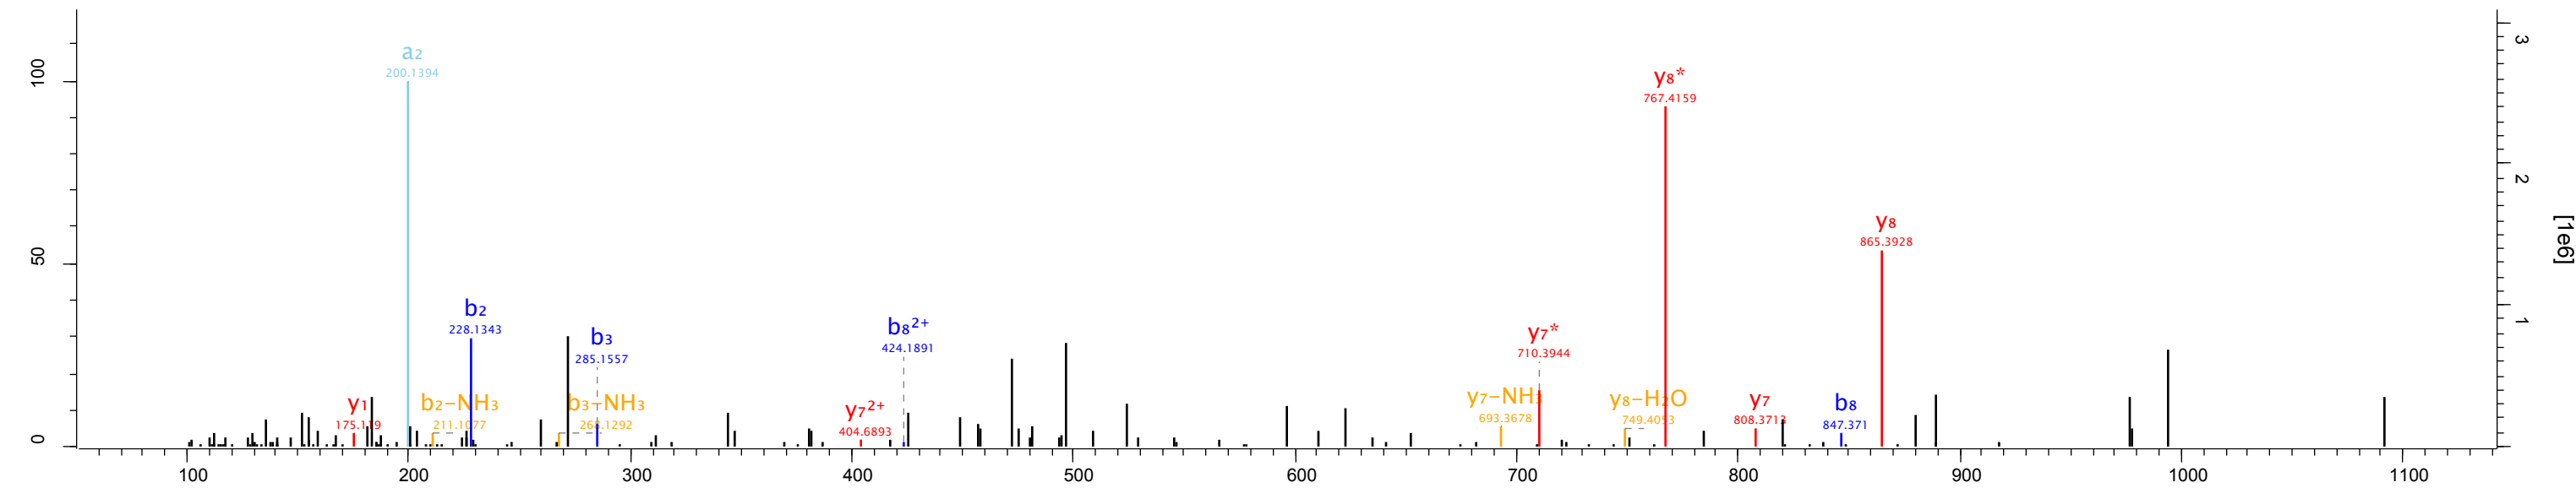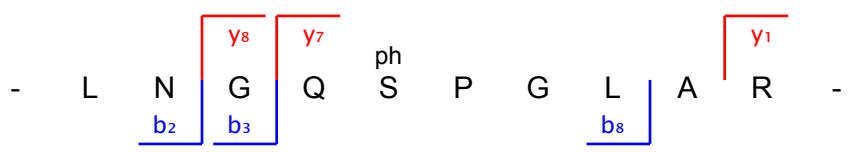

Raw file 20171215\_MaS\_33SR\_LMH\_phospho\_02 Scan 9833 Method FTMS; HCD Score 163.16 m/z 868.36 Gene names RAD9A

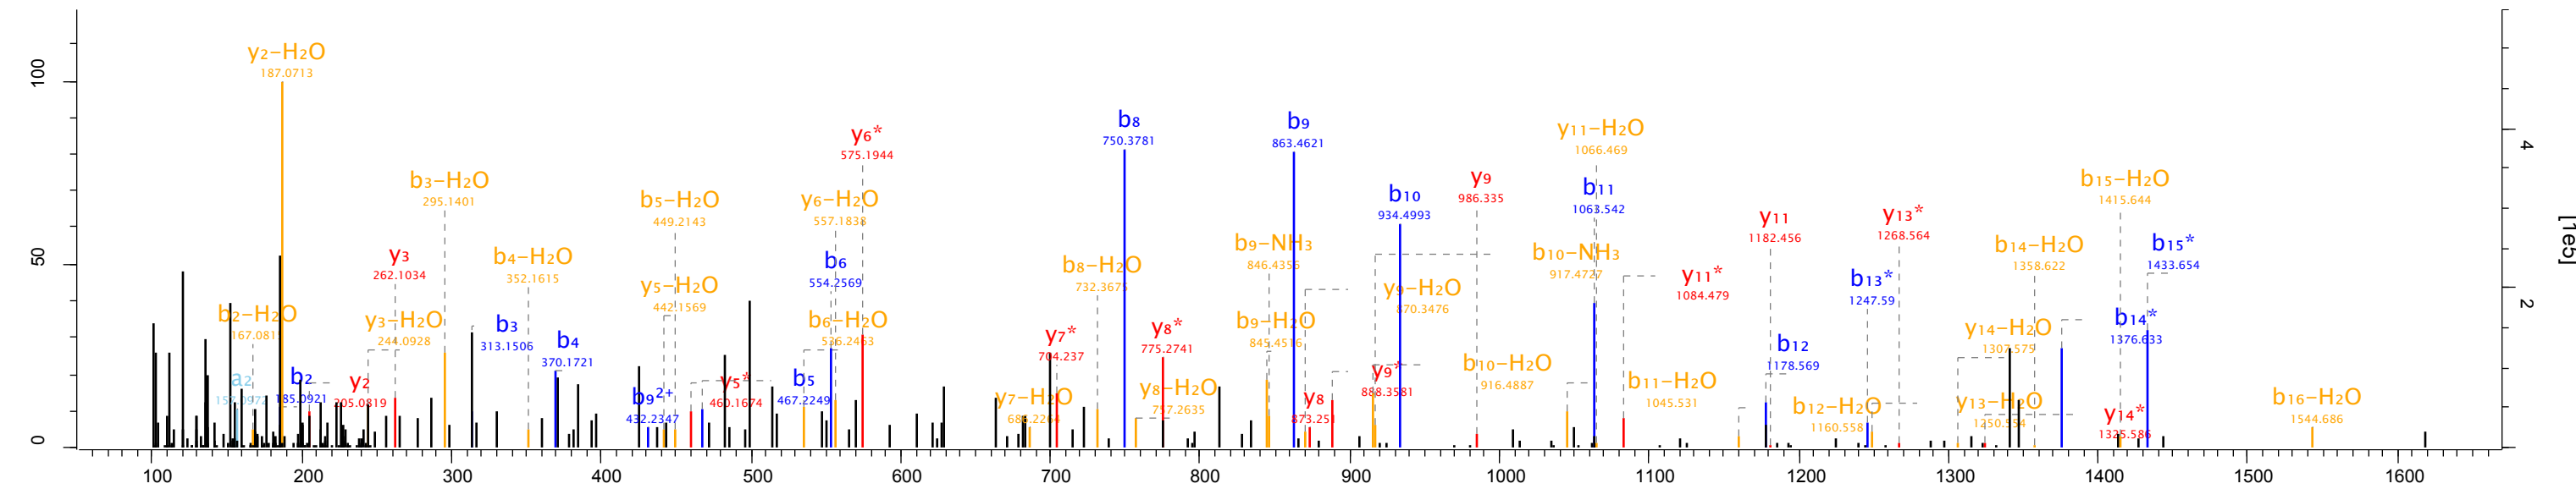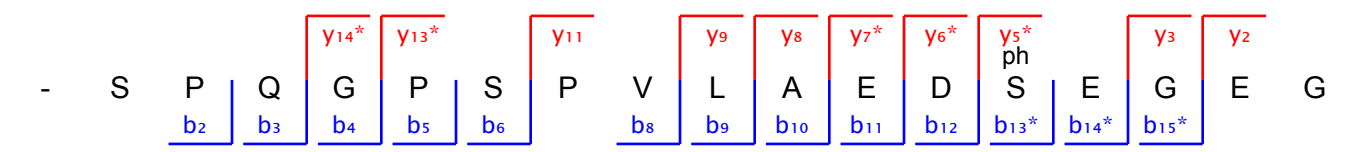

Raw file 20171215\_MaS\_33SR\_LMH\_phospho\_03 Scan 2193 Method FTMS; HCD Score 235.76 m/z 696.28 Gene names PLA2G4A

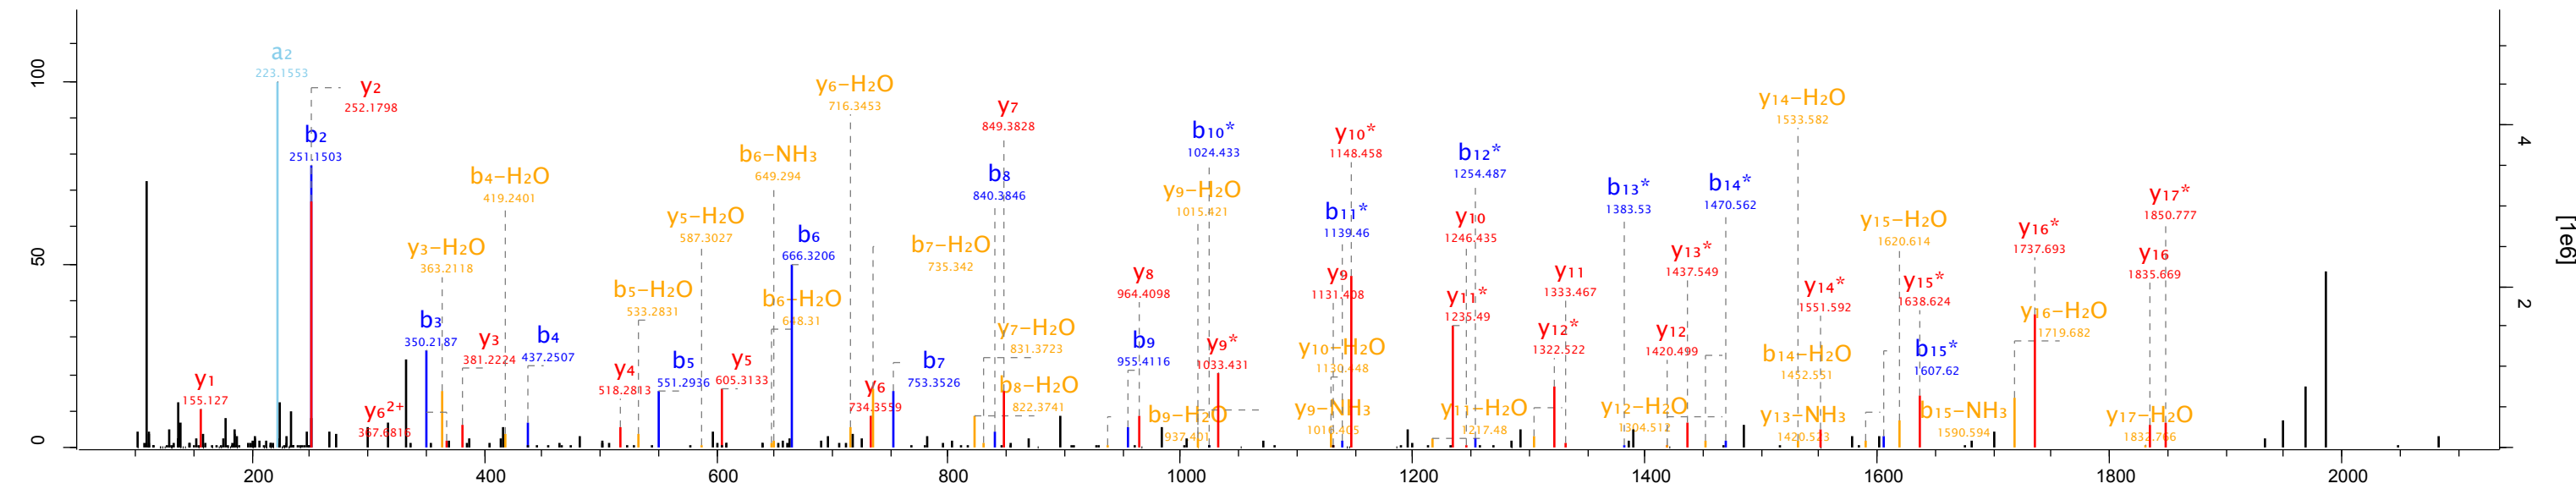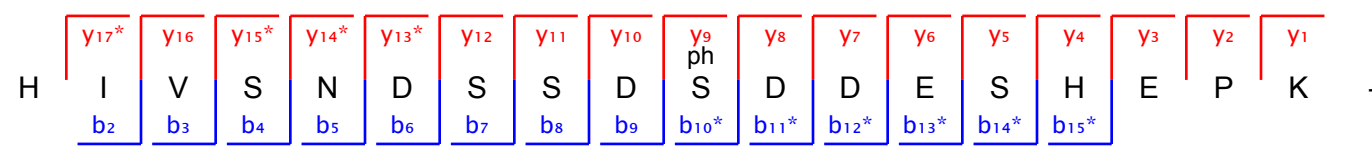

Raw file 20171215\_MaS\_33SR\_LMH\_phospho\_03 Scan 4033 Method FTMS; HCD Score 78.52 m/z 416.21 Gene names MLIP

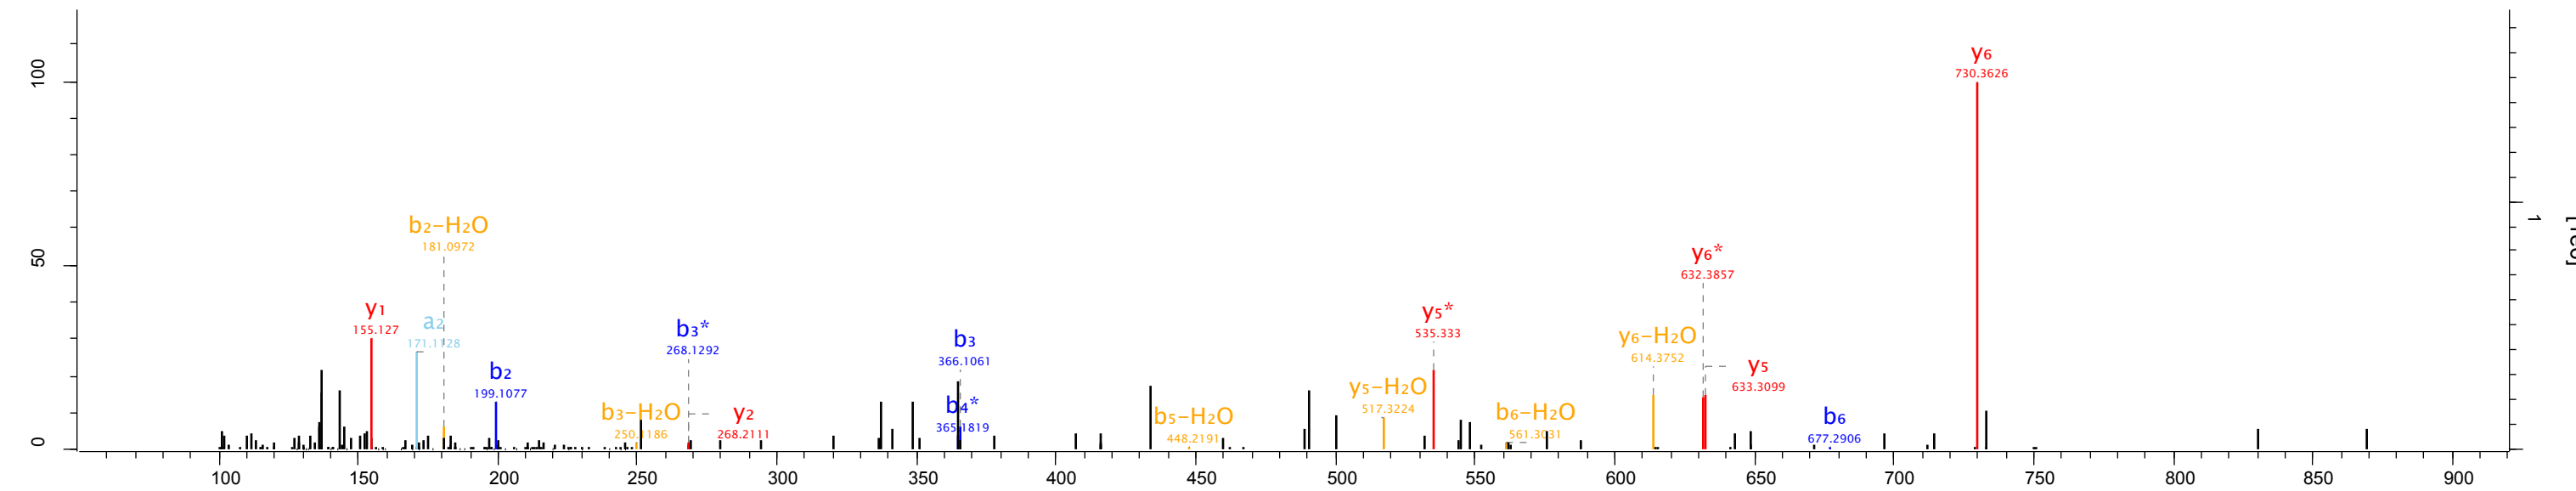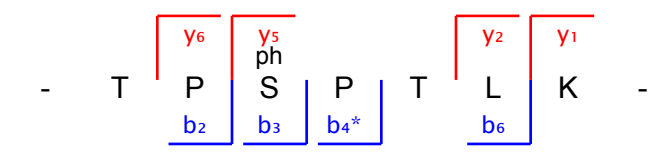



Raw file 20171215\_MaS\_33SR\_LMH\_phospho\_03 Scan 4743 Method FTMS; HCD Score 49.3 m/z 903.41 Gene names MPZL3

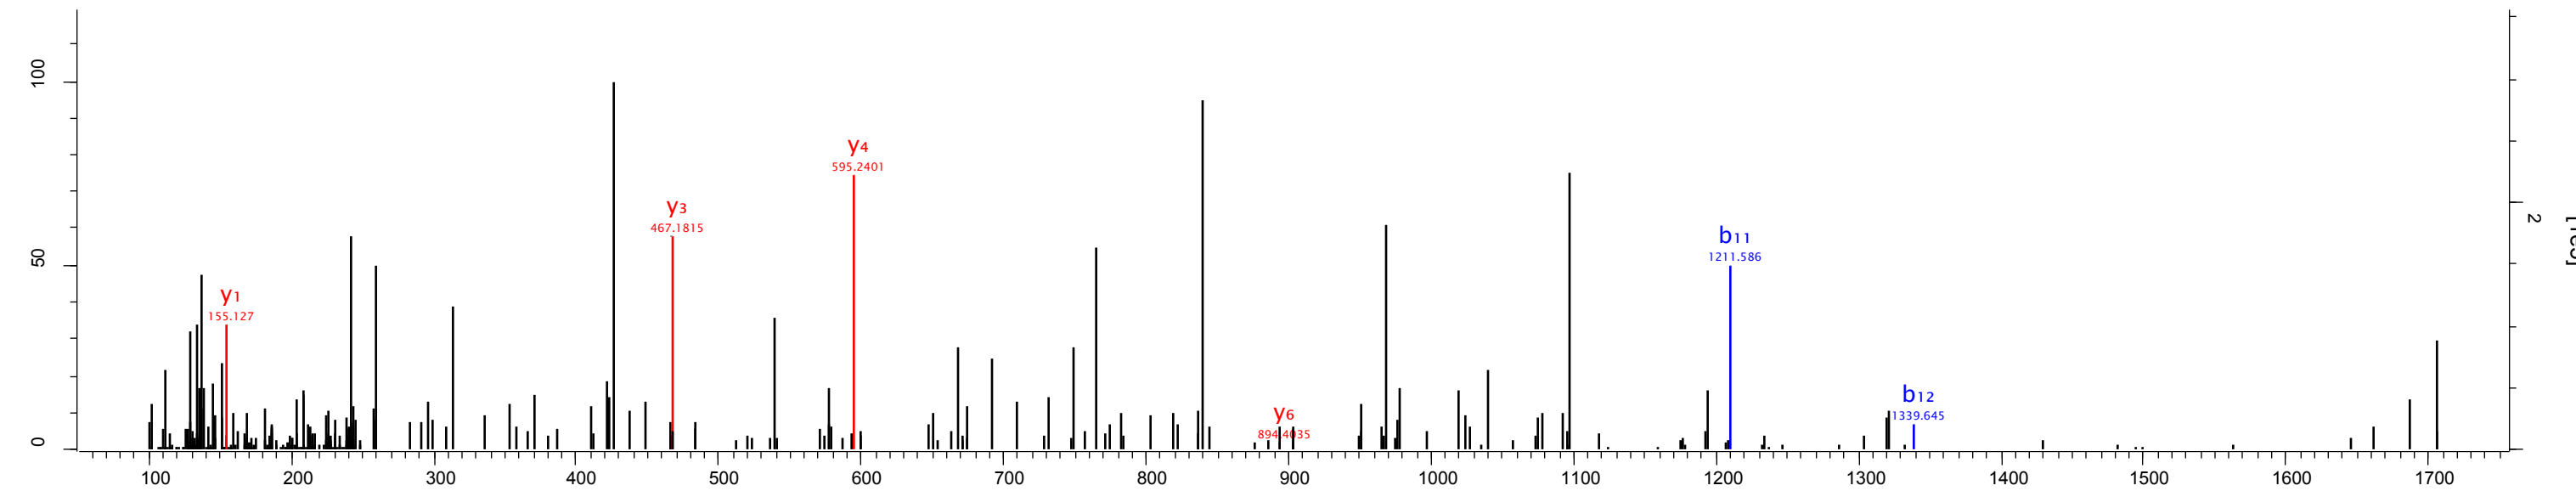

- G F V S V A L S A W I Q T M K -

ph

y6 y4 y3 y1

b11 b12

Raw file 20171215\_MaS\_33SR\_LMH\_phospho\_03 Scan 5103 Method FTMS; HCD Score 87.16 m/z 719.79 Gene names ZBTB38

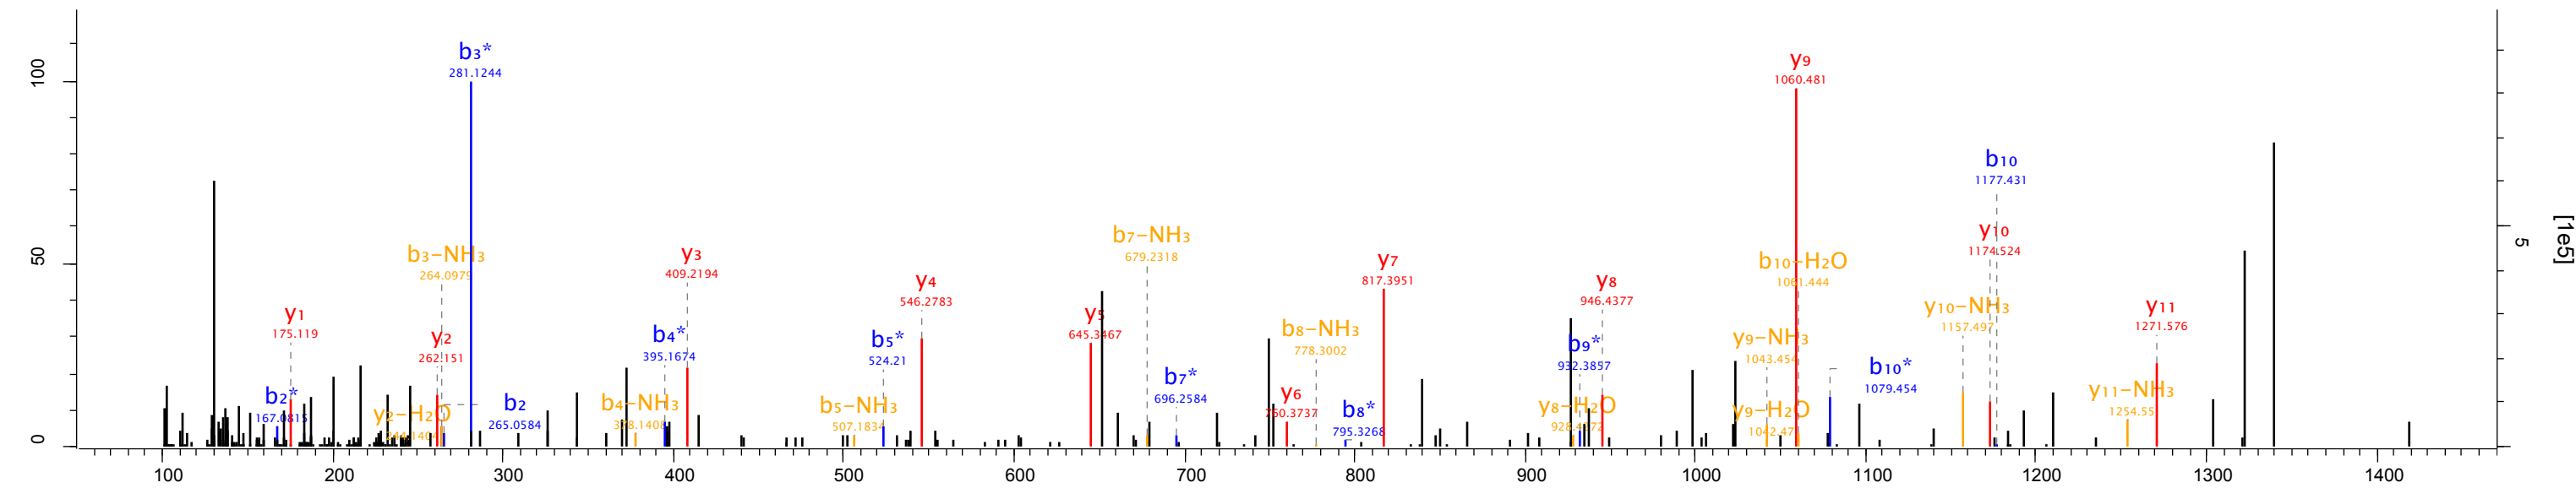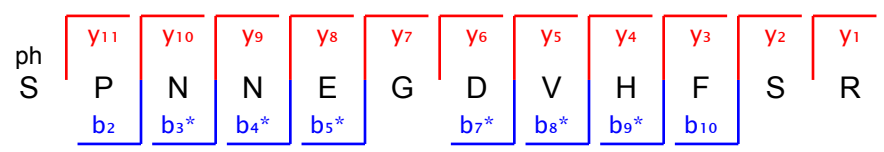

Raw file 20171215\_MaS\_33SR\_LMH\_phospho\_03 Scan 6393 Method FTMS; HCD Score 133.23 m/z 580.77 Gene names DYRK1A;DYRK1B

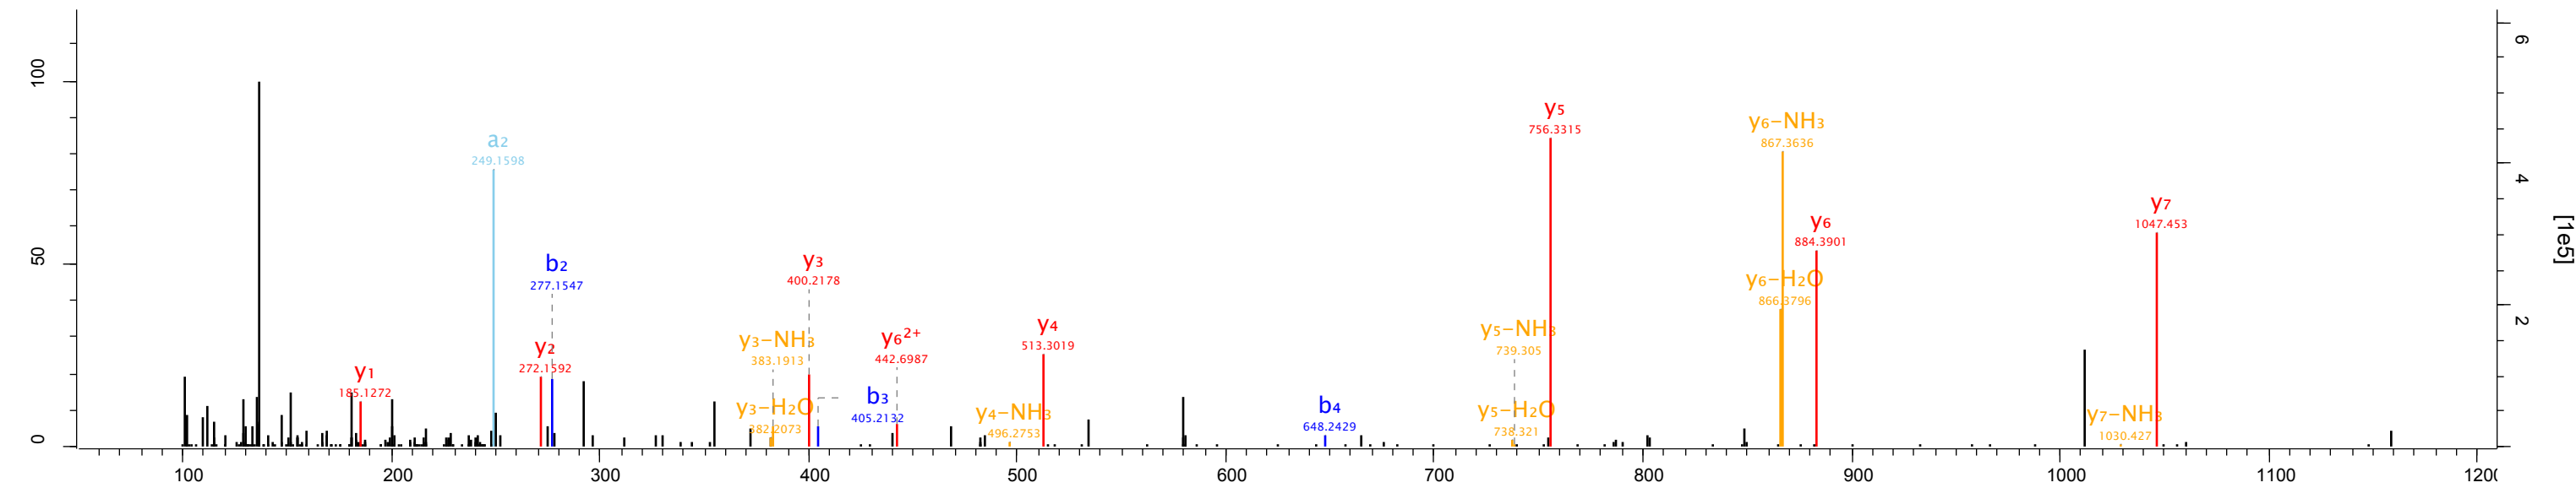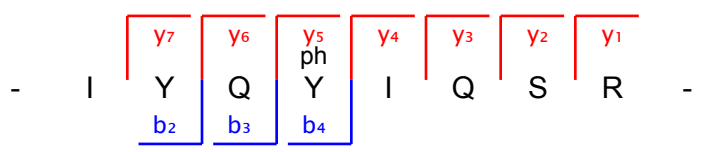

Raw file 20171215\_MaS\_33SR\_LMH\_phospho\_03 Scan 6413 Method FTMS; HCD Score 185.3 m/z 564.25 Gene names FCHO2

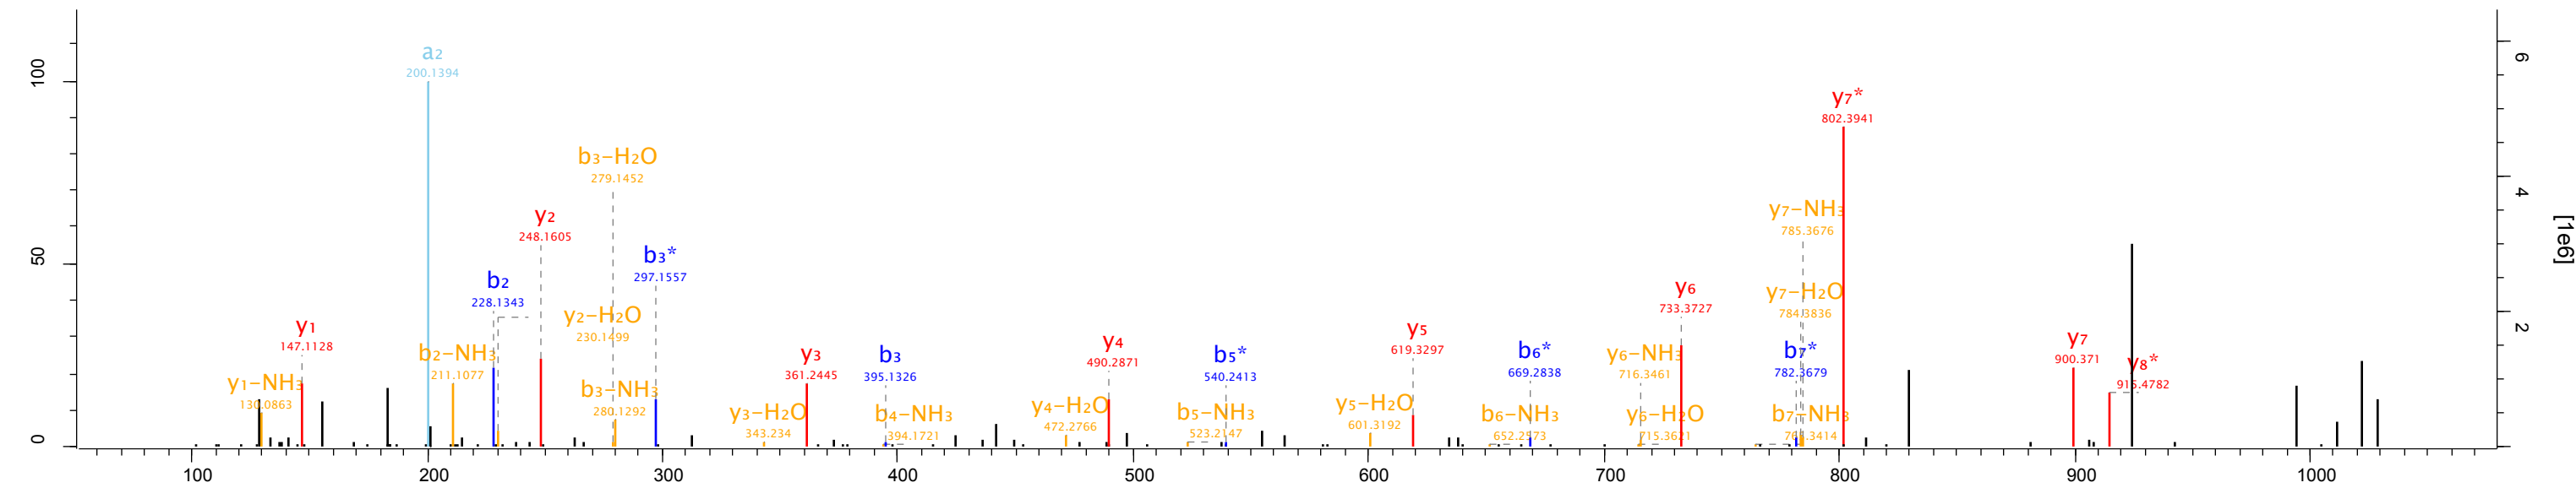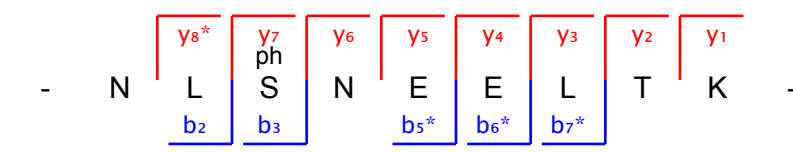

Raw file 20171215\_MaS\_33SR\_LMH\_phospho\_03 Scan 6513 Method FTMS; HCD Score 217.26 m/z 911.36 Gene names STARD13

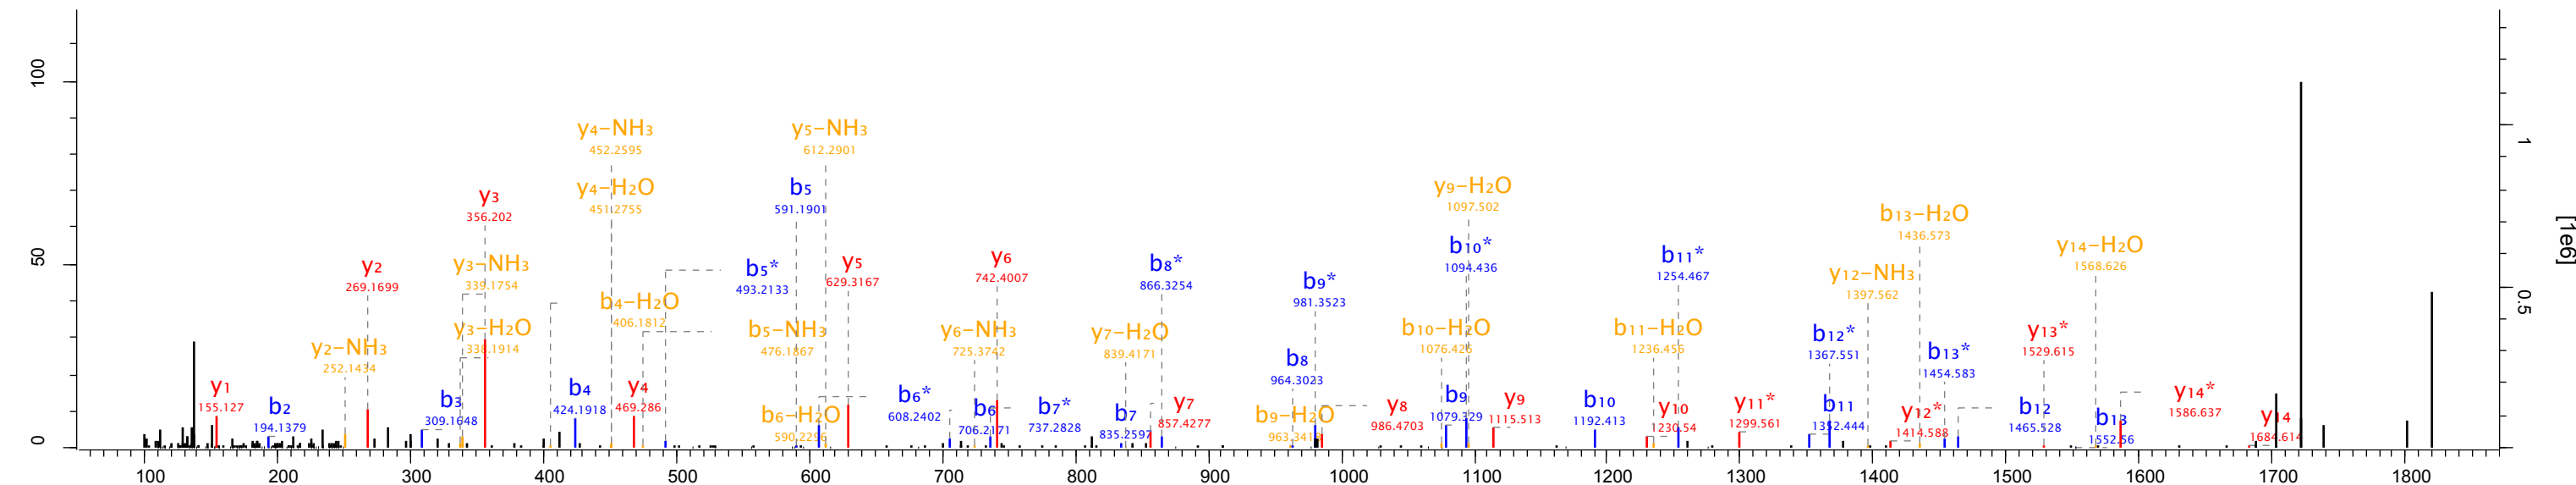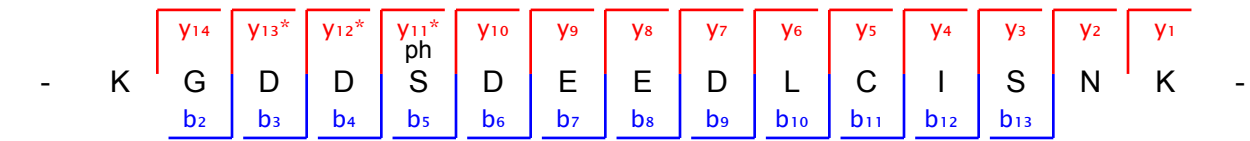

Raw file 20171215\_MaS\_33SR\_LMH\_phospho\_03 Scan 7493 Method FTMS; HCD Score 142.85 m/z 935.86 Gene names MAP3K4

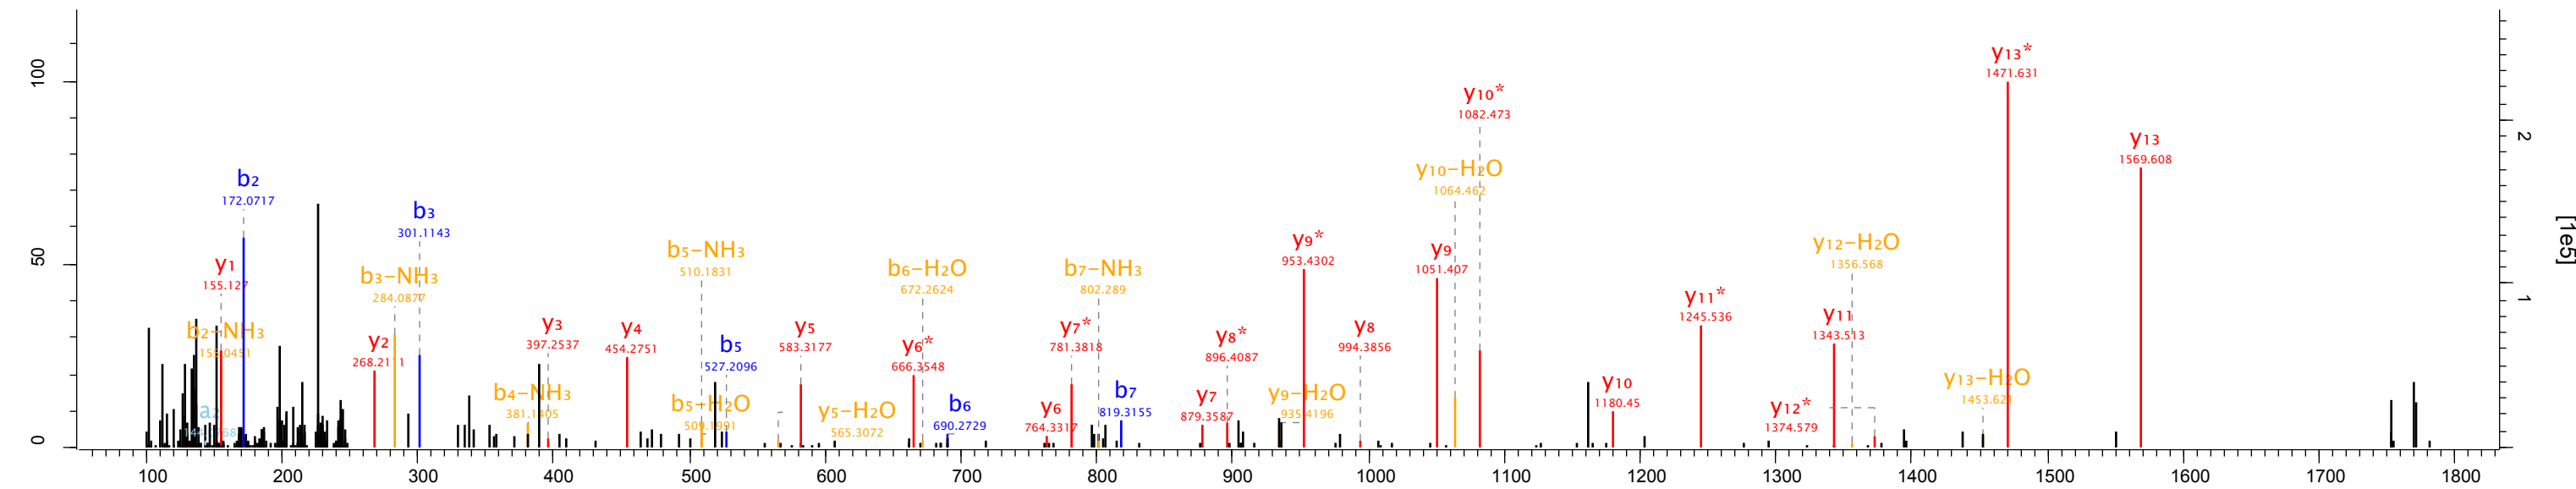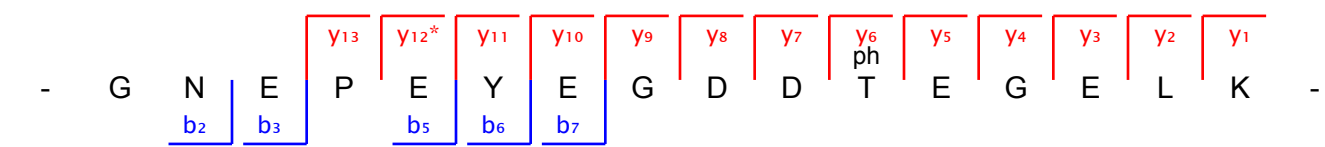

Raw file 20171215\_MaS\_33SR\_LMH\_phospho\_03 Scan 7663 Method FTMS; HCD Score 104.01 m/z 408.71 Gene names SLC7A11

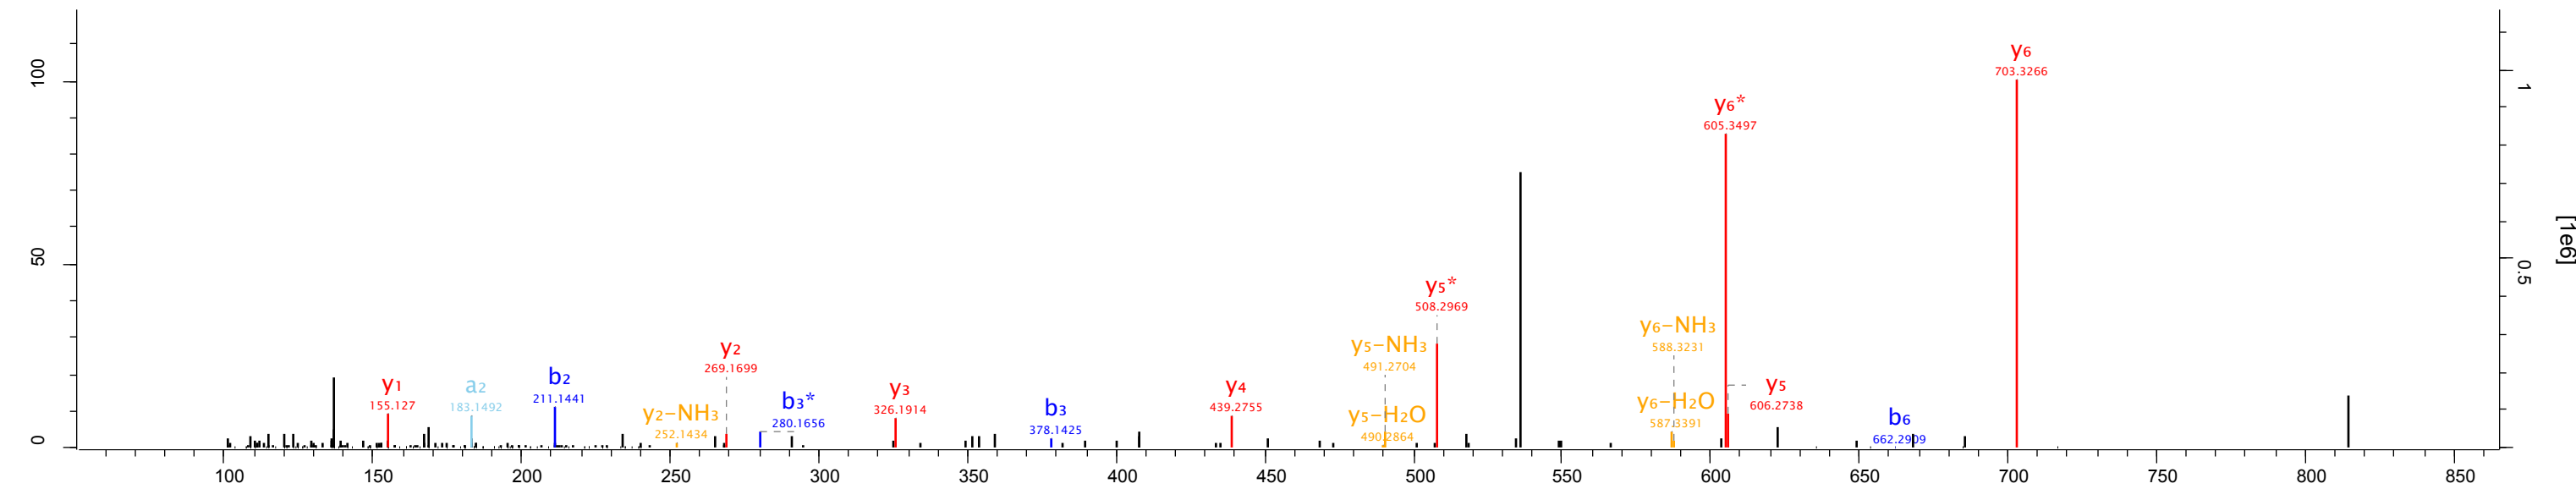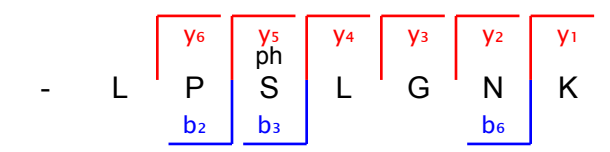

Raw file 20171215\_MaS\_33SR\_LMH\_phospho\_03 Scan 8393 Method FTMS; HCD Score 220.42 m/z 724.32 Gene names NCKAP5L

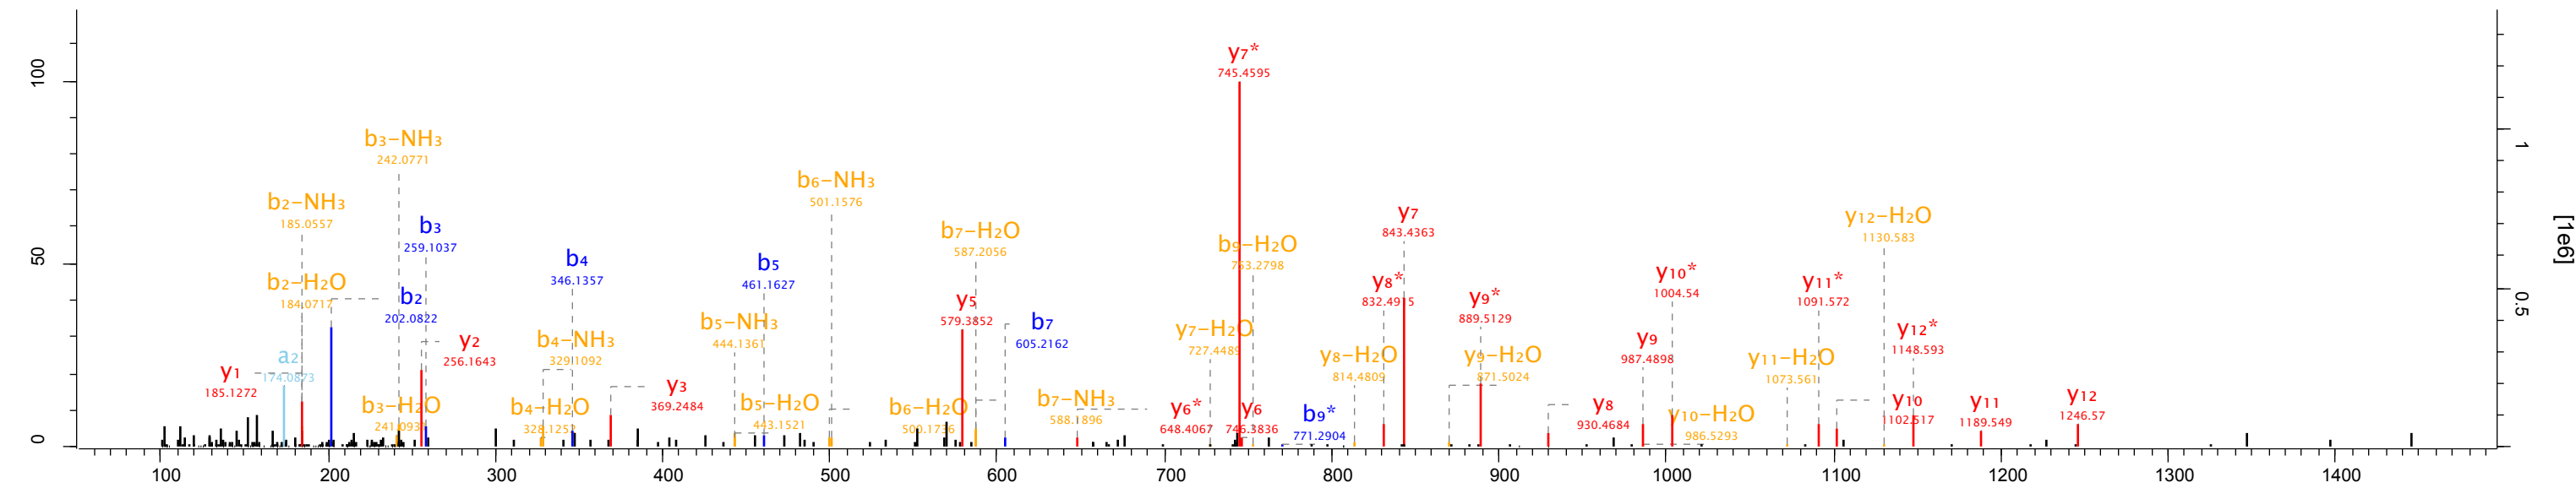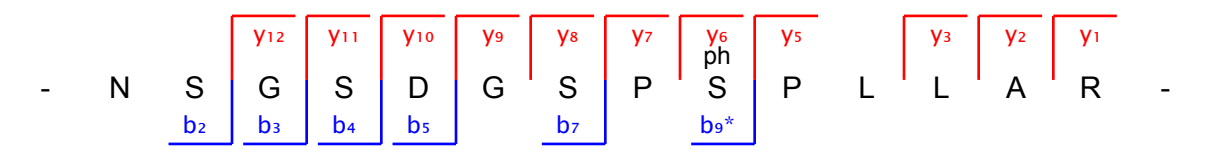



Raw file 20171215\_MaS\_33SR\_LMH\_phospho\_05 Scan 10083 Method FTMS; HCD Score 135.33 m/z 978.94 Gene names ABCC4

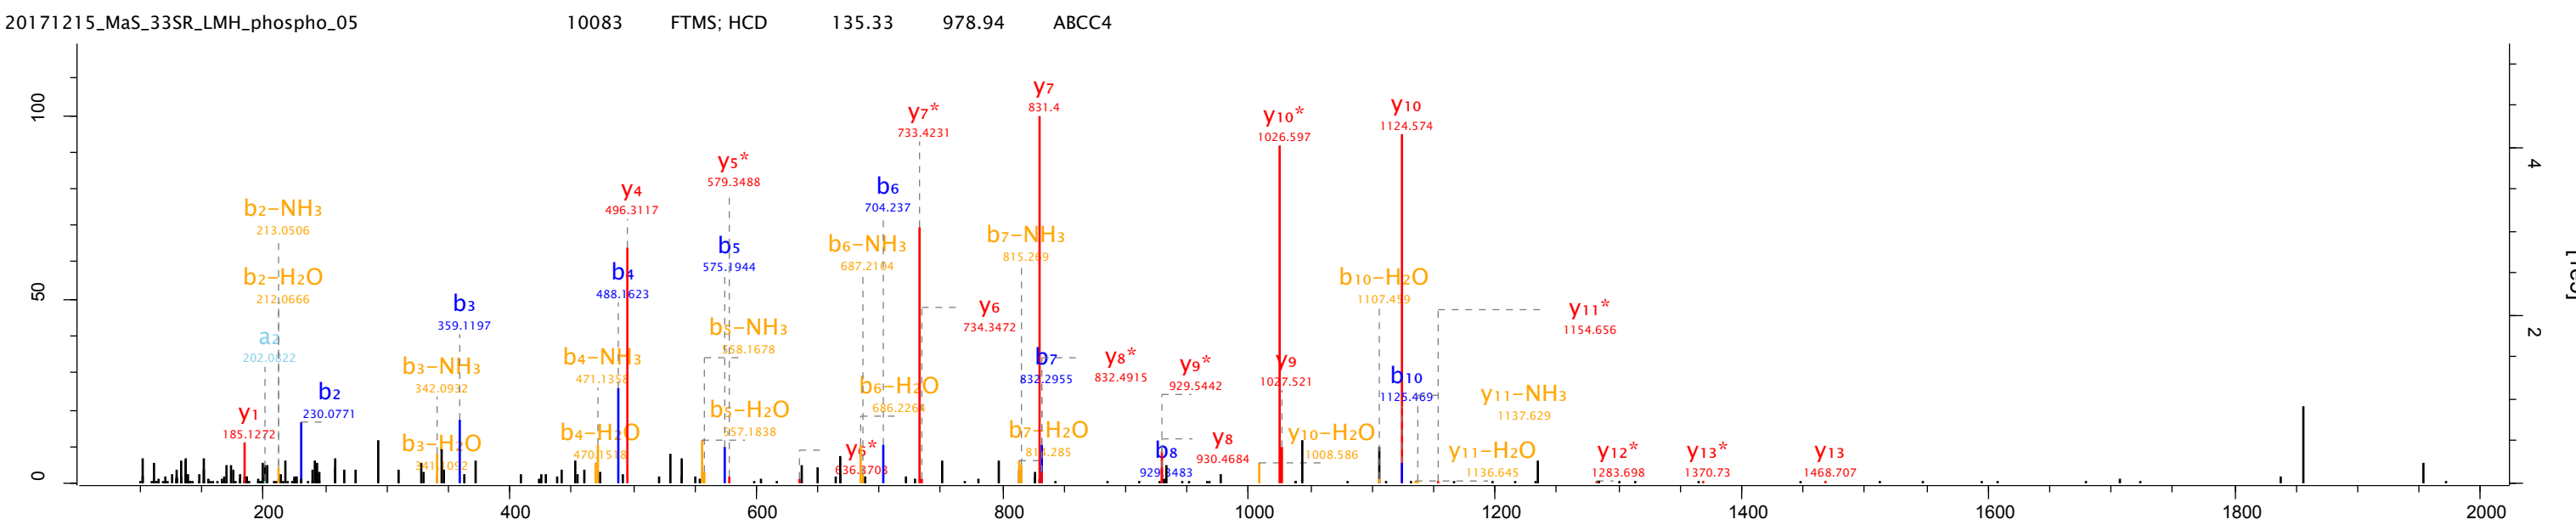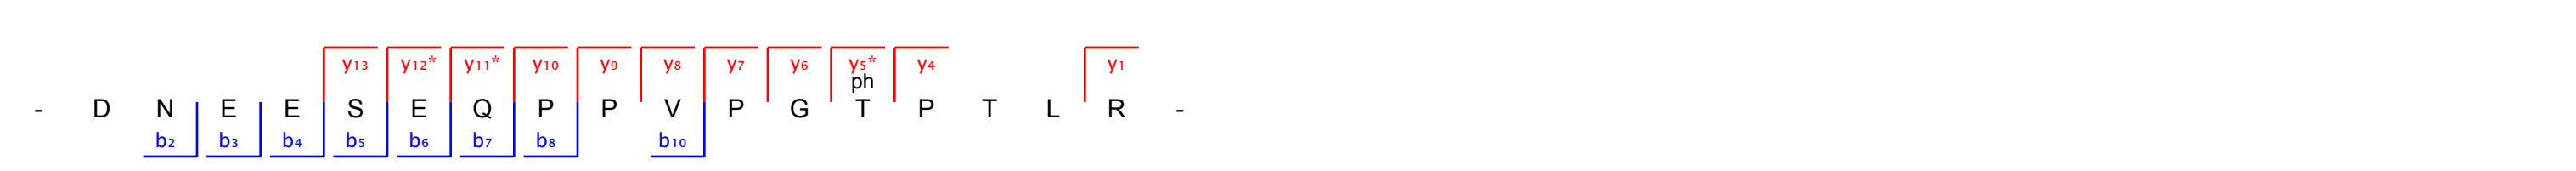

Raw file 20171215\_MaS\_33SR\_LMH\_phospho\_05 Scan 7913 Method FTMS; HCD Score 85.84 m/z 560.78

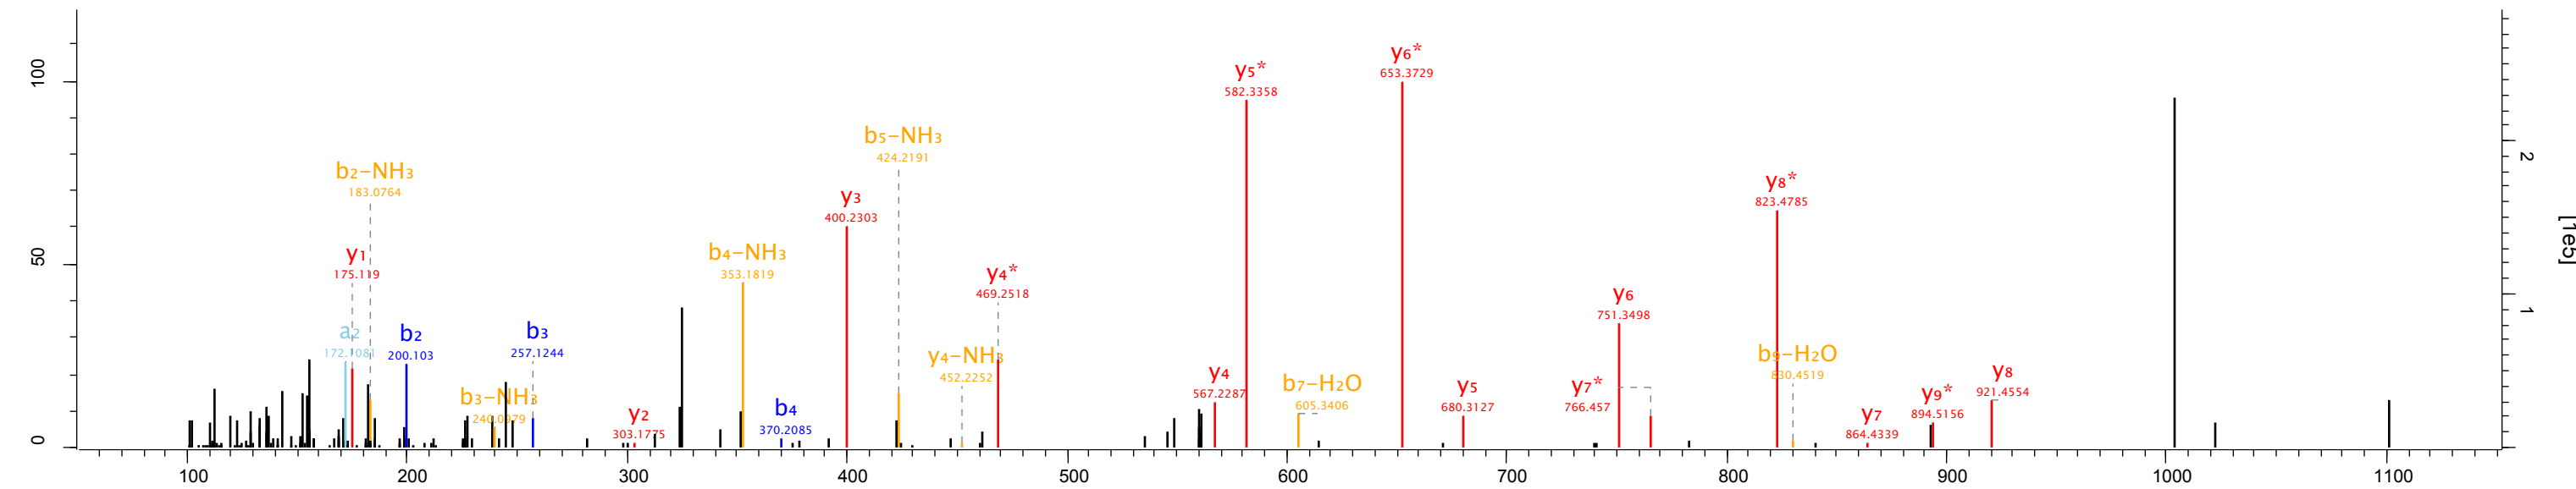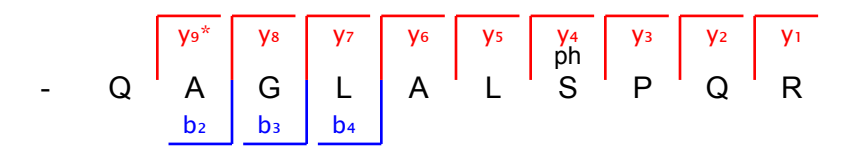

Raw file 20171215\_MaS\_33SR\_LMH\_phospho\_06 Scan 13883 Method FTMS; HCD Score 40.62 m/z 816.91 Gene names MEF2D

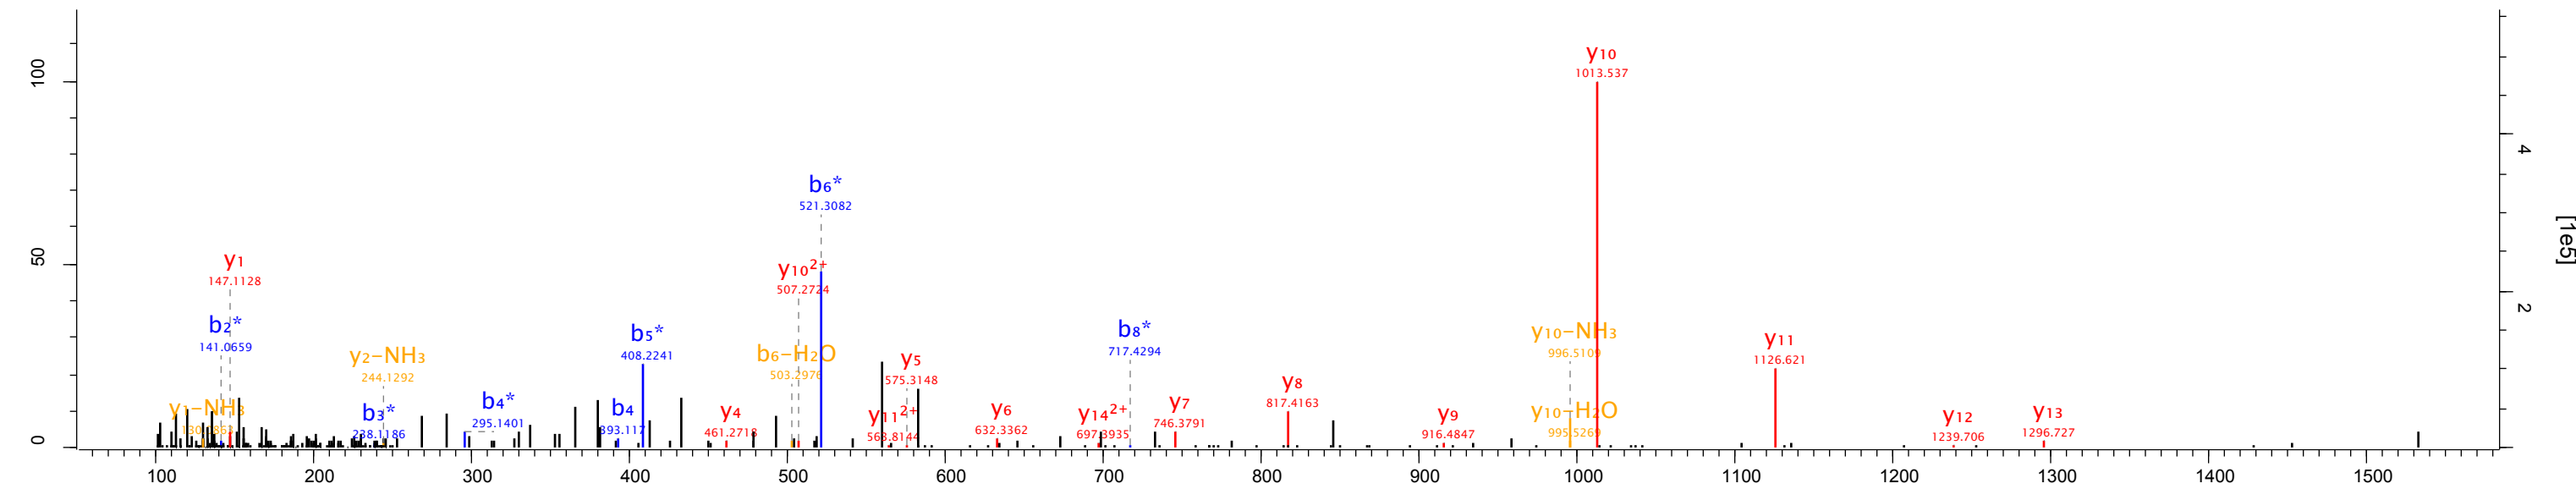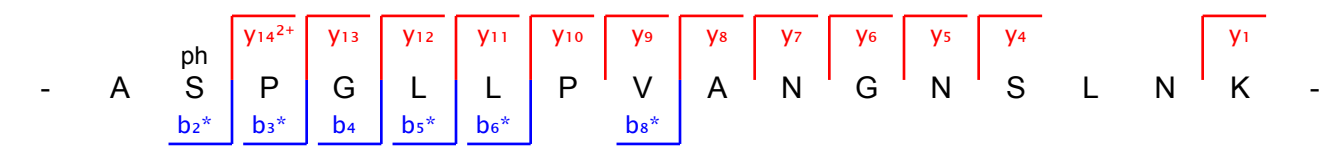

Raw file 20171215\_MaS\_33SR\_LMH\_phospho\_06 Scan 1483 Method FTMS; HCD Score 57.59 m/z 442.7

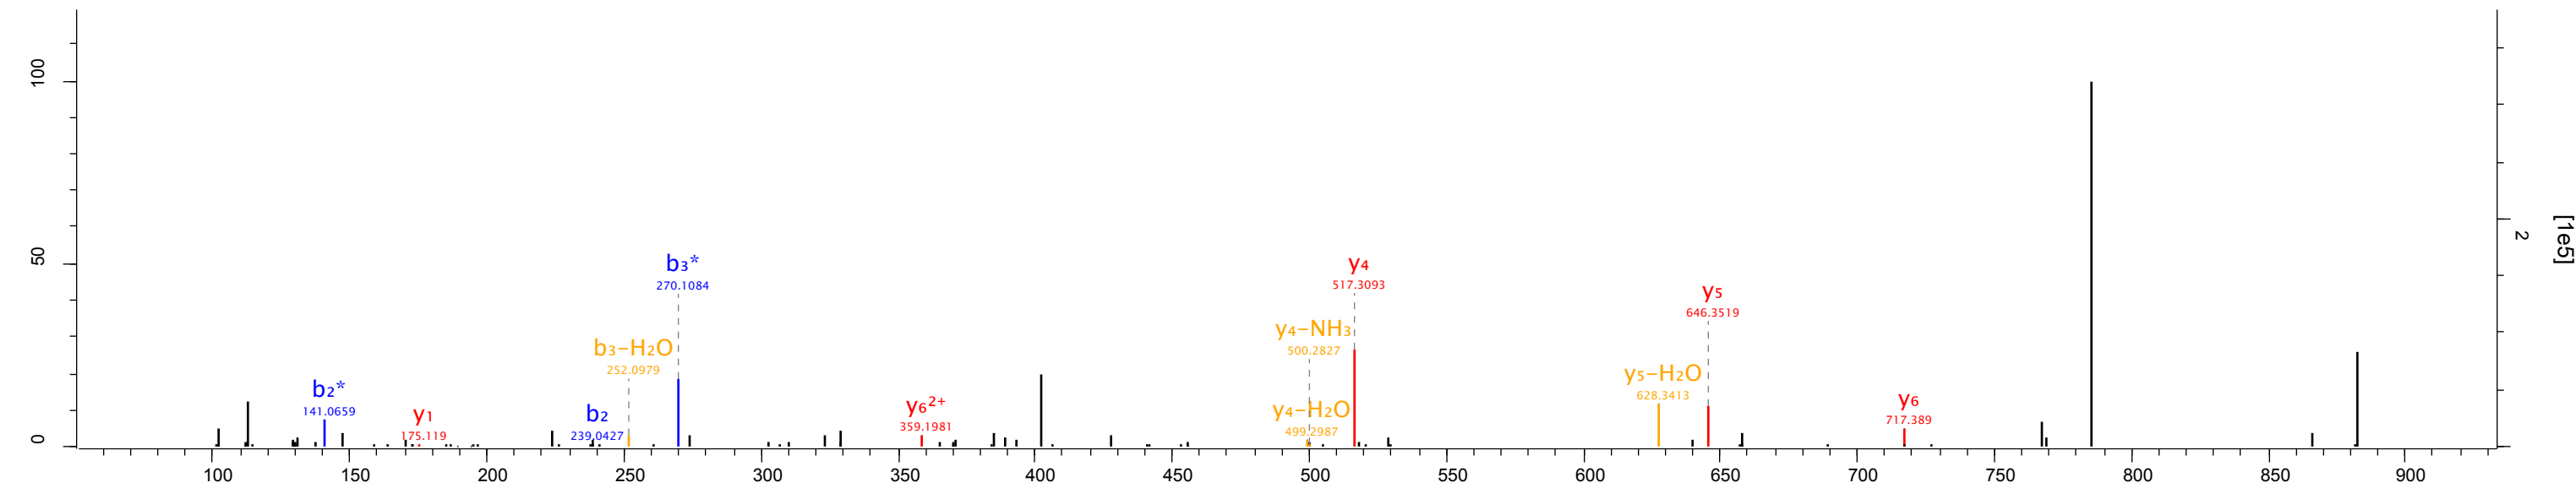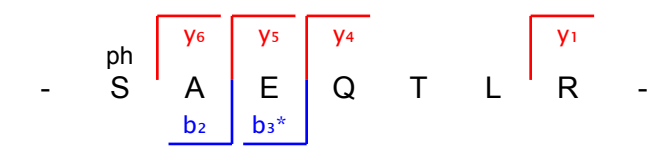

Raw file 20171215\_MaS\_33SR\_LMH\_phospho\_06 Scan 15433 Method FTMS; HCD Score 68.59 m/z 1197.56 Gene names CDYL

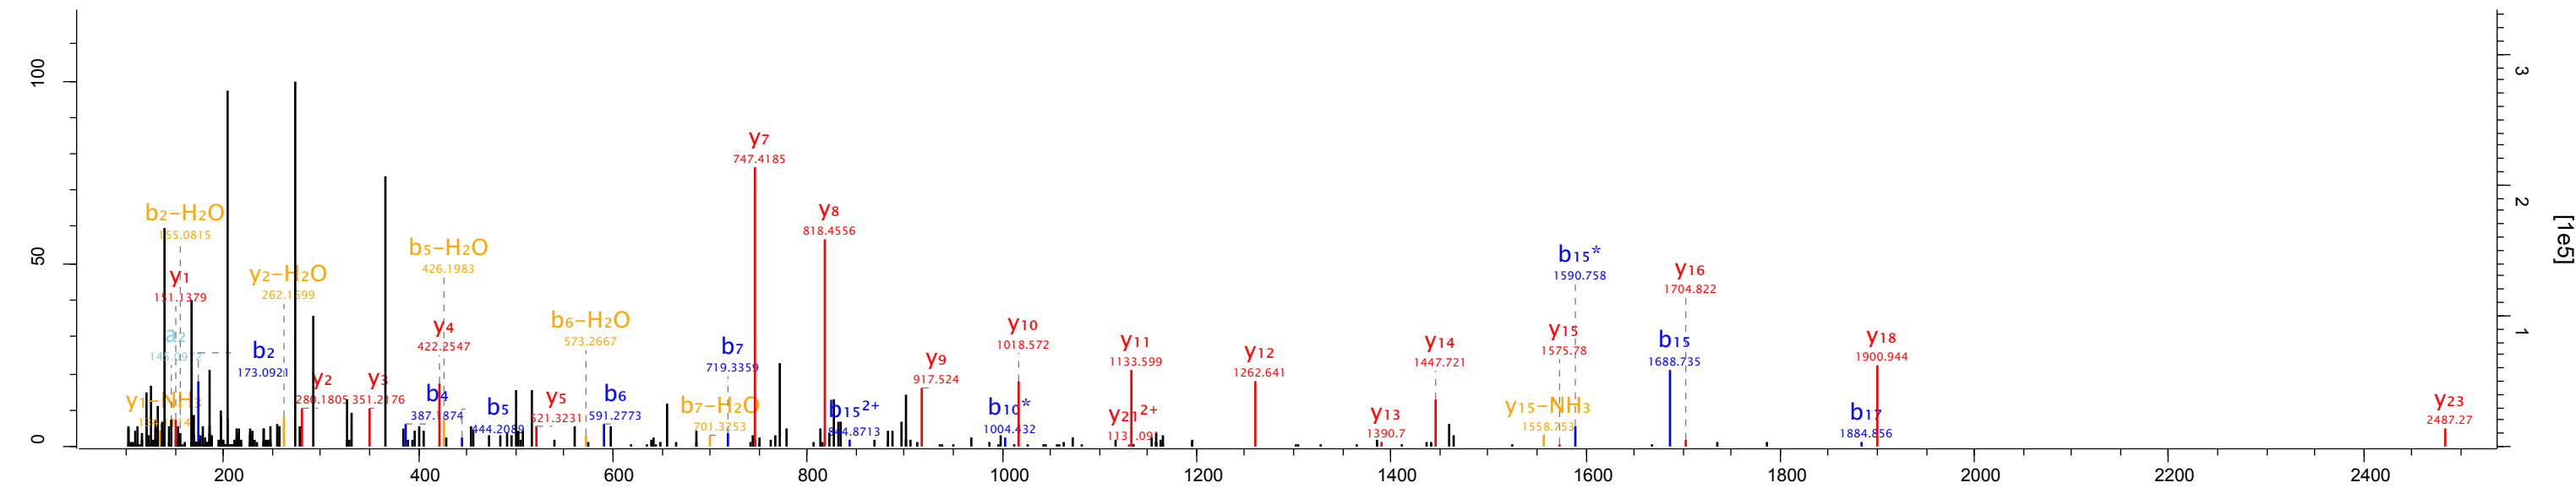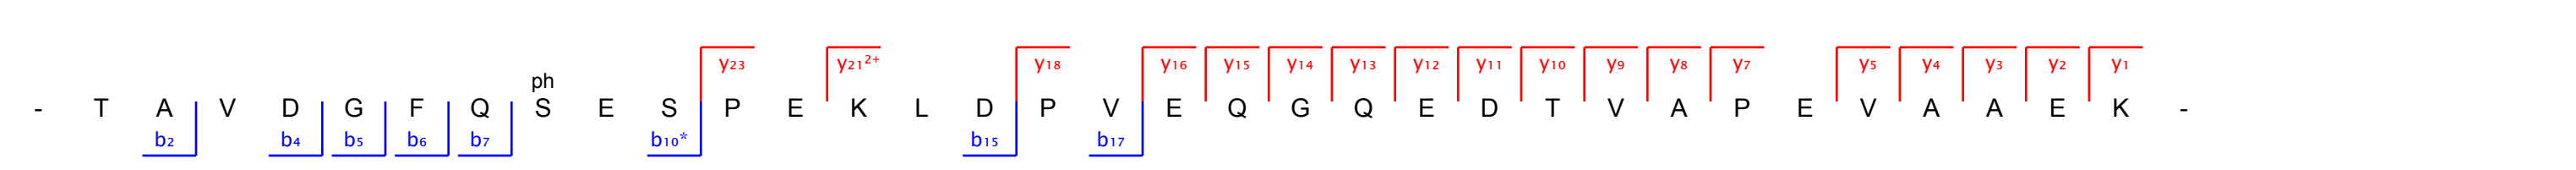

Raw file 20171215\_MaS\_33SR\_LMH\_phospho\_06 Scan 15593 Method FTMS; HCD Score 173.49 m/z 855.93 Gene names ASXL2

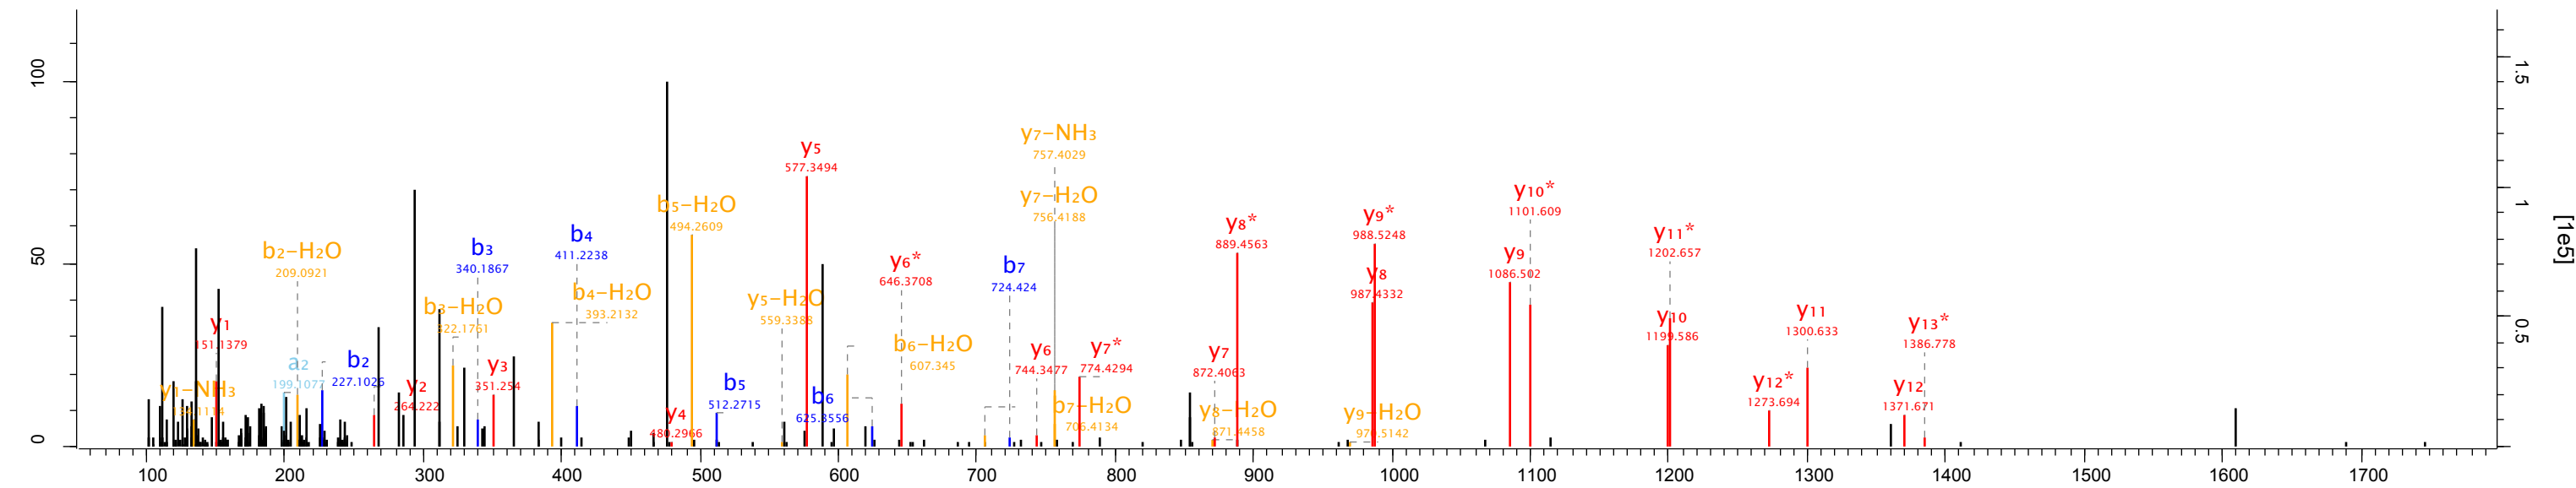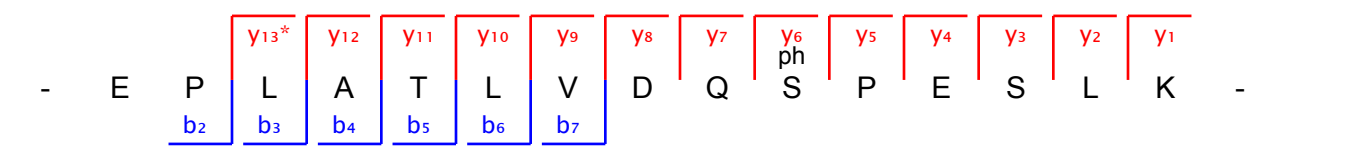

Raw file 20171215\_MaS\_33SR\_LMH\_phospho\_06 Scan 5073 Method FTMS; HCD Score 151.41 m/z 735.85 Gene names MCC

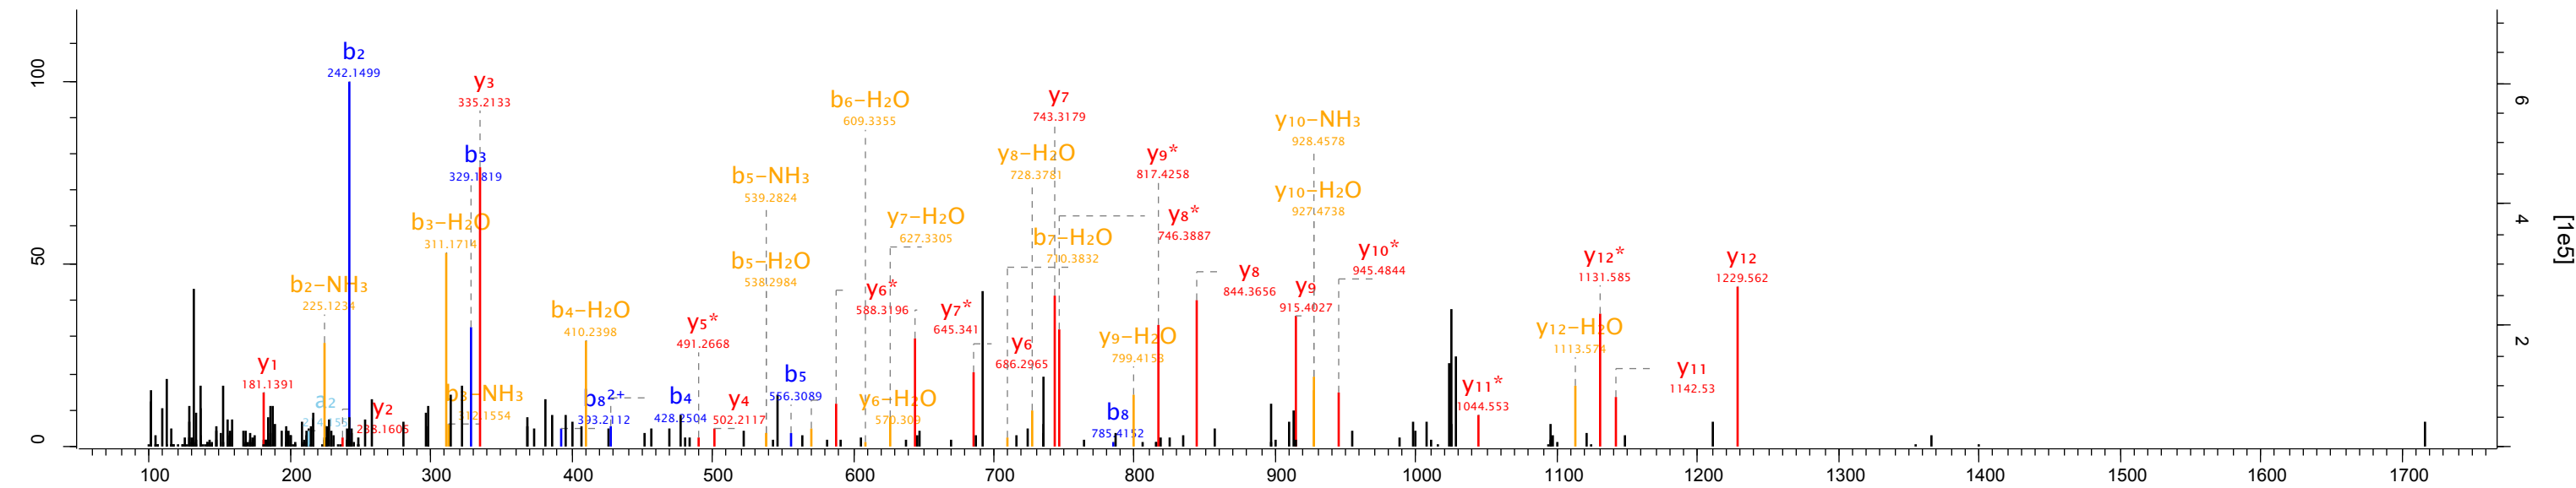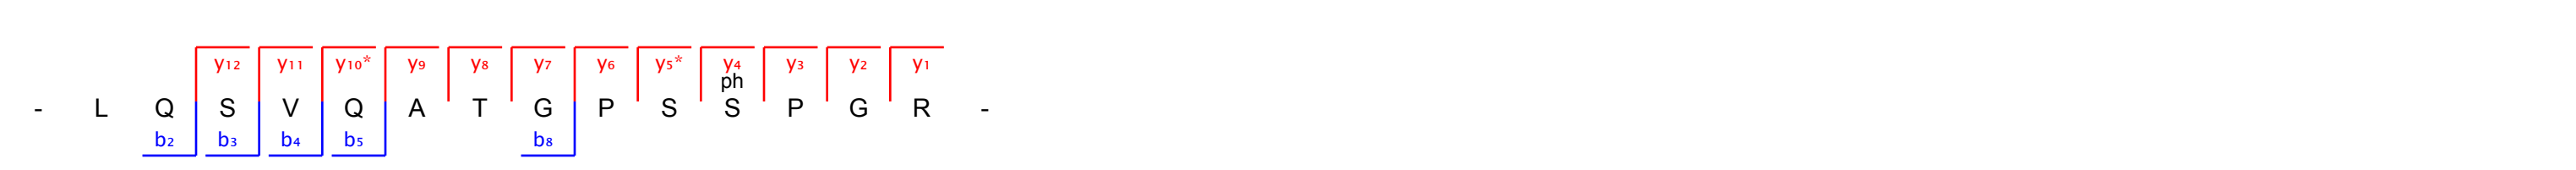

Raw file 20171215\_MaS\_33SR\_LMH\_phospho\_06 Scan 6653 Method FTMS; HCD Score 75.85 m/z 549.77 Gene names CLASRP

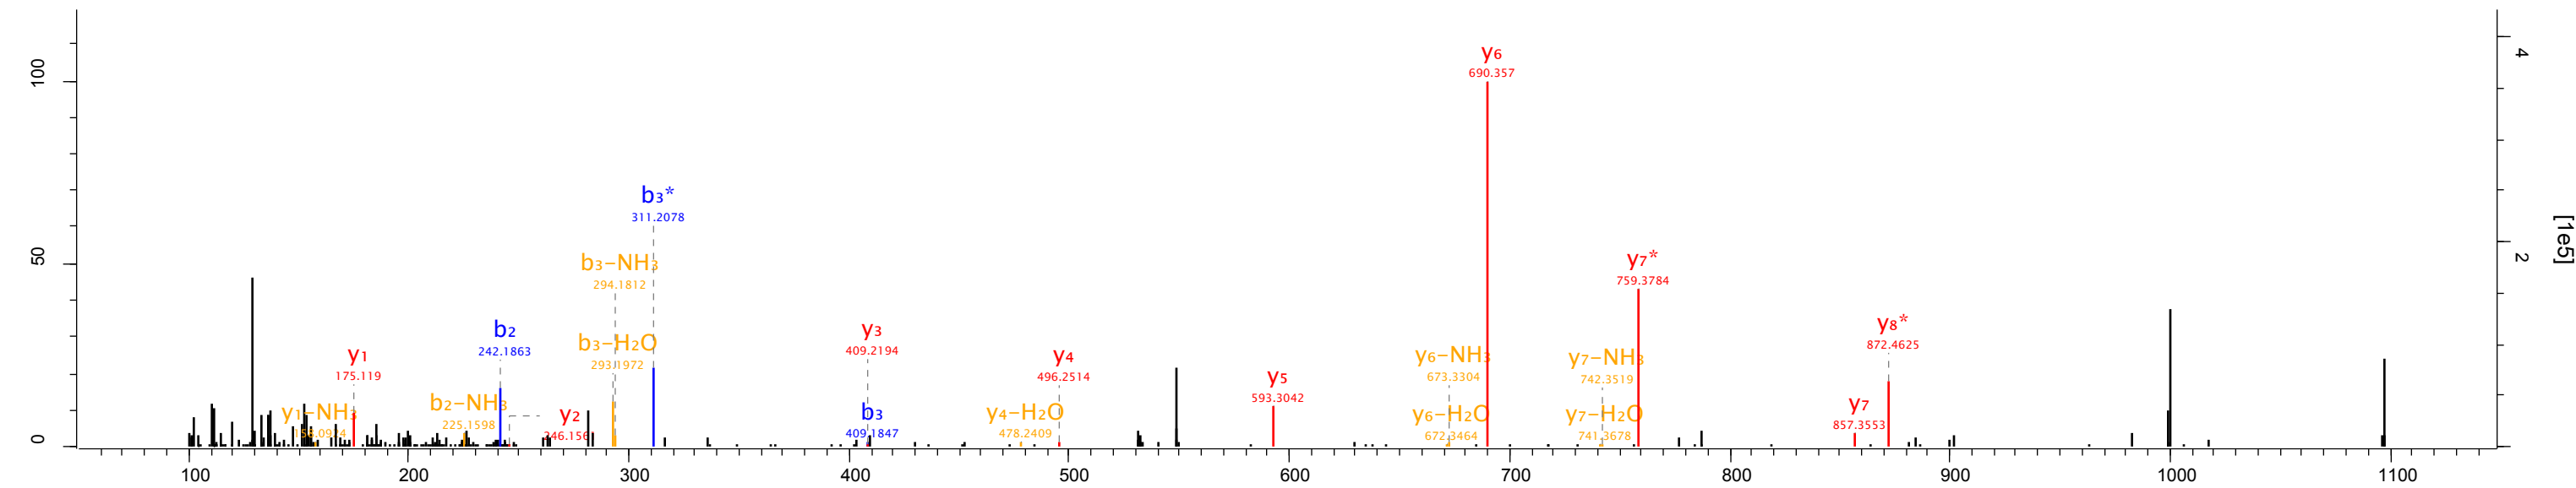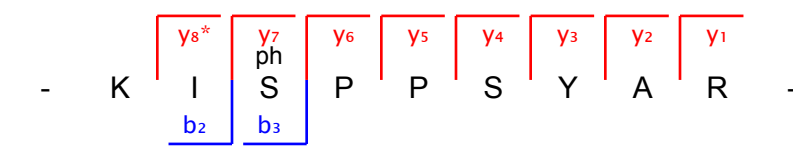



Raw file 20171215\_MaS\_33SR\_LMH\_phospho\_06 Scan 9713 Method FTMS; HCD Score 75.55 m/z 864.39

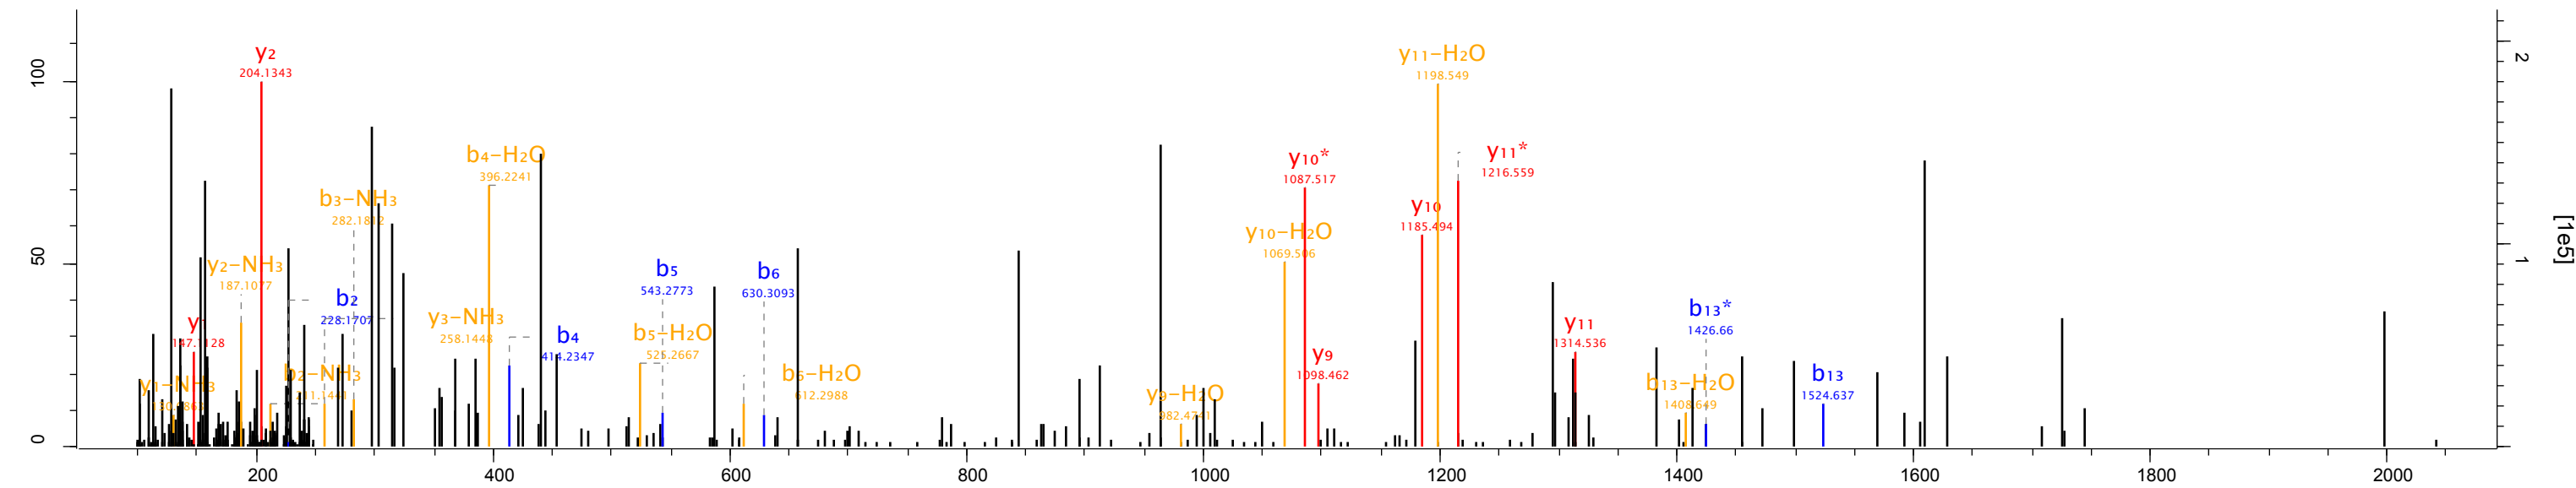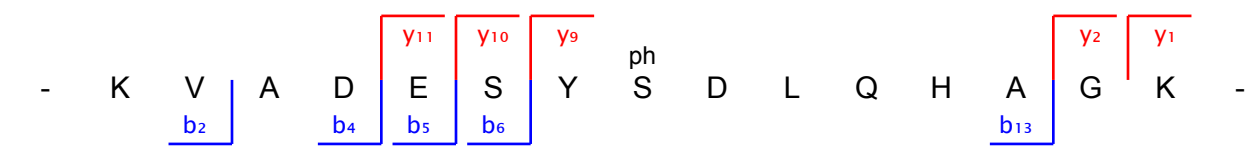

Raw file 20171215\_MaS\_33SR\_LMH\_phospho\_07 Scan 2363 Method FTMS; HCD Score 110.12 m/z 676.8 Gene names WWP2

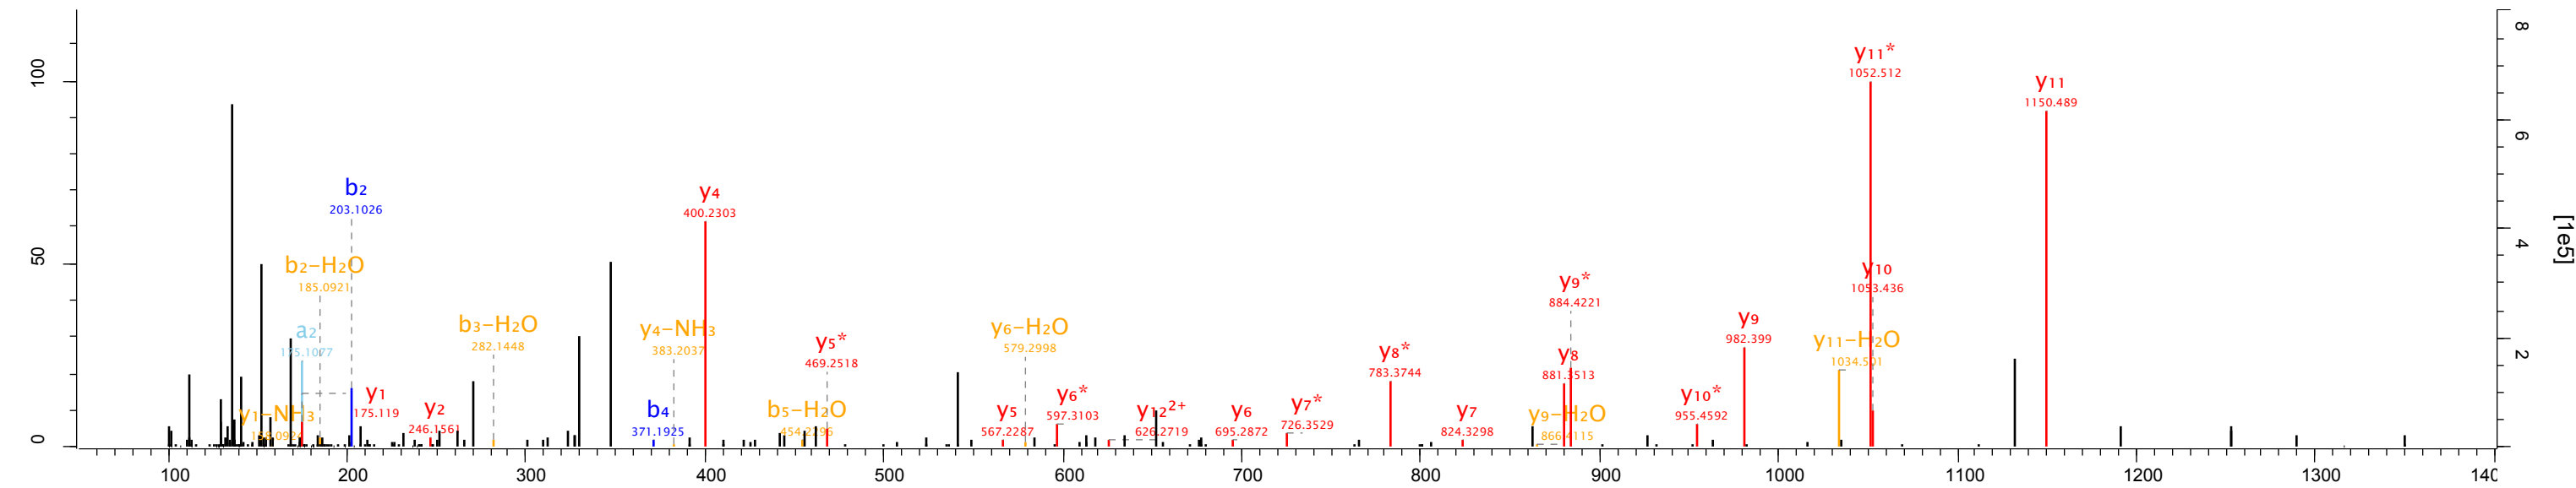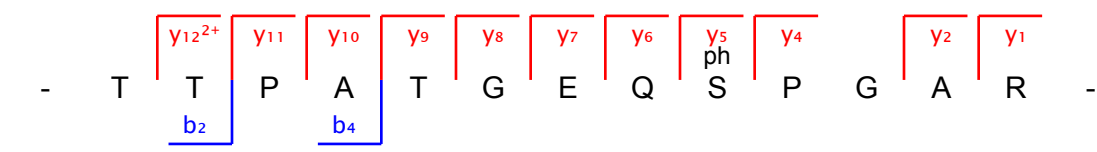

Raw file 20171215\_MaS\_33SR\_LMH\_phospho\_07 Scan 2533 Method FTMS; HCD Score 176.86 m/z 638.77 Gene names CD274

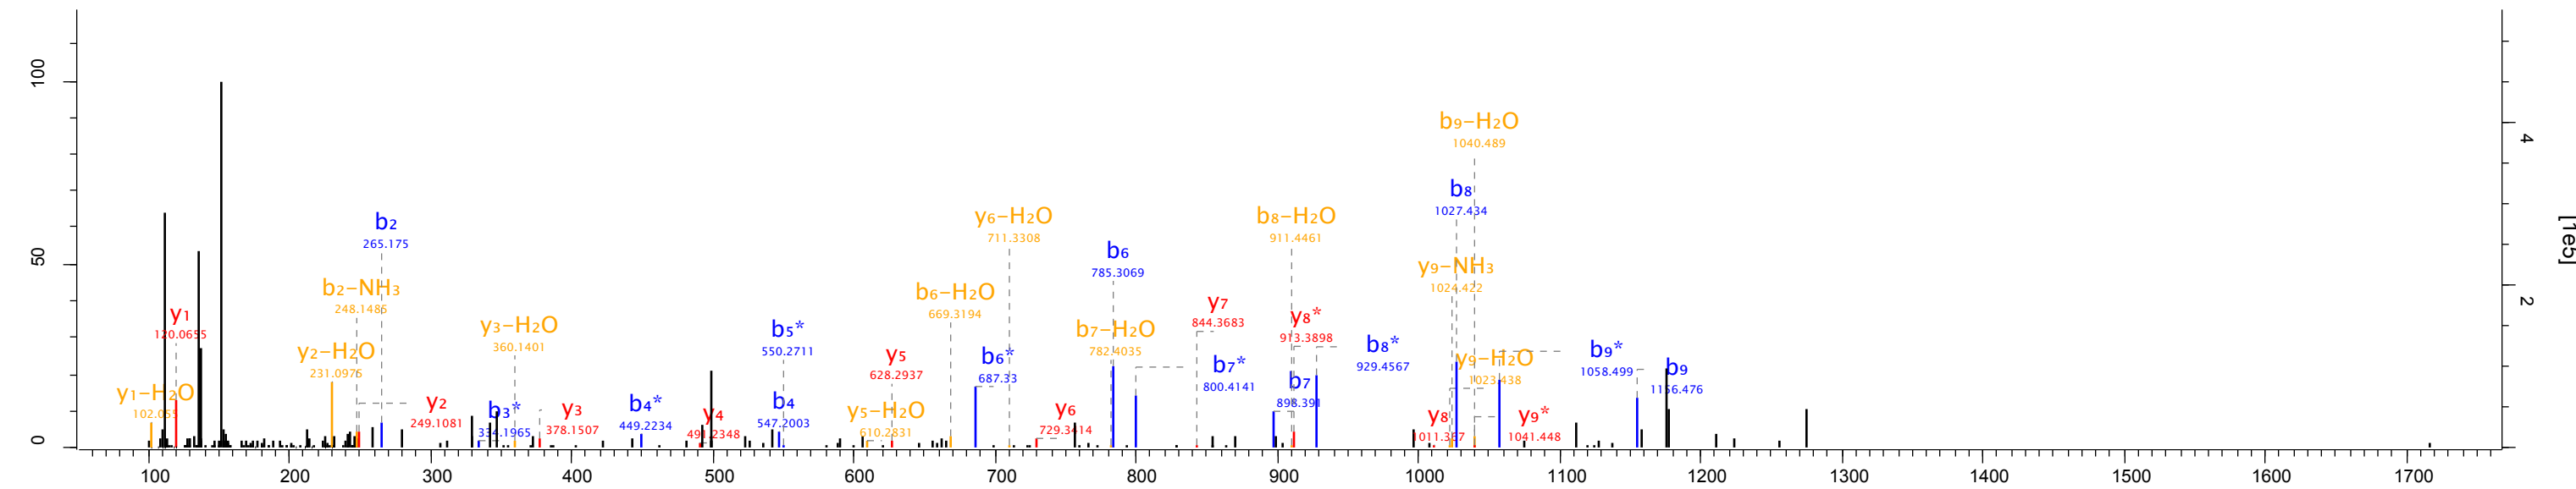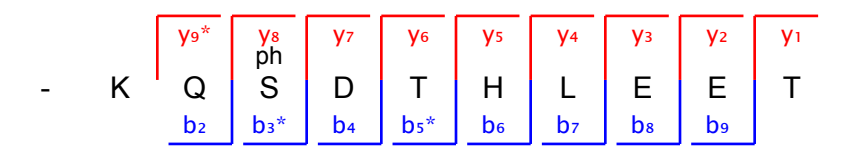

Raw file 20171215\_MaS\_33SR\_LMH\_phospho\_07 Scan 3913 Method FTMS; HCD Score 133.86 m/z 636.3 Gene names RNF219

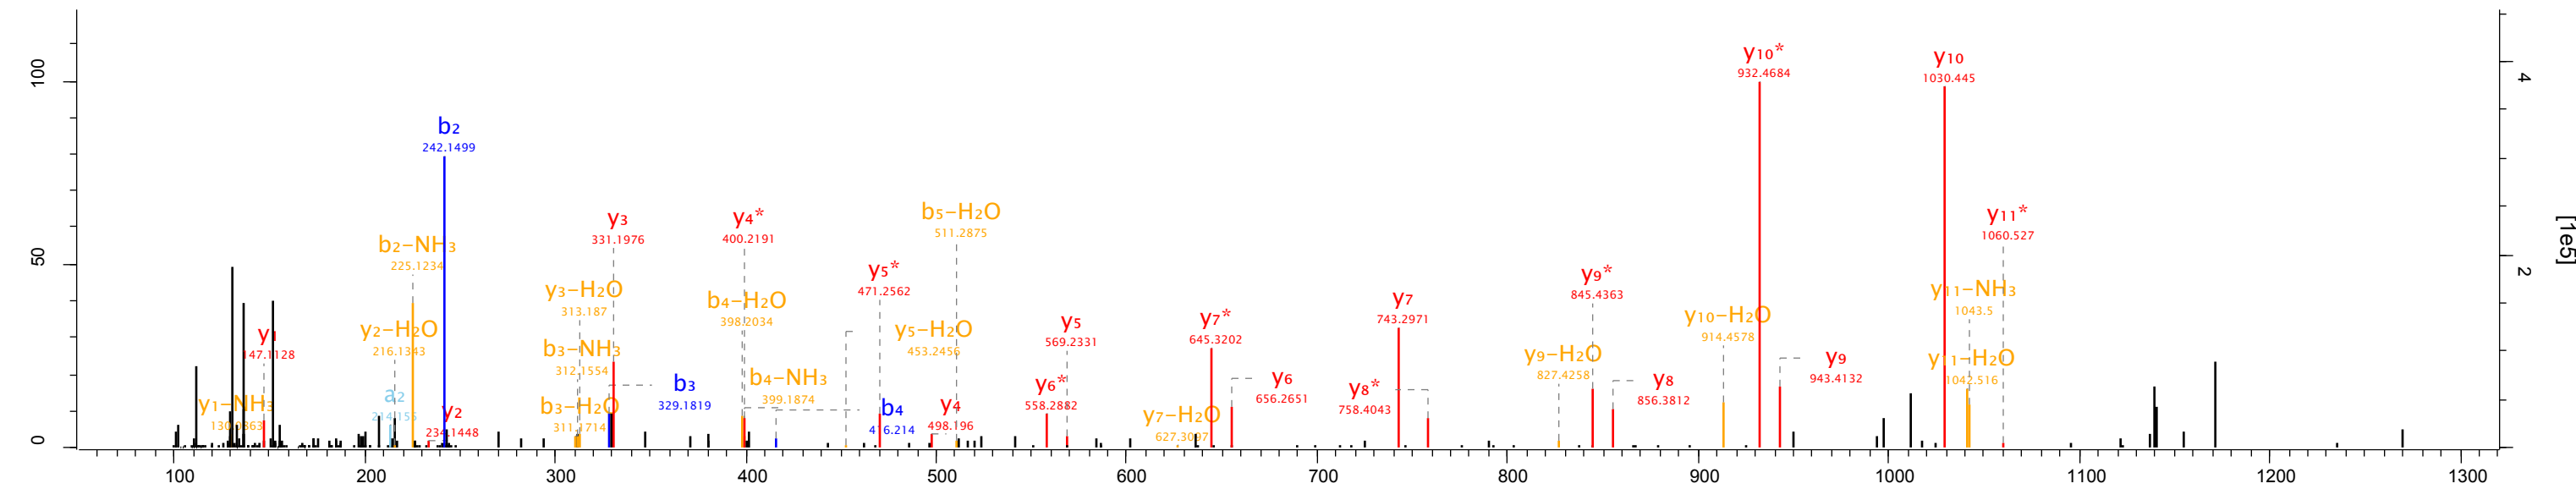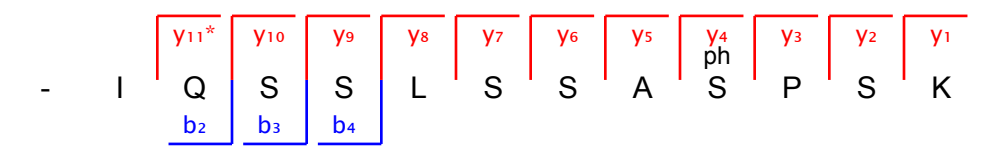

Raw file 20171215\_MaS\_33SR\_LMH\_phospho\_08 Scan 2603 Method FTMS; HCD Score 137.91 m/z 645.3 Gene names PBX2

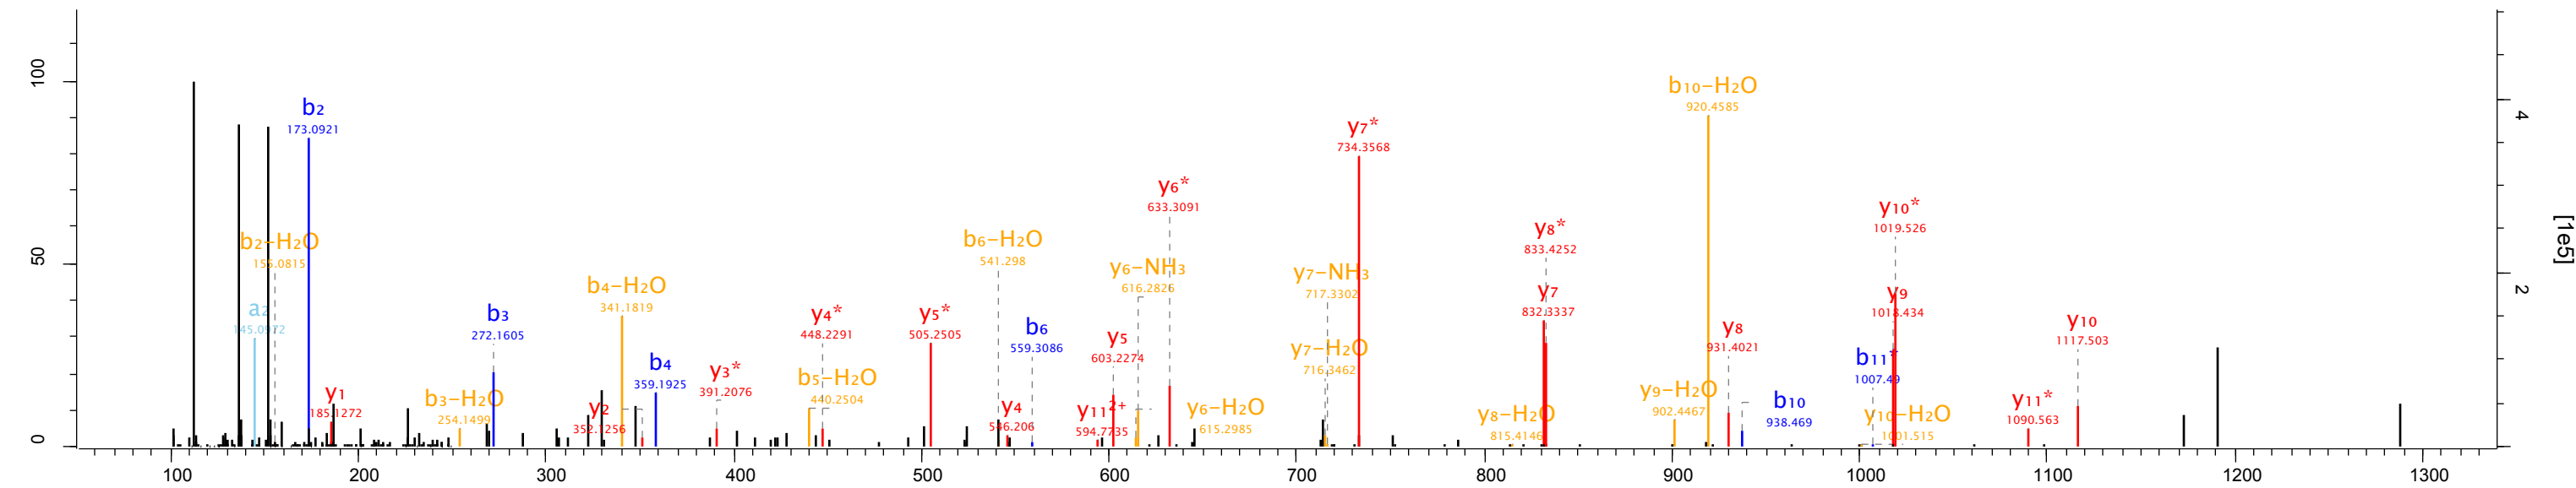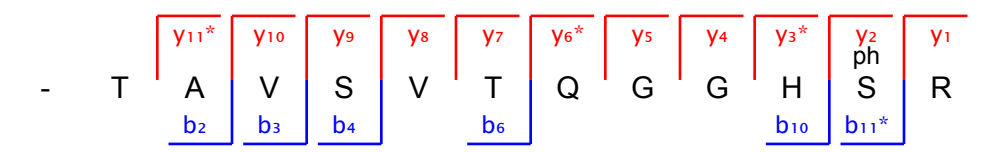

Raw file 20171215\_MaS\_33SR\_LMH\_phospho\_08 Scan 6393 Method FTMS; HCD Score 41.54 m/z 717.31 Gene names FLI1

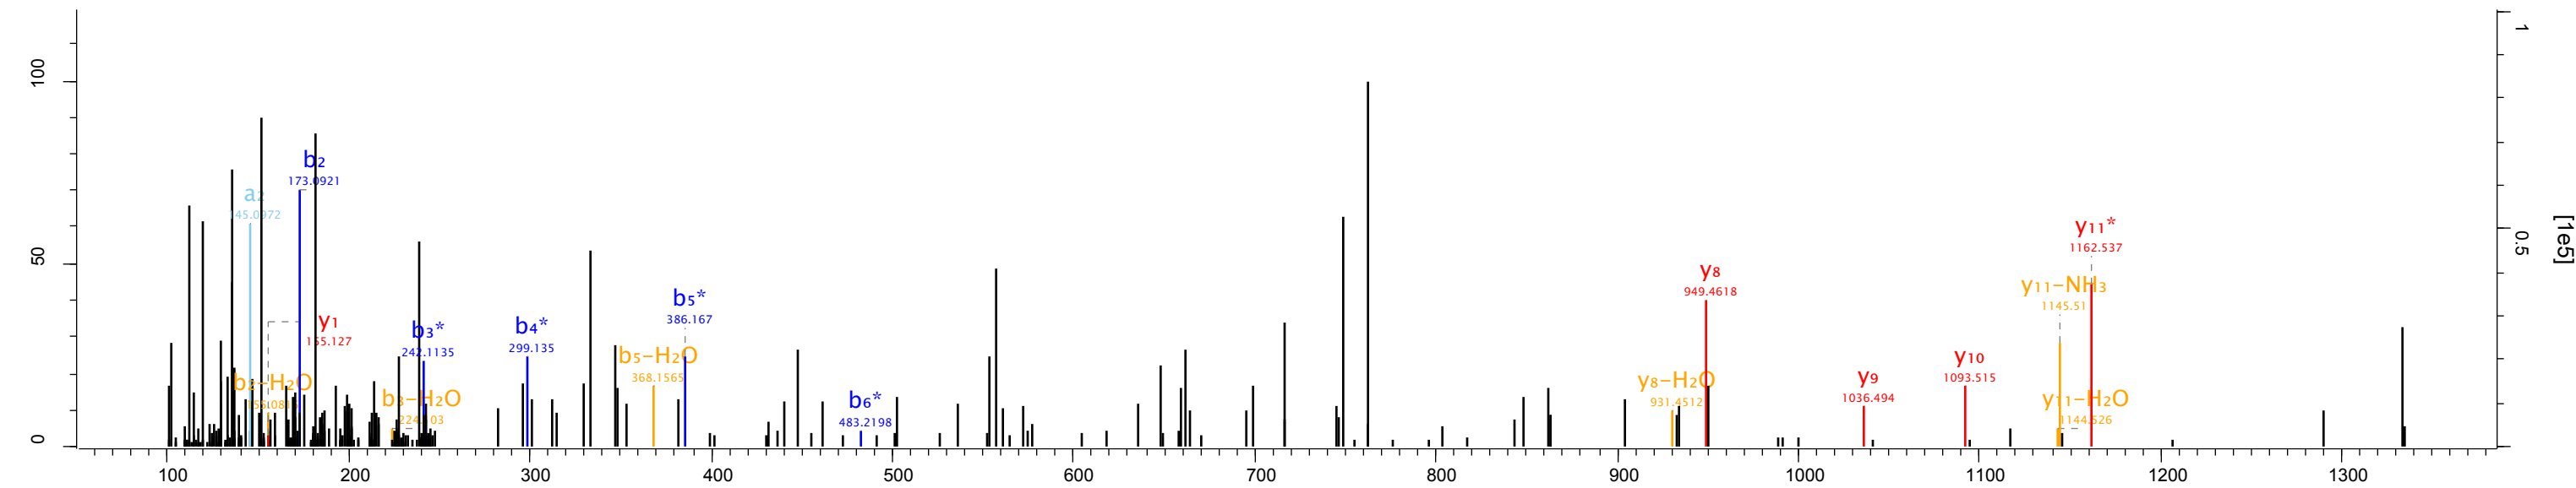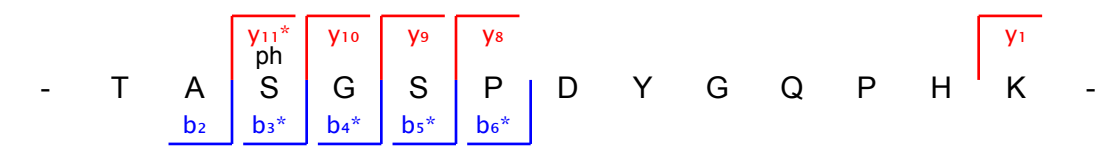

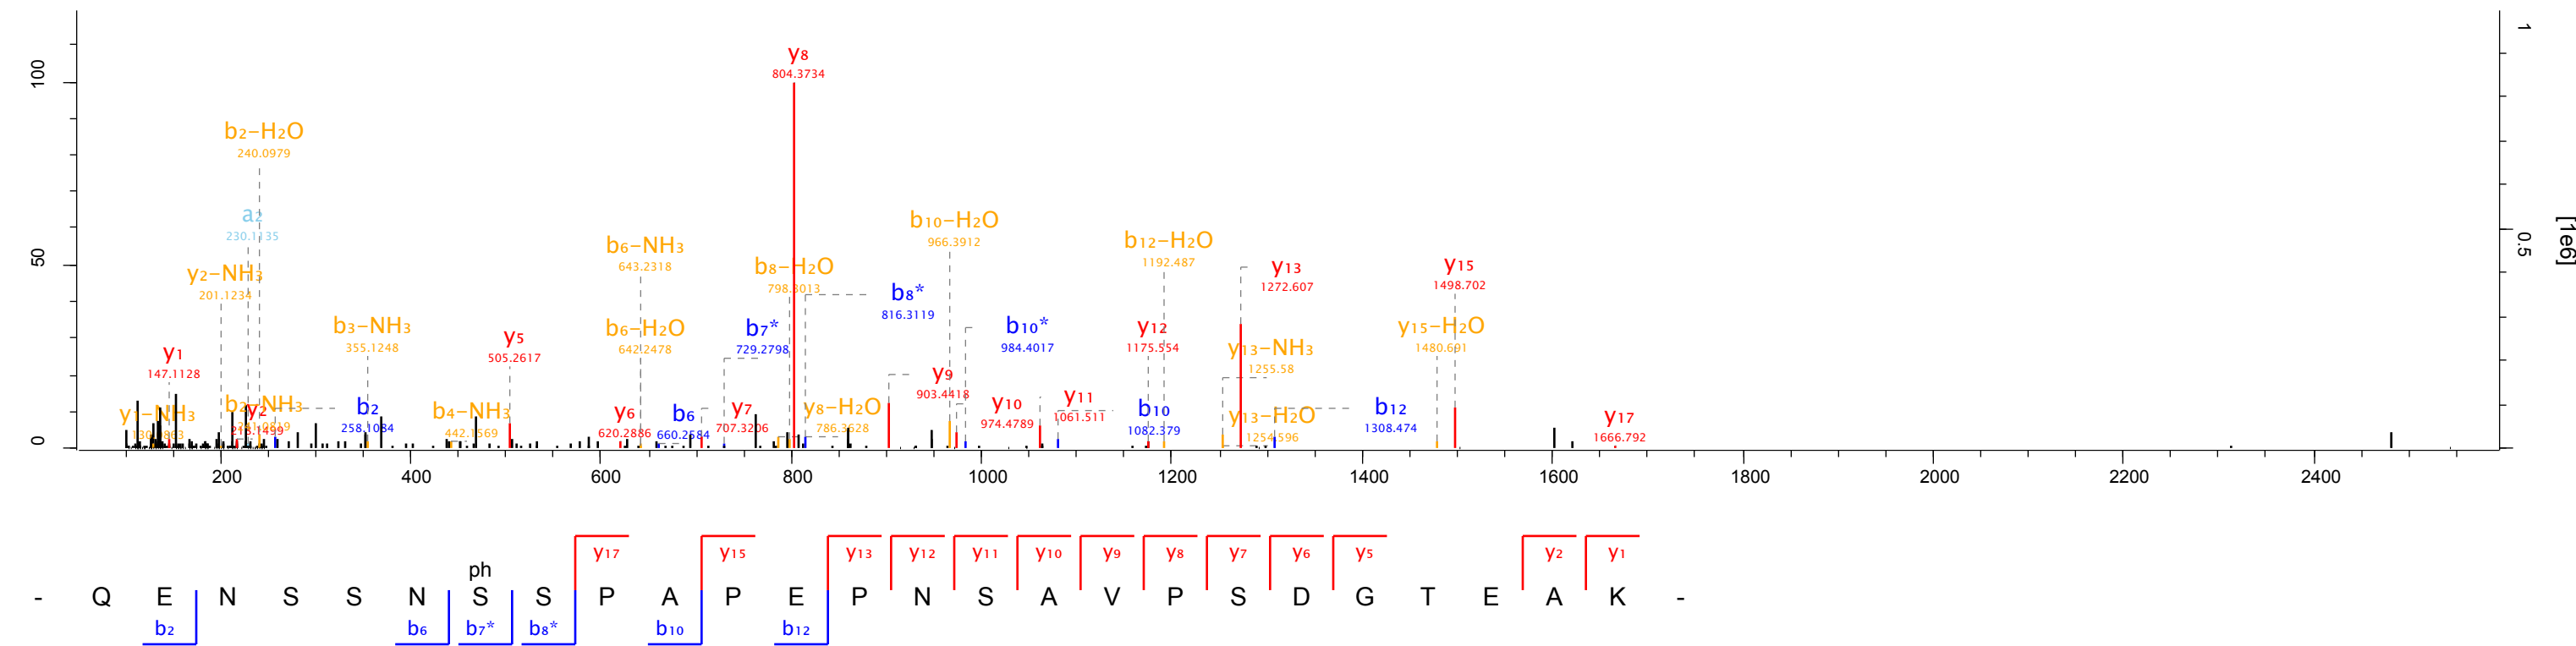

Raw file 20171215\_MaS\_33SR\_LMH\_phospho2\_01 Scan 5653 Method FTMS; HCD Score 68.42 m/z 639.63 Gene names RLF

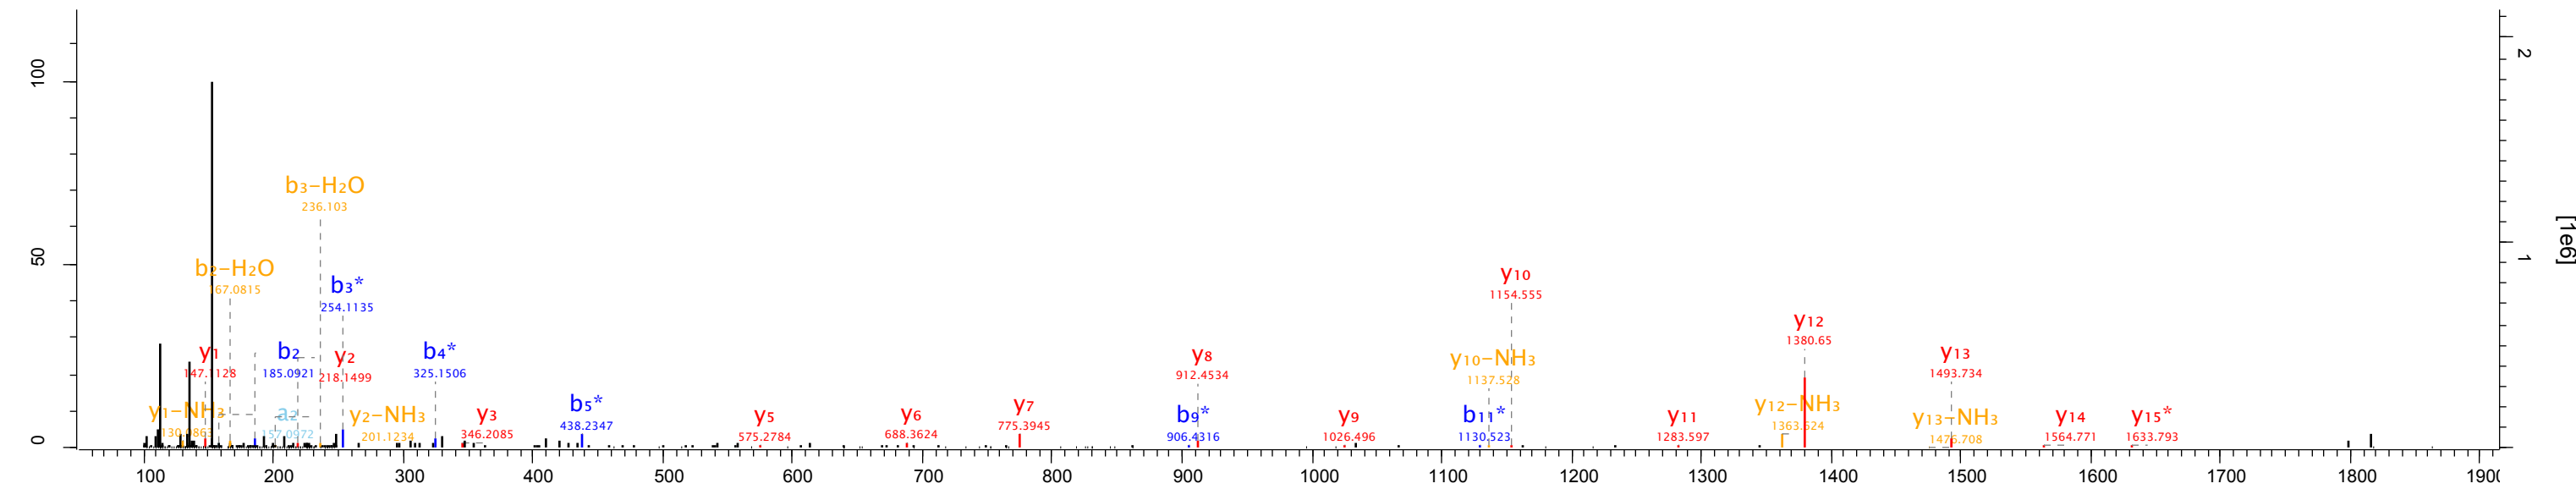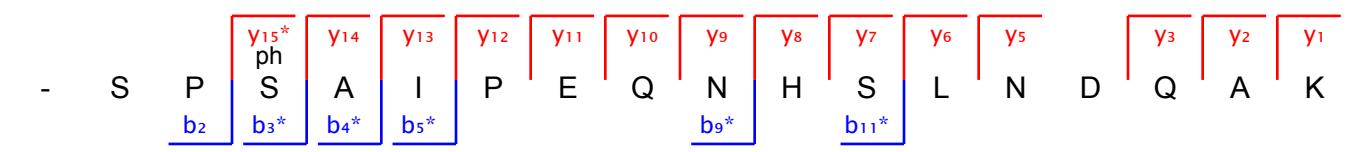



Raw file

20171215\_MaS\_33SR\_LMH\_phospho2\_01

| Scan | Method    | Score  | m/z    | Gene names |
|------|-----------|--------|--------|------------|
| 6243 | FTMS; HCD | 127.61 | 819.35 | EYA1       |

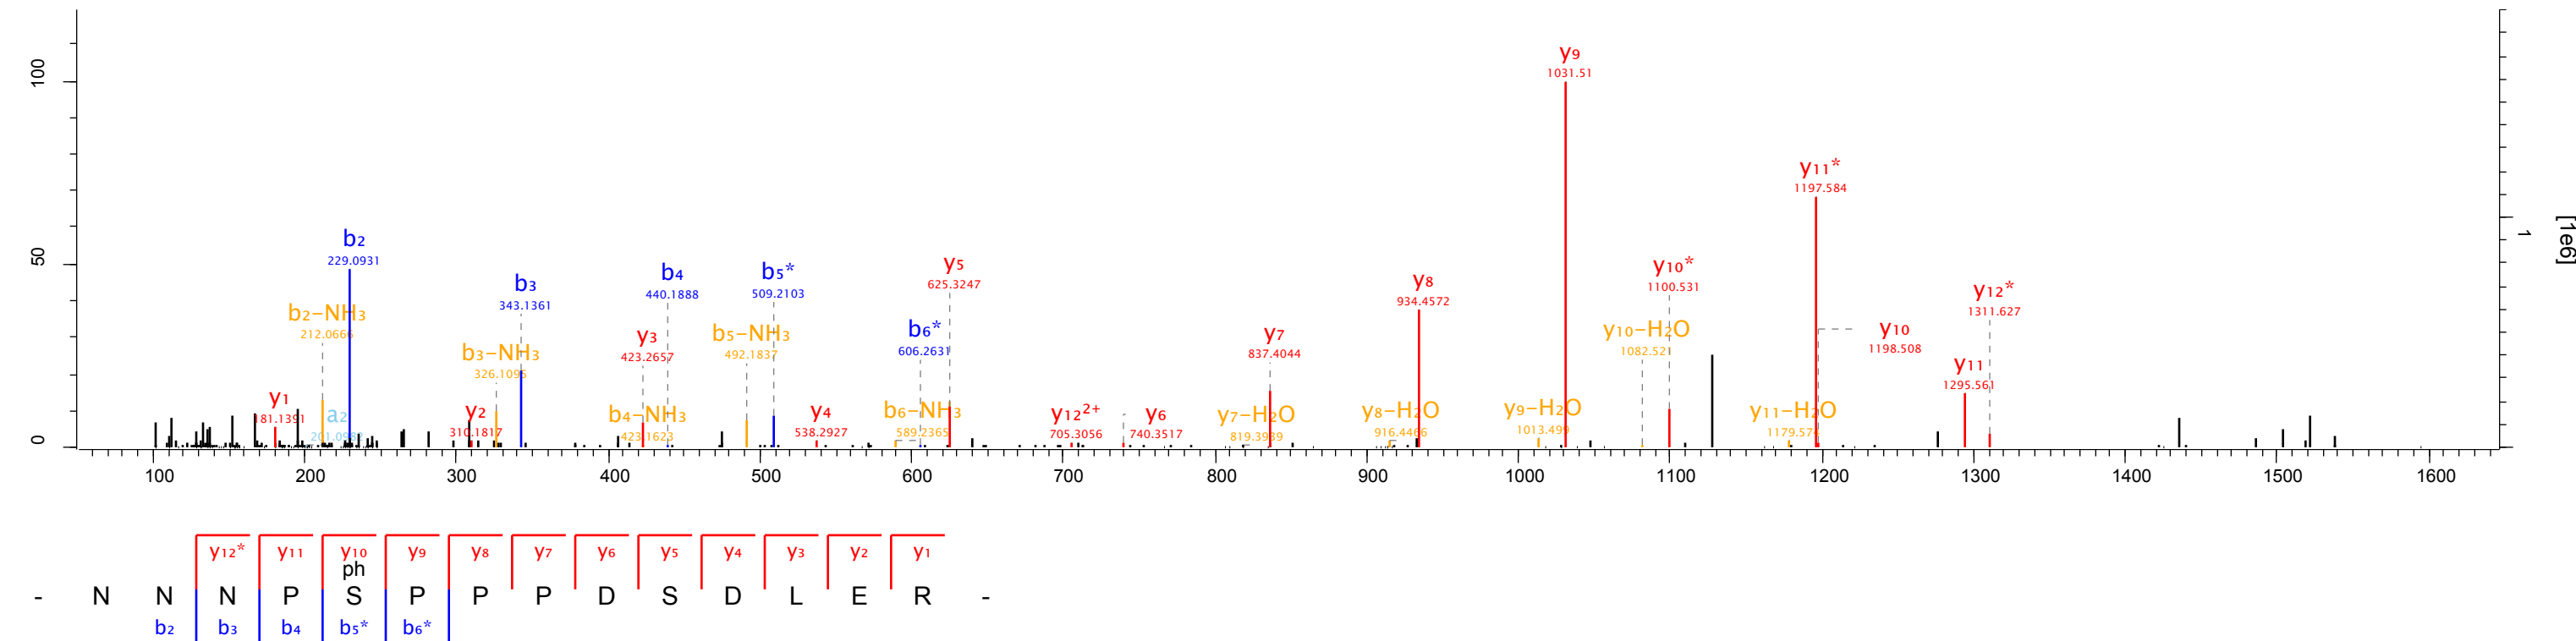

Raw file 20171215\_MaS\_33SR\_LMH\_phospho2\_02 Scan 10993 Method FTMS; HCD Score 140.95 m/z 959.4 Gene names TANC2

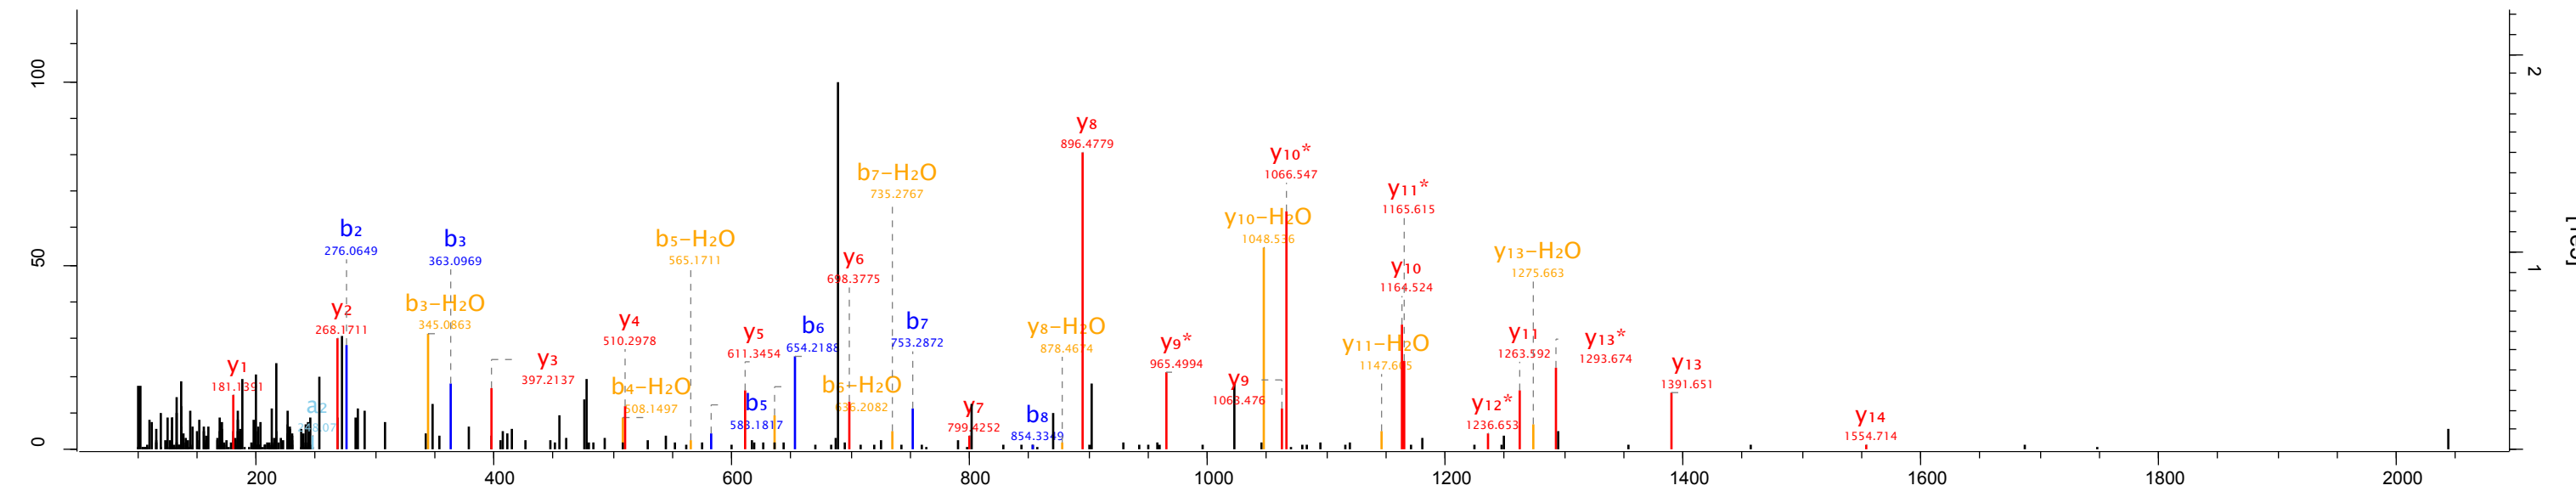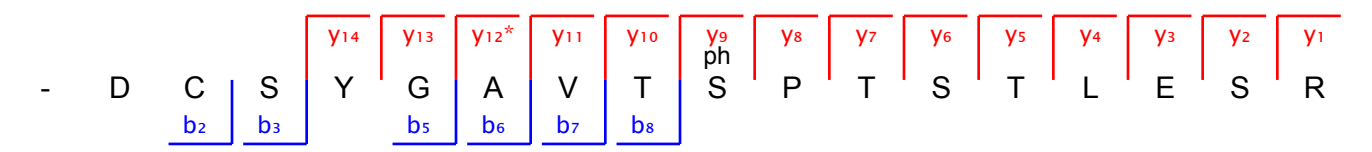

Raw file 20171215\_MaS\_33SR\_LMH\_phospho2\_02 Scan 11713 Method FTMS; HCD Score 190.57 m/z 1008.42 Gene names TNRC6B

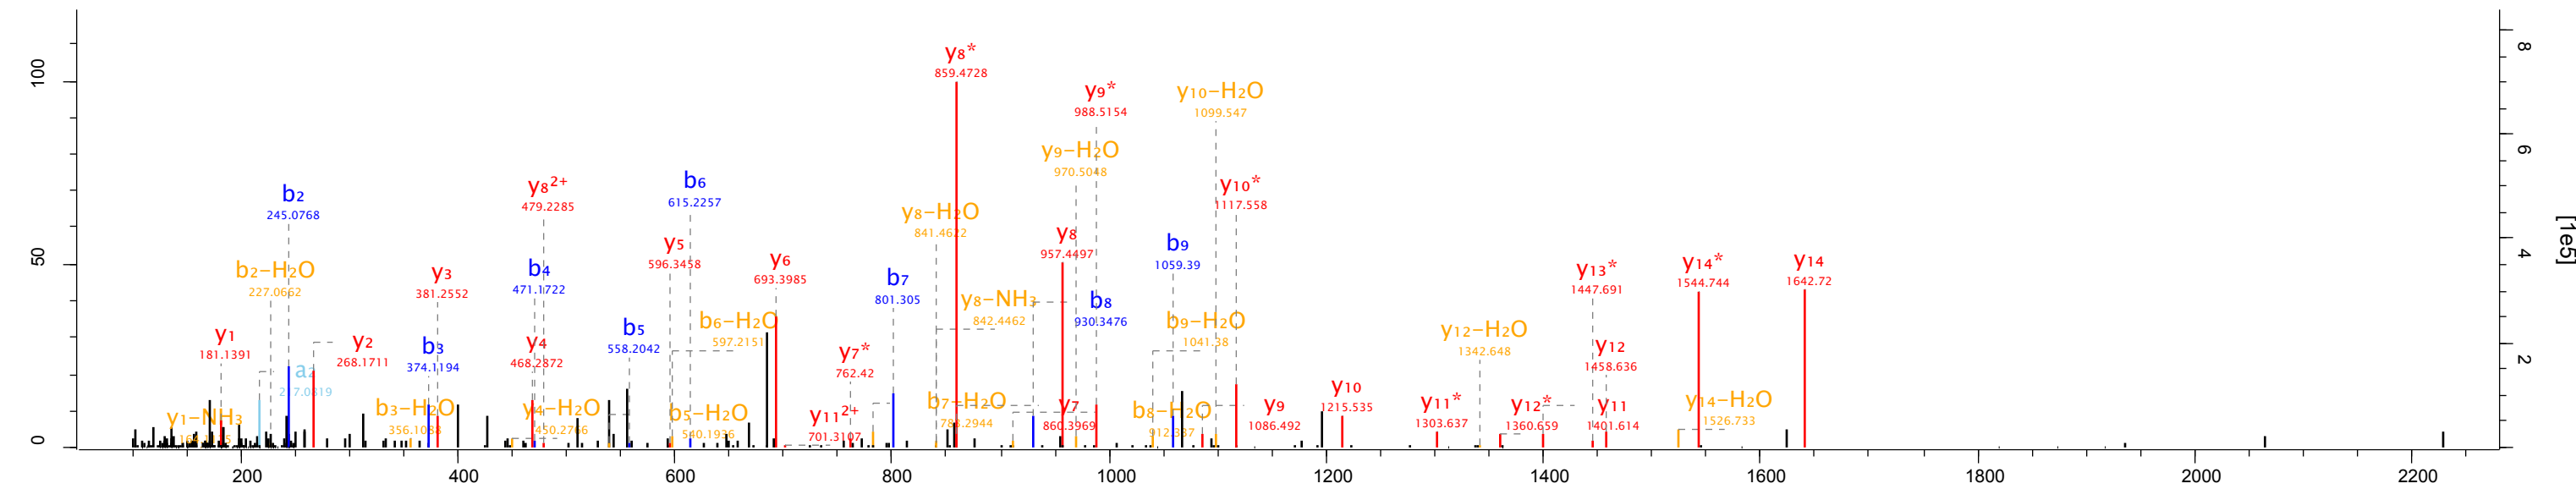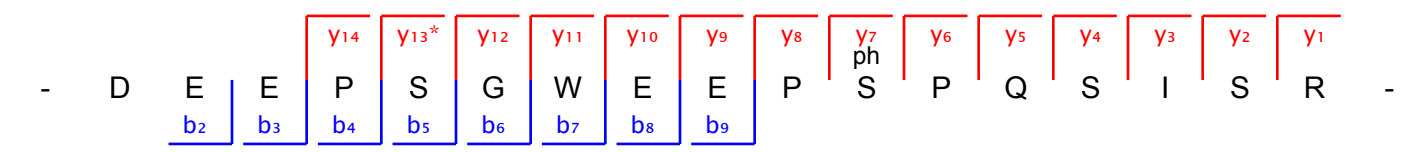

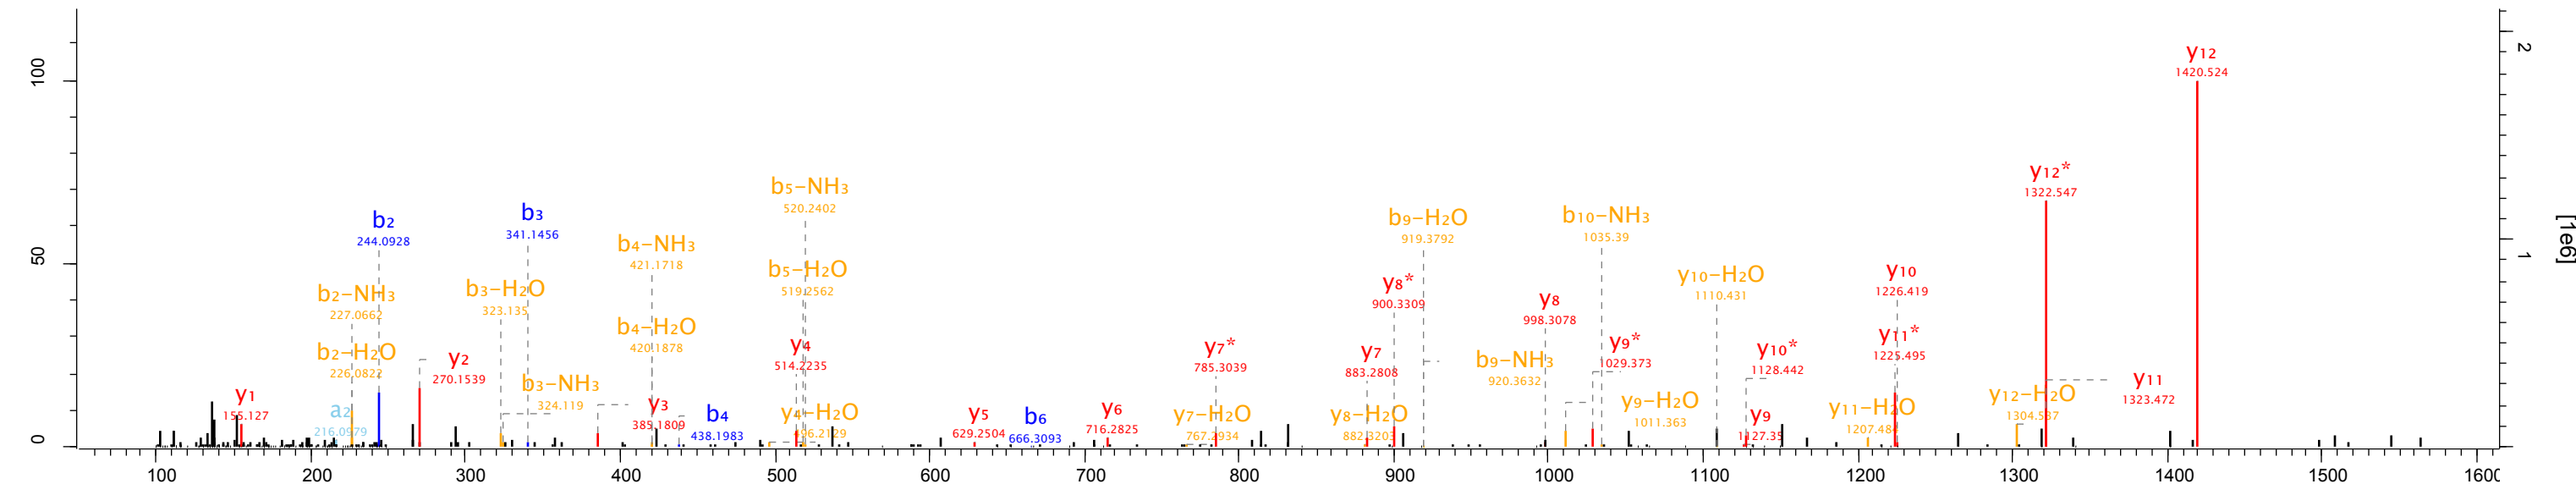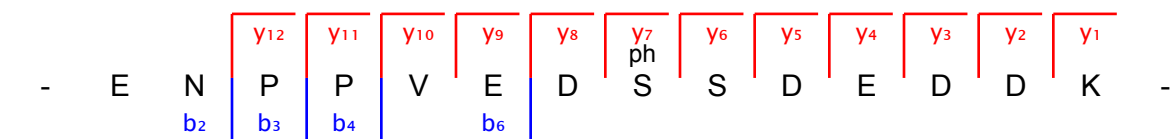

Raw file 20171215\_MaS\_33SR\_LMH\_phospho2\_02 Scan 5163 Method FTMS; HCD Score 80.39 m/z 730.33 Gene names CDON

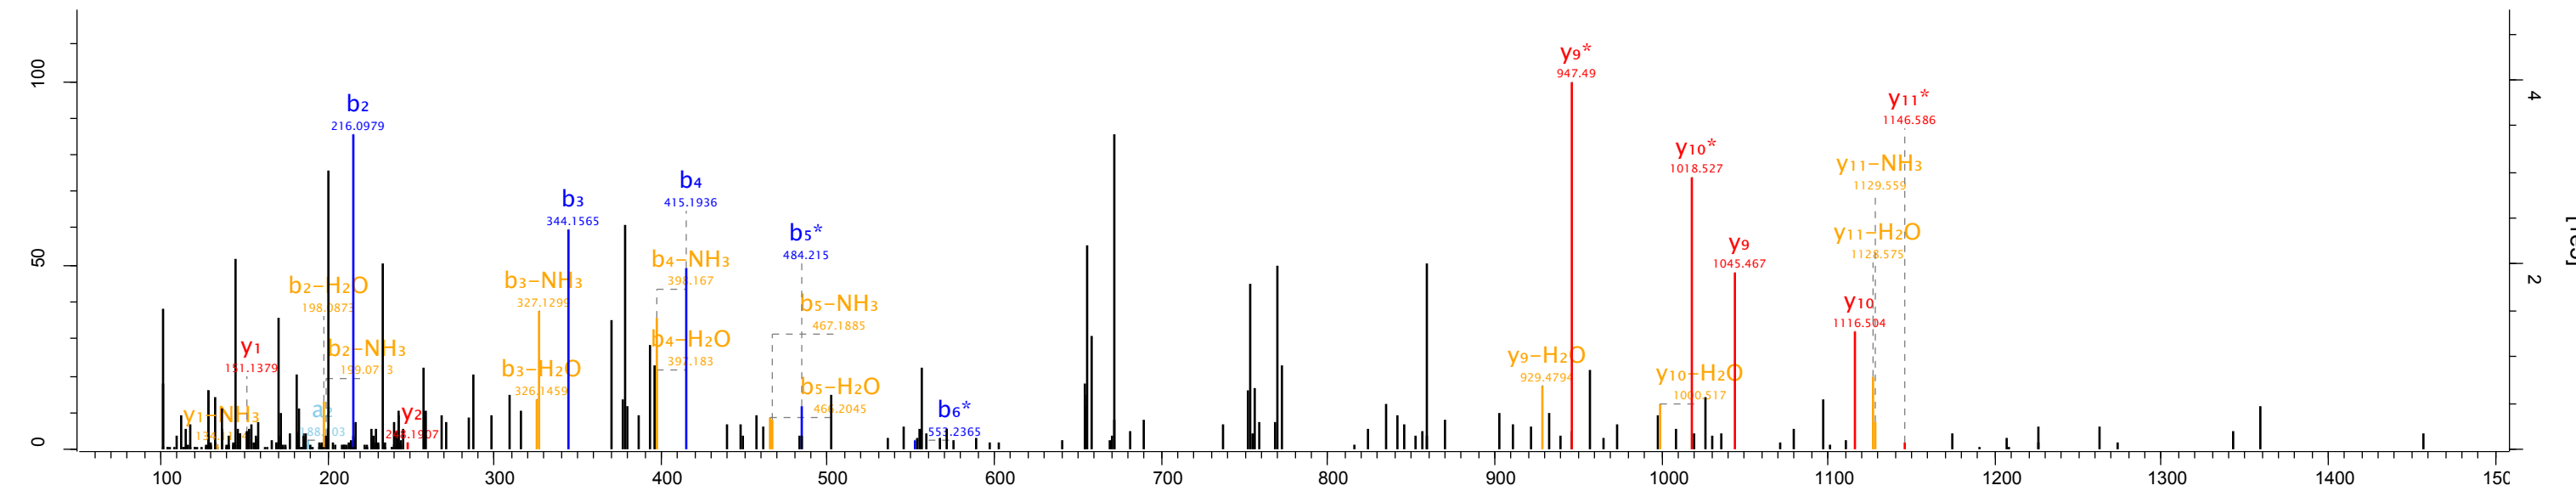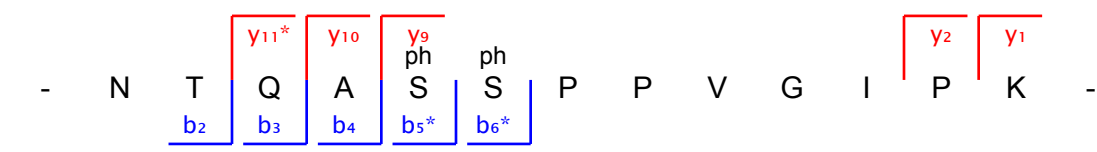

Raw file 20171215\_MaS\_33SR\_LMH\_phospho2\_02 Scan 6073 Method FTMS; HCD Score 54.2 m/z 527.27 Gene names SOX6

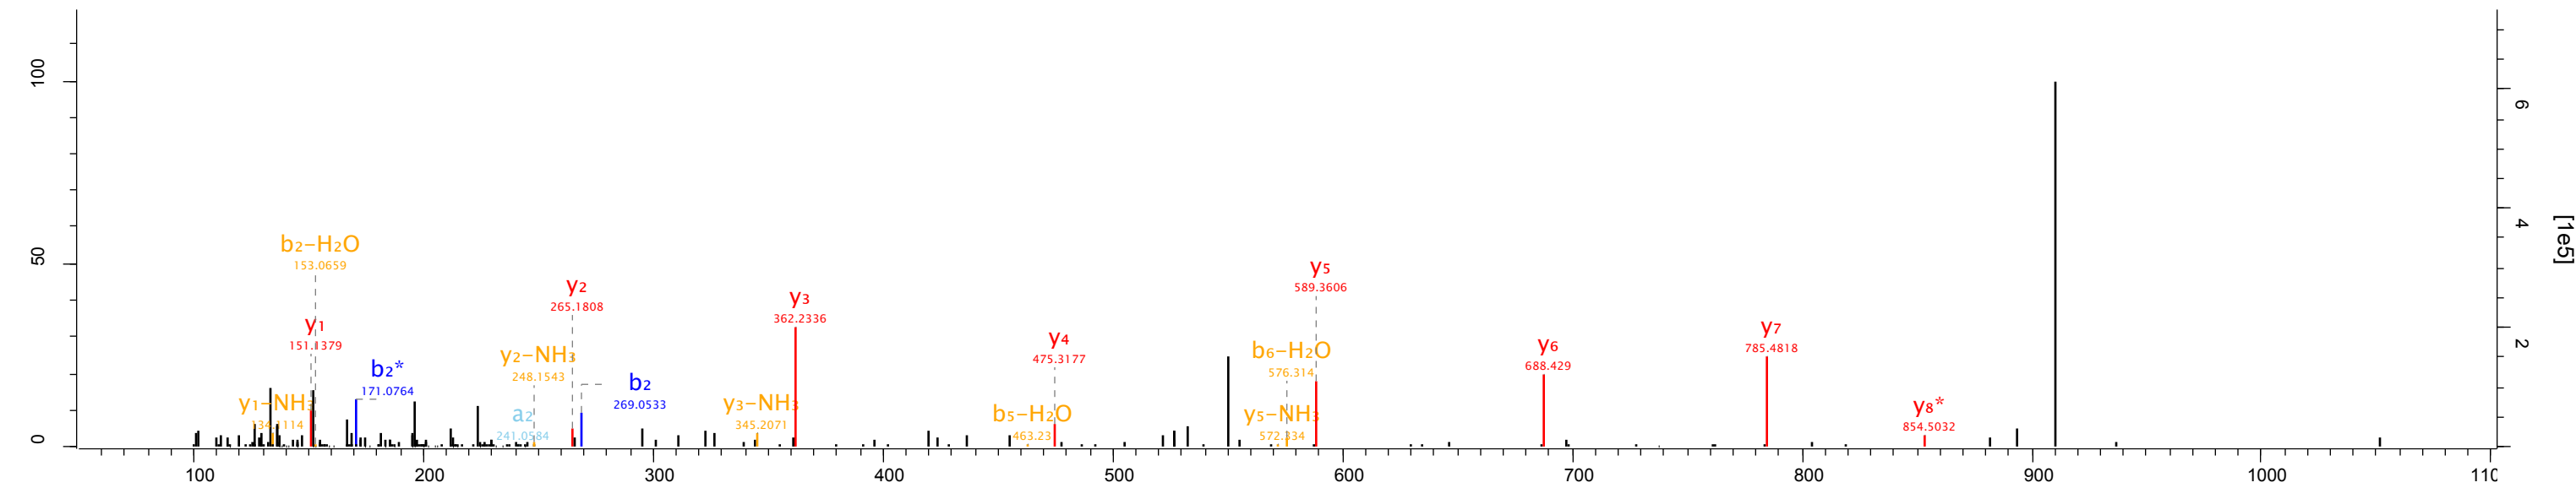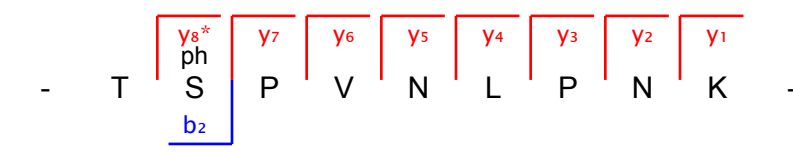

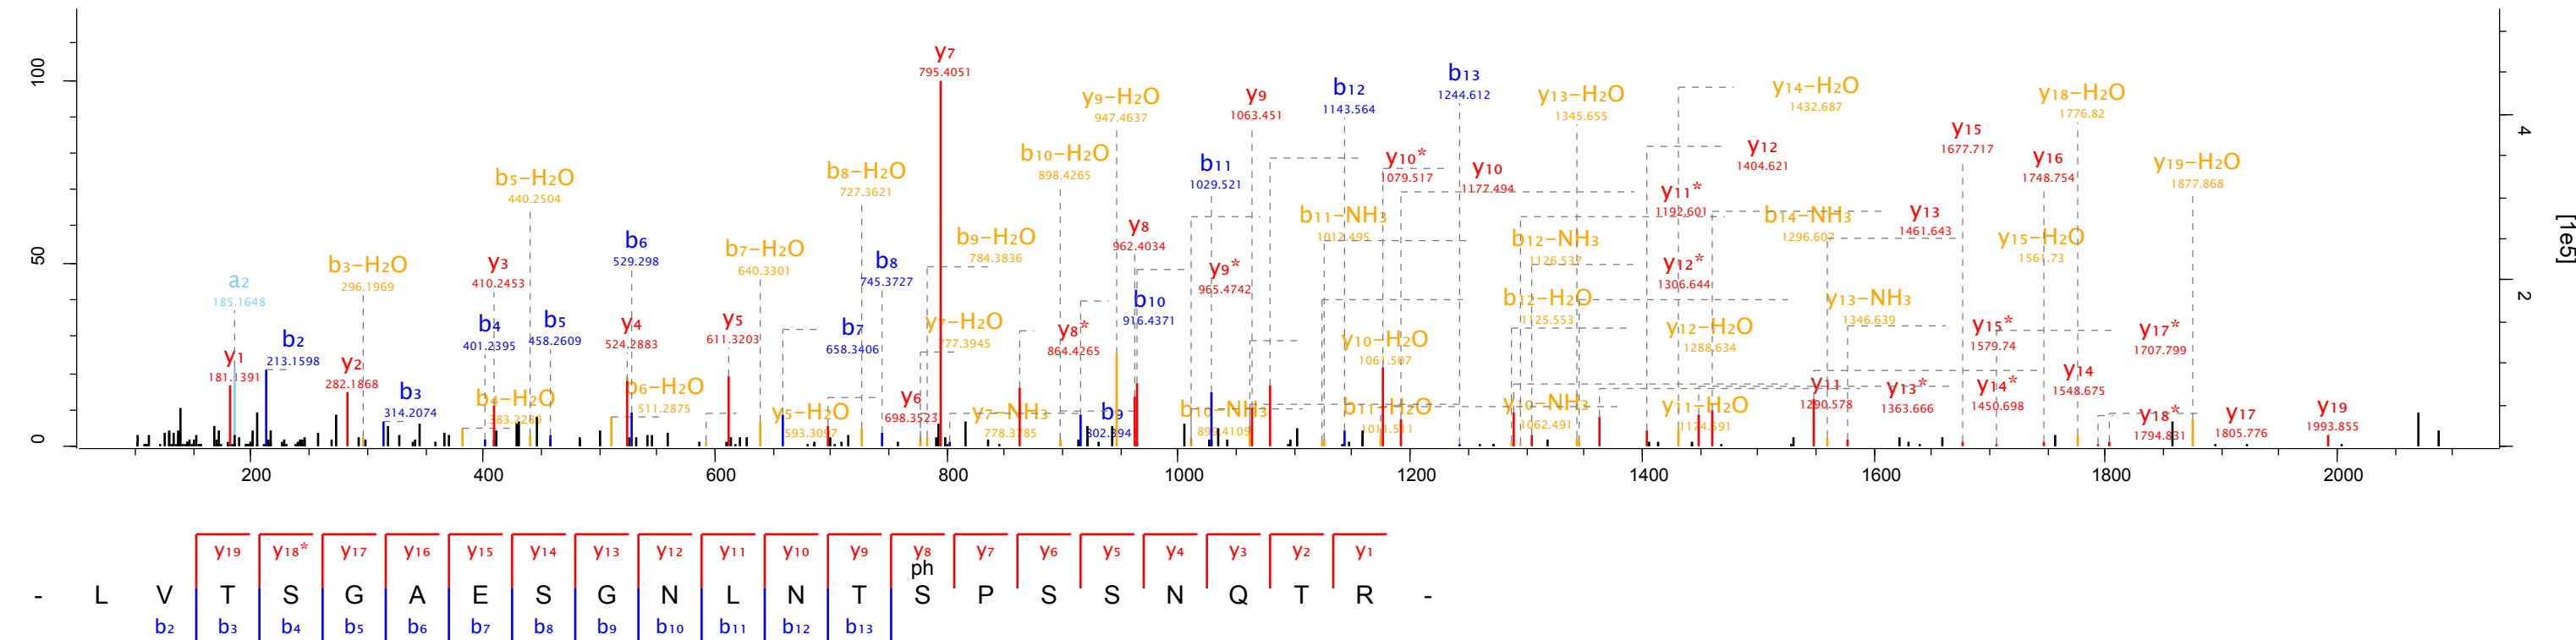

Raw file 20171215\_MaS\_33SR\_LMH\_phospho2\_03 Scan 12093 Method FTMS; HCD Score 133.81 m/z 1175.5 Gene names KLHDC4

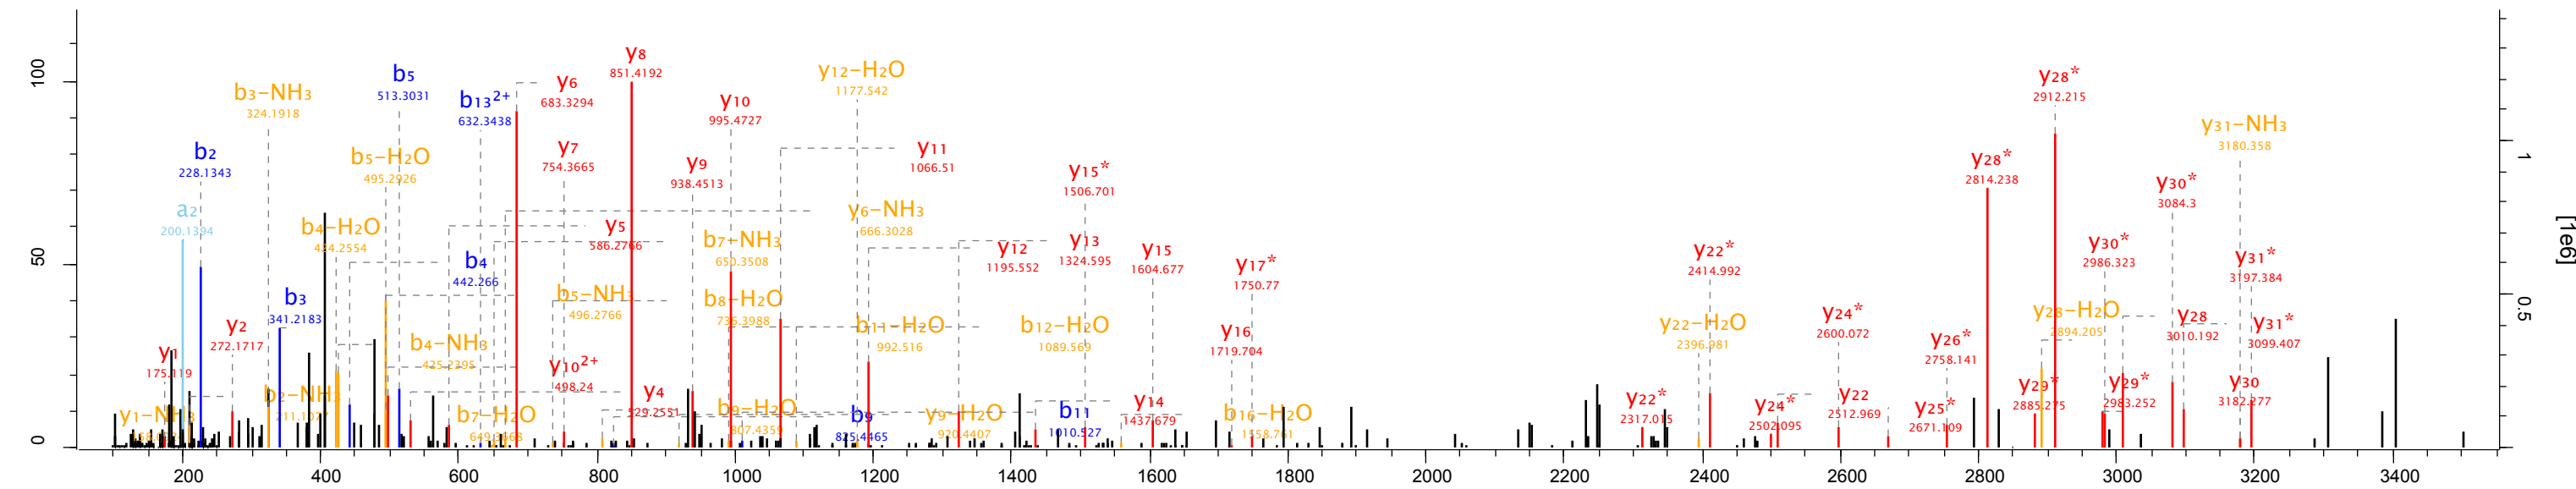

- Q V L T A P G S A G Q P R S E D E D S L E E A G S P A P G P C P R -

Fragmentation mapping (b and y ions) is shown below the sequence:

- b ions (blue boxes):** b<sub>2</sub> (V), b<sub>3</sub> (L), b<sub>4</sub> (T), b<sub>5</sub> (A), b<sub>9</sub> (A), b<sub>11</sub> (Q), b<sub>13</sub><sup>2+</sup> (P)
- y ions (red boxes):** y<sub>1</sub> (R), y<sub>2</sub> (C), y<sub>4</sub> (P), y<sub>5</sub> (G), y<sub>6</sub> (A), y<sub>7</sub> (S), y<sub>8</sub> (P), y<sub>9</sub> (A), y<sub>10</sub> (G), y<sub>11</sub> (A), y<sub>12</sub> (E), y<sub>13</sub> (E), y<sub>14</sub> (L), y<sub>15</sub> (S), y<sub>16</sub> (D), y<sub>17</sub> (E), y<sub>22</sub> (P), y<sub>24</sub> (G), y<sub>25</sub> (A), y<sub>26</sub> (S), y<sub>28</sub> (P), y<sub>29</sub> (A), y<sub>30</sub> (P), y<sub>31</sub> (L)



Raw file 20171215\_MaS\_33SR\_LMH\_phospho2\_03 Scan 12443 Method FTMS; HCD Score 43.76 m/z 743.34

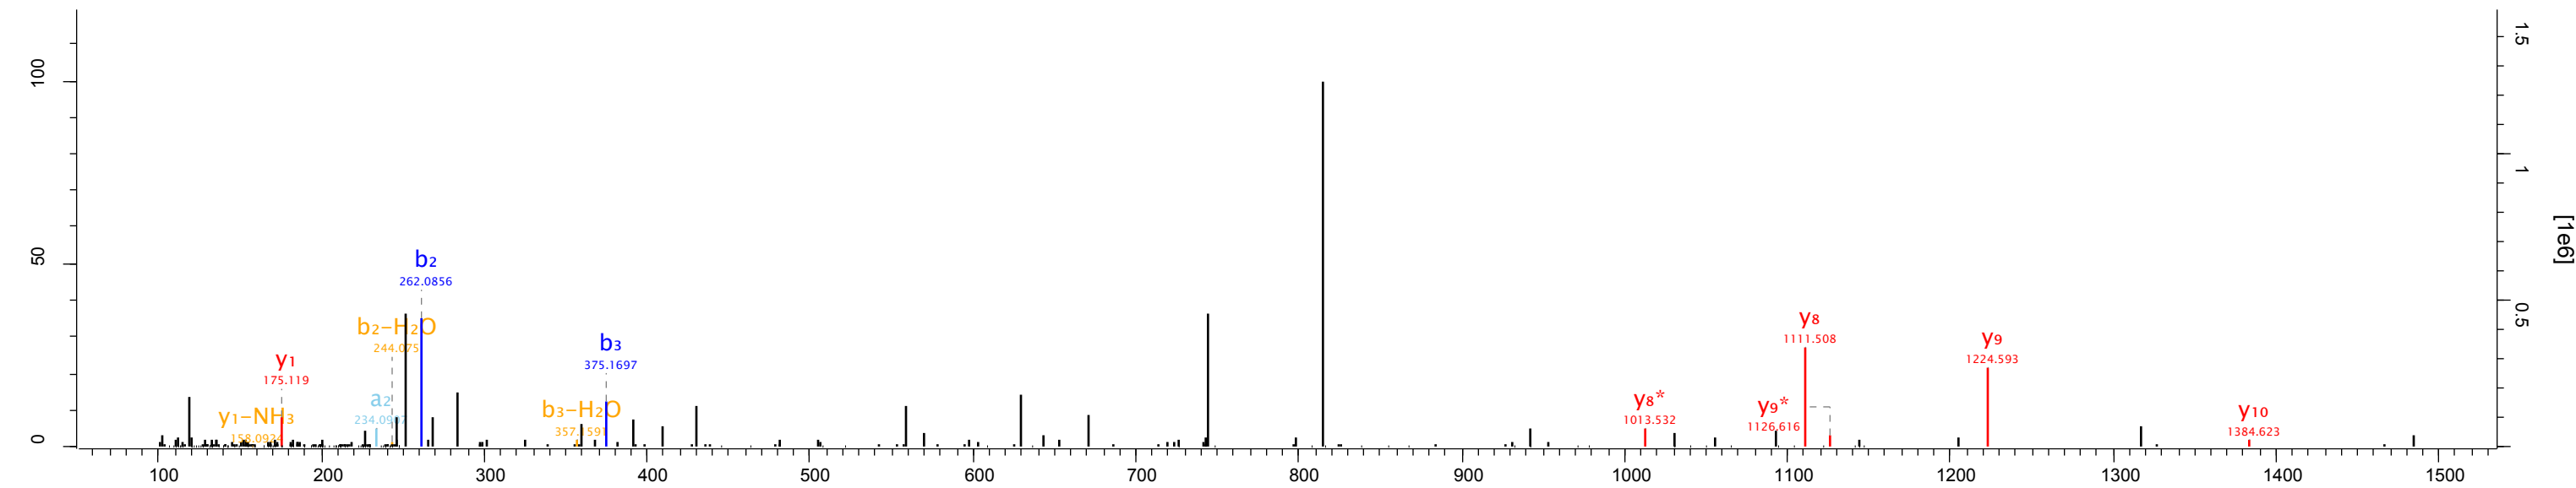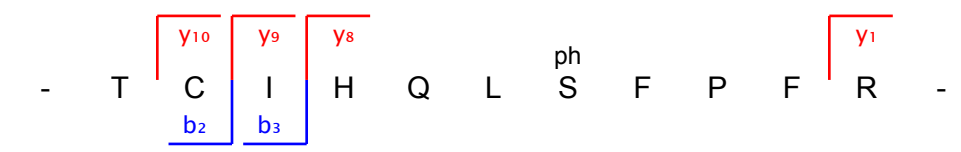

Raw file 20171215\_MaS\_33SR\_LMH\_phospho2\_03 Scan 14593 Method FTMS; HCD Score 92.54 m/z 908.39 Gene names GPR39

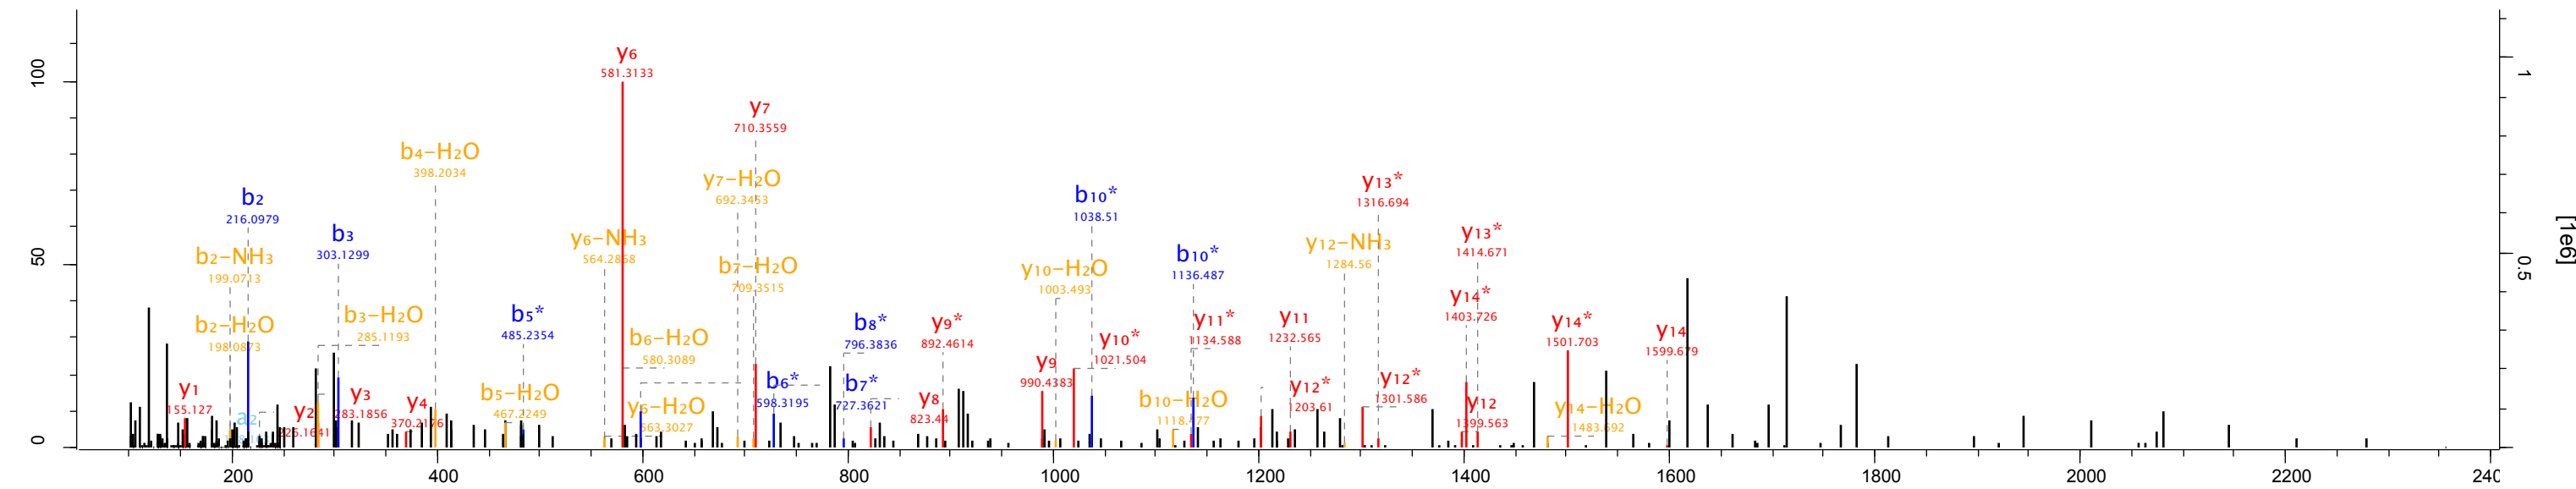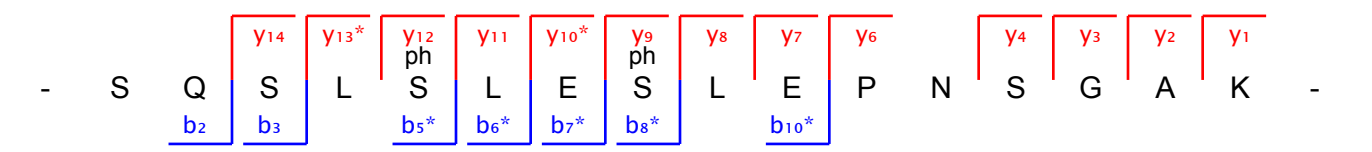

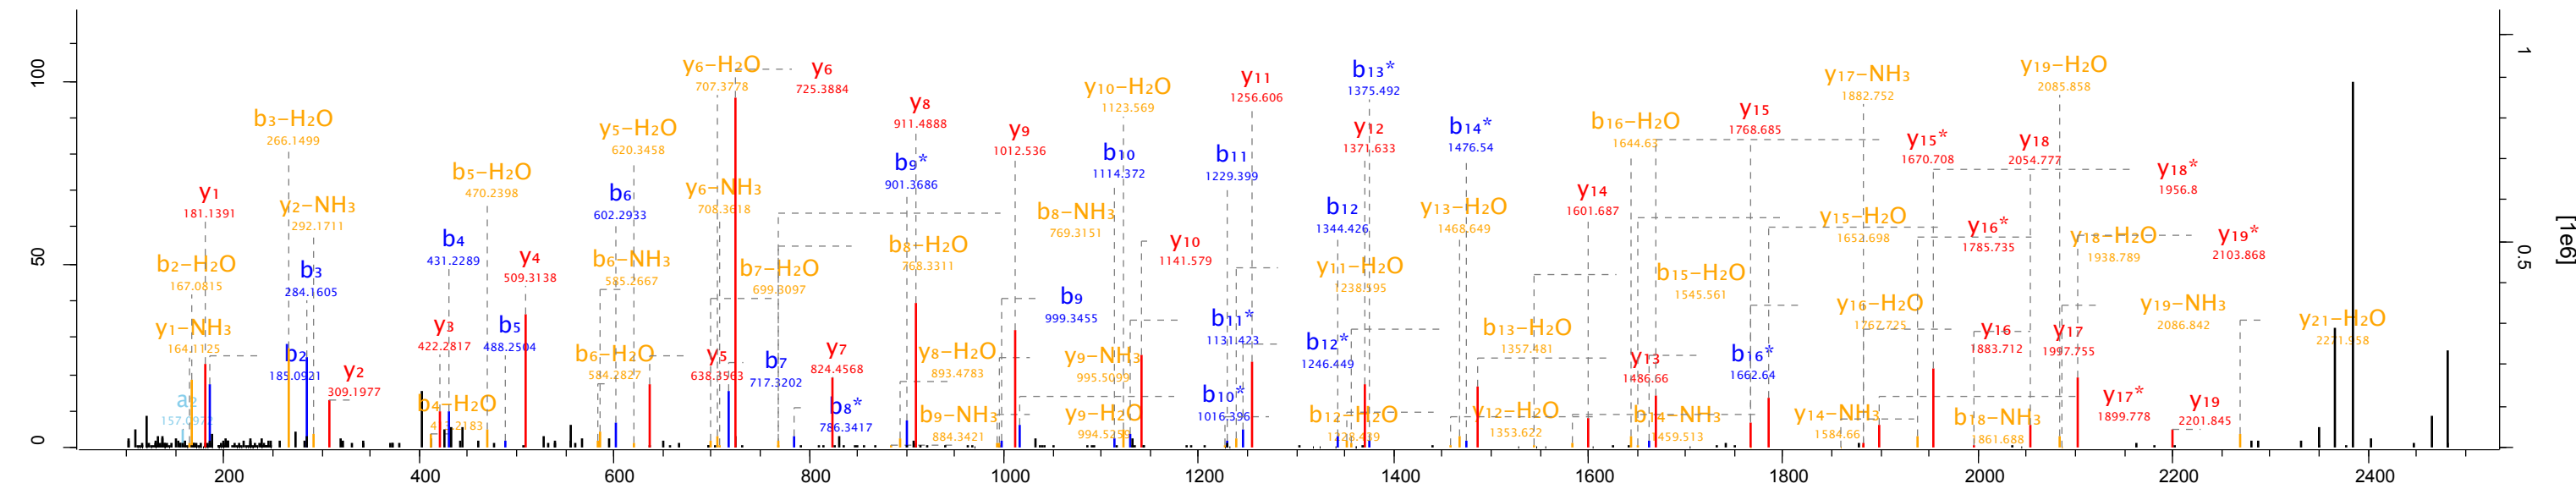

- P S V F G N D S D D D D E T S V S E S L Q R -

b<sub>2</sub> b<sub>3</sub> b<sub>4</sub> b<sub>5</sub> b<sub>6</sub> b<sub>7</sub> b<sub>8</sub><sup>\*</sup> b<sub>9</sub> b<sub>10</sub> b<sub>11</sub> b<sub>12</sub> b<sub>13</sub><sup>\*</sup> b<sub>14</sub><sup>\*</sup> b<sub>16</sub><sup>\*</sup>

y<sub>19</sub> y<sub>18</sub> y<sub>17</sub> y<sub>16</sub> y<sub>15</sub> ph y<sub>14</sub> y<sub>13</sub> y<sub>12</sub> y<sub>11</sub> y<sub>10</sub> y<sub>9</sub> y<sub>8</sub> y<sub>7</sub> y<sub>6</sub> y<sub>5</sub> y<sub>4</sub> y<sub>3</sub> y<sub>2</sub> y<sub>1</sub>

Raw file 20171215\_MaS\_33SR\_LMH\_phospho2\_03 Scan 15233 Method FTMS; HCD Score 111.98 m/z 1063.48 Gene names PCDH1

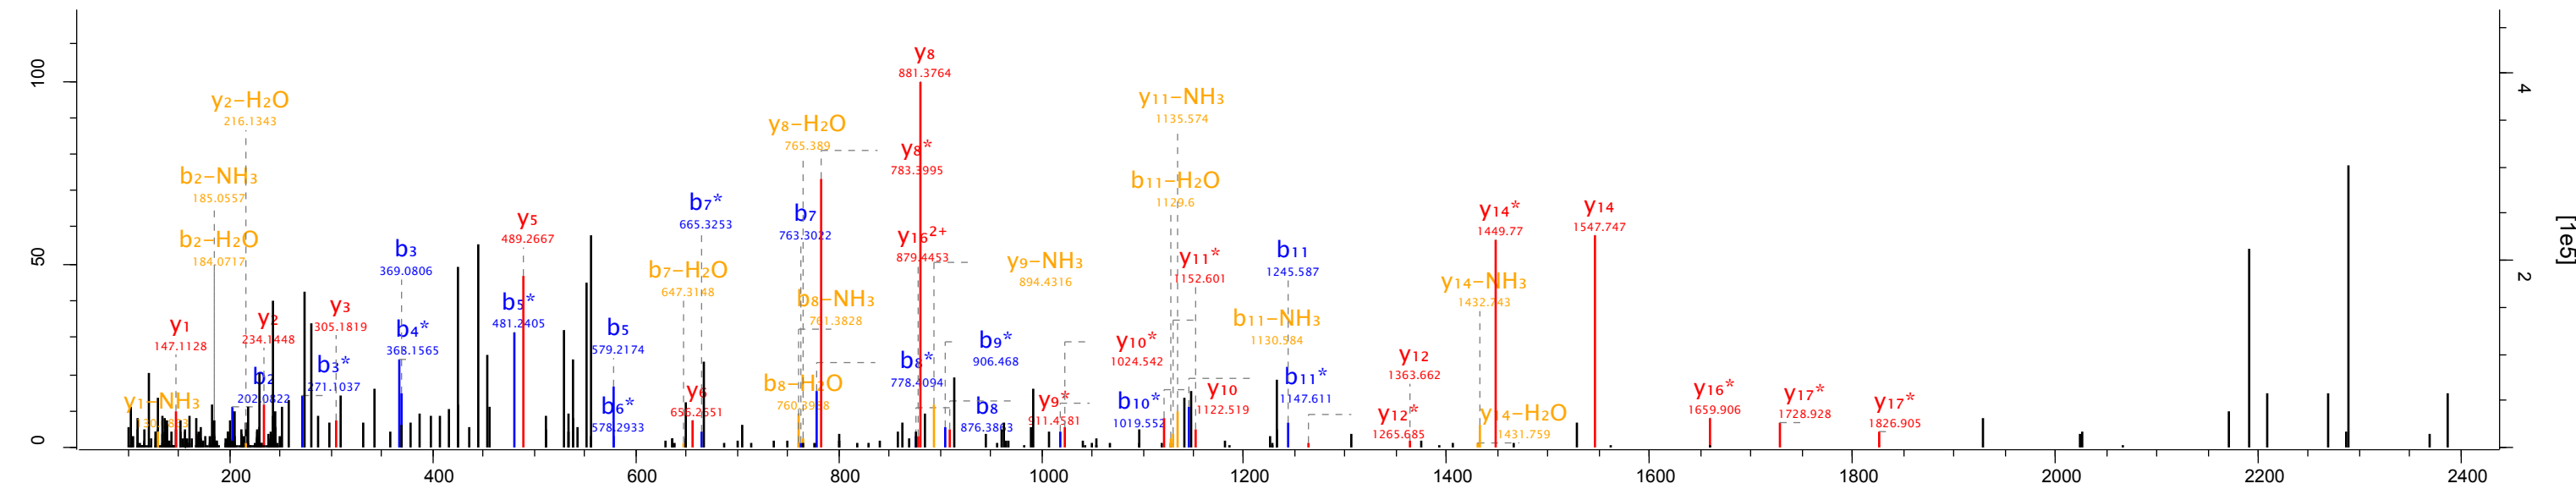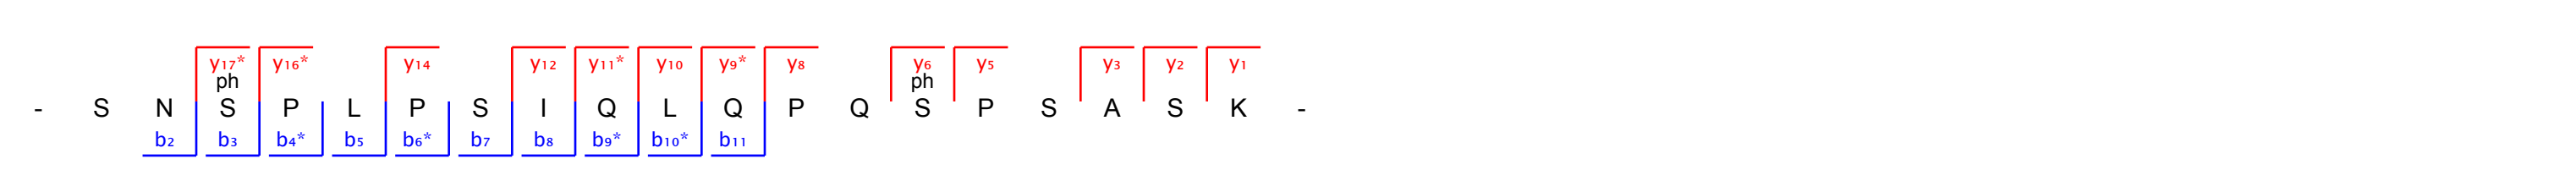

Raw file: 20171215\_MaS\_33SR\_LMH\_phospho2\_03  
 Scan: 15783 Method: FTMS; HCD Score: 129.35 m/z: 972.42 Gene names: SMEK2

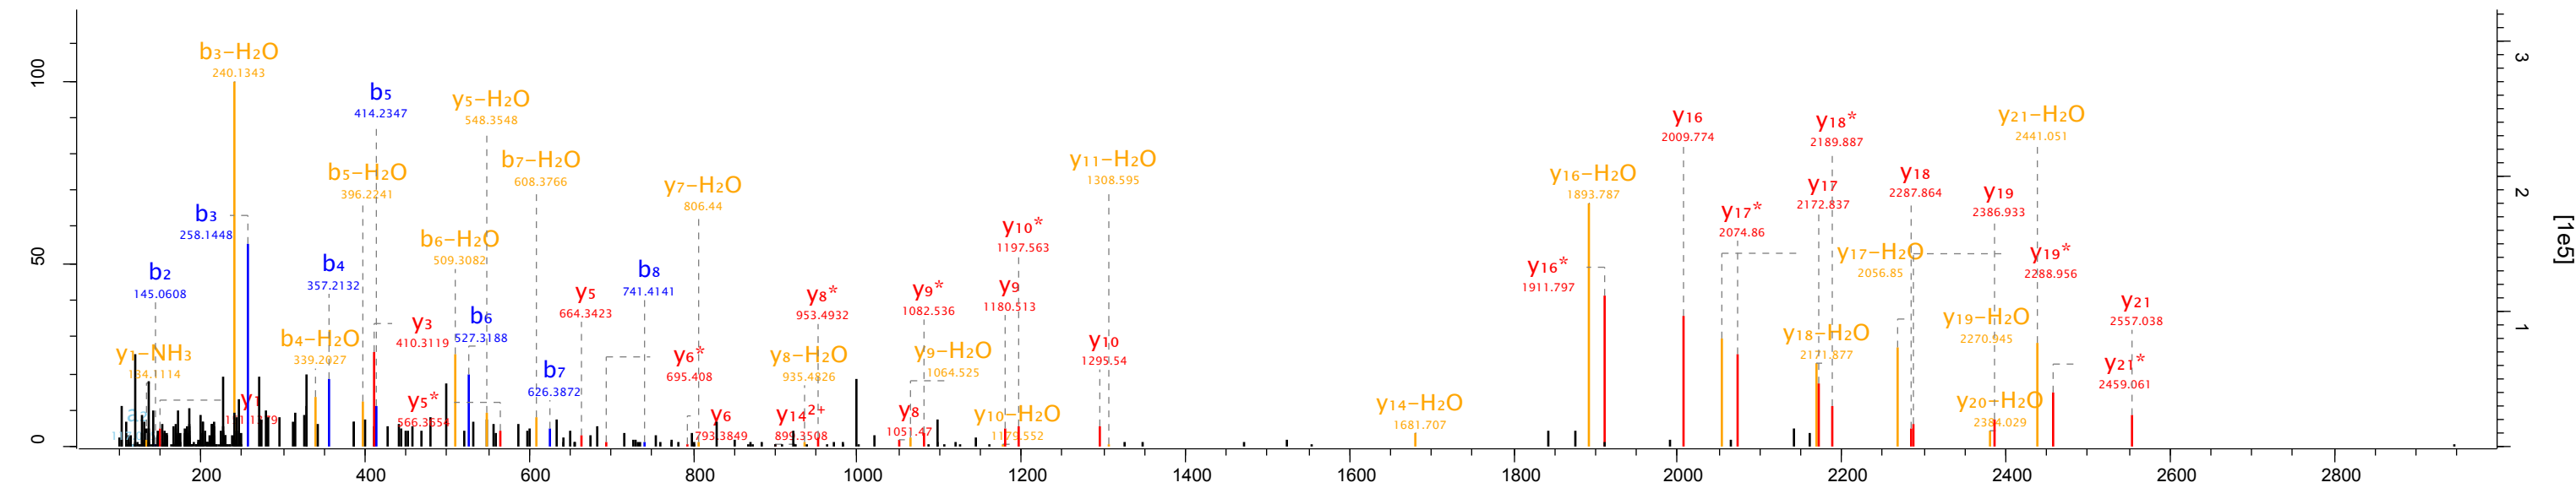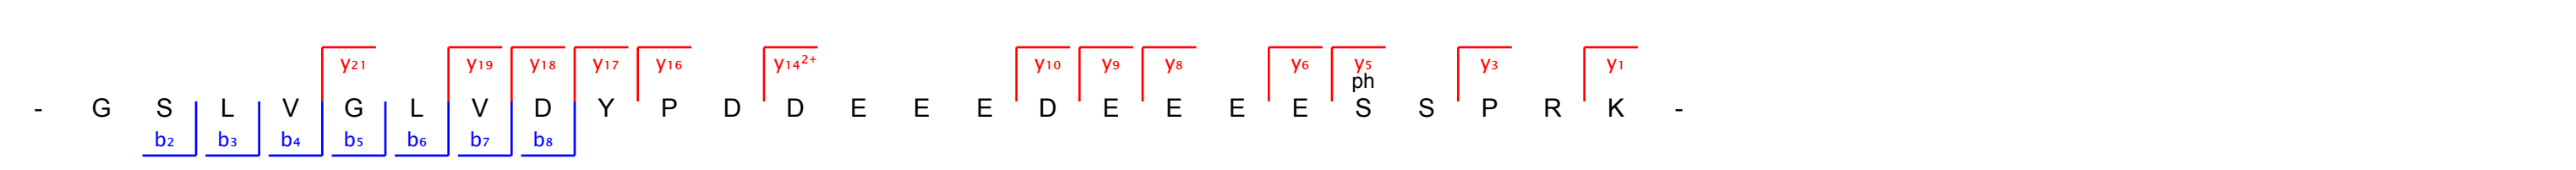

Raw file 20171215\_MaS\_33SR\_LMH\_phospho2\_03 Scan 16753 Method FTMS; HCD Score 143.17 m/z 968.44 Gene names AGGF1

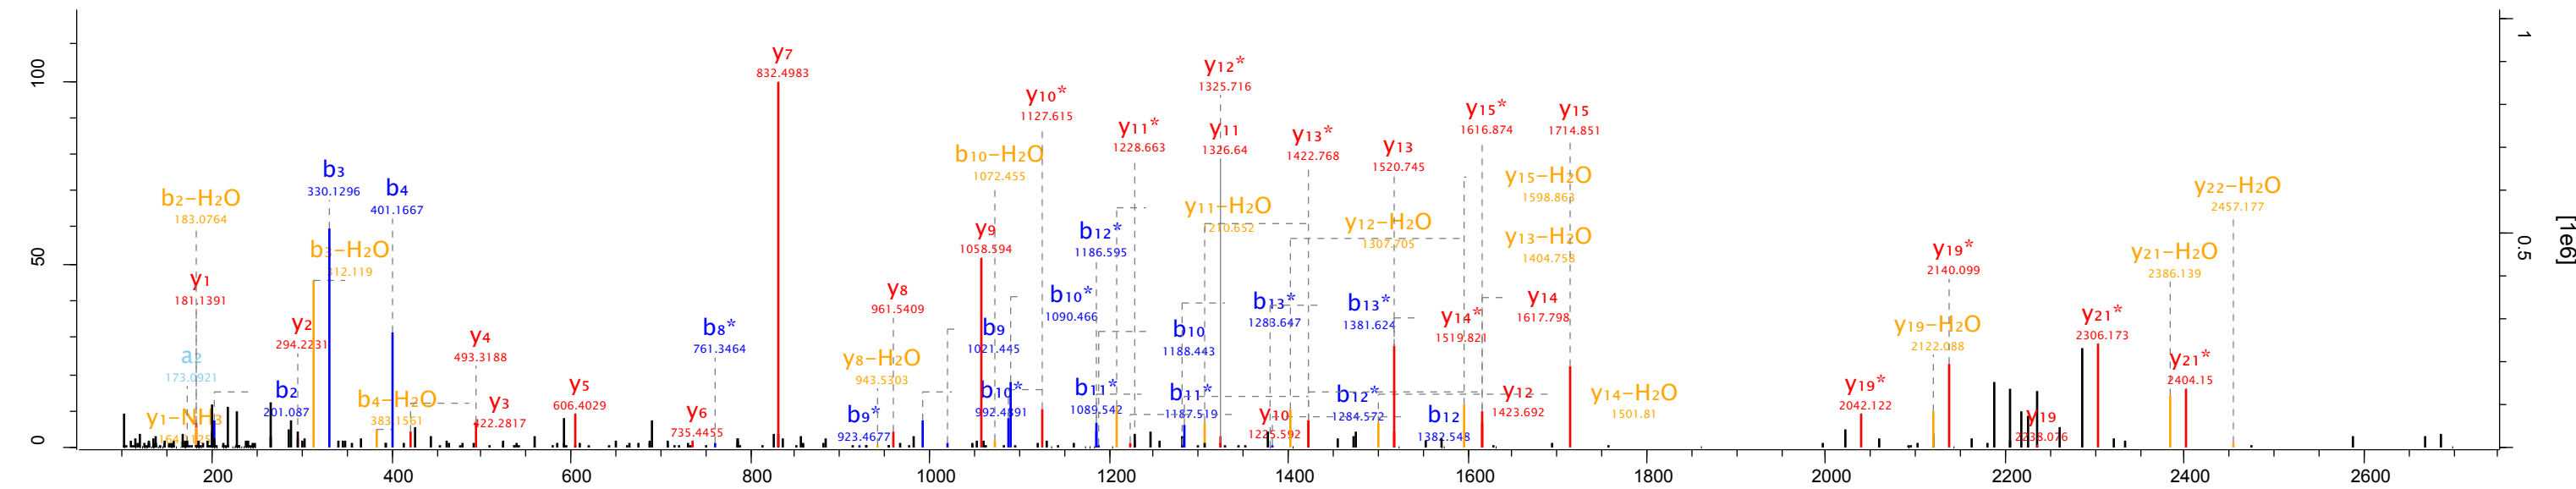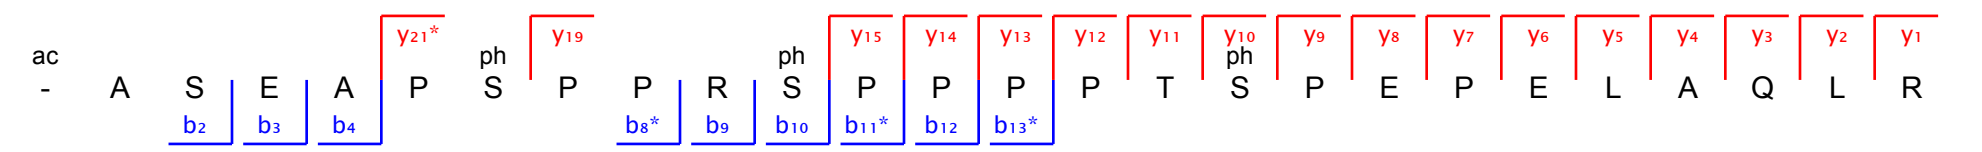

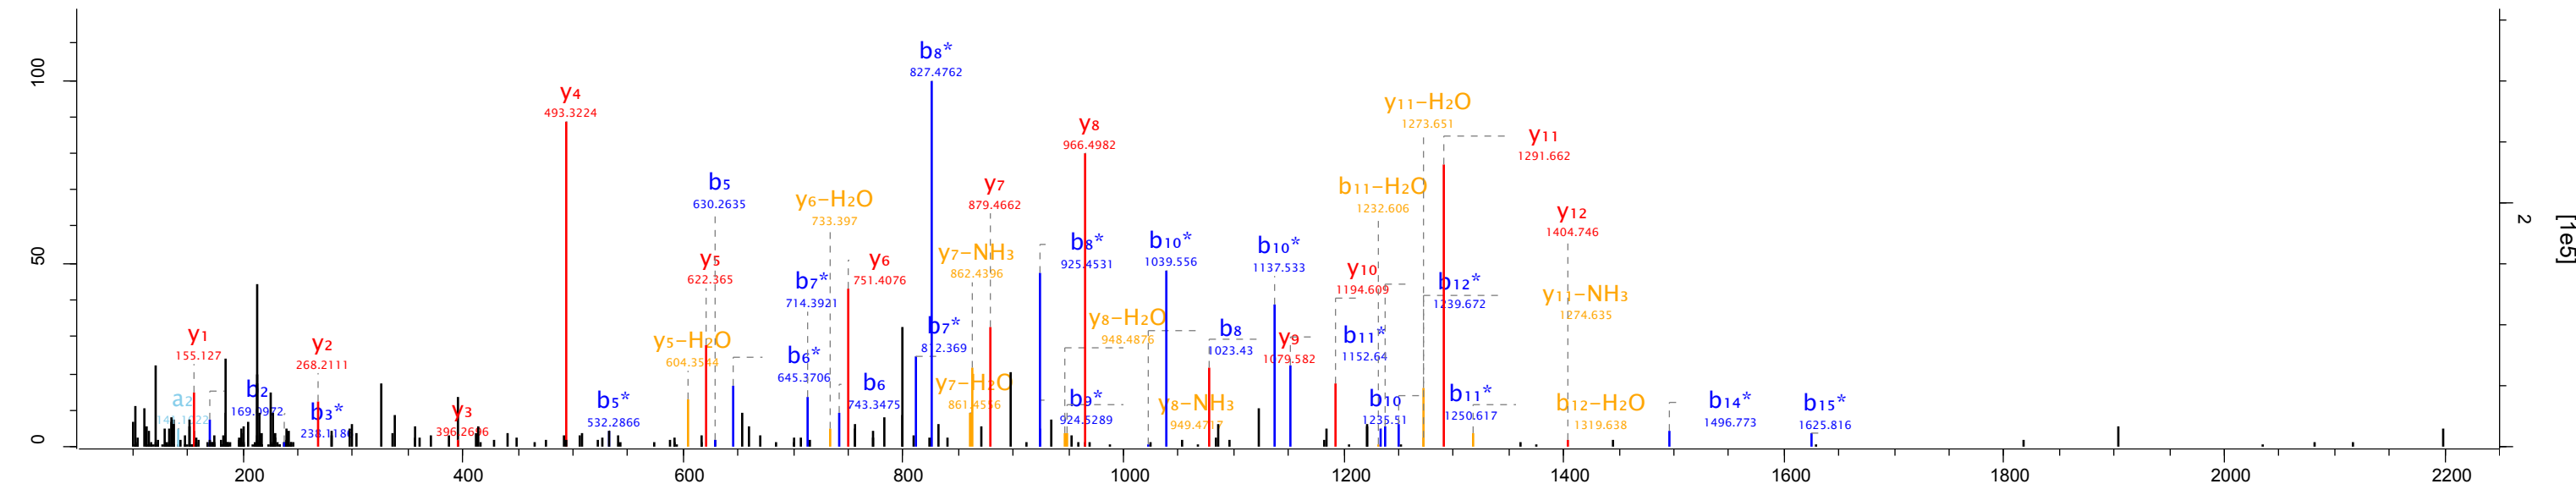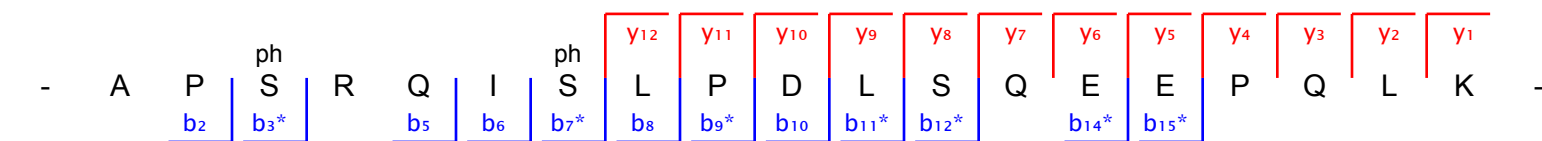

Raw file 20171215\_MaS\_33SR\_LMH\_phospho2\_03 Scan 4113 Method FTMS; HCD Score 156.48 m/z 934.79 Gene names TRIM44

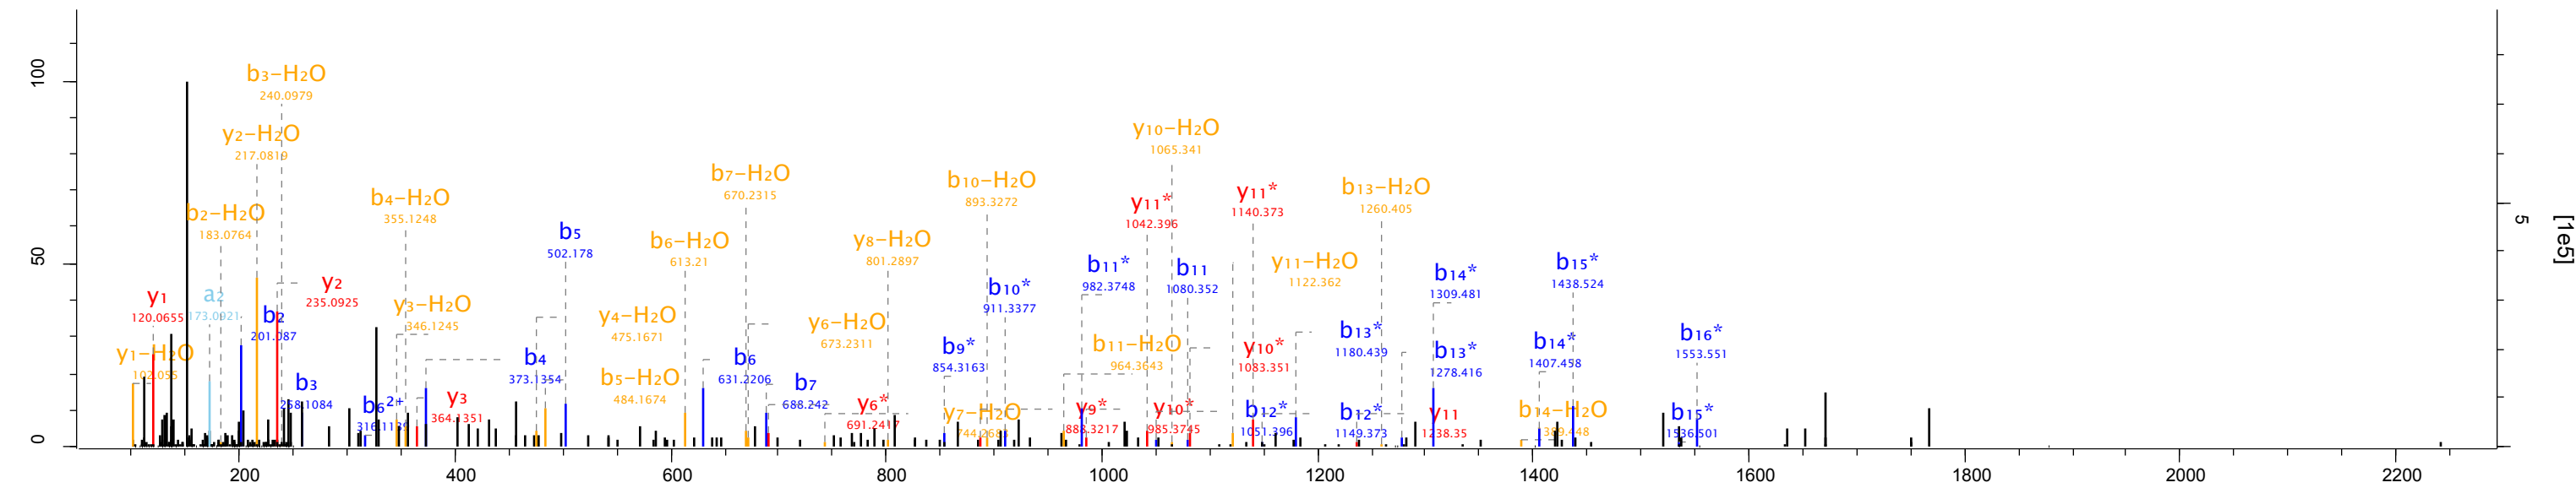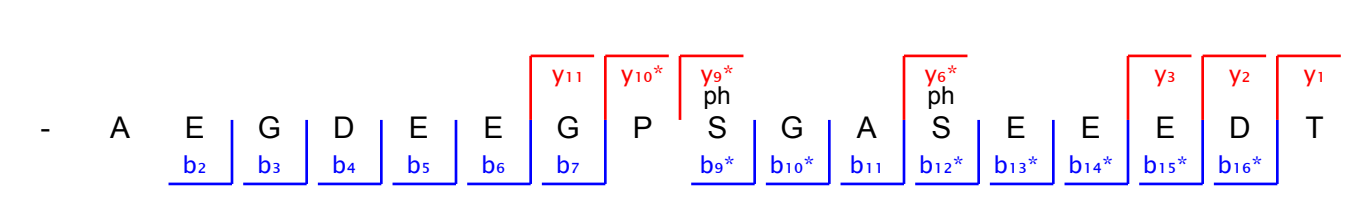



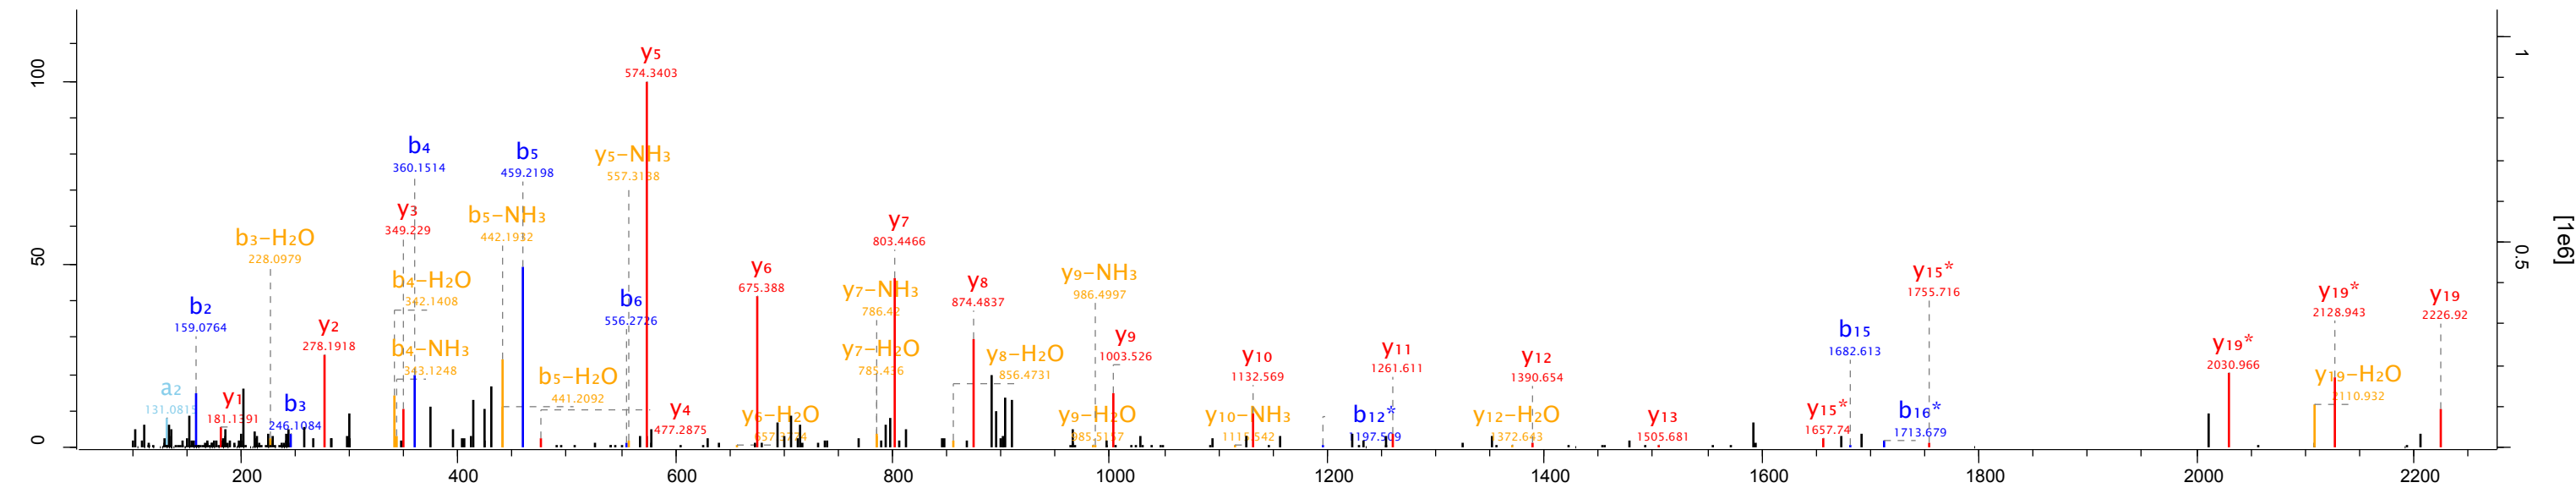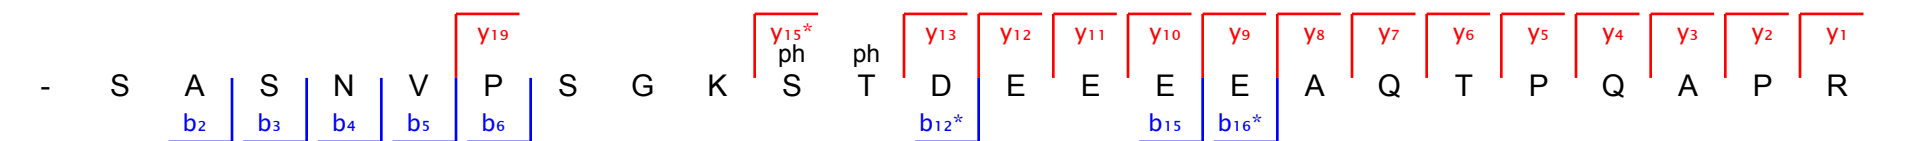

Raw file: 20171215\_MaS\_33SR\_LMH\_phospho2\_03  
 Scan: 7893 Method: FTMS; HCD Score: 142.45 m/z: 923.91 Gene names: MAP3K3

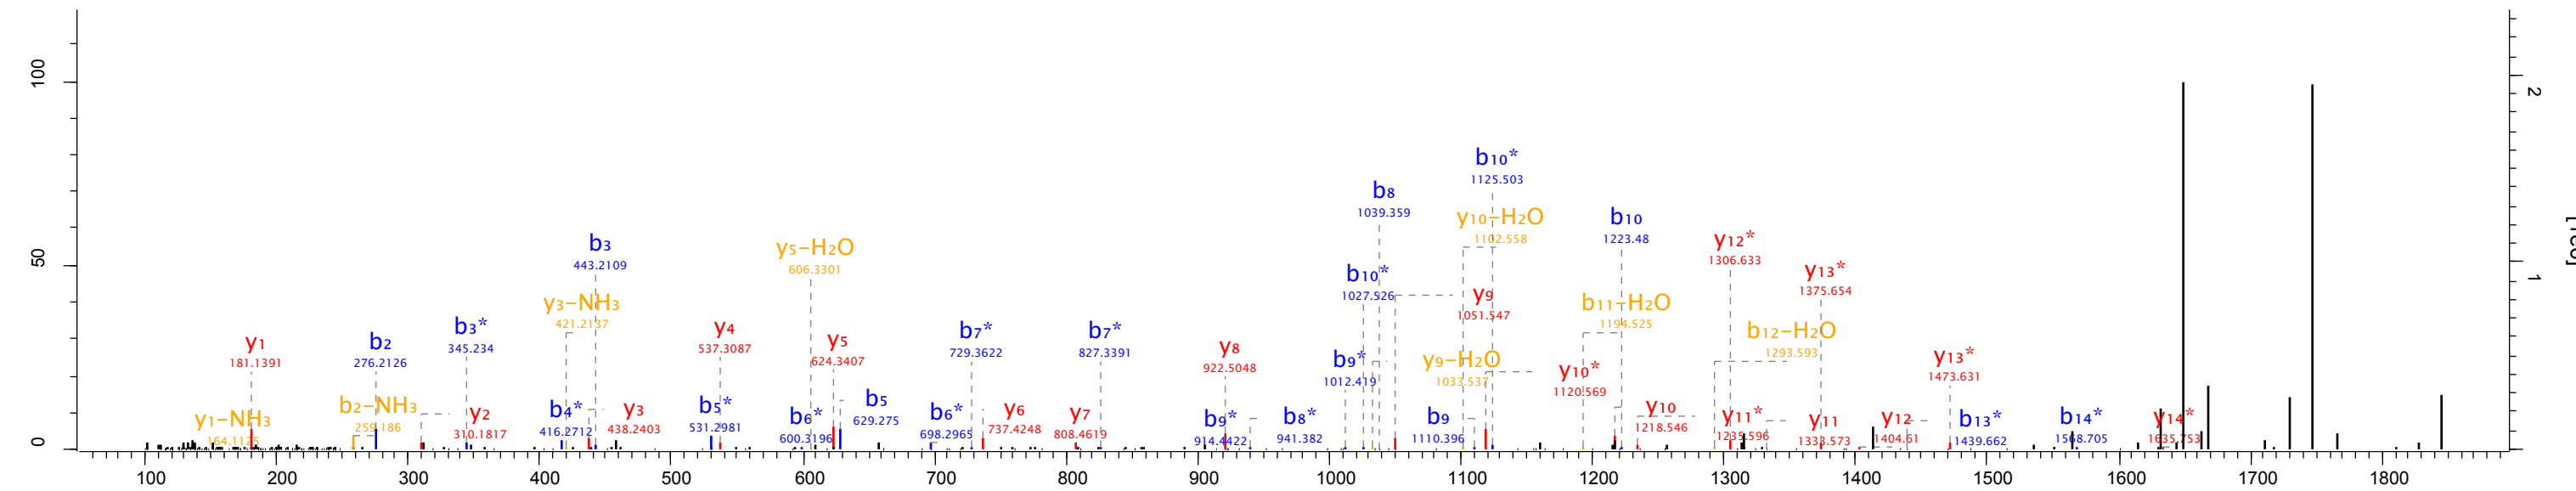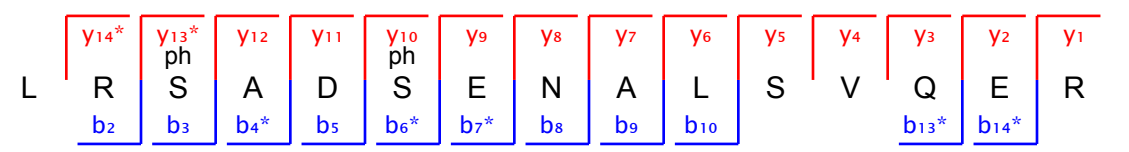

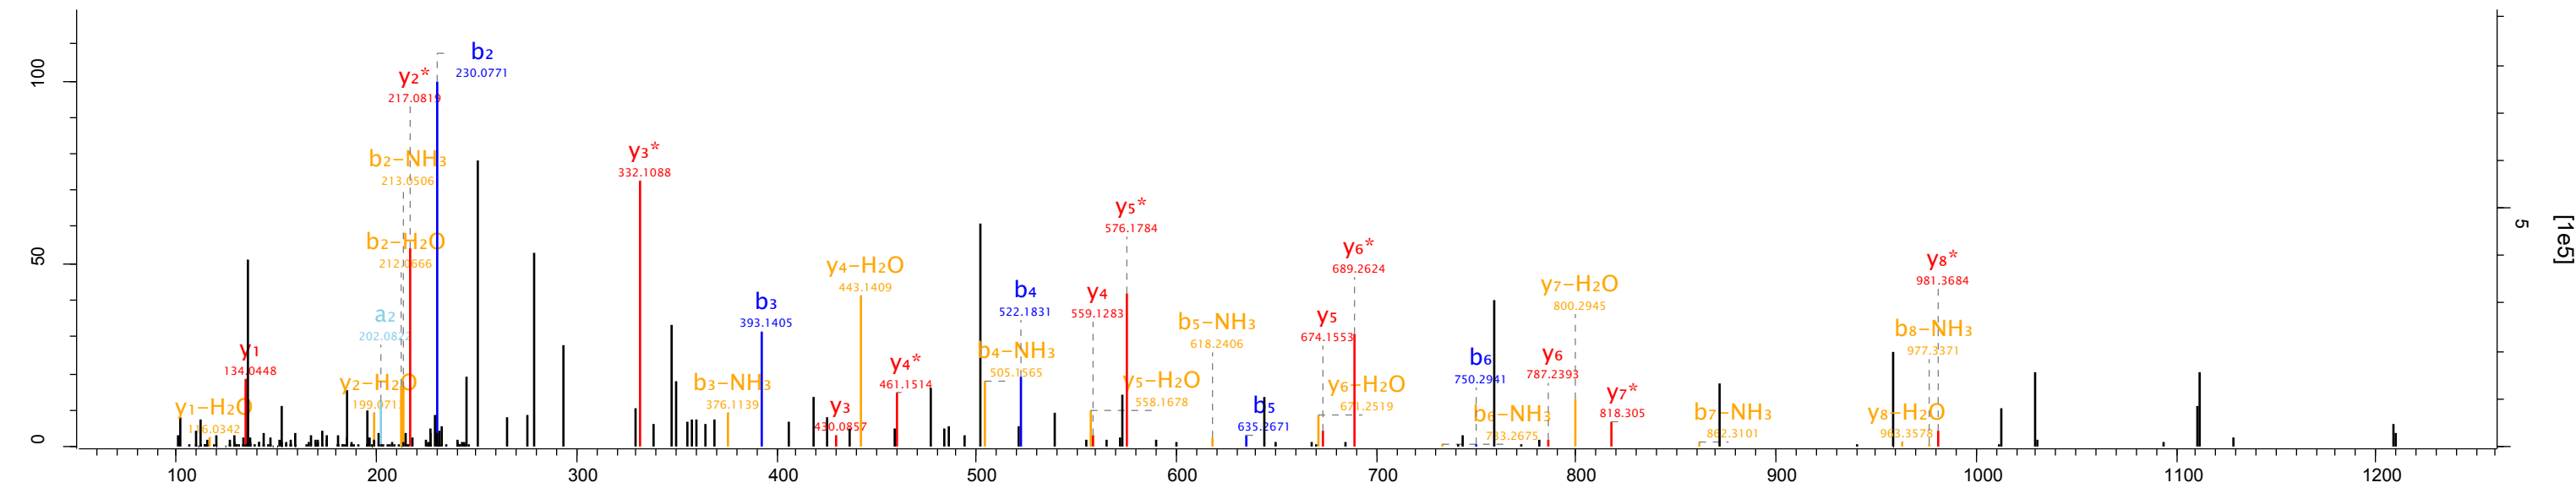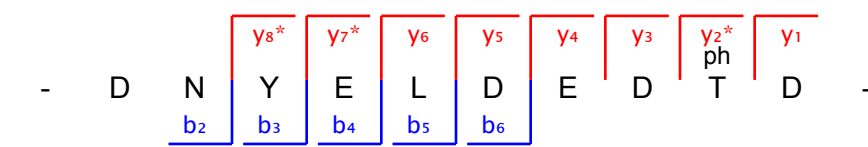

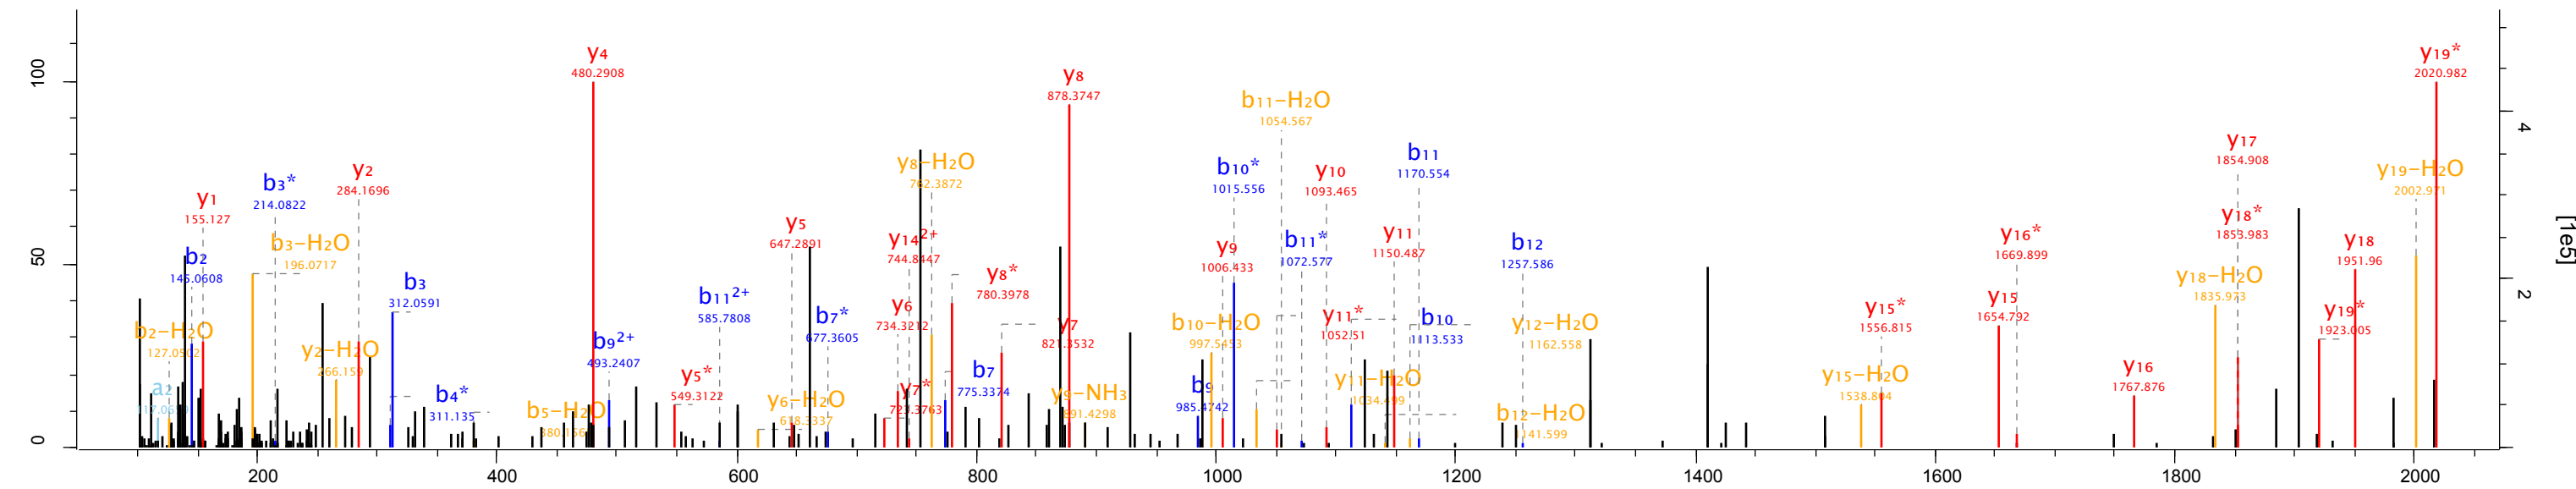

- G S S P S I R P I Q G S Q G S S ph S P V E K -

Fragmentation sites are indicated by brackets below the sequence:

- Red brackets (y-series): y<sub>19</sub><sup>\*</sup> (S), y<sub>18</sub> (P), y<sub>17</sub> (S), y<sub>16</sub> (I), y<sub>15</sub> (R), y<sub>14</sub><sup>2+</sup> (P)
- Blue brackets (b-series): b<sub>2</sub> (S), b<sub>3</sub> (S), b<sub>4</sub><sup>\*</sup> (P), b<sub>7</sub> (R), b<sub>9</sub> (I), b<sub>10</sub> (Q), b<sub>11</sub> (G), b<sub>12</sub> (S)

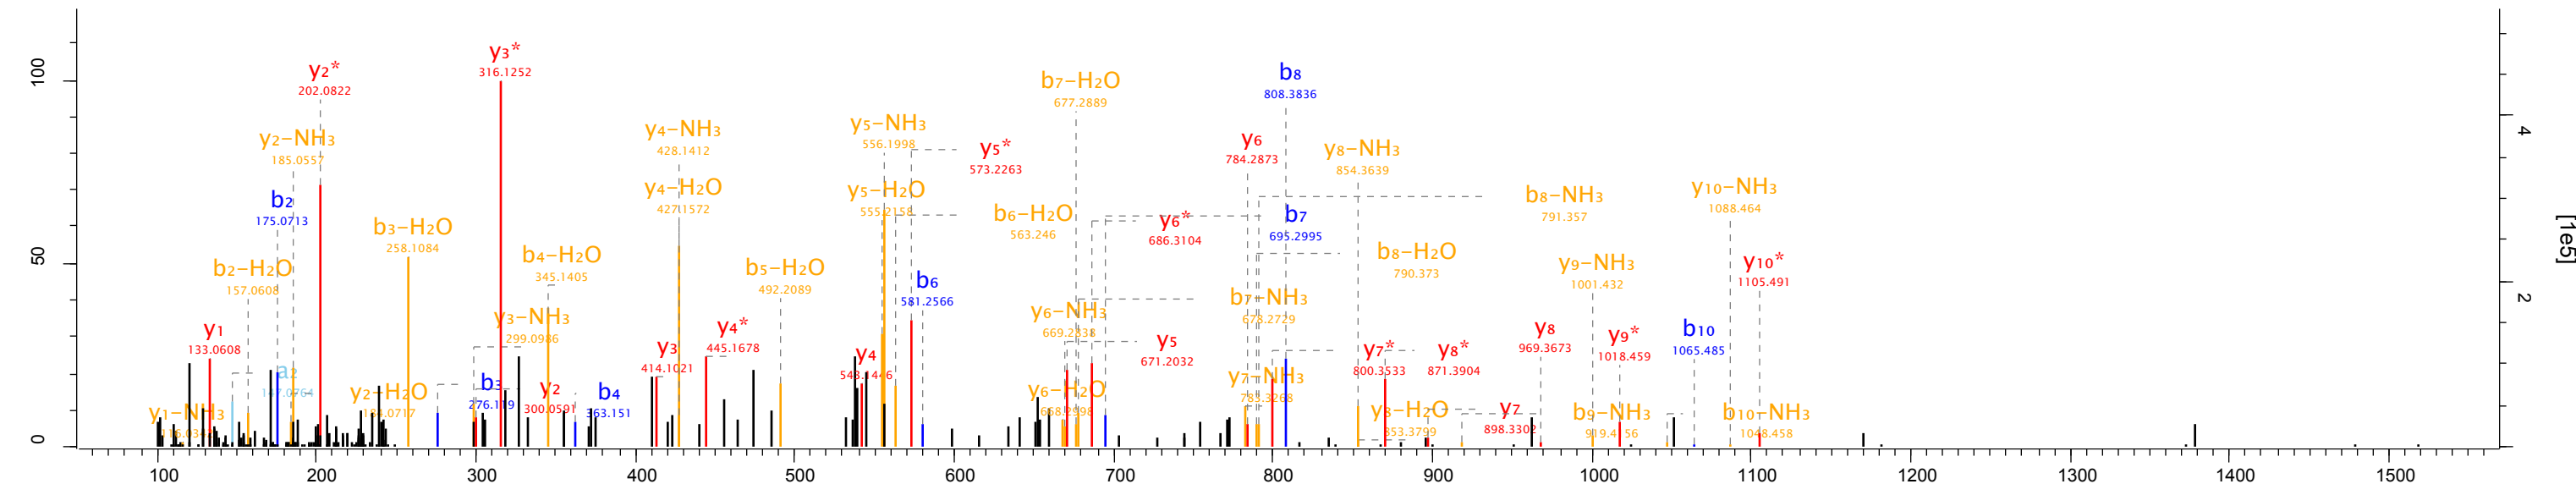

- S S T S F A N I Q E N S N -

b<sub>2</sub> b<sub>3</sub> b<sub>4</sub> b<sub>6</sub> b<sub>7</sub> b<sub>8</sub> b<sub>10</sub> y<sub>10</sub>\* y<sub>9</sub>\* y<sub>8</sub> y<sub>7</sub> y<sub>6</sub> y<sub>5</sub> y<sub>4</sub> y<sub>3</sub> y<sub>2</sub> y<sub>1</sub>

ph S N

Raw file 20171215\_MaS\_33SR\_LMH\_phospho2\_04 Scan 10003 Method FTMS; HCD Score 176.85 m/z 731.32 Gene names GPR56

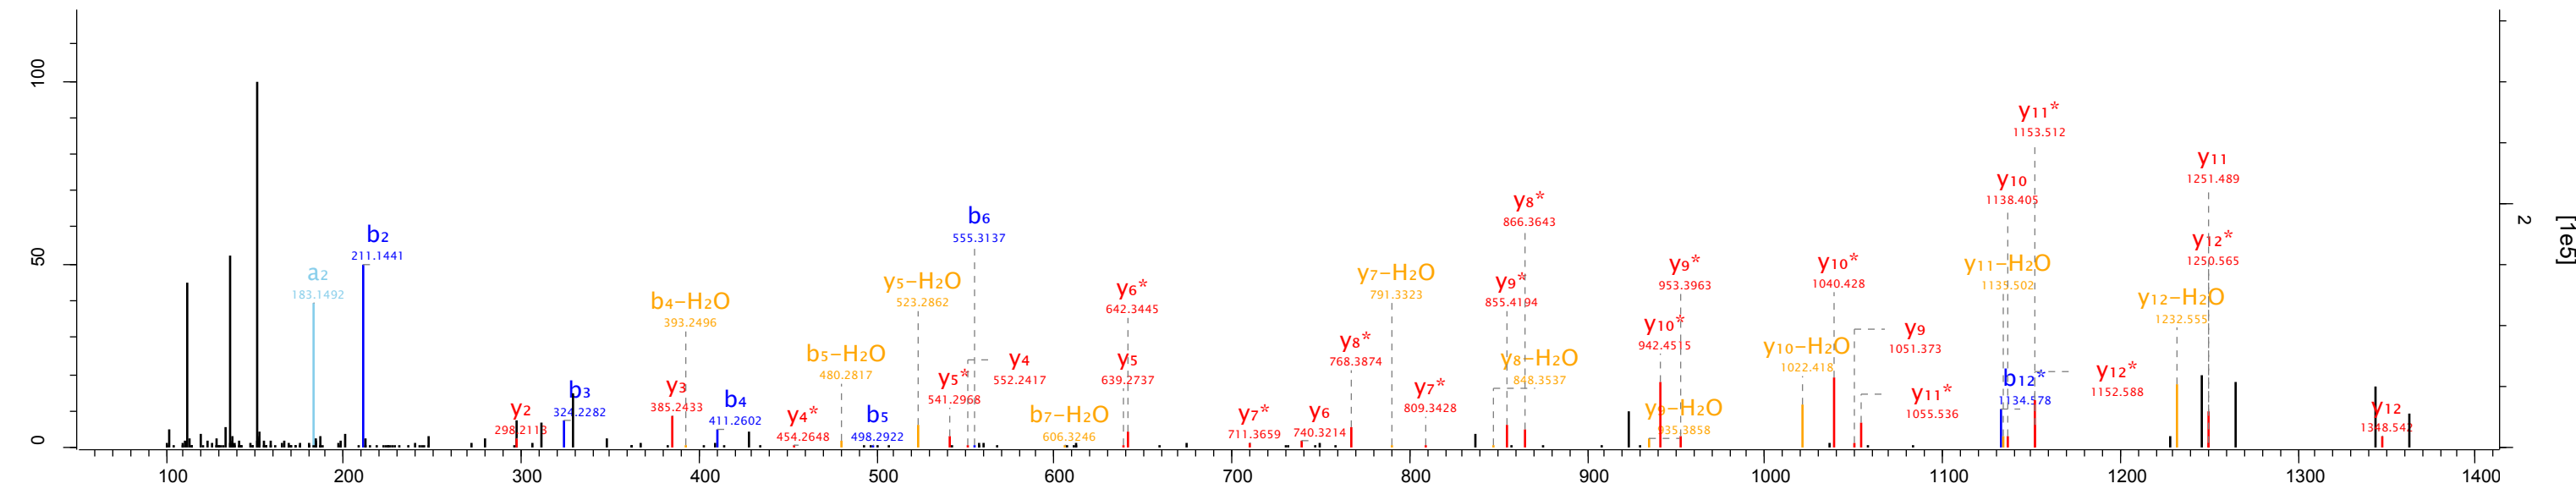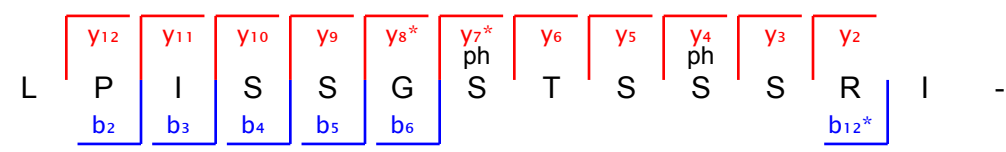

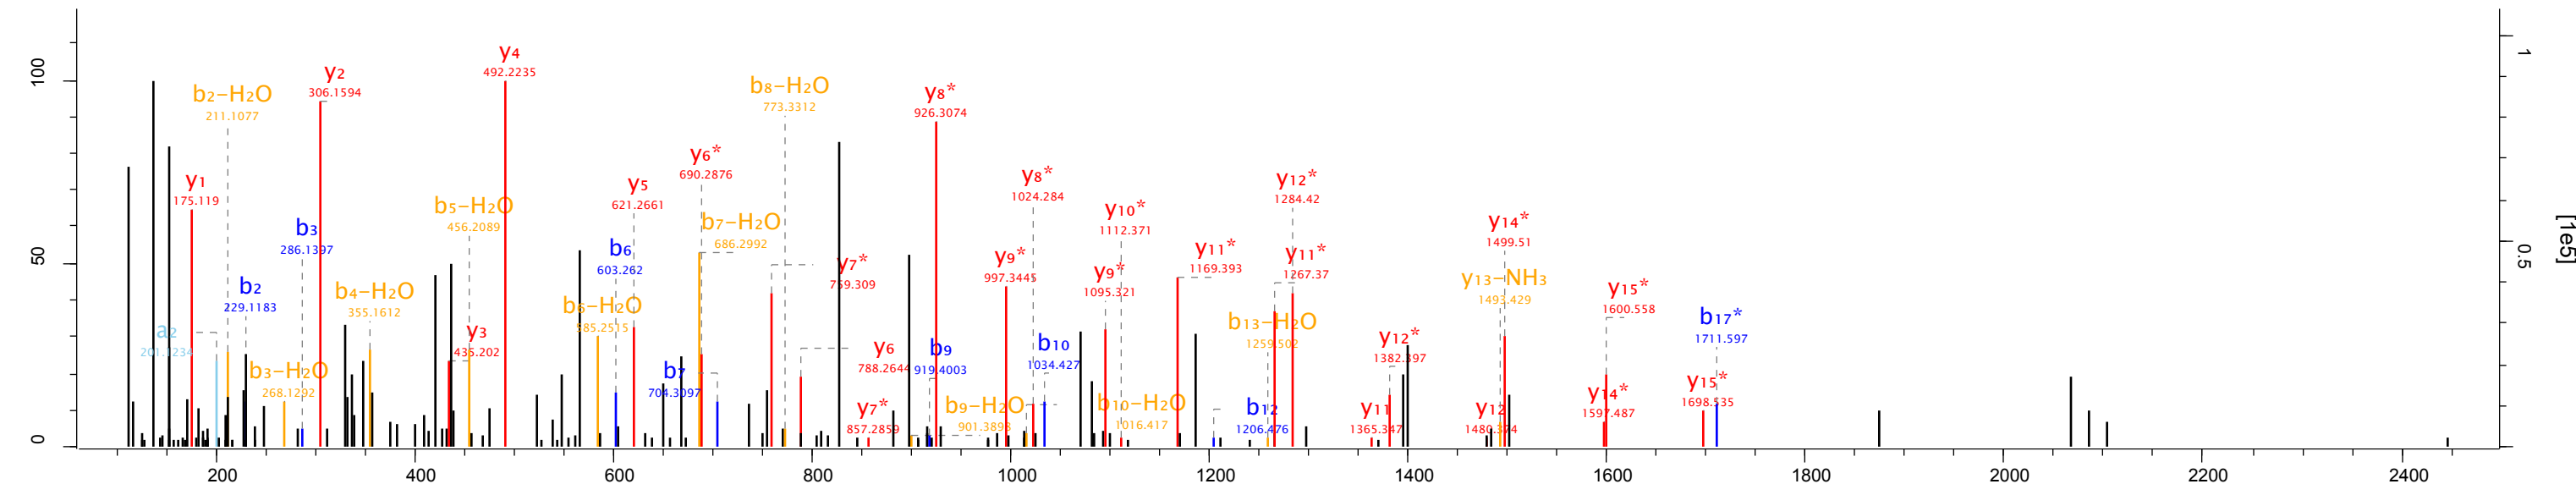

- E V G S T E T S Q D G D A S S S E G E M R -

b2 b3 b6 b7 b9 b10 b12 b17\*

y15\* y14\* y12 y11 y10\* y9\* y8\* ph y7\* ph y6 ph y5 y4 y3 y2 y1

Raw file 20171215\_MaS\_33SR\_LMH\_phospho2\_05 Scan 4963 Method FTMS; HCD Score 112.74 m/z 761.32 Gene names PEAK1

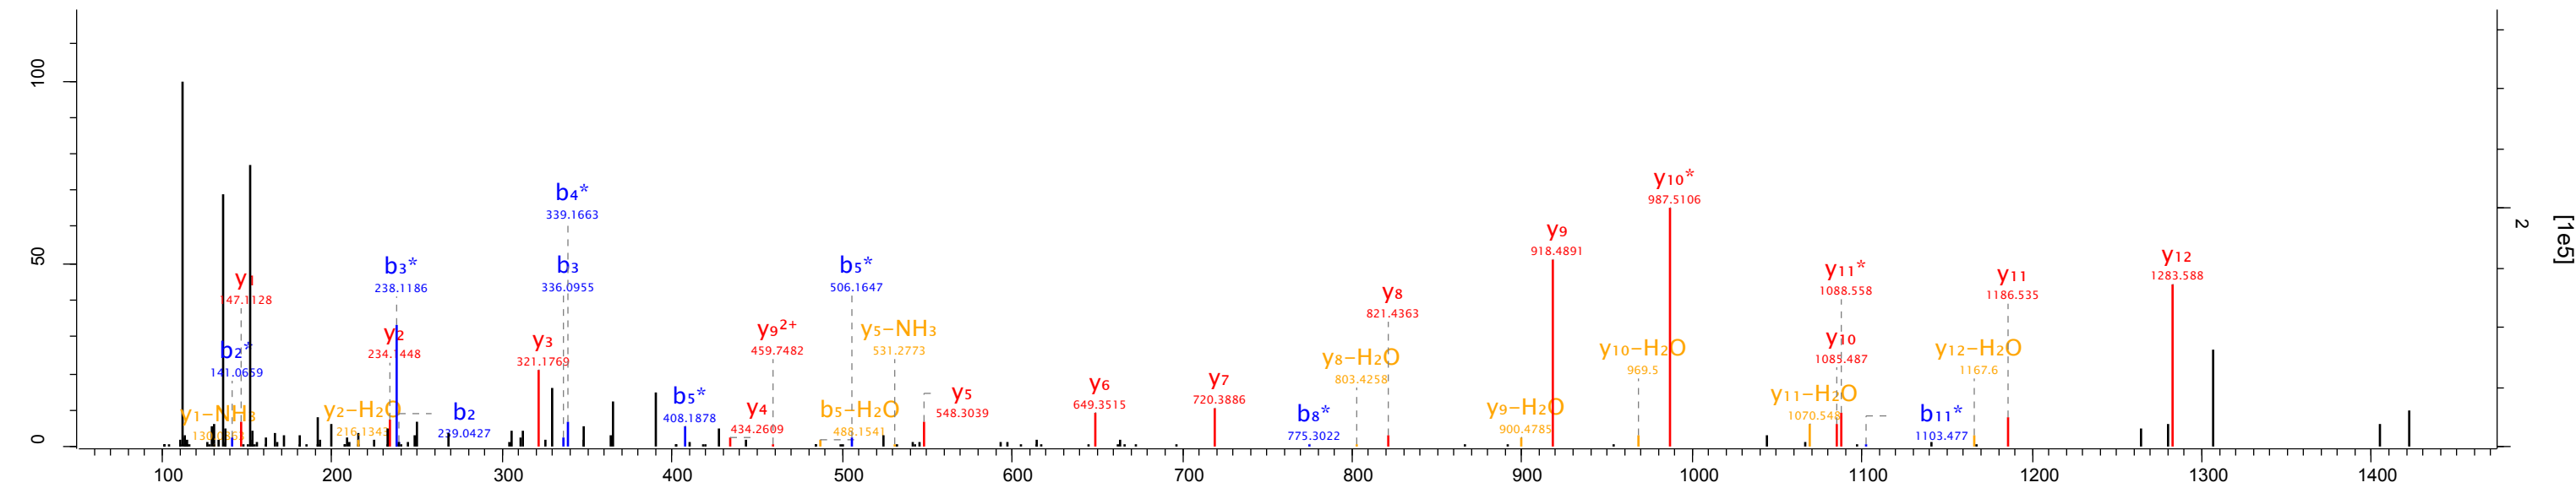

ph  
S

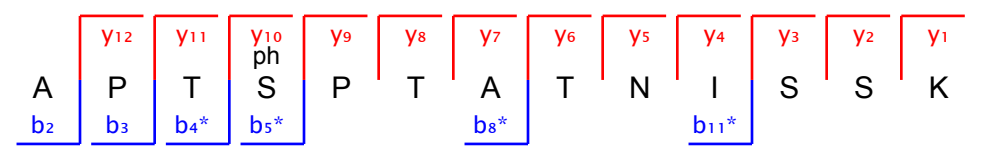



Raw file  
20171215\_MaS\_33SR\_LMH\_phospho2\_06

Scan 3443 Method FTMS; HCD Score 67.7 m/z 483.22 Gene names BRIP1

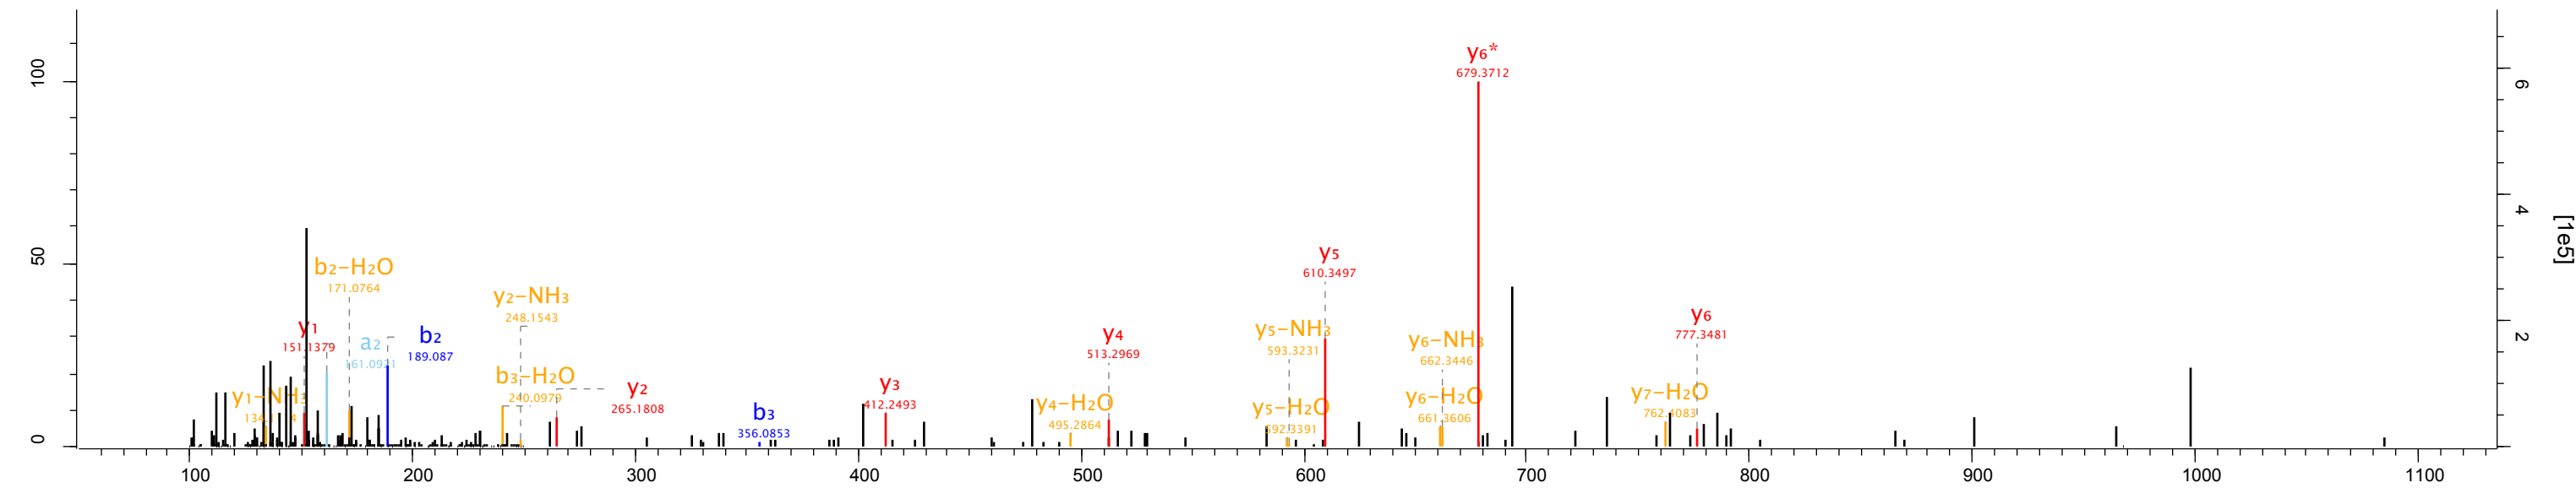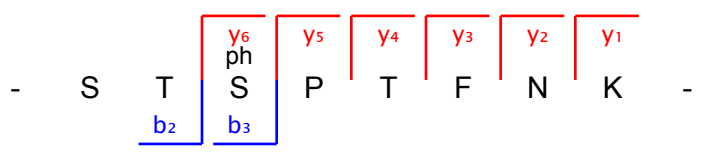

Raw file 20171215\_MaS\_33SR\_LMH\_phospho2\_09 Scan 3273 Method FTMS; HCD Score 74.85 m/z 626.79 Gene names PAN2

20171215\_MaS\_33SR\_LMH\_phospho2\_09

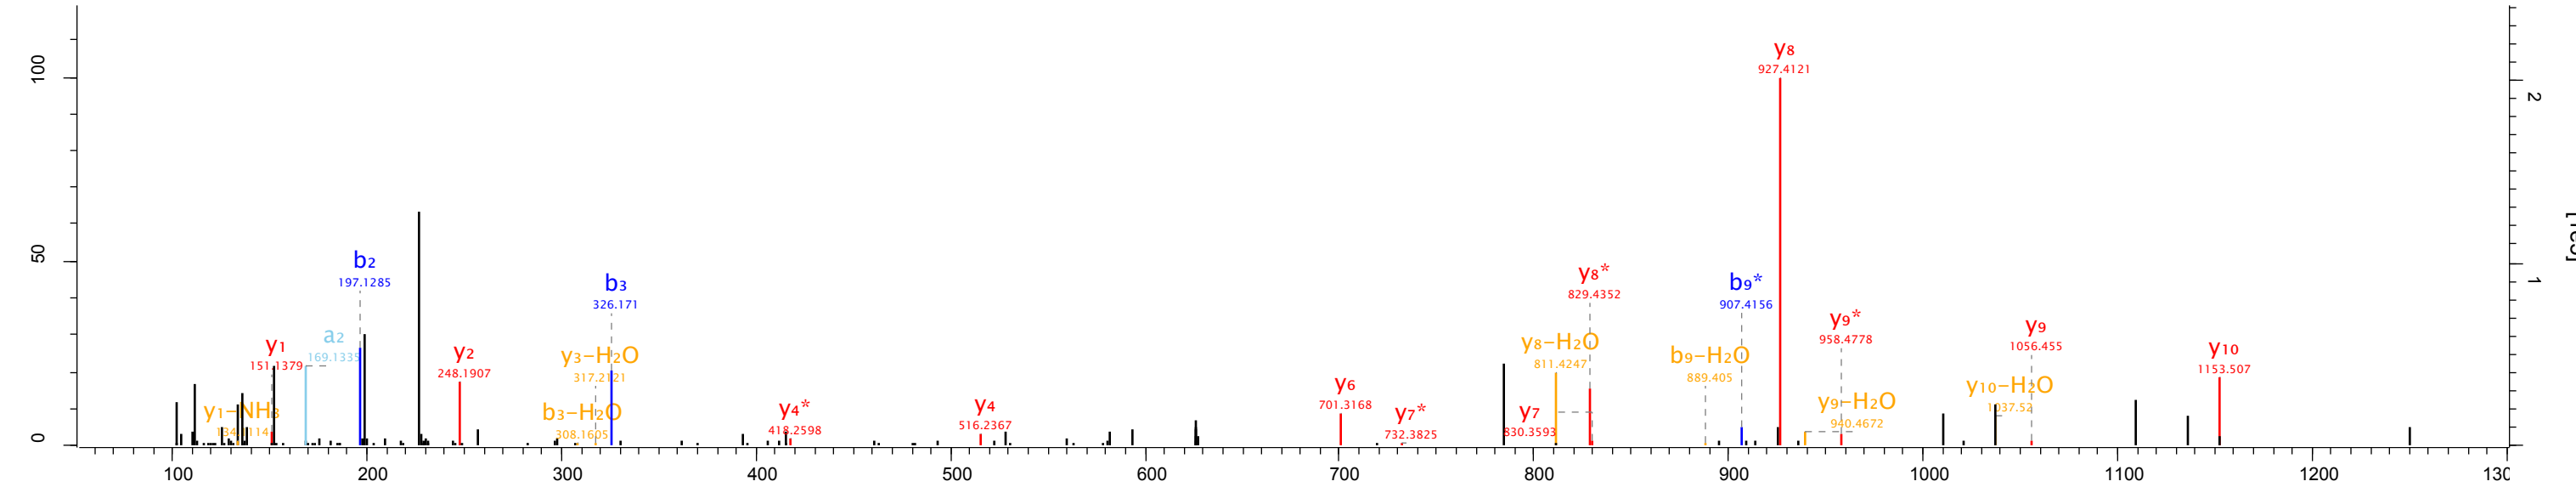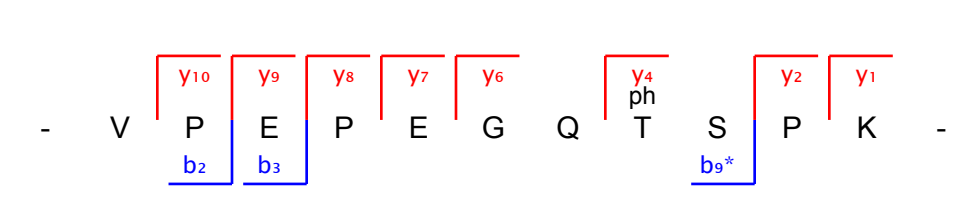

Raw file: 20171215\_MaS\_33SR\_LMH\_proteome\_01  
 Scan: 100843 Method: FTMS; HCD Score: 124.2 m/z: 1160.52 Gene names: GCSH

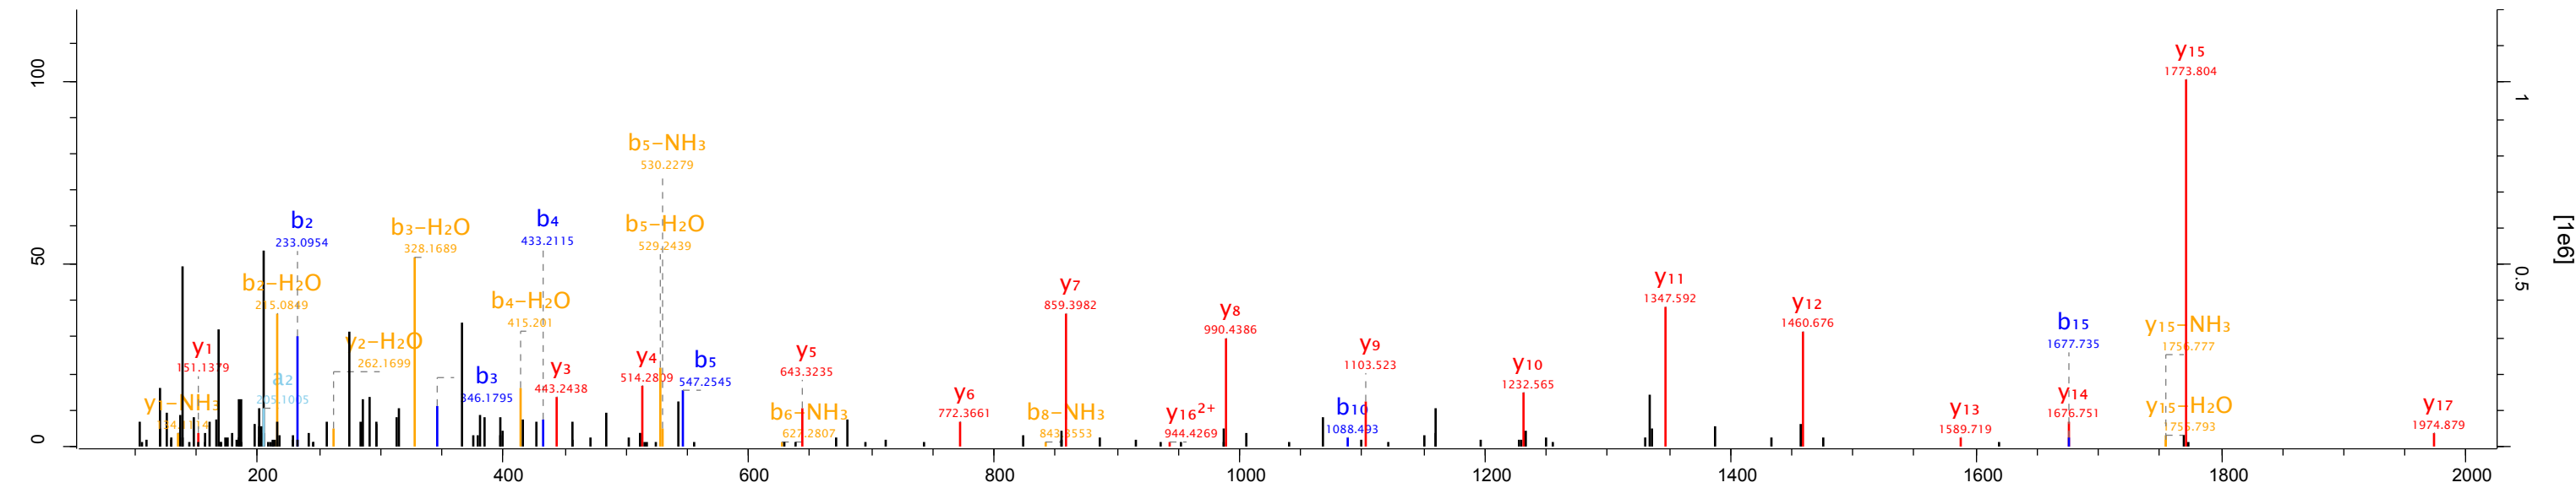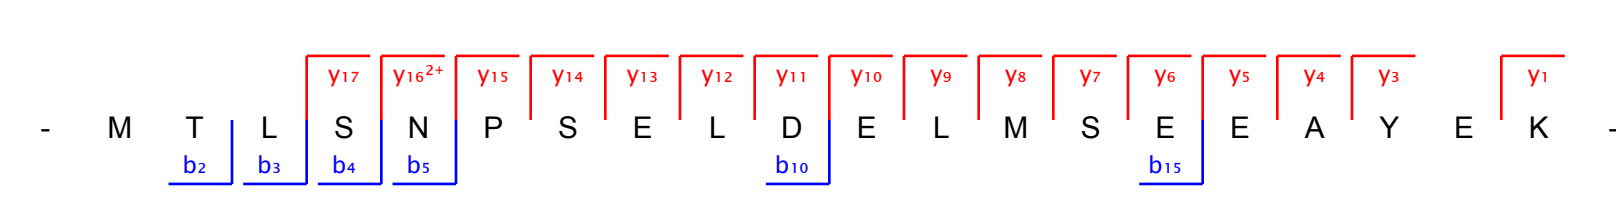

Raw file: 20171215\_MaS\_33SR\_LMH\_proteome\_01  
 Scan: 107033 Method: FTMS; HCD Score: 83.94 m/z: 1172.58 Gene names: MRPL52

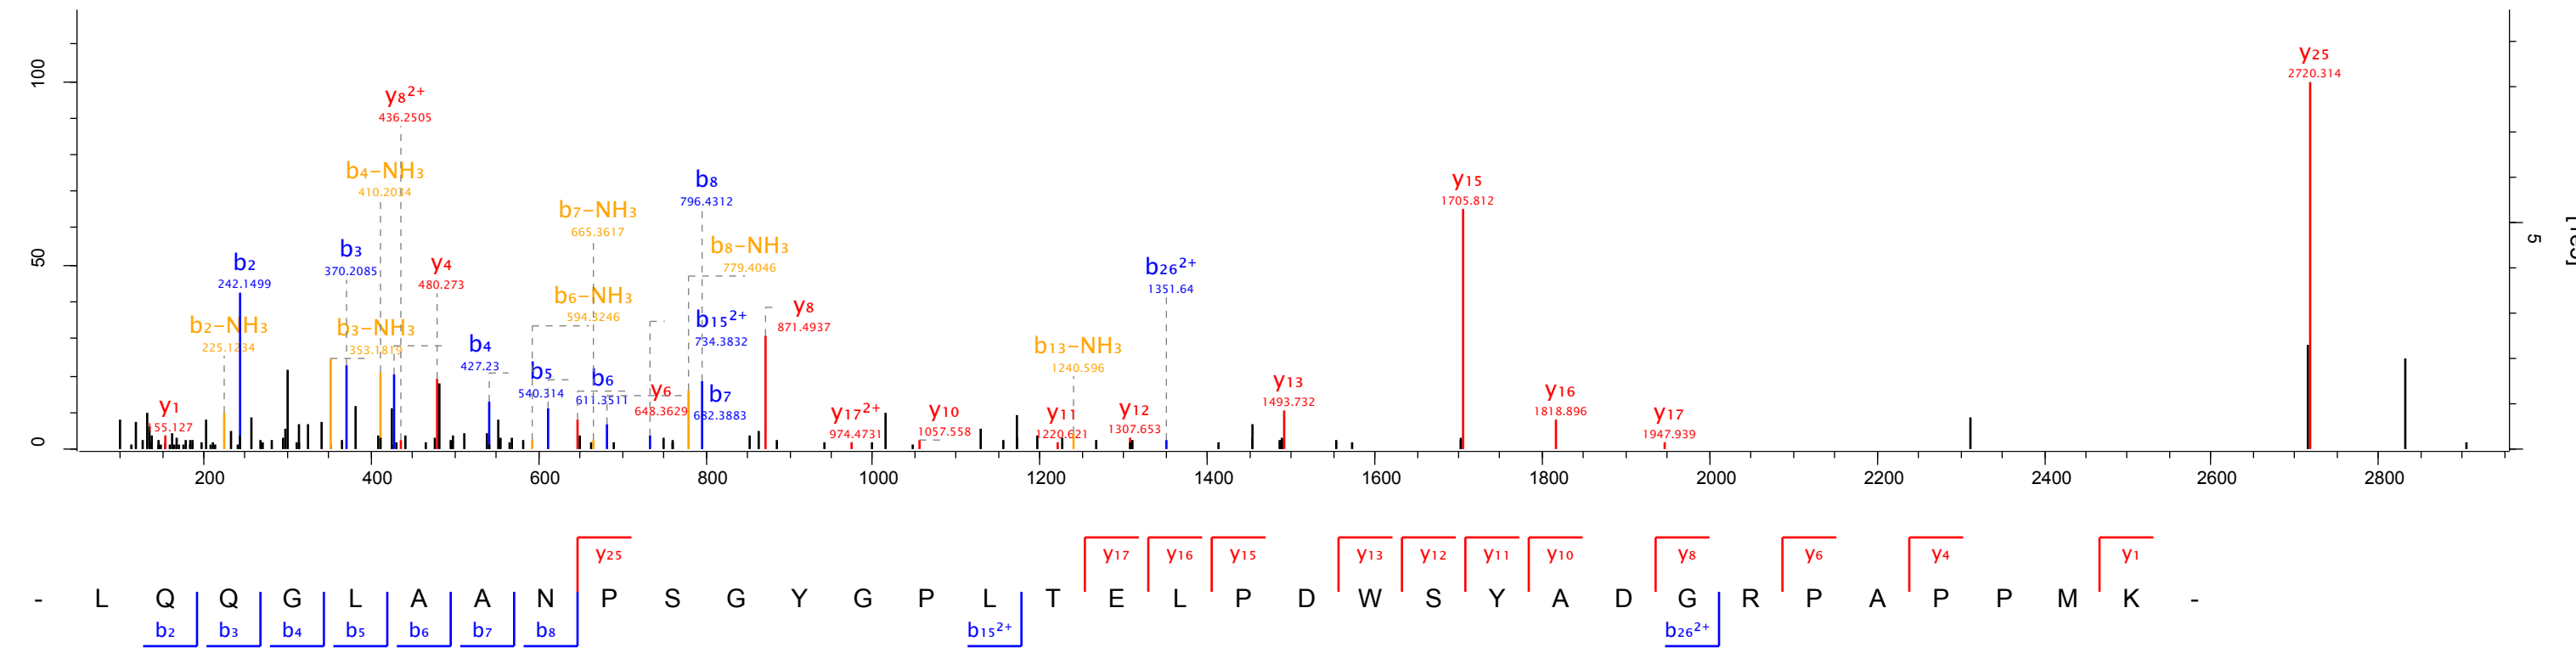

Raw file 20171215\_MaS\_33SR\_LMH\_proteome\_01 Scan 121413 Method FTMS; HCD Score 55.44 m/z 959.49 Gene names SPAG1

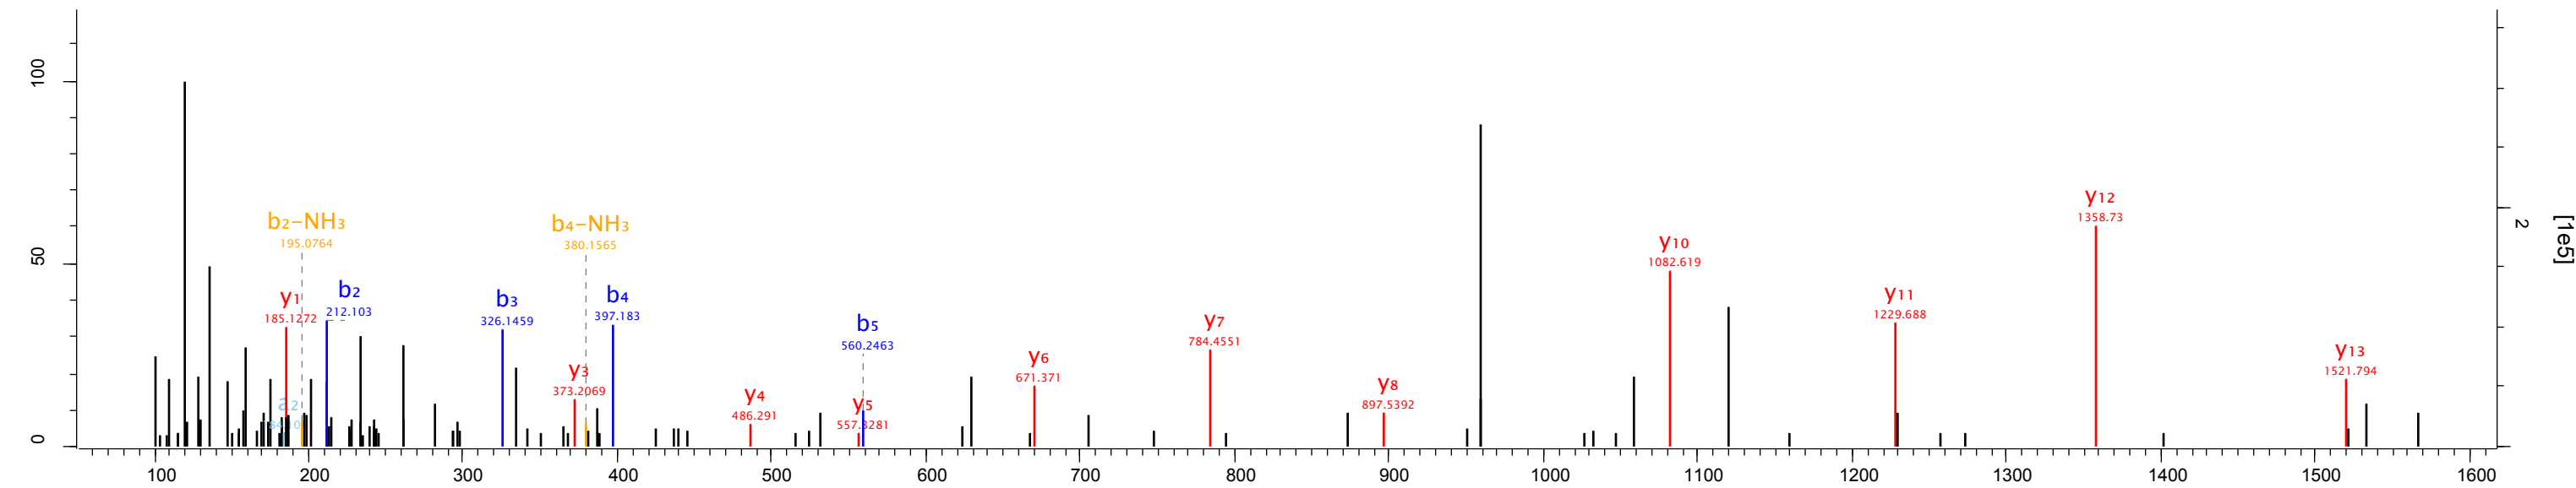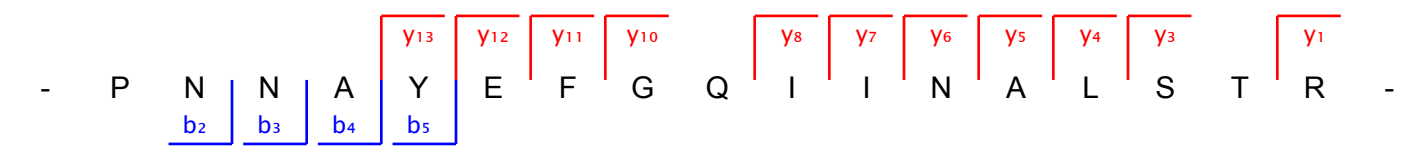

Raw file: 20171215\_MaS\_33SR\_LMH\_proteome\_01  
 Scan: 122573 Method: FTMS; HCD Score: 46.89 m/z: 870.99 Gene names: RPIA

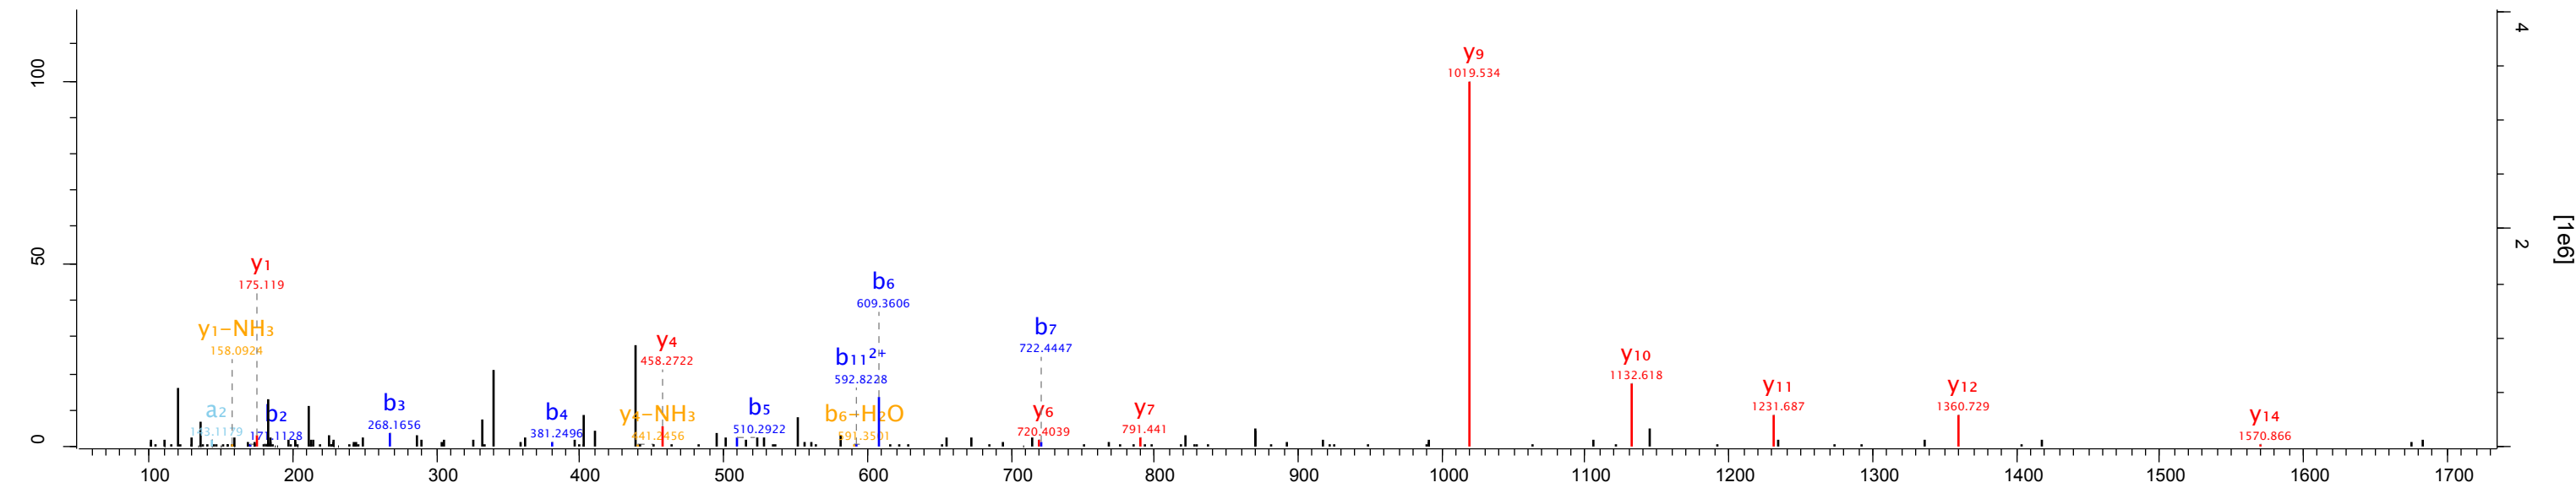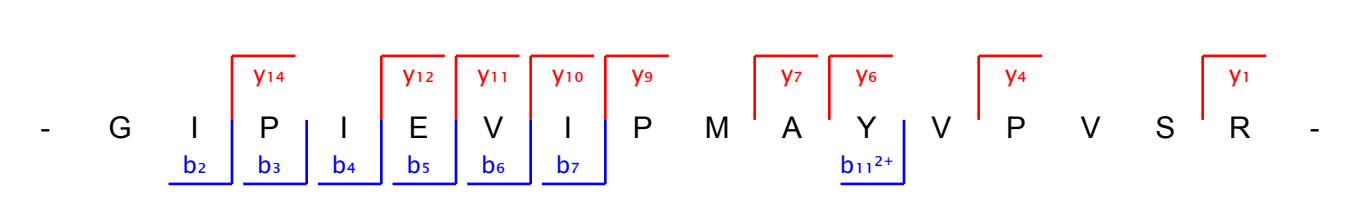

Raw file 20171215\_MaS\_33SR\_LMH\_proteome\_01 Scan 123223 Method FTMS; HCD Score 71.85 m/z 1098.57

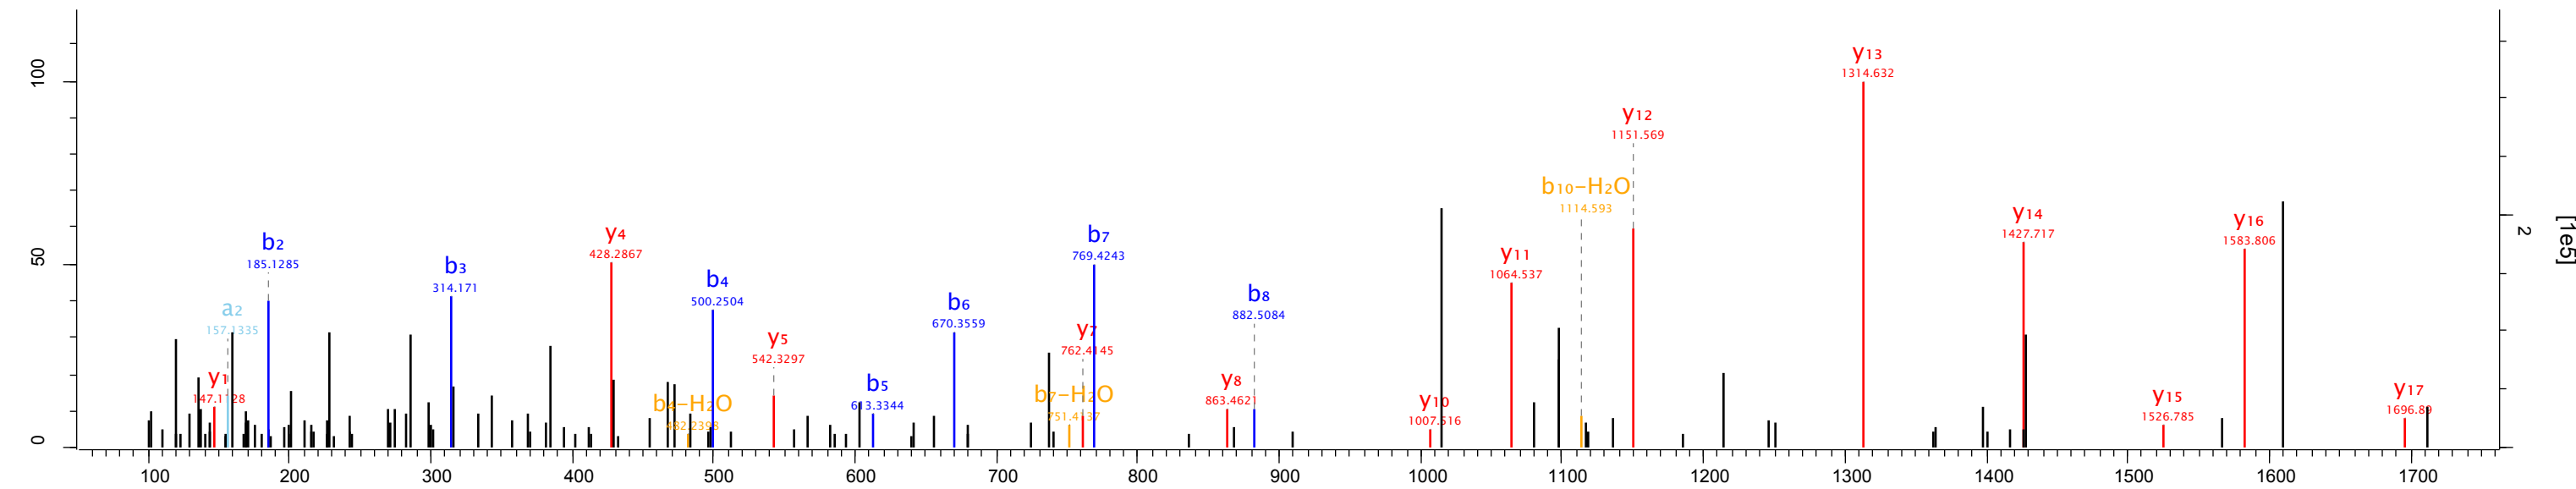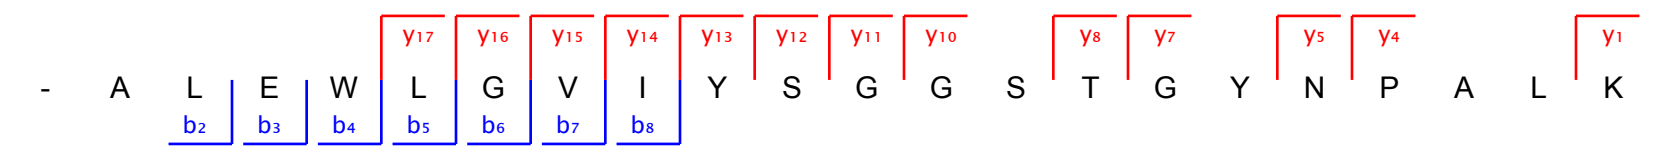

Raw file: 20171215\_MaS\_33SR\_LMH\_proteome\_01  
 Scan: 132153 Method: FTMS; HCD Score: 43.76 m/z: 731.41 Gene names: GARS

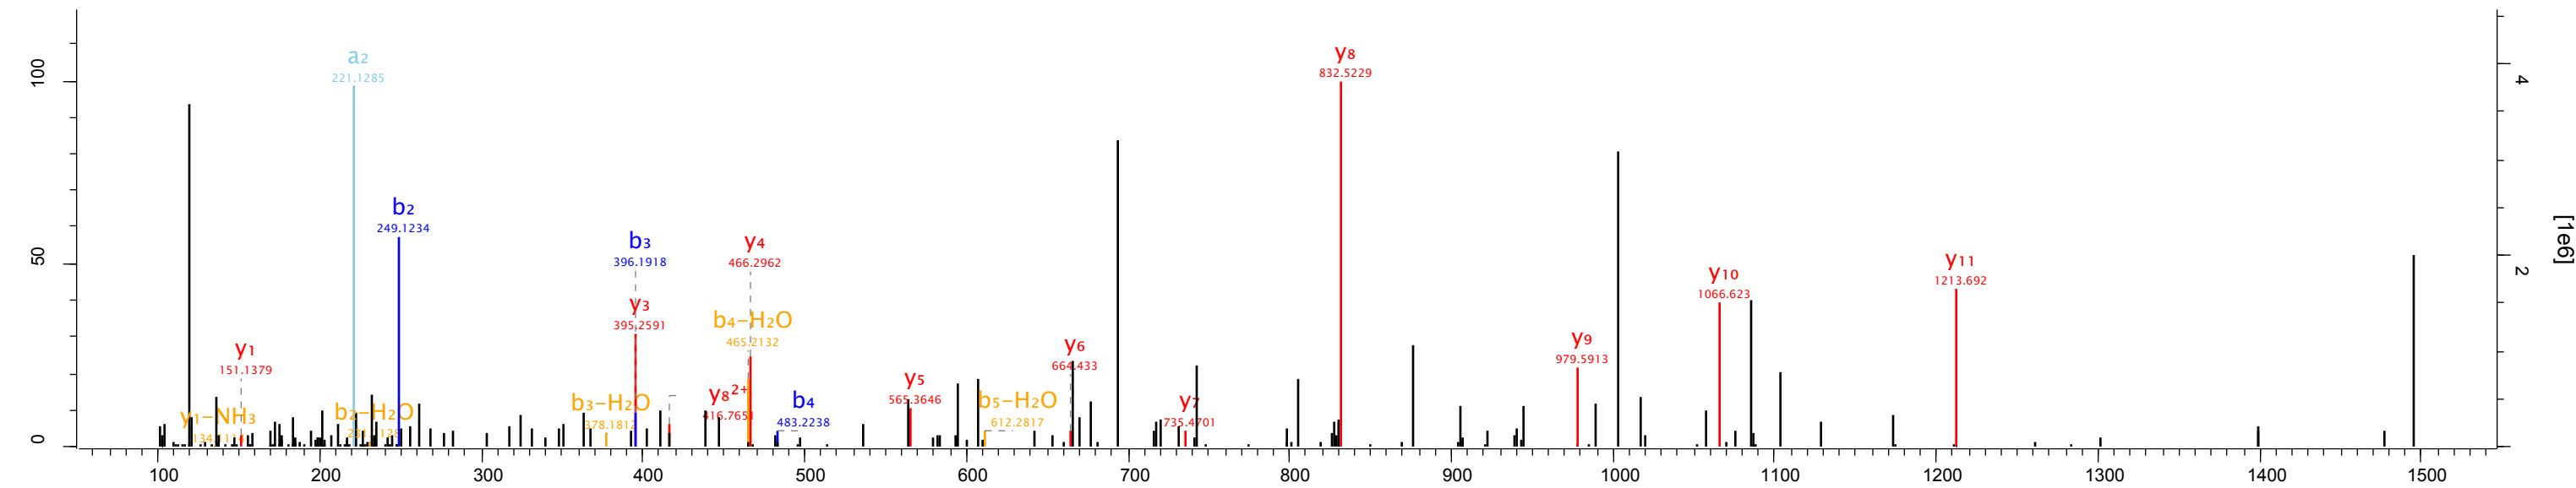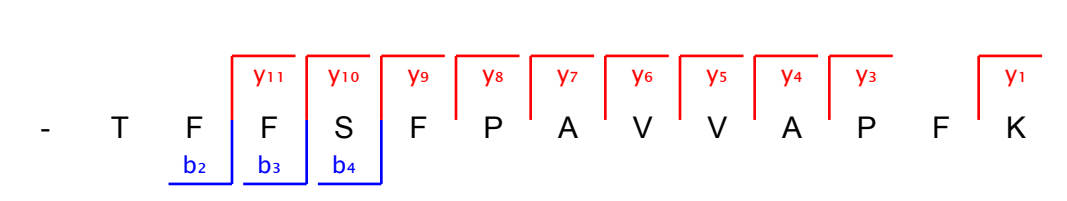



Raw file  
20171215\_MaS\_33SR\_LMH\_proteome\_01

Scan 13613 Method FTMS; HCD Score 110.12 m/z 835.94 Gene names RBM22

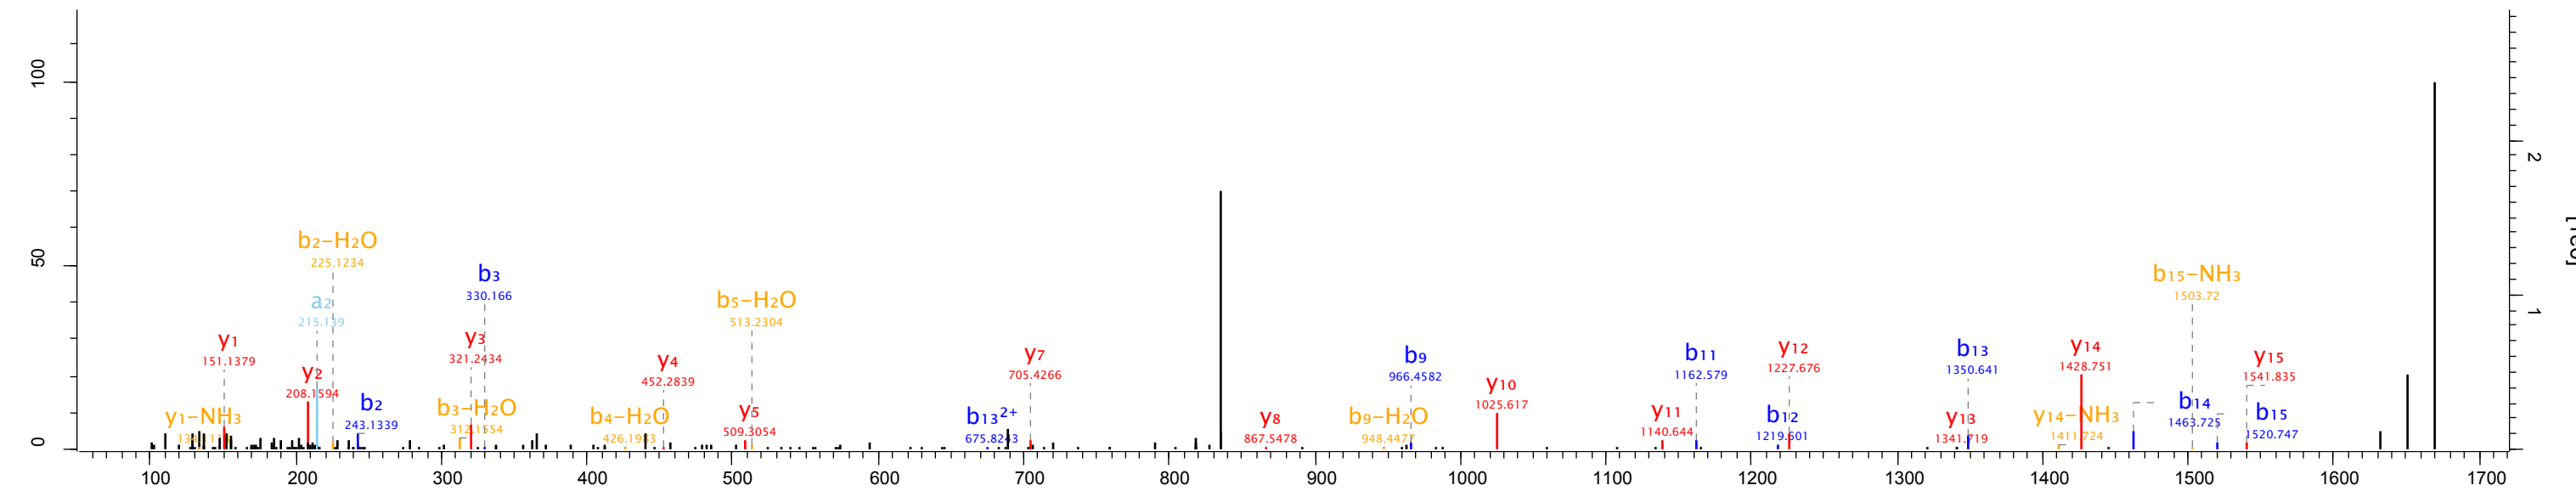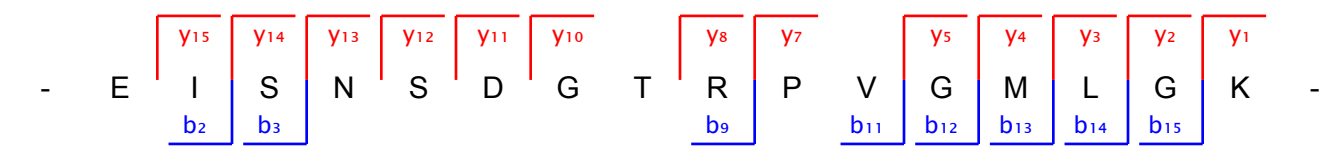

Raw file: 20171215\_MaS\_33SR\_LMH\_proteome\_01  
 Scan: 150733 Method: FTMS; HCD Score: 43.26 m/z: 1072.04 Gene names: TEX12

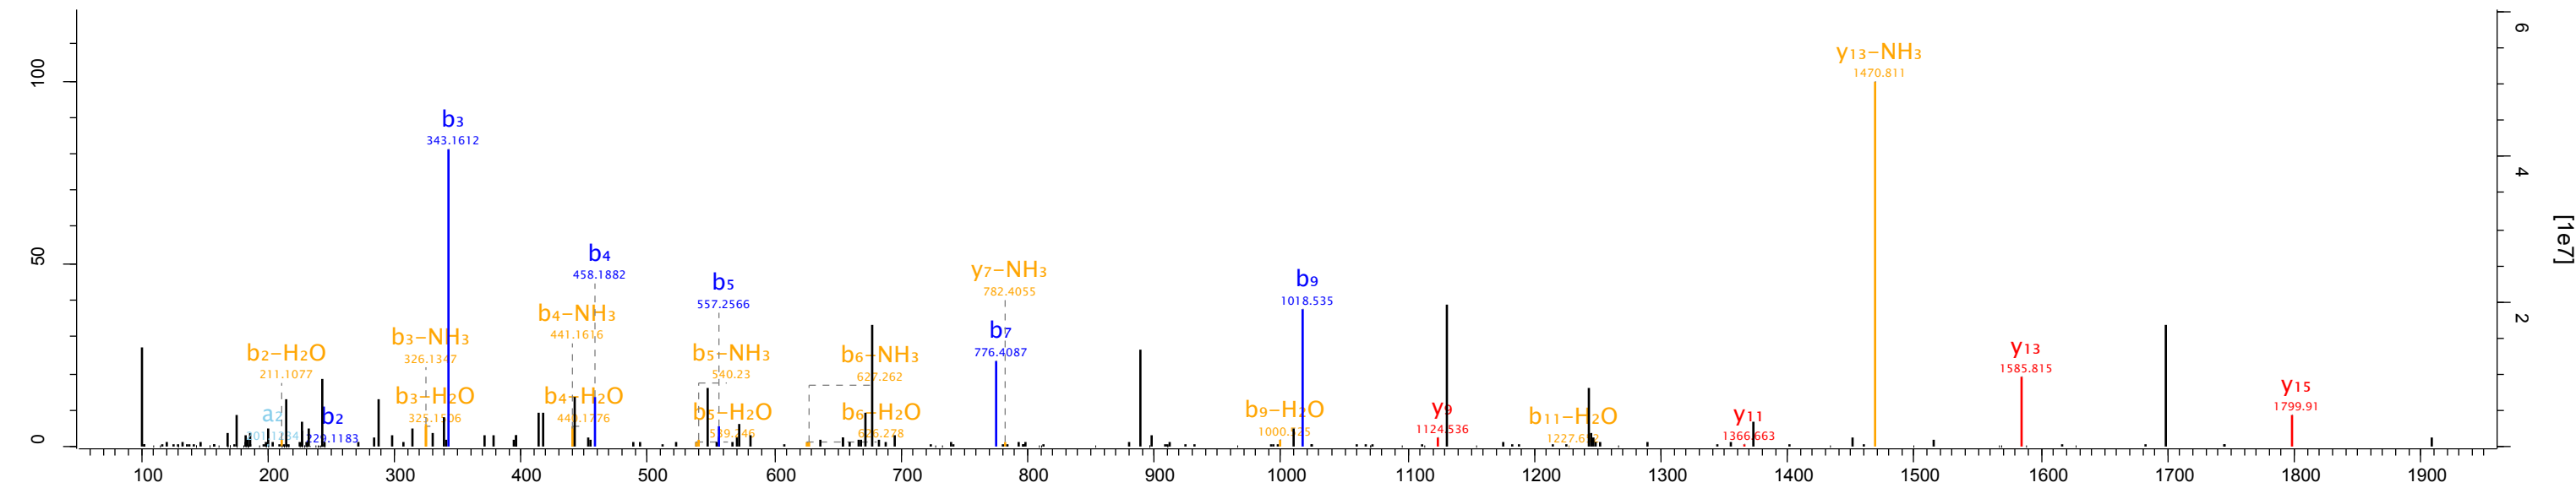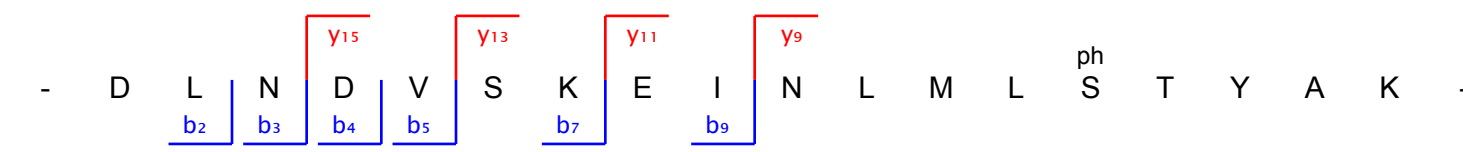

Raw file 20171215\_MaS\_33SR\_LMH\_proteome\_01 Scan 2663 Method FTMS; HCD Score 57.29 m/z 628.28

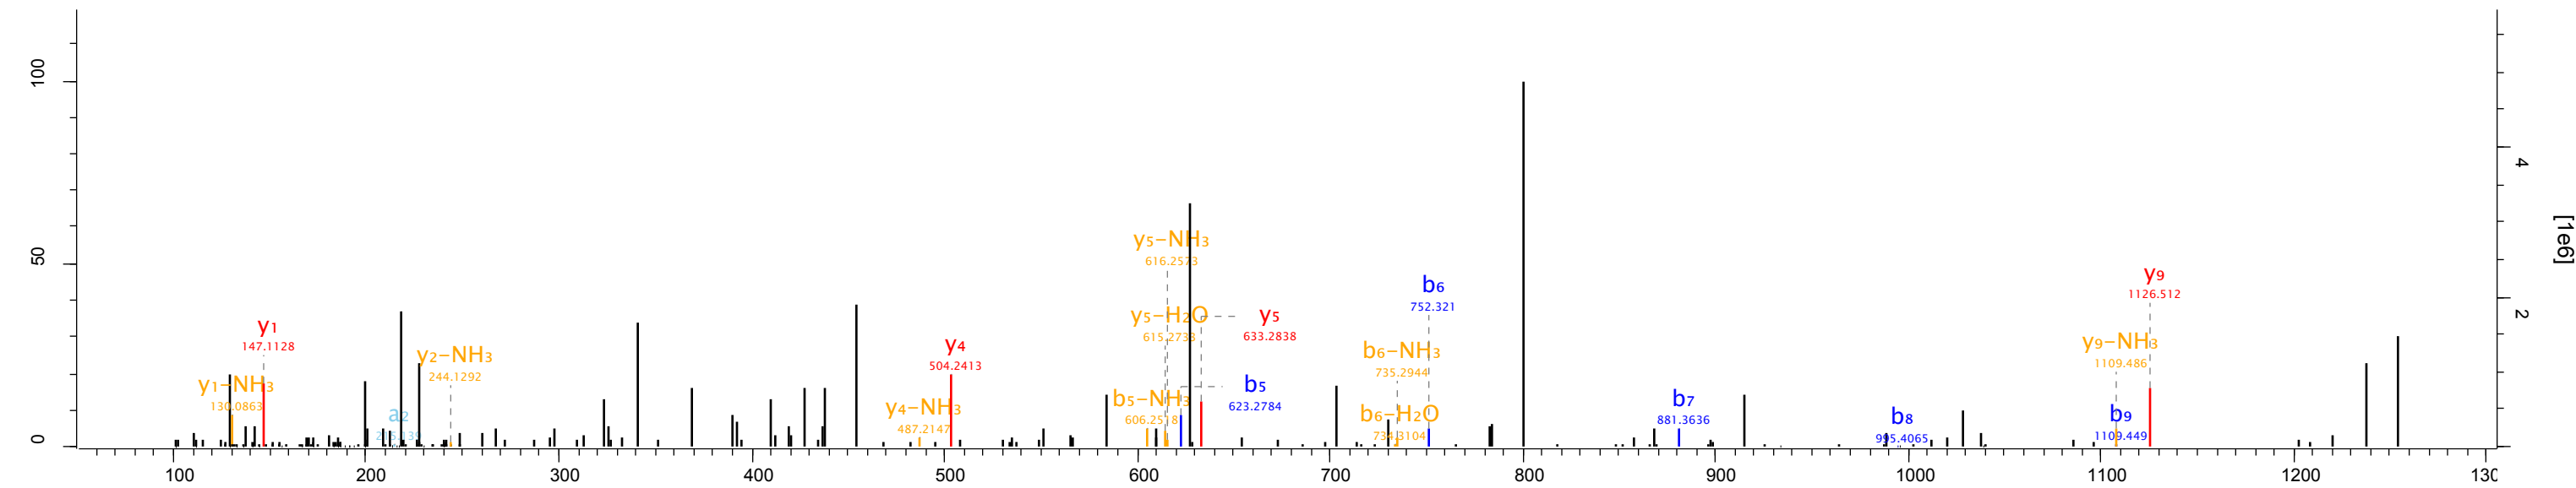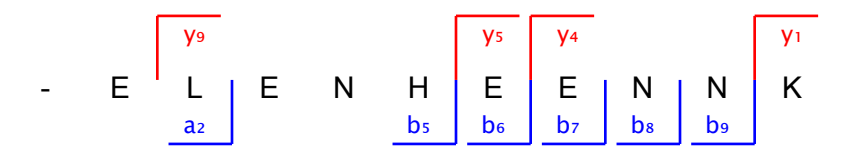

Raw file 20171215\_MaS\_33SR\_LMH\_proteome\_01 Scan 33733 Method FTMS; HCD Score 64.12 m/z 626.29 Gene names PPIL4

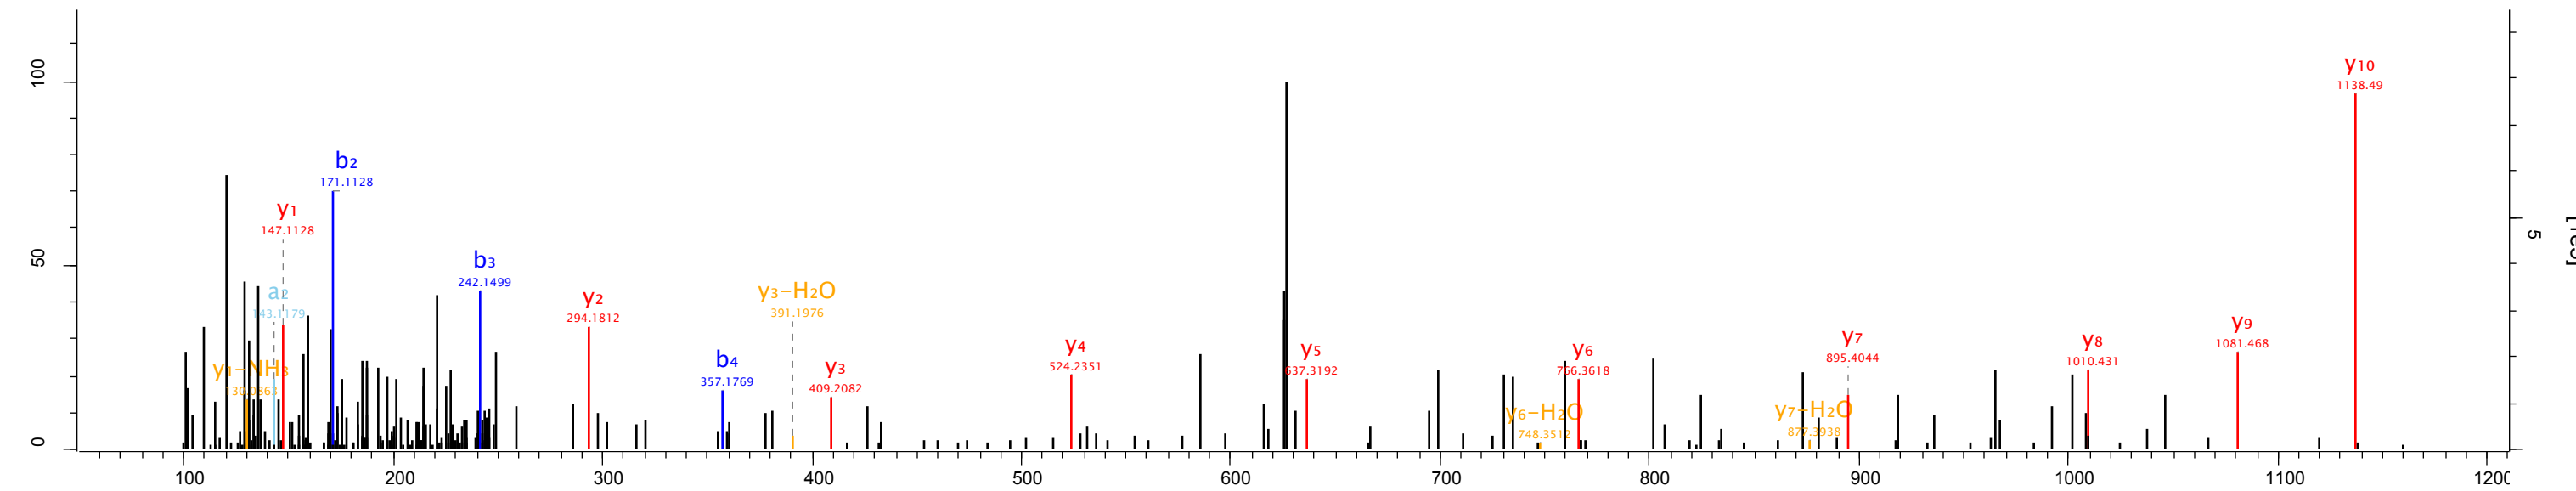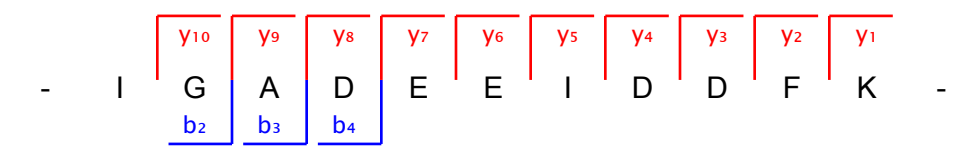

Raw file 20171215\_MaS\_33SR\_LMH\_proteome\_01 Scan 4223 Method FTMS; HCD Score 66.96 m/z 465.77 Gene names UBL5

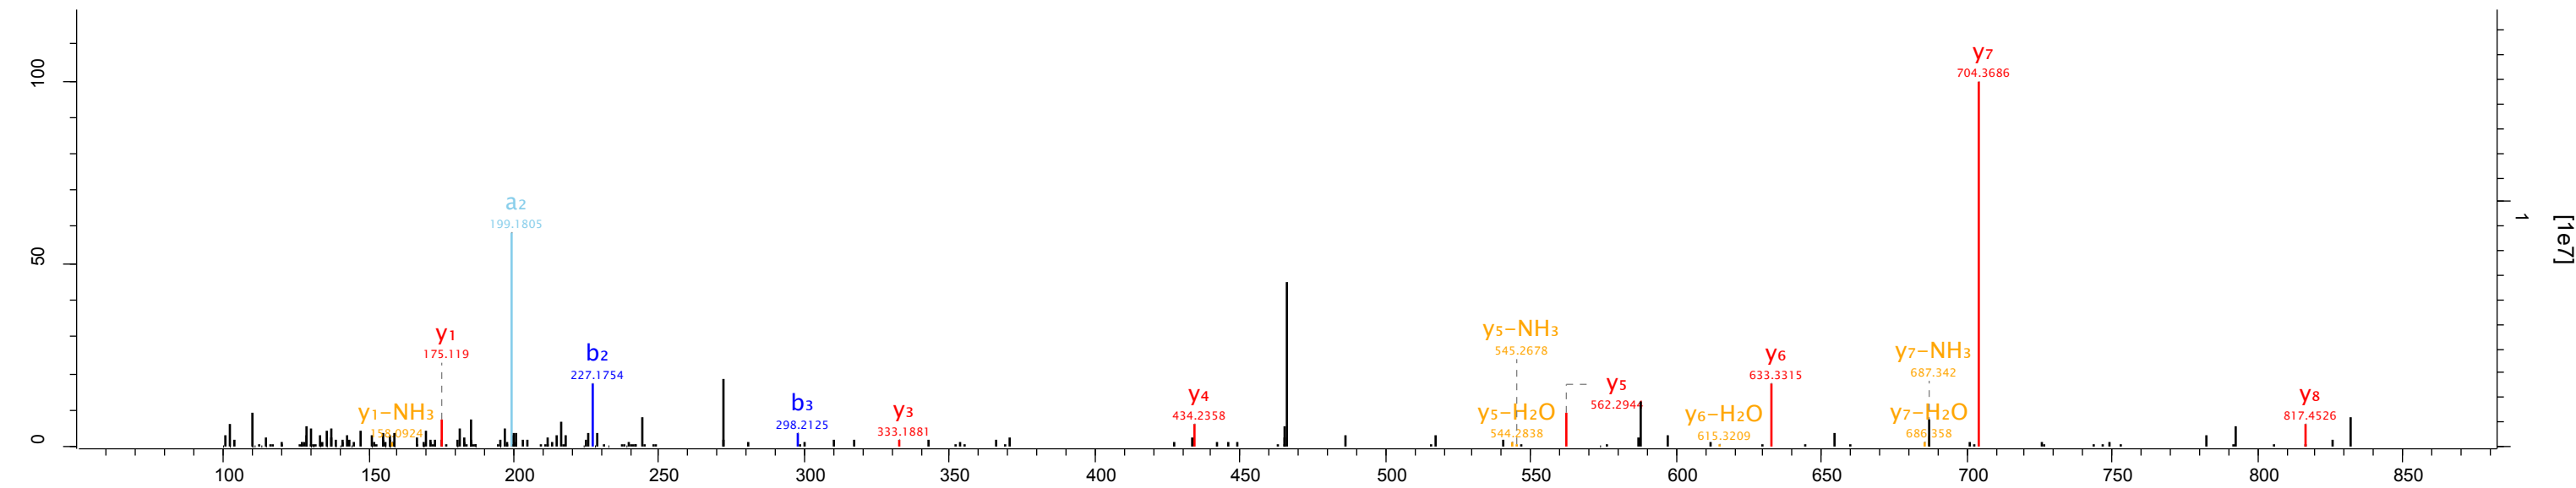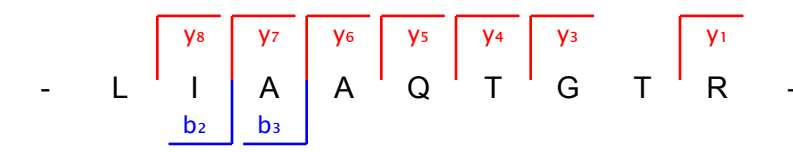

Raw file 20171215\_MaS\_33SR\_LMH\_proteome\_01 Scan 47553 Method FTMS; HCD Score 44.54 m/z 884.9 Gene names SURF4

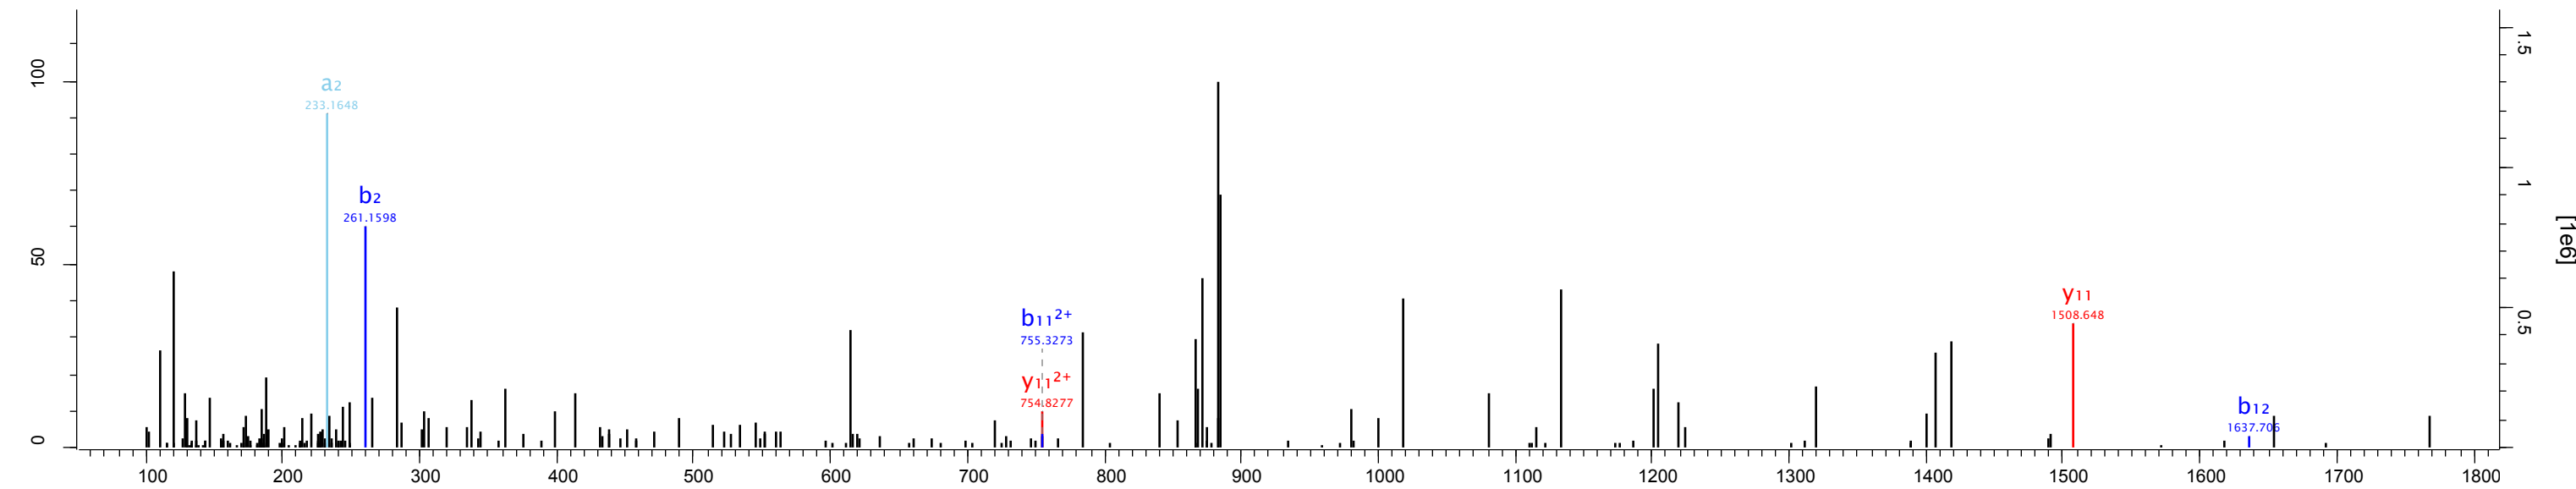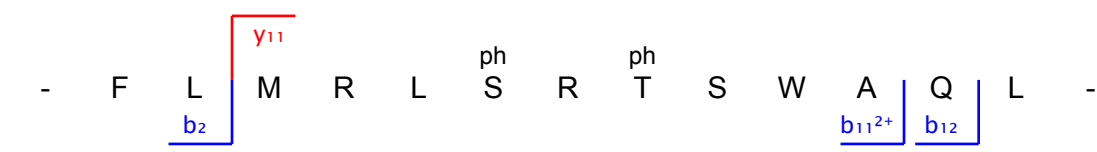

Raw file 20171215\_MaS\_33SR\_LMH\_proteome\_01 Scan 77353 Method FTMS; HCD Score 42.84 m/z 798.41

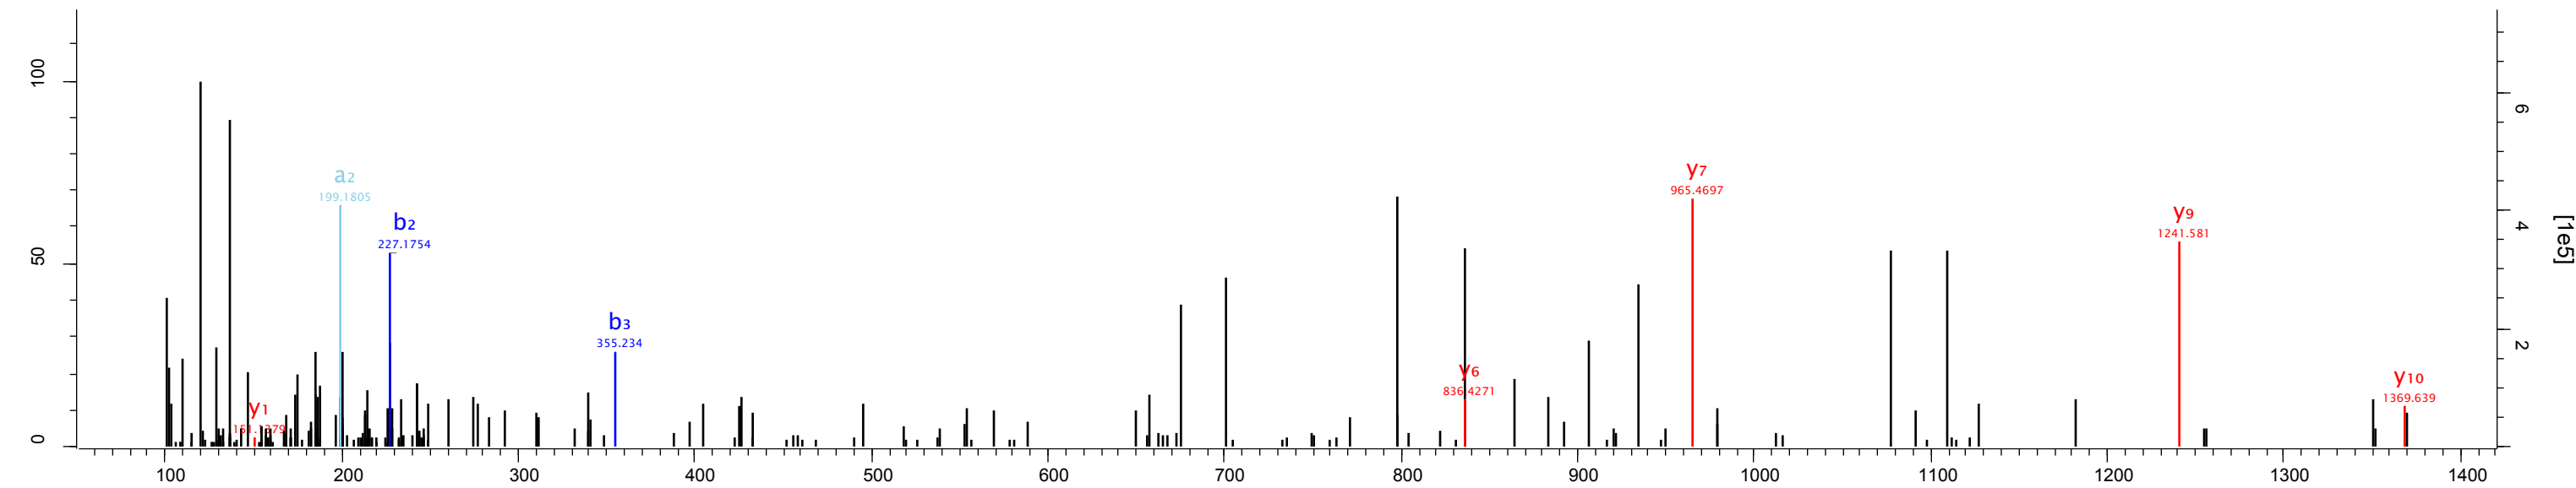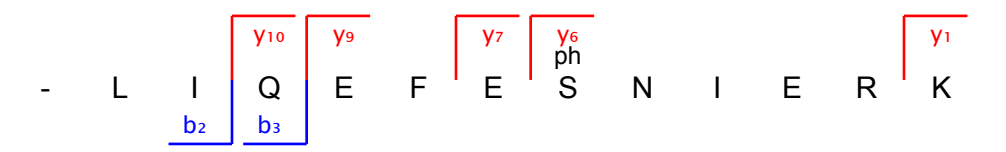

Raw file 20171215\_MaS\_33SR\_LMH\_proteome\_01 Scan 8423 Method FTMS; HCD Score 50.35 m/z 727.9 Gene names TRIM8

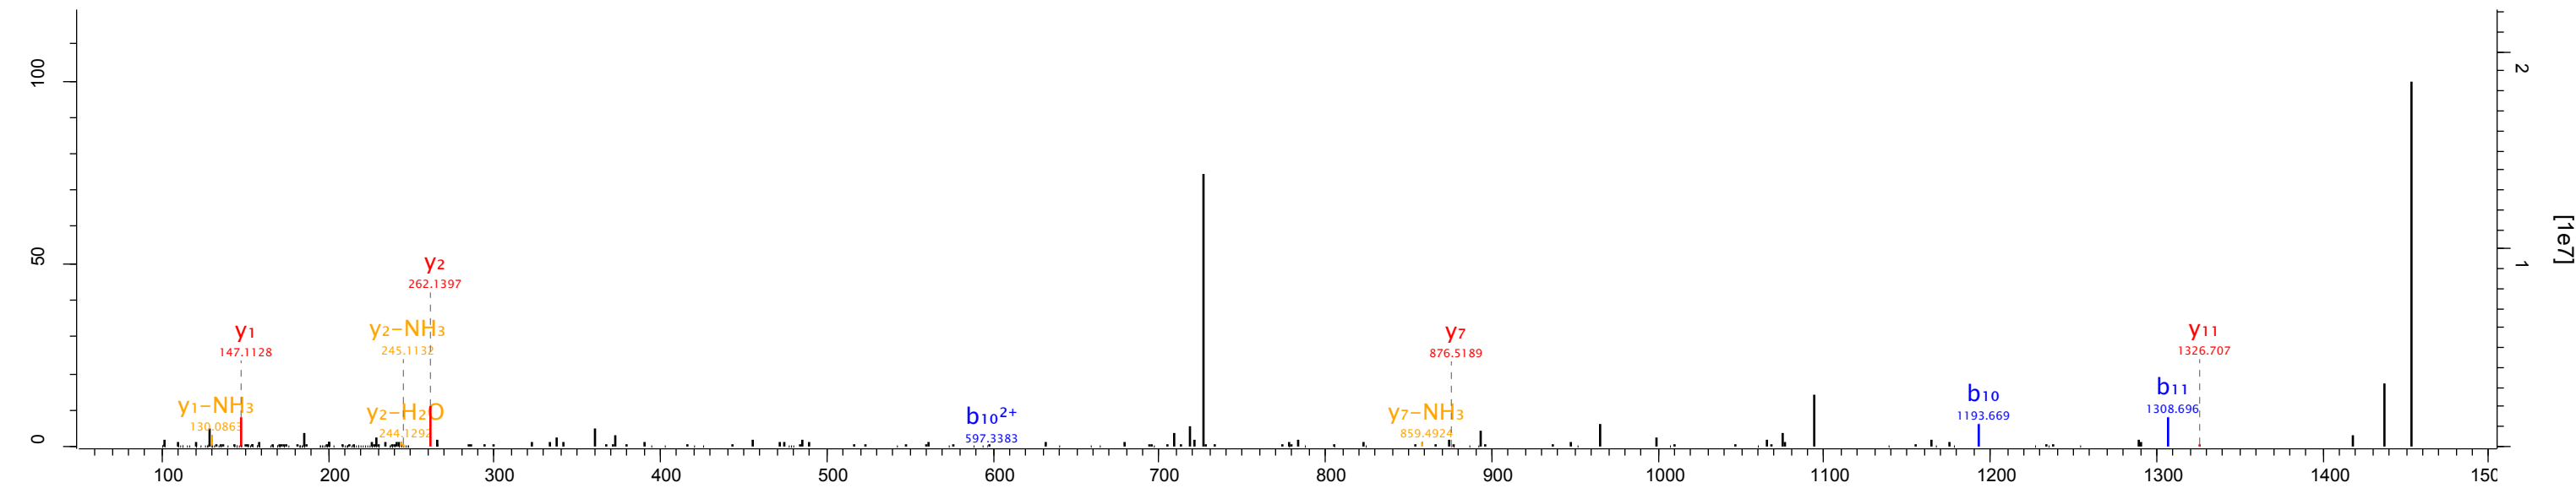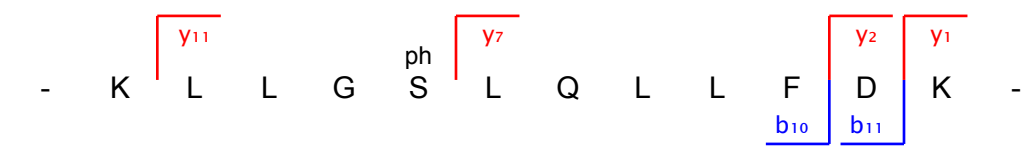



20171215\_MaS\_33SR\_LMH\_proteome\_01 87533 FTMS; HCD 68.54 706.35 GEMIN6

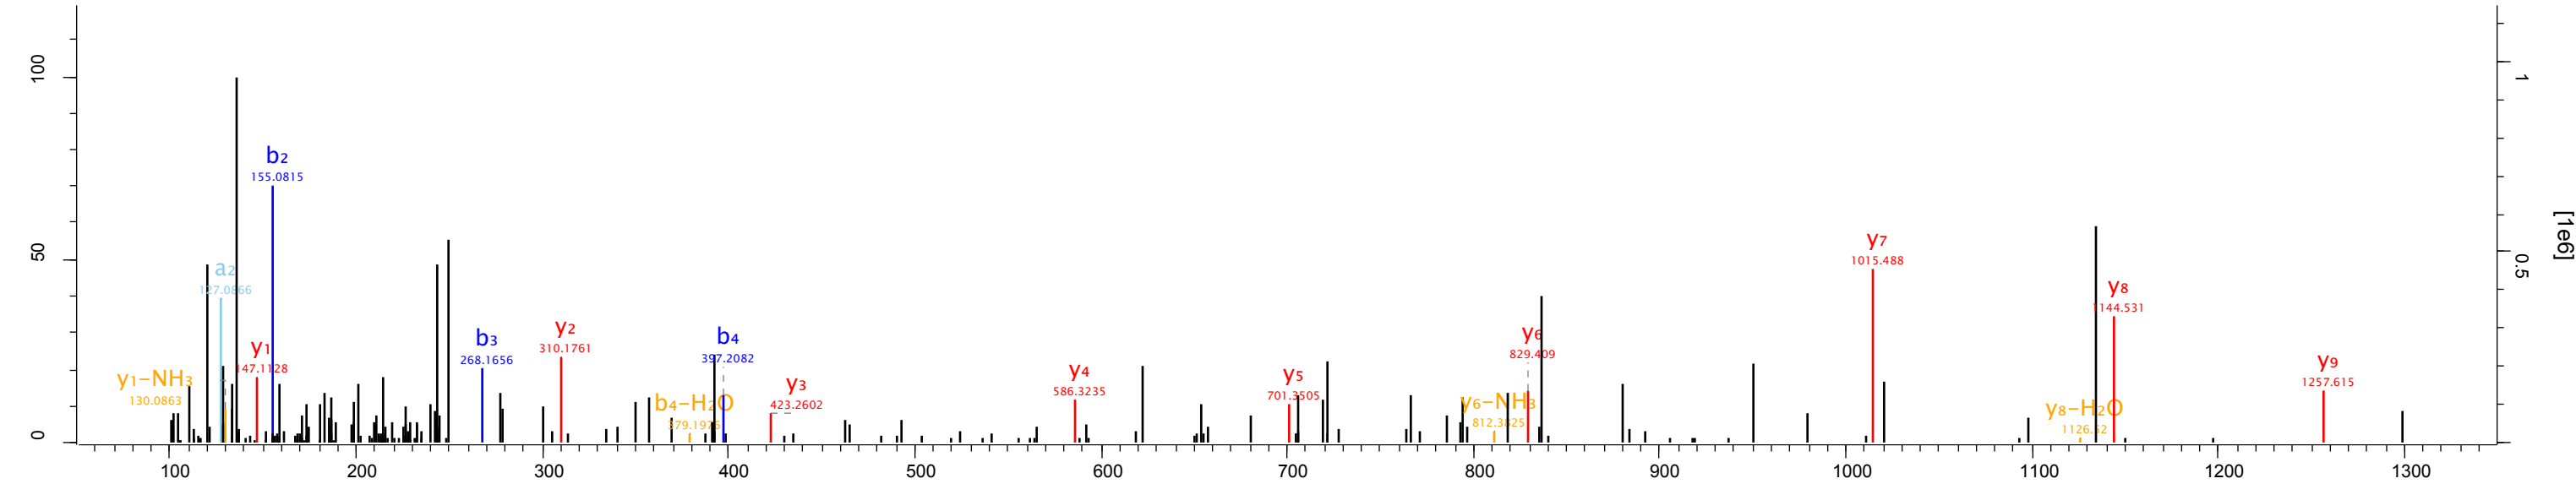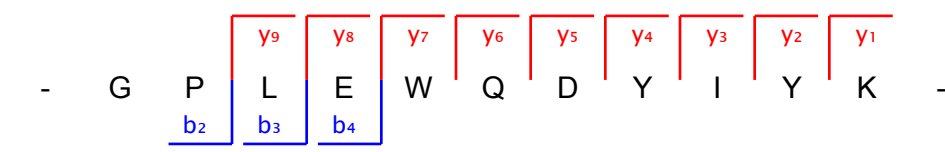

Raw file 20171215\_MaS\_33SR\_LMH\_proteome\_01 Scan 89363 Method FTMS; HCD Score 55.75 m/z 565.66 Gene names PPOX

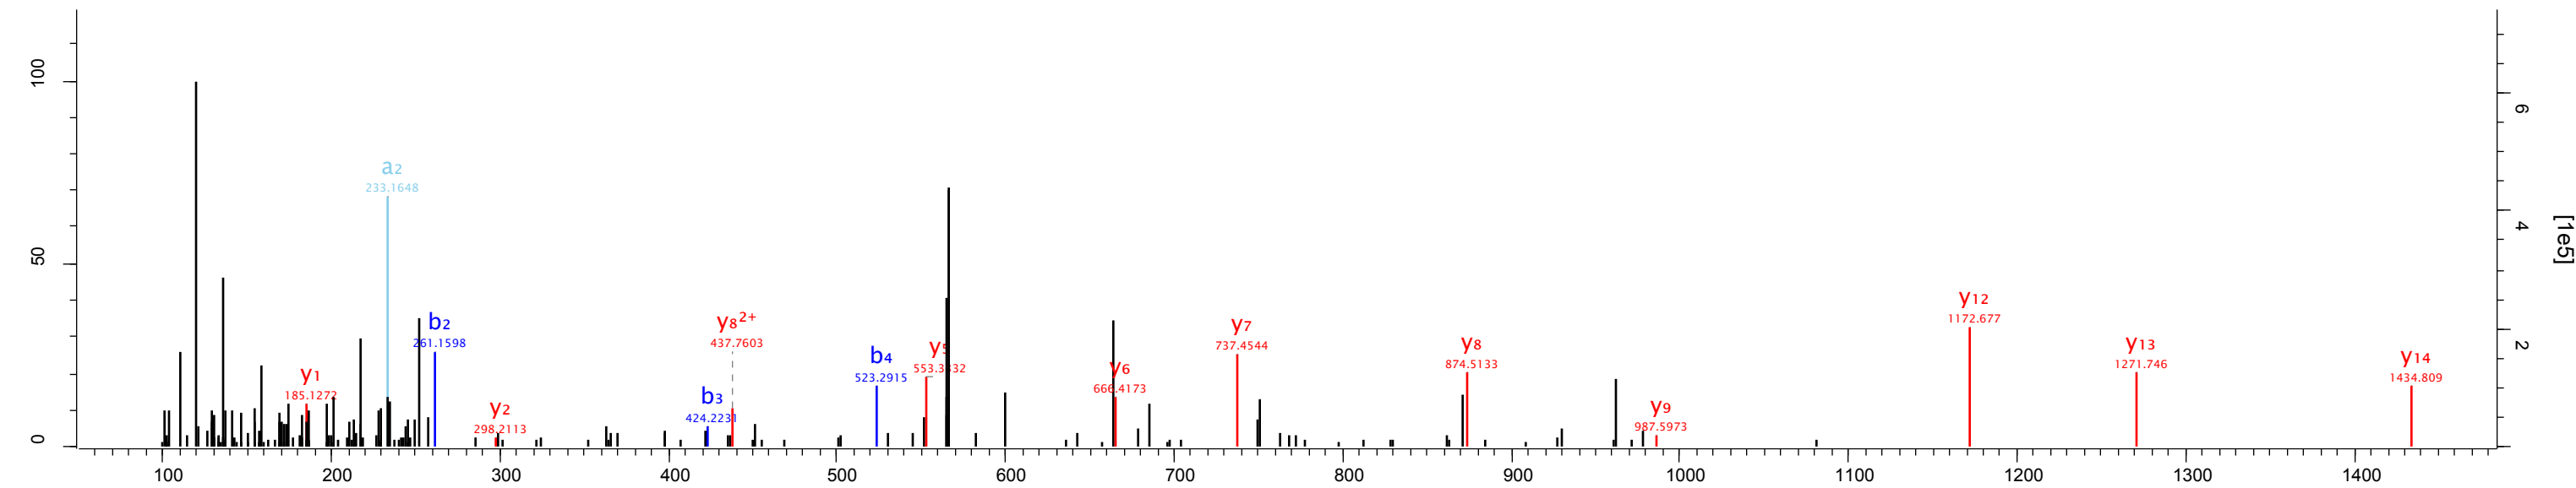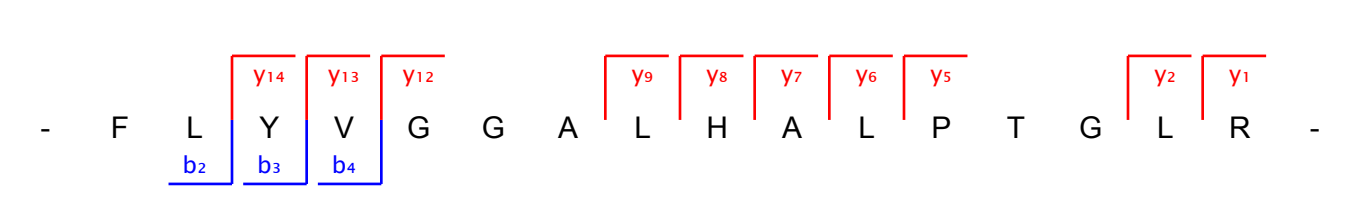

Raw file: 20171215\_MaS\_33SR\_LMH\_proteome\_02  
 Scan: 115763 Method: FTMS; HCD Score: 58.25 m/z: 933.04 Gene names: SPIN3;SPIN1

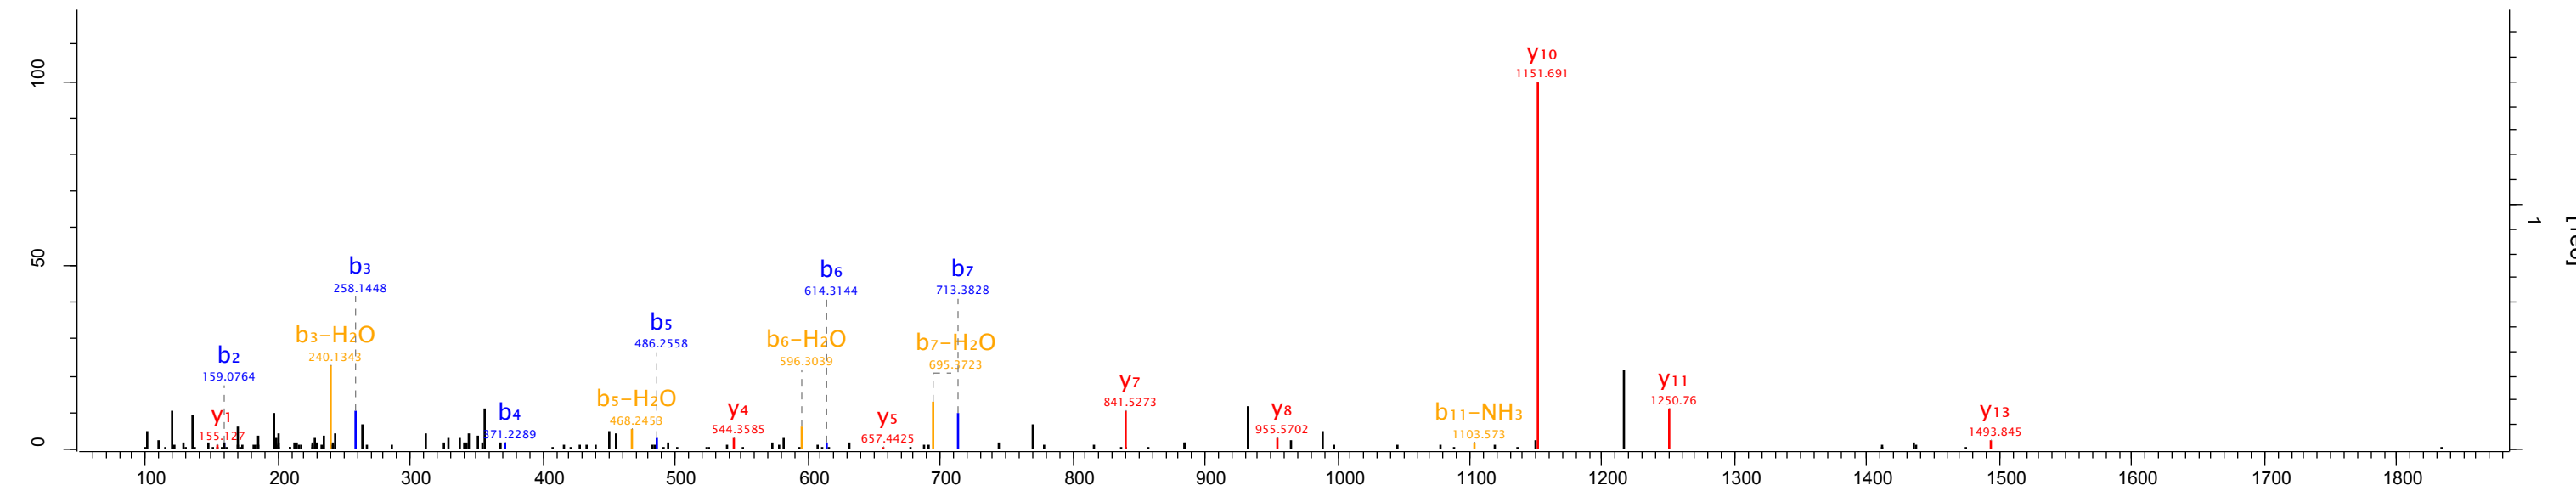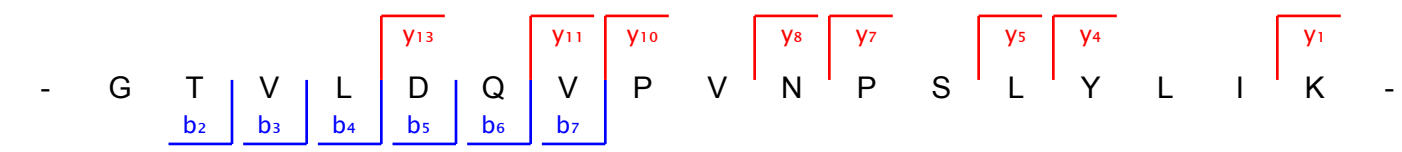

Raw file 20171215\_MaS\_33SR\_LMH\_proteome\_02 Scan 122783 Method FTMS; HCD Score 51.13 m/z 769.92 Gene names SUFU

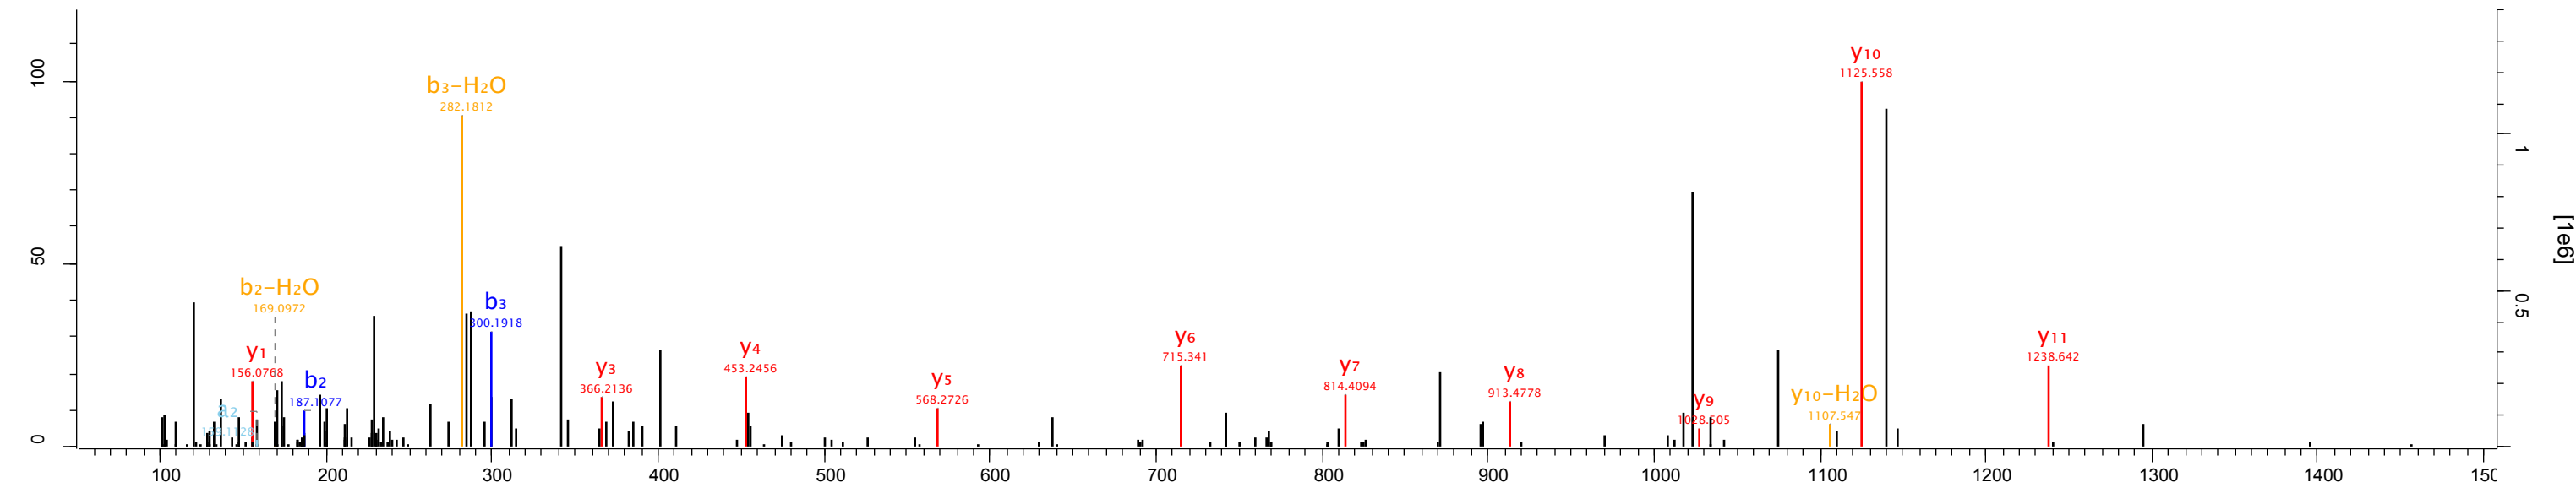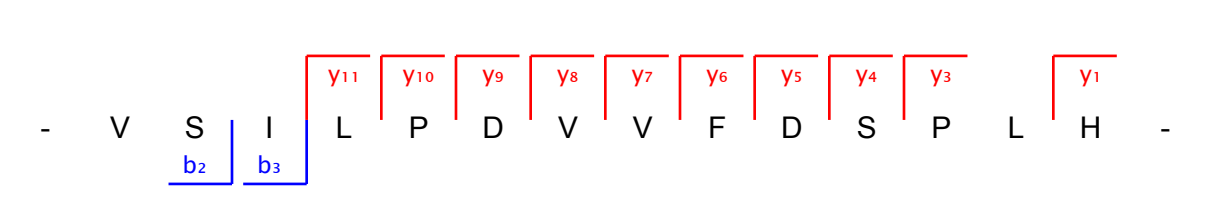

Raw file 20171215\_MaS\_33SR\_LMH\_proteome\_02 Scan 124443 Method FTMS; HCD Score 73.27 m/z 729.4 Gene names SLC1A4

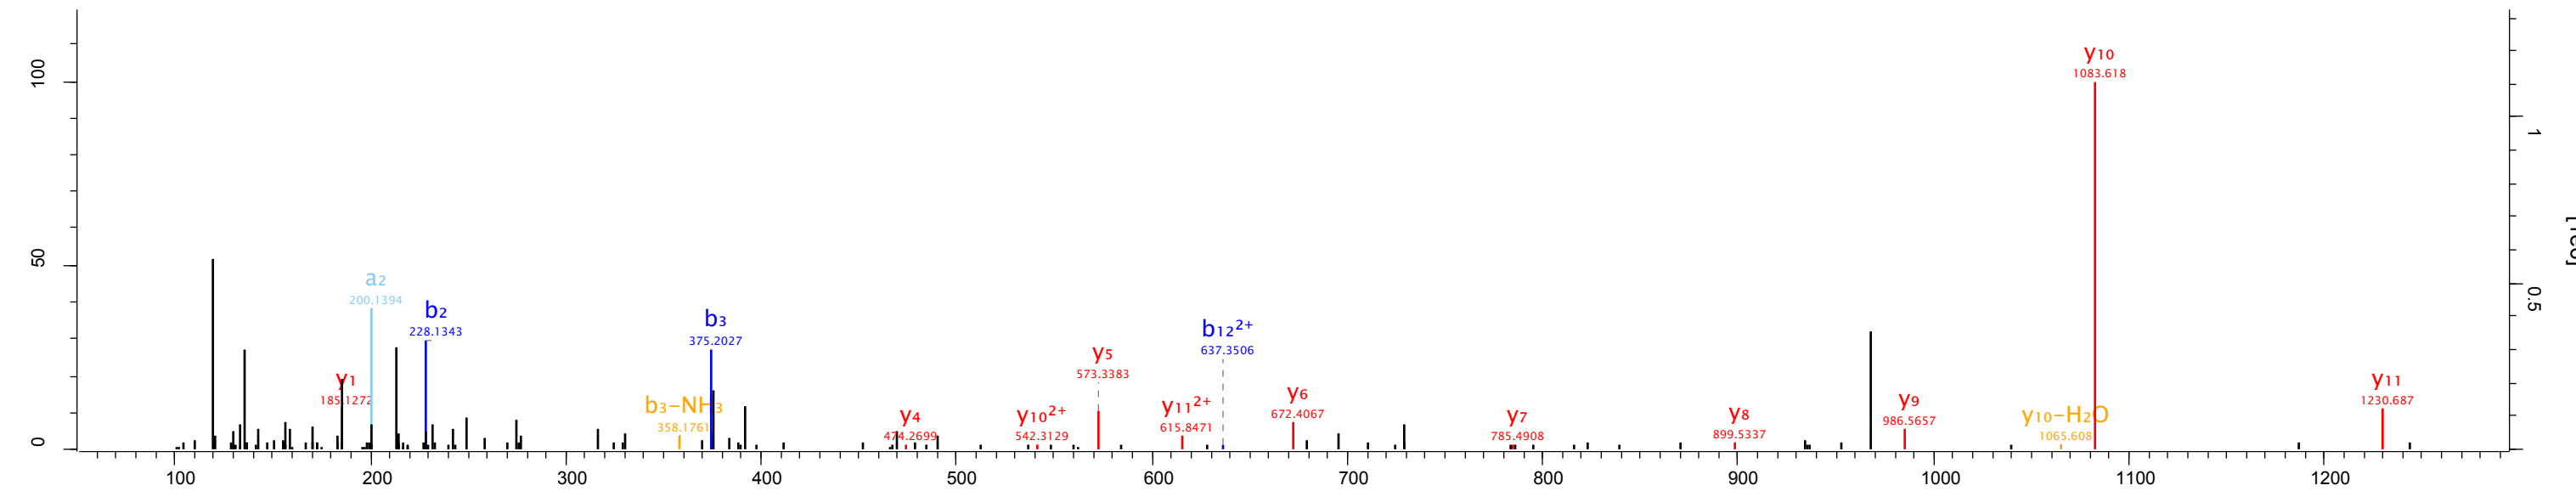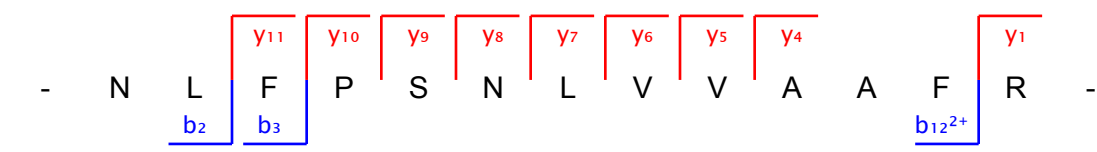

Raw file: 20171215\_MaS\_33SR\_LMH\_proteome\_02  
 Scan: 19373 Method: FTMS; HCD Score: 64.82 m/z: 480.31 Gene names: KRAS;HRAS;NRAS

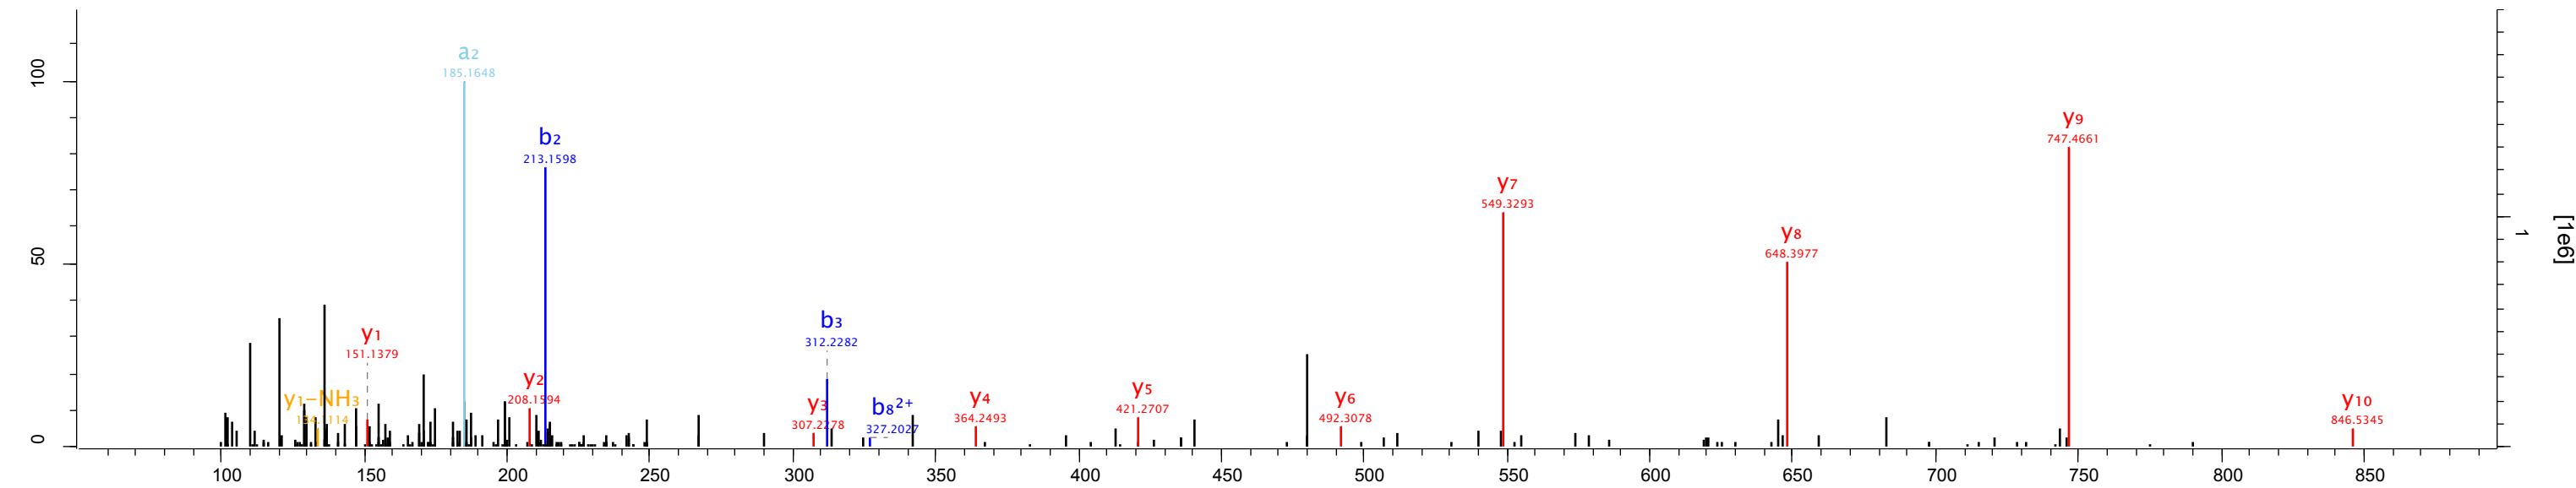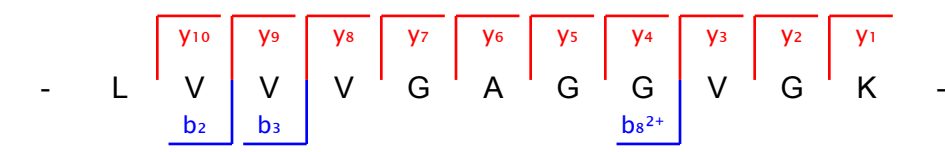

Raw file 20171215\_MaS\_33SR\_LMH\_proteome\_02 Scan 20243 Method FTMS; HCD Score 61.78 m/z 672.82

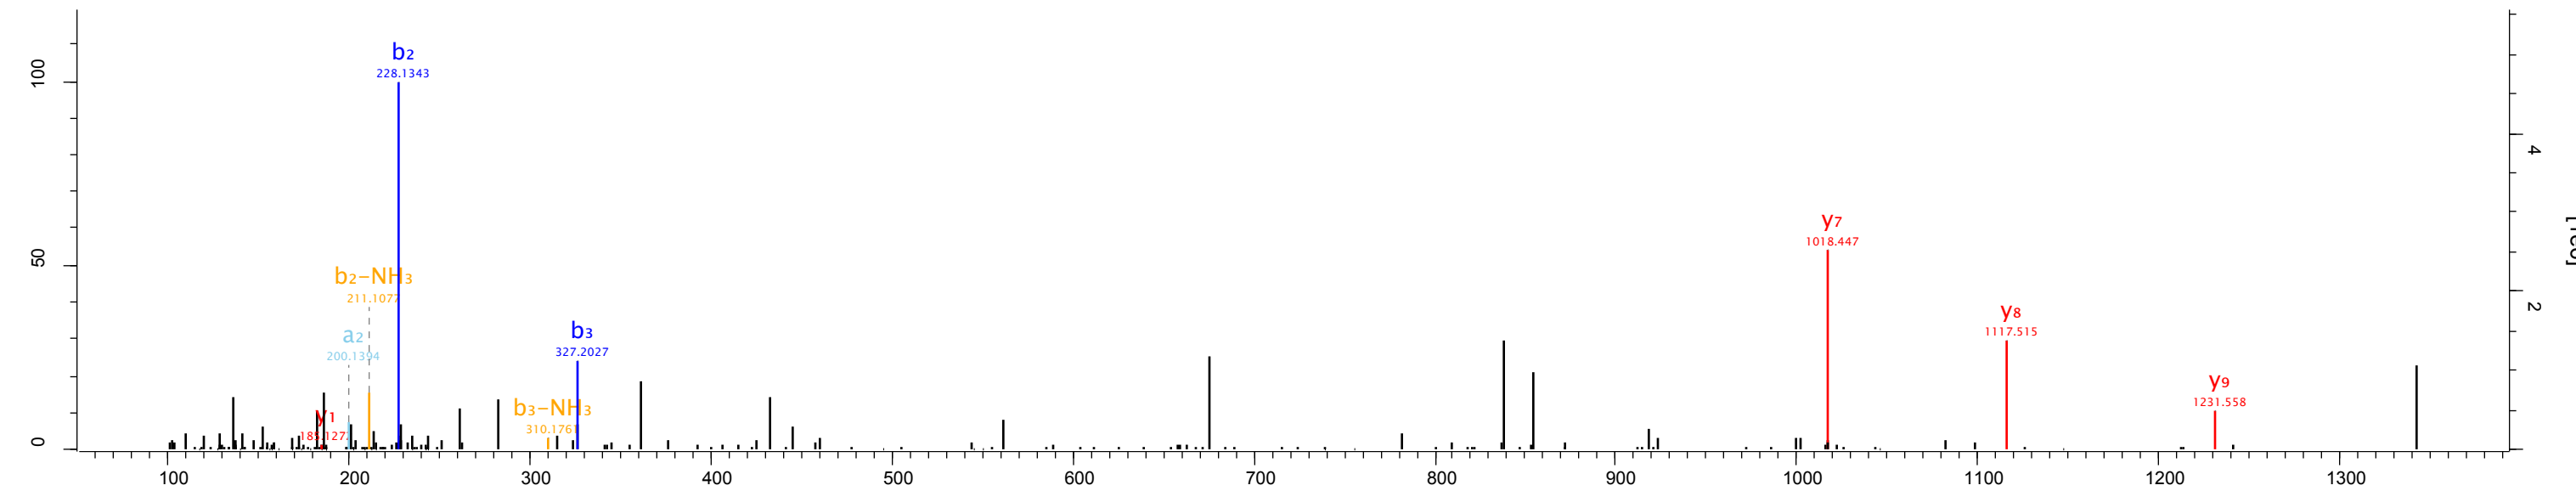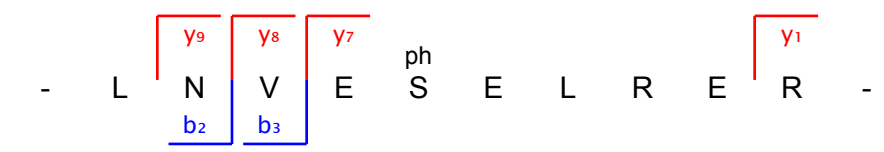

Raw file: 20171215\_MaS\_33SR\_LMH\_proteome\_02  
 Scan: 42563 Method: FTMS; HCD Score: 77.22 m/z: 780.39 Gene names: CCZ1B;CCZ1

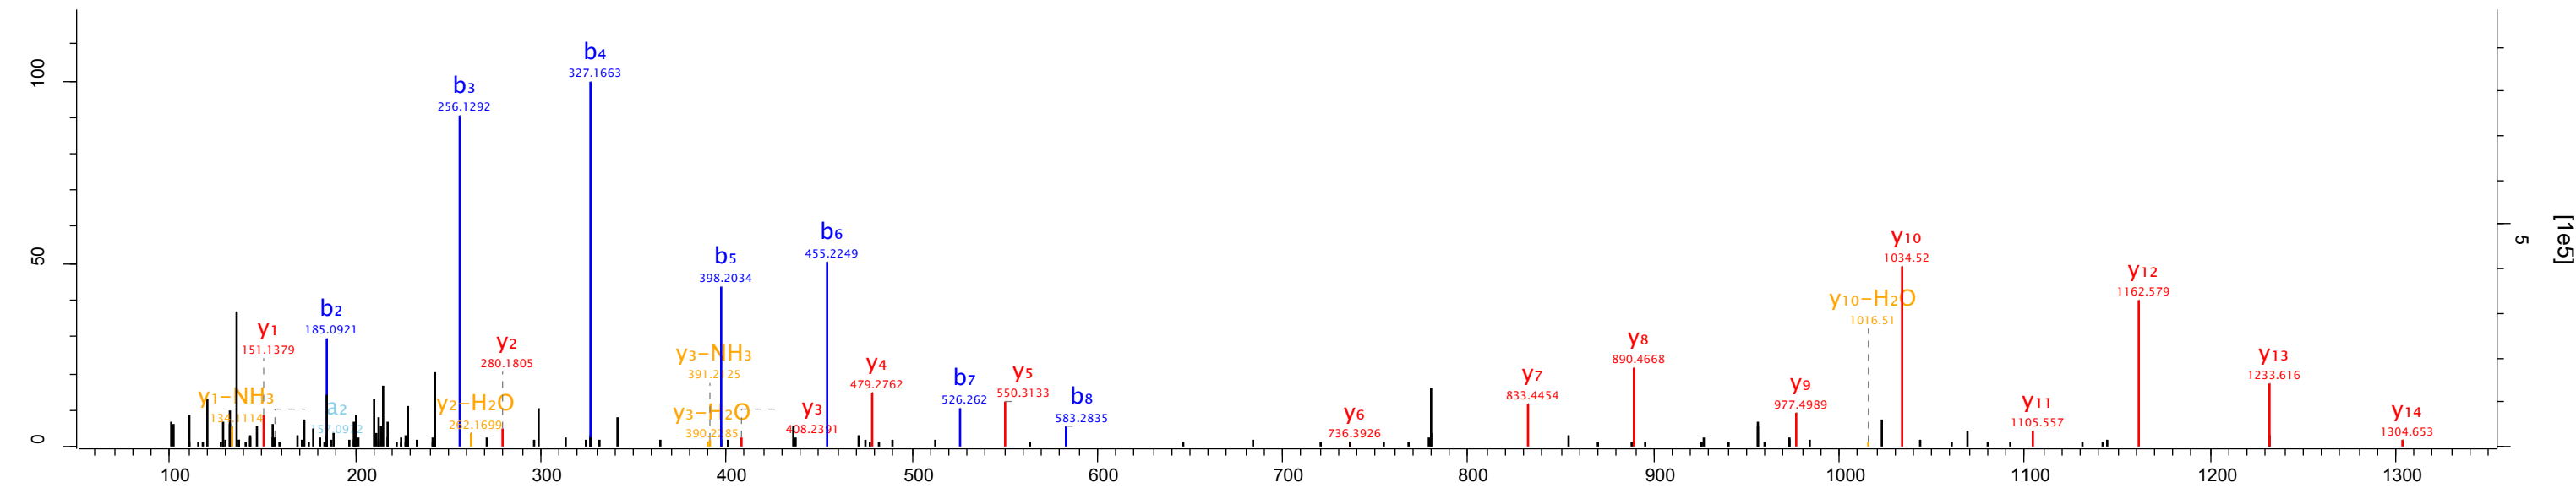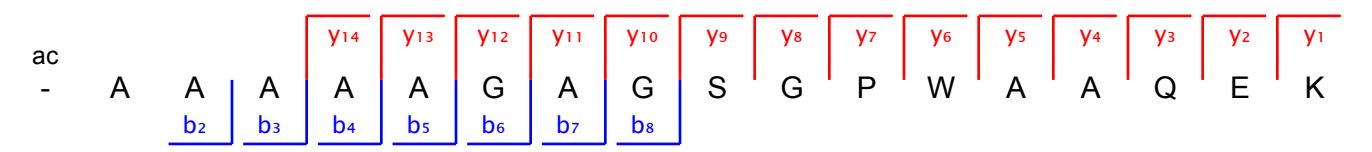



Raw file 20171215\_MaS\_33SR\_LMH\_proteome\_02 Scan 6253 Method FTMS; HCD Score 62.71 m/z 482.2

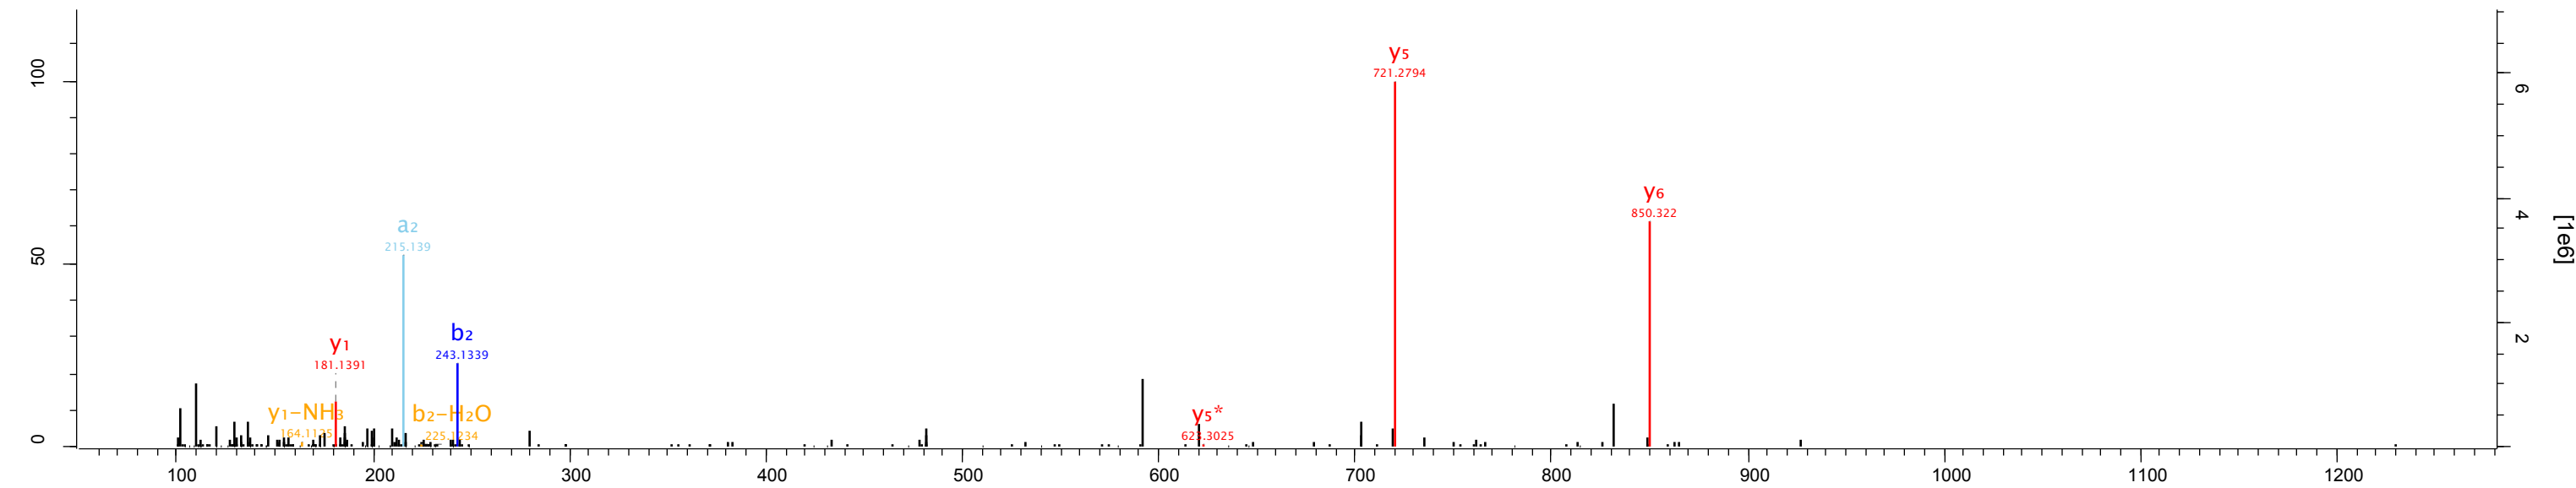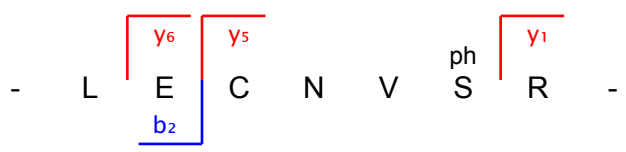

Raw file 20171215\_MaS\_33SR\_LMH\_proteome\_02 Scan 6943 Method FTMS; HCD Score 57.2 m/z 591.3

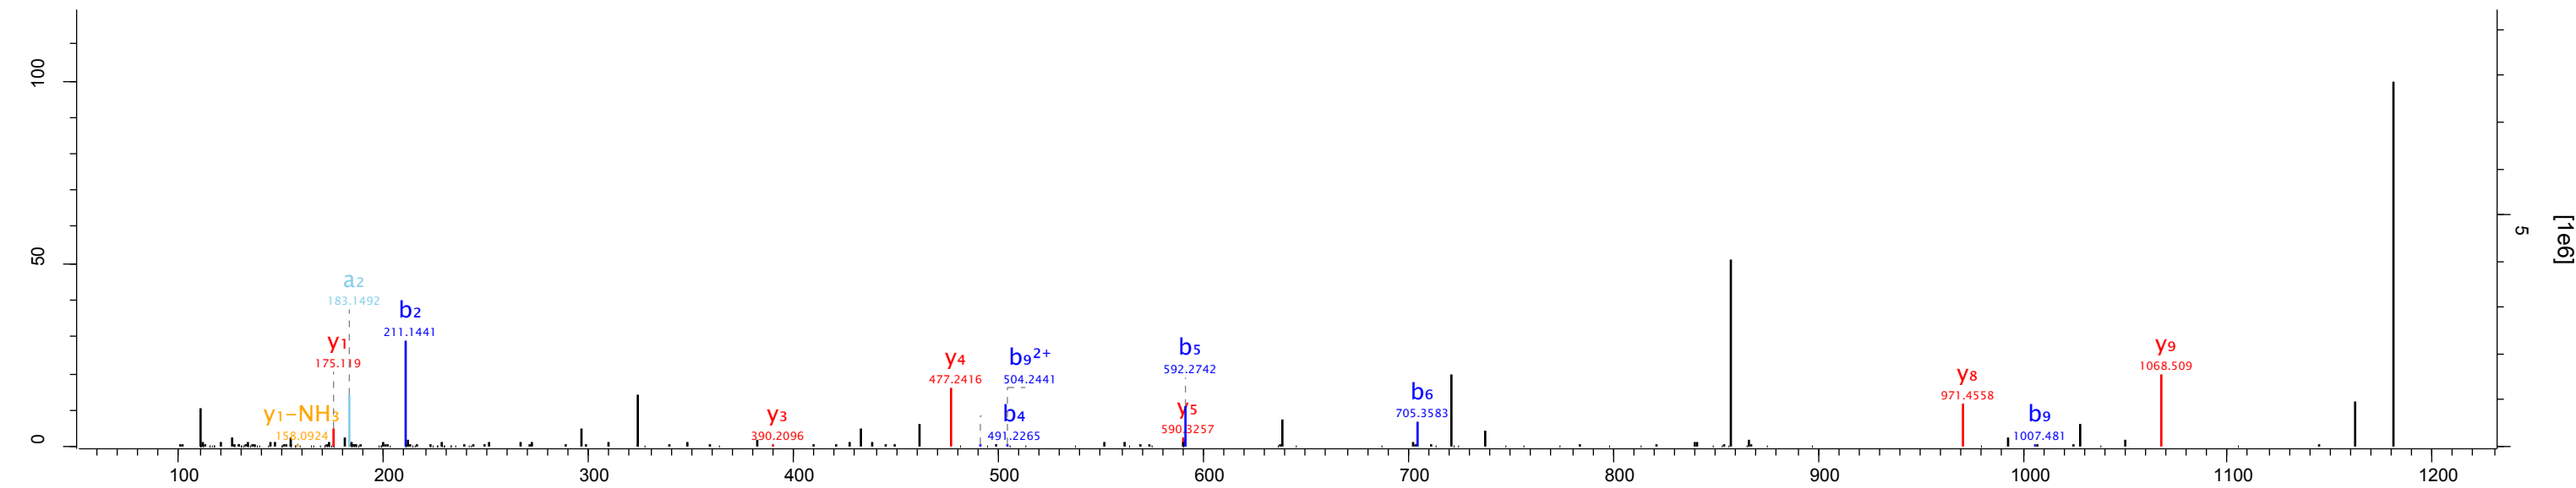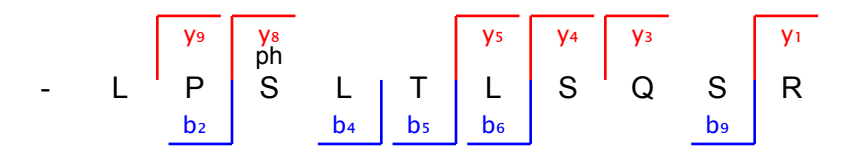

Raw file  
20171215\_MaS\_33SR\_LMH\_proteome\_02

Scan 7813 Method FTMS; HCD Score 95.98 m/z 515.6 Gene names SPANXC;SPANXD

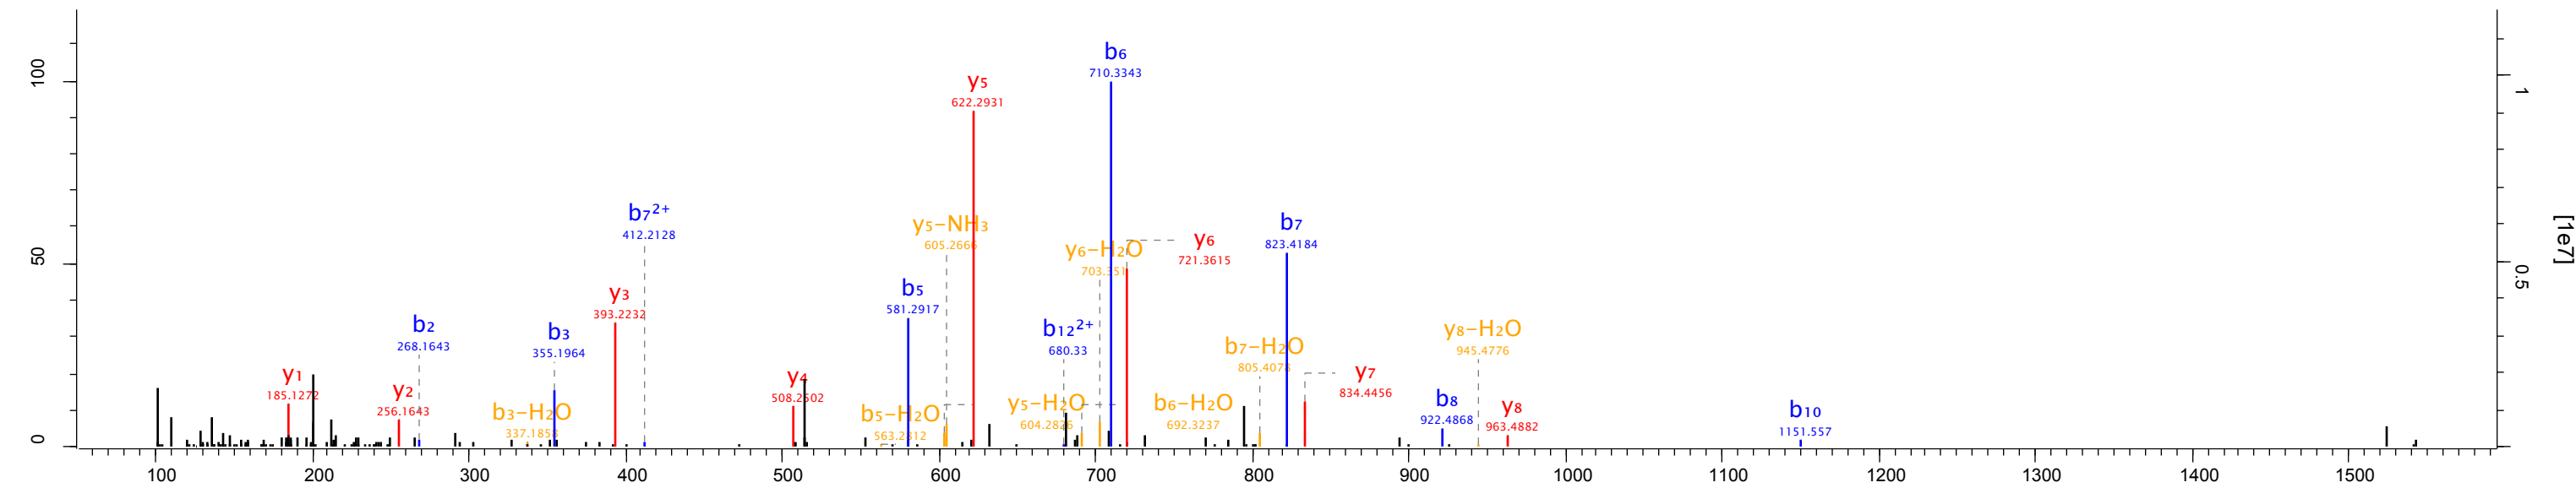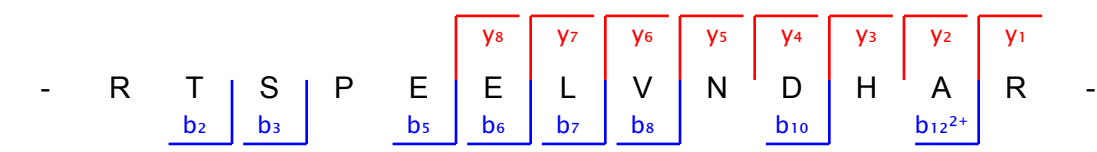

Raw file: 20171215\_MaS\_33SR\_LMH\_proteome\_02  
 Scan: 83823 Method: FTMS; HCD Score: 99.14 m/z: 423.26 Gene names: TRPC4;TRPC5

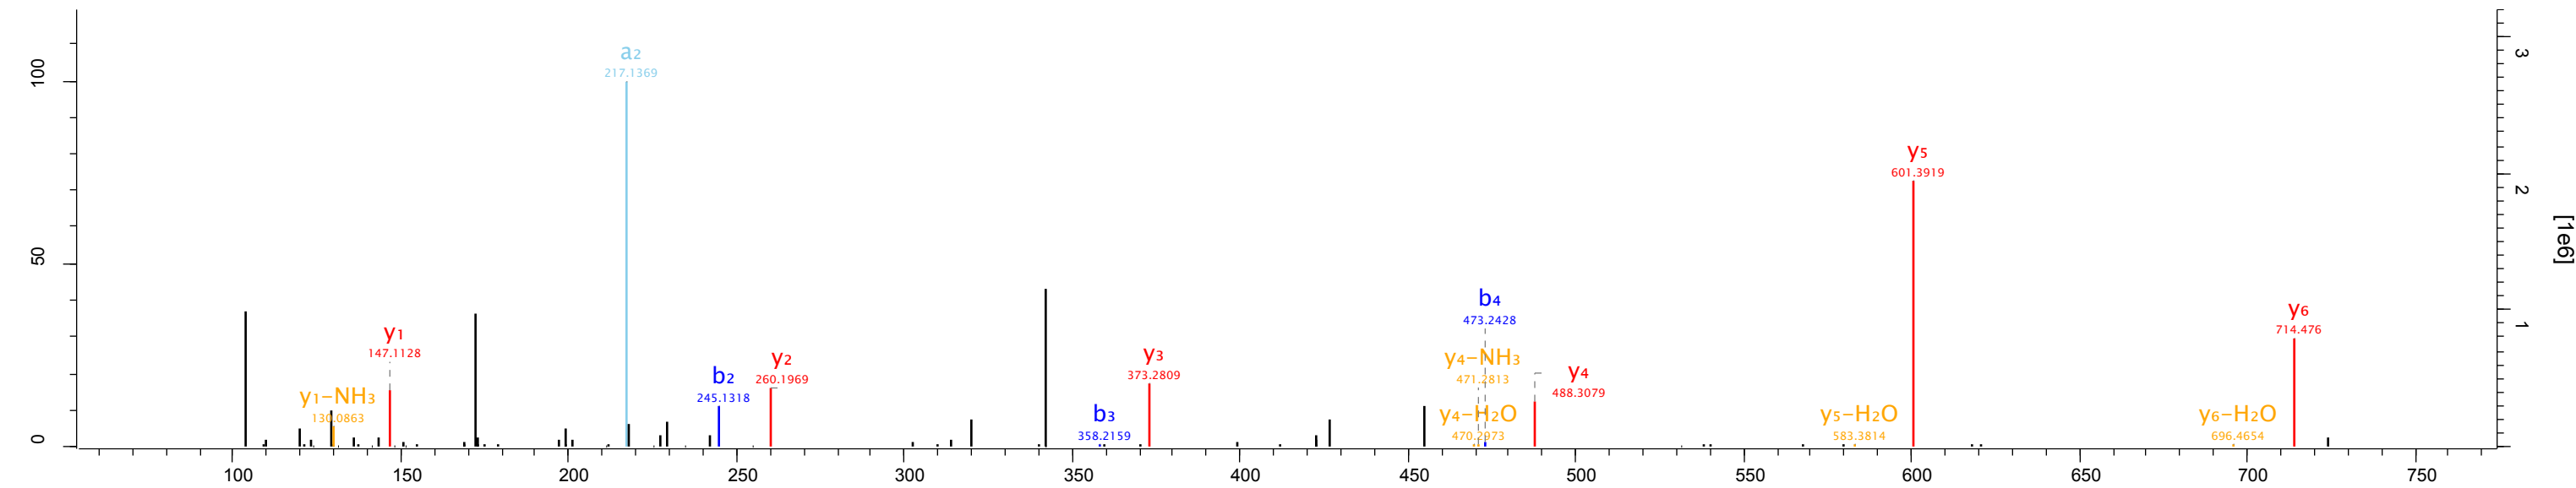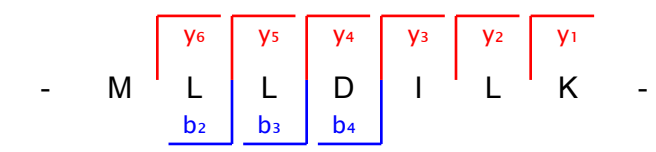

Raw file: 20171215\_MaS\_33SR\_LMH\_proteome\_02  
 Scan: 96273 Method: FTMS; HCD Score: 71.18 m/z: 719.41 Gene names: OSTC

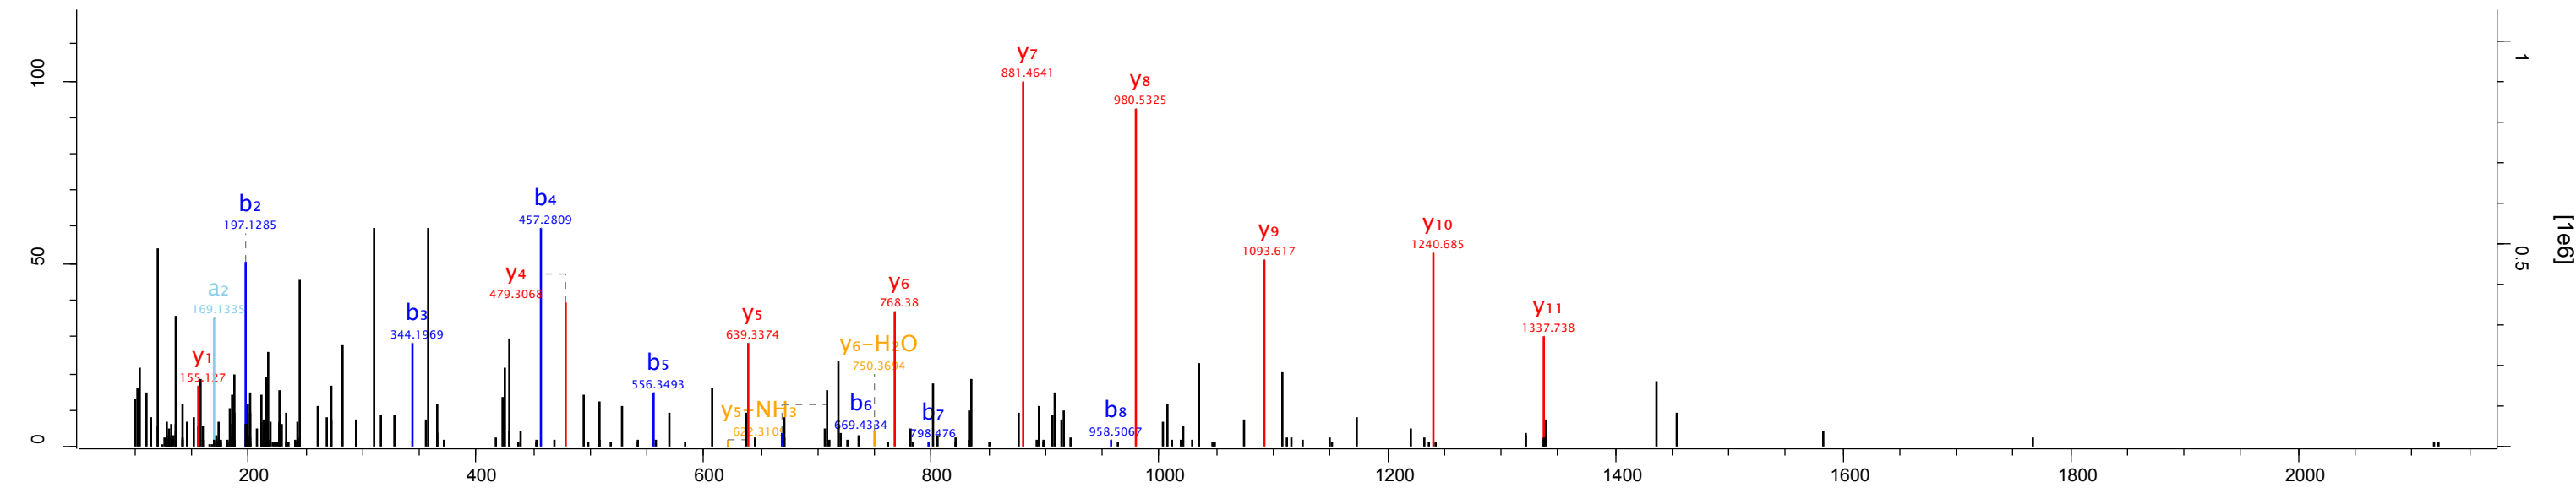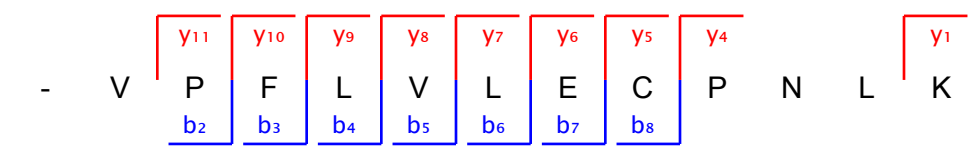

Raw file 20171215\_MaS\_33SR\_LMH\_phospho\_01 Scan 3384 Method FTMS; HCD Score 140.2 m/z 853.82 Gene names CLIP2

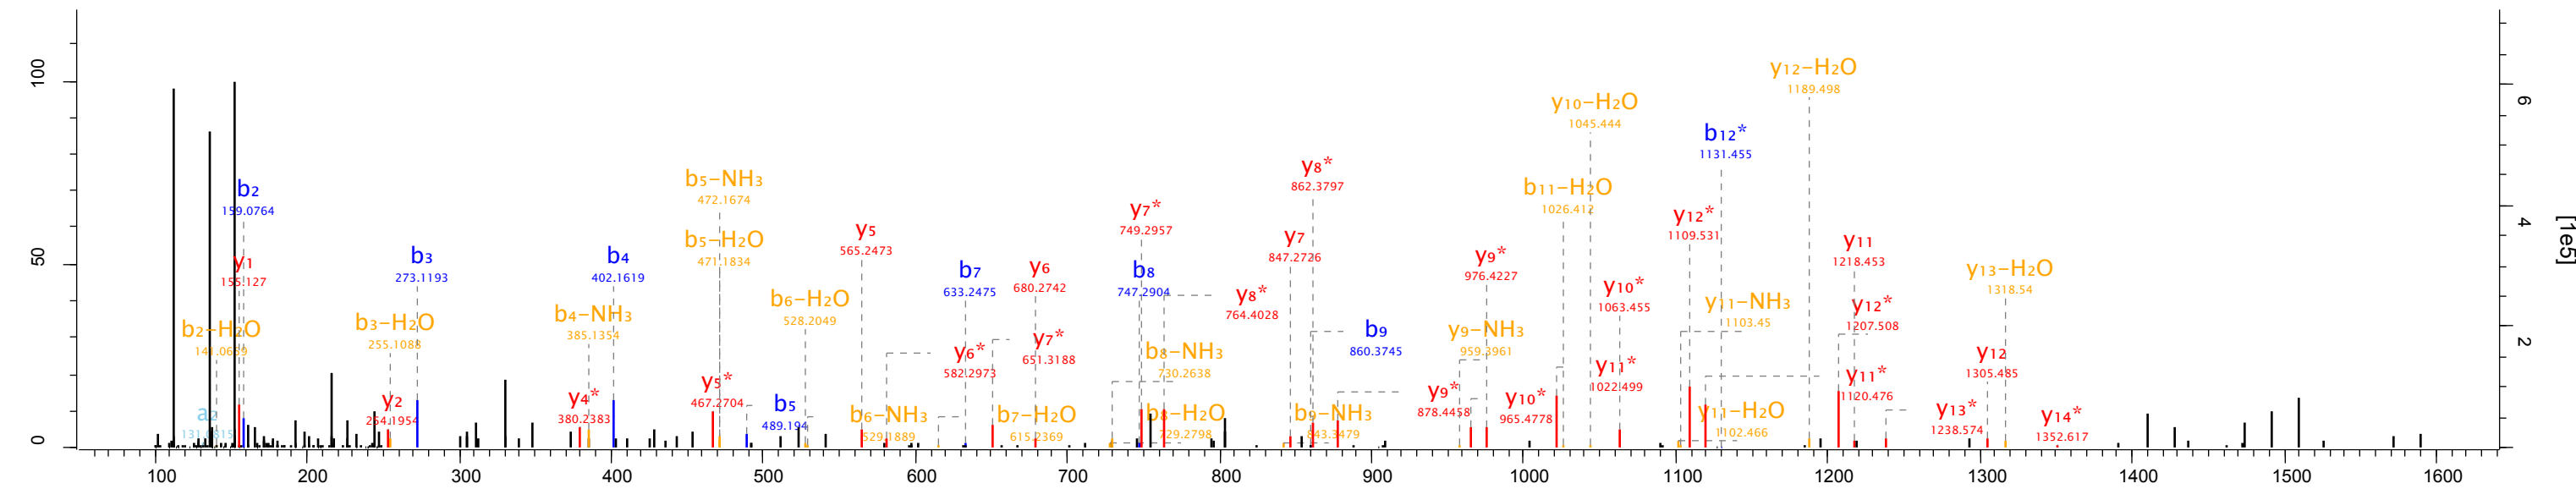

- T G N E S G S N L S G ph S V K -

Fragmentation mapping (b and y ions):

- b2: G
- b3: N
- b4: E
- b5: S
- b7: S
- b8: N
- b9: L
- b12\*: S
- y1: K
- y2: V
- y4\*: G
- y5: S
- y6: D
- y7: ph
- y8\*: L
- y9\*: N
- y10\*: S
- y11: G
- y12: S
- y13\*: E
- y14\*: N

Raw file Scan Method Score m/z Gene names

20171215\_MaS\_33SR\_LMH\_phospho\_01 4934 FTMS; HCD 115.1 583.75 MIEF1

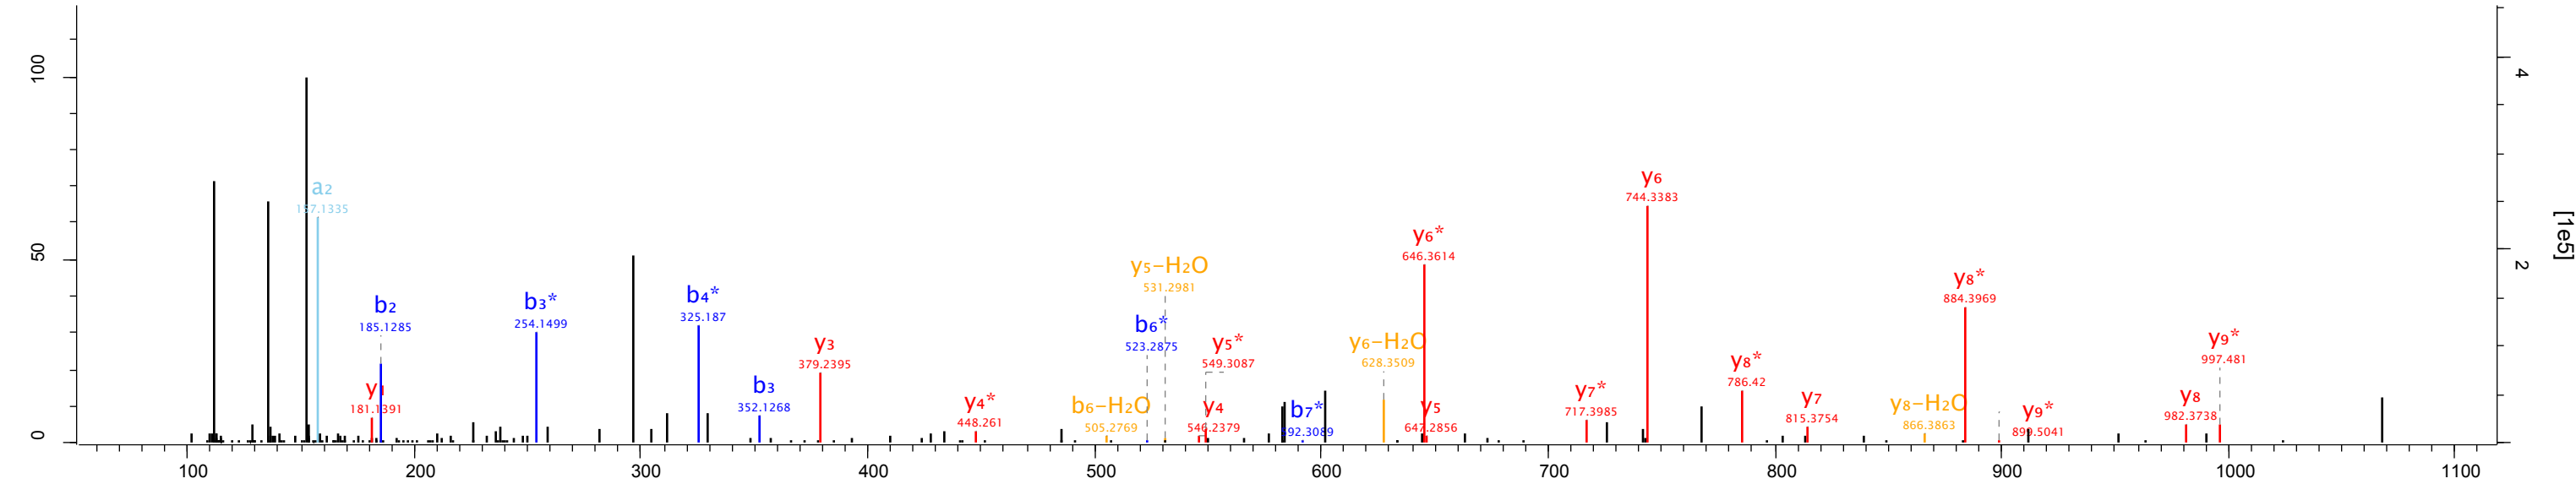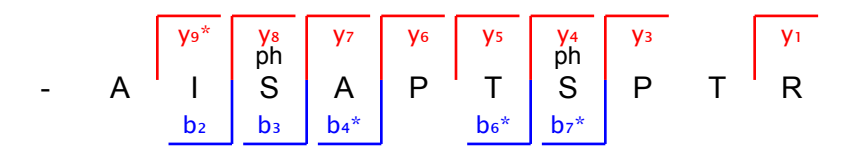

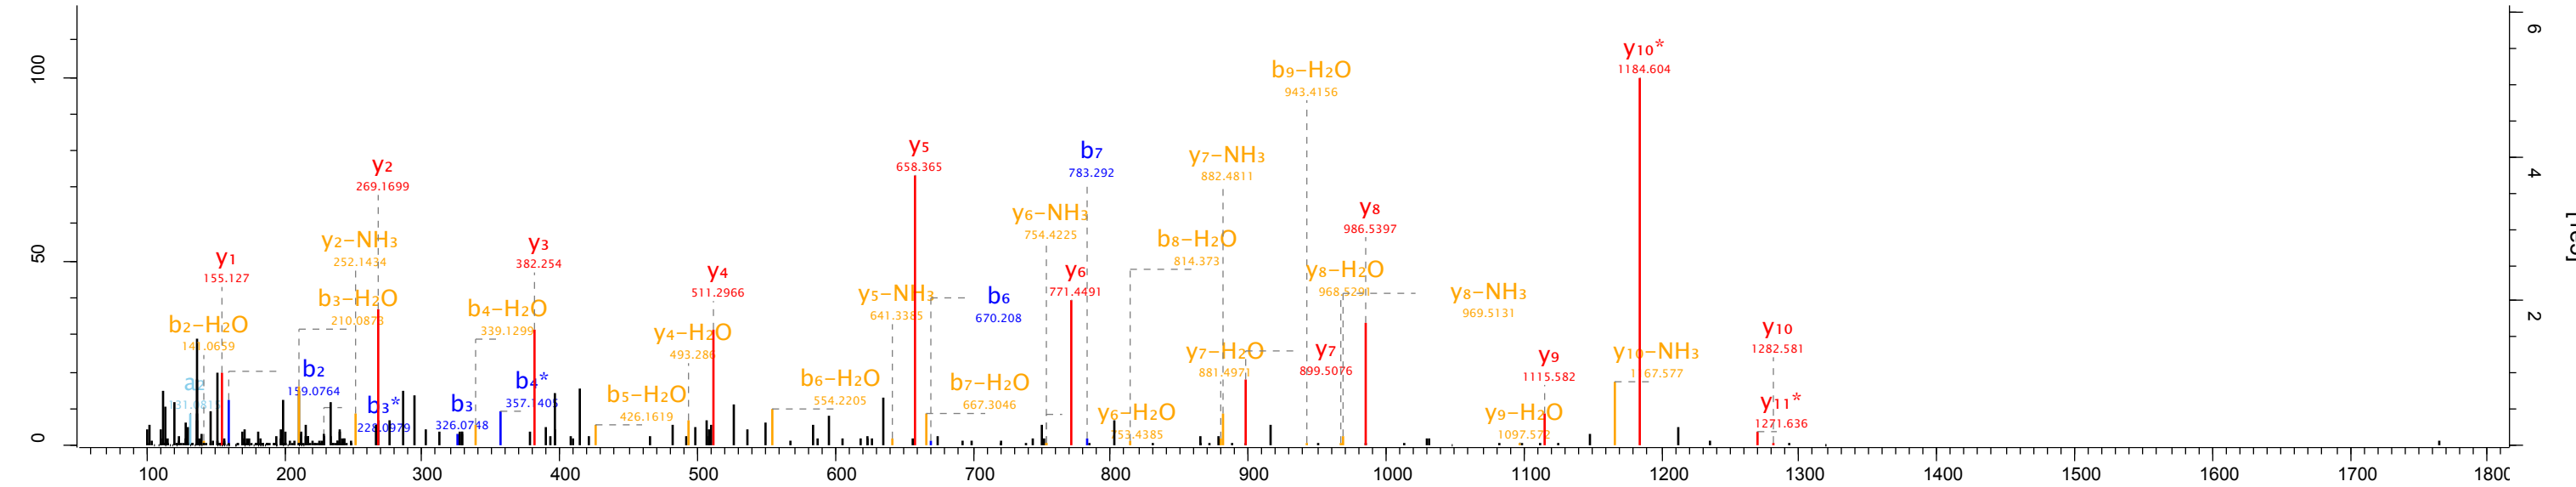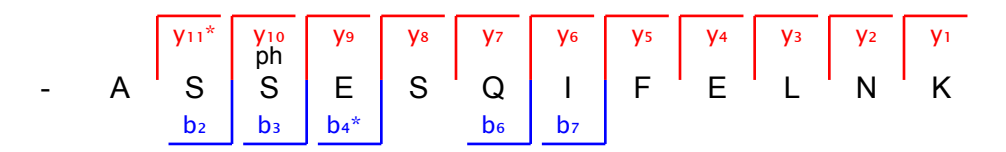



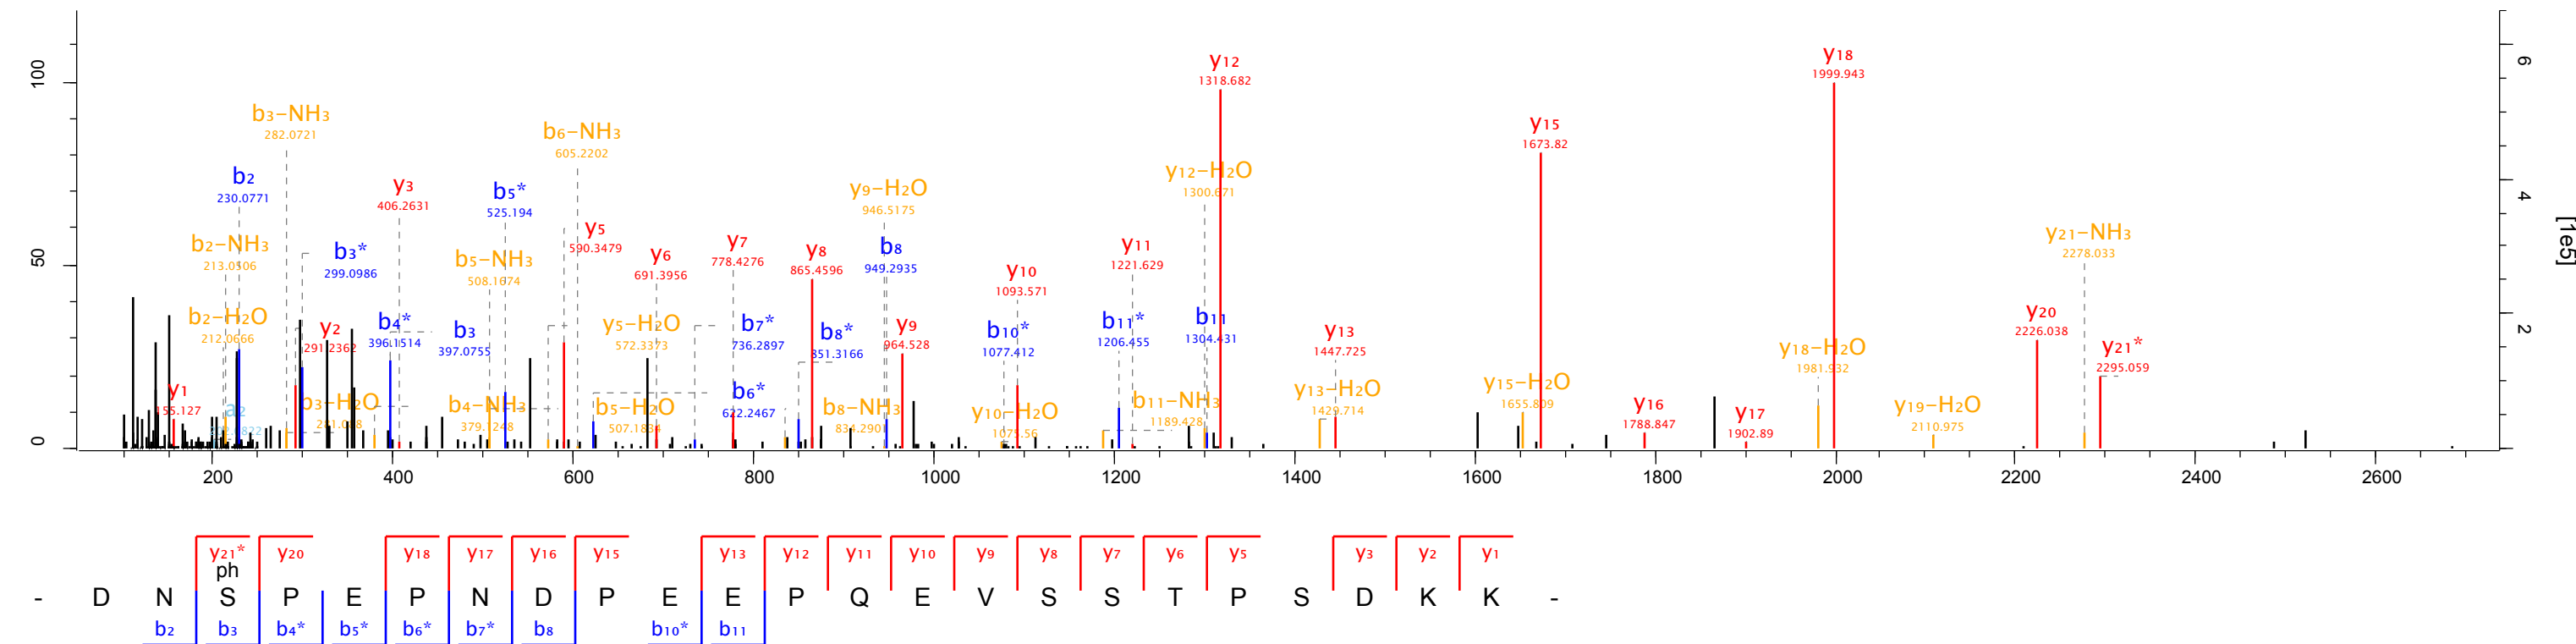

Raw file: 20171215\_MaS\_33SR\_LMH\_phospho\_02  
 Scan: 5634 Method: FTMS; HCD Score: 108.23 m/z: 690.23 Gene names: HERC1

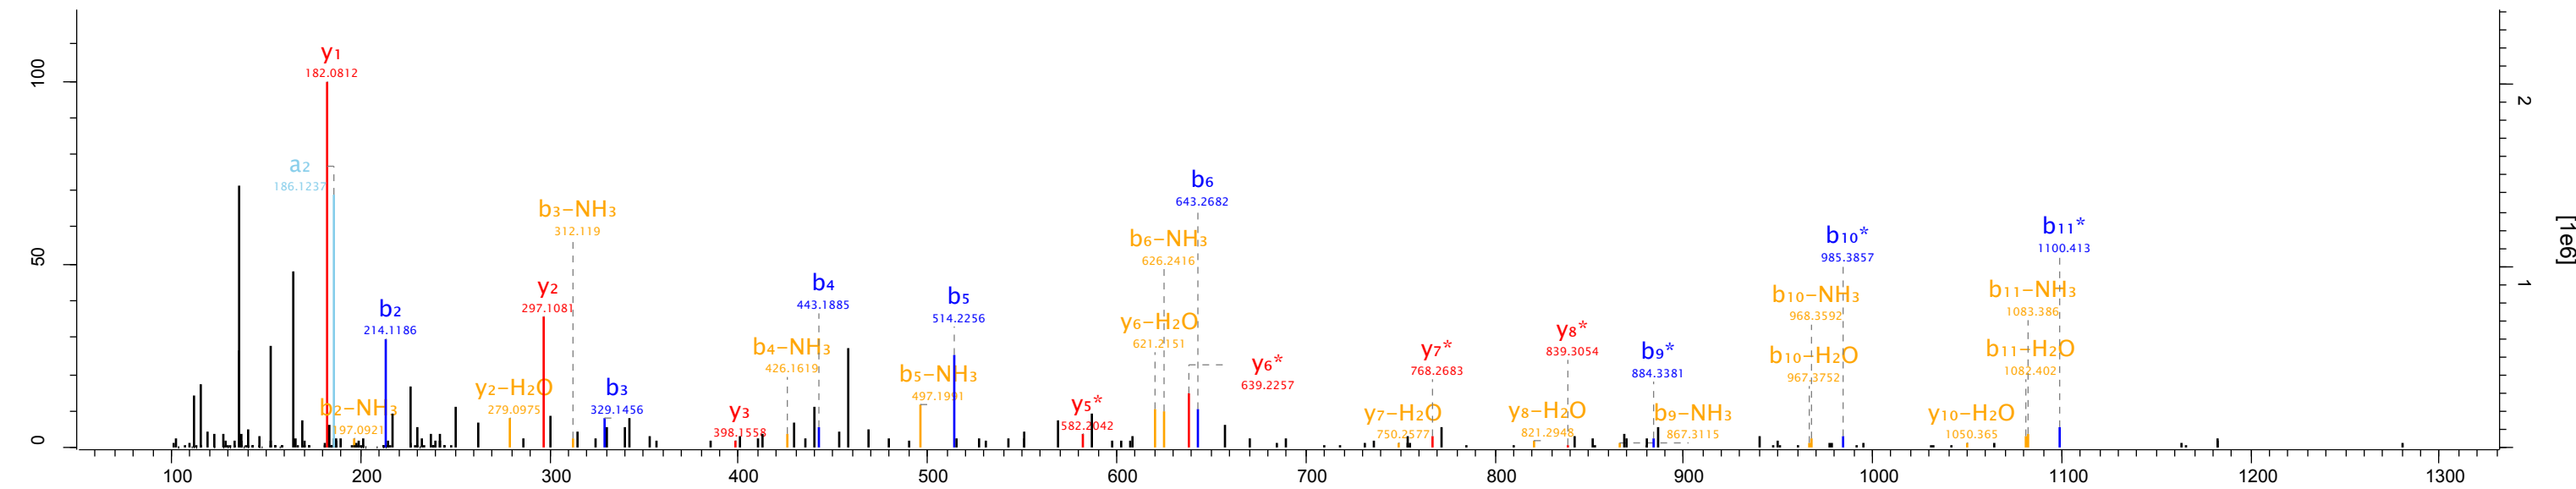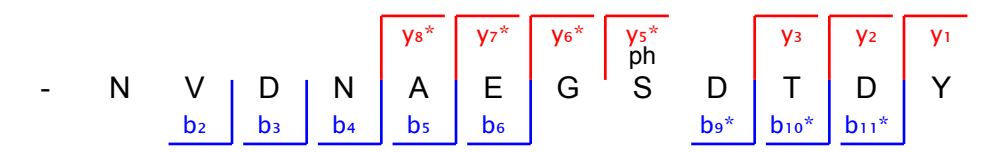

Raw file 20171215\_MaS\_33SR\_LMH\_phospho\_02 Scan 6534 Method FTMS; HCD Score 96.1 m/z 759.82 Gene names EYA4

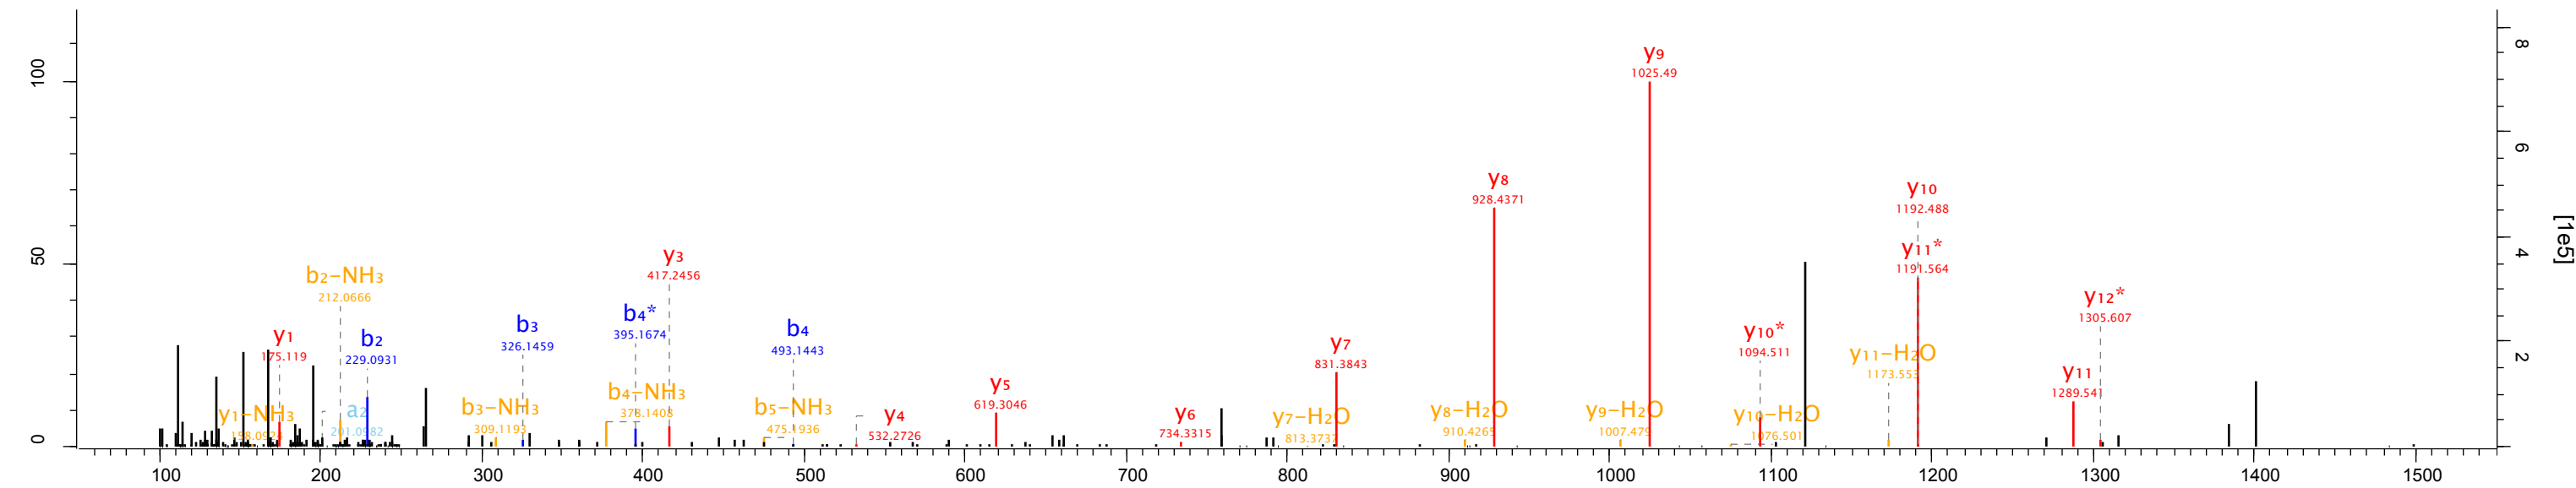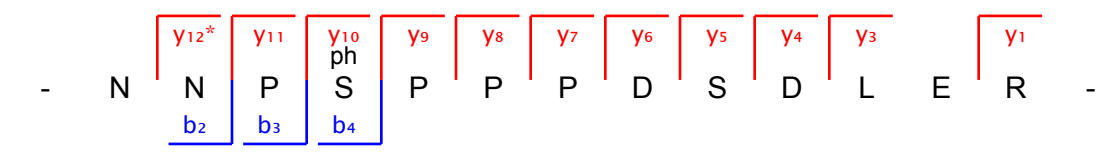

Raw file 20171215\_MaS\_33SR\_LMH\_phospho\_03 Scan 10334 Method FTMS; HCD Score 41.7 m/z 739.27 Gene names FBXO32

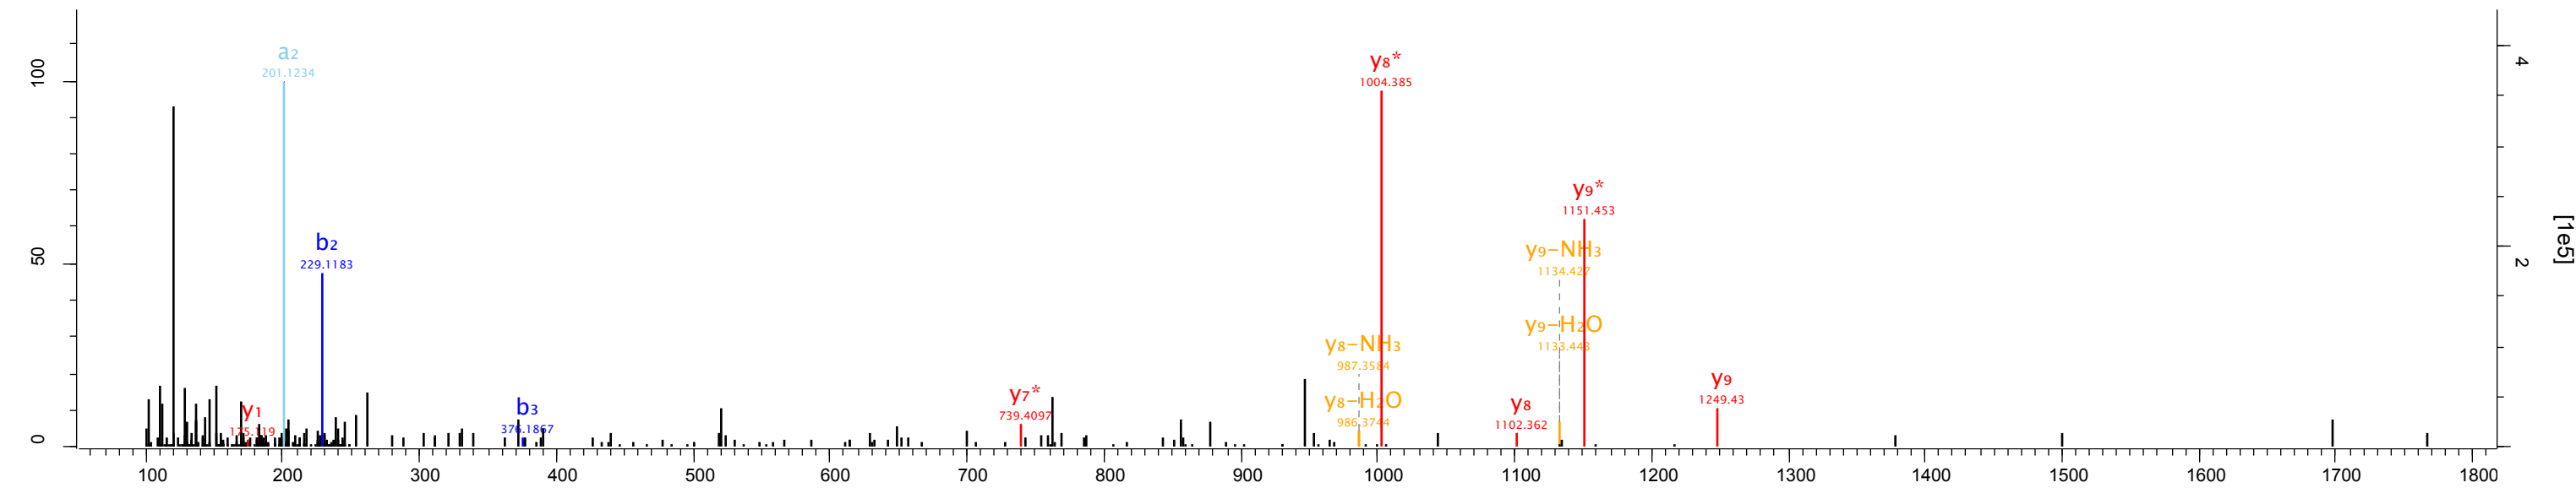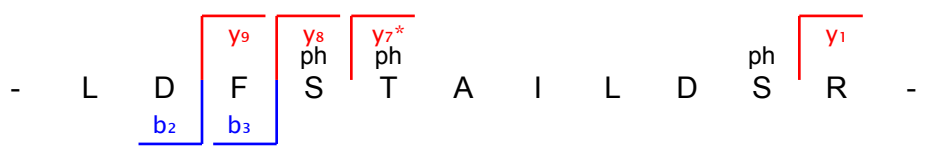

Raw file 20171215\_MaS\_33SR\_LMH\_phospho\_03 Scan 12954 Method FTMS; HCD Score 172.56 m/z 878.85 Gene names MTMR9

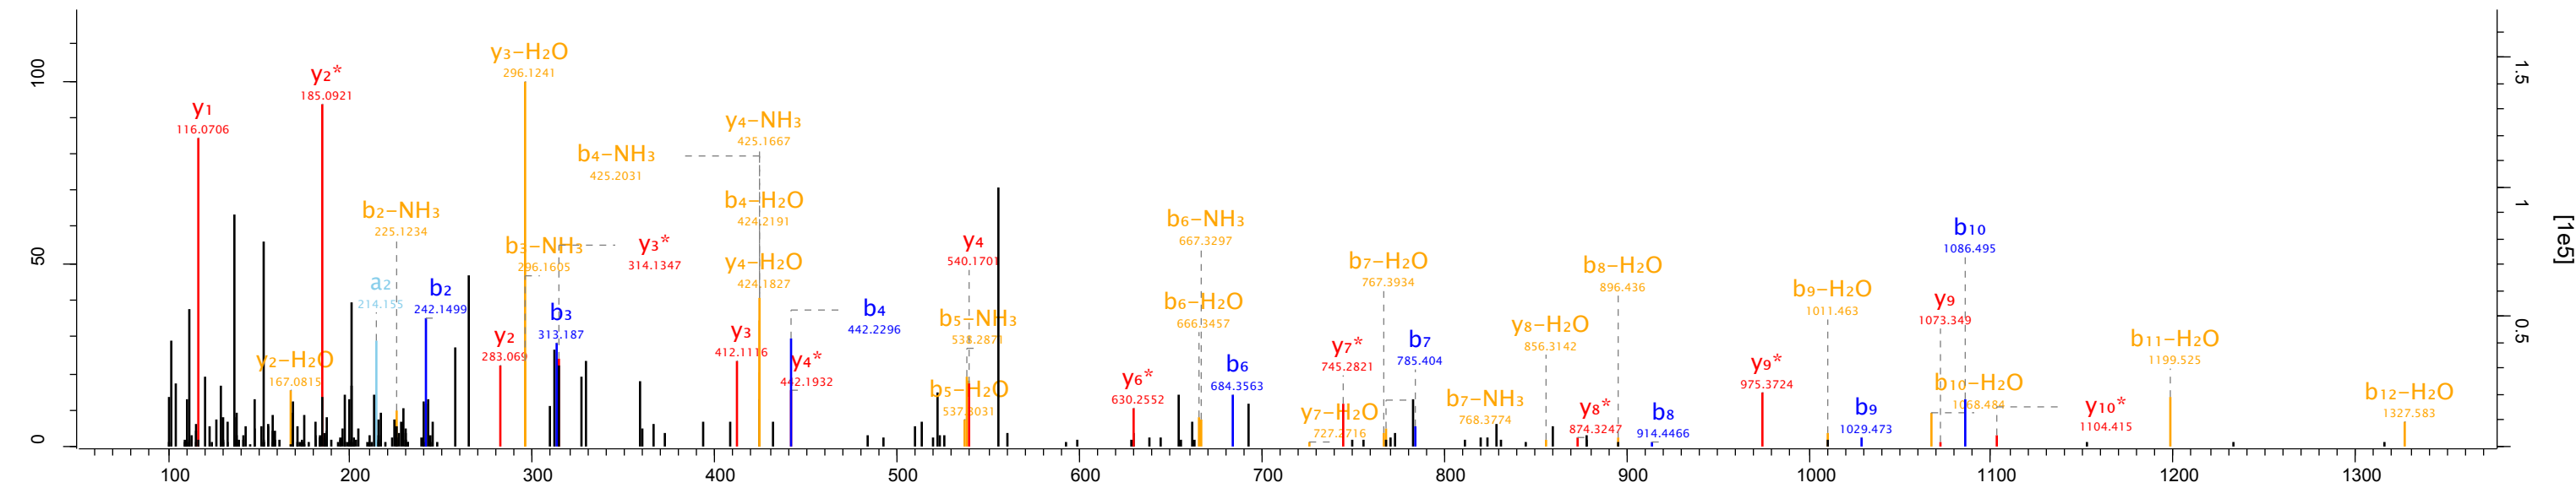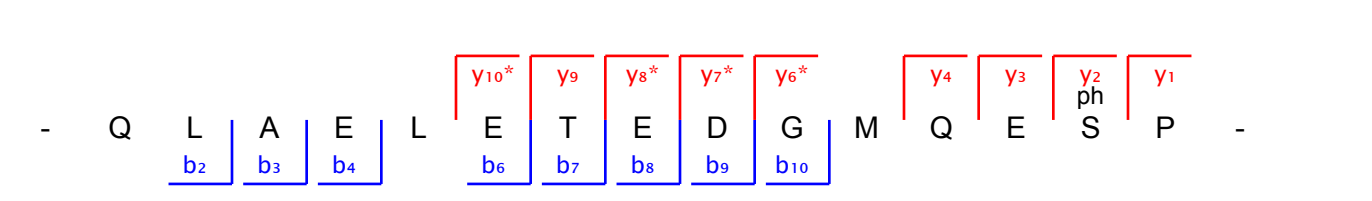

Raw file 20171215\_MaS\_33SR\_LMH\_phospho\_03 Scan 13194 Method FTMS; HCD Score 191.97 m/z 1198.53 Gene names USP34

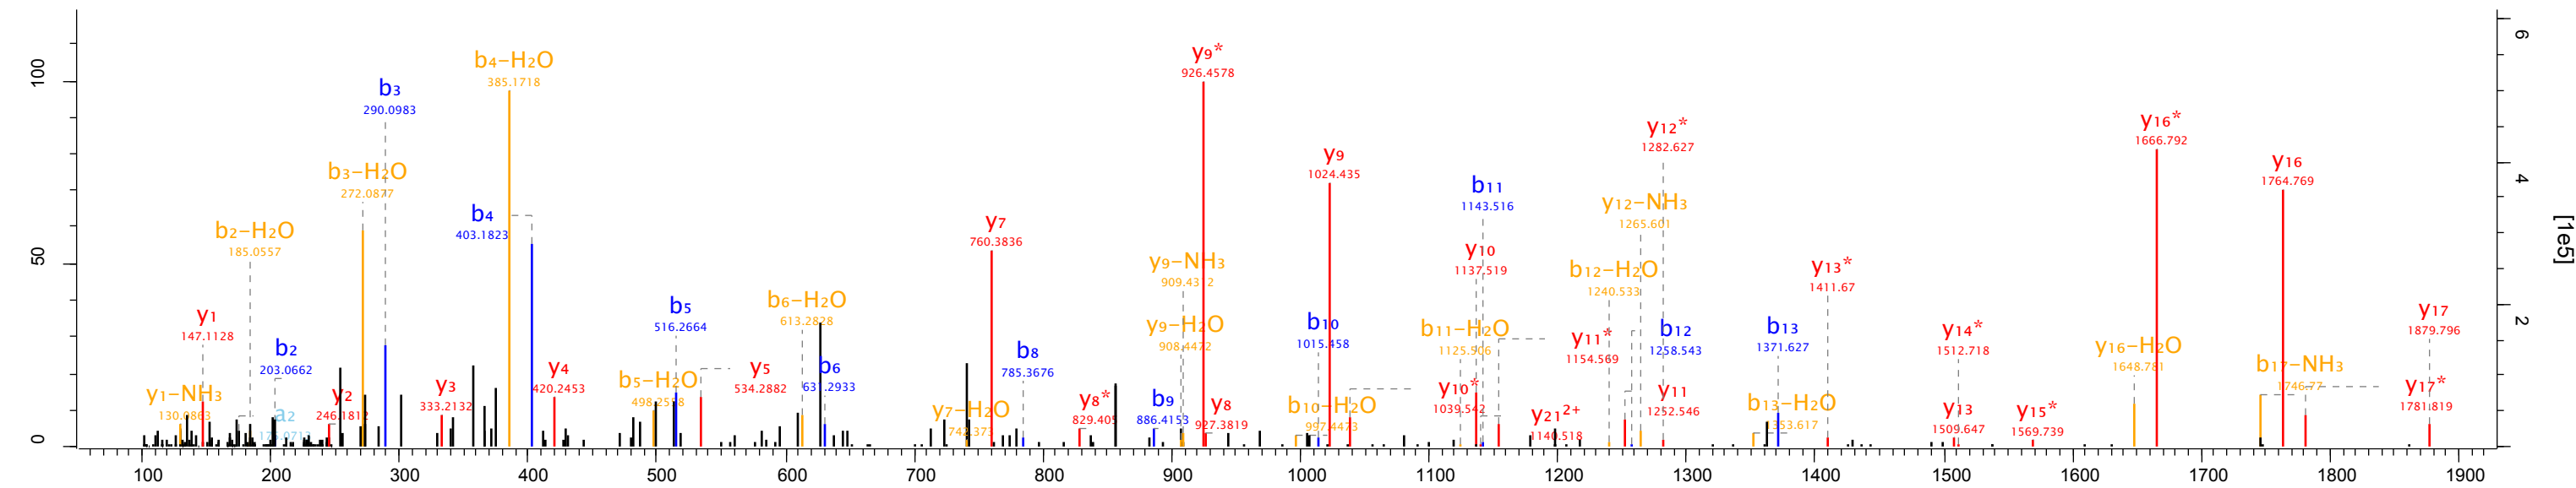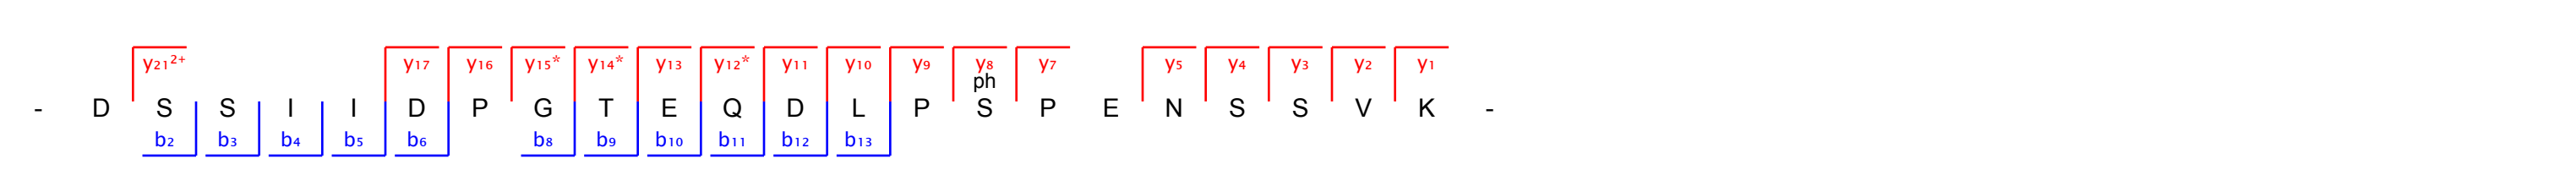

Raw file: 20171215\_MaS\_33SR\_LMH\_phospho\_03  
 Scan: 14164 Method: FTMS; HCD Score: 197.51 m/z: 899.39 Gene names: C9orf16

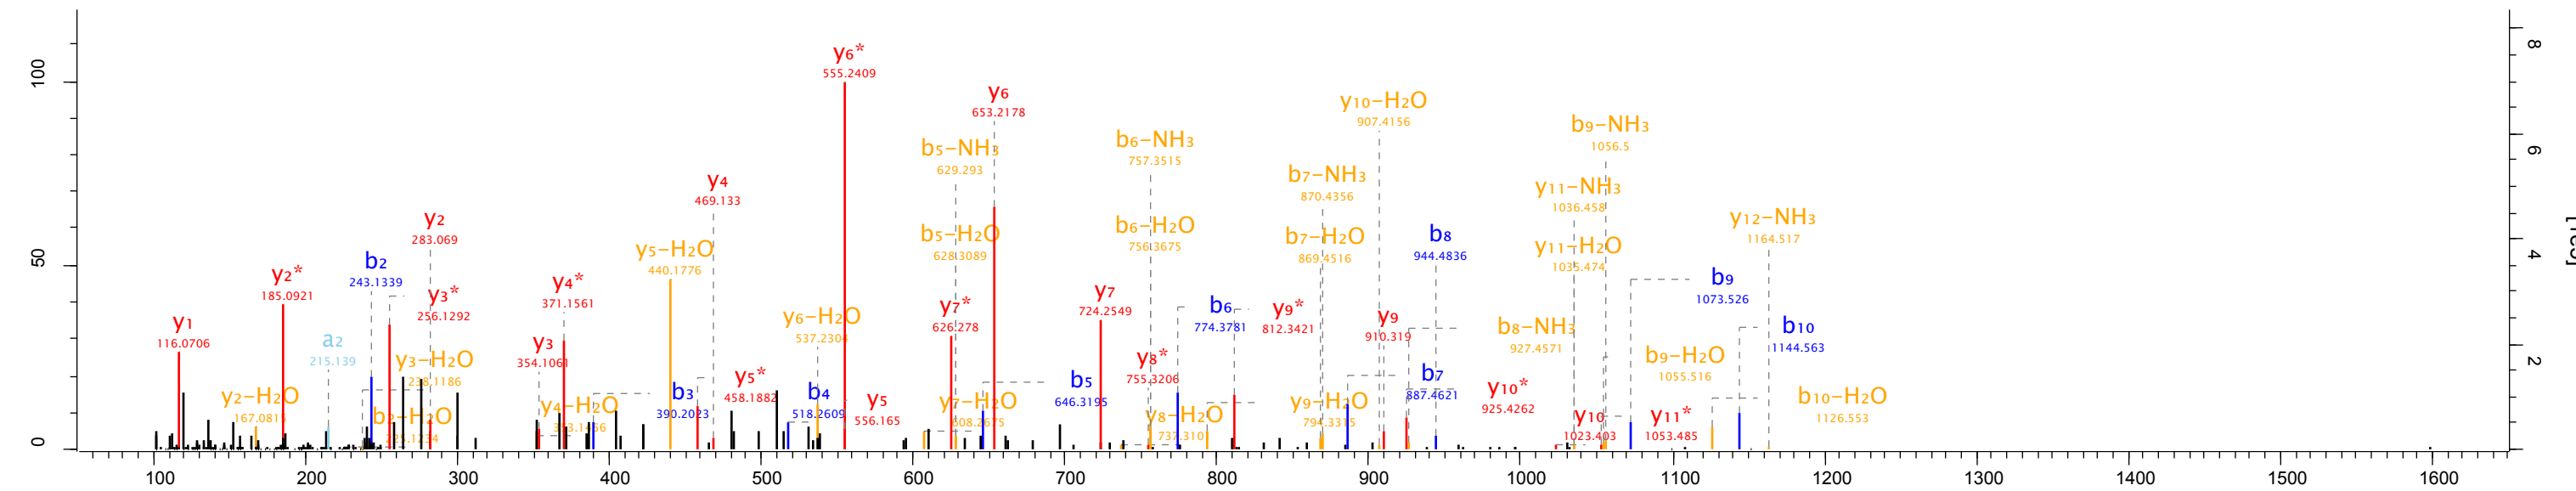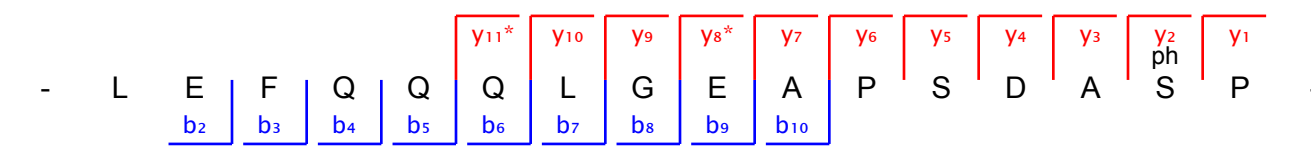

Raw file 20171215\_MaS\_33SR\_LMH\_phospho\_03 Scan 2264 Method FTMS; HCD Score 131.64 m/z 712.34 Gene names KDM5B

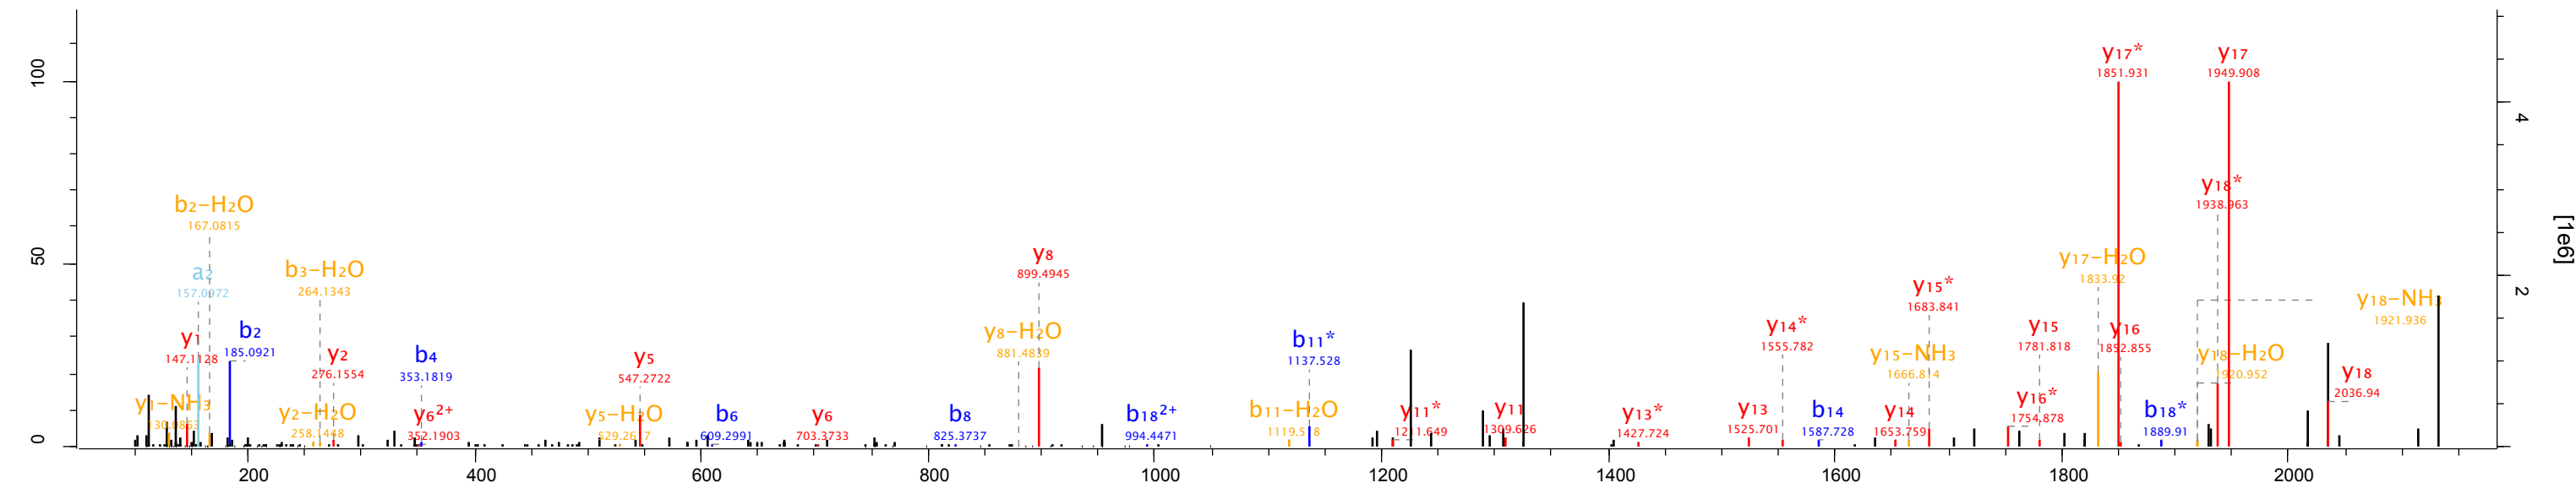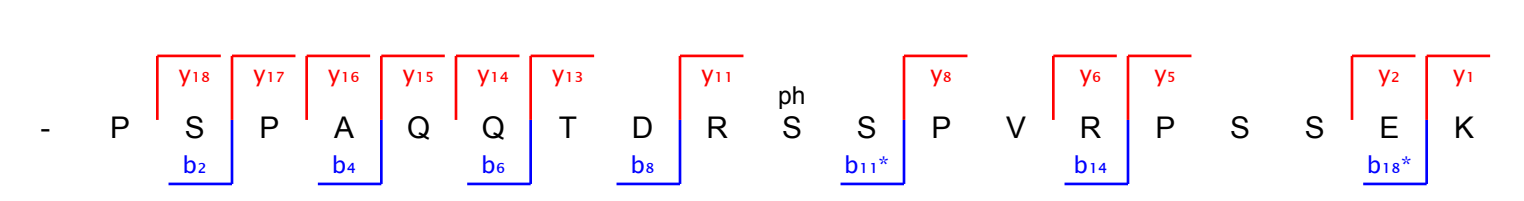



Raw file 20171215\_MaS\_33SR\_LMH\_phospho\_03 Scan 4884 Method FTMS; HCD Score 76.73 m/z 557.25 Gene names CWC25

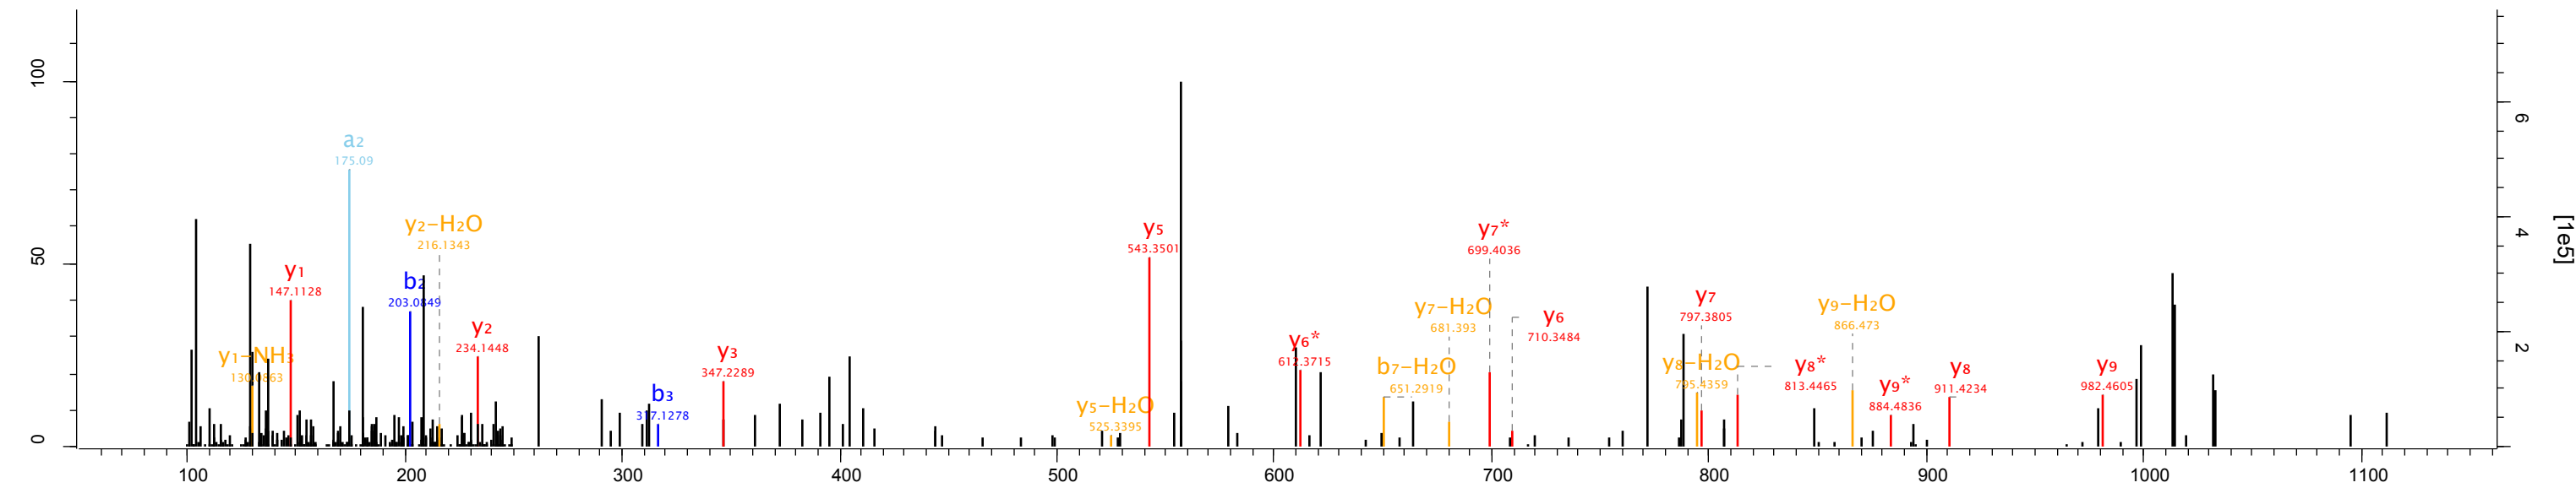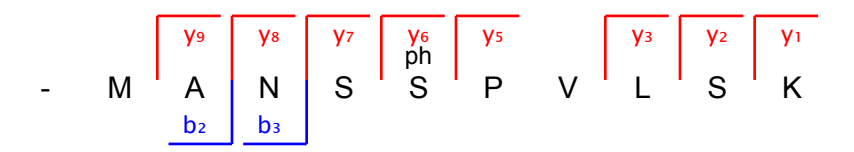

Raw file 20171215\_MaS\_33SR\_LMH\_phospho\_03 Scan 7014 Method FTMS; HCD Score 114.76 m/z 539.23 Gene names ZBTB11

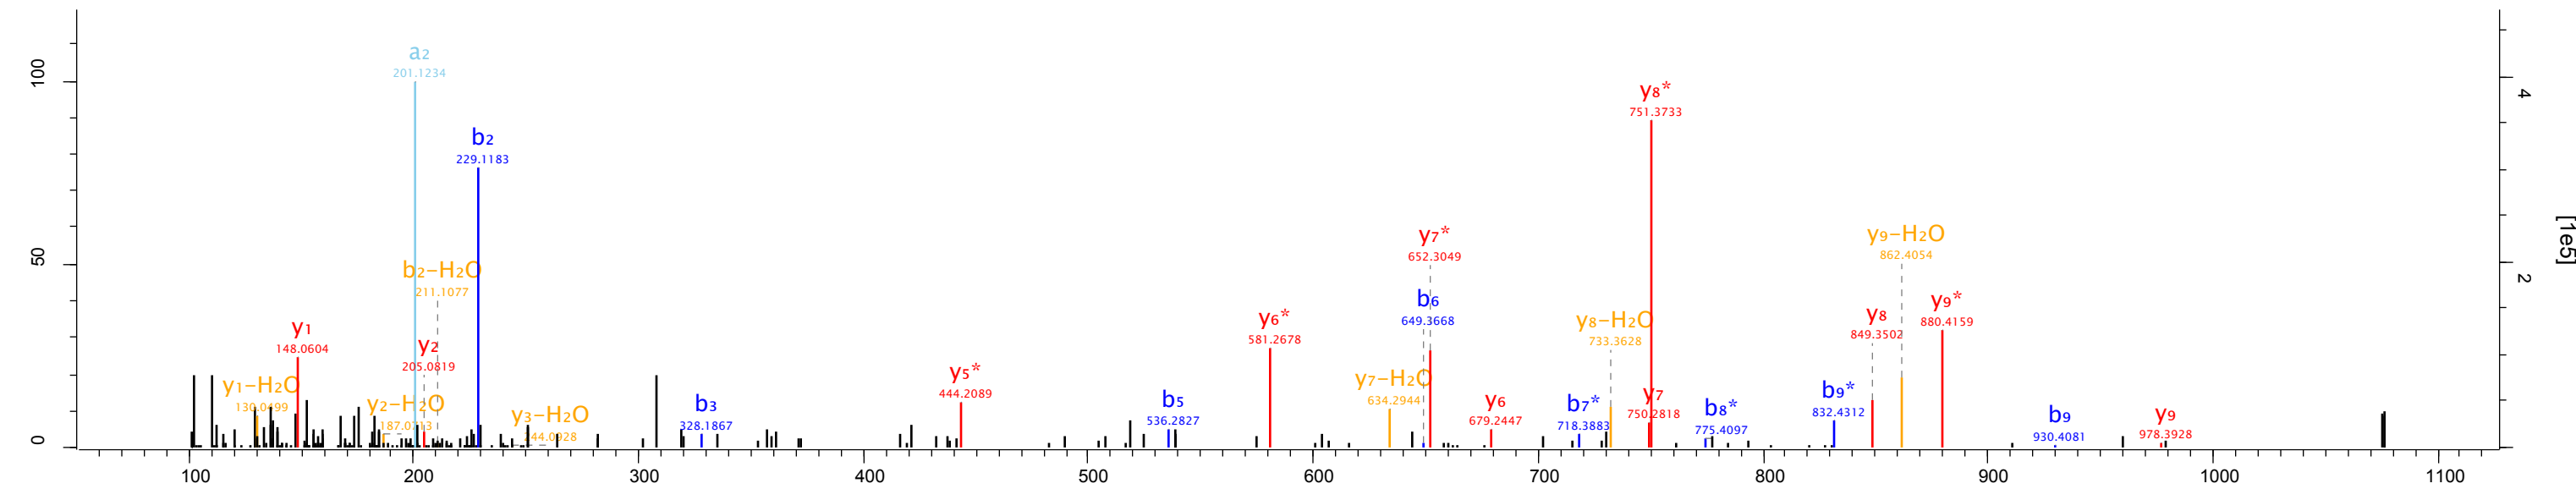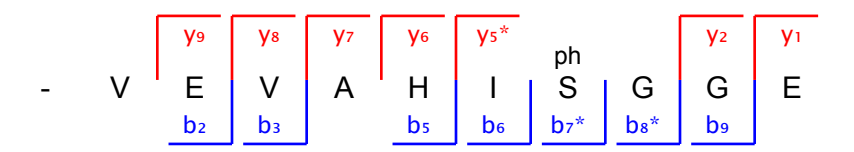

Raw file 20171215\_MaS\_33SR\_LMH\_phospho\_03 Scan 7824 Method FTMS; HCD Score 178.05 m/z 814.37 Gene names KIF7

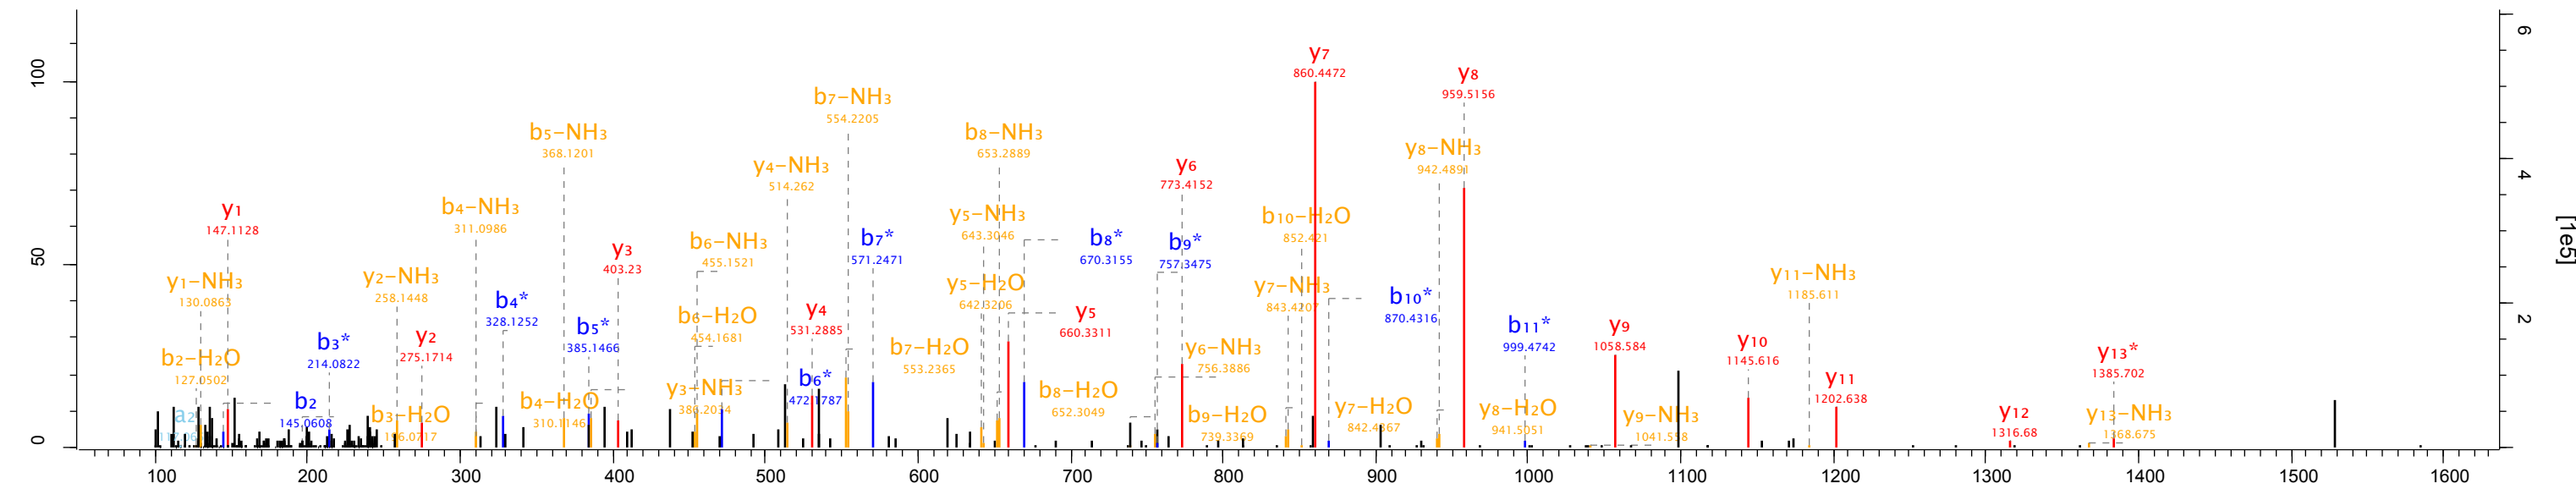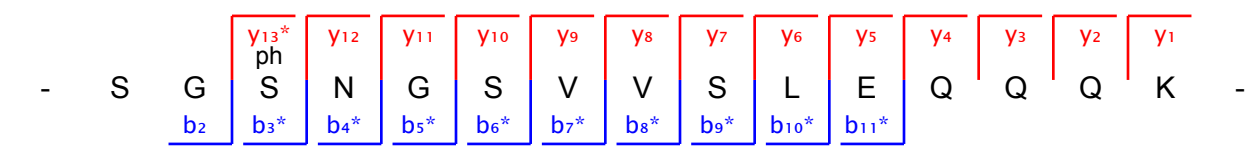

Raw file: 20171215\_MaS\_33SR\_LMH\_phospho\_03  
 Scan: 8274 Method: FTMS; HCD Score: 213.72 m/z: 1105.91 Gene names: FBXW9

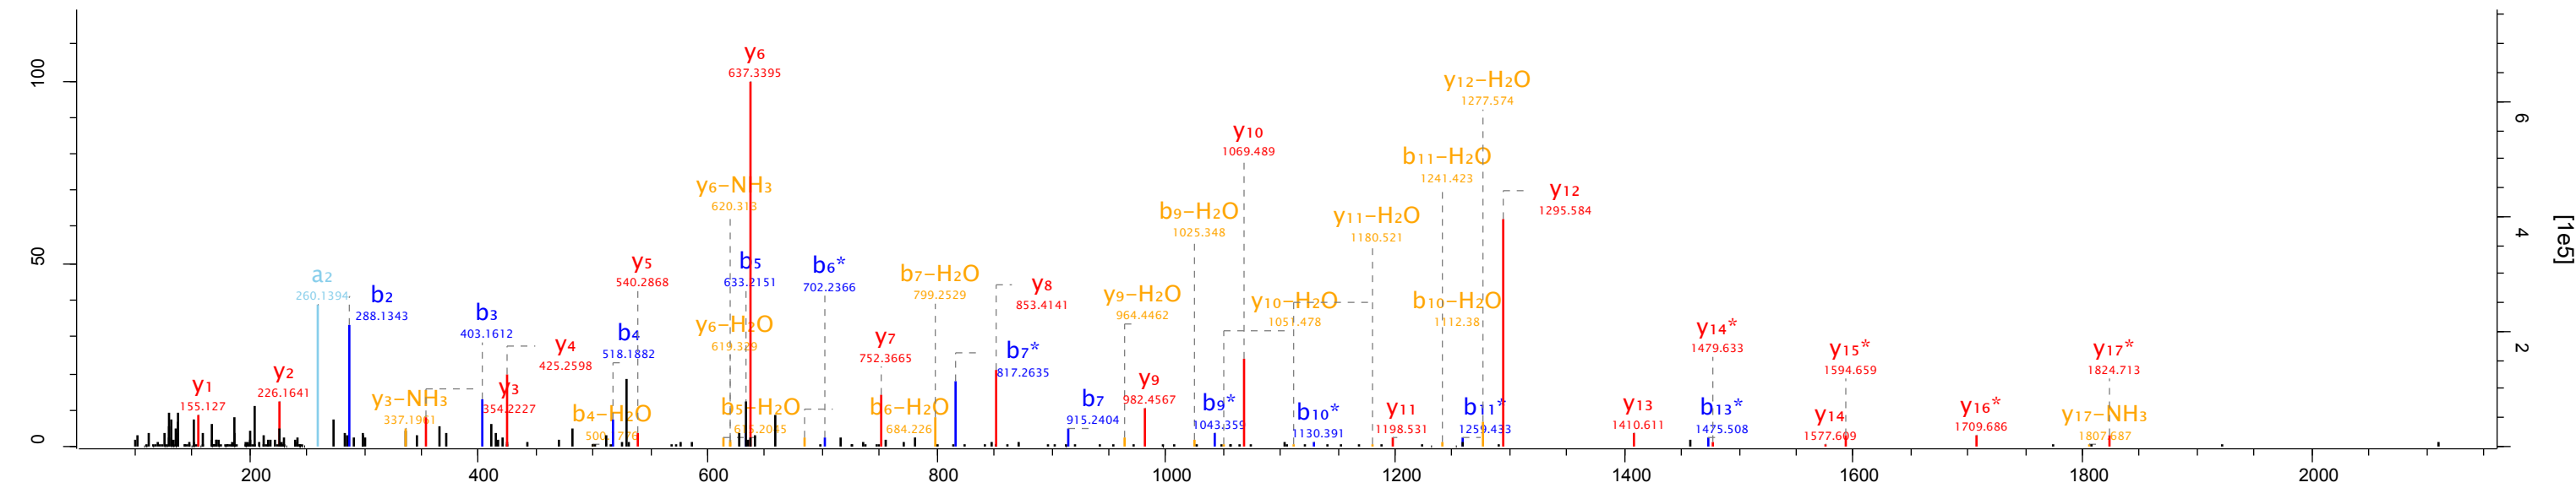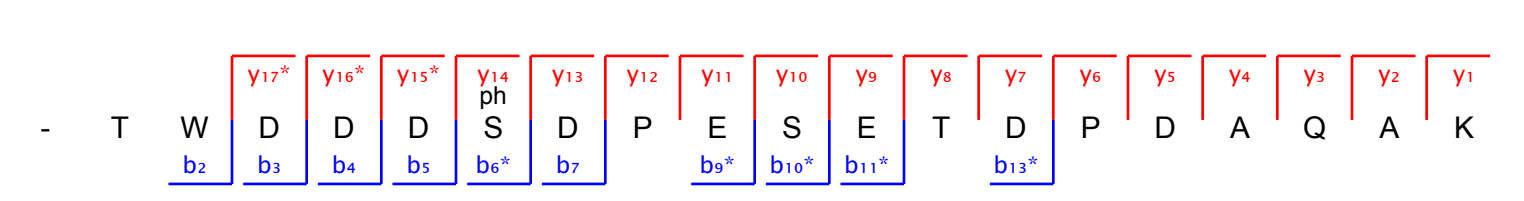

Raw file 20171215\_MaS\_33SR\_LMH\_phospho\_03 Scan 8474 Method FTMS; HCD Score 54.67 m/z 913.34 Gene names YTHDC2

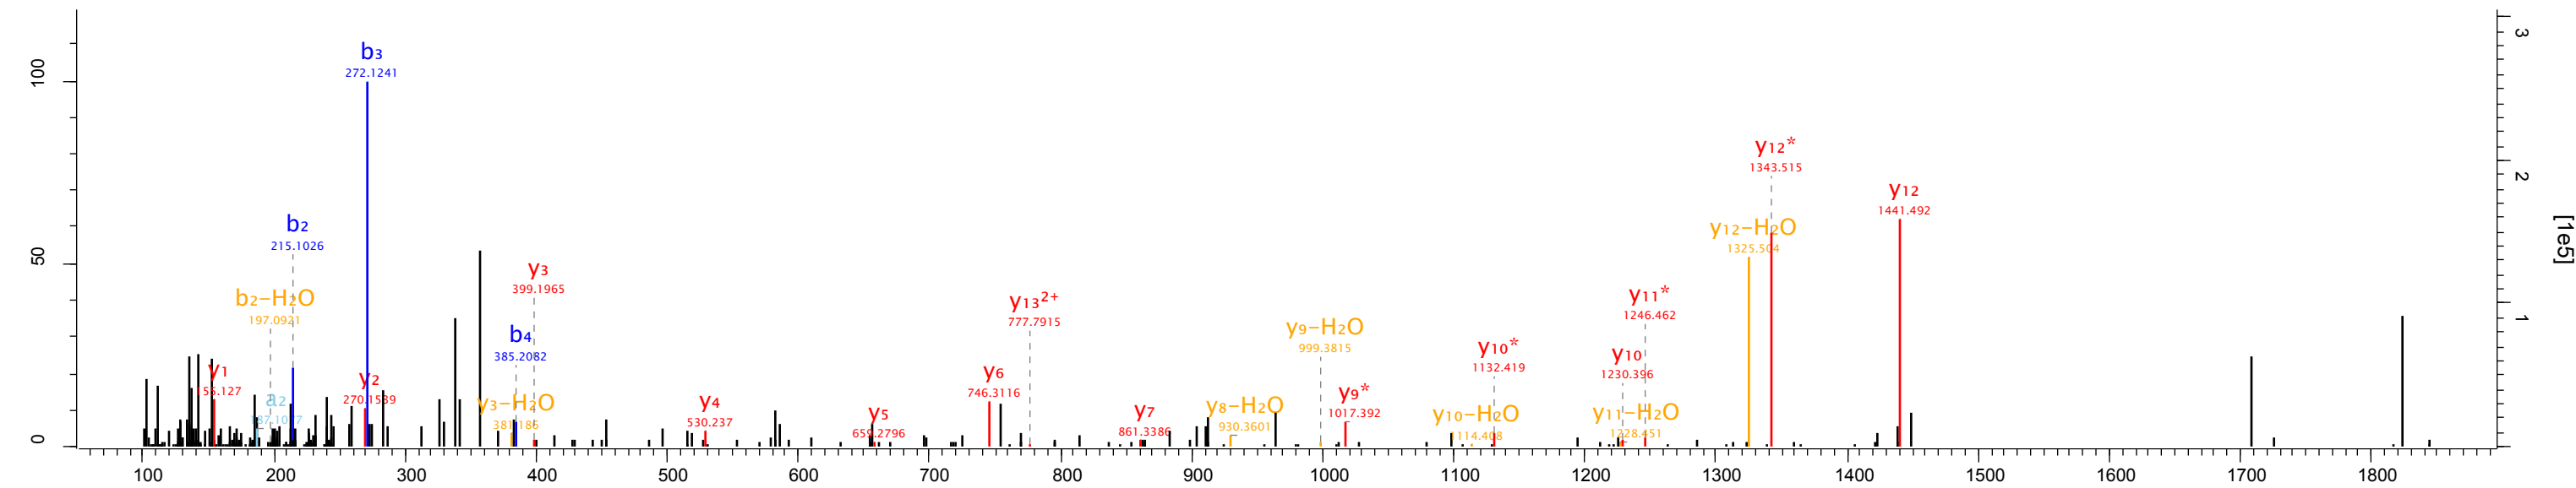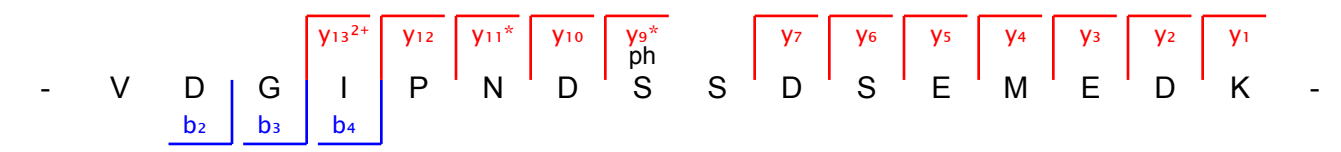

Raw file 20171215\_MaS\_33SR\_LMH\_phospho\_03 Scan 9114 Method FTMS; HCD Score 197.6 m/z 877.4 Gene names RAD51AP1

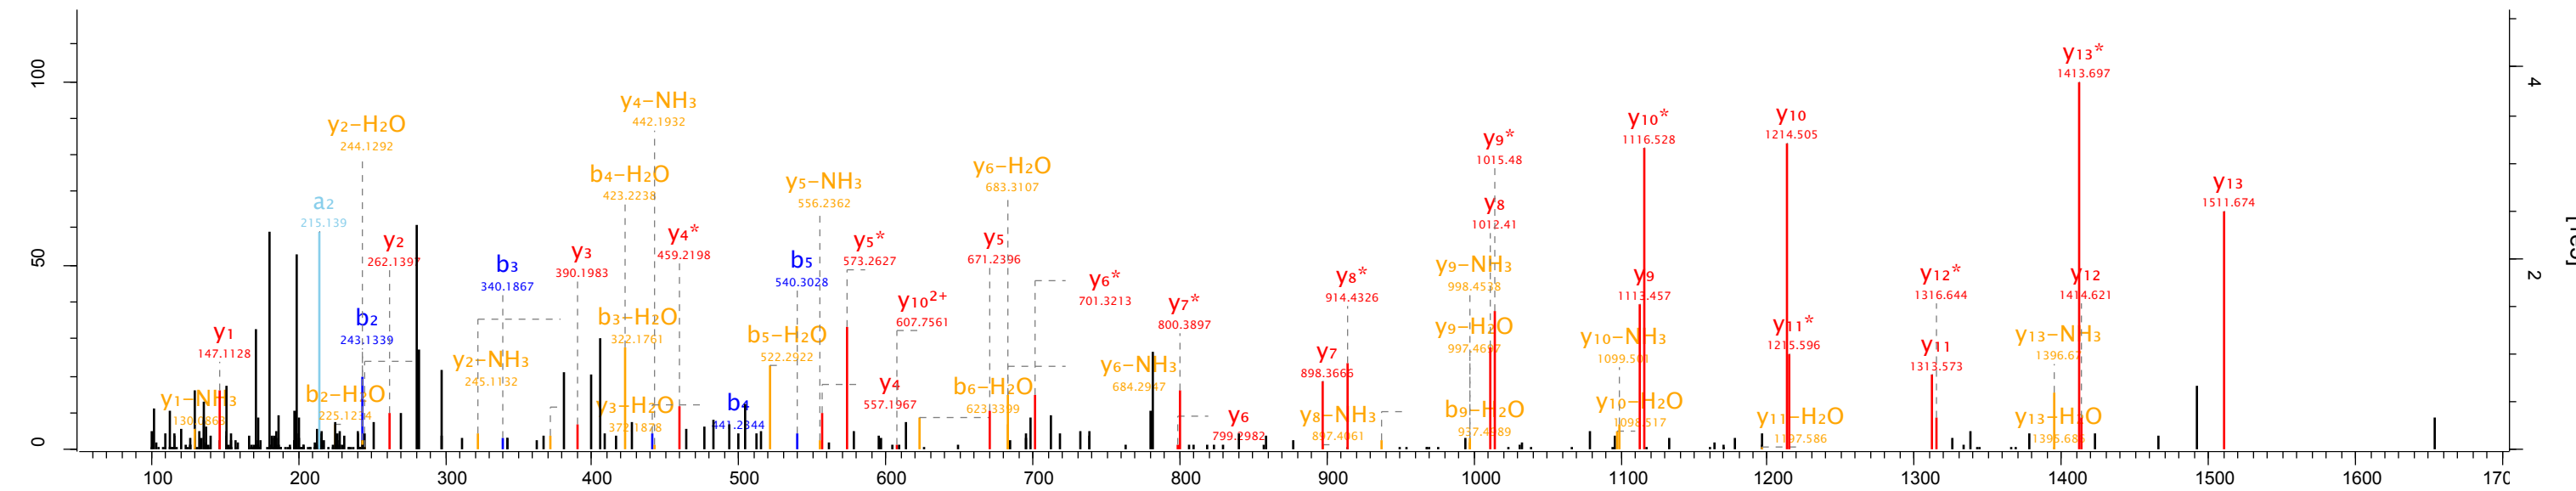

- E L P T V T T N V Q N S Q D K -

Fragmentation labels: b2, b3, b4, b5 (under L, P, T, V); y13, y12, y11, y10, y9, y8, y7, y6, y5, y4-ph, y3, y2, y1 (above P, T, V, T, T, N, V, Q, N, S, Q, D, K).

Raw file 20171215\_MaS\_33SR\_LMH\_phospho\_03 Scan 9364 Method FTMS; HCD Score 155.17 m/z 901.92 Gene names SSBP3

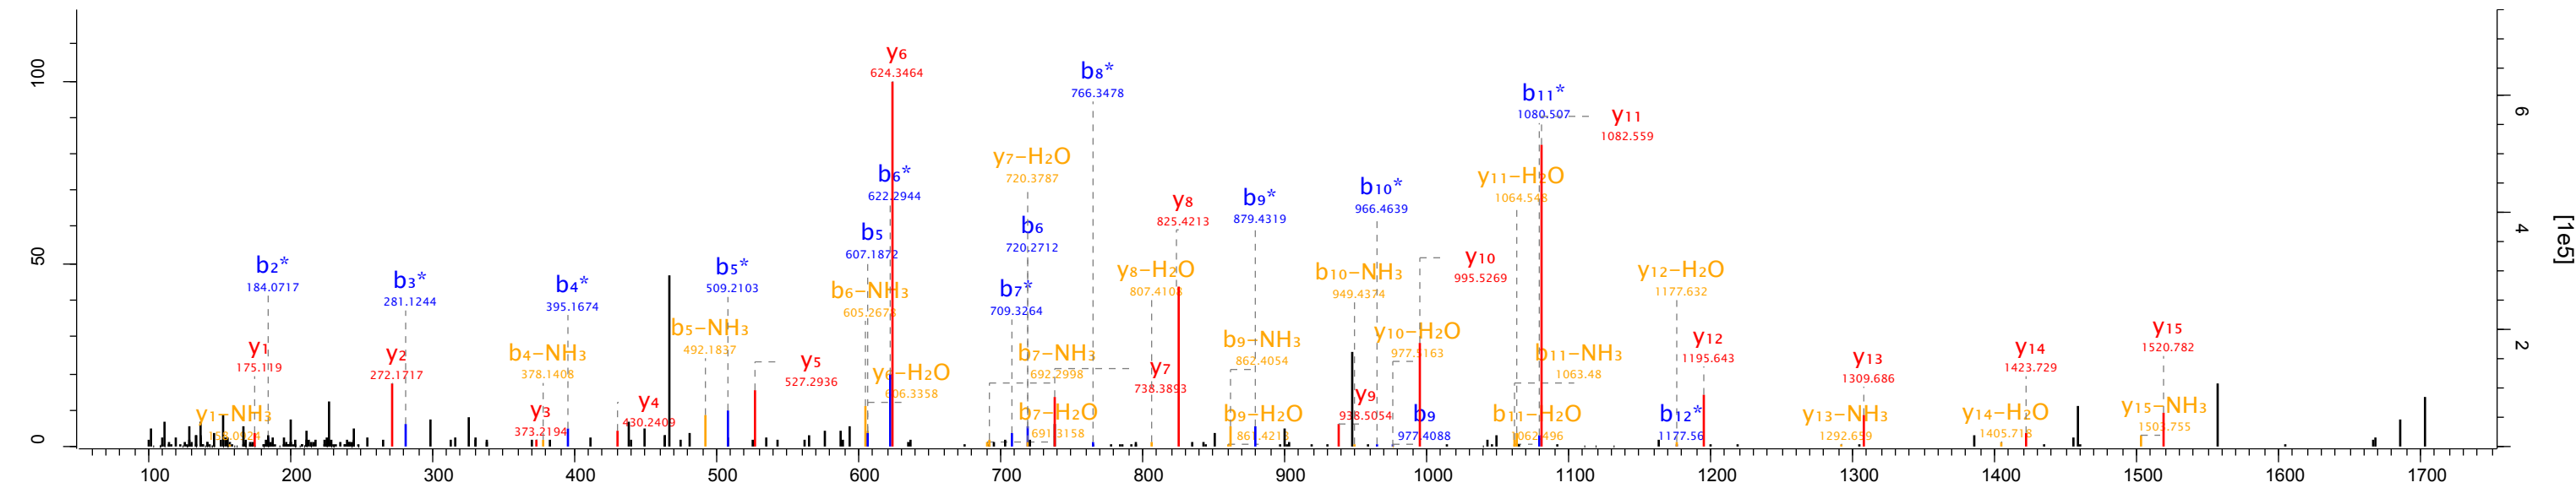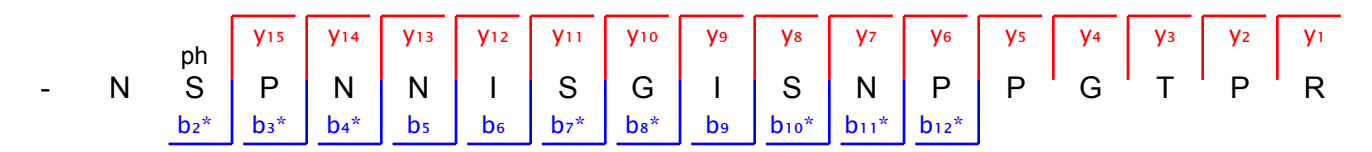

Raw file 20171215\_MaS\_33SR\_LMH\_phospho\_05 Scan 9744 Method FTMS; HCD Score 44.93 m/z 923.42 Gene names MMP16

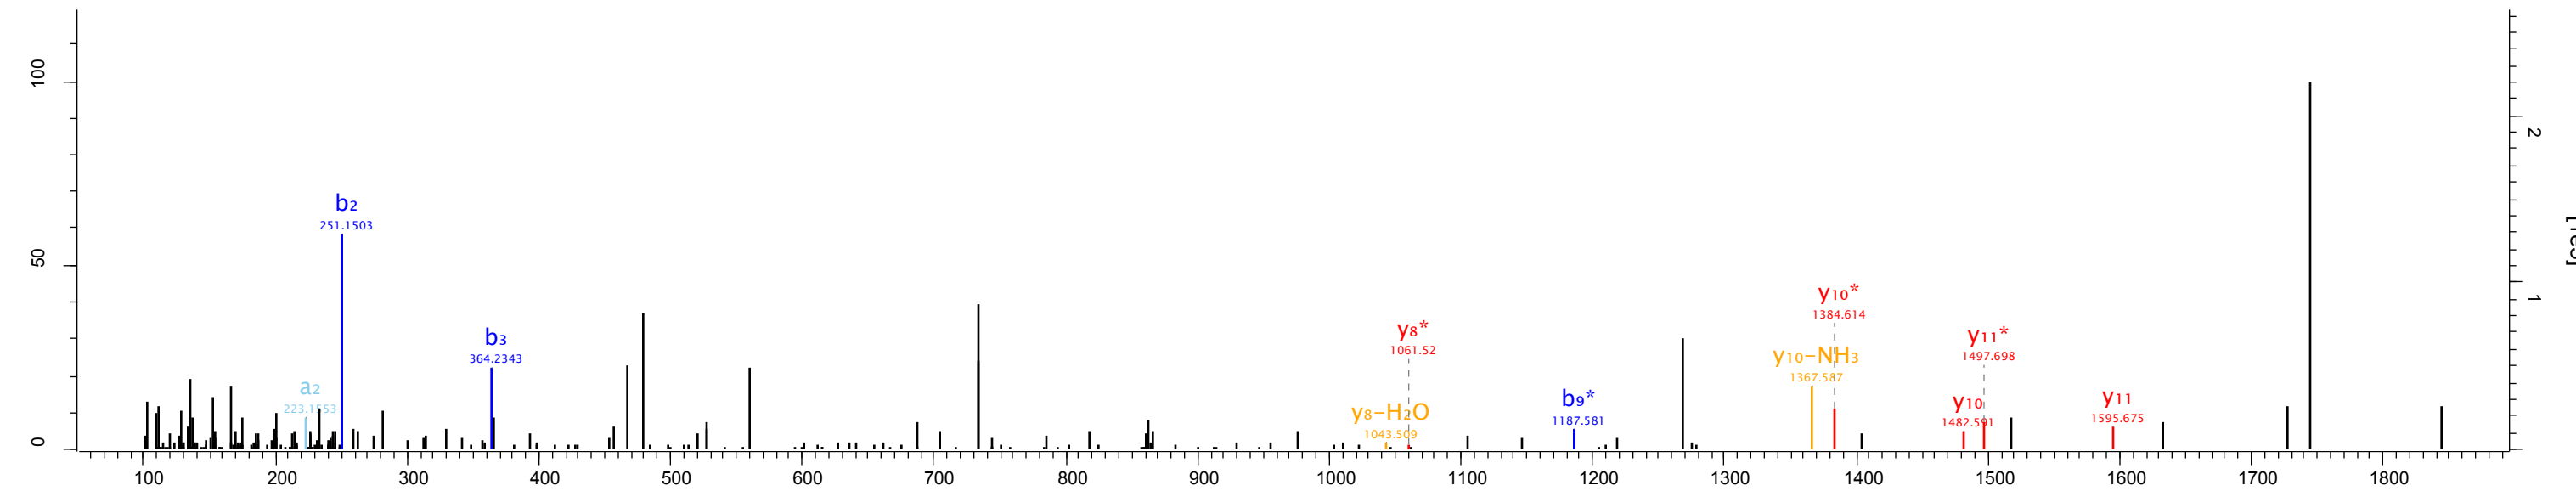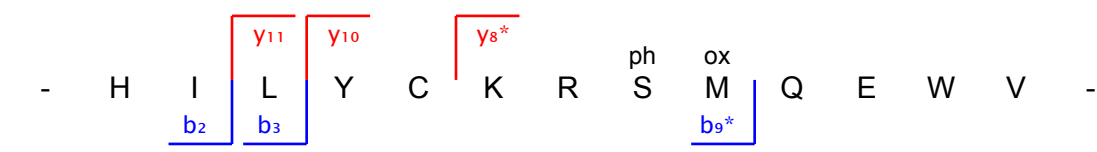



Raw file 20171215\_MaS\_33SR\_LMH\_phospho\_06 Scan 10414 Method FTMS; HCD Score 78.1 m/z 492.73

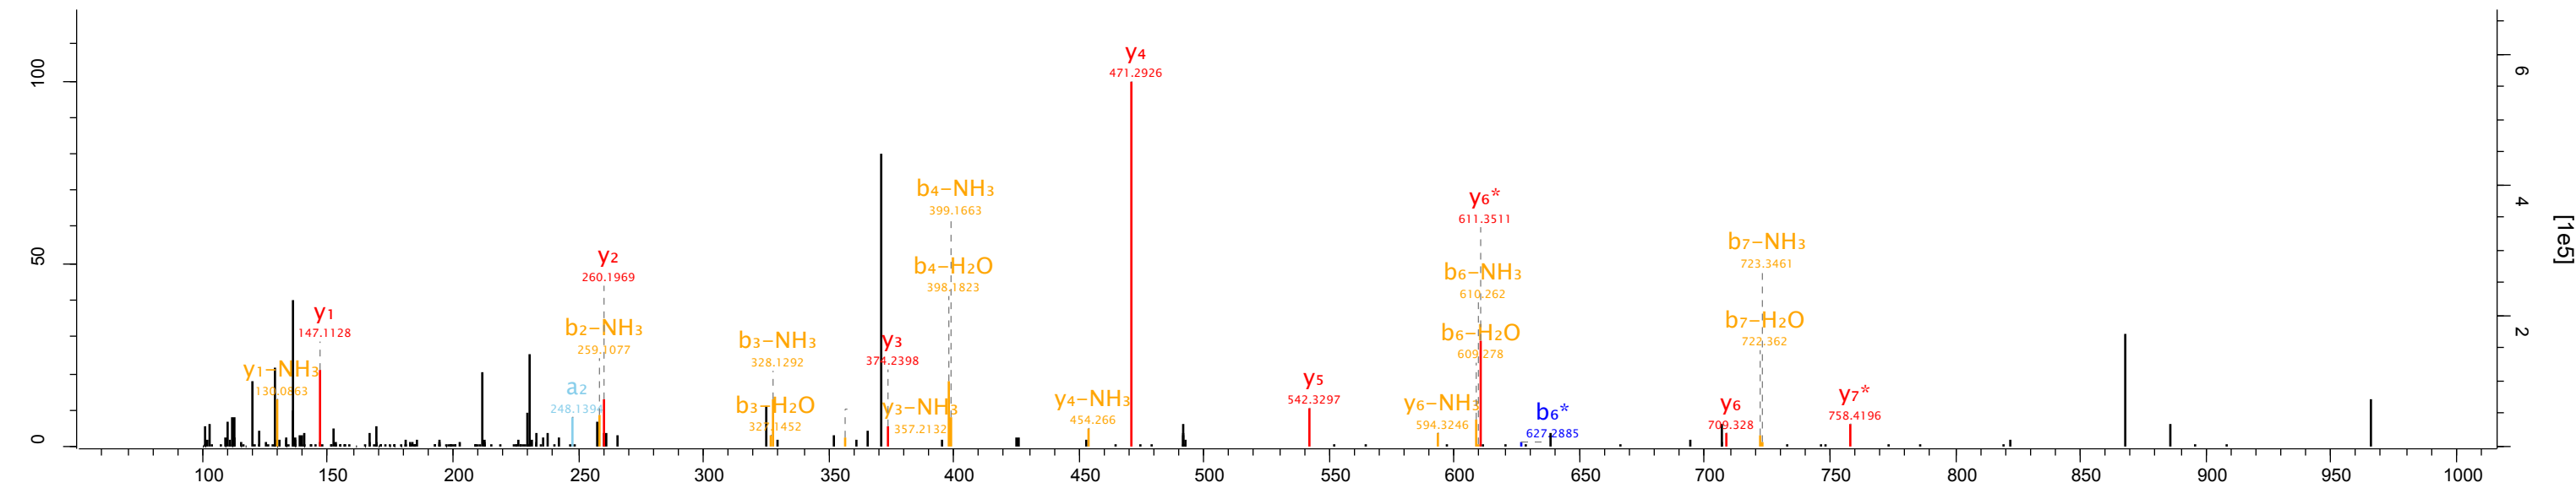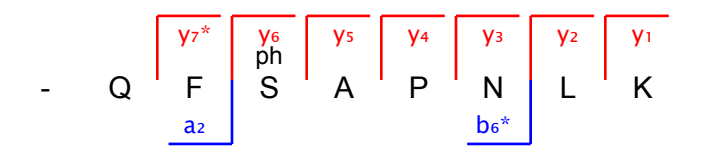

Raw file Scan Method Score m/z Gene names

20171215\_MaS\_33SR\_LMH\_phospho\_06 12194 FTMS; HCD 209.85 905.92 ZNF316

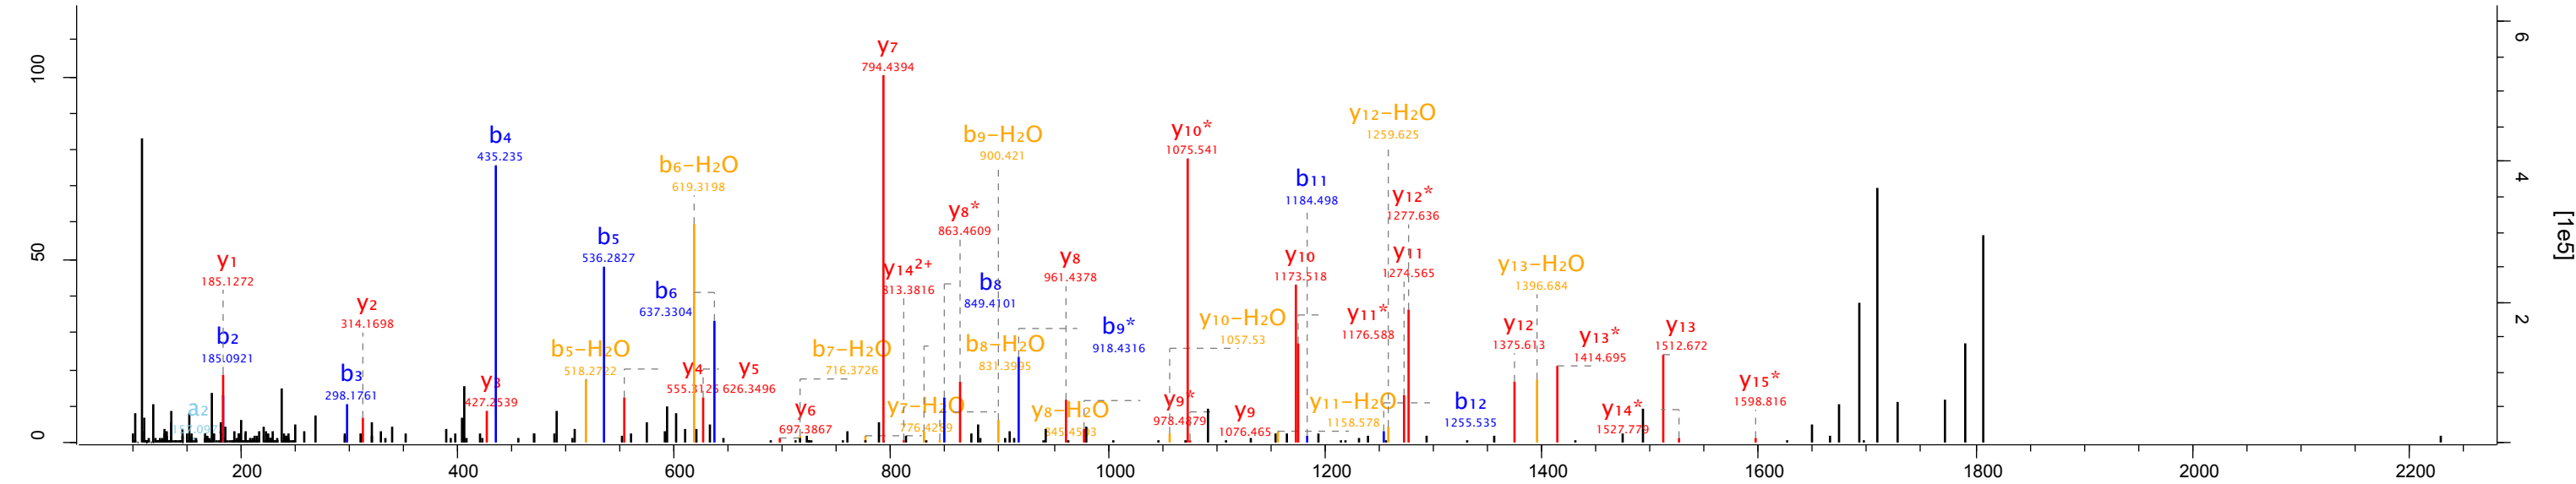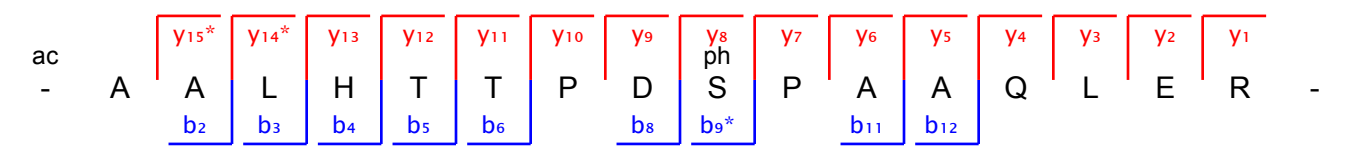

Raw file 20171215\_MaS\_33SR\_LMH\_phospho\_06 Scan 14064 Method FTMS; HCD Score 131.56 m/z 741.36 Gene names PITPNC1

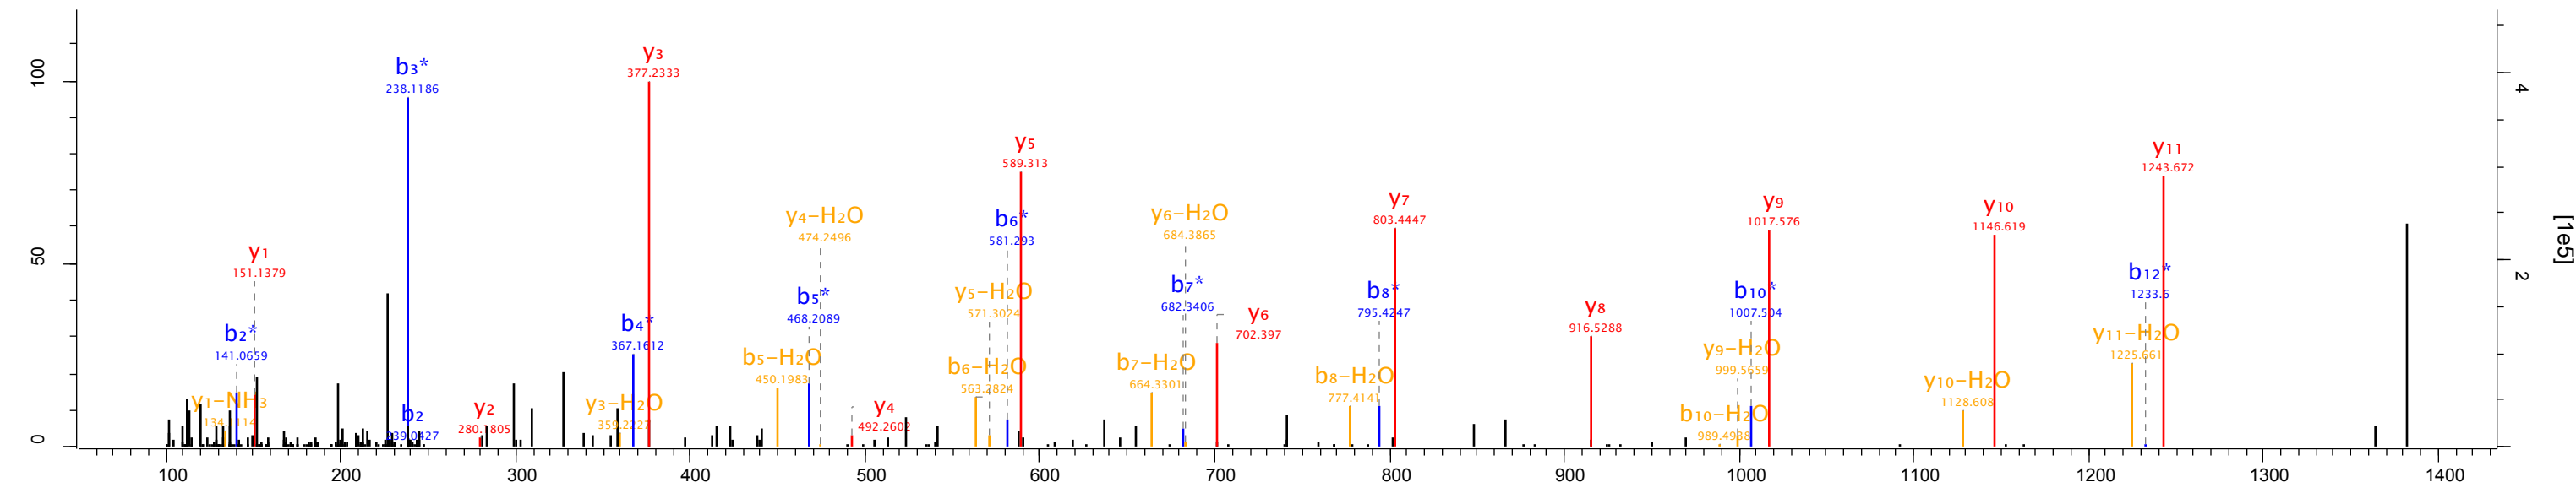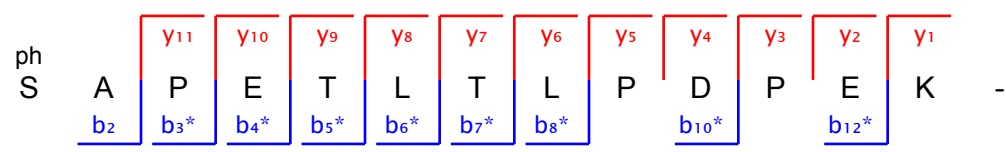

Raw file: 20171215\_MaS\_33SR\_LMH\_phospho\_06  
 Scan: 14074 Method: FTMS; HCD Score: 61.67 m/z: 1234.88 Gene names: RTN3

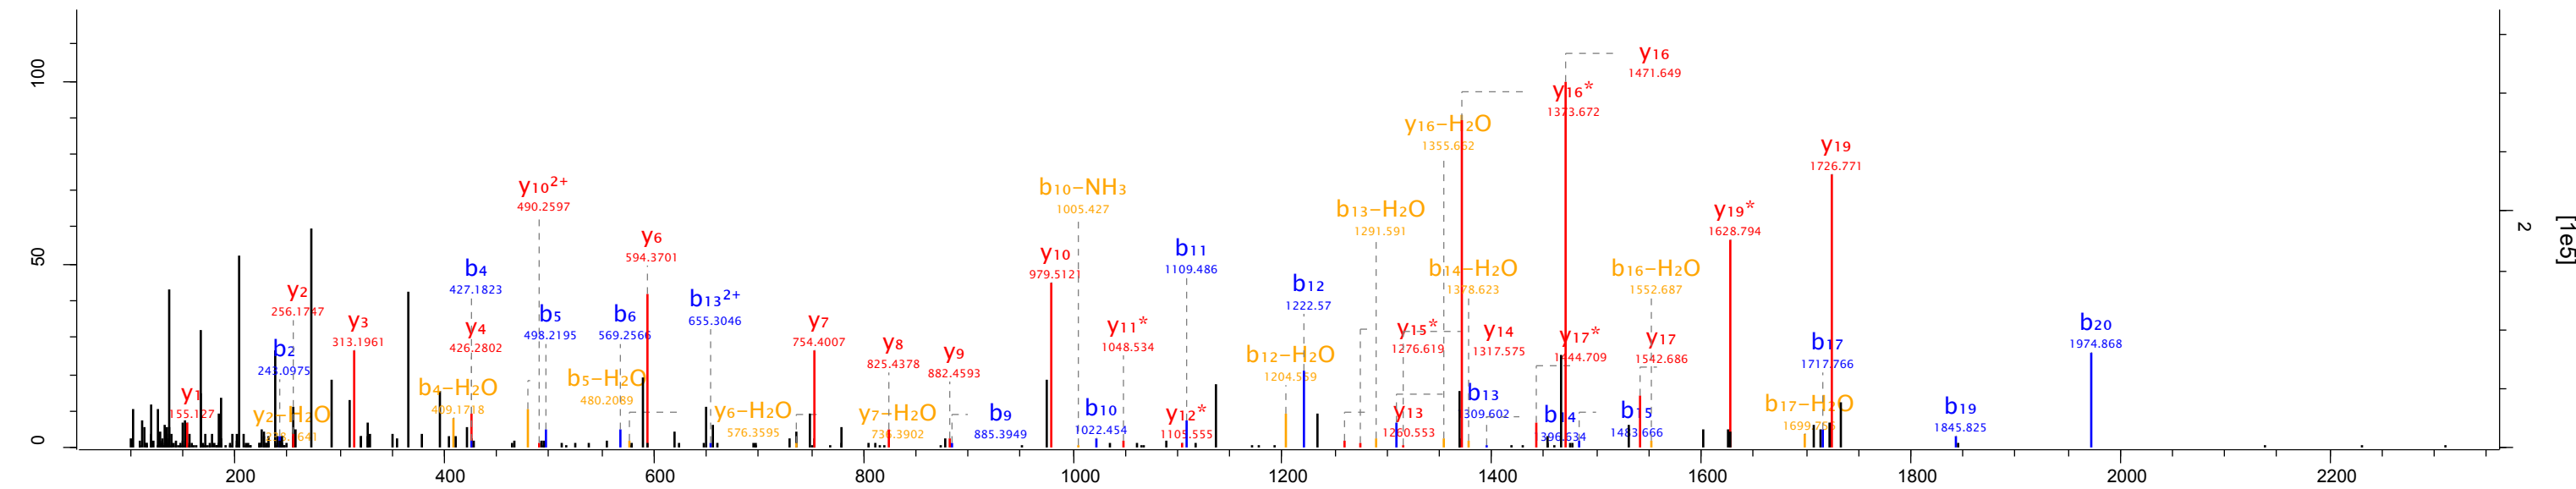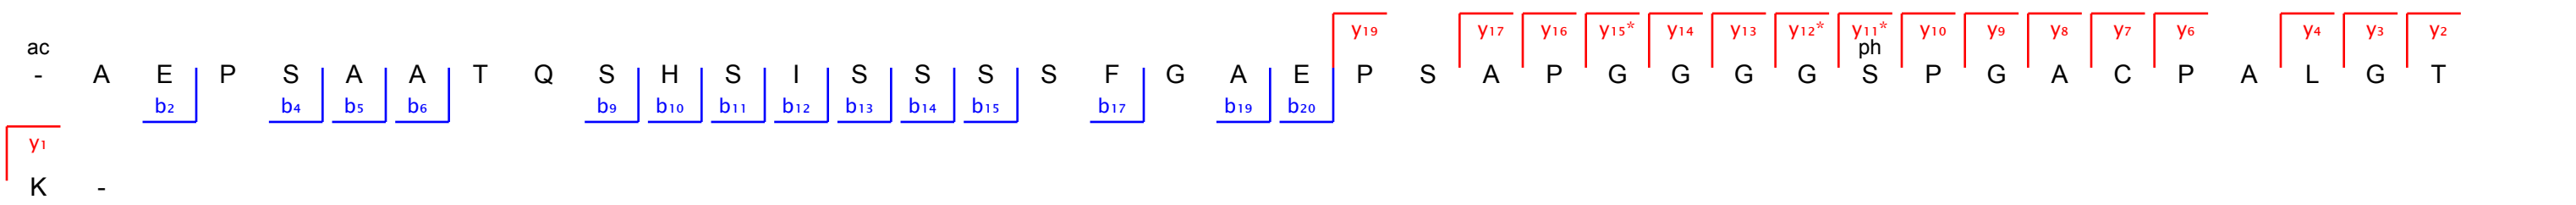

20171215\_MaS\_33SR\_LMH\_phospho\_06 15404 FTMS; HCD 123.68 673.32 INO80B

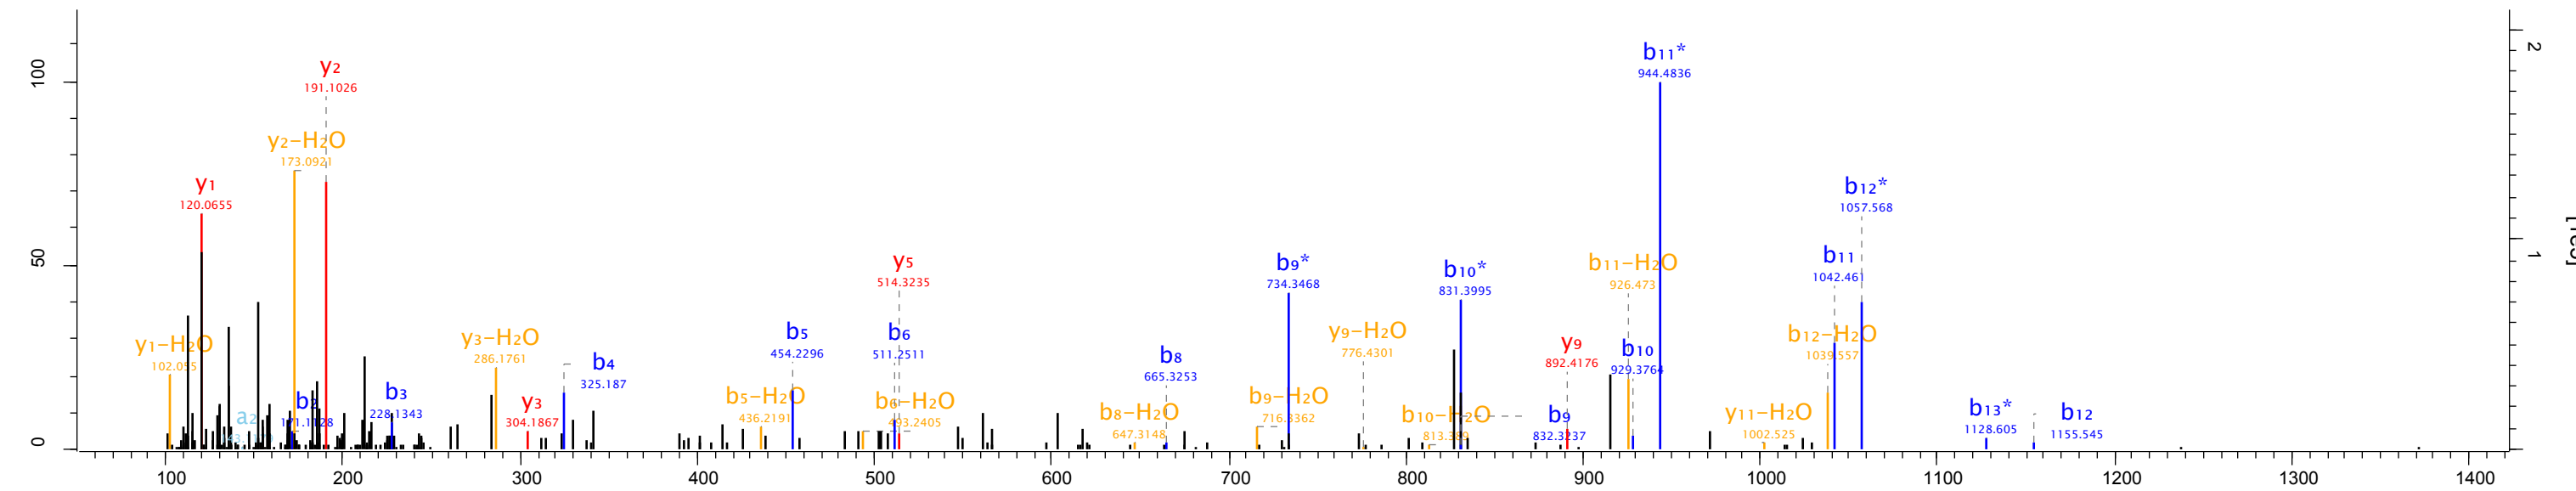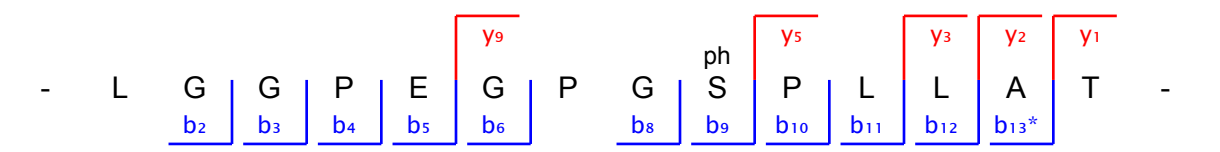

Raw file 20171215\_MaS\_33SR\_LMH\_phospho\_06 Scan 4554 Method FTMS; HCD Score 53.37 m/z 538.25 Gene names TRIM24

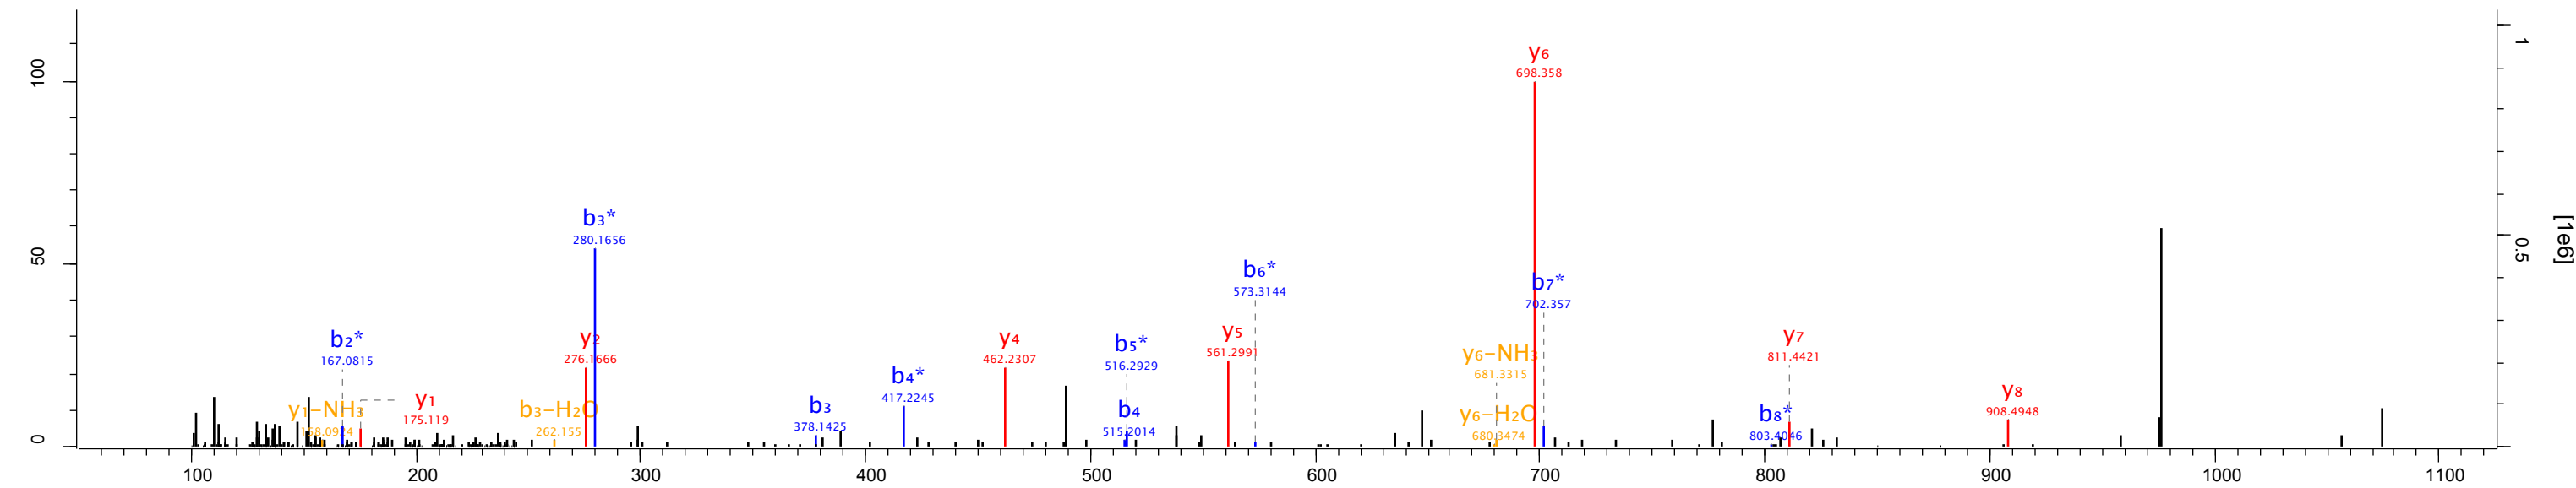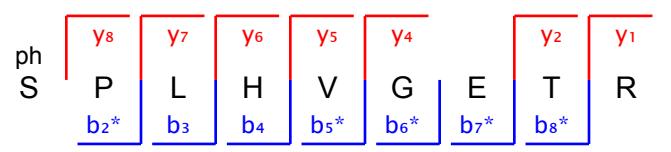

Raw file 20171215\_MaS\_33SR\_LMH\_phospho\_06 Scan 4864 Method FTMS; HCD Score 62.47 m/z 488.77 Gene names RFC1

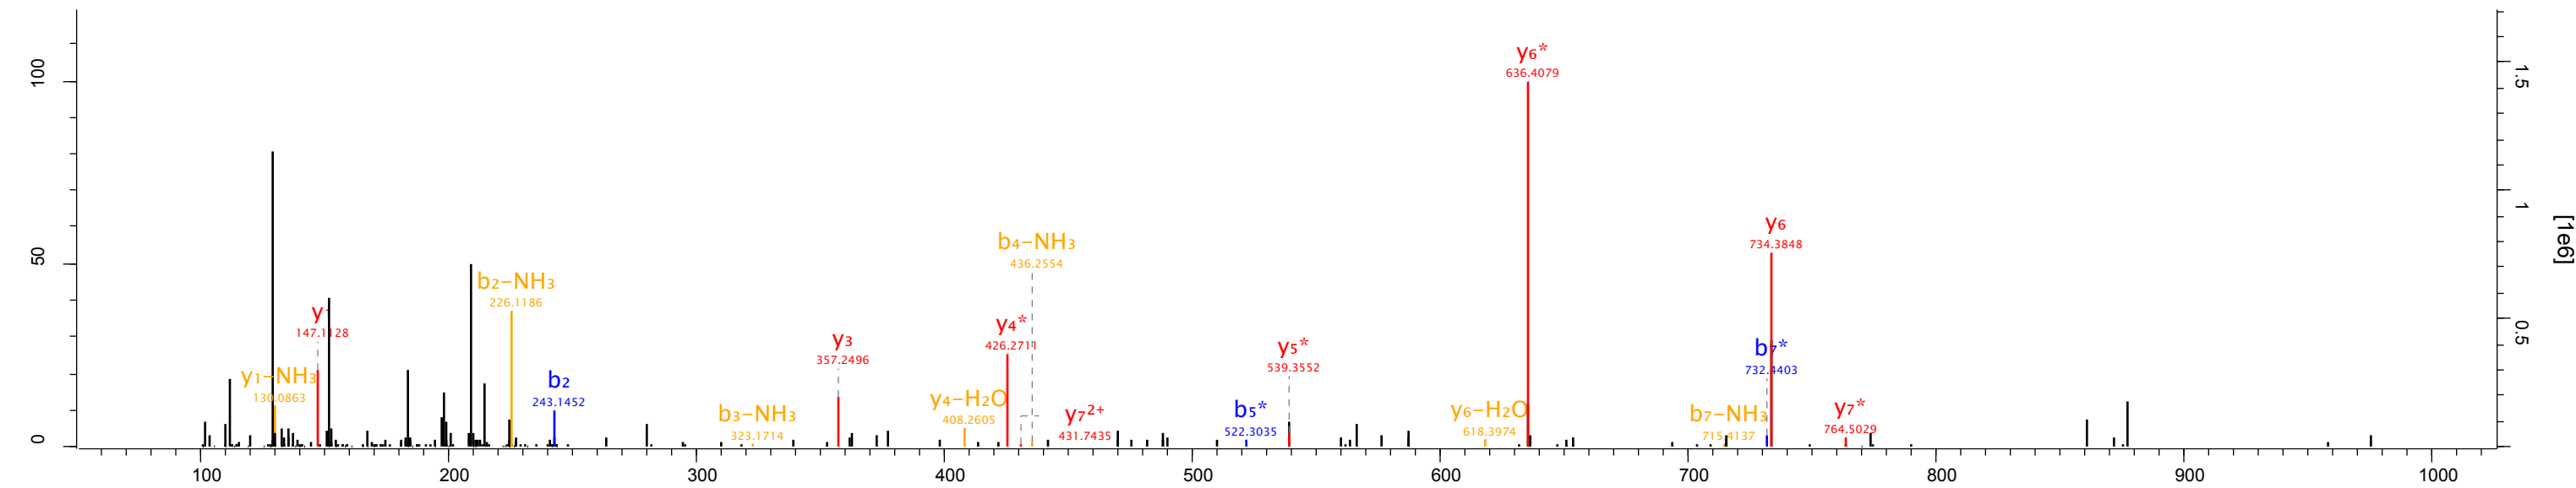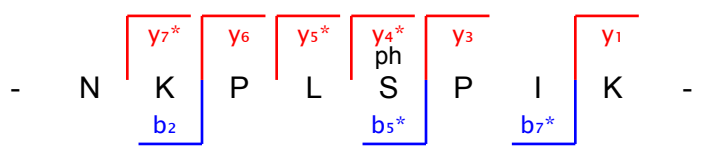

Raw file 20171215\_MaS\_33SR\_LMH\_phospho\_06 Scan 5074 Method FTMS; HCD Score 48.53 m/z 652.8 Gene names EXPH5

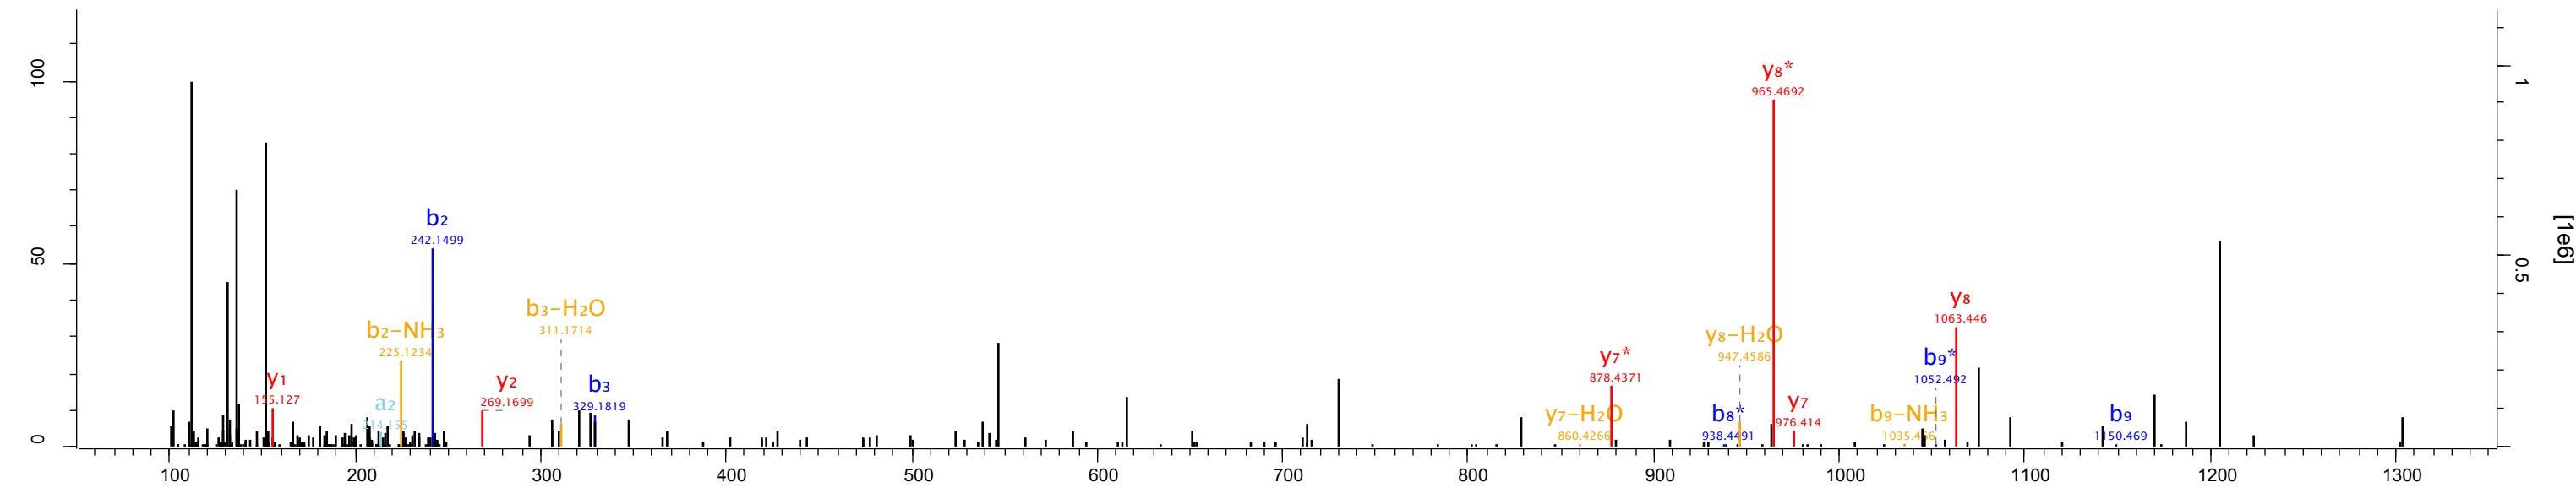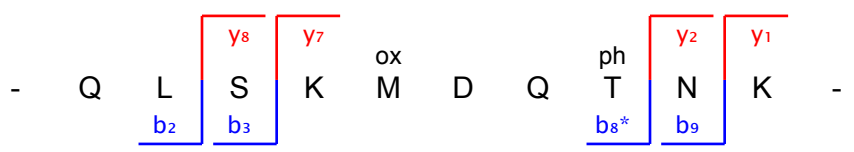



Raw file 20171215\_MaS\_33SR\_LMH\_phospho\_06 Scan 6234 Method FTMS; HCD Score 90.97 m/z 640.28 Gene names MAP3K1

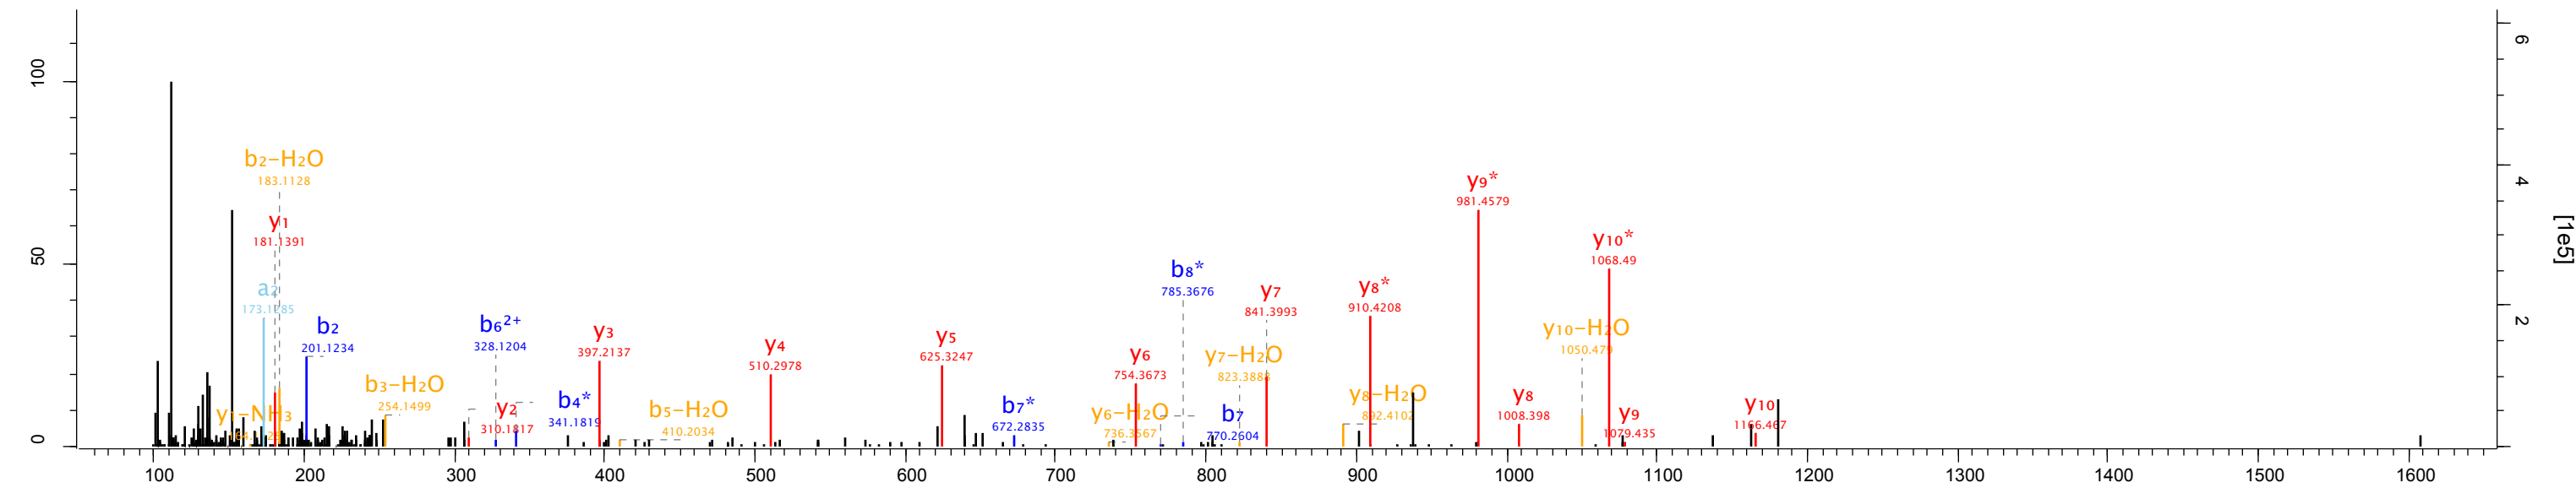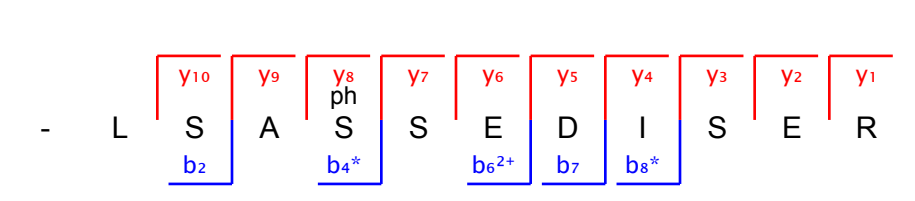

Raw file 20171215\_MaS\_33SR\_LMH\_phospho\_06 Scan 6904 Method FTMS; HCD Score 56.33 m/z 522.25 Gene names CASP8AP2

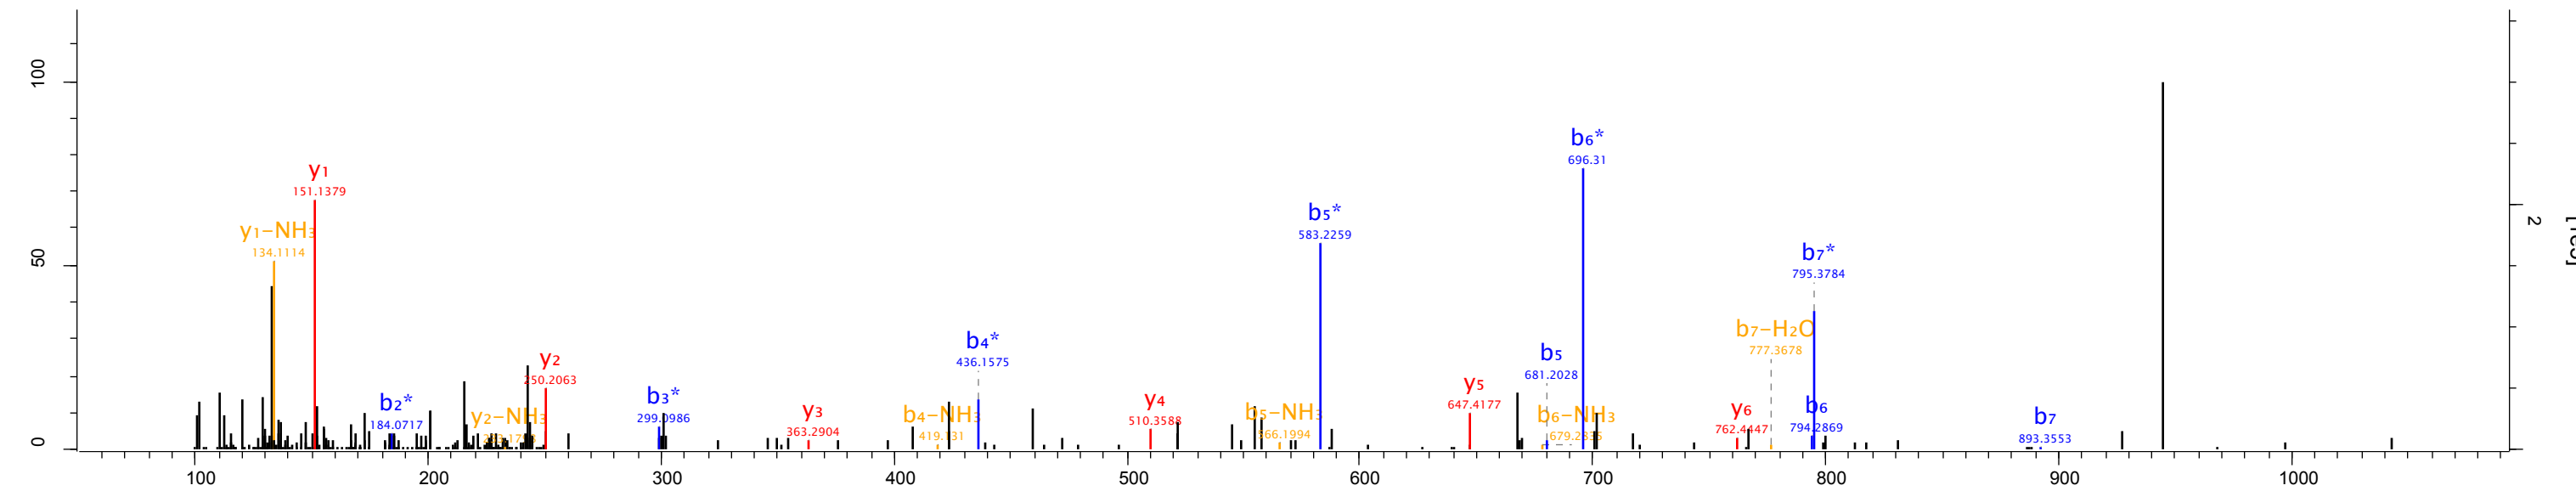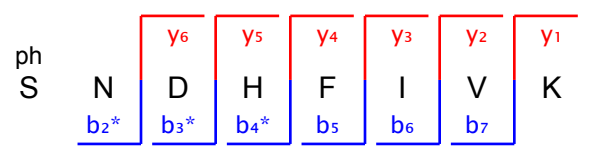

Raw file 20171215\_MaS\_33SR\_LMH\_phospho\_06 Scan 9344 Method FTMS; HCD Score 111.55 m/z 877.72 Gene names HDAC4

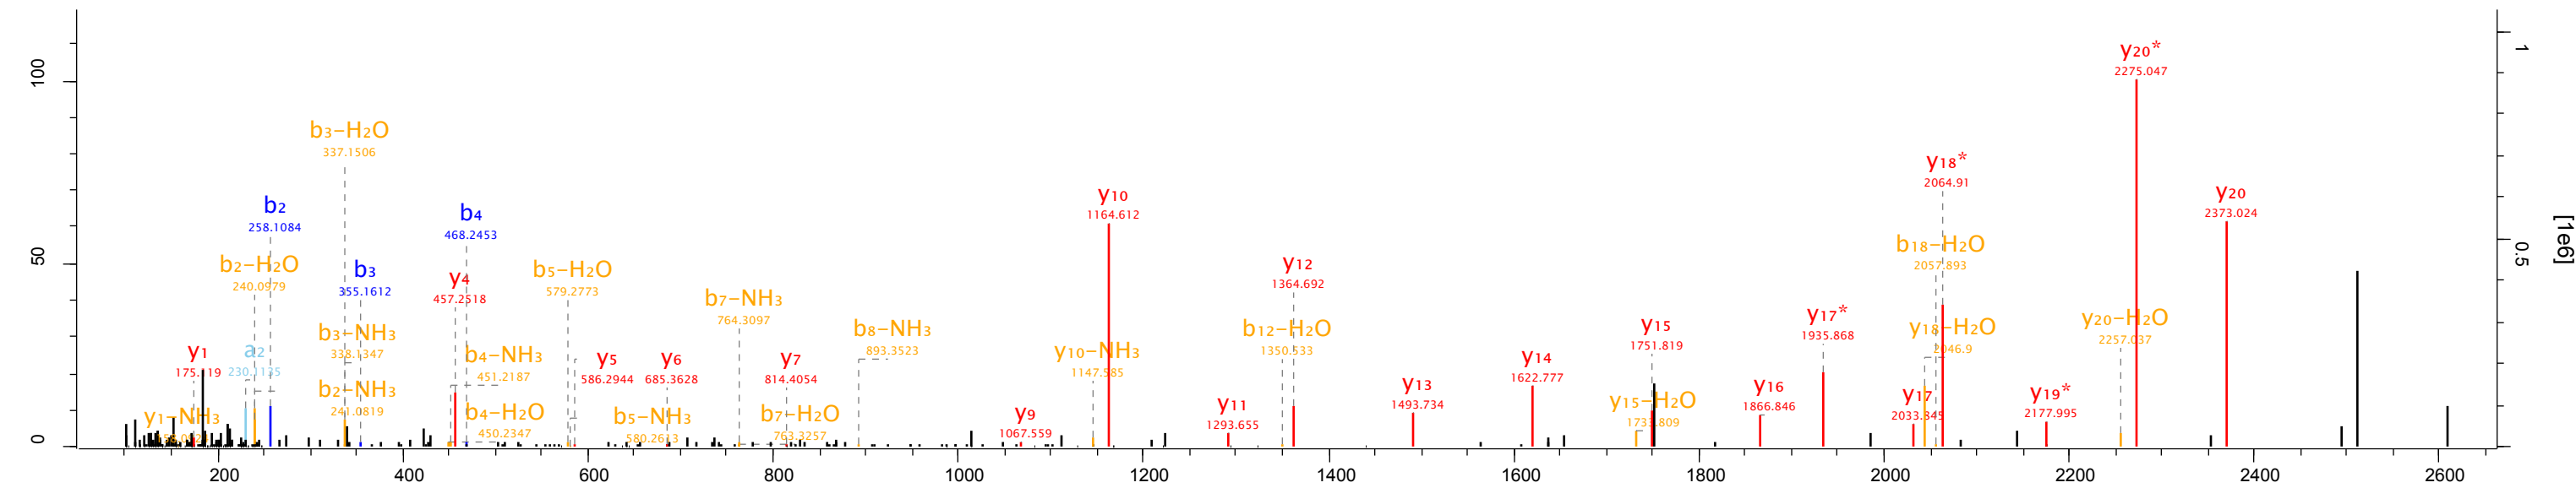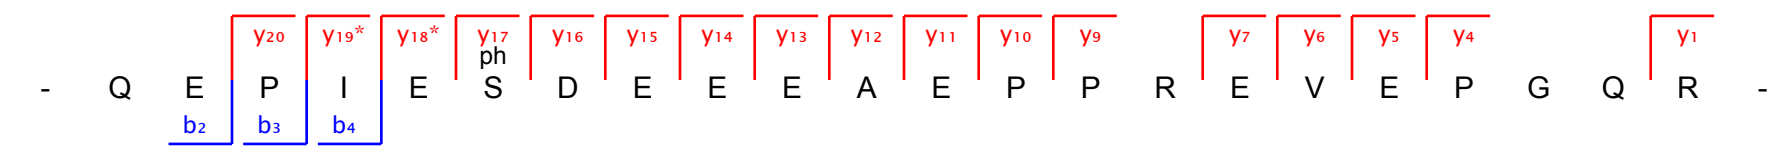

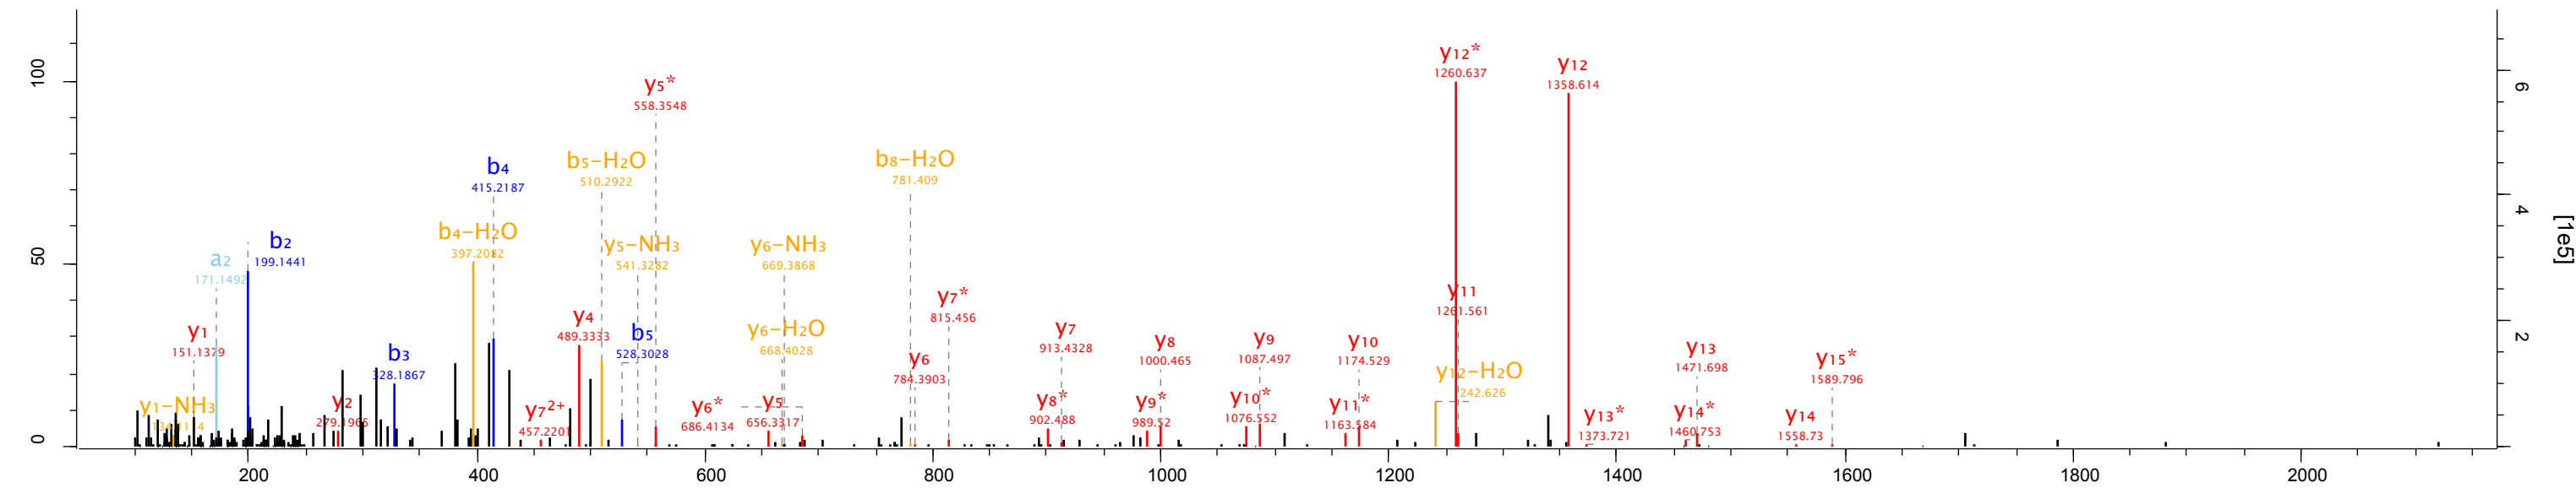

- V V E S L P S S S S E Q S P L Q K -

Fragmentation regions (b and y ions) are indicated by boxes below the sequence:

- Blue boxes: b<sub>2</sub> (V), b<sub>3</sub> (E), b<sub>4</sub> (S), b<sub>5</sub> (L)
- Red boxes: y<sub>15</sub>\* (E), y<sub>14</sub> (S), y<sub>13</sub> (L), y<sub>12</sub> (P), y<sub>11</sub> (S), y<sub>10</sub> (S), y<sub>9</sub> (S), y<sub>8</sub> (S), y<sub>7</sub> (E), y<sub>6</sub> (Q), y<sub>5</sub> (S), y<sub>4</sub> (P), y<sub>2</sub> (Q), y<sub>1</sub> (K)

Raw file

20171215\_MaS\_33SR\_LMH\_phospho\_06

Scan 9914 Method FTMS; HCD Score 87.72 m/z 554.75 Gene names NEK1

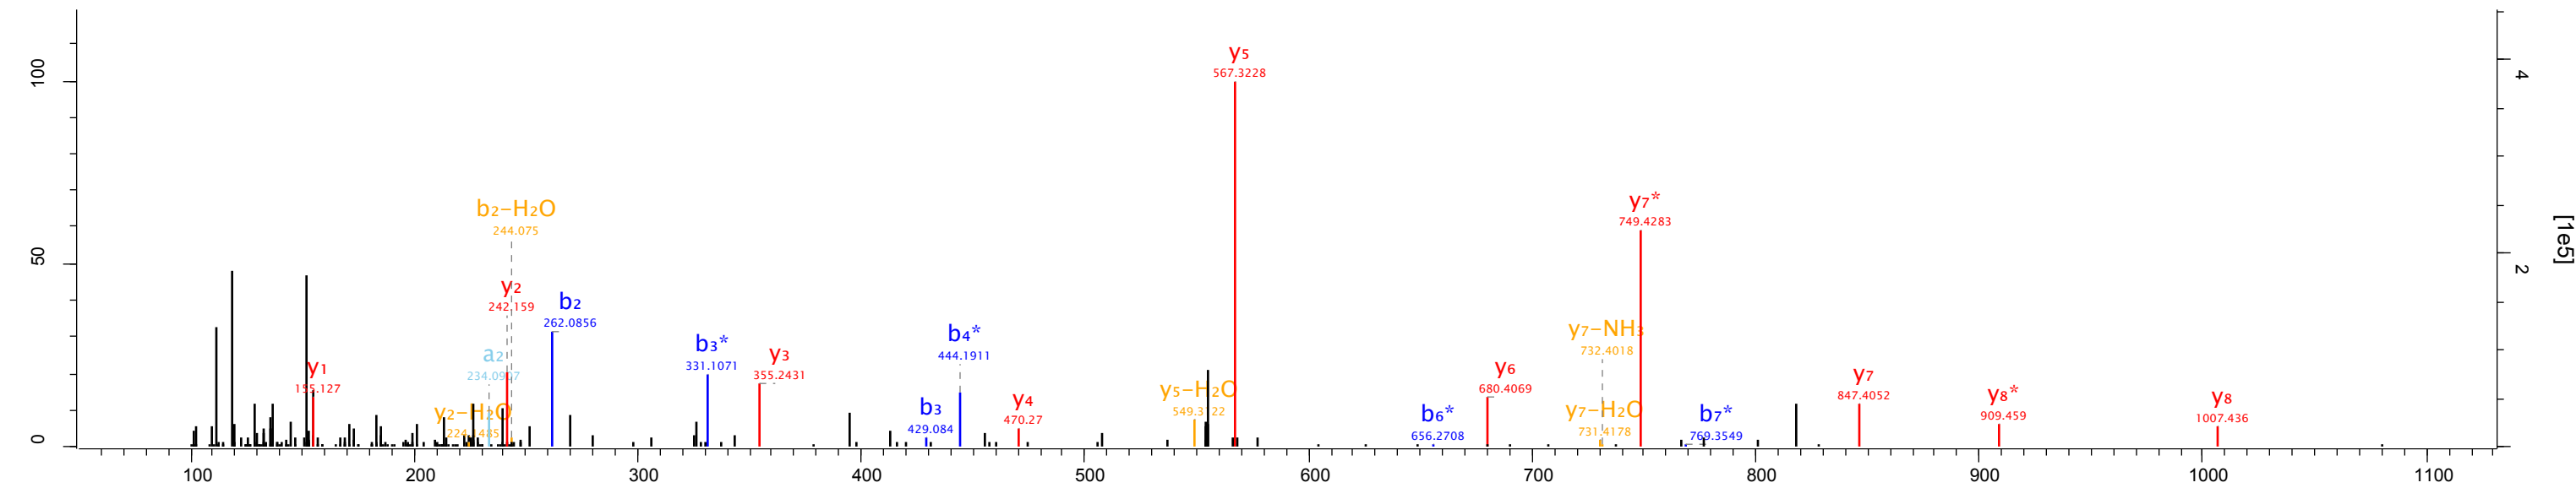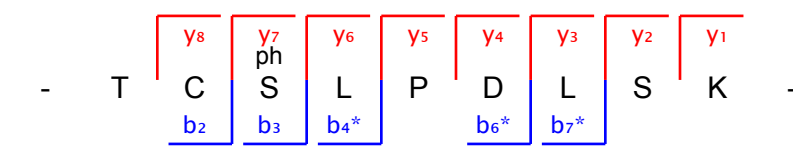

Raw file 20171215\_MaS\_33SR\_LMH\_phospho\_08 Scan 4454 Method FTMS; HCD Score 61.53 m/z 469.73 Gene names LZTS2

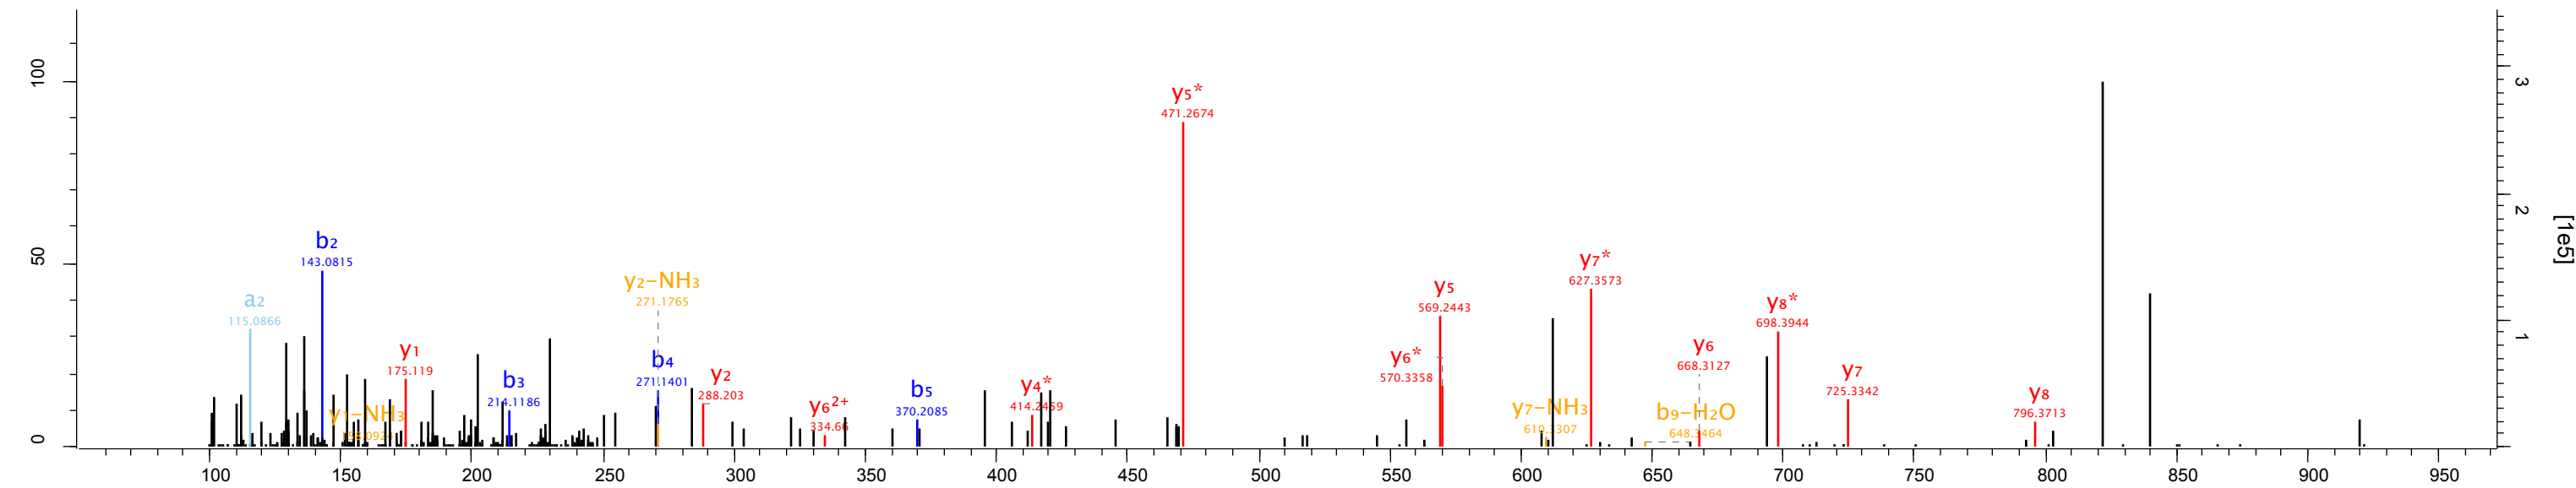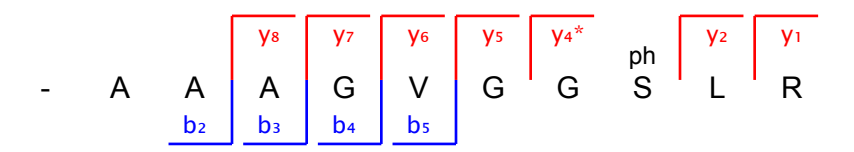

Raw file 20171215\_MaS\_33SR\_LMH\_phospho\_09 Scan 2374 Method FTMS; HCD Score 100.02 m/z 474.72 Gene names CCDC137

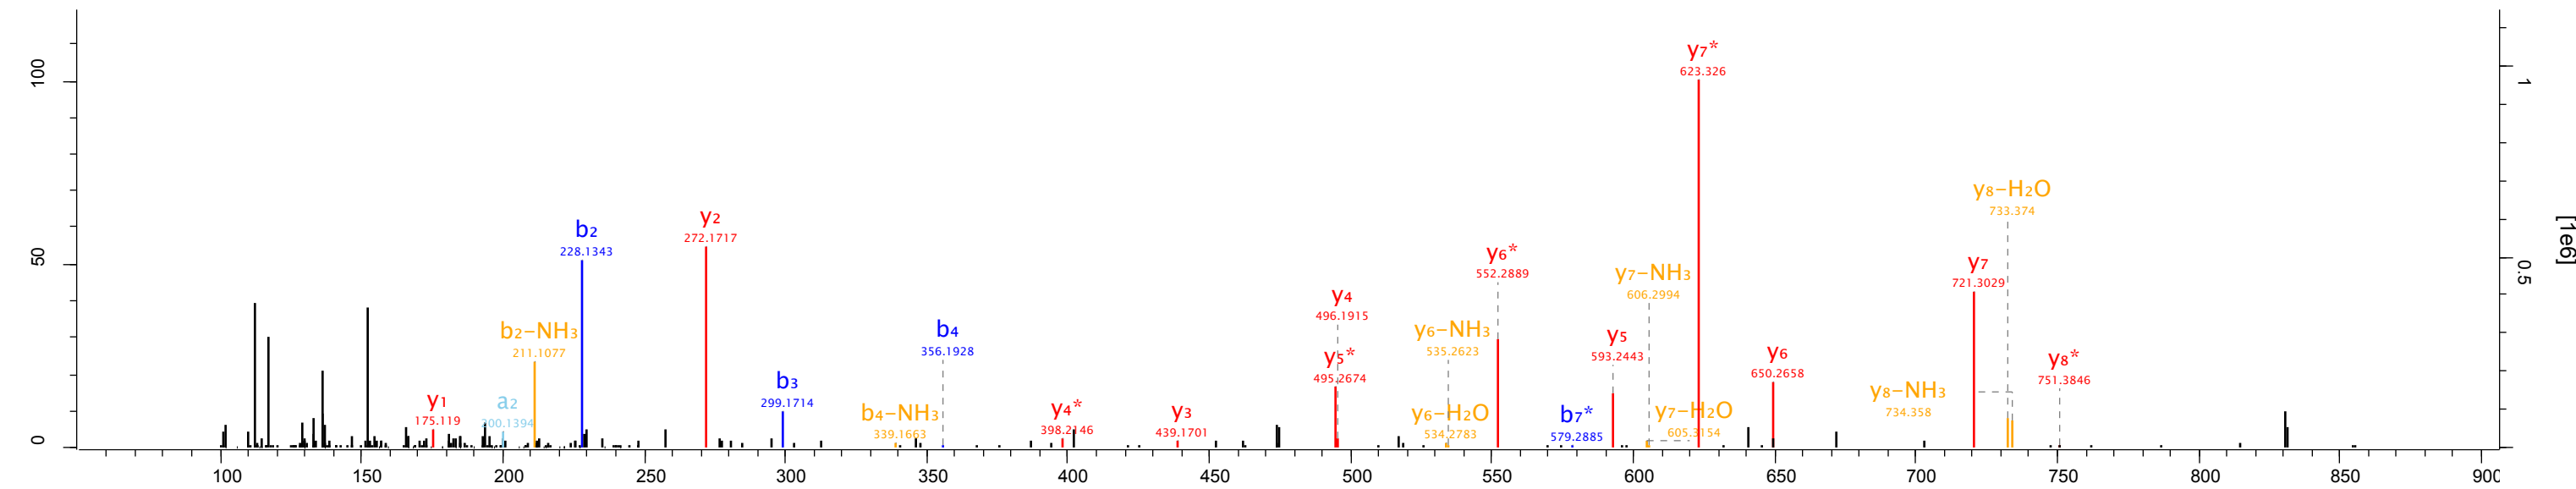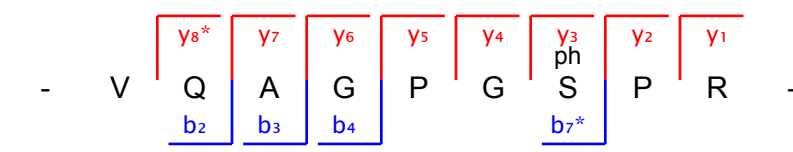

Raw file 20171215\_MaS\_33SR\_LMH\_phospho\_09 Scan 3494 Method FTMS; HCD Score 165.45 m/z 799.81 Gene names C17orf75

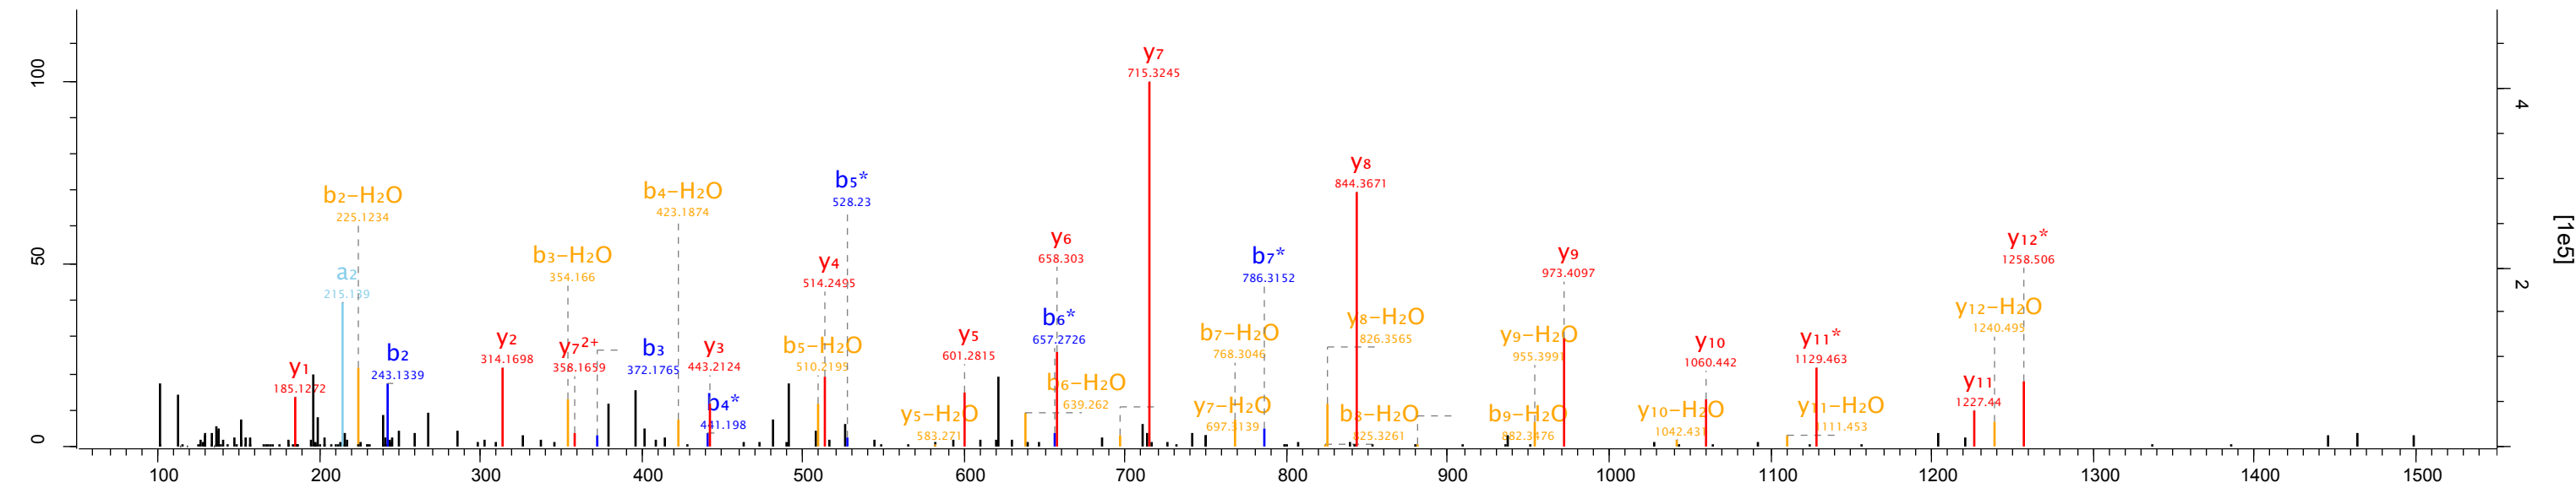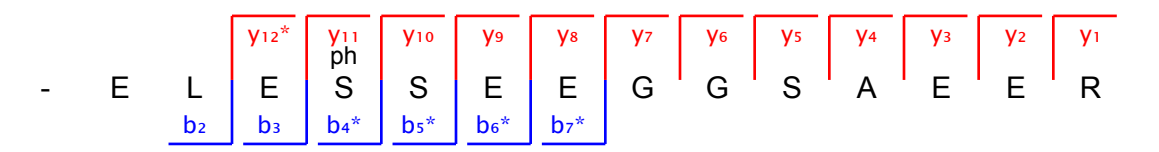



Raw file 20171215\_MaS\_33SR\_LMH\_phospho2\_01 Scan 3244 Method FTMS; HCD Score 58.09 m/z 787.39 Gene names KATNA1

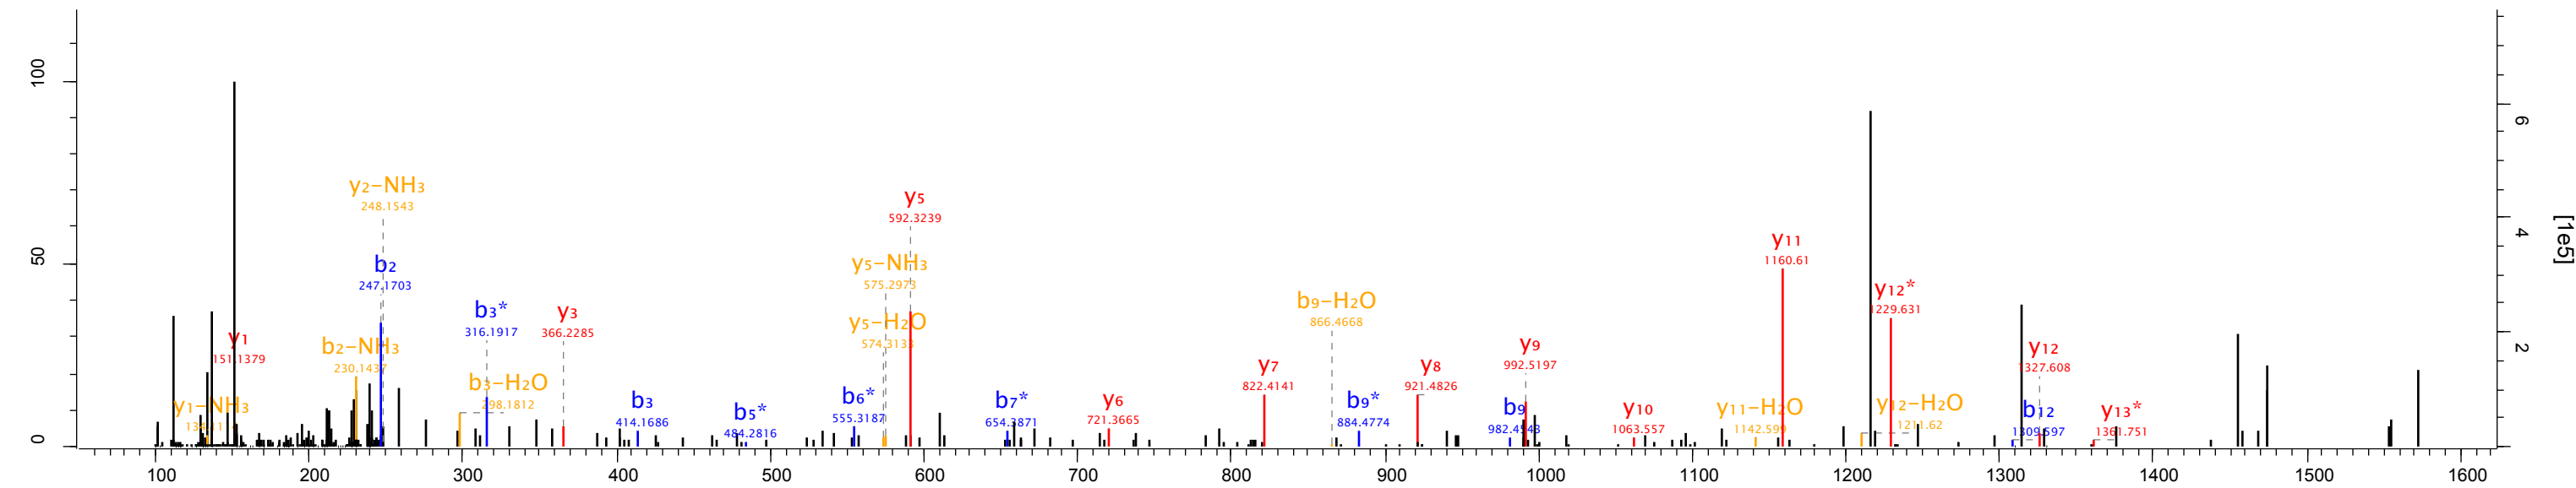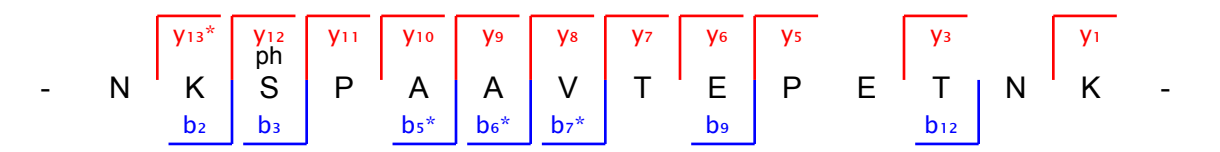

Raw file 20171215\_MaS\_33SR\_LMH\_phospho2\_01 Scan 3844 Method FTMS; HCD Score 52.5 m/z 539.74 Gene names ZNF335

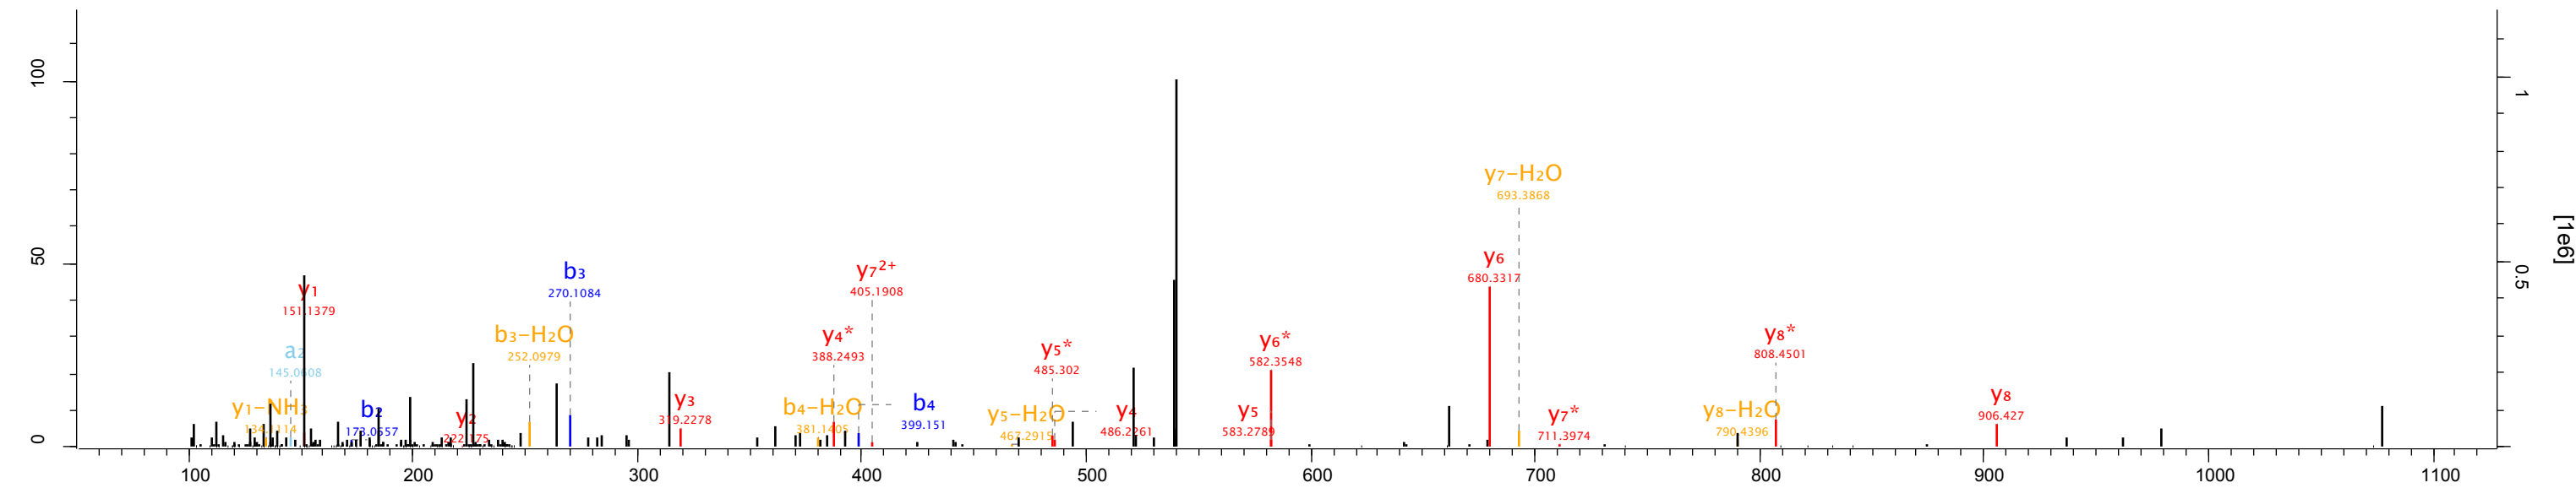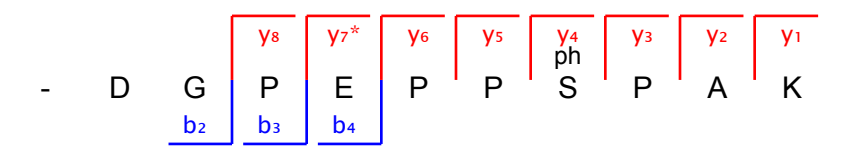

Raw file 20171215\_MaS\_33SR\_LMH\_phospho2\_02 Scan 11864 Method FTMS; HCD Score 108.25 m/z 758.36 Gene names FANCE

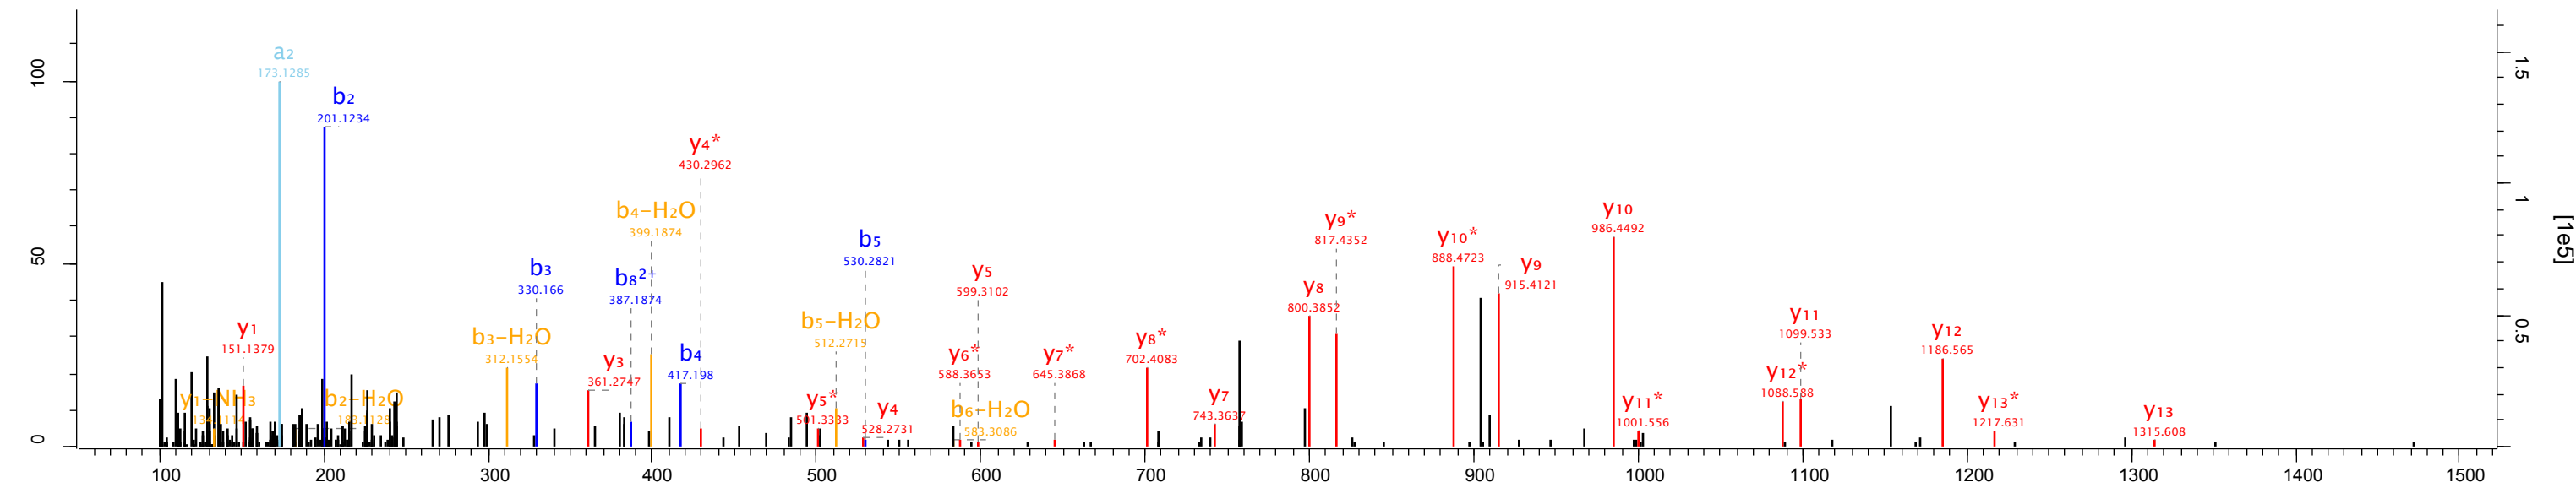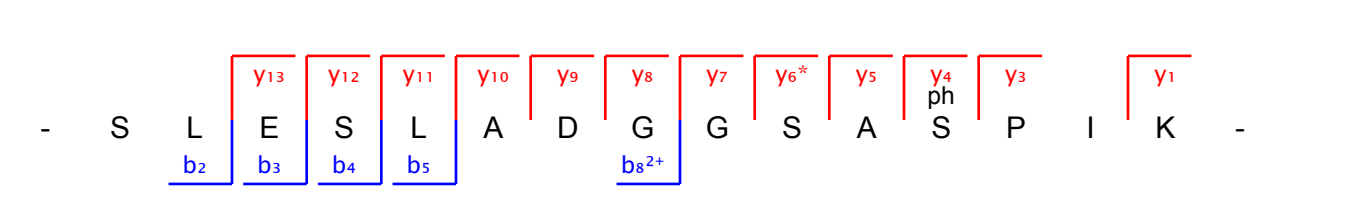

Raw file  
 20171215\_MaS\_33SR\_LMH\_phospho2\_02  
 Scan 4084 Method FTMS; HCD Score 55.72 m/z 661.78

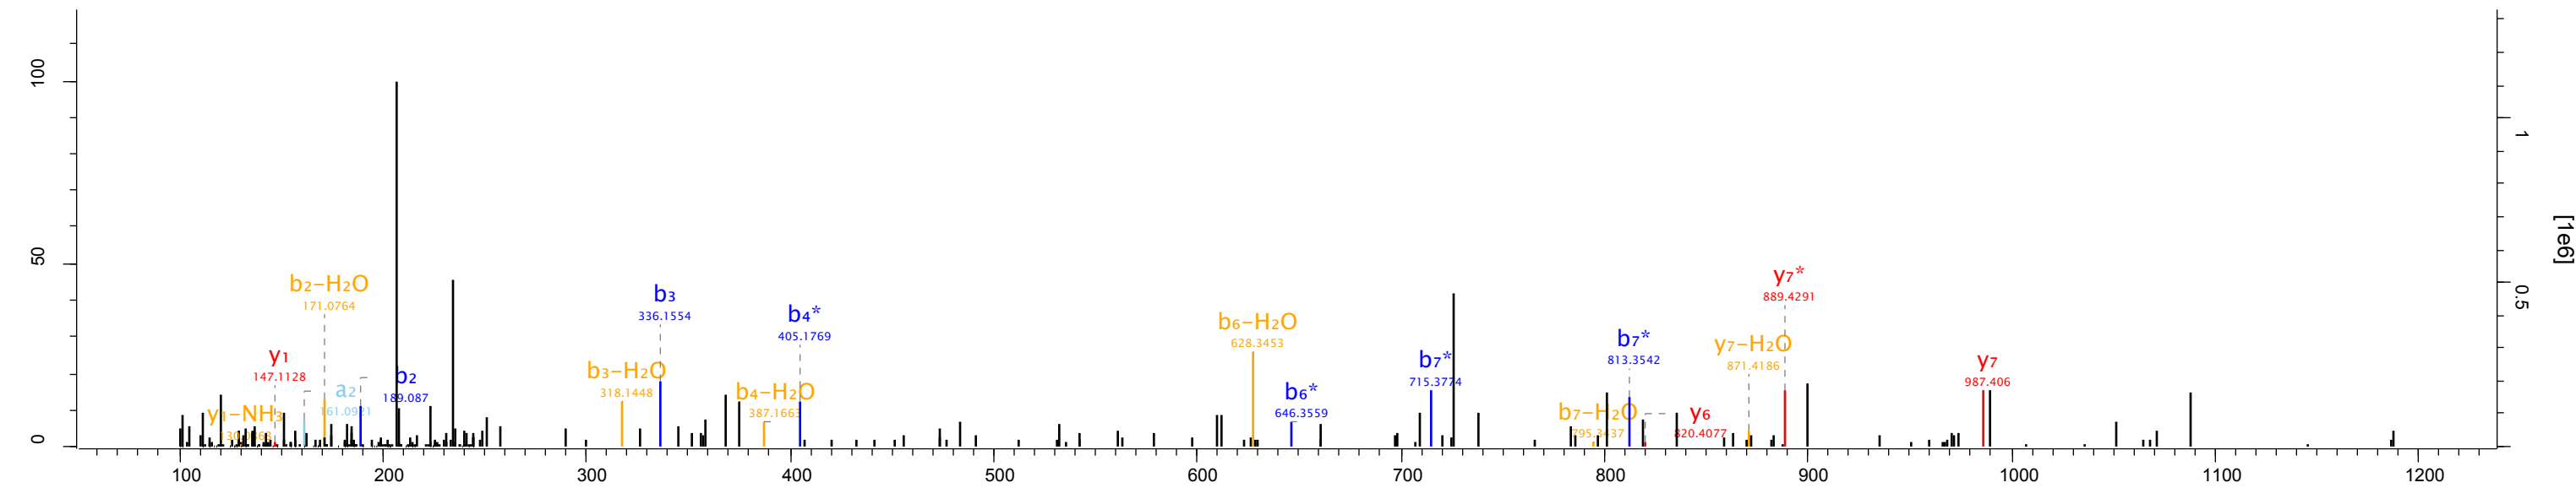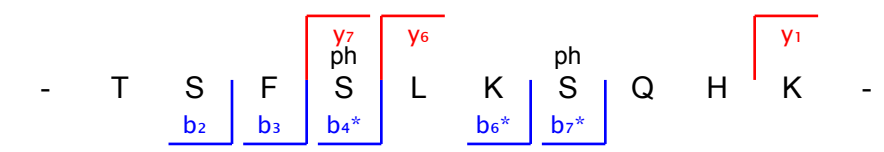

20171215\_MaS\_33SR\_LMH\_phospho2\_02

4144 FTMS; HCD 250.79 825.83 DTD1

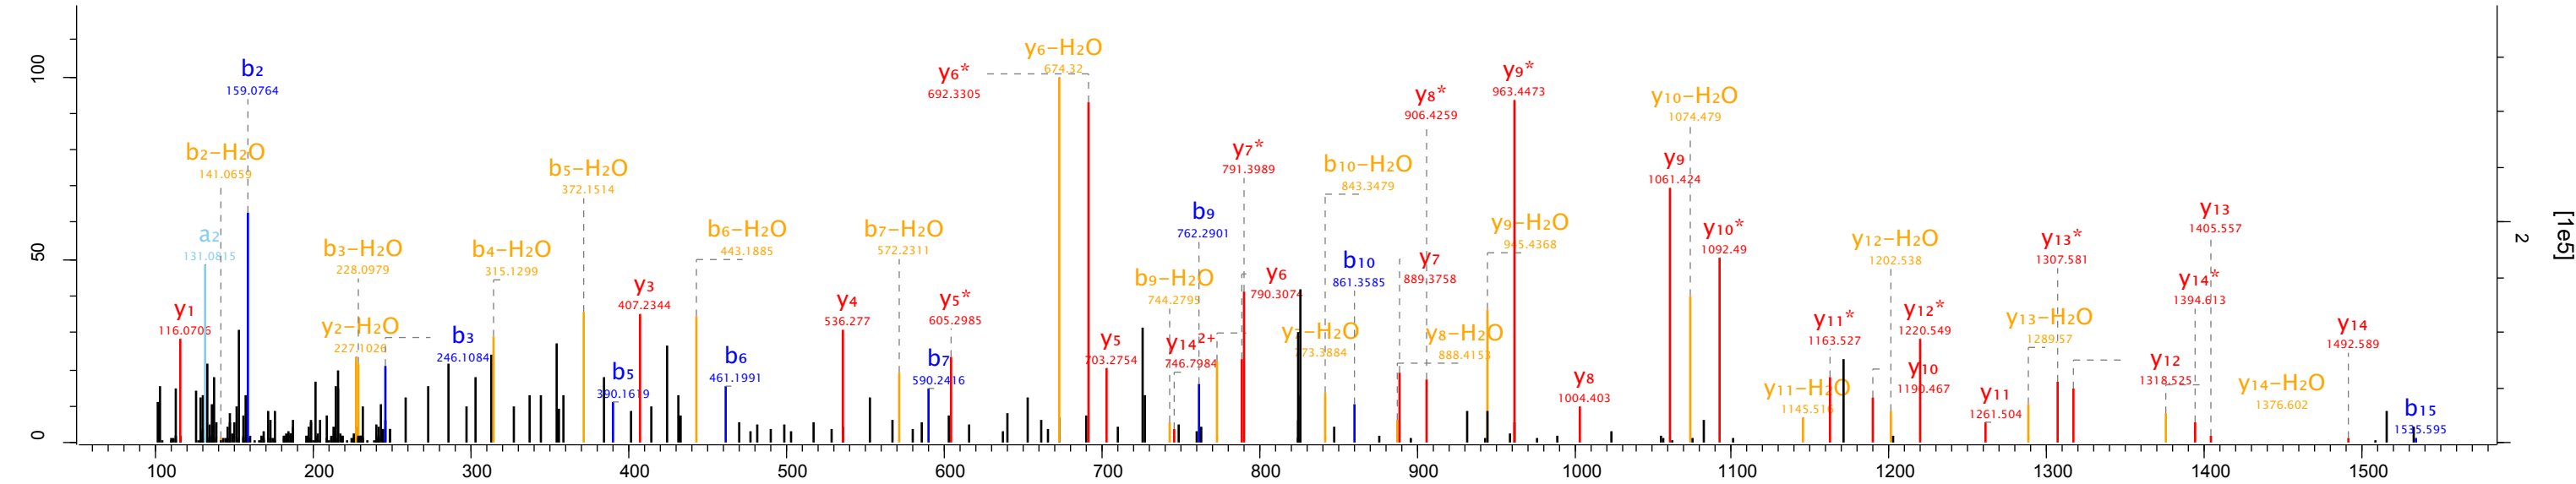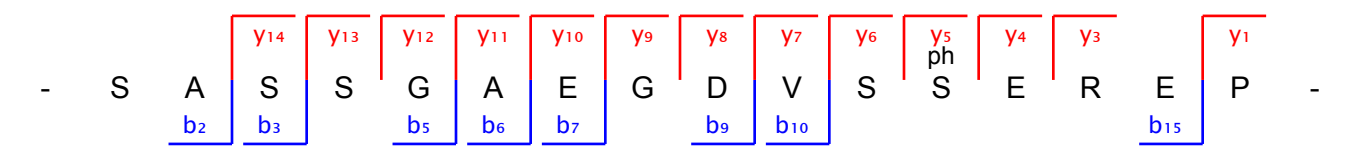

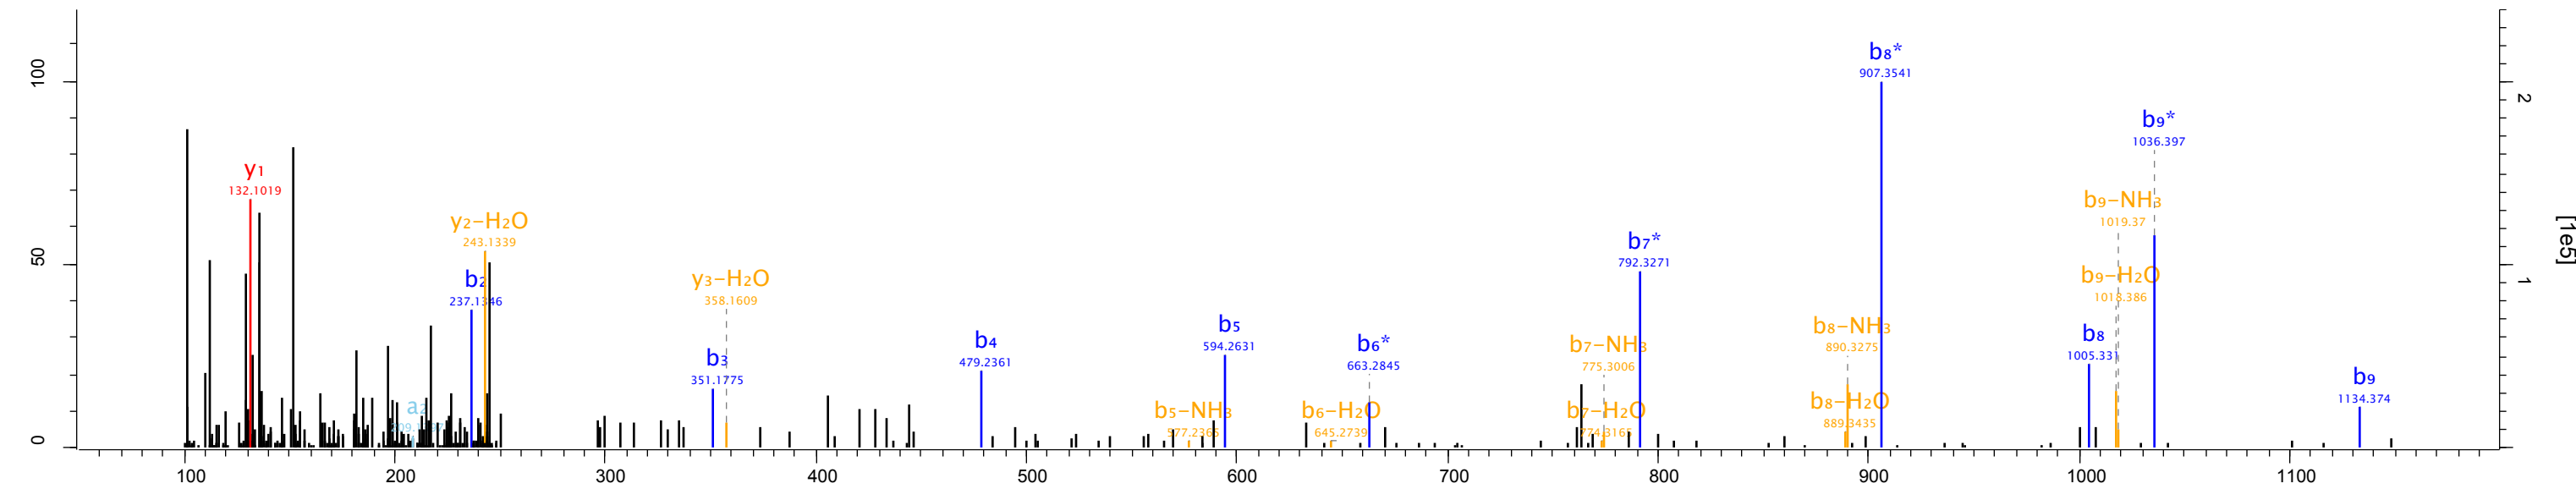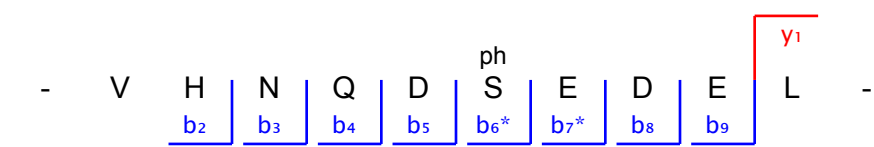

20171215\_MaS\_33SR\_LMH\_phospho2\_02 6114 FTMS; HCD 105.99 618.81 BUB1

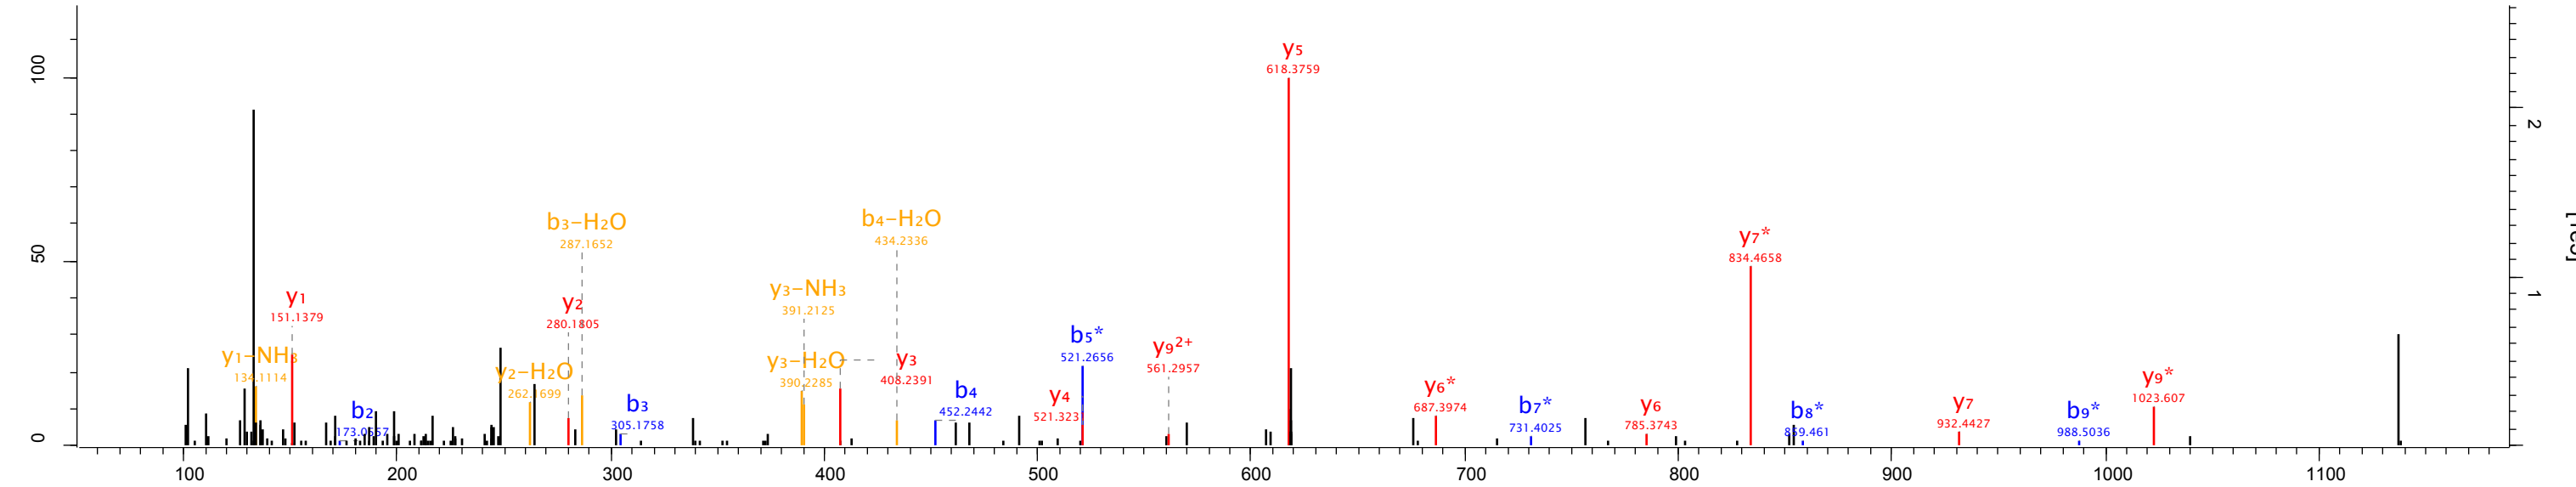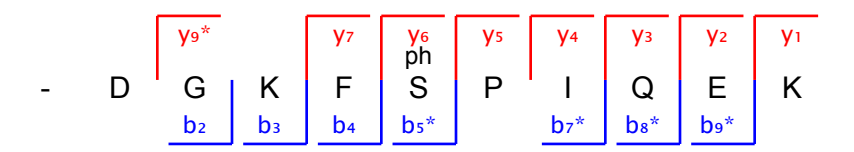

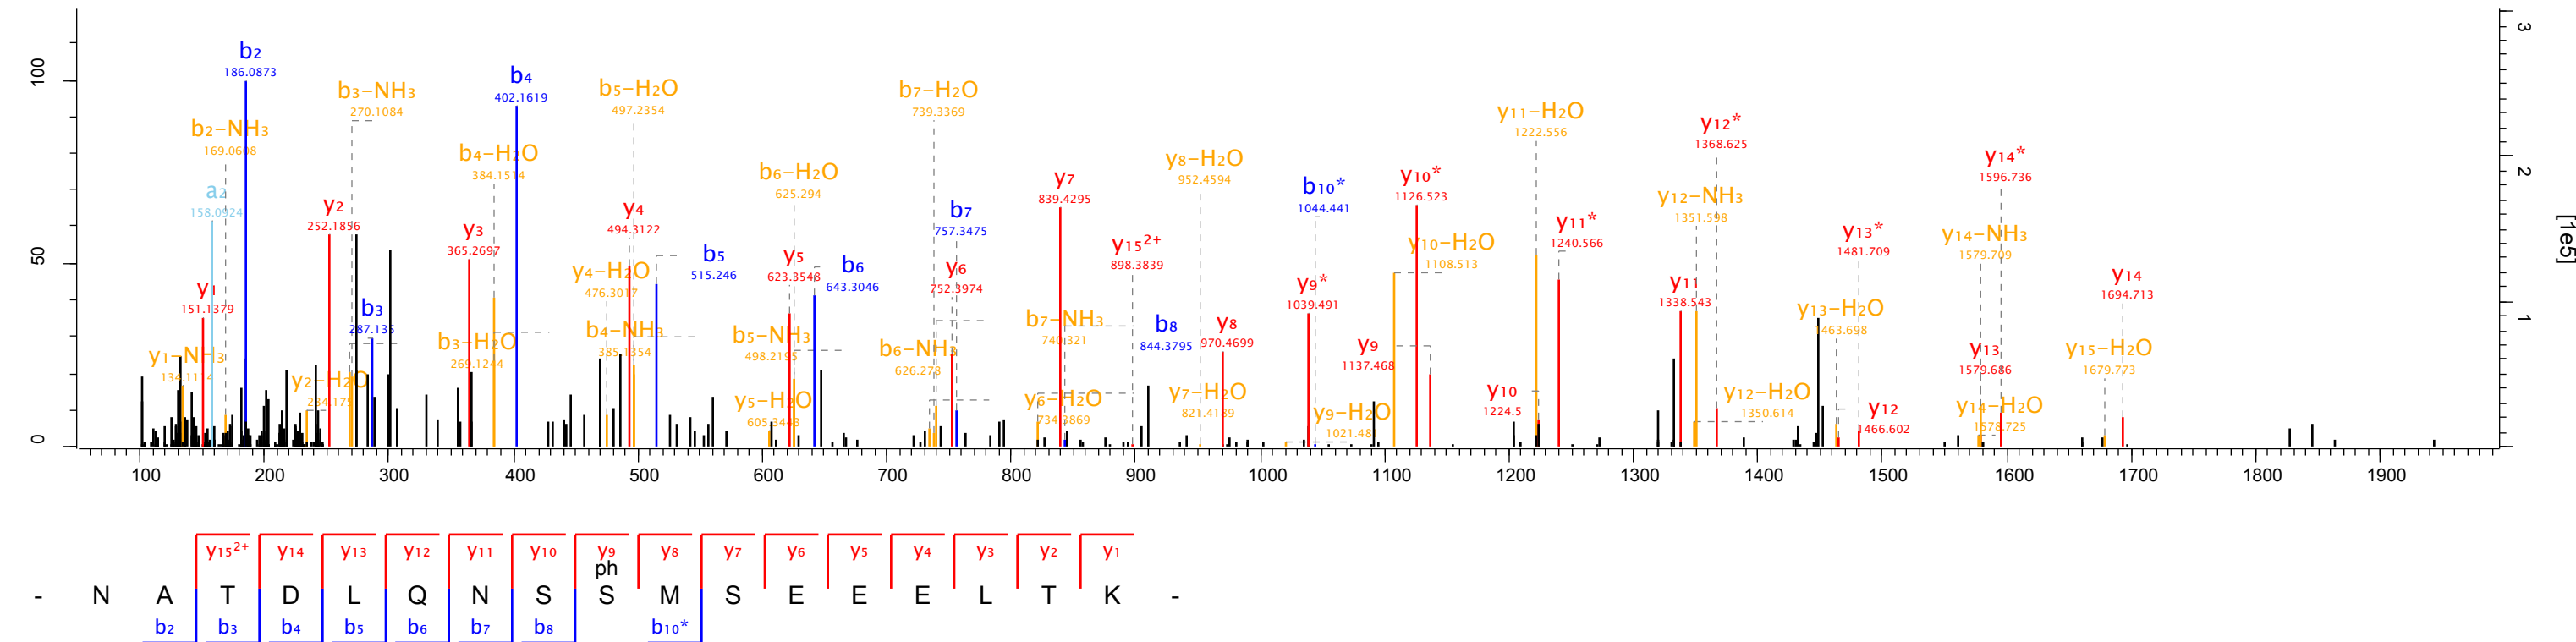



Raw file 20171215\_MaS\_33SR\_LMH\_phospho2\_03 Scan 11554 Method FTMS; HCD Score 117.8 m/z 831.36 Gene names TOX4

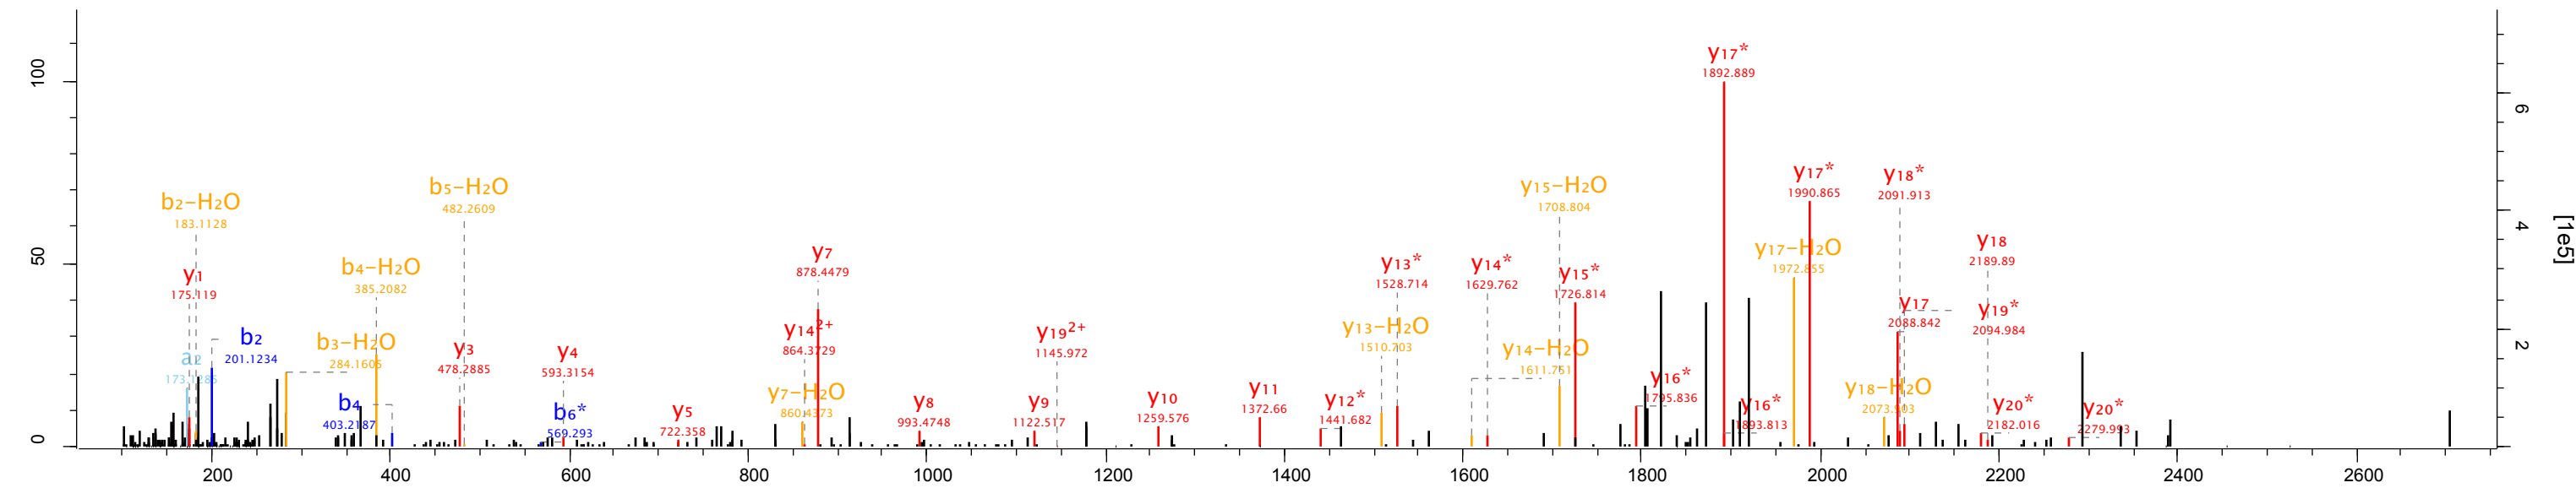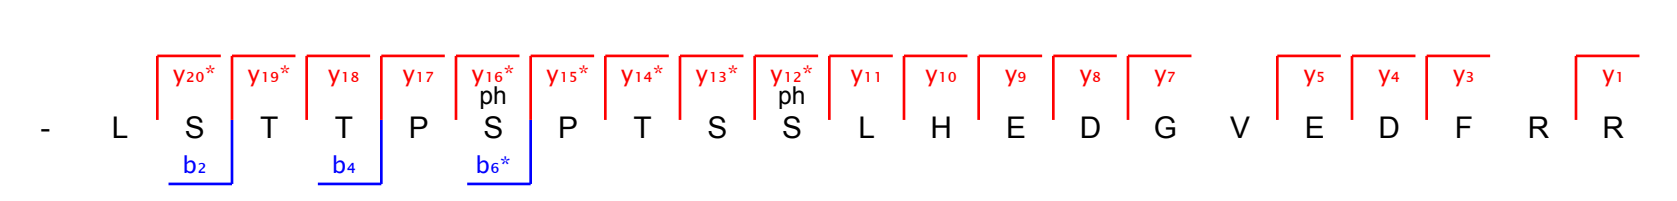

Raw file 20171215\_MaS\_33SR\_LMH\_phospho2\_03 Scan 11744 Method FTMS; HCD Score 146.6 m/z 974.87 Gene names MLLT1

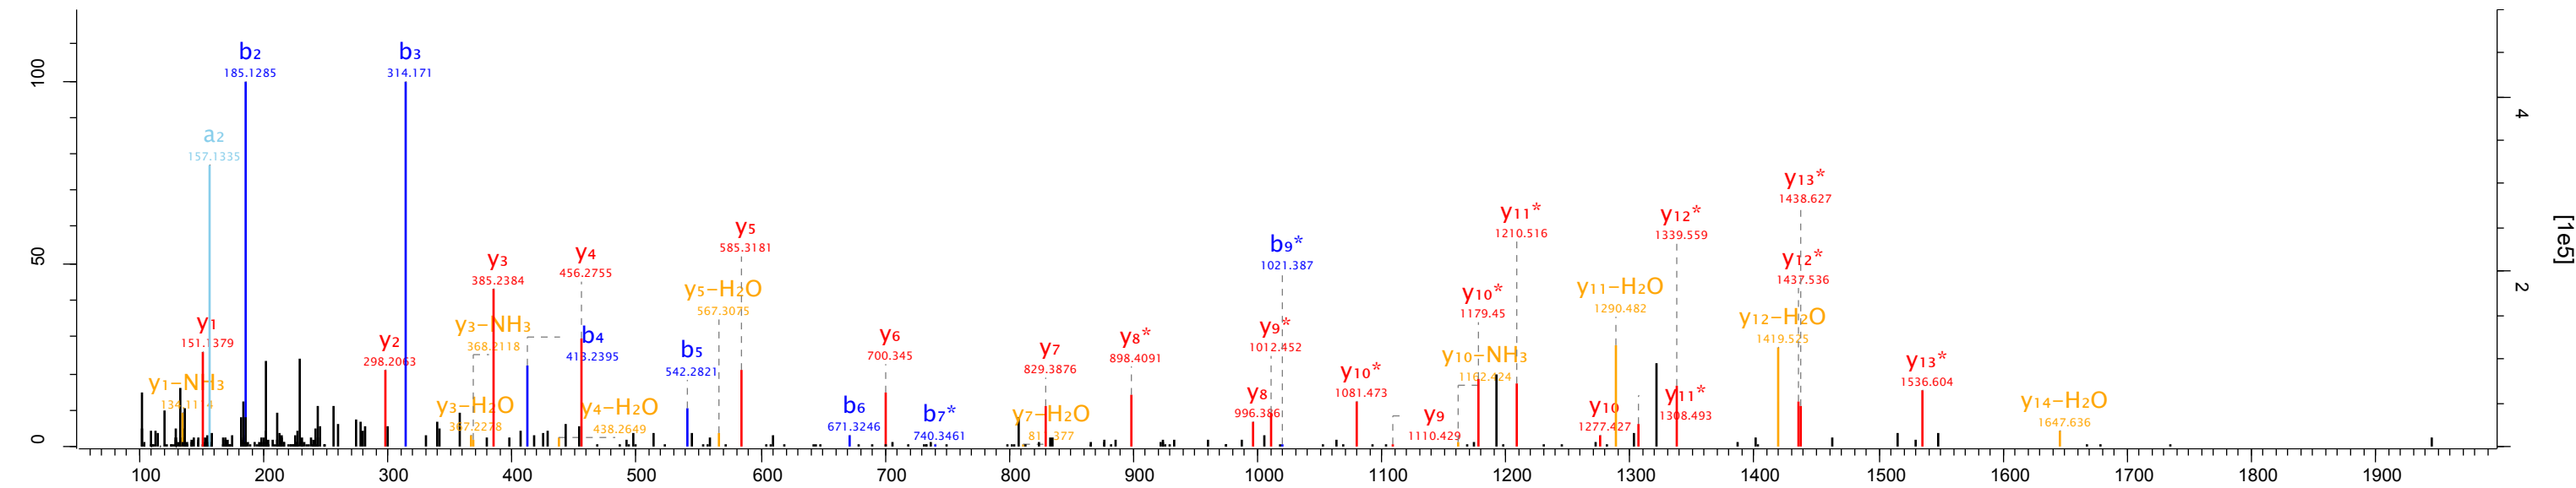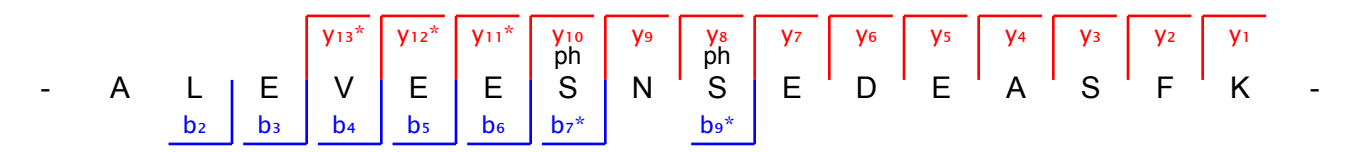

Raw file 20171215\_MaS\_33SR\_LMH\_phospho2\_03 Scan 12434 Method FTMS; HCD Score 48.23 m/z 806.35 Gene names KIZ

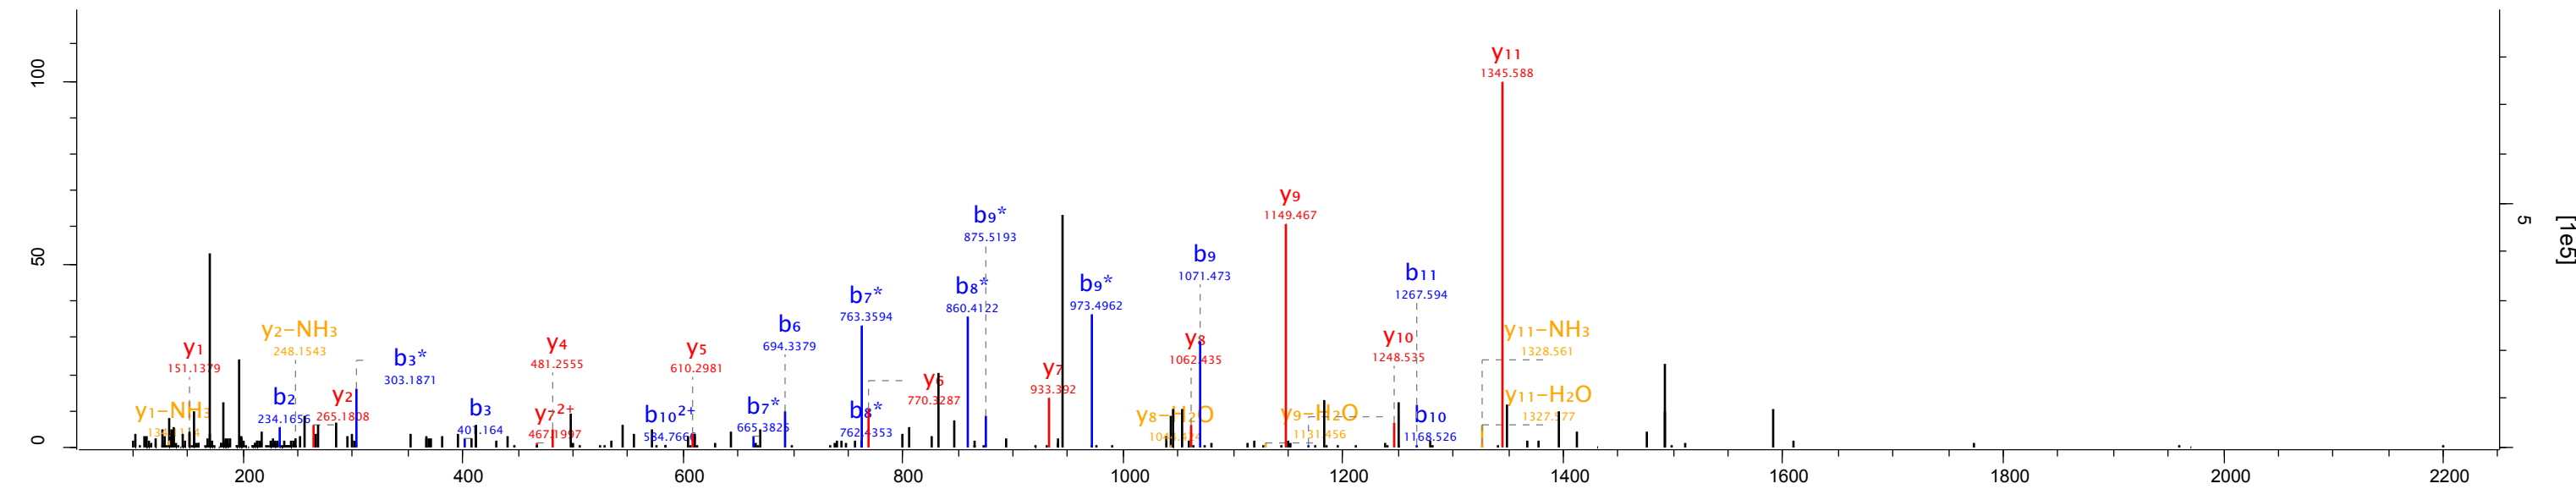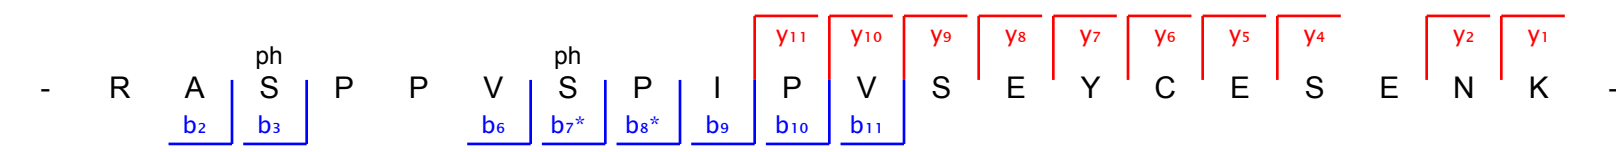

Raw file 20171215\_MaS\_33SR\_LMH\_phospho2\_03 Scan 13374 Method FTMS; HCD Score 137.5 m/z 835.35 Gene names USP20

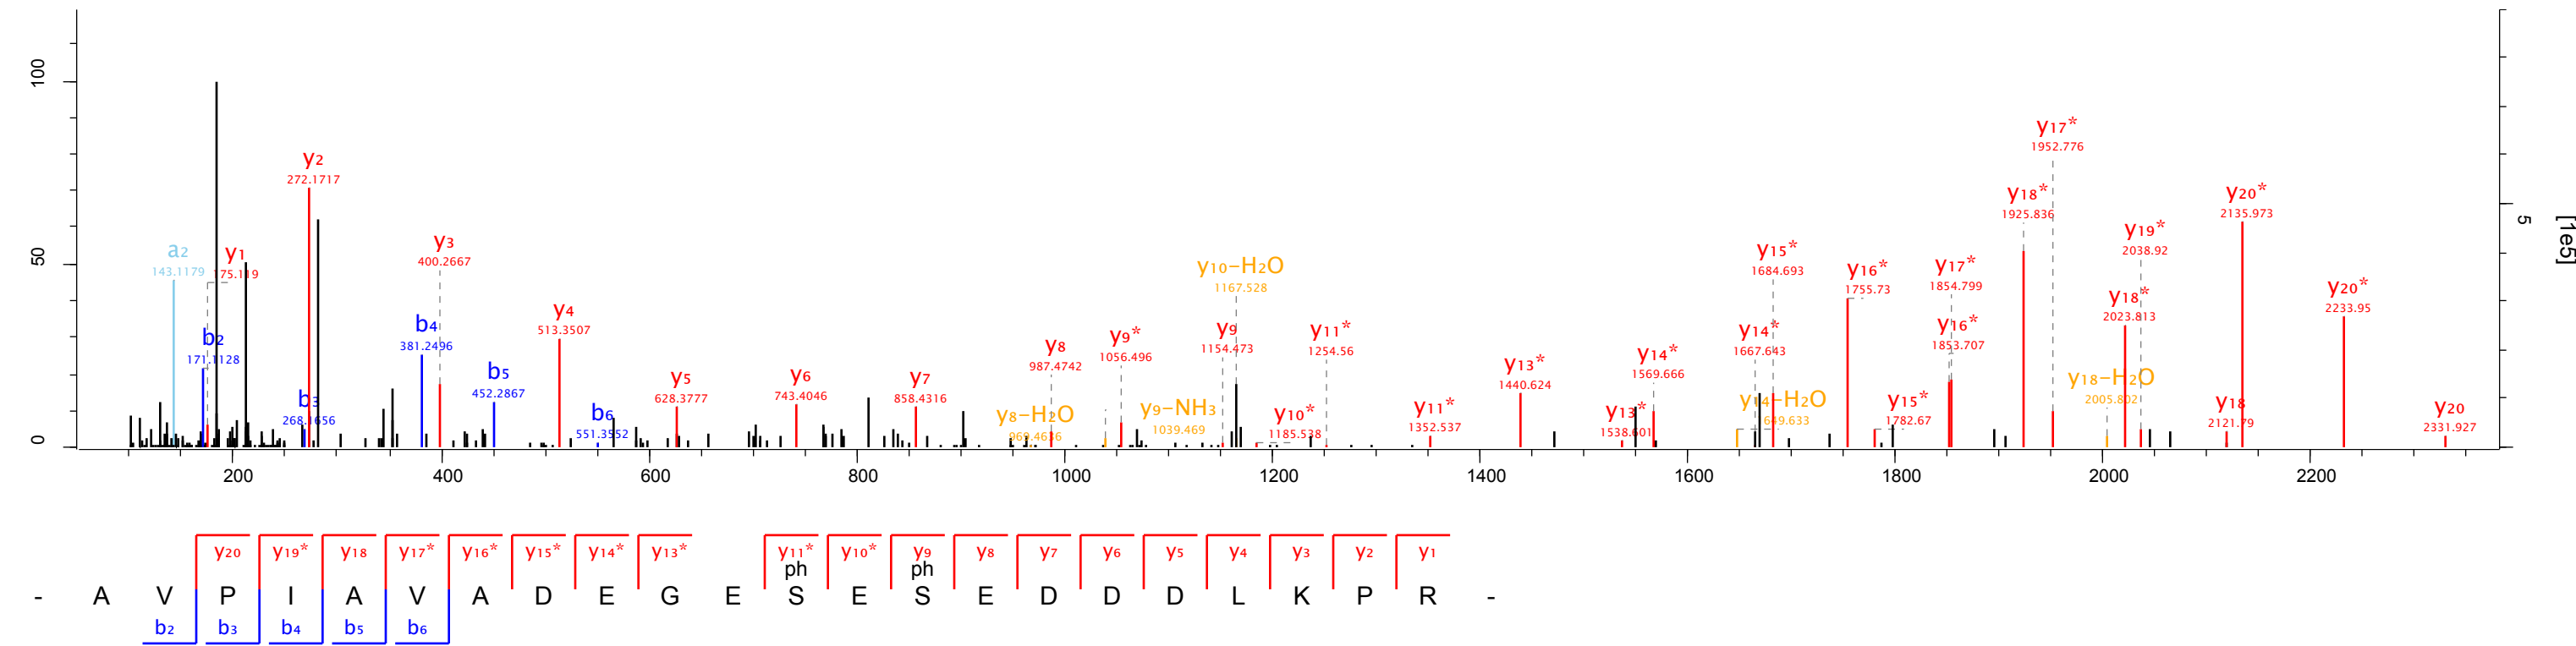

Raw file 20171215\_MaS\_33SR\_LMH\_phospho2\_03 Scan 15424 Method FTMS; HCD Score 166.52 m/z 740.31 Gene names LYSDM1

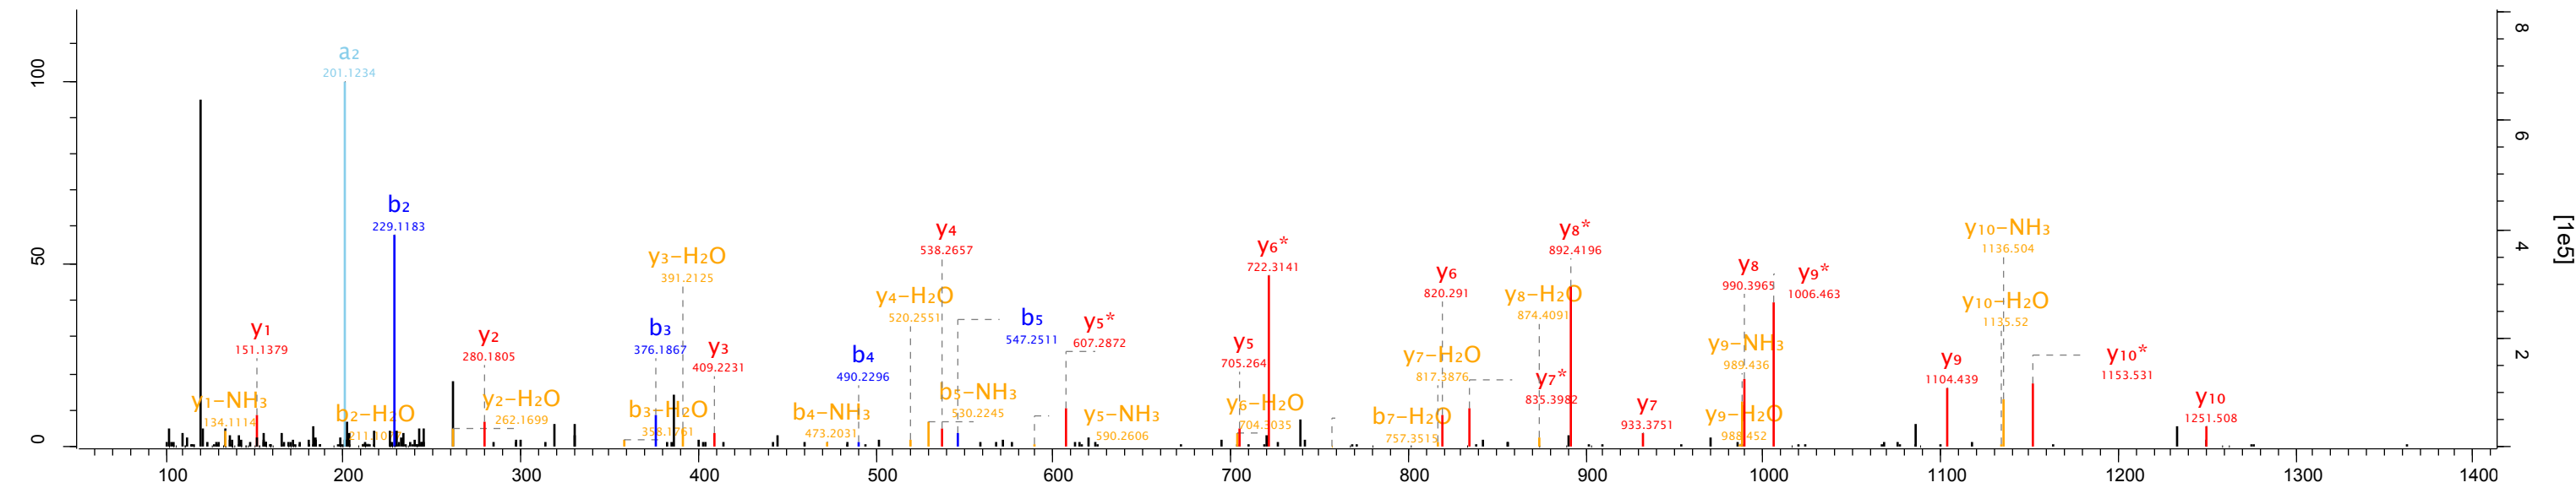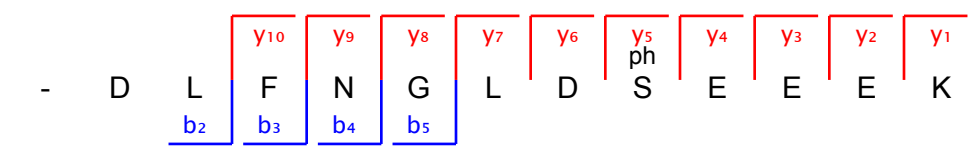

Raw file 20171215\_MaS\_33SR\_LMH\_phospho2\_03 Scan 15894 Method FTMS; HCD Score 152.32 m/z 845.87 Gene names PRKD1;PRKD3

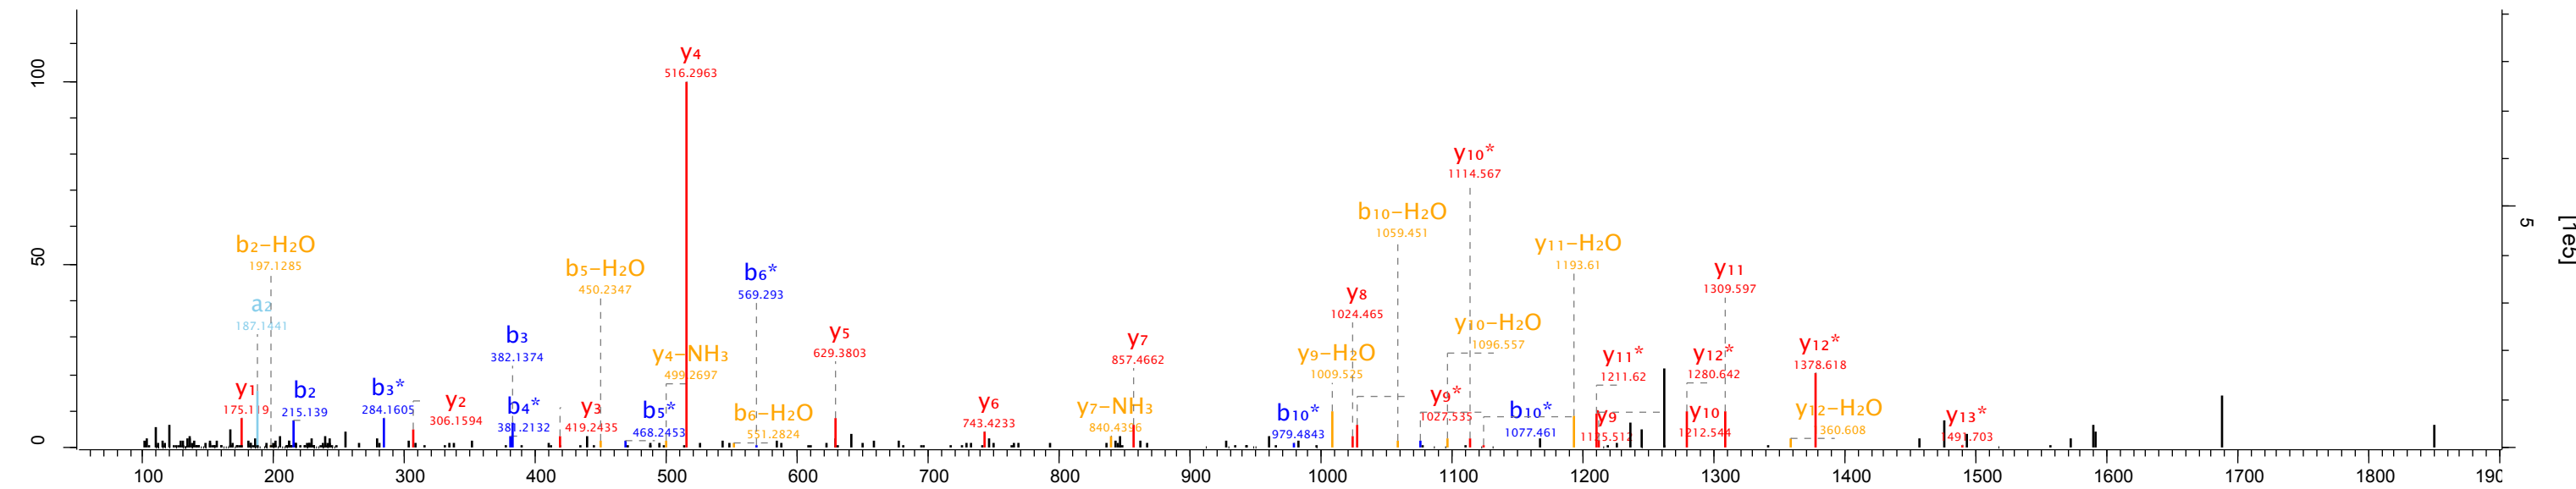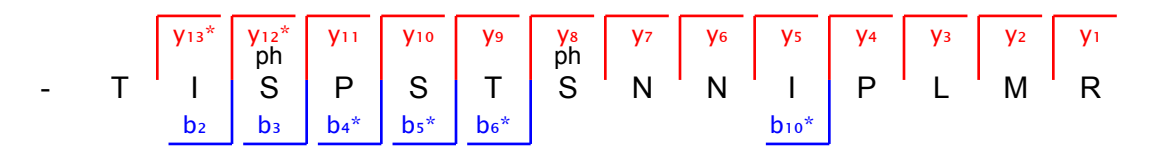

Raw file: 20171215\_MaS\_33SR\_LMH\_phospho2\_03  
 Scan: 16174 Method: FTMS; HCD Score: 205.24 m/z: 970.43 Gene names: ZFYVE20

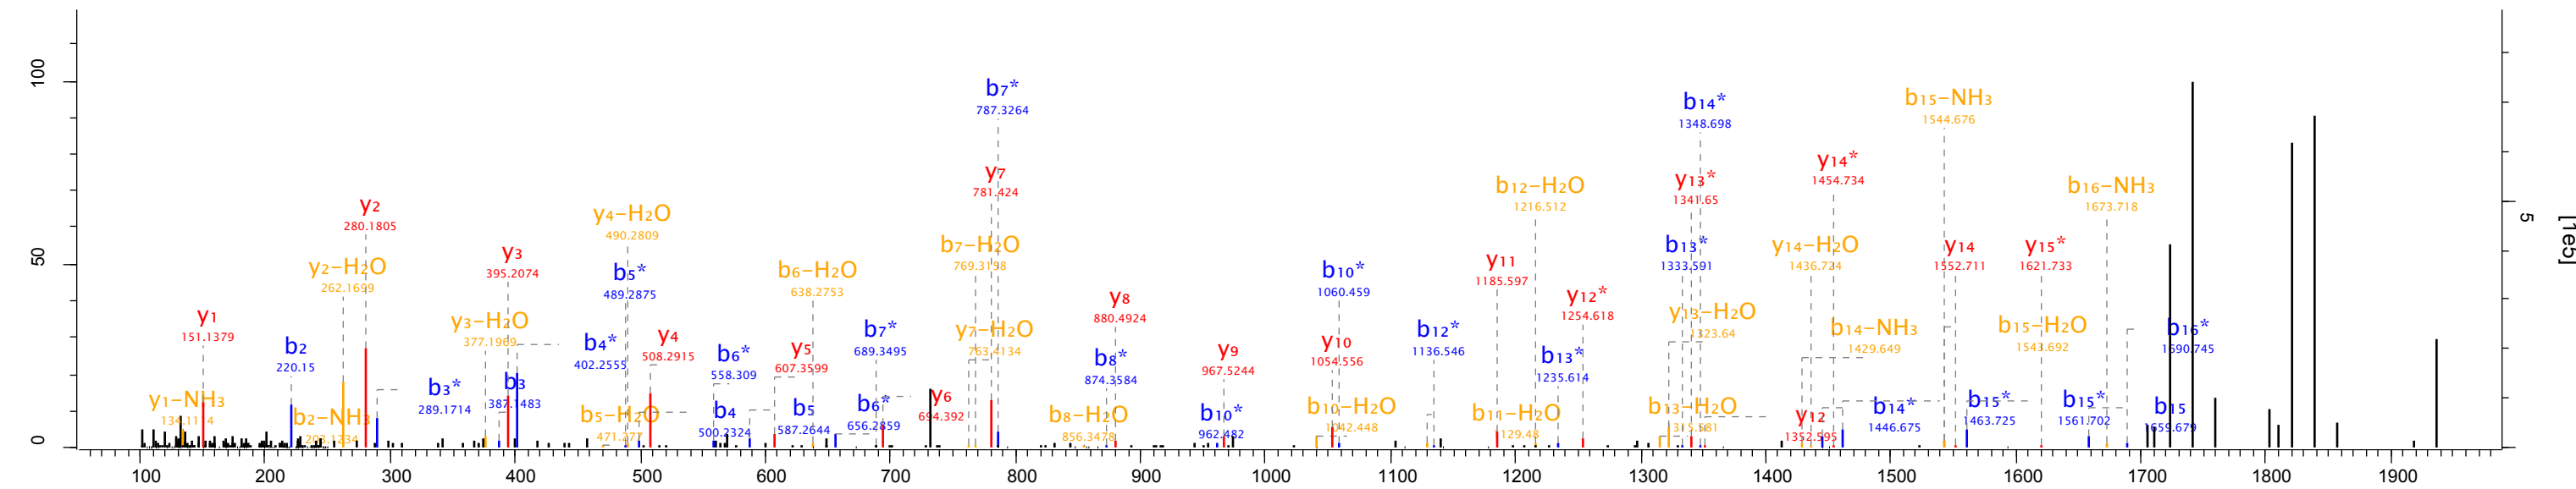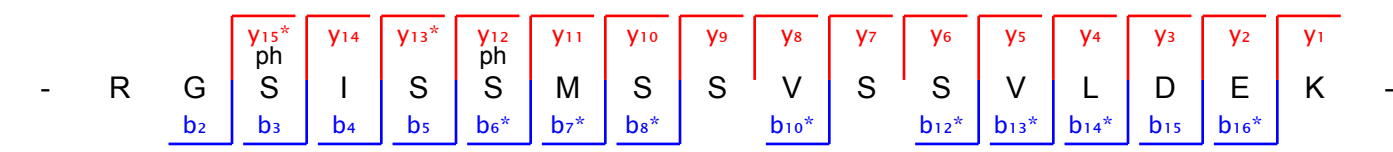

20171215\_MaS\_33SR\_LMH\_phospho2\_03

16544 FTMS; HCD 49.52 843.37 BRSK1

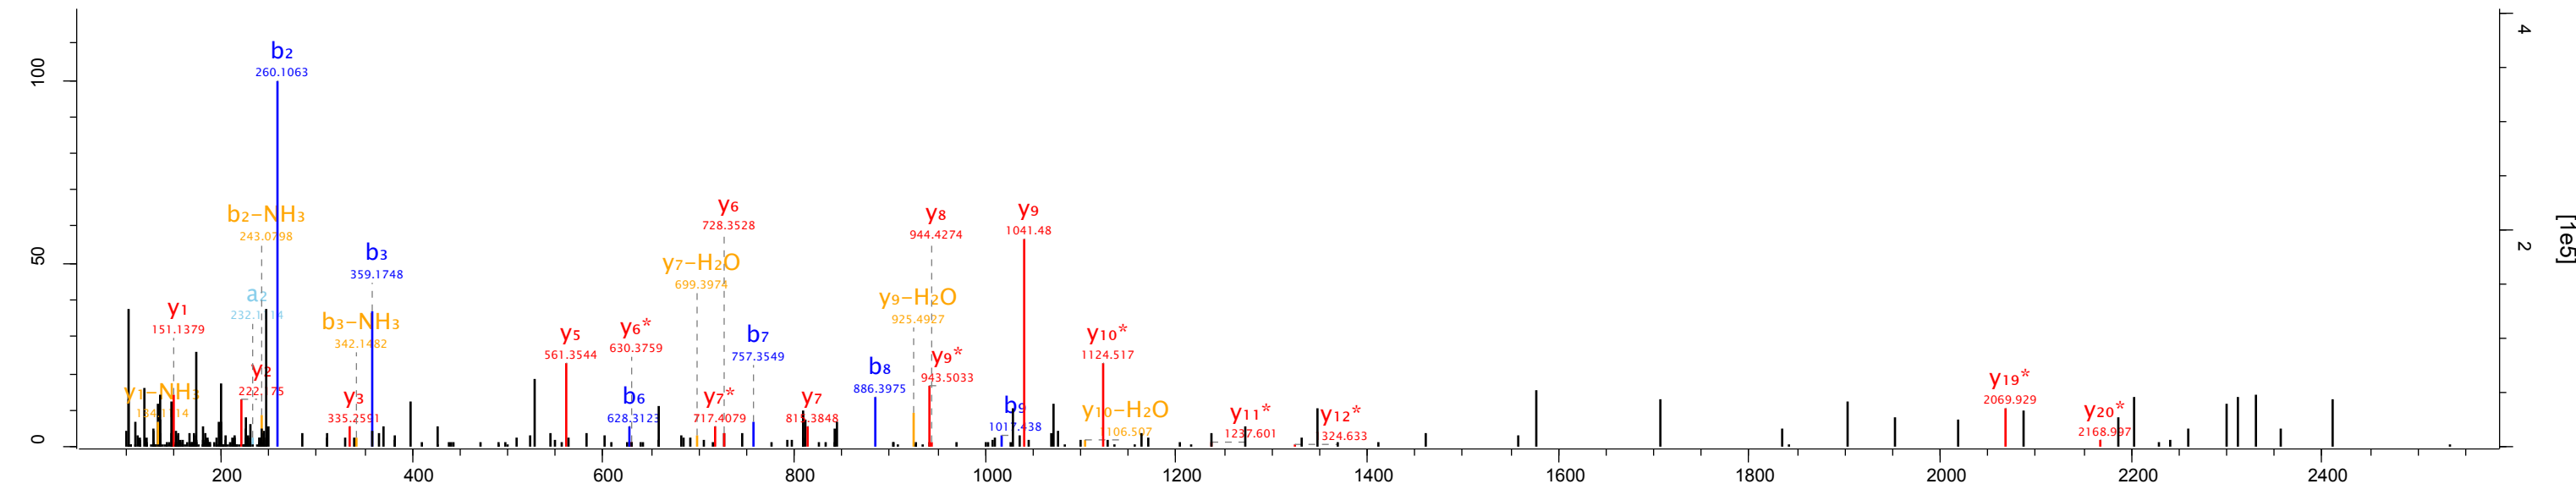

- M Q V P T A E E M S S L T P E S S P E L A K -

Fragmentation sites are indicated by brackets below the sequence:

- Blue brackets (b-ions): M-Q, Q-V, V-P, T-A, A-E, E-E, E-M, M-S.
- Red brackets (y-ions): V-P, P-T, T-S, S-L, L-T, T-P, P-E, E-S, S-S, S-P, P-E, E-L, L-A, A-K.



Raw file 20171215\_MaS\_33SR\_LMH\_phospho2\_03 Scan 17784 Method FTMS; HCD Score 95.21 m/z 817.35 Gene names SEPSECS

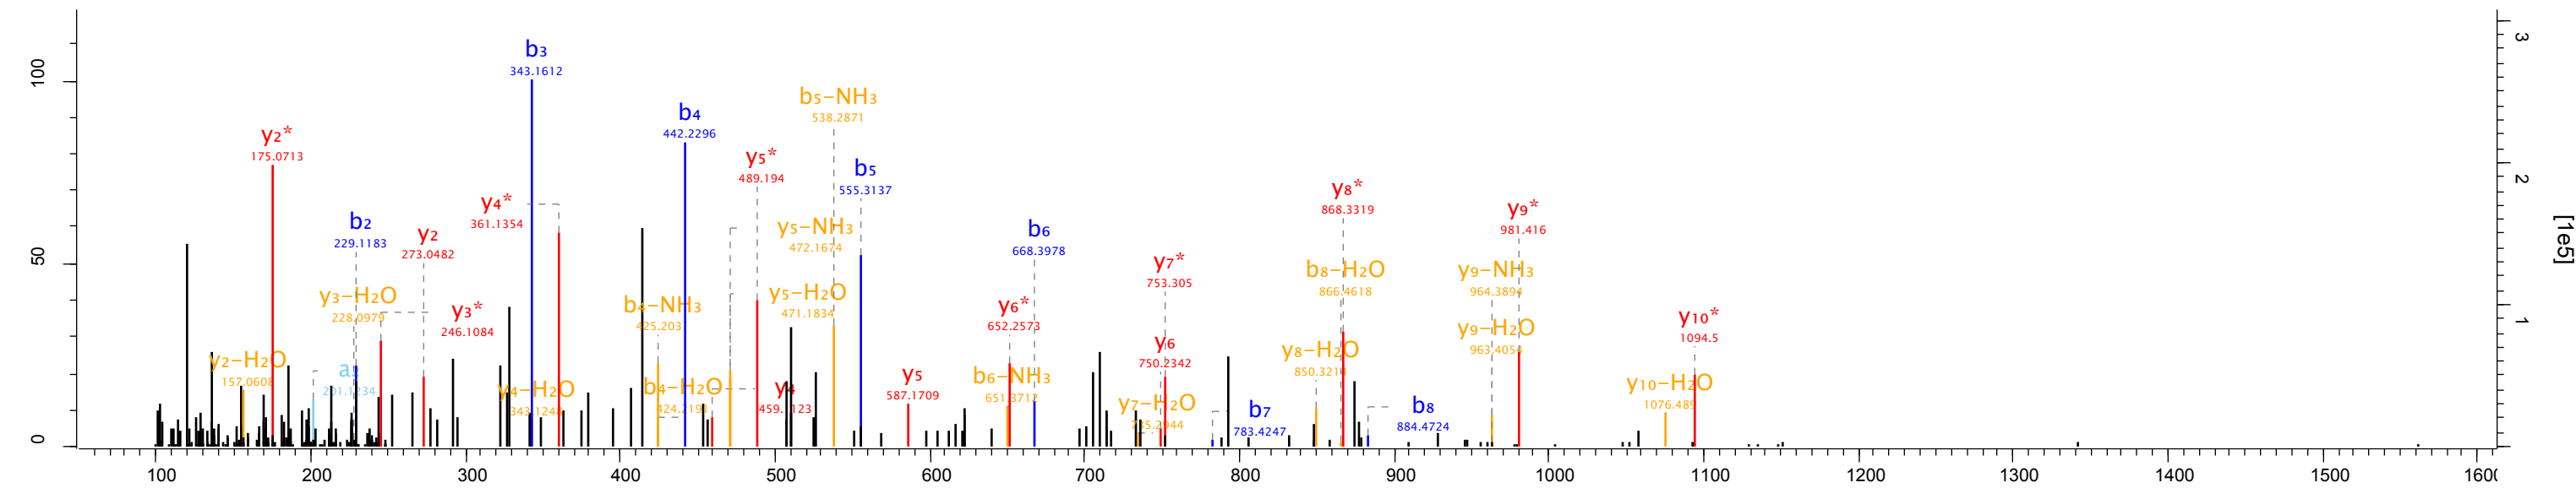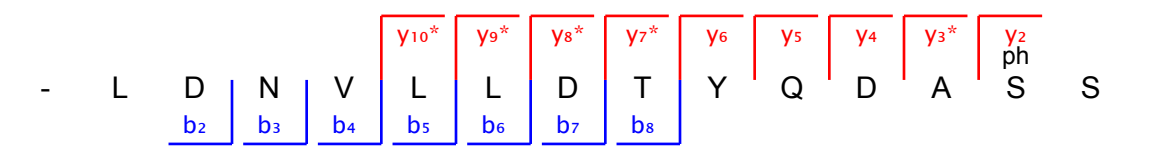

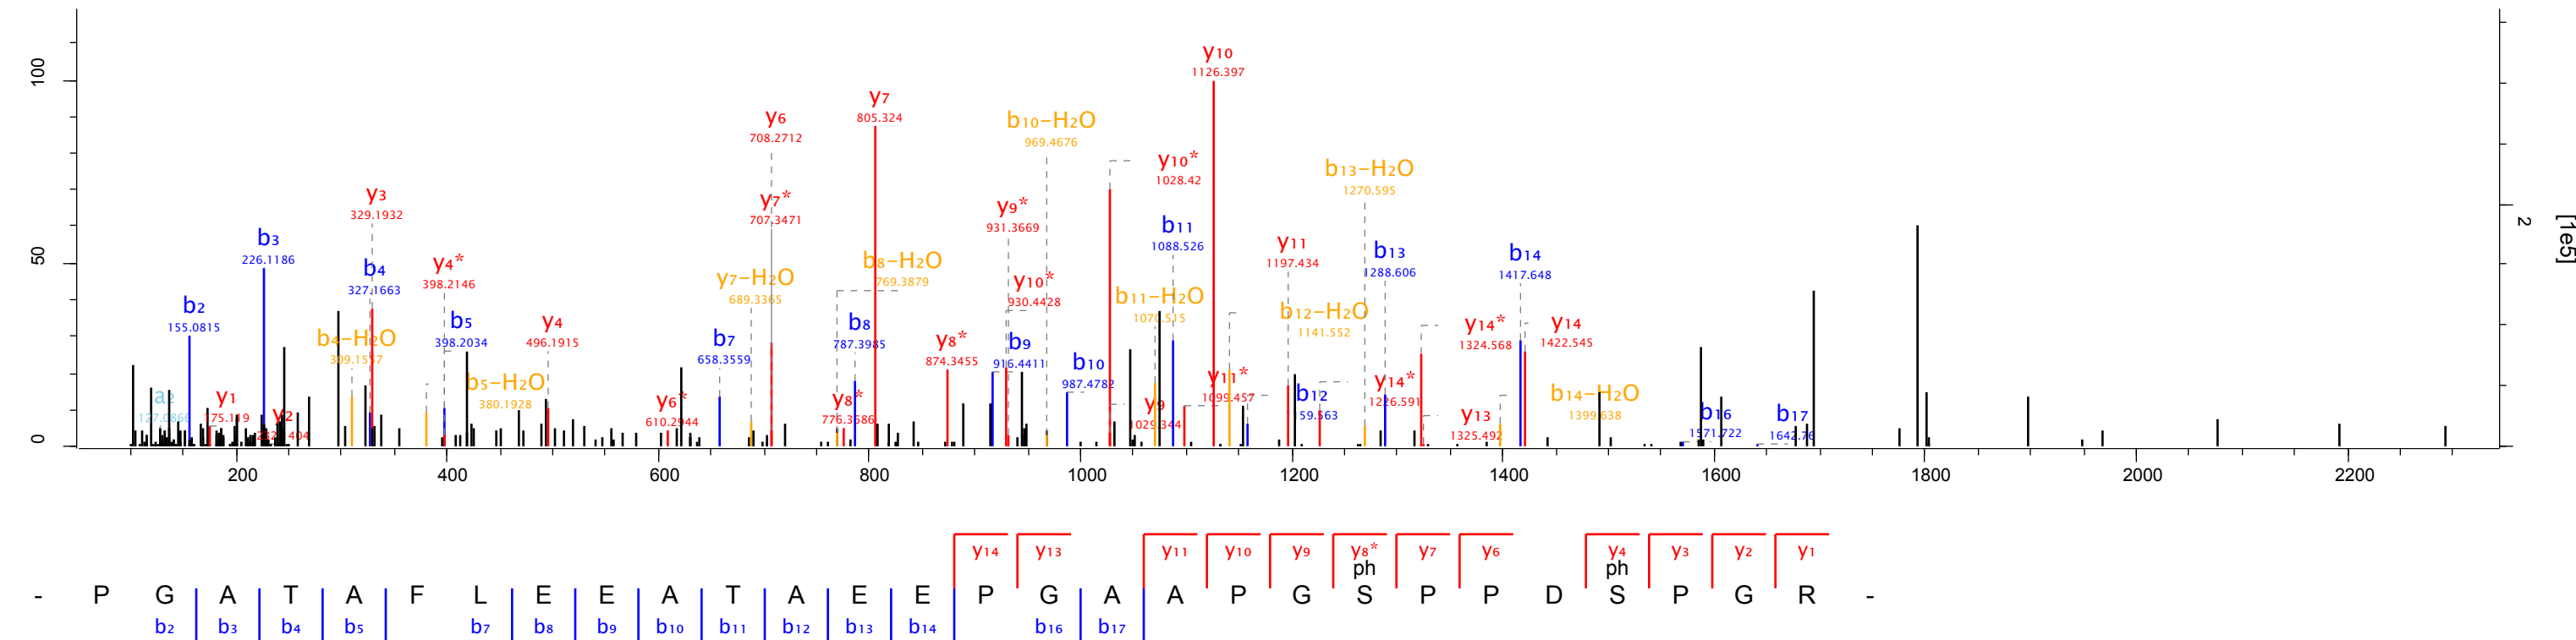

Raw file 20171215\_MaS\_33SR\_LMH\_phospho2\_03 Scan 20074 Method FTMS; HCD Score 45 m/z 949.39 Gene names ZCCHC6

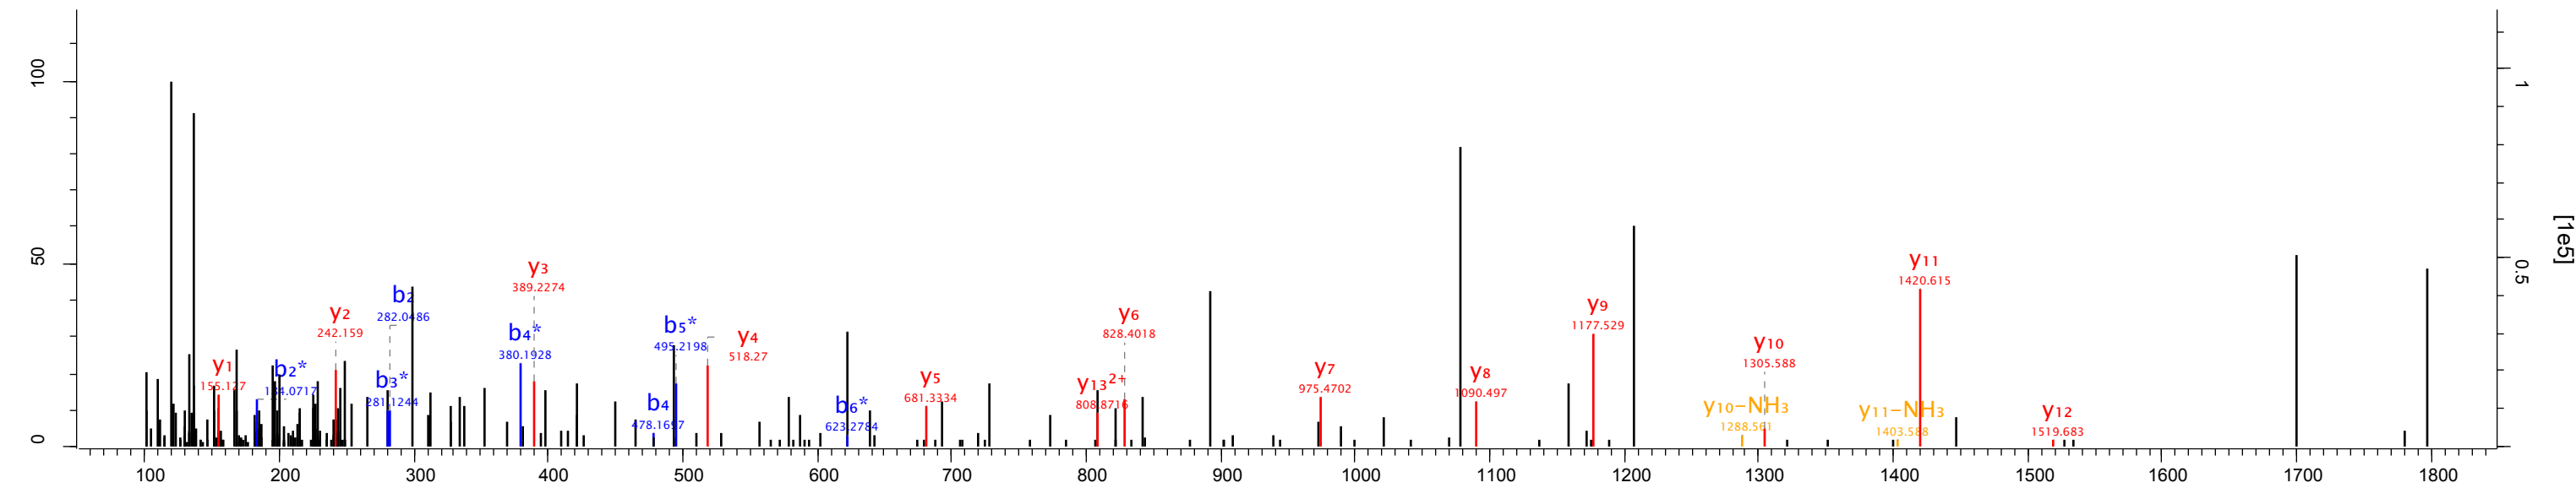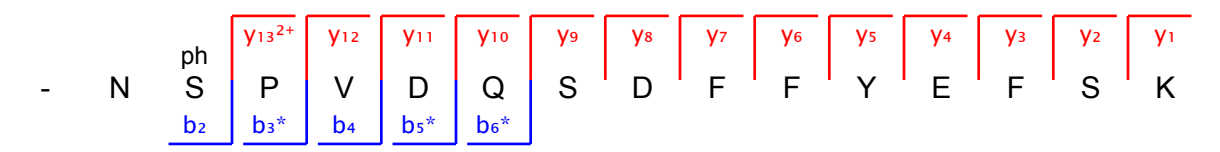

Raw file 20171215\_MaS\_33SR\_LMH\_phospho2\_03 Scan 22314 Method FTMS; HCD Score 83.6 m/z 1032.95 Gene names MCRS1

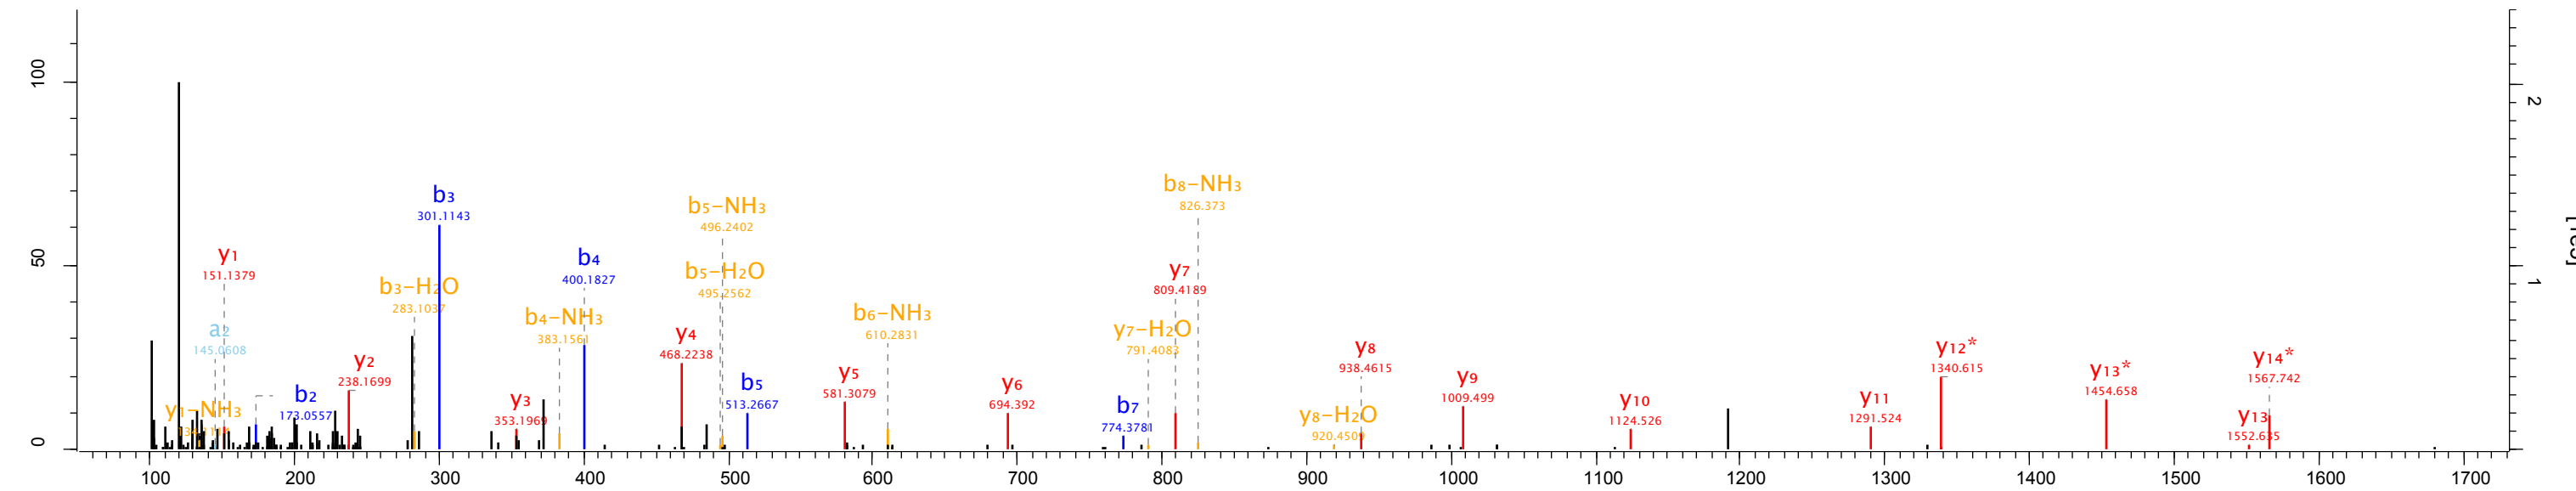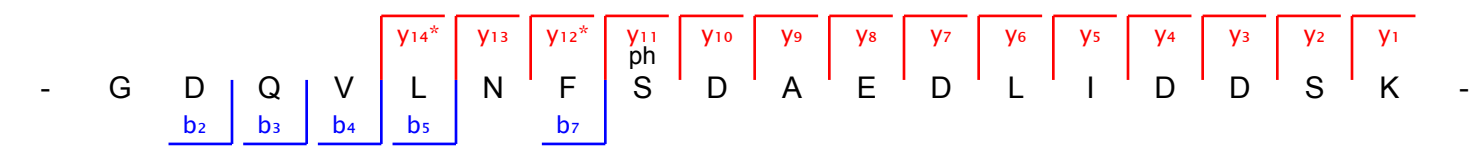

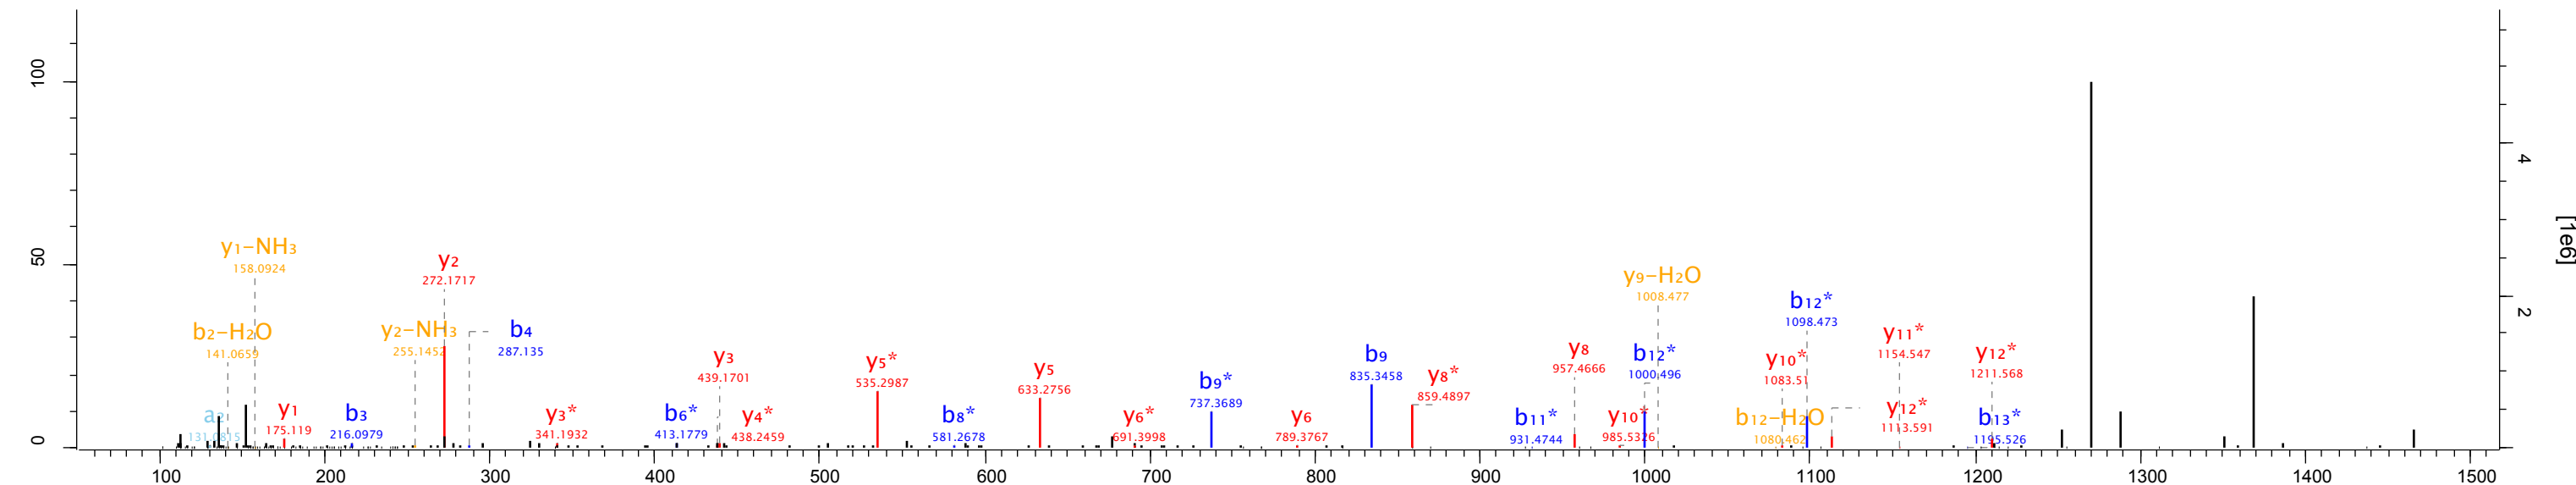

- S A G A G ph S P A R P P S P R -

a<sub>2</sub>
b<sub>3</sub>
b<sub>4</sub>
b<sub>6</sub>\*
b<sub>8</sub>\*
b<sub>9</sub>
b<sub>11</sub>\*
b<sub>12</sub>\*
b<sub>13</sub>\*
y<sub>12</sub>\*
y<sub>11</sub>\*
y<sub>10</sub>\*
y<sub>8</sub>
y<sub>6</sub>
y<sub>5</sub>
y<sub>4</sub>\*
y<sub>3</sub>ph
y<sub>2</sub>
y<sub>1</sub>

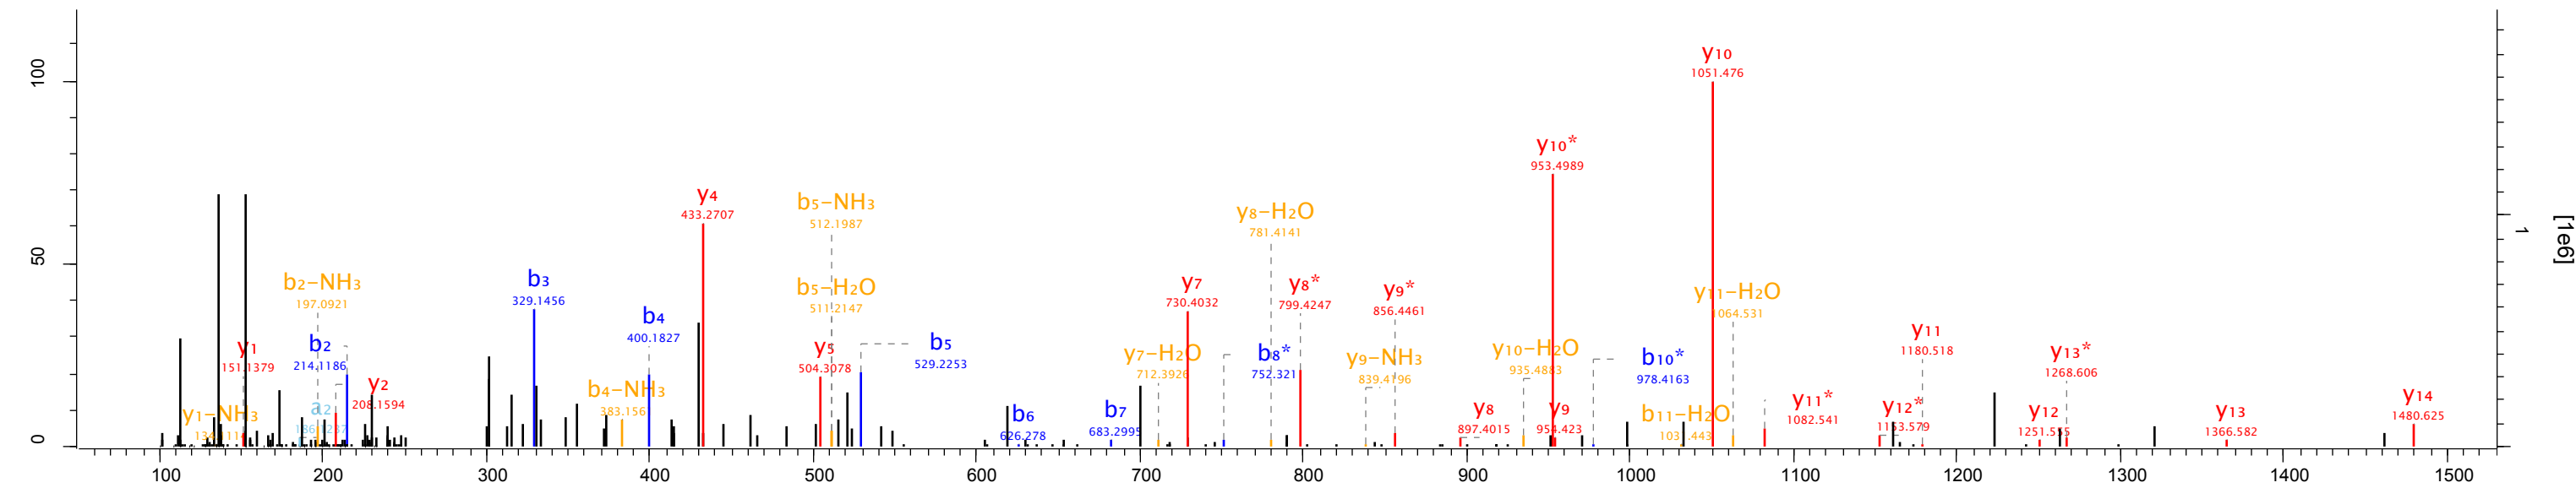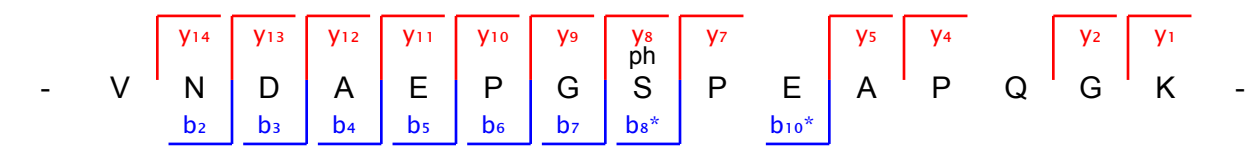

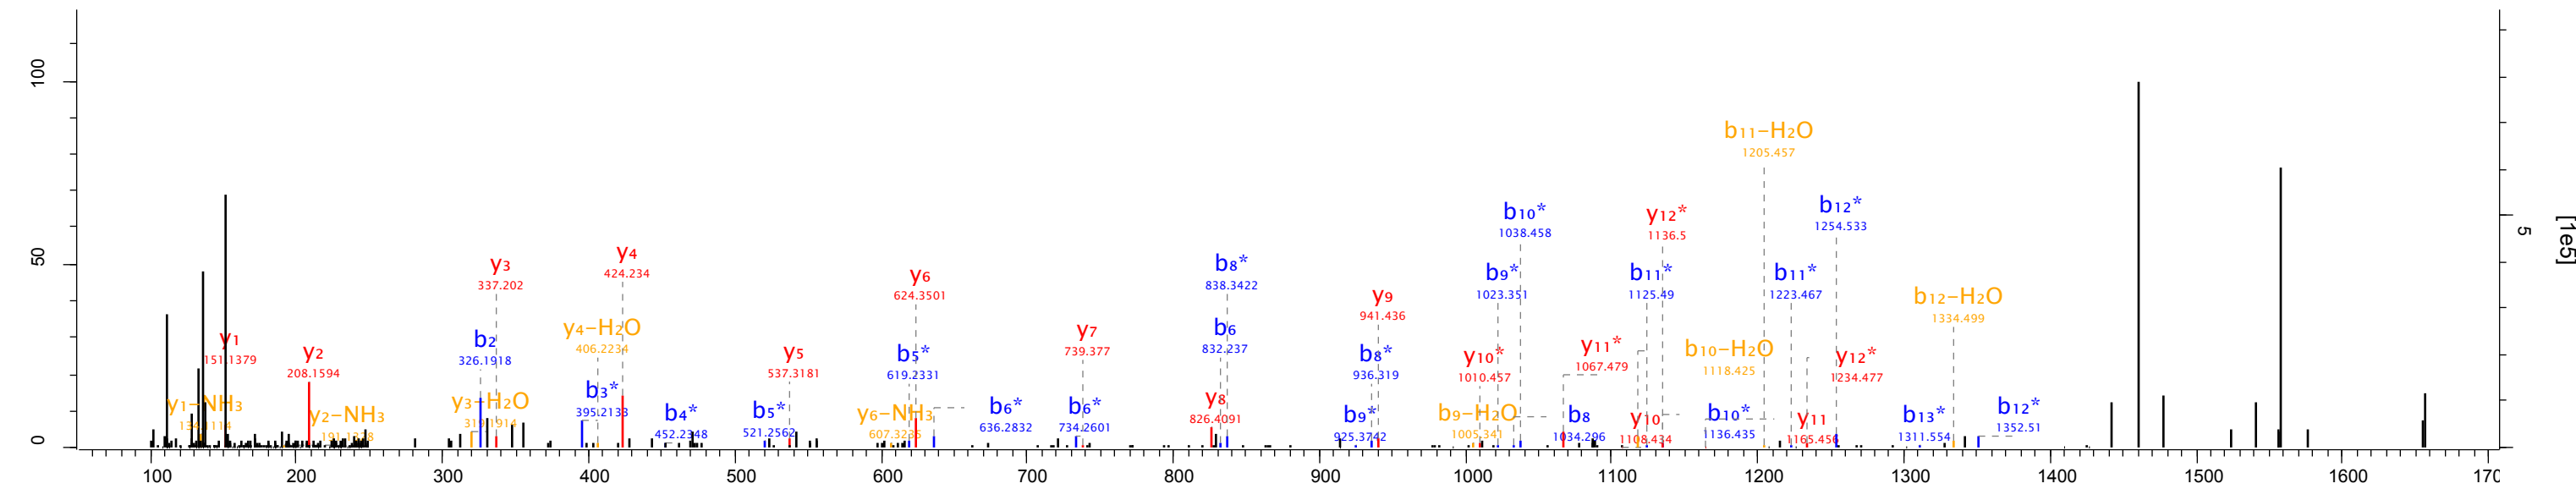

- R Y Y<sub>12</sub><sup>\*</sup>  
ph  
S Y<sub>11</sub>  
G Y<sub>10</sub>  
ph  
S Y<sub>9</sub>  
D S Y<sub>8</sub>  
D Y<sub>7</sub>  
D Y<sub>6</sub>  
S Y<sub>5</sub>  
I Y<sub>4</sub>  
S Y<sub>3</sub>  
E Y<sub>2</sub>  
G Y<sub>1</sub>  
K -

b<sub>2</sub> b<sub>3</sub><sup>\*</sup> b<sub>4</sub><sup>\*</sup> b<sub>5</sub><sup>\*</sup> b<sub>6</sub>
b<sub>8</sub> b<sub>9</sub><sup>\*</sup> b<sub>10</sub><sup>\*</sup> b<sub>11</sub><sup>\*</sup> b<sub>12</sub><sup>\*</sup> b<sub>13</sub><sup>\*</sup>

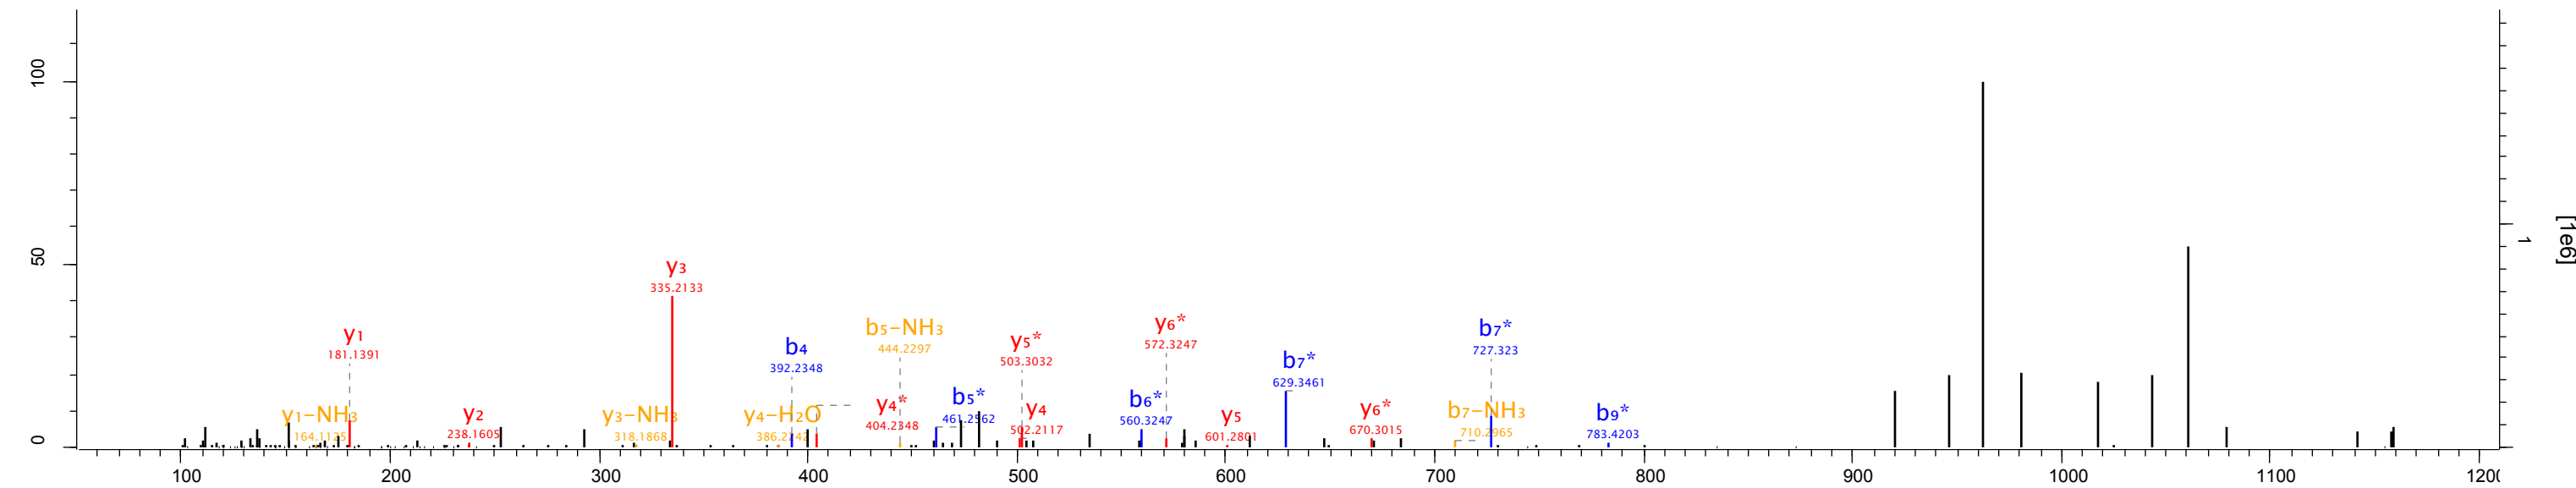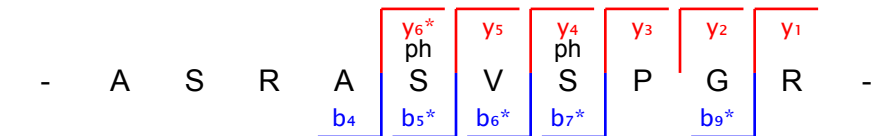



Raw file 20171215\_MaS\_33SR\_LMH\_phospho2\_03 Scan 5654 Method FTMS; HCD Score 133.86 m/z 671.8 Gene names ANKRD11

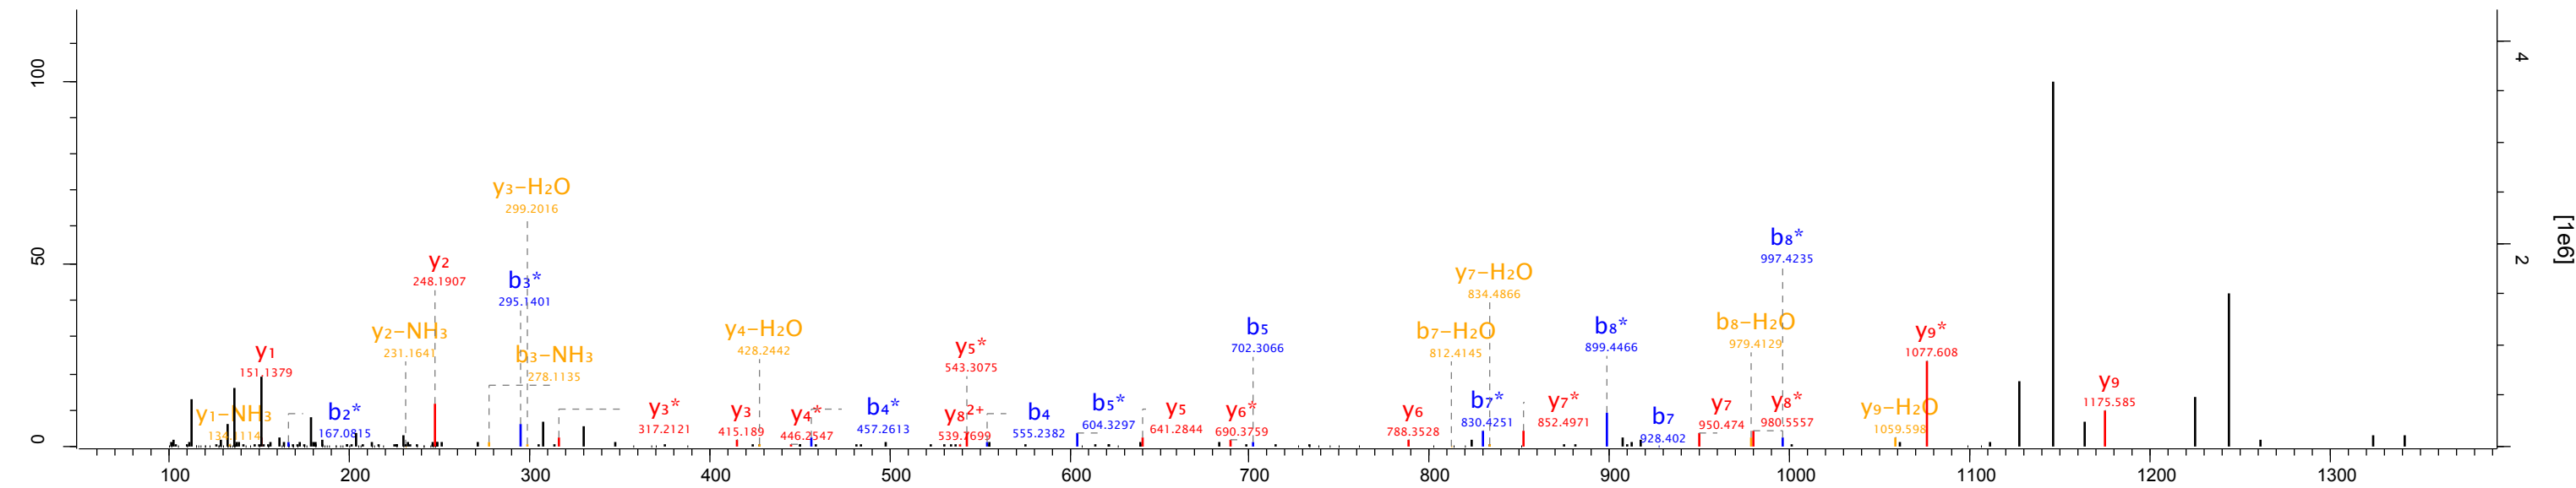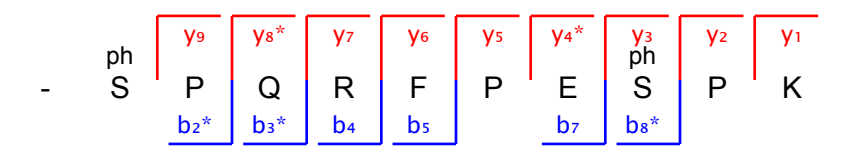

Raw file Scan Method Score m/z Gene names

20171215\_MaS\_33SR\_LMH\_phospho2\_03 8394 FTMS; HCD 81.28 829.69 MON1B

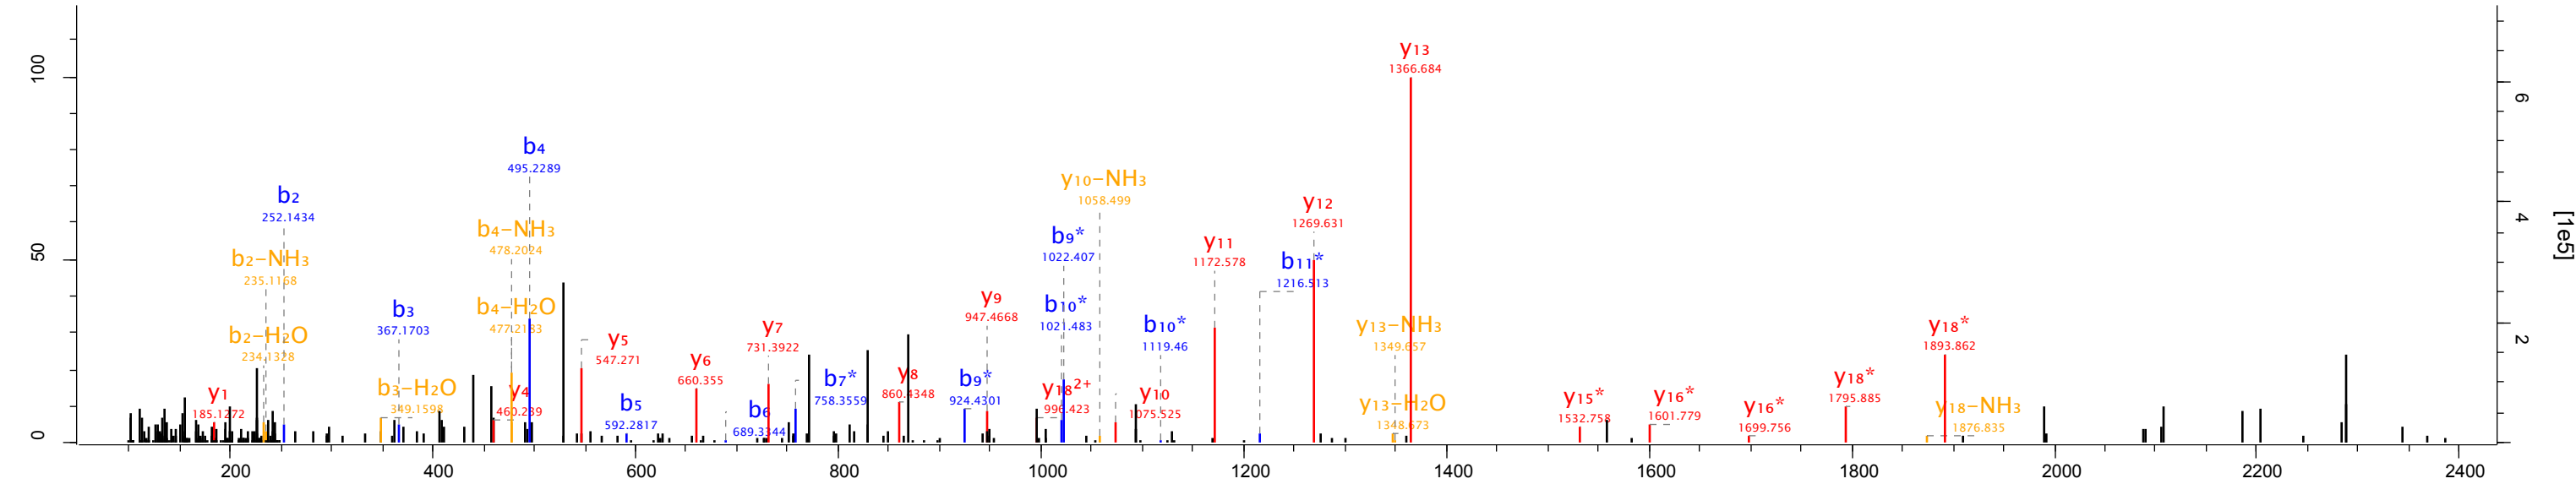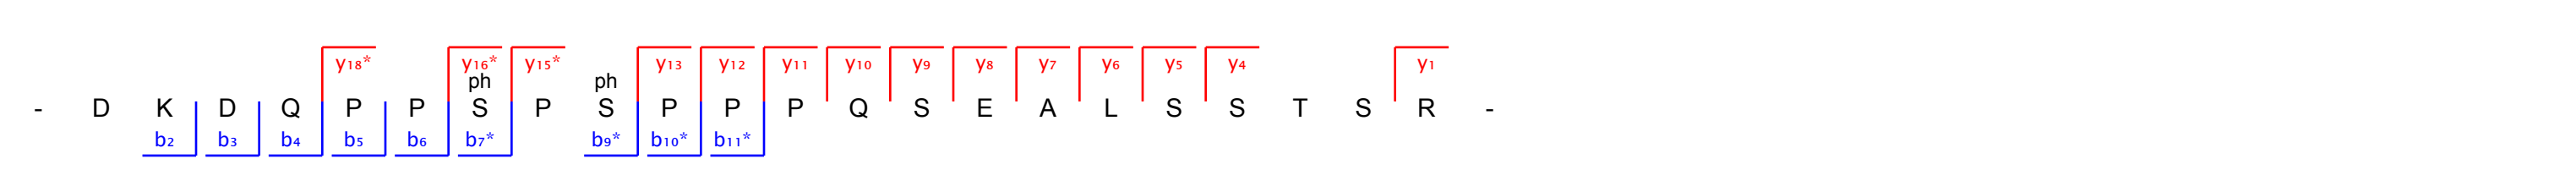

Raw file: 20171215\_MaS\_33SR\_LMH\_phospho2\_03  
 Scan: 8434 Method: FTMS; HCD Score: 116.04 m/z: 906.37 Gene names: SLC20A1

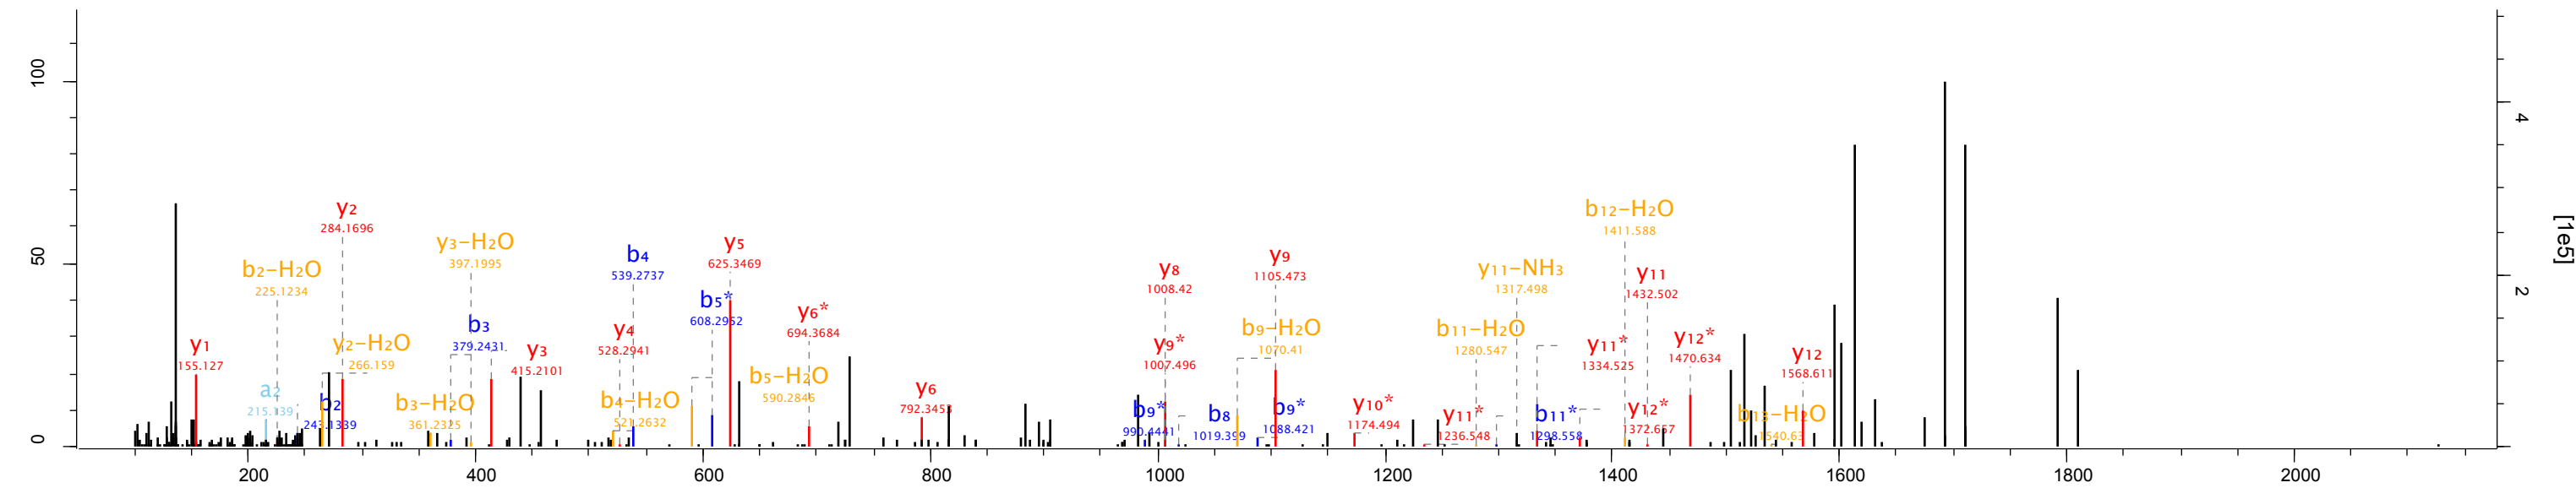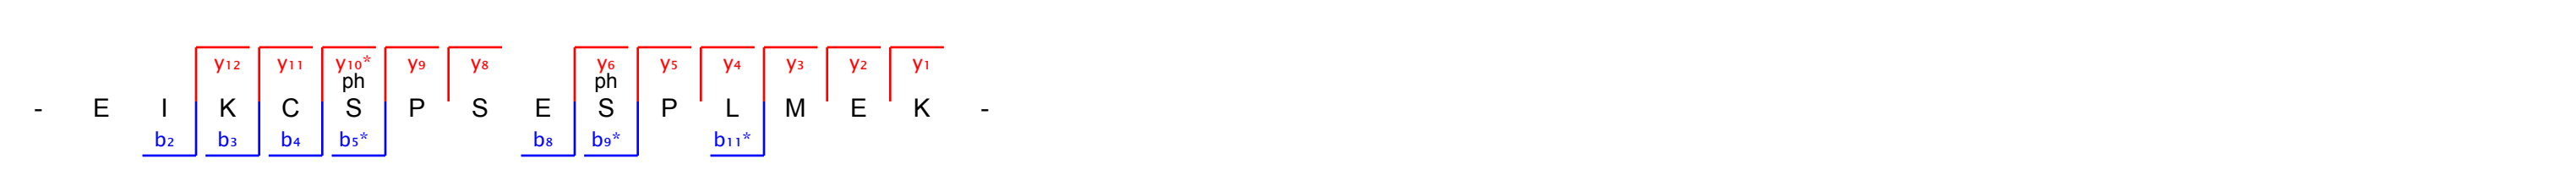

Raw file  
20171215\_MaS\_33SR\_LMH\_phospho2\_03

Scan 9534 Method FTMS; HCD Score 104.21 m/z 647.75 Gene names WDR13

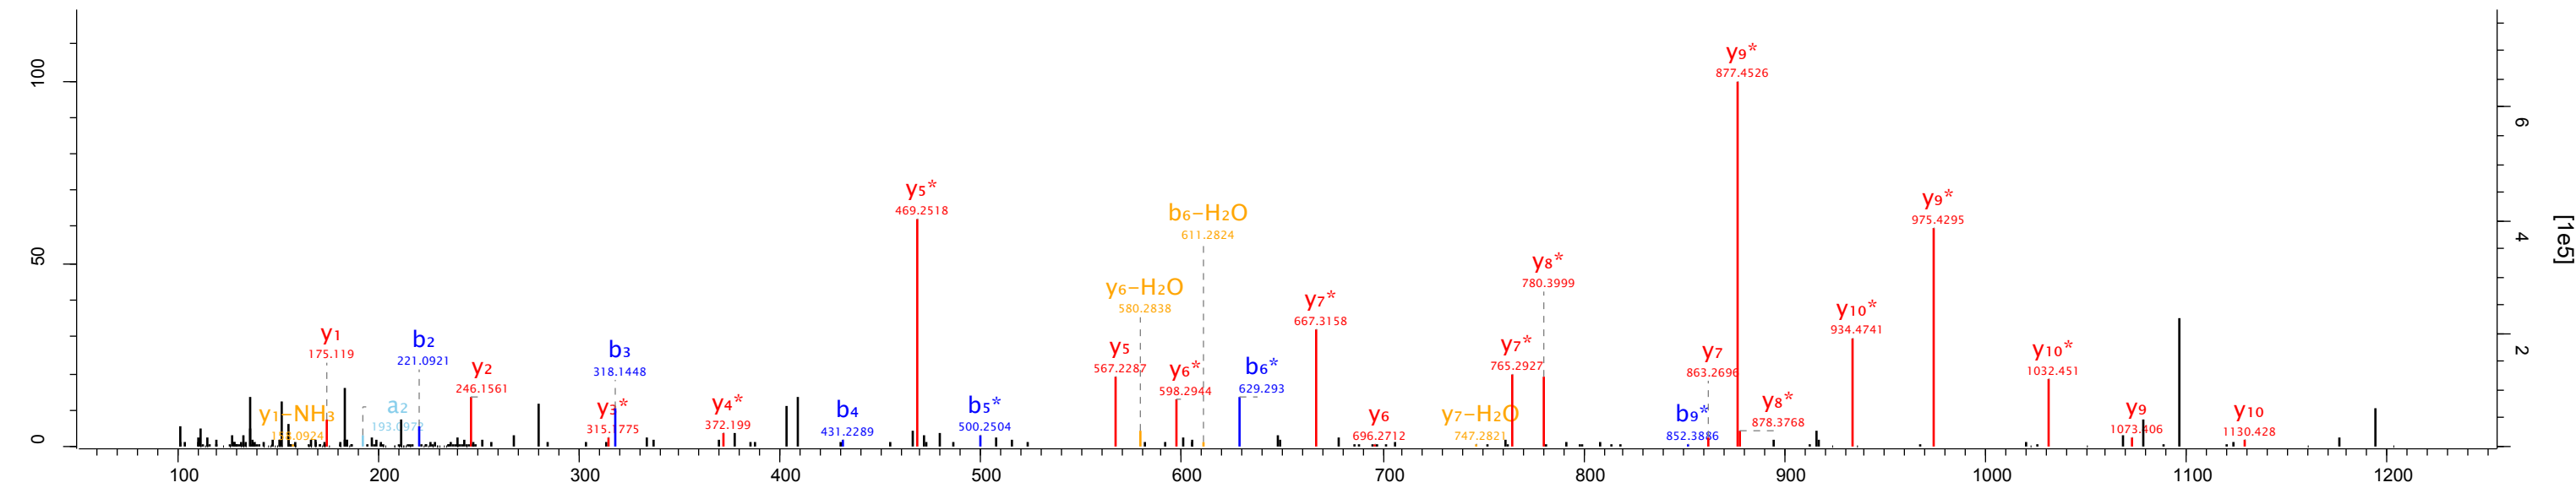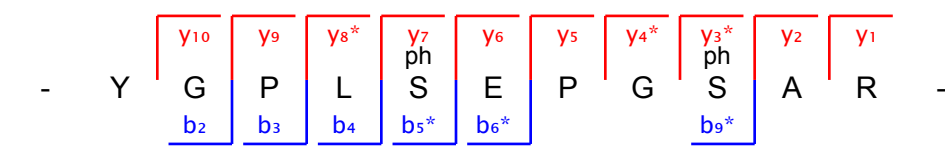

Raw file  
20171215\_MaS\_33SR\_LMH\_phospho2\_03

Scan 9724 Method FTMS; HCD Score 224.53 m/z 972.41 Gene names BCL7B

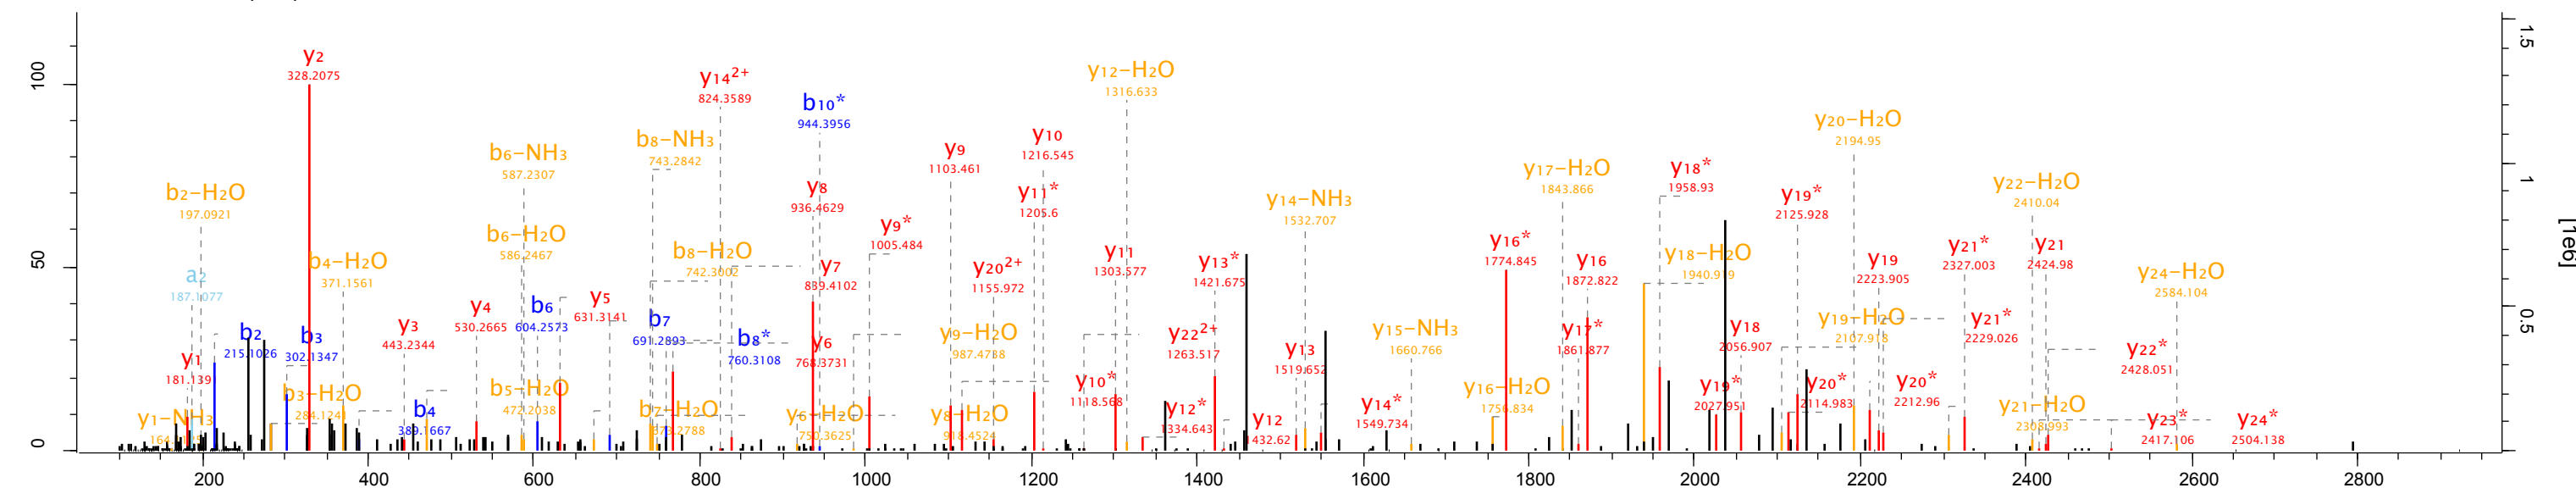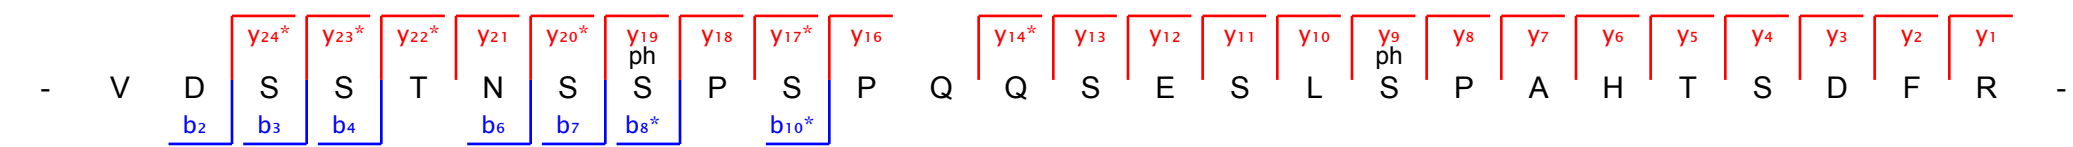

Raw file 20171215\_MaS\_33SR\_LMH\_phospho2\_04 Scan 3834 Method FTMS; HCD Score 138.37 m/z 898.8 Gene names CMTR1

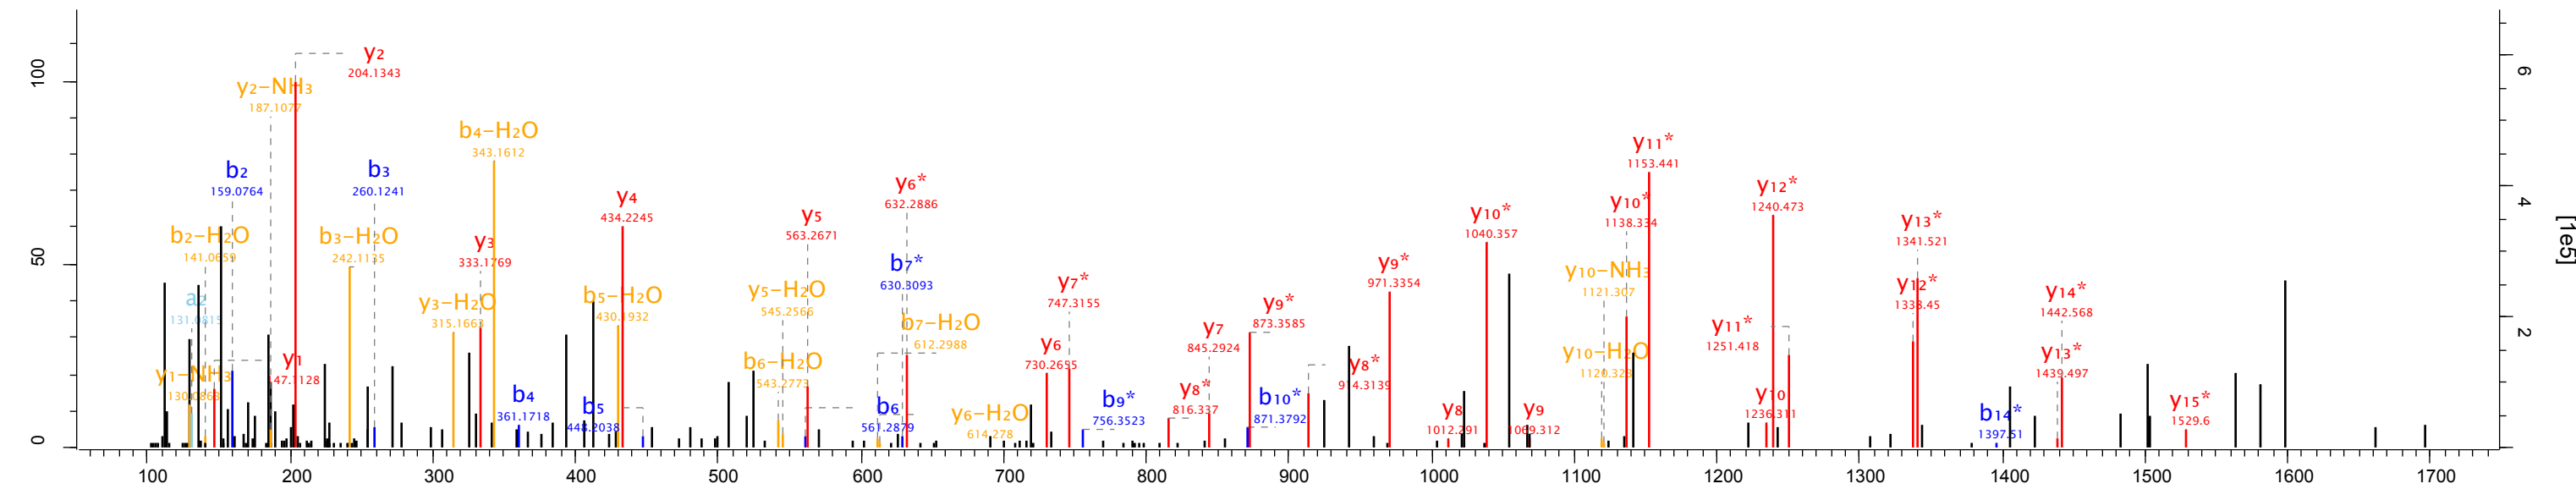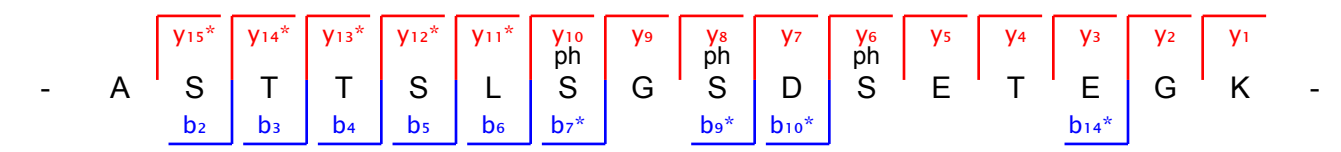

Raw file

20171215\_MaS\_33SR\_LMH\_phospho2\_04

| Scan | Method    | Score | m/z    | Gene names |
|------|-----------|-------|--------|------------|
| 5074 | FTMS; HCD | 66.25 | 699.27 | PPP1R15B   |

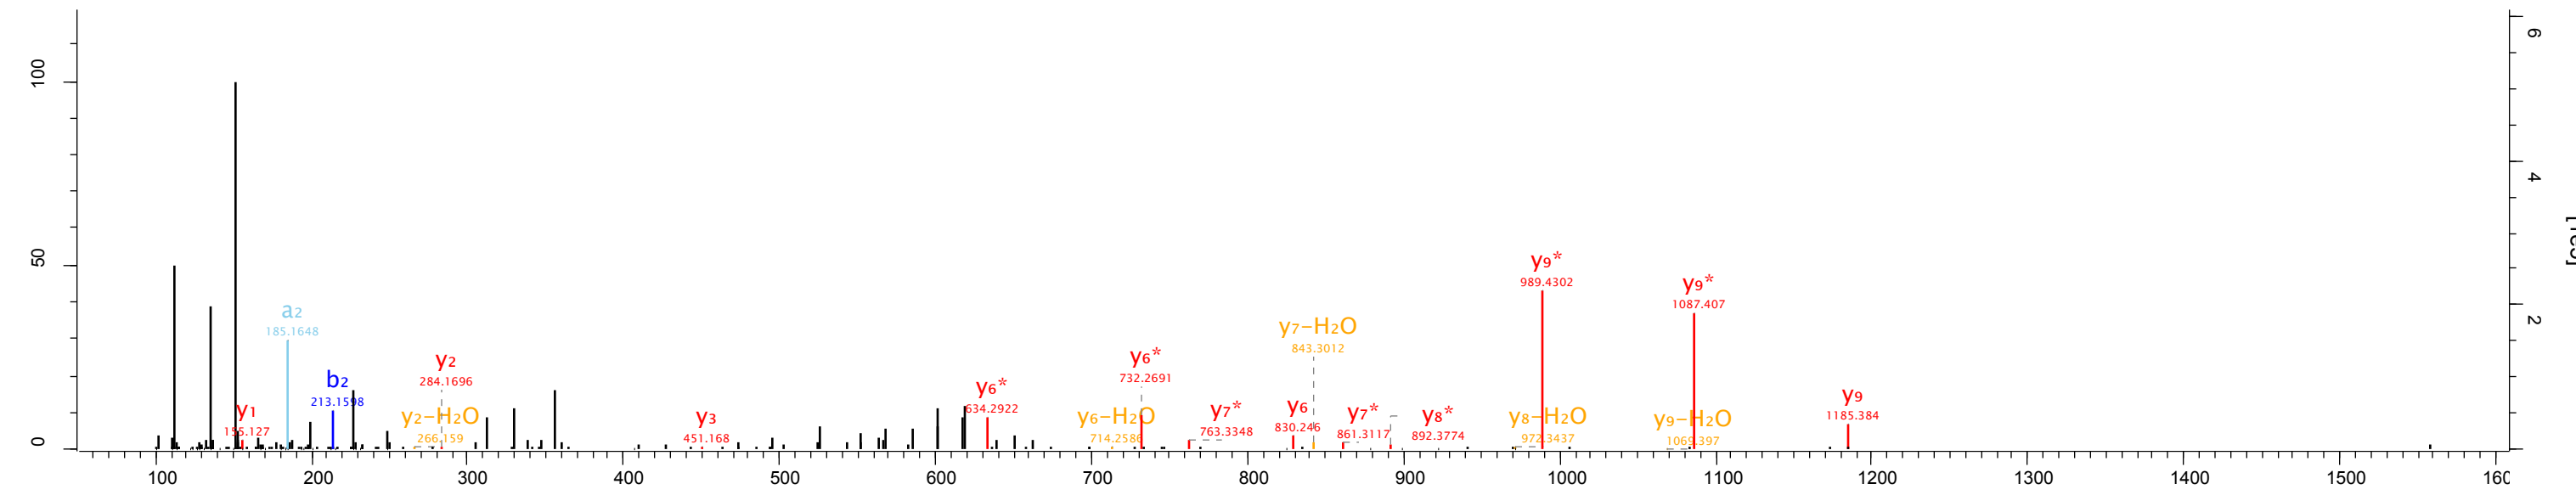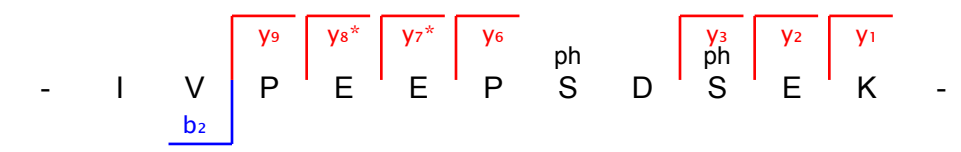

Raw file 20171215\_MaS\_33SR\_LMH\_phospho2\_04 Scan 5634 Method FTMS; HCD Score 112.91 m/z 699.77 Gene names TERF1

20171215\_MaS\_33SR\_LMH\_phospho2\_04

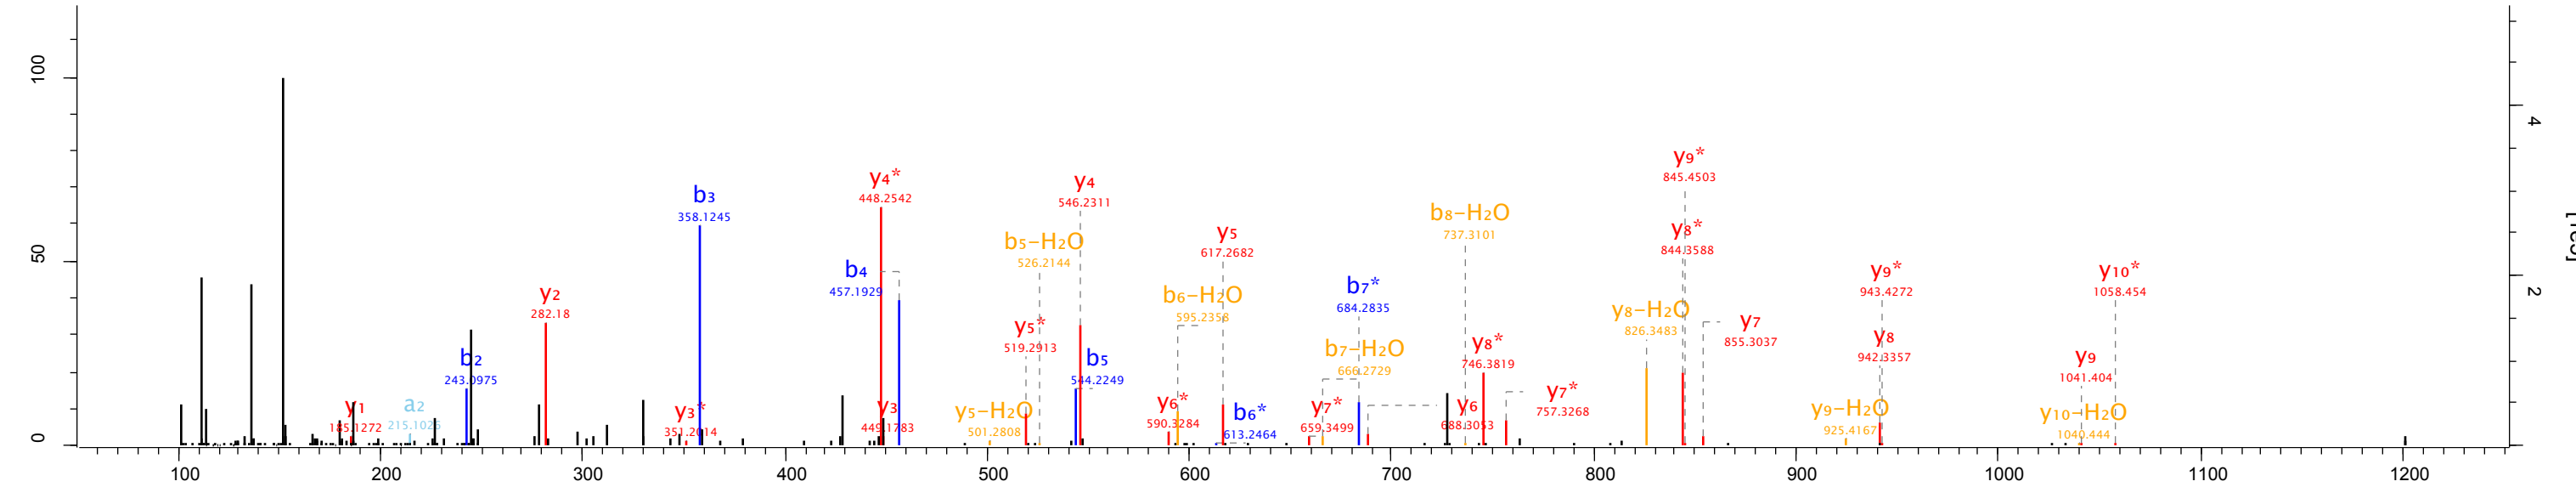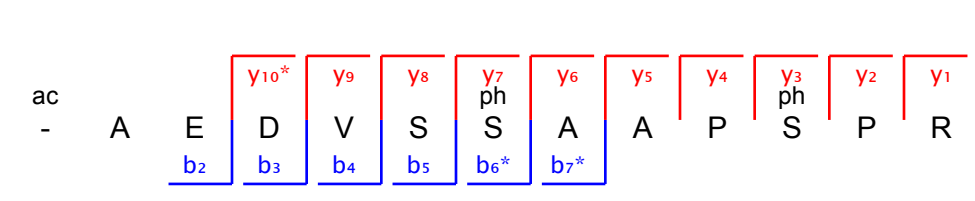



Raw file 20171215\_MaS\_33SR\_LMH\_phospho2\_05 Scan 4194 Method FTMS; HCD Score 103.66 m/z 1223.36 Gene names ARID4B

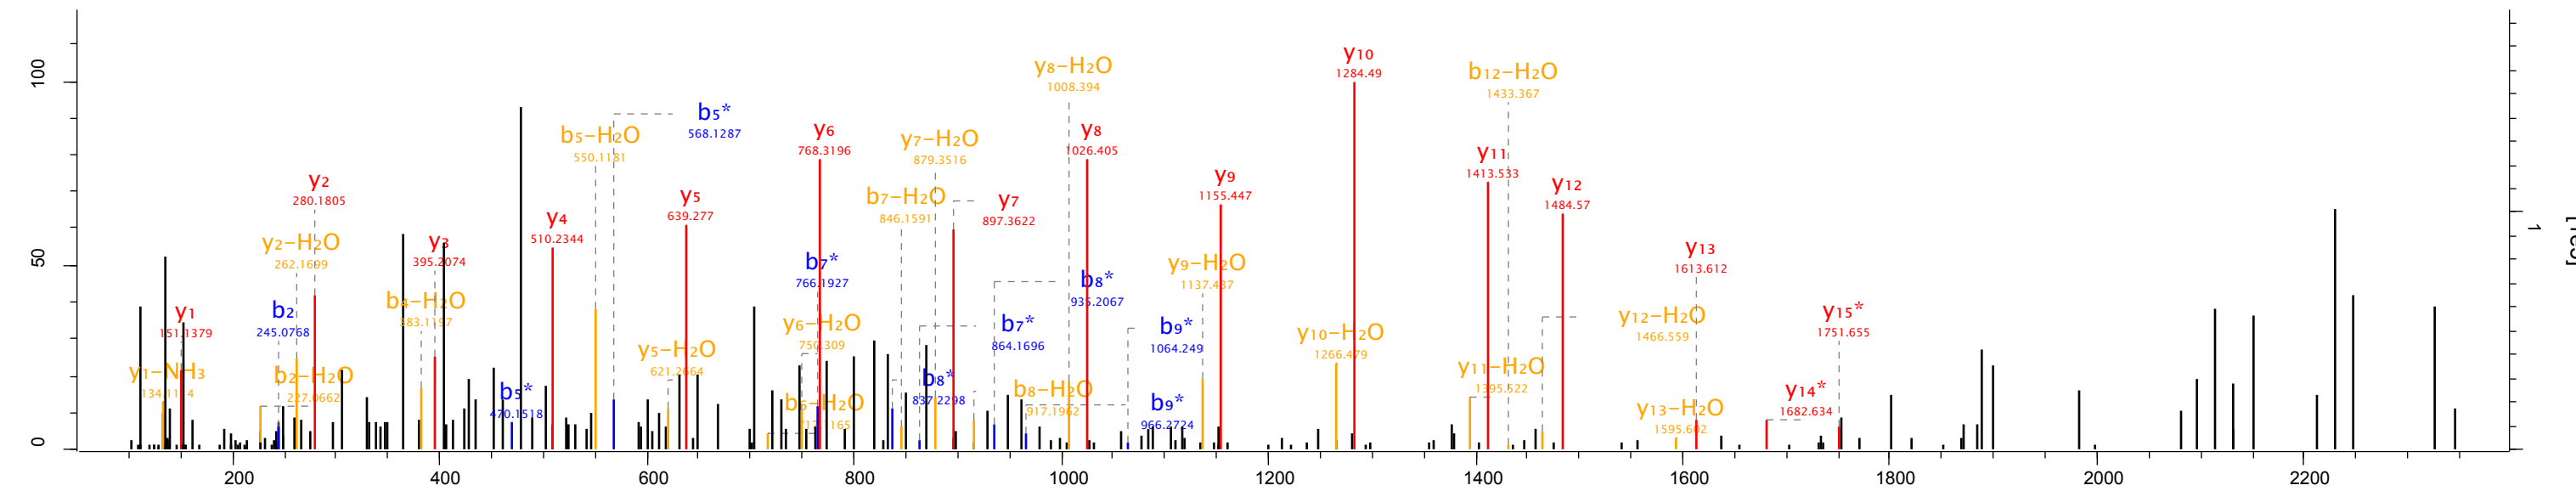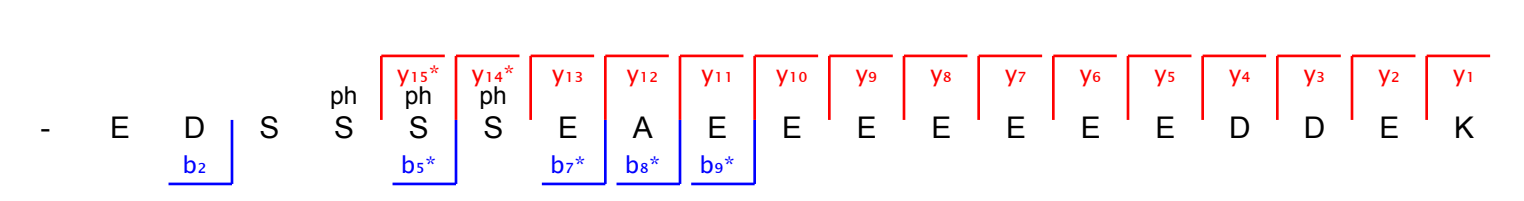

Raw file: 20171215\_MaS\_33SR\_LMH\_proteome\_01  
 Scan: 101544 Method: FTMS; HCD Score: 68.24 m/z: 1089.04 Gene names: NSDHL

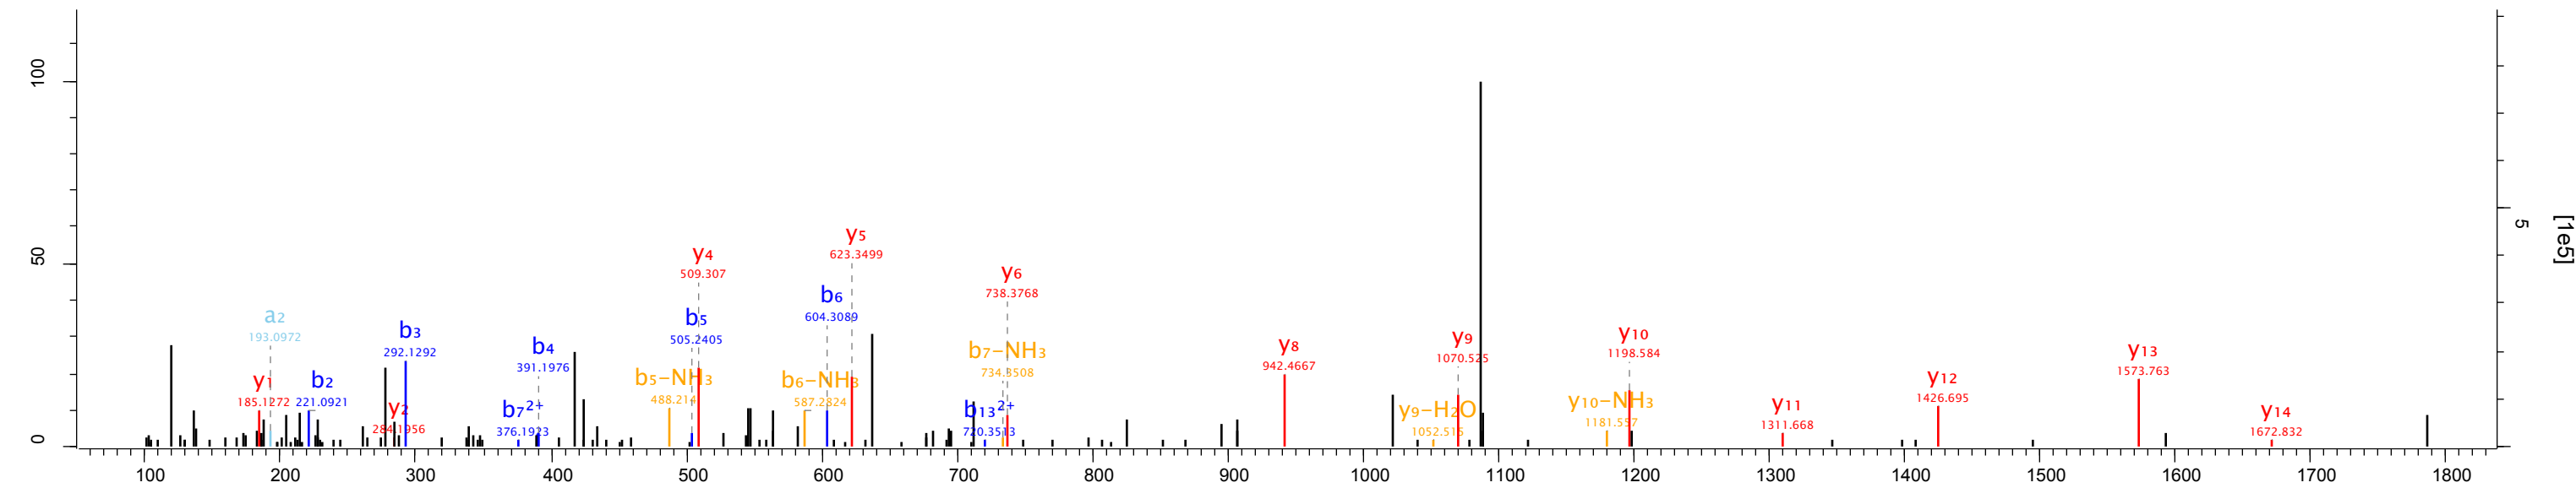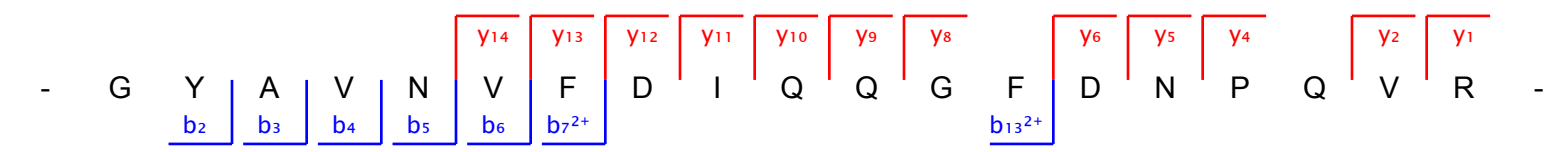

Raw file: 20171215\_MaS\_33SR\_LMH\_proteome\_01  
 Scan: 111004 Method: FTMS; HCD Score: 47.5 m/z: 803.42 Gene names: DHX30

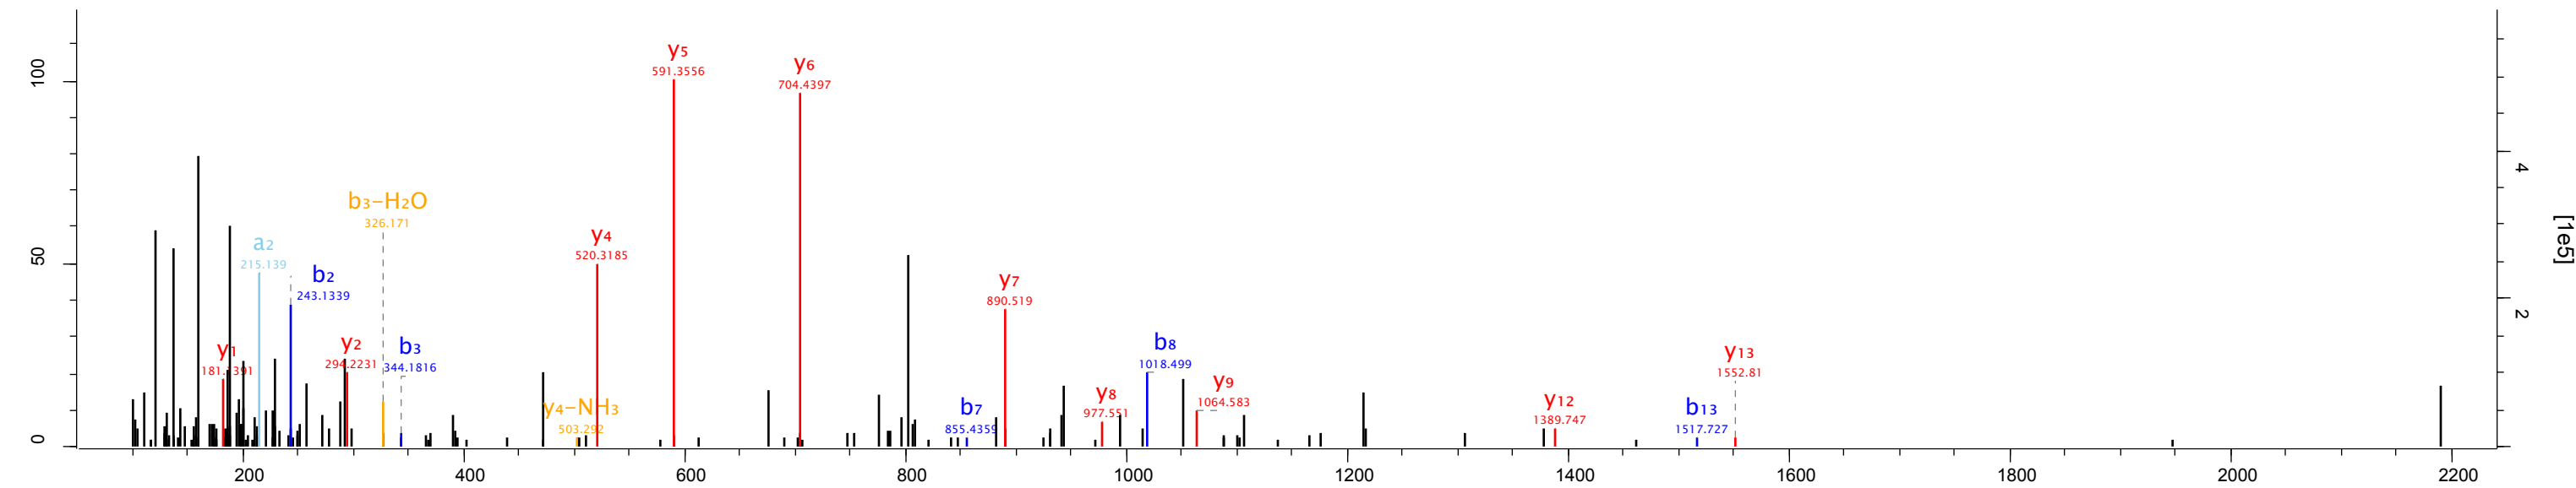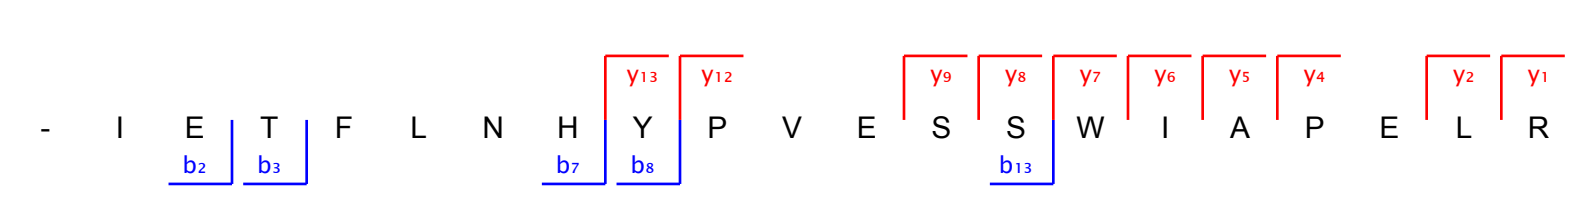

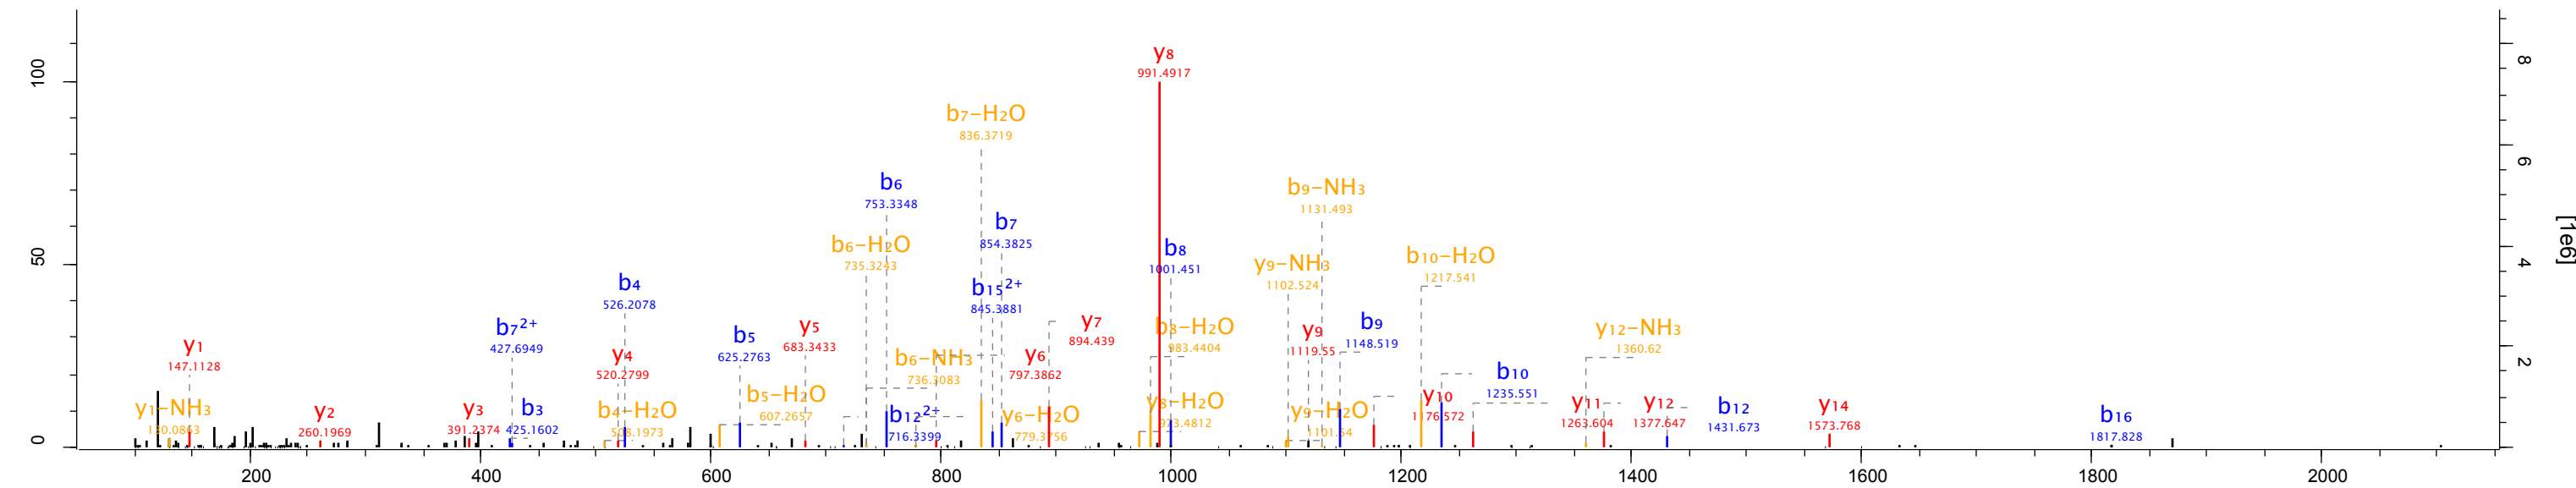

ac

- M N H T V Q T F F S P V N S G Q P P N Y E M L K -

Fragmentation sites are indicated by brackets below the sequence:

- Blue brackets (b<sub>3</sub> to b<sub>10</sub>) are located under H, T, V, Q, T, F, F, S.
- Blue brackets (b<sub>12</sub>, b<sub>15</sub><sup>2+</sup>, b<sub>16</sub>) are located under P, G, Q.
- Red brackets (y<sub>1</sub> to y<sub>14</sub>) are located under P, V, N, S, G, Q, P, P, N, Y, E, M, L, K.

Raw file: 20171215\_MaS\_33SR\_LMH\_proteome\_01  
 Scan: 119824 Method: FTMS; HCD Score: 47.17 m/z: 893.45 Gene names: PPP6R1

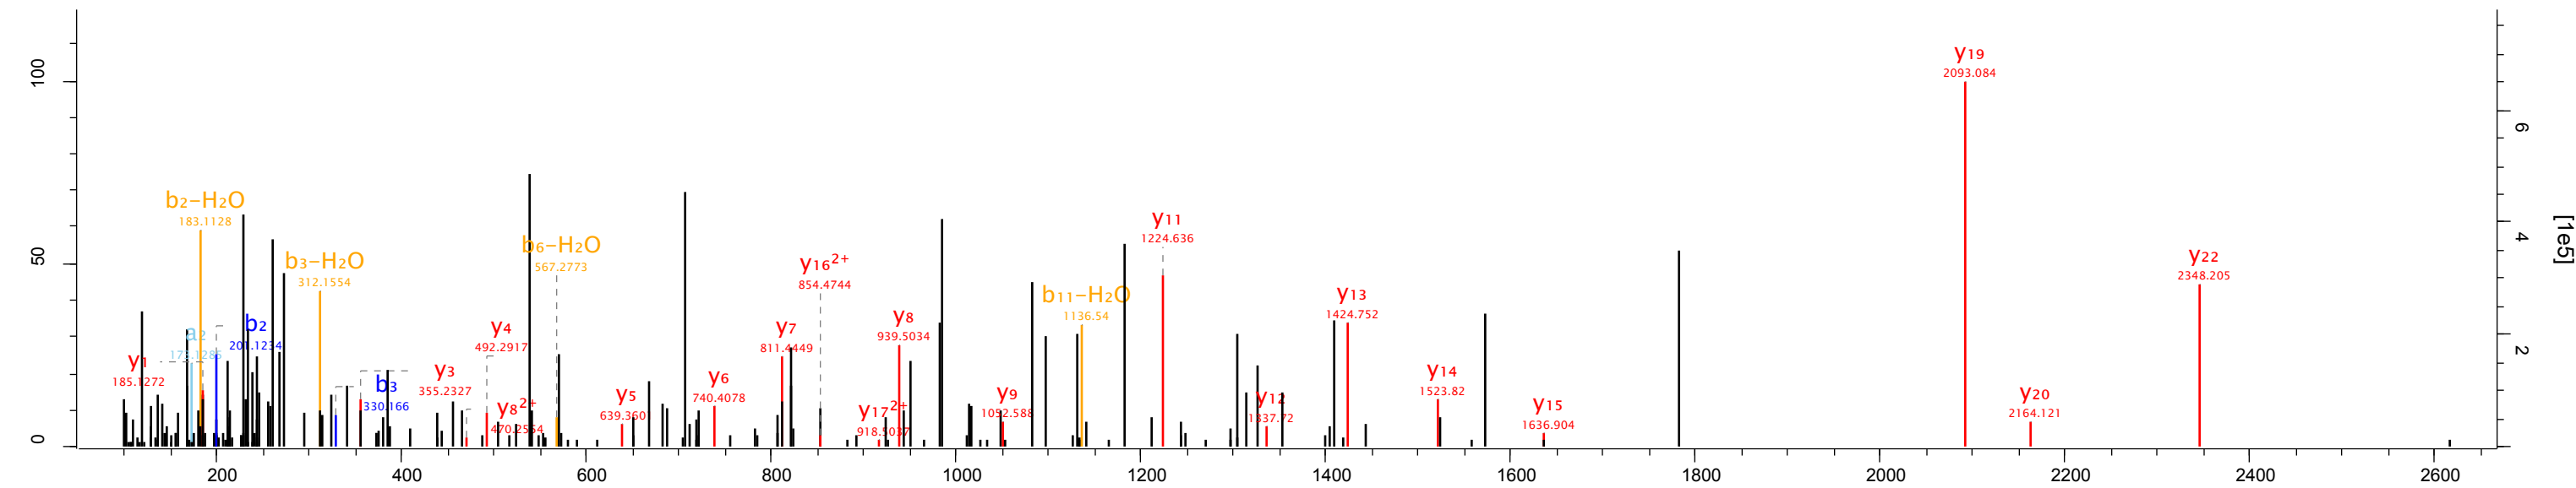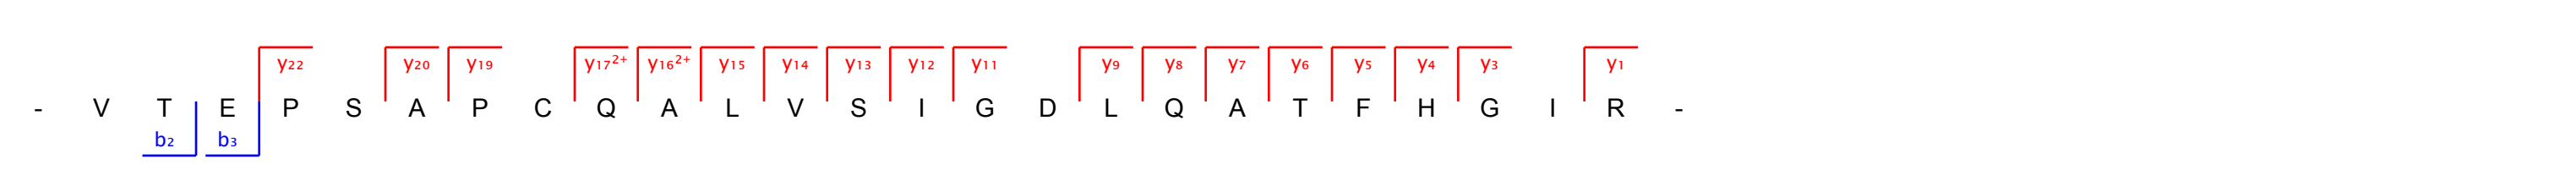

Raw file 20171215\_MaS\_33SR\_LMH\_proteome\_01 Scan 130254 Method FTMS; HCD Score 52.47 m/z 1000.83 Gene names MRPL54

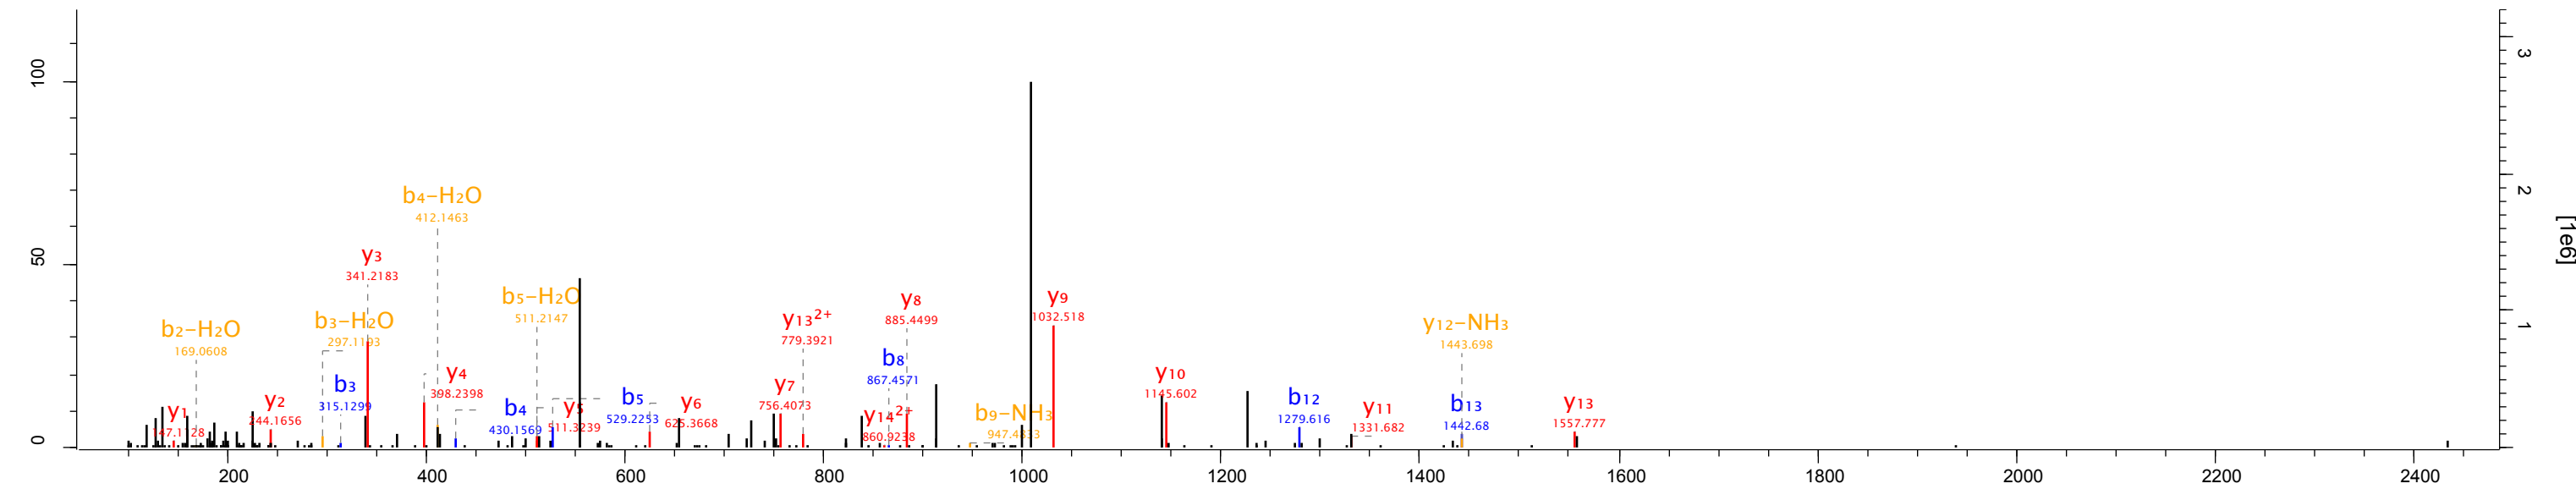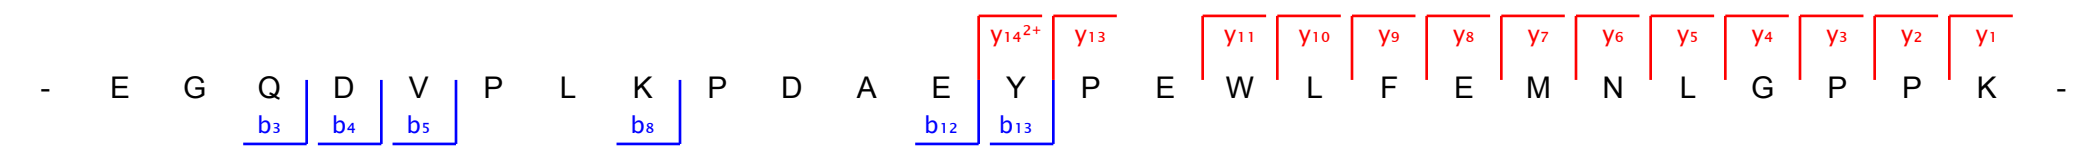

Raw file: 20171215\_MaS\_33SR\_LMH\_proteome\_01  
 Scan: 130854 Method: FTMS; HCD Score: 105.9 m/z: 913.5 Gene names: ECHDC1

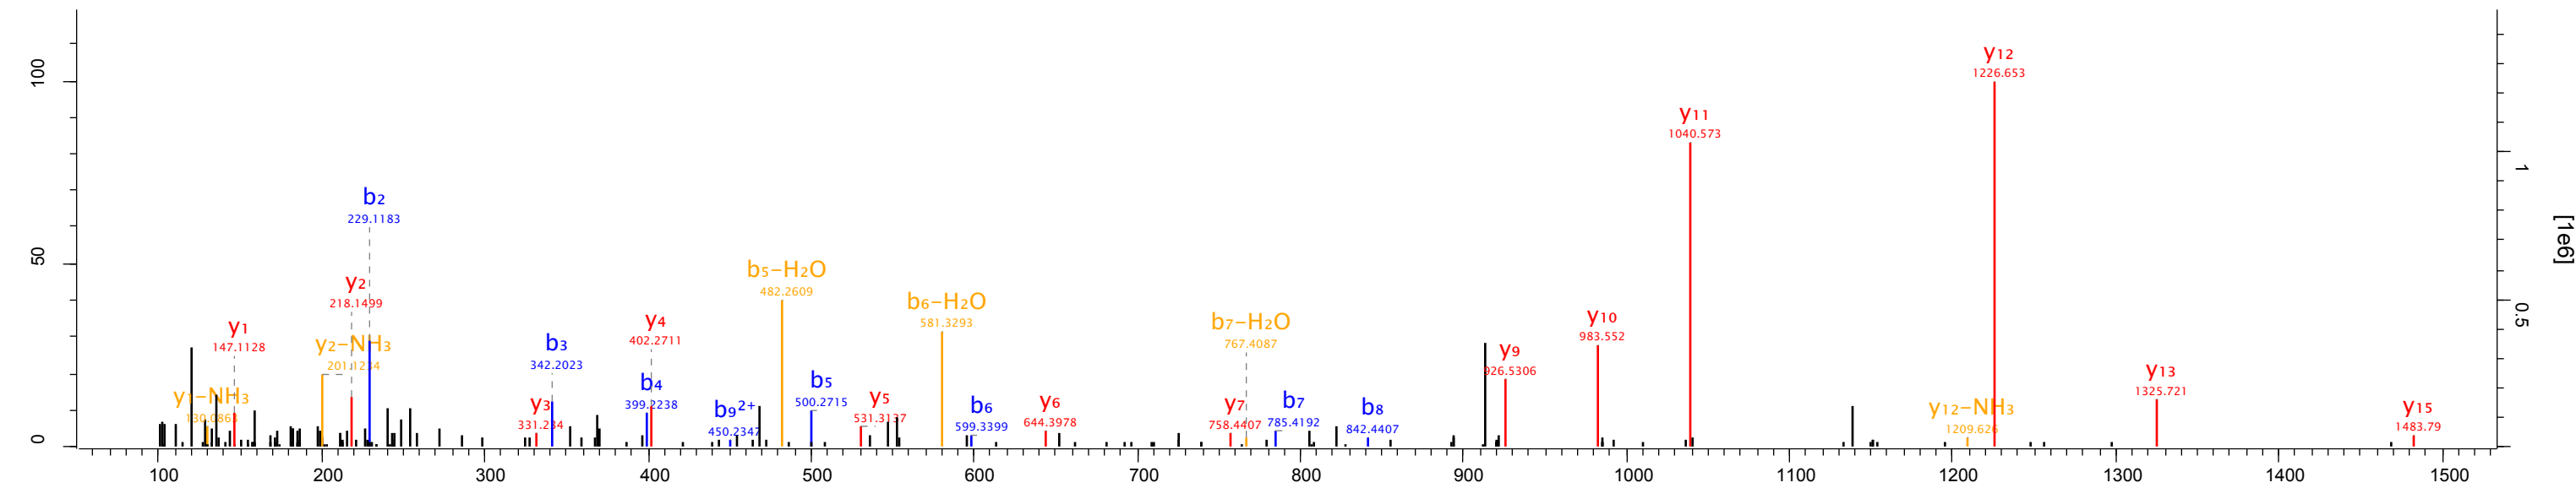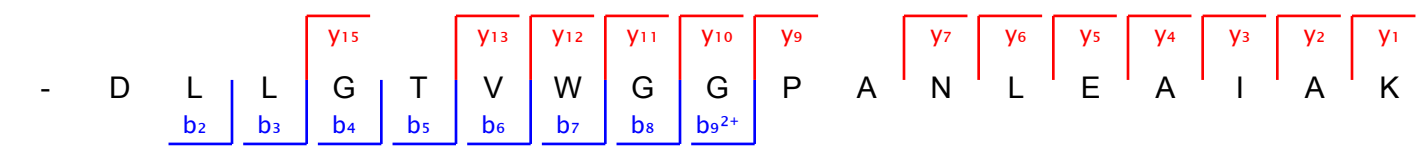

Raw file: 20171215\_MaS\_33SR\_LMH\_proteome\_01  
 Scan: 131464 Method: FTMS; HCD Score: 47.62 m/z: 695.35 Gene names: STAT2

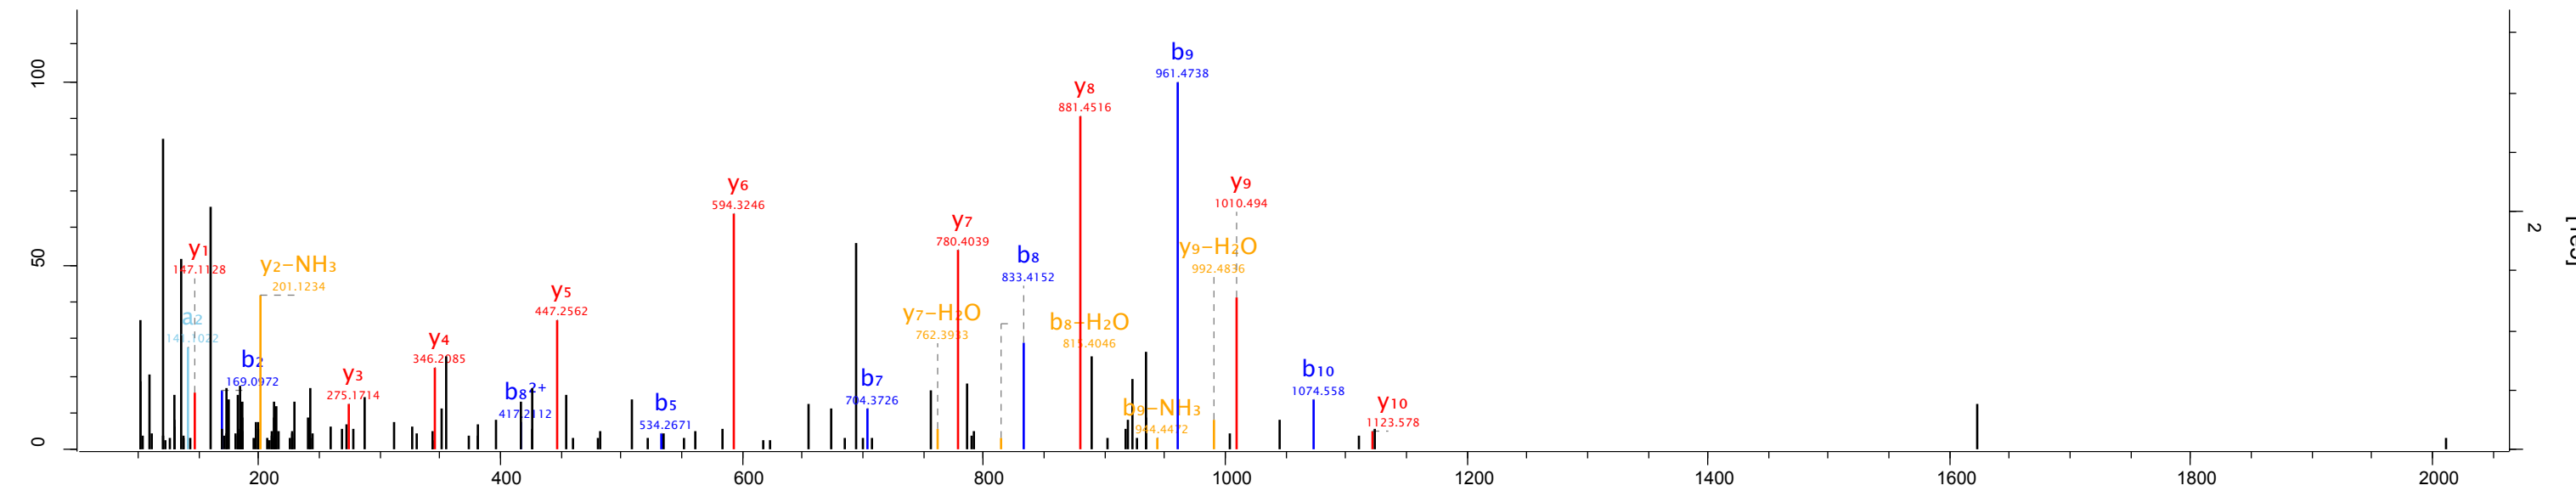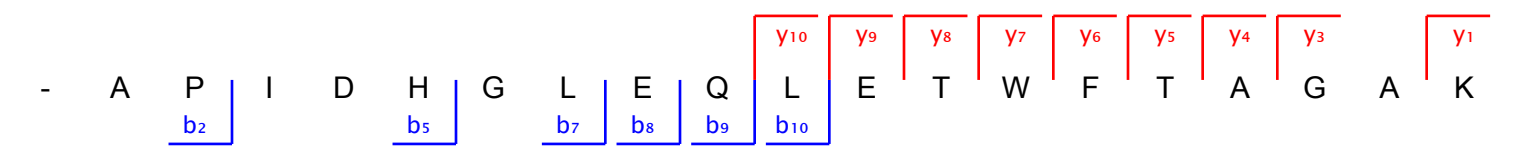



Raw file 20171215\_MaS\_33SR\_LMH\_proteome\_01 Scan 141134 Method FTMS; HCD Score 70.09 m/z 703.89 Gene names MPP5

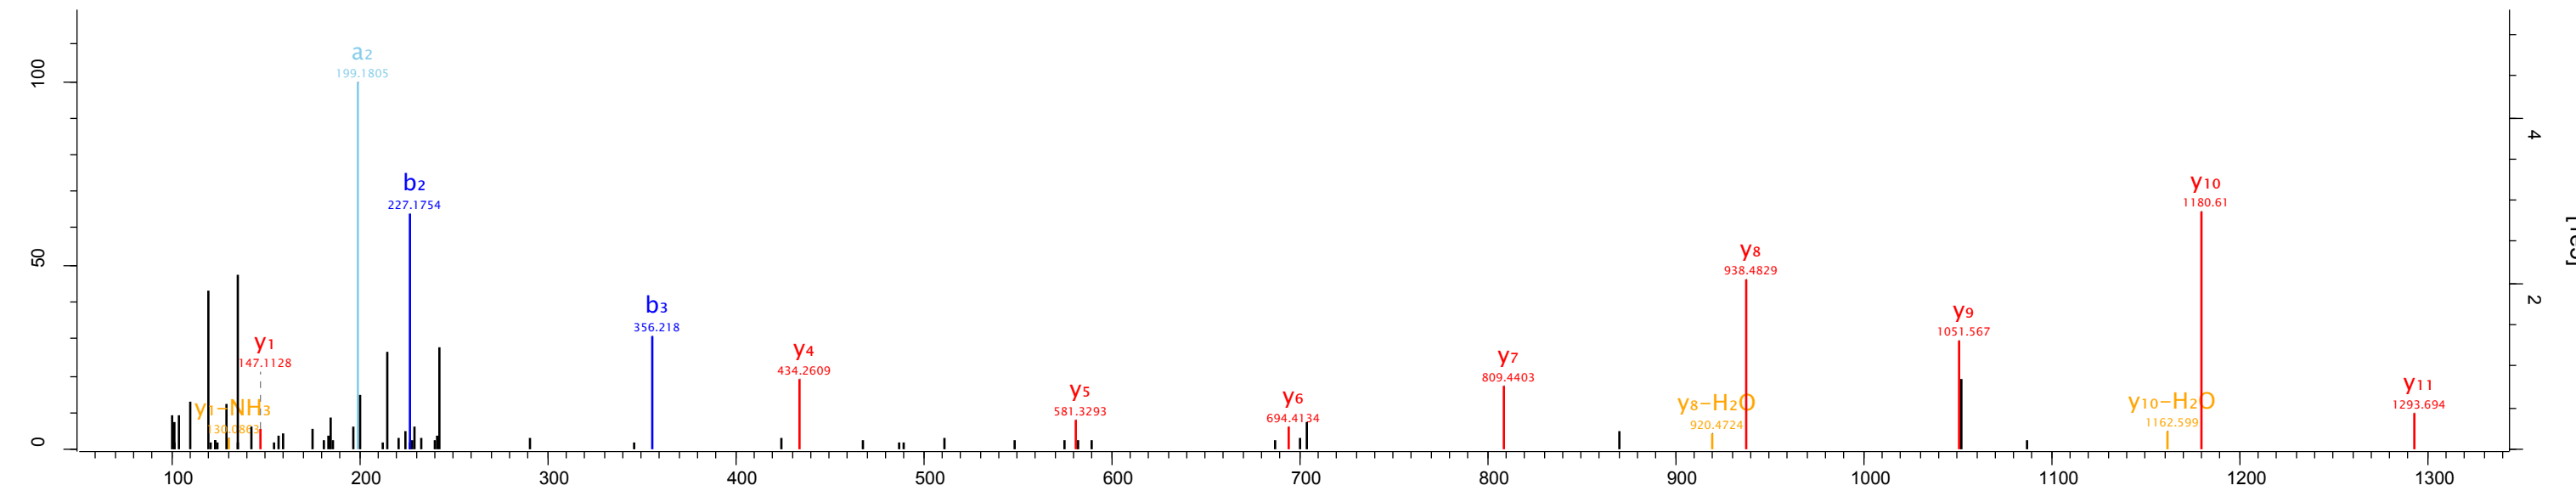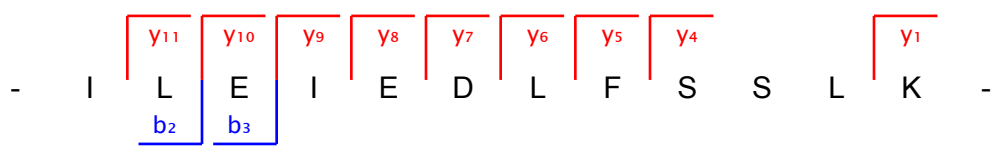

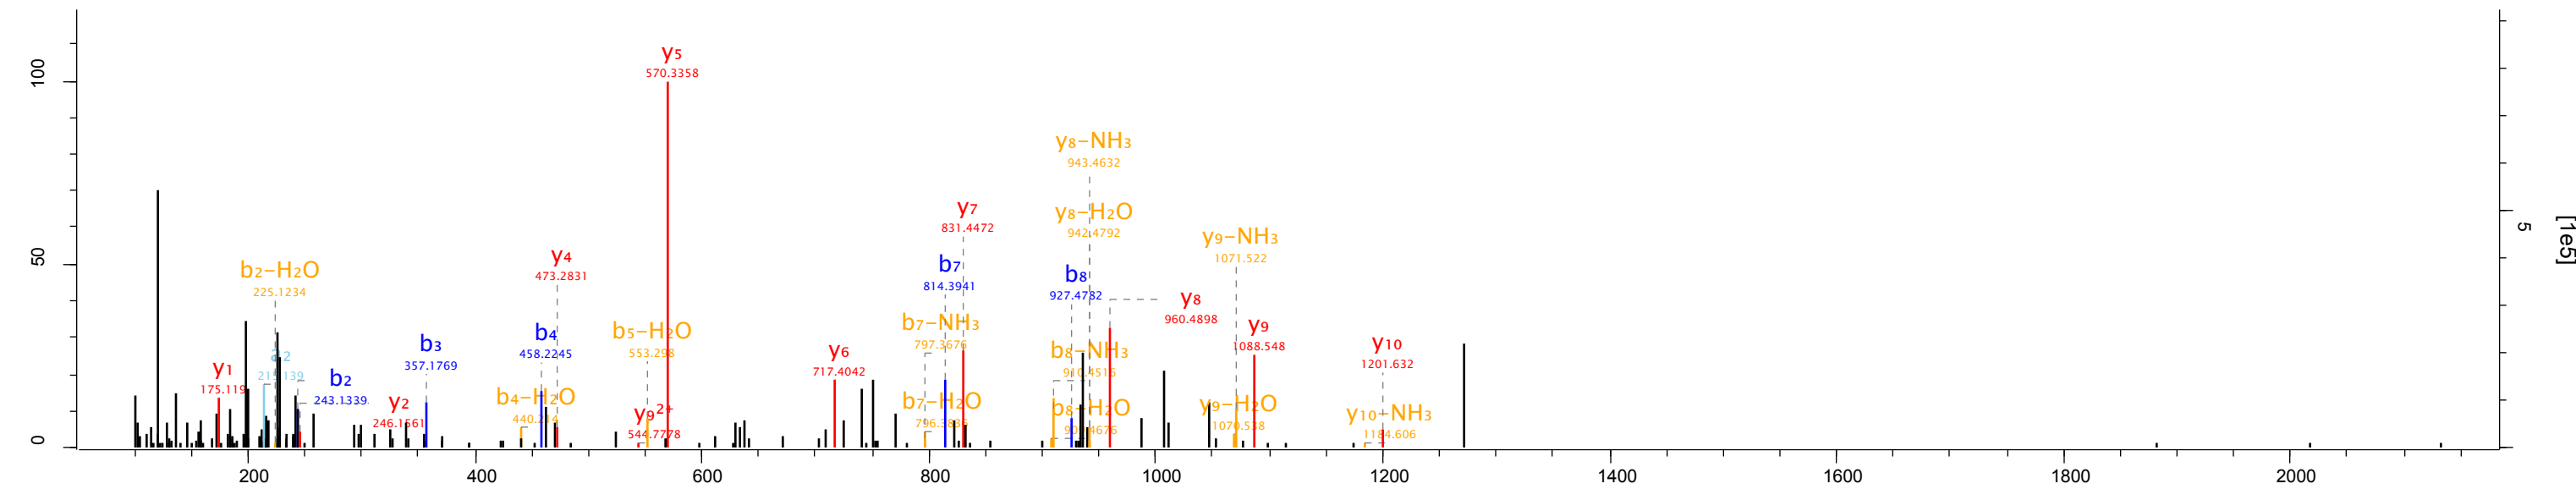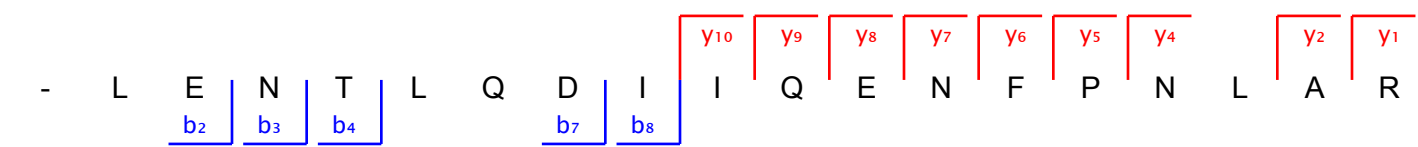

Raw file 20171215\_MaS\_33SR\_LMH\_proteome\_01 Scan 145554 Method FTMS; HCD Score 43.76 m/z 740.4 Gene names FIG4

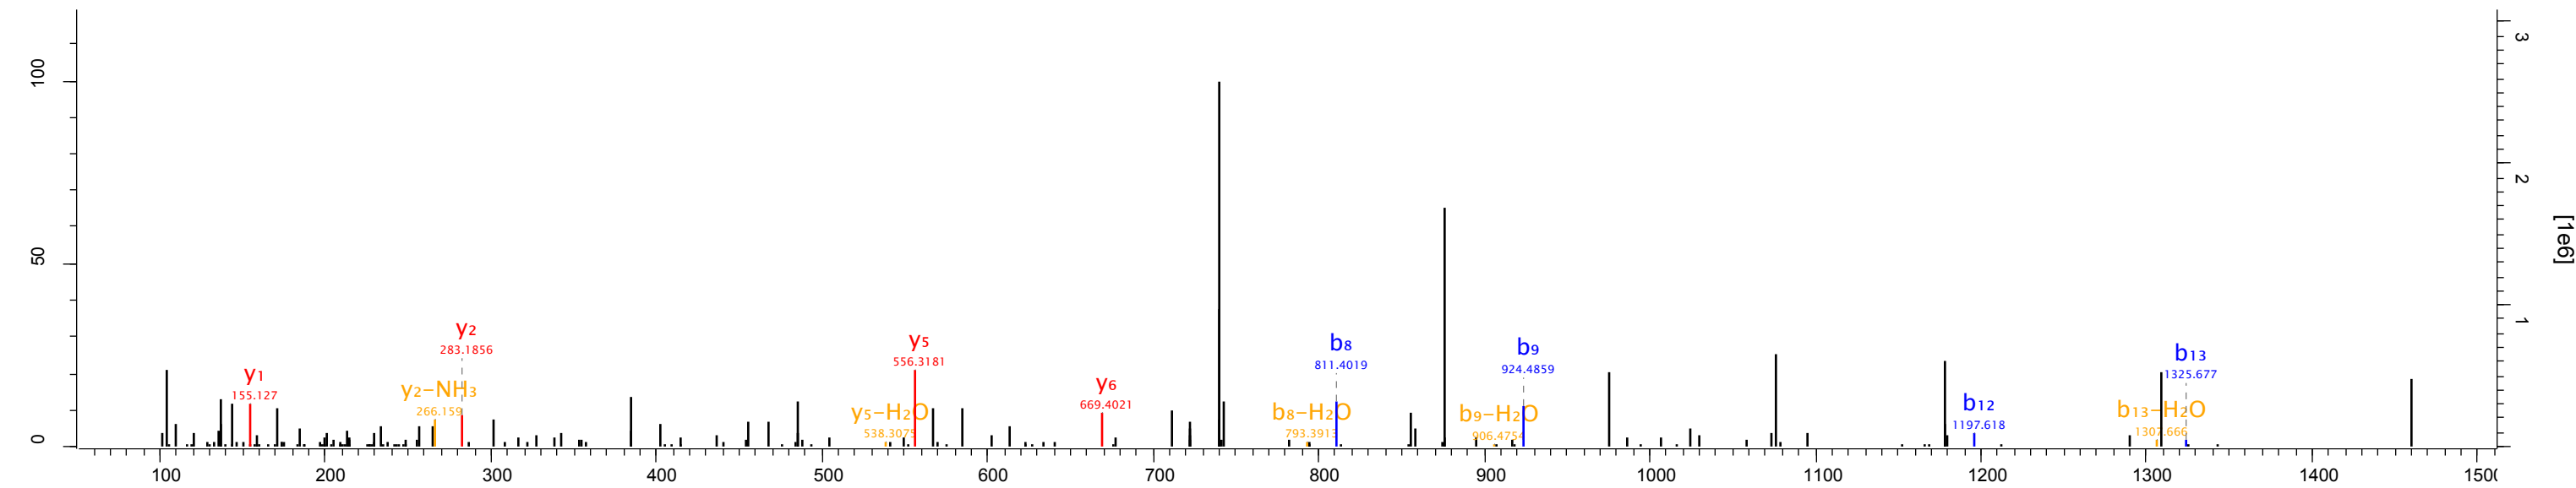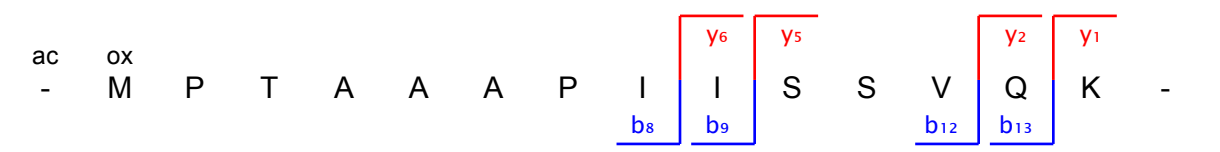

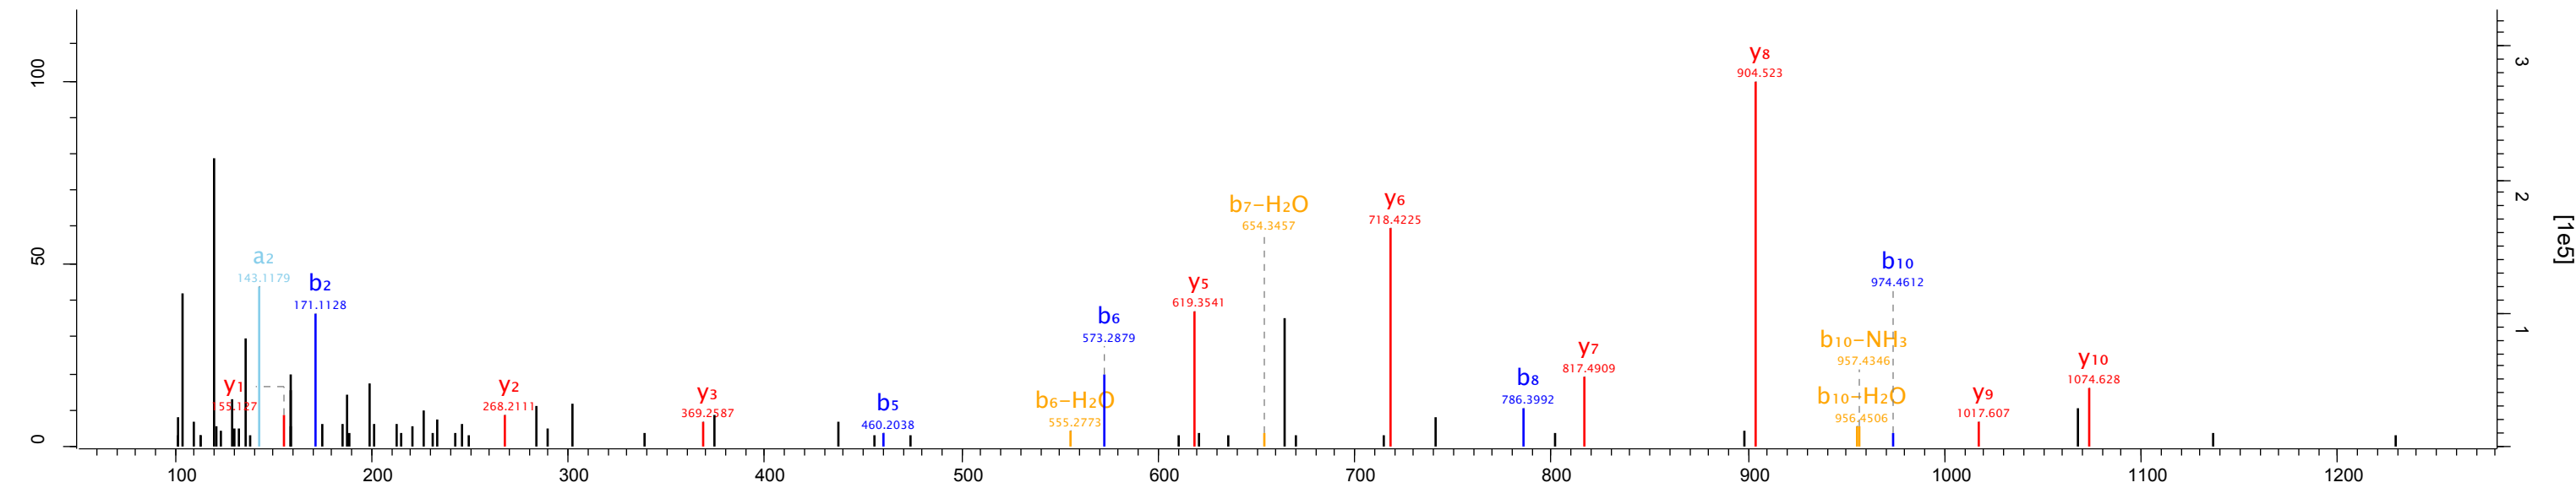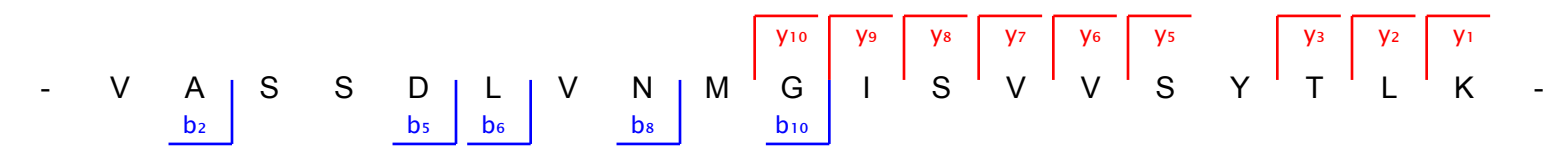

Raw file 20171215\_MaS\_33SR\_LMH\_proteome\_01 Scan 27214 Method FTMS; HCD Score 71.69 m/z 458.28

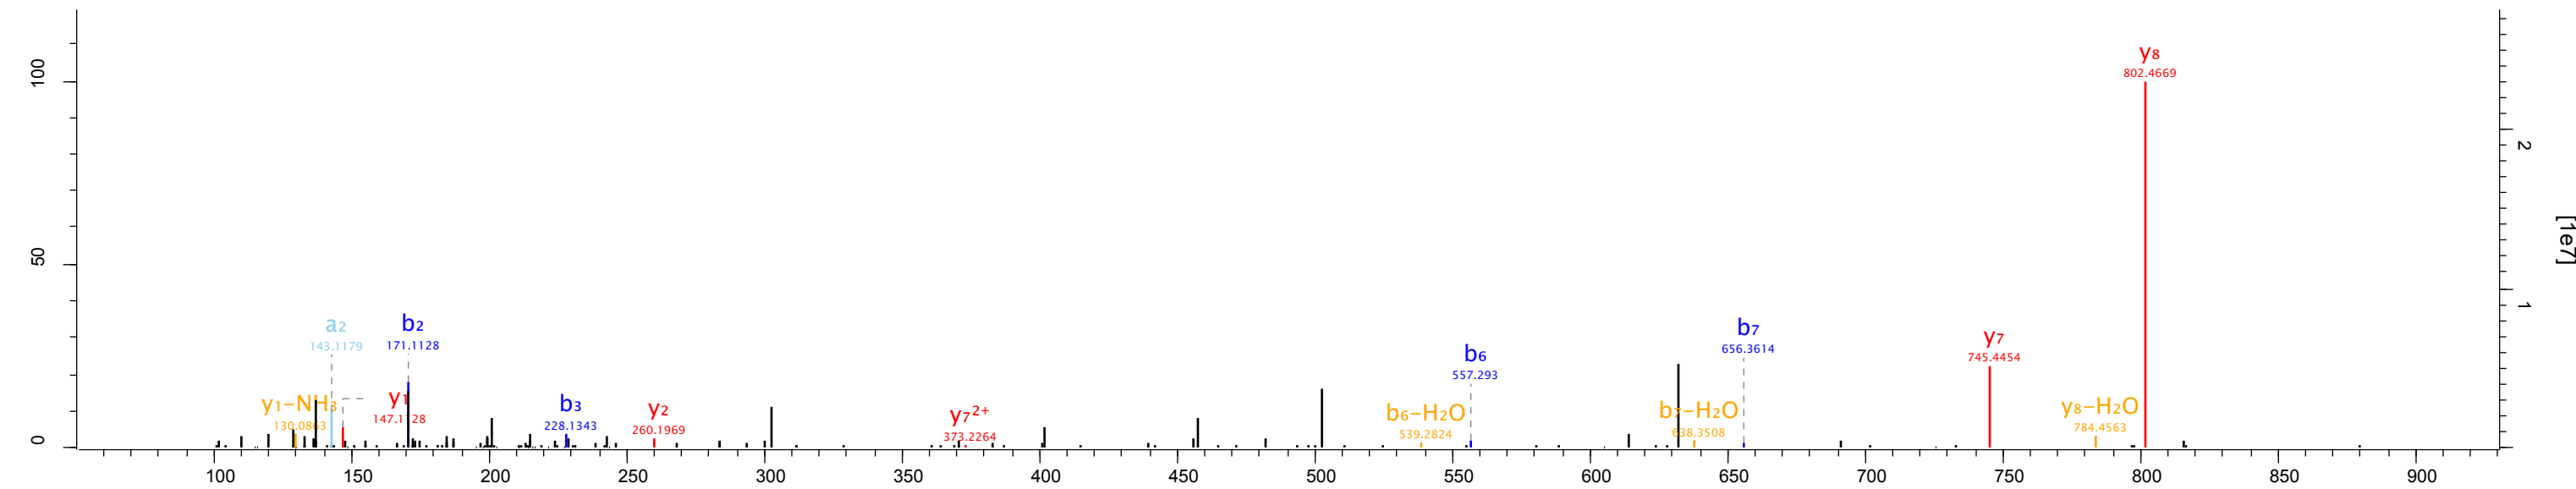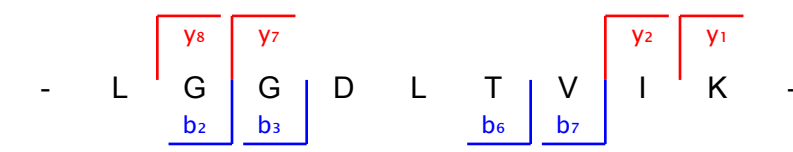

Raw file: 20171215\_MaS\_33SR\_LMH\_proteome\_01  
 Scan: 34854 Method: FTMS; HCD Score: 41.24 m/z: 524.95 Gene names: SETX

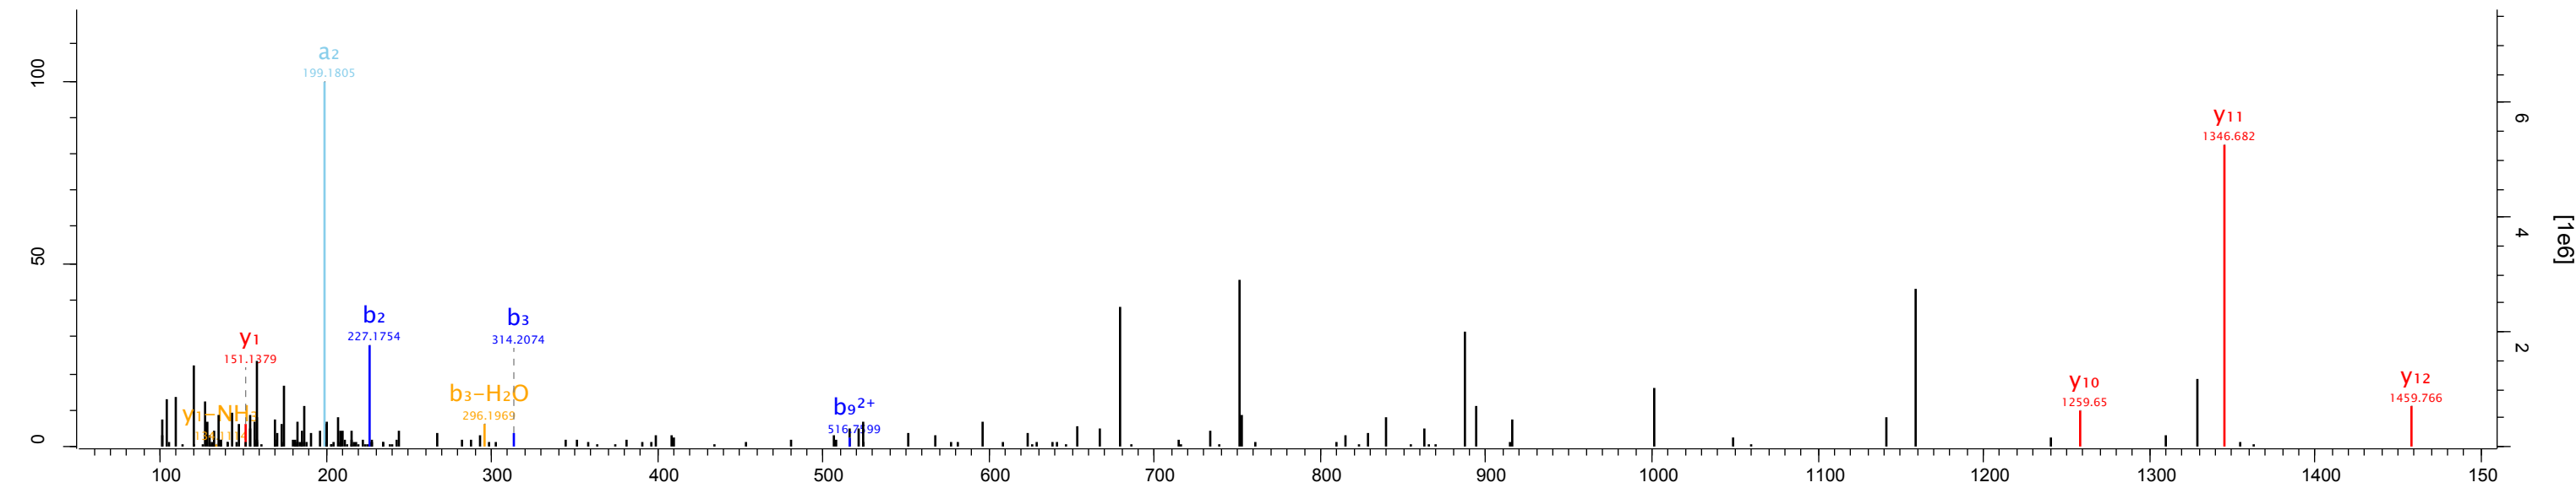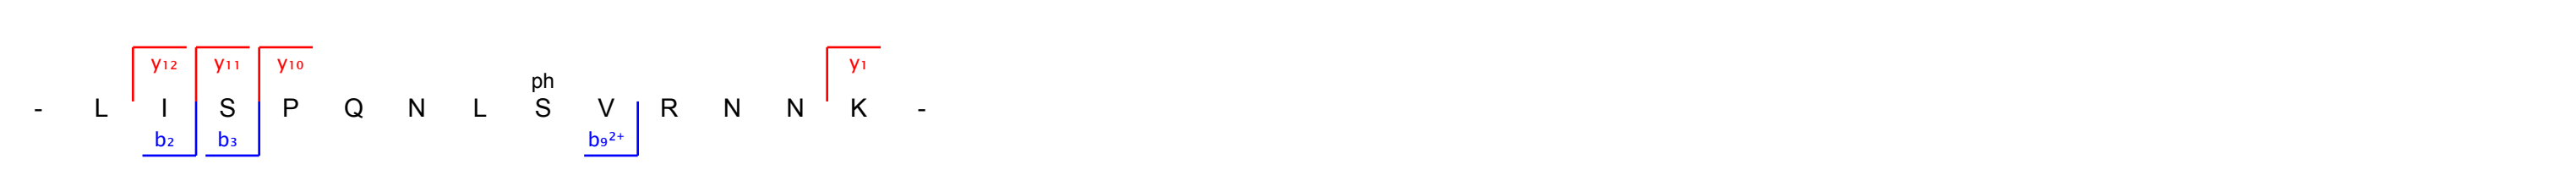

Raw file 20171215\_MaS\_33SR\_LMH\_proteome\_01 Scan 43594 Method FTMS; HCD Score 85.52 m/z 436.91 Gene names CYC1

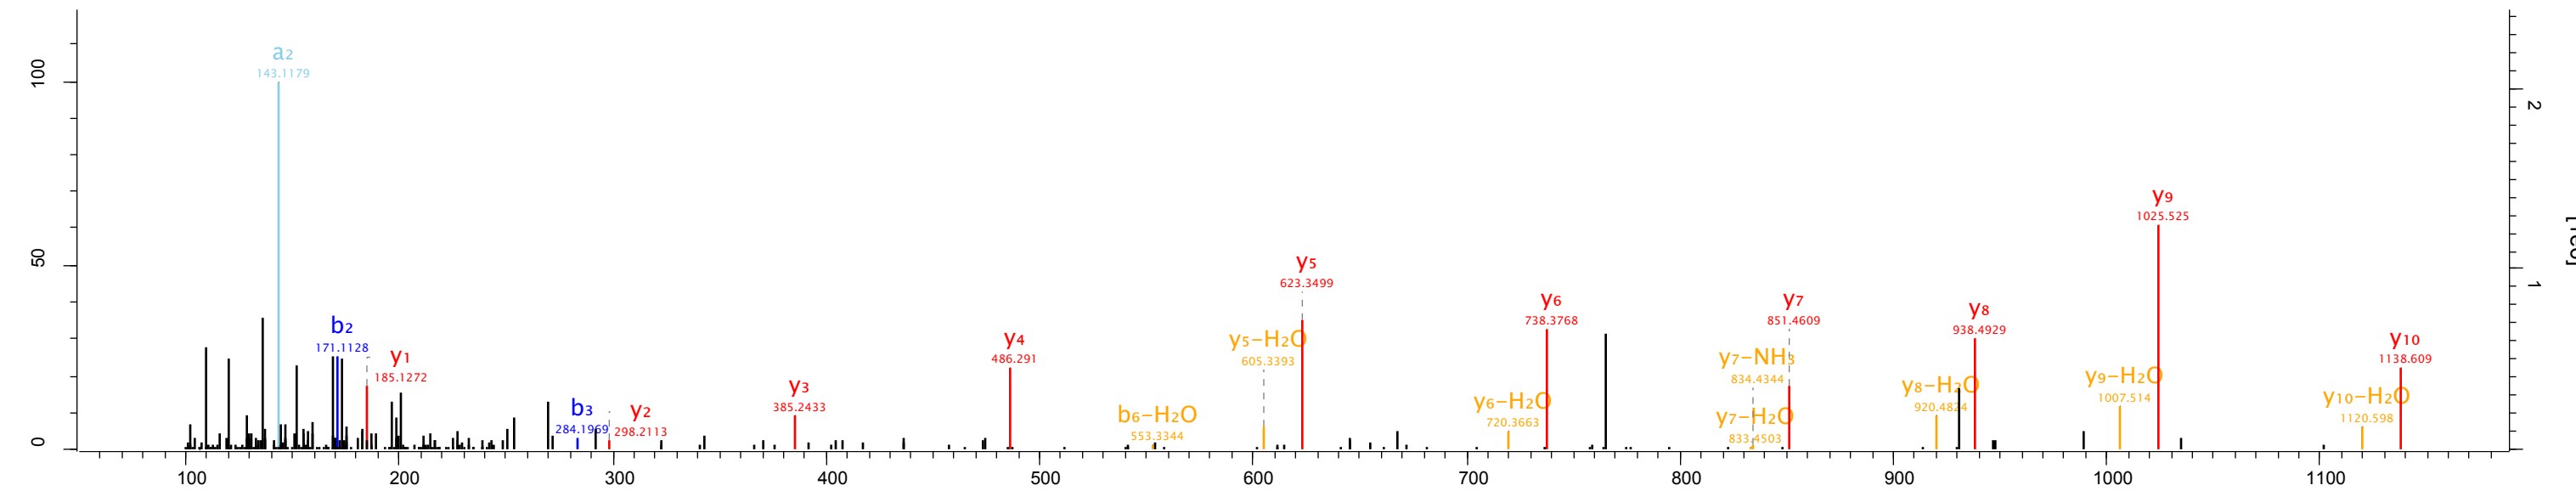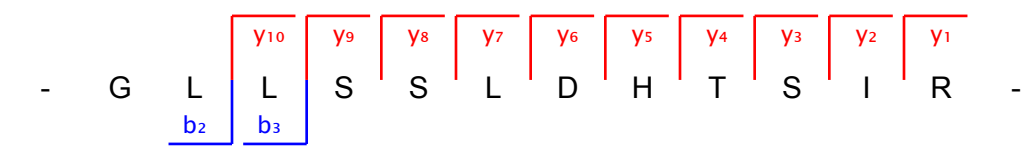

Raw file: 20171215\_MaS\_33SR\_LMH\_proteome\_01  
 Scan: 59394 Method: FTMS; HCD Score: 87.08 m/z: 843.4 Gene names: UBE2H

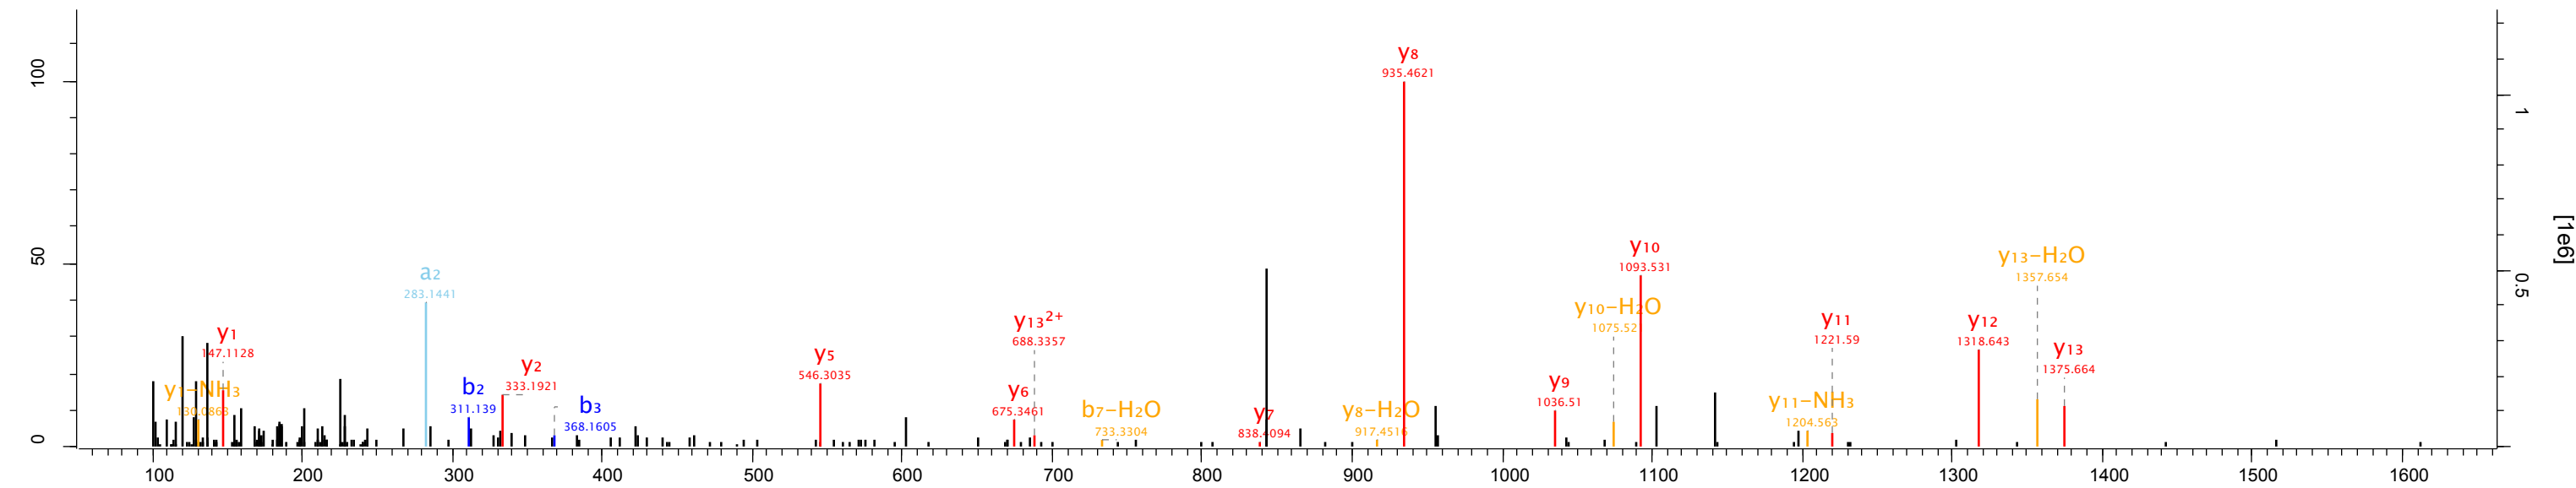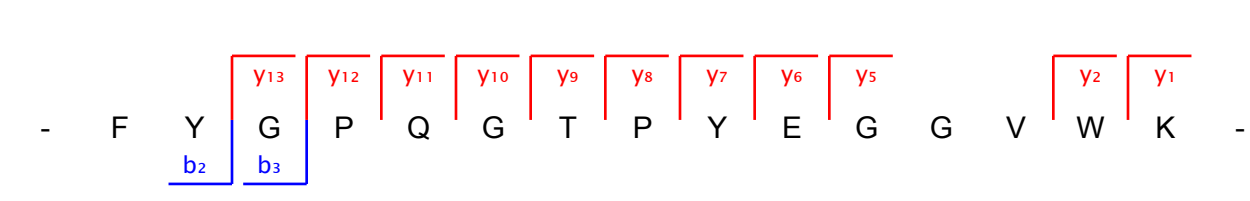



Raw file 20171215\_MaS\_33SR\_LMH\_proteome\_01 Scan 60164 Method FTMS; HCD Score 56.55 m/z 623.33

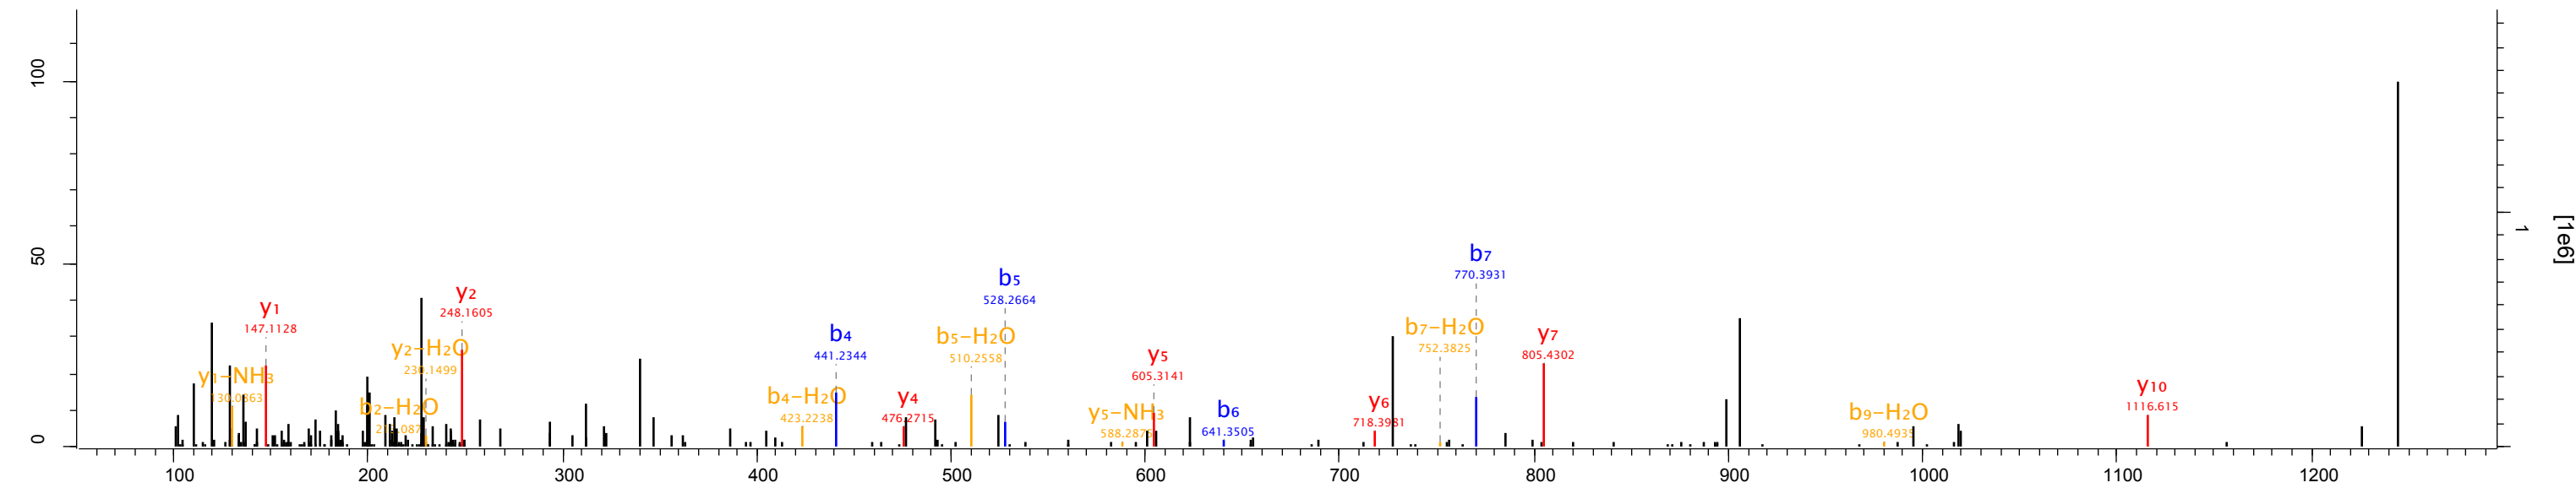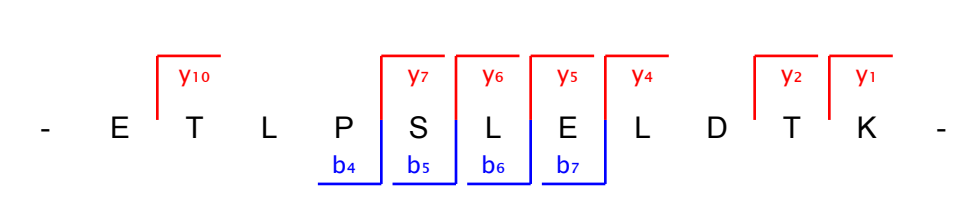

Raw file: 20171215\_MaS\_33SR\_LMH\_proteome\_01  
 Scan: 68144 Method: FTMS; HCD Score: 55.46 m/z: 634.81 Gene names: CEP135

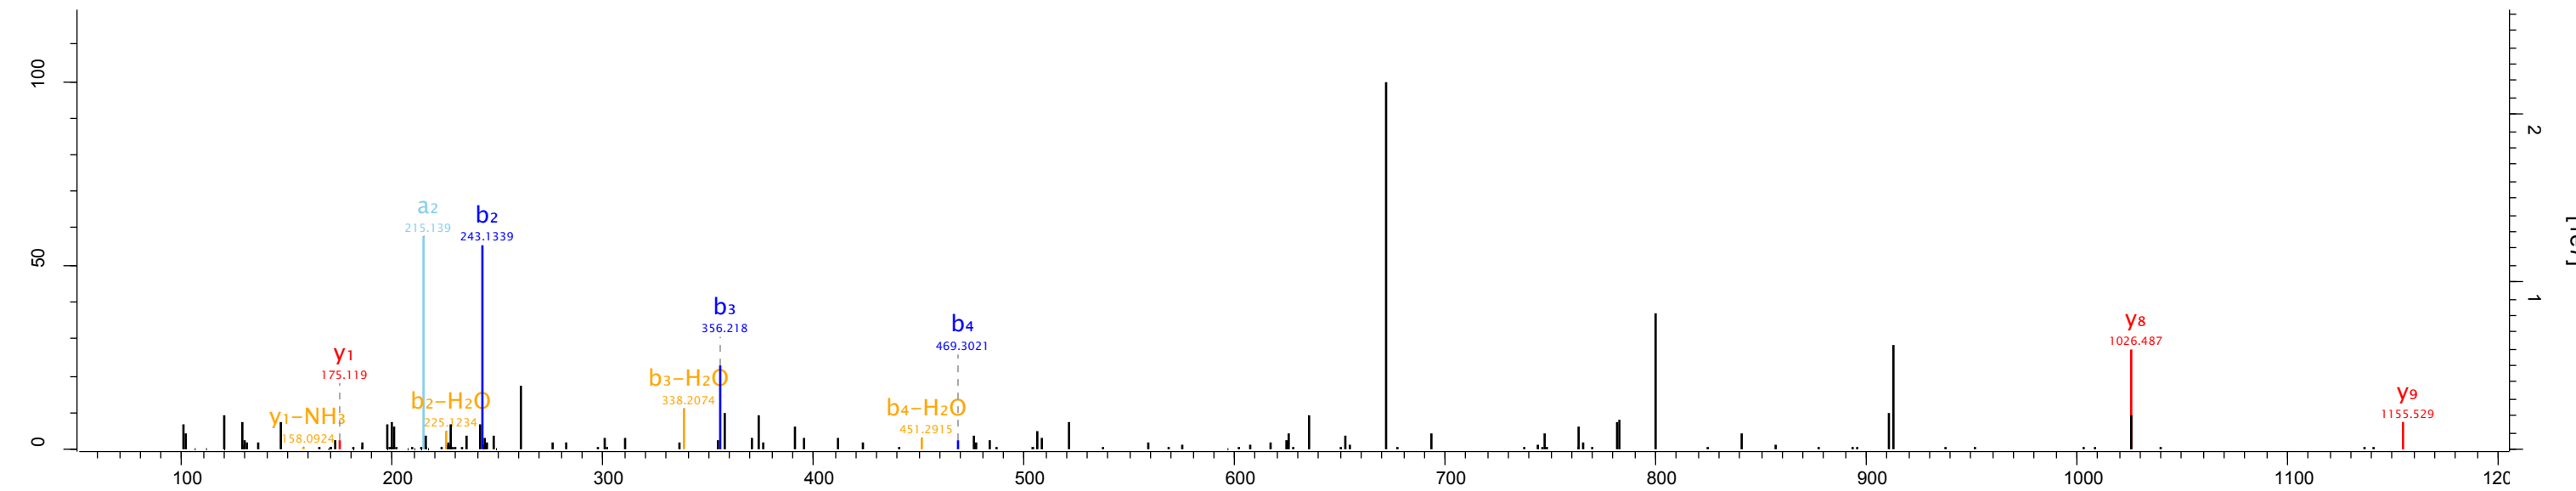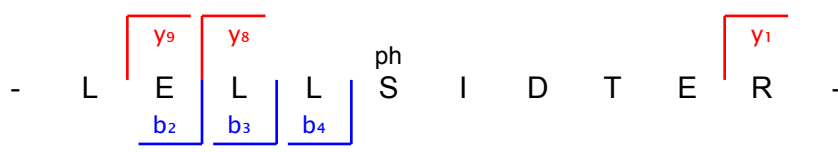

Raw file: 20171215\_MaS\_33SR\_LMH\_proteome\_01  
 Scan: 70884 Method: FTMS; HCD Score: 114.5 m/z: 499.29 Gene names: LAMP2

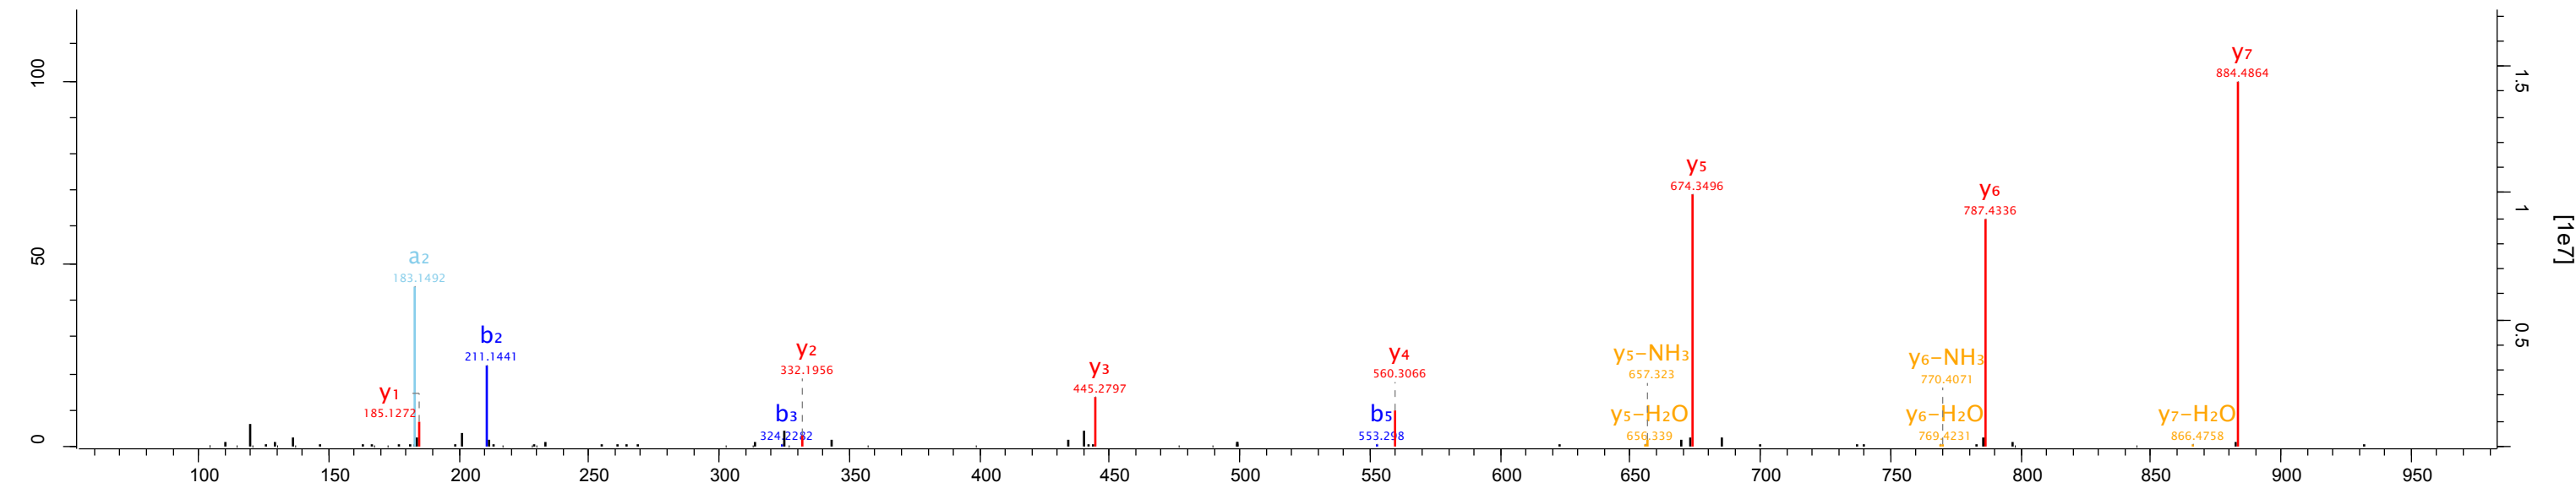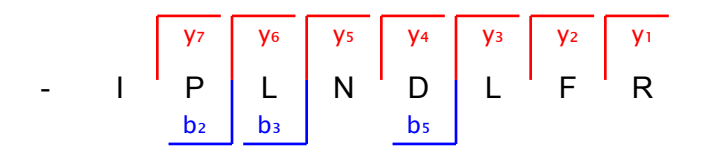

Raw file 20171215\_MaS\_33SR\_LMH\_proteome\_01 Scan 71604 Method FTMS; HCD Score 50.18 m/z 1006.5 Gene names SNTB1

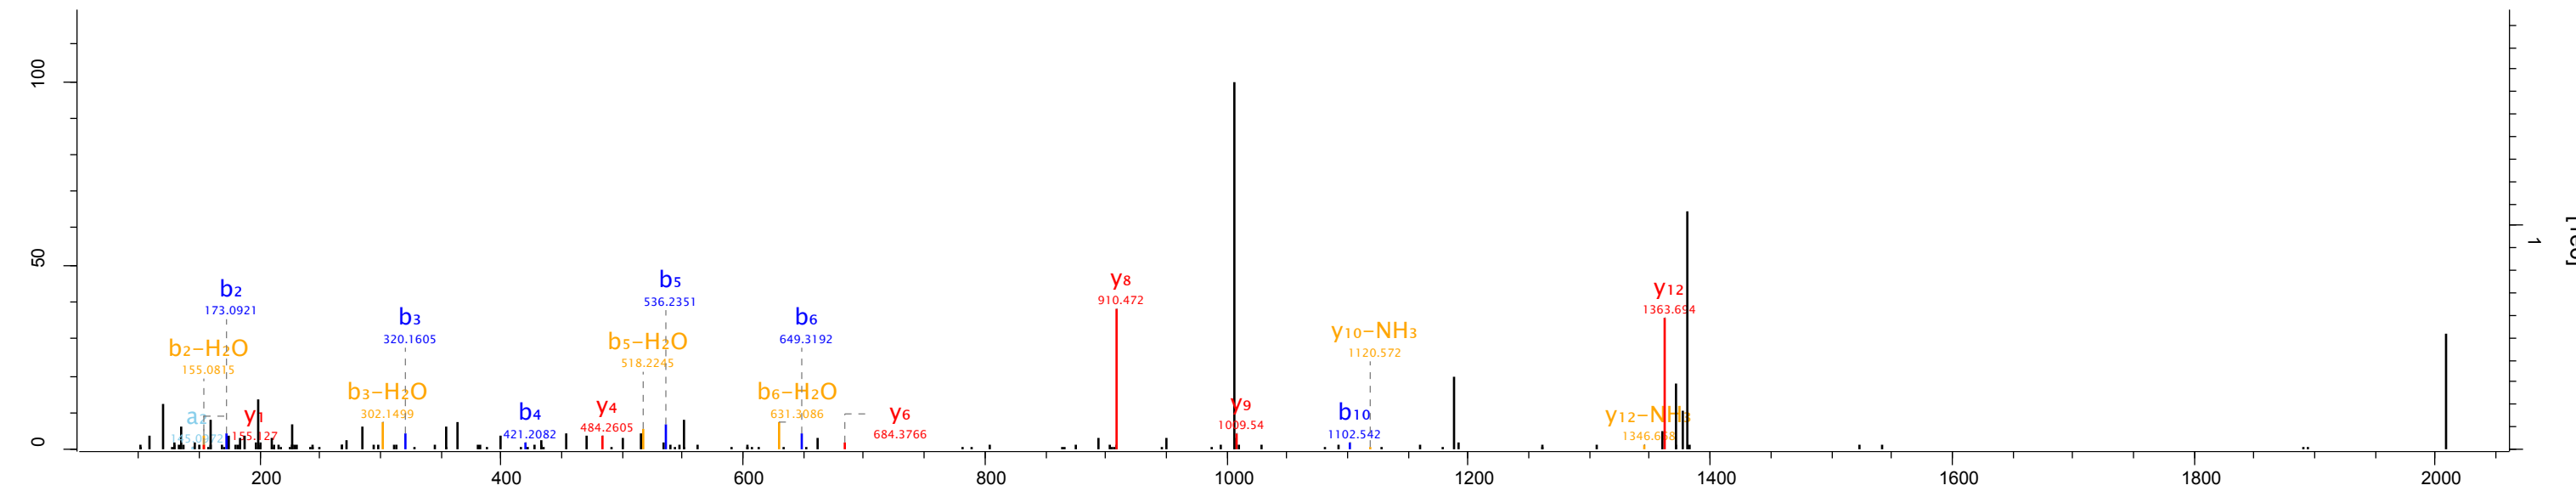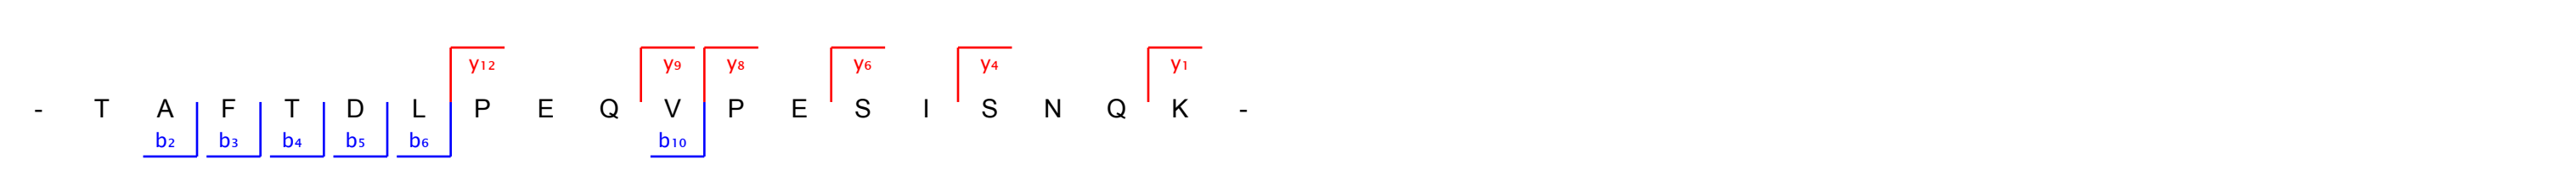

20171215\_MaS\_33SR\_LMH\_proteome\_01 72974 FTMS; HCD 68.24 712.36 SDF2L1

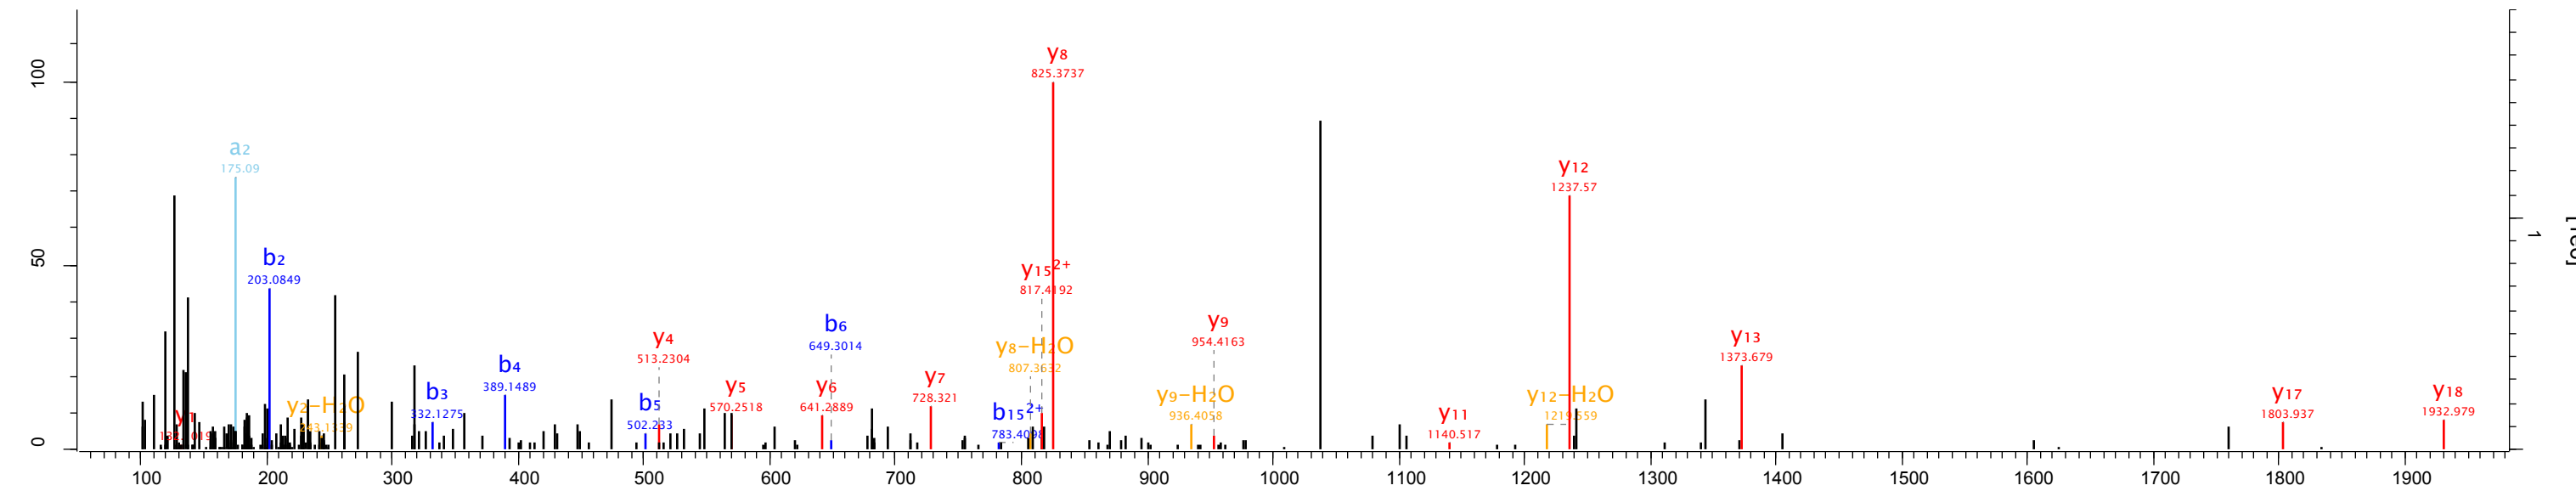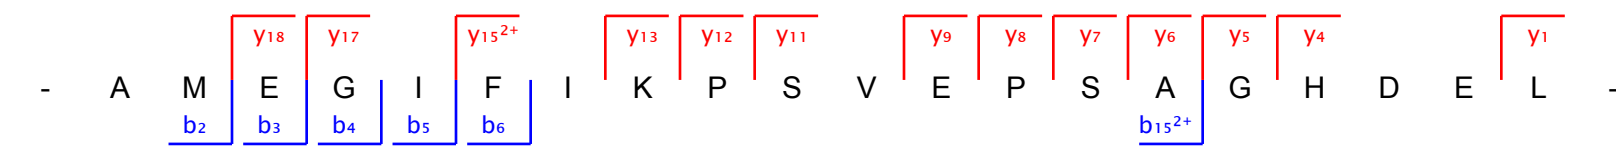

Raw file: 20171215\_MaS\_33SR\_LMH\_proteome\_01  
 Scan: 75454 Method: FTMS; HCD Score: 58.78 m/z: 566.86 Gene names: ARPC5L

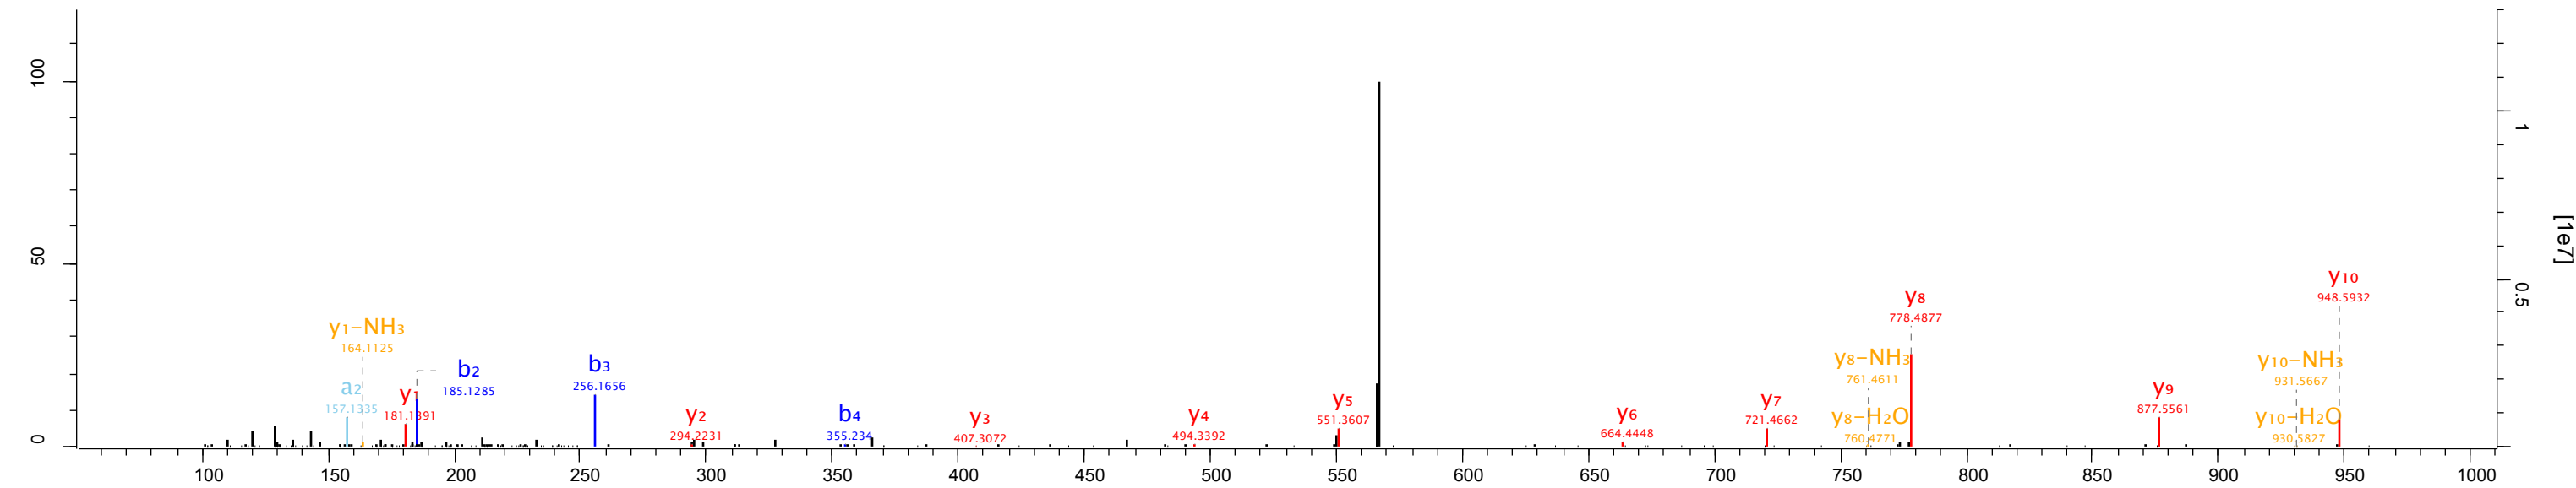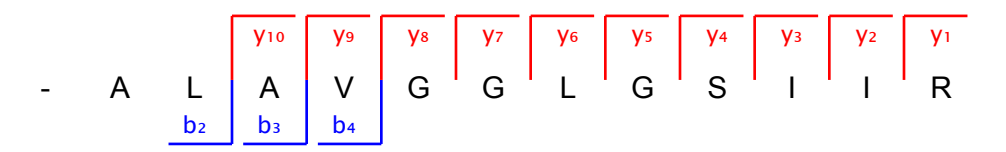

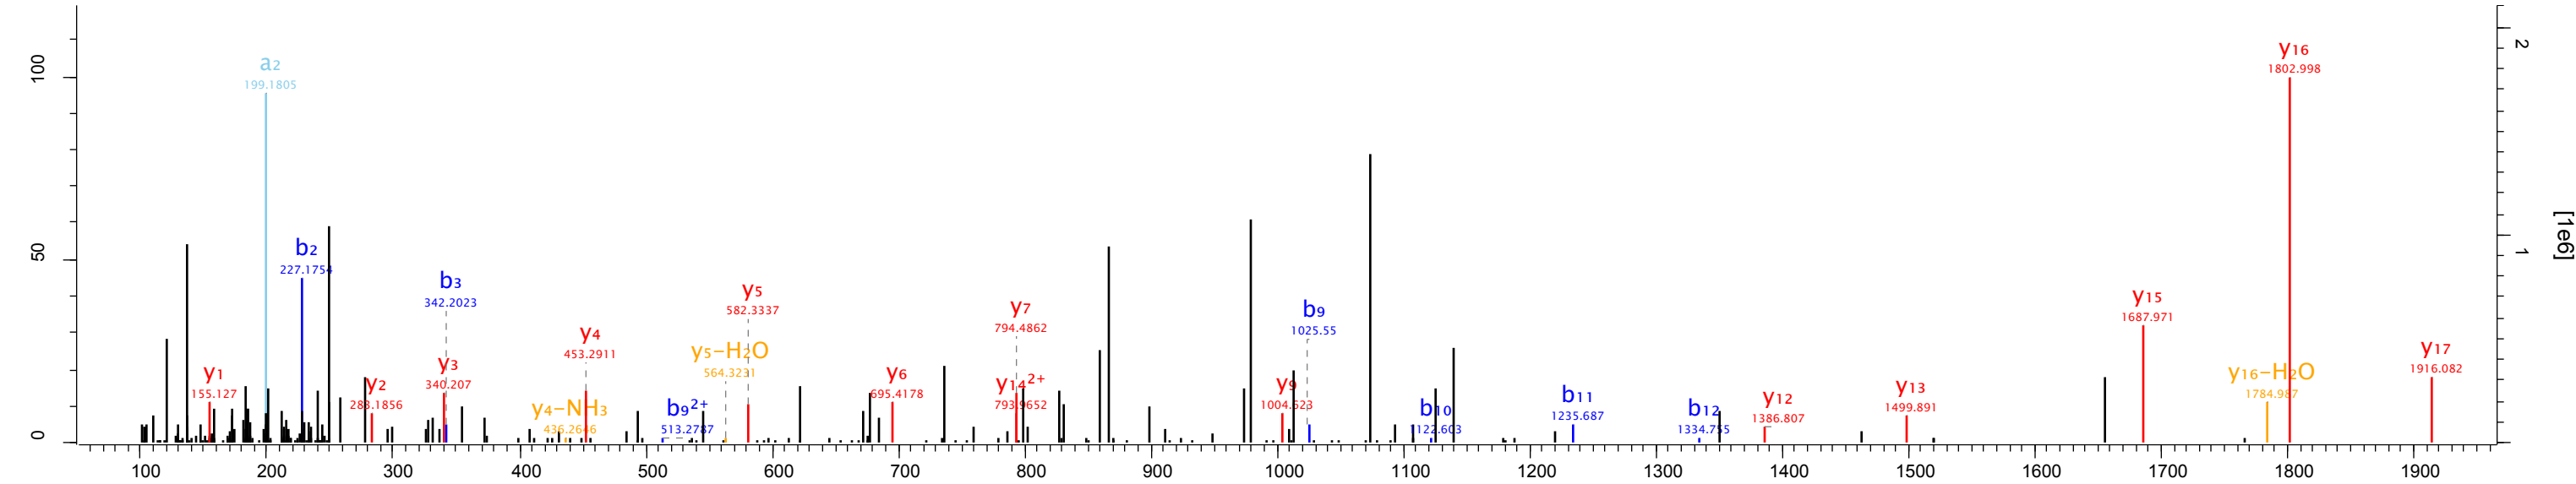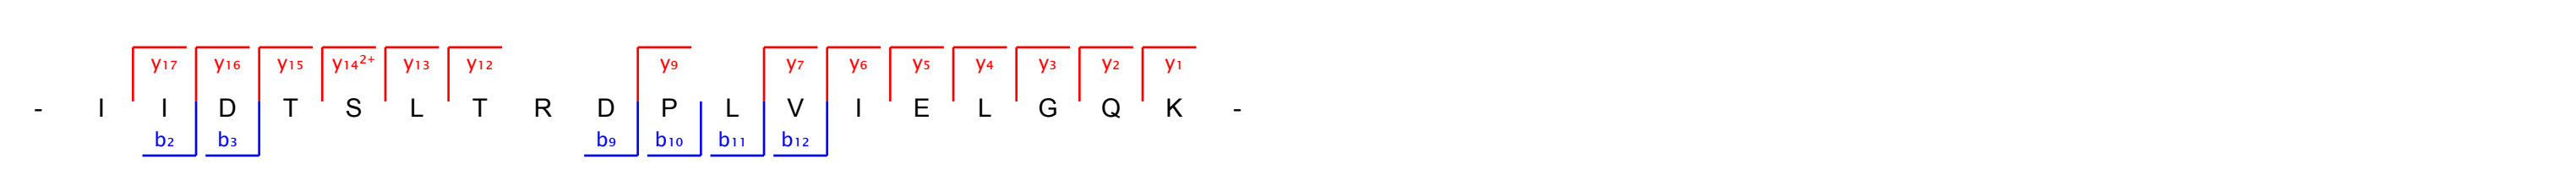

Raw file 20171215\_MaS\_33SR\_LMH\_proteome\_01 Scan 91454 Method FTMS; HCD Score 106.75 m/z 979.53 Gene names PTPN23

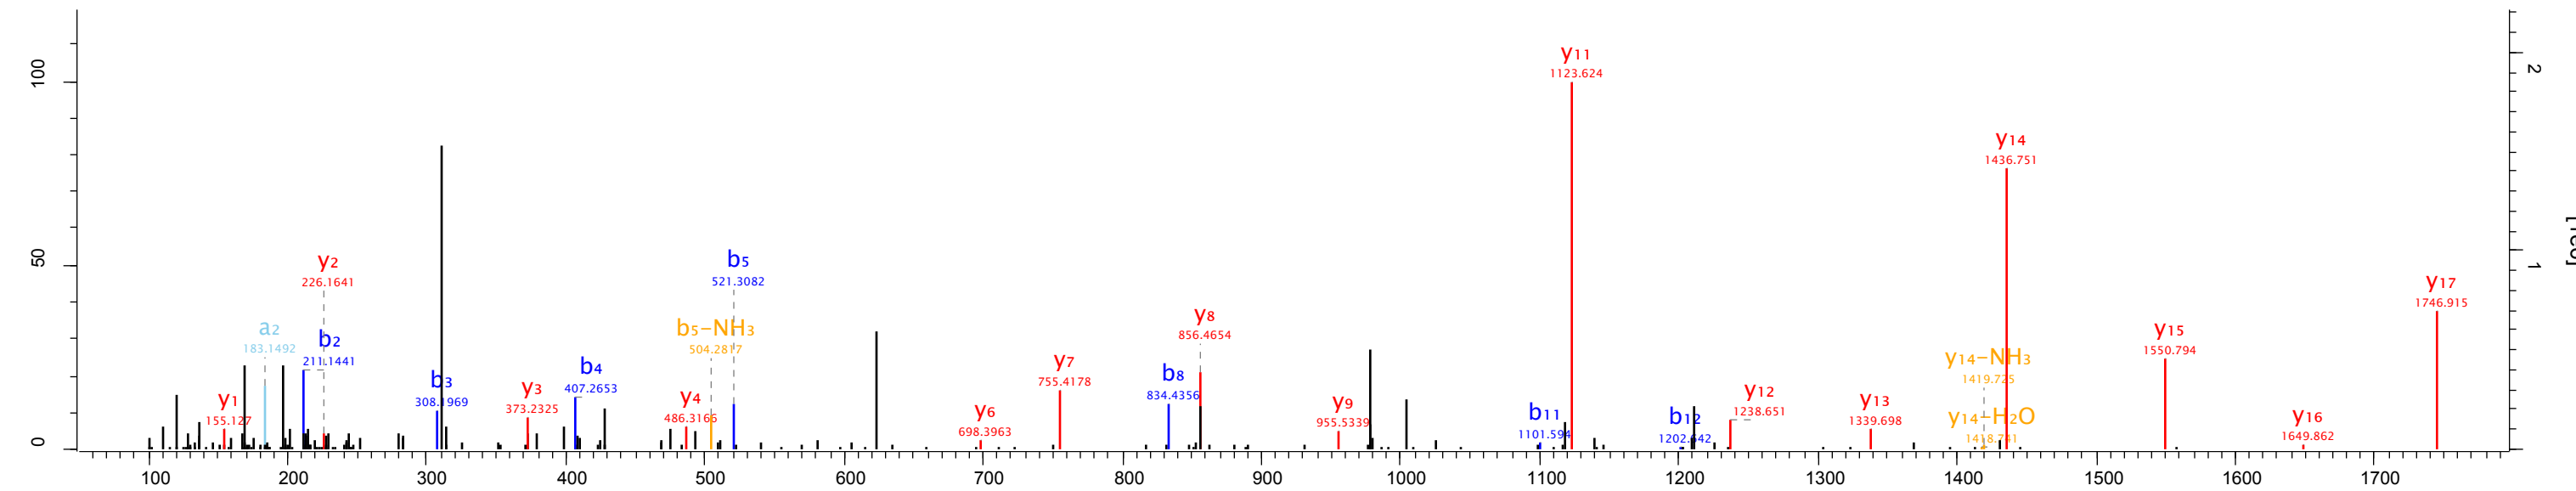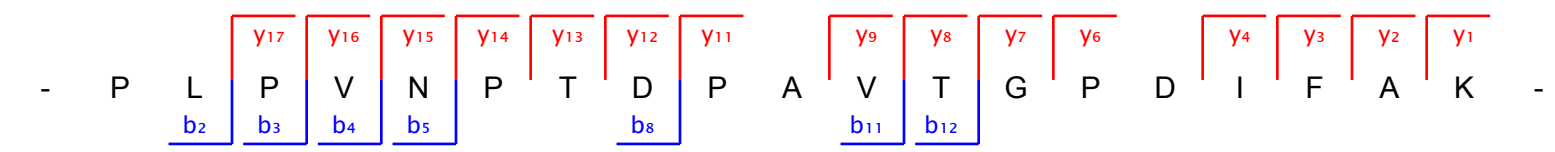



Raw file

20171215\_MaS\_33SR\_LMH\_proteome\_01

| Scan  | Method    | Score | m/z    | Gene names |
|-------|-----------|-------|--------|------------|
| 95514 | FTMS; HCD | 55.26 | 491.63 | TERF2      |

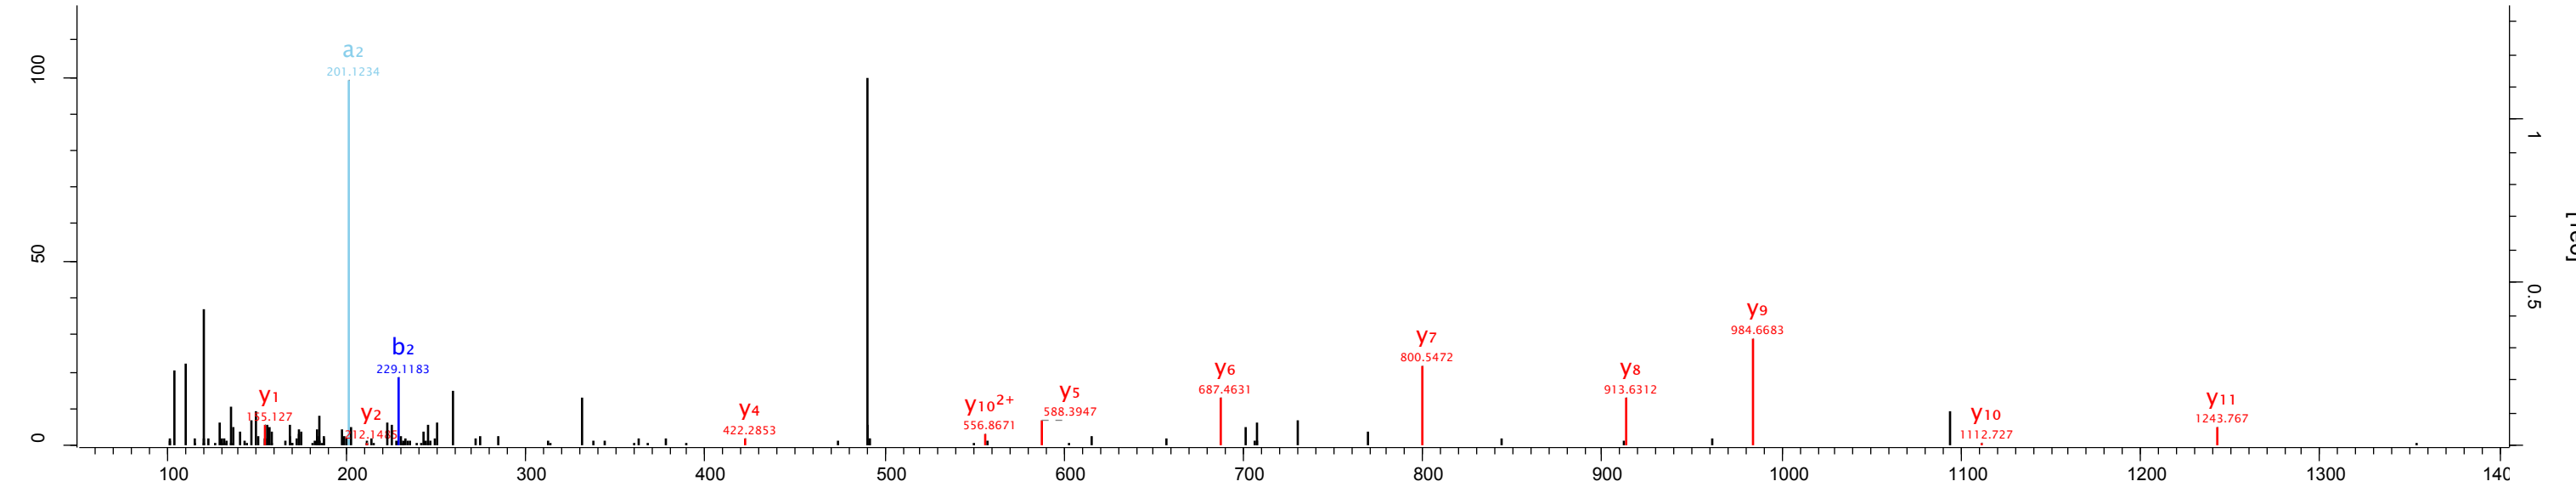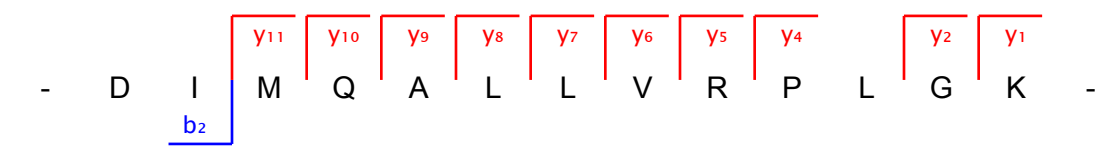

Raw file 20171215\_MaS\_33SR\_LMH\_proteome\_01 Scan 9644 Method FTMS; HCD Score 43.76 m/z 840.35

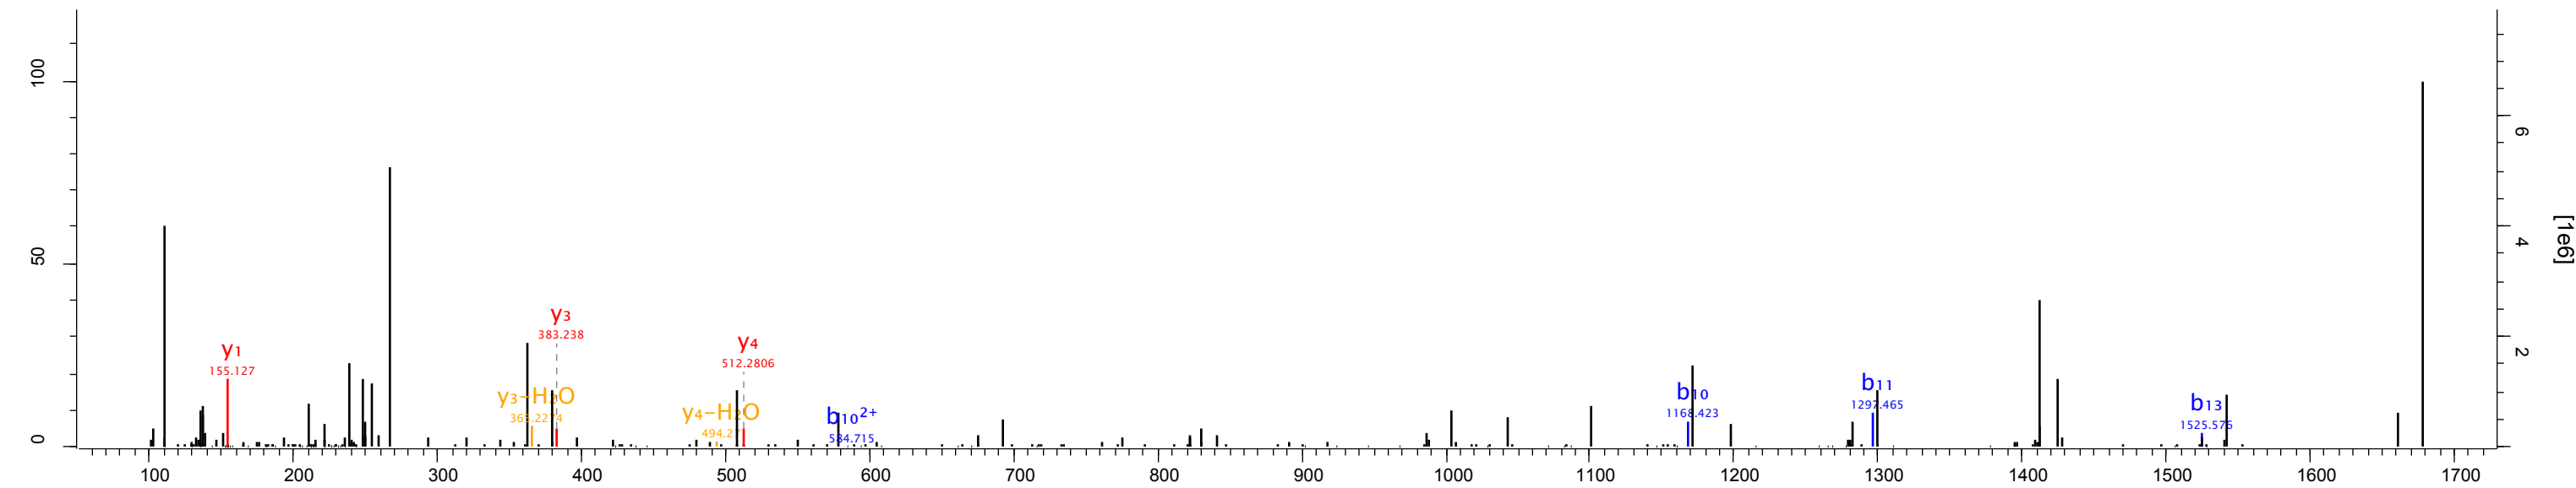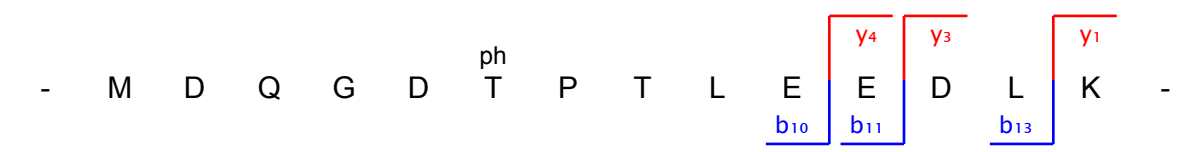

Raw file

20171215\_MaS\_33SR\_LMH\_proteome\_01

| Scan  | Method    | Score | m/z    | Gene names |
|-------|-----------|-------|--------|------------|
| 97864 | FTMS; HCD | 62.36 | 781.44 | SCYL1      |

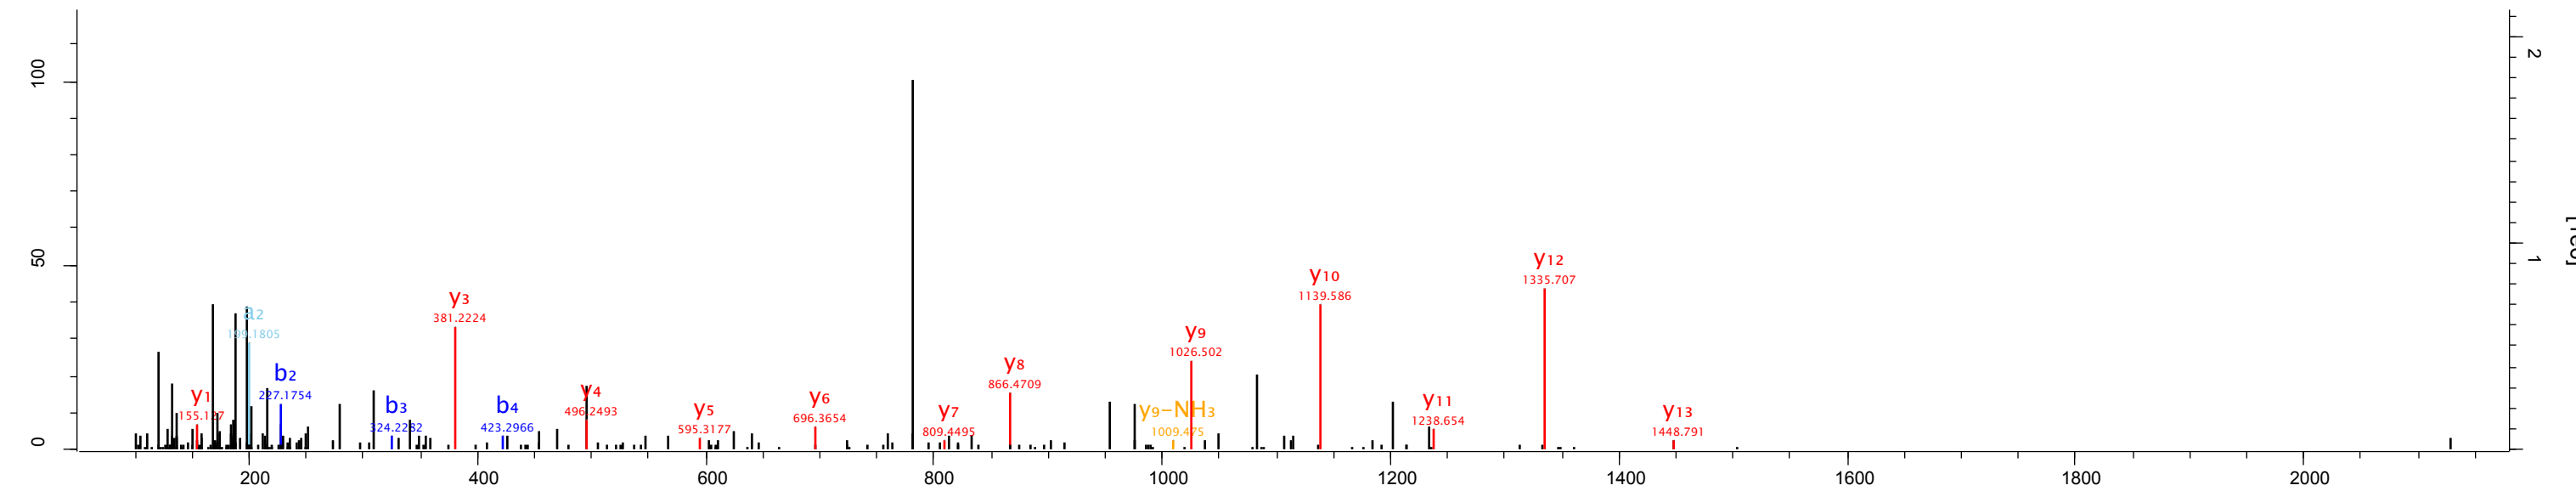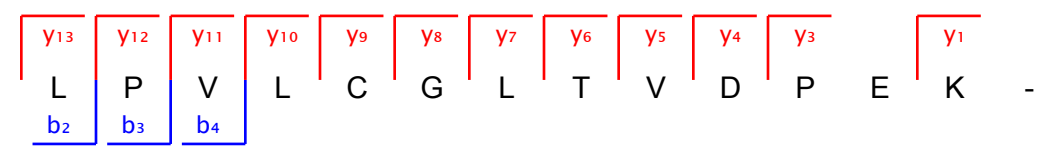

Raw file: 20171215\_MaS\_33SR\_LMH\_proteome\_01  
 Scan: 9824 Method: FTMS; HCD Score: 50.13 m/z: 446.71 Gene names: ZNF24

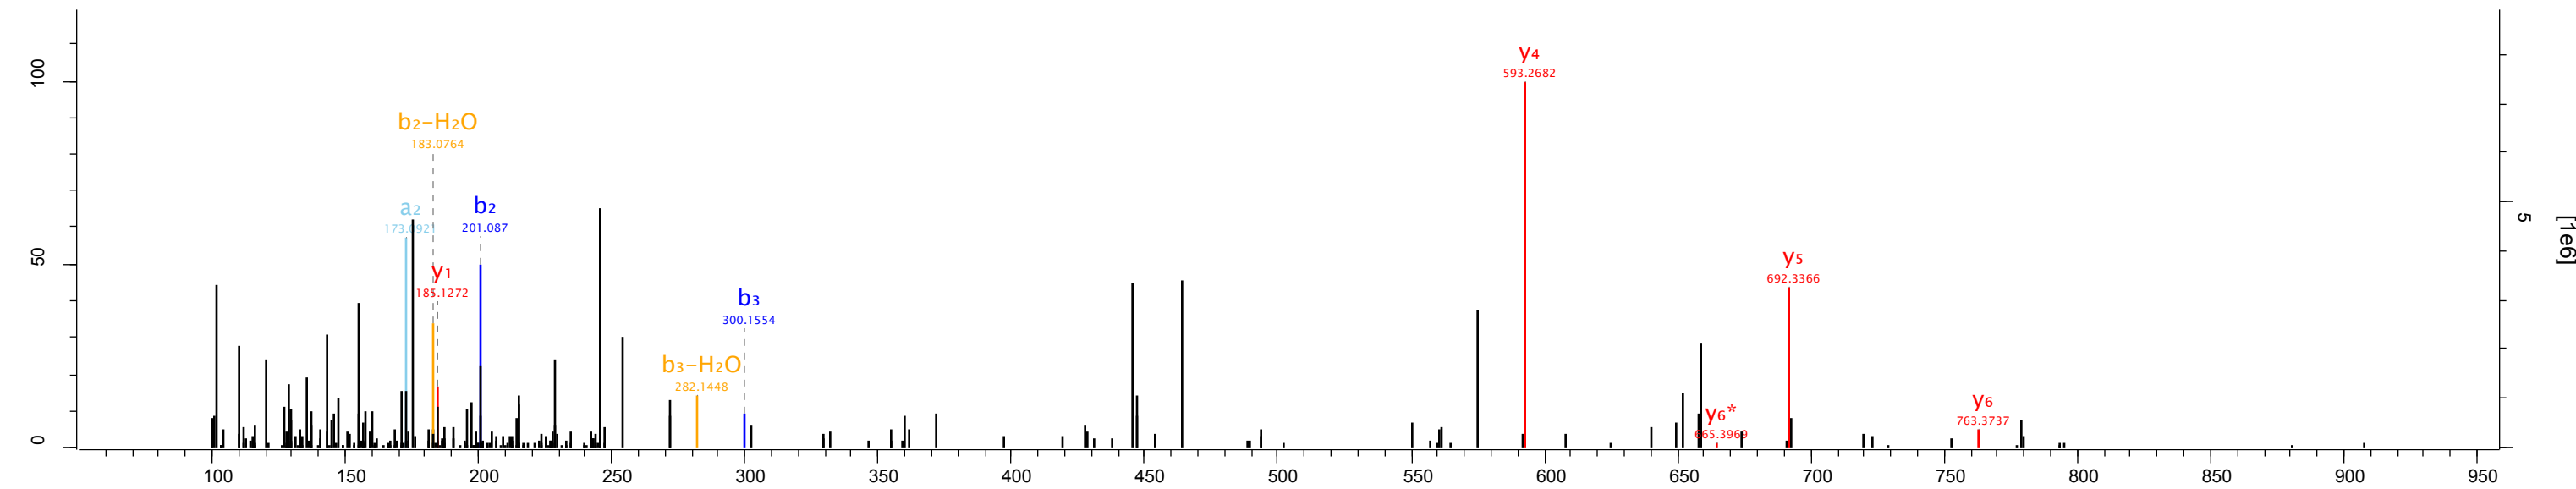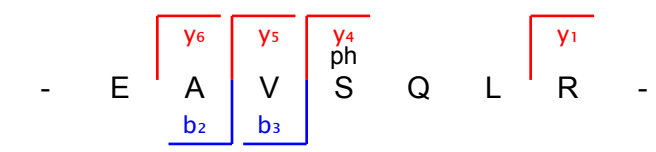

Raw file 20171215\_MaS\_33SR\_LMH\_proteome\_02 Scan 101334 Method FTMS; HCD Score 66.99 m/z 674.36 Gene names PANK4

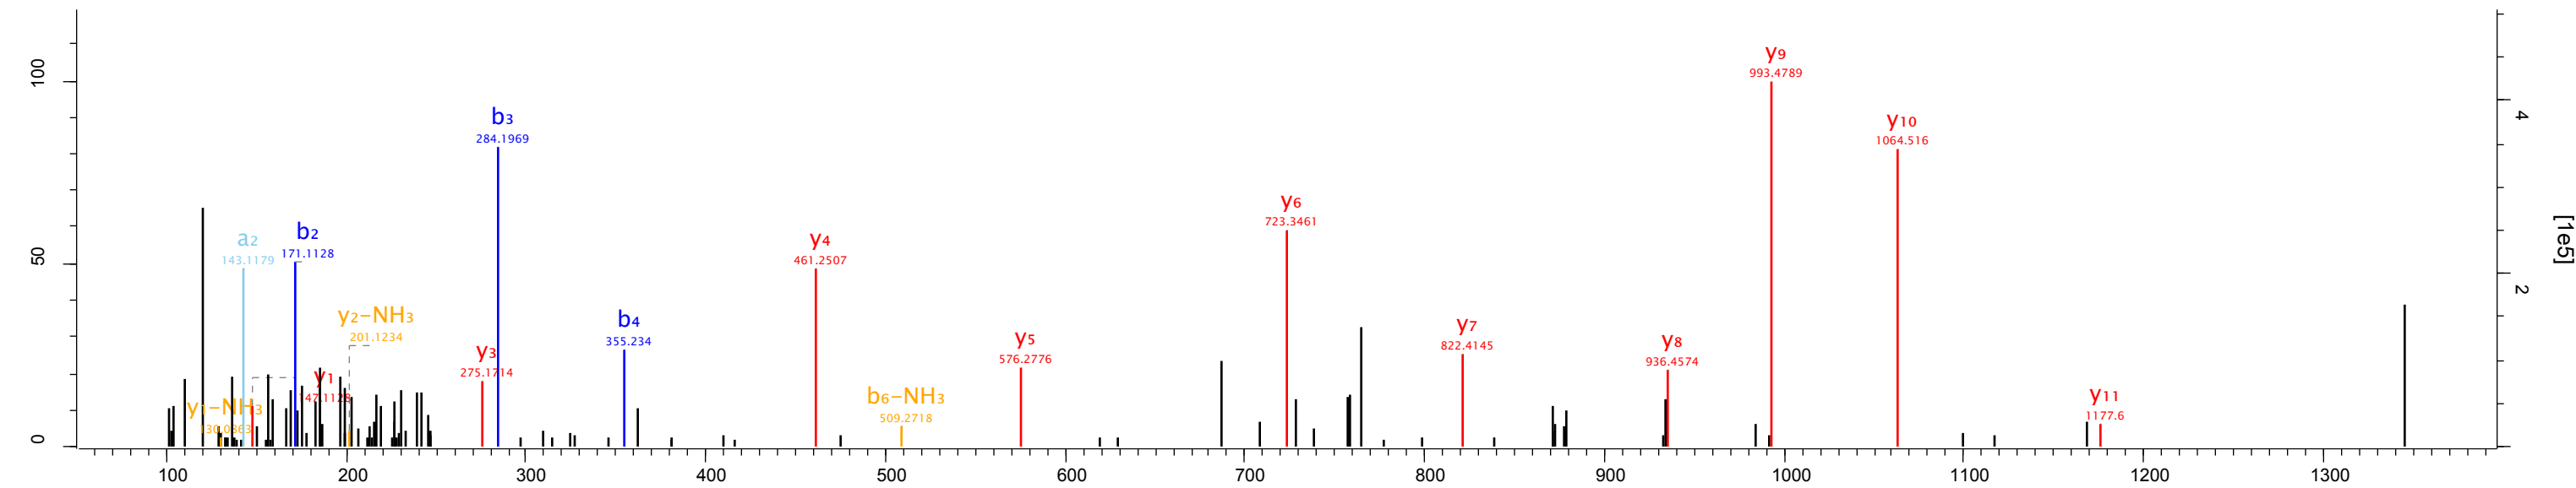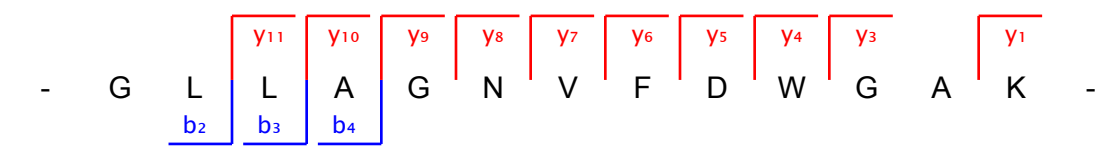

Raw file 20171215\_MaS\_33SR\_LMH\_proteome\_02 Scan 103724 Method FTMS; HCD Score 58.17 m/z 778.89 Gene names PROM1

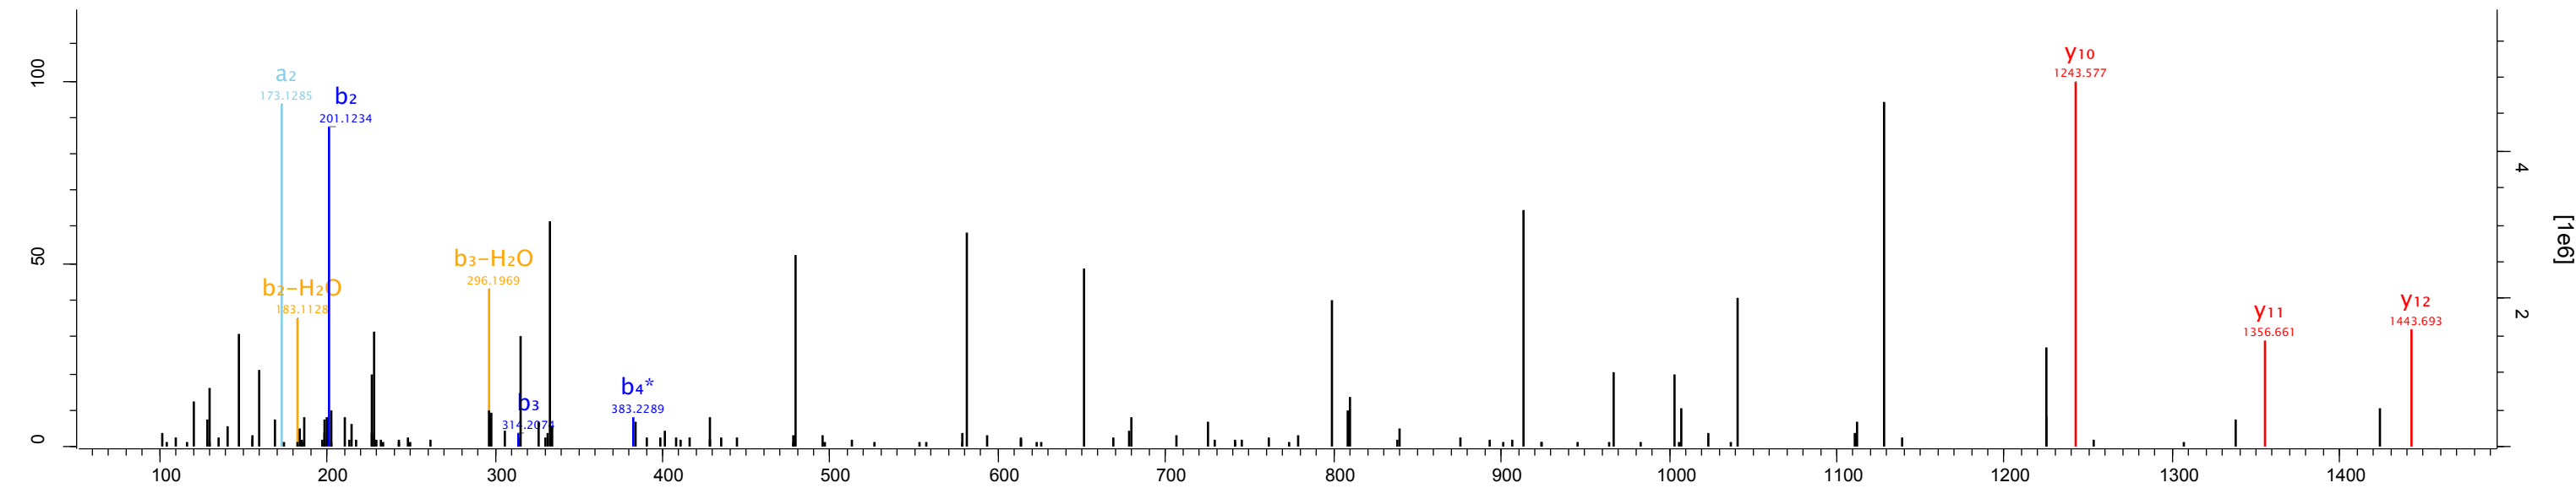

- L S L S Q L N S N P E L R -

b<sub>2</sub>
b<sub>3</sub>
b<sub>4</sub>\*

y<sub>12</sub>
y<sub>11</sub>
y<sub>10</sub>  
ph

Raw file: 20171215\_MaS\_33SR\_LMH\_proteome\_02  
 Scan: 108274 Method: FTMS; HCD Score: 66.22 m/z: 824.44 Gene names: OSBPL1A

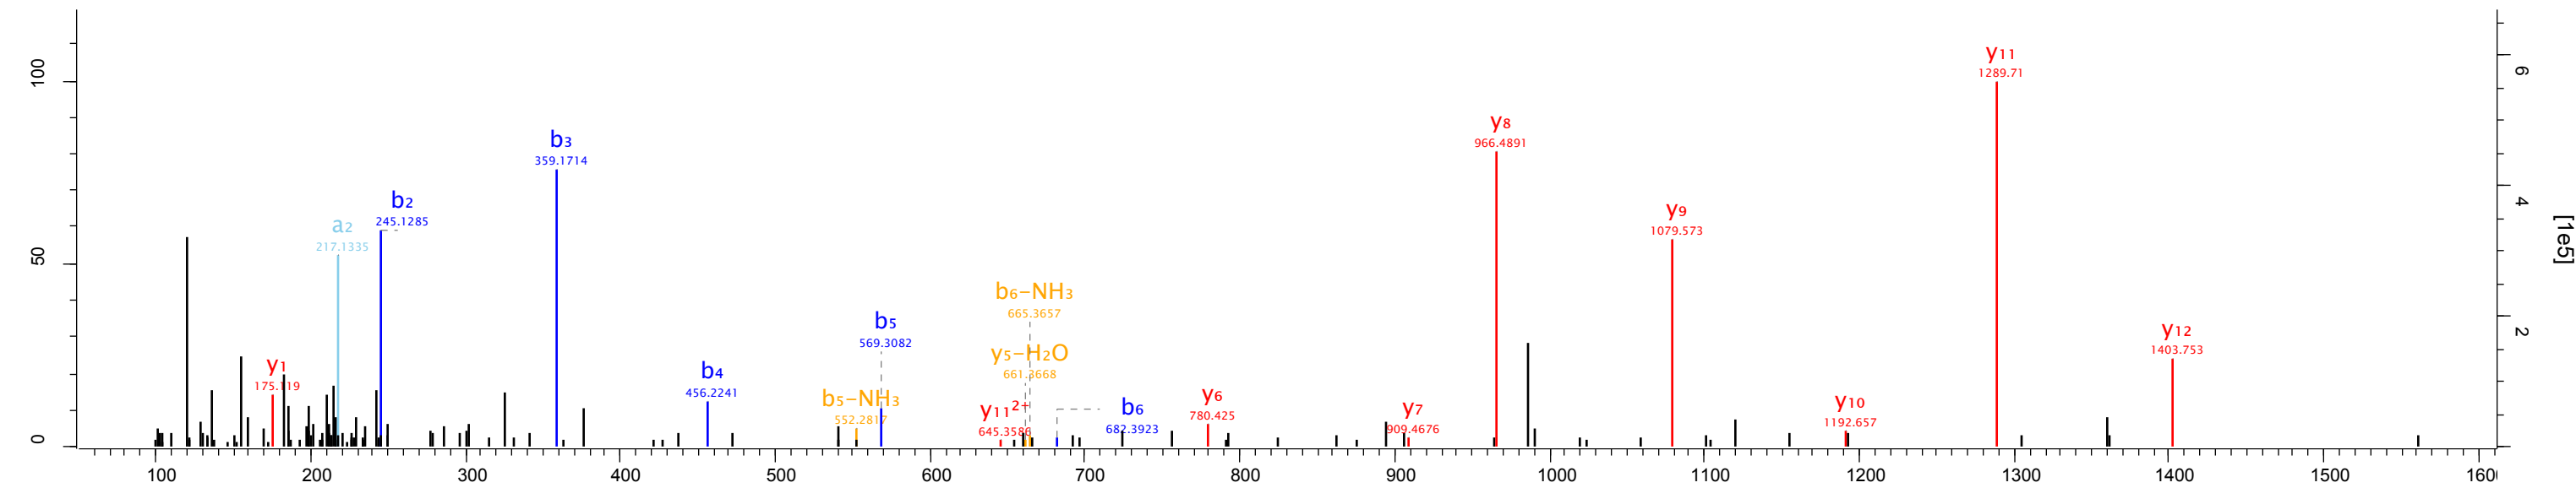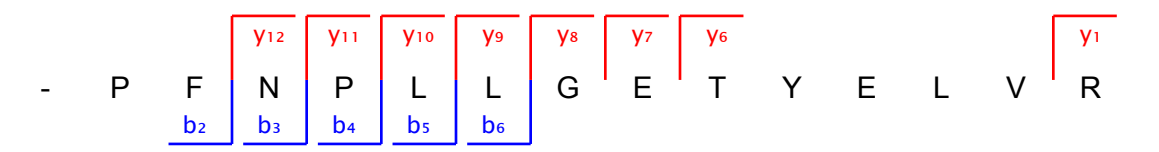

Raw file 20171215\_MaS\_33SR\_LMH\_proteome\_02 Scan 116144 Method FTMS; HCD Score 47.84 m/z 590.34 Gene names GLMN

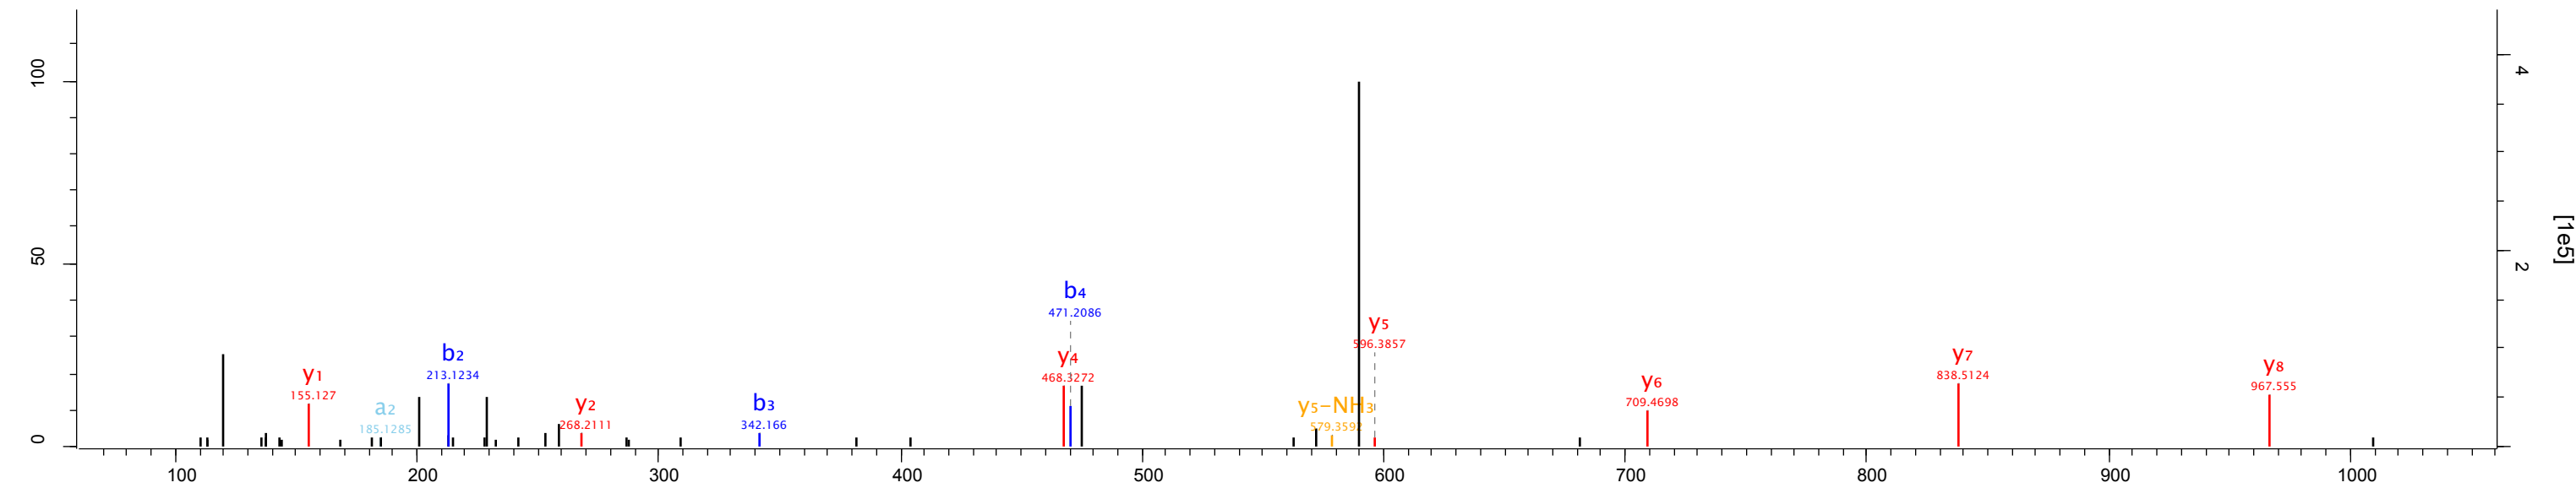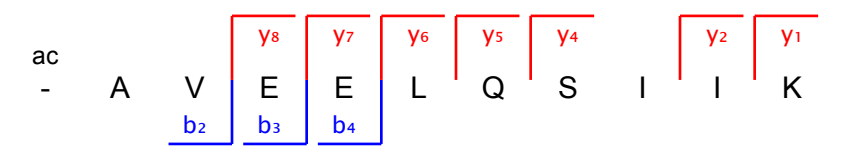



Raw file  
20171215\_MaS\_33SR\_LMH\_proteome\_02

| Scan   | Method    | Score | m/z    | Gene names |
|--------|-----------|-------|--------|------------|
| 119824 | FTMS; HCD | 47.04 | 953.52 | UPF2       |

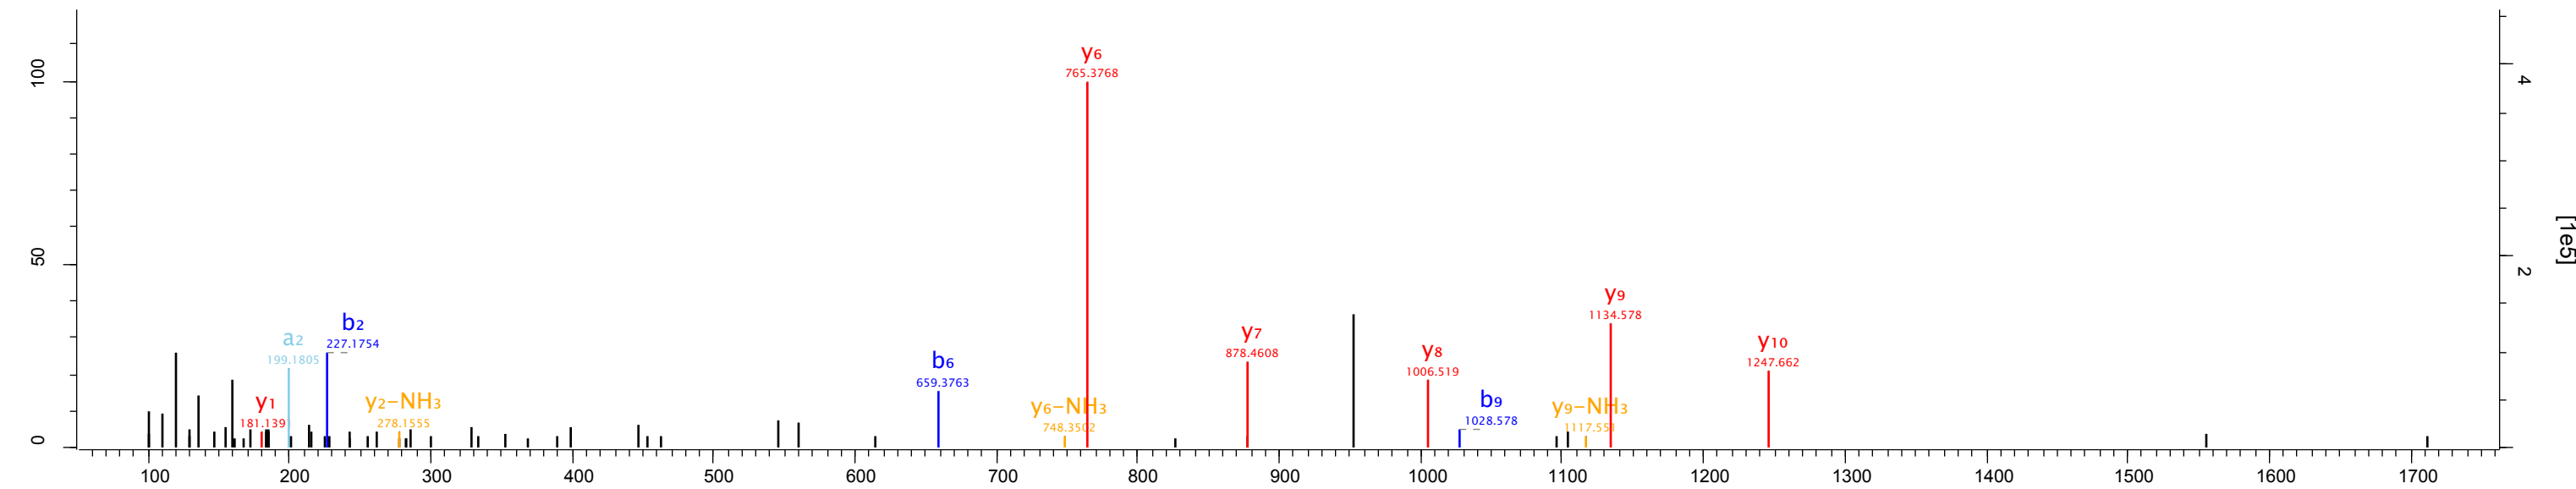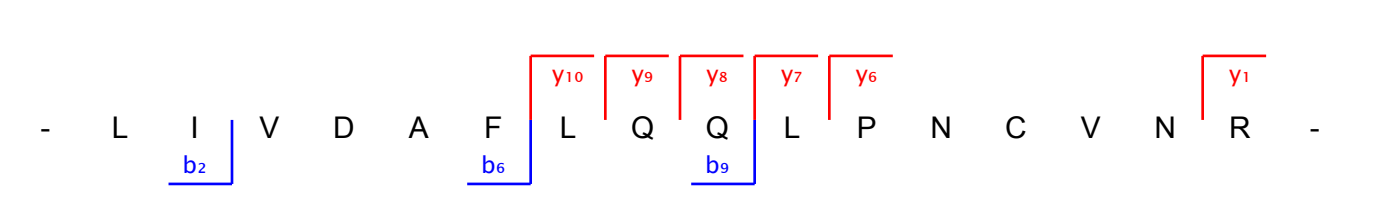

Raw file: 20171215\_MaS\_33SR\_LMH\_proteome\_02  
 Scan: 120824 Method: FTMS; HCD Score: 63.68 m/z: 752.93 Gene names: SPATA5L1

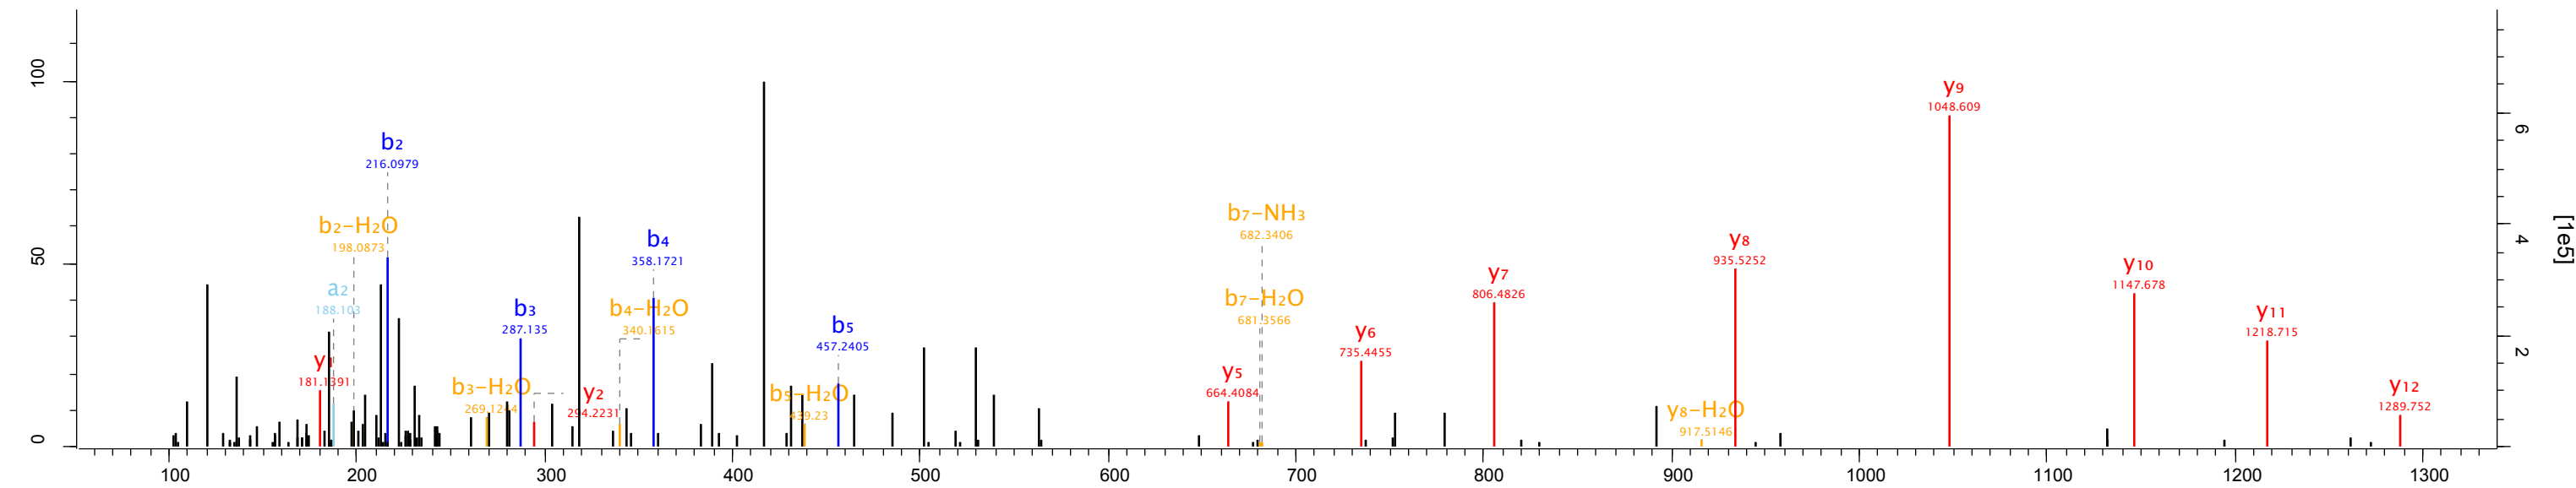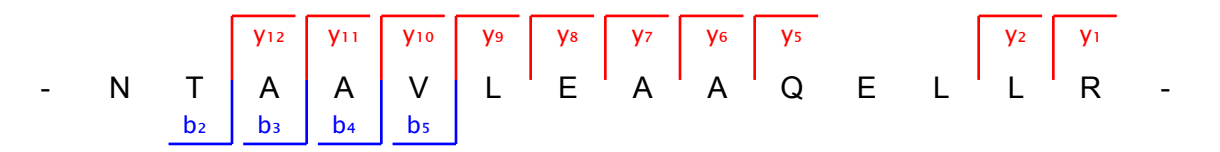

Raw file 20171215\_MaS\_33SR\_LMH\_proteome\_02 Scan 122714 Method FTMS; HCD Score 82.18 m/z 874.82 Gene names CCDC104

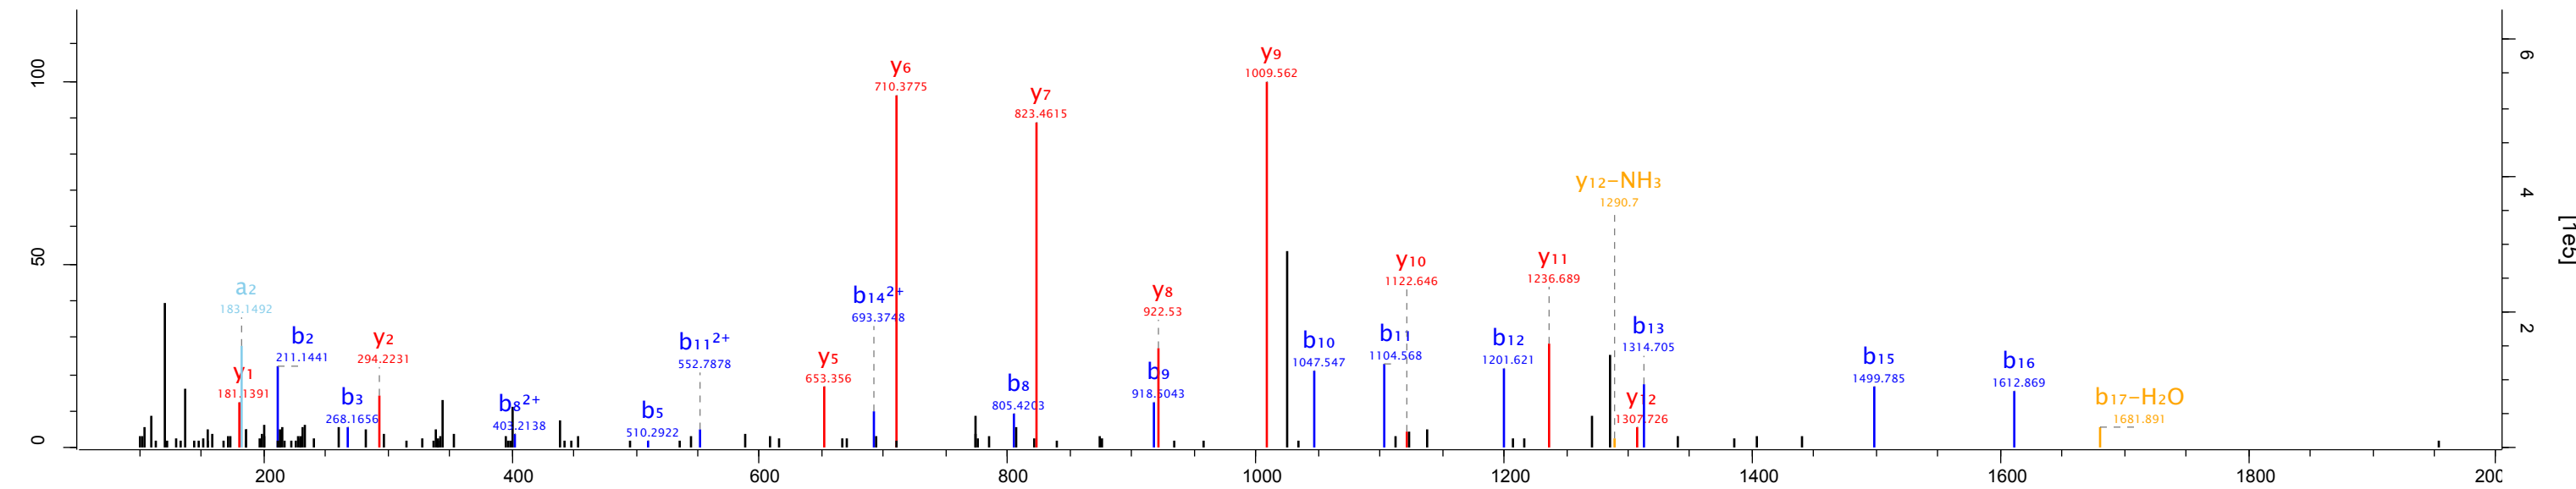

- I P G L E H A S I E G P I A N L S V L G T E E L R -

Fragmentation labels below the sequence:

- b2 (under P), b3 (under G), b5 (under E)
- b8 (under S), b9 (under I), b10 (under E), b11 (under G), b12 (under P), b13 (under I), b14<sup>2+</sup> (under A), b15 (under N), b16 (under L)
- y12 (under A), y11 (under N), y10 (under L), y9 (under S), y8 (under V), y7 (under L), y6 (under G), y5 (under T)
- y2 (under L), y1 (under R)

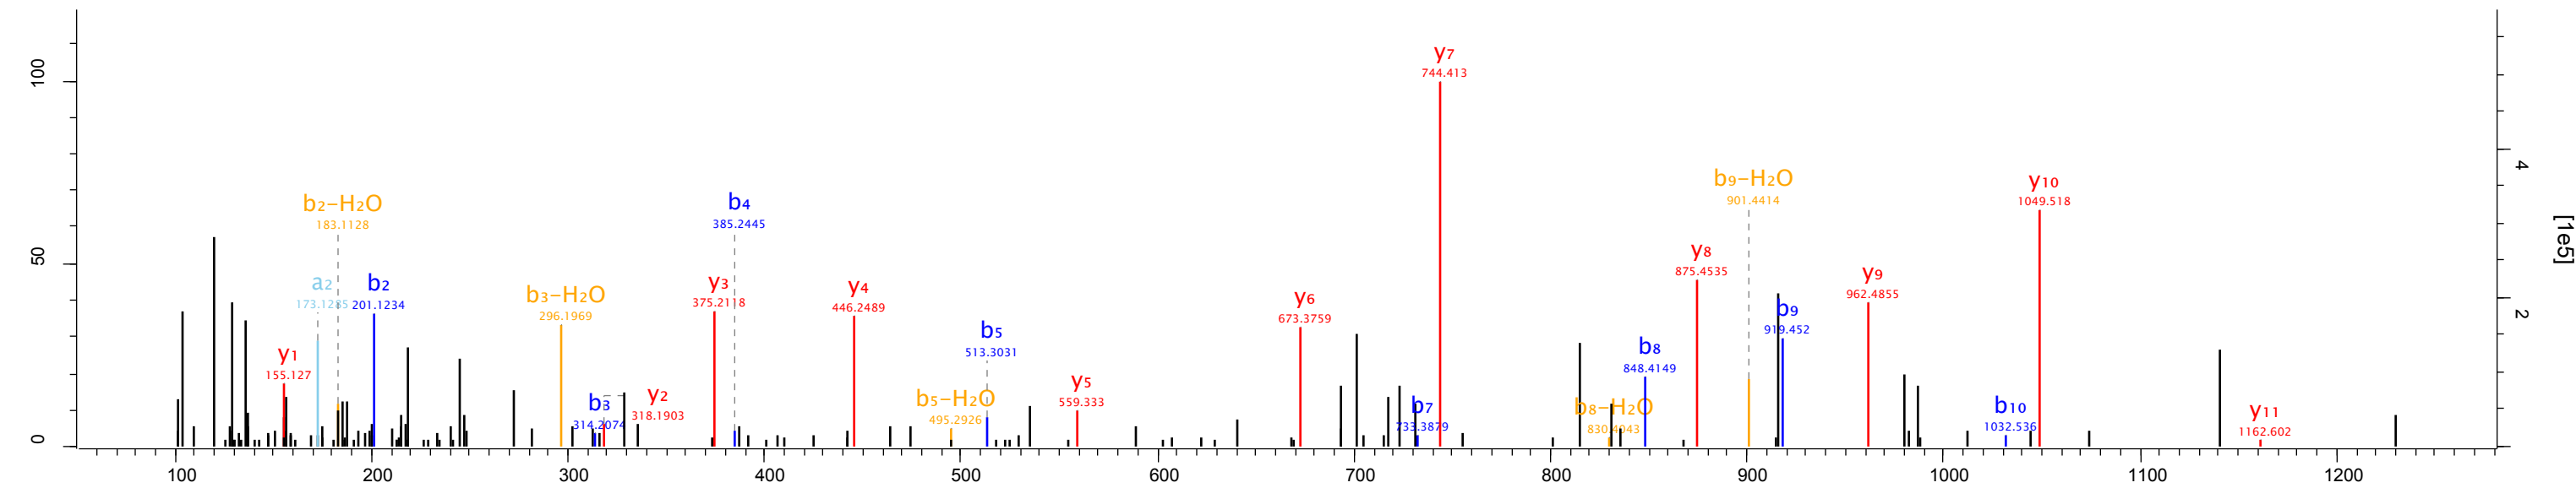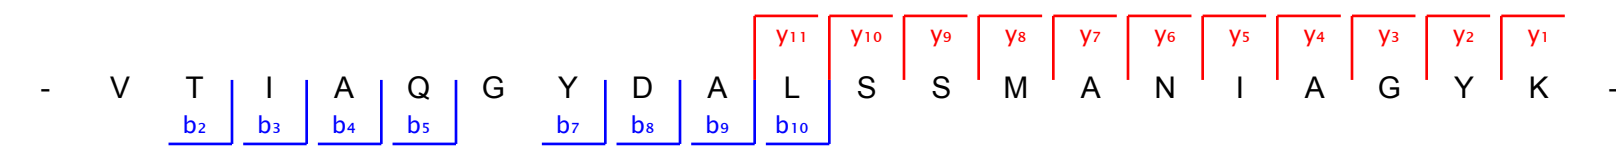

Raw file 20171215\_MaS\_33SR\_LMH\_proteome\_02 Scan 125894 Method FTMS; HCD Score 61.16 m/z 594.84 Gene names NDUFS8

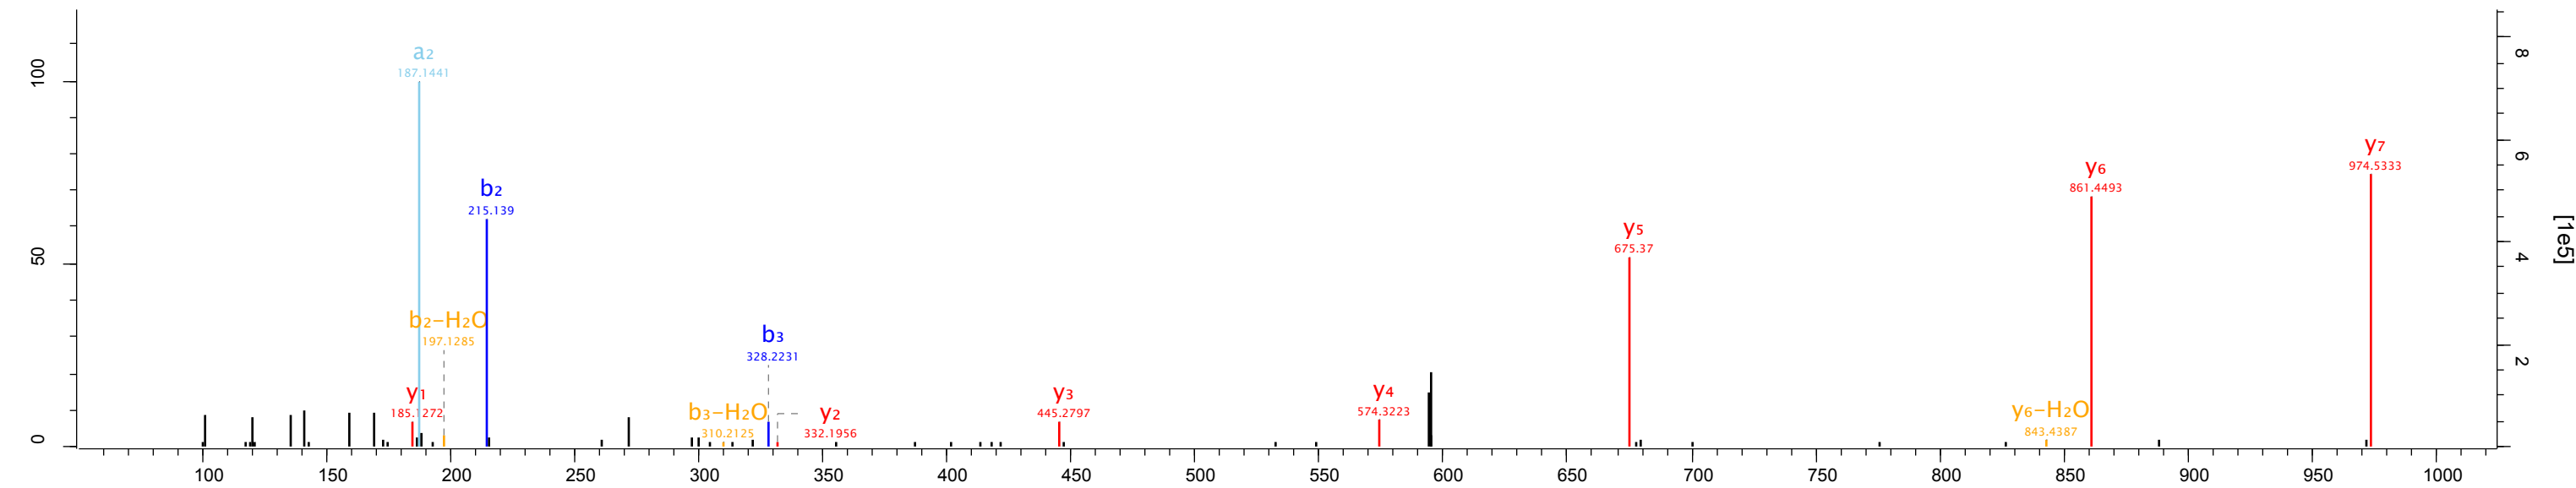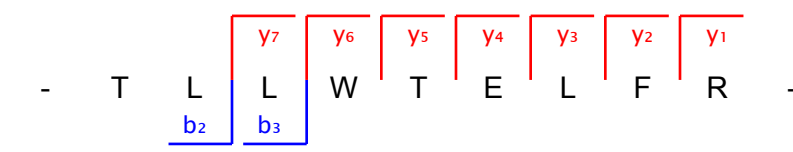

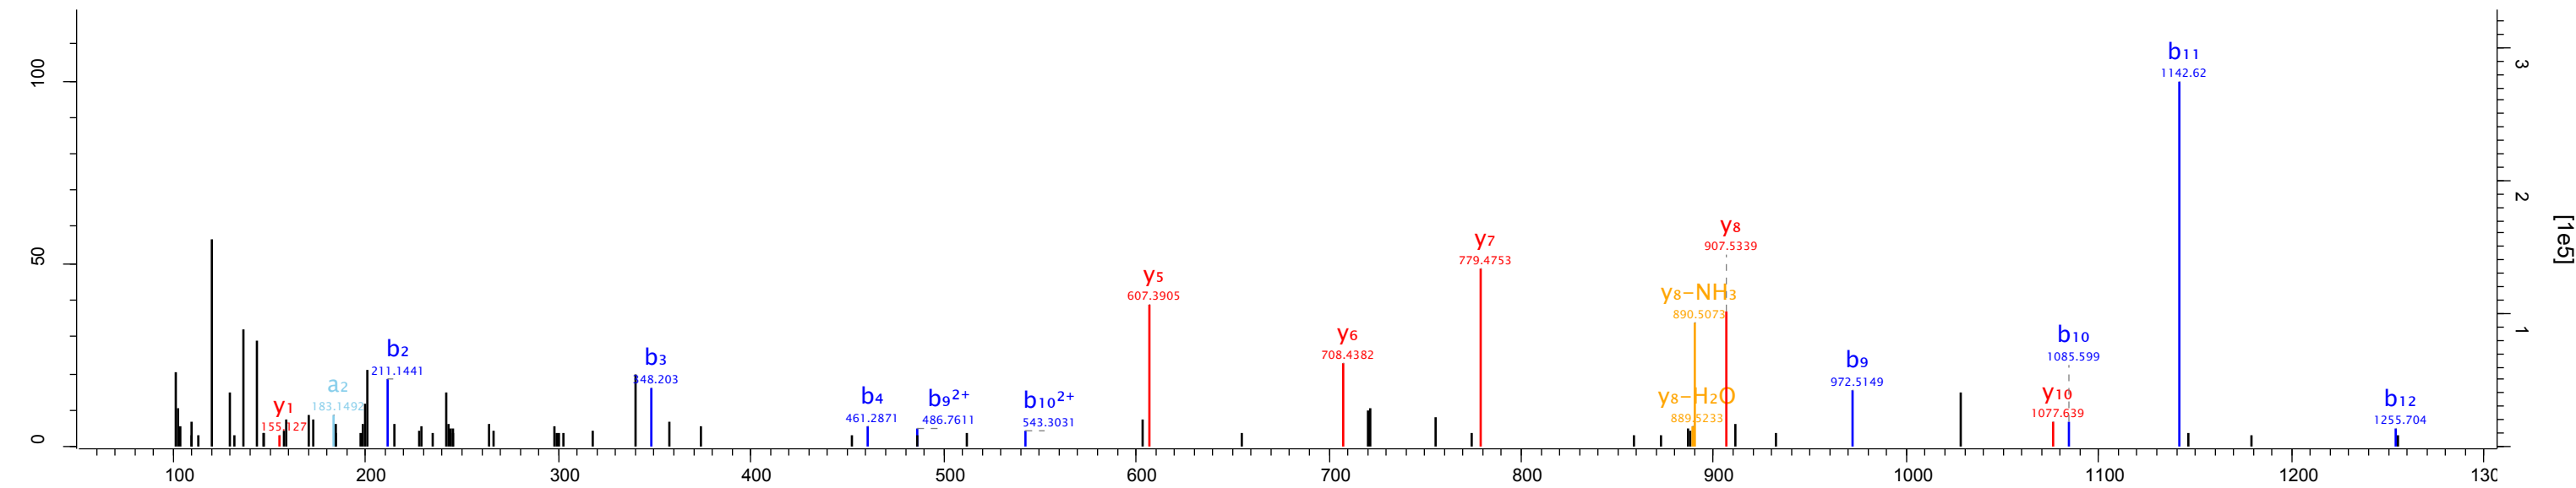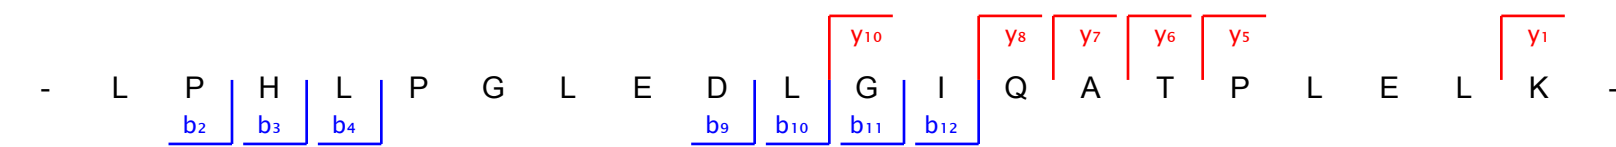

Raw file: 20171215\_MaS\_33SR\_LMH\_proteome\_02  
 Scan: 129404 Method: FTMS; HCD Score: 124.29 m/z: 698.05 Gene names: SCOC

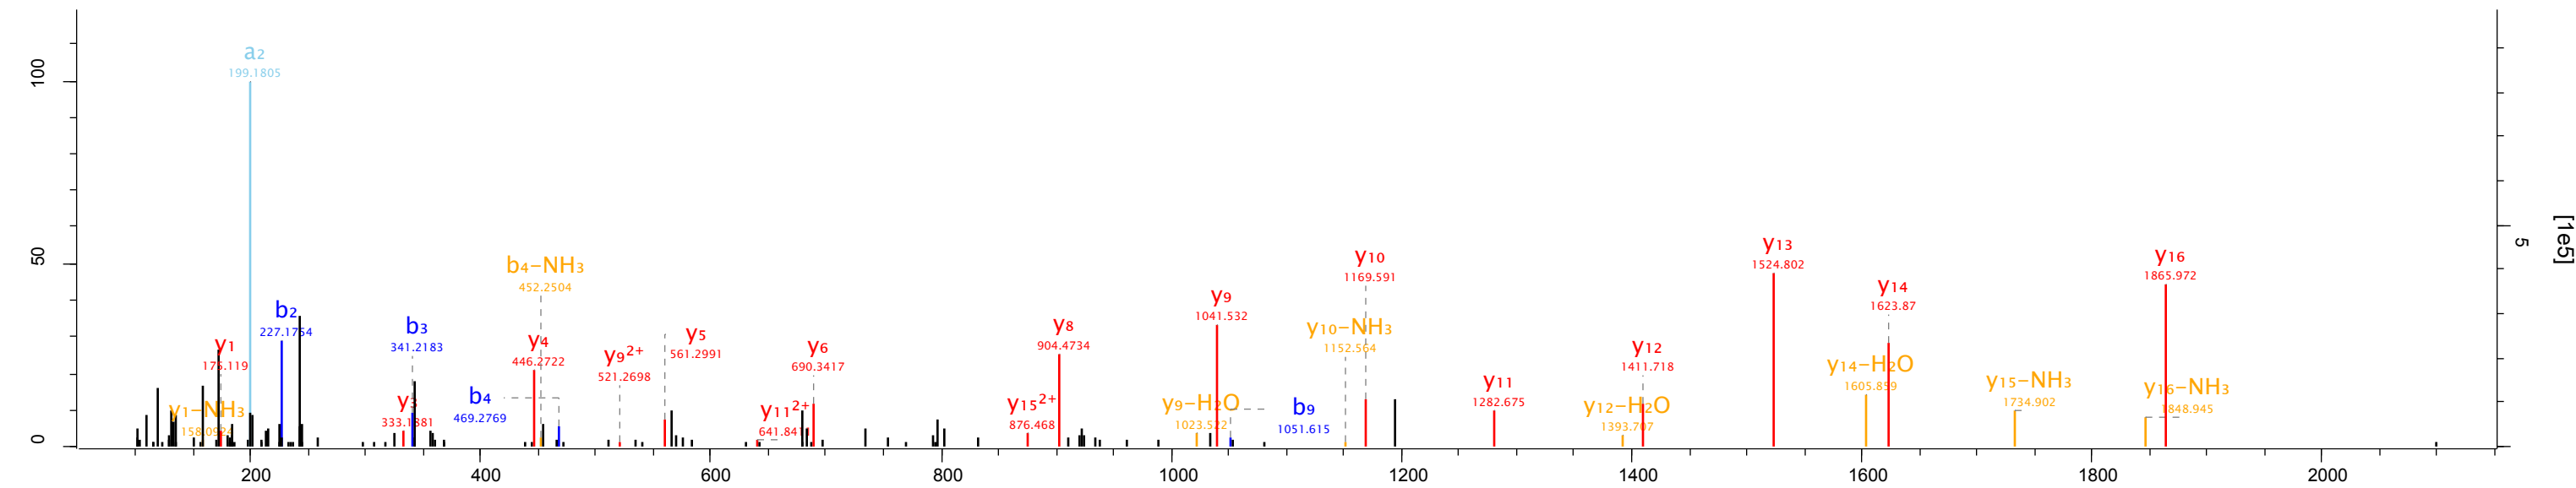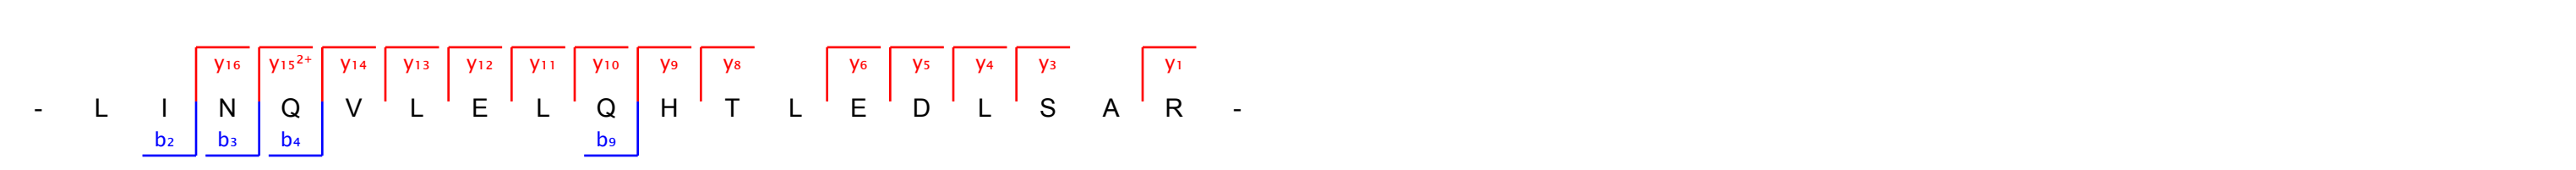

Raw file 20171215\_MaS\_33SR\_LMH\_proteome\_02 Scan 130044 Method FTMS; HCD Score 65.22 m/z 402.6 Gene names MAGEA11

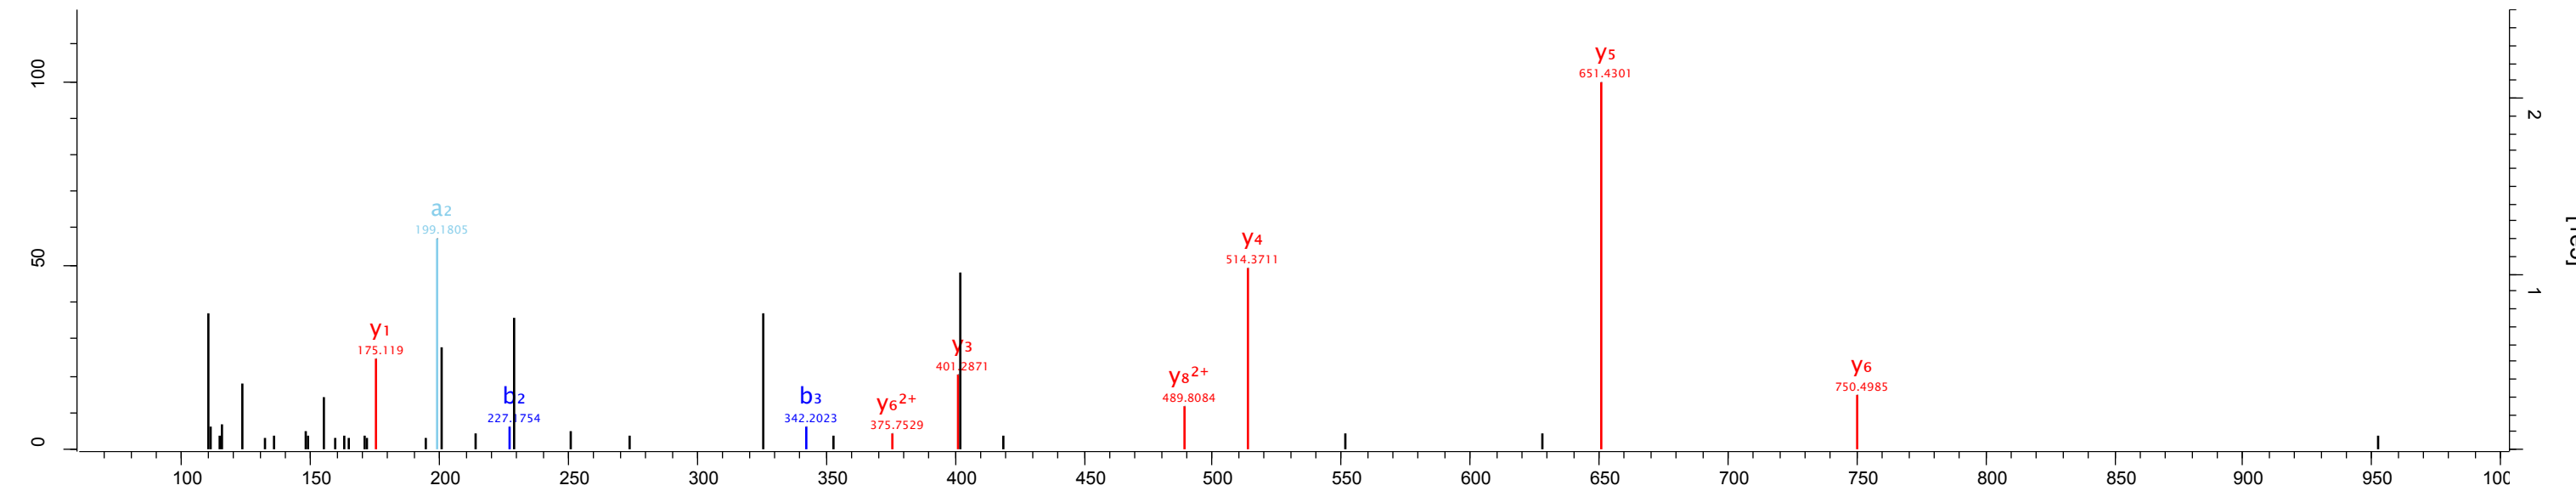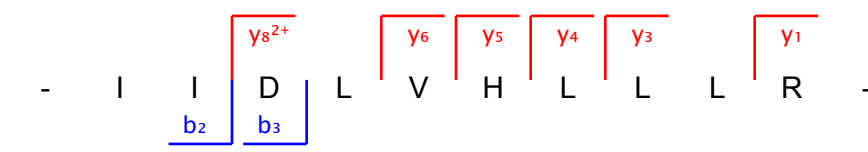



Raw file 20171215\_MaS\_33SR\_LMH\_proteome\_02 Scan 131534 Method FTMS; HCD Score 50.78 m/z 938.16 Gene names TARS2

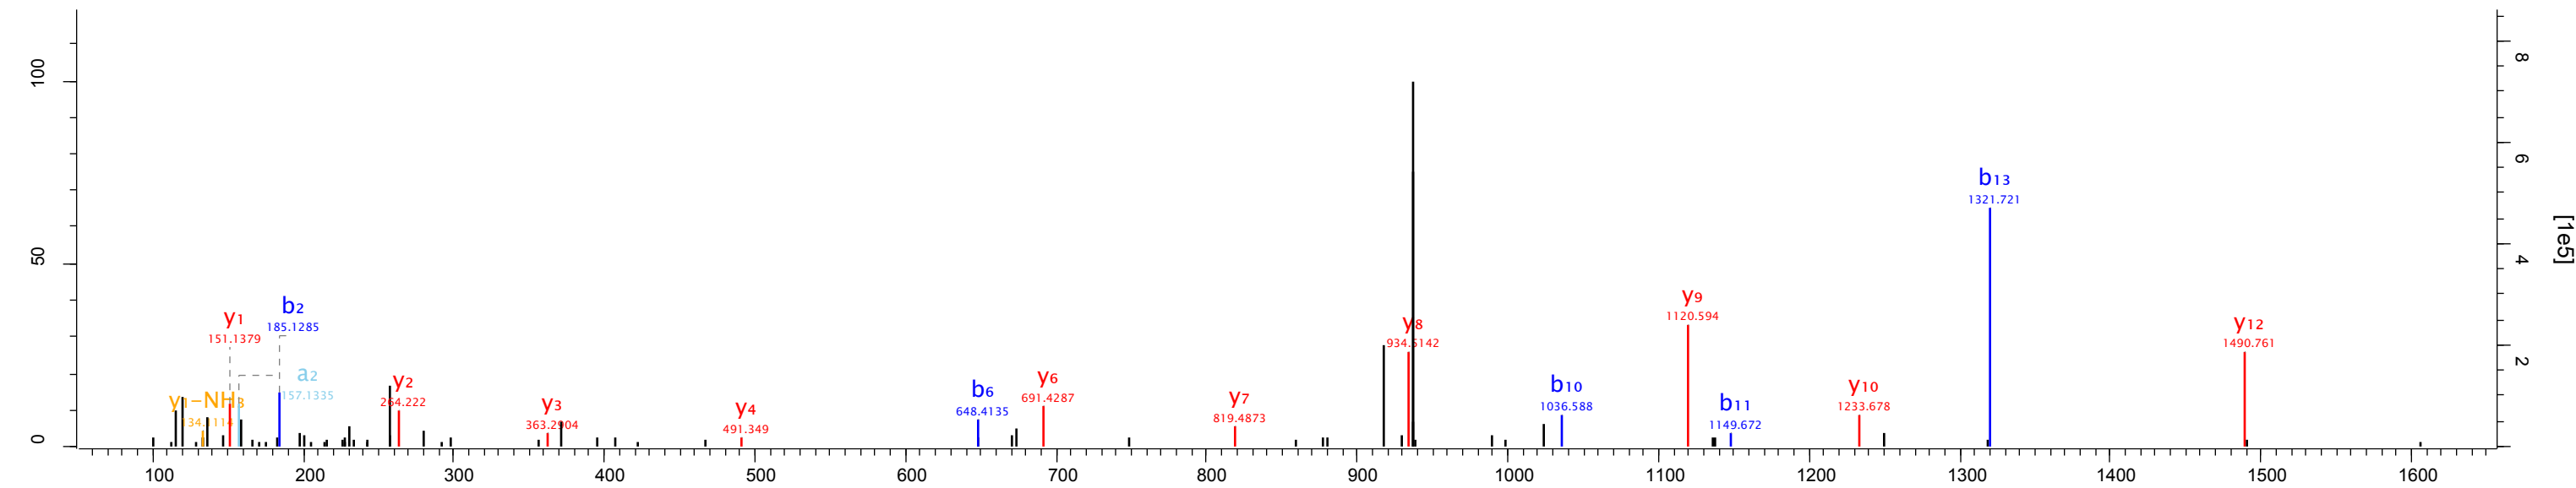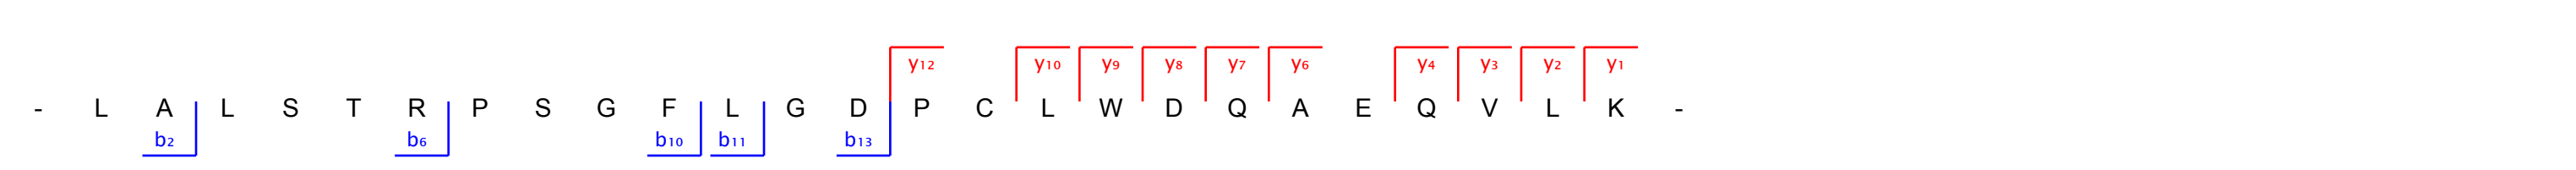

Raw file 20171215\_MaS\_33SR\_LMH\_proteome\_02 Scan 143794 Method FTMS; HCD Score 45.35 m/z 782.06 Gene names ARIH2

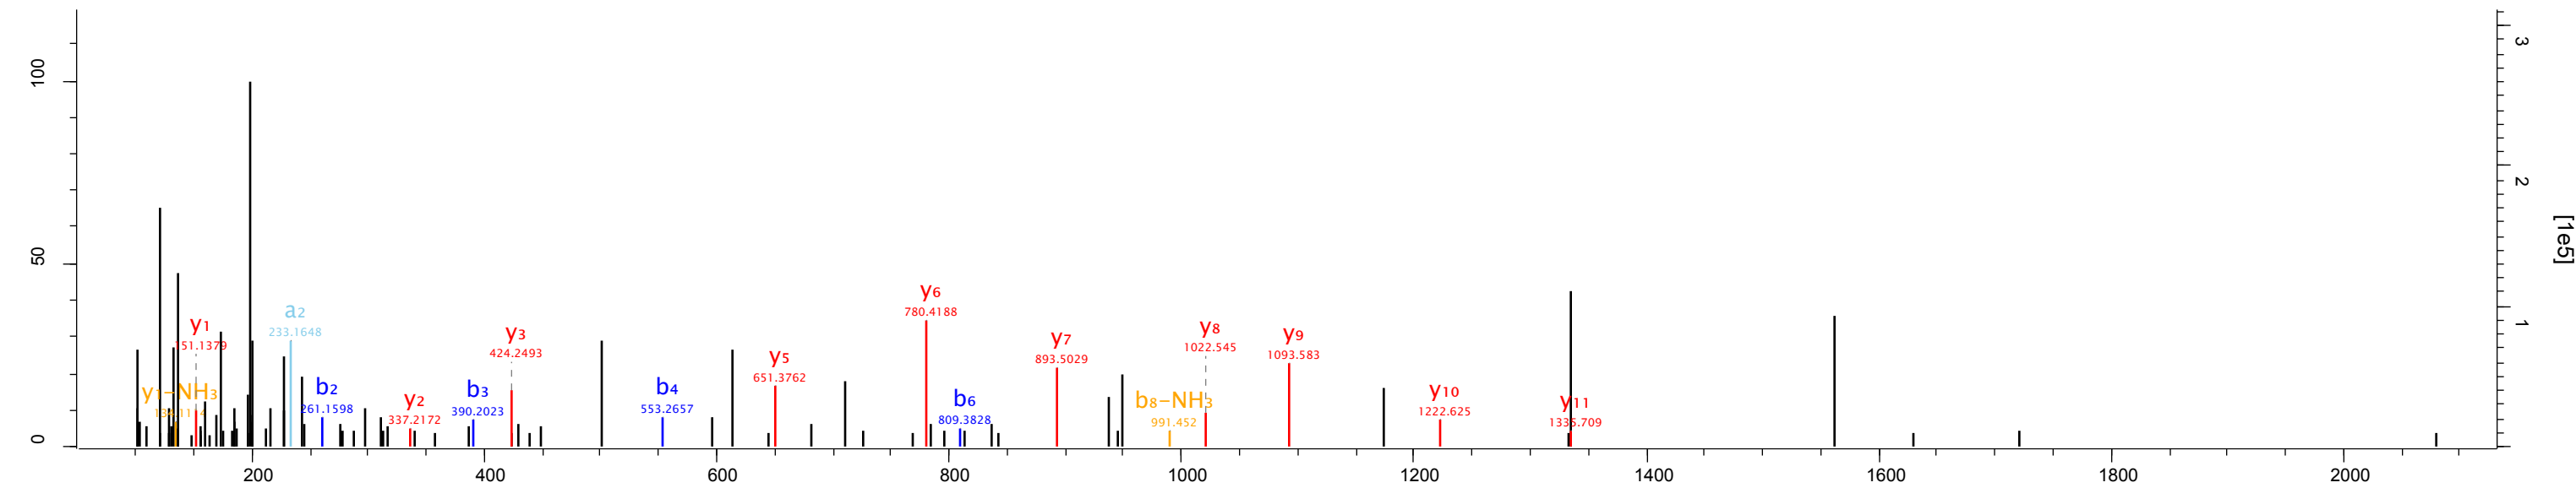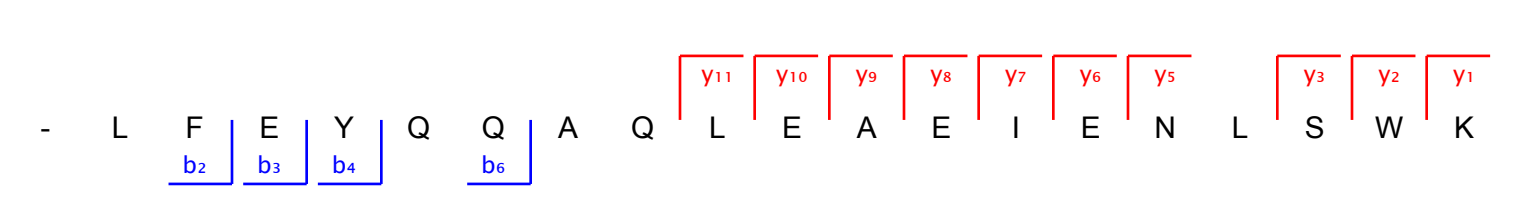

Raw file: 20171215\_MaS\_33SR\_LMH\_proteome\_02  
 Scan: 32314 Method: FTMS; HCD Score: 74.7 m/z: 555.81 Gene names: C19orf43

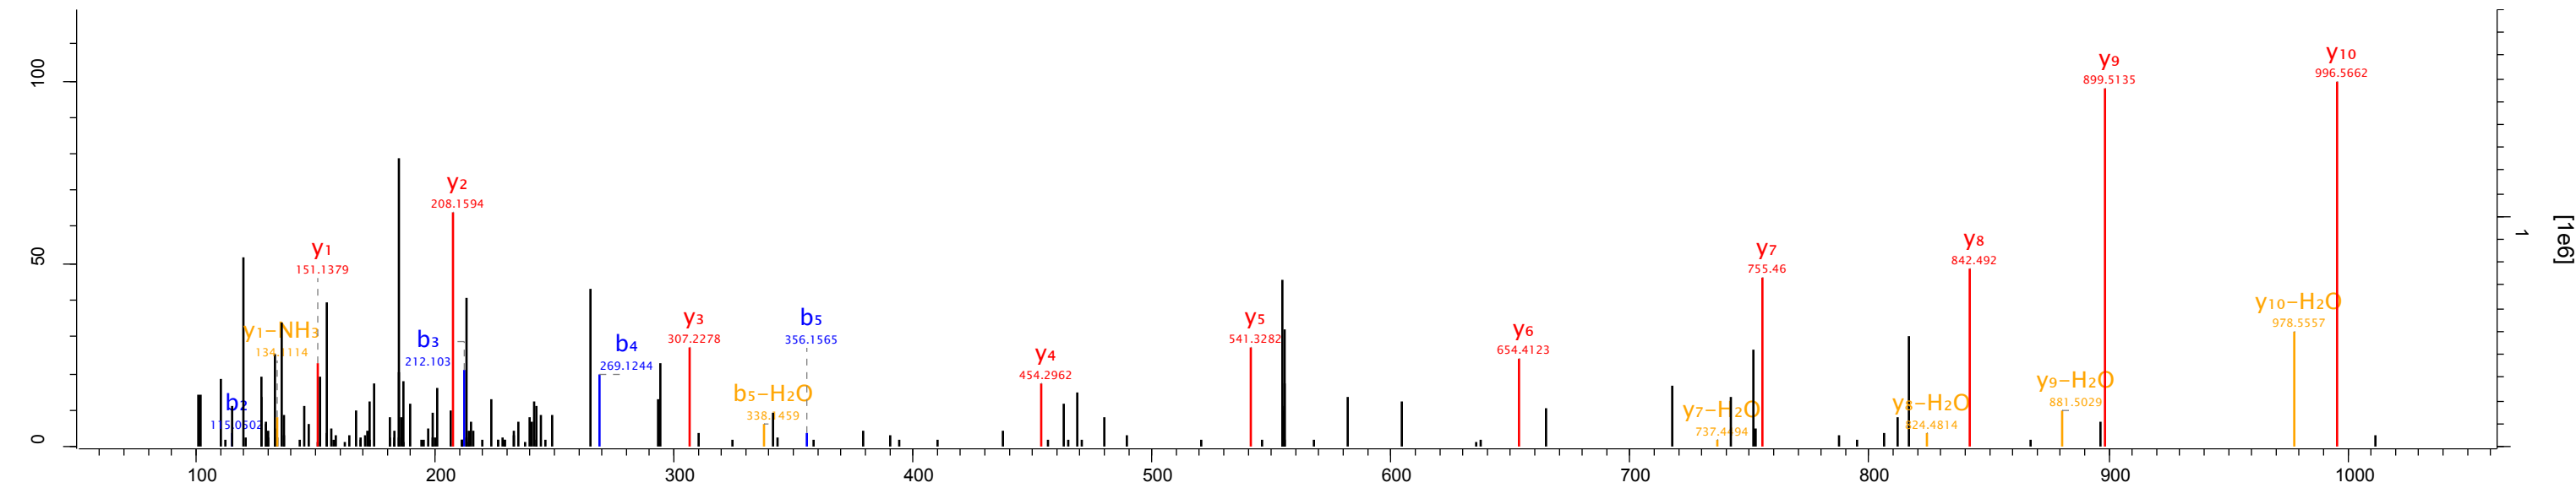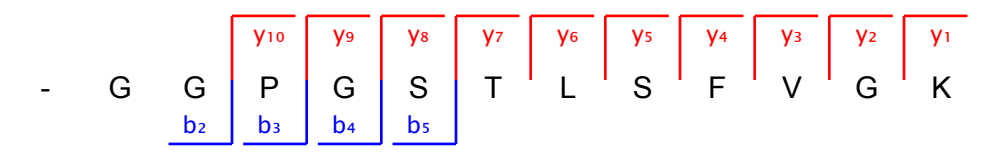

20171215\_MaS\_33SR\_LMH\_proteome\_02 42394 FTMS; HCD 89.23 721.86 SSU72

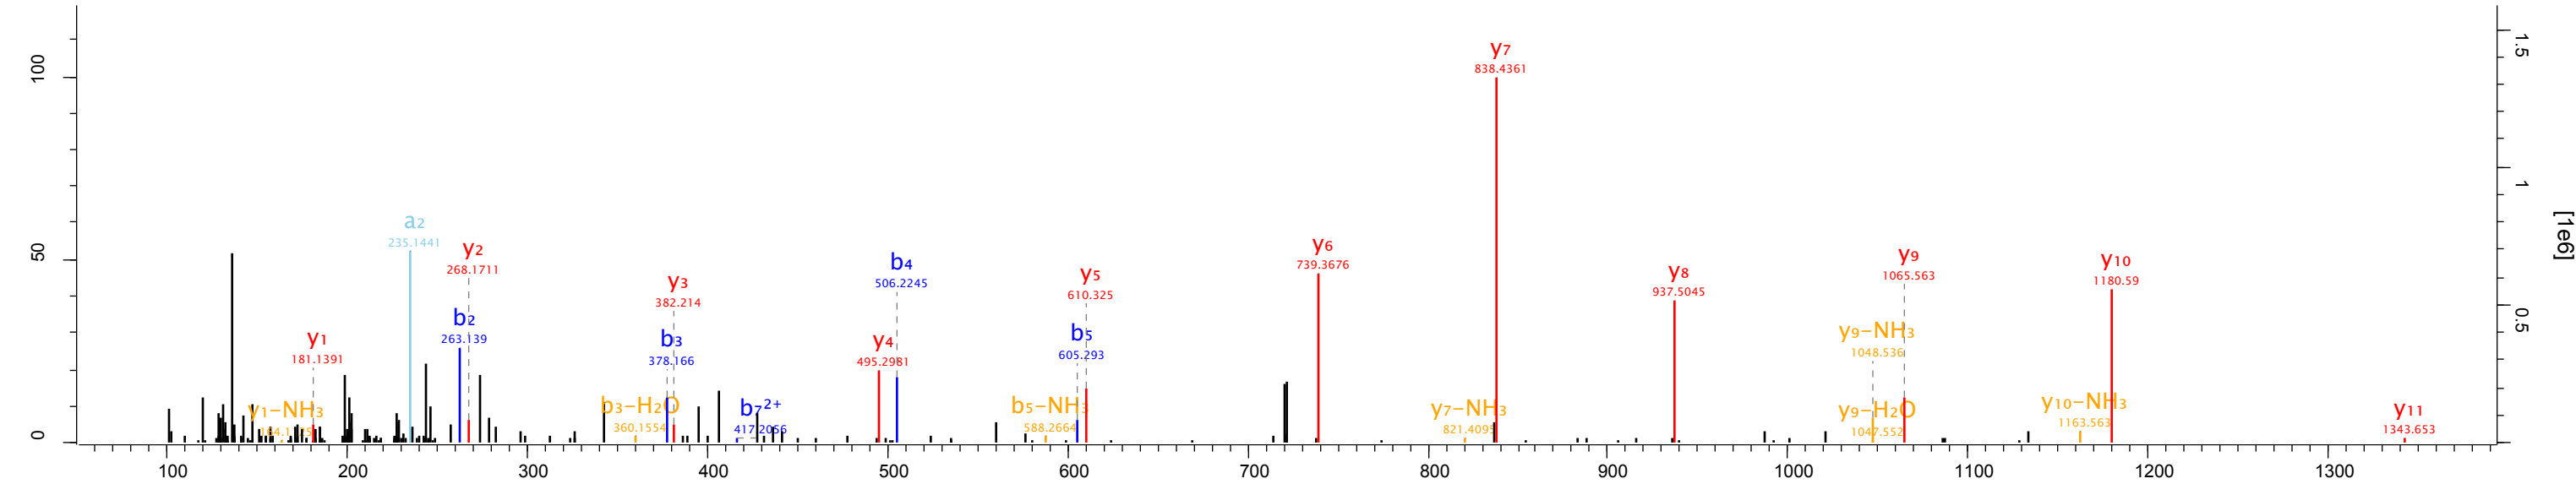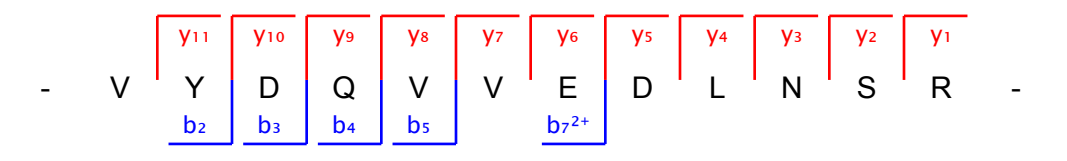

20171215\_MaS\_33SR\_LMH\_proteome\_02 49544 FTMS; HCD 85.81 588.85 KATNAL2

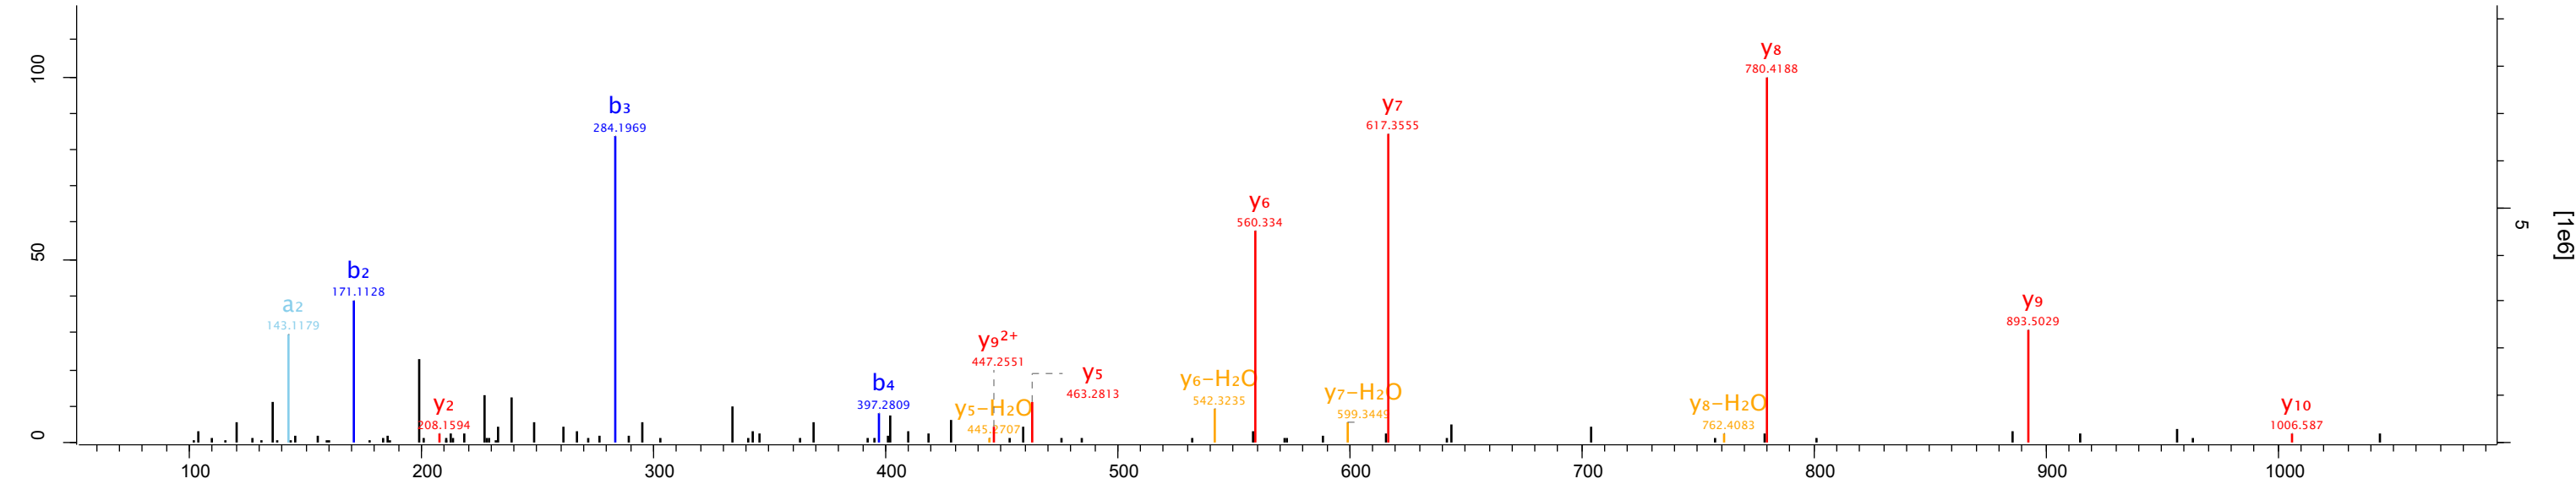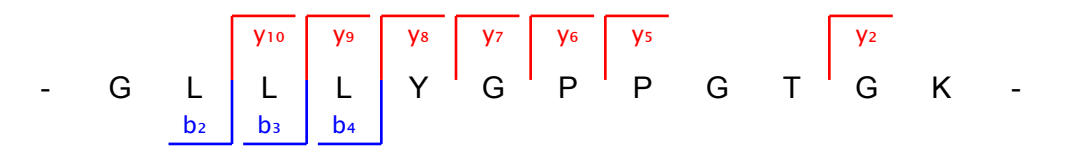

Raw file 20171215\_MaS\_33SR\_LMH\_proteome\_02 Scan 50044 Method FTMS; HCD Score 53.45 m/z 513.6 Gene names CDC26

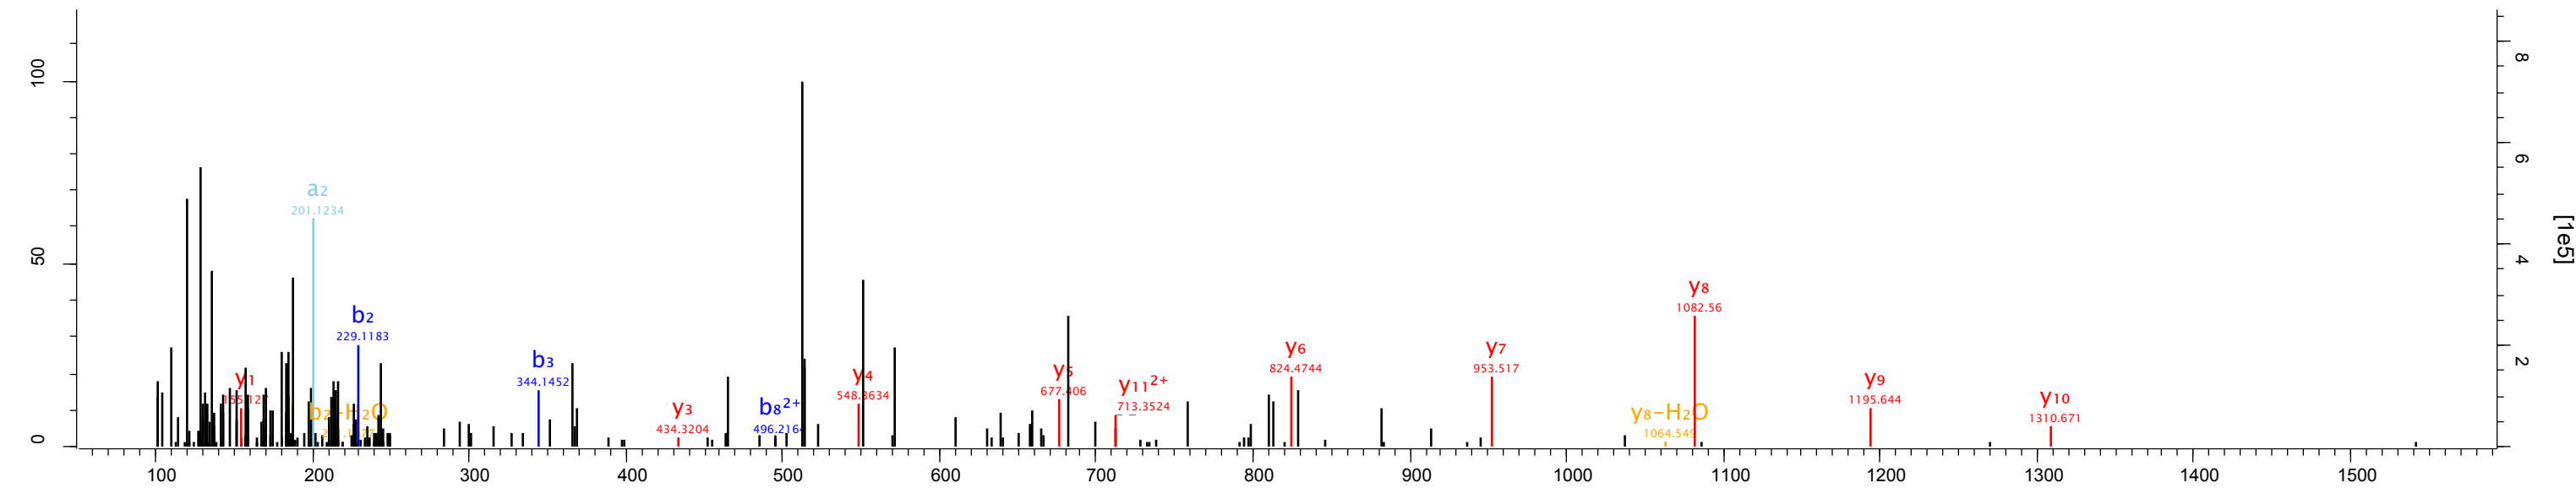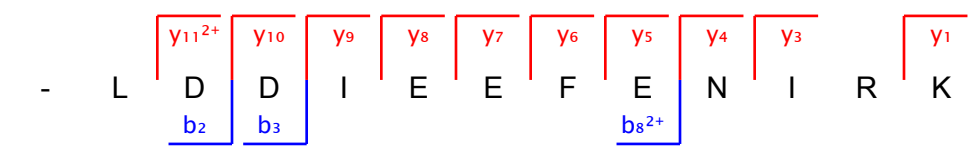

Raw file: 20171215\_MaS\_33SR\_LMH\_proteome\_02  
 Scan: 52364 Method: FTMS; HCD Score: 89.17 m/z: 569.3 Gene names: POLR2J3;POLR2J2;POLR2J

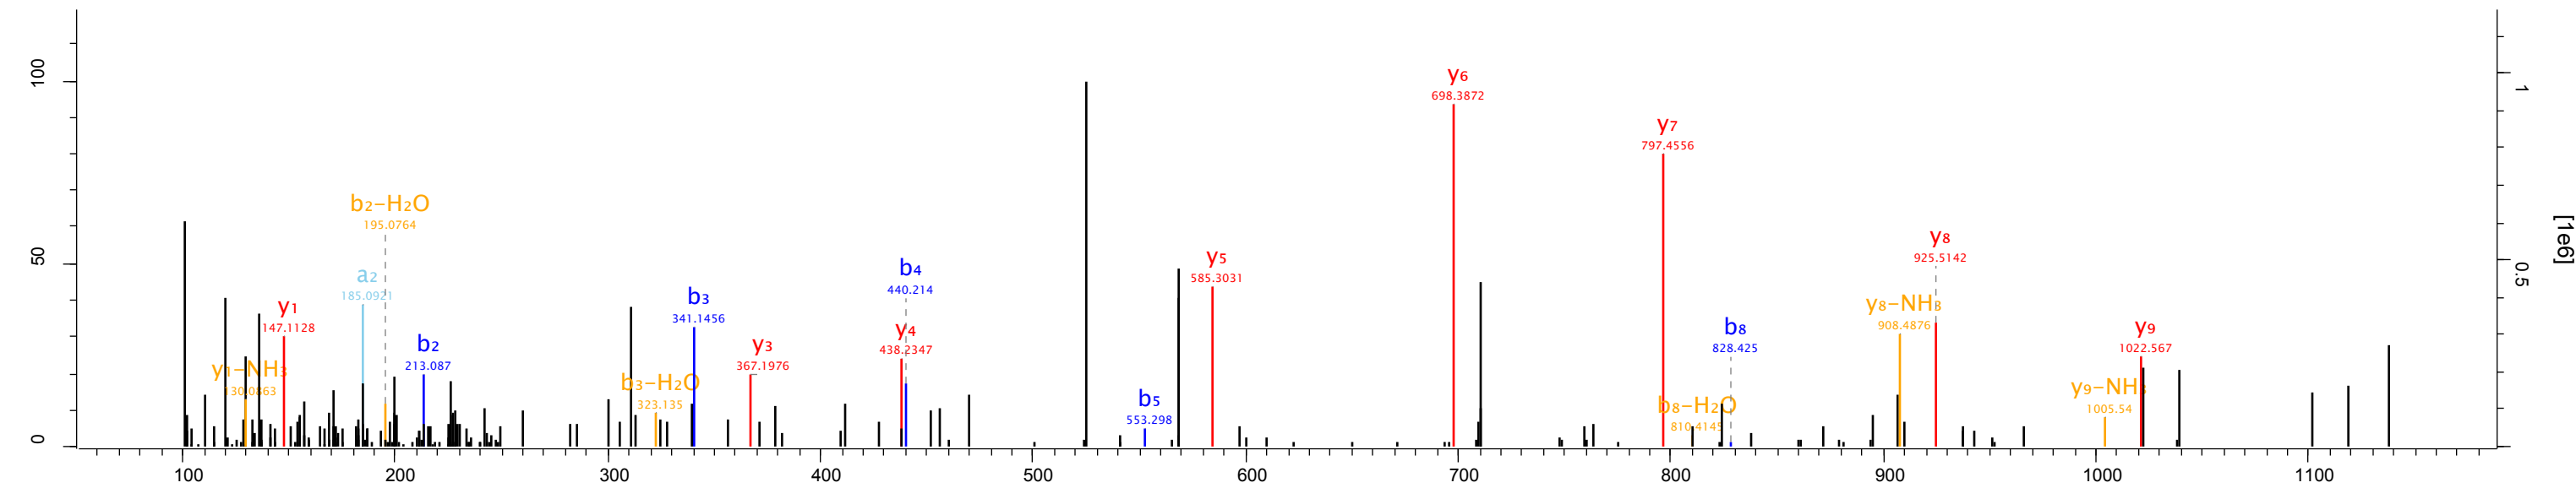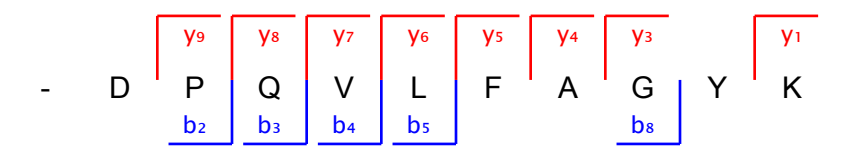

Raw file  
 20171215\_MaS\_33SR\_LMH\_proteome\_02  
 Scan 65014 Method FTMS; HCD Score 86.78 m/z 565.3 Gene names SCO1

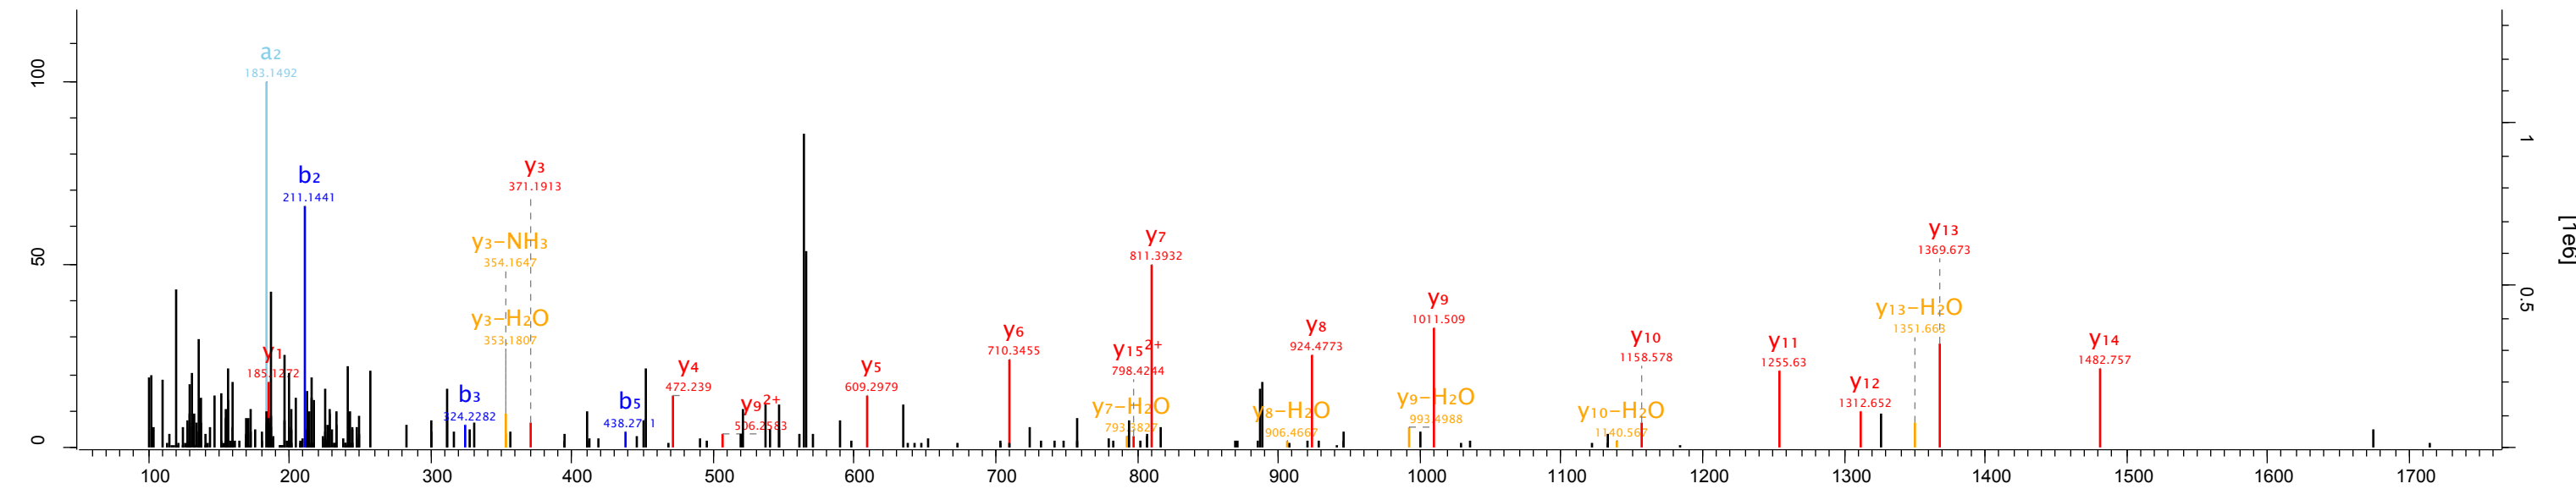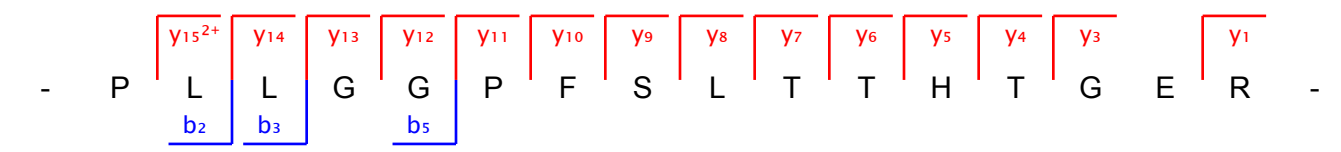



Raw file

20171215\_MaS\_33SR\_LMH\_proteome\_02

| Scan  | Method    | Score | m/z    | Gene names |
|-------|-----------|-------|--------|------------|
| 74434 | FTMS; HCD | 61.11 | 731.87 | JAGN1      |

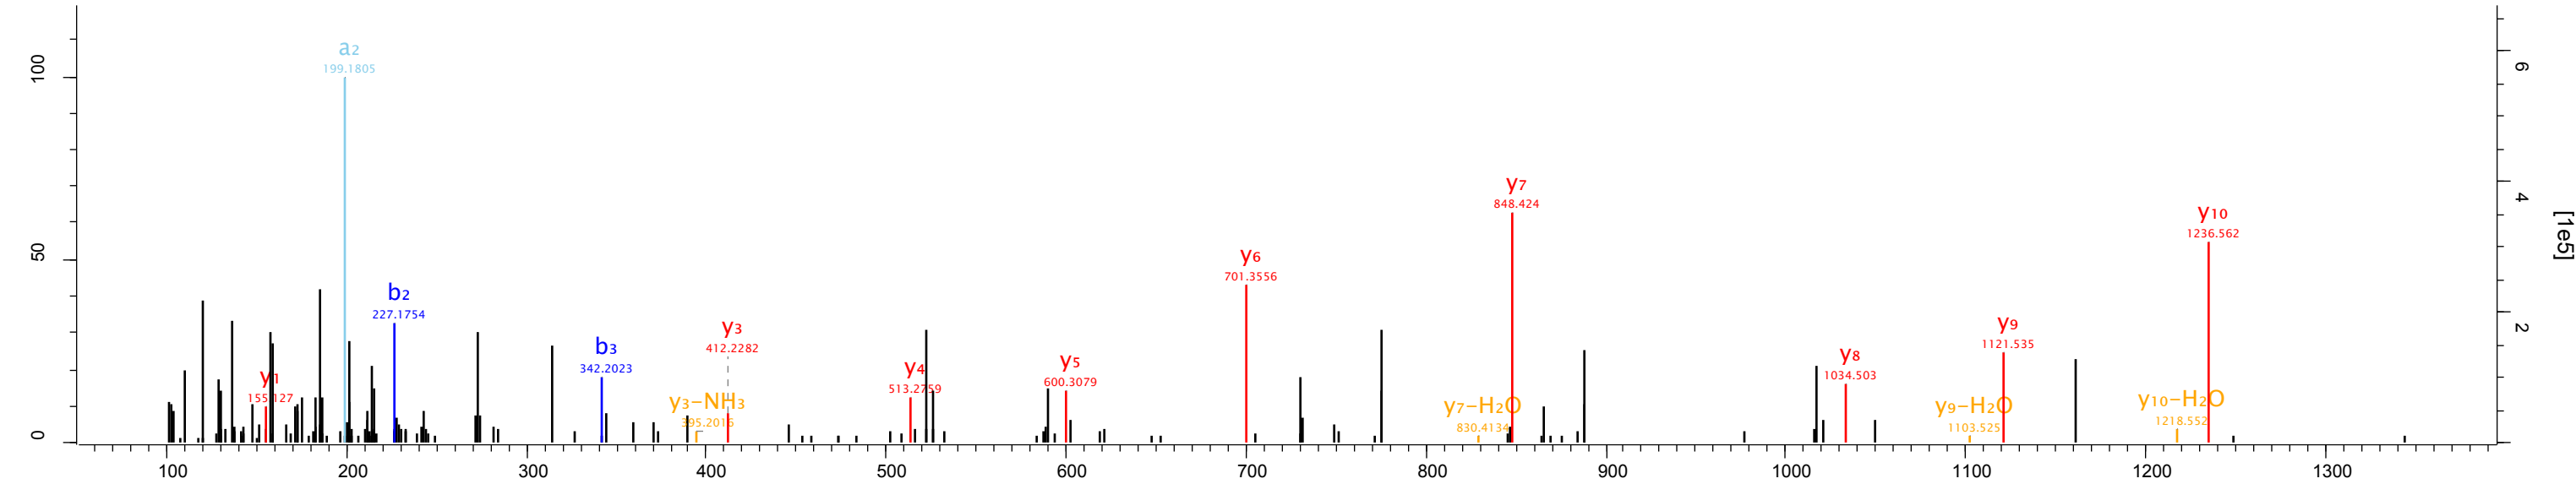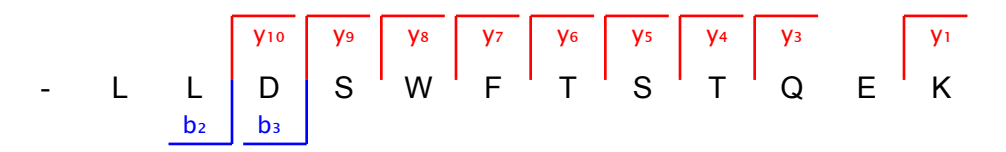

Raw file: 20171215\_MaS\_33SR\_LMH\_proteome\_02  
 Scan: 93934 Method: FTMS; HCD Score: 95.26 m/z: 814.43 Gene names: COX7A2

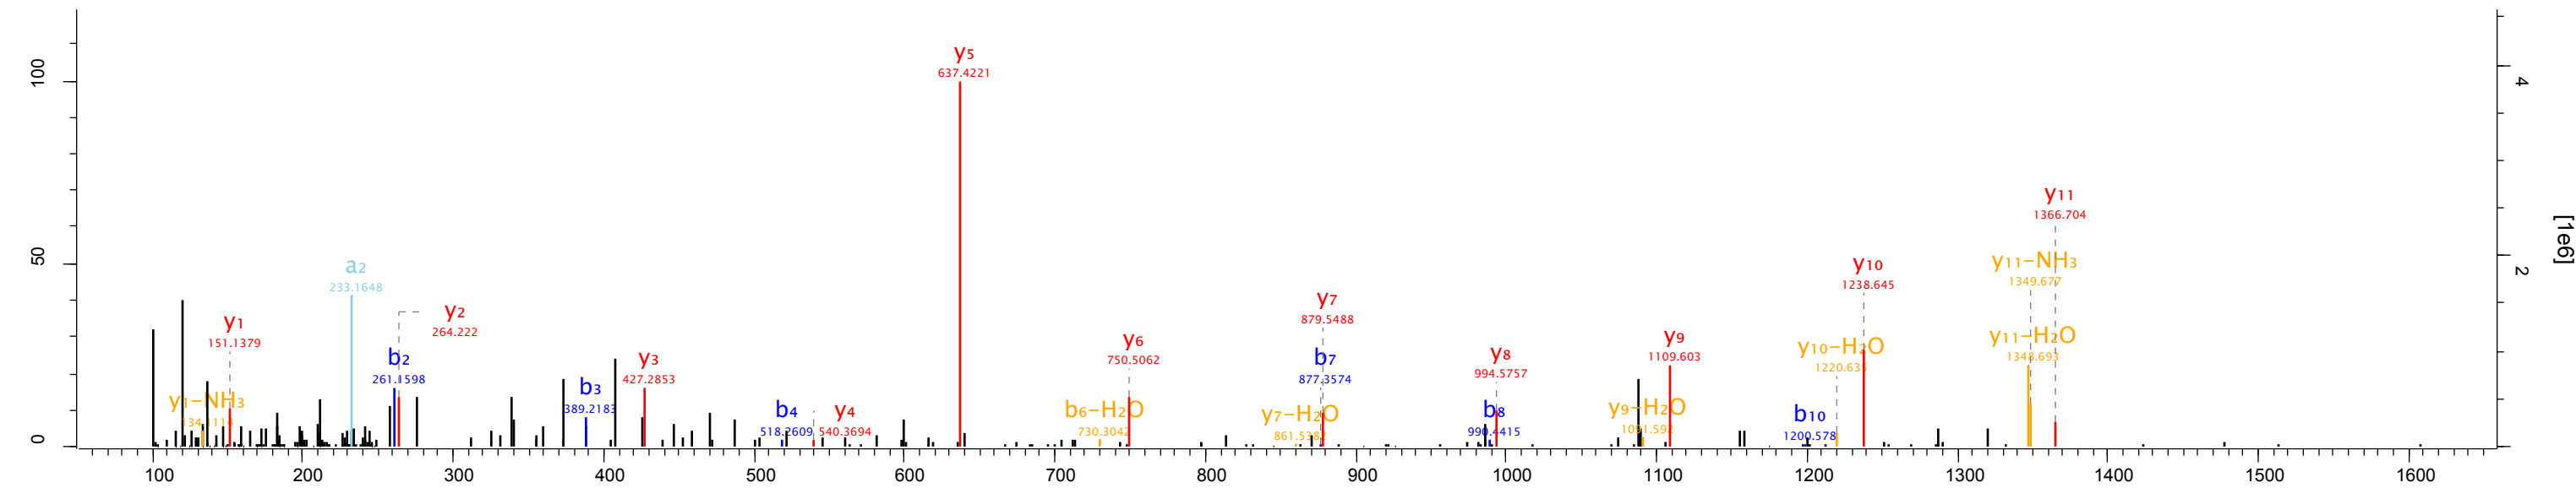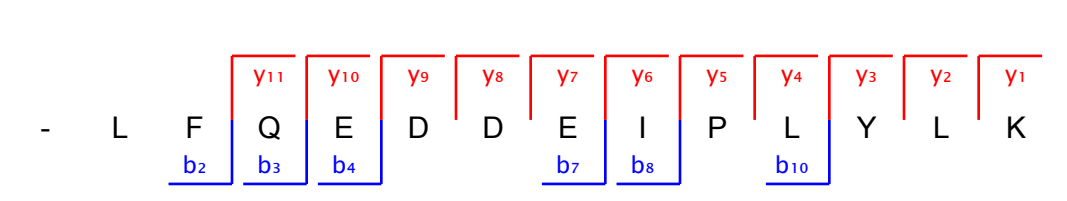

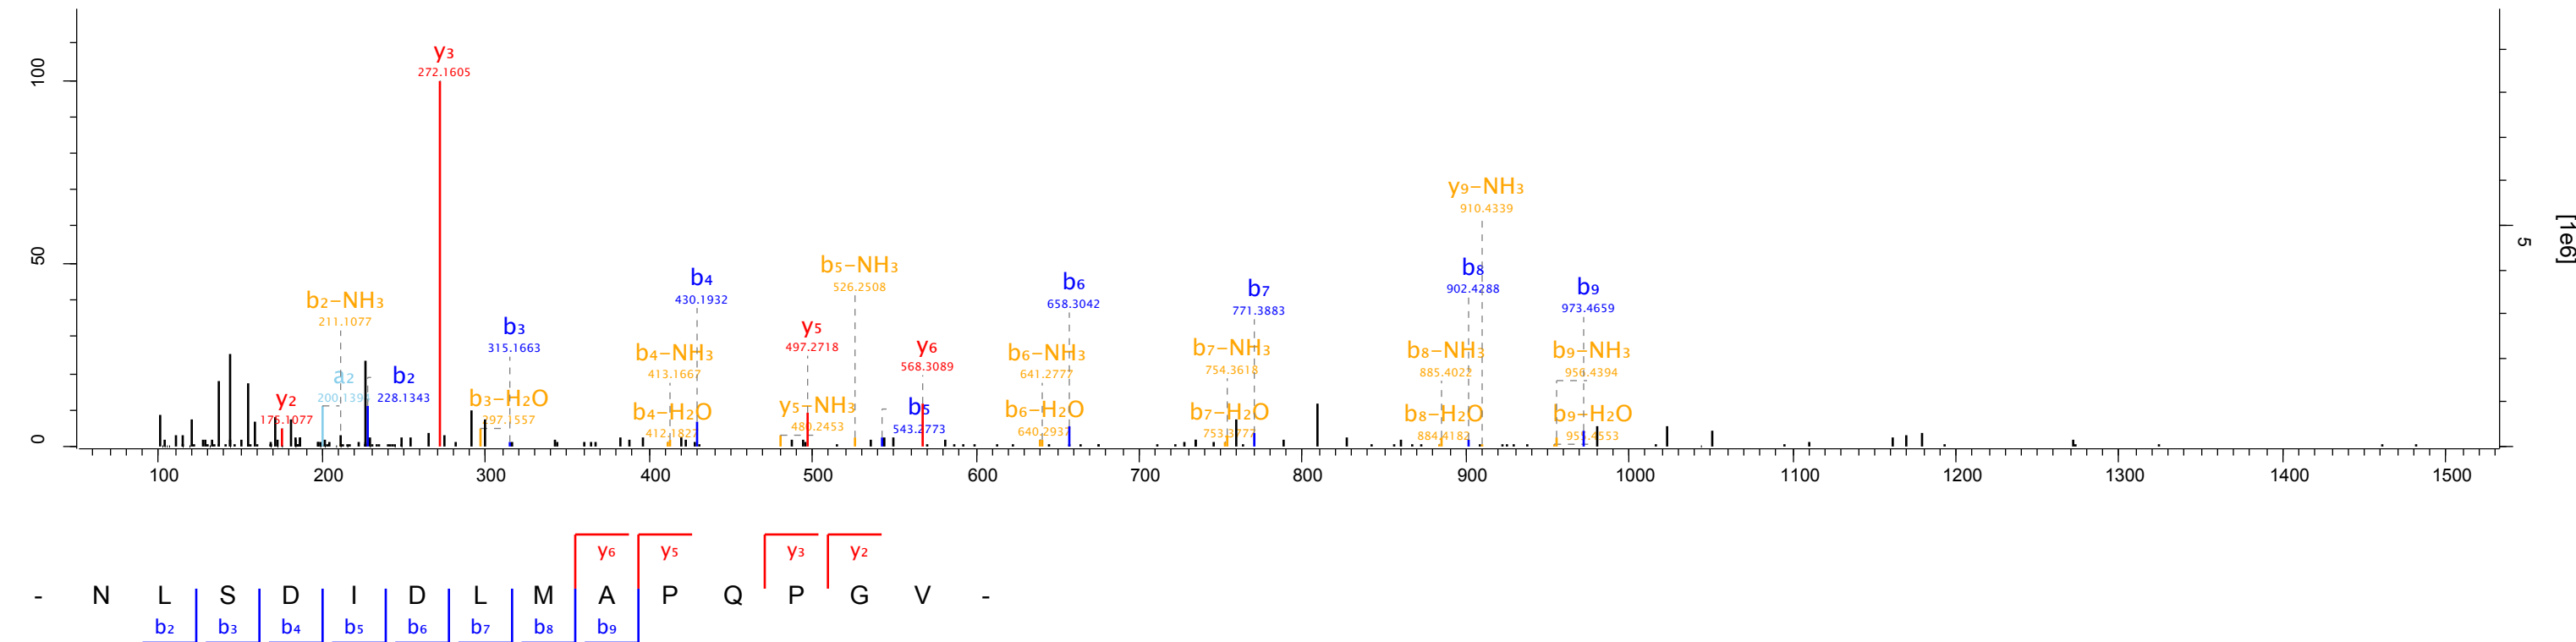

Raw file 20171215\_MaS\_33SR\_LMH\_phospho\_01 Scan 11305 Method FTMS; HCD Score 89.83 m/z 840.83 Gene names DSP

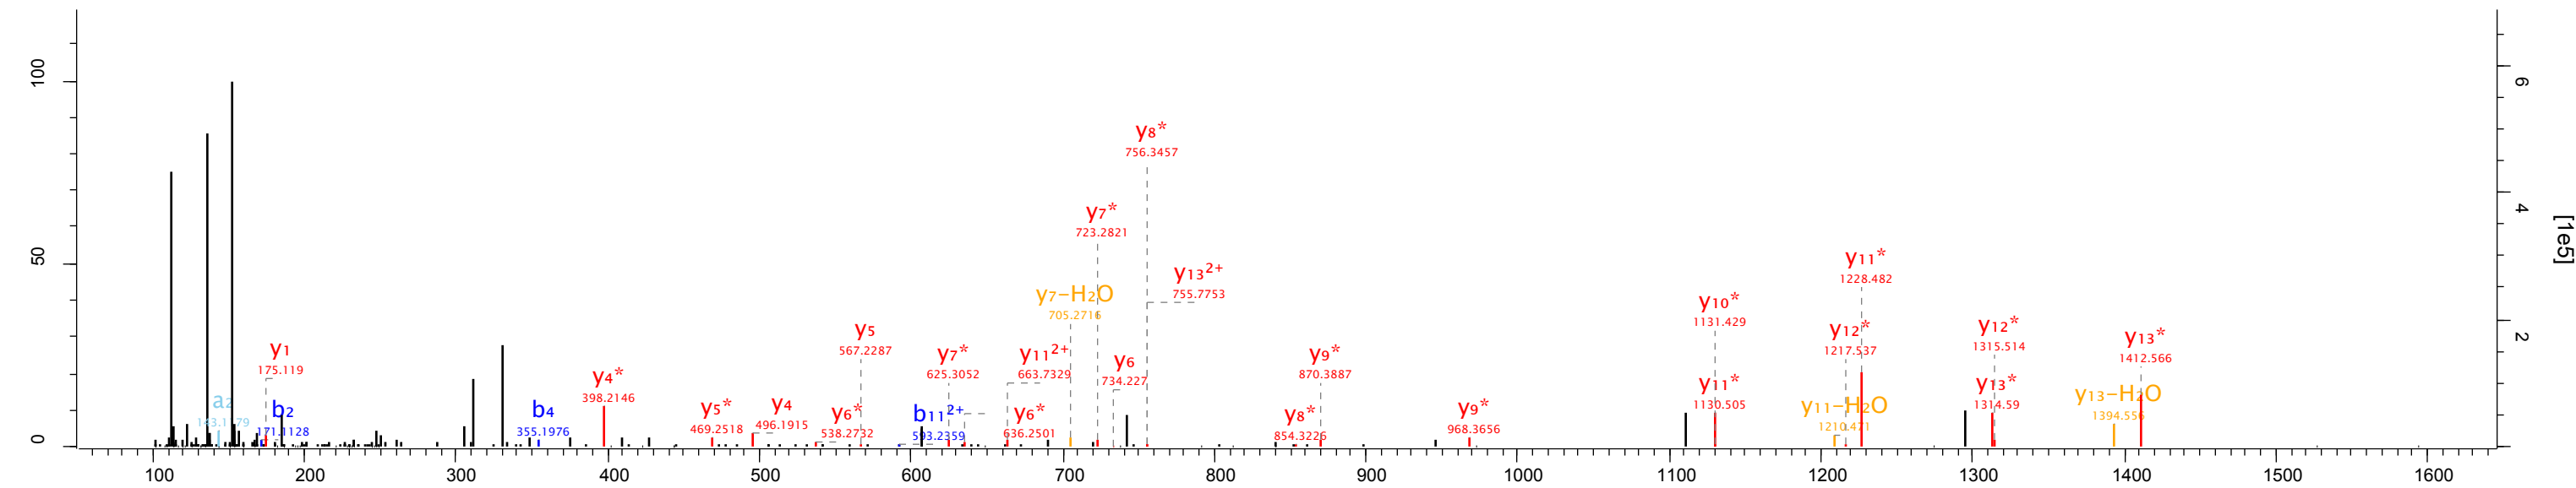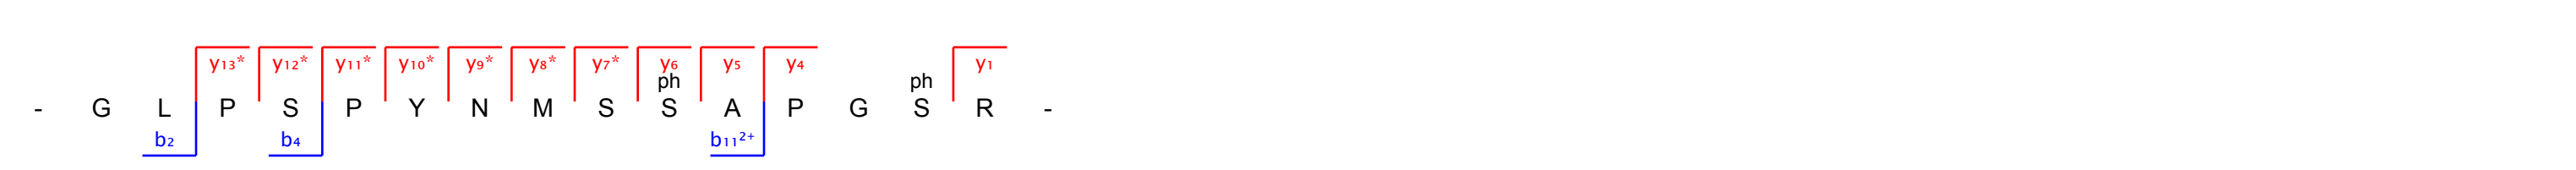

Raw file 20171215\_MaS\_33SR\_LMH\_phospho\_01 Scan 12385 Method FTMS; HCD Score 53.6 m/z 742.83 Gene names ARHGAP23

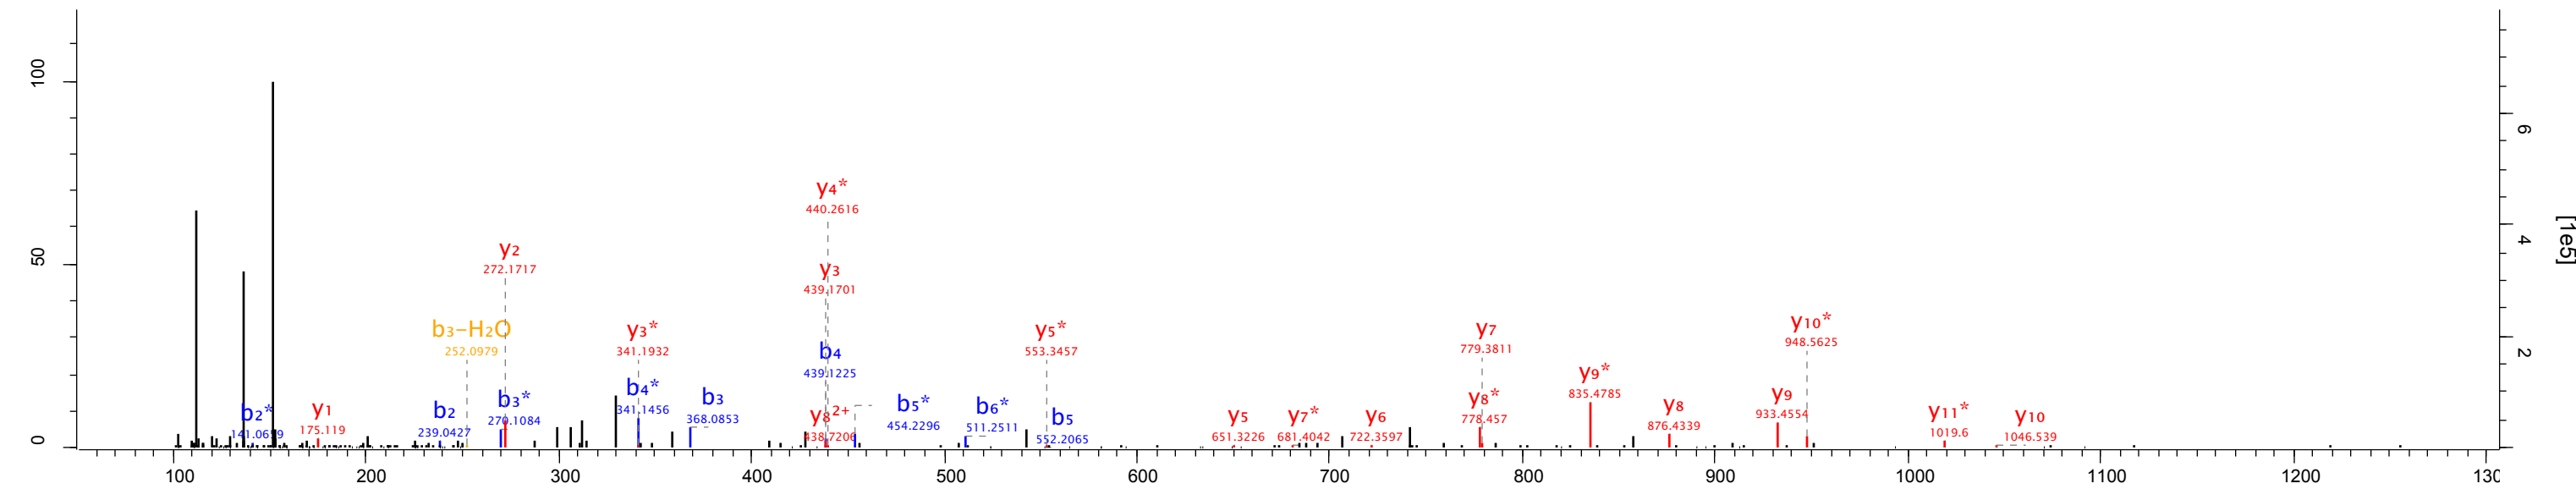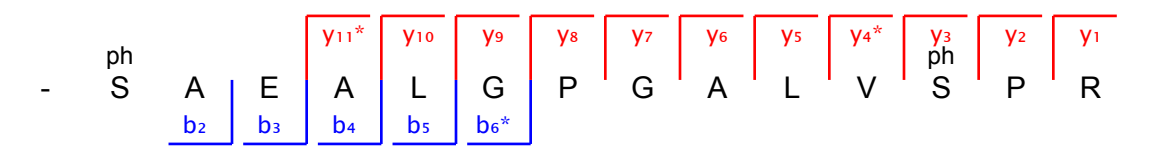

Raw file 20171215\_MaS\_33SR\_LMH\_phospho\_01 Scan 7615 Method FTMS; HCD Score 132.3 m/z 864.3 Gene names RANBP10

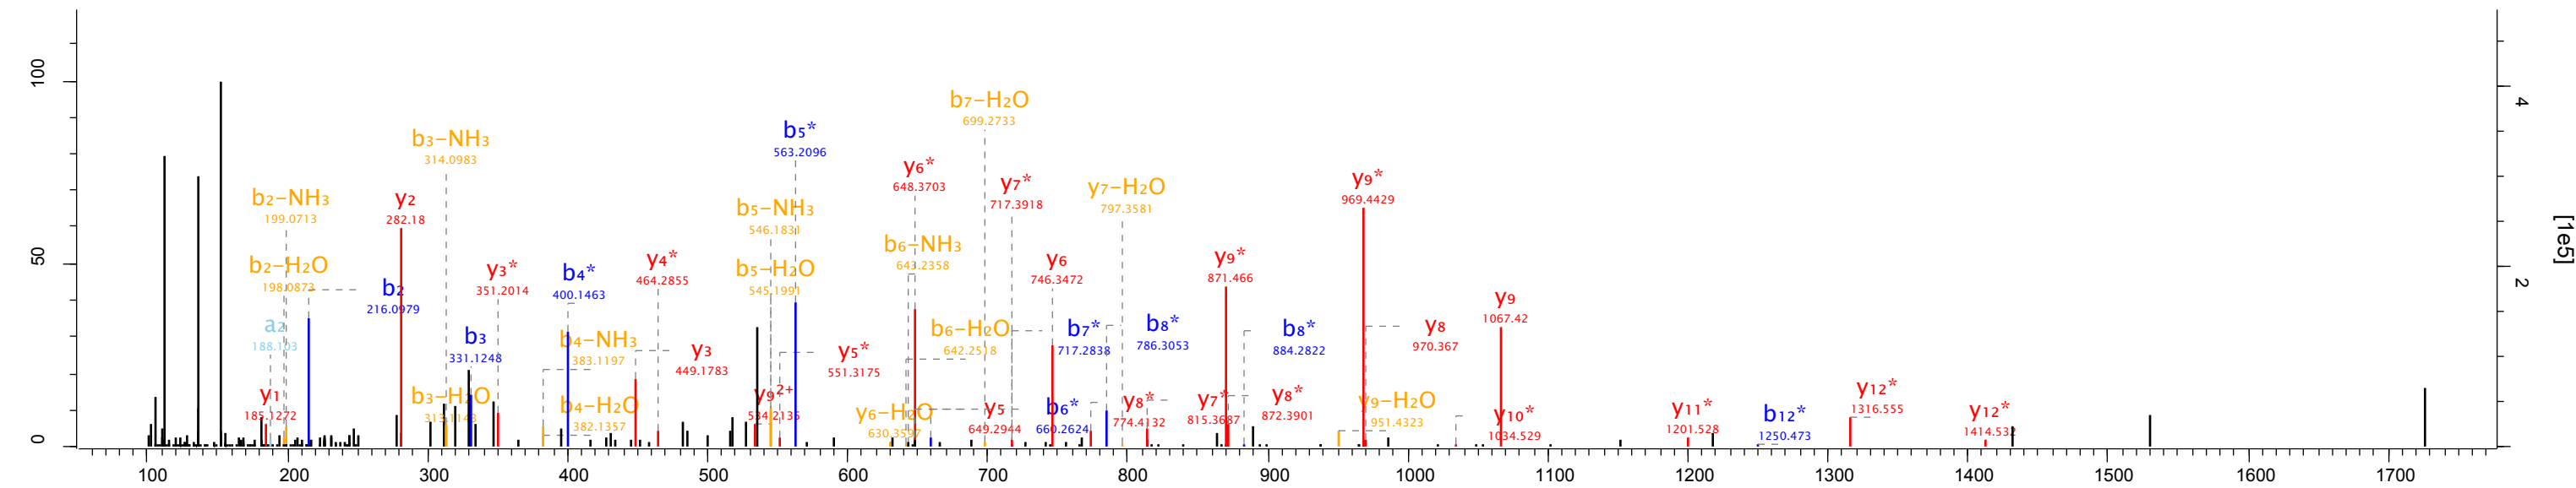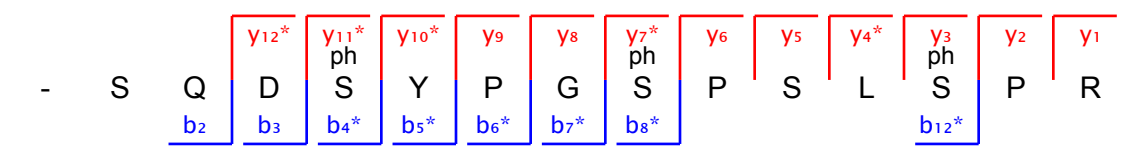

Raw file 20171215\_MaS\_33SR\_LMH\_phospho\_02 Scan 14735 Method FTMS; HCD Score 51.13 m/z 582.78 Gene names C5orf30

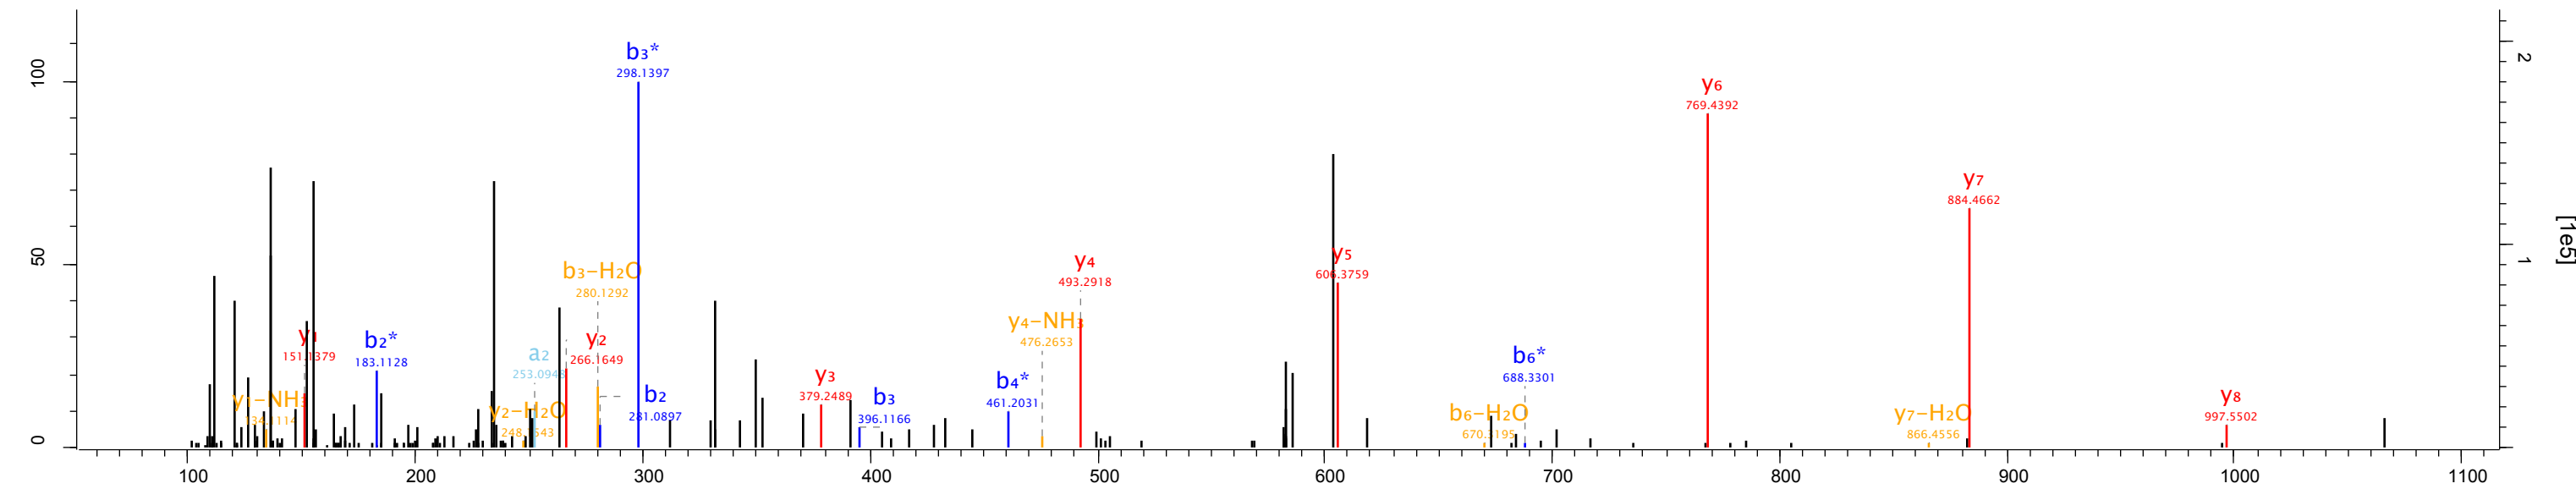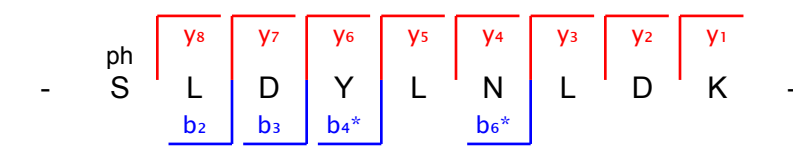

Raw file  
20171215\_MaS\_33SR\_LMH\_phospho\_02

Scan 7445 Method FTMS; HCD Score 42 m/z 651.23 Gene names DOCK11

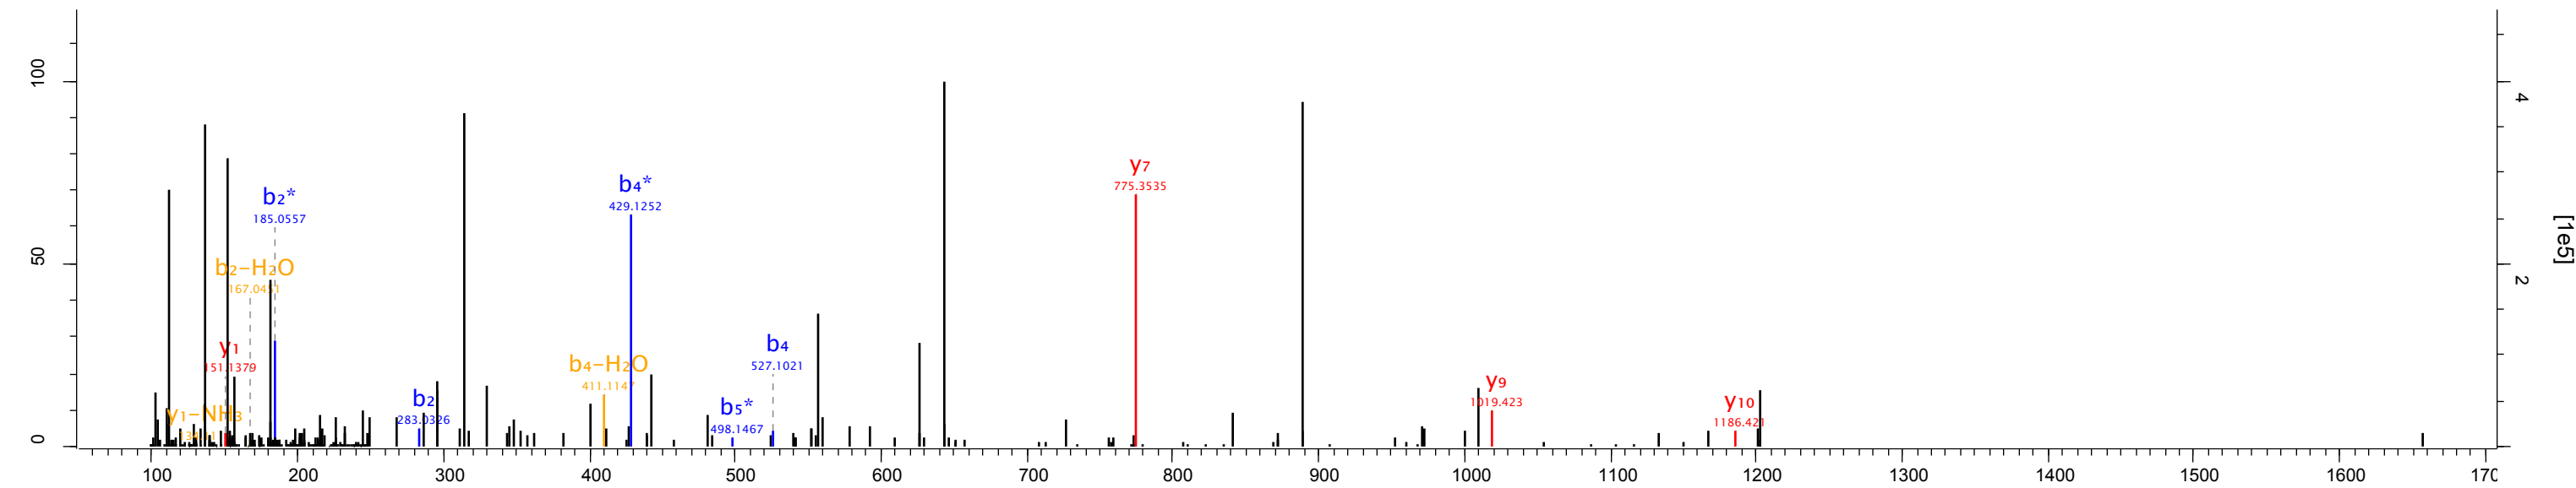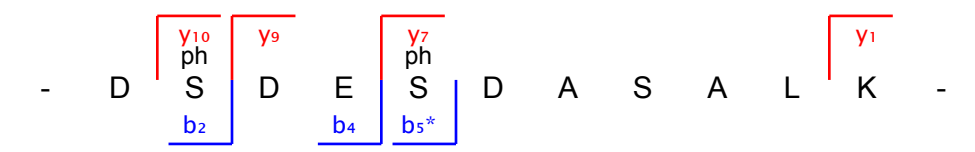



Raw file 20171215\_MaS\_33SR\_LMH\_phospho\_02 Scan 9185 Method FTMS; HCD Score 96.15 m/z 678.3 Gene names WHSC1

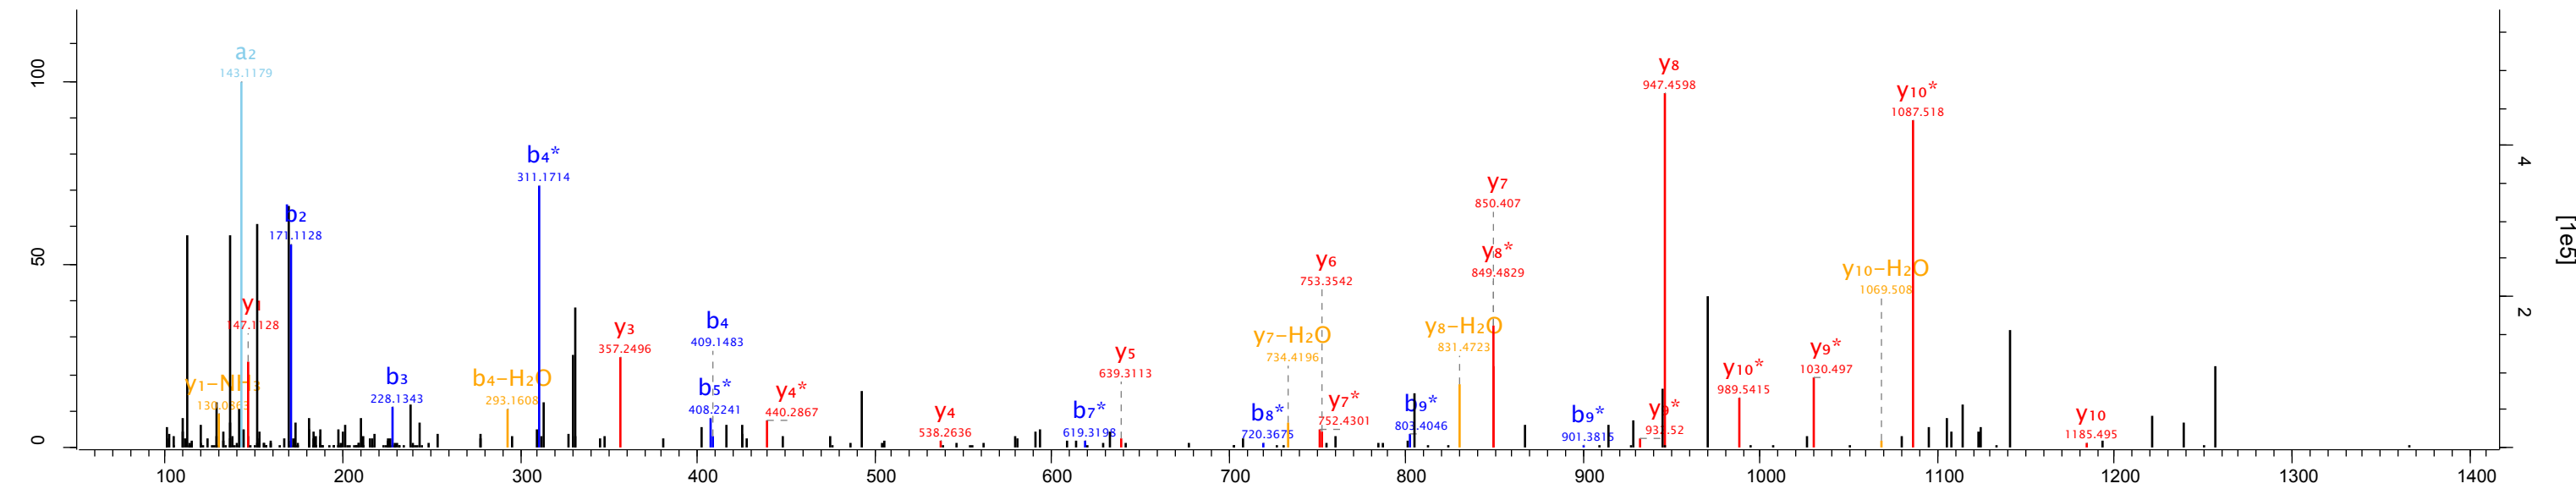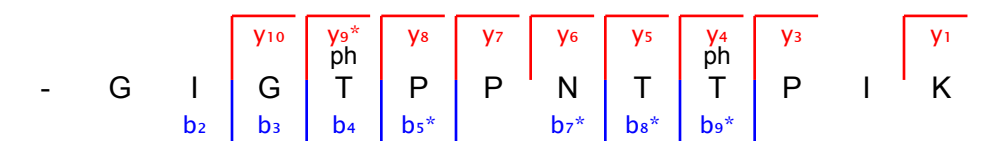

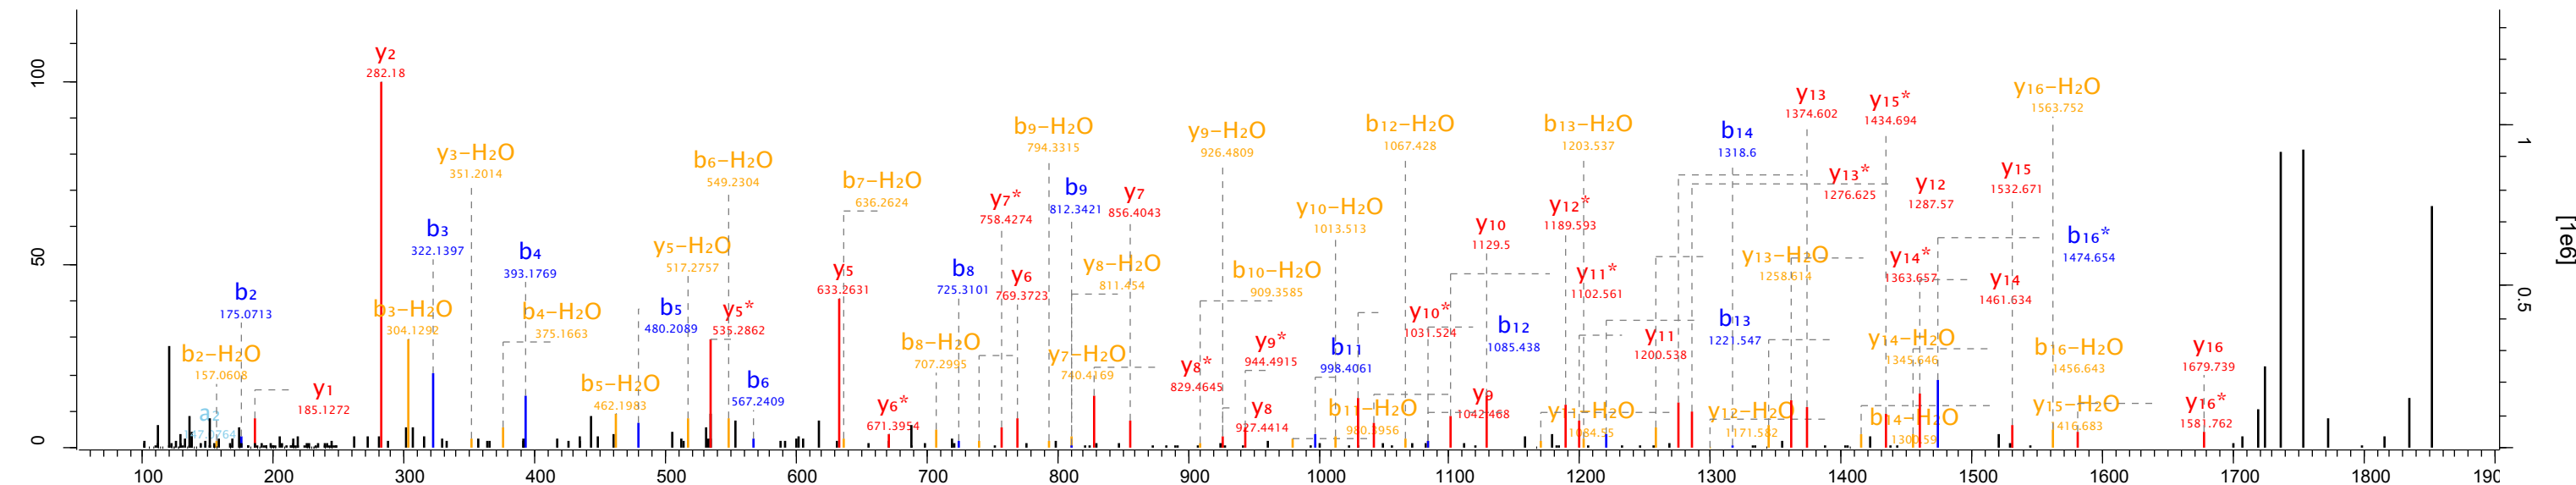

- S S F A S S S A S D A S K P ph S S P R -

Fragmentation scheme diagram showing amino acid residues (S, F, A, S, S, S, A, S, D, A, S, K, P) and their corresponding b and y ion fragments. The residues are grouped into boxes labeled b<sub>2</sub> through b<sub>16</sub>\* and y<sub>1</sub> through y<sub>16</sub>. The 'ph' label is positioned between the 'S' and 'S' residues.

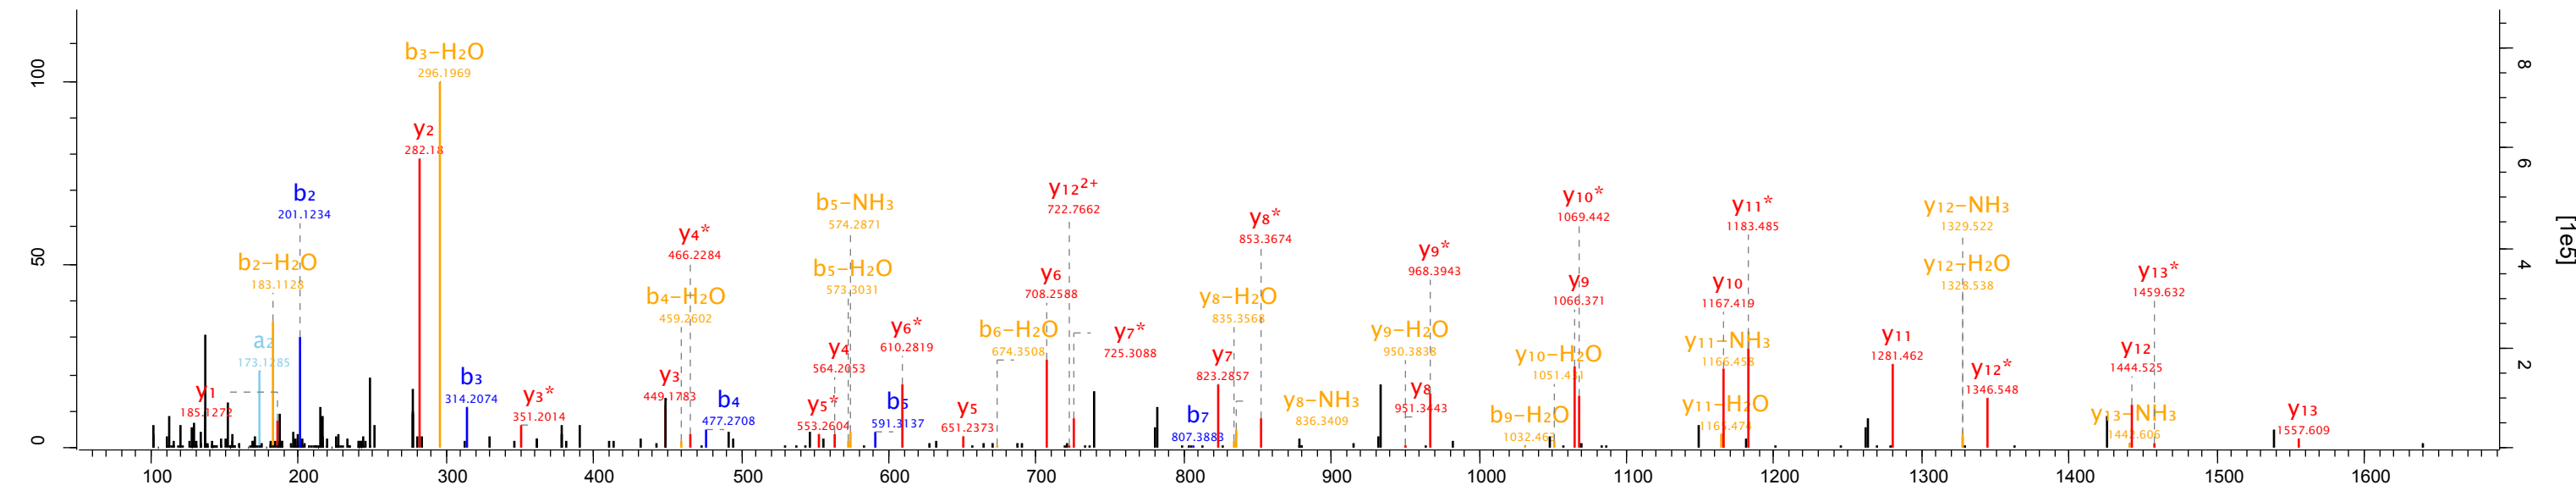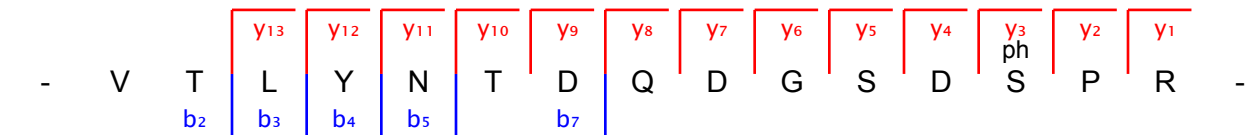

Raw file 20171215\_MaS\_33SR\_LMH\_phospho\_03 Scan 8605 Method FTMS; HCD Score 118.48 m/z 790.86 Gene names TENC1

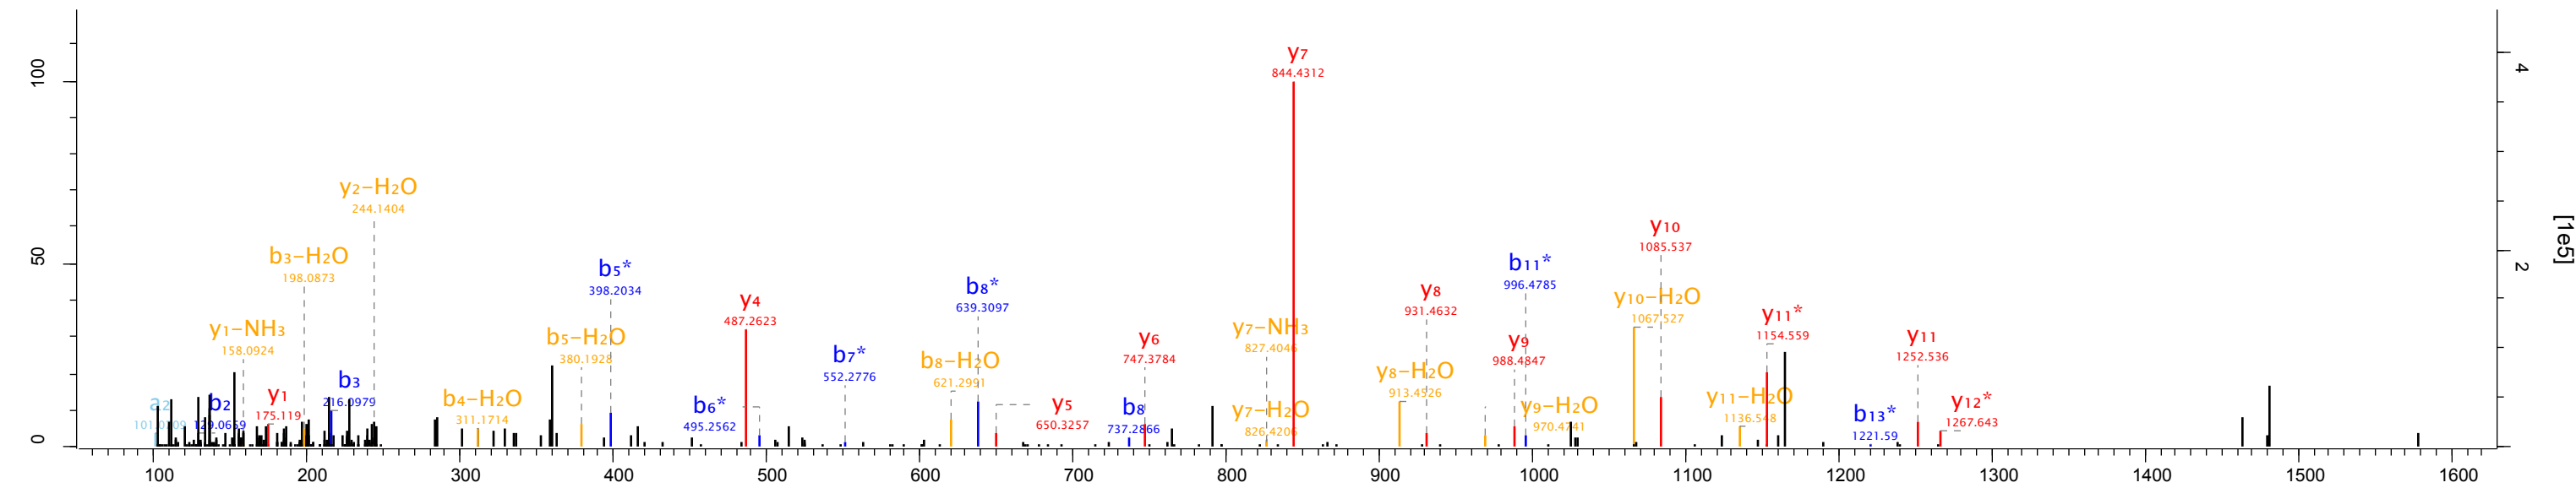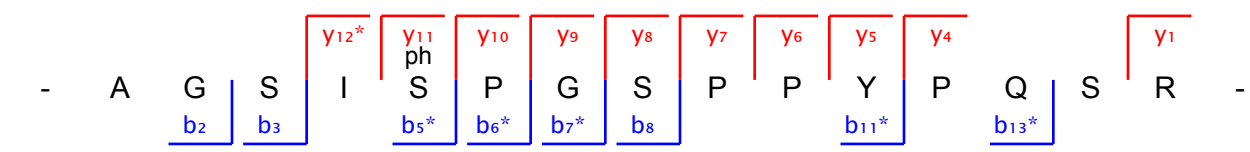

Raw file 20171215\_MaS\_33SR\_LMH\_phospho\_03 Scan 8705 Method FTMS; HCD Score 334.14 m/z 1031.92

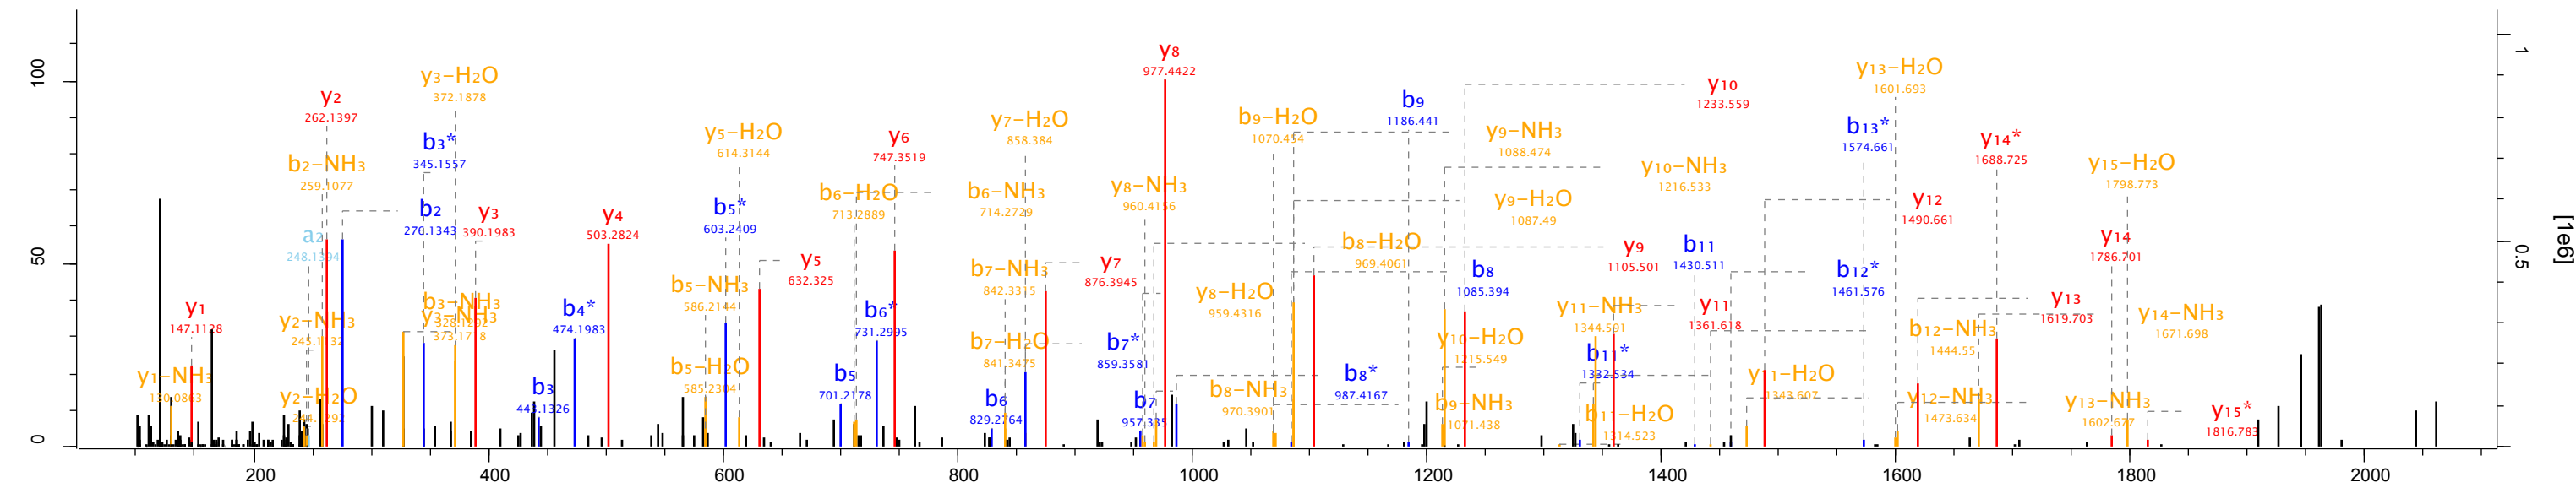

- F Q S E E Q Q Q T E D E L Q D K -

y15\*
y14
y13
y12
y11
y10
y9
y8
y7
y6
y5
y4
y3
y2
y1

b2
b3
b4\*
b5
b6
b7
b8
b9
b11
b12\*
b13\*

Raw file 20171215\_MaS\_33SR\_LMH\_phospho\_03 Scan 9885 Method FTMS; HCD Score 68.54 m/z 495.2 Gene names RNF13

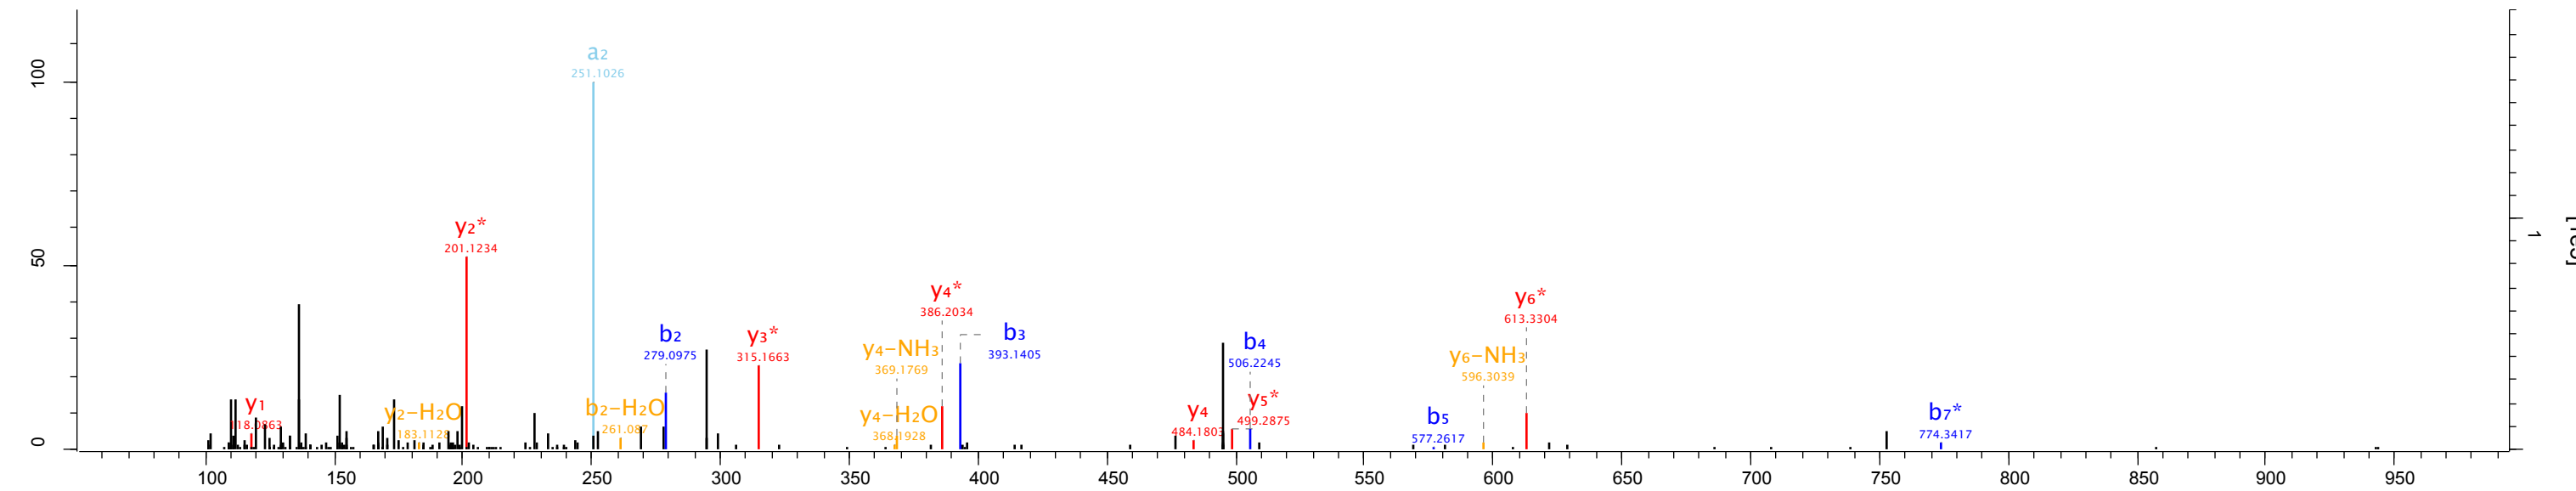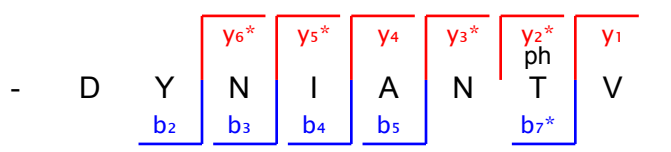

Raw file 20171215\_MaS\_33SR\_LMH\_phospho\_05 Scan 2085 Method FTMS; HCD Score 45.83 m/z 602.75 Gene names VCX3A;VCX;VCX3B;VCX2

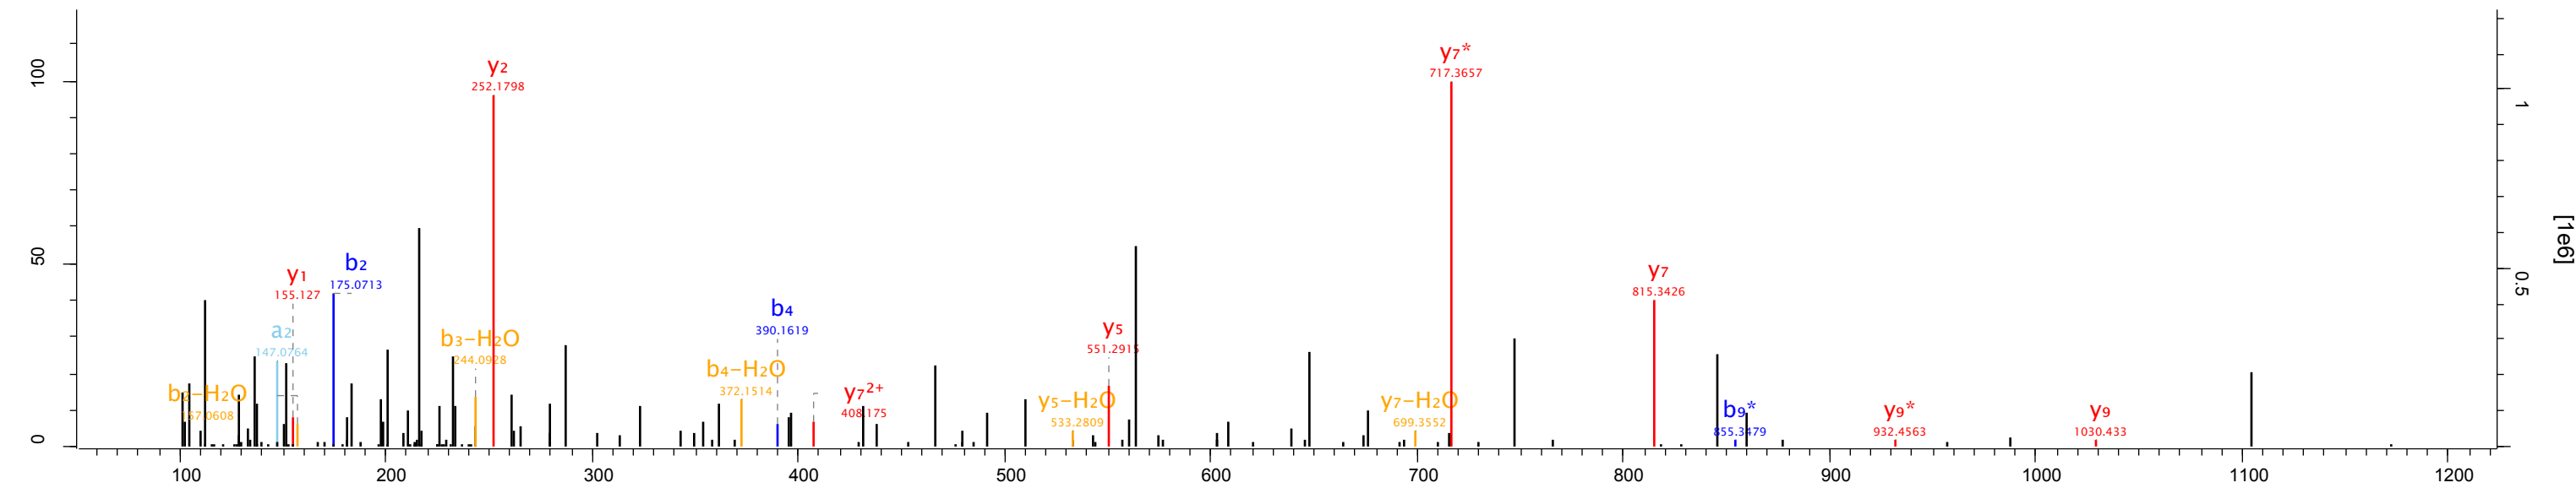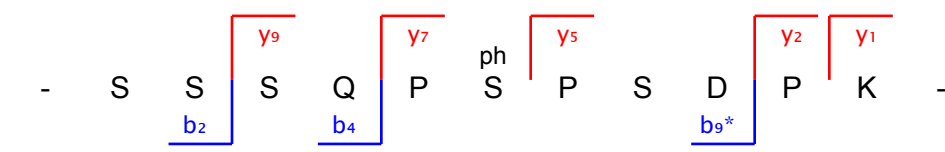

Raw file

20171215\_MaS\_33SR\_LMH\_phospho\_05

| Scan | Method    | Score | m/z    | Gene names |
|------|-----------|-------|--------|------------|
| 4415 | FTMS; HCD | 97.27 | 566.24 | STAMBPL1   |

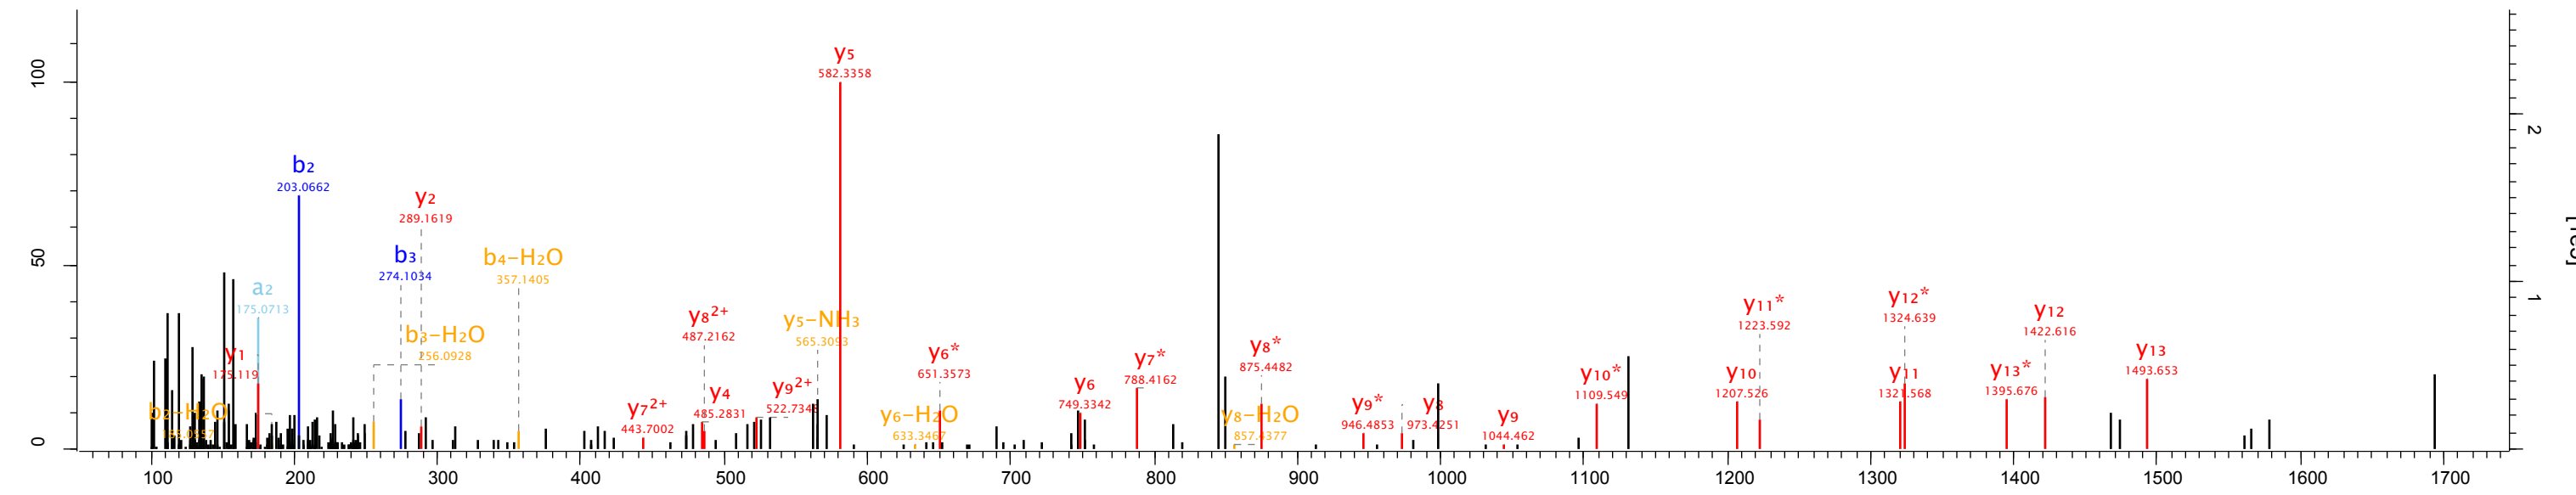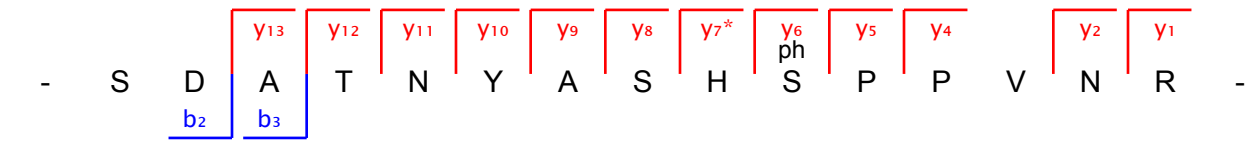



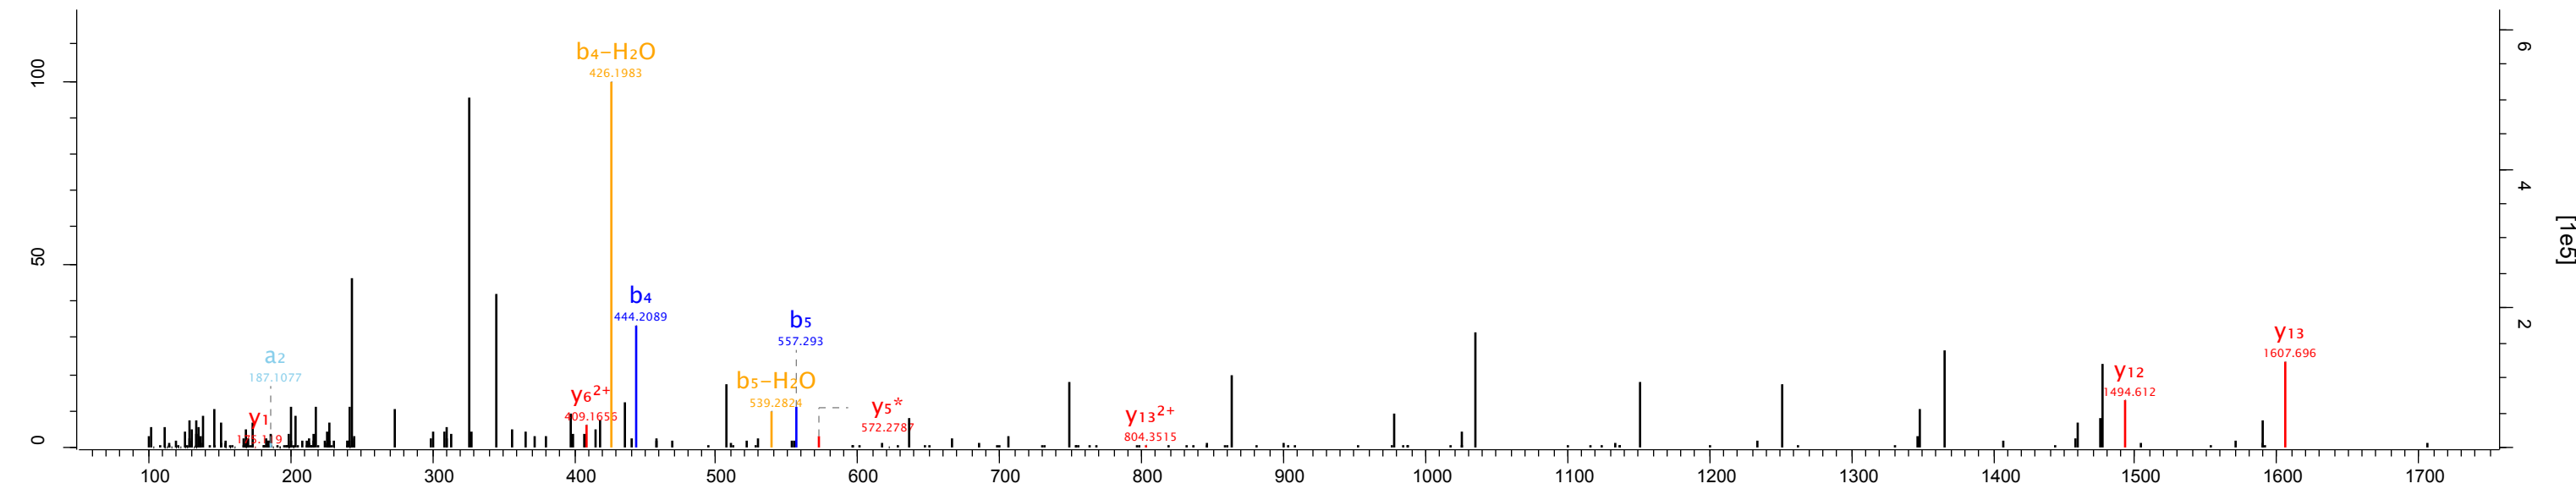

- D V Q T L A ox M L C S V F E A Q S R -

Fragmentation labels (a2, b4, b5, y13, y12, y6^2+, y5\*, y1) are shown above the corresponding amino acids in the sequence.

Raw file: 20171215\_MaS\_33SR\_LMH\_phospho\_06  
 Scan: 11525 Method: FTMS; HCD Score: 171.02 m/z: 826.05 Gene names: MCM3AP

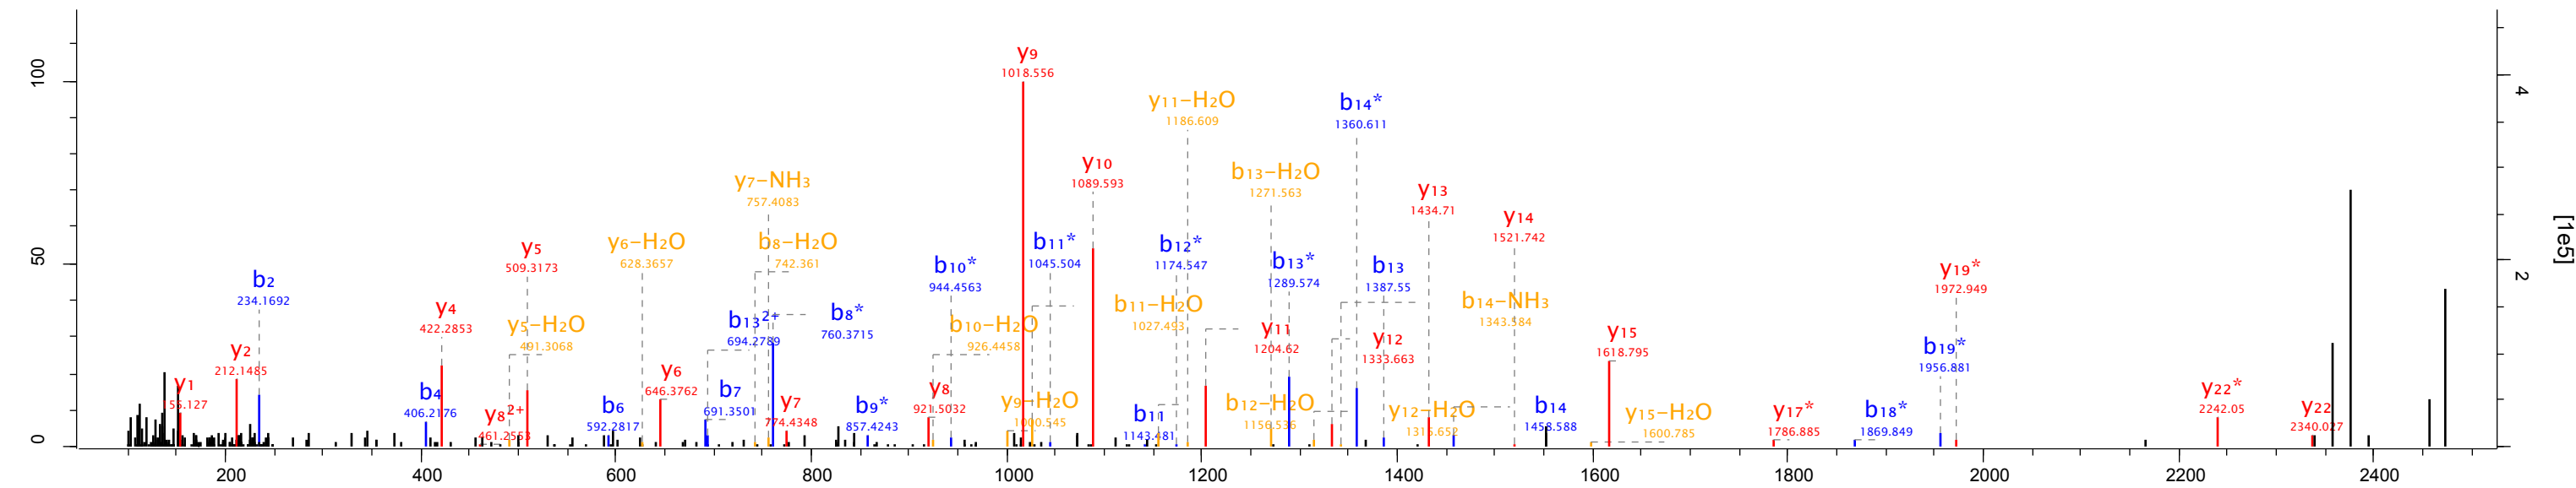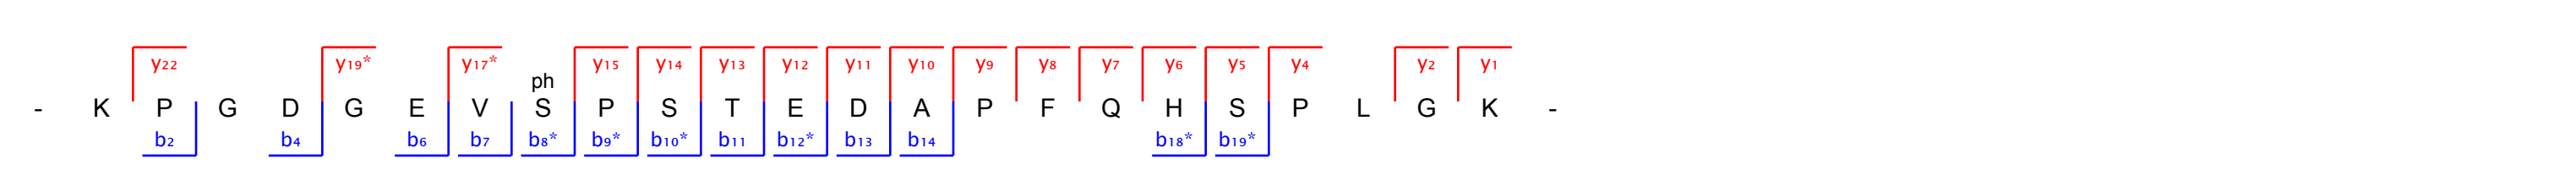

Raw file 20171215\_MaS\_33SR\_LMH\_phospho\_06 Scan 12345 Method FTMS; HCD Score 67.19 m/z 819.38 Gene names MSANTD2

20171215\_MaS\_33SR\_LMH\_phospho\_06

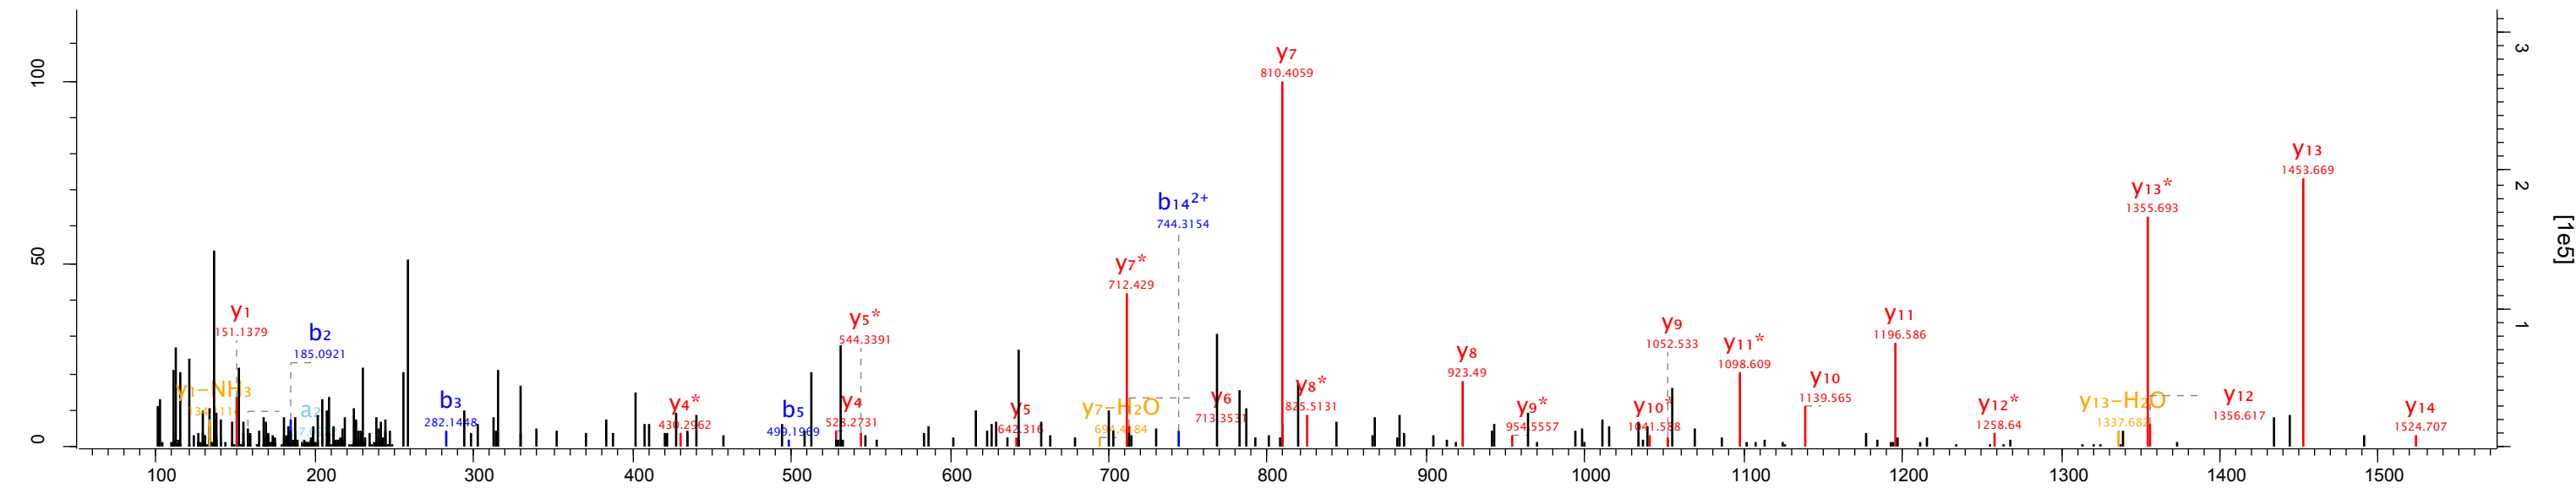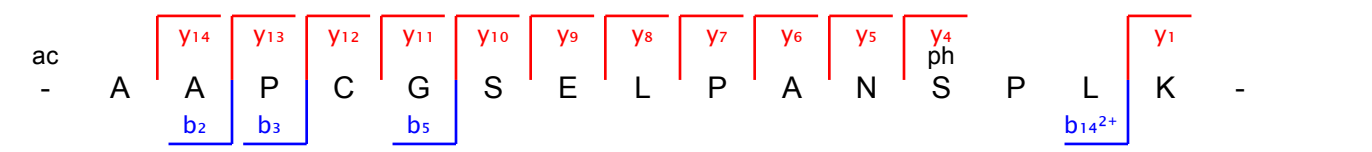

Raw file  
 20171215\_MaS\_33SR\_LMH\_phospho\_06  
 Scan 13755 Method FTMS; HCD Score 46.41 m/z 773.03 Gene names RSBN1L

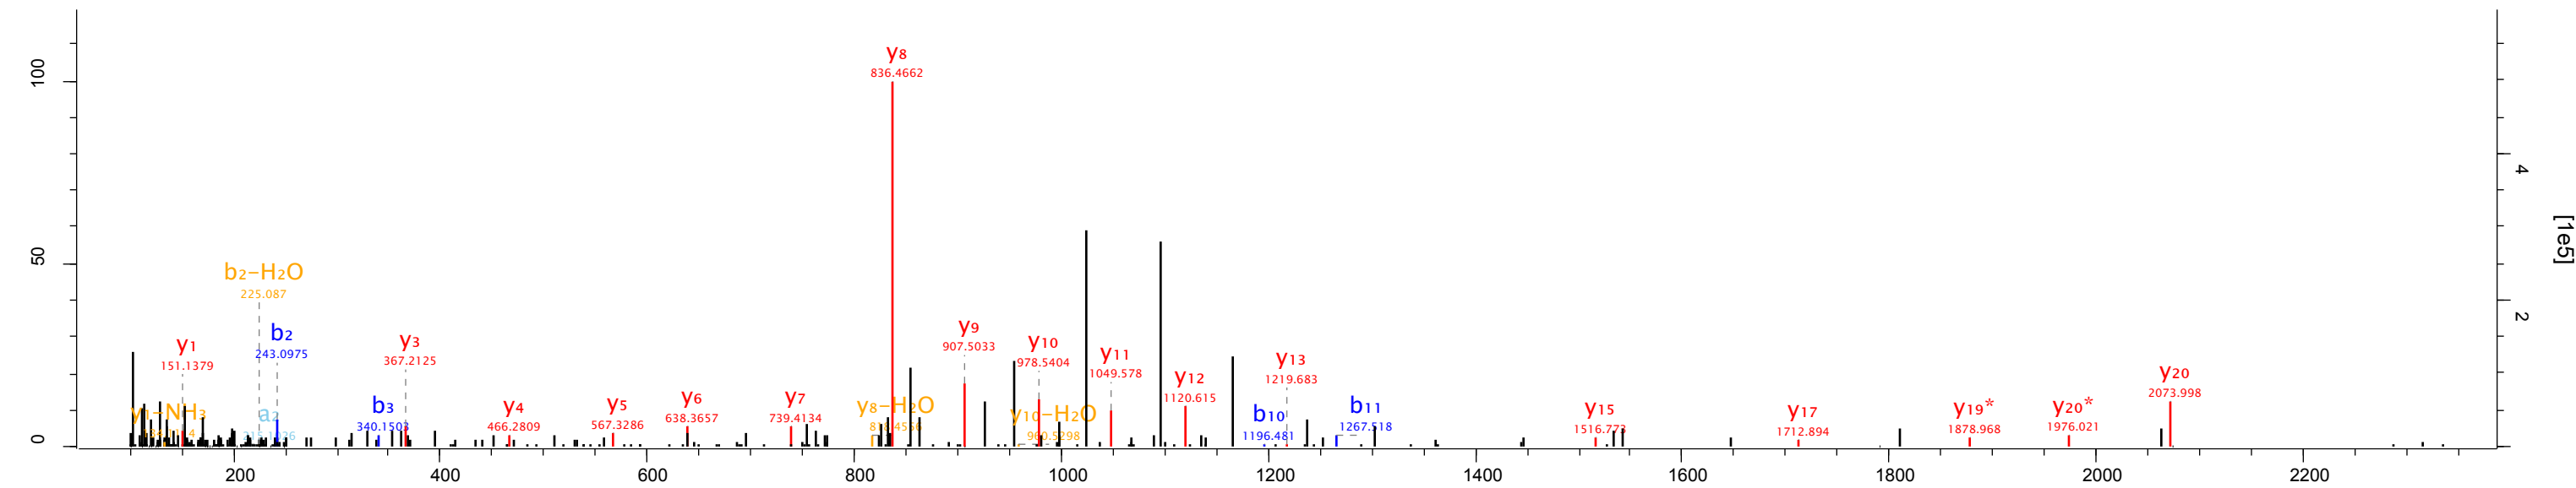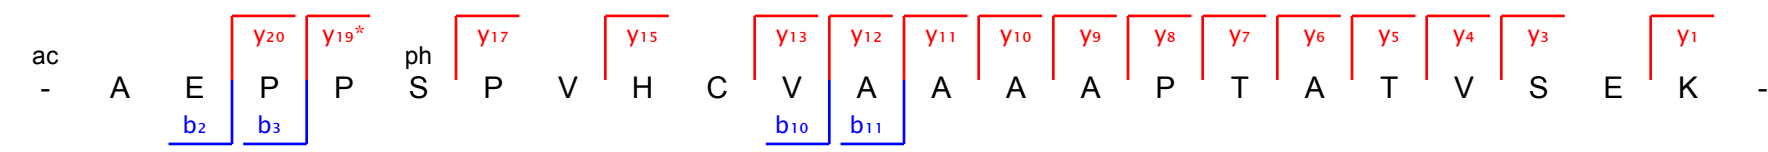

Raw file 20171215\_MaS\_33SR\_LMH\_phospho\_06 Scan 2805 Method FTMS; HCD Score 64.41 m/z 589.26 Gene names TAB2

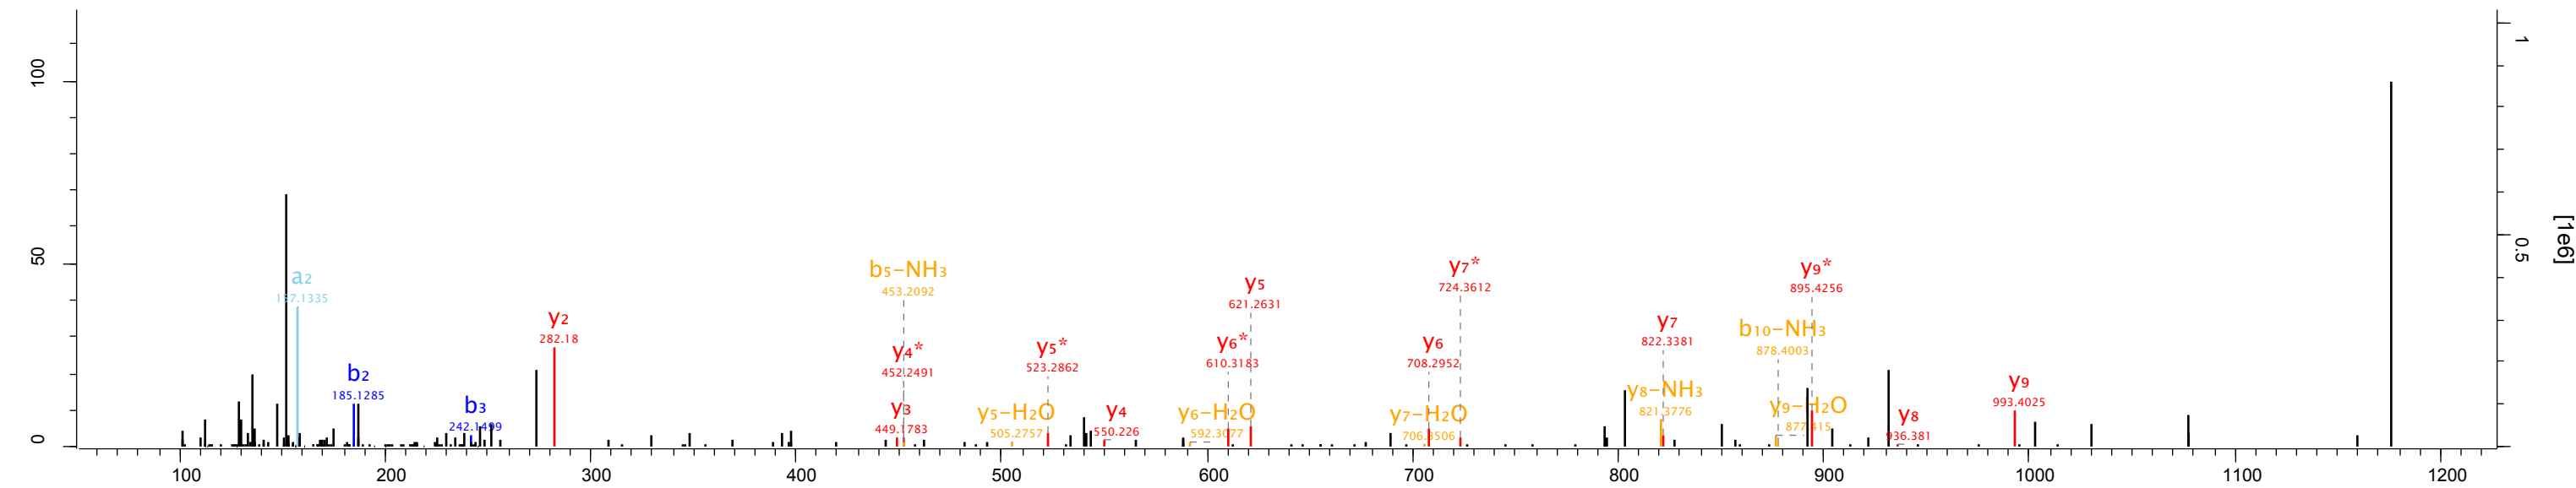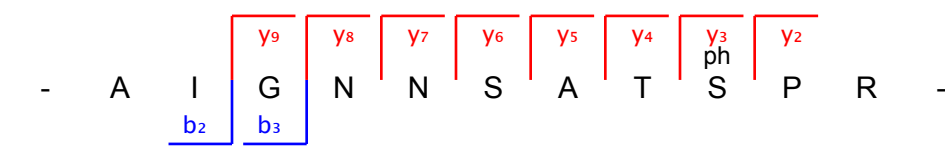

Raw file 20171215\_MaS\_33SR\_LMH\_phospho\_06 Scan 3345 Method FTMS; HCD Score 196.81 m/z 930.45 Gene names SEC61B

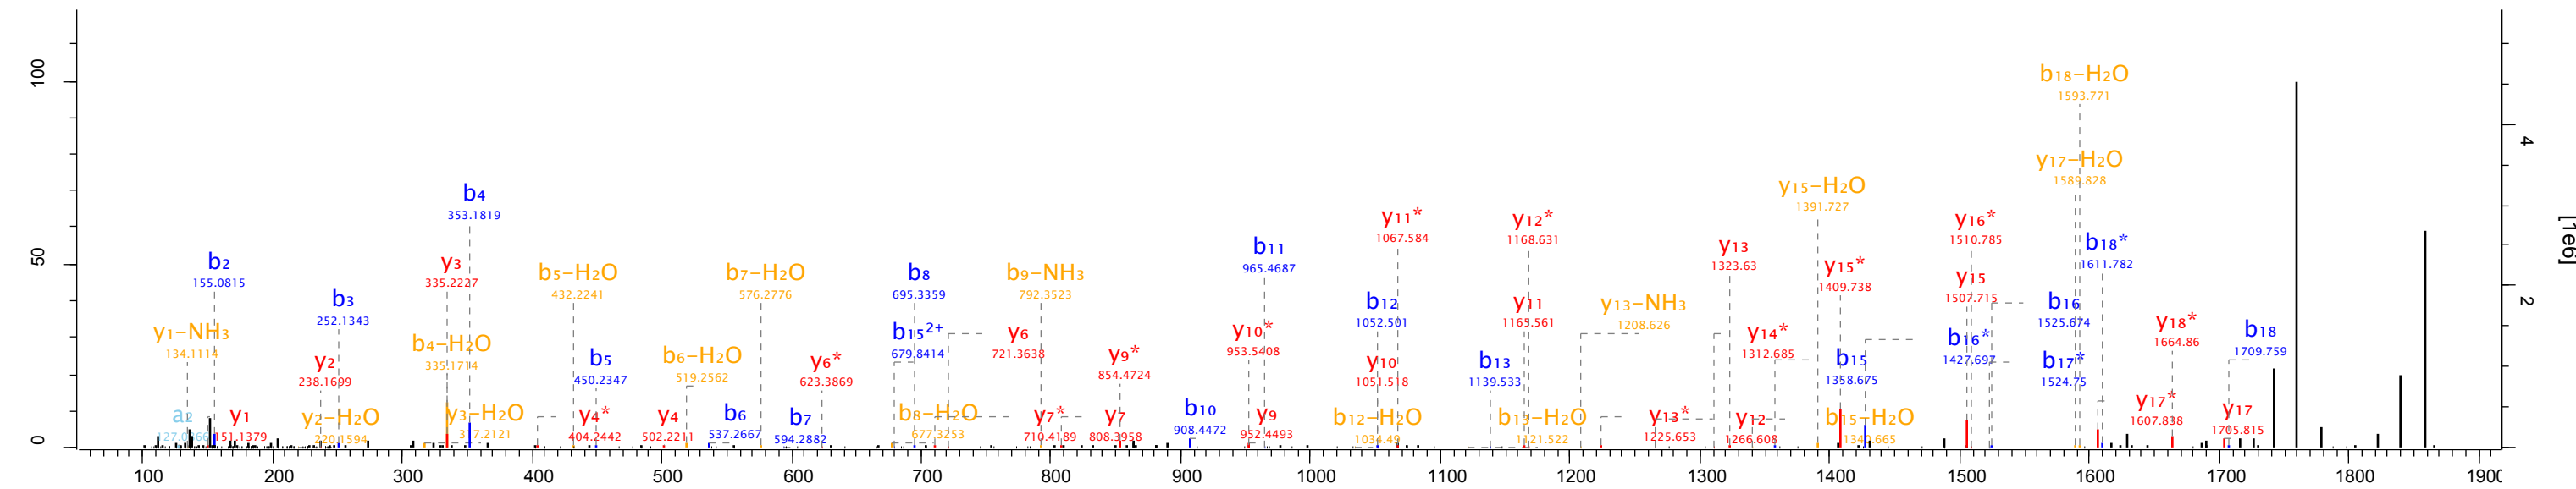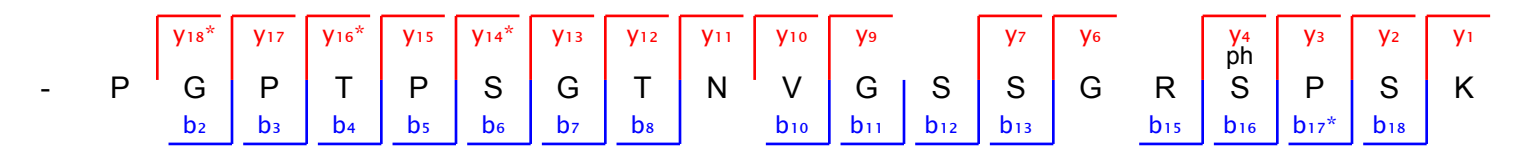

Raw file Scan Method Score m/z Gene names

20171215\_MaS\_33SR\_LMH\_phospho\_06 4105 FTMS; HCD 50.17 520.57 EGLN1

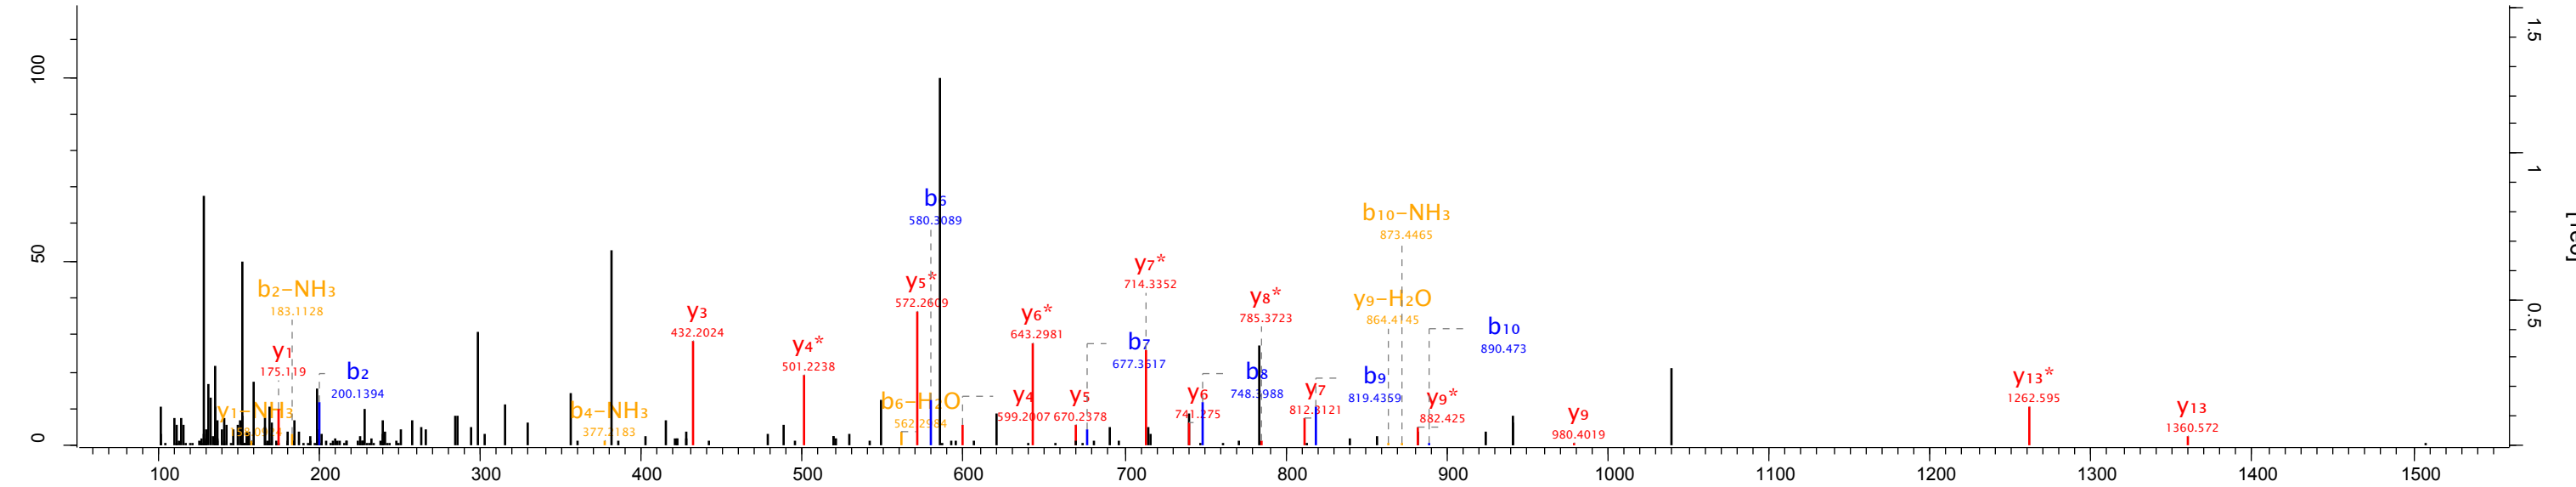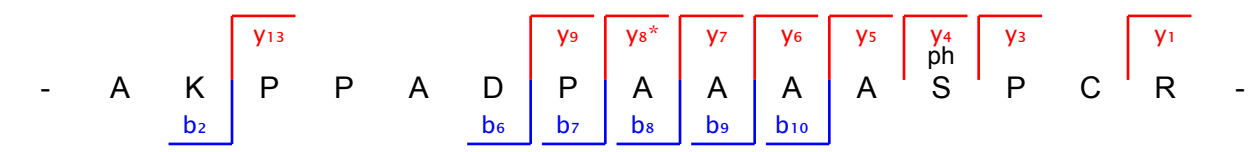

Raw file 20171215\_MaS\_33SR\_LMH\_phospho\_06 Scan 6335 Method FTMS; HCD Score 128.35 m/z 580.27 Gene names FNBP1L

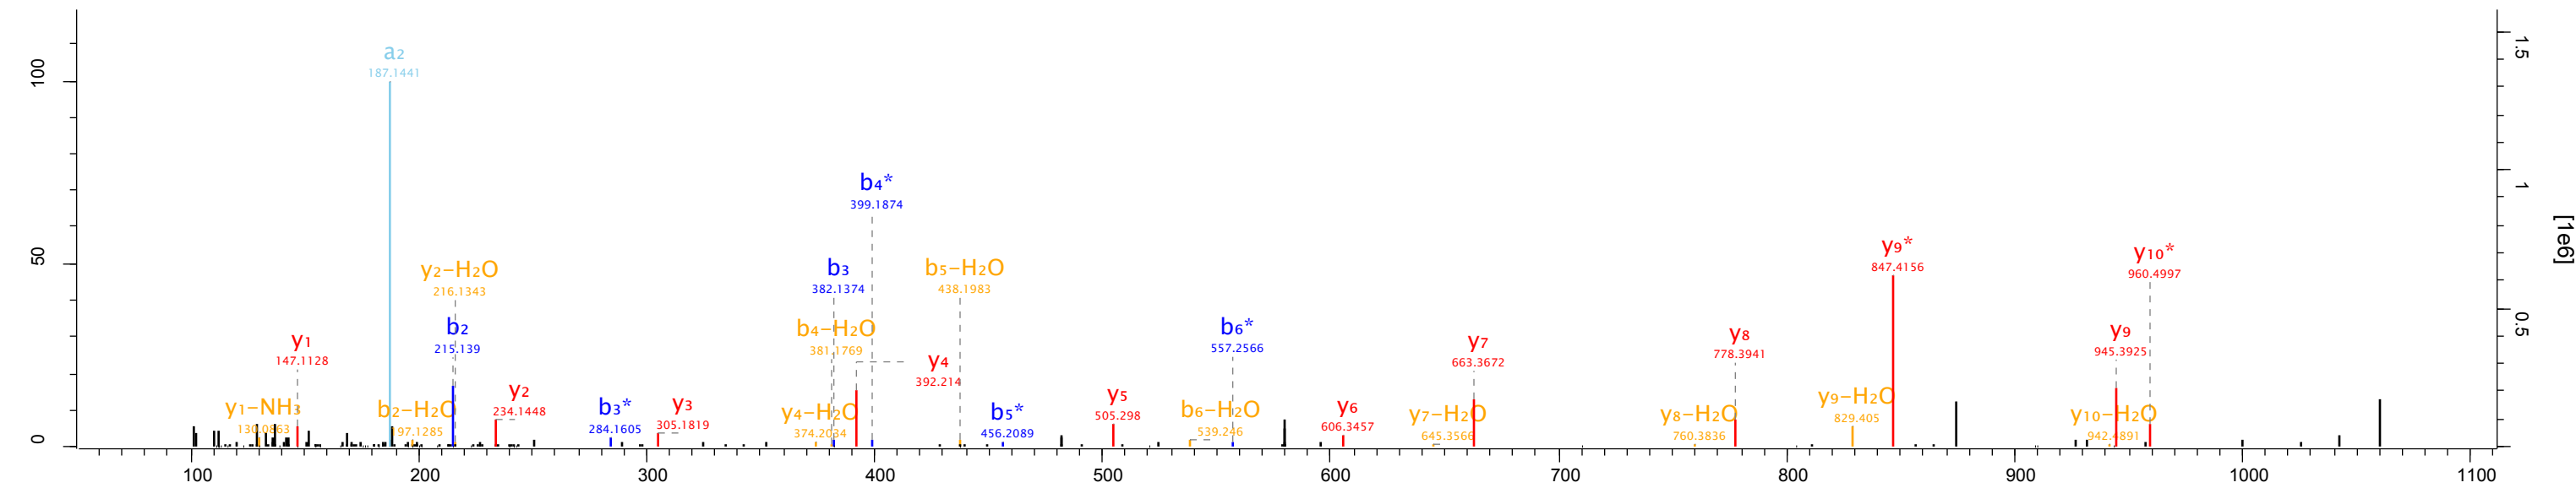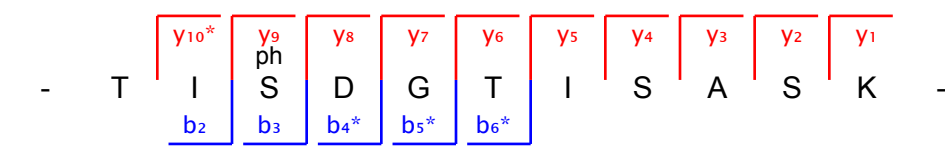



Raw file 20171215\_MaS\_33SR\_LMH\_phospho\_06 Scan 9205 Method FTMS; HCD Score 61.56 m/z 511.26

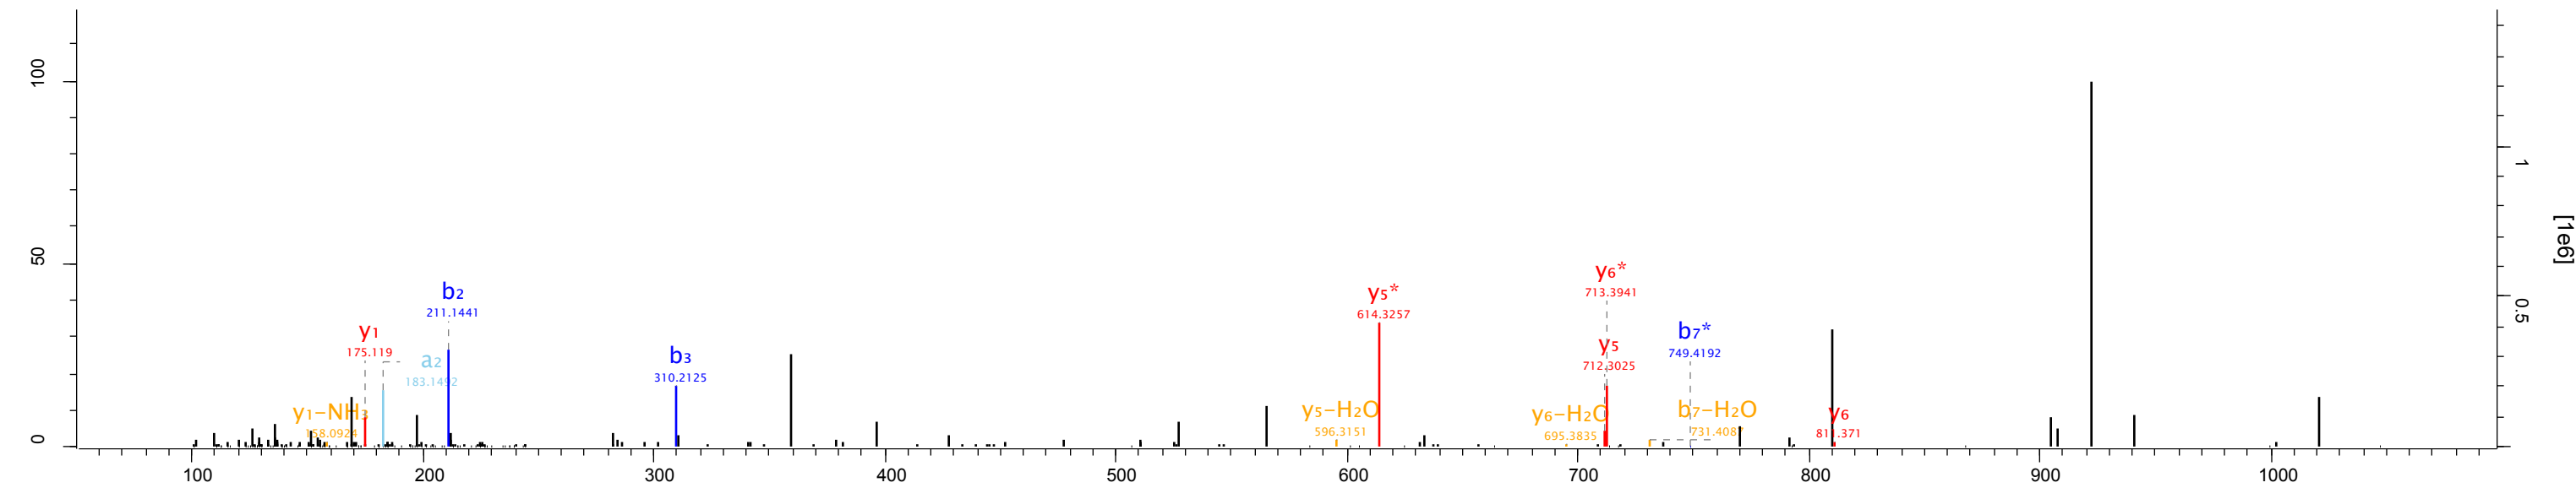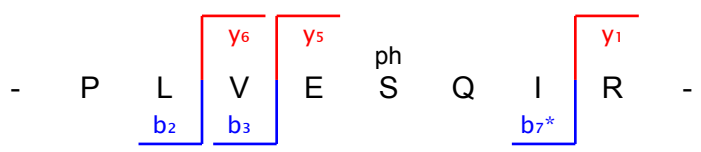

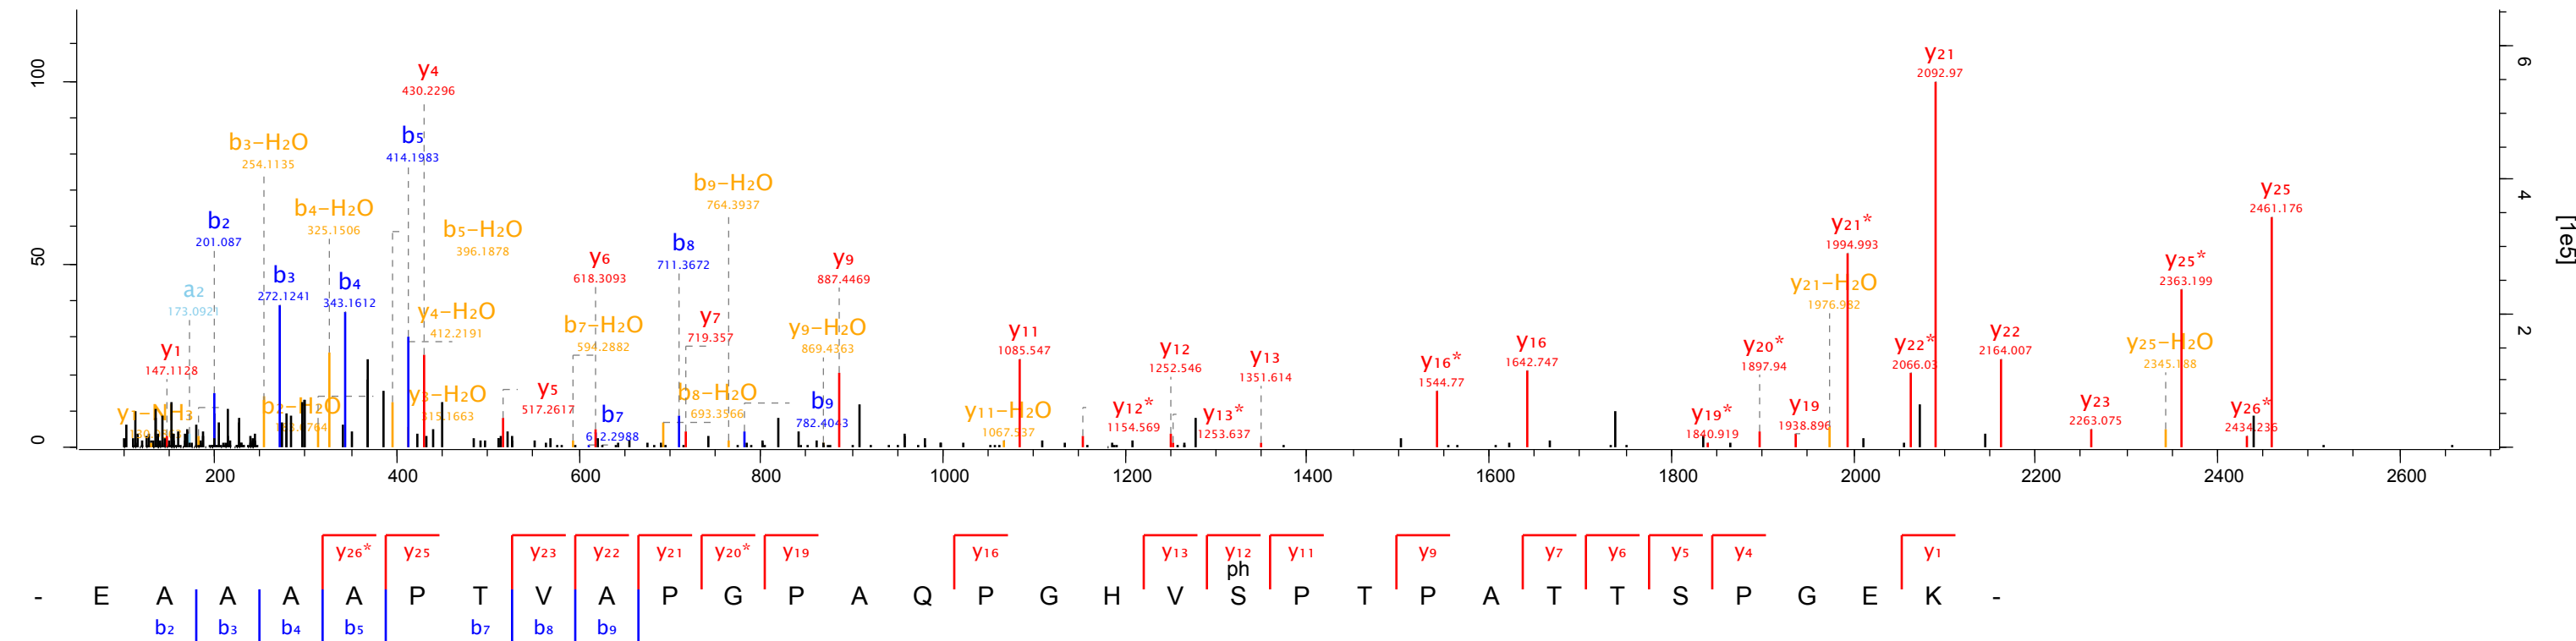

Raw file 20171215\_MaS\_33SR\_LMH\_phospho\_09 Scan 3015 Method FTMS; HCD Score 55.53 m/z 615.29 Gene names HEATR5B

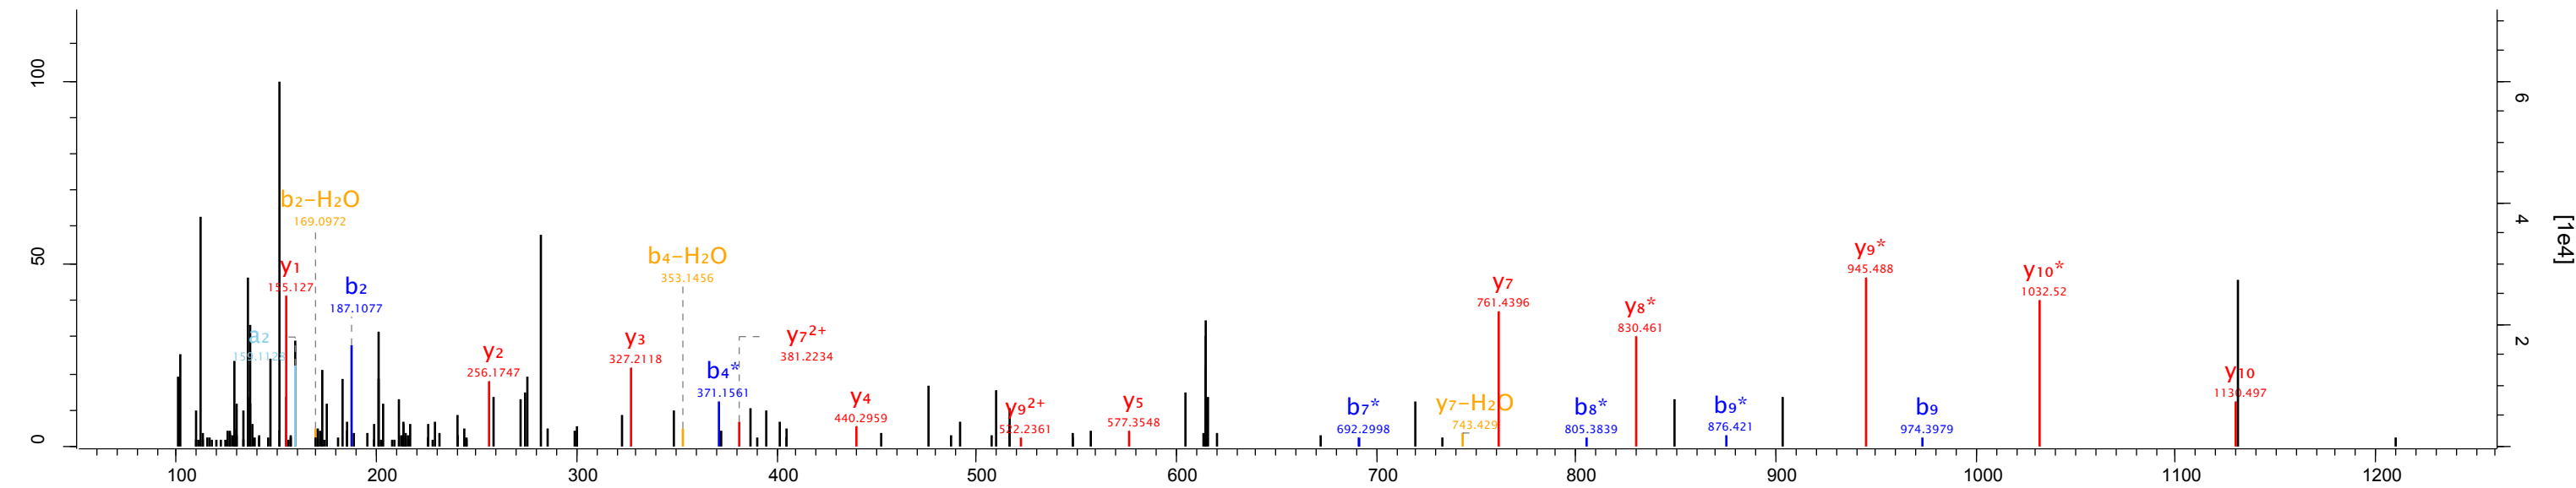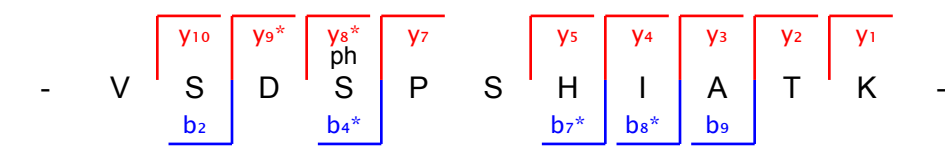

Raw file 20171215\_MaS\_33SR\_LMH\_phospho\_09 Scan 4595 Method FTMS; HCD Score 46.84 m/z 662.31 Gene names FAM19A2

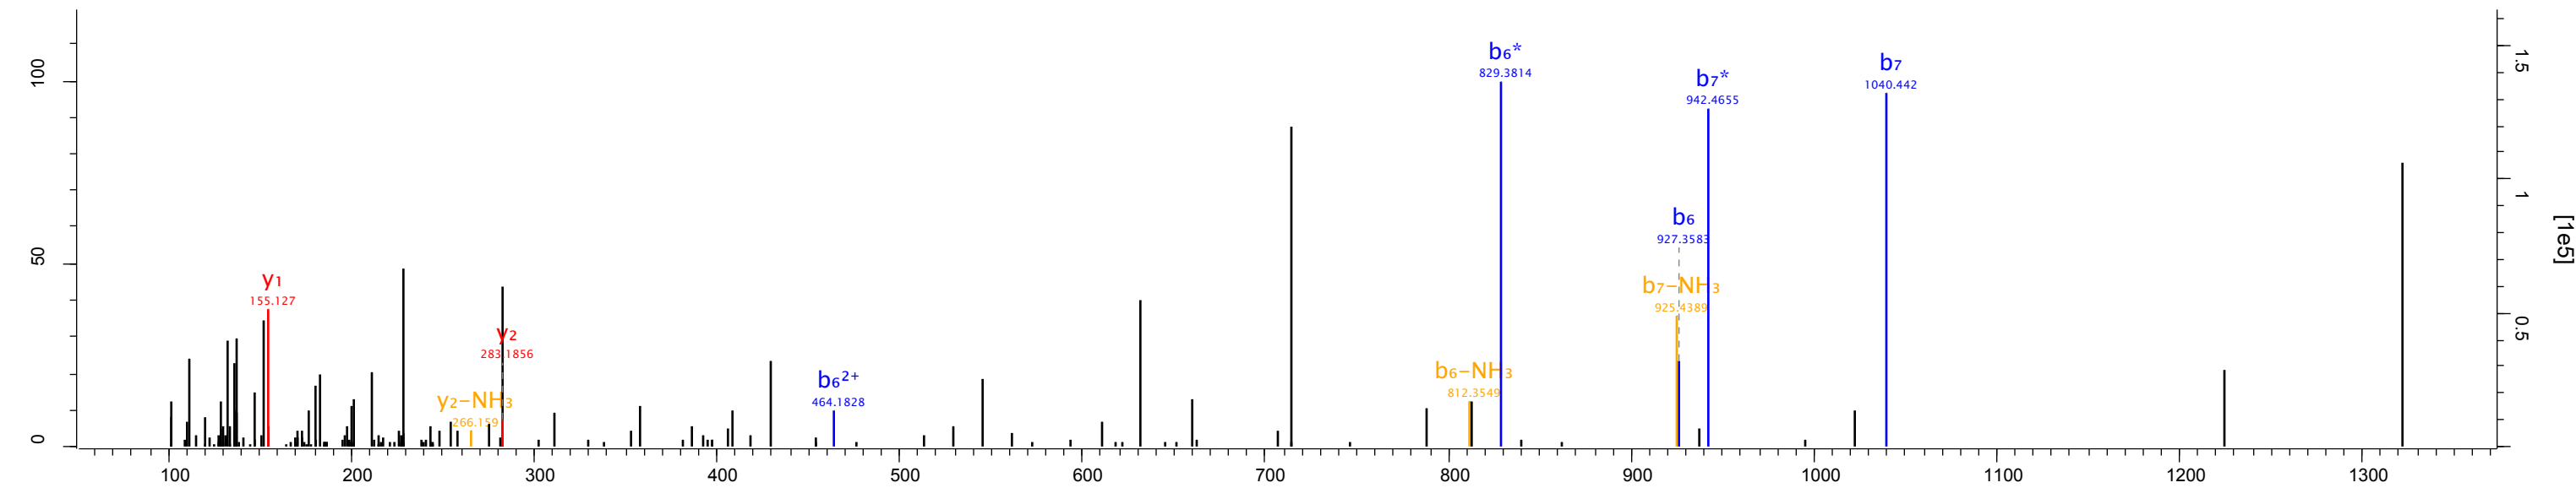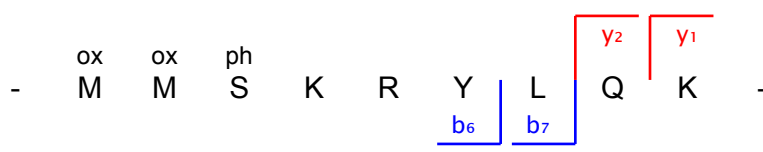

Raw file: 20171215\_MaS\_33SR\_LMH\_phospho2\_02  
 Scan: 3705 Method: FTMS; HCD Score: 99.75 m/z: 546.74 Gene names: ERBB2IP

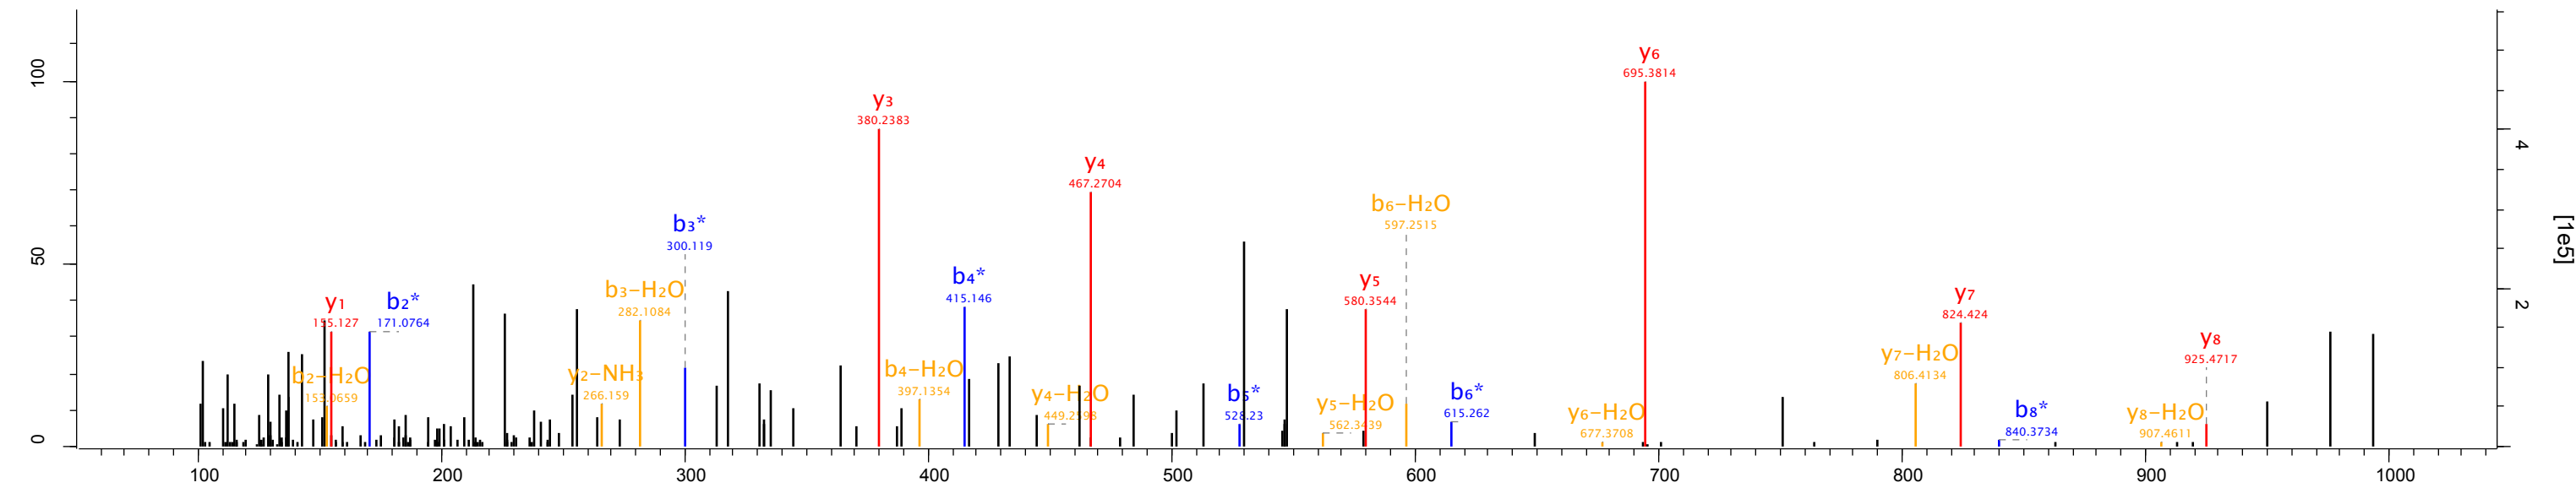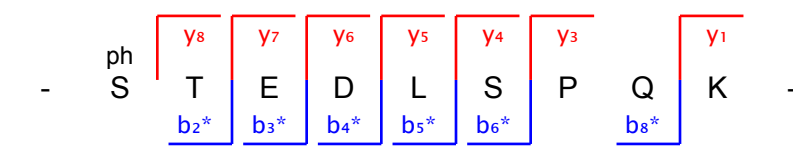

Raw file 20171215\_MaS\_33SR\_LMH\_phospho2\_02 Scan 5635 Method FTMS; HCD Score 194.37 m/z 709.29 Gene names MAF1

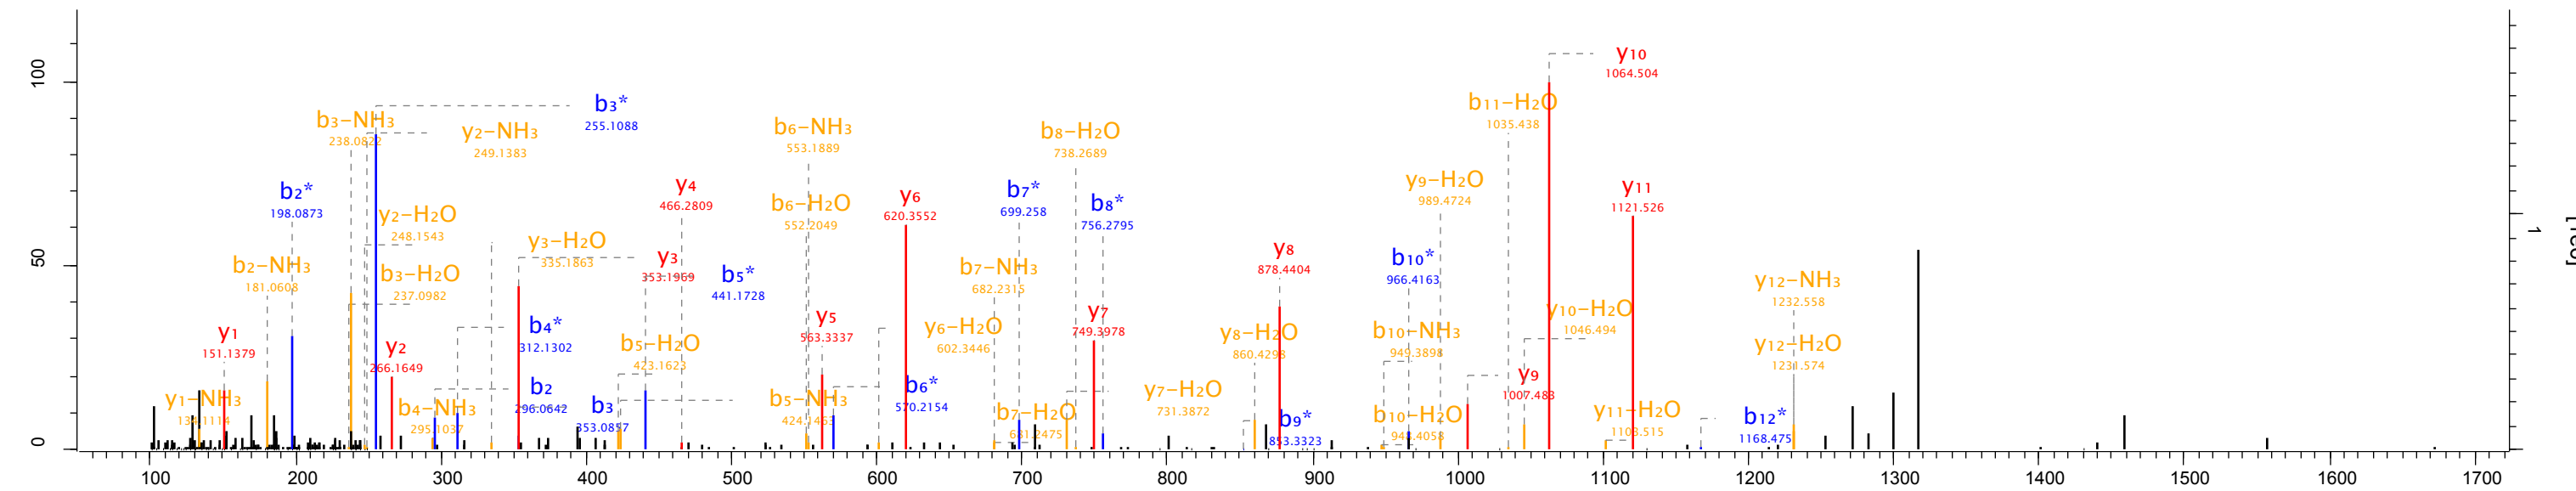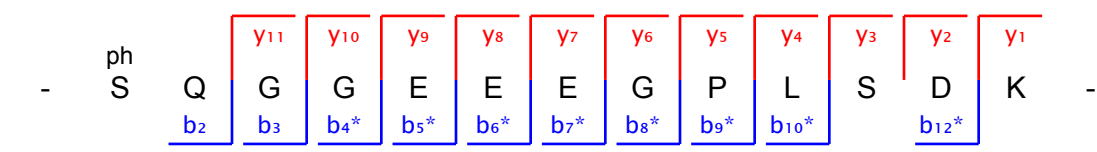

Raw file 20171215\_MaS\_33SR\_LMH\_phospho2\_02 Scan 6955 Method FTMS; HCD Score 205.43 m/z 1068.44 Gene names IGFBP3

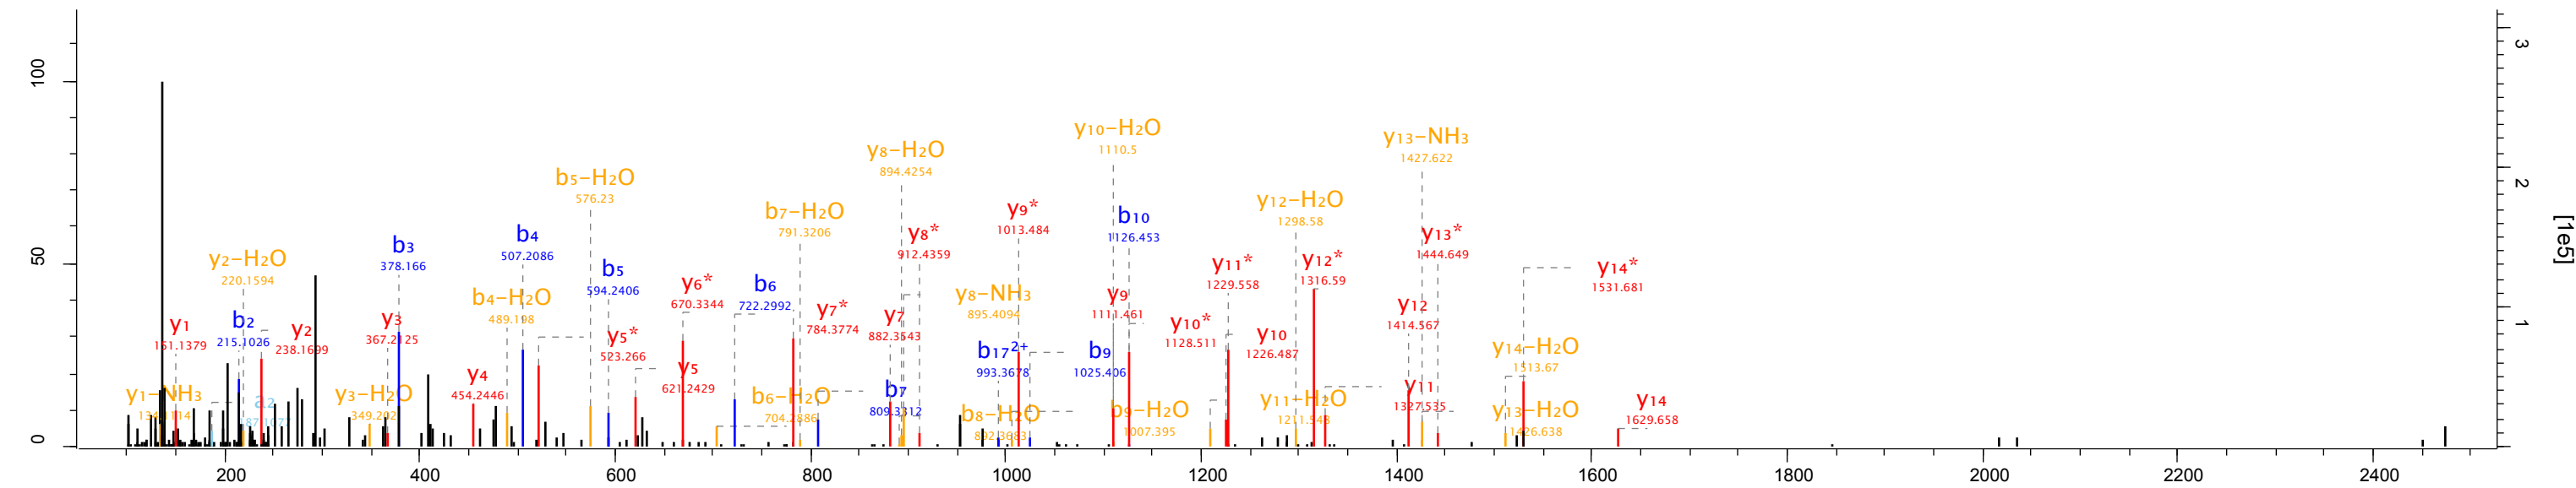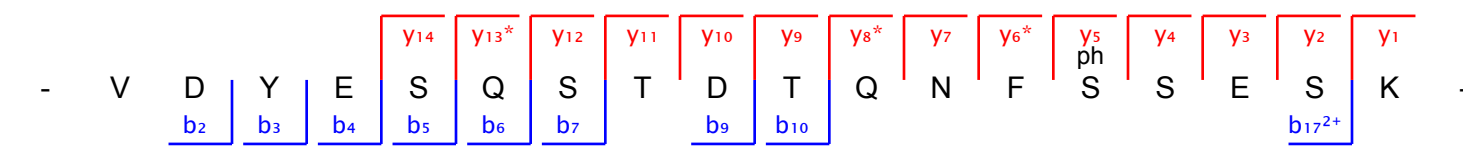

Raw file 20171215\_MaS\_33SR\_LMH\_phospho2\_02 Scan 7295 Method FTMS; HCD Score 233.62 m/z 684.8 Gene names RAD18

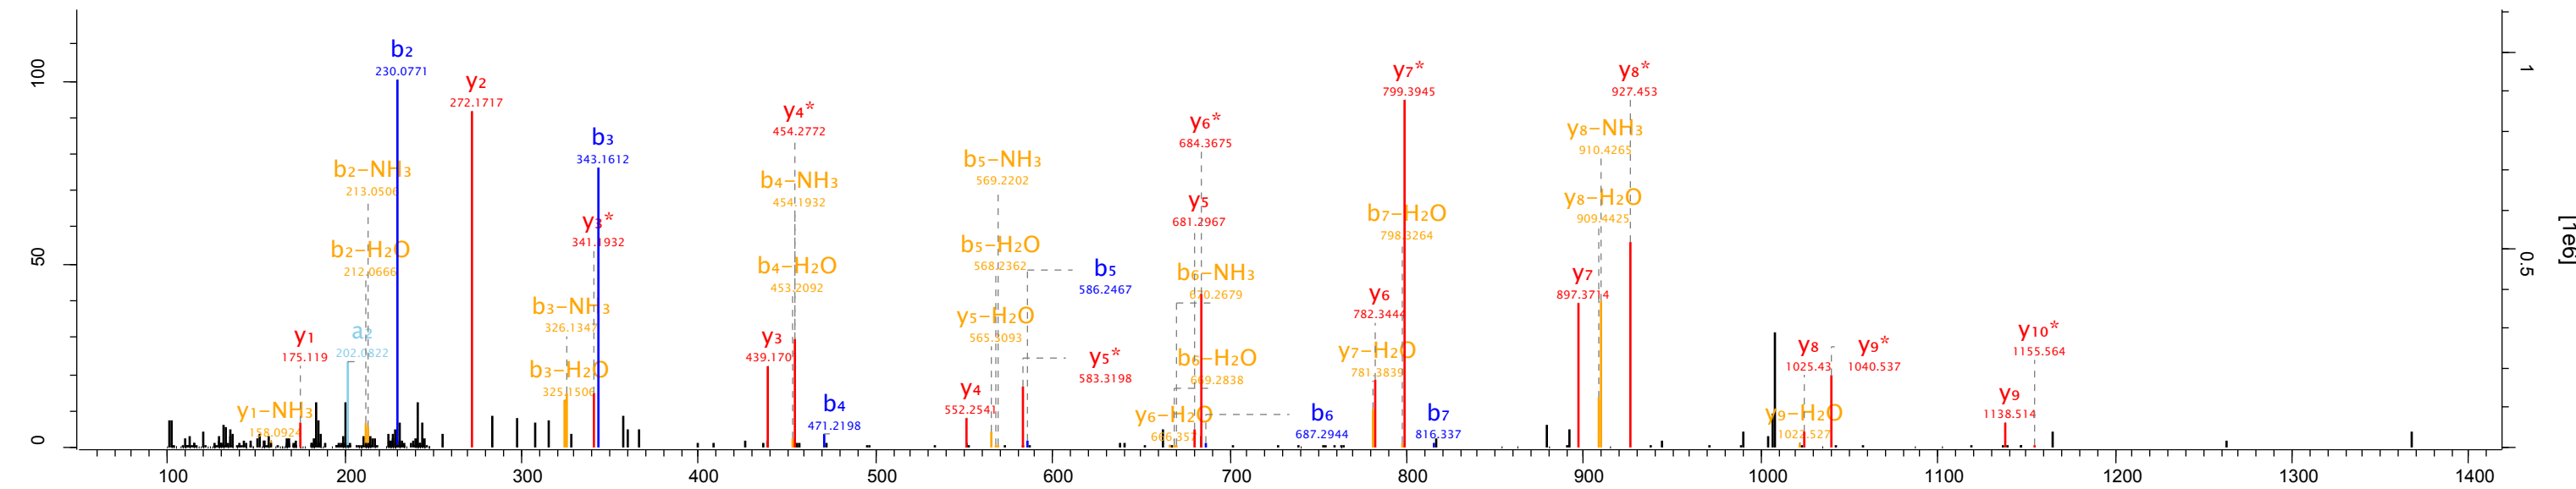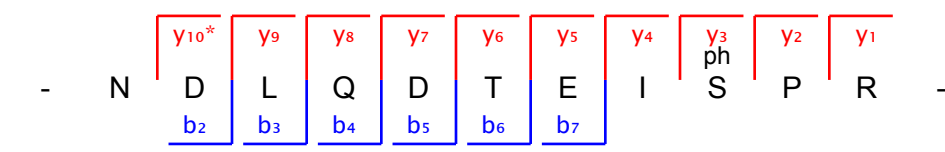



Raw file 20171215\_MaS\_33SR\_LMH\_phospho2\_03 Scan 15615 Method FTMS; HCD Score 160.57 m/z 789.86 Gene names HMGXB4

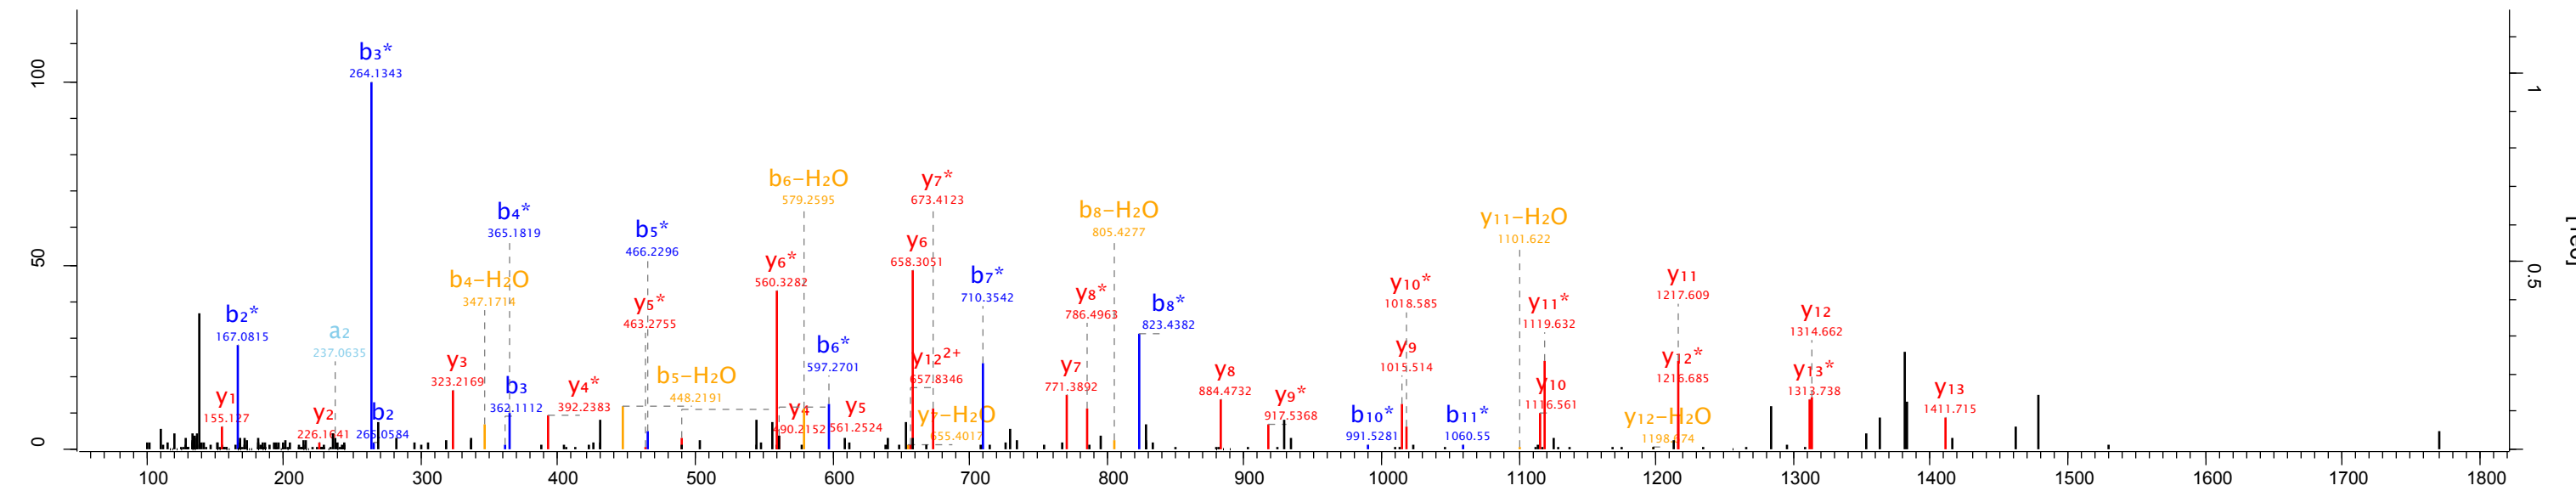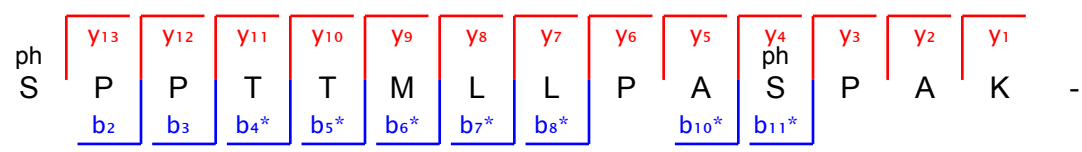

Raw file 20171215\_MaS\_33SR\_LMH\_phospho2\_03 Scan 17695 Method FTMS; HCD Score 45.14 m/z 1216.87 Gene names SLC39A10

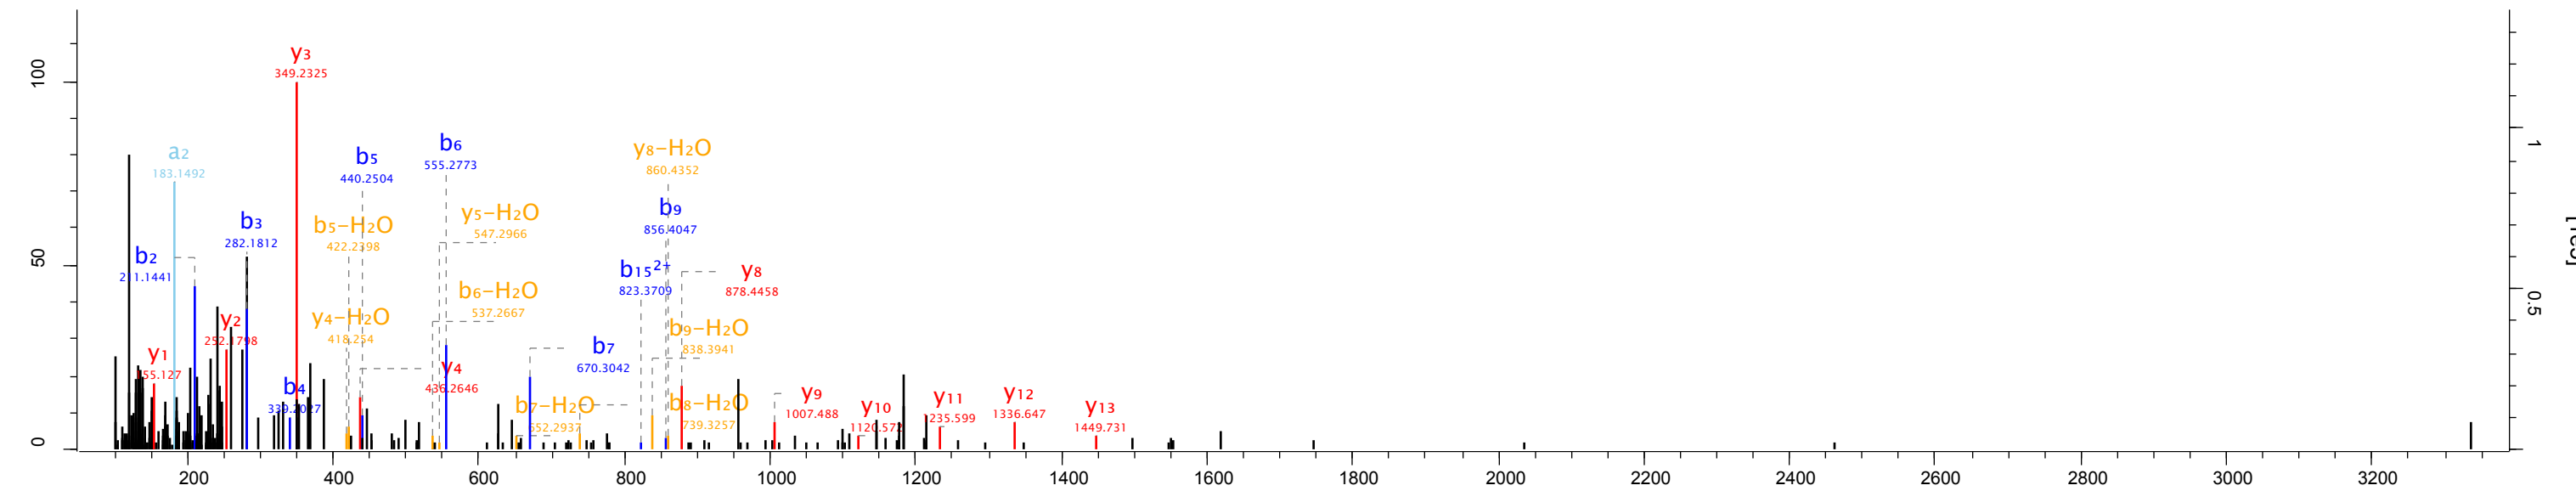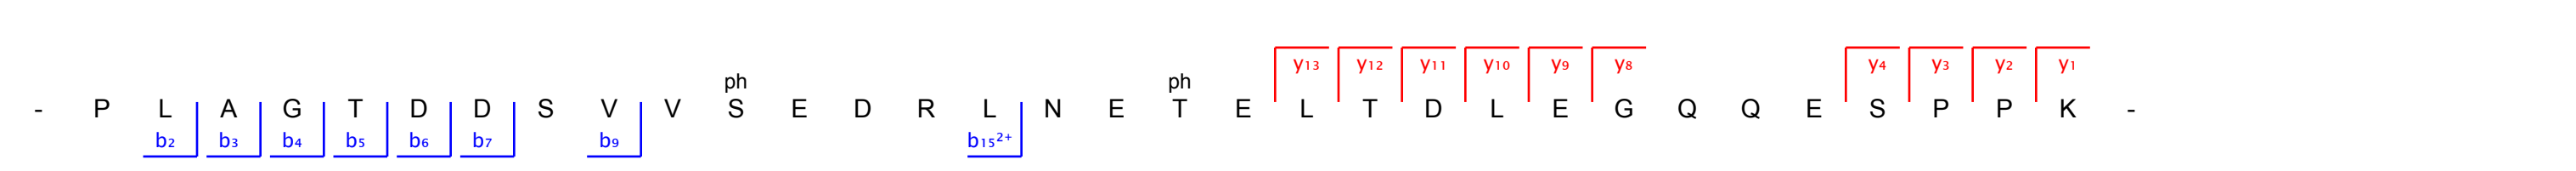

Raw file 20171215\_MaS\_33SR\_LMH\_phospho2\_03 Scan 4135 Method FTMS; HCD Score 73.45 m/z 877.37 Gene names CCDC132

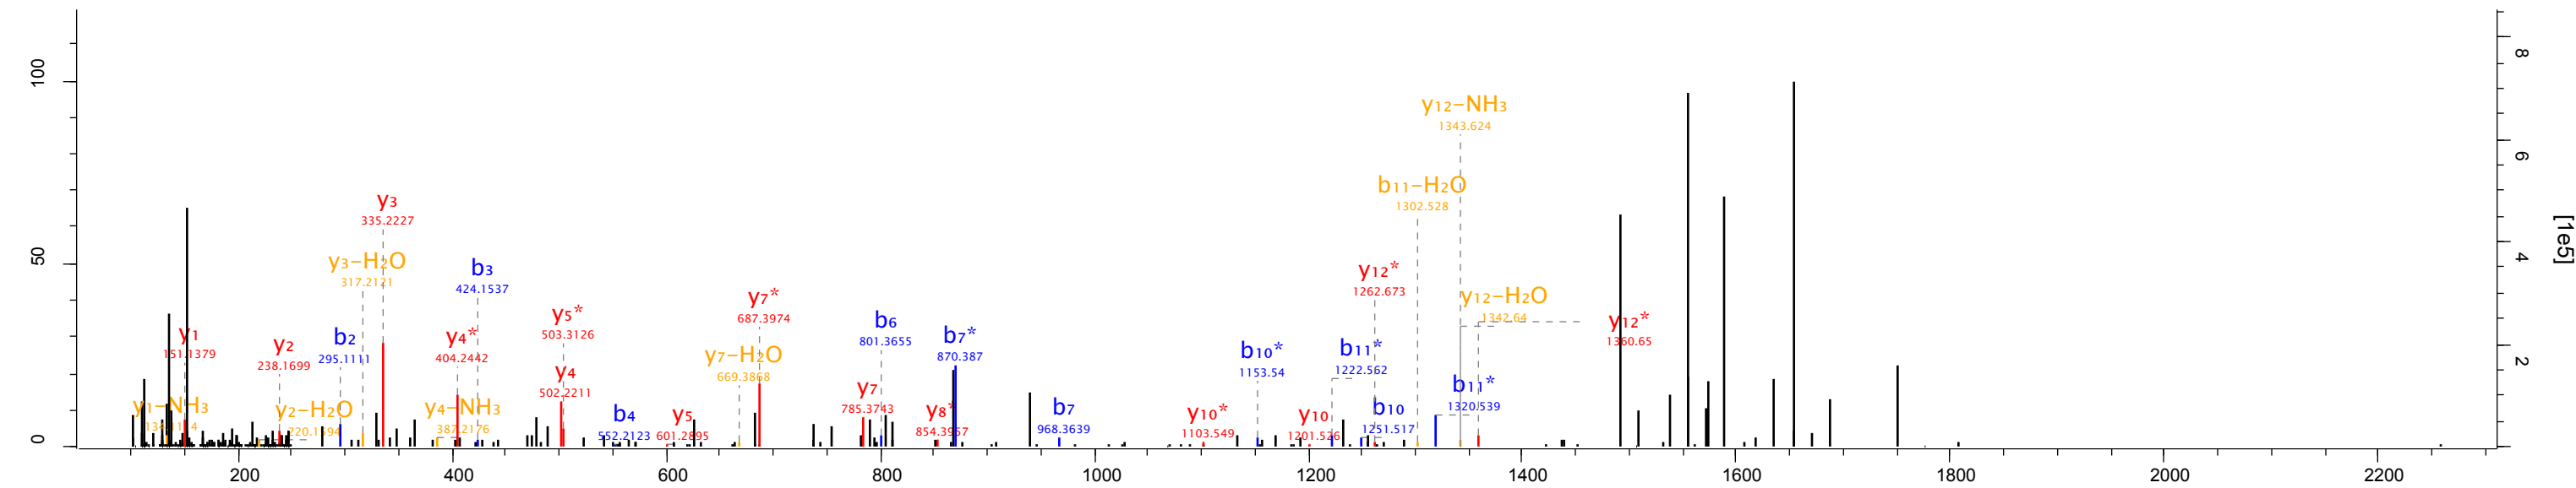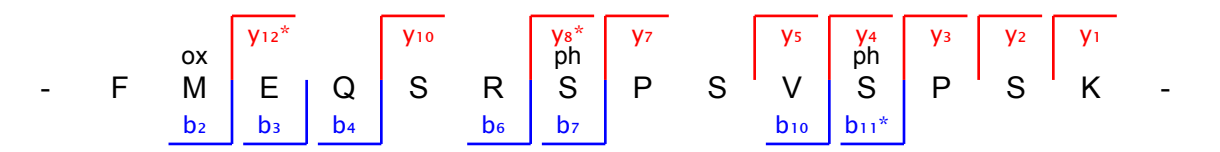

Raw file 20171215\_MaS\_33SR\_LMH\_phospho2\_03 Scan 6955 Method FTMS; HCD Score 138.54 m/z 1021.44 Gene names EYA3

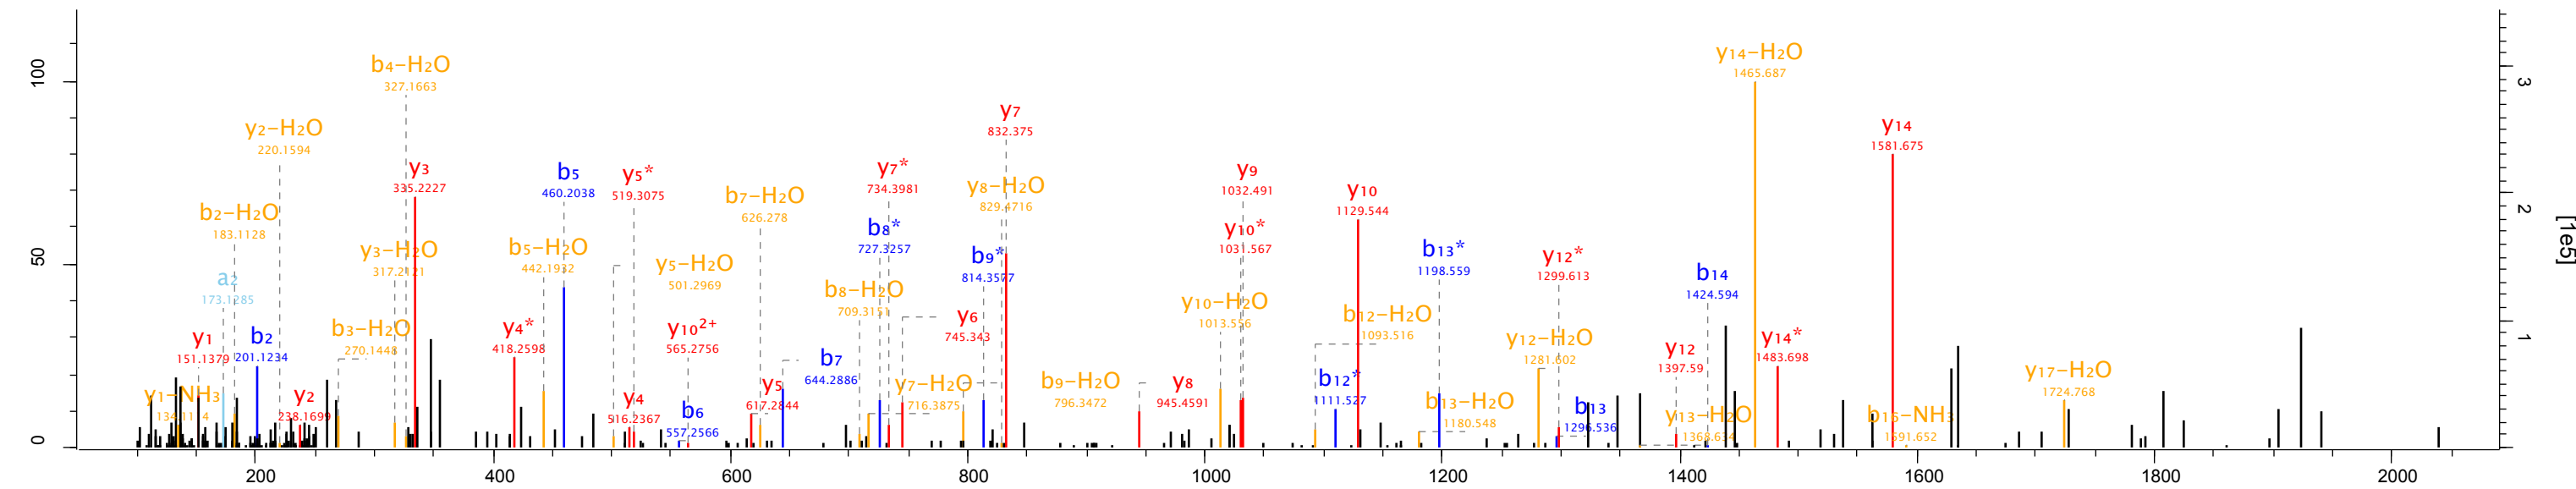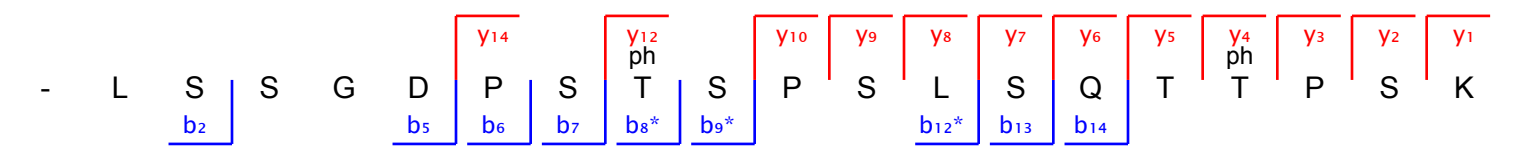

Raw file 20171215\_MaS\_33SR\_LMH\_phospho2\_03 Scan 7465 Method FTMS; HCD Score 84.4 m/z 688.81

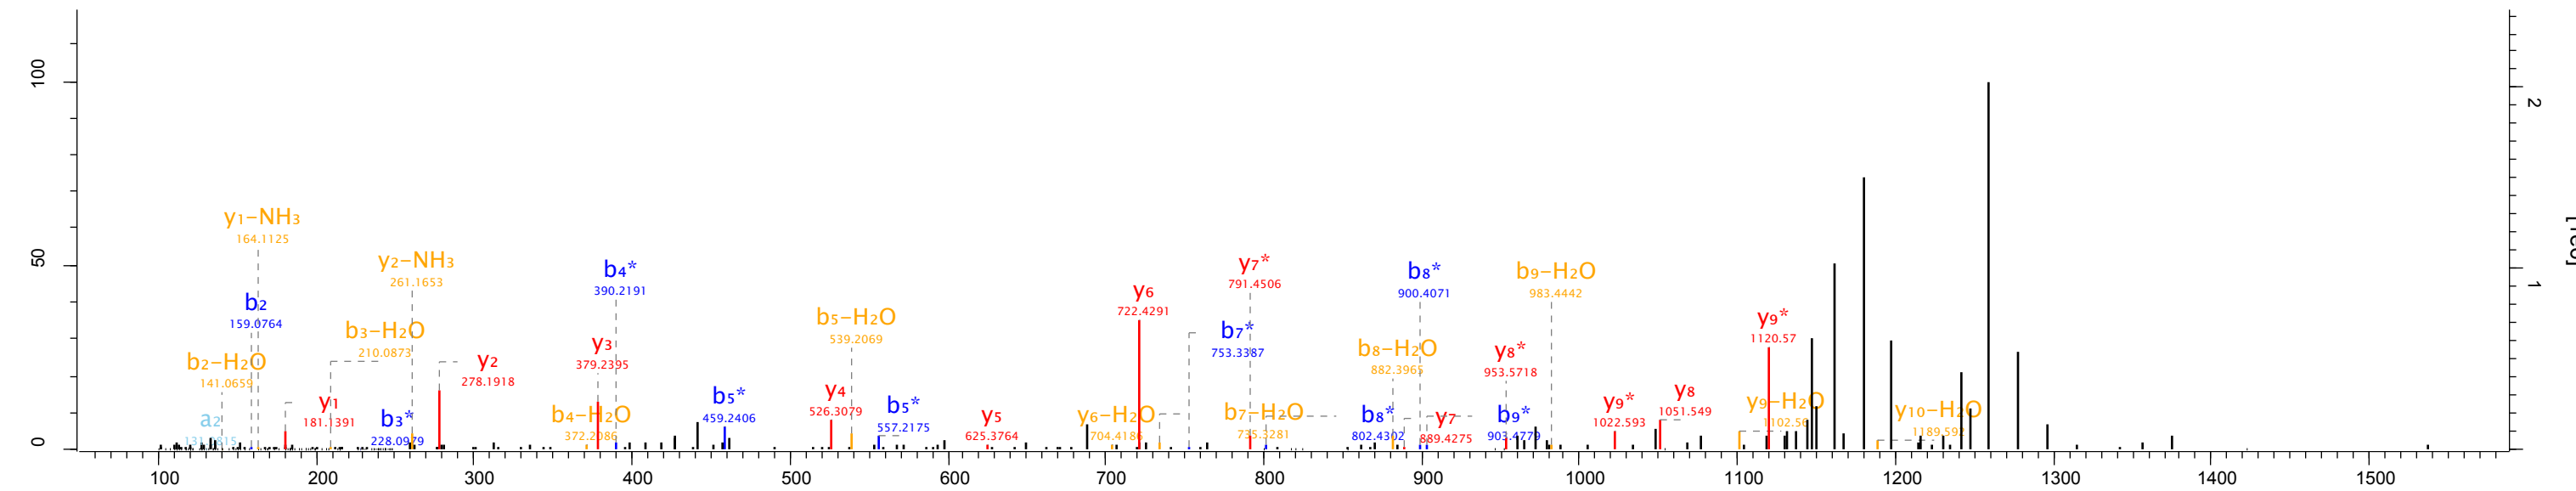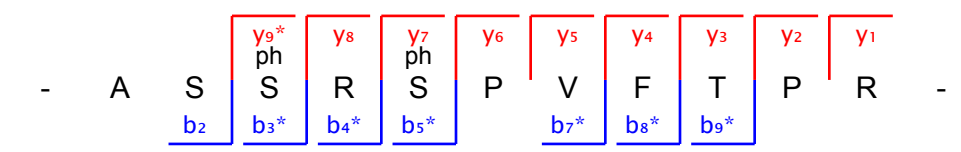

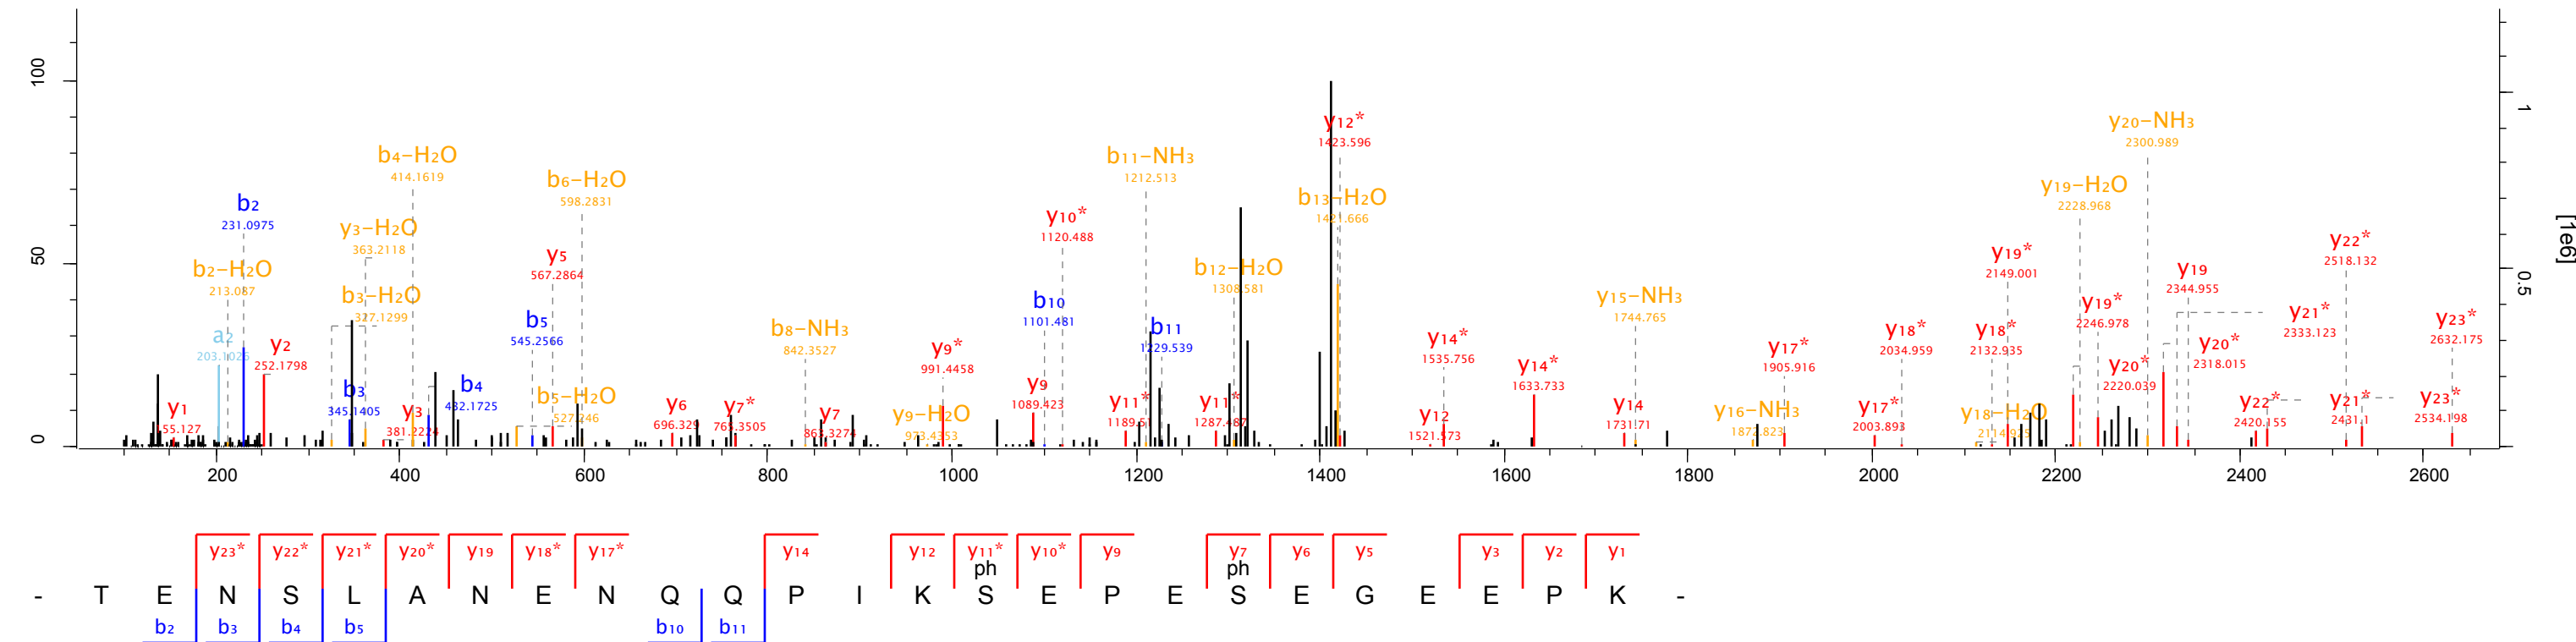

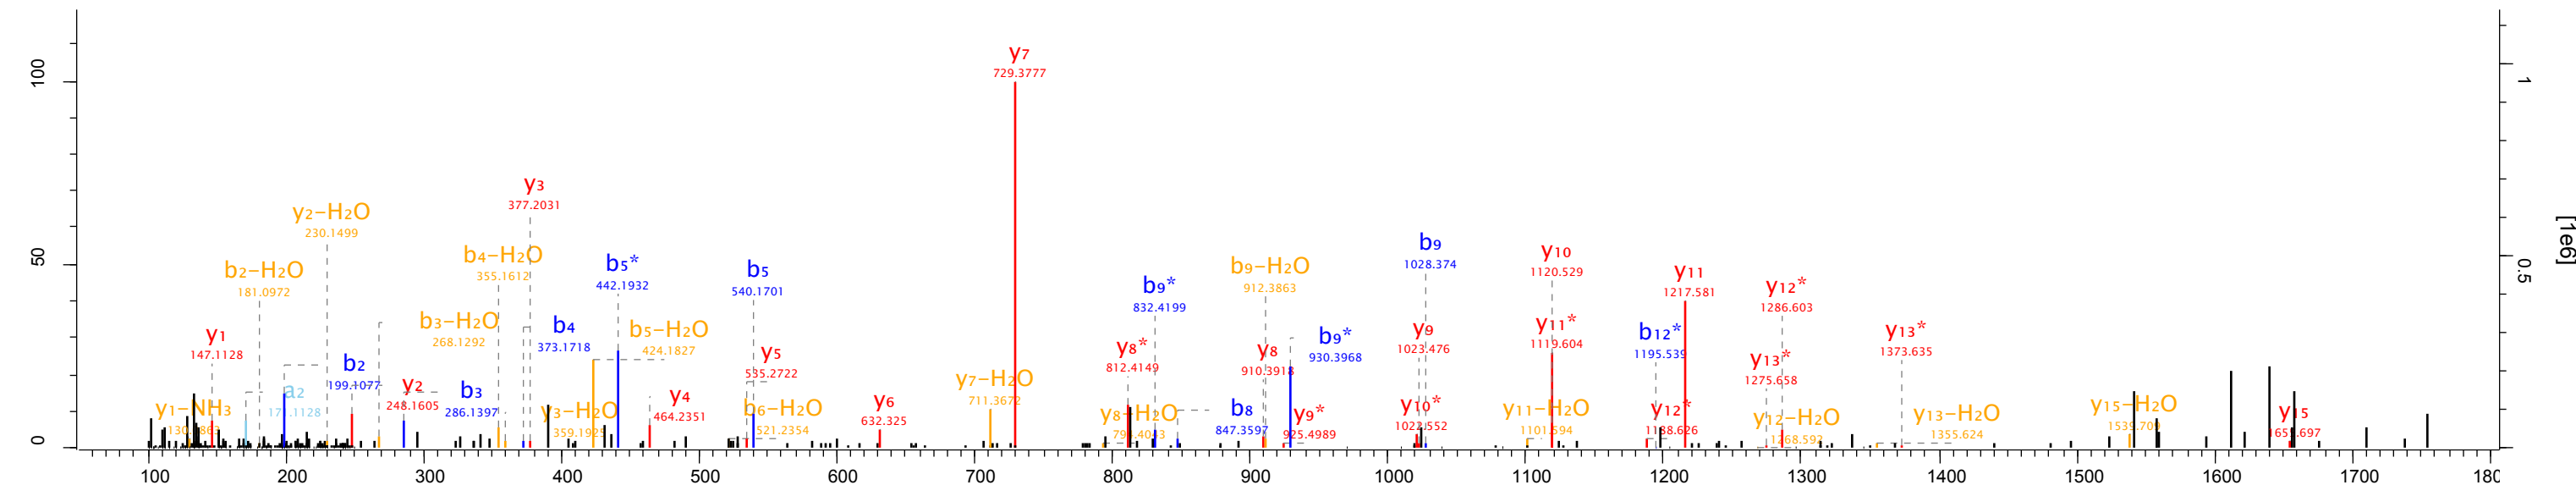

- T P S S P P I T P P A S E T K -

b<sub>2</sub> b<sub>3</sub> b<sub>4</sub> b<sub>5</sub> b<sub>8</sub> b<sub>9</sub> b<sub>12</sub>\*

y<sub>15</sub> y<sub>13</sub>\* y<sub>12</sub>\* y<sub>11</sub> y<sub>10</sub> y<sub>9</sub> y<sub>8</sub> y<sub>7</sub> y<sub>6</sub> y<sub>5</sub> y<sub>4</sub> y<sub>3</sub> y<sub>2</sub> y<sub>1</sub>

ph

Raw file  
20171215\_MaS\_33SR\_LMH\_phospho2\_03

Scan 8255 Method FTMS; HCD Score 291.68 m/z 890.68 Gene names BRPF1

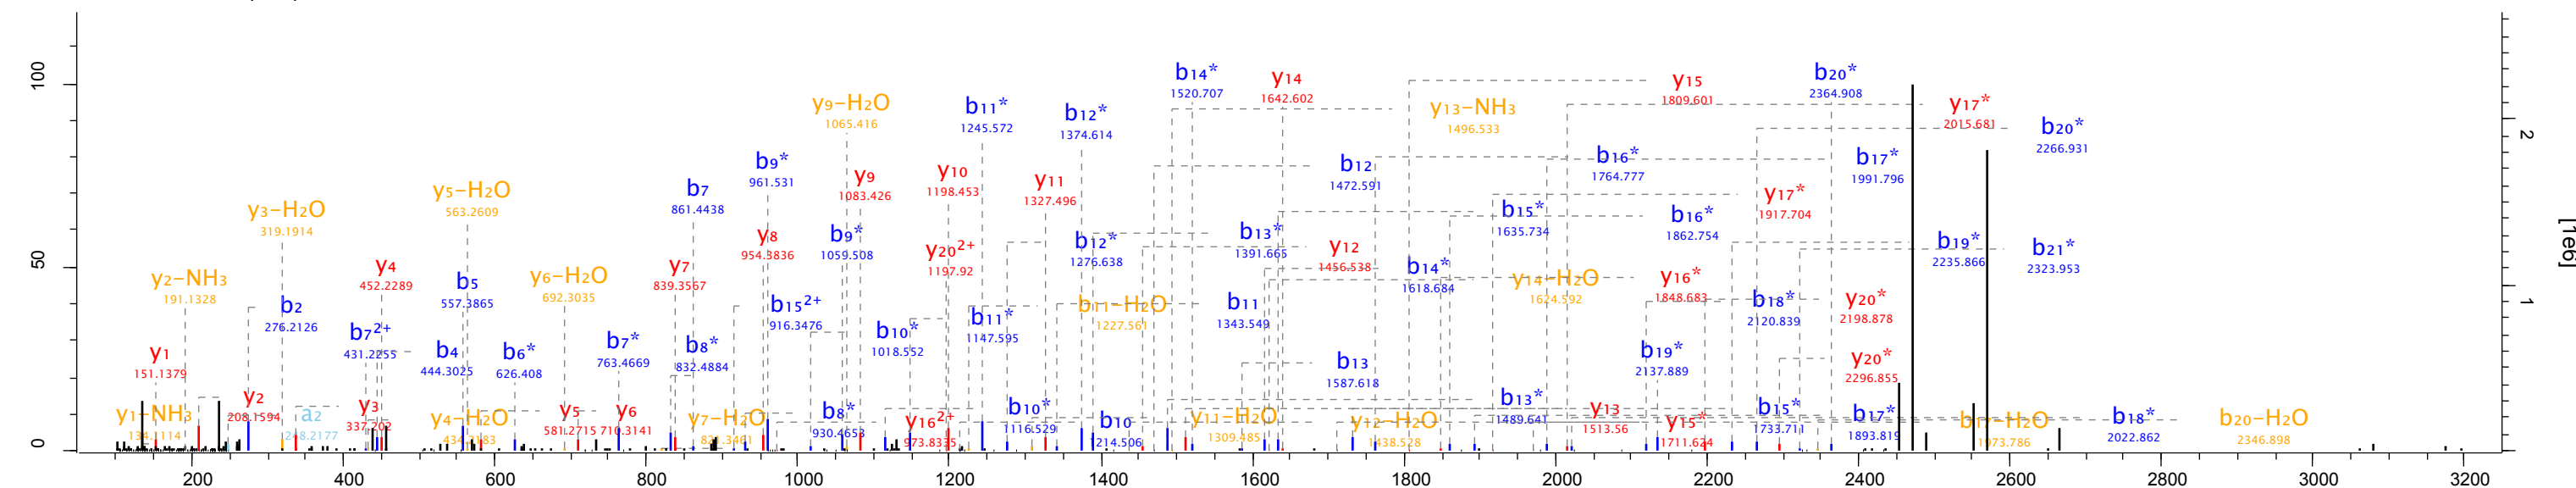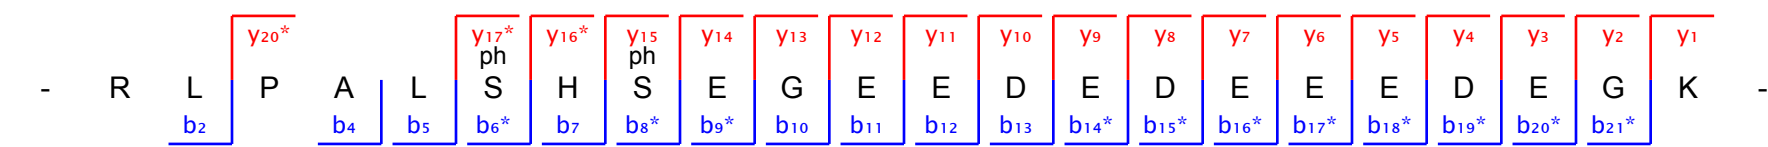



Raw file: 20171215\_MaS\_33SR\_LMH\_phospho2\_03  
 Scan: 8845 Method: FTMS; HCD Score: 184.14 m/z: 1001.42 Gene names: TRIP10

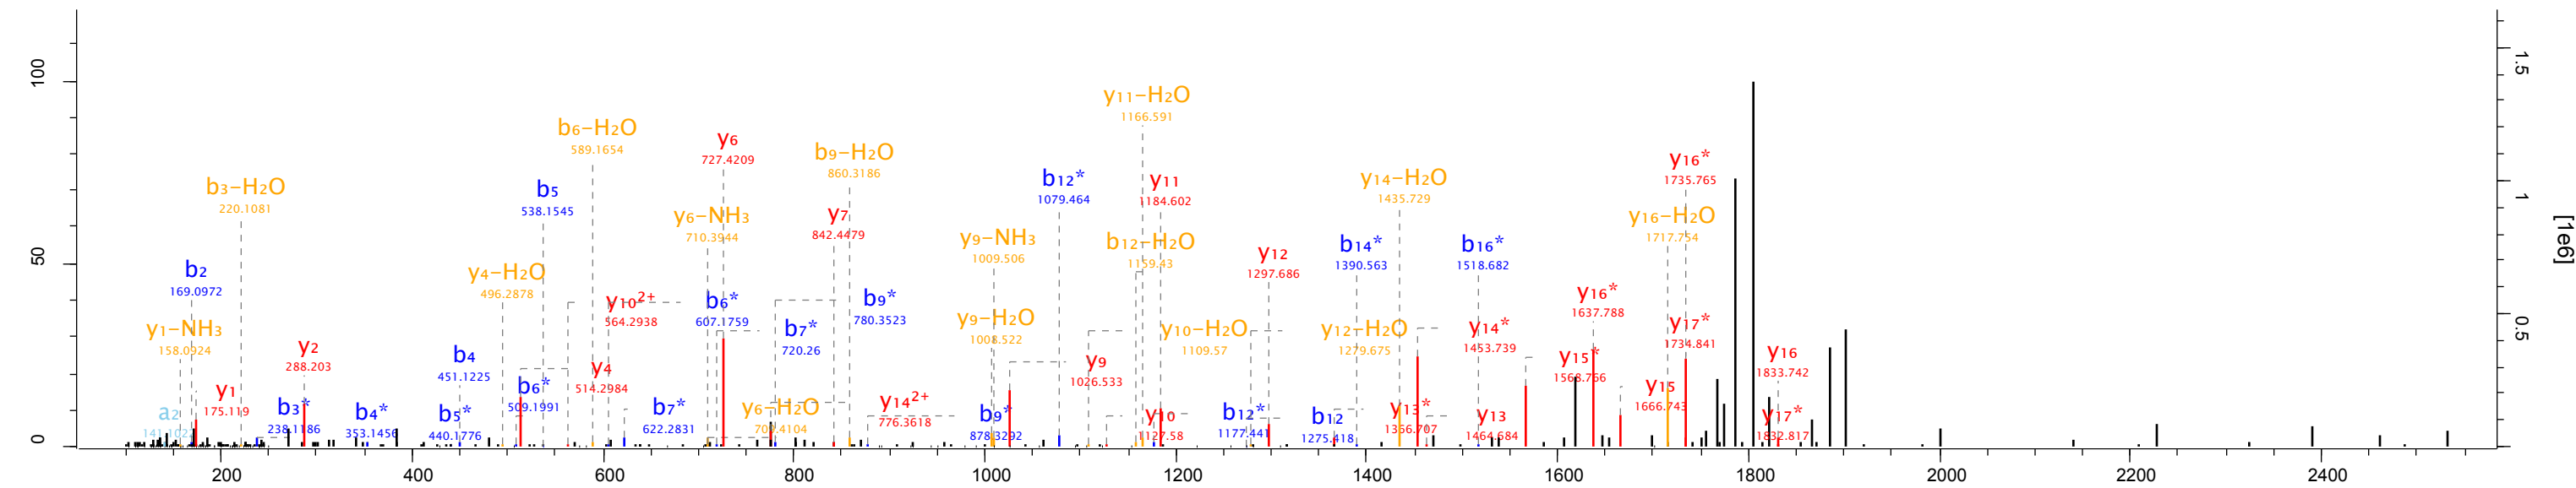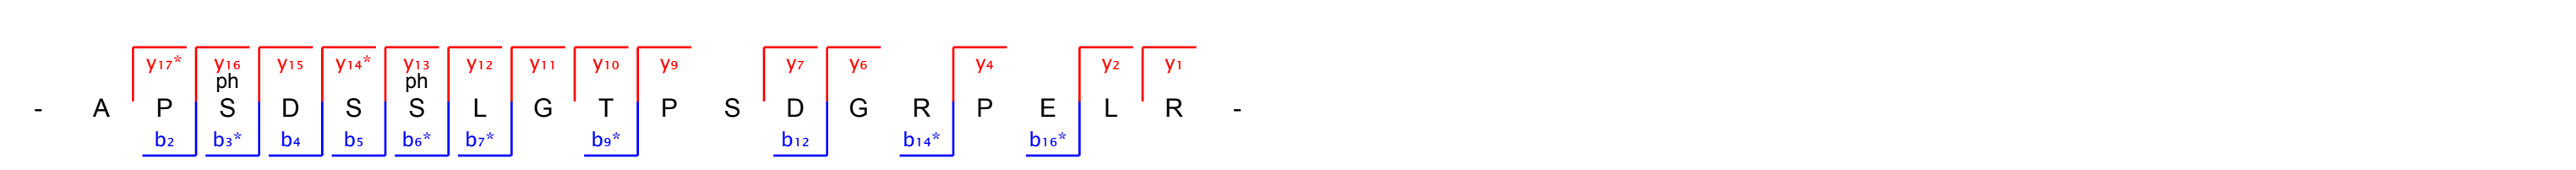

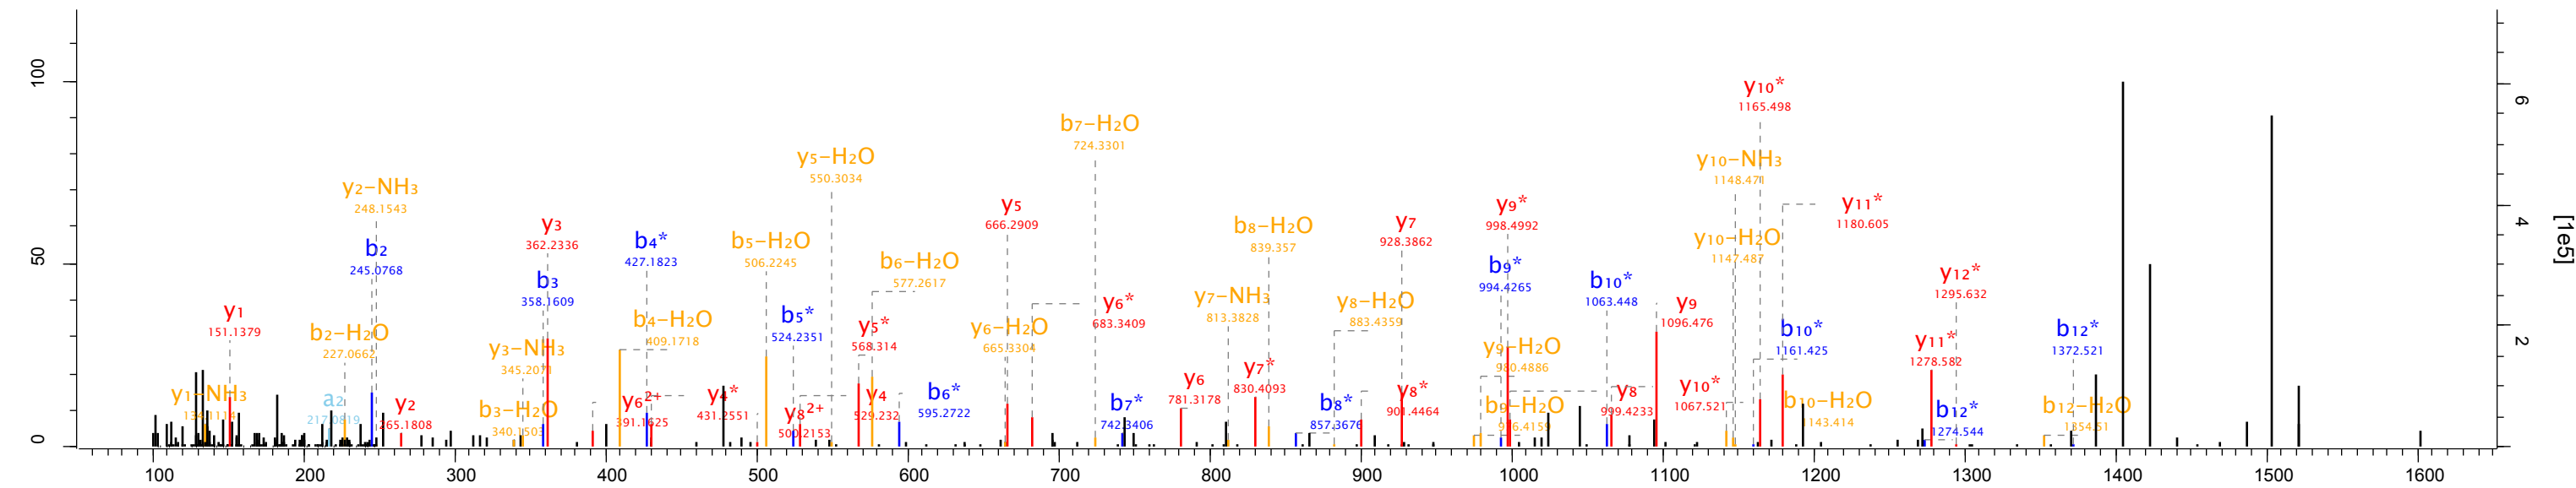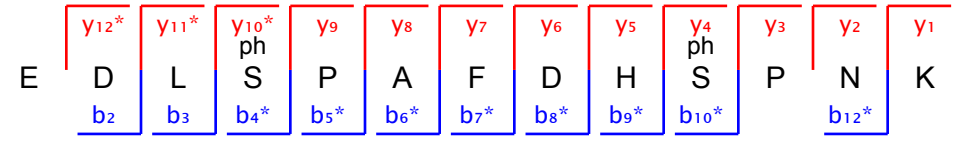

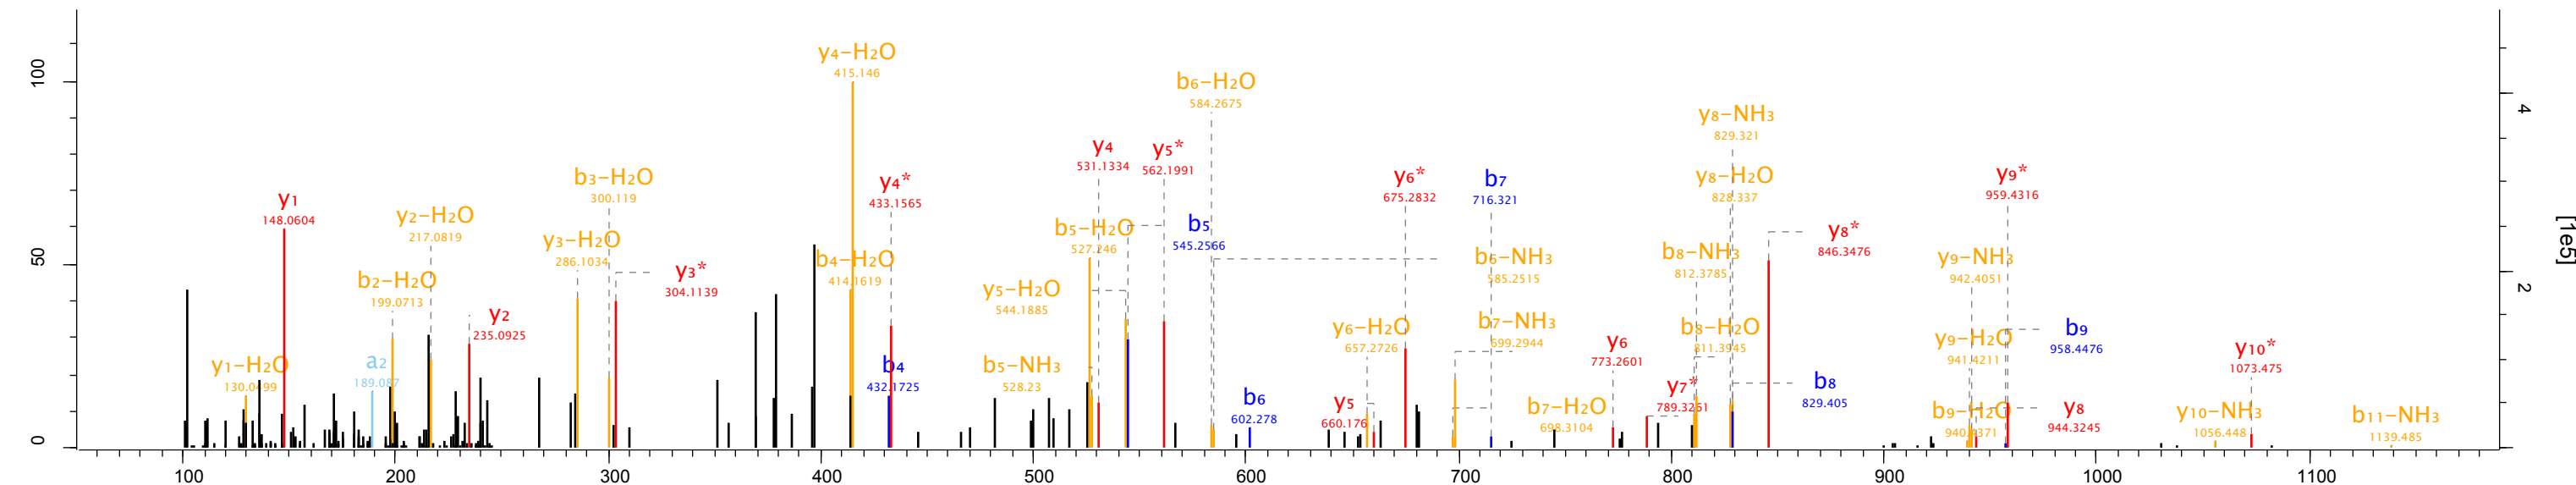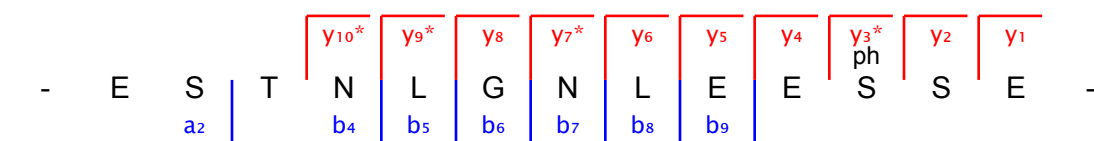

Raw file 20171215\_MaS\_33SR\_LMH\_phospho2\_05 Scan 10845 Method FTMS; HCD Score 44.16 m/z 836.33 Gene names CCDC61

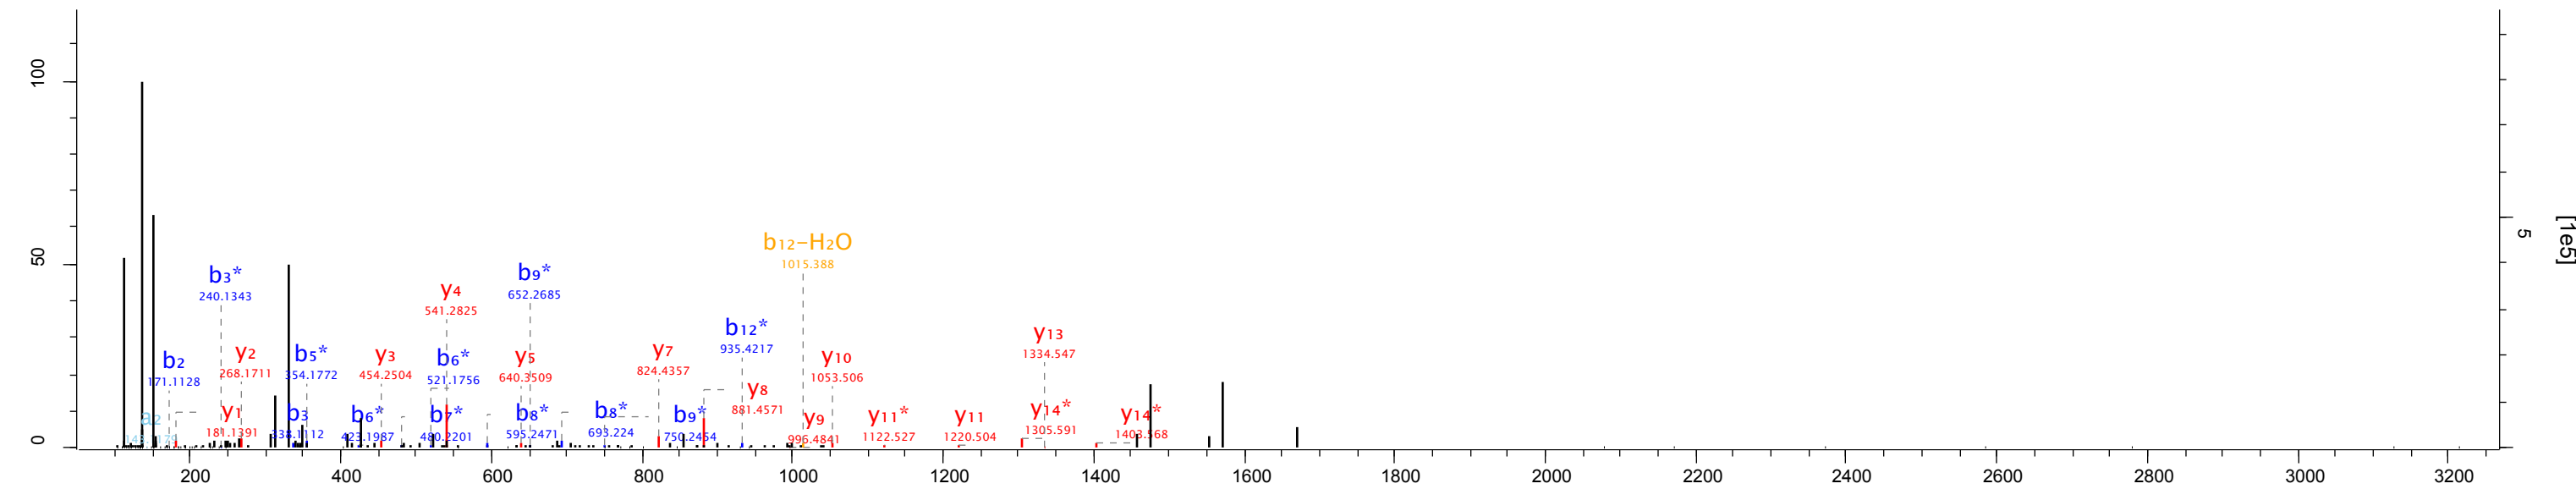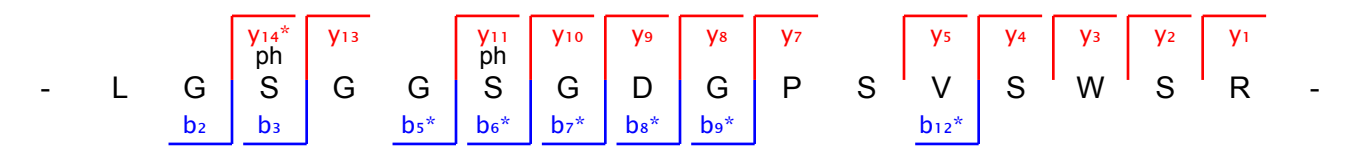

Raw file: 20171215\_MaS\_33SR\_LMH\_phospho2\_08  
 Scan: 2865 Method: FTMS; HCD Score: 55.84 m/z: 523.74 Gene names: NR3C1

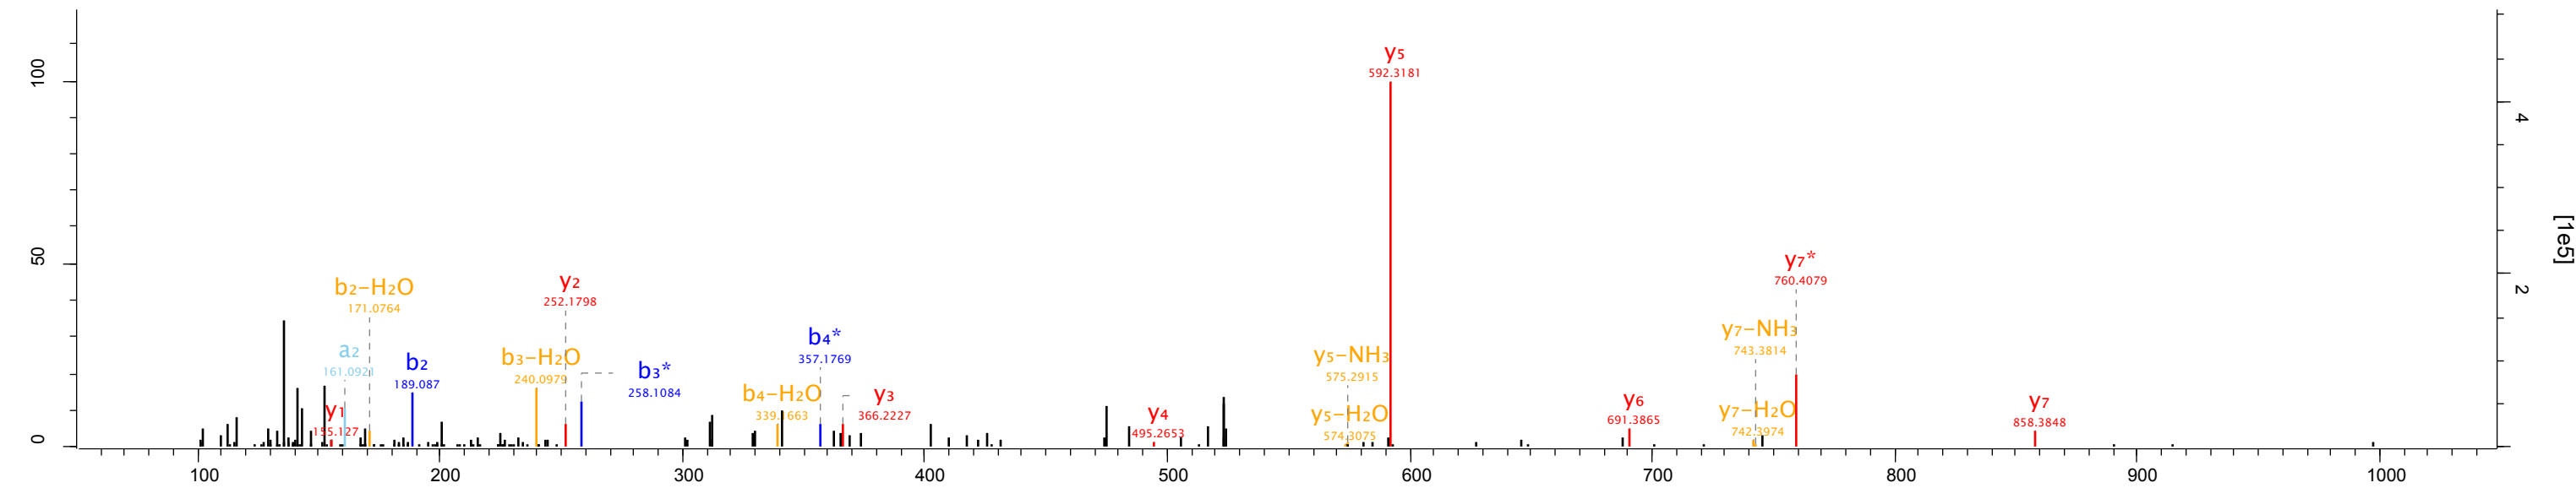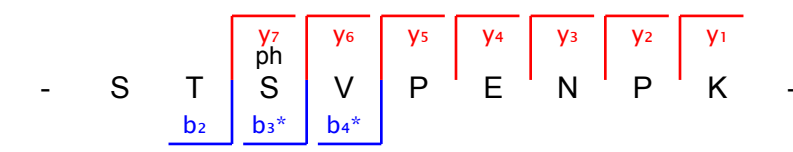

Raw file 20171215\_MaS\_33SR\_LMH\_phospho2\_09 Scan 3585 Method FTMS; HCD Score 82.03 m/z 411.18 Gene names BTN2A2;BTN2A1

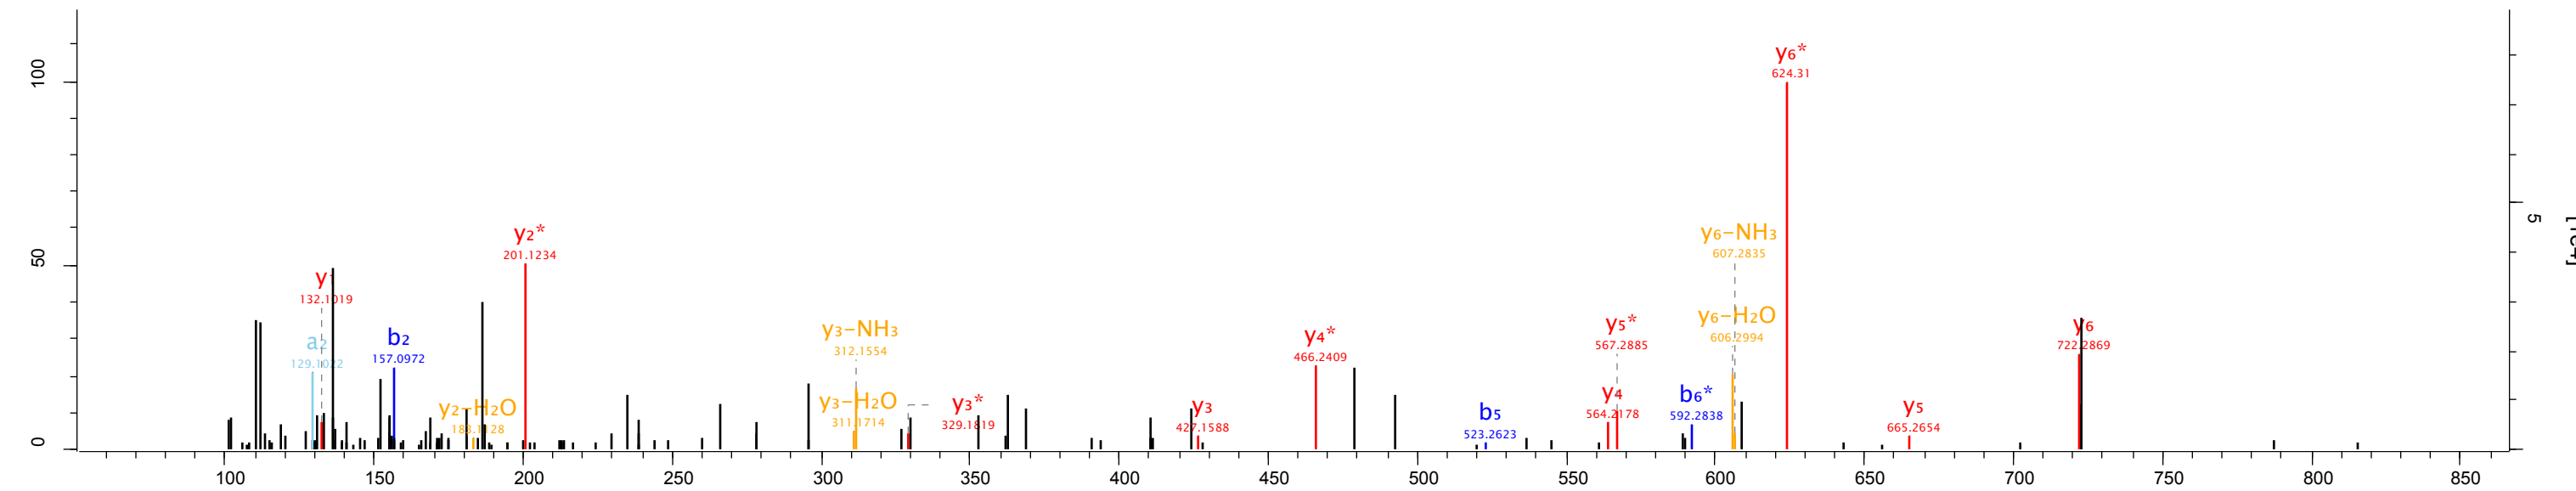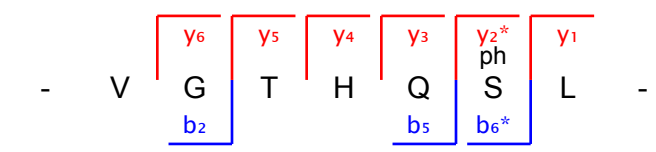

[1e4]

Raw file 20171215\_MaS\_33SR\_LMH\_proteome\_01 Scan 107675 Method FTMS; HCD Score 55.66 m/z 557.67 Gene names CLN3

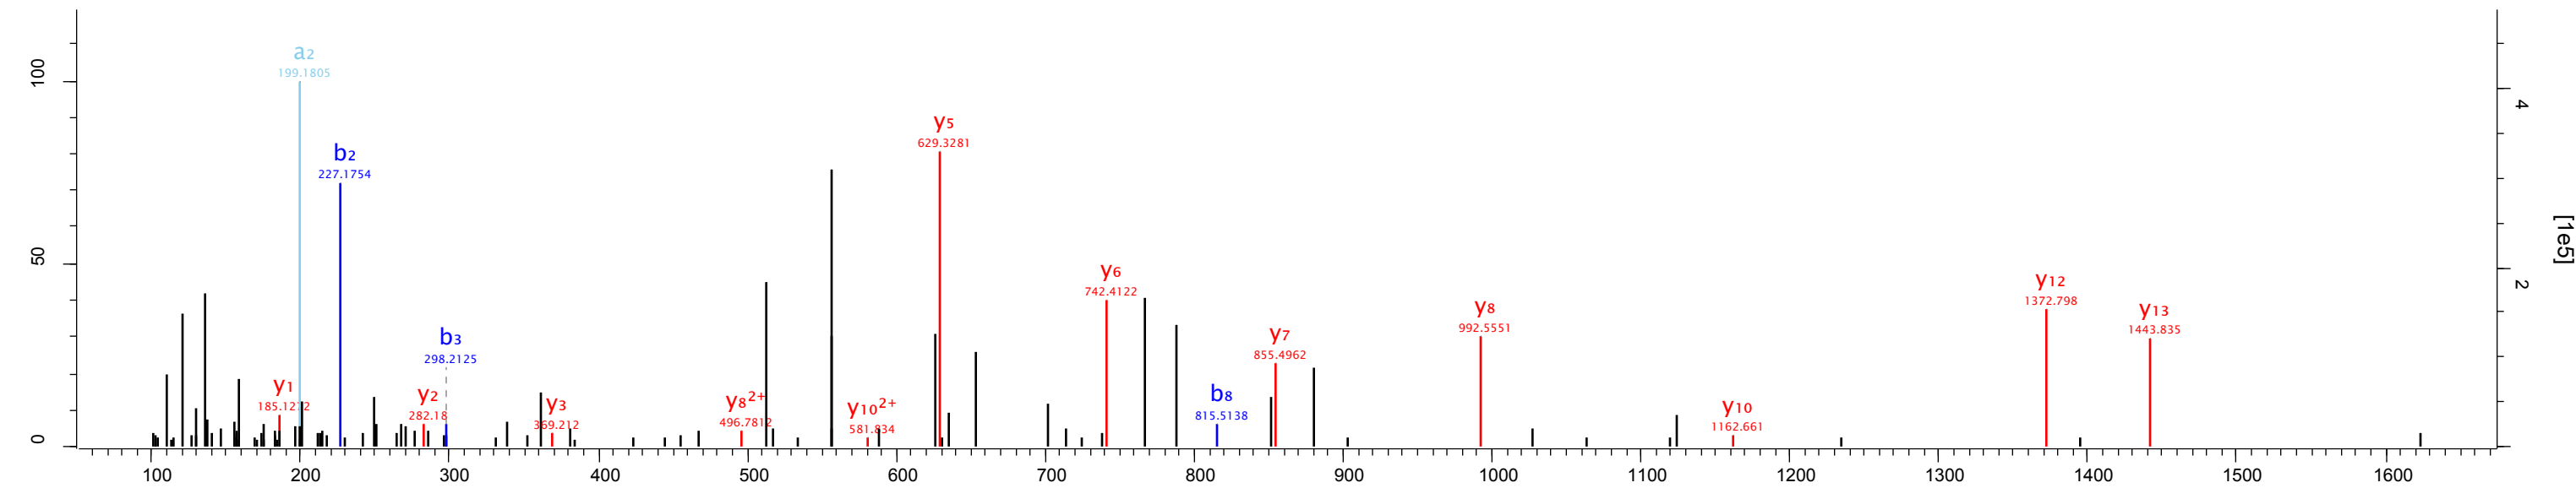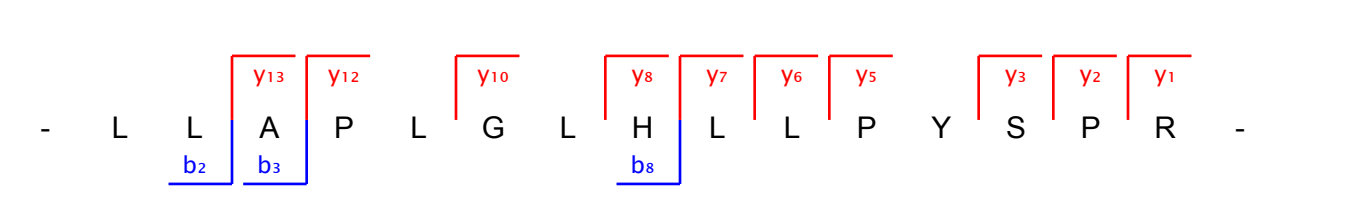

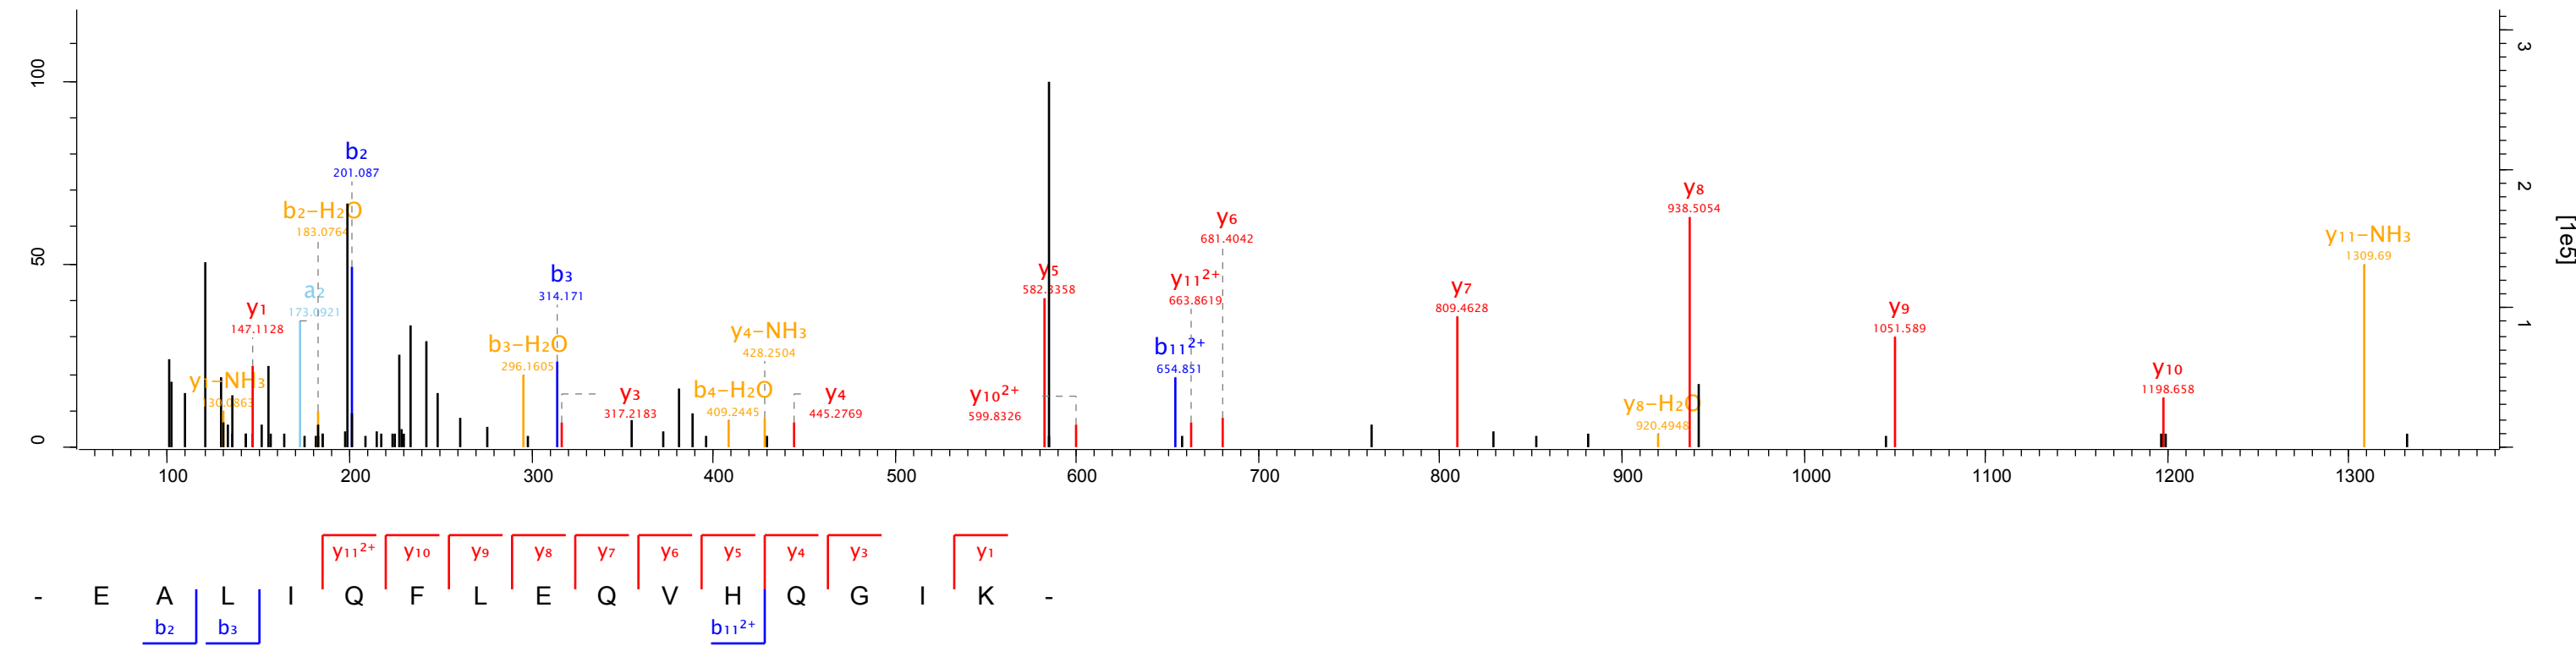



Raw file: 20171215\_MaS\_33SR\_LMH\_proteome\_01  
 Scan: 125465 Method: FTMS; HCD Score: 75.02 m/z: 849.47 Gene names: UBXN4

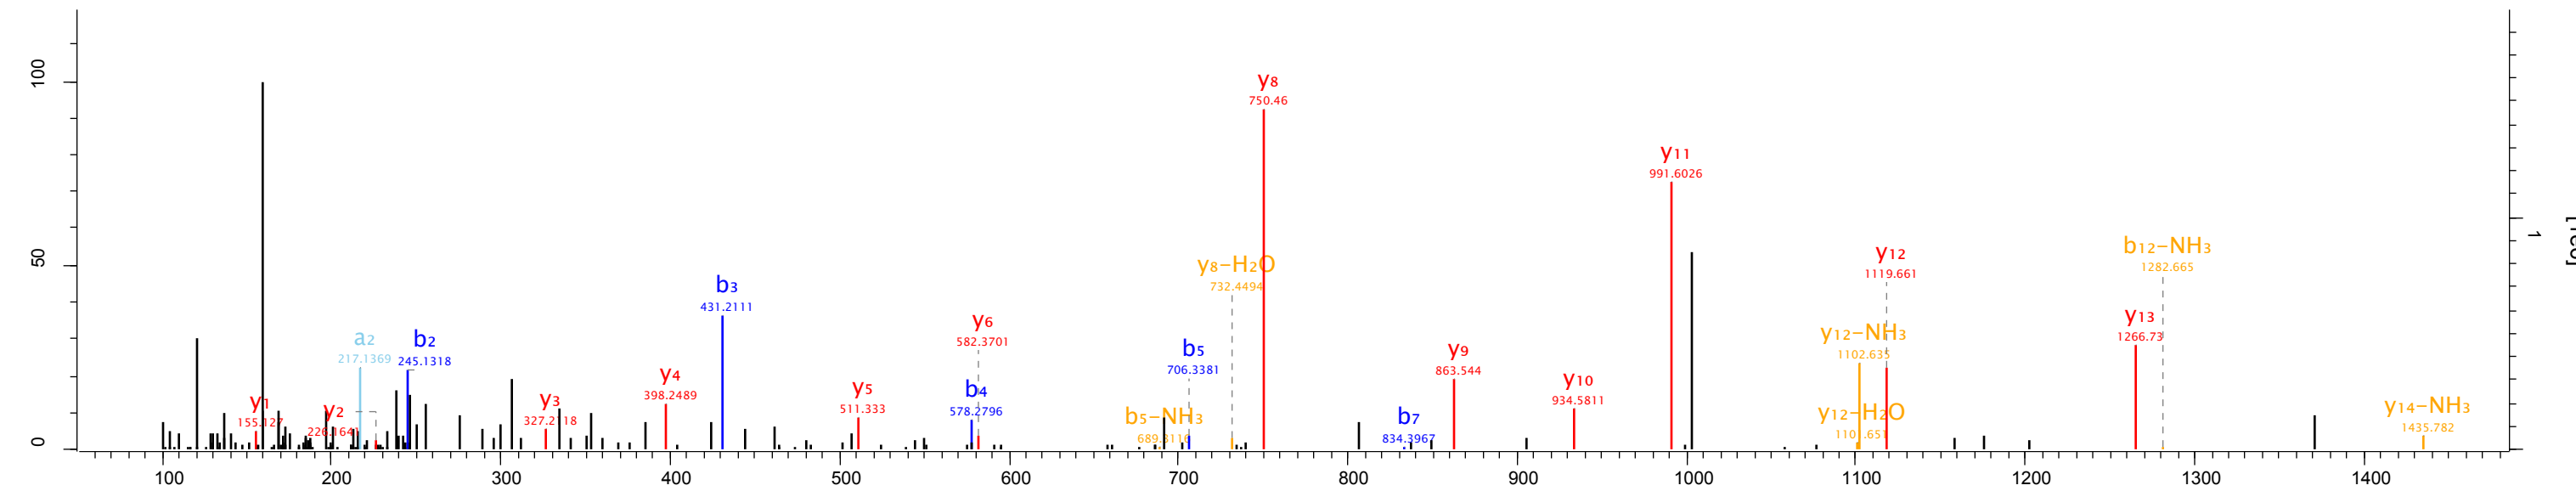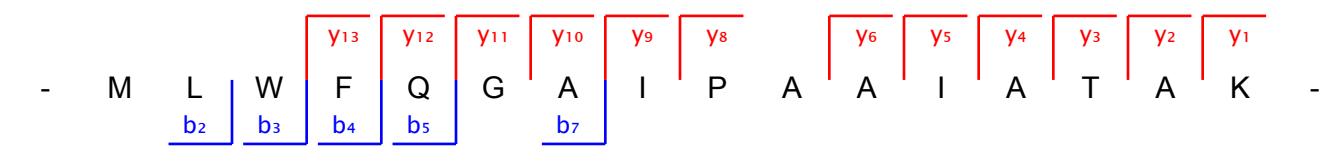

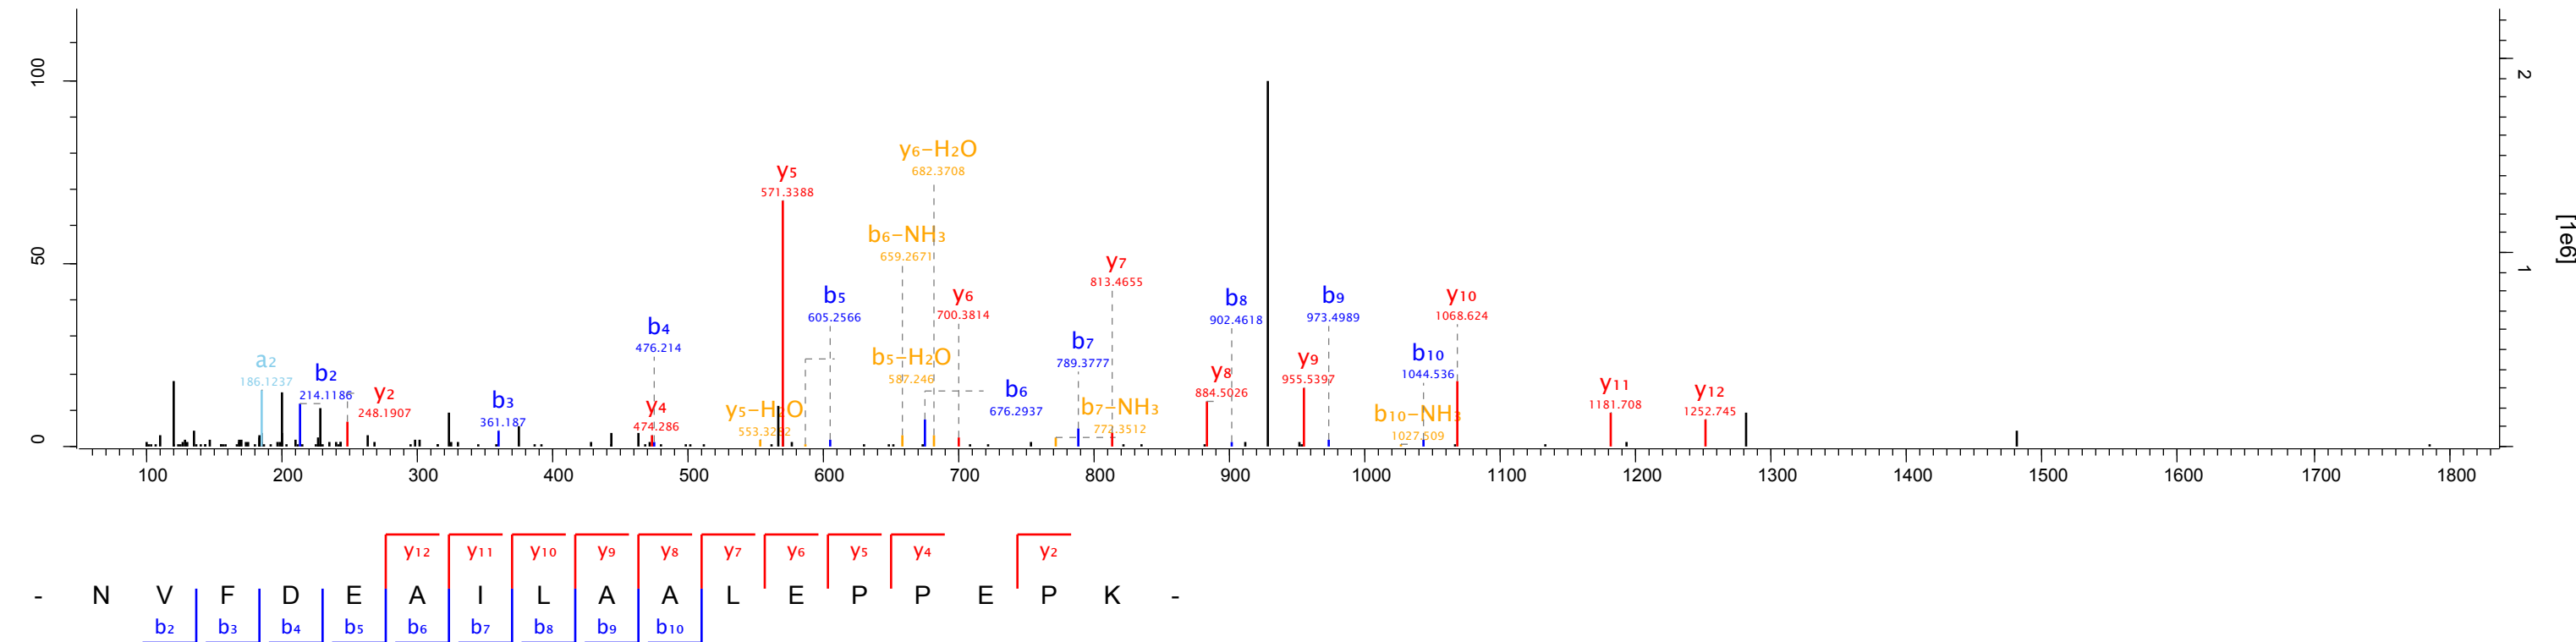

Raw file 20171215\_MaS\_33SR\_LMH\_proteome\_01 Scan 144305 Method FTMS; HCD Score 89.88 m/z 943.79 Gene names LSM7

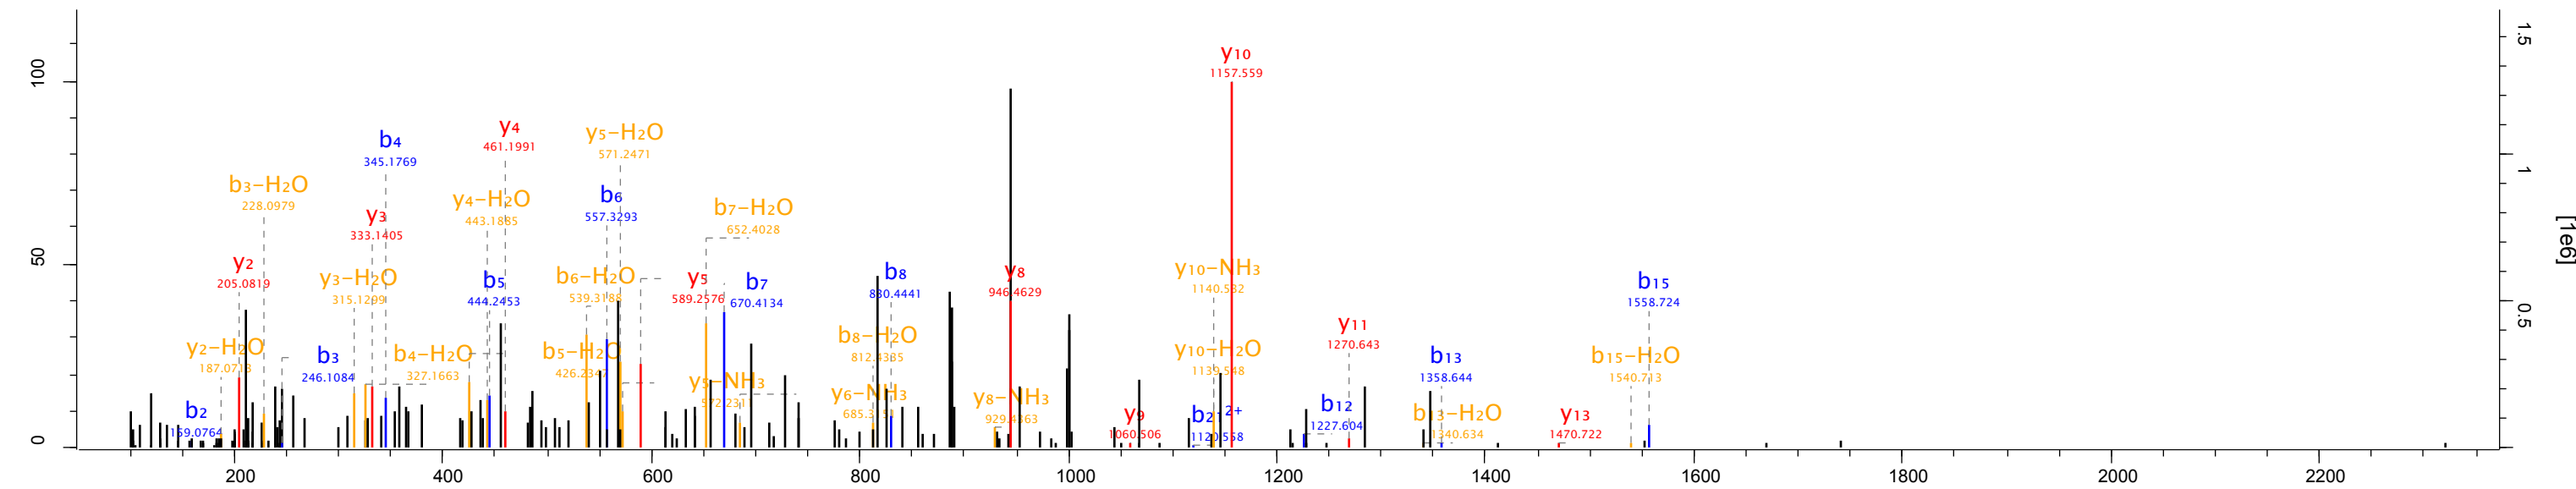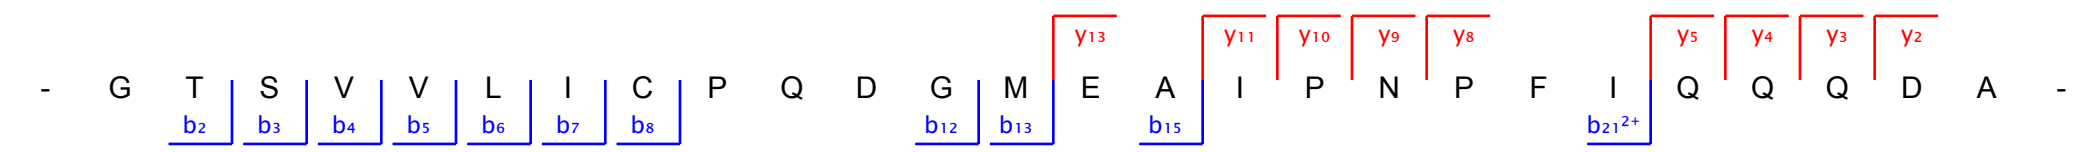

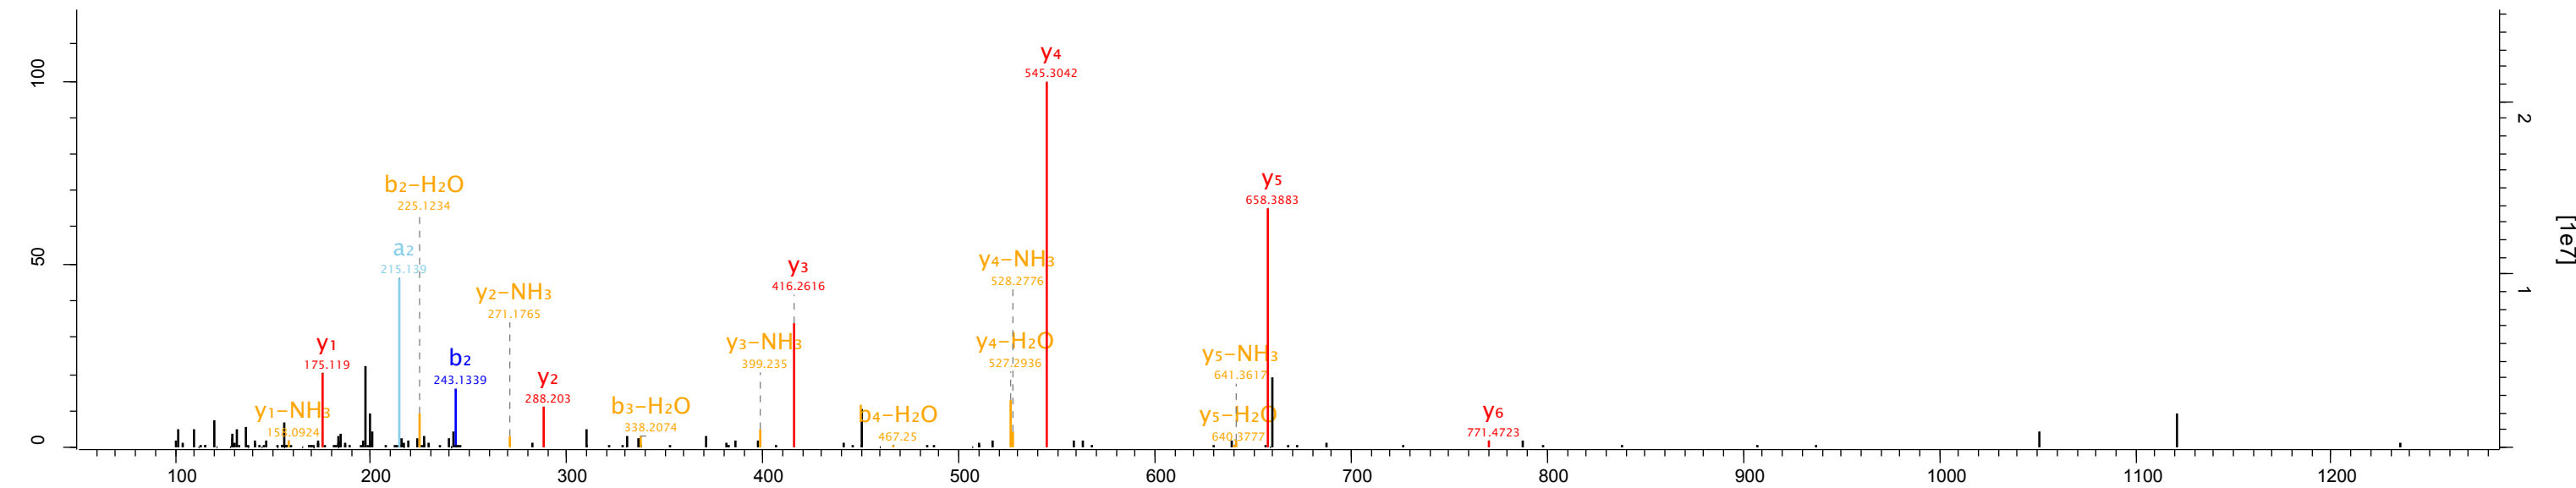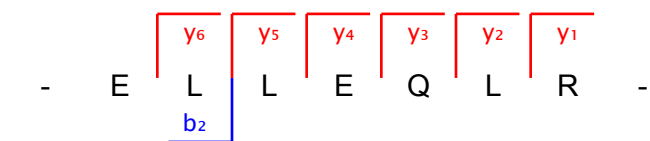

Raw file: 20171215\_MaS\_33SR\_LMH\_proteome\_01  
 Scan: 24305 Method: FTMS; HCD Score: 137.05 m/z: 634.79 Gene names: CD63

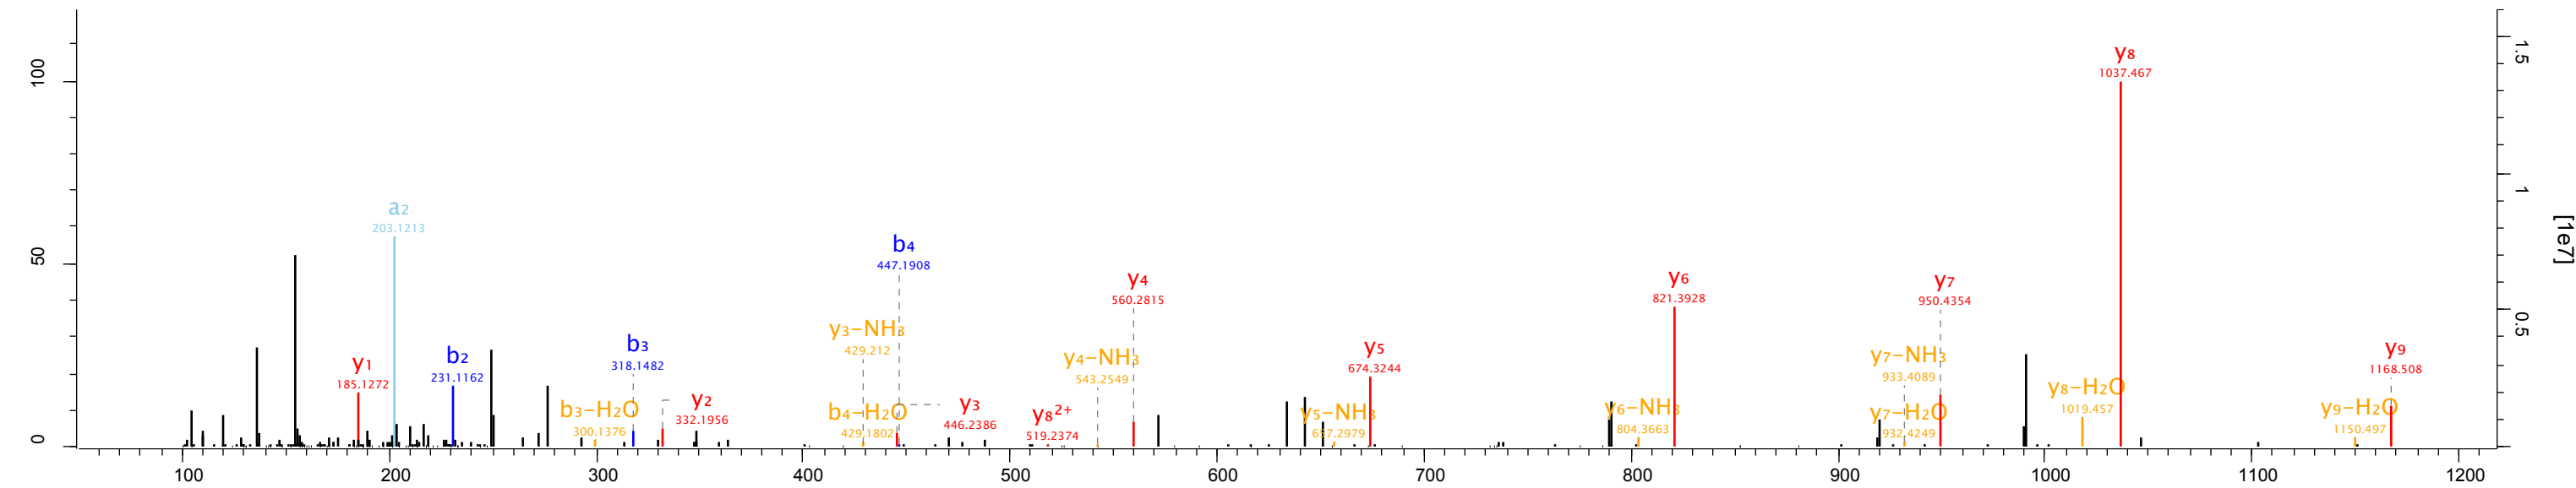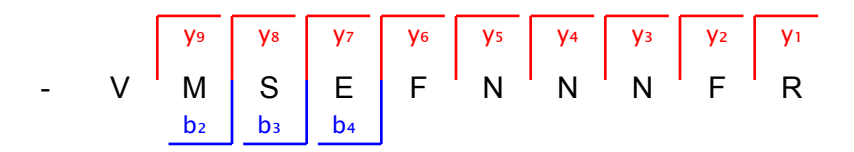

Raw file 20171215\_MaS\_33SR\_LMH\_proteome\_01 Scan 26535 Method FTMS; HCD Score 136.49 m/z 632.82 Gene names CNPY3

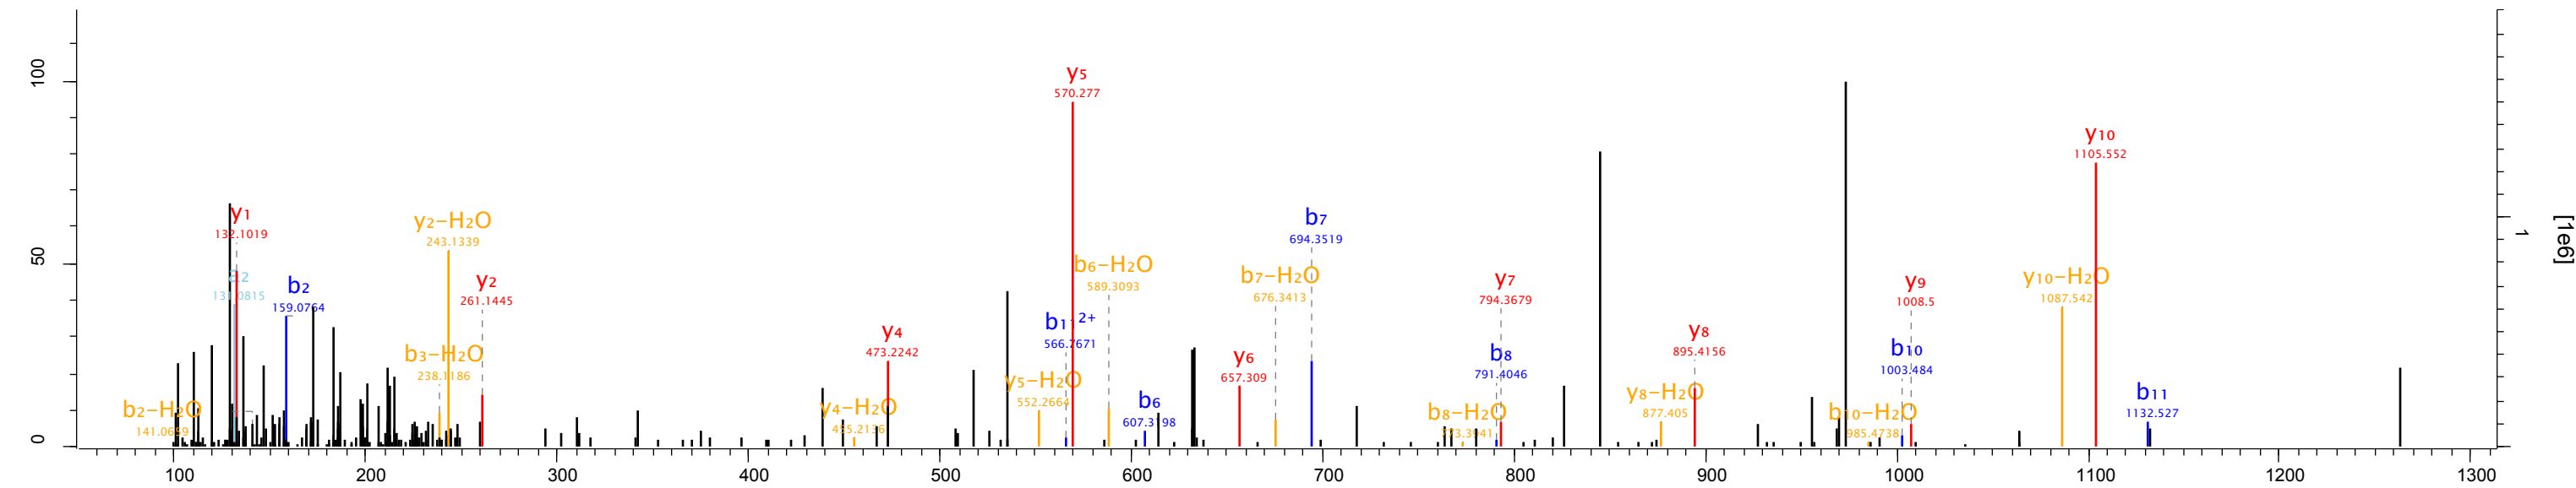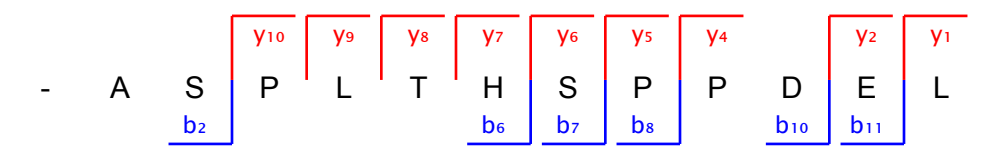

Raw file: 20171215\_MaS\_33SR\_LMH\_proteome\_01  
 Scan: 33565 Method: FTMS; HCD Score: 168.5 m/z: 840.44 Gene names: STX7

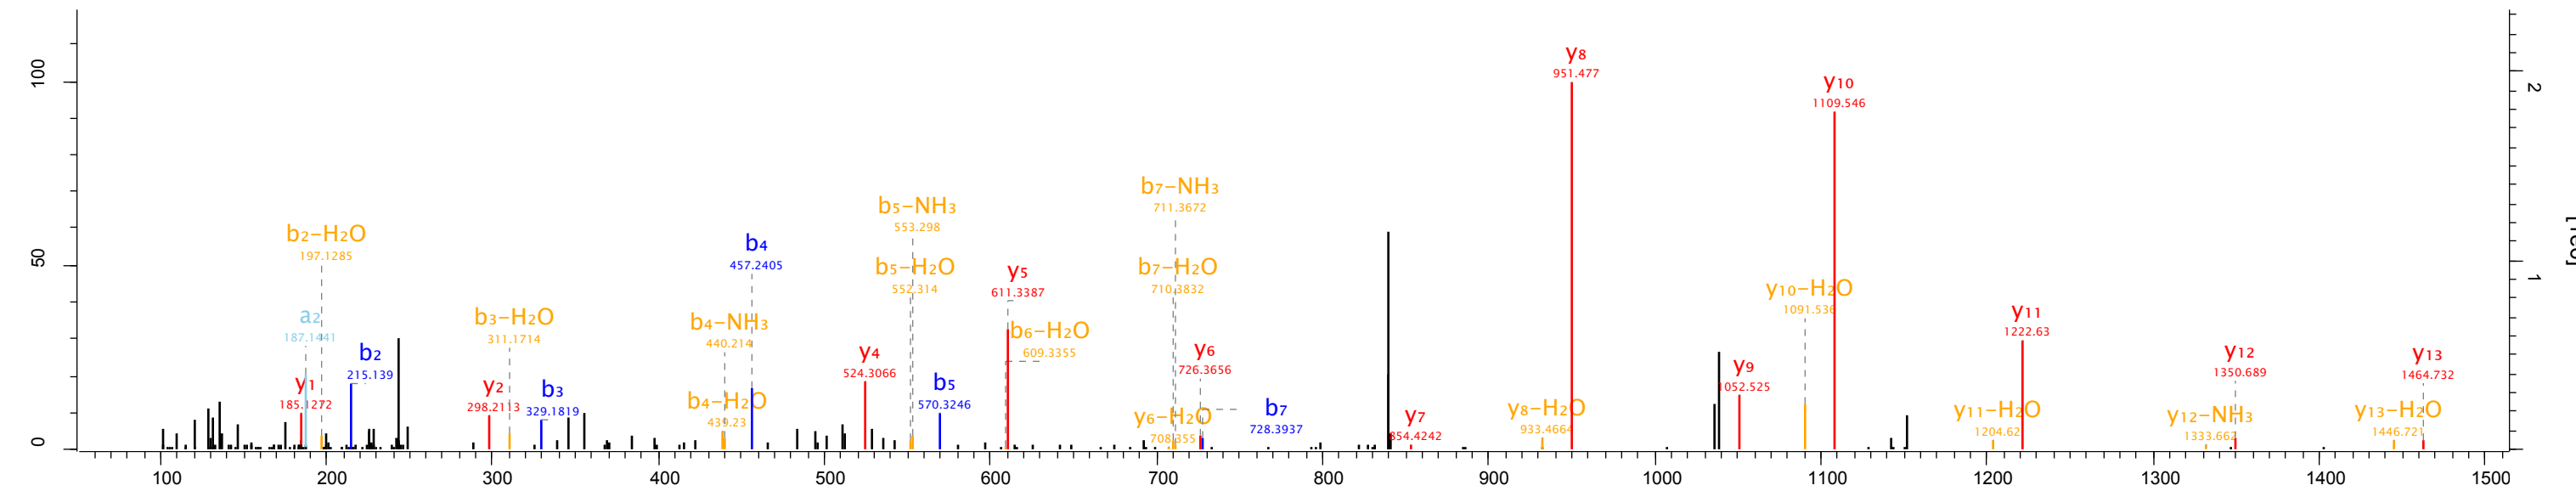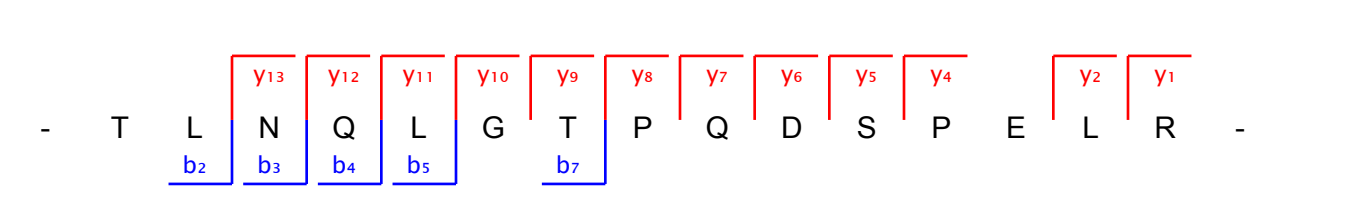

Raw file: 20171215\_MaS\_33SR\_LMH\_proteome\_01  
 Scan: 35625 Method: FTMS; HCD Score: 57.86 m/z: 497.82 Gene names: ENTPD8

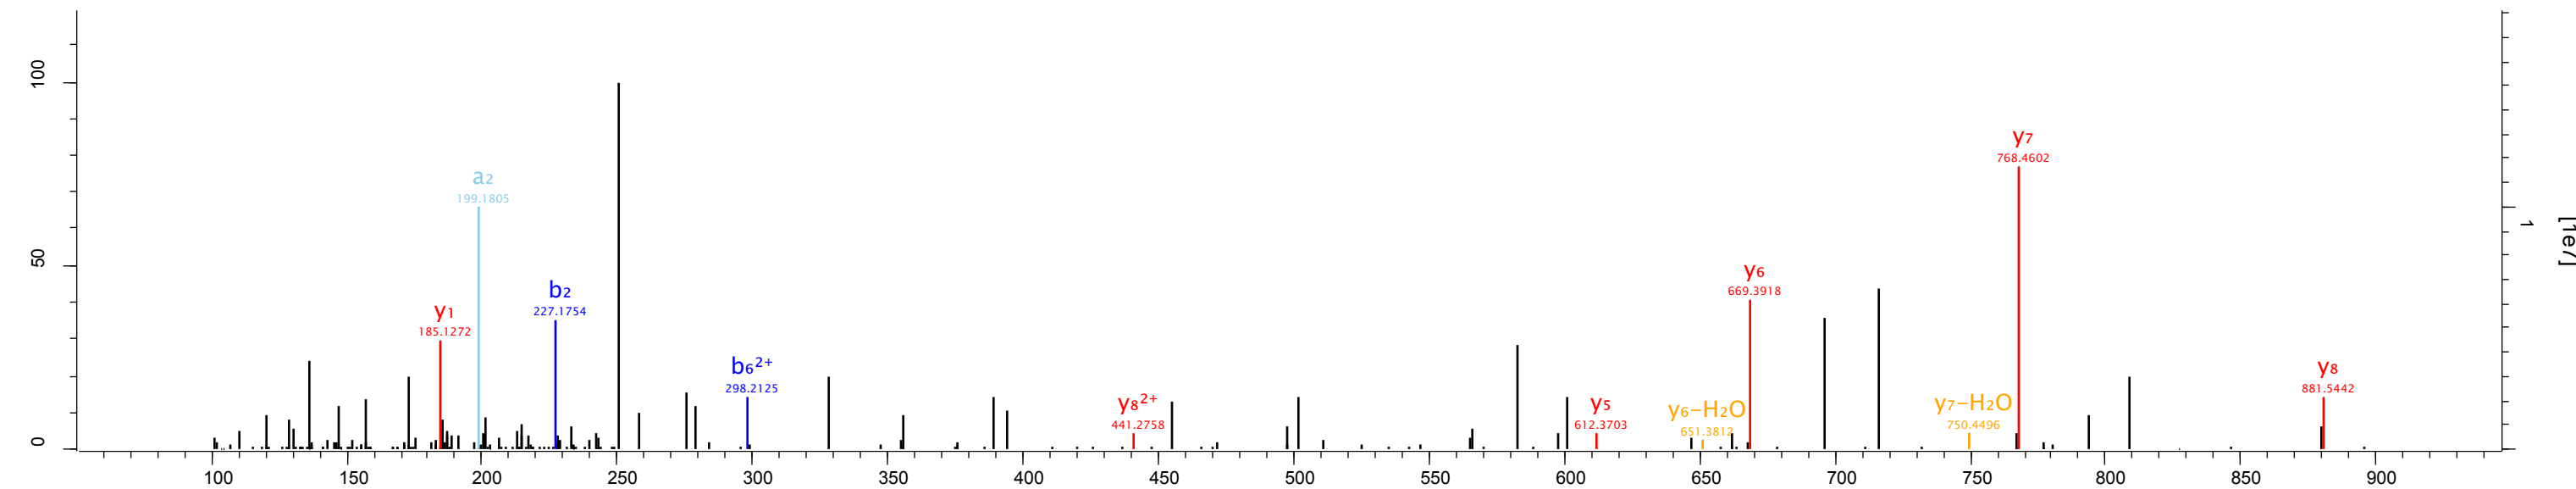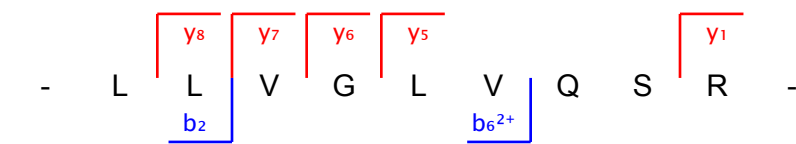



Raw file 20171215\_MaS\_33SR\_LMH\_proteome\_01 Scan 4025 Method FTMS; HCD Score 44.86 m/z 571.76 Gene names RGL2

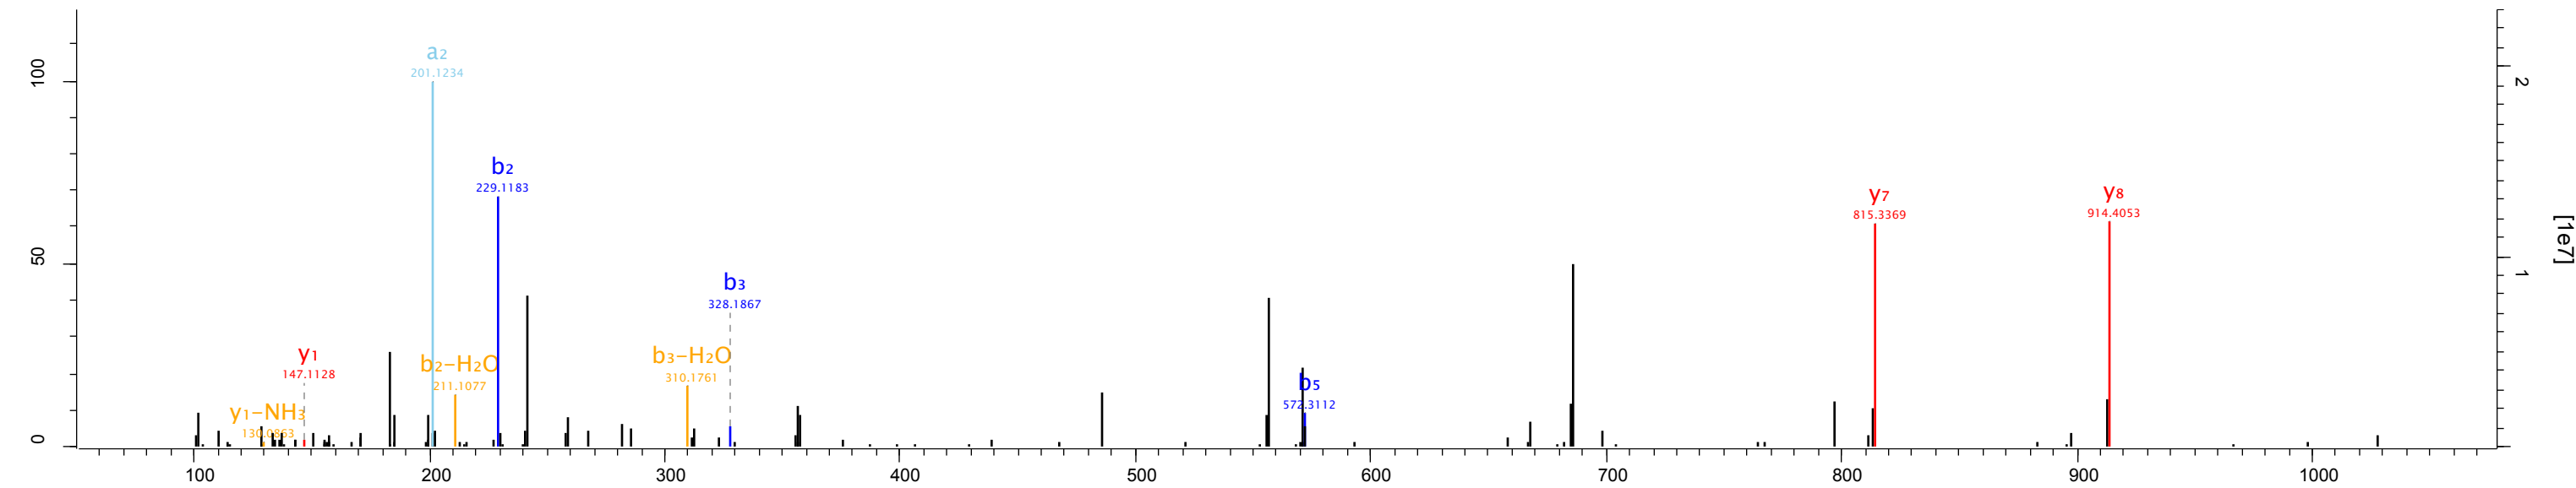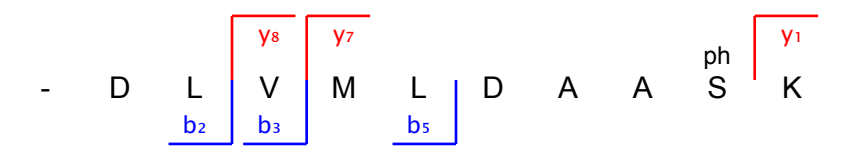

Raw file 20171215\_MaS\_33SR\_LMH\_proteome\_01 Scan 64745 Method FTMS; HCD Score 83.17 m/z 496.76 Gene names SEPT3

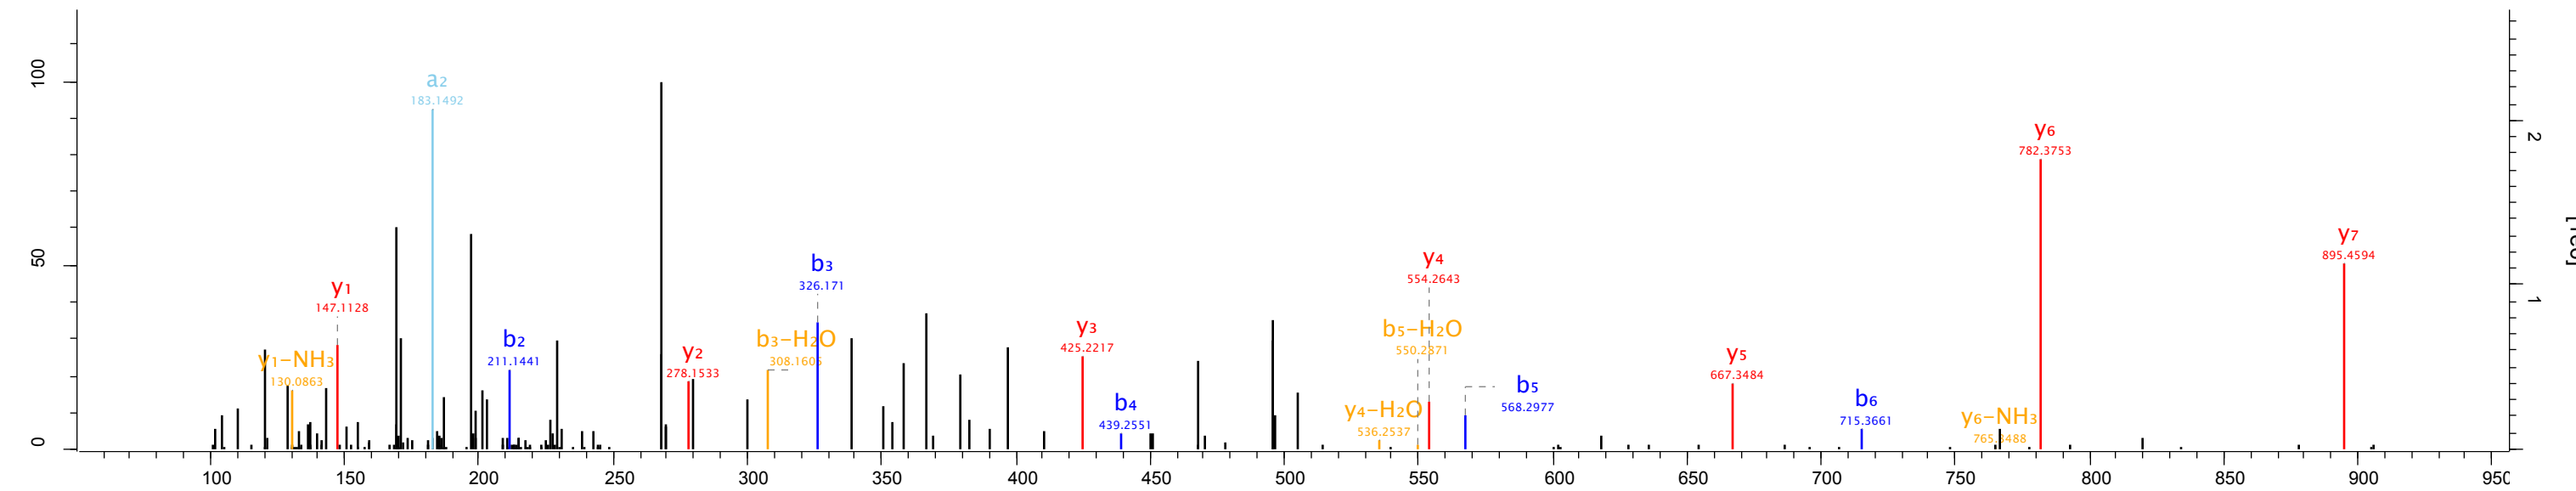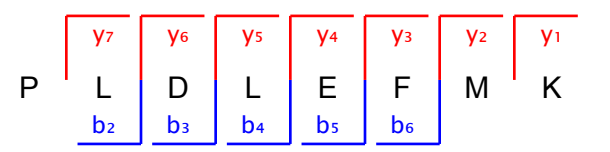

Raw file: 20171215\_MaS\_33SR\_LMH\_proteome\_01  
 Scan: 64785 Method: FTMS; HCD Score: 117.93 m/z: 421.25 Gene names: TRAV18

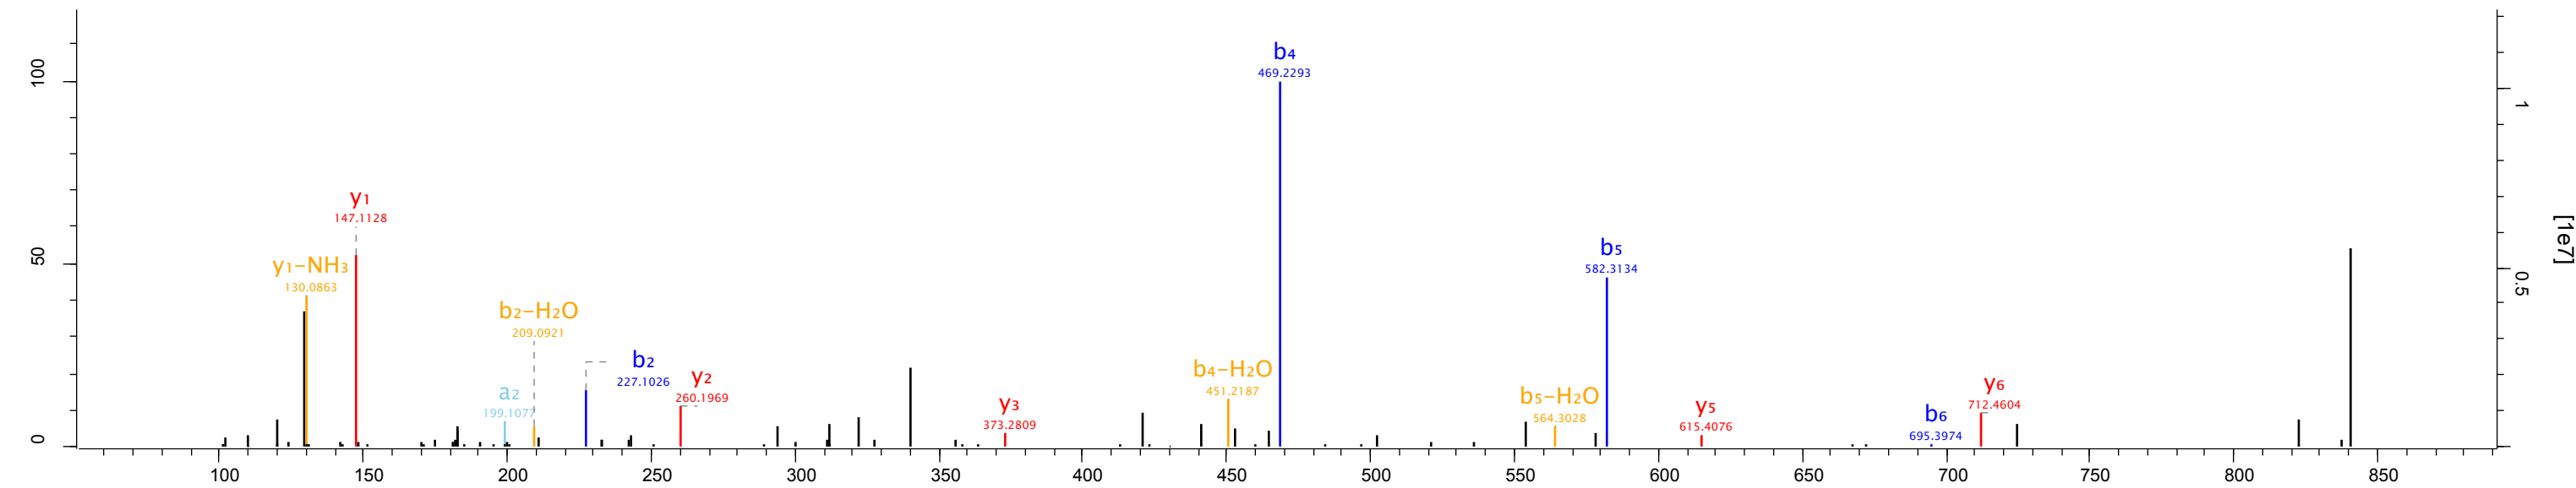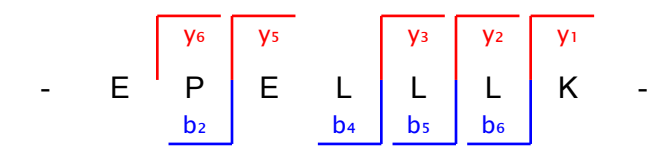

Raw file: 20171215\_MaS\_33SR\_LMH\_proteome\_01  
 Scan: 70775 Method: FTMS; HCD Score: 111.61 m/z: 492.81 Gene names: STON2

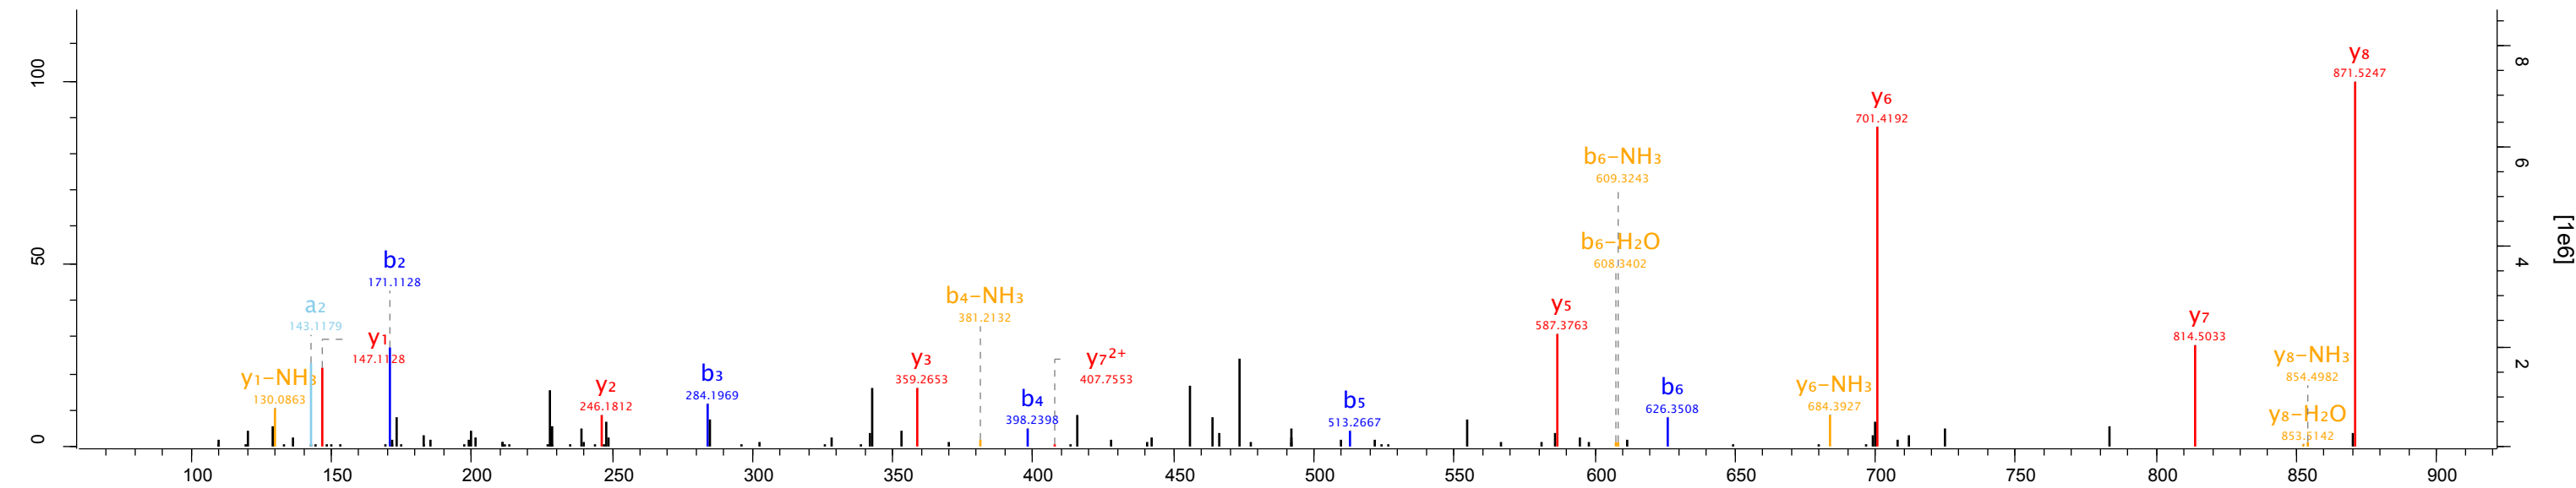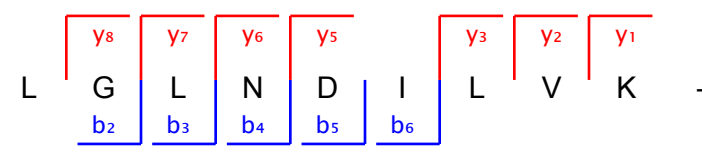

Raw file: 20171215\_MaS\_33SR\_LMH\_proteome\_01  
 Scan: 72195 Method: FTMS; HCD Score: 45.08 m/z: 482.78 Gene names: ARMCX5

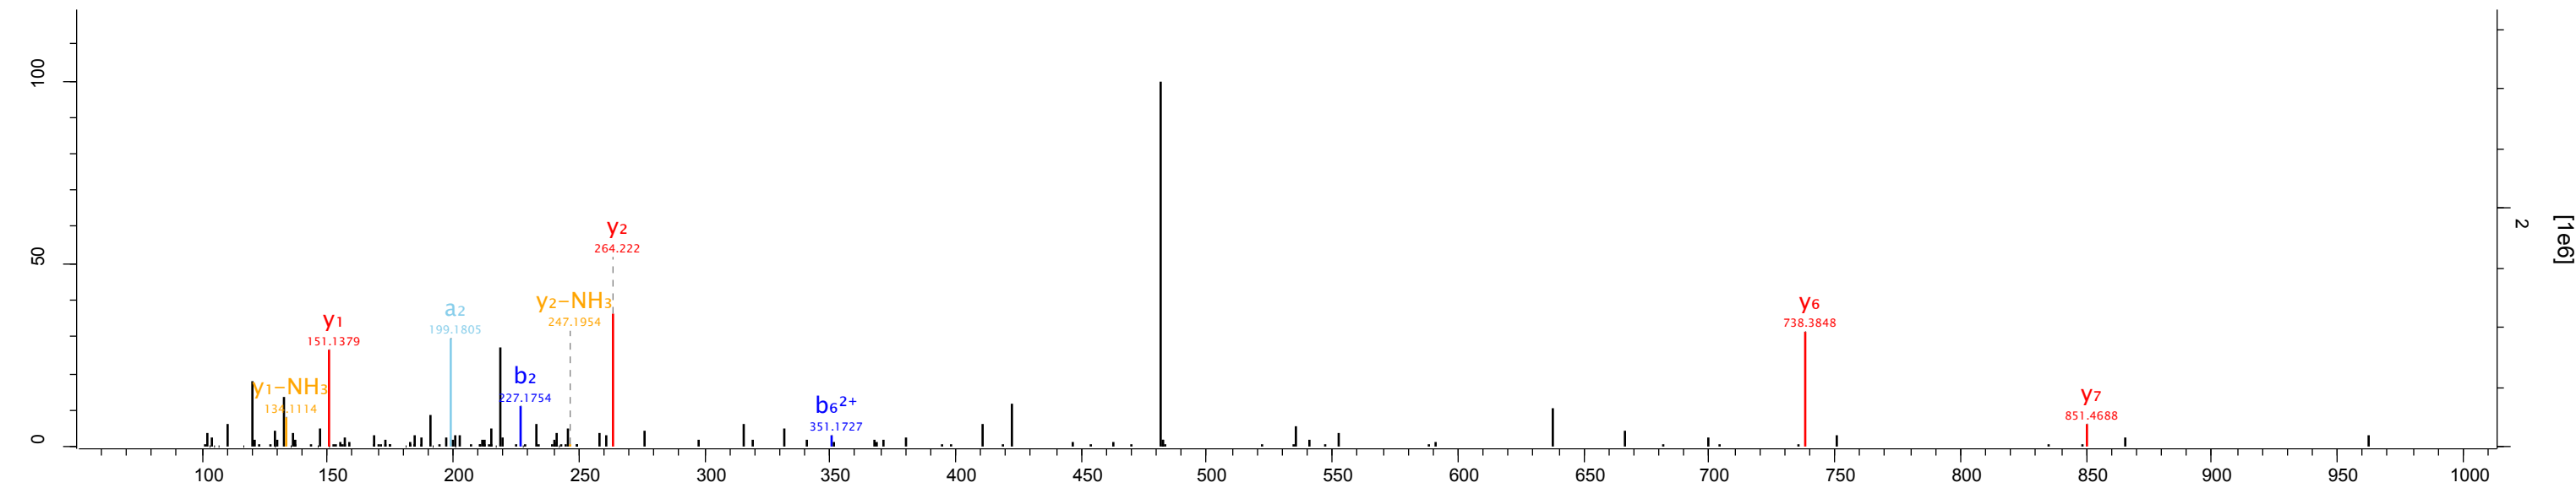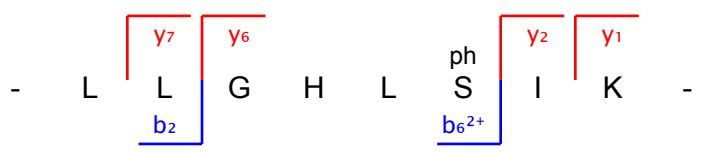

Raw file 20171215\_MaS\_33SR\_LMH\_proteome\_01 Scan 74795 Method FTMS; HCD Score 164.92 m/z 805.92 Gene names NDUFB9

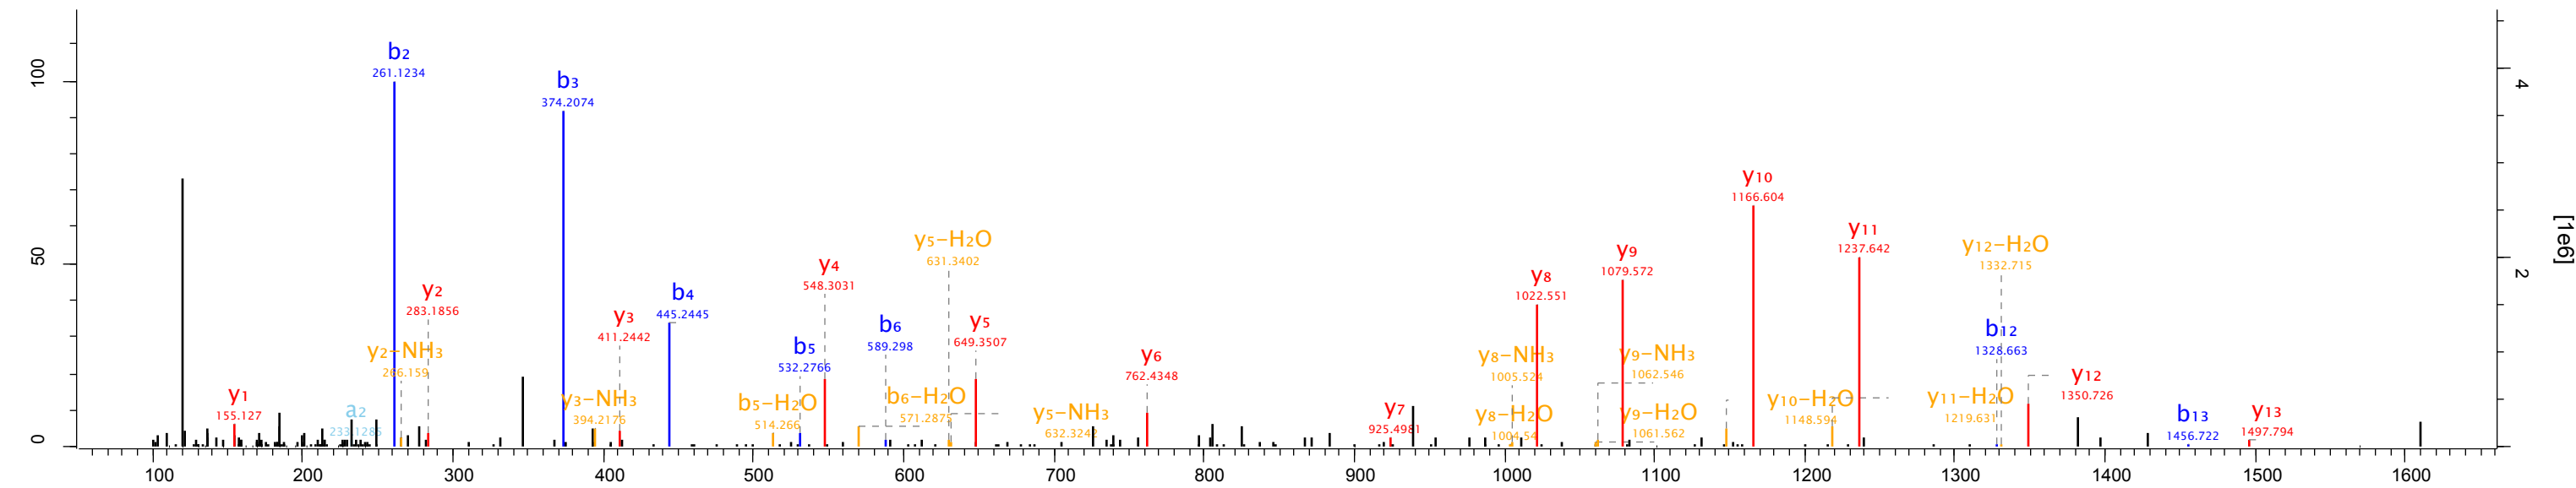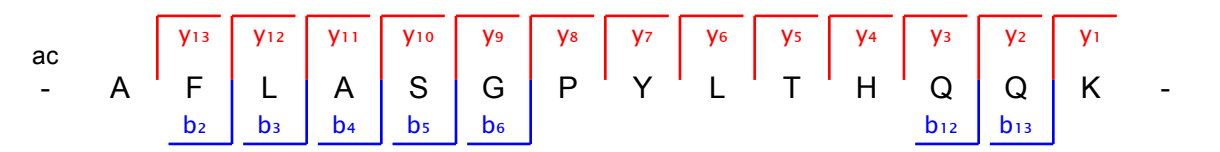

Raw file: 20171215\_MaS\_33SR\_LMH\_proteome\_01  
 Scan: 80865 Method: FTMS; HCD Score: 47.85 m/z: 816.47 Gene names: GORASP2

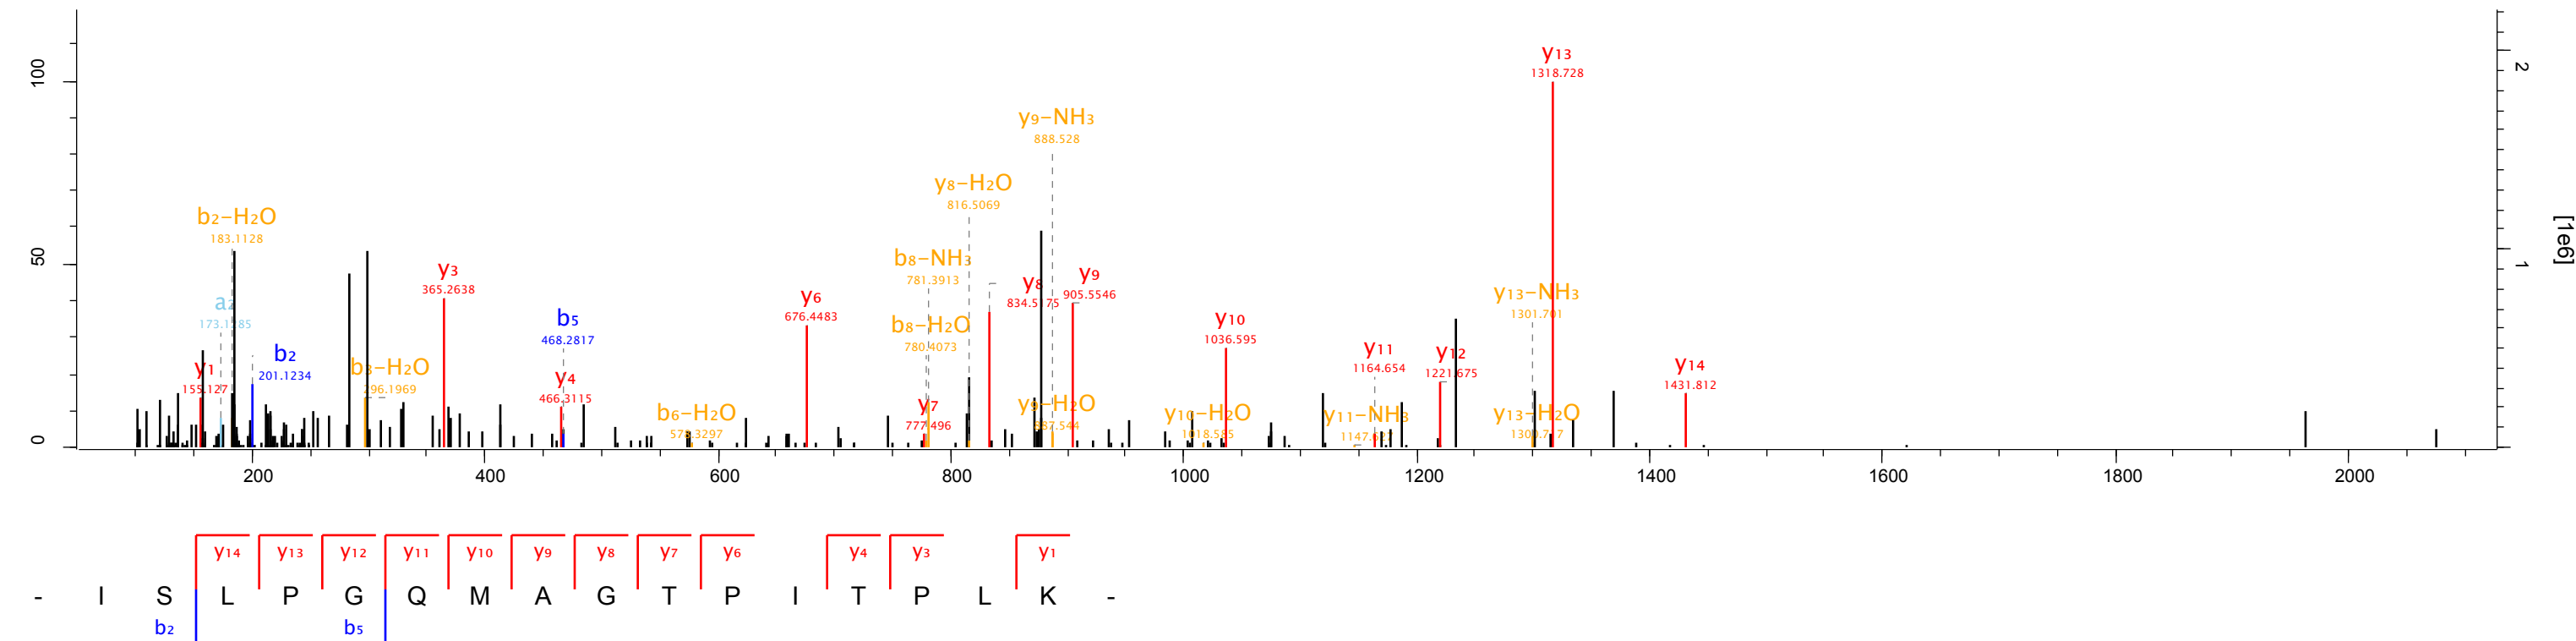

Raw file 20171215\_MaS\_33SR\_LMH\_proteome\_01 Scan 85545 Method FTMS; HCD Score 66.51 m/z 850.4 Gene names TRAPPC2P1;TRAPPC2

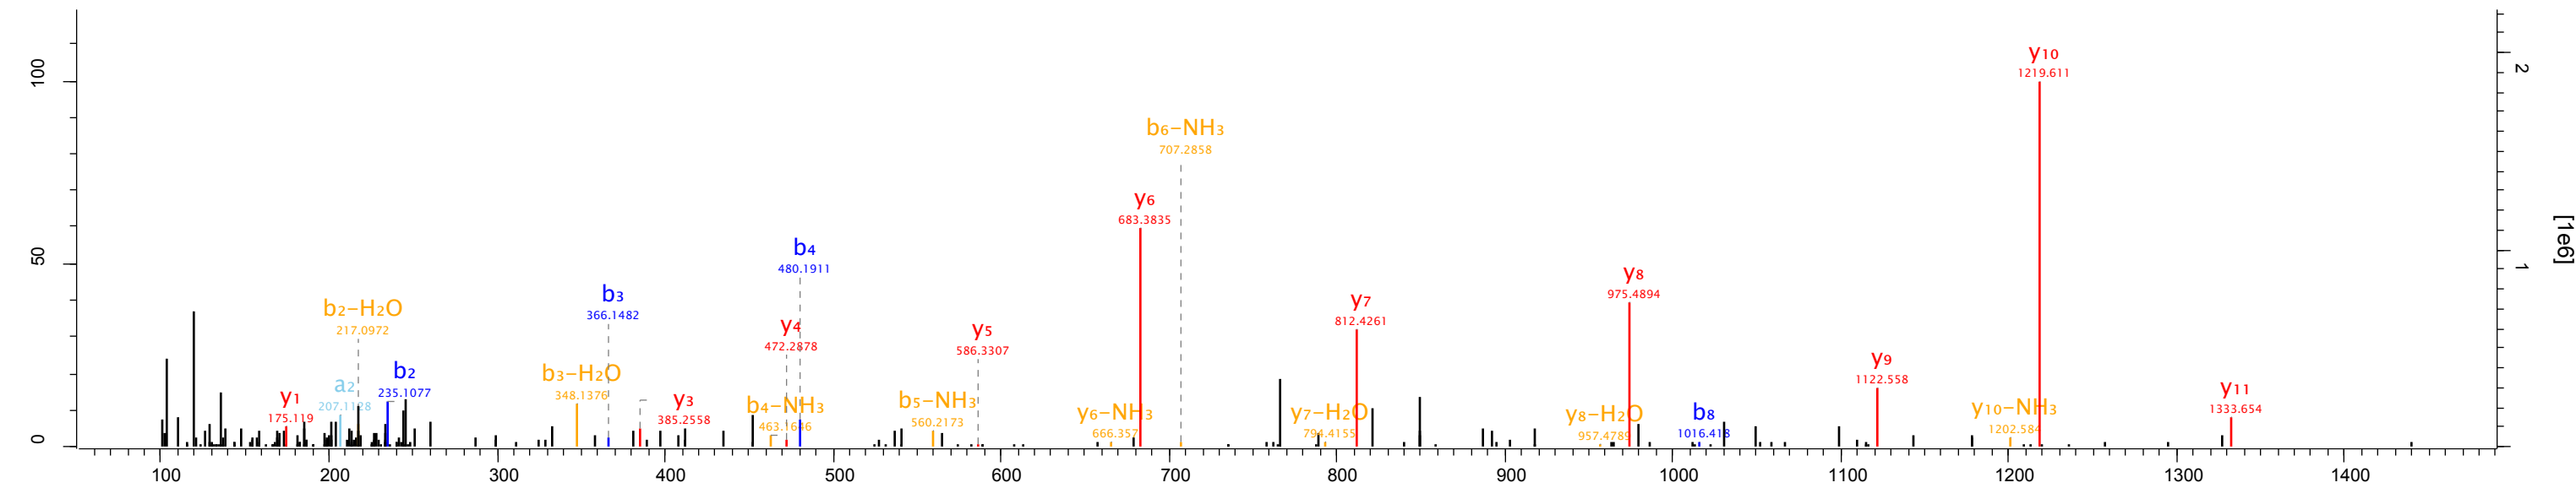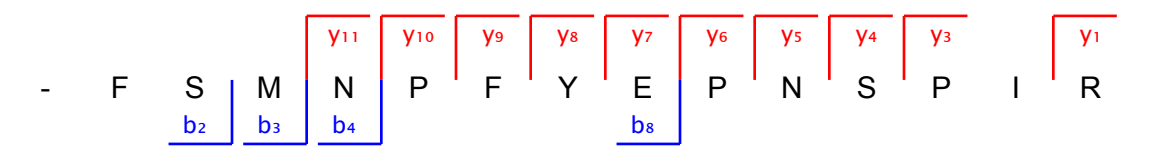



Raw file 20171215\_MaS\_33SR\_LMH\_proteome\_01 Scan 86425 Method FTMS; HCD Score 57.53 m/z 629.34 Gene names LYAR

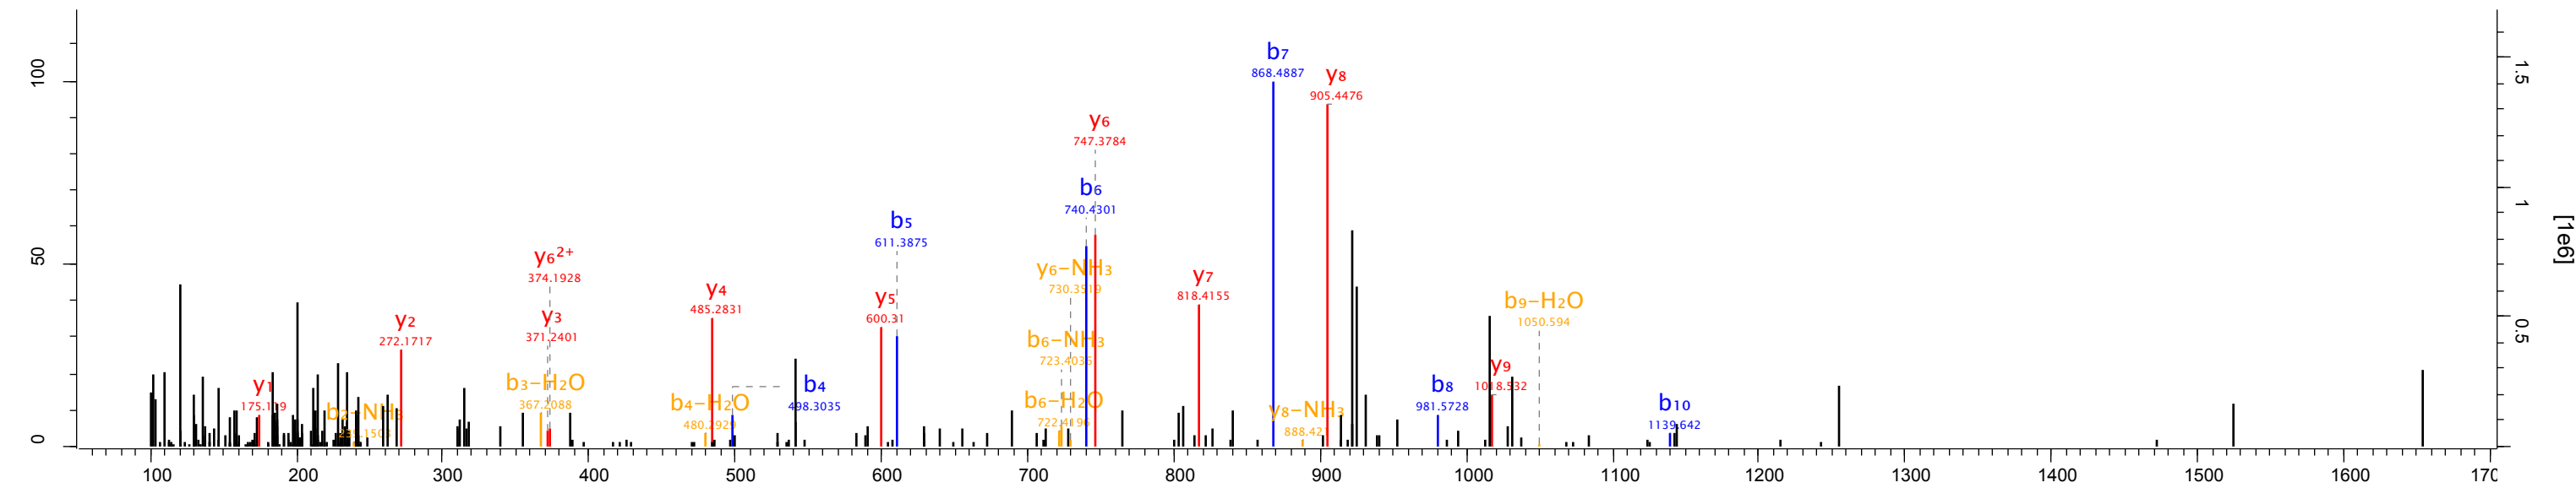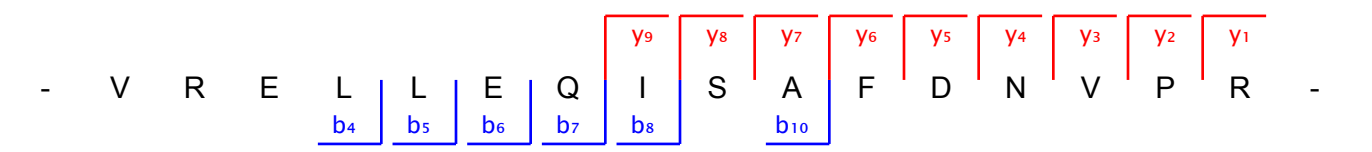

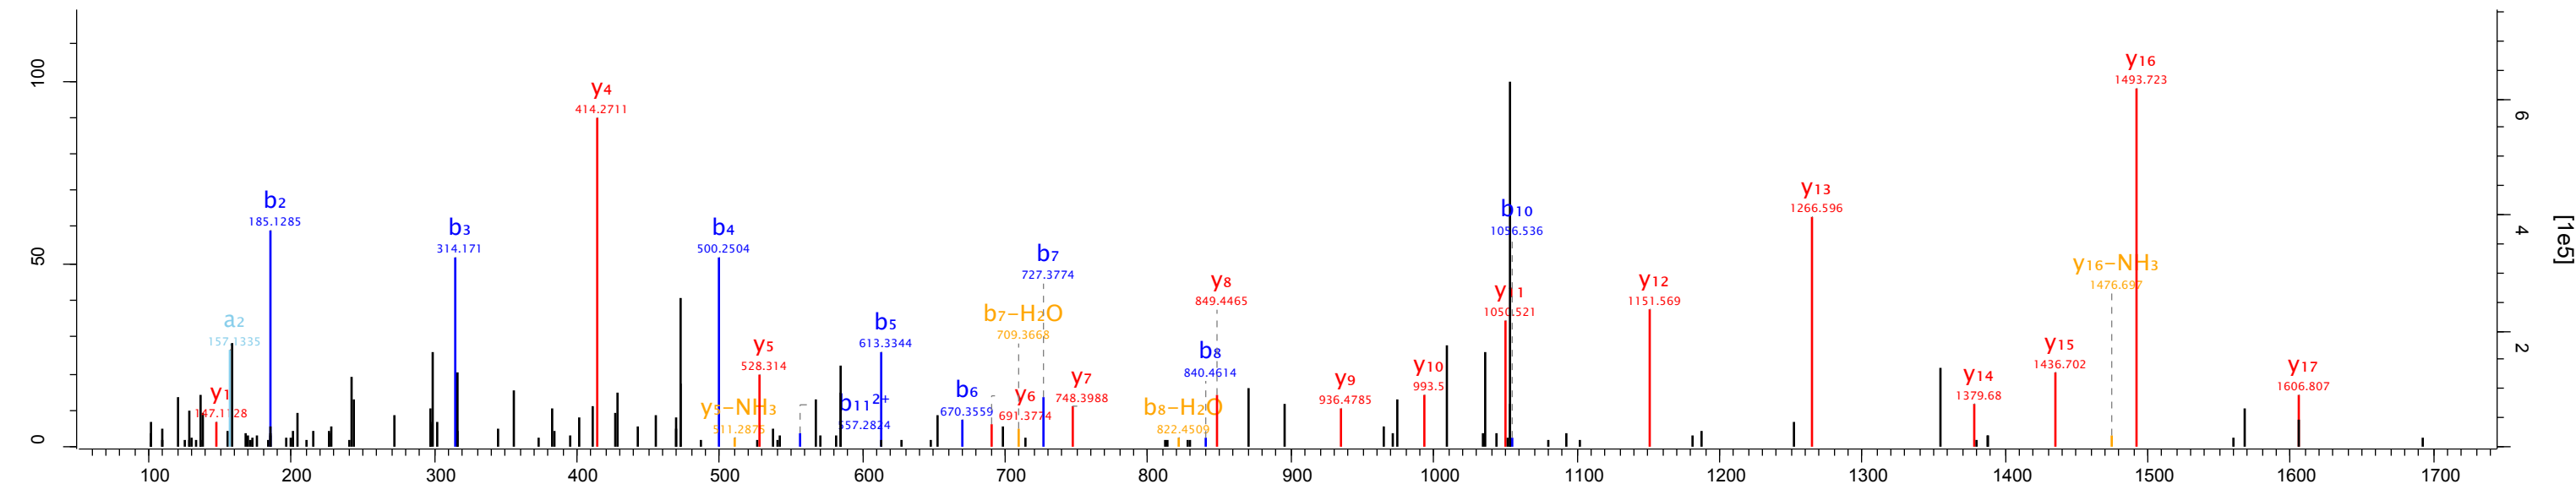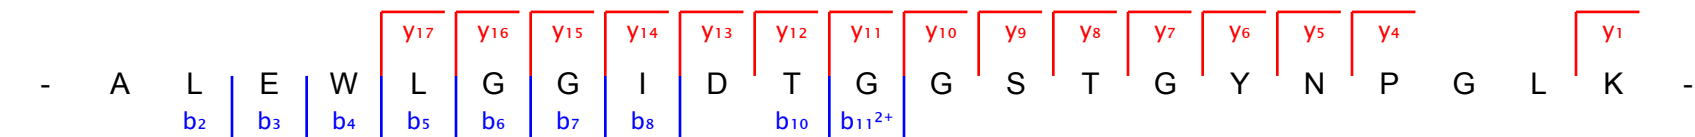

Raw file 20171215\_MaS\_33SR\_LMH\_proteome\_01 Scan 95465 Method FTMS; HCD Score 107.17 m/z 710.85 Gene names SF3B6

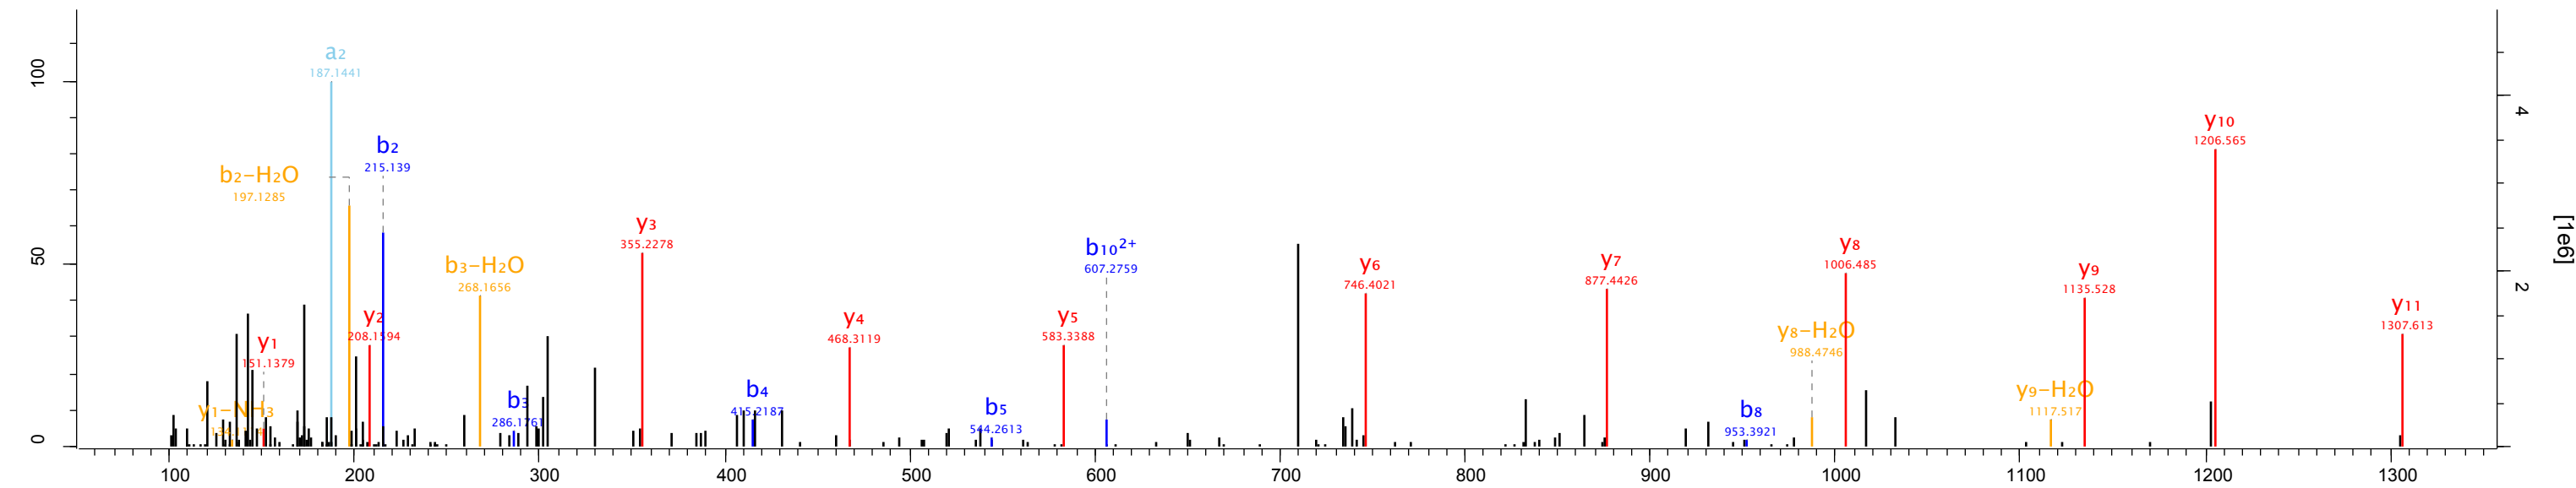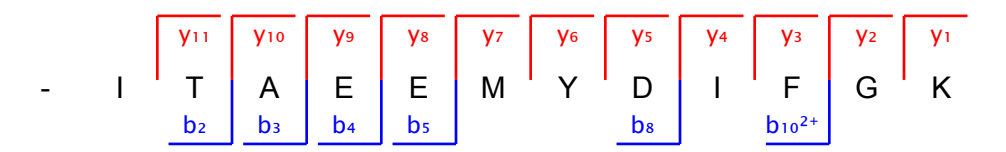

Raw file: 20171215\_MaS\_33SR\_LMH\_proteome\_01  
 Scan: 98225 Method: FTMS; HCD Score: 105.46 m/z: 635.37 Gene names: POLR3F

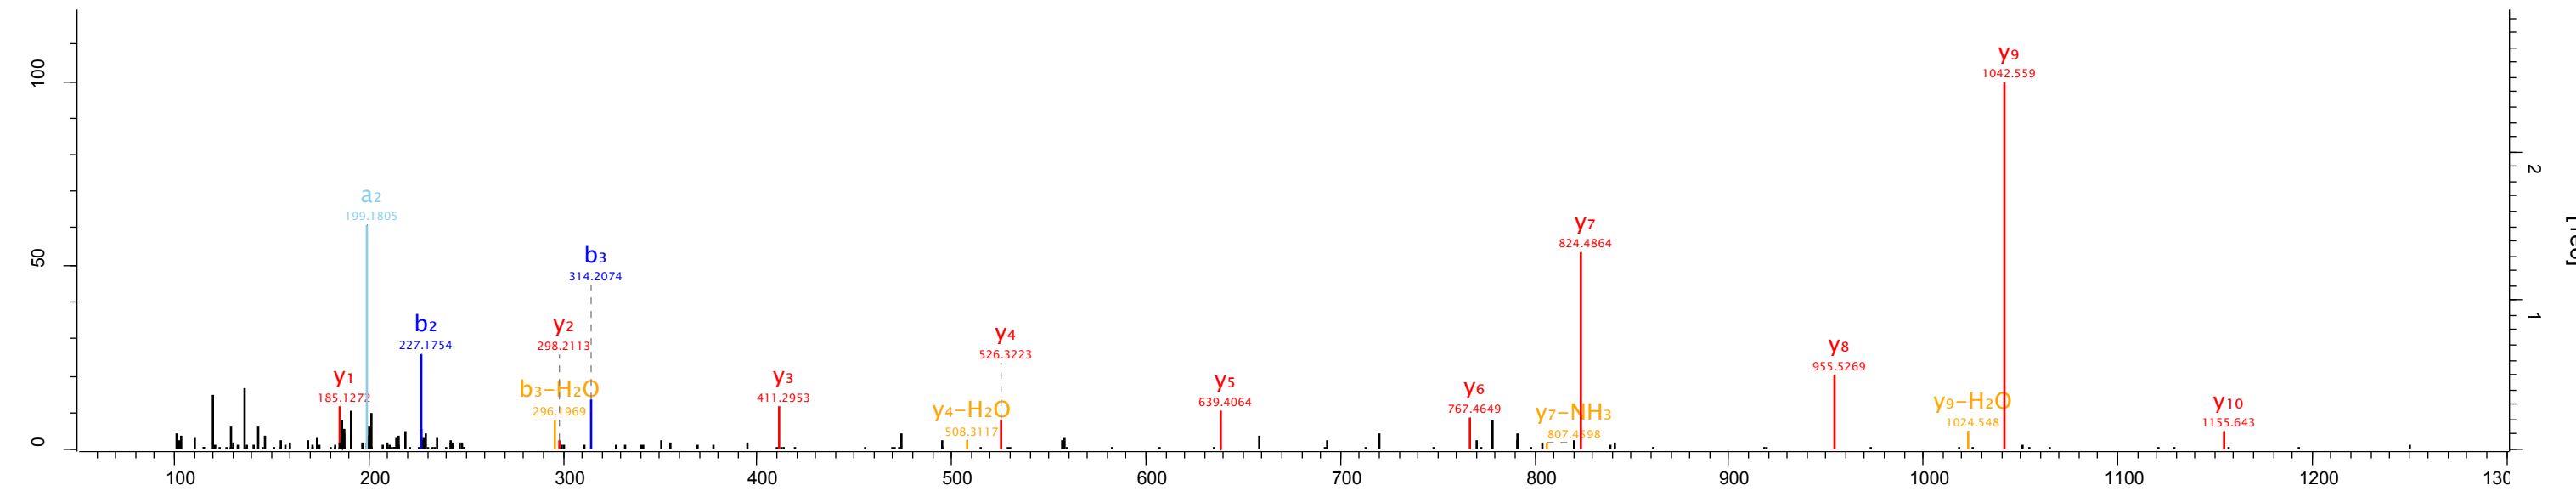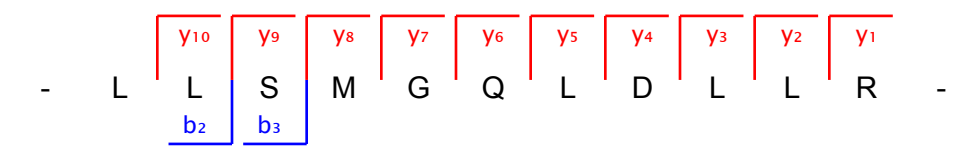

Raw file 20171215\_MaS\_33SR\_LMH\_proteome\_02 Scan 11075 Method FTMS; HCD Score 40.73 m/z 666.31

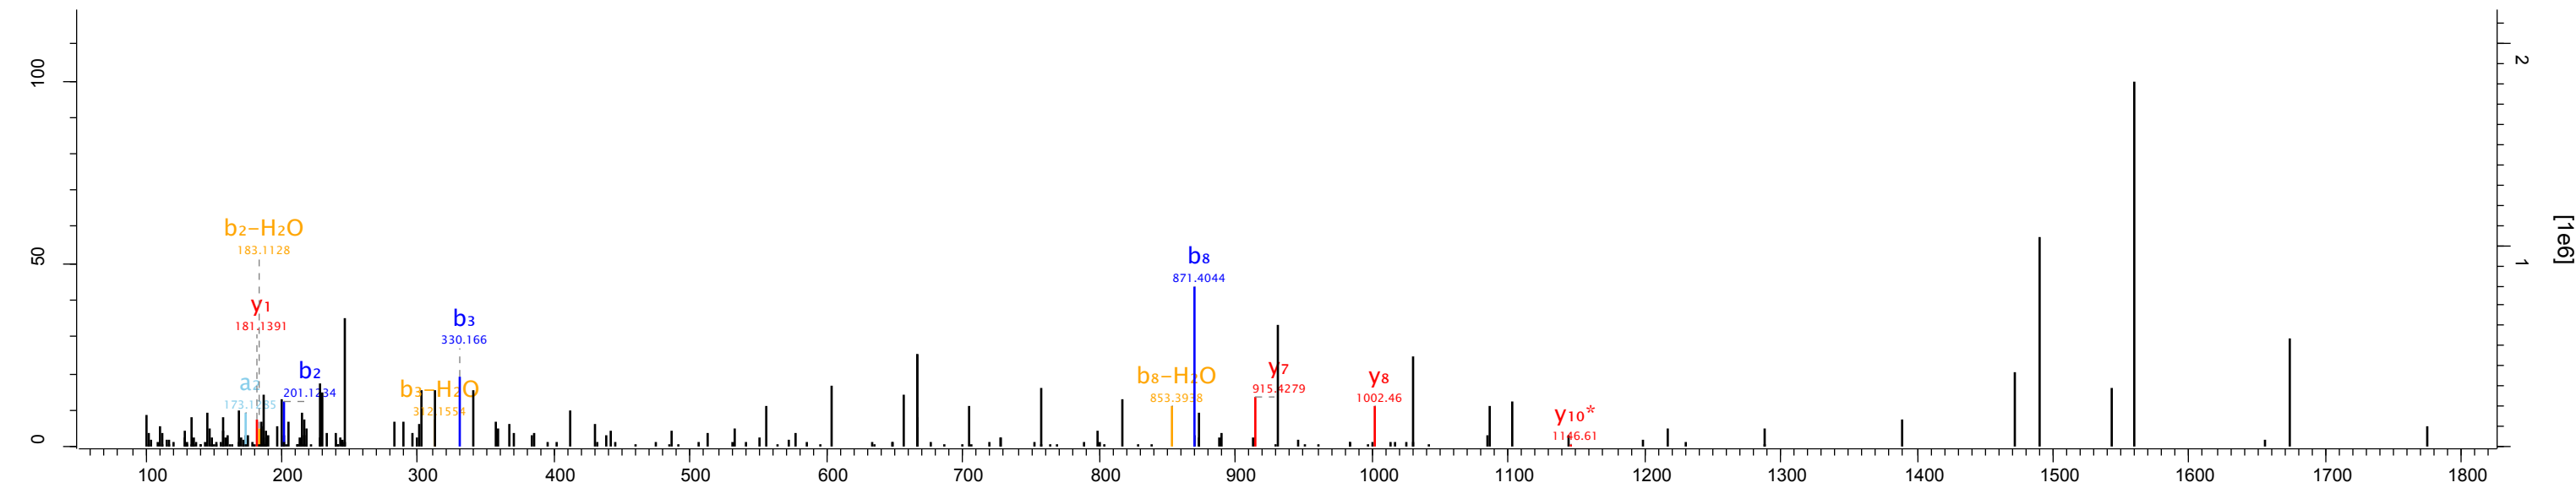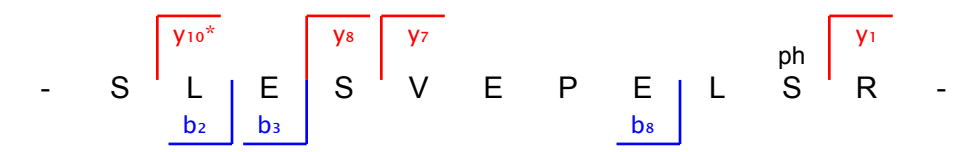

Raw file: 20171215\_MaS\_33SR\_LMH\_proteome\_02  
 Scan: 111955 Method: FTMS; HCD Score: 68.58 m/z: 919.46 Gene names: MRPL55

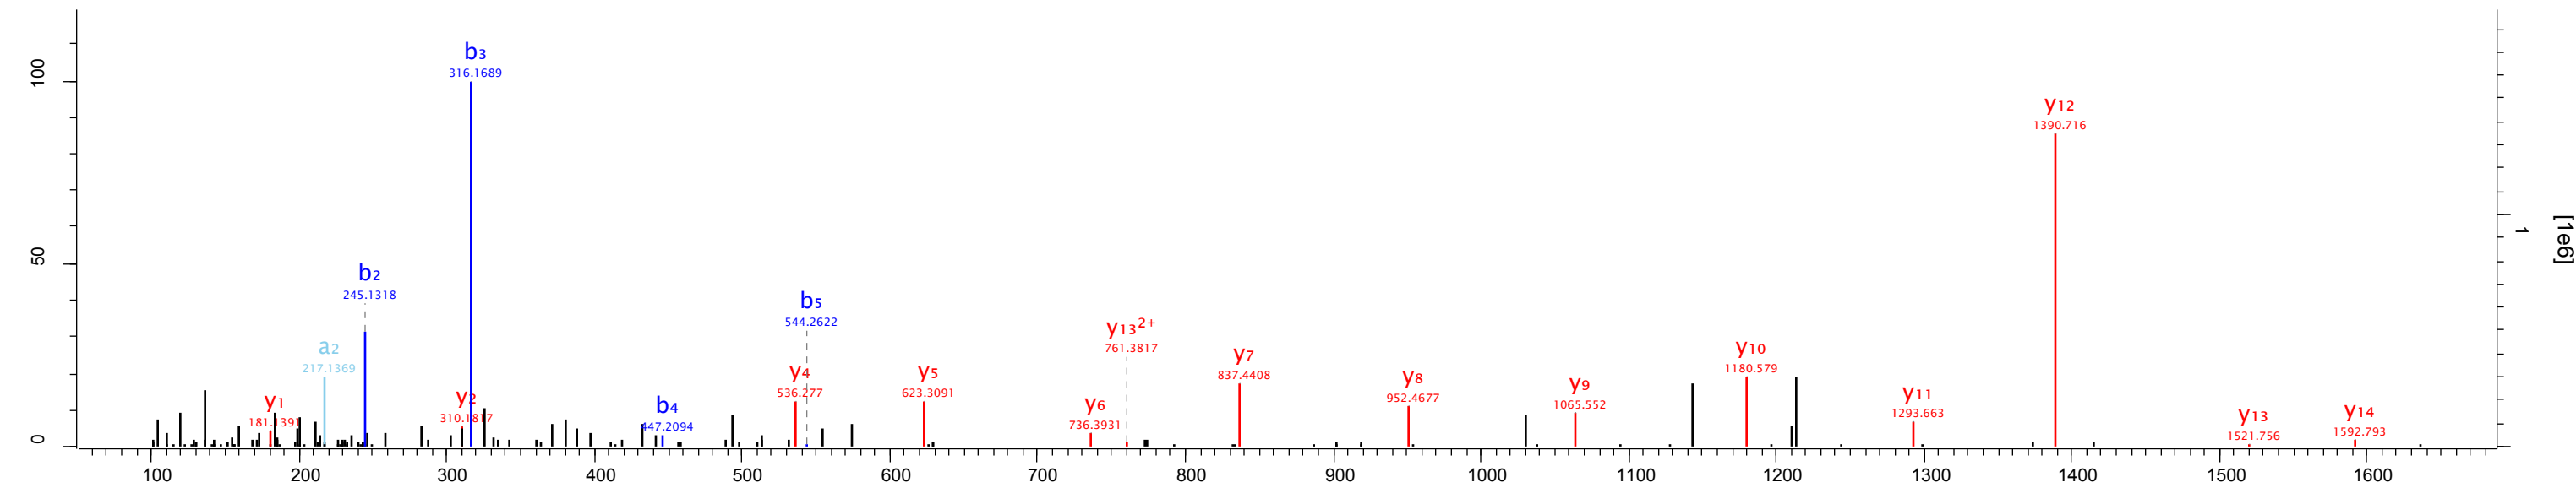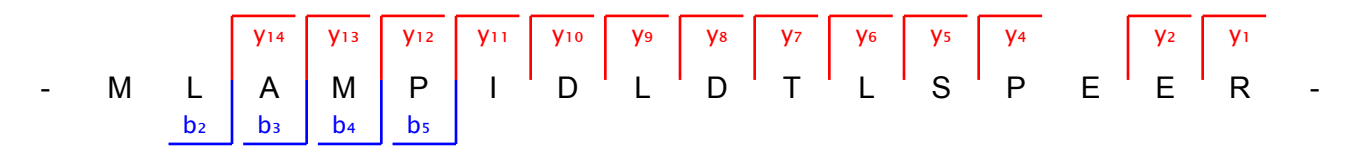

Raw file: 20171215\_MaS\_33SR\_LMH\_proteome\_02  
 Scan: 112255 Method: FTMS; HCD Score: 83.69 m/z: 863.89 Gene names: RANBP9

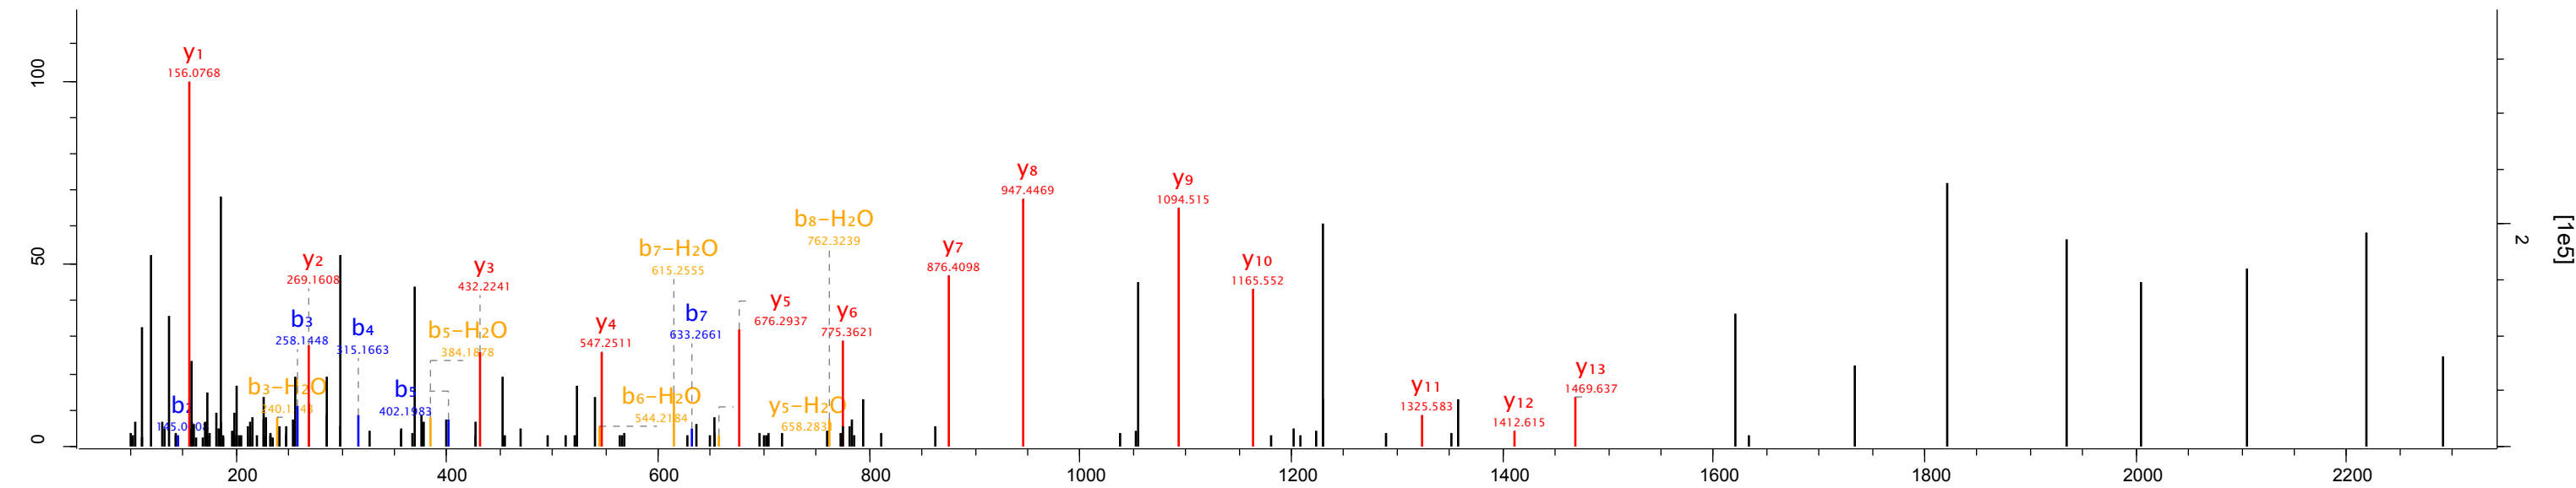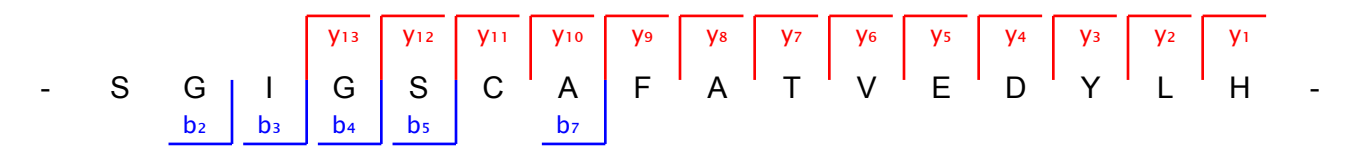

Raw file: 20171215\_MaS\_33SR\_LMH\_proteome\_02  
 Scan: 113245 Method: FTMS; HCD Score: 52.45 m/z: 1046.02 Gene names: RIOK3

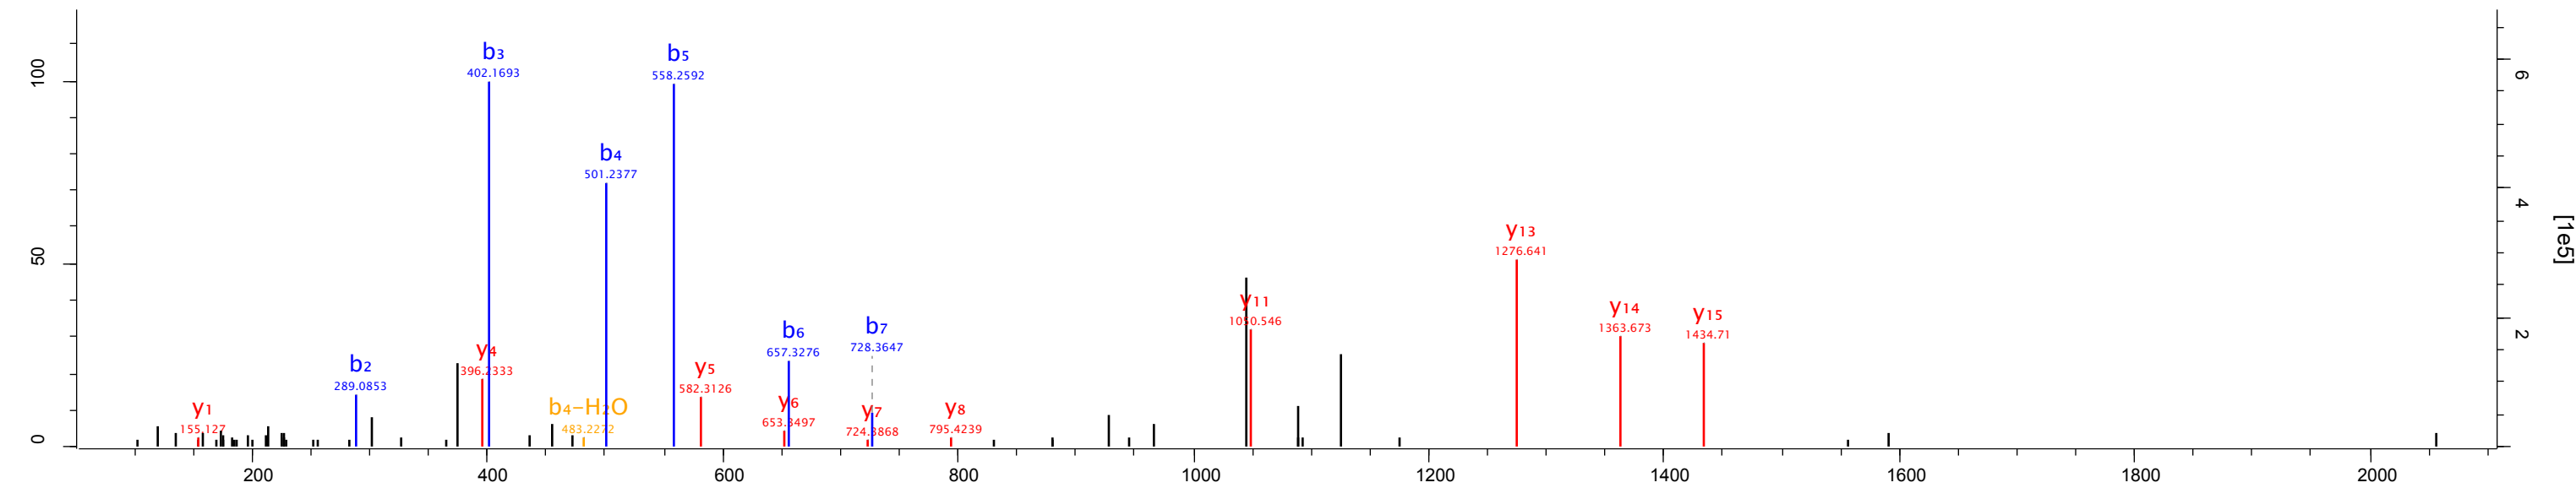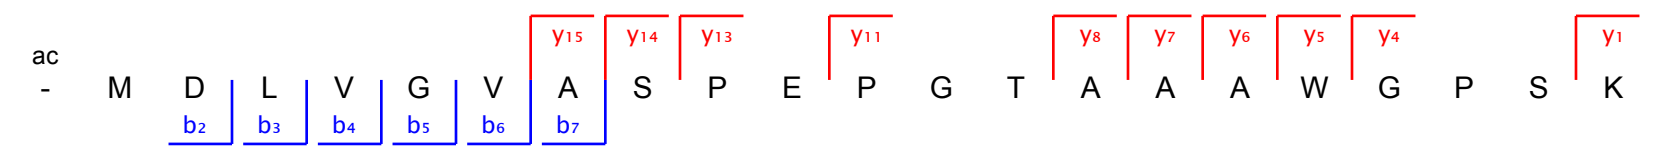



Raw file 20171215\_MaS\_33SR\_LMH\_proteome\_02 Scan 117225 Method FTMS; HCD Score 85.84 m/z 578.99 Gene names TMCO1

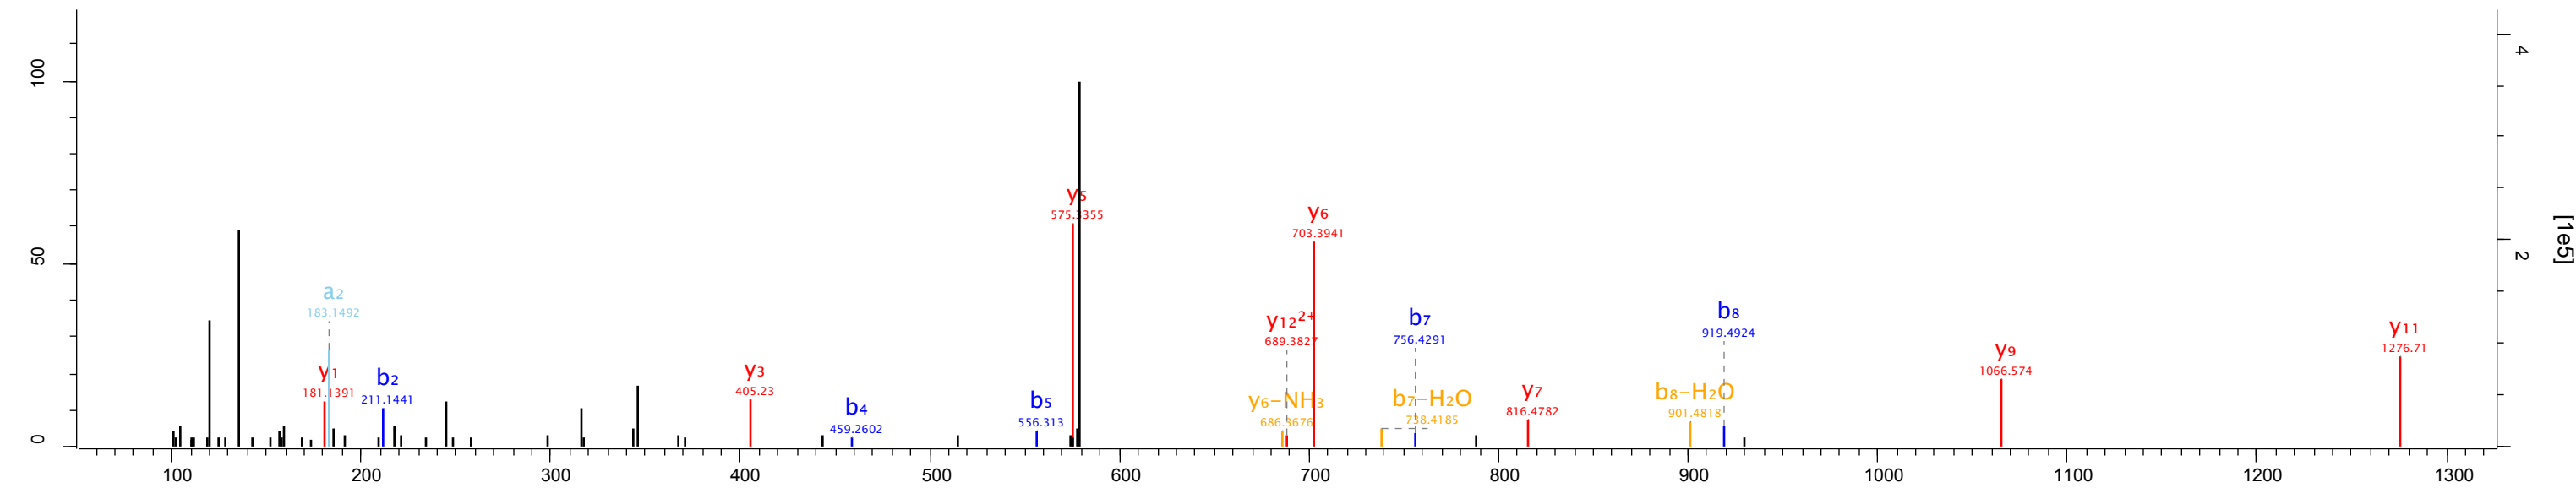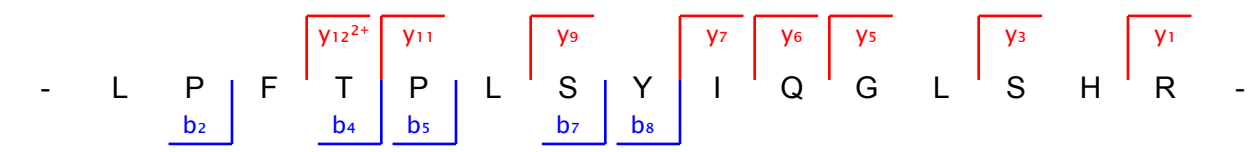

Raw file 20171215\_MaS\_33SR\_LMH\_proteome\_02 Scan 118855 Method FTMS; HCD Score 88.02 m/z 683.39 Gene names CNOT10

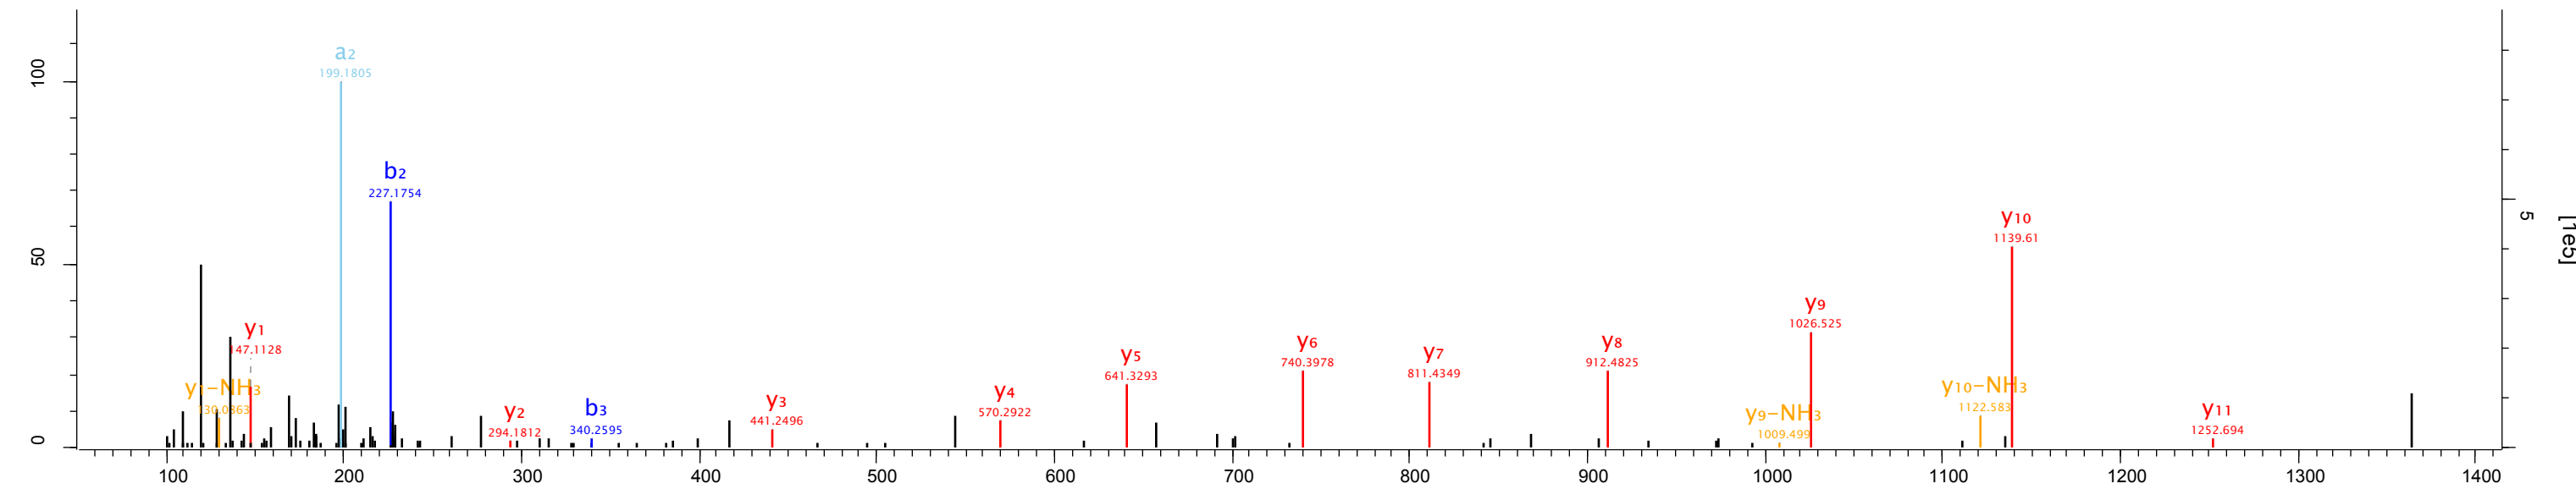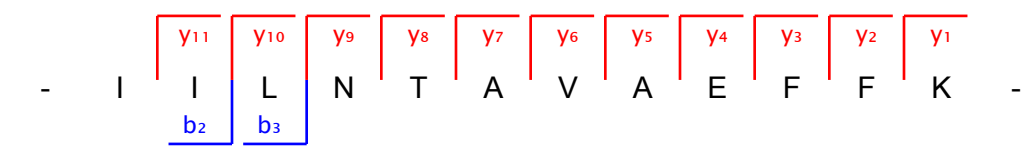

Raw file 20171215\_MaS\_33SR\_LMH\_proteome\_02 Scan 119585 Method FTMS; HCD Score 90.56 m/z 967.01 Gene names TBPL1

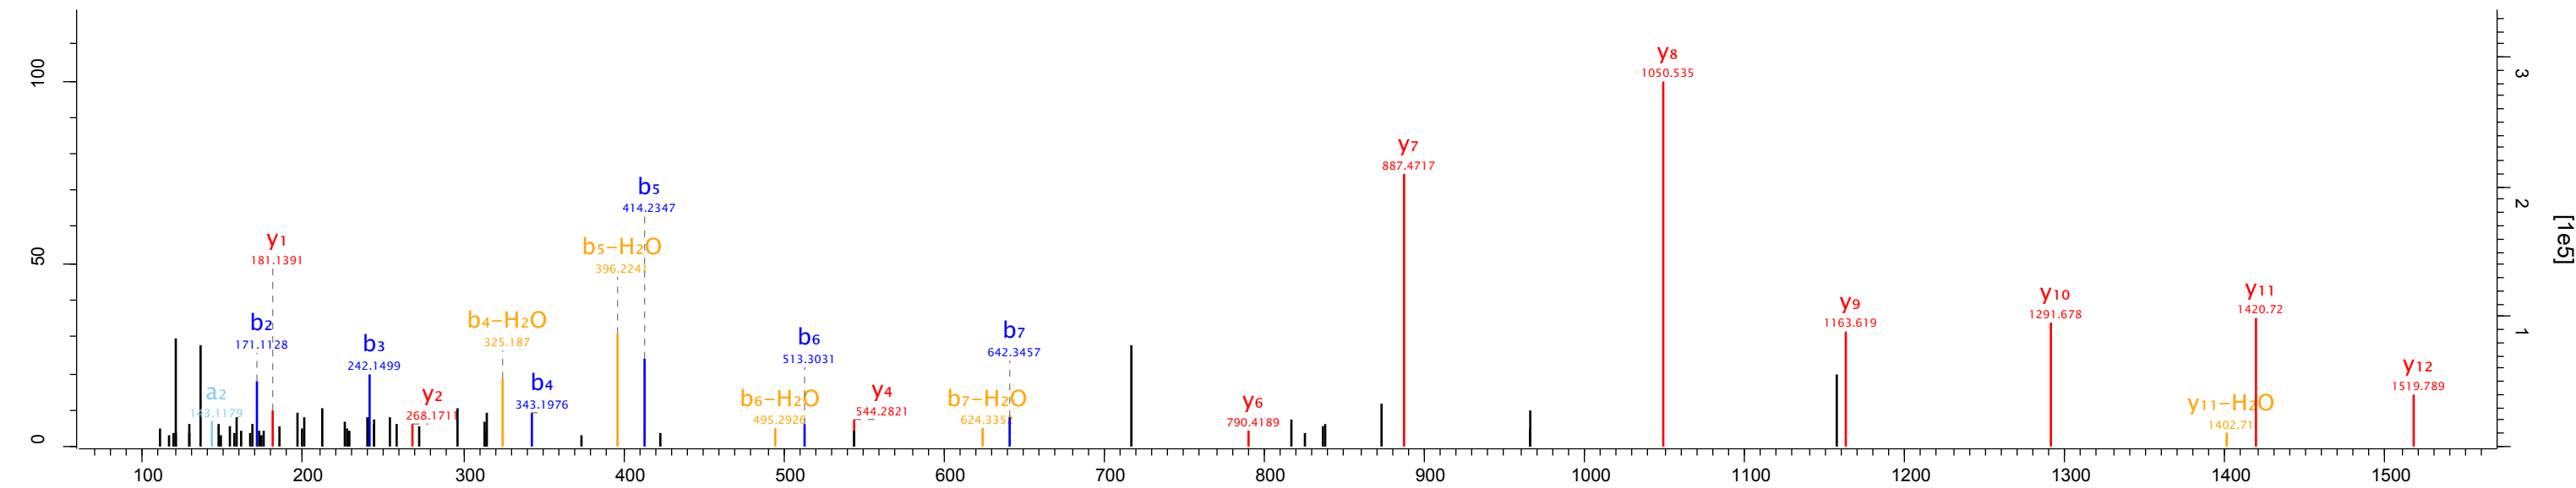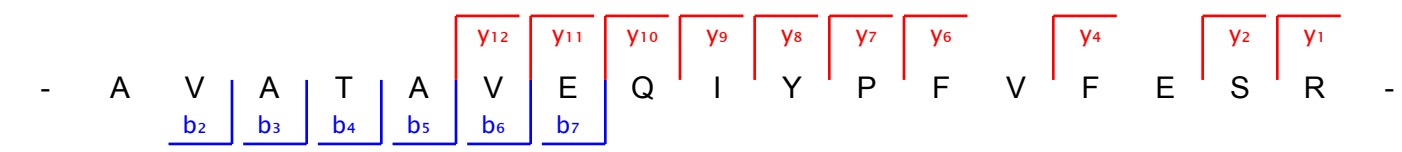

Raw file: 20171215\_MaS\_33SR\_LMH\_proteome\_02  
 Scan: 119645 Method: FTMS; HCD Score: 47.06 m/z: 701.91

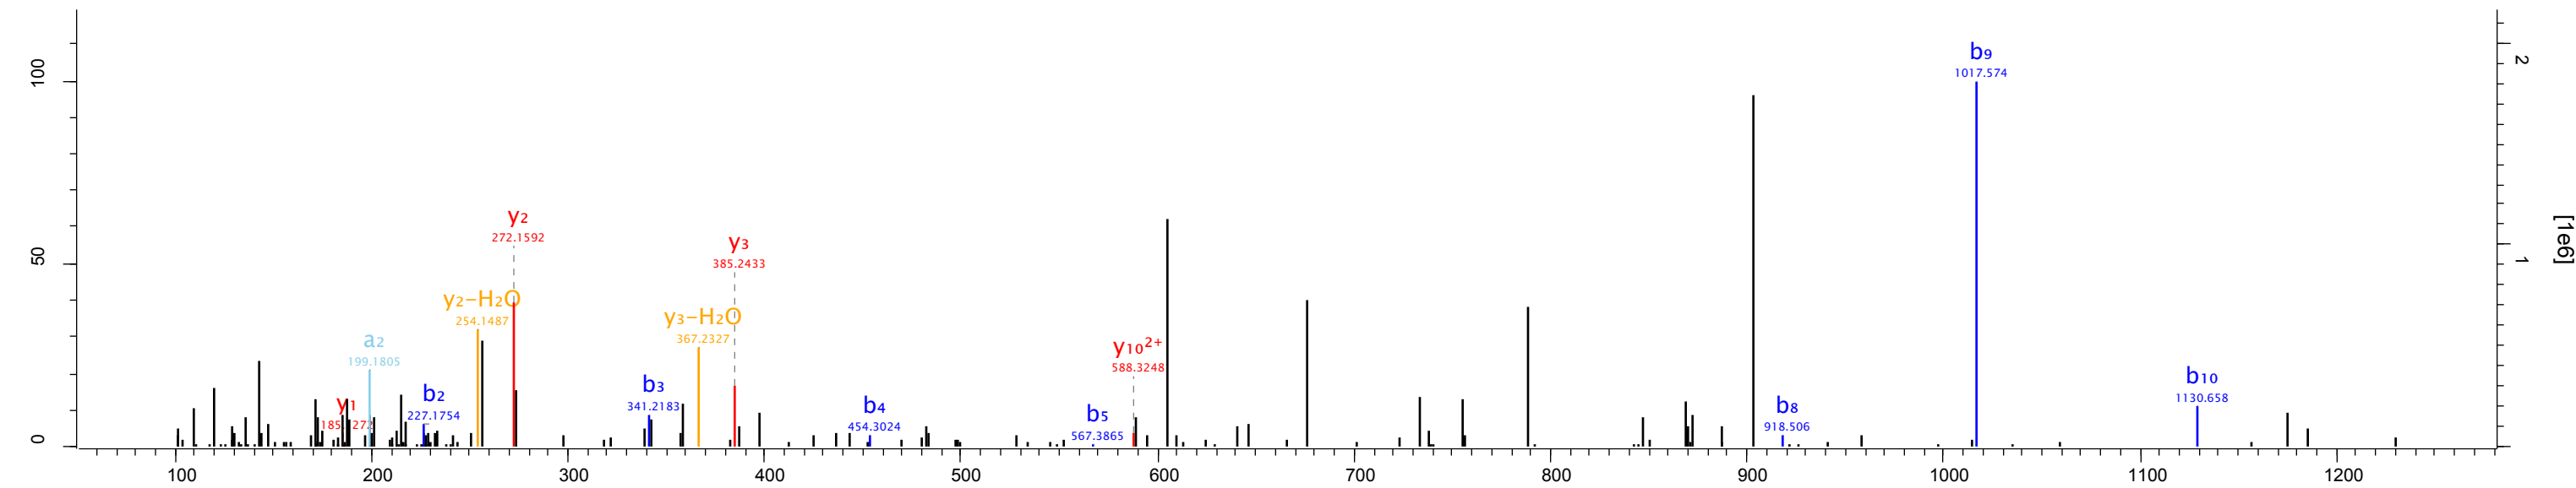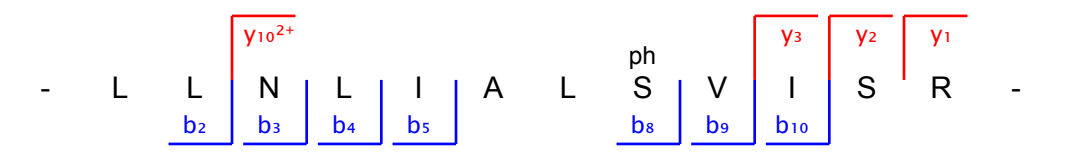

Raw file 20171215\_MaS\_33SR\_LMH\_proteome\_02 Scan 127325 Method FTMS; HCD Score 81.16 m/z 975 Gene names PCK2

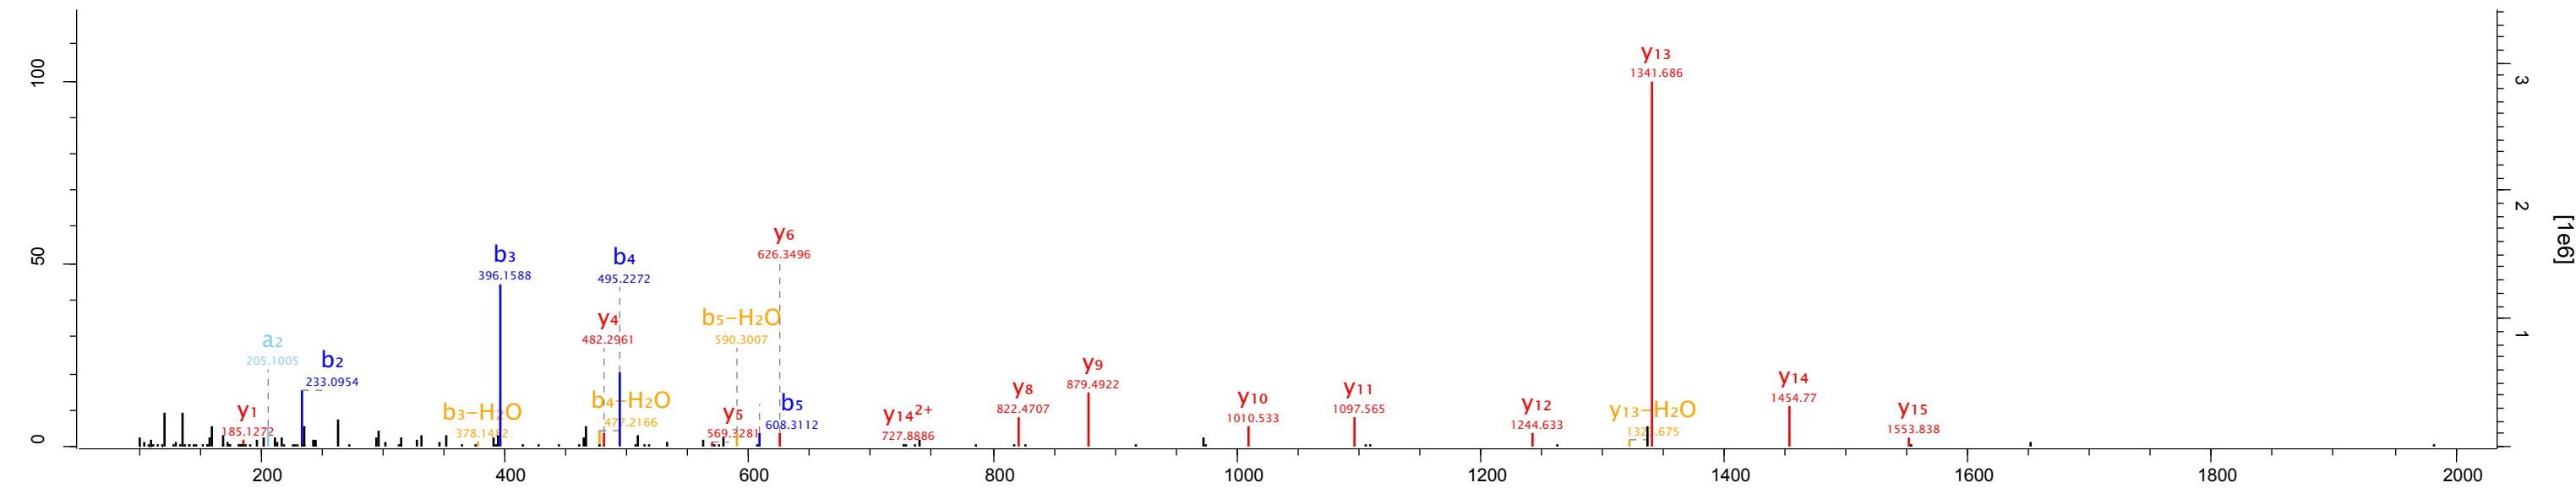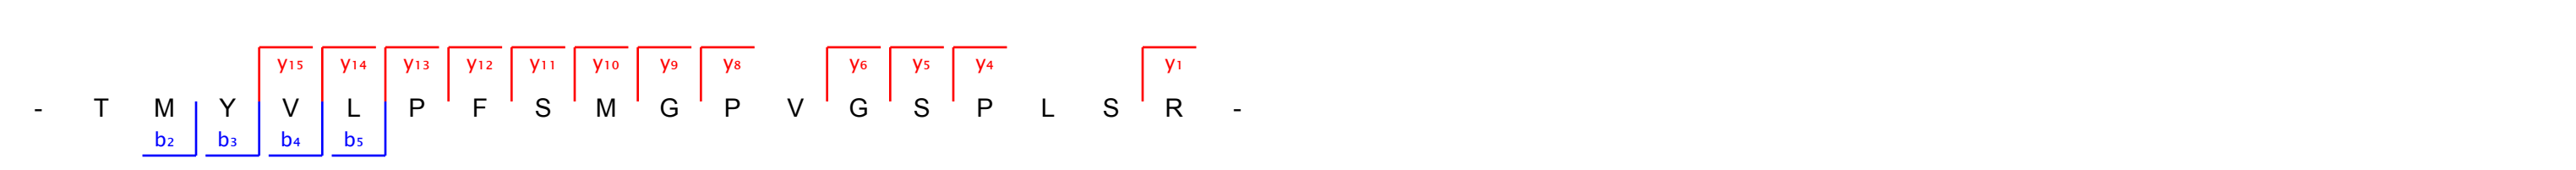

Raw file: 20171215\_MaS\_33SR\_LMH\_proteome\_02  
 Scan: 137595 Method: FTMS; HCD Score: 47.37 m/z: 787.78 Gene names: ANKZF1

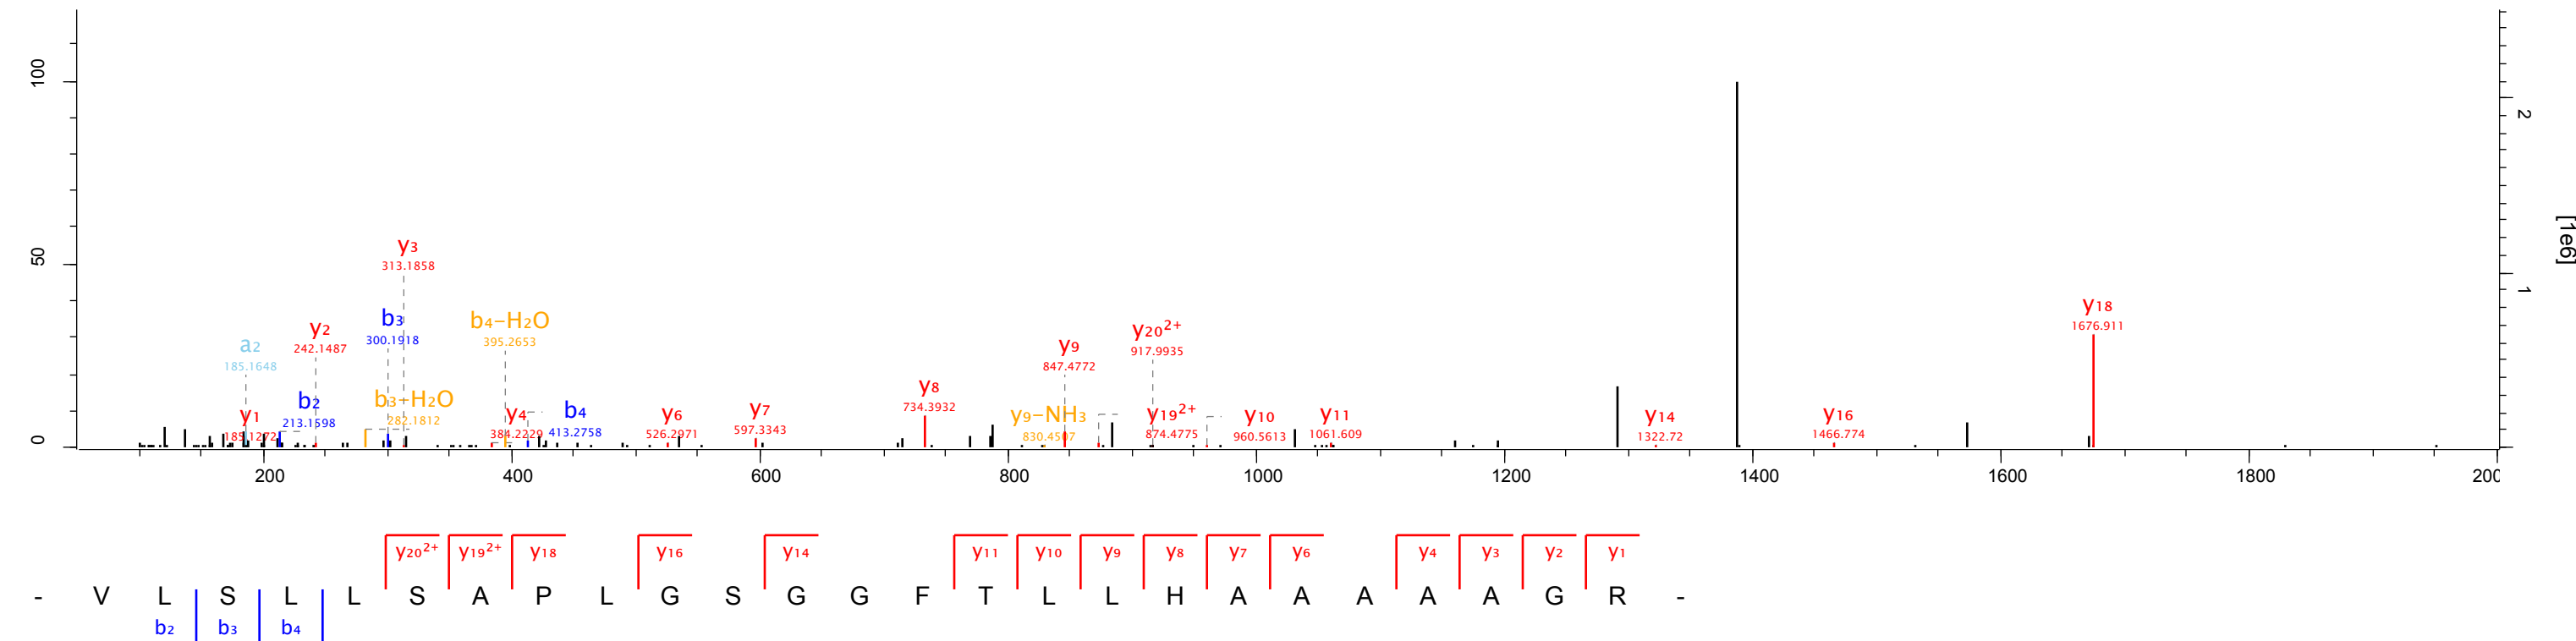

20171215\_MaS\_33SR\_LMH\_proteome\_02 24555 FTMS; HCD 62.16 696.87 TSSC1

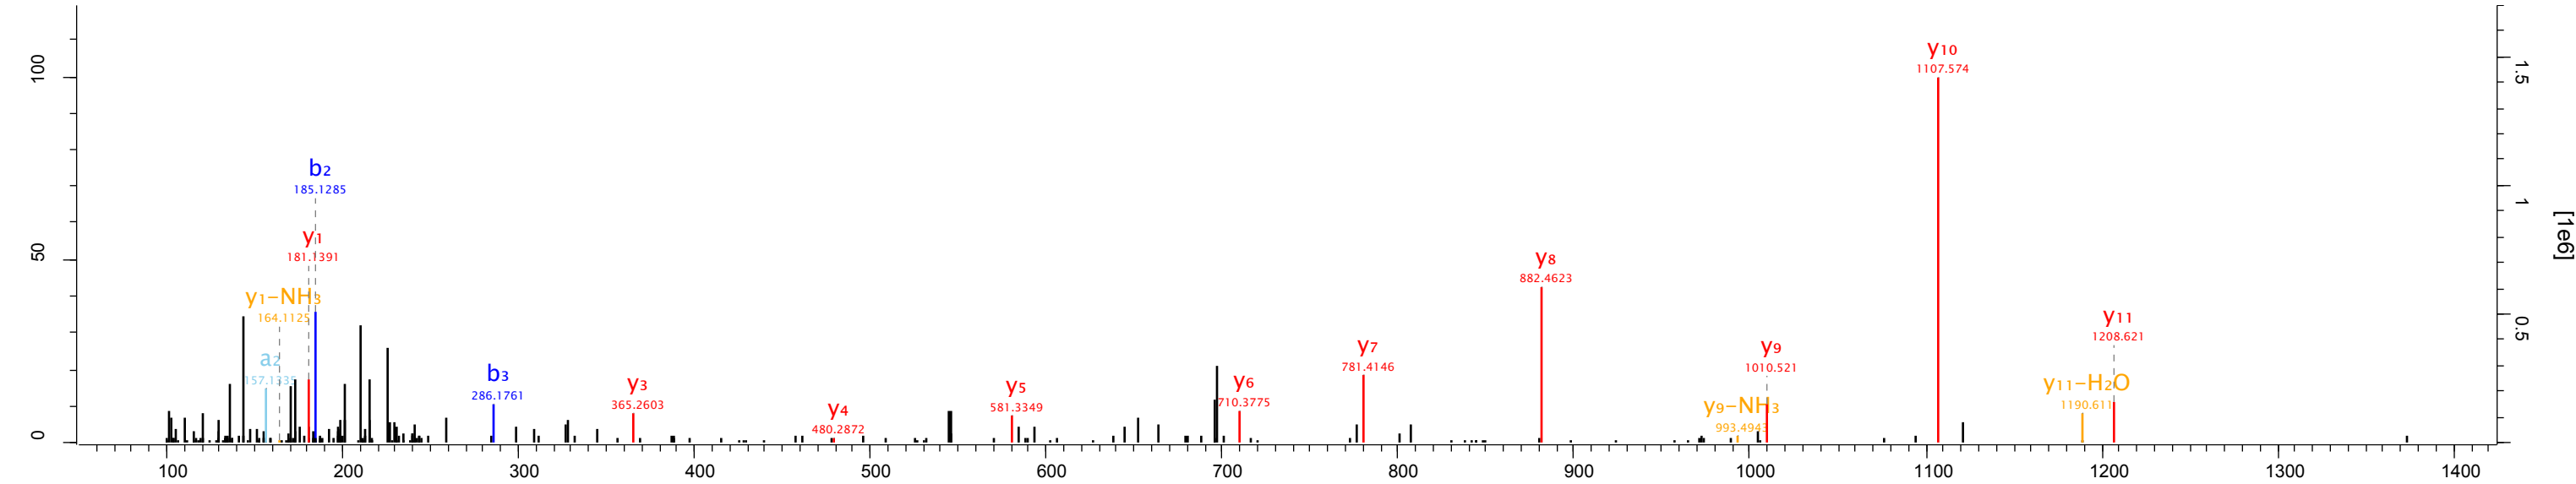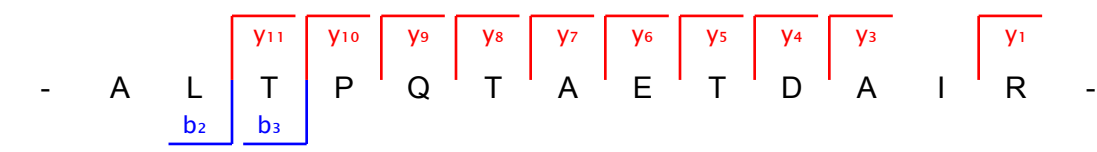

Raw file 20171215\_MaS\_33SR\_LMH\_proteome\_02 Scan 24675 Method FTMS; HCD Score 99.14 m/z 419.76 Gene names SAG

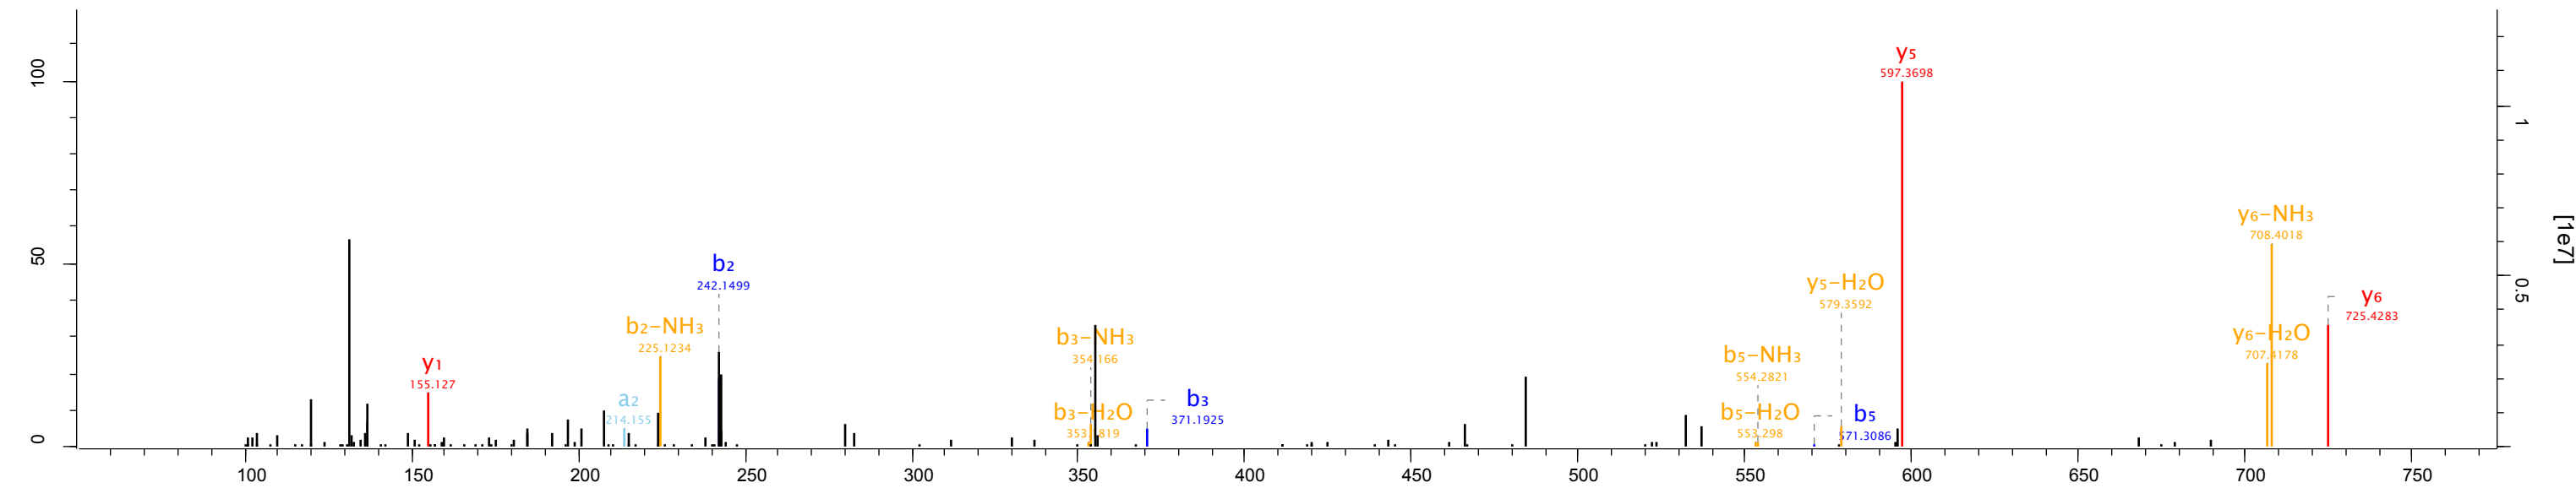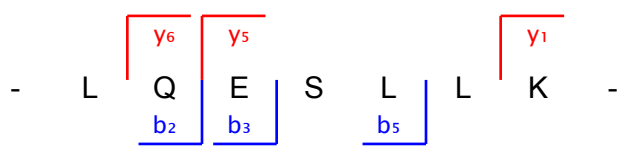



Raw file 20171215\_MaS\_33SR\_LMH\_proteome\_02 Scan 24885 Method FTMS; HCD Score 119.57 m/z 450.76

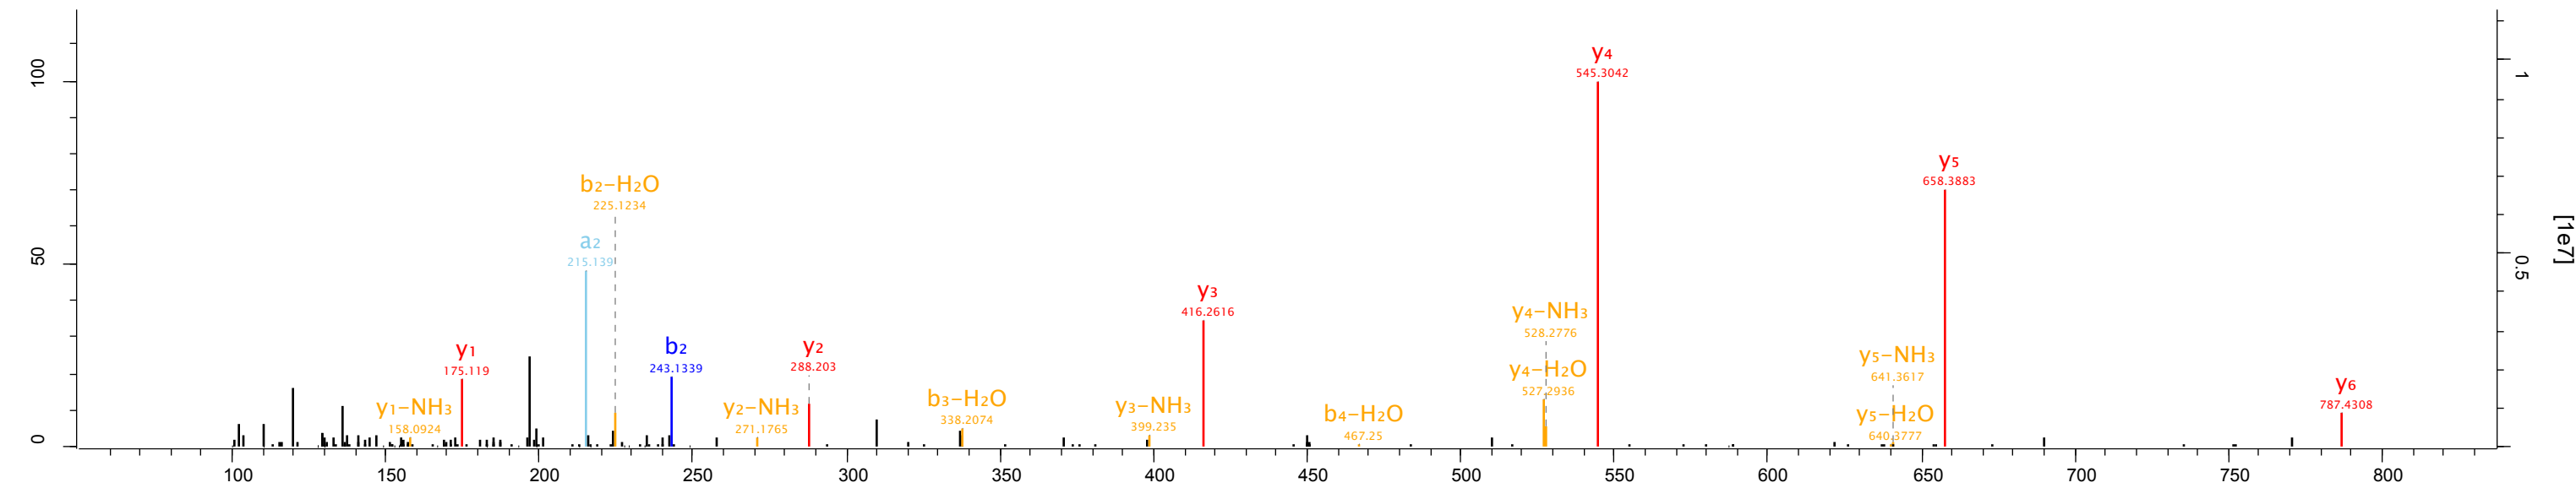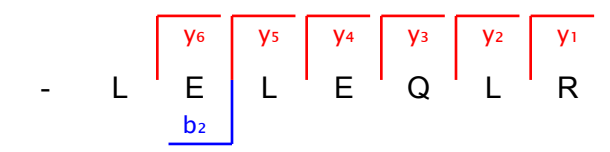

Raw file 20171215\_MaS\_33SR\_LMH\_proteome\_02 Scan 2505 Method FTMS; HCD Score 54.49 m/z 628.28

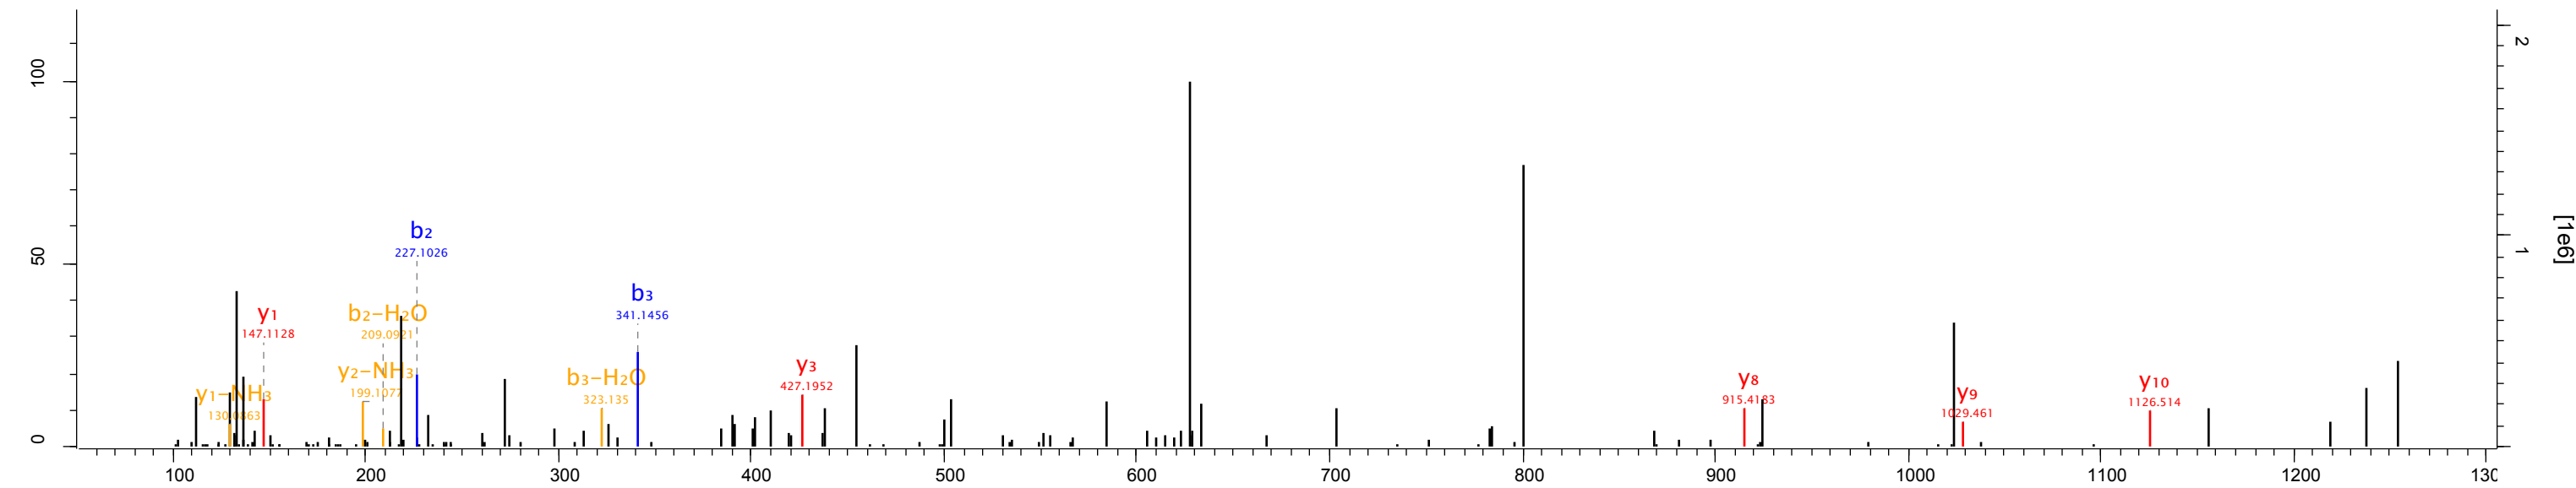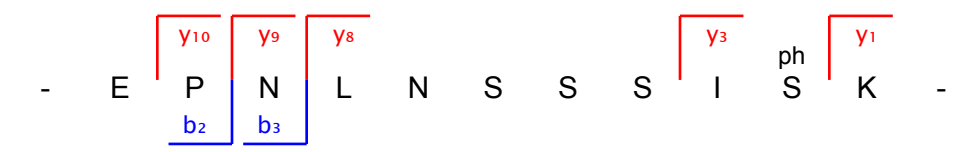

Raw file 20171215\_MaS\_33SR\_LMH\_proteome\_02 Scan 29955 Method FTMS; HCD Score 68.48 m/z 858.93 Gene names APOC3

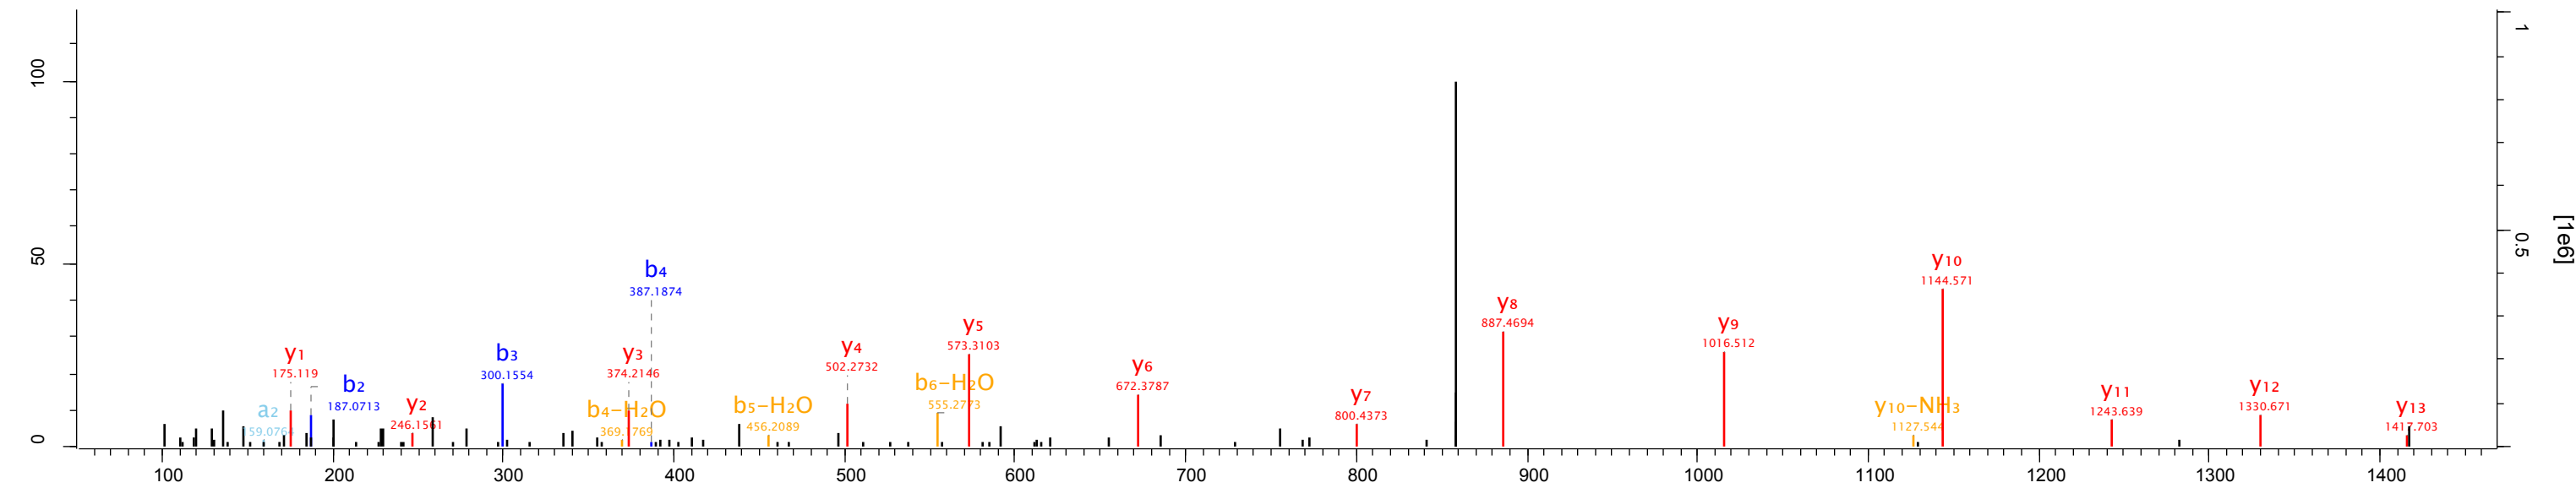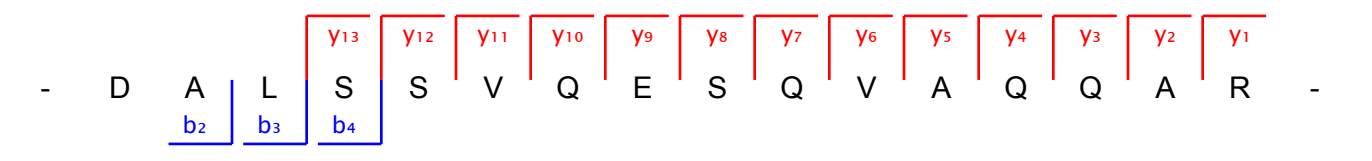

Raw file: 20171215\_MaS\_33SR\_LMH\_proteome\_02  
 Scan: 35365 Method: FTMS; HCD Score: 56.34 m/z: 816.42 Gene names: STRN4

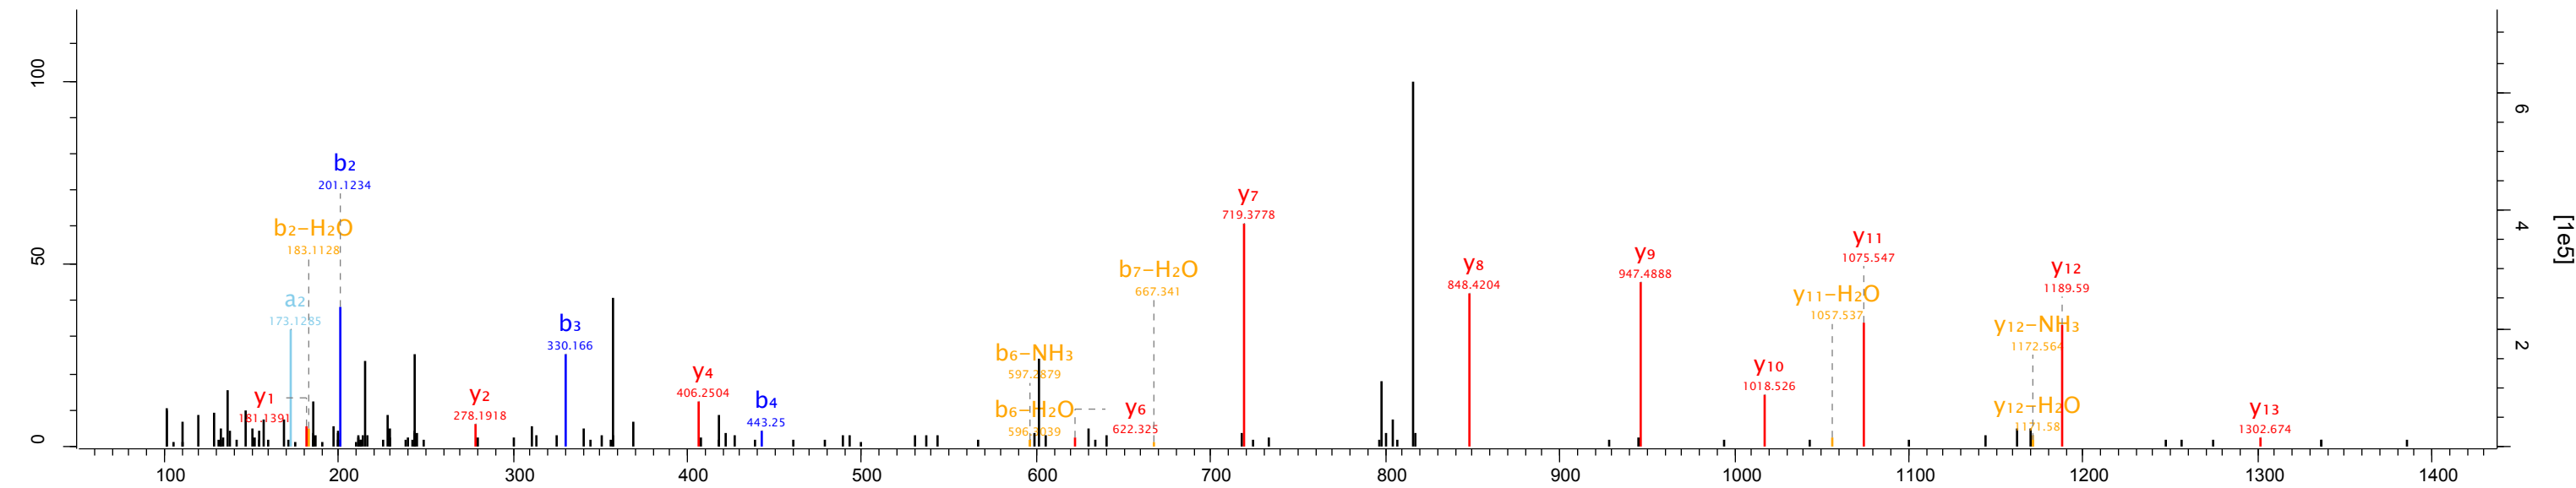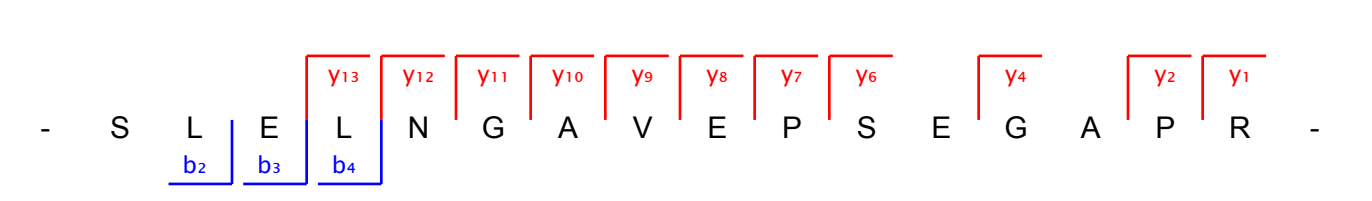

Raw file 20171215\_MaS\_33SR\_LMH\_proteome\_02 Scan 3665 Method FTMS; HCD Score 124.12 m/z 562.28 Gene names RAB21

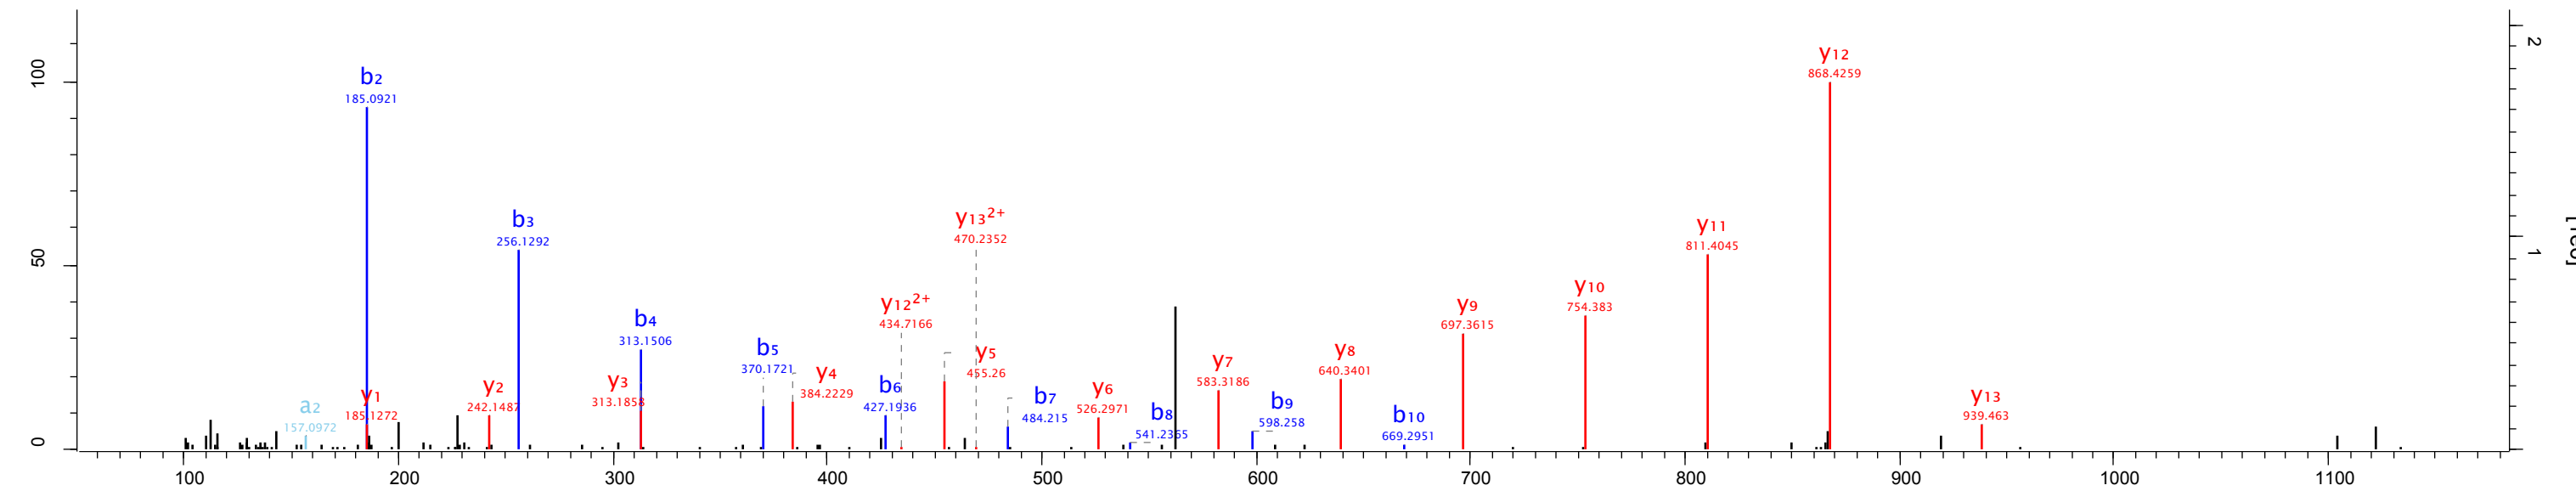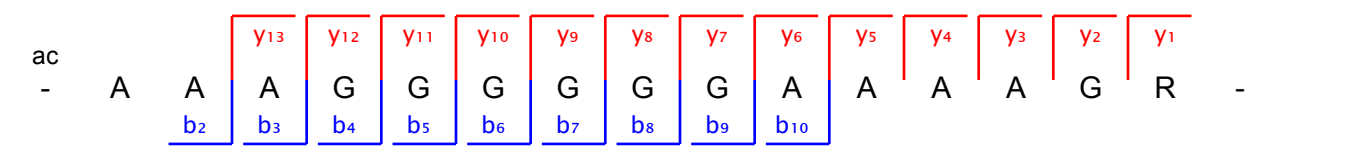

Raw file: 20171215\_MaS\_33SR\_LMH\_proteome\_02  
 Scan: 38535 Method: FTMS; HCD Score: 86.29 m/z: 706.86 Gene names: SNF8

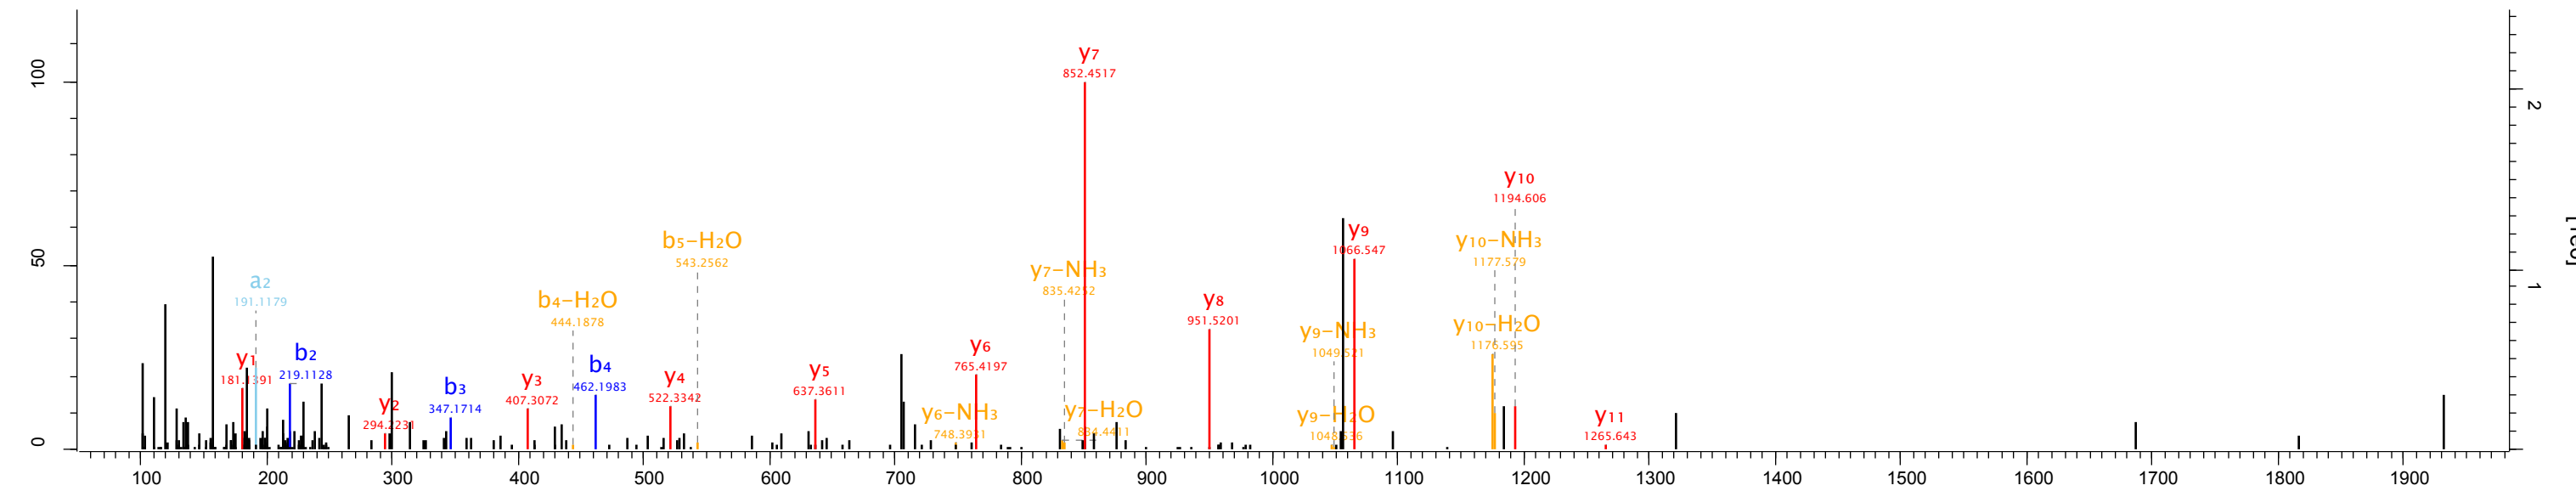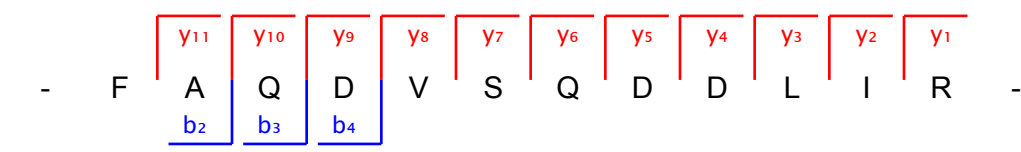

Raw file

20171215\_MaS\_33SR\_LMH\_proteome\_02

| Scan  | Method    | Score | m/z    | Gene names |
|-------|-----------|-------|--------|------------|
| 43295 | FTMS; HCD | 41.7  | 687.88 | SLC13A1    |

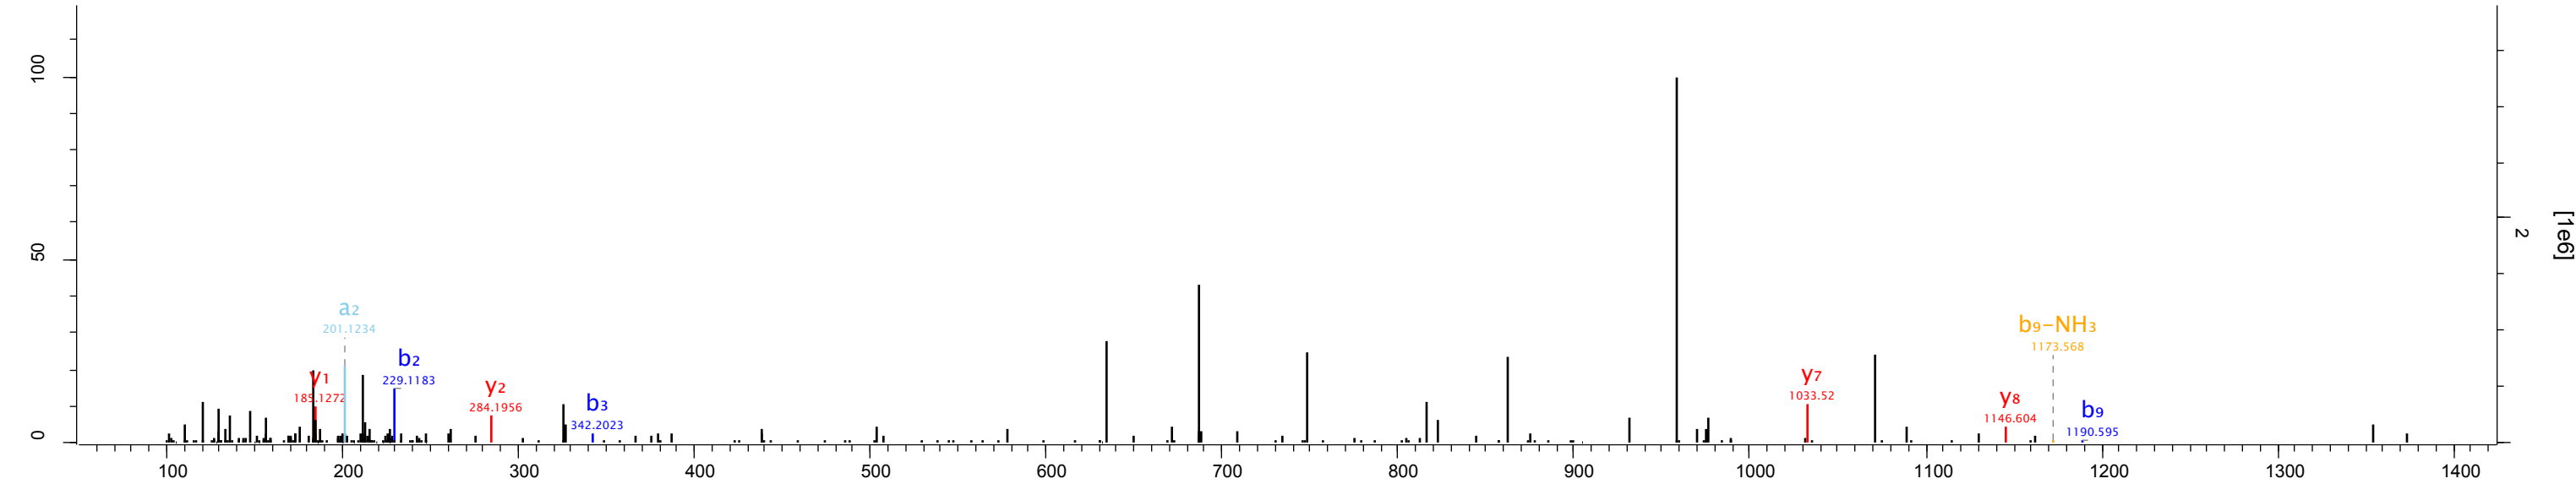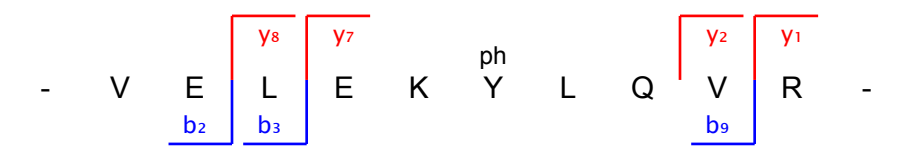

Raw file 20171215\_MaS\_33SR\_LMH\_proteome\_02 Scan 4595 Method FTMS; HCD Score 98.1 m/z 556.8 Gene names NRGN

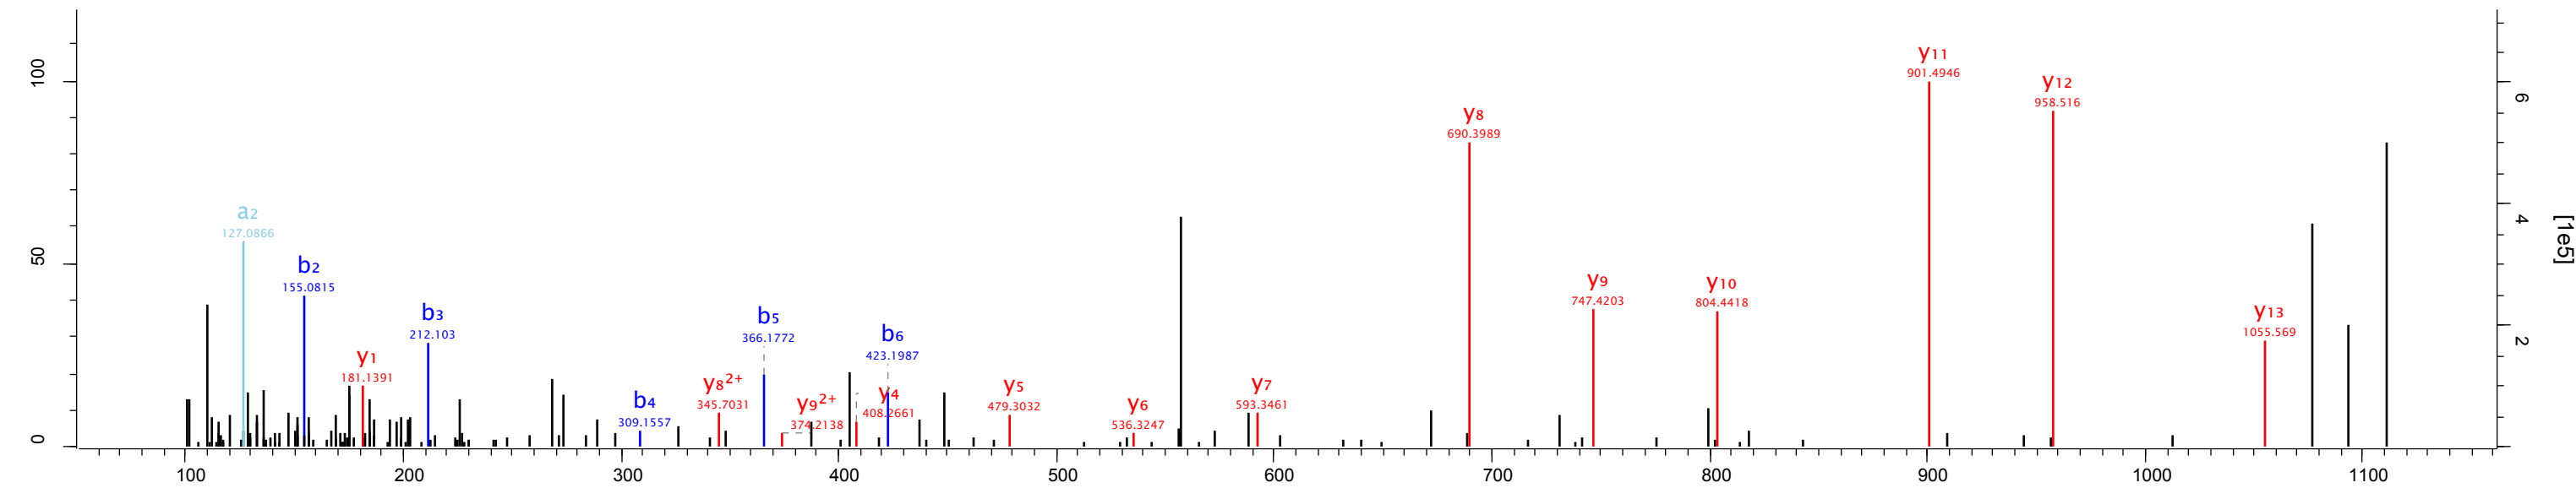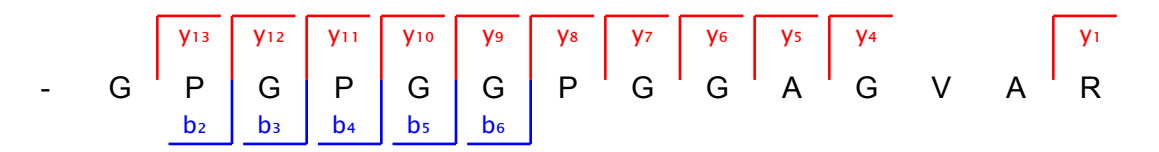



Raw file 20171215\_MaS\_33SR\_LMH\_proteome\_02 Scan 56635 Method FTMS; HCD Score 101.53 m/z 768.89 Gene names GOSR1

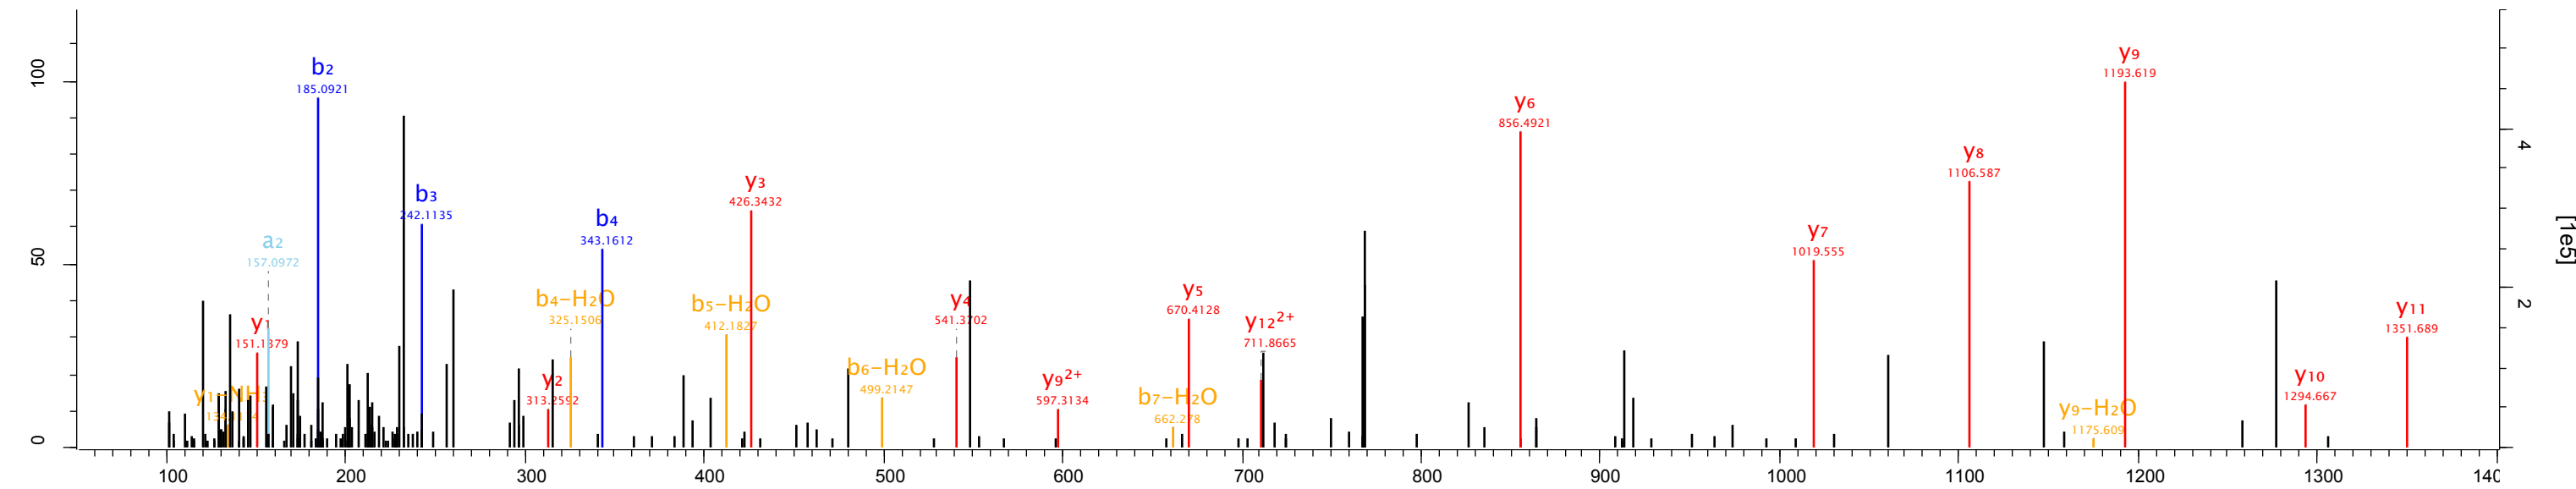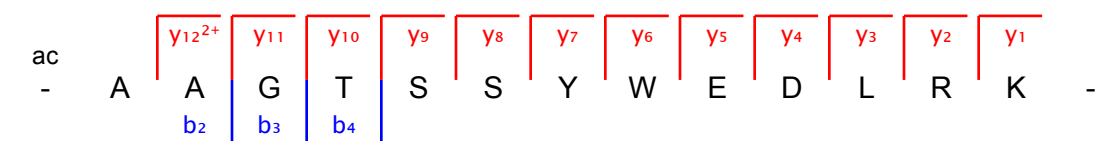

Raw file 20171215\_MaS\_33SR\_LMH\_proteome\_02 Scan 59925 Method FTMS; HCD Score 110.39 m/z 694.38 Gene names PELO

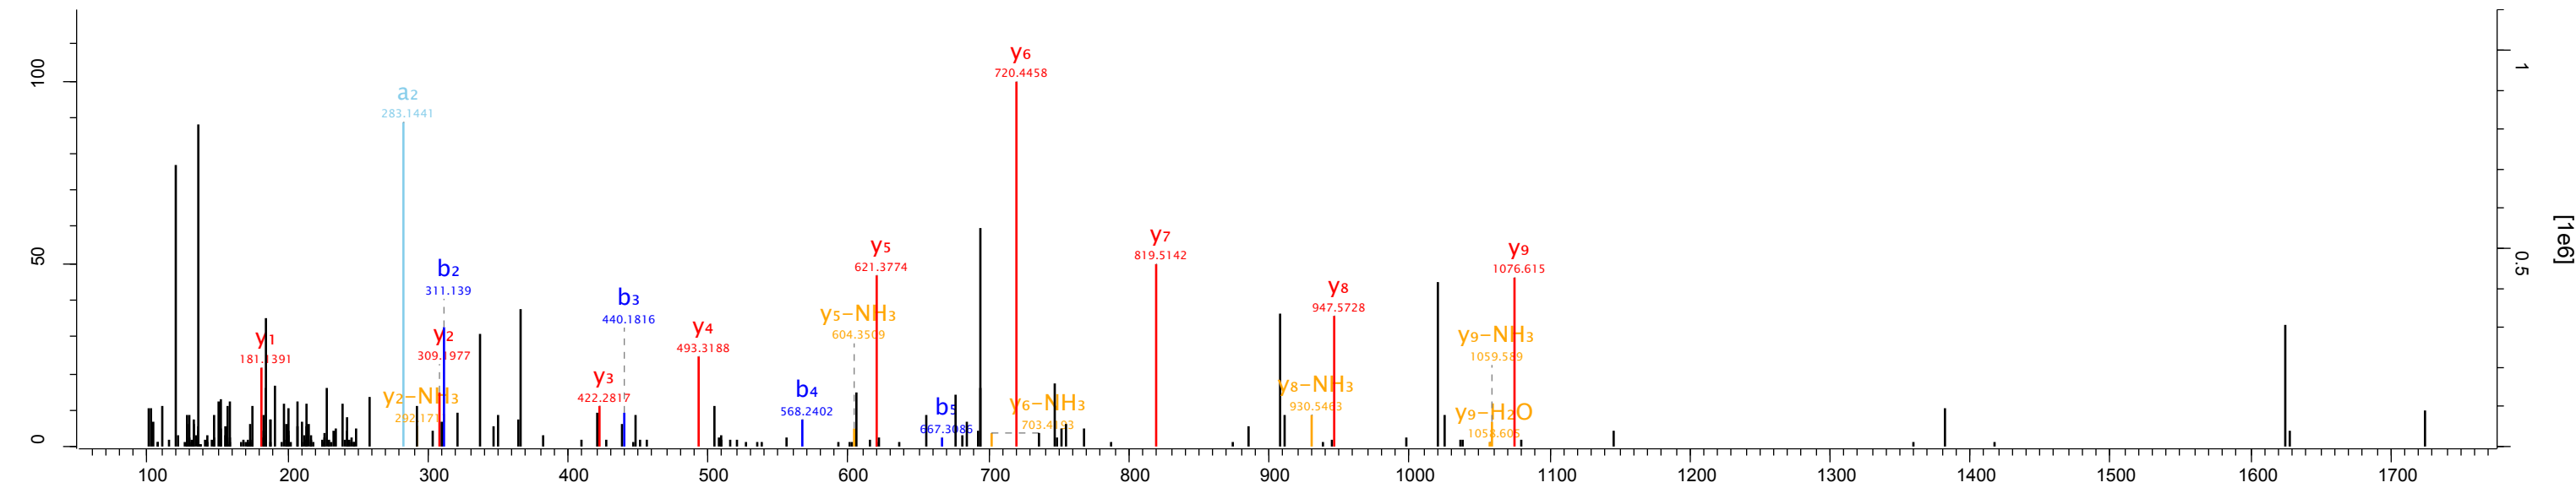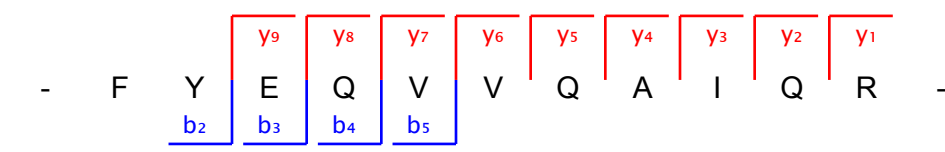

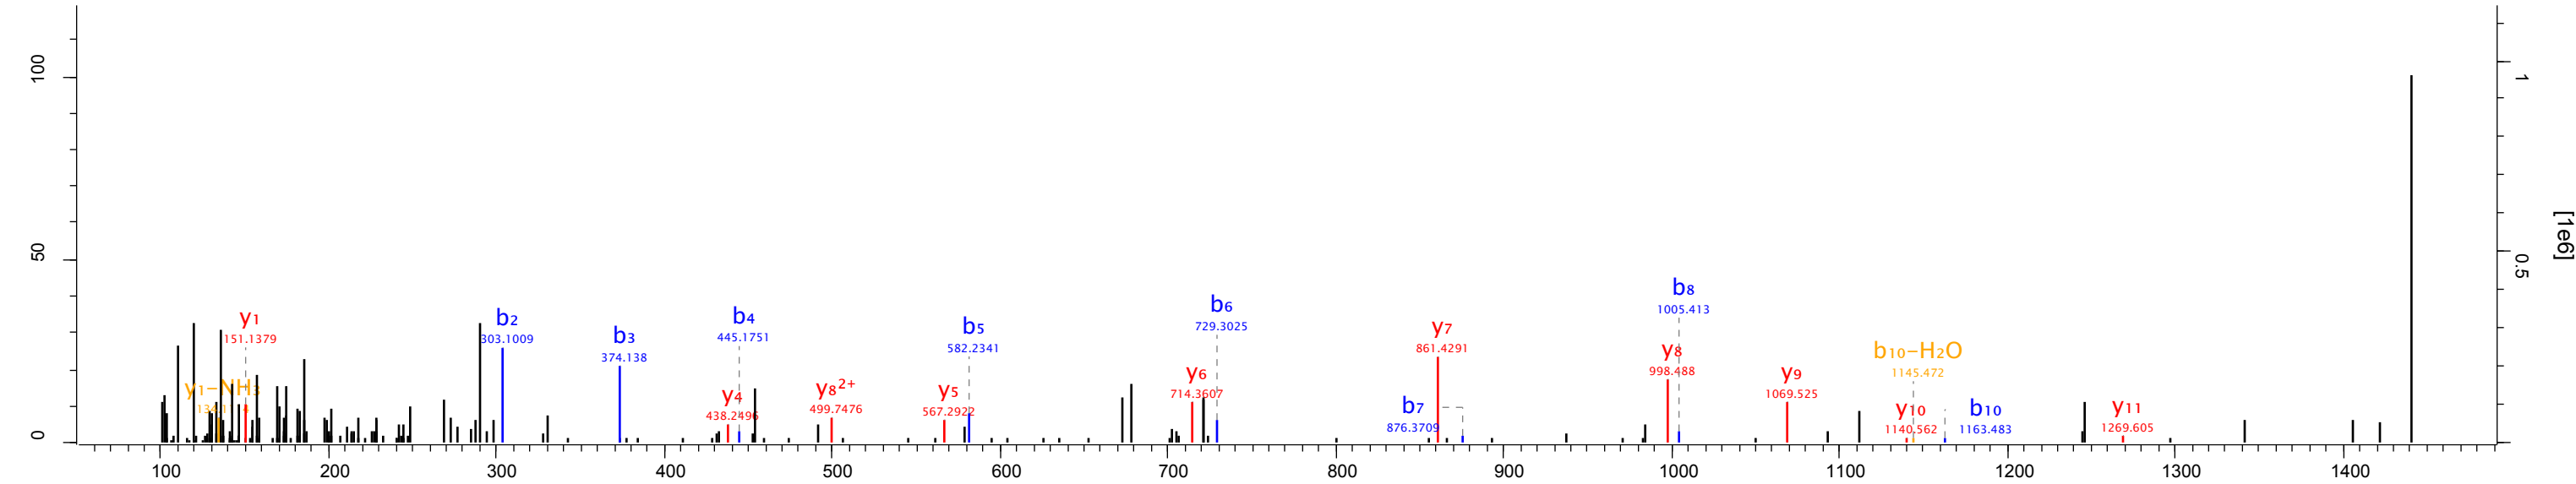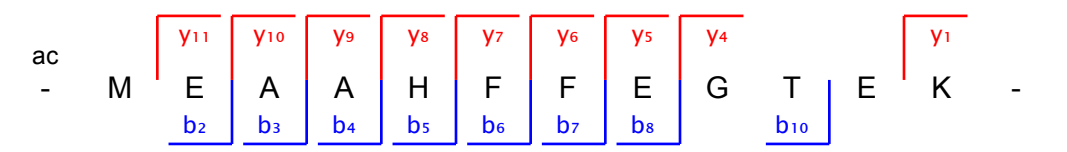

Raw file 20171215\_MaS\_33SR\_LMH\_proteome\_02 Scan 88935 Method FTMS; HCD Score 83.05 m/z 625.38 Gene names TRAF1

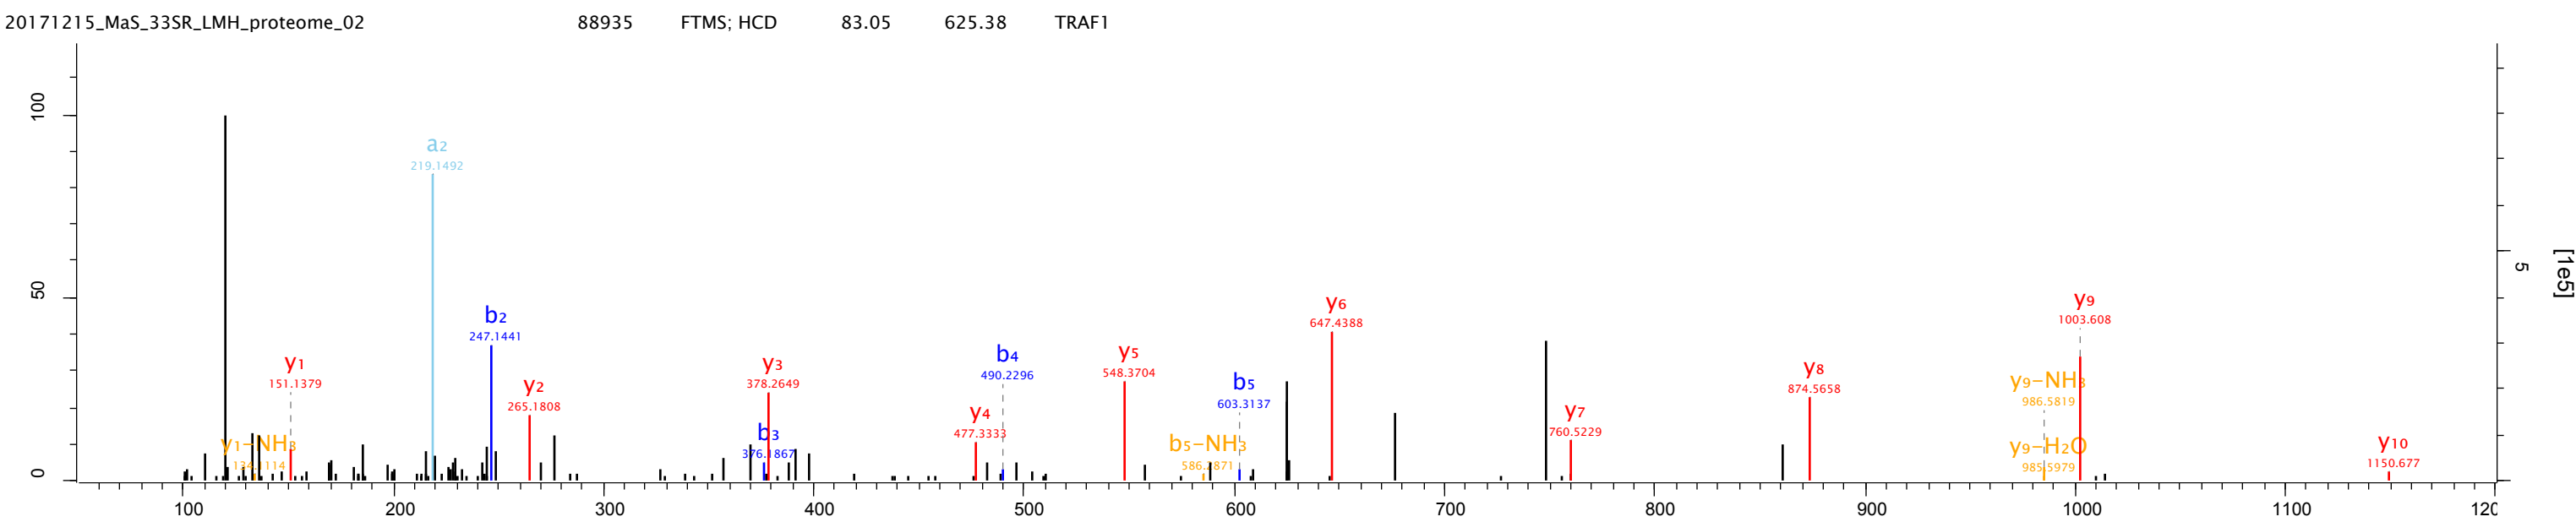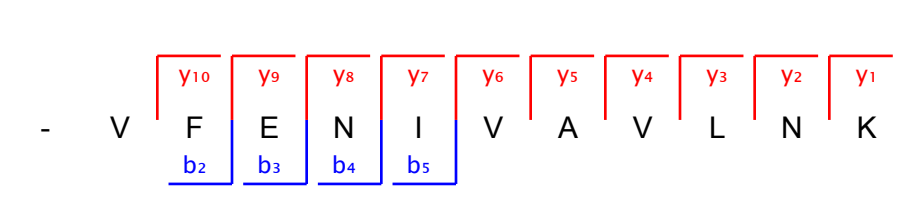

Raw file: 20171215\_MaS\_33SR\_LMH\_proteome\_02  
 Scan: 91065 Method: FTMS; HCD Score: 67.65 m/z: 870.91 Gene names: SPATS2

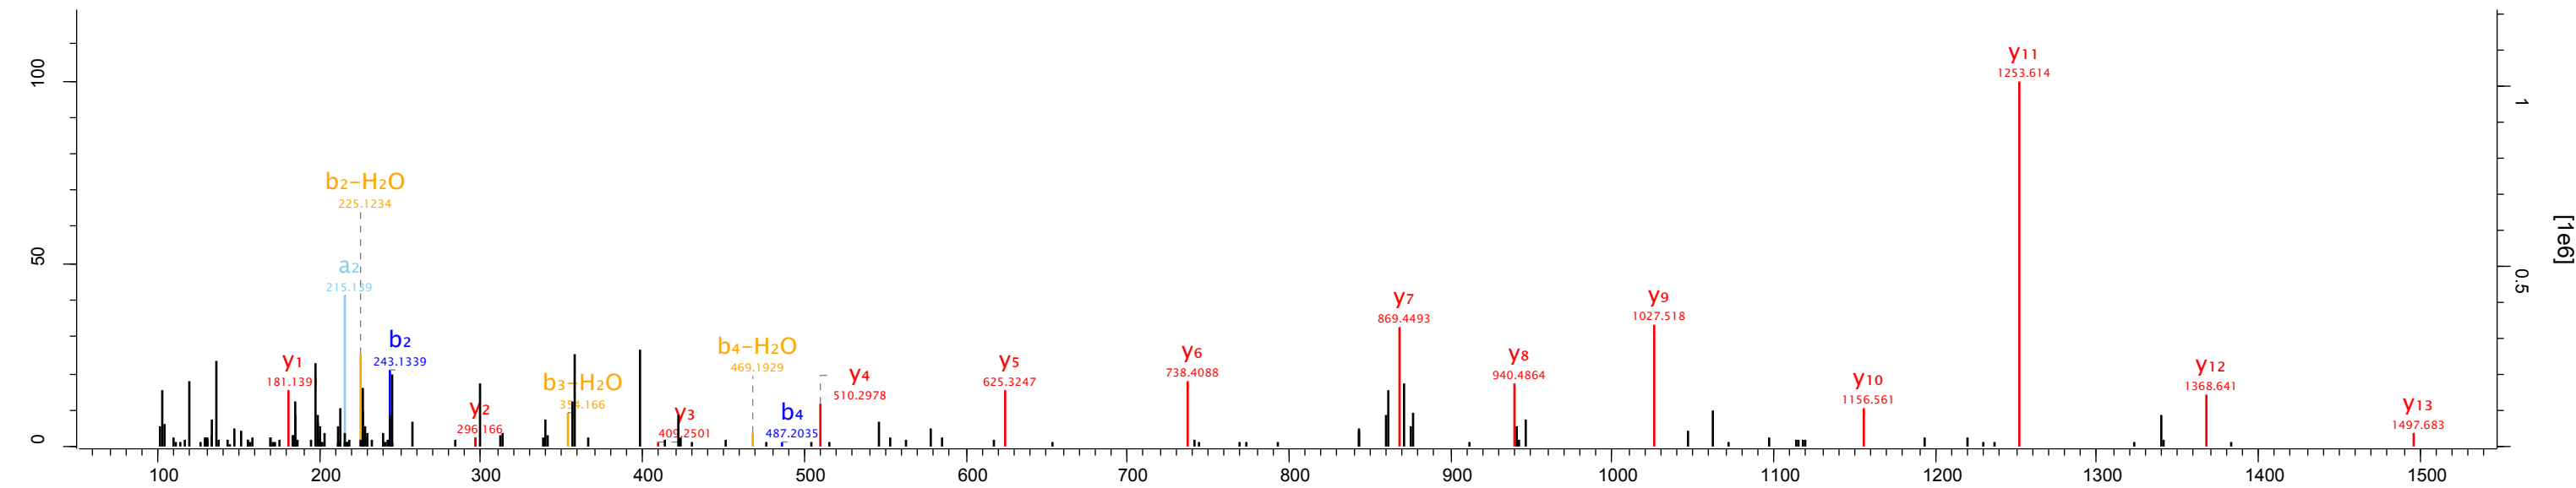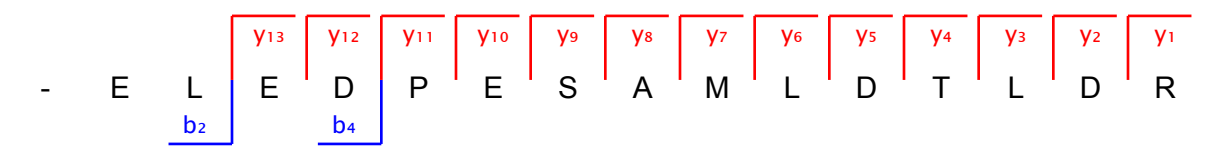

Raw file 20171215\_MaS\_33SR\_LMH\_proteome\_02 Scan 9725 Method FTMS; HCD Score 97.69 m/z 834.9 Gene names YY1

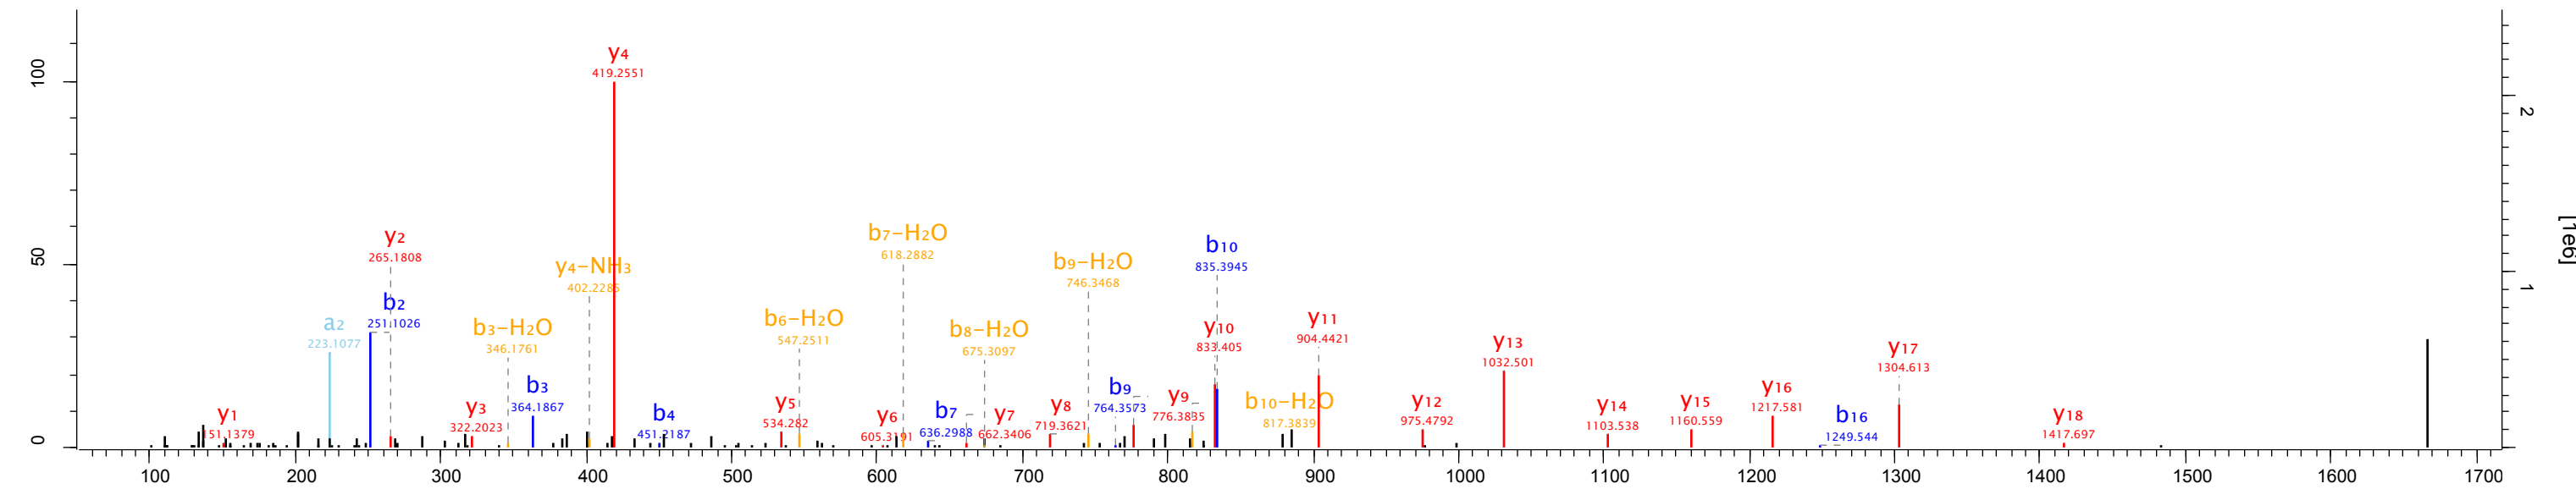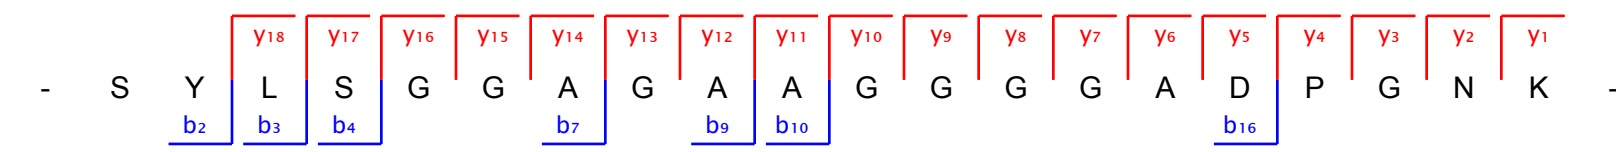

Raw file 20171215\_MaS\_33SR\_LMH\_phospho\_01 Scan 7626 Method FTMS; HCD Score 75.3 m/z 891.8 Gene names SLC2A13

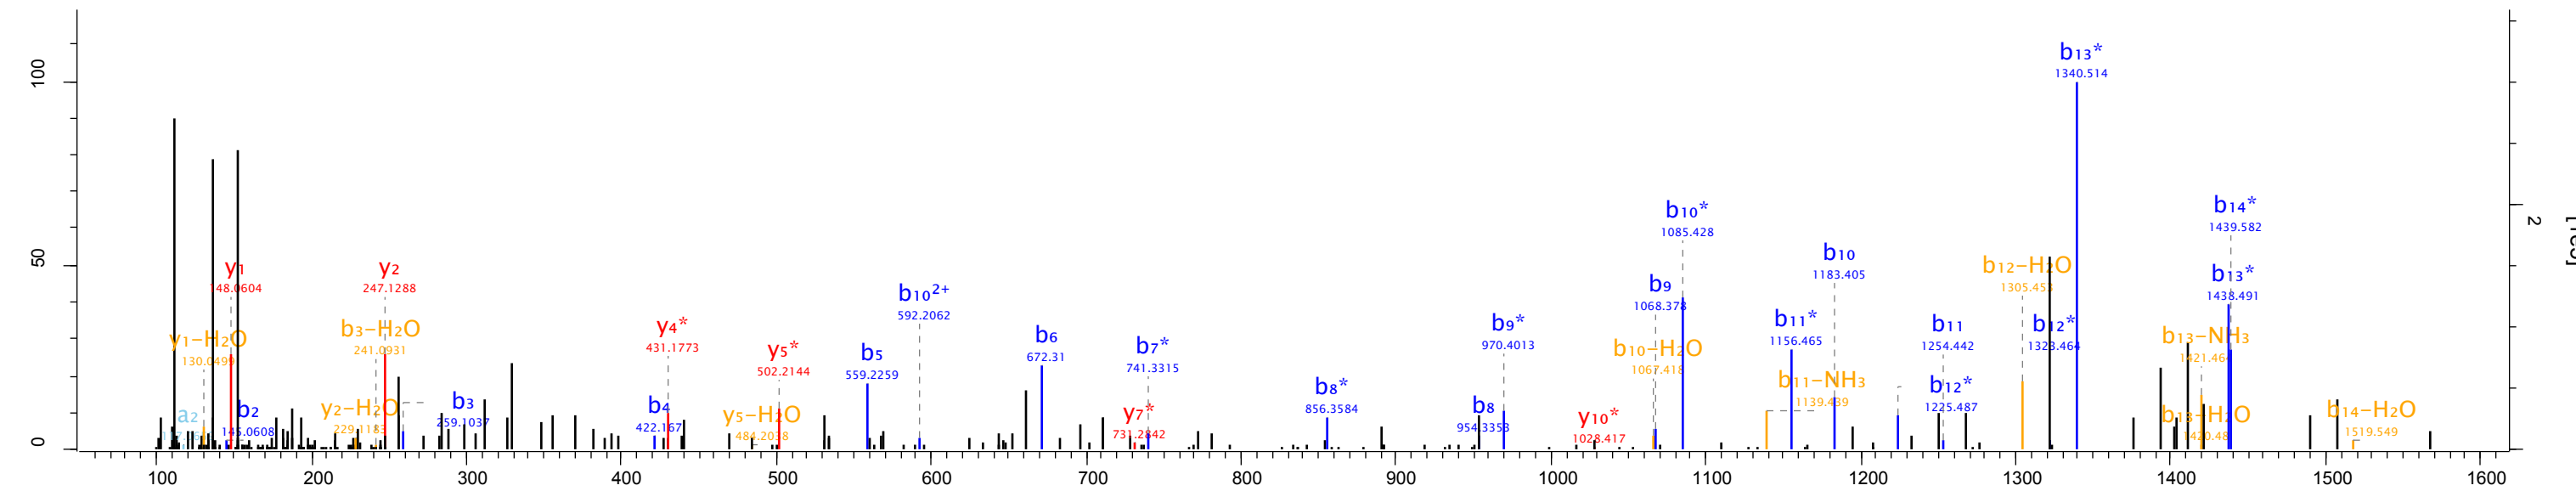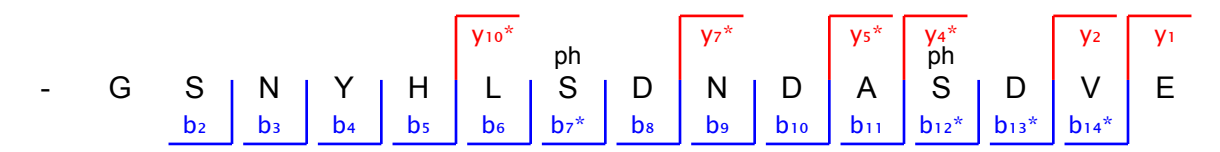

Raw file 20171215\_MaS\_33SR\_LMH\_phospho\_01 Scan 7696 Method FTMS; HCD Score 43.69 m/z 763.31

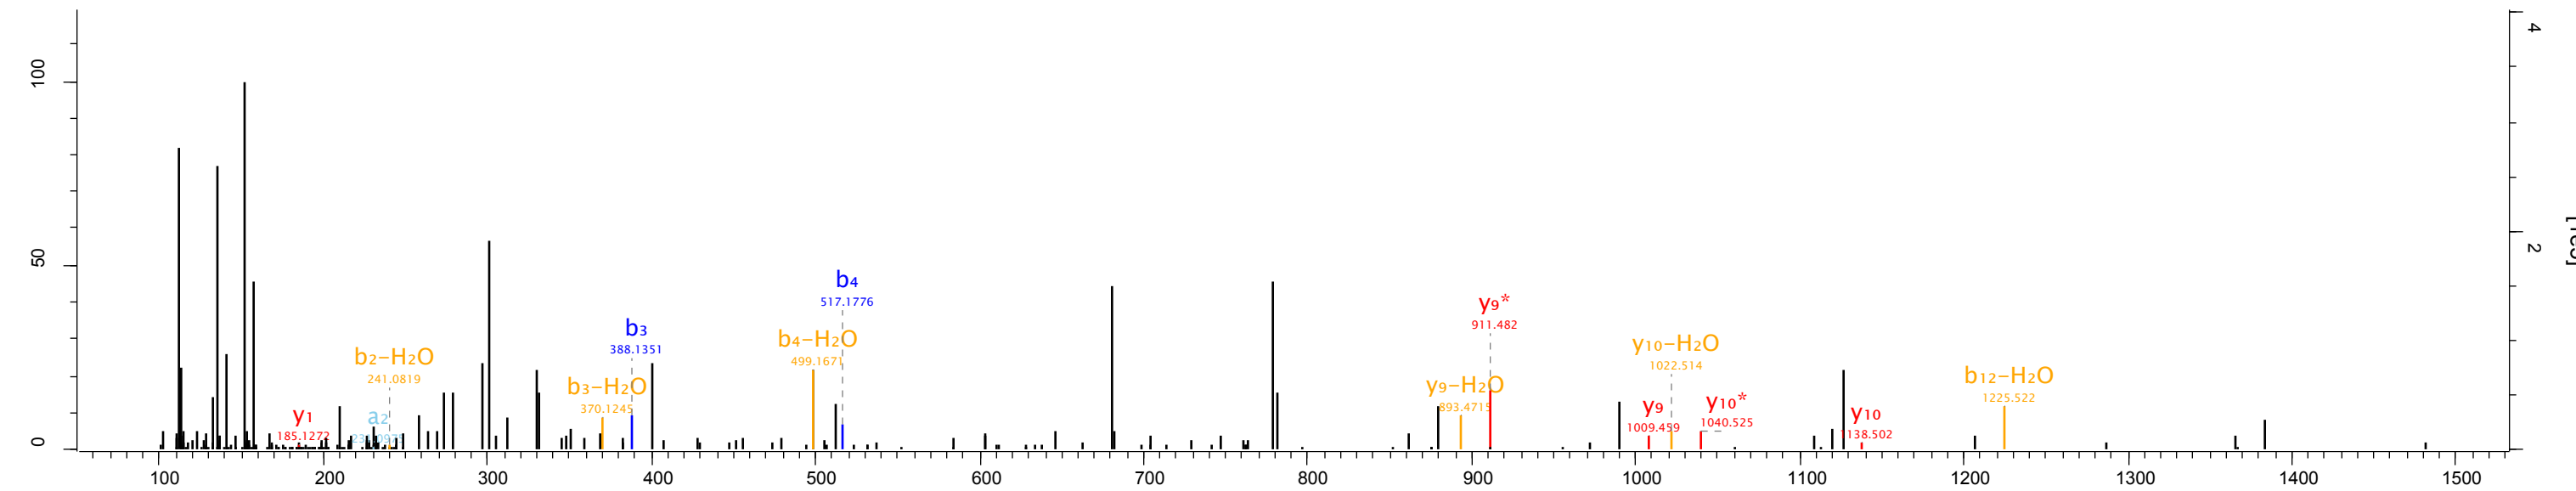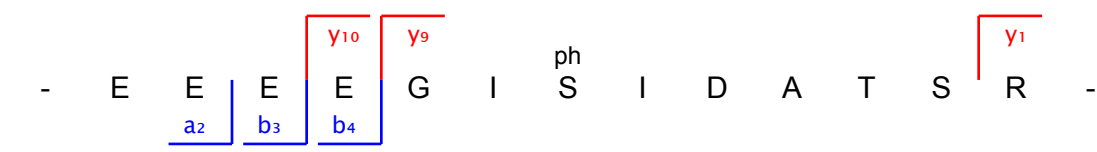



Raw file 20171215\_MaS\_33SR\_LMH\_phospho\_01 Scan 8086 Method FTMS; HCD Score 55.75 m/z 817.28 Gene names CTU2

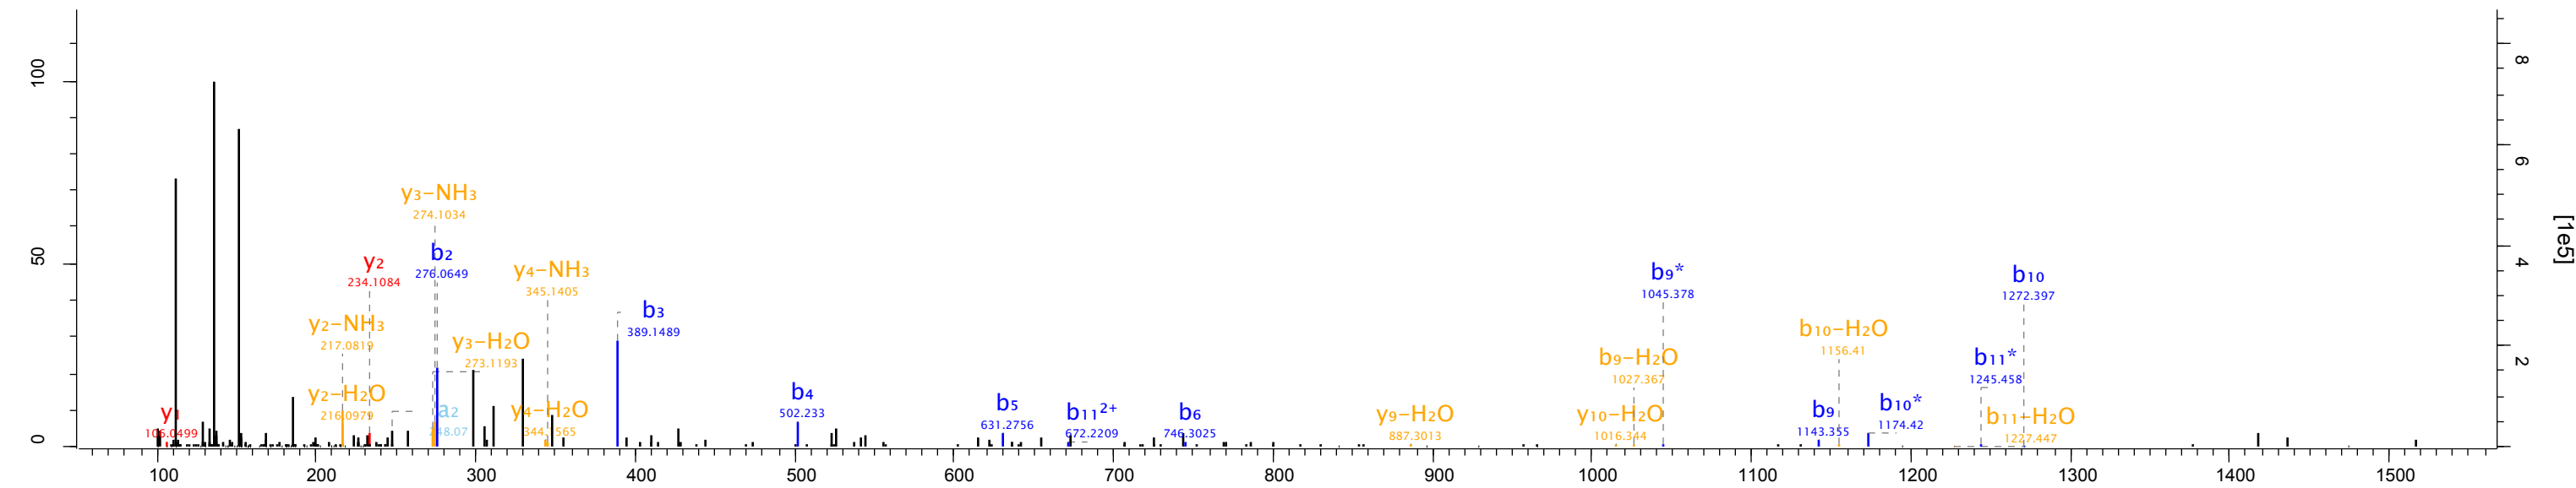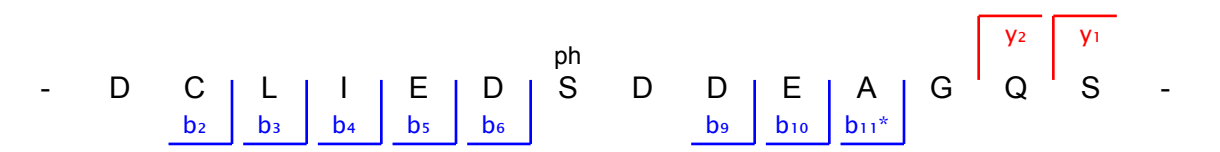

Raw file

20171215\_MaS\_33SR\_LMH\_phospho\_02

| Scan  | Method    | Score | m/z    | Gene names |
|-------|-----------|-------|--------|------------|
| 10926 | FTMS; HCD | 52.96 | 813.04 | WIPF2      |

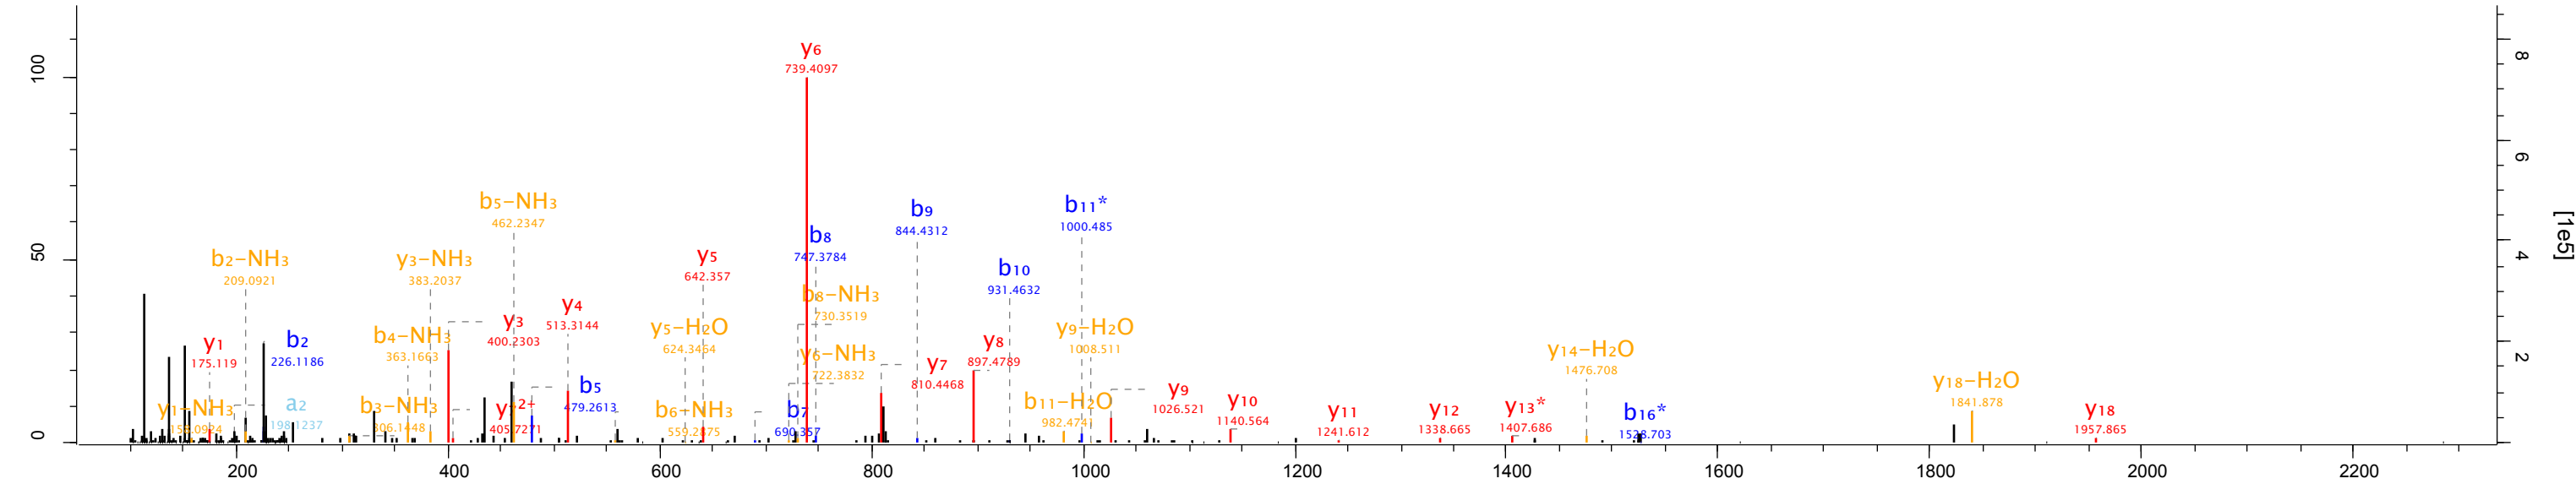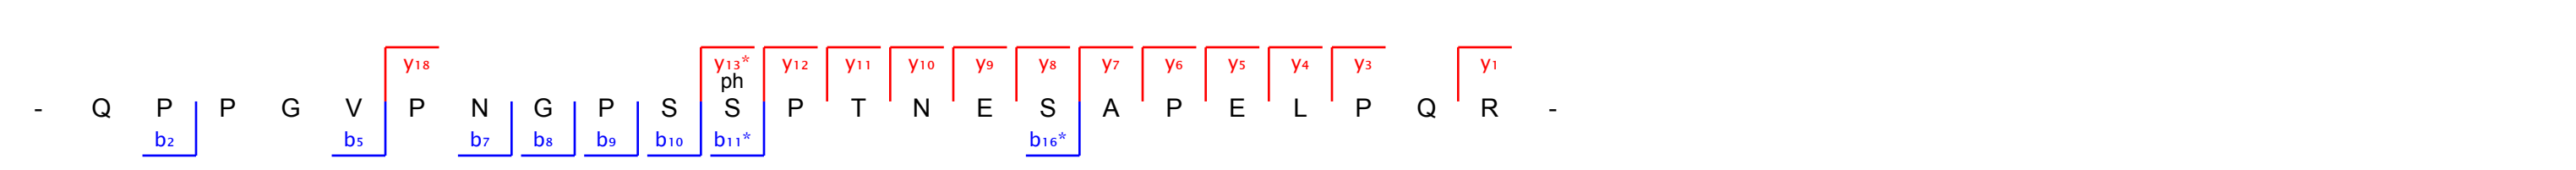

Raw file 20171215\_MaS\_33SR\_LMH\_phospho\_02 Scan 15156 Method FTMS; HCD Score 166.57 m/z 1086.93 Gene names SLC14A1

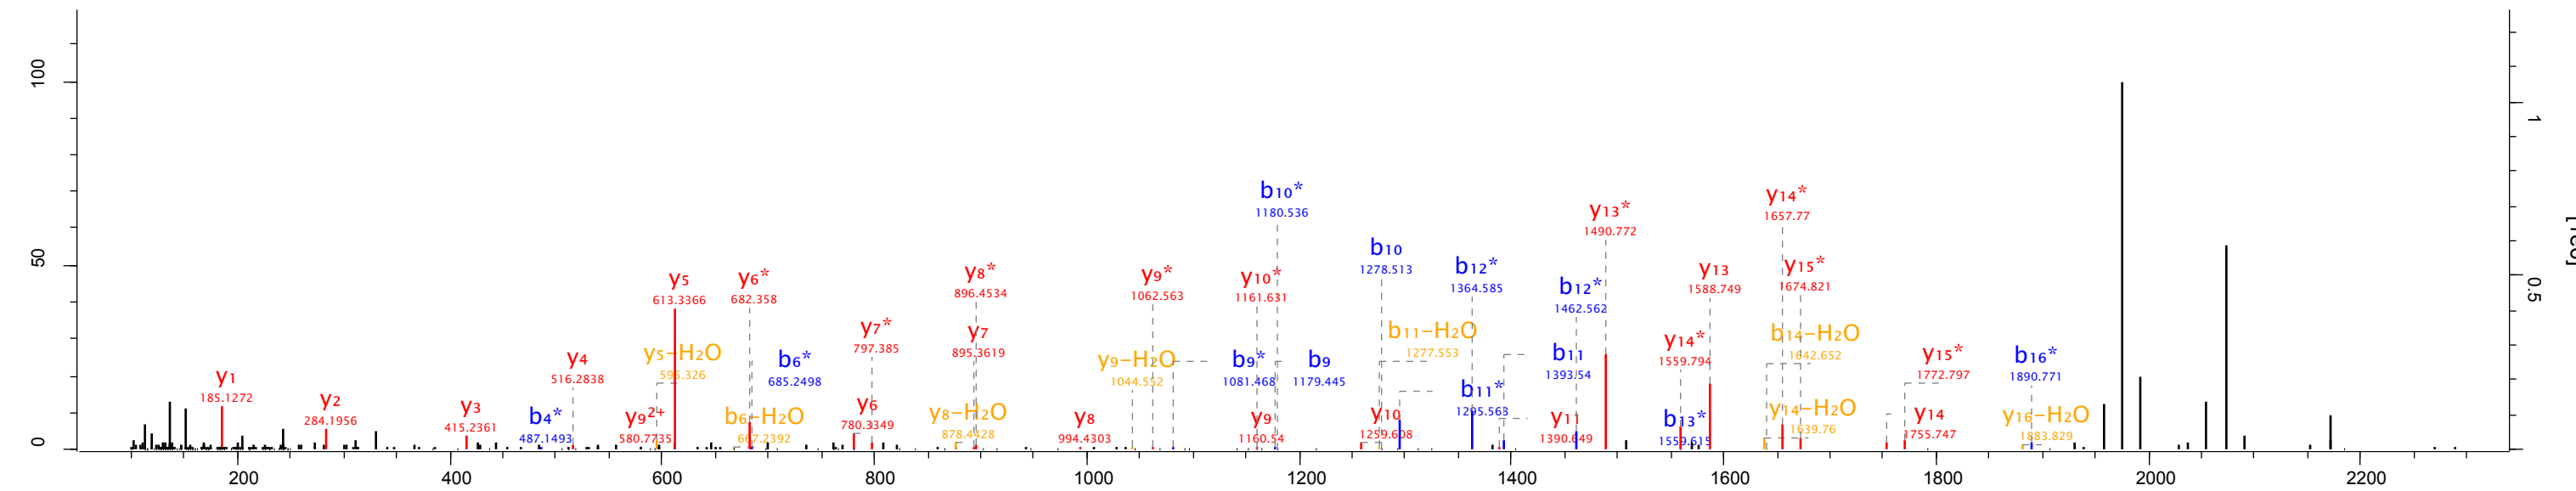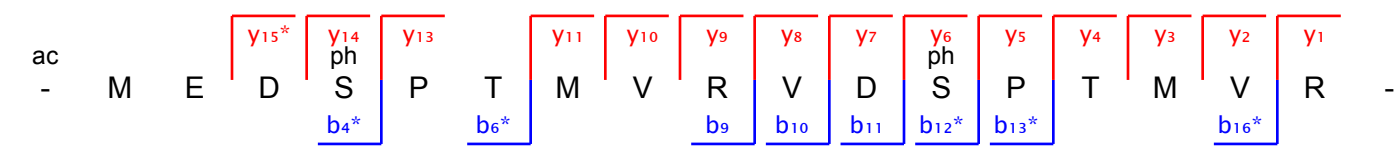

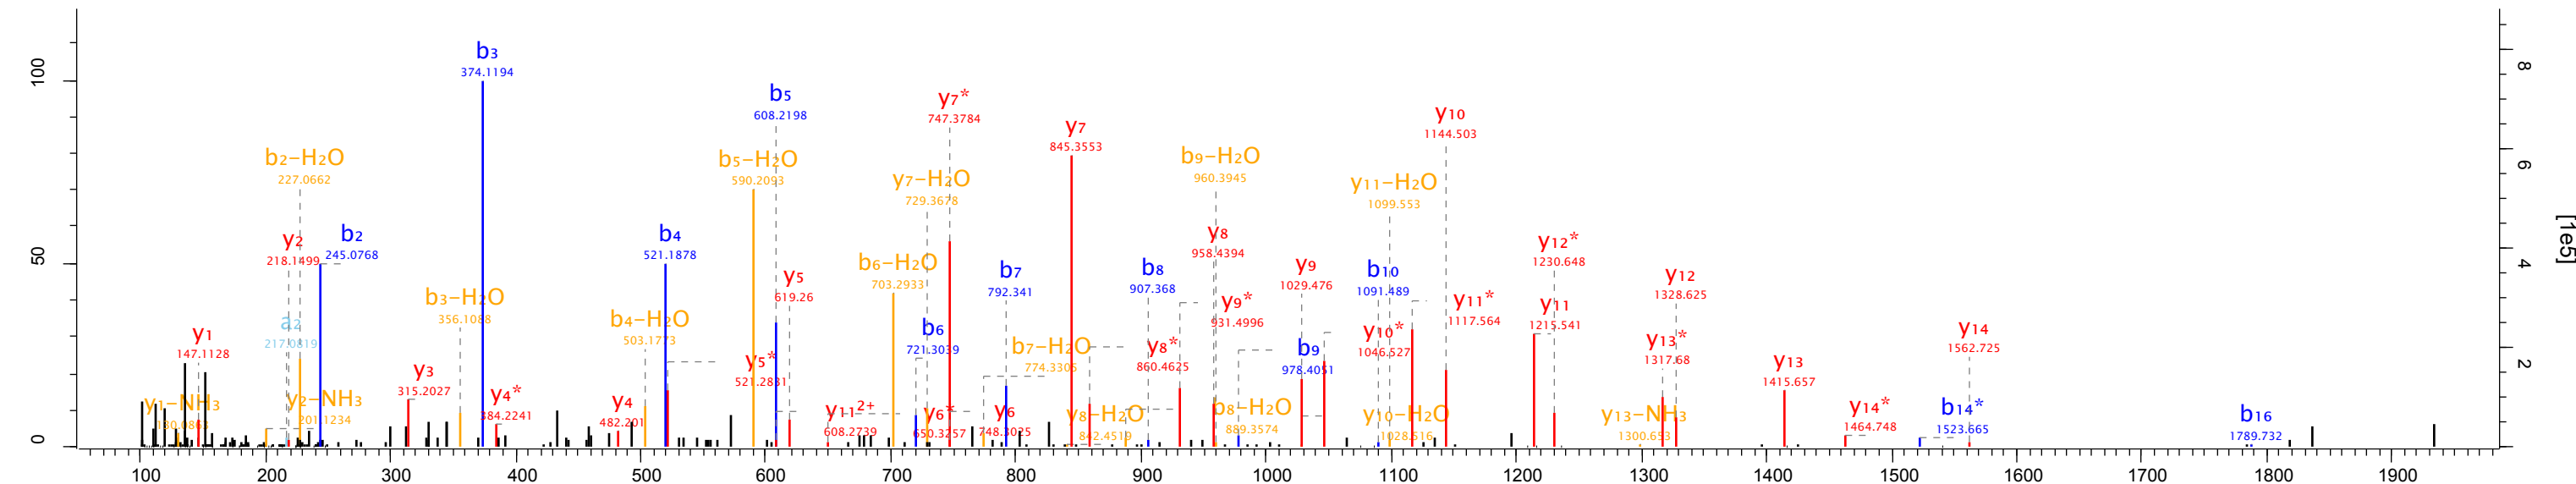

ac

-

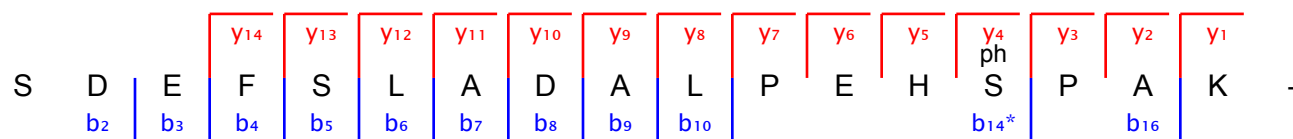

Raw file 20171215\_MaS\_33SR\_LMH\_phospho\_02 Scan 3676 Method FTMS; HCD Score 82.66 m/z 780.78 Gene names TMEM45A

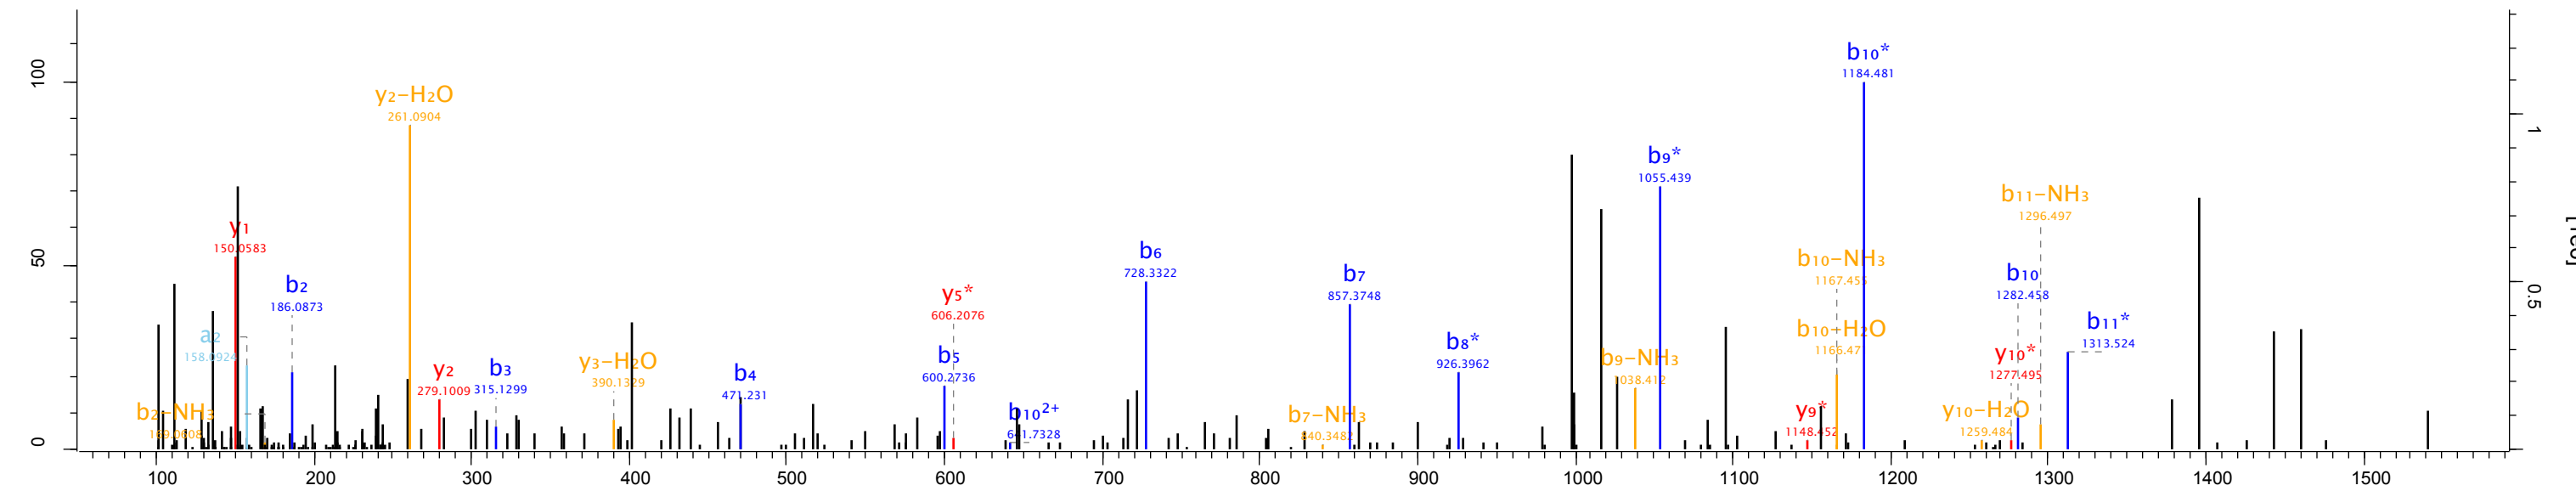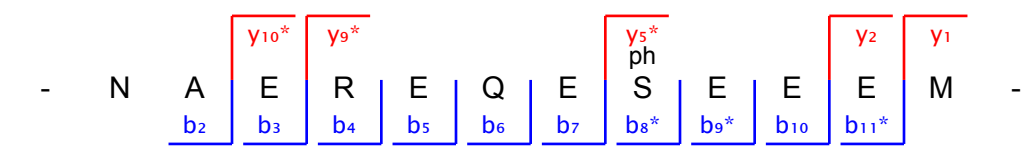

Raw file 20171215\_MaS\_33SR\_LMH\_phospho\_02 Scan 3996 Method FTMS; HCD Score 61.48 m/z 661.27 Gene names GPSM3

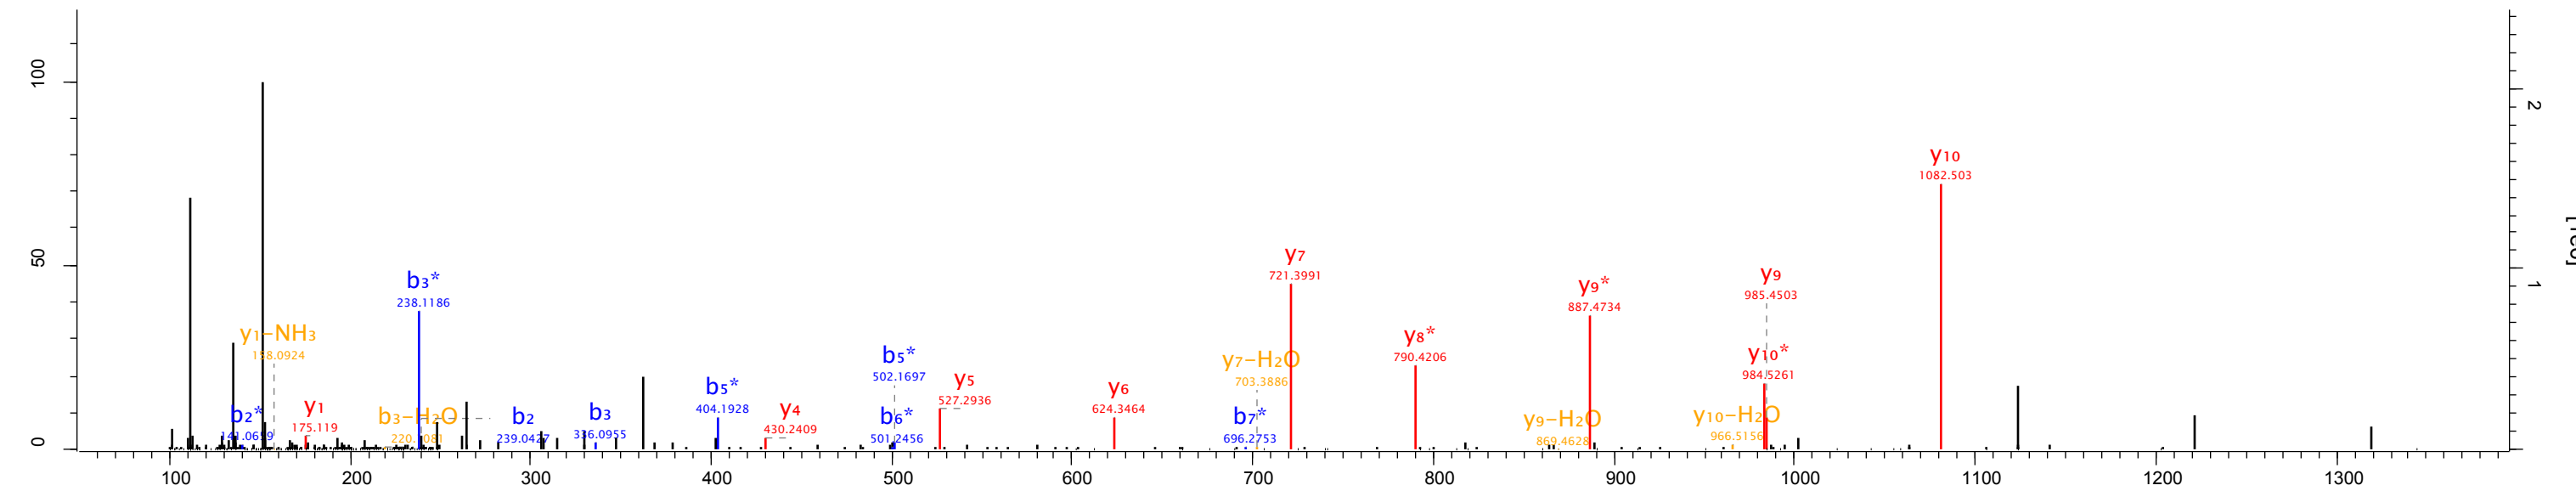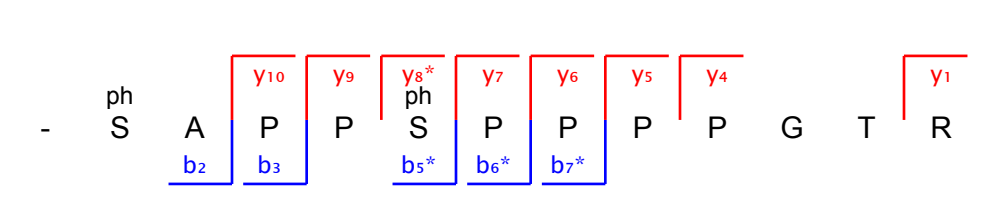

Raw file 20171215\_MaS\_33SR\_LMH\_phospho\_03 Scan 15446 Method FTMS; HCD Score 44.64 m/z 841.35 Gene names FBXO4

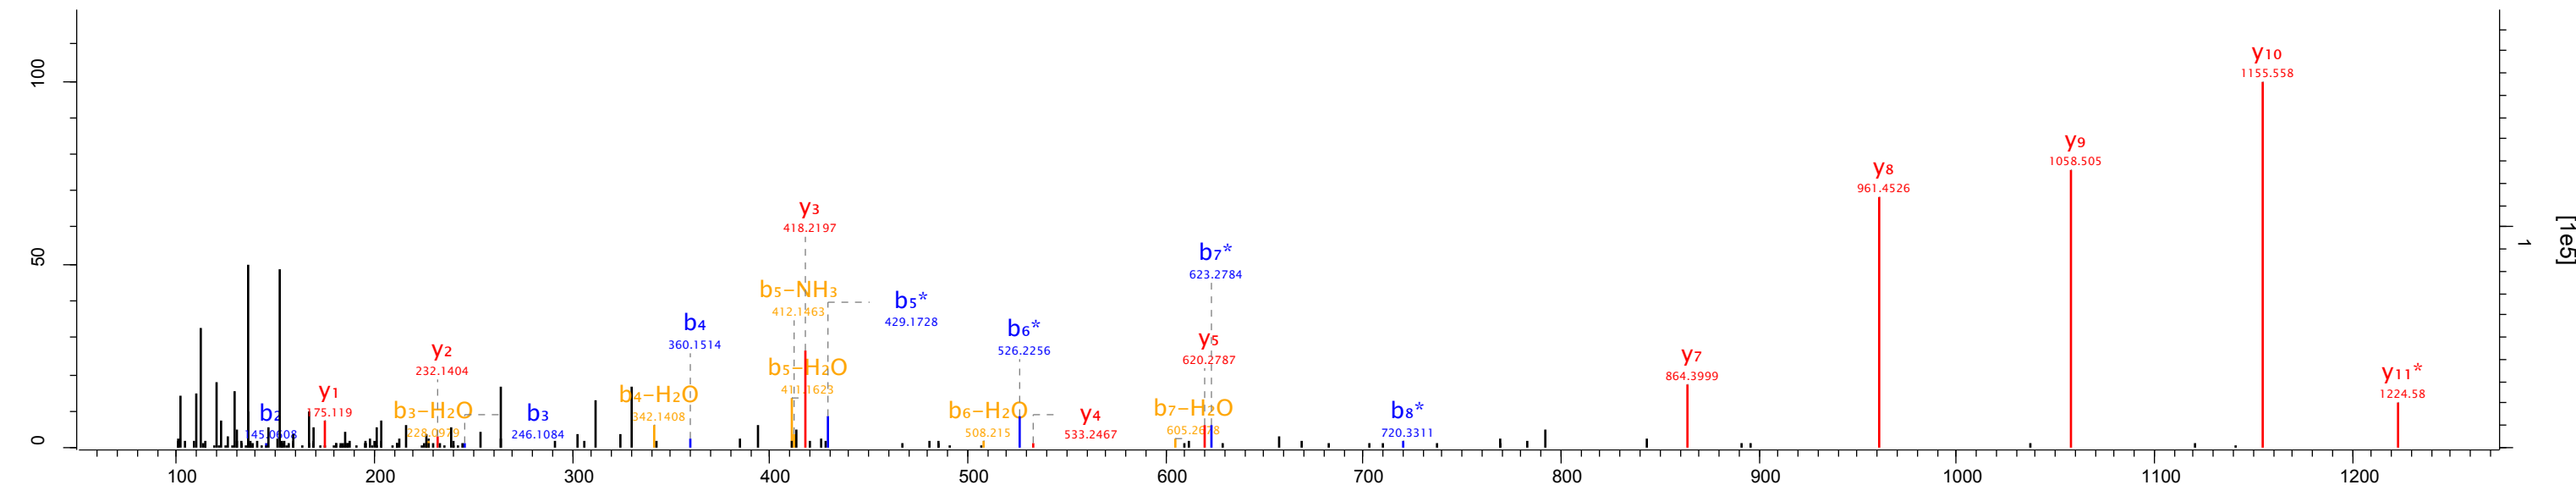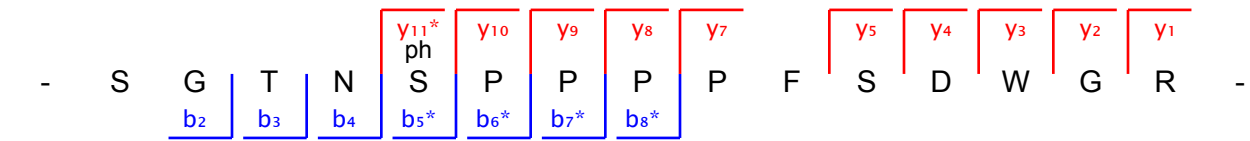

Raw file 20171215\_MaS\_33SR\_LMH\_phospho\_03 Scan 16236 Method FTMS; HCD Score 78.4 m/z 721.3 Gene names SLC1A1

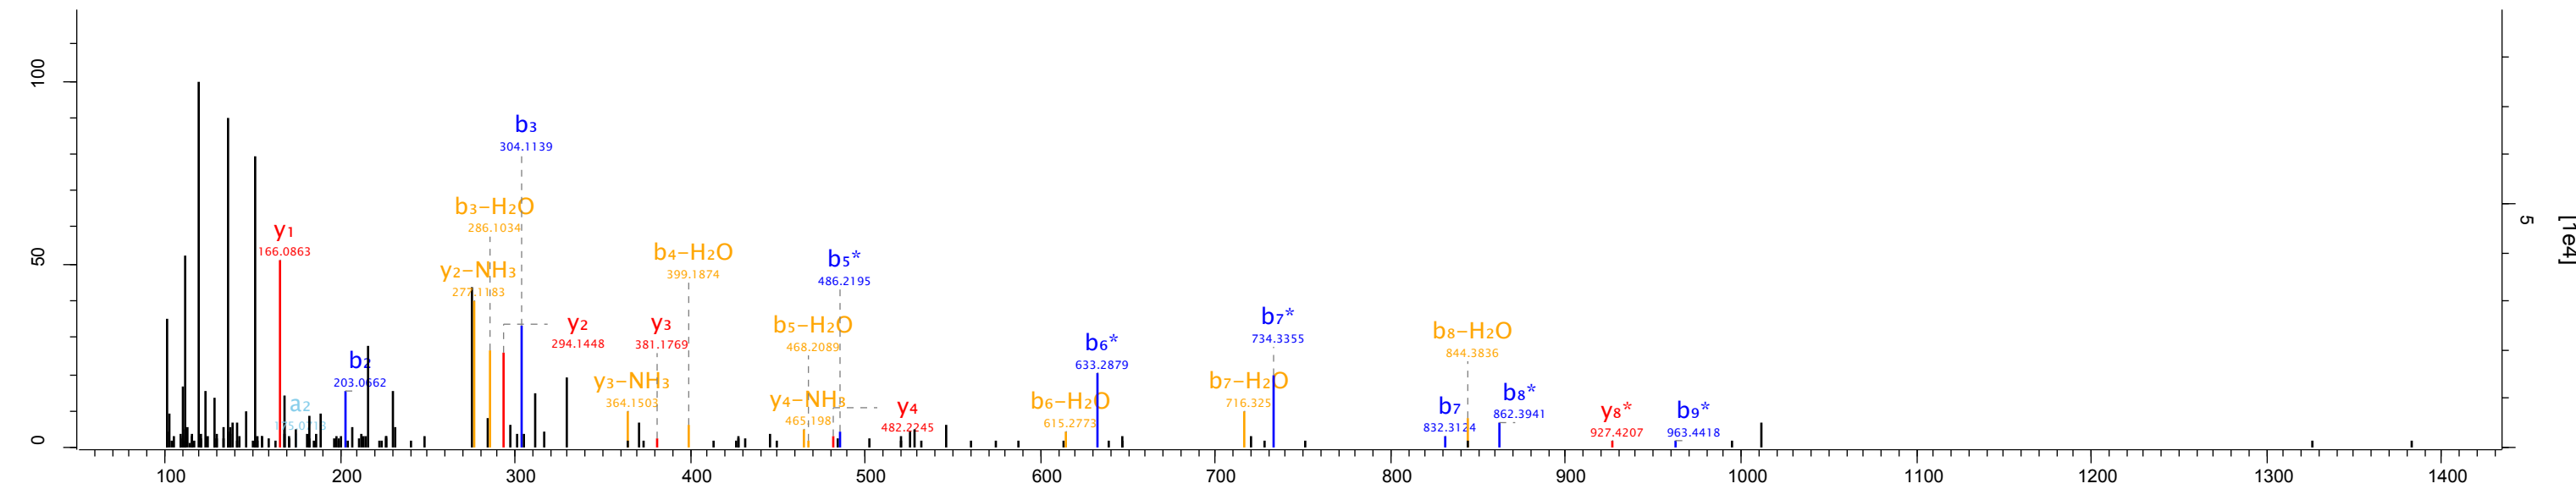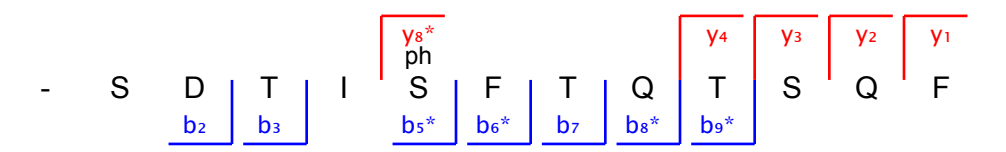



Raw file 20171215\_MaS\_33SR\_LMH\_phospho\_03 Scan 3416 Method FTMS; HCD Score 43.21 m/z 907.33 Gene names ALMS1

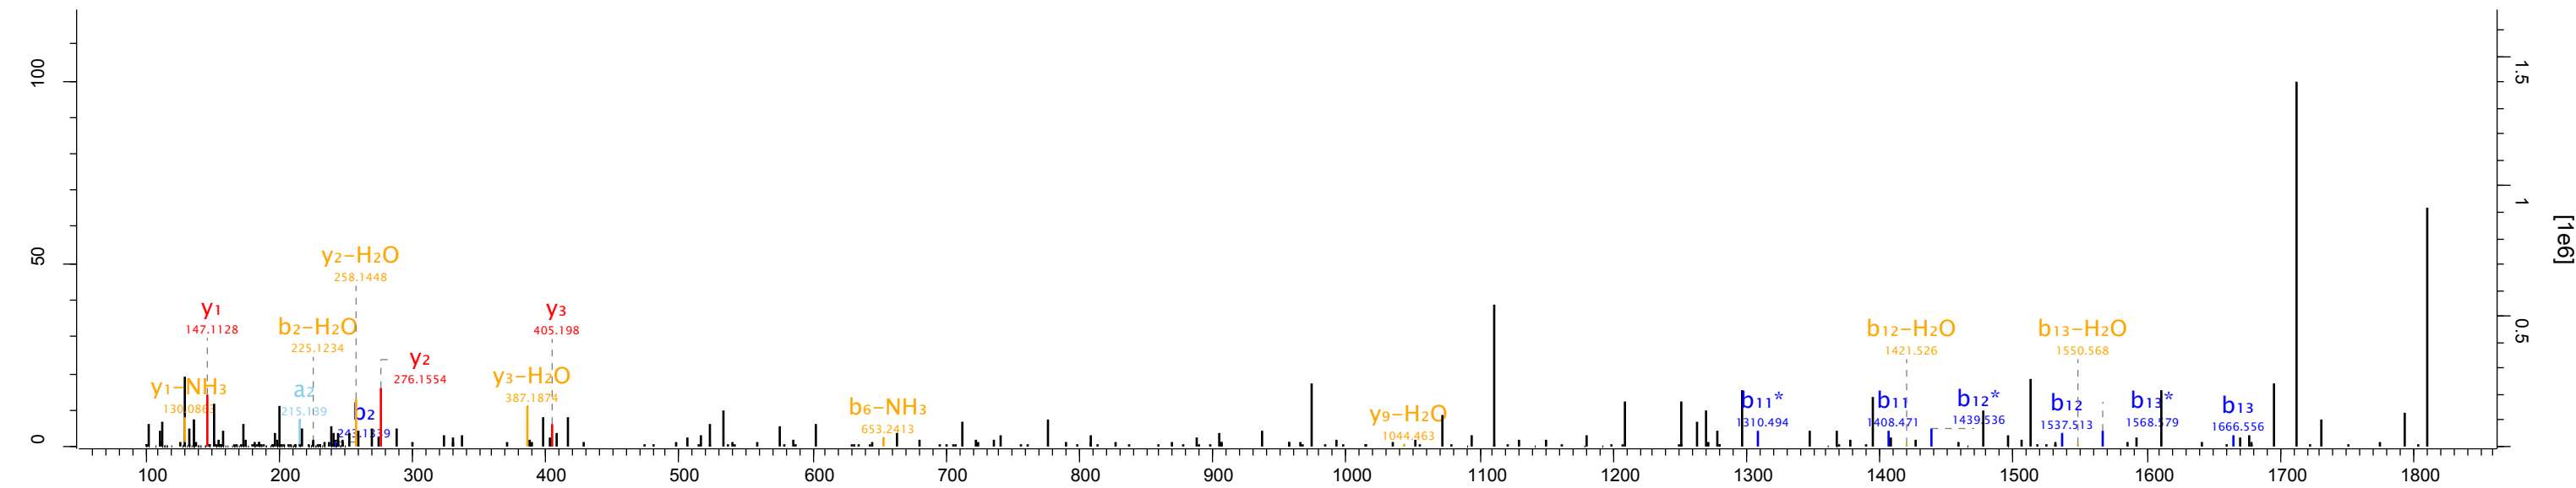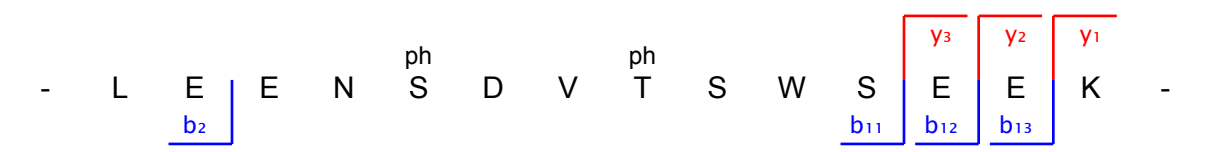

Raw file 20171215\_MaS\_33SR\_LMH\_phospho\_03 Scan 8386 Method FTMS; HCD Score 99.96 m/z 1136.94 Gene names EVA1B

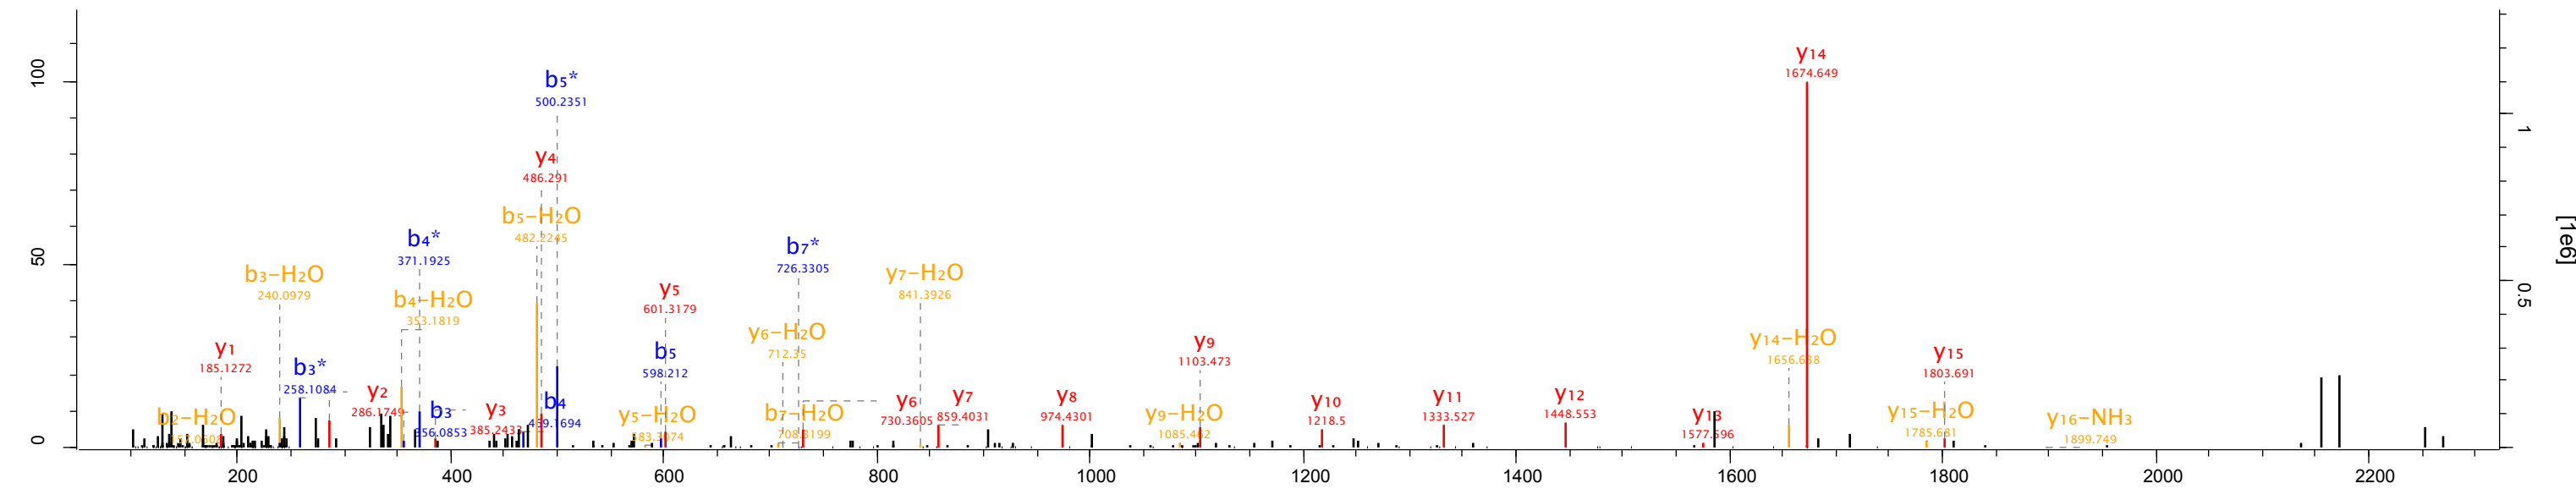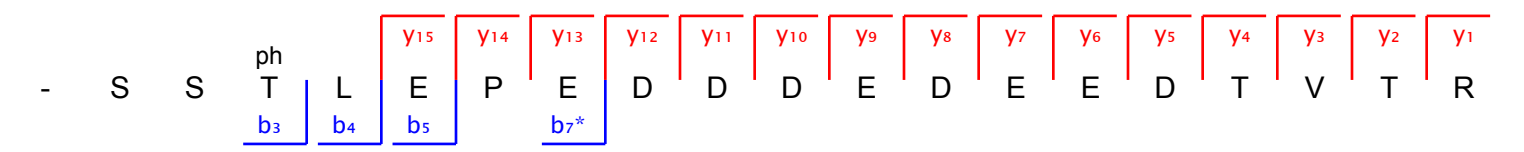

Raw file 20171215\_MaS\_33SR\_LMH\_phospho\_03 Scan 9966 Method FTMS; HCD Score 119.65 m/z 639.83 Gene names TOPBP1

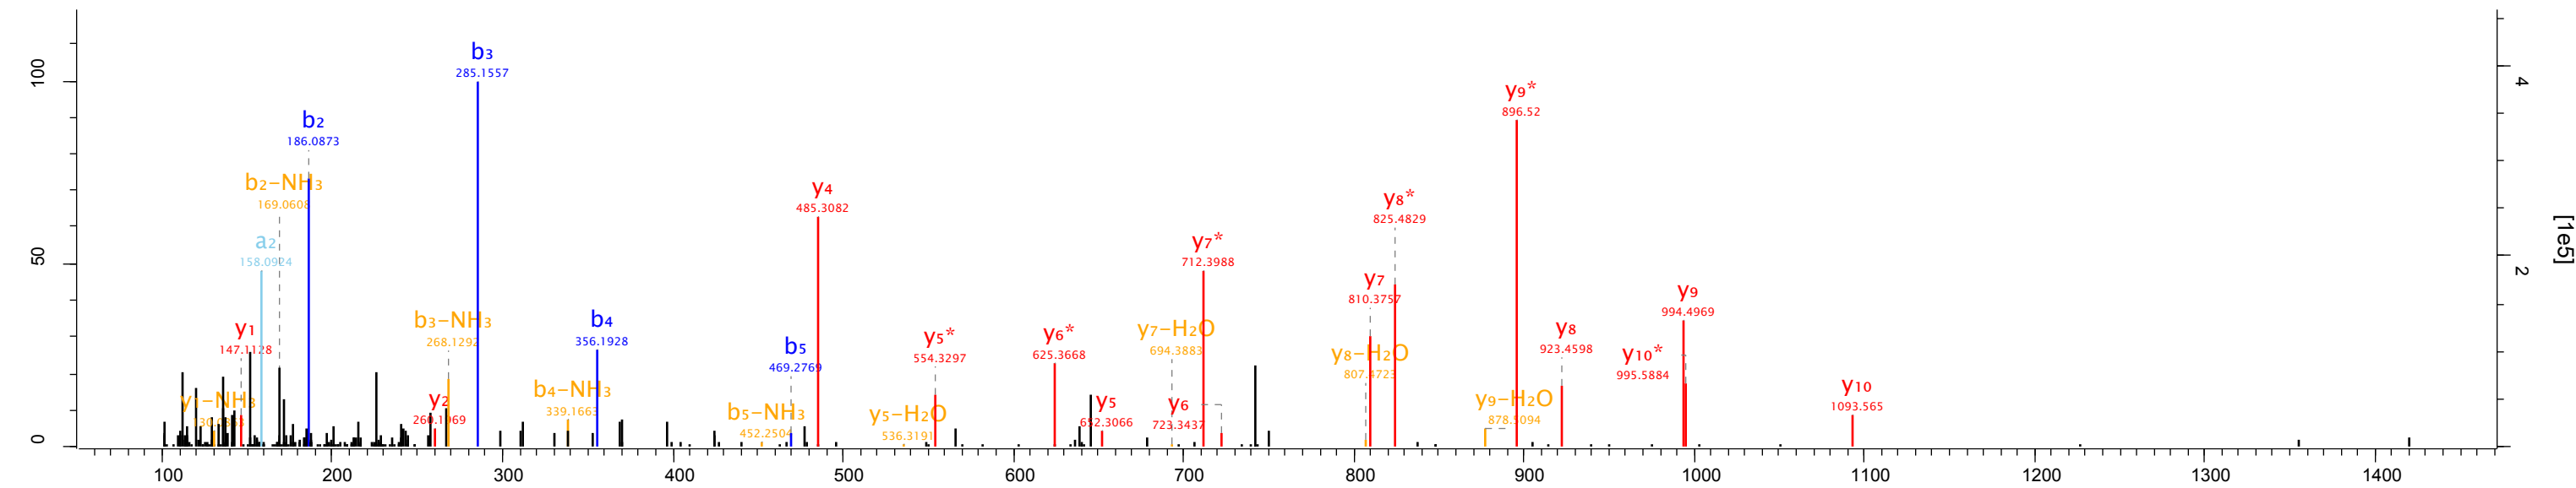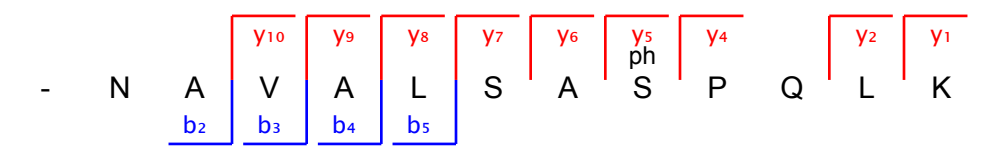

Raw file 20171215\_MaS\_33SR\_LMH\_phospho\_05 Scan 3156 Method FTMS; HCD Score 80.31 m/z 572.75 Gene names AKAP17A

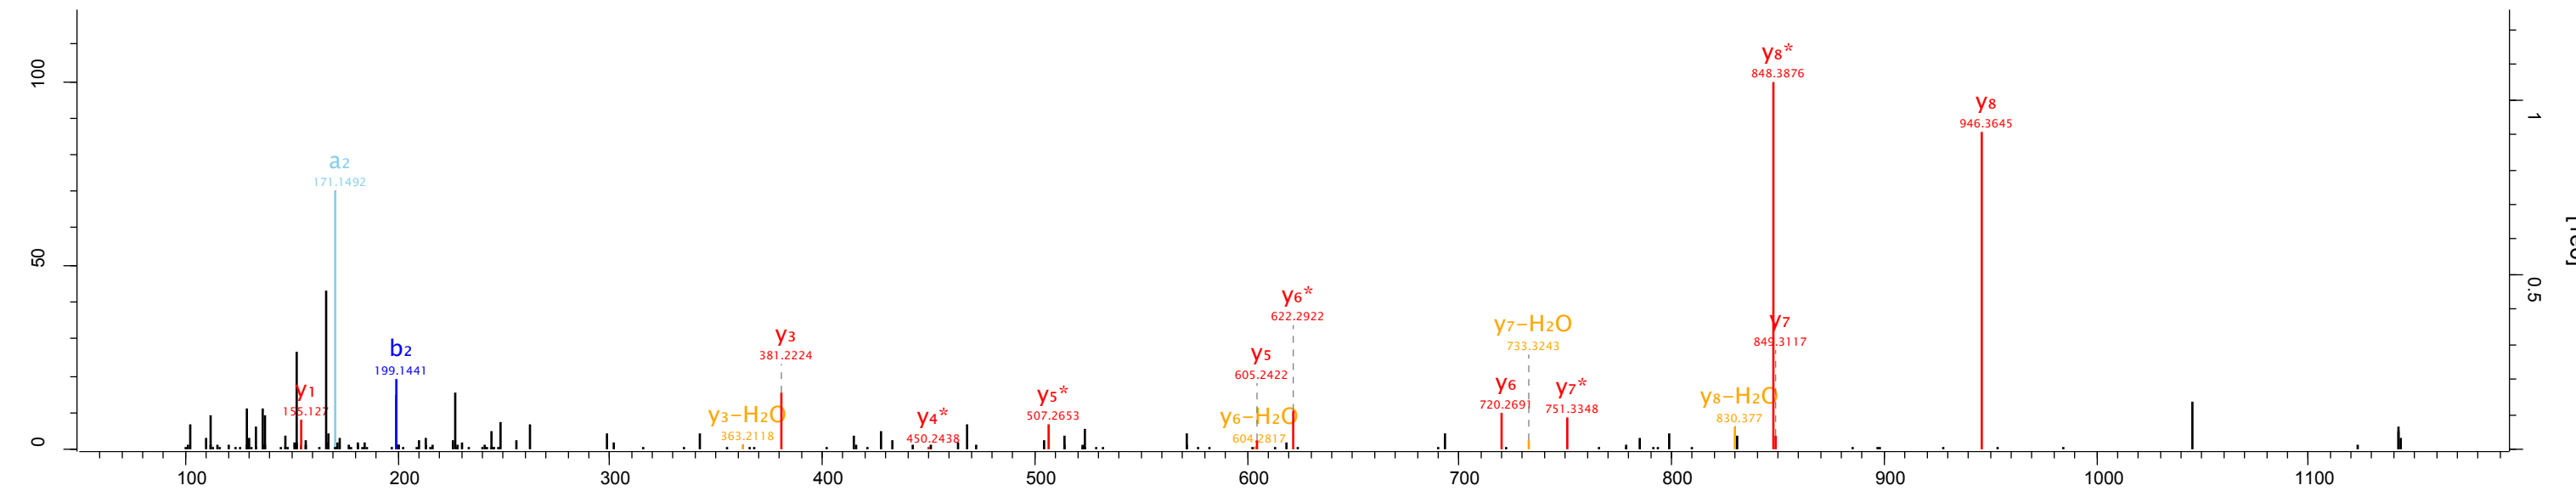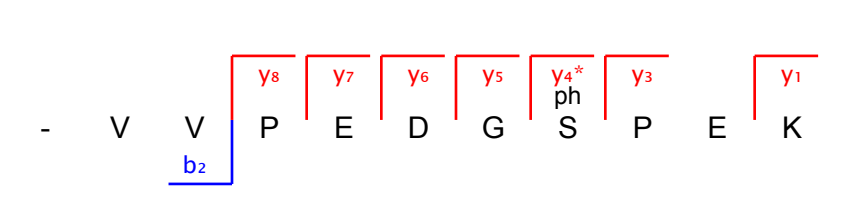

Raw file 20171215\_MaS\_33SR\_LMH\_phospho\_05 Scan 4196 Method FTMS; HCD Score 150.26 m/z 708.29 Gene names SLC39A6

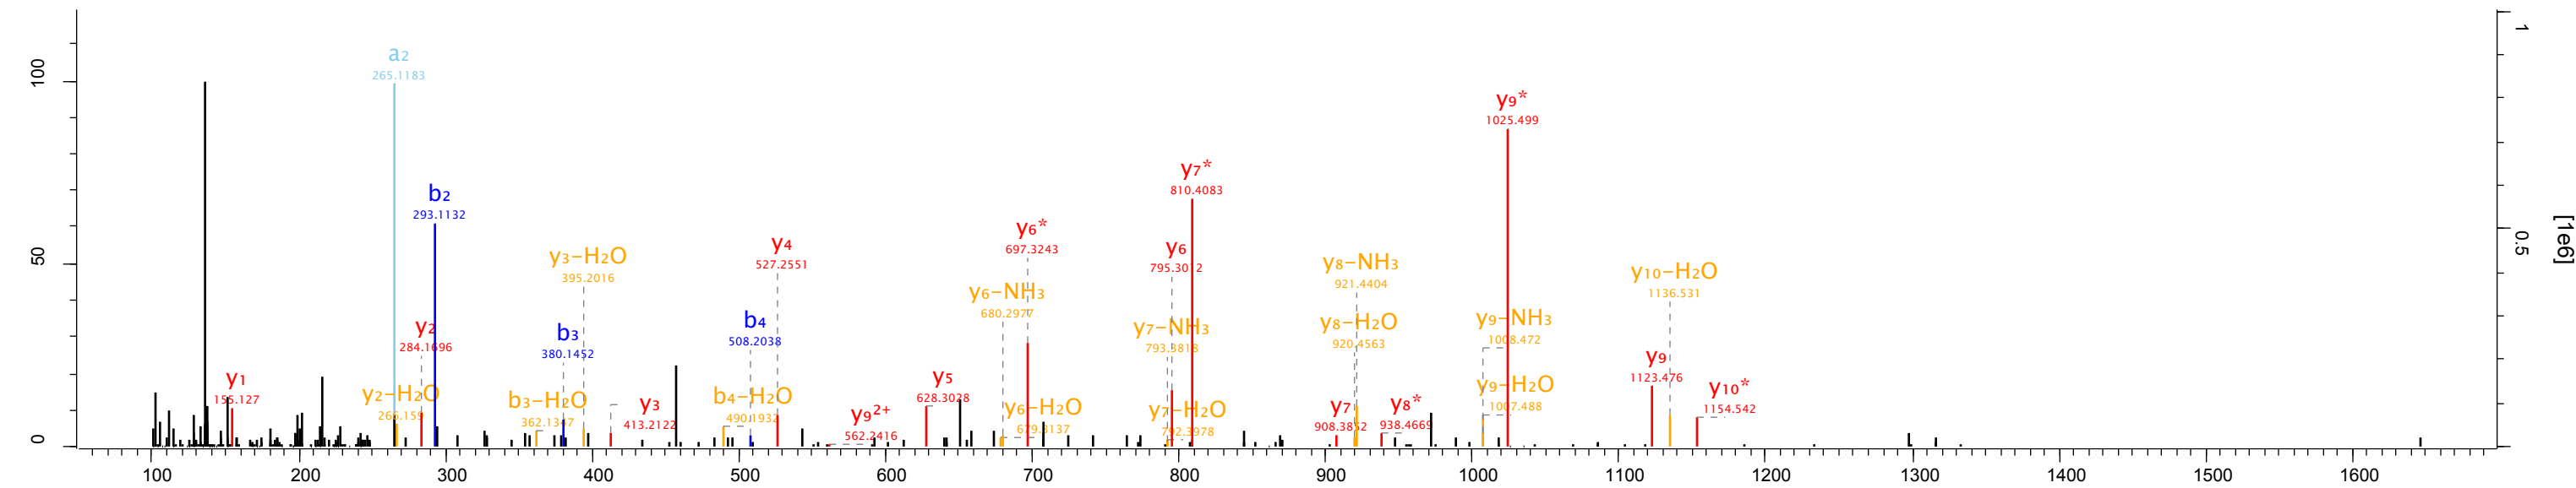

- Y E S Q L S T N E E K -

Fragmentation mapping (red boxes):

- y10\* (E)
- y9 (S)
- y8\* (Q)
- y7 (L)
- y6 ph (S)
- y5 (T)
- y4 (N)
- y3 (E)
- y2 (E)
- y1 (K)

Fragmentation mapping (blue boxes):

- b2 (E)
- b3 (S)
- b4 (Q)

Raw file 20171215\_MaS\_33SR\_LMH\_phospho\_06 Scan 10306 Method FTMS; HCD Score 48.83 m/z 972.46 Gene names SOX6;ZNF385A

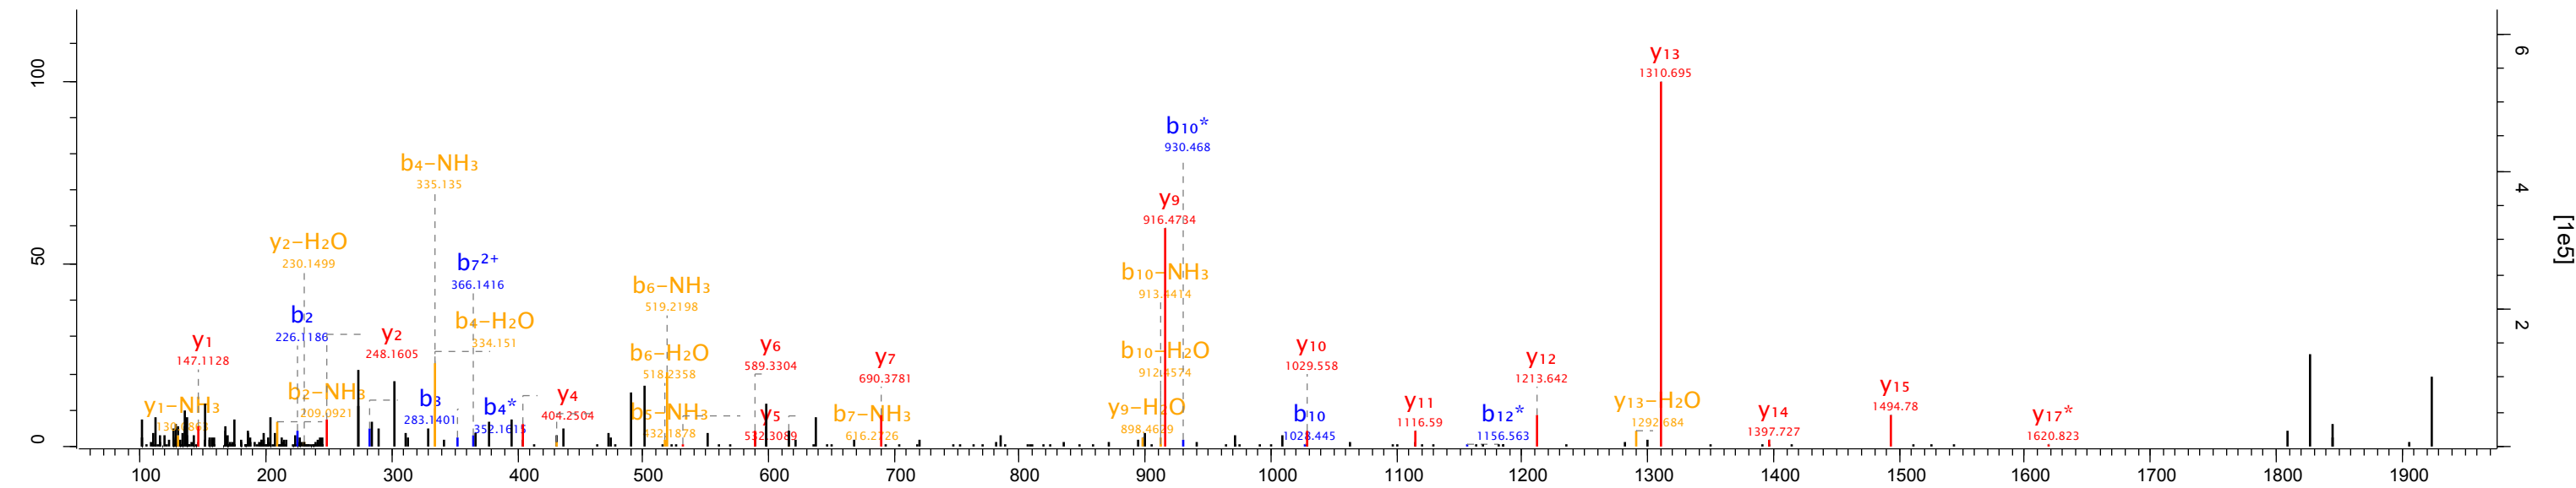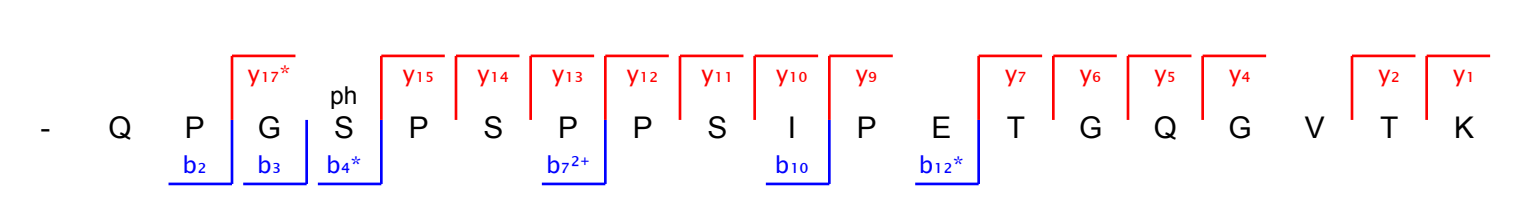

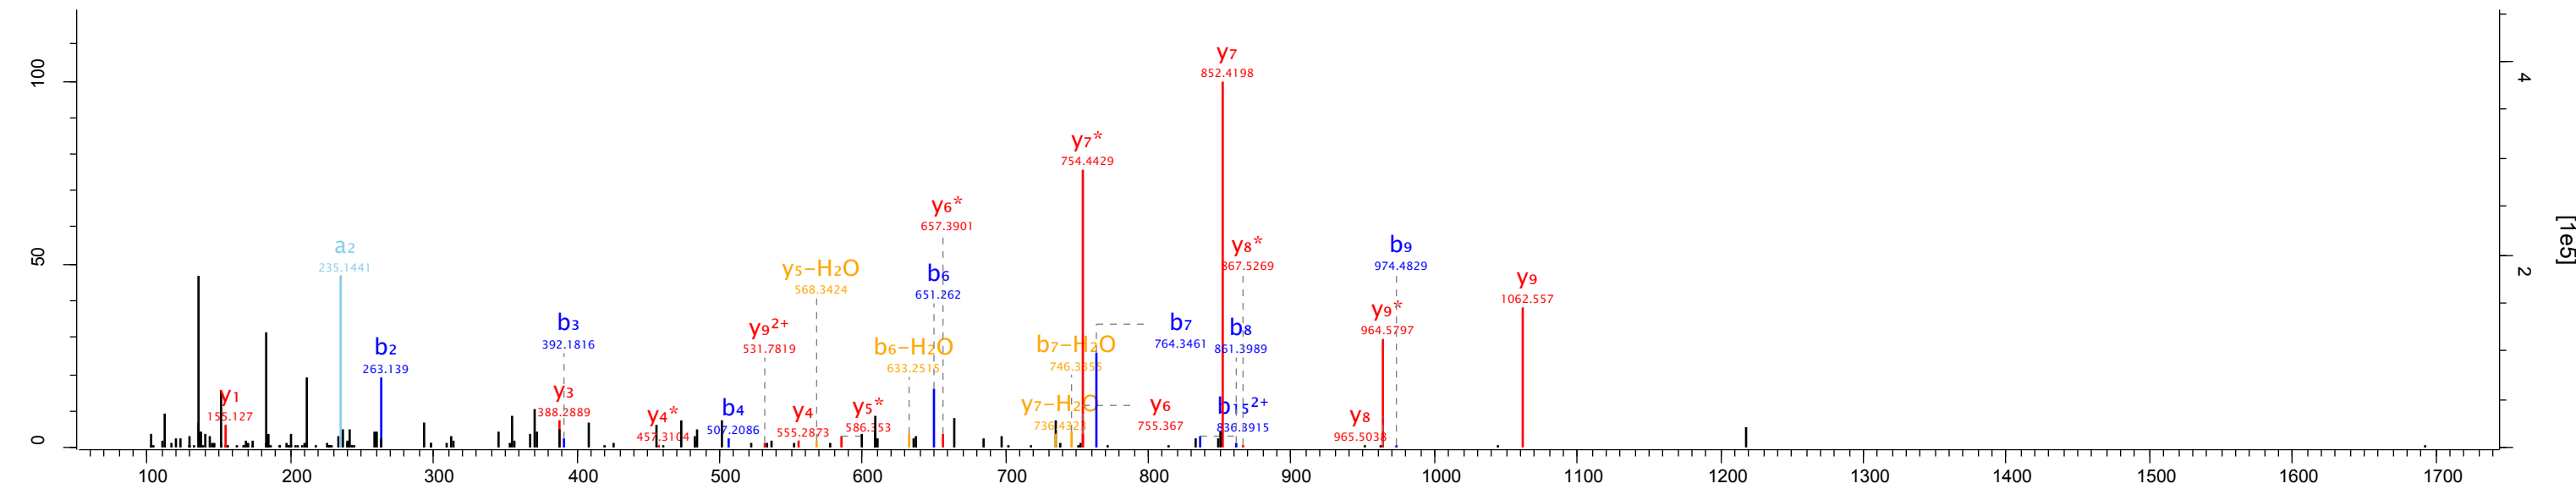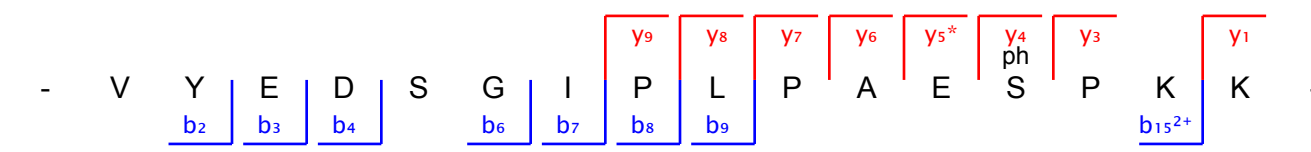

Raw file 20171215\_MaS\_33SR\_LMH\_phospho\_06 Scan 14386 Method FTMS; HCD Score 195.92 m/z 759.85 Gene names C6orf106

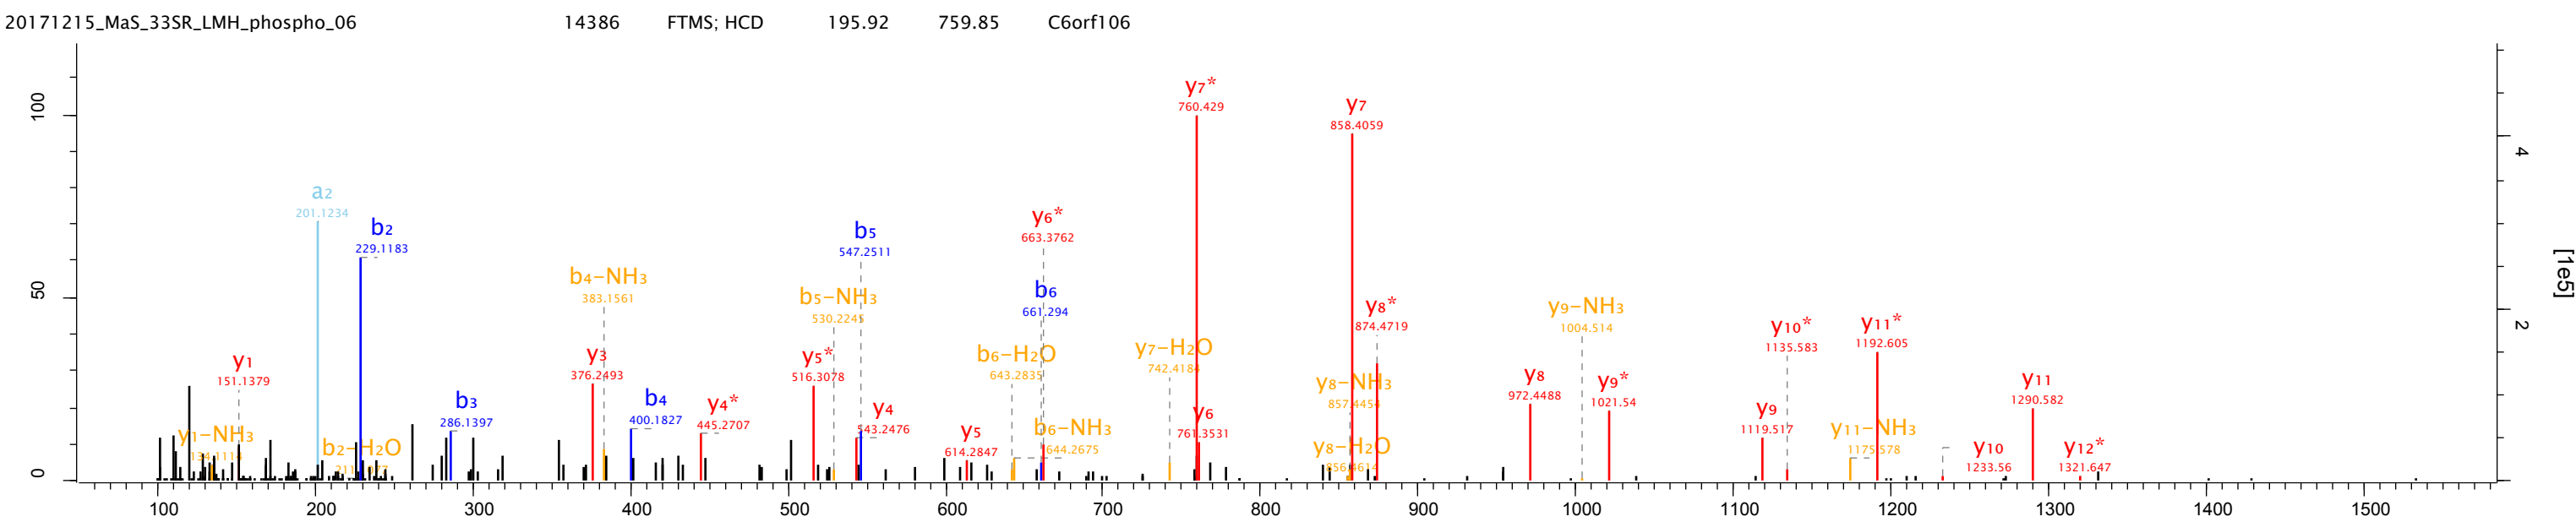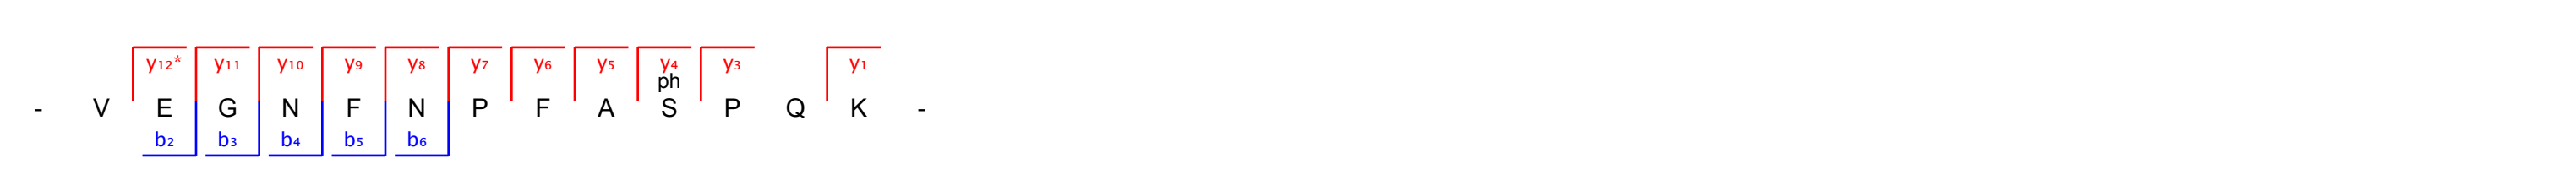



Raw file 20171215\_MaS\_33SR\_LMH\_phospho\_06 Scan 2576 Method FTMS; HCD Score 98.41 m/z 531.25 Gene names CXorf38

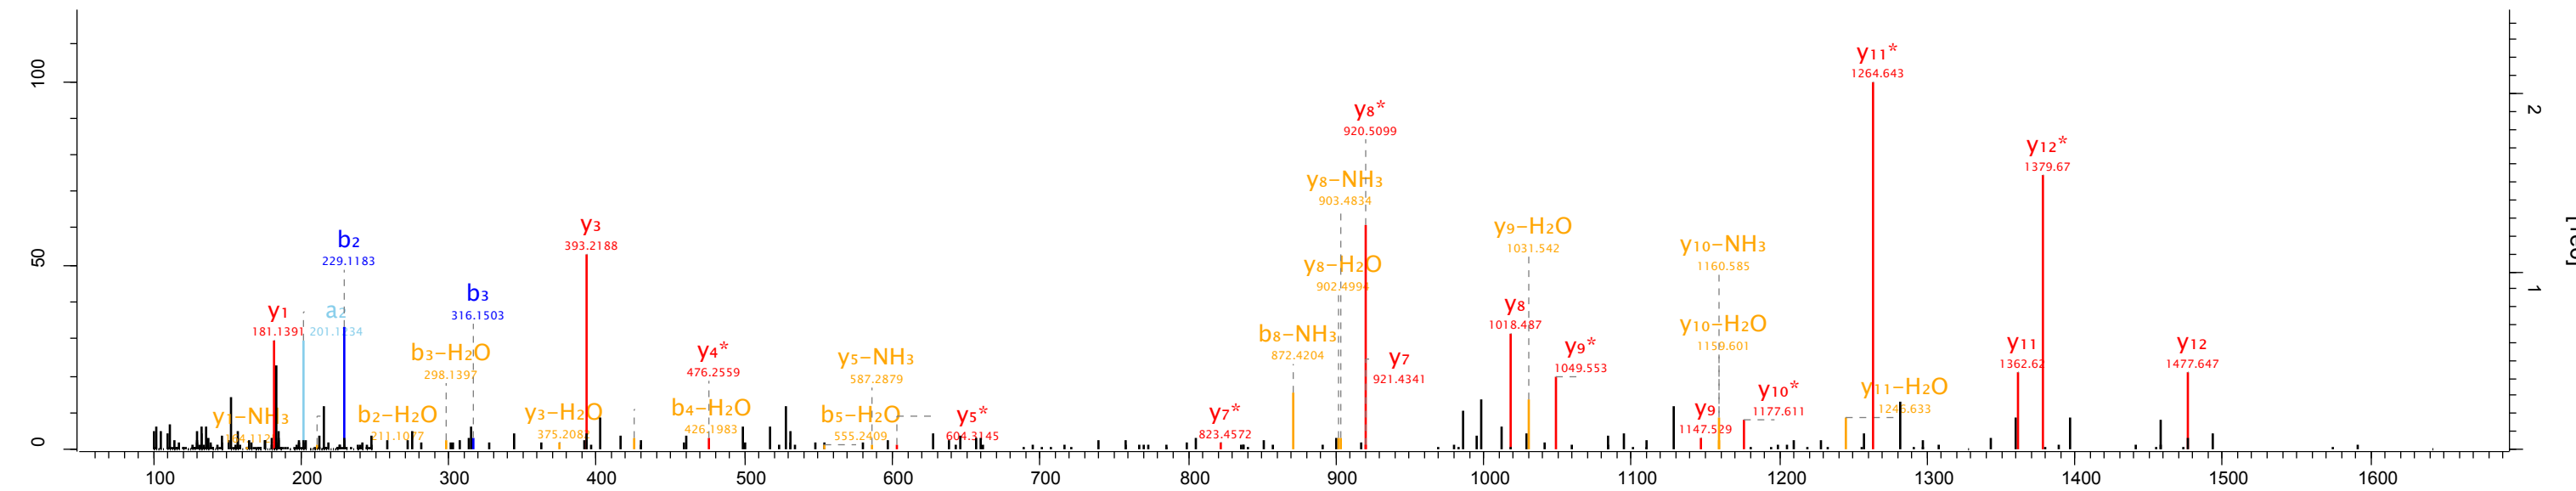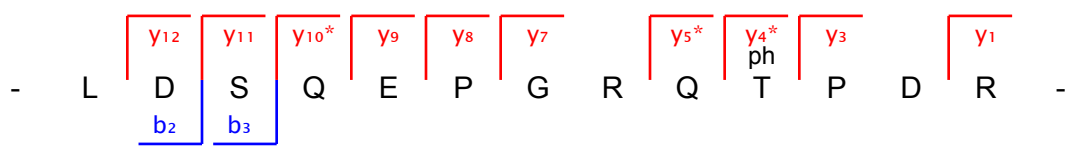

Raw file 20171215\_MaS\_33SR\_LMH\_phospho\_06 Scan 4566 Method FTMS; HCD Score 64.84 m/z 432.75

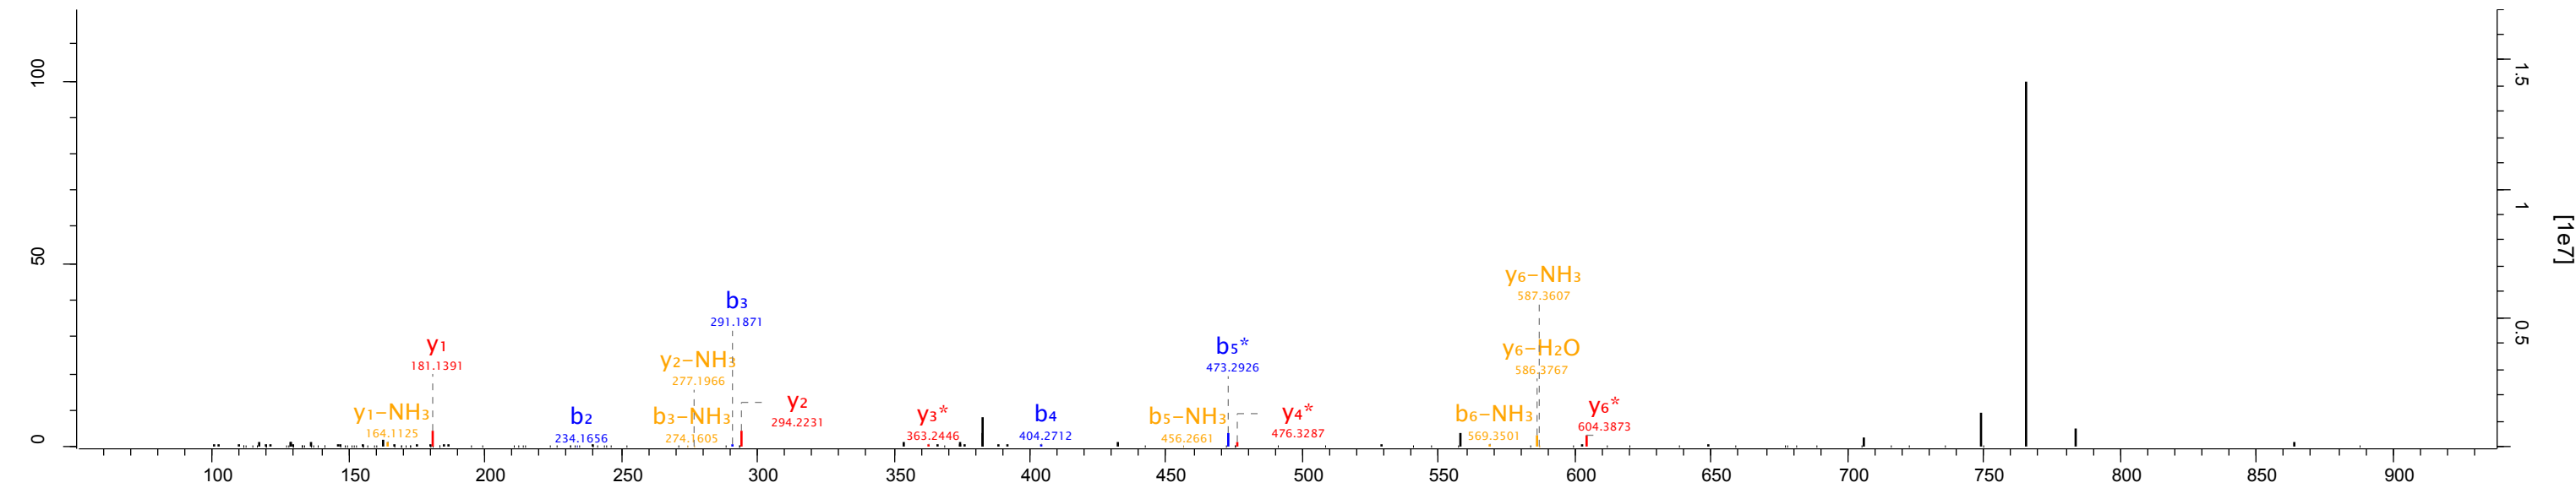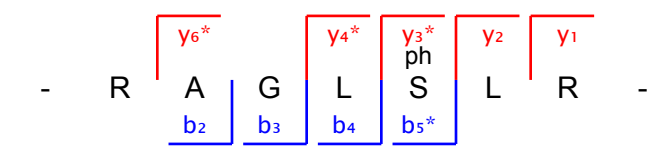

Raw file 20171215\_MaS\_33SR\_LMH\_phospho\_06 Scan 4936 Method FTMS; HCD Score 74.74 m/z 610.8 Gene names TCF7L2

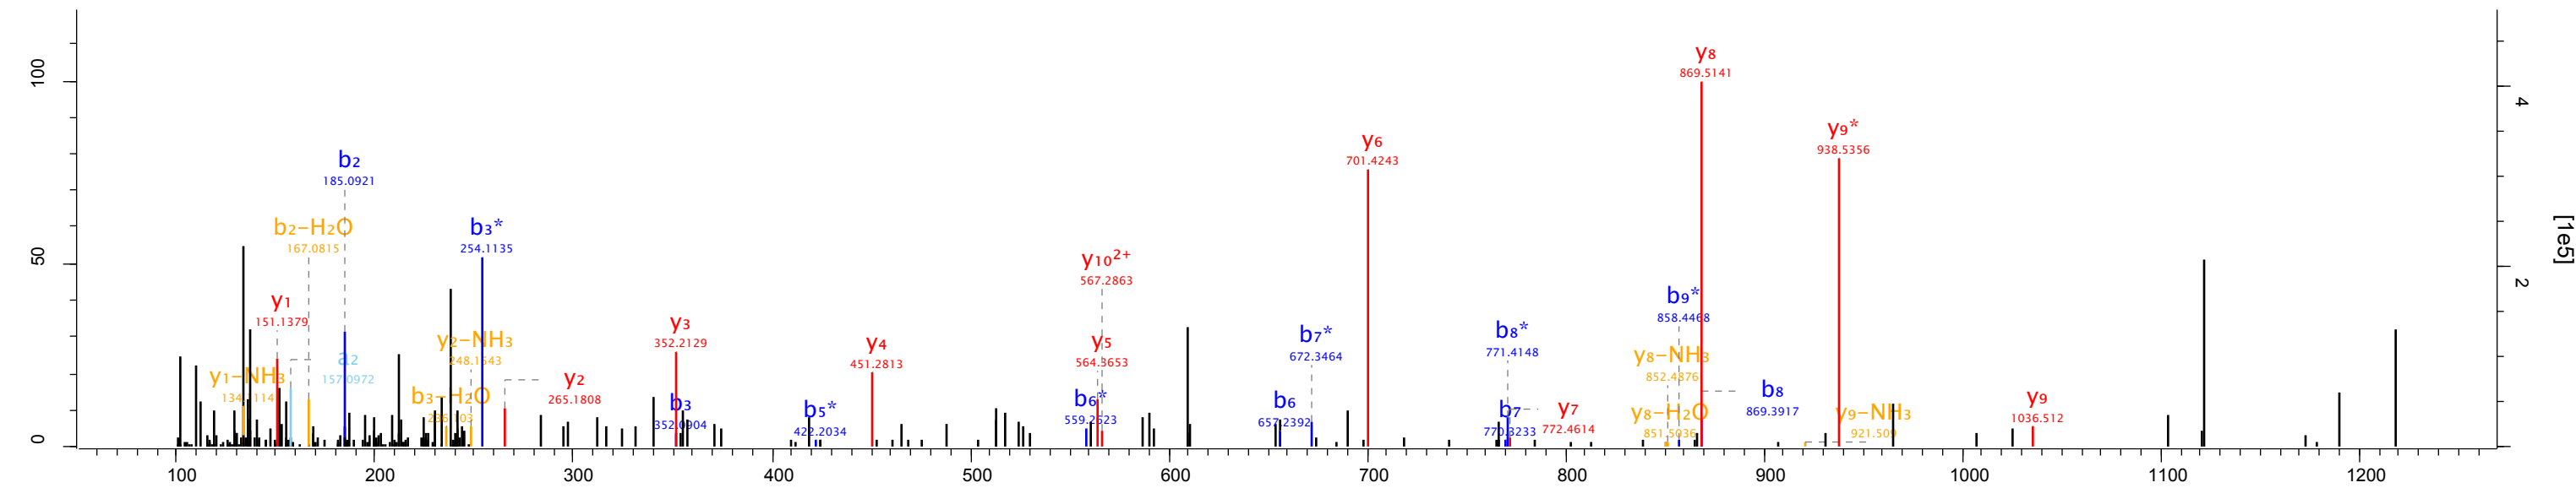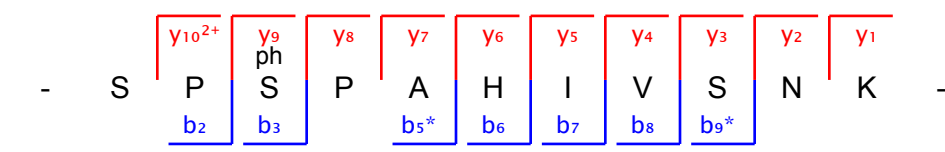

Raw file 20171215\_MaS\_33SR\_LMH\_phospho\_06 Scan 5776 Method FTMS; HCD Score 84.4 m/z 690.82 Gene names MIER2

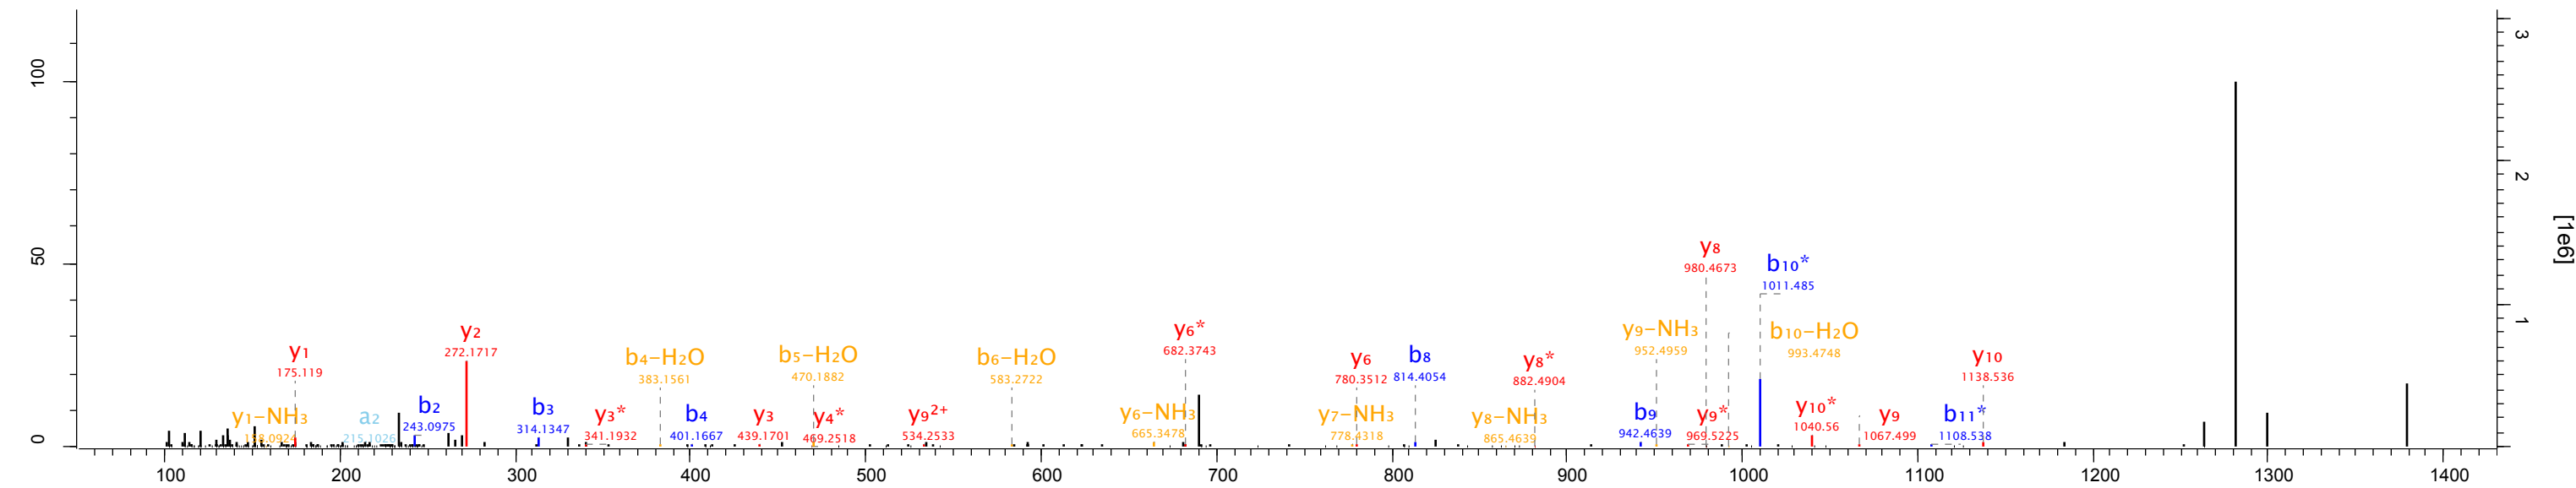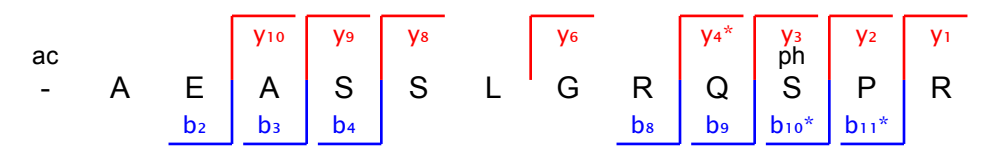

Raw file 20171215\_MaS\_33SR\_LMH\_phospho\_06 Scan 6966 Method FTMS; HCD Score 92.15 m/z 740.82 Gene names HECW2

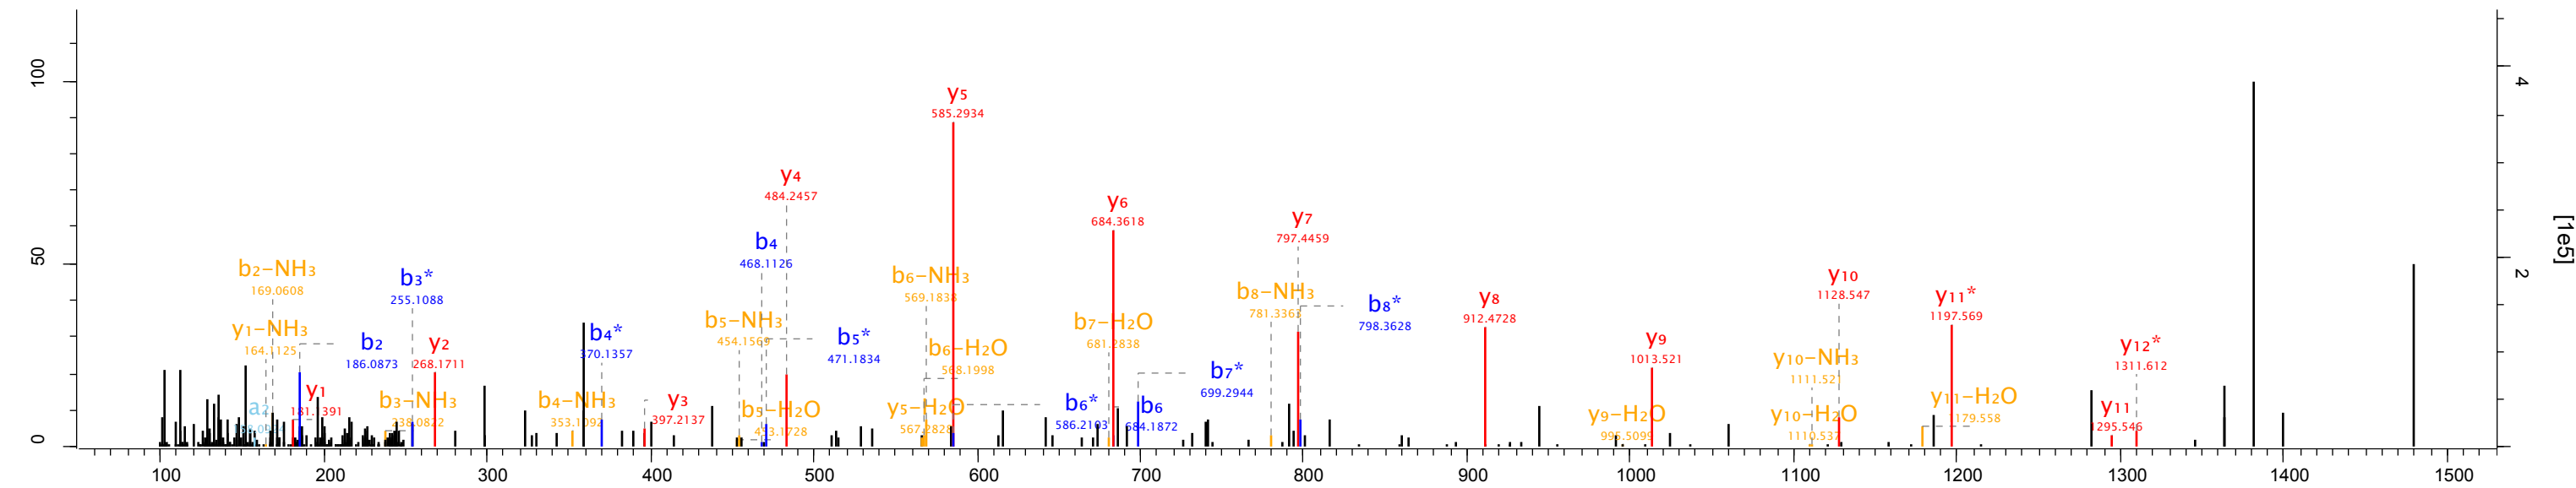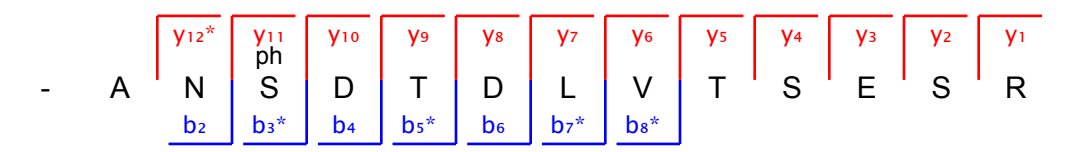

Raw file 20171215\_MaS\_33SR\_LMH\_phospho\_06 Scan 8056 Method FTMS; HCD Score 145.86 m/z 650.79 Gene names PANK2

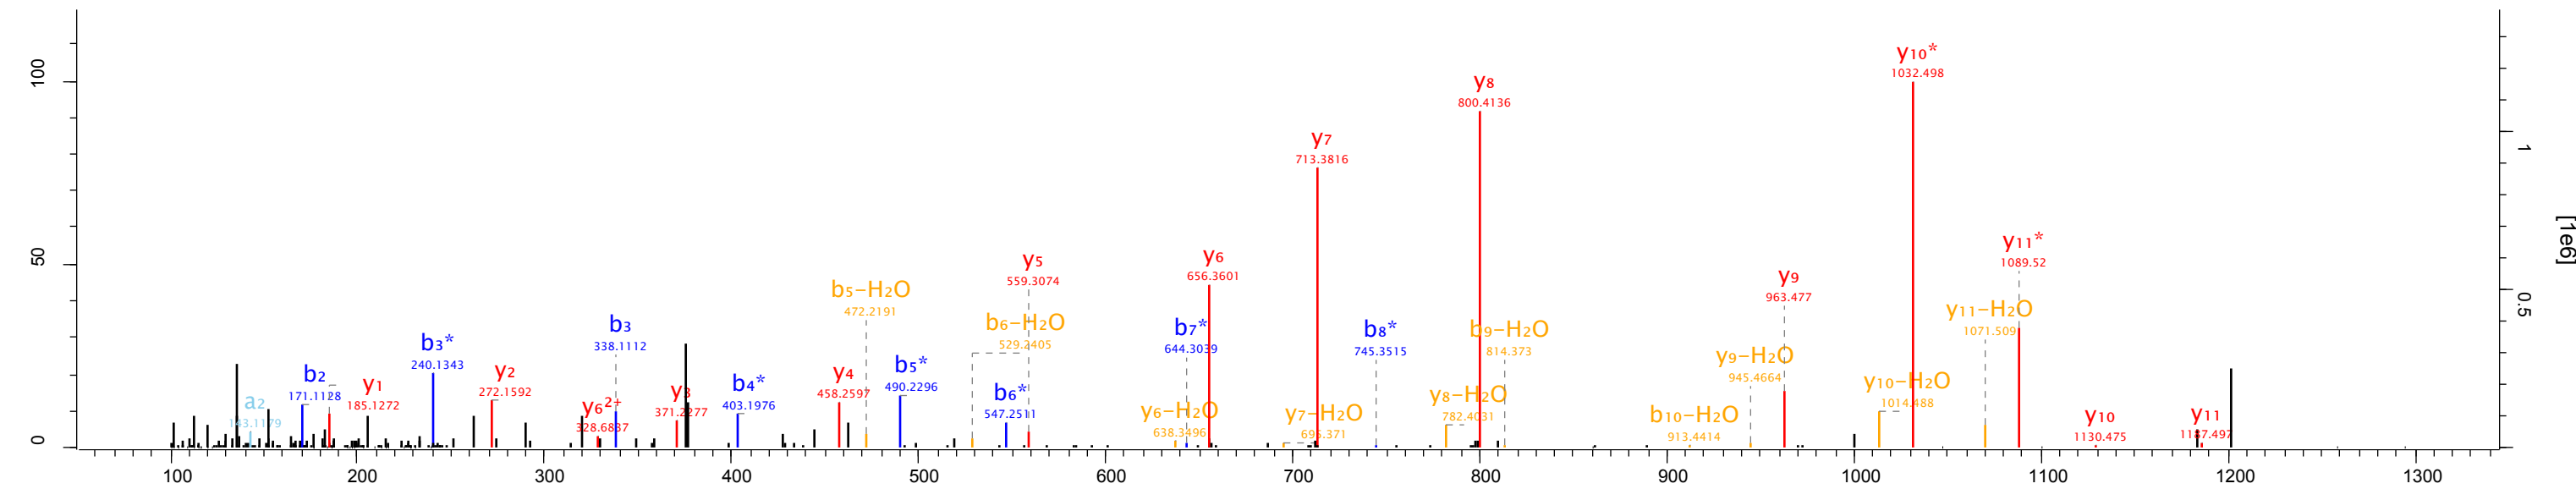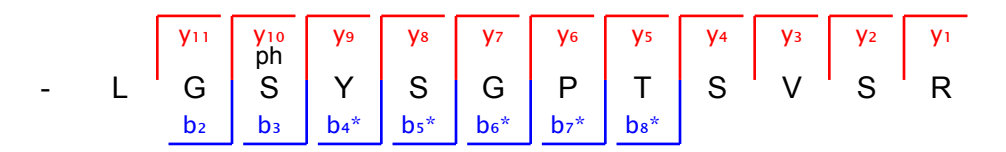

Raw file 20171215\_MaS\_33SR\_LMH\_phospho\_06 Scan 8706 Method FTMS; HCD Score 81.88 m/z 541.25 Gene names ZSCAN5A;ZSCAN5B

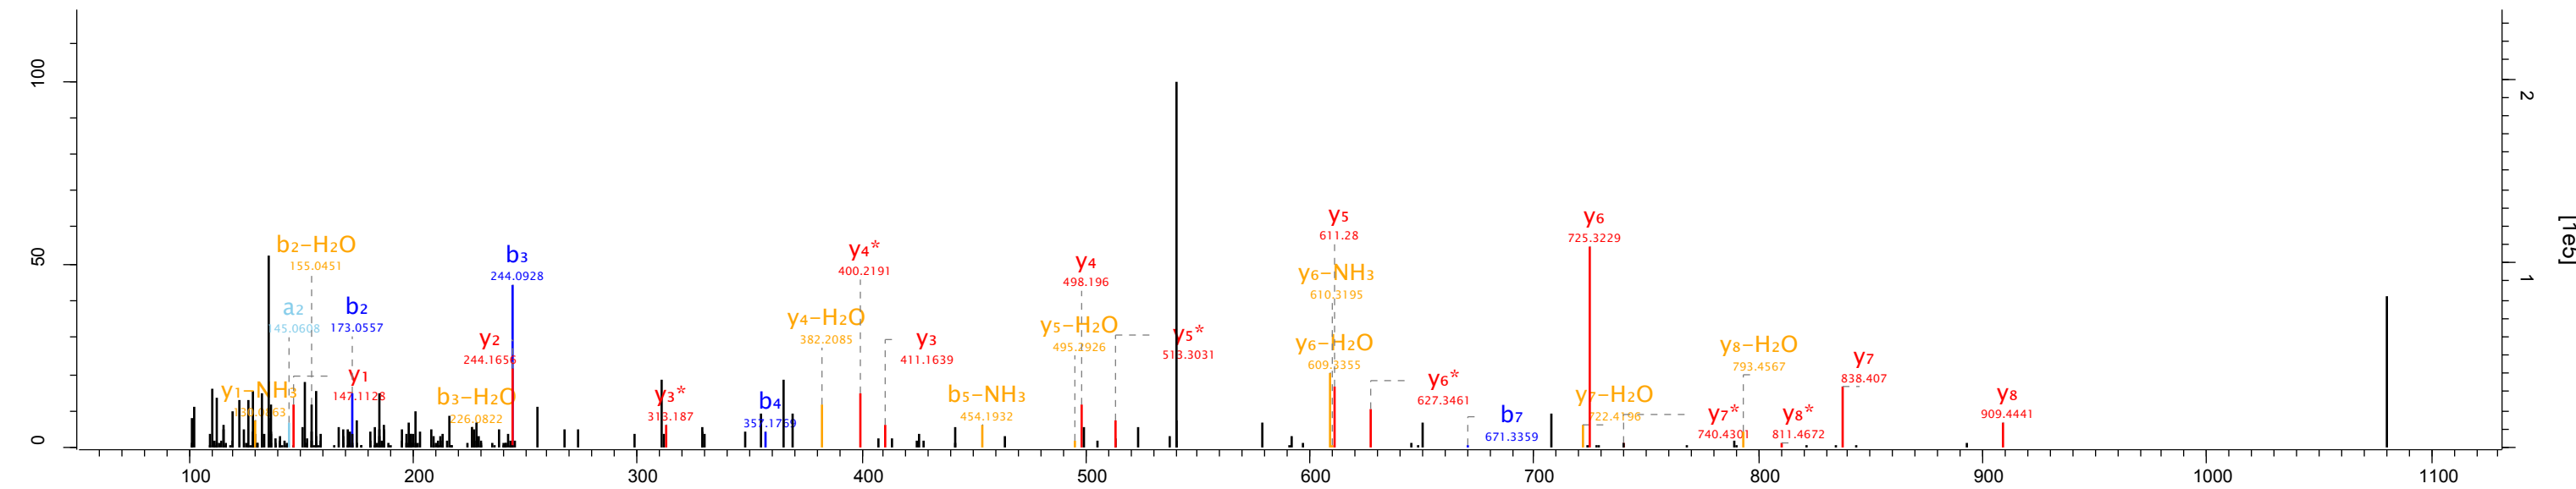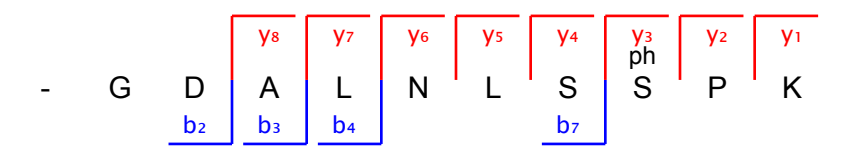

Raw file 20171215\_MaS\_33SR\_LMH\_phospho\_07 Scan 4066 Method FTMS; HCD Score 81.02 m/z 469.72 Gene names ZFP36

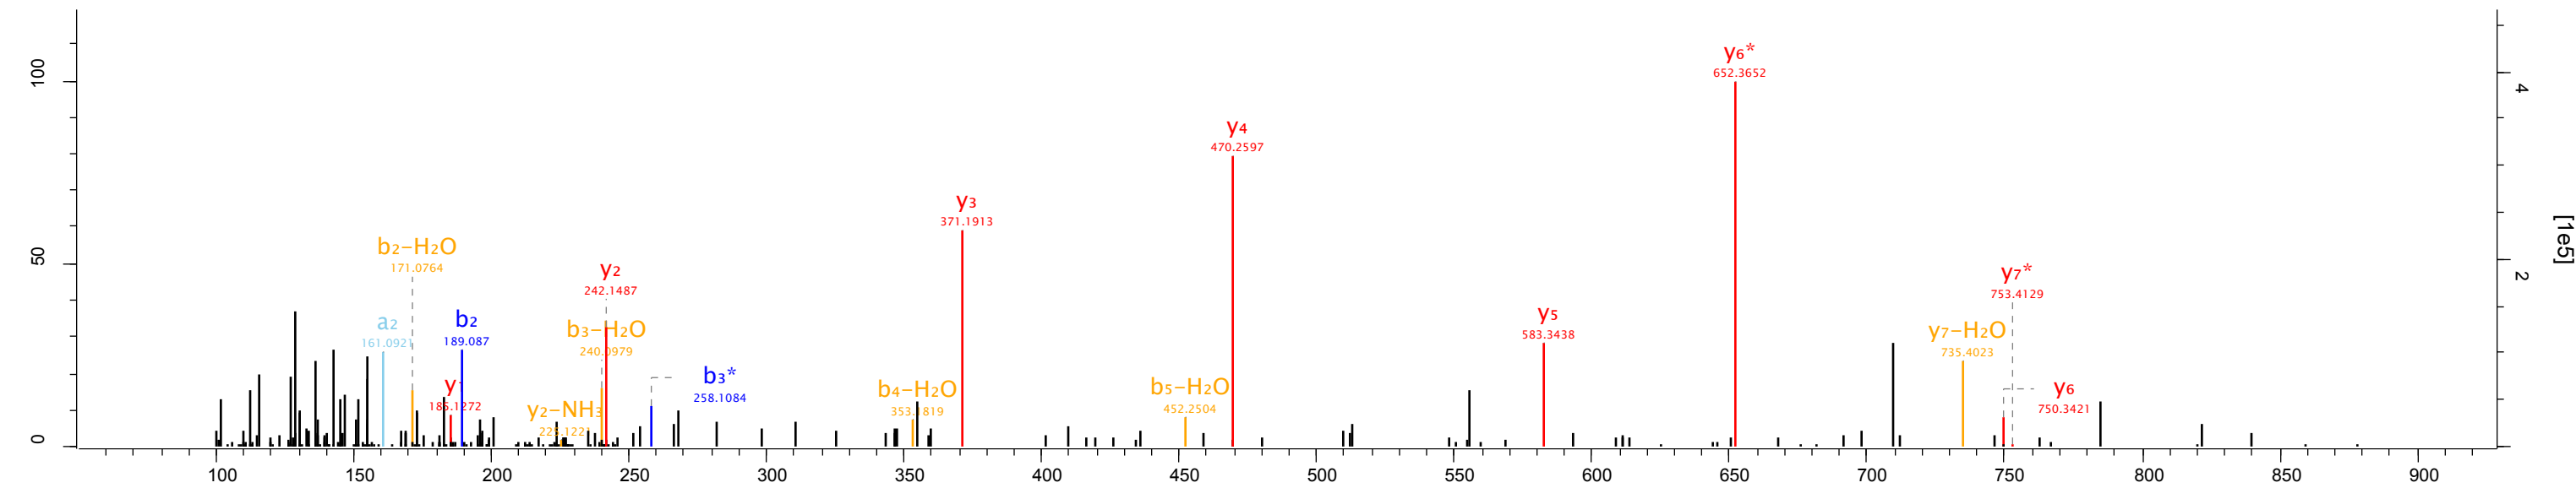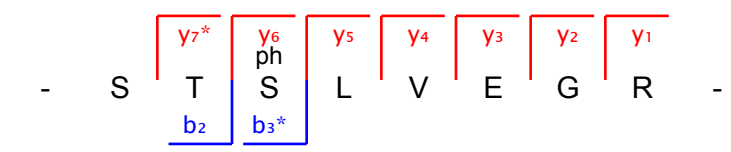



Raw file 20171215\_MaS\_33SR\_LMH\_phospho\_07 Scan 5666 Method FTMS; HCD Score 54.1 m/z 783.36 Gene names CRYBB1

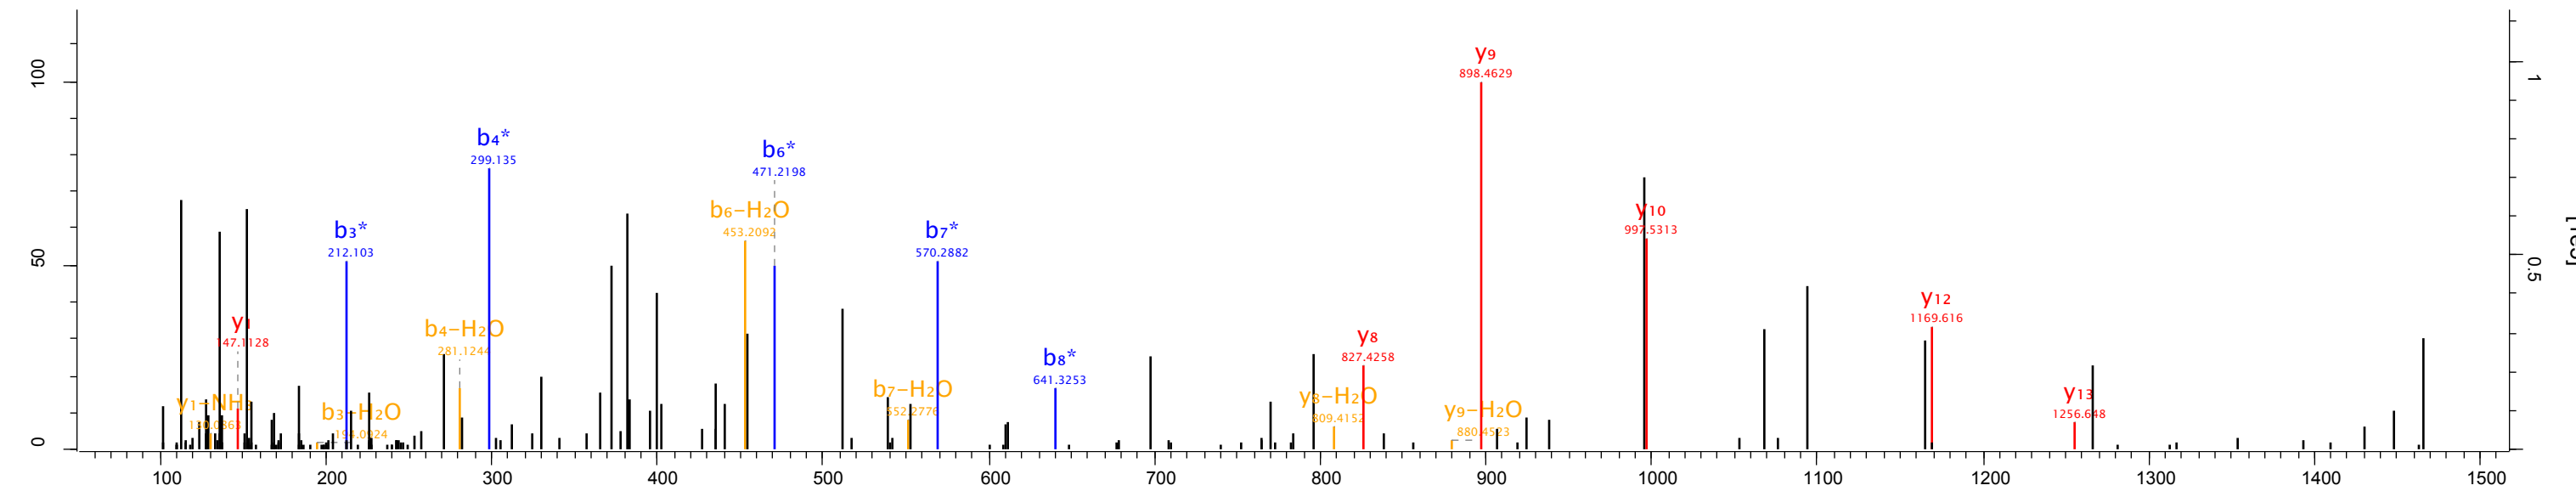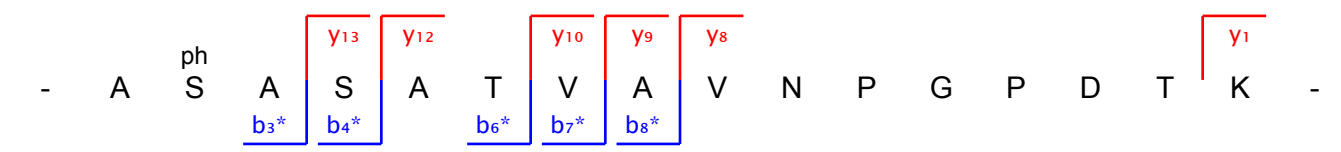

Raw file 20171215\_MaS\_33SR\_LMH\_phospho\_08 Scan 5216 Method FTMS; HCD Score 111.66 m/z 647.8 Gene names DAP

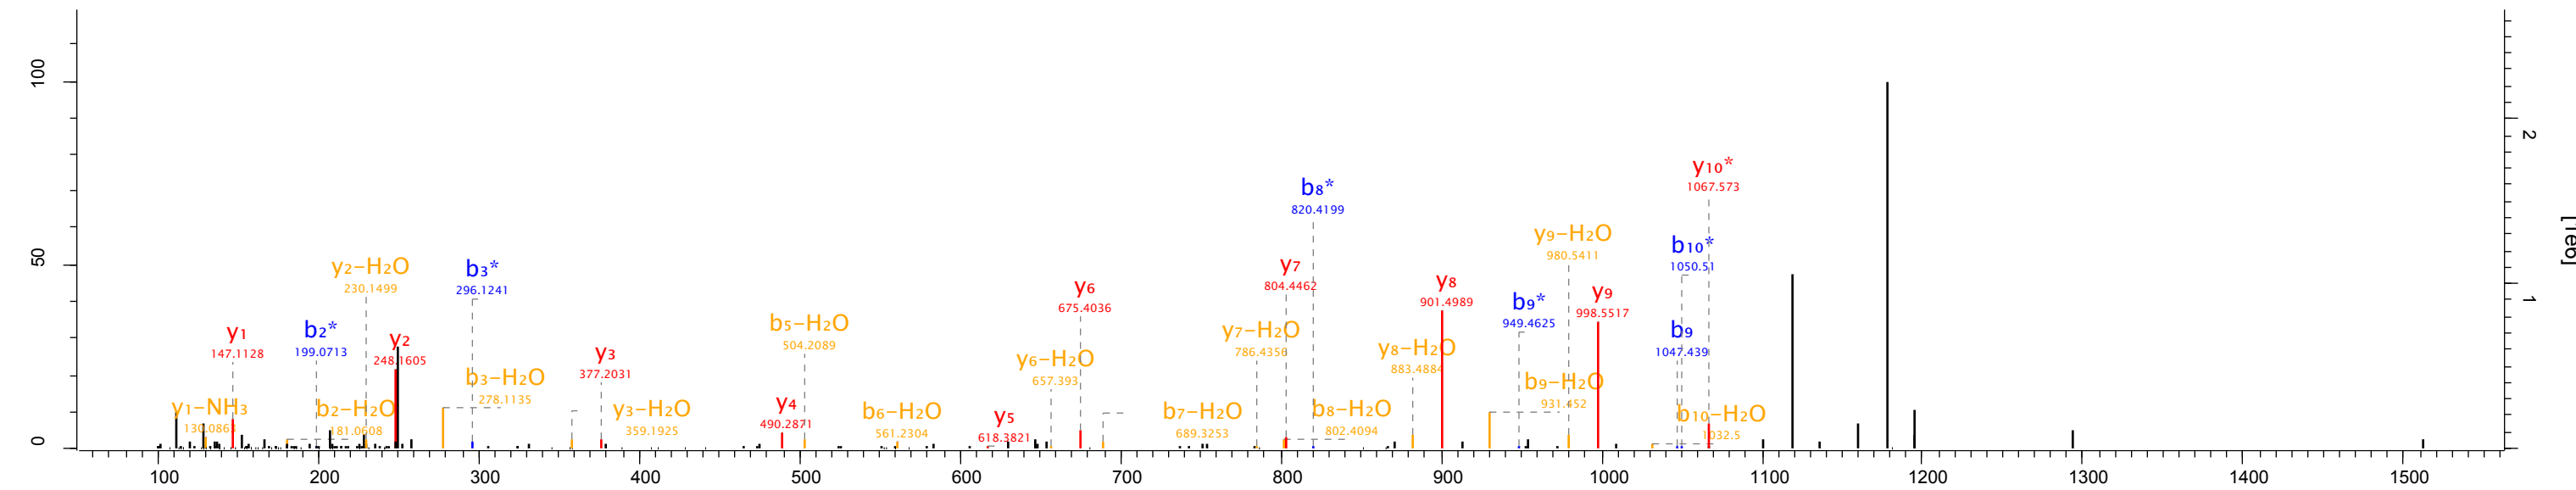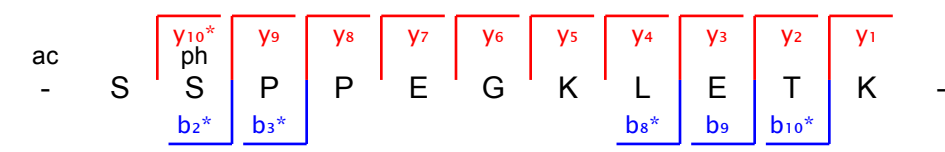

Raw file: 20171215\_MaS\_33SR\_LMH\_phospho\_09  
 Scan: 5306 Method: FTMS; HCD Score: 56.04 m/z: 450.72 Gene names: ZNF740

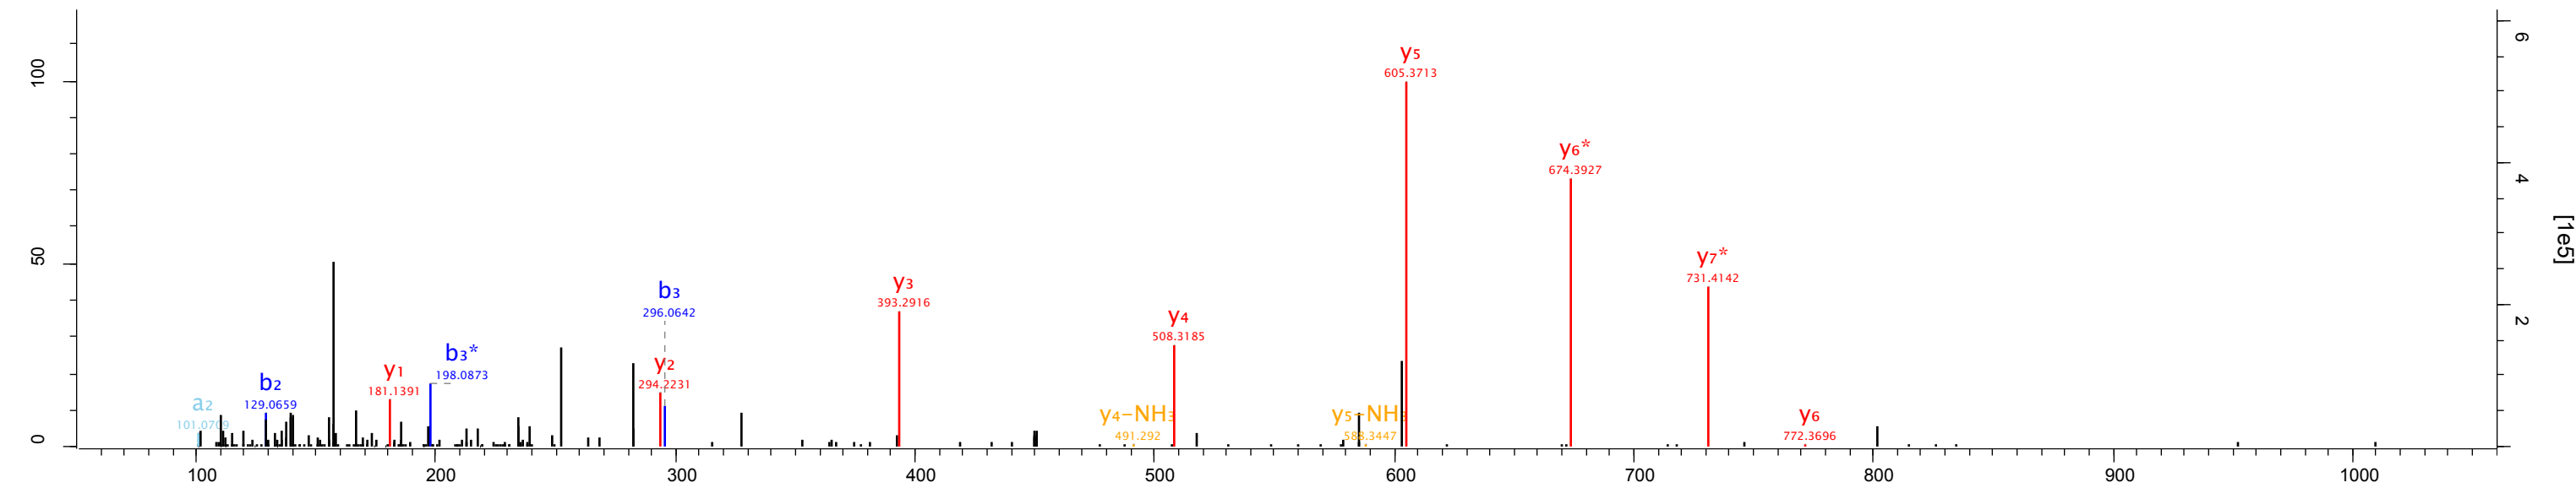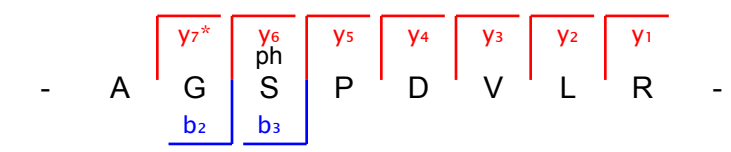

Raw file: 20171215\_MaS\_33SR\_LMH\_phospho2\_01  
 Scan: 3686 Method: FTMS; HCD Score: 362.68 m/z: 1057.42 Gene names: ARRB1

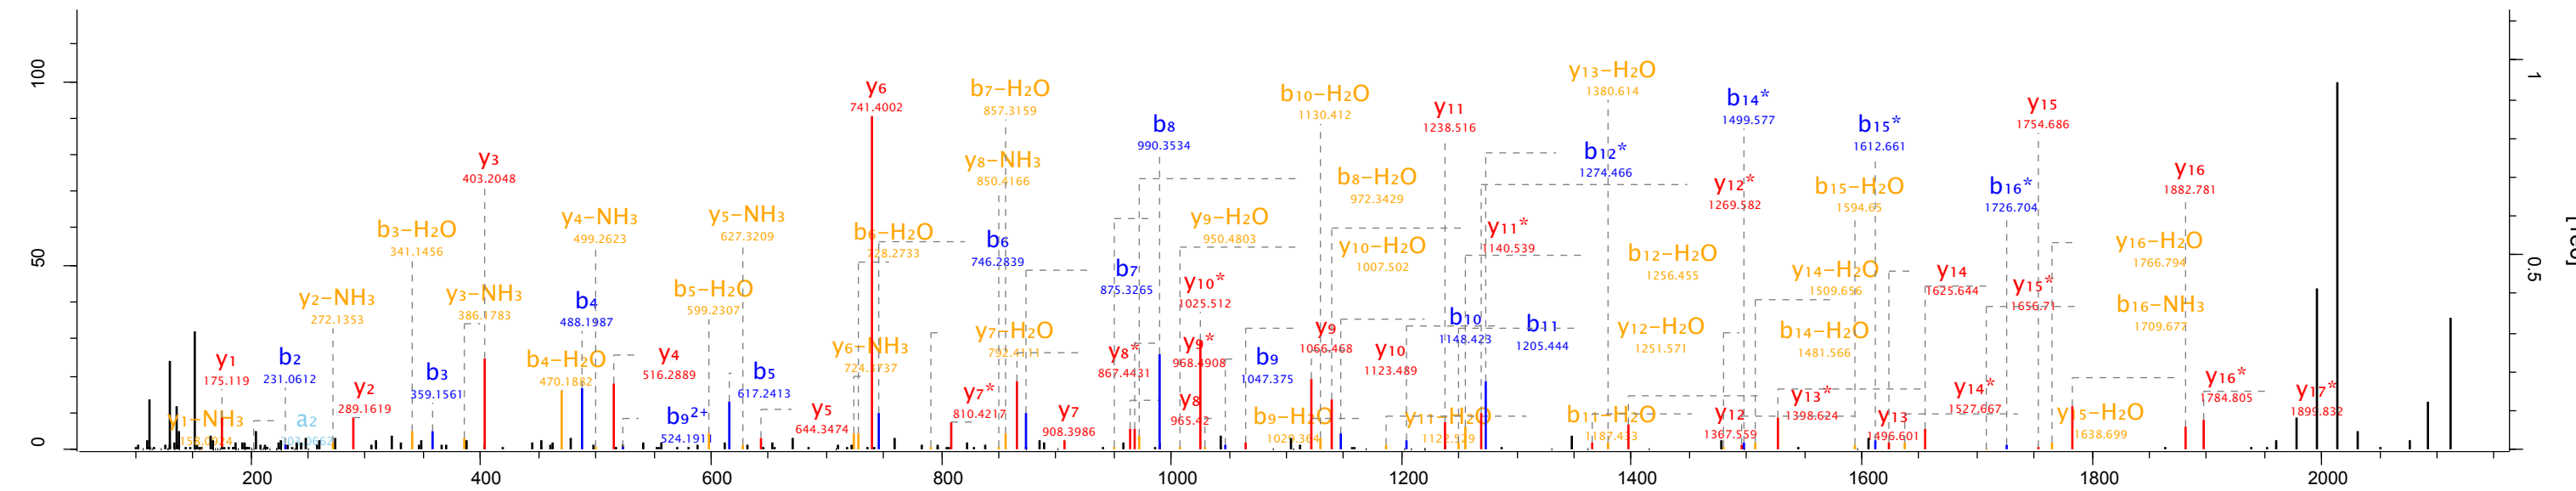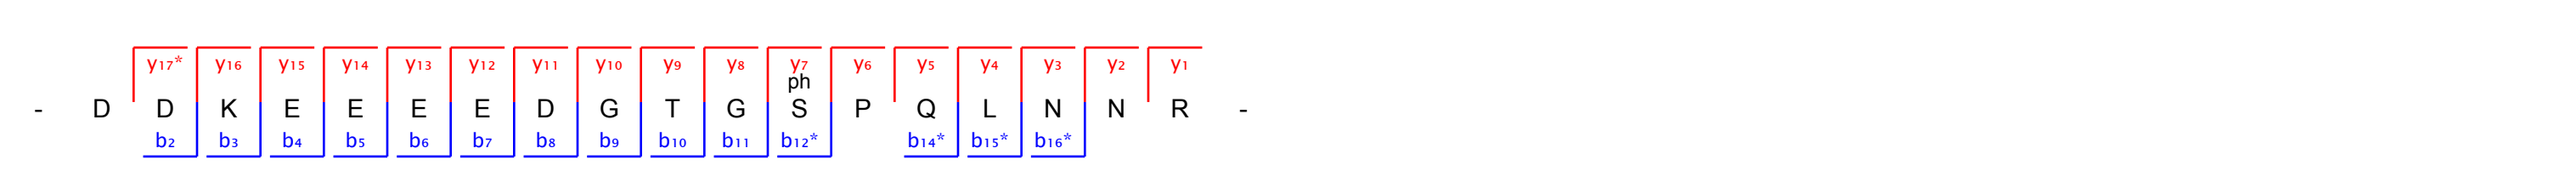

Raw file  
20171215\_MaS\_33SR\_LMH\_phospho2\_01

Scan 4186 Method FTMS; HCD Score 112.09 m/z 907.42 Gene names EP300

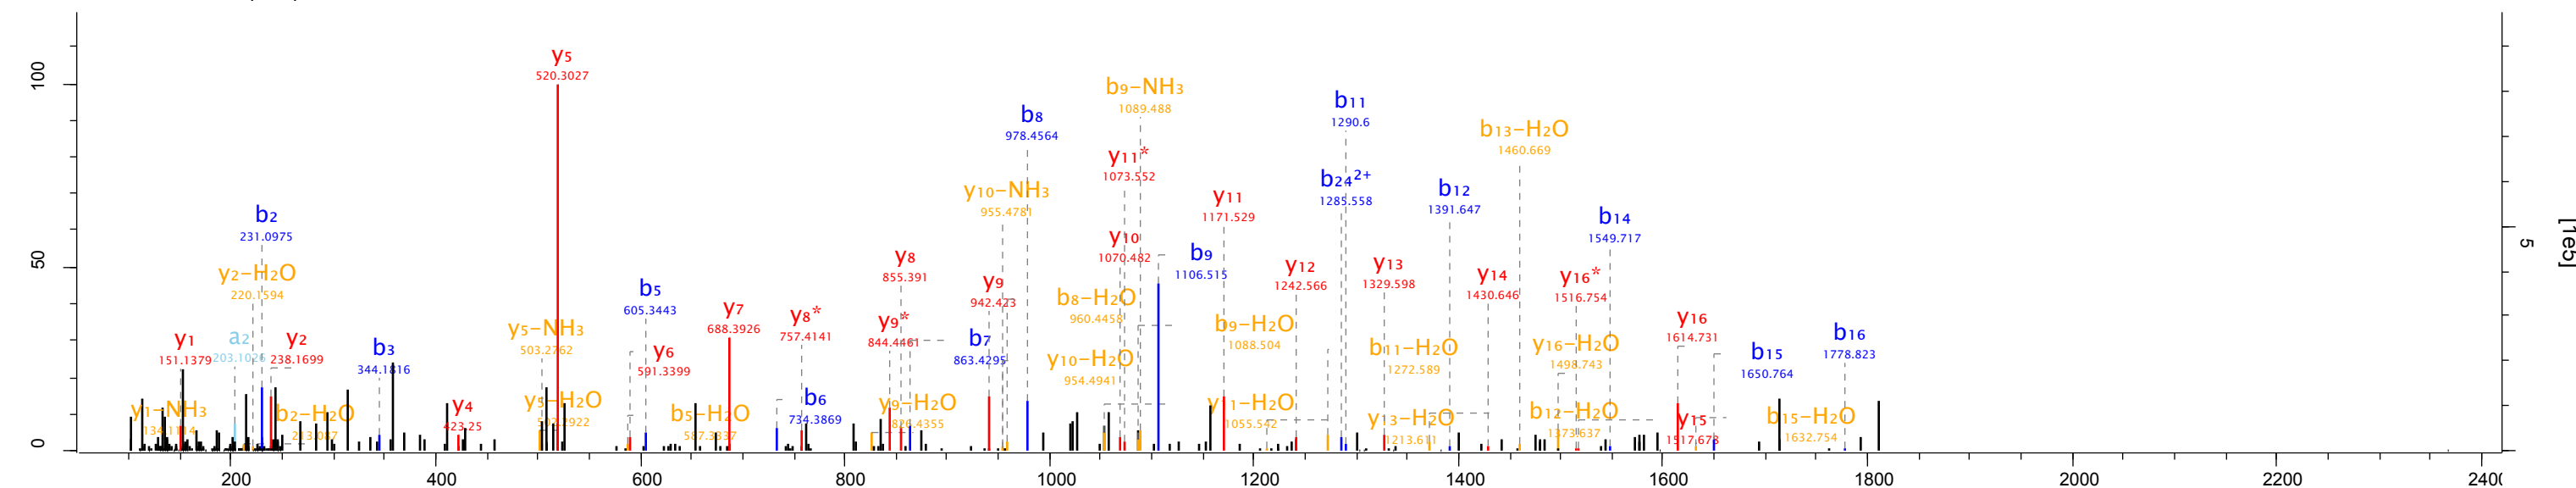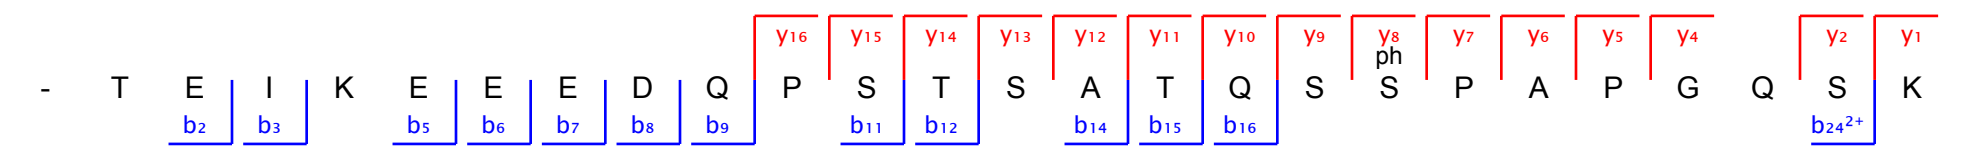

Raw file 20171215\_MaS\_33SR\_LMH\_phospho2\_01 Scan 4576 Method FTMS; HCD Score 141.75 m/z 661.21 Gene names KXD1

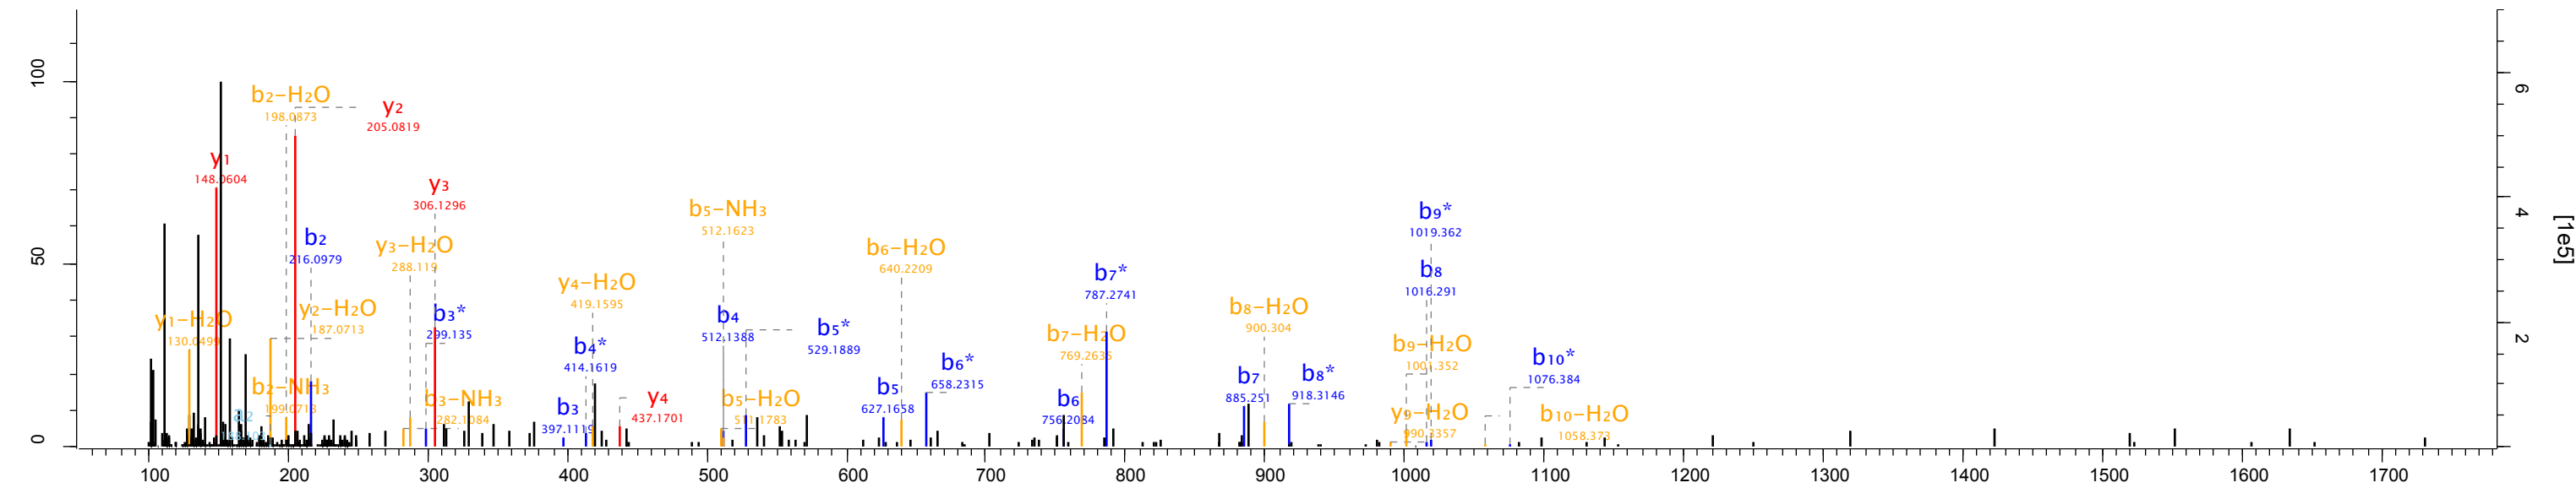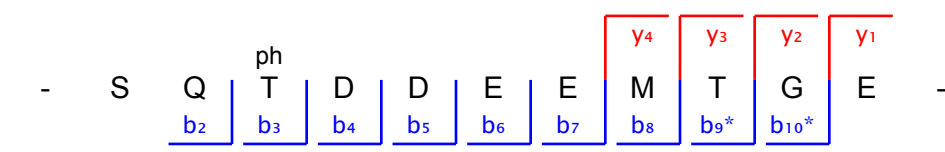

Raw file 20171215\_MaS\_33SR\_LMH\_phospho2\_02 Scan 12916 Method FTMS; HCD Score 71.69 m/z 828.37 Gene names GAREM

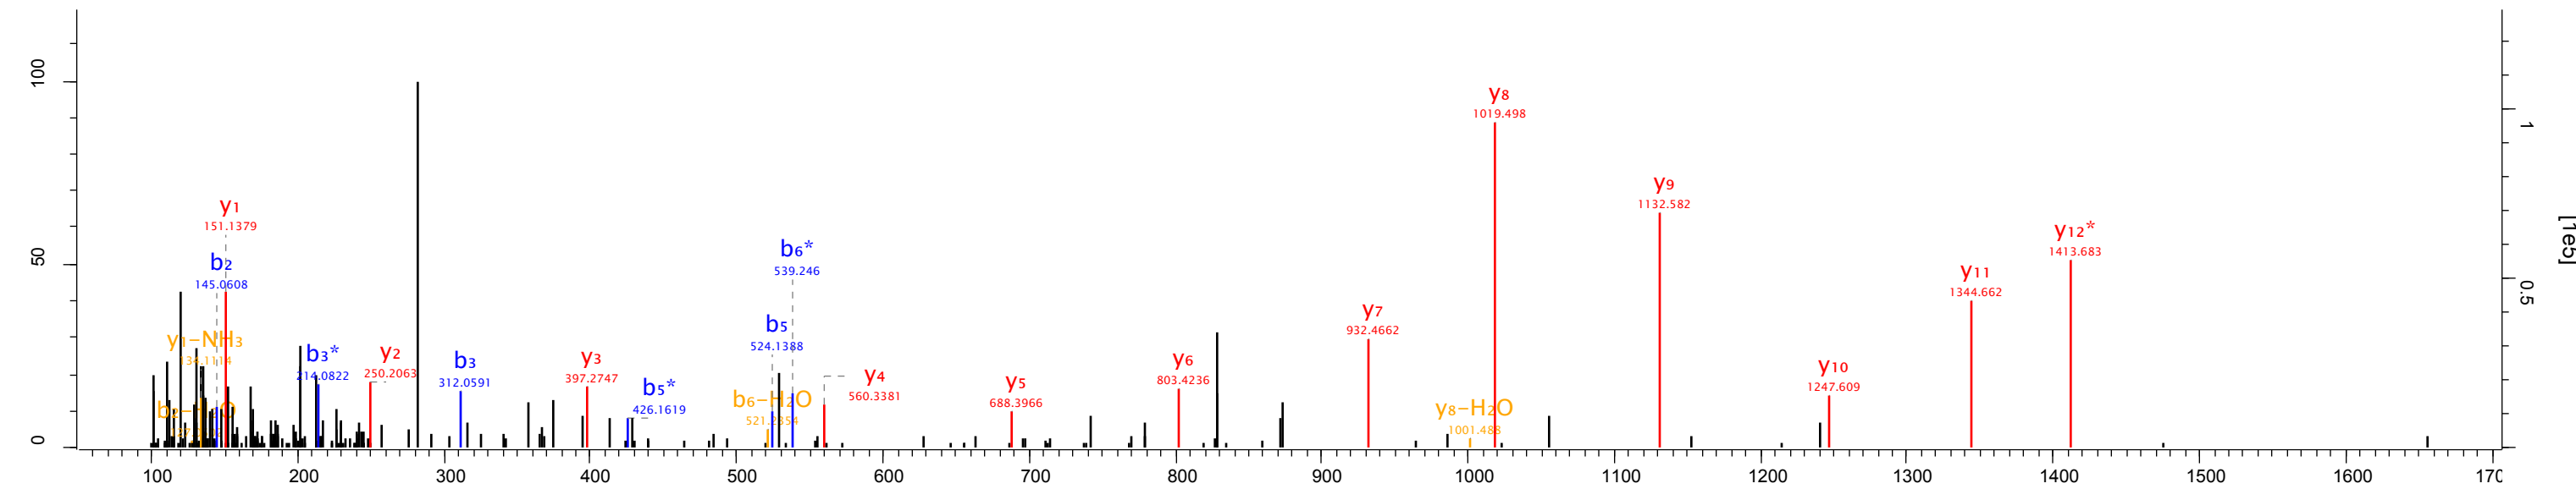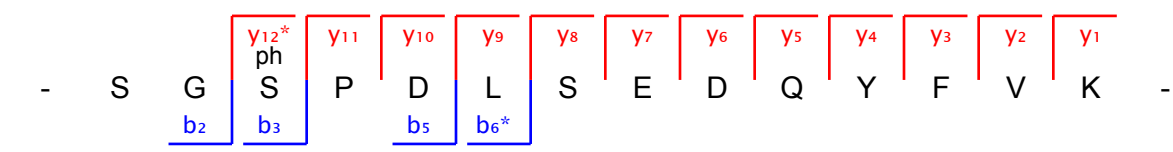

Raw file 20171215\_MaS\_33SR\_LMH\_phospho2\_02 Scan 3556 Method FTMS; HCD Score 40.5 m/z 422.72 Gene names CASQ2

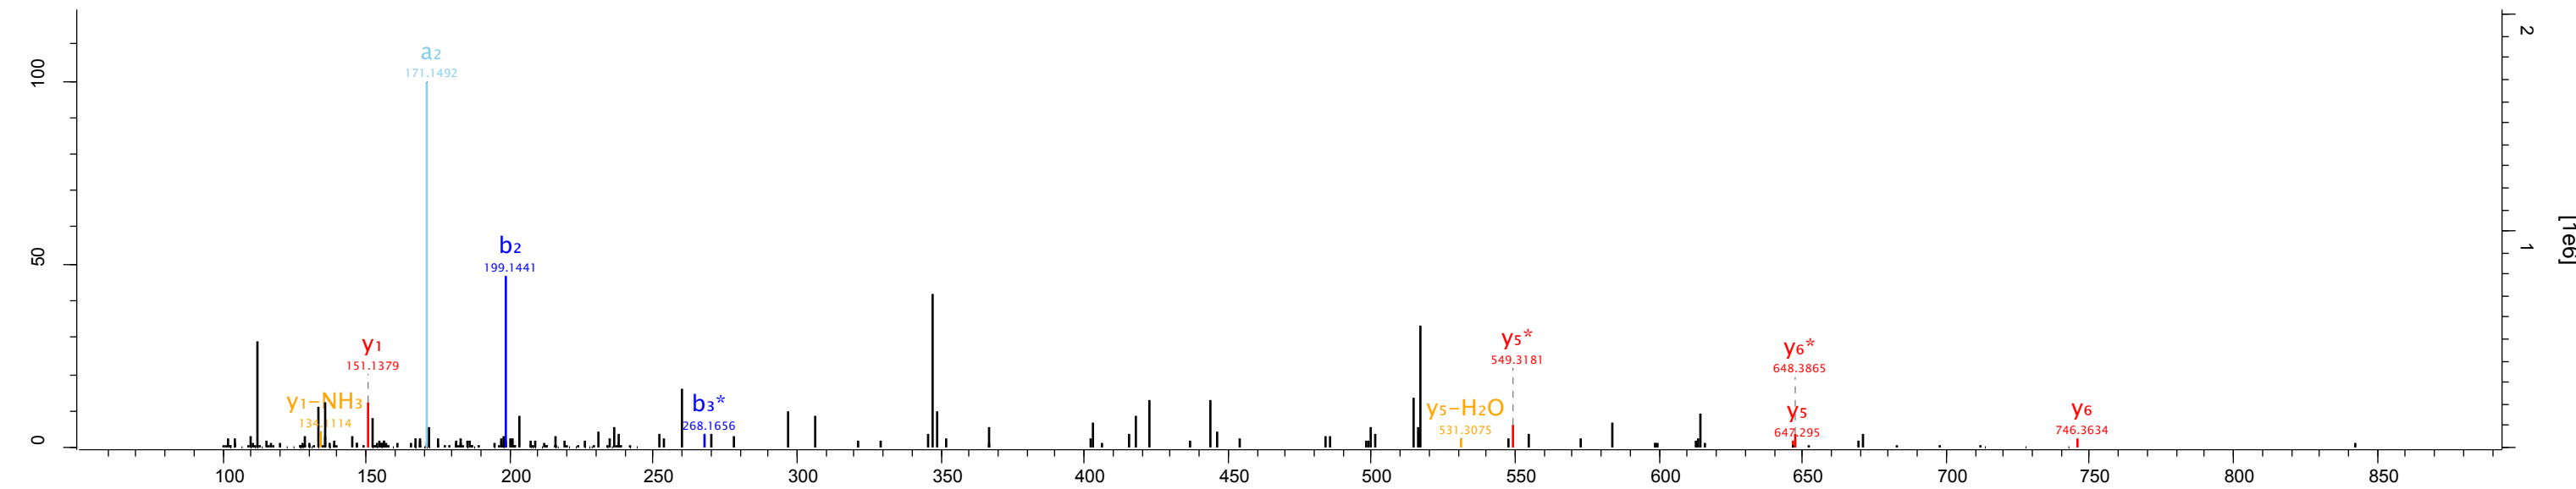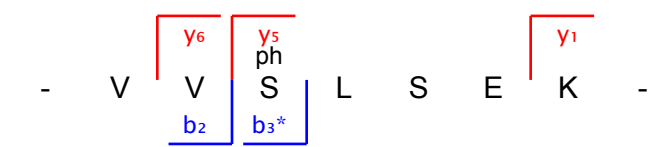



Raw file 20171215\_MaS\_33SR\_LMH\_phospho2\_02 Scan 3596 Method FTMS; HCD Score 83.2 m/z 520.75 Gene names FAM208B

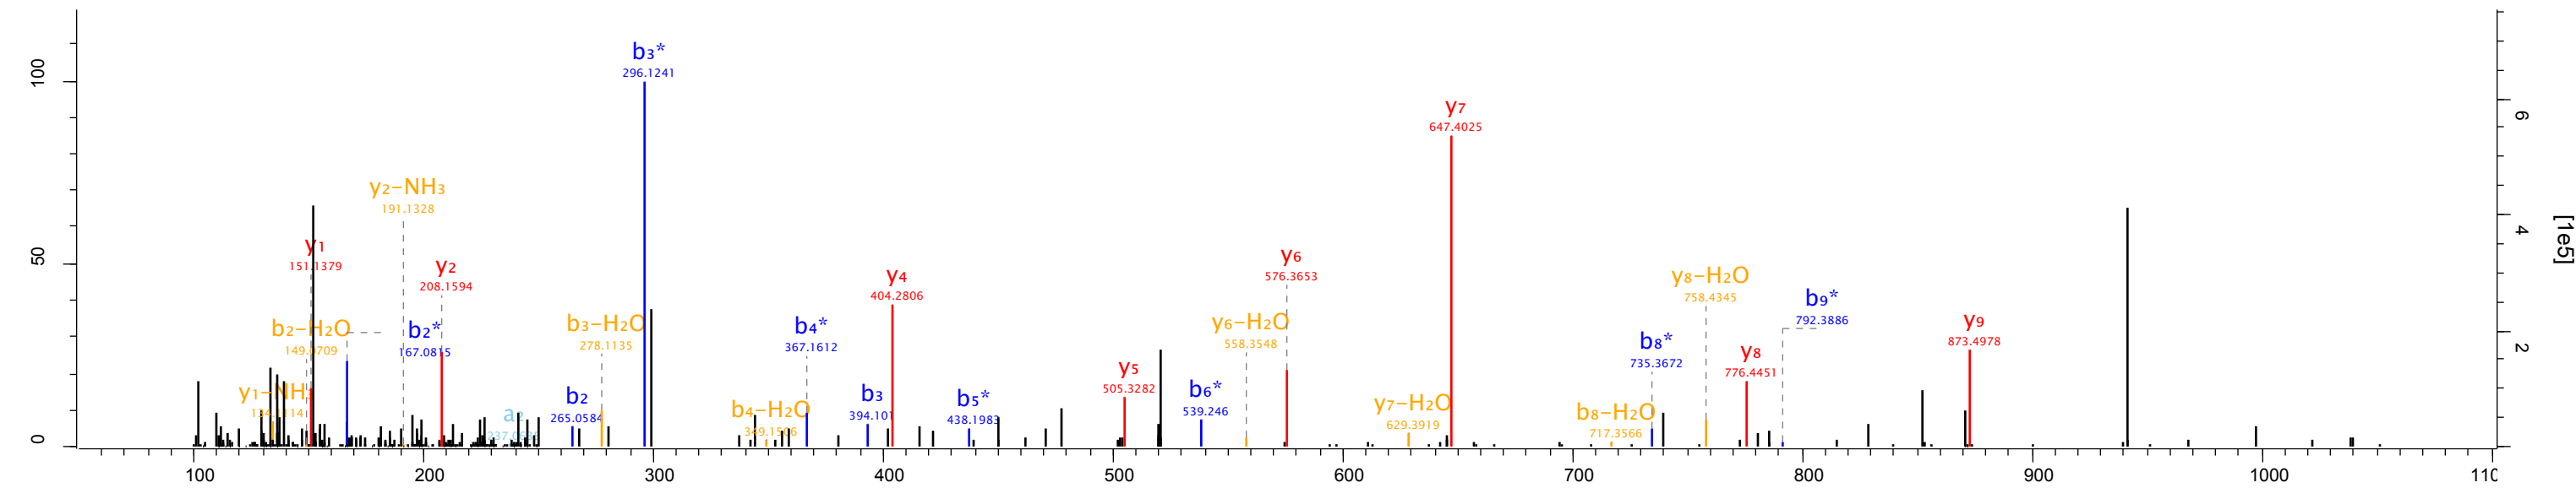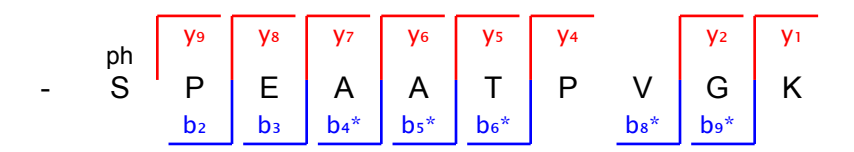

Raw file 20171215\_MaS\_33SR\_LMH\_phospho2\_02 Scan 3876 Method FTMS; HCD Score 112.73 m/z 519.24 Gene names ANKRD50

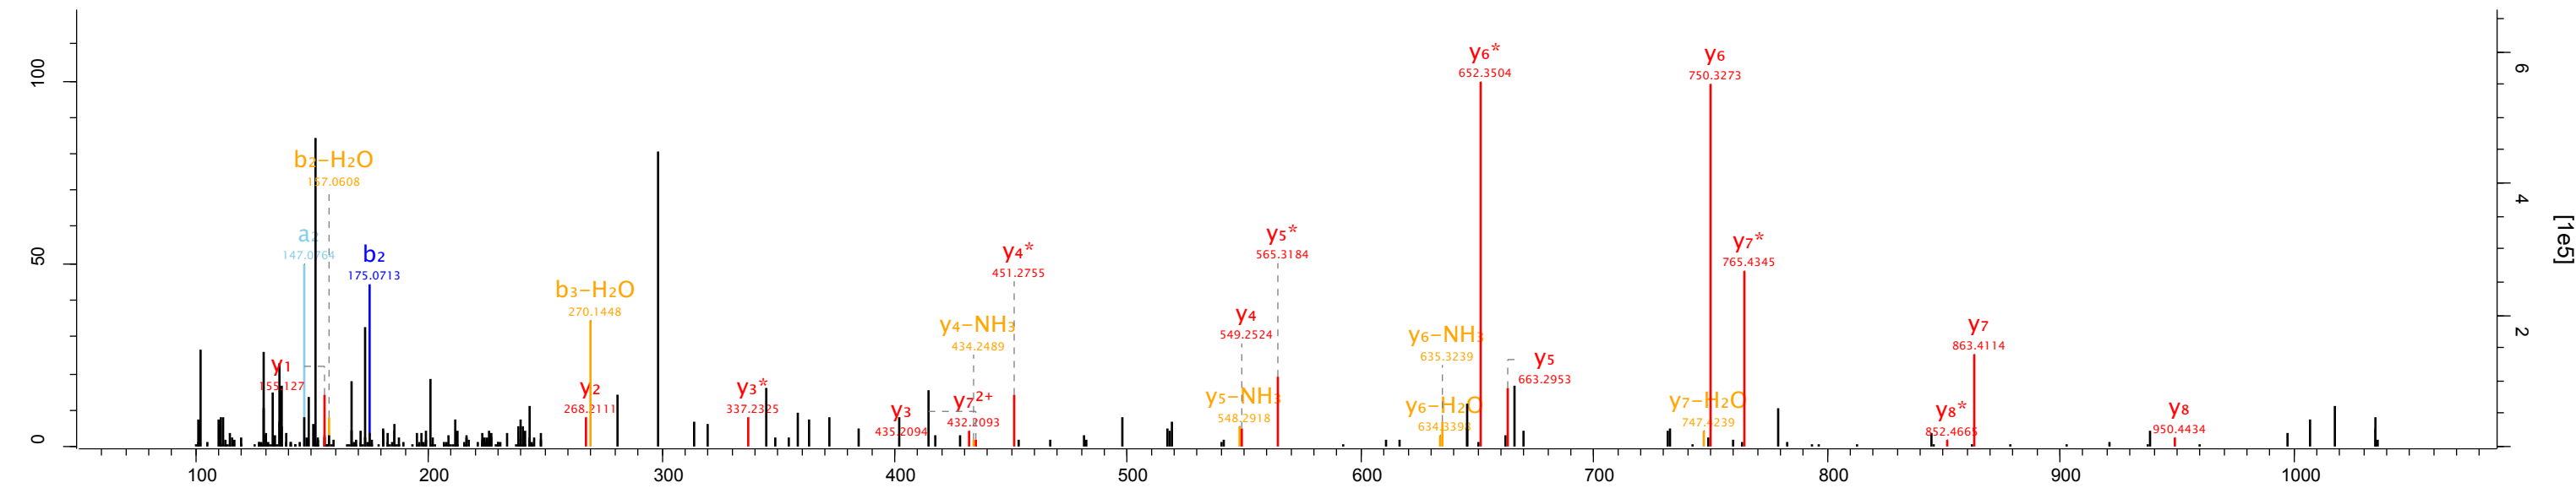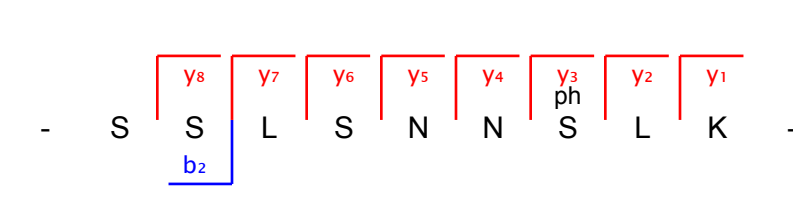

Raw file 20171215\_MaS\_33SR\_LMH\_phospho2\_02 Scan 8086 Method FTMS; HCD Score 86.41 m/z 633.31 Gene names MLK4

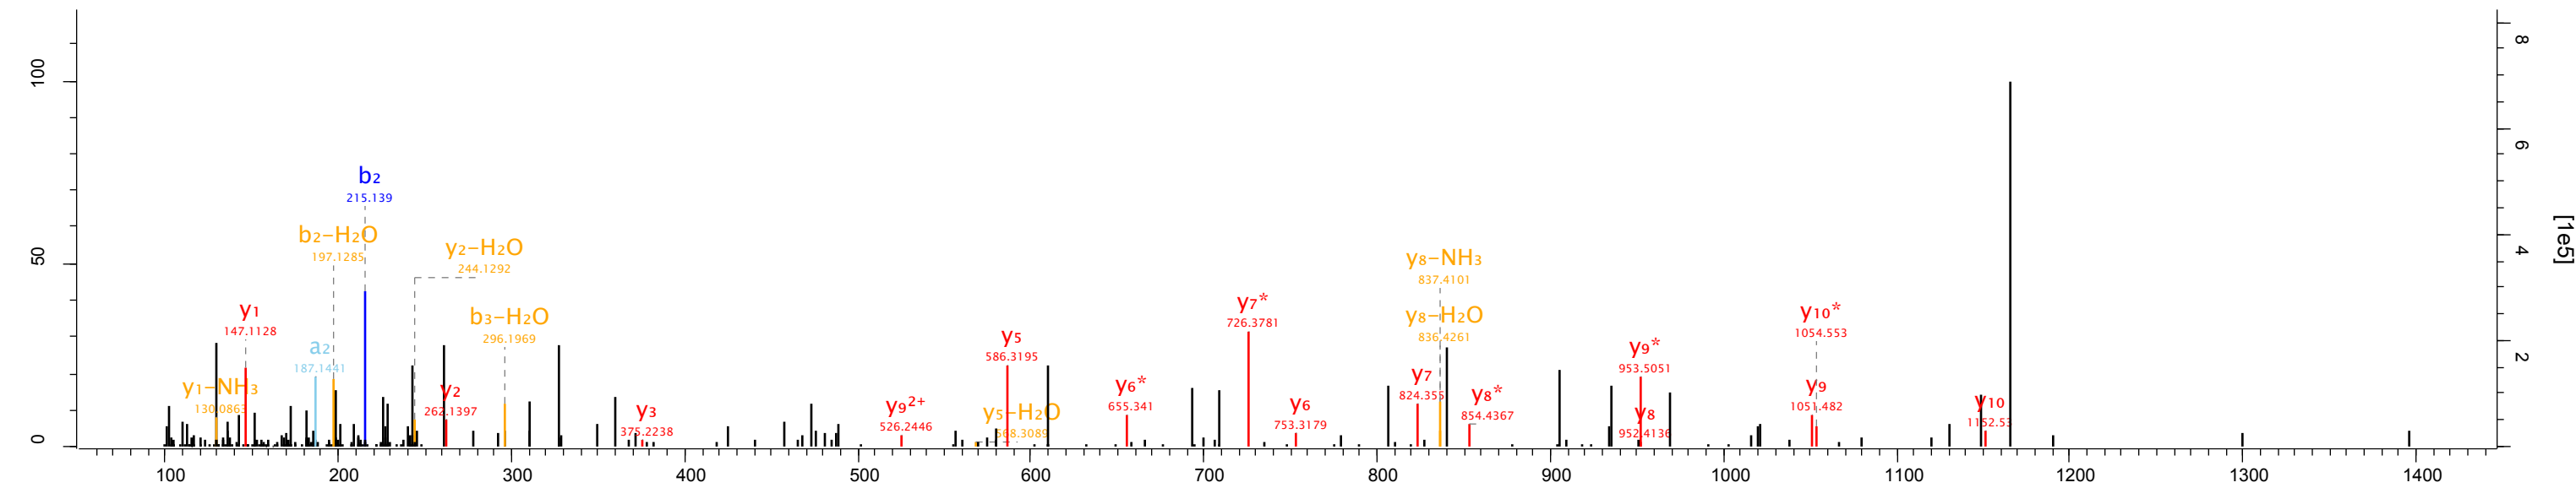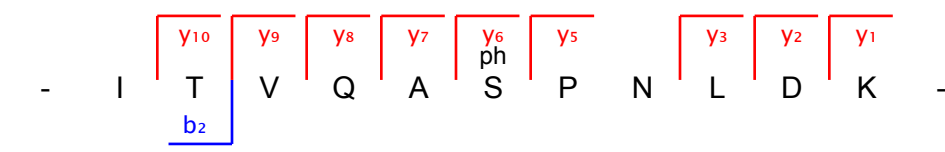

Raw file  
20171215\_MaS\_33SR\_LMH\_phospho2\_03

Scan 12676 Method FTMS; HCD Score 223.49 m/z 1175.51 Gene names OTUD5

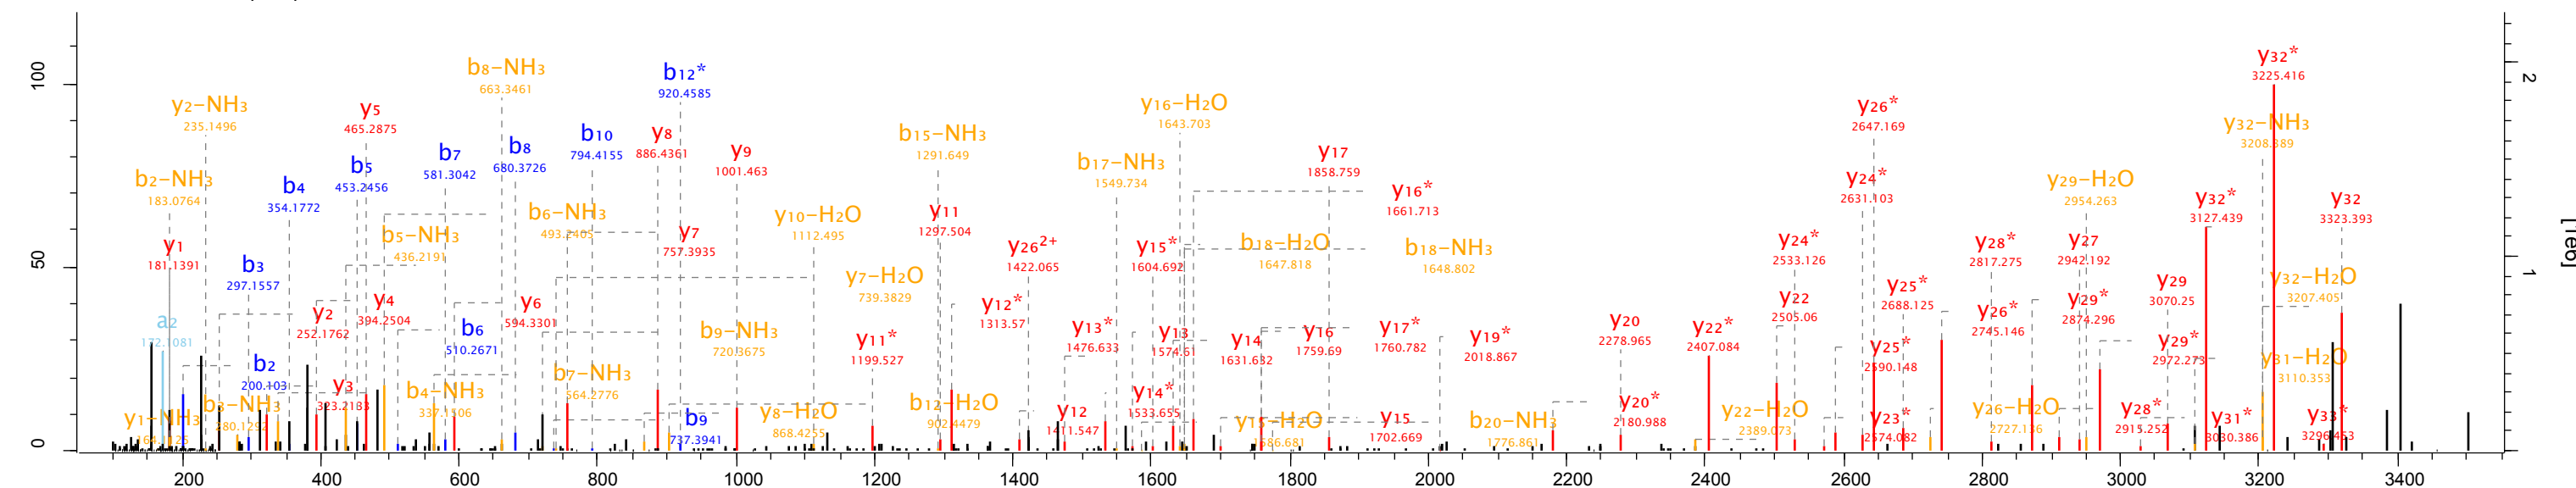

- Q A P G V G A V G G S P E R E E V G A G Y N S E D E Y E A A A A R -

b<sub>2</sub>
b<sub>3</sub>
b<sub>4</sub>
b<sub>5</sub>
b<sub>6</sub>
b<sub>7</sub>
b<sub>8</sub>
b<sub>9</sub>
b<sub>10</sub>
b<sub>12</sub><sup>\*</sup>
y<sub>23</sub><sup>\*</sup> ph

Raw file 20171215\_MaS\_33SR\_LMH\_phospho2\_03 Scan 14906 Method FTMS; HCD Score 71.49 m/z 706.95 Gene names PPID

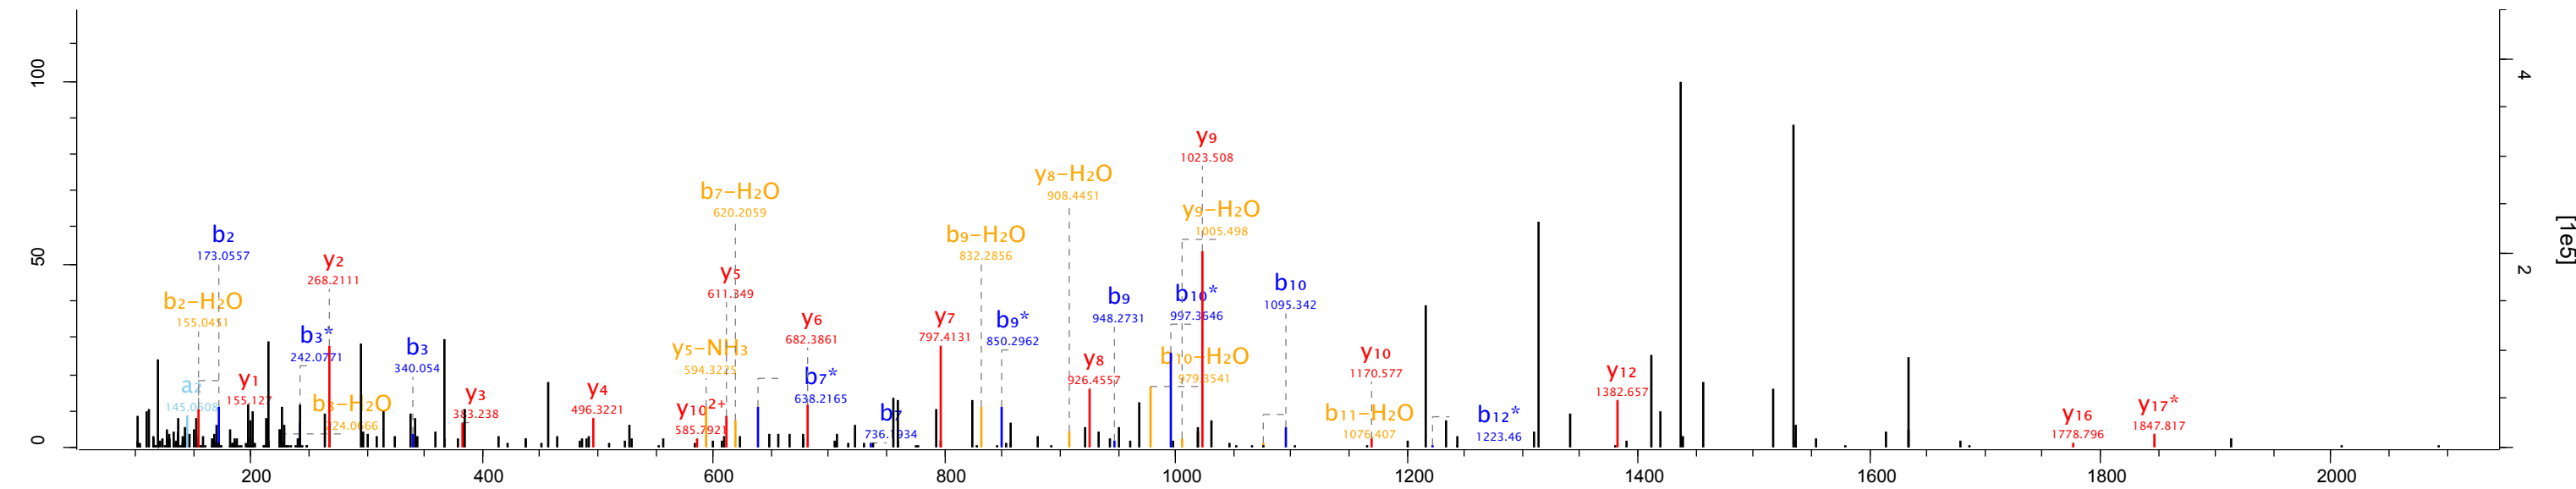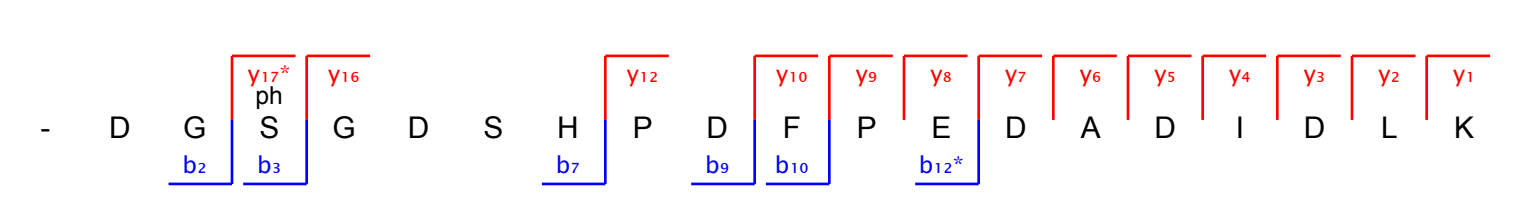

Raw file

20171215\_MaS\_33SR\_LMH\_phospho2\_03

| Scan  | Method    | Score | m/z    | Gene names |
|-------|-----------|-------|--------|------------|
| 15446 | FTMS; HCD | 45.38 | 534.72 | GYG2       |

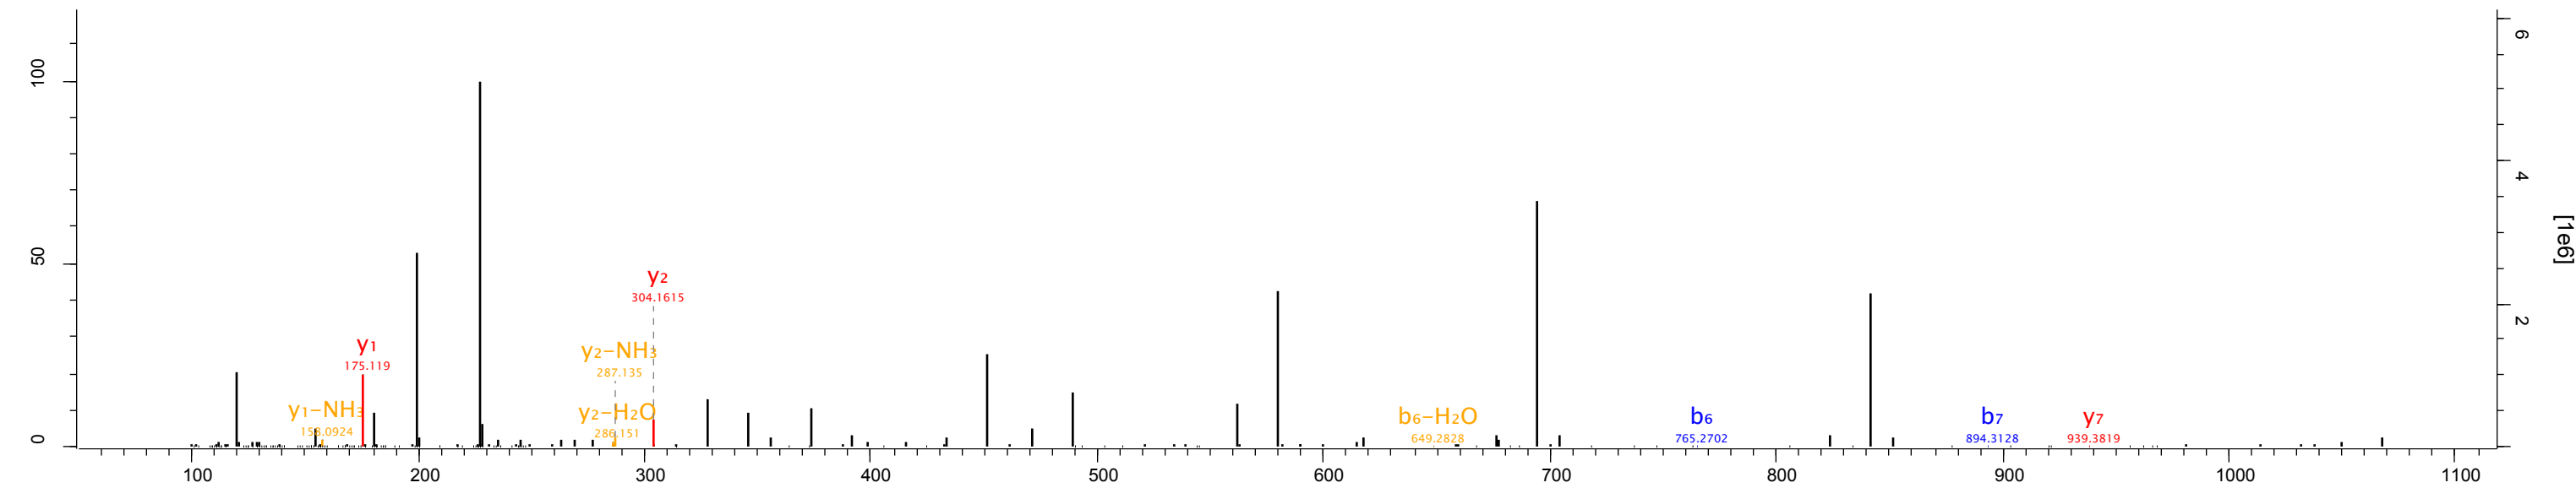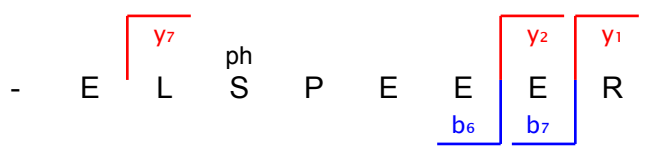

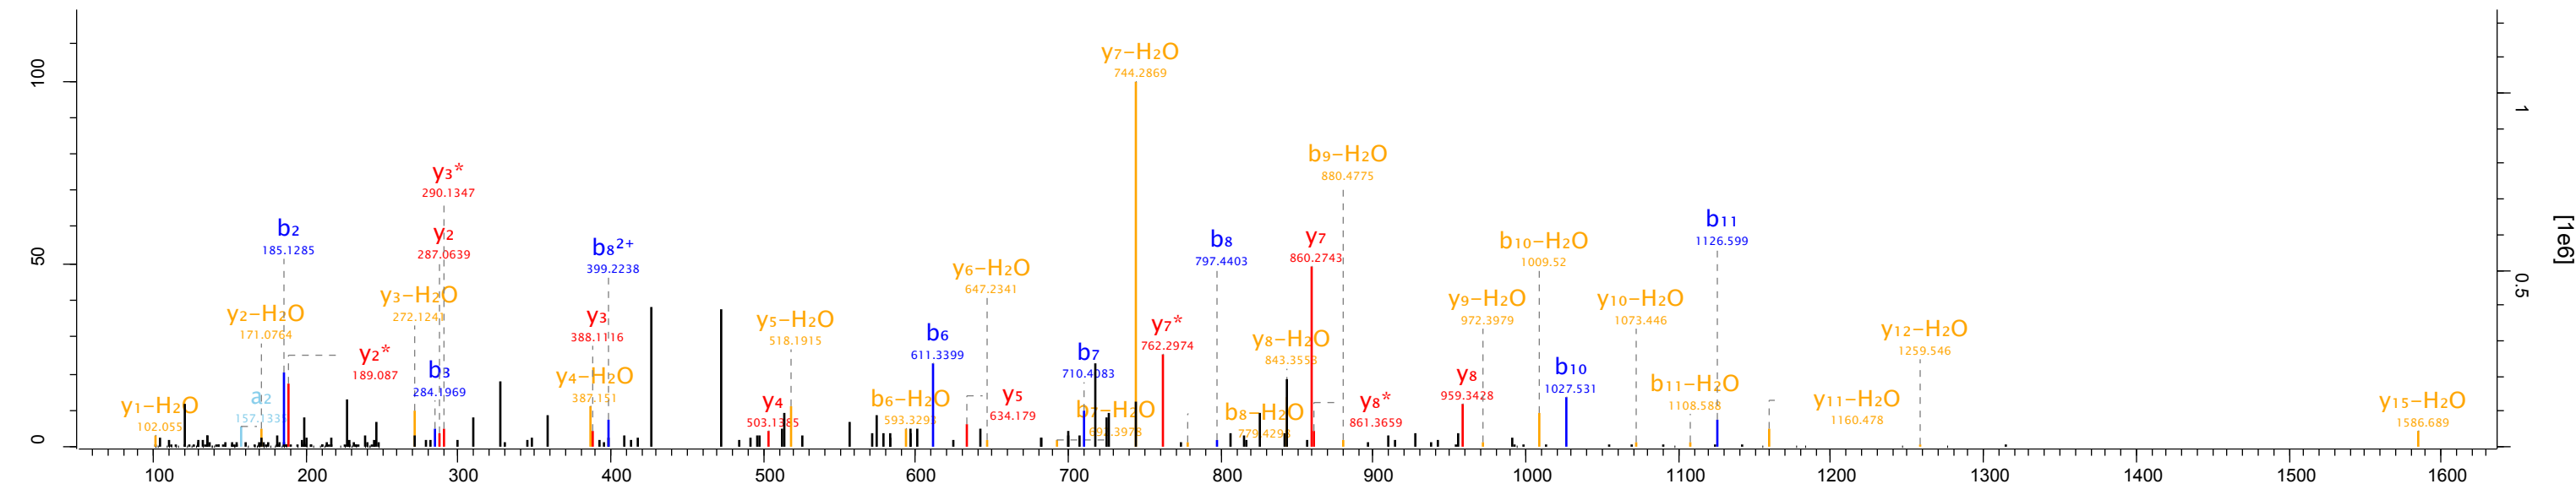

- L A V P T E V S T E V P E M D T S T -

Fragmentation mapping (b and y ions):

- Blue boxes (b ions): A-V, V-P, E-V, V-S, S-T, E-V, V-P, E-M, M-D, D-T, T-S.
- Red boxes (y ions): V-P, E-M, M-D, D-T, T-S.

Raw file  
20171215\_MaS\_33SR\_LMH\_phospho2\_03

Scan: 6626  
Method: FTMS; HCD  
Score: 43.77  
m/z: 1334.52  
Gene names: AOC1

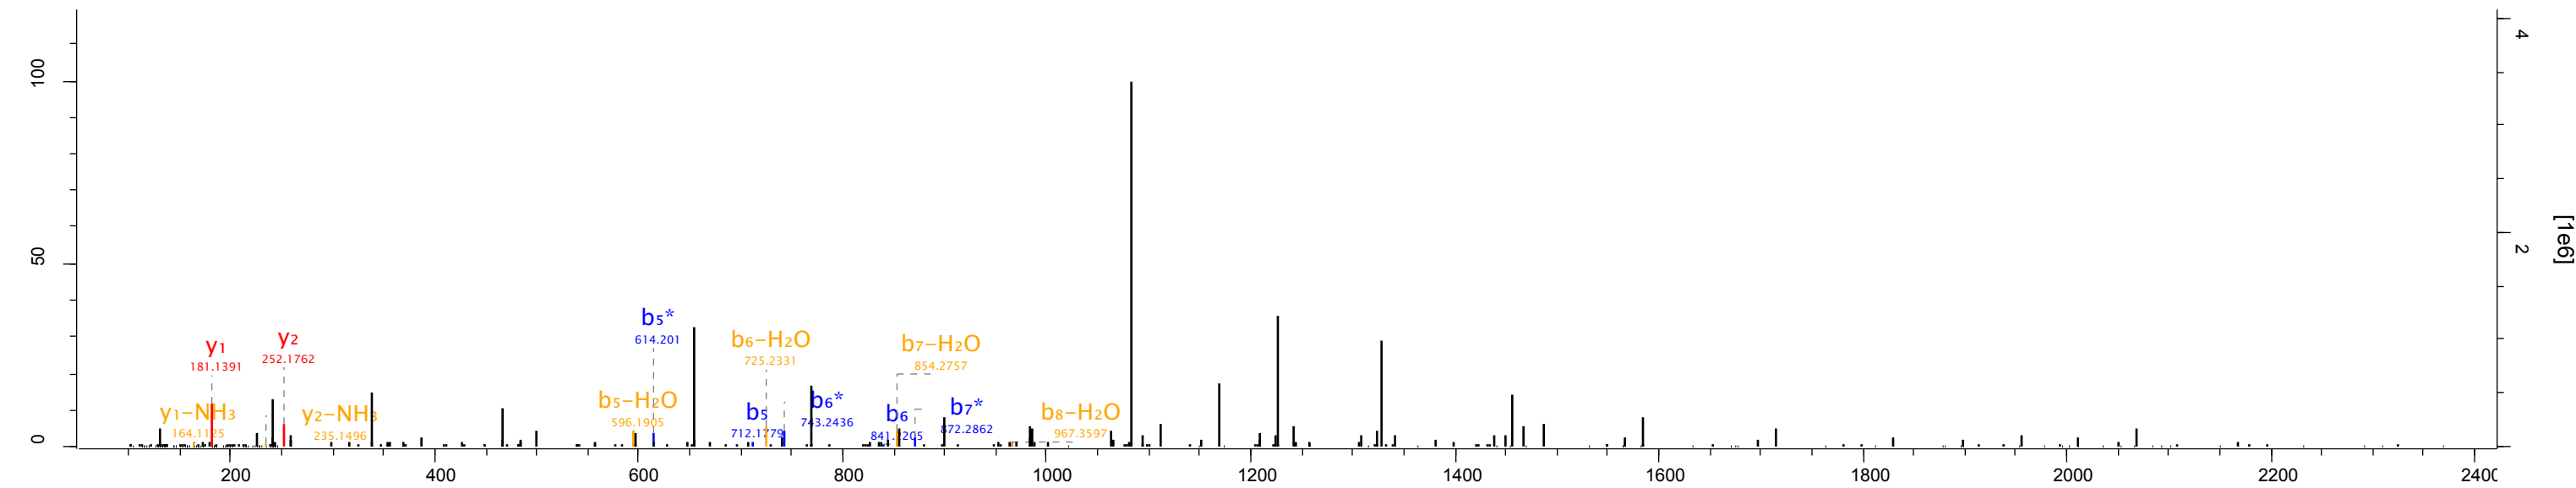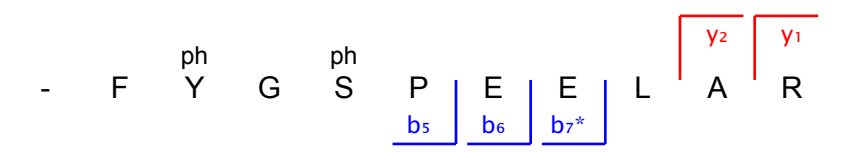



Raw file 20171215\_MaS\_33SR\_LMH\_phospho2\_03 Scan 6826 Method FTMS; HCD Score 149.52 m/z 768.3 Gene names GPSM1

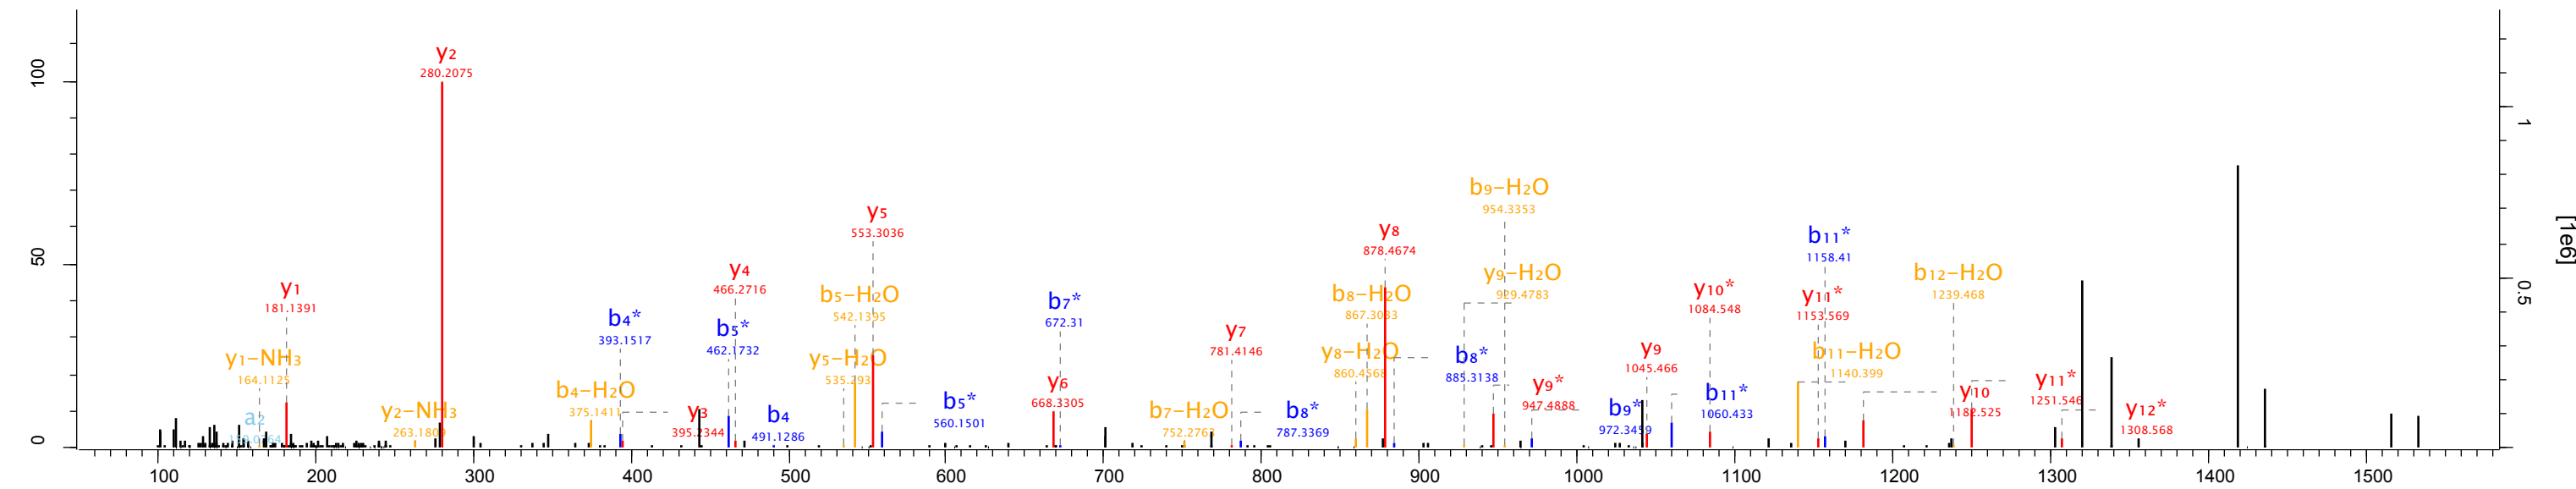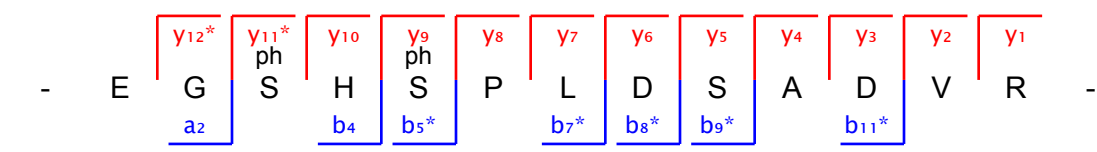

Raw file 20171215\_MaS\_33SR\_LMH\_phospho2\_03 Scan 7936 Method FTMS; HCD Score 69.22 m/z 519.71 Gene names SNX29

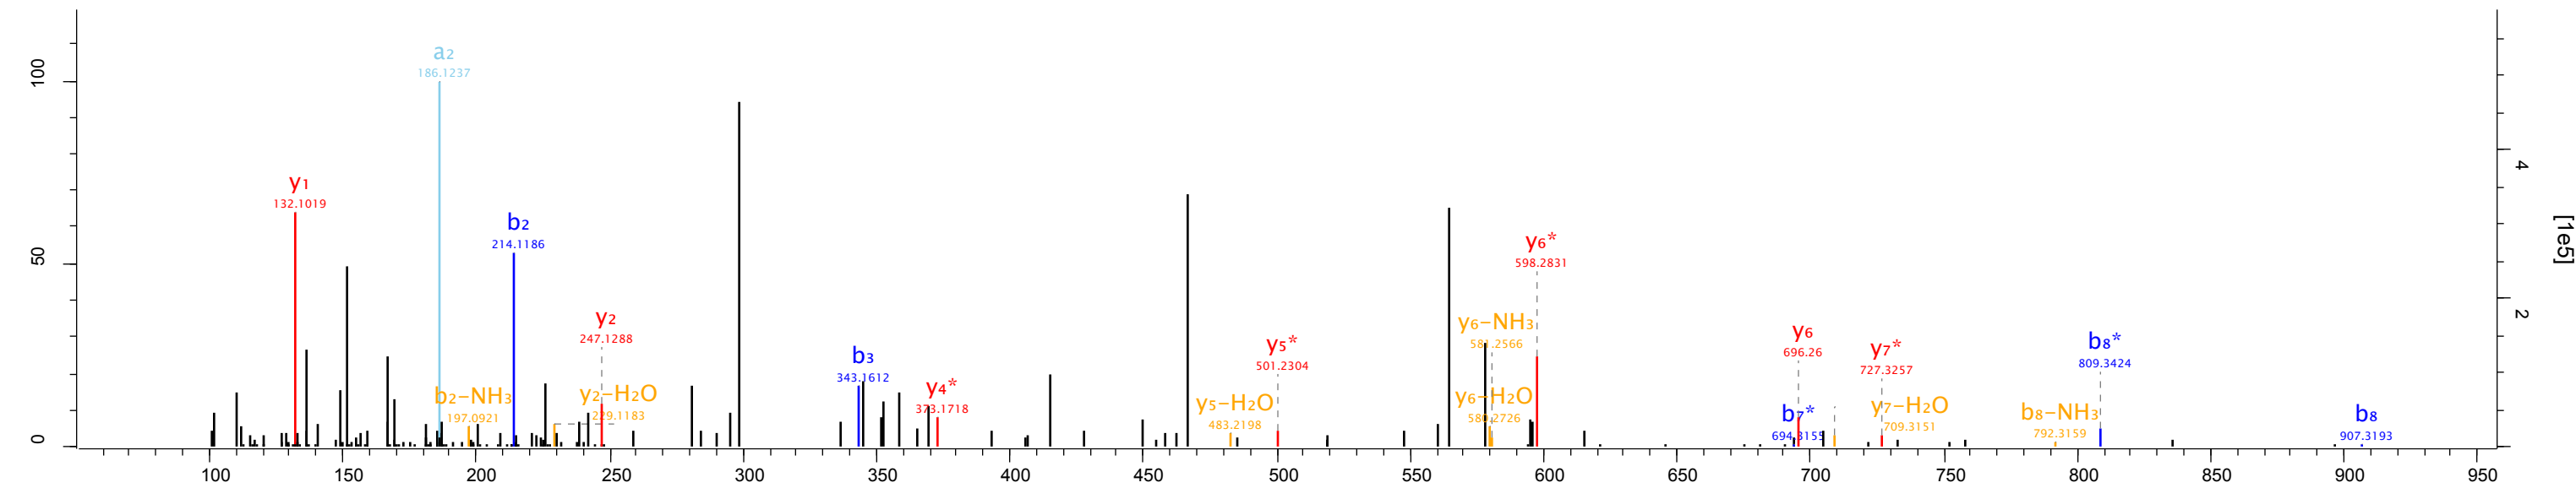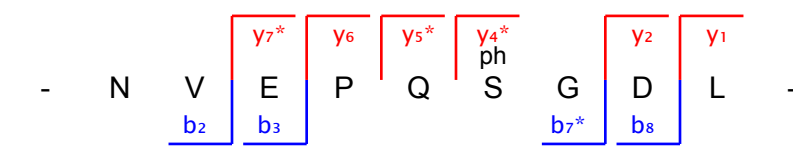

Raw file 20171215\_MaS\_33SR\_LMH\_phospho2\_03 Scan 8296 Method FTMS; HCD Score 164.94 m/z 1007.84 Gene names CCDC25

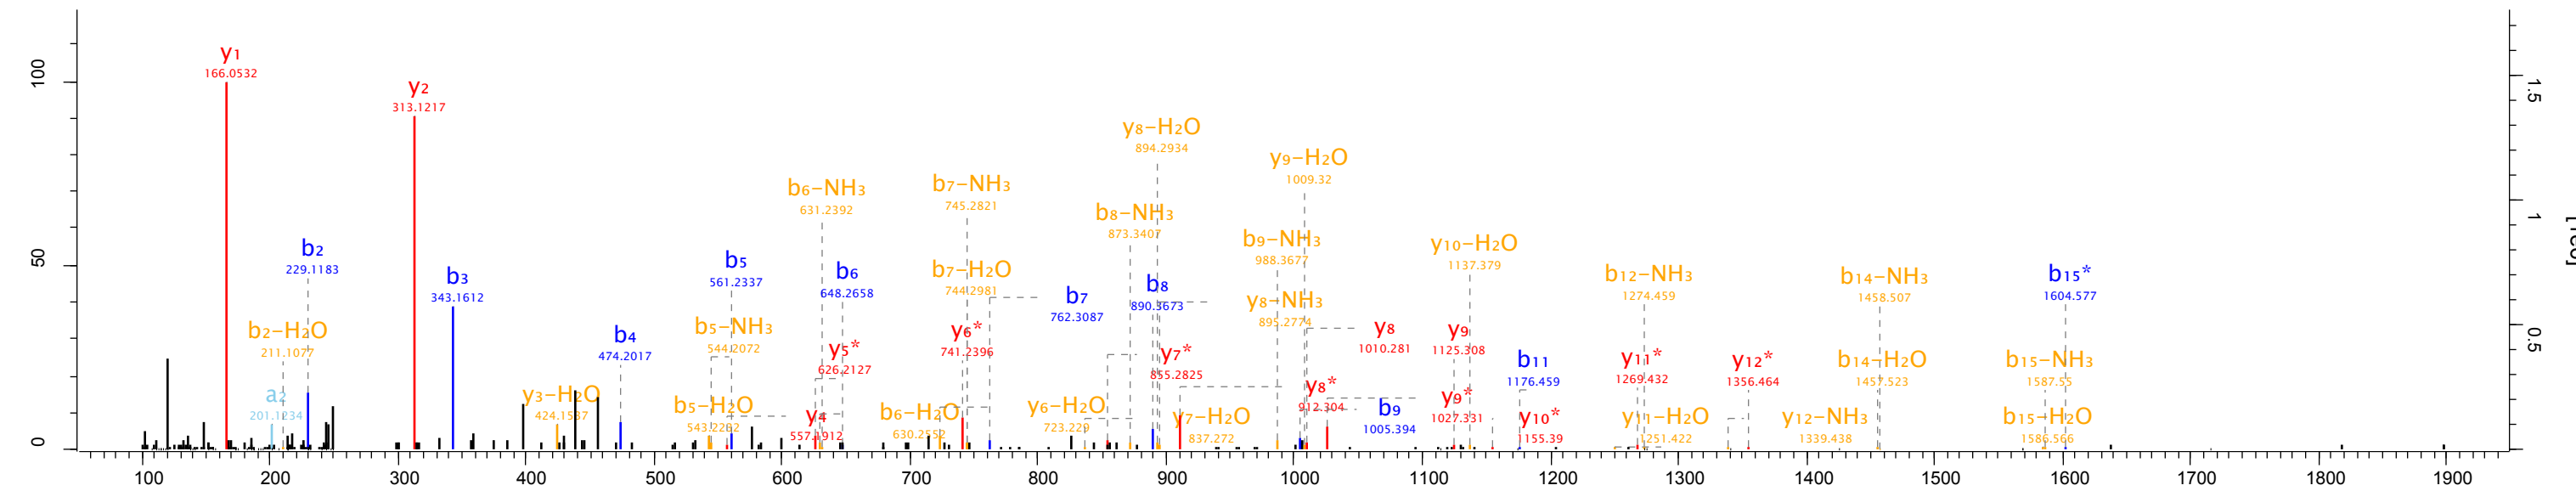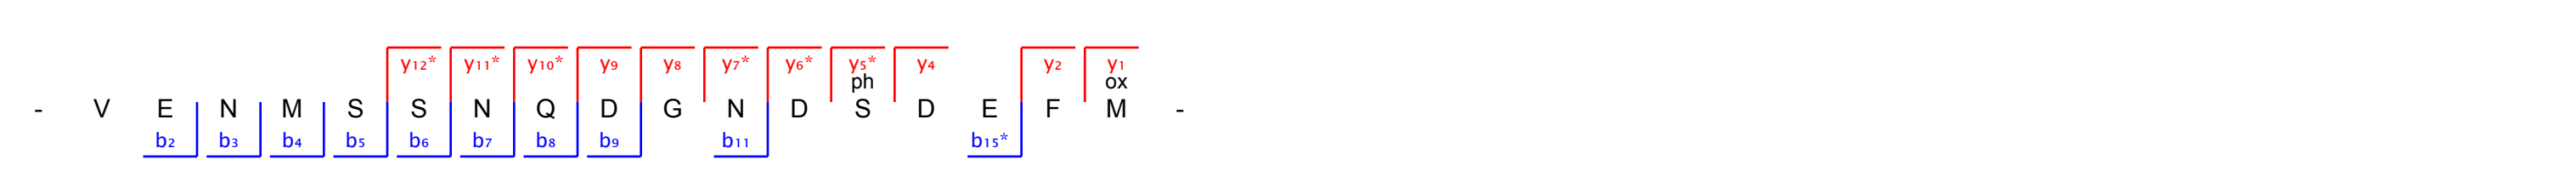

Raw file  
20171215\_MaS\_33SR\_LMH\_phospho2\_03

Scan 9696 Method FTMS; HCD Score 123.71 m/z 939.92 Gene names SMG1

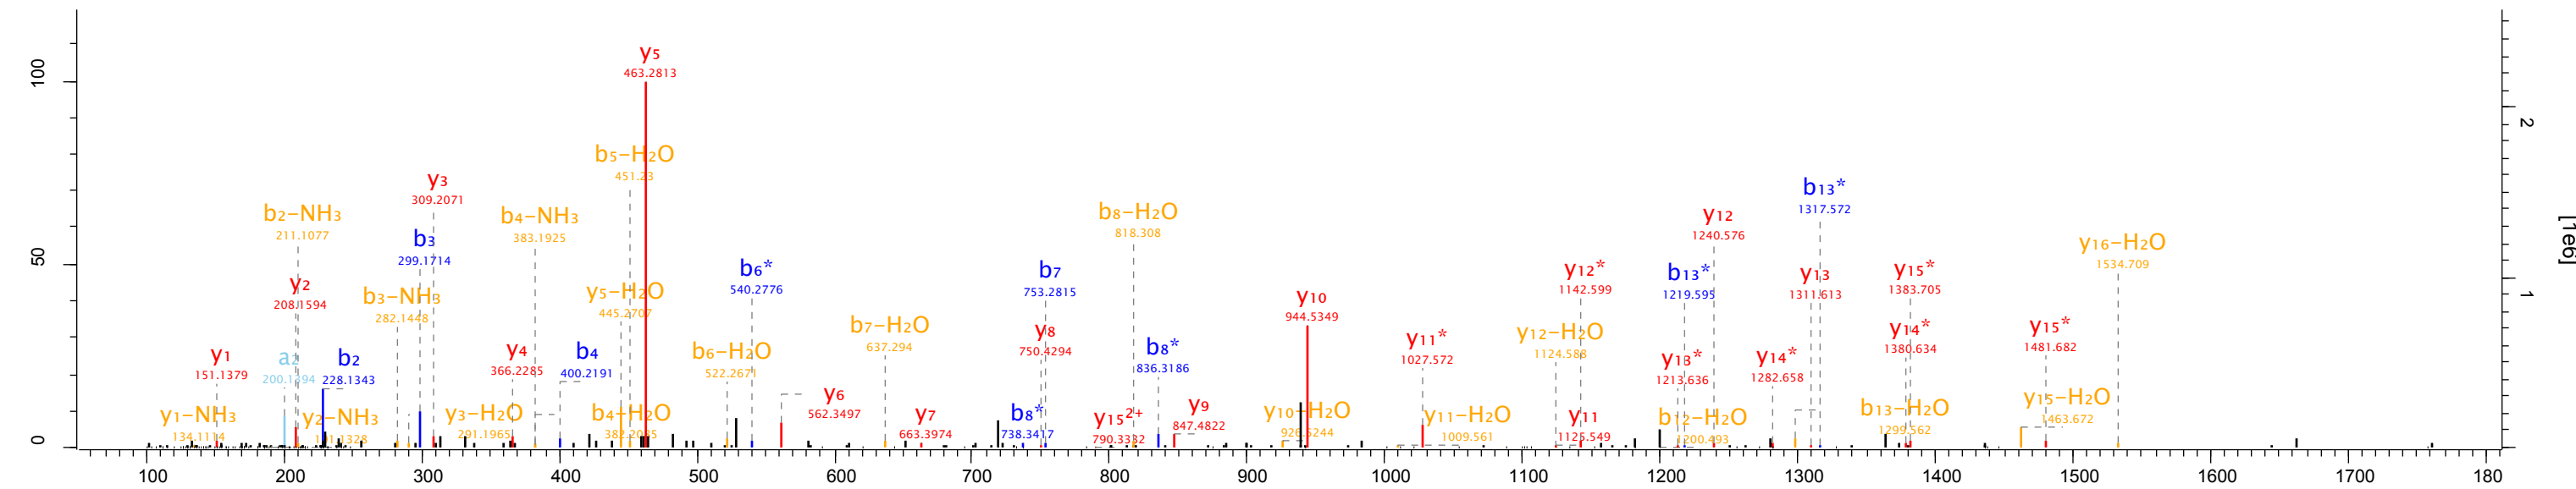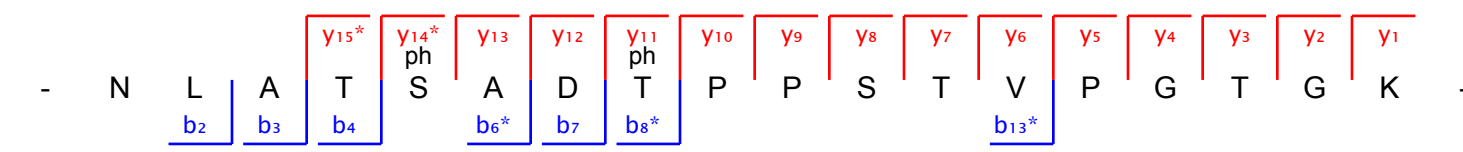

Raw file  
20171215\_MaS\_33SR\_LMH\_phospho2\_06

Scan Method Score m/z Gene names  
2076 FTMS; HCD 89.83 635.61 RNPC3

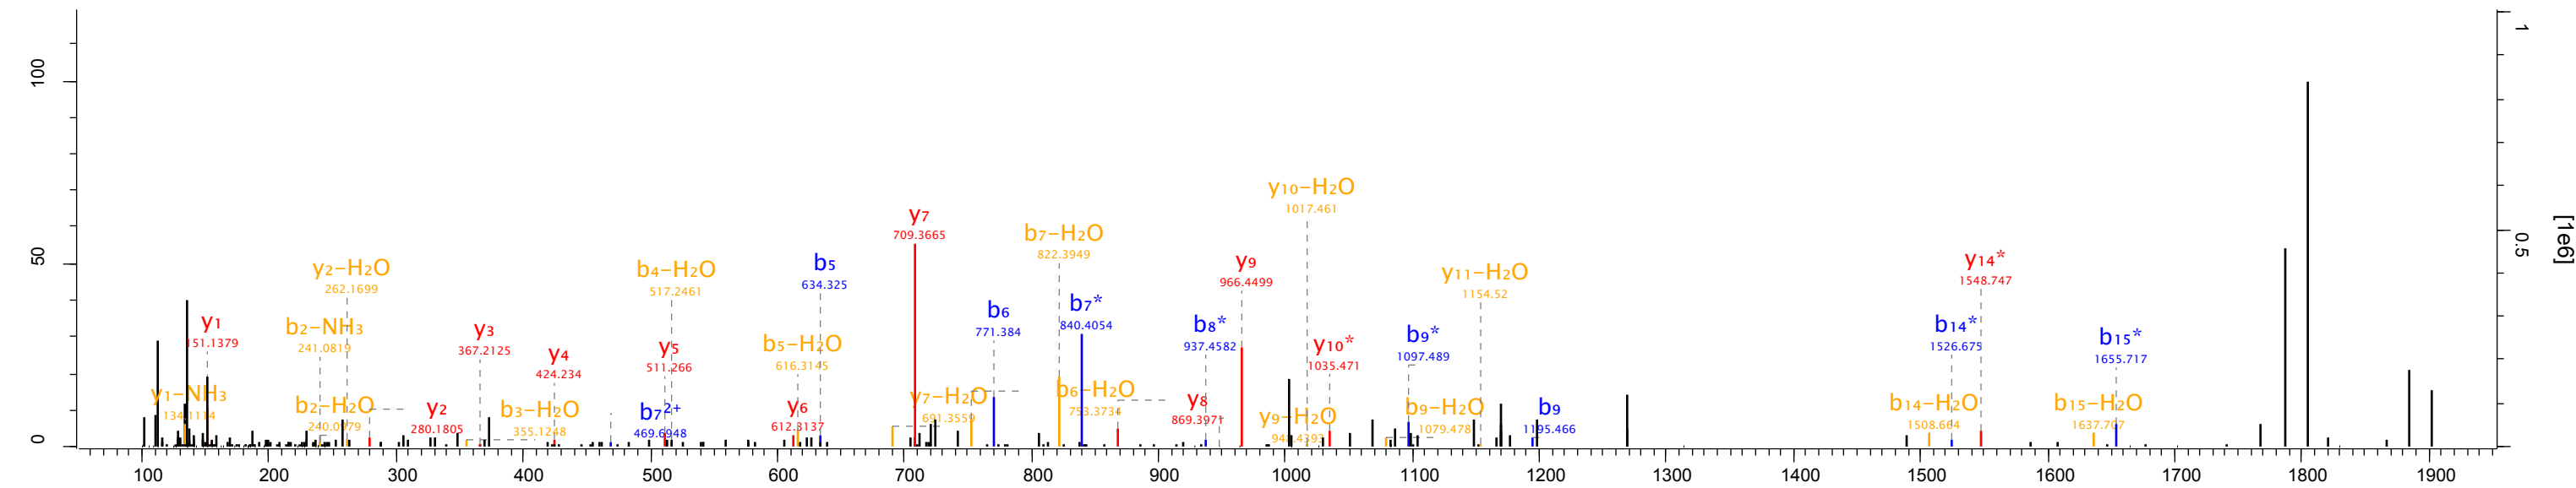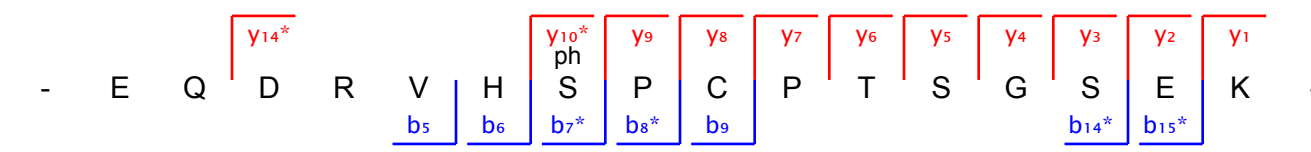

Raw file: 20171215\_MaS\_33SR\_LMH\_phospho2\_06  
 Scan: 2146 Method: FTMS; HCD Score: 125.39 m/z: 774.66 Gene names: RNASEH1

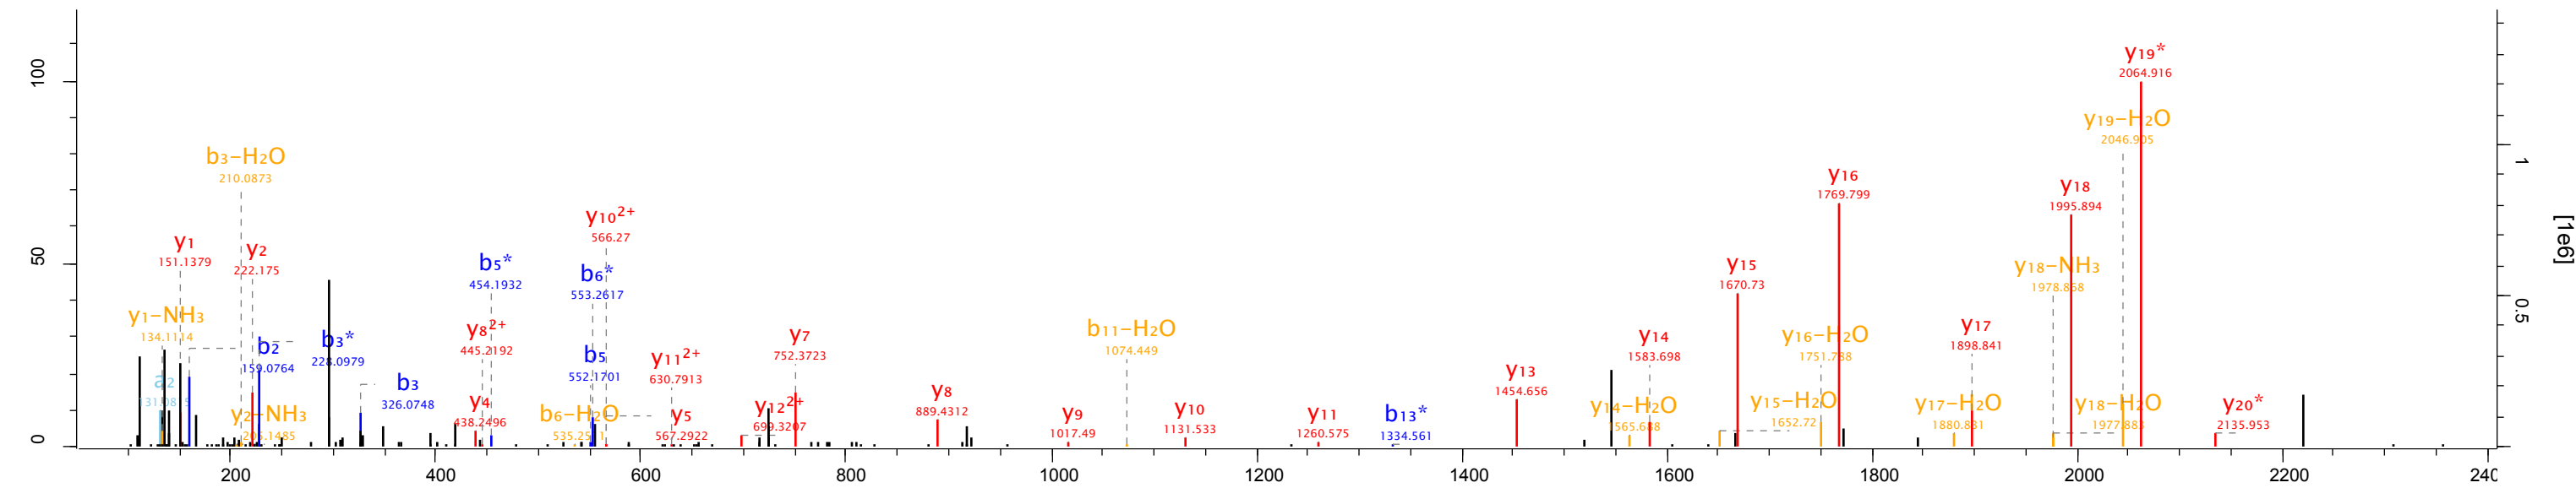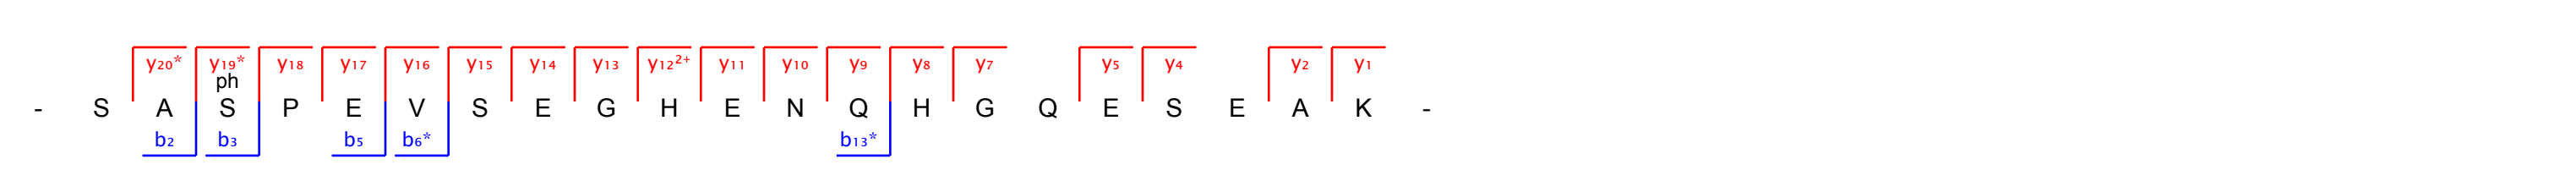

Raw file 20171215\_MaS\_33SR\_LMH\_phospho2\_08 Scan 4836 Method FTMS; HCD Score 68 m/z 559.76 Gene names ICE1

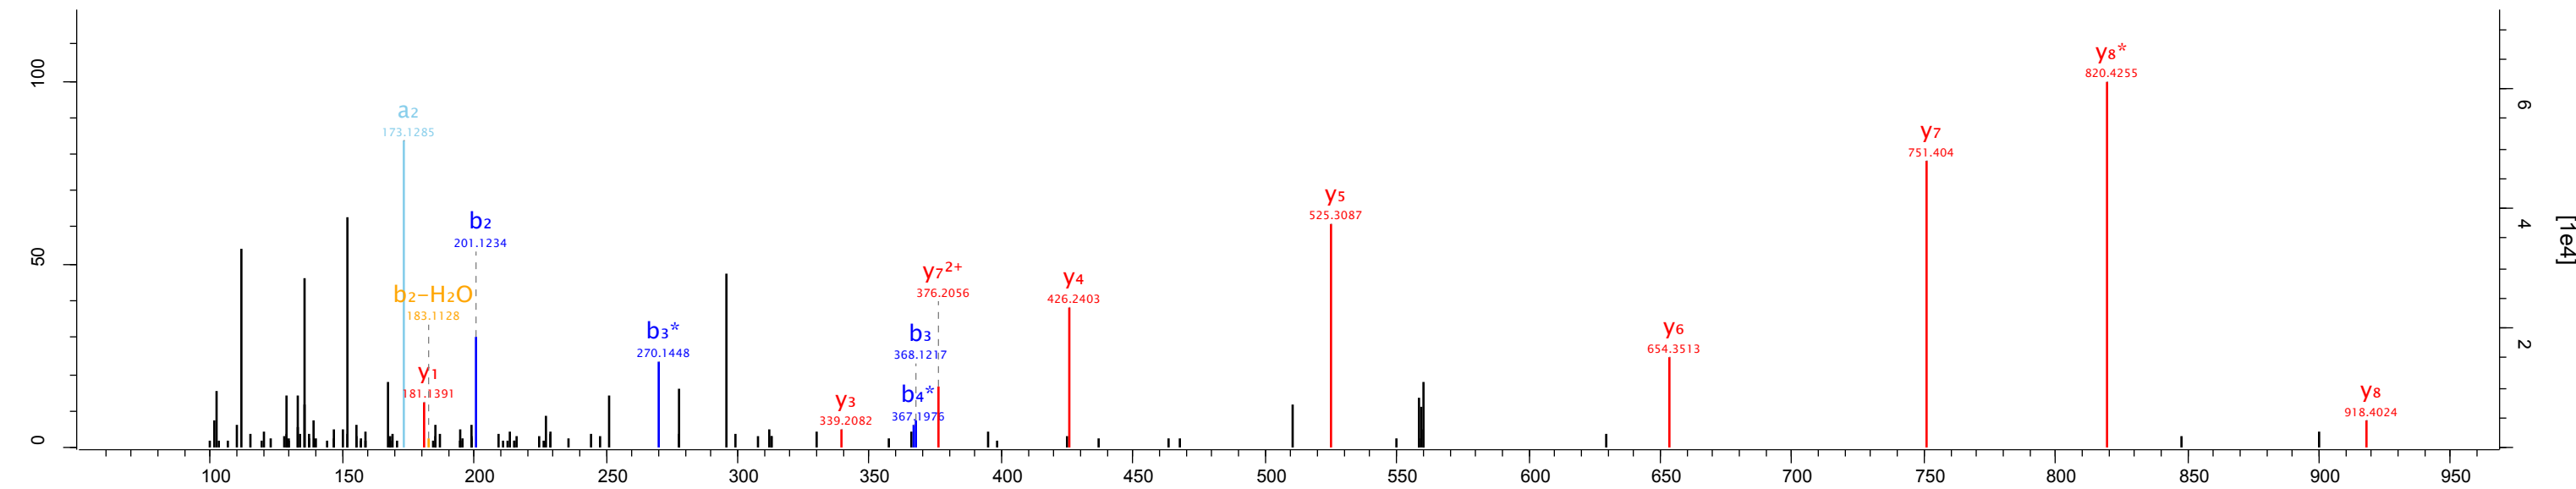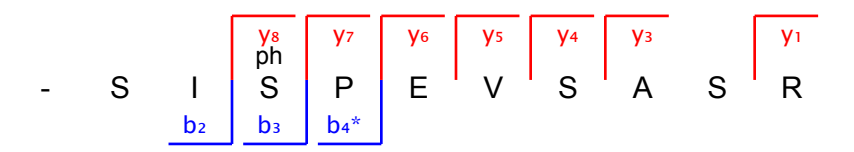

Raw file: 20171215\_MaS\_33SR\_LMH\_proteome\_01  
 Scan: 10466 Method: FTMS; HCD Score: 66.27 m/z: 521.27 Gene names: TENM1

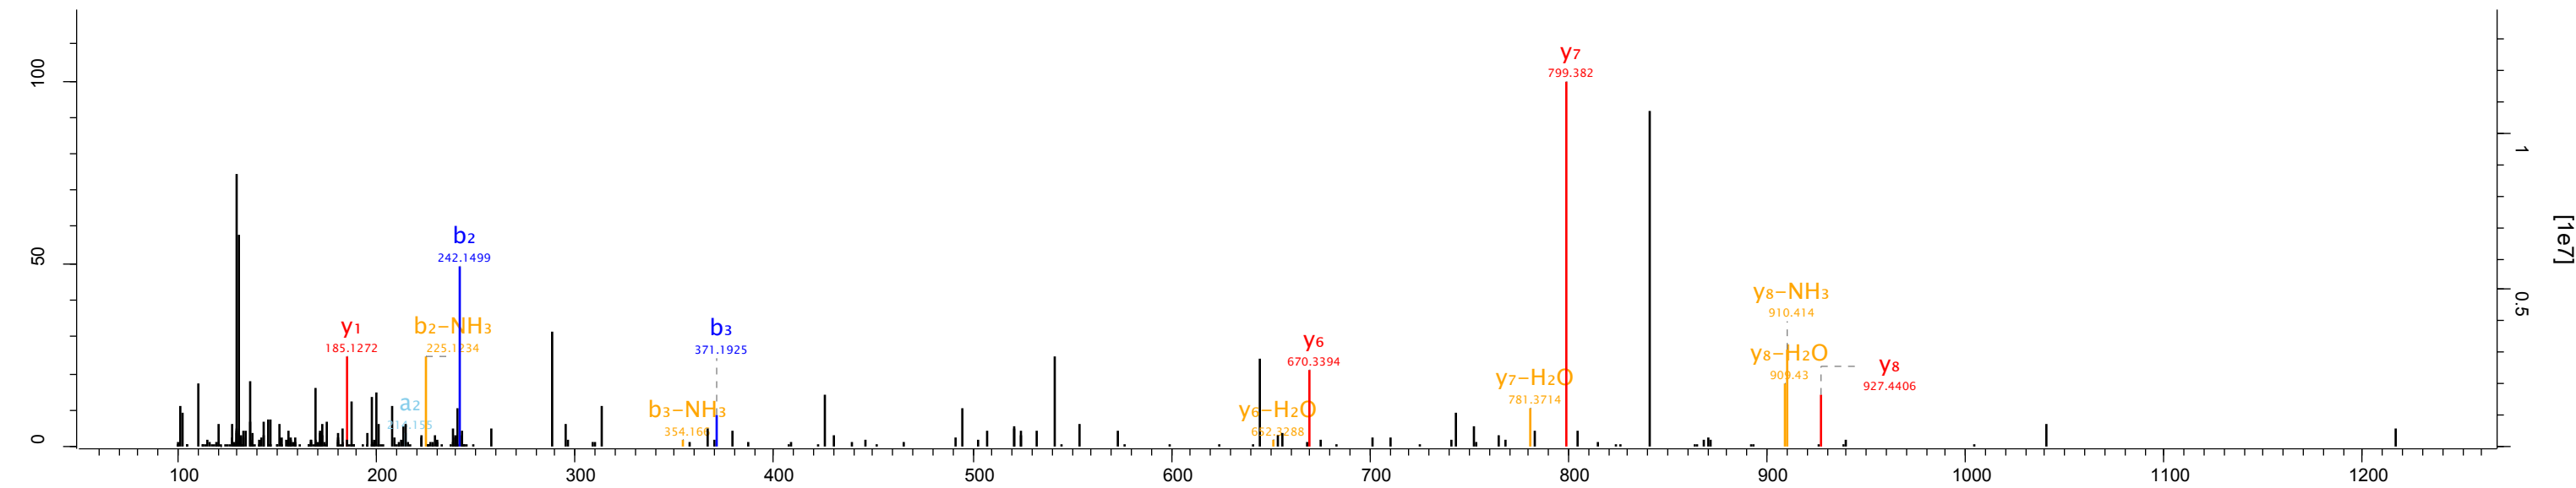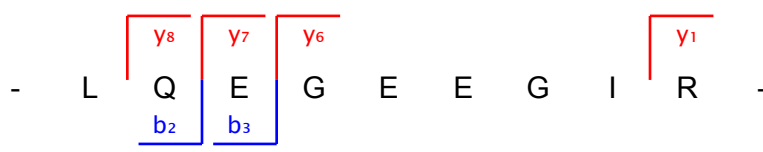



Raw file 20171215\_MaS\_33SR\_LMH\_proteome\_01 Scan 107946 Method FTMS; HCD Score 74.14 m/z 917.95 Gene names UGCG

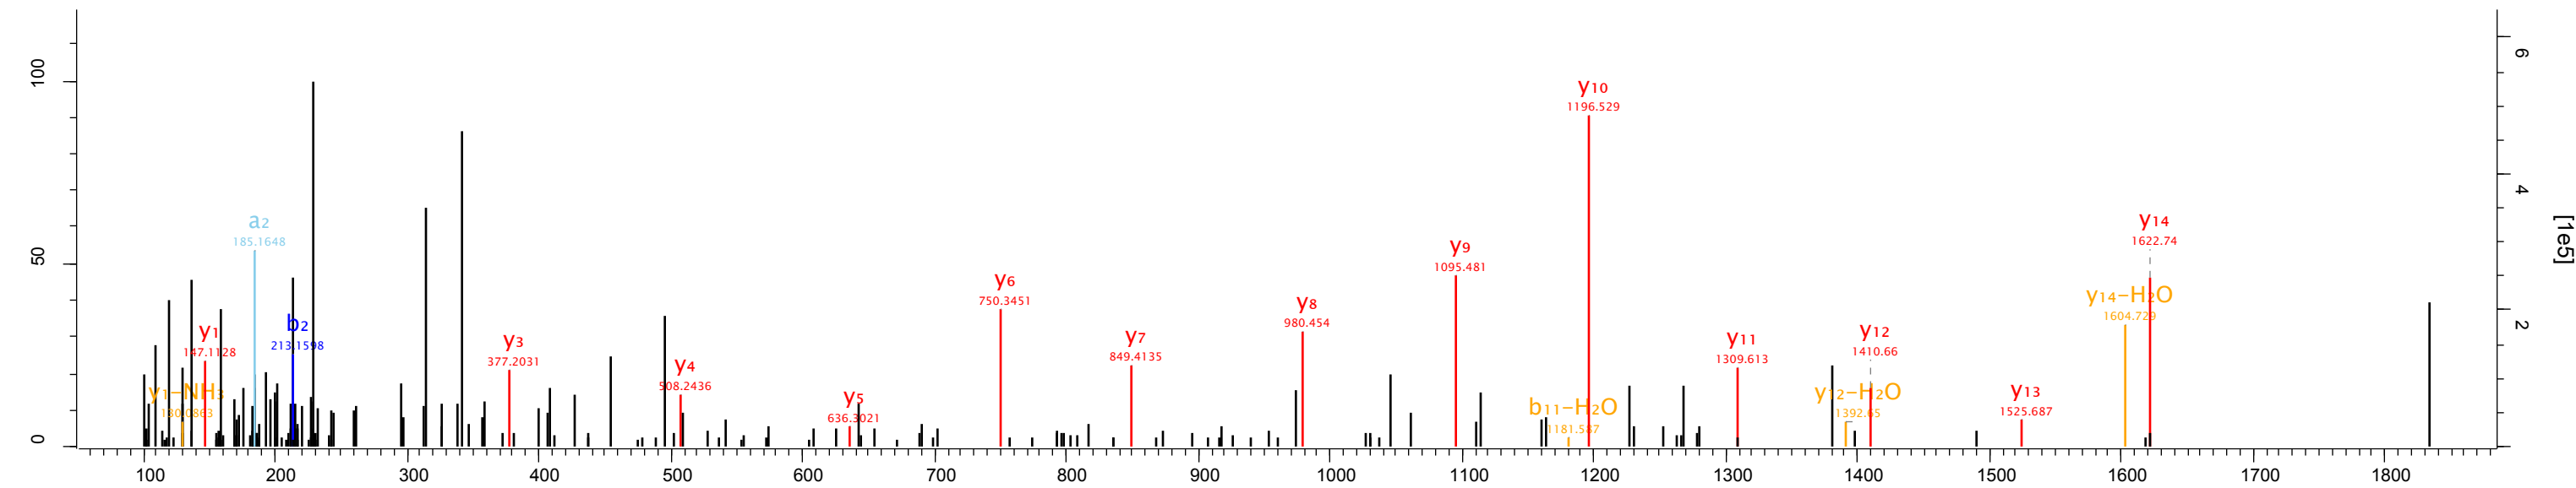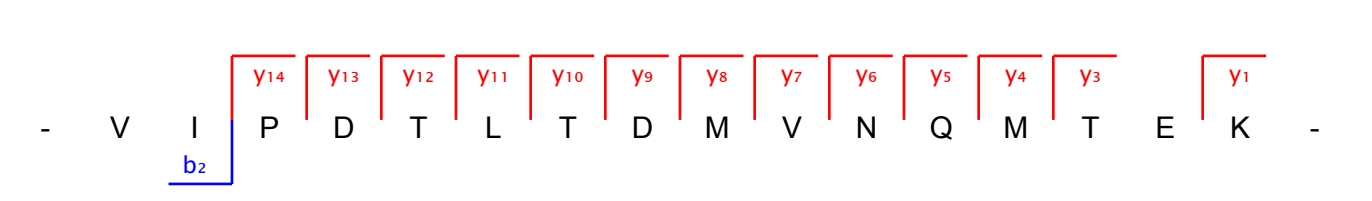

Raw file 20171215\_MaS\_33SR\_LMH\_proteome\_01 Scan 114686 Method FTMS; HCD Score 176.21 m/z 1057.55 Gene names NFYA

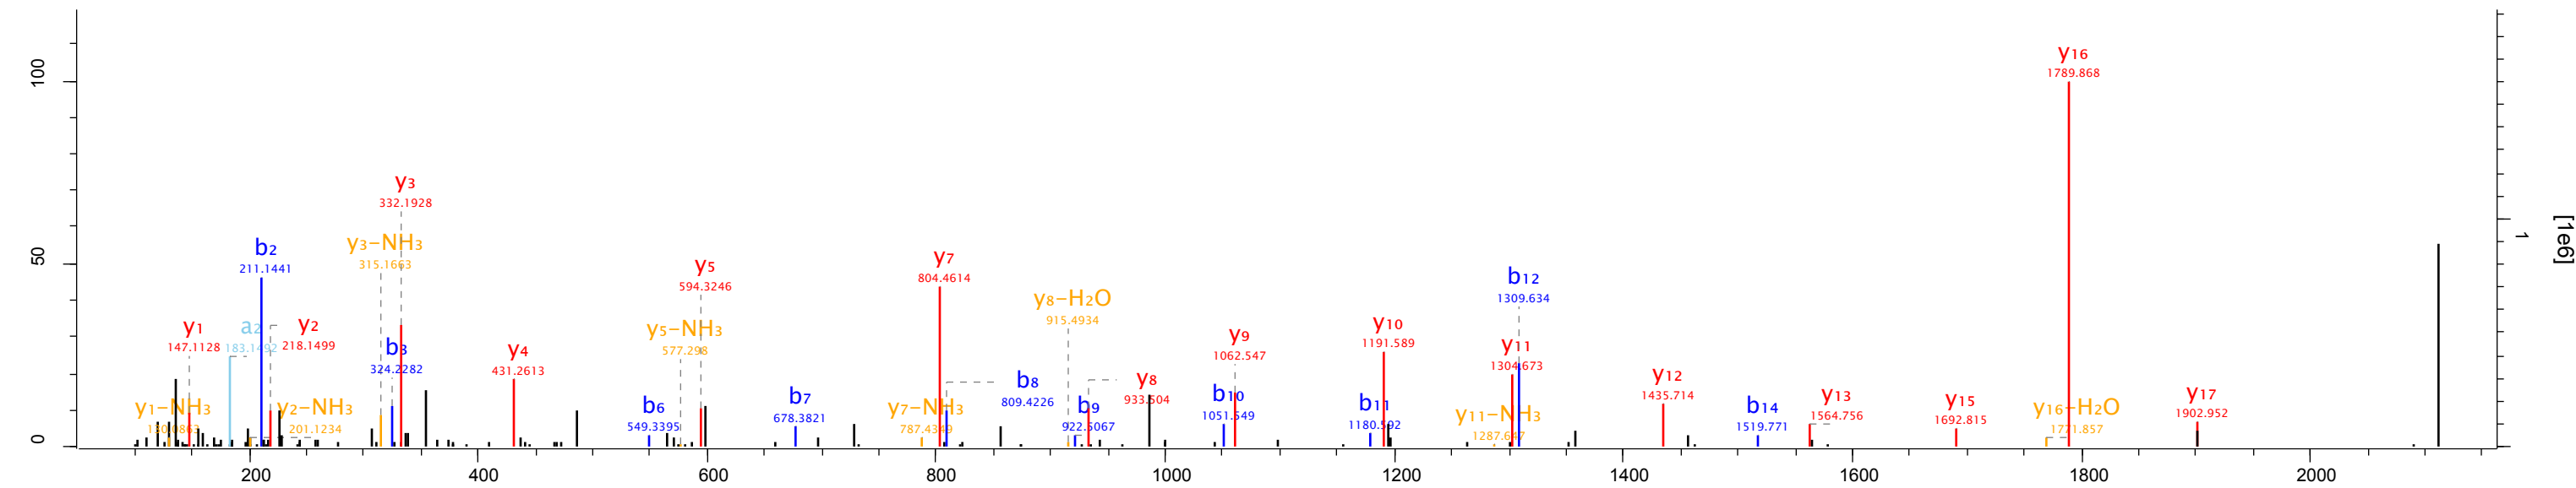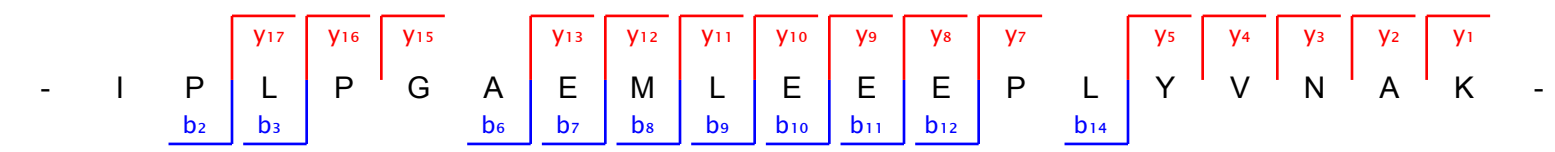

Raw file 20171215\_MaS\_33SR\_LMH\_proteome\_01 Scan 116416 Method FTMS; HCD Score 57.97 m/z 854.78 Gene names LRP1

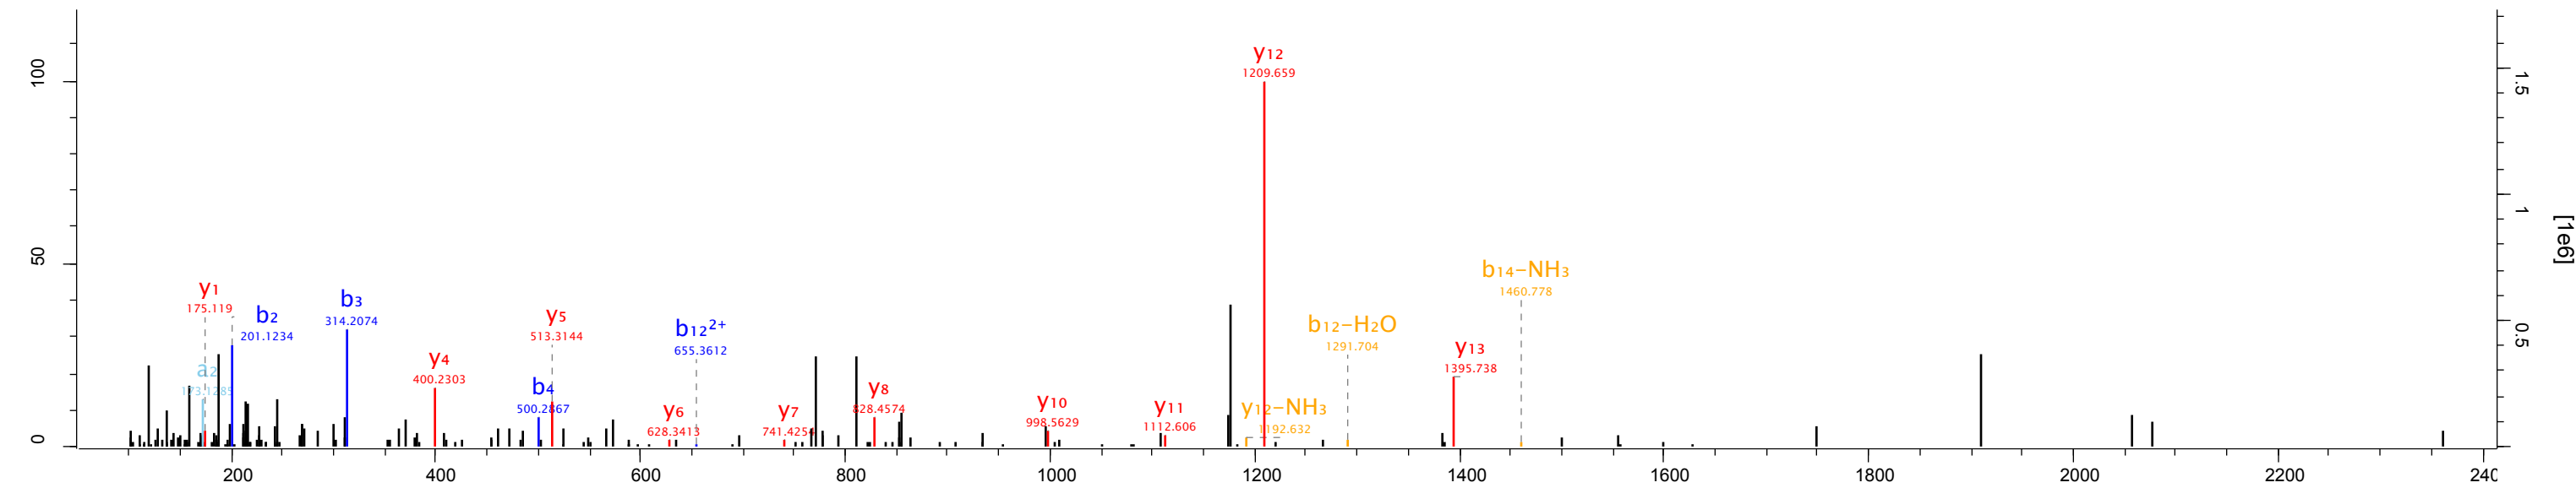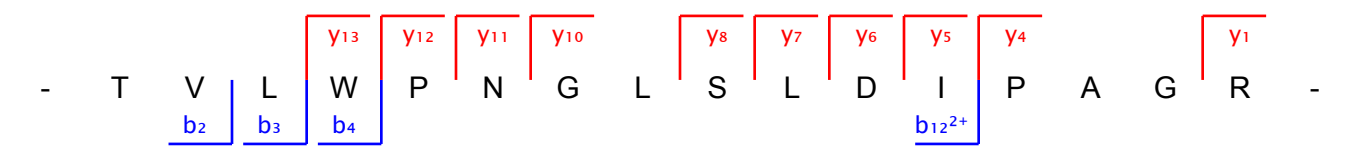

Raw file 20171215\_MaS\_33SR\_LMH\_proteome\_01 Scan 116626 Method FTMS; HCD Score 36.17 m/z 1049.55 Gene names GTF2H1

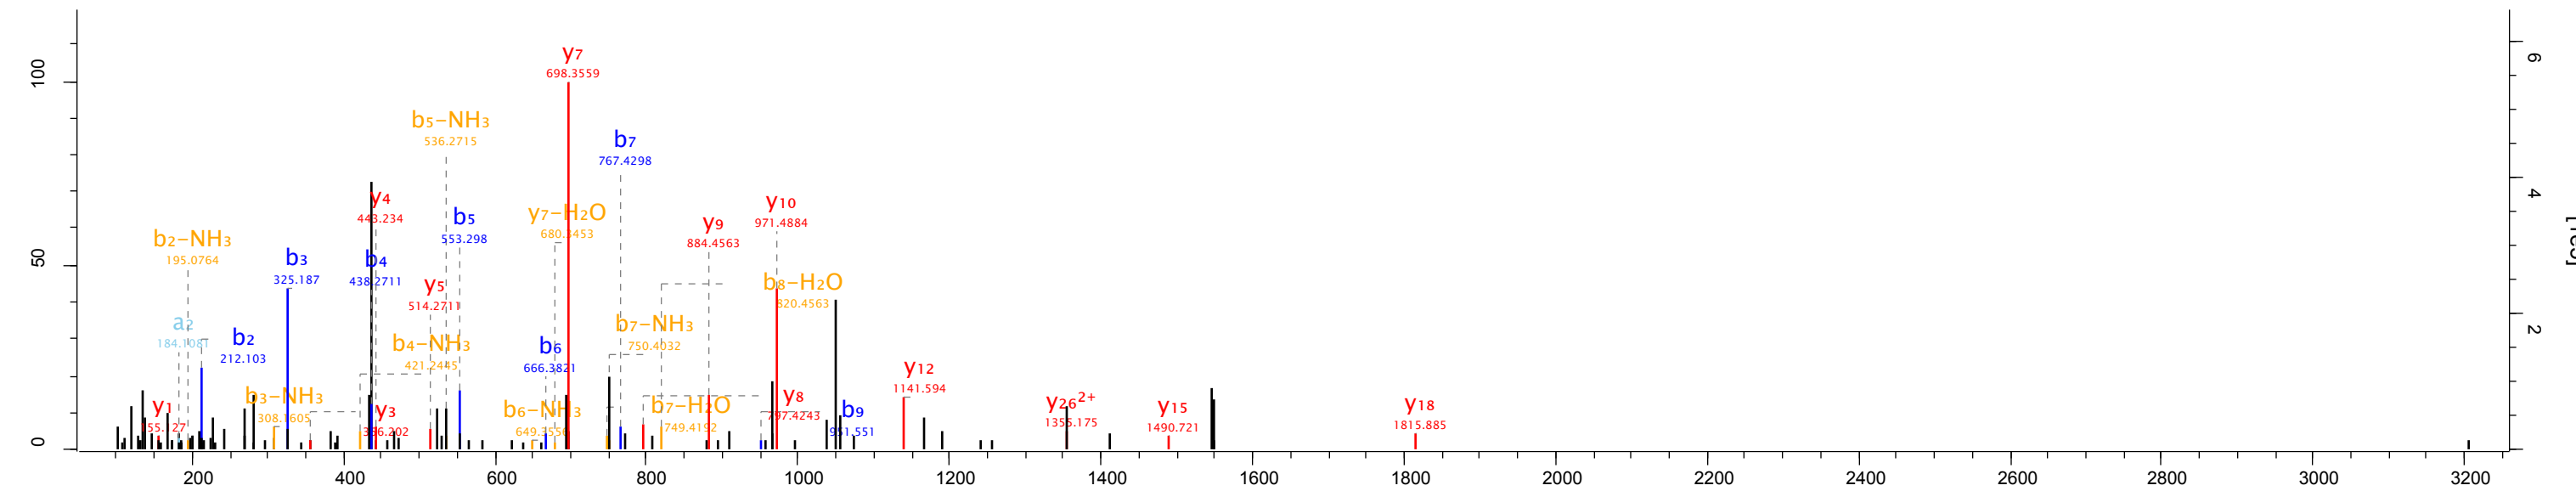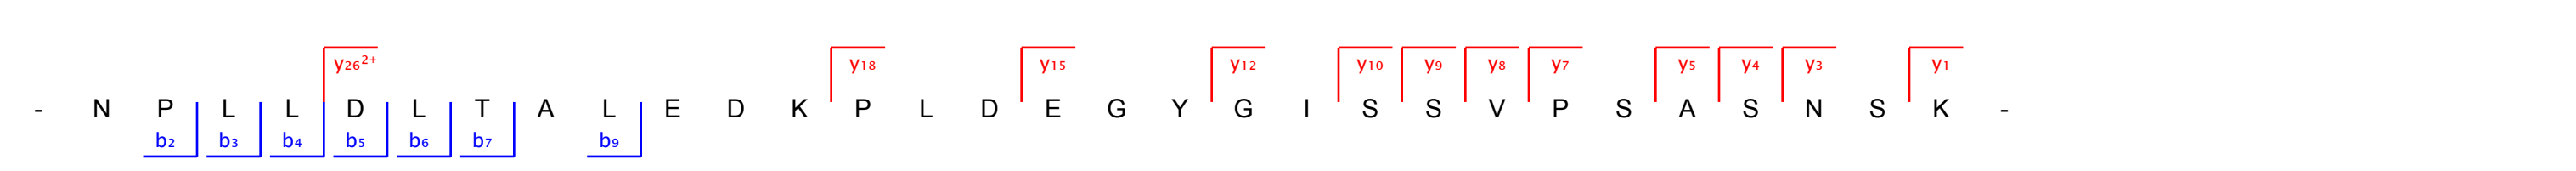

Raw file: 20171215\_MaS\_33SR\_LMH\_proteome\_01  
 Scan: 117086 Method: FTMS; HCD Score: 43.79 m/z: 704.06 Gene names: TRIM21

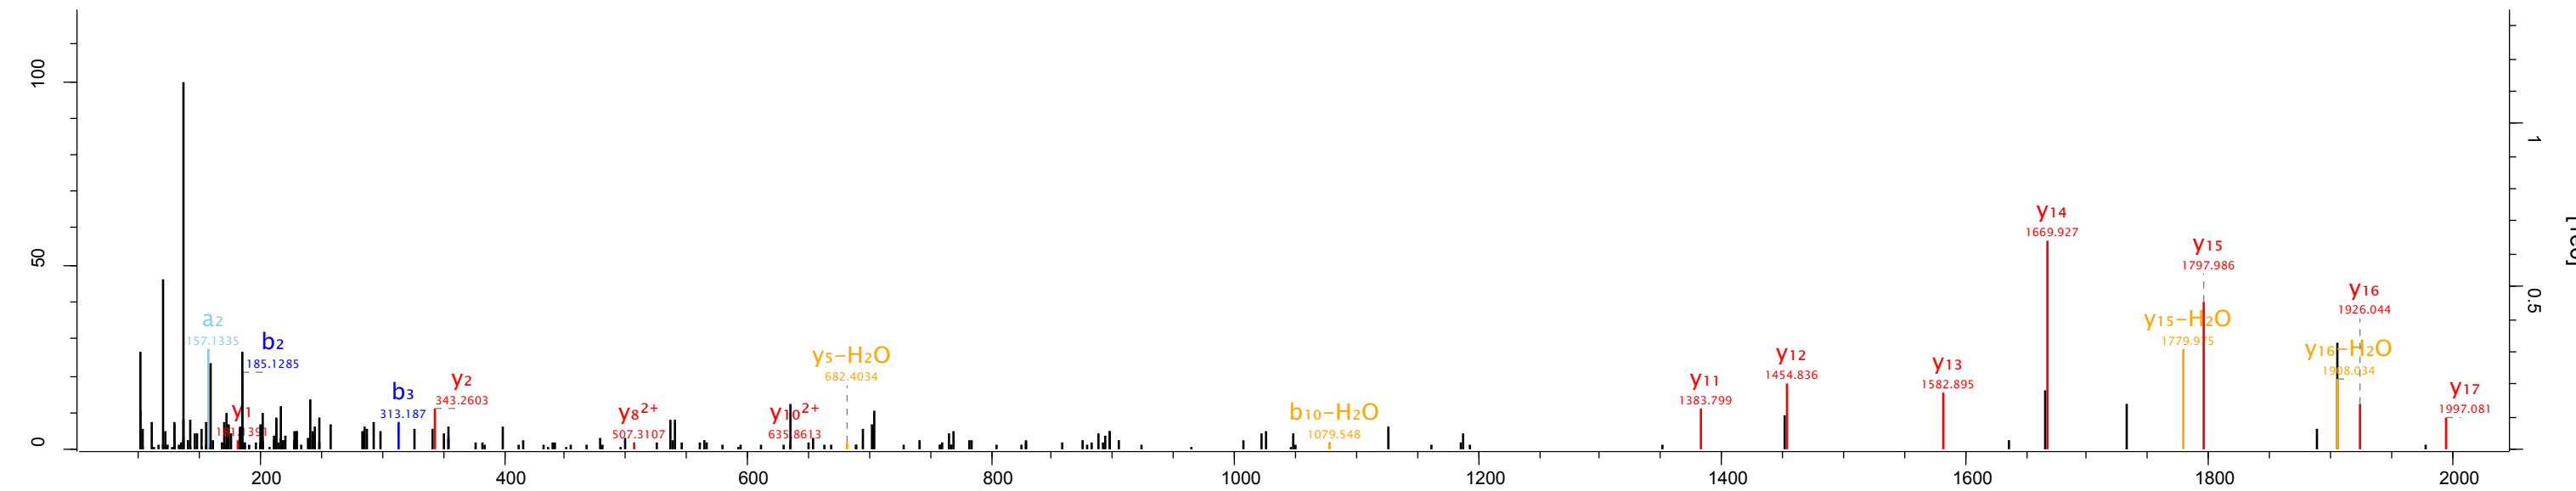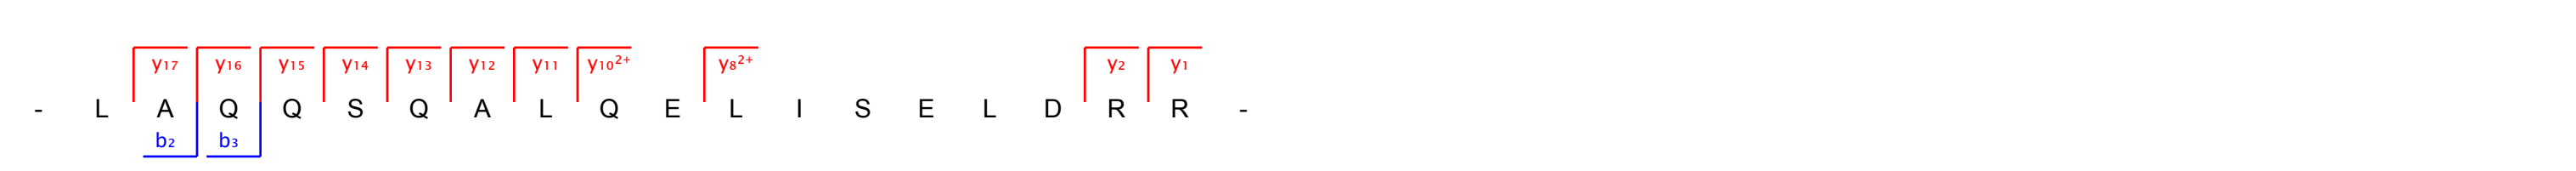

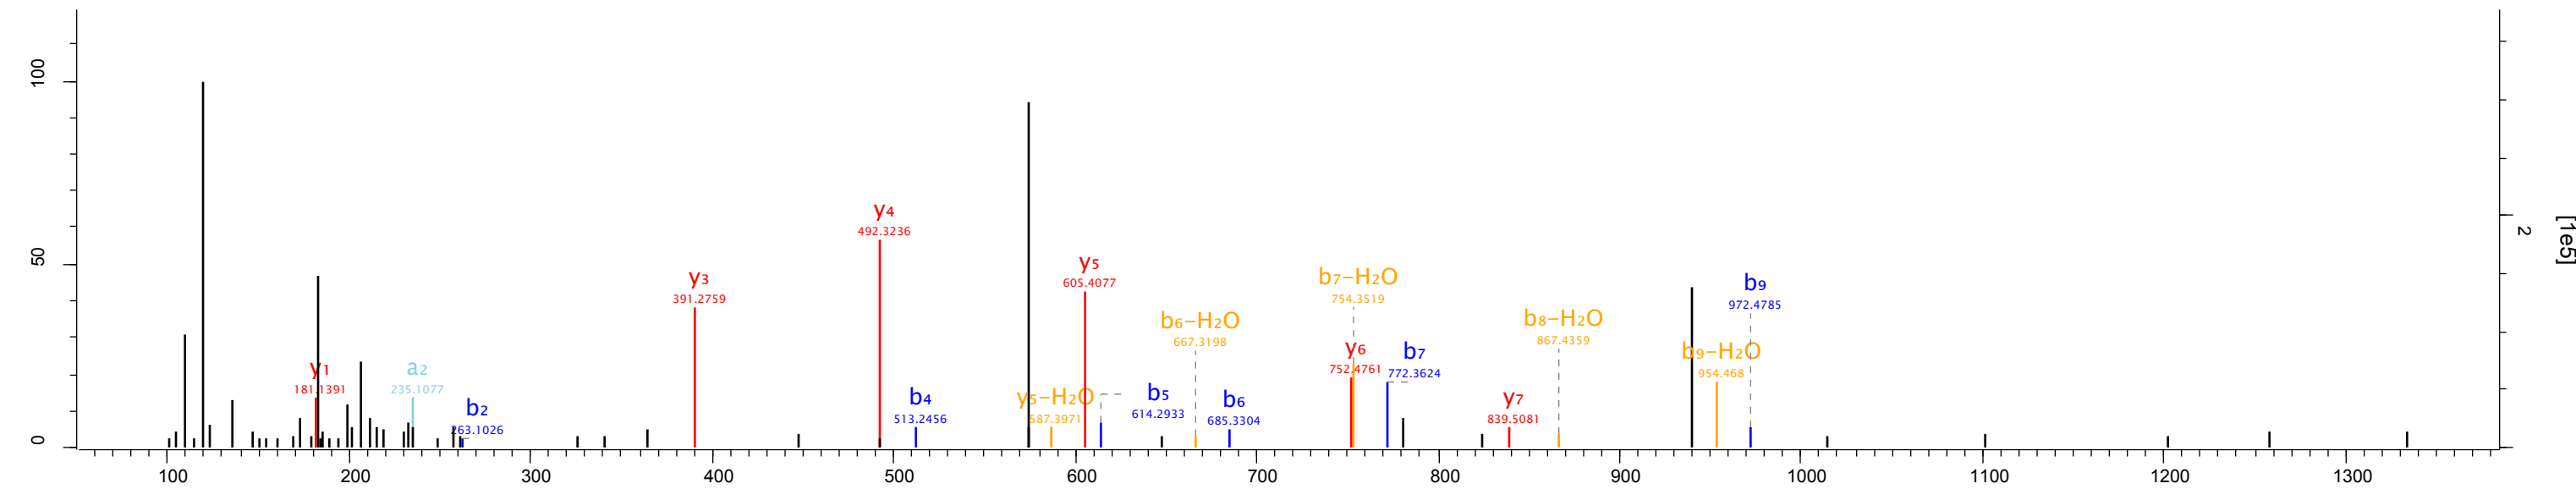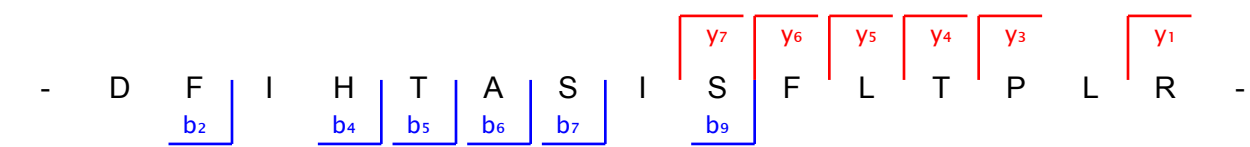

Raw file: 20171215\_MaS\_33SR\_LMH\_proteome\_01  
 Scan: 118086 Method: FTMS; HCD Score: 48.85 m/z: 1138.96 Gene names: COX7A2L

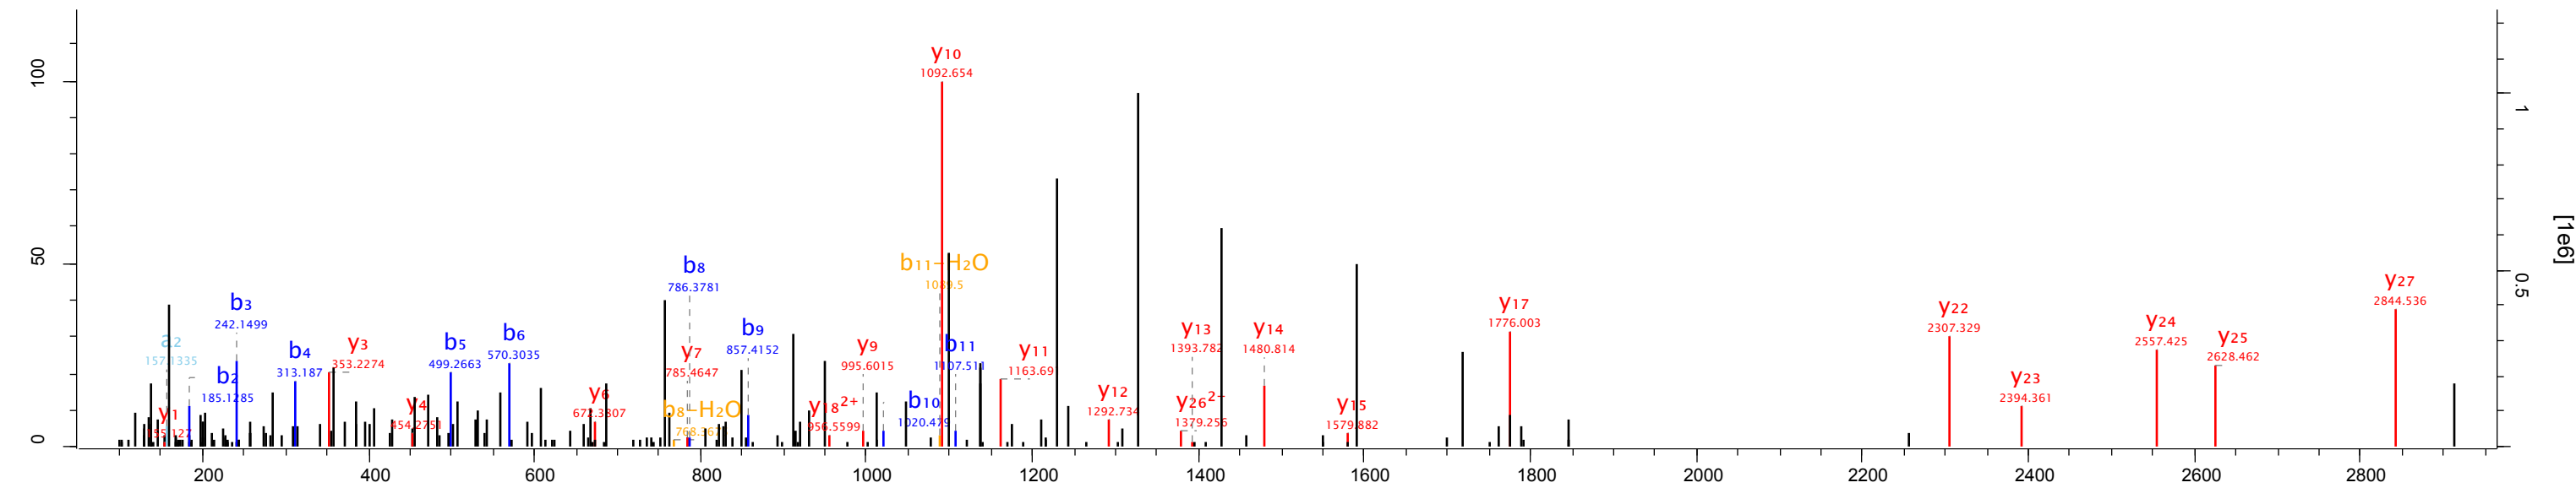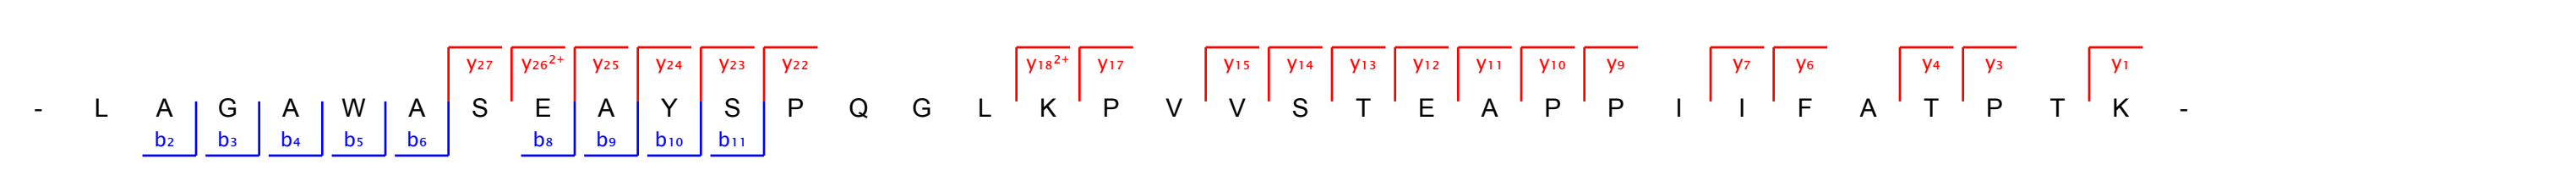

Raw file: 20171215\_MaS\_33SR\_LMH\_proteome\_01  
 Scan: 12026 Method: FTMS; HCD Score: 107.43 m/z: 380.23

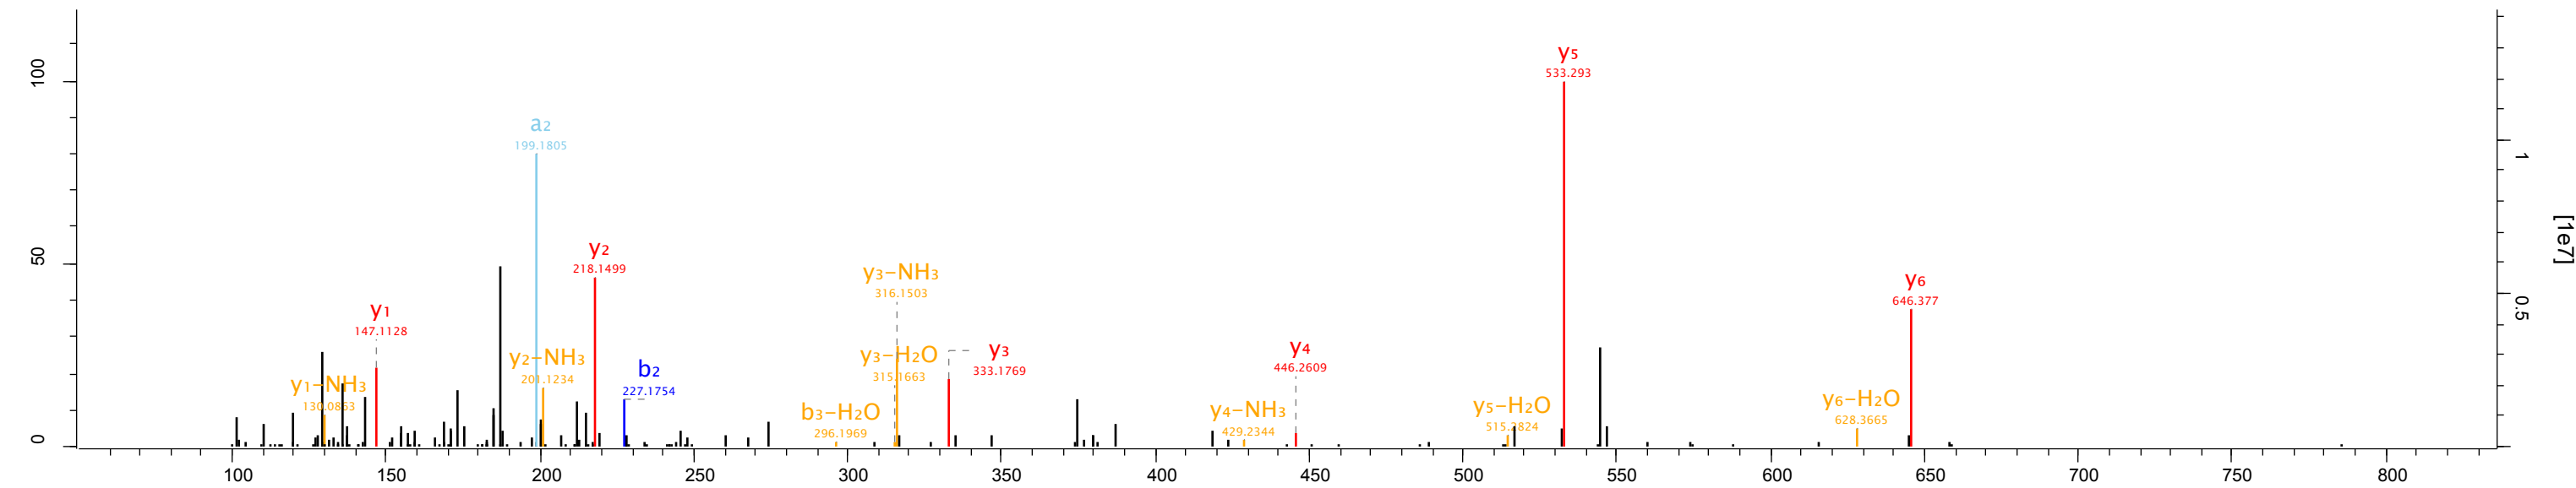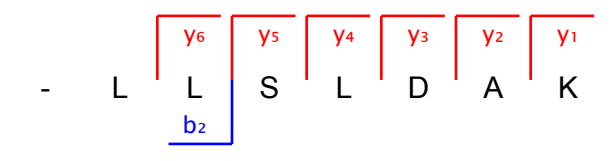



Raw file: 20171215\_MaS\_33SR\_LMH\_proteome\_01  
 Scan: 131726 Method: FTMS; HCD Score: 65.18 m/z: 777.78 Gene names: DHX36

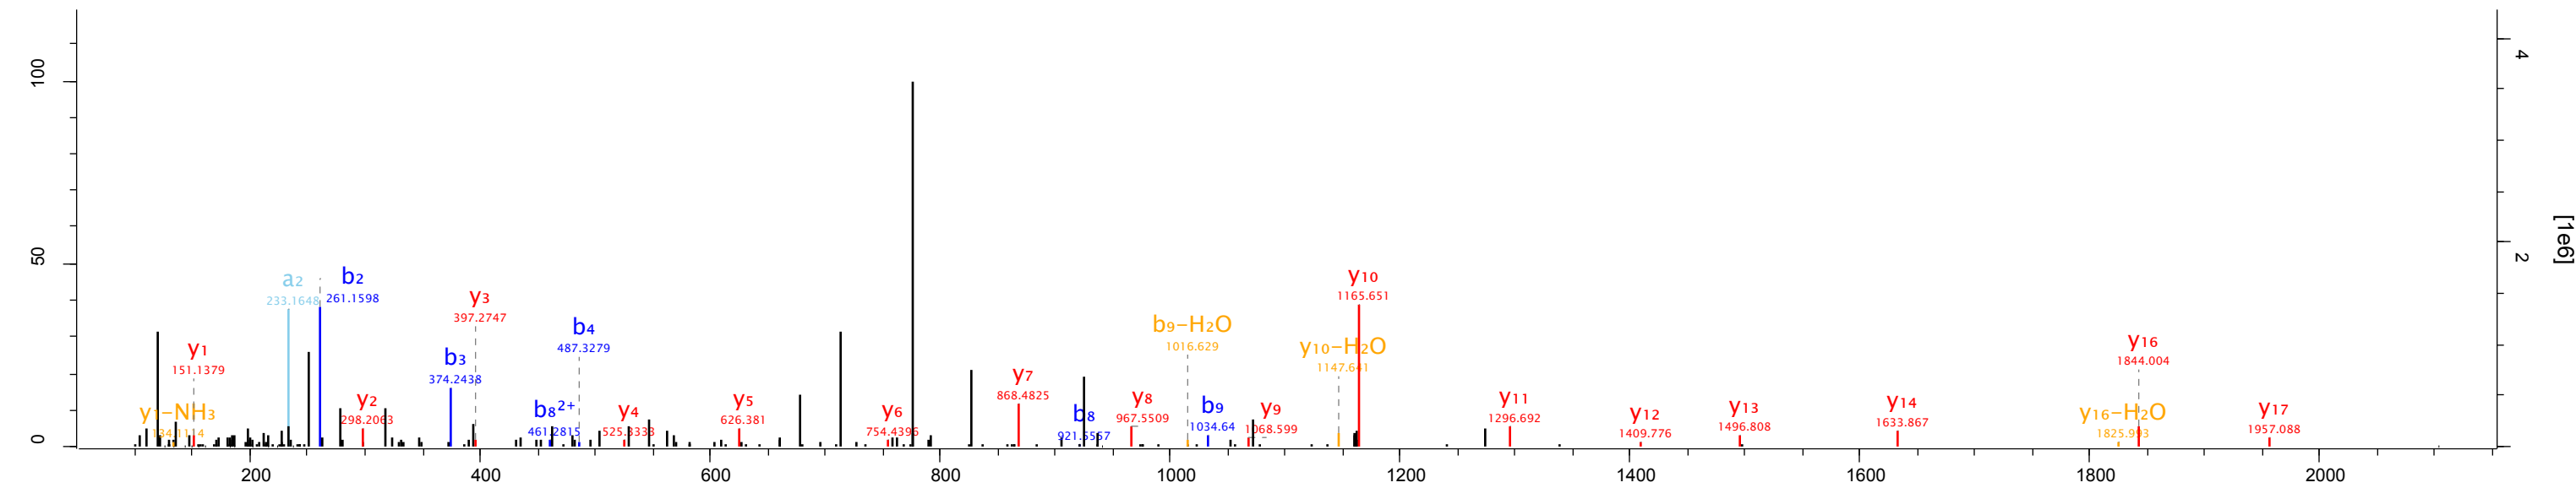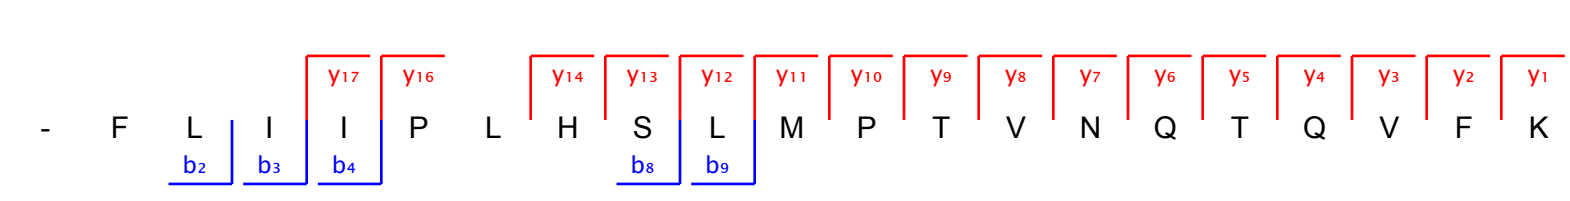

Raw file: 20171215\_MaS\_33SR\_LMH\_proteome\_01  
 Scan: 131736 Method: FTMS; HCD Score: 38.59 m/z: 1094.53 Gene names: SLC30A5

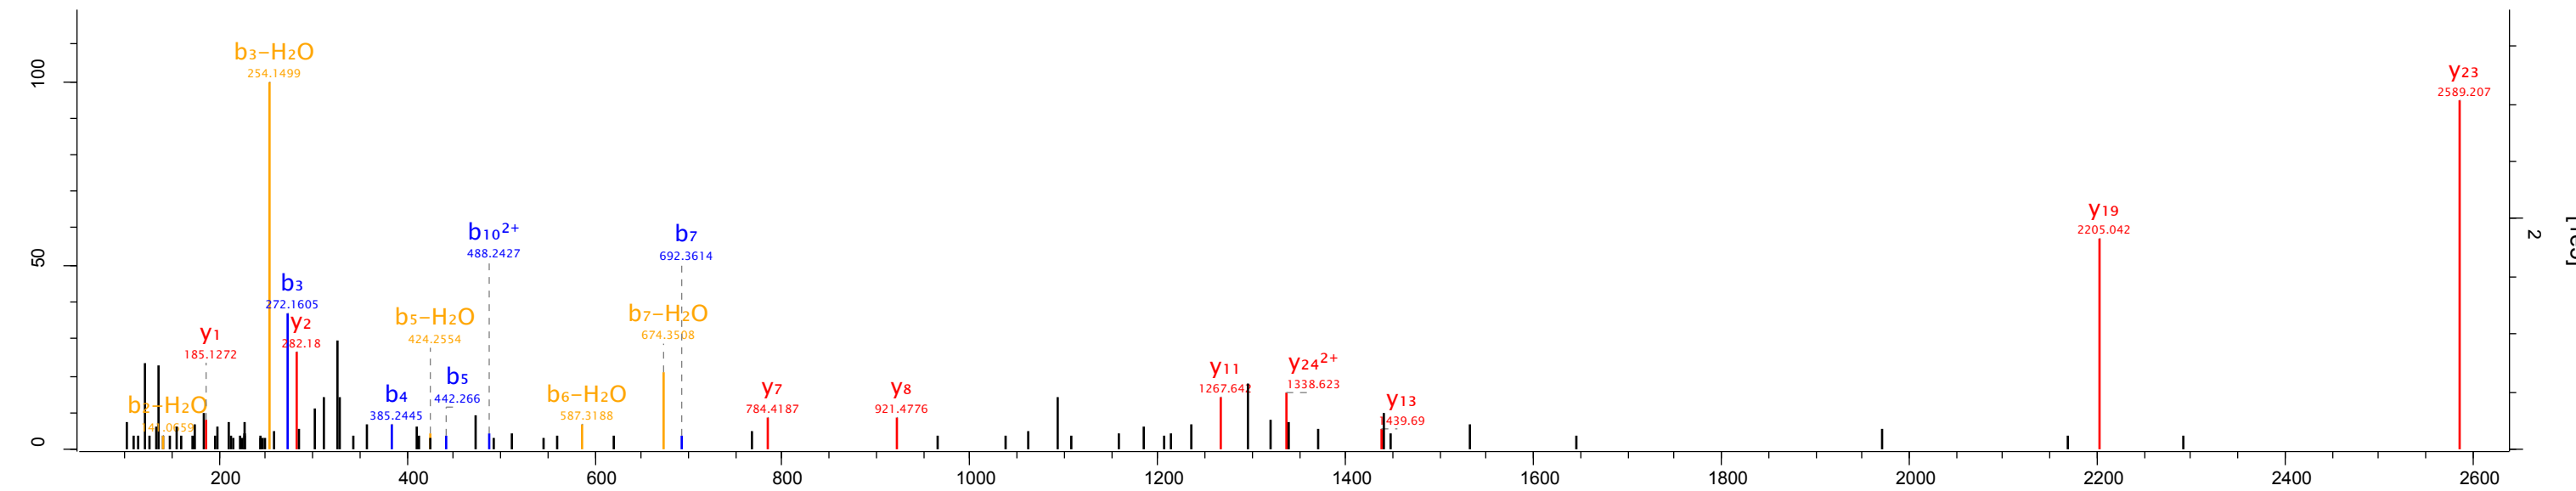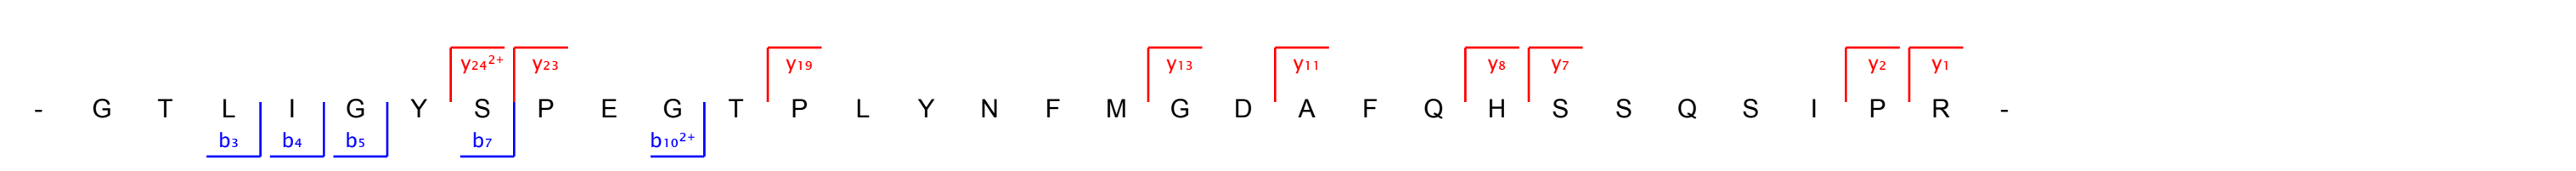

[1e5]

Raw file: 20171215\_MaS\_33SR\_LMH\_proteome\_01  
 Scan: 140406 Method: FTMS; HCD Score: 107.03 m/z: 665.36 Gene names: KIF23

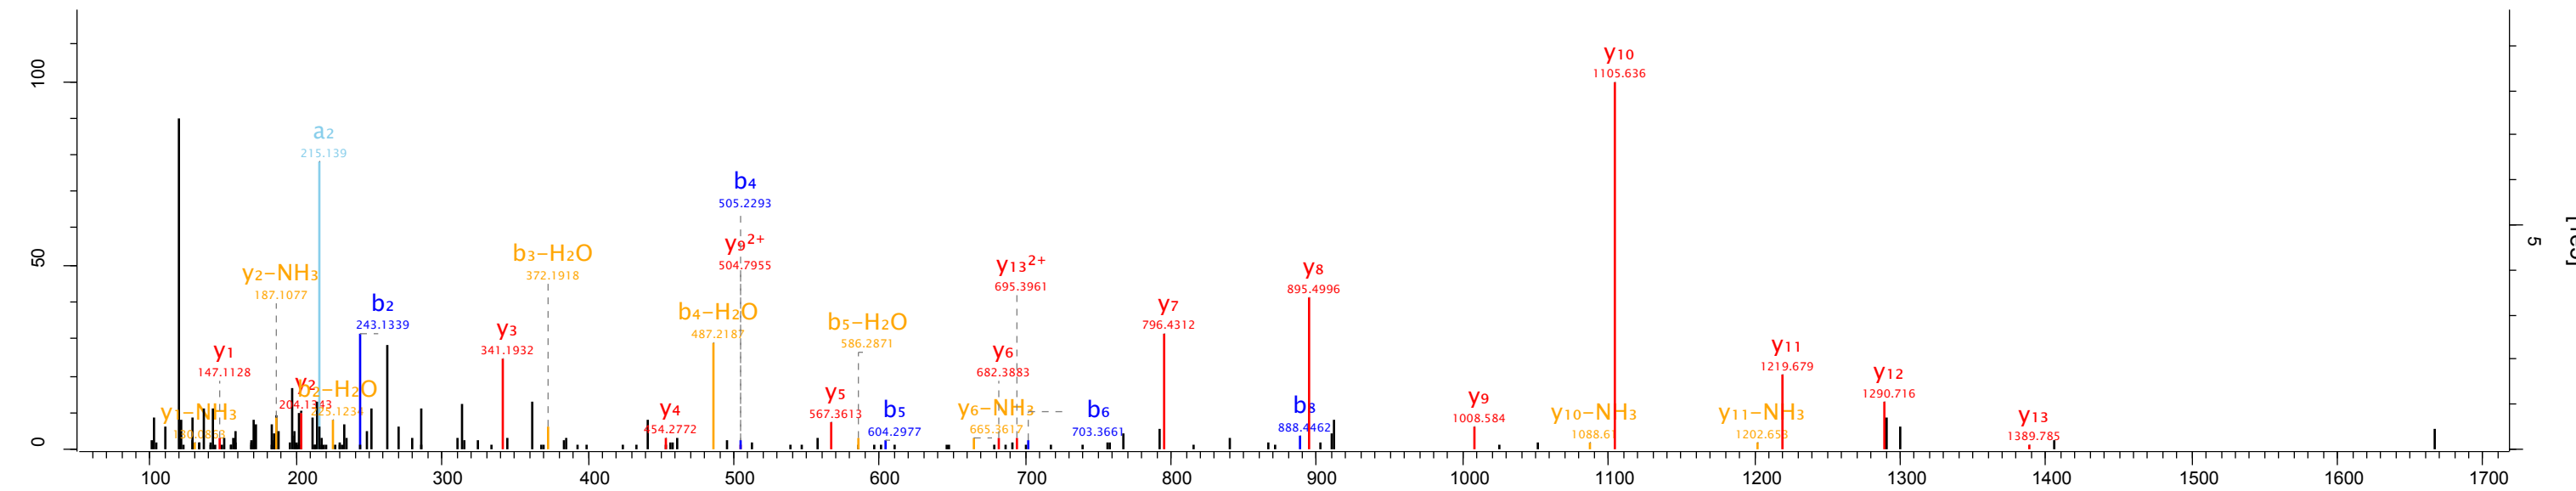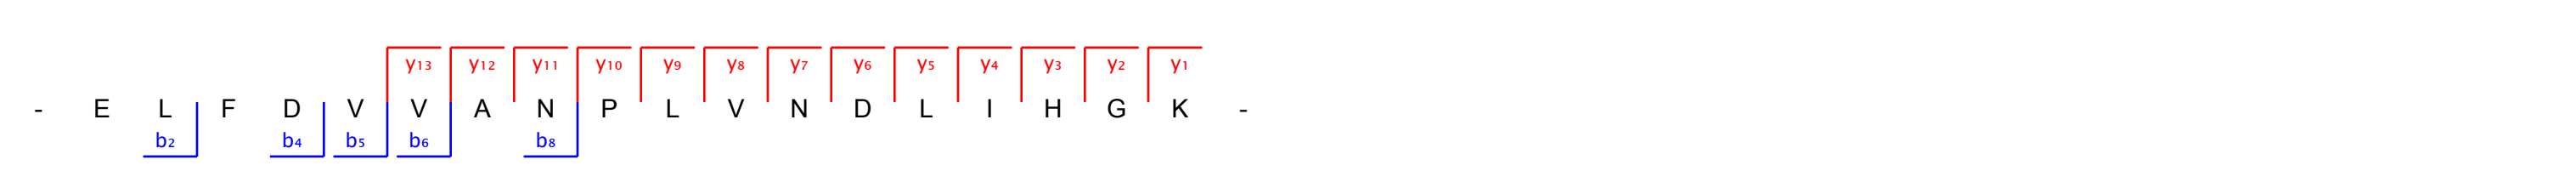

Raw file

20171215\_MaS\_33SR\_LMH\_proteome\_01

Scan 15086 Method FTMS; HCD Score 41.4 m/z 692.33 Gene names C8G

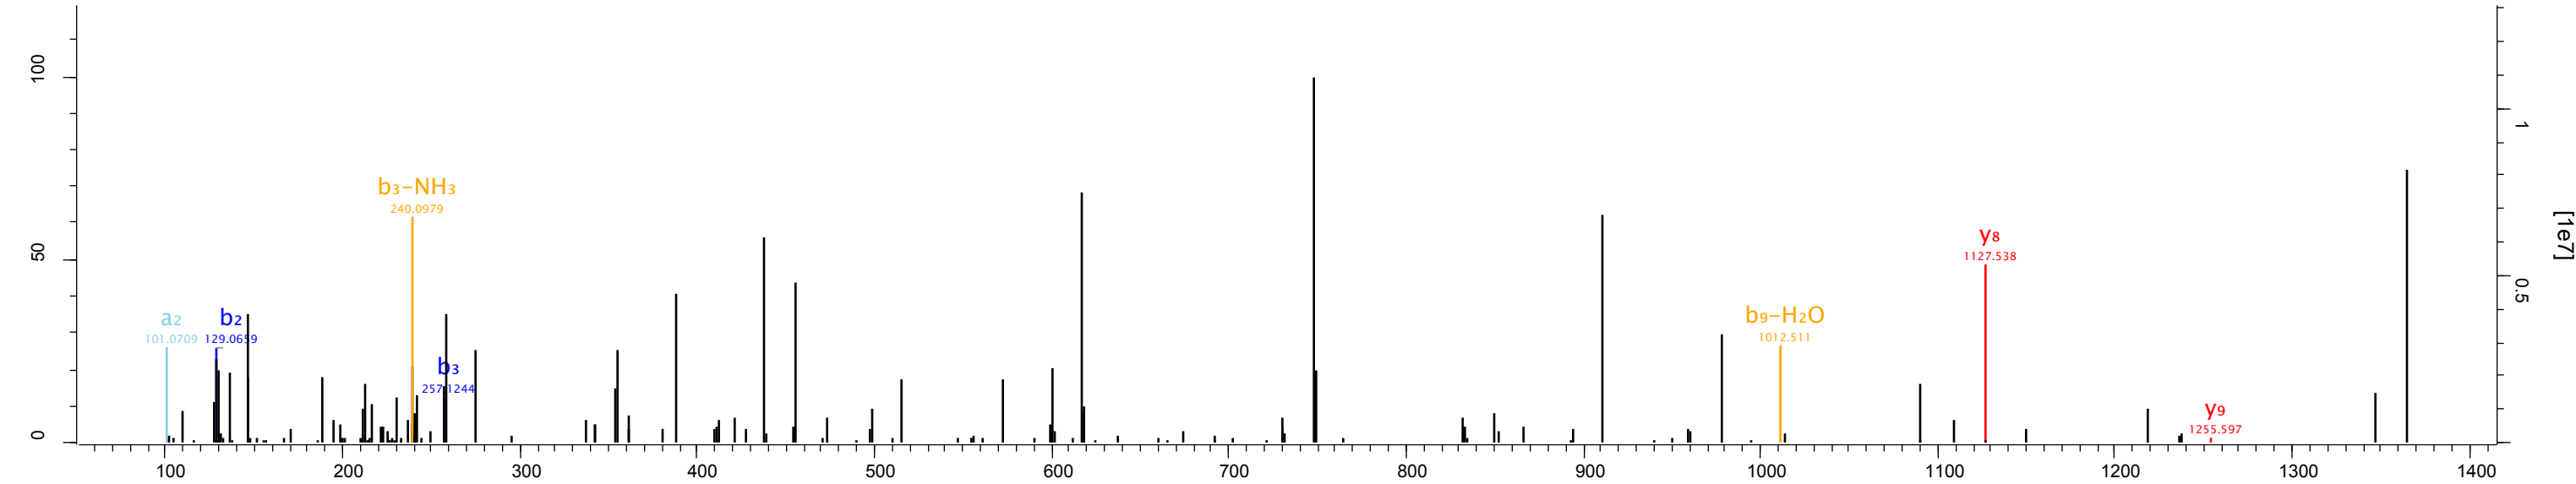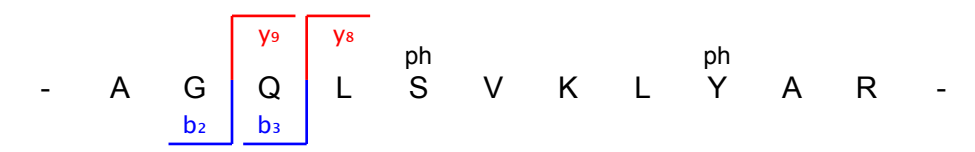

Raw file 20171215\_MaS\_33SR\_LMH\_proteome\_01 Scan 24176 Method FTMS; HCD Score 43.77 m/z 560.32 Gene names ORC1

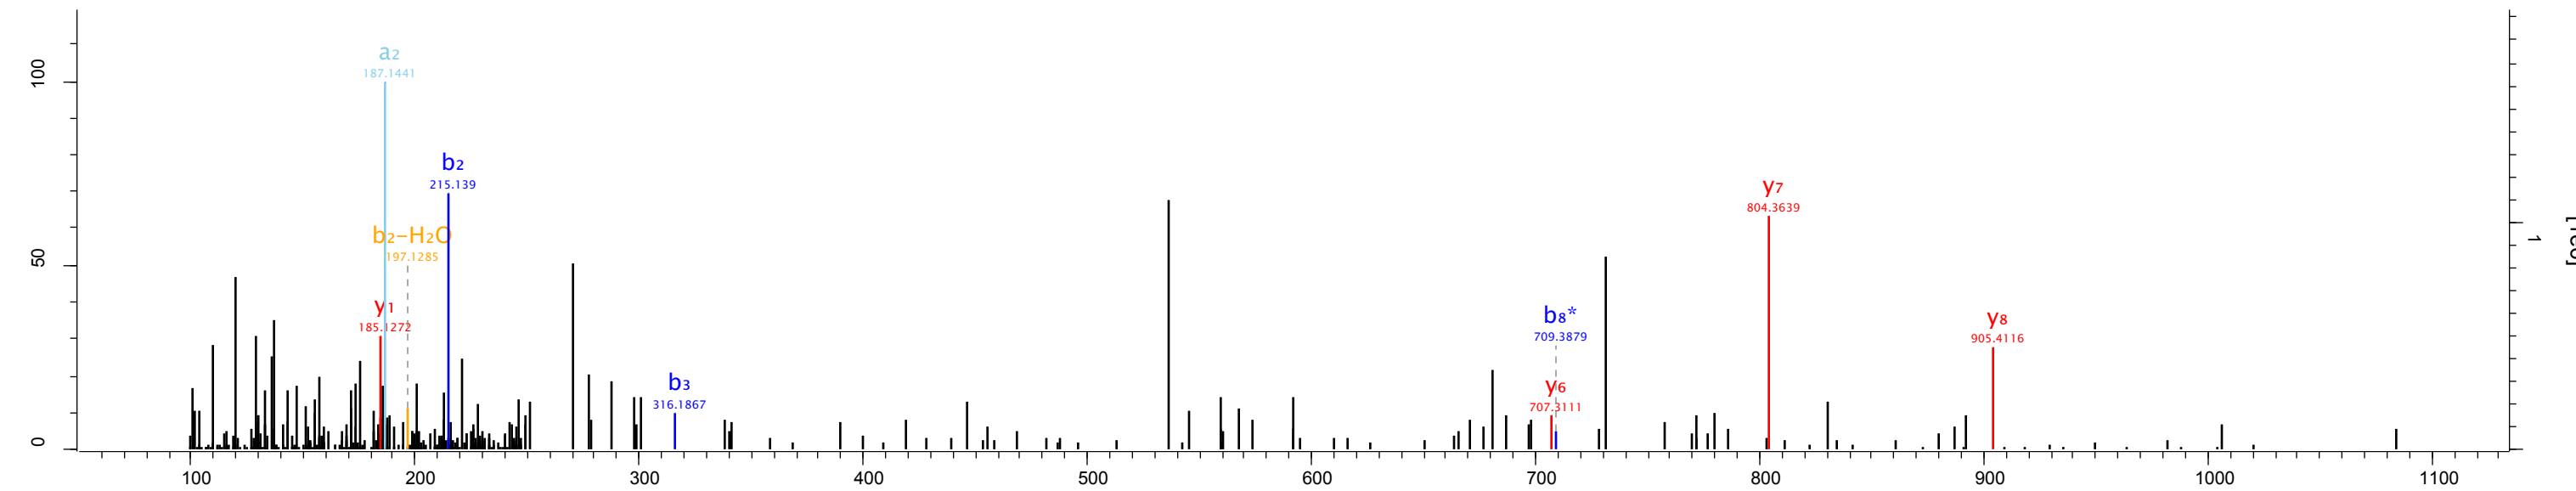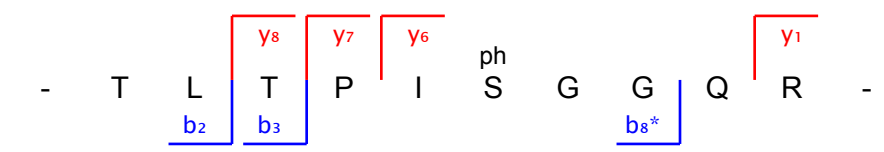

Raw file 20171215\_MaS\_33SR\_LMH\_proteome\_01 Scan 26806 Method FTMS; HCD Score 41.68 m/z 817.4 Gene names ANKRD42

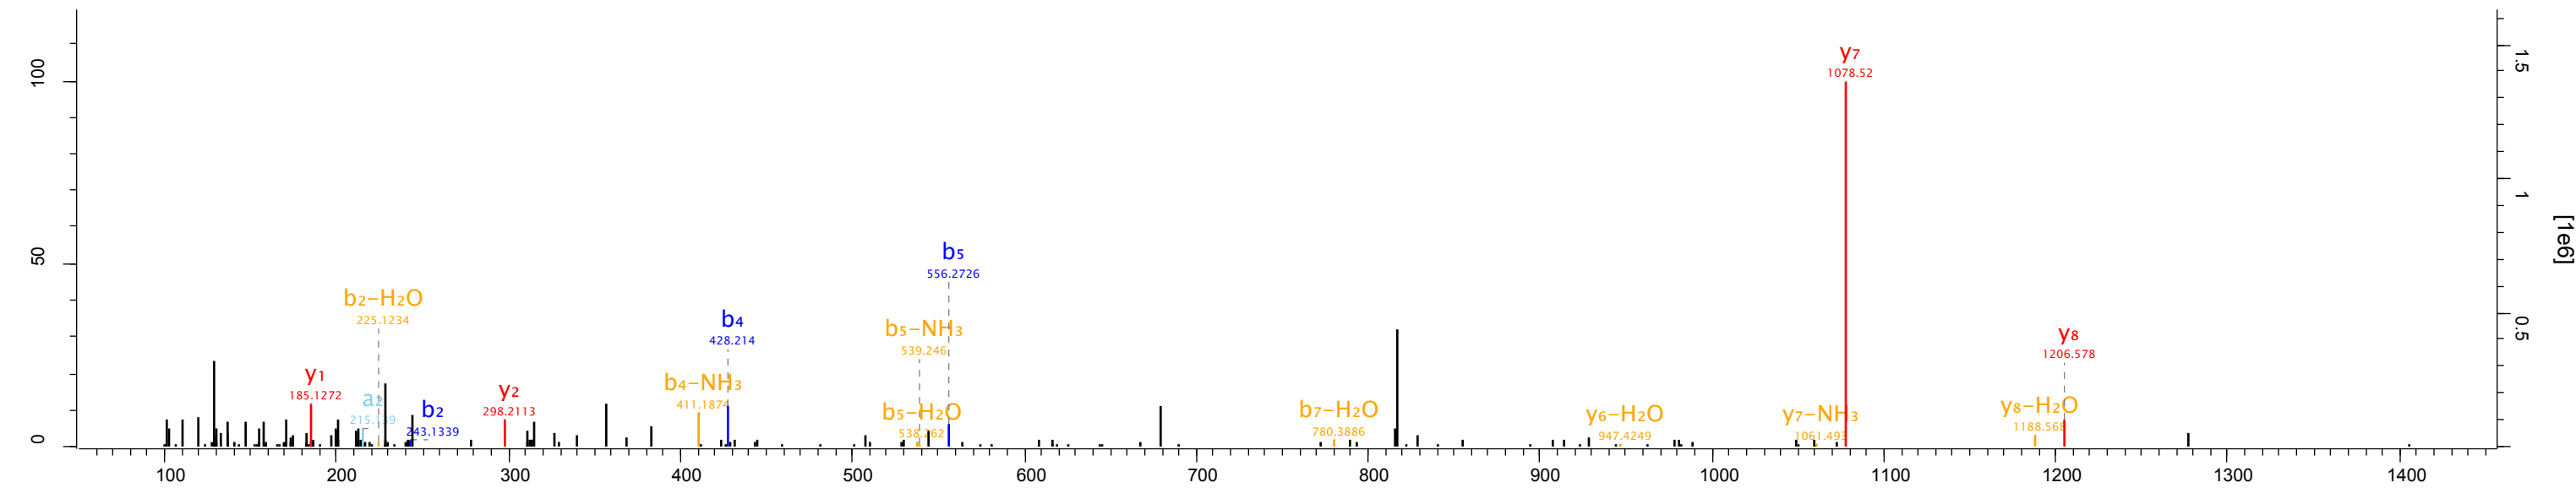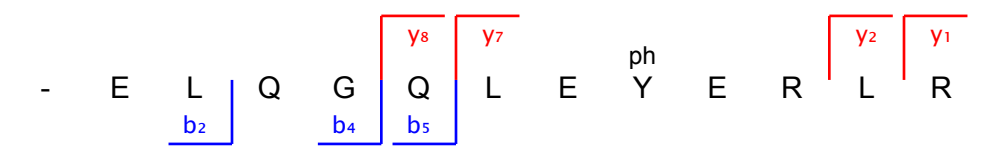

Raw file: 20171215\_MaS\_33SR\_LMH\_proteome\_01  
 Scan: 30506 Method: FTMS; HCD Score: 58.66 m/z: 783.42 Gene names: CRLF3

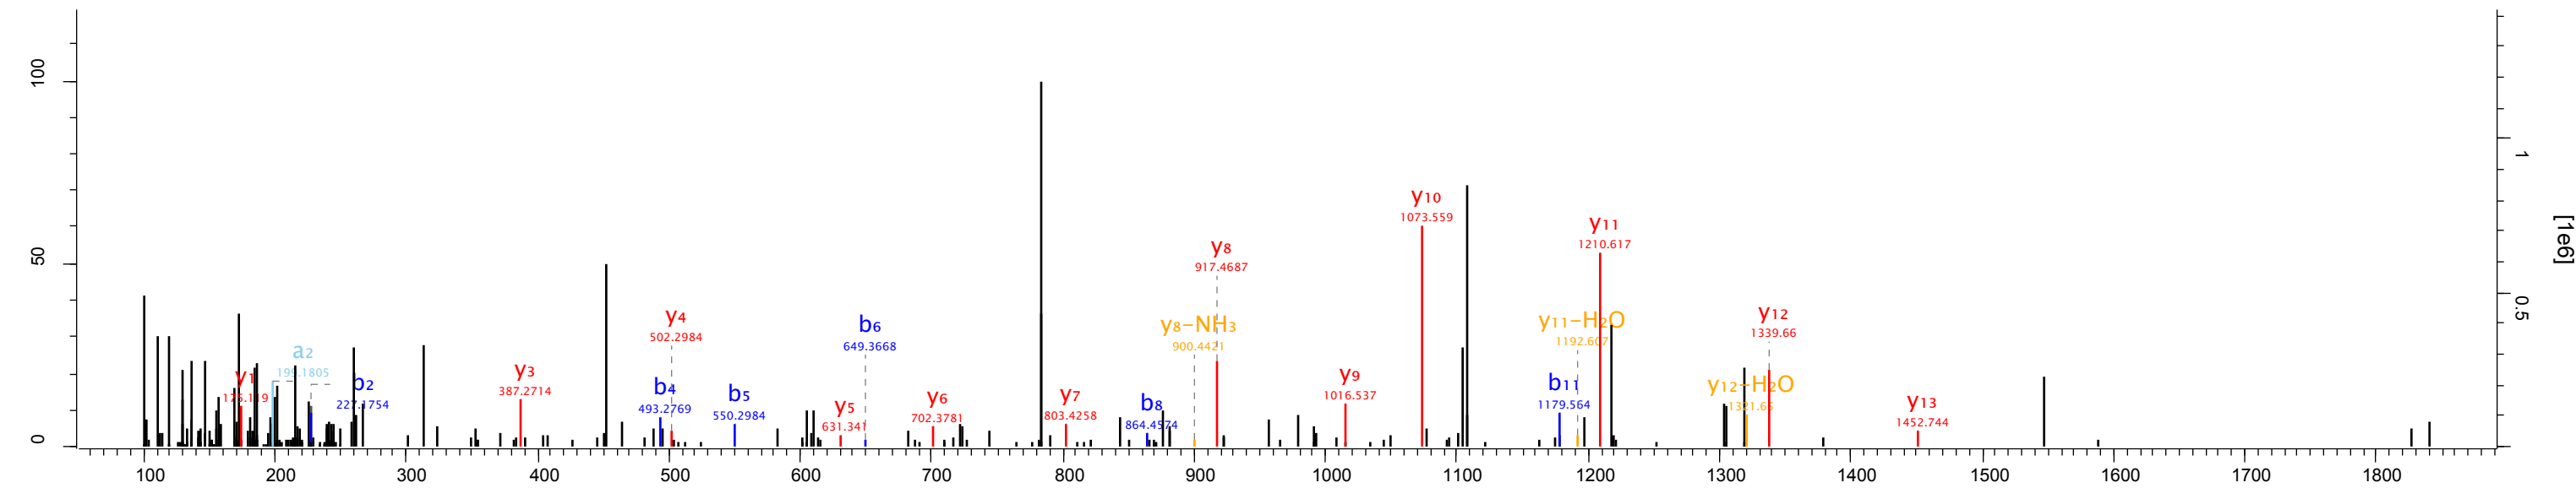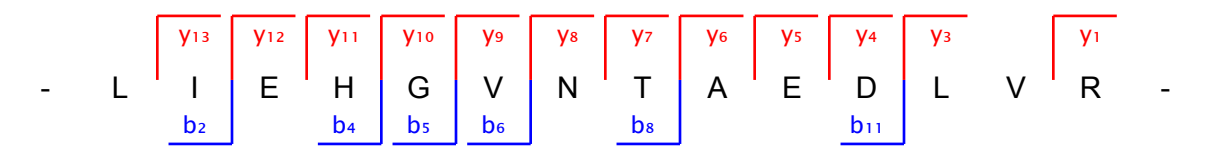

Raw file 20171215\_MaS\_33SR\_LMH\_proteome\_01 Scan 31456 Method FTMS; HCD Score 60.4 m/z 503.27 Gene names S100A2

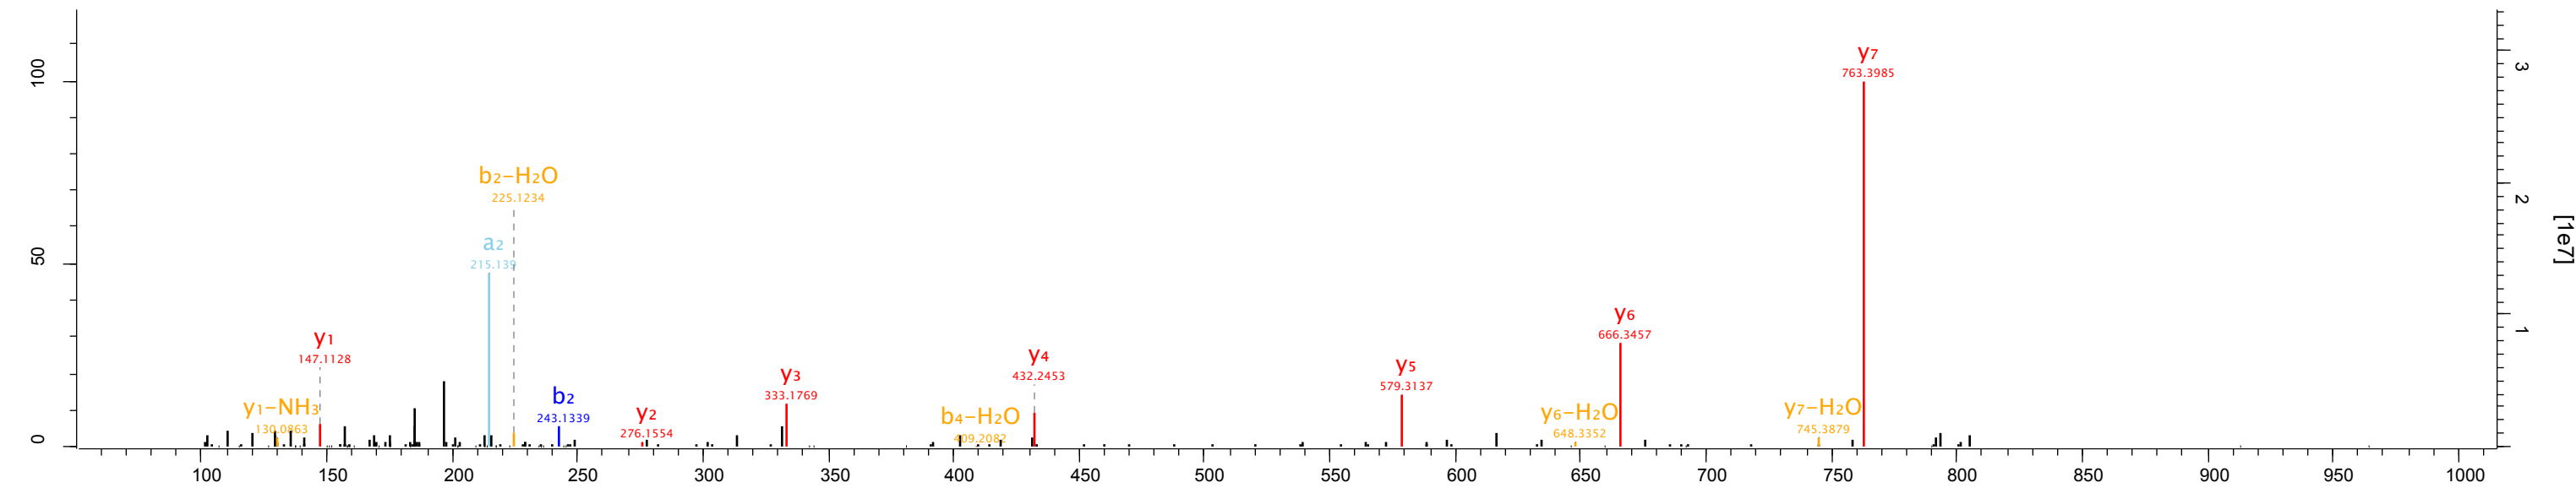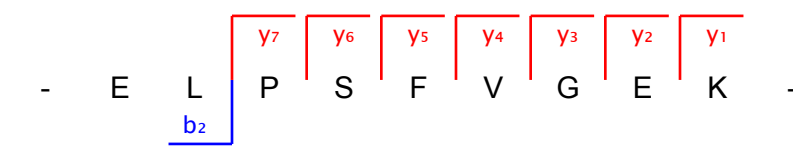



Raw file 20171215\_MaS\_33SR\_LMH\_proteome\_01 Scan 32246 Method FTMS; HCD Score 134.14 m/z 924.99 Gene names MED29;IXL

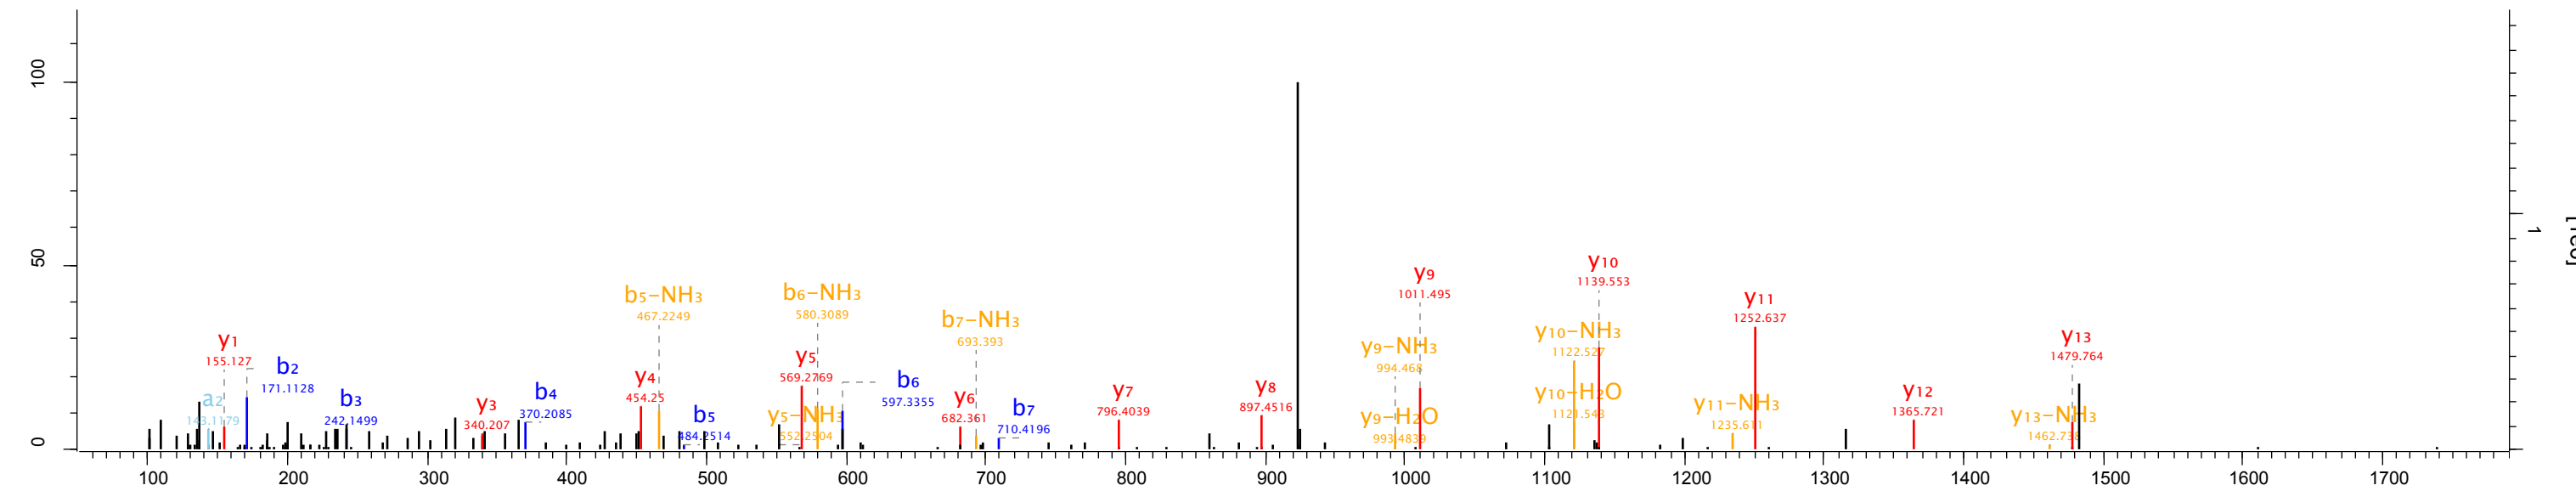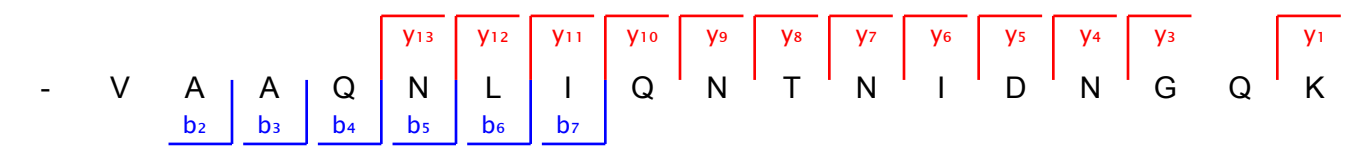

Raw file 20171215\_MaS\_33SR\_LMH\_proteome\_01 Scan 48536 Method FTMS; HCD Score 52.07 m/z 755.91

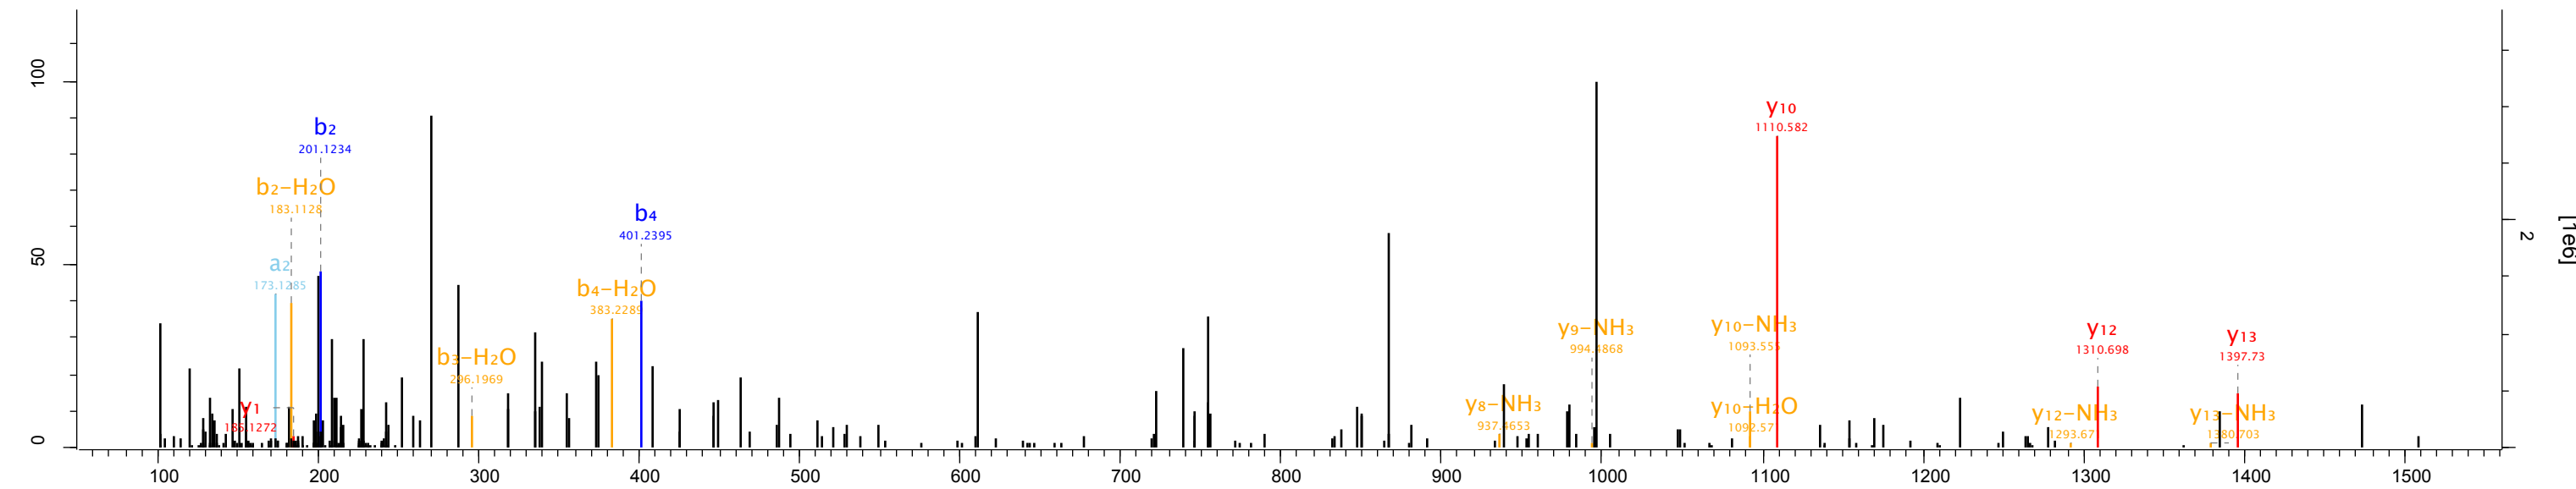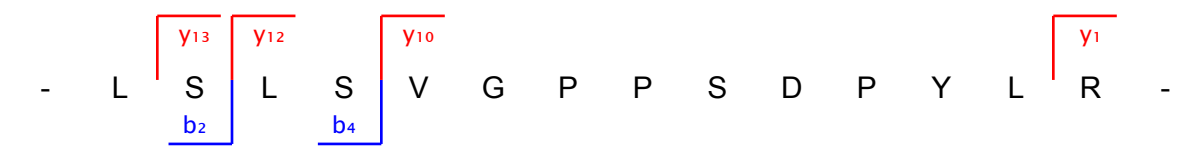

Raw file 20171215\_MaS\_33SR\_LMH\_proteome\_01 Scan 5436 Method FTMS; HCD Score 47.44 m/z 971.5 Gene names ZNF732

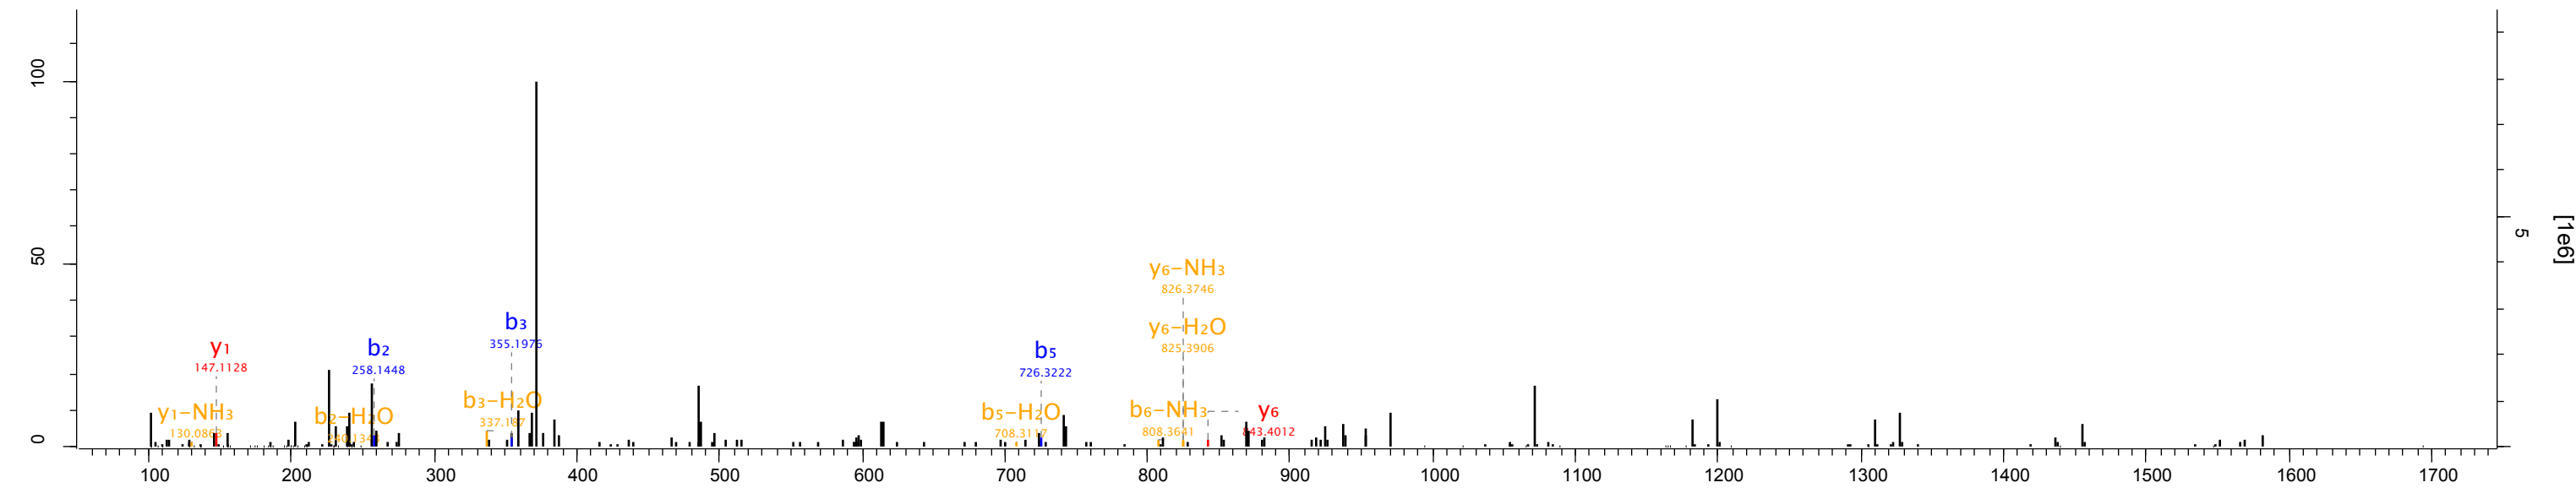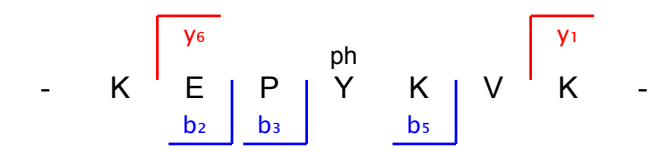

Raw file

20171215\_MaS\_33SR\_LMH\_proteome\_01

| Scan  | Method    | Score | m/z    | Gene names |
|-------|-----------|-------|--------|------------|
| 55756 | FTMS; HCD | 55.26 | 461.92 | SRA1       |

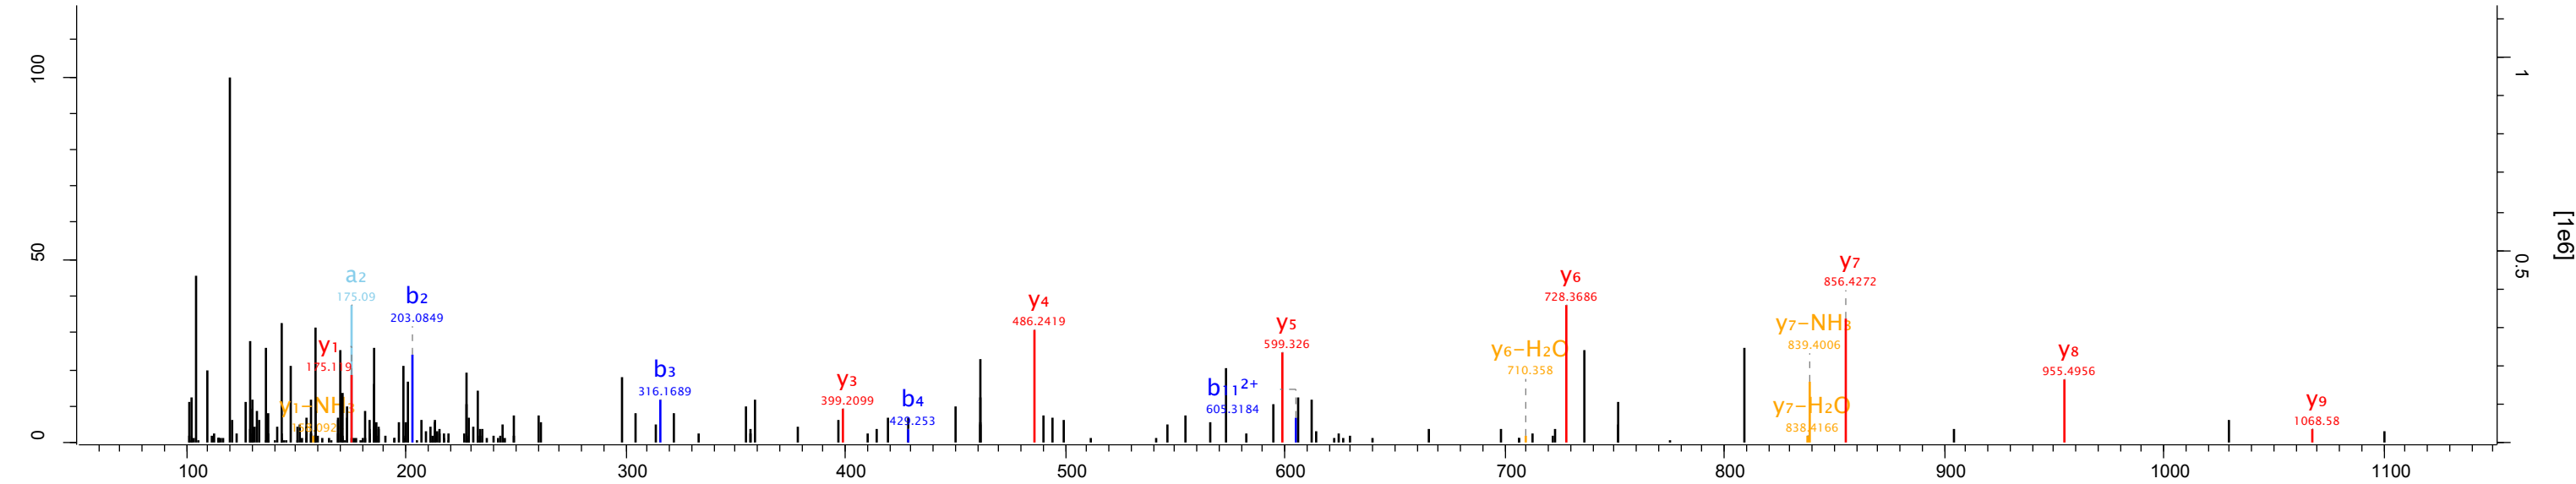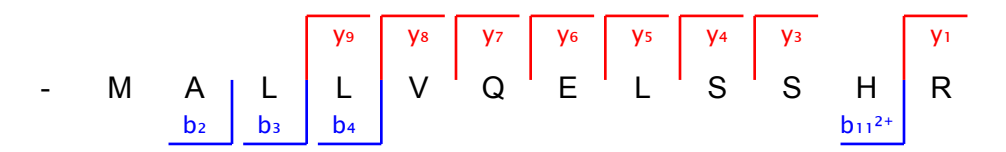

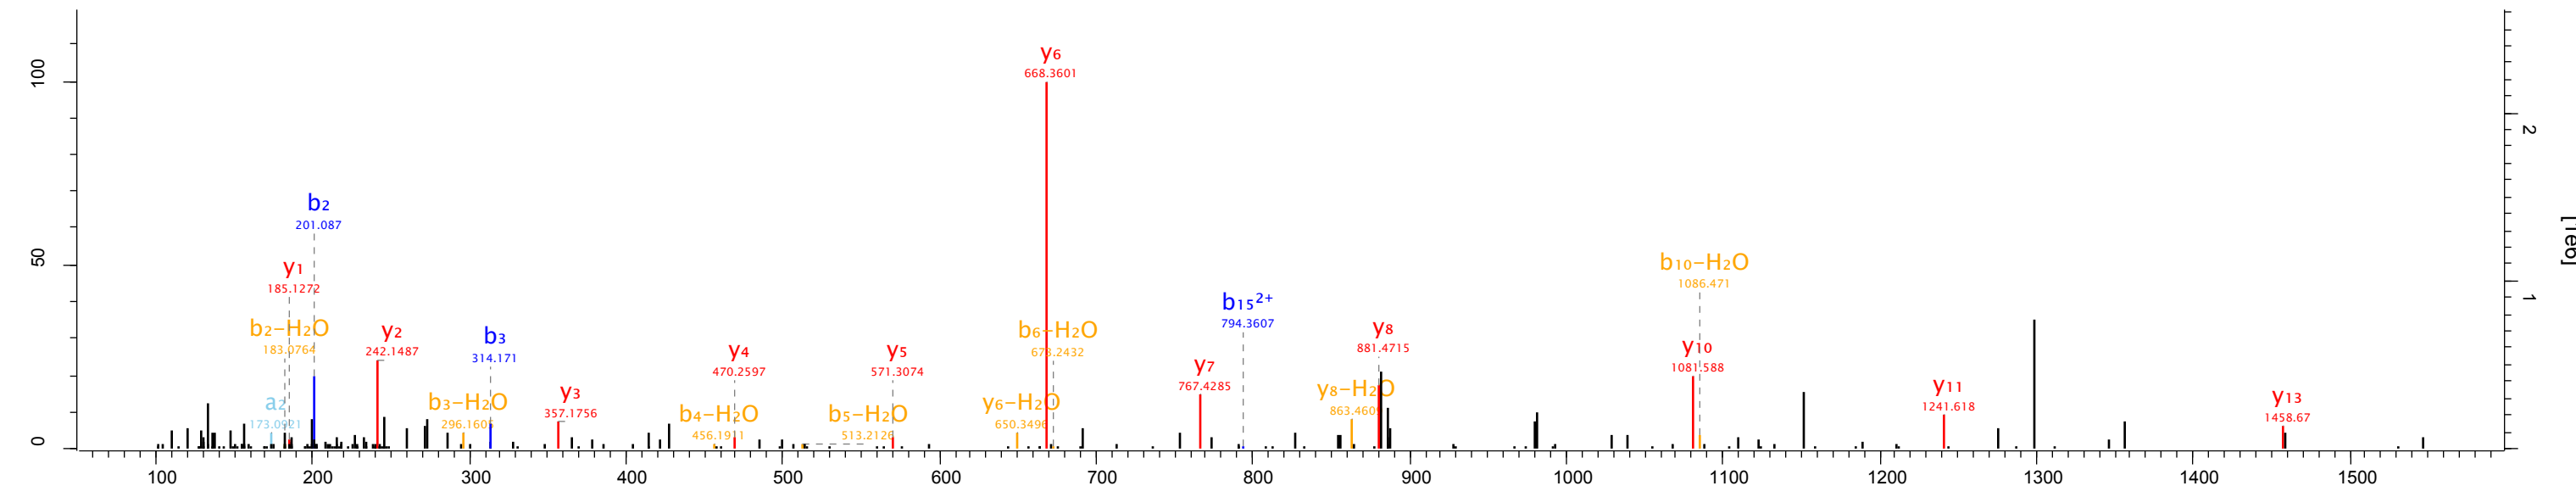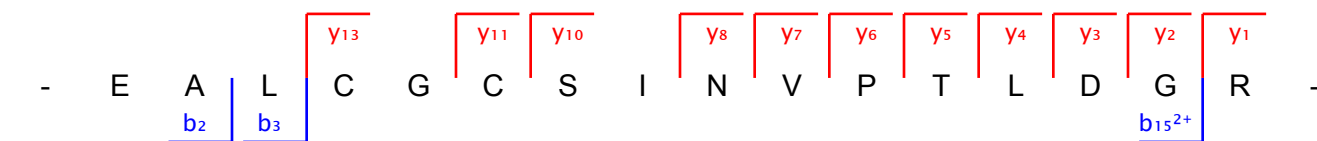

Raw file 20171215\_MaS\_33SR\_LMH\_proteome\_01 Scan 62356 Method FTMS; HCD Score 42.08 m/z 729.37

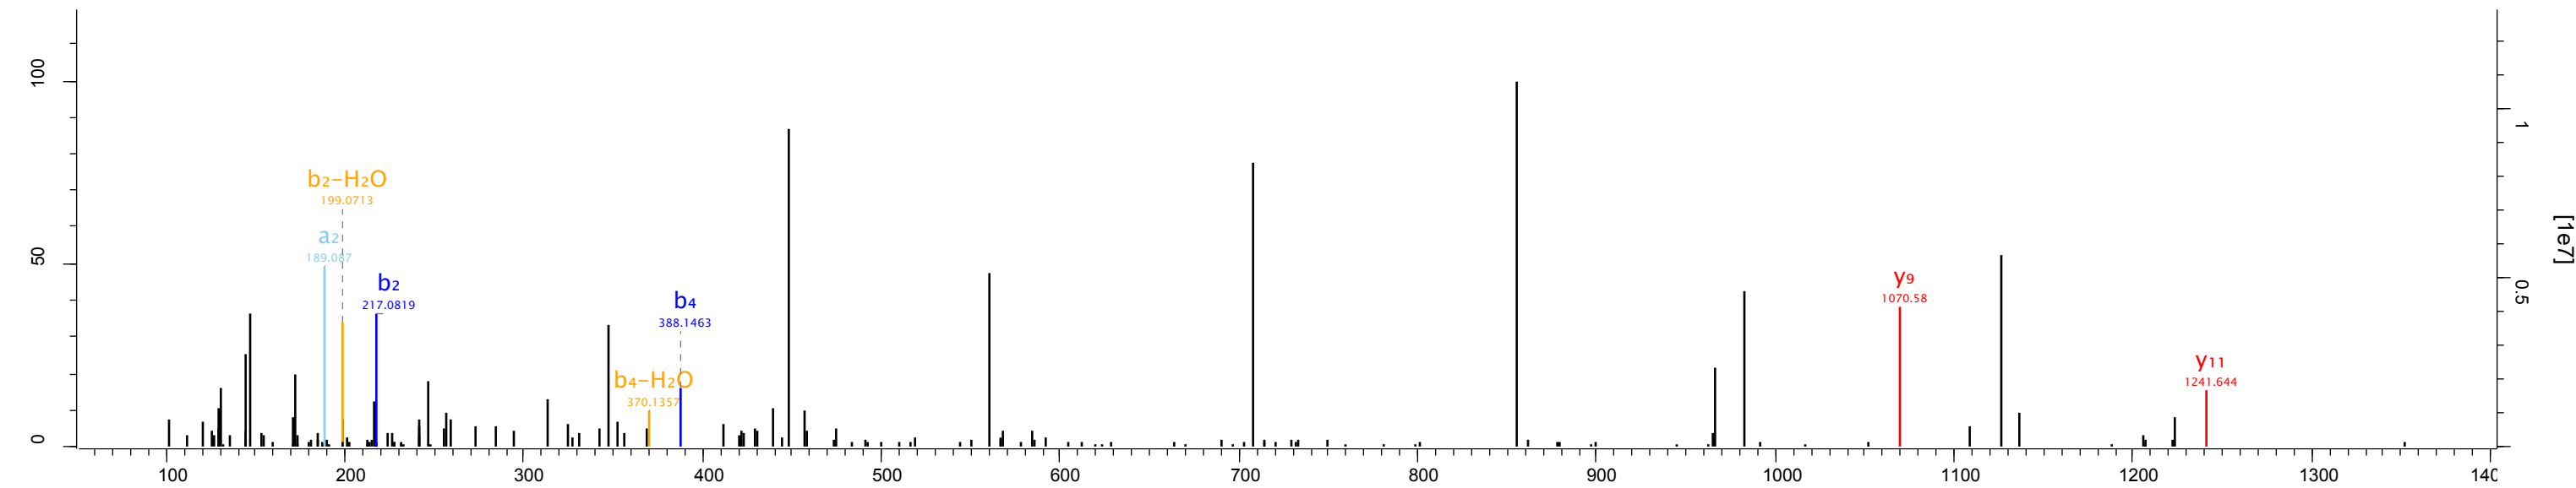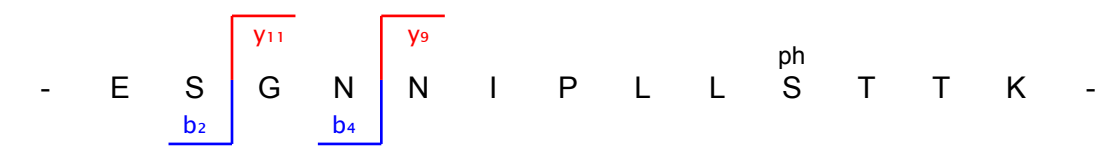

Raw file: 20171215\_MaS\_33SR\_LMH\_proteome\_01  
 Scan: 66016 Method: FTMS; HCD Score: 60.16 m/z: 814.92 Gene names: ATP2A2;ATP2A3

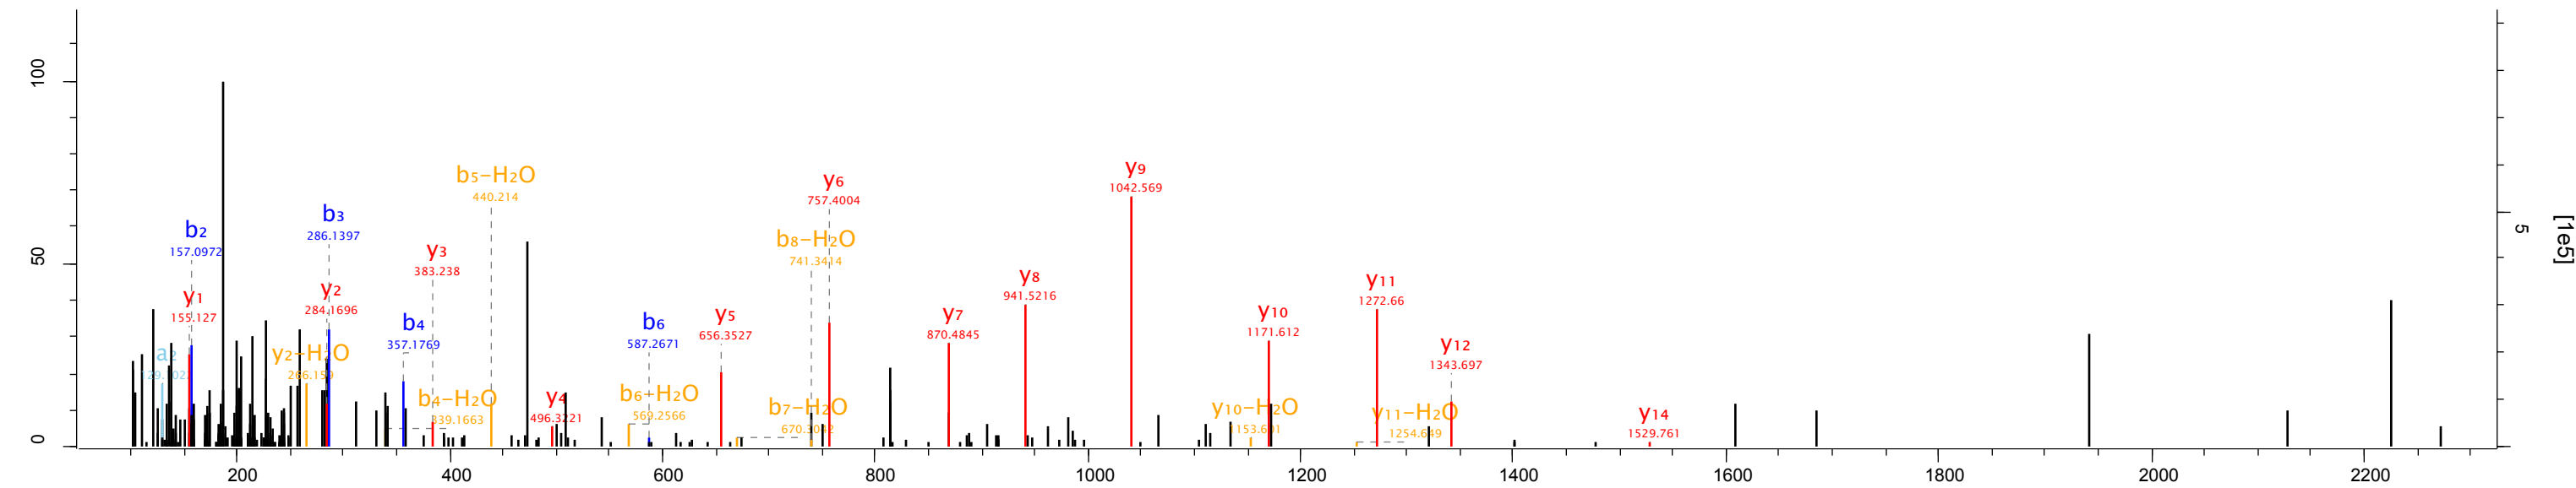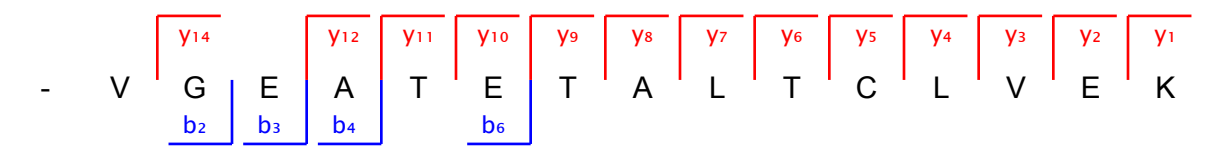

Raw file 20171215\_MaS\_33SR\_LMH\_proteome\_01 Scan 71286 Method FTMS; HCD Score 64.7 m/z 910.47 Gene names XIAP

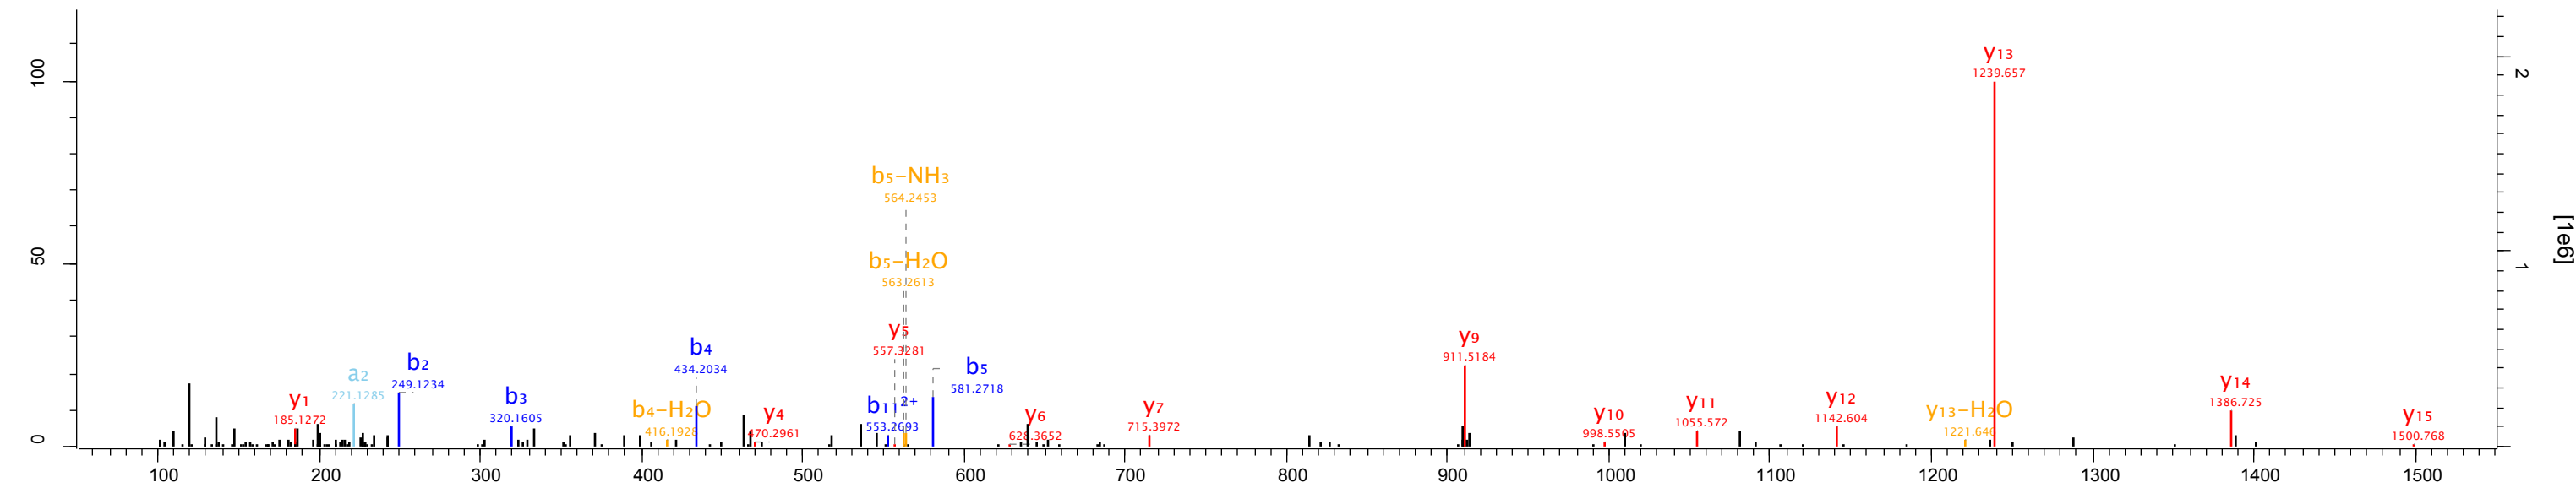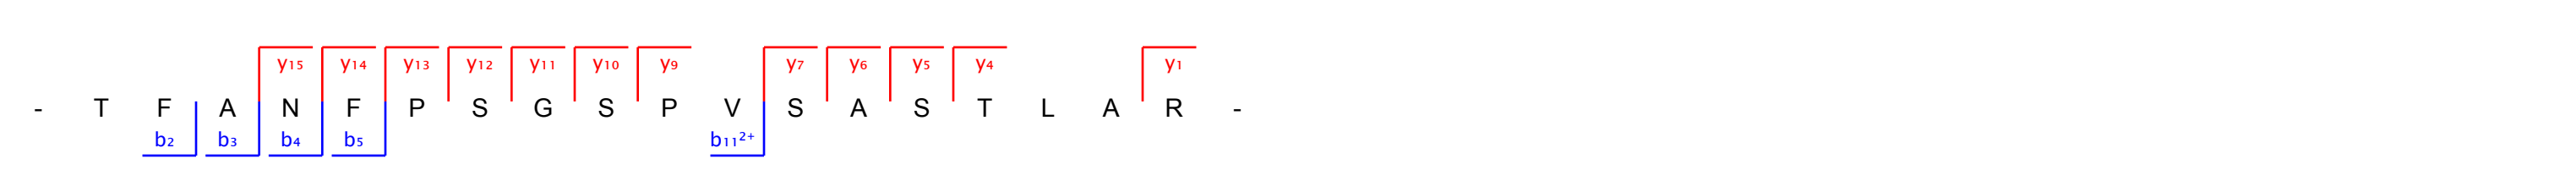



Raw file 20171215\_MaS\_33SR\_LMH\_proteome\_01 Scan 71366 Method FTMS; HCD Score 58.25 m/z 862.93

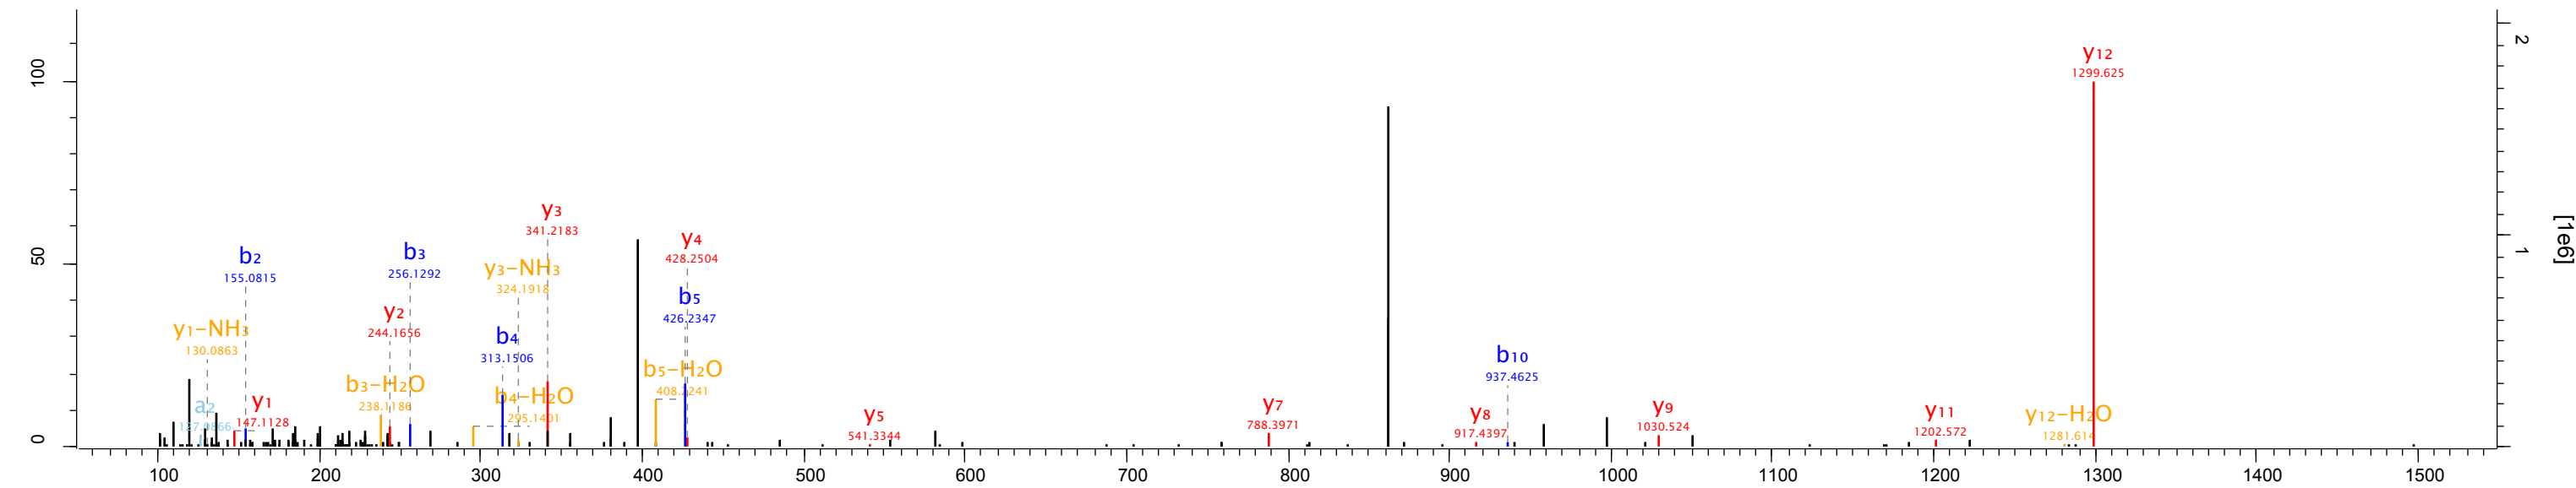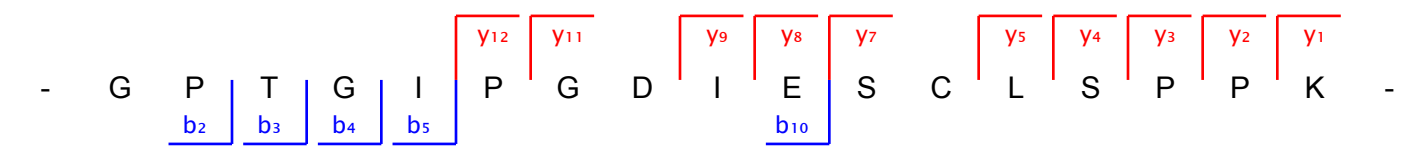

Raw file 20171215\_MaS\_33SR\_LMH\_proteome\_01 Scan 71646 Method FTMS; HCD Score 48.28 m/z 556.33 Gene names NCAM2

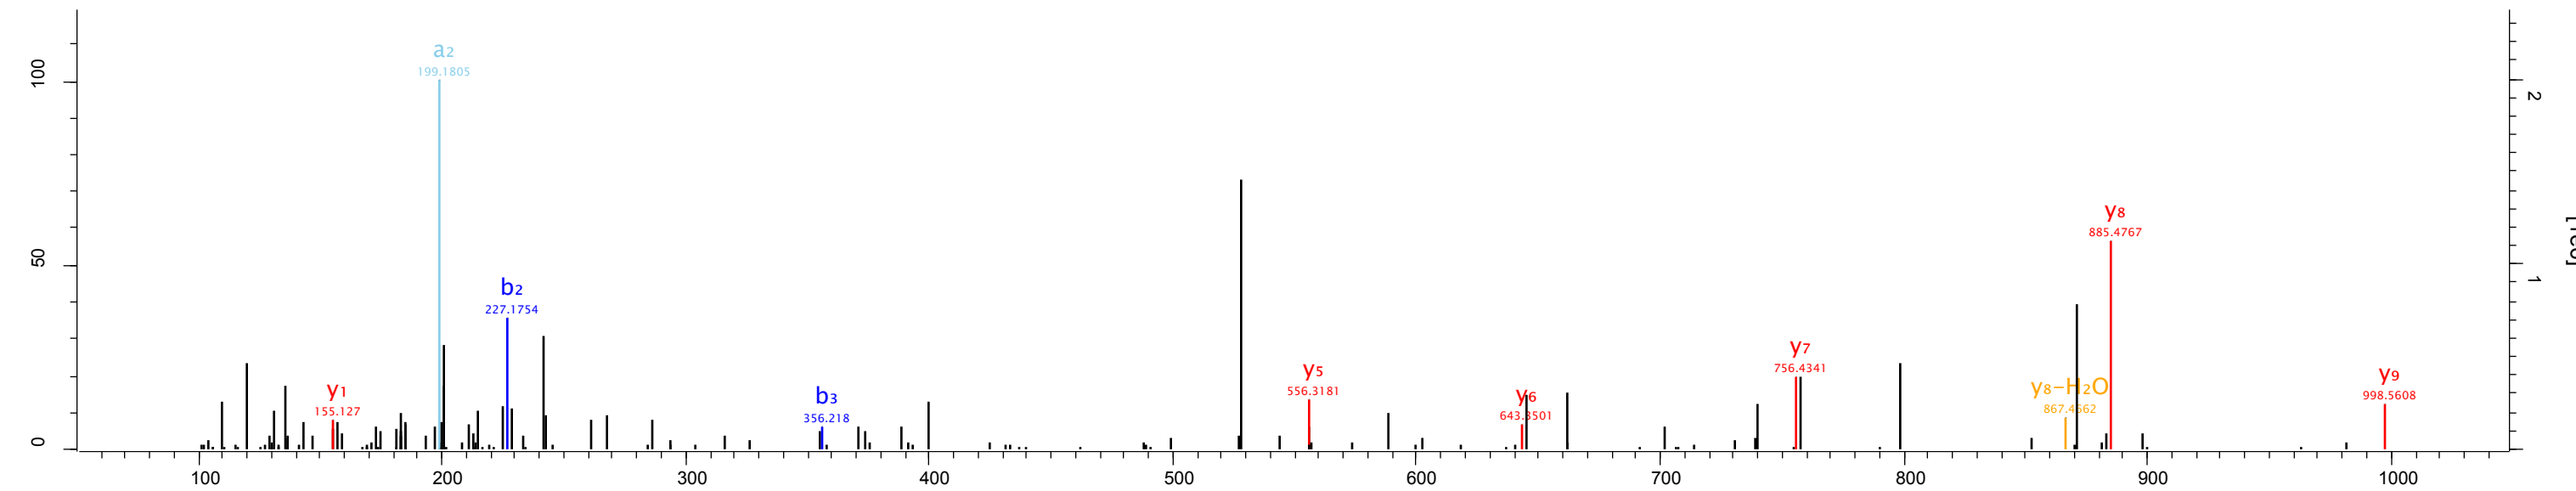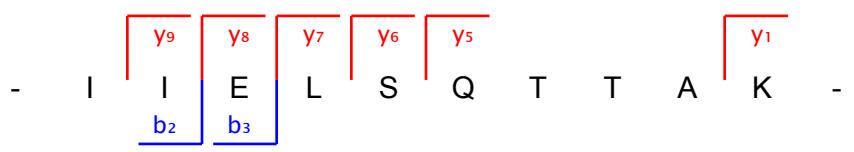

Raw file 20171215\_MaS\_33SR\_LMH\_proteome\_01 Scan 73546 Method FTMS; HCD Score 69.19 m/z 1072.02 Gene names PTGR2

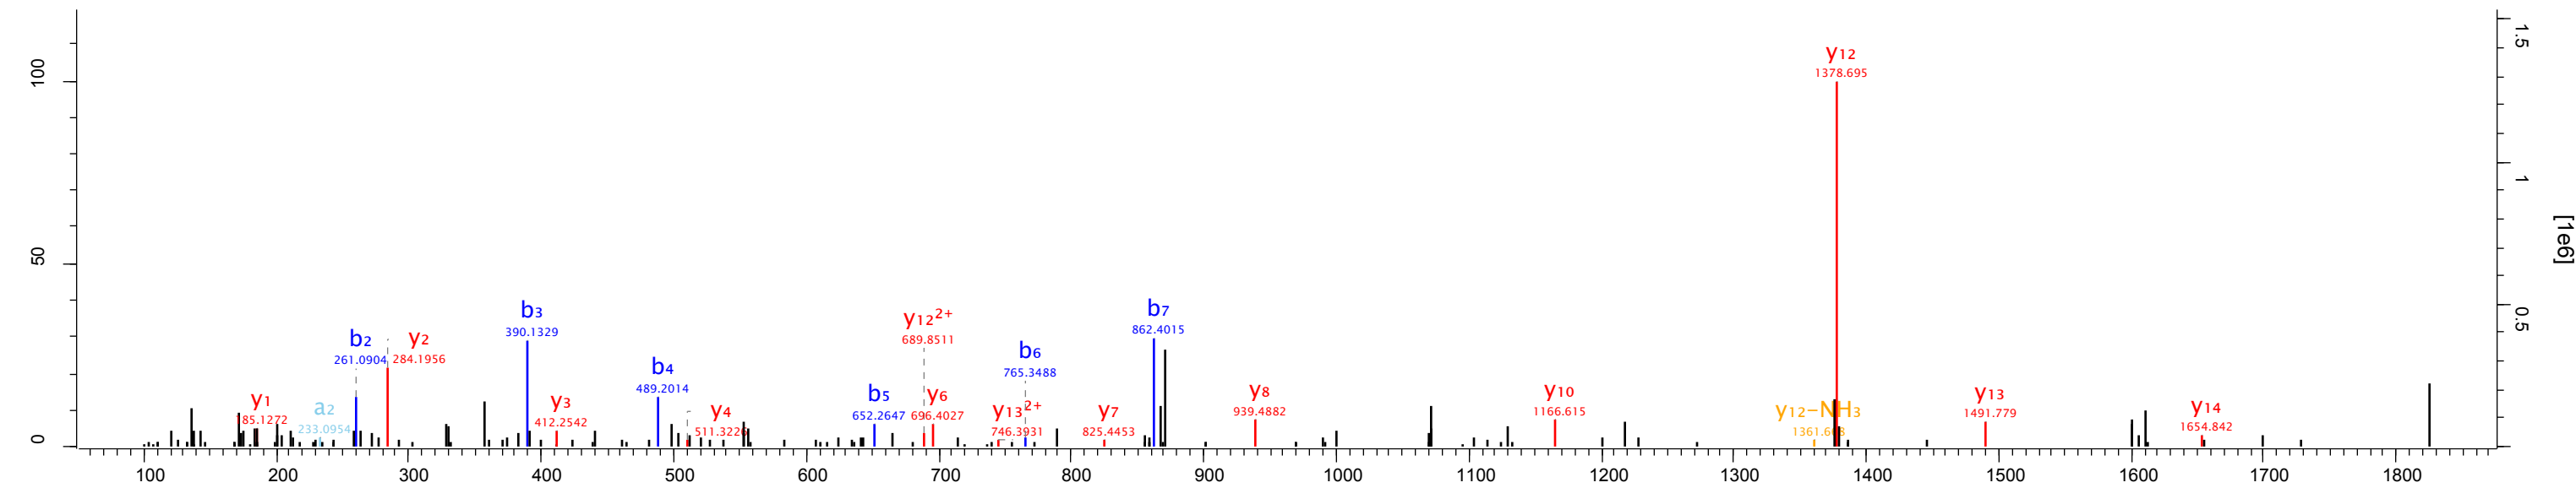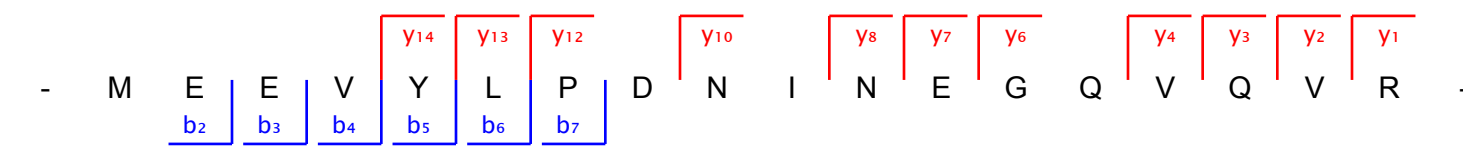

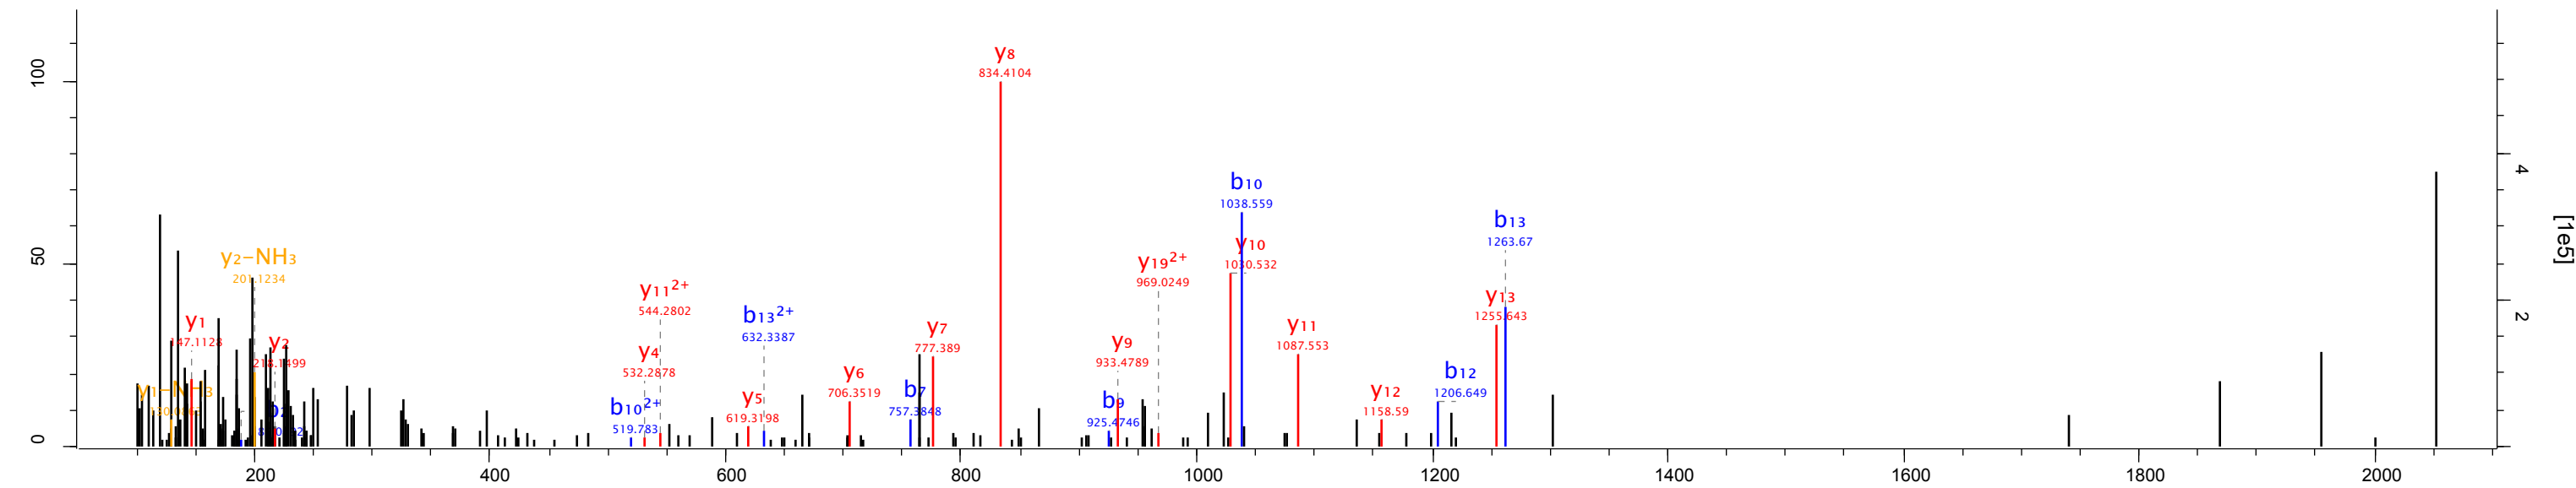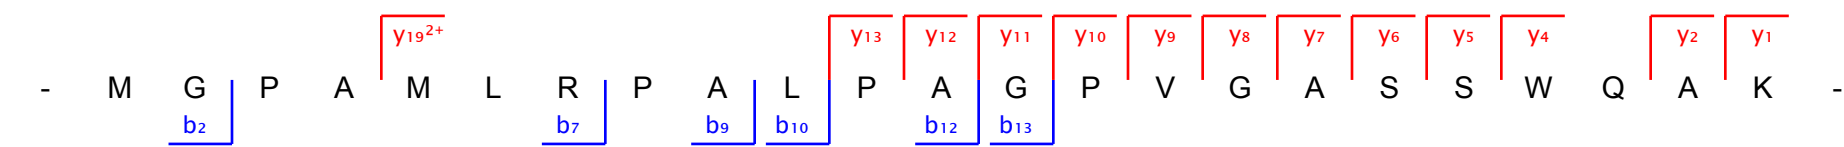

Raw file

20171215\_MaS\_33SR\_LMH\_proteome\_01

Scan 85506 Method FTMS; HCD Score 61.34 m/z 564.31 Gene names NDUFV1

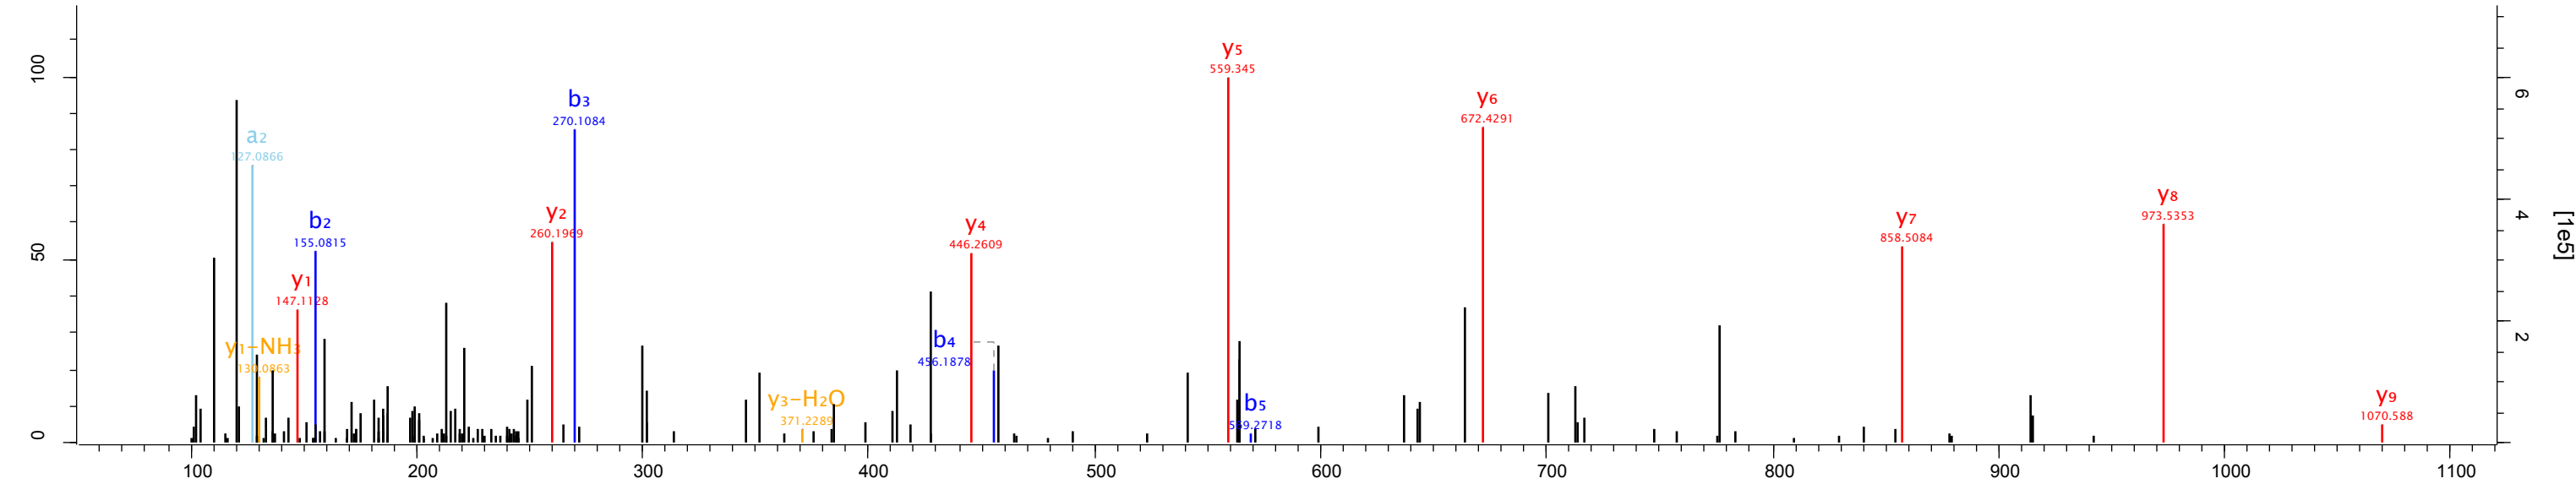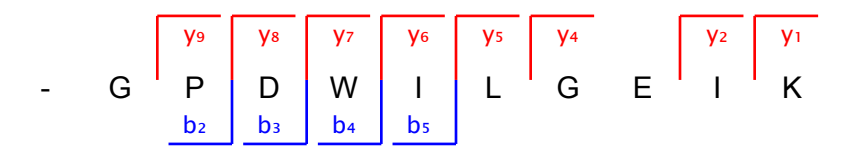

Raw file 20171215\_MaS\_33SR\_LMH\_proteome\_01 Scan 93376 Method FTMS; HCD Score 47.55 m/z 465.24 Gene names SMYD2

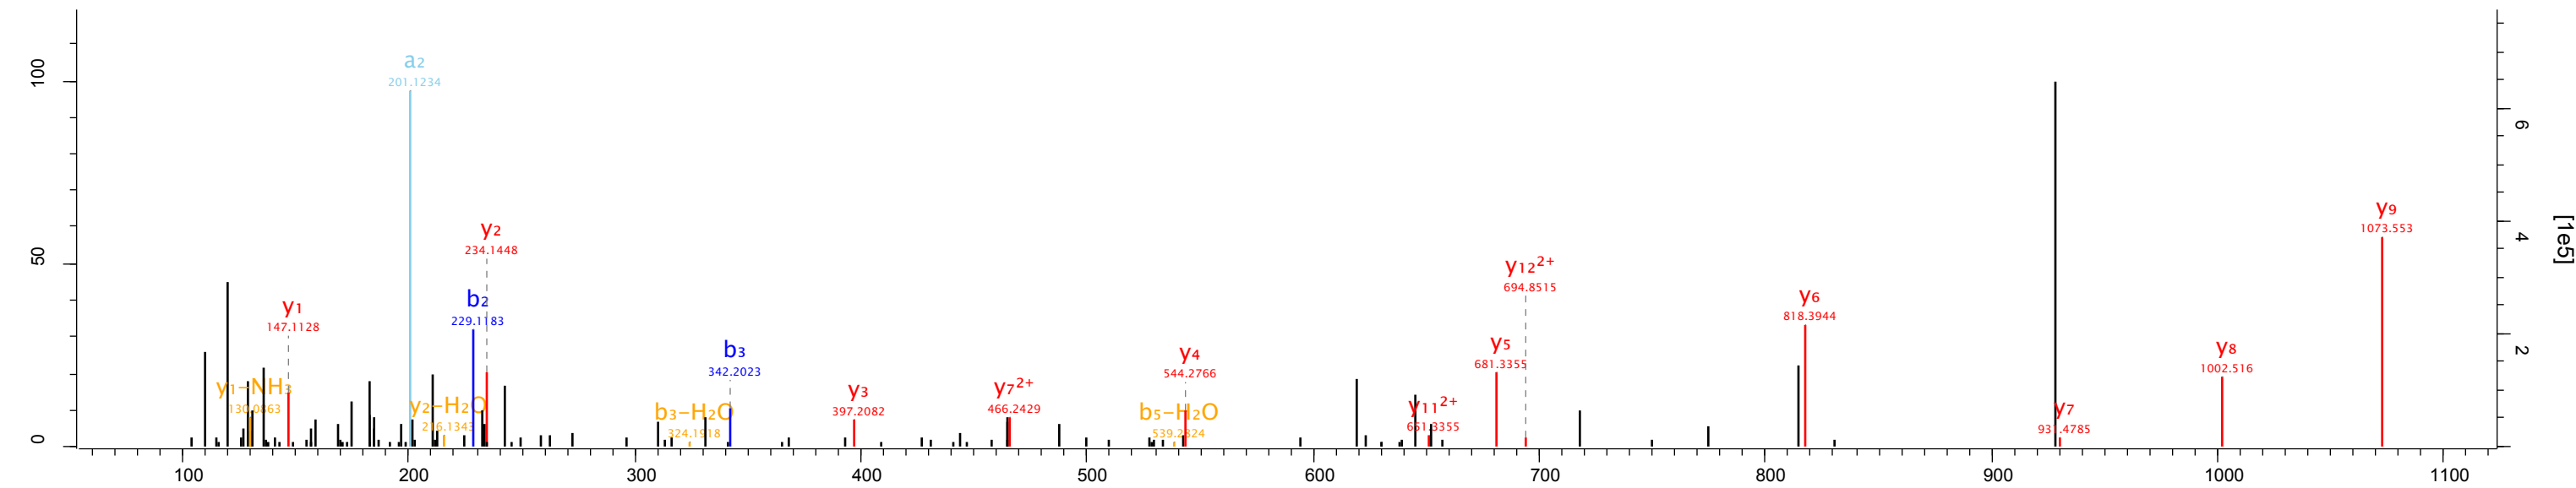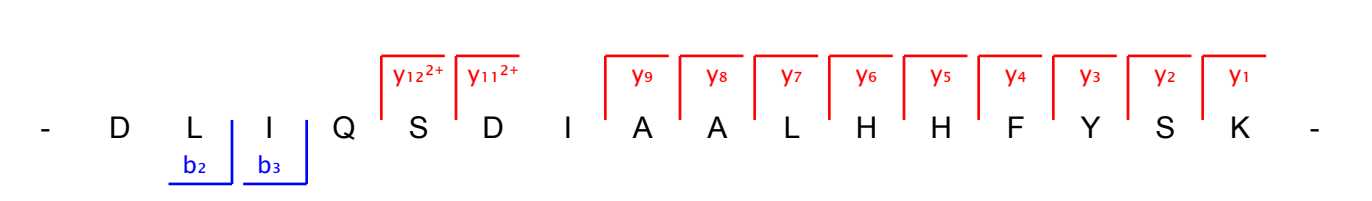

Raw file 20171215\_MaS\_33SR\_LMH\_proteome\_01 Scan 99226 Method FTMS; HCD Score 57.17 m/z 428.27 Gene names MAGEA3

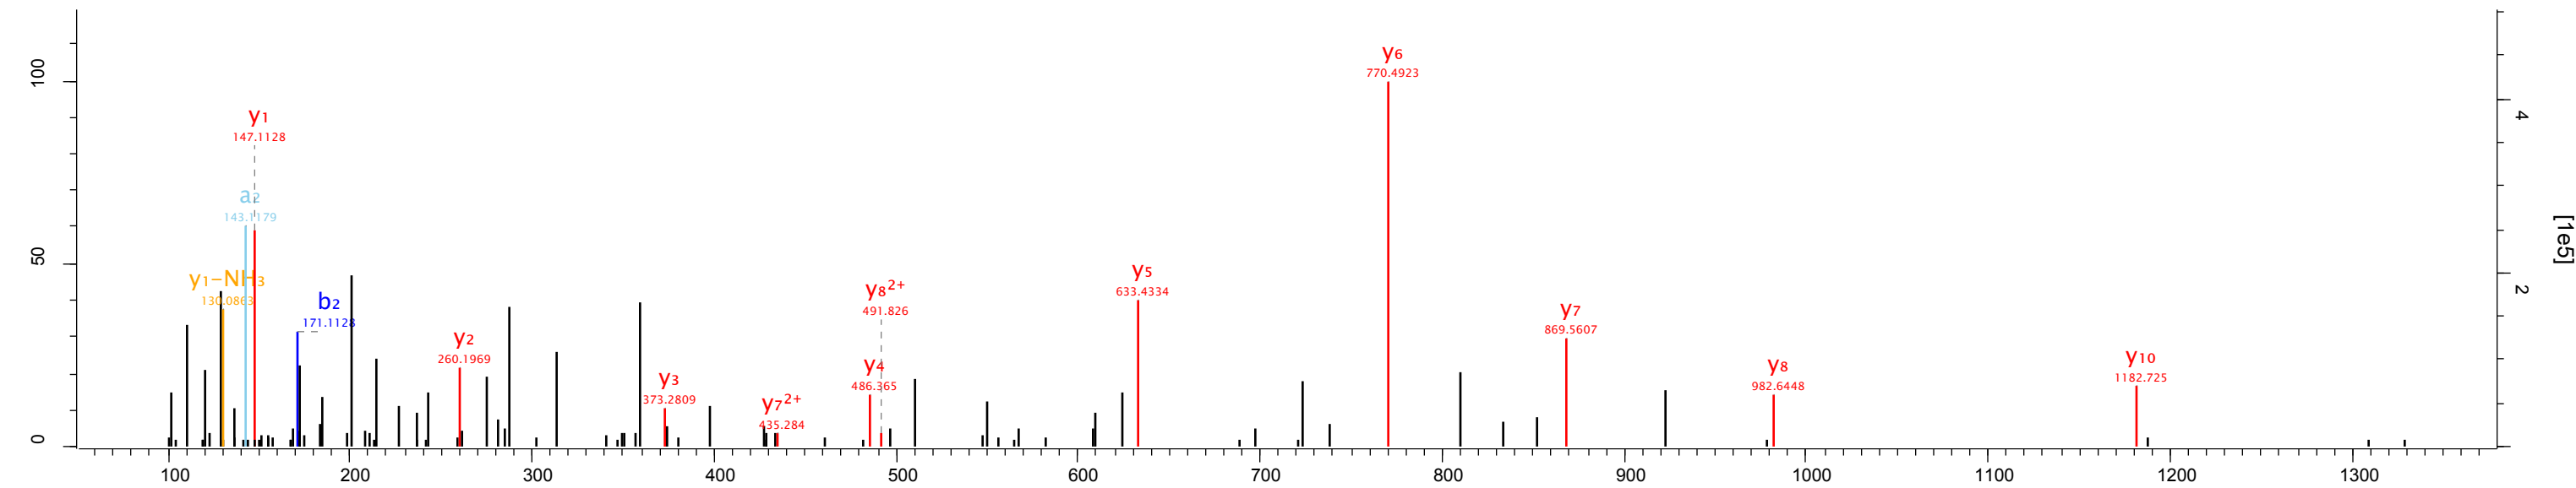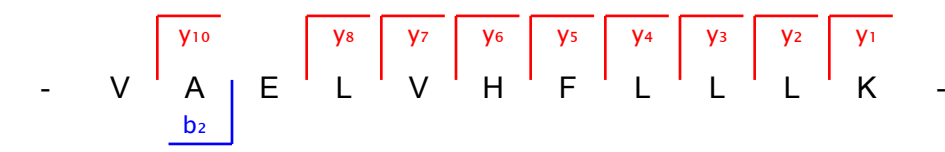

Raw file 20171215\_MaS\_33SR\_LMH\_proteome\_02 Scan 101136 Method FTMS; HCD Score 59.12 m/z 650.51 Gene names GFM2

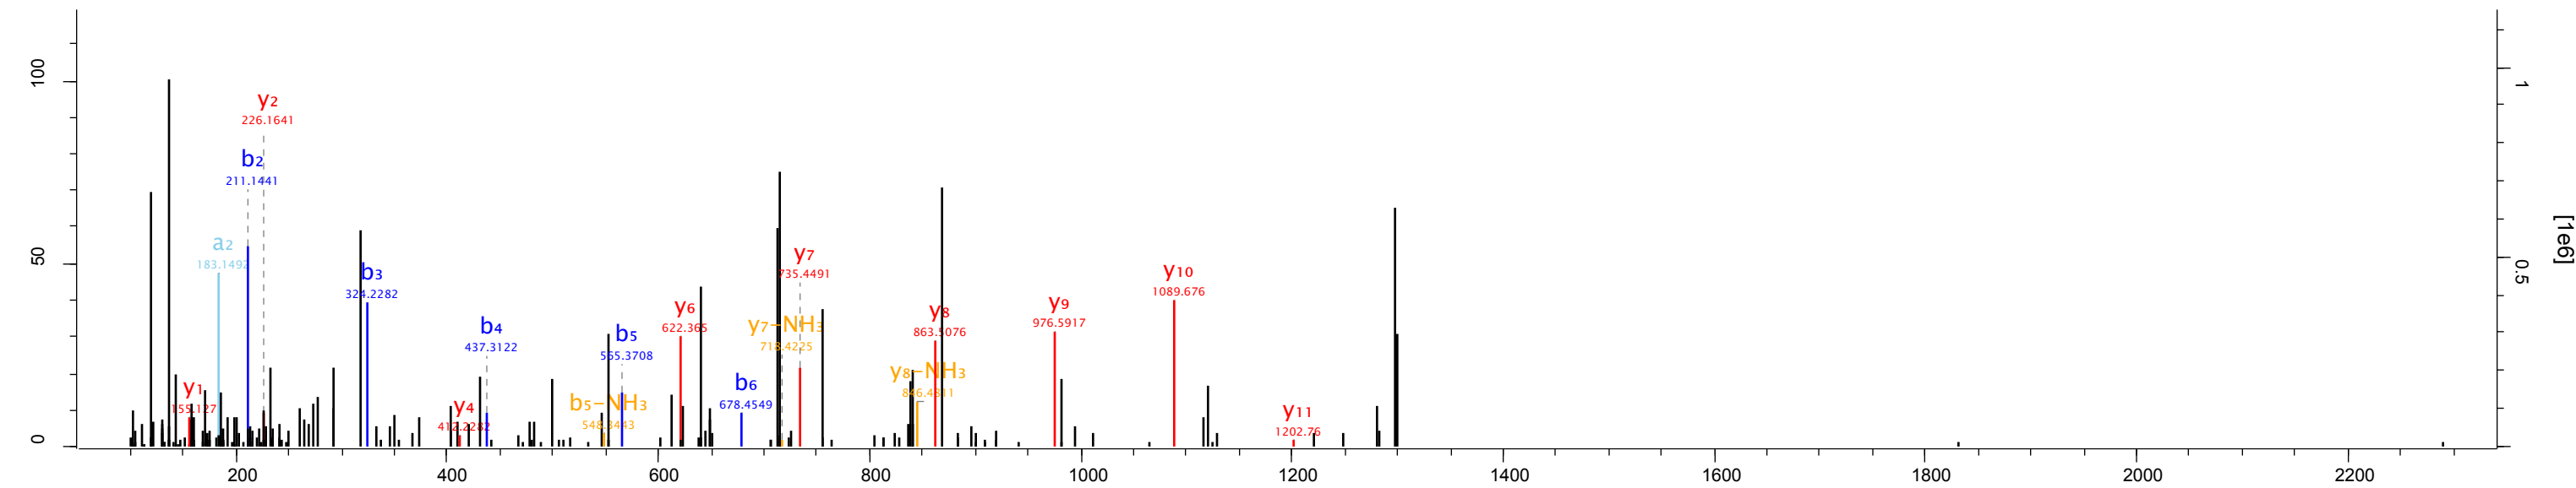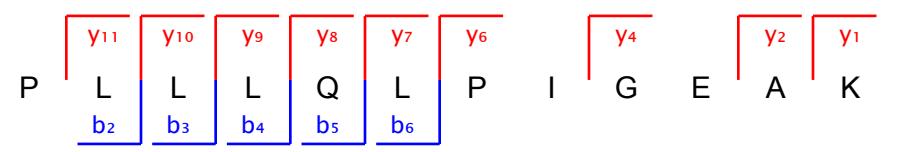



Raw file

20171215\_MaS\_33SR\_LMH\_proteome\_02

| Scan   | Method    | Score | m/z     | Gene names |
|--------|-----------|-------|---------|------------|
| 102996 | FTMS; HCD | 59.29 | 1045.51 | TNFRSF12A  |

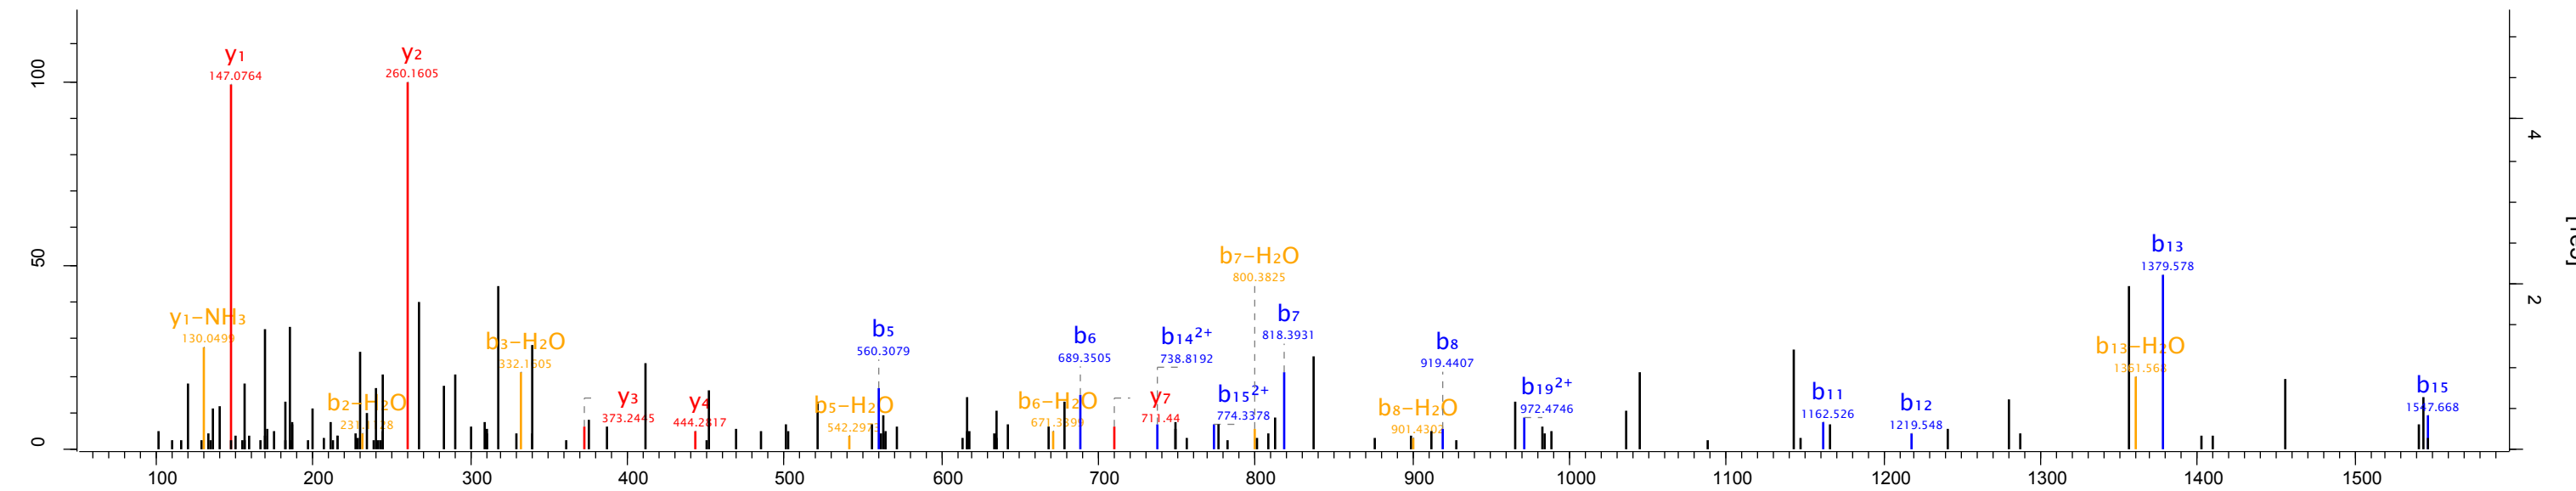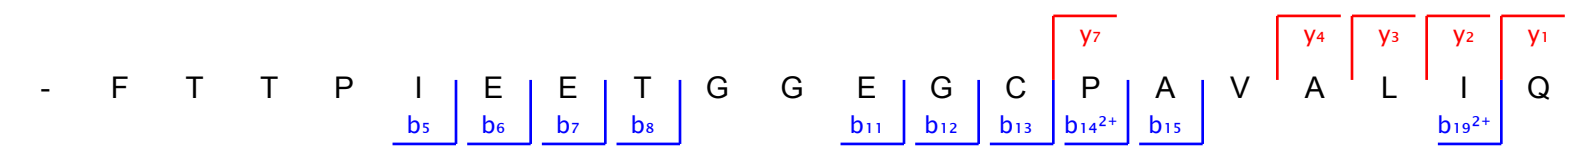

Raw file 20171215\_MaS\_33SR\_LMH\_proteome\_02 Scan 105476 Method FTMS; HCD Score 68.37 m/z 573.57

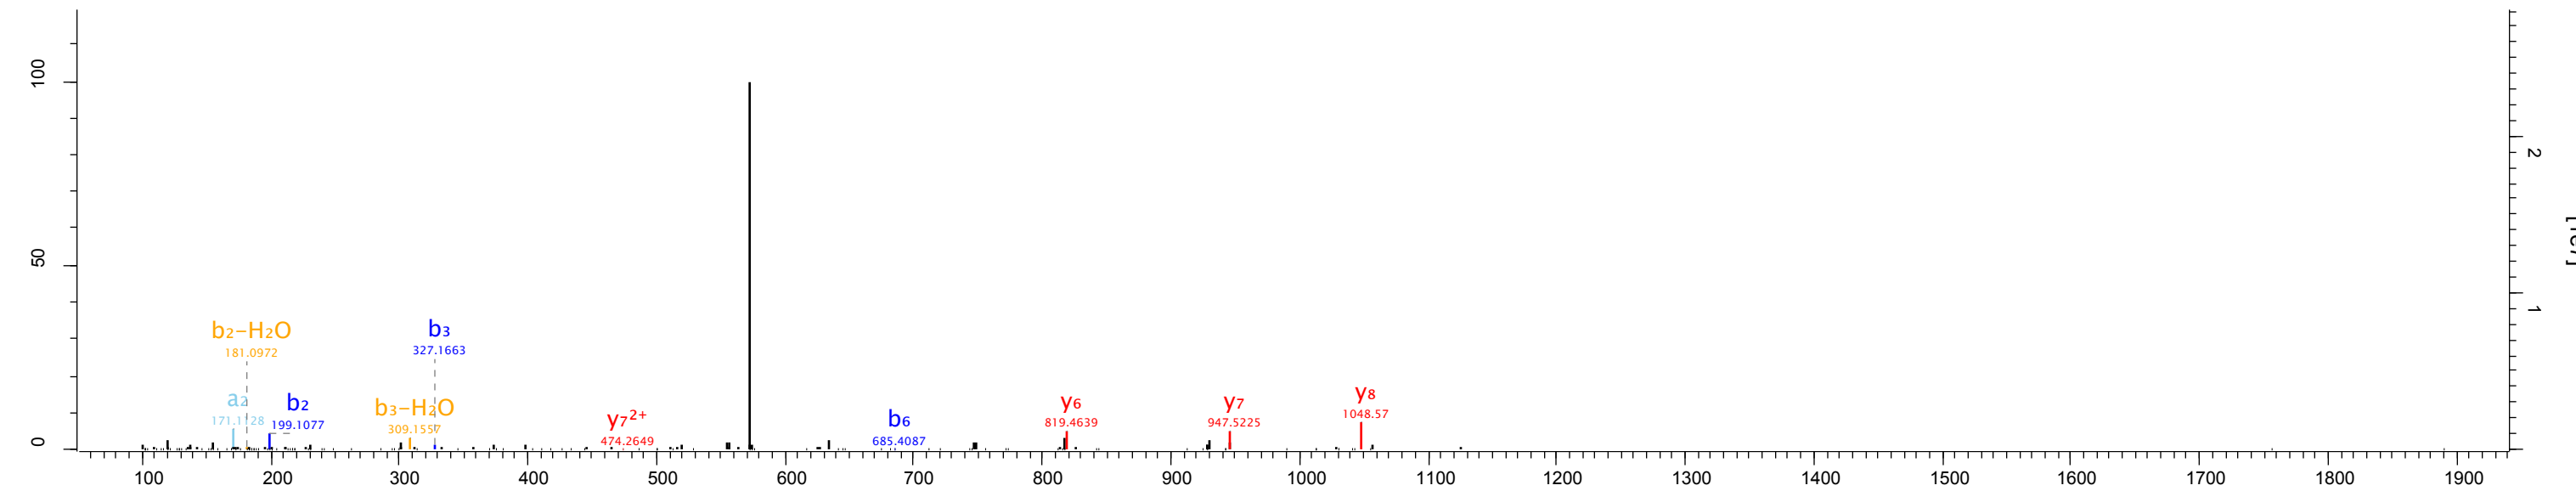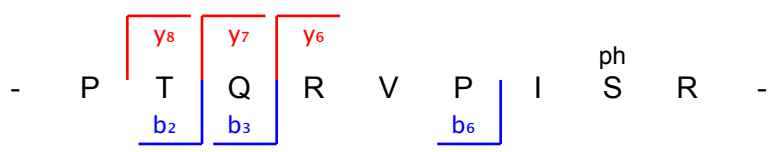

Raw file  
20171215\_MaS\_33SR\_LMH\_proteome\_02

Scan 121846 Method FTMS; HCD Score 70.84 m/z 750.41 Gene names CACUL1

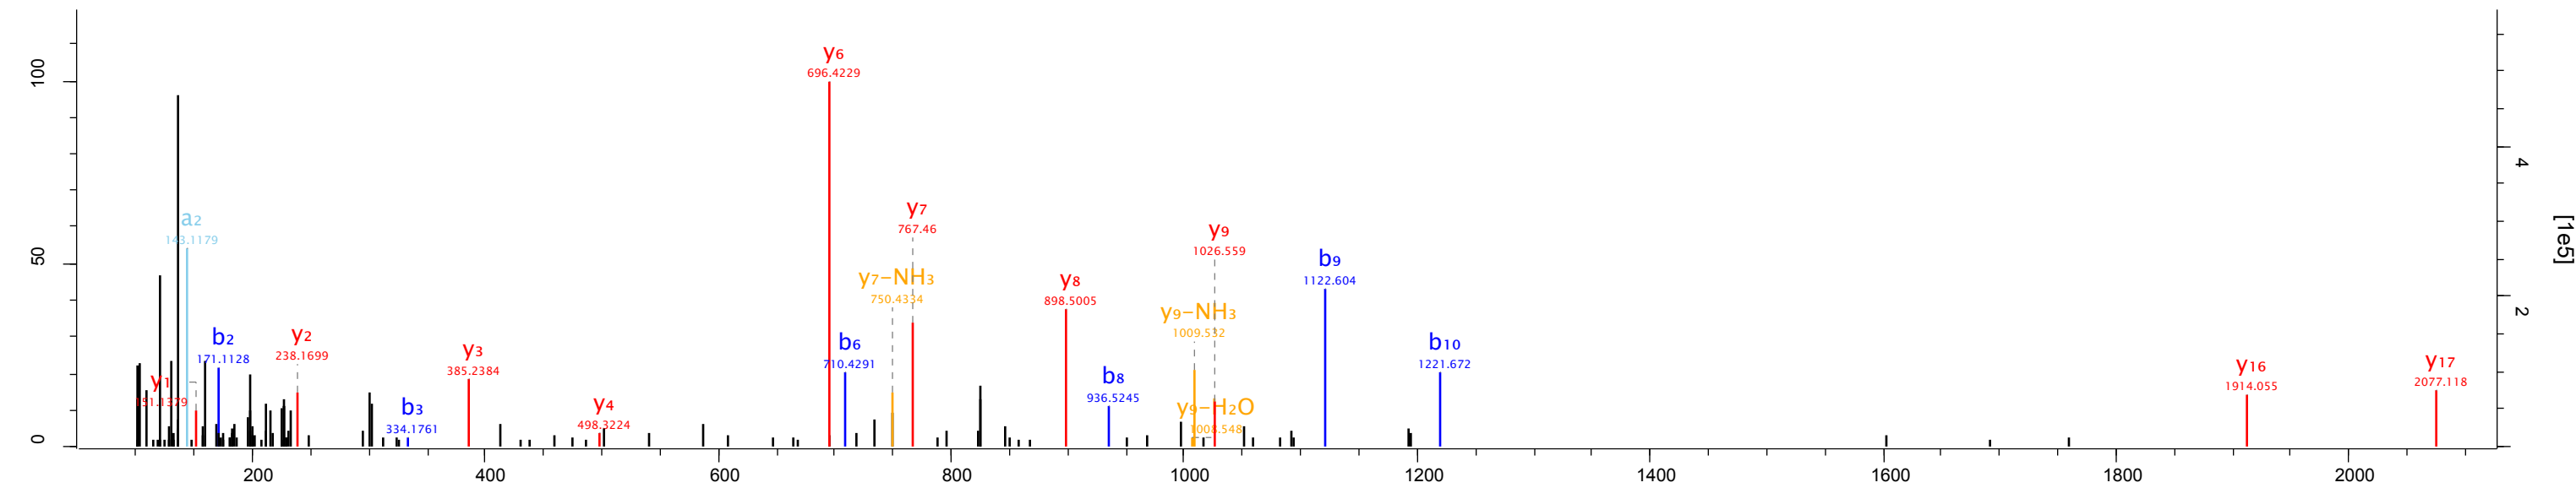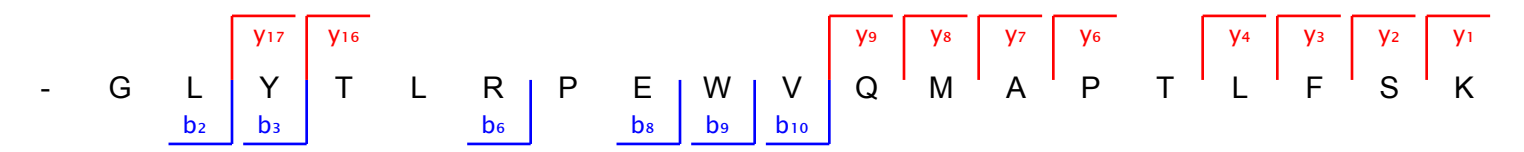

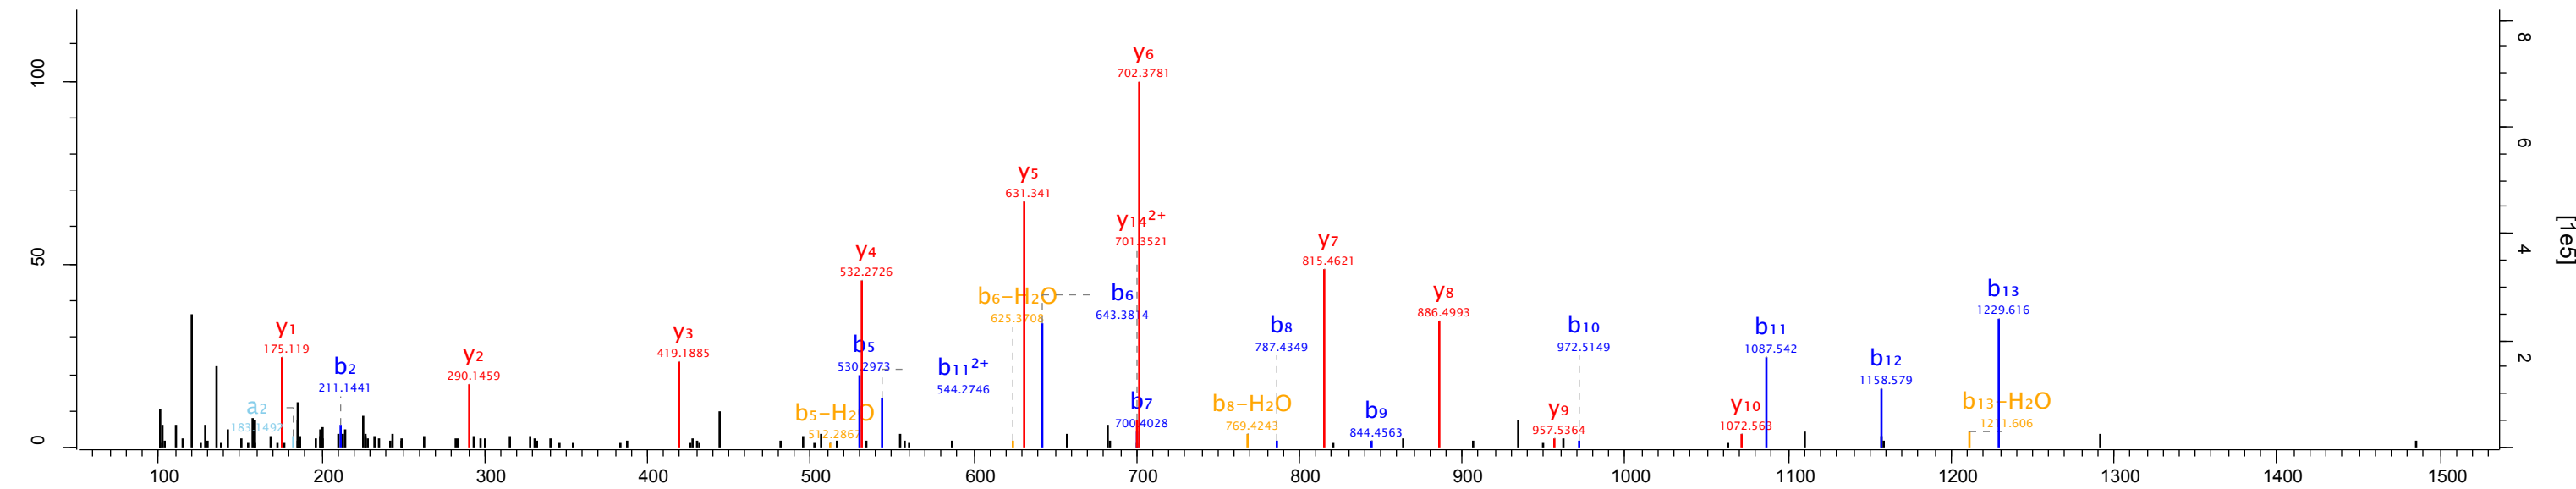

- L P F T A L G S G Q D A A L A V L E D R -

Fragmentation sites are indicated by brackets below the sequence:

- b2: [P]
- b5: [A]
- b6: [L]
- b7: [G]
- b8: [S]
- b9: [G]
- b10: [Q]
- b11: [D]
- b12: [A]
- b13: [A]
- y1: [R]
- y2: [D]
- y3: [E]
- y4: [L]
- y5: [V]
- y6: [A]
- y7: [L]
- y8: [A]
- y9: [D]
- y10: [Q]
- y14<sup>2+</sup>: [G]

Raw file: 20171215\_MaS\_33SR\_LMH\_proteome\_02  
 Scan: 130476 Method: FTMS; HCD Score: 74.79 m/z: 860.44 Gene names: AK3

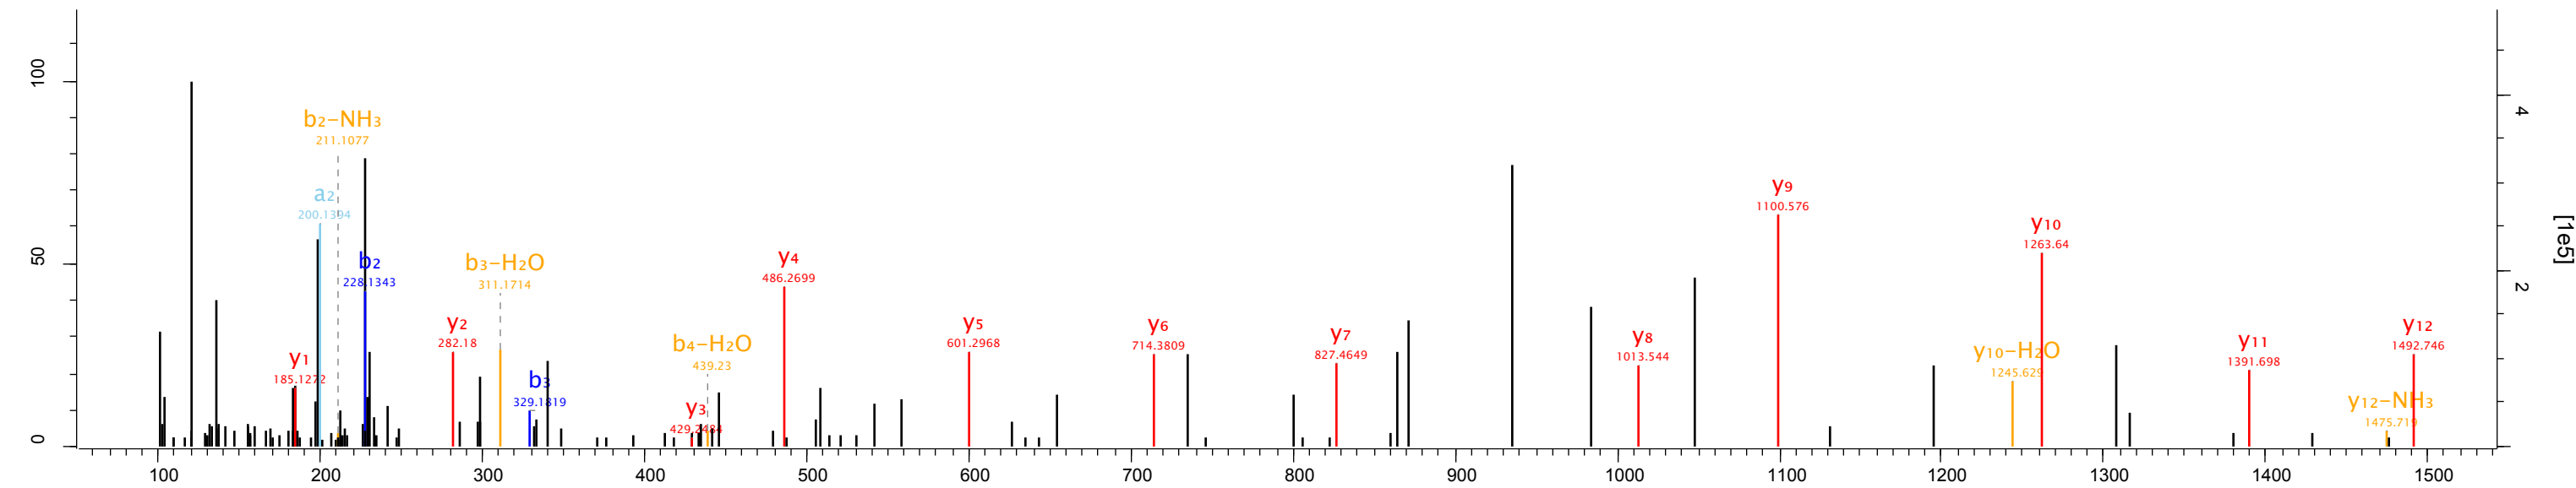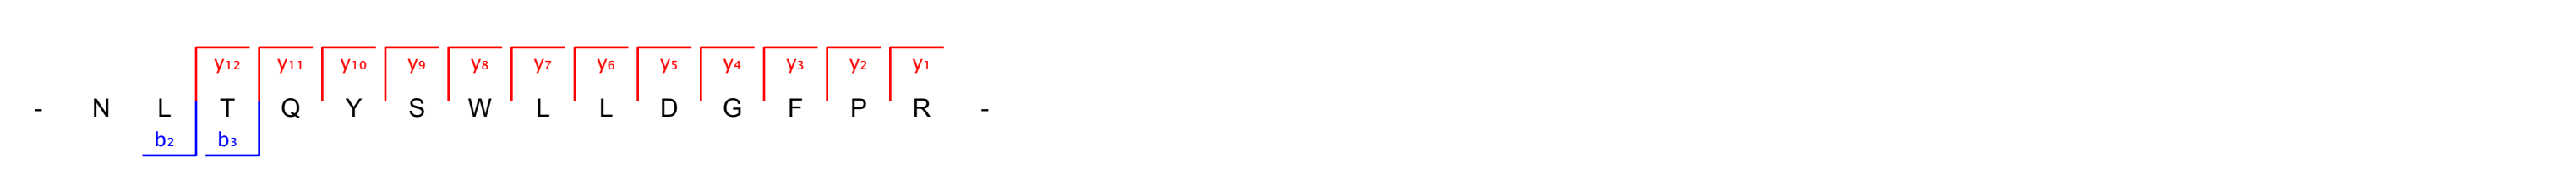

Raw file 20171215\_MaS\_33SR\_LMH\_proteome\_02 Scan 131326 Method FTMS; HCD Score 46.56 m/z 878.47 Gene names STXBP1

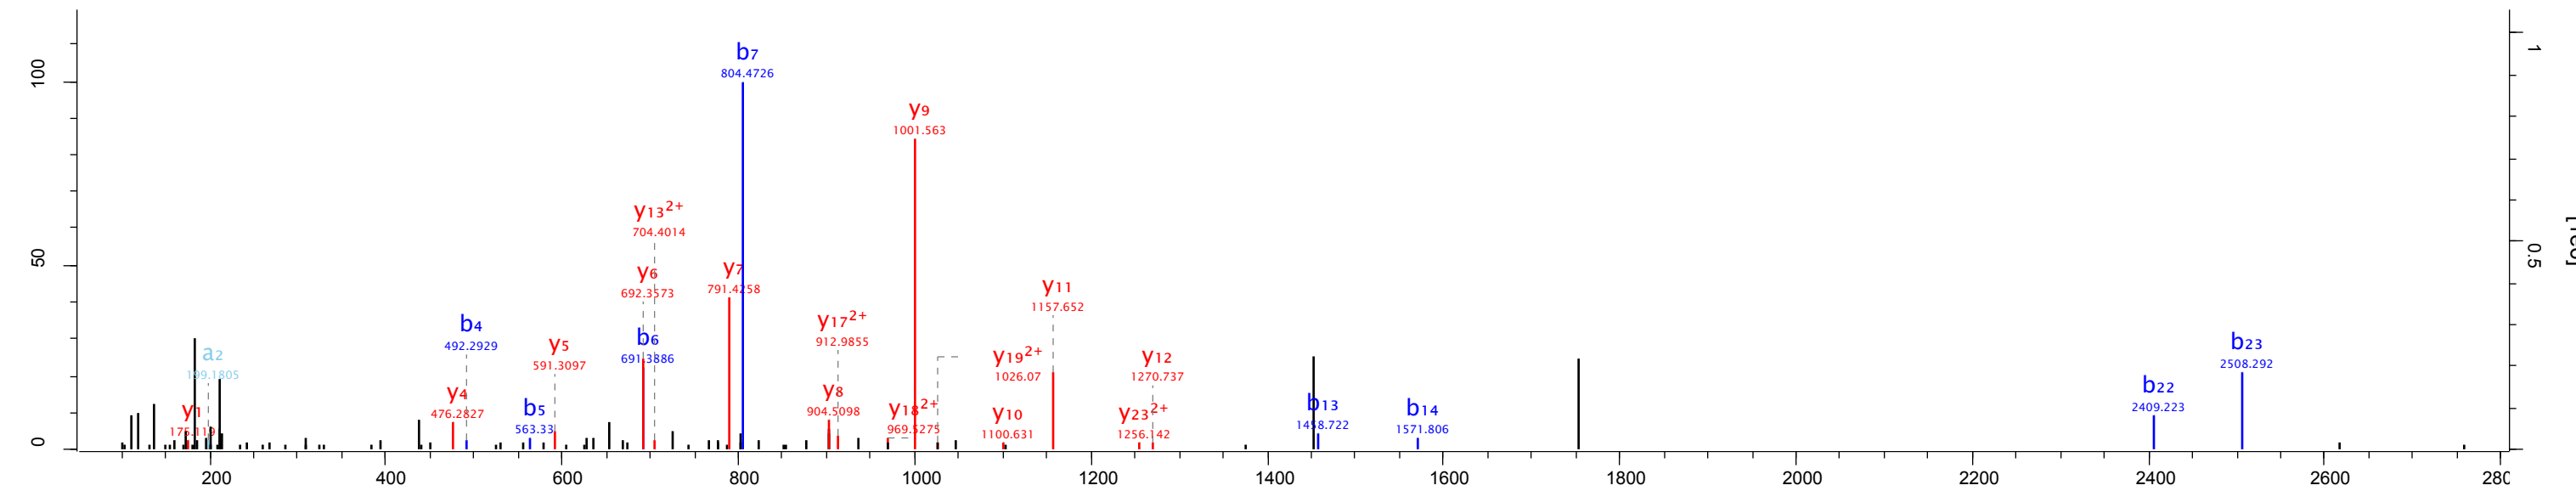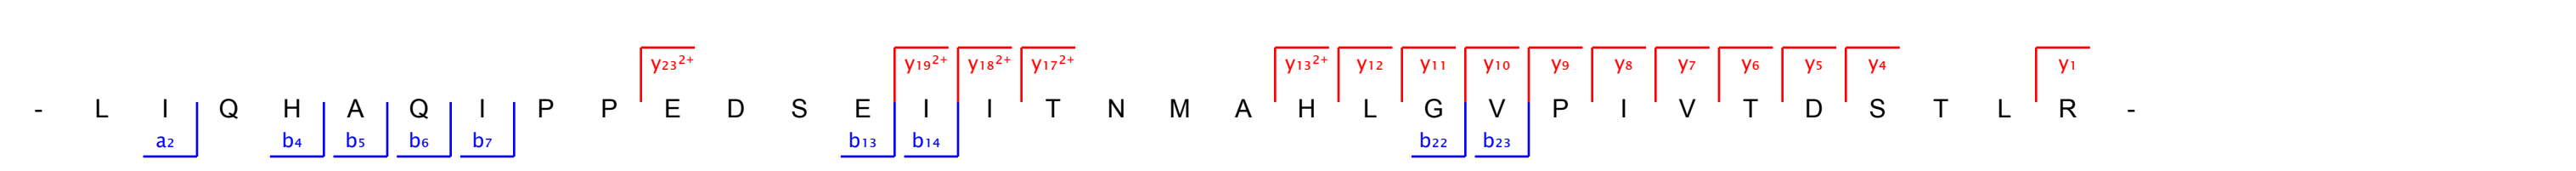

Raw file: 20171215\_MaS\_33SR\_LMH\_proteome\_02  
 Scan: 133596 Method: FTMS; HCD Score: 72.79 m/z: 774.38 Gene names: VAPA

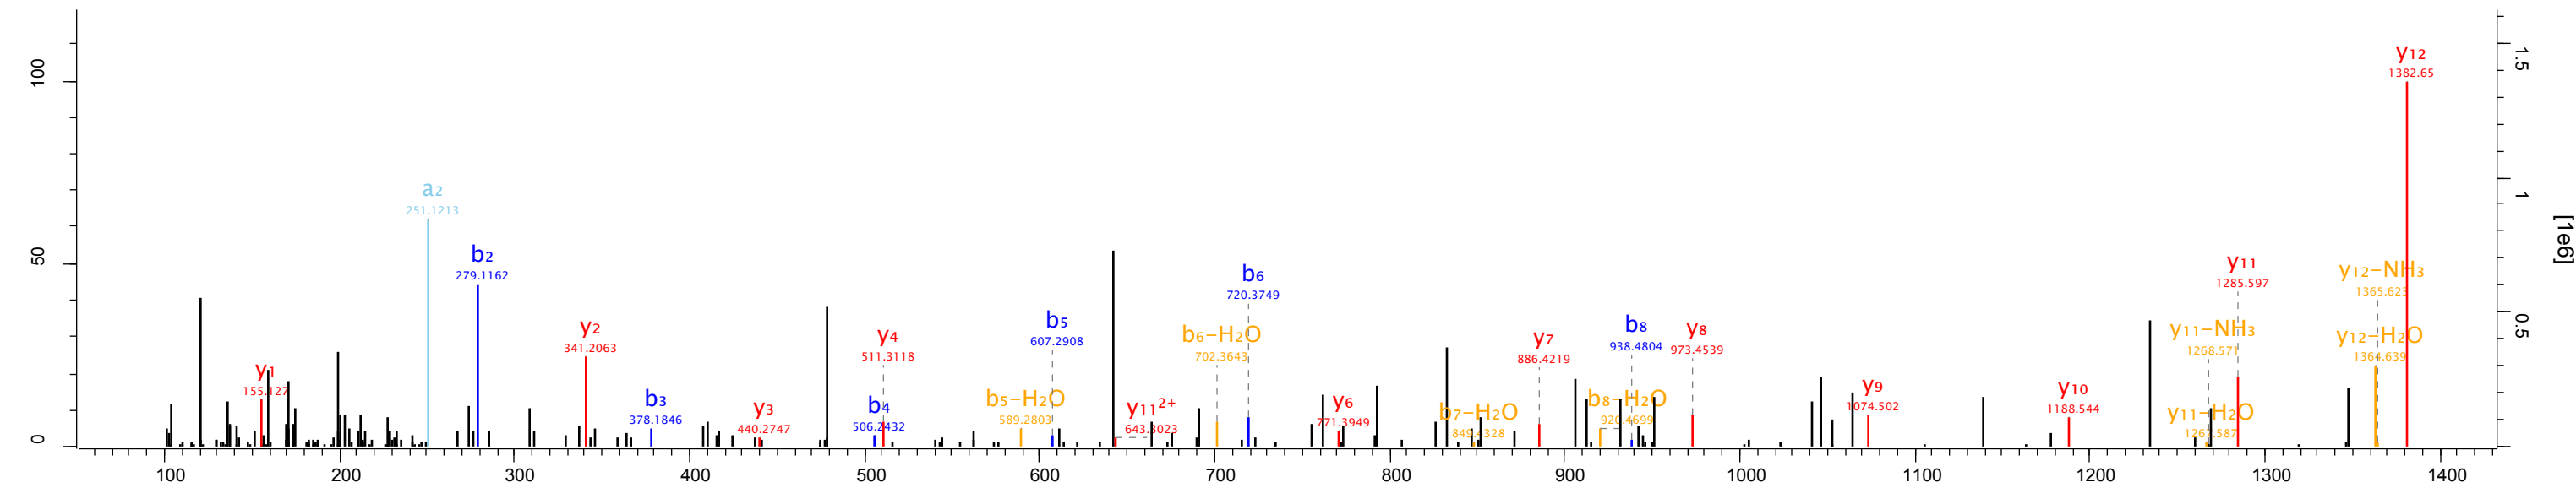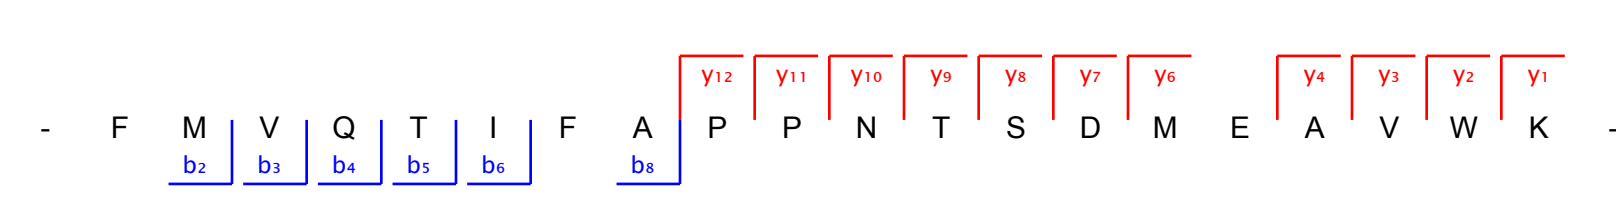

Raw file 20171215\_MaS\_33SR\_LMH\_proteome\_02 Scan 14486 Method FTMS; HCD Score 63.18 m/z 690.84

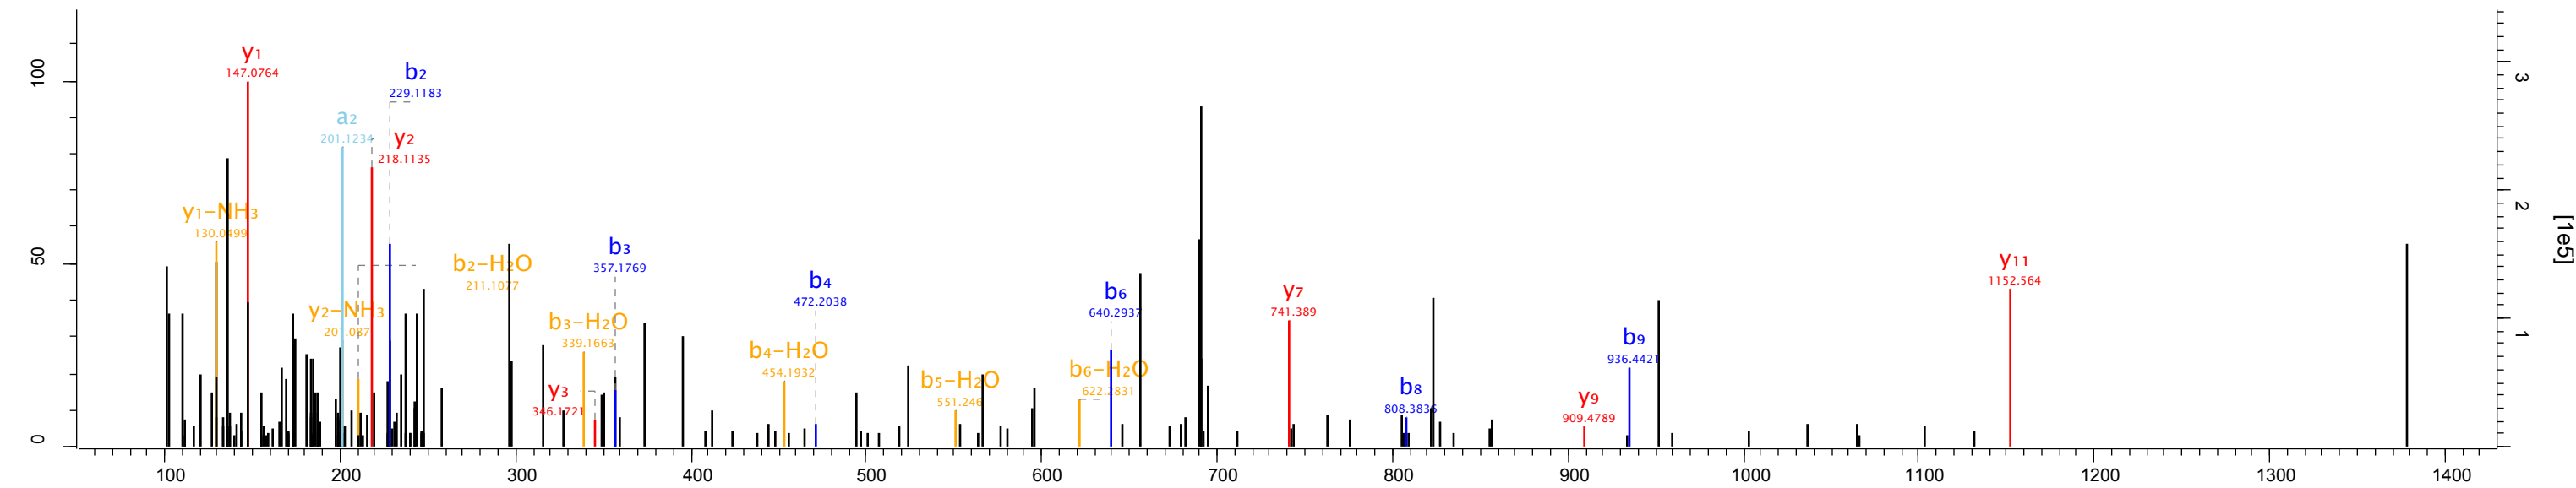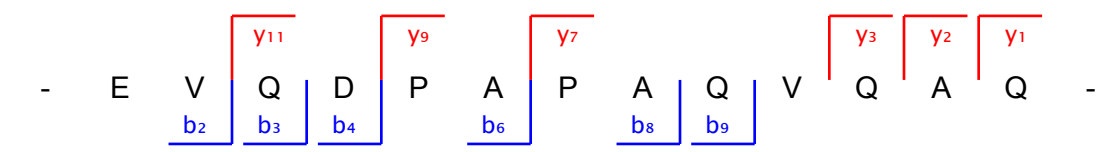



Raw file: 20171215\_MaS\_33SR\_LMH\_proteome\_02  
 Scan: 148886 Method: FTMS; HCD Score: 199.84 m/z: 789.47 Gene names: COPS7B

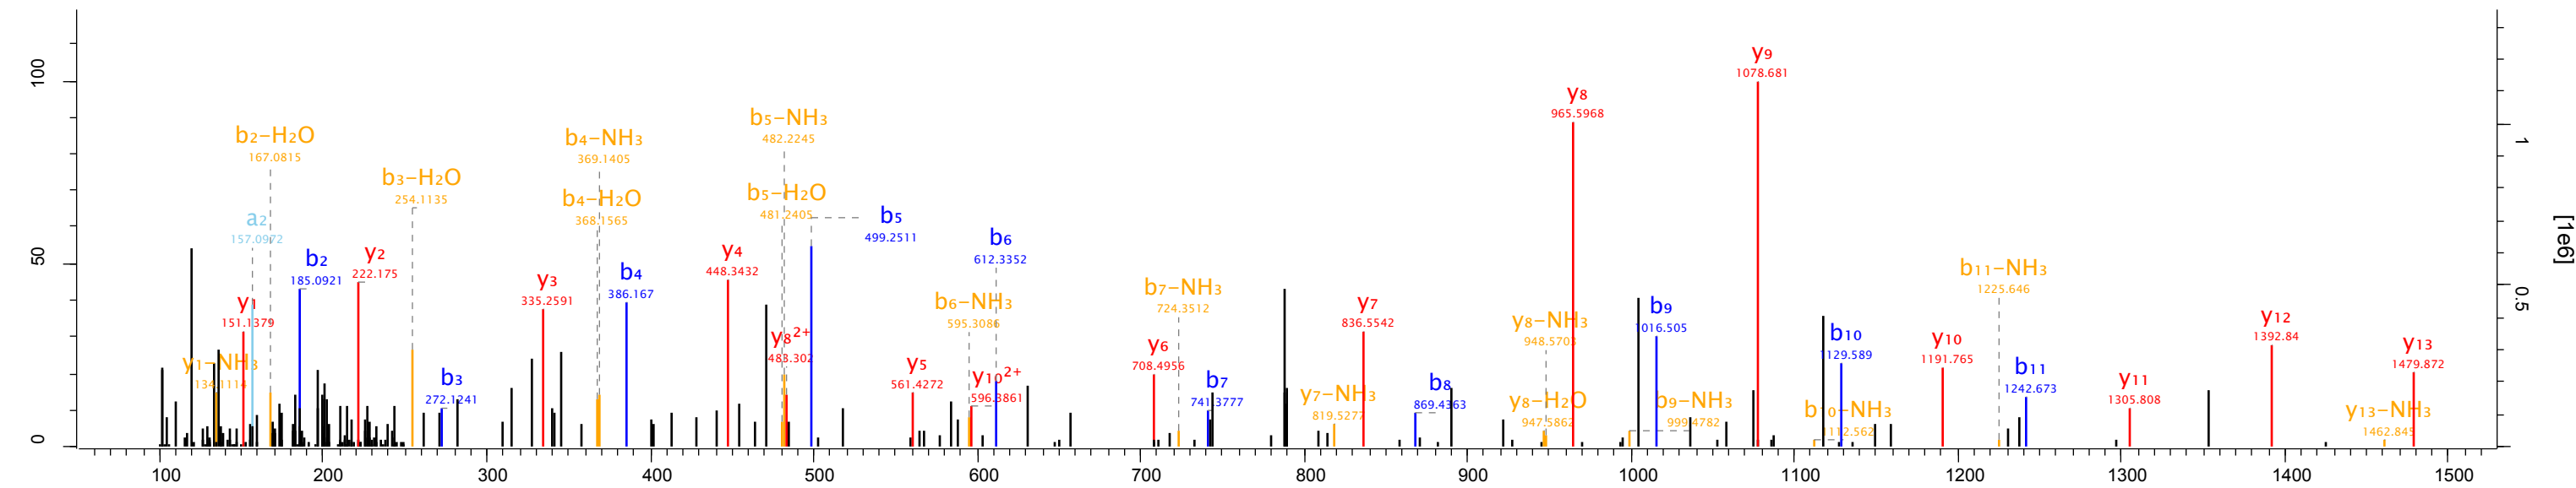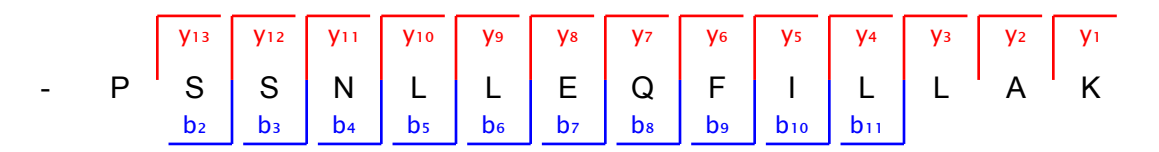

Raw file  
20171215\_MaS\_33SR\_LMH\_proteome\_02

Scan 16086 Method FTMS; HCD Score 177.04 m/z 832.91 Gene names COX17

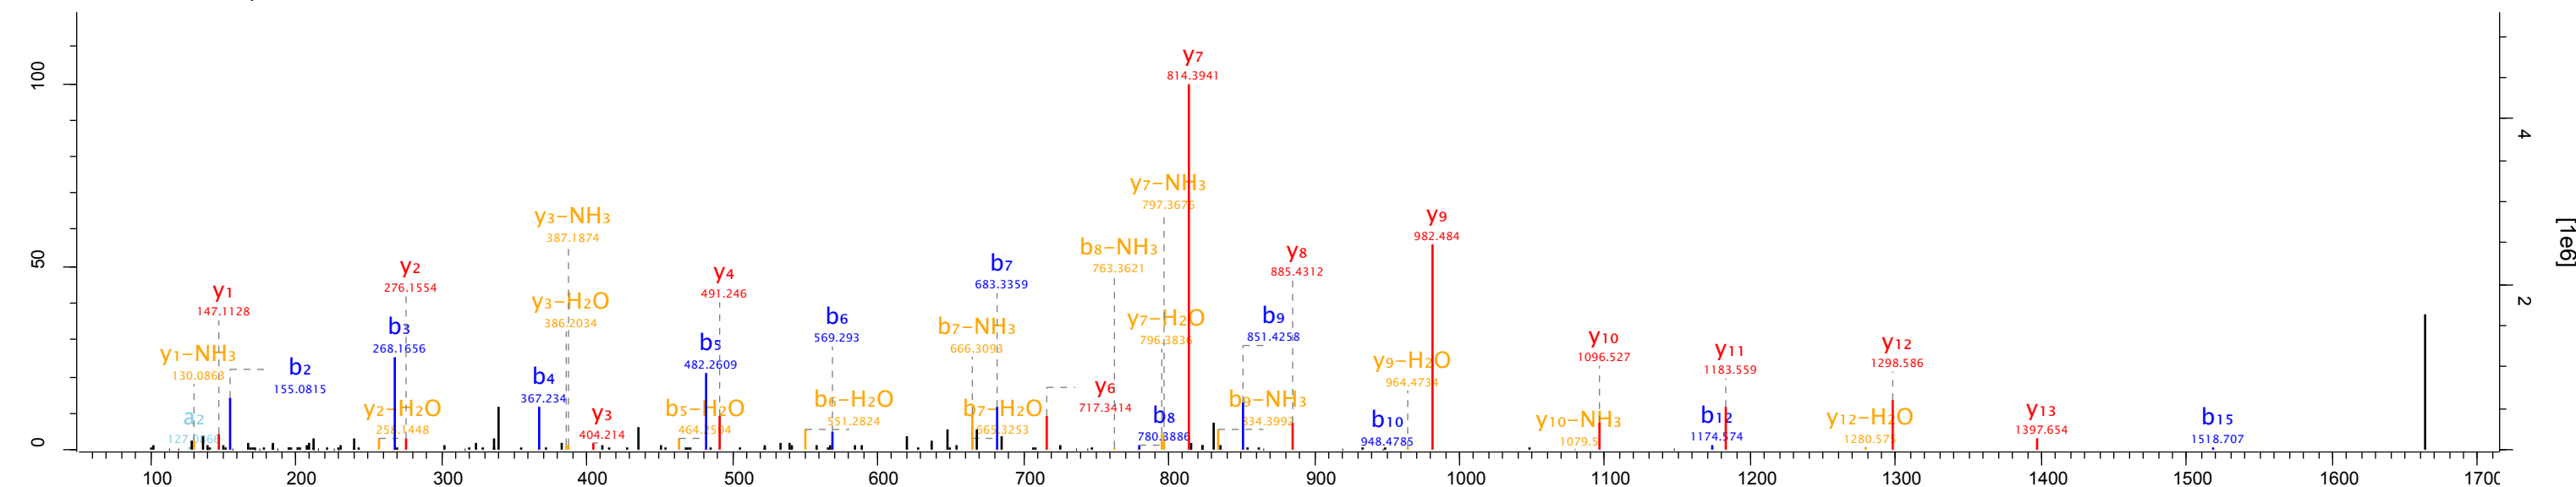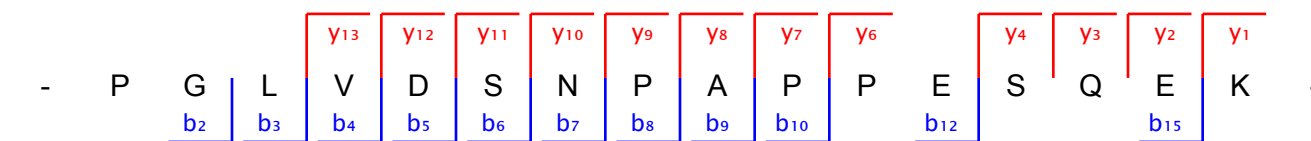

Raw file

20171215\_MaS\_33SR\_LMH\_proteome\_02

| Scan  | Method    | Score | m/z    | Gene names |
|-------|-----------|-------|--------|------------|
| 37286 | FTMS; HCD | 46.32 | 478.94 | KTI12      |

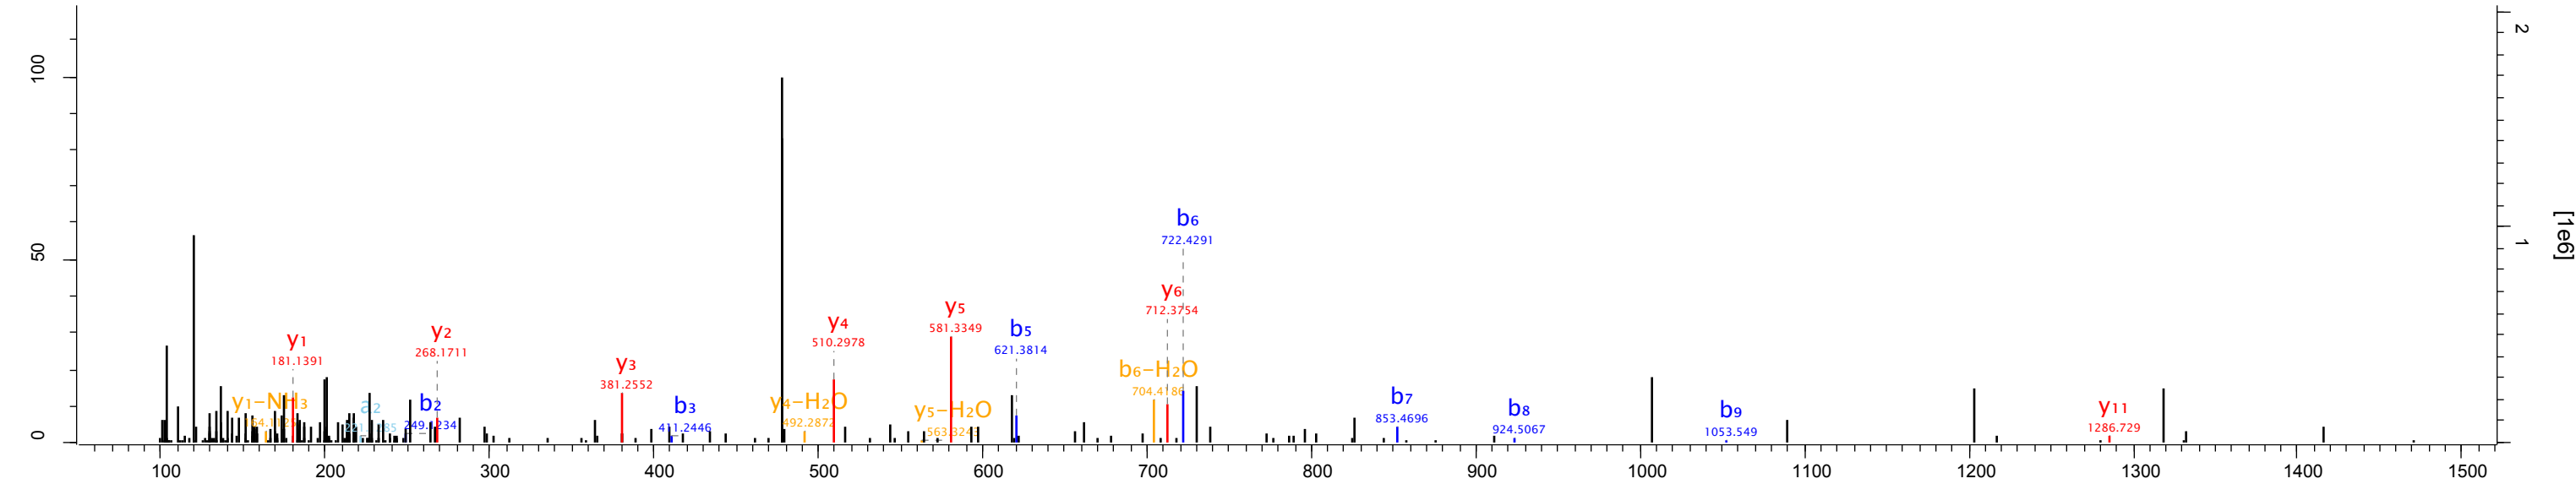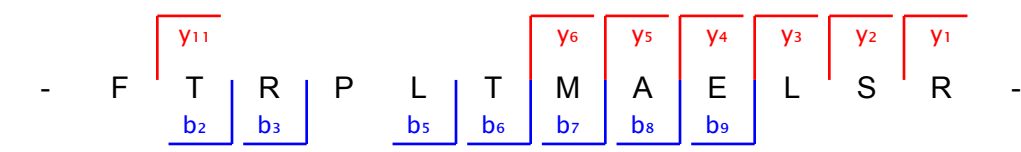

Raw file: 20171215\_MaS\_33SR\_LMH\_proteome\_02  
 Scan: 37476 Method: FTMS; HCD Score: 86.87 m/z: 402.26 Gene names: AQP11

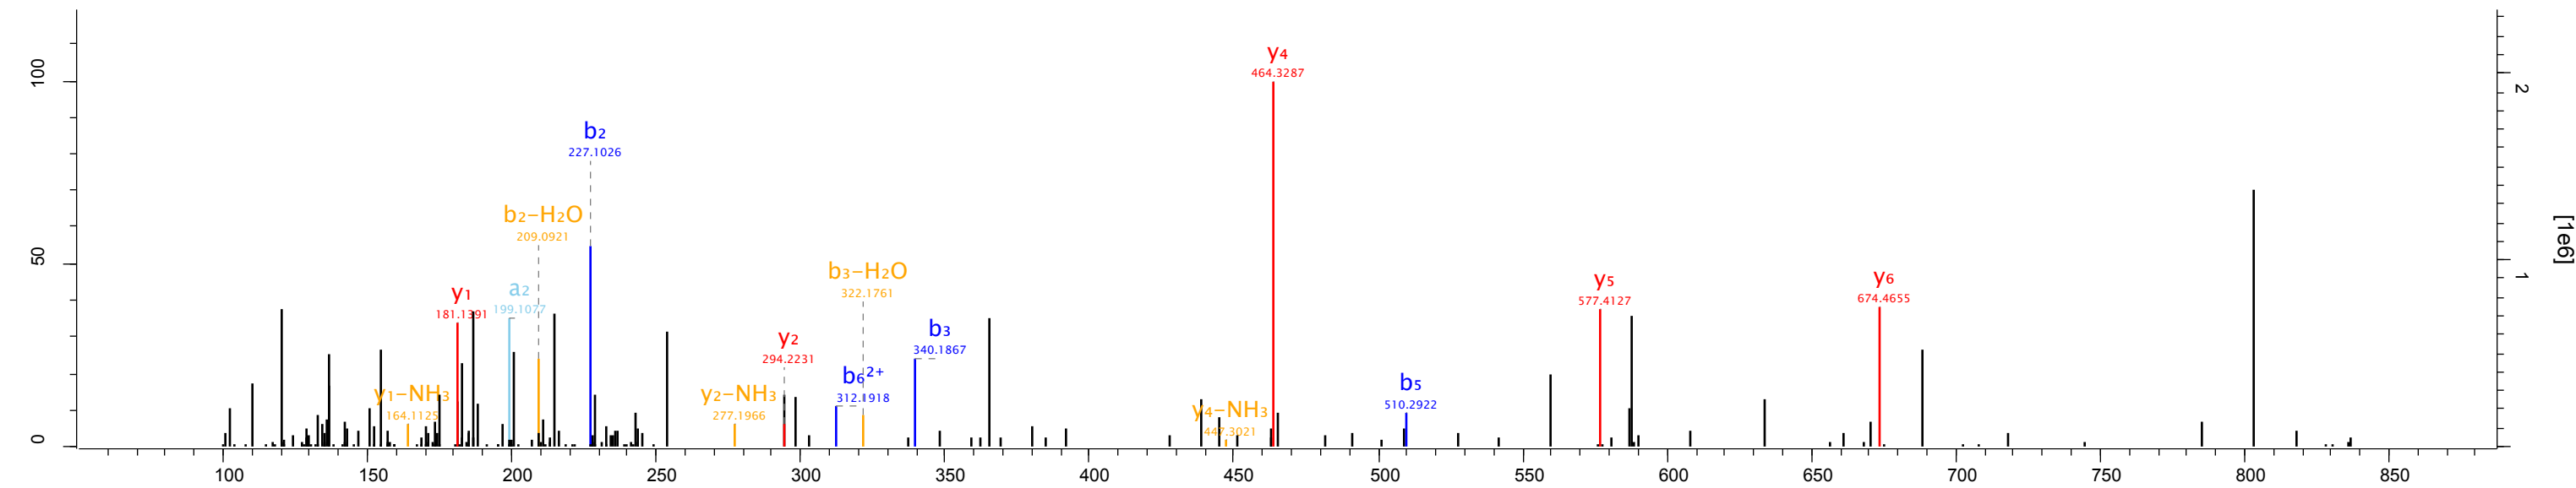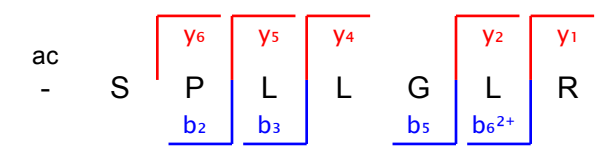

Raw file: 20171215\_MaS\_33SR\_LMH\_proteome\_02  
 Scan: 39356 Method: FTMS; HCD Score: 61.96 m/z: 448.26 Gene names: NUDT4

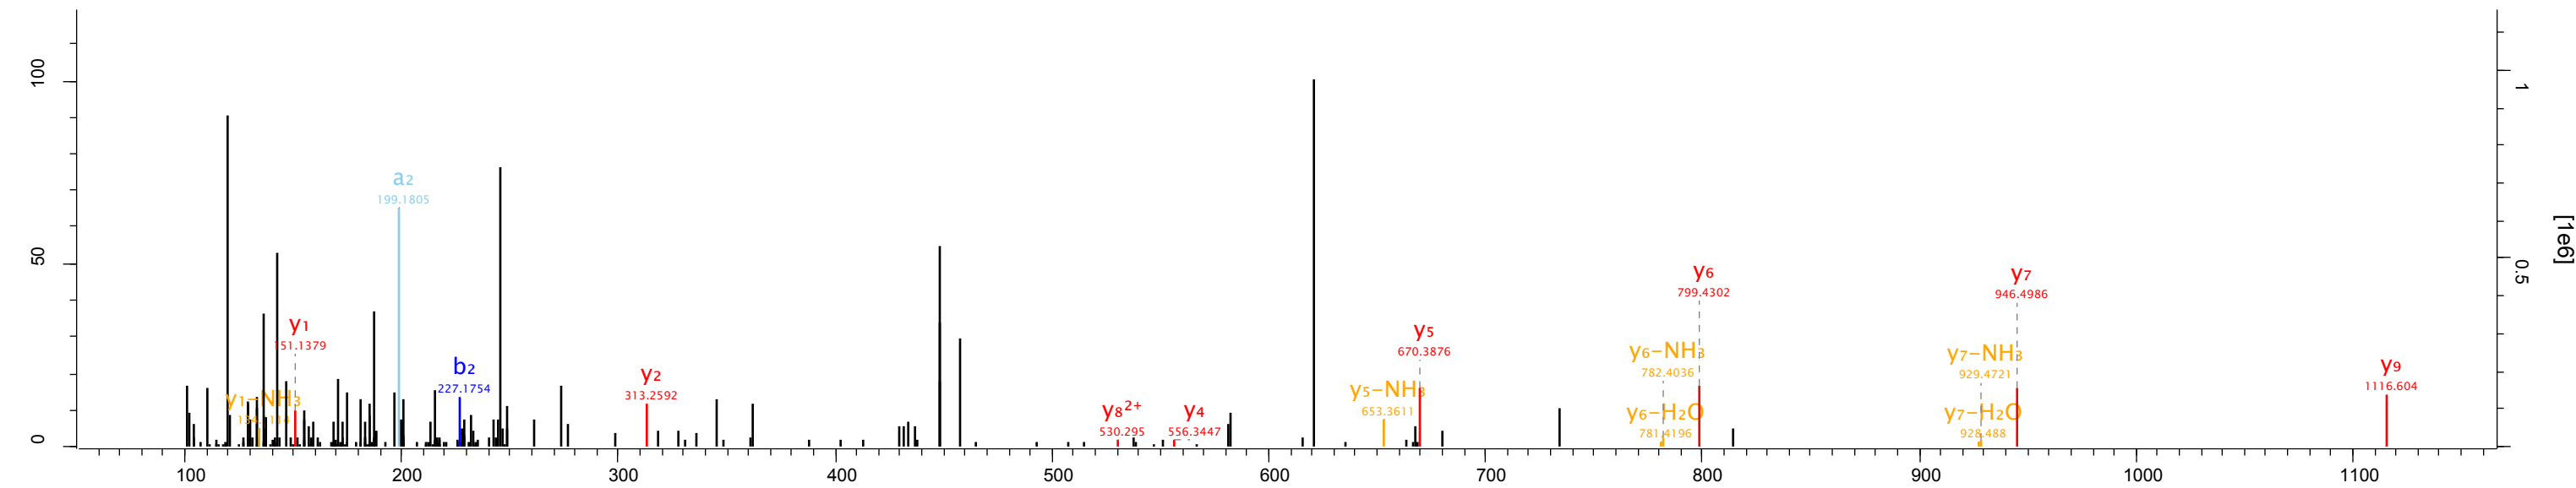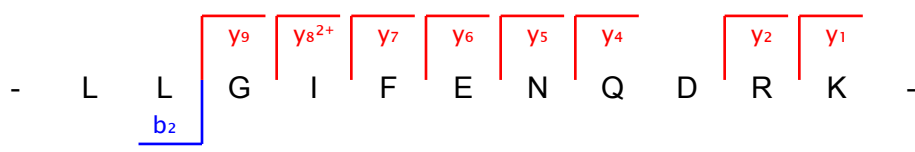

Raw file 20171215\_MaS\_33SR\_LMH\_proteome\_02 Scan 40366 Method FTMS; HCD Score 123.76 m/z 810.9 Gene names USMG5

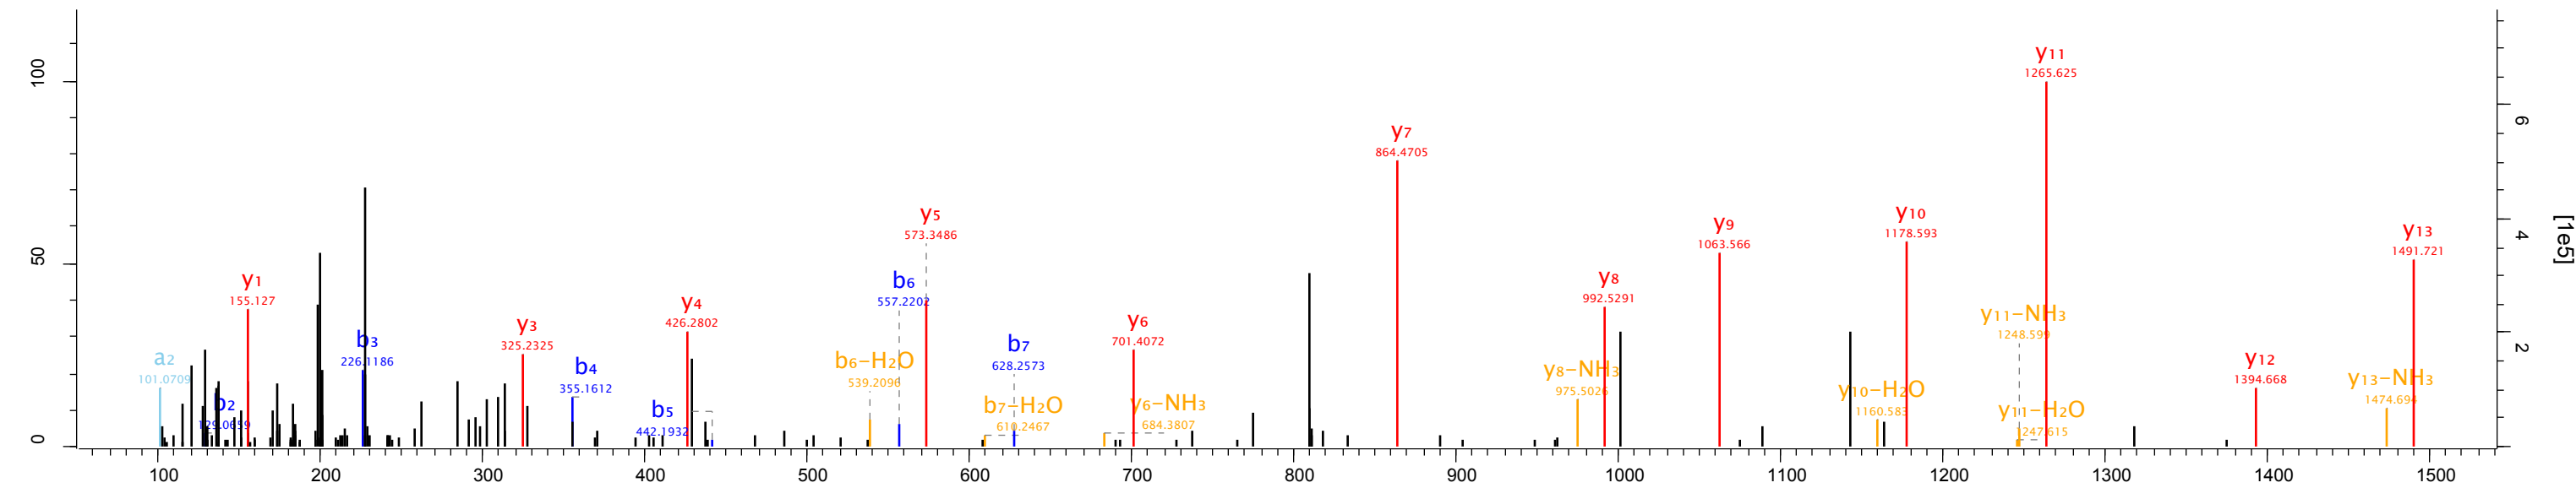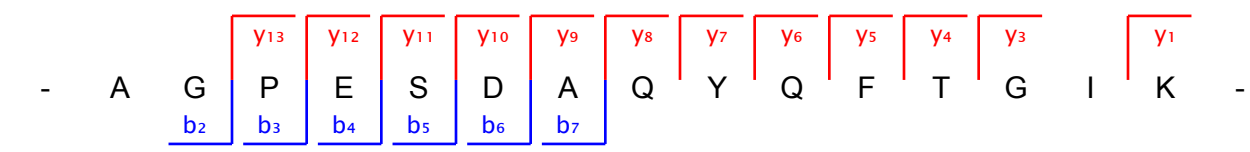

Raw file 20171215\_MaS\_33SR\_LMH\_proteome\_02 Scan 49416 Method FTMS; HCD Score 41.58 m/z 751.83

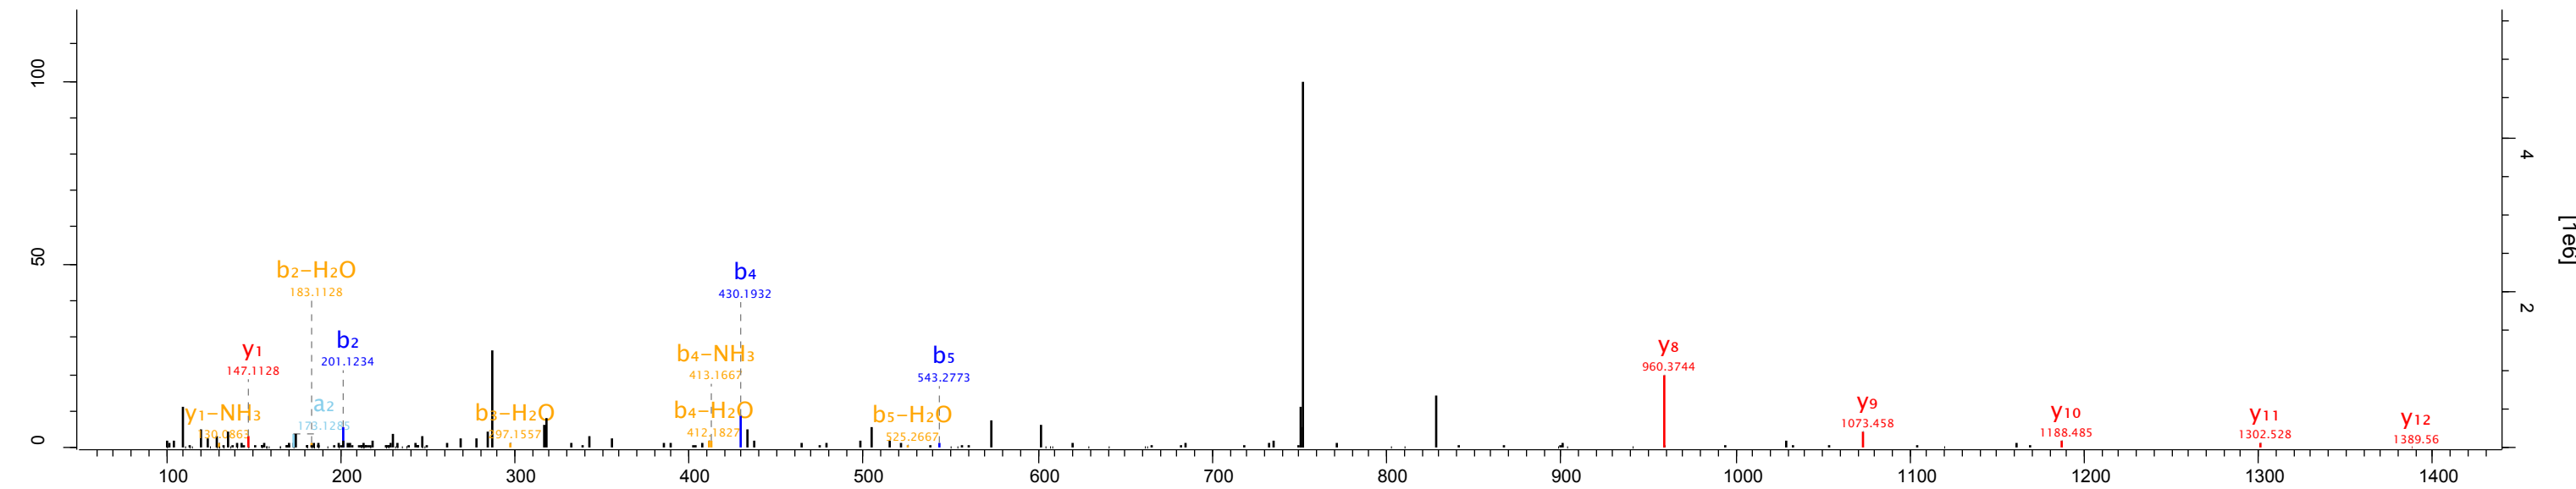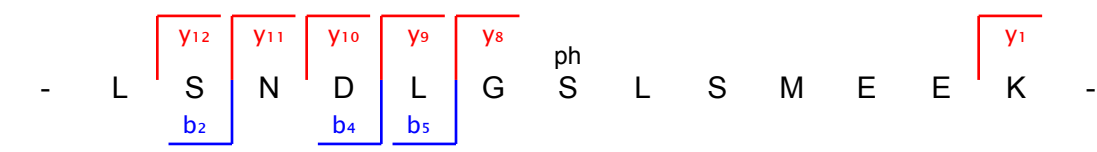

Raw file: 20171215\_MaS\_33SR\_LMH\_proteome\_02  
 Scan: 63166 Method: FTMS; HCD Score: 83.86 m/z: 795.38 Gene names: CTNNBIP1

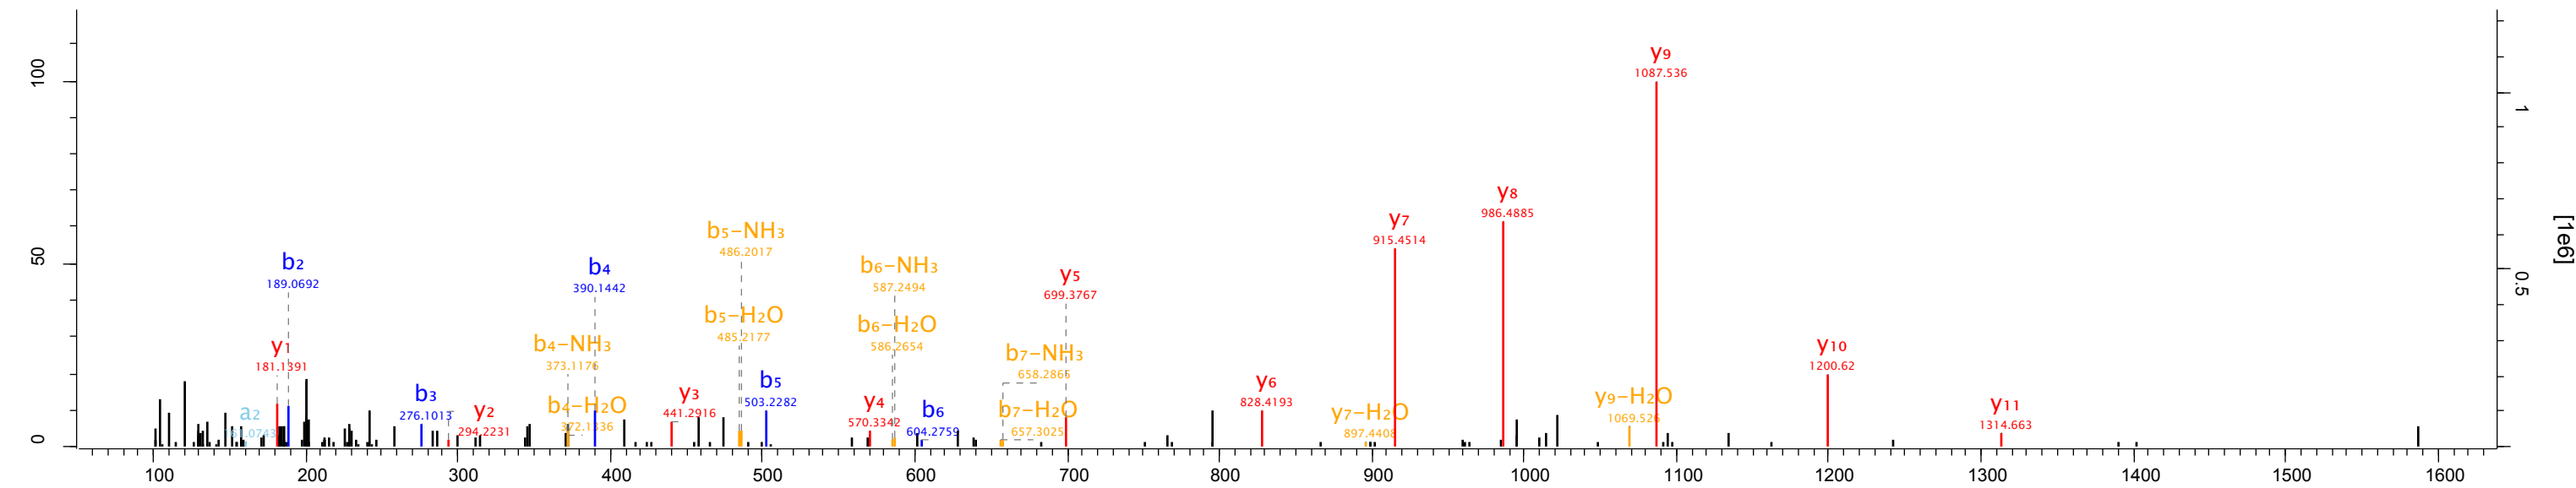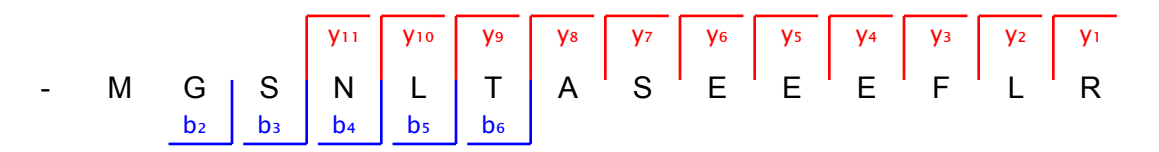



Raw file 20171215\_MaS\_33SR\_LMH\_proteome\_02 Scan 6806 Method FTMS; HCD Score 80.39 m/z 662.36 Gene names C1orf174

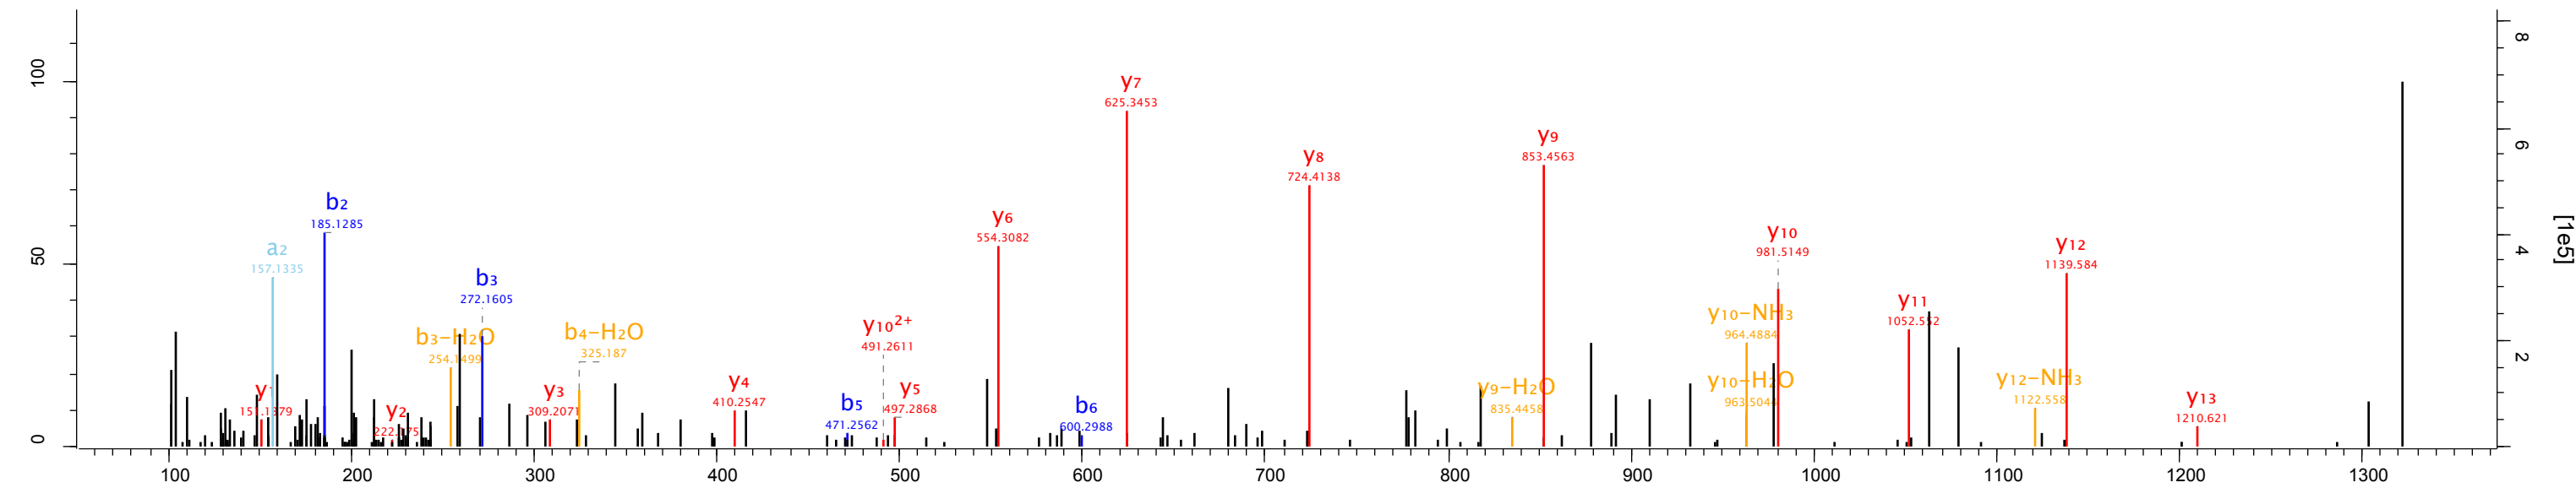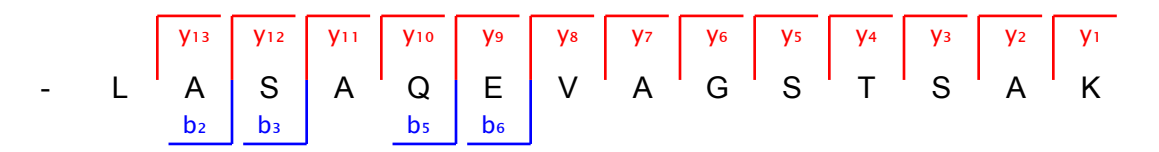

Raw file  
 20171215\_MaS\_33SR\_LMH\_proteome\_02  
 Scan 7166 Method FTMS; HCD Score 42 m/z 853.37

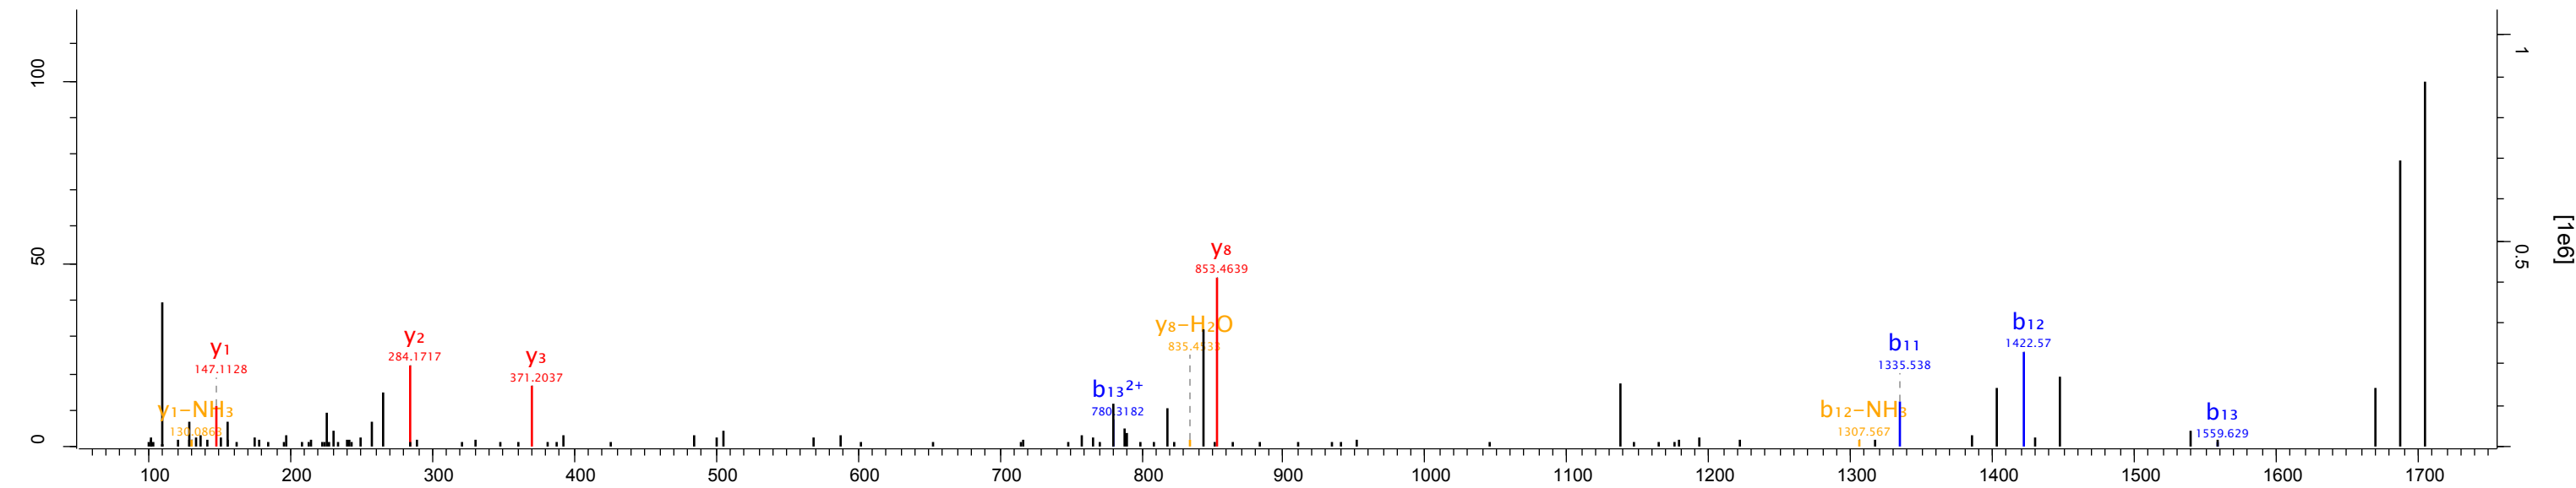

- L S S E Y L A S R A P S H K -

Fragmentation labels above the sequence:

- $y_8$  above A
- $y_3$  above S
- $y_2$  above H
- $y_1$  above K

Fragmentation labels below the sequence:

- $b_{11}$  below P
- $b_{12}$  below S
- $b_{13}$  below H

Raw file 20171215\_MaS\_33SR\_LMH\_proteome\_02 Scan 75276 Method FTMS; HCD Score 58.81 m/z 875.45 Gene names ATP6V1D

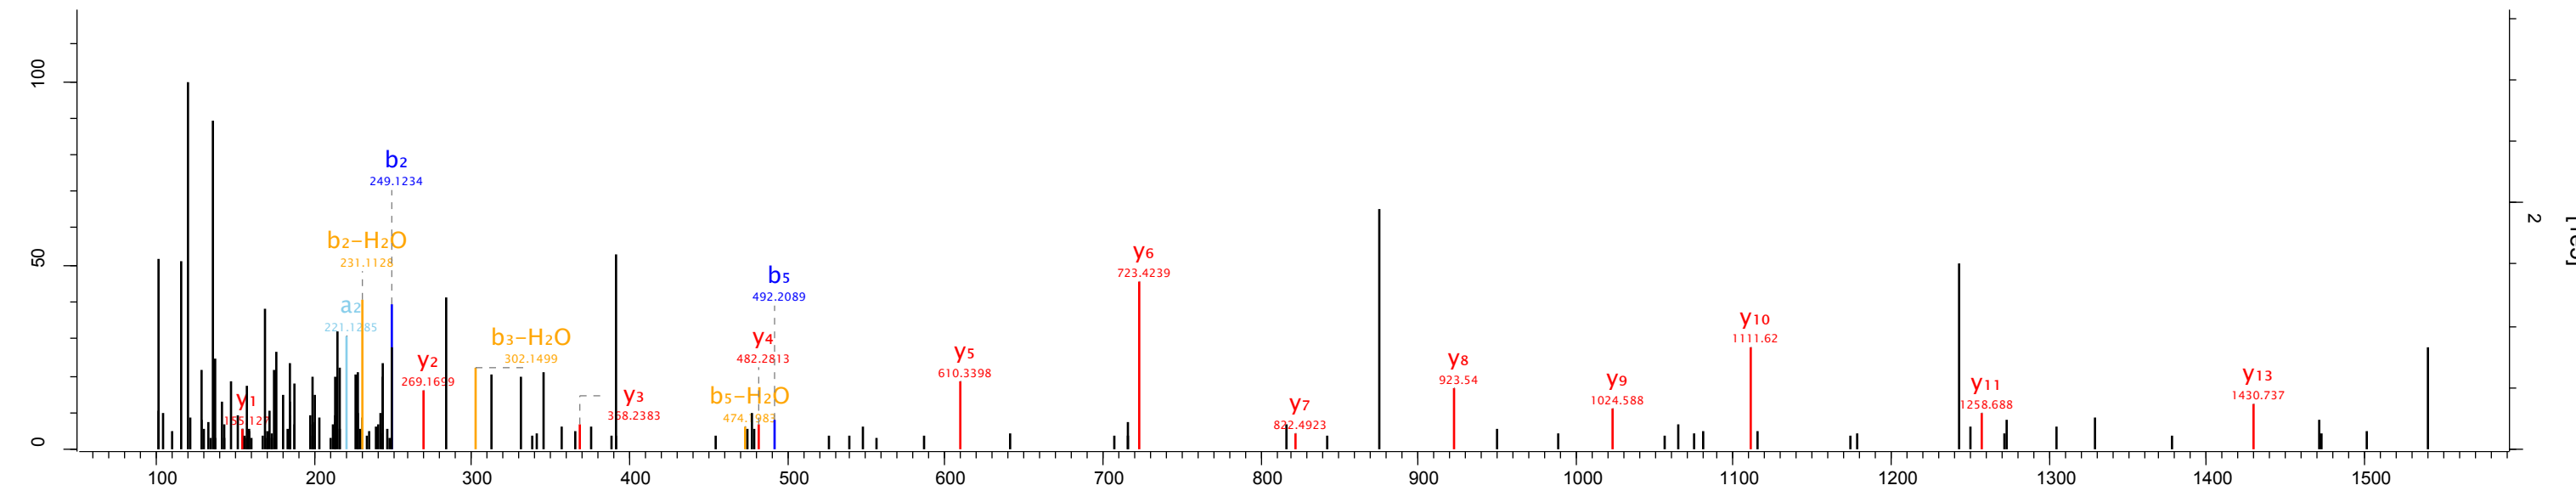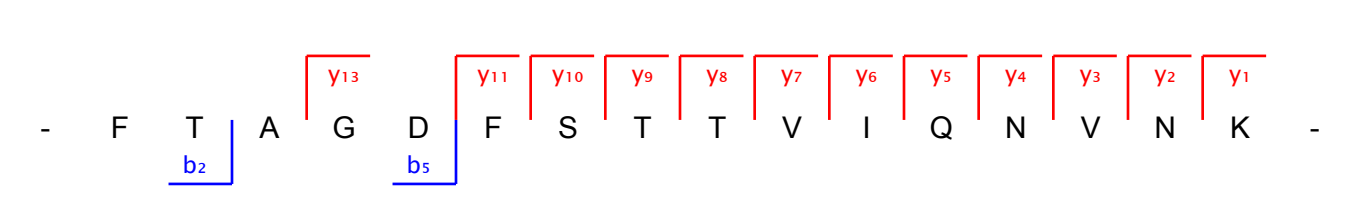

Raw file 20171215\_MaS\_33SR\_LMH\_proteome\_02 Scan 79686 Method FTMS; HCD Score 56.26 m/z 538.81

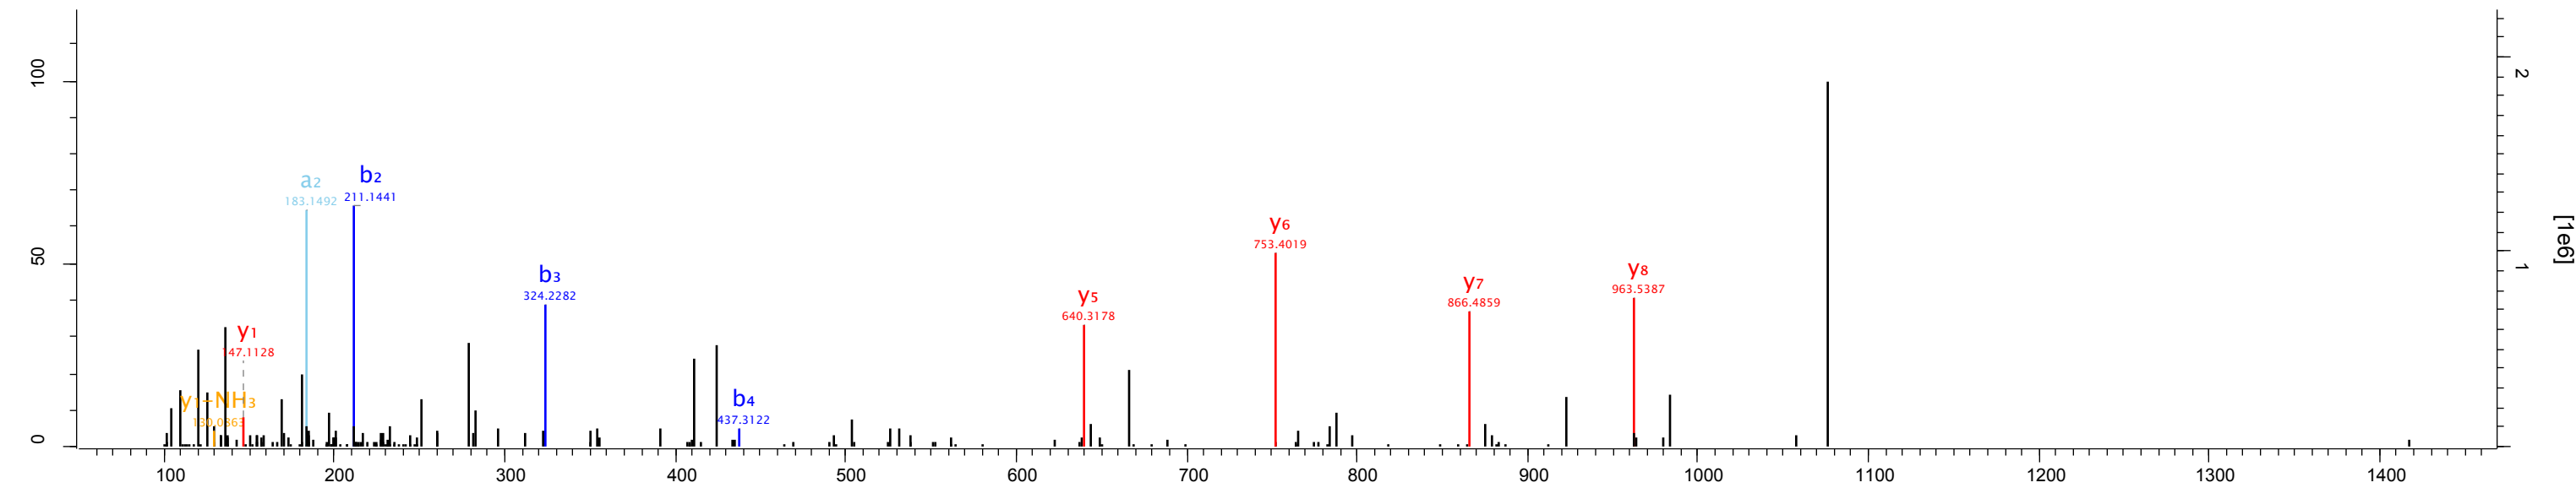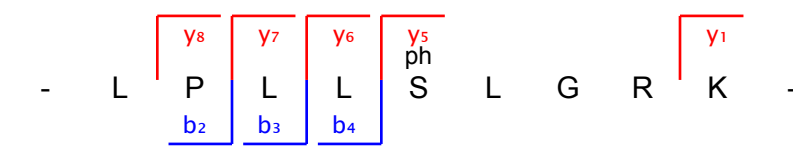

Raw file 20171215\_MaS\_33SR\_LMH\_proteome\_02 Scan 90586 Method FTMS; HCD Score 50.81 m/z 527.29 Gene names EARS2

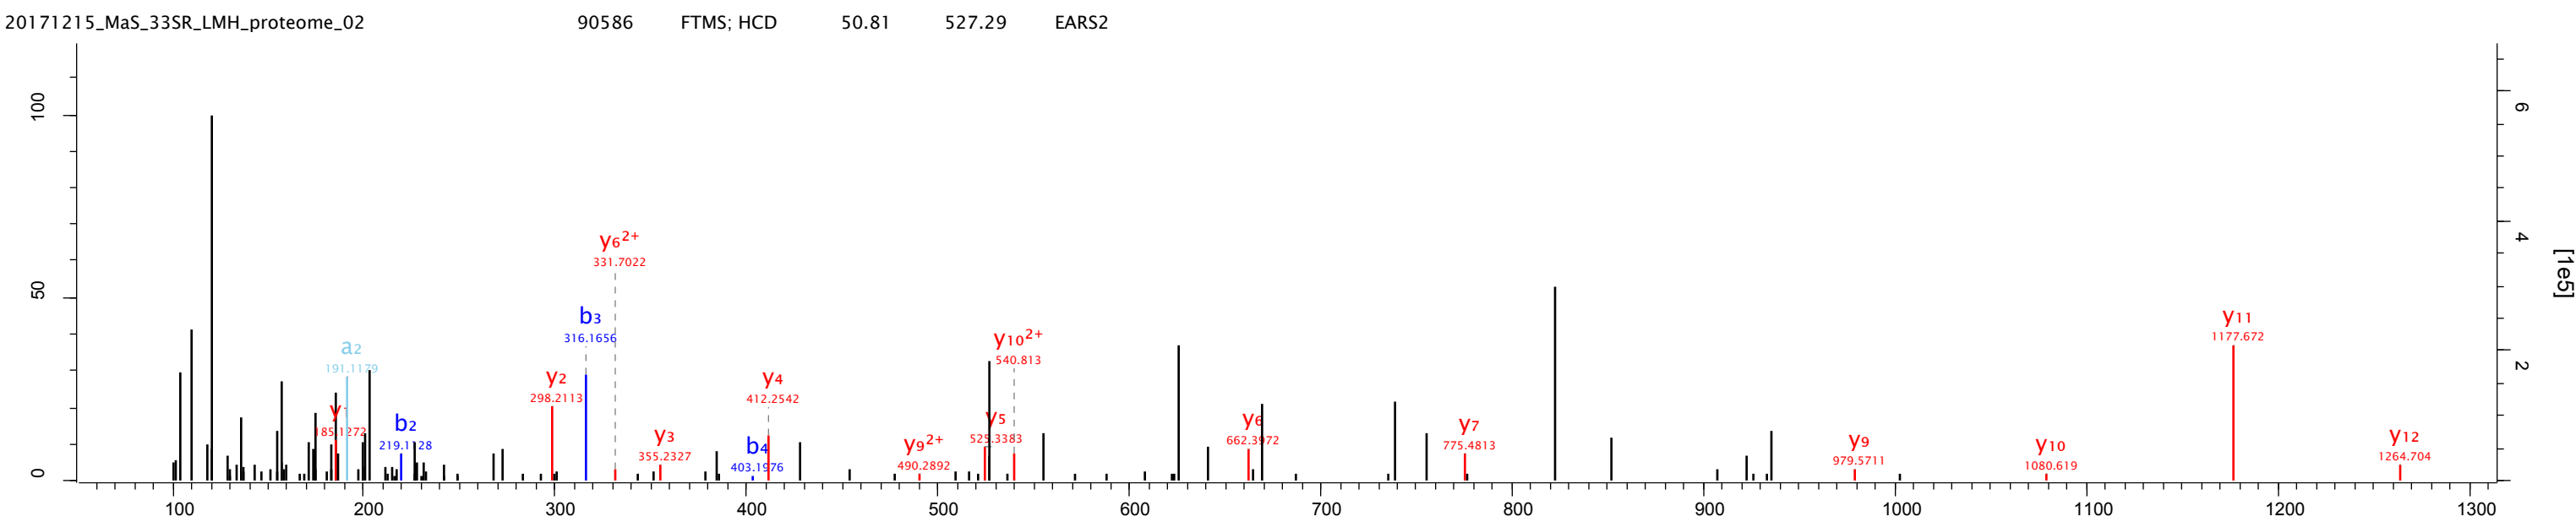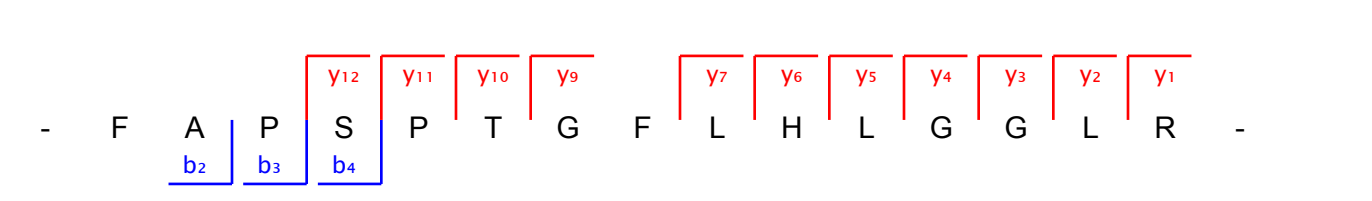

Raw file: 20171215\_MaS\_33SR\_LMH\_proteome\_02  
 Scan: 95456 Method: FTMS; HCD Score: 63.69 m/z: 848.97 Gene names: WBP4

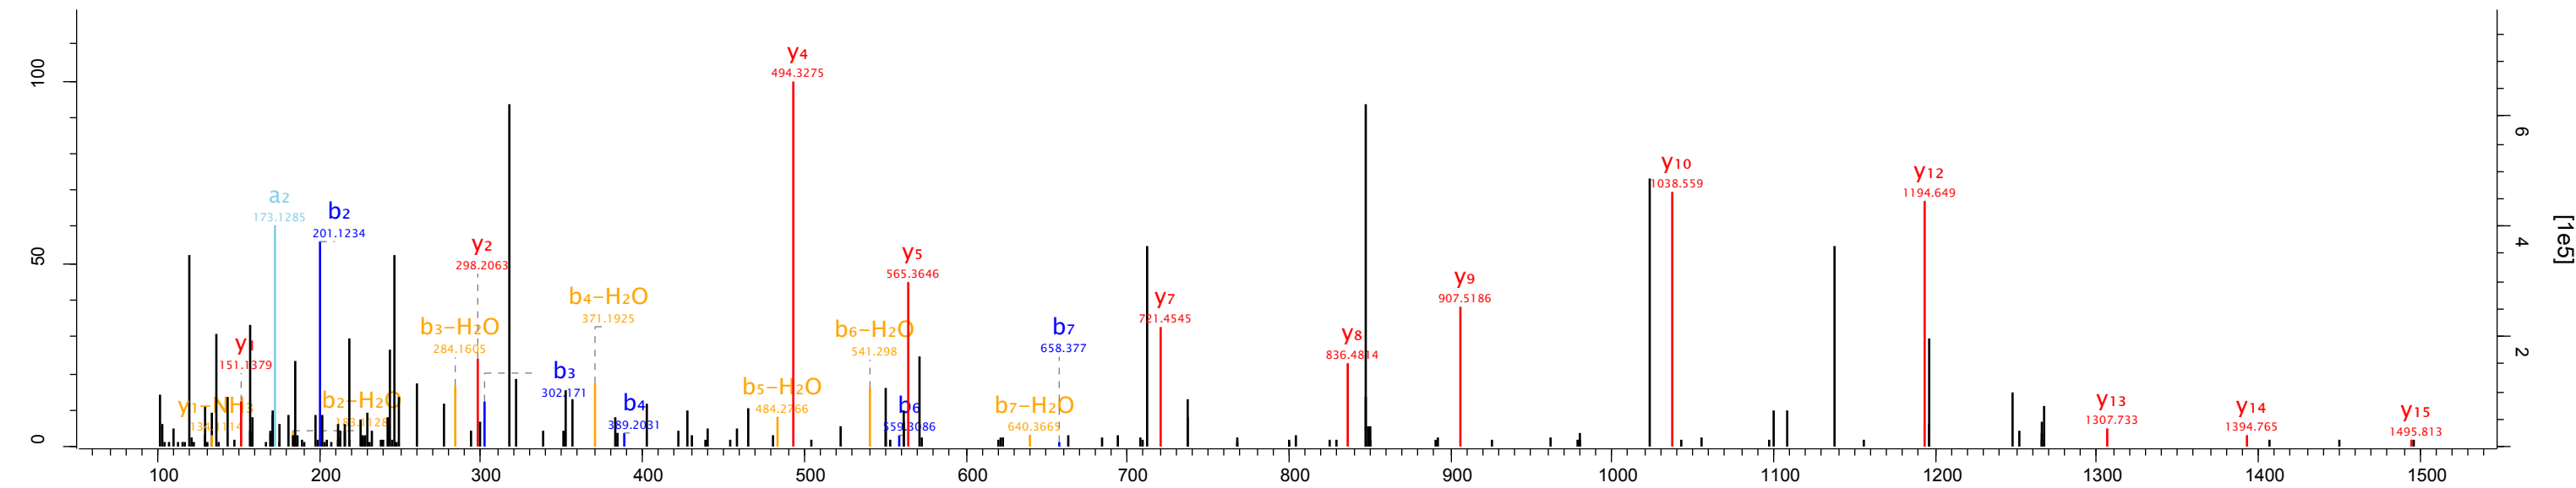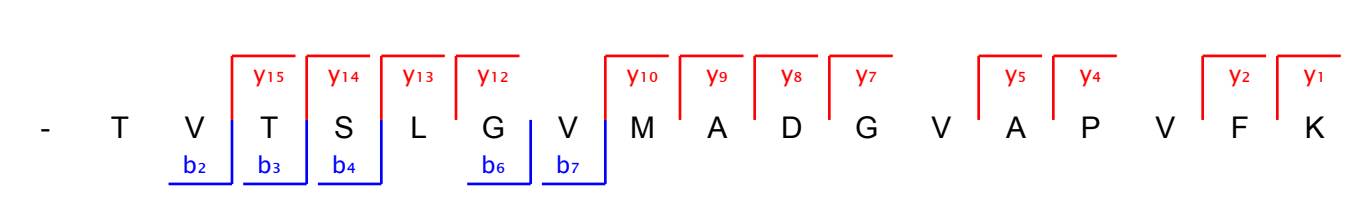

Raw file 20171215\_MaS\_33SR\_LMH\_proteome\_02 Scan 95746 Method FTMS; HCD Score 70.2 m/z 781.9 Gene names IGSF9B;MSI2

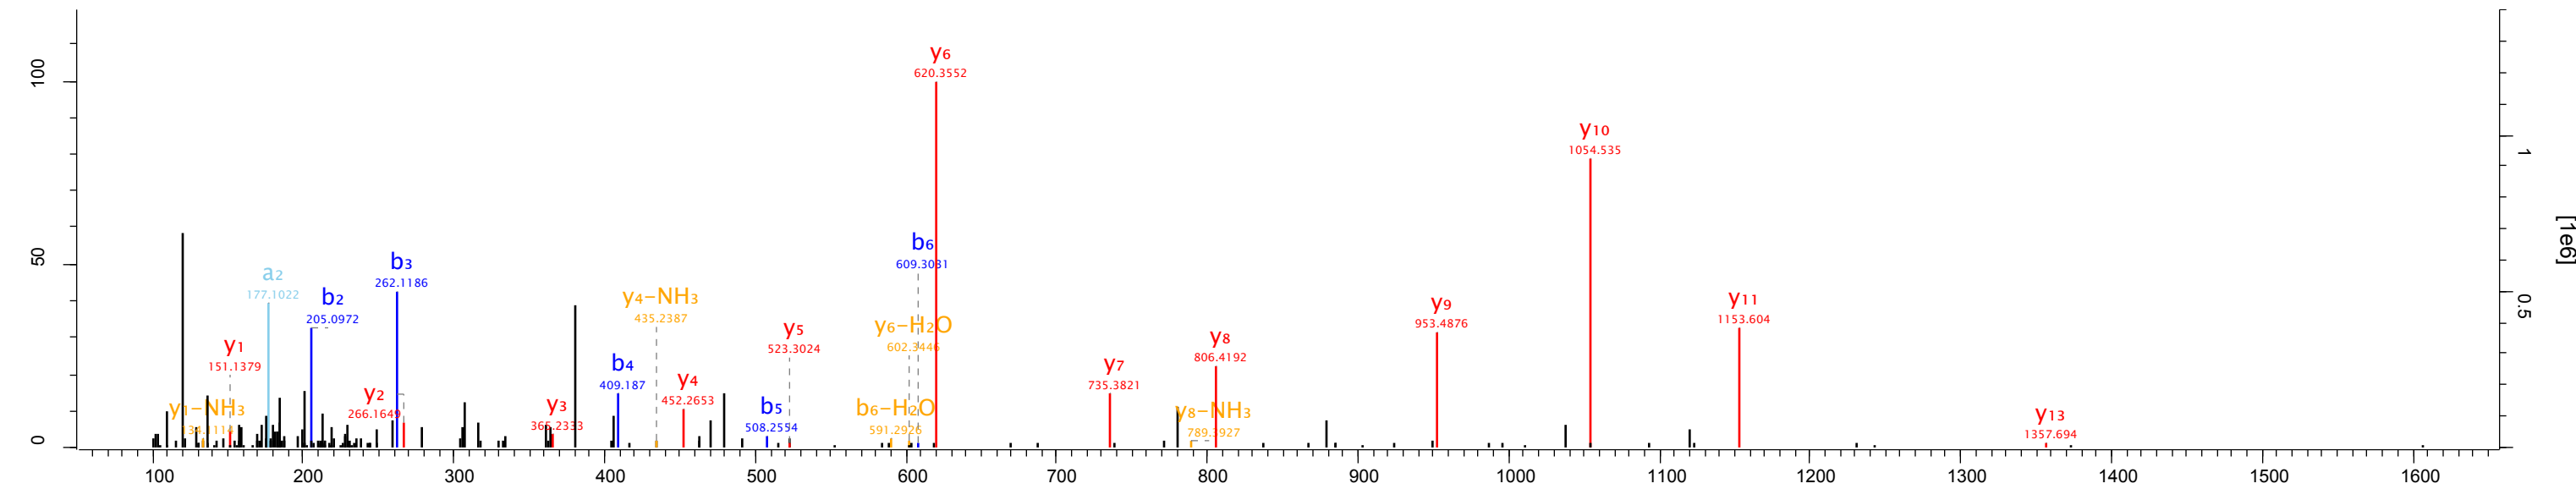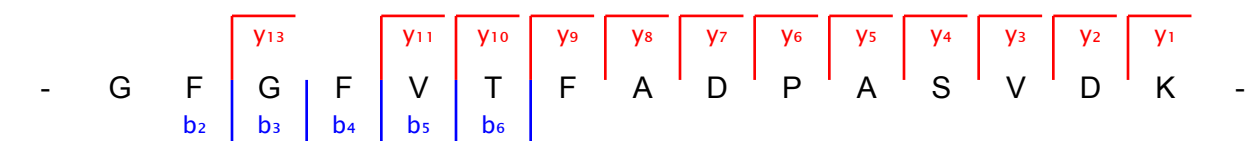

Raw file: 20171215\_MaS\_33SR\_LMH\_proteome\_02  
 Scan: 96536 Method: FTMS; HCD Score: 62.86 m/z: 868.48 Gene names: RIPK2

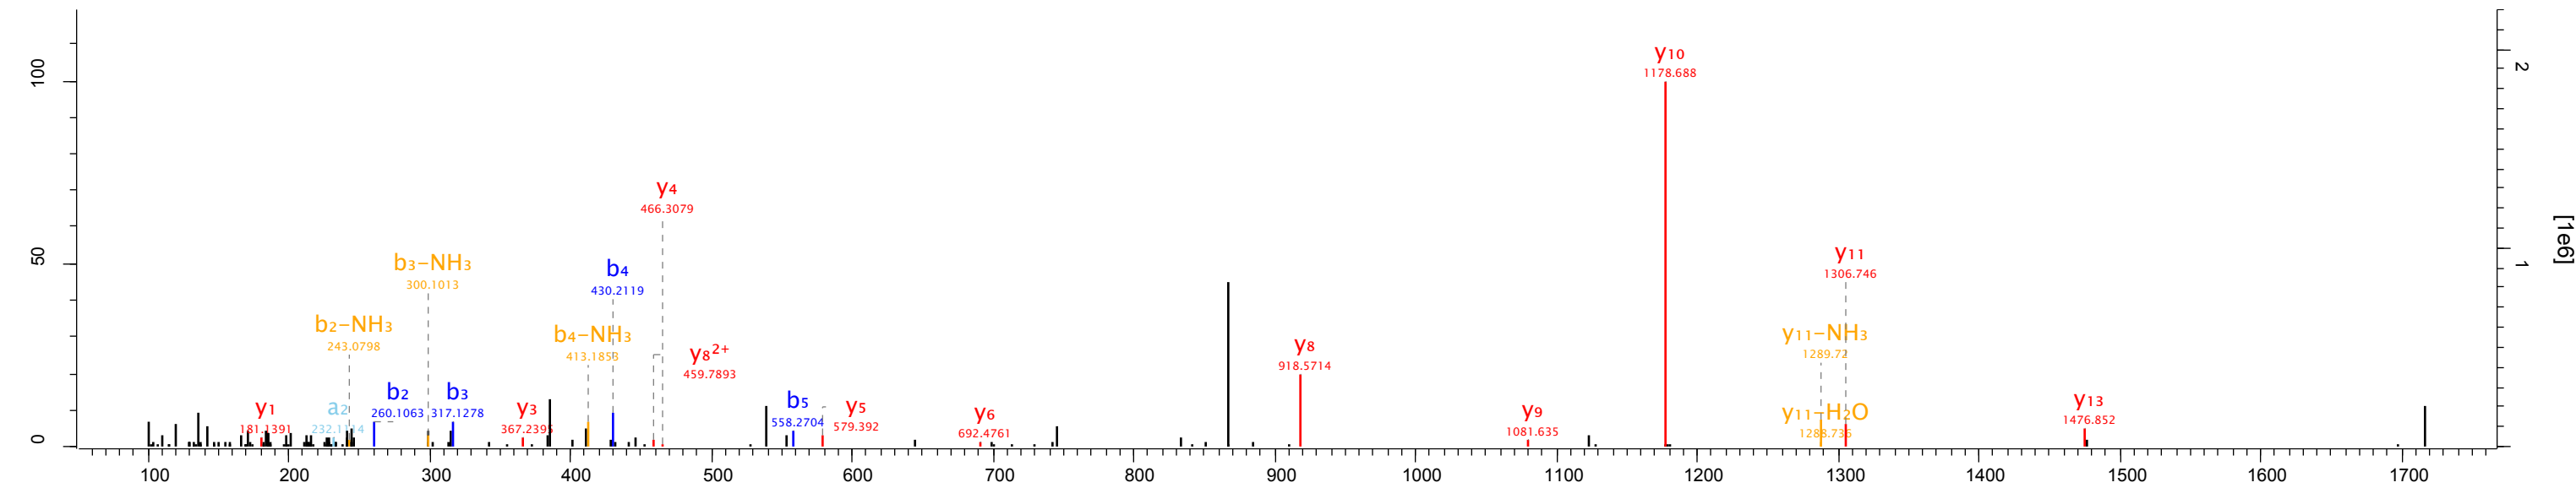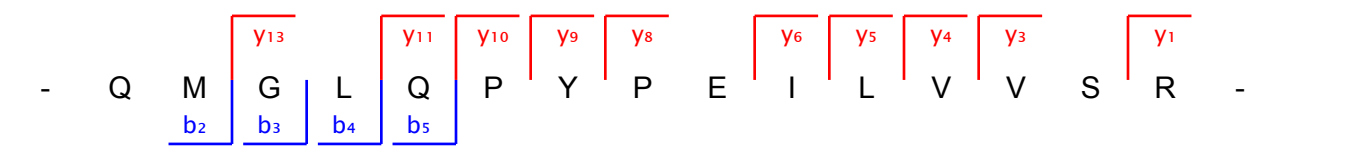



20171215\_MaS\_33SR\_LMH\_proteome\_02 98696 FTMS; HCD 48.19 568.34 MRPS27

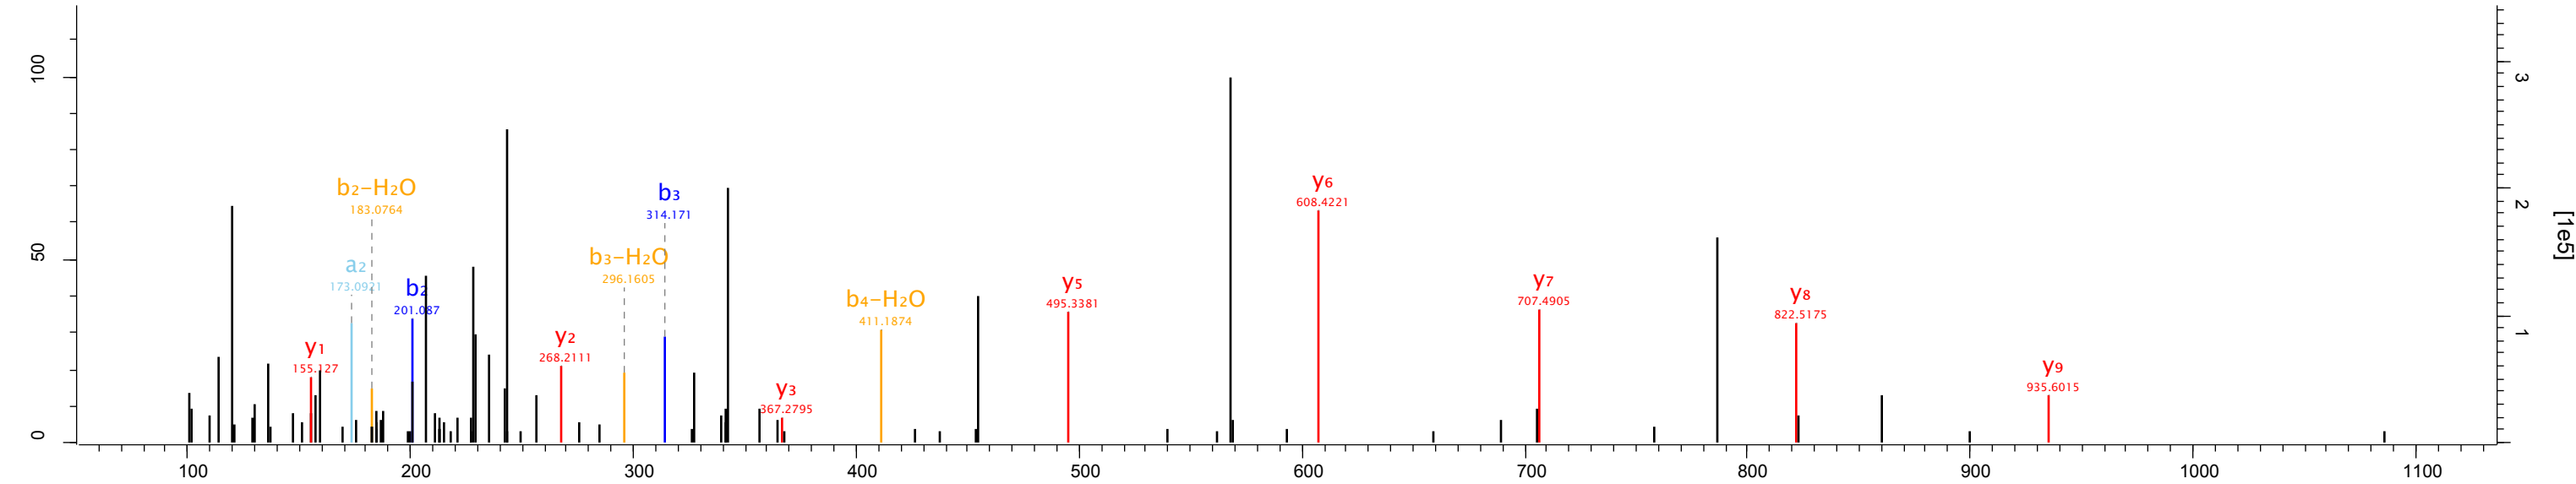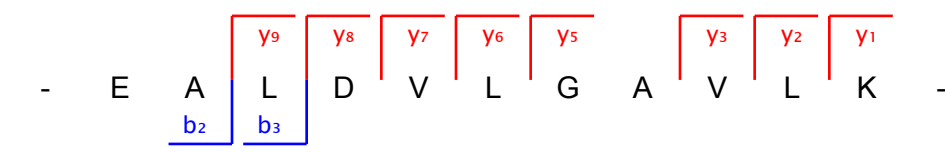

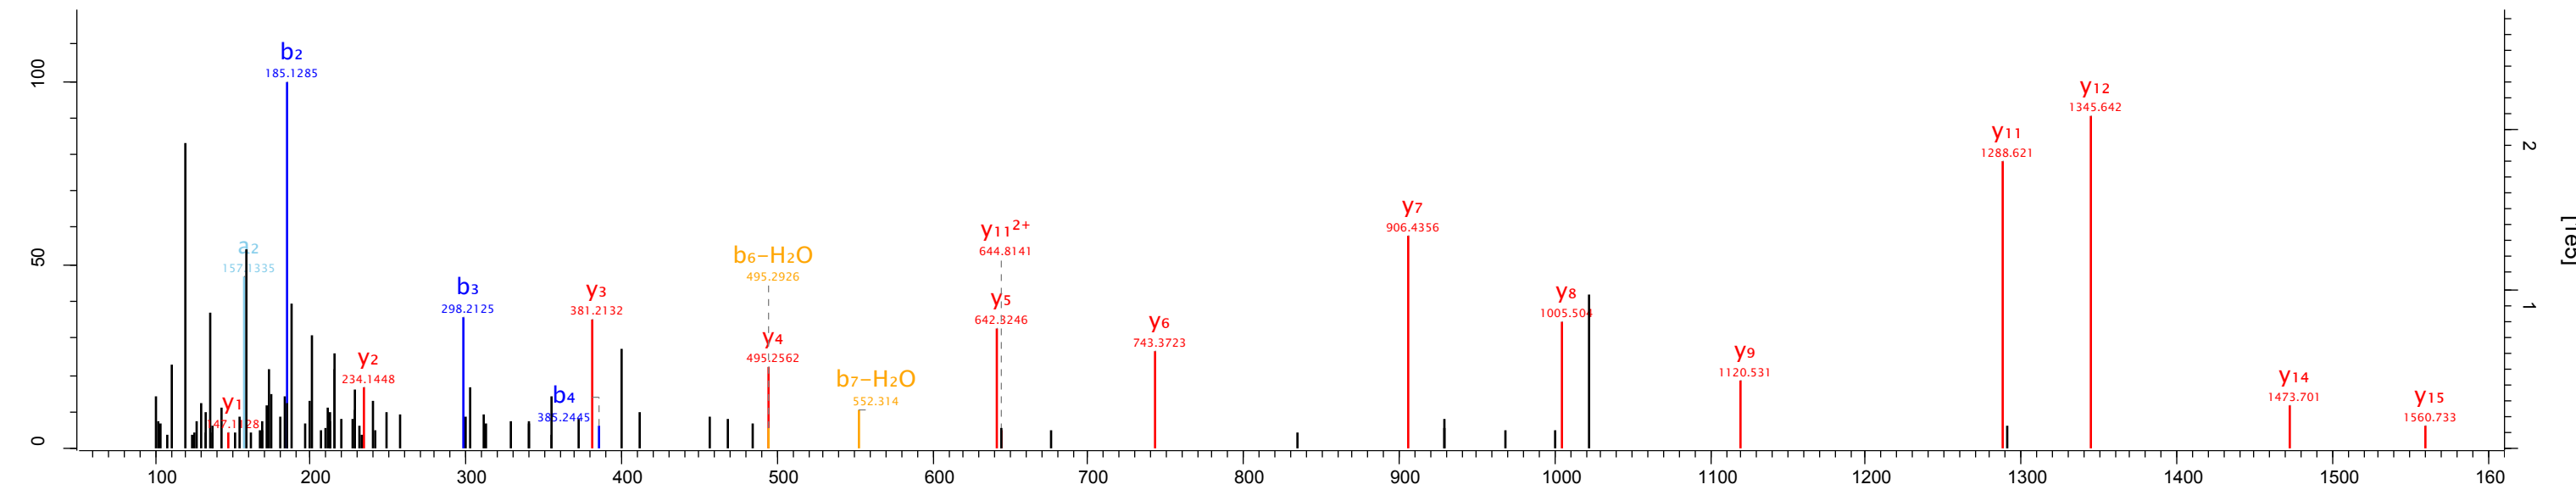

- A L L S G A G P A D V Y T F N F S K -

Fragmentation sites are indicated by brackets below the sequence:

- b<sub>2</sub> (L)
- b<sub>3</sub> (L)
- b<sub>4</sub> (S)
- y<sub>15</sub> (S)
- y<sub>14</sub> (G)
- y<sub>12</sub> (G)
- y<sub>11</sub> (P)
- y<sub>9</sub> (D)
- y<sub>8</sub> (V)
- y<sub>7</sub> (Y)
- y<sub>6</sub> (T)
- y<sub>5</sub> (F)
- y<sub>4</sub> (N)
- y<sub>3</sub> (F)
- y<sub>2</sub> (S)
- y<sub>1</sub> (K)

Raw file 20171215\_MaS\_33SR\_LMH\_phospho\_01 Scan 10007 Method FTMS; HCD Score 117.97 m/z 772.78 Gene names BRD1

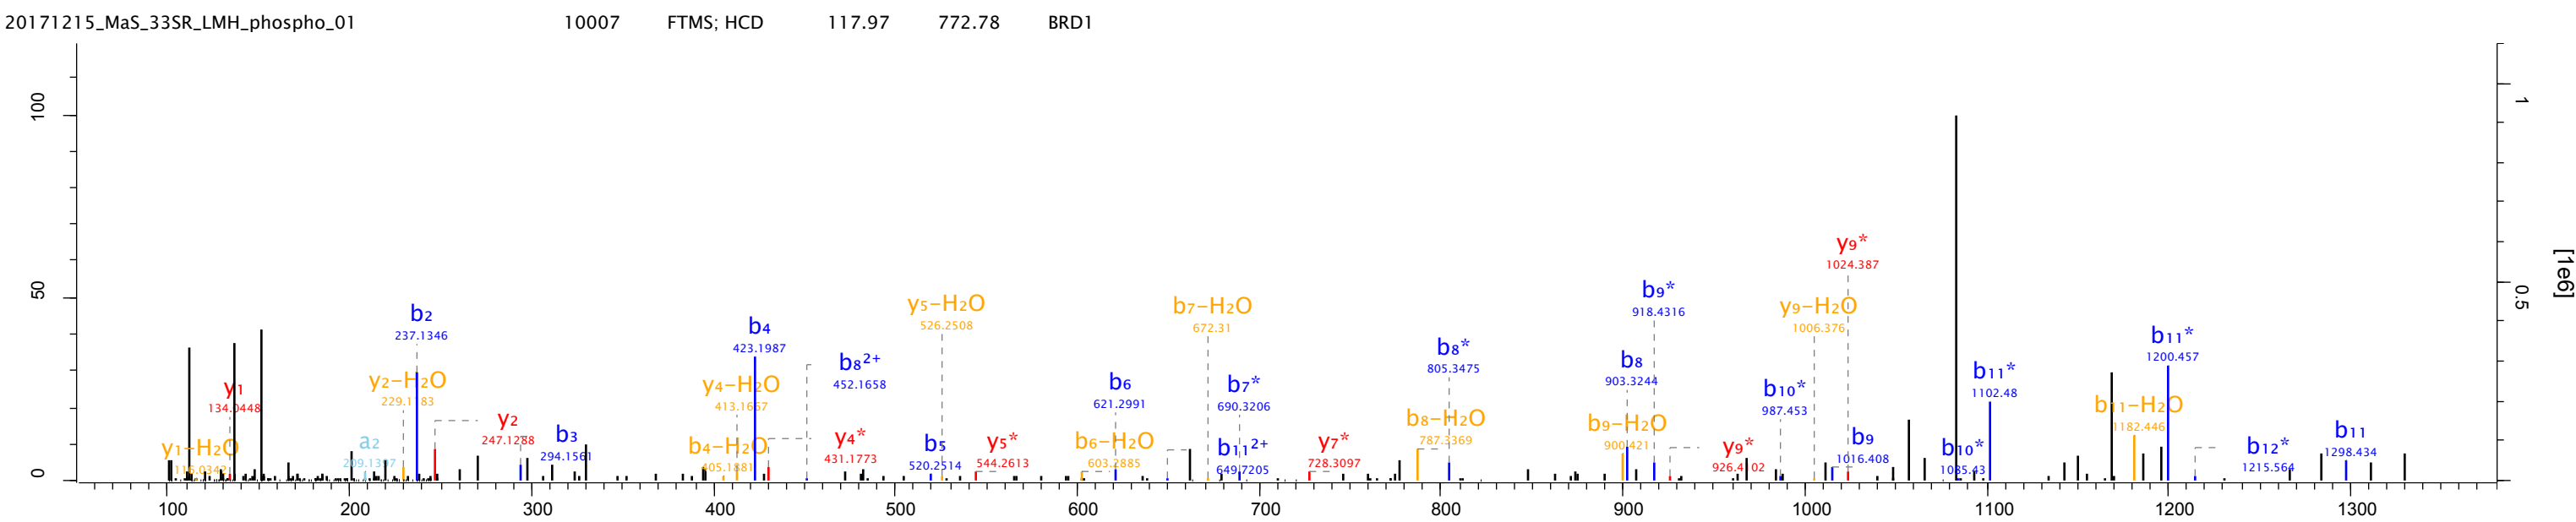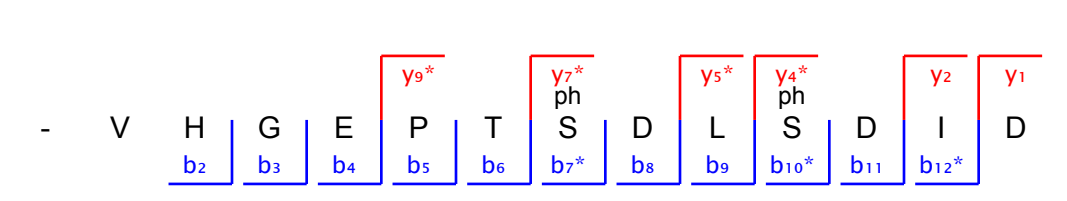

Raw file 20171215\_MaS\_33SR\_LMH\_phospho\_02 Scan 3517 Method FTMS; HCD Score 45.88 m/z 744.81 Gene names TAF6

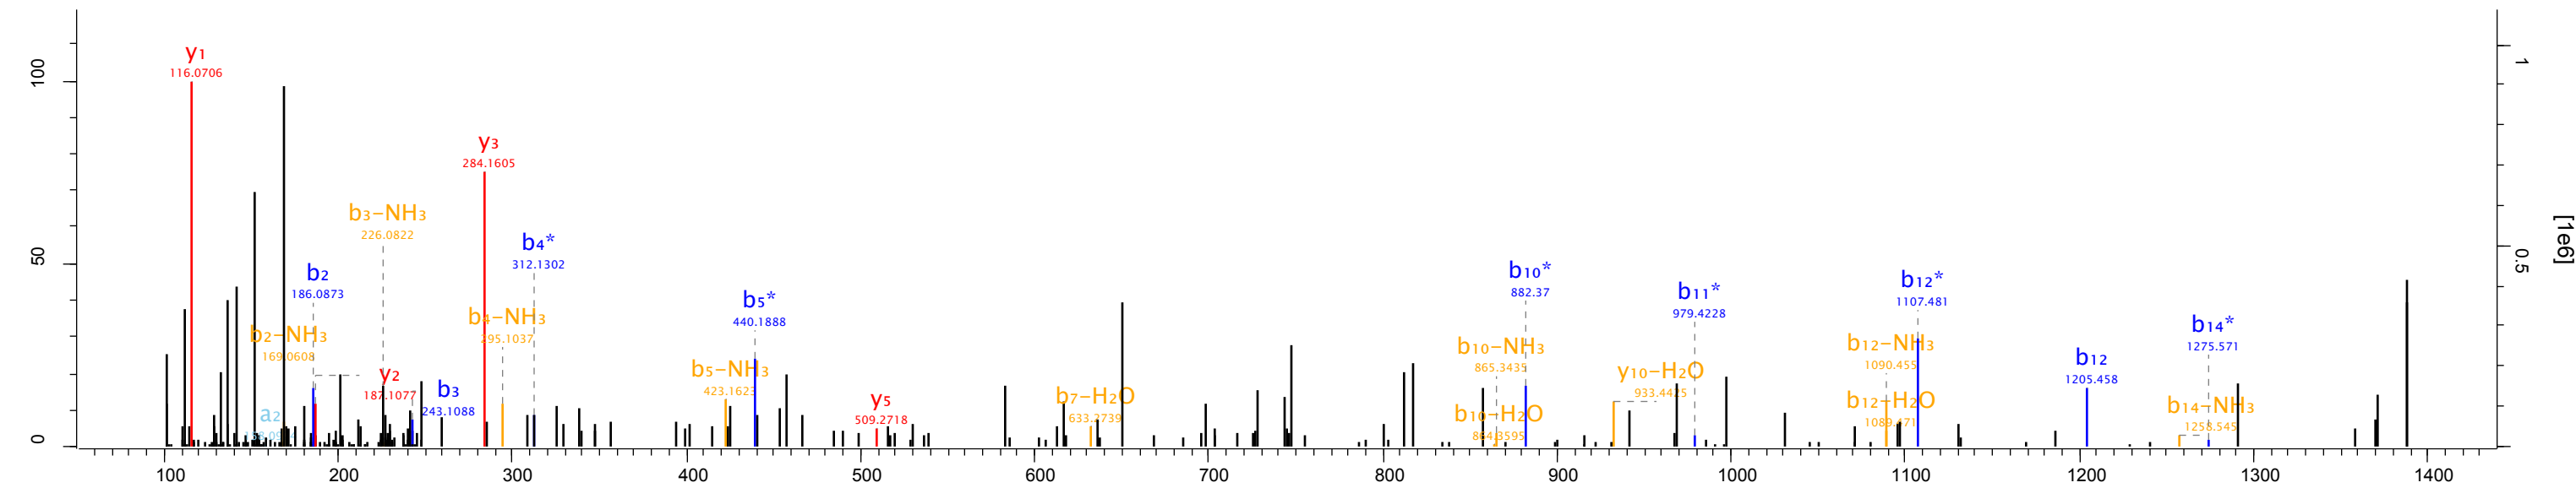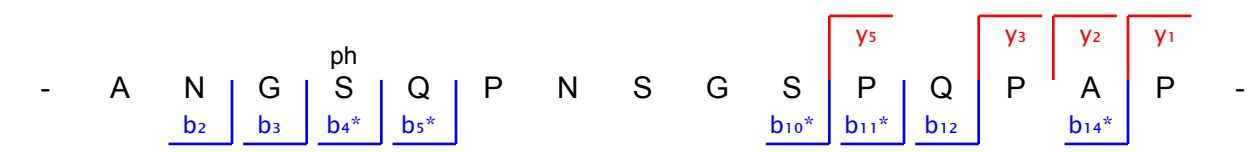

Raw file 20171215\_MaS\_33SR\_LMH\_phospho\_02 Scan 9877 Method FTMS; HCD Score 119.51 m/z 723.78 Gene names PSEN2

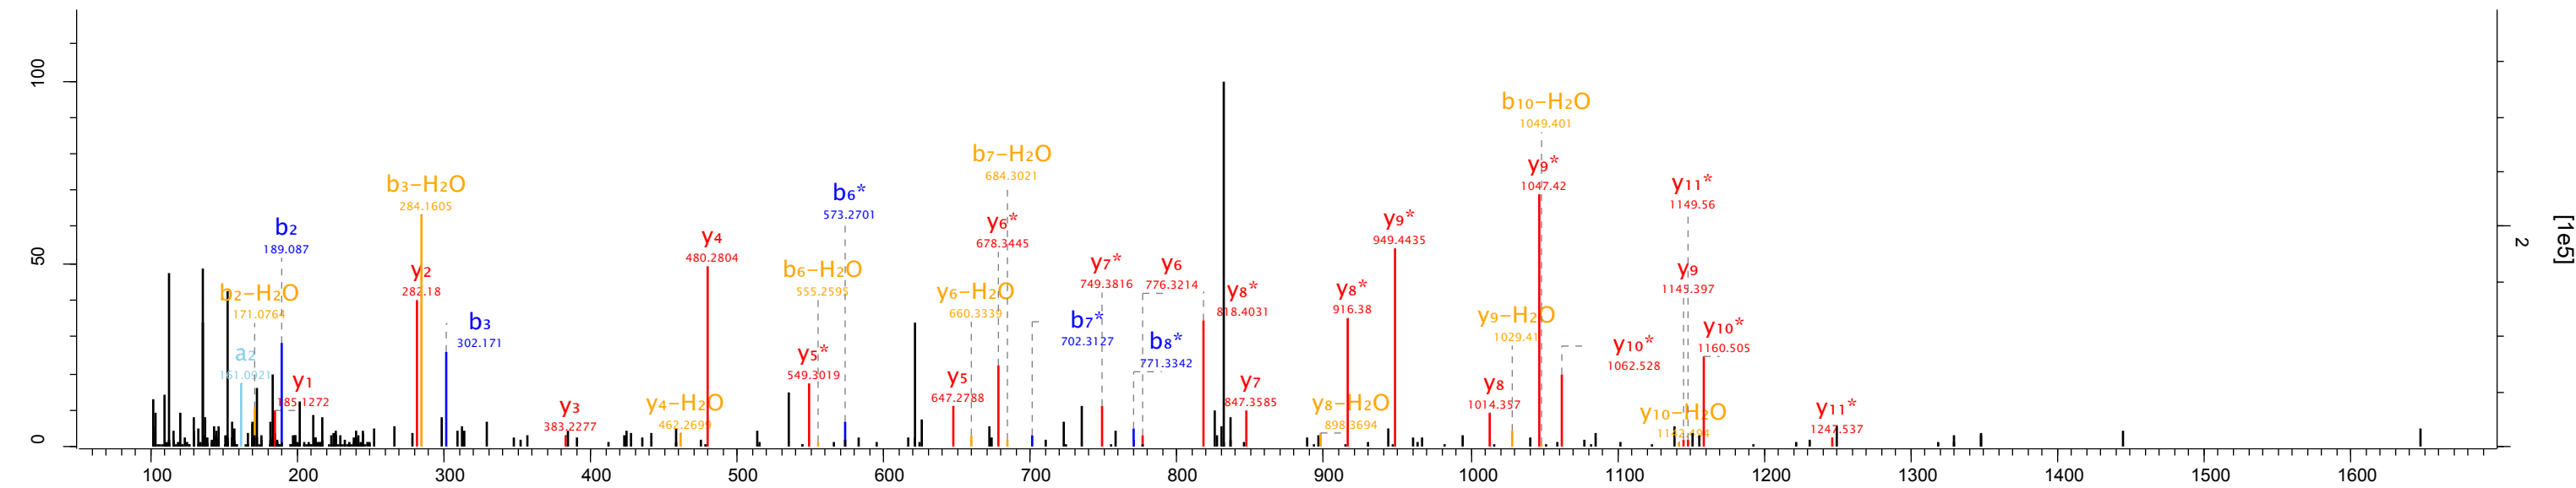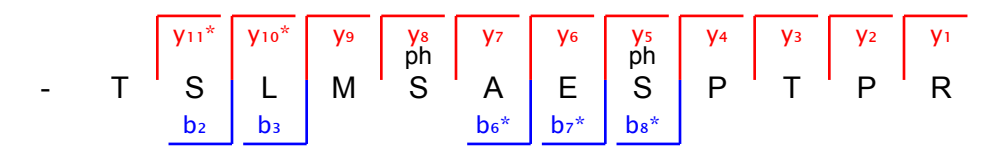

Raw file 20171215\_MaS\_33SR\_LMH\_phospho\_03 Scan 11697 Method FTMS; HCD Score 42.34 m/z 601.82 Gene names FAM178B

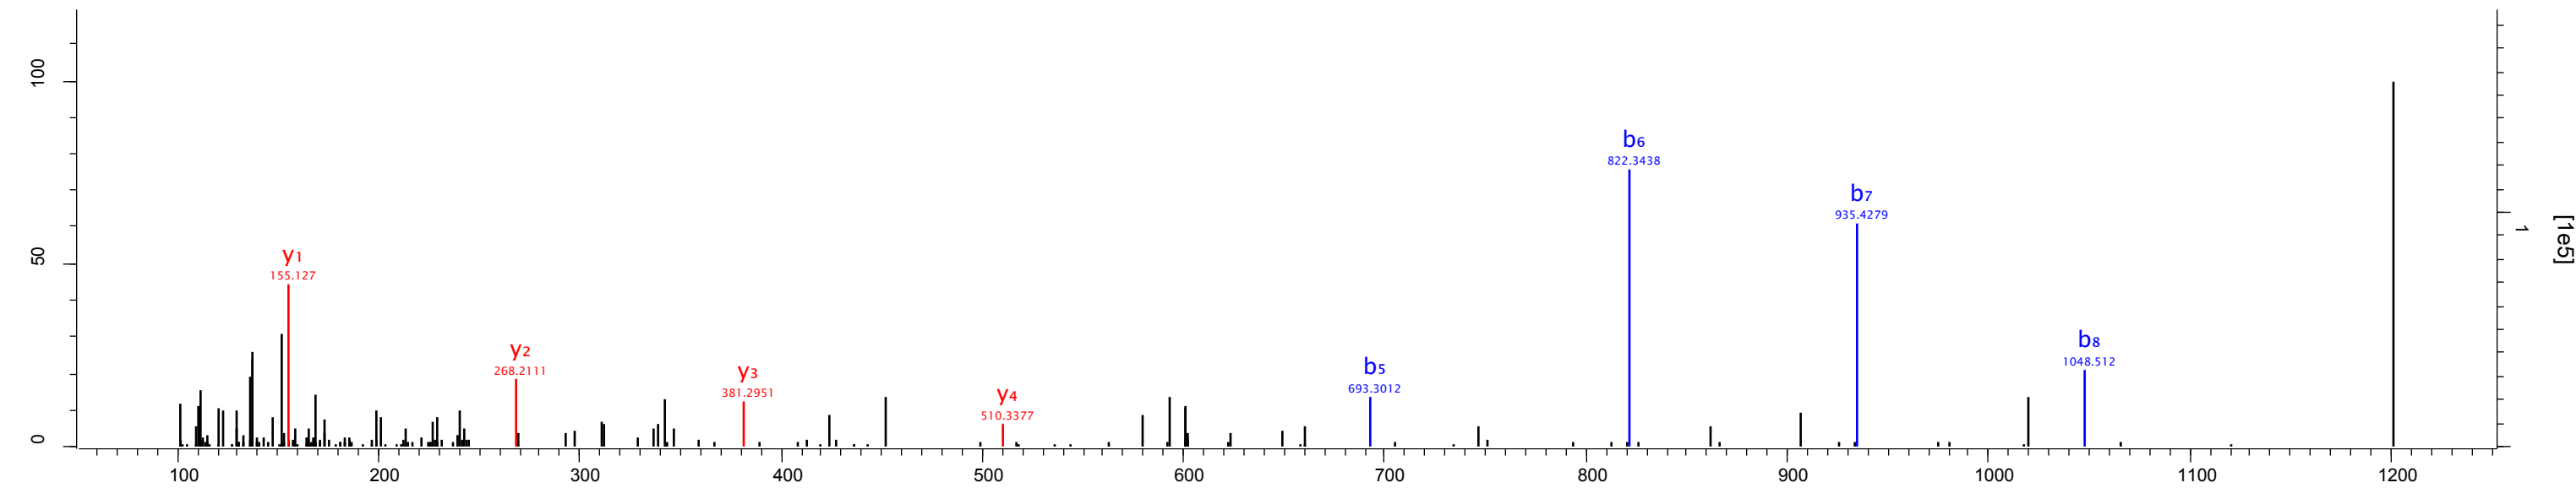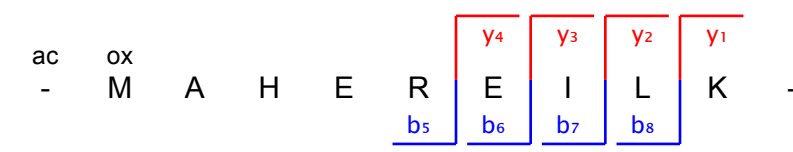

Raw file 20171215\_MaS\_33SR\_LMH\_phospho\_03 Scan 14727 Method FTMS; HCD Score 114.31 m/z 712.83 Gene names RB1CC1

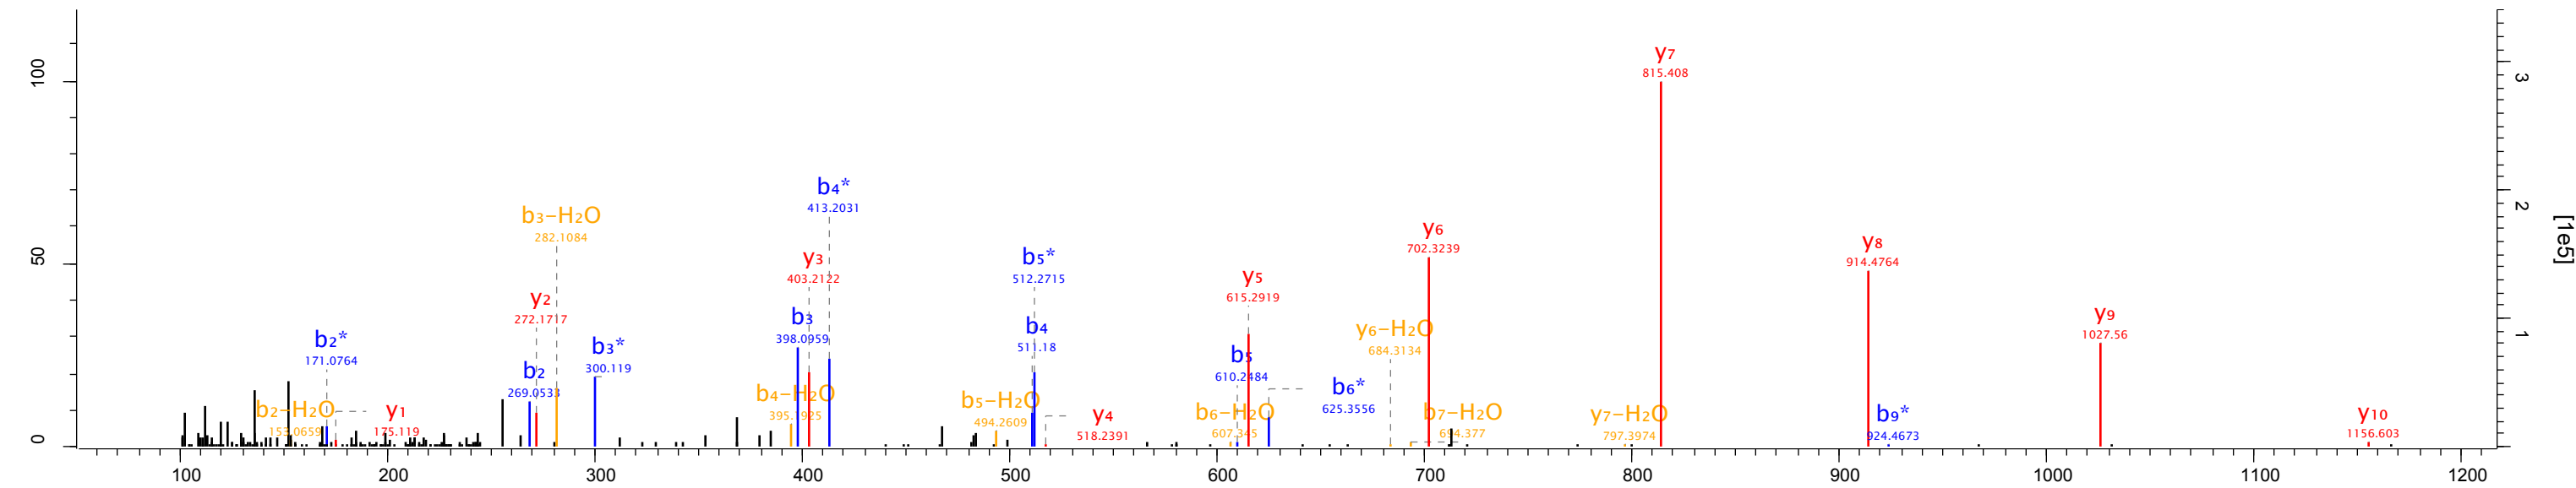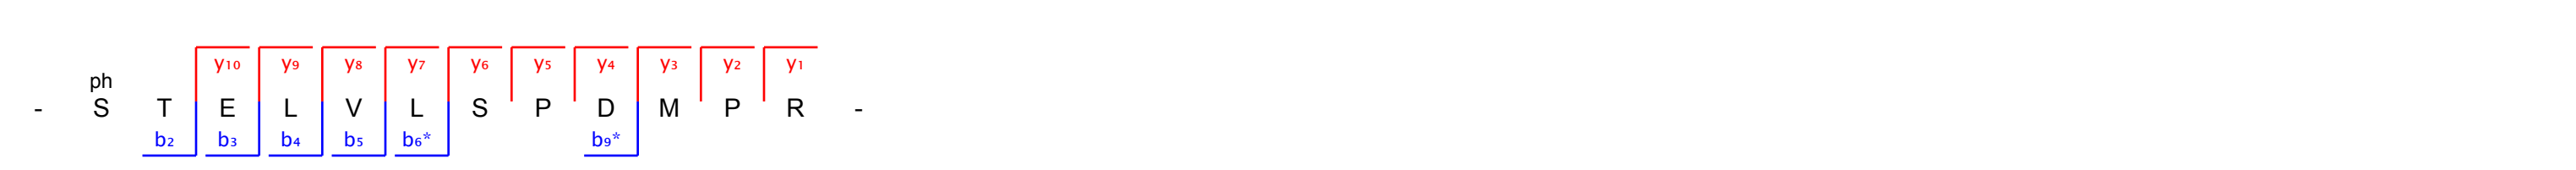

Raw file 20171215\_MaS\_33SR\_LMH\_phospho\_03 Scan 16797 Method FTMS; HCD Score 107.78 m/z 1046.45 Gene names PRKAB2

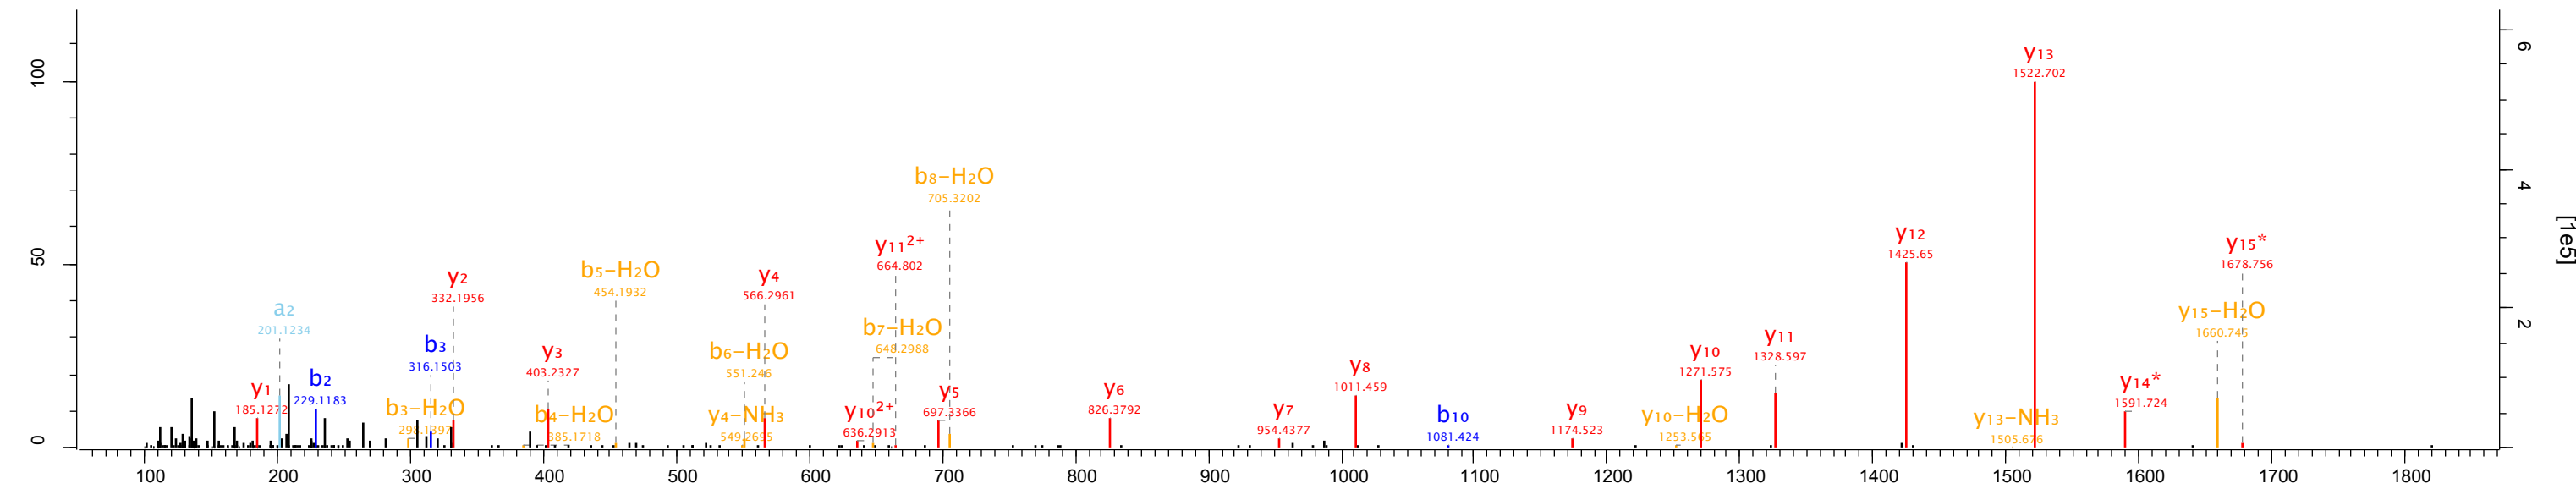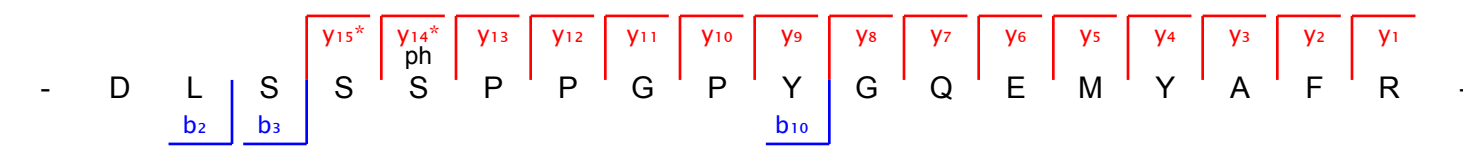



Raw file 20171215\_MaS\_33SR\_LMH\_phospho\_03 Scan 18687 Method FTMS; HCD Score 128.88 m/z 1014.96 Gene names PAGR1

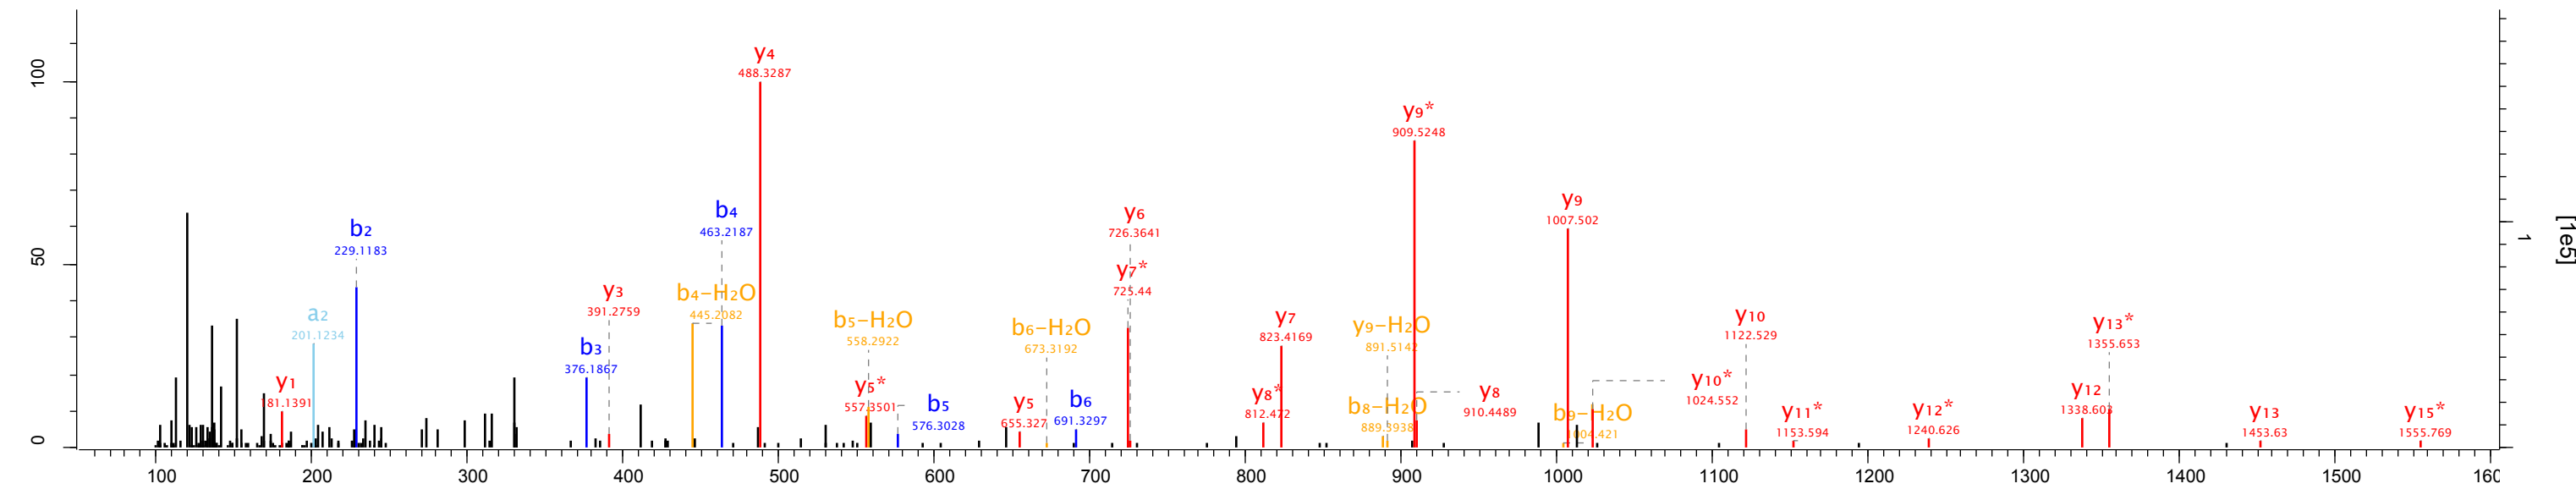

- D L F S L D S E D P S P A S P P L R -

Fragmentation mapping (b and y ions):

- b2: L
- b3: F
- b4: S
- b5: L
- b6: D
- y1: R
- y3: P
- y4: S
- y5: A
- y6: P
- y7: S
- y8: P
- y9: D
- y10: E
- y11: S
- y12: L
- y13: F
- y15: D

Raw file 20171215\_MaS\_33SR\_LMH\_phospho\_03 Scan 2257 Method FTMS; HCD Score 147.75 m/z 741.32 Gene names CDC42BPB

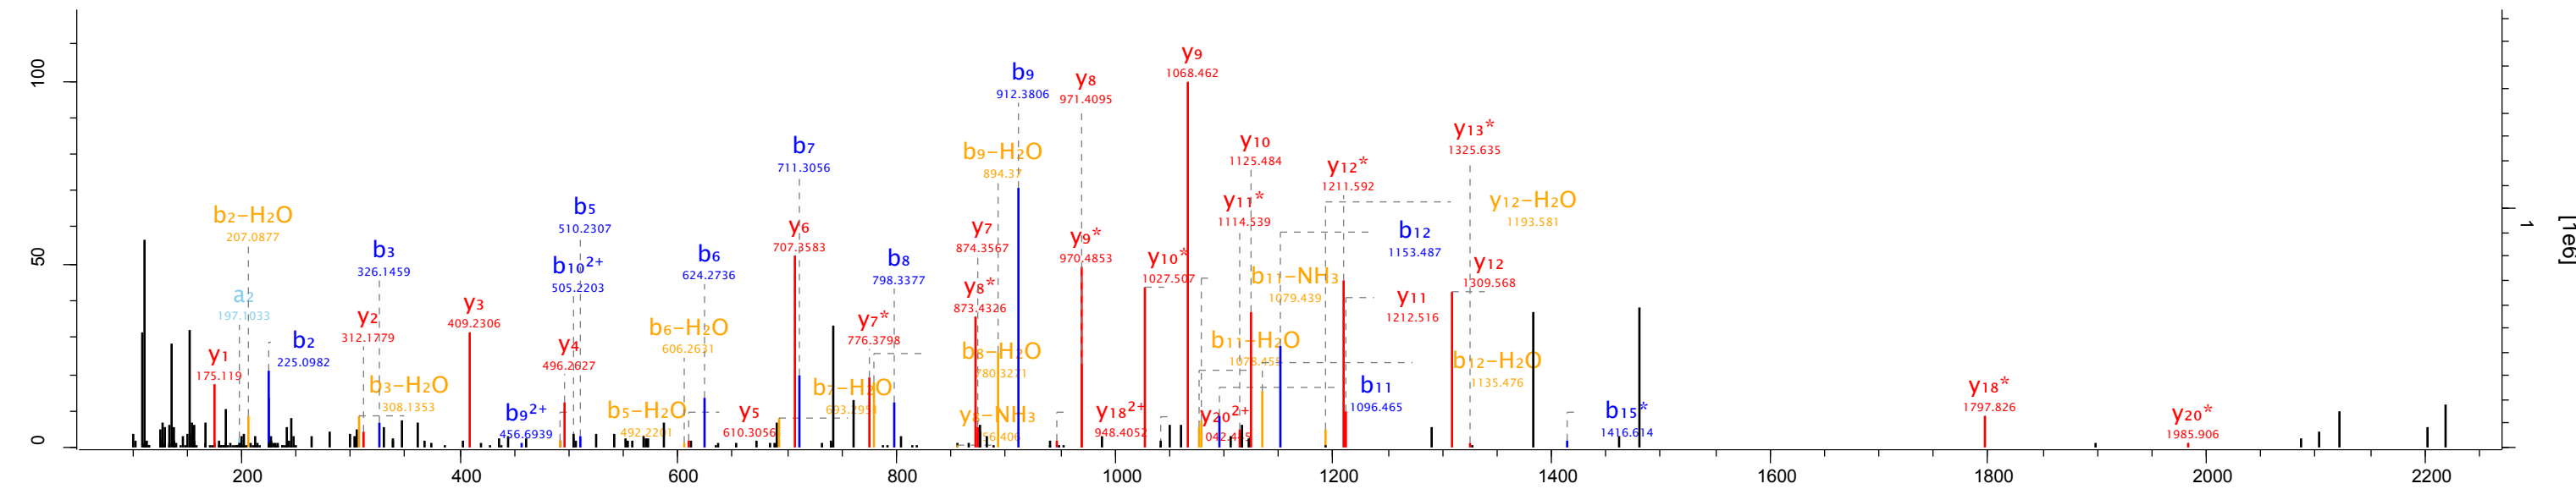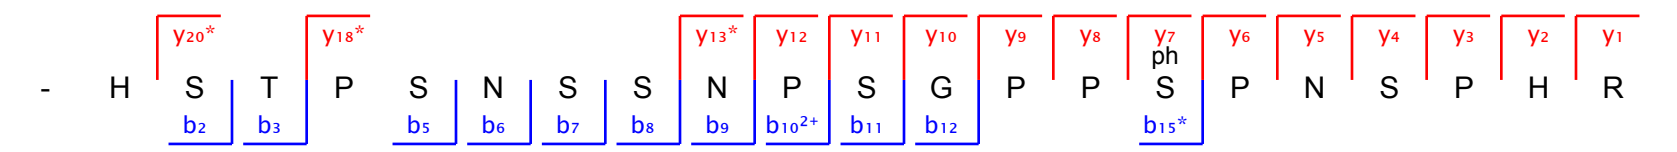

Raw file 20171215\_MaS\_33SR\_LMH\_phospho\_03 Scan 4407 Method FTMS; HCD Score 93.72 m/z 540.28 Gene names CCNL2

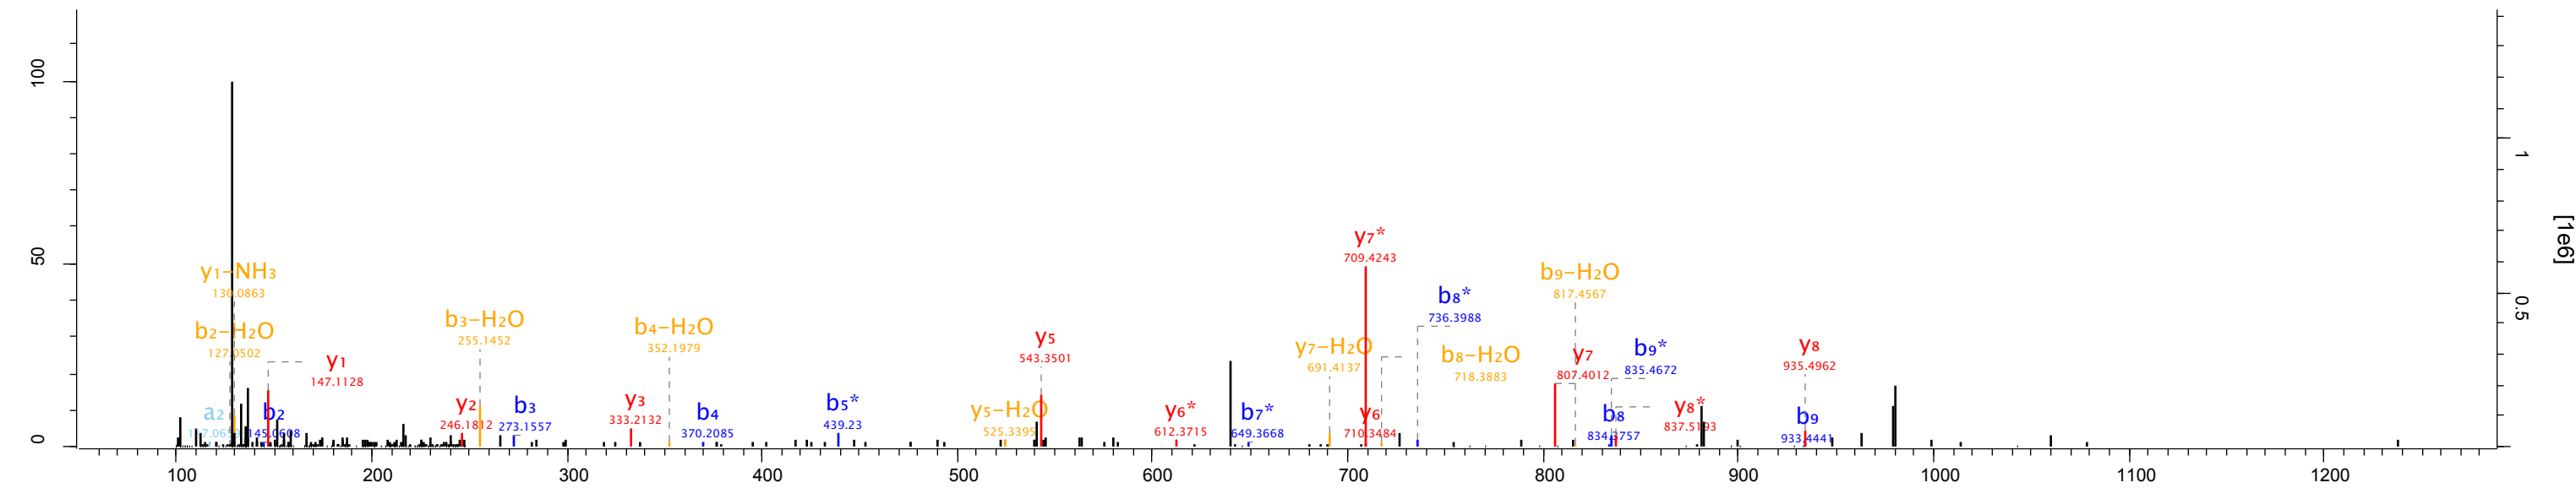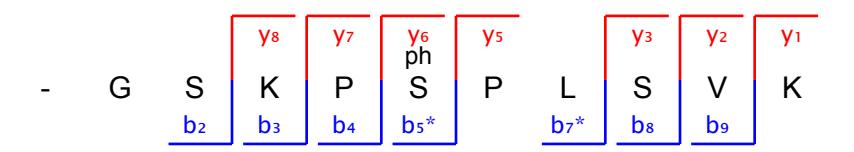

Raw file 20171215\_MaS\_33SR\_LMH\_phospho\_03 Scan 4857 Method FTMS; HCD Score 49.99 m/z 564.27 Gene names MEOX2

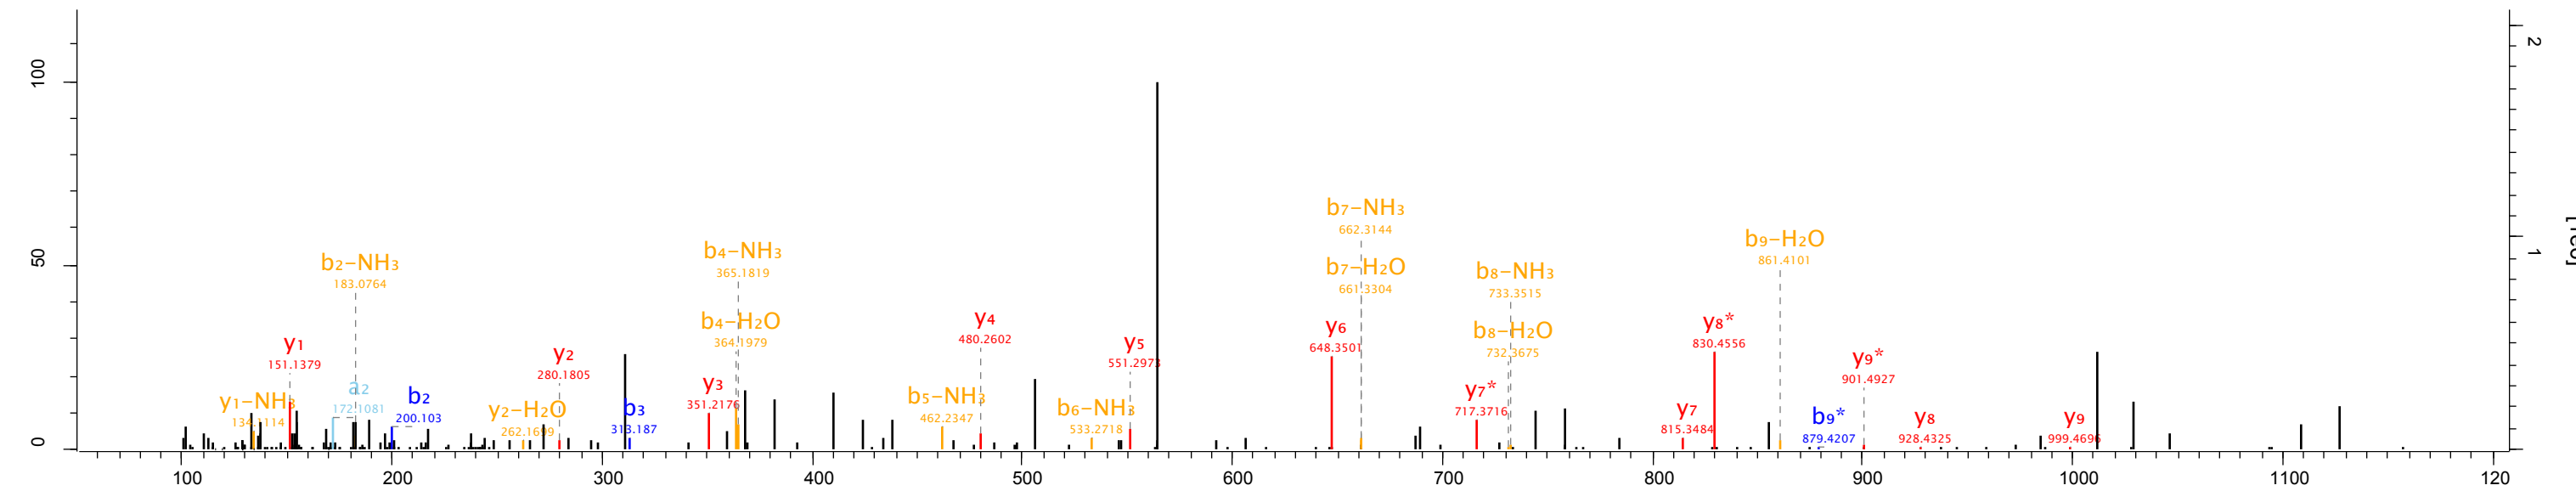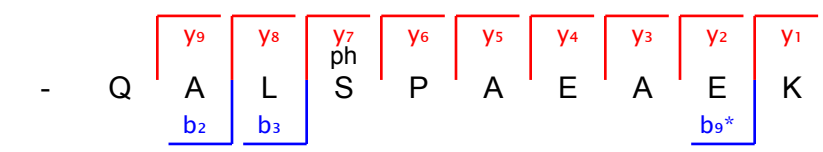

Raw file 20171215\_MaS\_33SR\_LMH\_phospho\_03 Scan 6127 Method FTMS; HCD Score 86.46 m/z 555.24 Gene names TNRC6A

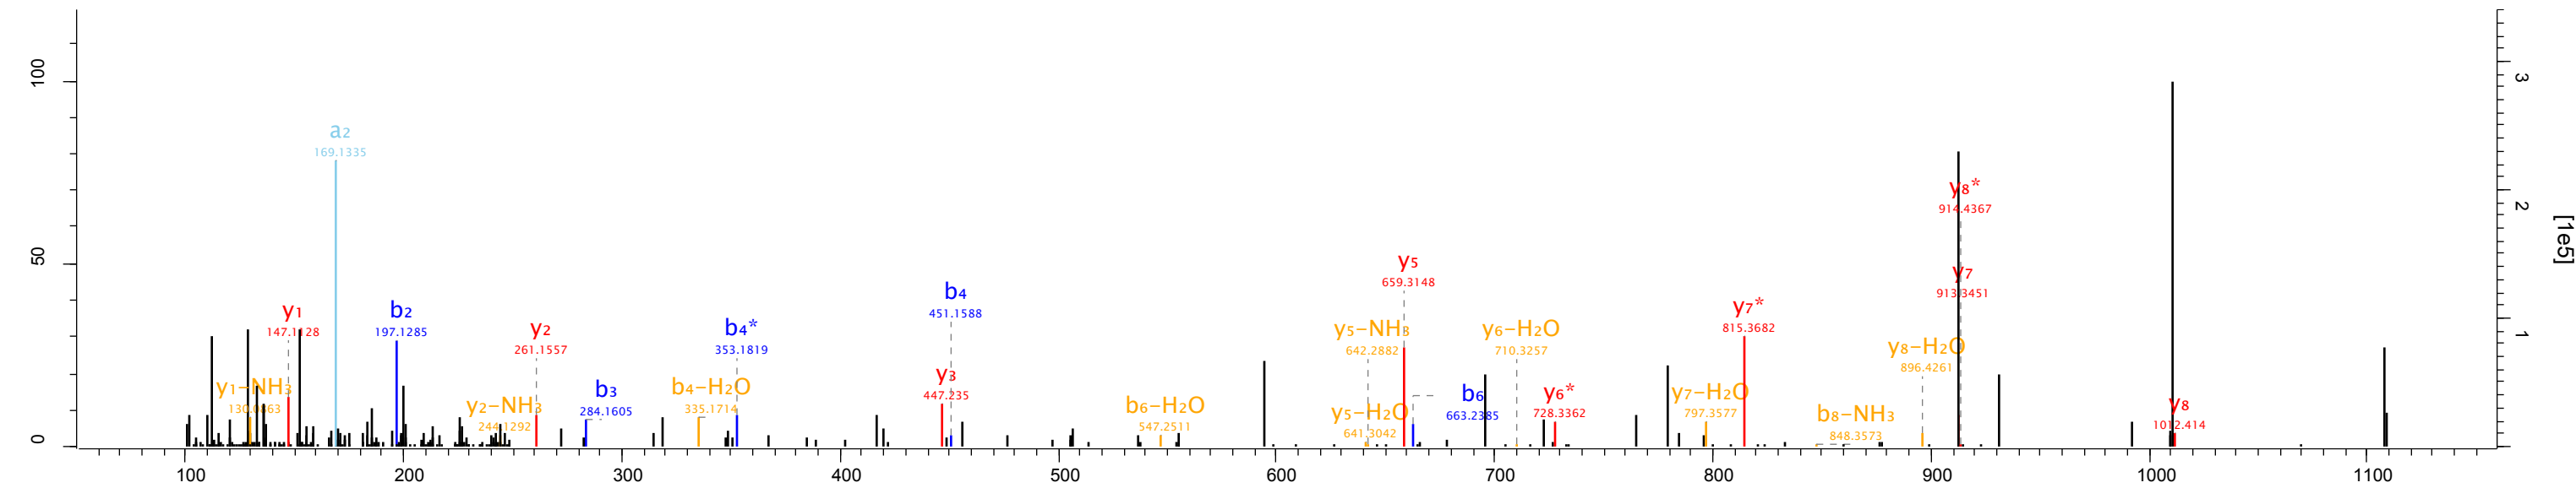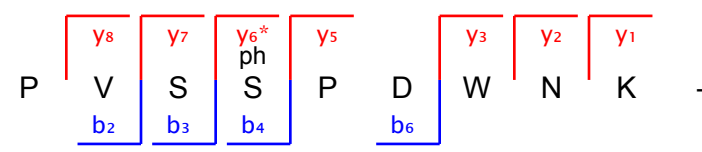

Raw file 20171215\_MaS\_33SR\_LMH\_phospho\_03 Scan 7657 Method FTMS; HCD Score 57.1 m/z 787.37 Gene names RPP25

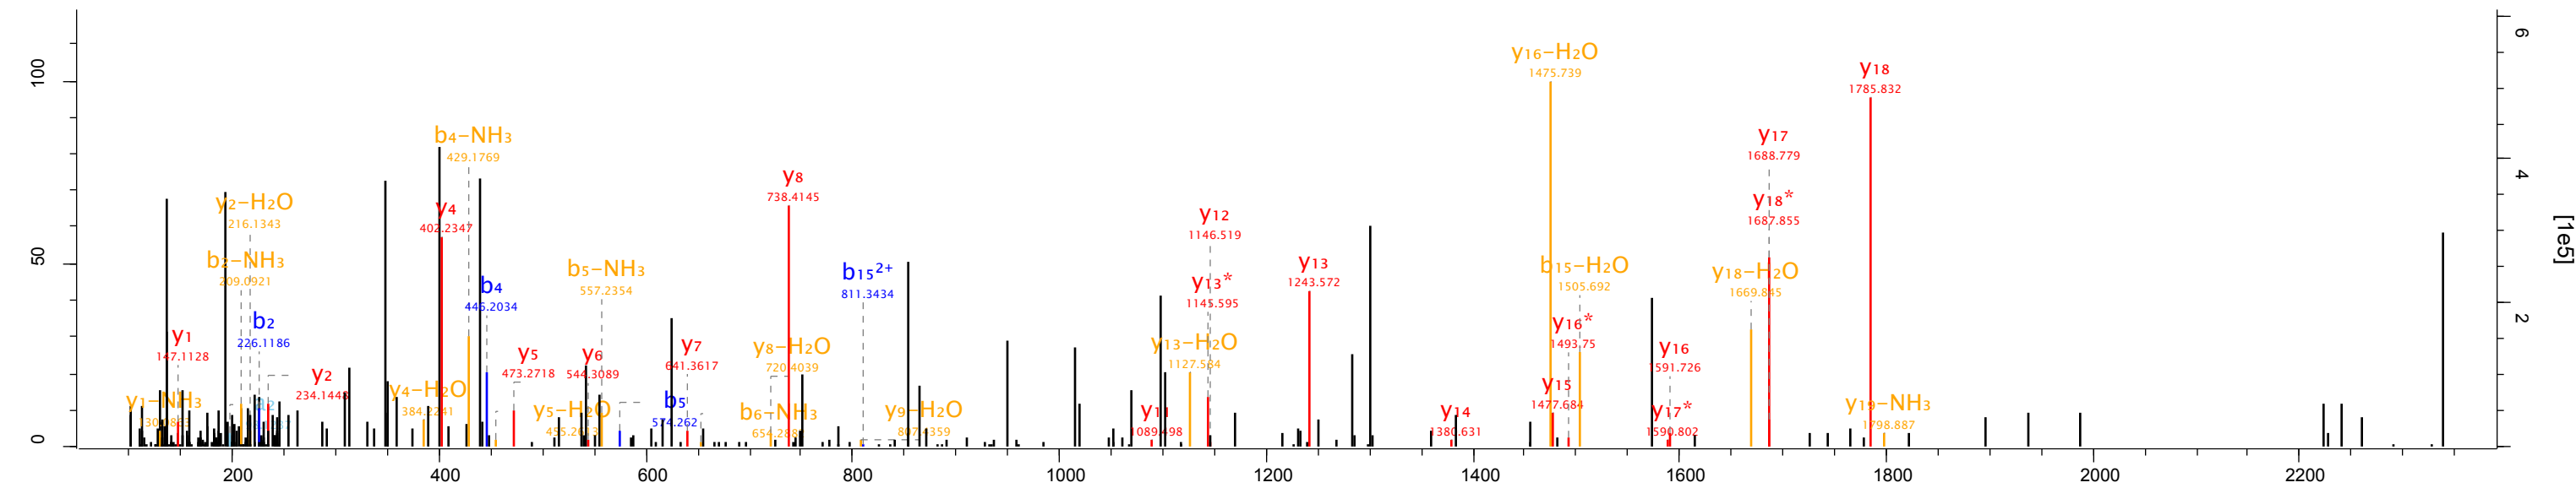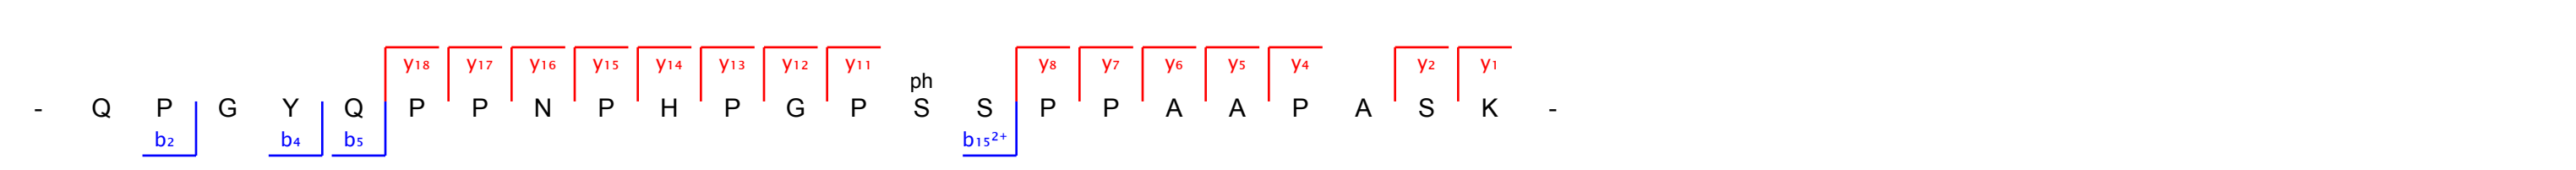

Raw file 20171215\_MaS\_33SR\_LMH\_phospho\_03 Scan 8637 Method FTMS; HCD Score 114.55 m/z 925.86 Gene names KDM4A

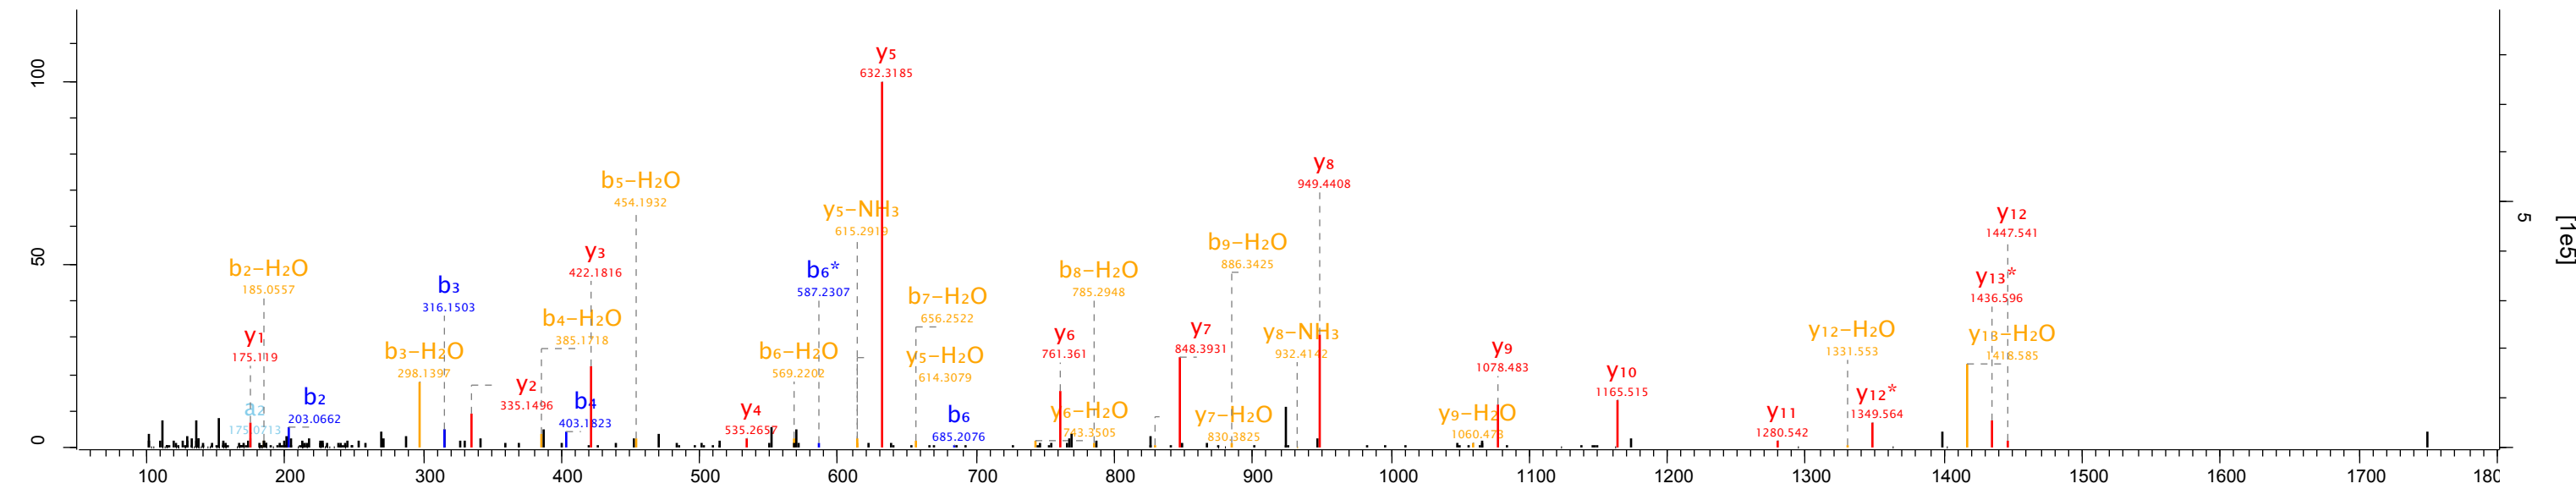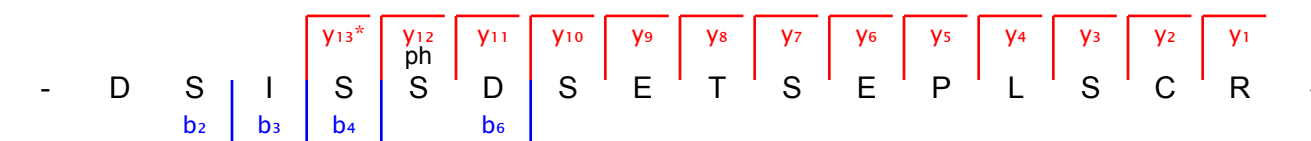

Raw file 20171215\_MaS\_33SR\_LMH\_phospho\_03 Scan 8867 Method FTMS; HCD Score 93.65 m/z 408.19 Gene names FAM83B

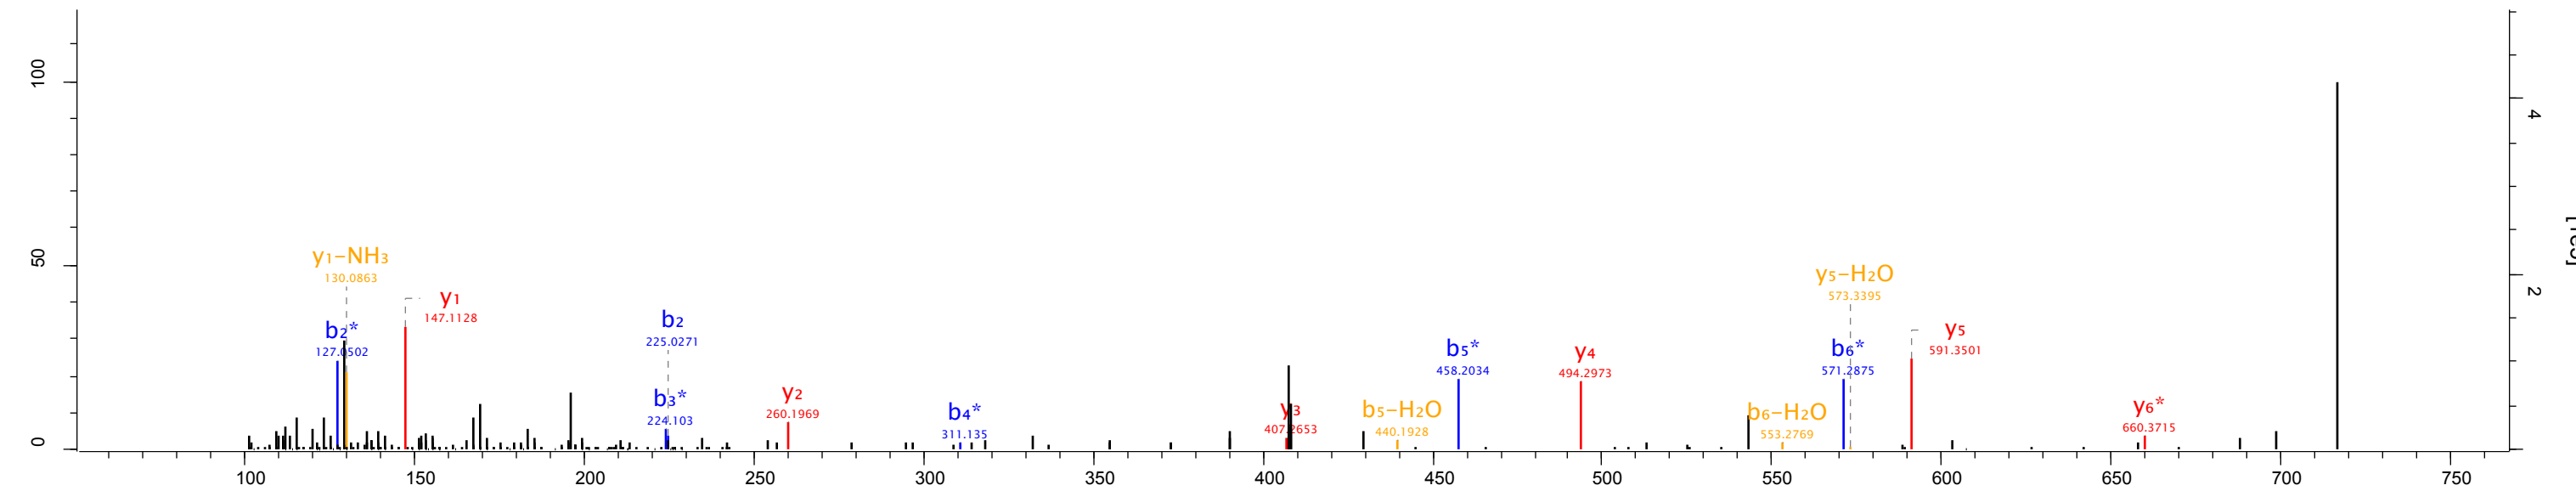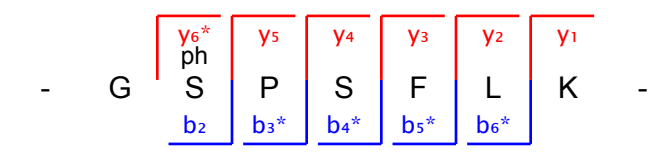



Raw file 20171215\_MaS\_33SR\_LMH\_phospho\_03 Scan 9727 Method FTMS; HCD Score 124.68 m/z 800.84 Gene names C7orf50

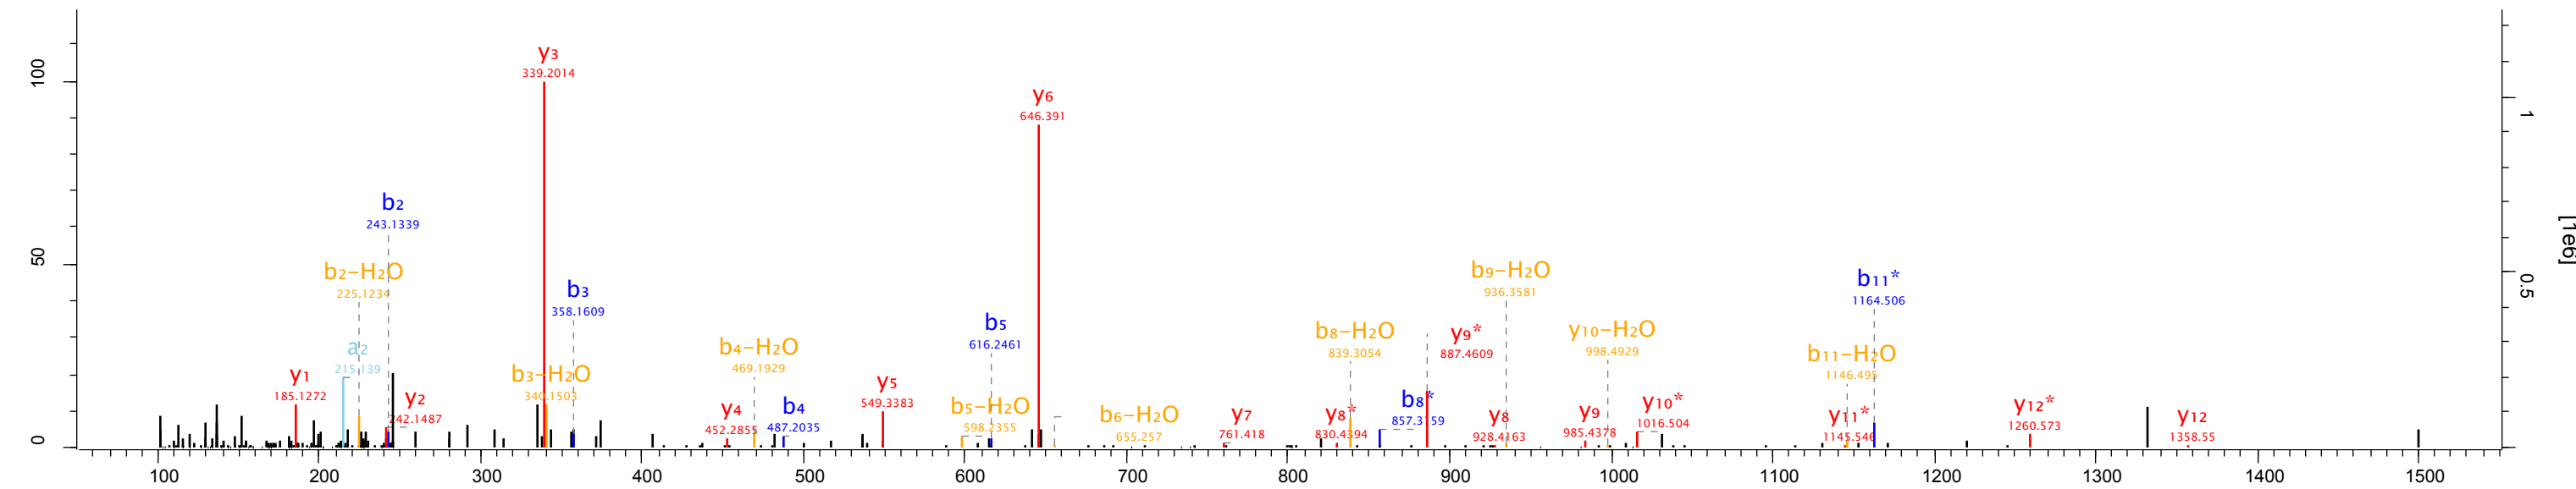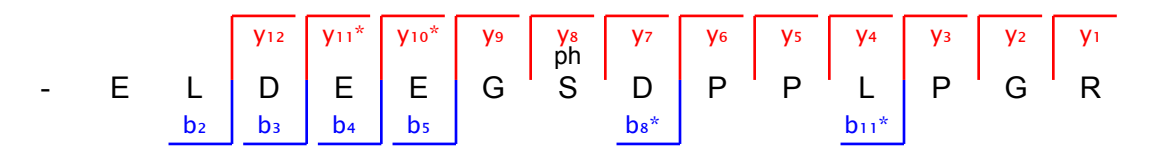

Raw file 20171215\_MaS\_33SR\_LMH\_phospho\_03 Scan 9757 Method FTMS; HCD Score 109.1 m/z 748.85 Gene names ULK1

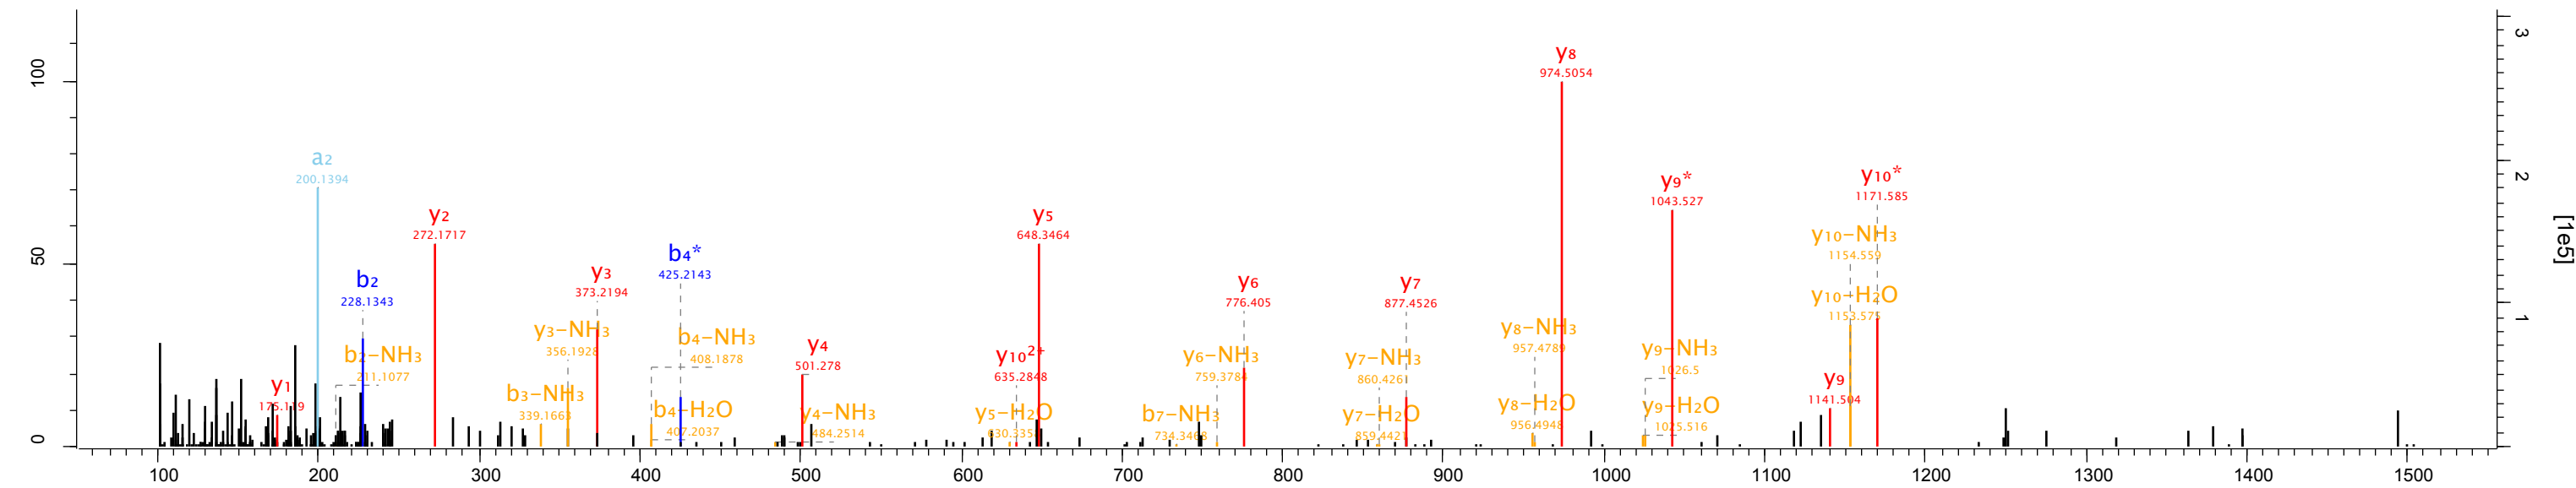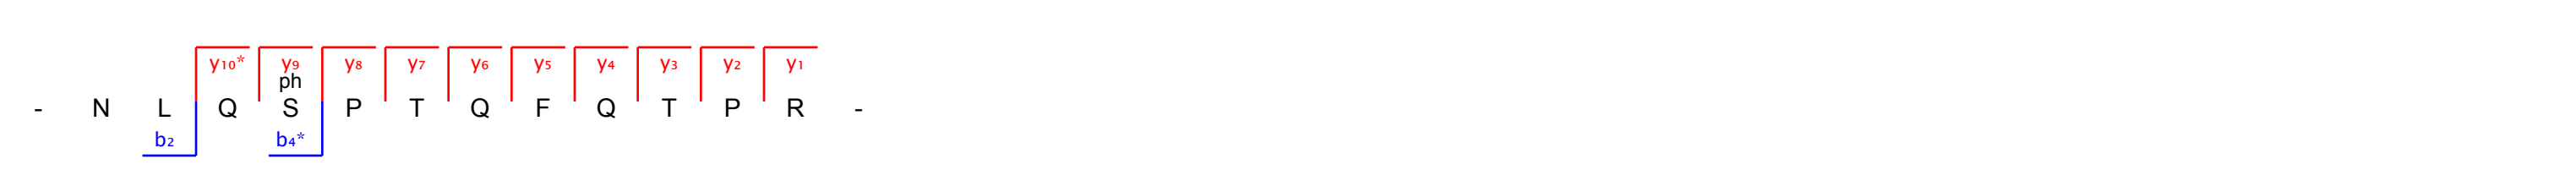

Raw file Scan Method Score m/z Gene names

20171215\_MaS\_33SR\_LMH\_phospho\_05 2197 FTMS; HCD 41.54 496.56 DBR1

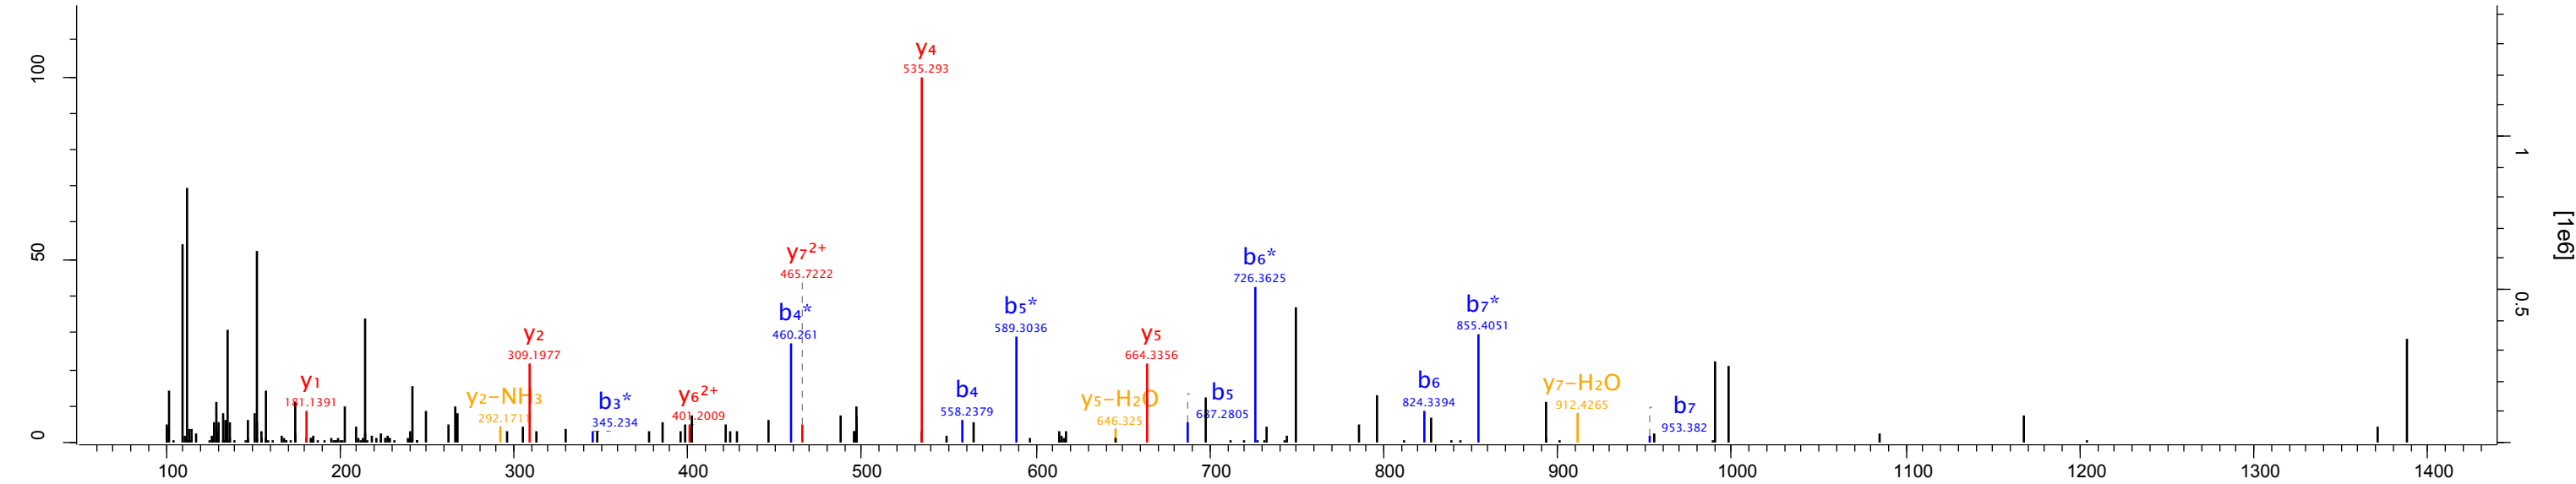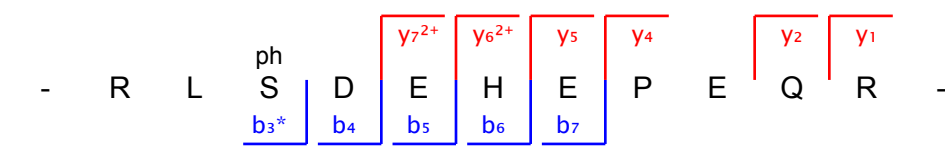

Raw file 20171215\_MaS\_33SR\_LMH\_phospho\_05 Scan 6097 Method FTMS; HCD Score 97.73 m/z 483.24 Gene names C16orf72

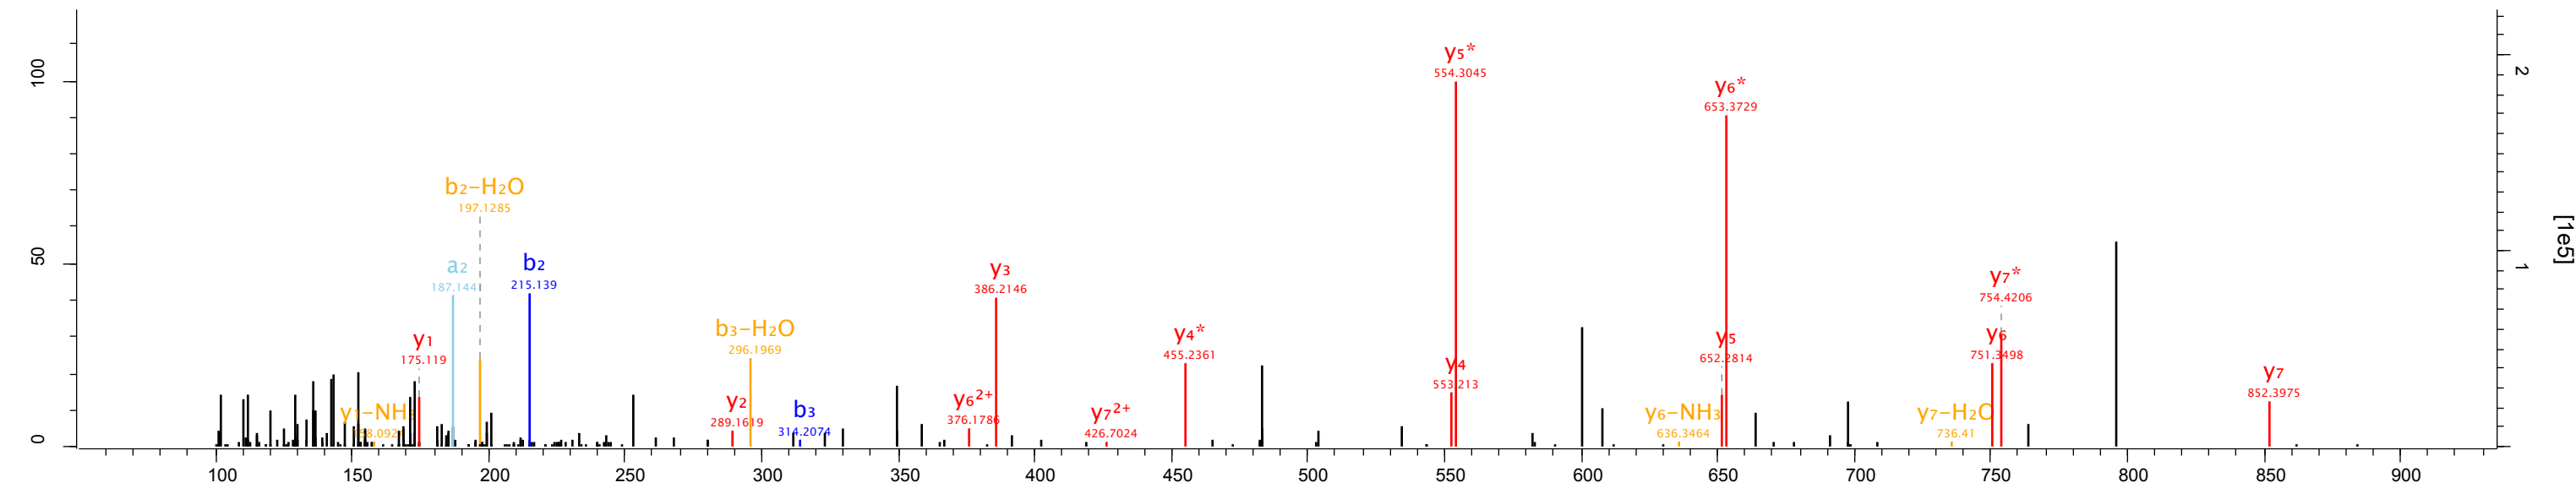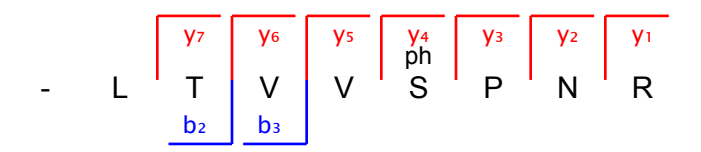

Raw file 20171215\_MaS\_33SR\_LMH\_phospho\_05 Scan 9727 Method FTMS; HCD Score 163.68 m/z 908.39 Gene names DAXX

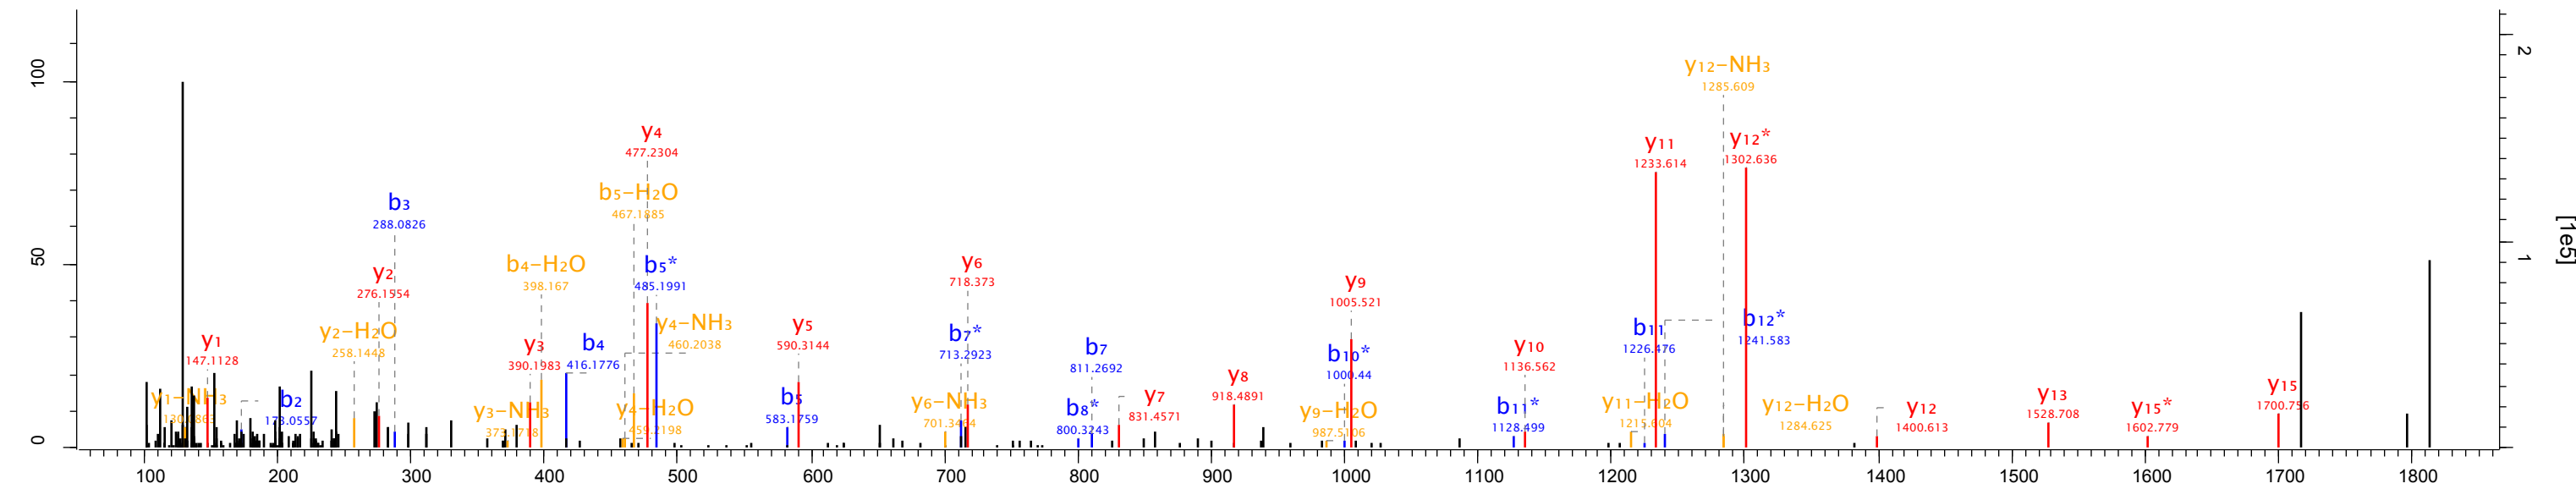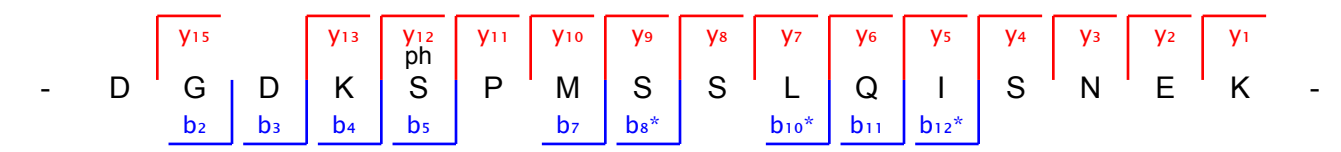

Raw file 20171215\_MaS\_33SR\_LMH\_phospho\_06 Scan 11627 Method FTMS; HCD Score 61.99 m/z 657.28 Gene names TOP1

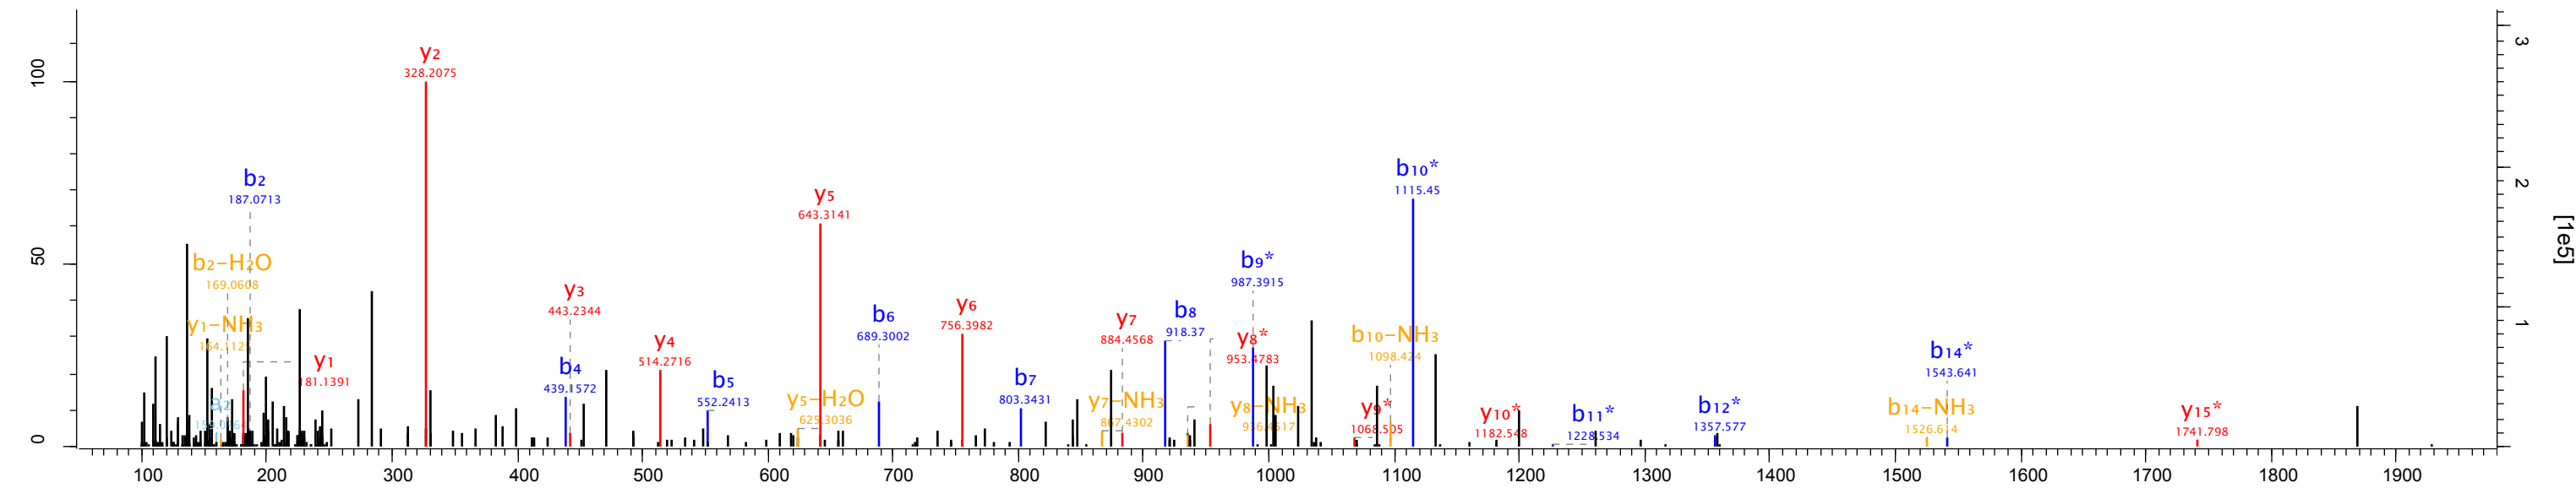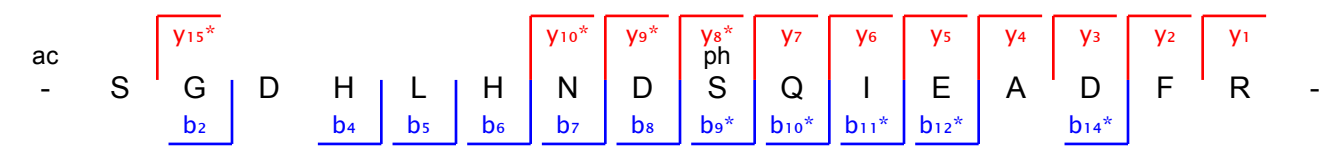

Raw file 20171215\_MaS\_33SR\_LMH\_phospho\_06 Scan 12147 Method FTMS; HCD Score 123.68 m/z 652.32 Gene names TFDP2

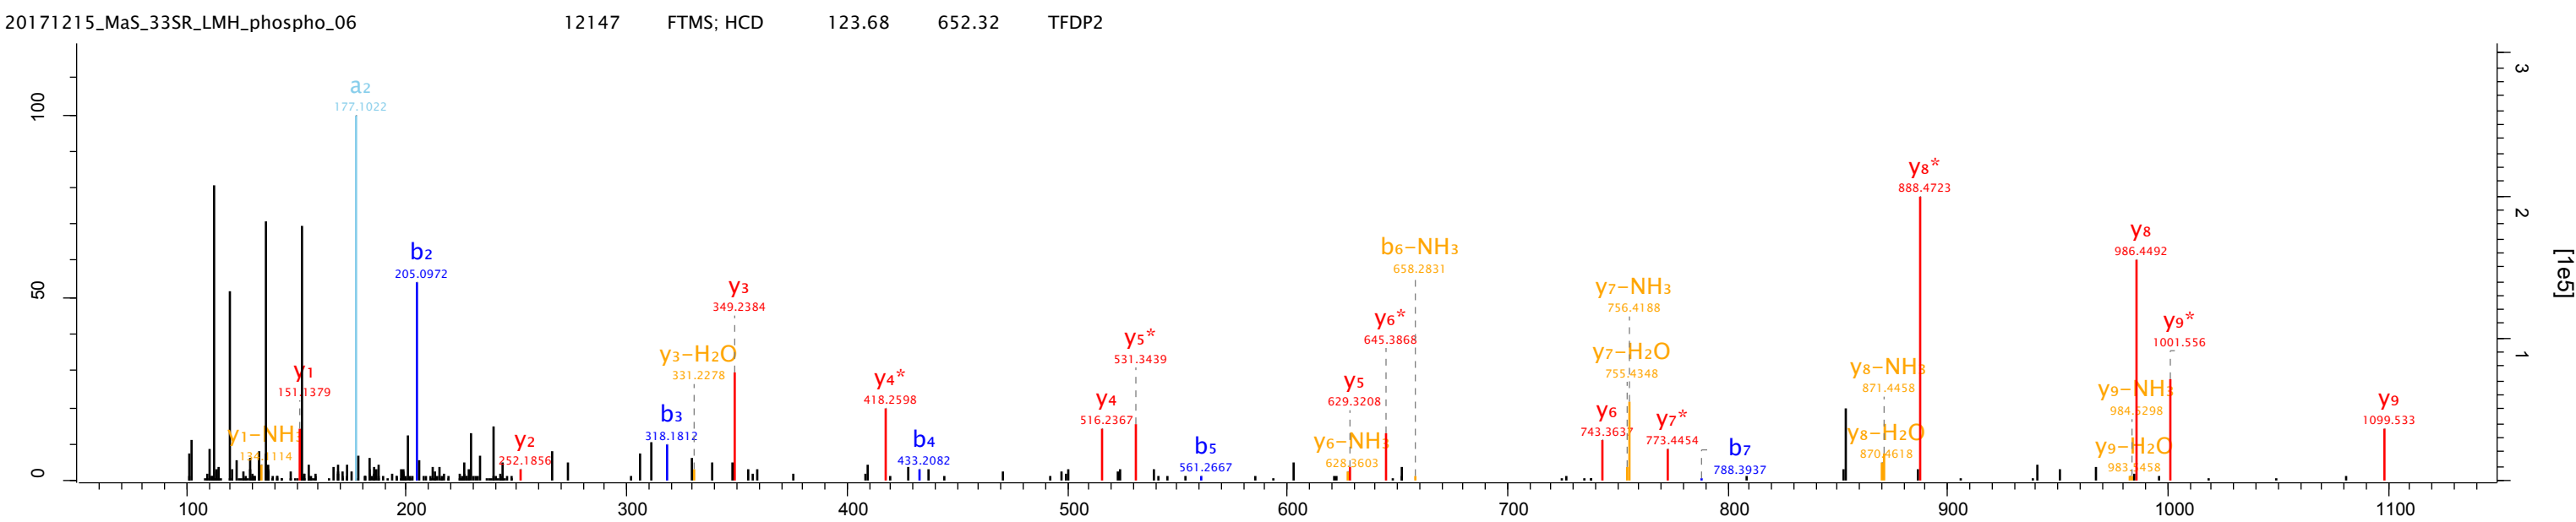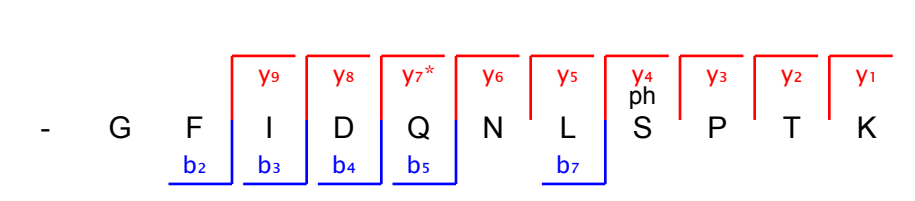

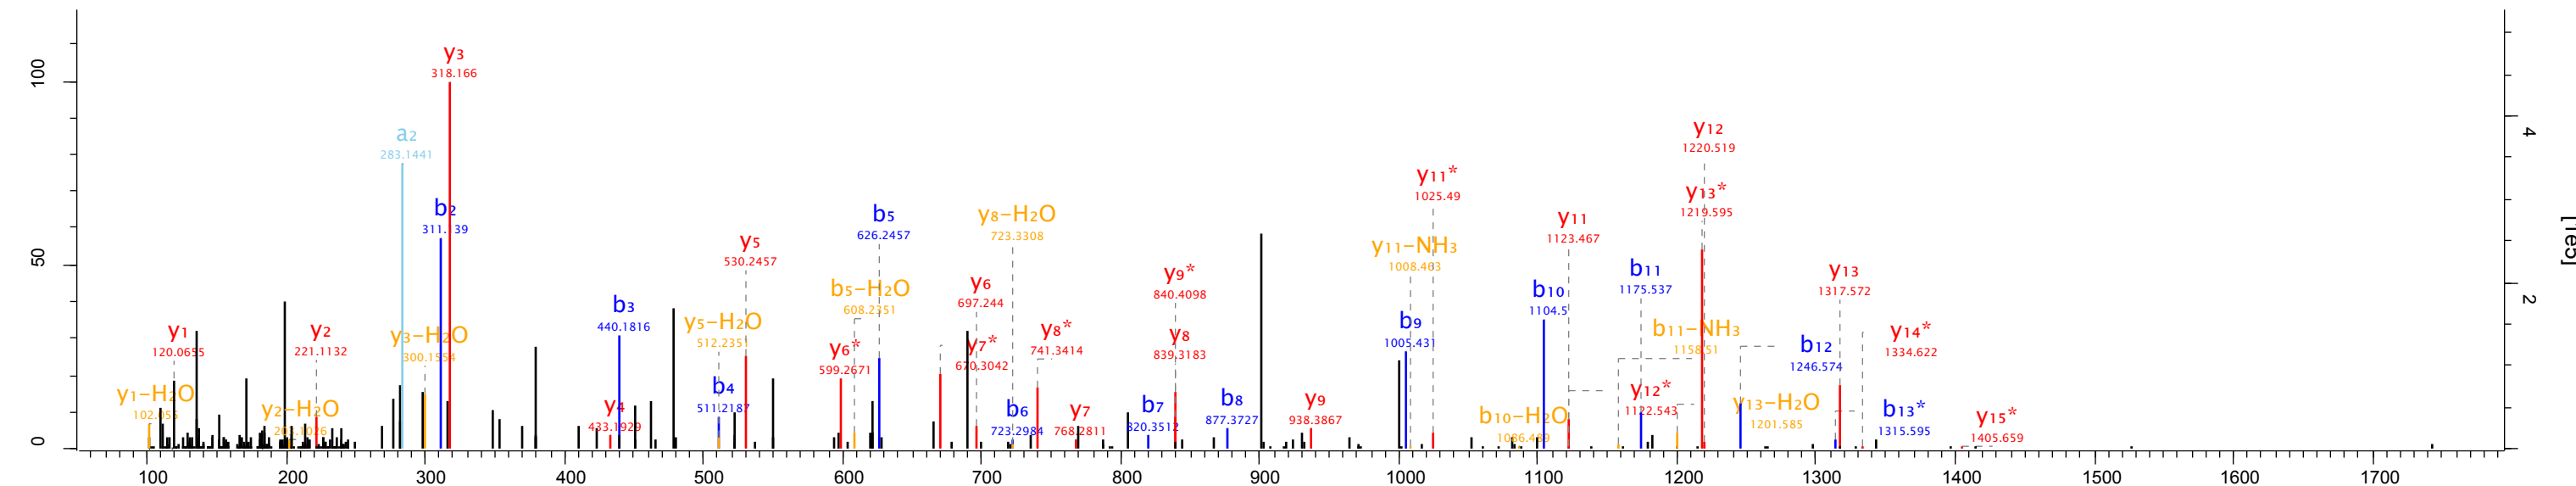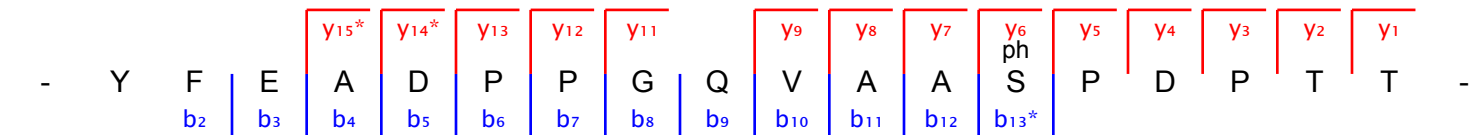



Raw file 20171215\_MaS\_33SR\_LMH\_phospho\_06 Scan 13607 Method FTMS; HCD Score 174.62 m/z 684.32 Gene names NIPBL

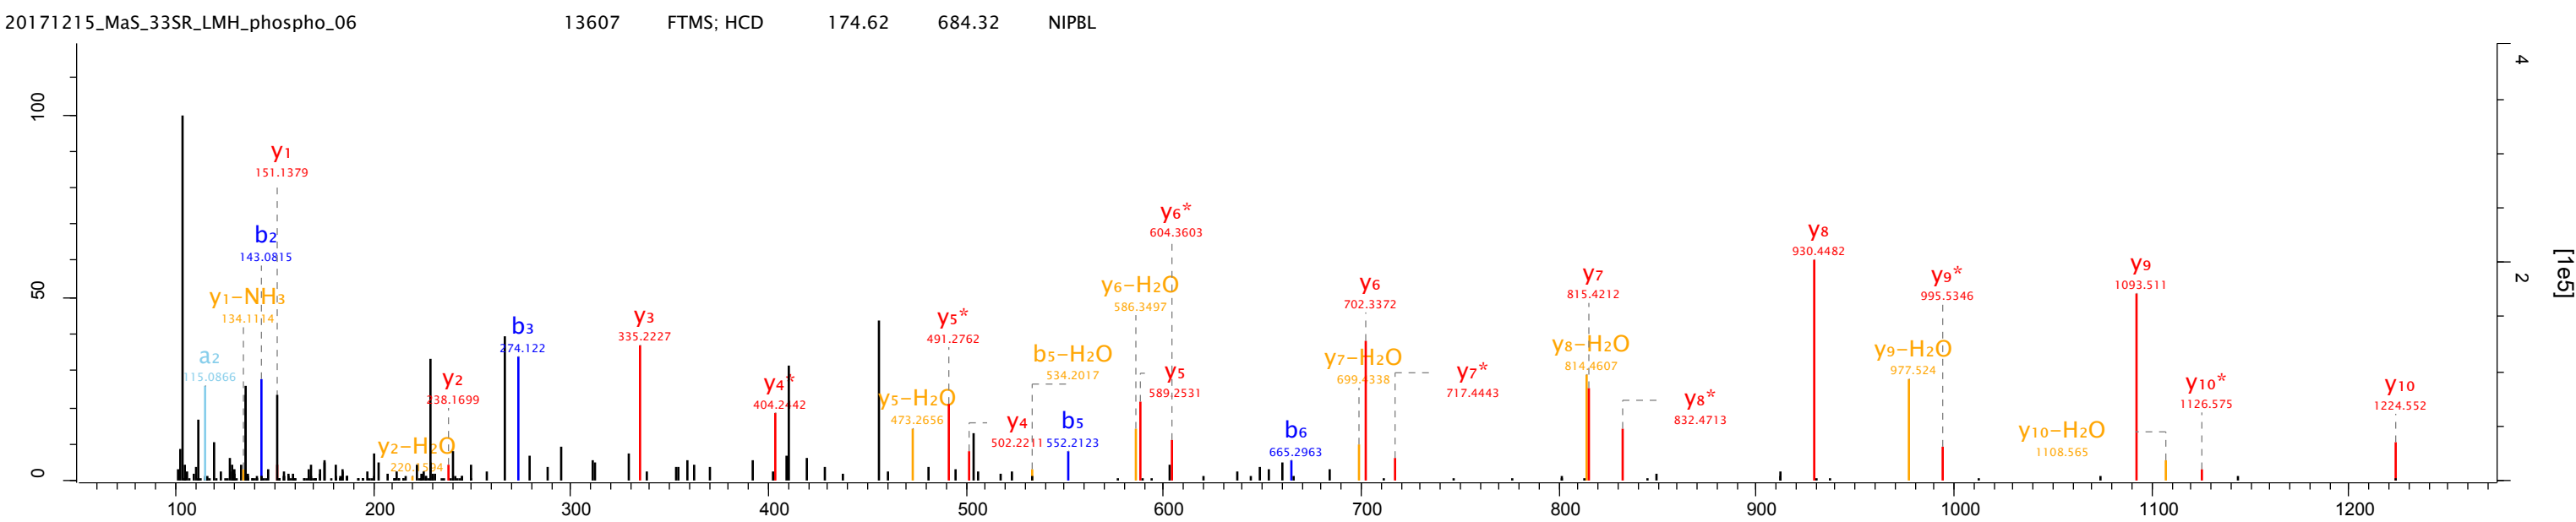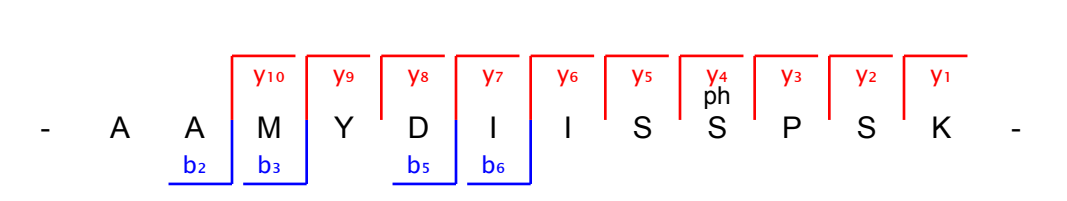

Raw file 20171215\_MaS\_33SR\_LMH\_phospho\_06 Scan 14127 Method FTMS; HCD Score 85.47 m/z 820.35 Gene names SPRED2

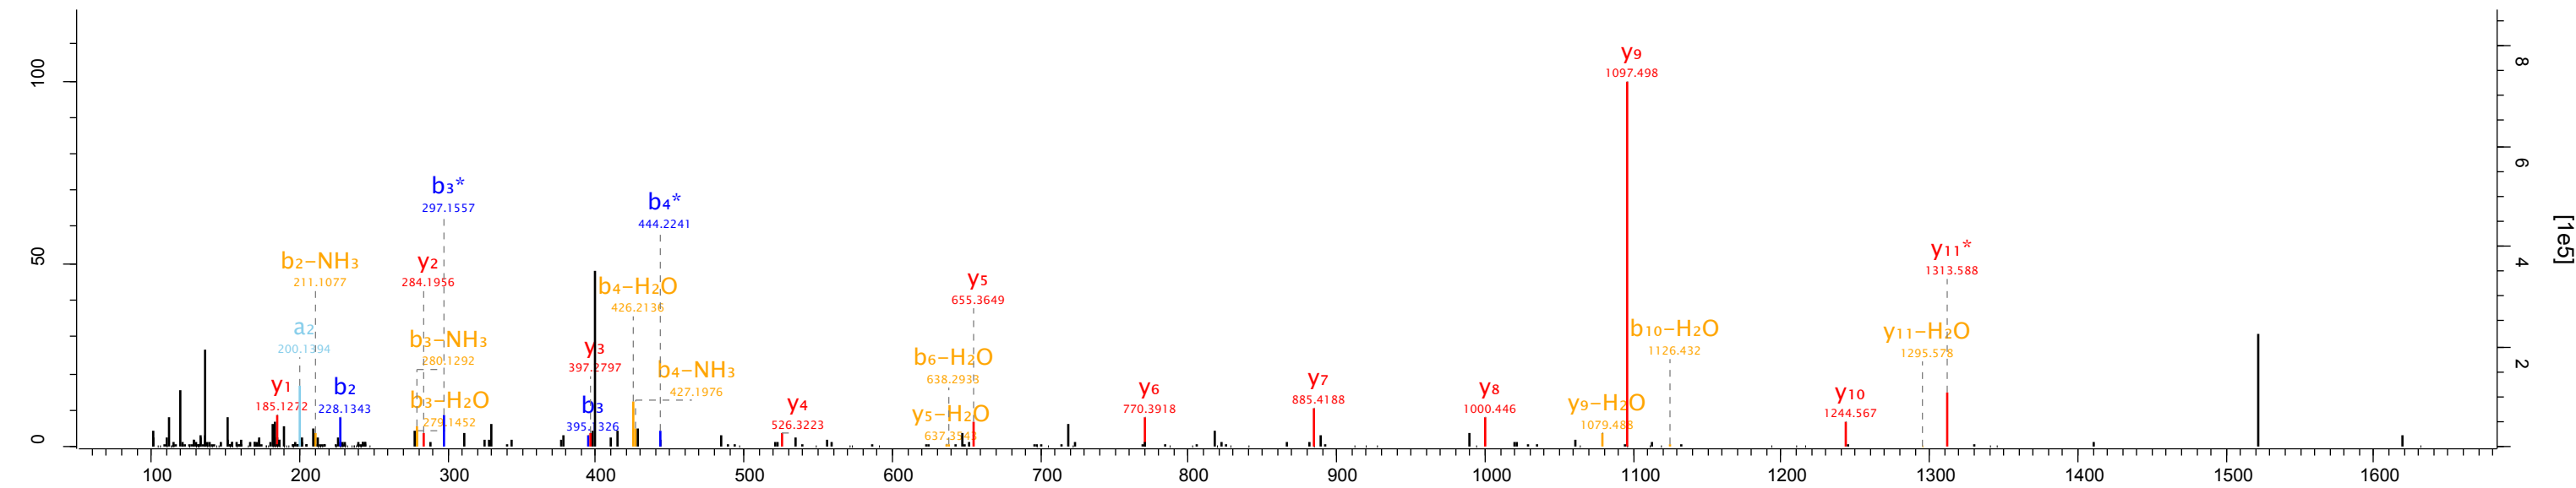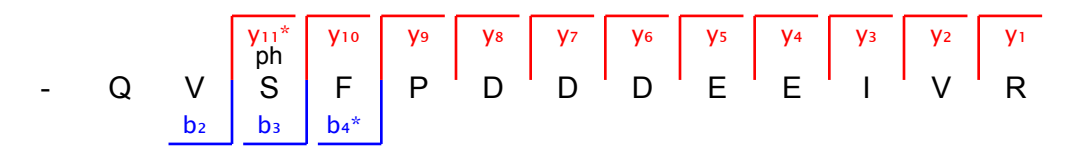

Raw file: 20171215\_MaS\_33SR\_LMH\_phospho\_06  
 Scan: 4377 Method: FTMS; HCD Score: 92.05 m/z: 400.19 Gene names: RTKN

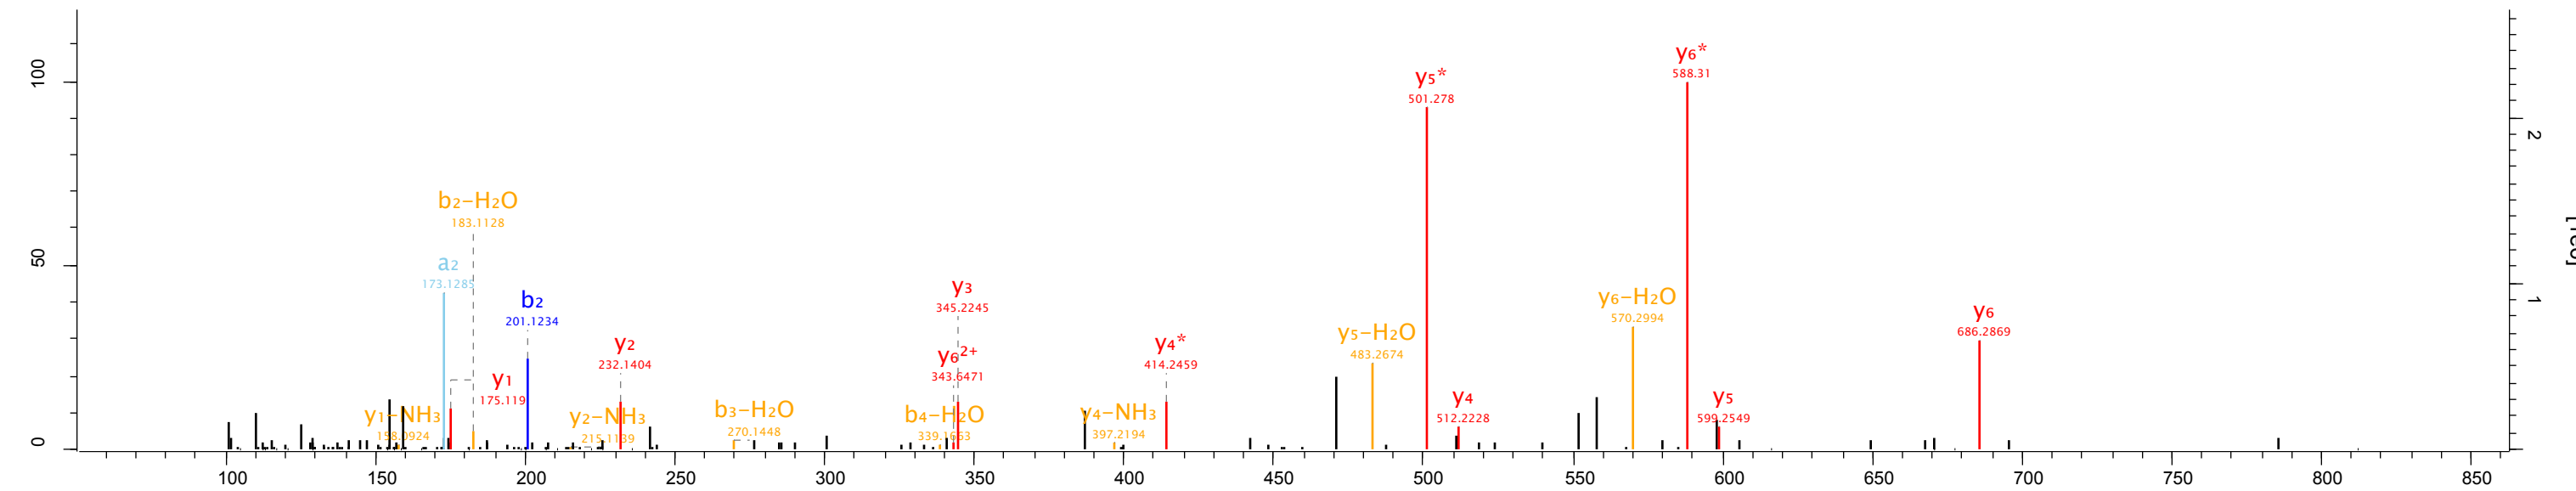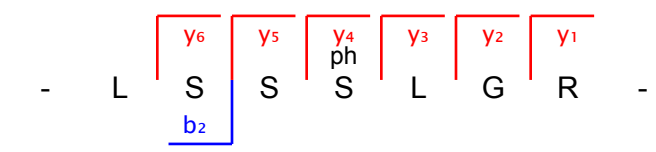

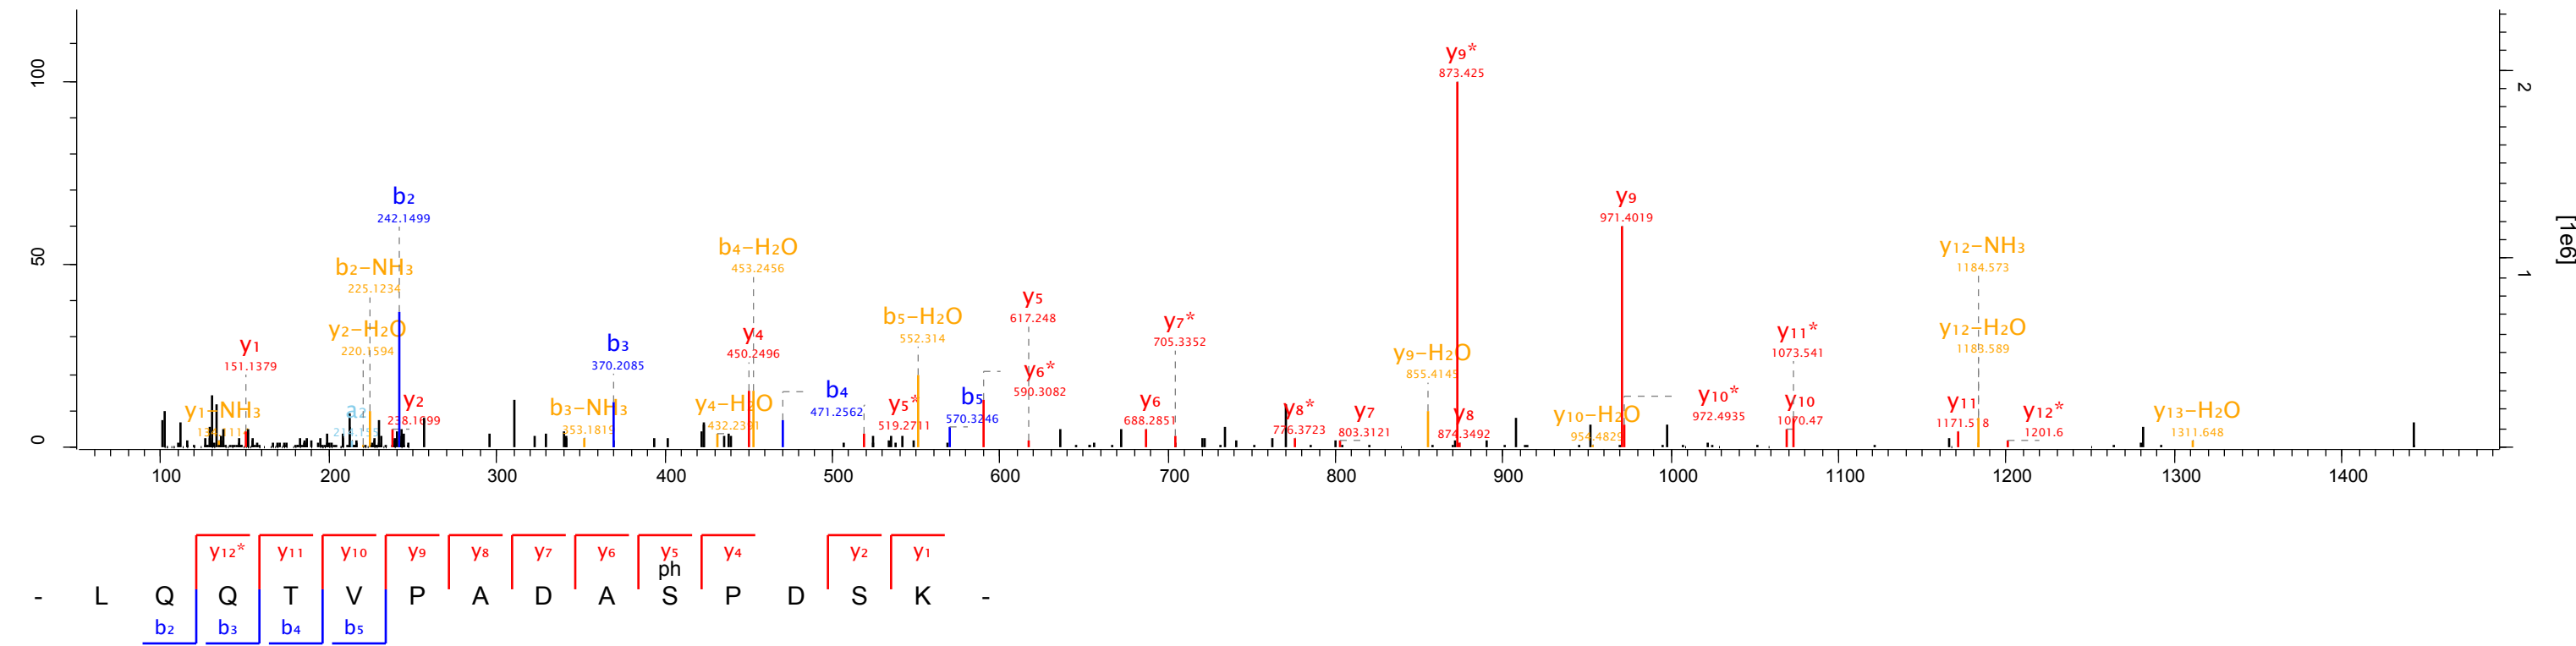

Raw file 20171215\_MaS\_33SR\_LMH\_phospho\_06 Scan 8417 Method FTMS; HCD Score 74.59 m/z 695.29 Gene names SPEG

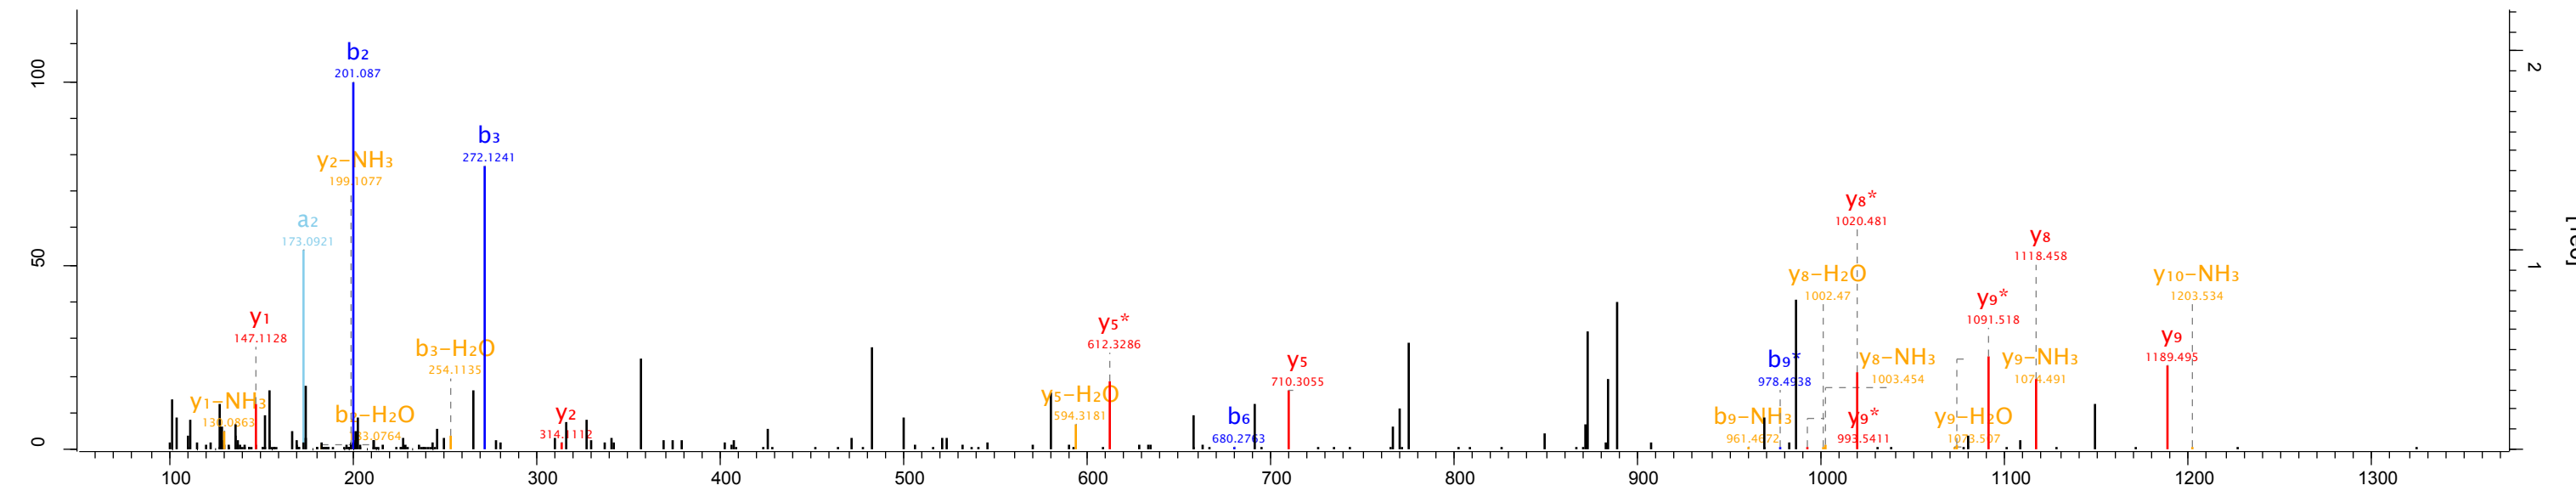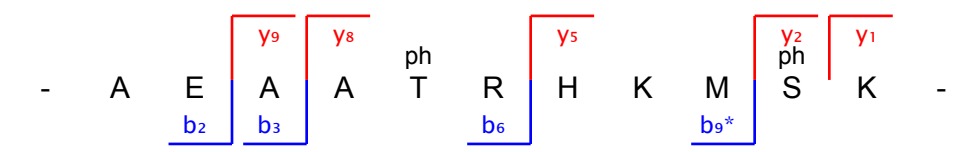

Raw file 20171215\_MaS\_33SR\_LMH\_phospho\_06 Scan 9837 Method FTMS; HCD Score 84.65 m/z 675.02 Gene names FLYWCH2

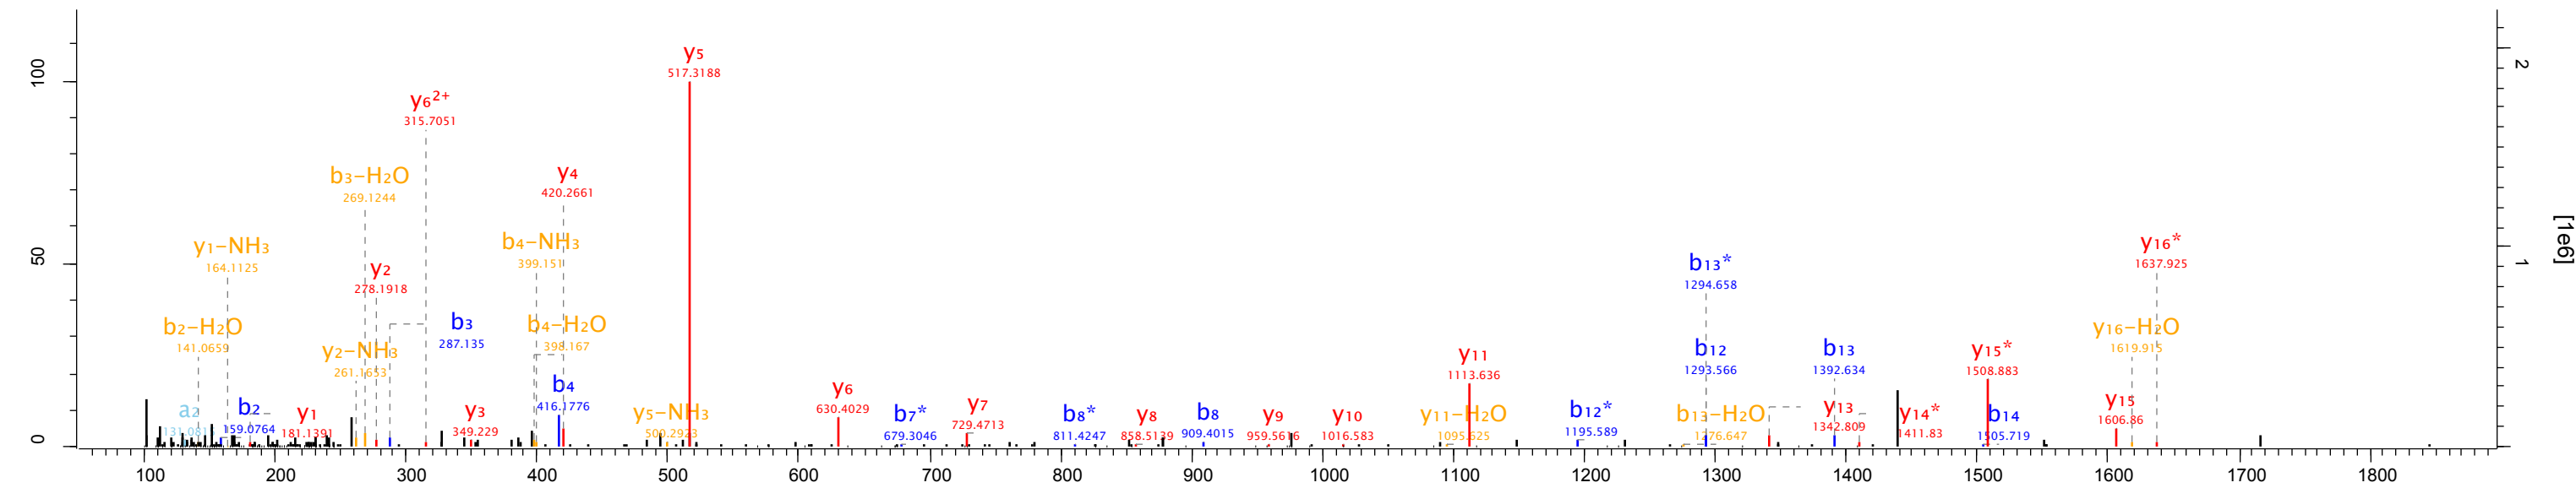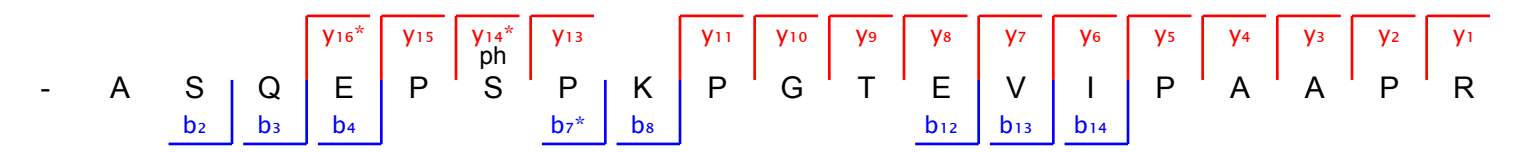

Raw file 20171215\_MaS\_33SR\_LMH\_phospho\_07 Scan 2997 Method FTMS; HCD Score 56.09 m/z 432.87

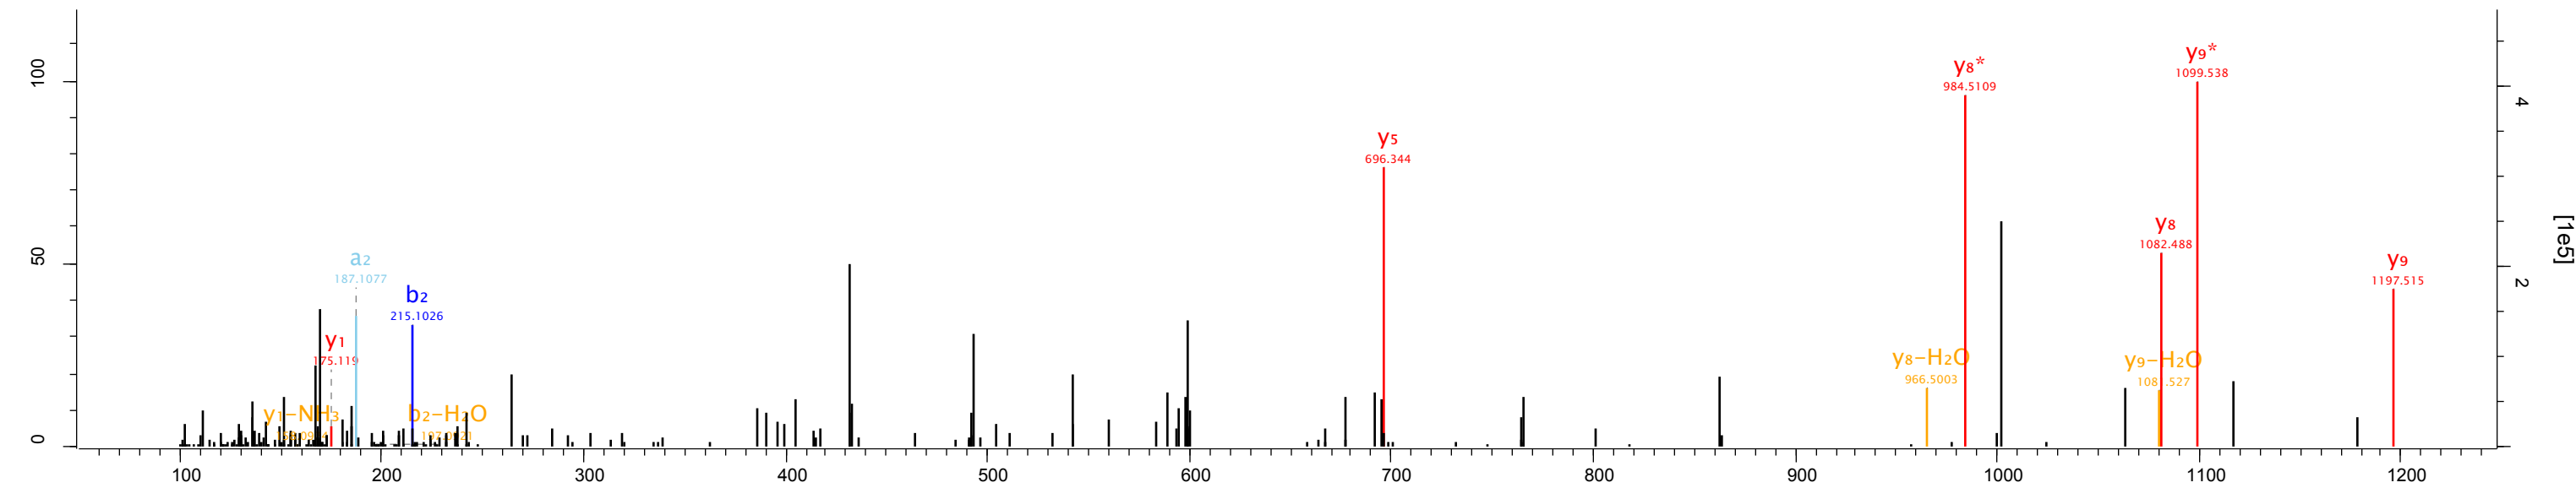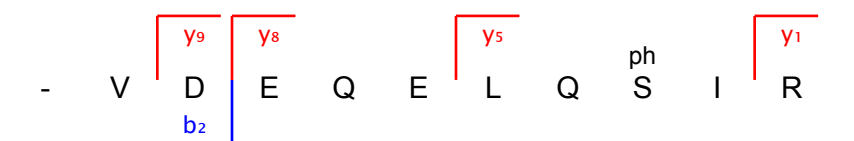

Raw file 20171215\_MaS\_33SR\_LMH\_phospho\_07 Scan 3167 Method FTMS; HCD Score 48.53 m/z 693.28 Gene names SAMD15

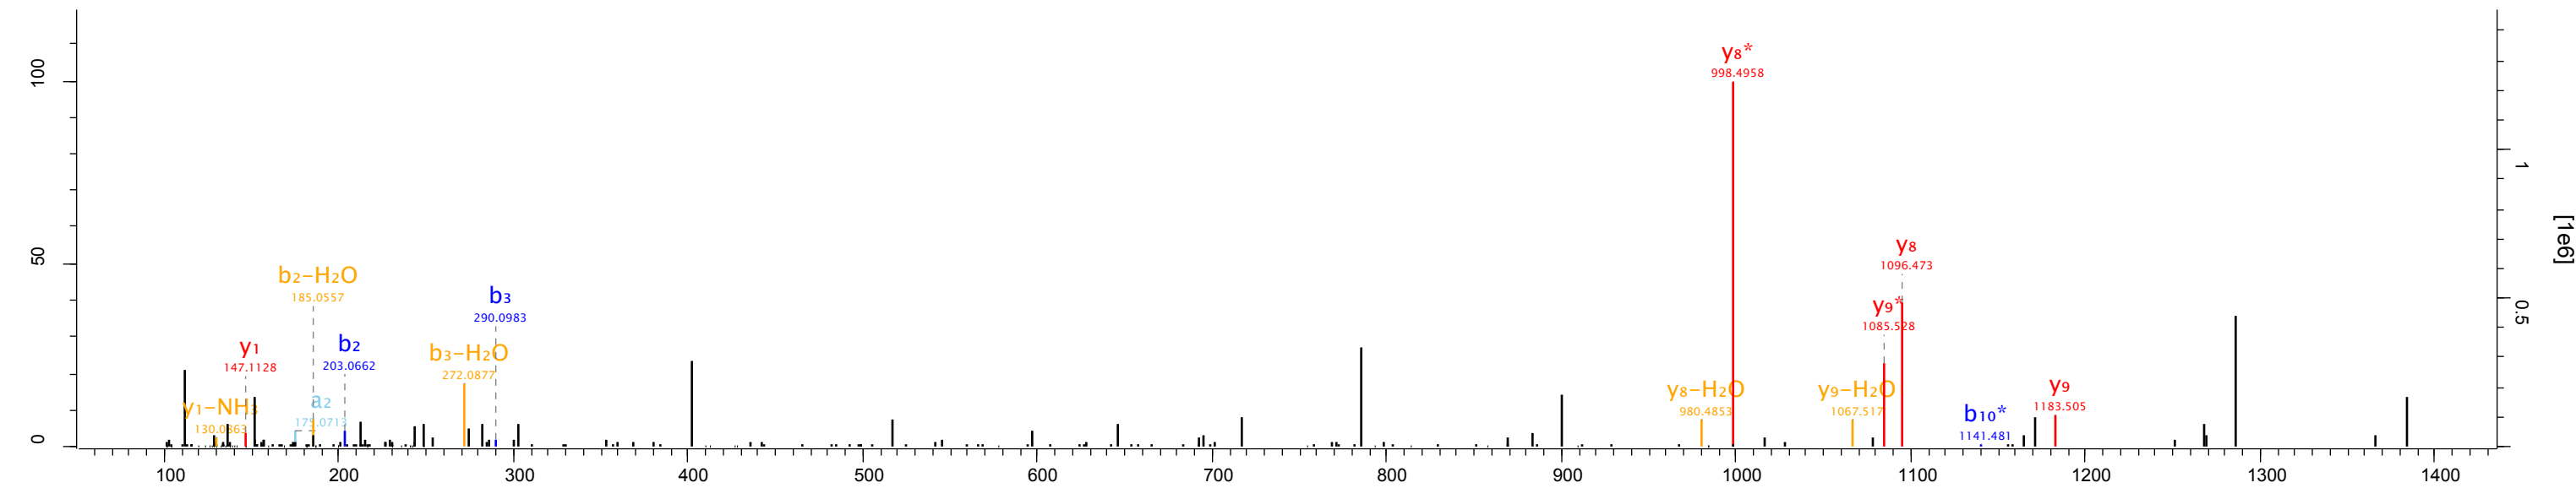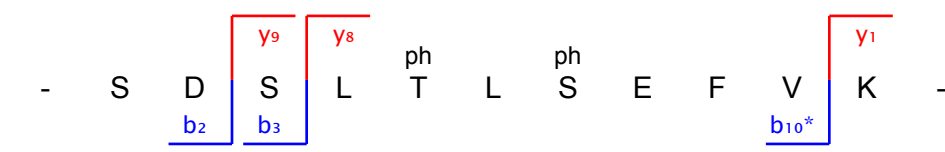



Raw file 20171215\_MaS\_33SR\_LMH\_phospho\_07 Scan 5037 Method FTMS; HCD Score 52.73 m/z 728.32 Gene names MYLK

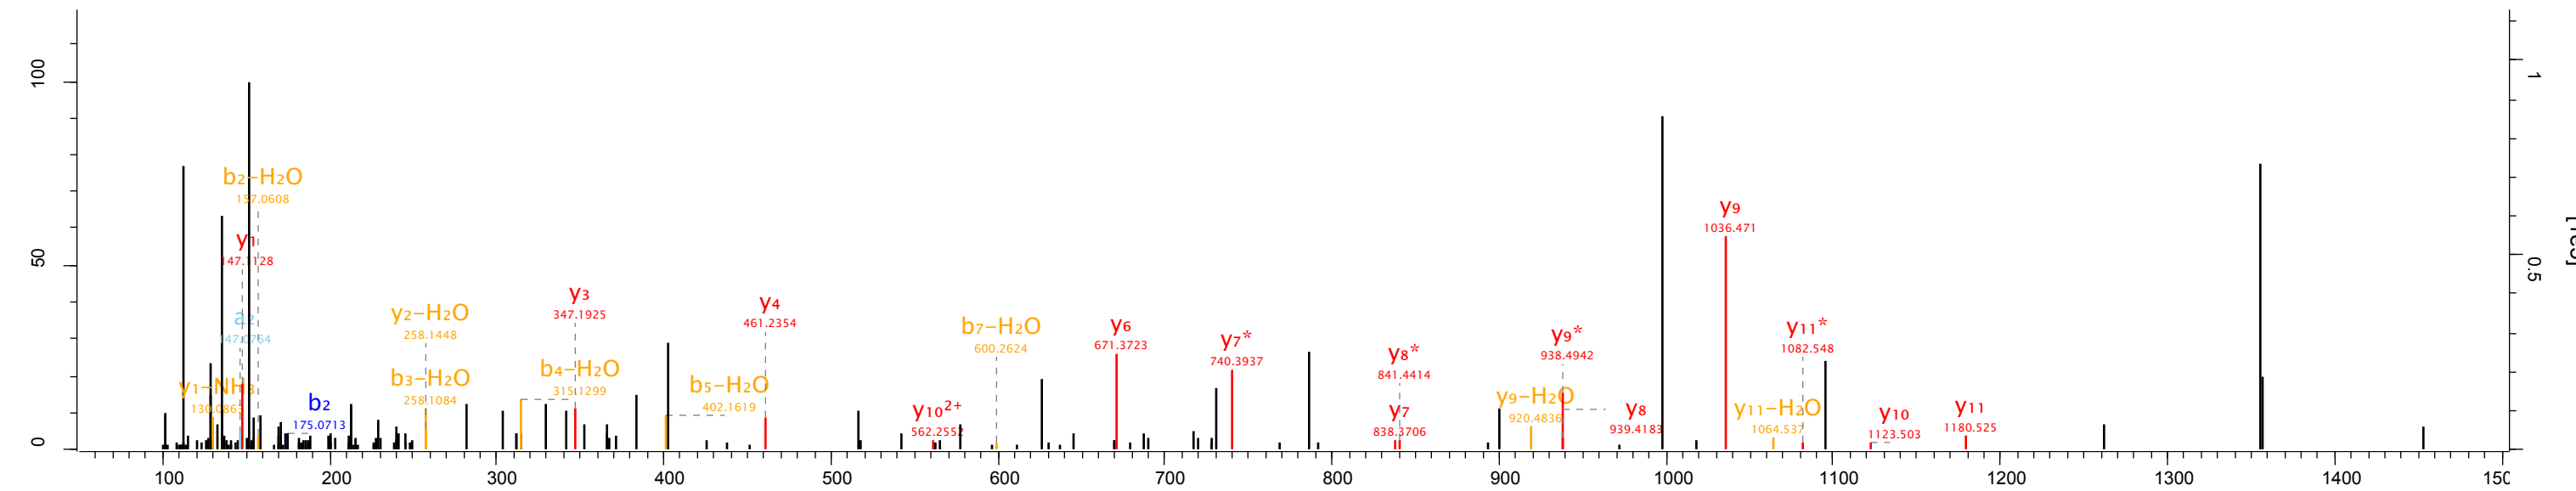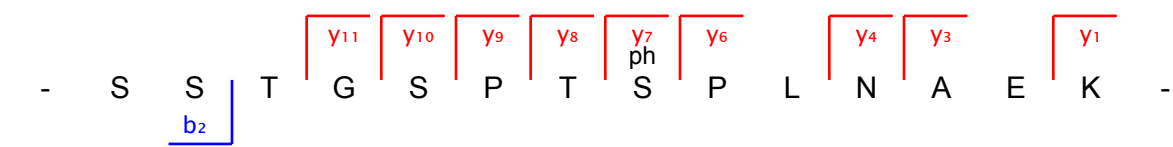

Raw file 20171215\_MaS\_33SR\_LMH\_phospho\_08 Scan 2697 Method FTMS; HCD Score 91.23 m/z 643.28 Gene names NSMCE2

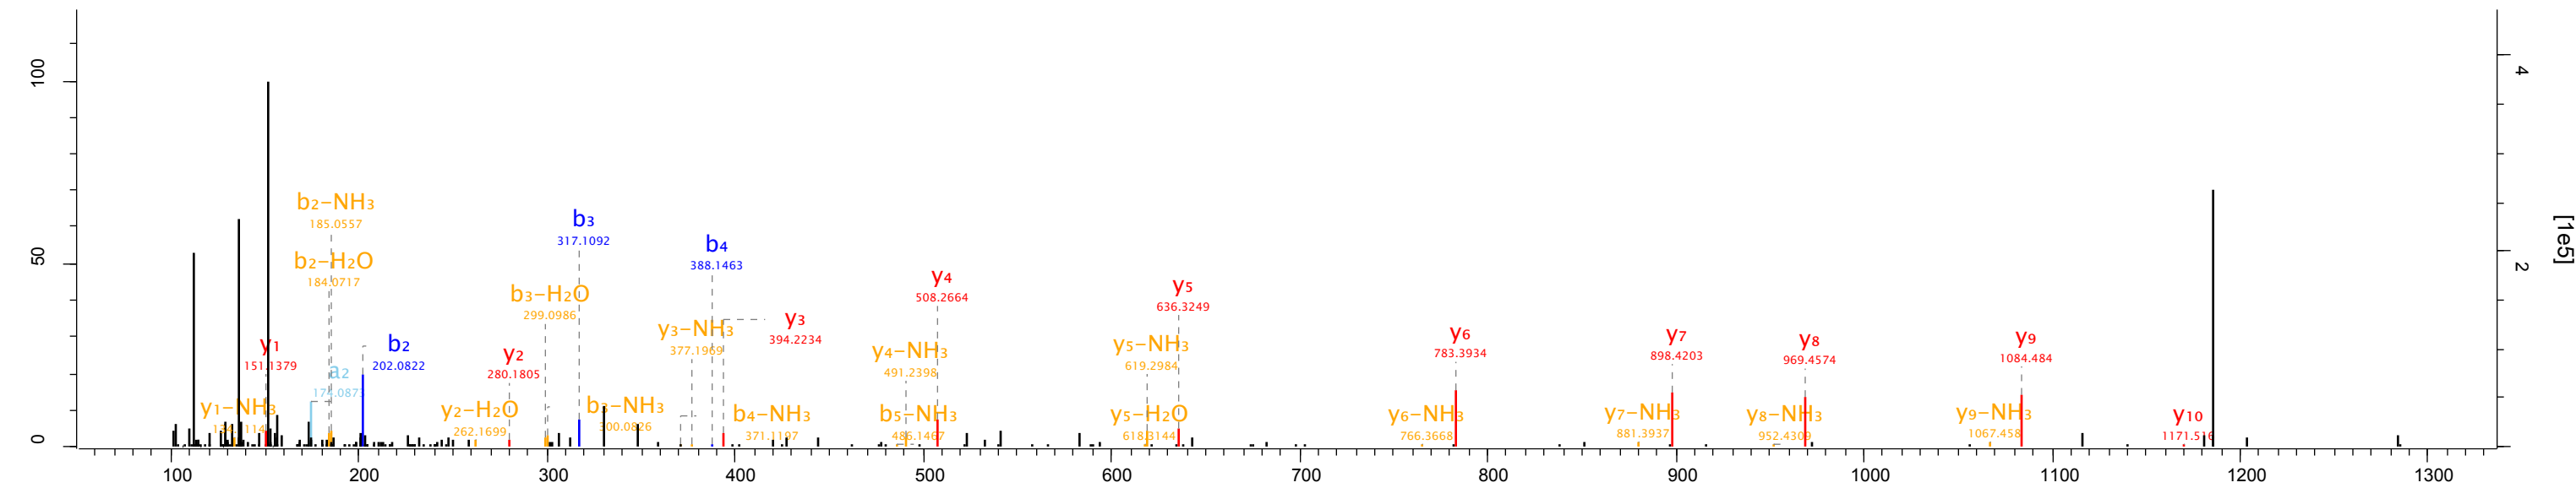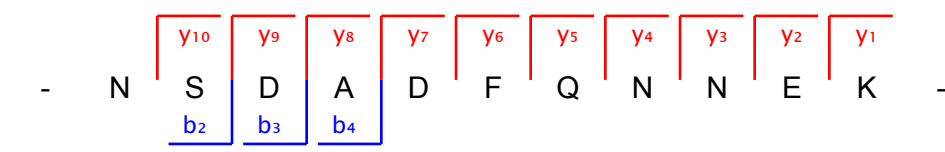

Raw file 20171215\_MaS\_33SR\_LMH\_phospho\_08 Scan 4987 Method FTMS; HCD Score 66.96 m/z 476.2

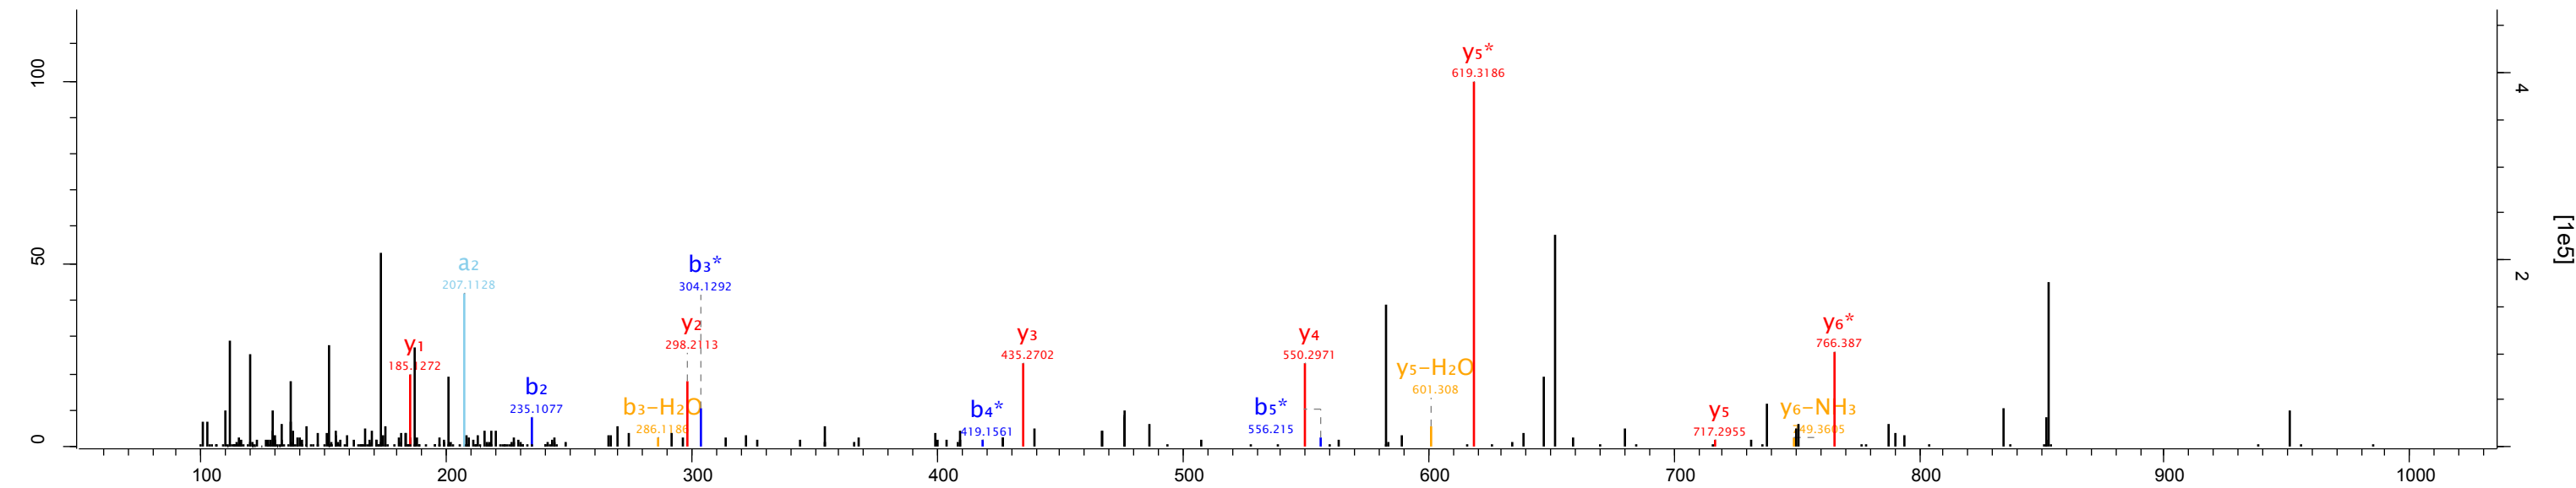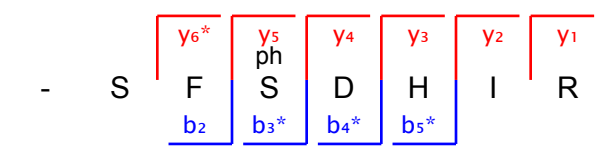

Raw file: 20171215\_MaS\_33SR\_LMH\_phospho\_08  
 Scan: 6977 Method: FTMS; HCD Score: 81.02 m/z: 461.24 Gene names: AKAP1

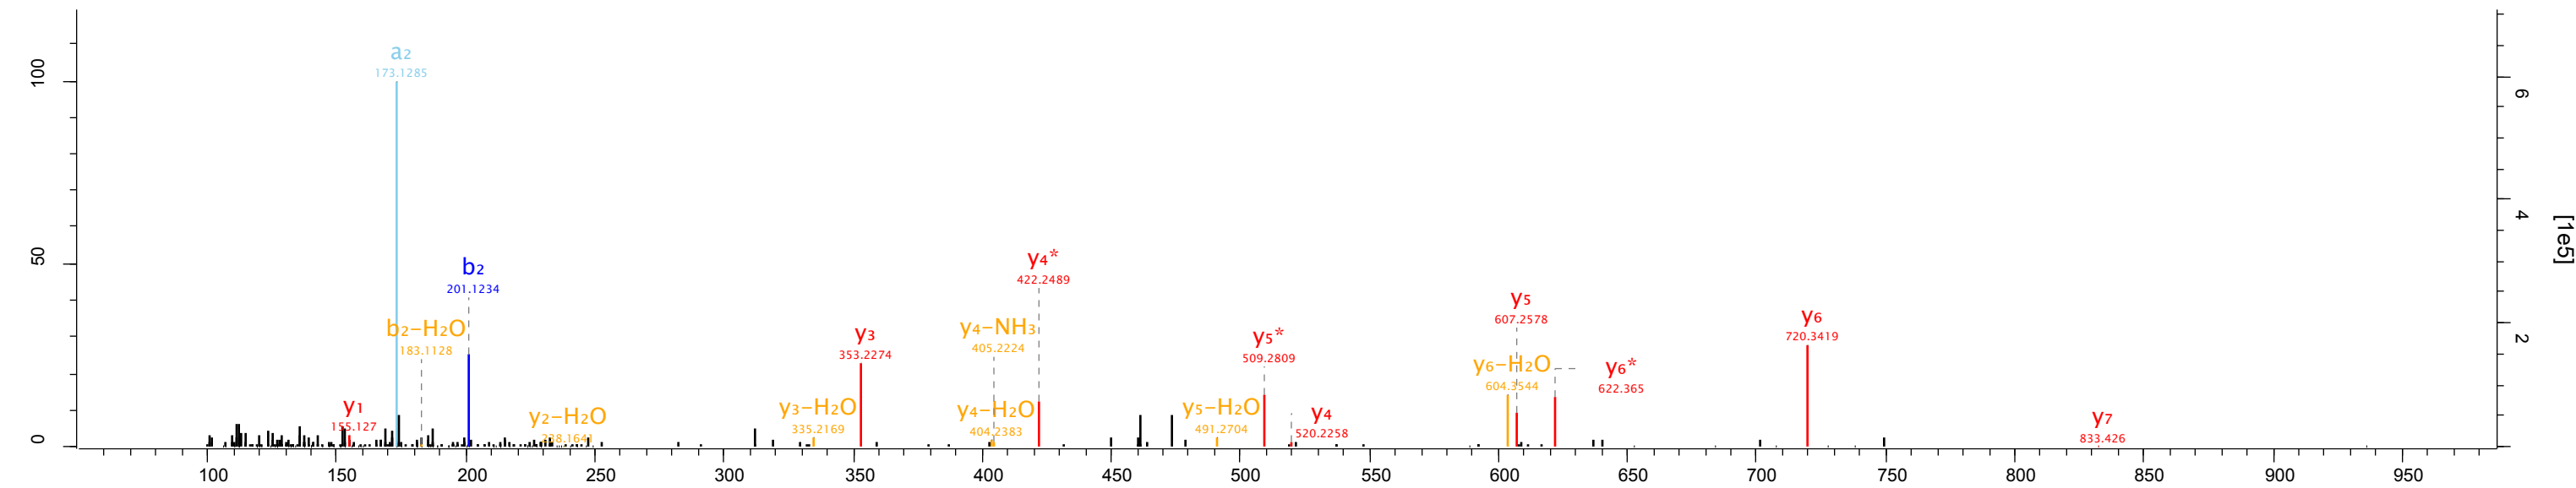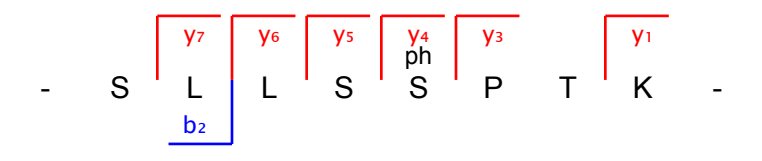

Raw file 20171215\_MaS\_33SR\_LMH\_phospho\_08 Scan 8477 Method FTMS; HCD Score 48.22 m/z 994.94 Gene names MXRA5

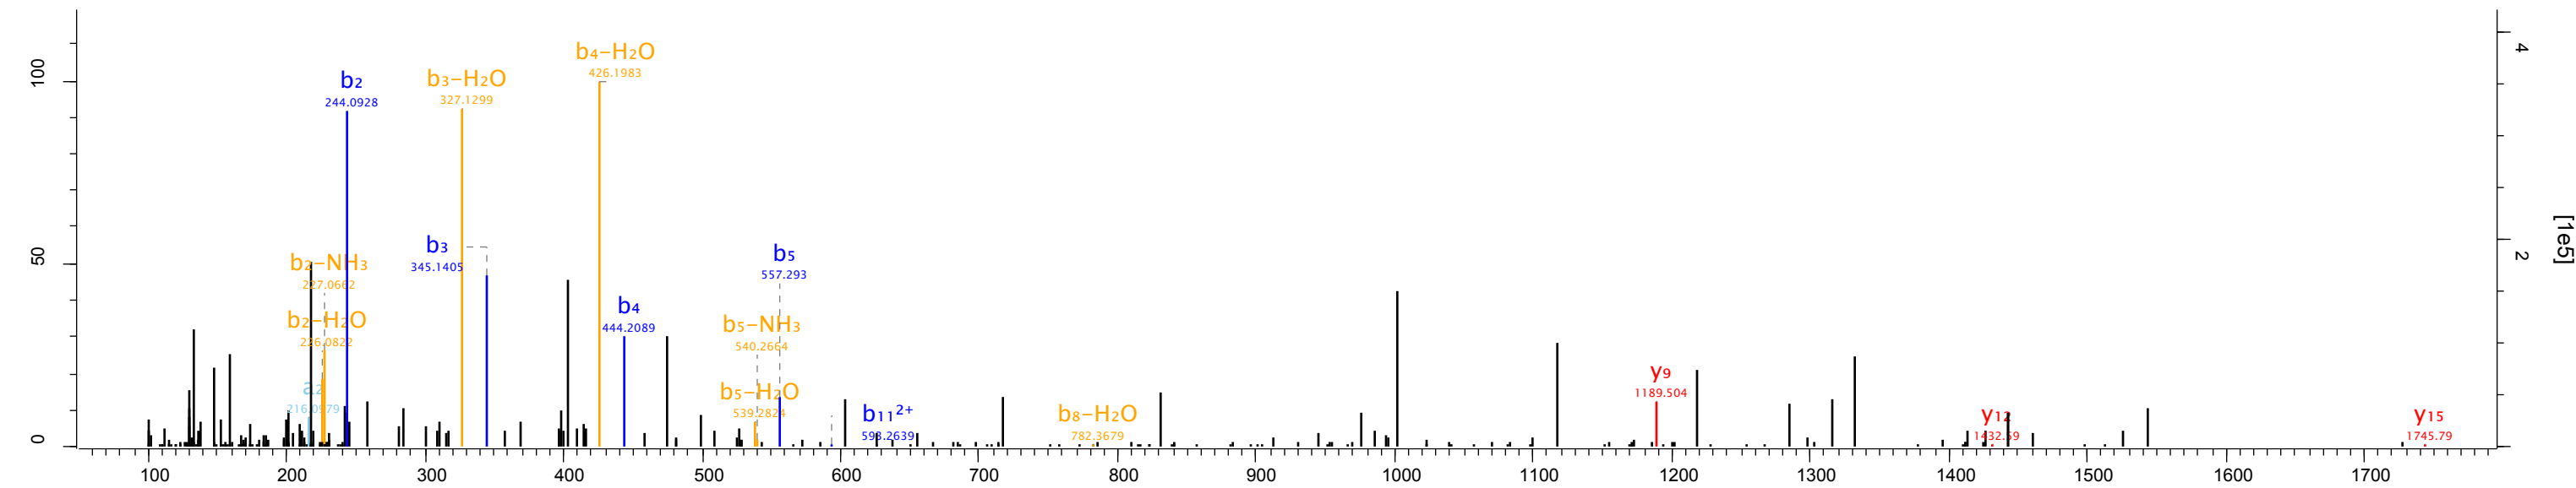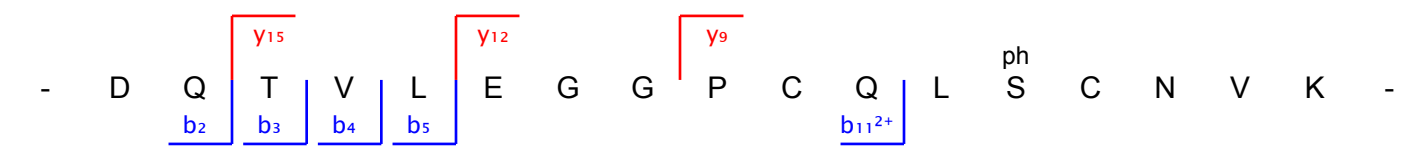

Raw file 20171215\_MaS\_33SR\_LMH\_phospho\_09 Scan 2537 Method FTMS; HCD Score 44.35 m/z 363.19

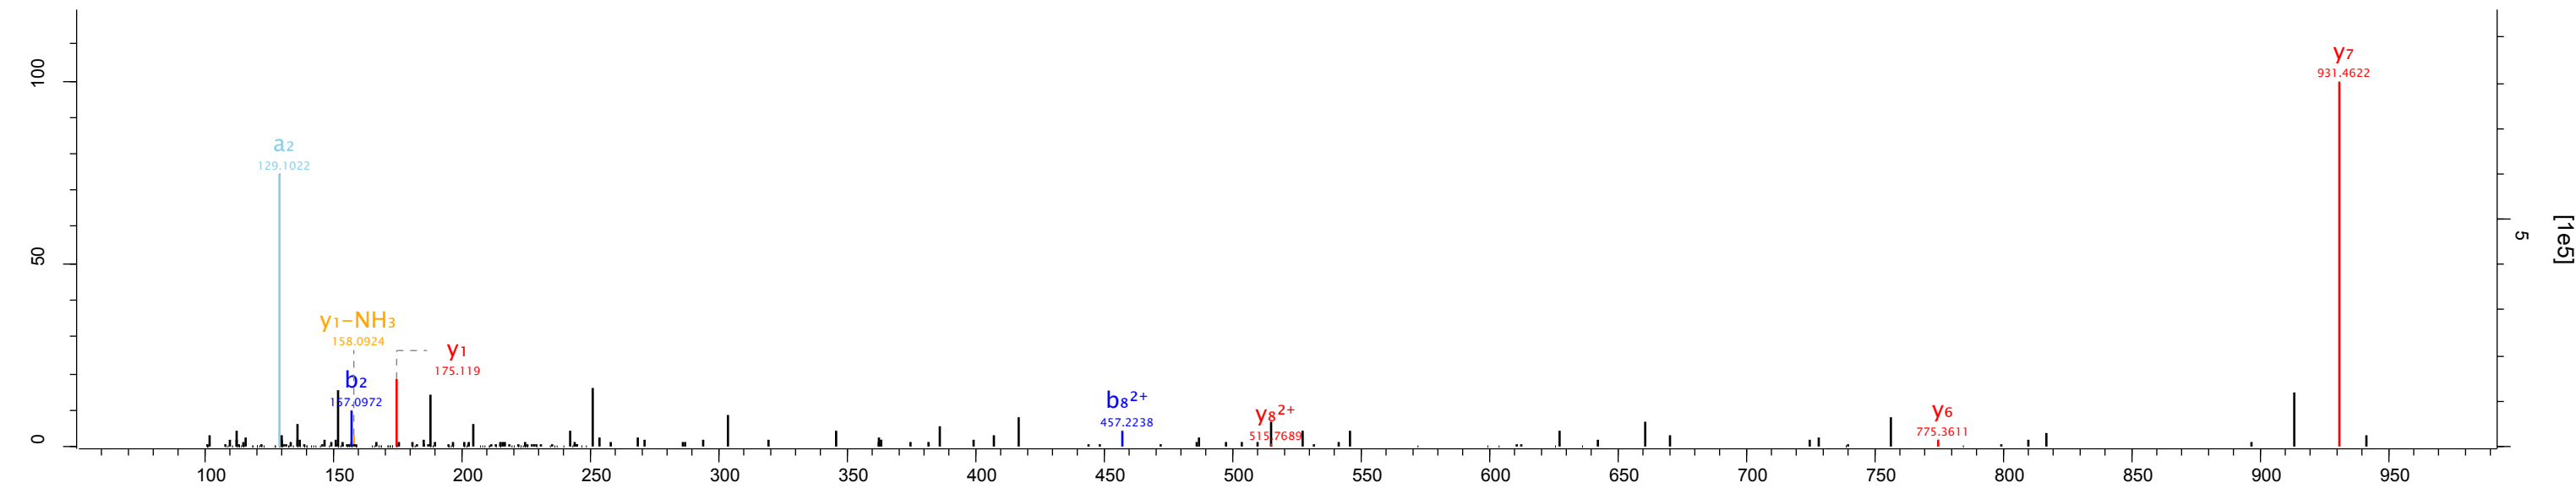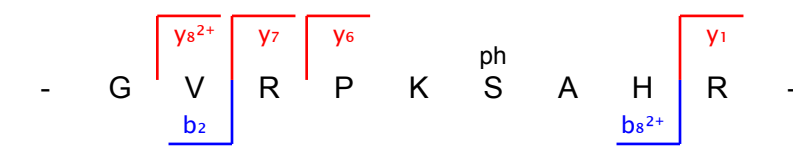

Raw file 20171215\_MaS\_33SR\_LMH\_phospho2\_01 Scan 2697 Method FTMS; HCD Score 60.49 m/z 853.77 Gene names DIS3L2

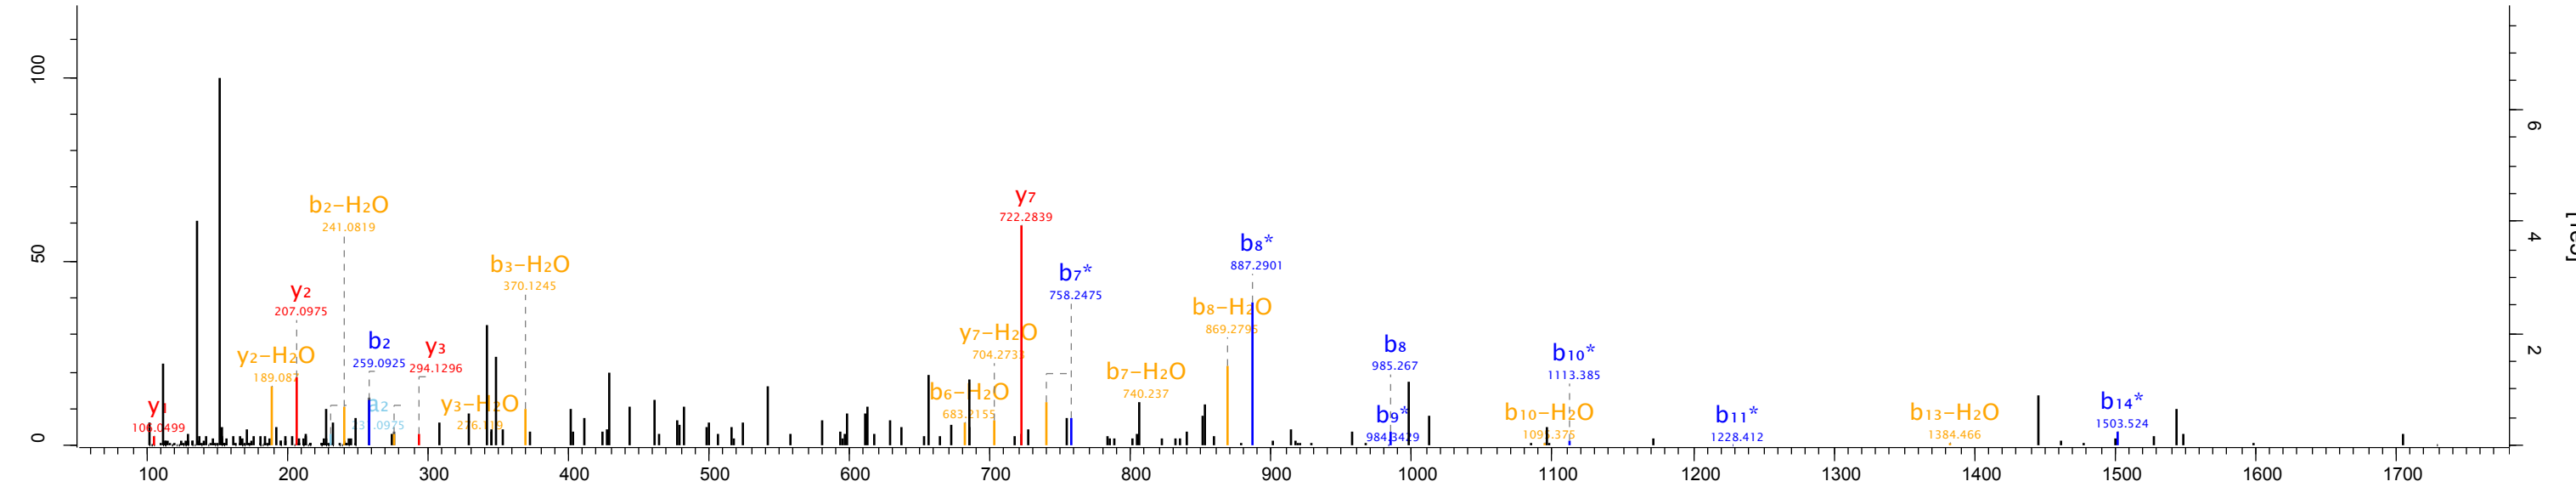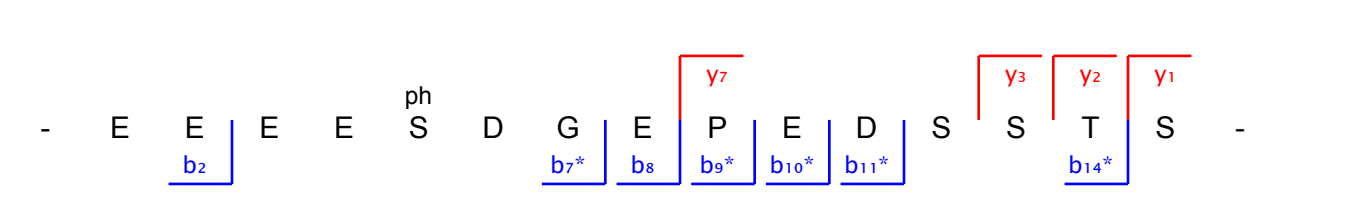

Raw file: 20171215\_MaS\_33SR\_LMH\_phospho2\_01  
 Scan: 3397 Method: FTMS; HCD Score: 227.73 m/z: 696.79 Gene names: CCDC82

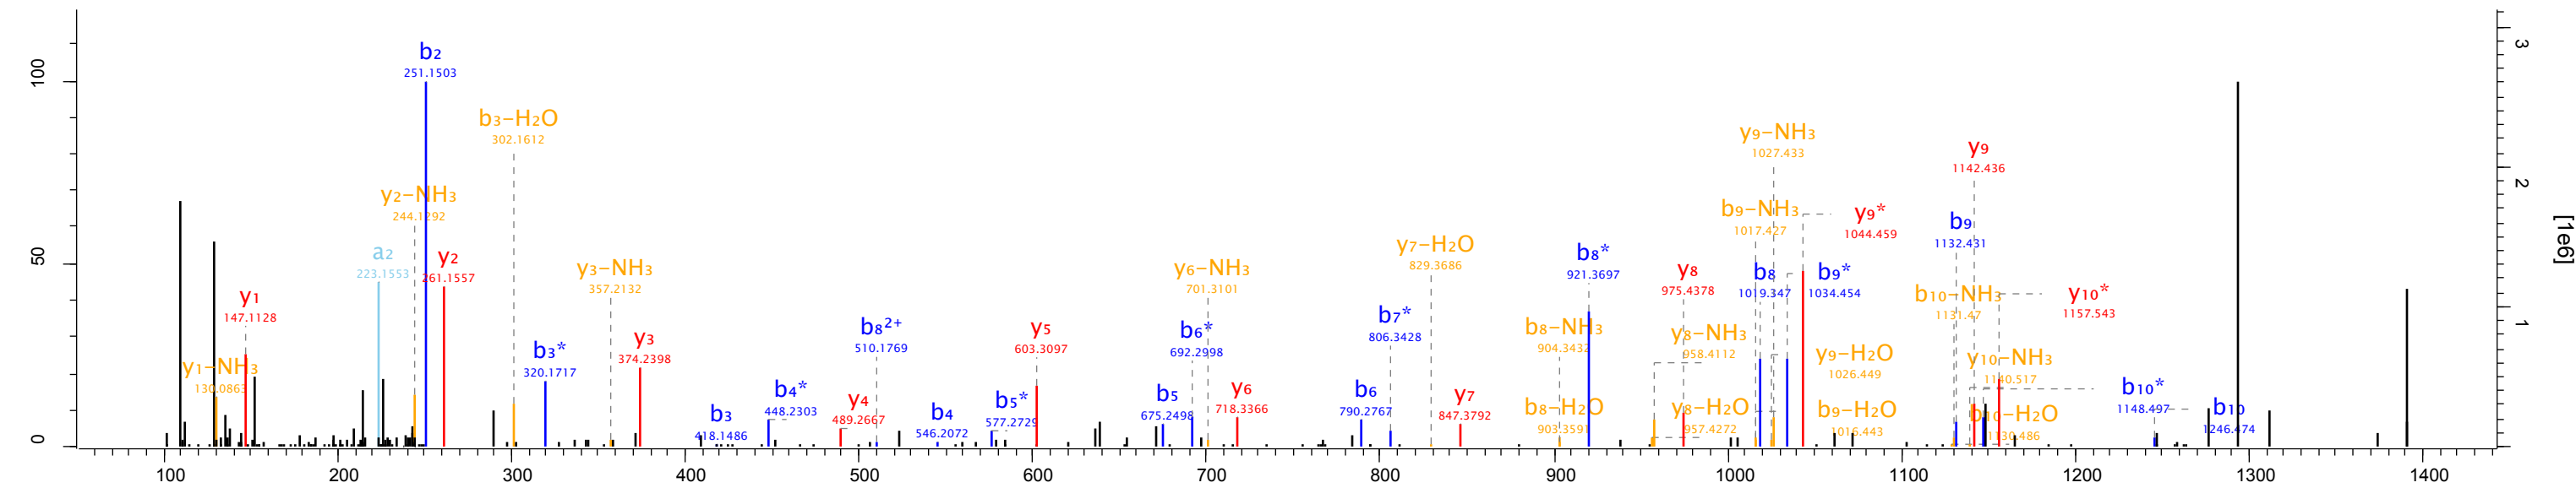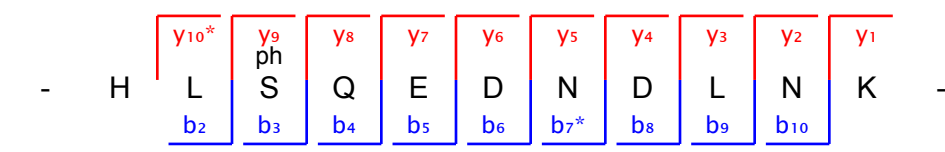



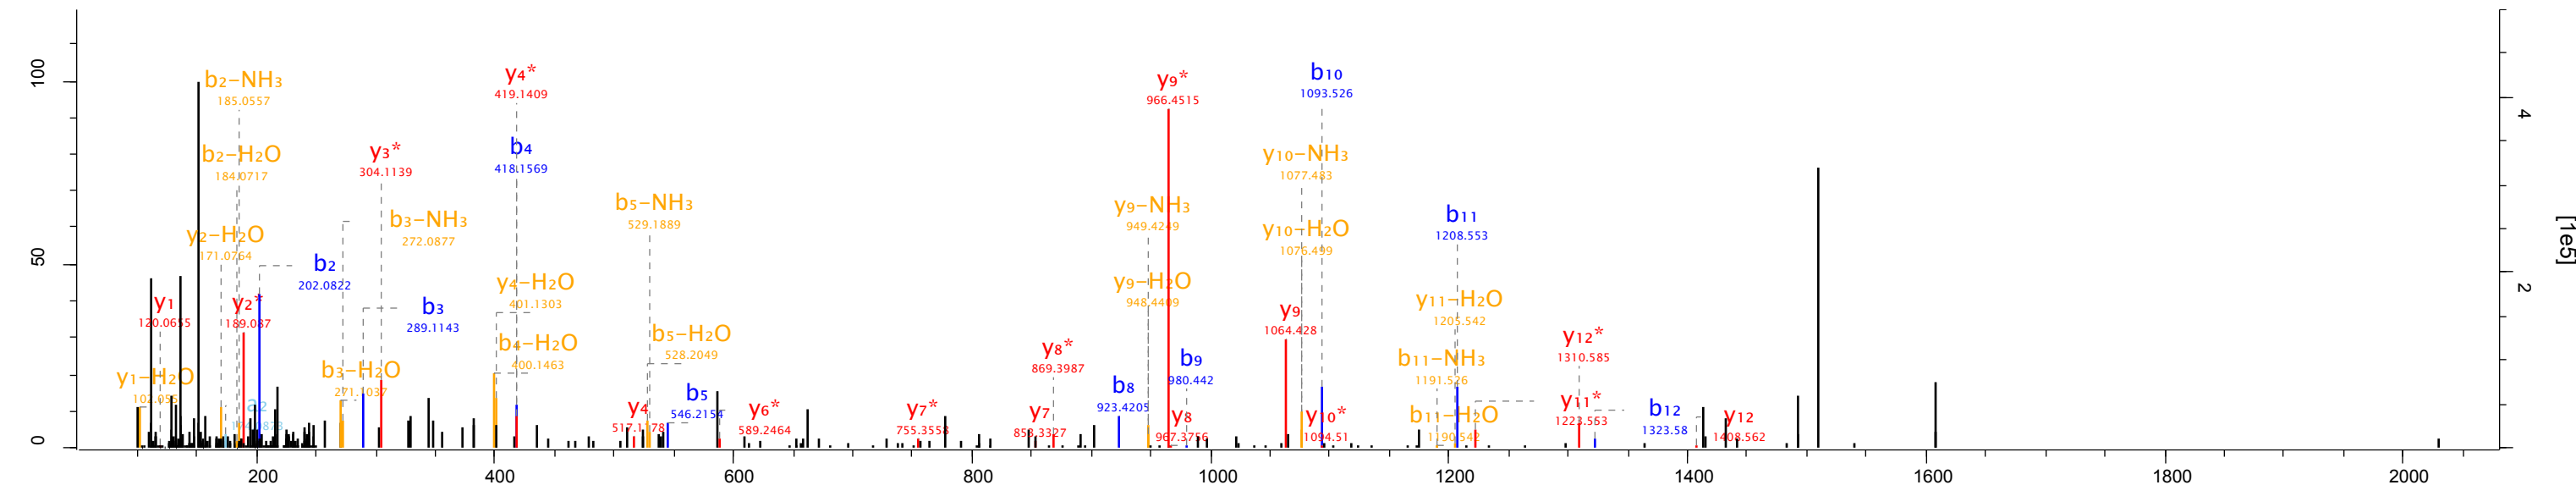

- S N S E Q P N R G L D D S T -

b<sub>2</sub> b<sub>3</sub> b<sub>4</sub> b<sub>5</sub> b<sub>8</sub> b<sub>9</sub> b<sub>10</sub> b<sub>11</sub> b<sub>12</sub> y<sub>12</sub> y<sub>11</sub>\* y<sub>10</sub>\* y<sub>9</sub> y<sub>8</sub> y<sub>7</sub> y<sub>6</sub>\* y<sub>4</sub> y<sub>3</sub>\* y<sub>2</sub>\* ph y<sub>1</sub>

Raw file Scan Method Score m/z Gene names

20171215\_MaS\_33SR\_LMH\_phospho2\_01 5197 FTMS; HCD 59.98 838.86 SH3BP5

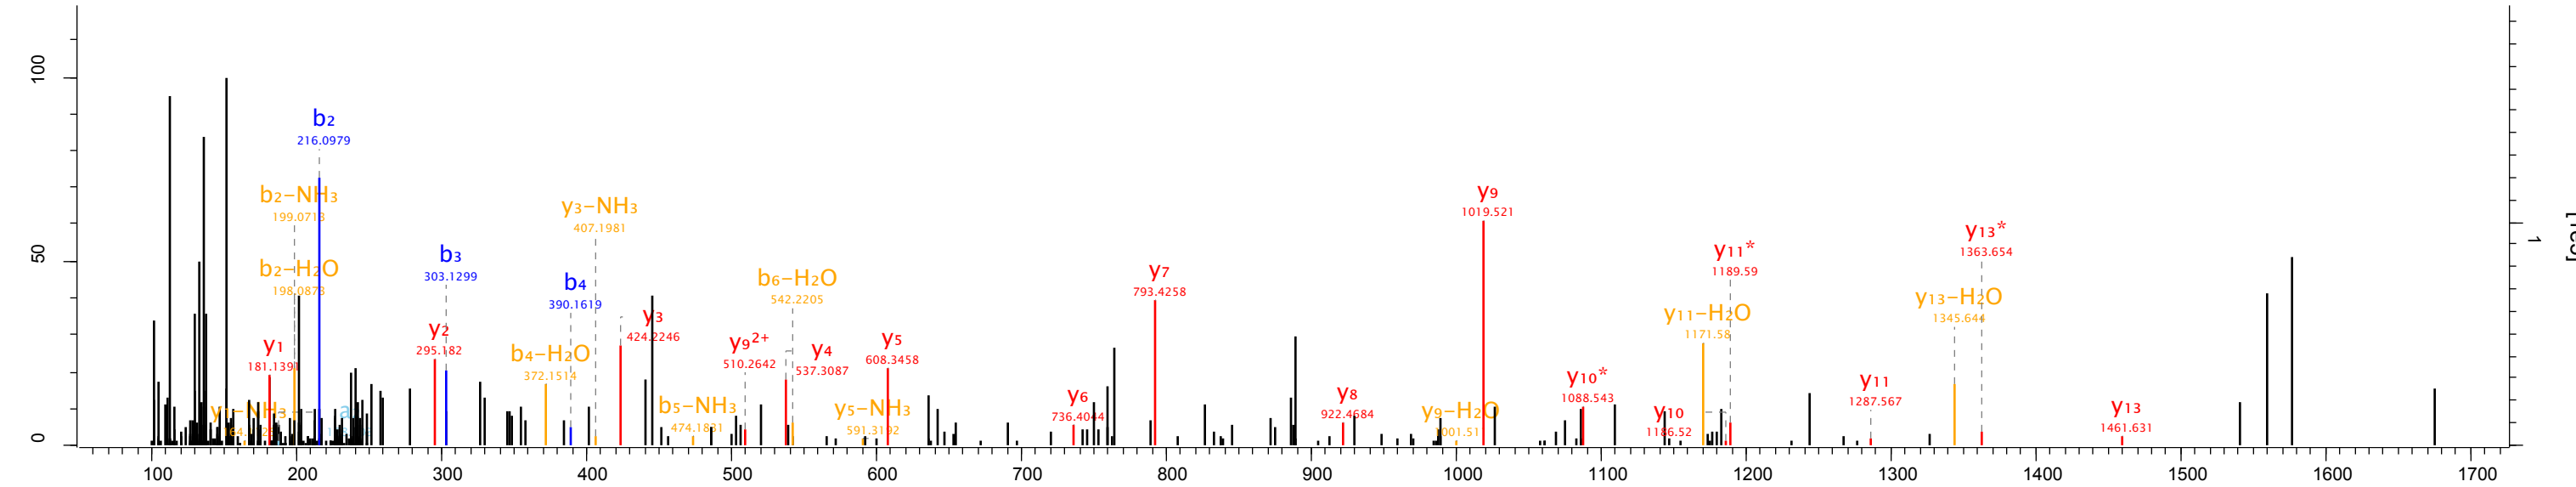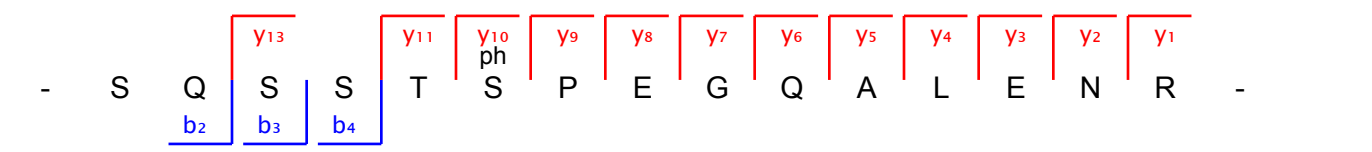

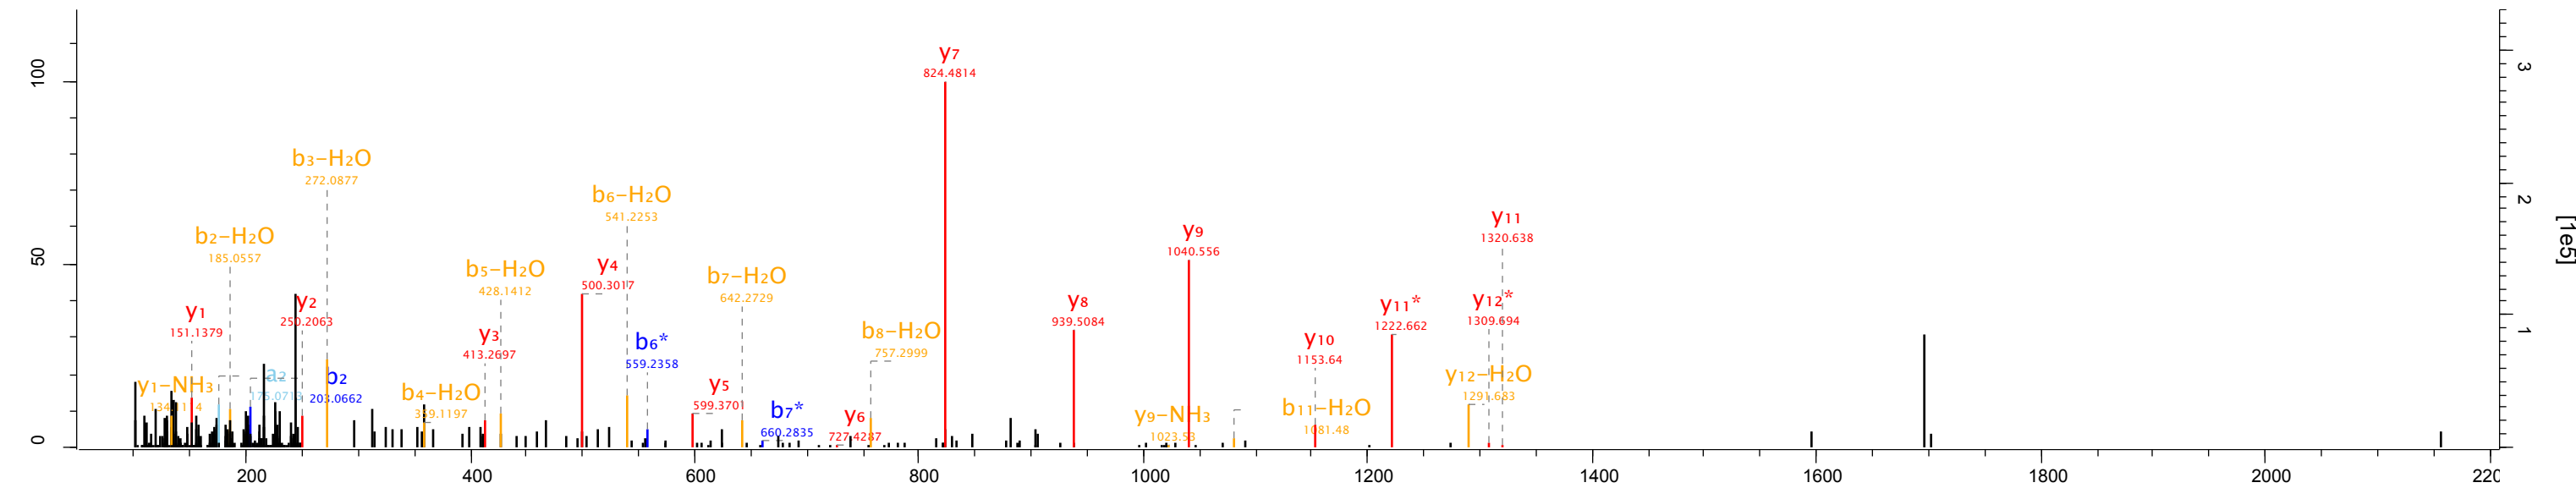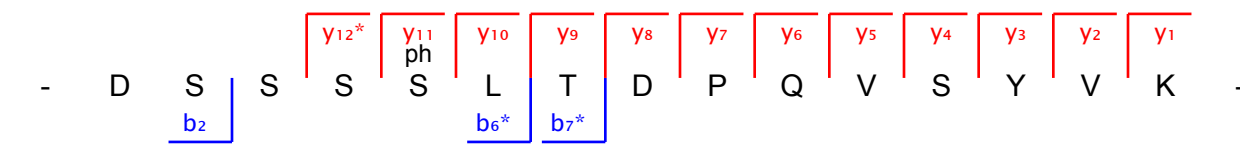

Raw file 20171215\_MaS\_33SR\_LMH\_phospho2\_02 Scan 10497 Method FTMS; HCD Score 135.43 m/z 810.39 Gene names CDCA8

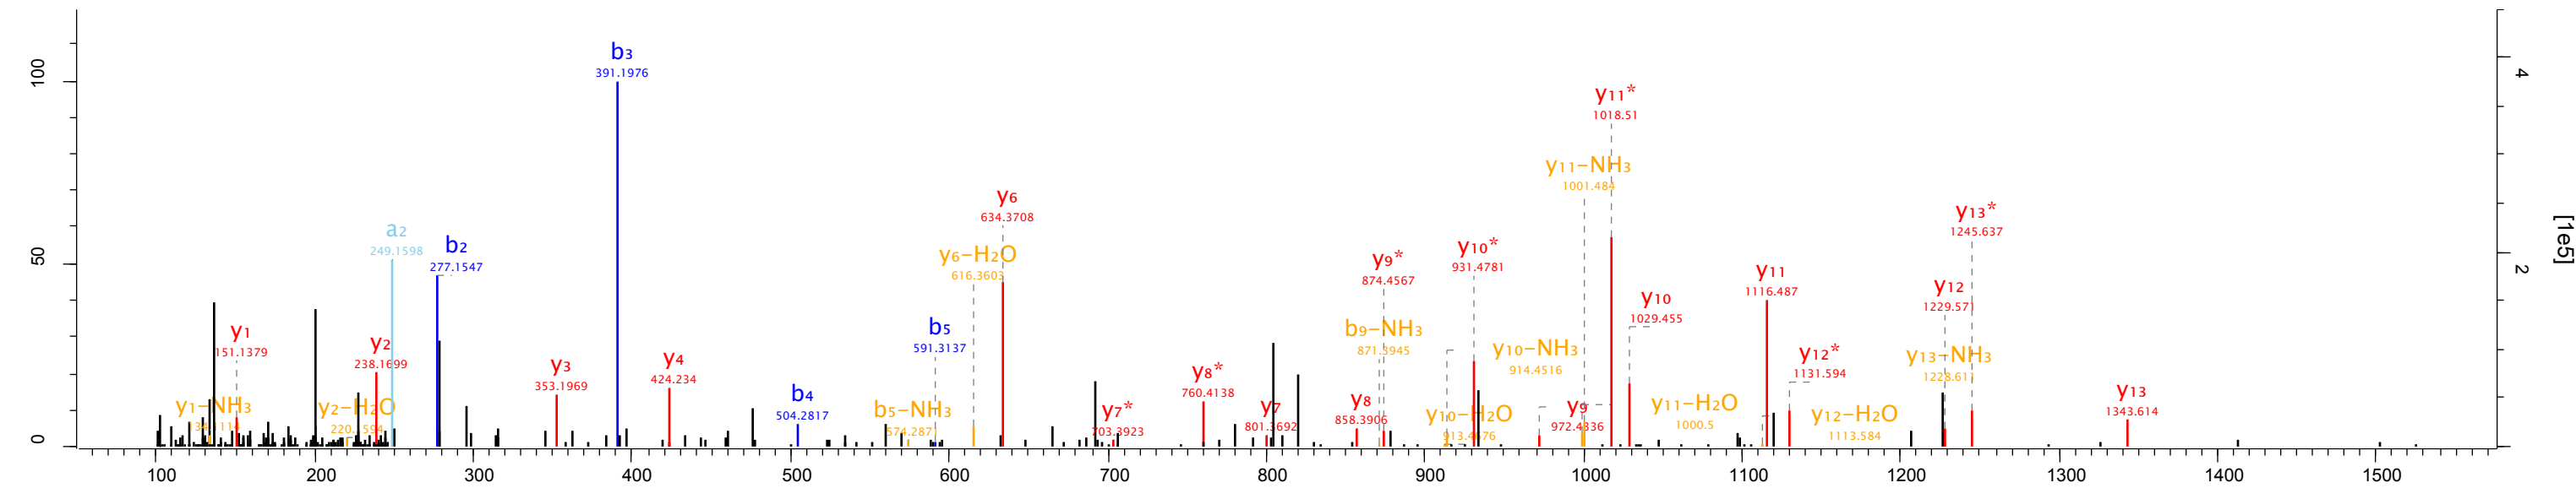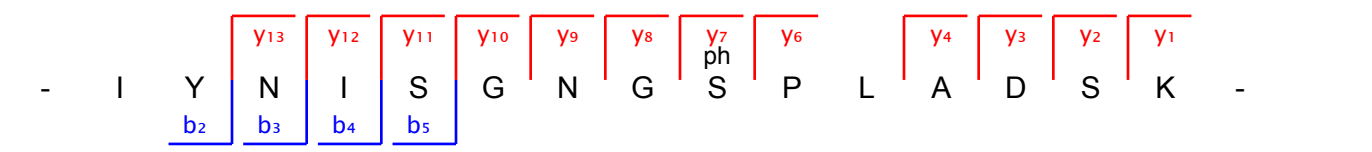

Raw file  
20171215\_MaS\_33SR\_LMH\_phospho2\_02

Scan 2357 Method FTMS; HCD Score 184.21 m/z 868.34 Gene names DNAJC17

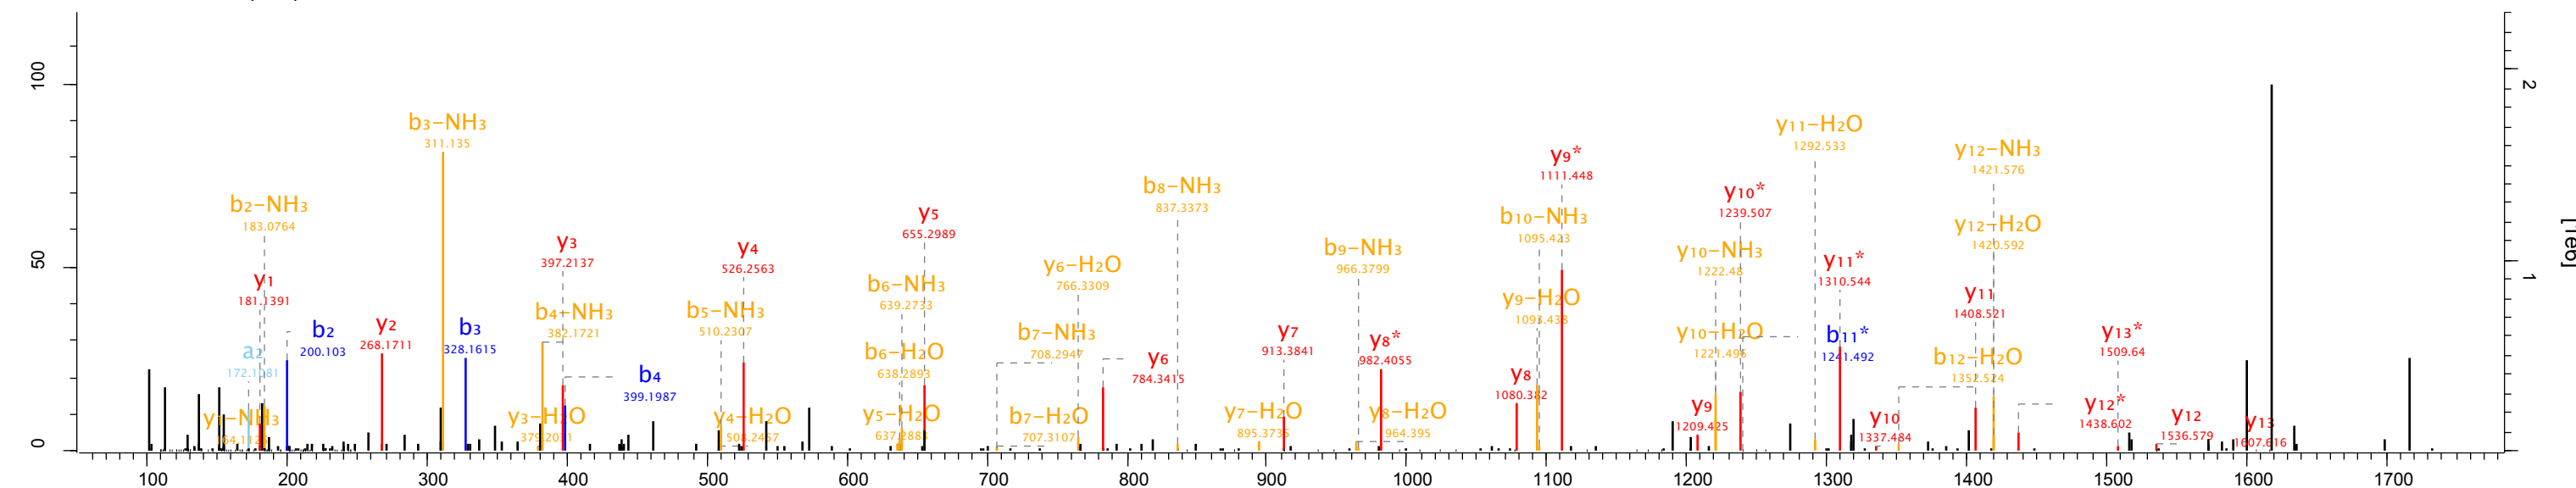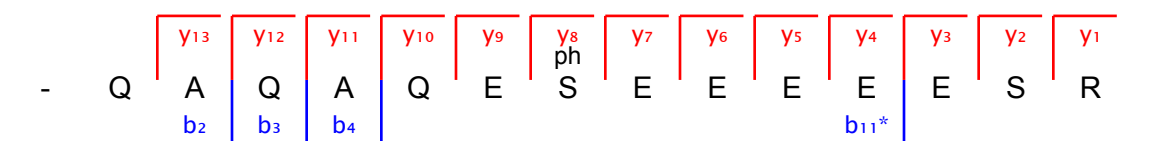

Raw file 20171215\_MaS\_33SR\_LMH\_phospho2\_02 Scan 2947 Method FTMS; HCD Score 117.28 m/z 457.22 Gene names NCOA3

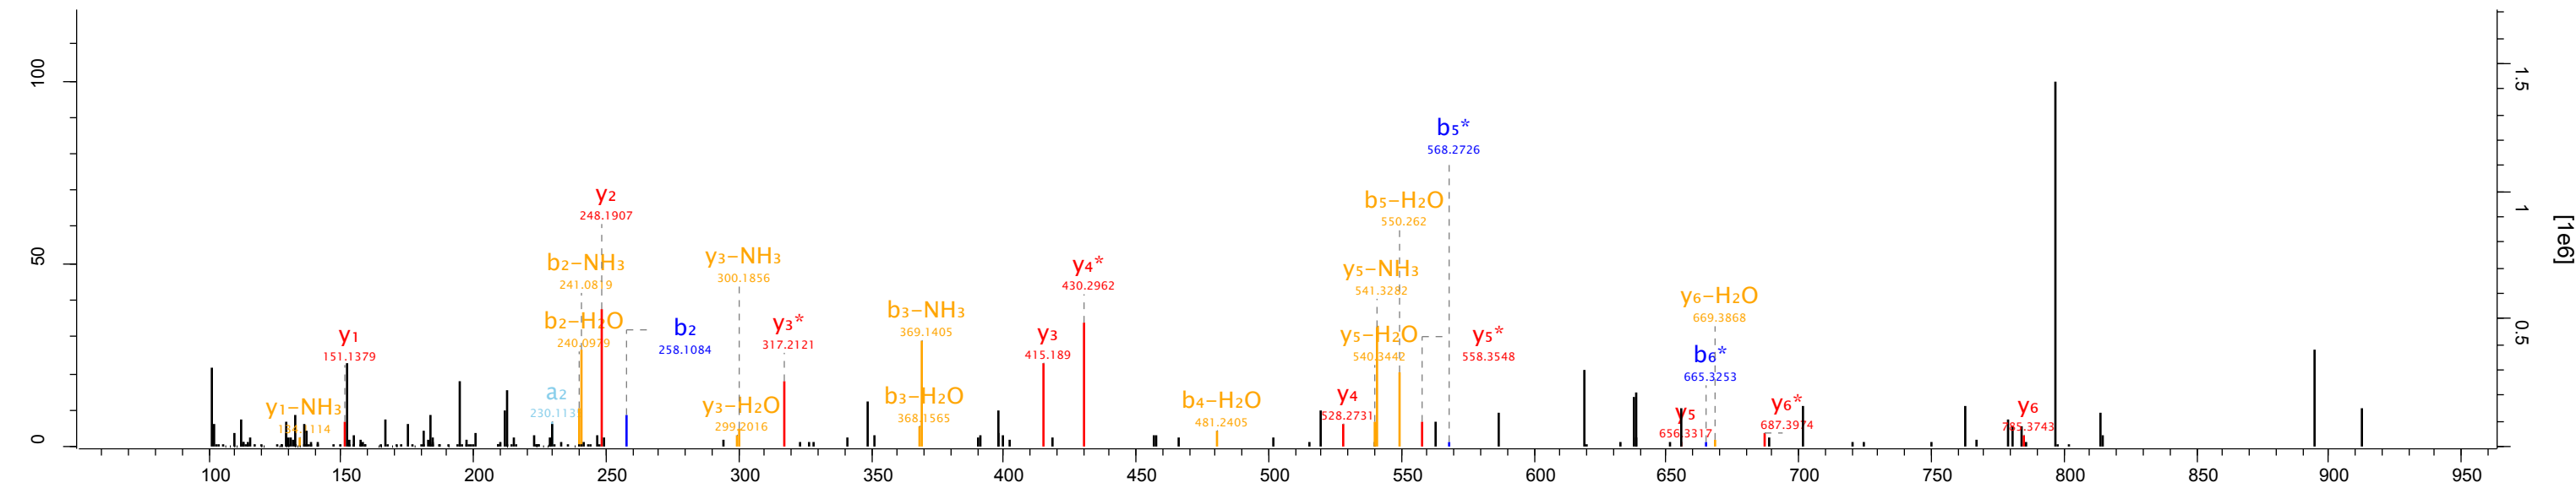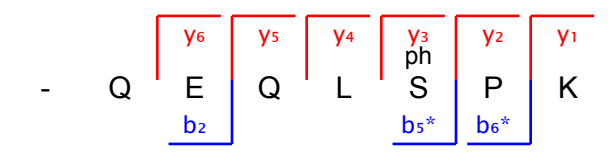

Raw file  
20171215\_MaS\_33SR\_LMH\_phospho2\_02

Scan 4017 Method FTMS; HCD Score 160.12 m/z 844.36 Gene names YAF2

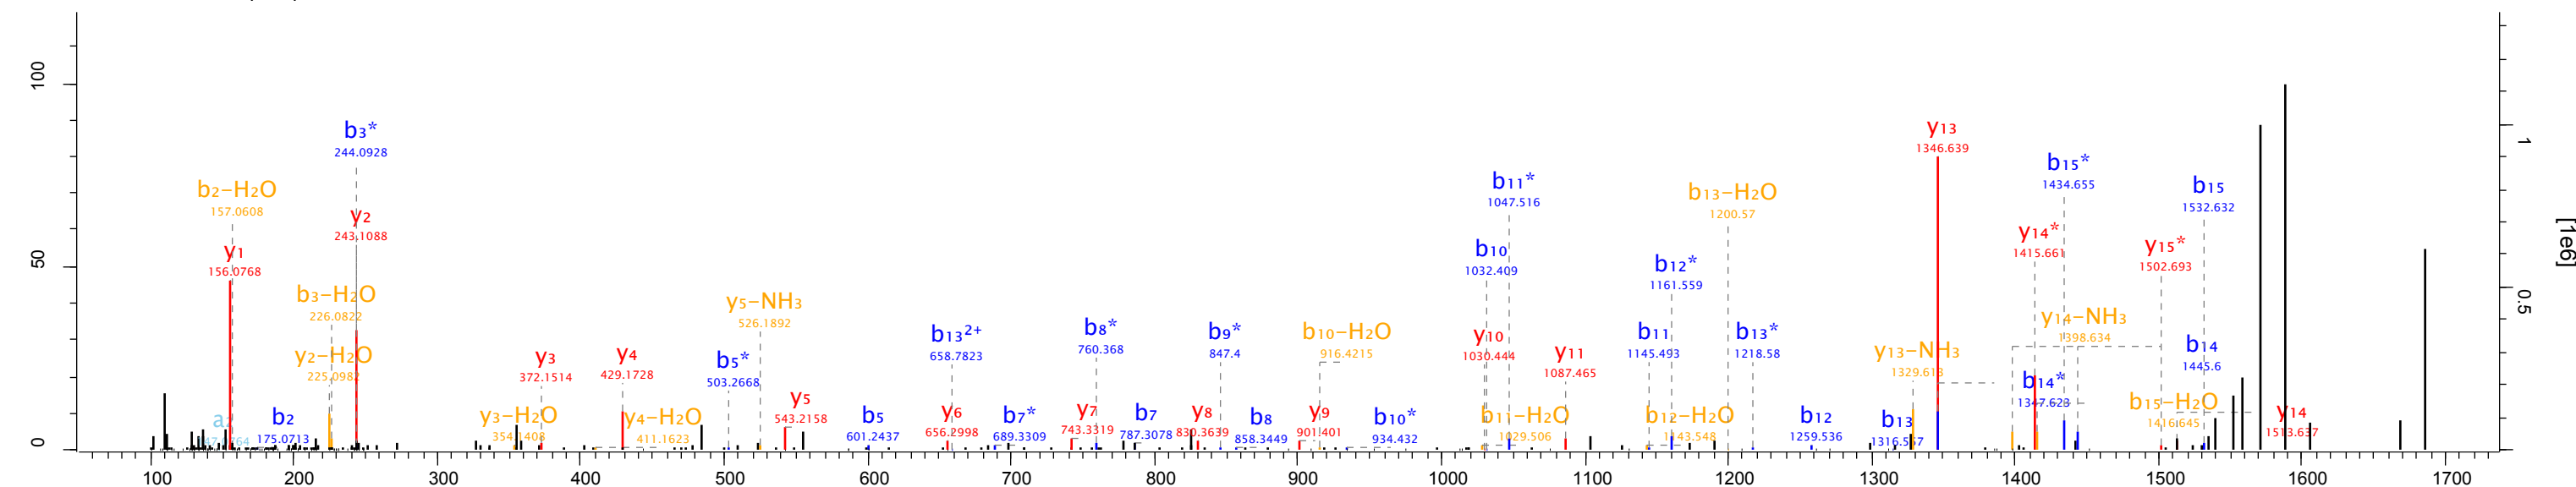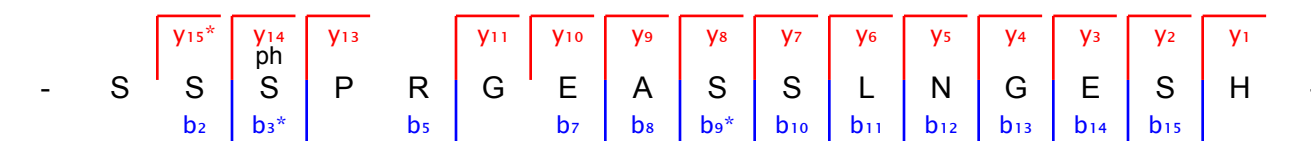

Raw file: 20171215\_MaS\_33SR\_LMH\_phospho2\_02  
 Scan: 6887 Method: FTMS; HCD Score: 105.2 m/z: 550.26 Gene names: C11orf96

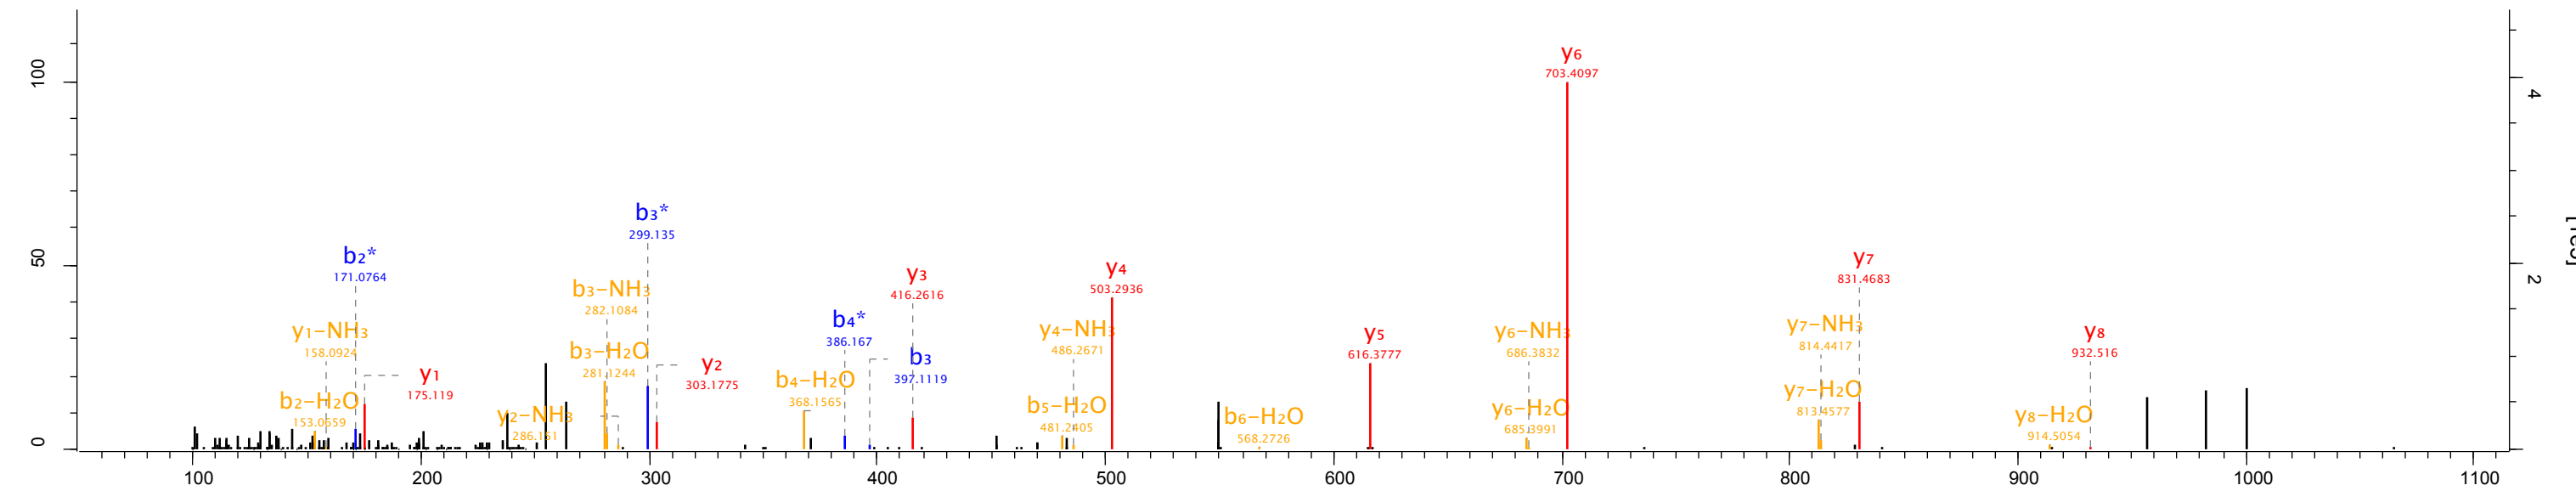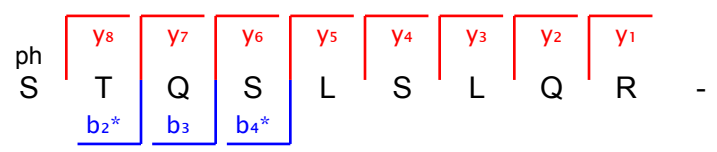



Raw file 20171215\_MaS\_33SR\_LMH\_phospho2\_02 Scan 9487 Method FTMS; HCD Score 150.14 m/z 753.34 Gene names AHNAK2

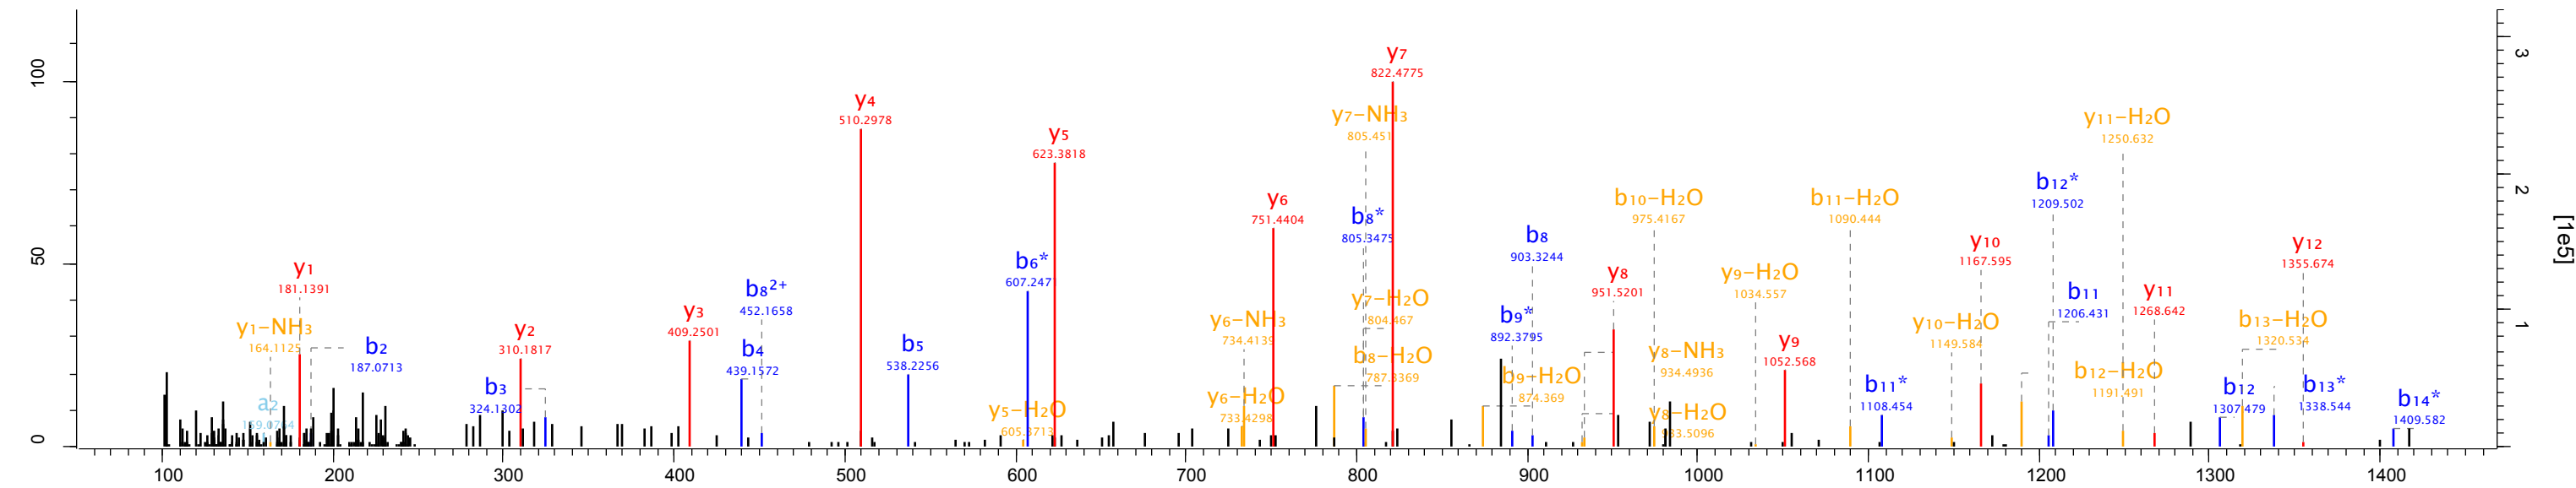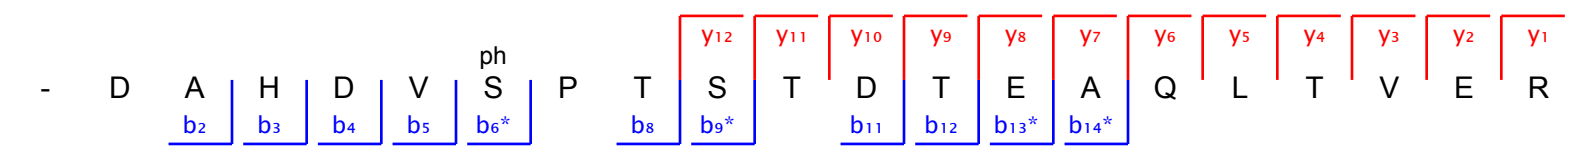

Raw file 20171215\_MaS\_33SR\_LMH\_phospho2\_03 Scan 11577 Method FTMS; HCD Score 150.5 m/z 910.91 Gene names ELF2

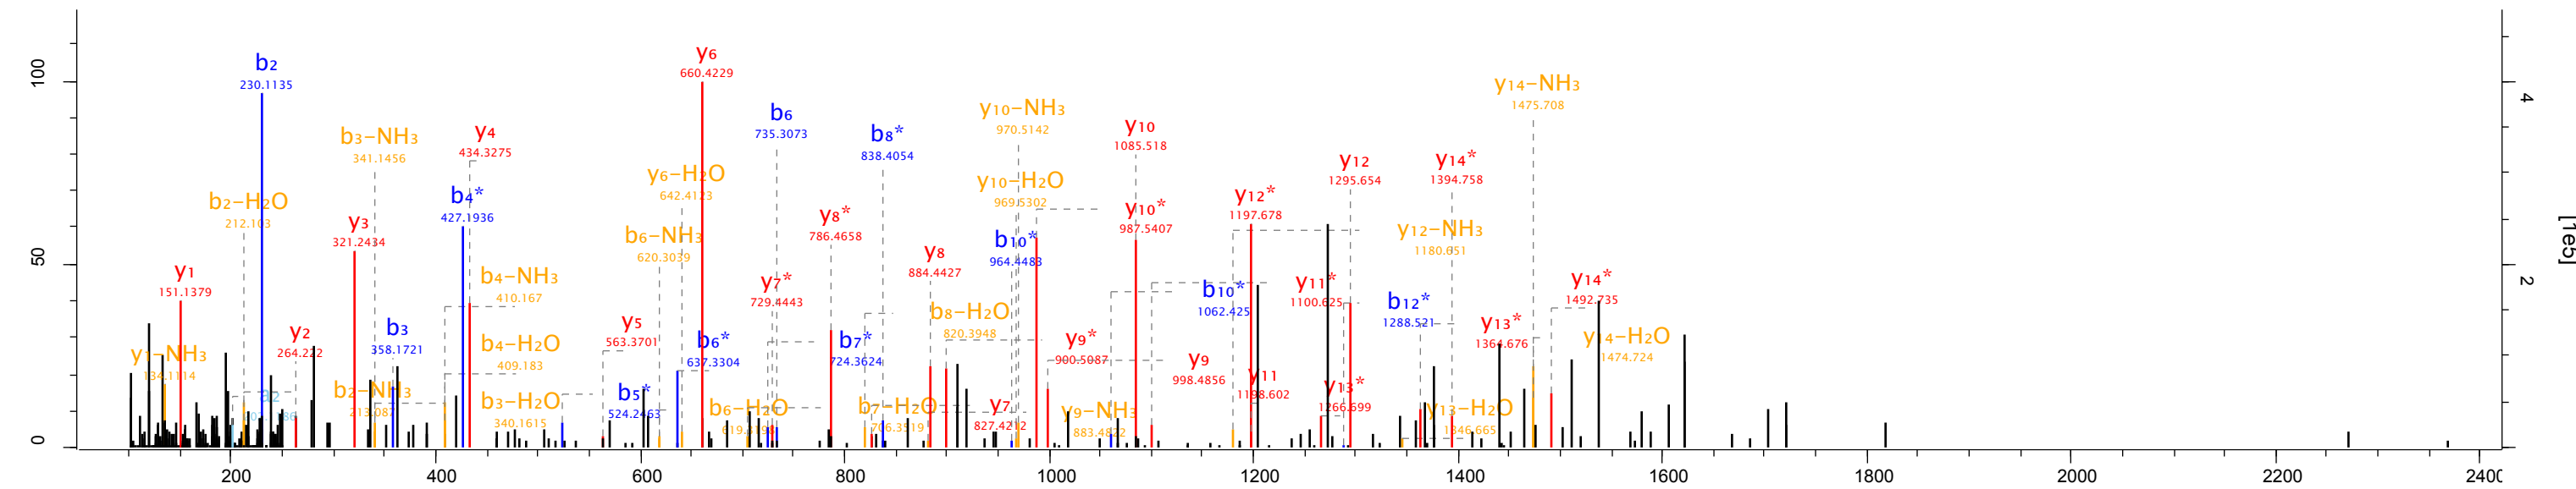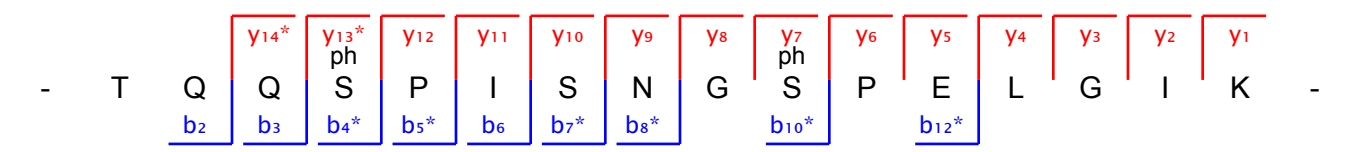

Raw file 20171215\_MaS\_33SR\_LMH\_phospho2\_03 Scan 11727 Method FTMS; HCD Score 286.58 m/z 1140.85 Gene names BCL7C

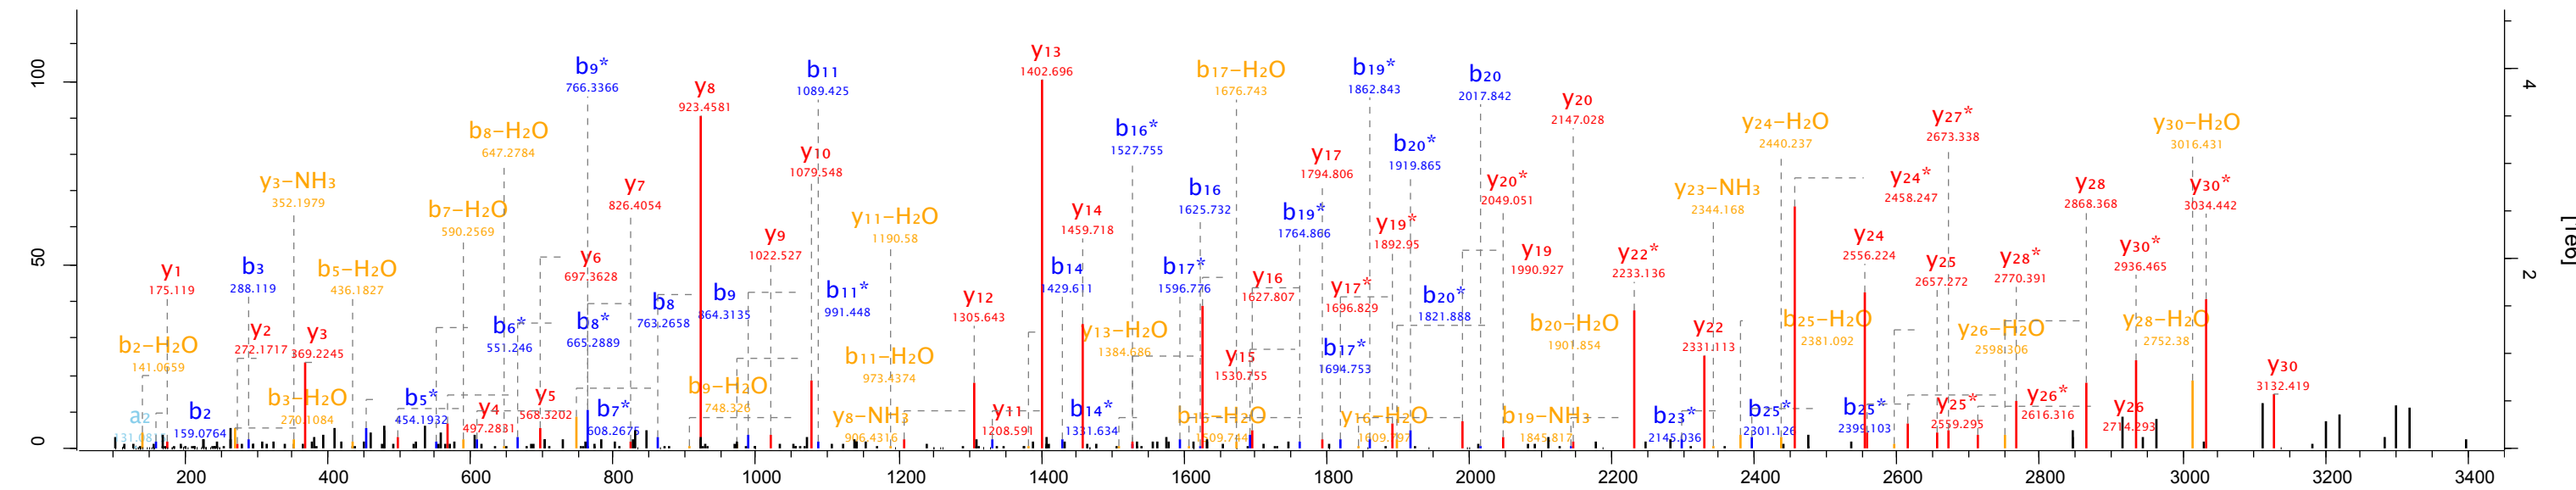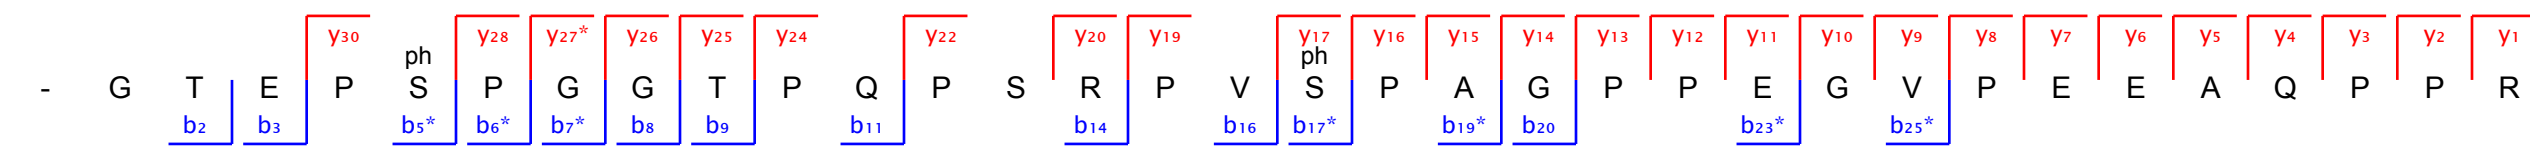

Raw file: 20171215\_MaS\_33SR\_LMH\_phospho2\_03  
 Scan: 12517 Method: FTMS; HCD Score: 155.4 m/z: 1026.93 Gene names: UNK

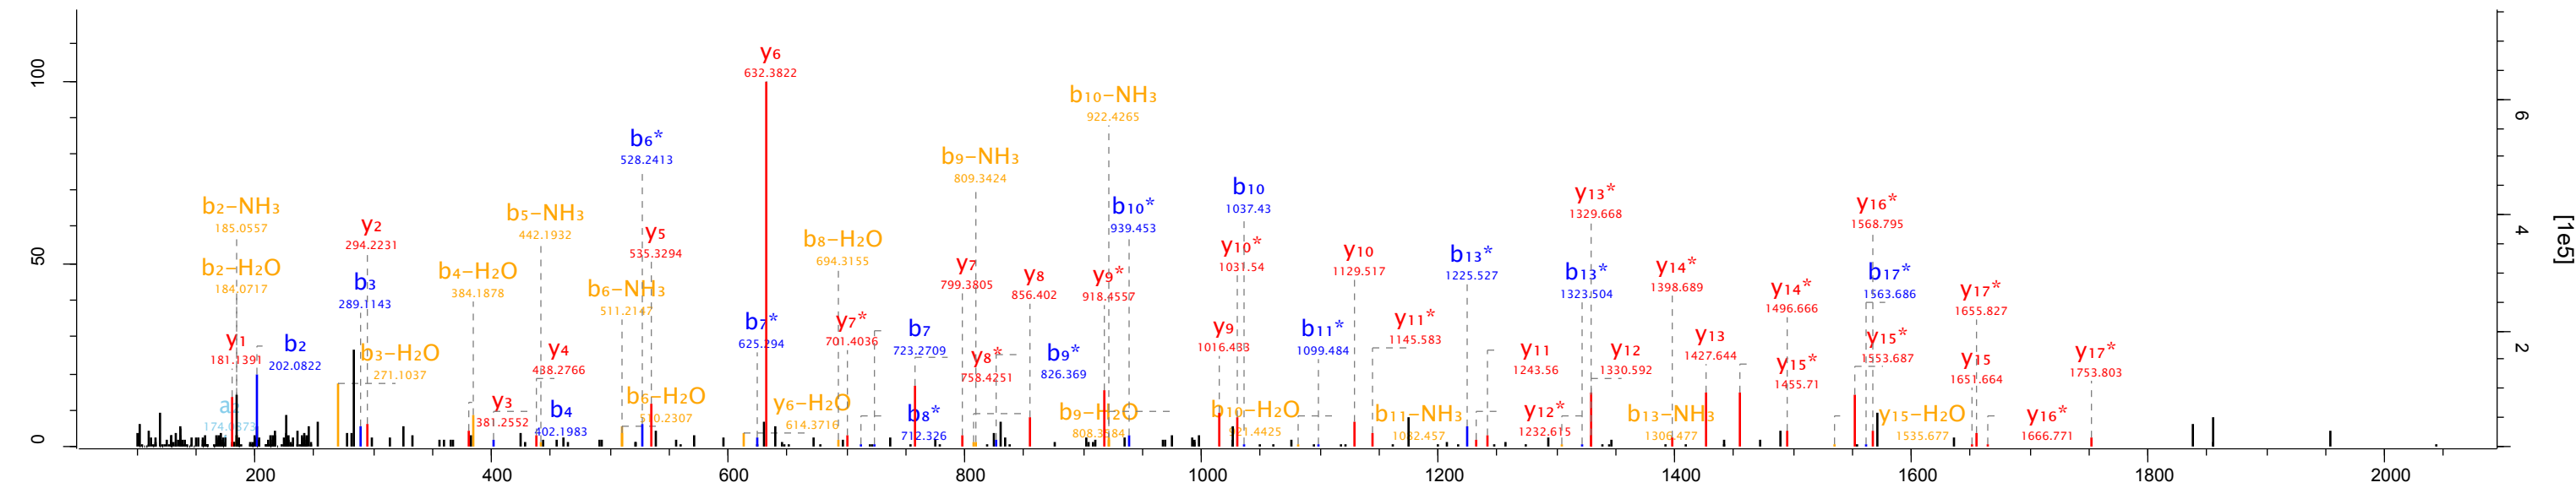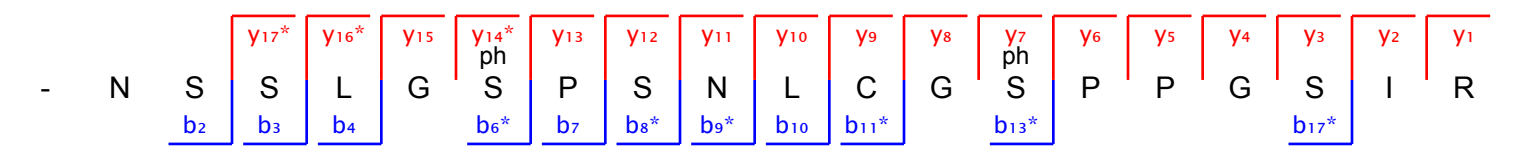

Raw file 20171215\_MaS\_33SR\_LMH\_phospho2\_03 Scan 16247 Method FTMS; HCD Score 87.68 m/z 718.83 Gene names SLC26A6

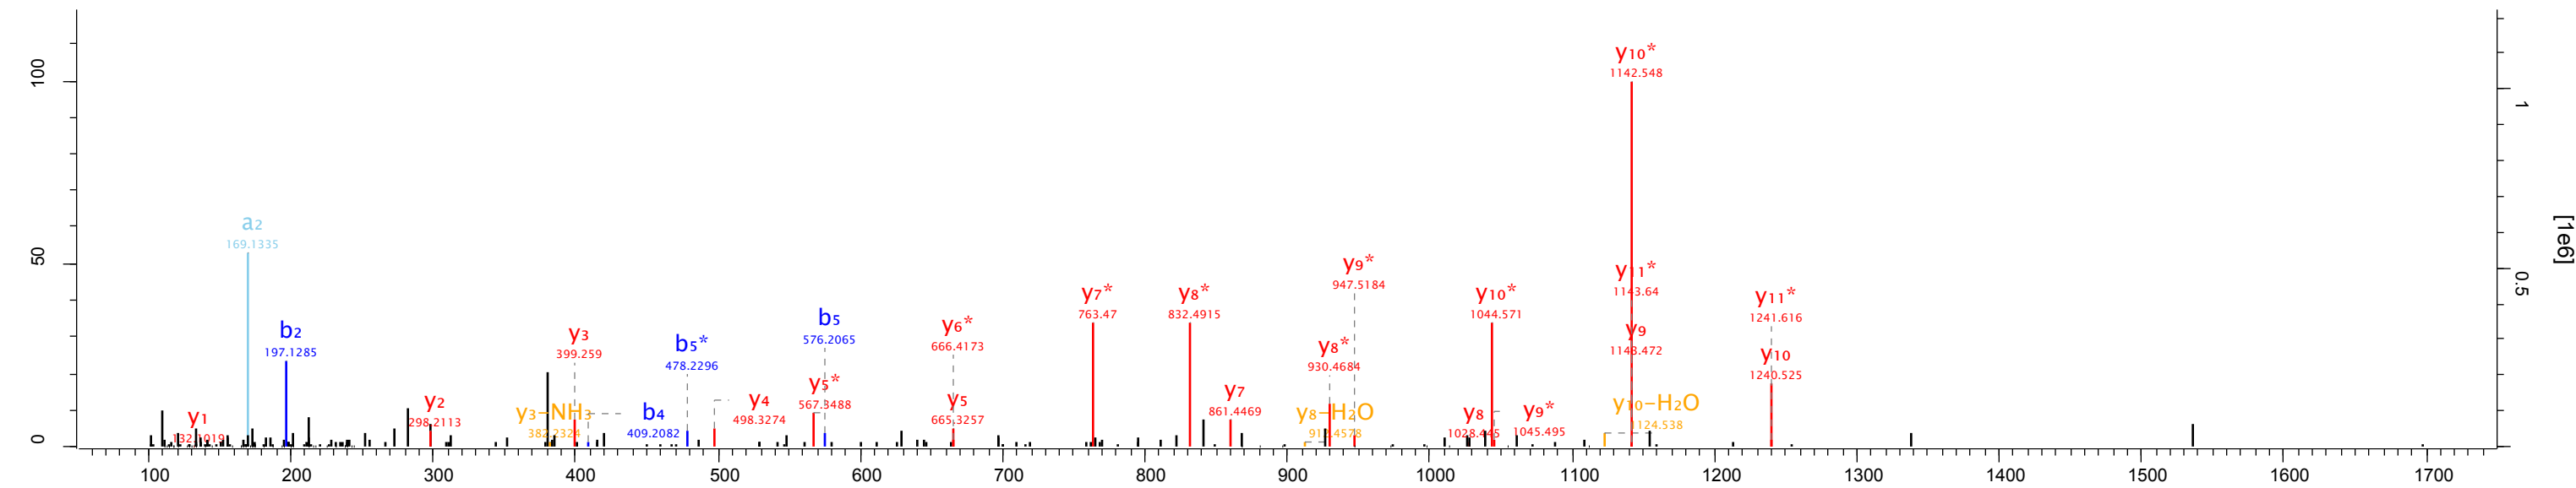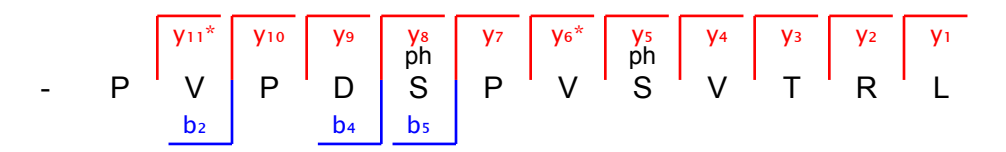

Raw file: 20171215\_MaS\_33SR\_LMH\_phospho2\_03  
 Scan: 3407 Method: FTMS; HCD Score: 84.17 m/z: 578.77 Gene names: C17orf85

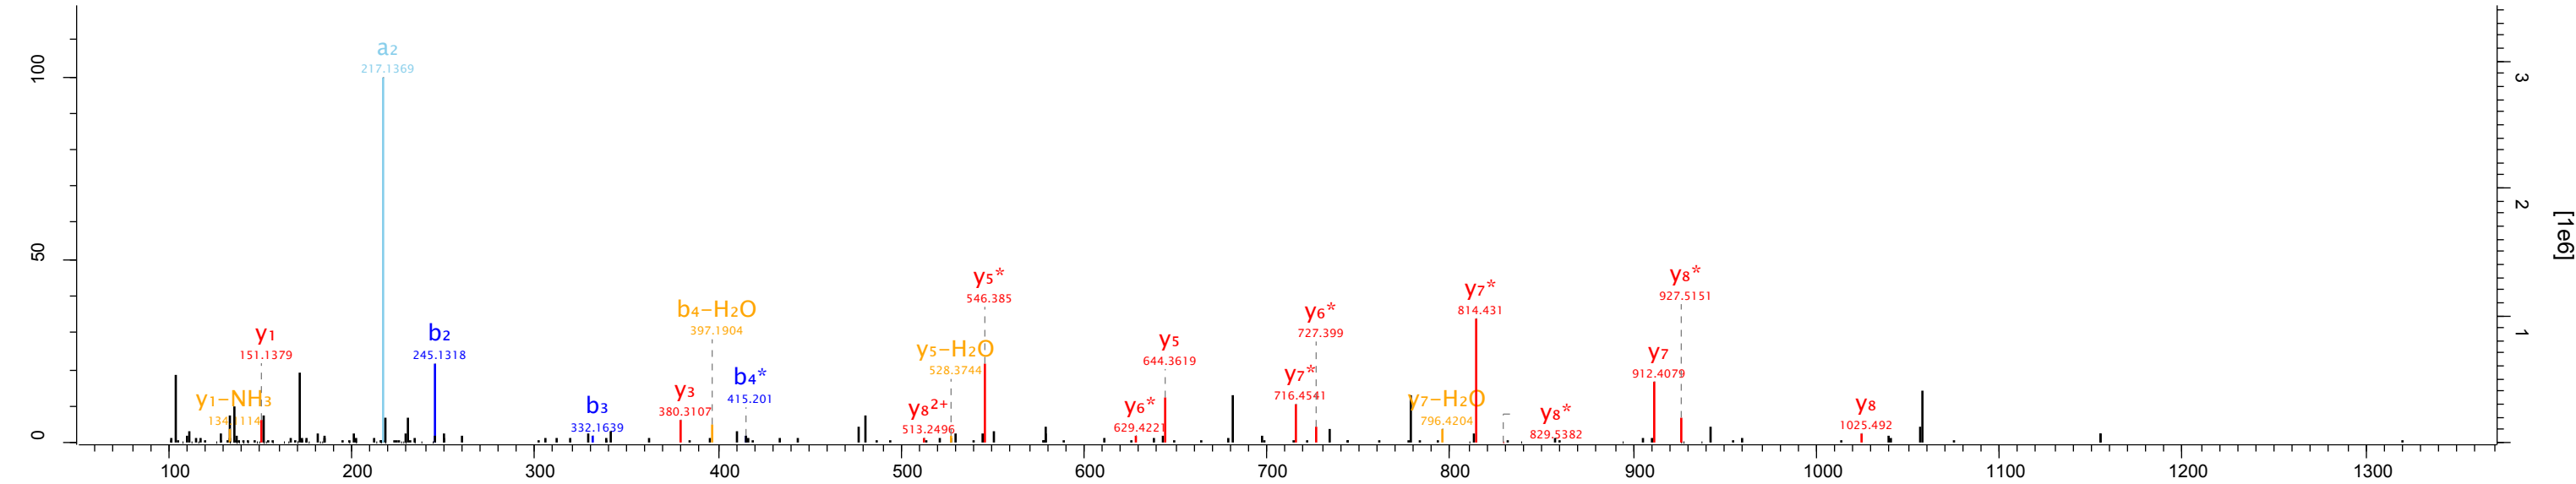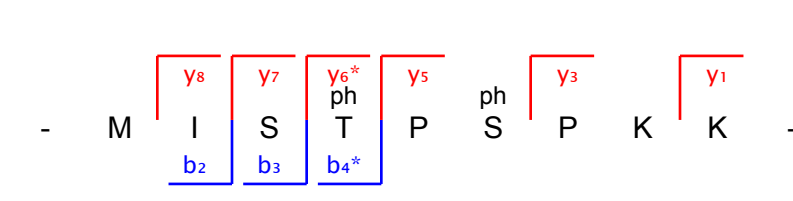

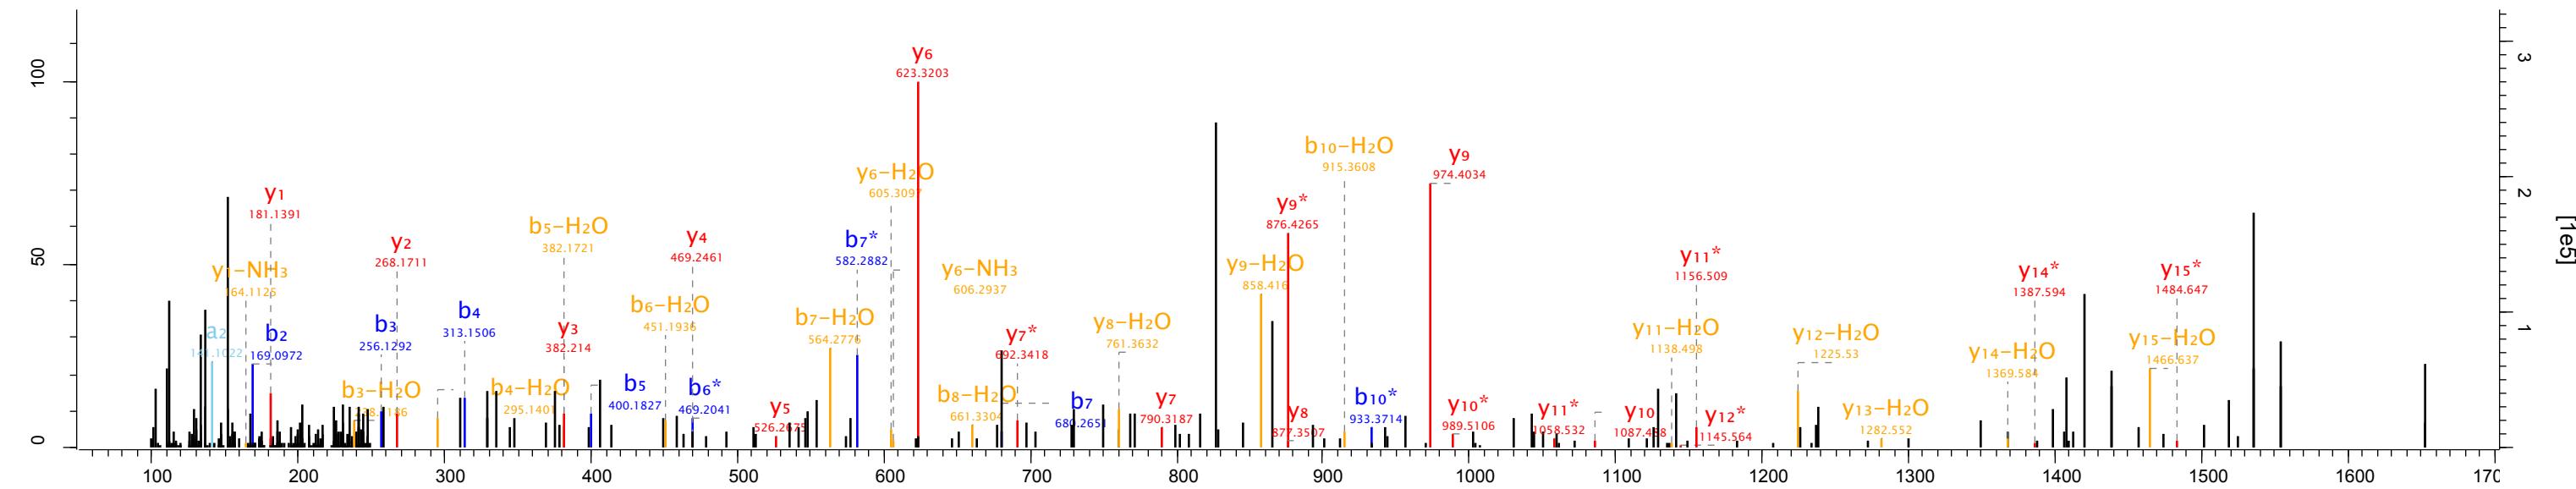

- A P S G S S L P S P G S N S R -

b<sub>2</sub> b<sub>3</sub> b<sub>4</sub> b<sub>5</sub> b<sub>6</sub>\* b<sub>7</sub> b<sub>10</sub>\*

y<sub>15</sub>\* y<sub>14</sub>\* y<sub>12</sub>\* y<sub>11</sub>\* ph S y<sub>10</sub> y<sub>9</sub> y<sub>8</sub> y<sub>7</sub> ph S y<sub>6</sub> y<sub>5</sub> y<sub>4</sub> y<sub>3</sub> y<sub>2</sub> y<sub>1</sub>

Raw file: 20171215\_MaS\_33SR\_LMH\_phospho2\_03  
 Scan: 5087 Method: FTMS; HCD Score: 84.95 m/z: 589.26 Gene names: E2F8

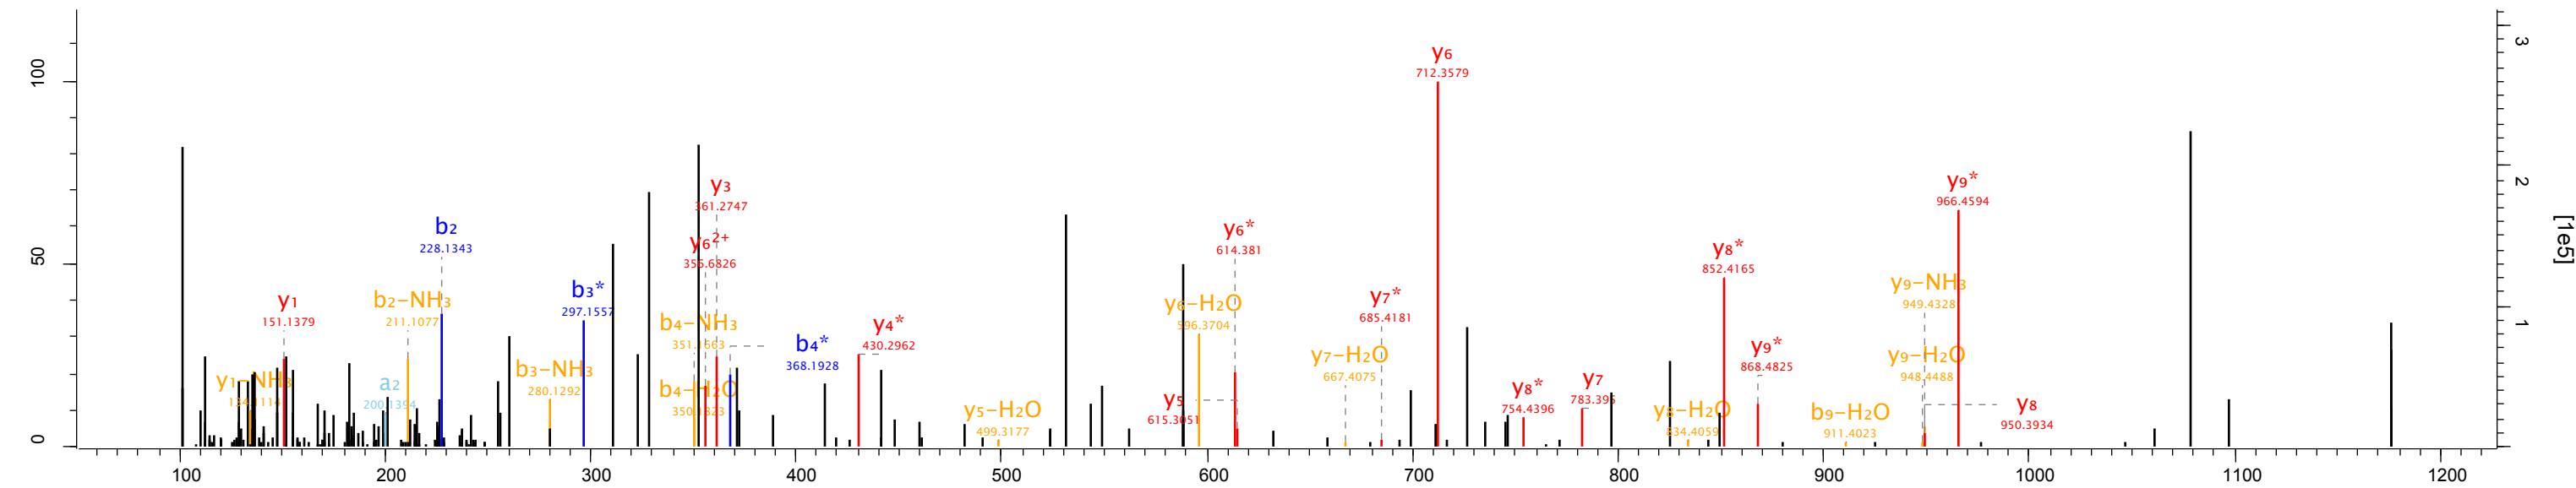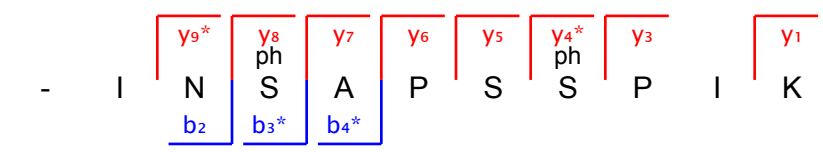



Raw file 20171215\_MaS\_33SR\_LMH\_phospho2\_03 Scan 6297 Method FTMS; HCD Score 84.75 m/z 602.77 Gene names BRPF3

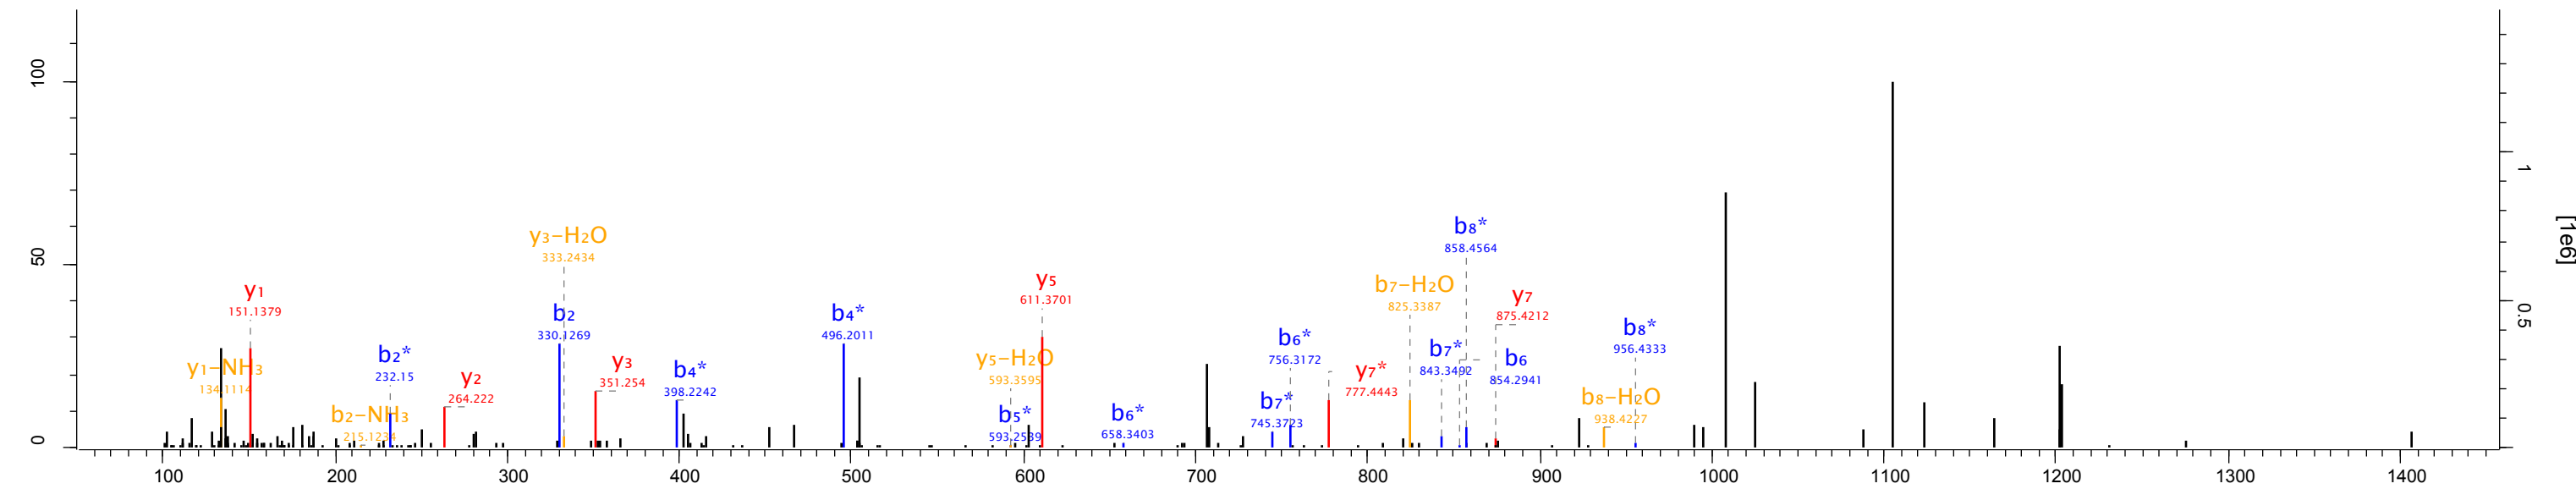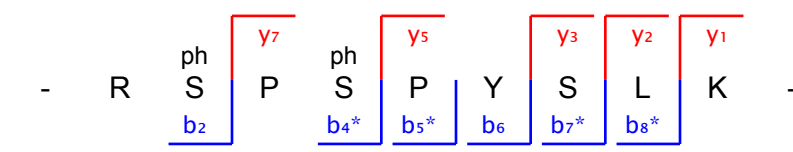

Raw file  
20171215\_MaS\_33SR\_LMH\_phospho2\_03

Scan 9477 Method FTMS; HCD Score 98.39 m/z 911.04 Gene names ZNF446

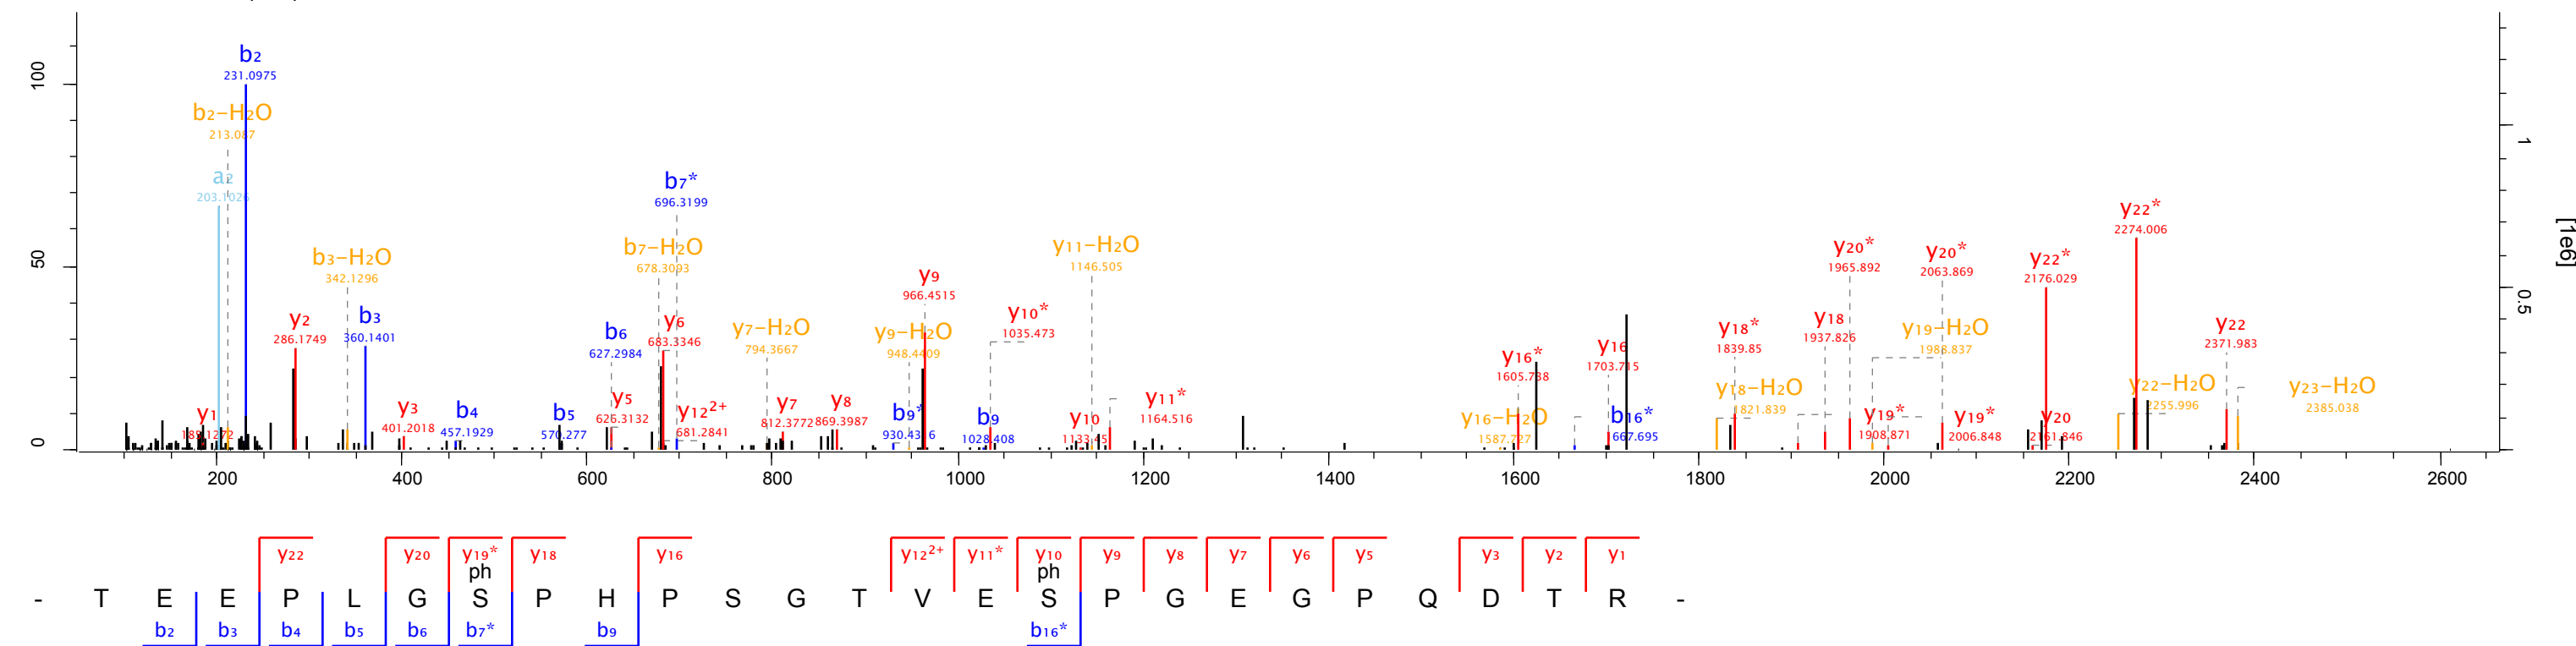

Raw file: 20171215\_MaS\_33SR\_LMH\_phospho2\_03  
 Scan: 9887 Method: FTMS; HCD Score: 155.16 m/z: 1027.93 Gene names: GLE1

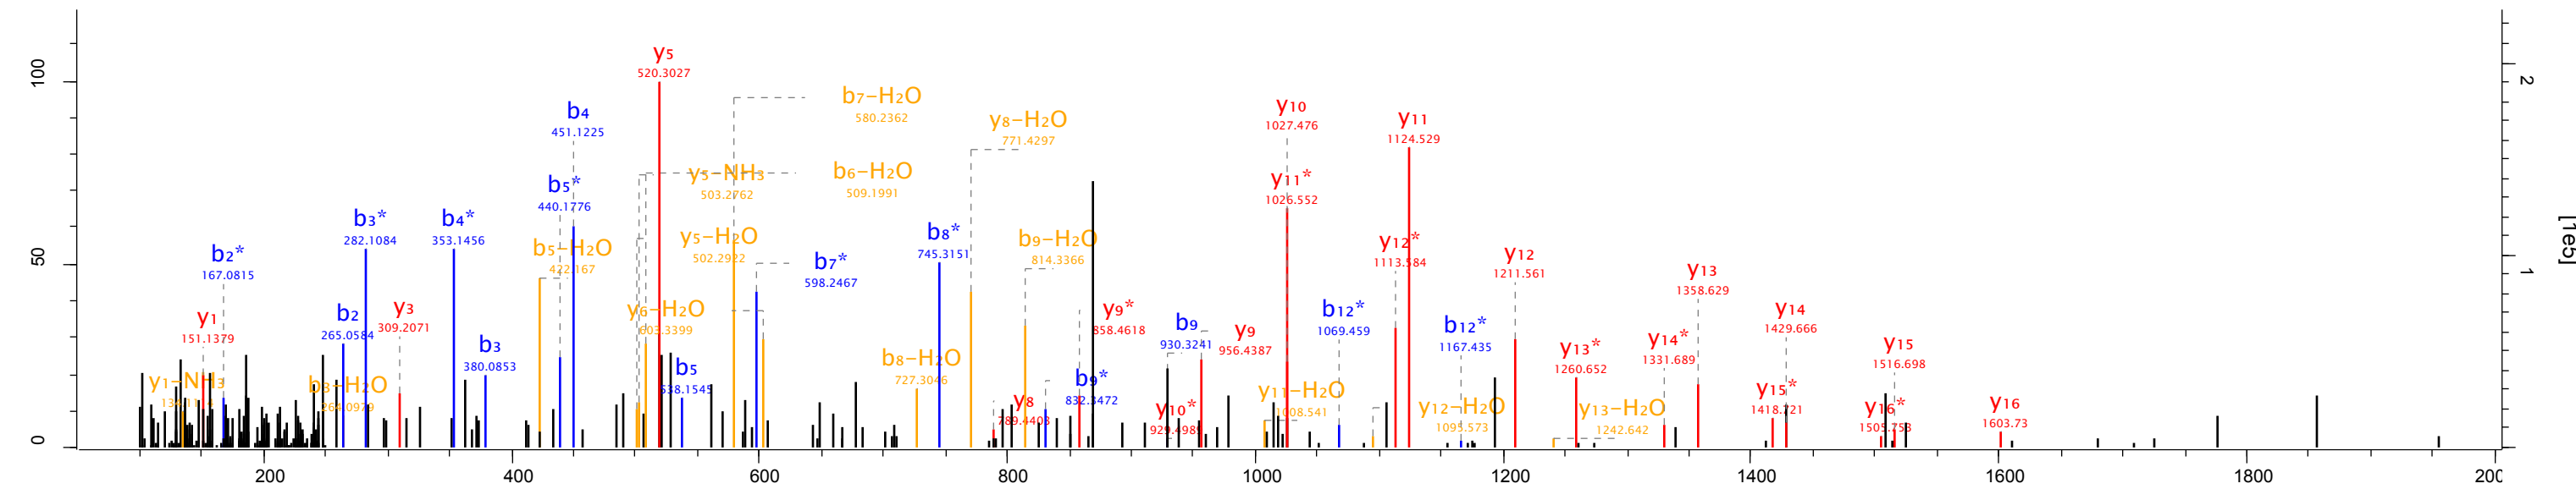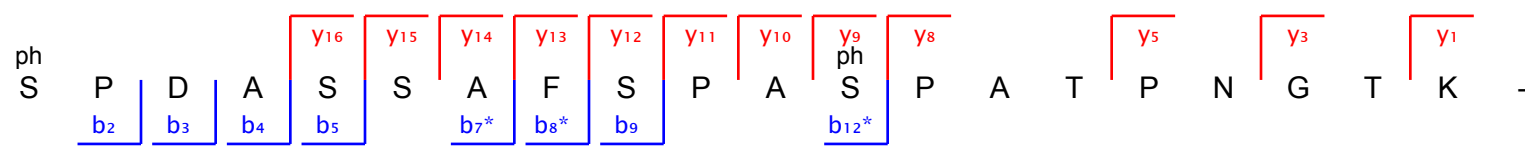

Raw file 20171215\_MaS\_33SR\_LMH\_phospho2\_08 Scan 5817 Method FTMS; HCD Score 61.41 m/z 643.31 Gene names STIM2

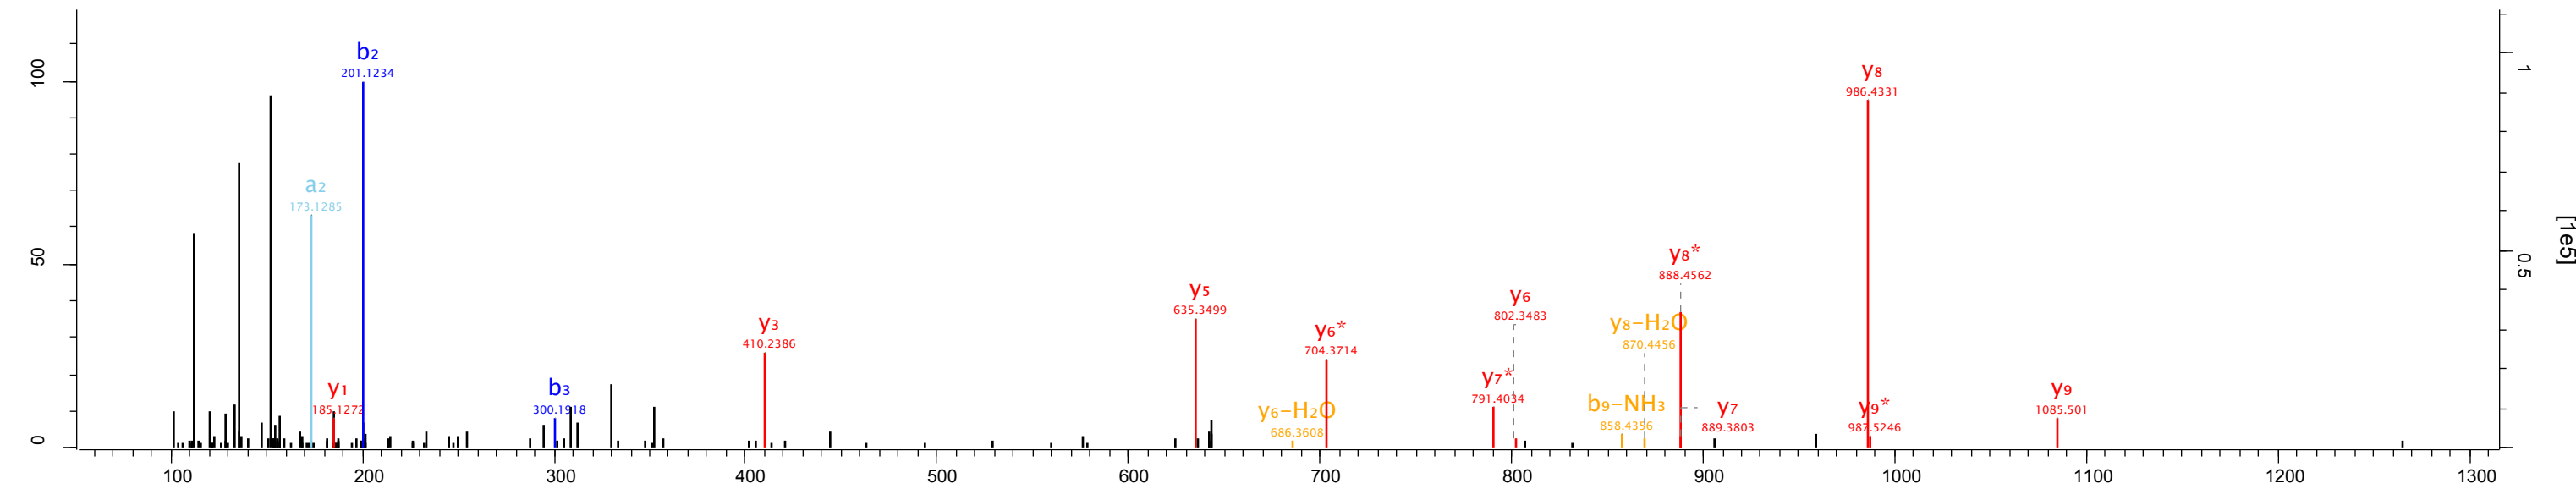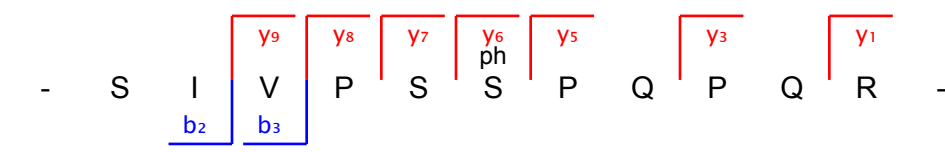

Raw file: 20171215\_MaS\_33SR\_LMH\_proteome\_01  
 Scan: 112027 Method: FTMS; HCD Score: 53.24 m/z: 623.37 Gene names: CNOT7

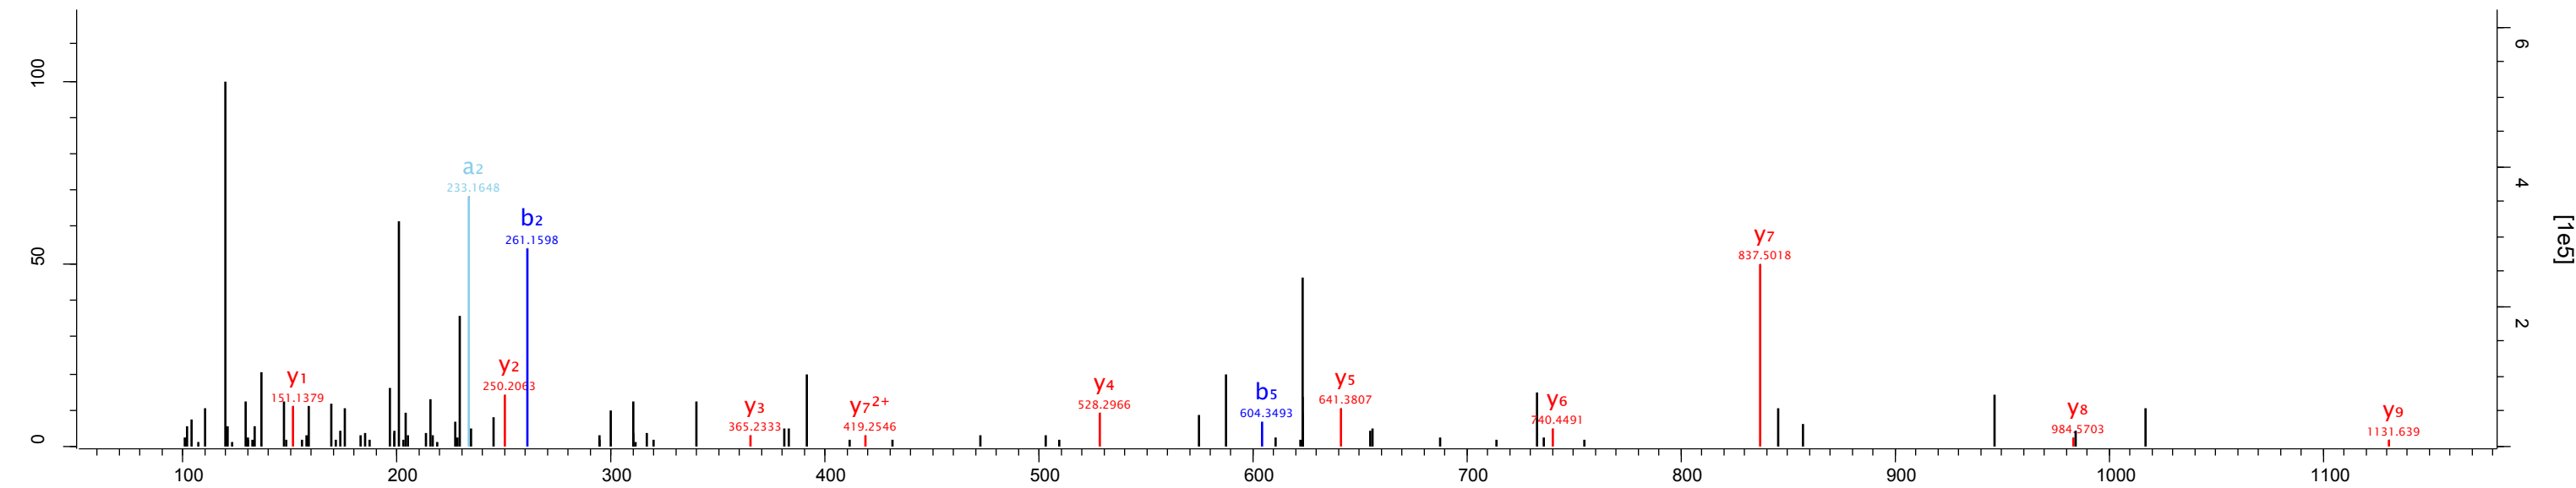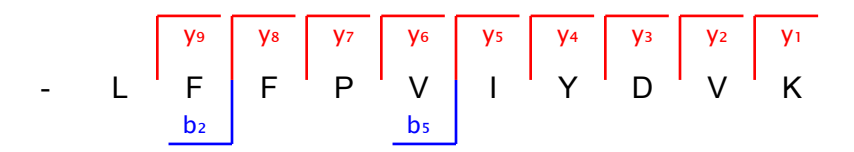

Raw file 20171215\_MaS\_33SR\_LMH\_proteome\_01 Scan 113677 Method FTMS; HCD Score 53.3 m/z 724.43 Gene names UBAC1

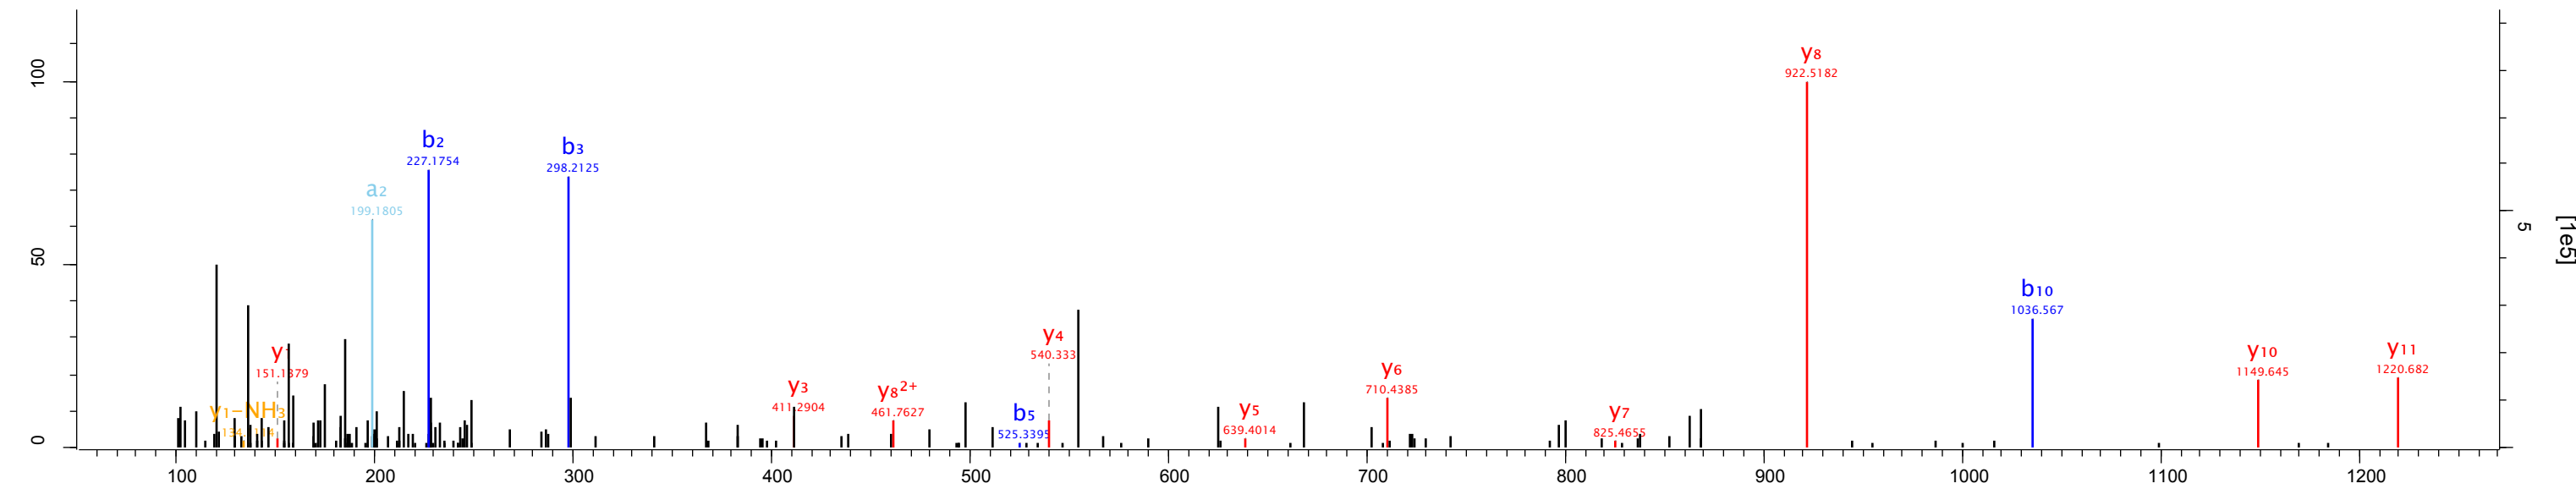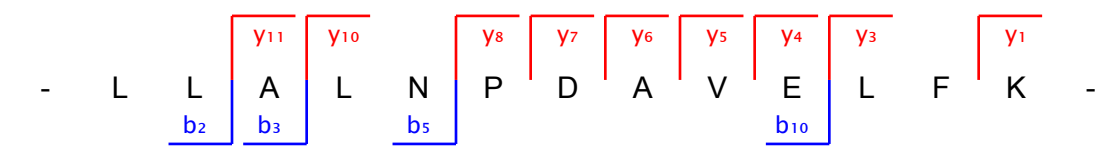

Raw file 20171215\_MaS\_33SR\_LMH\_proteome\_01 Scan 115267 Method FTMS; HCD Score 46.88 m/z 715.4

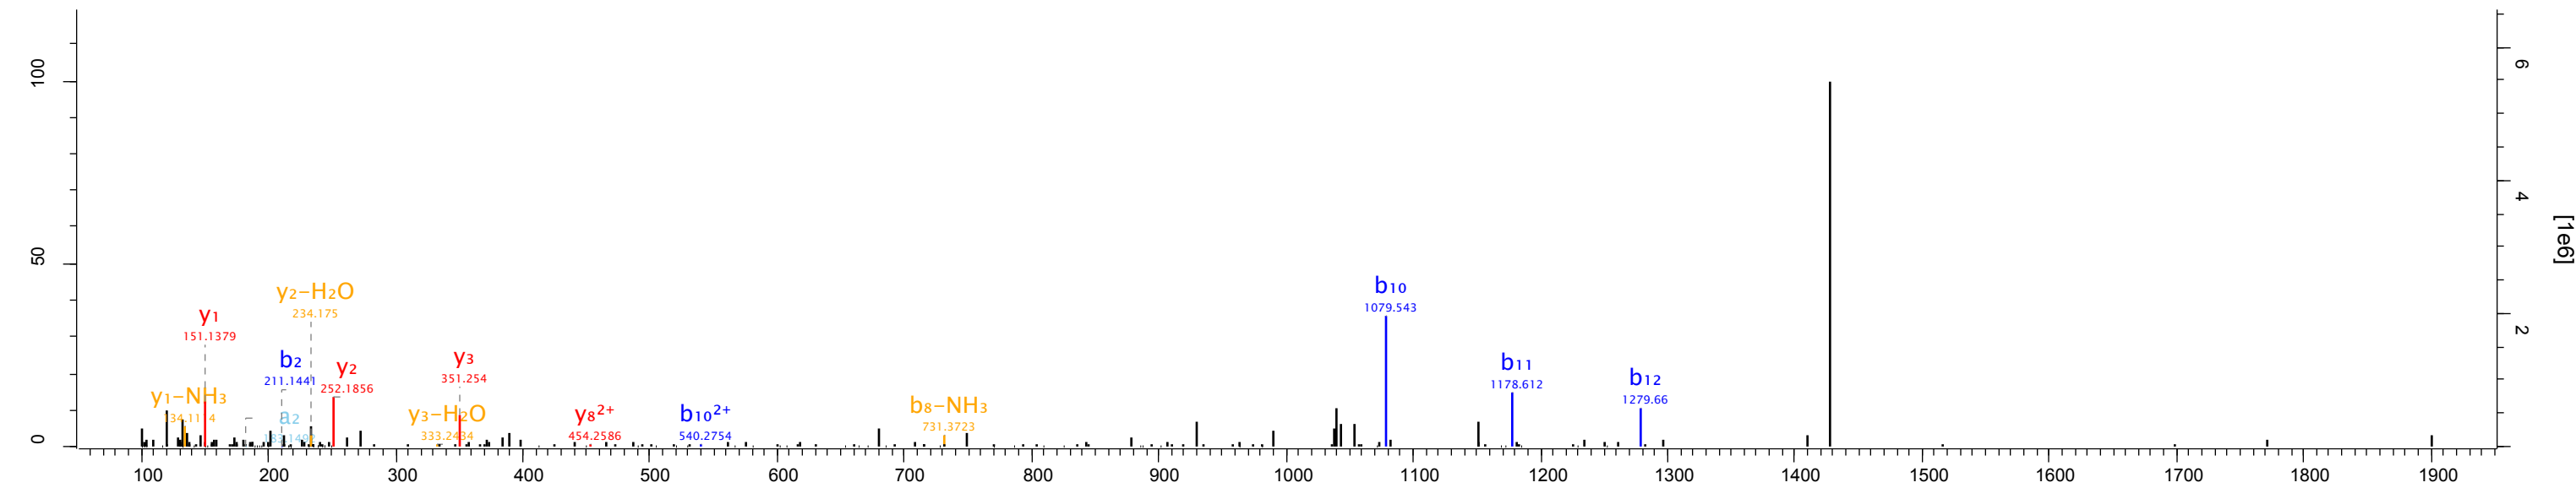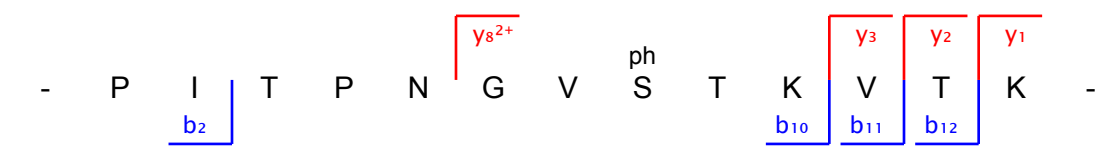

Raw file: 20171215\_MaS\_33SR\_LMH\_proteome\_01  
 Scan: 116917  
 Method: FTMS; HCD  
 Score: 79.35  
 m/z: 823.44  
 Gene names: RNASEH2C

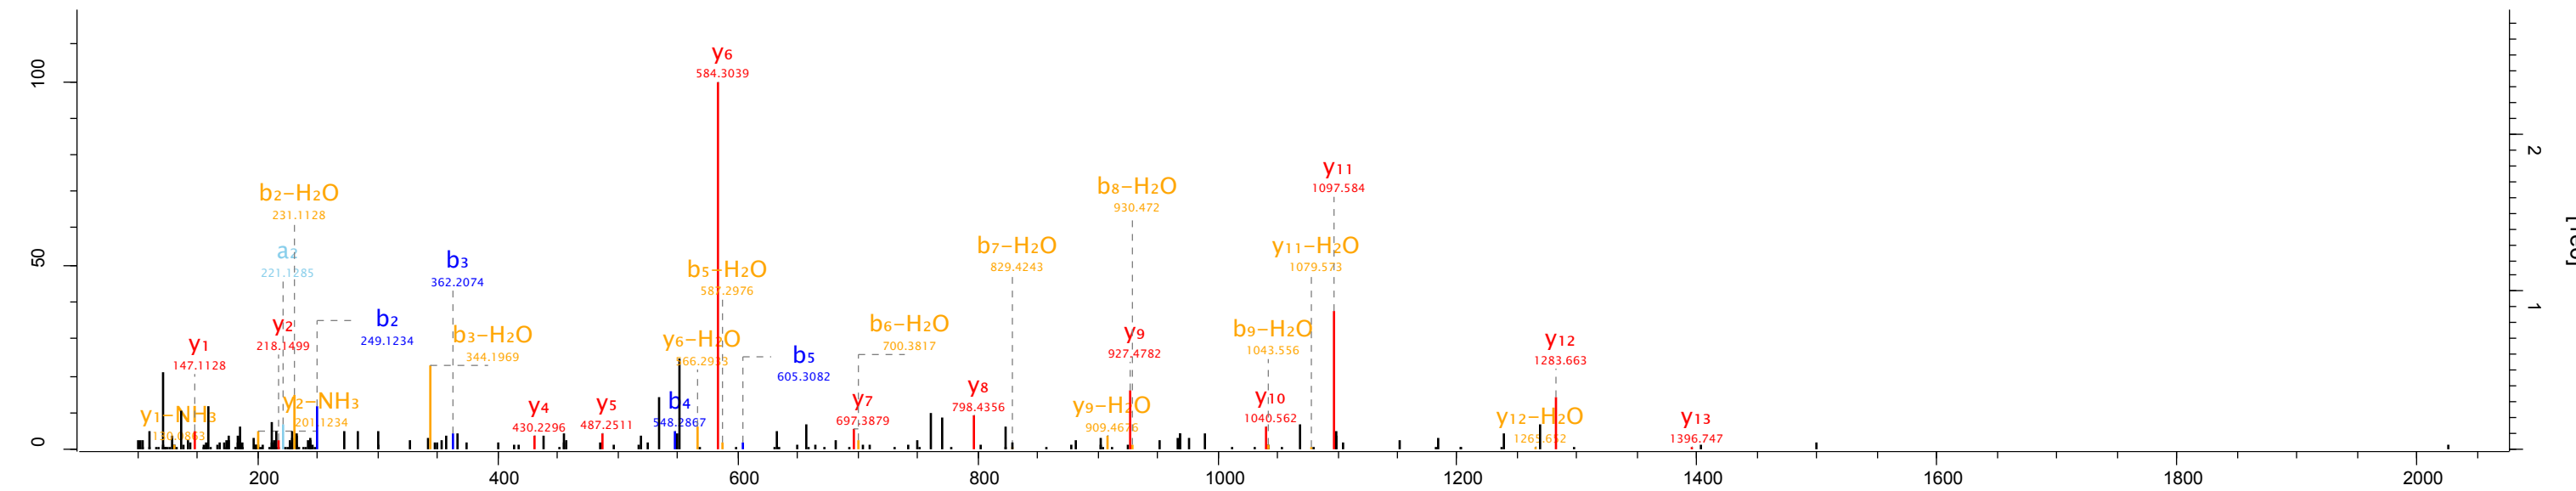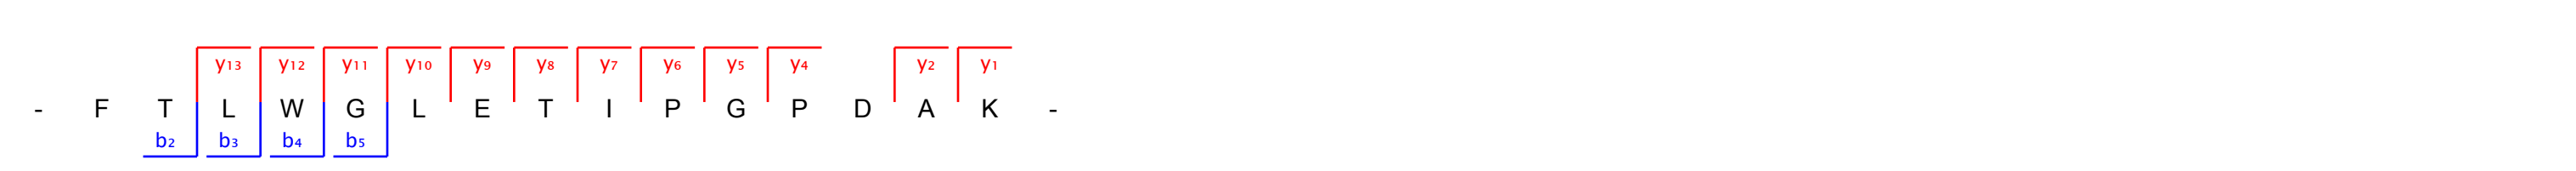



Raw file 20171215\_MaS\_33SR\_LMH\_proteome\_01 Scan 120137 Method FTMS; HCD Score 81.88 m/z 748.43 Gene names C19orf25

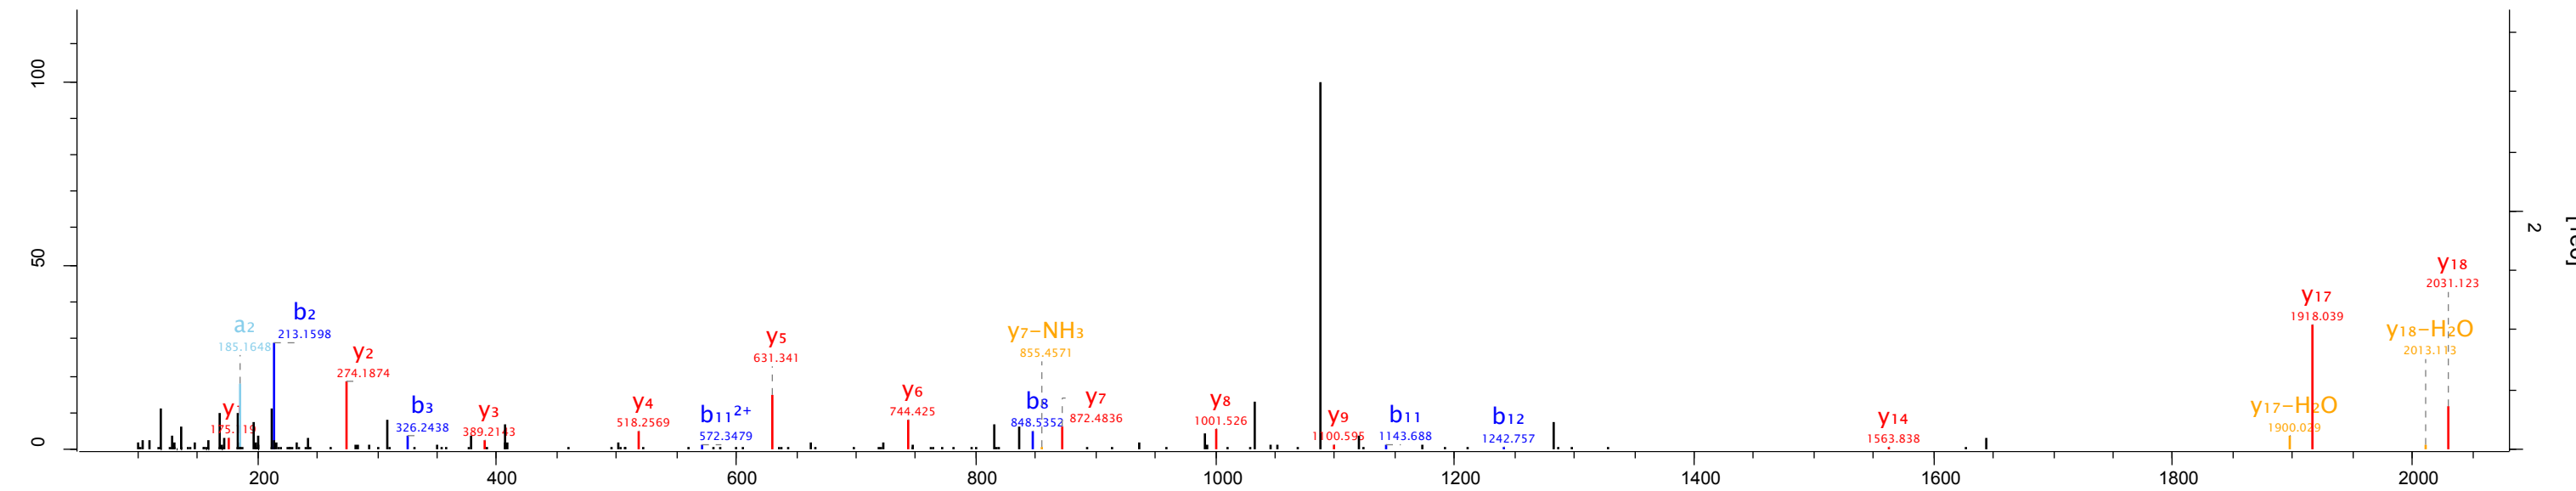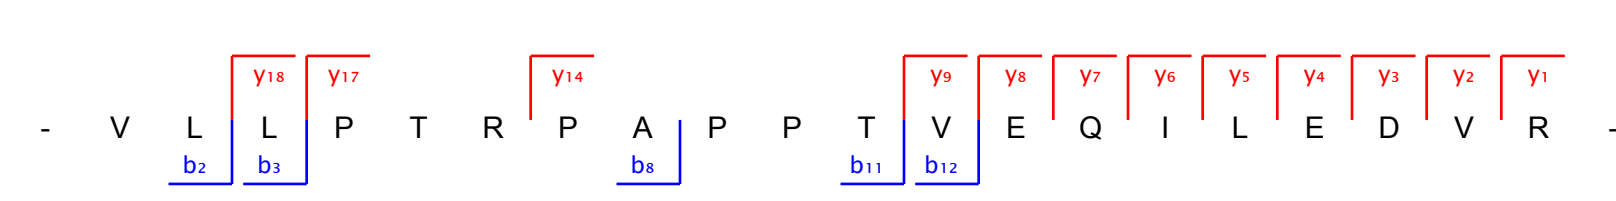

Raw file: 20171215\_MaS\_33SR\_LMH\_proteome\_01  
 Scan: 120257 Method: FTMS; HCD Score: 50.09 m/z: 524.98 Gene names: NDUFAF4

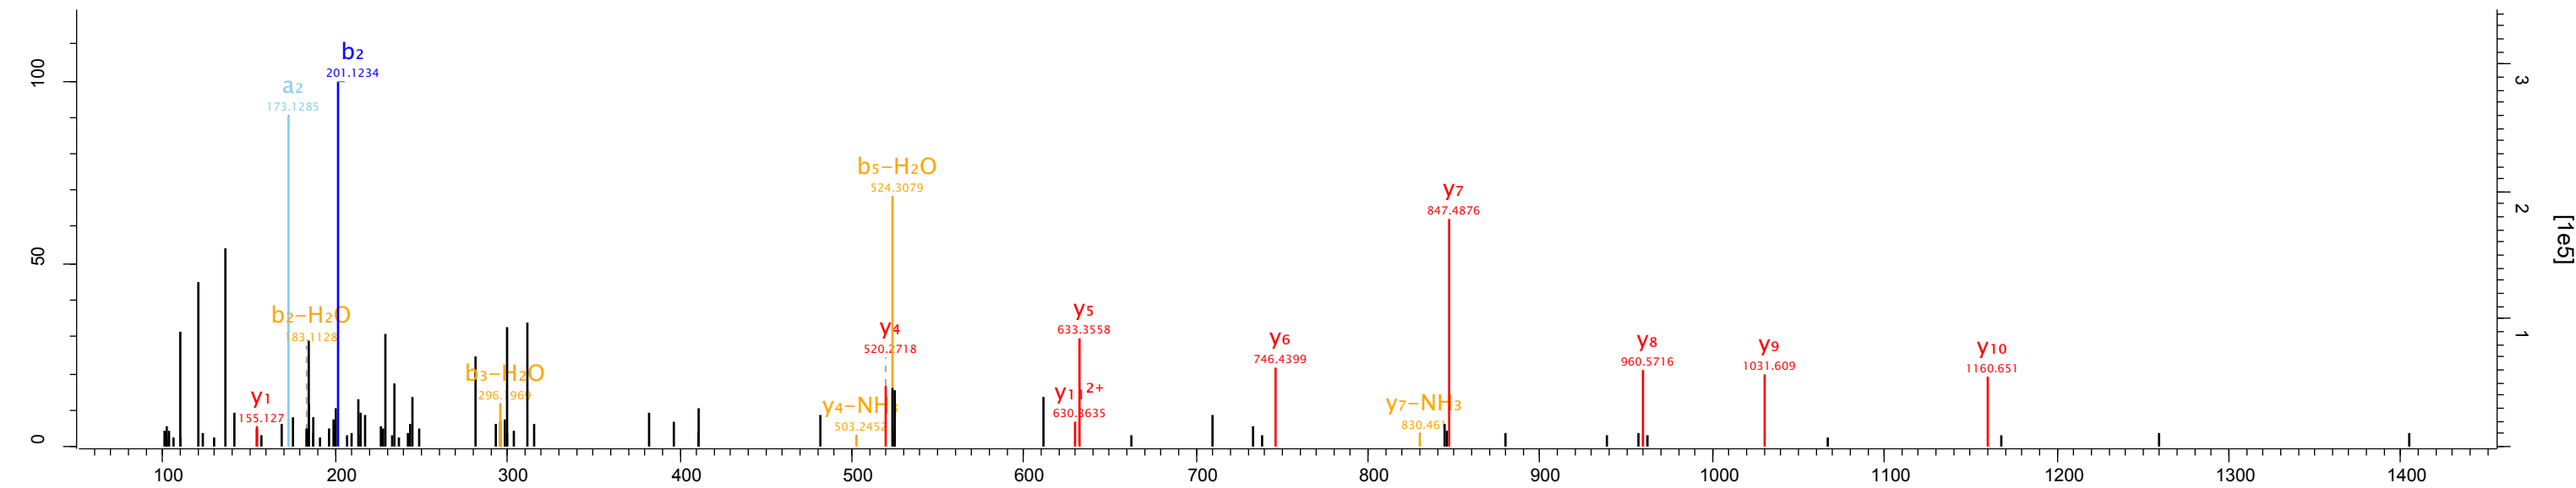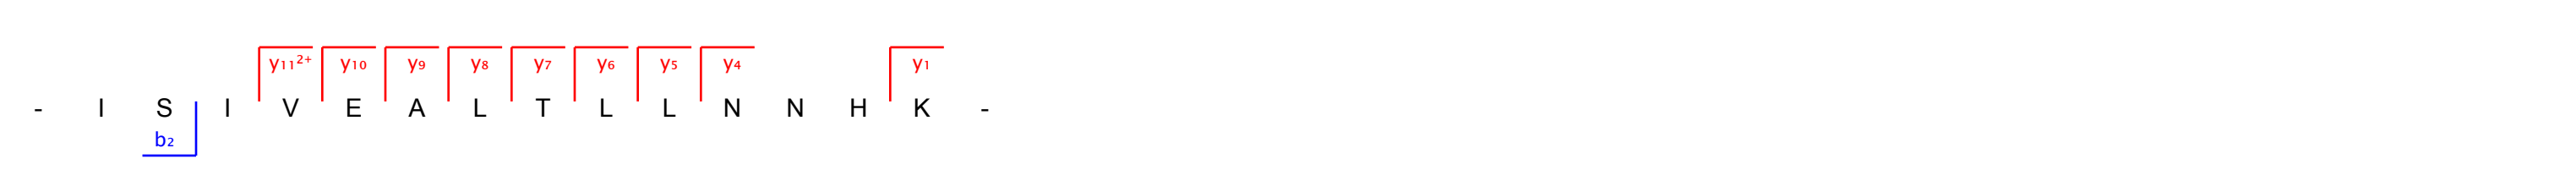

Raw file 20171215\_MaS\_33SR\_LMH\_proteome\_01 Scan 120557 Method FTMS; HCD Score 94.2 m/z 688.69 Gene names IL6ST

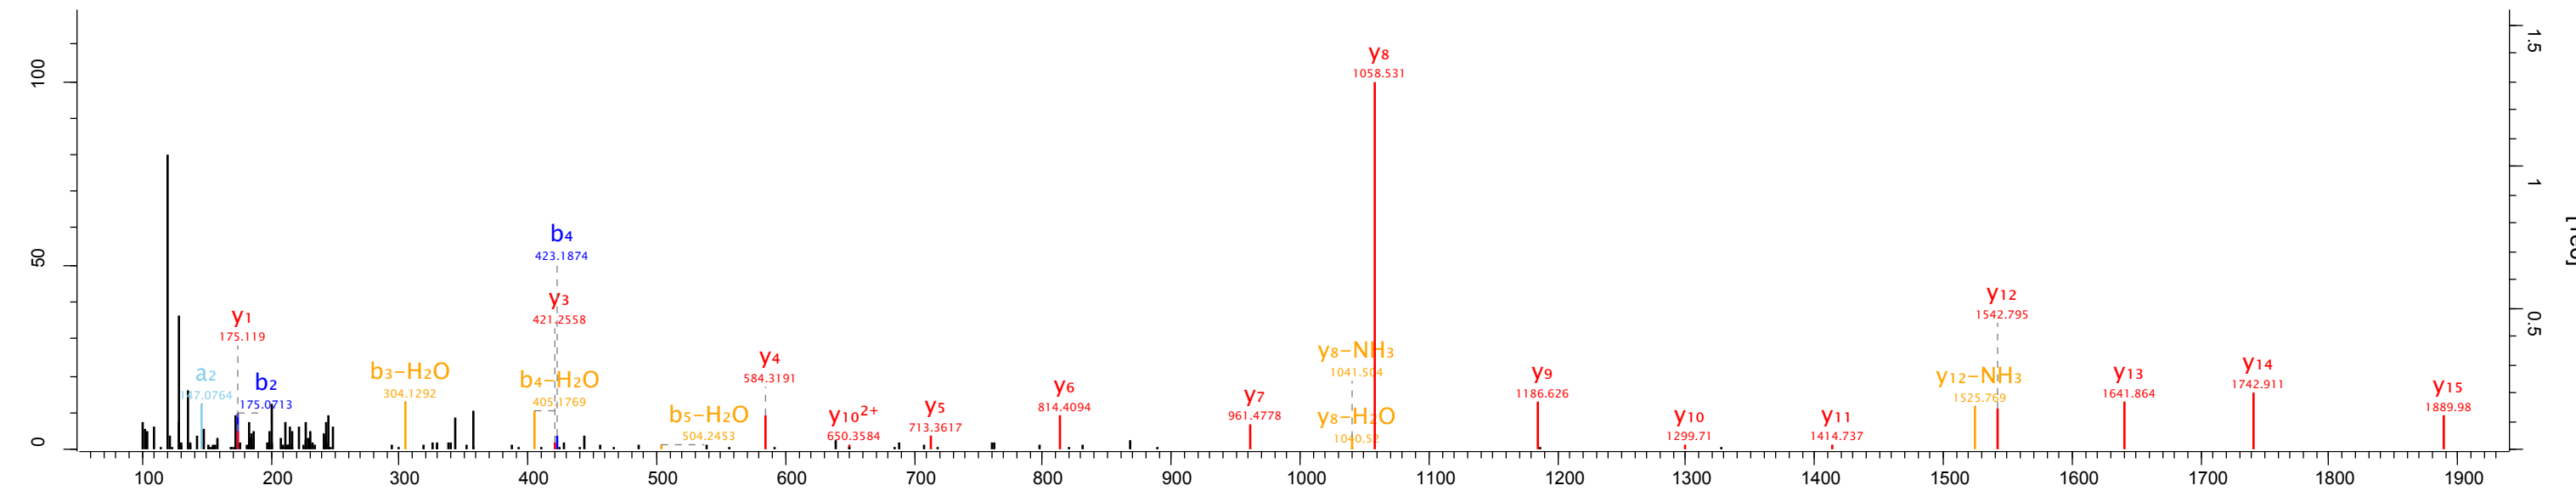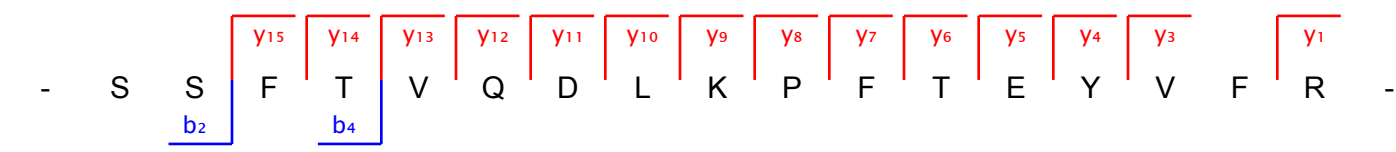

Raw file: 20171215\_MaS\_33SR\_LMH\_proteome\_01  
 Scan: 125607 Method: FTMS; HCD Score: 86.08 m/z: 677.86 Gene names: HAUS8

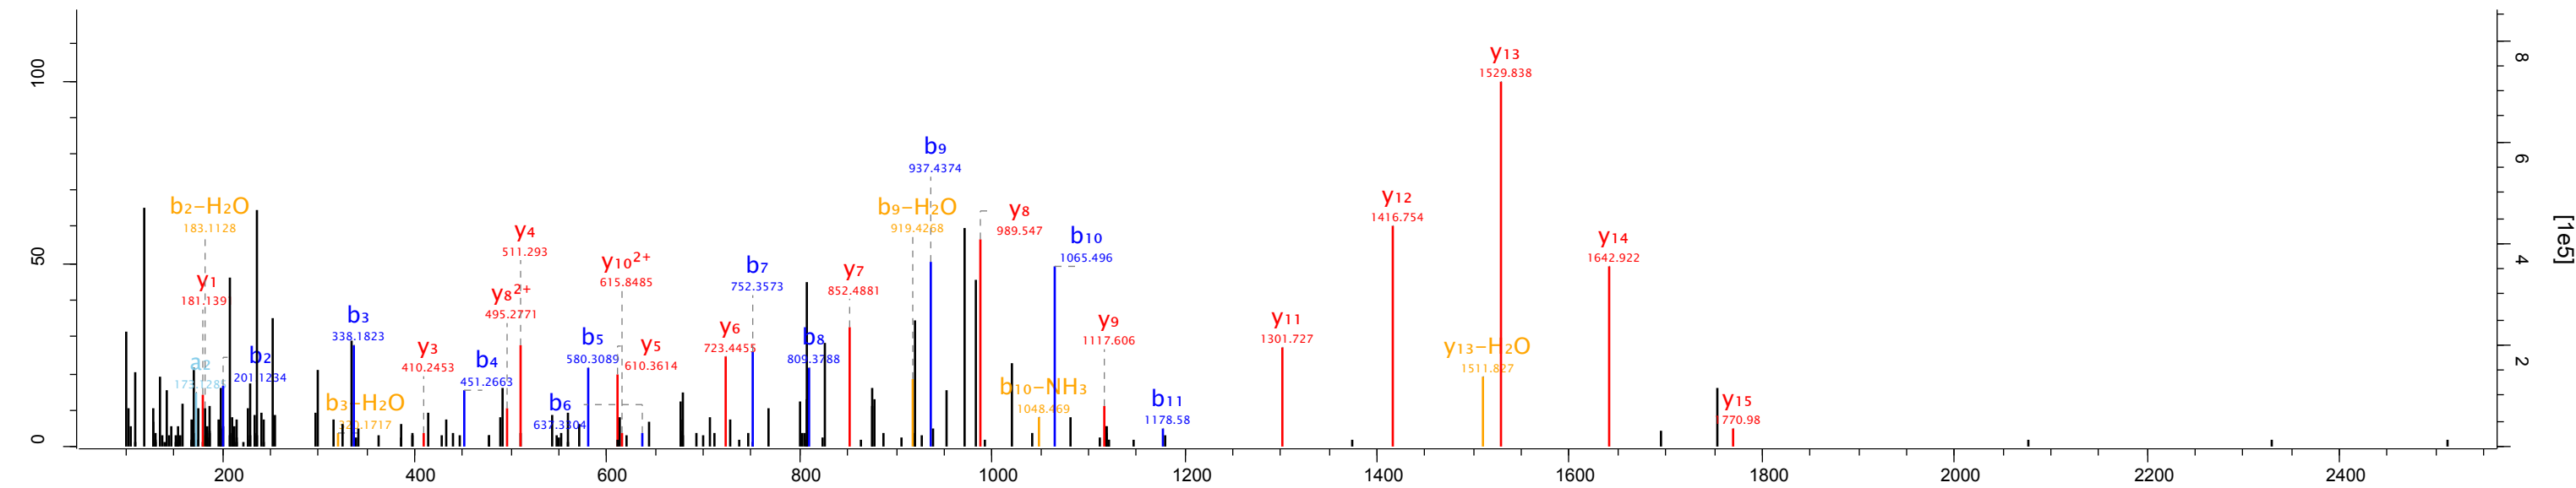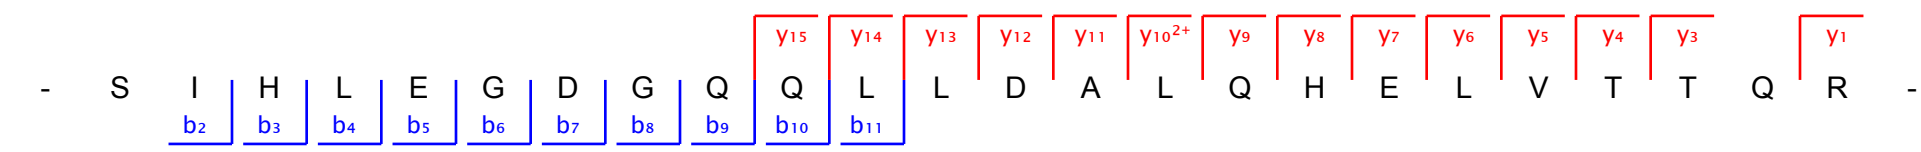

Raw file 20171215\_MaS\_33SR\_LMH\_proteome\_01 Scan 131887 Method FTMS; HCD Score 45.1 m/z 993.22 Gene names POLR3D

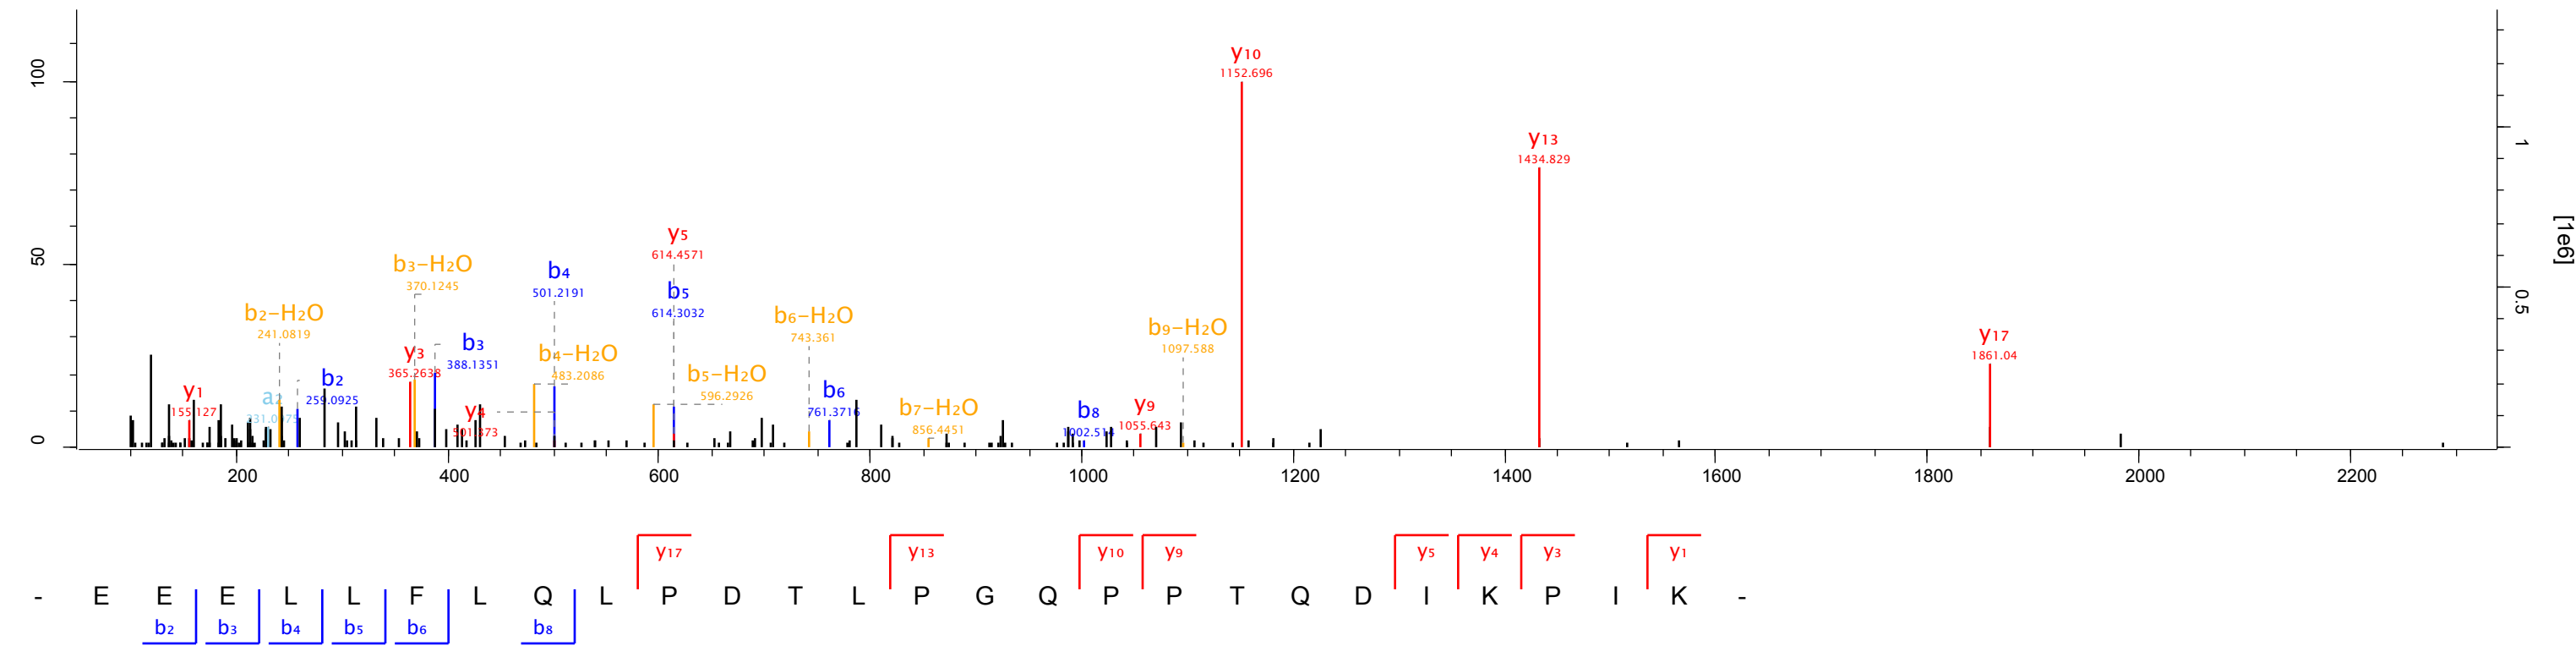

Raw file: 20171215\_MaS\_33SR\_LMH\_proteome\_01  
 Scan: 135897 Method: FTMS; HCD Score: 45.88 m/z: 700.02 Gene names: COL9A3

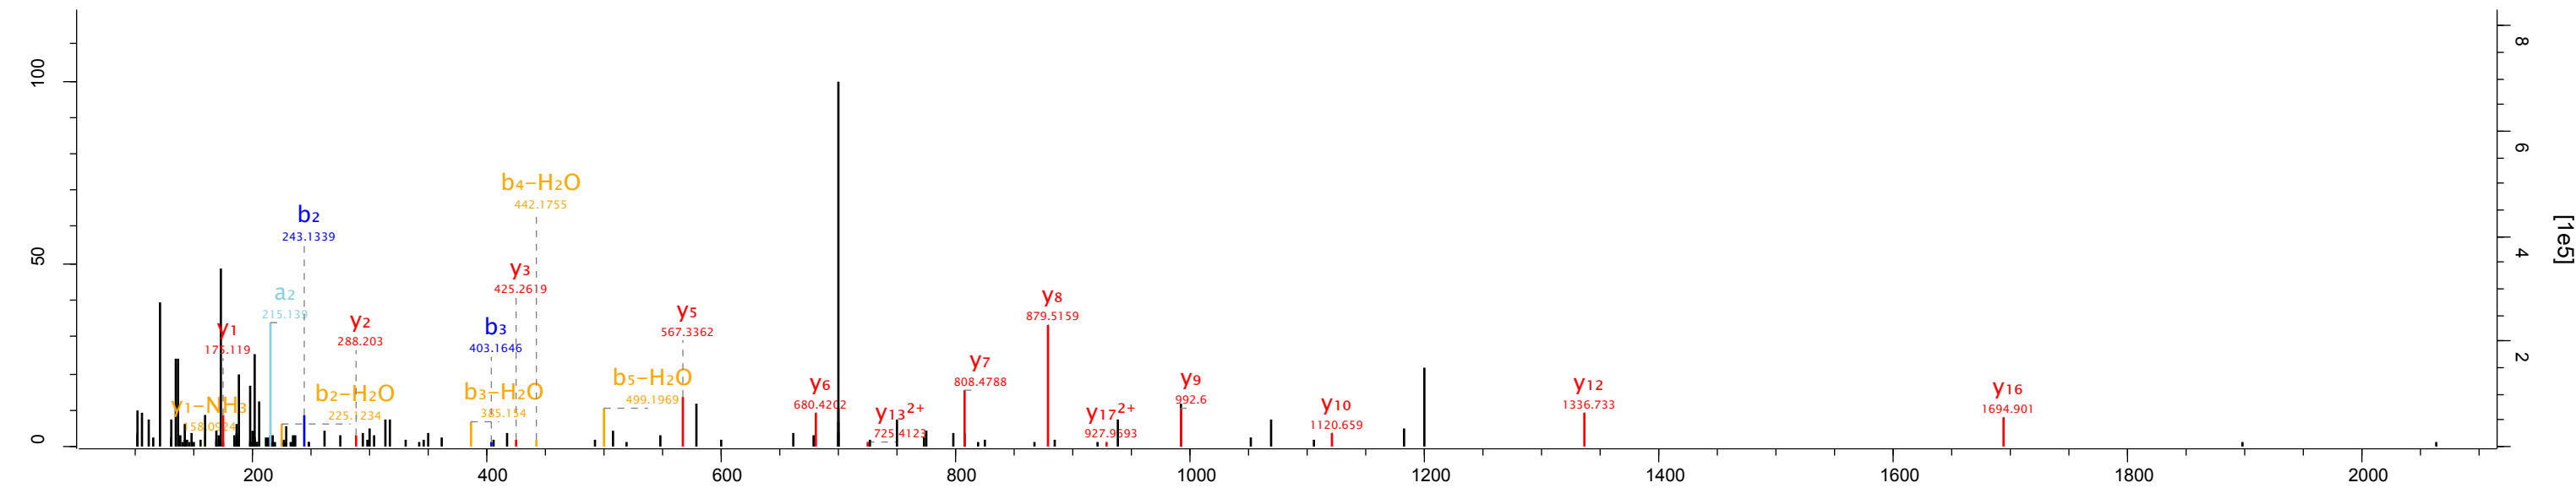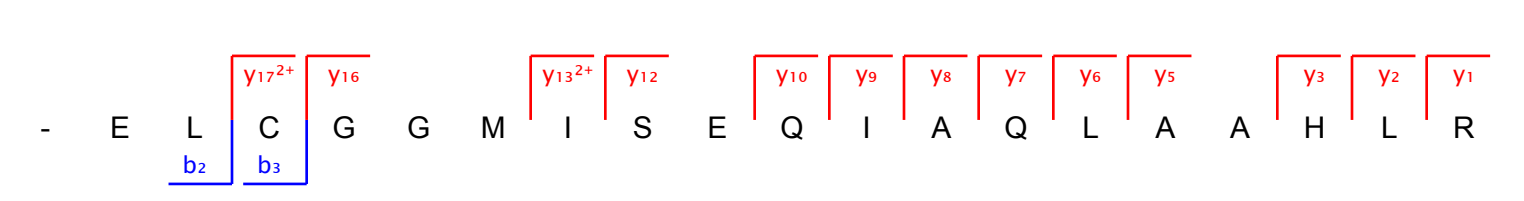

Raw file: 20171215\_MaS\_33SR\_LMH\_proteome\_01  
 Scan: 140547 Method: FTMS; HCD Score: 57.53 m/z: 643.33 Gene names: C16orf62

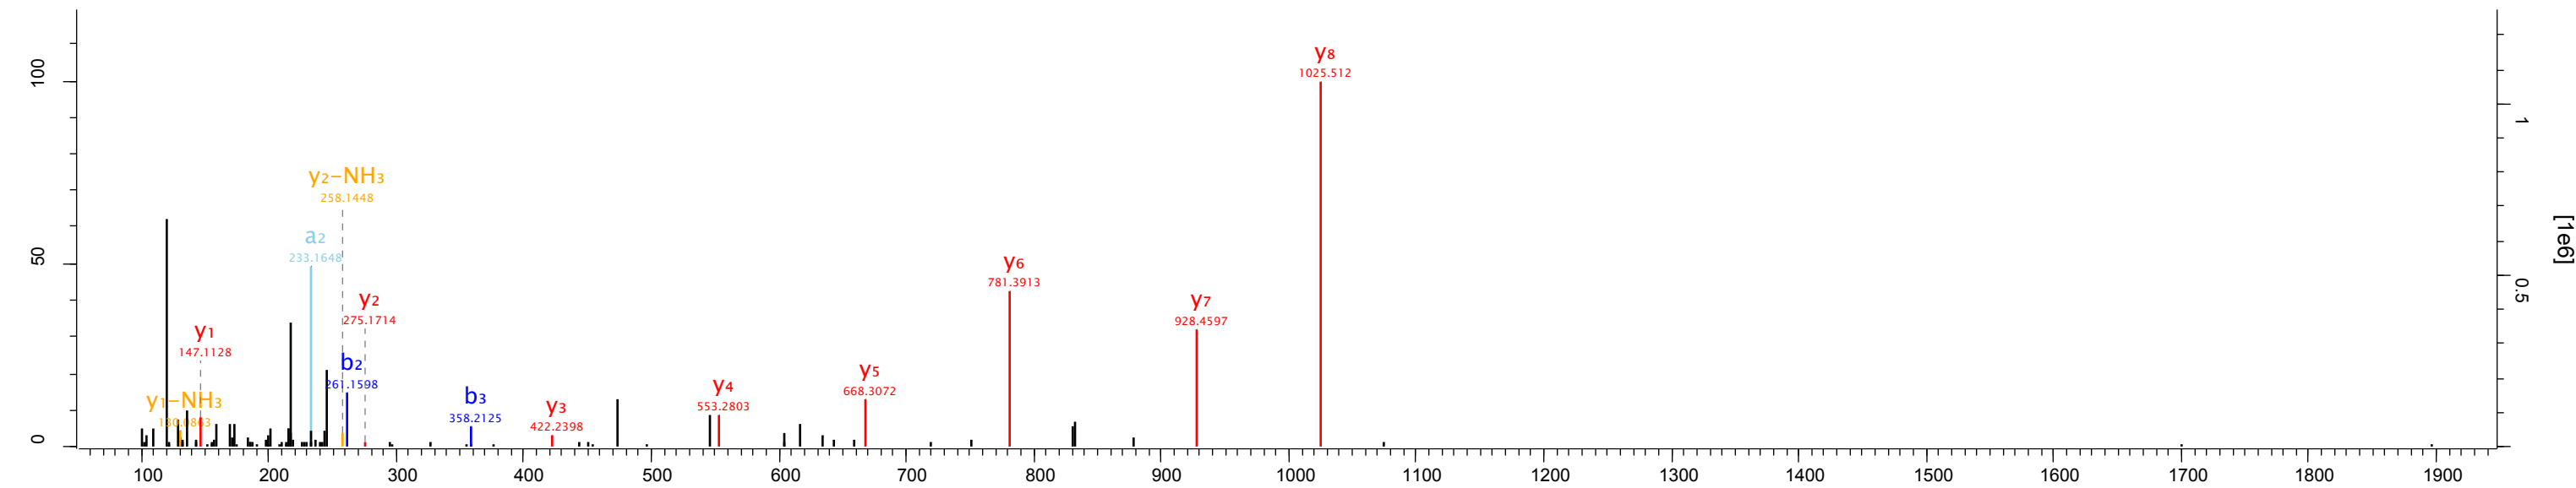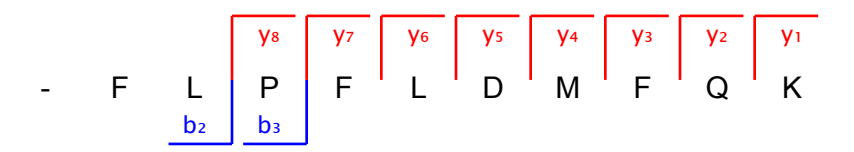

Raw file: 20171215\_MaS\_33SR\_LMH\_proteome\_01  
 Scan: 144057 Method: FTMS; HCD Score: 91.59 m/z: 1059.61 Gene names: GSTZ1

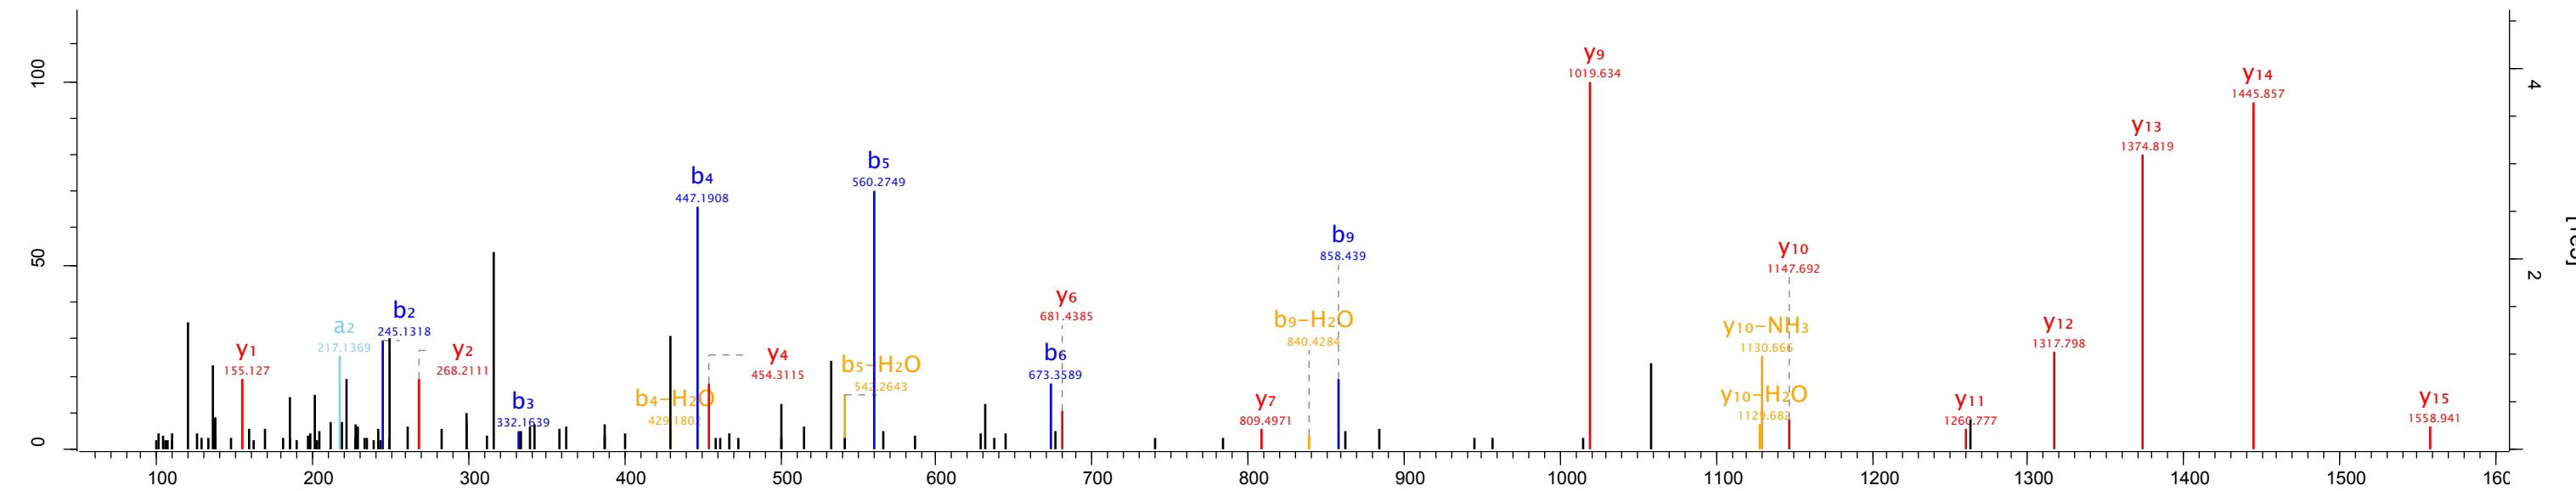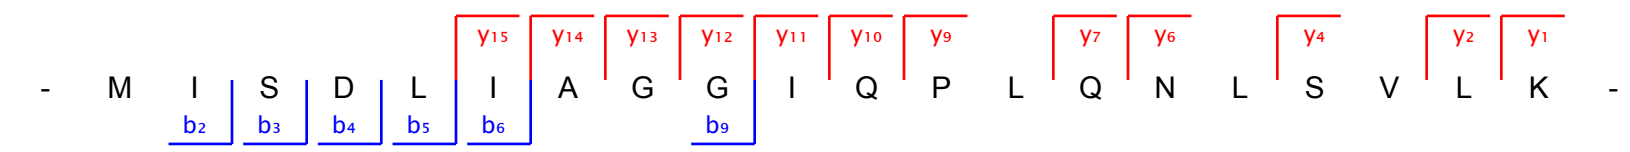



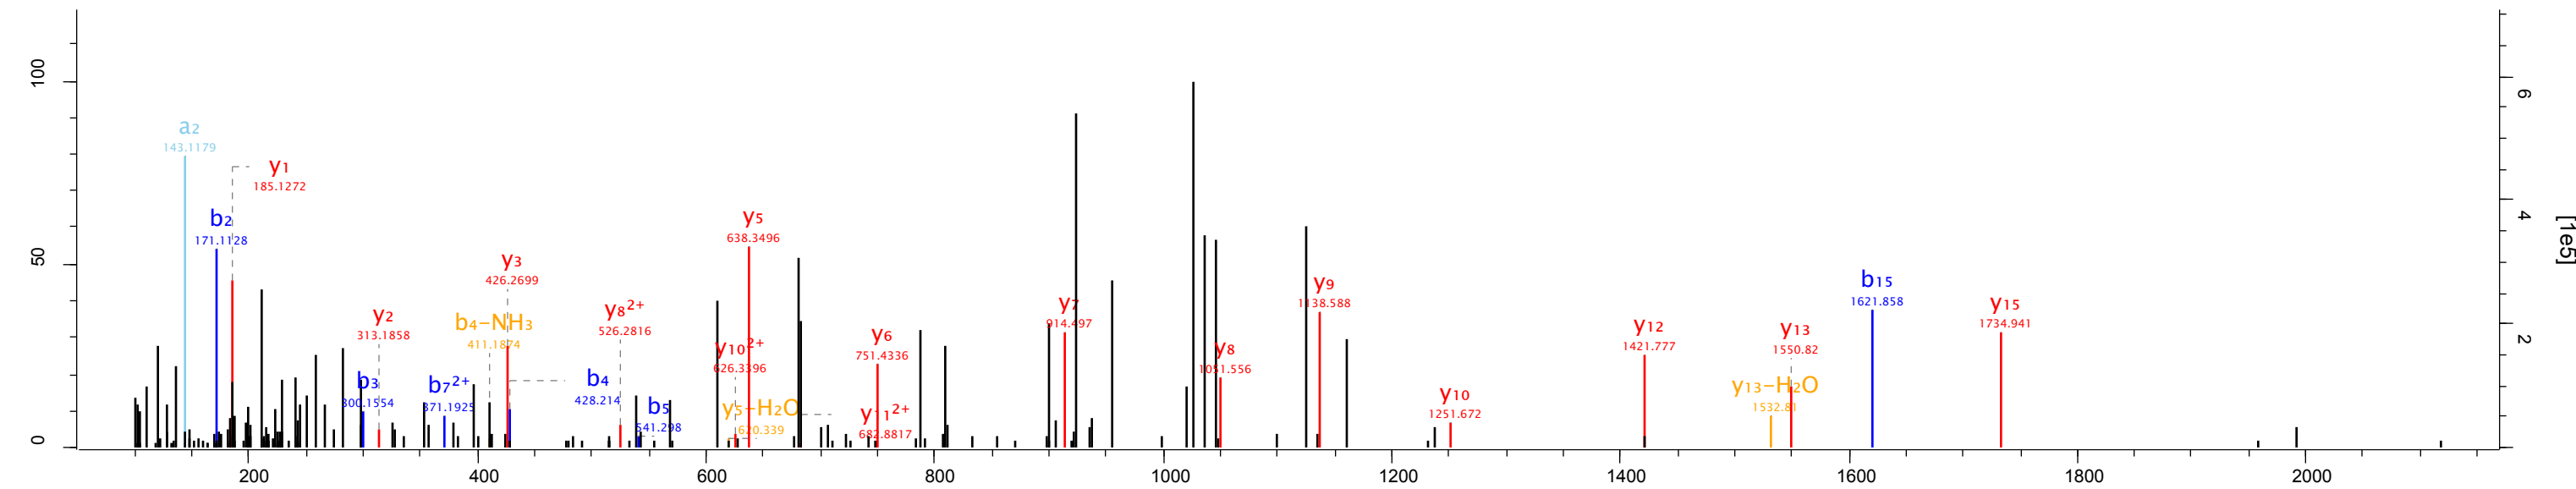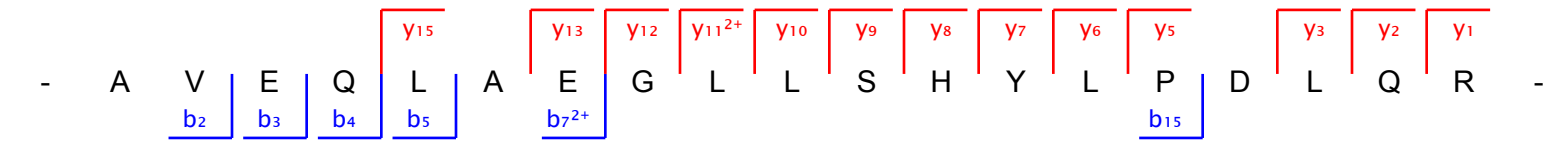

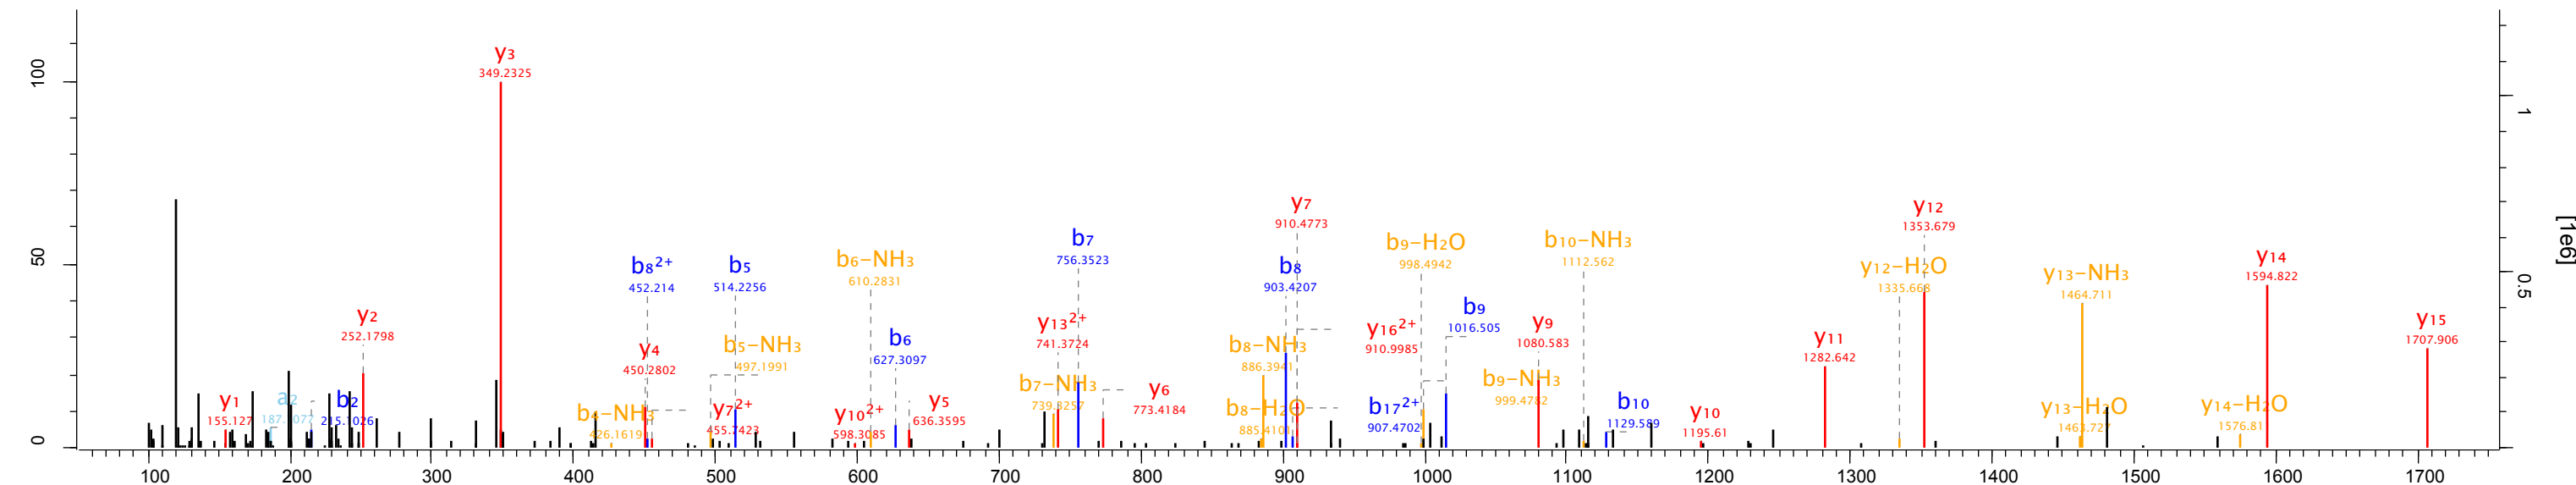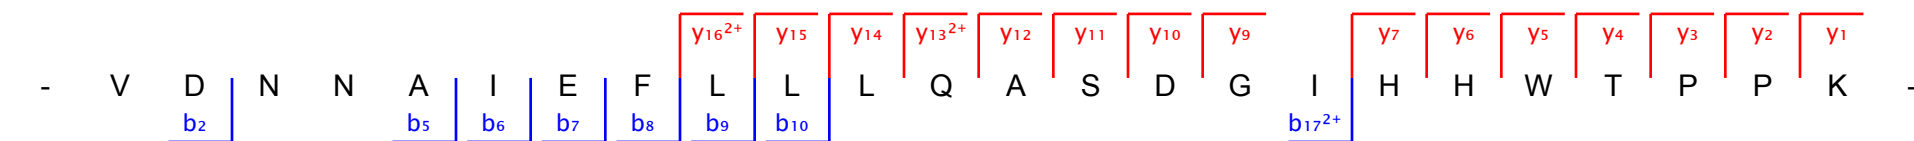

Raw file: 20171215\_MaS\_33SR\_LMH\_proteome\_01  
 Scan: 151207 Method: FTMS; HCD Score: 288.25 m/z: 973.51 Gene names: S100A2

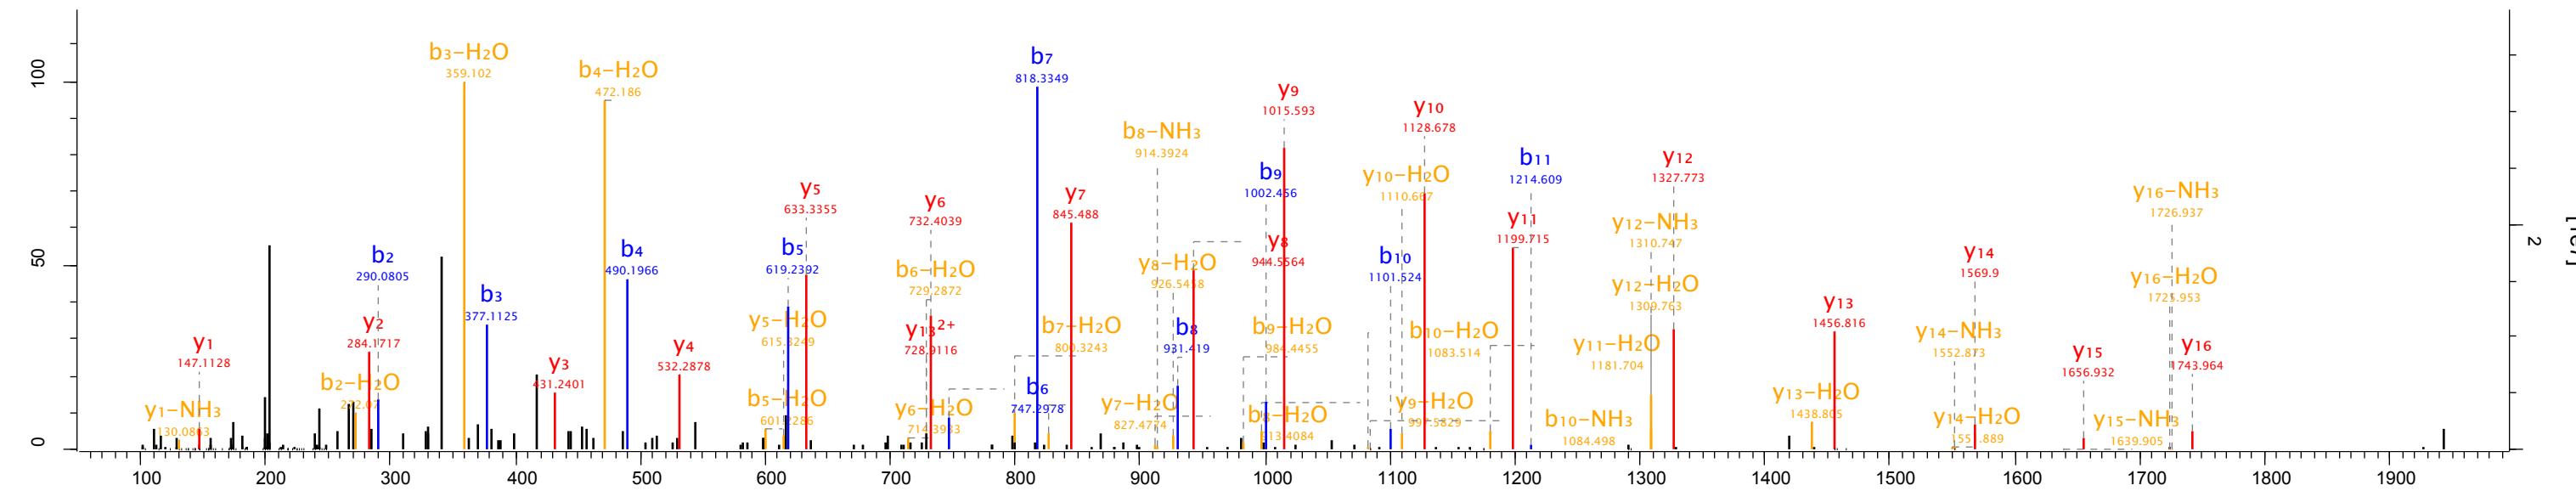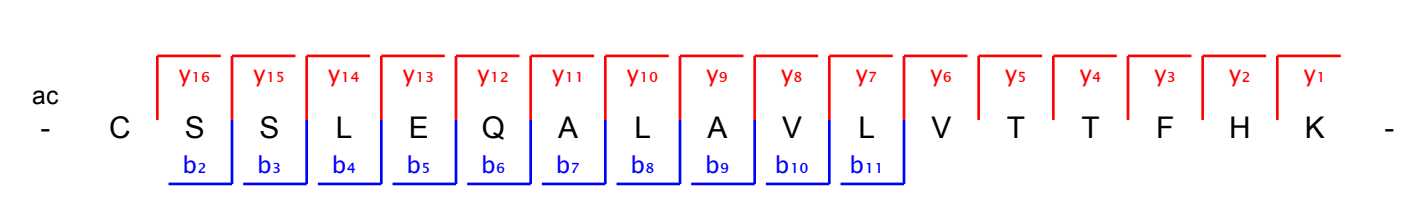

Raw file 20171215\_MaS\_33SR\_LMH\_proteome\_01 Scan 28457 Method FTMS; HCD Score 80.69 m/z 798.93

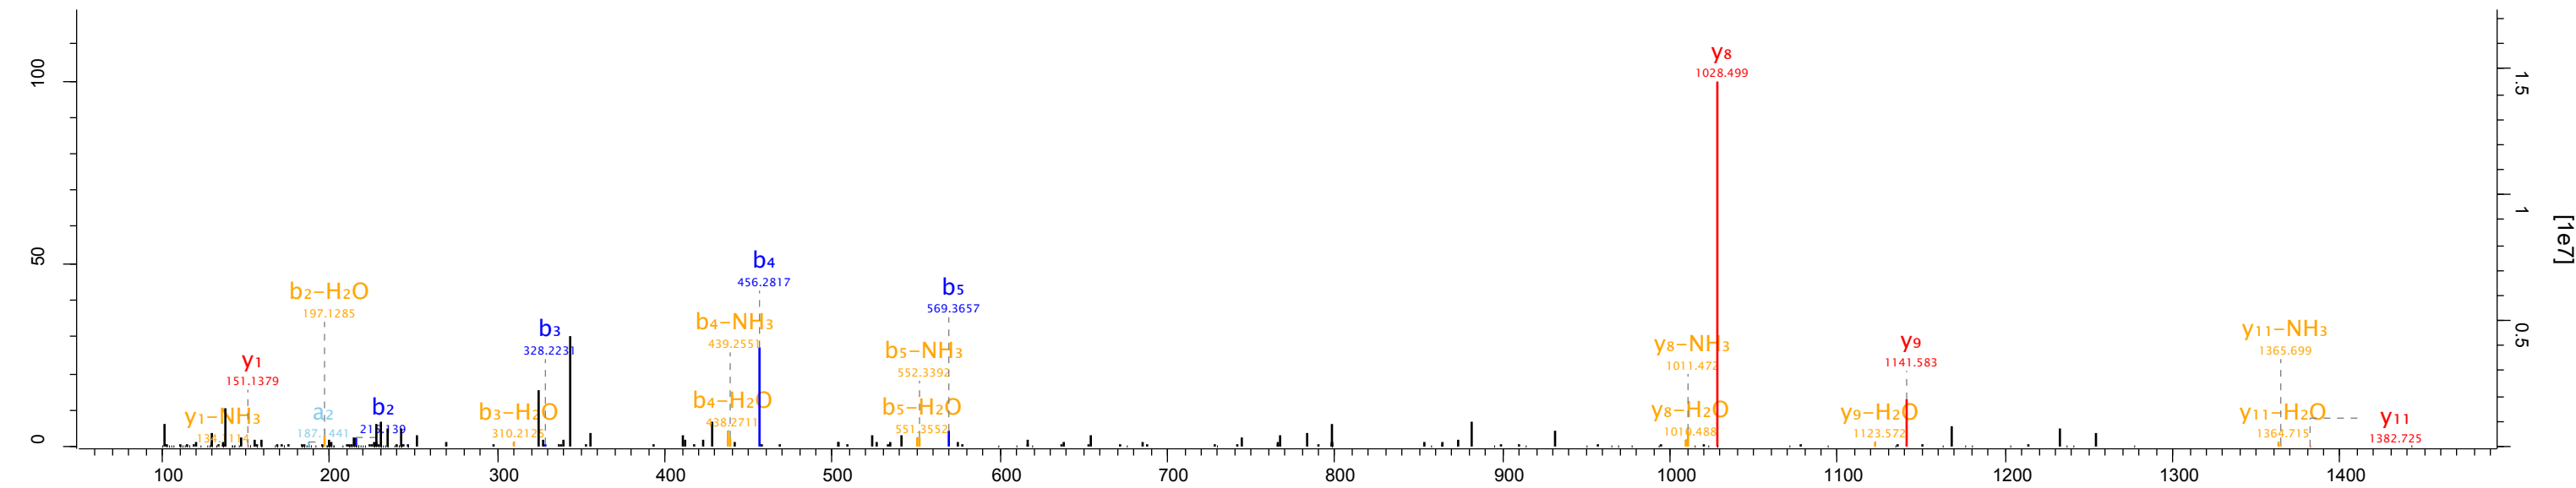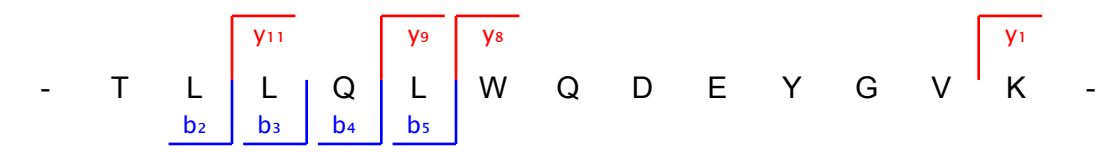

Raw file: 20171215\_MaS\_33SR\_LMH\_proteome\_01  
 Scan: 55687 Method: FTMS; HCD Score: 115.38 m/z: 920.96 Gene names: SSNA1

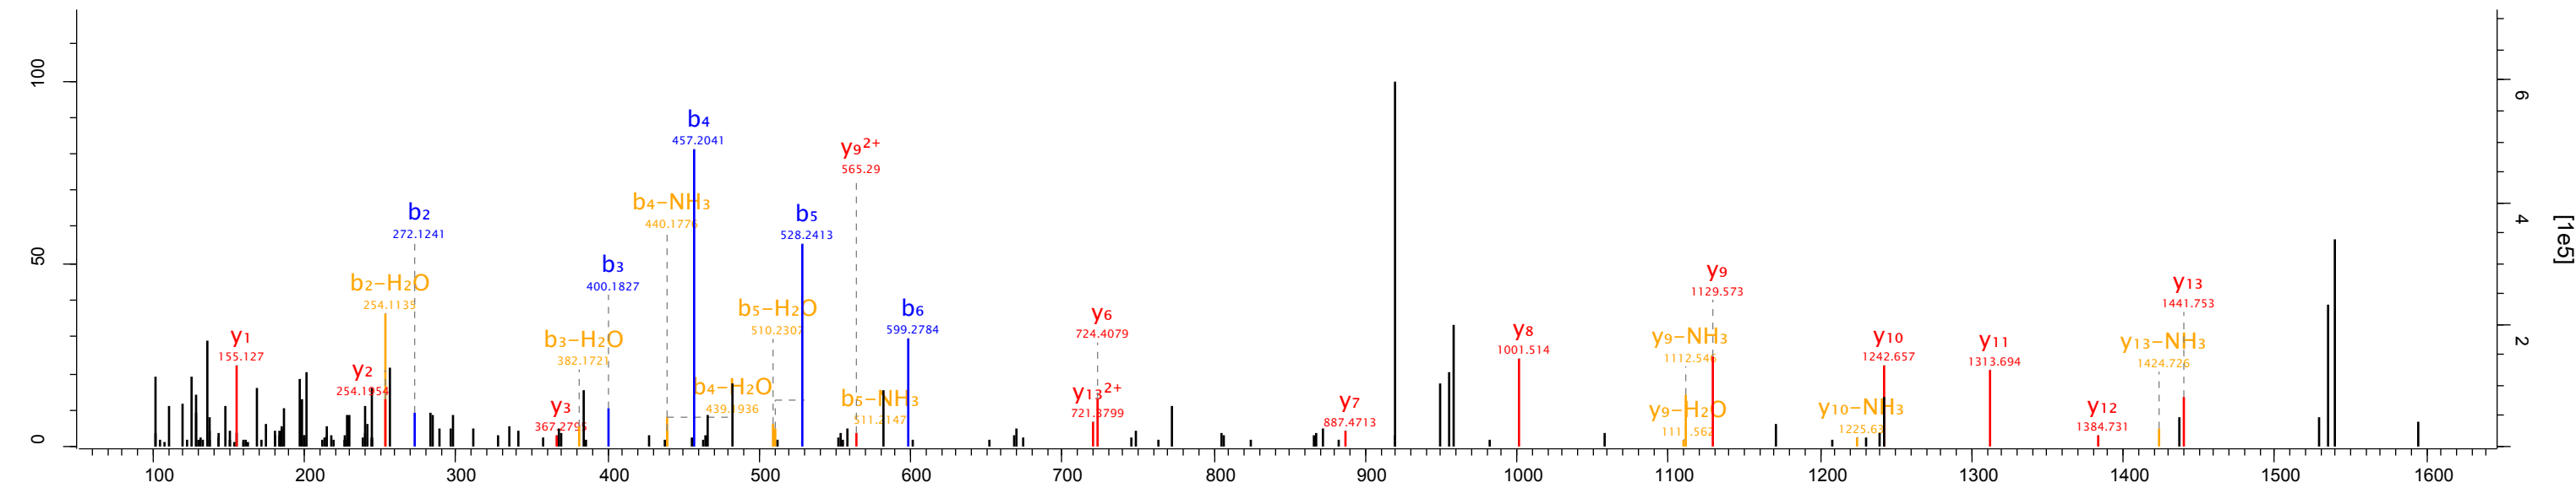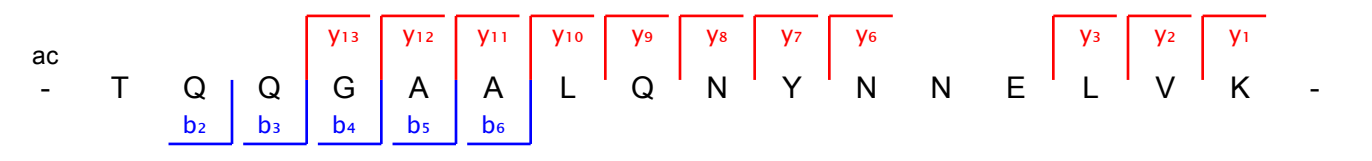

Raw file

20171215\_MaS\_33SR\_LMH\_proteome\_01

Scan 61017 Method FTMS; HCD Score 67.52 m/z 662.37 Gene names UBFD1

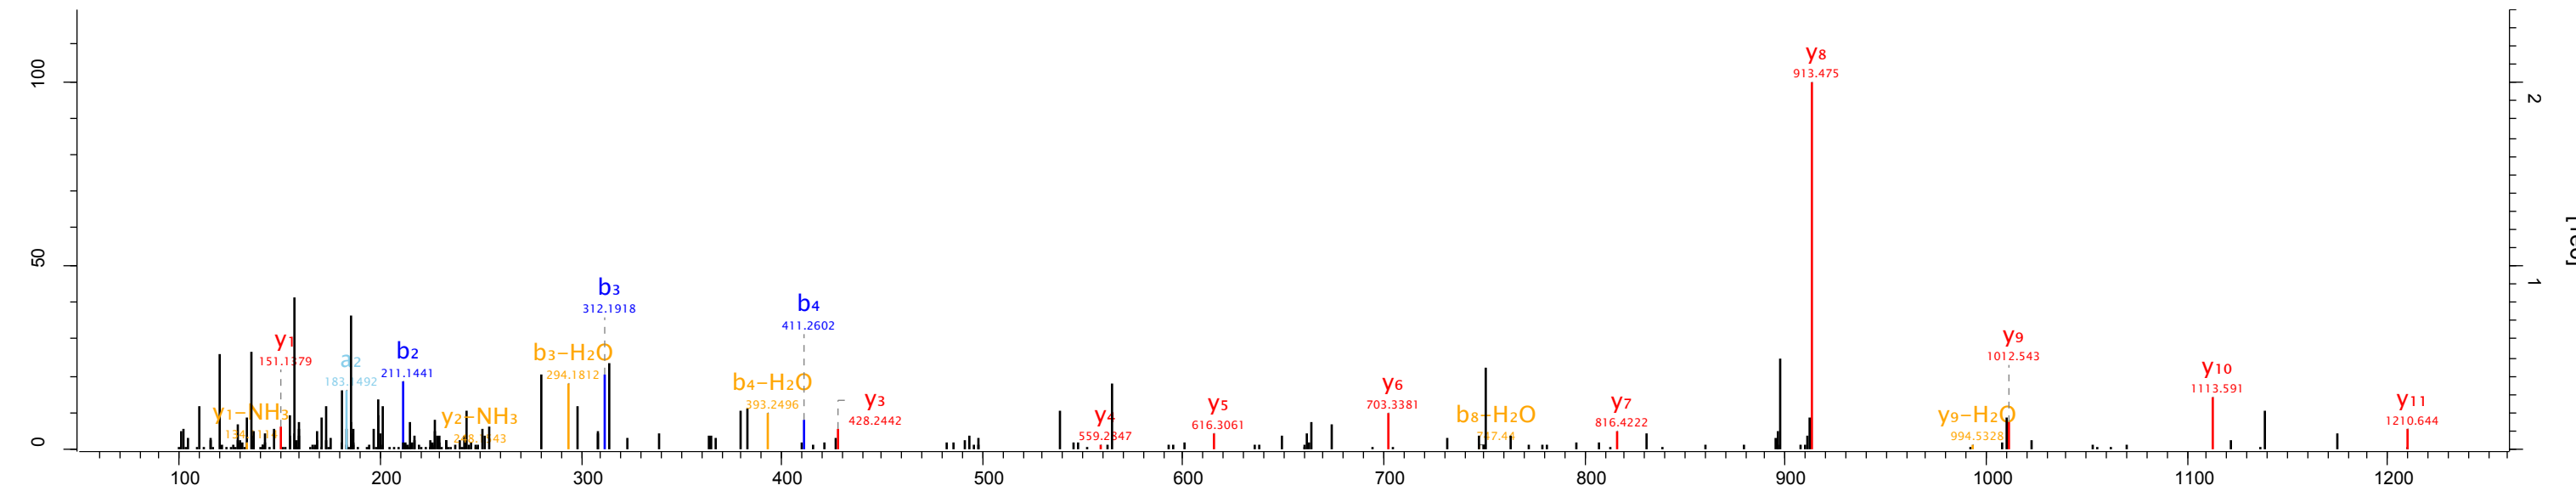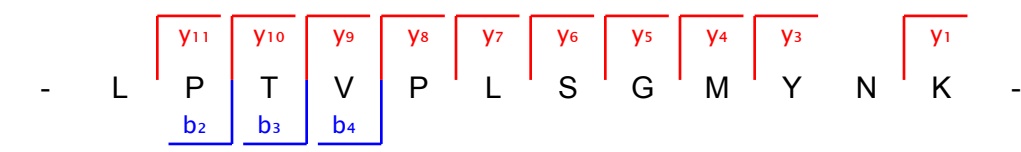

Raw file

20171215\_MaS\_33SR\_LMH\_proteome\_01

Scan 61657 Method FTMS; HCD Score 67.75 m/z 641.36 Gene names NRF1

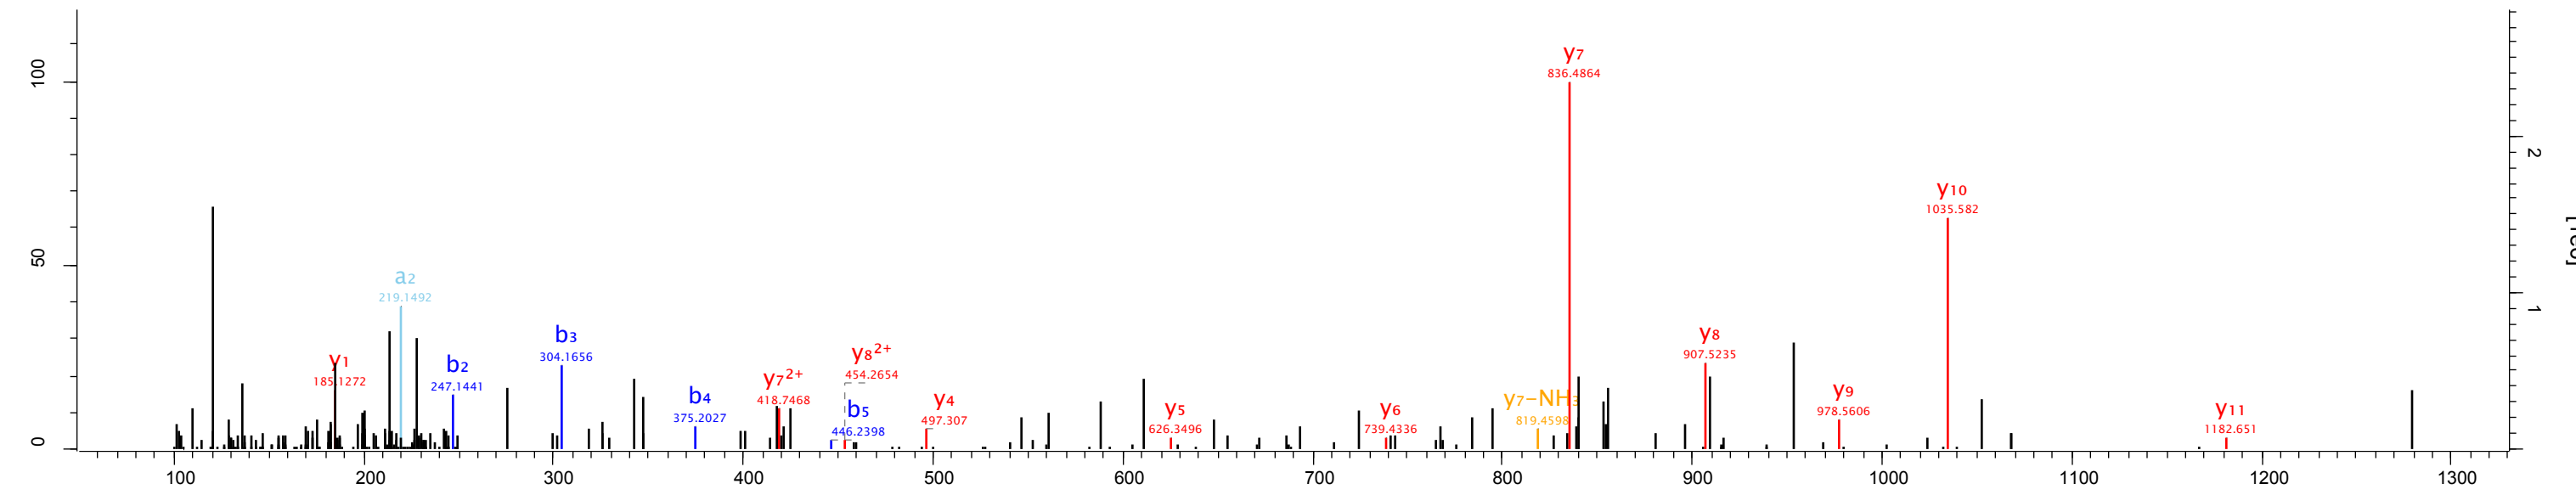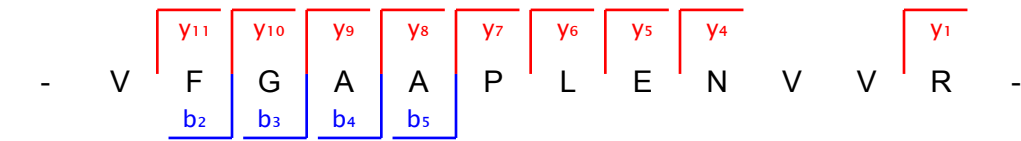

Raw file 20171215\_MaS\_33SR\_LMH\_proteome\_01 Scan 72417 Method FTMS; HCD Score 80.96 m/z 718.39 Gene names RBM5

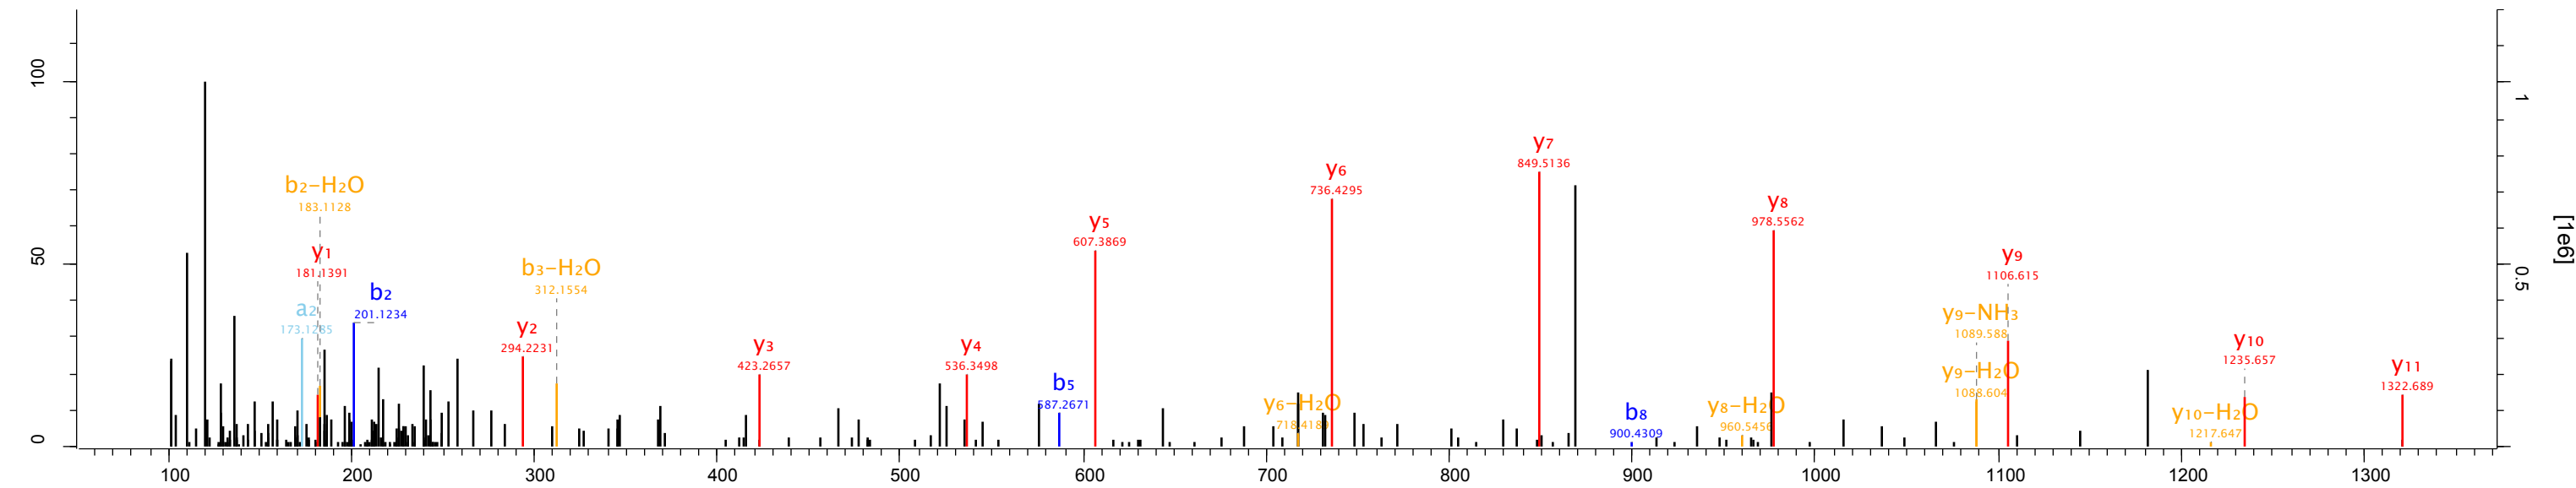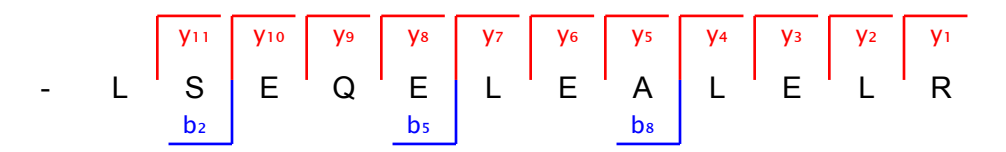



Raw file 20171215\_MaS\_33SR\_LMH\_proteome\_01 Scan 74487 Method FTMS; HCD Score 66 m/z 755.4 Gene names PDRG1

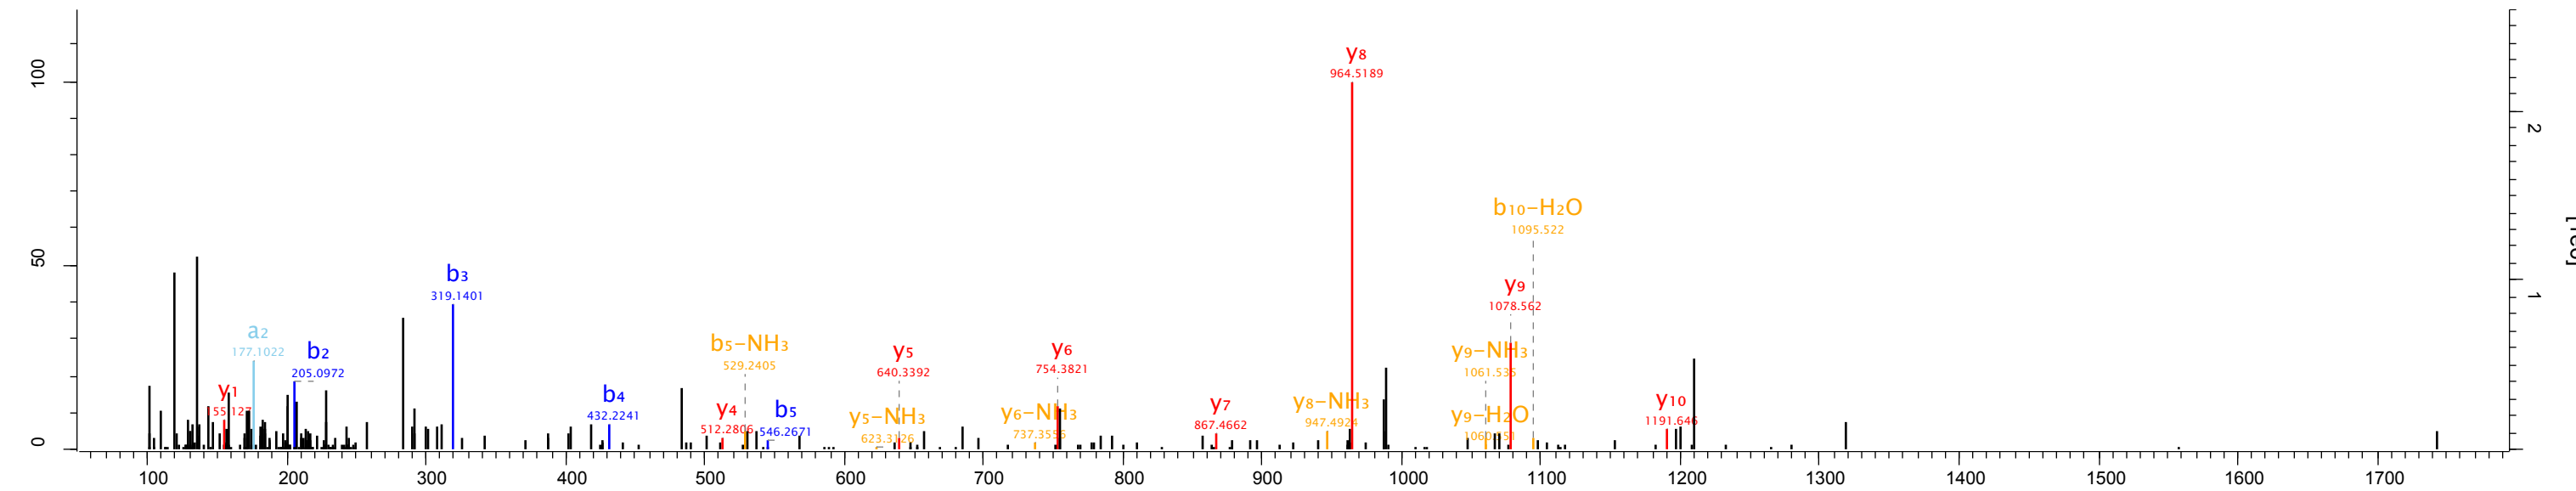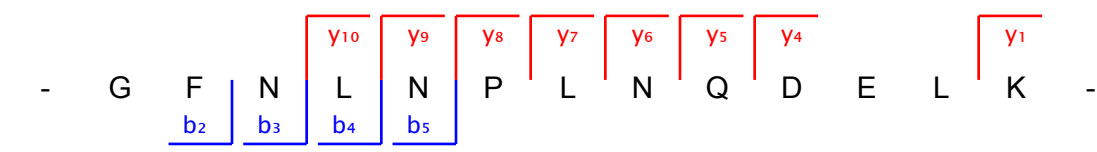

Raw file: 20171215\_MaS\_33SR\_LMH\_proteome\_01  
 Scan: 74687 Method: FTMS; HCD Score: 63.18 m/z: 584.33 Gene names: RRAGB;RRAGA

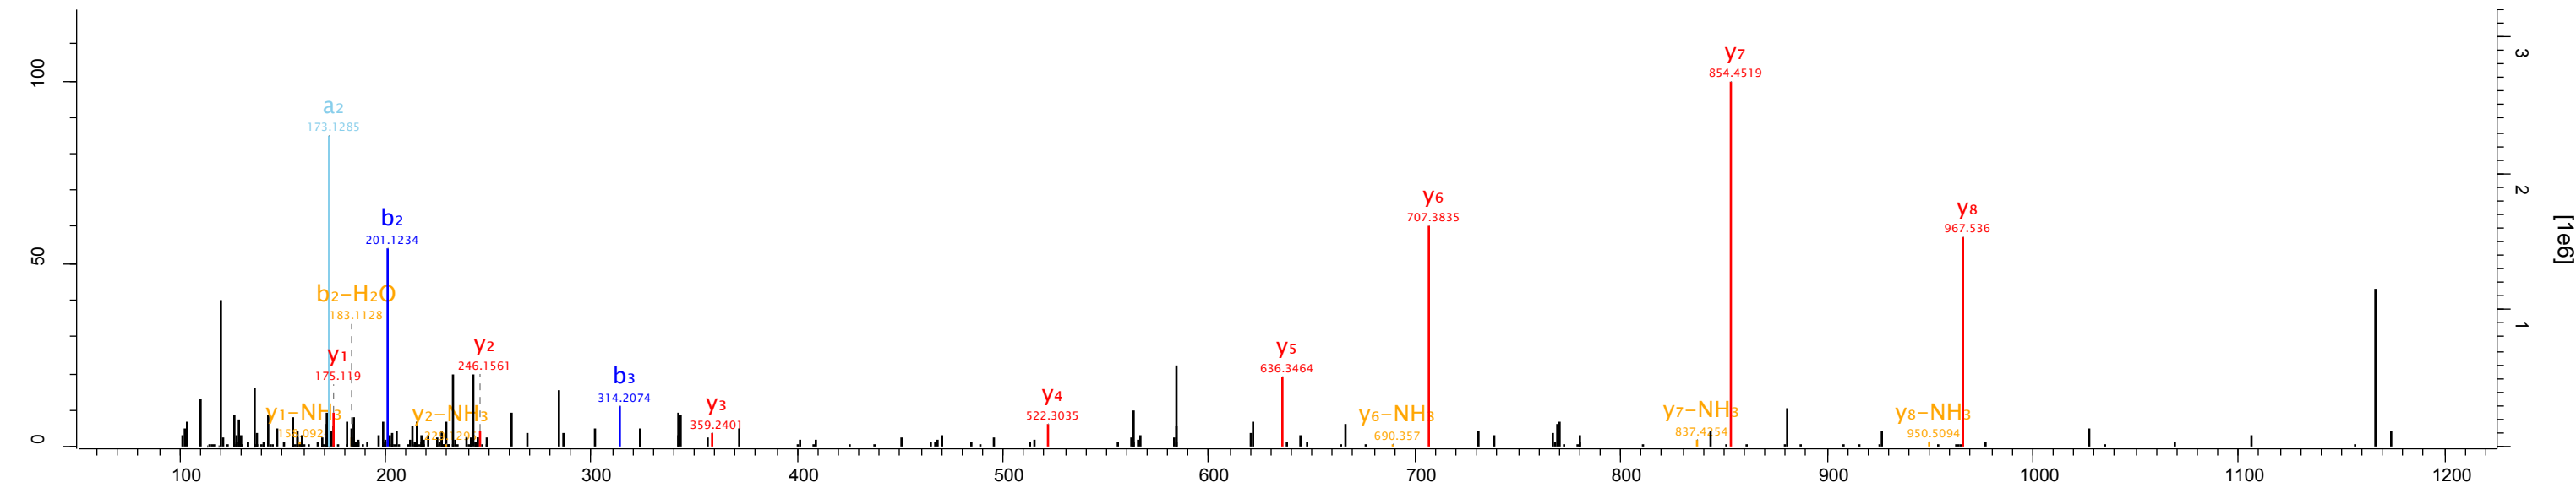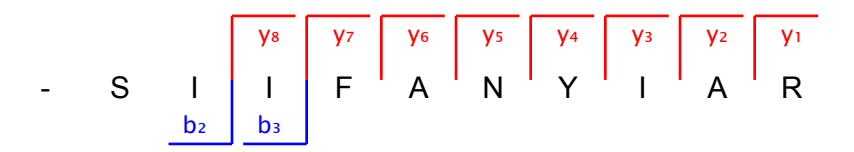

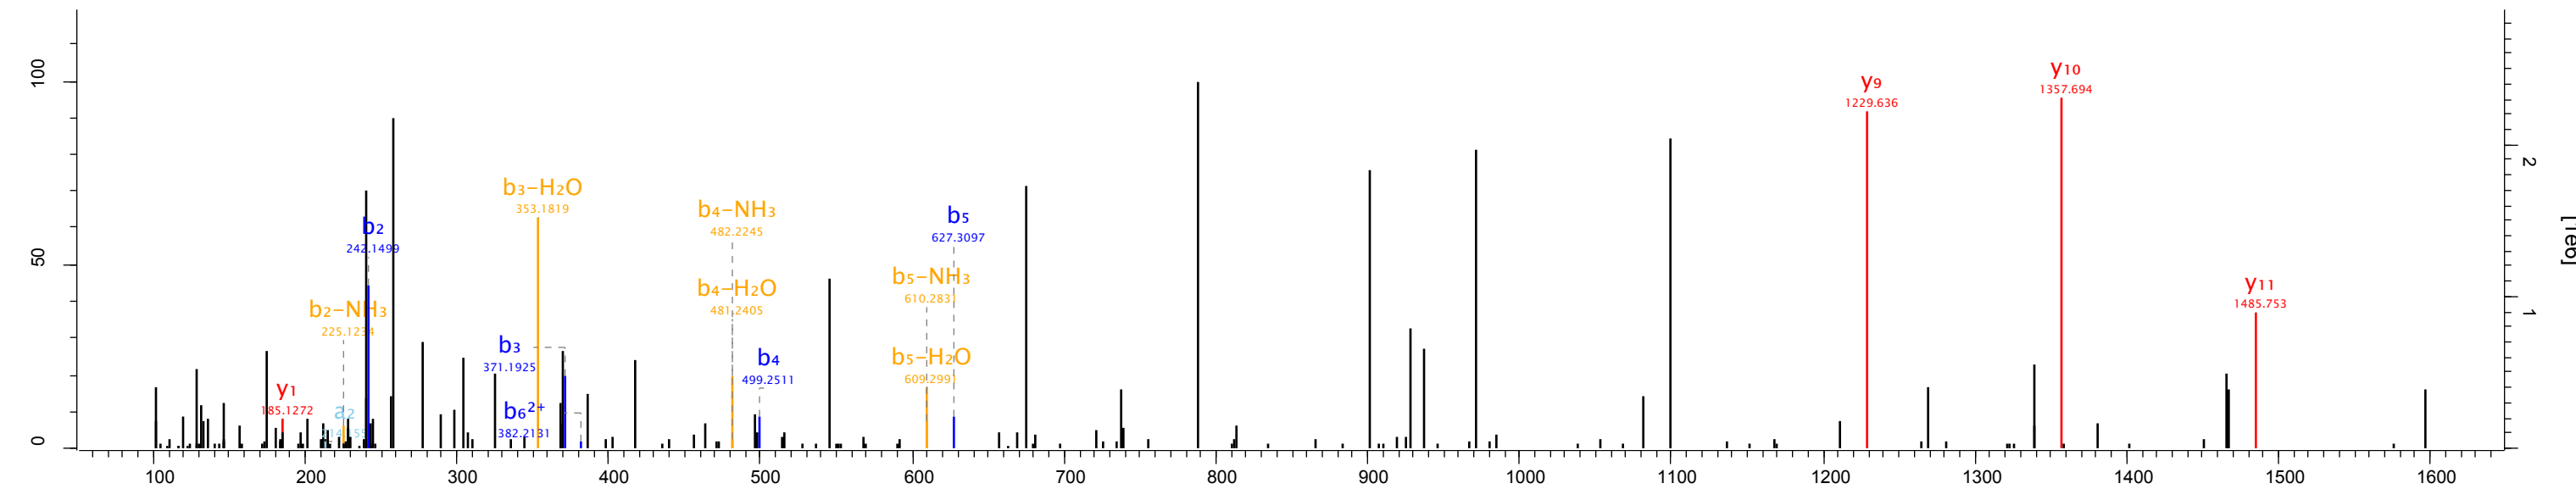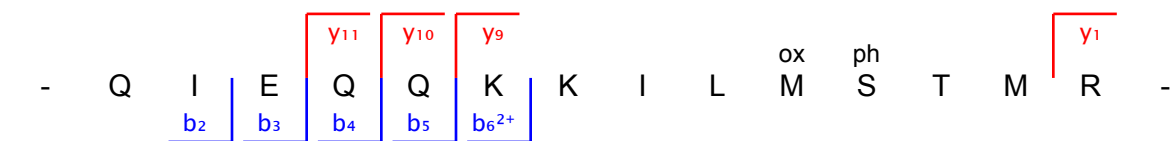

Raw file: 20171215\_MaS\_33SR\_LMH\_proteome\_01

Scan: 95457 Method: FTMS; HCD Score: 48.62 m/z: 640.04 Gene names: TRADD

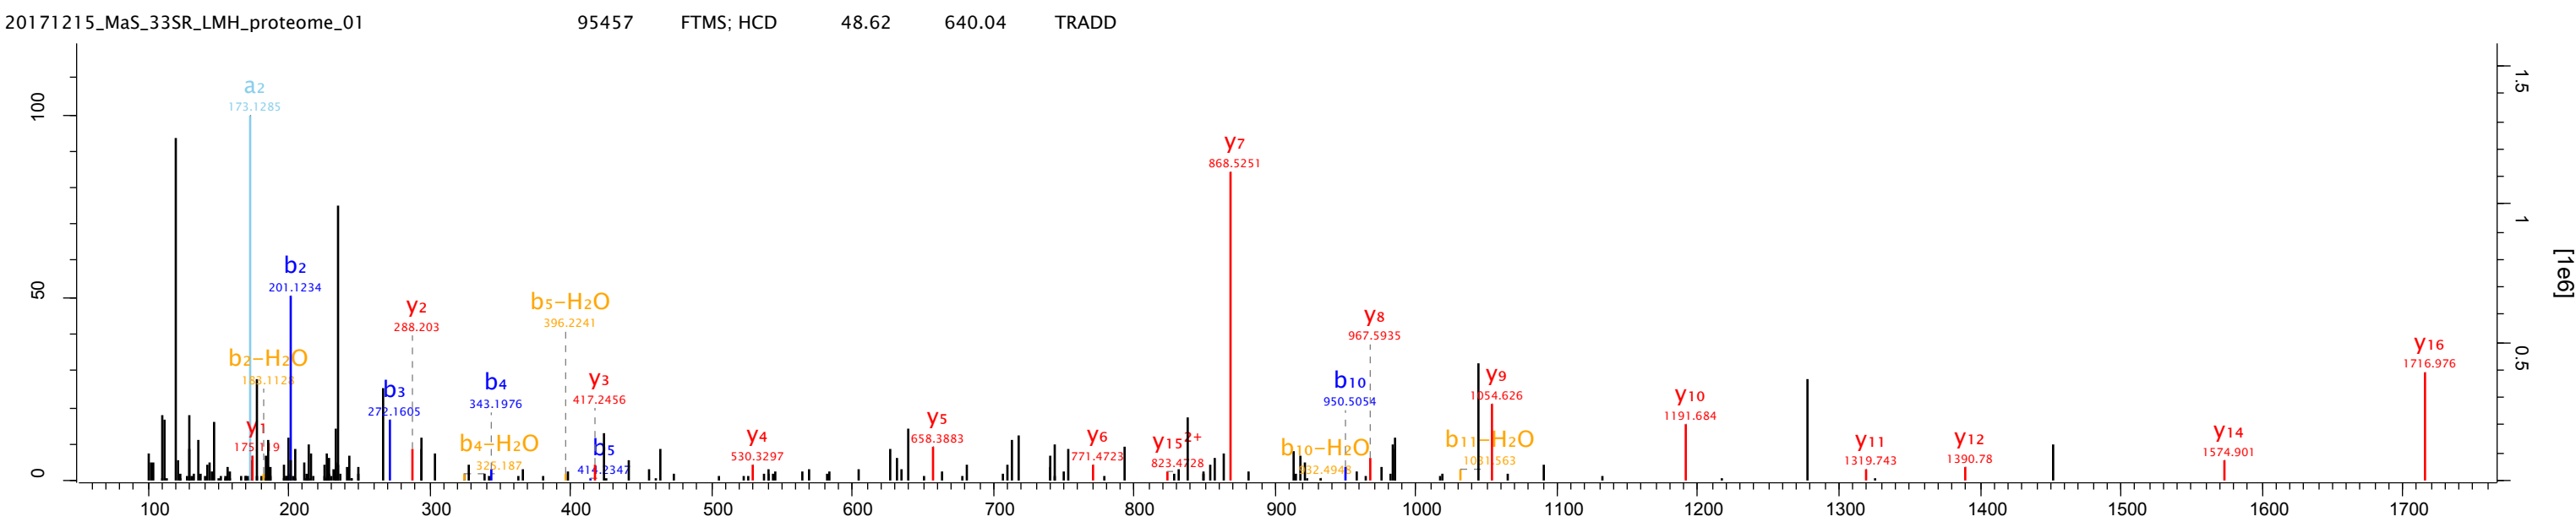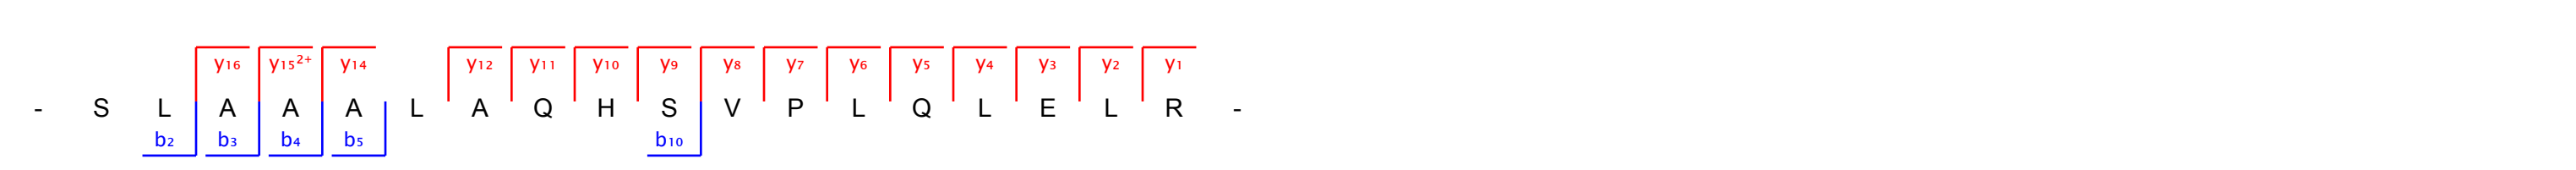

Raw file 20171215\_MaS\_33SR\_LMH\_proteome\_01 Scan 97727 Method FTMS; HCD Score 106.67 m/z 500.6 Gene names SEC11A

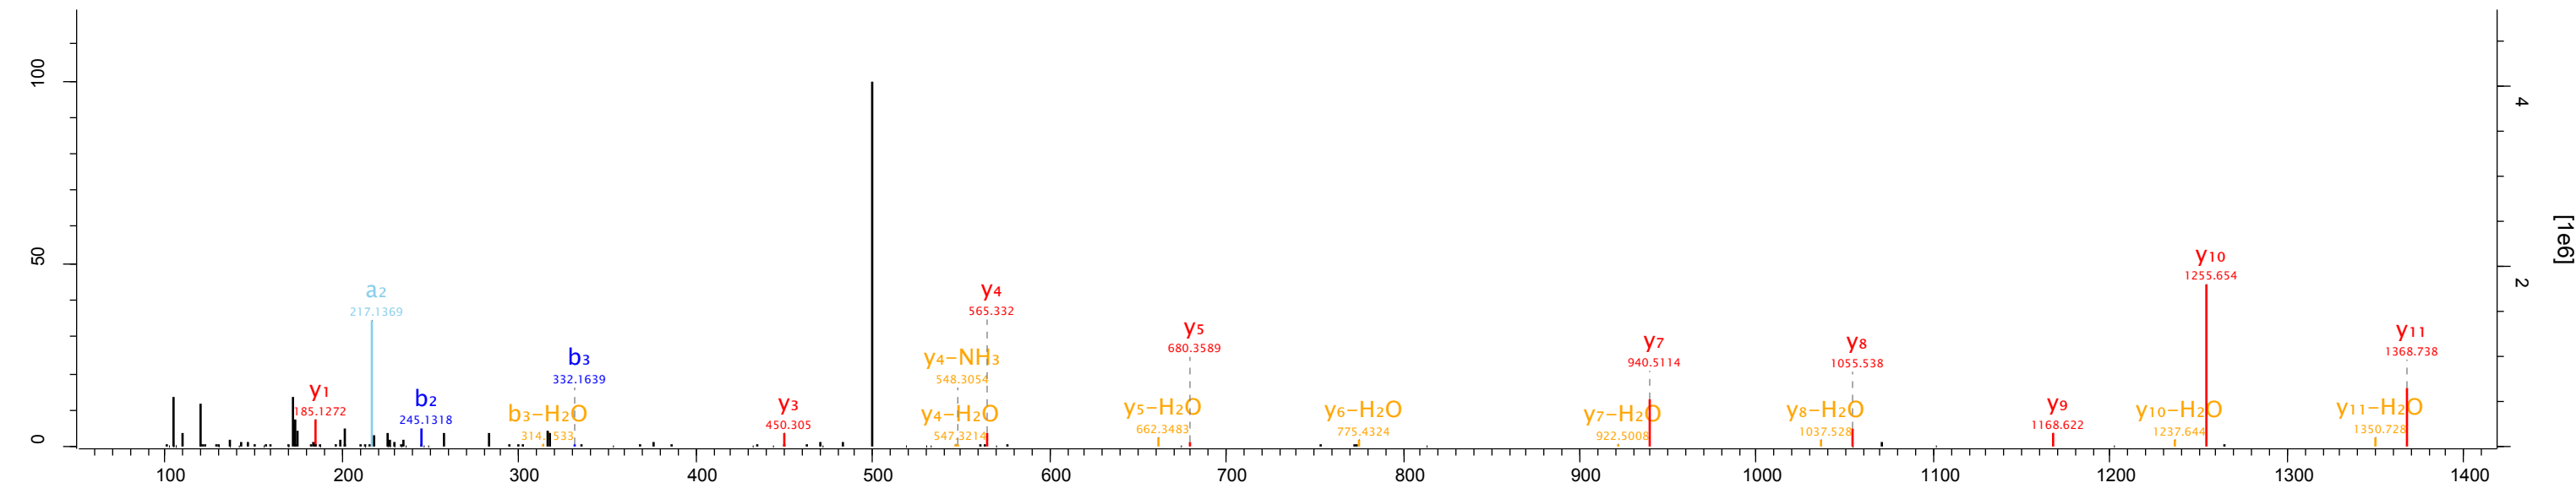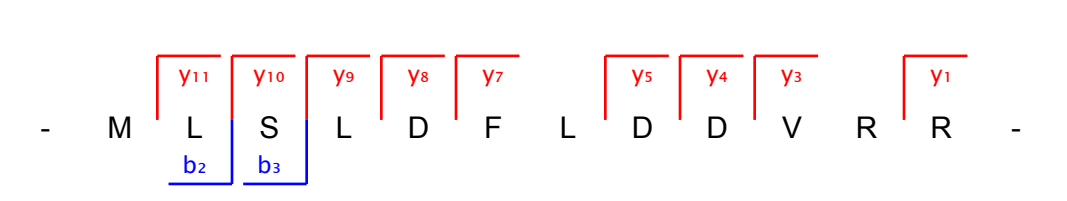

Raw file 20171215\_MaS\_33SR\_LMH\_proteome\_01 Scan 97877 Method FTMS; HCD Score 90.69 m/z 772.88 Gene names GLYAT;BICD1

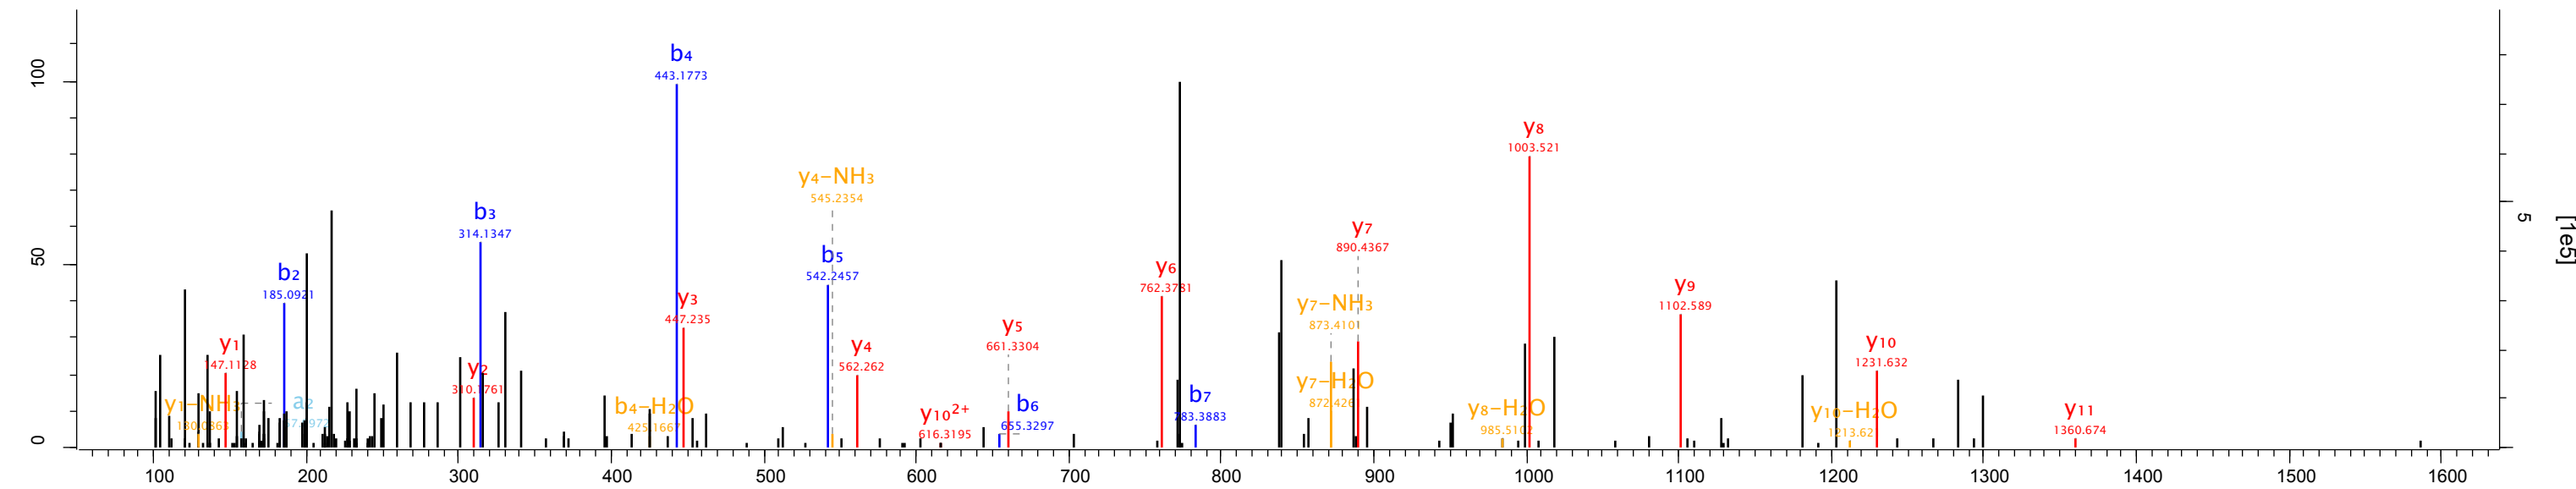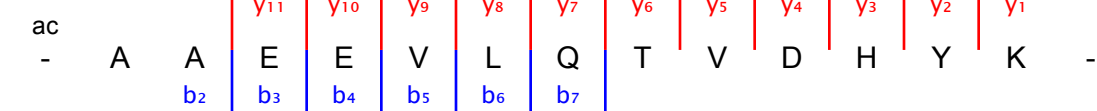

Raw file: 20171215\_MaS\_33SR\_LMH\_proteome\_02  
 Scan: 102187 Method: FTMS; HCD Score: 96.67 m/z: 932.99 Gene names: TRAPPC1

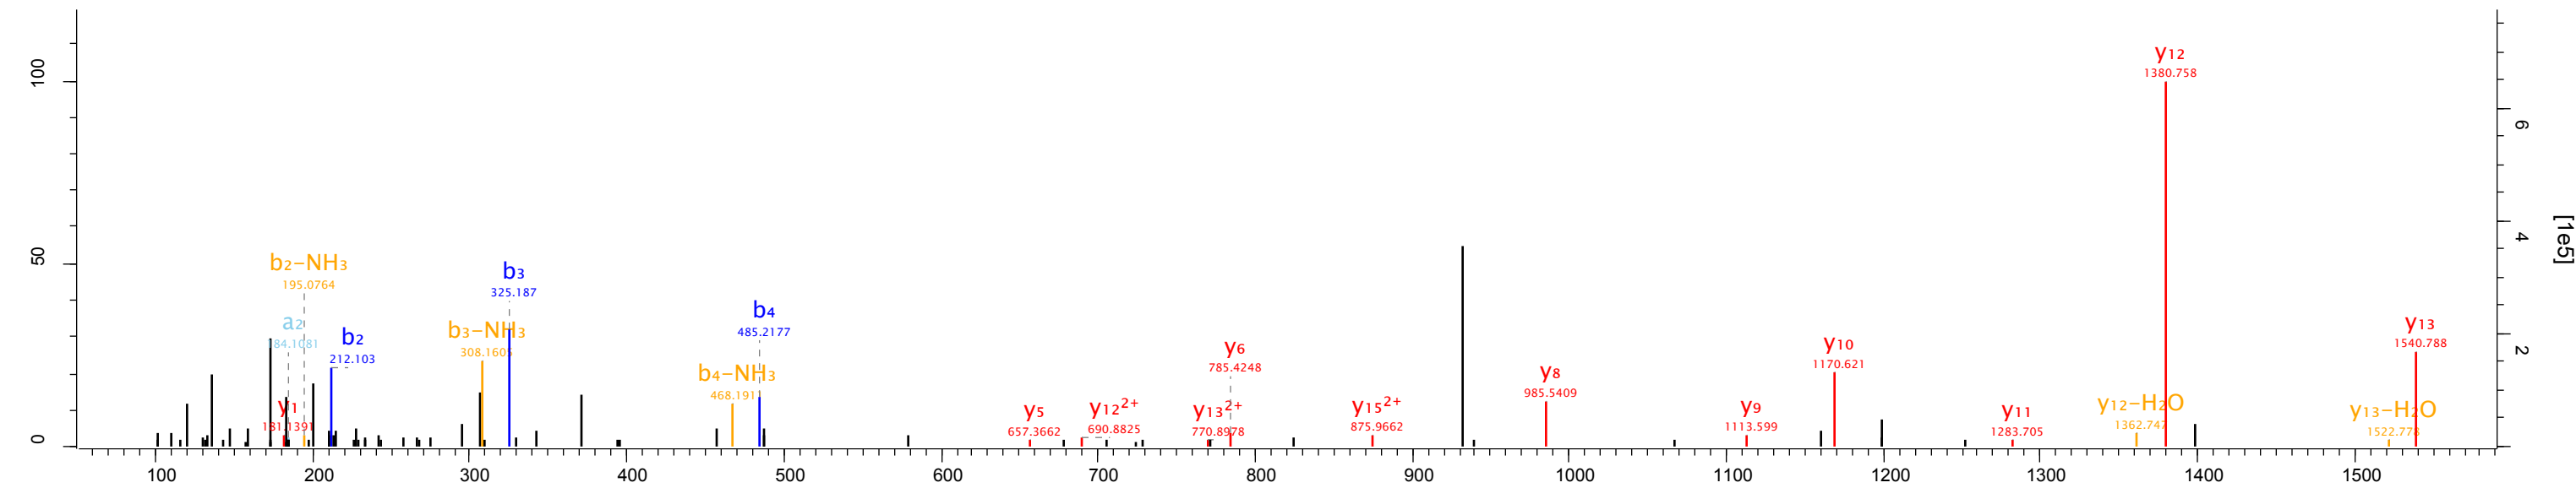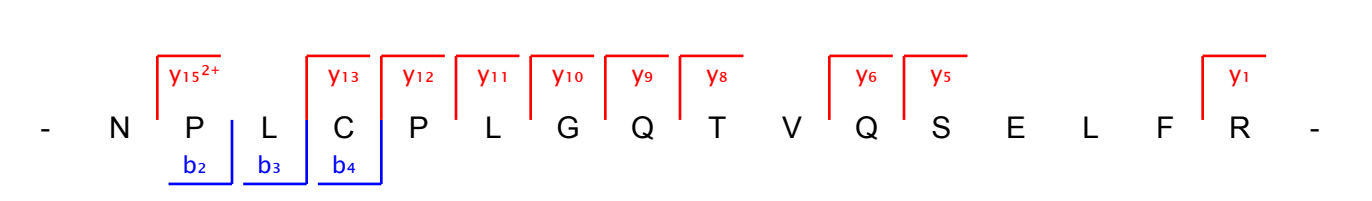

Raw file: 20171215\_MaS\_33SR\_LMH\_proteome\_02  
 Scan: 110697  
 Method: FTMS; HCD  
 Score: 48.05  
 m/z: 784.09  
 Gene names: IPO8

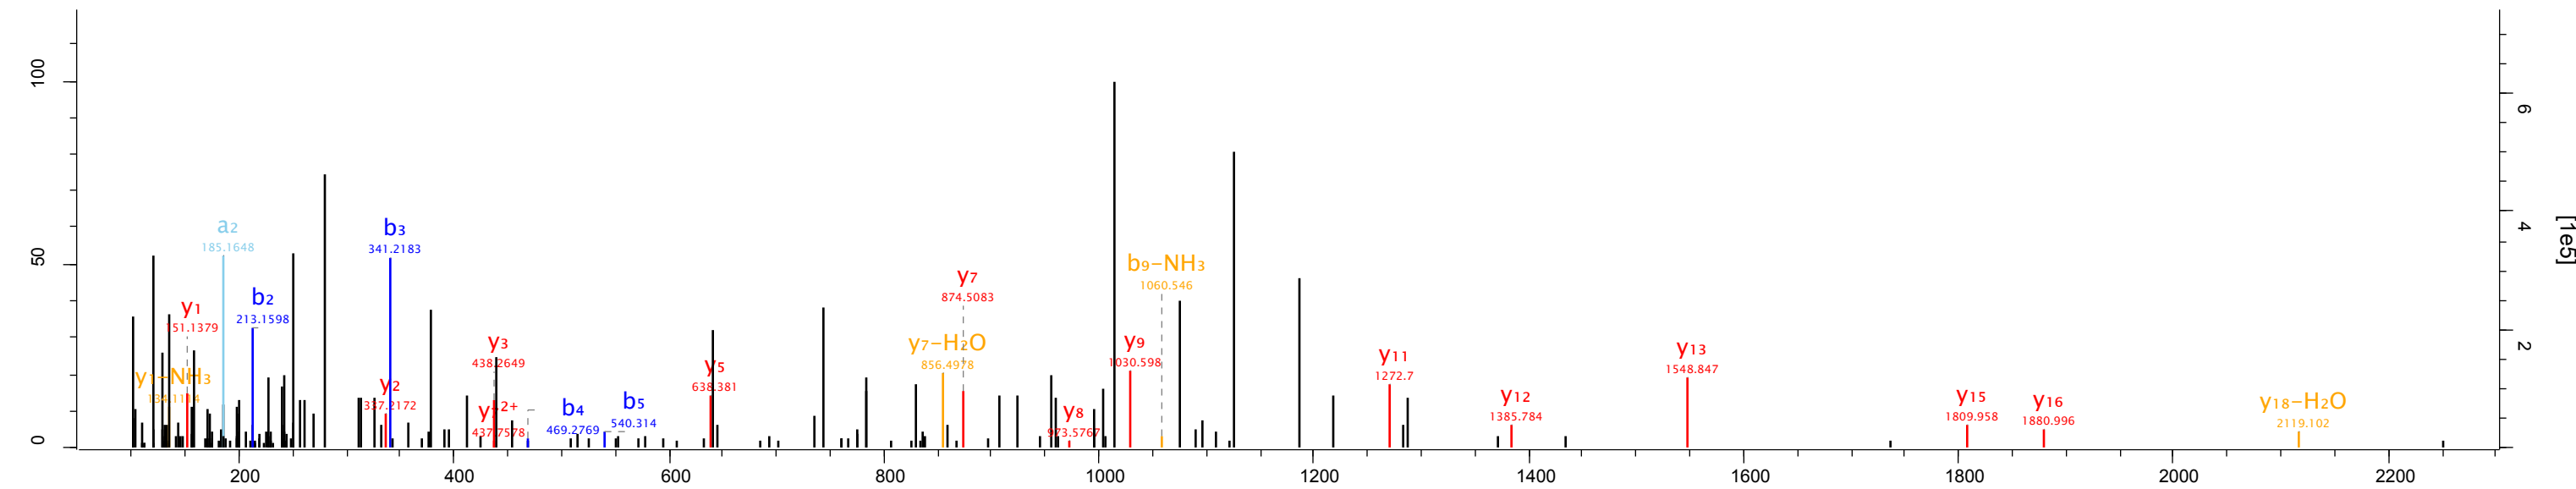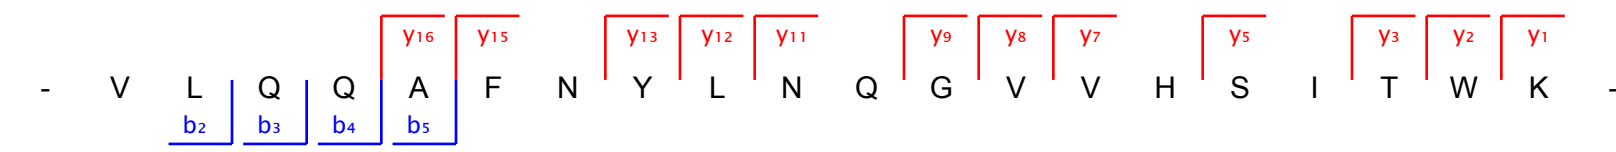



Raw file 20171215\_MaS\_33SR\_LMH\_proteome\_02 Scan 112177 Method FTMS; HCD Score 73.83 m/z 879.92 Gene names TPM4

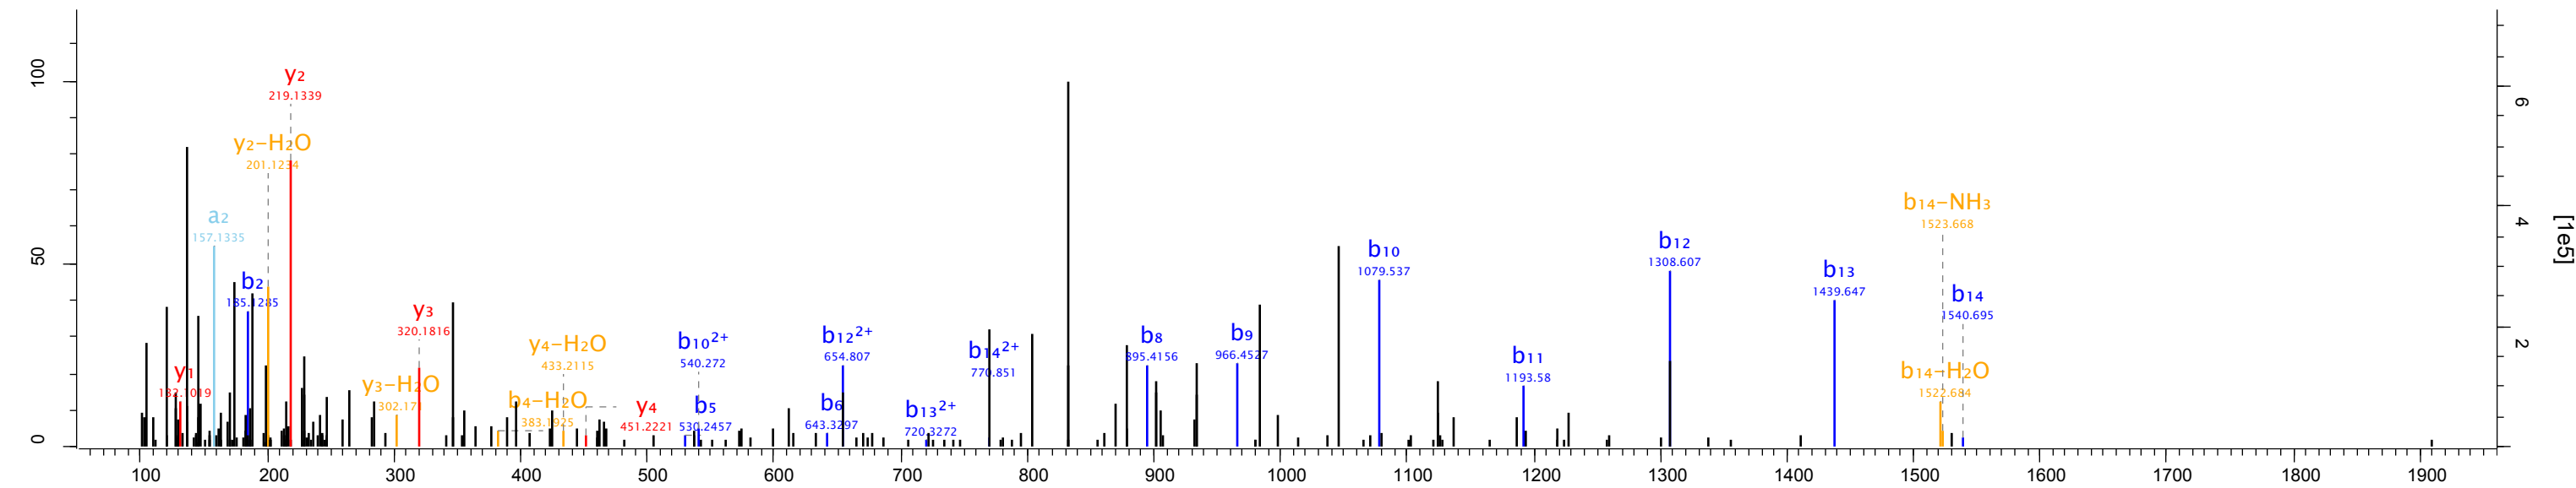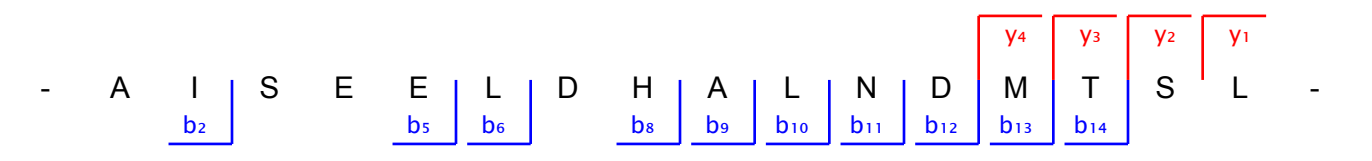

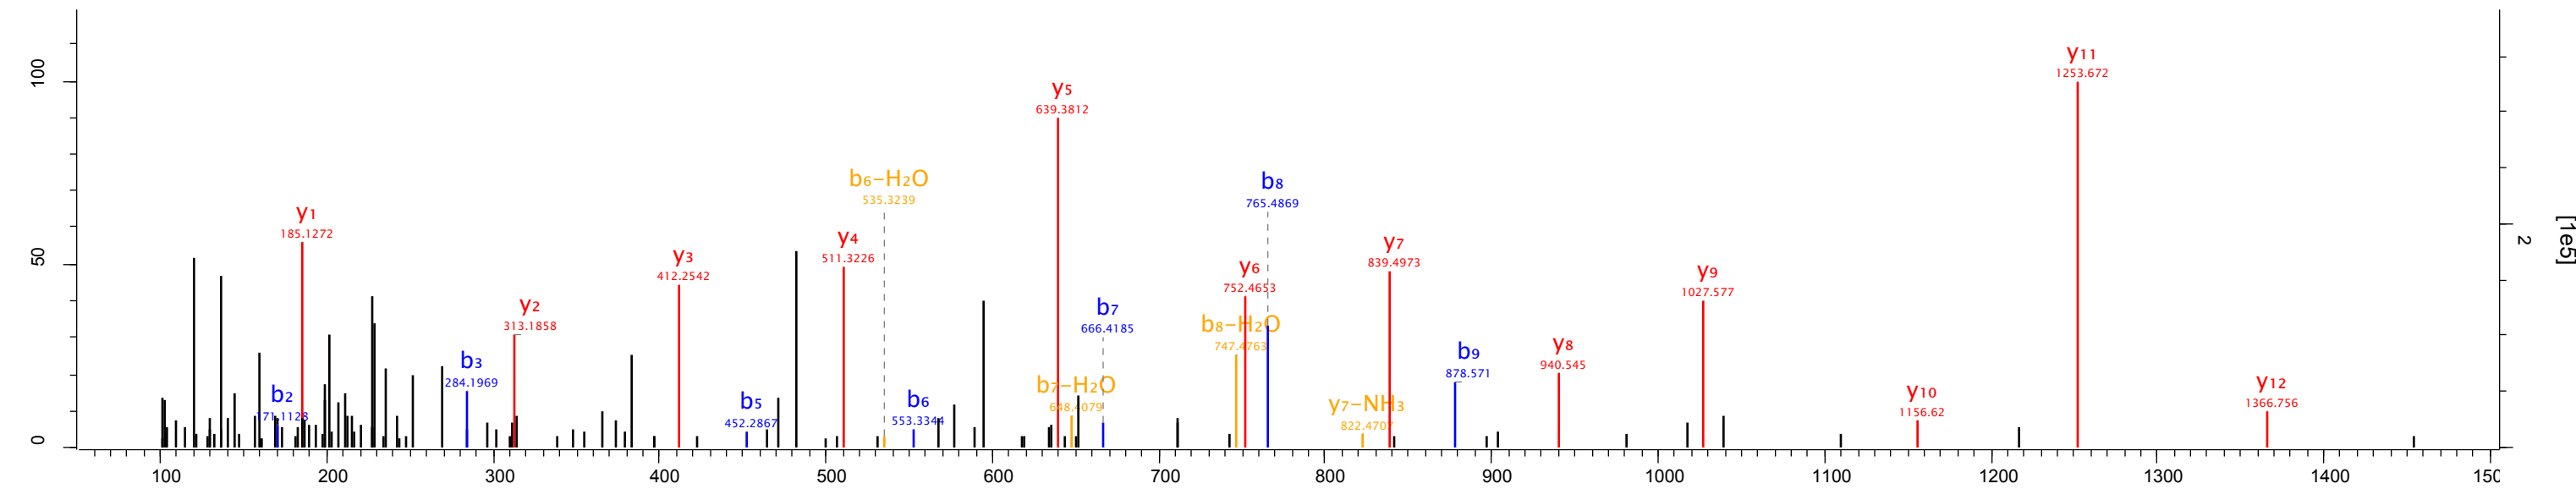

- L G I P A T I V L P E S T S L Q V V Q R -

Fragmentation sites are indicated by brackets below the amino acid sequence:

- b2: G-I
- b3: I-P
- b5: A-T
- b6: T-I
- b7: I-V
- b8: V-L
- b9: L-P

Y-series fragments are labeled above the sequence from L to R.

Raw file: 20171215\_MaS\_33SR\_LMH\_proteome\_02  
 Scan: 115827 Method: FTMS; HCD Score: 85.81 m/z: 662.87 Gene names: ATP5J2-PTCD1;ATP5J2

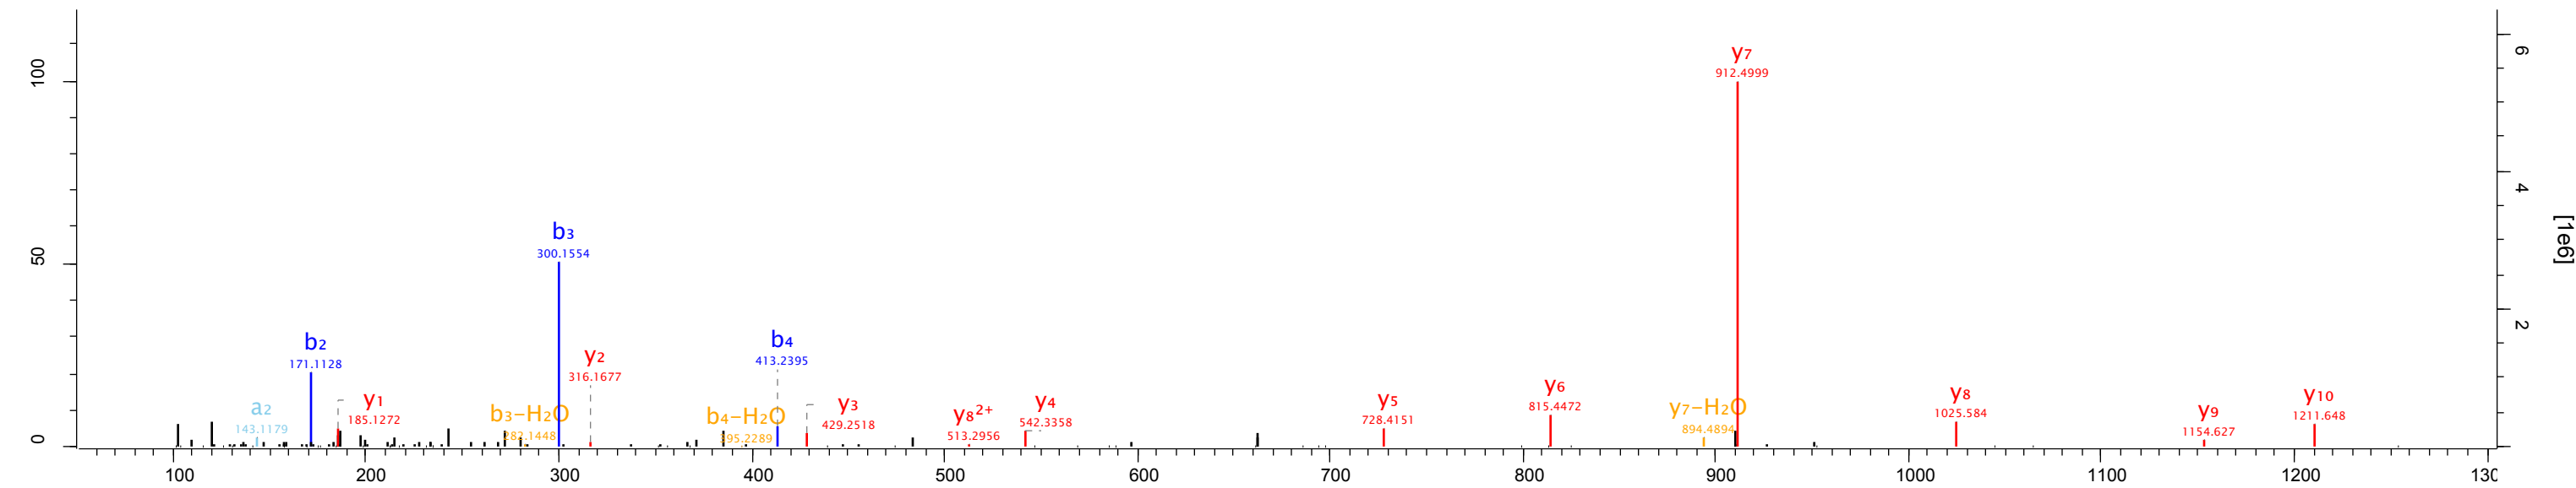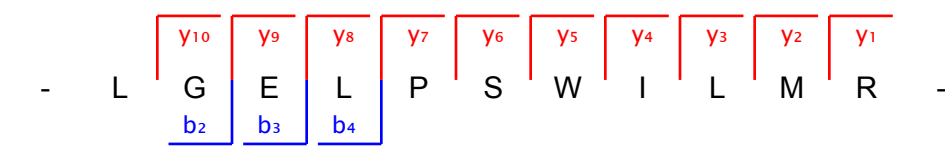

Raw file 20171215\_MaS\_33SR\_LMH\_proteome\_02 Scan 123927 Method FTMS; HCD Score 84.36 m/z 756.94 Gene names GEMIN7

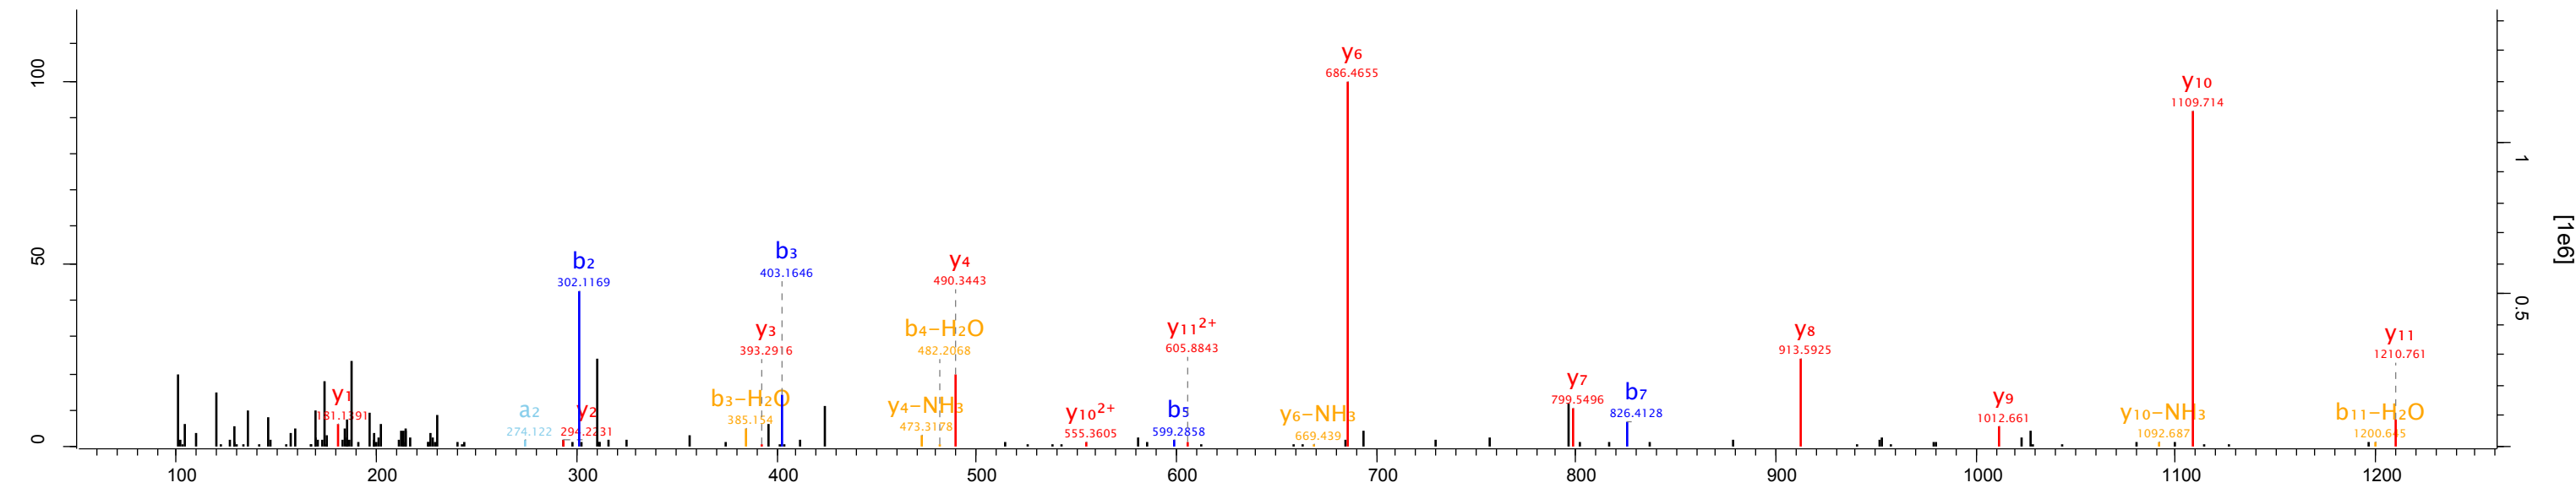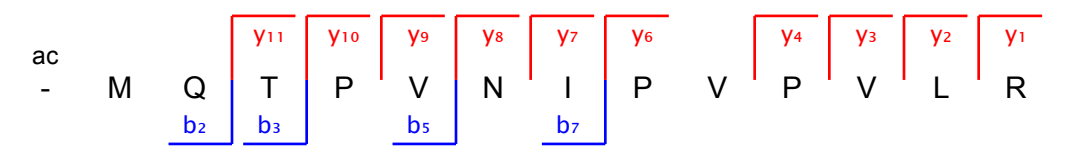

Raw file: 20171215\_MaS\_33SR\_LMH\_proteome\_02  
 Scan: 125617 Method: FTMS; HCD Score: 65.29 m/z: 726.92 Gene names: TSEN34

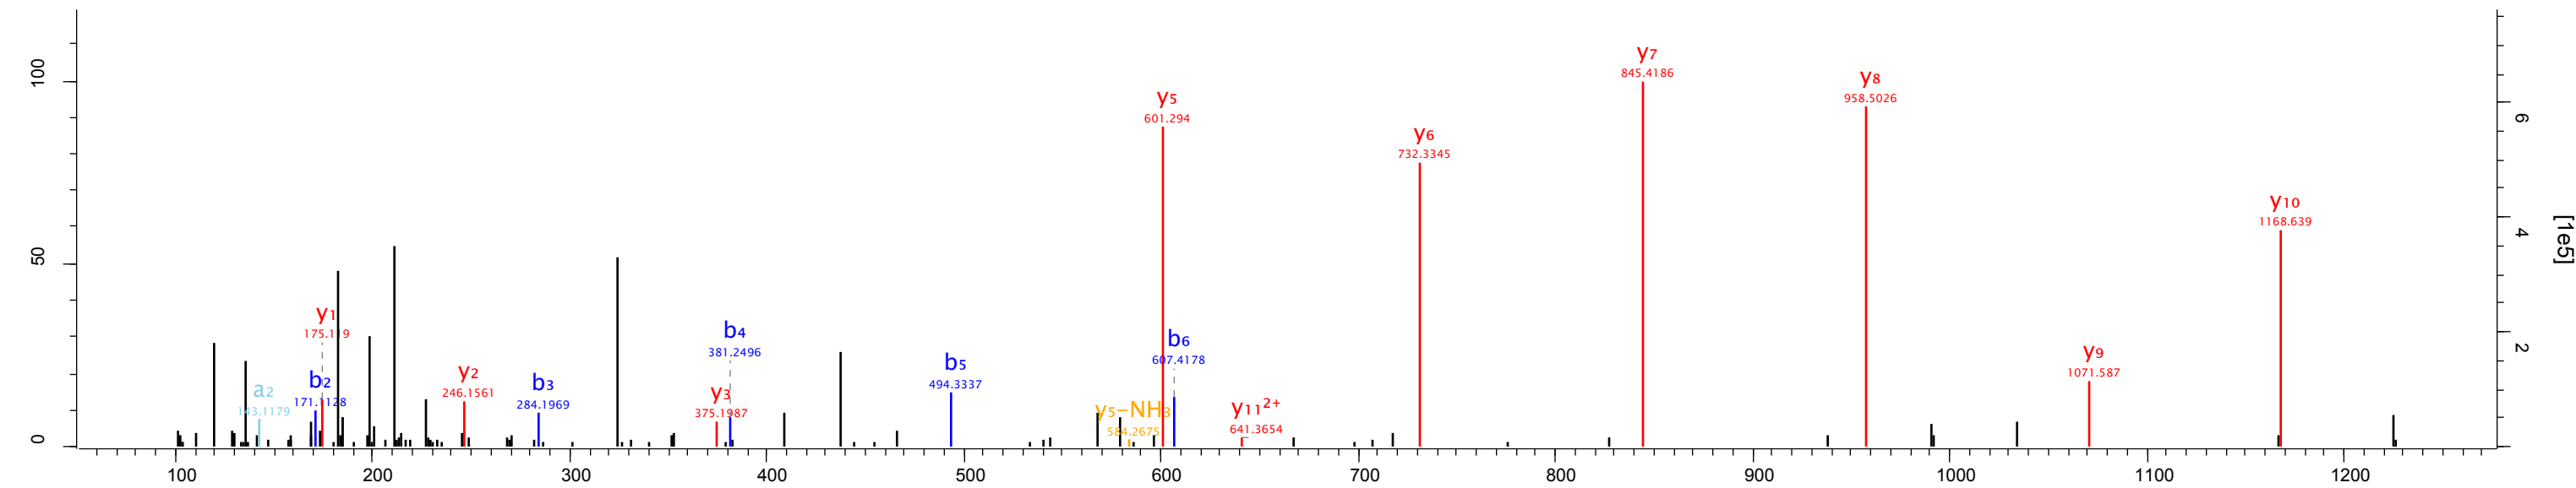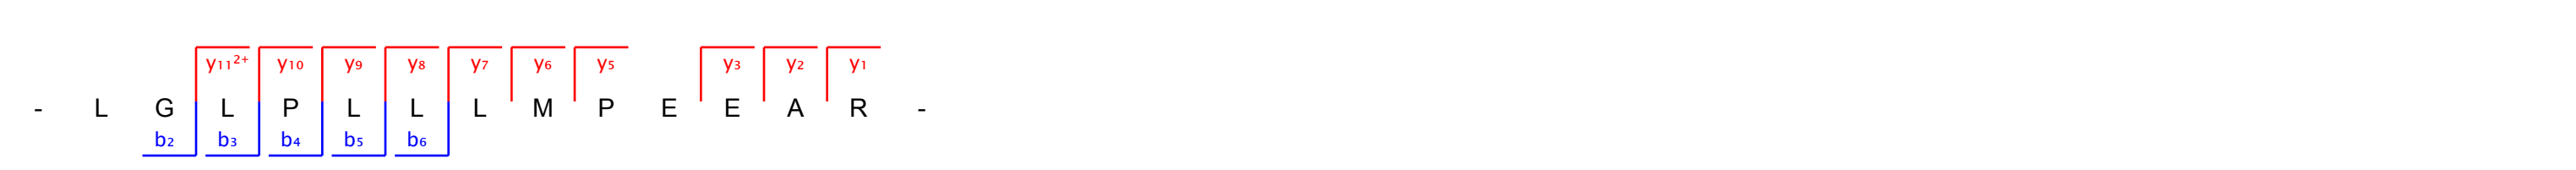

Raw file

20171215\_MaS\_33SR\_LMH\_proteome\_02

Scan 128967 Method FTMS; HCD Score 64.7 m/z 777.7 Gene names MED20

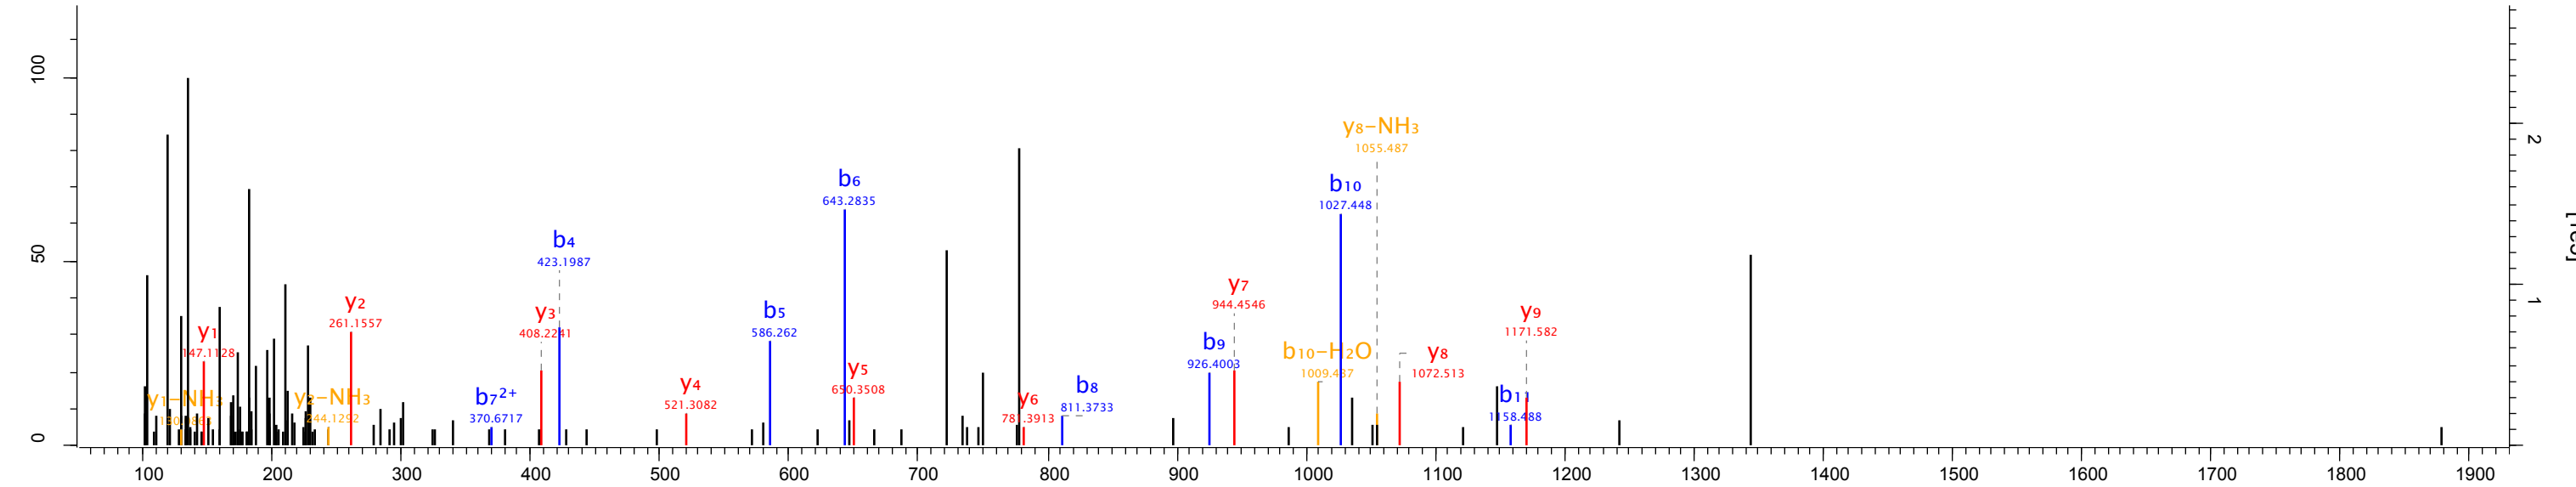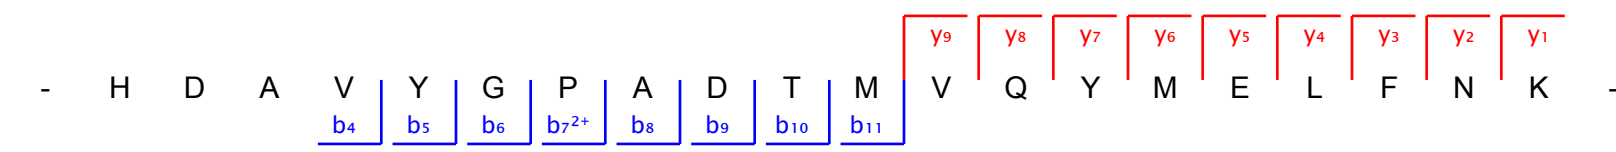

Raw file: 20171215\_MaS\_33SR\_LMH\_proteome\_02  
 Scan: 141007 Method: FTMS; HCD Score: 56.72 m/z: 1078.52 Gene names: KDELC1

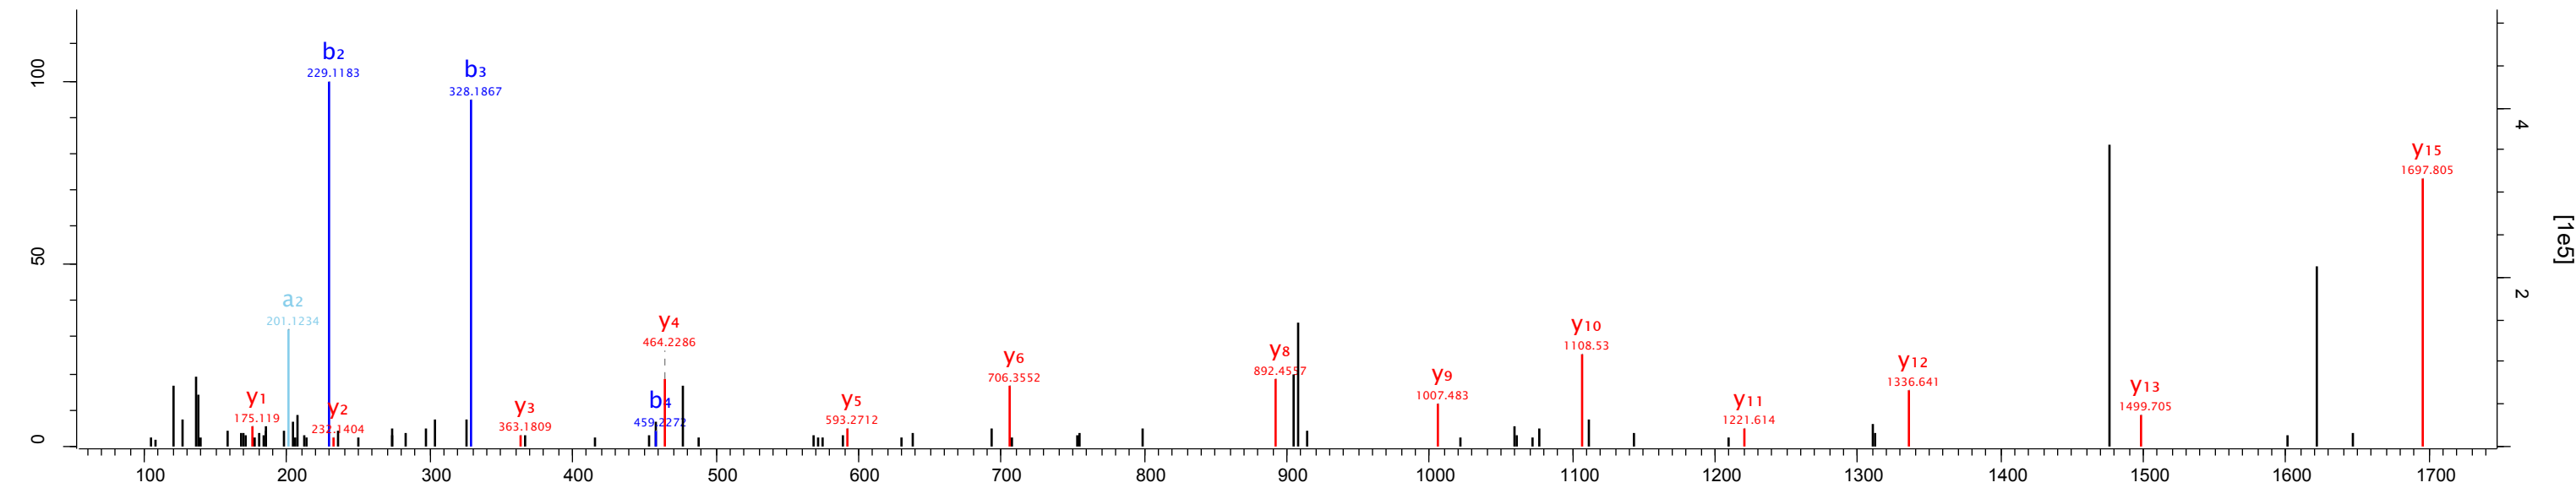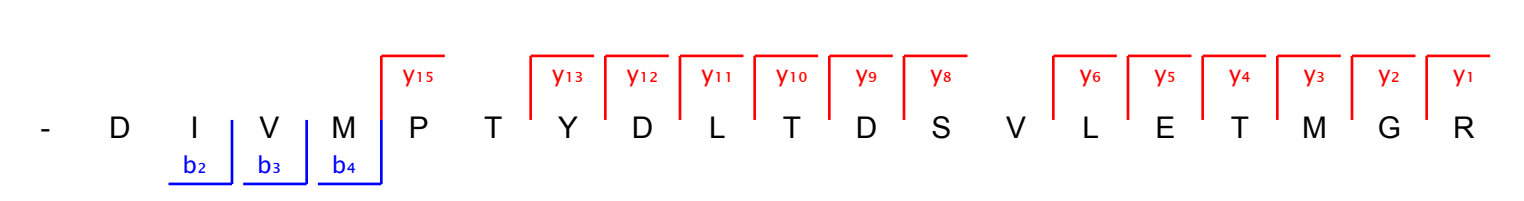

Raw file: 20171215\_MaS\_33SR\_LMH\_proteome\_02  
 Scan: 14487 Method: FTMS; HCD Score: 77.07 m/z: 842.38 Gene names: SF3B5

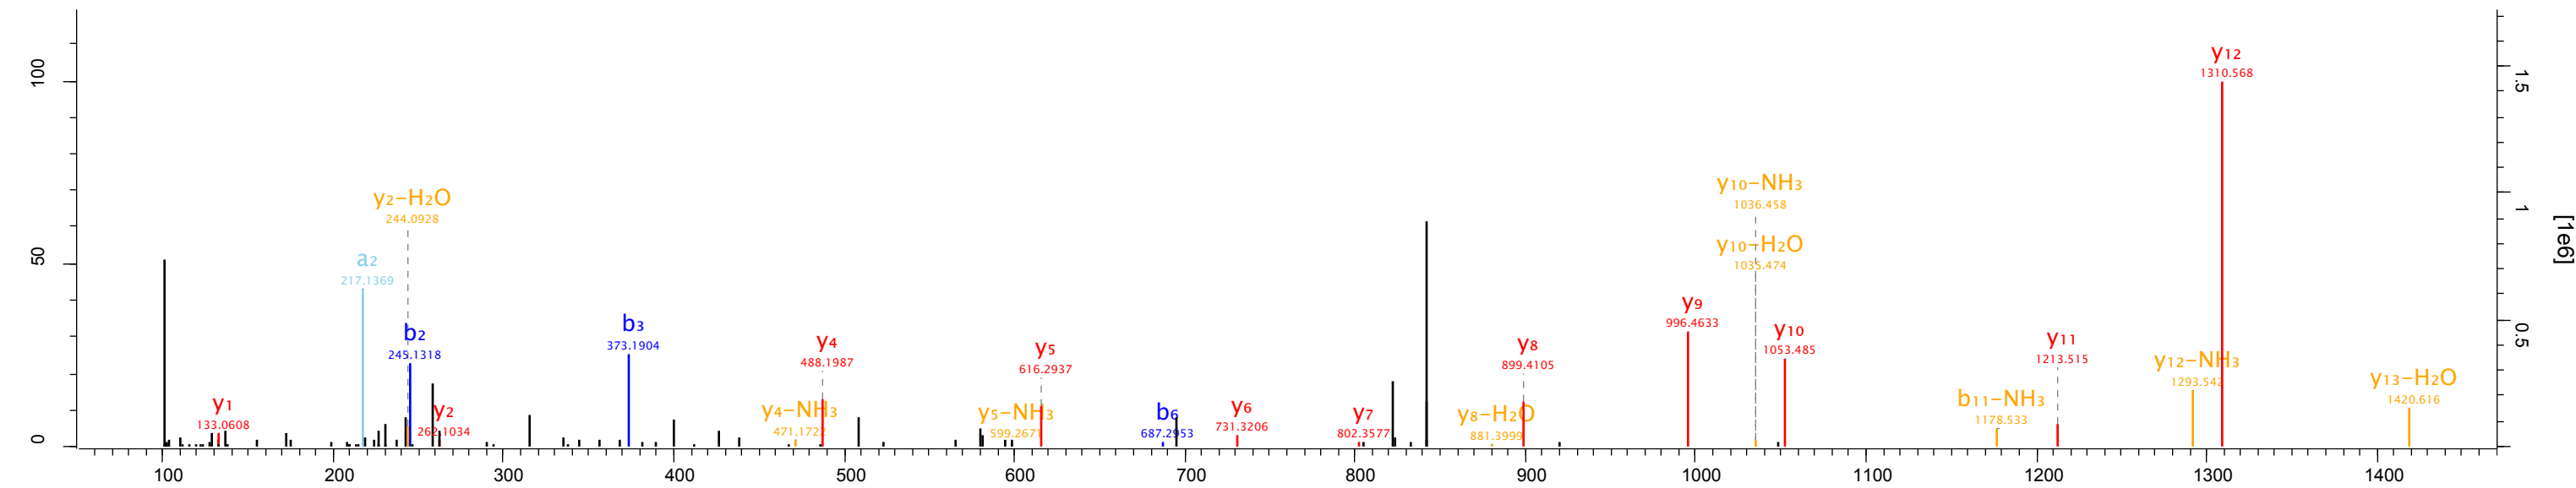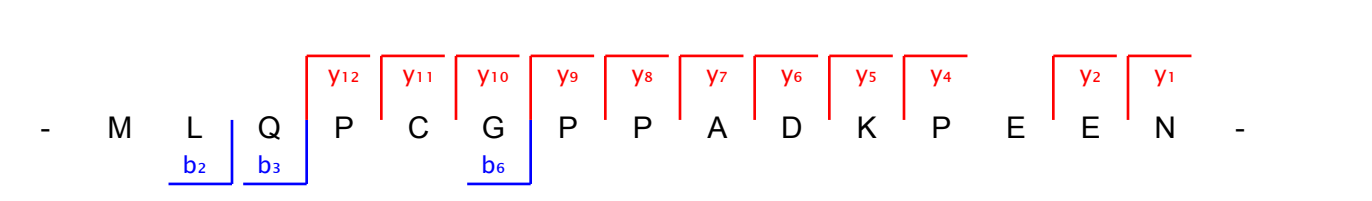



Raw file

20171215\_MaS\_33SR\_LMH\_proteome\_02

| Scan  | Method    | Score | m/z    | Gene names |
|-------|-----------|-------|--------|------------|
| 27647 | FTMS; HCD | 53.49 | 499.31 | KEAP1      |

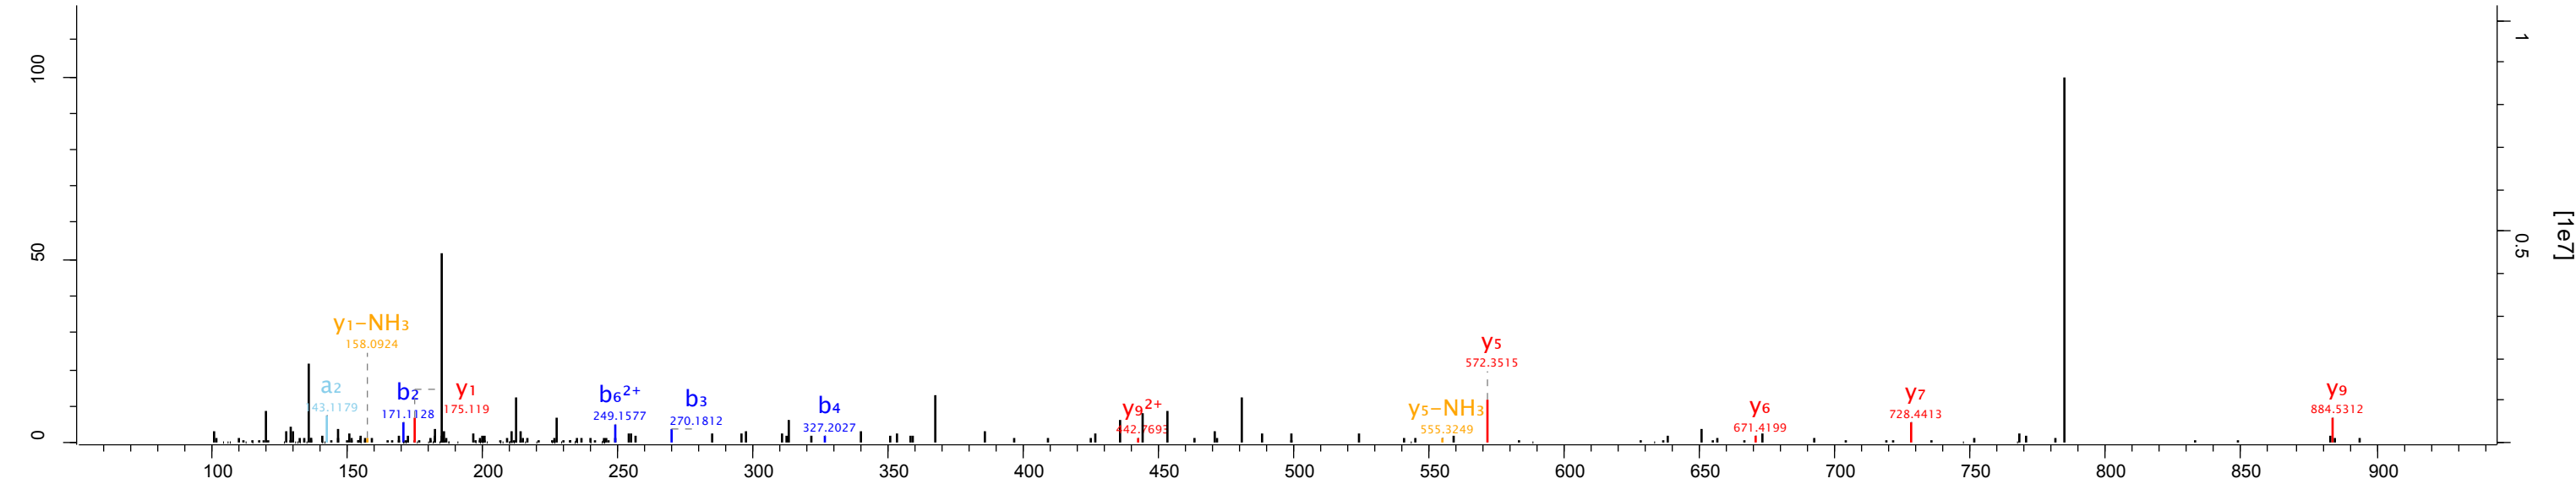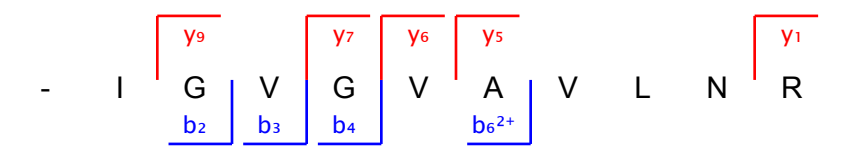

Raw file: 20171215\_MaS\_33SR\_LMH\_proteome\_02  
 Scan: 31257 Method: FTMS; HCD Score: 132.8 m/z: 374.26 Gene names: RTTN

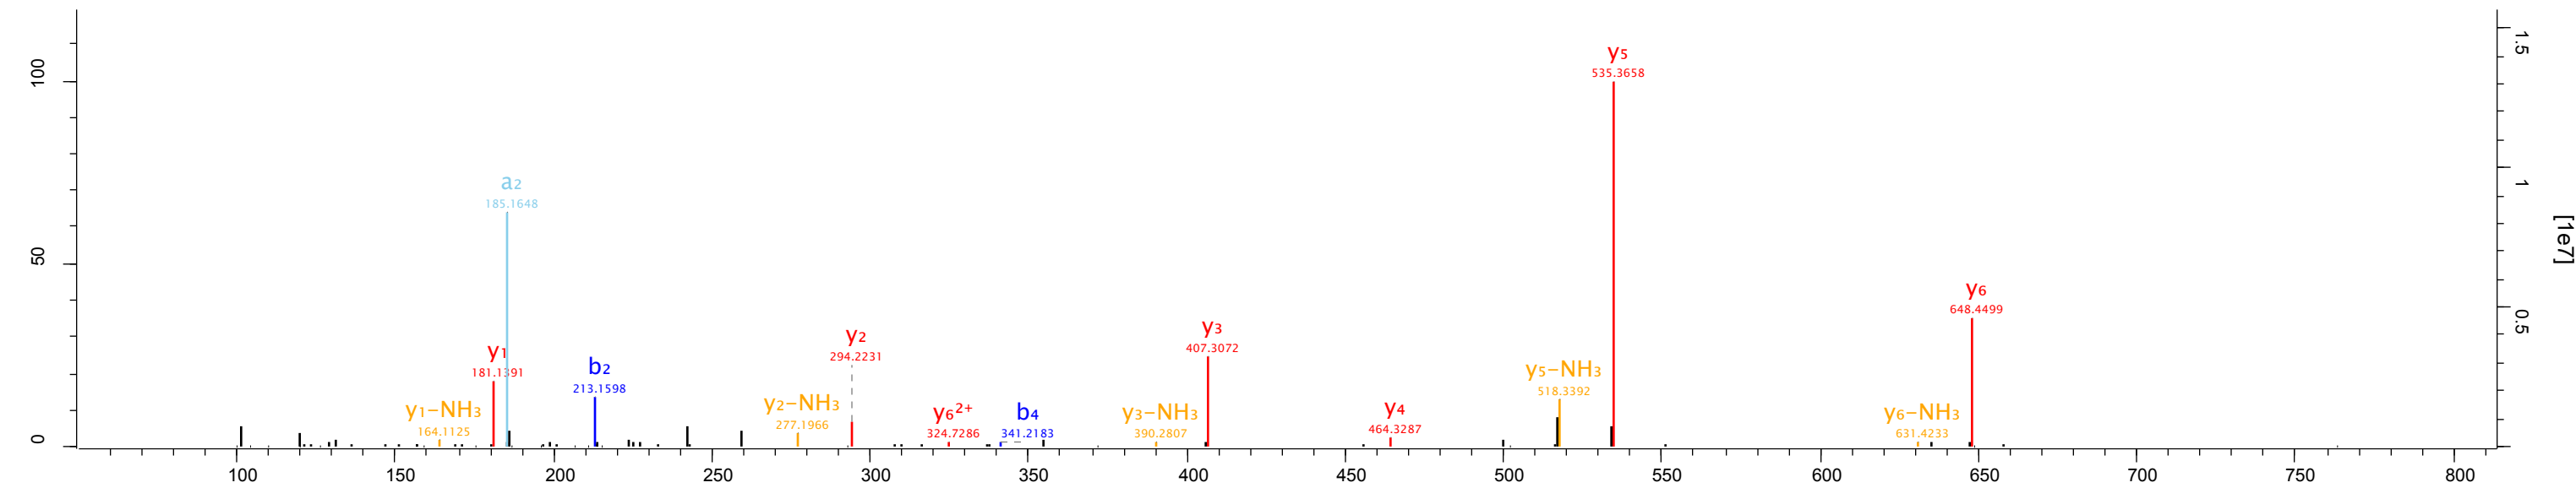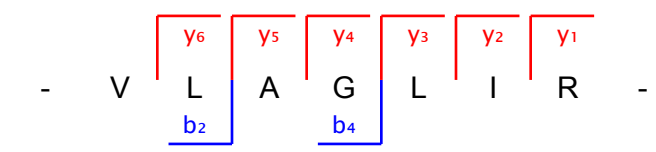

Raw file: 20171215\_MaS\_33SR\_LMH\_proteome\_02  
 Scan: 35747 Method: FTMS; HCD Score: 40.49 m/z: 700.64 Gene names: RALGAPB

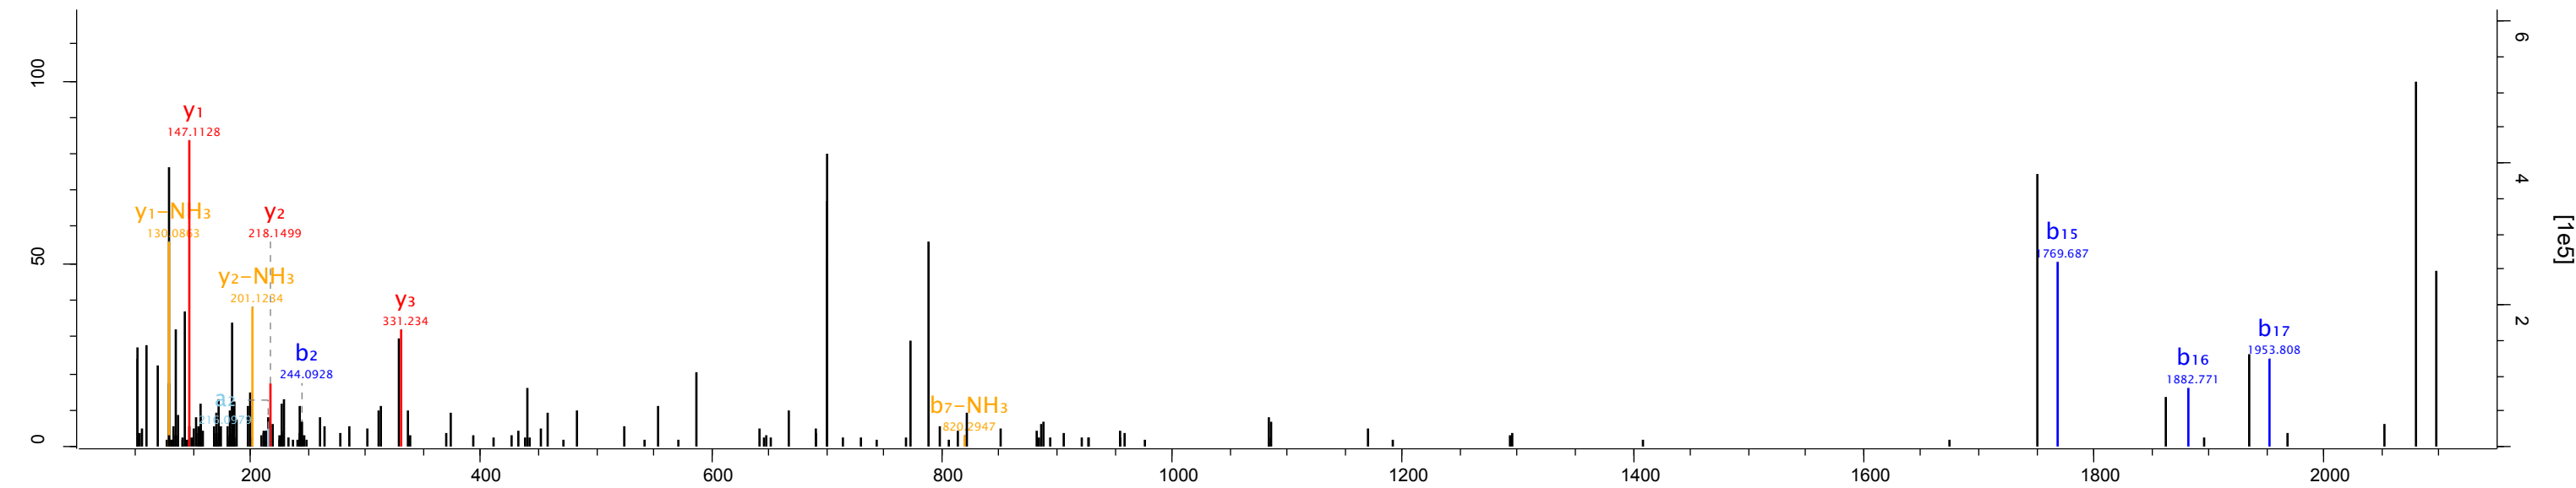

- Q D M ph S I ph S L A A L E L L S G L A K -

Annotations below the sequence:

- b<sub>2</sub> is underlined under 'D'.
- b<sub>15</sub> is underlined under 'G'.
- b<sub>16</sub> is underlined under 'L'.
- b<sub>17</sub> is underlined under 'A'.
- y<sub>3</sub> is above 'L'.
- y<sub>2</sub> is above 'A'.
- y<sub>1</sub> is above 'K'.

Raw file 20171215\_MaS\_33SR\_LMH\_proteome\_02 Scan 36537 Method FTMS; HCD Score 74.84 m/z 705.35 Gene names OR52Z1

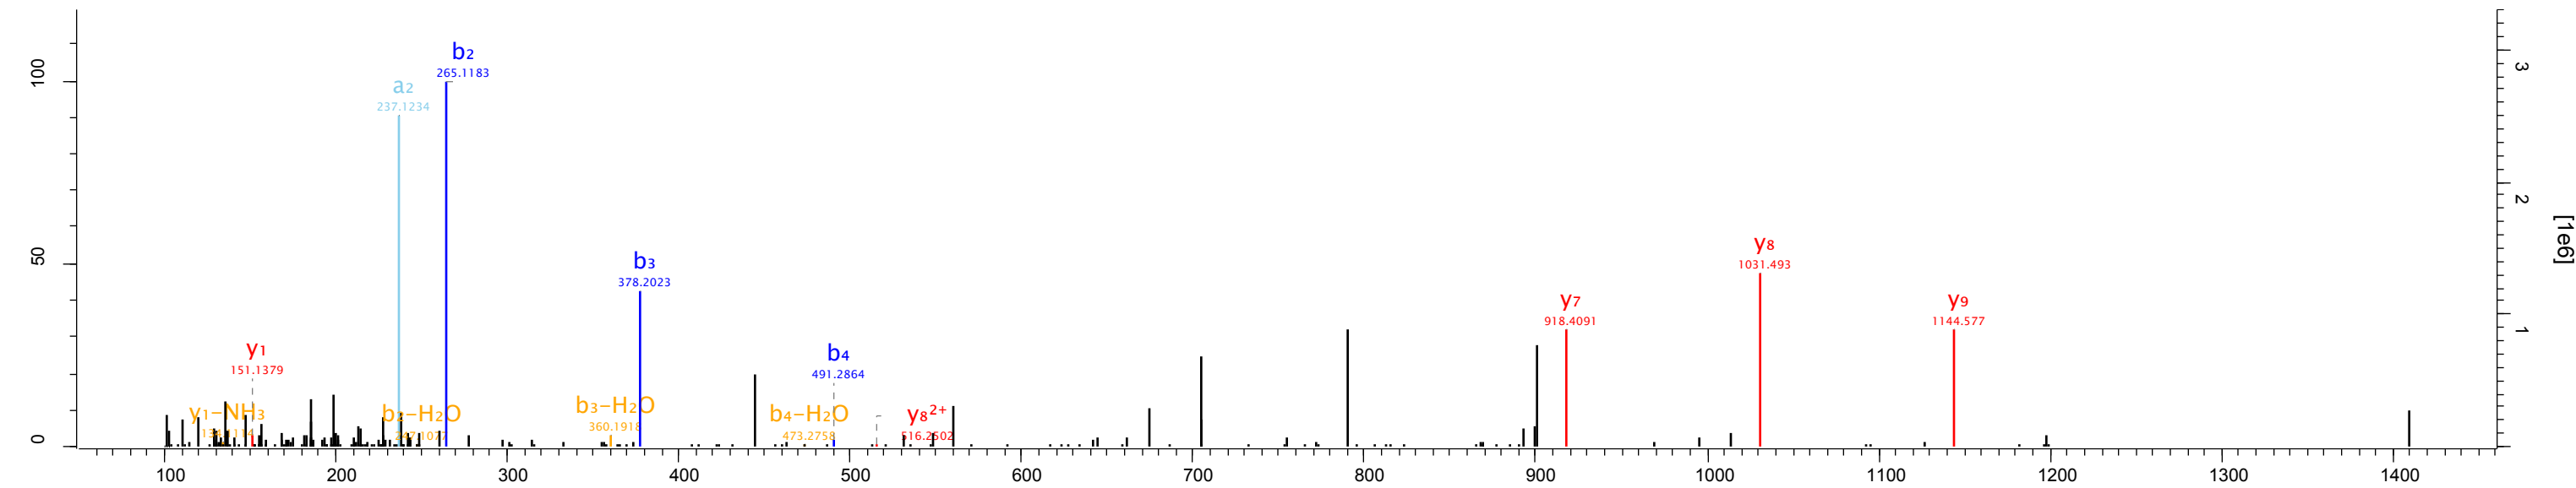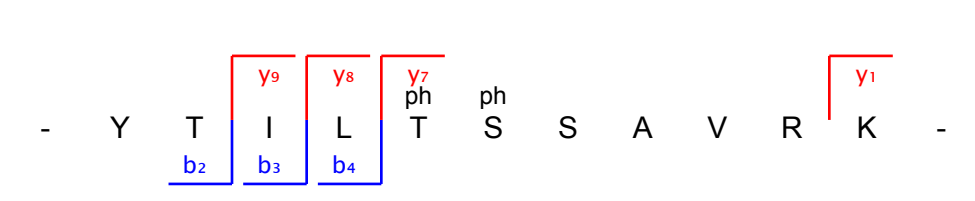

Raw file: 20171215\_MaS\_33SR\_LMH\_proteome\_02  
 Scan: 36777 Method: FTMS; HCD Score: 93.59 m/z: 416.77 Gene names: VN1R5

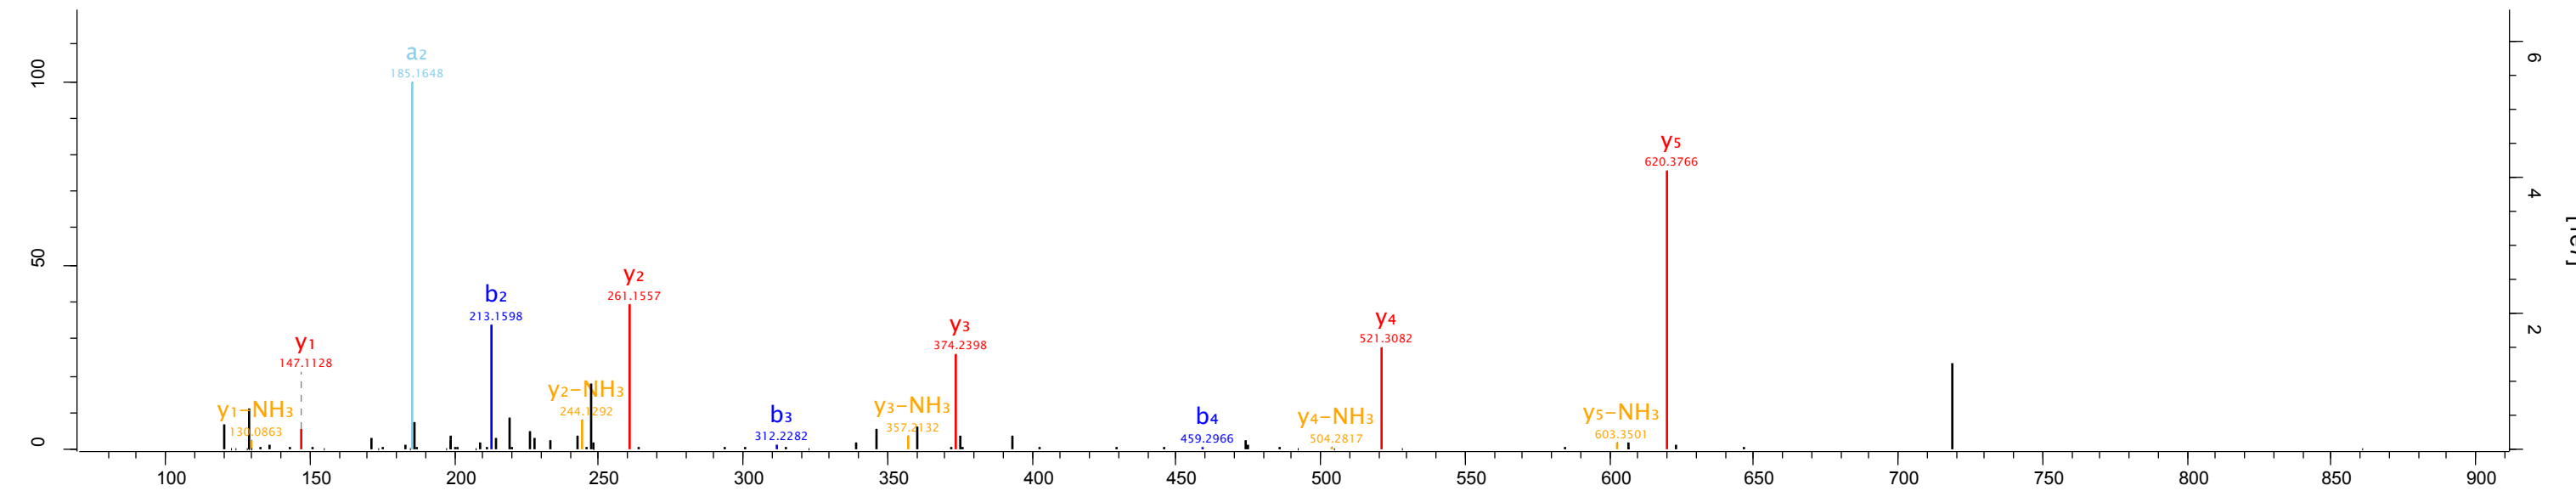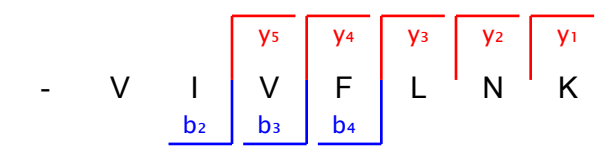

Raw file 20171215\_MaS\_33SR\_LMH\_proteome\_02 Scan 43997 Method FTMS; HCD Score 62.24 m/z 652.02 Gene names EIF1AD

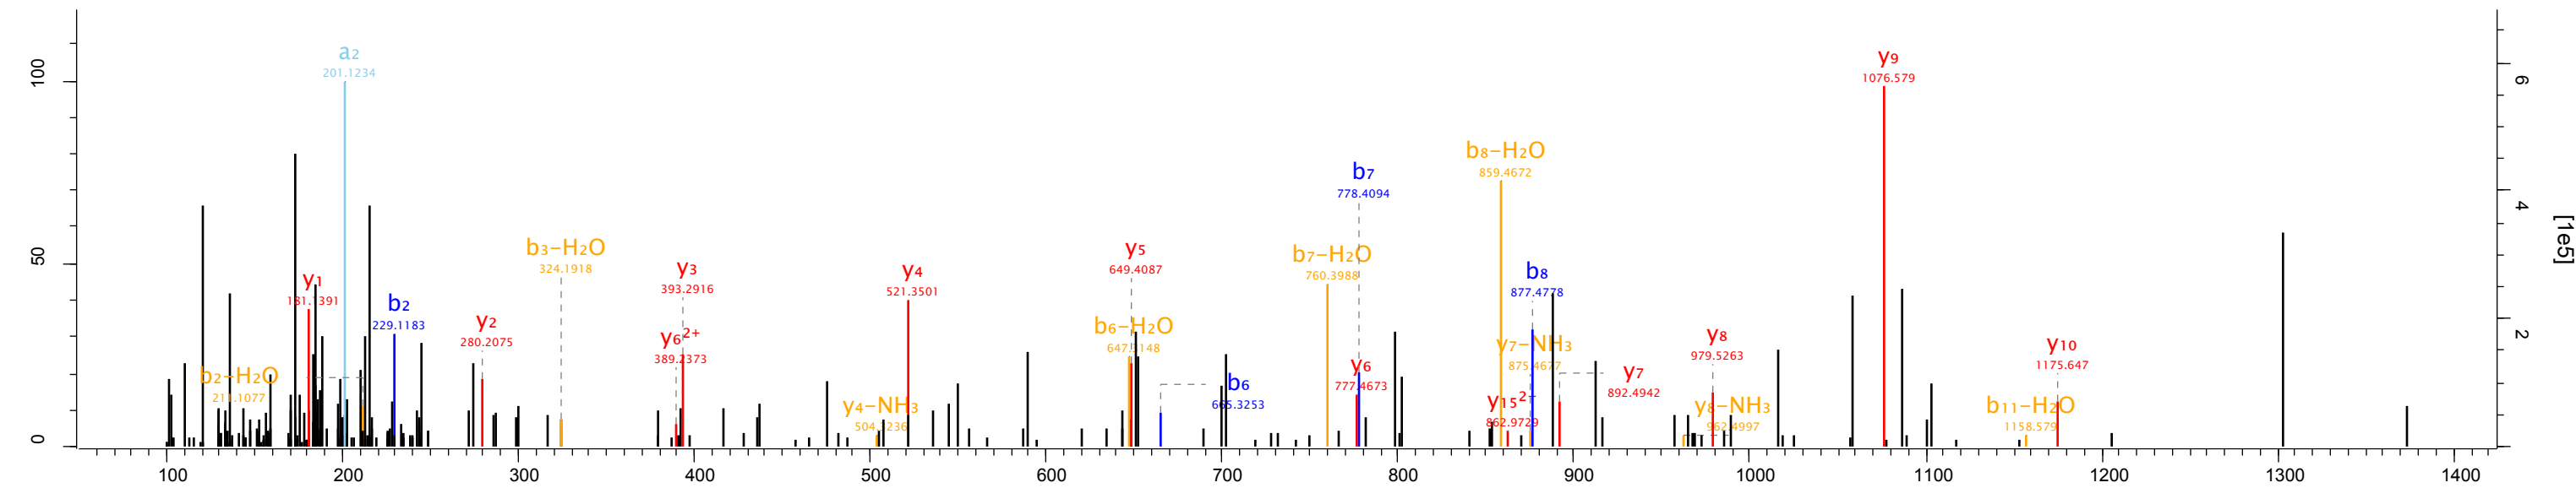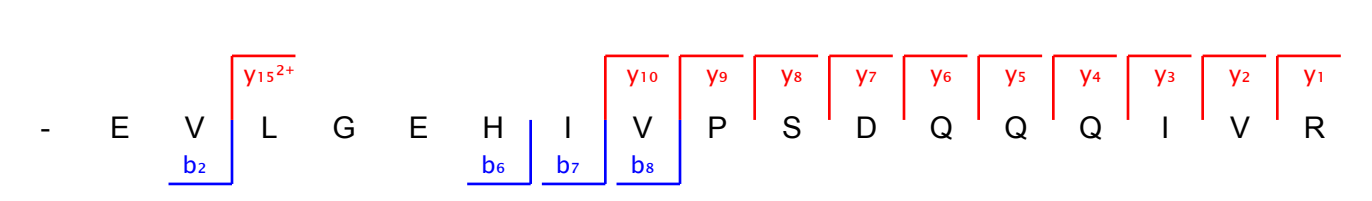

20171215\_MaS\_33SR\_LMH\_proteome\_02 44567 FTMS; HCD 95.98 522.97 SNRPD1

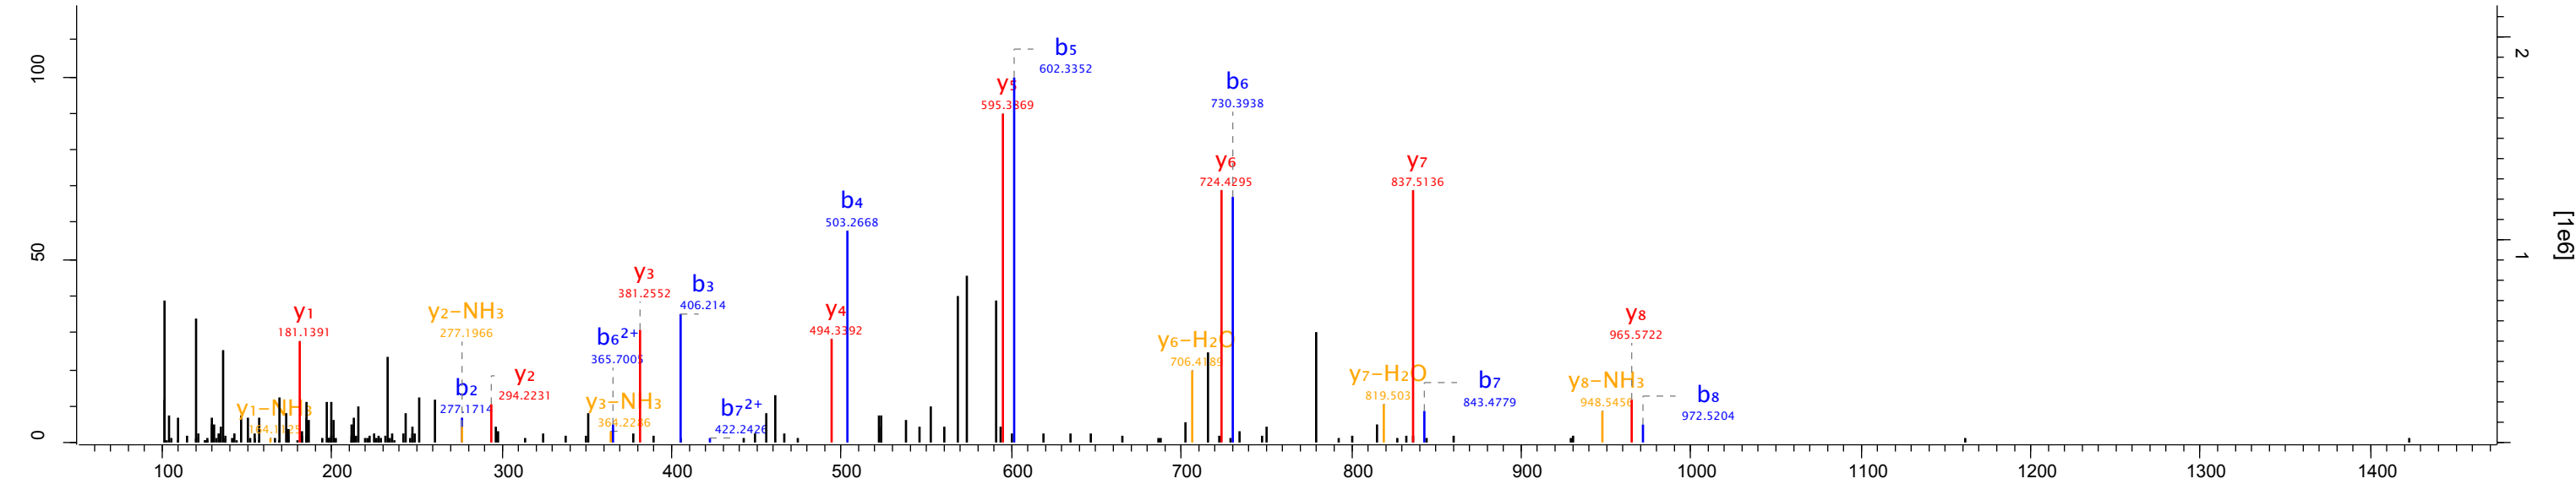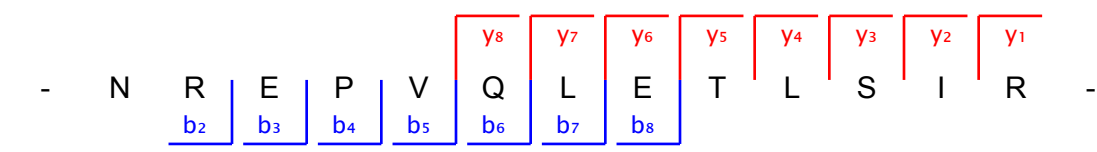

Raw file 20171215\_MaS\_33SR\_LMH\_proteome\_02 Scan 46937 Method FTMS; HCD Score 78.44 m/z 882.95 Gene names HLA-DQB1

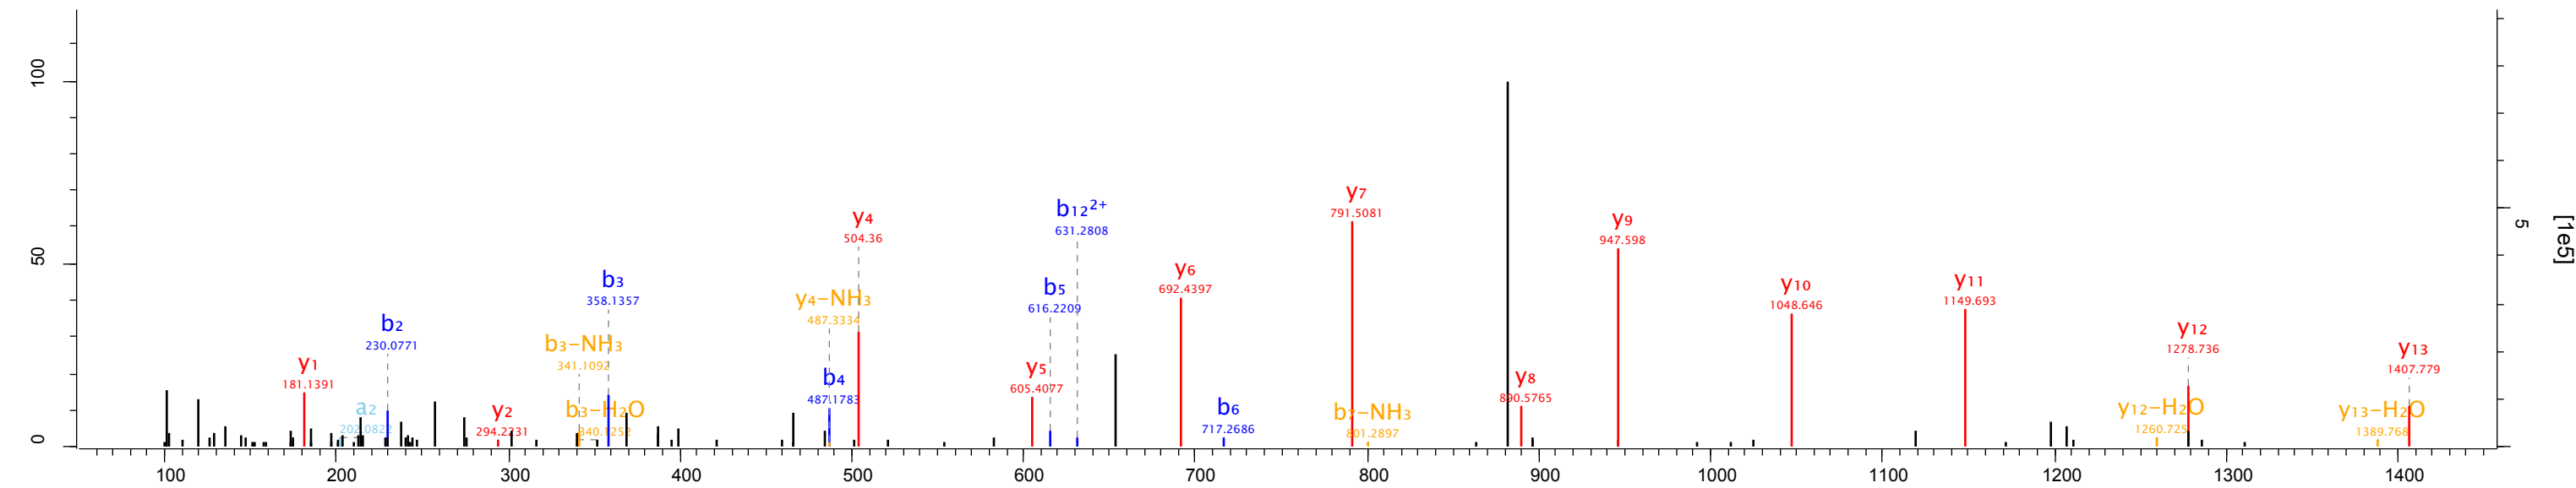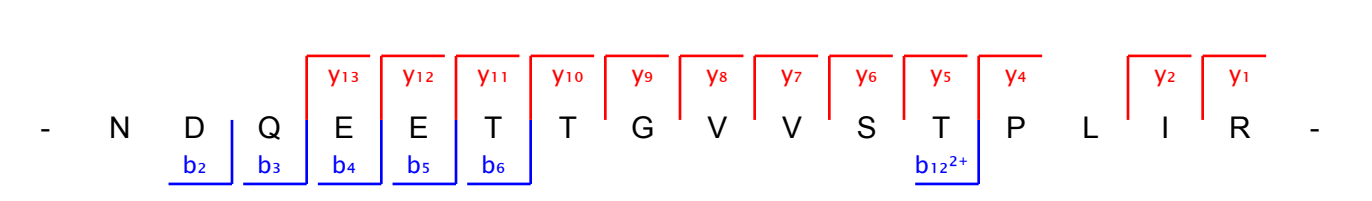



Raw file 20171215\_MaS\_33SR\_LMH\_proteome\_02 Scan 48747 Method FTMS; HCD Score 48.57 m/z 749.88 Gene names CHRNA3

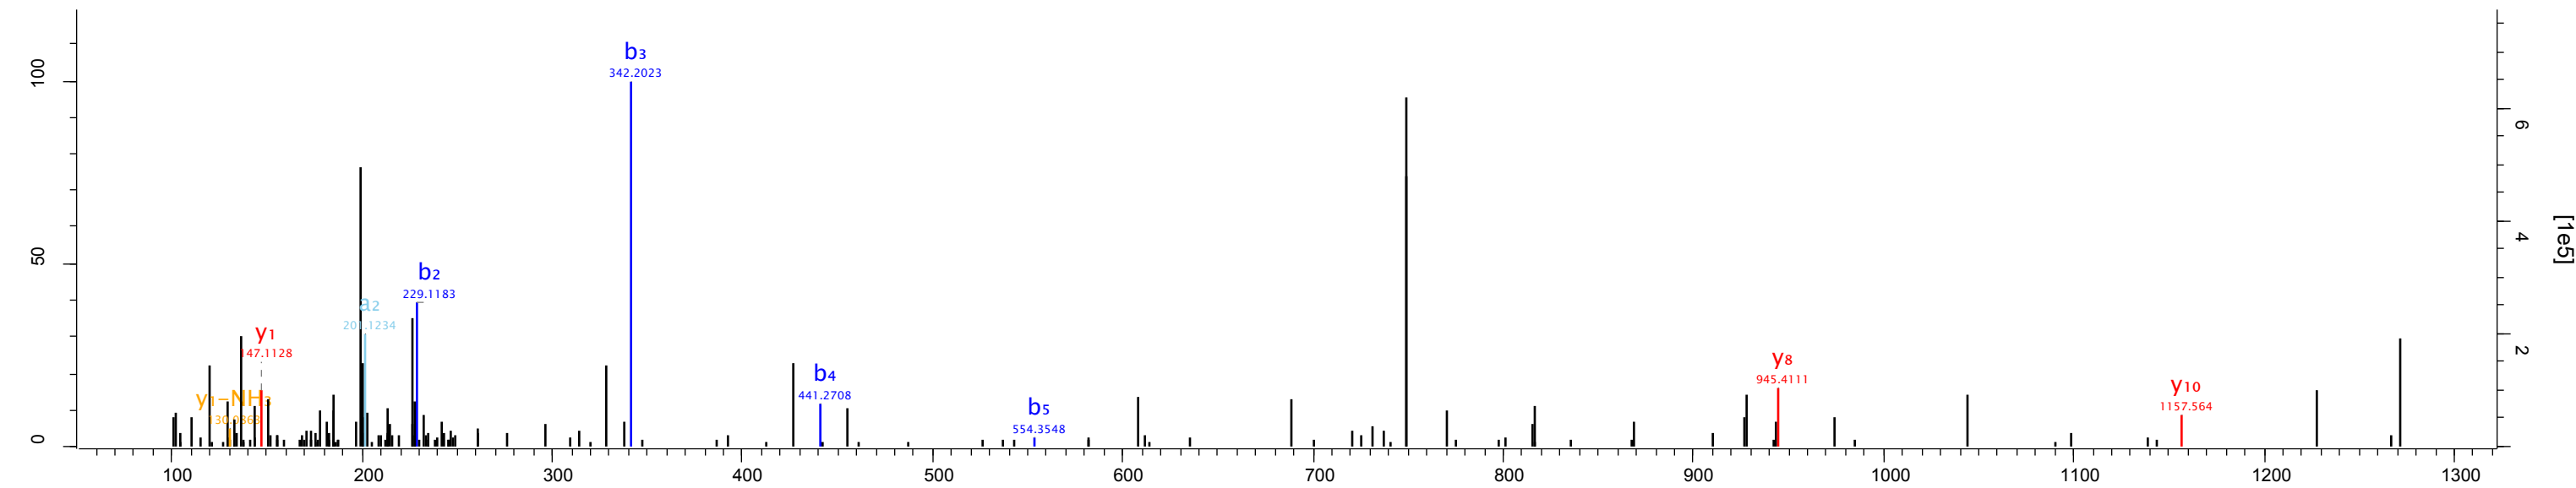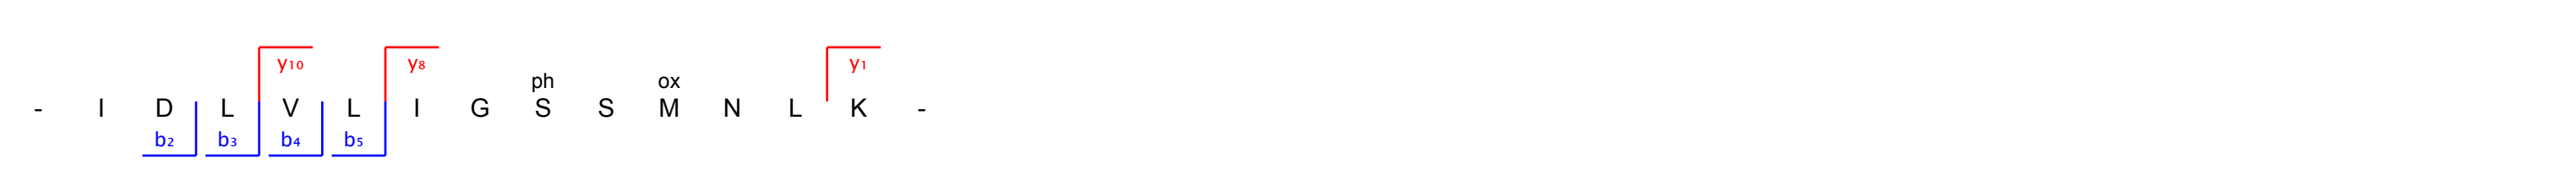

Raw file: 20171215\_MaS\_33SR\_LMH\_proteome\_02  
 Scan: 56097 Method: FTMS; HCD Score: 60.38 m/z: 916.46 Gene names: USP19

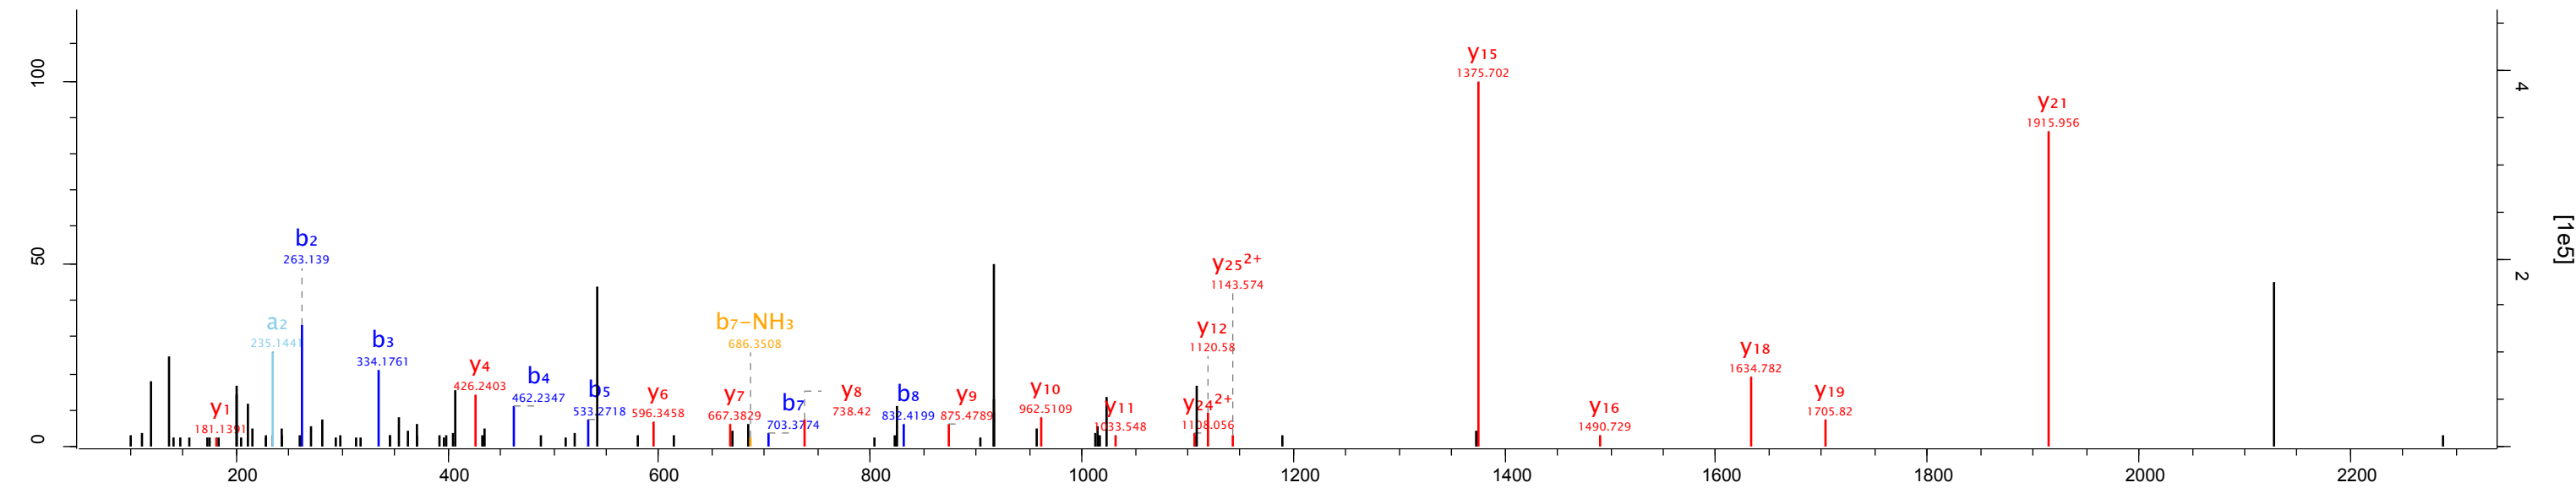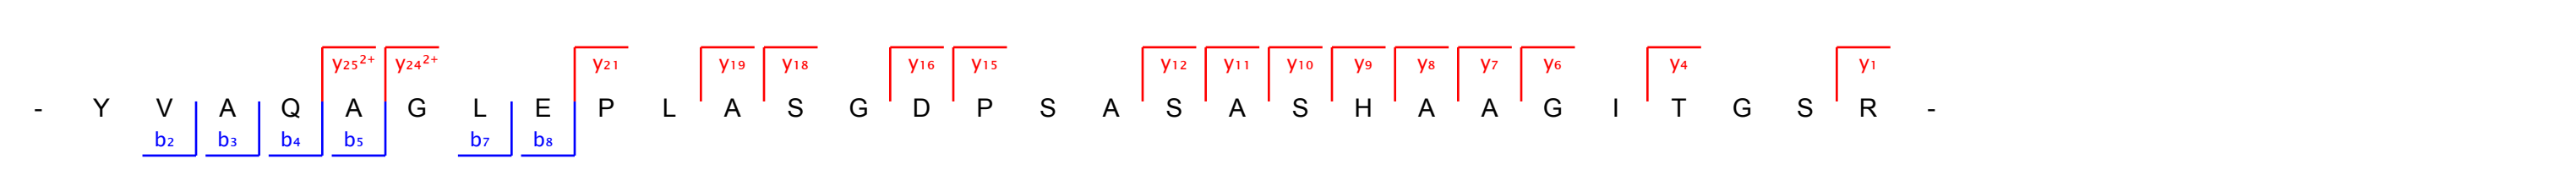

Raw file

20171215\_MaS\_33SR\_LMH\_proteome\_02

Scan 56707 Method FTMS; HCD Score 71.27 m/z 536.29 Gene names BLOC1S2

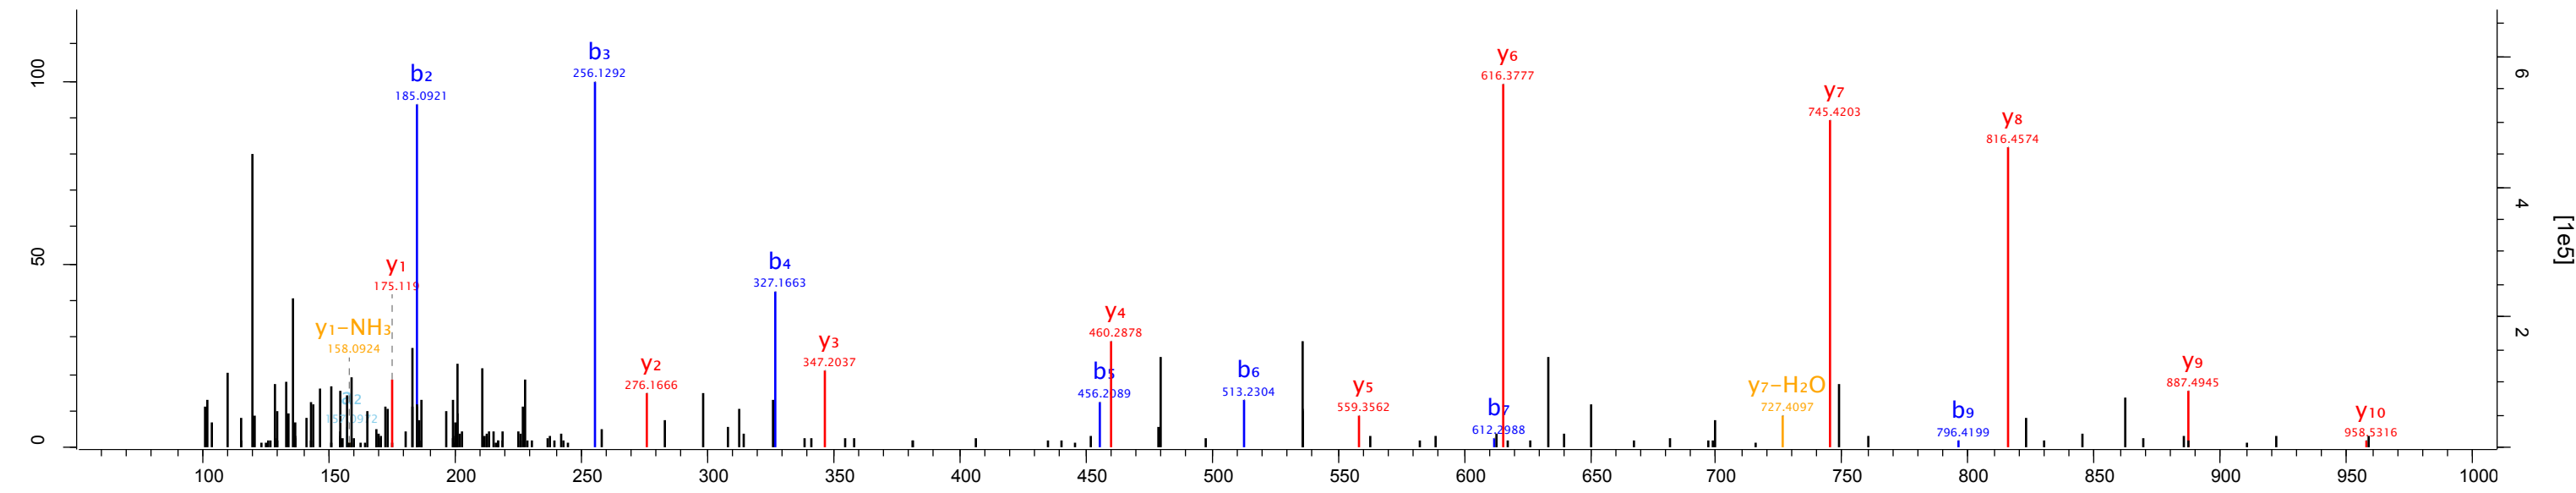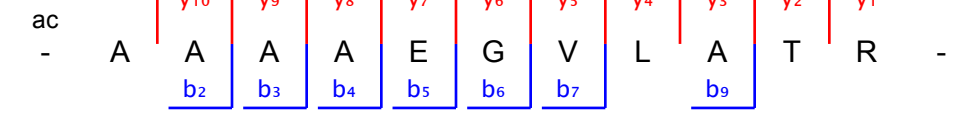

Raw file 20171215\_MaS\_33SR\_LMH\_proteome\_02 Scan 67657 Method FTMS; HCD Score 55.55 m/z 799.39 Gene names GOLPH3L

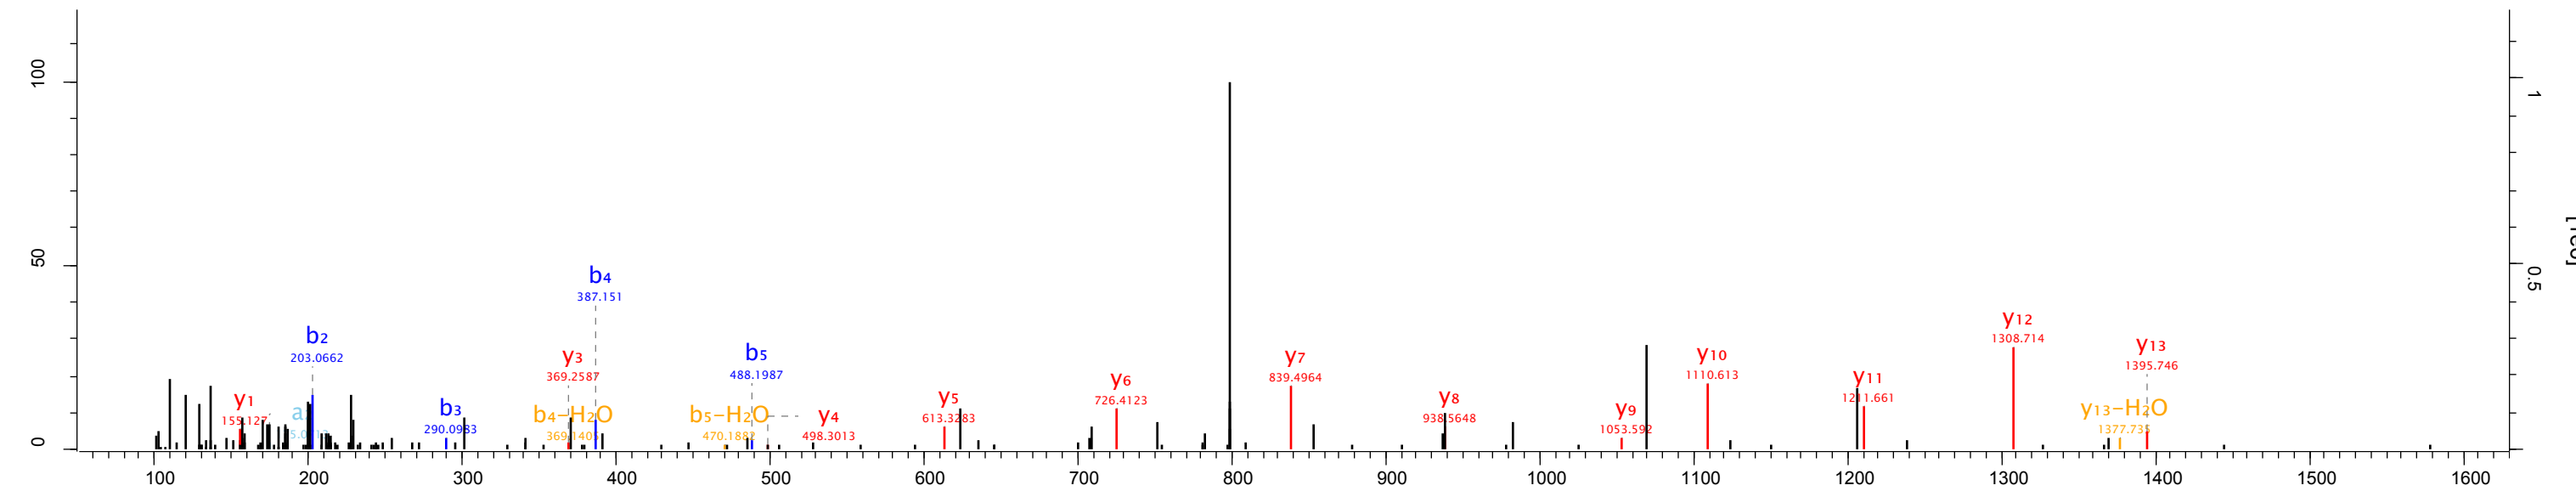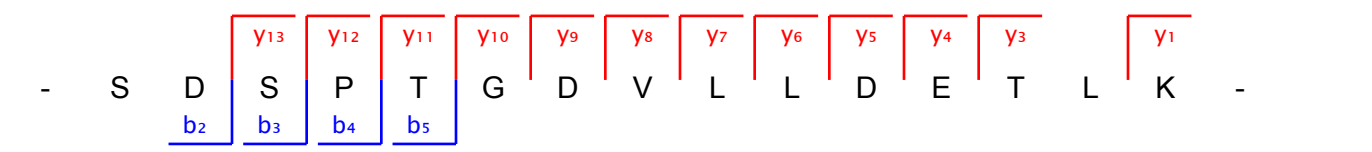

Raw file  
20171215\_MaS\_33SR\_LMH\_proteome\_02

Scan 70267 Method FTMS; HCD Score 54.83 m/z 1001.02 Gene names RNF31

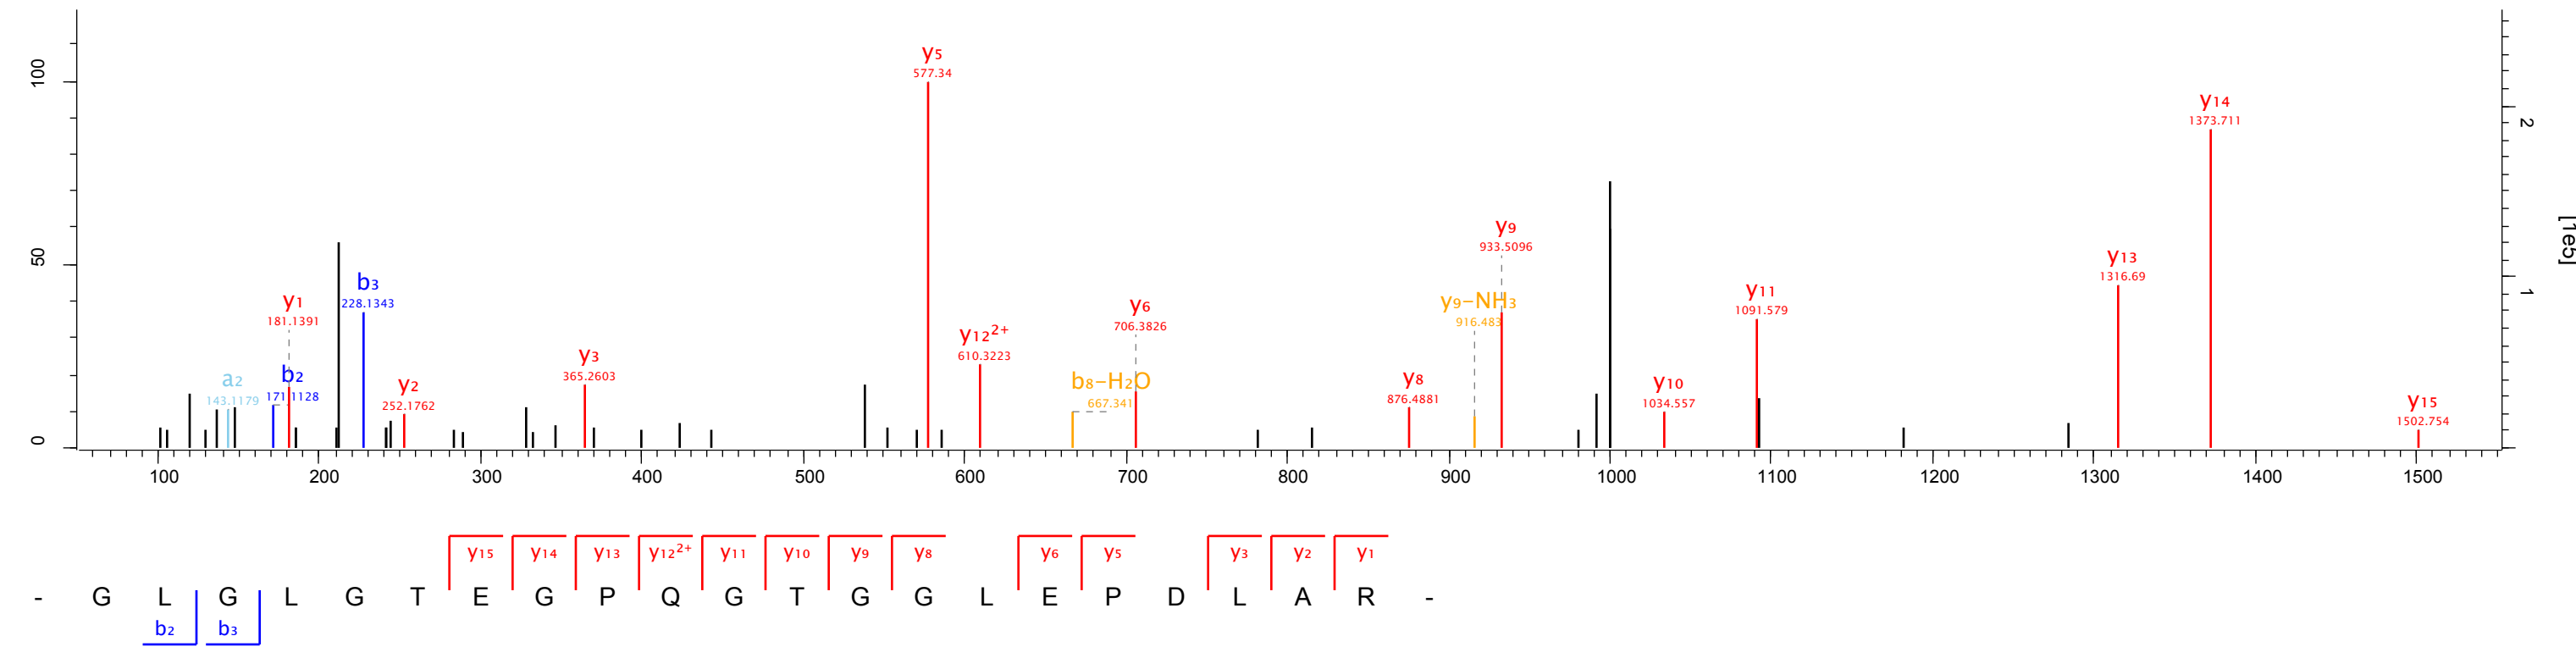

Raw file 20171215\_MaS\_33SR\_LMH\_proteome\_02 Scan 80027 Method FTMS; HCD Score 89.14 m/z 819.44 Gene names STX12

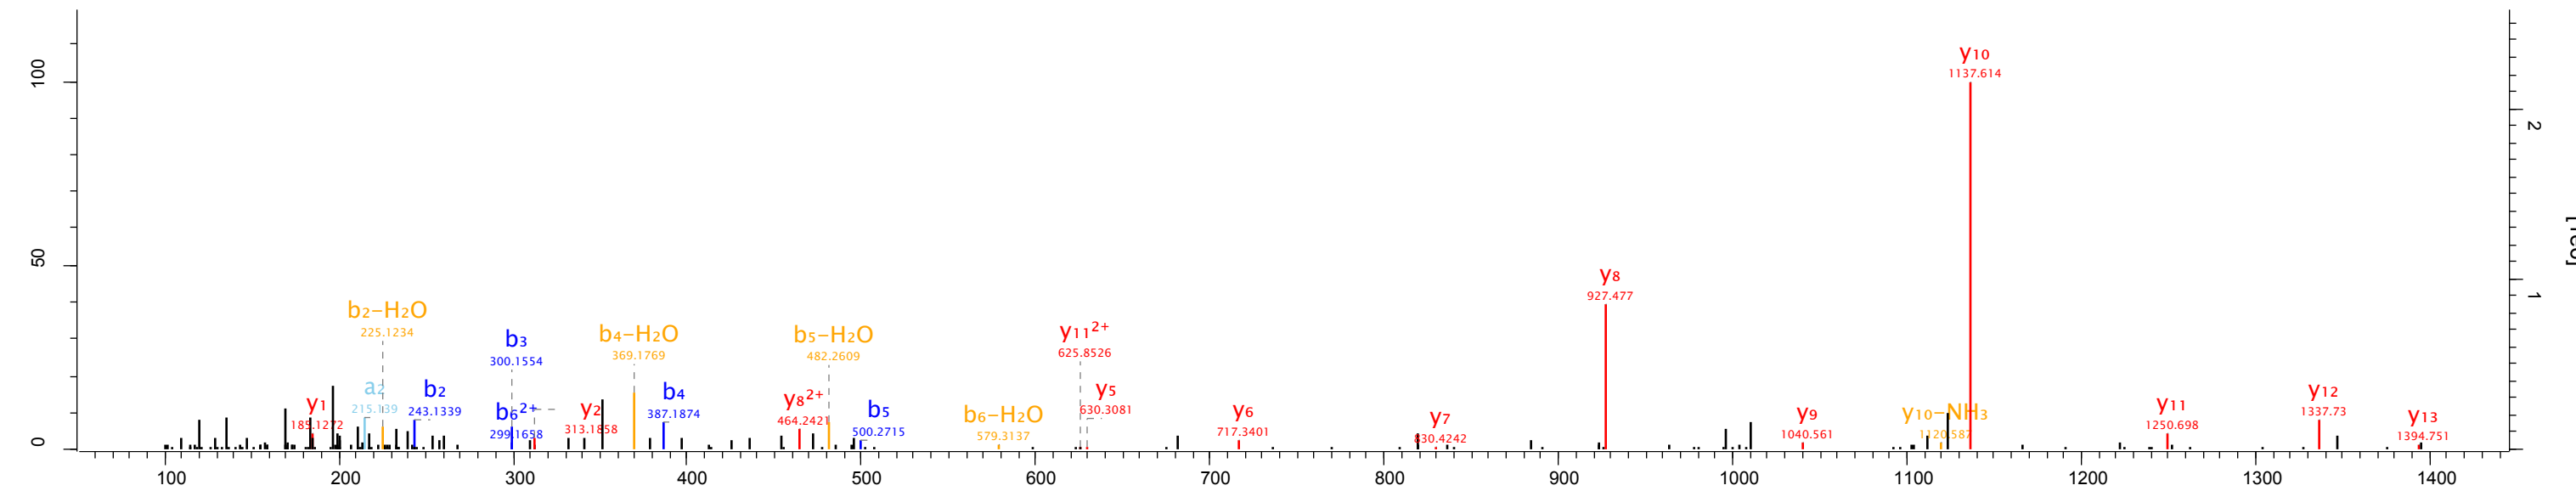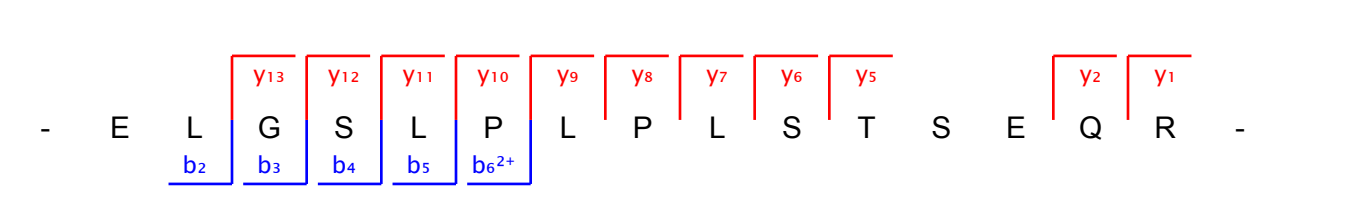

Raw file

20171215\_MaS\_33SR\_LMH\_proteome\_02

| Scan  | Method    | Score | m/z    | Gene names |
|-------|-----------|-------|--------|------------|
| 83187 | FTMS; HCD | 46.32 | 904.43 | GPN2       |

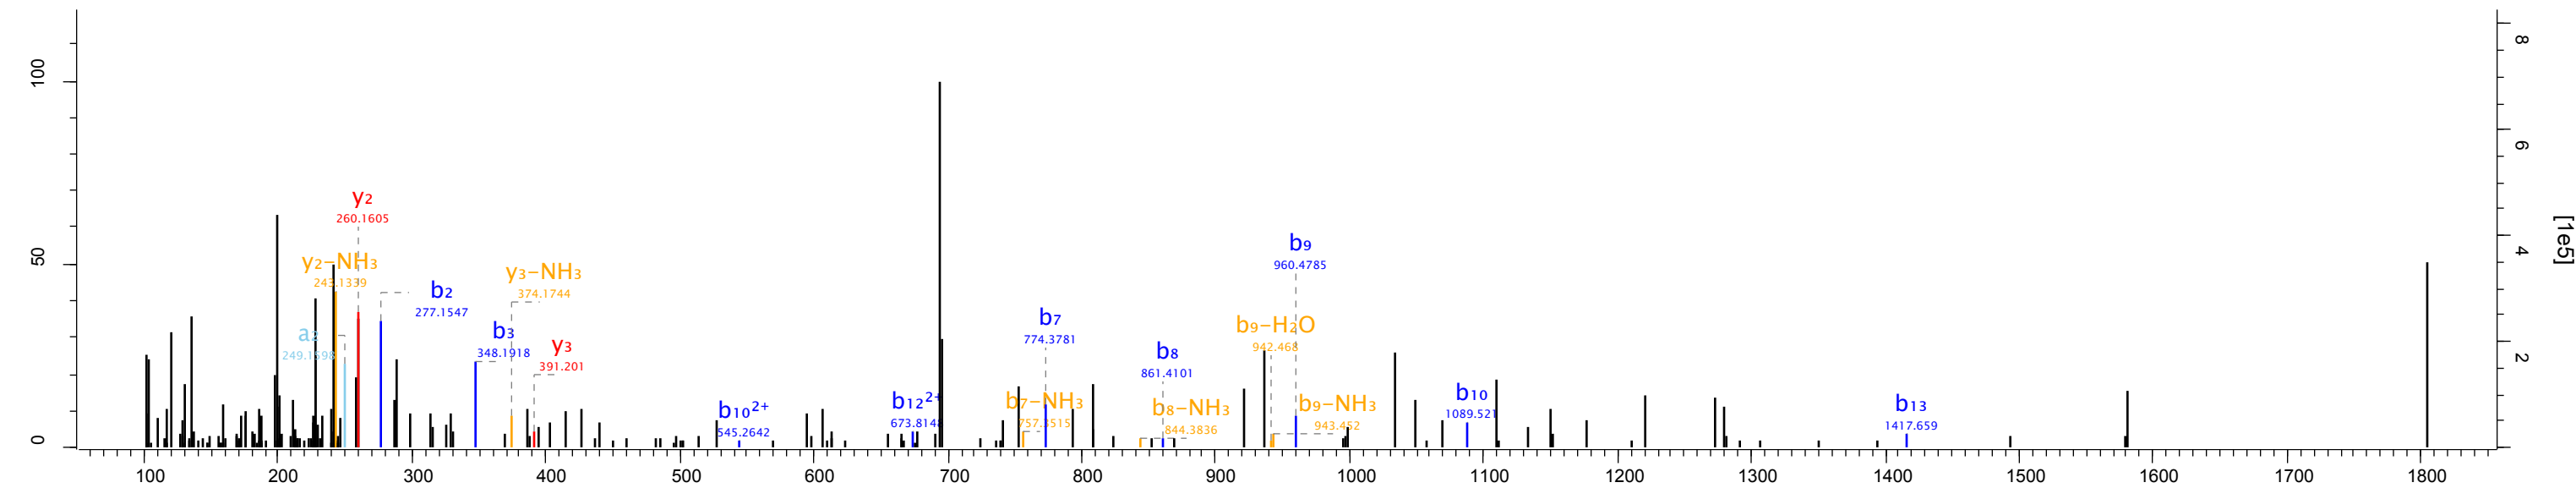

- Y L A P S N Q S V E Q E A M Q L -

Fragmentation sites are indicated by brackets below the sequence:

- b<sub>2</sub> (L, A)
- b<sub>3</sub> (A)
- b<sub>7</sub> (Q, S)
- b<sub>8</sub> (S, V)
- b<sub>9</sub> (V, E)
- b<sub>10</sub> (E, Q)
- b<sub>12</sub><sup>2+</sup> (E, A)
- b<sub>13</sub> (A, M)
- y<sub>3</sub> (M)
- y<sub>2</sub> (Q)

Raw file 20171215\_MaS\_33SR\_LMH\_proteome\_02 Scan 85787 Method FTMS; HCD Score 71.18 m/z 691.9 Gene names UQCC2

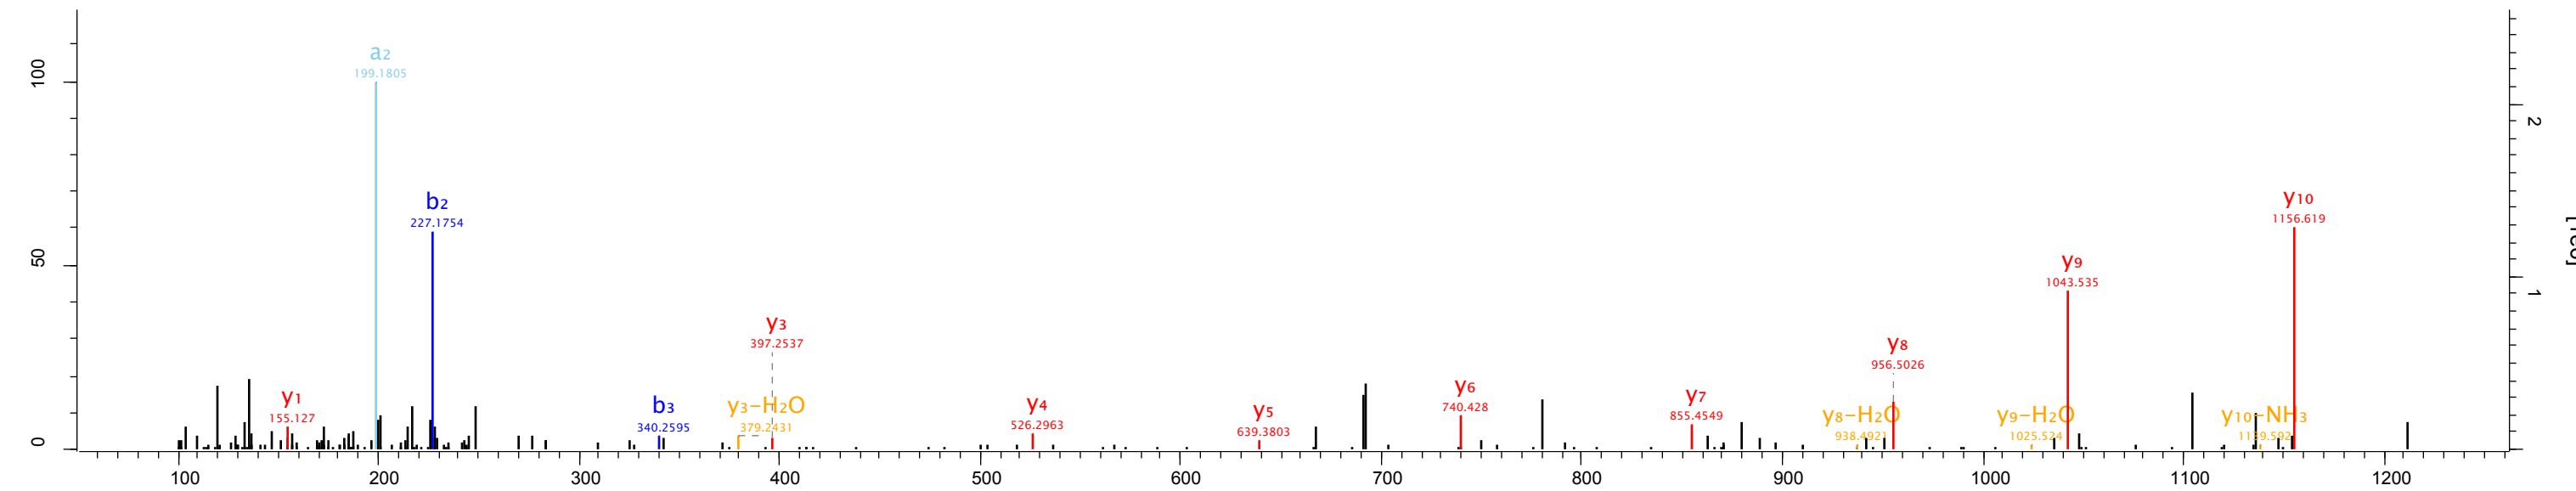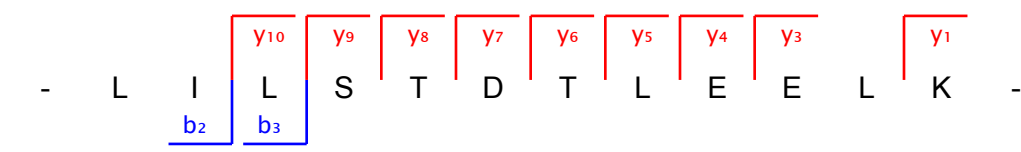



Raw file 20171215\_MaS\_33SR\_LMH\_proteome\_02 Scan 8597 Method FTMS; HCD Score 88.13 m/z 604.32 Gene names DPM3

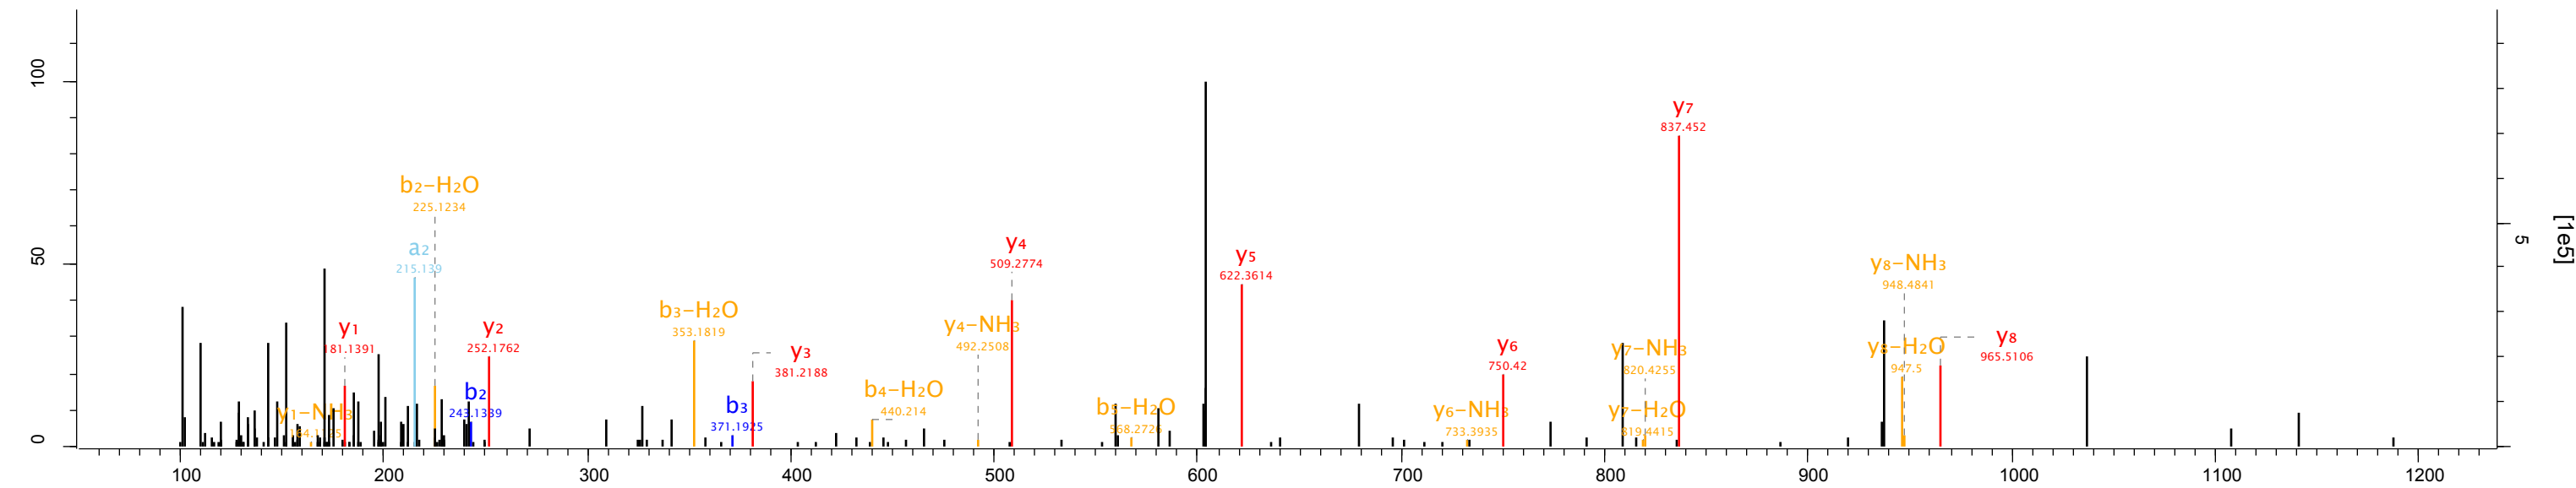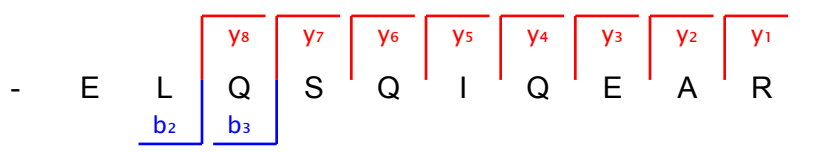

Raw file 20171215\_MaS\_33SR\_LMH\_proteome\_02 Scan 87487 Method FTMS; HCD Score 61.68 m/z 571.3

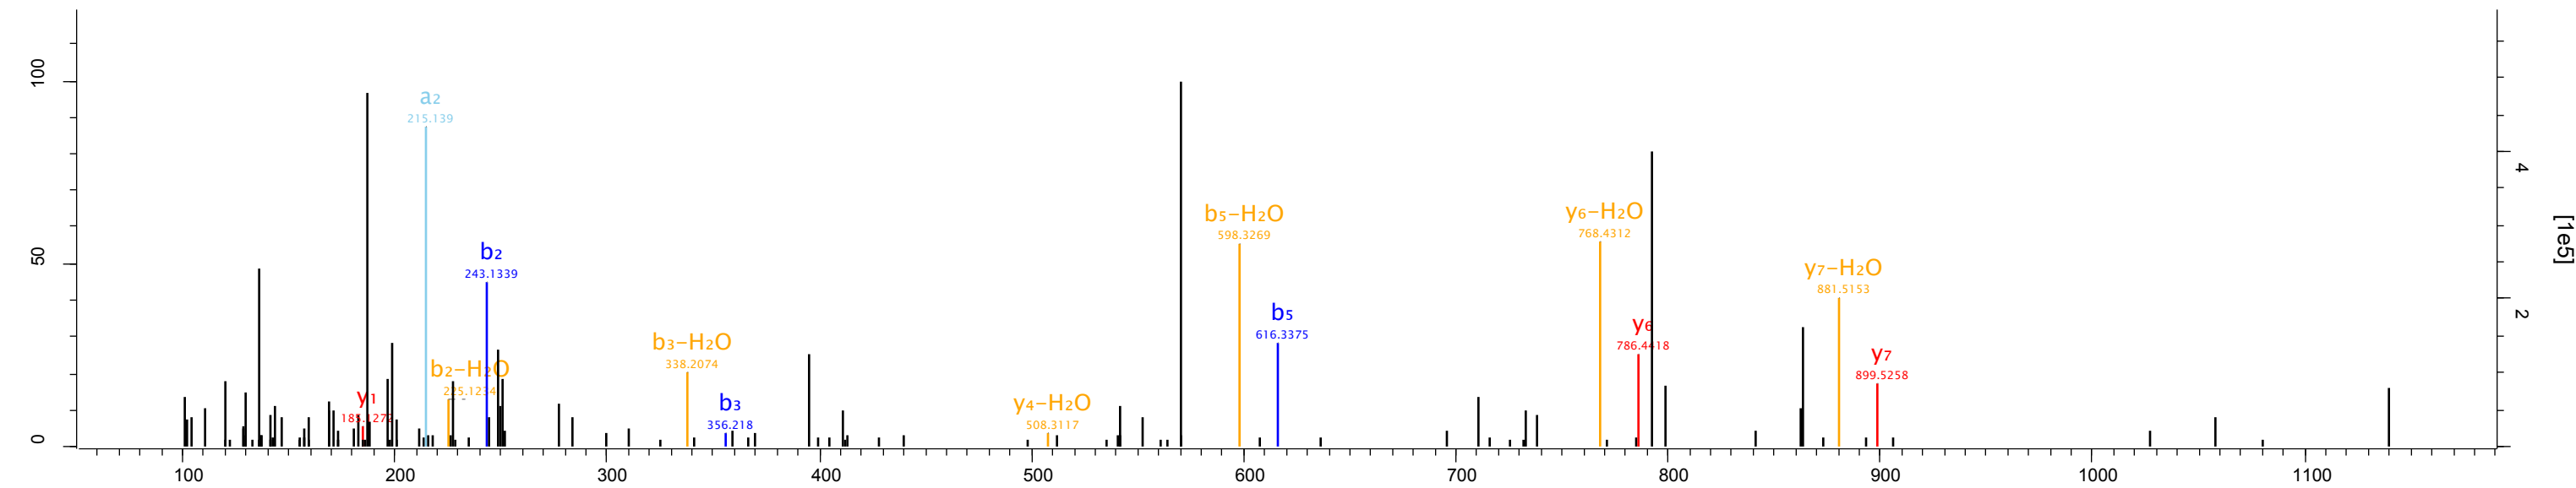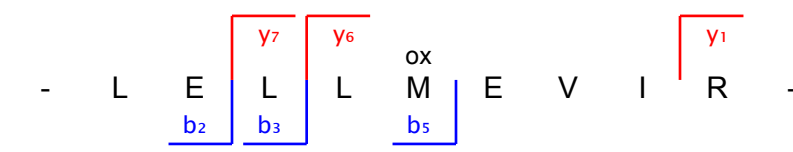

Raw file 20171215\_MaS\_33SR\_LMH\_proteome\_02 Scan 88157 Method FTMS; HCD Score 48.53 m/z 1008.47 Gene names PTPRC

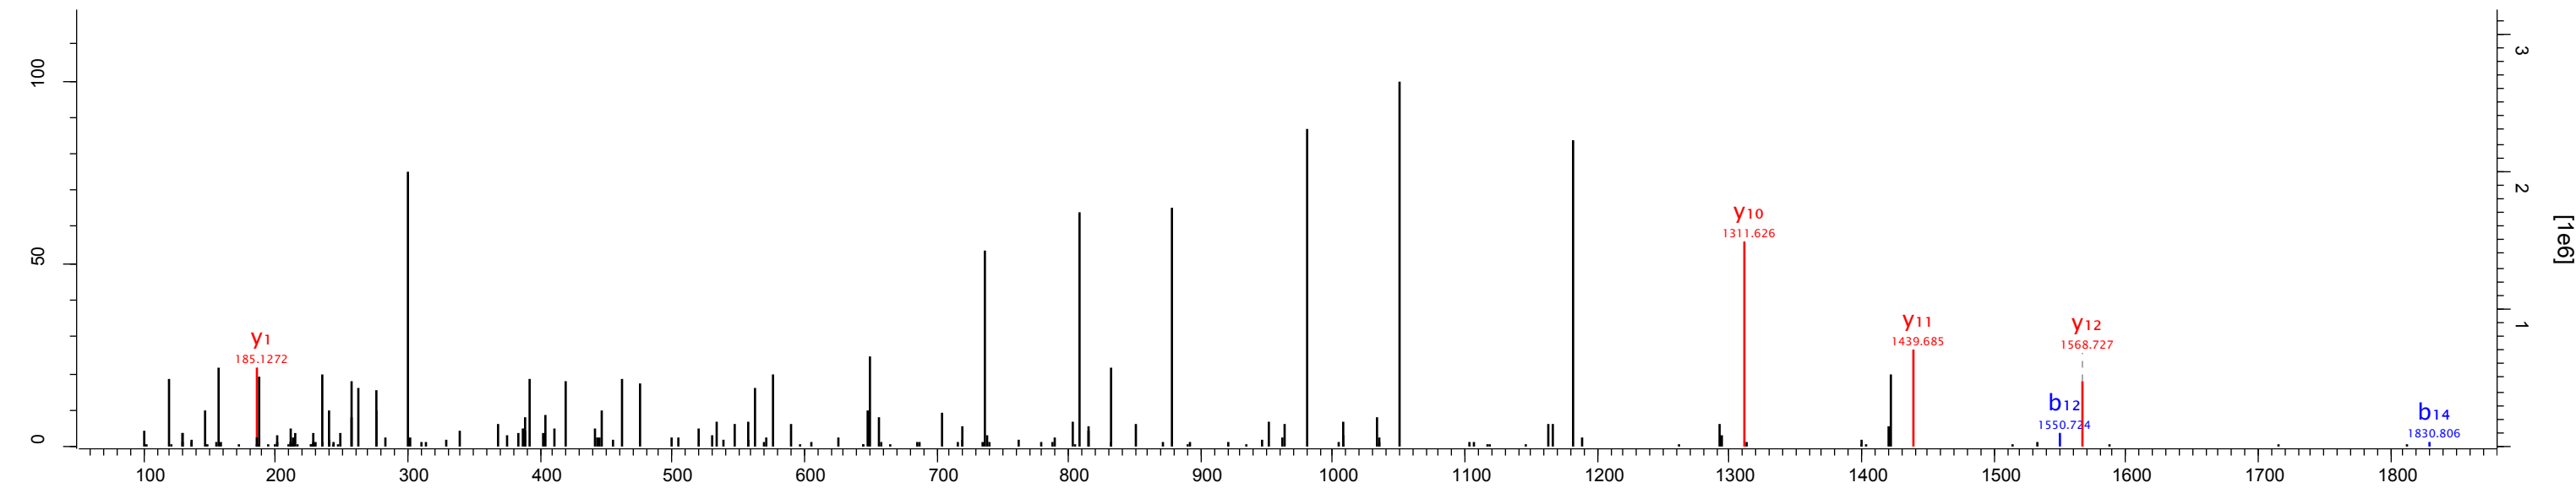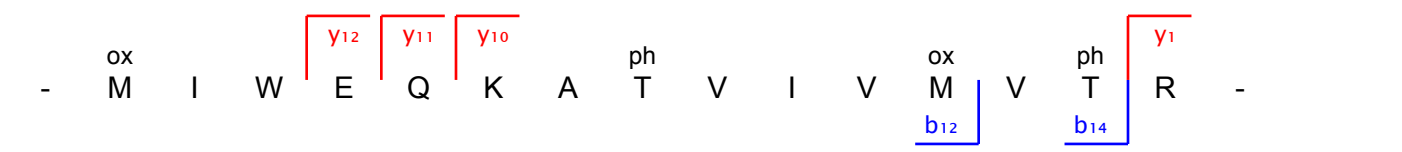

Raw file 20171215\_MaS\_33SR\_LMH\_phospho\_01 Scan 12358 Method FTMS; HCD Score 44.39 m/z 832.79 Gene names SLC9A8

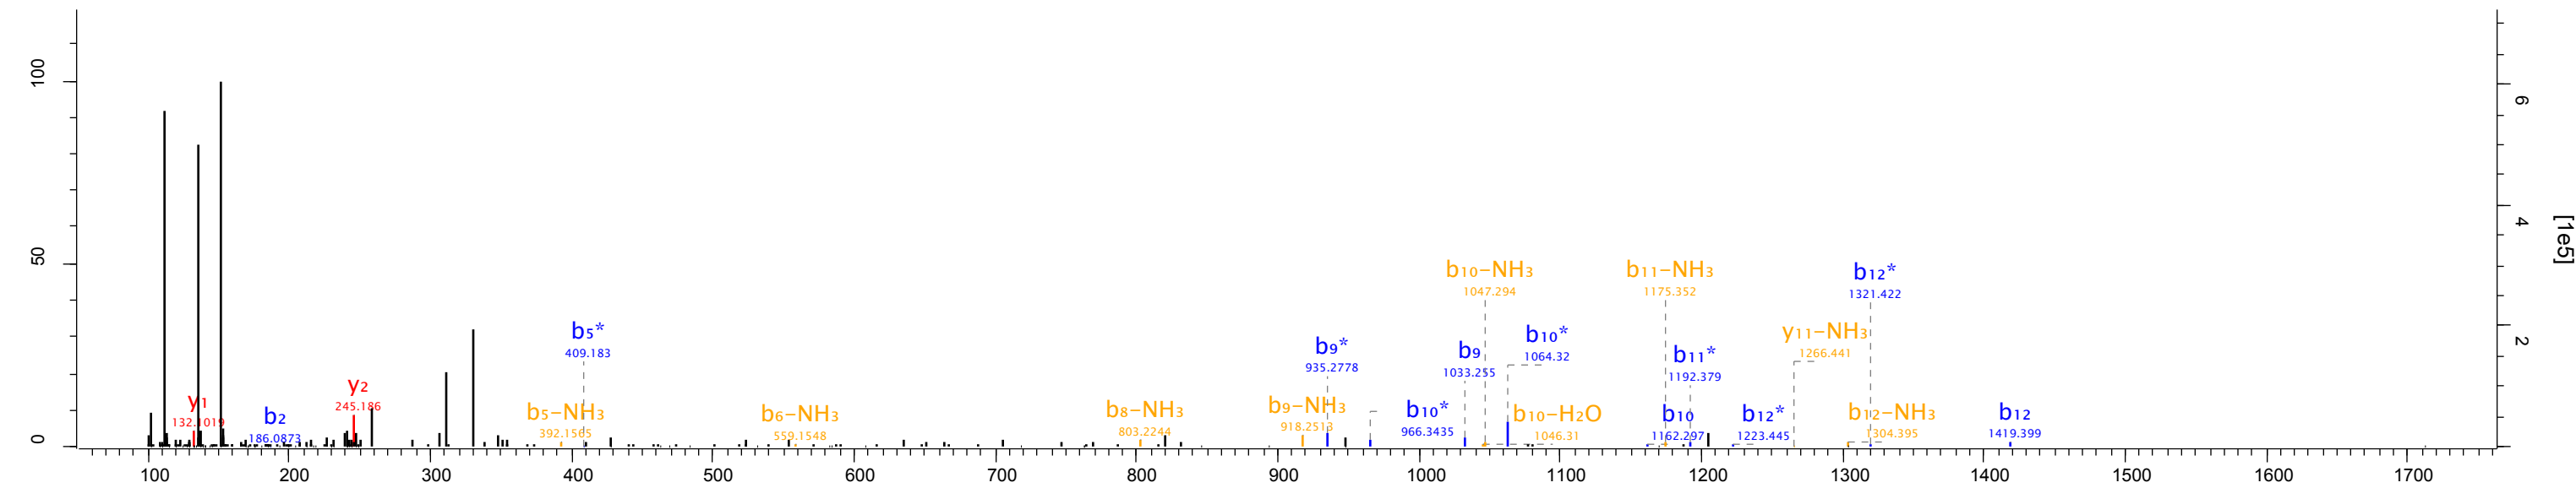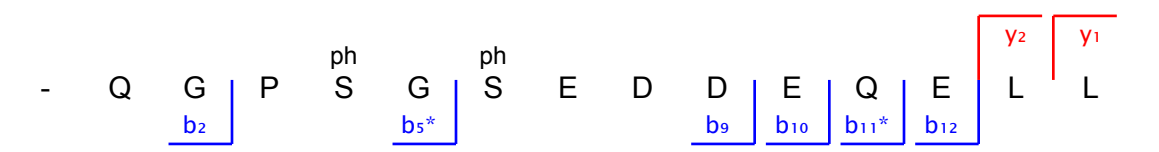

Raw file 20171215\_MaS\_33SR\_LMH\_phospho\_02 Scan 16848 Method FTMS; HCD Score 92.15 m/z 1122.01 Gene names FRMD8

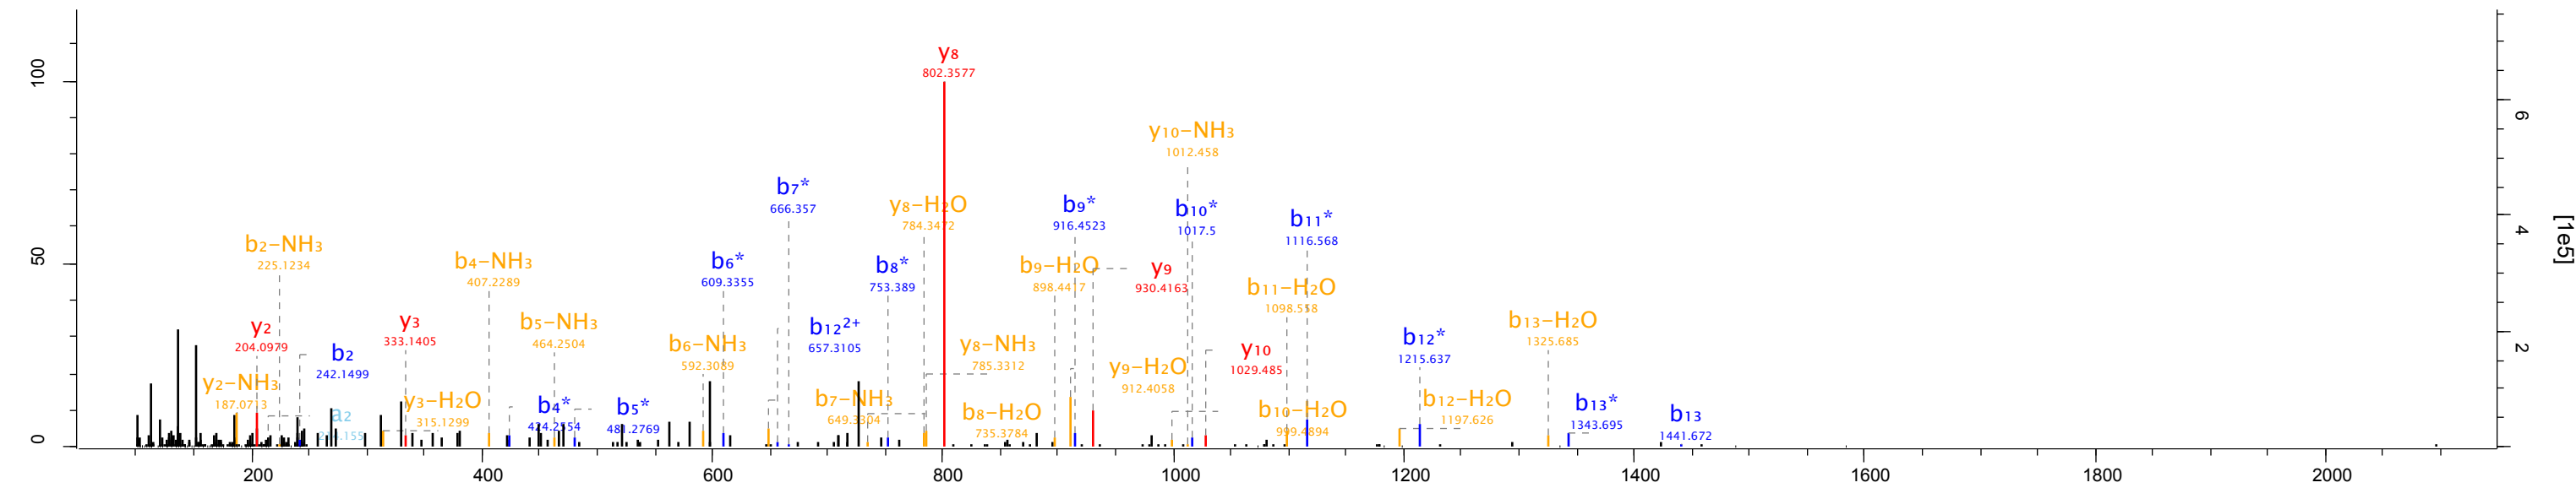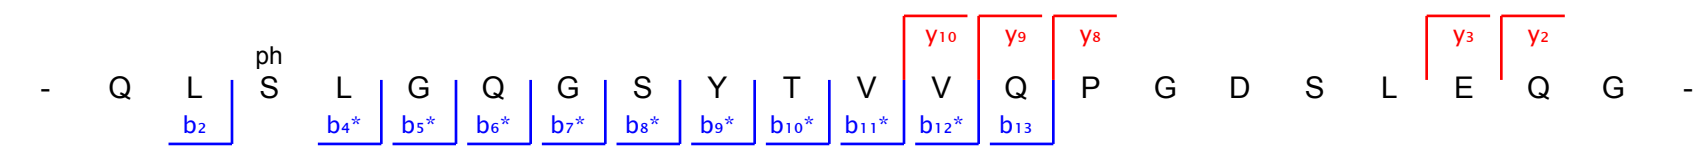

20171215\_MaS\_33SR\_LMH\_phospho\_02

3638 FTMS; HCD 47.62 580.72 ZFPM2

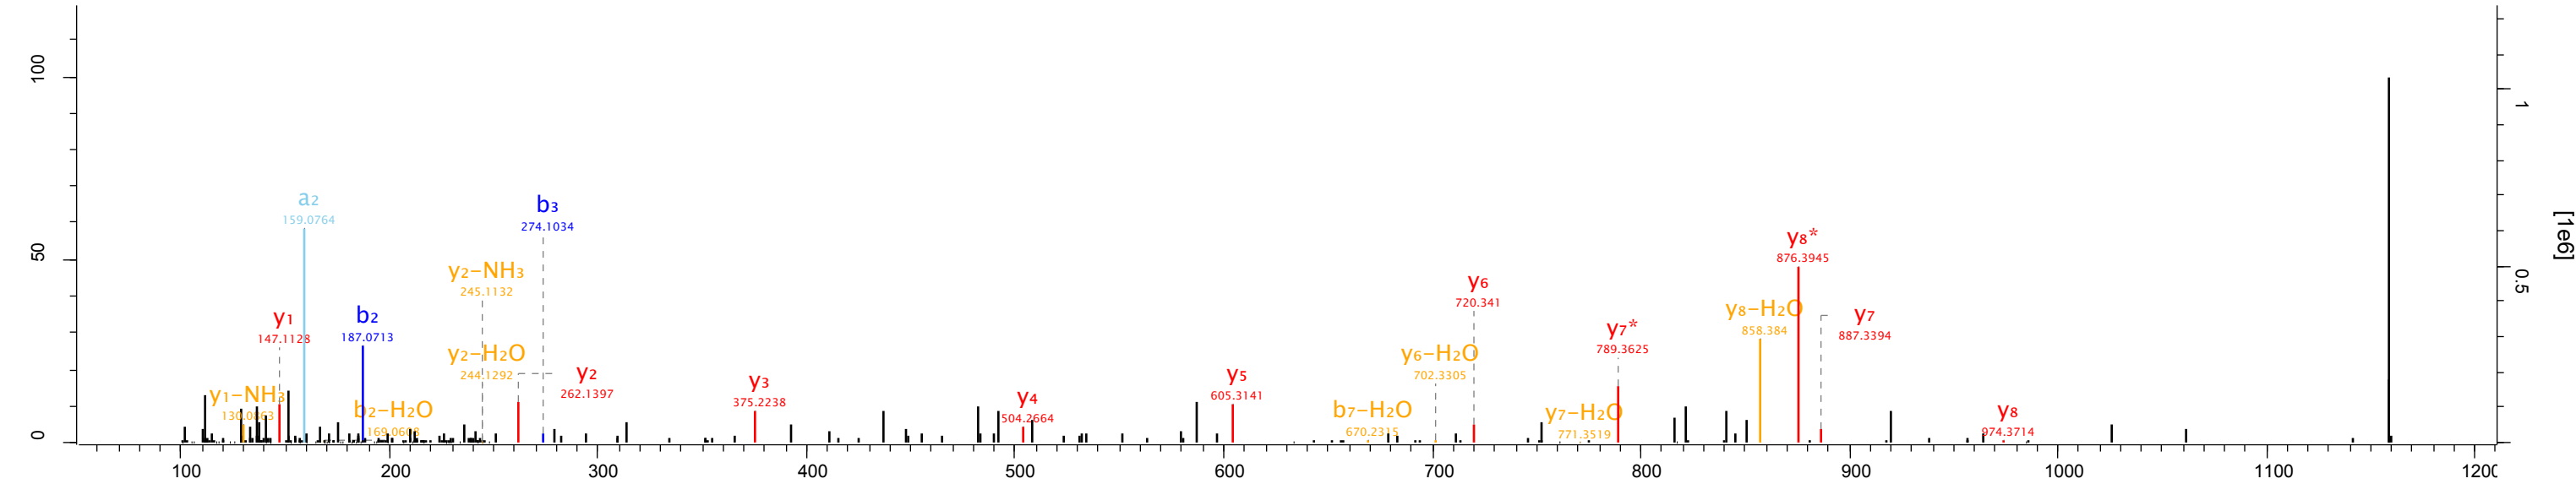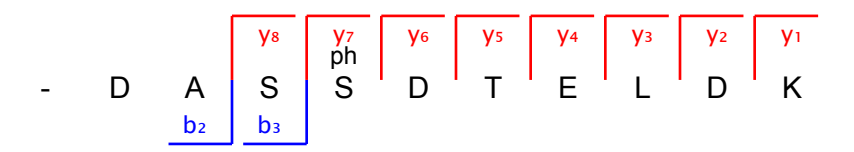

Raw file 20171215\_MaS\_33SR\_LMH\_phospho\_02 Scan 4958 Method FTMS; HCD Score 144.27 m/z 582.71 Gene names SULF2

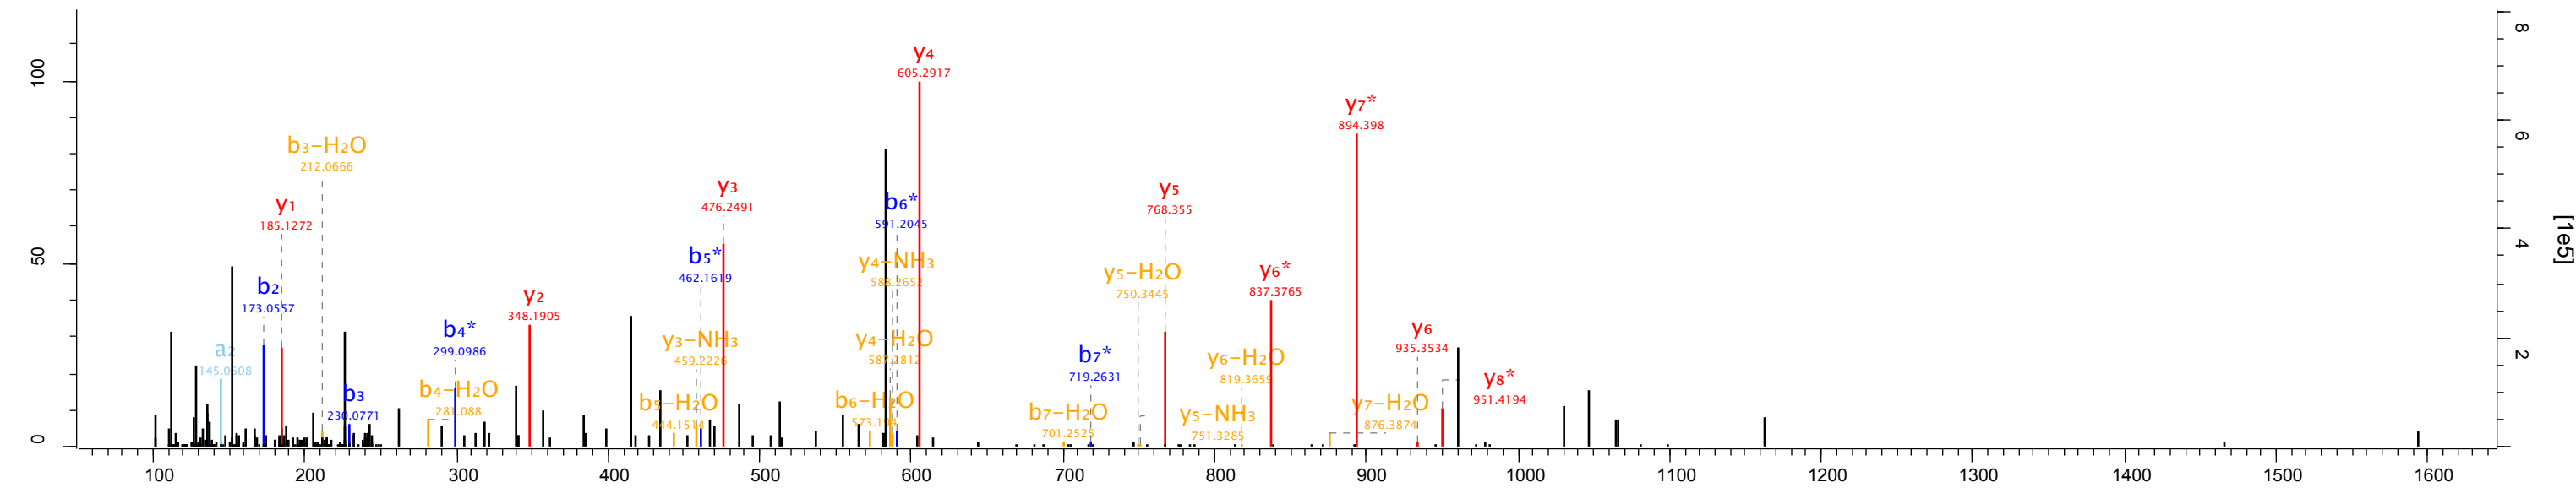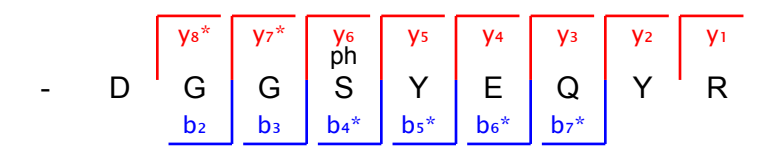

Raw file 20171215\_MaS\_33SR\_LMH\_phospho\_02 Scan 5158 Method FTMS; HCD Score 155.7 m/z 937.34 Gene names UBN2

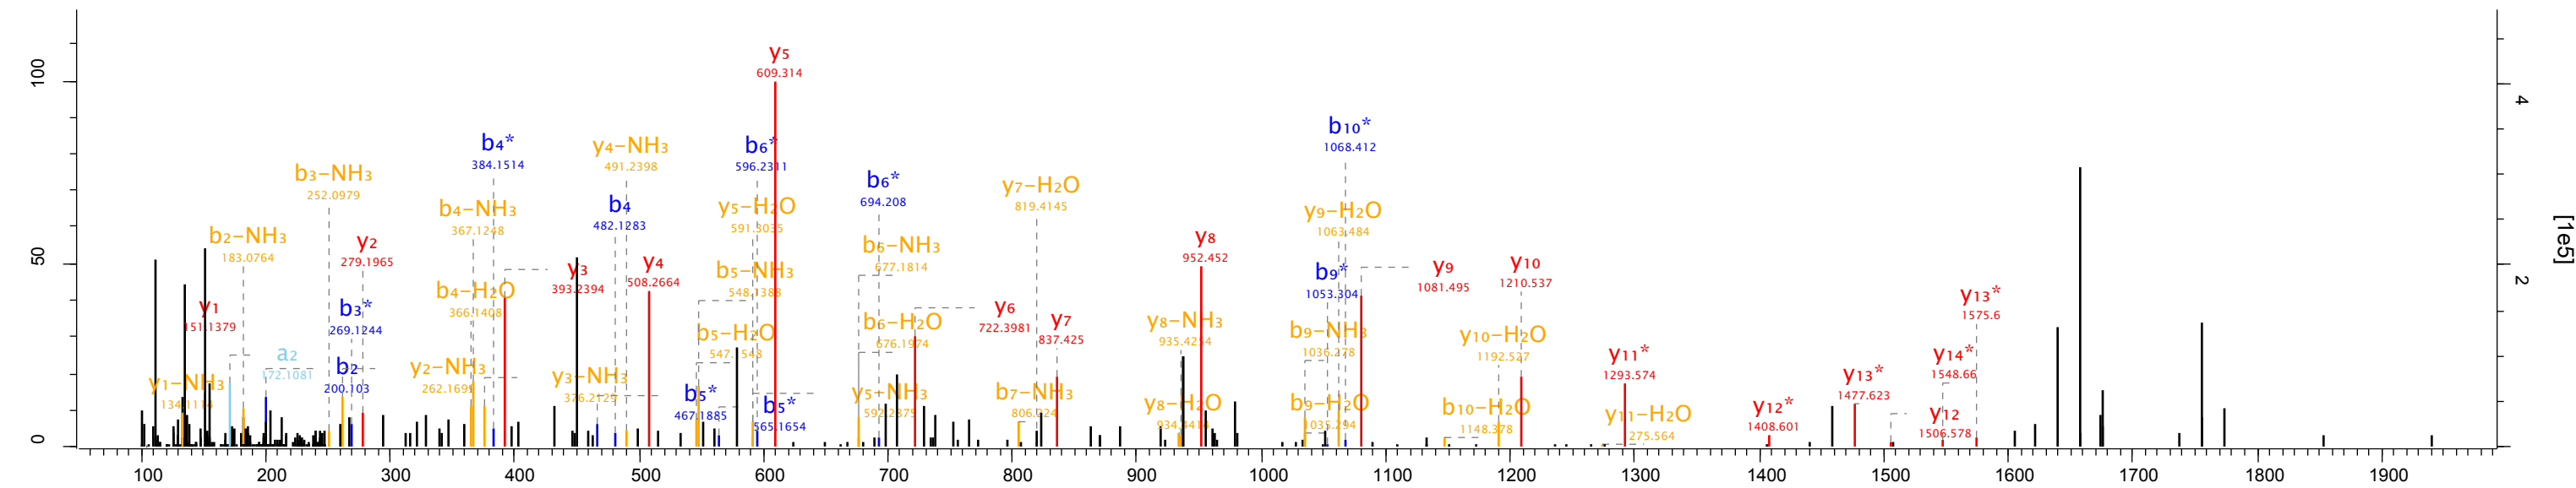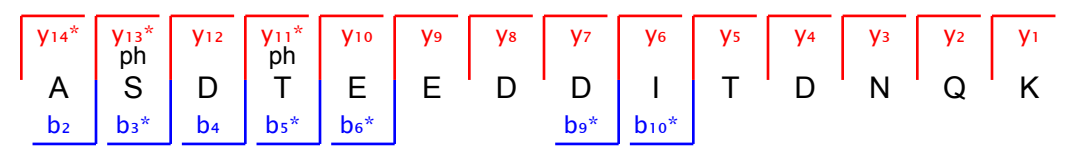



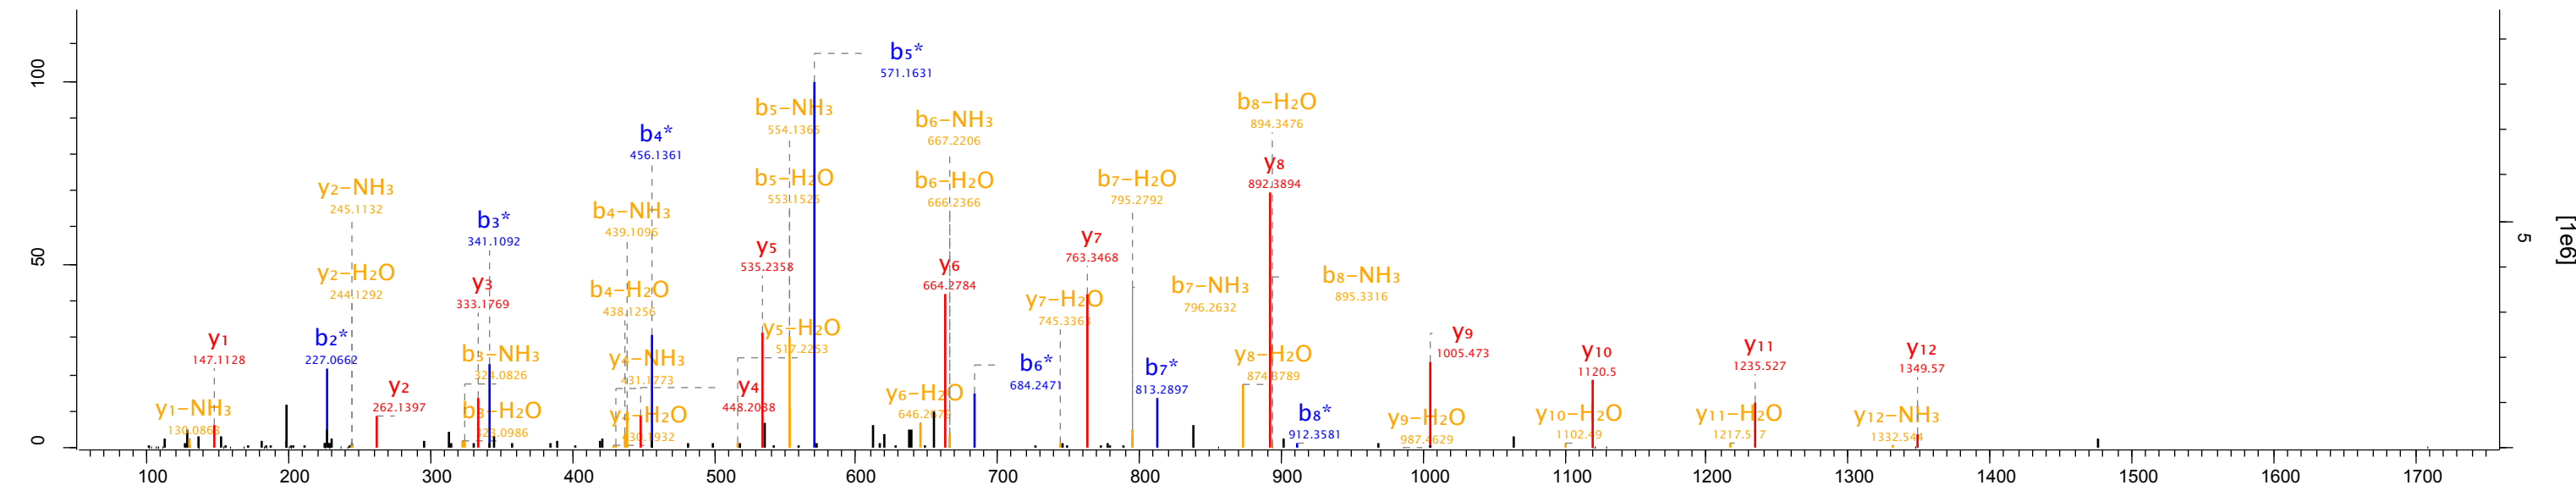

ac

-

ph

S

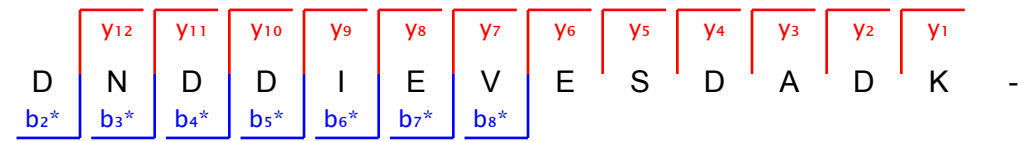

Raw file 20171215\_MaS\_33SR\_LMH\_phospho\_02 Scan 9488 Method FTMS; HCD Score 98.15 m/z 1084.97 Gene names KDM6A

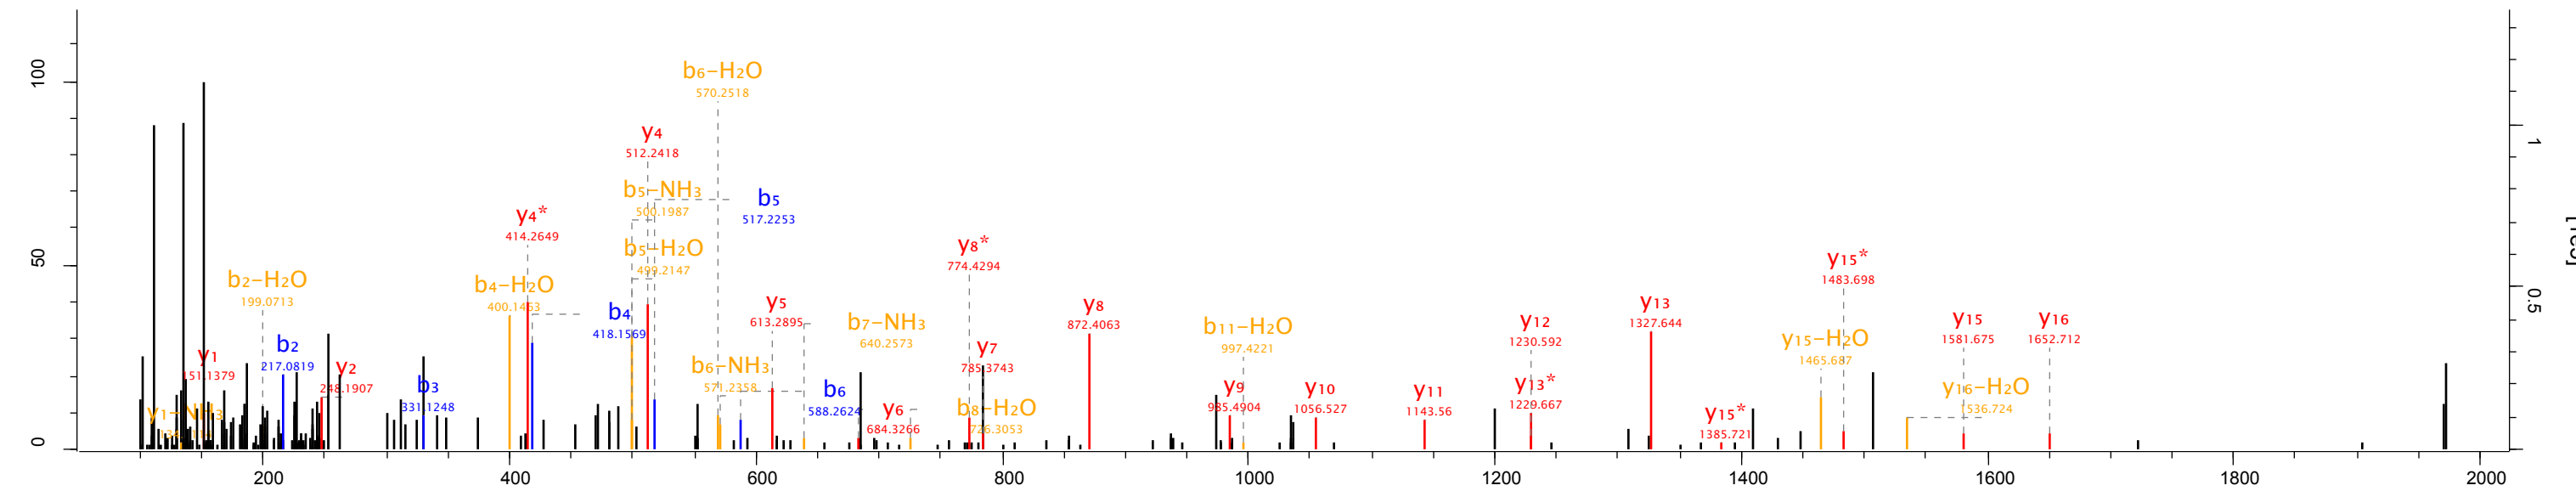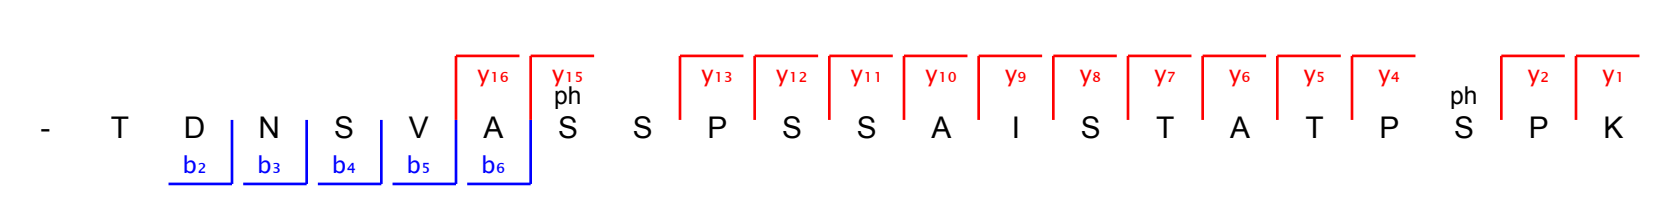

Raw file 20171215\_MaS\_33SR\_LMH\_phospho\_03 Scan 11458 Method FTMS; HCD Score 40.38 m/z 816.83 Gene names CNKSR3

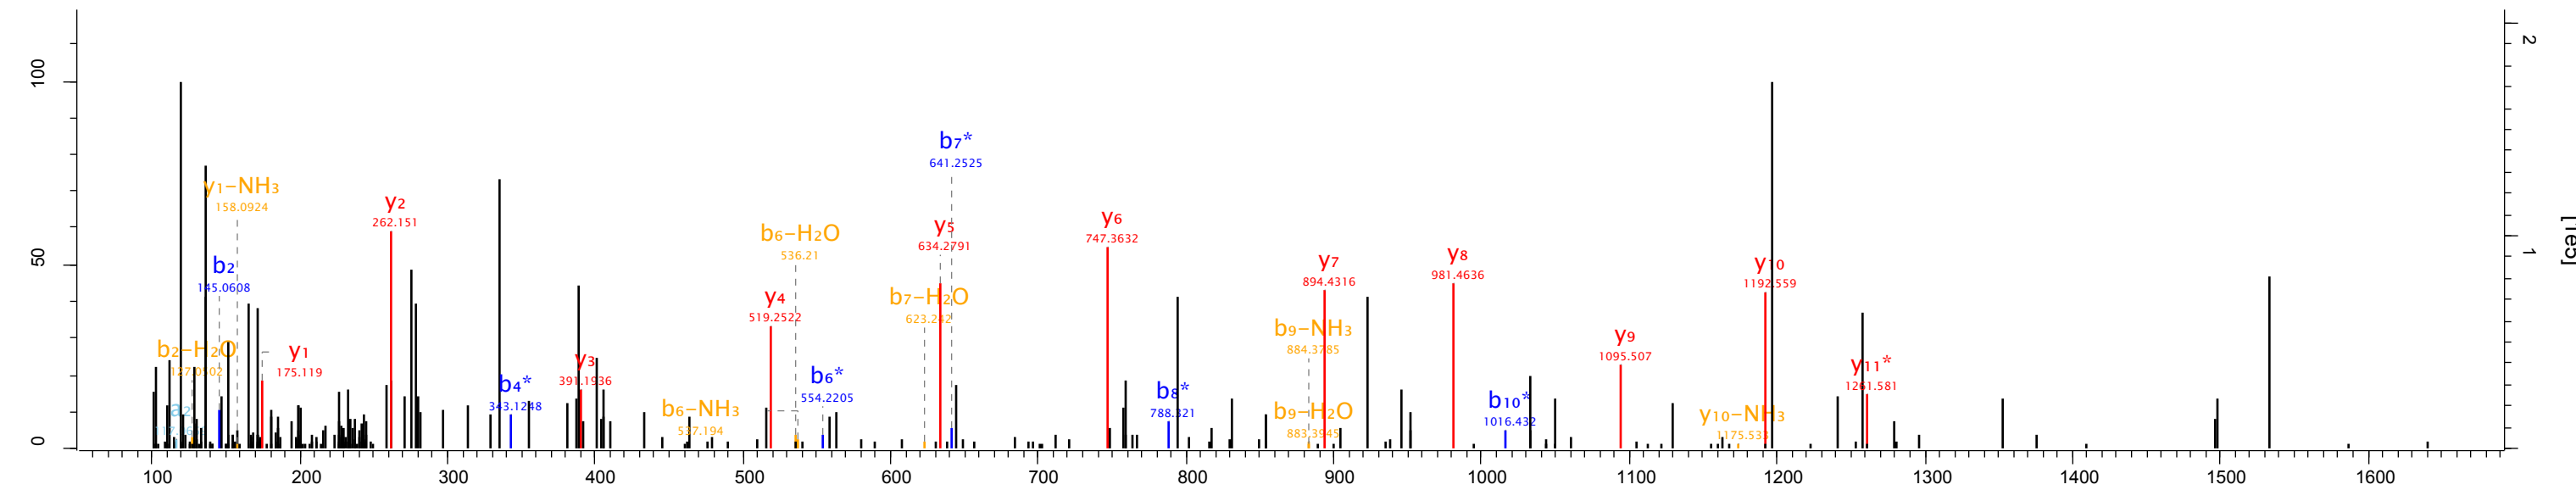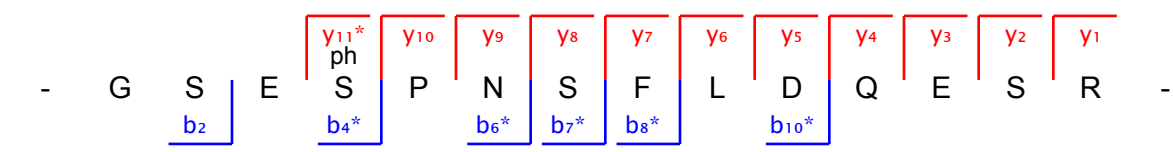

Raw file 20171215\_MaS\_33SR\_LMH\_phospho\_03 Scan 3488 Method FTMS; HCD Score 89.02 m/z 857.04 Gene names JADE3

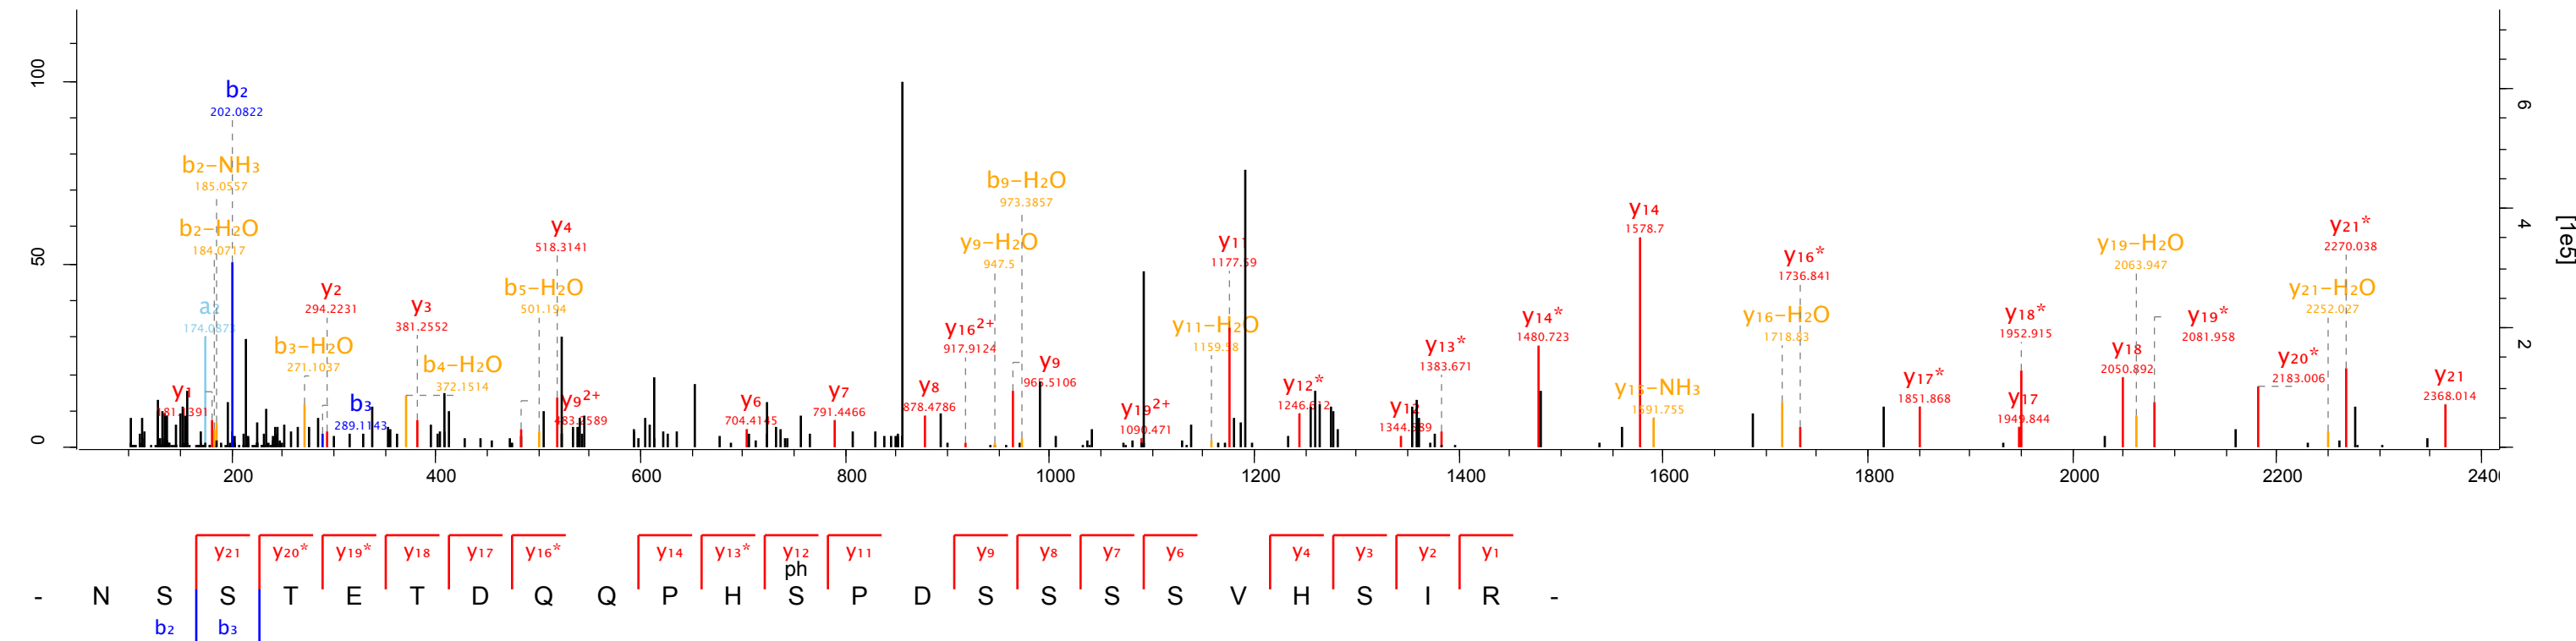

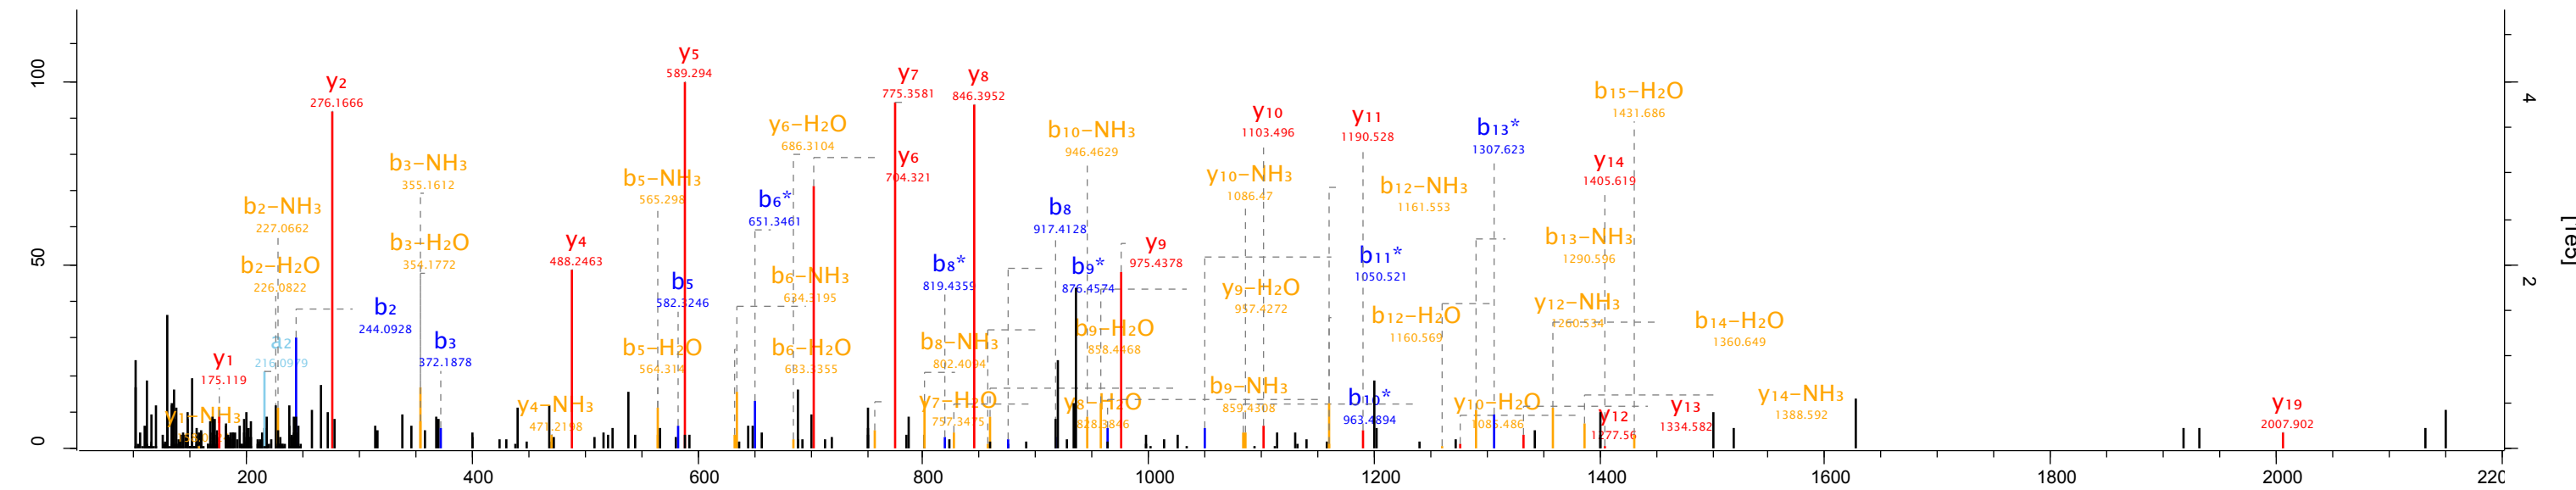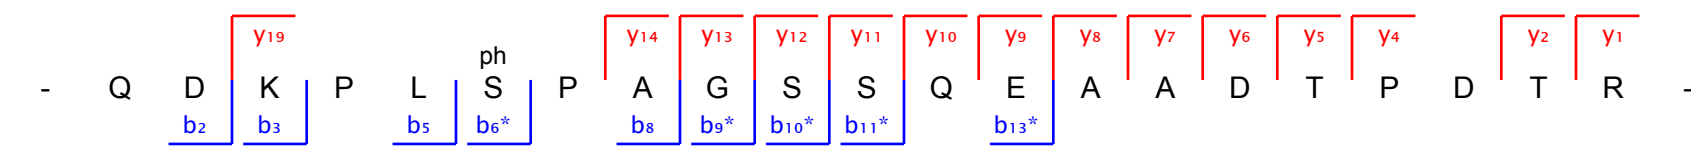

Raw file 20171215\_MaS\_33SR\_LMH\_phospho\_03 Scan 6748 Method FTMS; HCD Score 60.75 m/z 885.88 Gene names WDHD1

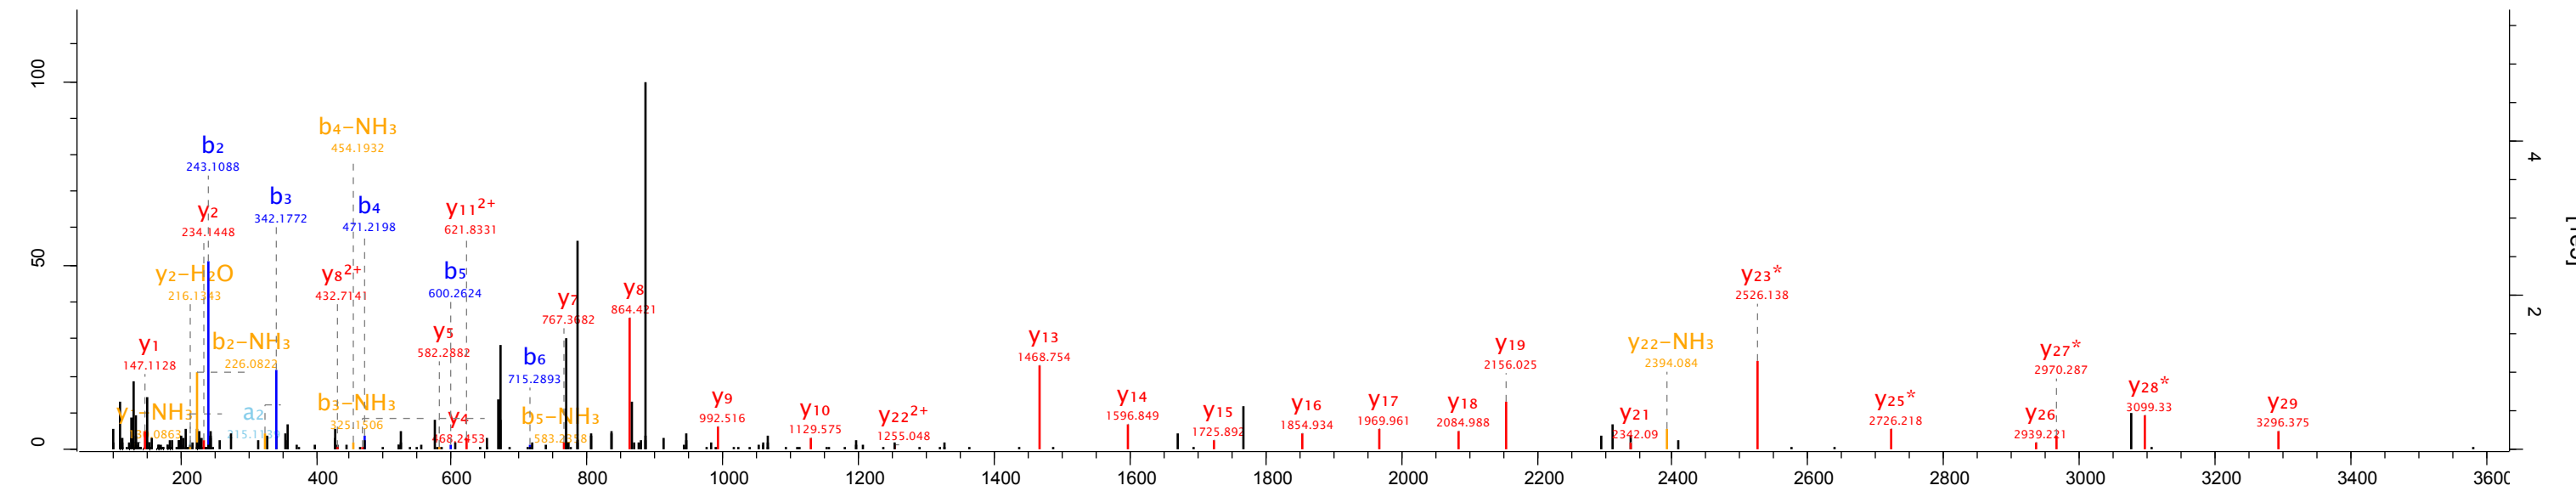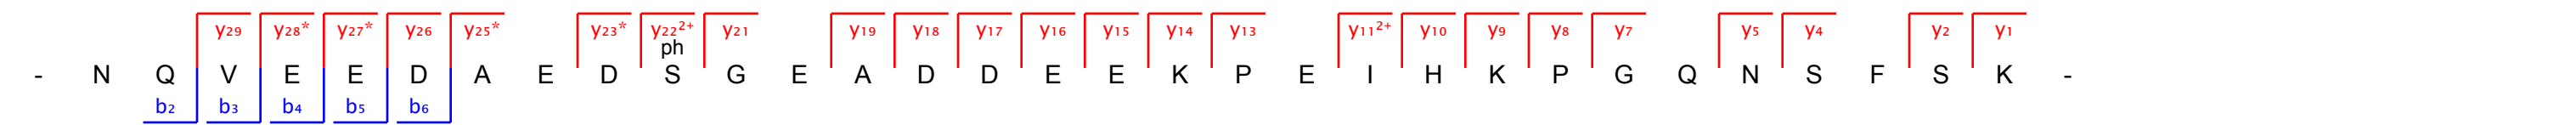

Raw file 20171215\_MaS\_33SR\_LMH\_phospho\_03 Scan 7548 Method FTMS; HCD Score 85.58 m/z 775.27 Gene names STARD10

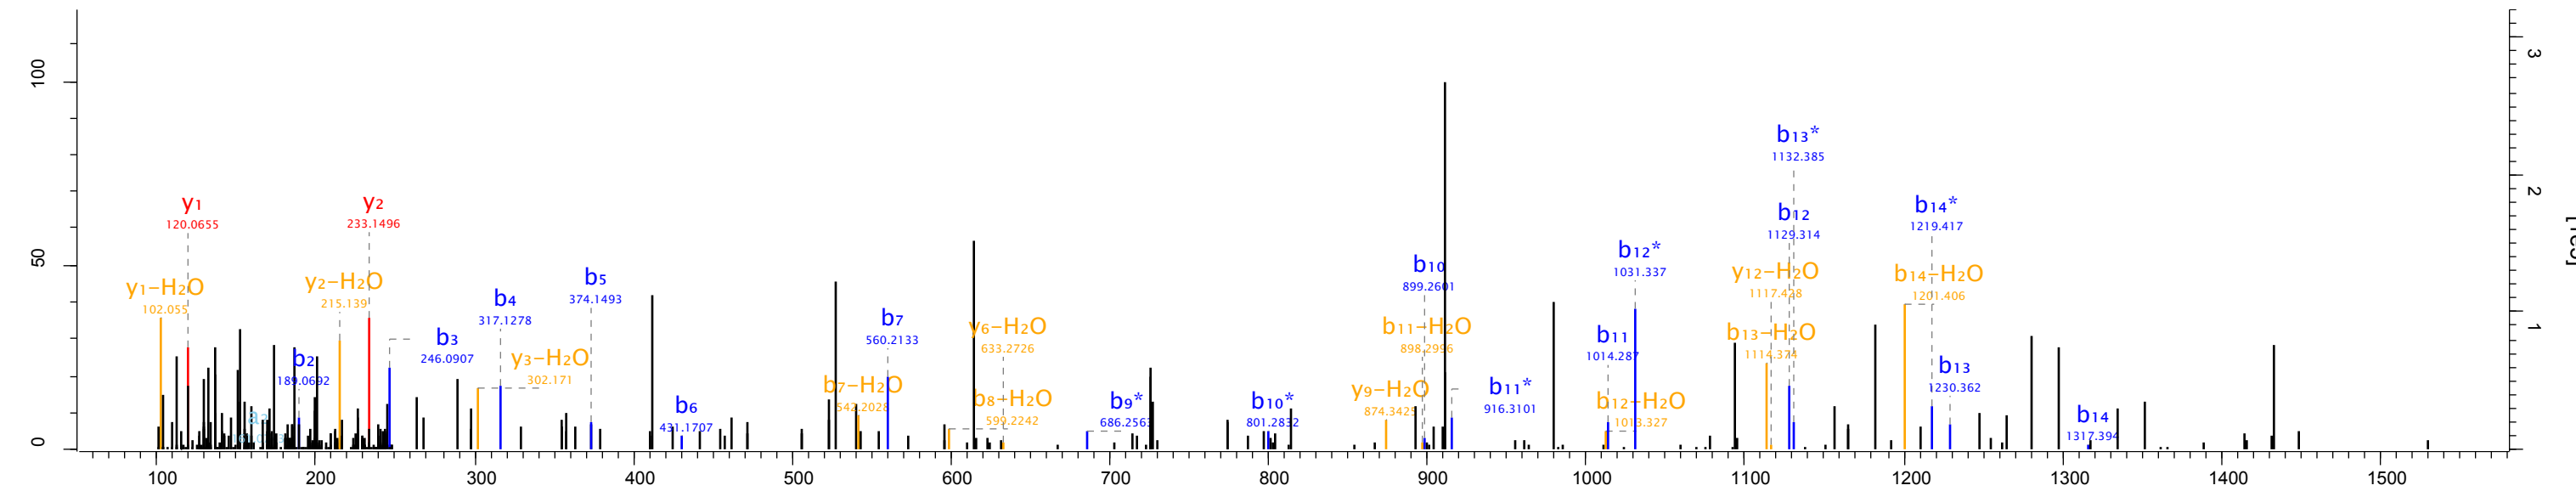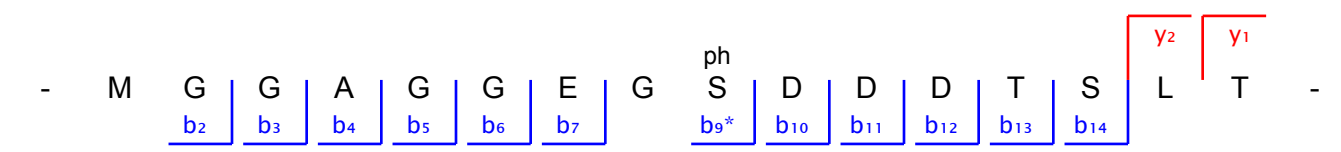

Raw file 20171215\_MaS\_33SR\_LMH\_phospho\_03 Scan 7638 Method FTMS; HCD Score 142.4 m/z 817.81 Gene names NEXN

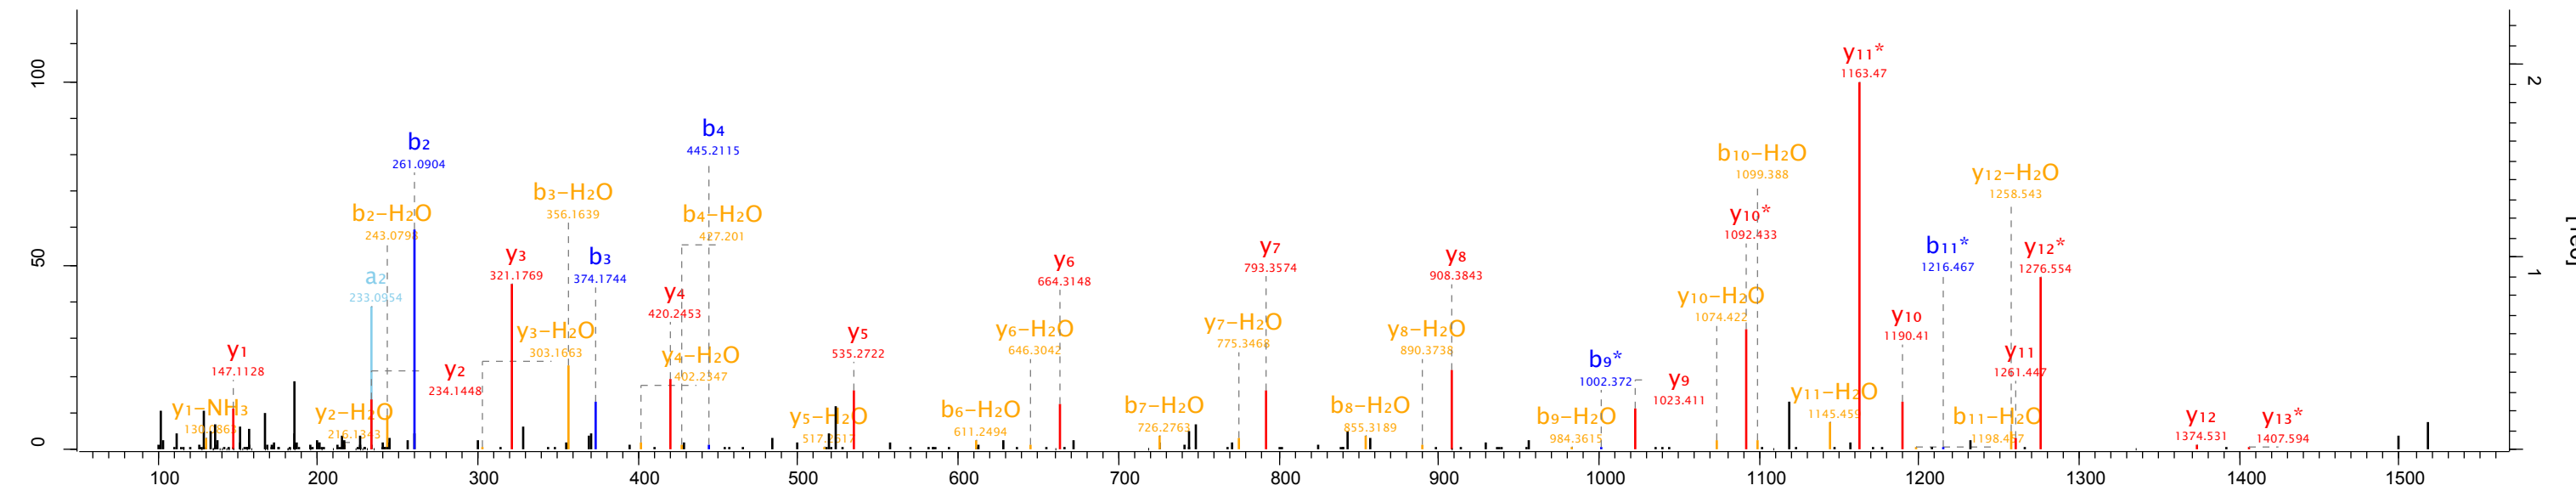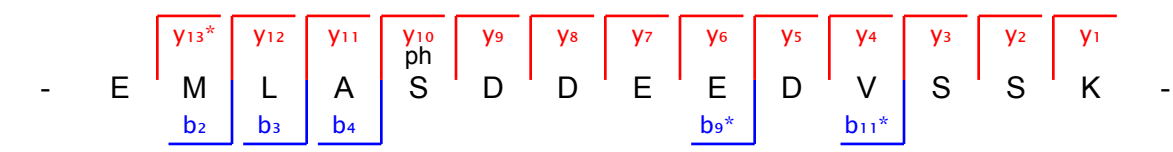



Raw file: 20171215\_MaS\_33SR\_LMH\_phospho\_03  
 Scan: 7768 Method: FTMS; HCD Score: 82.65 m/z: 749.84 Gene names: KANSL1

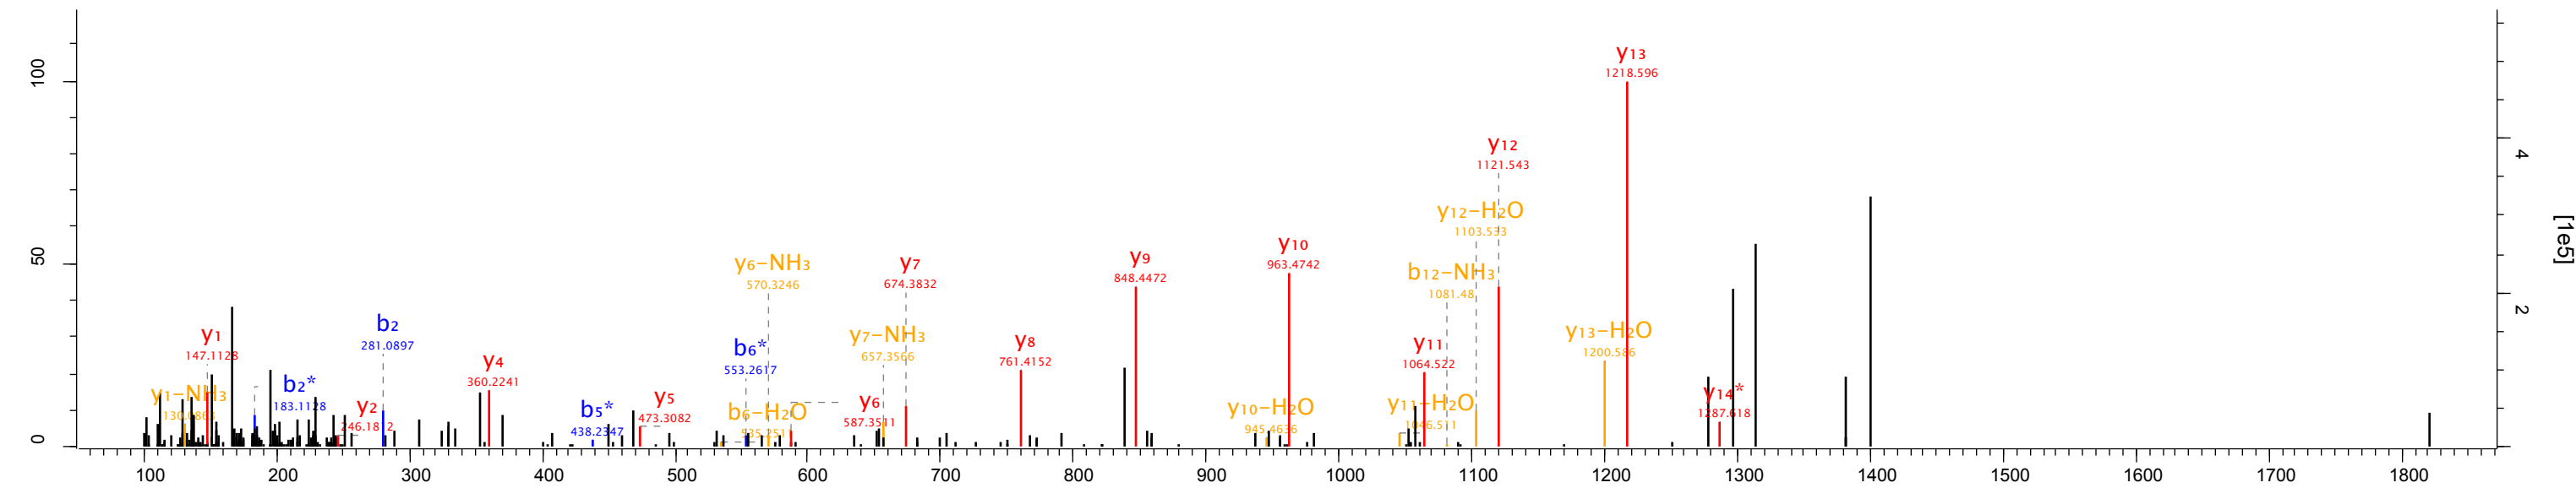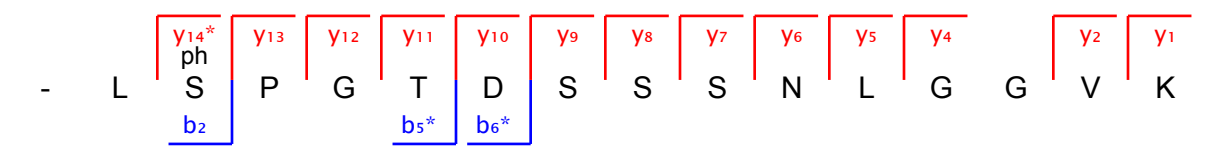

Raw file 20171215\_MaS\_33SR\_LMH\_phospho\_03 Scan 8348 Method FTMS; HCD Score 147.49 m/z 781.32 Gene names BSDC1

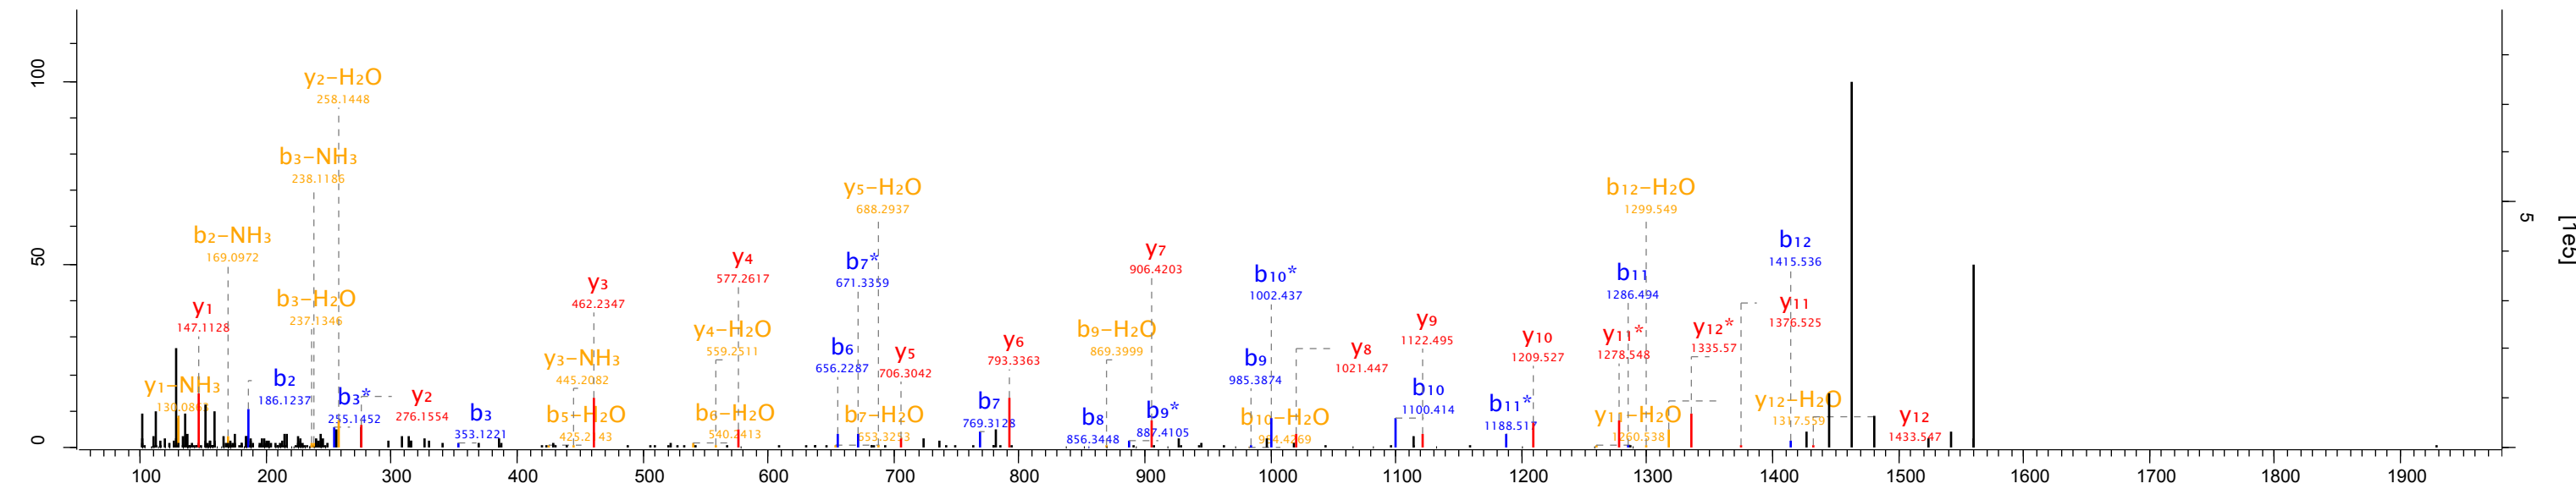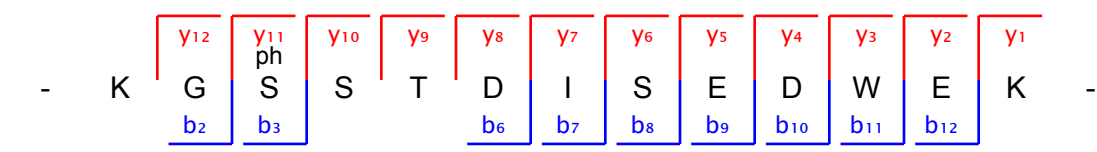

Raw file 20171215\_MaS\_33SR\_LMH\_phospho\_03 Scan 8538 Method FTMS; HCD Score 84.05 m/z 726.82 Gene names AKAP9

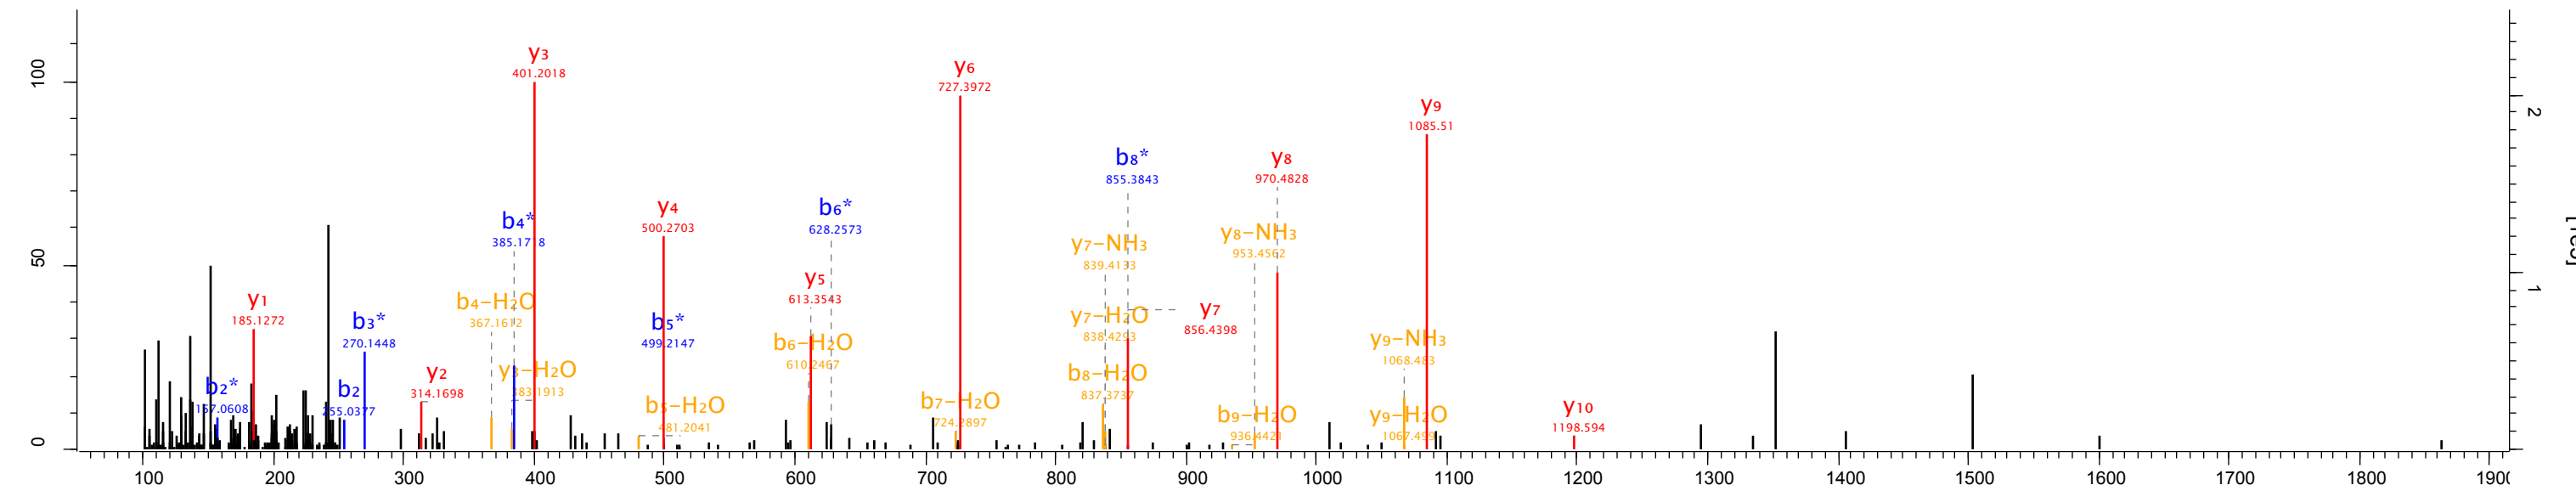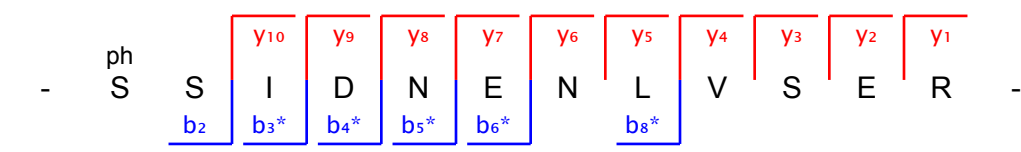

Raw file 20171215\_MaS\_33SR\_LMH\_phospho\_03 Scan 8878 Method FTMS; HCD Score 97.69 m/z 882.37 Gene names AIM1

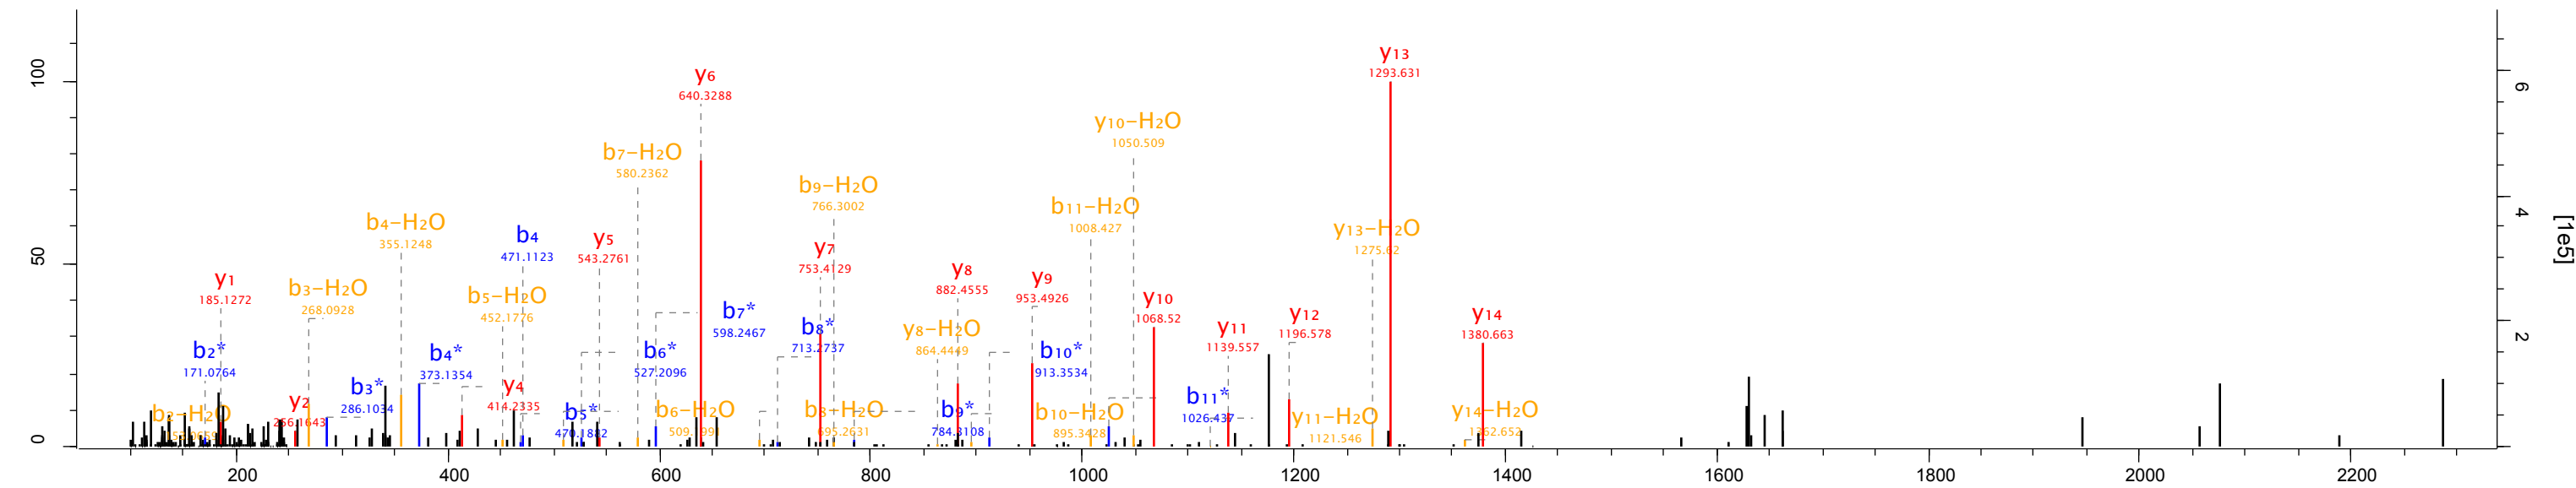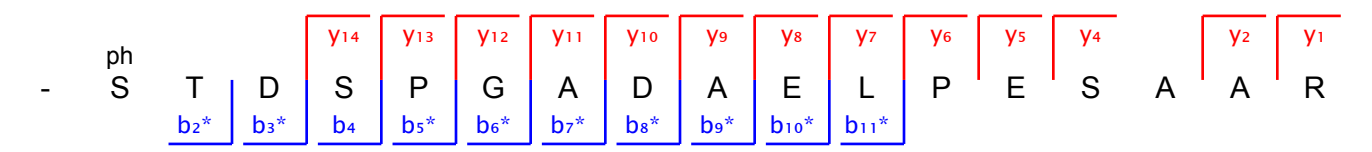

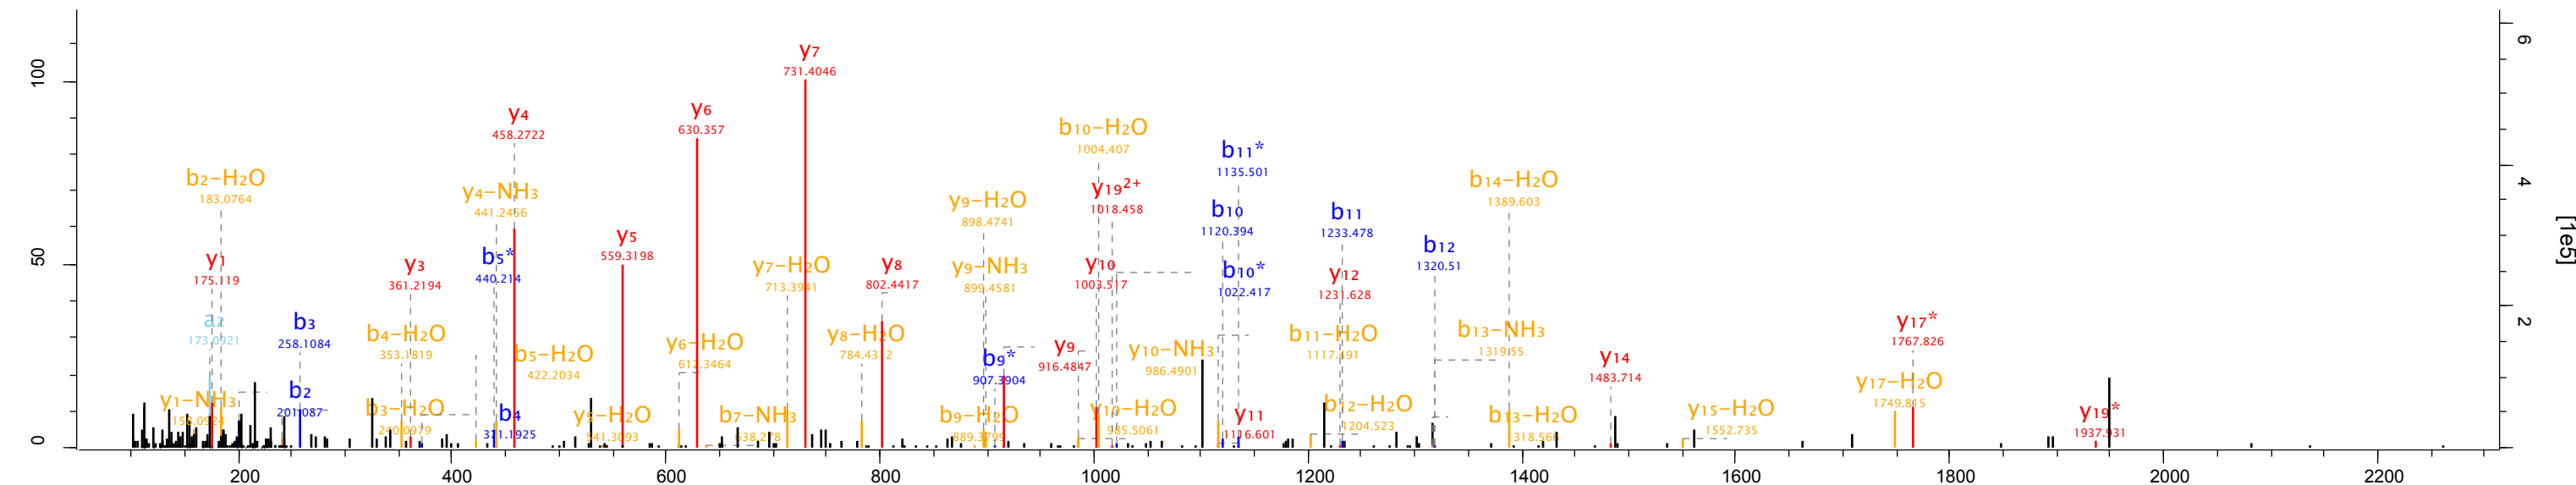

- E A G L S Q S H D D L S N A T A T P S V R -

b<sub>2</sub> b<sub>3</sub> b<sub>4</sub> b<sub>5</sub><sup>\*</sup>
y<sub>19</sub><sup>\*</sup> y<sub>17</sub><sup>ph</sup>
y<sub>14</sub> y<sub>12</sub> y<sub>11</sub> y<sub>10</sub> y<sub>9</sub> y<sub>8</sub> y<sub>7</sub> y<sub>6</sub> y<sub>5</sub> y<sub>4</sub> y<sub>3</sub> y<sub>1</sub>

Raw file 20171215\_MaS\_33SR\_LMH\_phospho\_05 Scan 10378 Method FTMS; HCD Score 45.88 m/z 873.88 Gene names SNURF

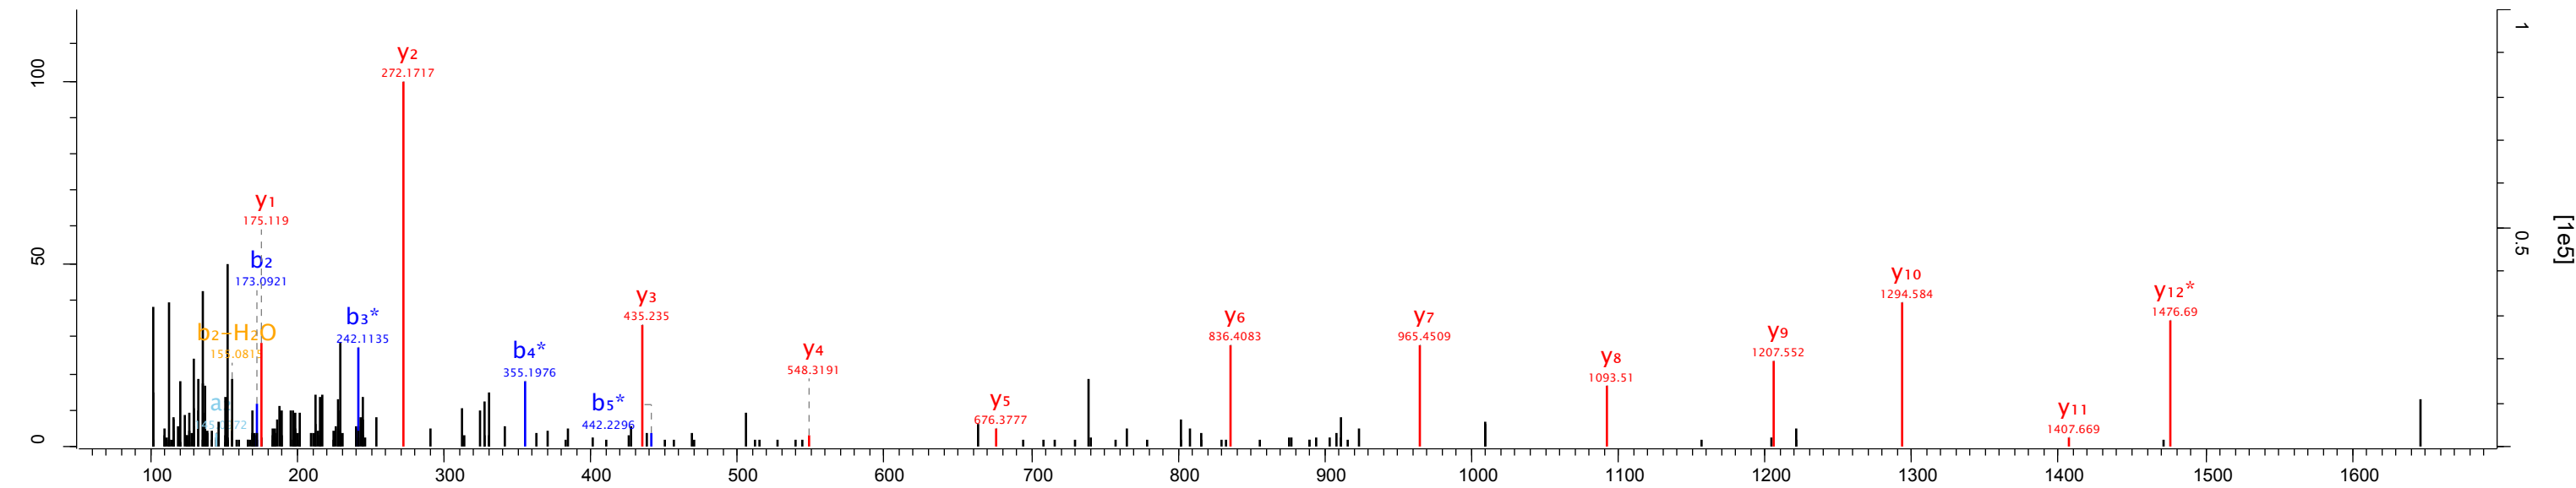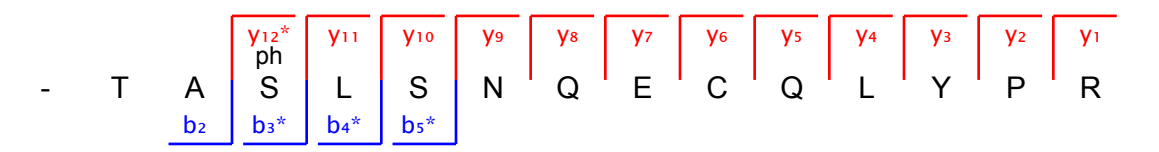

Raw file 20171215\_MaS\_33SR\_LMH\_phospho\_05 Scan 4968 Method FTMS; HCD Score 52.1 m/z 530.75 Gene names VGLL4

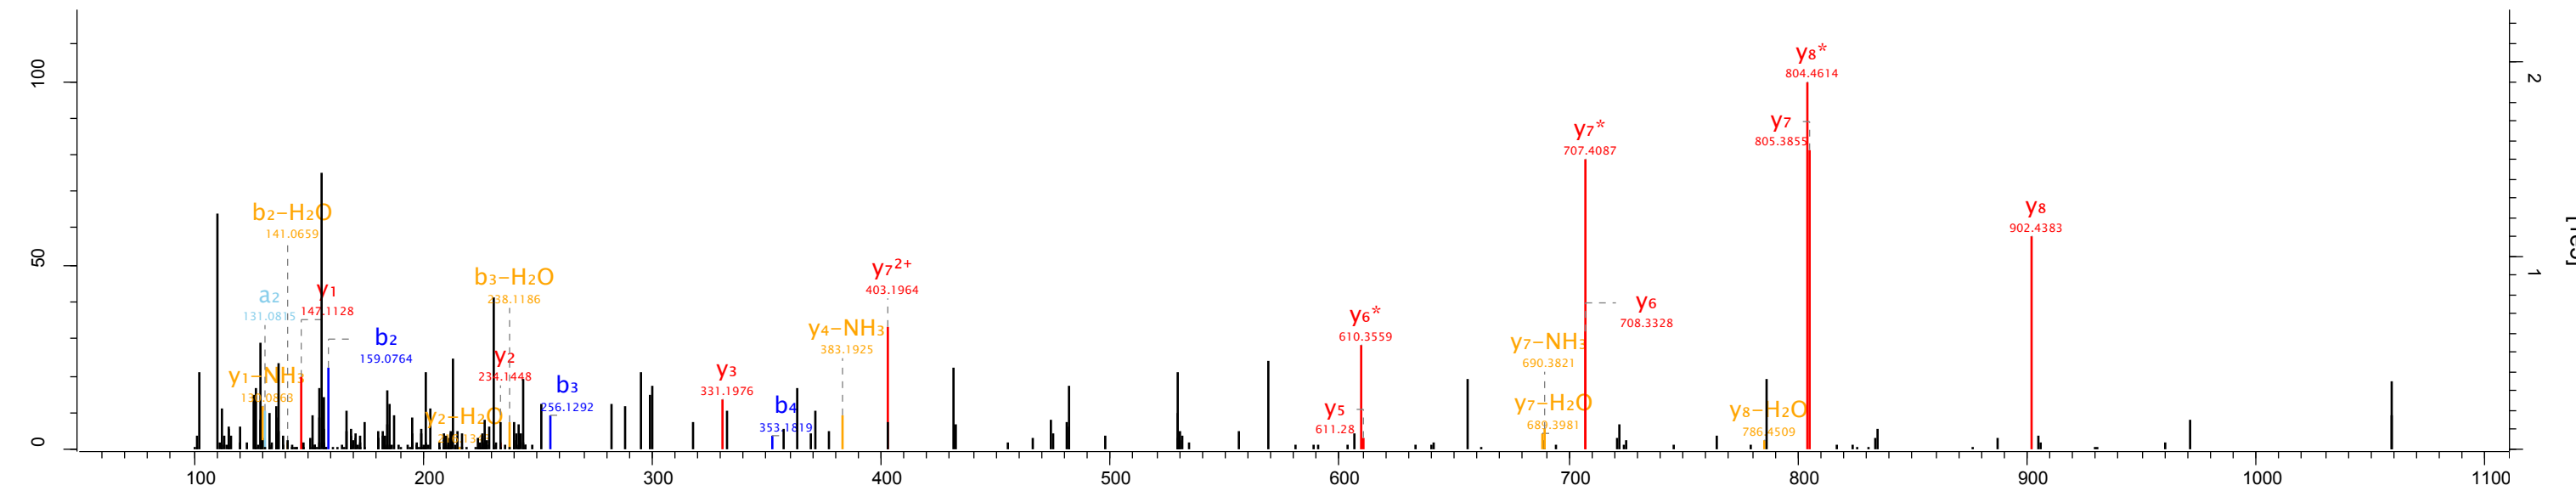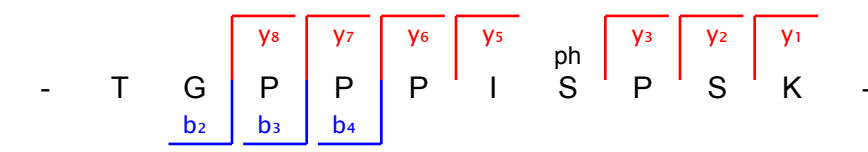

Raw file 20171215\_MaS\_33SR\_LMH\_phospho\_06 Scan 11318 Method FTMS; HCD Score 121.21 m/z 861.91 Gene names MARK3

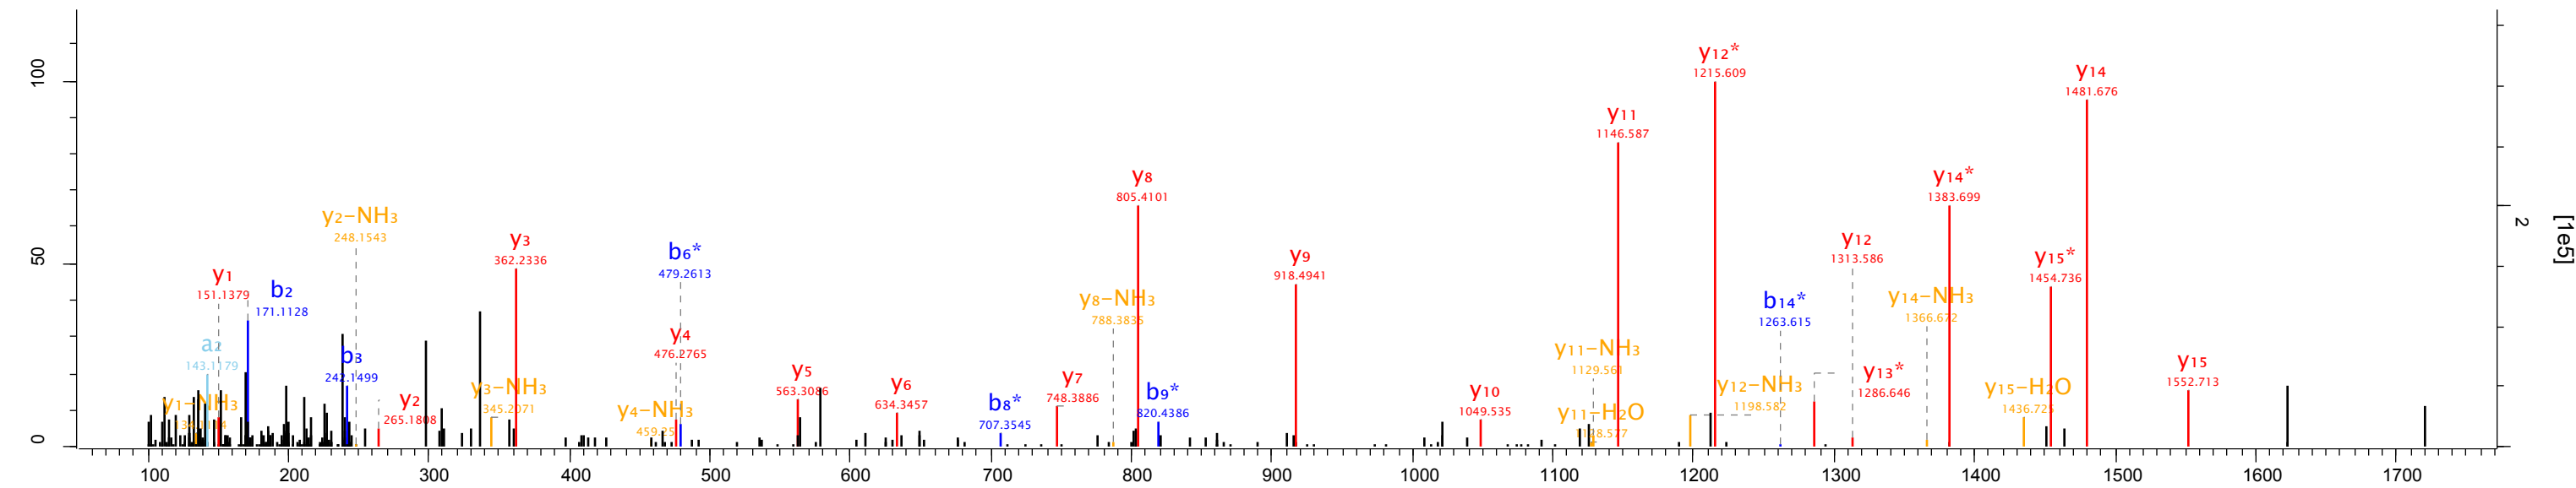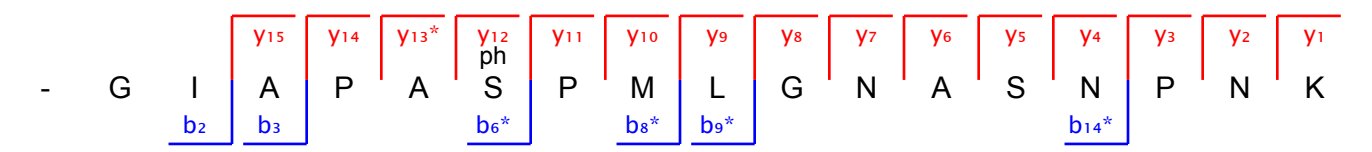



Raw file 20171215\_MaS\_33SR\_LMH\_phospho\_06 Scan 12268 Method FTMS; HCD Score 138.55 m/z 941.77 Gene names CNOT4

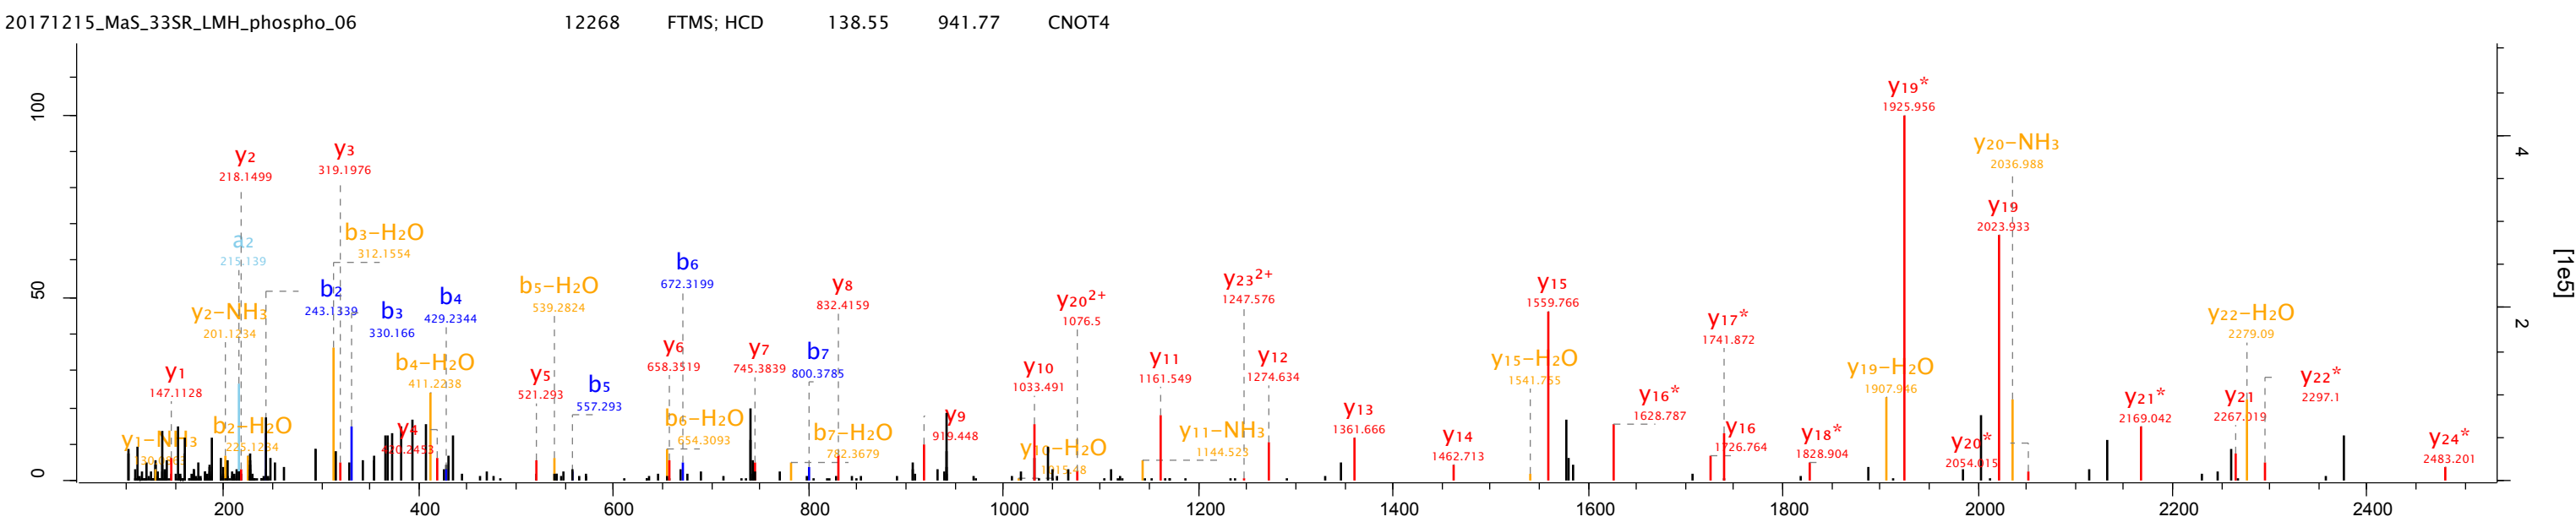

- E L S V Q D Q P S L S P T S L Q N S S S H T T T A K -

Fragmentation sites are indicated by boxes below the sequence:

- Red boxes: y24\*, y23<sup>2+</sup>, y22\*, y21, y20\*, y19, y18\*, y17\*, y16, y15, y14, y13, y12, y11, y10, y9, y8, y7, y6, y5, y4, y3, y2, y1
- Blue boxes: b2, b3, b4, b5, b6, b7

Raw file 20171215\_MaS\_33SR\_LMH\_phospho\_06 Scan 12308 Method FTMS; HCD Score 113.42 m/z 1022.93 Gene names SLC12A4

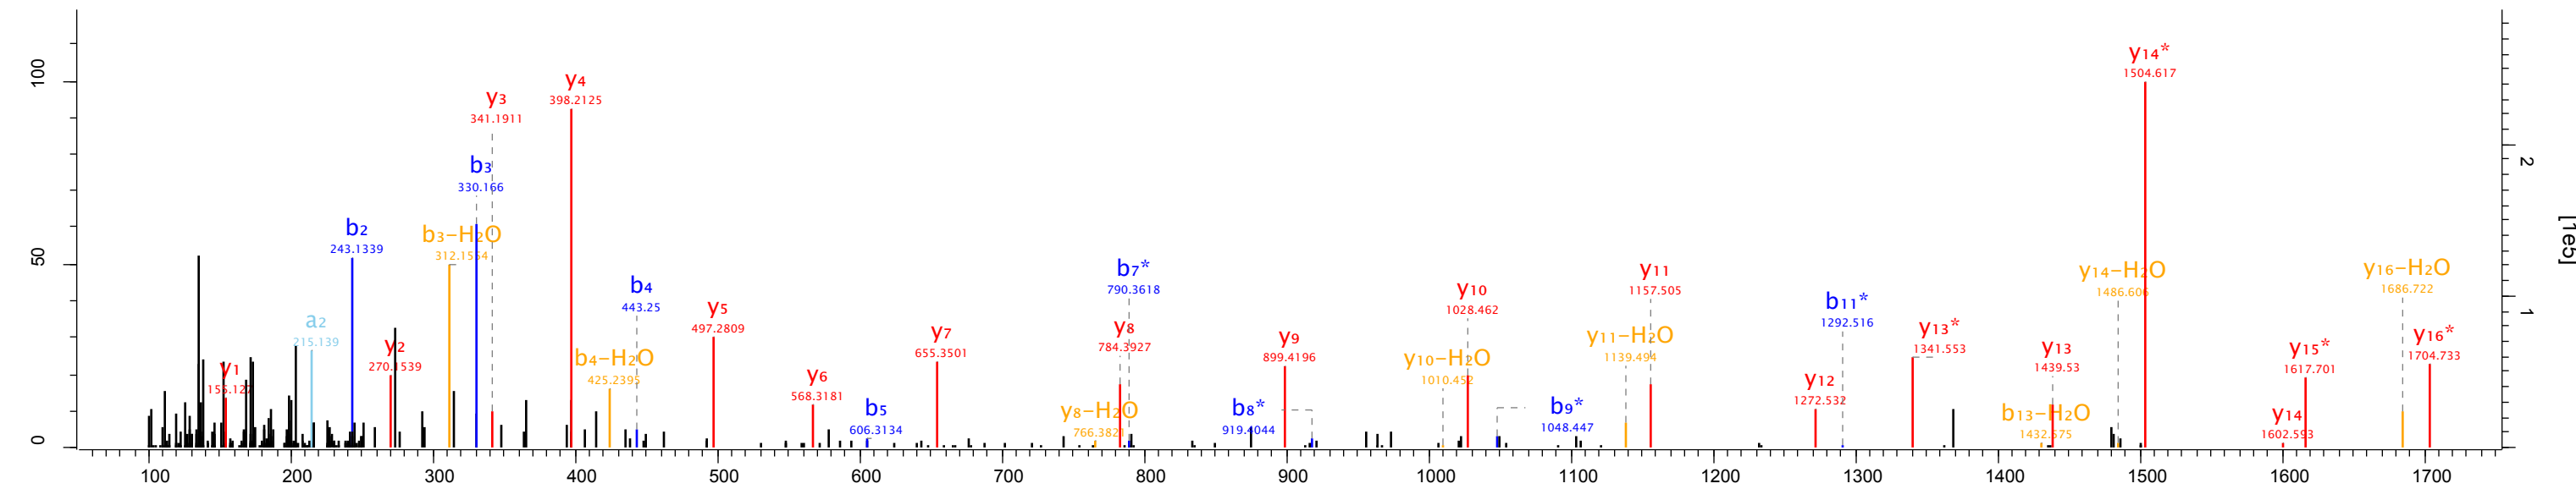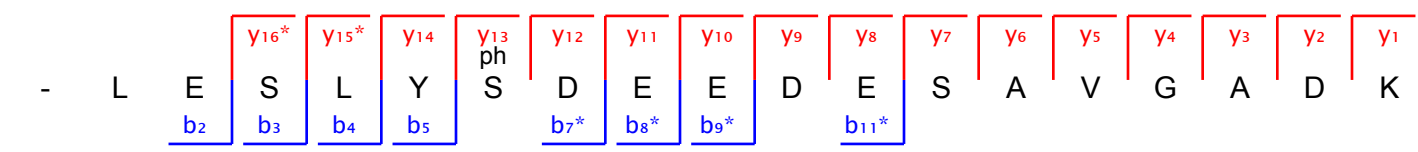

Raw file: 20171215\_MaS\_33SR\_LMH\_phospho\_06  
 Scan: 14008 Method: FTMS; HCD Score: 115.69 m/z: 597.81 Gene names: MTMR12

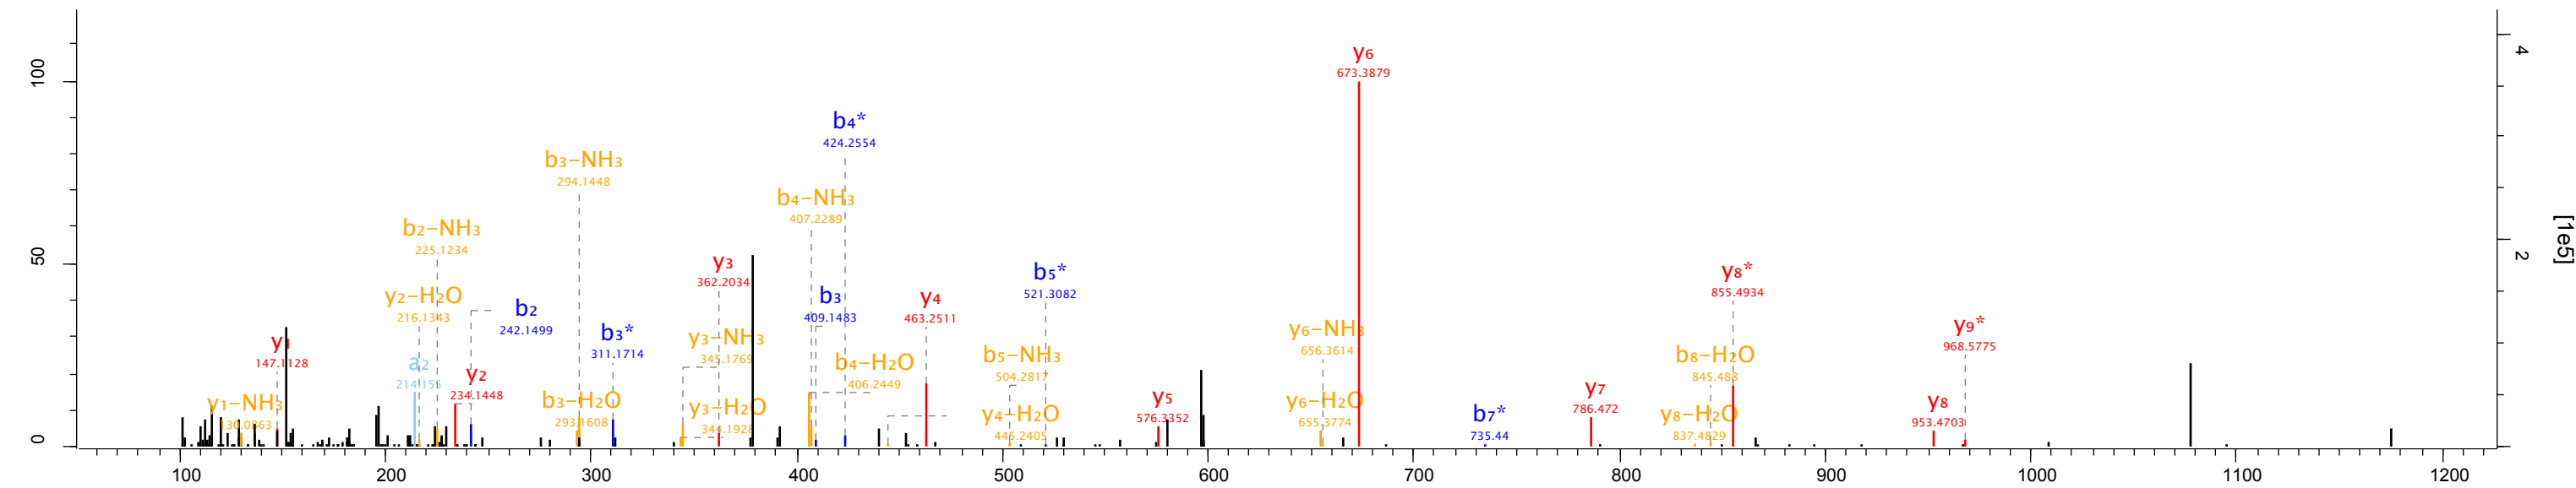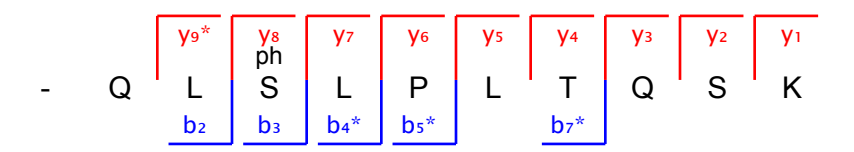

Raw file 20171215\_MaS\_33SR\_LMH\_phospho\_06 Scan 14298 Method FTMS; HCD Score 105.63 m/z 728.31 Gene names TOMM20

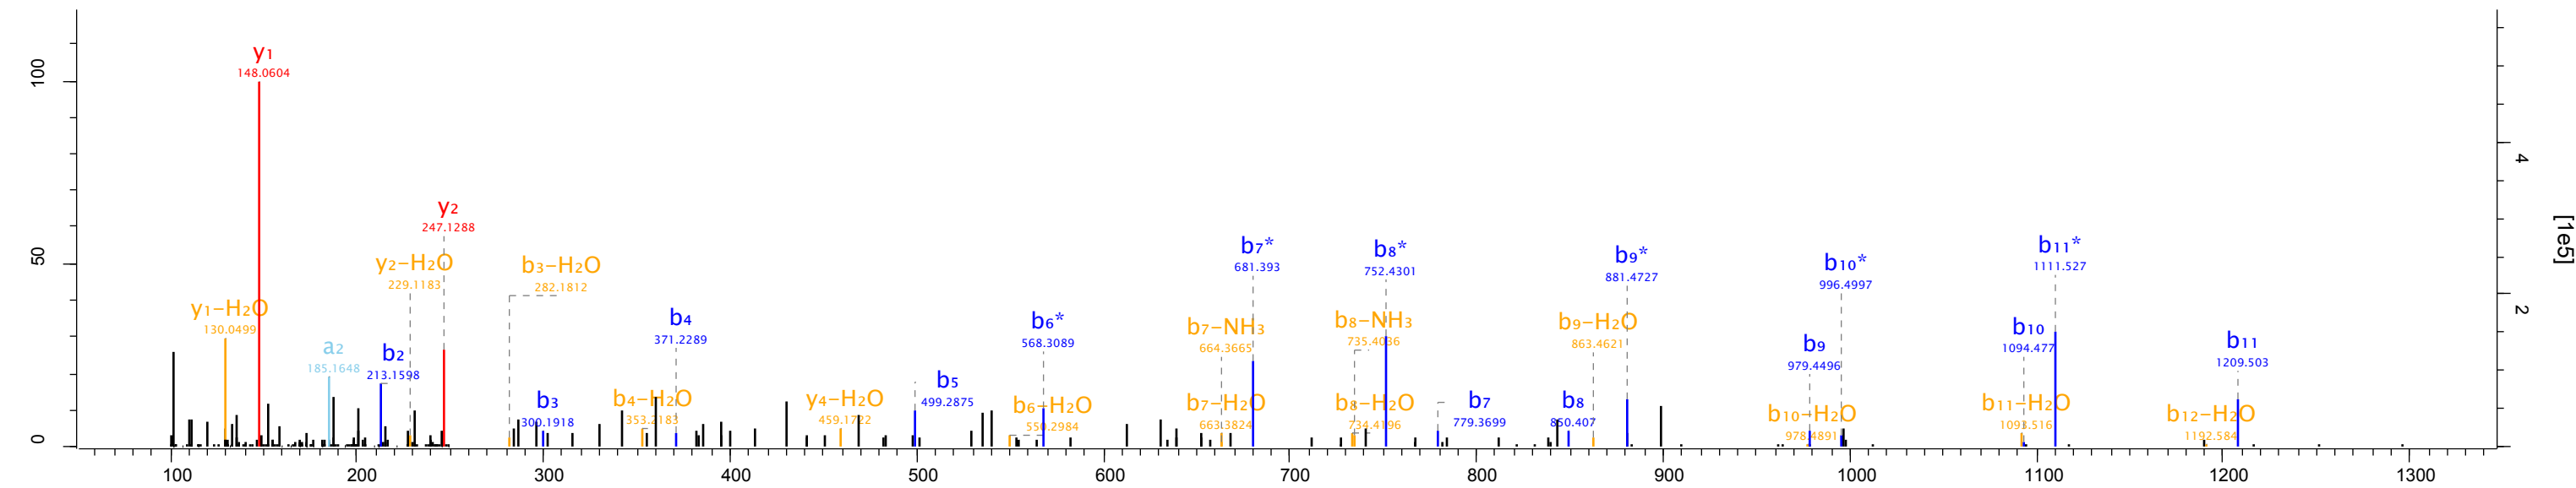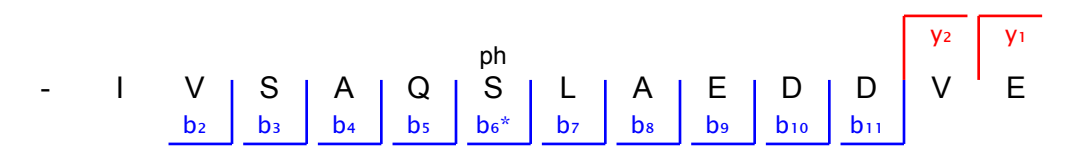

Raw file 20171215\_MaS\_33SR\_LMH\_phospho\_06 Scan 15658 Method FTMS; HCD Score 92.25 m/z 547.27 Gene names YTHDC1

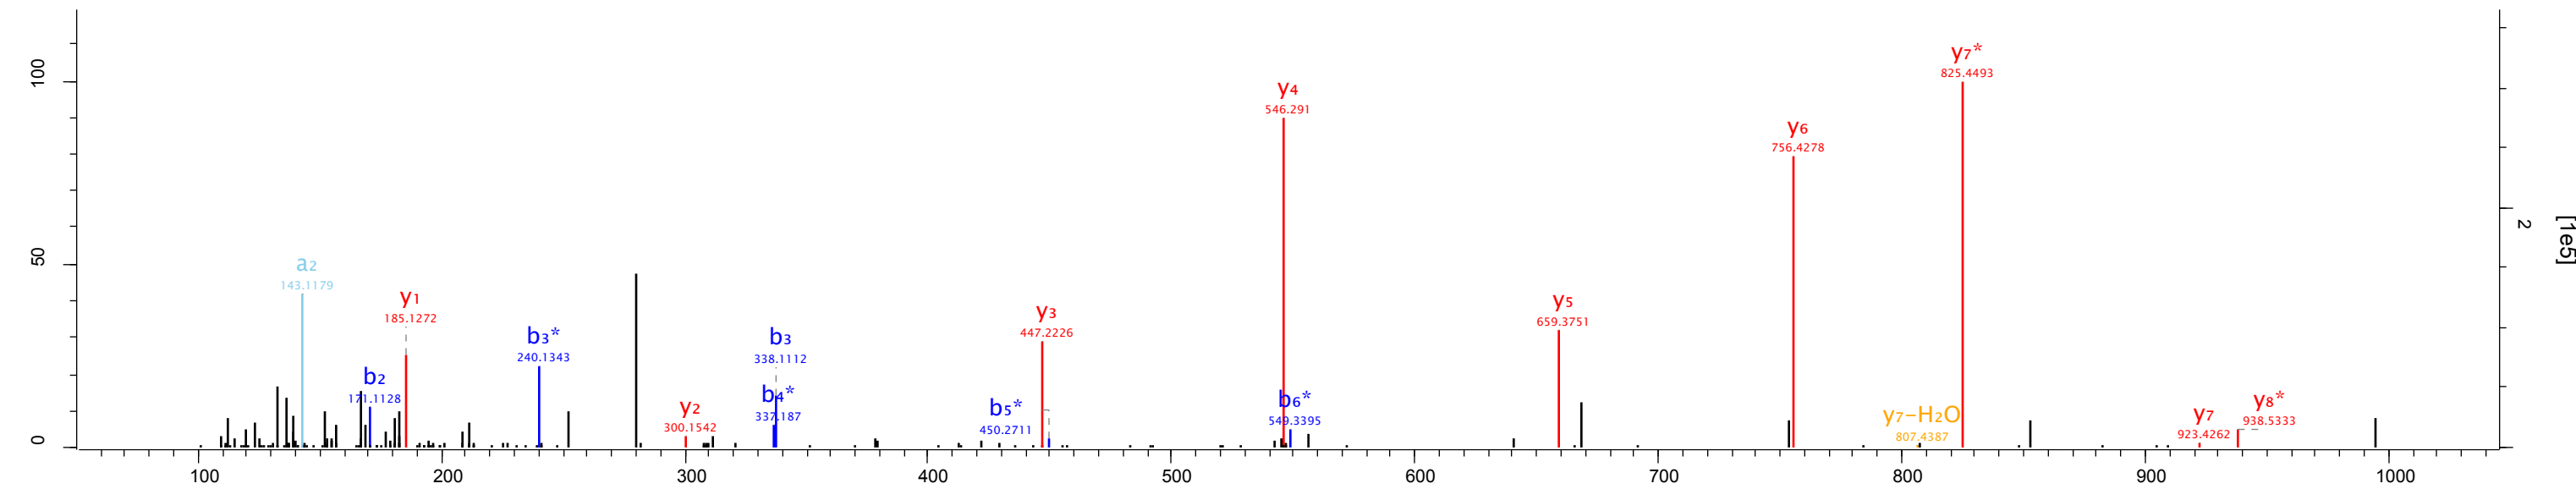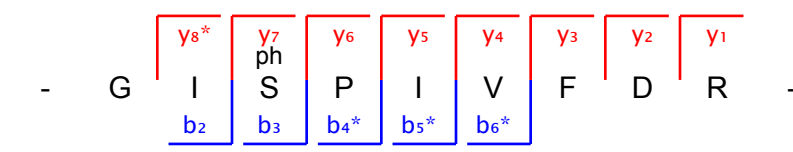

Raw file 20171215\_MaS\_33SR\_LMH\_phospho\_06 Scan 4028 Method FTMS; HCD Score 71.08 m/z 469.74 Gene names PRC1

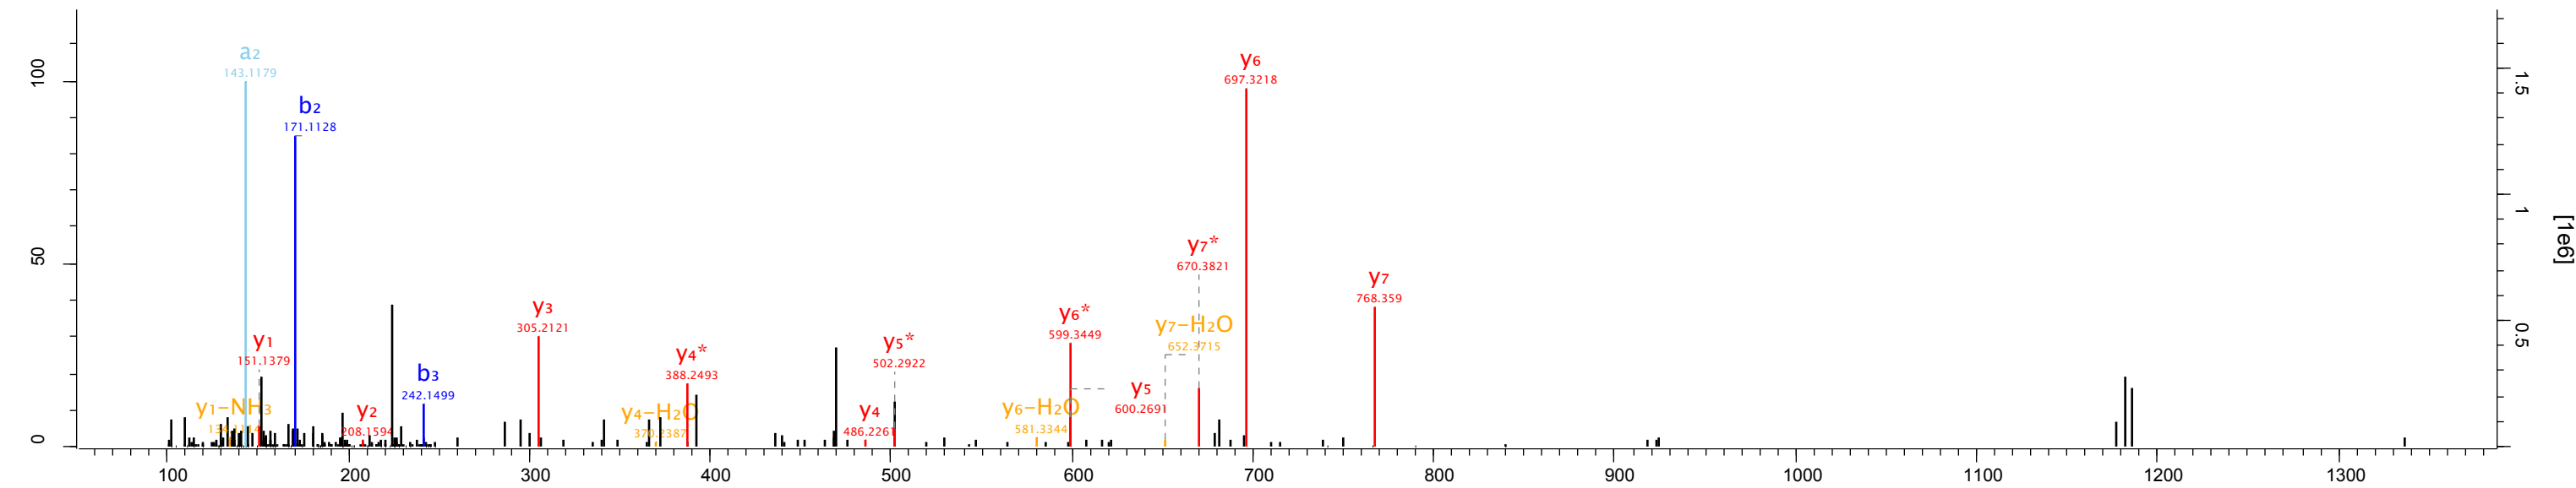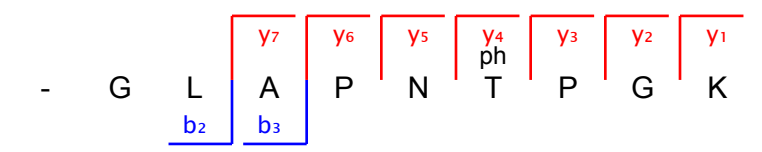

Raw file: 20171215\_MaS\_33SR\_LMH\_phospho\_06  
 Scan: 6228 Method: FTMS; HCD Score: 67.95 m/z: 554.25 Gene names: BNC1

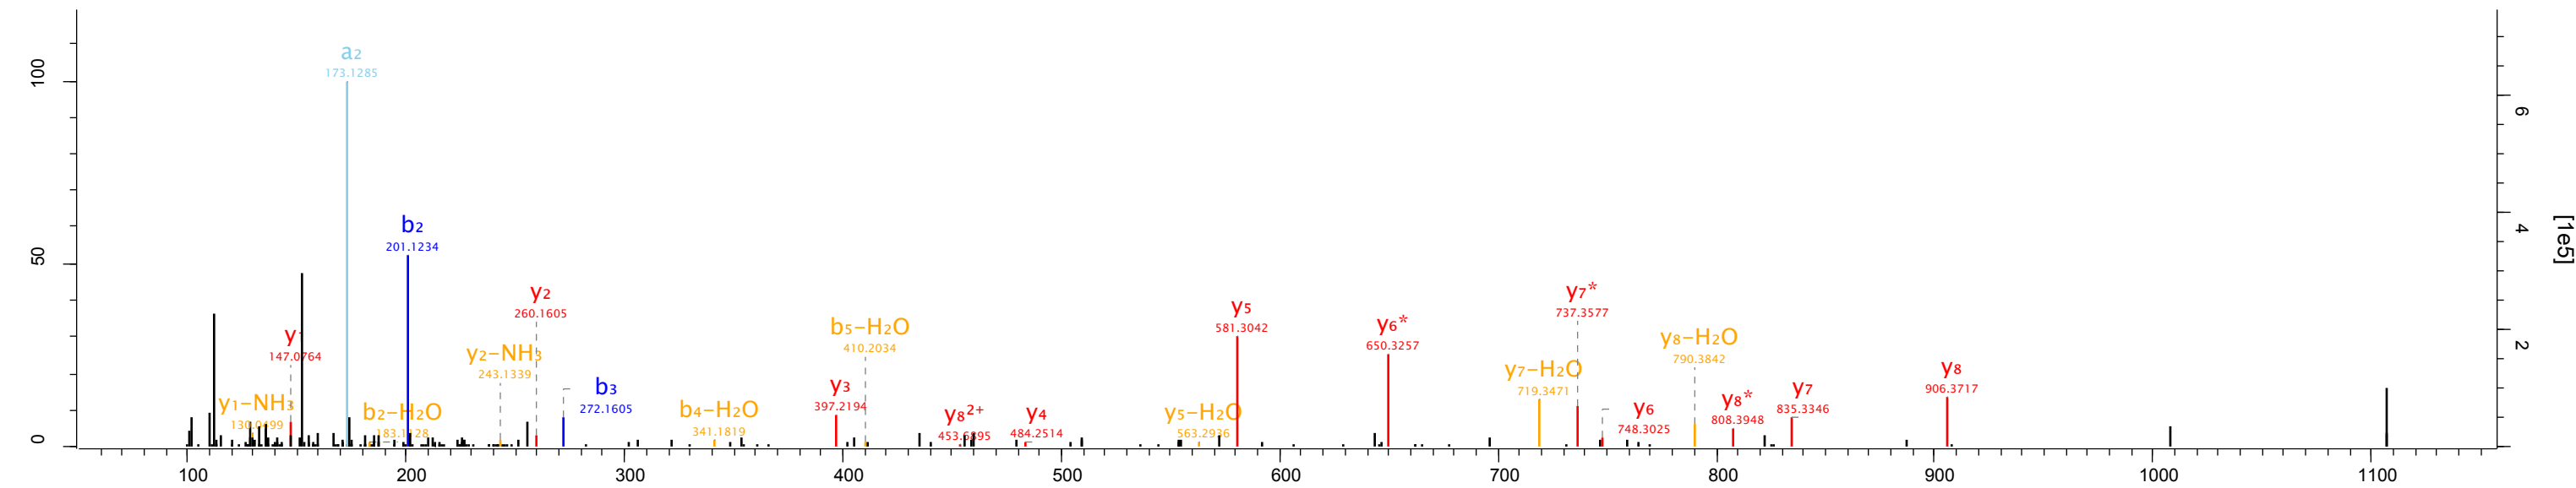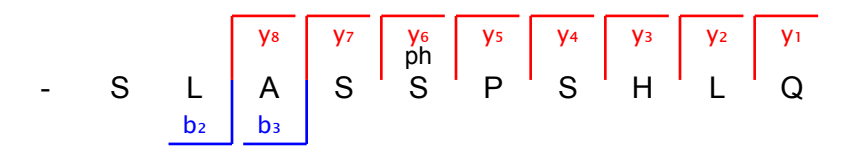

Raw file 20171215\_MaS\_33SR\_LMH\_phospho\_06 Scan 6698 Method FTMS; HCD Score 107.88 m/z 919.93 Gene names APBB2

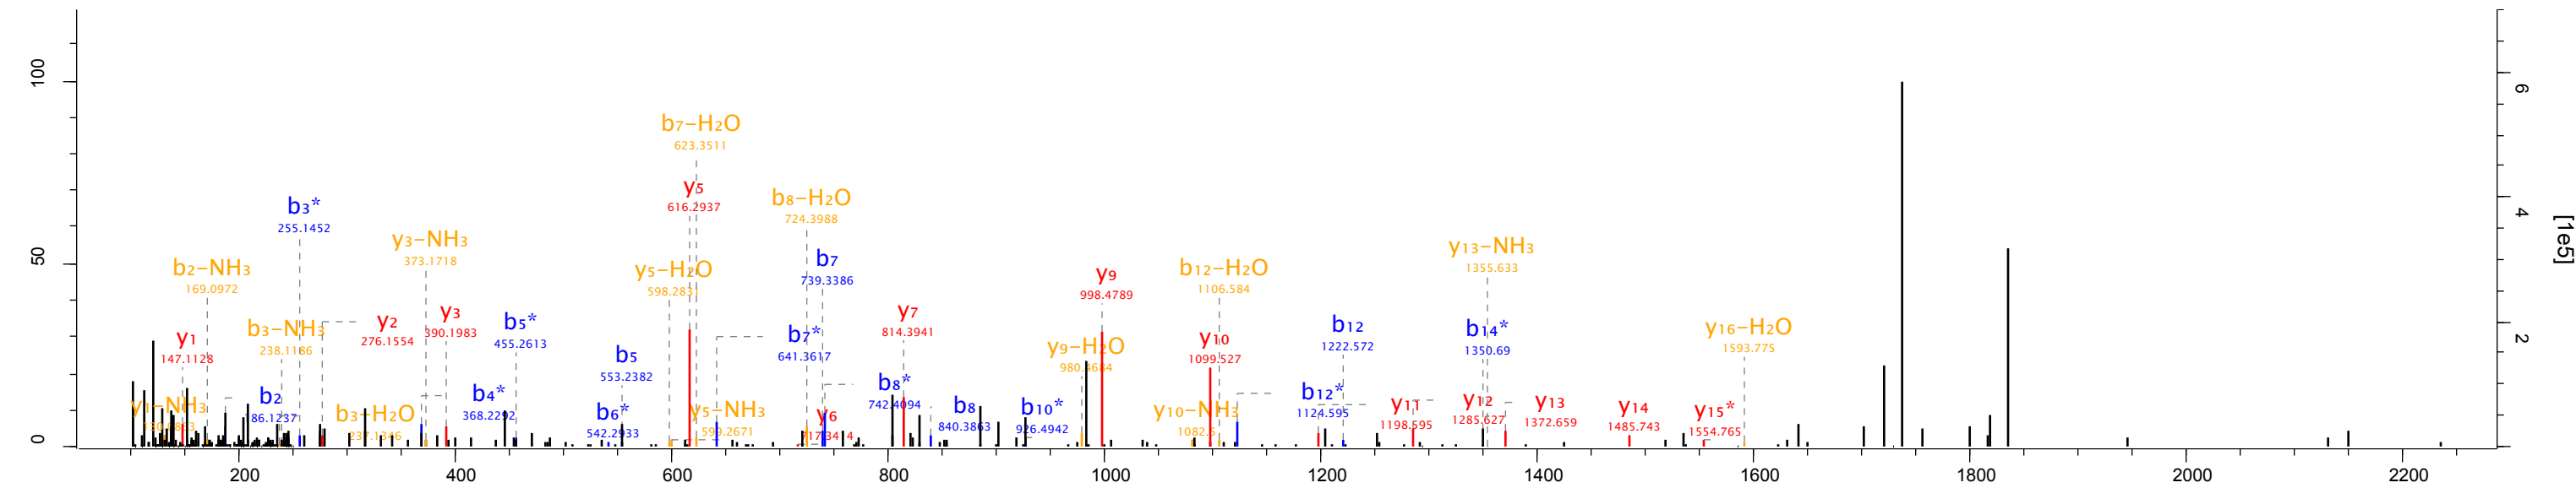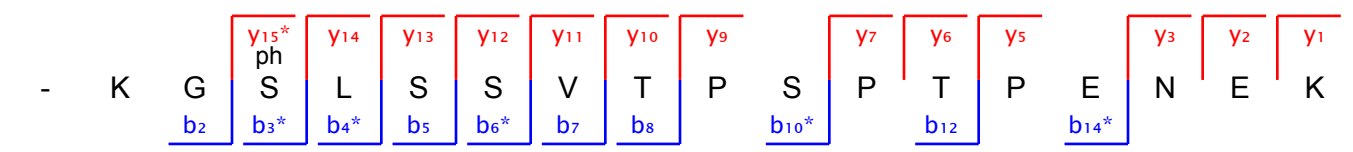



Raw file 20171215\_MaS\_33SR\_LMH\_phospho\_06 Scan 9018 Method FTMS; HCD Score 111.52 m/z 552.73 Gene names MAP4K5

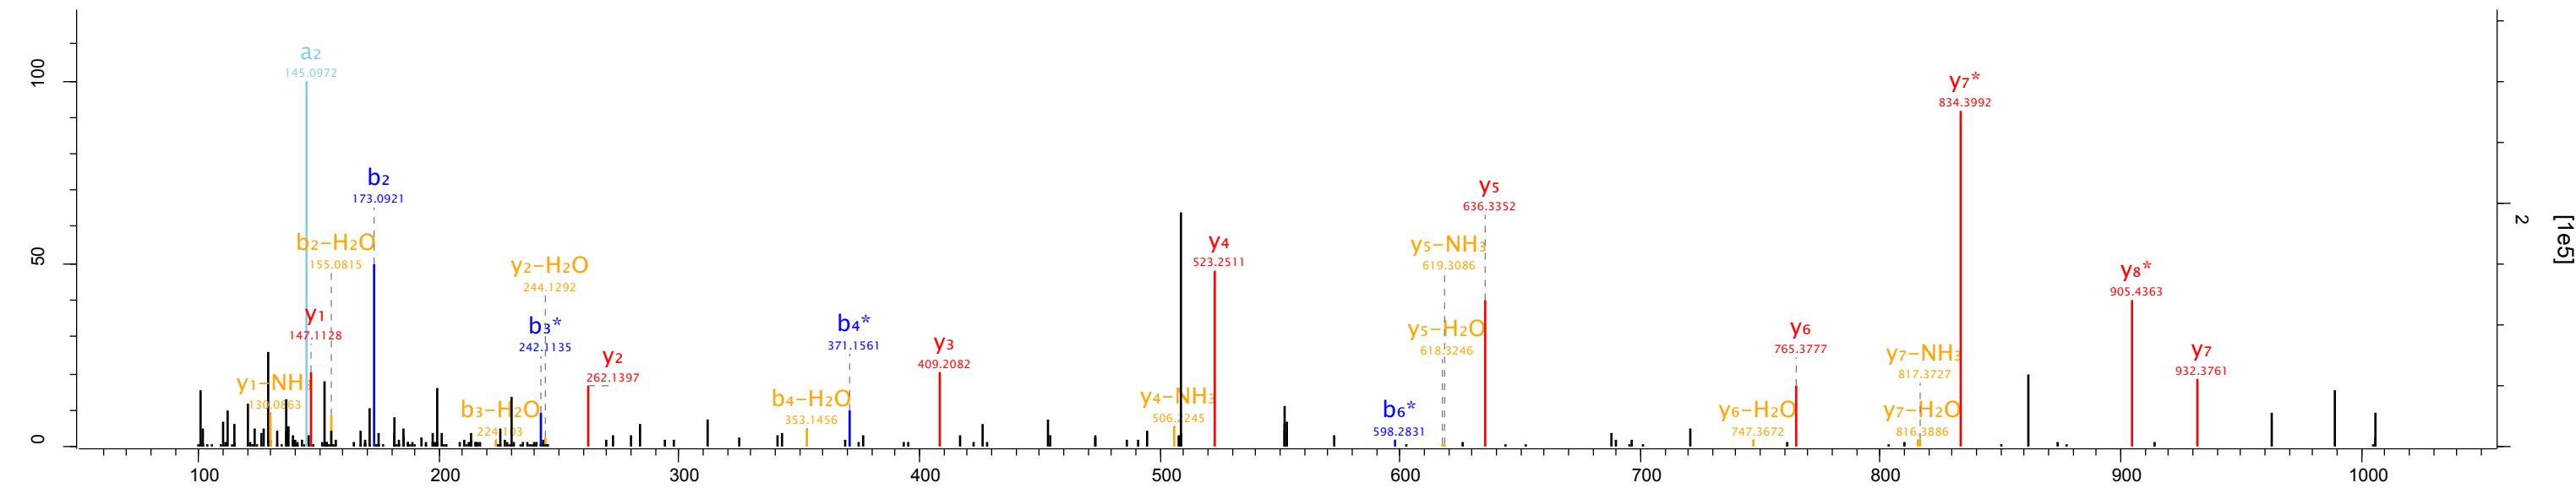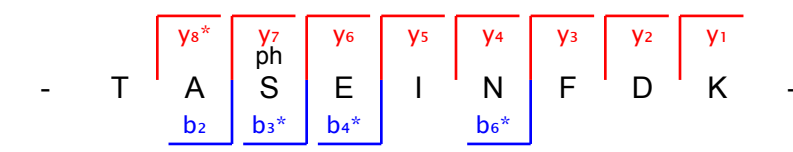

Raw file 20171215\_MaS\_33SR\_LMH\_phospho\_08 Scan 10288 Method FTMS; HCD Score 94.38 m/z 946.91 Gene names POU3F2

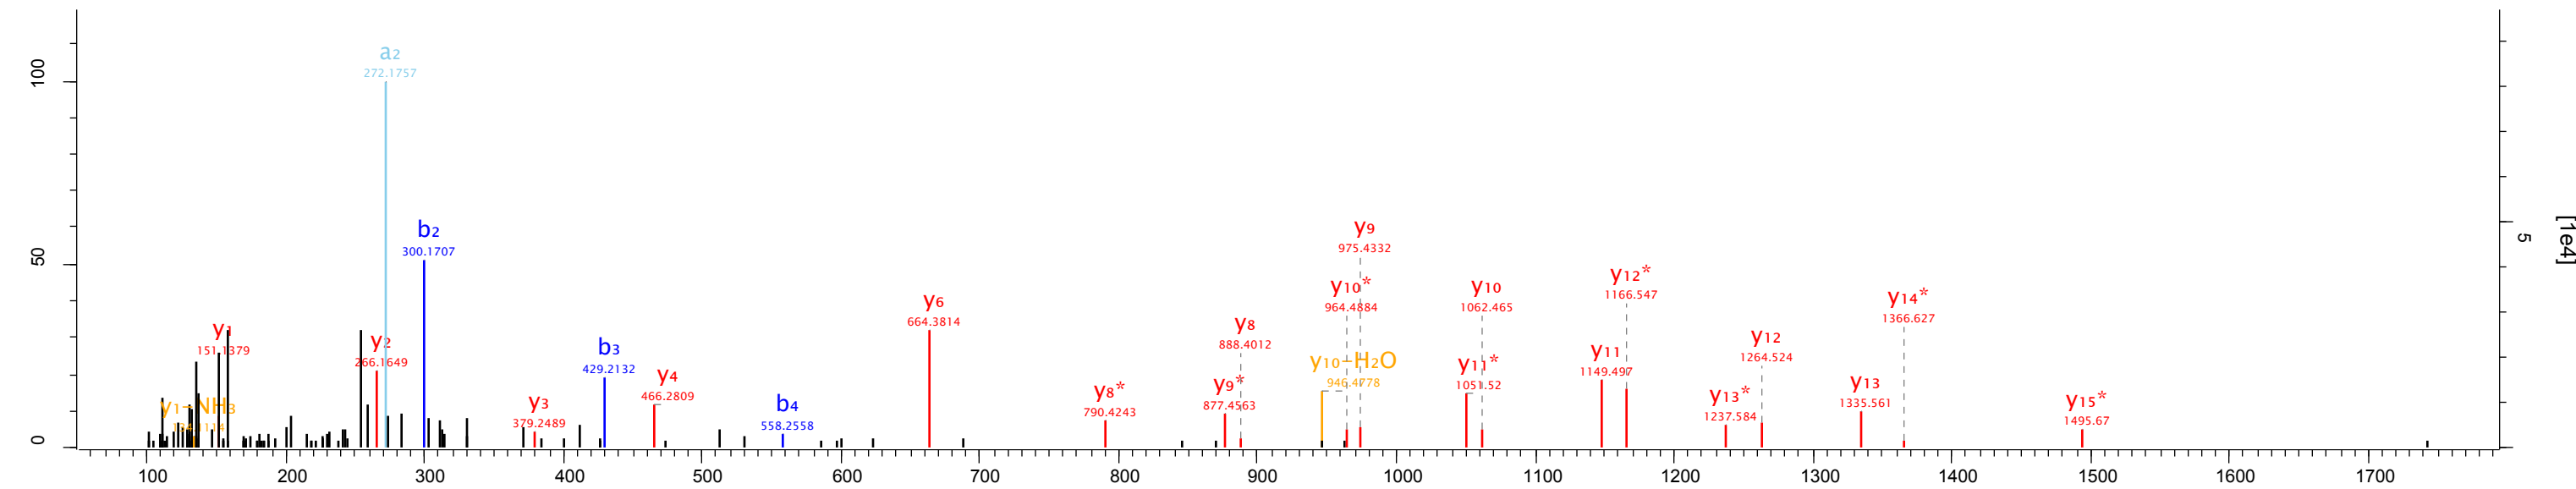

- W L E E A D S S S G S P T S I D K -

Fragmentation mapping: b2 (L), b3 (E), b4 (E), y15\* (E), y14\* (E), y13 (A), y12 (D), y11 (S), y10 (S), y9 (S), y8 (G), y6 (P), y4 (S), y3 (I), y2 (D), y1 (K).

Raw file 20171215\_MaS\_33SR\_LMH\_phospho\_08 Scan 2628 Method FTMS; HCD Score 45.43 m/z 682.81 Gene names SREBF1

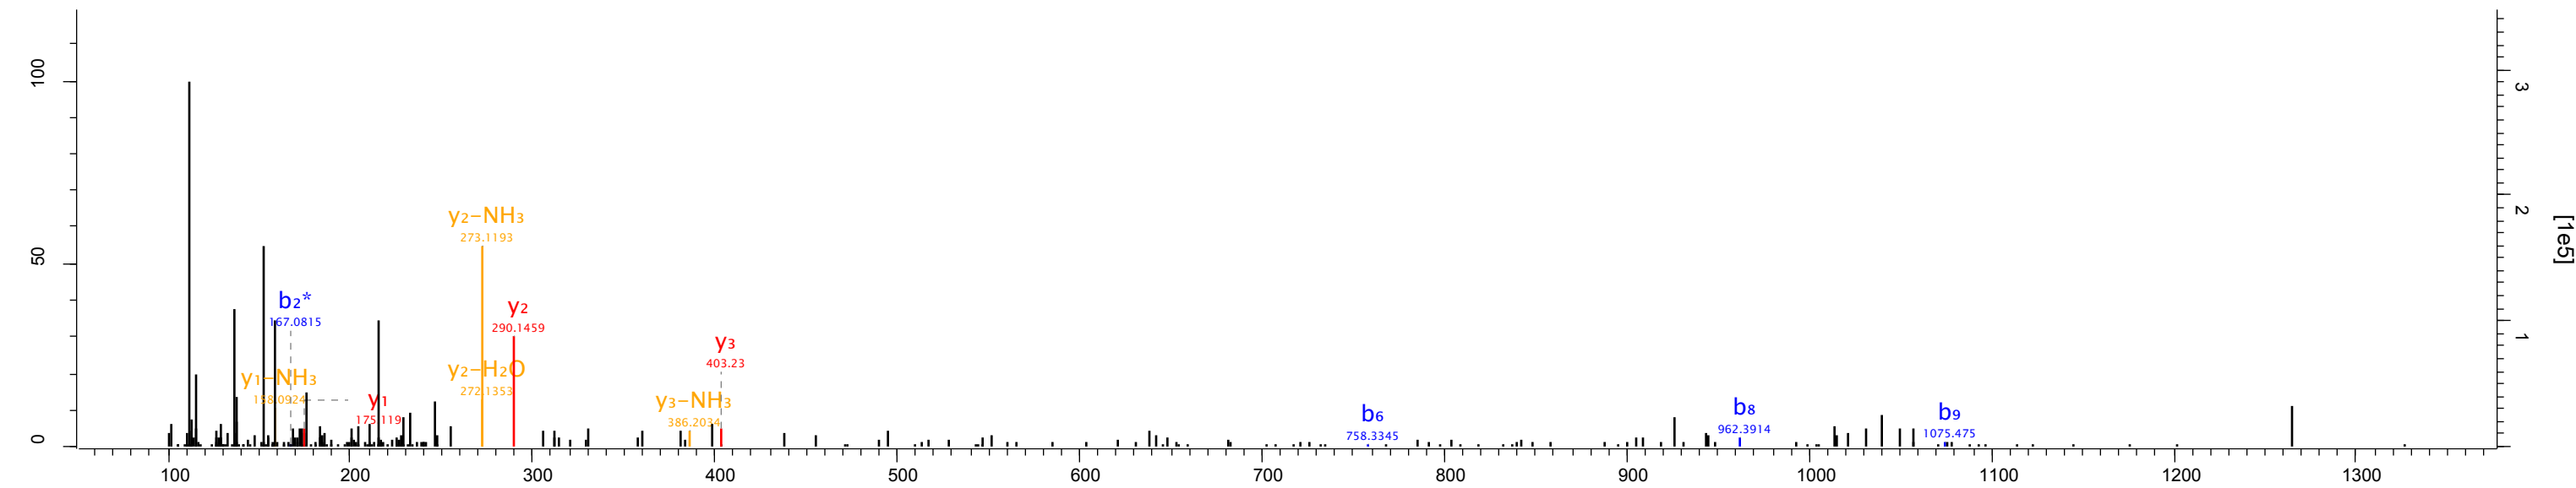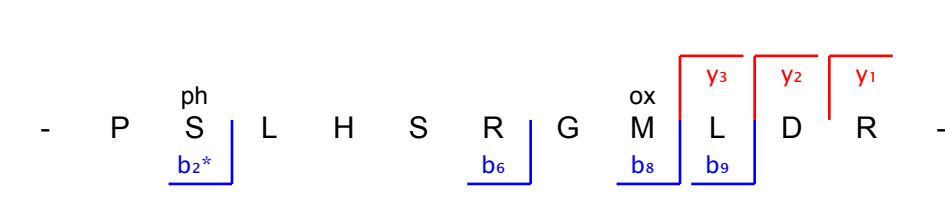

Raw file: 20171215\_MaS\_33SR\_LMH\_phospho\_08  
 Scan: 4958 Method: FTMS; HCD Score: 71.24 m/z: 656.31 Gene names: DCAF15

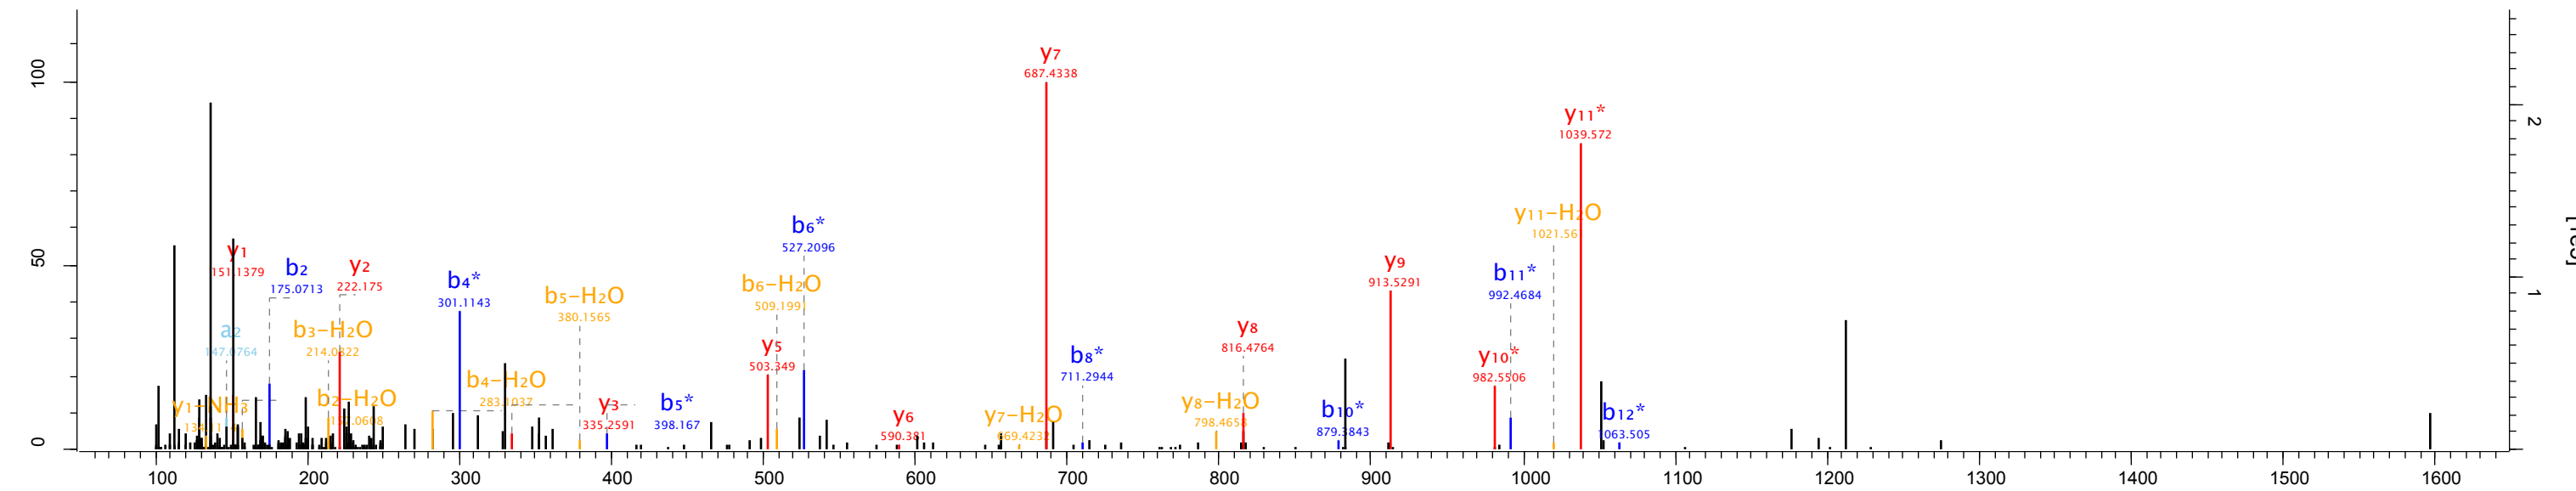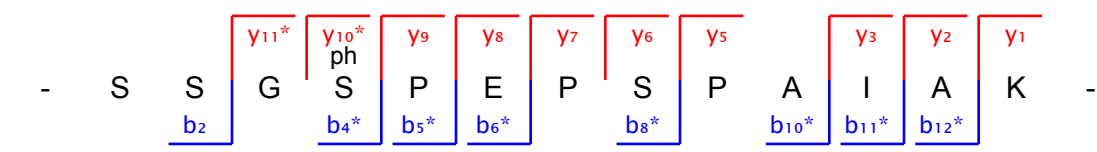

Raw file  
 20171215\_MaS\_33SR\_LMH\_phospho\_08  
 Scan 6498 Method FTMS; HCD Score 161.46 m/z 837.39 Gene names RAB12

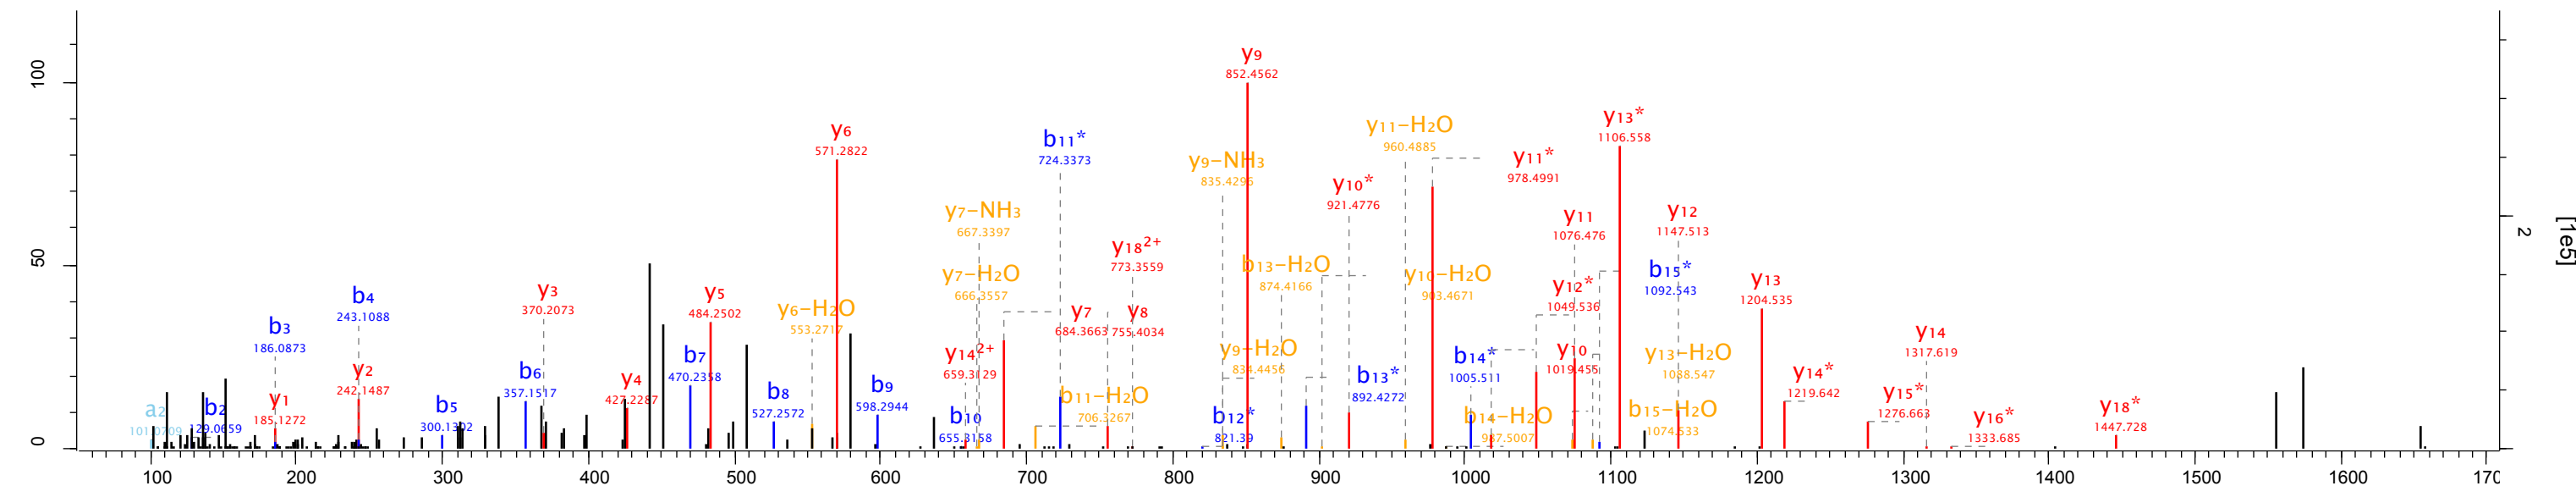

- A G G G G G L G A G S P A L S G G Q G R -

Peptide sequence: A G G G G G L G A G S P A L S G G Q G R

Fragmentation sites (b and y ions):

- b<sub>2</sub> (under G)
- b<sub>3</sub> (under G)
- b<sub>4</sub> (under G)
- b<sub>5</sub> (under G)
- b<sub>6</sub> (under G)
- b<sub>7</sub> (under L)
- b<sub>8</sub> (under G)
- b<sub>9</sub> (under A)
- b<sub>10</sub> (under G)
- b<sub>11</sub>\* (under S)
- b<sub>12</sub>\* (under P)
- b<sub>13</sub>\* (under A)
- b<sub>14</sub>\* (under L)
- b<sub>15</sub>\* (under S)

Fragmentation sites (b and y ions):

- y<sub>1</sub> (under R)
- y<sub>2</sub> (under G)
- y<sub>3</sub> (under Q)
- y<sub>4</sub> (under G)
- y<sub>5</sub> (under S)
- y<sub>6</sub> (under L)
- y<sub>7</sub> (under A)
- y<sub>8</sub> (under P)
- y<sub>9</sub> (under S)
- y<sub>10</sub> (under G)
- y<sub>11</sub> (under A)
- y<sub>12</sub> (under L)
- y<sub>13</sub> (under S)
- y<sub>14</sub> (under G)
- y<sub>15</sub>\* (under R)
- y<sub>16</sub>\* (under -)
- y<sub>18</sub>\* (under -)

Raw file 20171215\_MaS\_33SR\_LMH\_phospho2\_01 Scan 11618 Method FTMS; HCD Score 83.78 m/z 416.2 Gene names PDYN

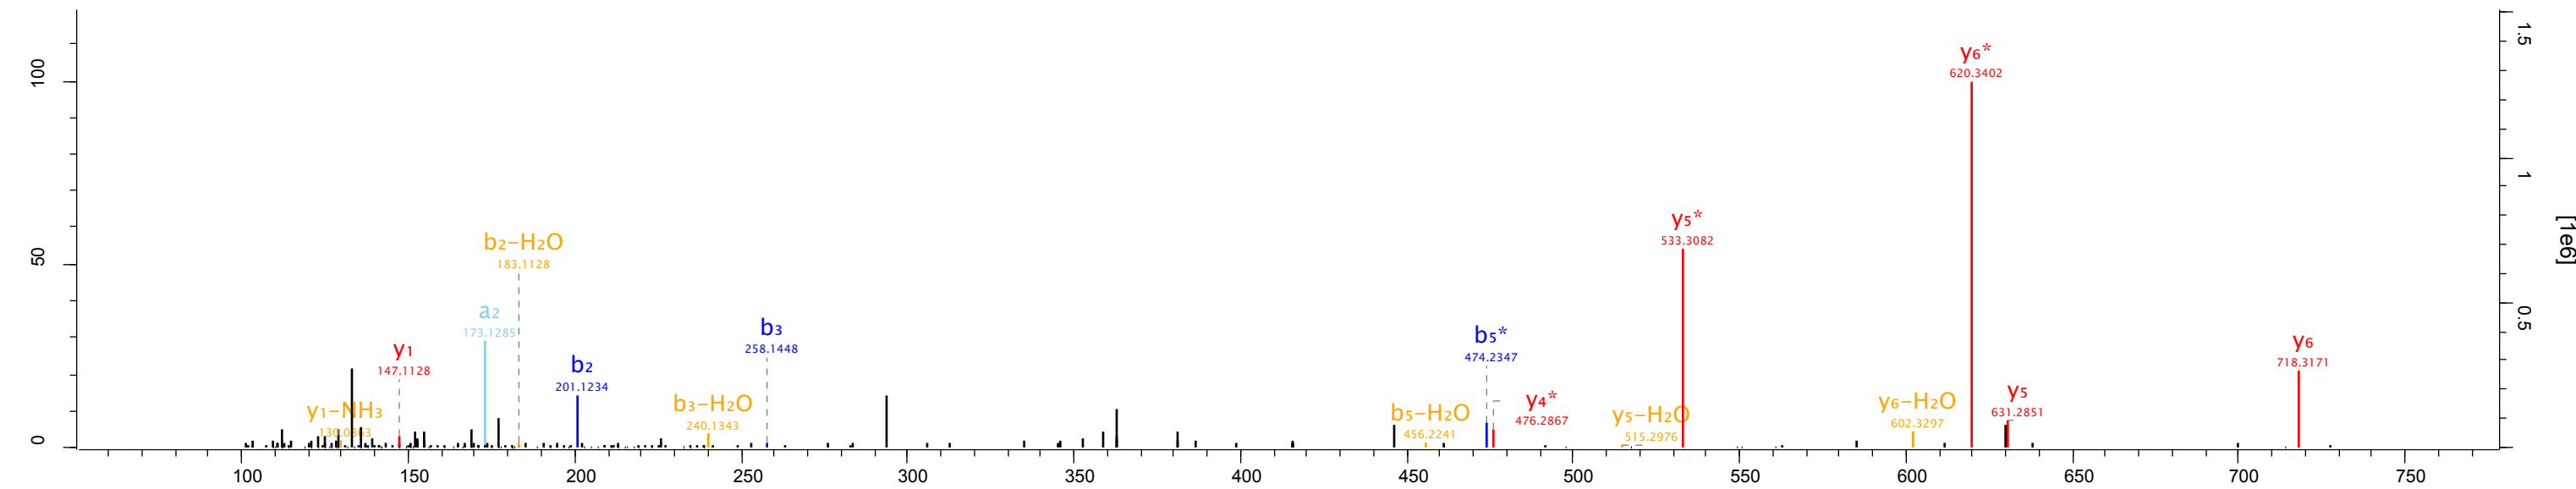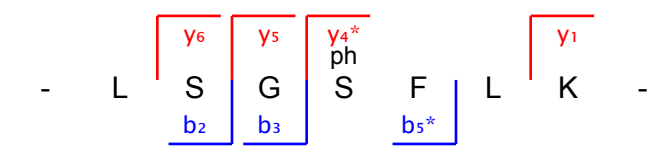

Raw file 20171215\_MaS\_33SR\_LMH\_phospho2\_01 Scan 2638 Method FTMS; HCD Score 135.08 m/z 698.26 Gene names SSH3

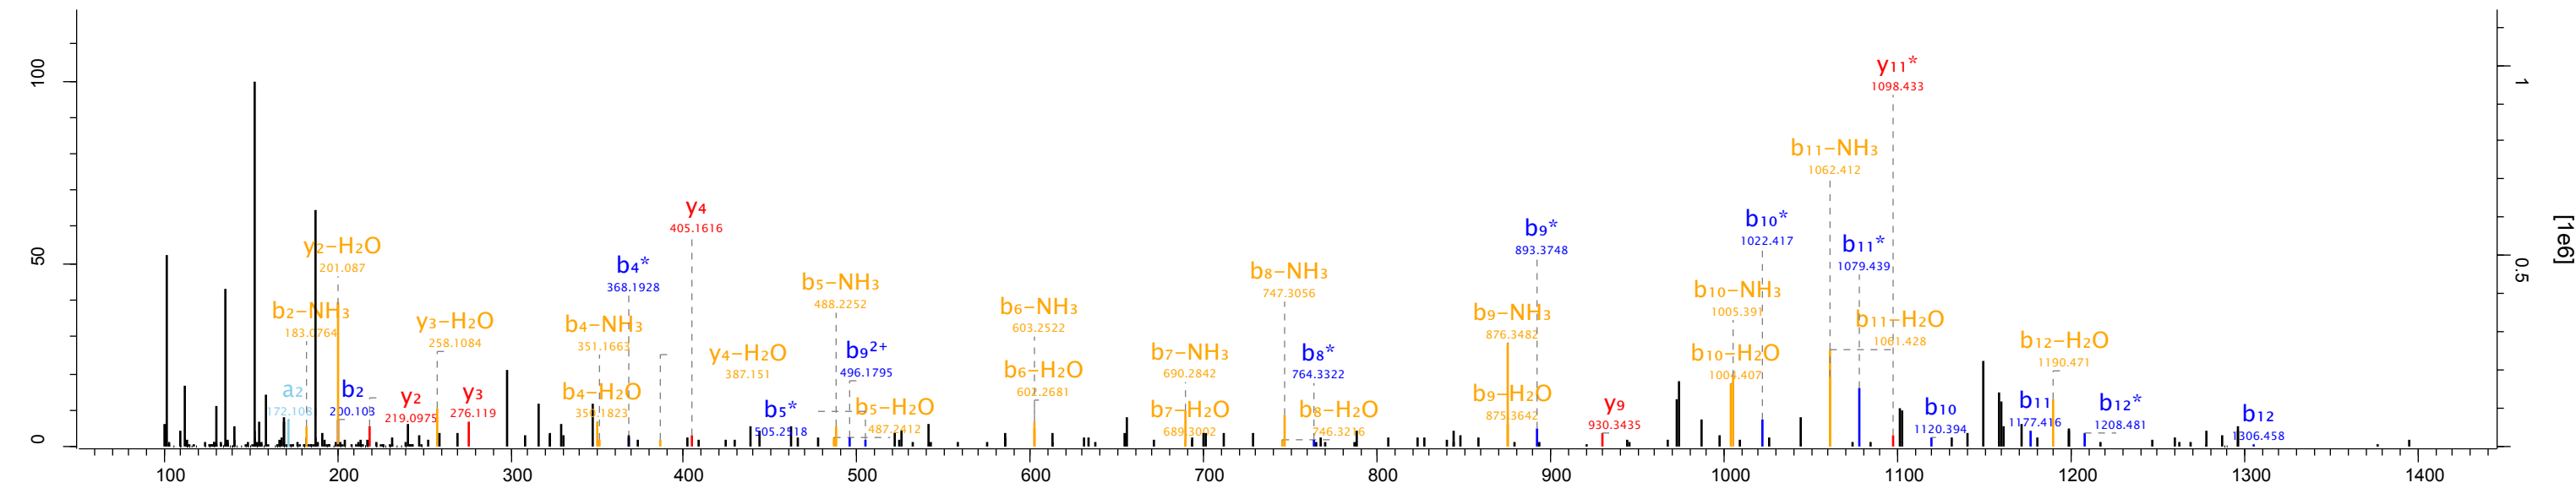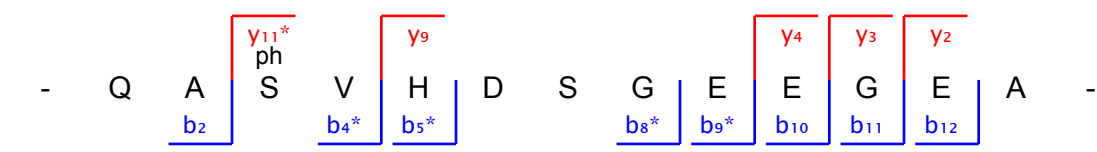

20171215\_MaS\_33SR\_LMH\_phospho2\_01 5058 FTMS; HCD 82.07 562.79 BCL6

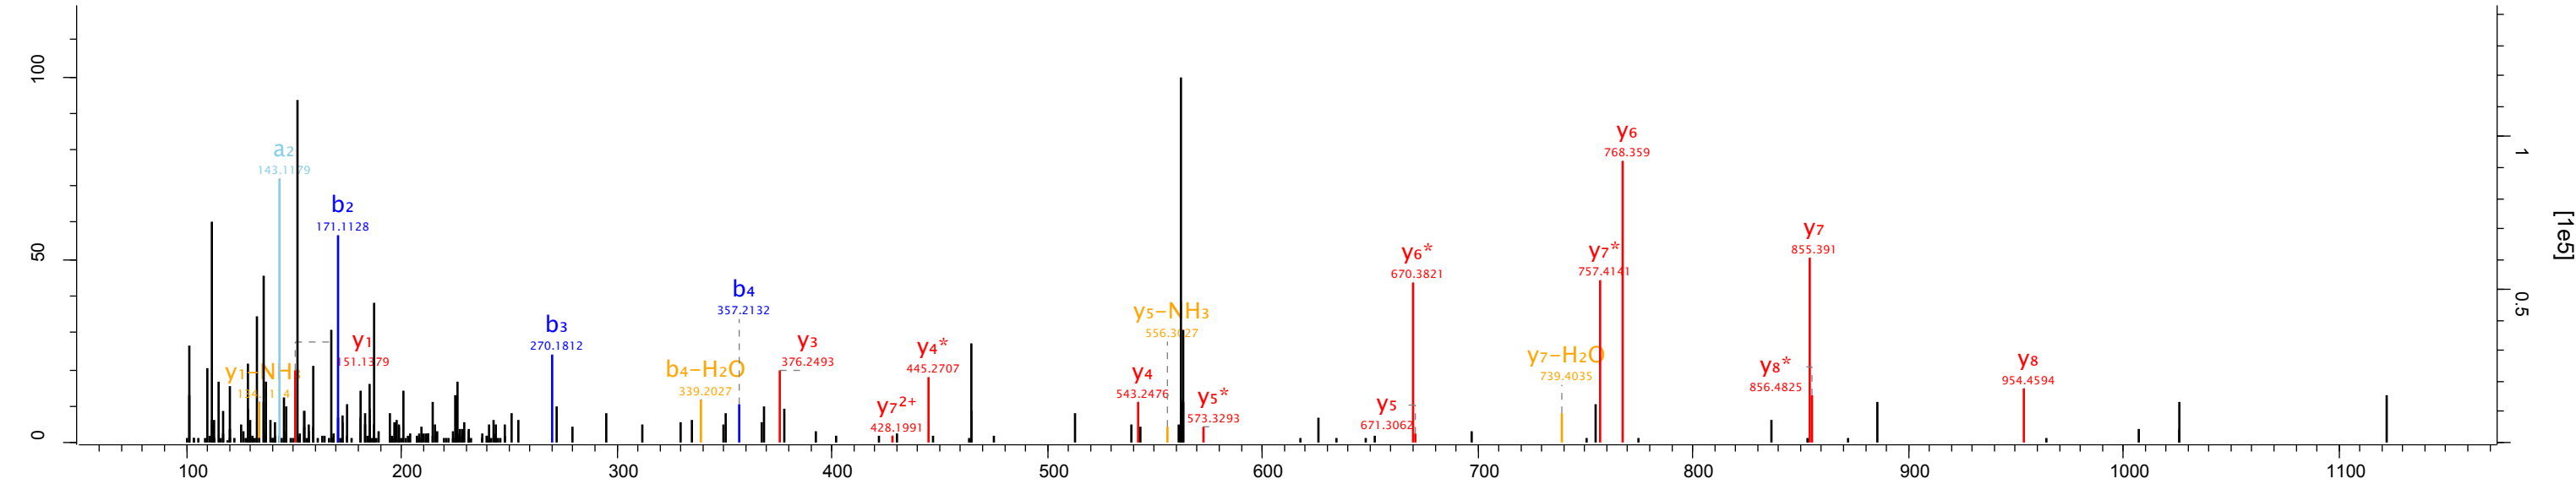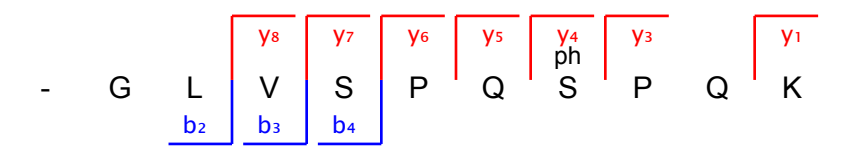



Raw file: 20171215\_MaS\_33SR\_LMH\_phospho2\_02  
 Scan: 10648 Method: FTMS; HCD Score: 64.38 m/z: 928.42 Gene names: CCDC114

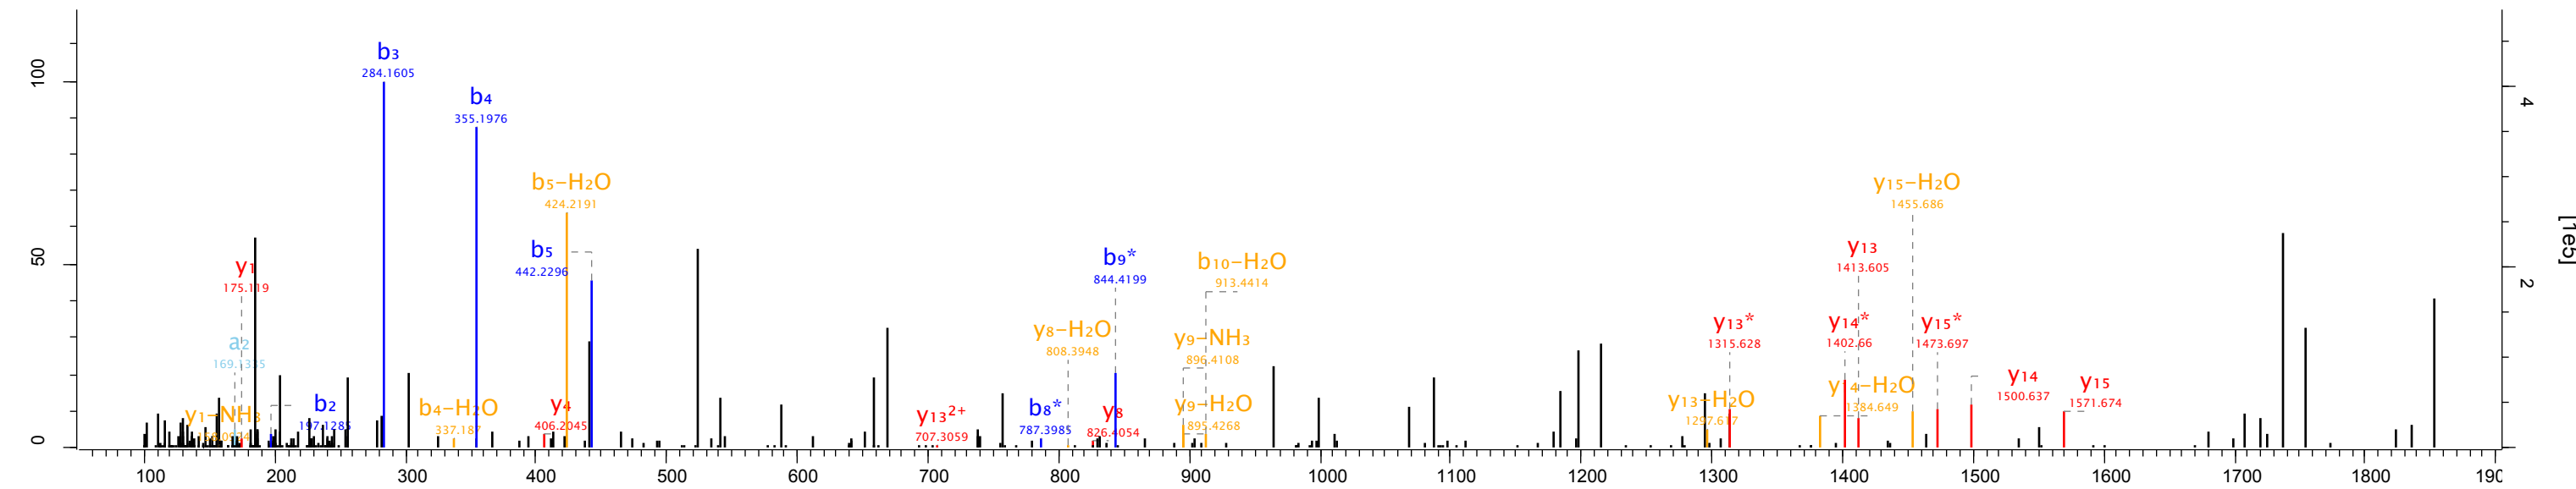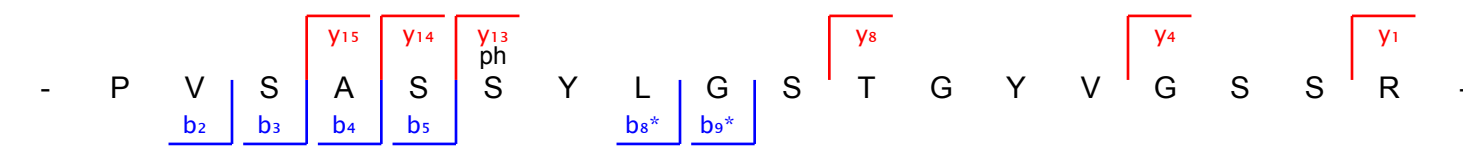

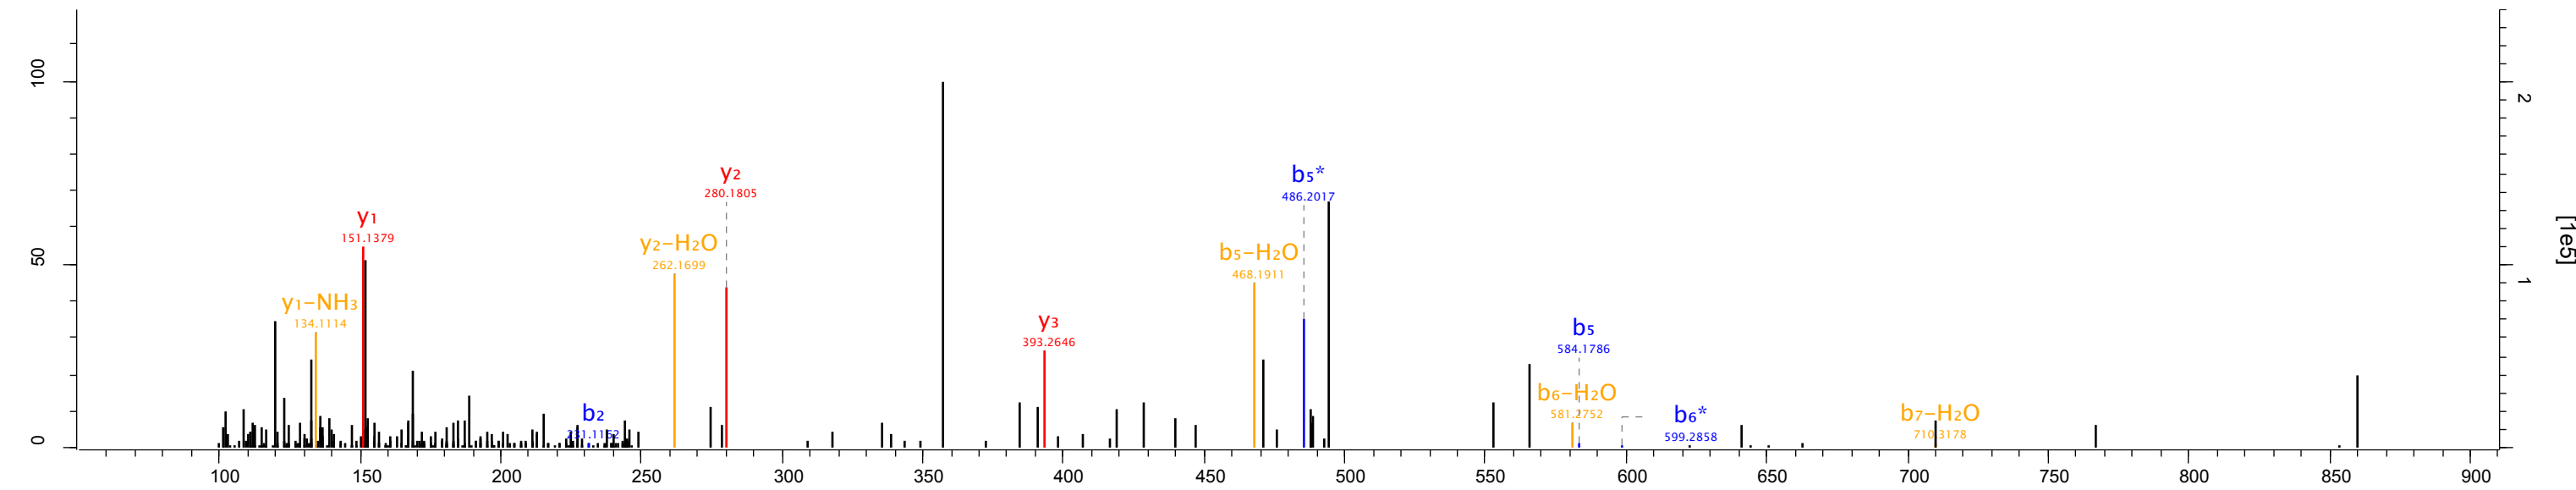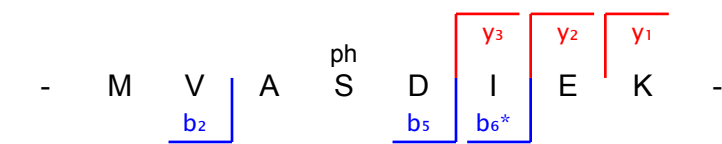

Raw file 20171215\_MaS\_33SR\_LMH\_phospho2\_02 Scan 4558 Method FTMS; HCD Score 158.17 m/z 709.3 Gene names CCDC93

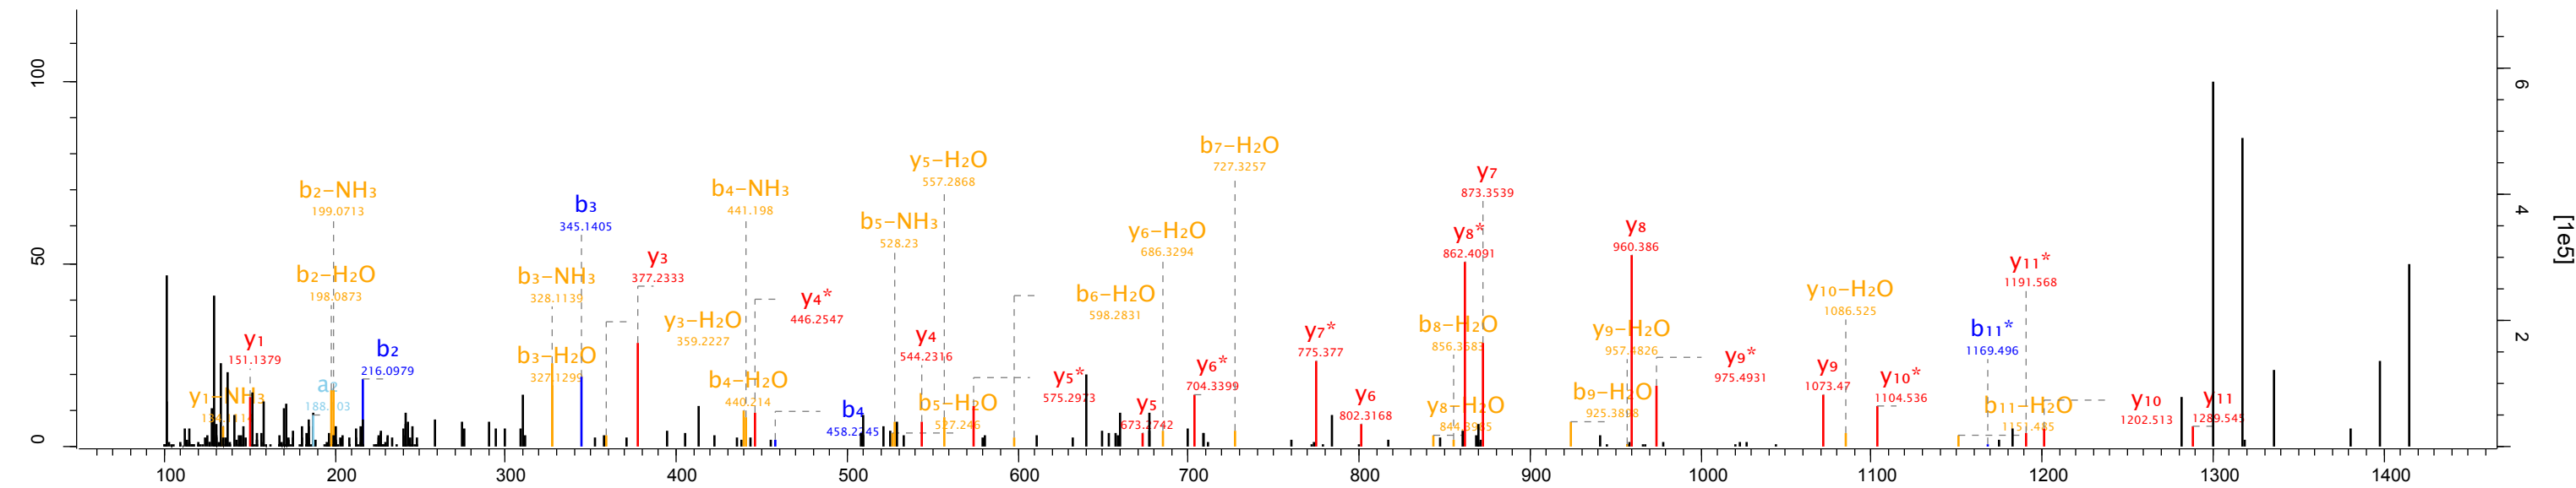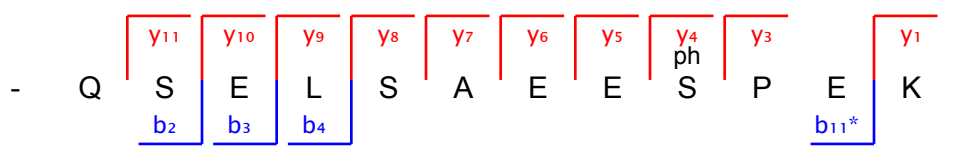

Raw file 20171215\_MaS\_33SR\_LMH\_phospho2\_02 Scan 5178 Method FTMS; HCD Score 59.42 m/z 566.76

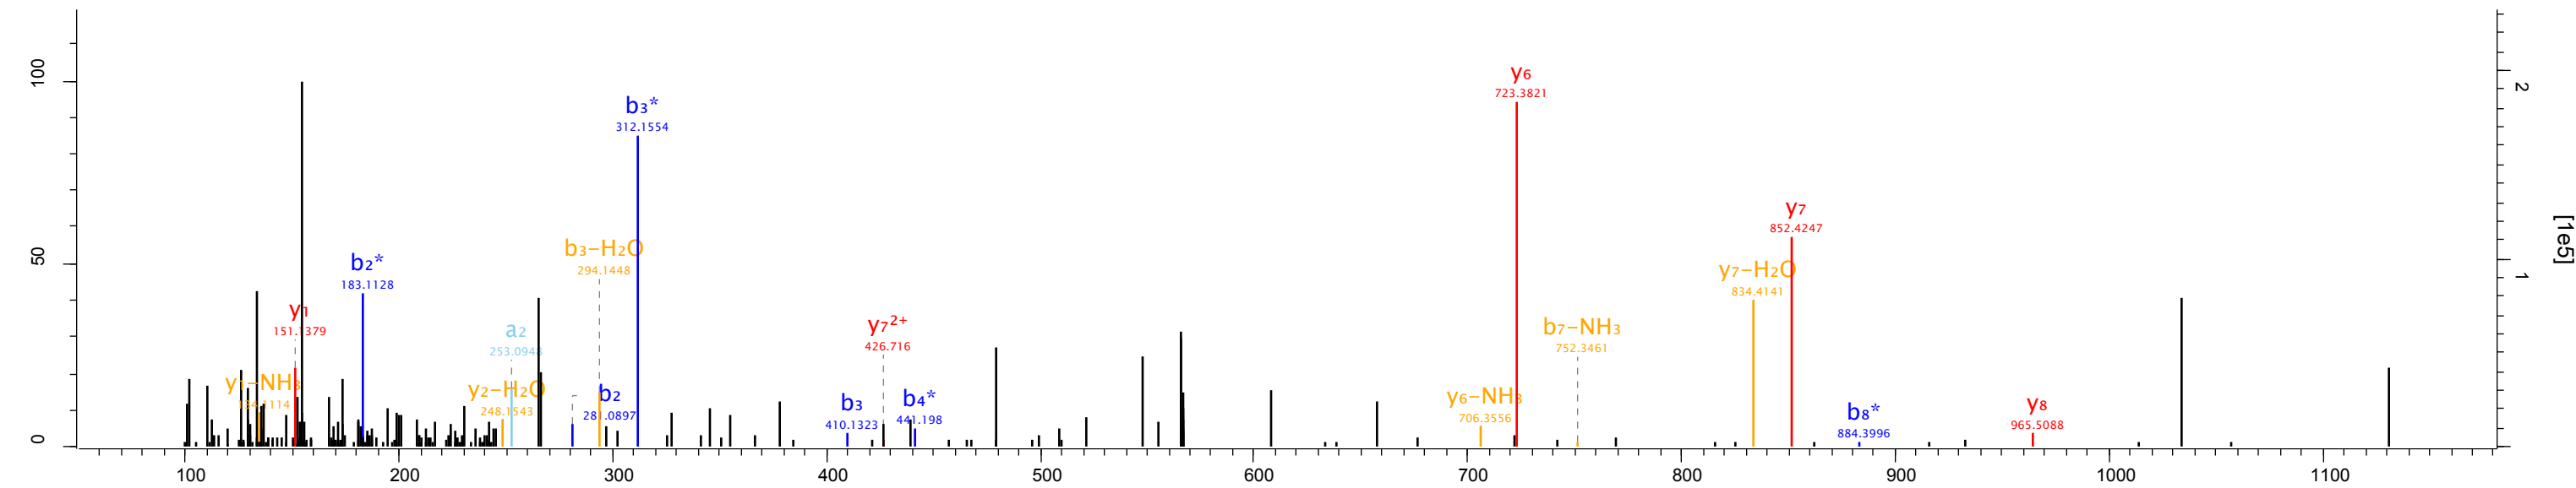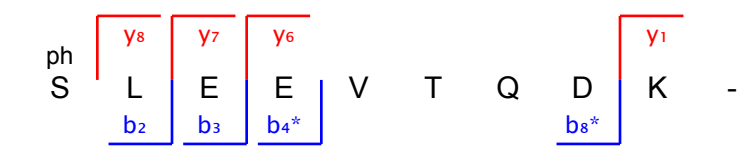

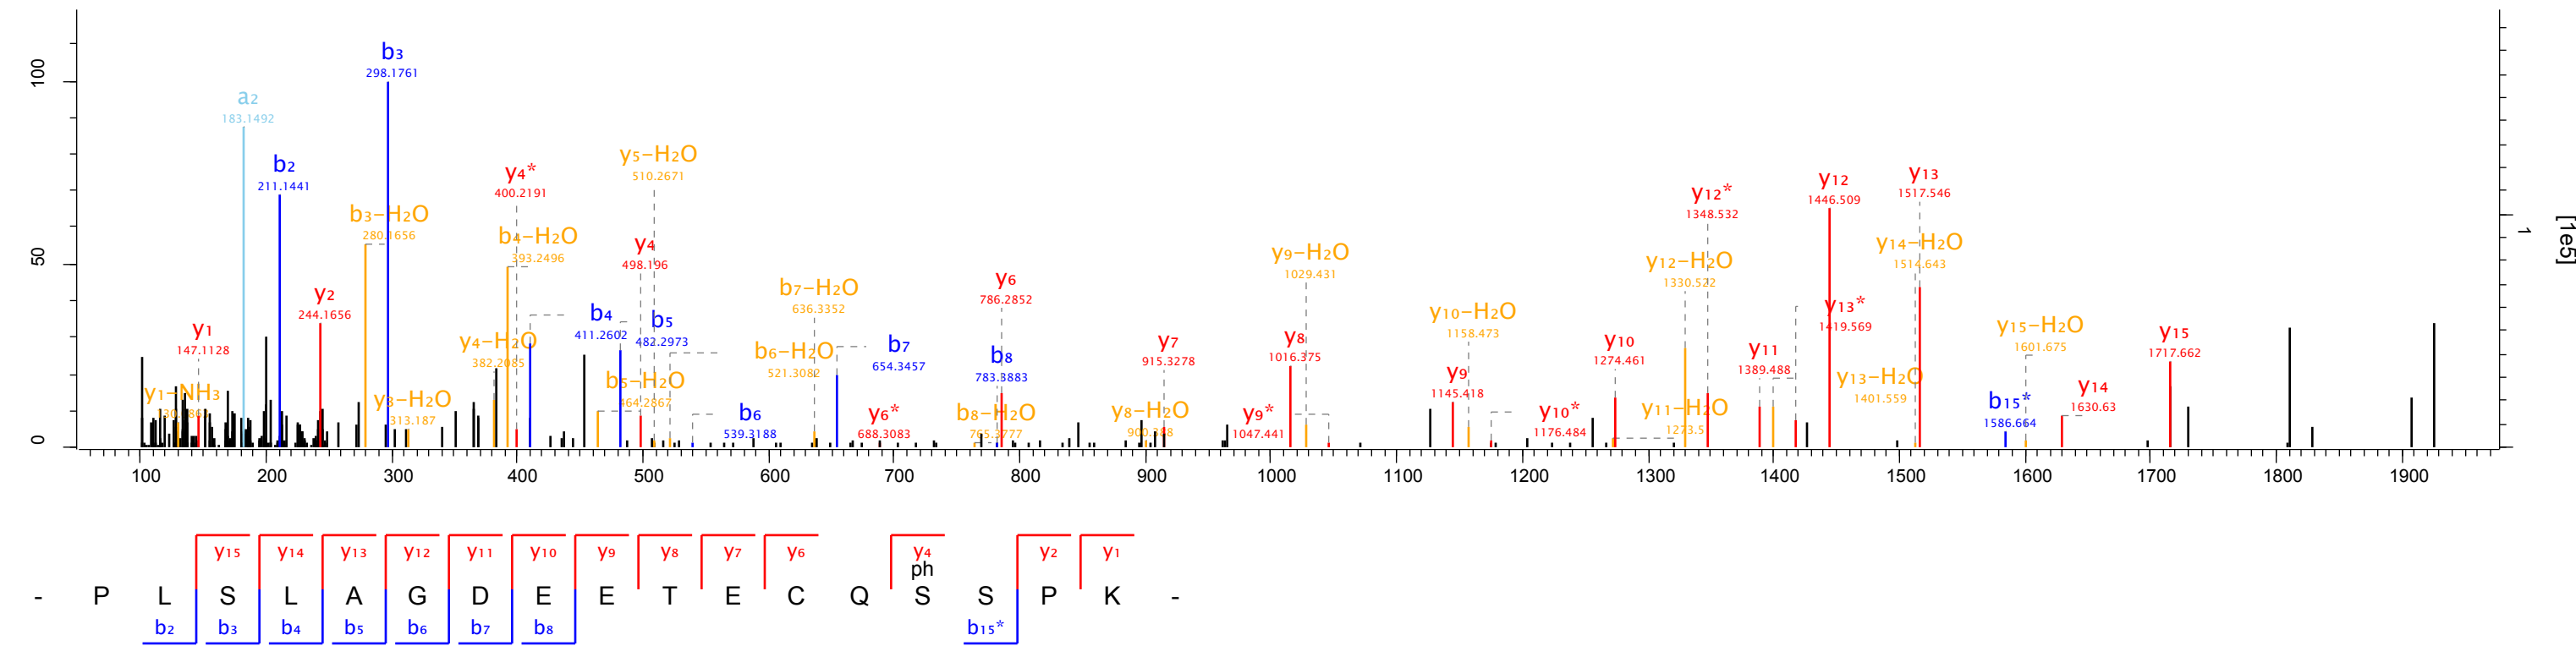

Raw file 20171215\_MaS\_33SR\_LMH\_phospho2\_03 Scan 10008 Method FTMS; HCD Score 54.66 m/z 785.34 Gene names CXorf23

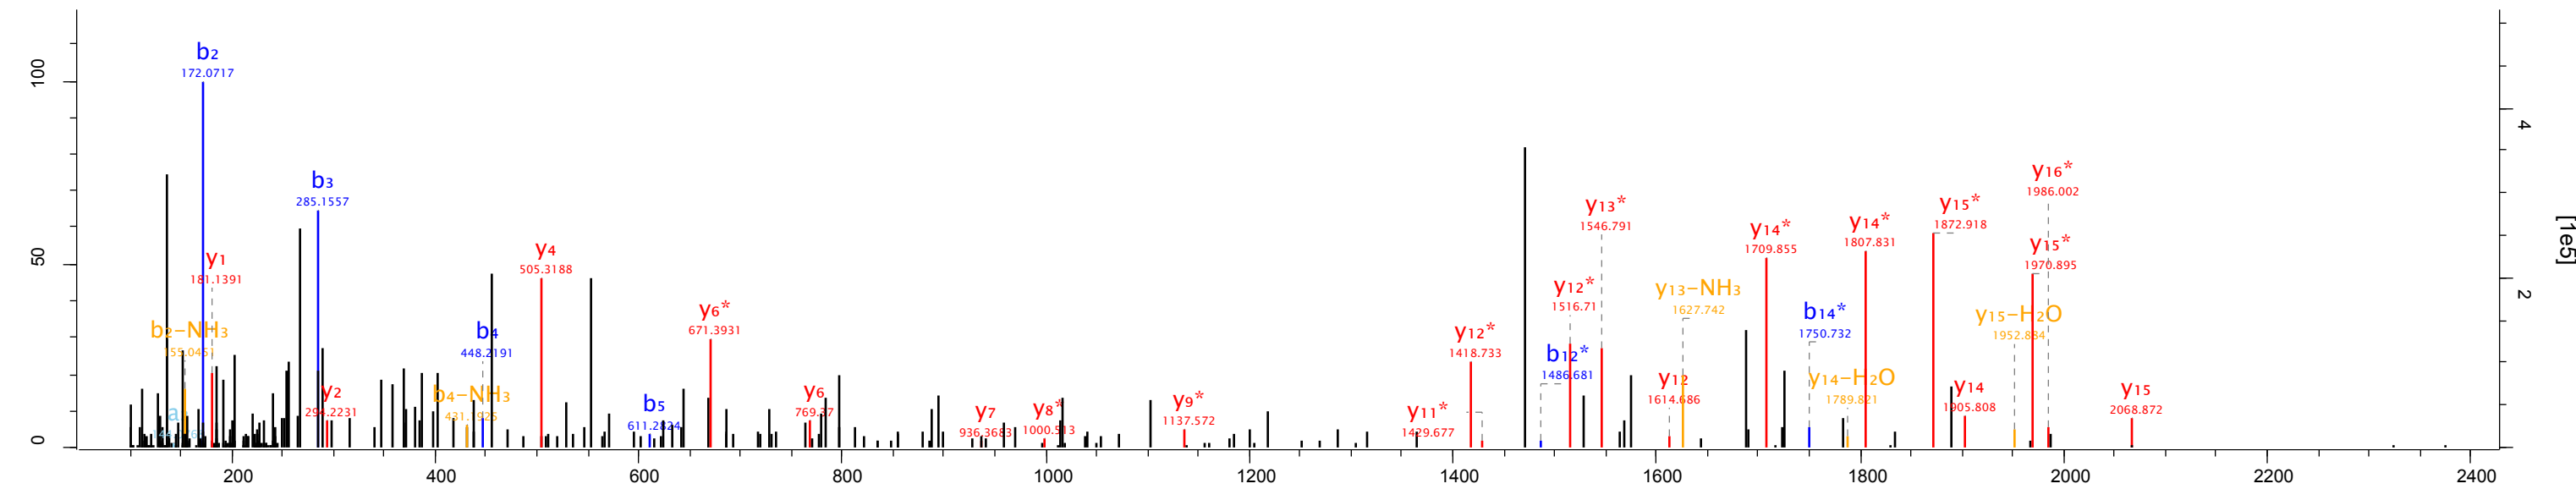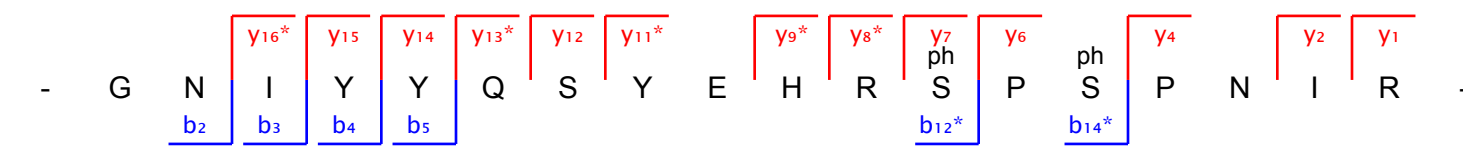

Raw file 20171215\_MaS\_33SR\_LMH\_phospho2\_03 Scan 13548 Method FTMS; HCD Score 202.24 m/z 657.83 Gene names TBC1D25

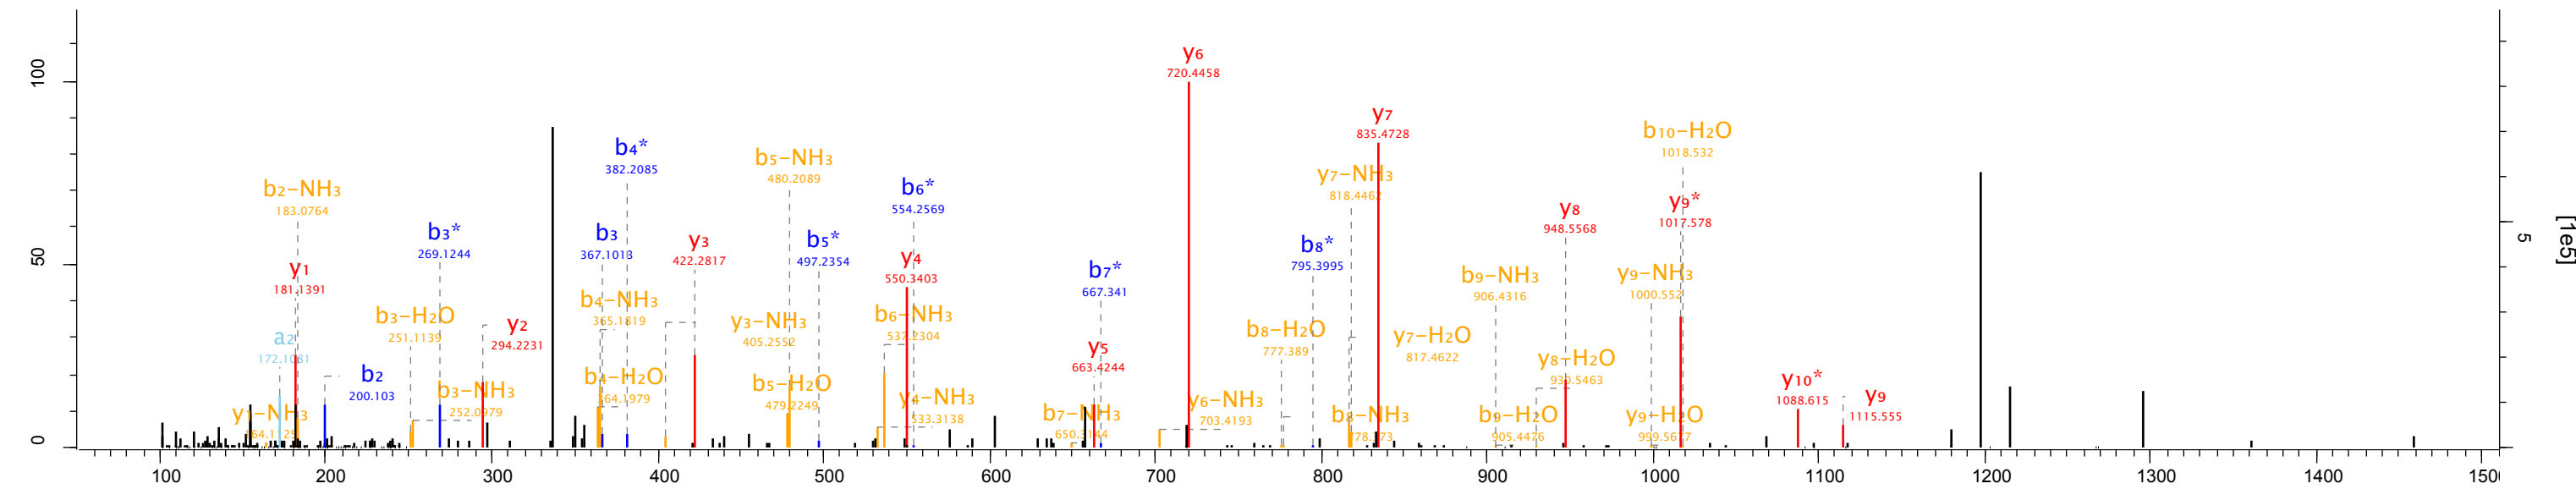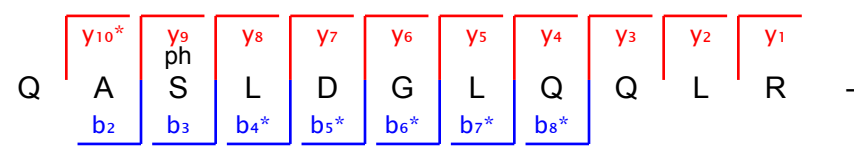

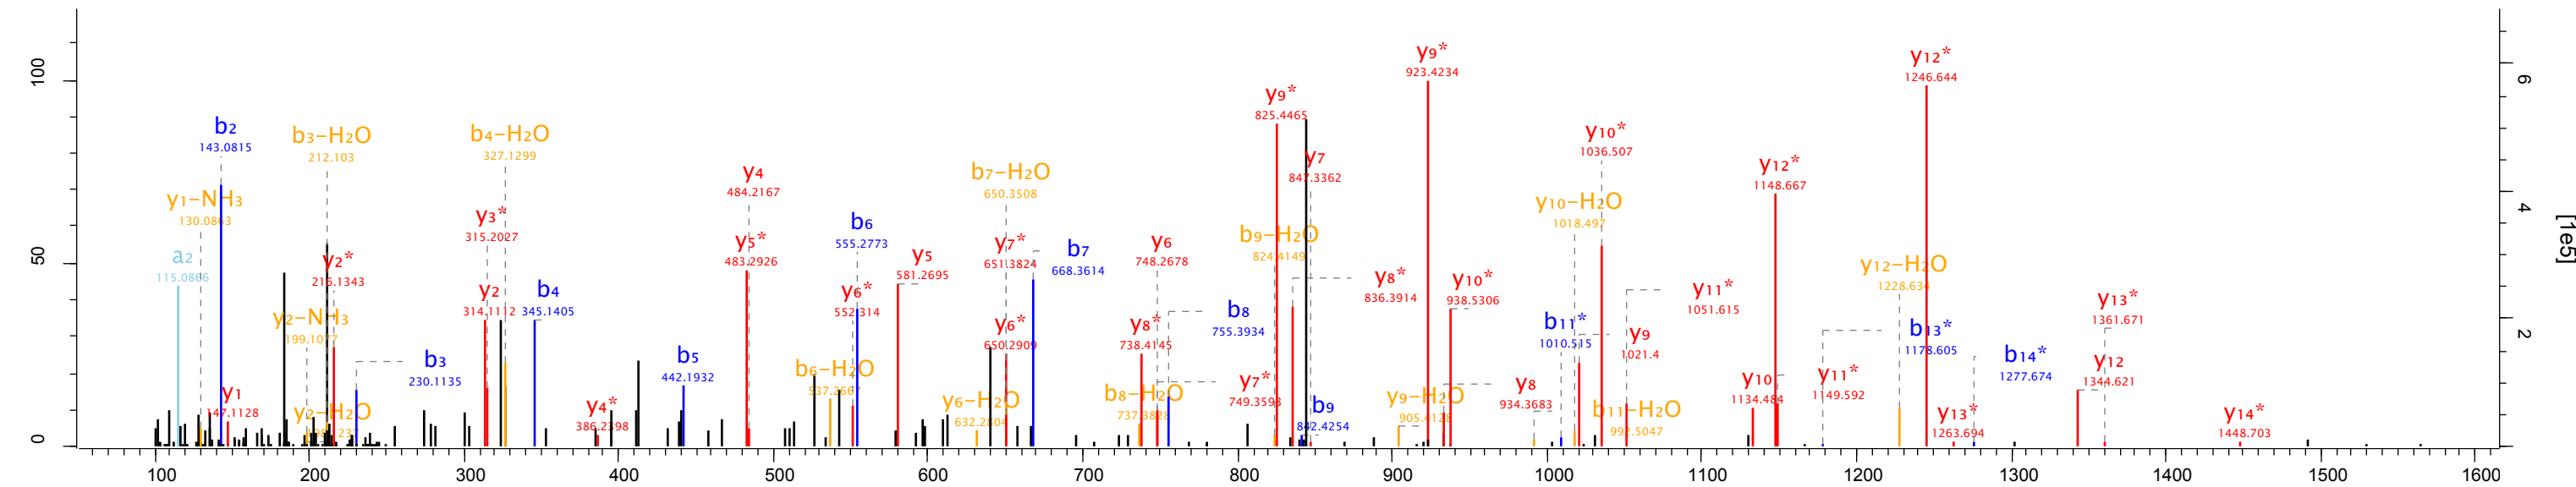

- A A S D P L L S S V S P A V S K -

b<sub>2</sub>
b<sub>3</sub>
b<sub>4</sub>
b<sub>5</sub>
b<sub>6</sub>
b<sub>7</sub>
b<sub>8</sub>
b<sub>9</sub>
b<sub>11</sub>\*
b<sub>13</sub>\*
b<sub>14</sub>\*

y<sub>14</sub>\*
y<sub>13</sub>\*
y<sub>12</sub>
y<sub>11</sub>\*
y<sub>10</sub>
y<sub>9</sub>
y<sub>8</sub>
y<sub>7</sub>
y<sub>6</sub>  
ph
y<sub>5</sub>
y<sub>4</sub>
y<sub>3</sub>\*
y<sub>2</sub>  
ph
y<sub>1</sub>



Raw file 20171215\_MaS\_33SR\_LMH\_phospho2\_03 Scan 16358 Method FTMS; HCD Score 78.42 m/z 855.33 Gene names CDC42BPA

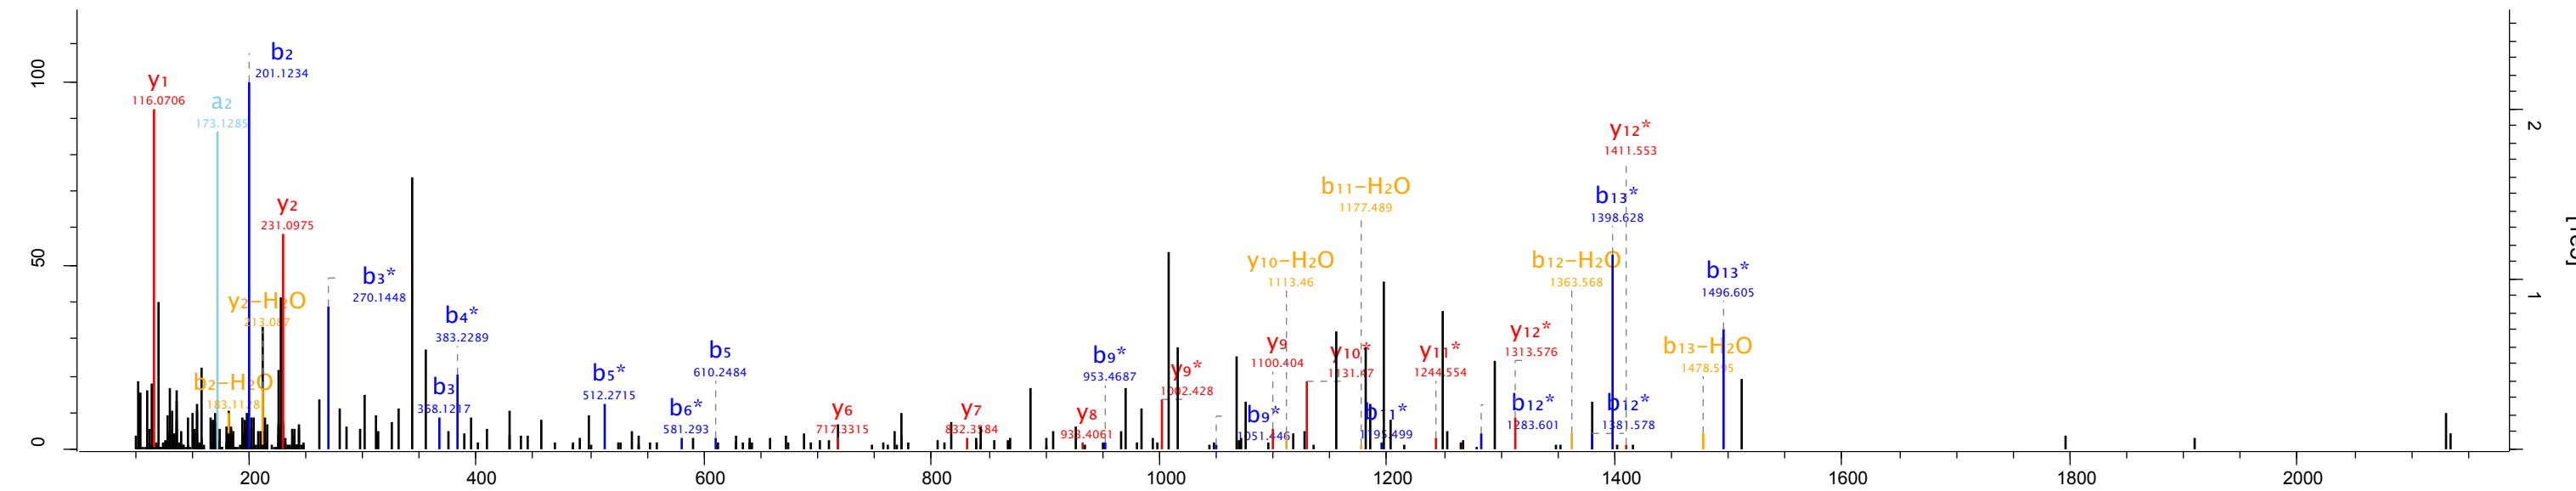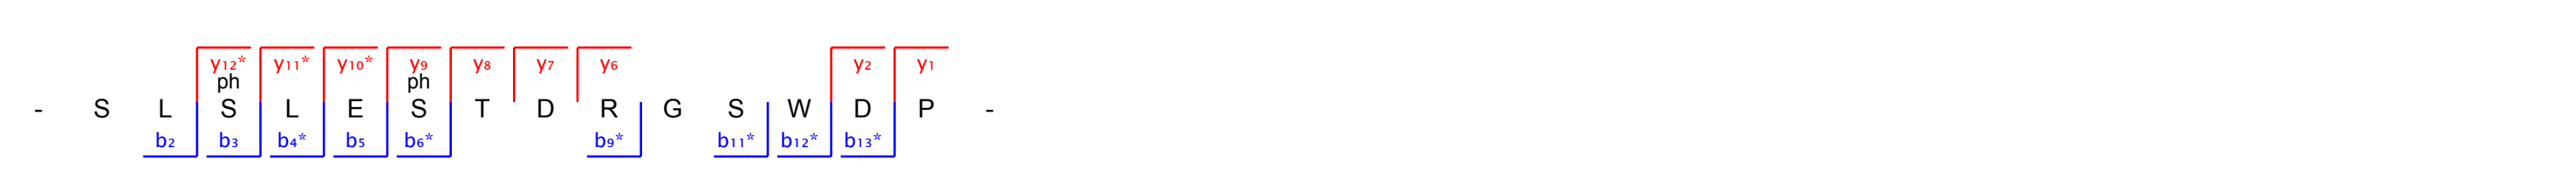

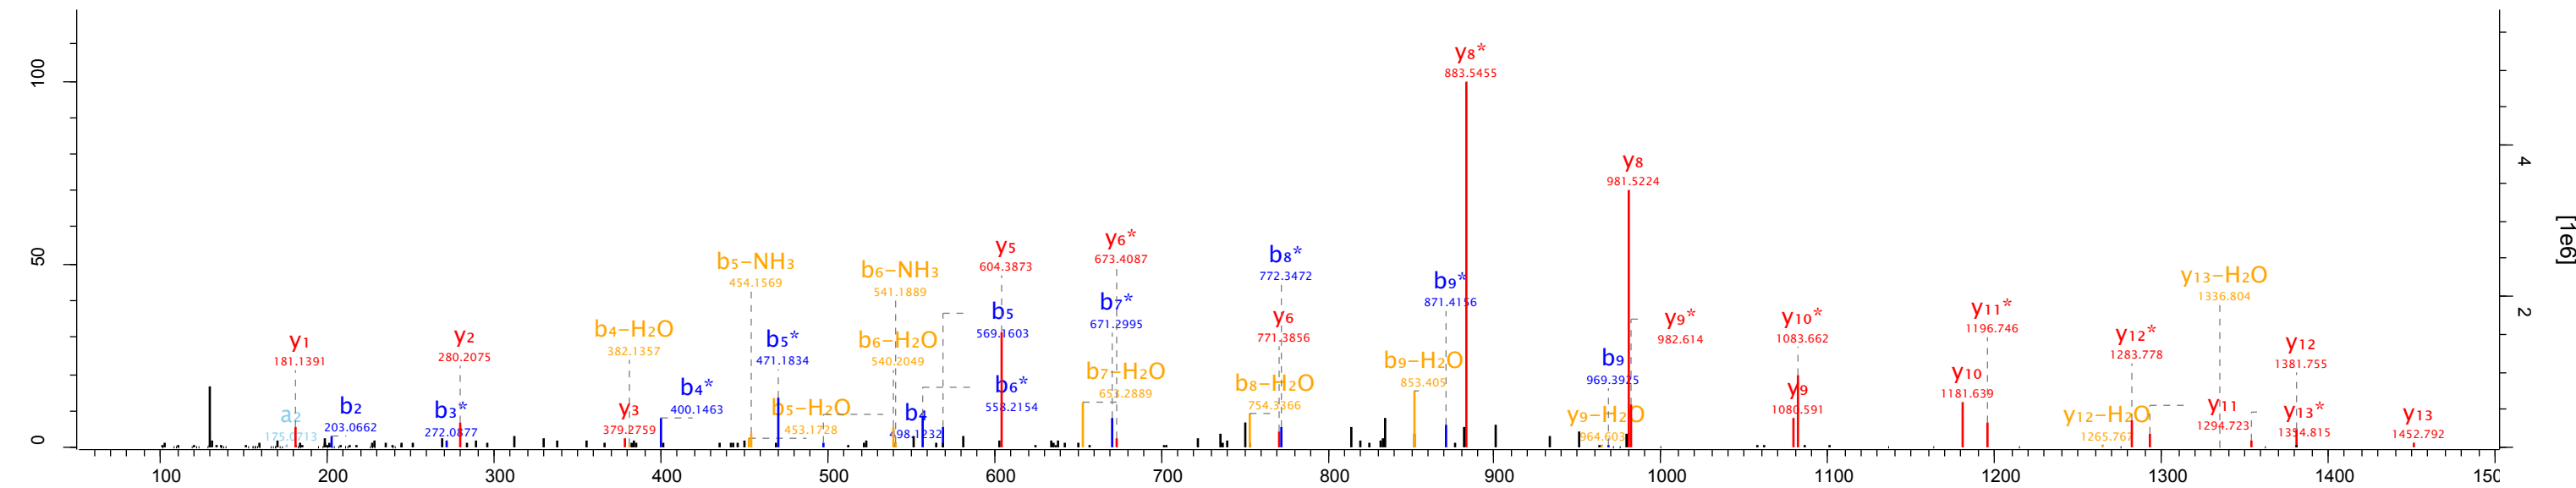

- S D S ph Q A S L T V P L S ph P Q V V R -

Fragmentation mapping (b and y ions):

- b2: D
- b3\*: S
- b4: Q
- b5: A
- b6\*: S
- b7\*: L
- b8\*: T
- b9: V
- y8: P
- y6: S
- y5: P
- y3: V
- y2: V
- y1: R

Raw file 20171215\_MaS\_33SR\_LMH\_phospho2\_03 Scan 17238 Method FTMS; HCD Score 53.03 m/z 963.38 Gene names MAP2K4

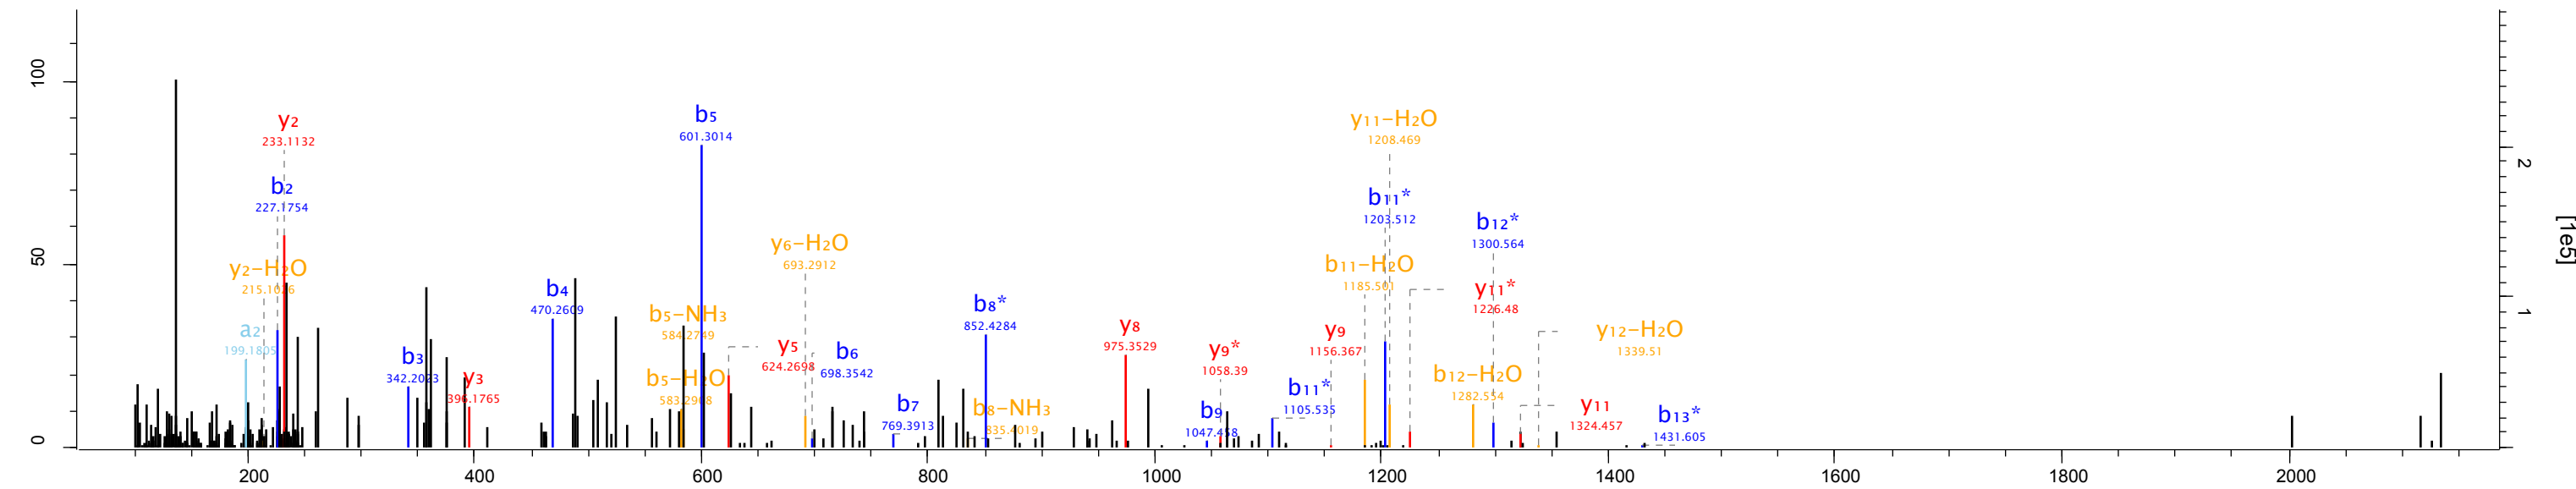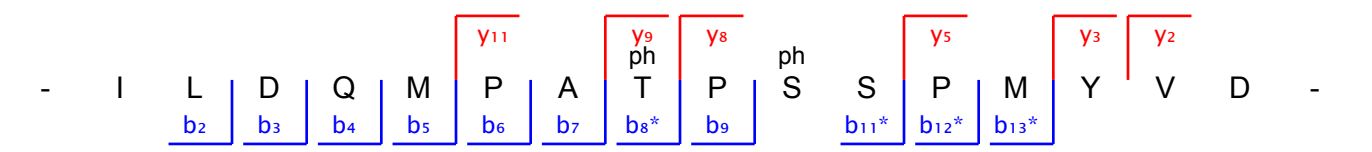

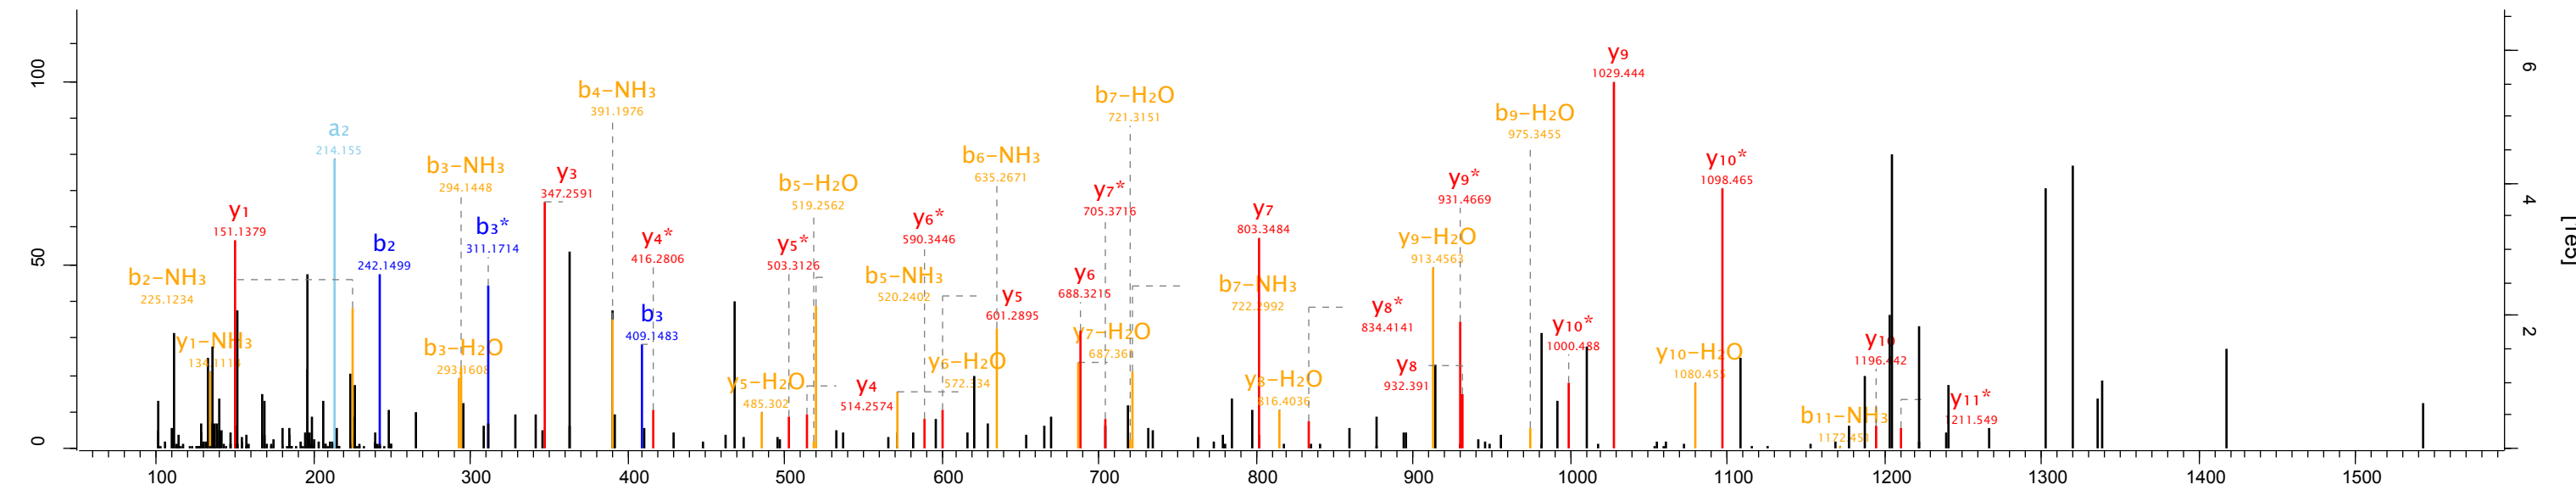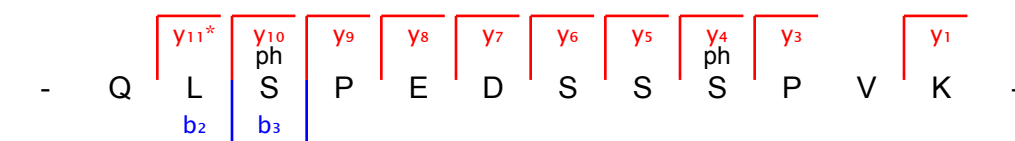

Raw file 20171215\_MaS\_33SR\_LMH\_phospho2\_03 Scan 5938 Method FTMS; HCD Score 52.52 m/z 697.3 Gene names C1orf106

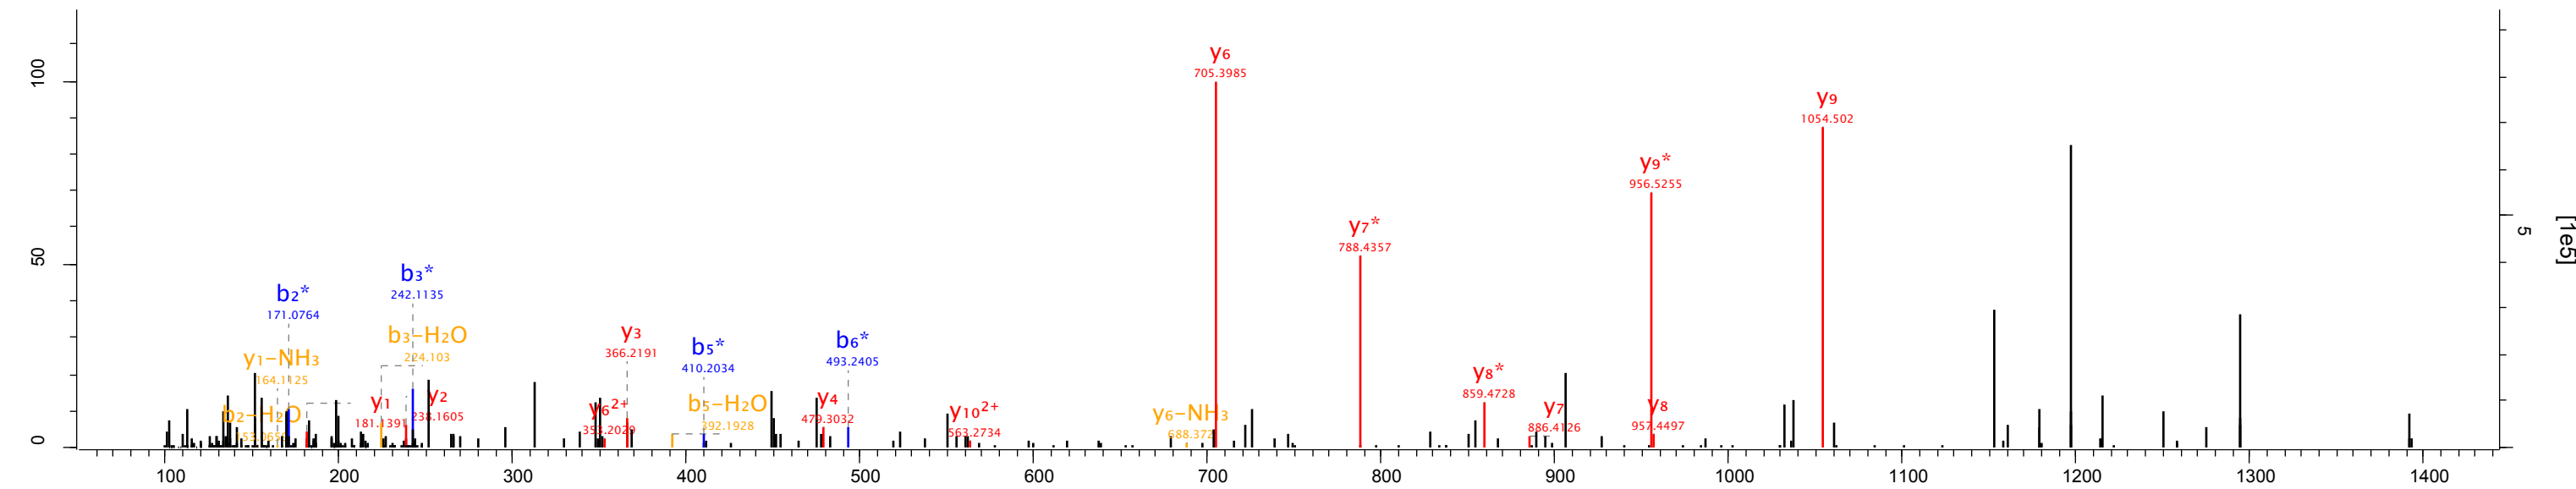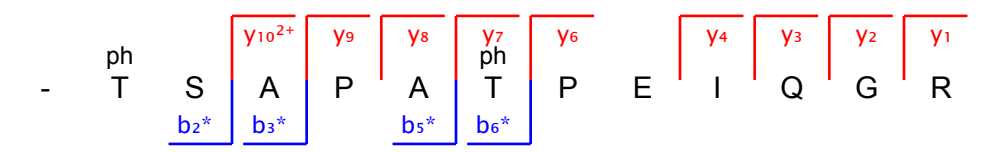

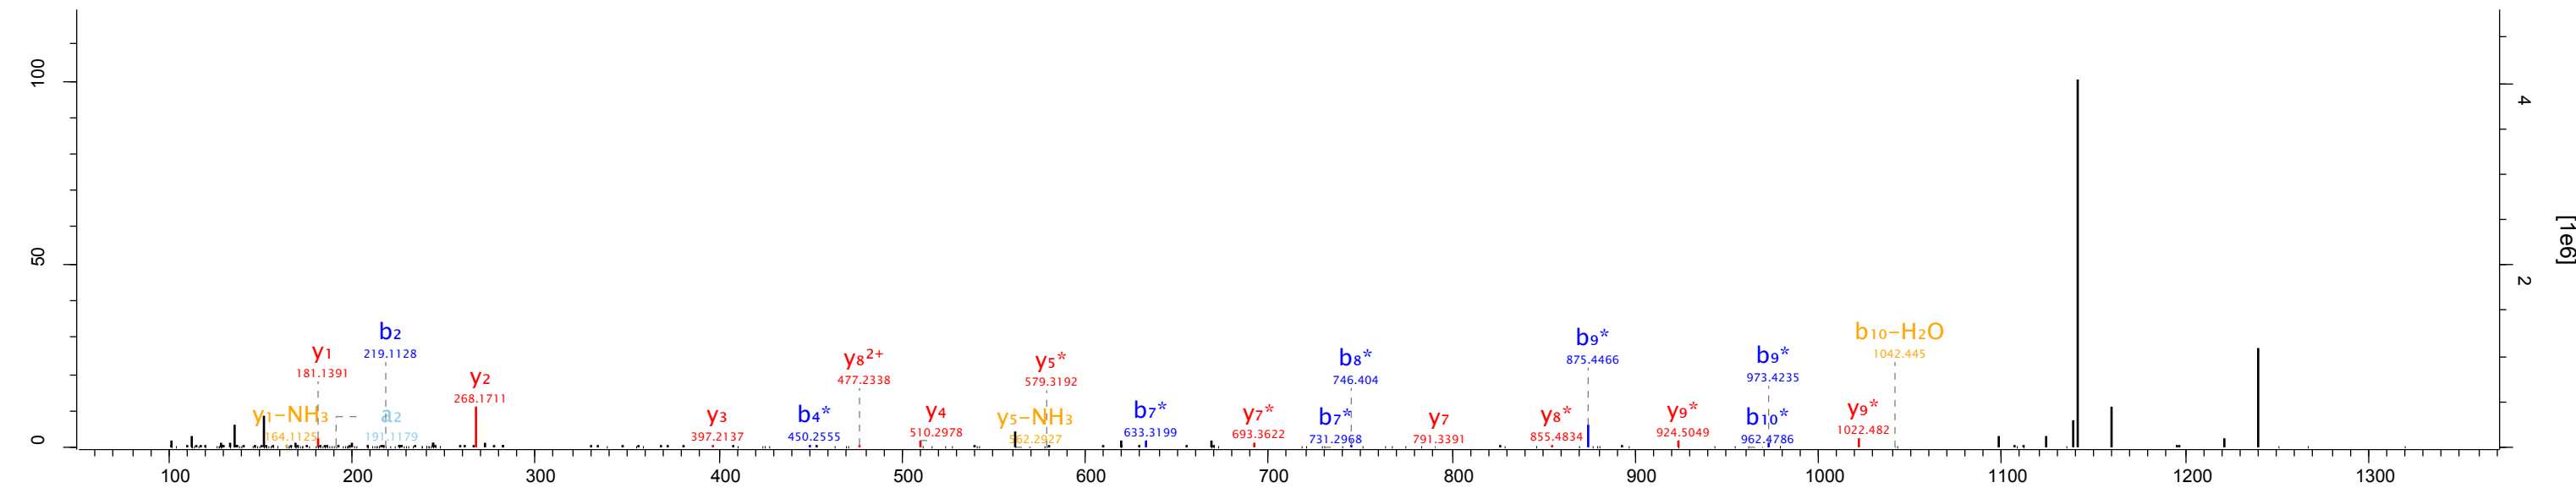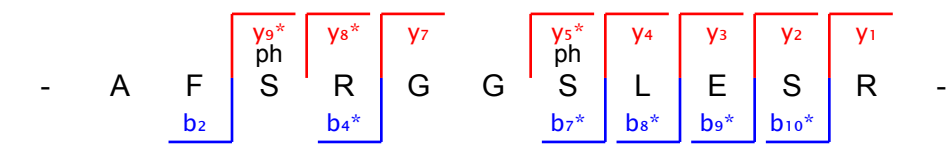

Raw file  
20171215\_MaS\_33SR\_LMH\_phospho2\_03

Scan 9028 Method FTMS; HCD Score 158.41 m/z 743.31 Gene names KIAA0930

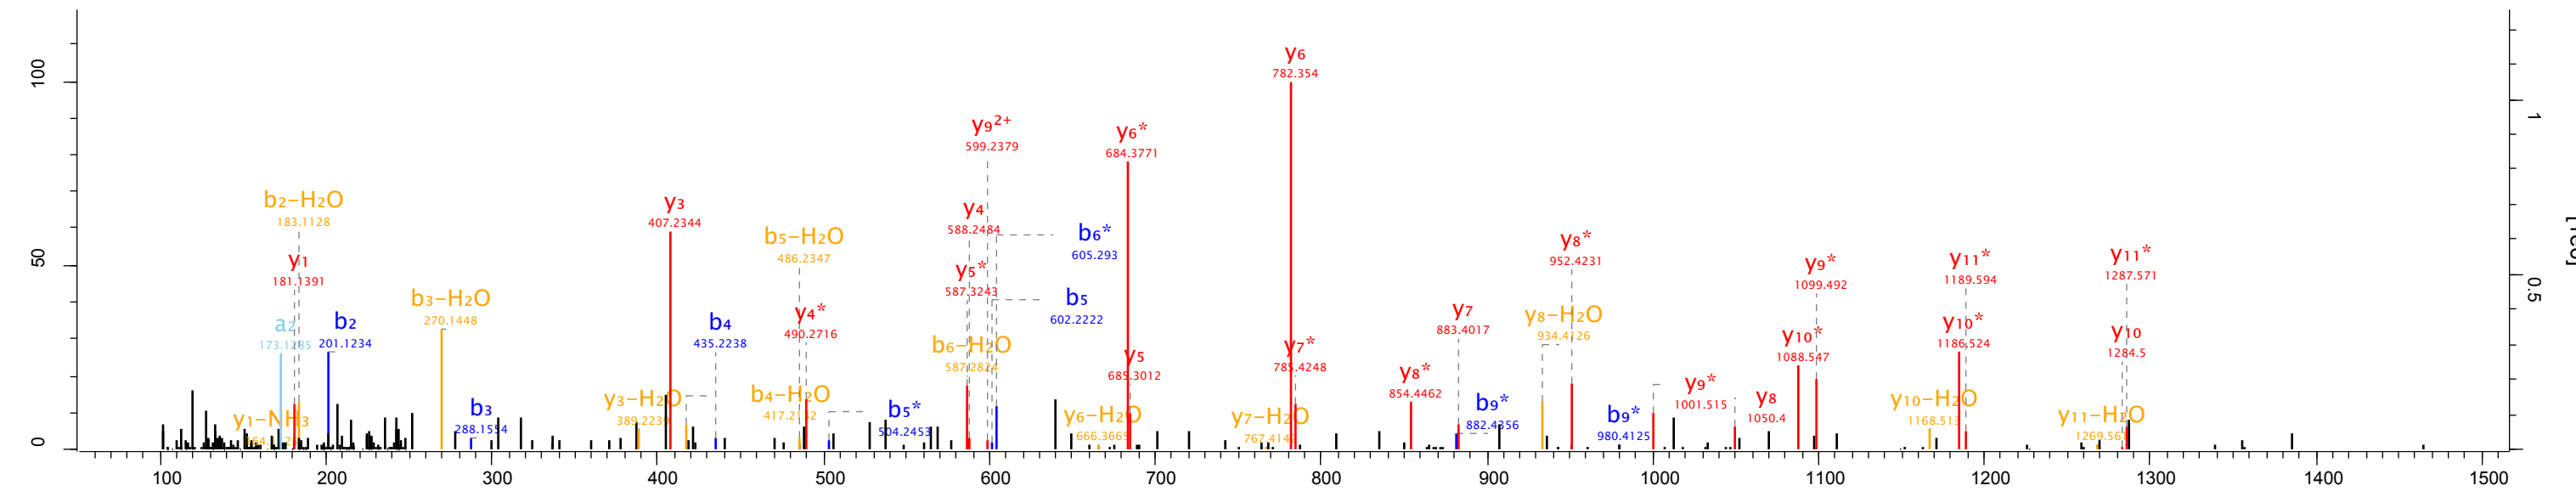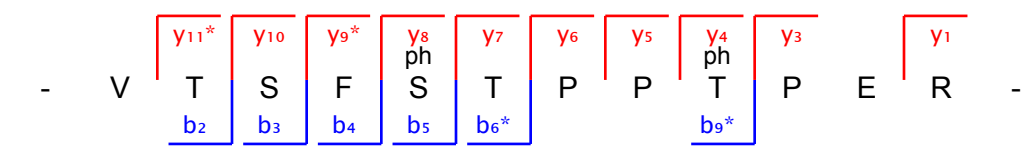

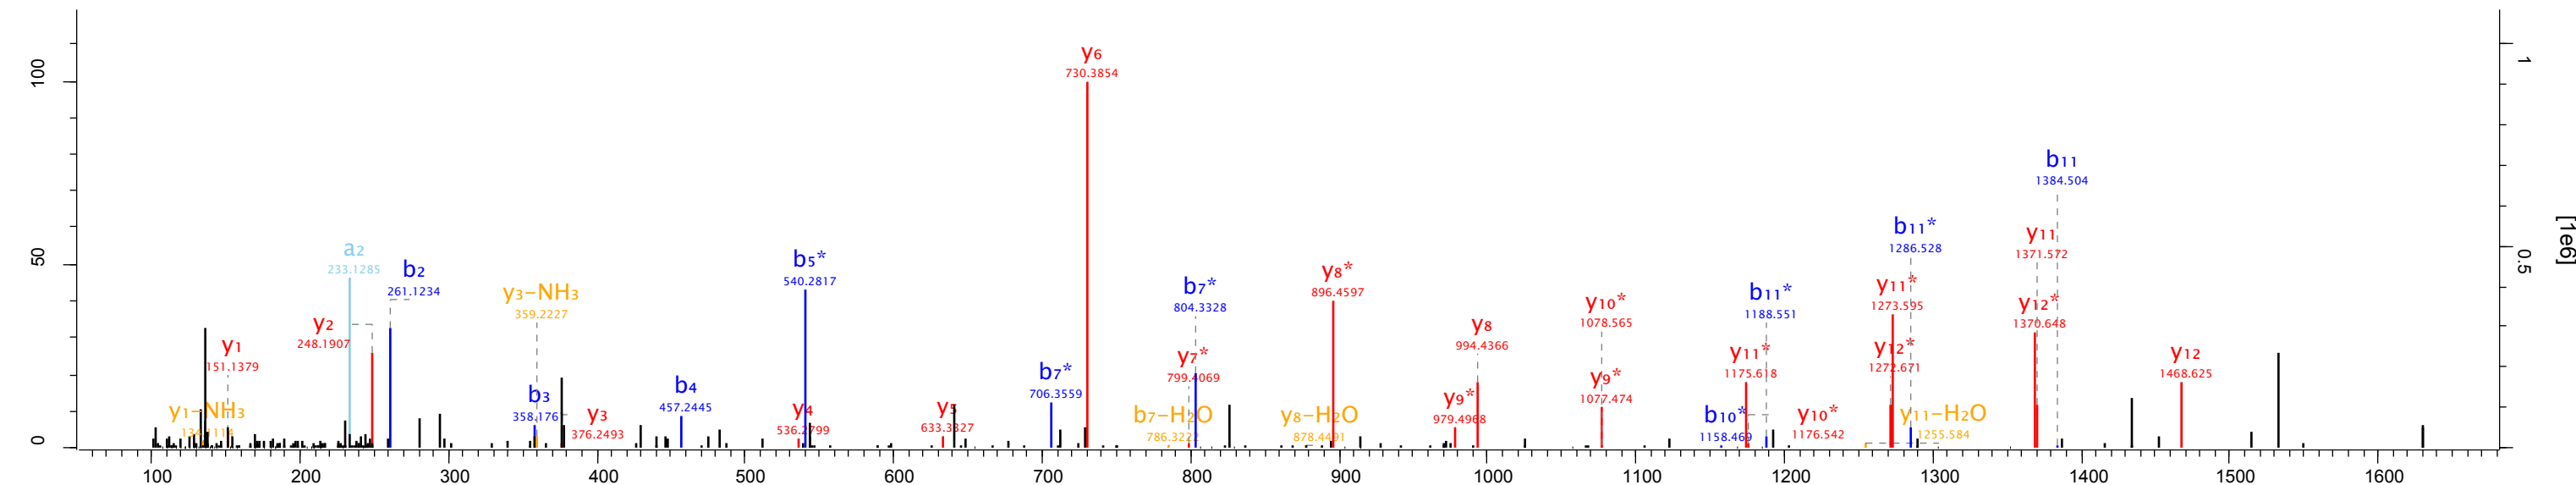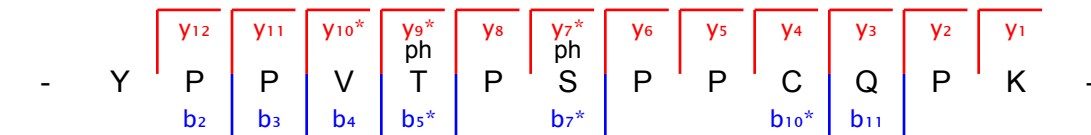



Raw file: 20171215\_MaS\_33SR\_LMH\_phospho2\_04  
 Scan: 2258 Method: FTMS; HCD Score: 65.22 m/z: 878.77 Gene names: C11orf57

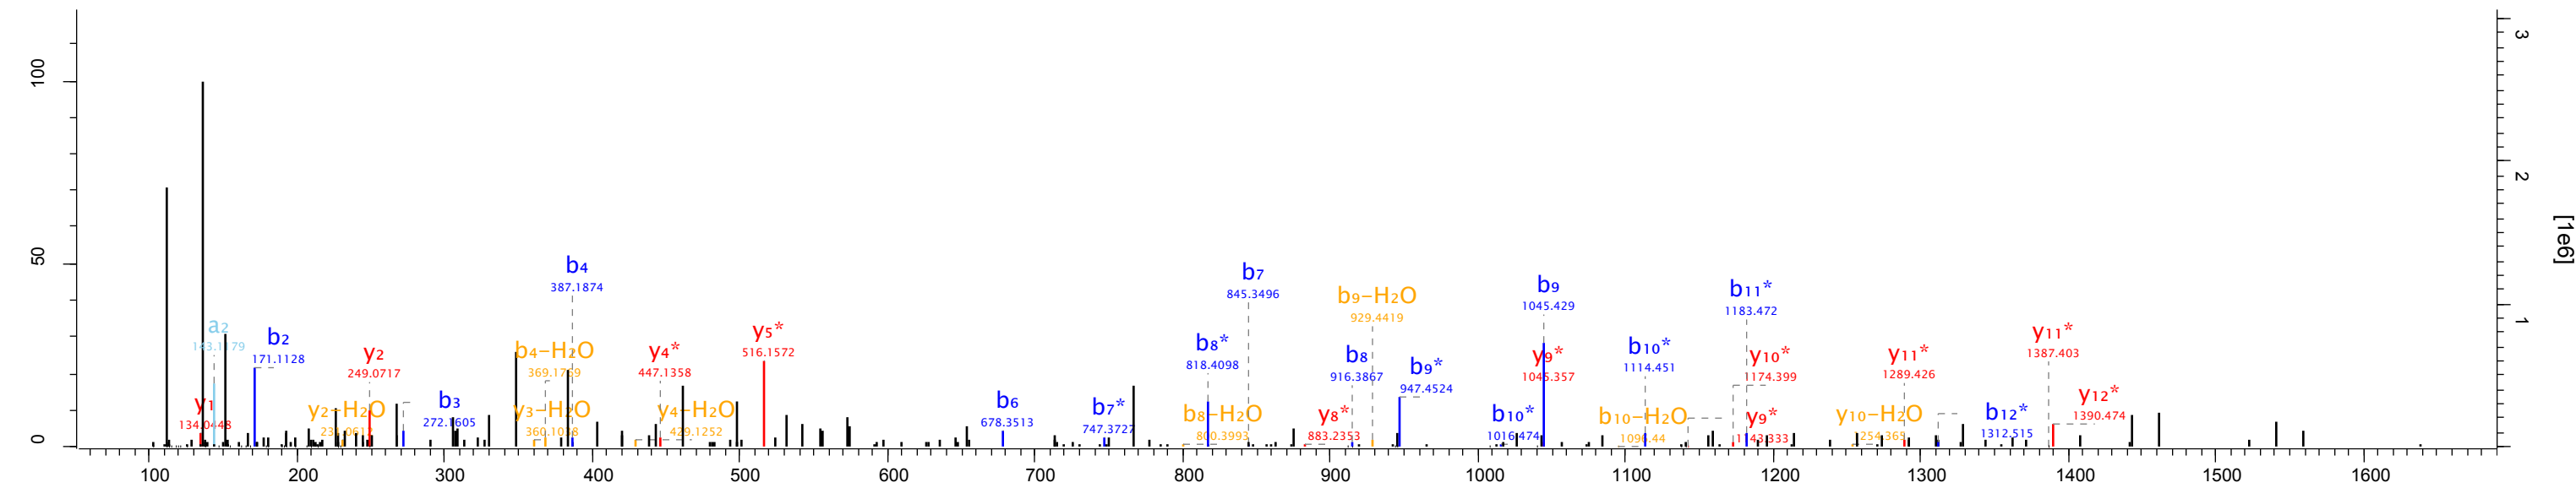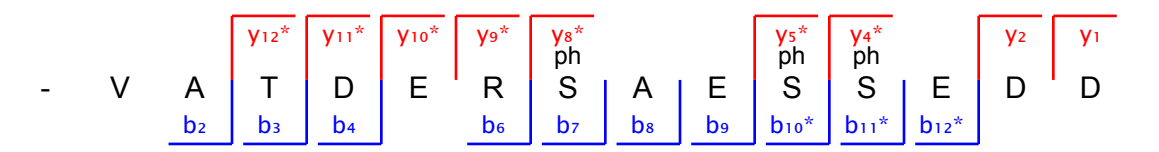

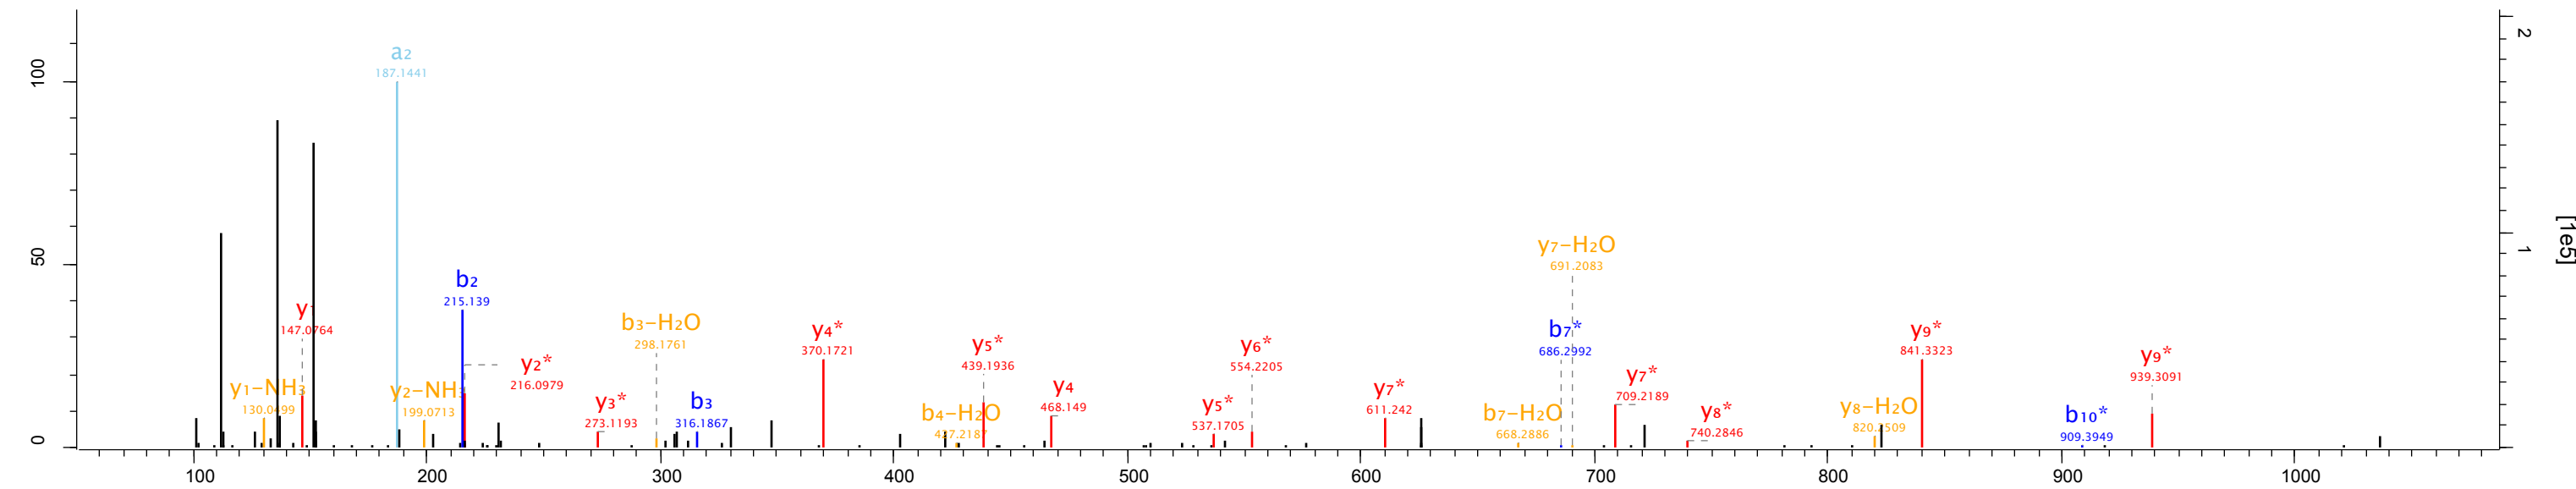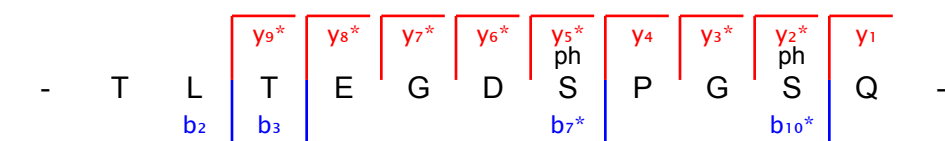

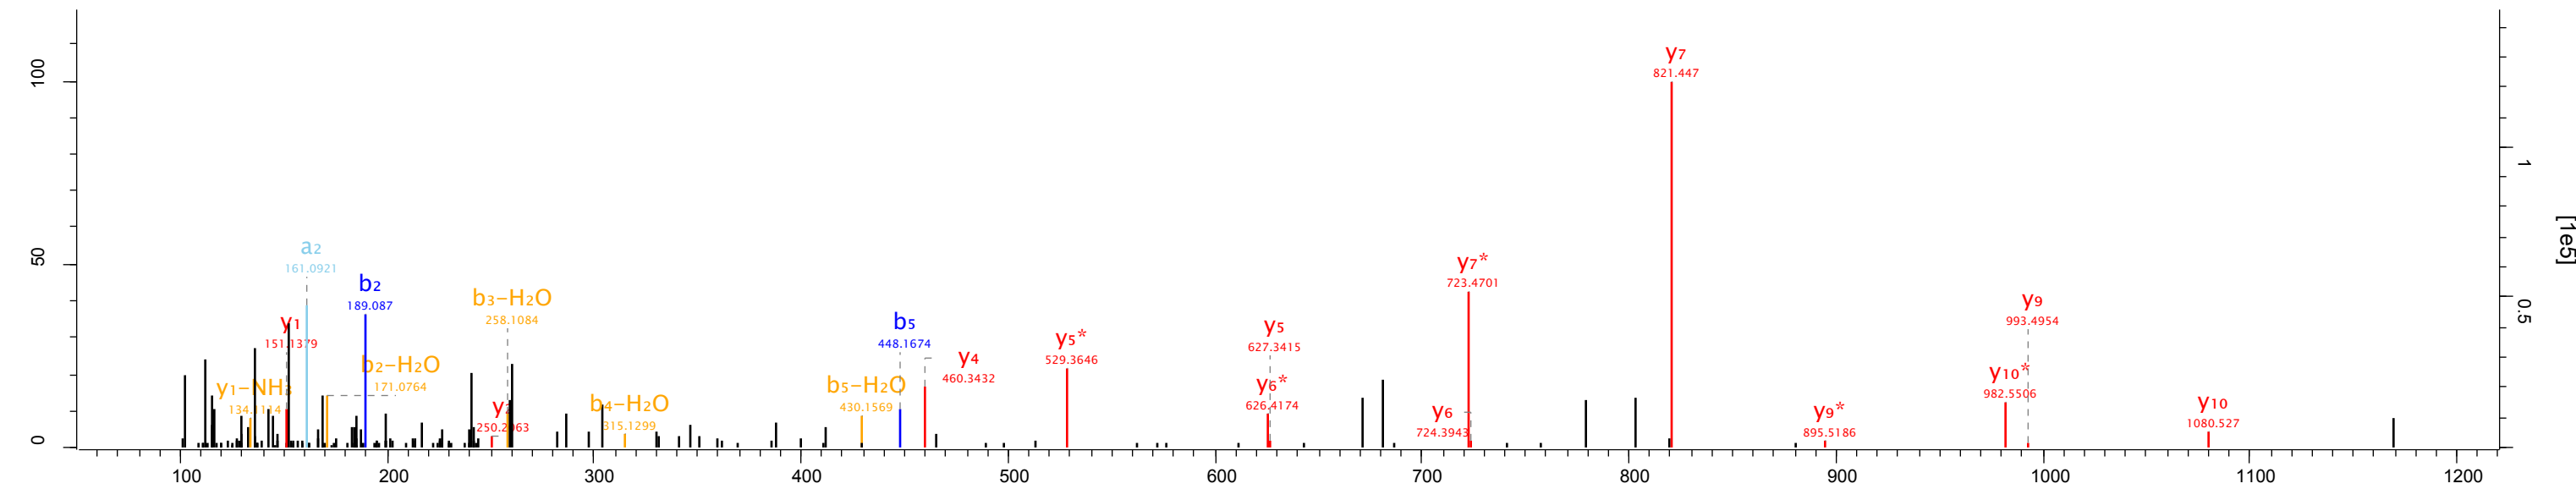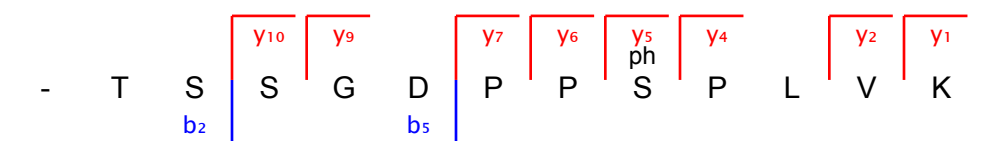

Raw file 20171215\_MaS\_33SR\_LMH\_proteome\_01 Scan 104808 Method FTMS; HCD Score 68.97 m/z 734.44 Gene names MRPL21

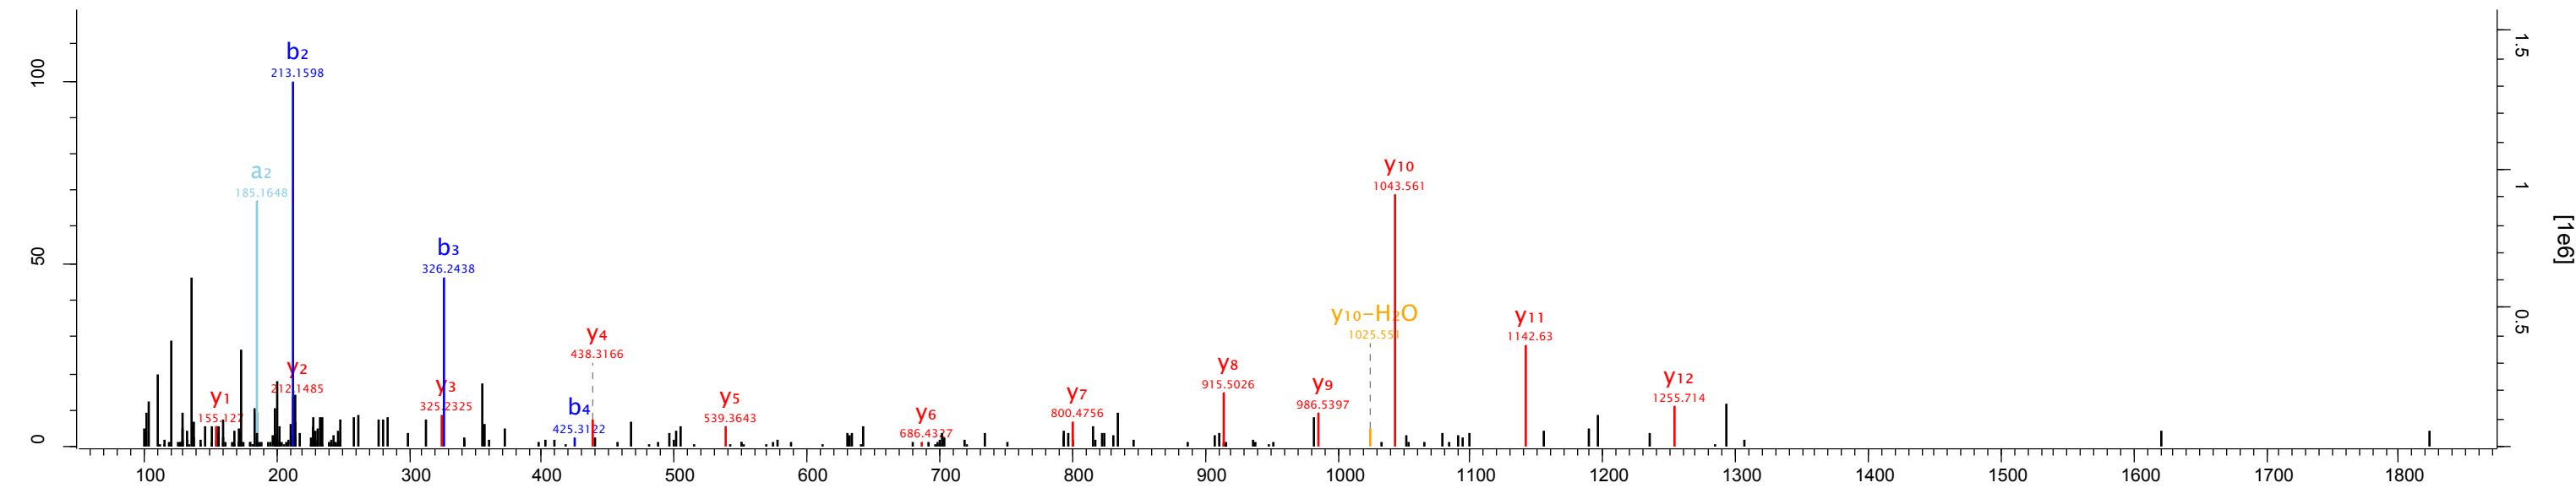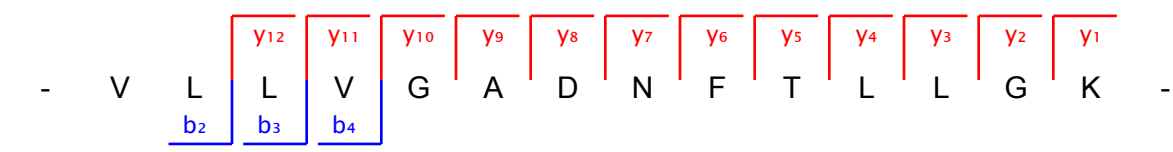

Raw file 20171215\_MaS\_33SR\_LMH\_proteome\_01 Scan 105458 Method FTMS; HCD Score 56.96 m/z 910.42 Gene names CYB5B

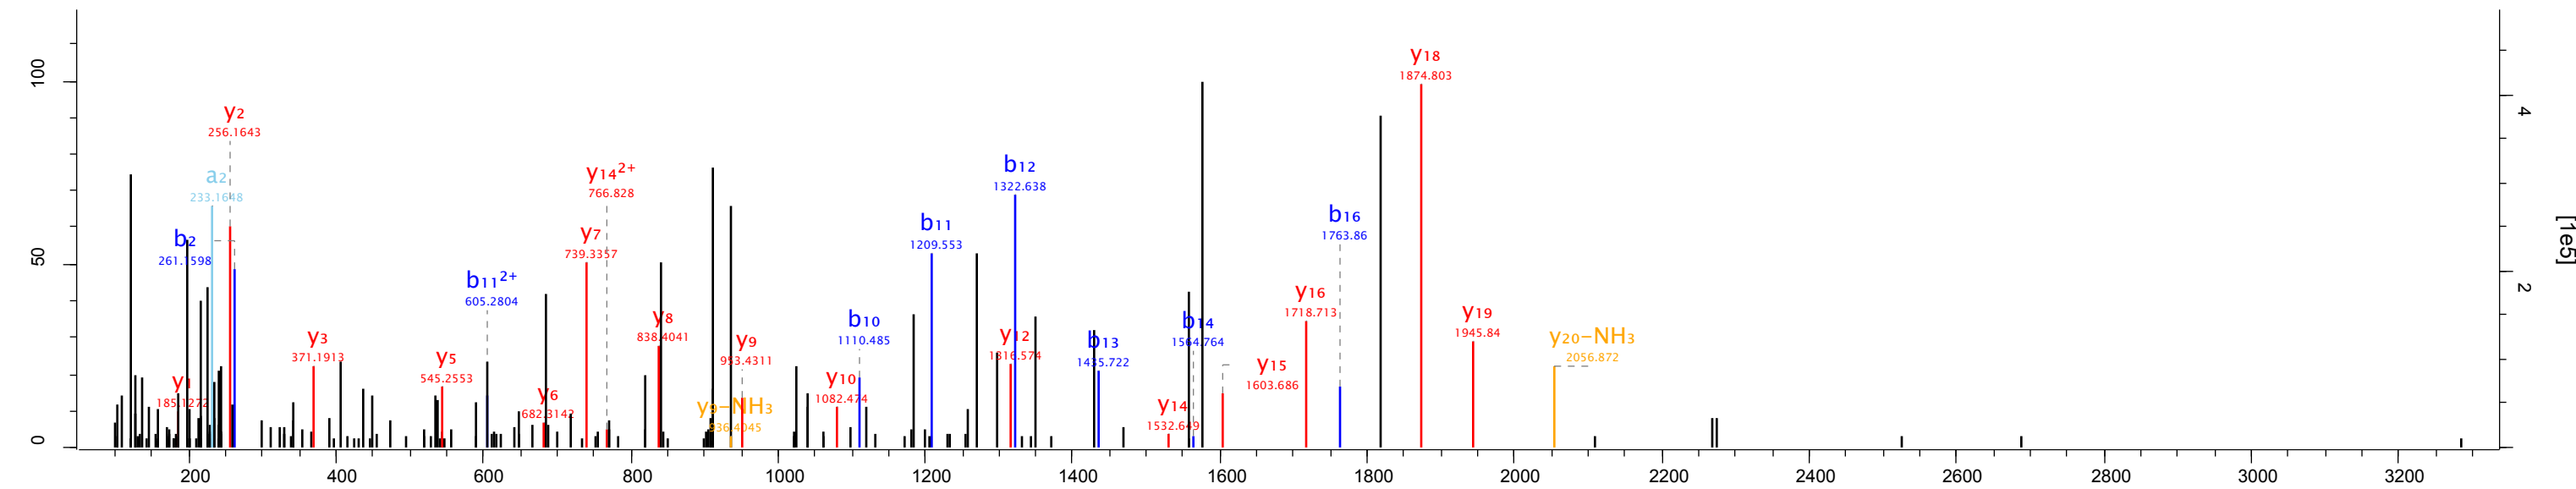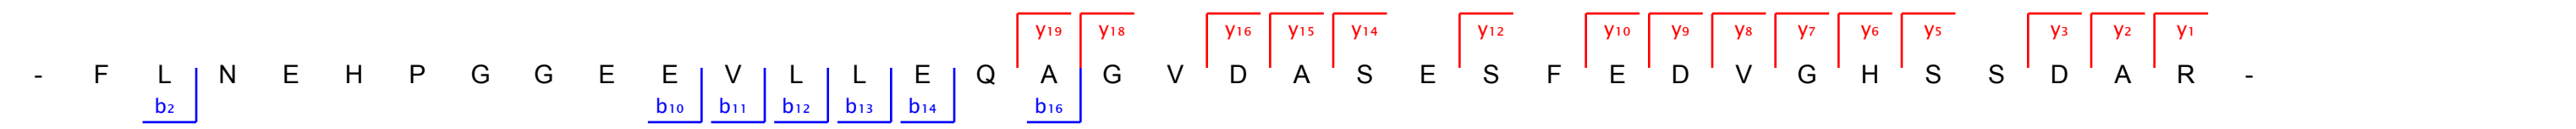

Raw file: 20171215\_MaS\_33SR\_LMH\_proteome\_01  
 Scan: 119478 Method: FTMS; HCD Score: 52.09 m/z: 846.1 Gene names: SUSP2

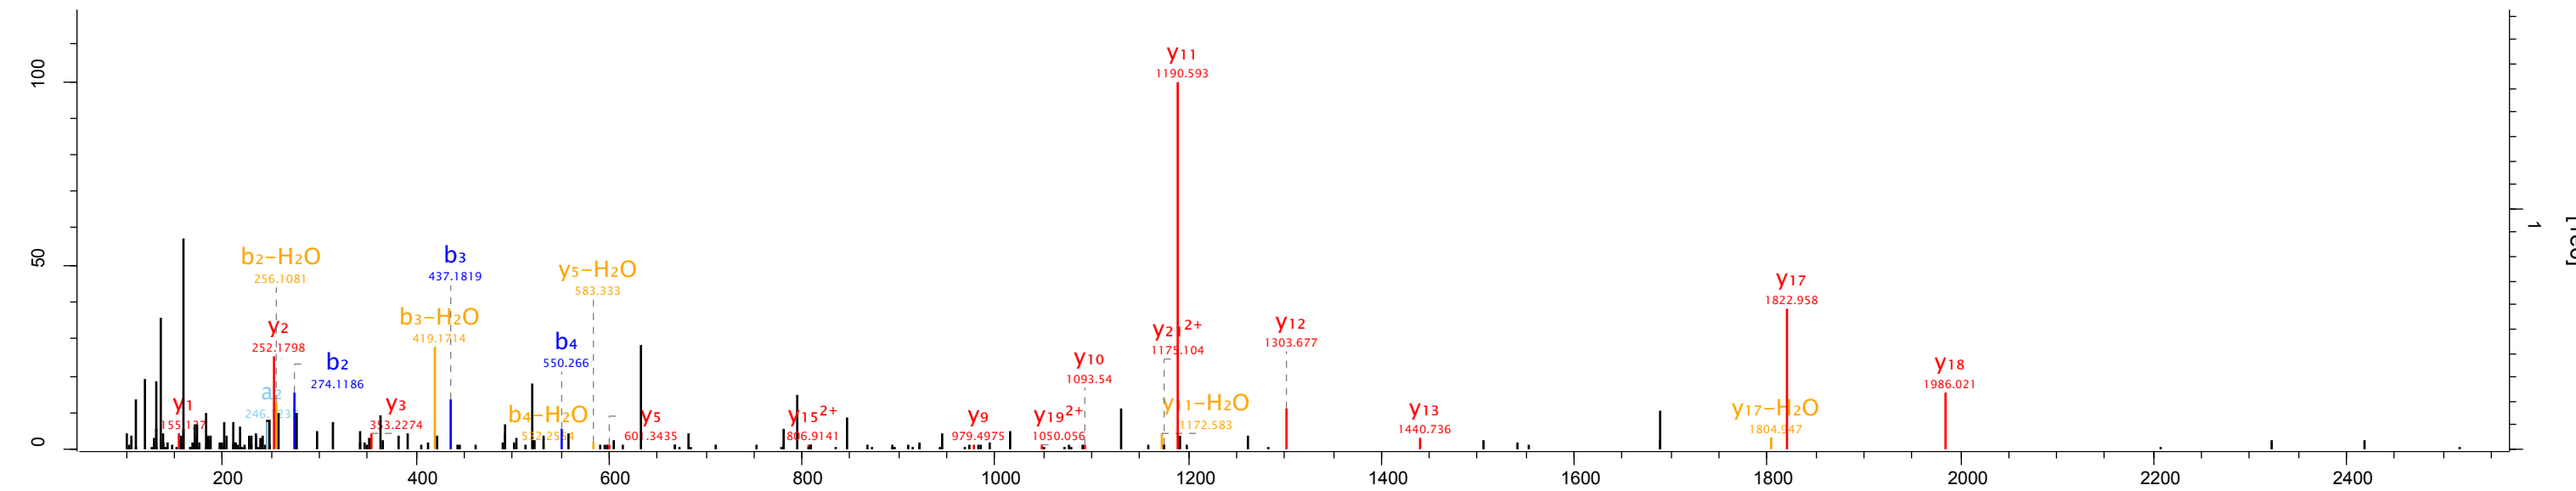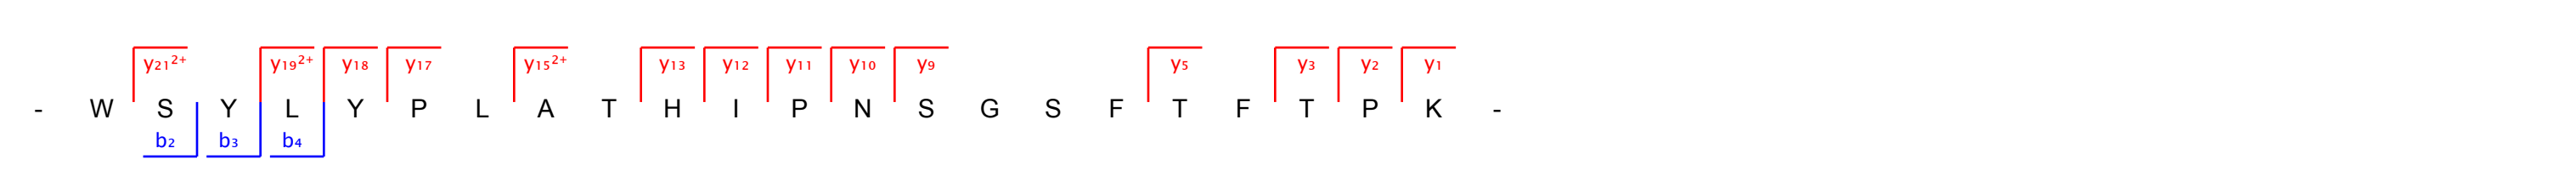

Raw file 20171215\_MaS\_33SR\_LMH\_proteome\_01 Scan 123508 Method FTMS; HCD Score 72.43 m/z 851.49 Gene names RPP14

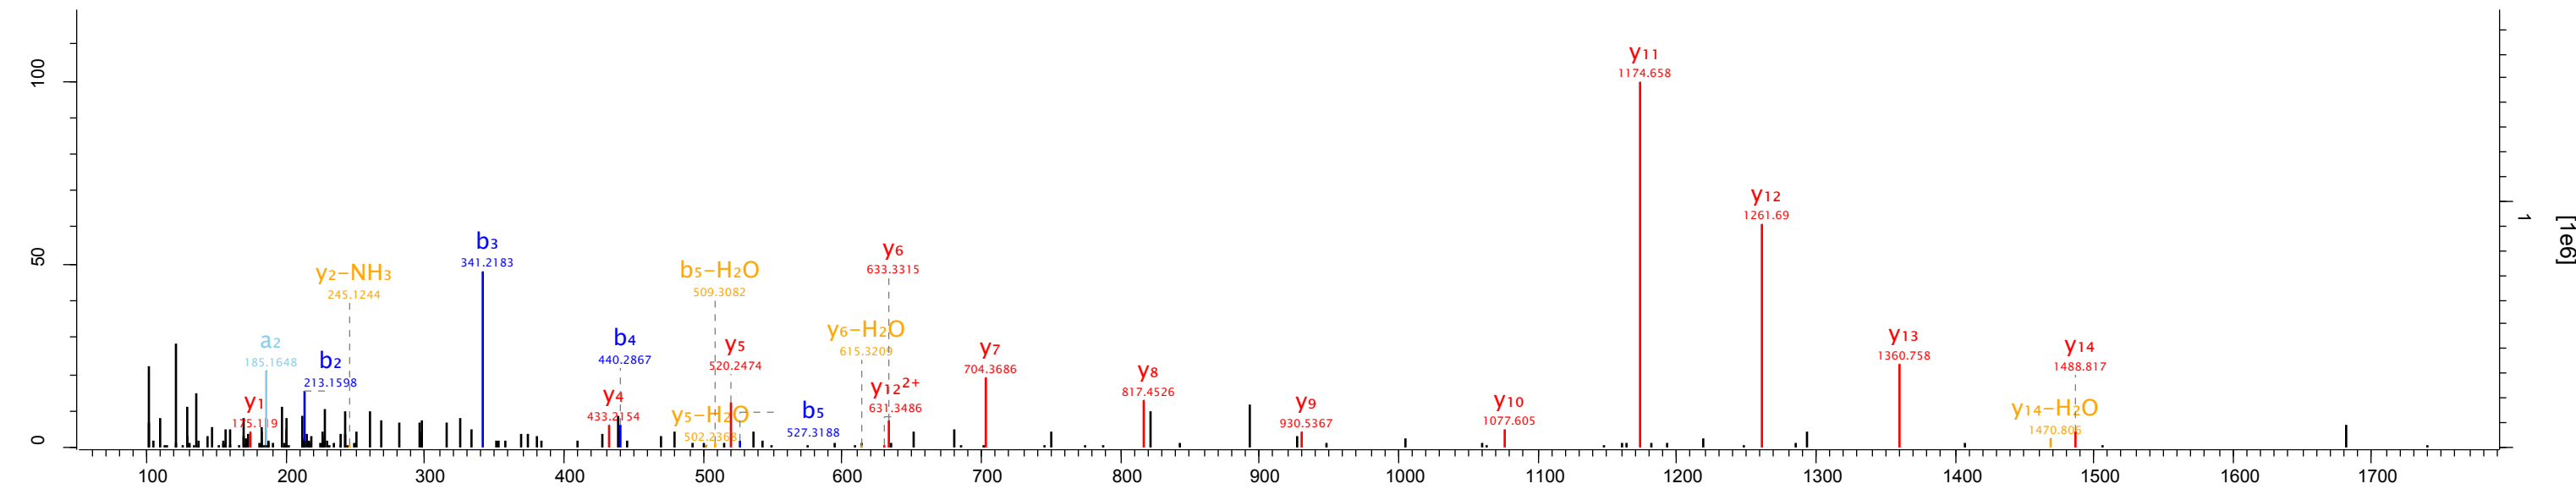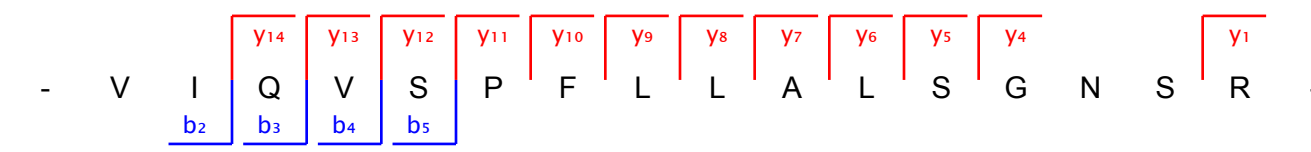

Raw file: 20171215\_MaS\_33SR\_LMH\_proteome\_01  
 Scan: 125208 Method: FTMS; HCD Score: 50.36 m/z: 1165.53 Gene names: VAPB

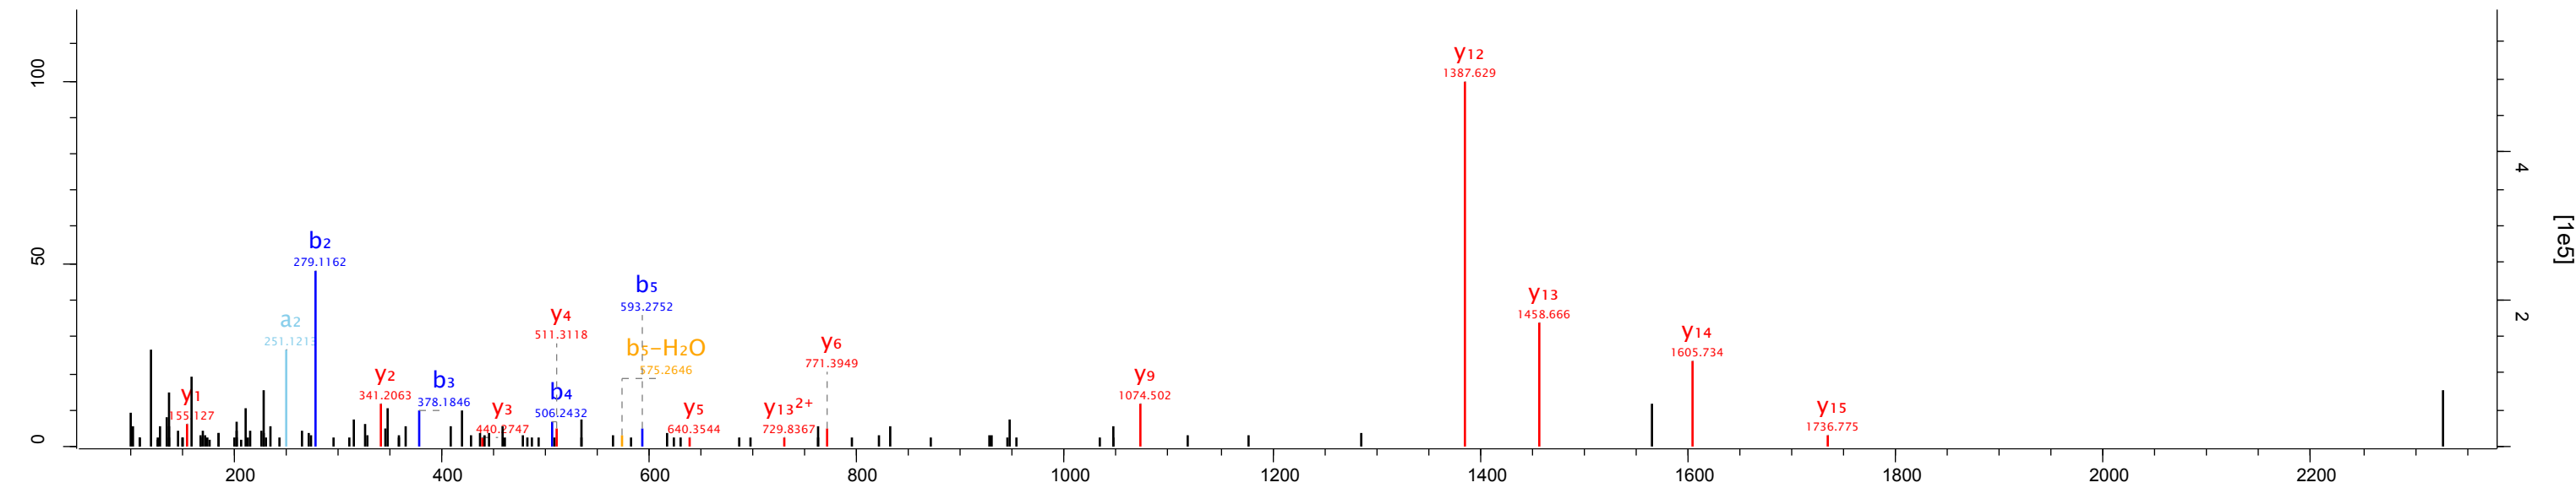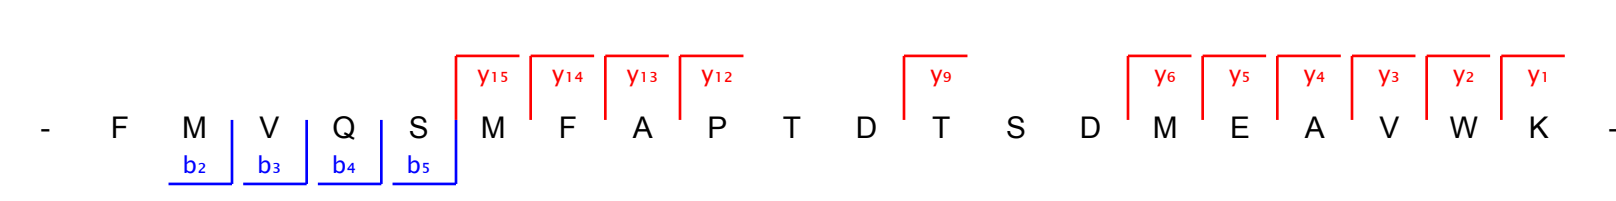



Raw file 20171215\_MaS\_33SR\_LMH\_proteome\_01 Scan 126318 Method FTMS; HCD Score 77.08 m/z 1013.03 Gene names ZCCHC3

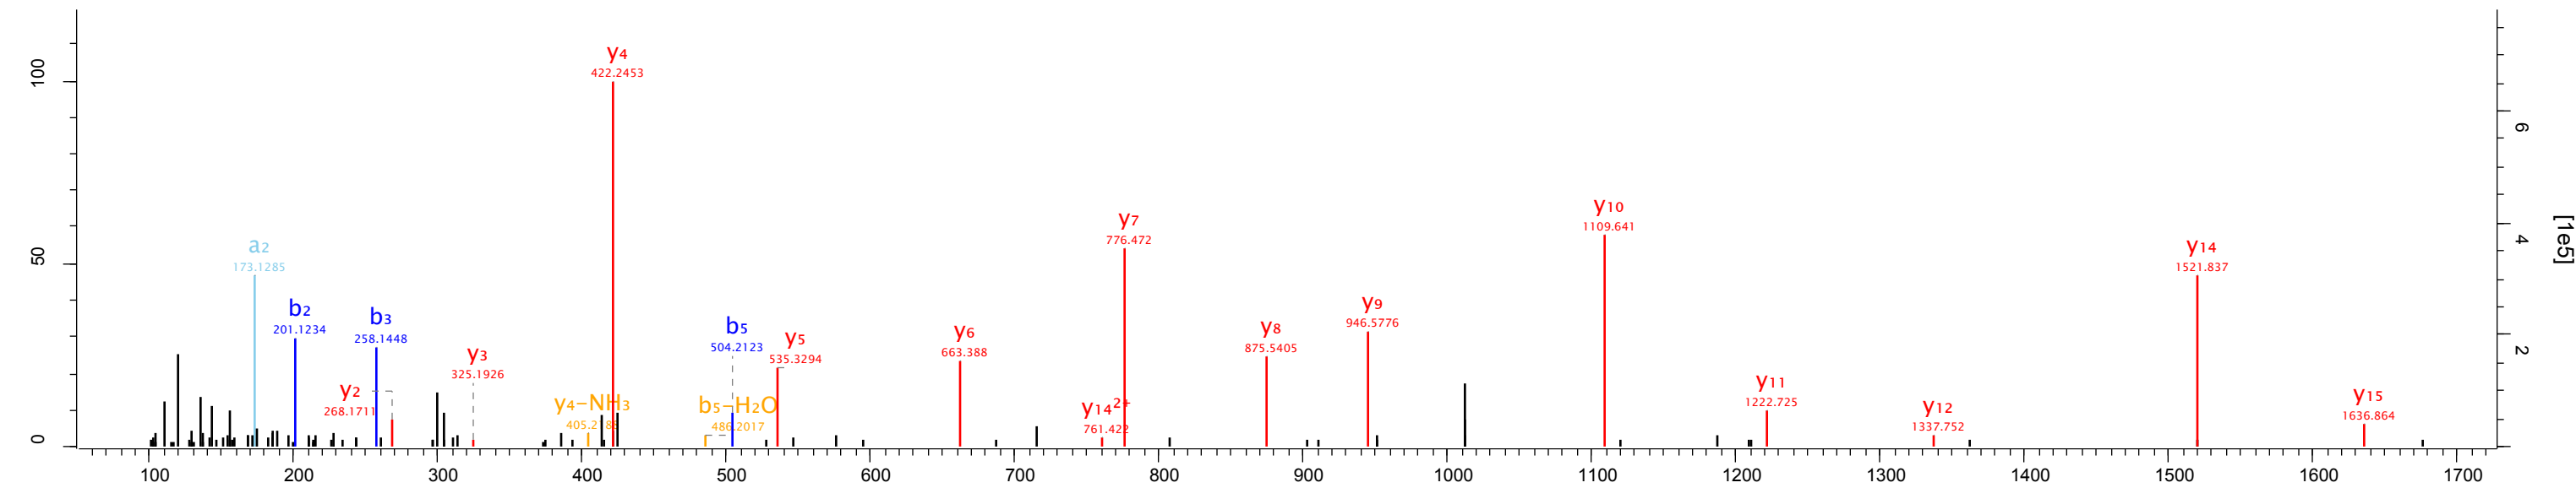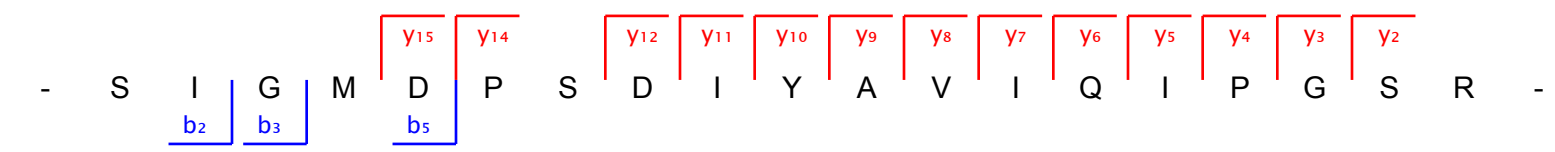

Raw file 20171215\_MaS\_33SR\_LMH\_proteome\_01 Scan 128418 Method FTMS; HCD Score 82.28 m/z 537.34 Gene names CFAP20

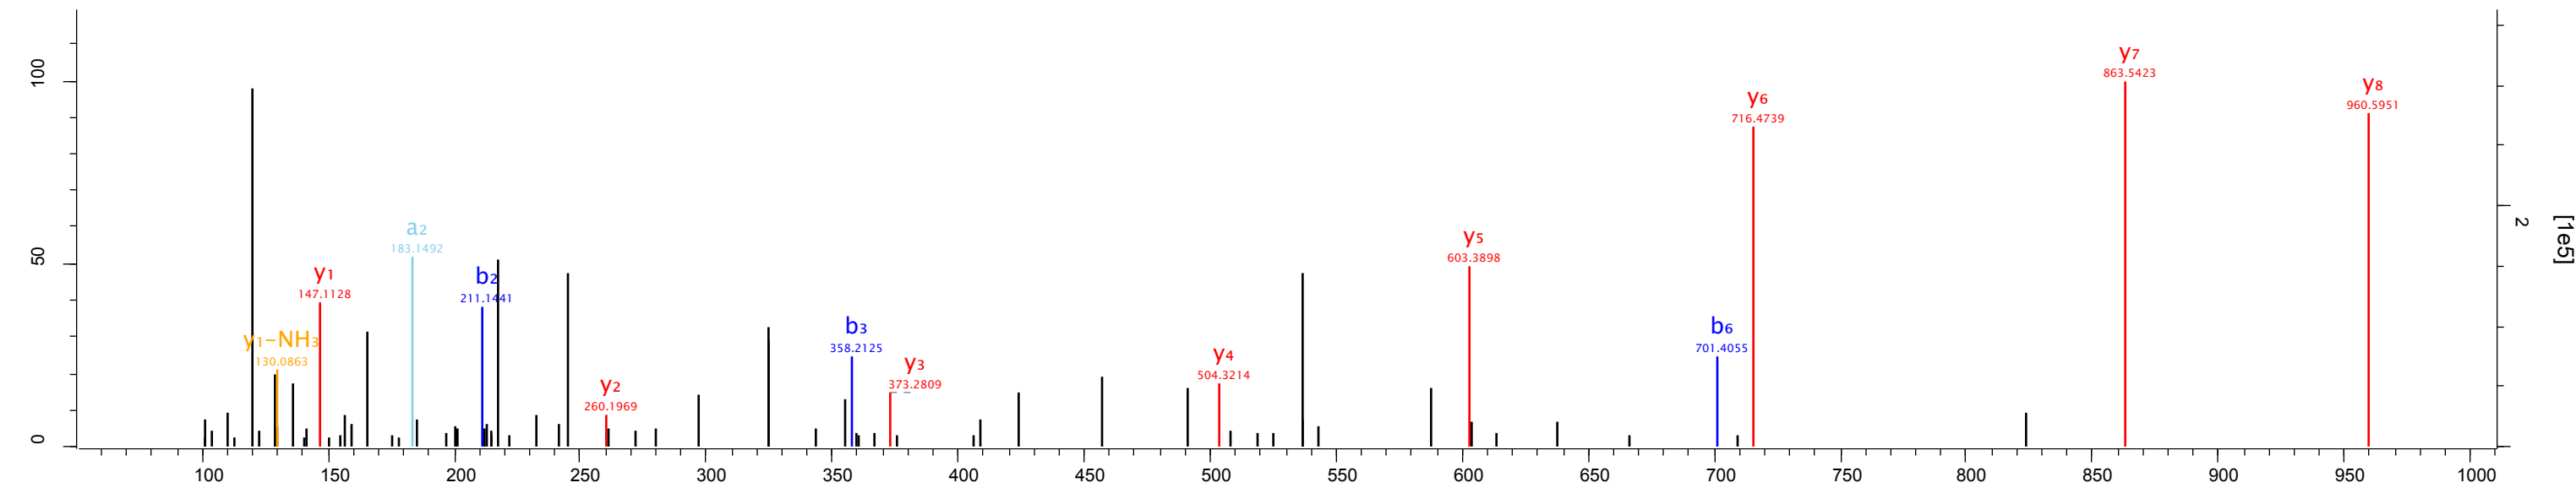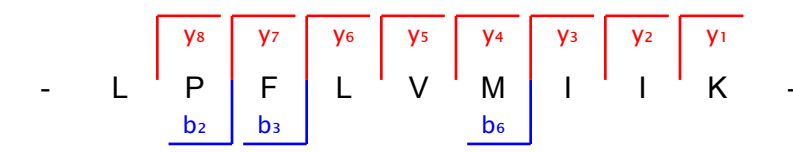

Raw file: 20171215\_MaS\_33SR\_LMH\_proteome\_01  
 Scan: 142678 Method: FTMS; HCD Score: 61.04 m/z: 904.45 Gene names: ZMYM3

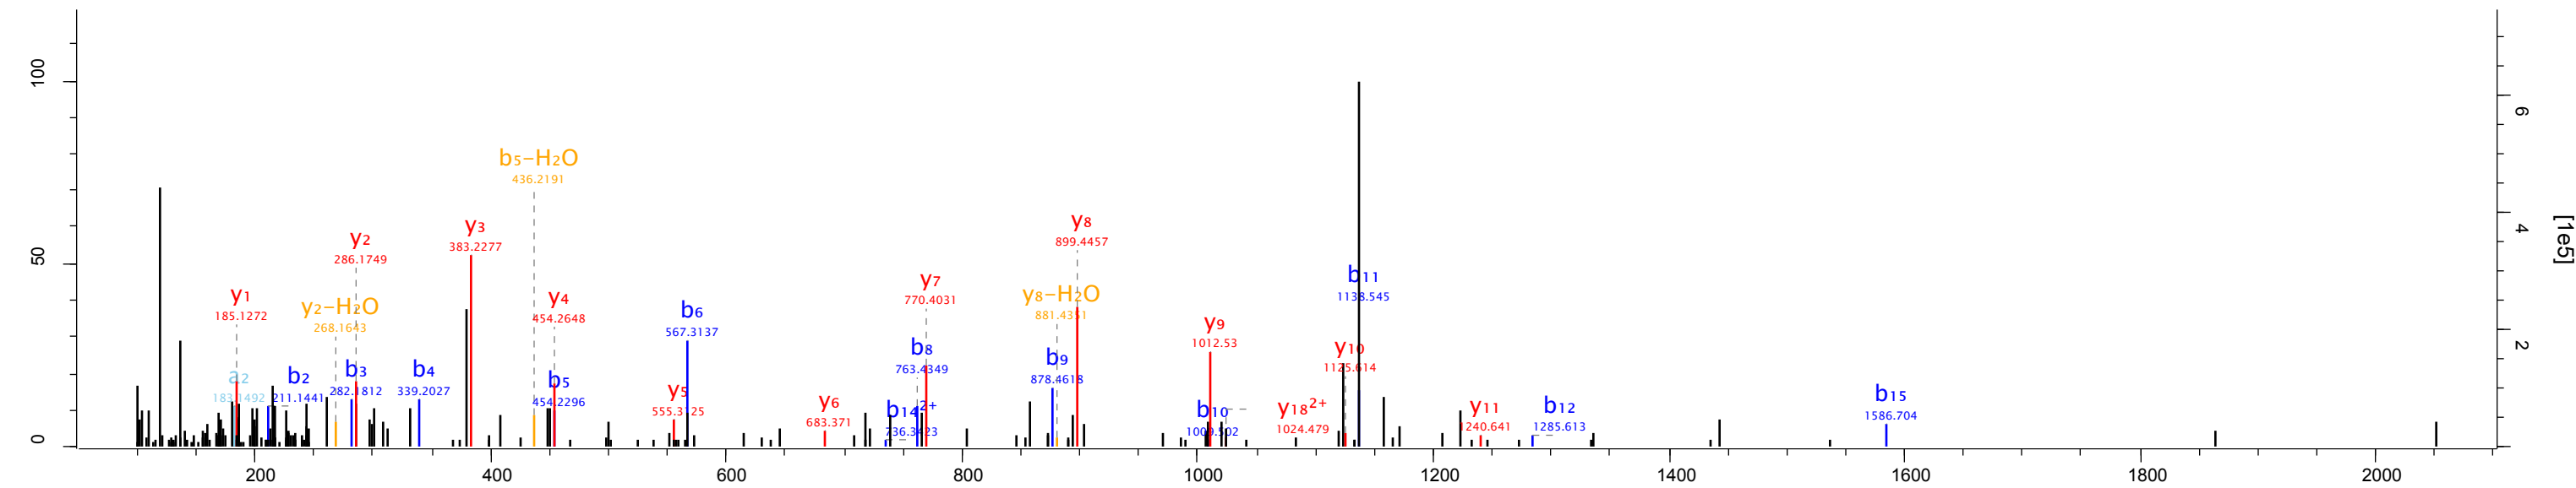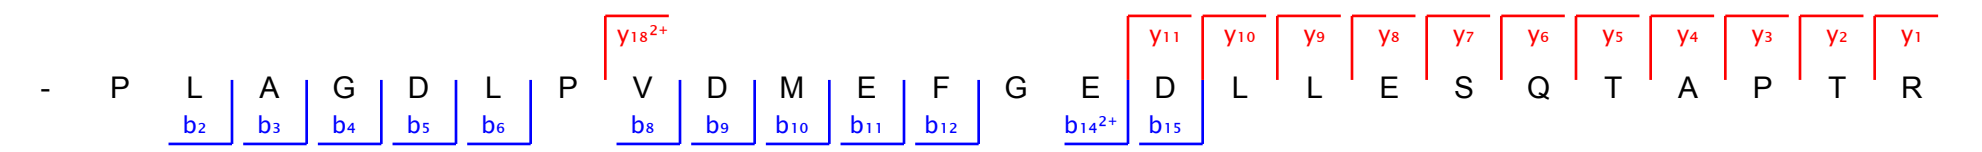

Raw file 20171215\_MaS\_33SR\_LMH\_proteome\_01 Scan 150998 Method FTMS; HCD Score 88.87 m/z 777.41 Gene names SMAD4

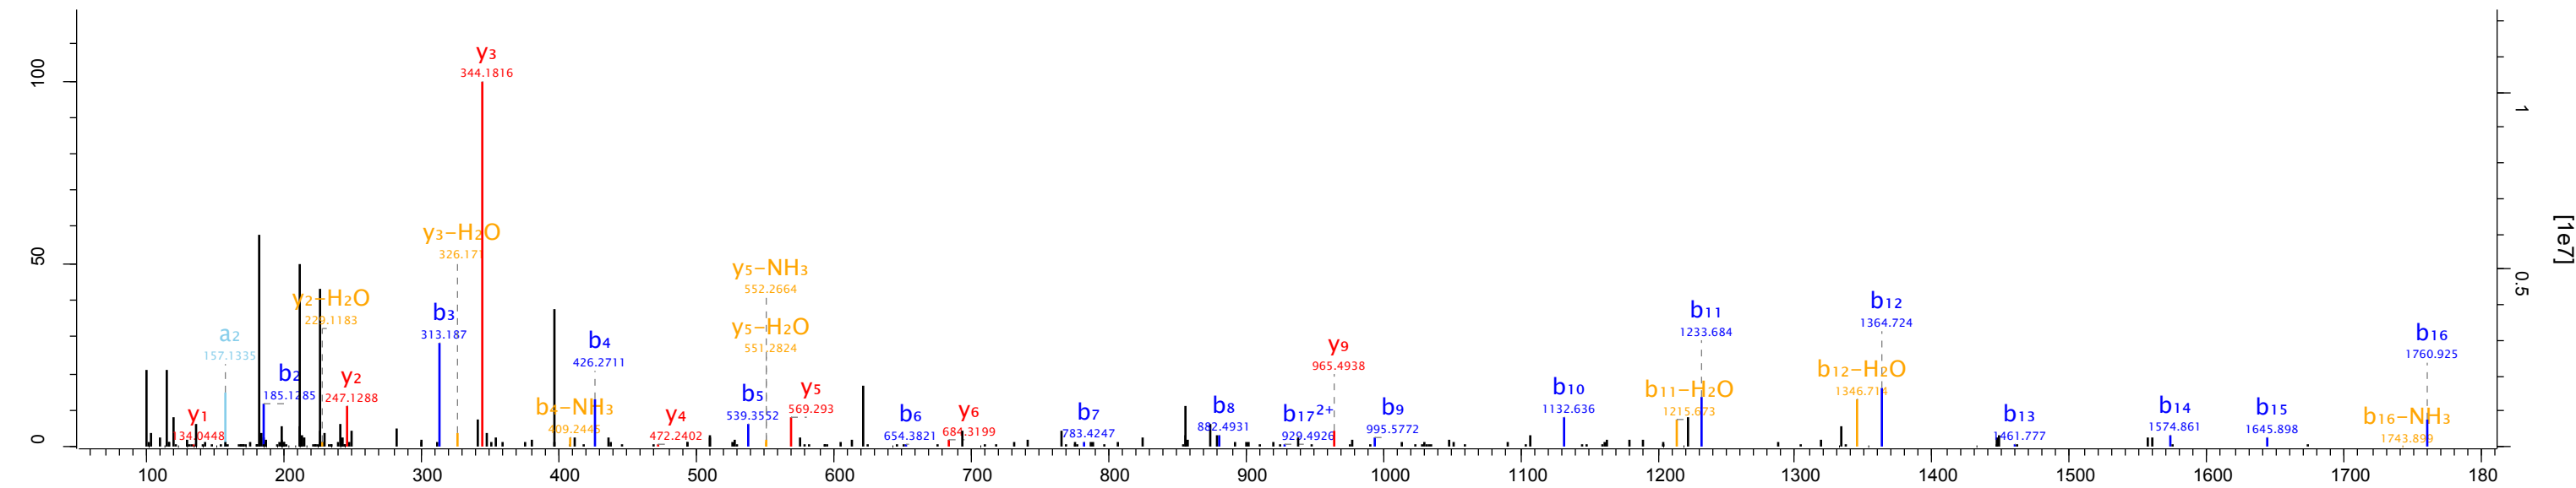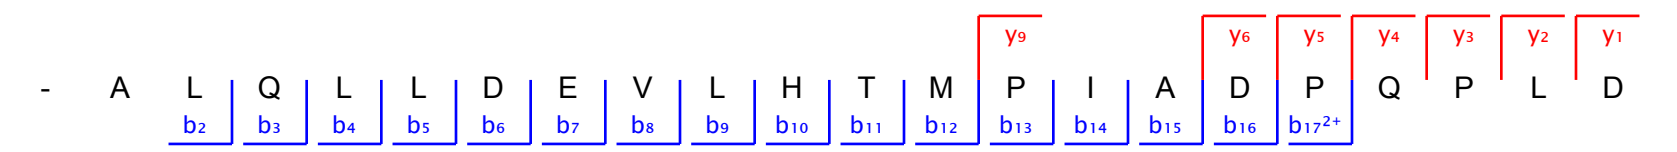

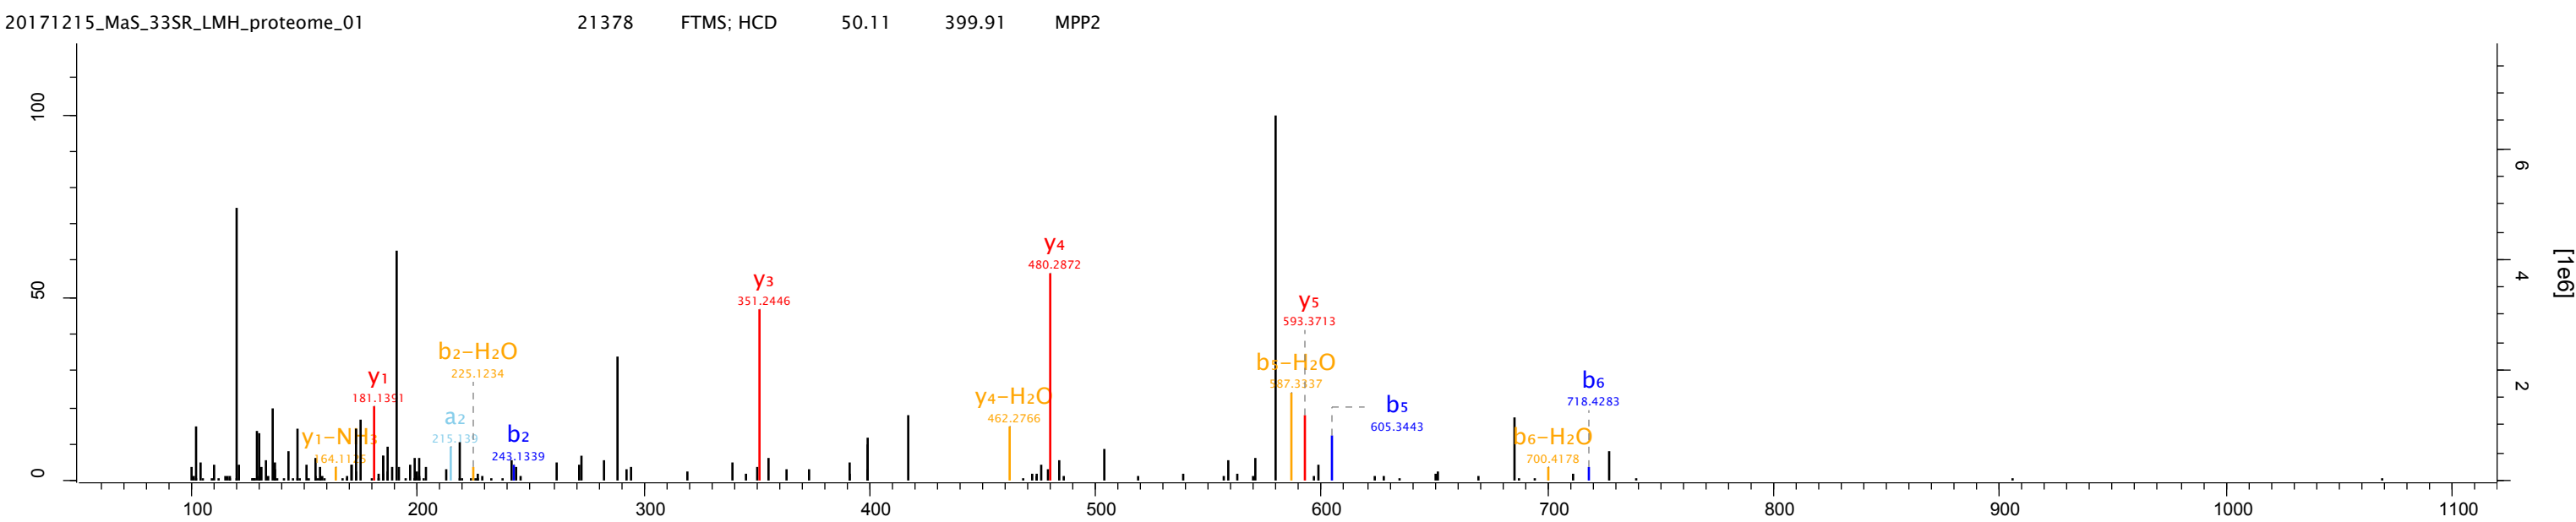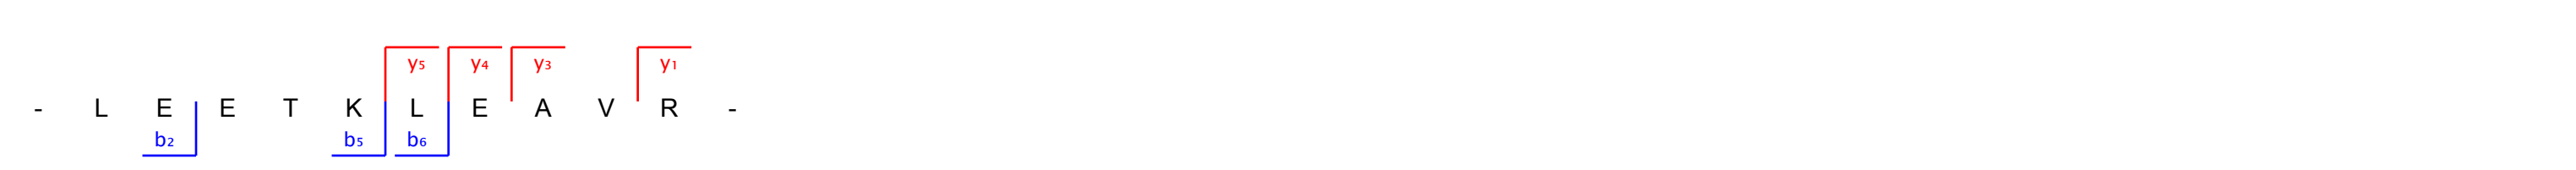

Raw file  
20171215\_MaS\_33SR\_LMH\_proteome\_01

Scan Method Score m/z Gene names  
22978 FTMS; HCD 61.11 767.35 BAZ1A

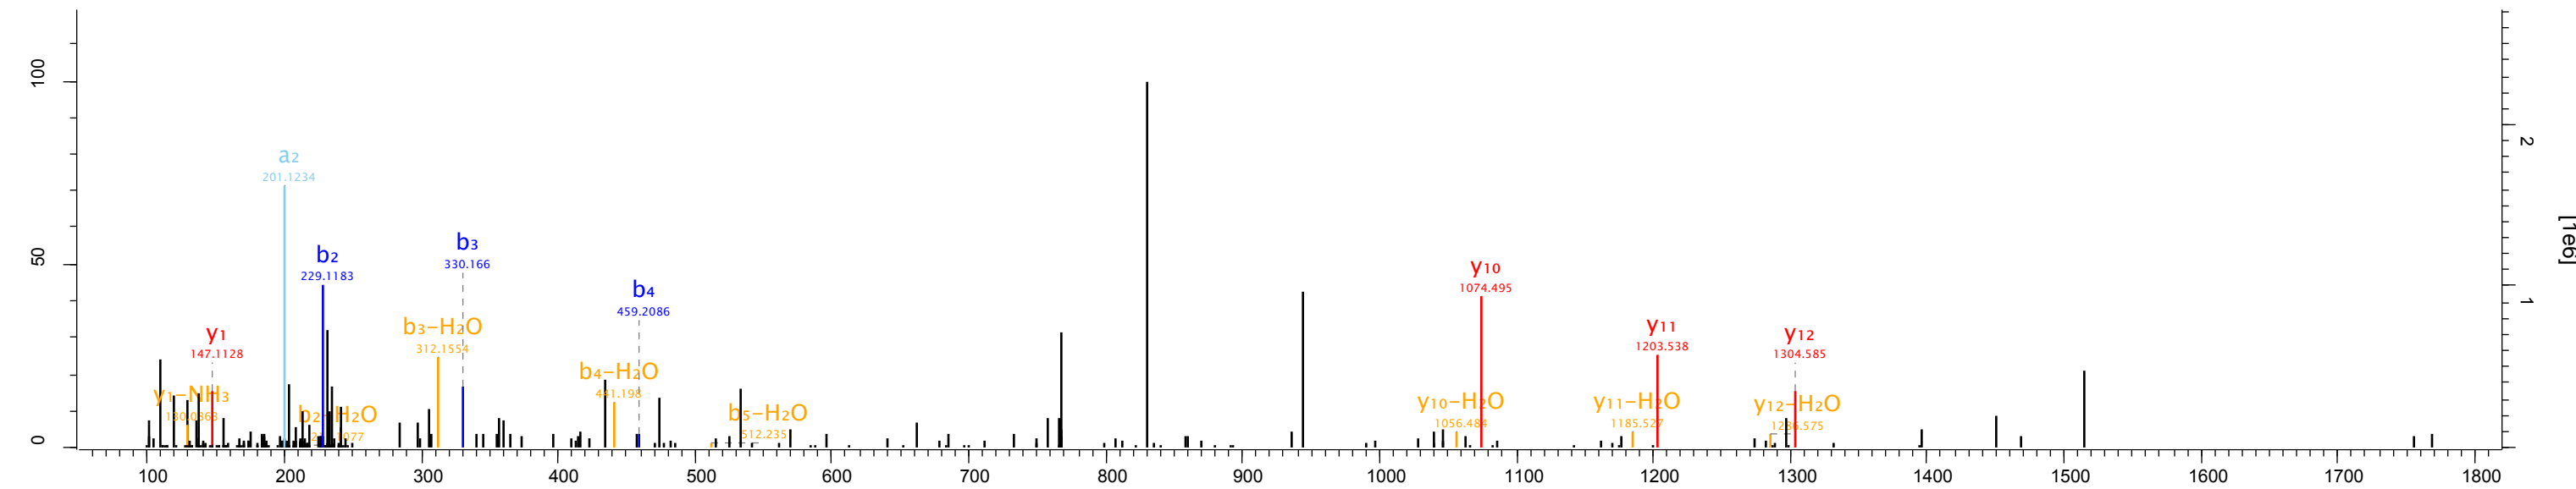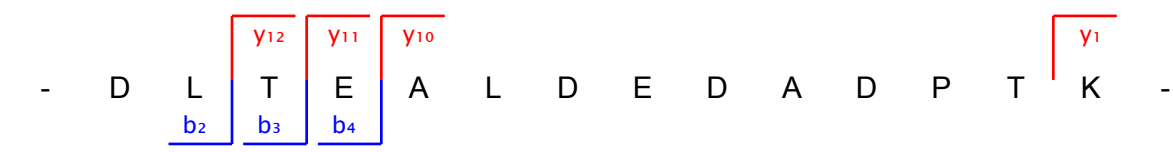

Raw file: 20171215\_MaS\_33SR\_LMH\_proteome\_01  
 Scan: 31138 Method: FTMS; HCD Score: 81.92 m/z: 702.37 Gene names: RNF128

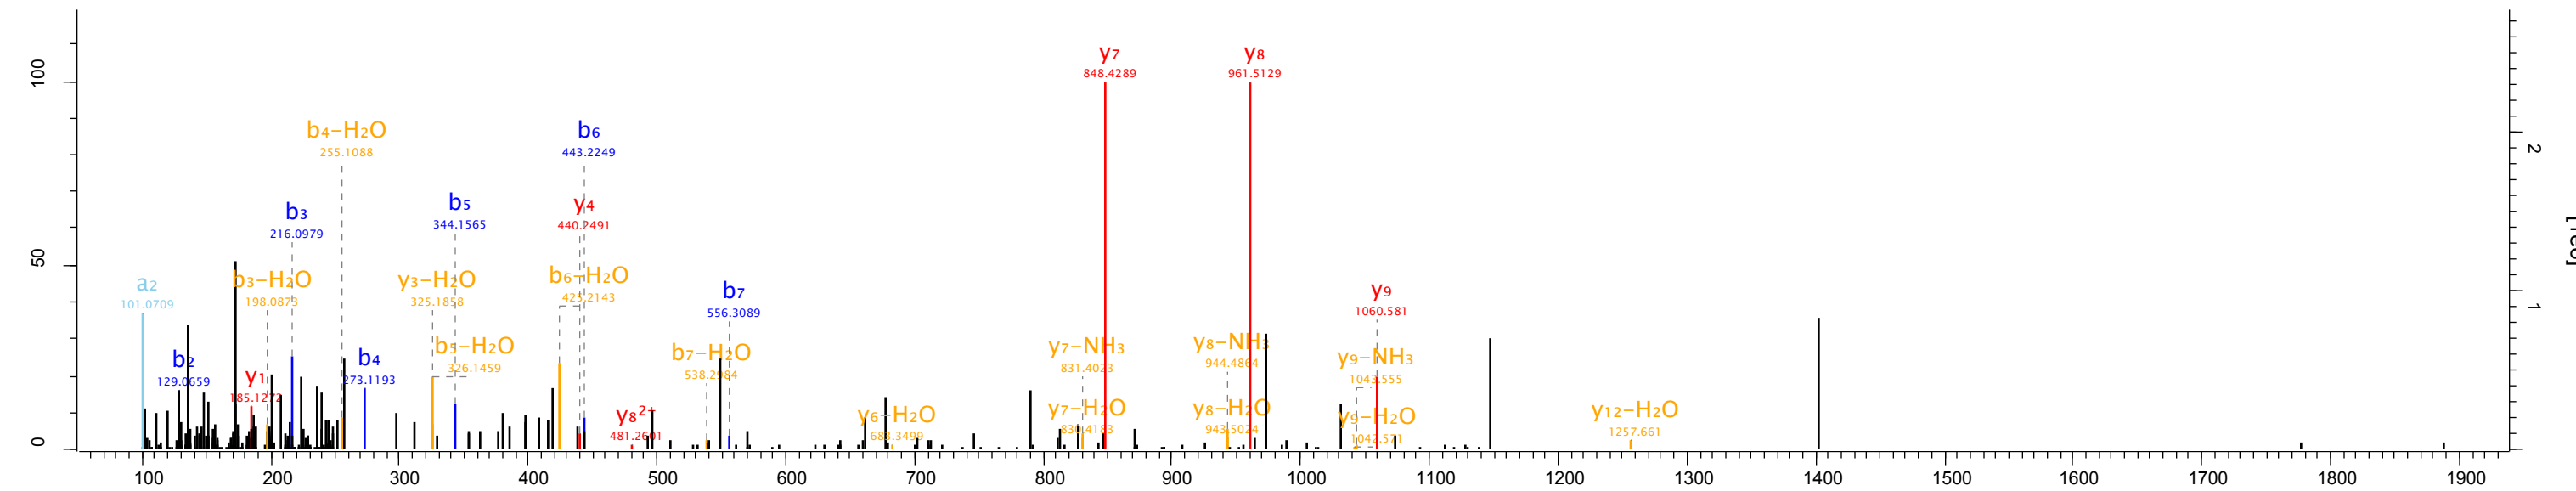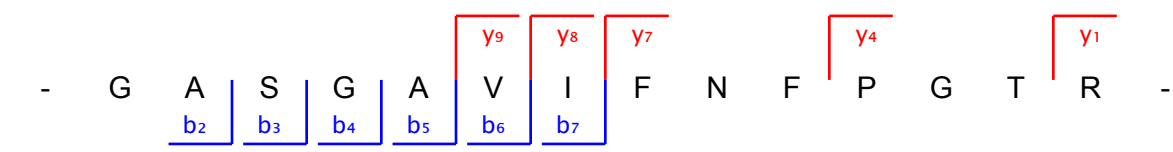

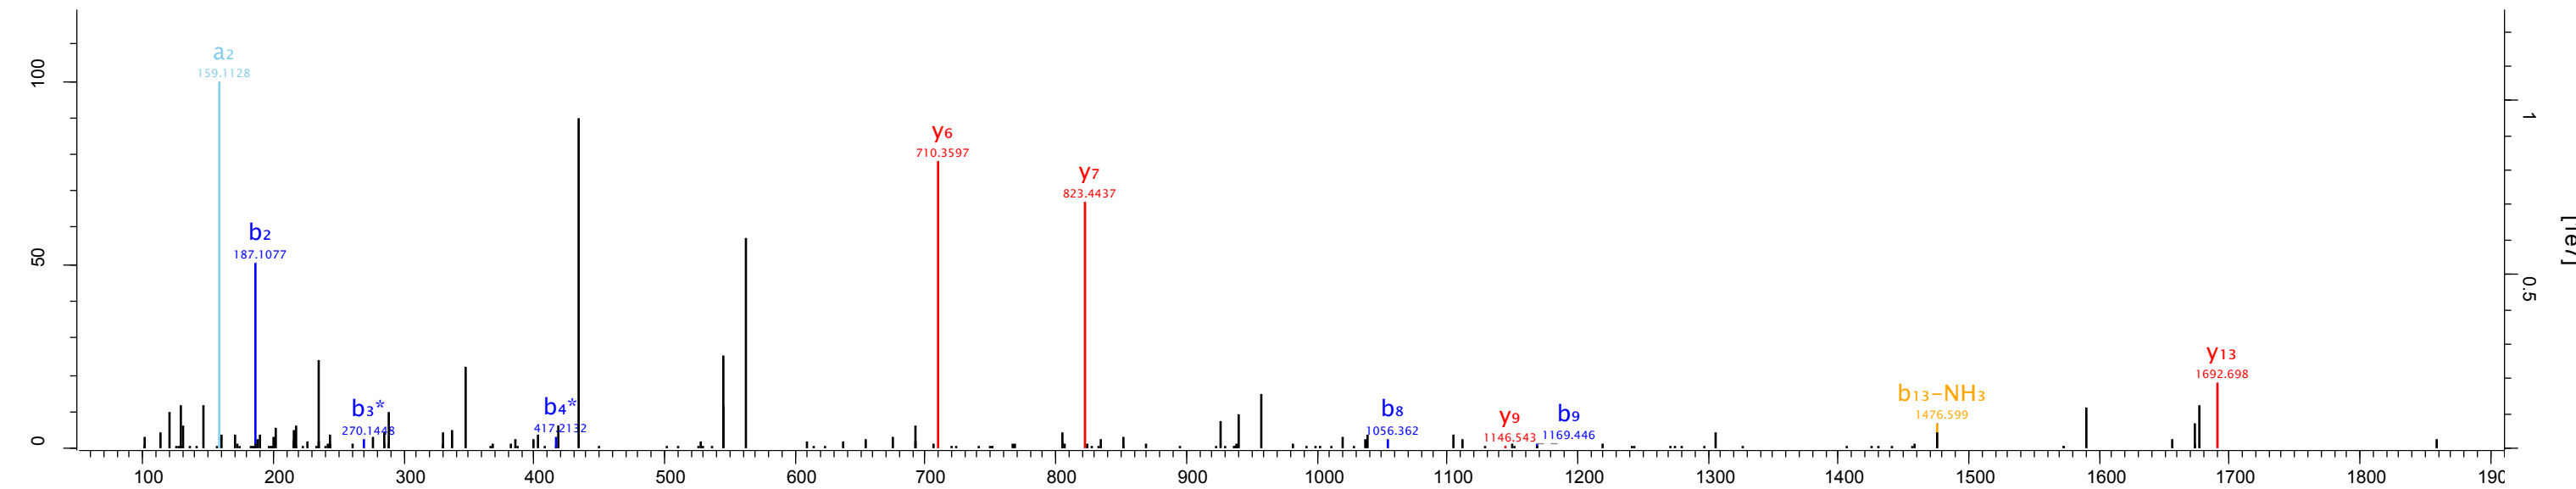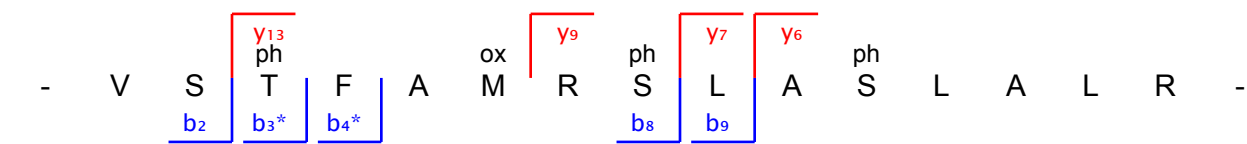



Raw file 20171215\_MaS\_33SR\_LMH\_proteome\_01 Scan 72188 Method FTMS; HCD Score 37.07 m/z 689.66 Gene names DCAF13

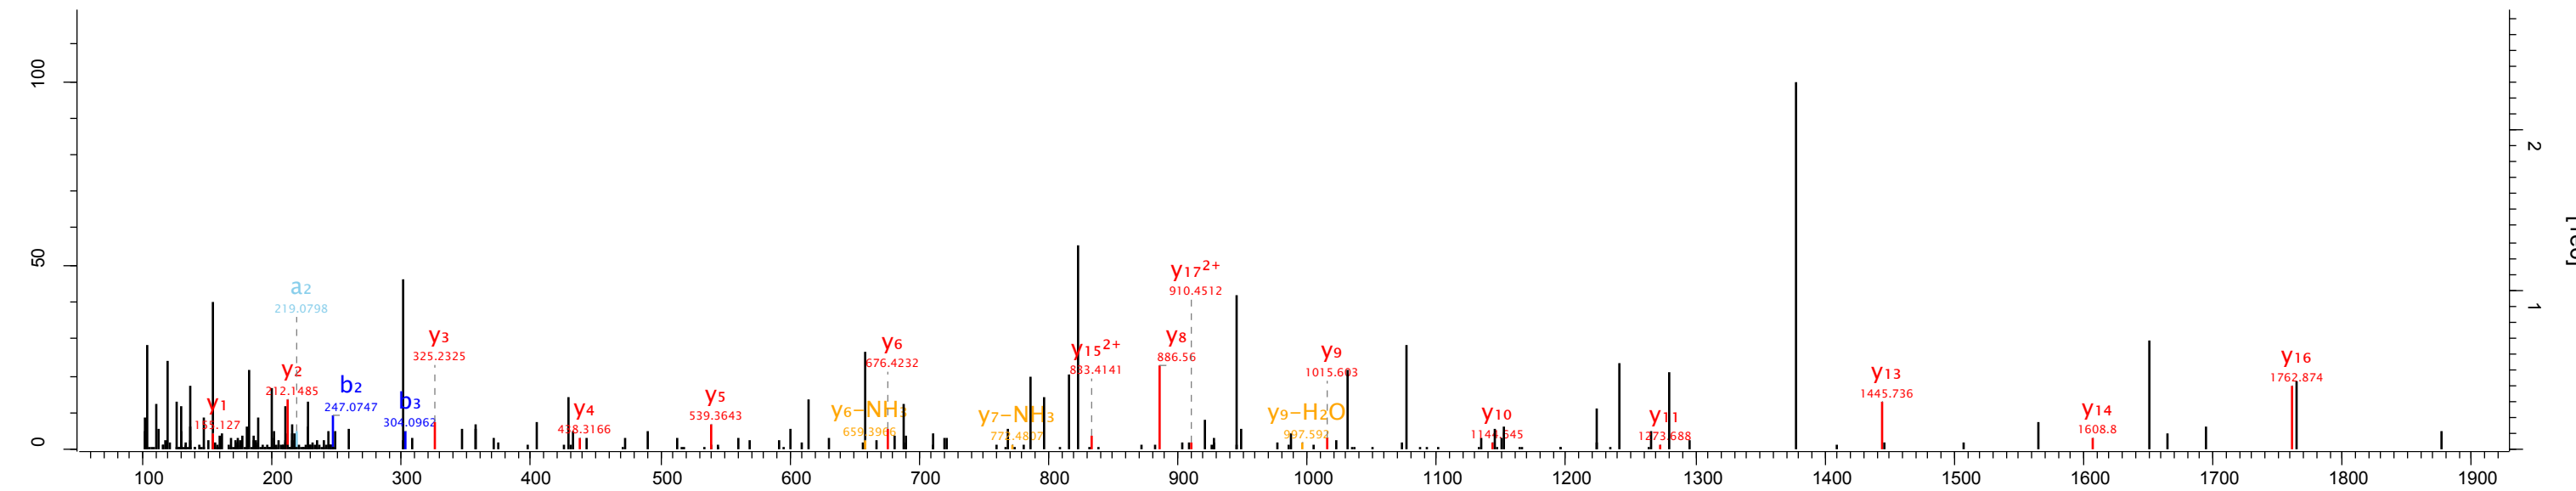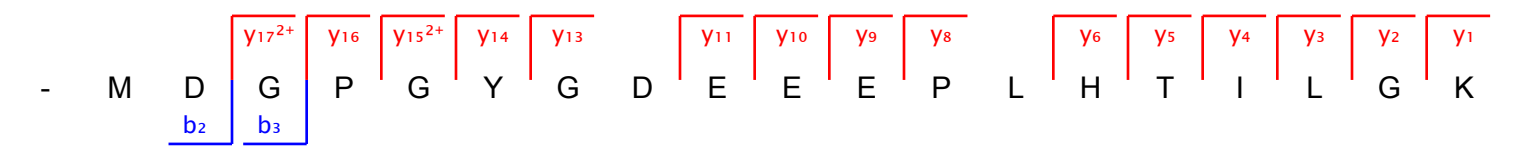

Raw file 20171215\_MaS\_33SR\_LMH\_proteome\_01 Scan 75098 Method FTMS; HCD Score 75.82 m/z 704.87 Gene names SMAP2

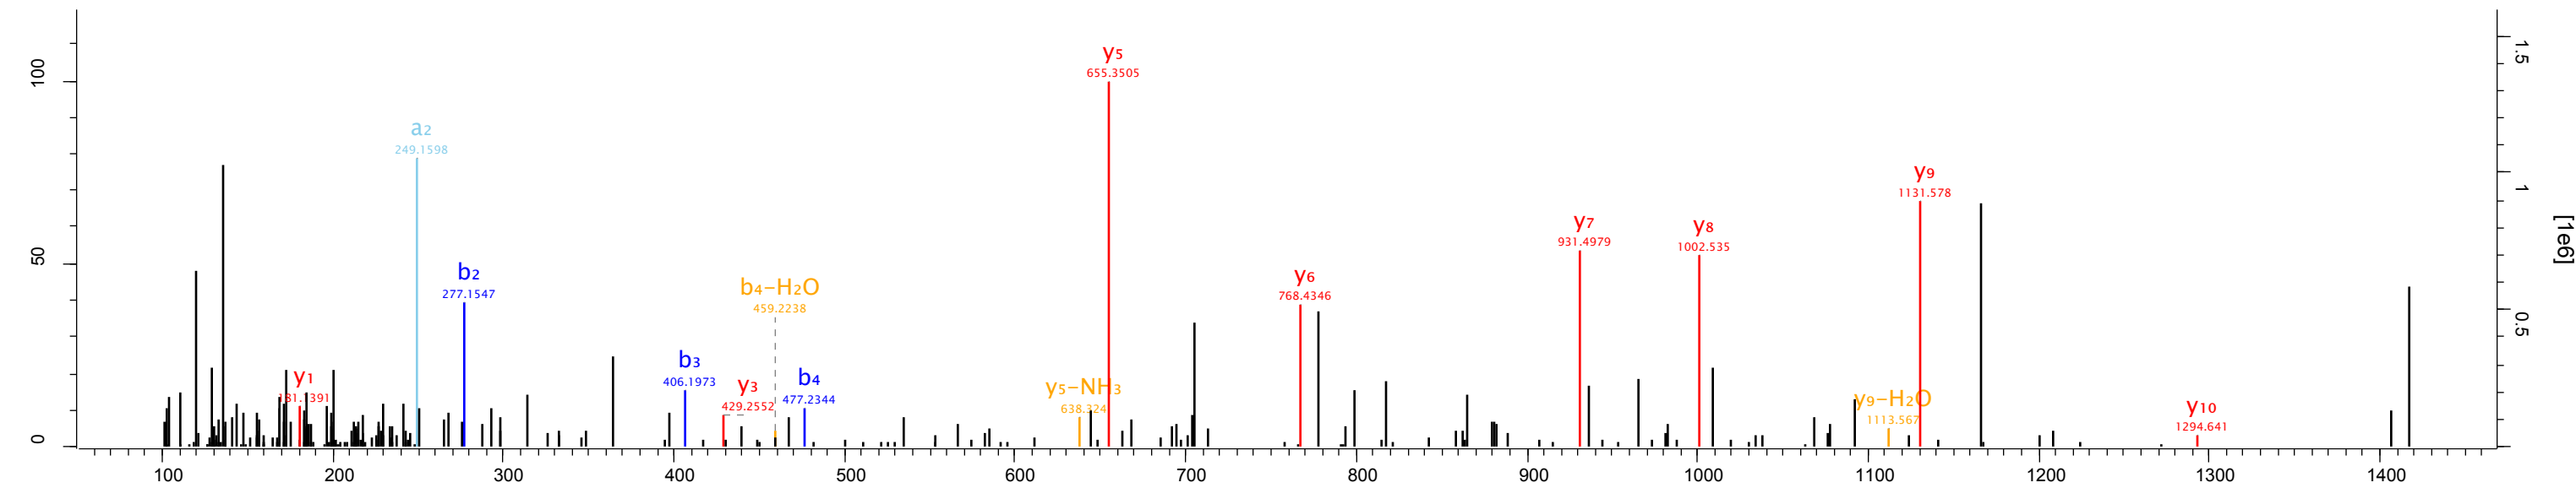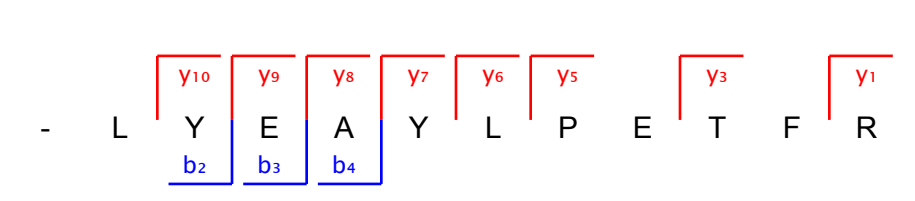

Raw file 20171215\_MaS\_33SR\_LMH\_proteome\_01 Scan 85578 Method FTMS; HCD Score 66.55 m/z 572.37 Gene names RPL7L1

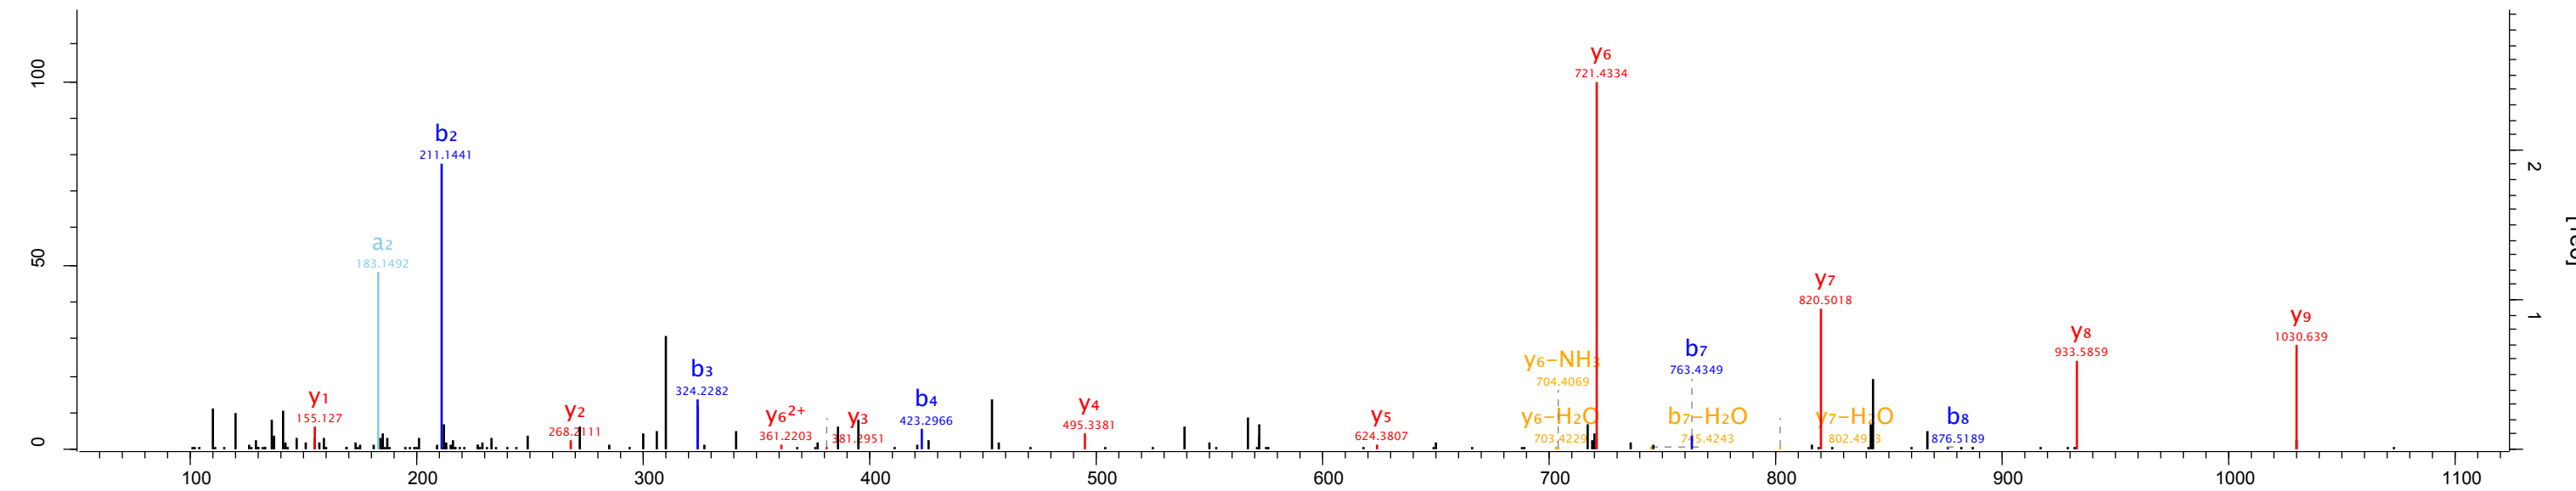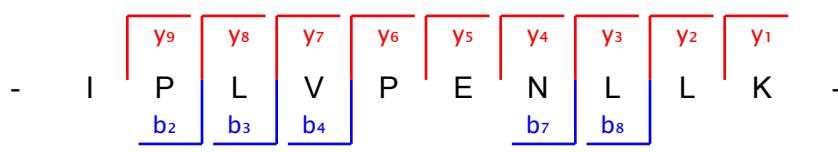

Raw file: 20171215\_MaS\_33SR\_LMH\_proteome\_01  
 Scan: 87188 Method: FTMS; HCD Score: 96.76 m/z: 519.28 Gene names: LEPREL4

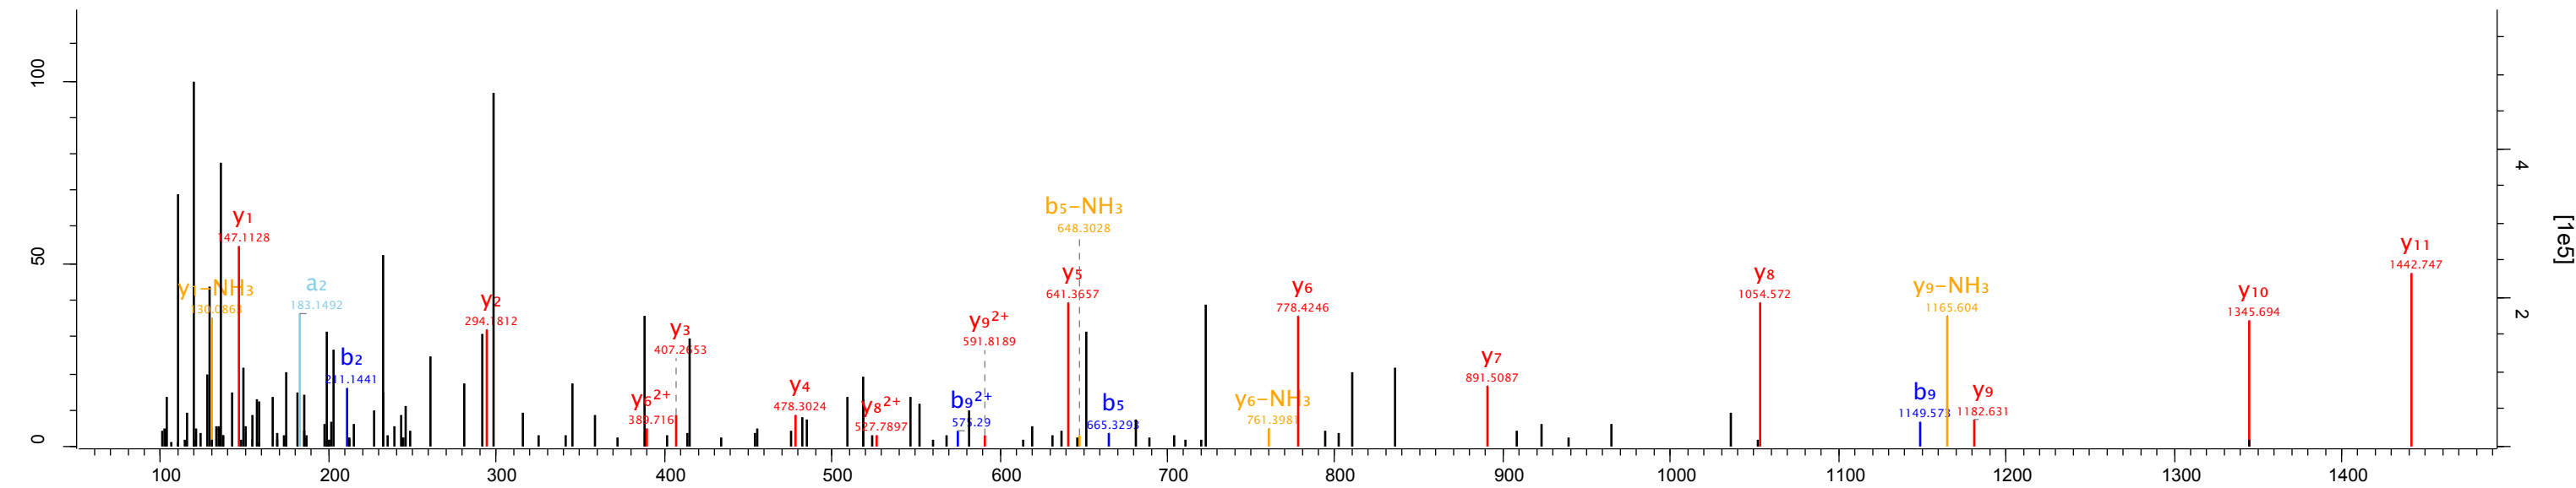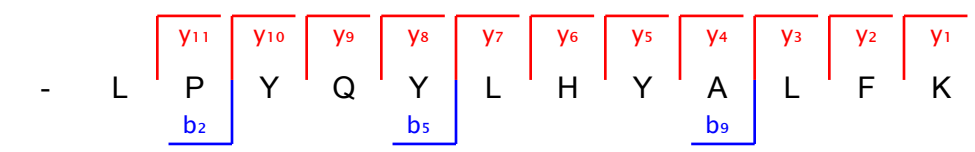

Raw file

20171215\_MaS\_33SR\_LMH\_proteome\_01

| Scan  | Method    | Score | m/z    | Gene names |
|-------|-----------|-------|--------|------------|
| 87248 | FTMS; HCD | 50.35 | 610.81 | MRPS23     |

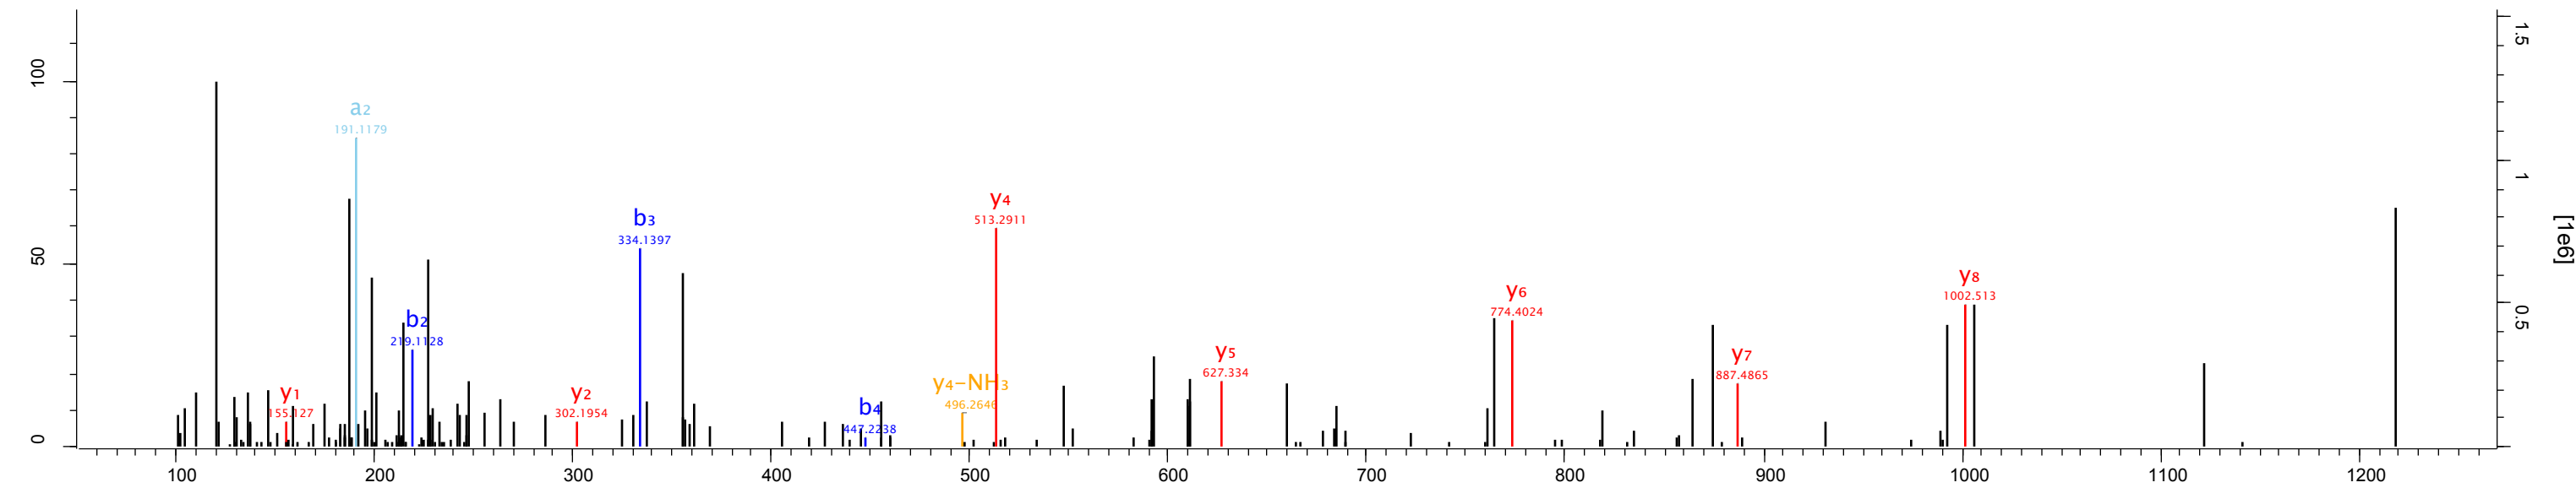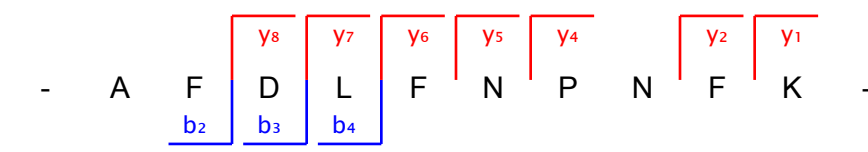

Raw file 20171215\_MaS\_33SR\_LMH\_proteome\_01 Scan 9208 Method FTMS; HCD Score 52.73 m/z 596.74 Gene names ZNF155

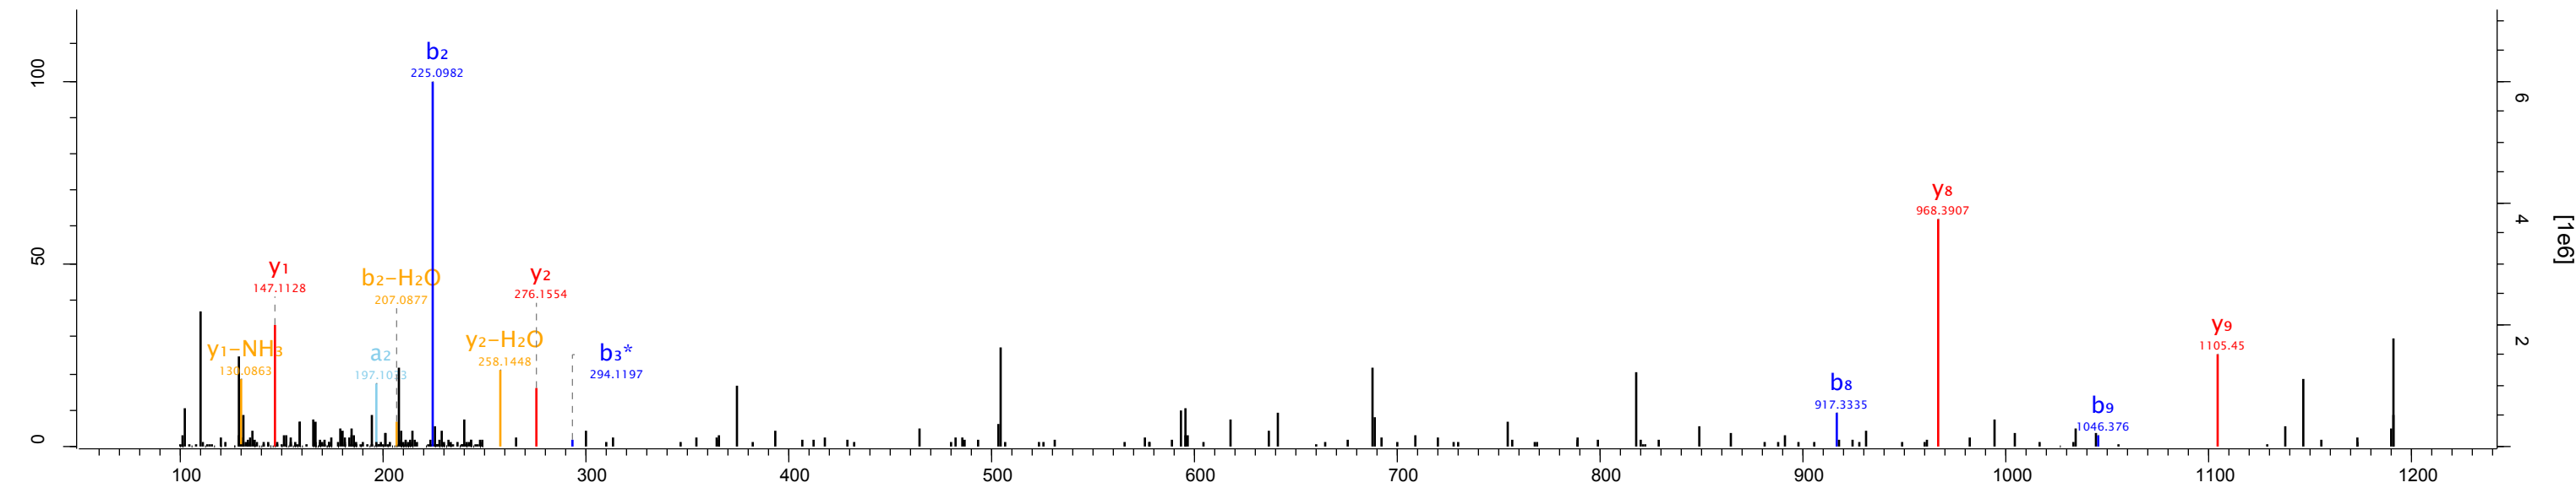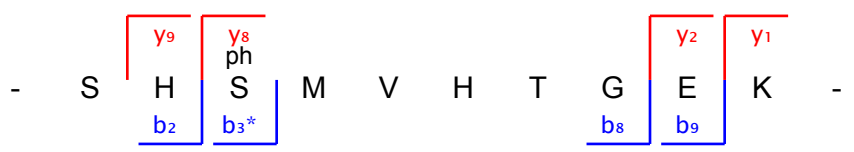

20171215\_MaS\_33SR\_LMH\_proteome\_01

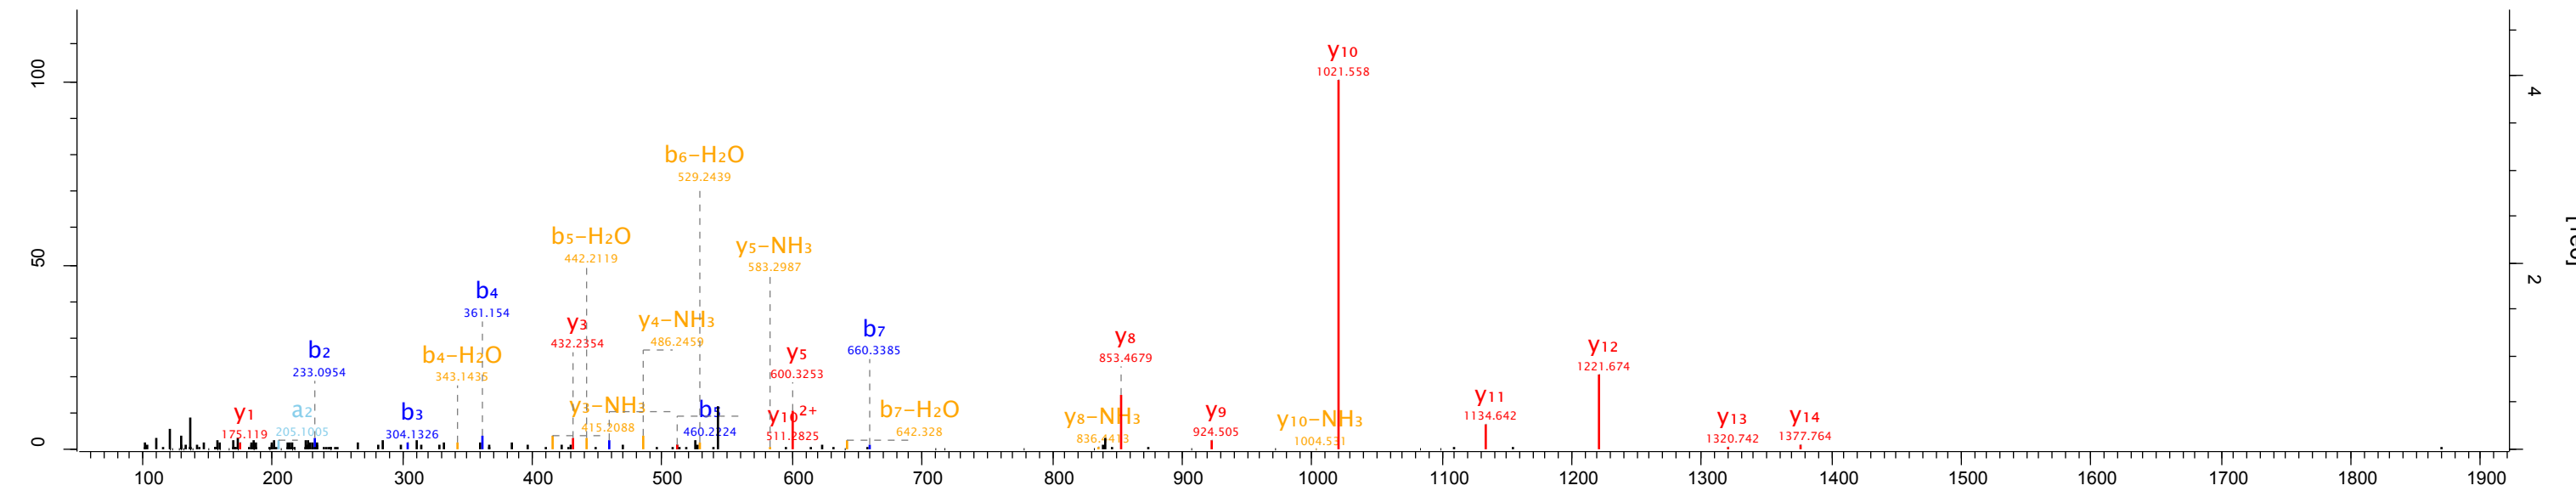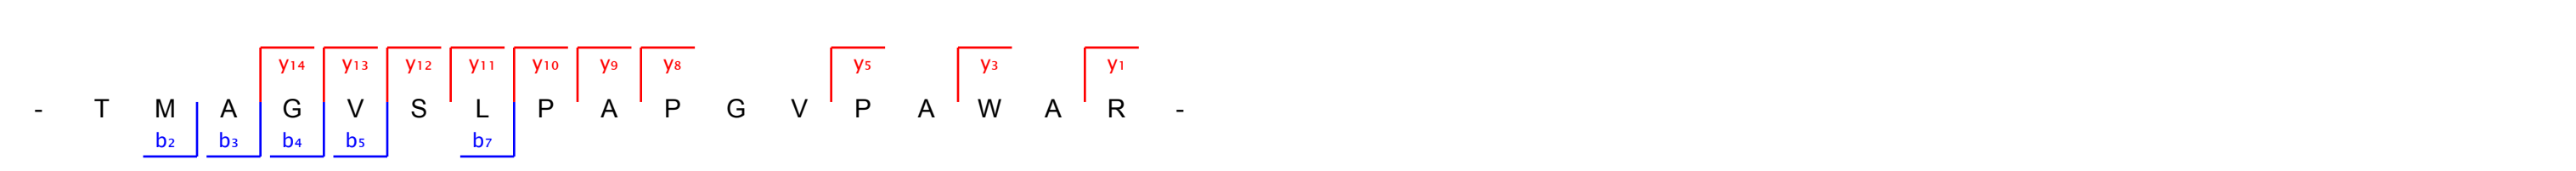

Raw file: 20171215\_MaS\_33SR\_LMH\_proteome\_02  
 Scan: 101658 Method: FTMS; HCD Score: 85.81 m/z: 656.88 Gene names: HIBCH

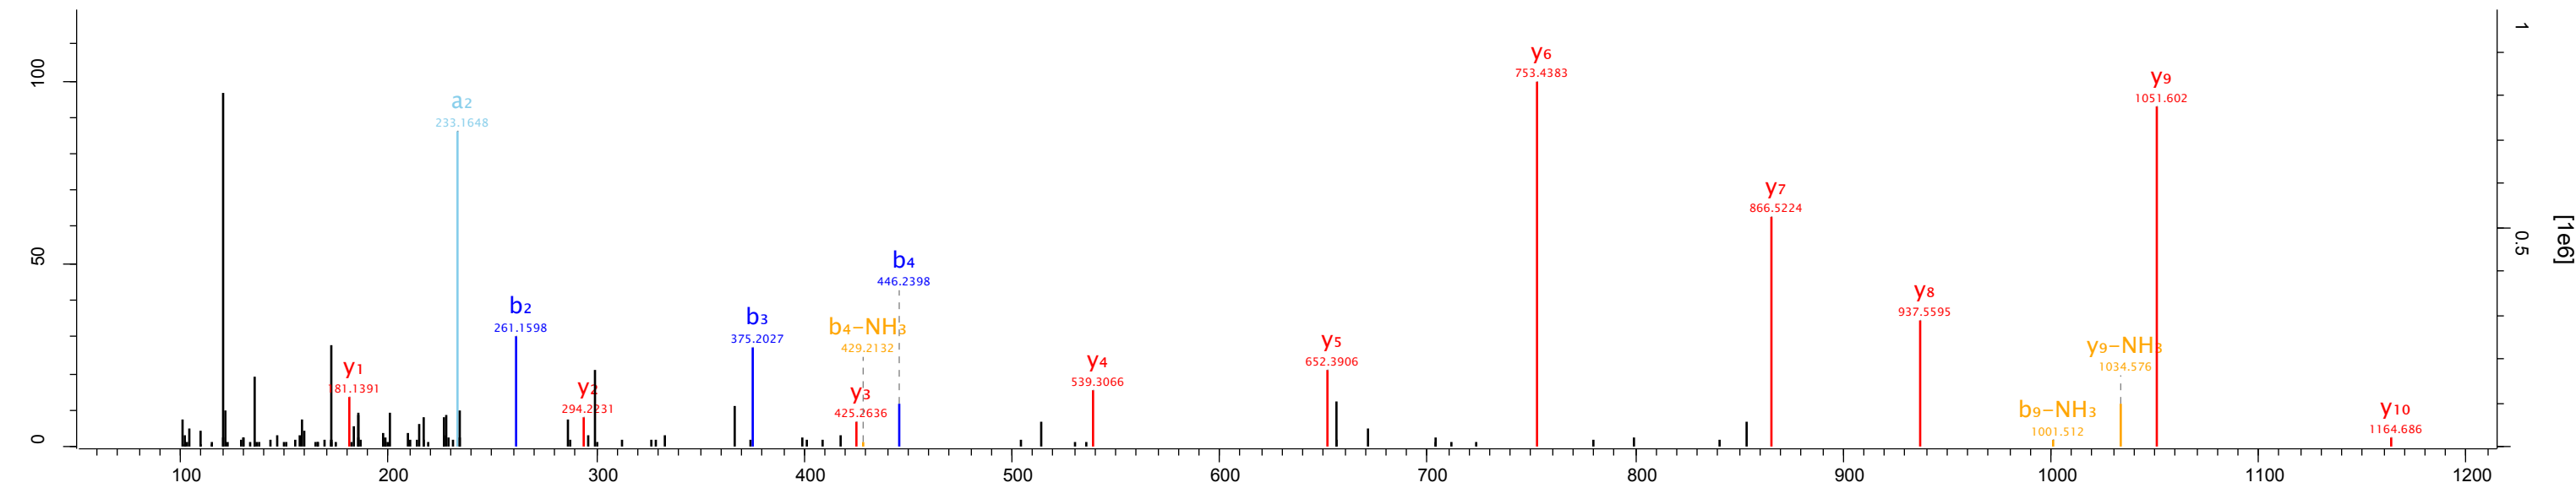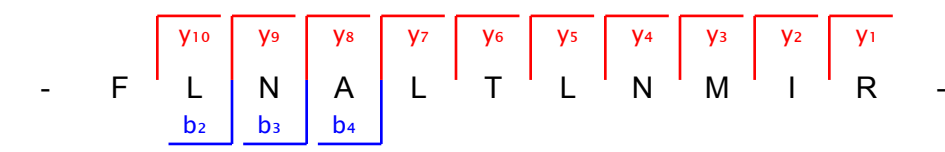



Raw file: 20171215\_MaS\_33SR\_LMH\_proteome\_02  
 Scan: 106538 Method: FTMS; HCD Score: 59.37 m/z: 1014.51 Gene names: CASP8

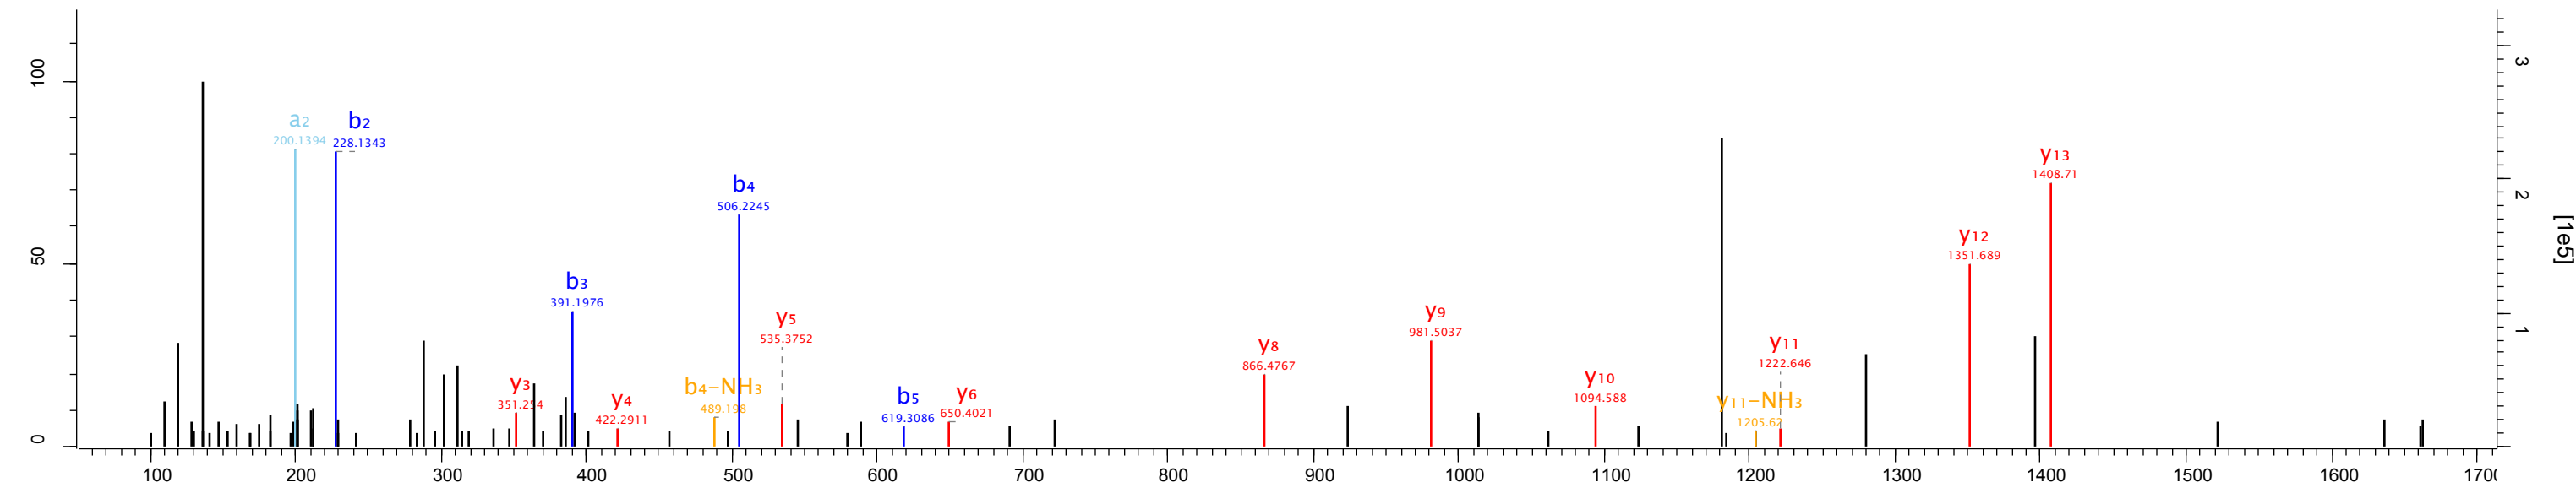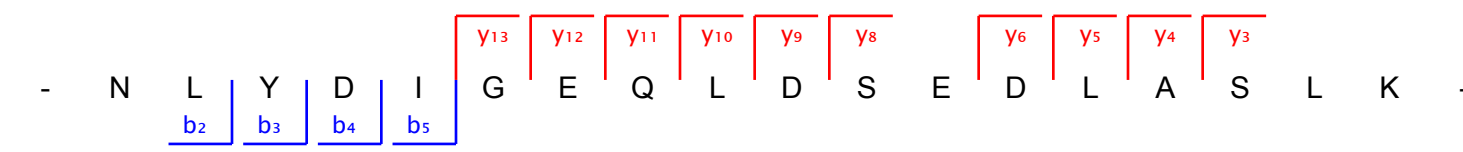

Raw file 20171215\_MaS\_33SR\_LMH\_proteome\_02 Scan 116368 Method FTMS; HCD Score 54.98 m/z 519.82 Gene names TMEM167A

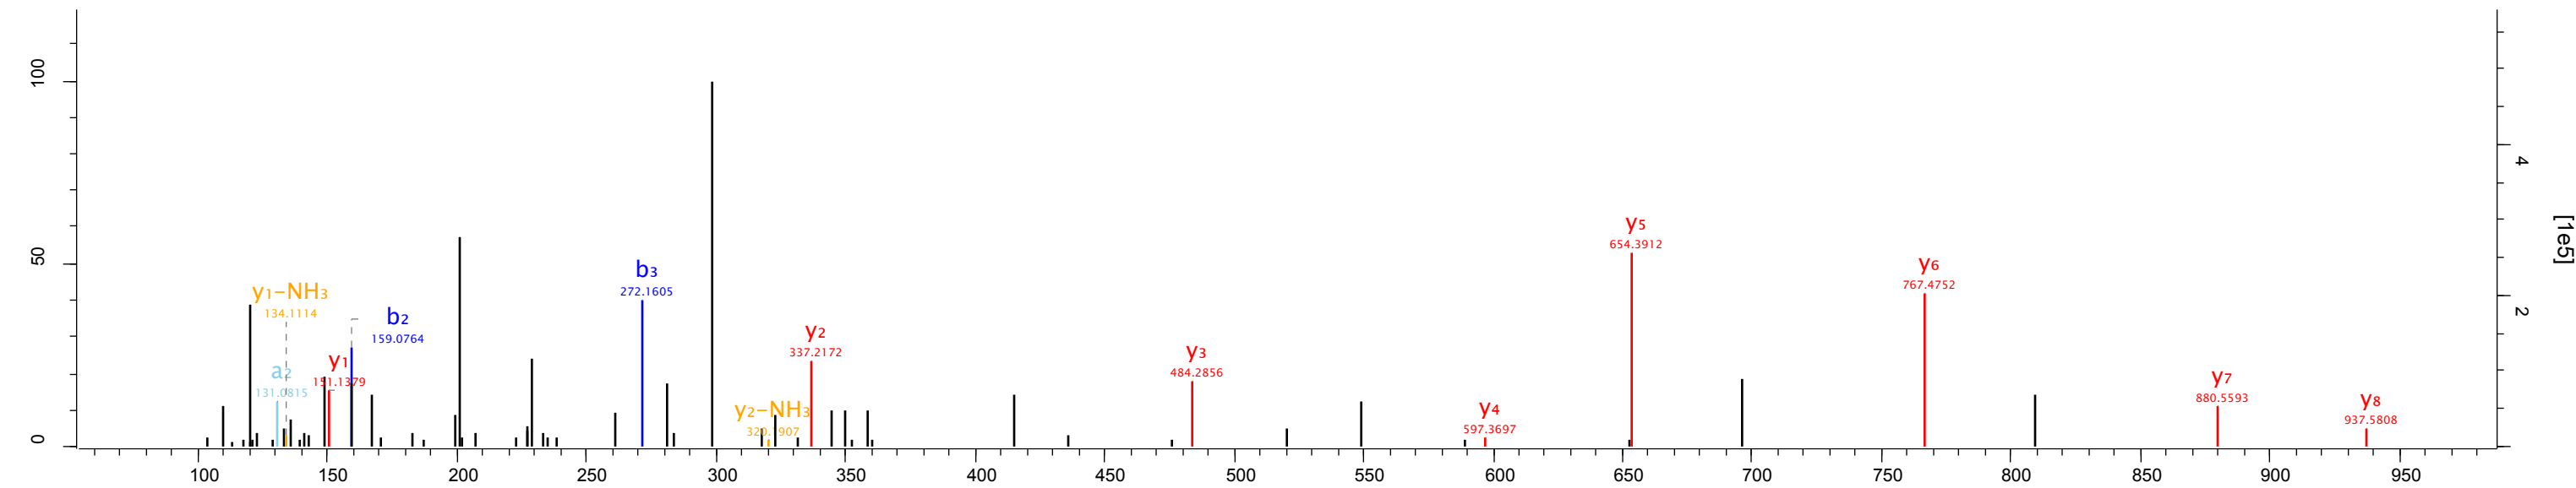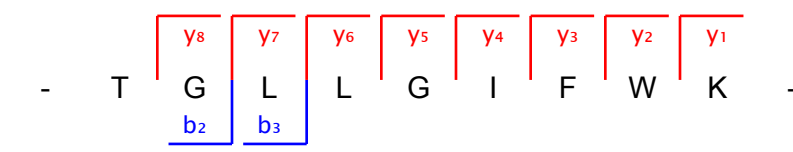

Raw file 20171215\_MaS\_33SR\_LMH\_proteome\_02 Scan 116808 Method FTMS; HCD Score 45.42 m/z 835.09 Gene names NDUFS6

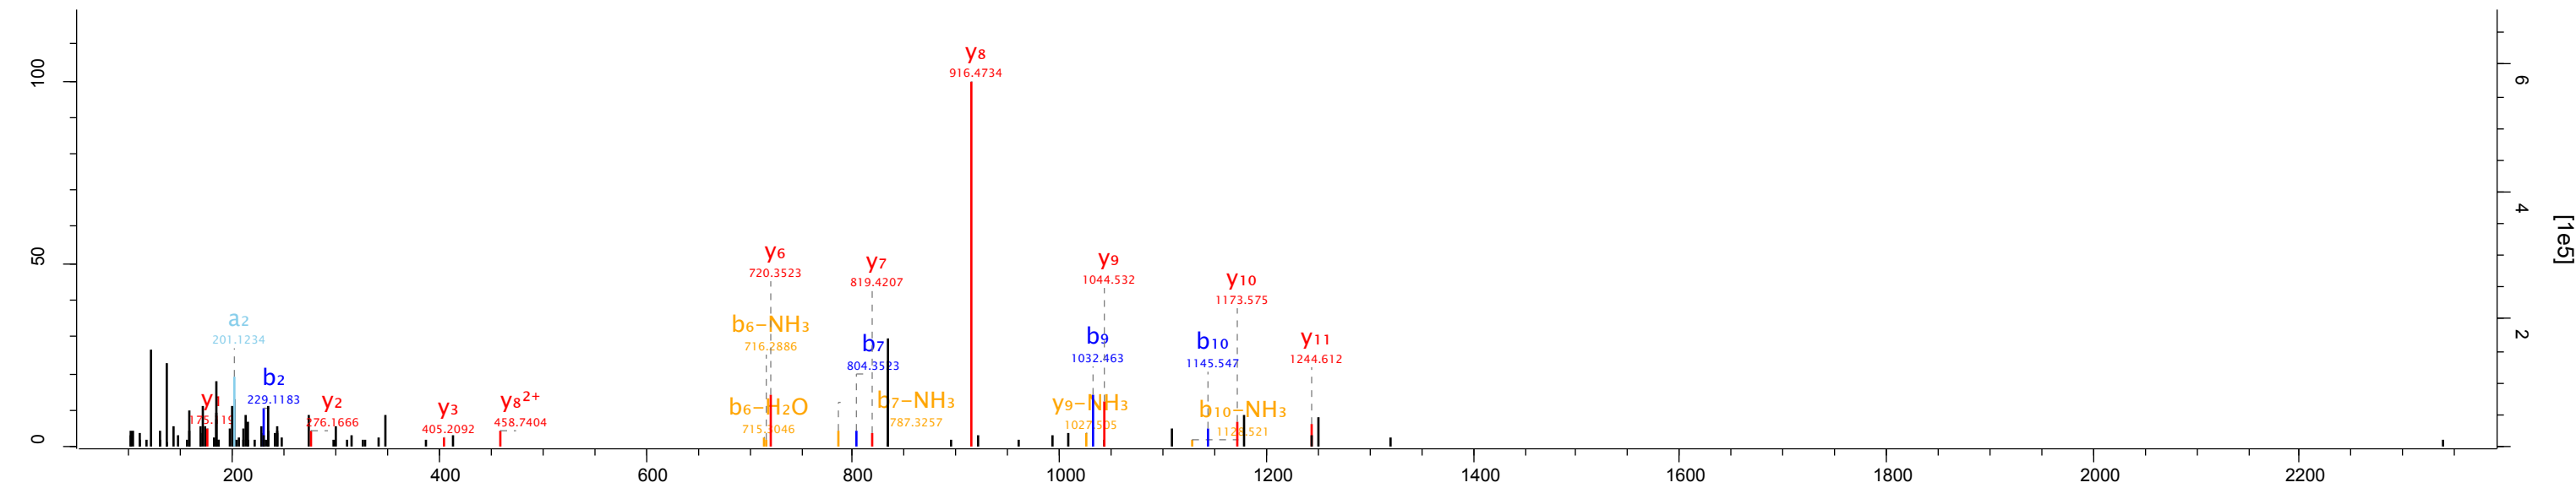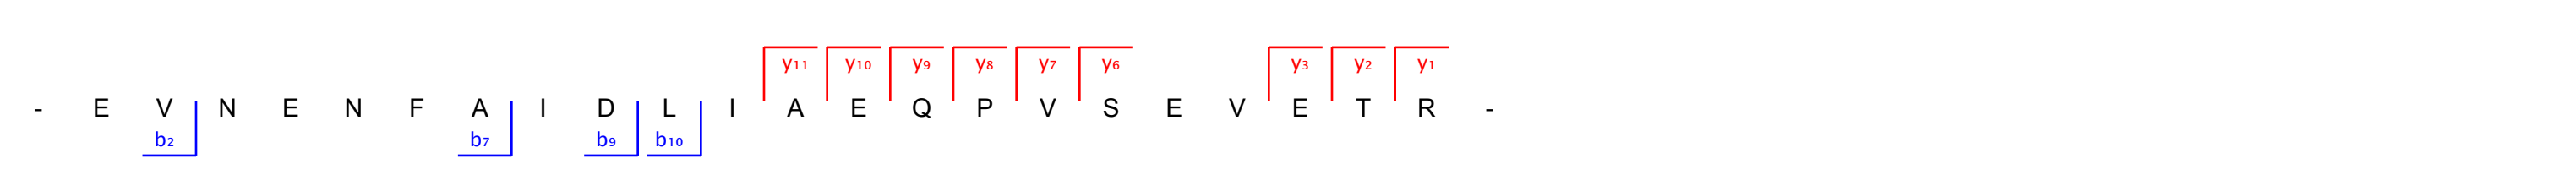

Raw file 20171215\_MaS\_33SR\_LMH\_proteome\_02 Scan 123998 Method FTMS; HCD Score 48.53 m/z 717.38 Gene names CPSF4

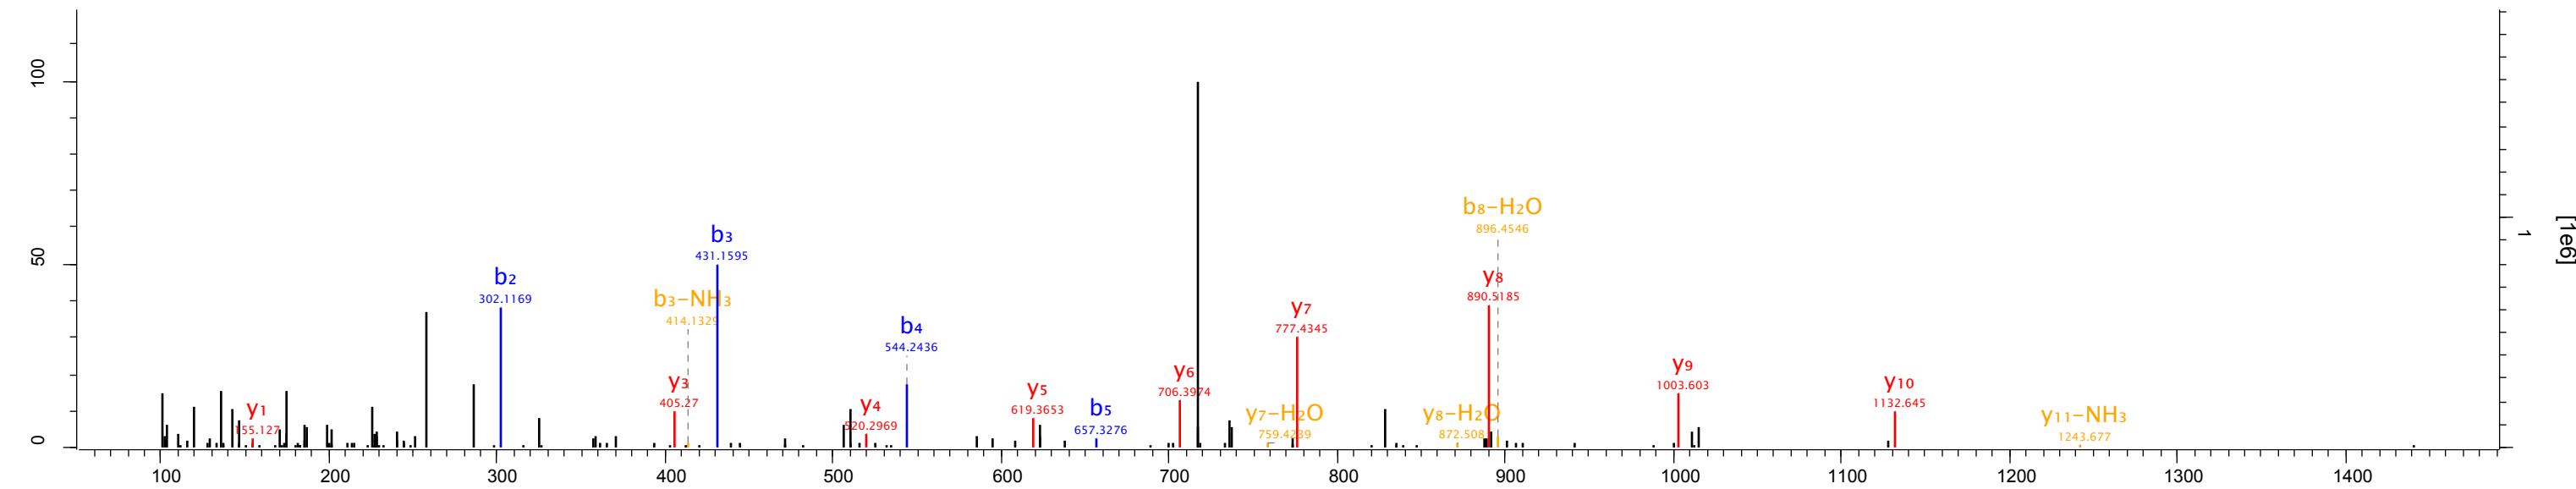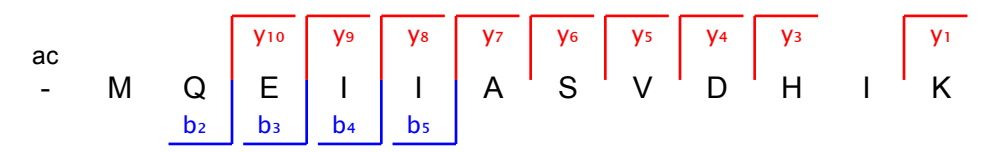

Raw file 20171215\_MaS\_33SR\_LMH\_proteome\_02 Scan 133258 Method FTMS; HCD Score 70.26 m/z 854.99 Gene names POLR3B

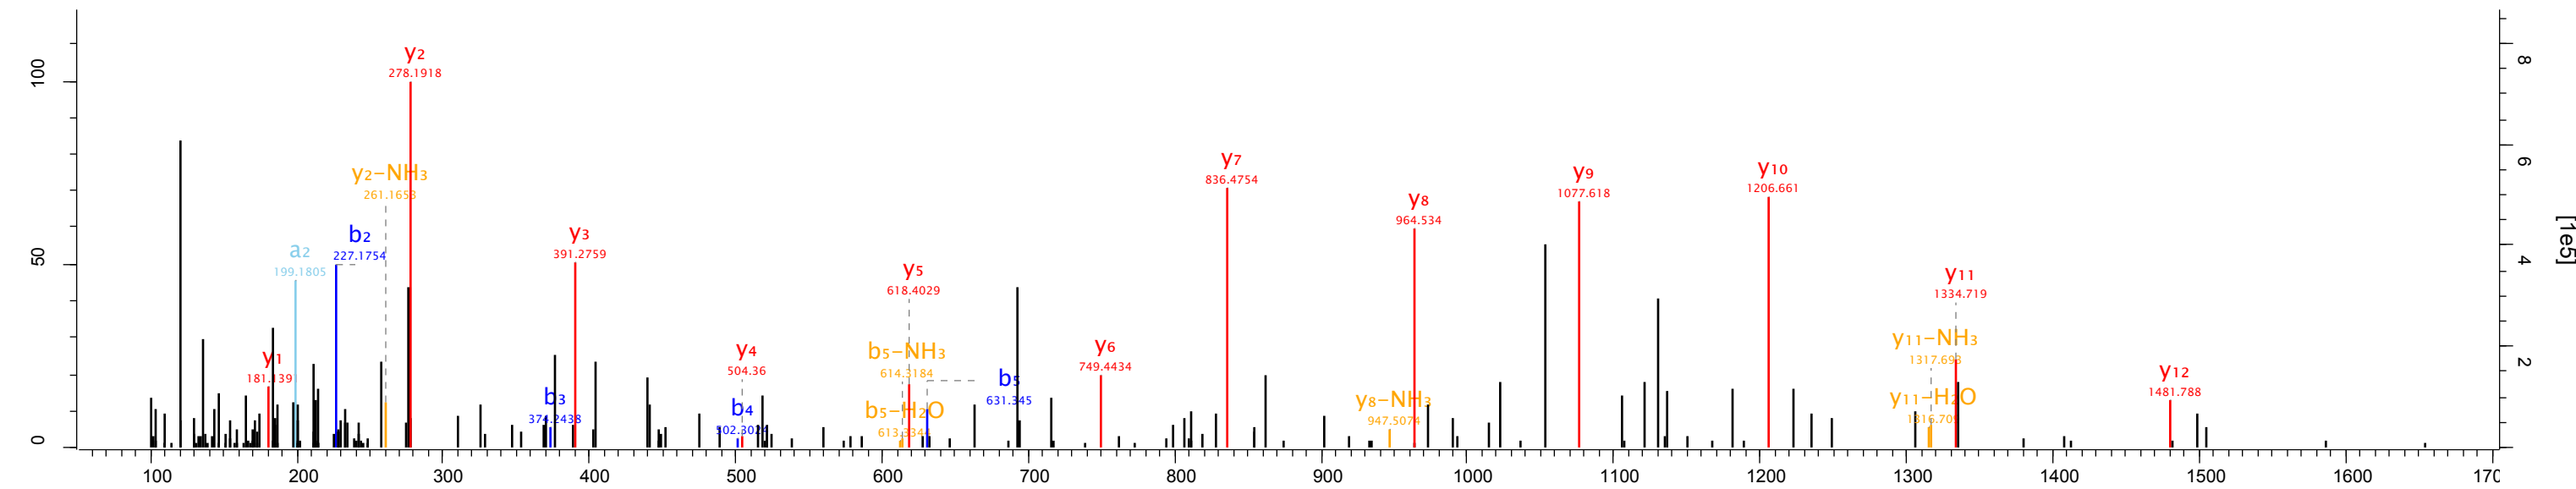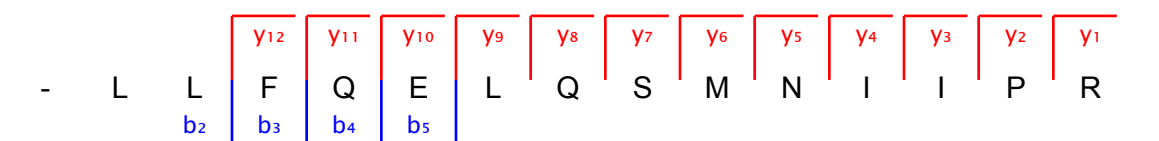

Raw file: 20171215\_MaS\_33SR\_LMH\_proteome\_02  
 Scan: 147308 Method: FTMS; HCD Score: 56.69 m/z: 1030.22 Gene names: AIFM2

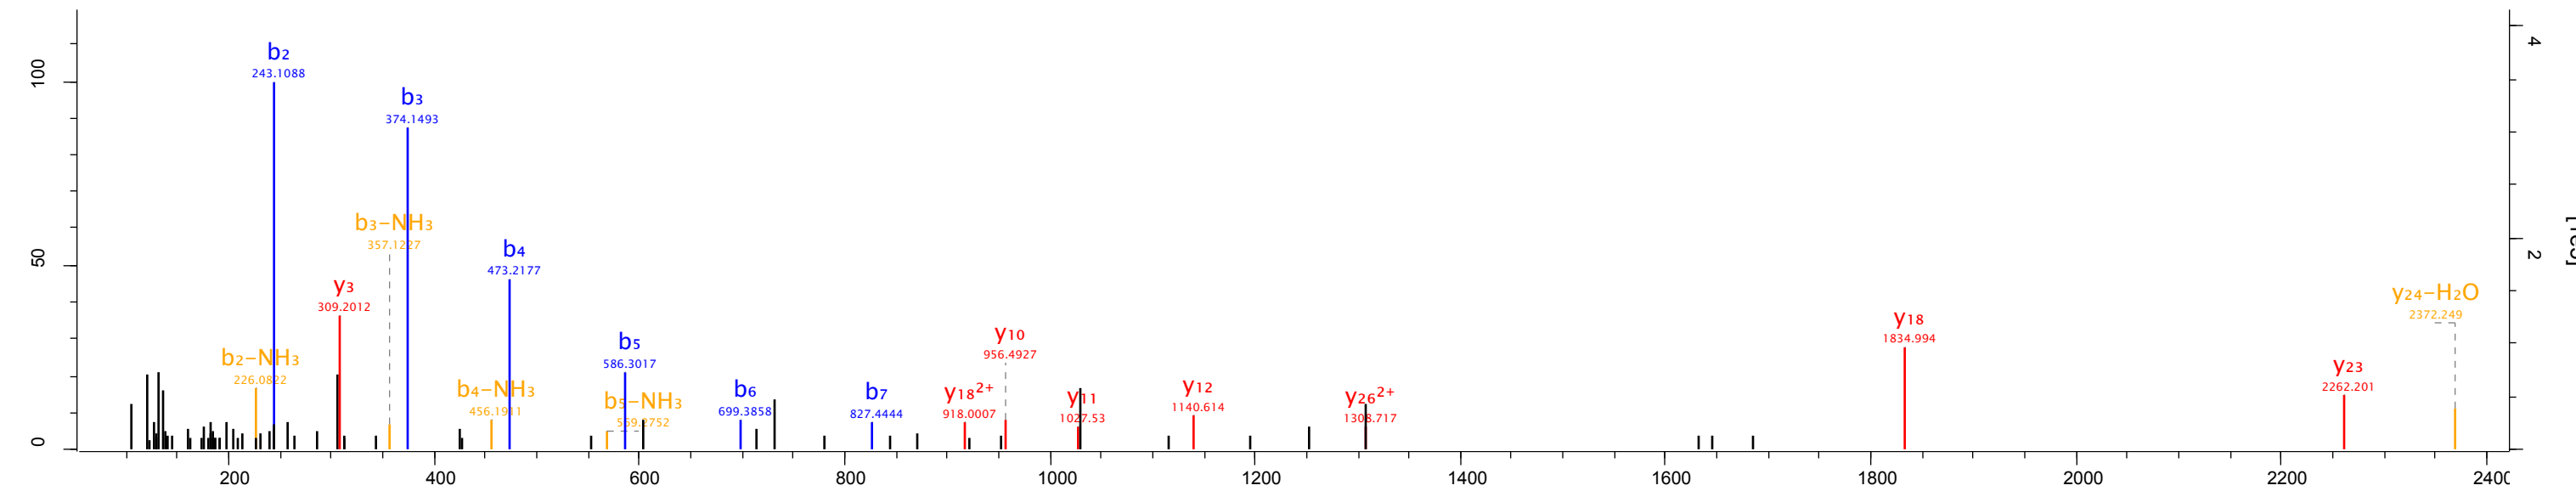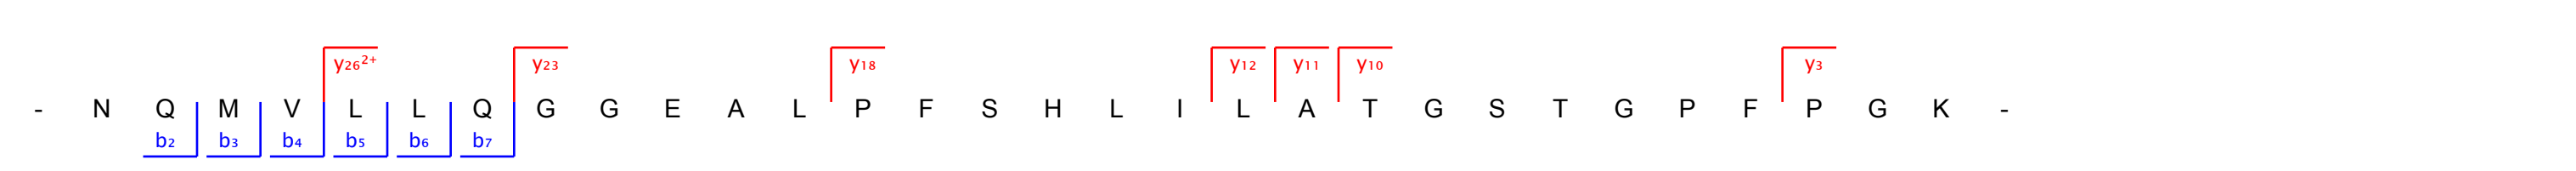

Raw file 20171215\_MaS\_33SR\_LMH\_proteome\_02 Scan 16828 Method FTMS; HCD Score 92.87 m/z 631.84 Gene names THOC7

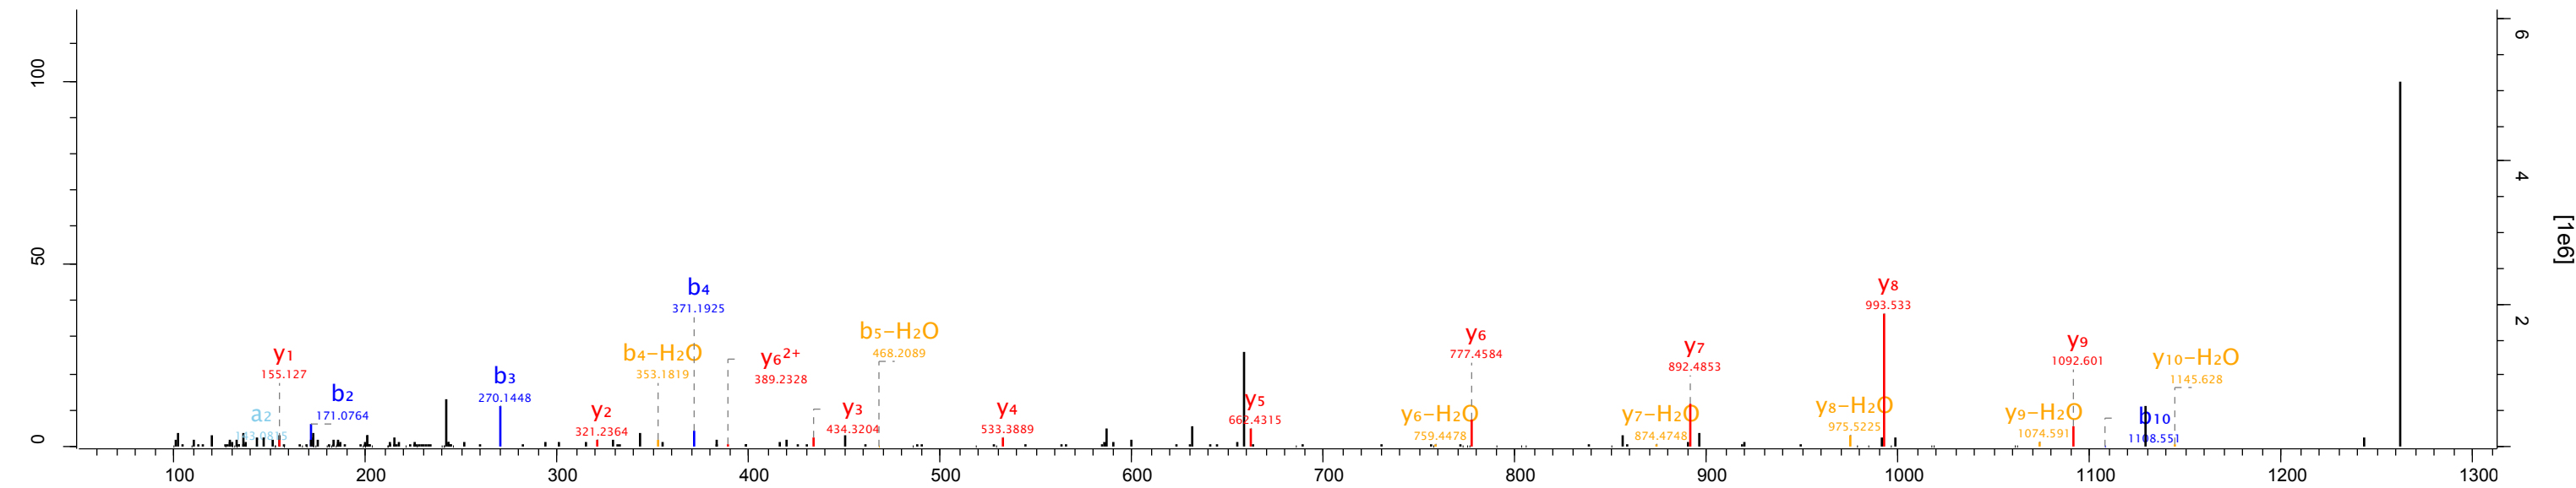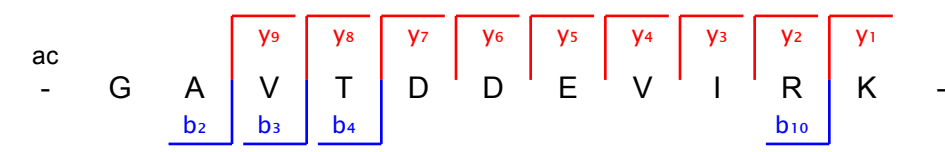

Raw file

20171215\_MaS\_33SR\_LMH\_proteome\_02

| Scan  | Method    | Score | m/z    | Gene names |
|-------|-----------|-------|--------|------------|
| 19638 | FTMS; HCD | 46.46 | 581.27 | KDM5A      |

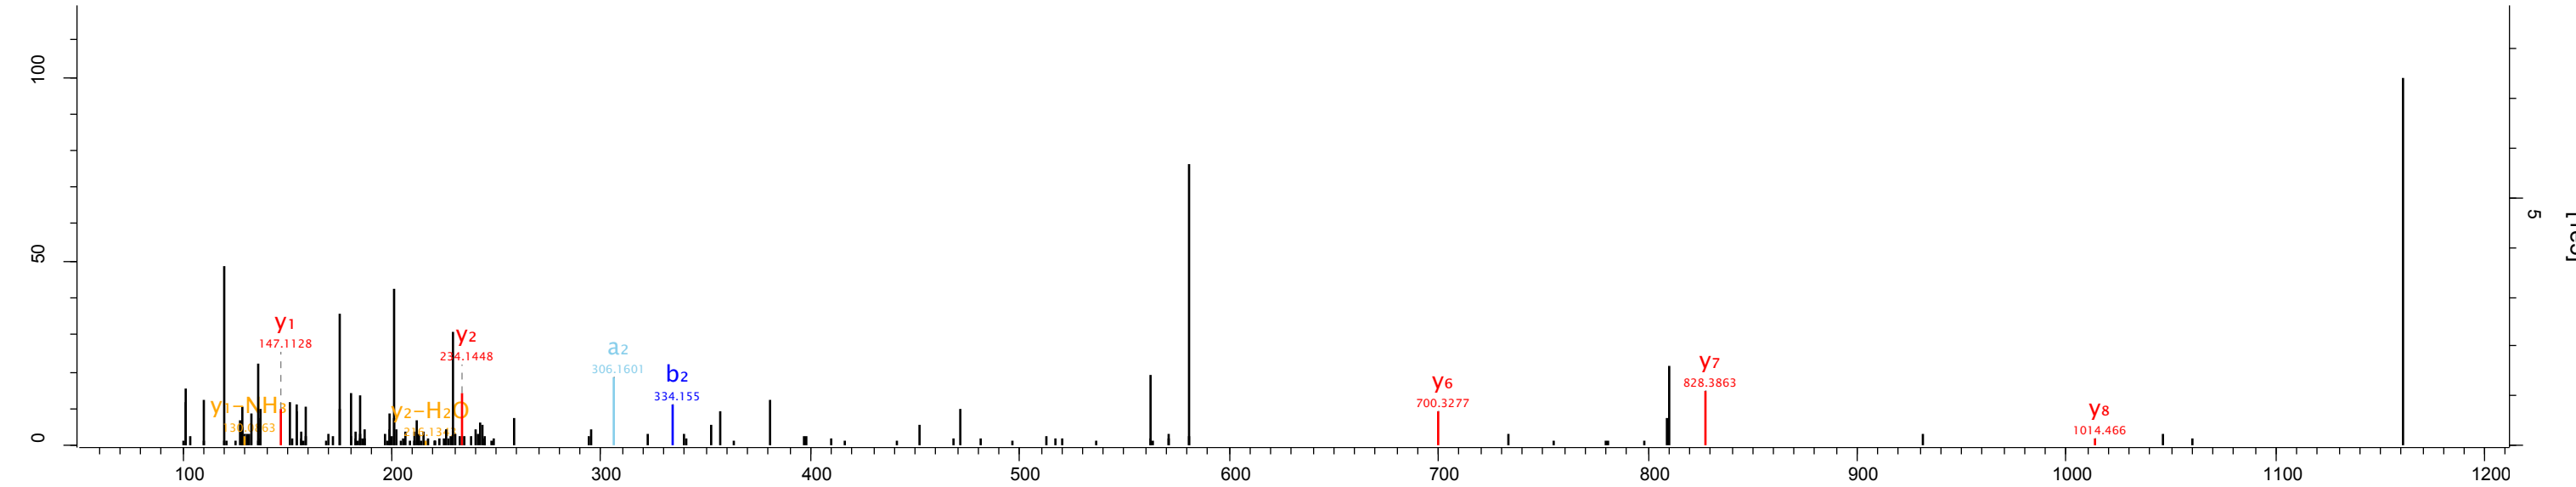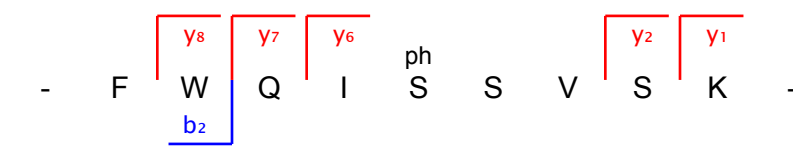



Raw file: 20171215\_MaS\_33SR\_LMH\_proteome\_02  
 Scan: 35568 Method: FTMS; HCD Score: 87.67 m/z: 676.82 Gene names: NCBP2

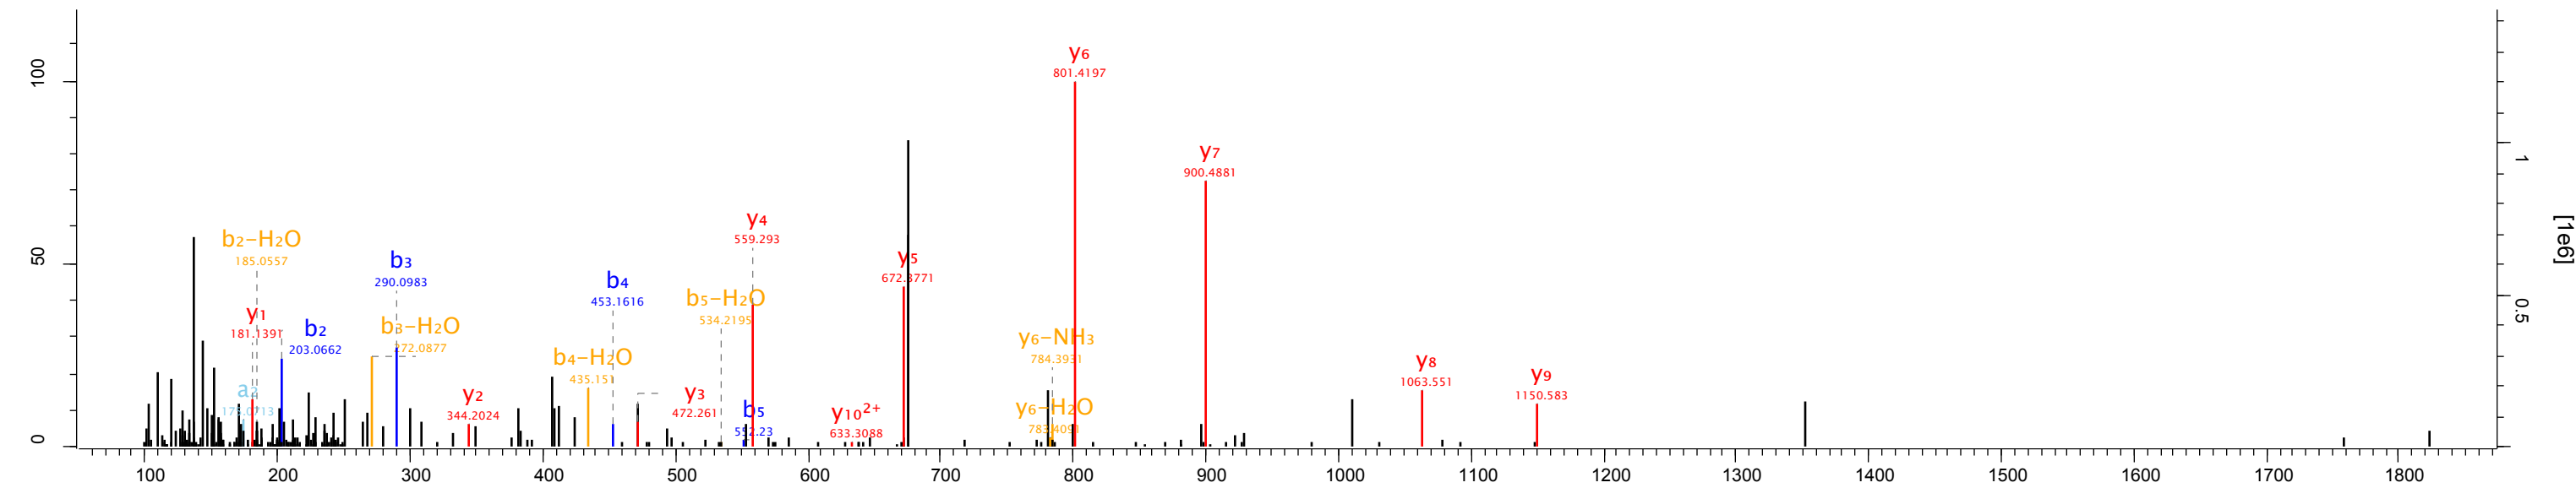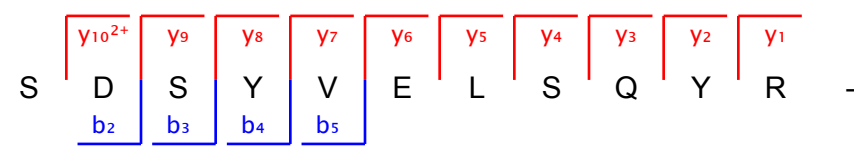

Raw file 20171215\_MaS\_33SR\_LMH\_proteome\_02 Scan 37248 Method FTMS; HCD Score 93.88 m/z 399.25

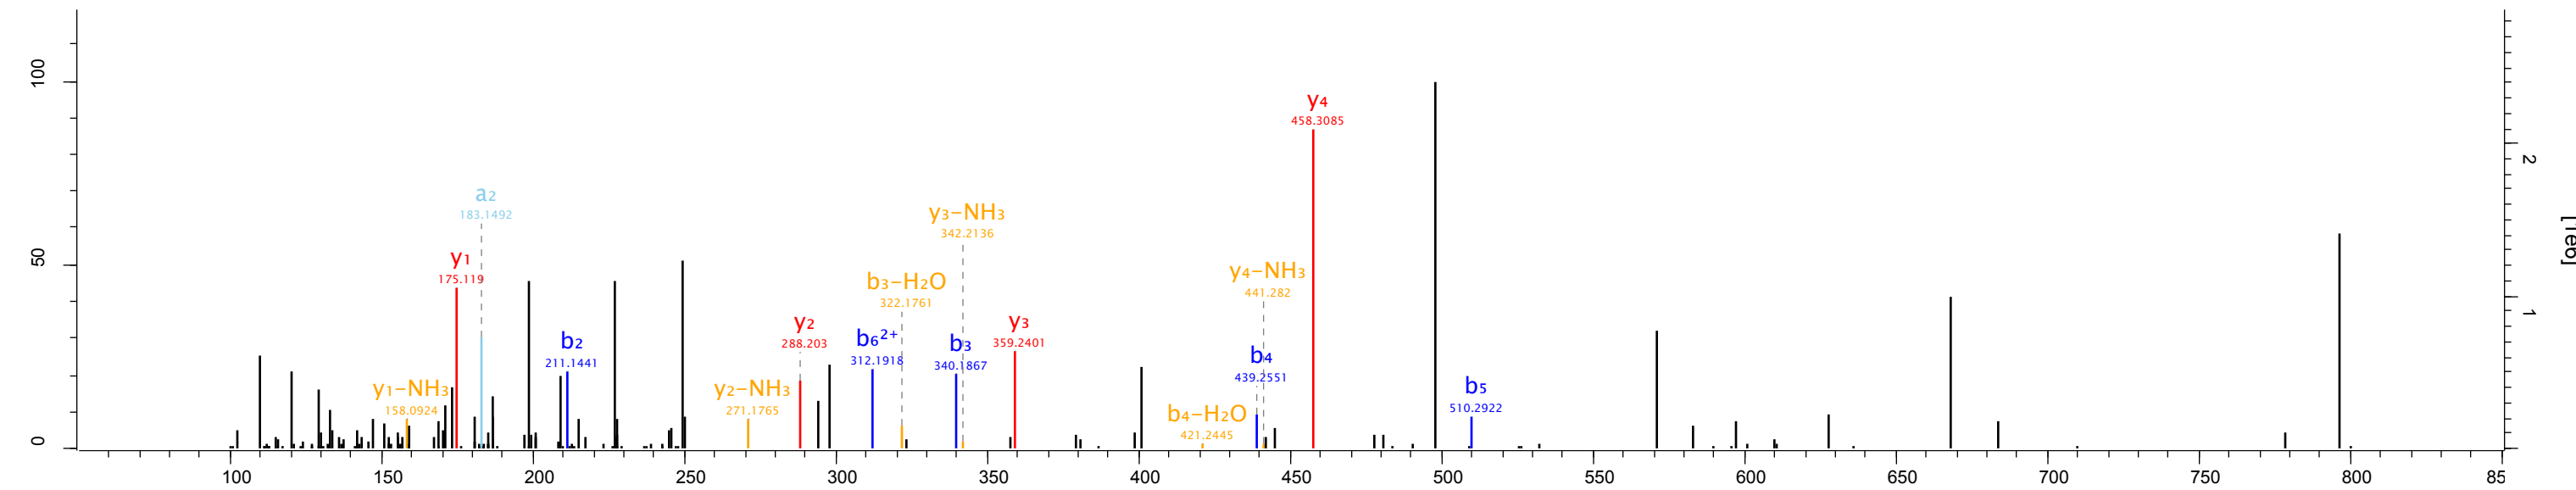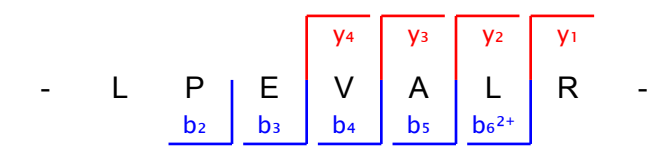

Raw file 20171215\_MaS\_33SR\_LMH\_proteome\_02 Scan 37838 Method FTMS; HCD Score 48.9 m/z 937.94 Gene names ROMO1

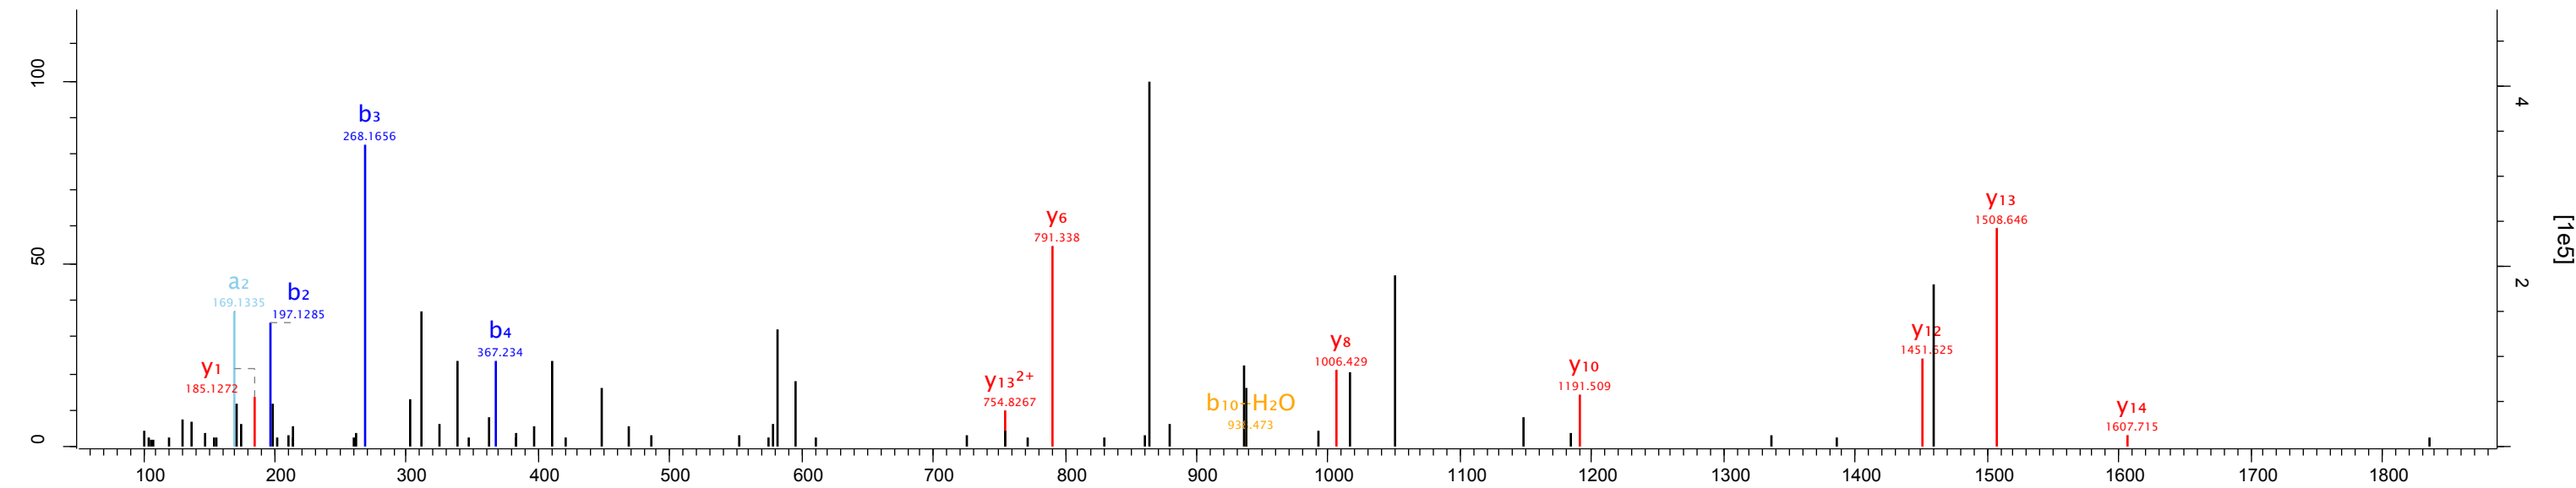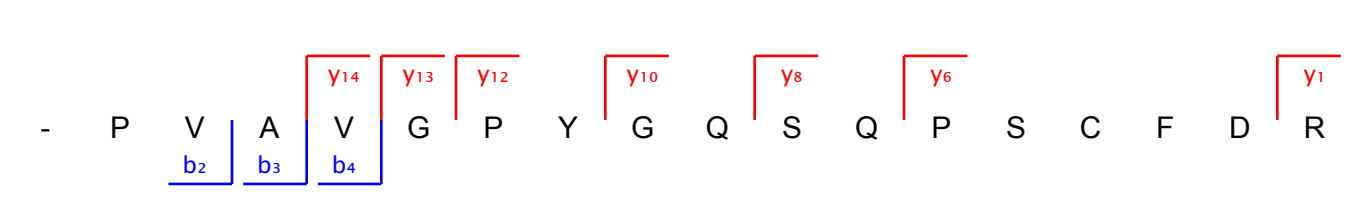

Raw file 20171215\_MaS\_33SR\_LMH\_proteome\_02 Scan 40328 Method FTMS; HCD Score 88.43 m/z 847.46 Gene names MRPL37

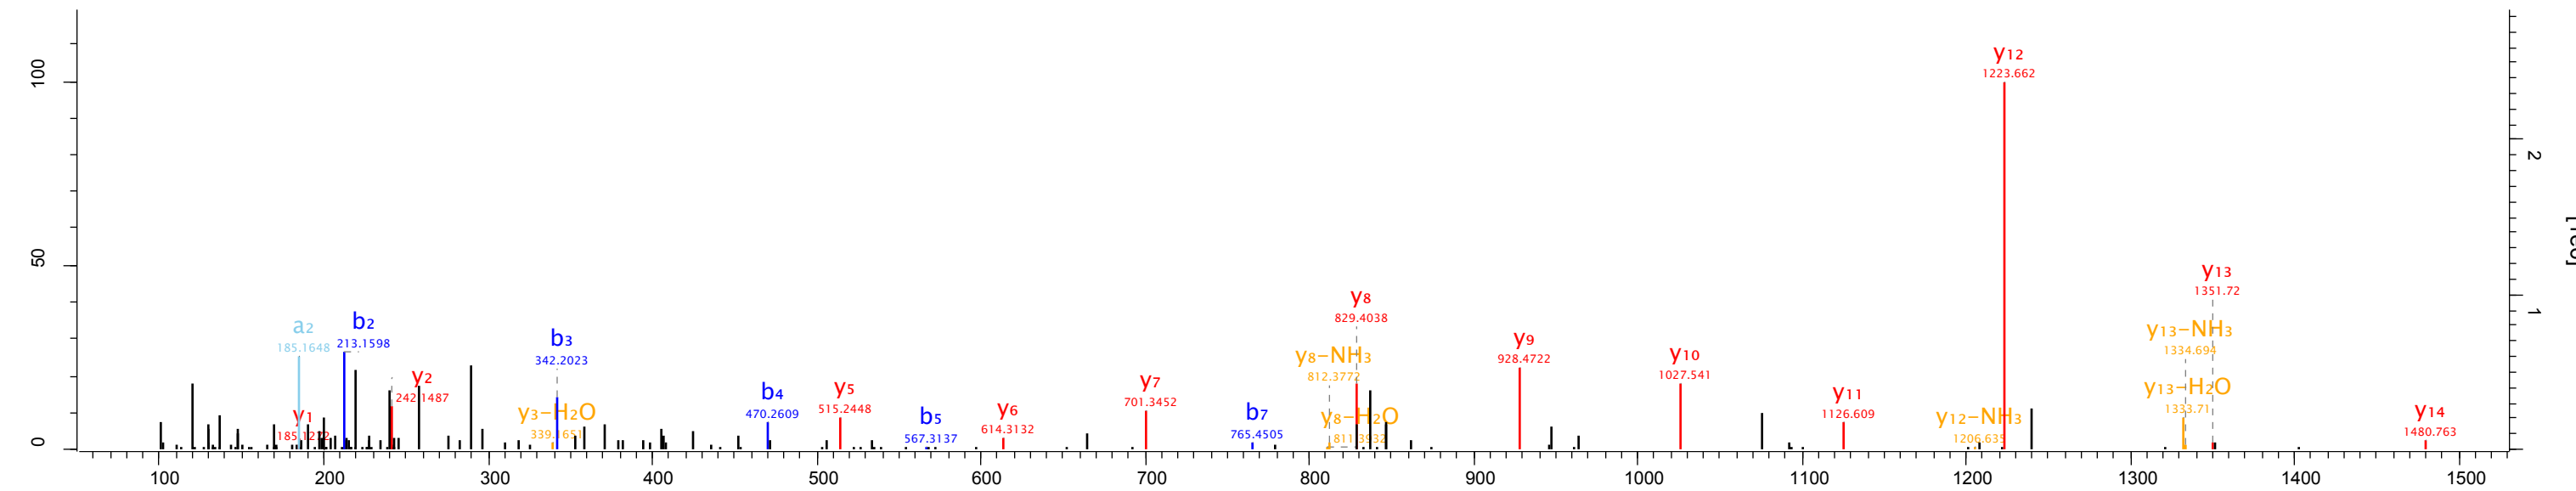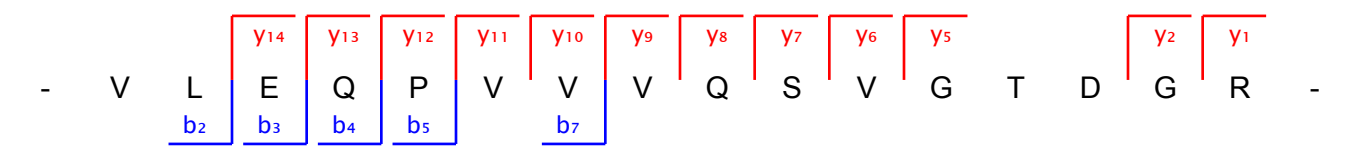

Raw file 20171215\_MaS\_33SR\_LMH\_proteome\_02 Scan 54948 Method FTMS; HCD Score 59.23 m/z 724.38 Gene names CHURC1-FNTB;CHURC1

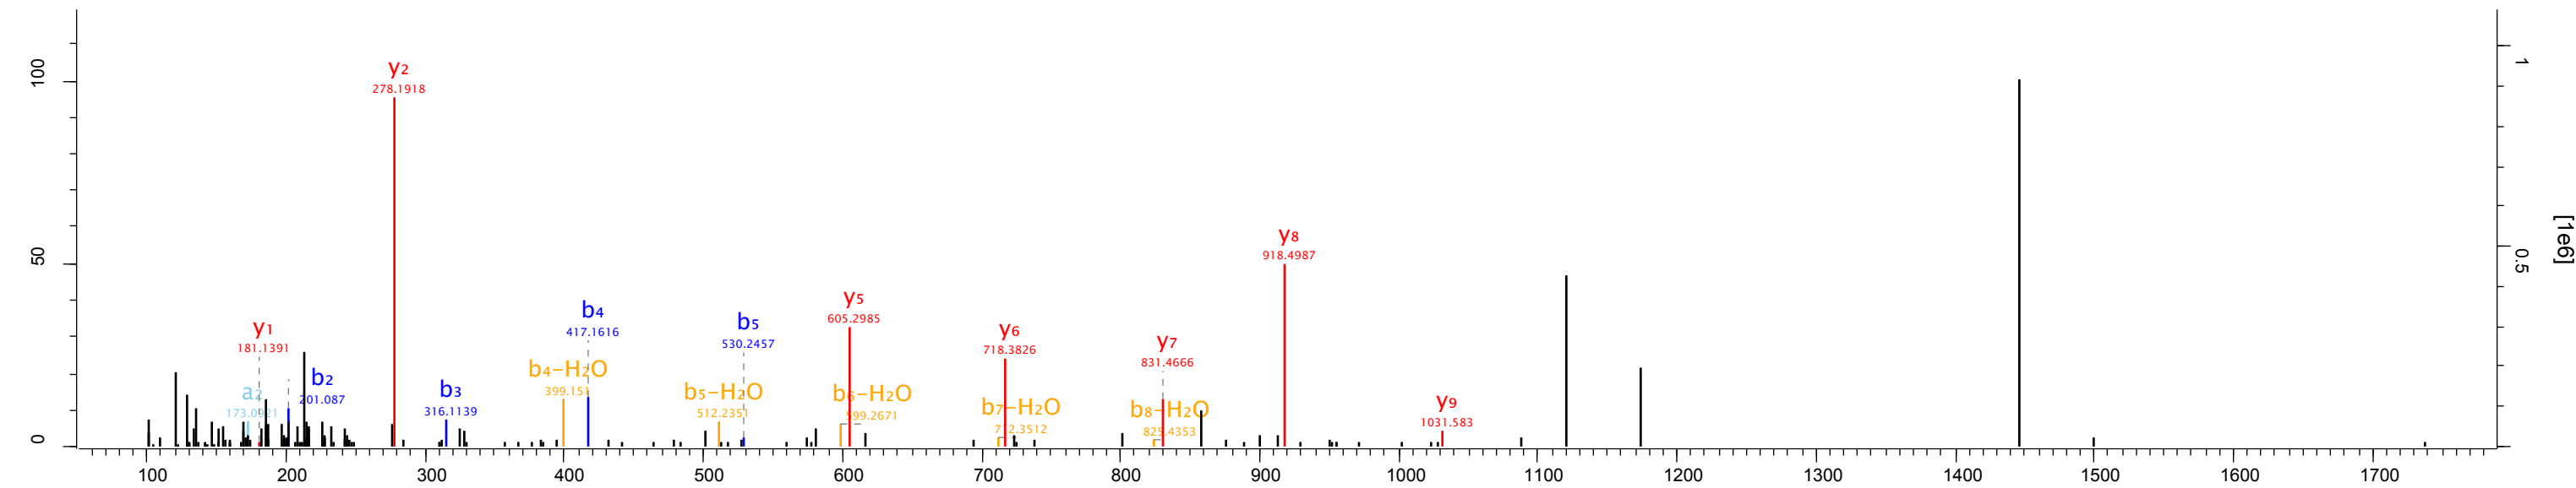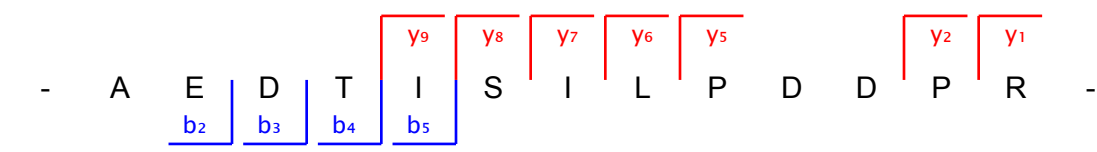

Raw file 20171215\_MaS\_33SR\_LMH\_proteome\_02 Scan 57168 Method FTMS; HCD Score 68.28 m/z 675.9 Gene names LOC102288414

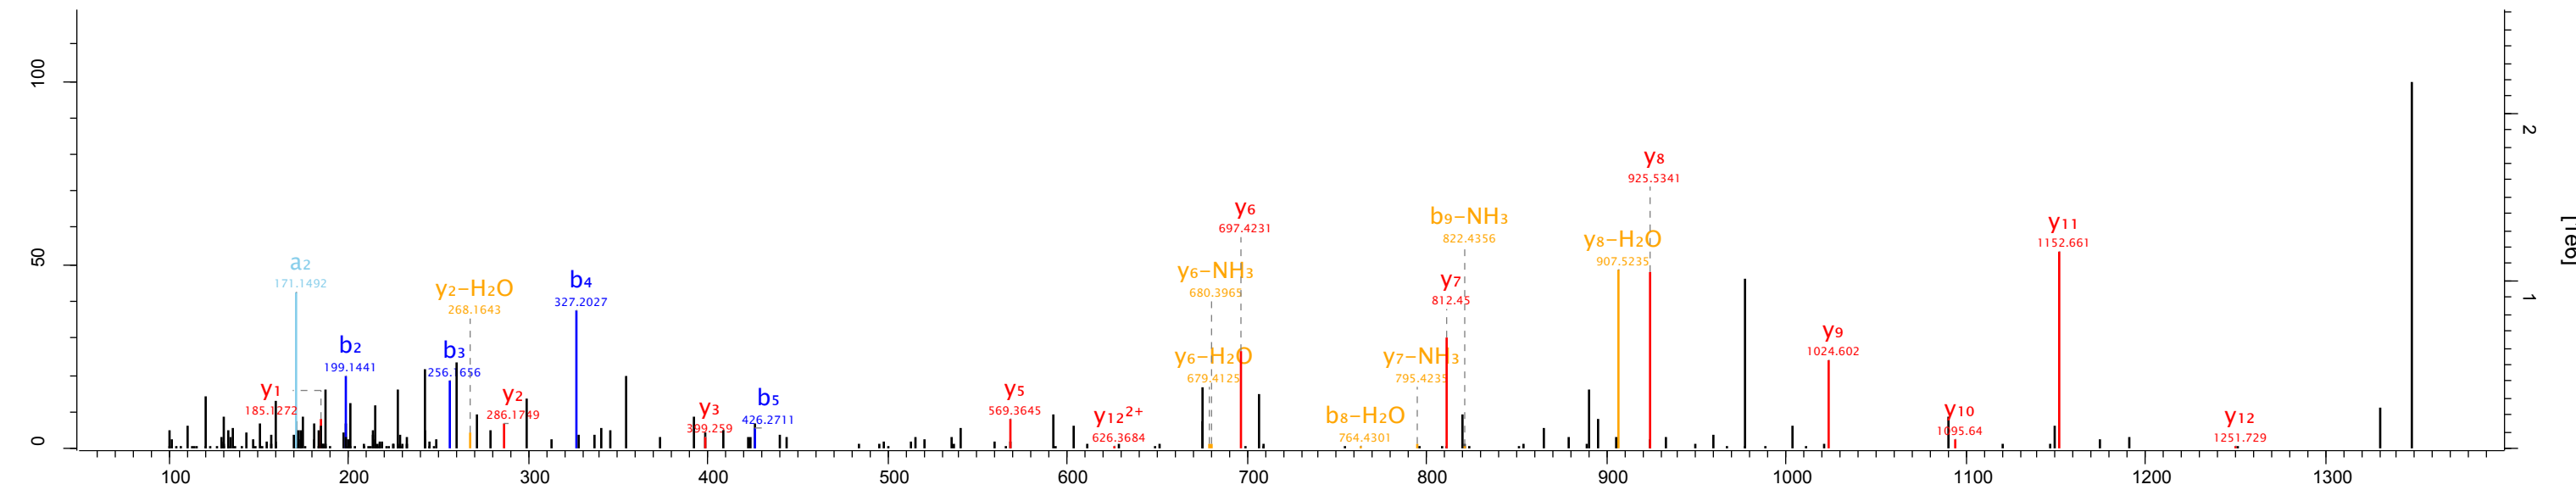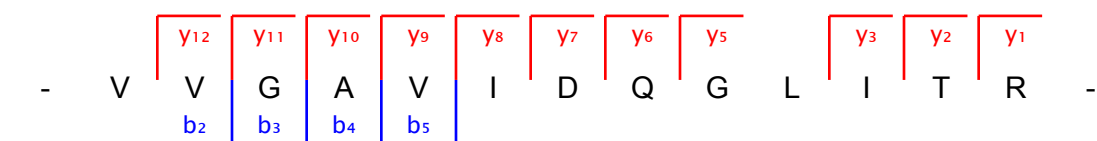

Raw file 20171215\_MaS\_33SR\_LMH\_proteome\_02 Scan 59008 Method FTMS; HCD Score 66.39 m/z 480.27 Gene names HLA-DPA1;HLA-DQA1

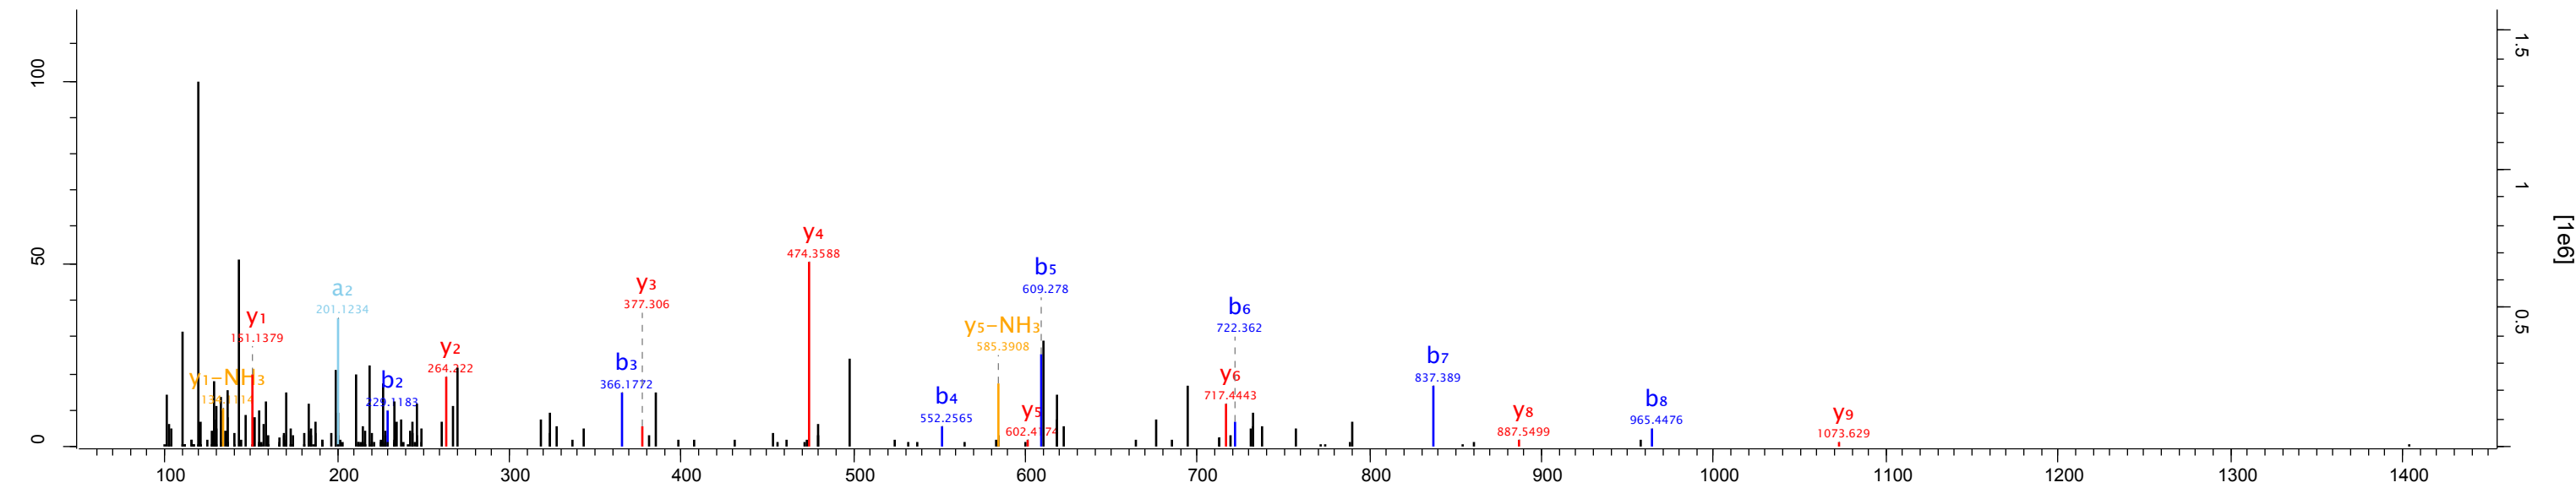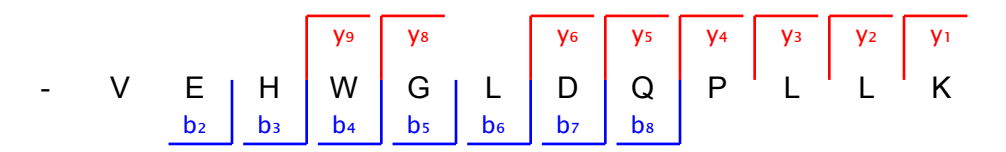

20171215\_MaS\_33SR\_LMH\_proteome\_02 64228 FTMS; HCD 80.59 865.99 DHODH

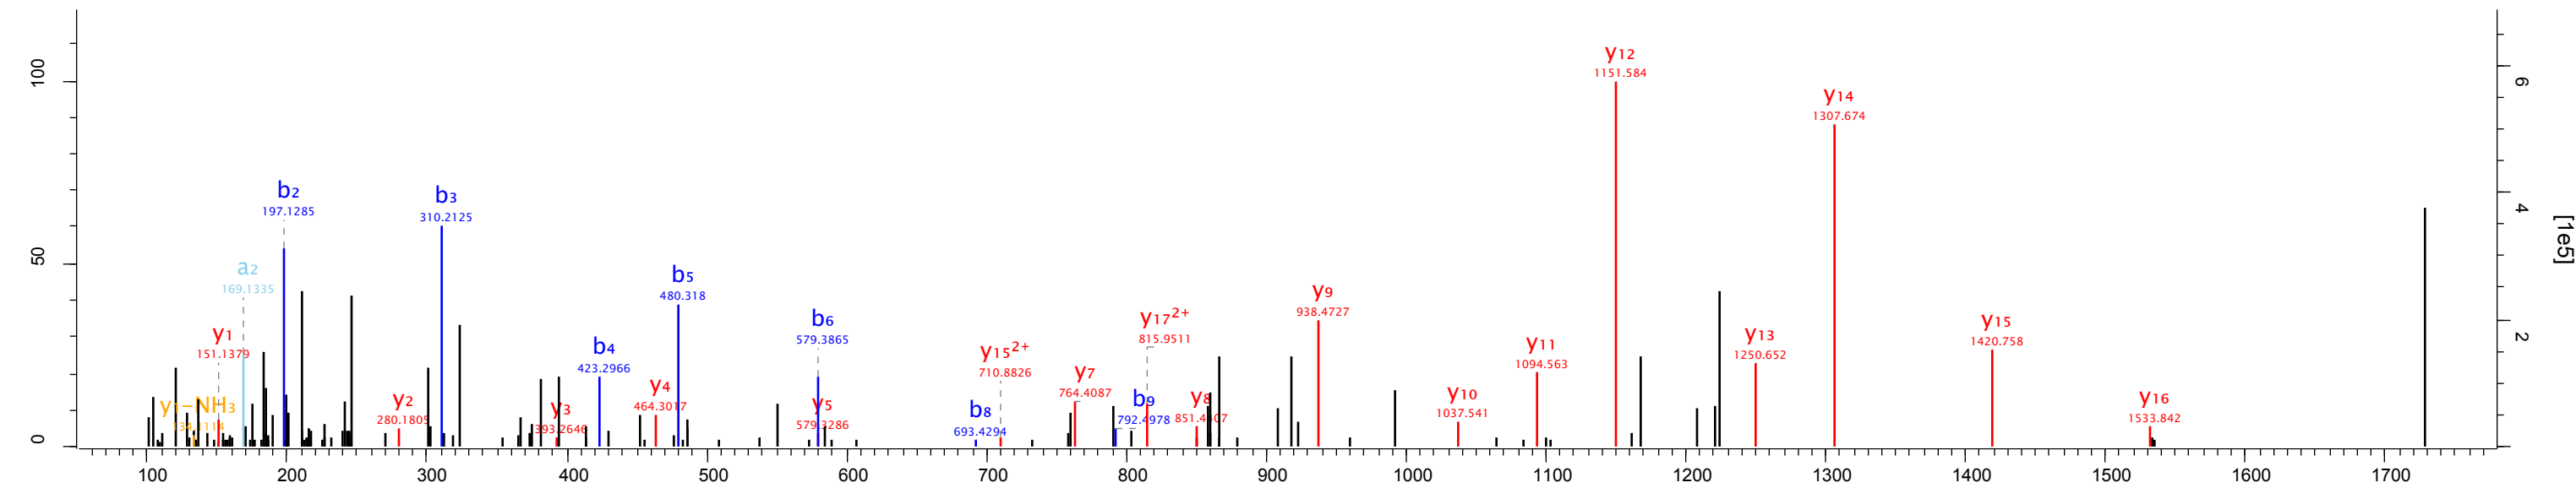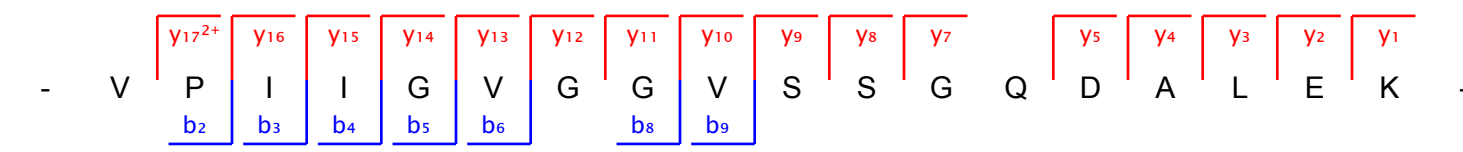



Raw file

20171215\_MaS\_33SR\_LMH\_proteome\_02

| Scan  | Method    | Score | m/z    | Gene names |
|-------|-----------|-------|--------|------------|
| 69428 | FTMS; HCD | 57.17 | 642.86 | NFYC       |

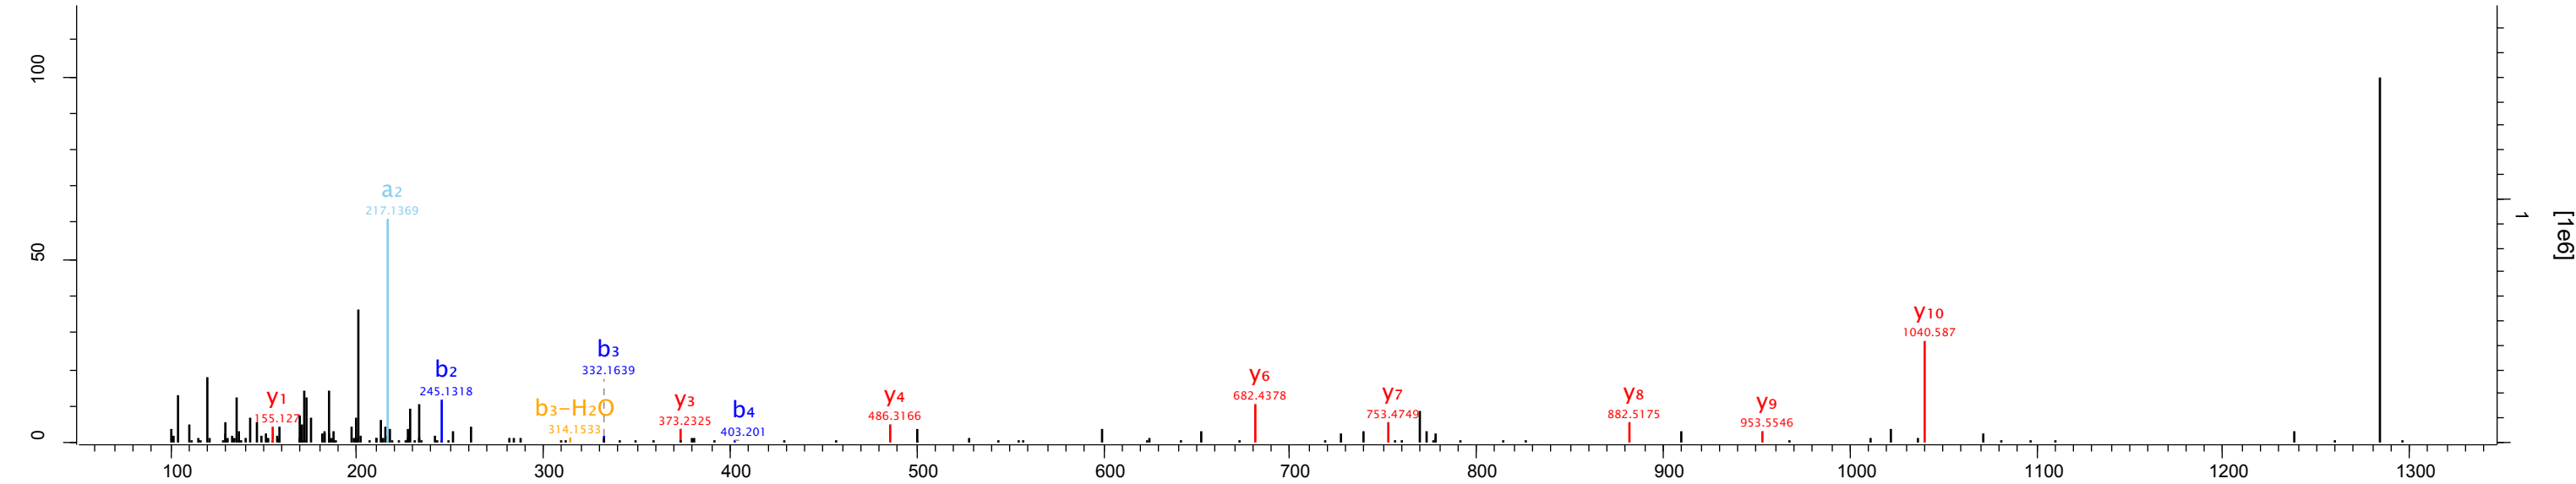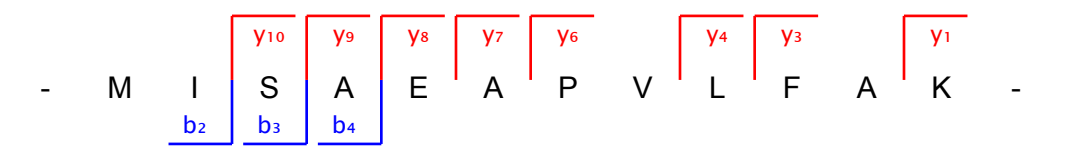

Raw file: 20171215\_MaS\_33SR\_LMH\_proteome\_02  
 Scan: 73208 Method: FTMS; HCD Score: 106.38 m/z: 866.41 Gene names: FKBP8

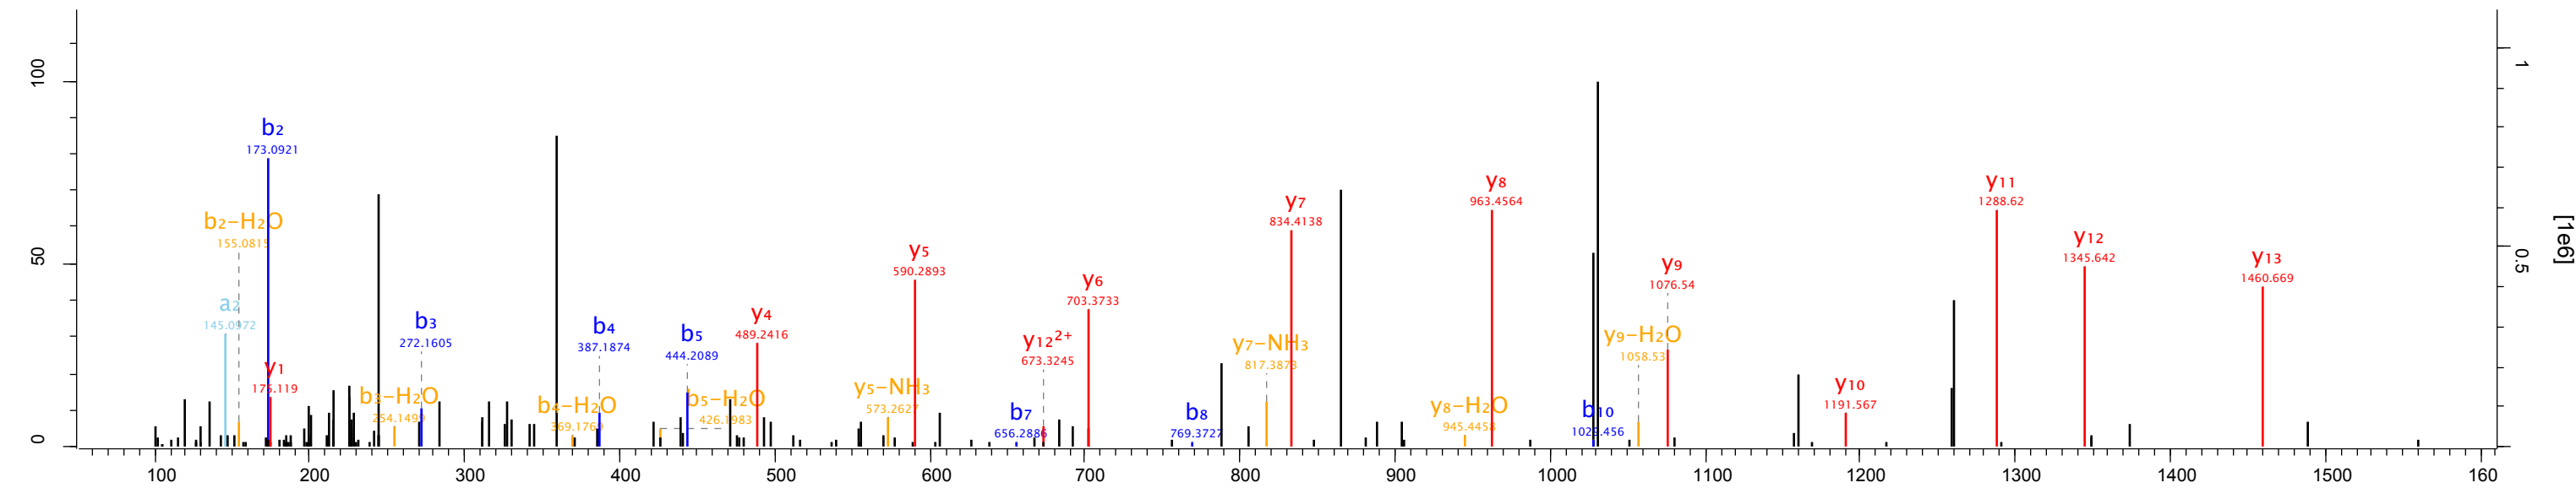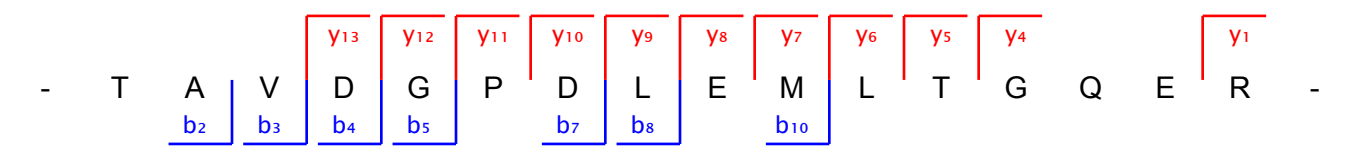

Raw file 20171215\_MaS\_33SR\_LMH\_proteome\_02 Scan 75388 Method FTMS; HCD Score 48.29 m/z 927.43 Gene names LSM12

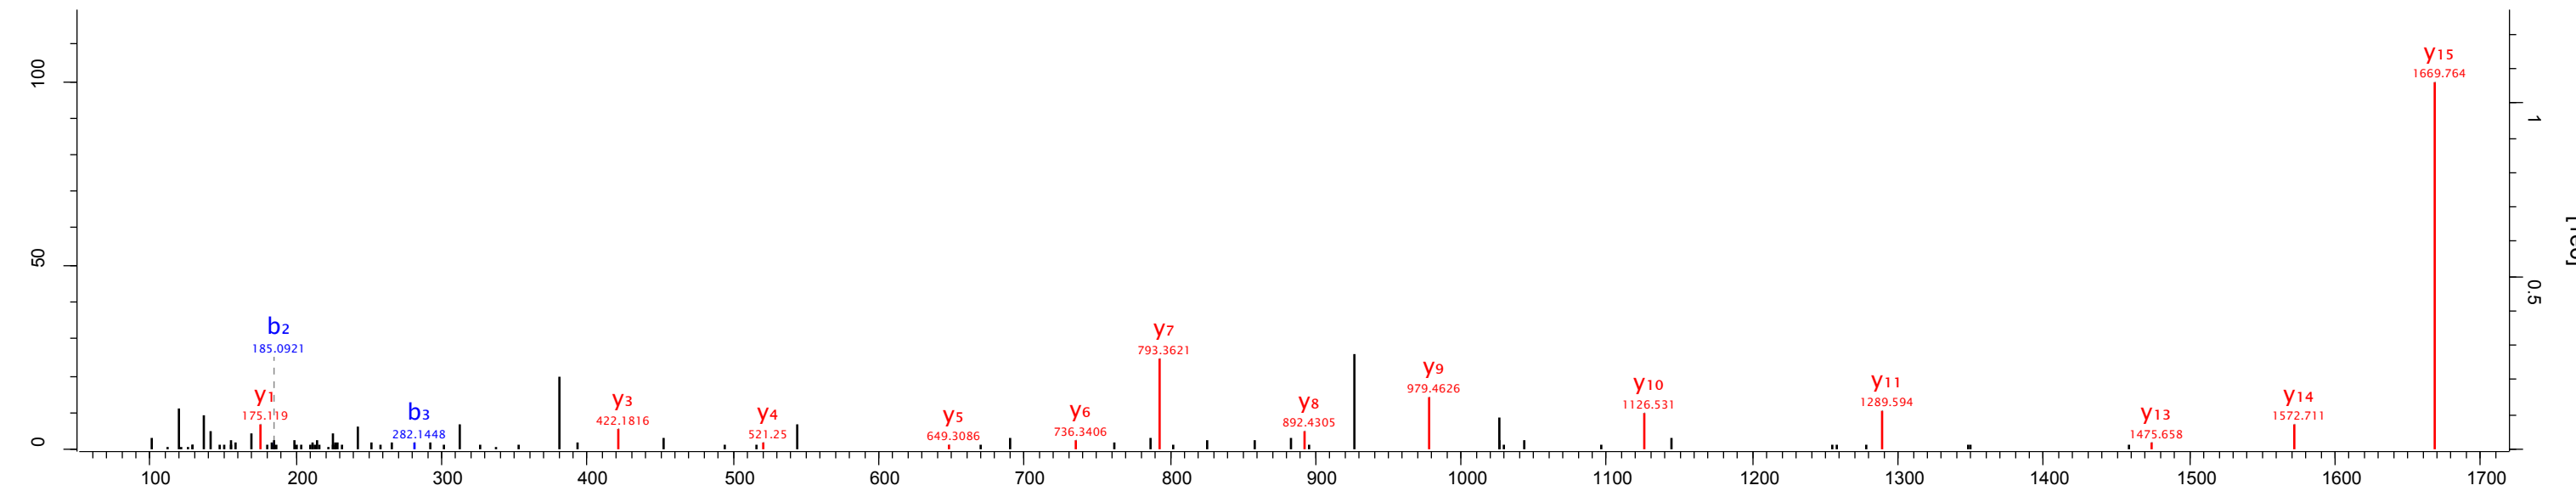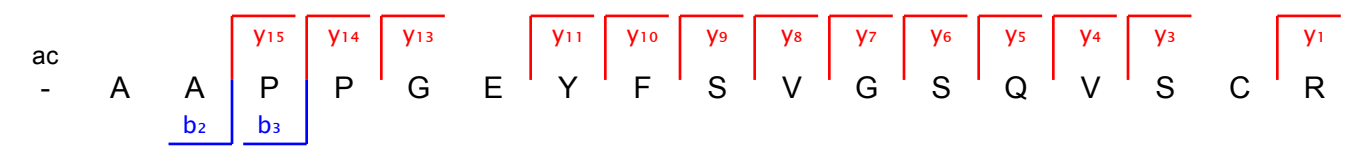

Raw file 20171215\_MaS\_33SR\_LMH\_proteome\_02 Scan 78298 Method FTMS; HCD Score 57.29 m/z 819.87 Gene names RBFOX1;RBFOX2

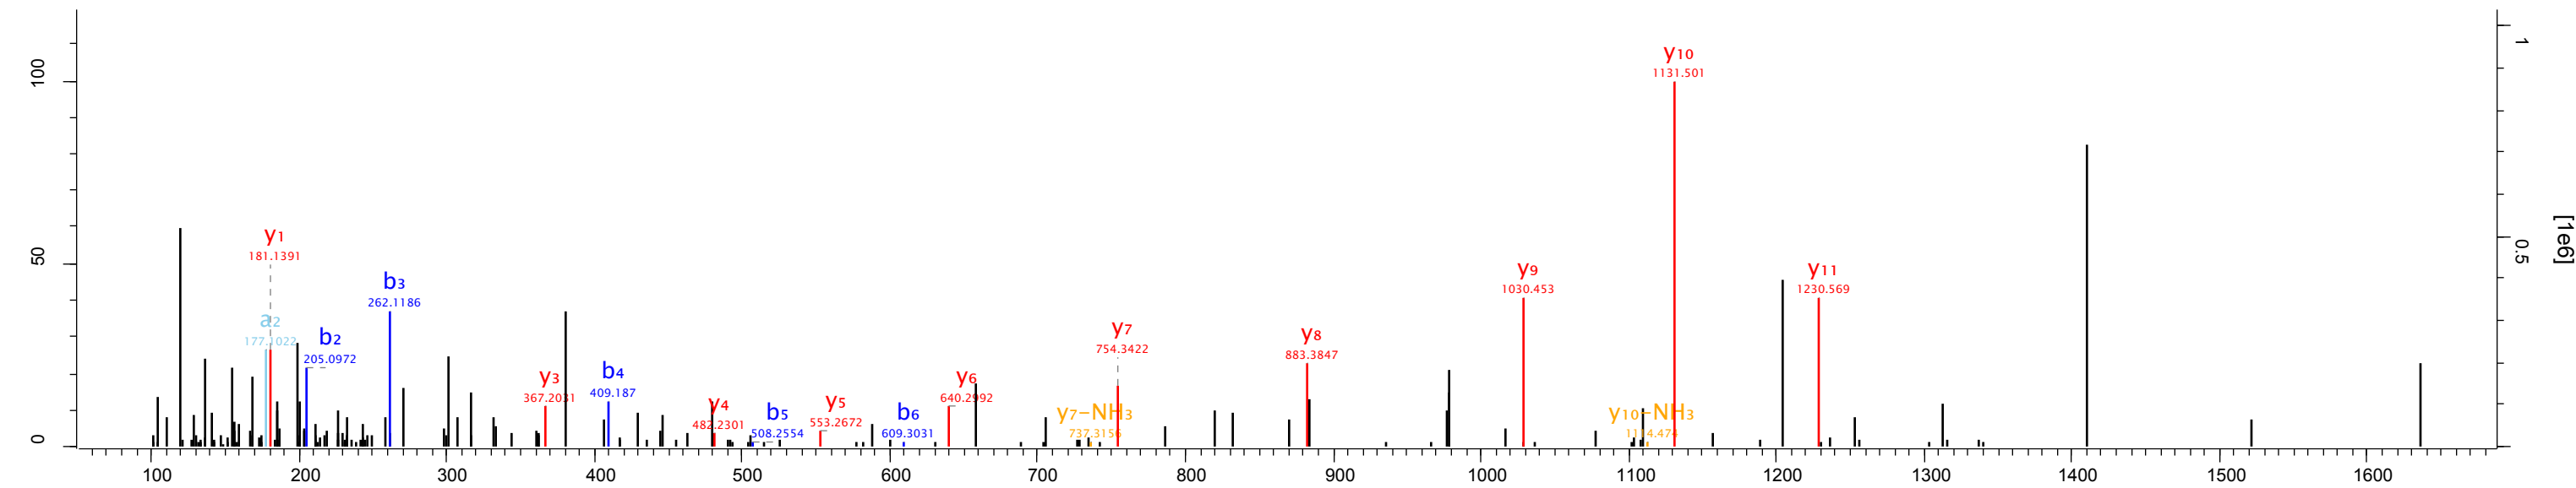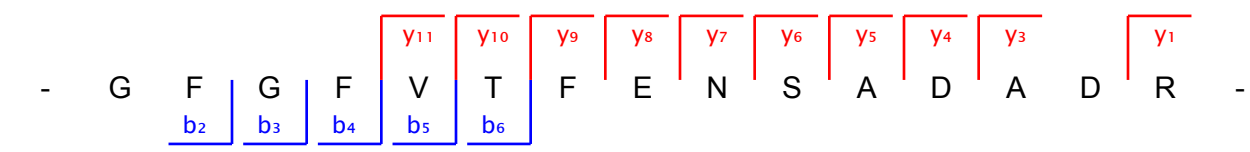

Raw file: 20171215\_MaS\_33SR\_LMH\_proteome\_02  
 Scan: 79708 Method: FTMS; HCD Score: 75.51 m/z: 433.57 Gene names: ATP6V0A1

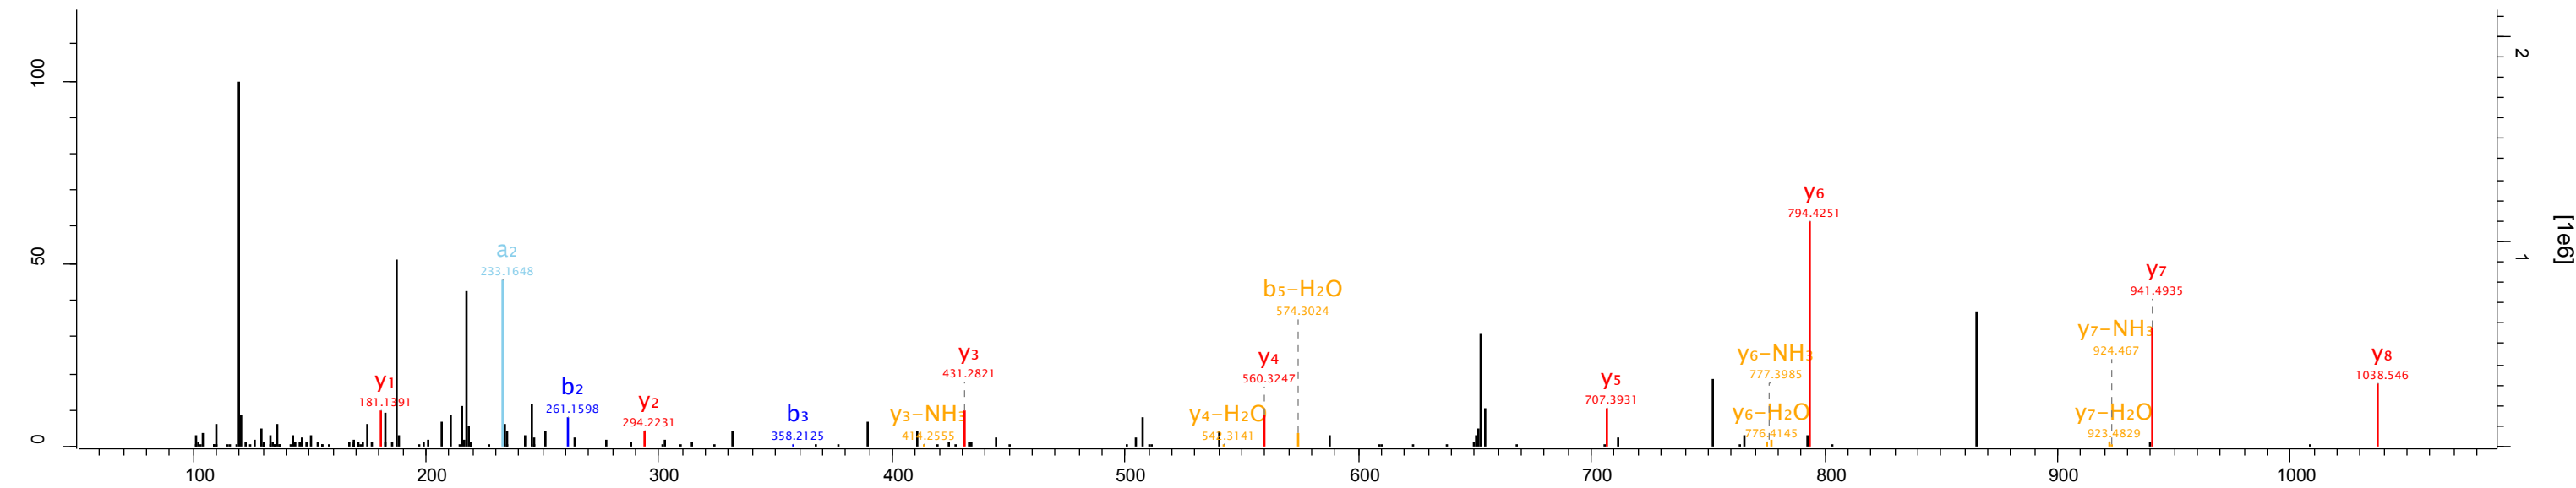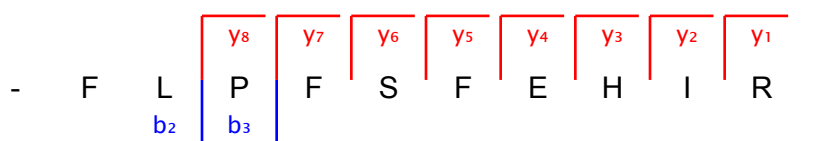

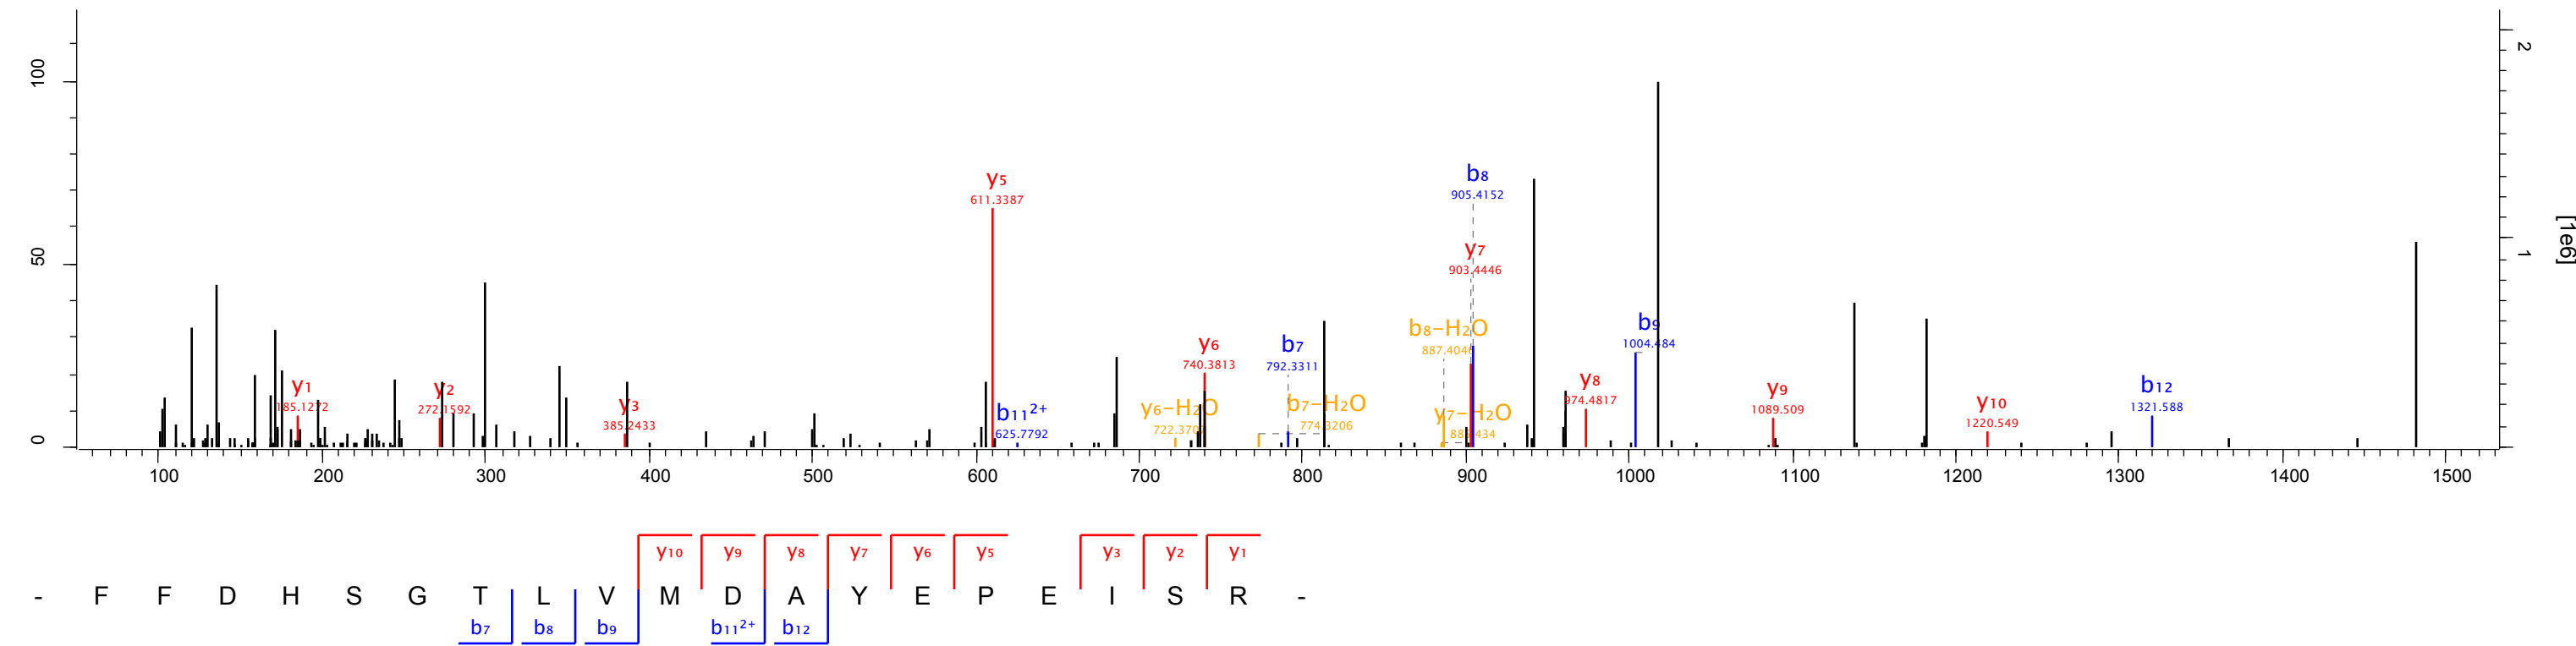

Raw file  
20171215\_MaS\_33SR\_LMH\_proteome\_02

Scan Method Score m/z Gene names  
84678 FTMS; HCD 56.35 695.06 CAMK4

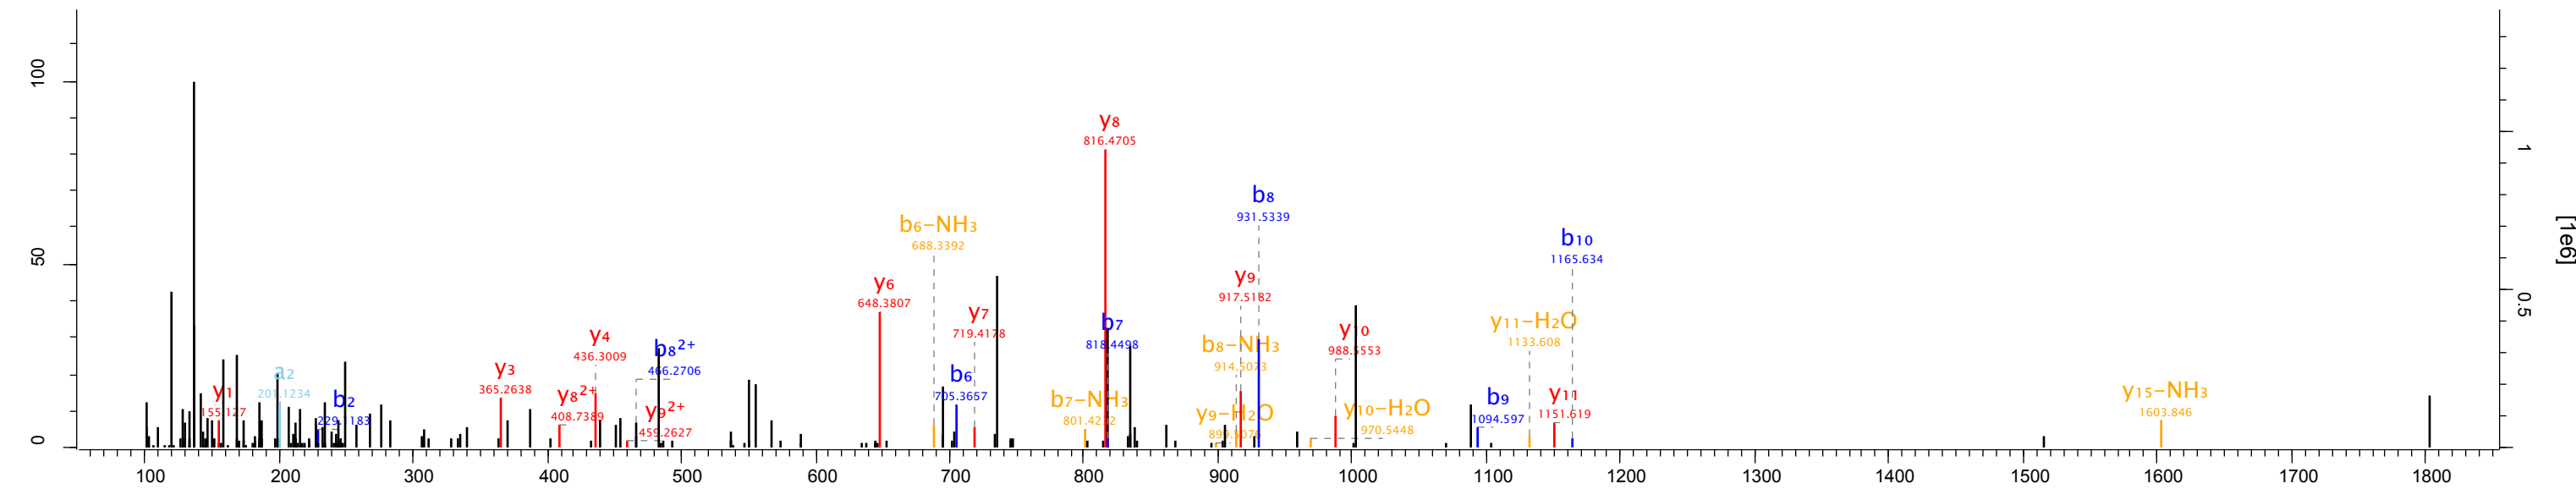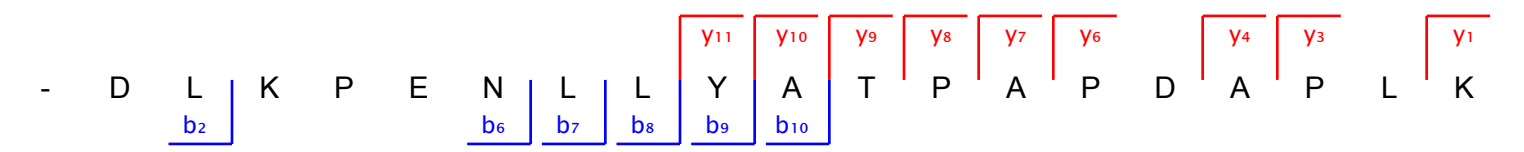

Raw file 20171215\_MaS\_33SR\_LMH\_proteome\_02 Scan 88148 Method FTMS; HCD Score 66.99 m/z 762.4 Gene names NPC1

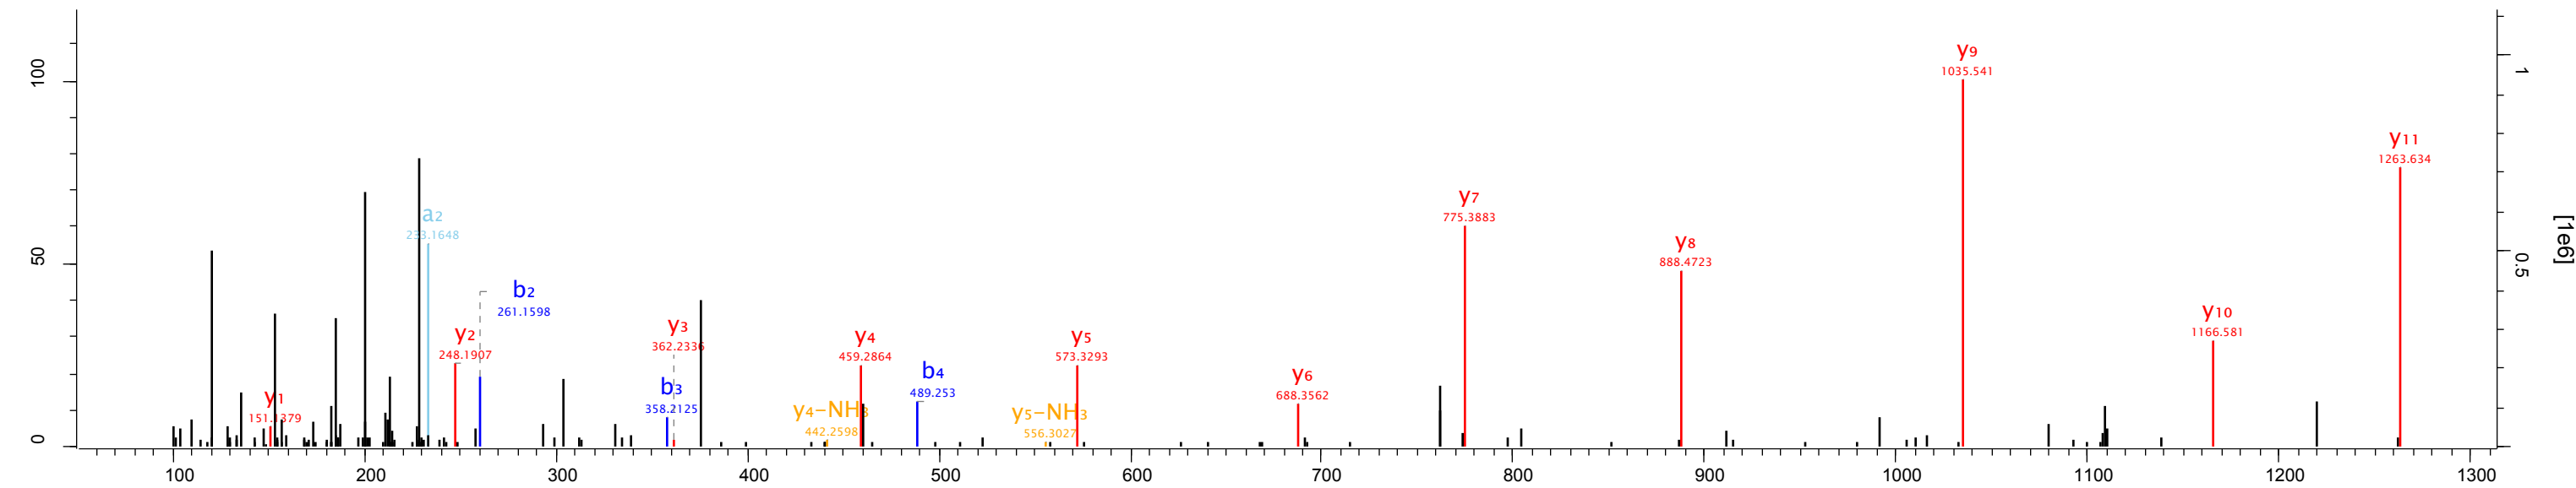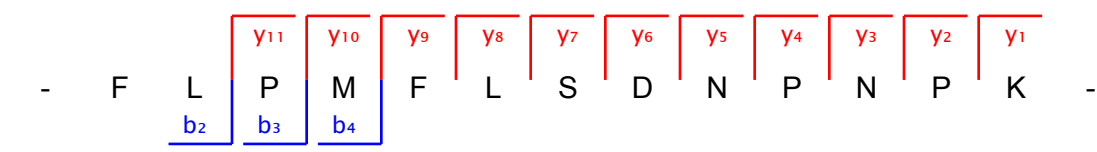



Raw file 20171215\_MaS\_33SR\_LMH\_proteome\_02 Scan 92788 Method FTMS; HCD Score 133.12 m/z 498.79

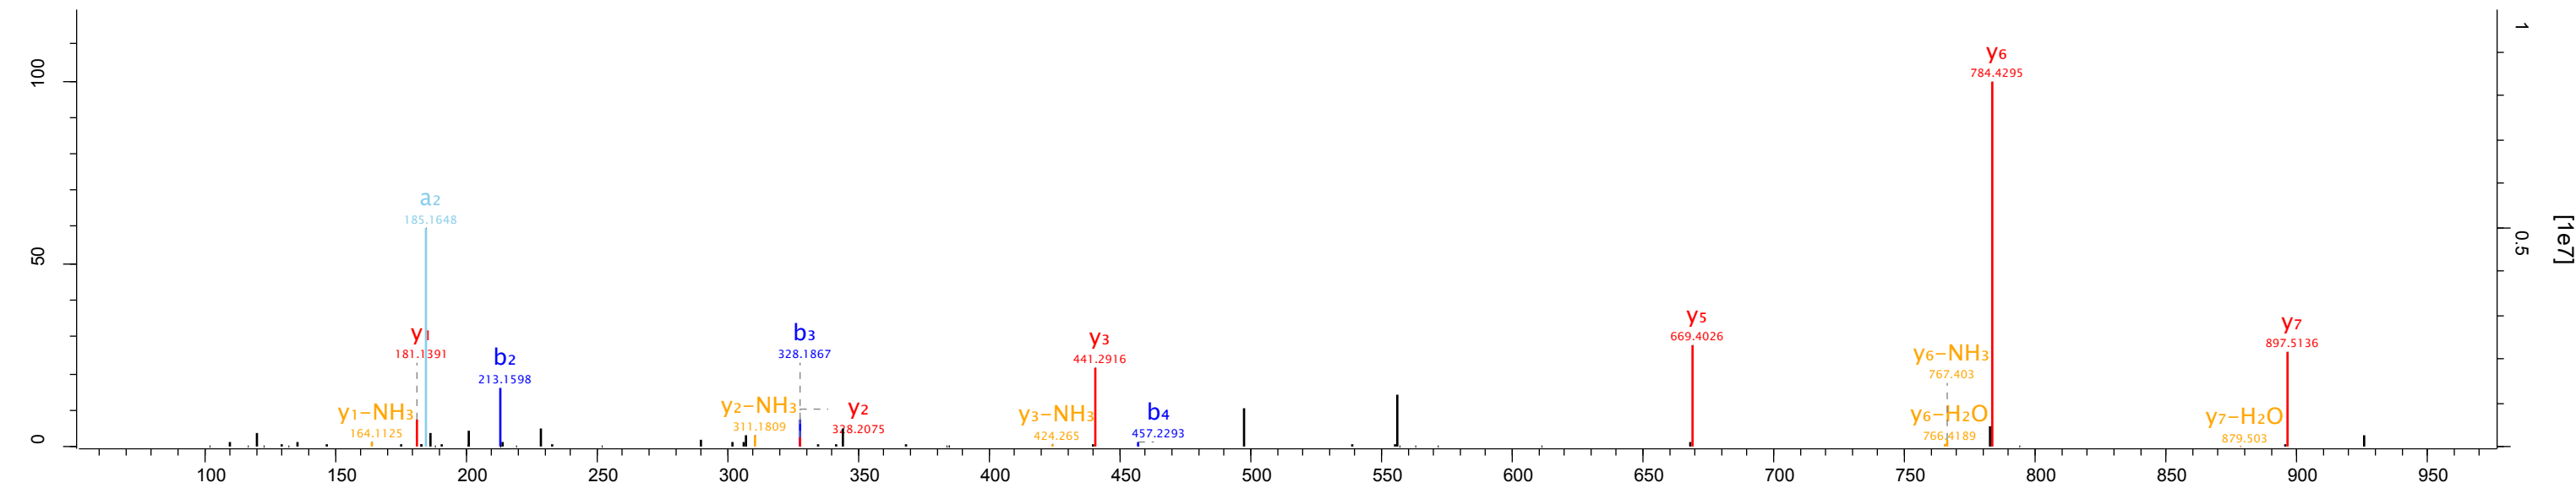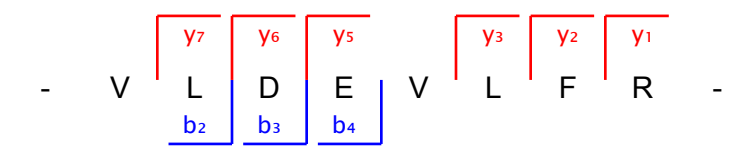

Raw file 20171215\_MaS\_33SR\_LMH\_proteome\_02 Scan 96078 Method FTMS; HCD Score 55.69 m/z 1126.08 Gene names PTBP2

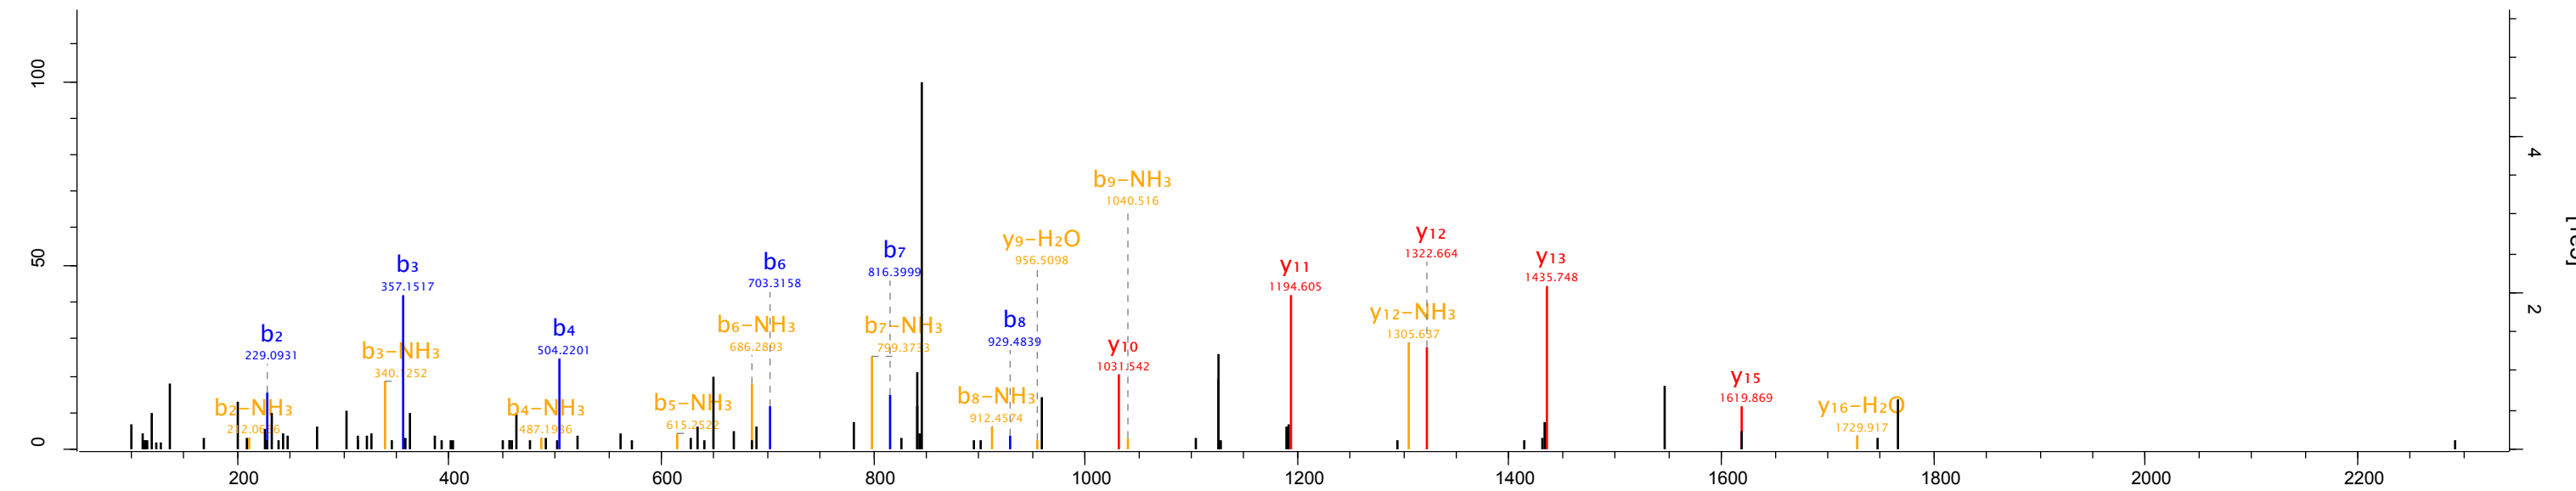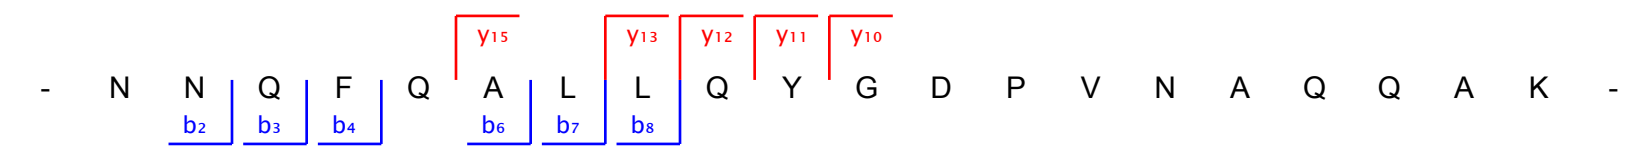

Raw file 20171215\_MaS\_33SR\_LMH\_phospho\_01 Scan 8609 Method FTMS; HCD Score 60.03 m/z 1186.46 Gene names TLK2

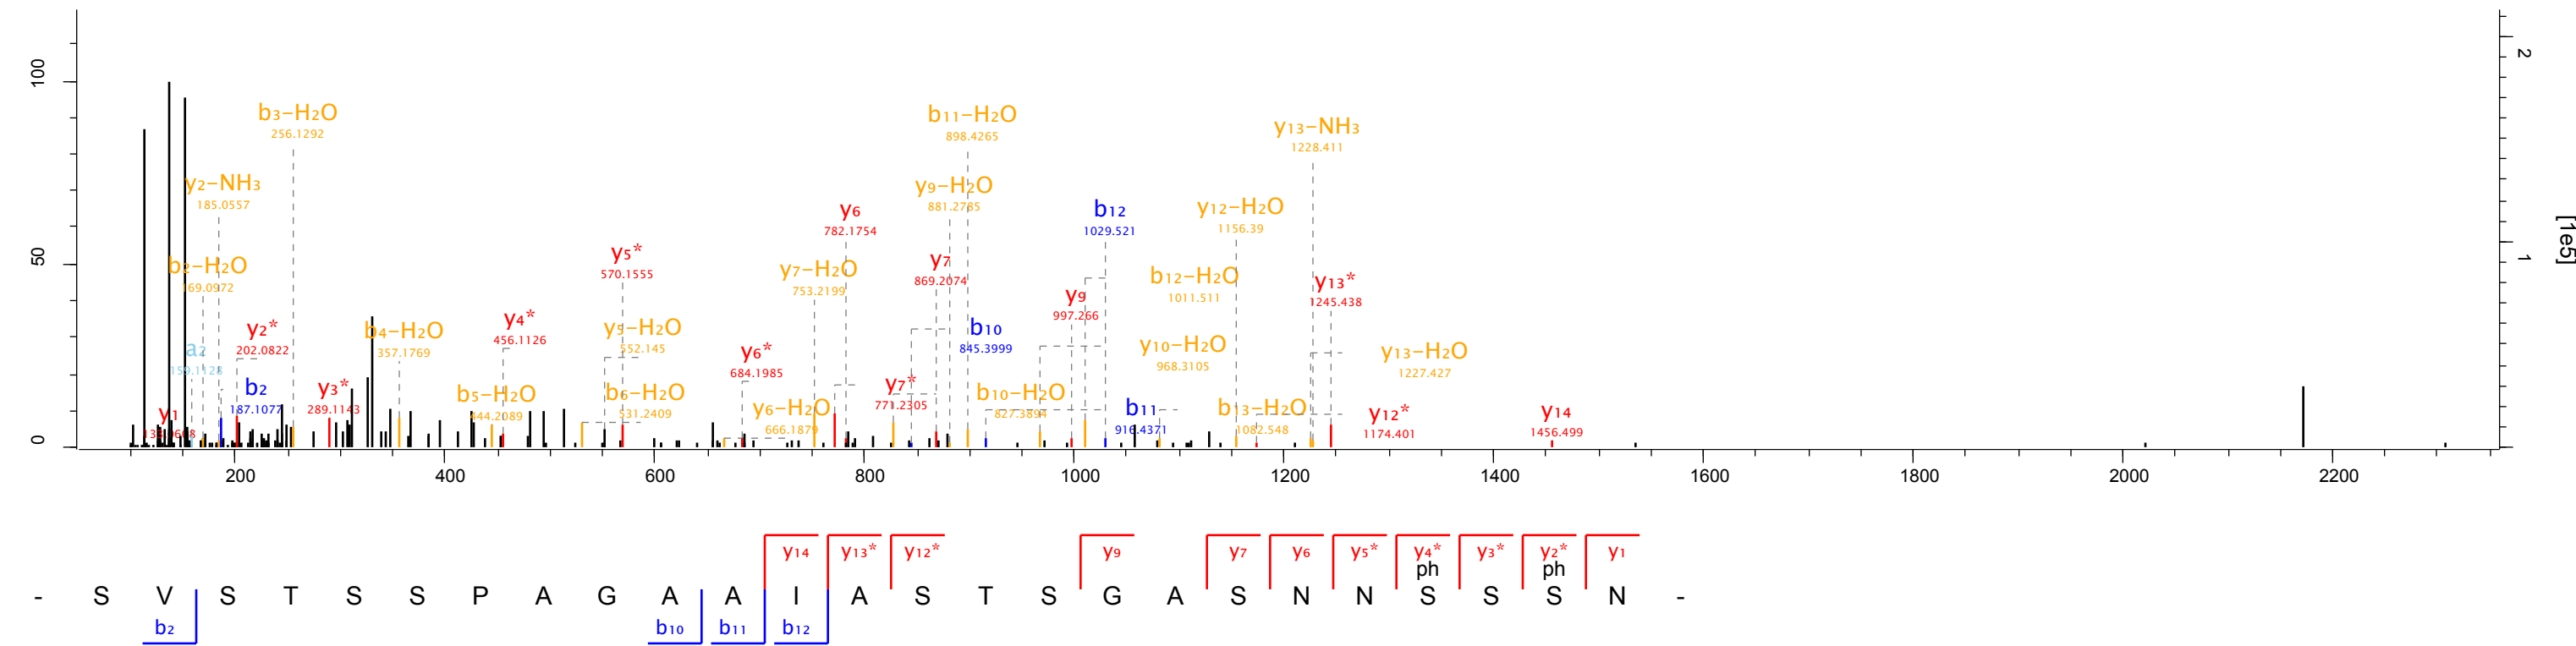

Raw file 20171215\_MaS\_33SR\_LMH\_phospho\_02 Scan 2459 Method FTMS; HCD Score 56.55 m/z 516.23

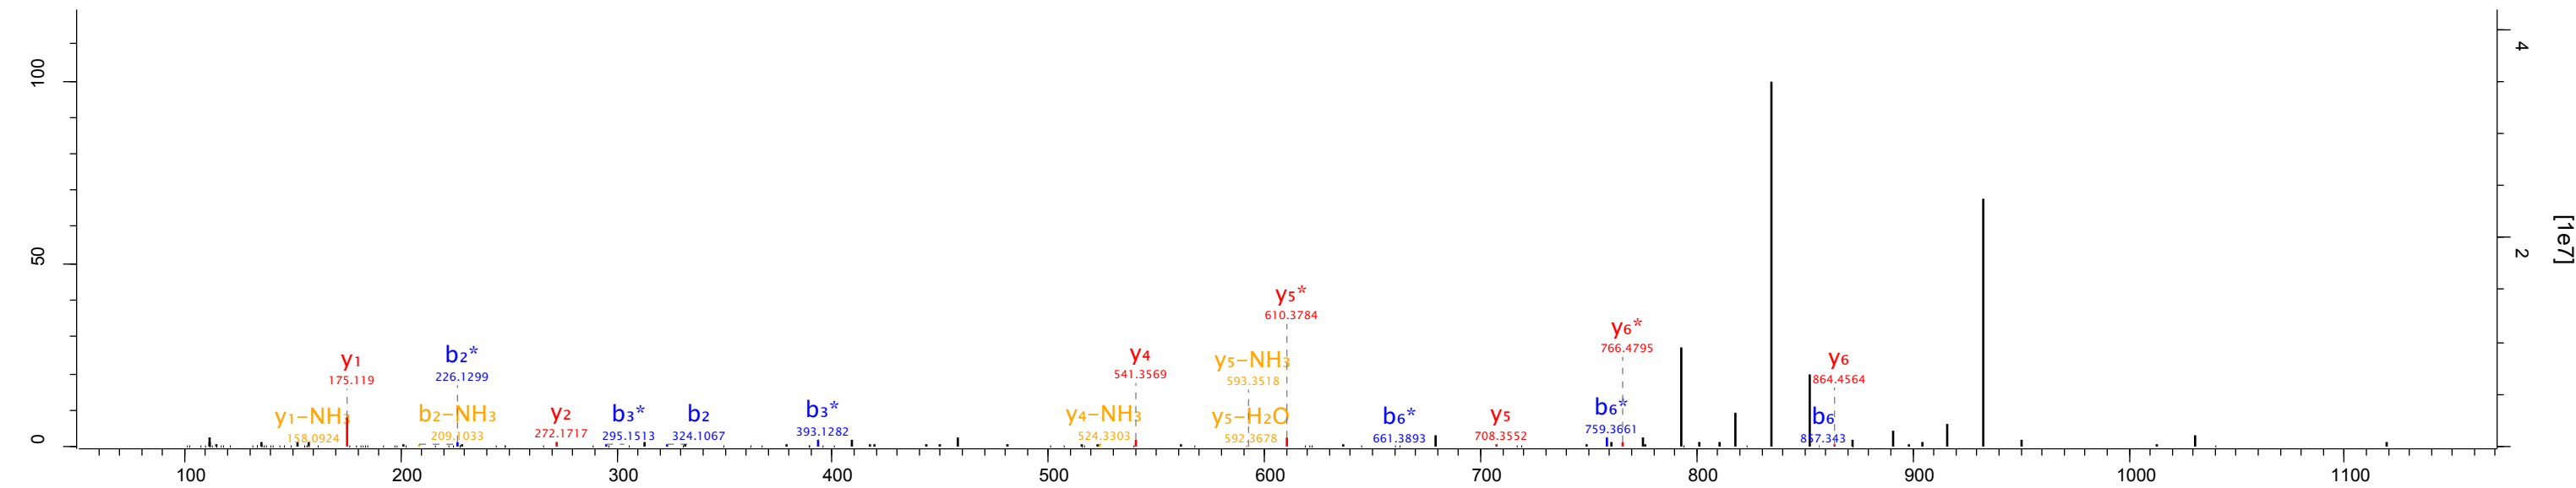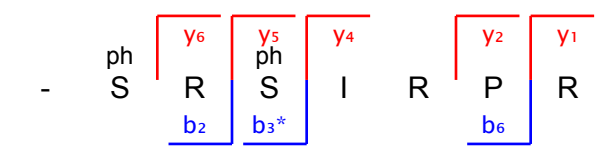

Raw file 20171215\_MaS\_33SR\_LMH\_phospho\_02 Scan 3979 Method FTMS; HCD Score 61.34 m/z 495.22 Gene names KIF15

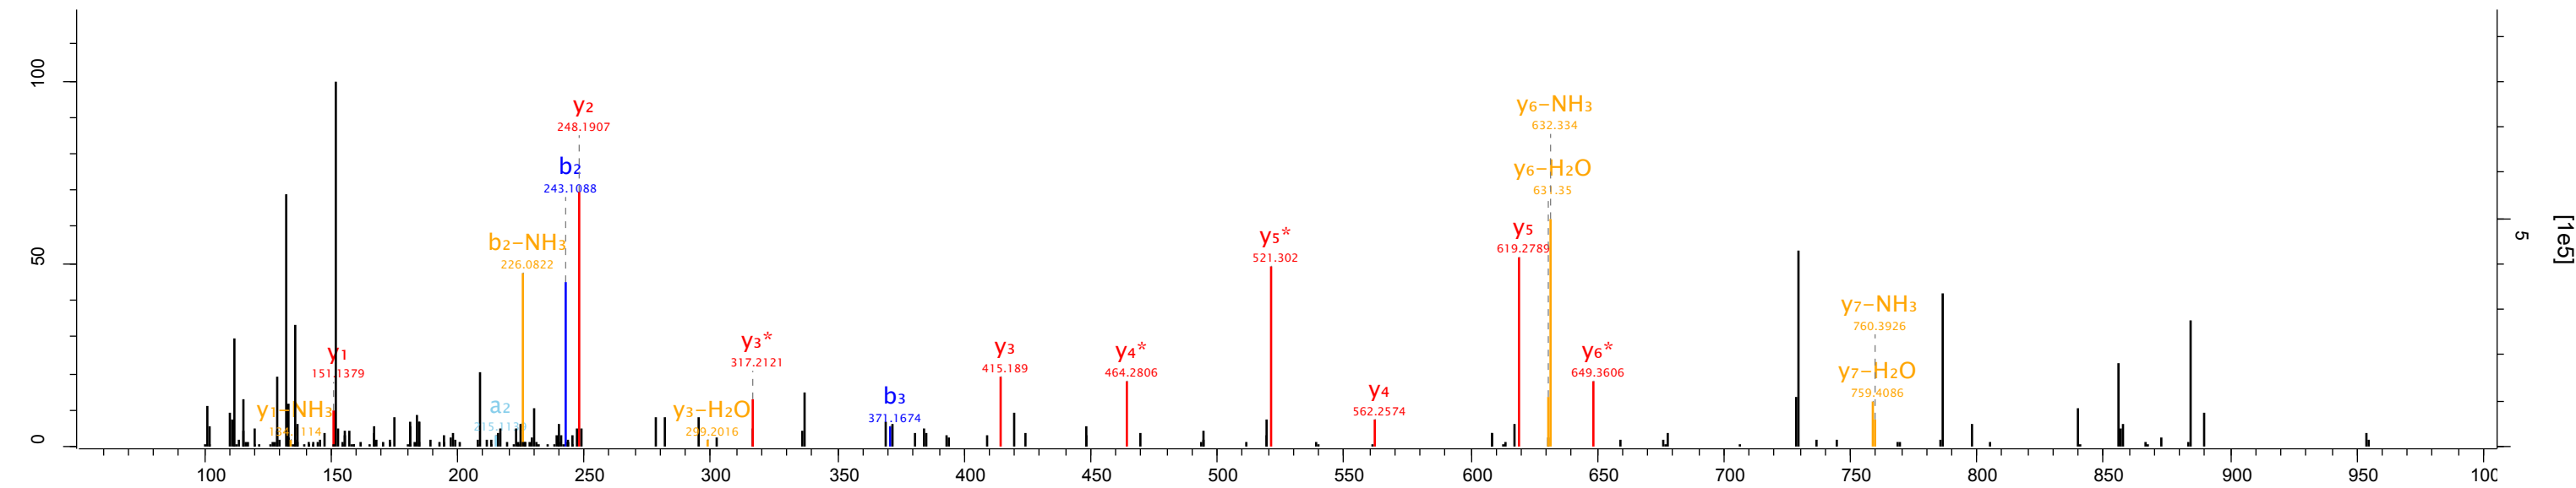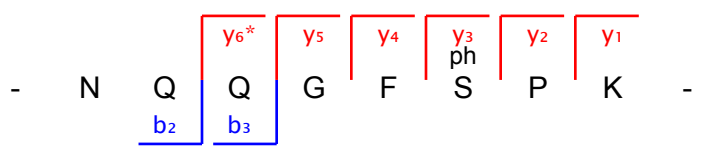

Raw file 20171215\_MaS\_33SR\_LMH\_phospho\_02 Scan 4259 Method FTMS; HCD Score 61.16 m/z 629.82 Gene names FAM83G

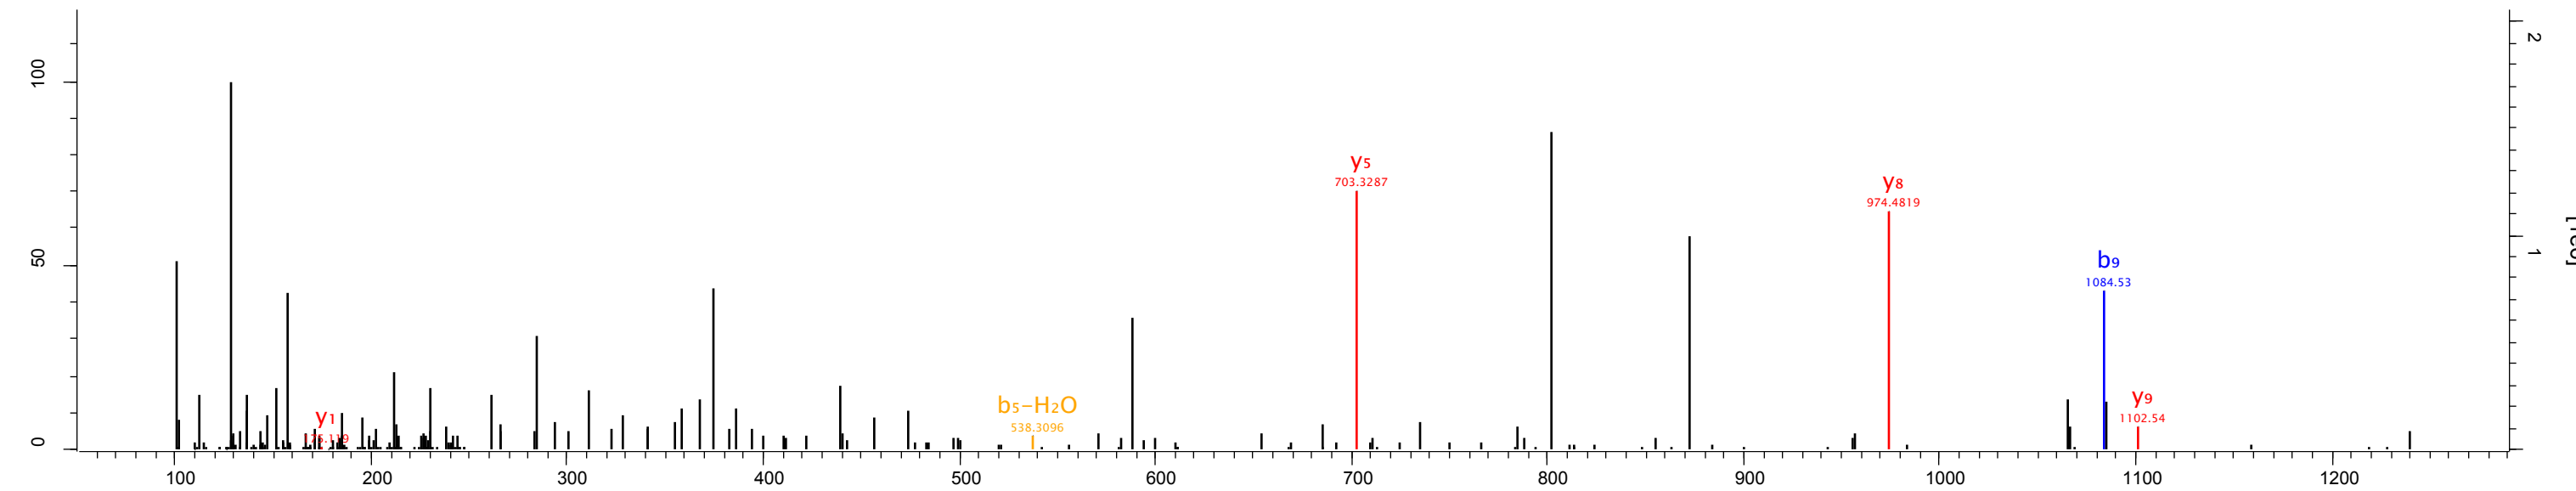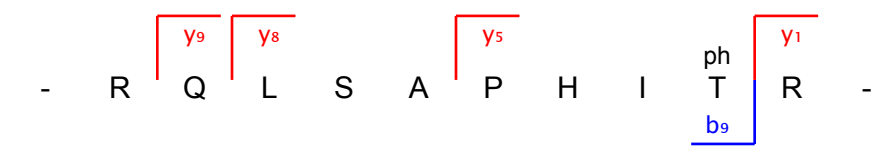

Raw file: 20171215\_MaS\_33SR\_LMH\_phospho\_03  
 Scan: 11089 Method: FTMS; HCD Score: 95.44 m/z: 861.38 Gene names: SETD1A

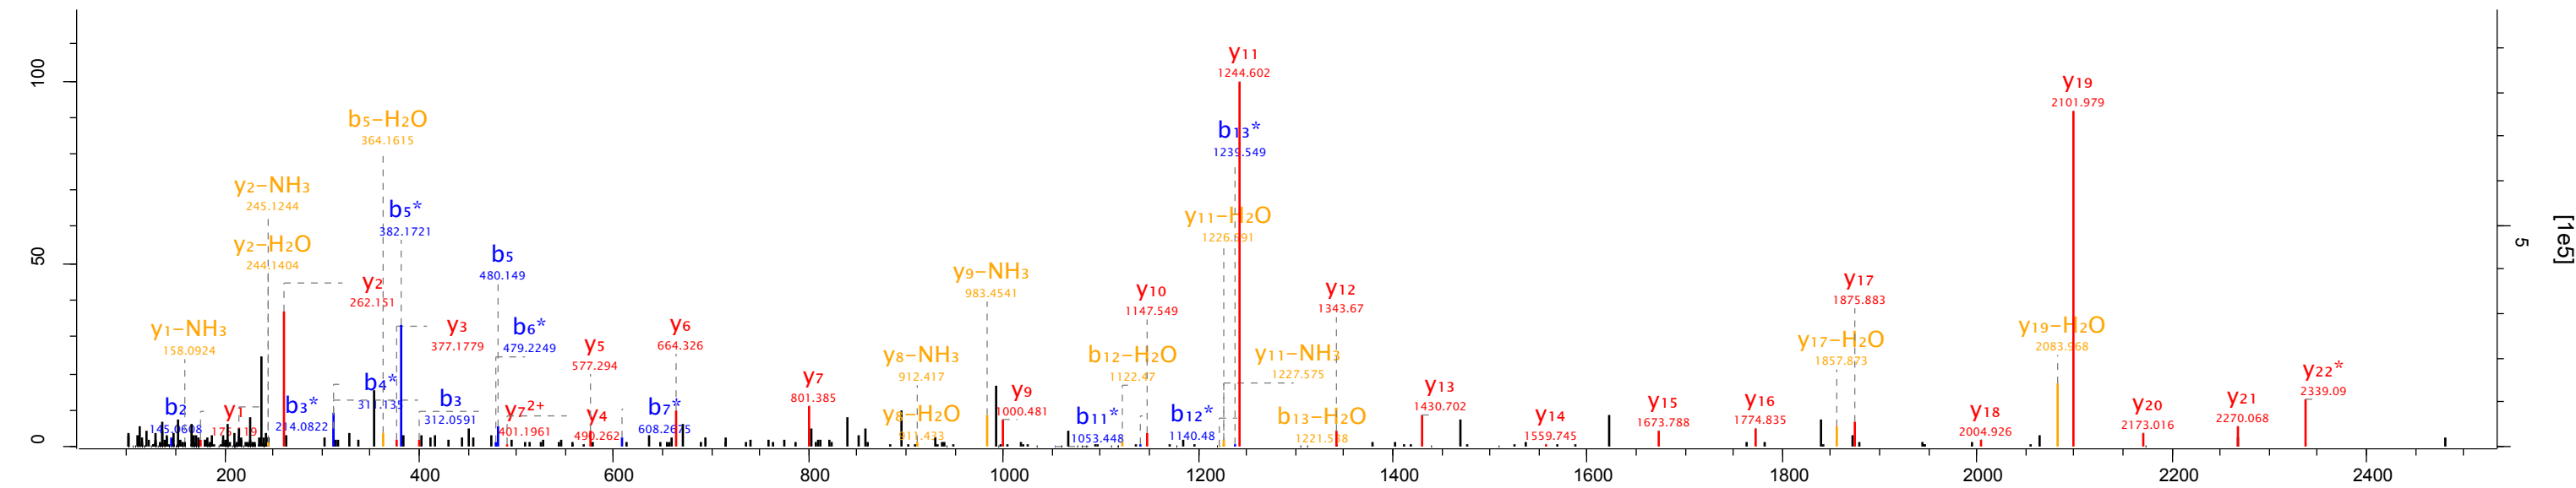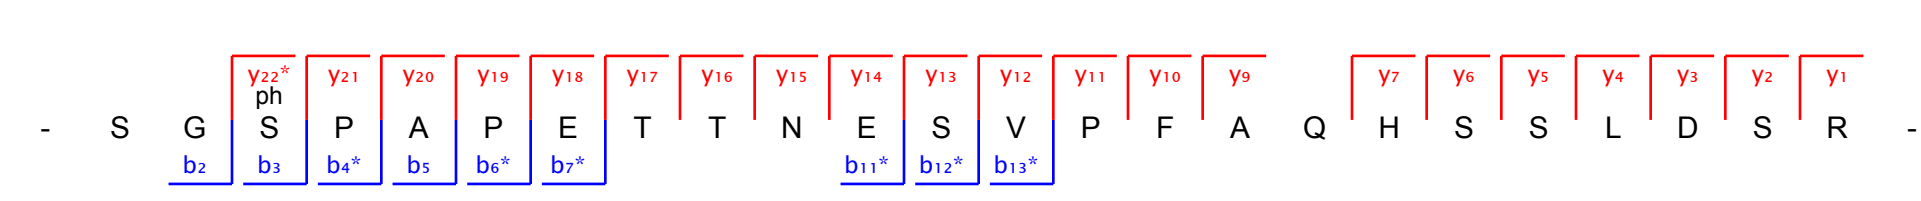

Raw file 20171215\_MaS\_33SR\_LMH\_phospho\_03 Scan 12209 Method FTMS; HCD Score 103.2 m/z 674.23 Gene names CLUAP1

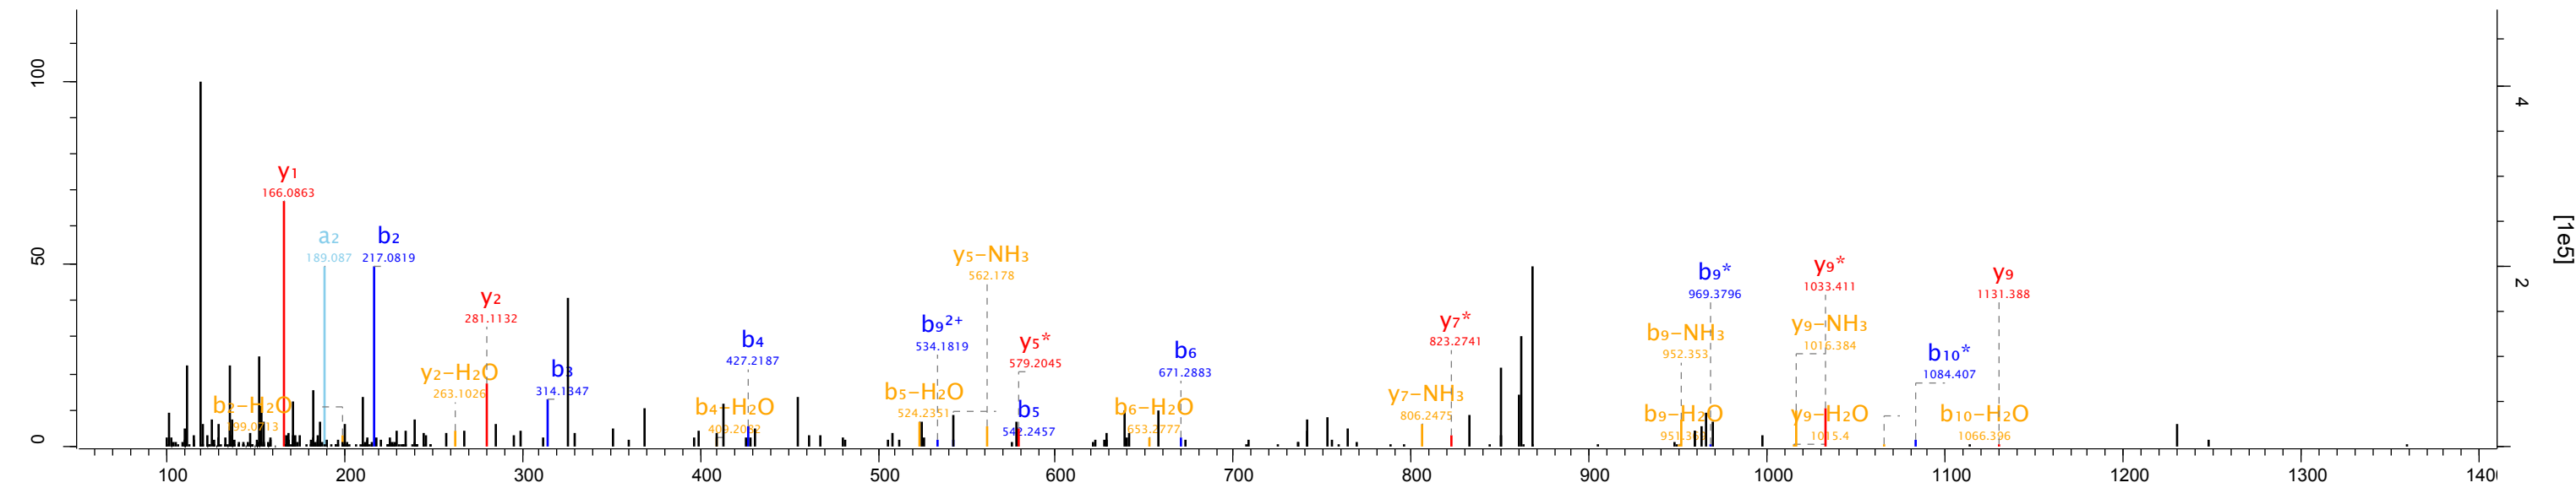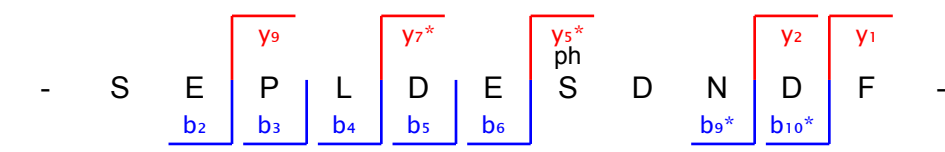



Raw file 20171215\_MaS\_33SR\_LMH\_phospho\_03 Scan 13049 Method FTMS; HCD Score 41.26 m/z 914.43

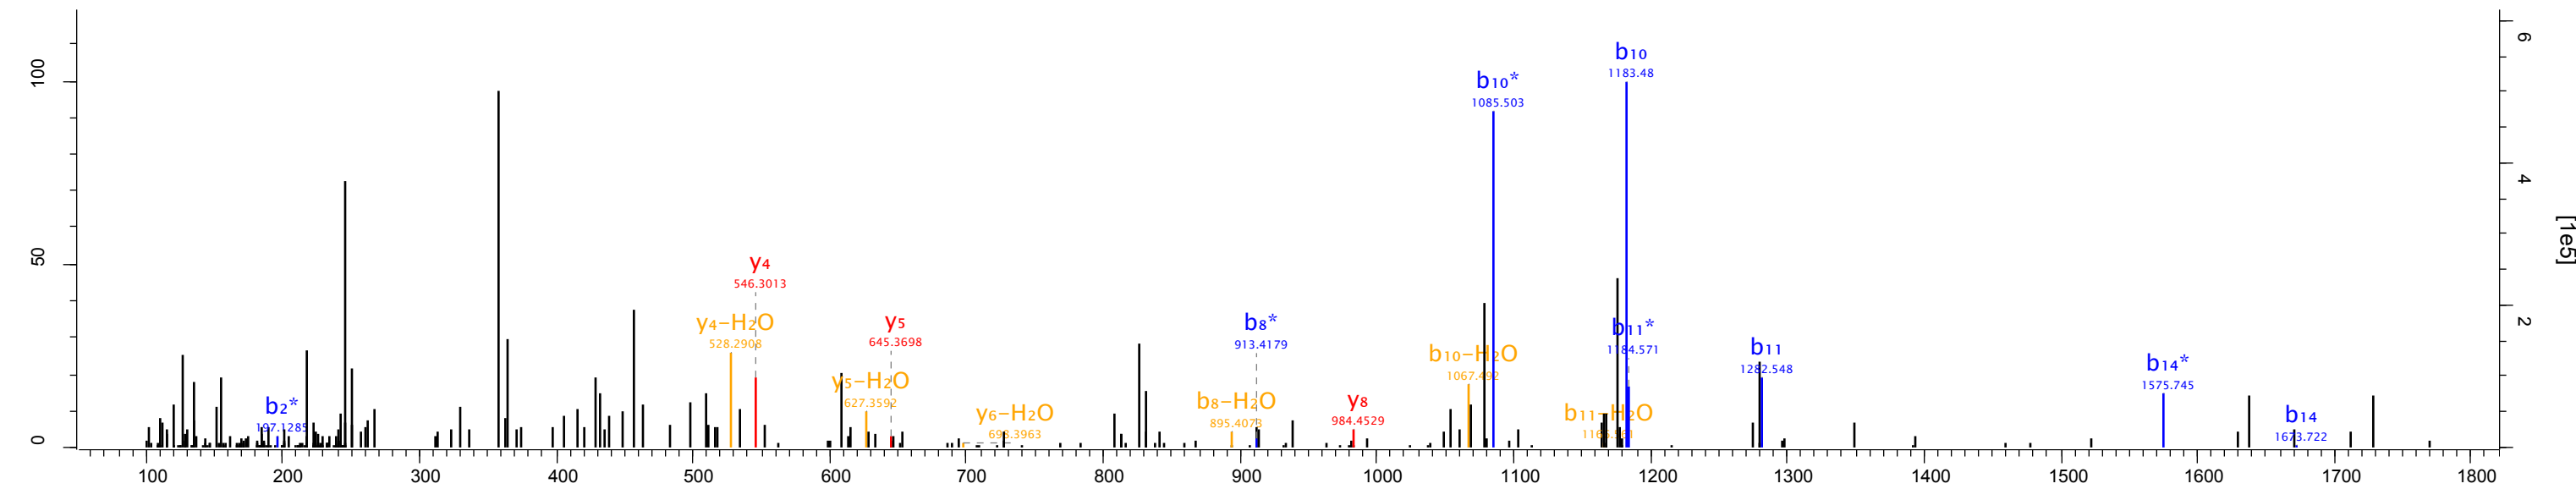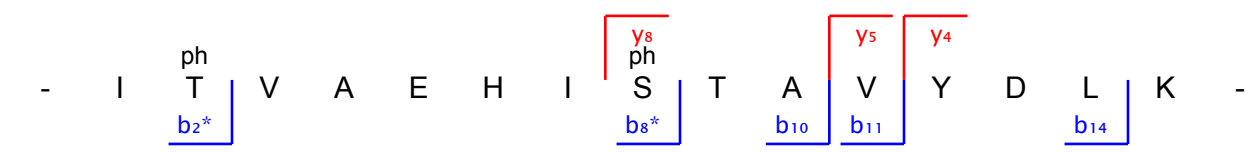

Raw file 20171215\_MaS\_33SR\_LMH\_phospho\_03 Scan 3569 Method FTMS; HCD Score 43.95 m/z 605.28 Gene names DMWD

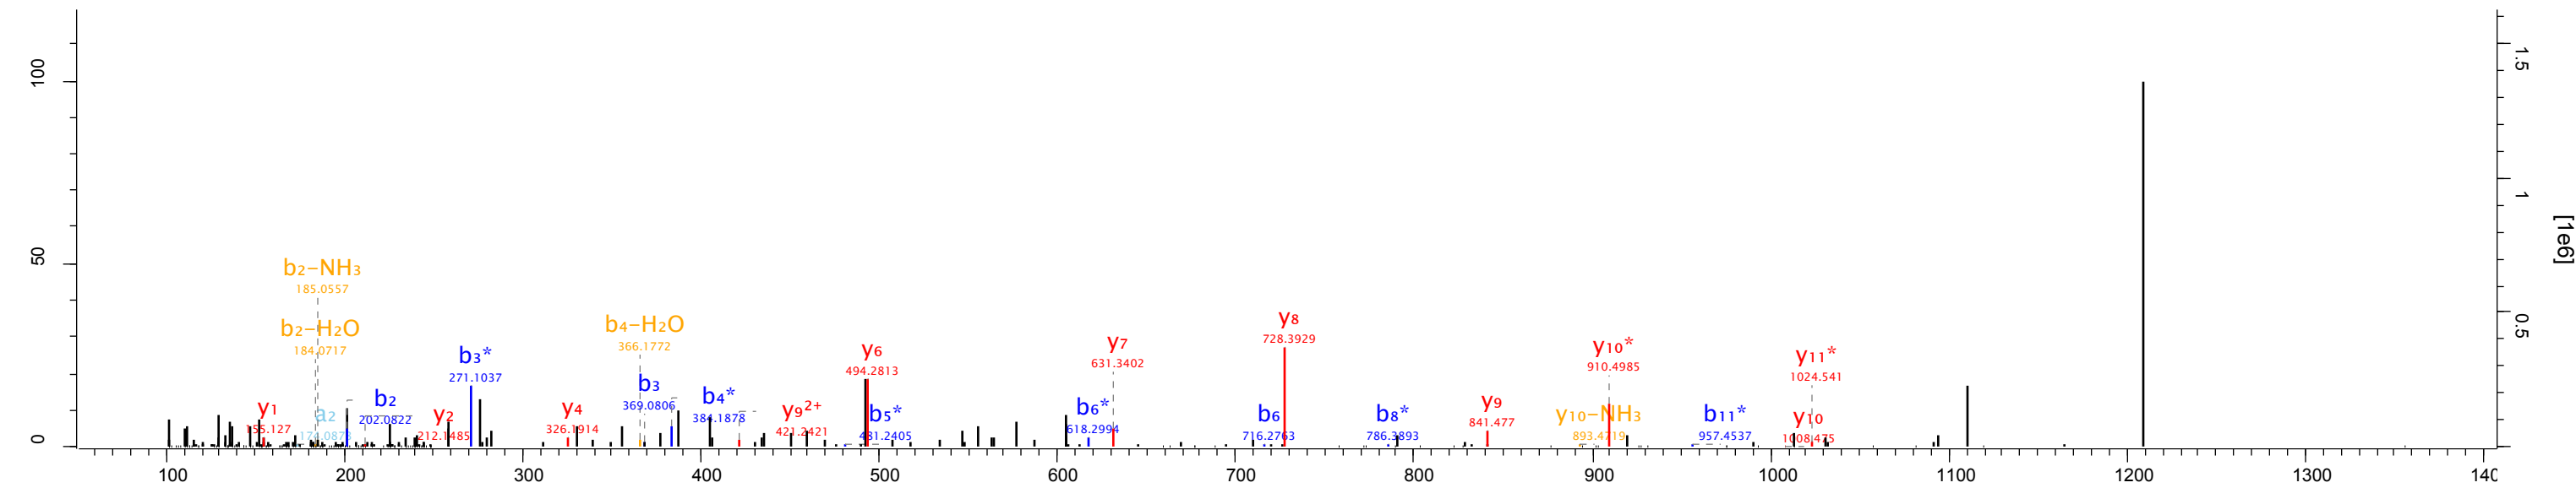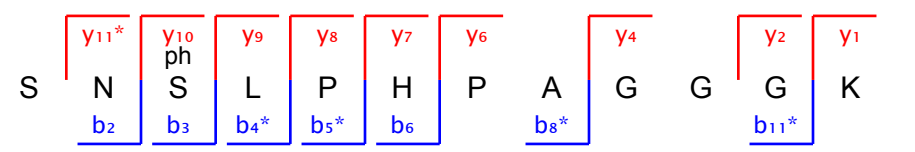

Raw file 20171215\_MaS\_33SR\_LMH\_phospho\_03 Scan 4559 Method FTMS; HCD Score 125.83 m/z 647.8 Gene names NFIX

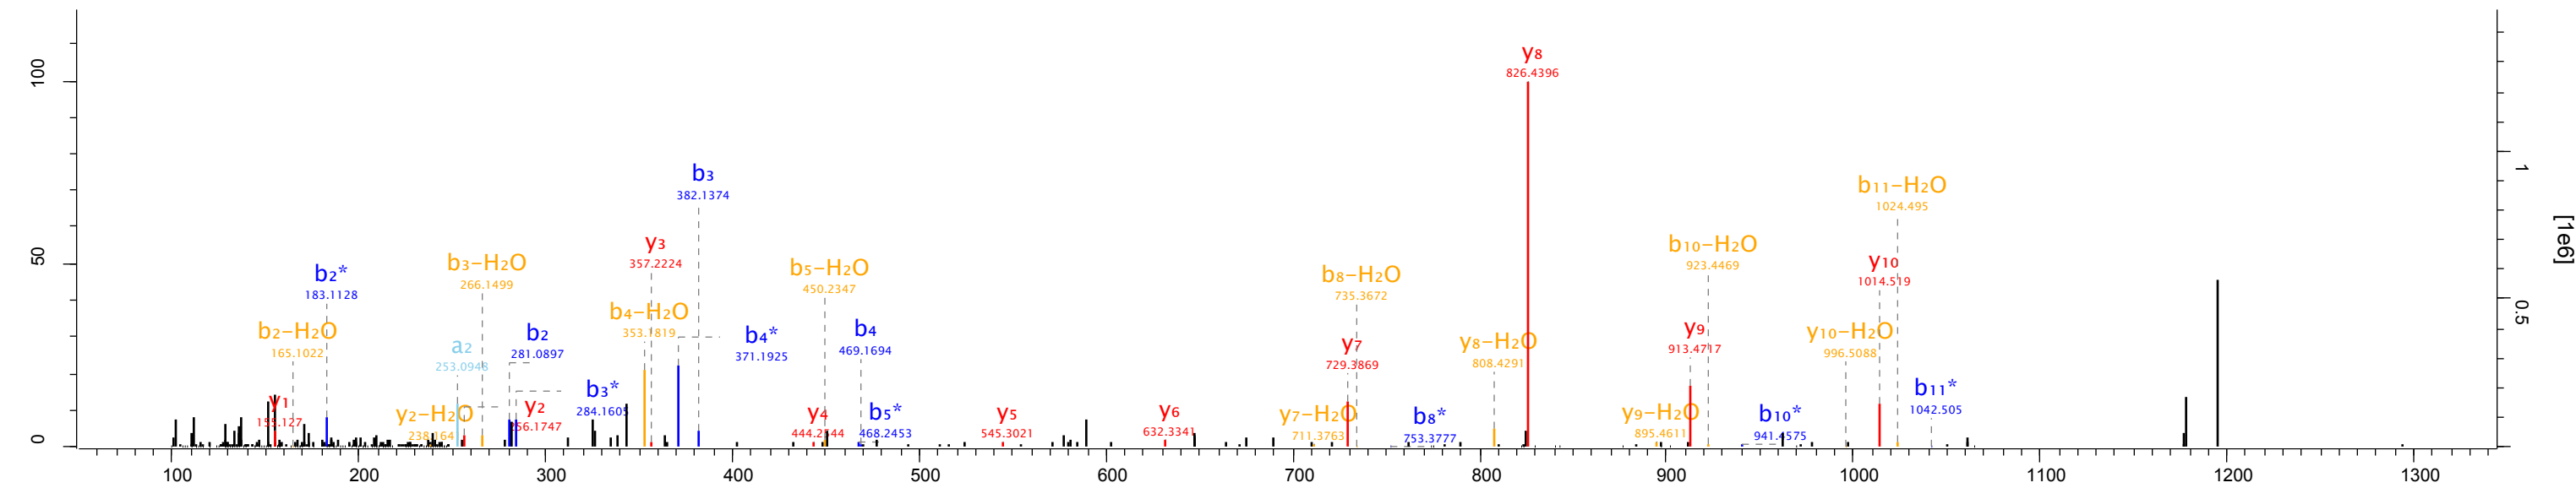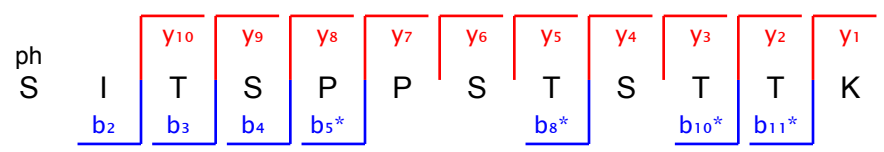

Raw file: 20171215\_MaS\_33SR\_LMH\_phospho\_03  
 Scan: 6409 Method: FTMS; HCD Score: 94.92 m/z: 784.83 Gene names: SYTL2

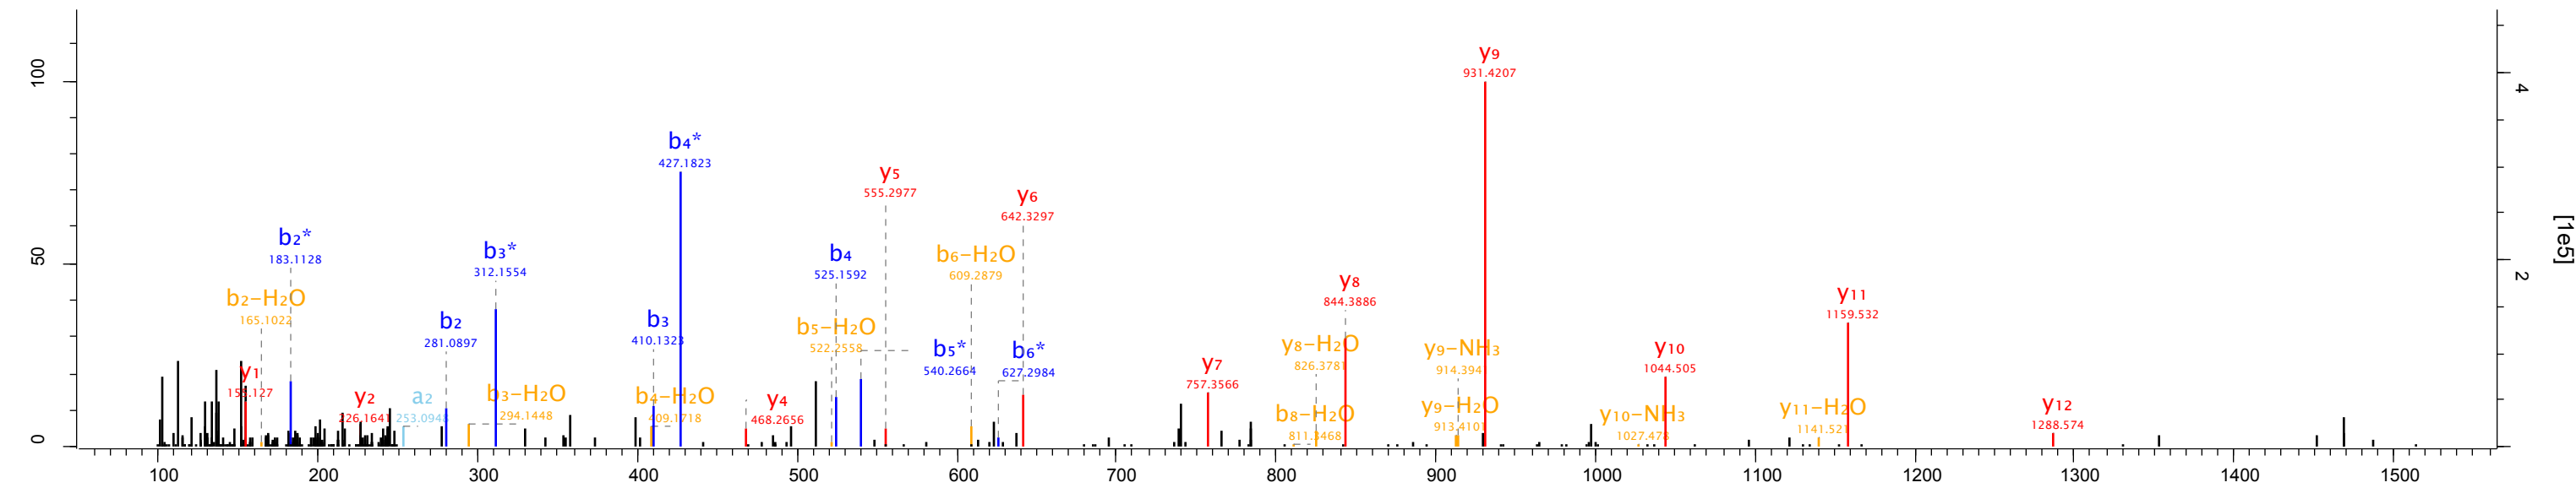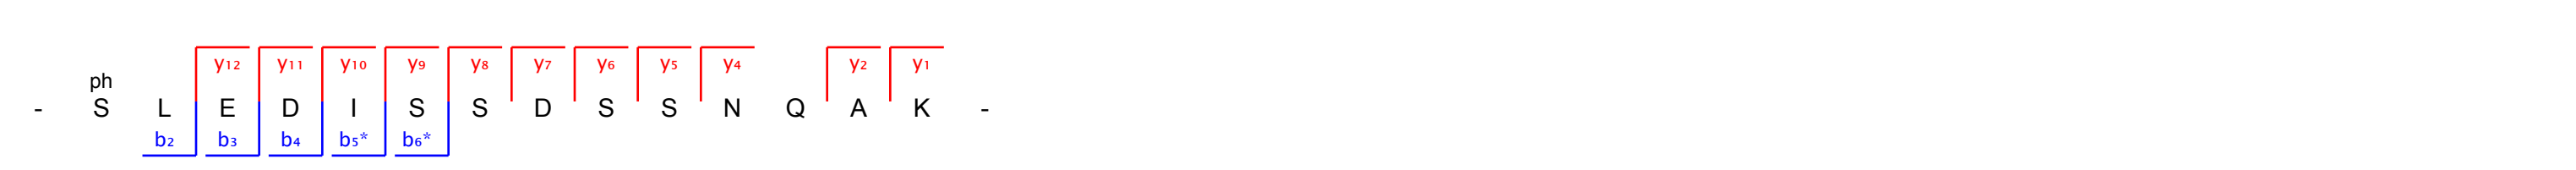

Raw file 20171215\_MaS\_33SR\_LMH\_phospho\_03 Scan 7359 Method FTMS; HCD Score 110.83 m/z 873.39 Gene names MSL1

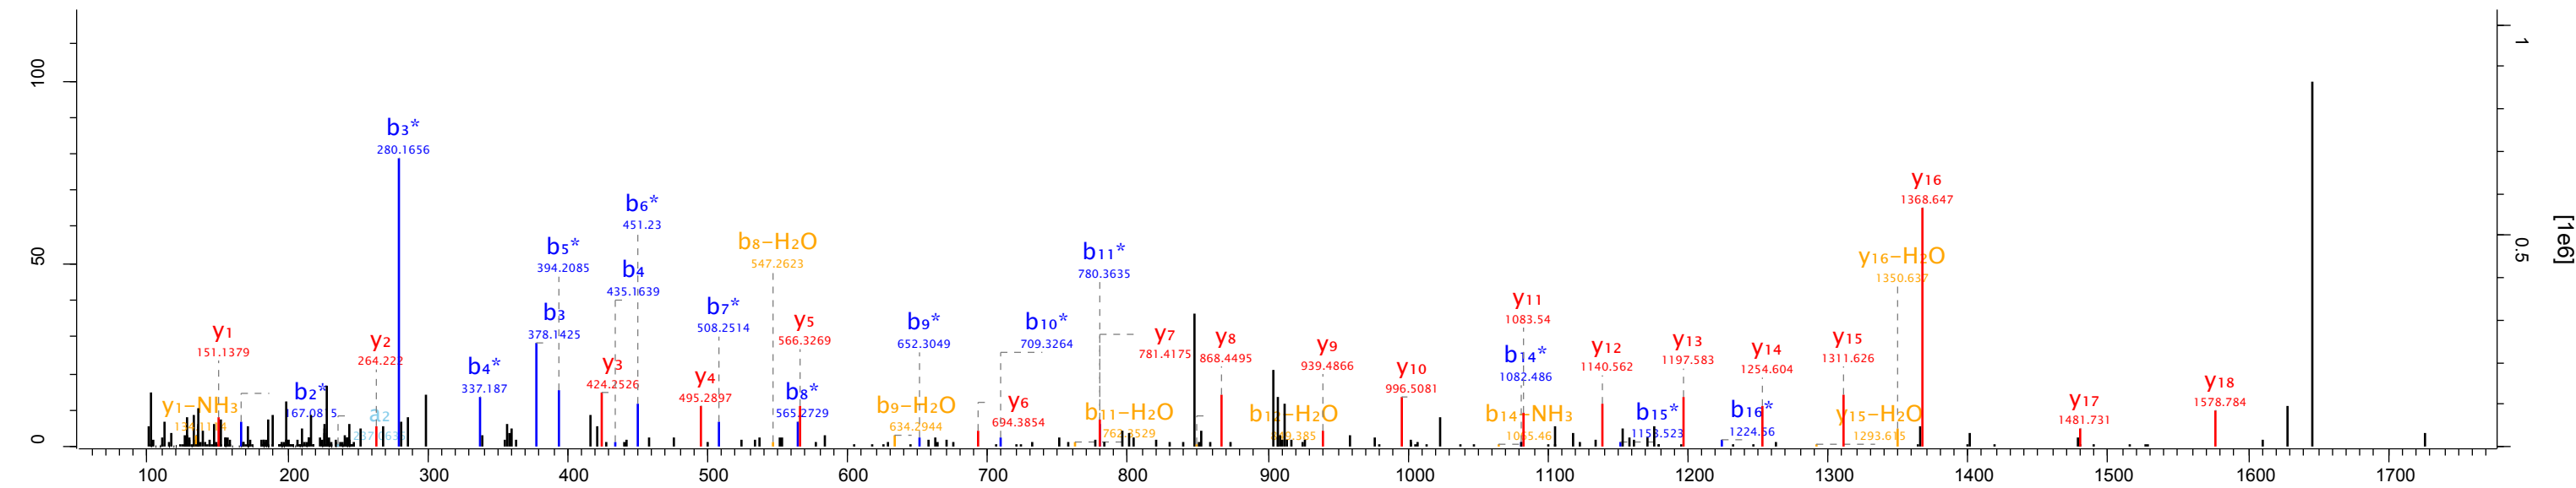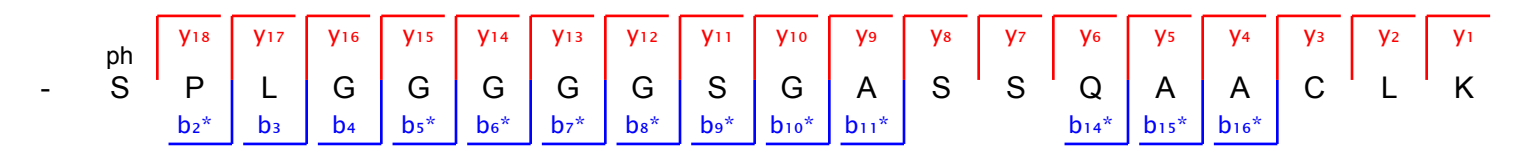

Raw file 20171215\_MaS\_33SR\_LMH\_phospho\_03 Scan 7599 Method FTMS; HCD Score 54.2 m/z 624.3

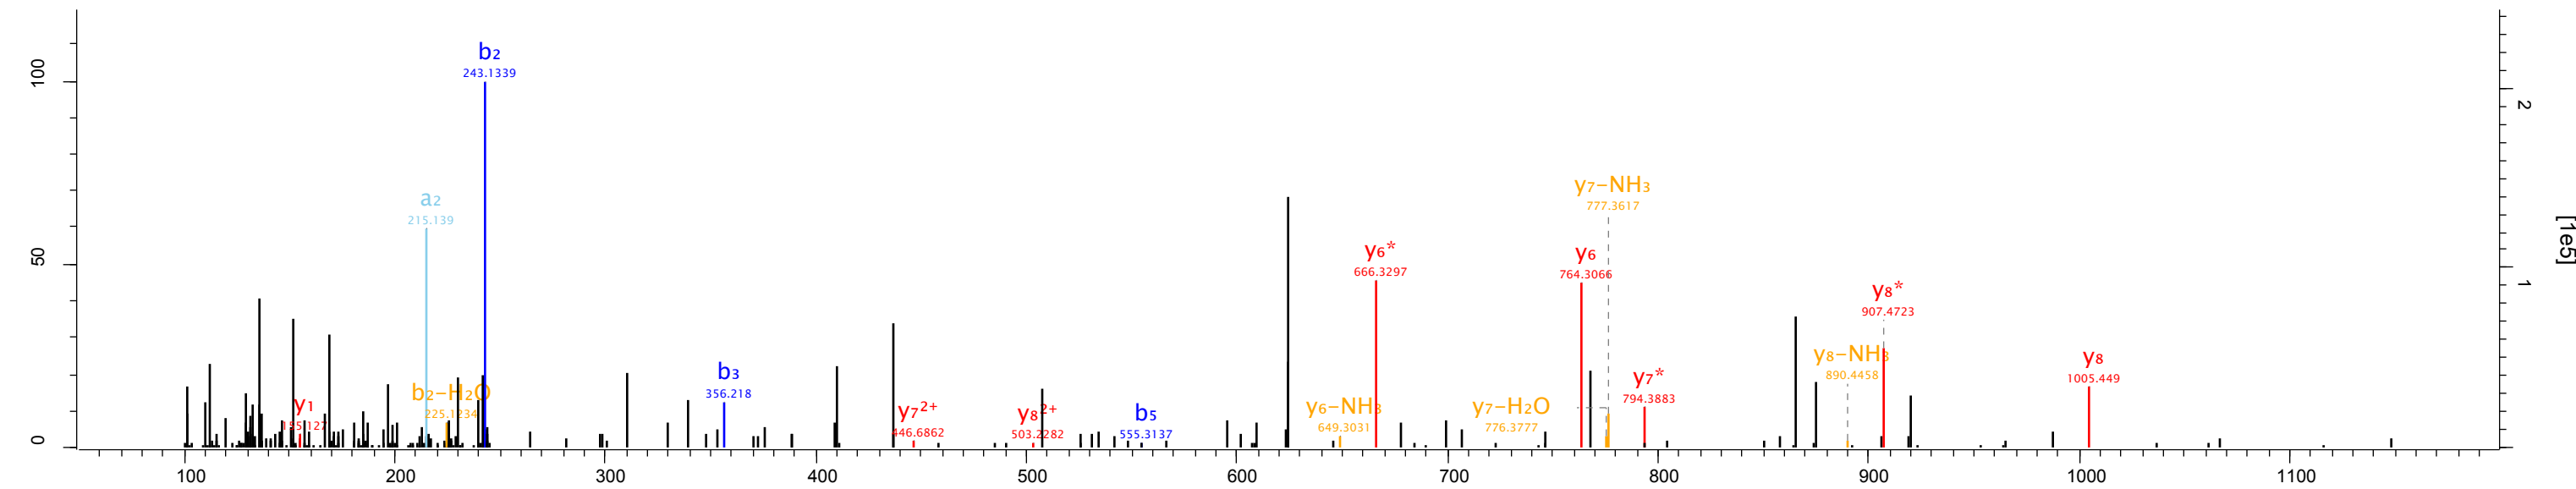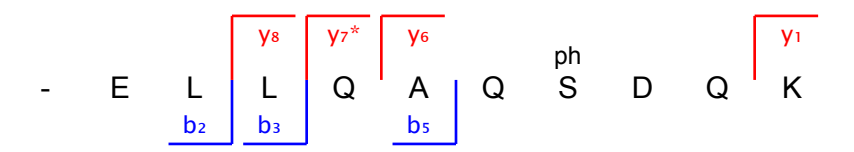

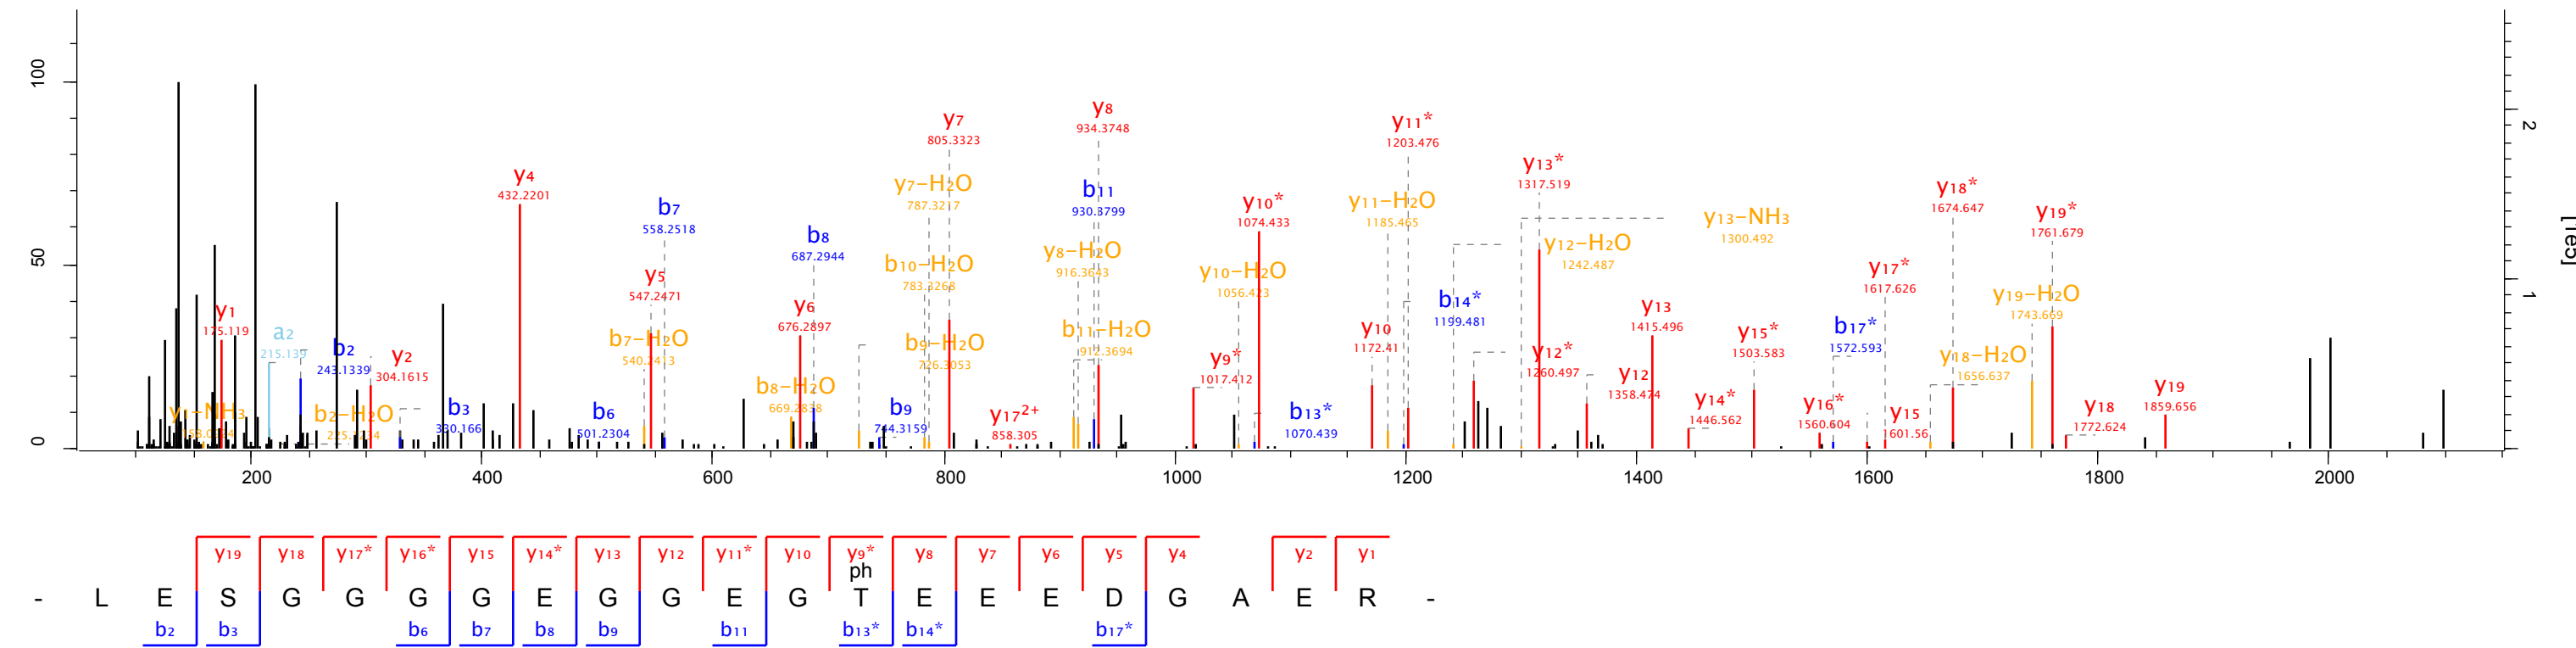

Raw file 20171215\_MaS\_33SR\_LMH\_phospho\_05 Scan 4319 Method FTMS; HCD Score 43.53 m/z 706.8 Gene names E2F7

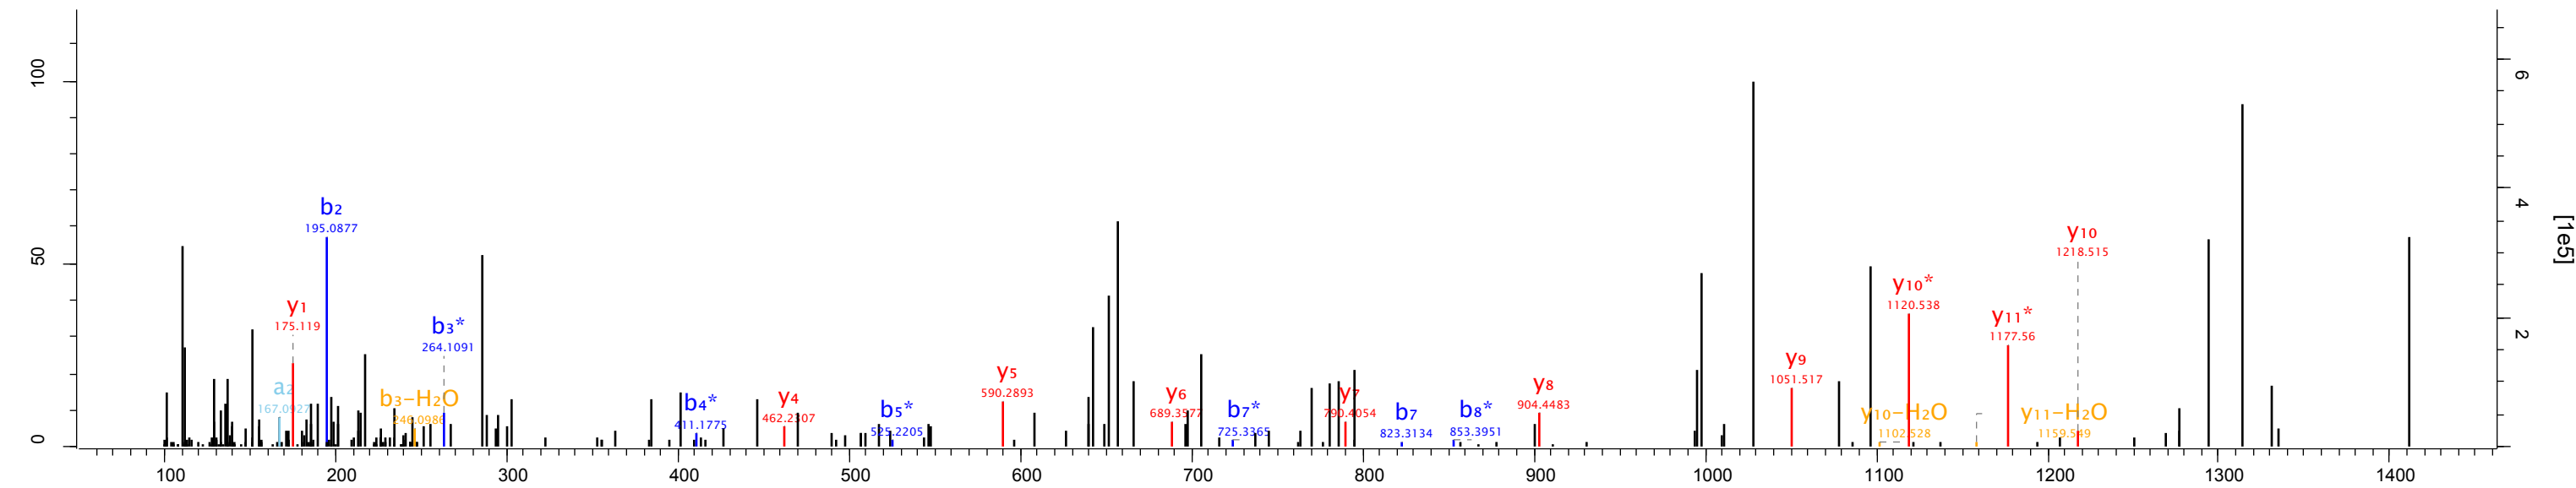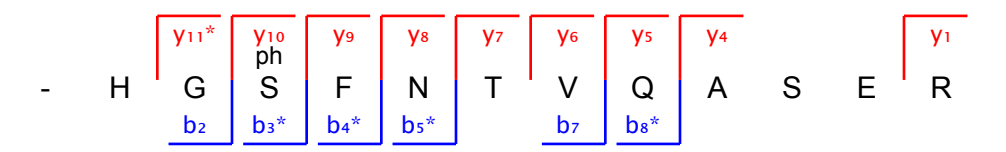



Raw file 20171215\_MaS\_33SR\_LMH\_phospho\_05 Scan 5449 Method FTMS; HCD Score 89.91 m/z 454.2 Gene names UNC13D

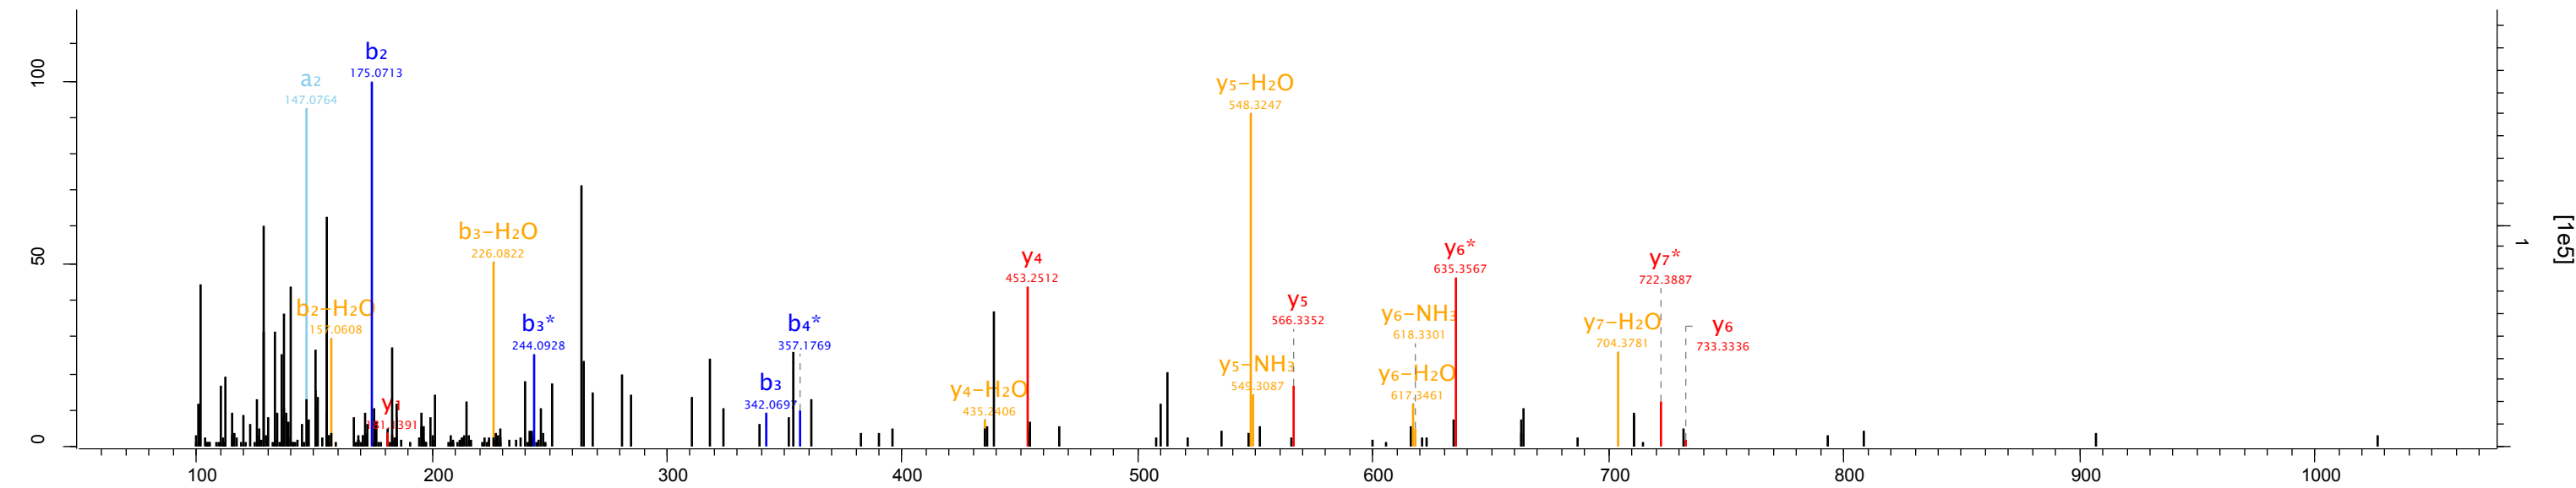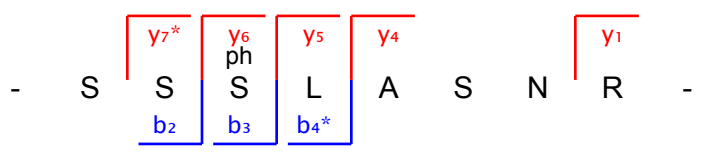

Raw file 20171215\_MaS\_33SR\_LMH\_phospho\_05 Scan 5459 Method FTMS; HCD Score 73.3 m/z 654.79 Gene names MLPH

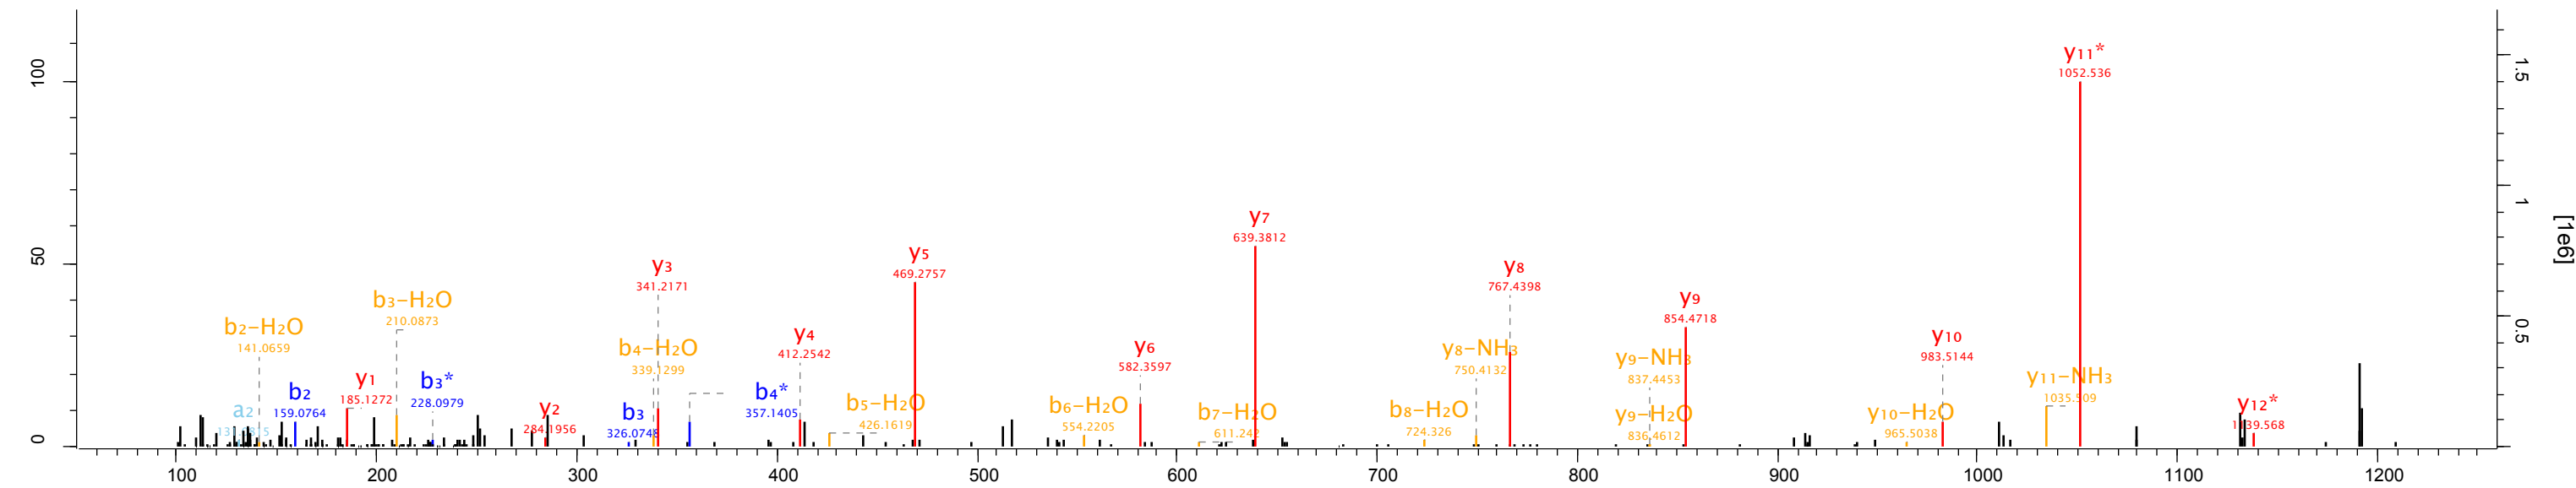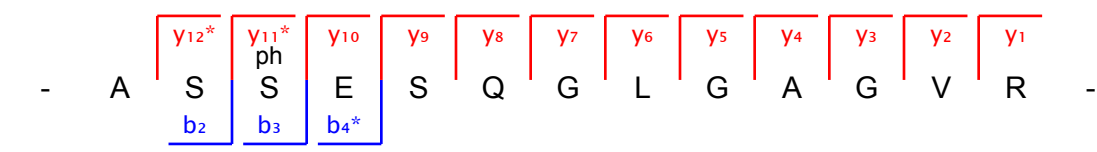

20171215\_MaS\_33SR\_LMH\_phospho\_05 7259 FTMS; HCD 90.39 715.32 NDRG2

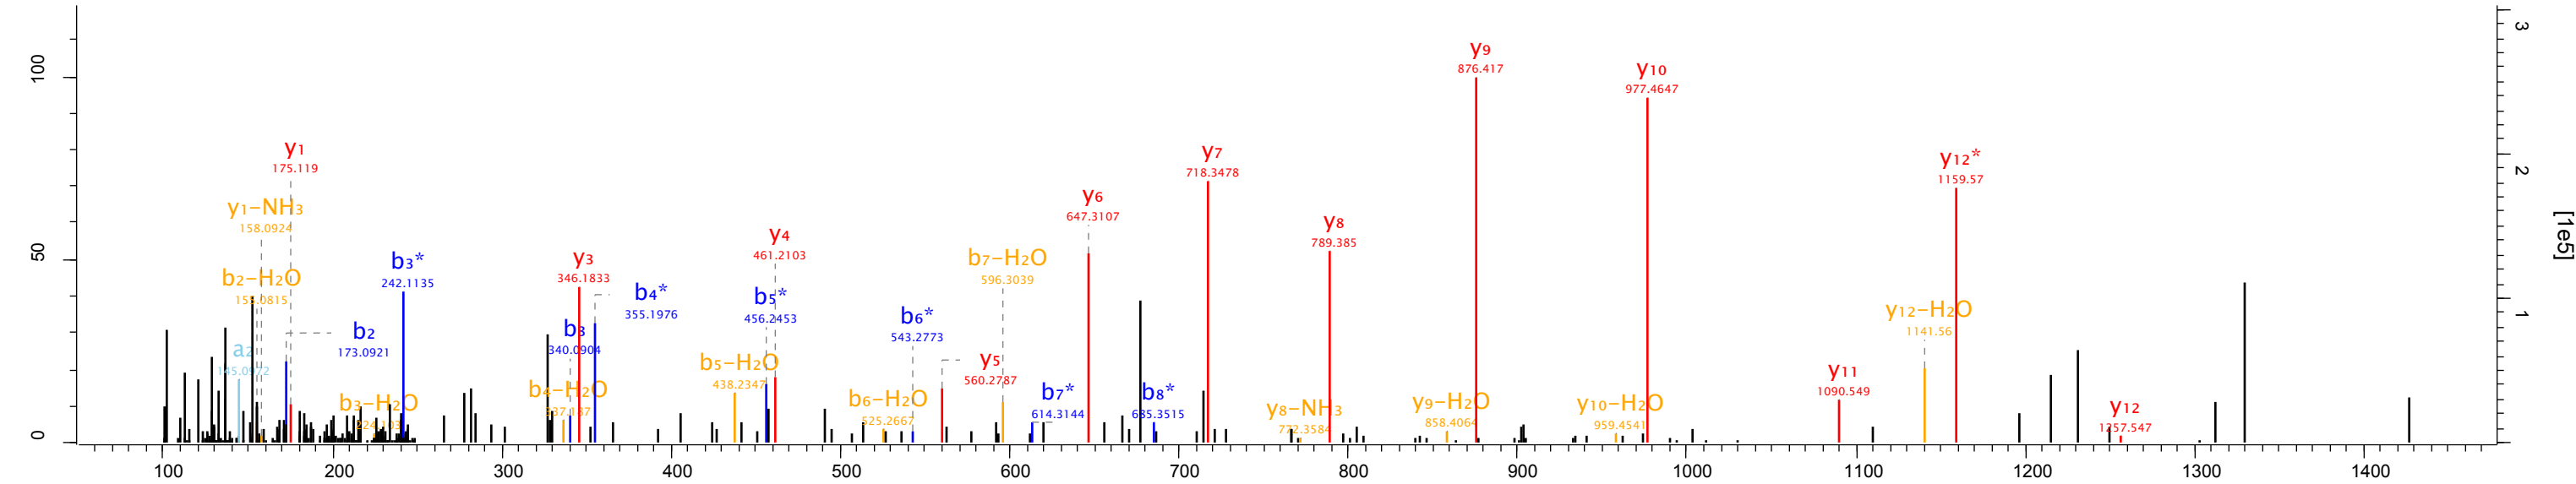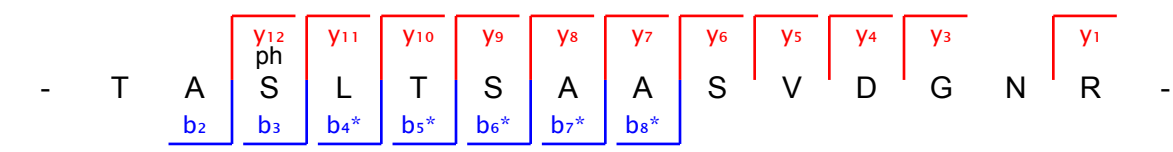

Raw file 20171215\_MaS\_33SR\_LMH\_phospho\_06 Scan 10159 Method FTMS; HCD Score 202.65 m/z 999.41 Gene names ELMO1

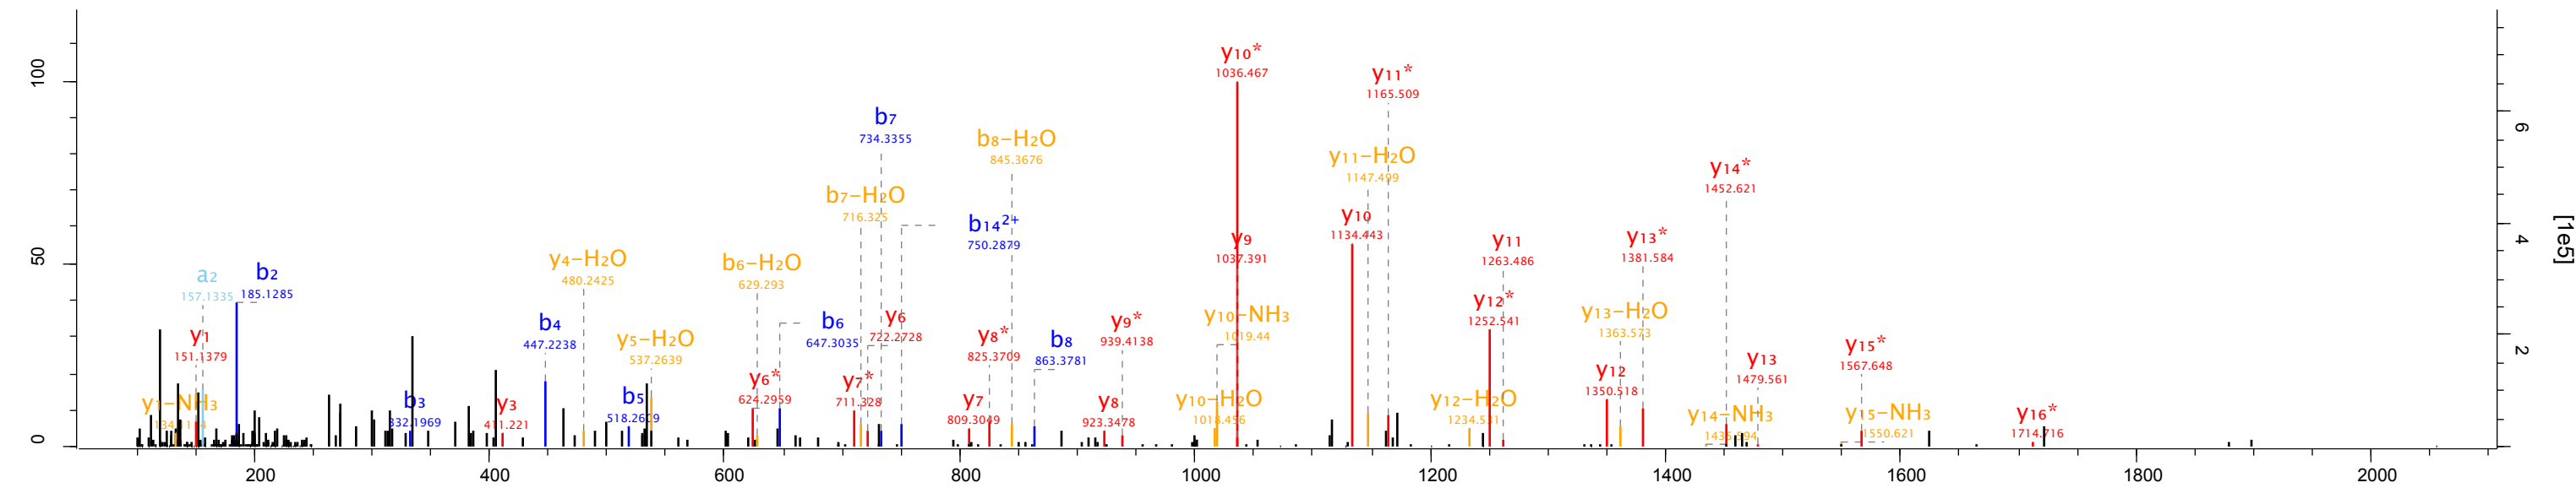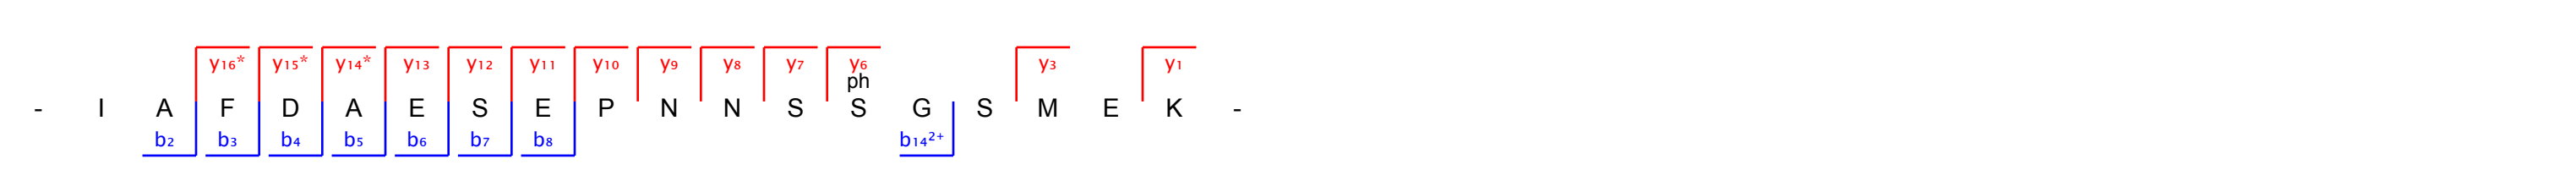

Raw file 20171215\_MaS\_33SR\_LMH\_phospho\_06 Scan 11299 Method FTMS; HCD Score 94.2 m/z 647.3 Gene names DAB2

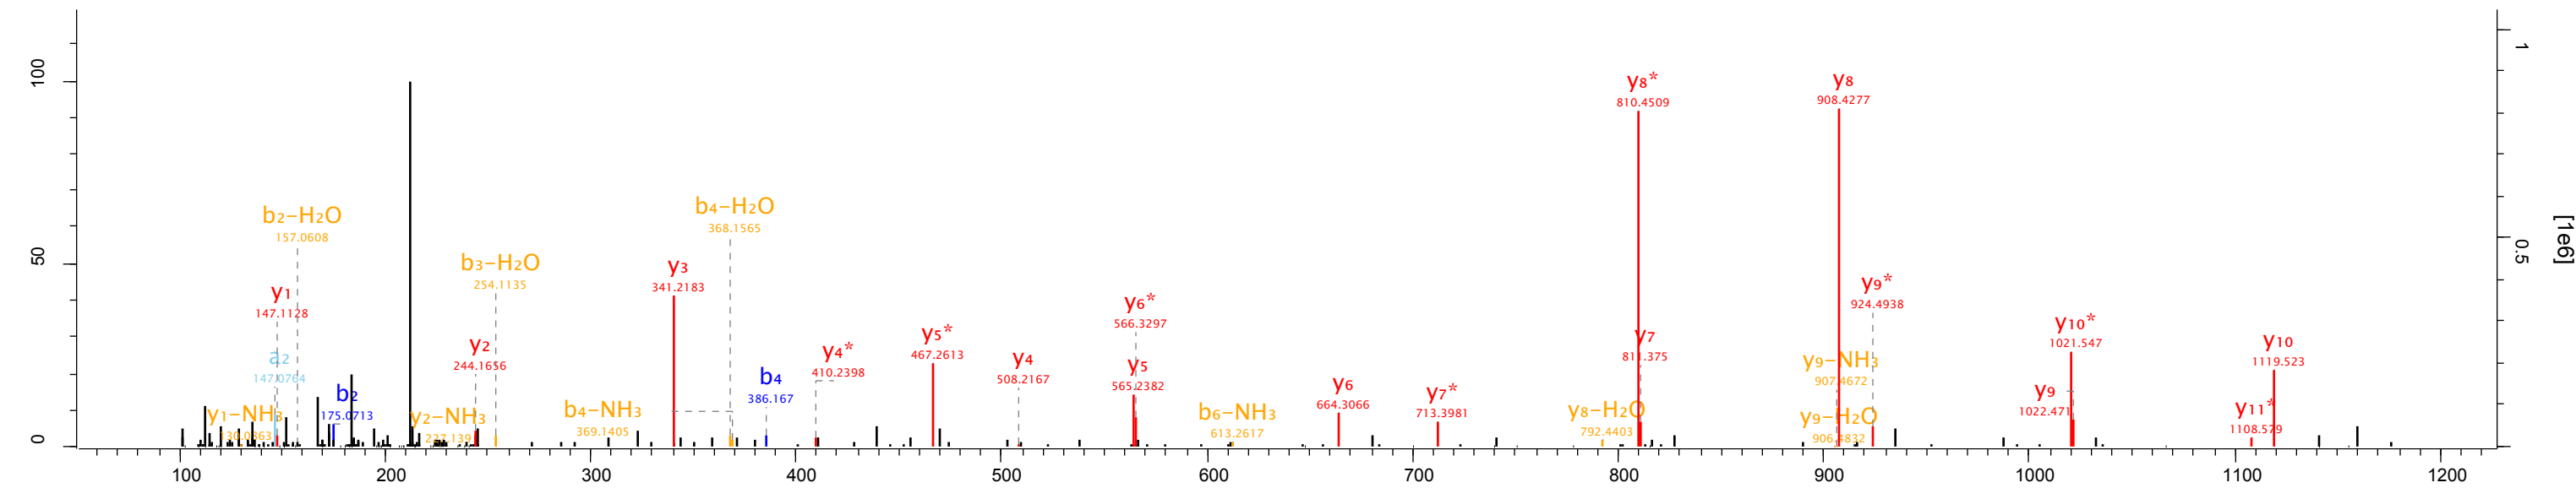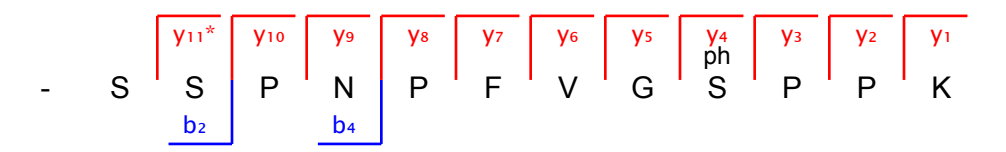

Raw file 20171215\_MaS\_33SR\_LMH\_phospho\_06 Scan 11379 Method FTMS; HCD Score 207.13 m/z 1170.93 Gene names CAAP1

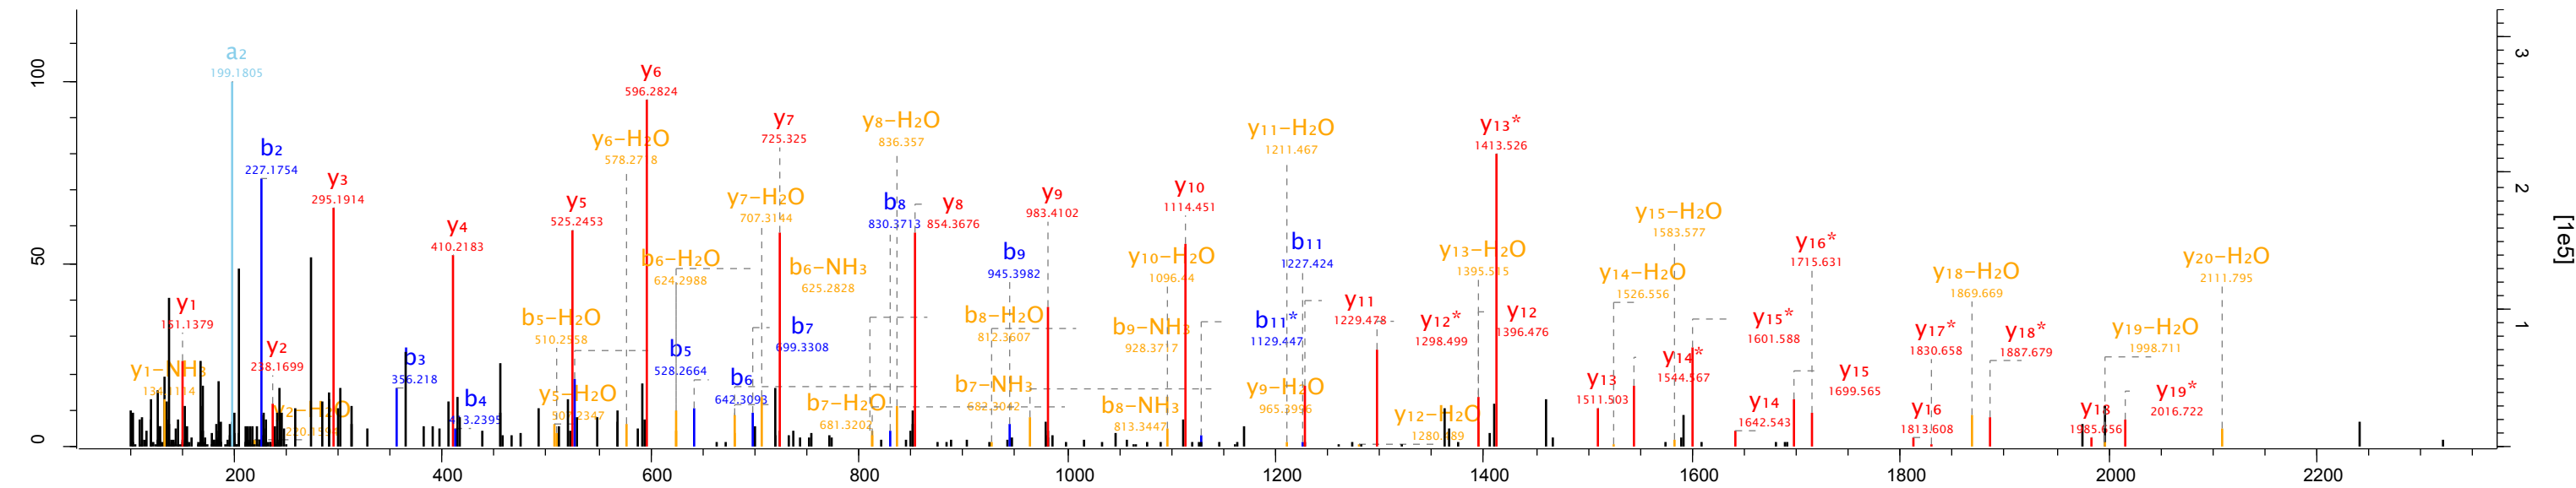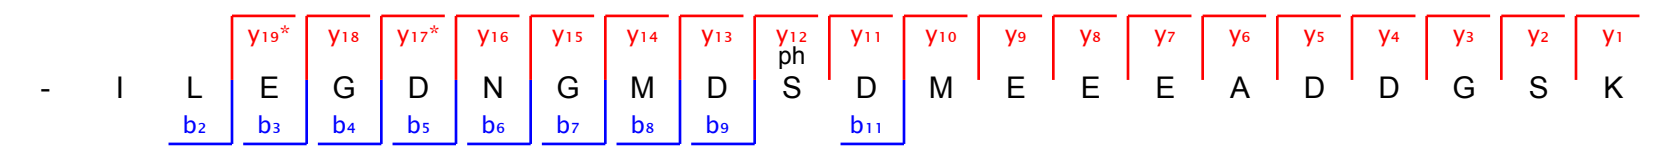

20171215\_MaS\_33SR\_LMH\_phospho\_06 12559 FTMS; HCD 107.62 795.37 UBR1

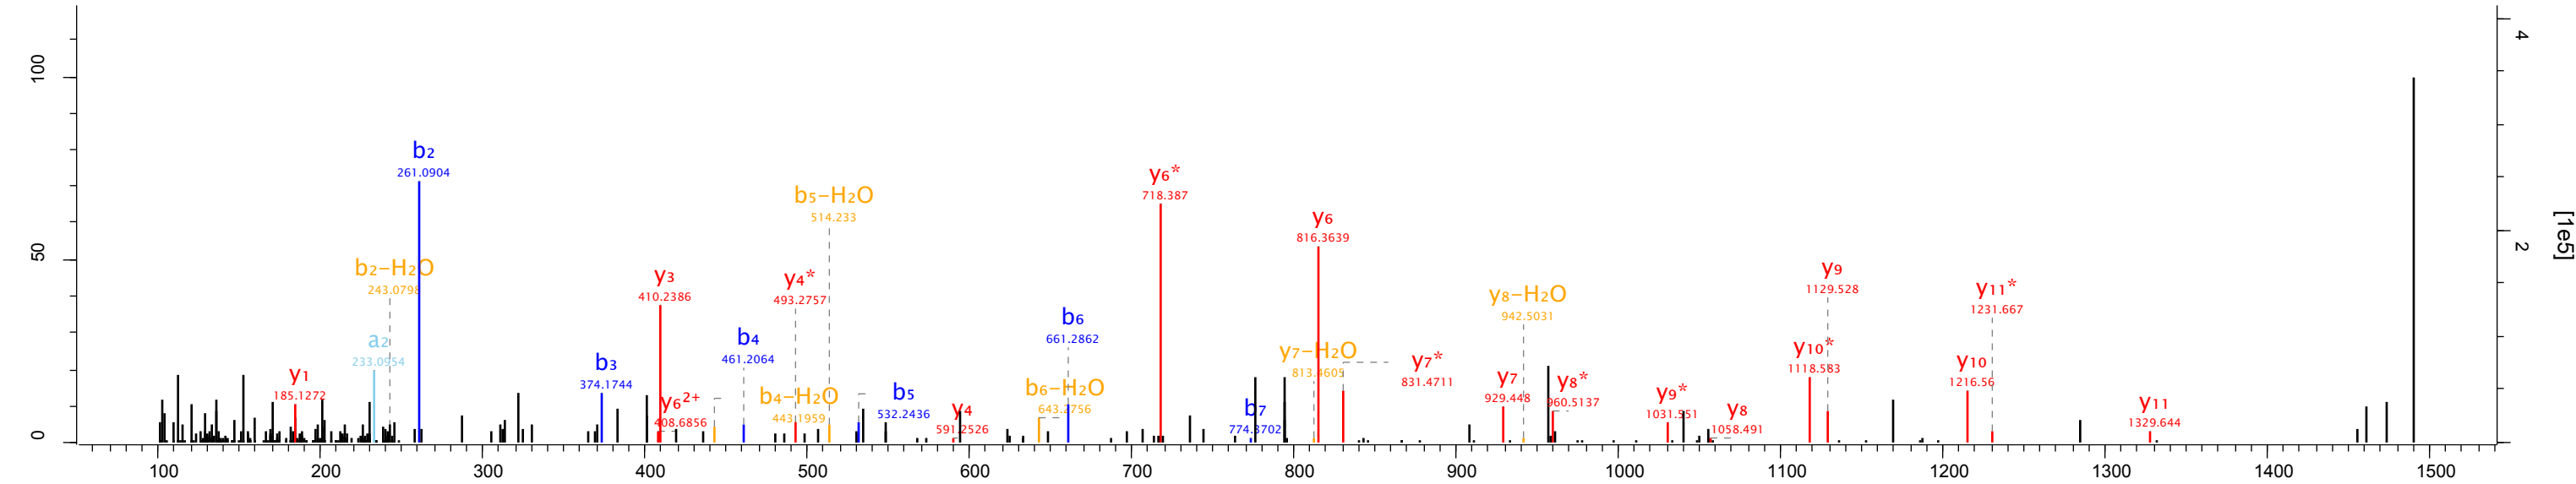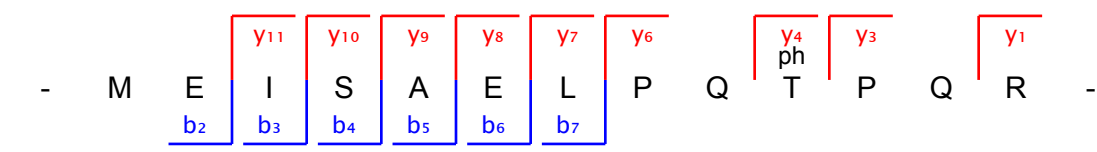

Raw file 20171215\_MaS\_33SR\_LMH\_phospho\_06 Scan 13749 Method FTMS; HCD Score 114.46 m/z 867.41 Gene names URGCP;URGCP-MRPS24

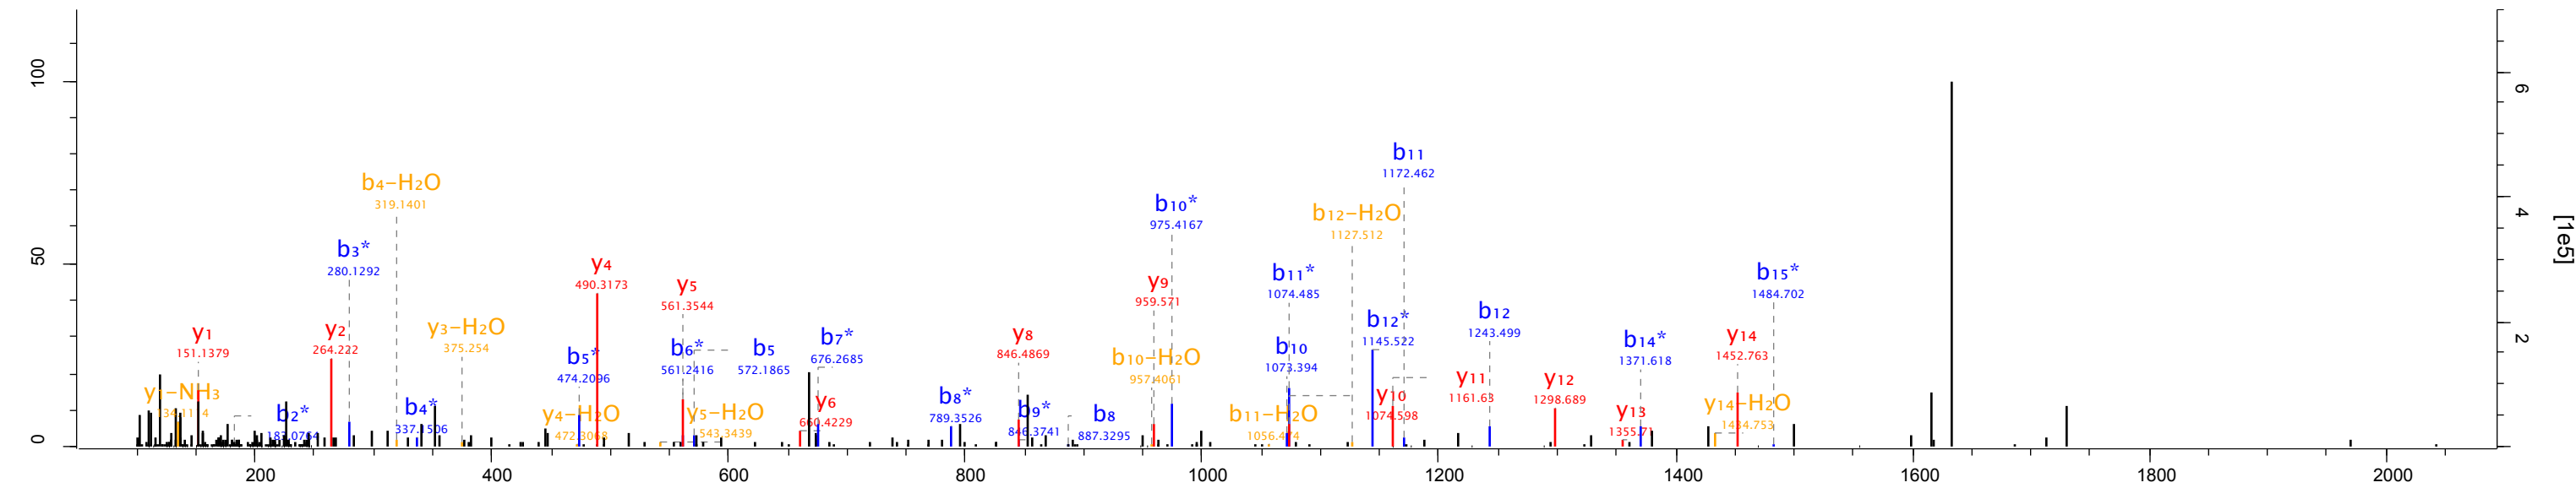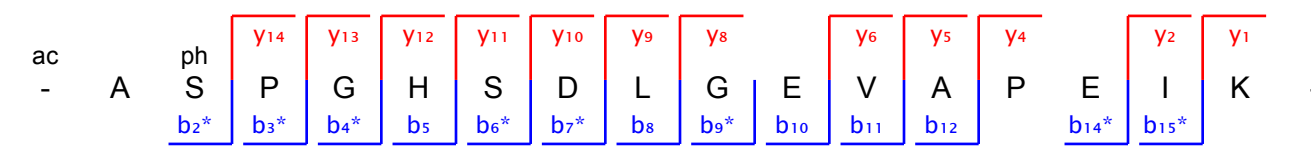



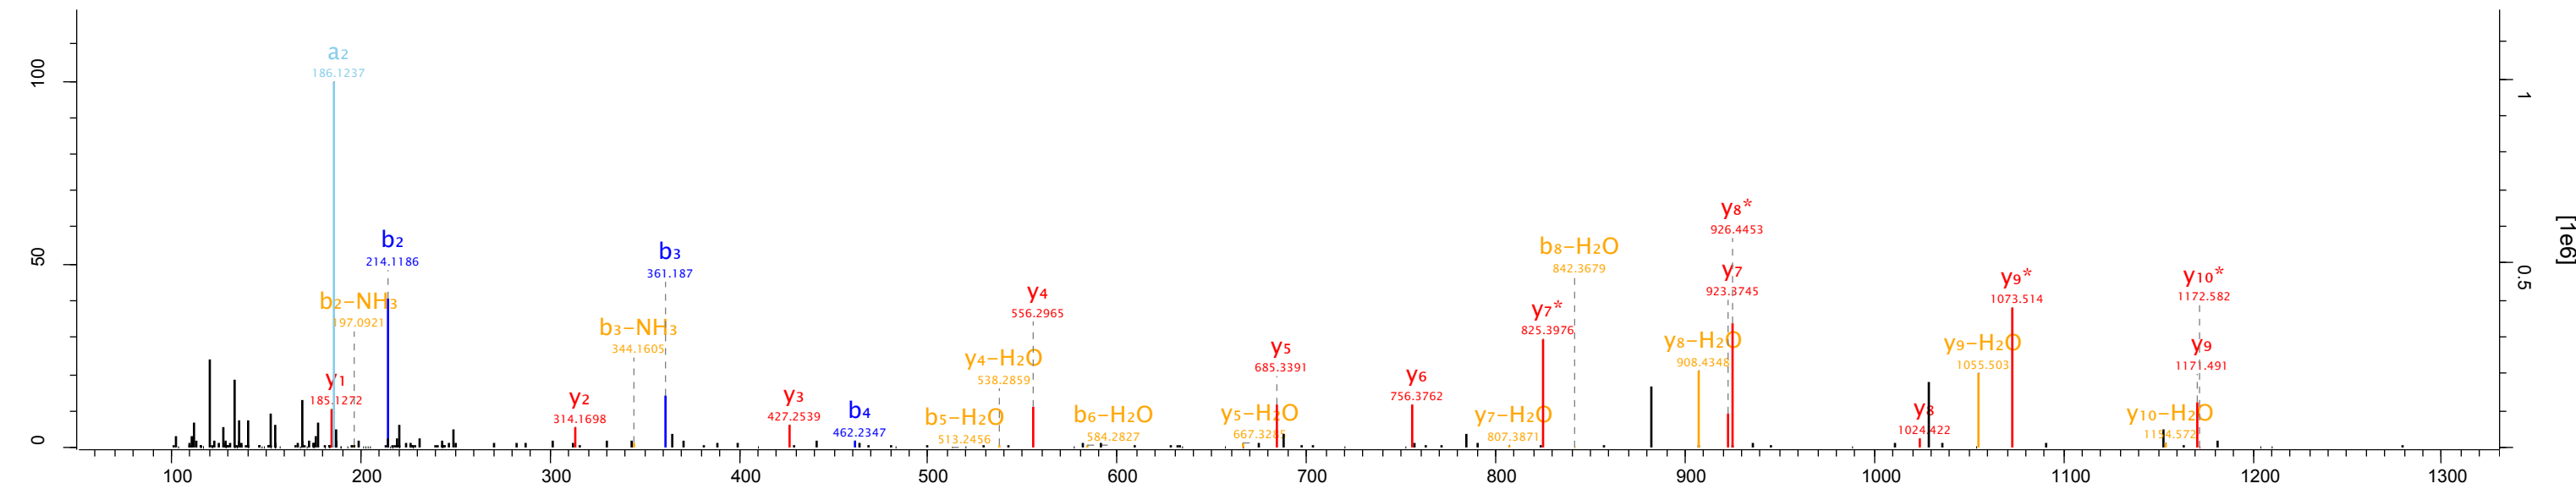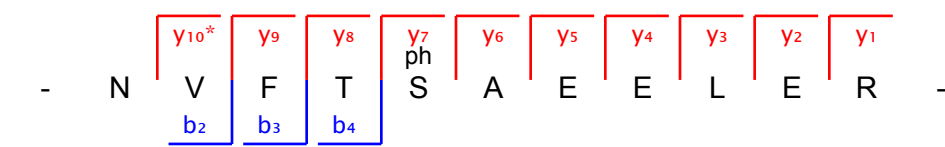

Raw file 20171215\_MaS\_33SR\_LMH\_phospho\_06 Scan 7239 Method FTMS; HCD Score 65.92 m/z 636.61 Gene names ARHGEF18

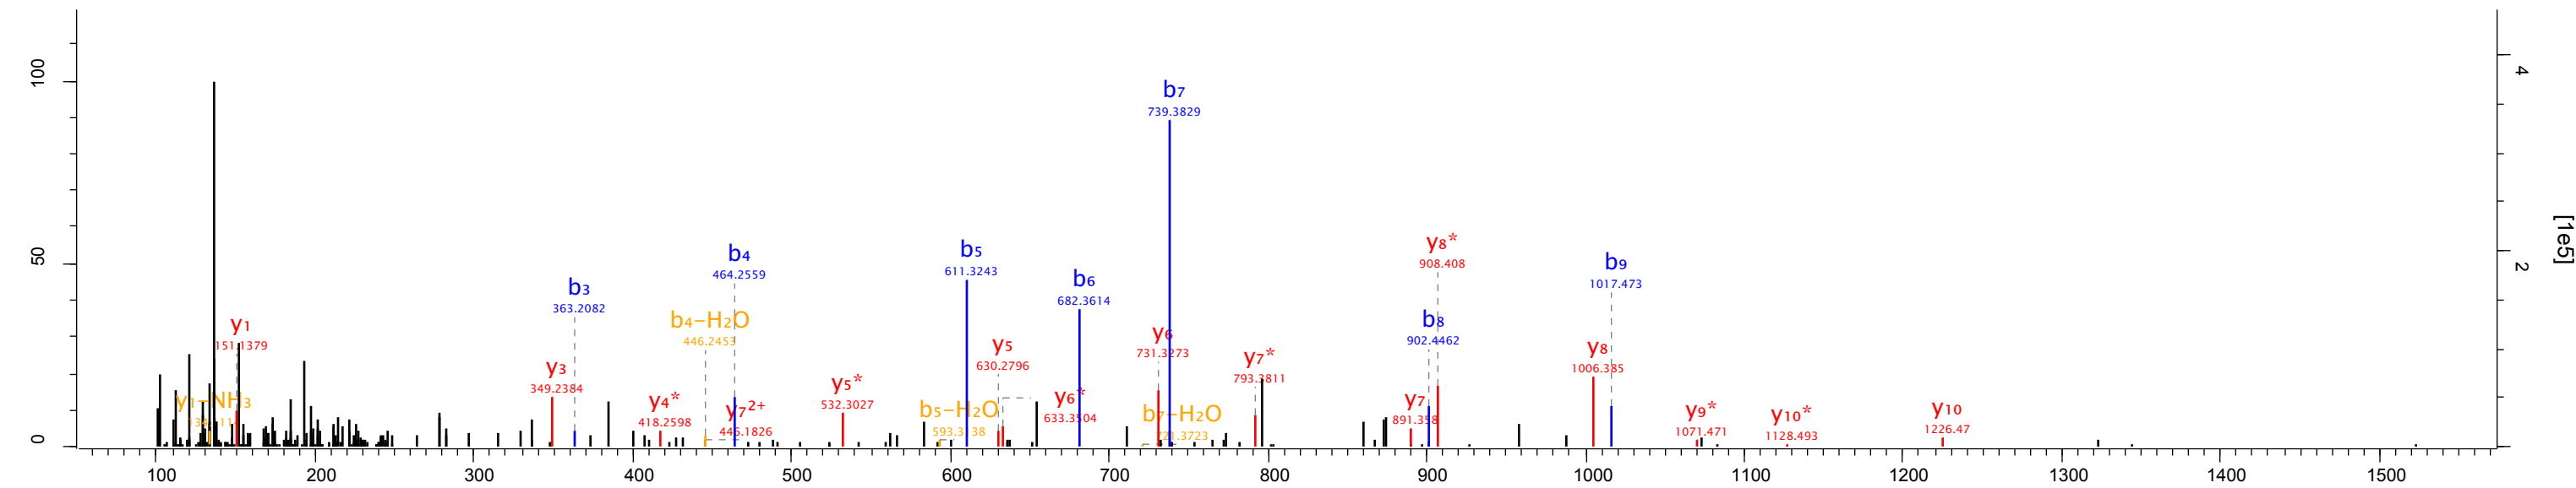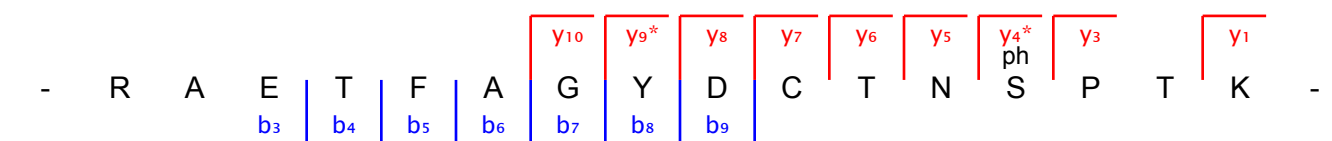

Raw file 20171215\_MaS\_33SR\_LMH\_phospho\_06 Scan 8389 Method FTMS; HCD Score 80.36 m/z 693.36 Gene names ELK3

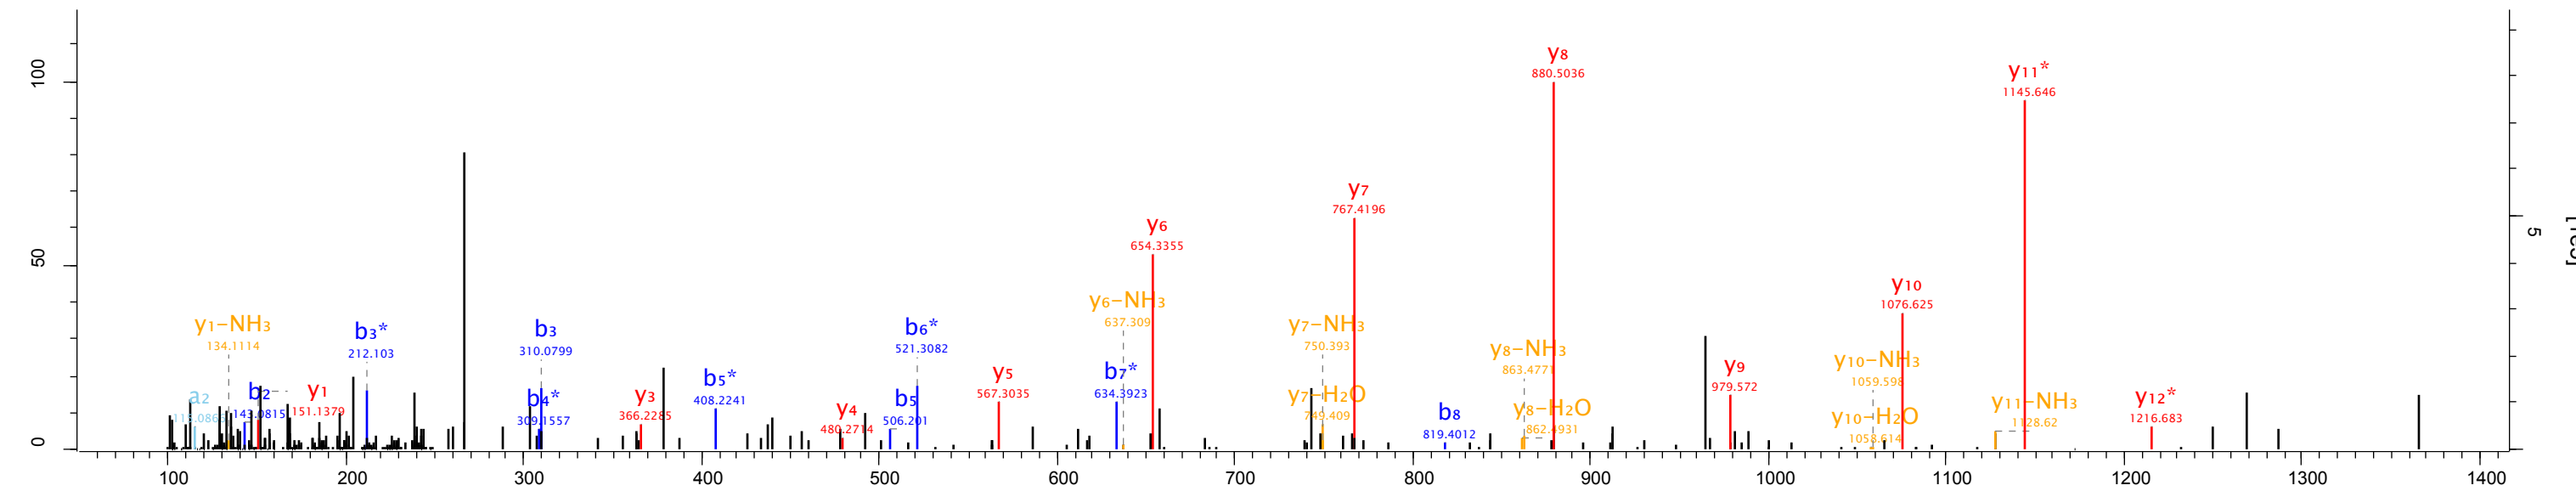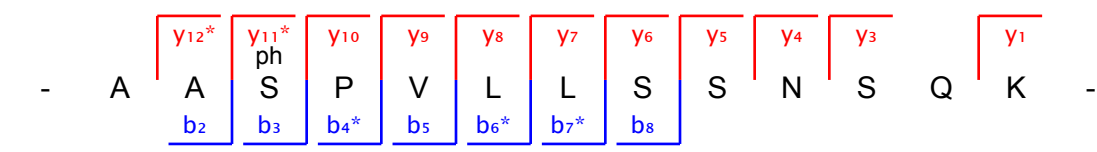

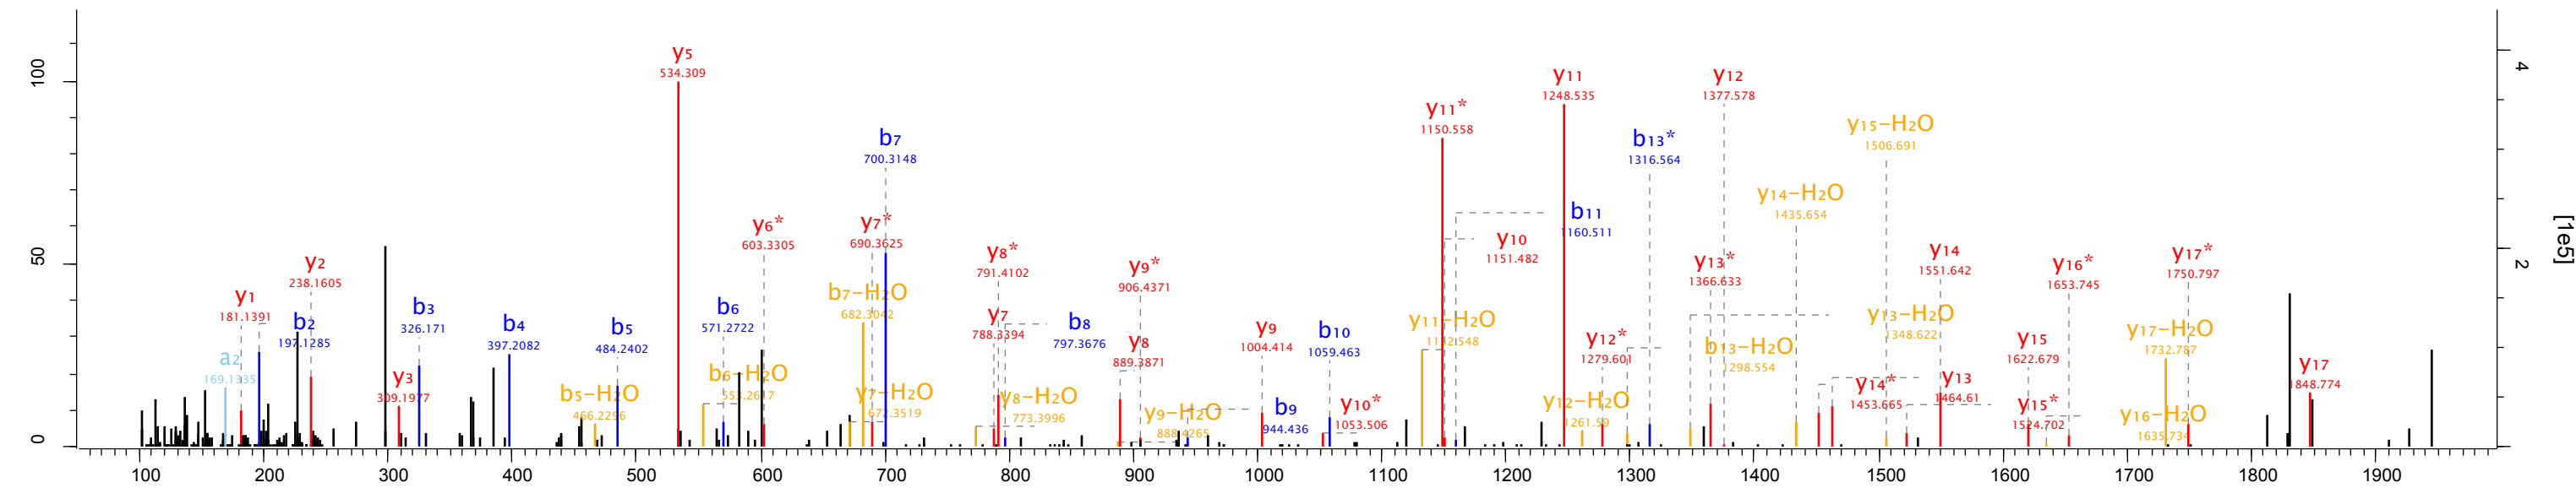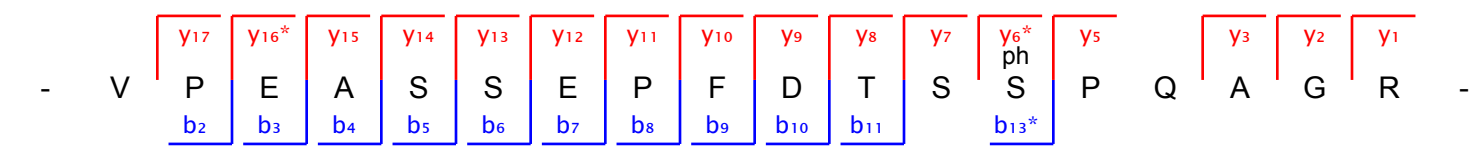

Raw file  
20171215\_MaS\_33SR\_LMH\_phospho\_07

Scan 2339 Method FTMS; HCD Score 253.82 m/z 677.78 Gene names BNIP3

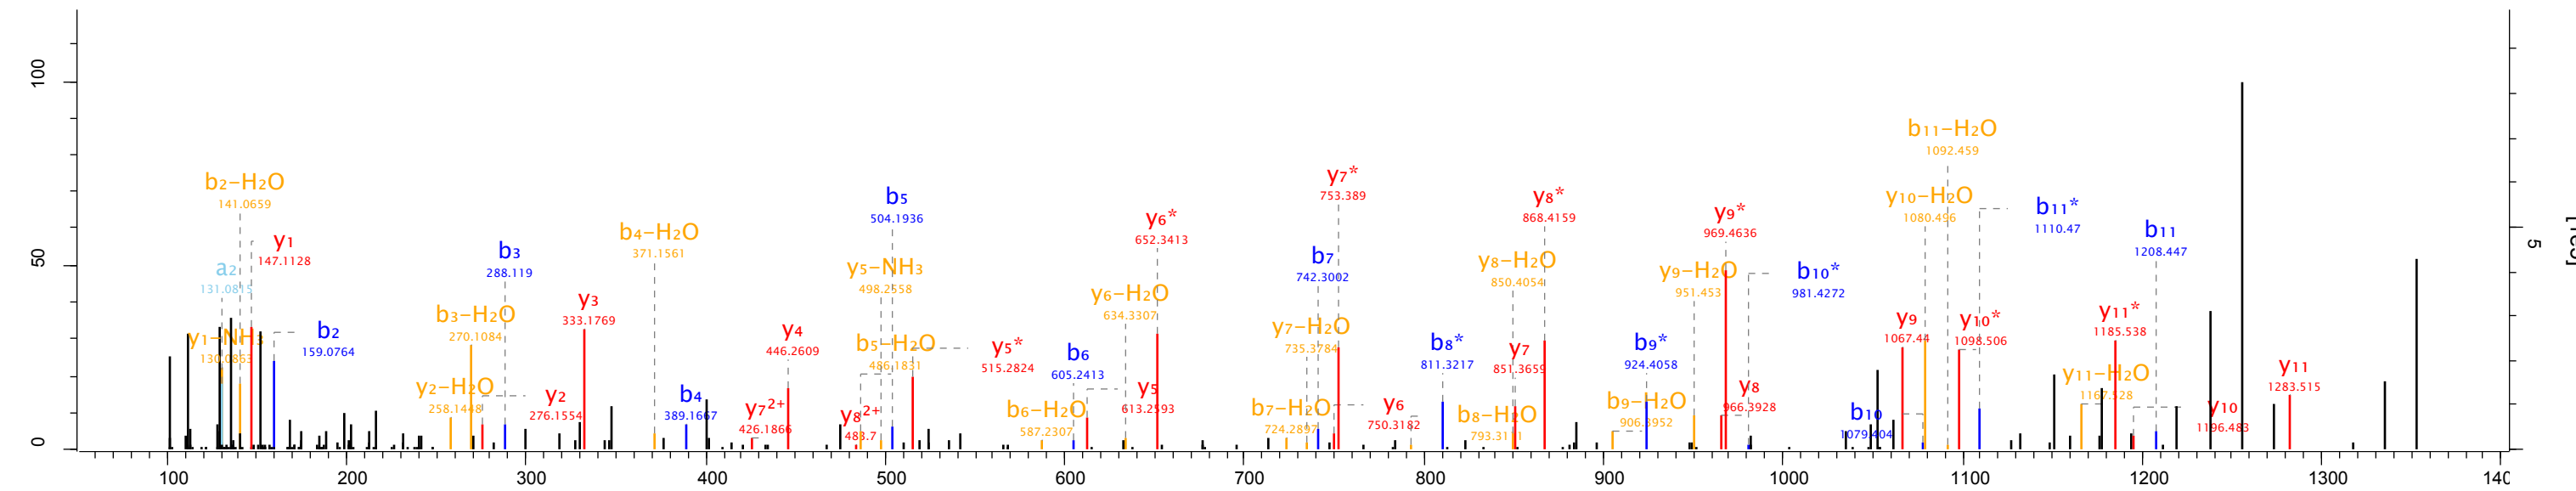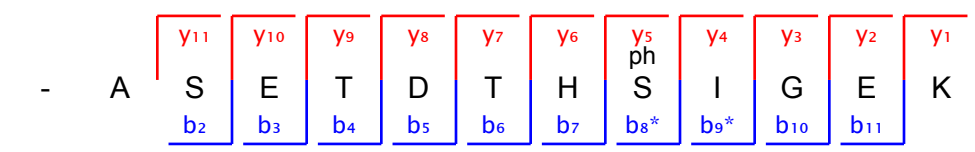

Raw file 20171215\_MaS\_33SR\_LMH\_phospho\_08 Scan 4309 Method FTMS; HCD Score 46.73 m/z 501.24

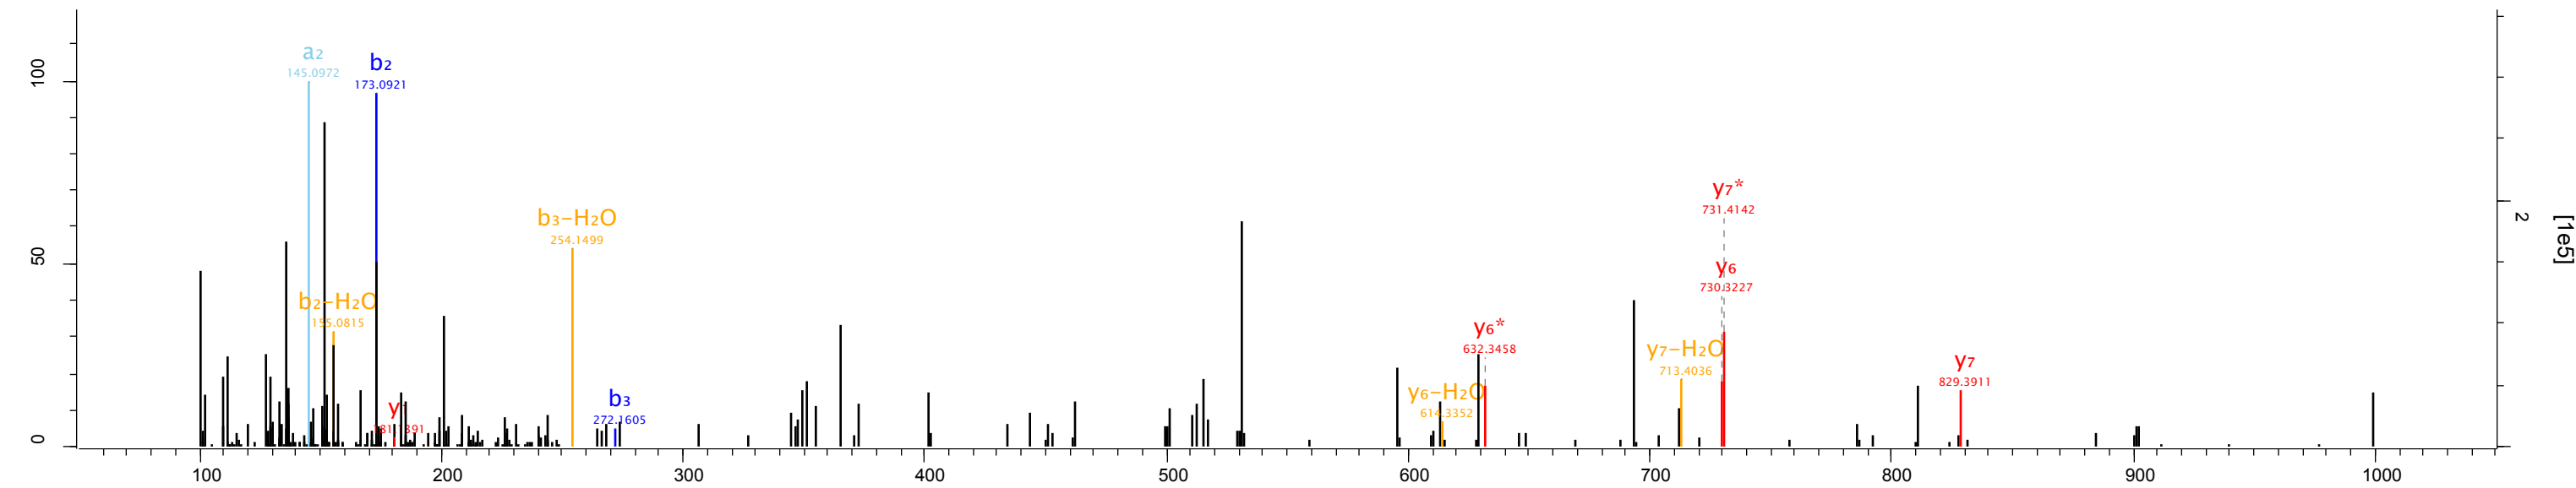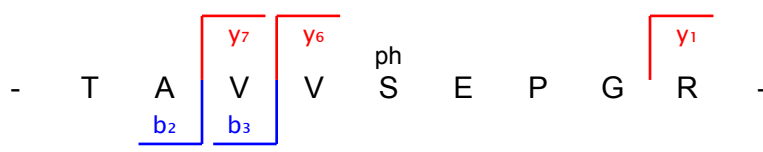

Raw file 20171215\_MaS\_33SR\_LMH\_phospho\_09 Scan 2649 Method FTMS; HCD Score 62.69 m/z 560.76 Gene names CSNK1E

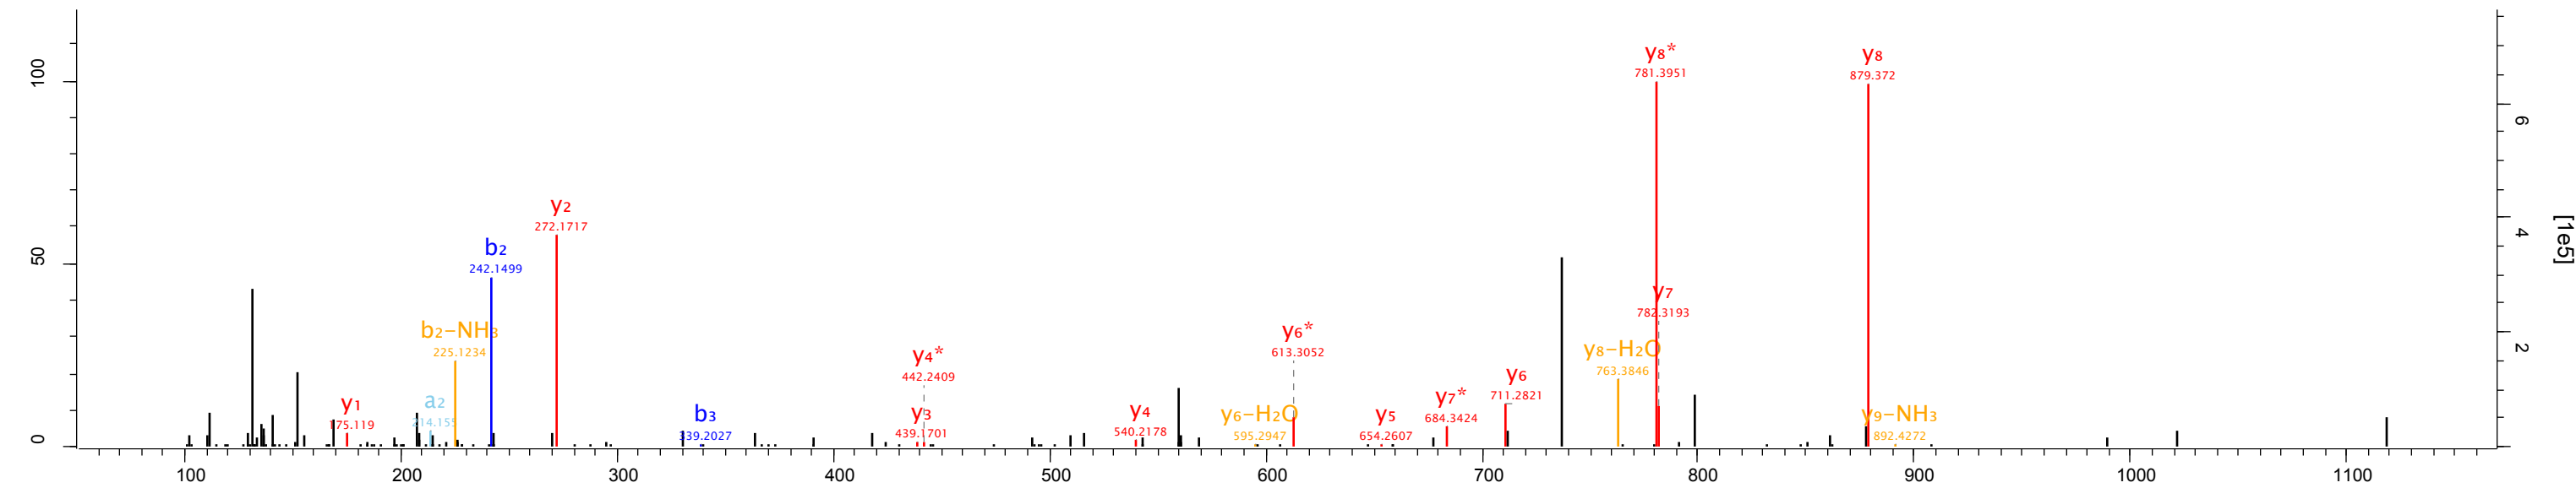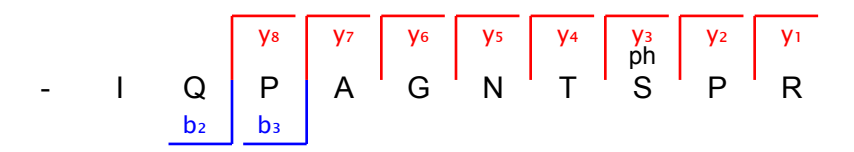

Raw file: 20171215\_MaS\_33SR\_LMH\_phospho2\_01  
 Scan: 1999 Method: FTMS; HCD Score: 154.92 m/z: 631.28 Gene names: CDKN1A

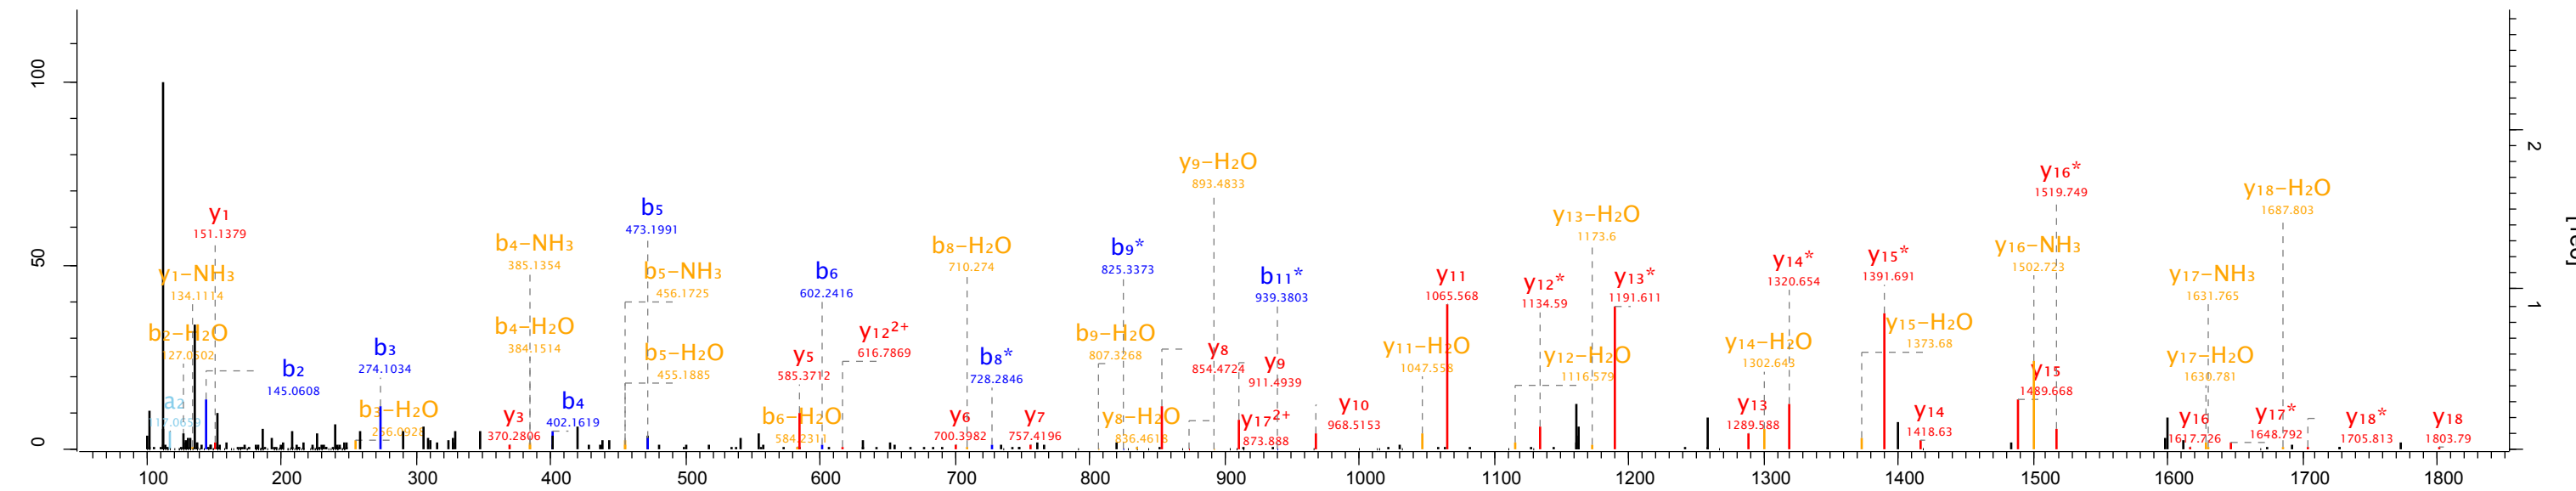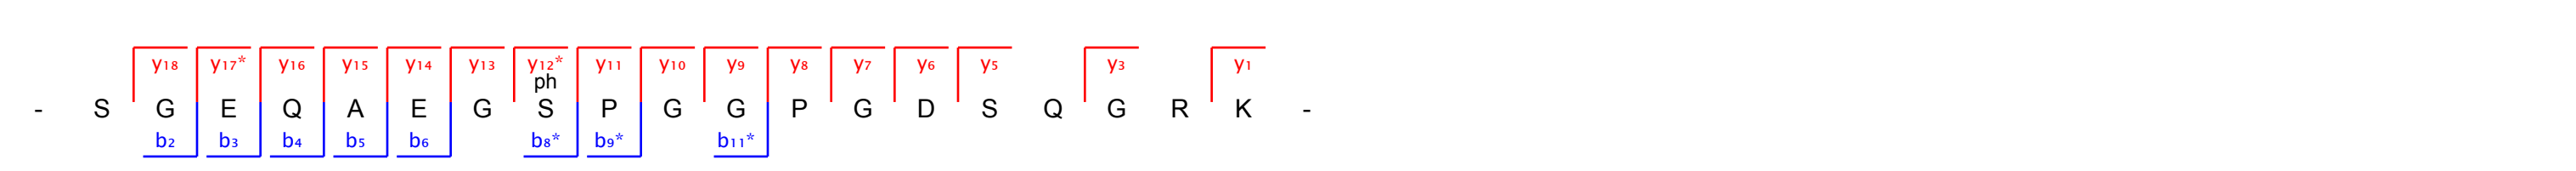



Raw file 20171215\_MaS\_33SR\_LMH\_phospho2\_01 Scan 4239 Method FTMS; HCD Score 63.3 m/z 513.91 Gene names WDR20

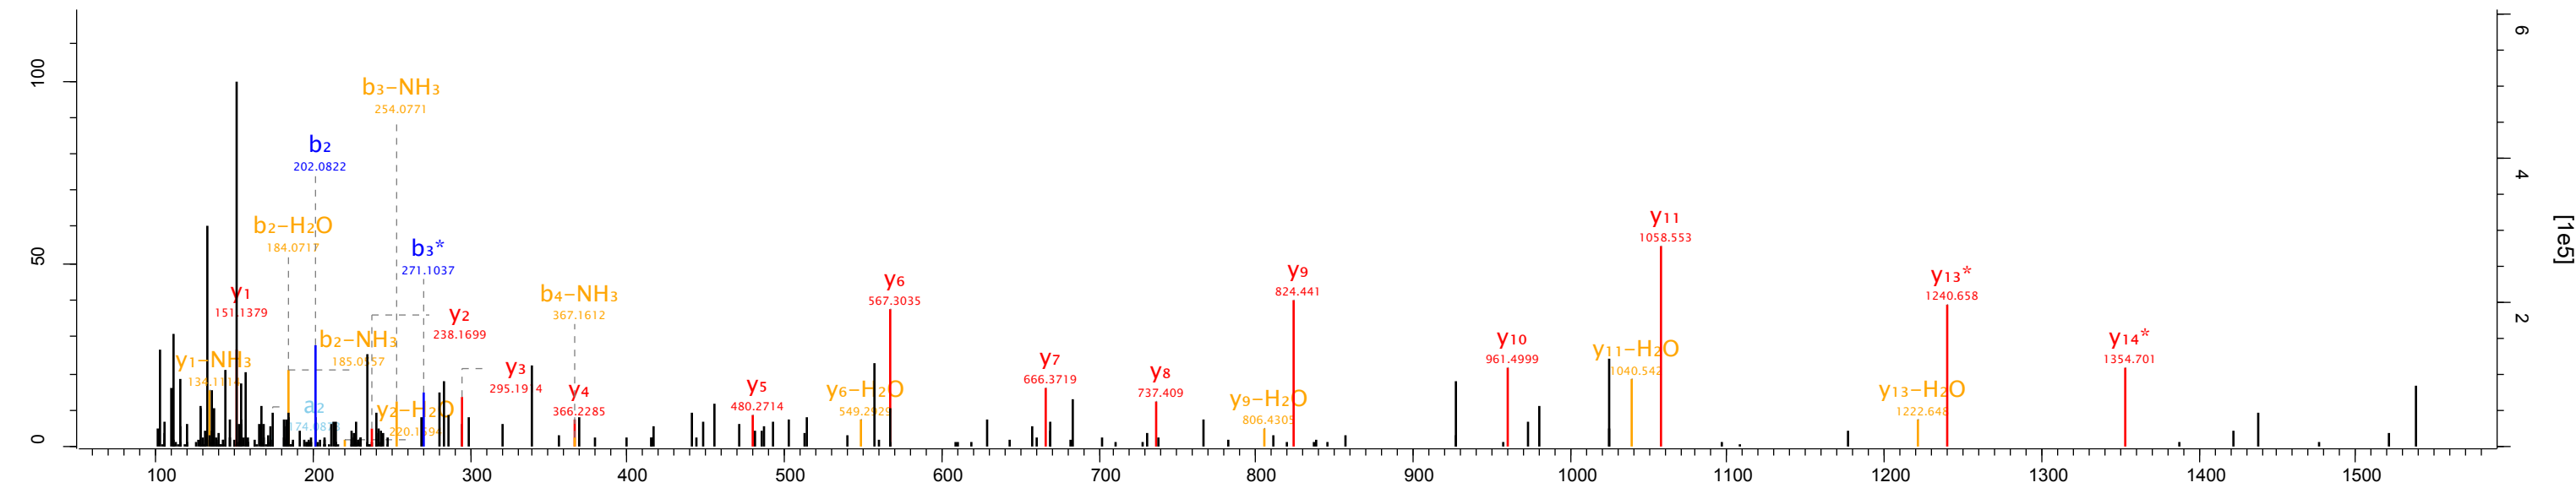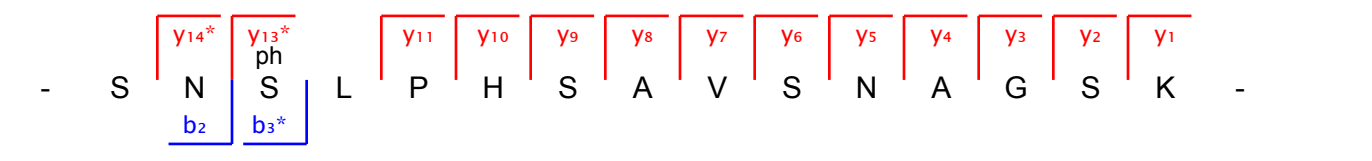

Raw file 20171215\_MaS\_33SR\_LMH\_phospho2\_01 Scan 4519 Method FTMS; HCD Score 98.96 m/z 562.28 Gene names MAPT

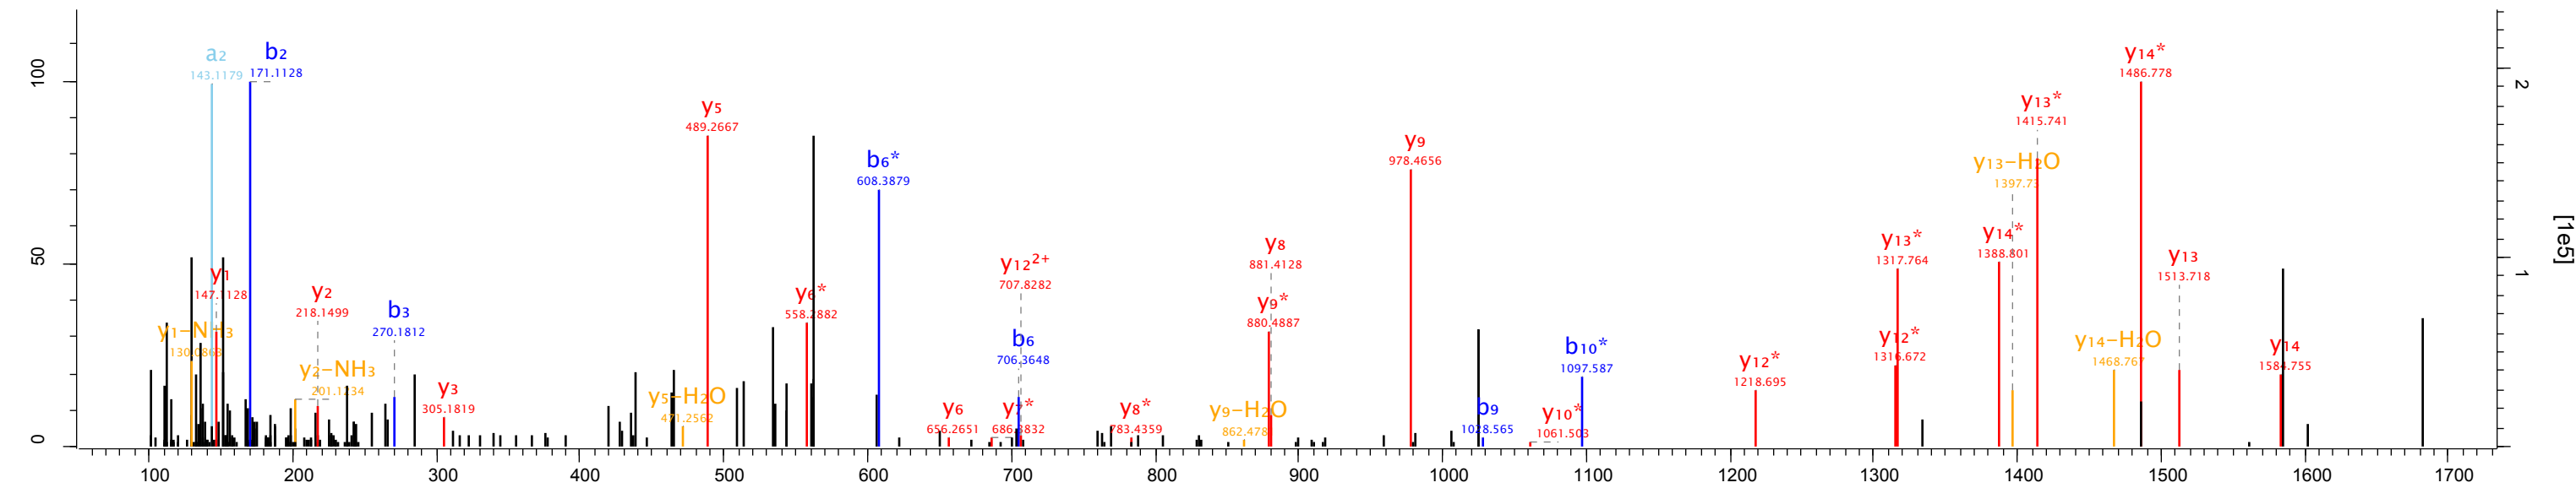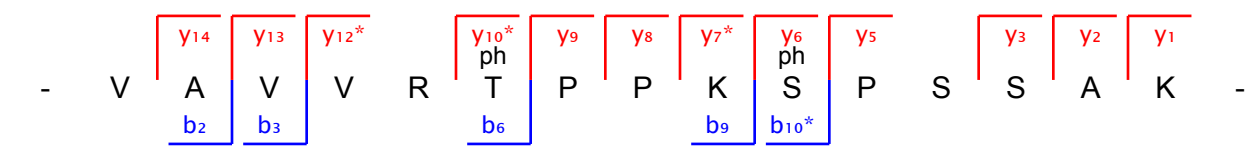

Raw file 20171215\_MaS\_33SR\_LMH\_phospho2\_02 Scan 19719 Method FTMS; HCD Score 89.36 m/z 658.82 Gene names MAML2

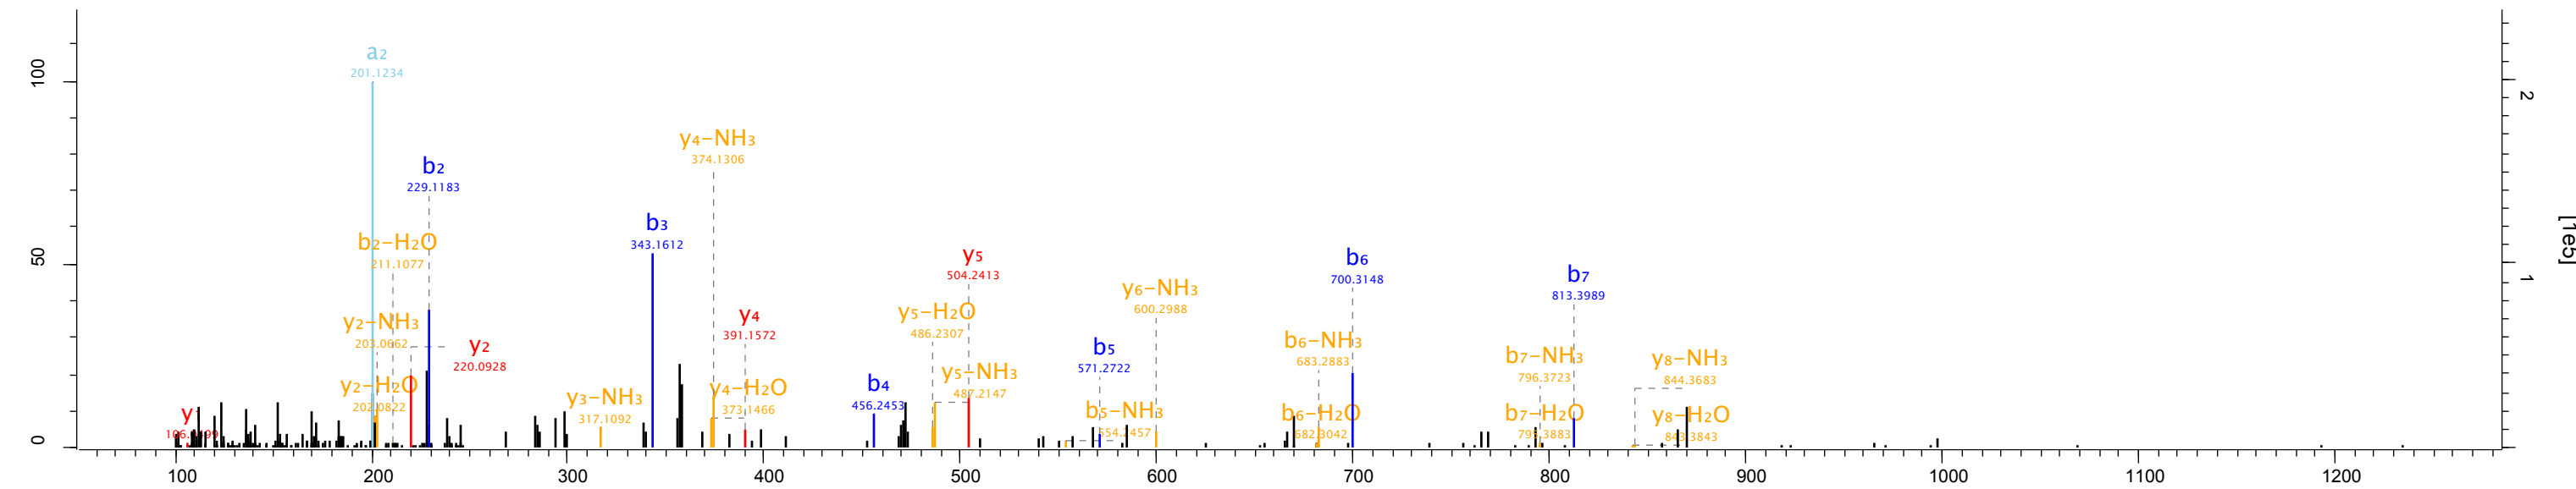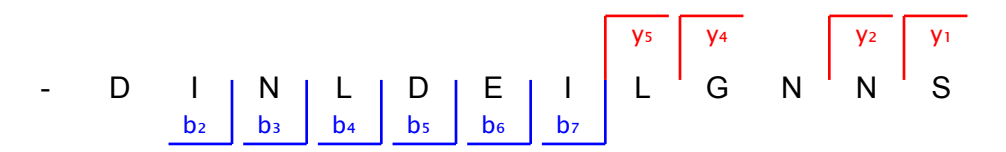

Raw file  
20171215\_MaS\_33SR\_LMH\_phospho2\_02

Scan 9319 Method FTMS; HCD Score 112.34 m/z 779.7 Gene names FKBP5

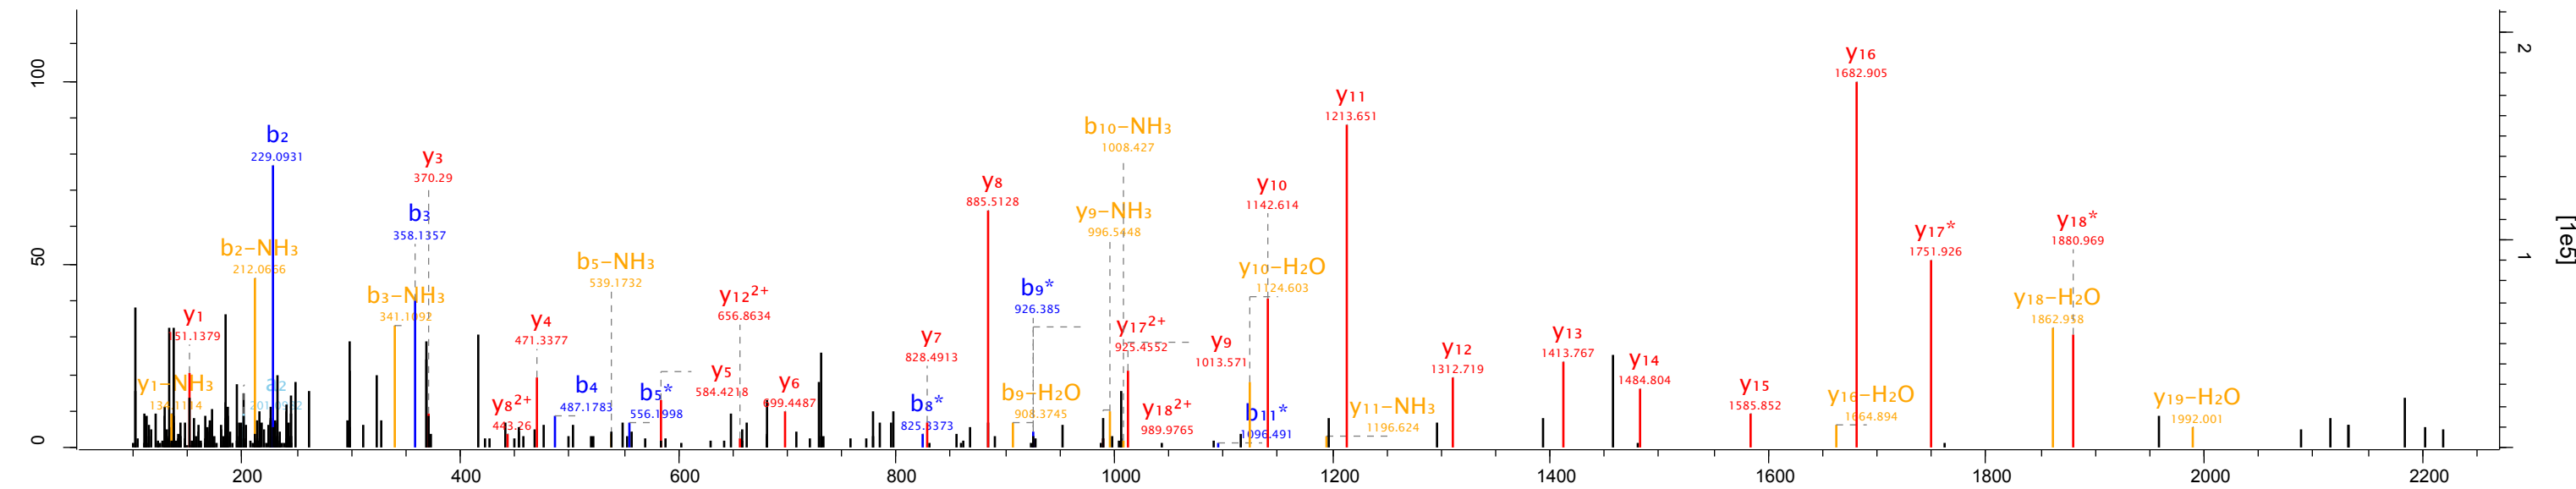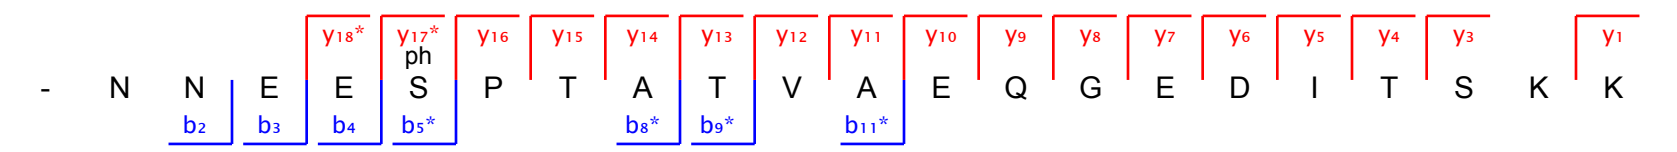

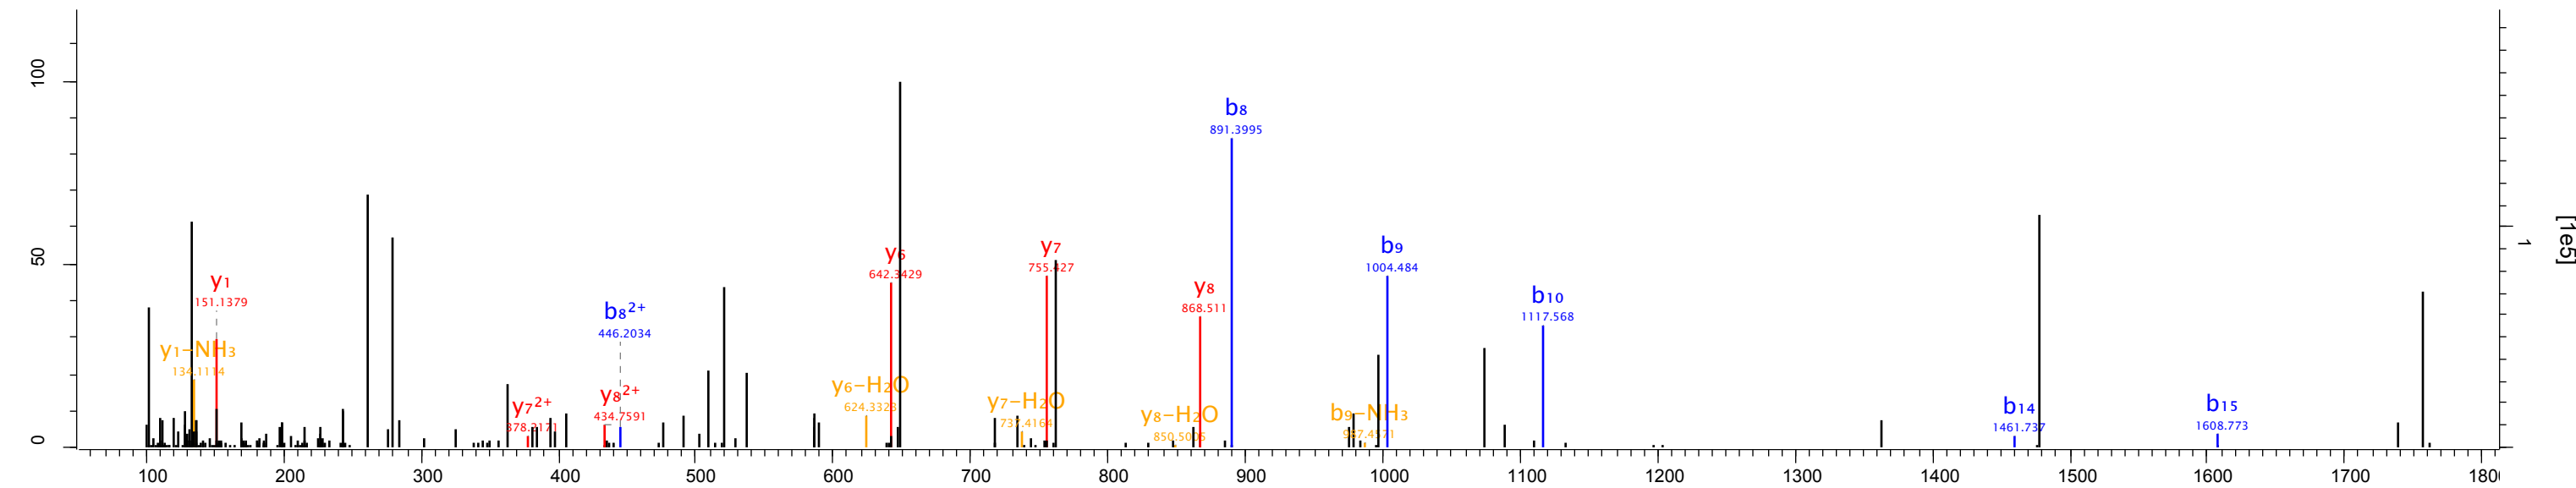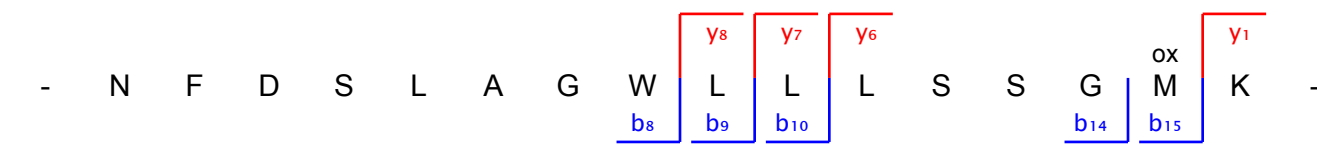

Raw file: 20171215\_MaS\_33SR\_LMH\_phospho2\_03  
 Scan: 11379 Method: FTMS; HCD Score: 147.11 m/z: 715.3 Gene names: CHD9

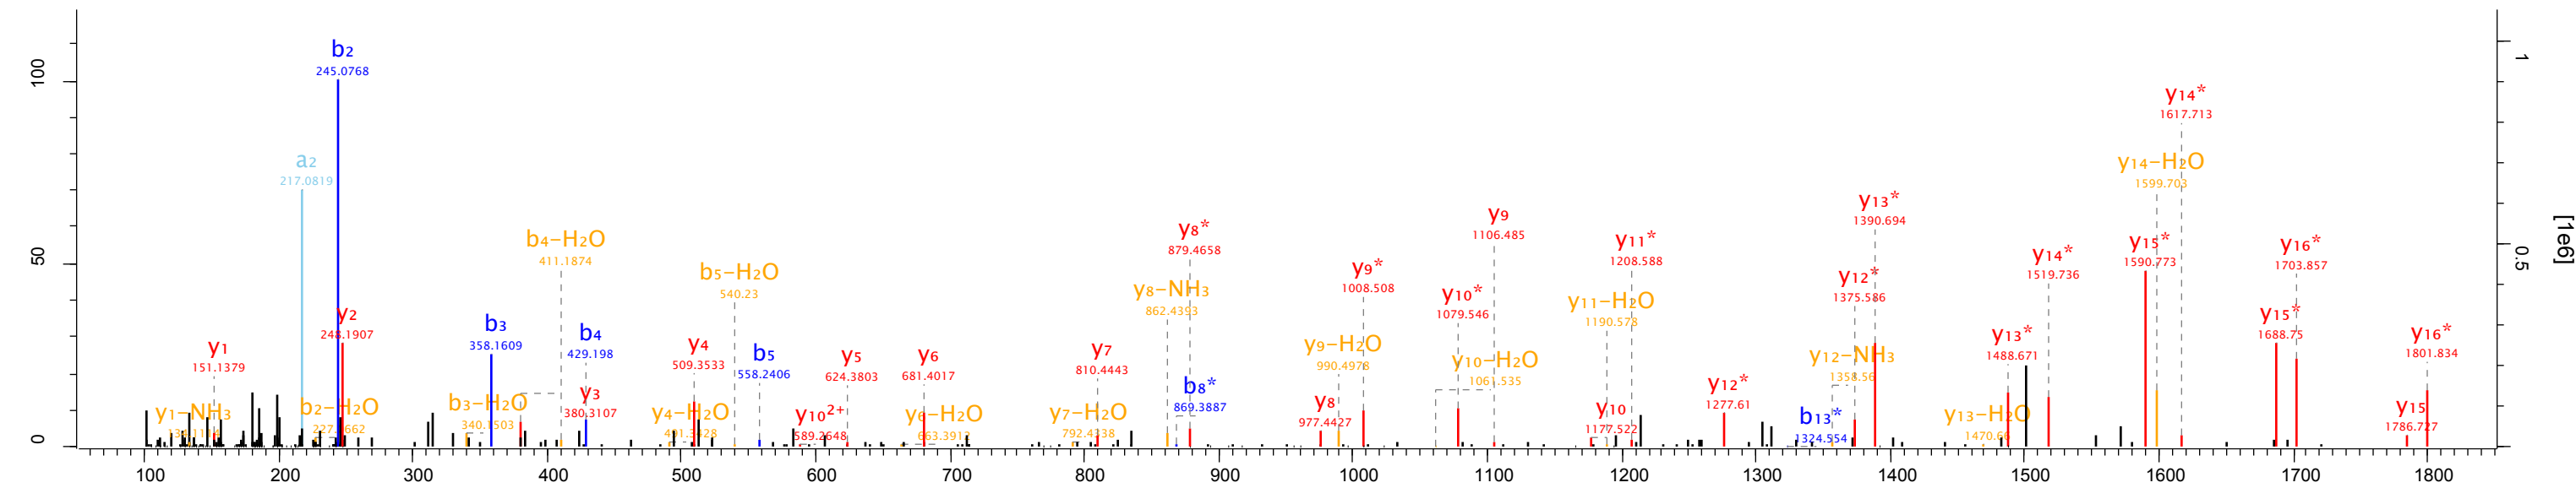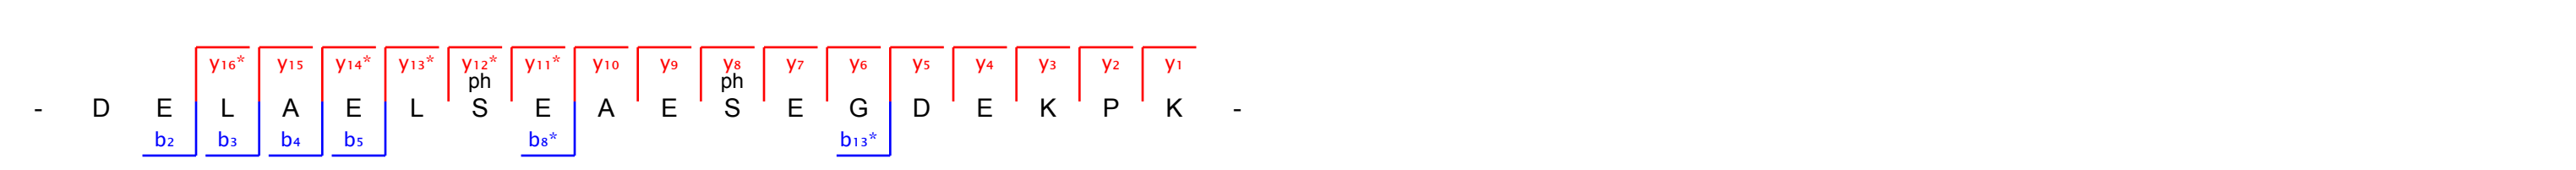

Raw file 20171215\_MaS\_33SR\_LMH\_phospho2\_03 Scan 11649 Method FTMS; HCD Score 135.82 m/z 920.86 Gene names OXR1

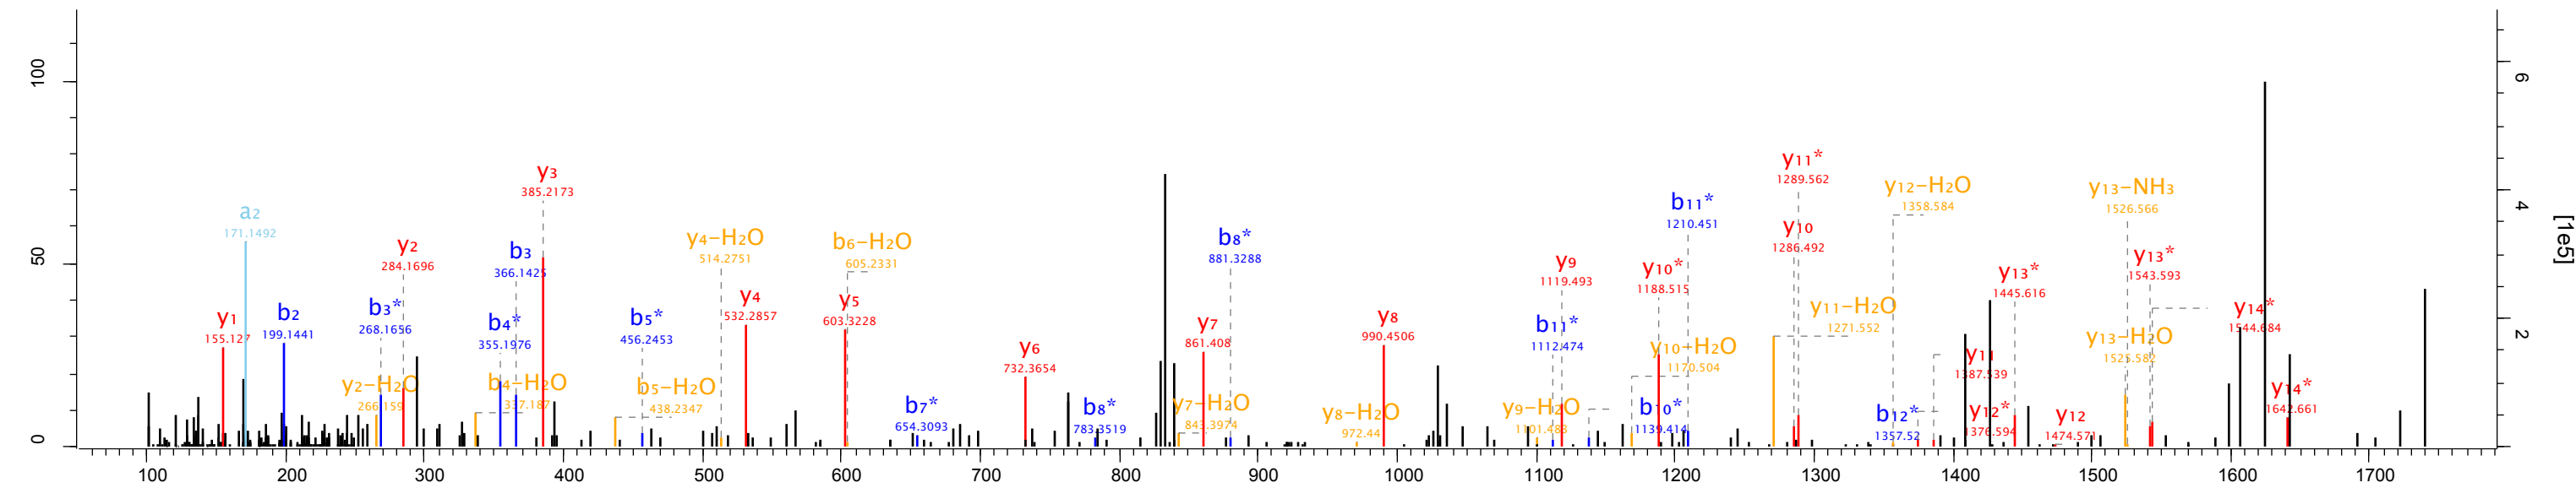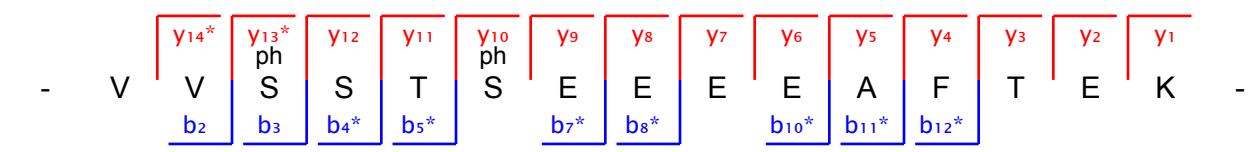

Raw file

20171215\_MaS\_33SR\_LMH\_phospho2\_03

| Scan  | Method    | Score  | m/z    | Gene names |
|-------|-----------|--------|--------|------------|
| 13099 | FTMS; HCD | 101.45 | 831.02 | PTPRK      |

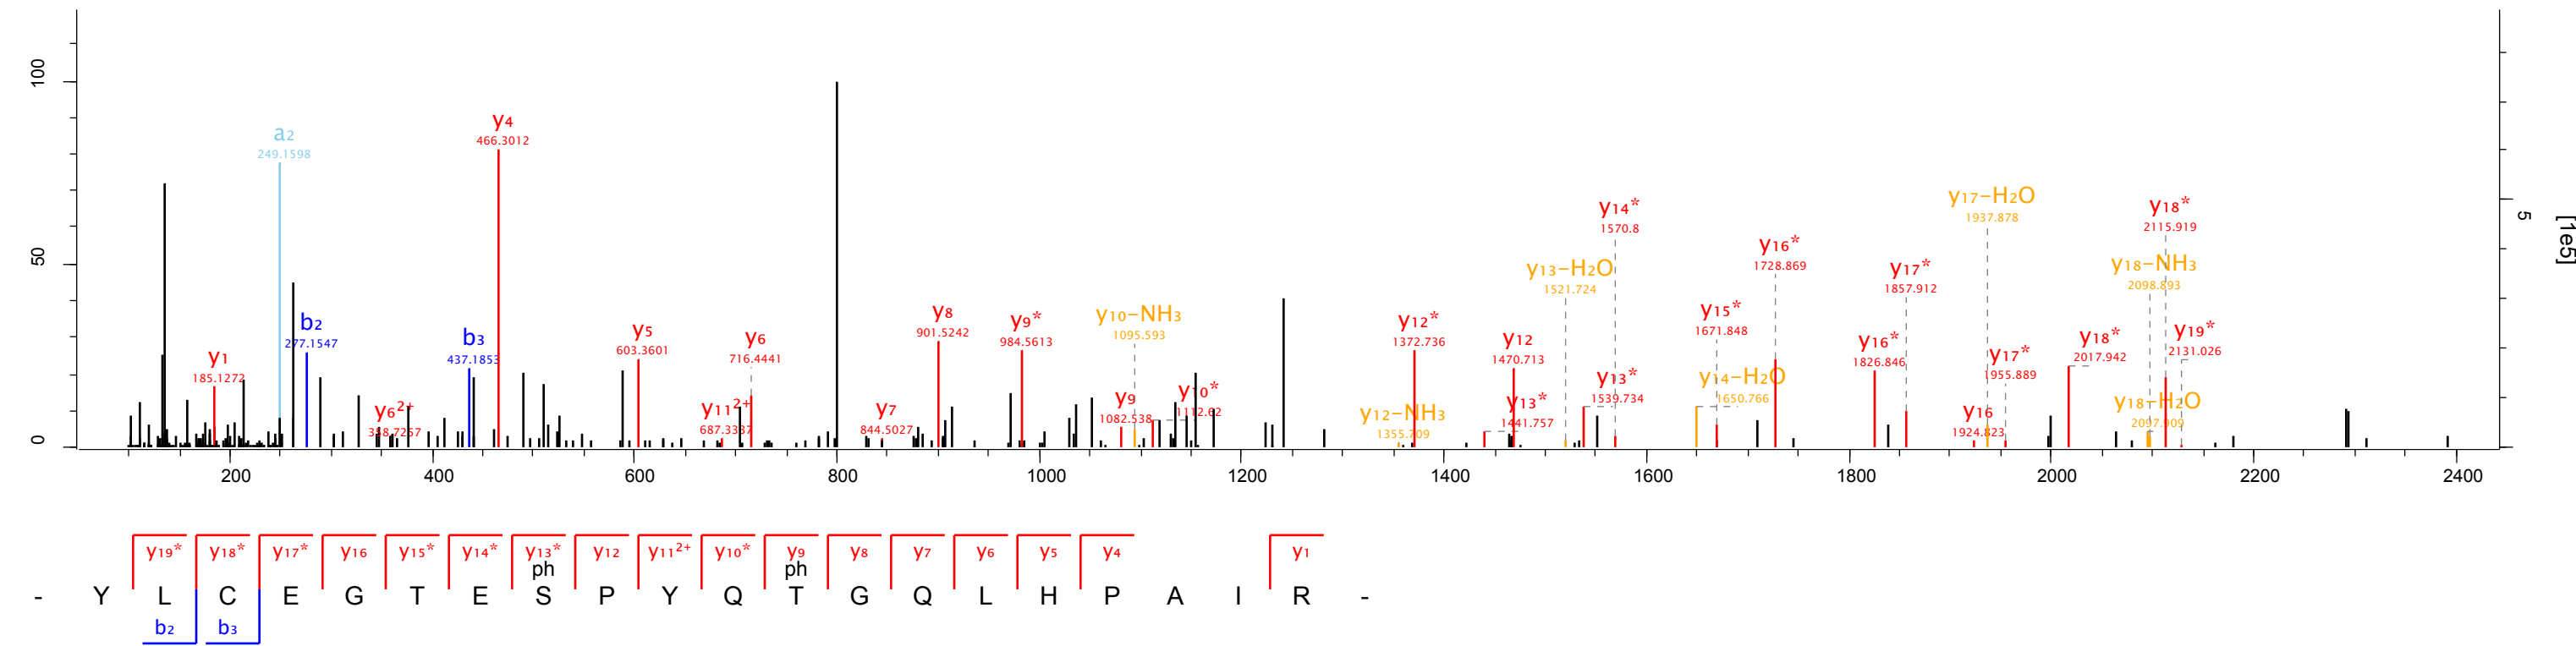



Raw file 20171215\_MaS\_33SR\_LMH\_phospho2\_03 Scan 14509 Method FTMS; HCD Score 118.72 m/z 581.25 Gene names RPS6KC1

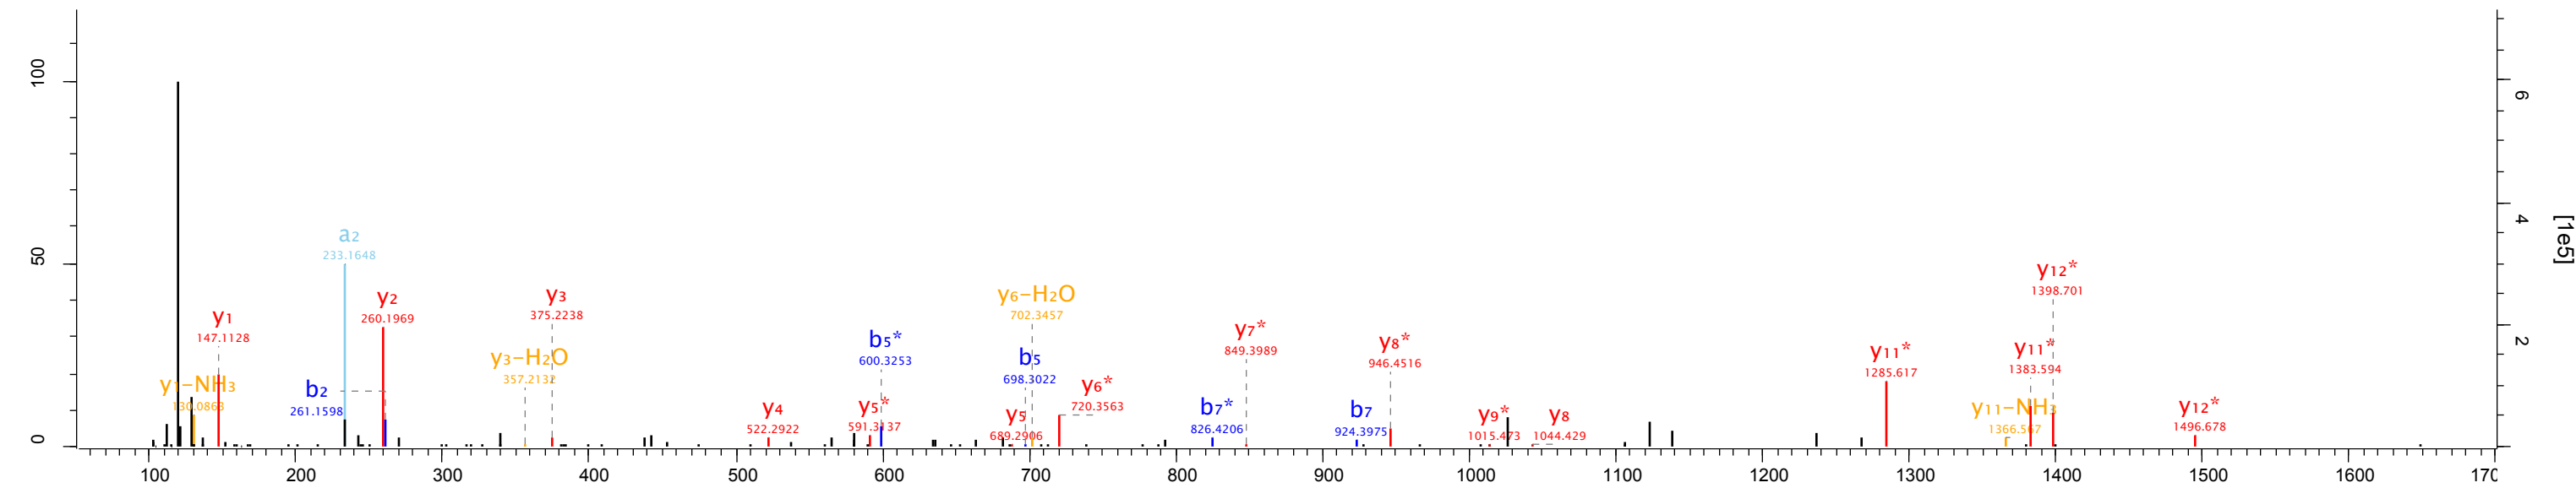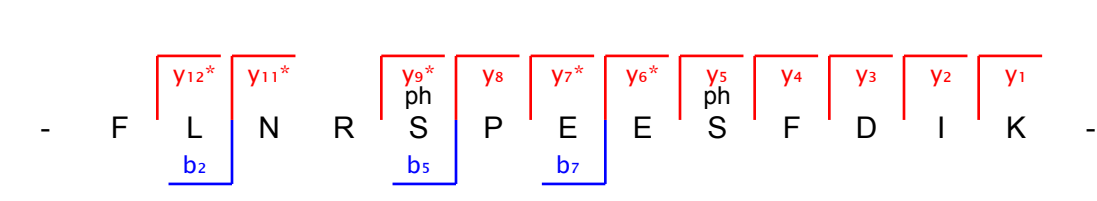

Raw file 20171215\_MaS\_33SR\_LMH\_phospho2\_03 Scan 18609 Method FTMS; HCD Score 100.75 m/z 1137.48 Gene names PRKRIR

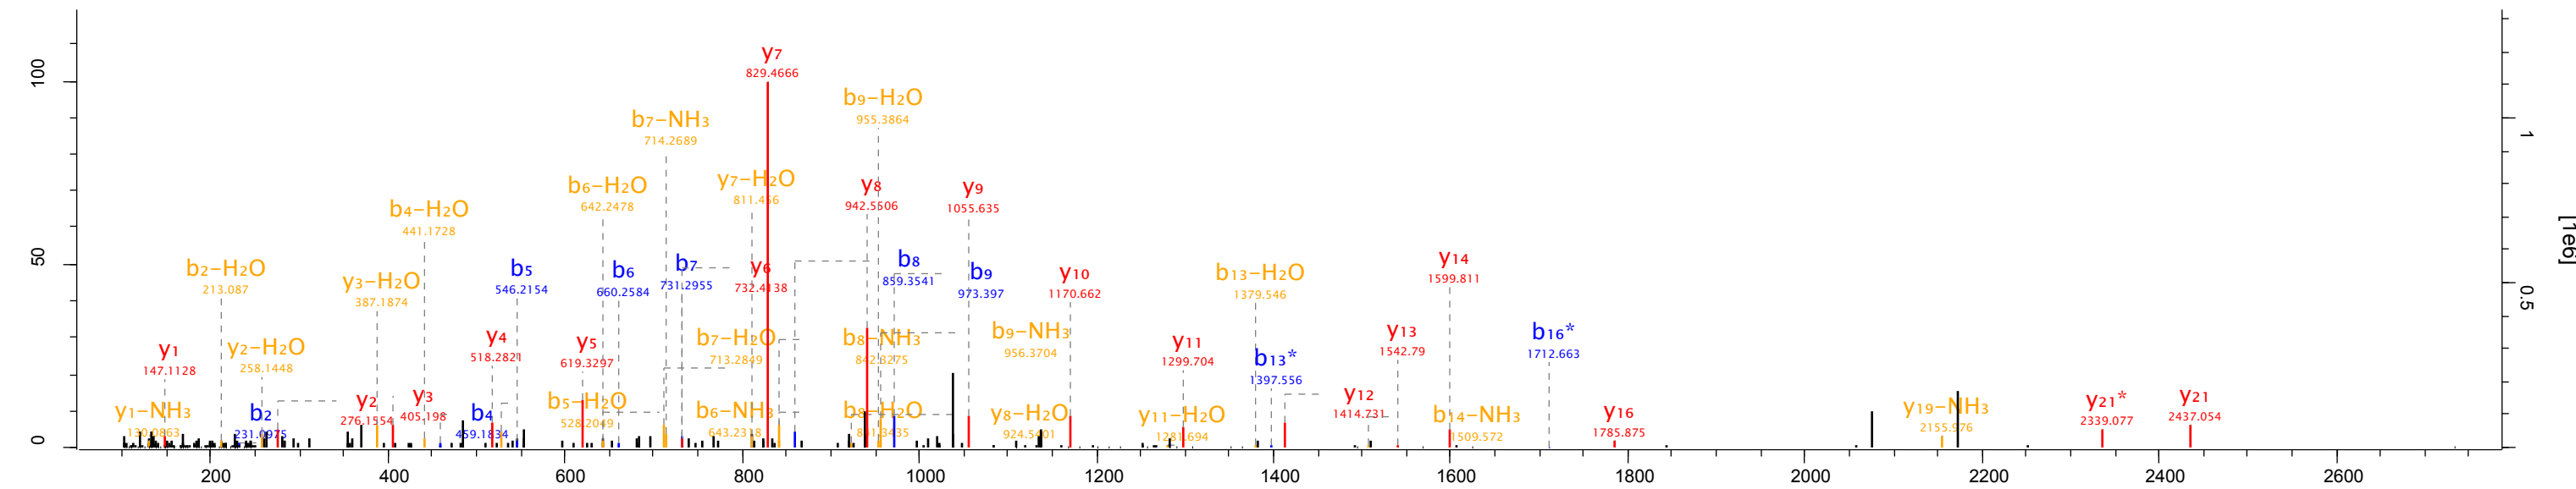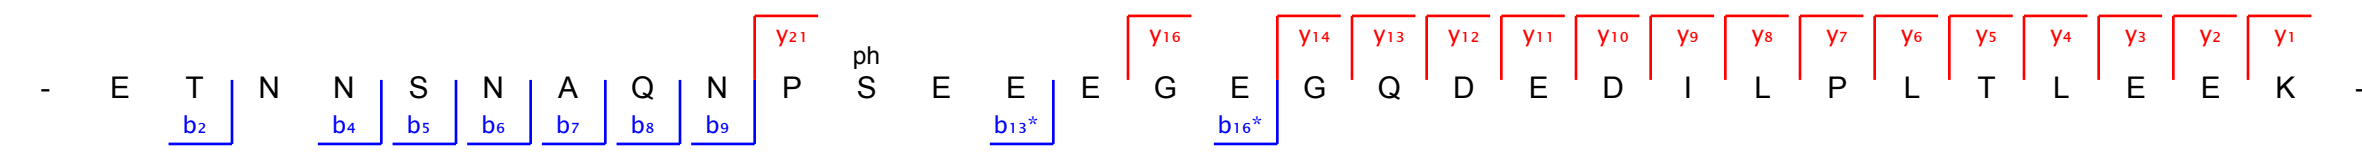

Raw file 20171215\_MaS\_33SR\_LMH\_phospho2\_03 Scan 19089 Method FTMS; HCD Score 49.12 m/z 1142.93 Gene names SCNM1

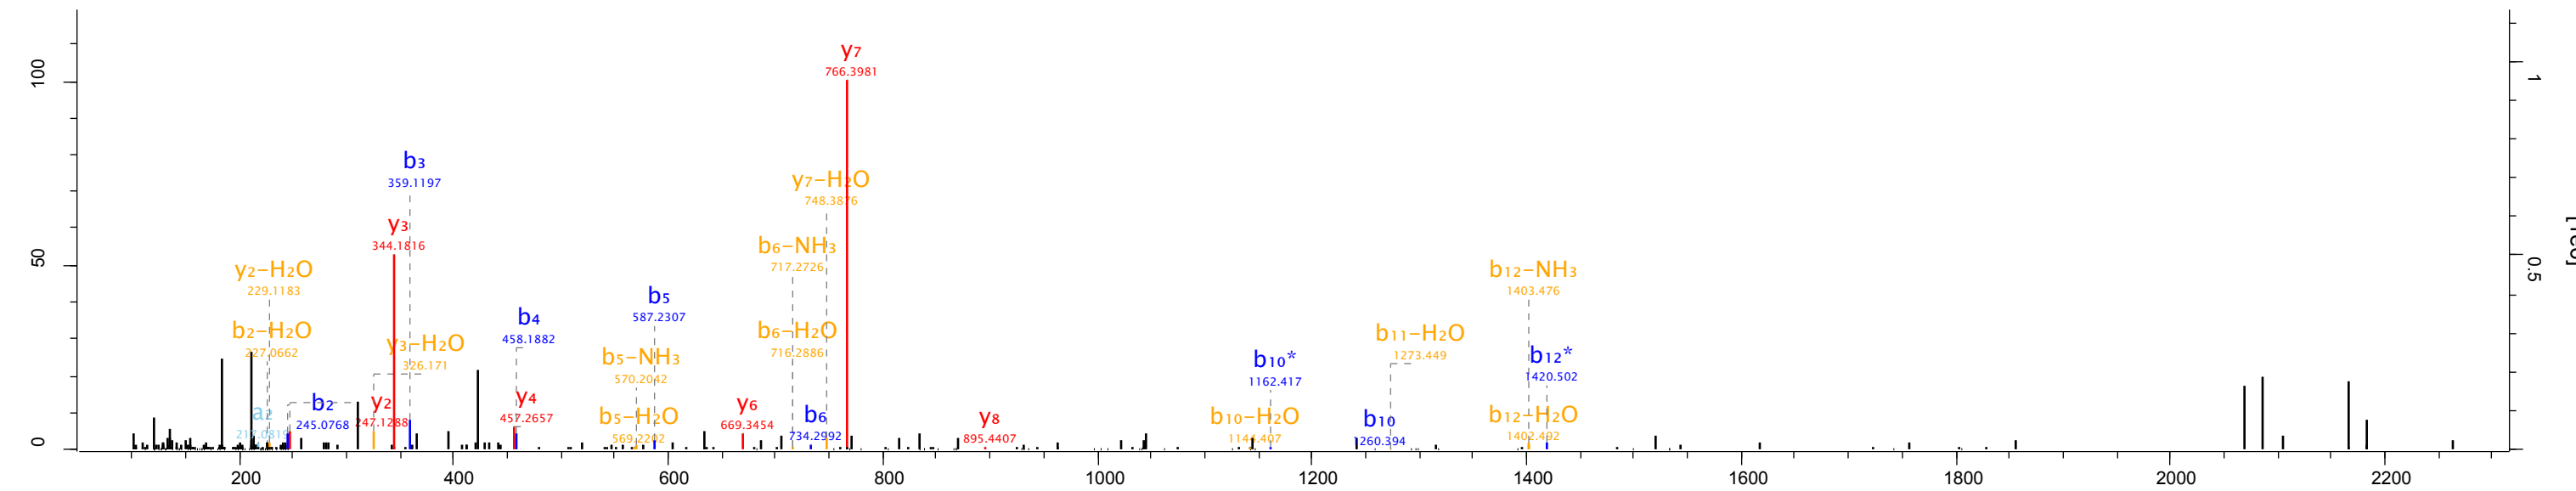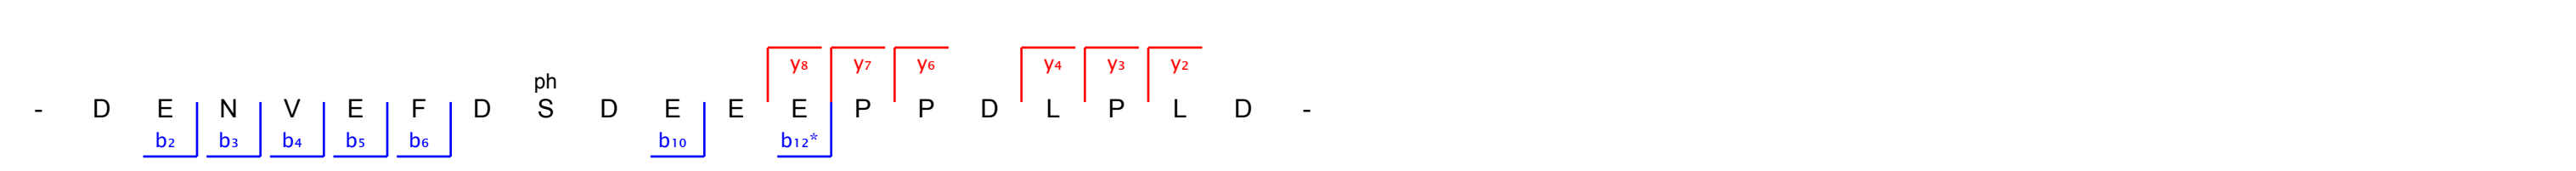



Raw file

20171215\_MaS\_33SR\_LMH\_phospho2\_03

| Scan | Method    | Score | m/z    | Gene names |
|------|-----------|-------|--------|------------|
| 3039 | FTMS; HCD | 68.28 | 556.76 | CABLES1    |

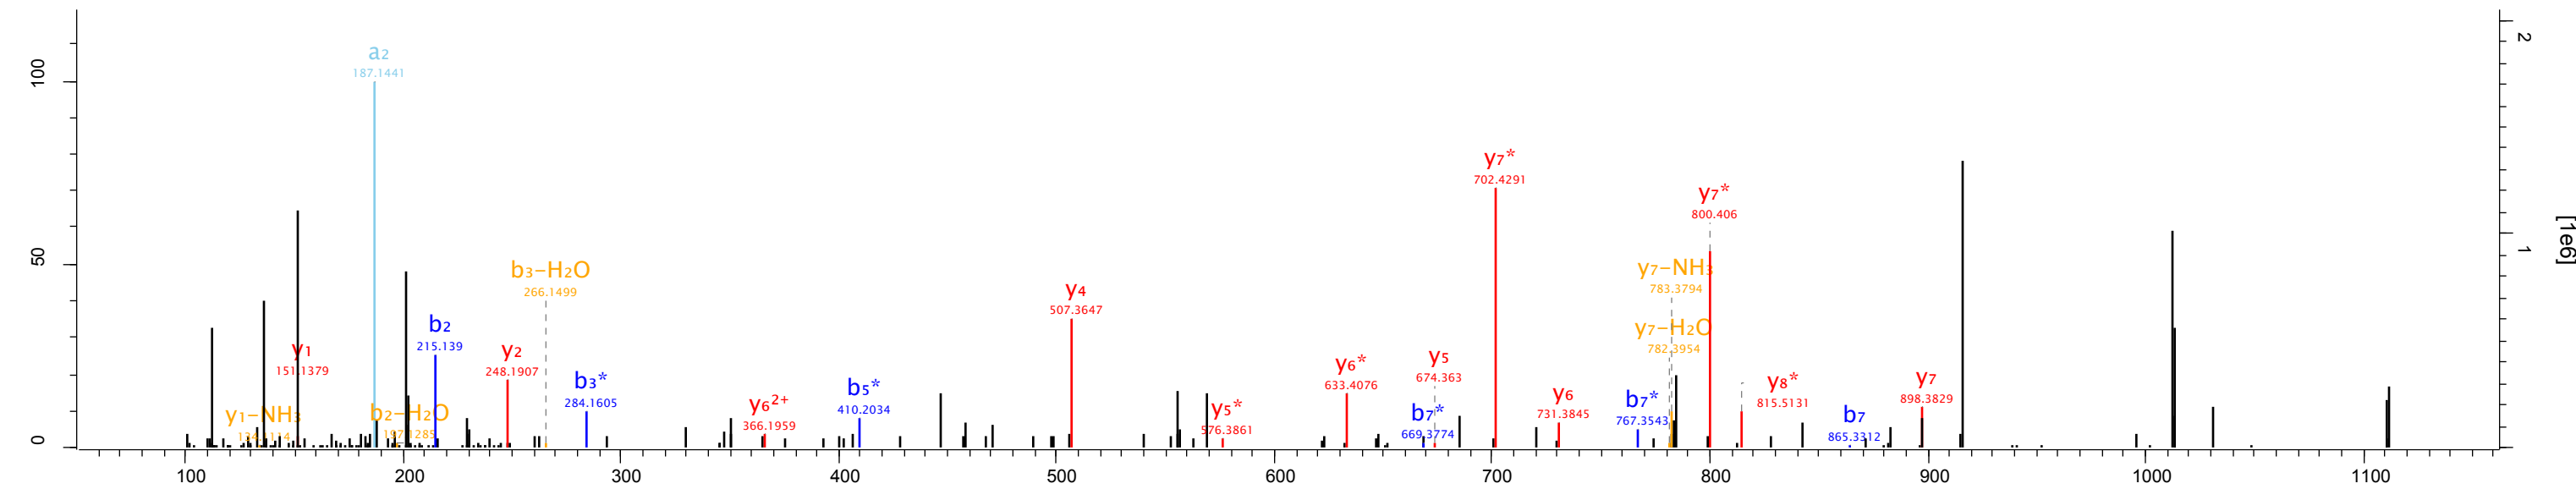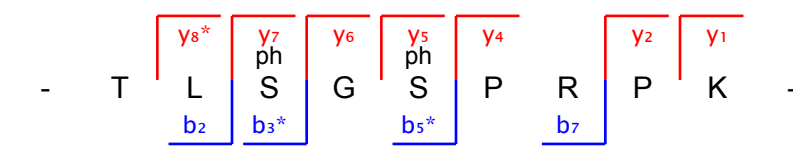



Raw file 20171215\_MaS\_33SR\_LMH\_phospho2\_03 Scan 6059 Method FTMS; HCD Score 62.1 m/z 612.75 Gene names EI24

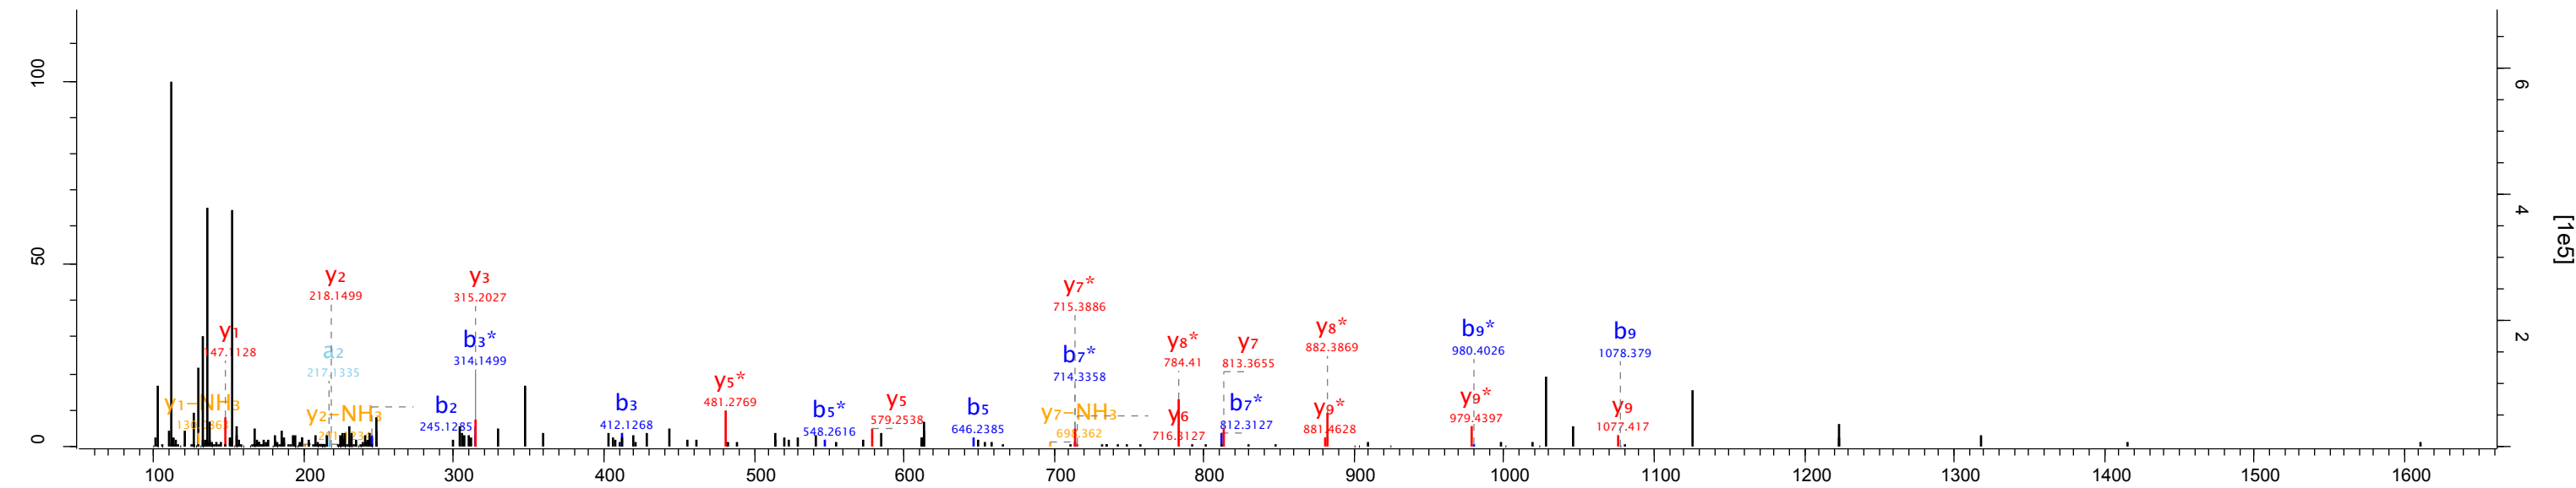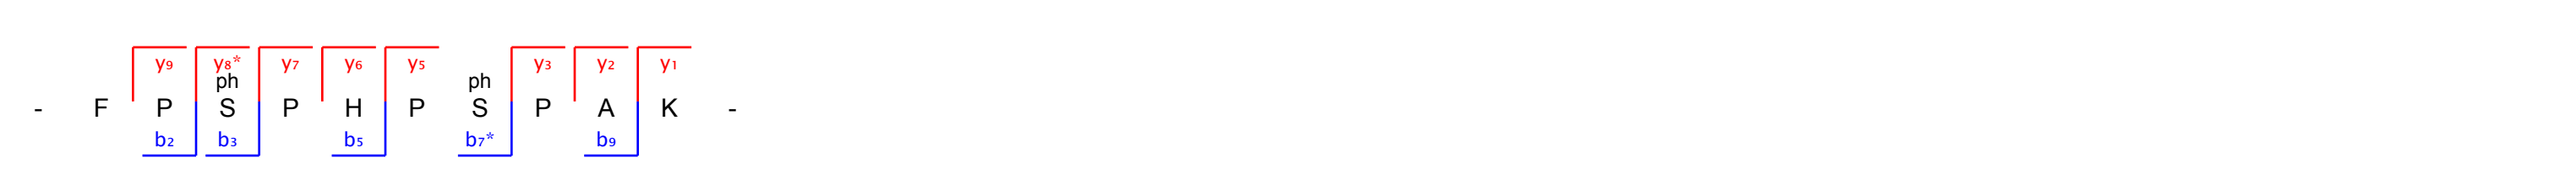

Raw file: 20171215\_MaS\_33SR\_LMH\_phospho2\_04  
 Scan: 11579 Method: FTMS; HCD Score: 76.02 m/z: 776.35 Gene names: USP32

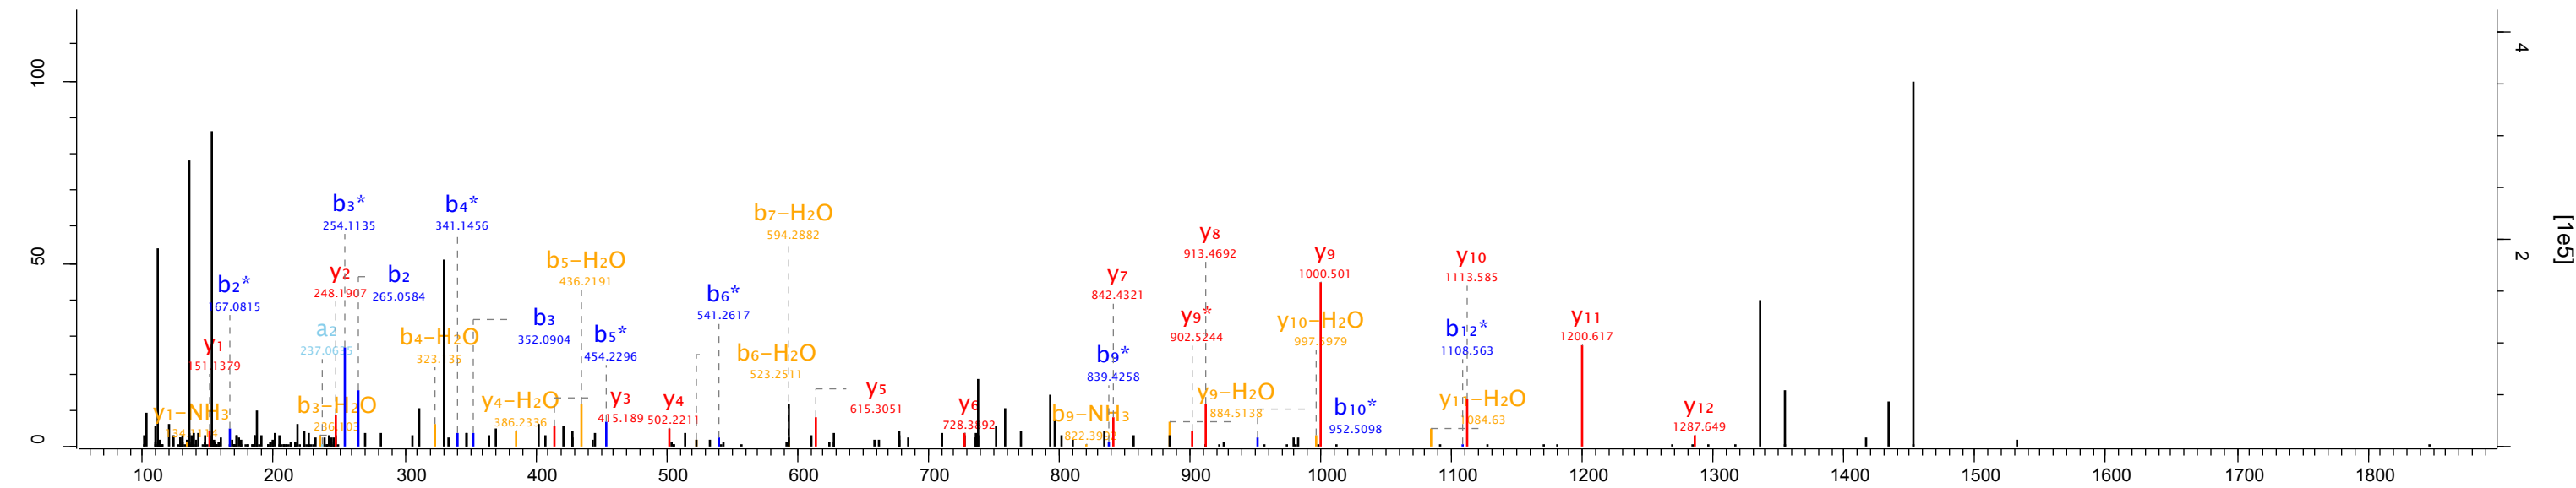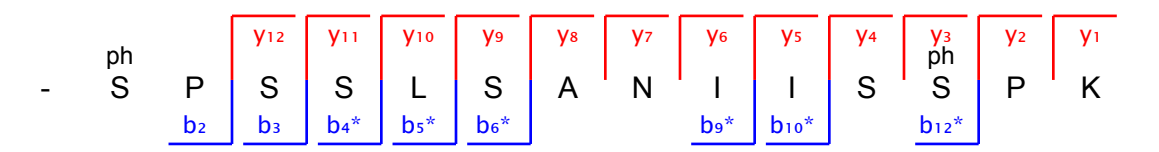



Raw file  
20171215\_MaS\_33SR\_LMH\_phospho2\_04

Scan 4659 Method FTMS; HCD Score 111.98 m/z 609.26 Gene names PLEKHA7

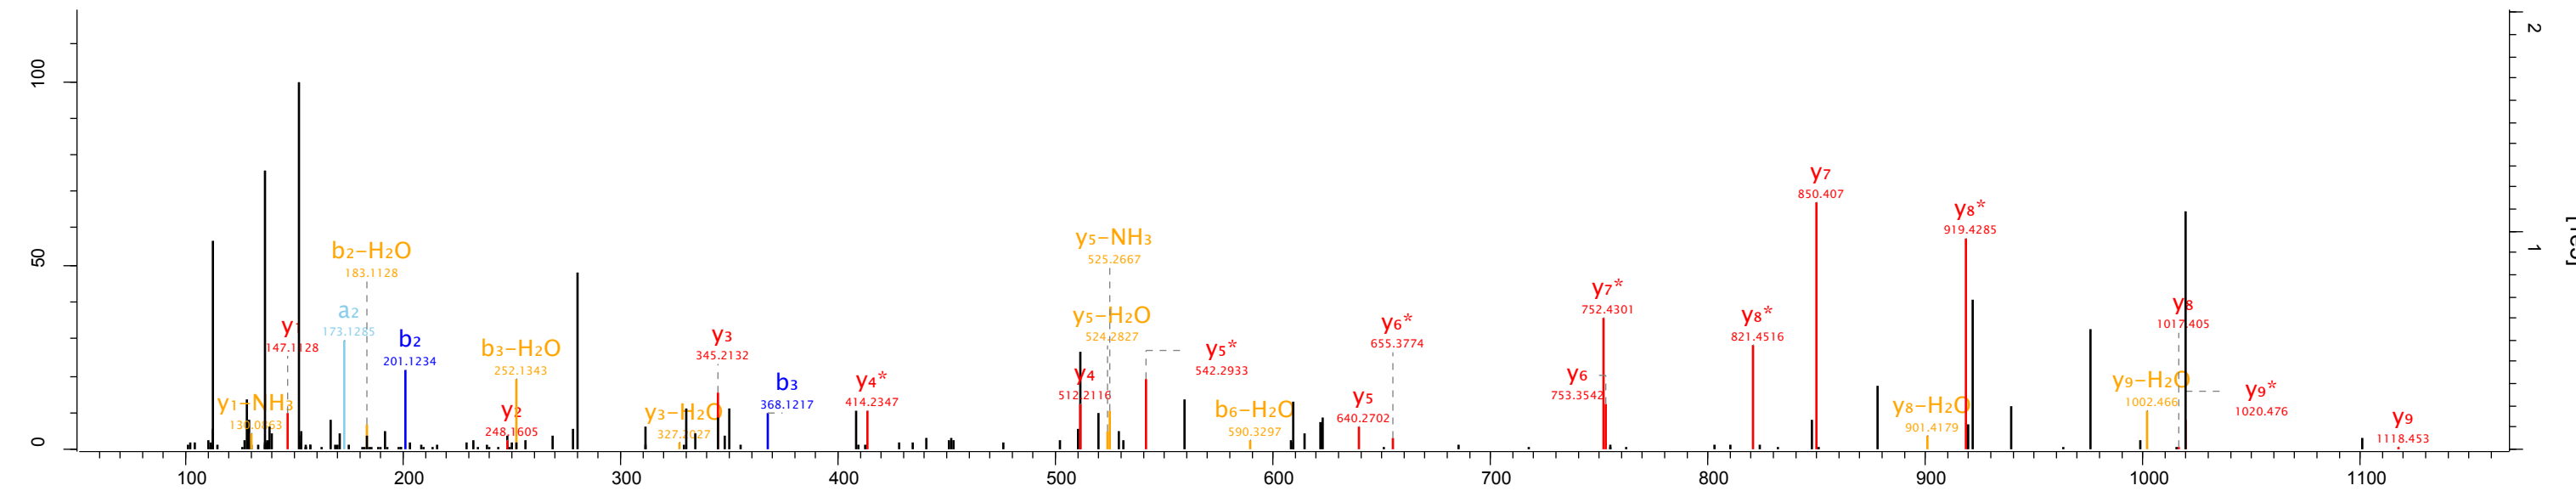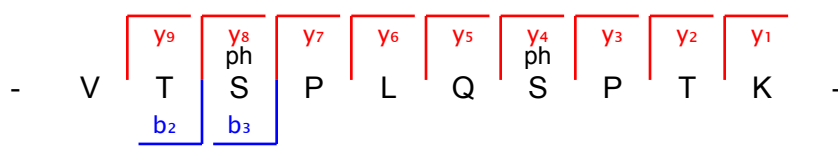

Raw file: 20171215\_MaS\_33SR\_LMH\_phospho2\_04  
 Scan: 5019 Method: FTMS; HCD Score: 72.8 m/z: 951.87 Gene names: RAP1GAP2

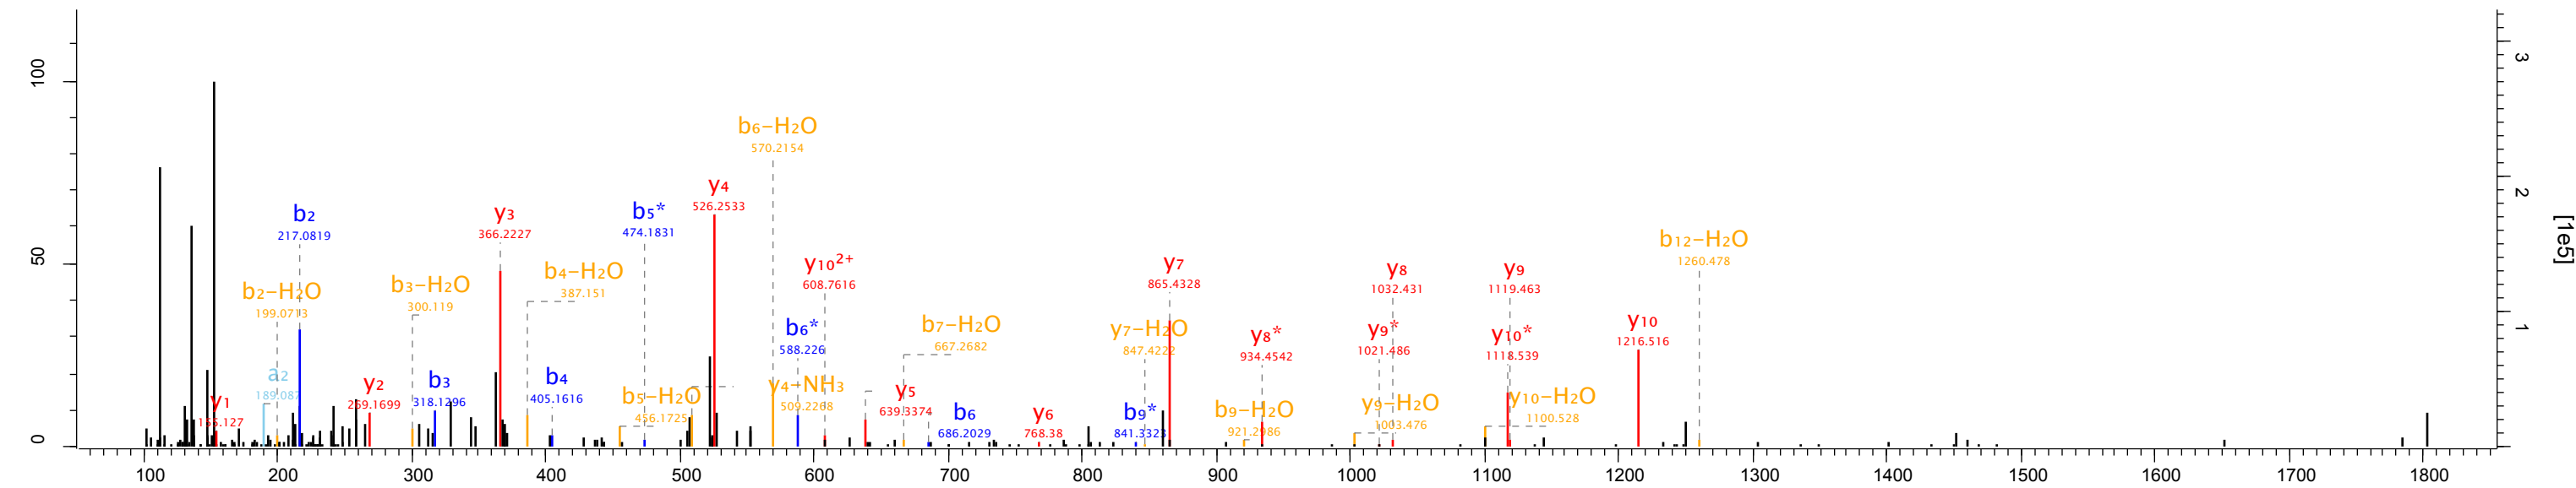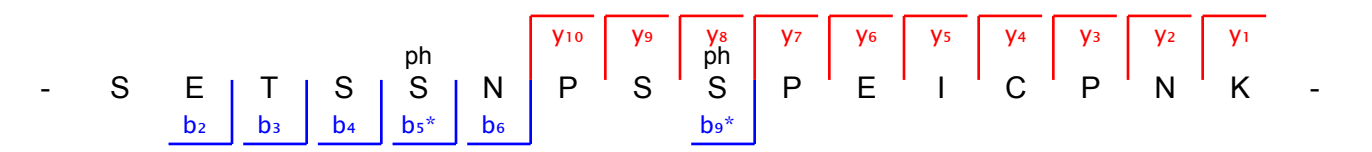

Raw file 20171215\_MaS\_33SR\_LMH\_phospho2\_06 Scan 3739 Method FTMS; HCD Score 173.06 m/z 650.79 Gene names ABI2

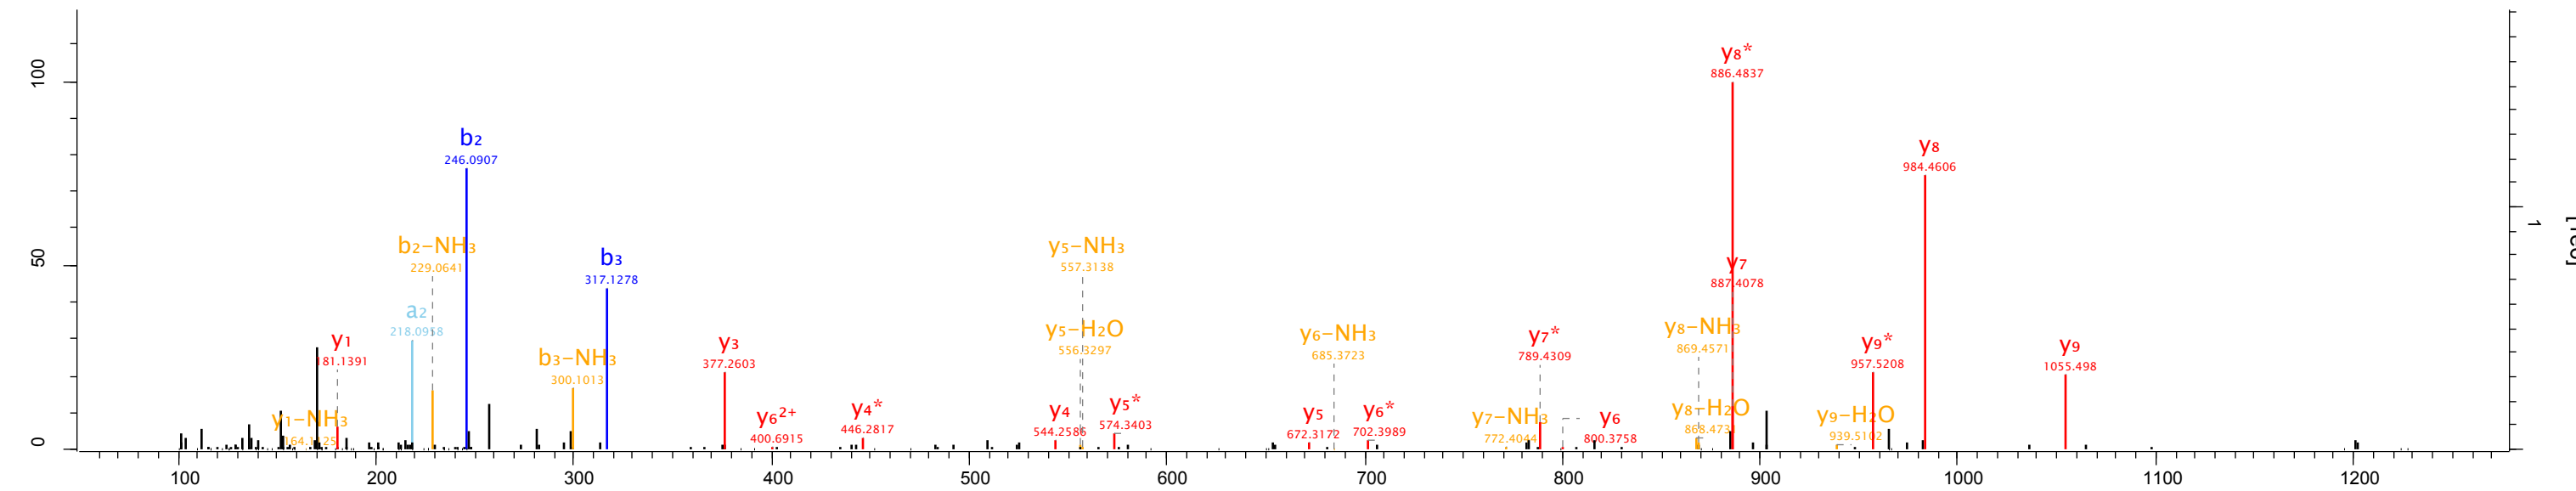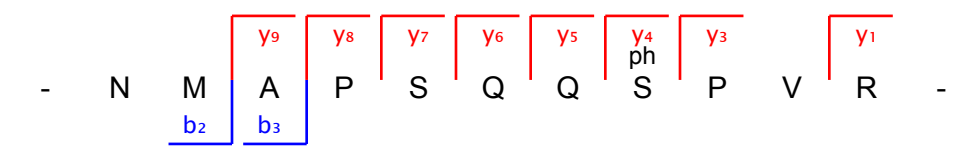

Raw file 20171215\_MaS\_33SR\_LMH\_phospho2\_09 Scan 3319 Method FTMS; HCD Score 68.53 m/z 428.71 Gene names AFAP1L1

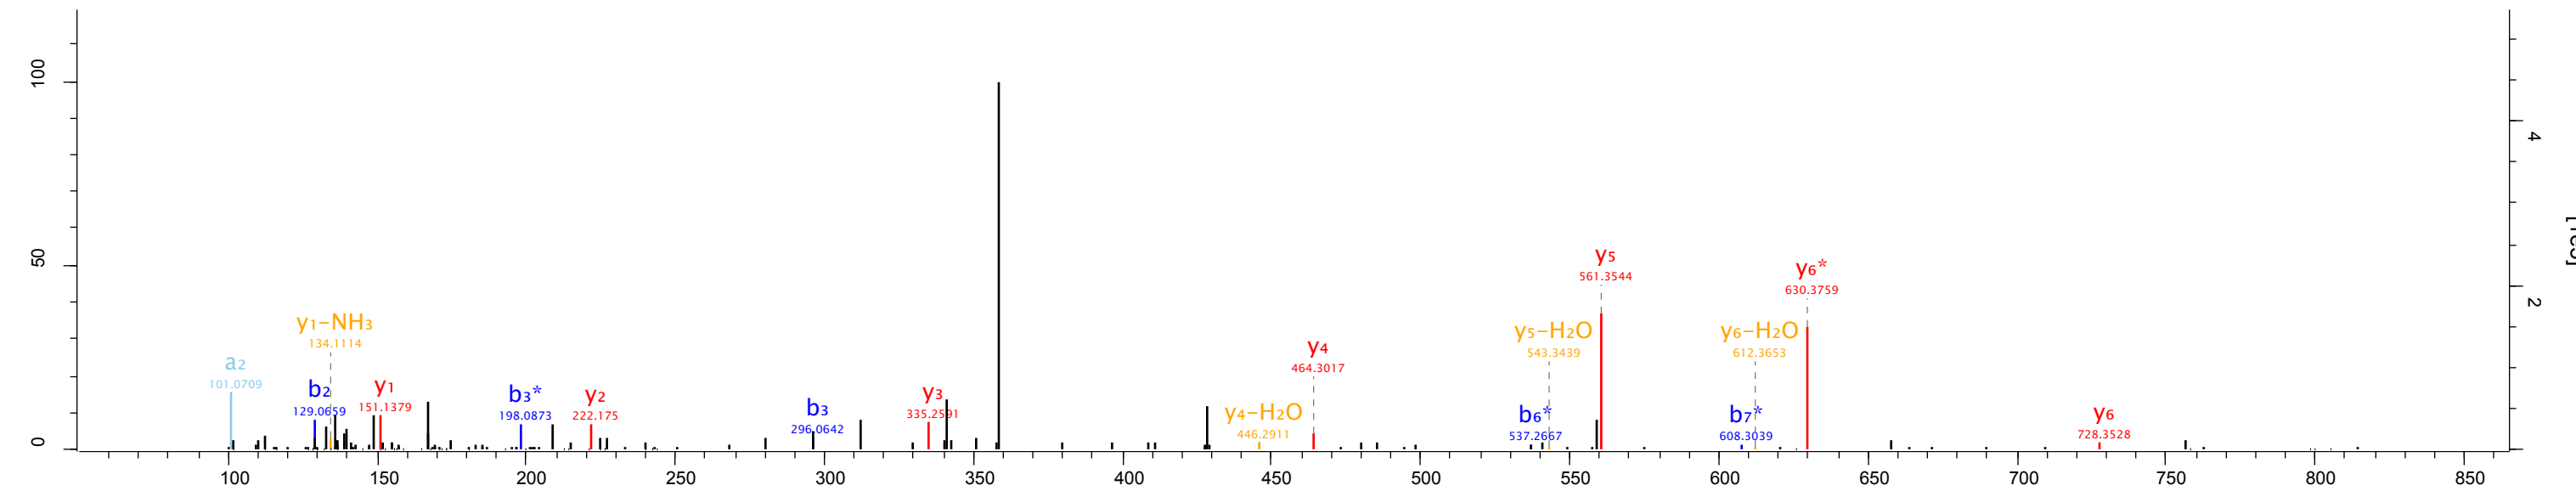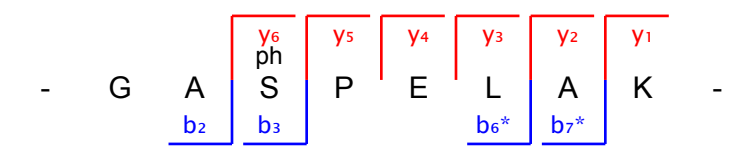

Raw file 20171215\_MaS\_33SR\_LMH\_phospho2\_09 Scan 4189 Method FTMS; HCD Score 60.51 m/z 499.25 Gene names LIN52

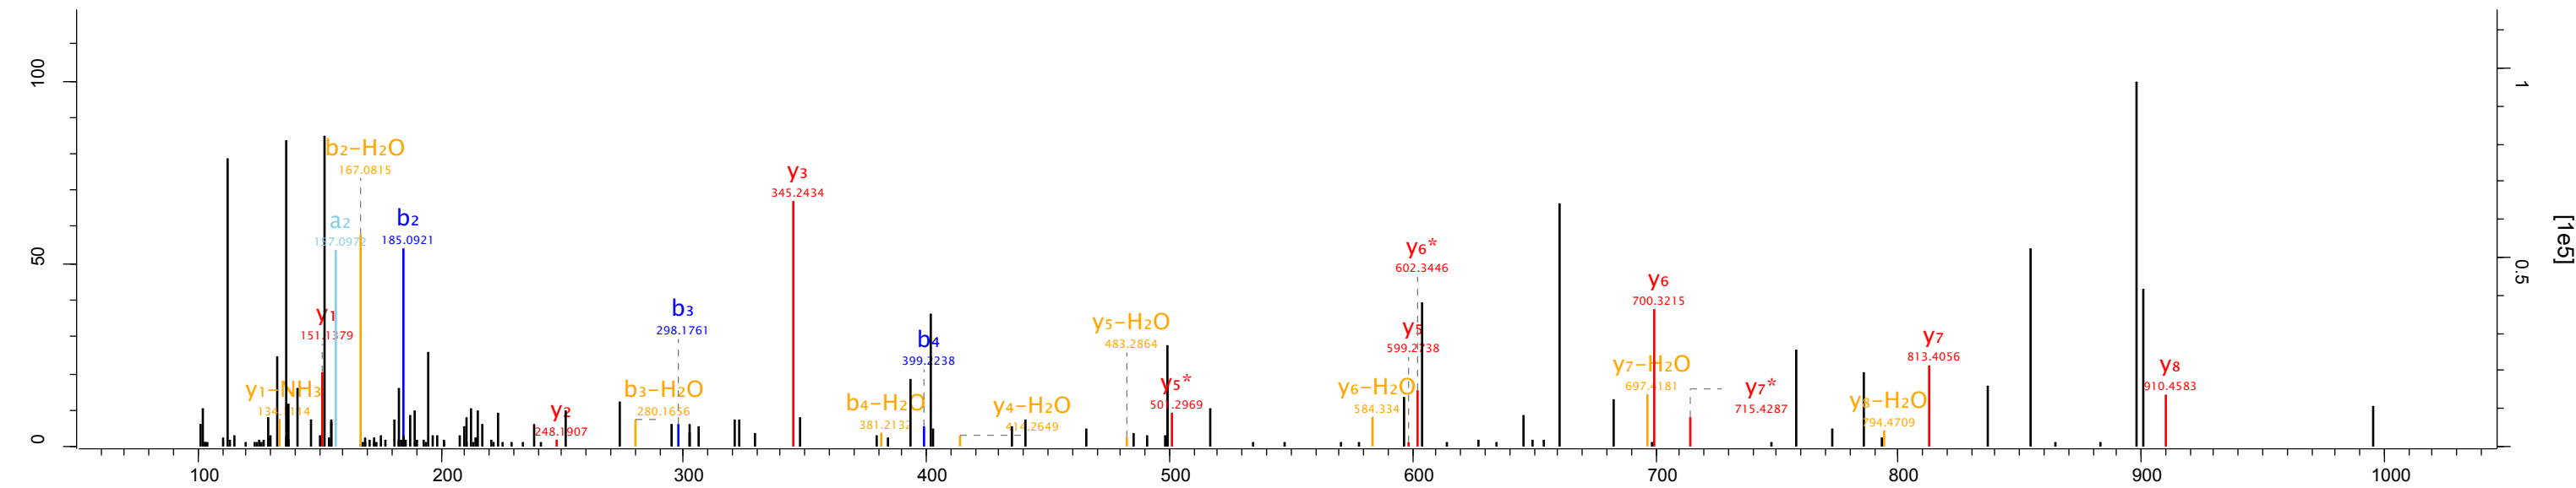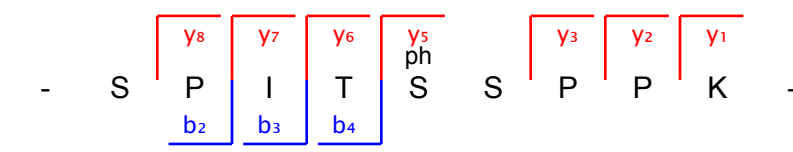

Raw file: 20171215\_MaS\_33SR\_LMH\_proteome\_01  
 Scan: 102919 Method: FTMS; HCD Score: 46.35 m/z: 778.89 Gene names: FMN2

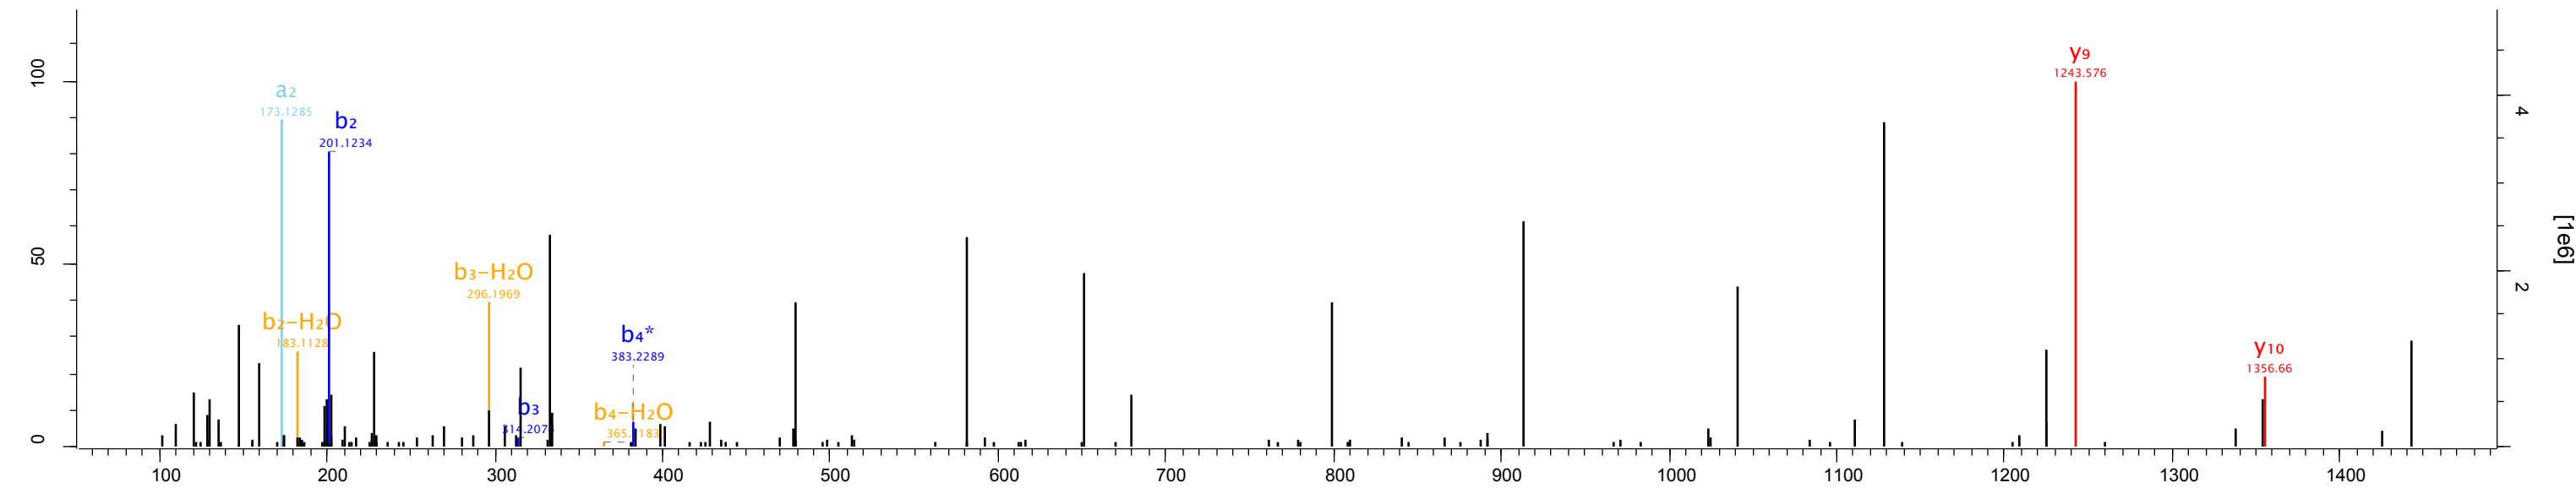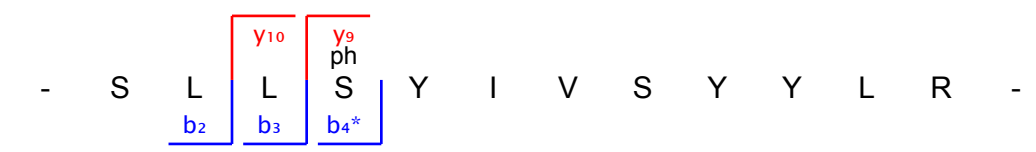

Raw file 20171215\_MaS\_33SR\_LMH\_proteome\_01 Scan 103039 Method FTMS; HCD Score 56.4 m/z 574.34 Gene names ATG12

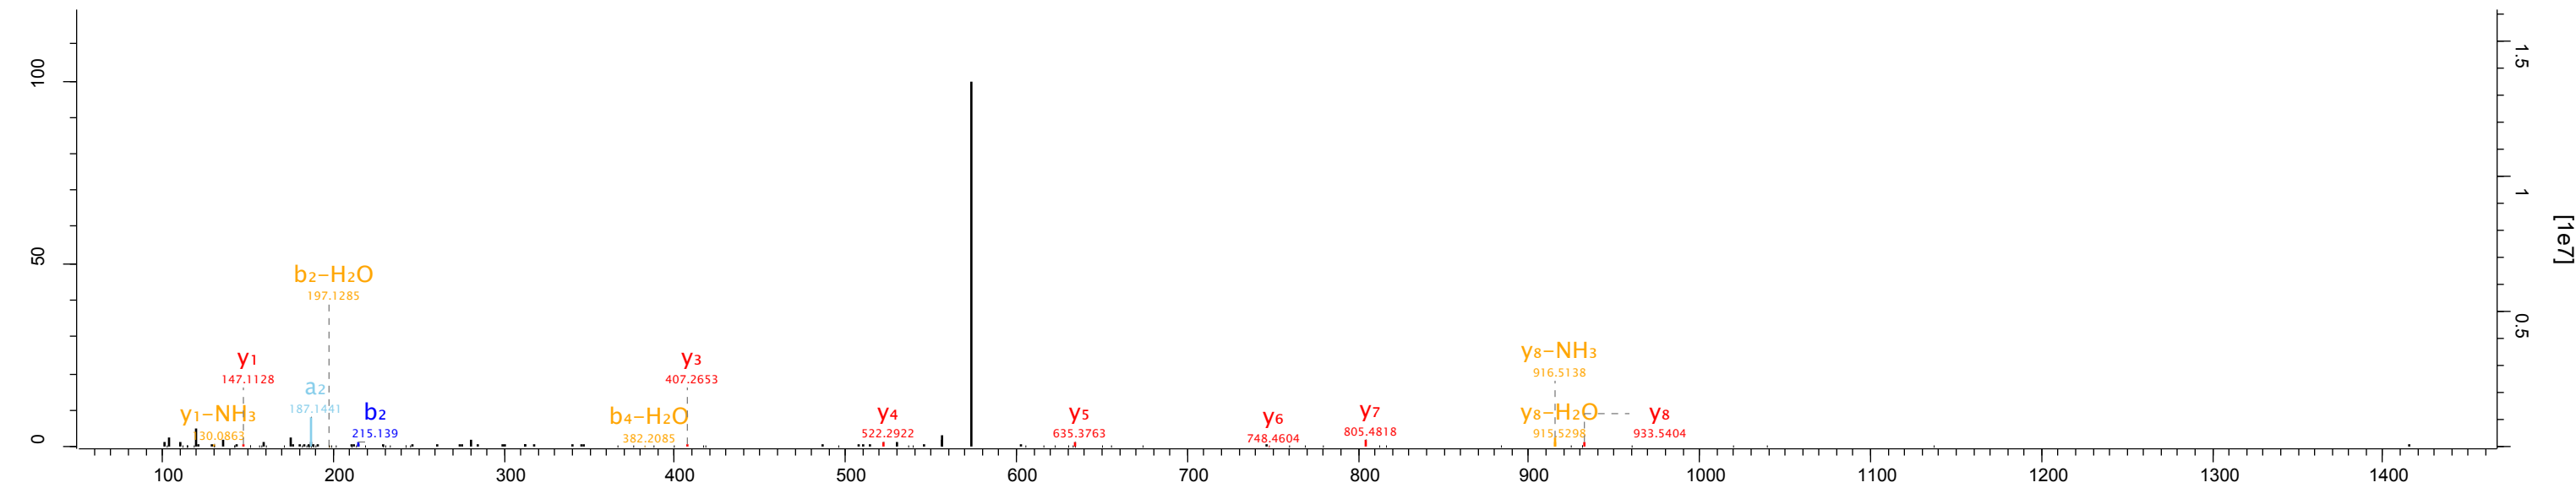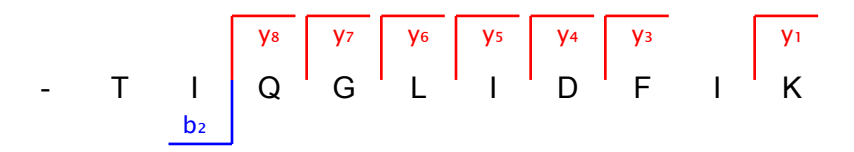

Raw file 20171215\_MaS\_33SR\_LMH\_proteome\_01 Scan 10449 Method FTMS; HCD Score 87.32 m/z 324.85

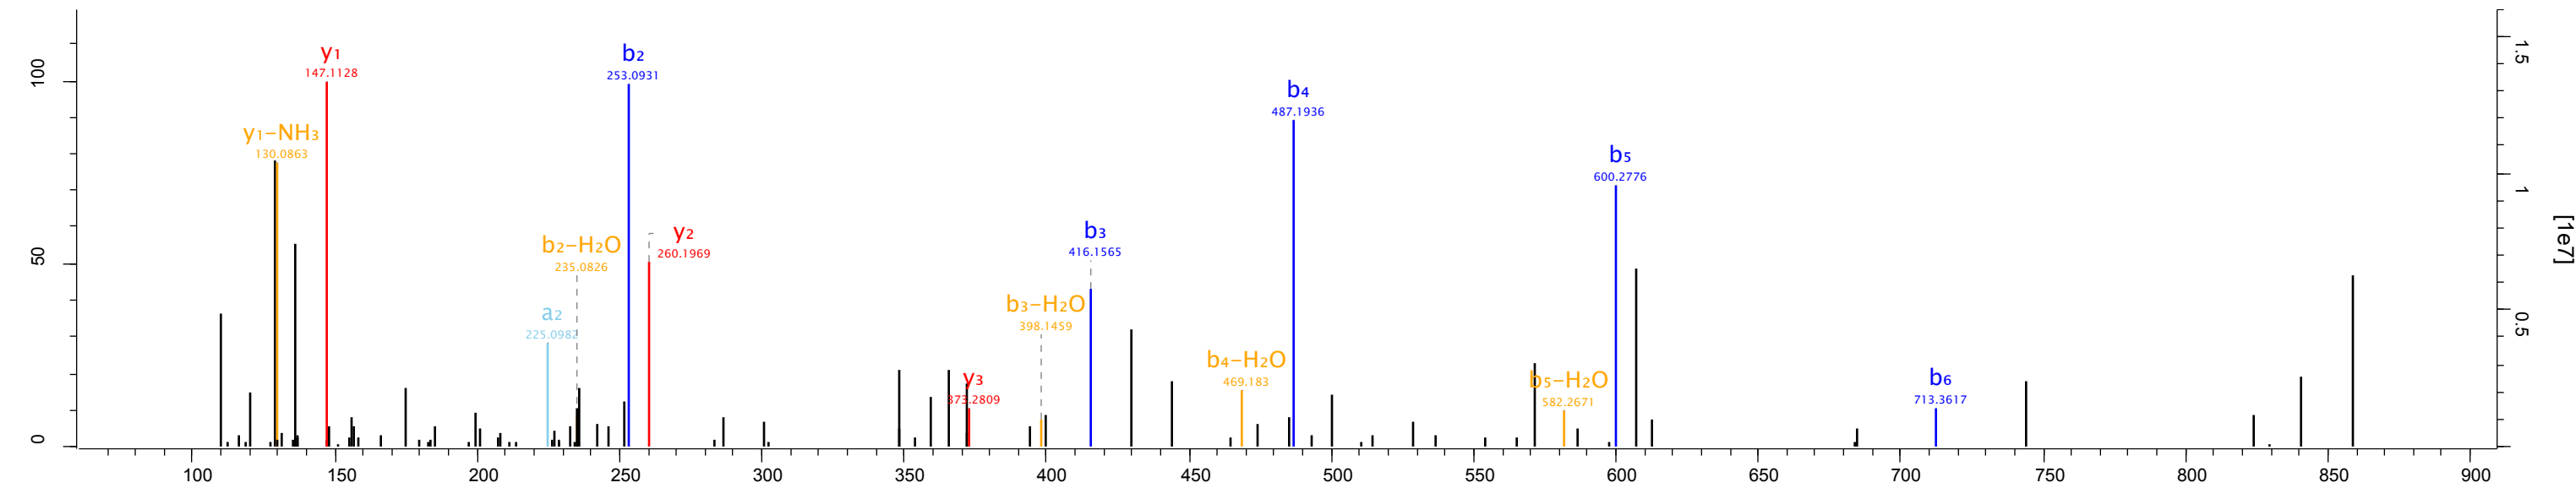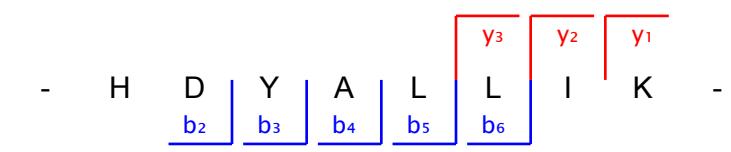



Raw file 20171215\_MaS\_33SR\_LMH\_proteome\_01 Scan 112369 Method FTMS; HCD Score 52.36 m/z 807.11 Gene names GTPBP10

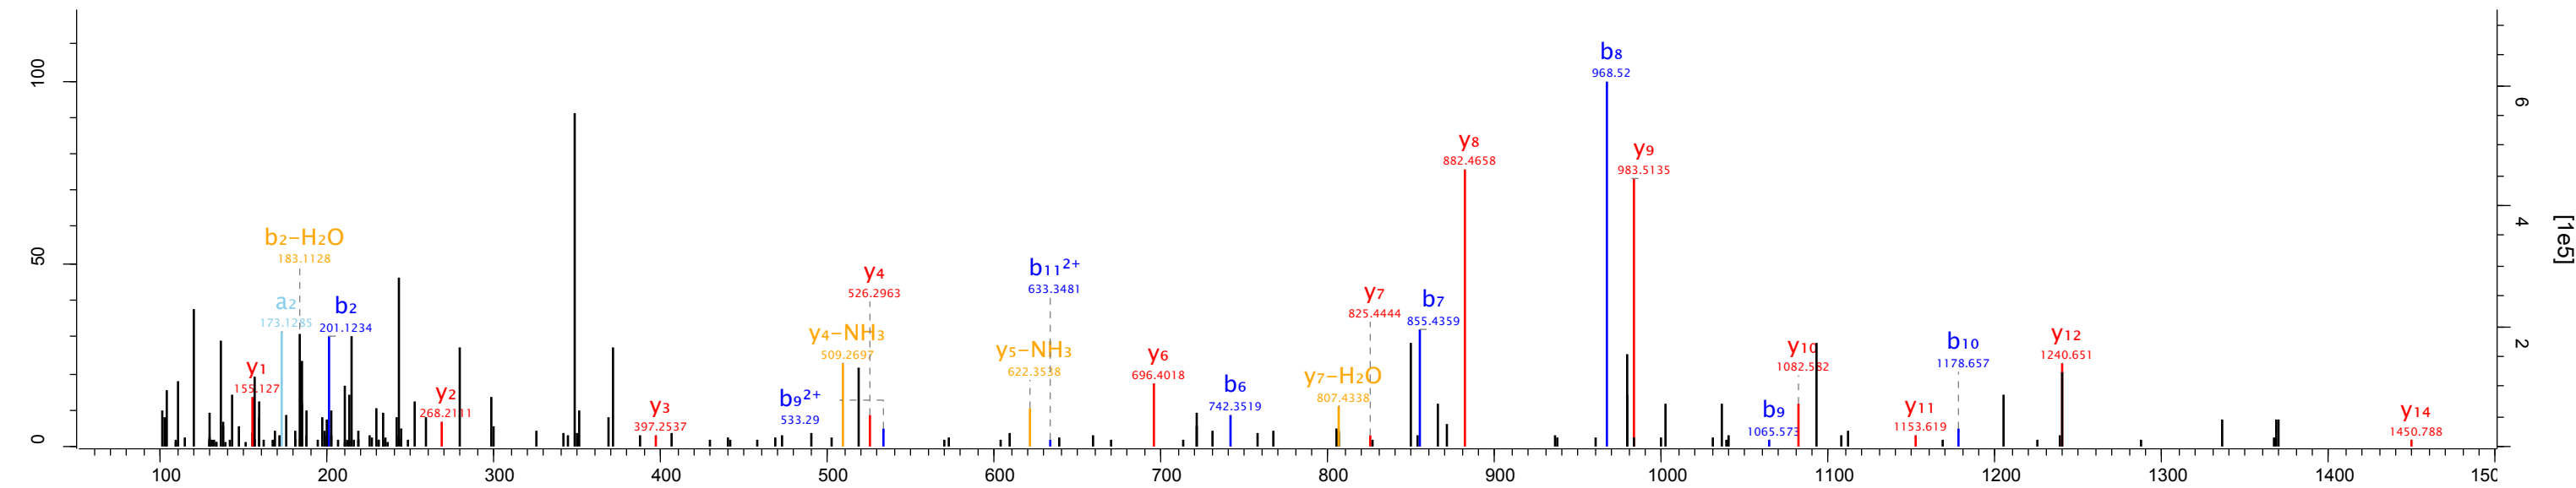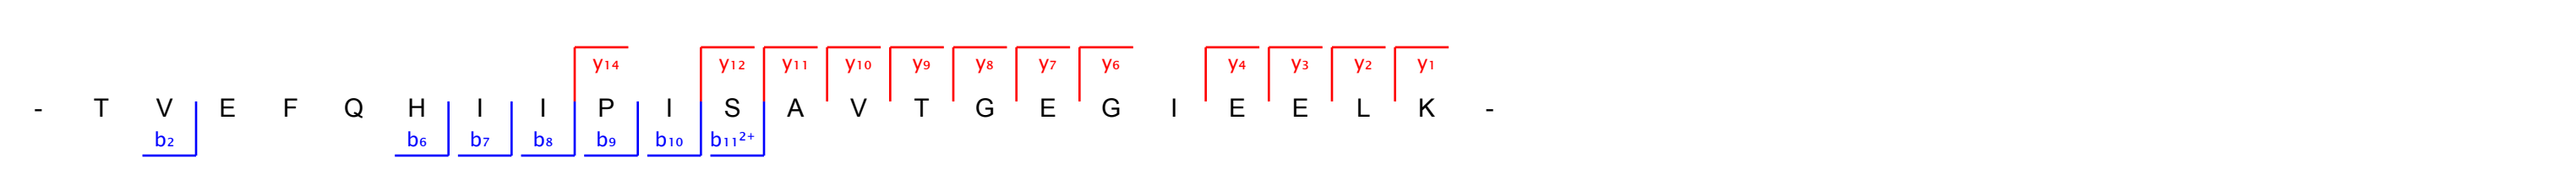

Raw file: 20171215\_MaS\_33SR\_LMH\_proteome\_01  
 Scan: 117479 Method: FTMS; HCD Score: 53.3 m/z: 564 Gene names: MTX1

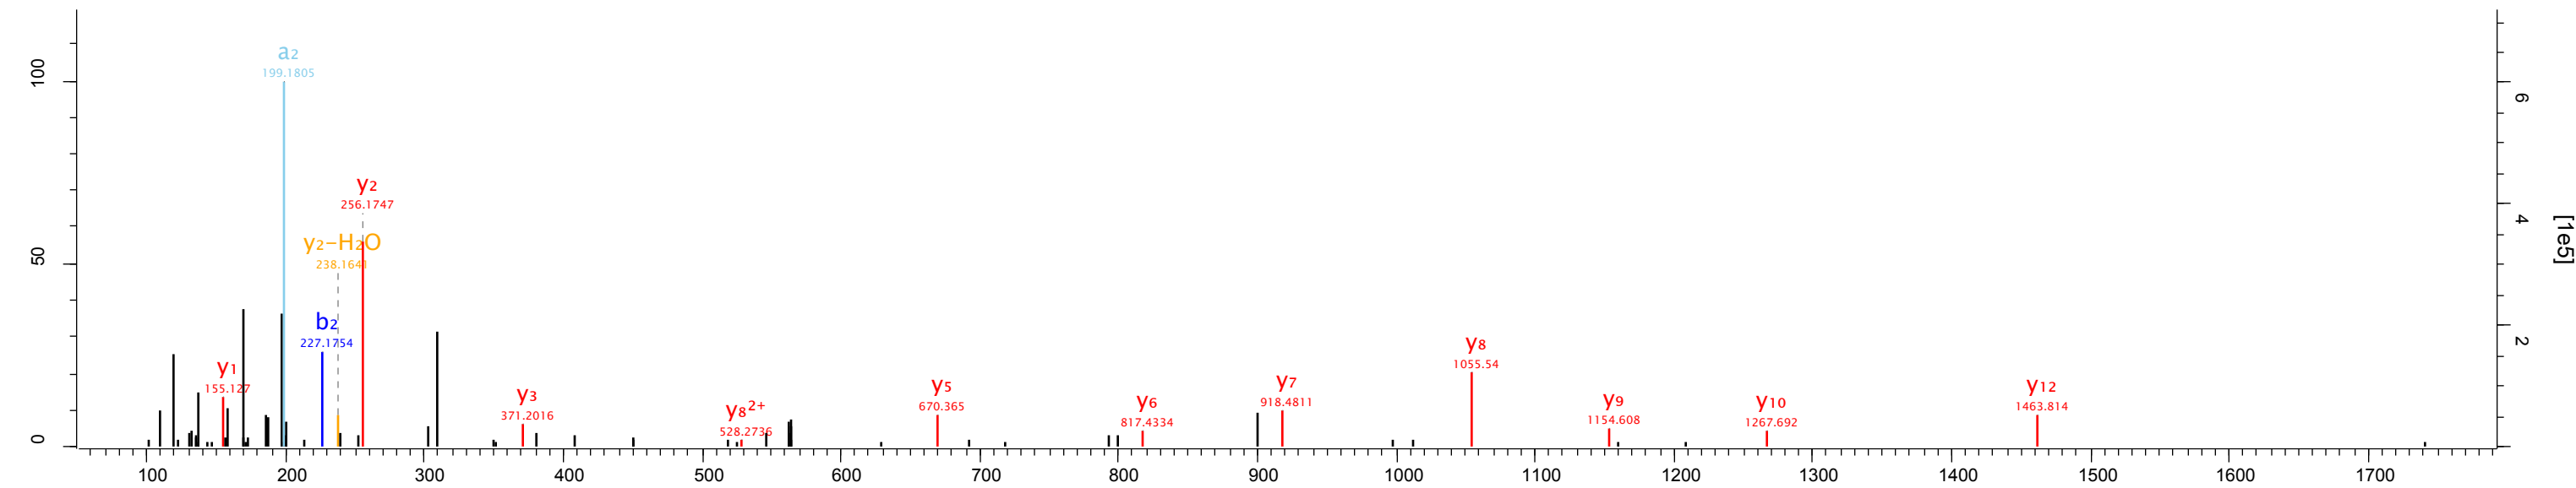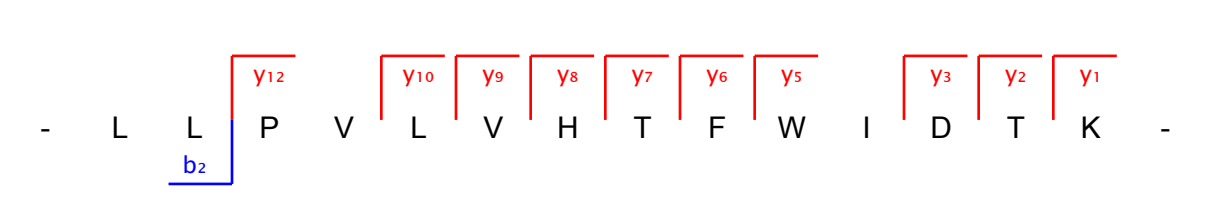

Raw file: 20171215\_MaS\_33SR\_LMH\_proteome\_01  
 Scan: 120889 Method: FTMS; HCD Score: 62.63 m/z: 655.44 Gene names: PDCD2L

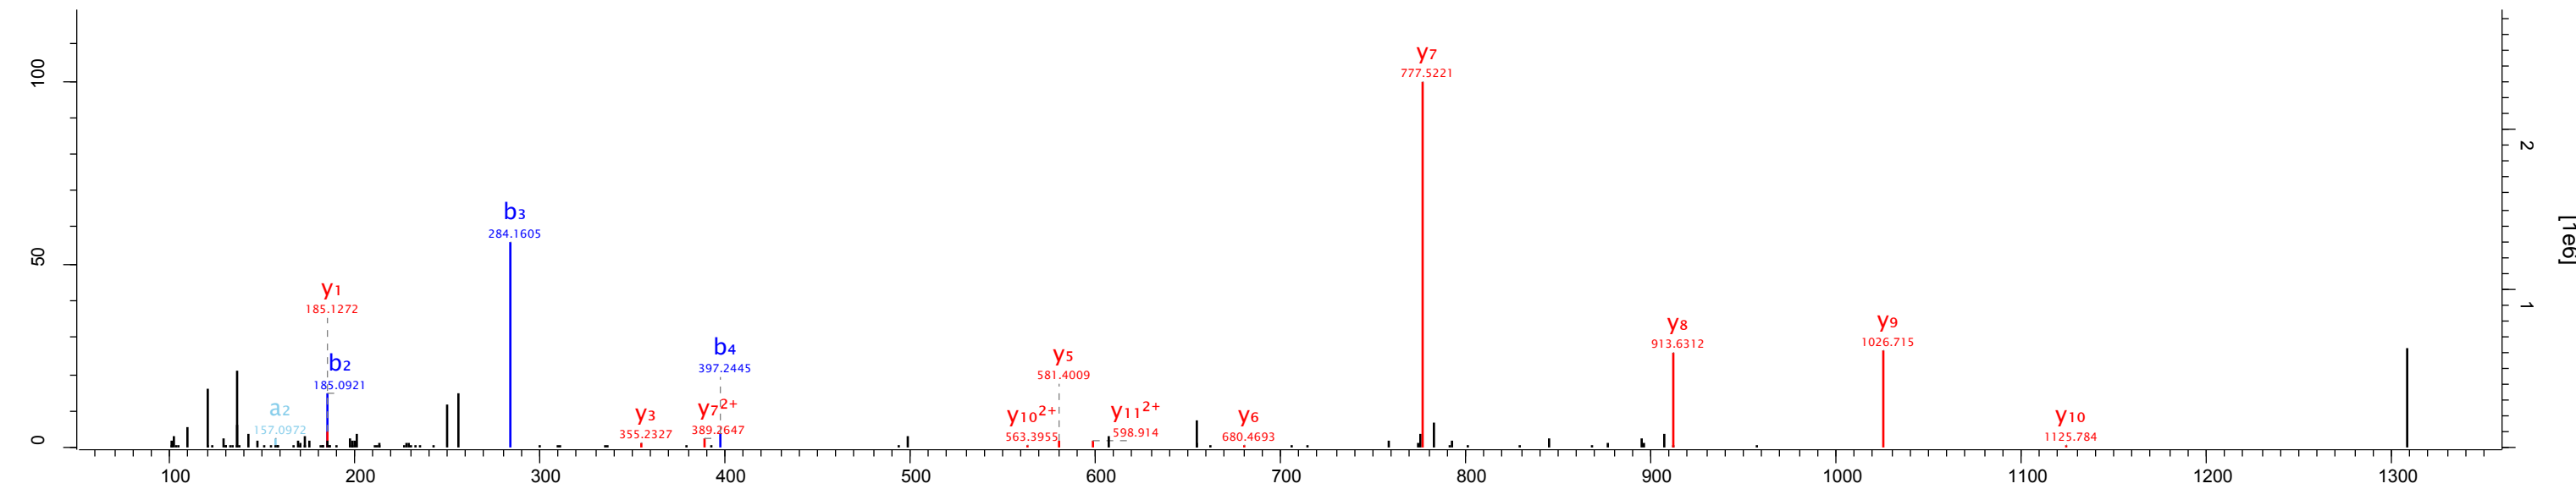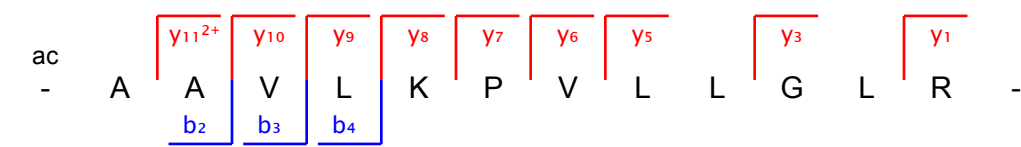

Raw file: 20171215\_MaS\_33SR\_LMH\_proteome\_01  
 Scan: 137599 Method: FTMS; HCD Score: 75.14 m/z: 917.14 Gene names: PLBD2

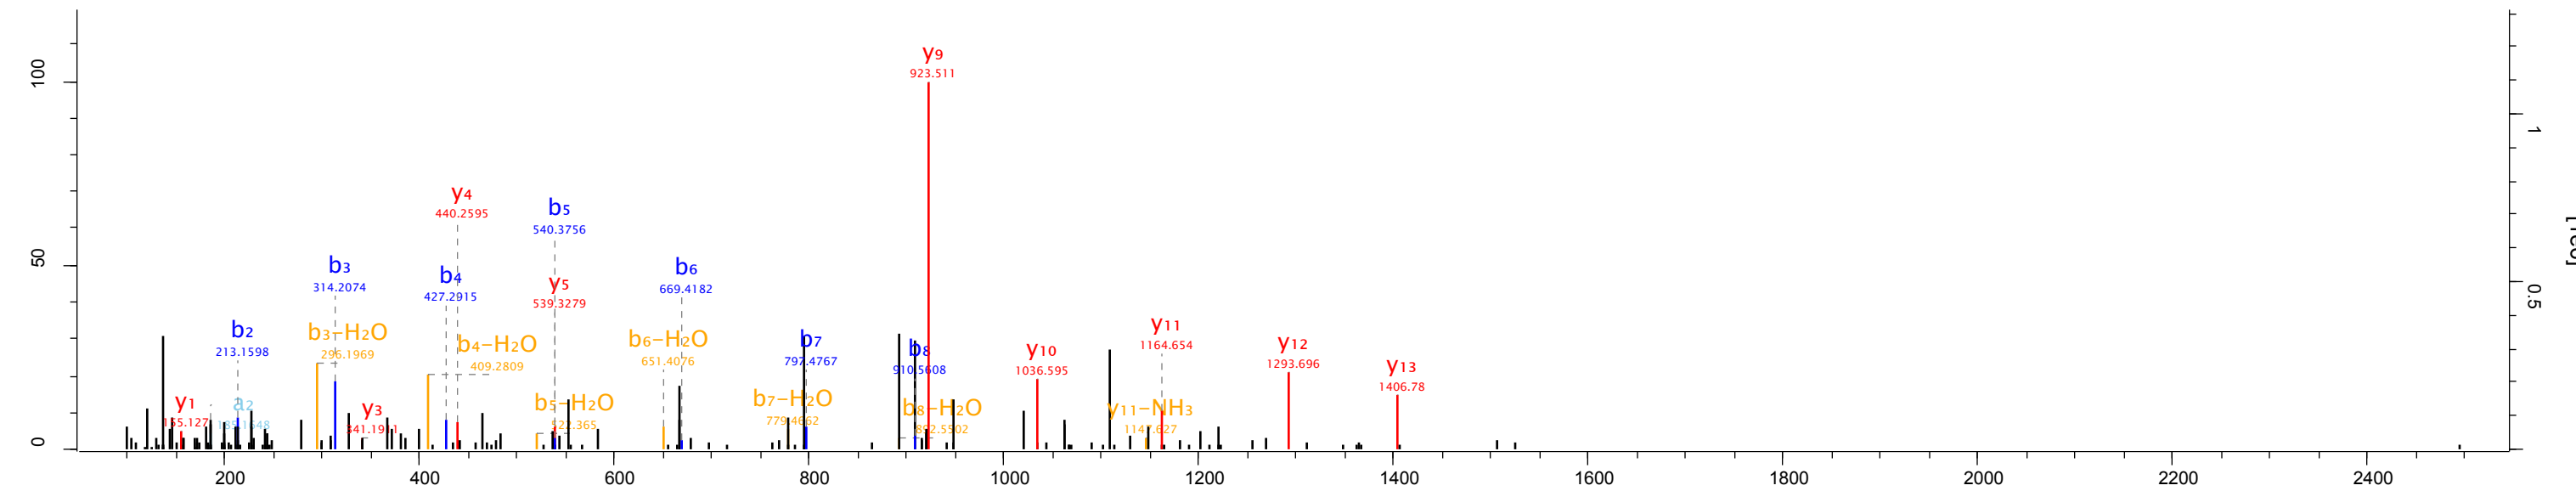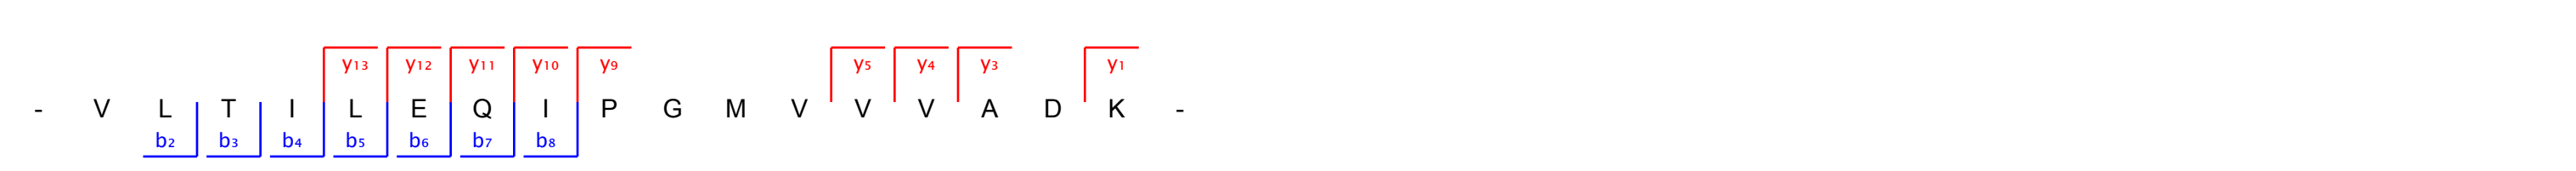

Raw file 20171215\_MaS\_33SR\_LMH\_proteome\_01 Scan 14039 Method FTMS; HCD Score 128.57 m/z 505.3

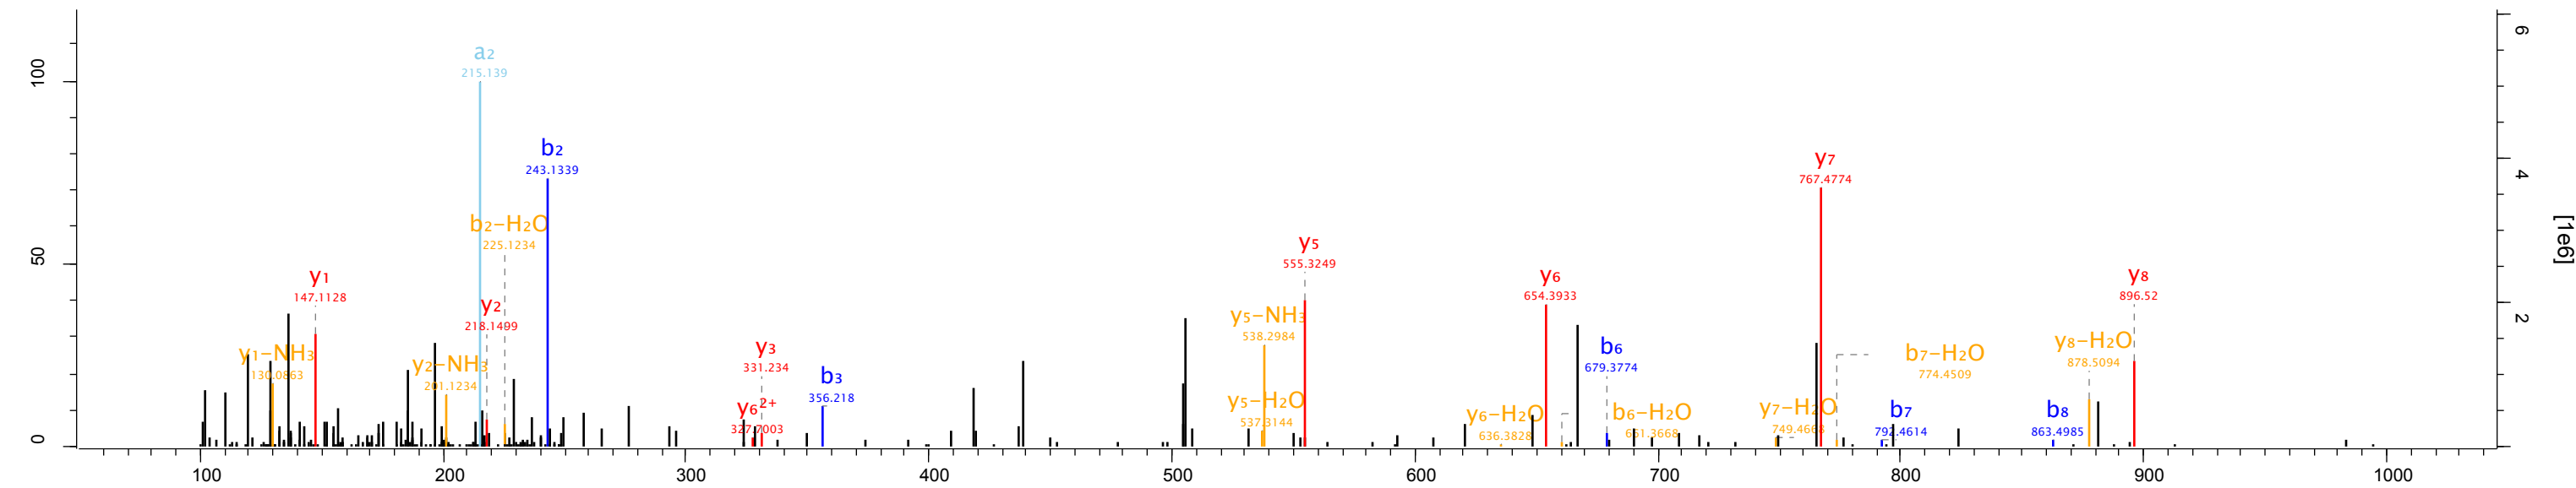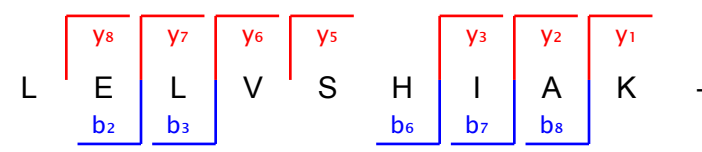

Raw file 20171215\_MaS\_33SR\_LMH\_proteome\_01 Scan 23649 Method FTMS; HCD Score 76.81 m/z 440.6 Gene names RPL39P5;RPL39

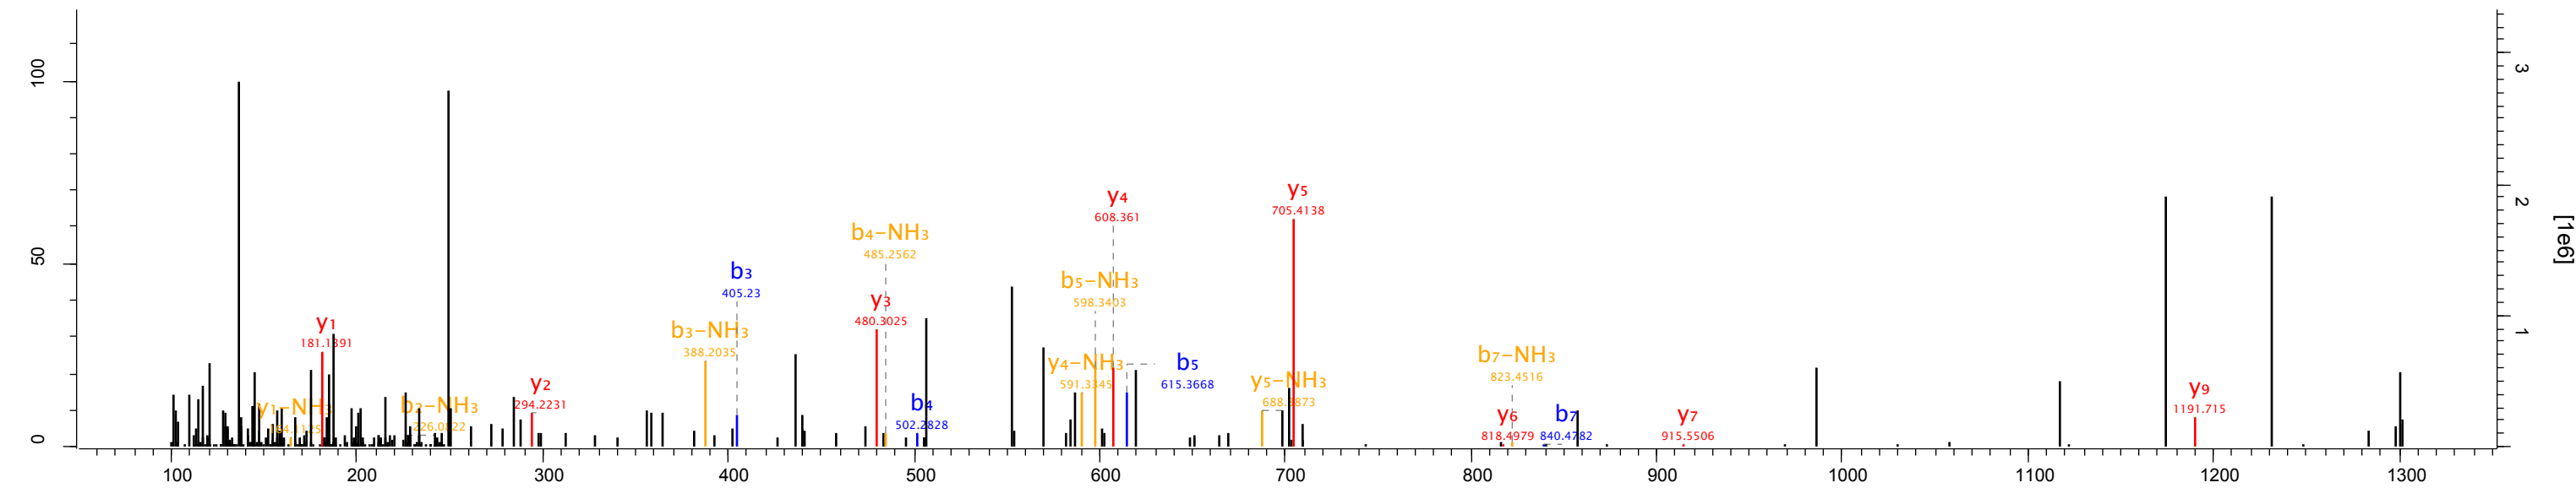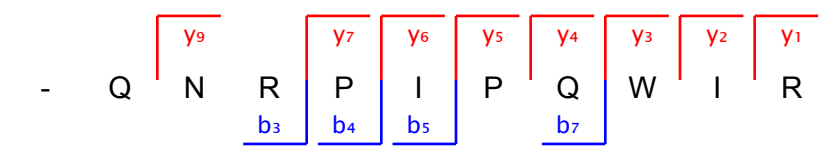

Raw file

20171215\_MaS\_33SR\_LMH\_proteome\_01

Scan 23919 Method FTMS; HCD Score 42.34 m/z 632.77 Gene names PIGG

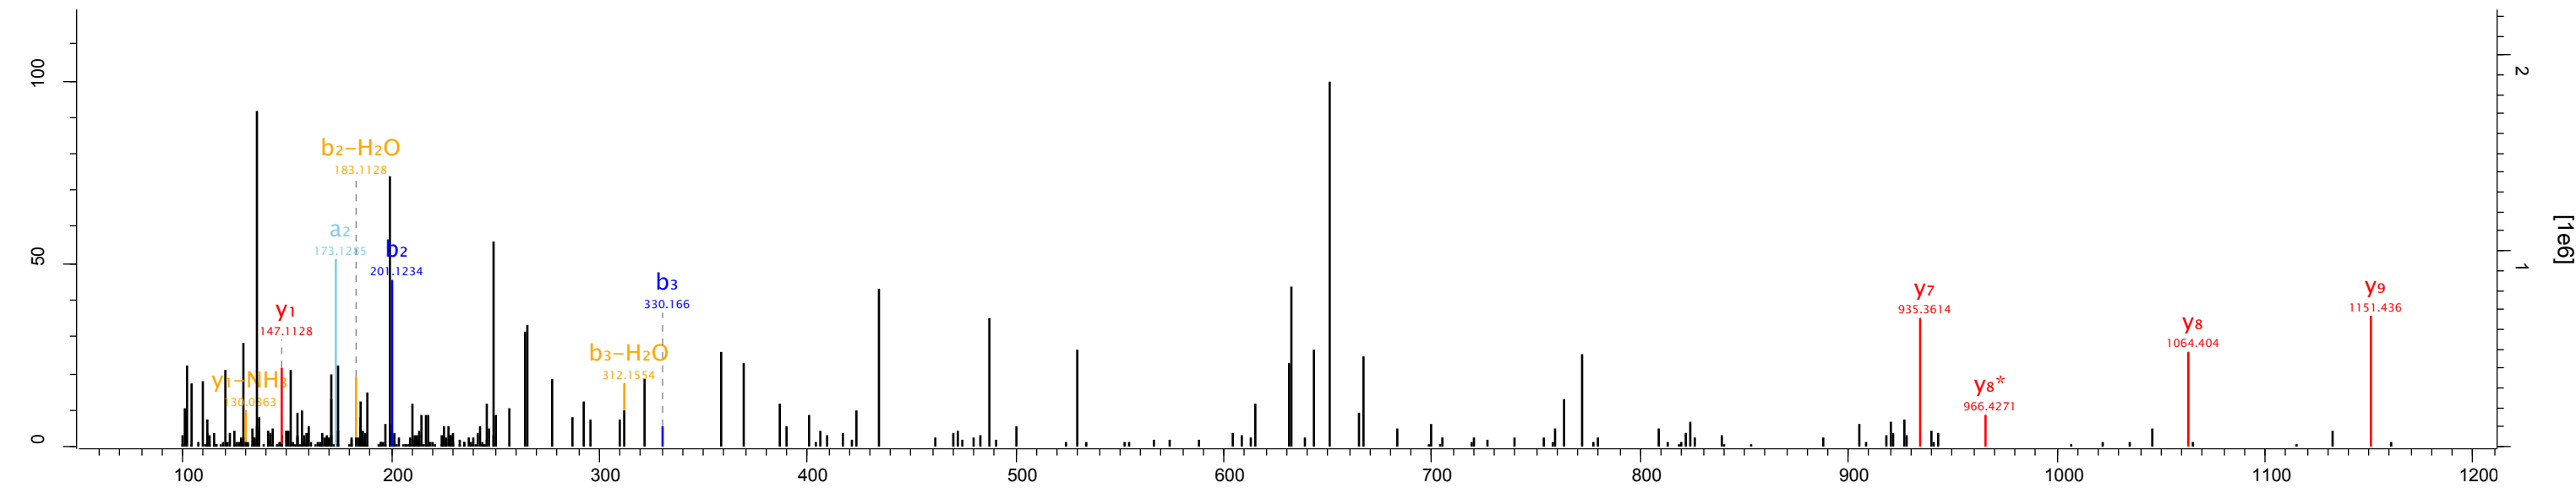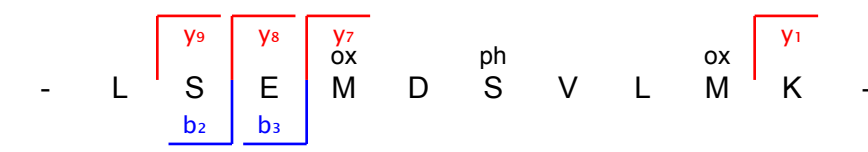

Raw file: 20171215\_MaS\_33SR\_LMH\_proteome\_01  
 Scan: 26549 Method: FTMS; HCD Score: 101.2 m/z: 765.89 Gene names: CHMP4A

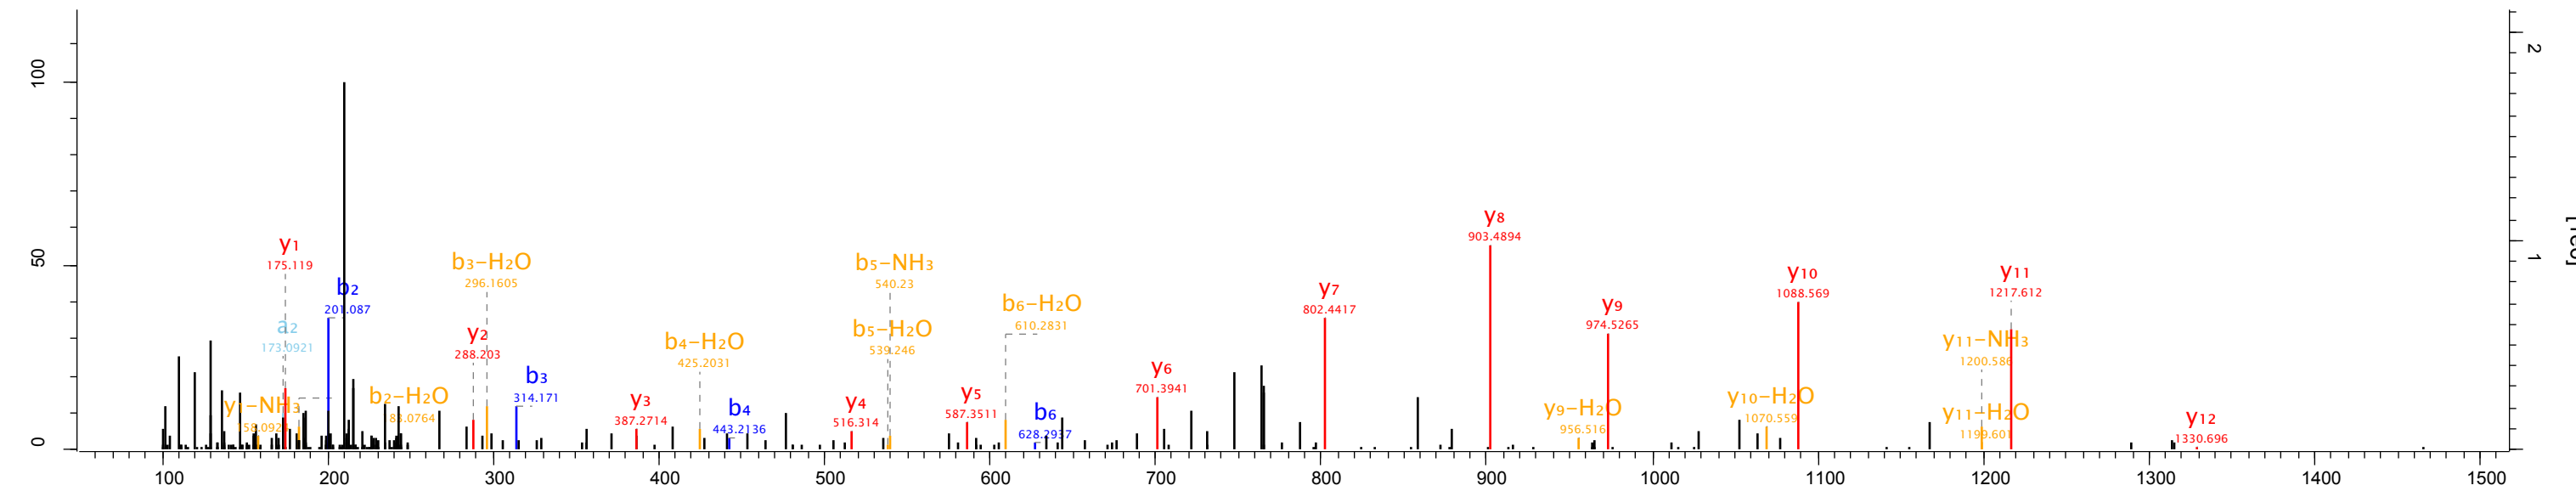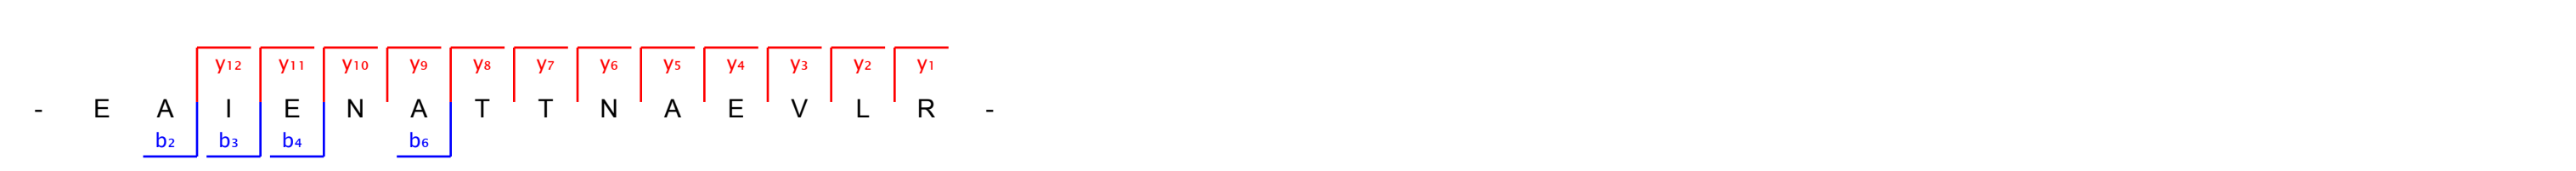



Raw file 20171215\_MaS\_33SR\_LMH\_proteome\_01 Scan 42869 Method FTMS; HCD Score 45.28 m/z 779.38 Gene names WDR72

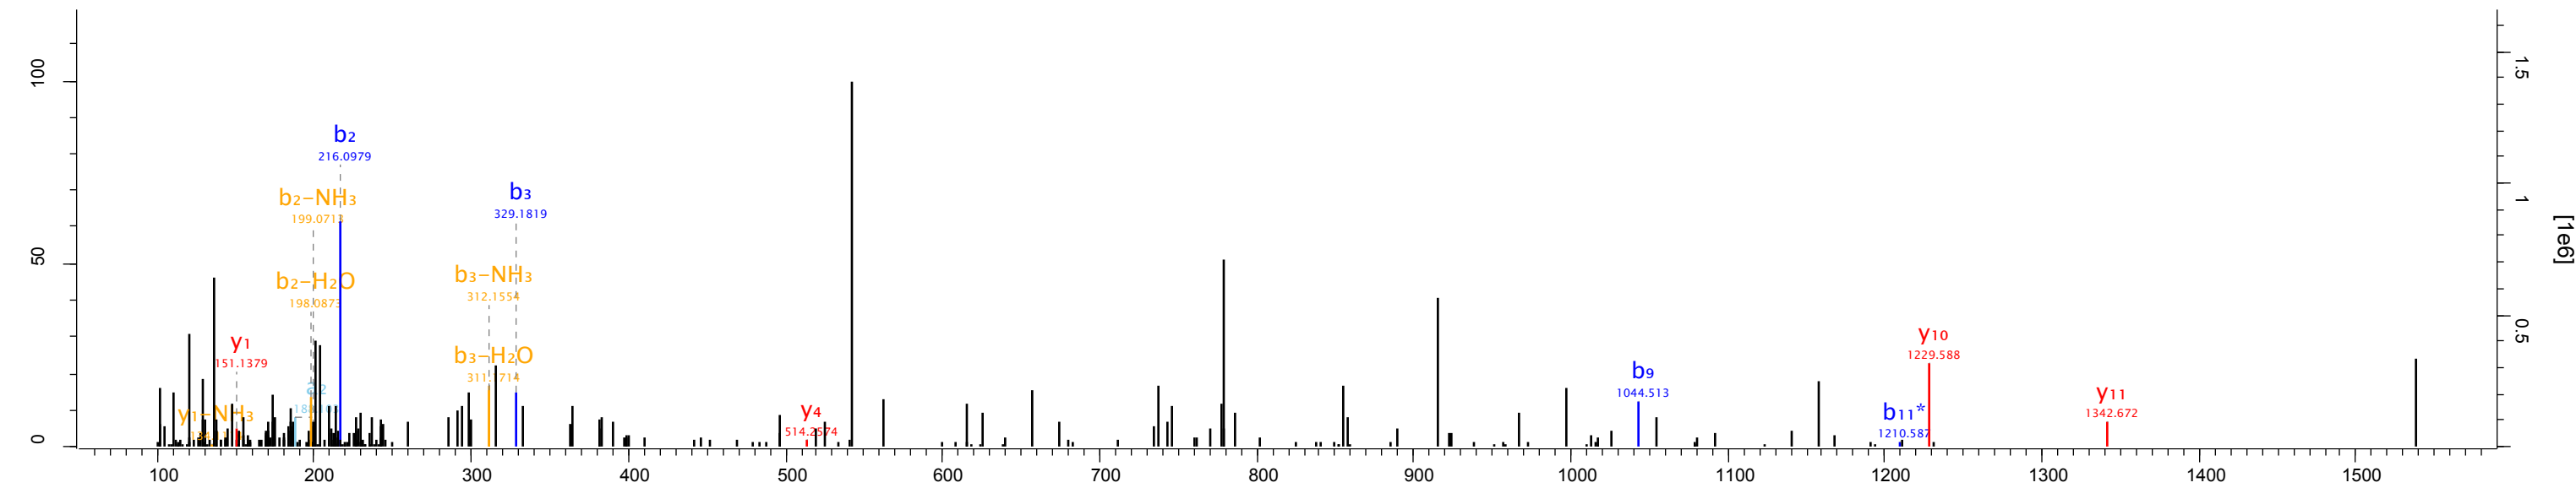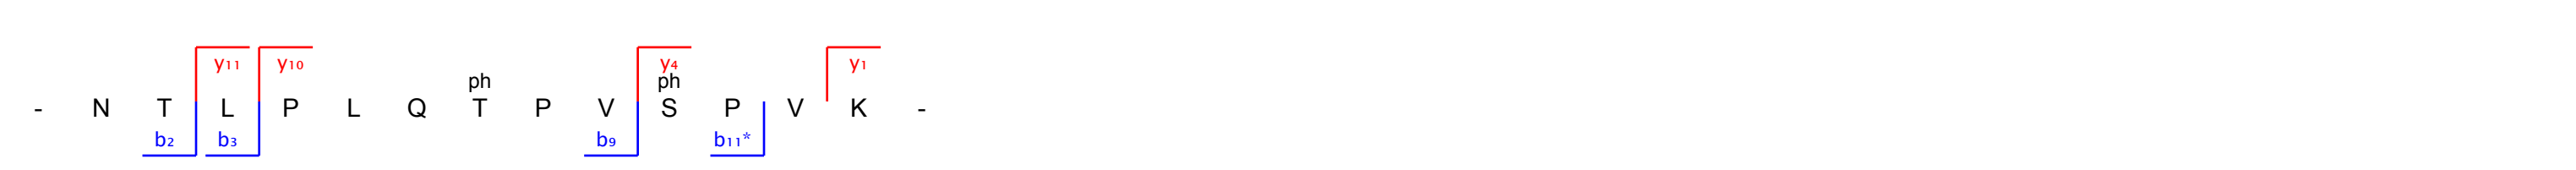

Raw file 20171215\_MaS\_33SR\_LMH\_proteome\_01 Scan 46639 Method FTMS; HCD Score 62.36 m/z 741.9 Gene names DUSP3

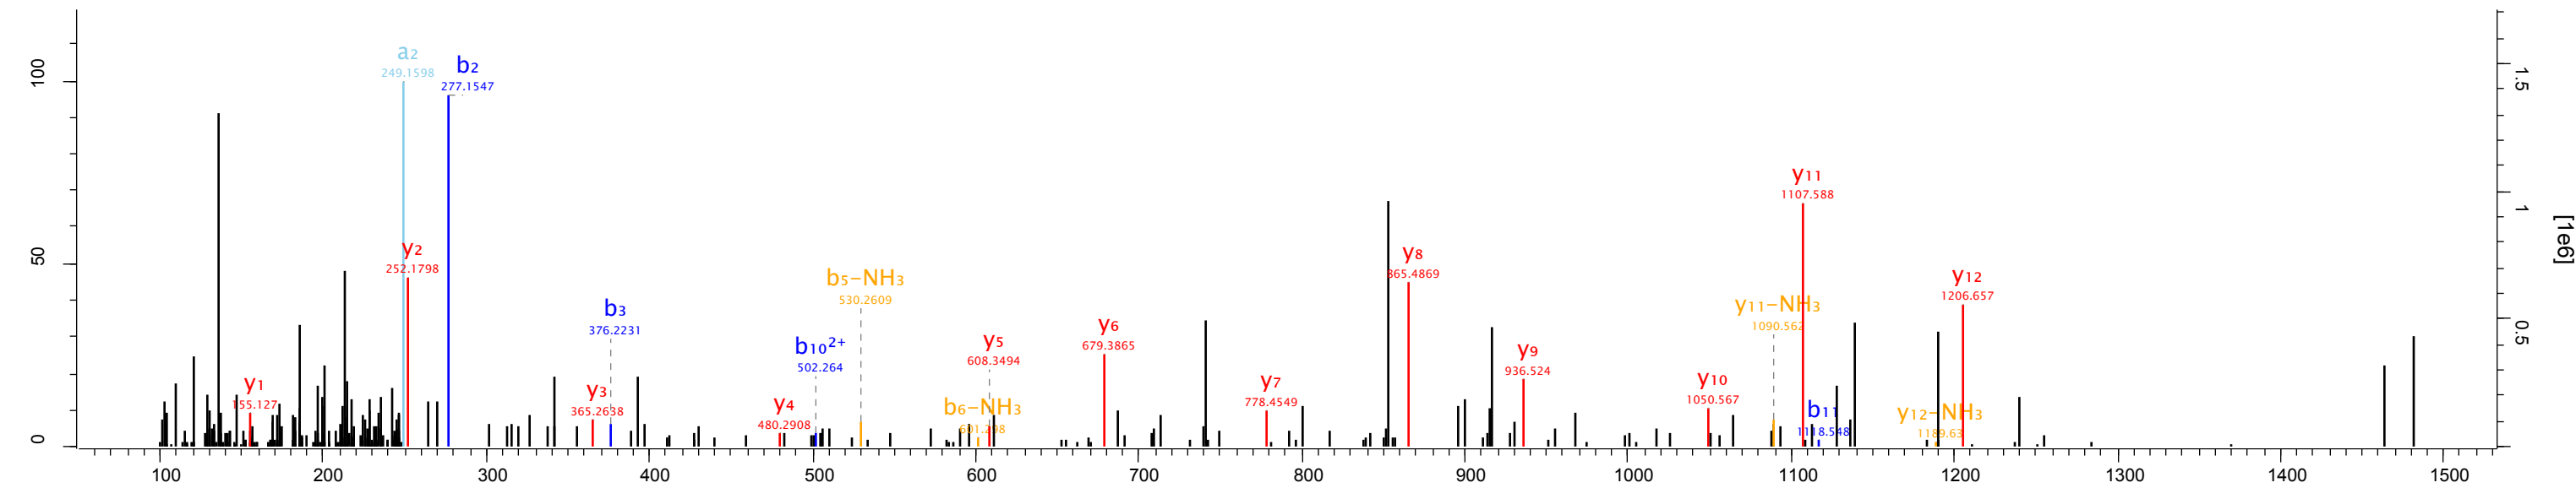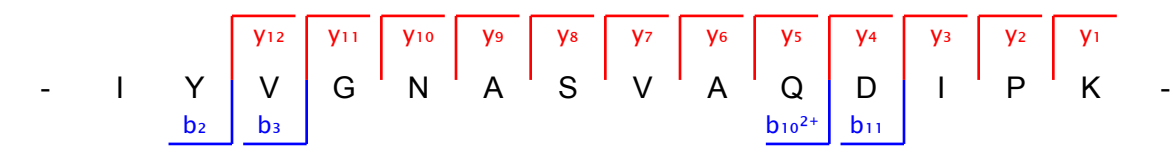

Raw file 20171215\_MaS\_33SR\_LMH\_proteome\_01 Scan 48039 Method FTMS; HCD Score 85.68 m/z 447.78

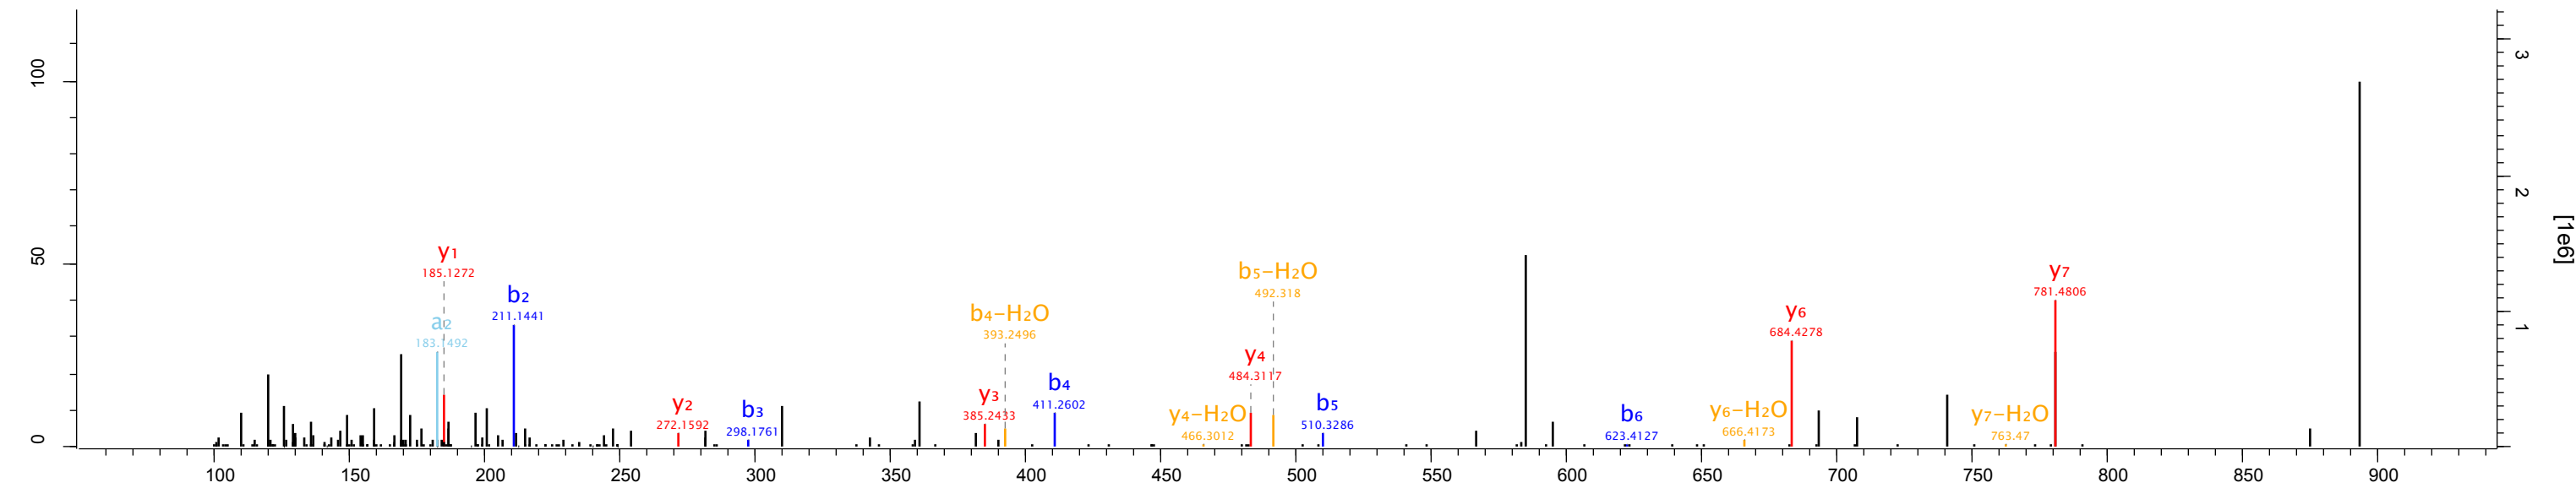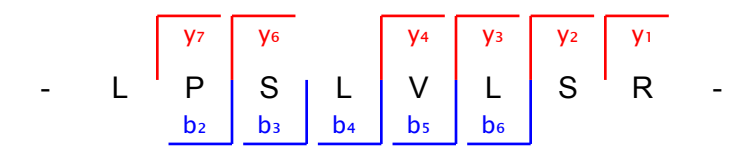

Raw file: 20171215\_MaS\_33SR\_LMH\_proteome\_01  
 Scan: 57689 Method: FTMS; HCD Score: 126.07 m/z: 810.45 Gene names: HRSP12

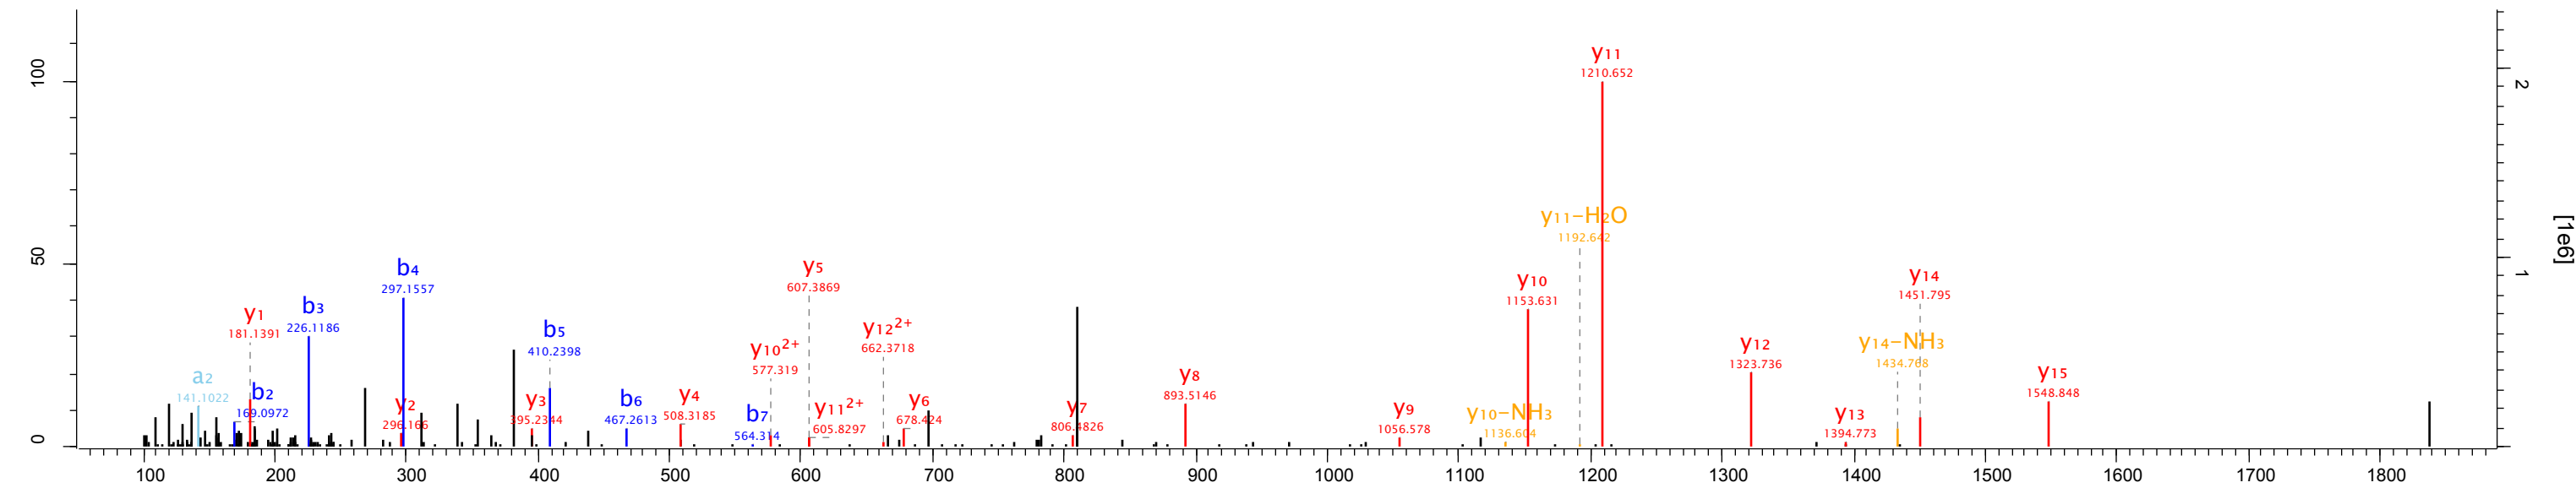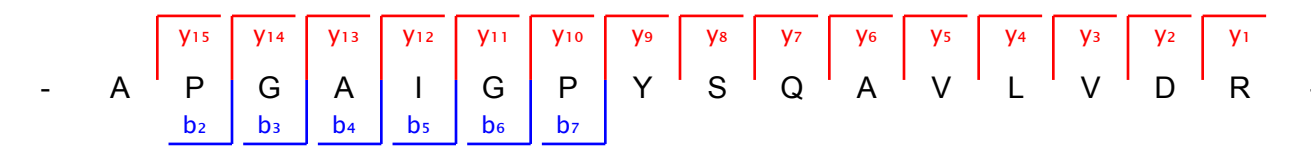

Raw file 20171215\_MaS\_33SR\_LMH\_proteome\_01 Scan 64549 Method FTMS; HCD Score 74.99 m/z 484.59 Gene names SYNJ2BP

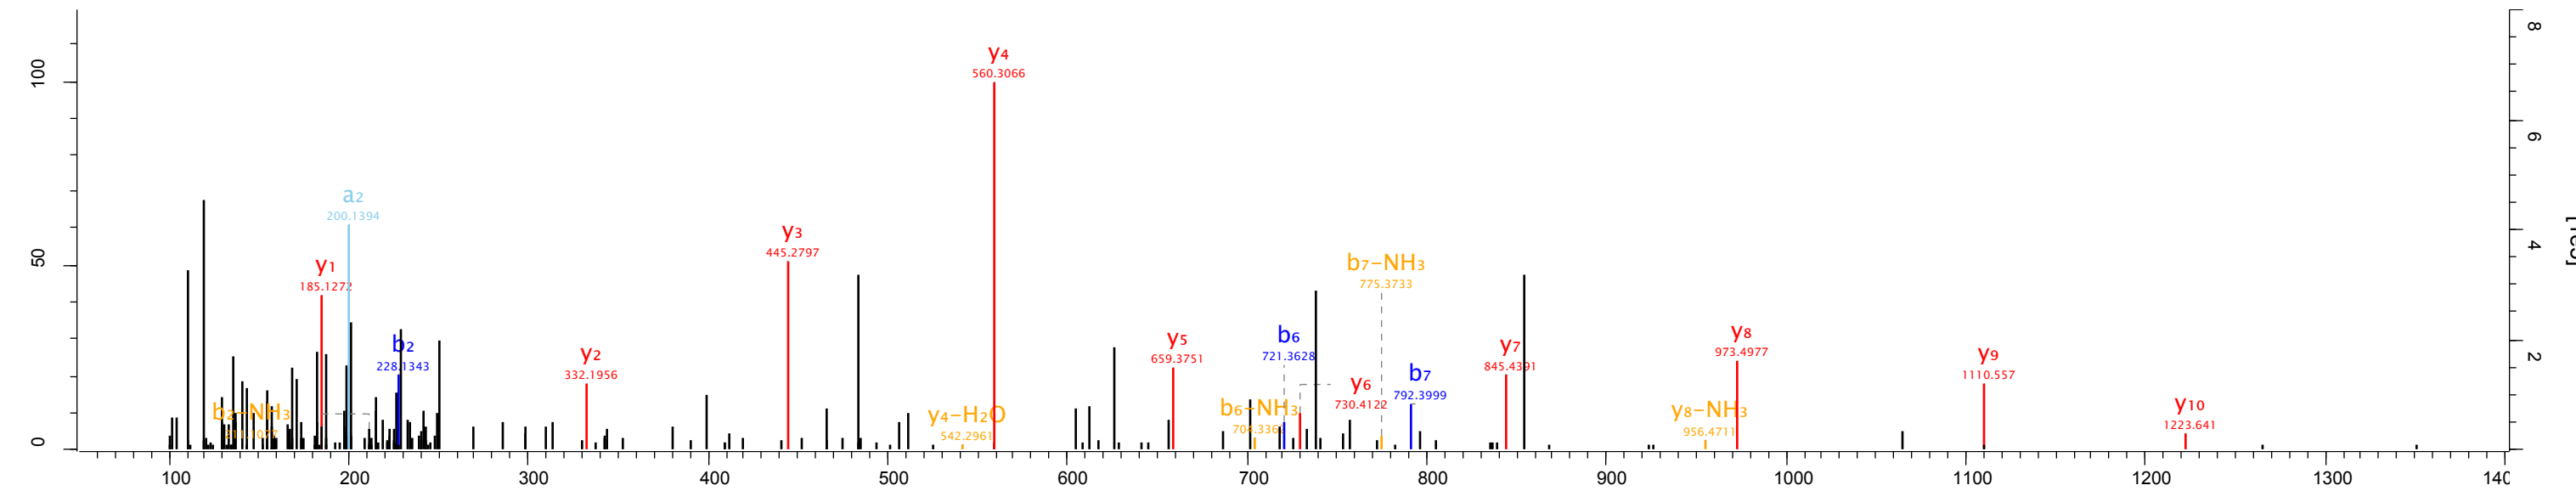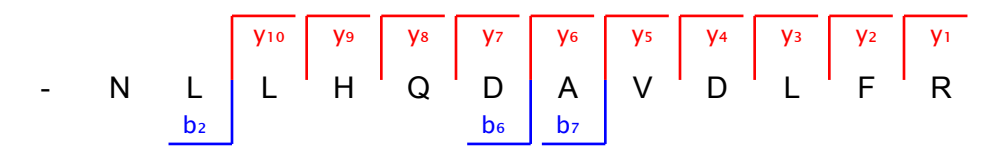

Raw file: 20171215\_MaS\_33SR\_LMH\_proteome\_01  
 Scan: 67469 Method: FTMS; HCD Score: 48.22 m/z: 531.64 Gene names: FTL

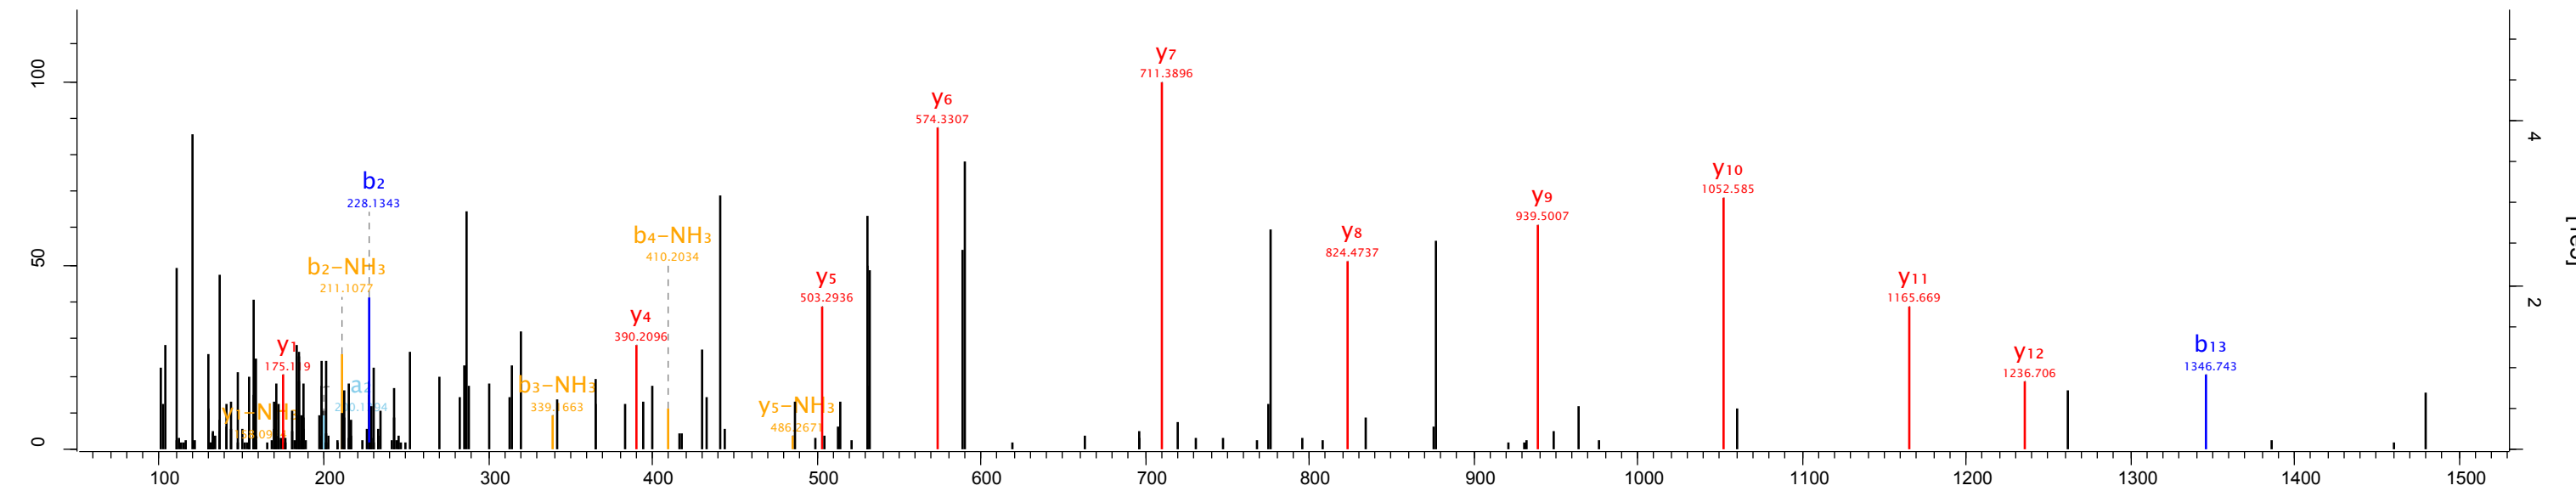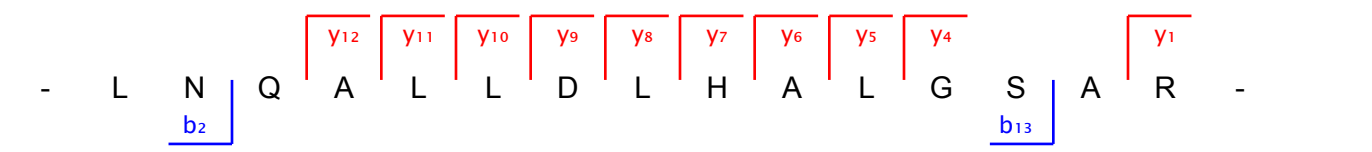

Raw file 20171215\_MaS\_33SR\_LMH\_proteome\_01 Scan 68729 Method FTMS; HCD Score 89.62 m/z 807.91 Gene names EML2

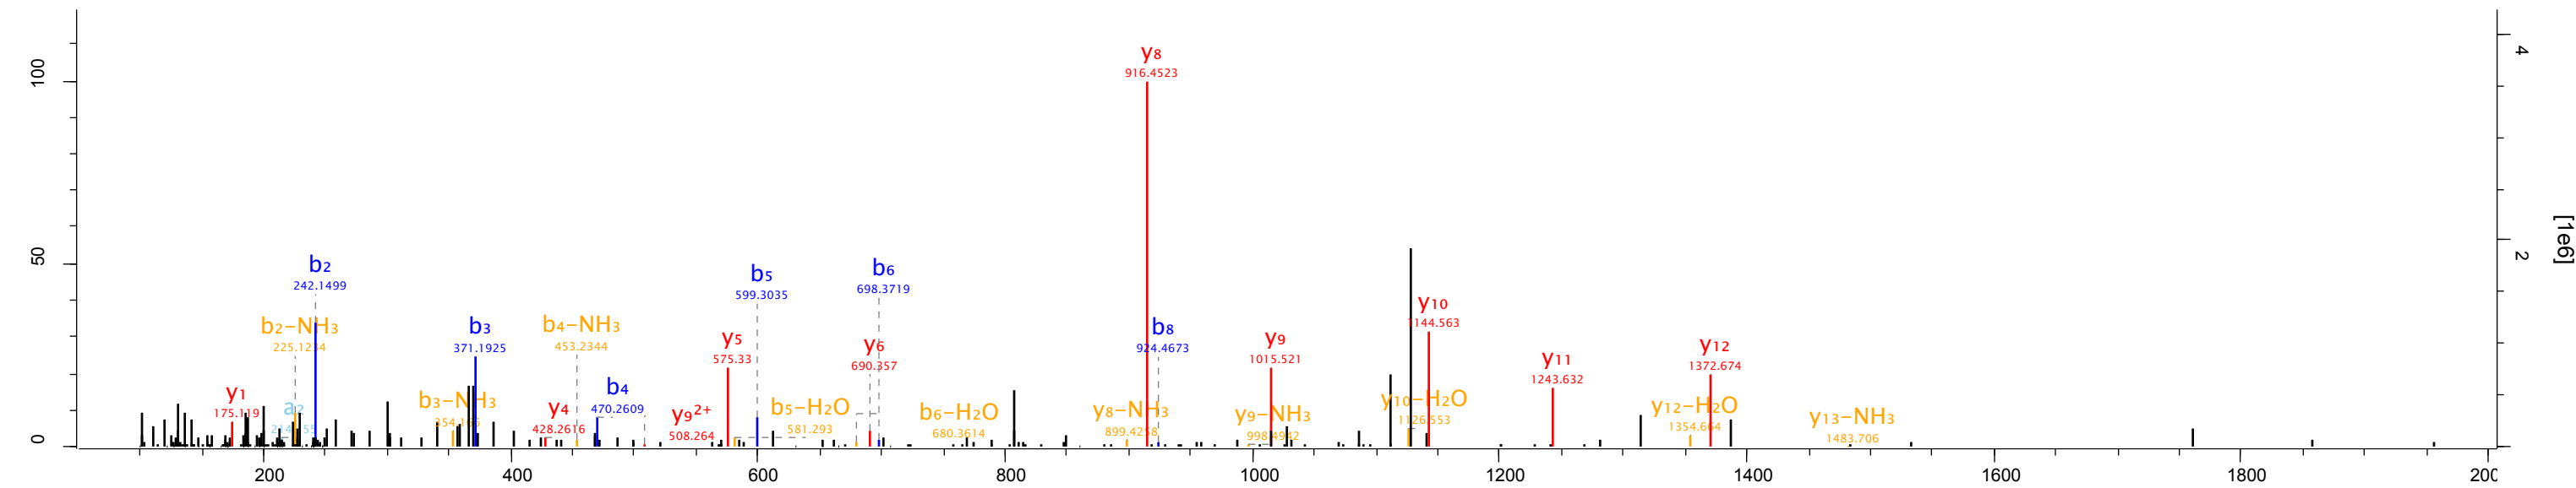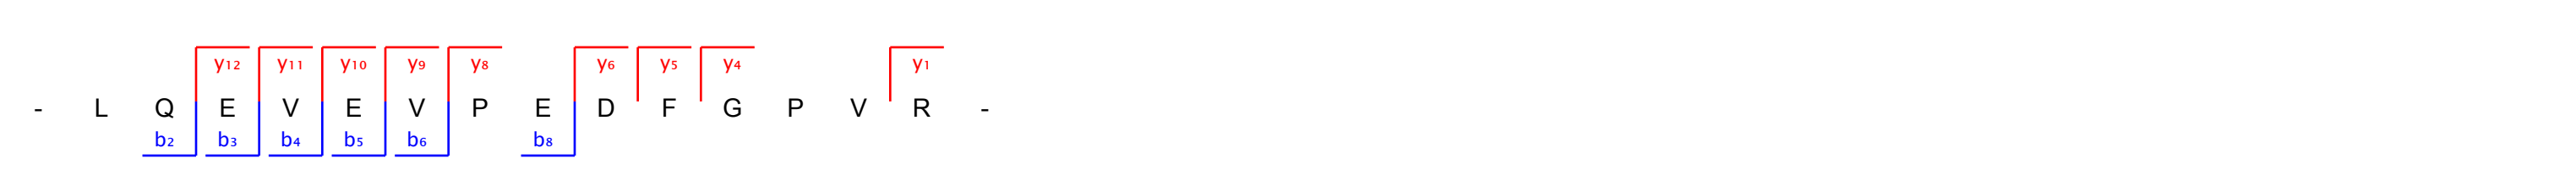

Raw file

Scan Method Score m/z Gene names

20171215\_MaS\_33SR\_LMH\_proteome\_01 69529 FTMS; HCD 60.35 721.38 FYCO1

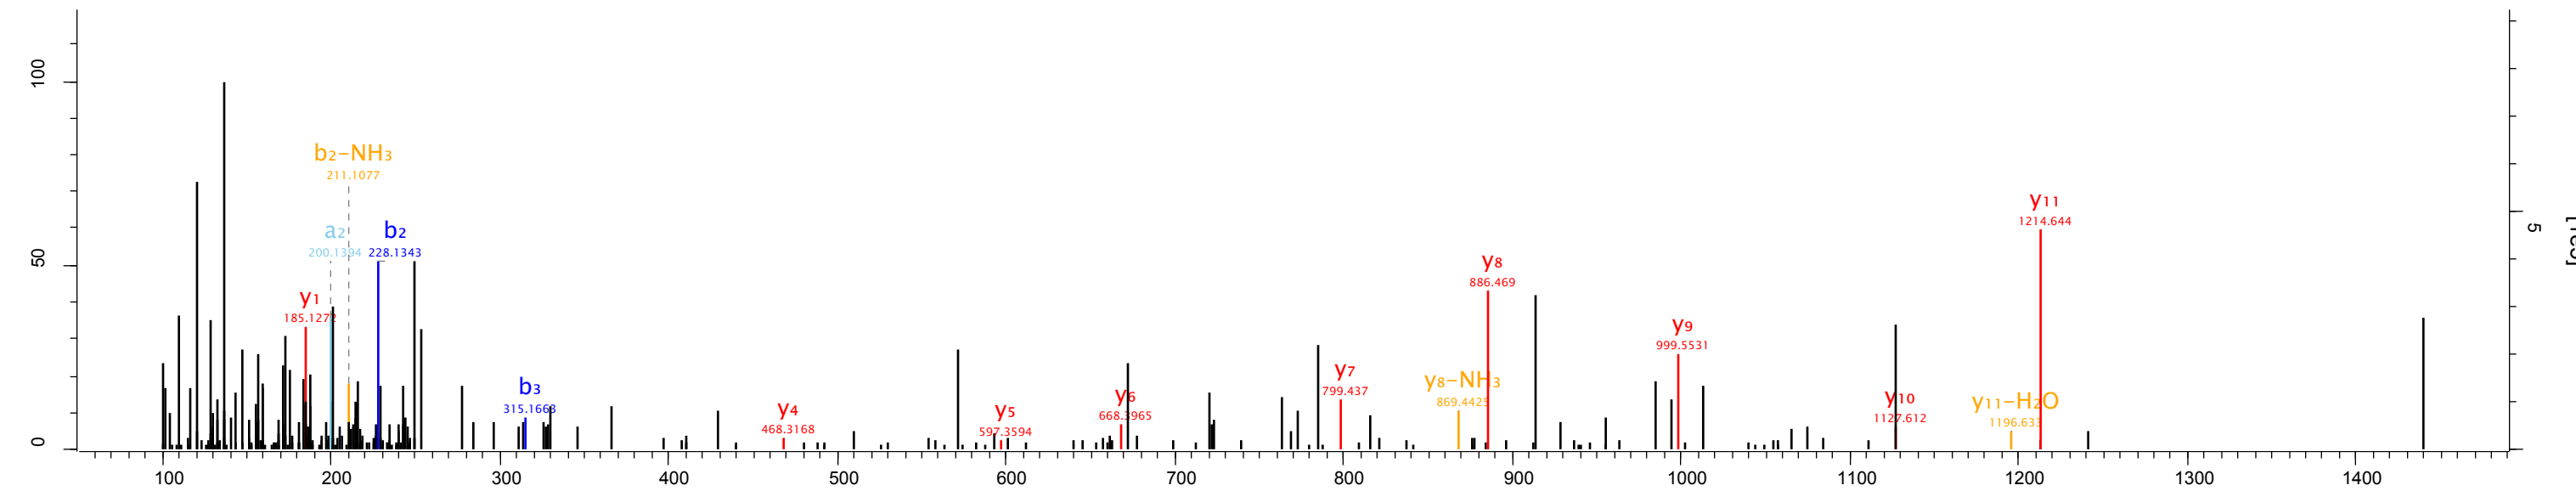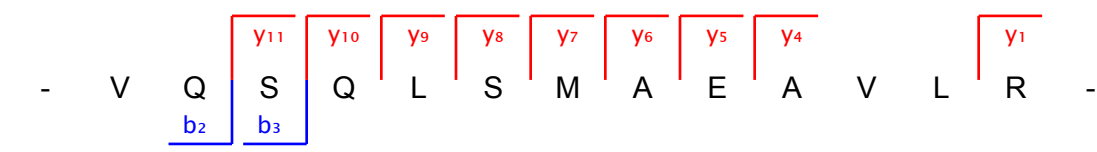



Raw file 20171215\_MaS\_33SR\_LMH\_proteome\_01 Scan 72519 Method FTMS; HCD Score 50.1 m/z 794.4 Gene names TRIM68

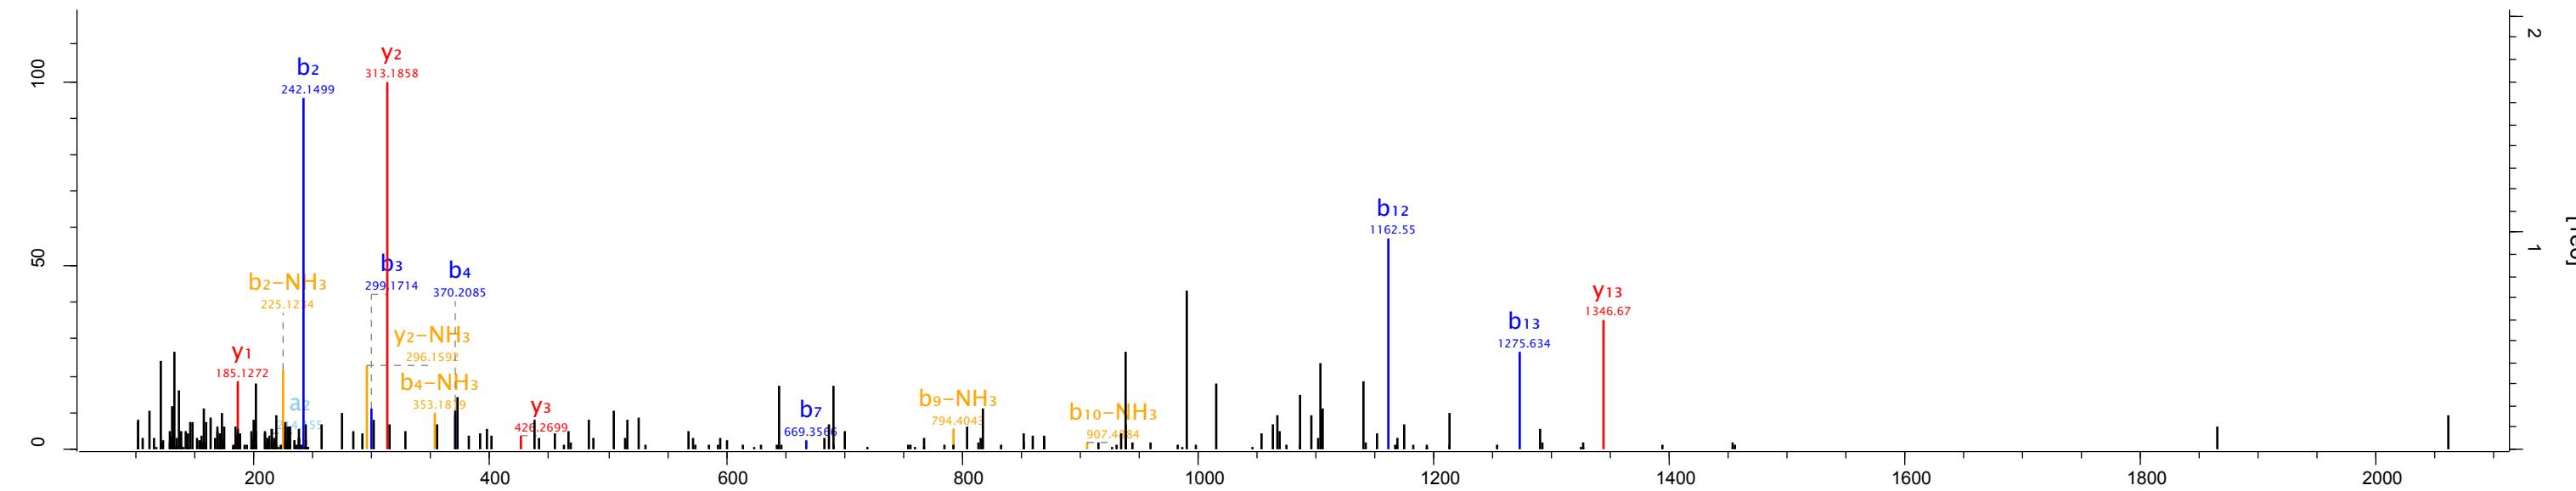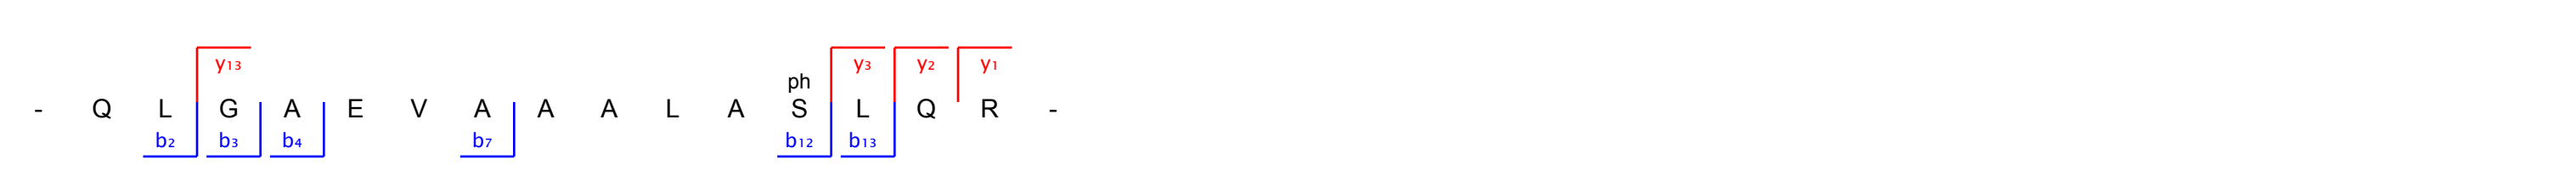

Raw file: 20171215\_MaS\_33SR\_LMH\_proteome\_01  
 Scan: 72529 Method: FTMS; HCD Score: 83.54 m/z: 645.3 Gene names: CASP5; CASP4

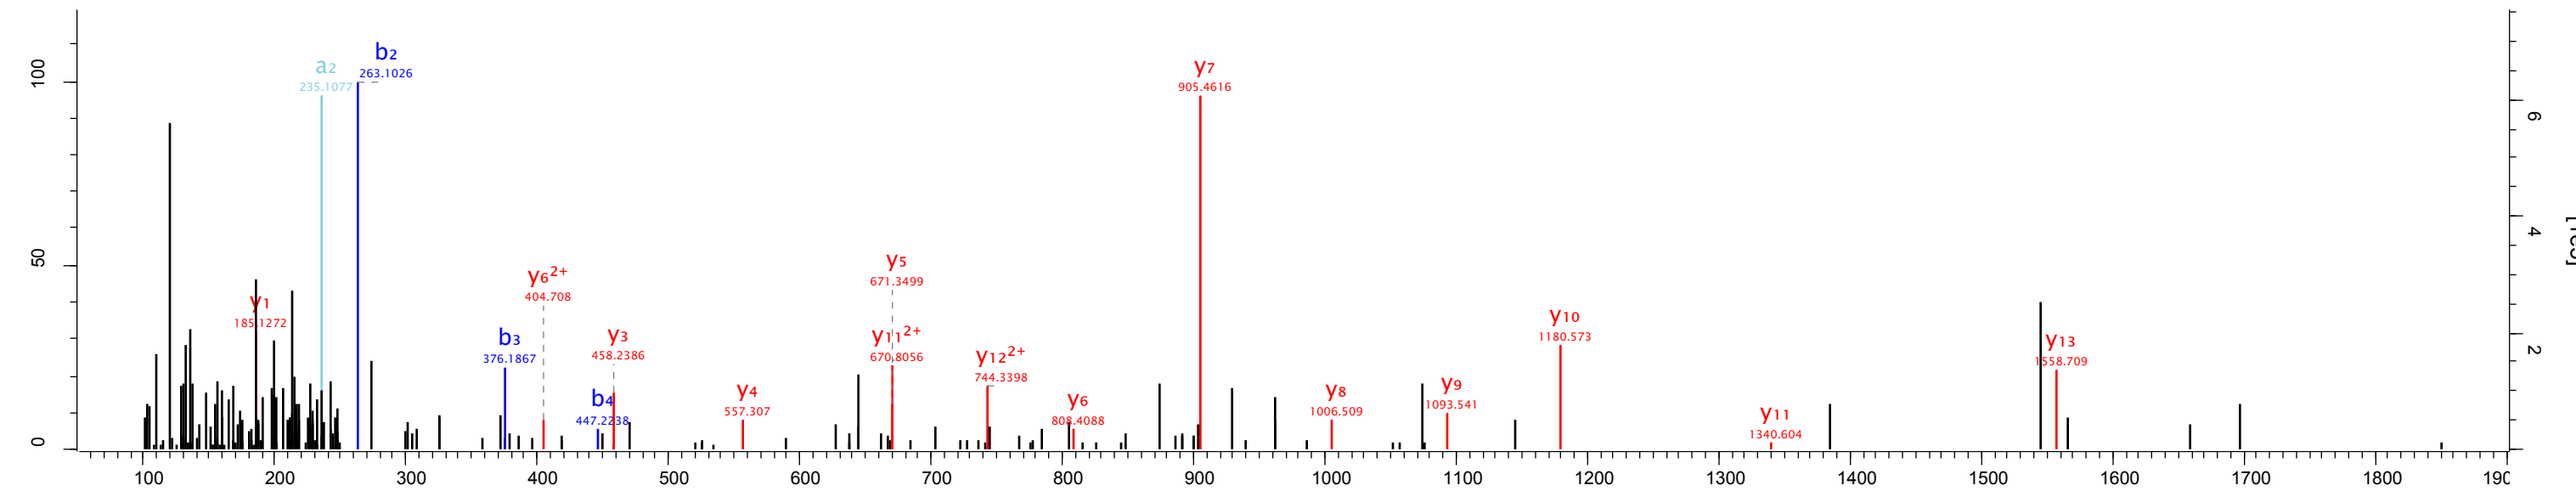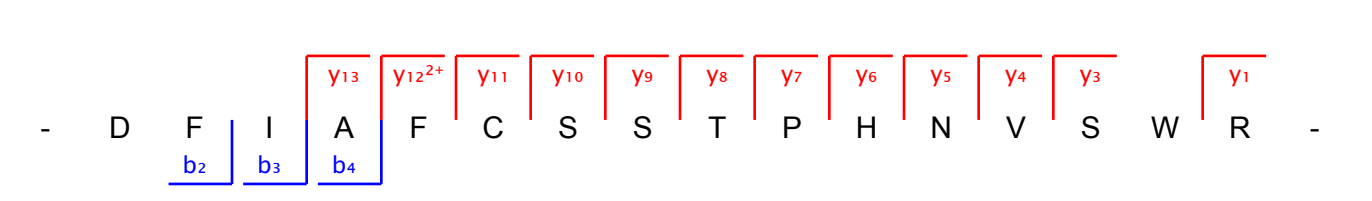

Raw file 20171215\_MaS\_33SR\_LMH\_proteome\_01 Scan 7699 Method FTMS; HCD Score 85.68 m/z 469.28 Gene names GTF2A2

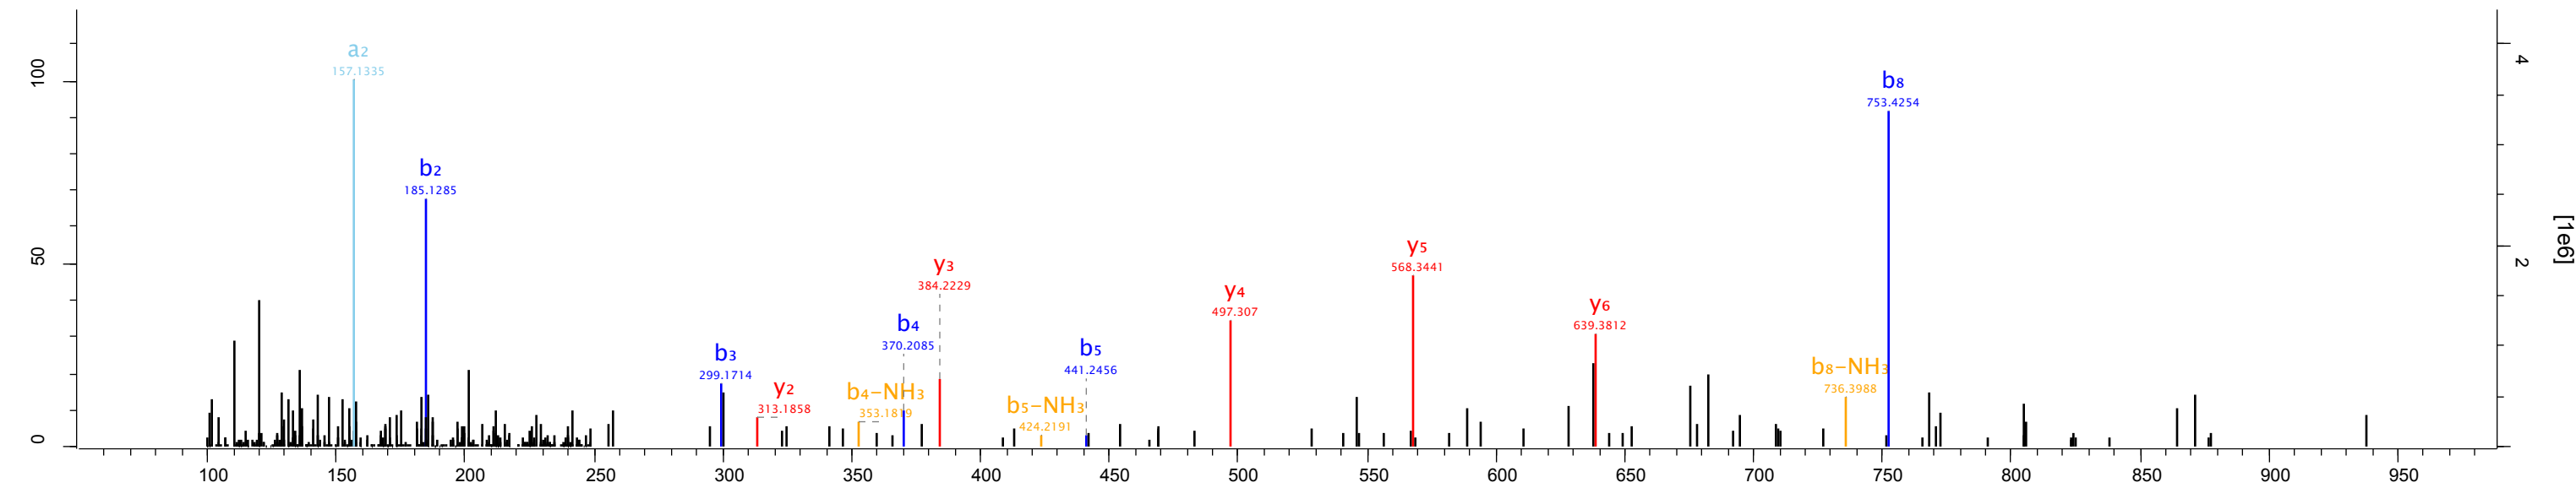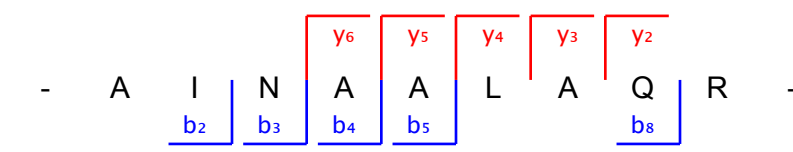

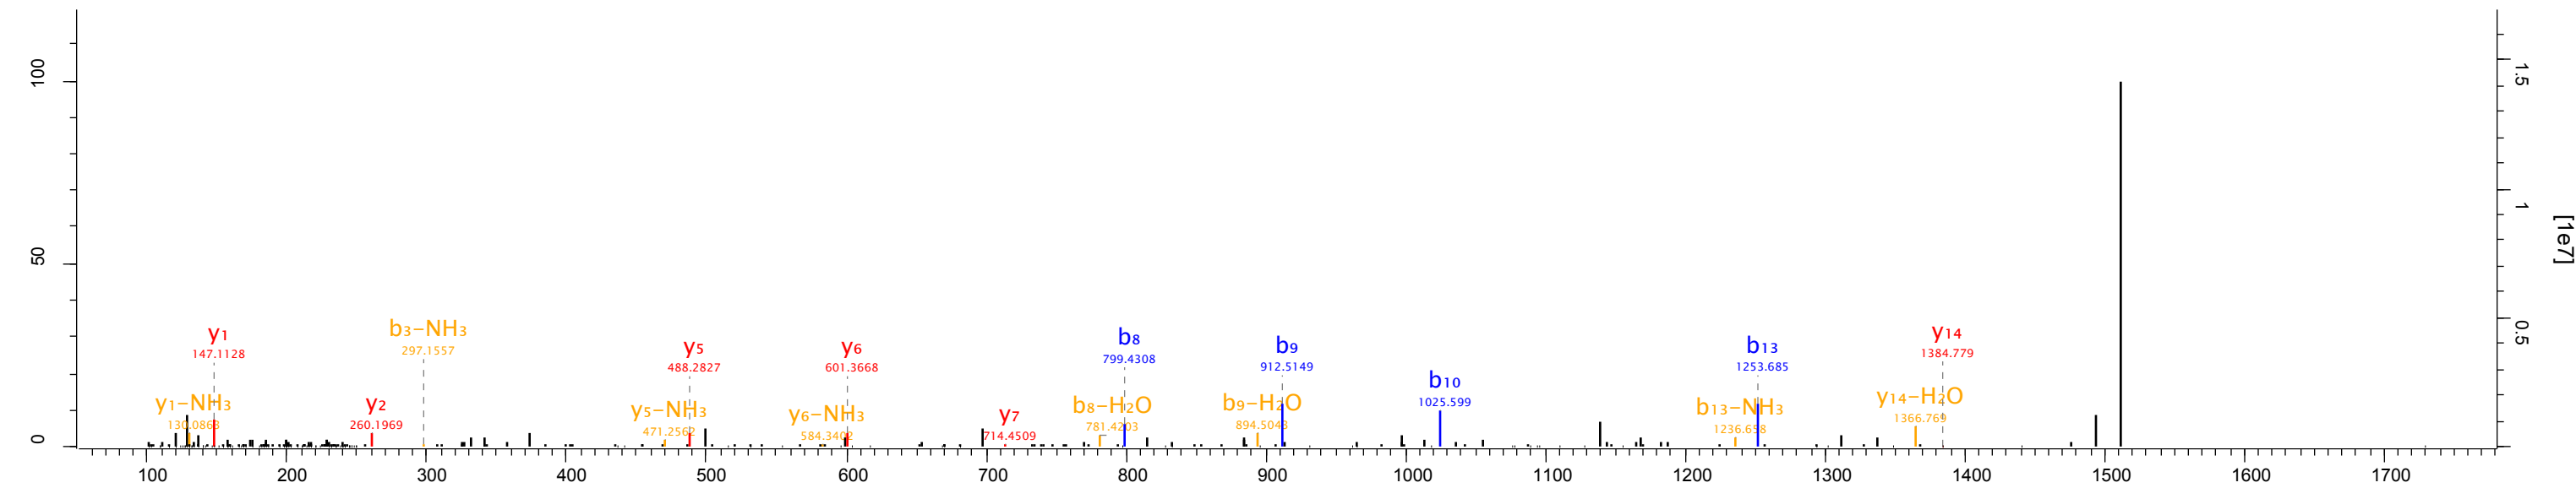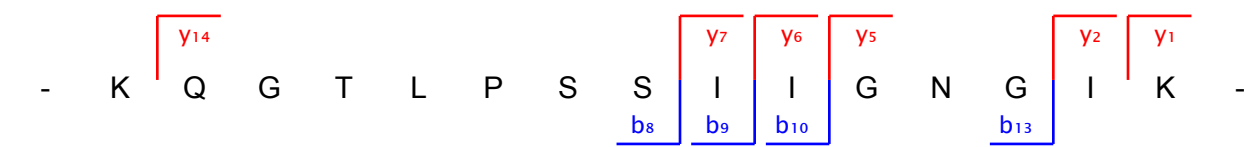

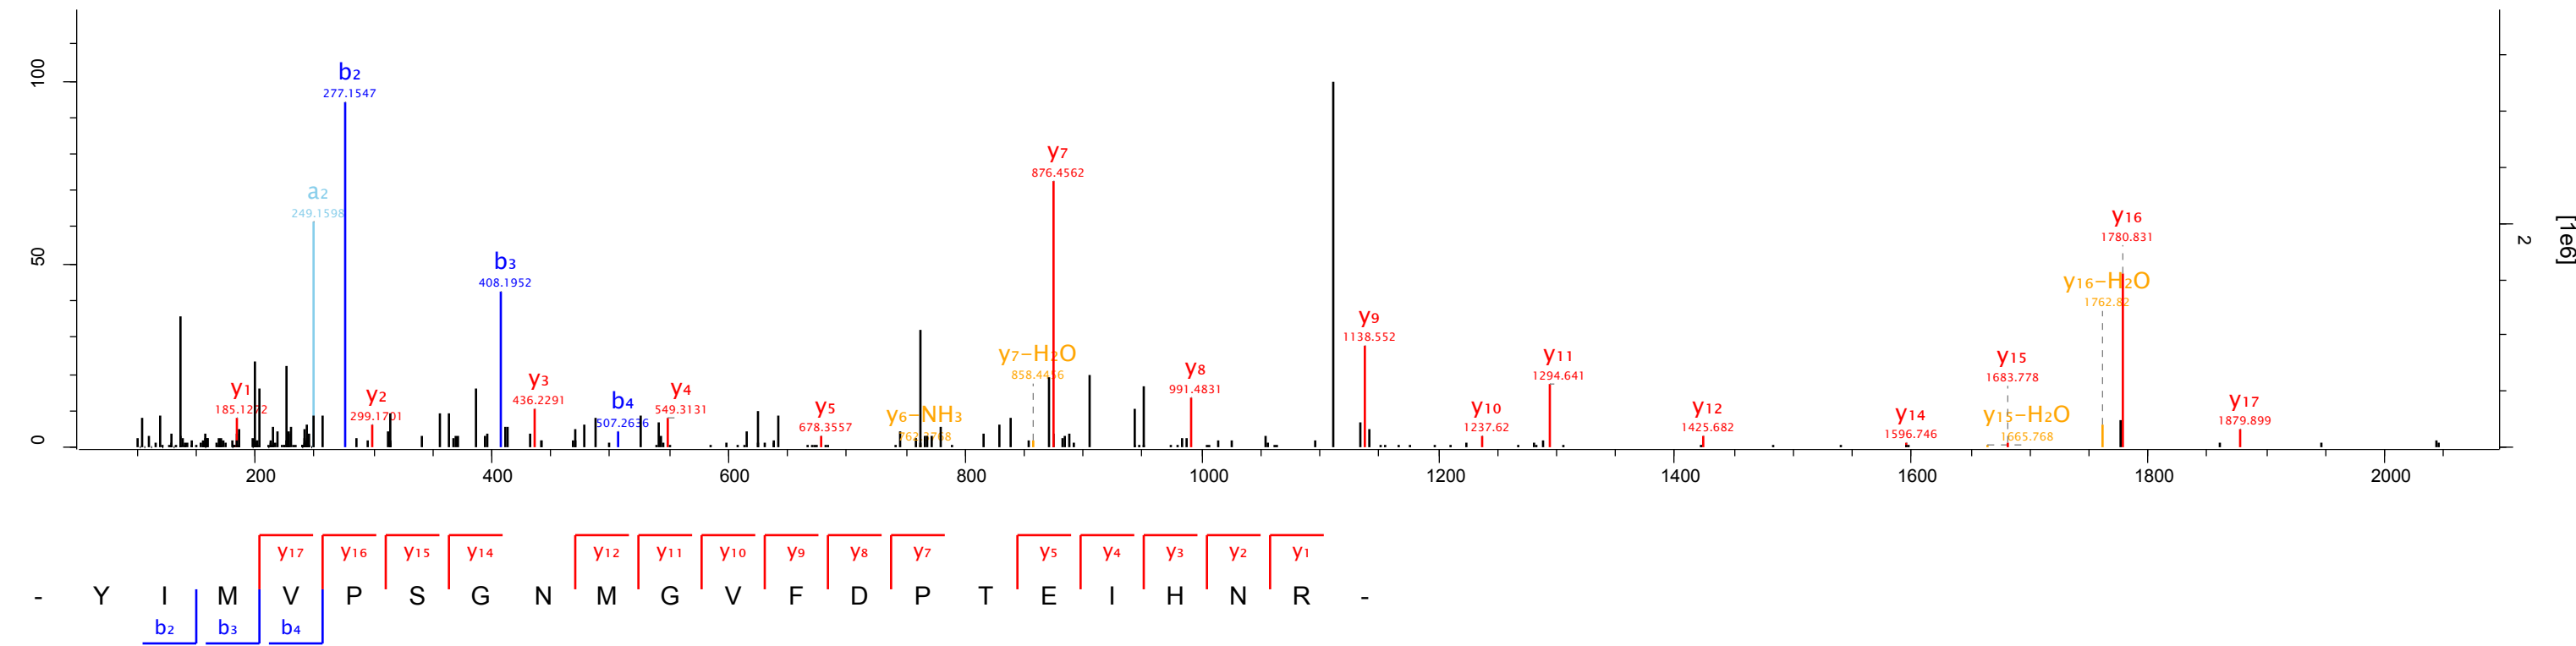

Raw file

20171215\_MaS\_33SR\_LMH\_proteome\_01

Scan 89849 Method FTMS; HCD Score 58.72 m/z 856.95 Gene names SARS2

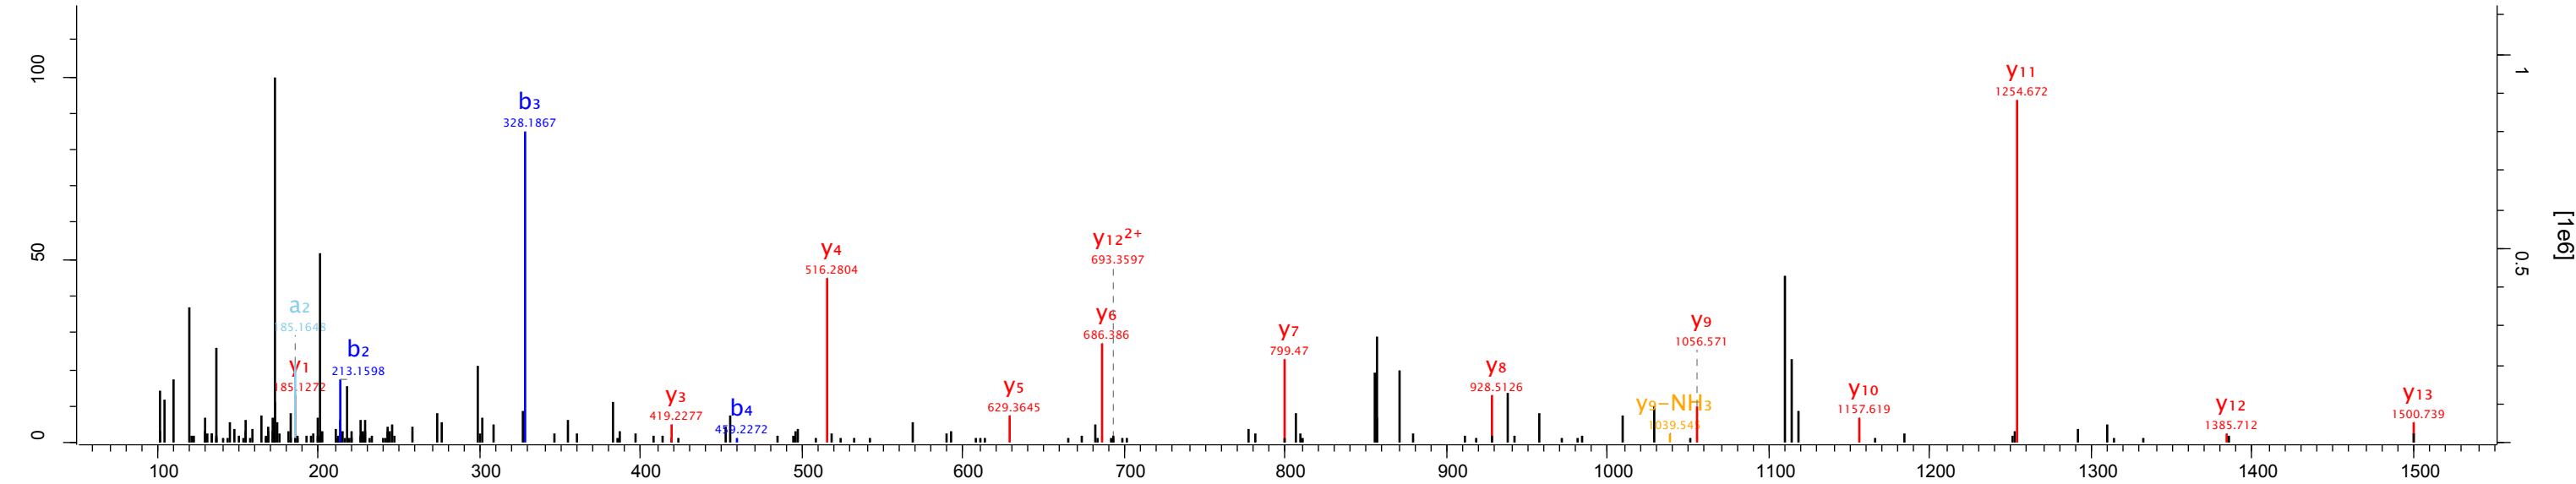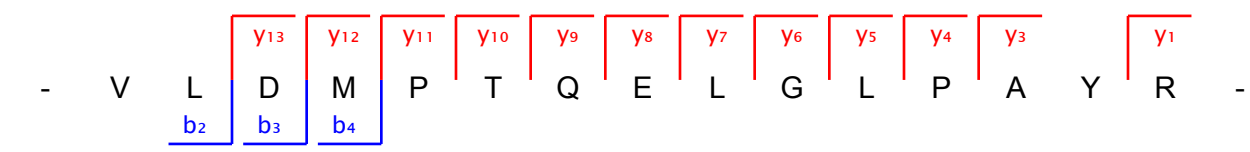

Raw file: 20171215\_MaS\_33SR\_LMH\_proteome\_01  
 Scan: 91209 Method: FTMS; HCD Score: 65.18 m/z: 446.27 Gene names: C9orf41

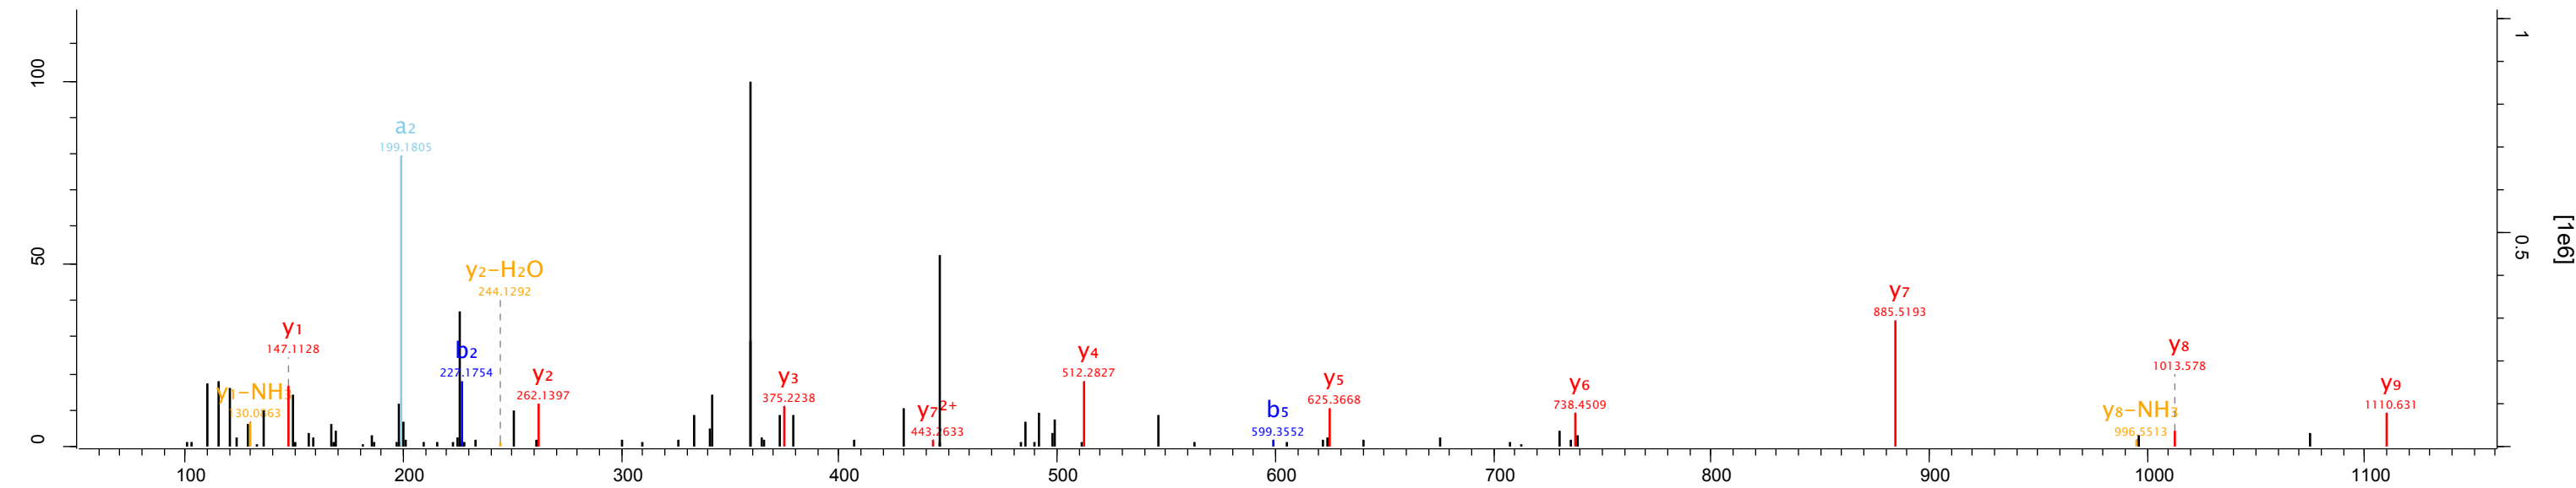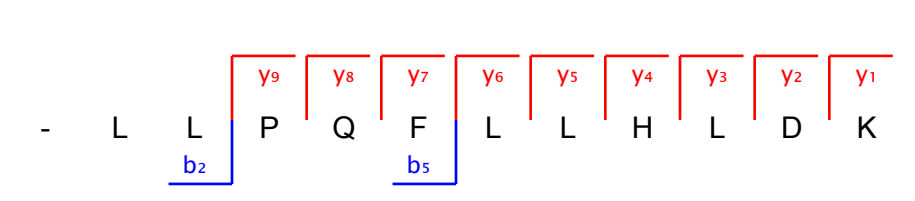

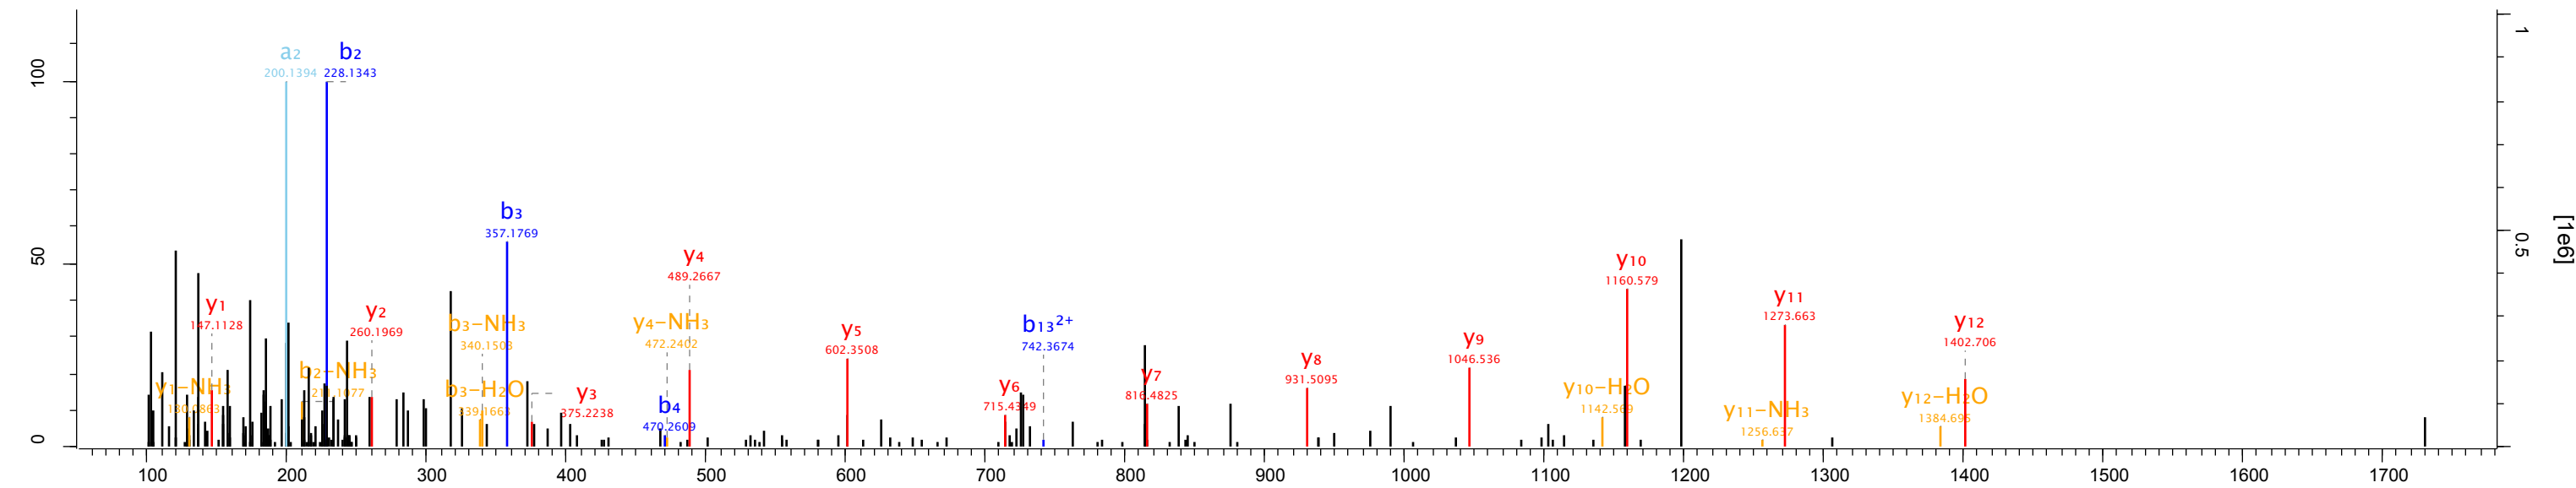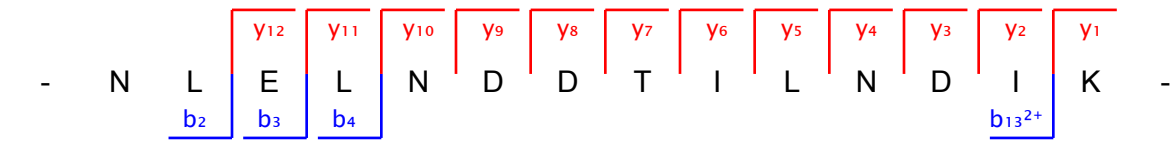



Raw file 20171215\_MaS\_33SR\_LMH\_proteome\_01 Scan 93729 Method FTMS; HCD Score 57.93 m/z 984.73 Gene names NDUFA3

20171215\_MaS\_33SR\_LMH\_proteome\_01

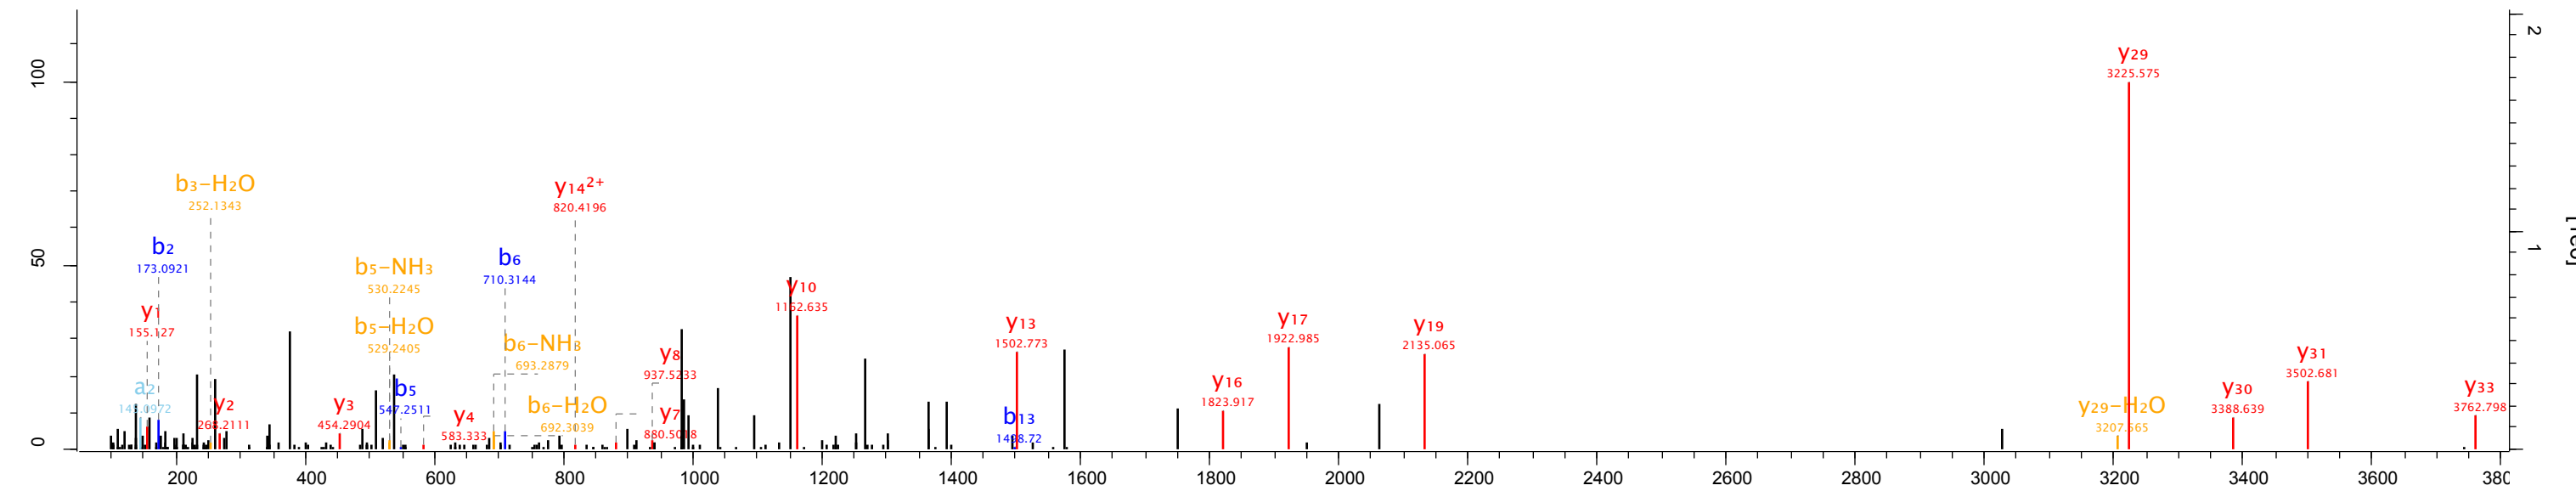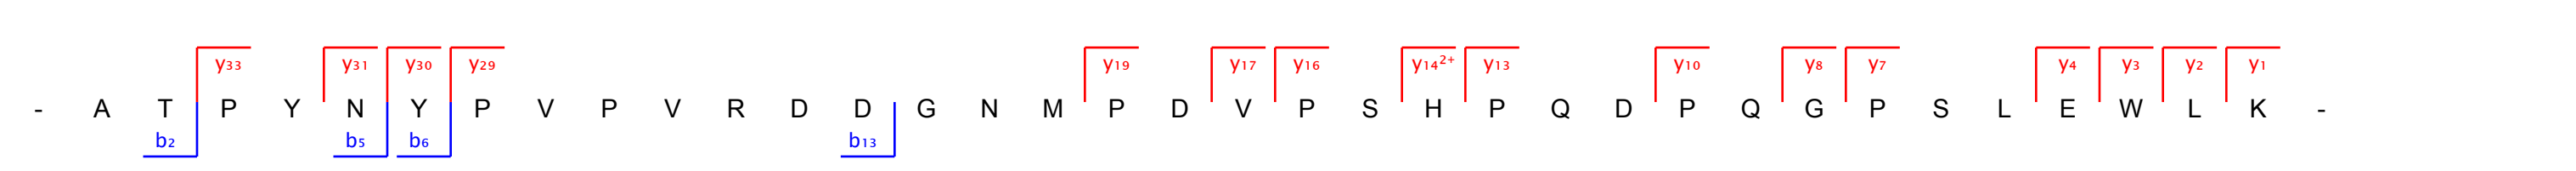

Raw file

20171215\_MaS\_33SR\_LMH\_proteome\_02

| Scan  | Method    | Score  | m/z    | Gene names |
|-------|-----------|--------|--------|------------|
| 10069 | FTMS; HCD | 120.32 | 624.79 | PLP2       |

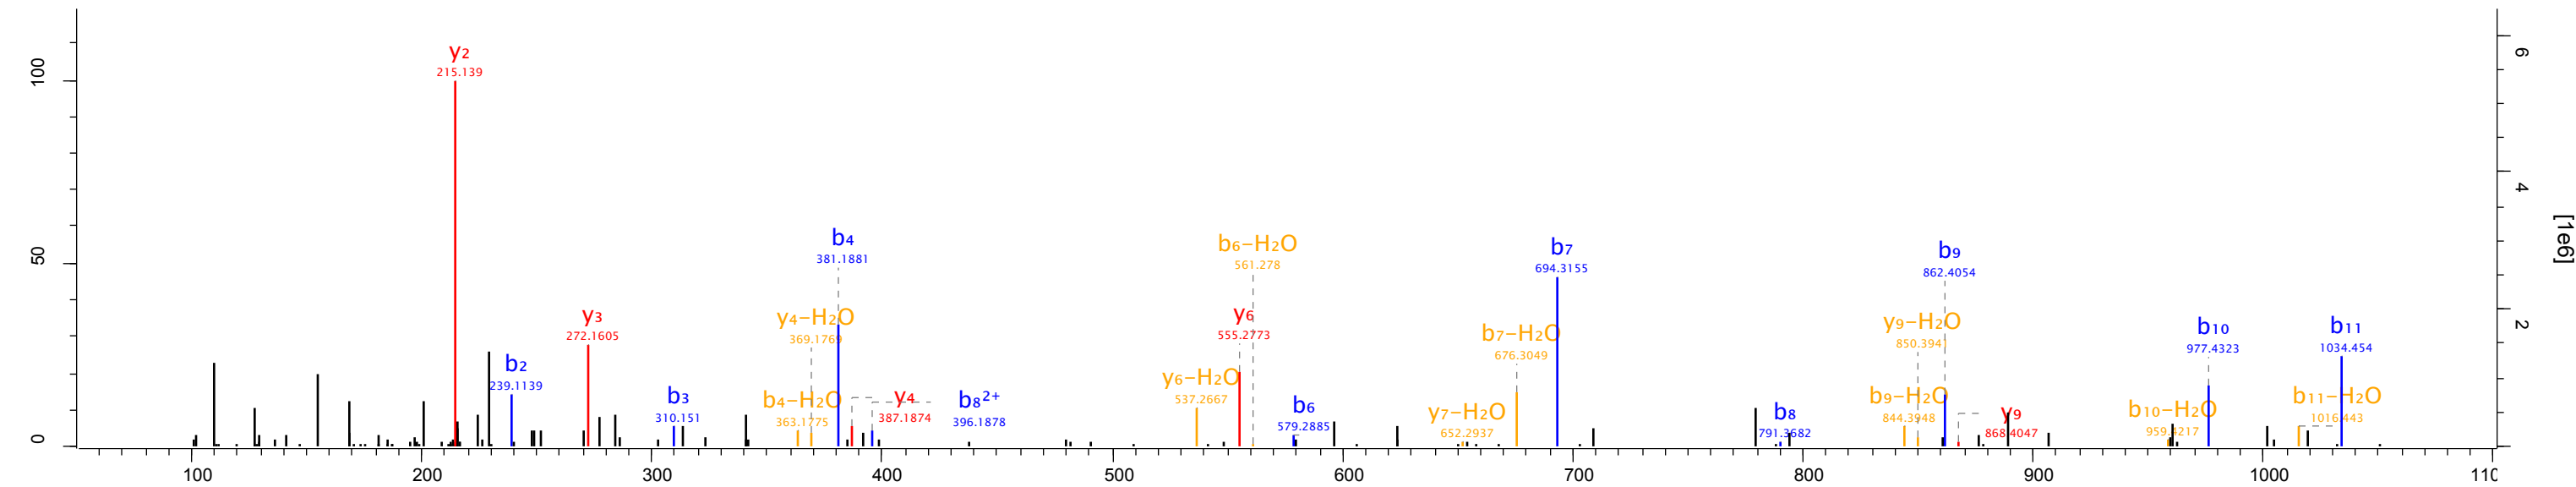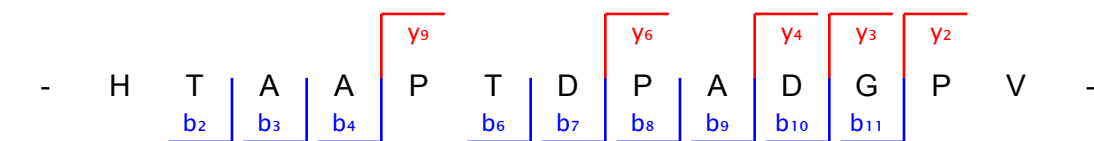

Raw file 20171215\_MaS\_33SR\_LMH\_proteome\_02 Scan 122489 Method FTMS; HCD Score 53.3 m/z 802.42 Gene names ACOX3

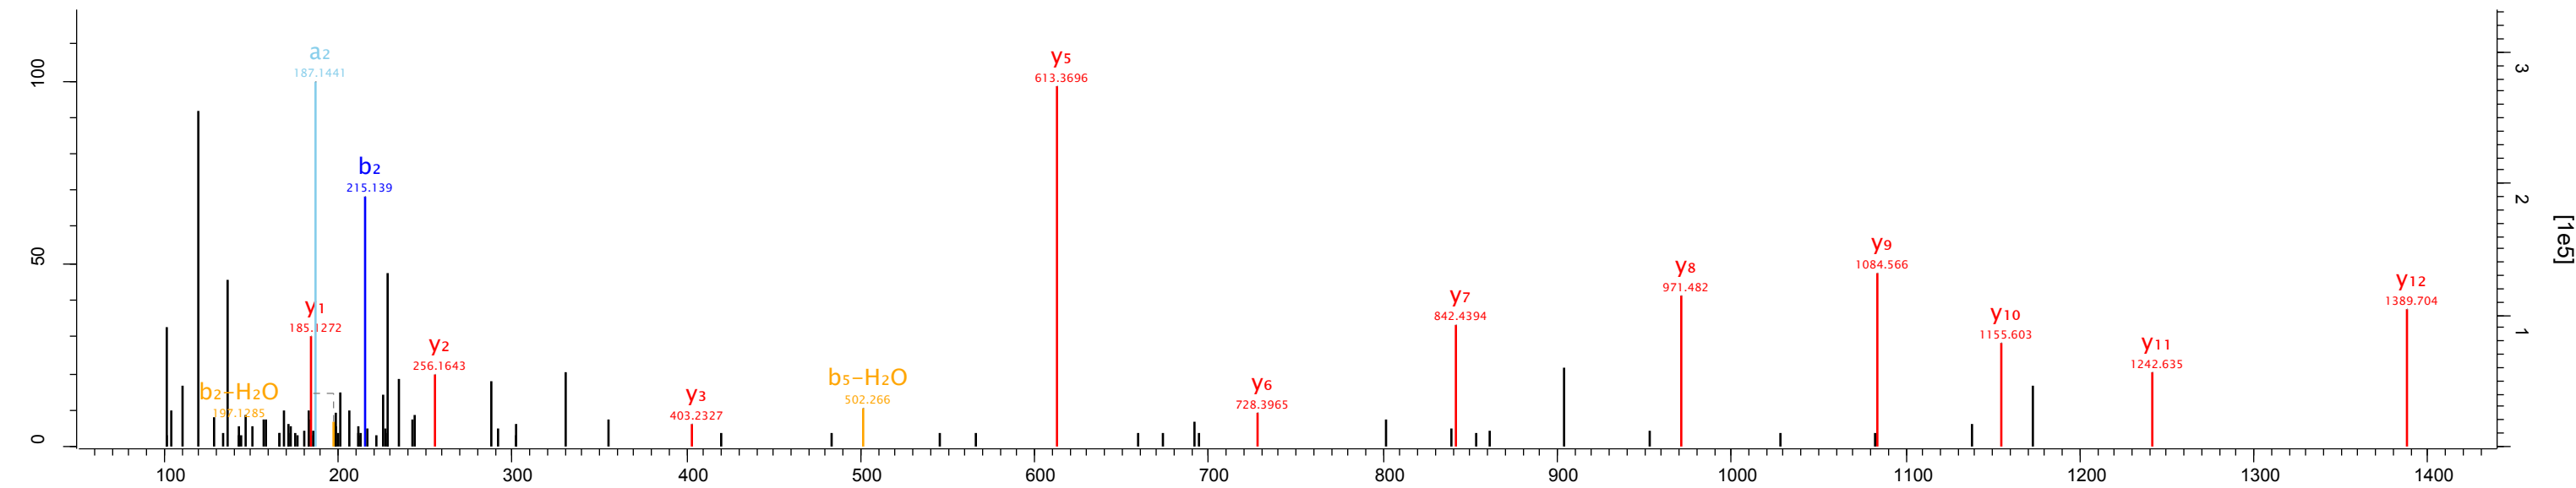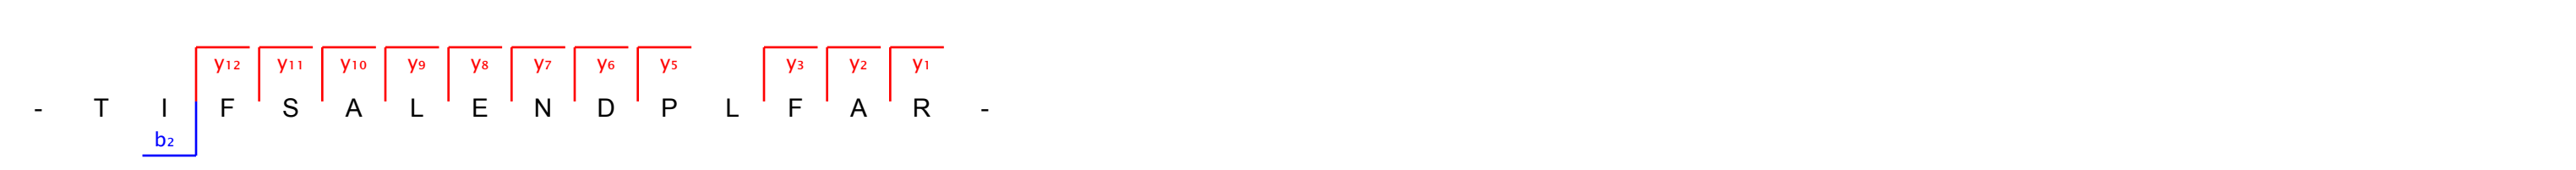

Raw file 20171215\_MaS\_33SR\_LMH\_proteome\_02 Scan 123799 Method FTMS; HCD Score 64.45 m/z 681.73 Gene names THOC6

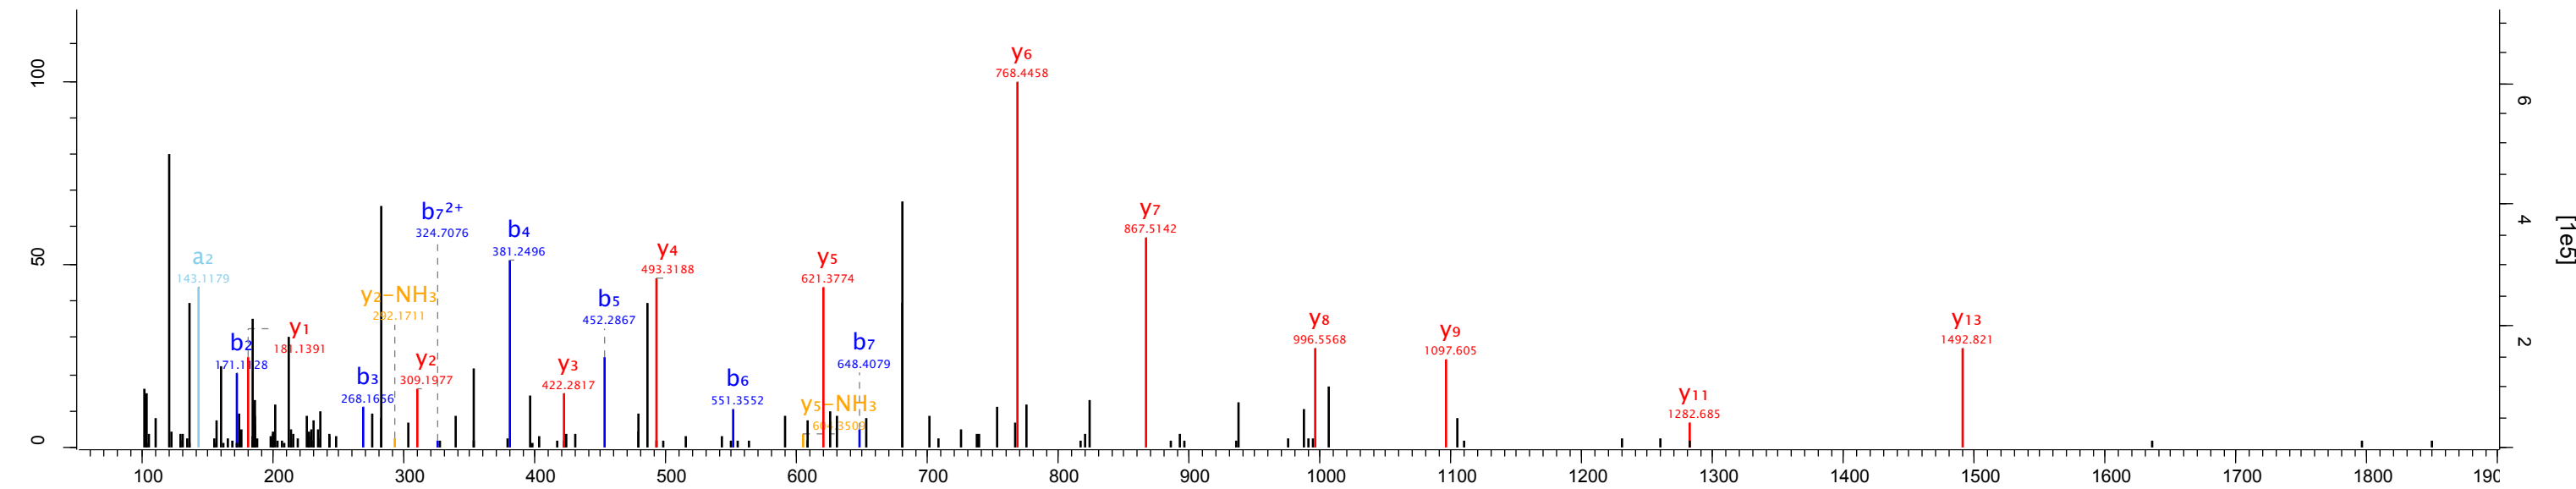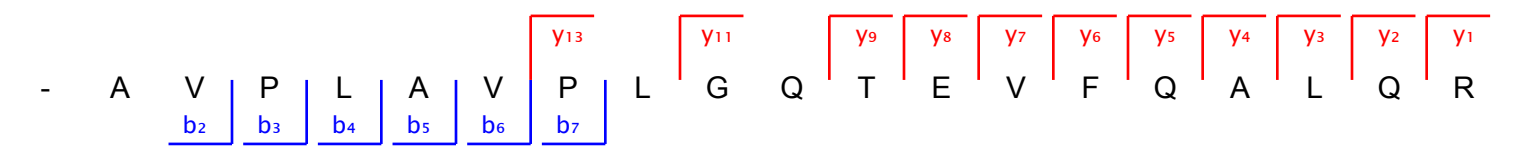

Raw file  
20171215\_MaS\_33SR\_LMH\_proteome\_02

Scan 124579 Method FTMS; HCD Score 43.7 m/z 836.07 Gene names MEMO1

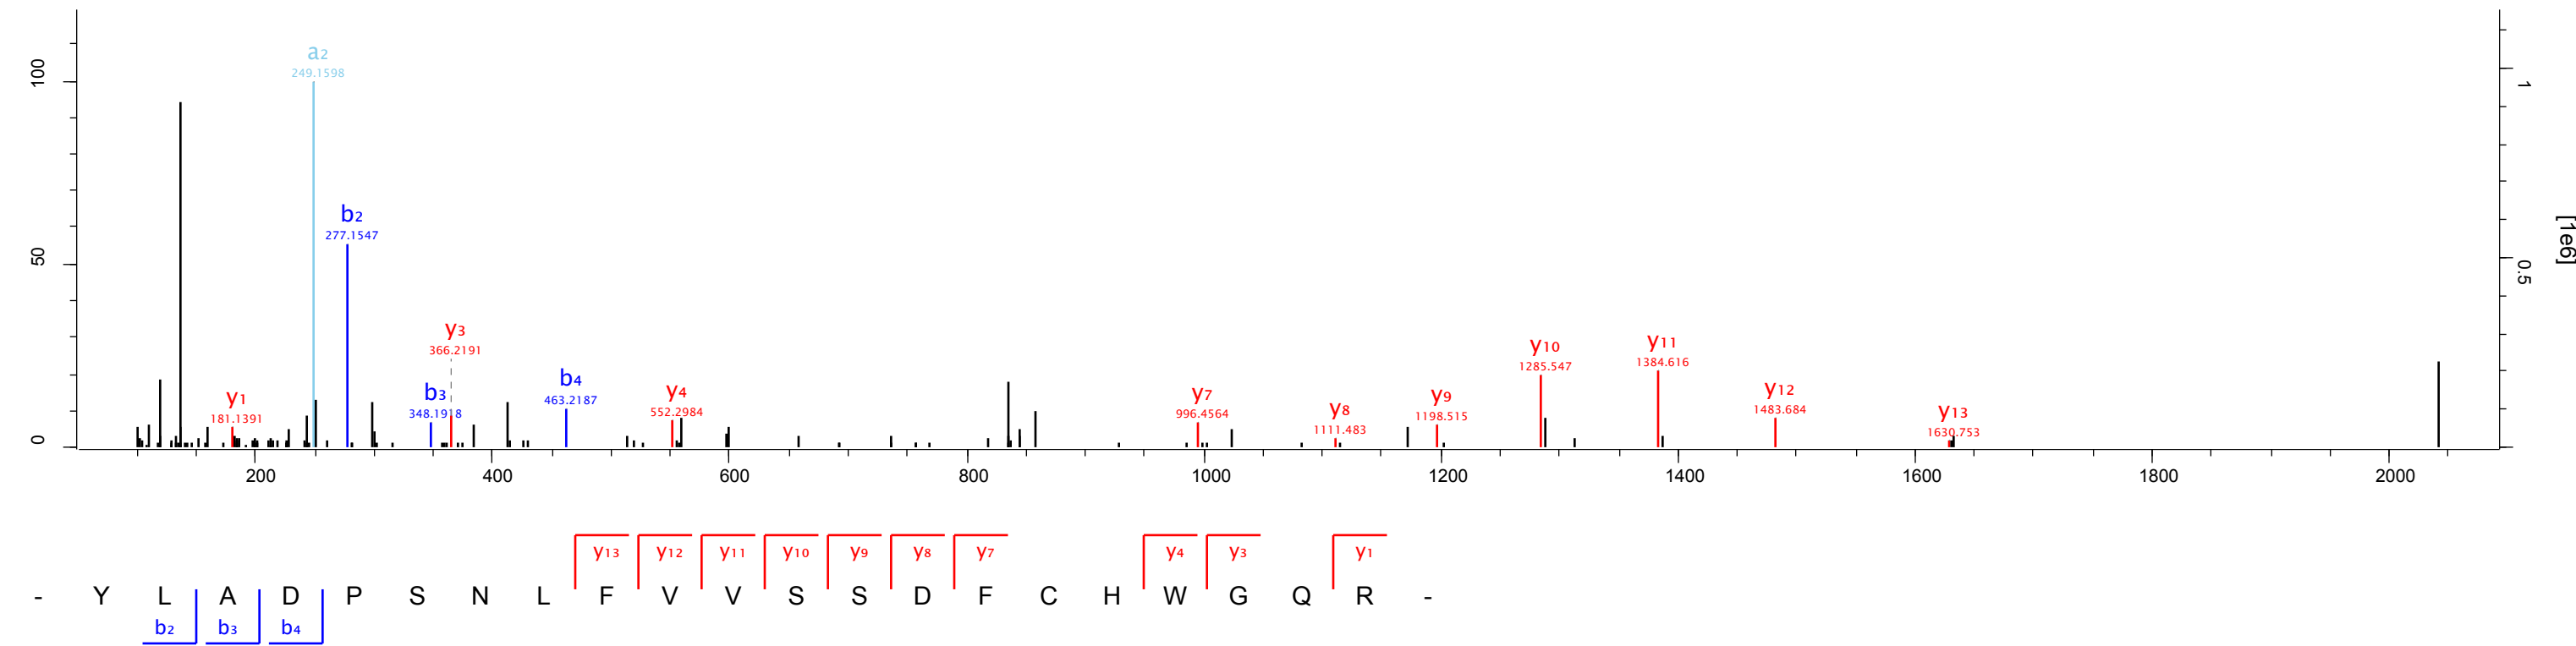

Raw file: 20171215\_MaS\_33SR\_LMH\_proteome\_02  
 Scan: 125499 Method: FTMS; HCD Score: 56.2 m/z: 724.9 Gene names: PIK3R1

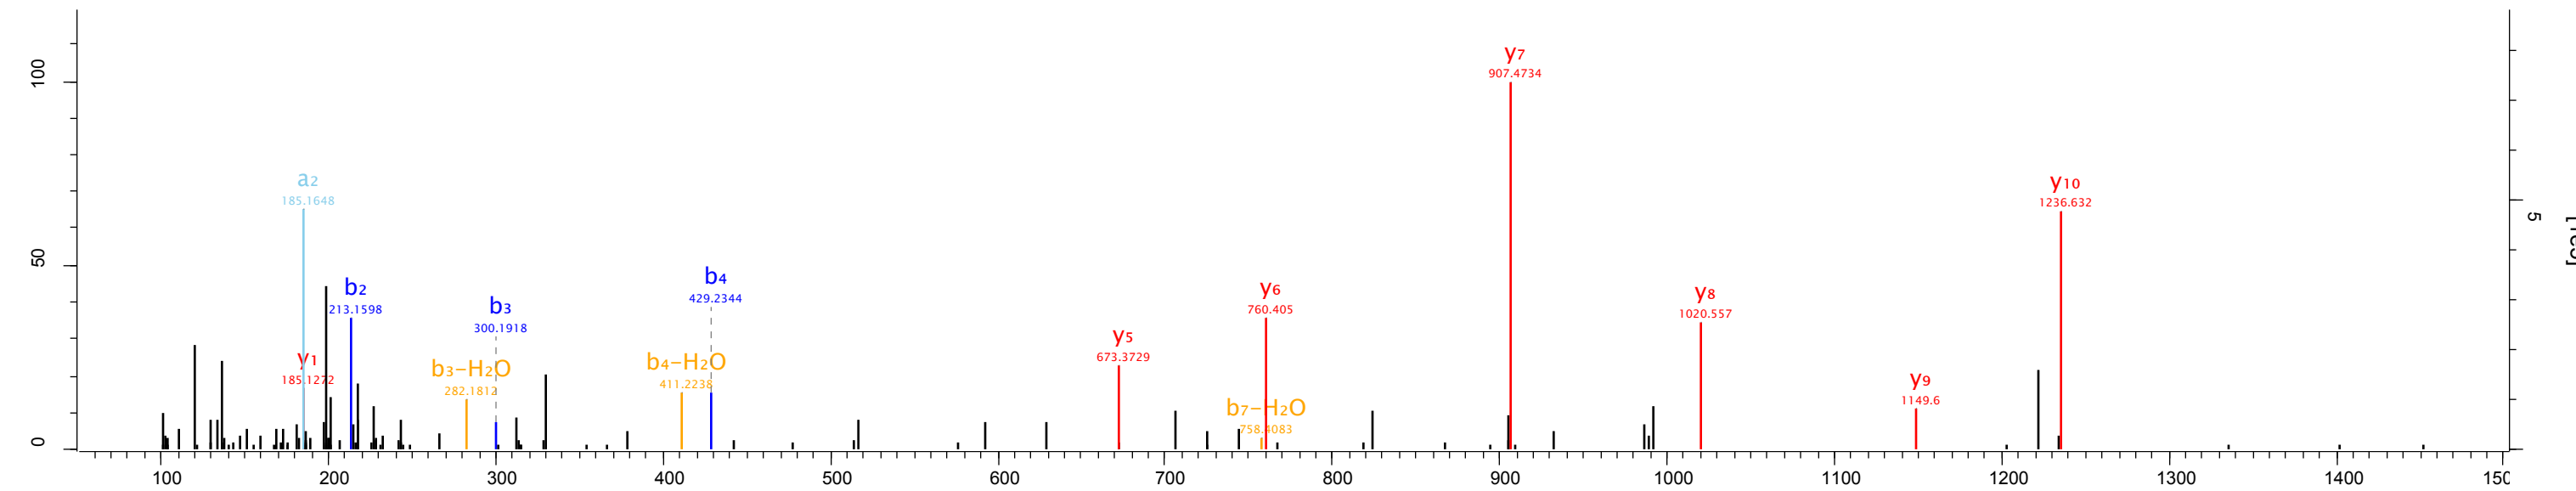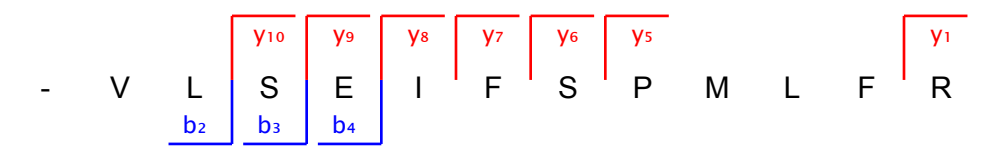

Raw file: 20171215\_MaS\_33SR\_LMH\_proteome\_02  
 Scan: 129389 Method: FTMS; HCD Score: 106.42 m/z: 611.33 Gene names: S100B

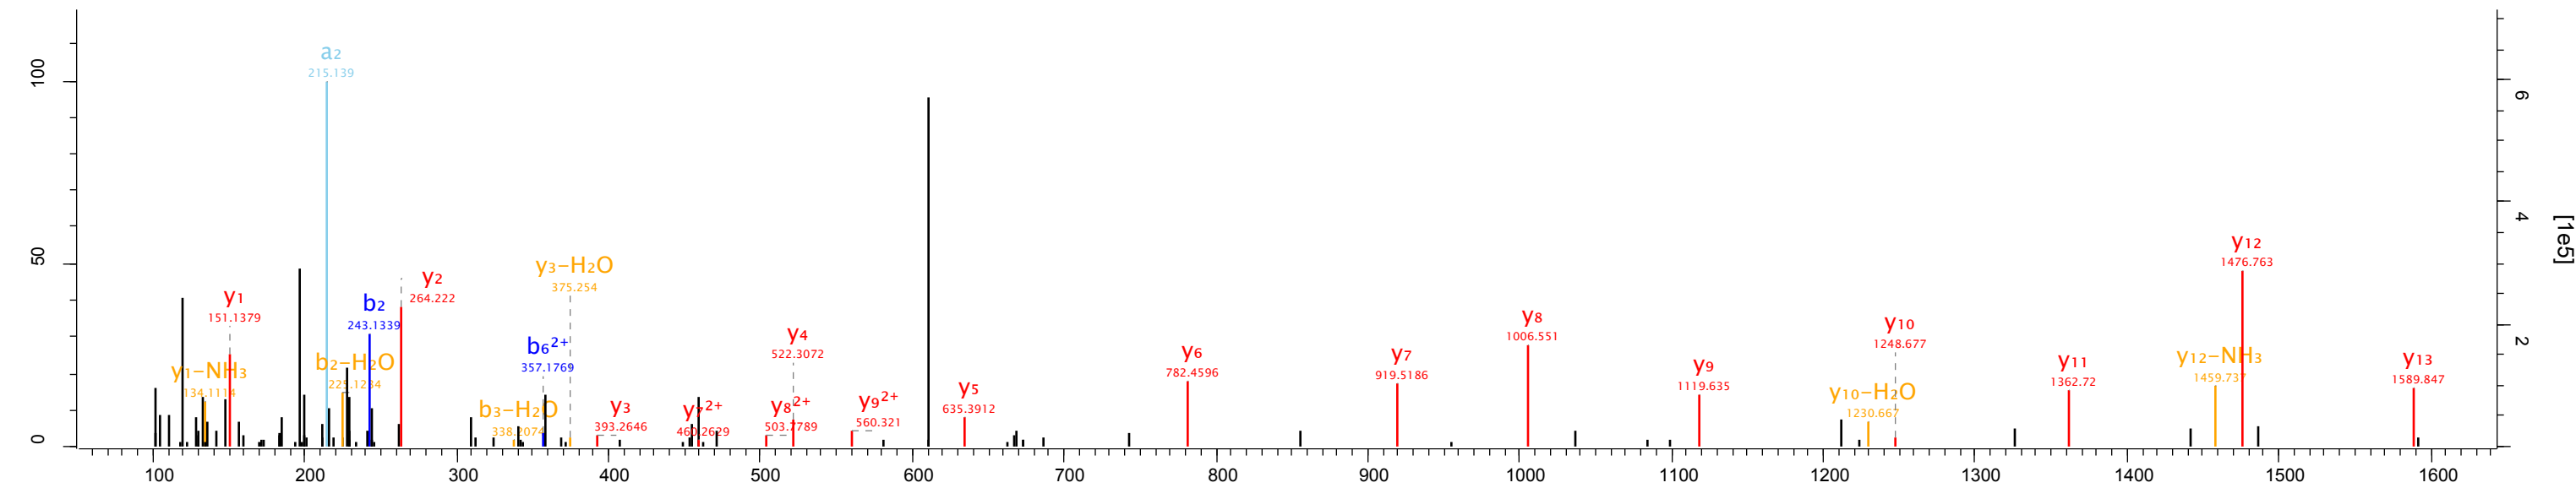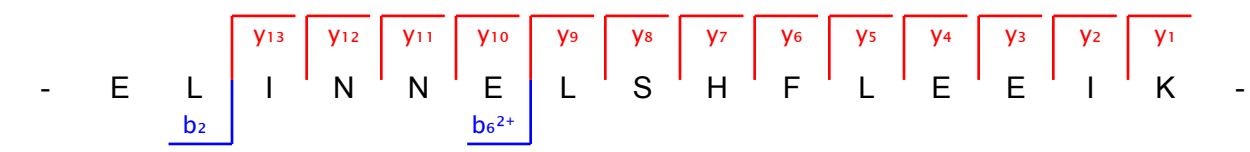

Raw file: 20171215\_MaS\_33SR\_LMH\_proteome\_02  
 Scan: 132479 Method: FTMS; HCD Score: 57.53 m/z: 936.51 Gene names: RIMKLB

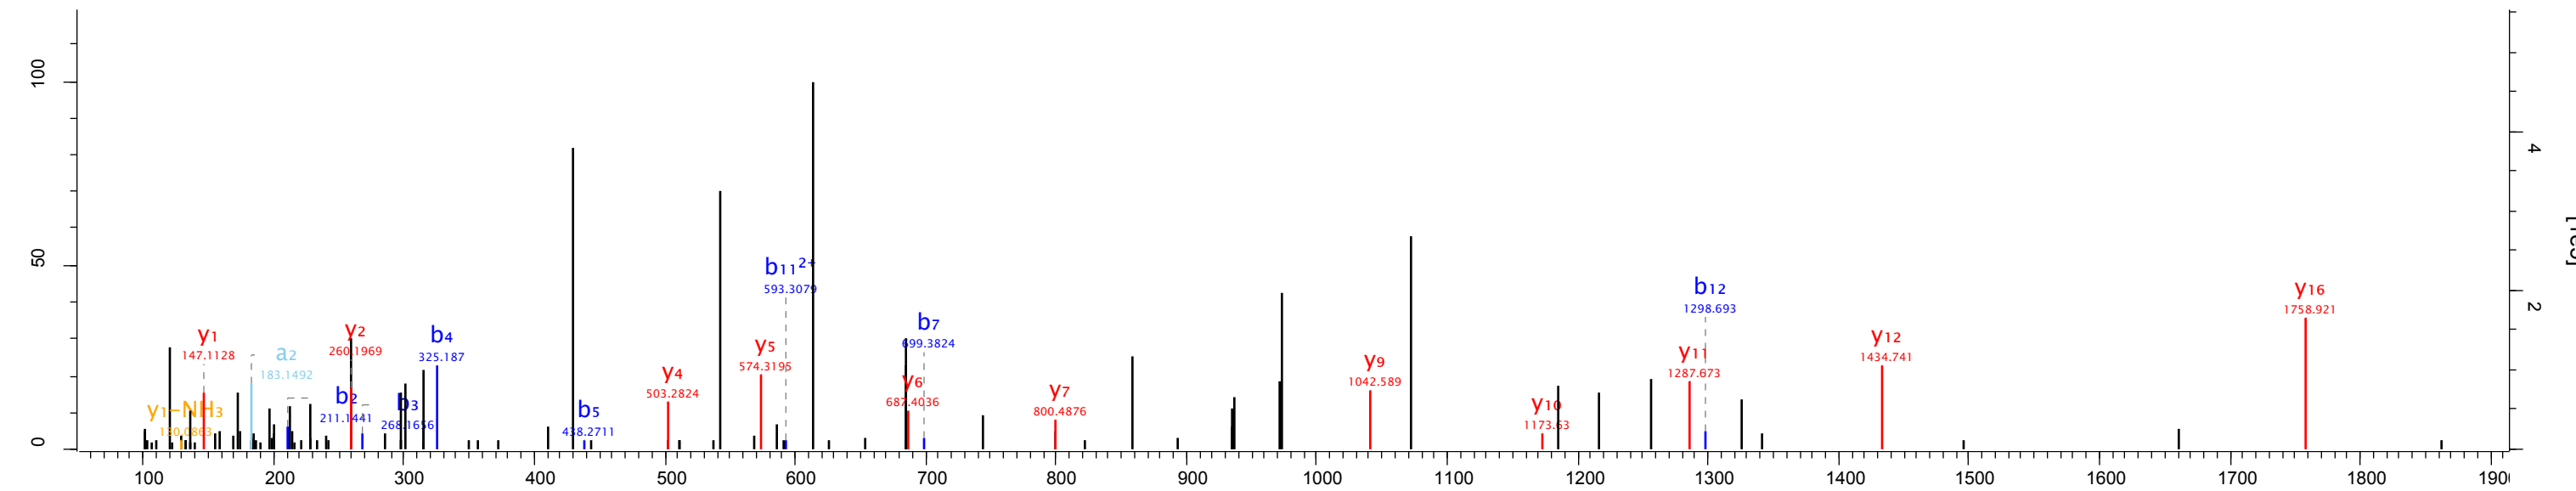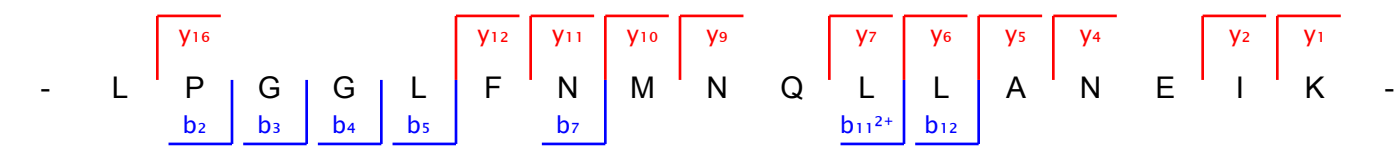



Raw file: 20171215\_MaS\_33SR\_LMH\_proteome\_02  
 Scan: 138159 Method: FTMS; HCD Score: 77.78 m/z: 743.93 Gene names: MAPK9;MAPK10

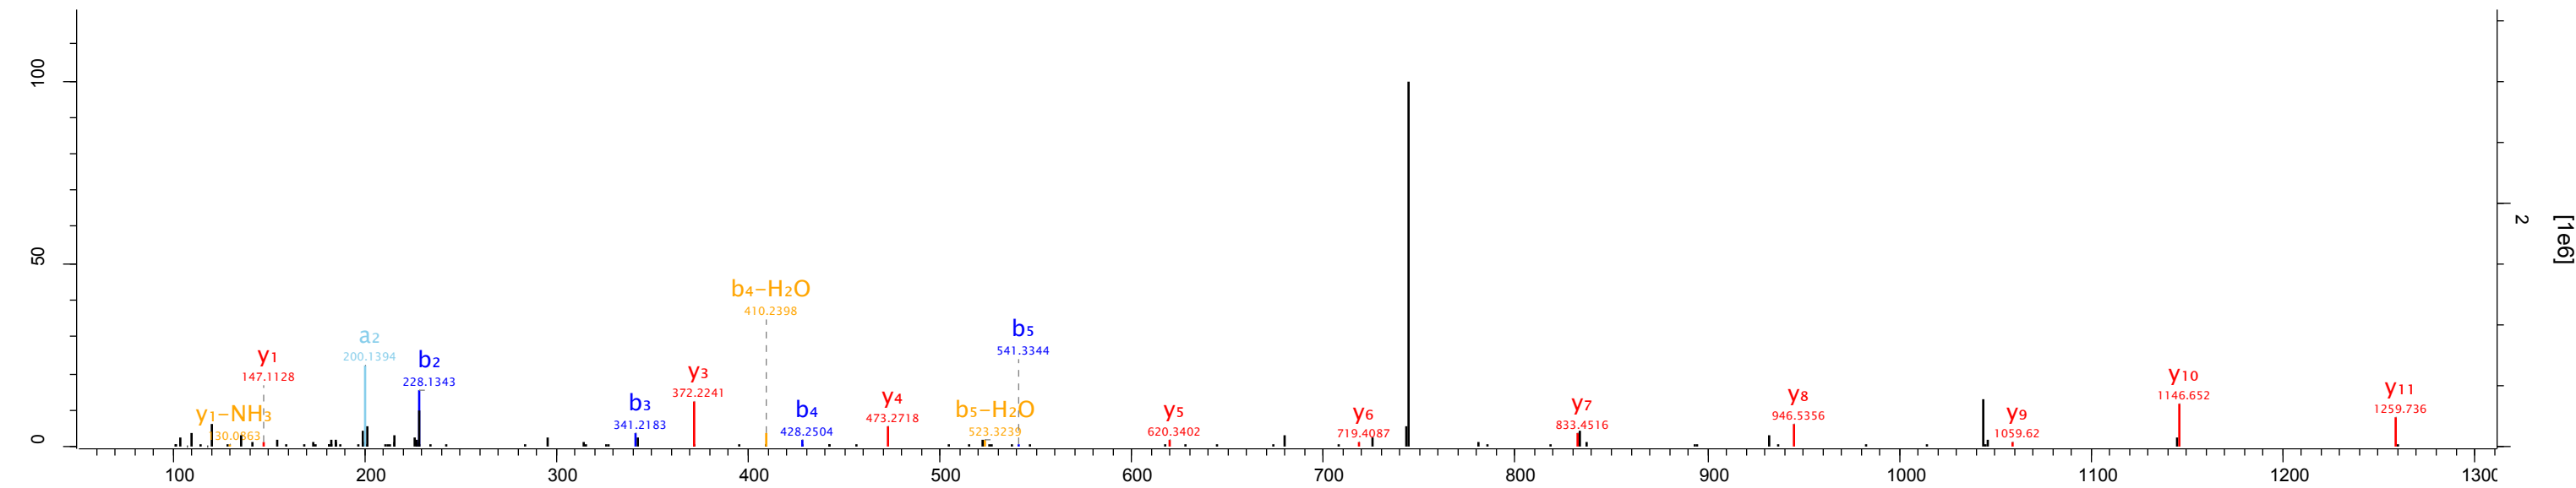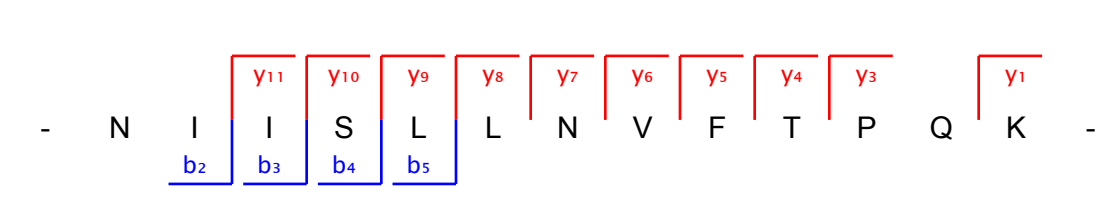

Raw file 20171215\_MaS\_33SR\_LMH\_proteome\_02 Scan 148619 Method FTMS; HCD Score 59.18 m/z 706.4 Gene names RPP40

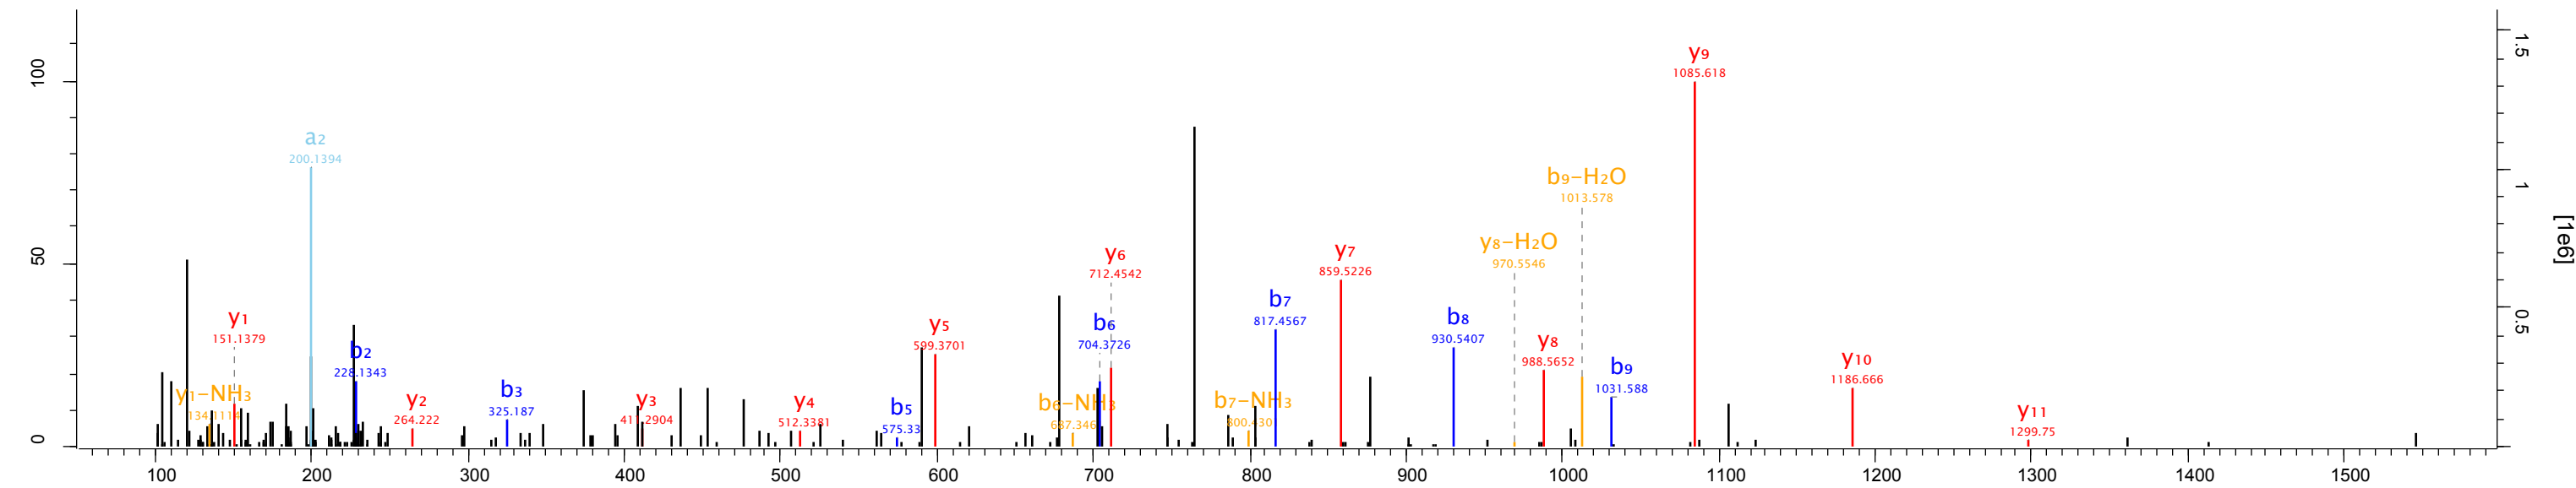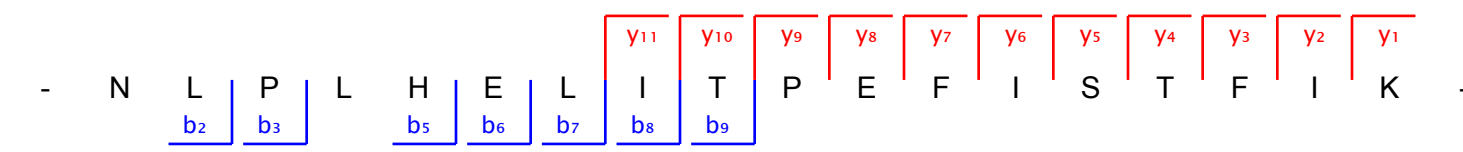

Raw file: 20171215\_MaS\_33SR\_LMH\_proteome\_02  
 Scan: 149189 Method: FTMS; HCD Score: 88.5 m/z: 616.36 Gene names: PSMG2

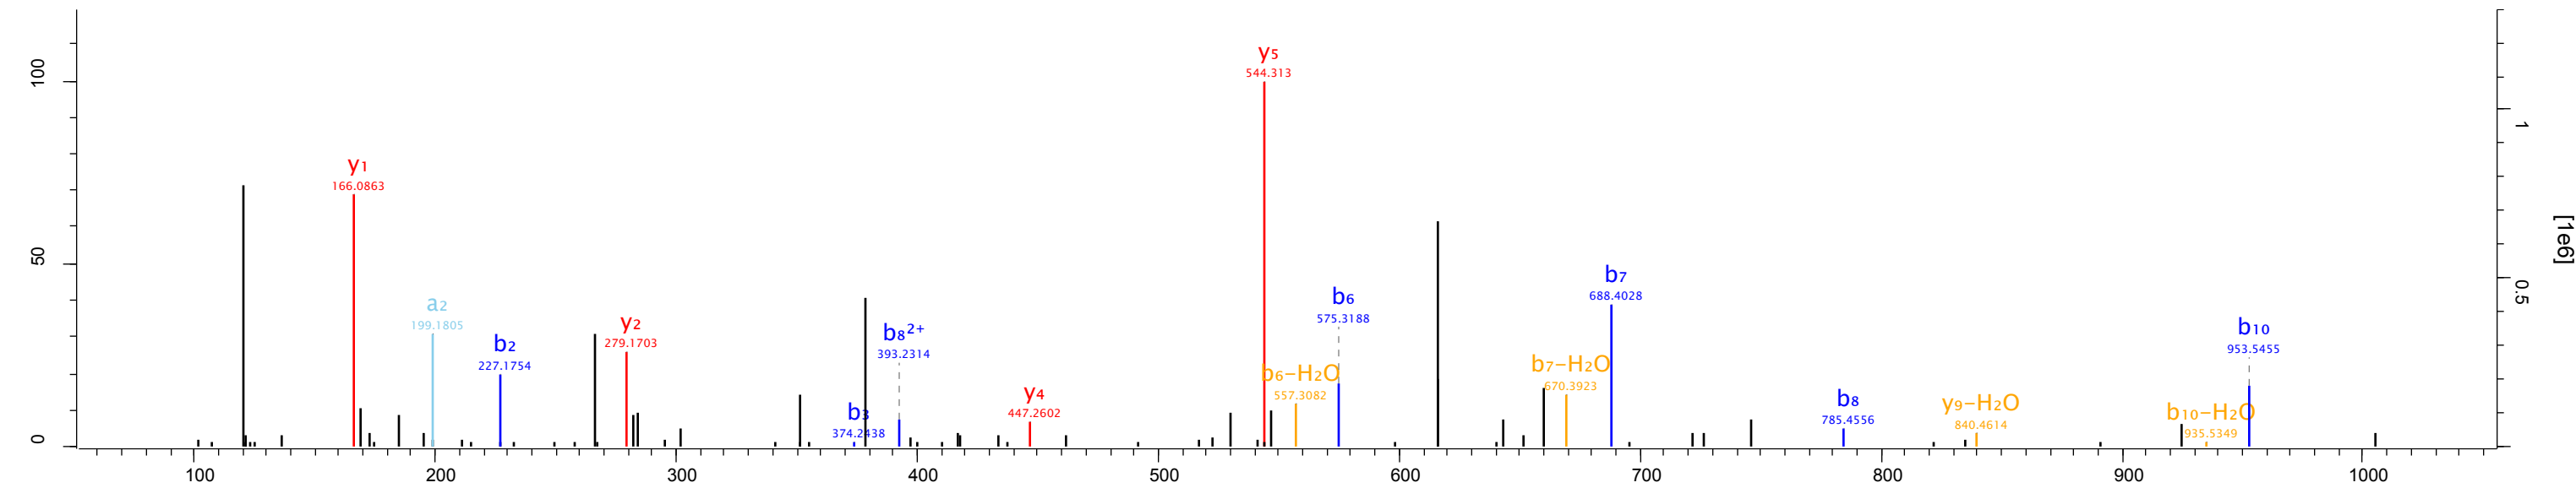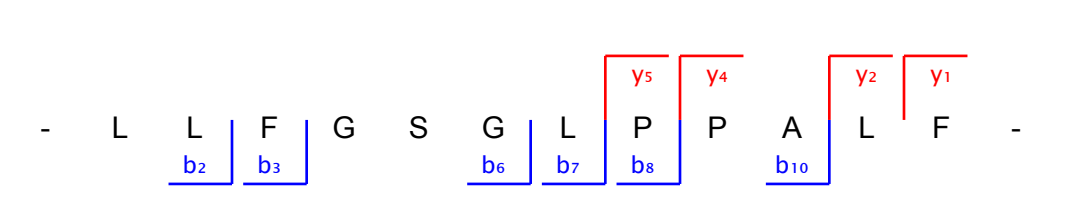

Raw file 20171215\_MaS\_33SR\_LMH\_proteome\_02 Scan 21909 Method FTMS; HCD Score 65.9 m/z 408.21

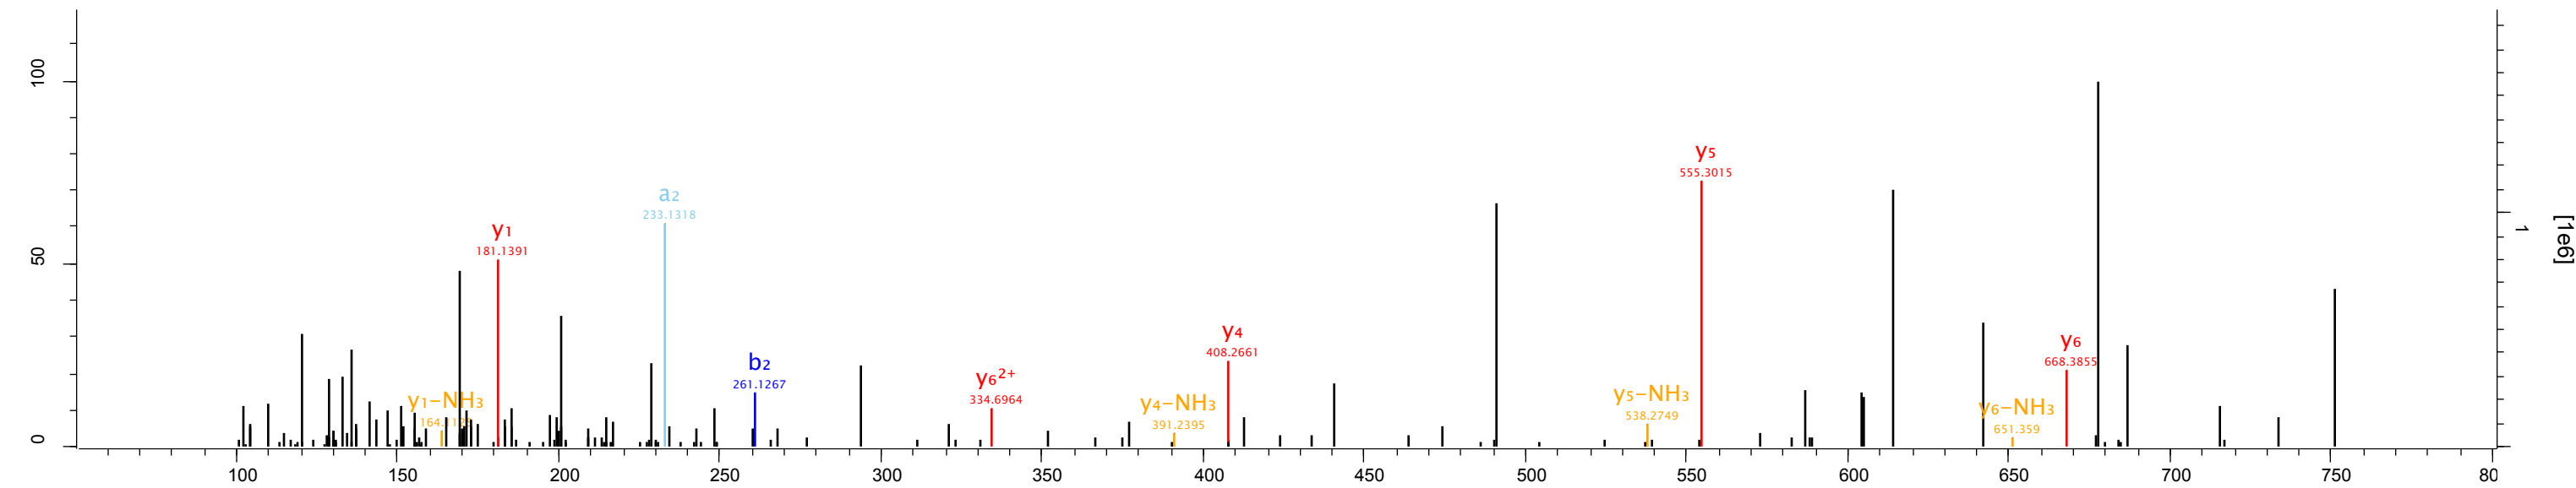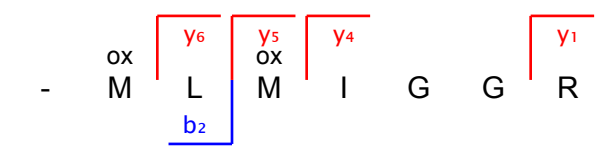

Raw file  
20171215\_MaS\_33SR\_LMH\_proteome\_02

Scan 32319 Method FTMS; HCD Score 92.32 m/z 402.77 Gene names KCNK1

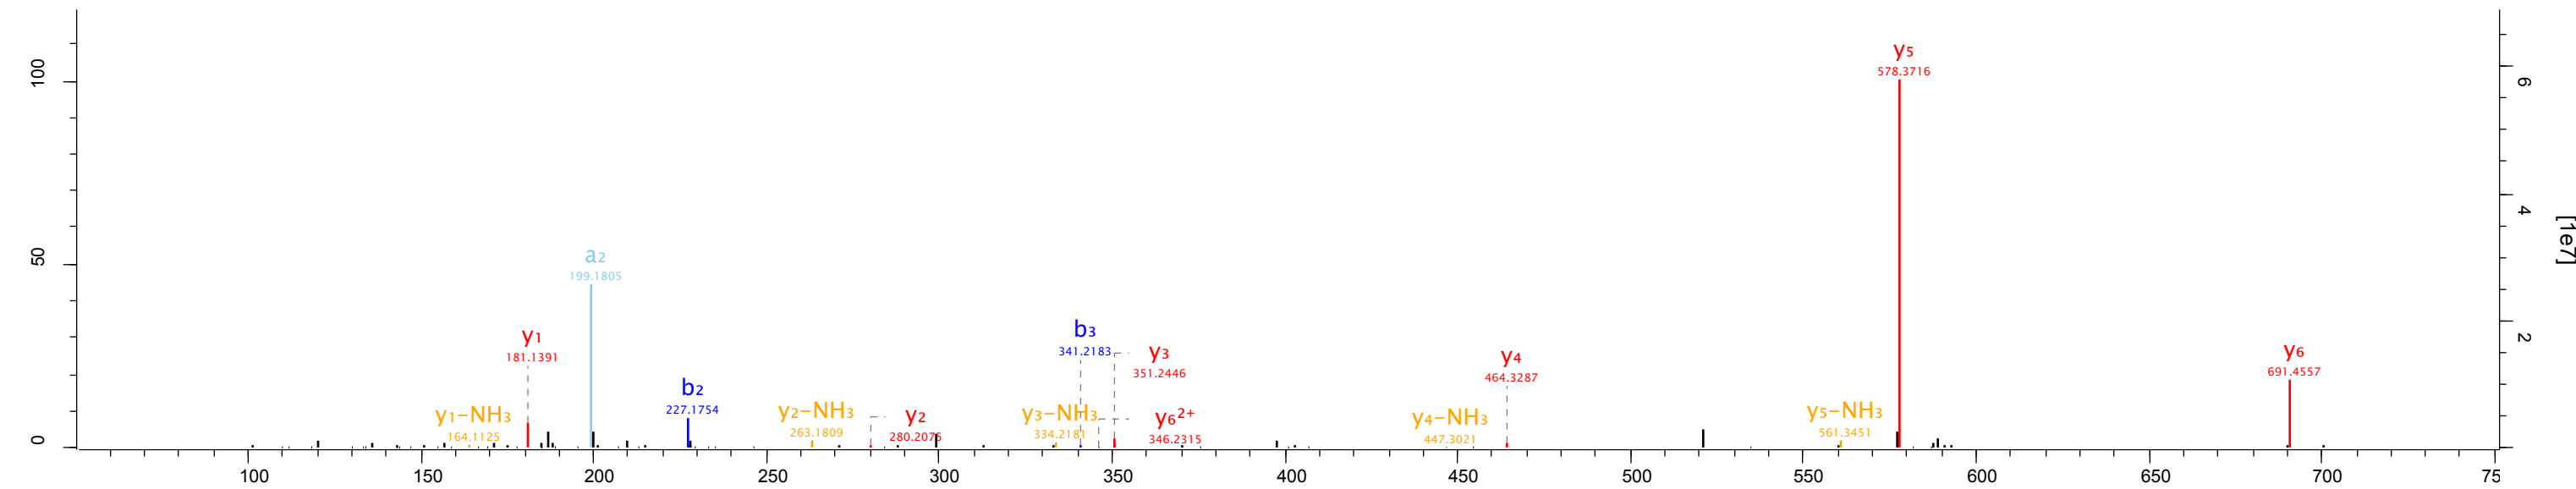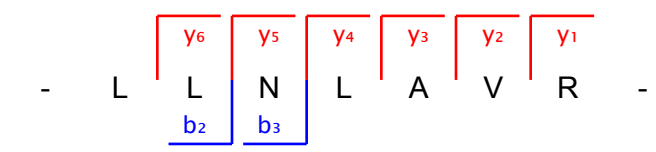

Raw file 20171215\_MaS\_33SR\_LMH\_proteome\_02 Scan 38489 Method FTMS; HCD Score 41.23 m/z 884.92 Gene names C17orf97

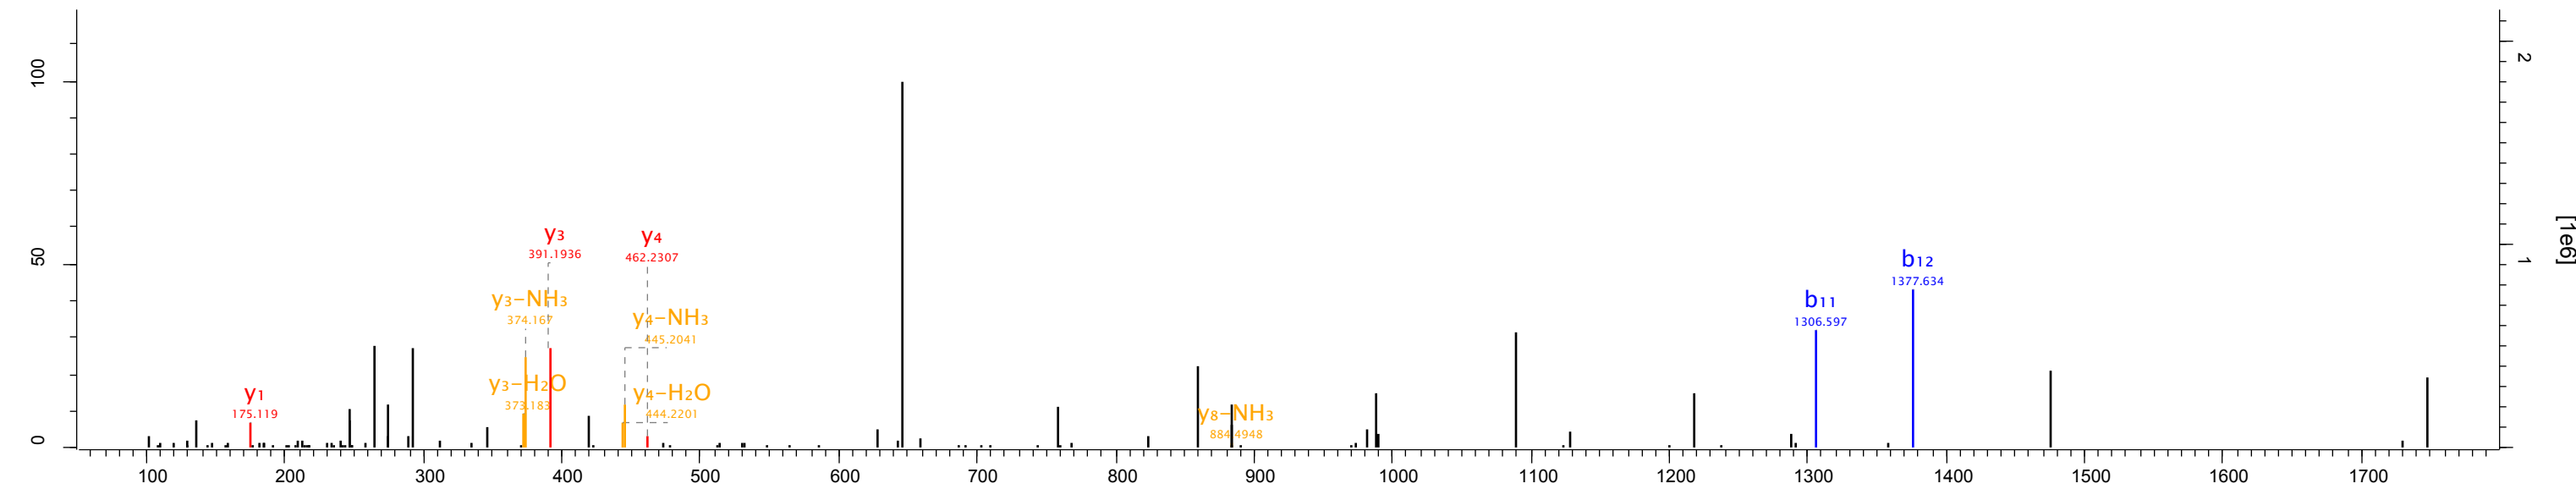

ac ox ph  
 - M E T R G P G L A V R A E S R -

b<sub>11</sub> b<sub>12</sub> y<sub>4</sub> y<sub>3</sub> y<sub>1</sub>

Raw file 20171215\_MaS\_33SR\_LMH\_proteome\_02 Scan 57919 Method FTMS; HCD Score 47.06 m/z 459.57 Gene names ZMAT2

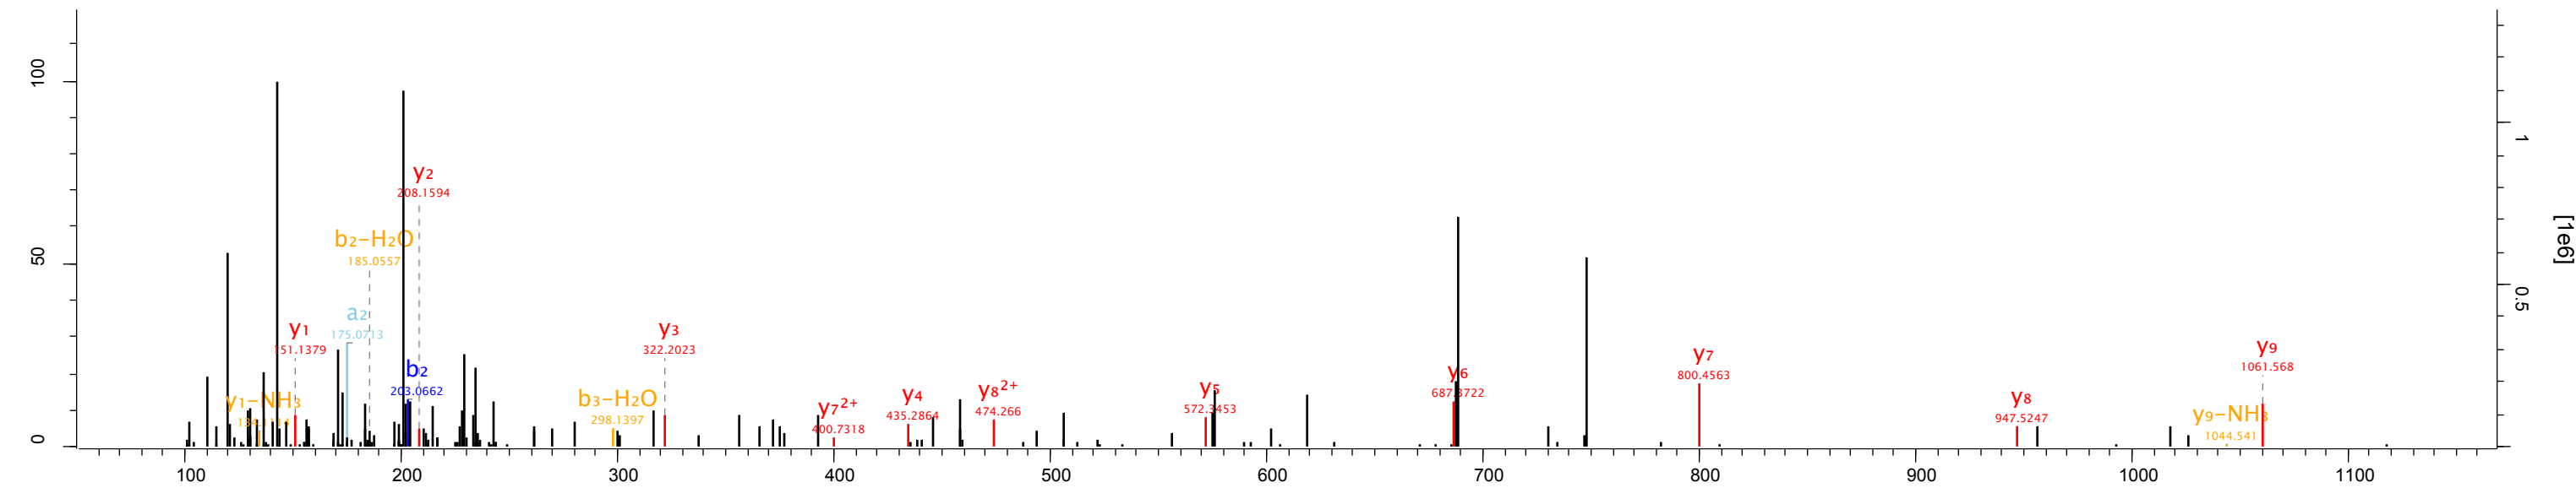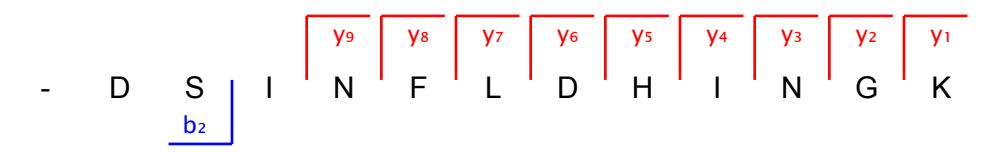

Raw file  
20171215\_MaS\_33SR\_LMH\_proteome\_02

Scan 64449 Method FTMS; HCD Score 45.42 m/z 718.03 Gene names C8orf33

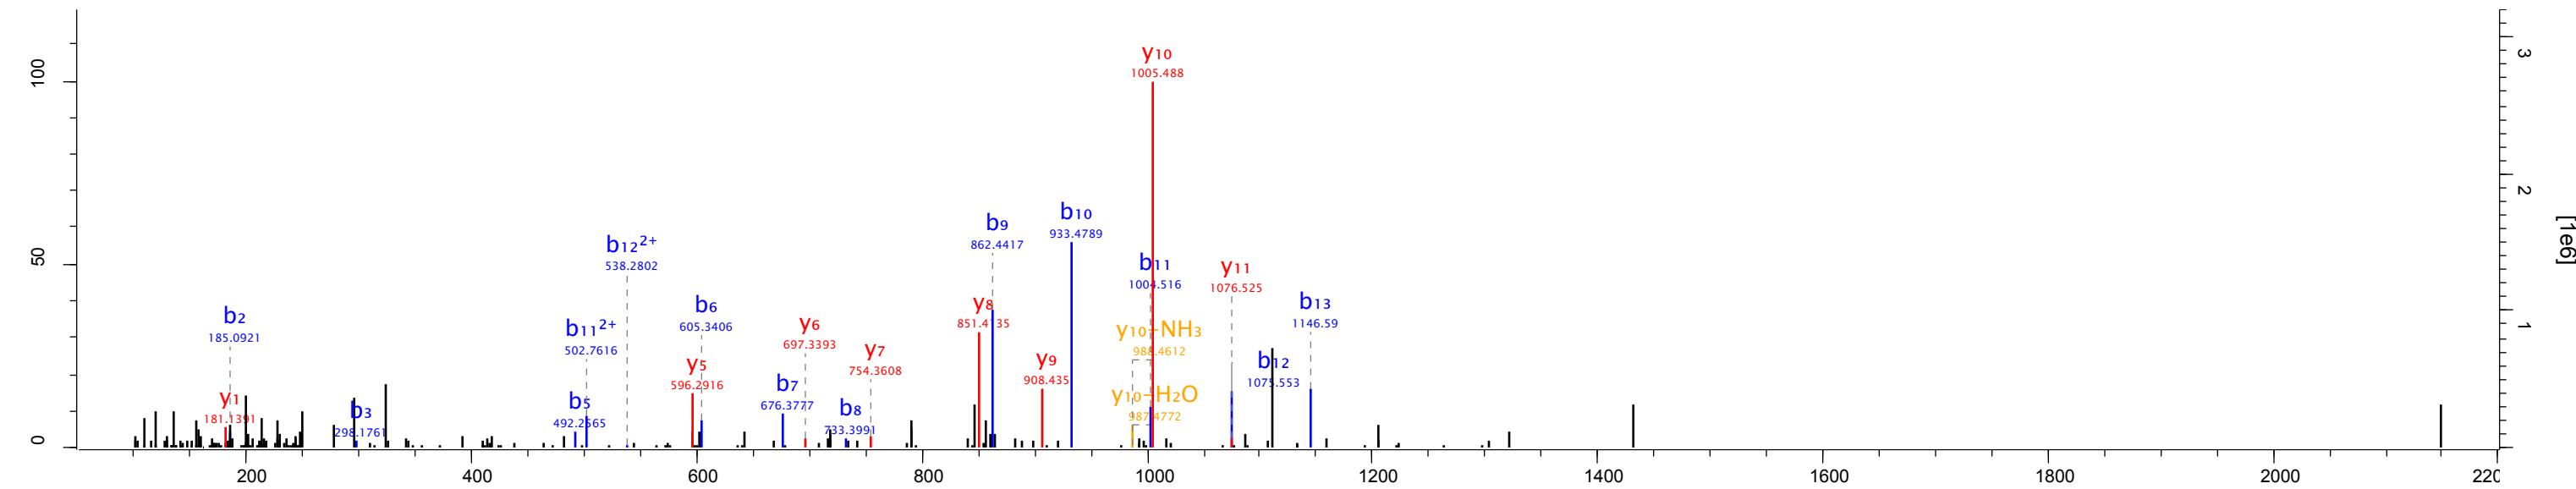

ac  
- A A L G H L A G E A A A A P G P G T P C A S R -

Fragmentation mapping:  
- b2 b3 b5 b6 b7 b8 b9 b10 b11 b12 b13 y11 y10 y9 y8 y7 y6 y5 y1





Raw file 20171215\_MaS\_33SR\_LMH\_proteome\_02 Scan 79729 Method FTMS; HCD Score 82.59 m/z 844.45 Gene names DCAF8

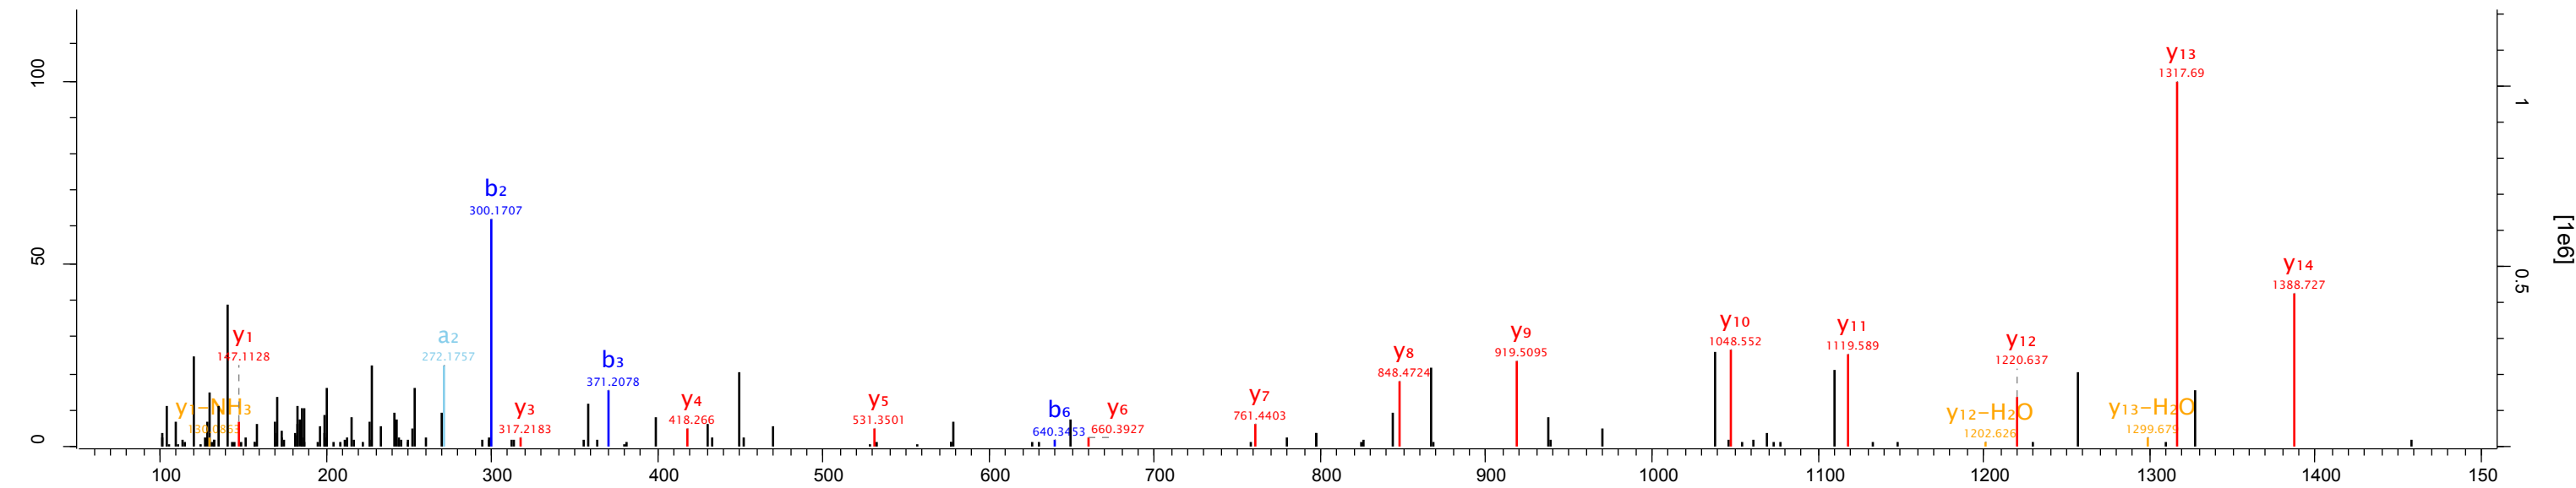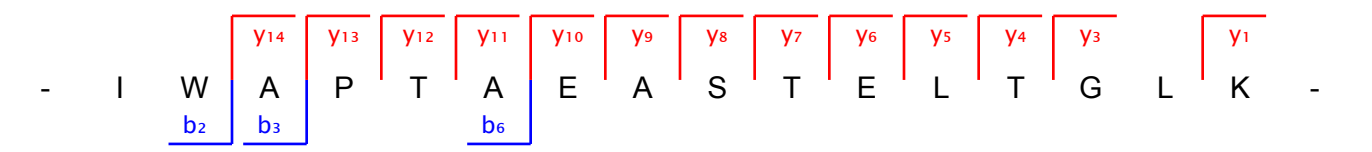

Raw file 20171215\_MaS\_33SR\_LMH\_proteome\_02 Scan 83329 Method FTMS; HCD Score 64.7 m/z 1069.51 Gene names RHOG

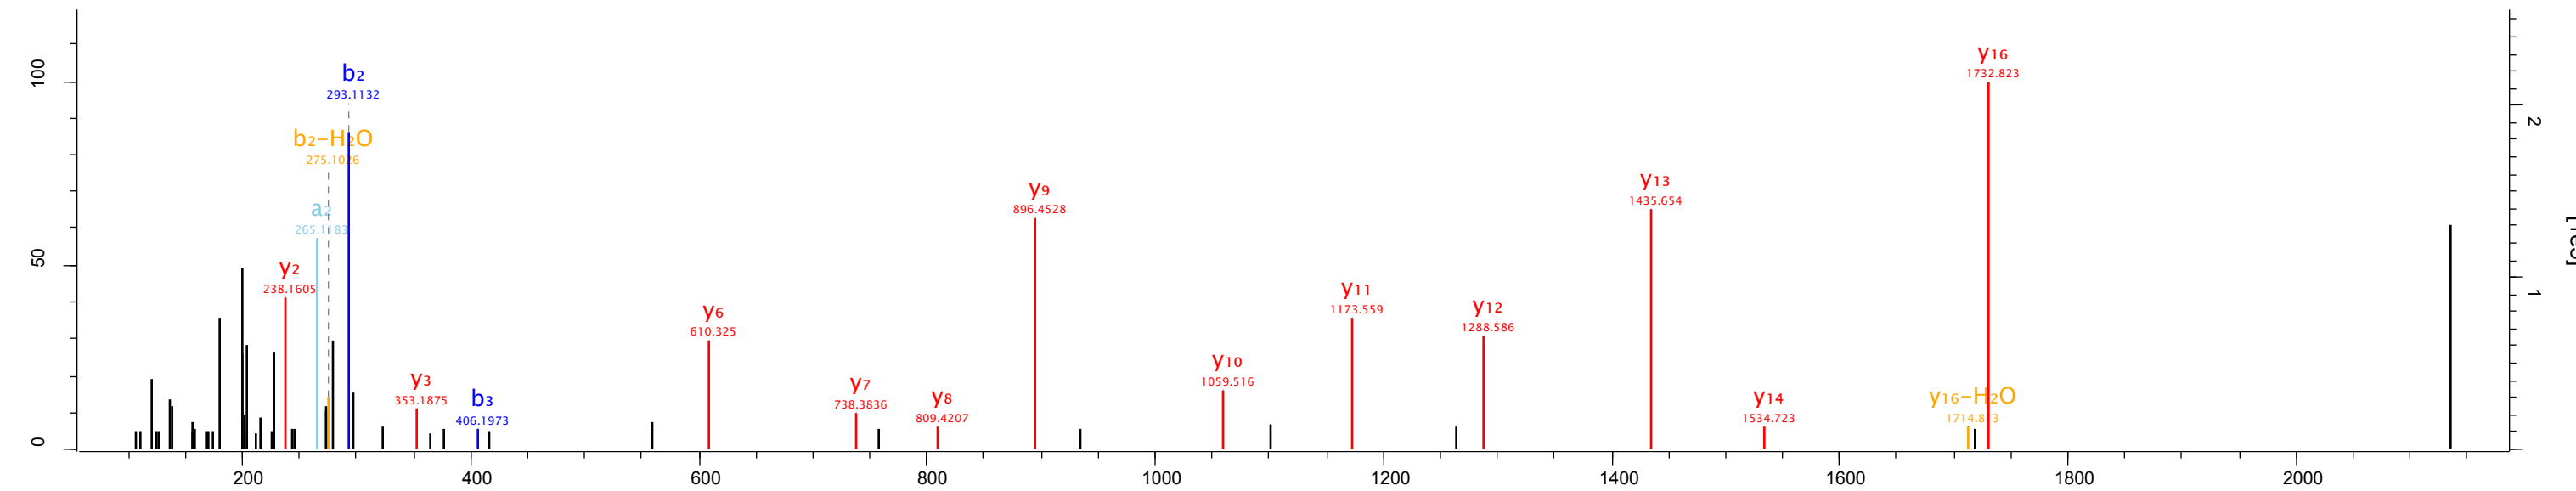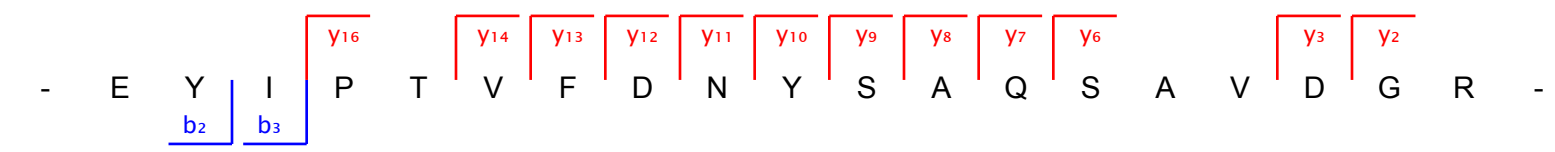

Raw file 20171215\_MaS\_33SR\_LMH\_proteome\_02 Scan 88159 Method FTMS; HCD Score 41.91 m/z 877.77 Gene names ERIC-1s;TACC3

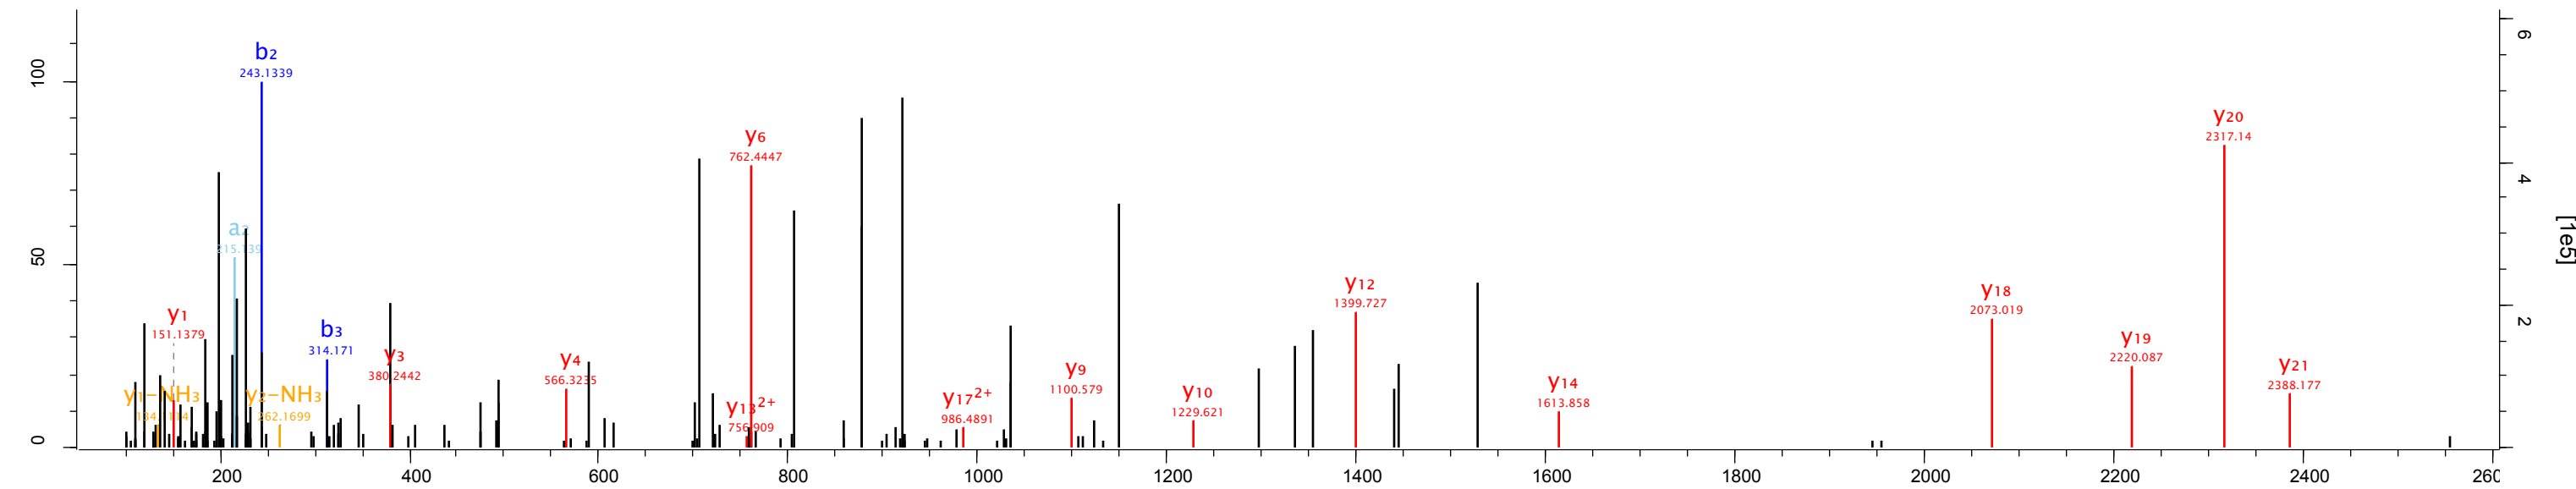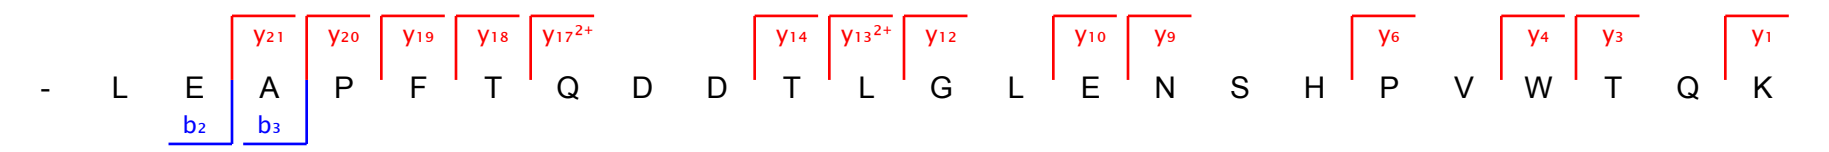

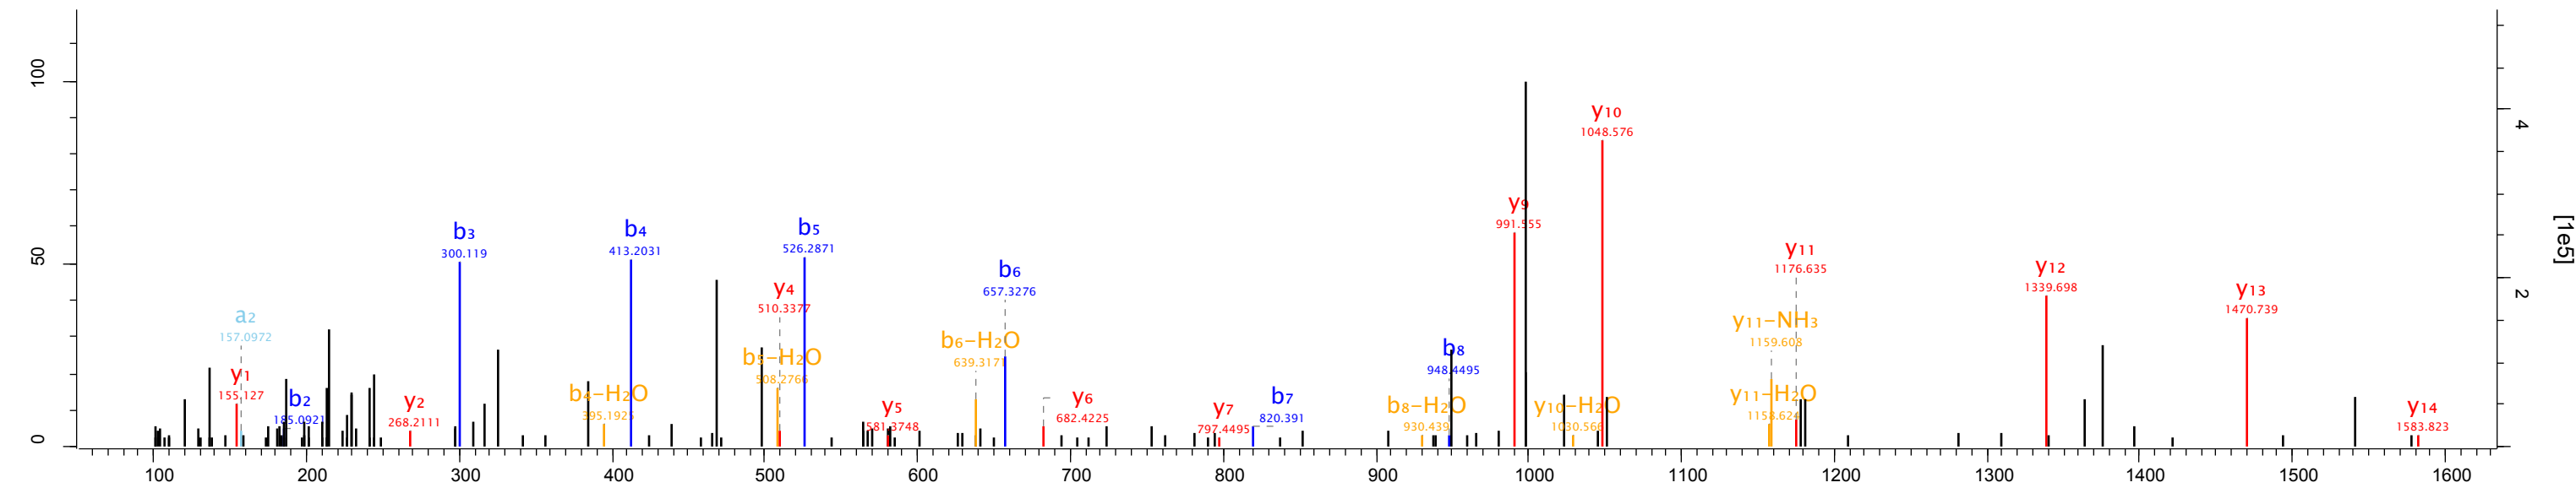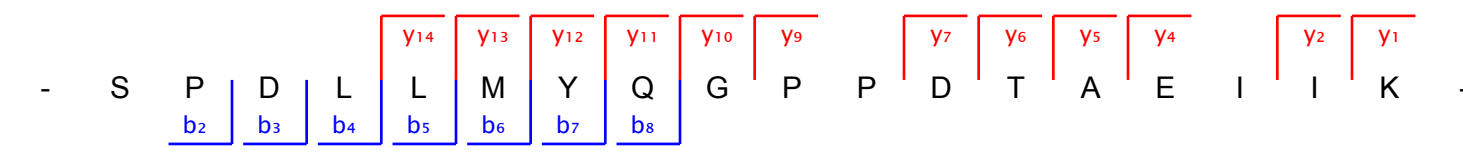

Supplement: 142829_1_supp_284404_pmrjtf.pdf [file 142829_1_supp_284404_pmrjtf.pdf]
