# Supplementary material
Source: PubMed Central journal article supplement (PMC6553926)
Supplement: 142829_1_supp_284401_pmrjg9.pdf [file 142829_1_supp_284401_pmrjg9.pdf]

Raw file: 20150812\_A375SR\_Phospho\_BR1\_01  
 Scan: 10010 Method: FTMS; HCD Score: 142.94 m/z: 781.27 Gene names: TSSC4

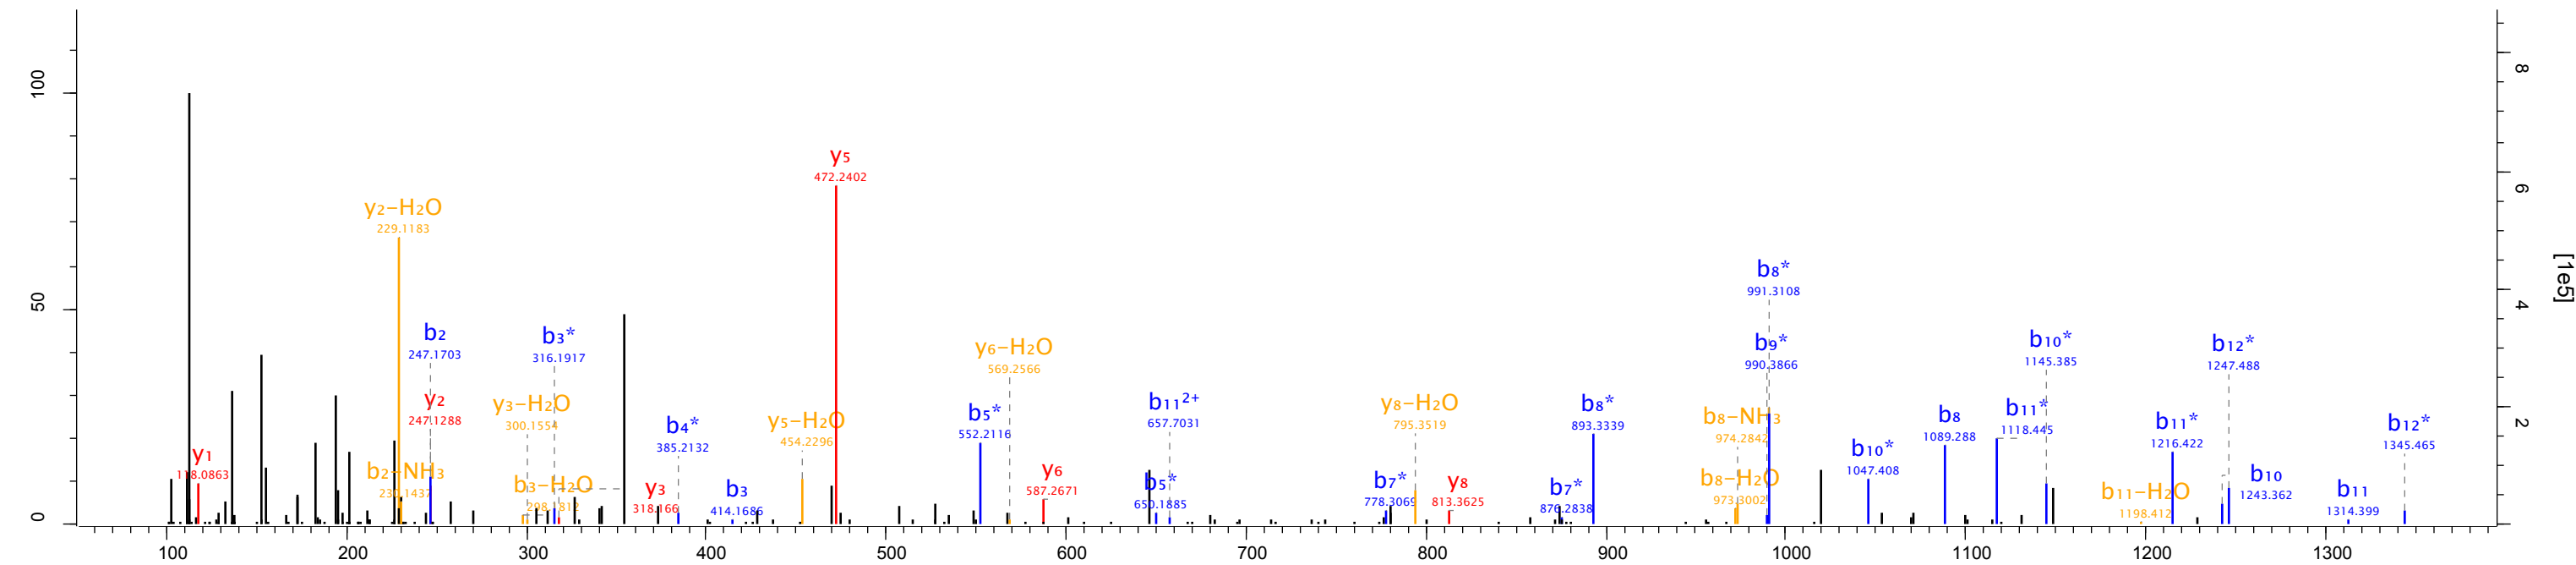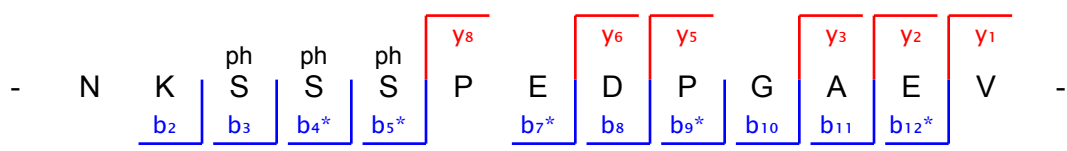

Raw file 20150812\_A375SR\_Phospho\_BR1\_01 Scan 10660 Method FTMS; HCD Score 73.86 m/z 1094.37 Gene names CHD9

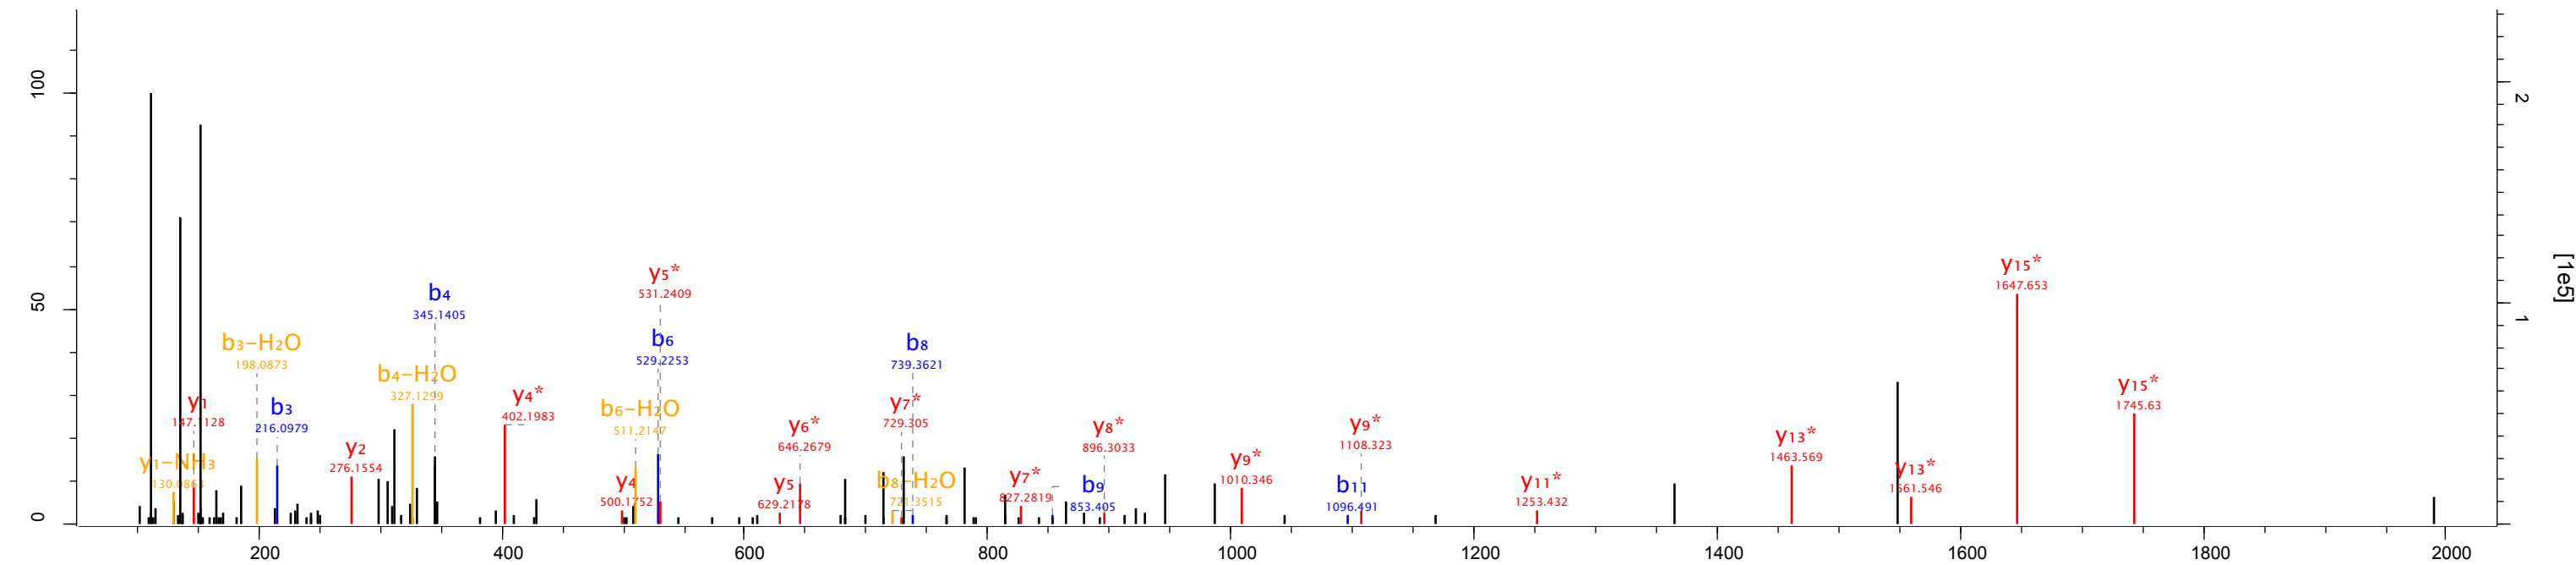

- G G T E P S P L N E N S T D E G S E K -

Fragmentation mapping (b and y ions):

- b3: T
- b4: E
- b6: S
- b8: L
- b9: N
- b11: N
- y1: K
- y2: E
- y4: G
- y5: E
- y6\*: D
- y7\*: T
- y8\*: S
- y9\*: N
- y11\*: N
- y13\*: P
- y15\*: P



Raw file: 20150812\_A375SR\_Phospho\_BR1\_01  
 Scan: 12260 Method: FTMS; HCD Score: 201.8 m/z: 857.76 Gene names: PUS1

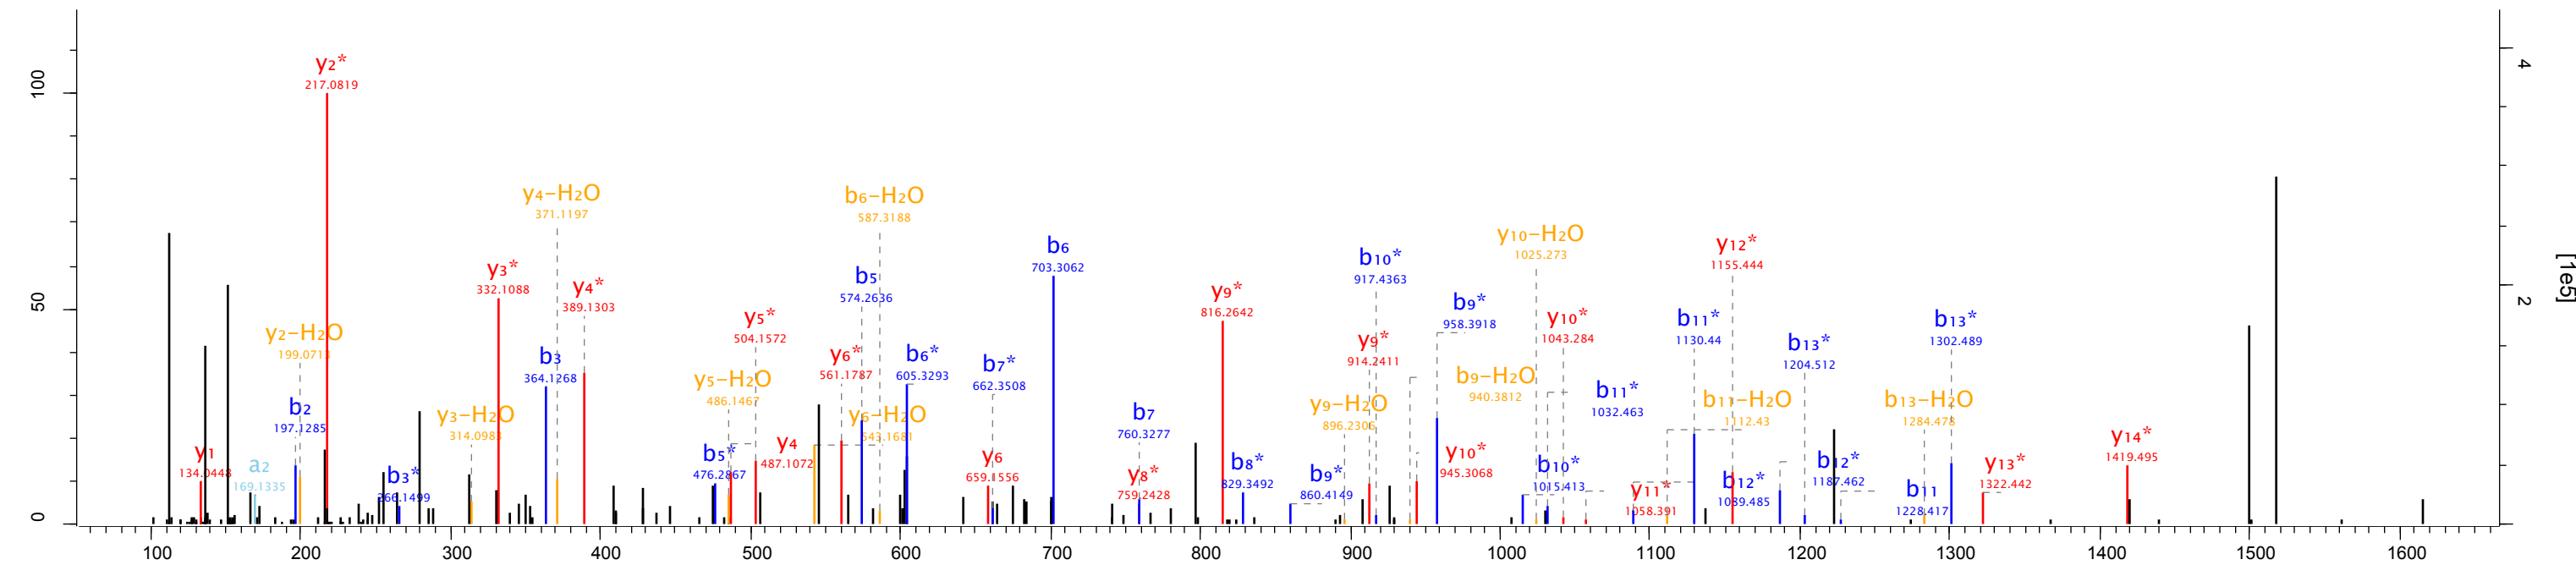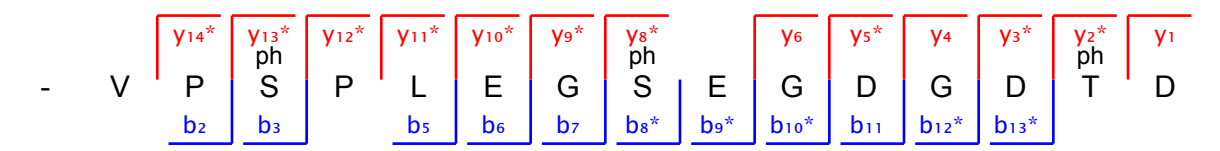

Raw file: 20150812\_A375SR\_Phospho\_BR1\_01  
 Scan: 4210 Method: FTMS; HCD Score: 85.74 m/z: 871.82 Gene names: RAB11FIP1

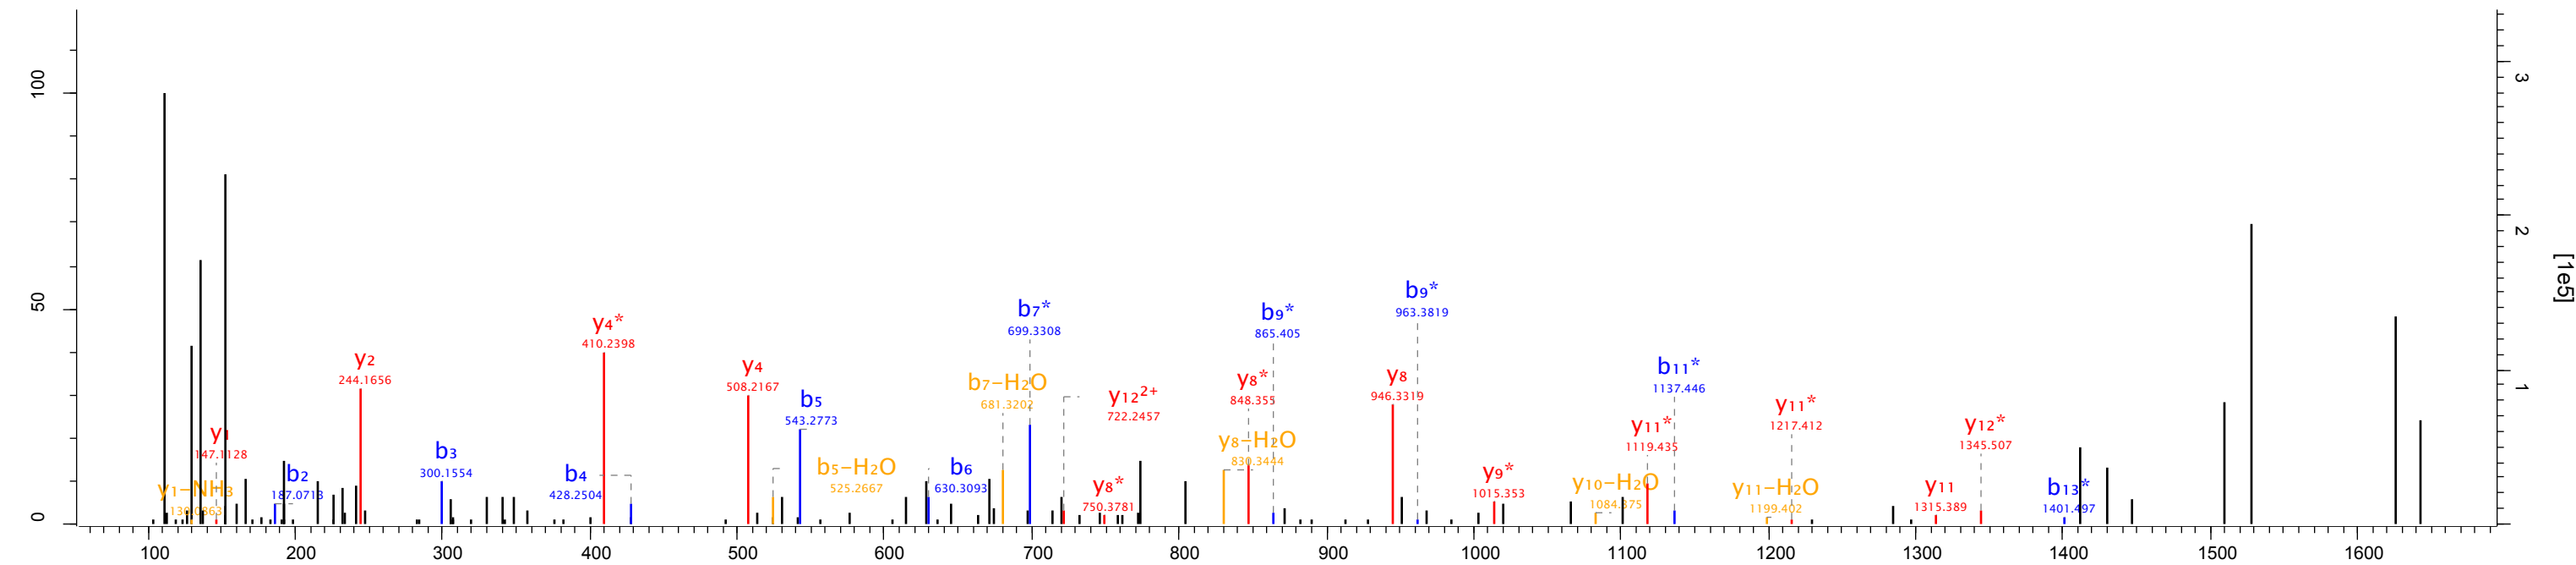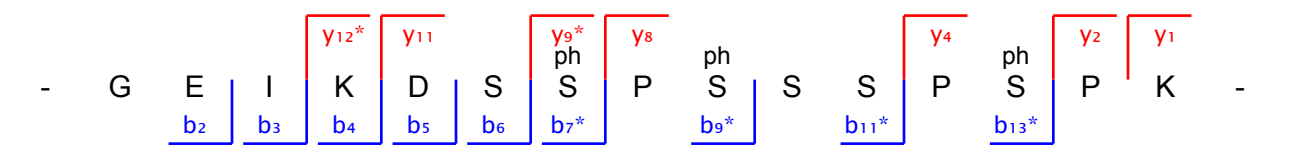

Raw file: 20150812\_A375SR\_Phospho\_BR1\_01  
 Scan: 5270 Method: FTMS; HCD Score: 156.17 m/z: 767.73 Gene names: SRRM2

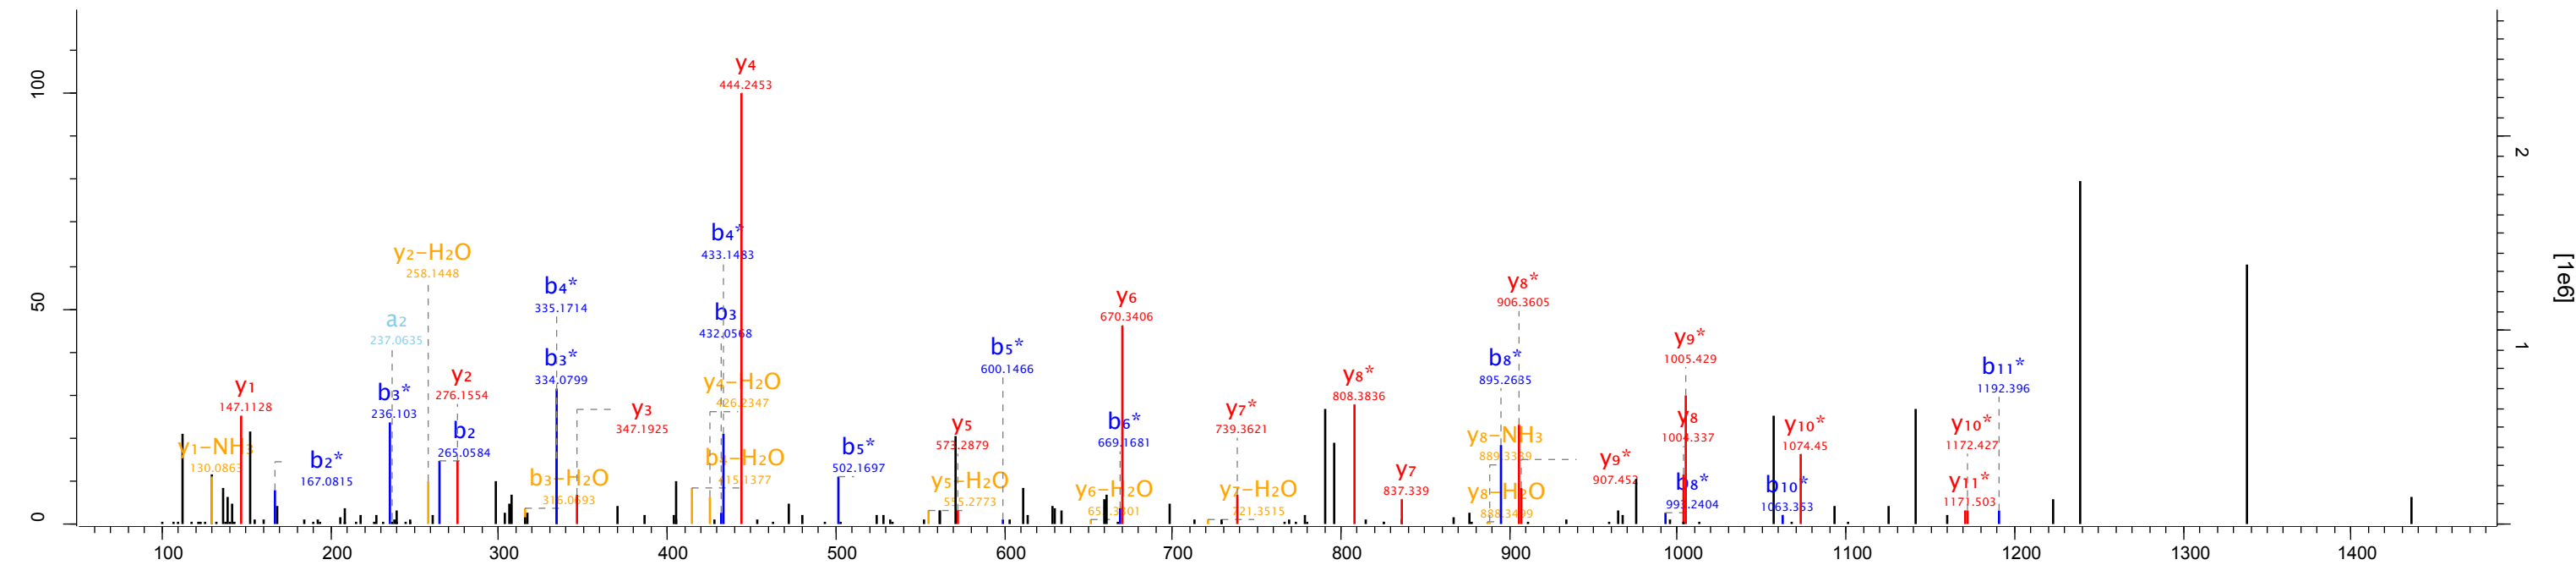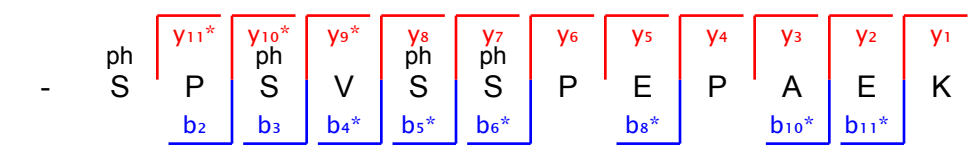

Raw file: 20150812\_A375SR\_Phospho\_BR1\_01  
 Scan: 6650 Method: FTMS; HCD Score: 78.45 m/z: 686.25 Gene names: ANKRD17

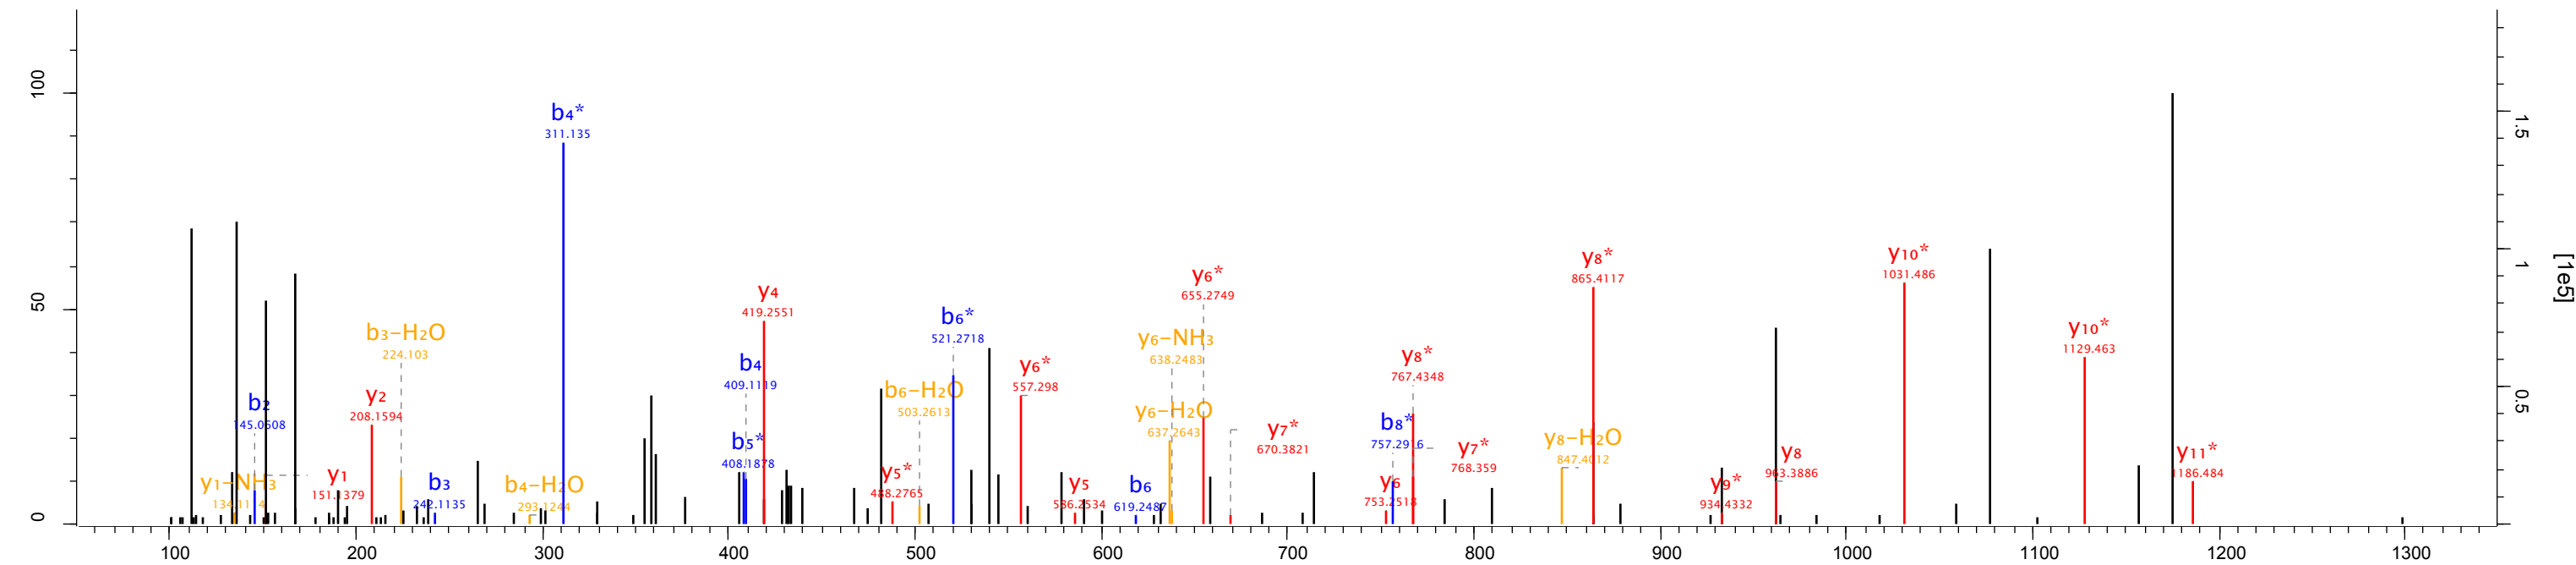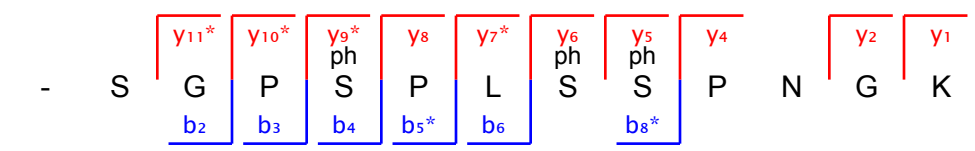

Raw file: 20150812\_A375SR\_Phospho\_BR1\_01  
 Scan: 7520 Method: FTMS; HCD Score: 83.86 m/z: 1058.8 Gene names: SSRP1

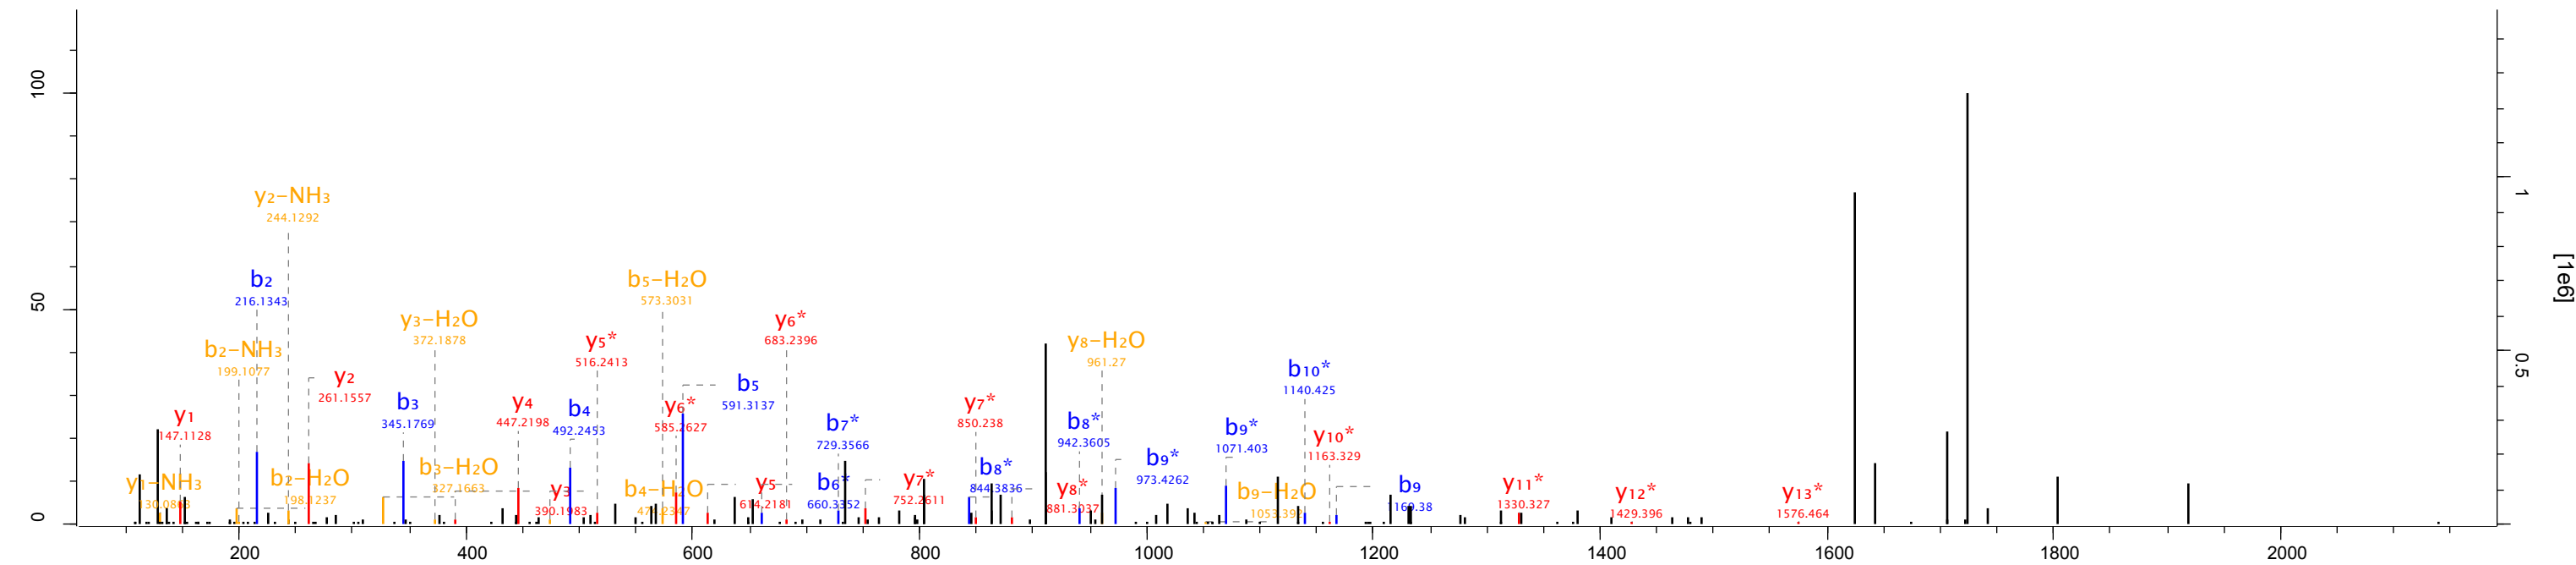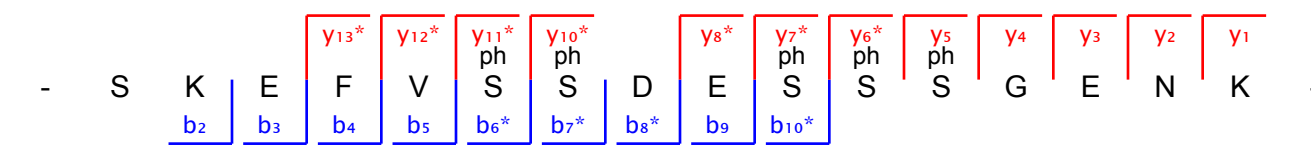

Raw file: 20150812\_A375SR\_Phospho\_BR1\_01  
 Scan: 8060 Method: FTMS; HCD Score: 43.96 m/z: 1047.84 Gene names: CENPT

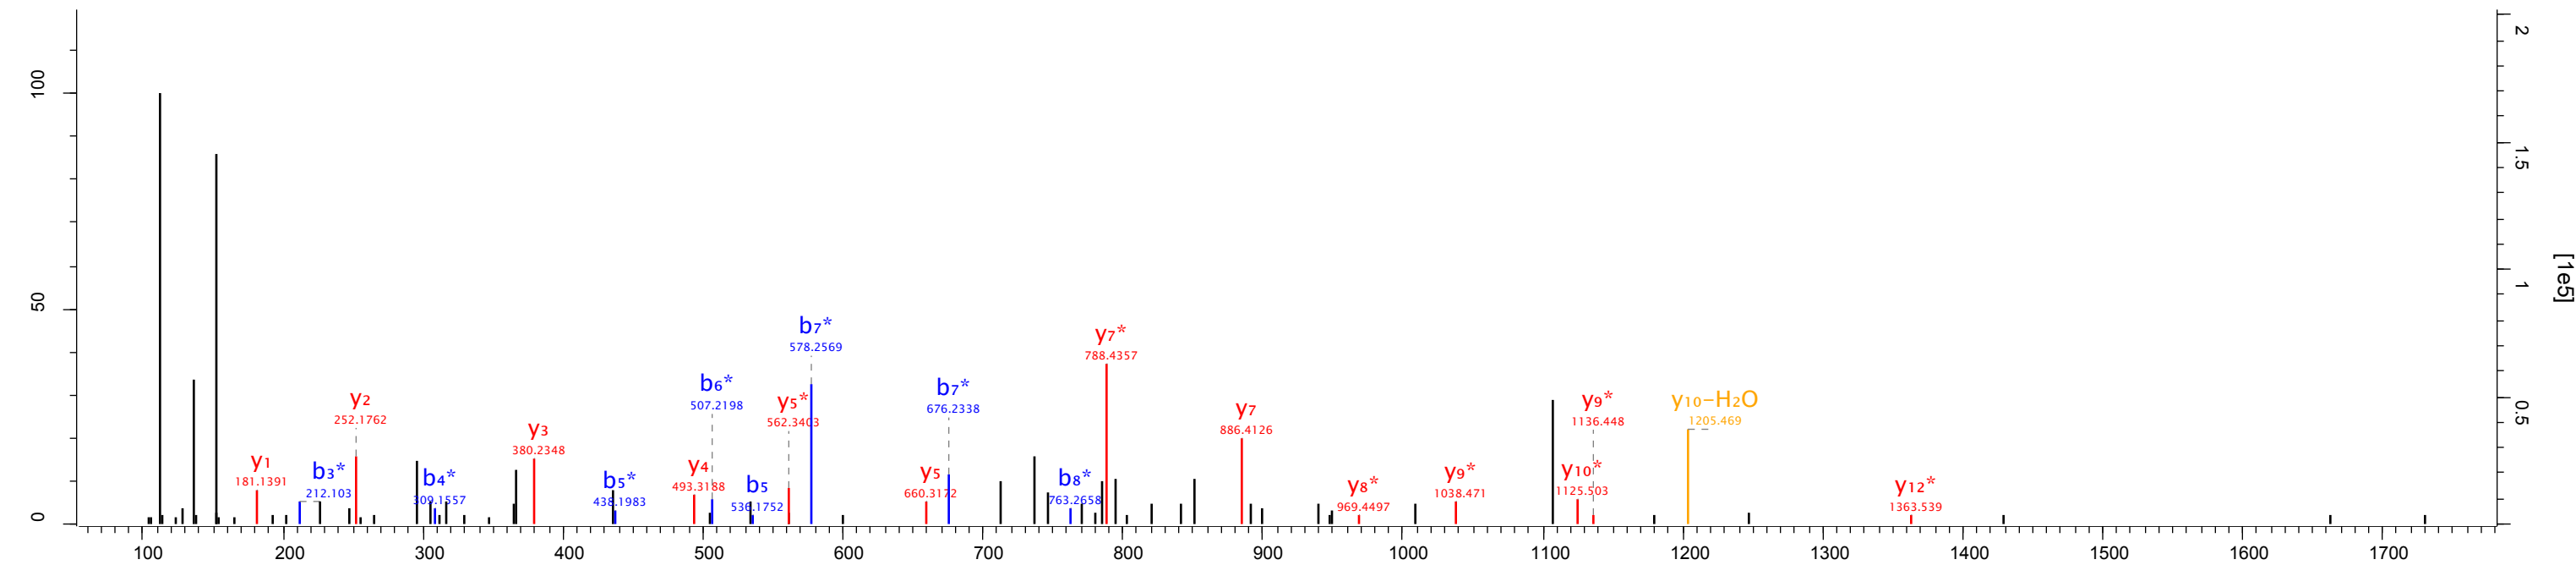

- A A ph S P E y12\* ph S A y10\* S y9\* ph S y8\* ph T y7 P E y5 ph S y4 L y3 Q y2 A y1 R -

b3\*
b4\*
b5
b6\*
b7\*
b8\*

Raw file: 20150812\_A375SR\_Phospho\_BR1\_01  
 Scan: 9320 Method: FTMS; HCD Score: 49.56 m/z: 804.33 Gene names: CBLB

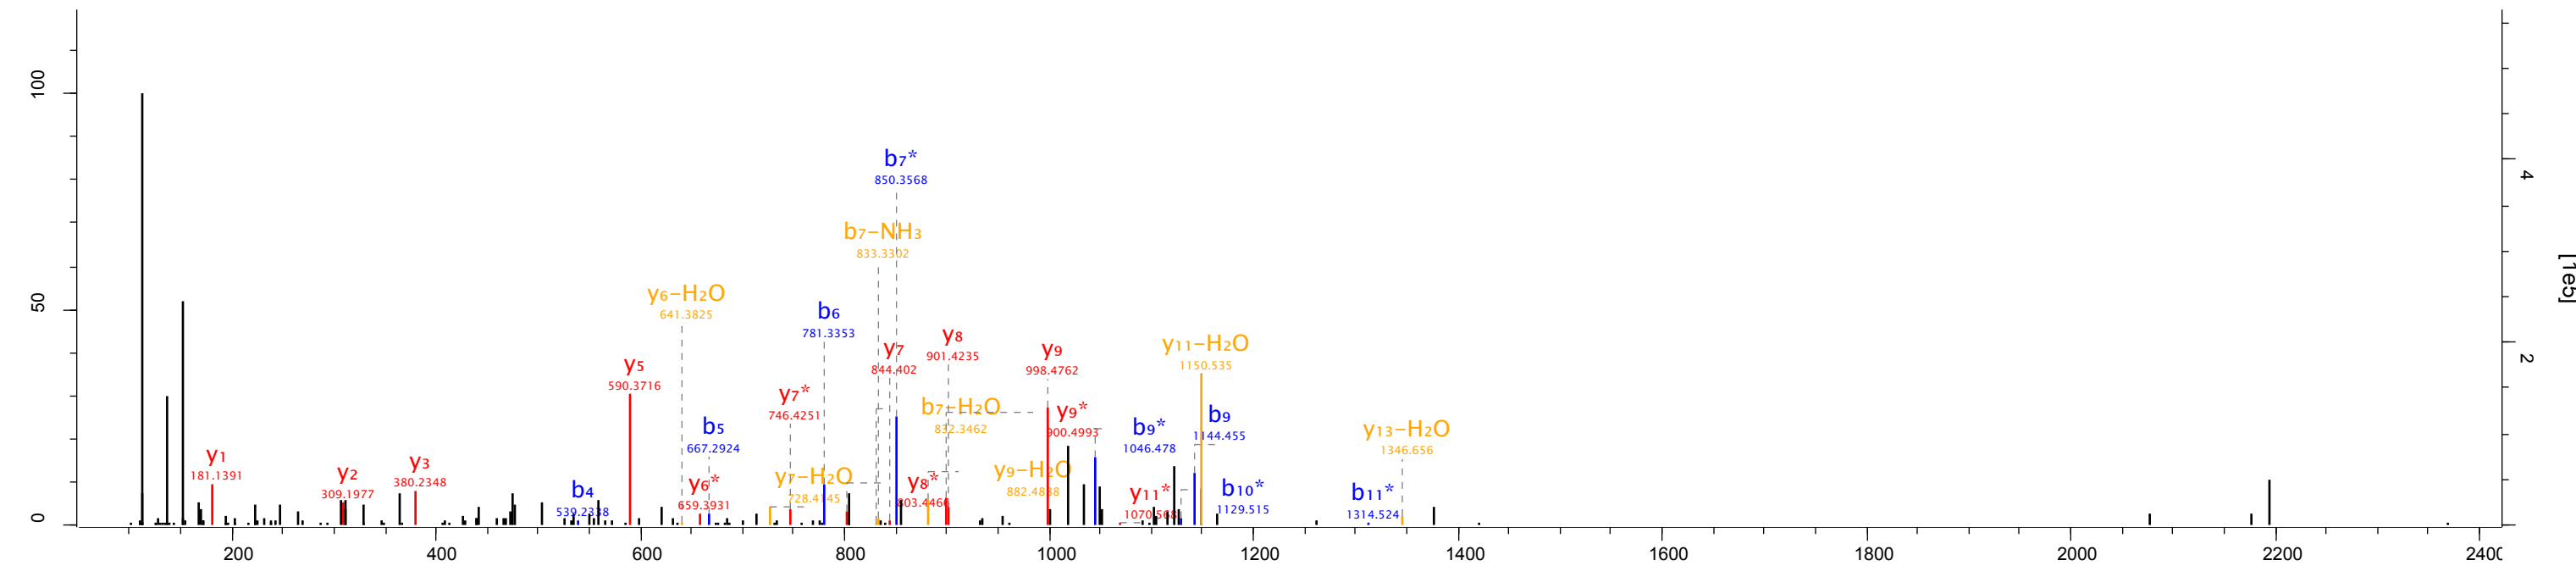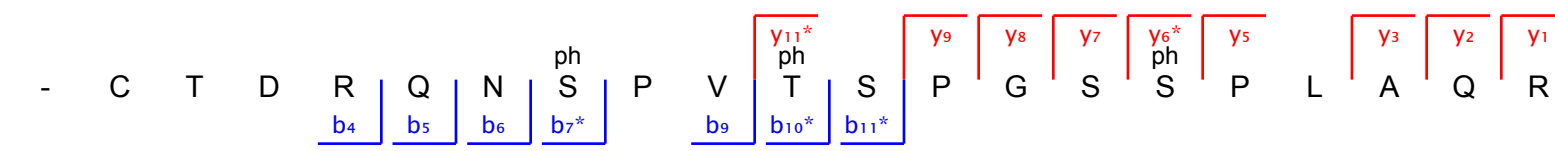

Raw file: 20150812\_A375SR\_Phospho\_BR1\_01  
 Scan: 9860 Method: FTMS; HCD Score: 80.63 m/z: 659.32 Gene names: PPA2

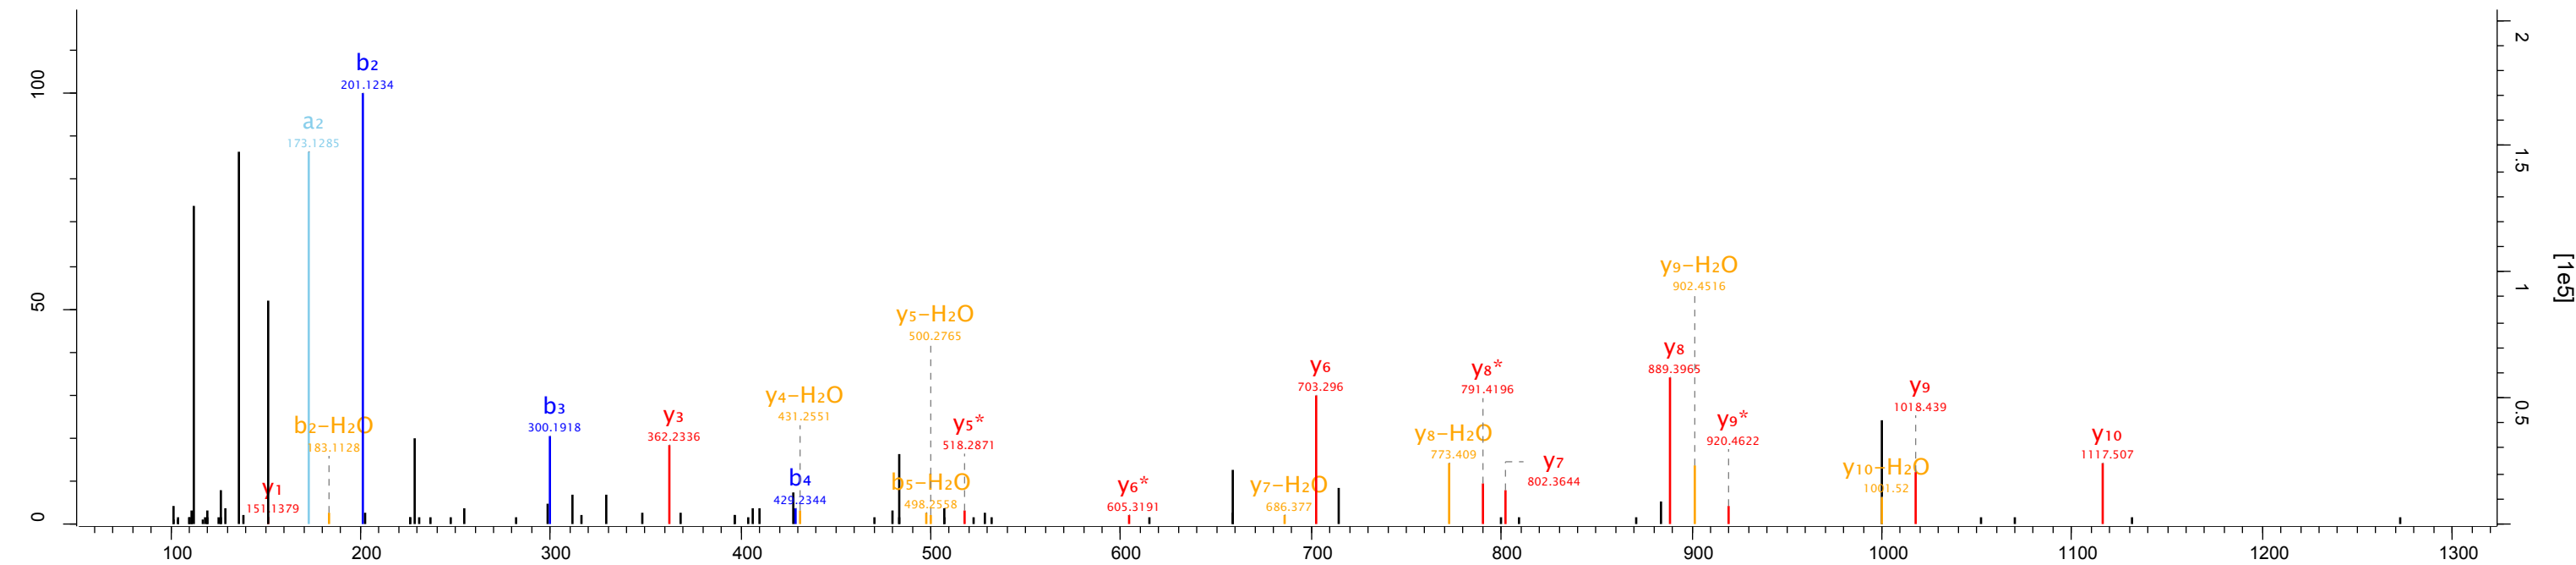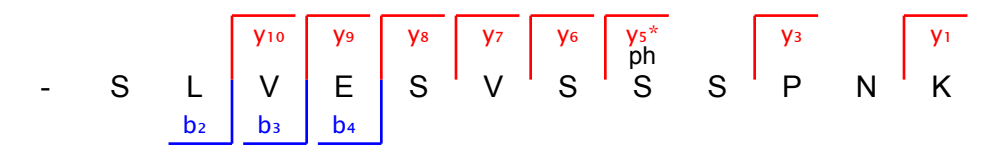



Raw file Scan Method Score m/z Gene names  
 20150812\_A375SR\_Phospho\_BR1\_02 10340 FTMS; HCD 118.42 731.34 RPS6

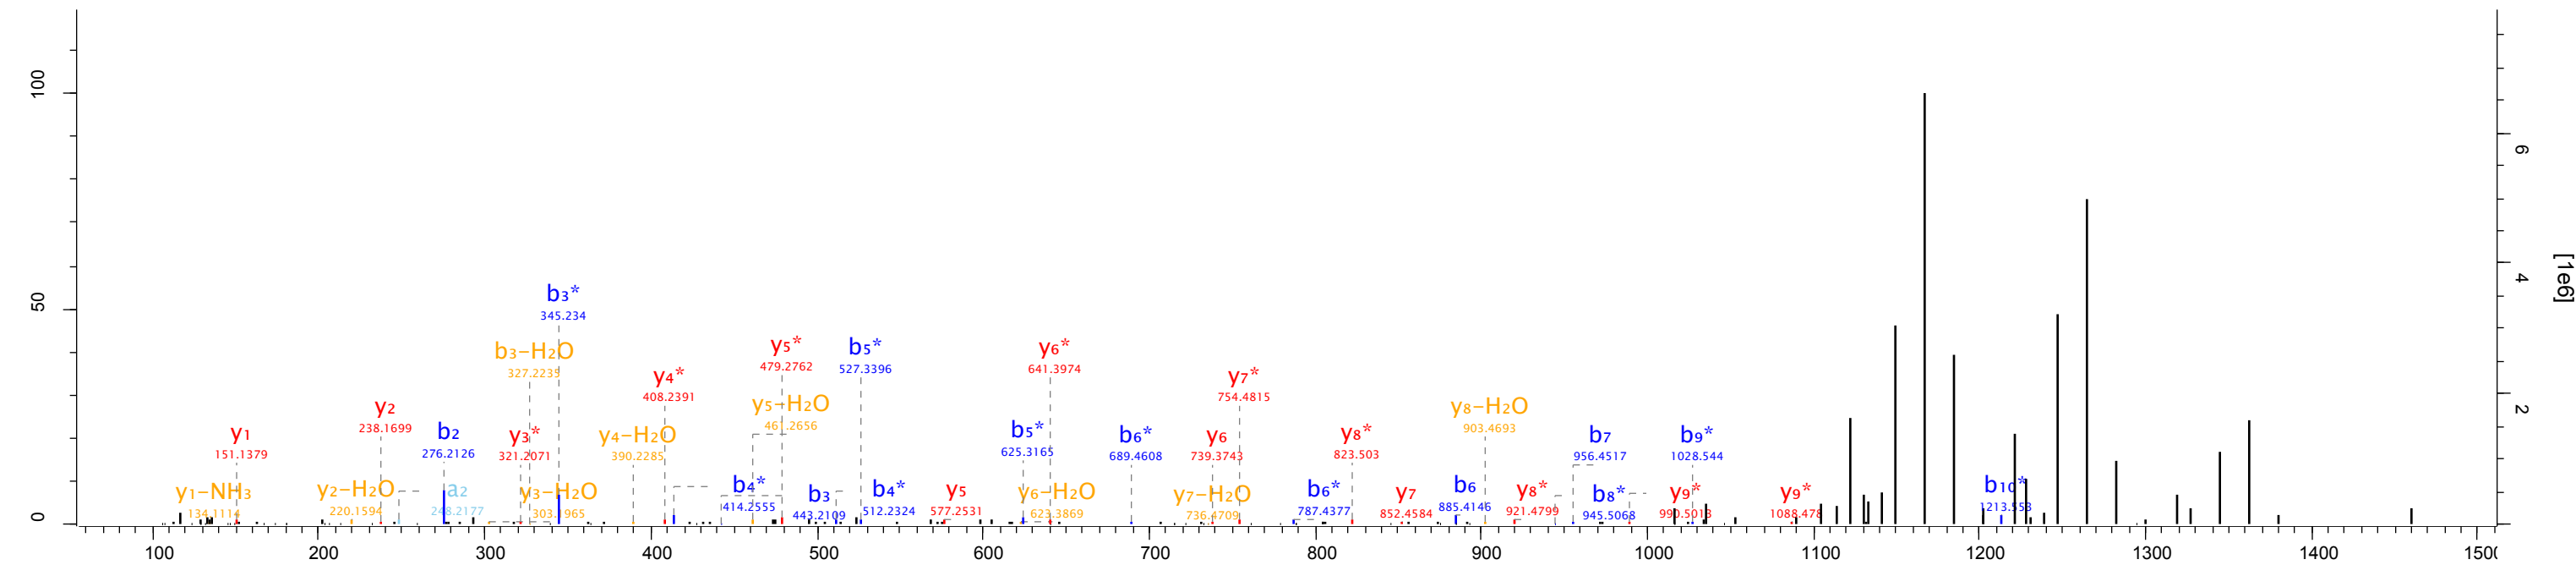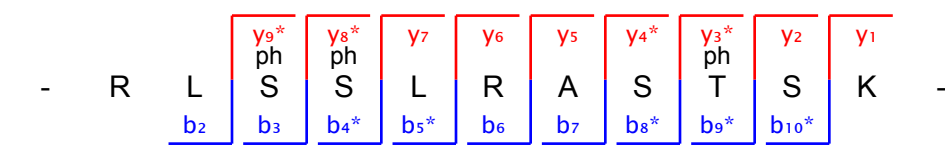

Raw file 20150812\_A375SR\_Phospho\_BR1\_02 Scan 10380 Method FTMS; HCD Score 235.21 m/z 1136.35 Gene names PDAP1

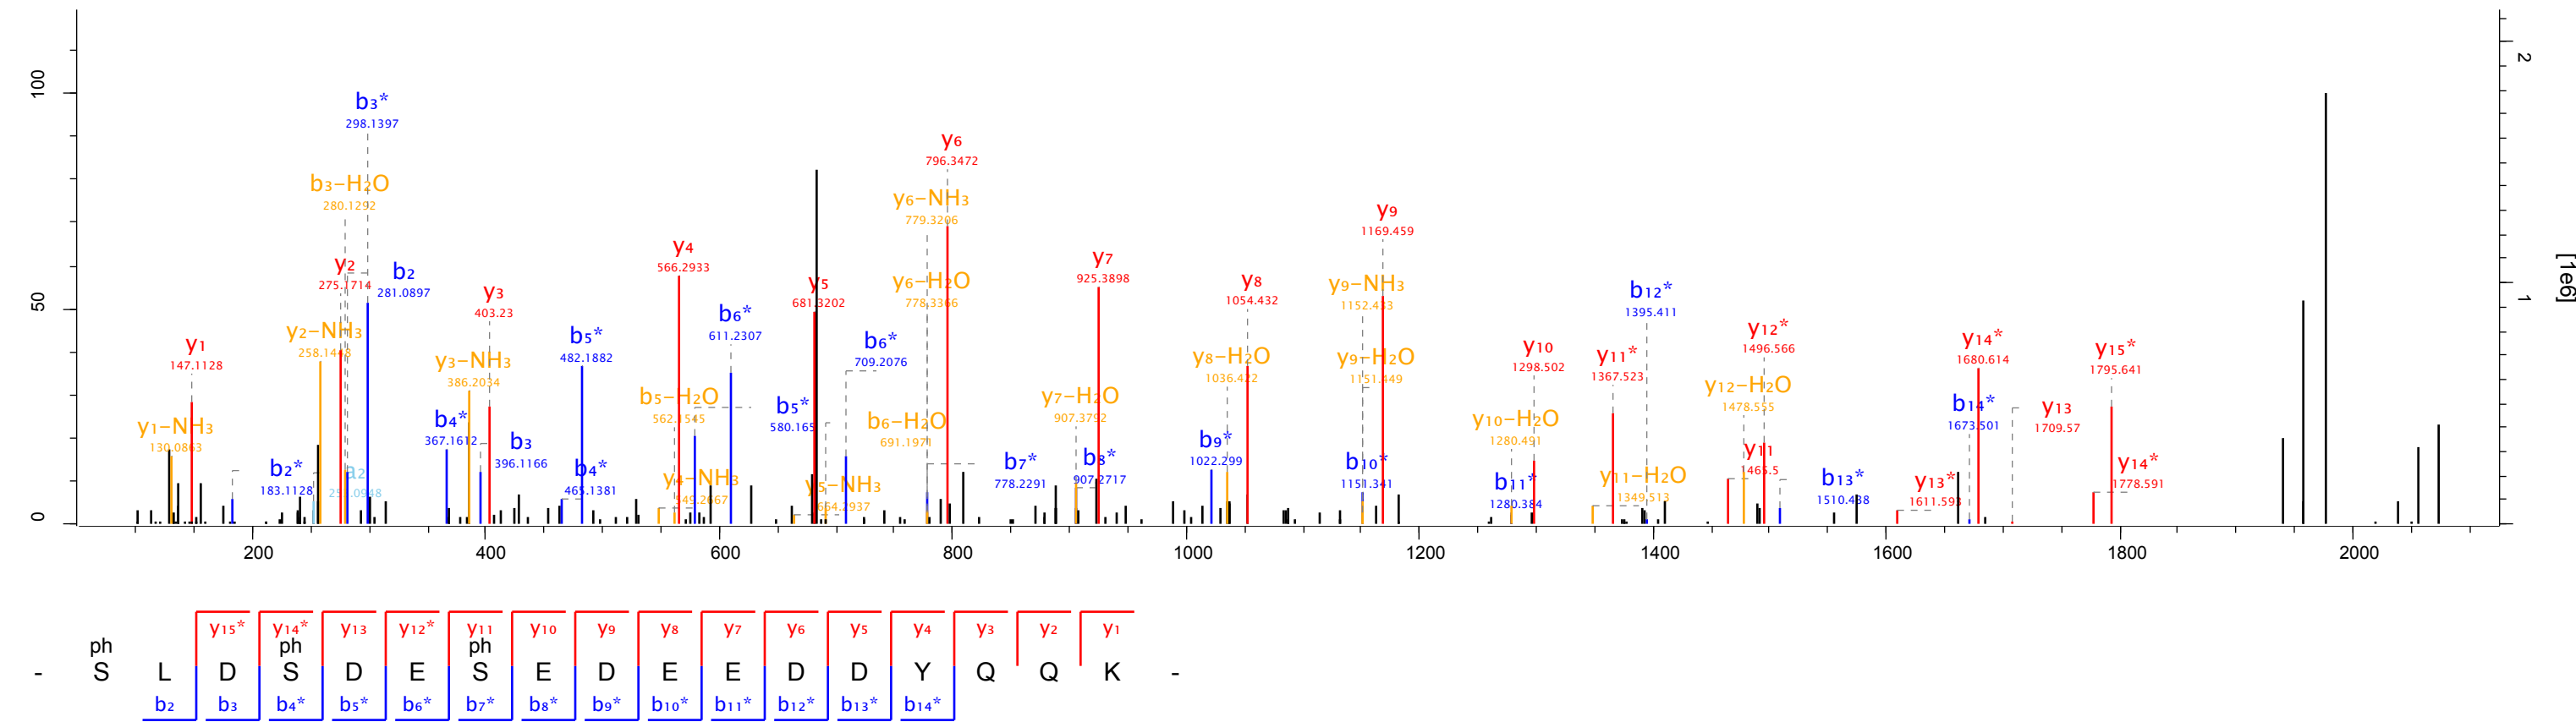

Raw file: 20150812\_A375SR\_Phospho\_BR1\_02  
 Scan: 10390 Method: FTMS; HCD Score: 273.9 m/z: 1129.96 Gene names: THUMPD1

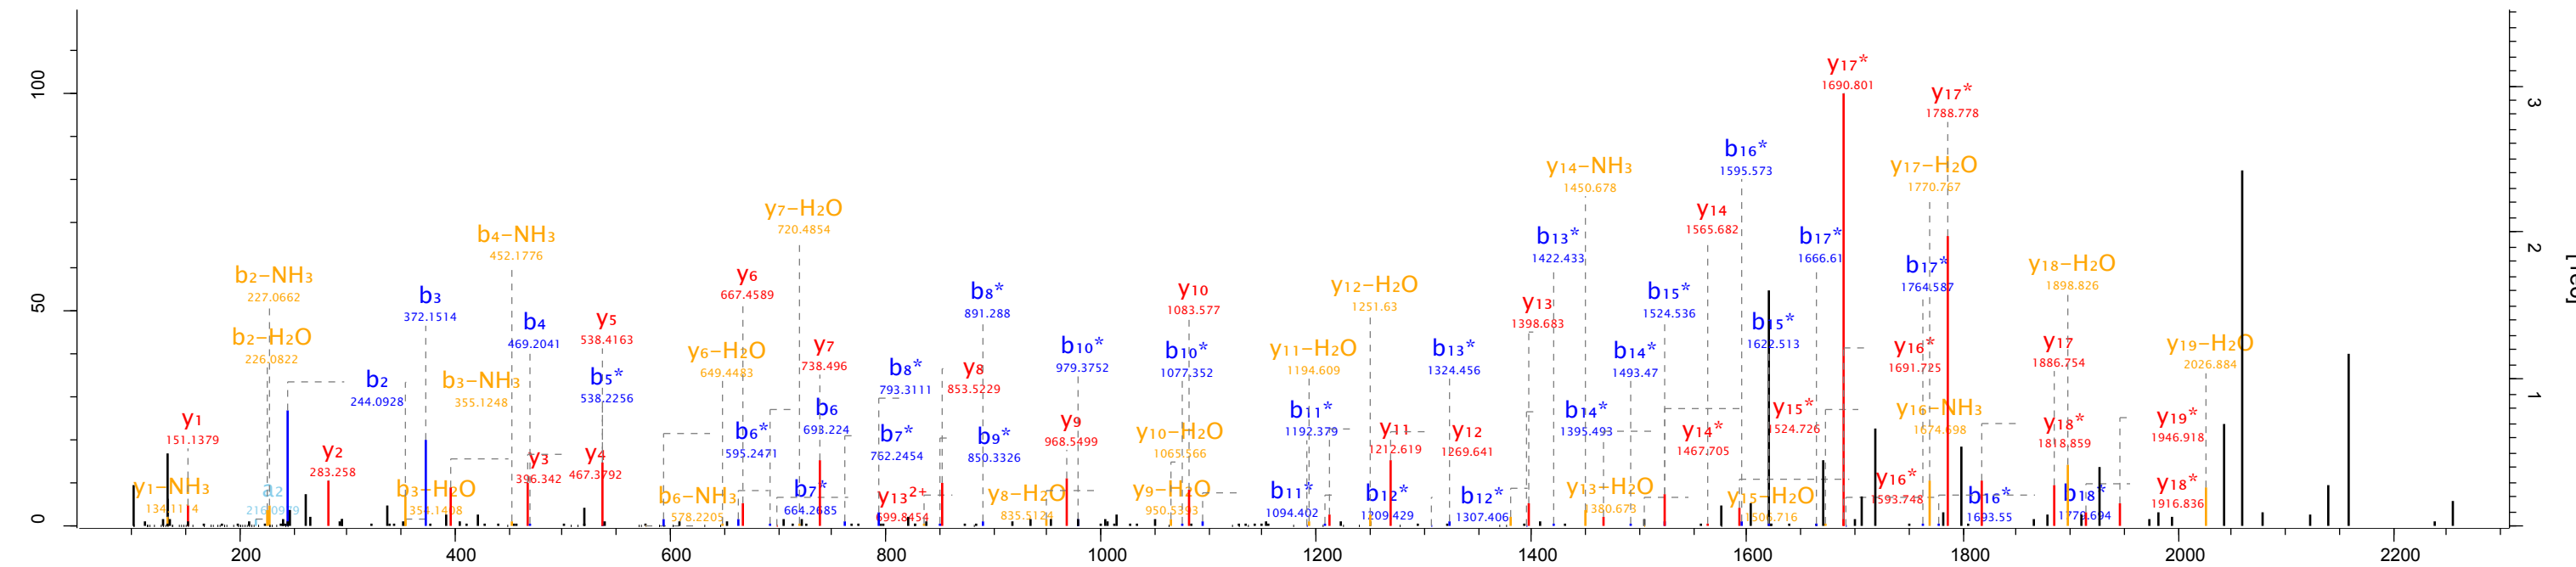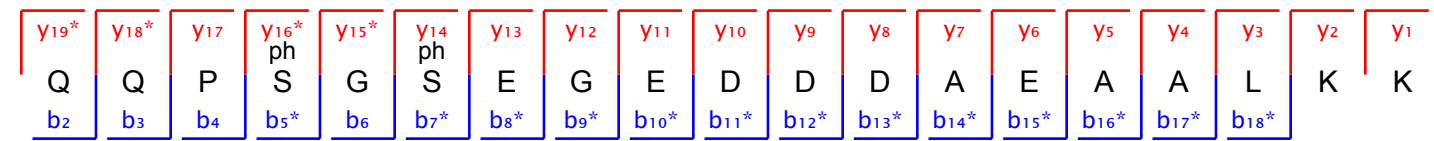

Raw file 20150812\_A375SR\_Phospho\_BR1\_02 Scan 11240 Method FTMS; HCD Score 242.1 m/z 1349.05 Gene names ZC3HC1

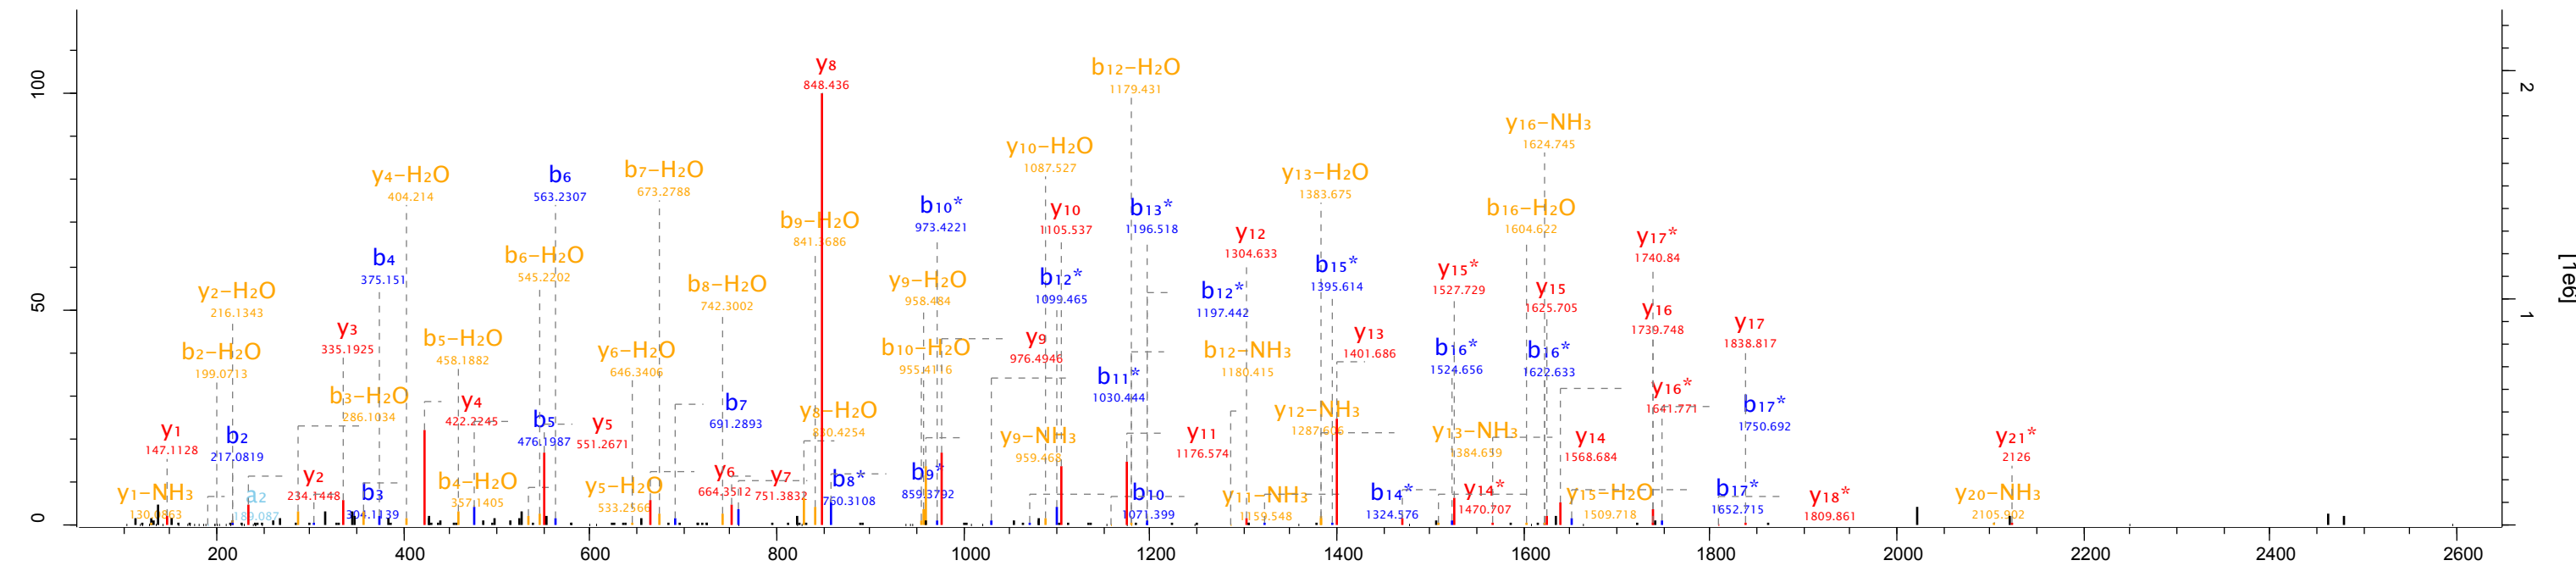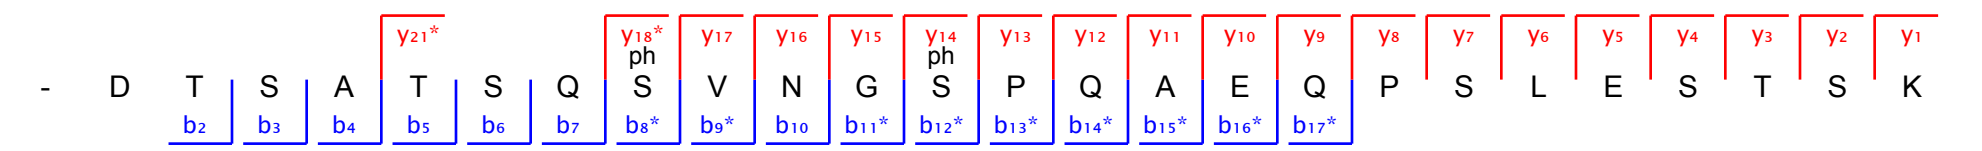

Raw file: 20150812\_A375SR\_Phospho\_BR1\_02  
 Scan: 11900 Method: FTMS; HCD Score: 303.72 m/z: 1161.45 Gene names: ZFAND5

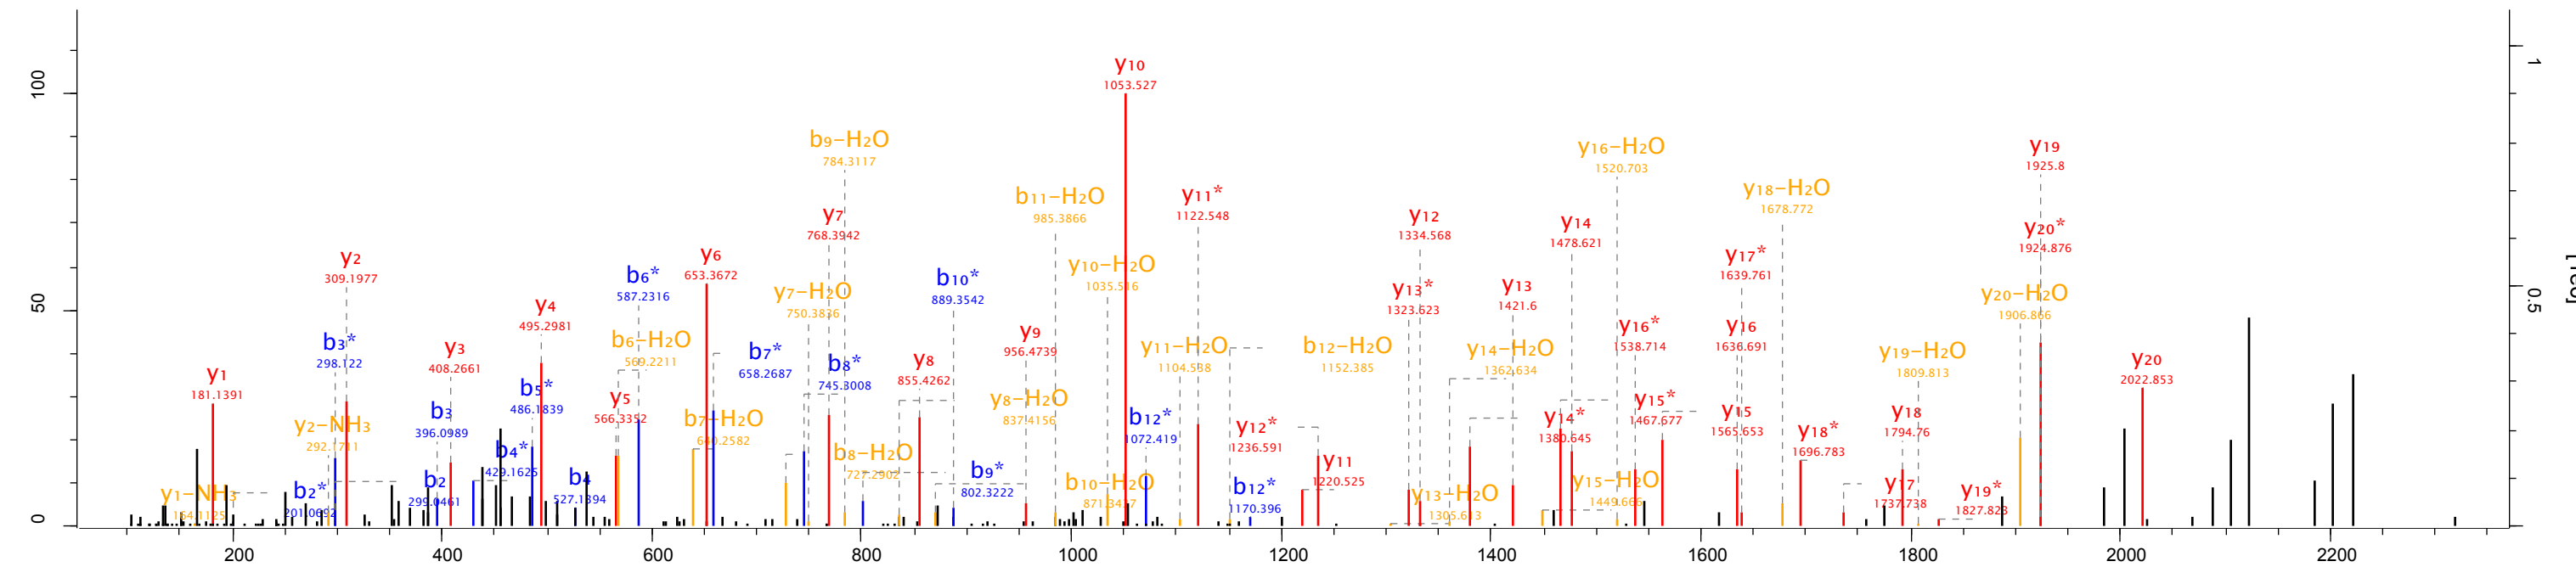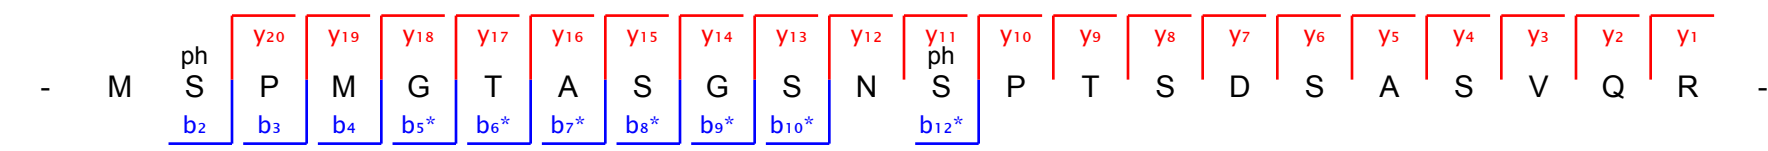

Raw file 20150812\_A375SR\_Phospho\_BR1\_02 Scan 12070 Method FTMS; HCD Score 116.81 m/z 591.2 Gene names DOCK7

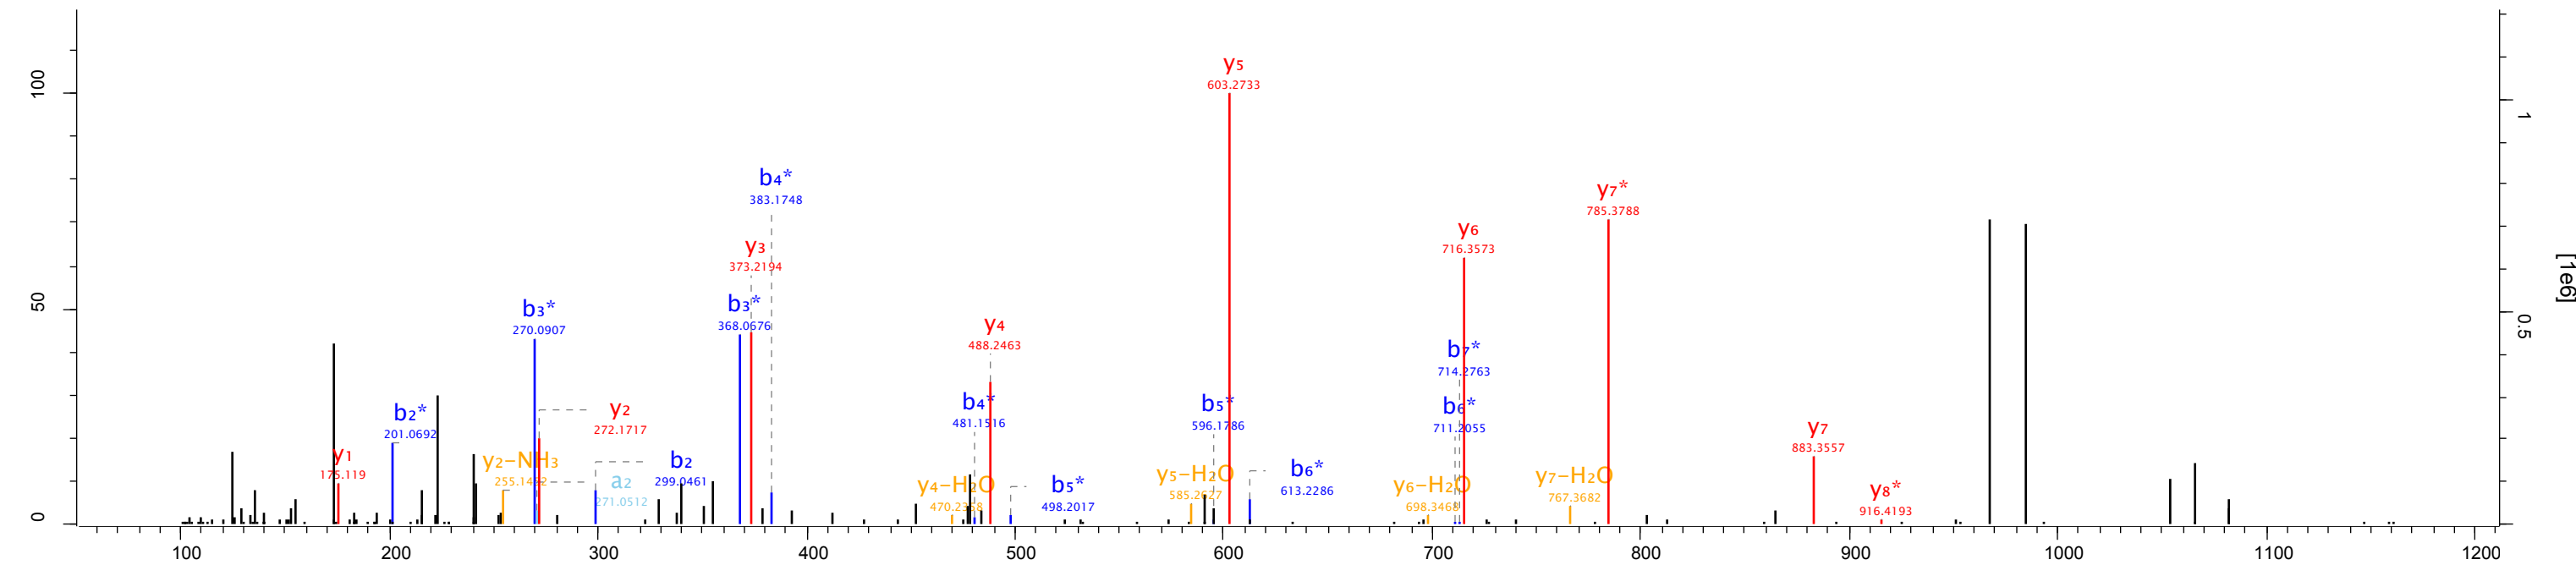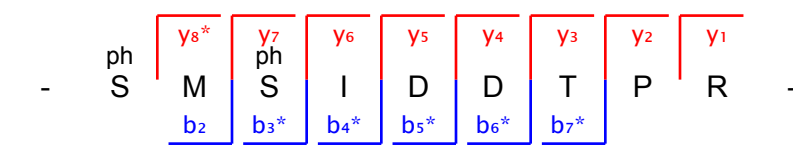

Raw file: 20150812\_A375SR\_Phospho\_BR1\_02  
 Scan: 12390 Method: FTMS; HCD Score: 153.1 m/z: 905.35 Gene names: NRBP1

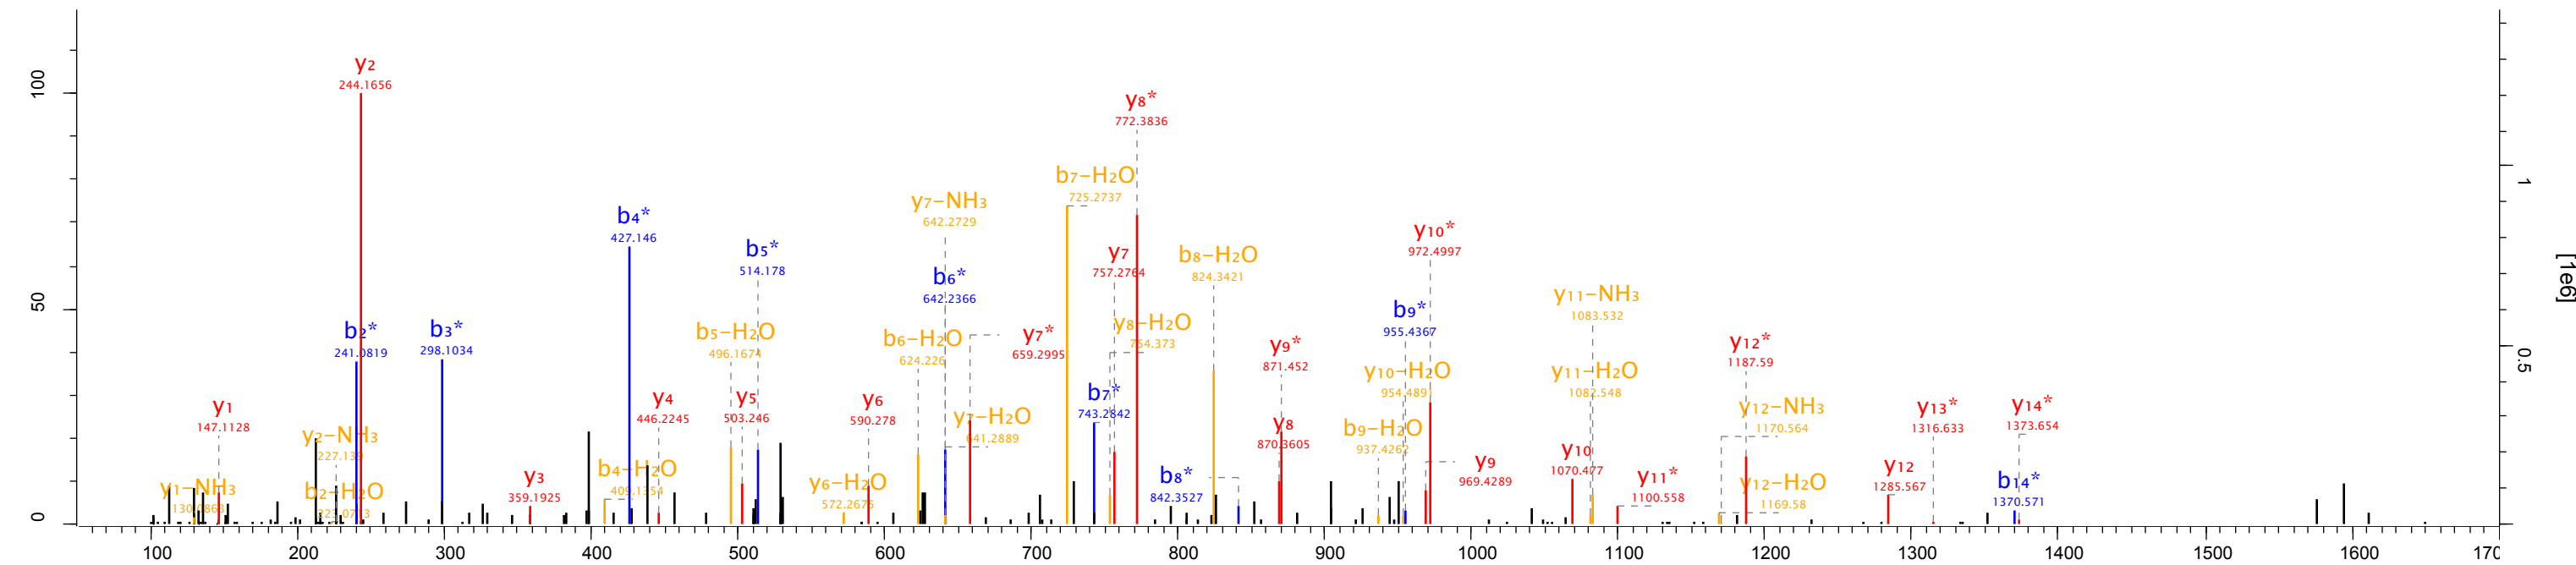

ac - pH S E G E S Q T V L S S G S D P K -

Fragmentation mapping (b and y ions):

- b2\* (E)
- b3\* (G)
- b4\* (E)
- b5\* (S)
- b6\* (Q)
- b7\* (T)
- b8\* (V)
- b9\* (L)
- b14\* (D)
- y1 (K)
- y2 (P)
- y3 (D)
- y4 (S)
- y5 (G)
- y6 (S)
- y7 (S)
- y8 (L)
- y9 (V)
- y10 (T)
- y11 (Q)
- y12 (S)
- y13 (E)
- y14 (G)

Raw file 20150812\_A375SR\_Phospho\_BR1\_02 Scan 12800 Method FTMS; HCD Score 42.02 m/z 984.76 Gene names RAPGEF2

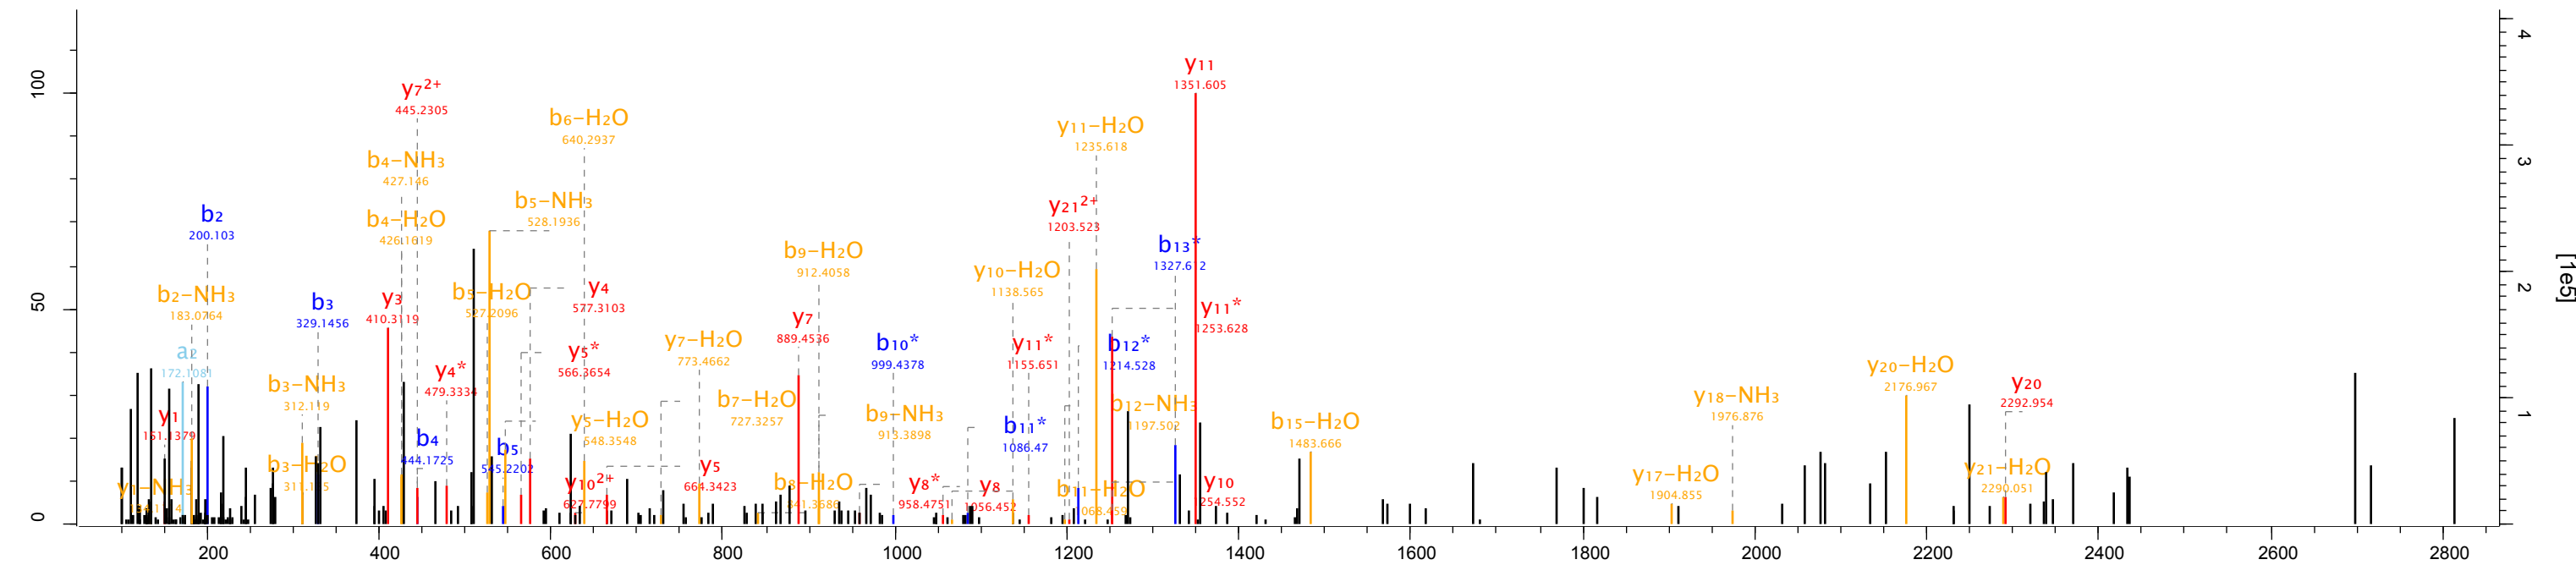

- Q A E D T I S N A S S Q L S S P P T S P Q S S P R K -

b<sub>2</sub>
b<sub>3</sub>
b<sub>4</sub>
b<sub>5</sub>
y<sub>21</sub><sup>2+</sup>
y<sub>20</sub>
b<sub>10</sub><sup>\*</sup>
b<sub>11</sub><sup>\*</sup>
b<sub>12</sub><sup>\*</sup>
b<sub>13</sub><sup>\*</sup>
y<sub>11</sub>
y<sub>10</sub>
y<sub>8</sub>
y<sub>7</sub>
y<sub>5</sub>
y<sub>4</sub>
y<sub>3</sub>
y<sub>1</sub>



Raw file 20150812\_A375SR\_Phospho\_BR1\_02 Scan 12870 Method FTMS; HCD Score 184.62 m/z 864.7 Gene names DOCK7

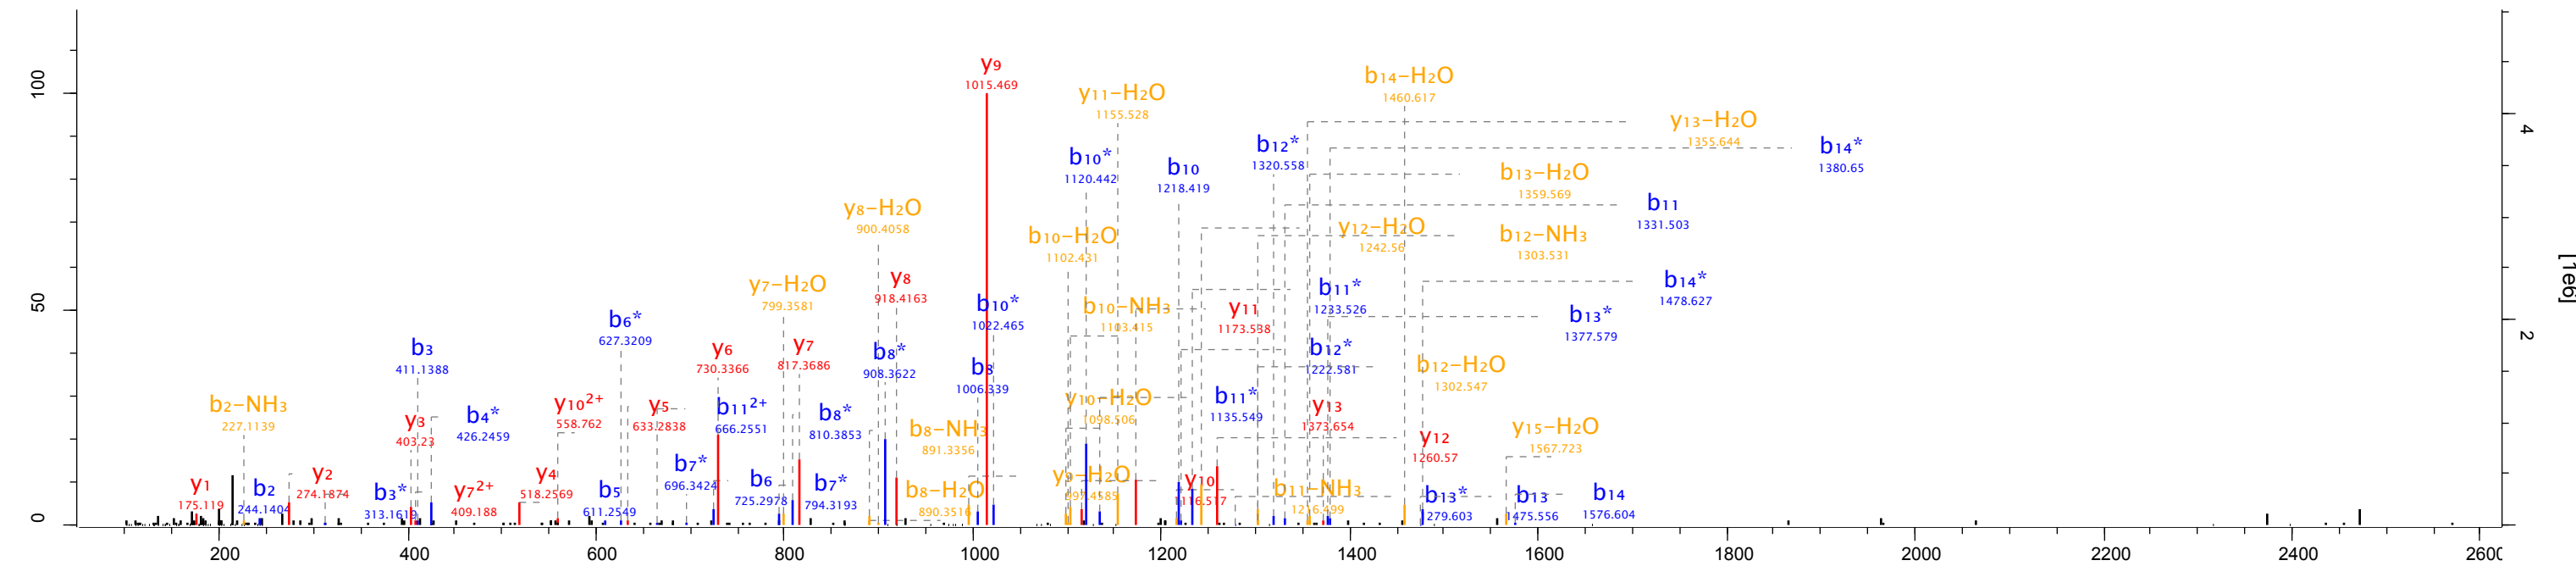

- S R S L S N S N P D I S G T P T S P D D E V R -

Fragmentation sites (b and y ions) are indicated by brackets below the sequence:

- b<sub>2</sub> (R)
- b<sub>3</sub> (S)
- b<sub>4</sub><sup>\*</sup> (L)
- b<sub>5</sub> (S)
- b<sub>6</sub> (N)
- b<sub>7</sub><sup>\*</sup> (S)
- b<sub>8</sub> (N)
- b<sub>10</sub> (D)
- b<sub>11</sub> (I)
- b<sub>12</sub><sup>\*</sup> (S)
- b<sub>13</sub> (G)
- b<sub>14</sub> (T)
- y<sub>1</sub> (R)
- y<sub>2</sub> (V)
- y<sub>3</sub> (E)
- y<sub>4</sub> (D)
- y<sub>5</sub> (D)
- y<sub>6</sub> (P)
- y<sub>7</sub> (S)
- y<sub>8</sub> (T)
- y<sub>9</sub> (P)
- y<sub>10</sub> (T)
- y<sub>11</sub> (G)
- y<sub>12</sub> (S)
- y<sub>13</sub> (I)

Raw file  
 20150812\_A375SR\_Phospho\_BR1\_02  
 Scan 13920 Method FTMS; HCD Score 300.12 m/z 991.45 Gene names RPTOR

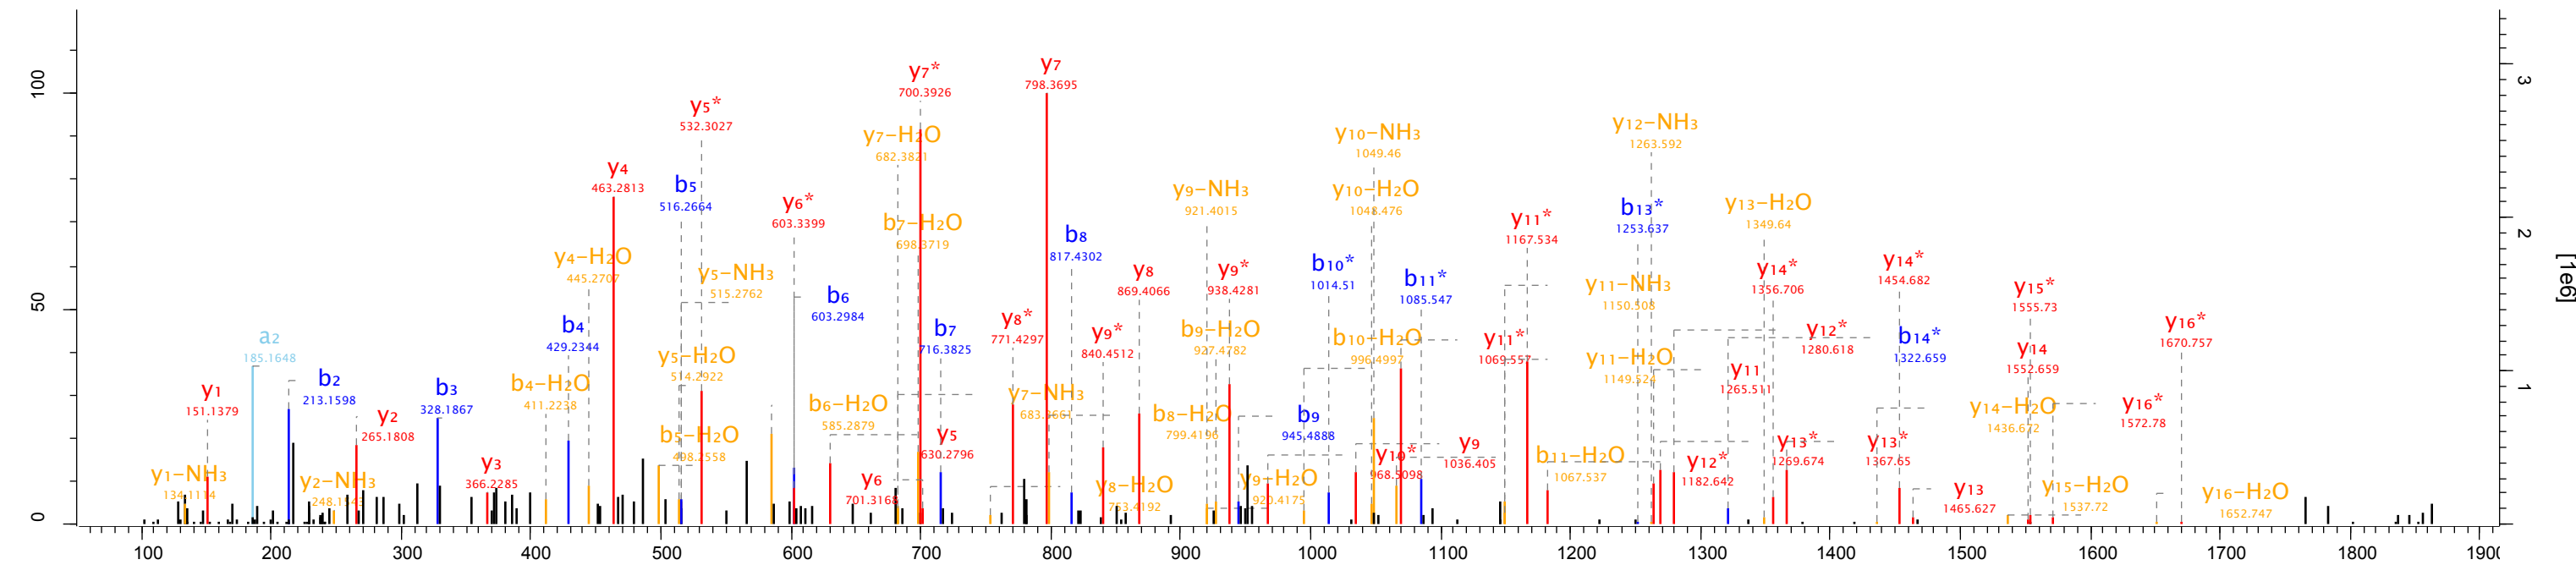

- V L D T S S L T Q S A P A S P T N K -

b<sub>2</sub>
b<sub>3</sub>
b<sub>4</sub>
b<sub>5</sub>
b<sub>6</sub>
b<sub>7</sub>
b<sub>8</sub>
b<sub>9</sub>
b<sub>10</sub>\*
b<sub>11</sub>\*
b<sub>13</sub>\*
b<sub>14</sub>\*

y<sub>16</sub>\*
y<sub>15</sub>\*
y<sub>14</sub>
y<sub>13</sub>
y<sub>12</sub>\*
y<sub>11</sub>
y<sub>10</sub>\*
y<sub>9</sub>  
ph
y<sub>8</sub>
y<sub>7</sub>
y<sub>6</sub>
y<sub>5</sub>  
ph
y<sub>4</sub>
y<sub>3</sub>
y<sub>2</sub>
y<sub>1</sub>



Raw file 20150812\_A375SR\_Phospho\_BR1\_02 Scan 14320 Method FTMS; HCD Score 93.73 m/z 832.83 Gene names HEXIM2

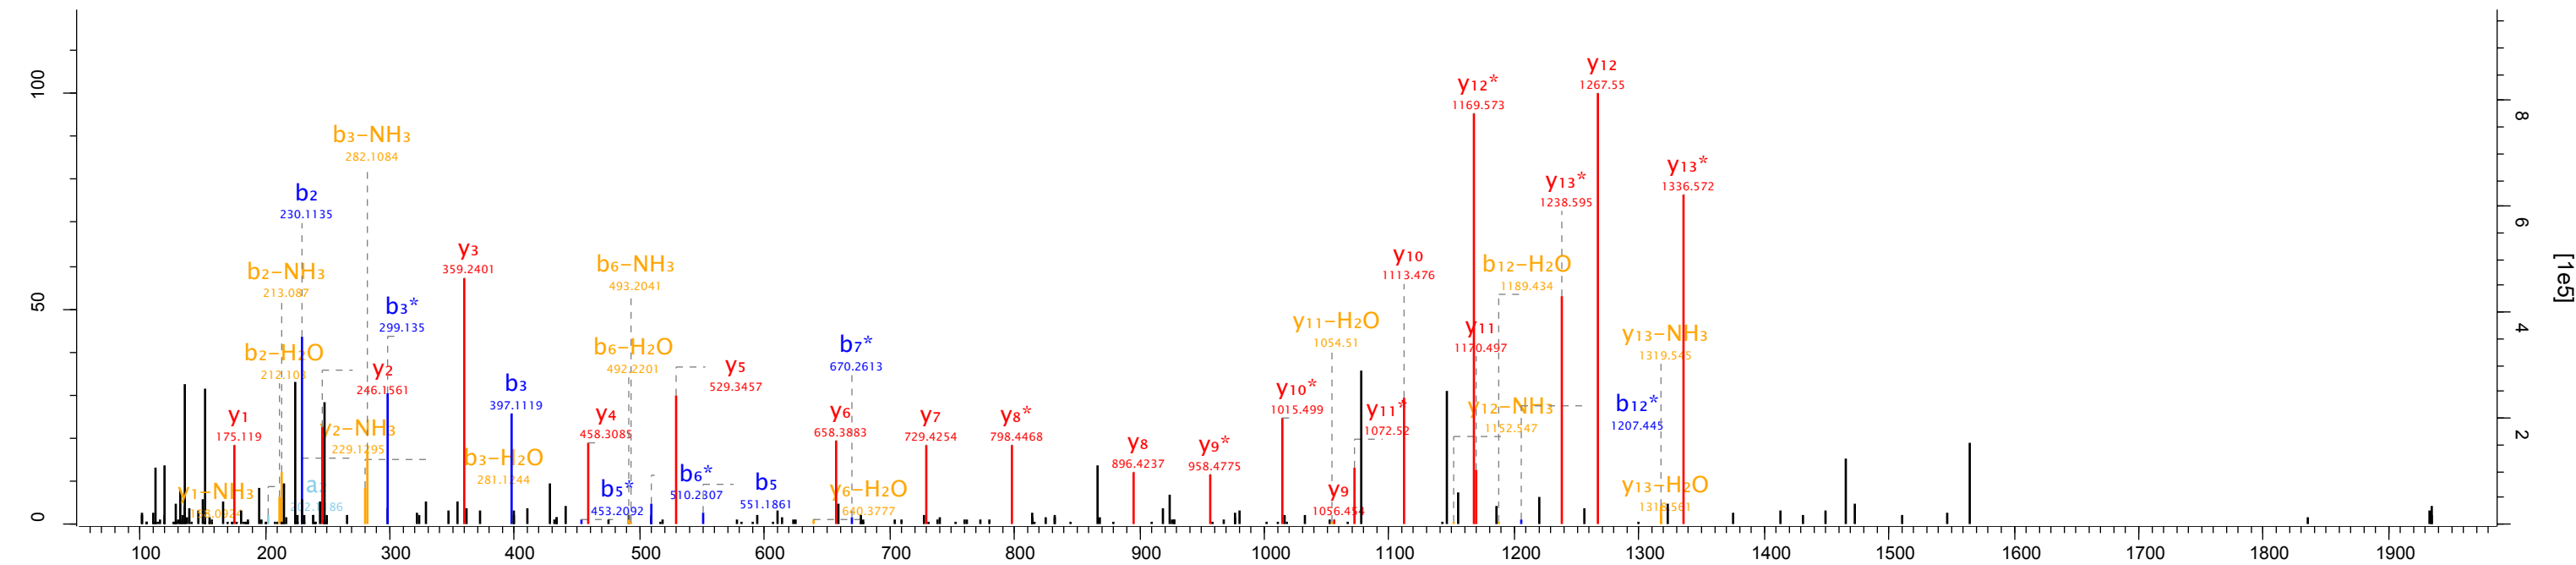

- T Q **Q** **S** P **G** **G** **C** **S** **A** **E** **A** **V** **L** **A** **R** -

Fragmentation sites are indicated by brackets below the sequence:

- Red brackets: y13\* (S), y12 (P), y11 (G), y10 (G), y9 (C), y8\* (S), y7 (A), y6 (E), y5 (A), y4 (V), y3 (L), y2 (A), y1 (R)
- Blue brackets: b2 (Q), b3 (S), b5 (G), b6\* (G), b7\* (C), b12\* (V)

Raw file 20150812\_A375SR\_Phospho\_BR1\_02 Scan 14450 Method FTMS; HCD Score 133.48 m/z 782.31 Gene names NUFIP2

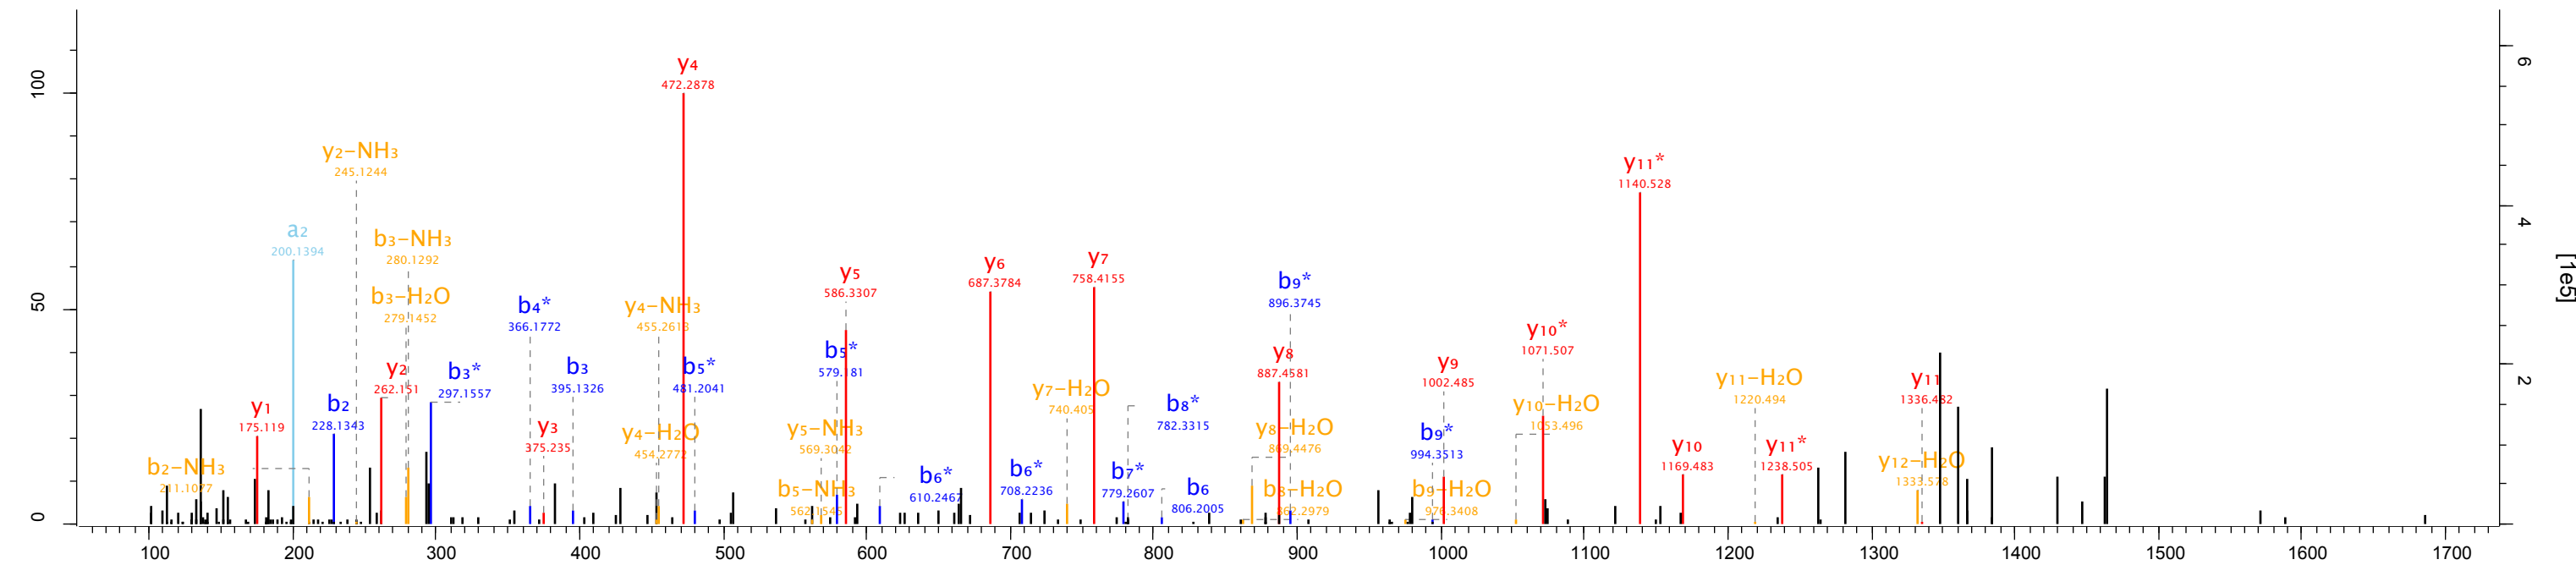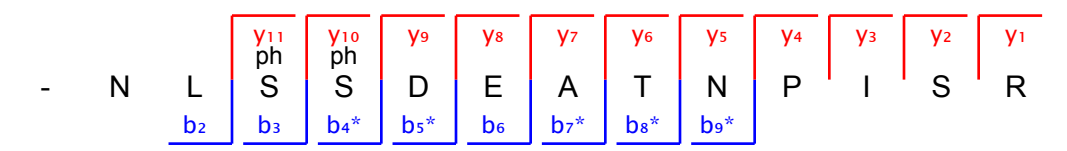

Raw file 20150812\_A375SR\_Phospho\_BR1\_02 Scan 14500 Method FTMS; HCD Score 152.38 m/z 849.35 Gene names DOCK10

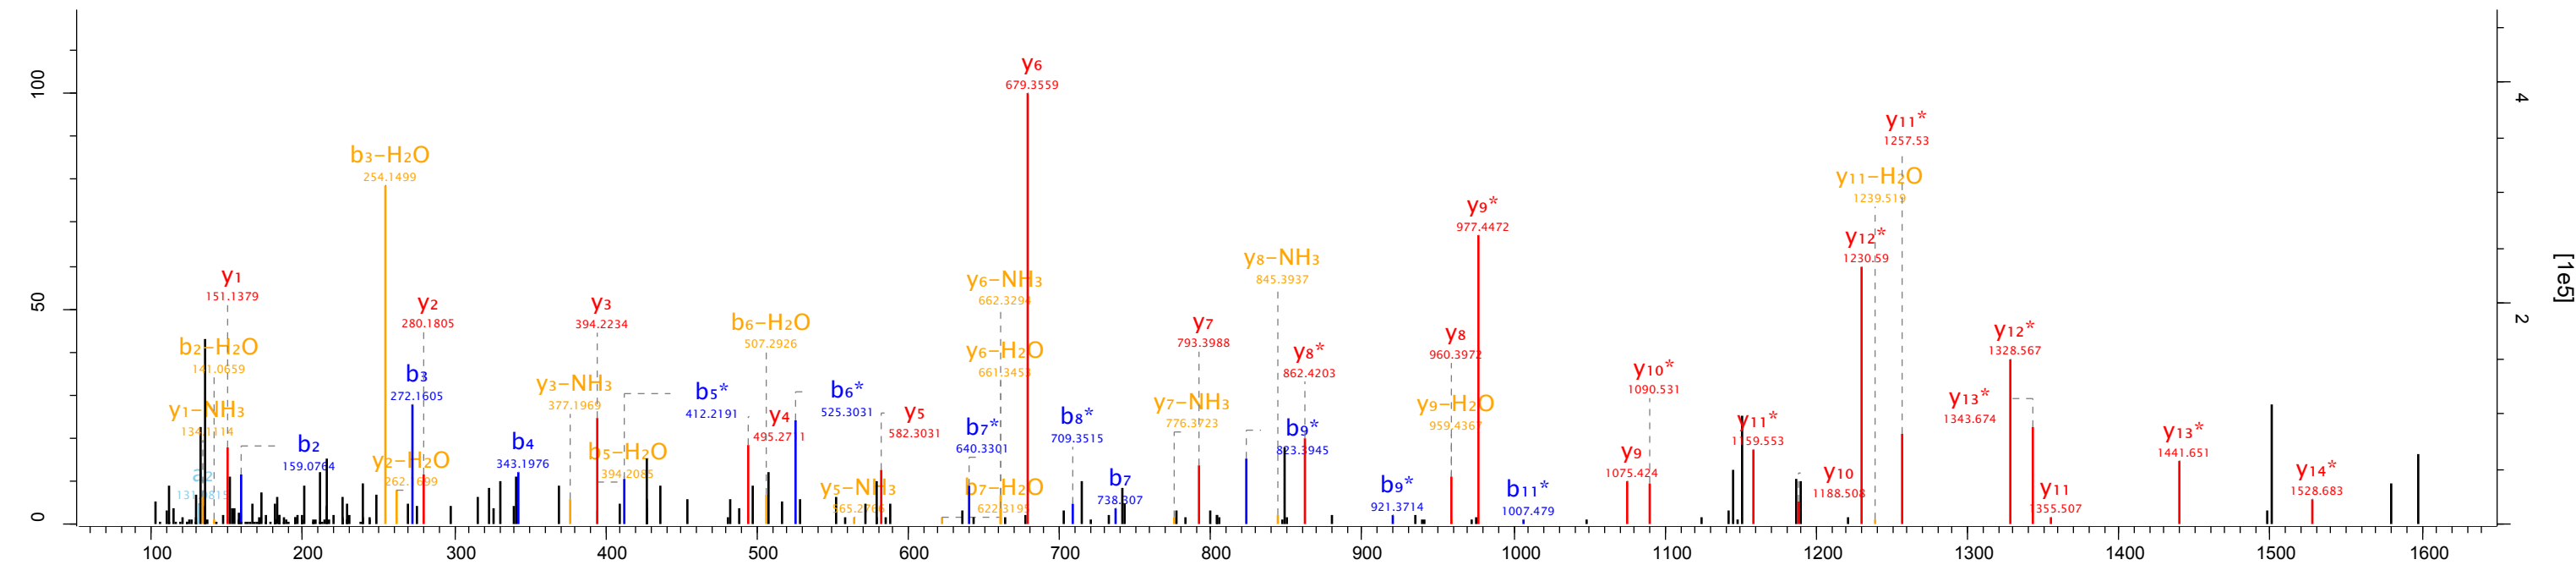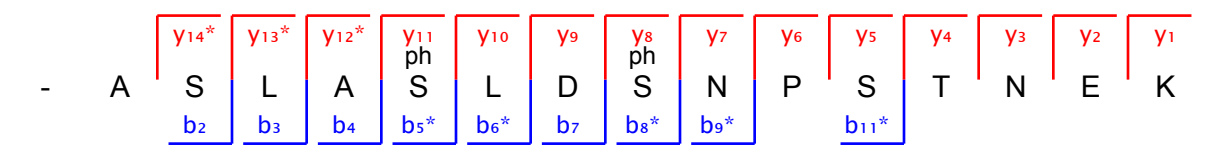

Raw file: 20150812\_A375SR\_Phospho\_BR1\_02  
 Scan: 14630 Method: FTMS; HCD Score: 163.09 m/z: 827.32 Gene names: PRRC2C

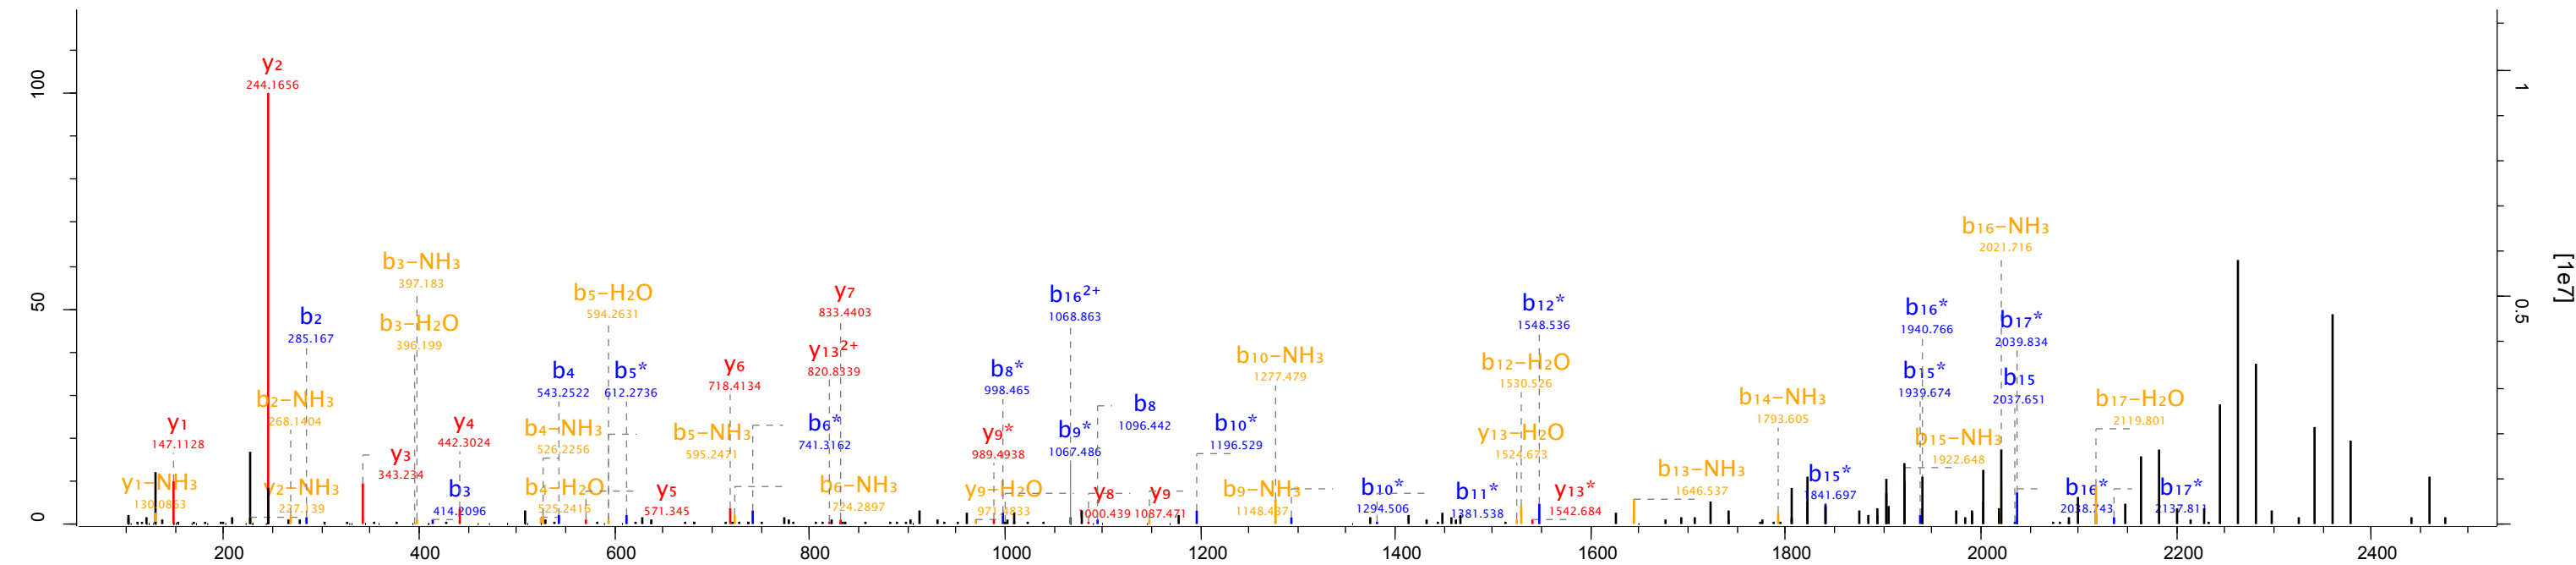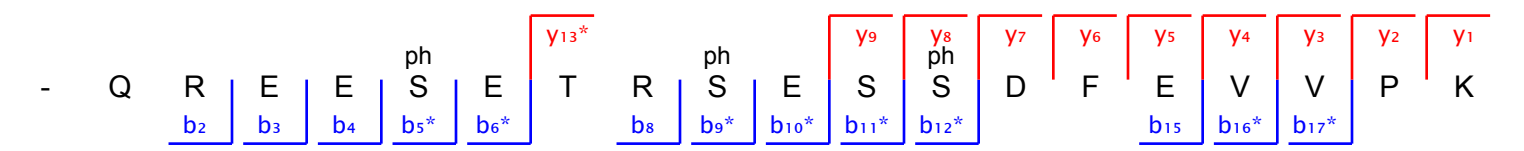

Raw file: 20150812\_A375SR\_Phospho\_BR1\_02  
 Scan: 15010 Method: FTMS; HCD Score: 153.23 m/z: 1116.88 Gene names: PRRC2A

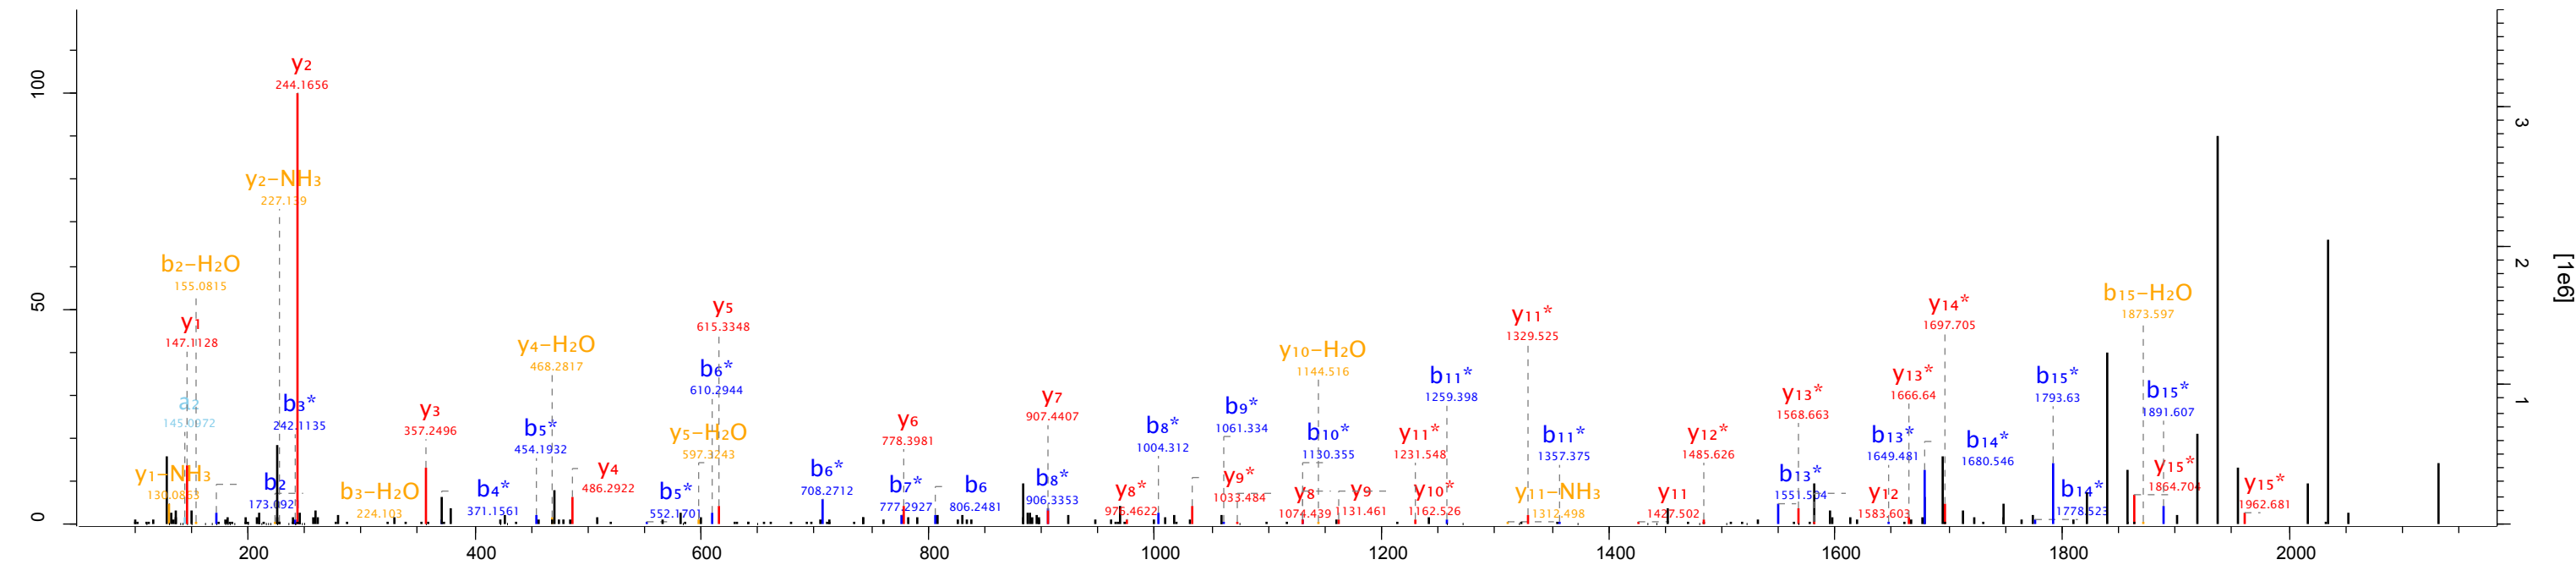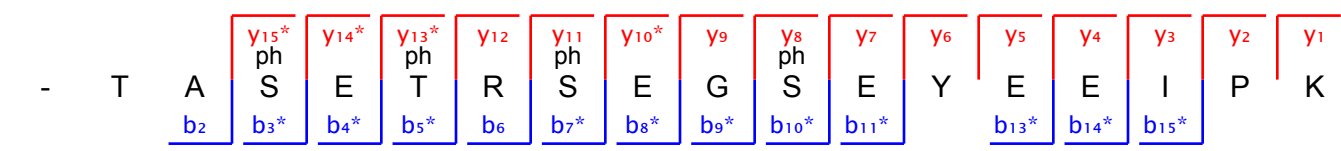



Raw file: 20150812\_A375SR\_Phospho\_BR1\_02  
 Scan: 15060 Method: FTMS; HCD Score: 64.58 m/z: 1040.87 Gene names: PLEC

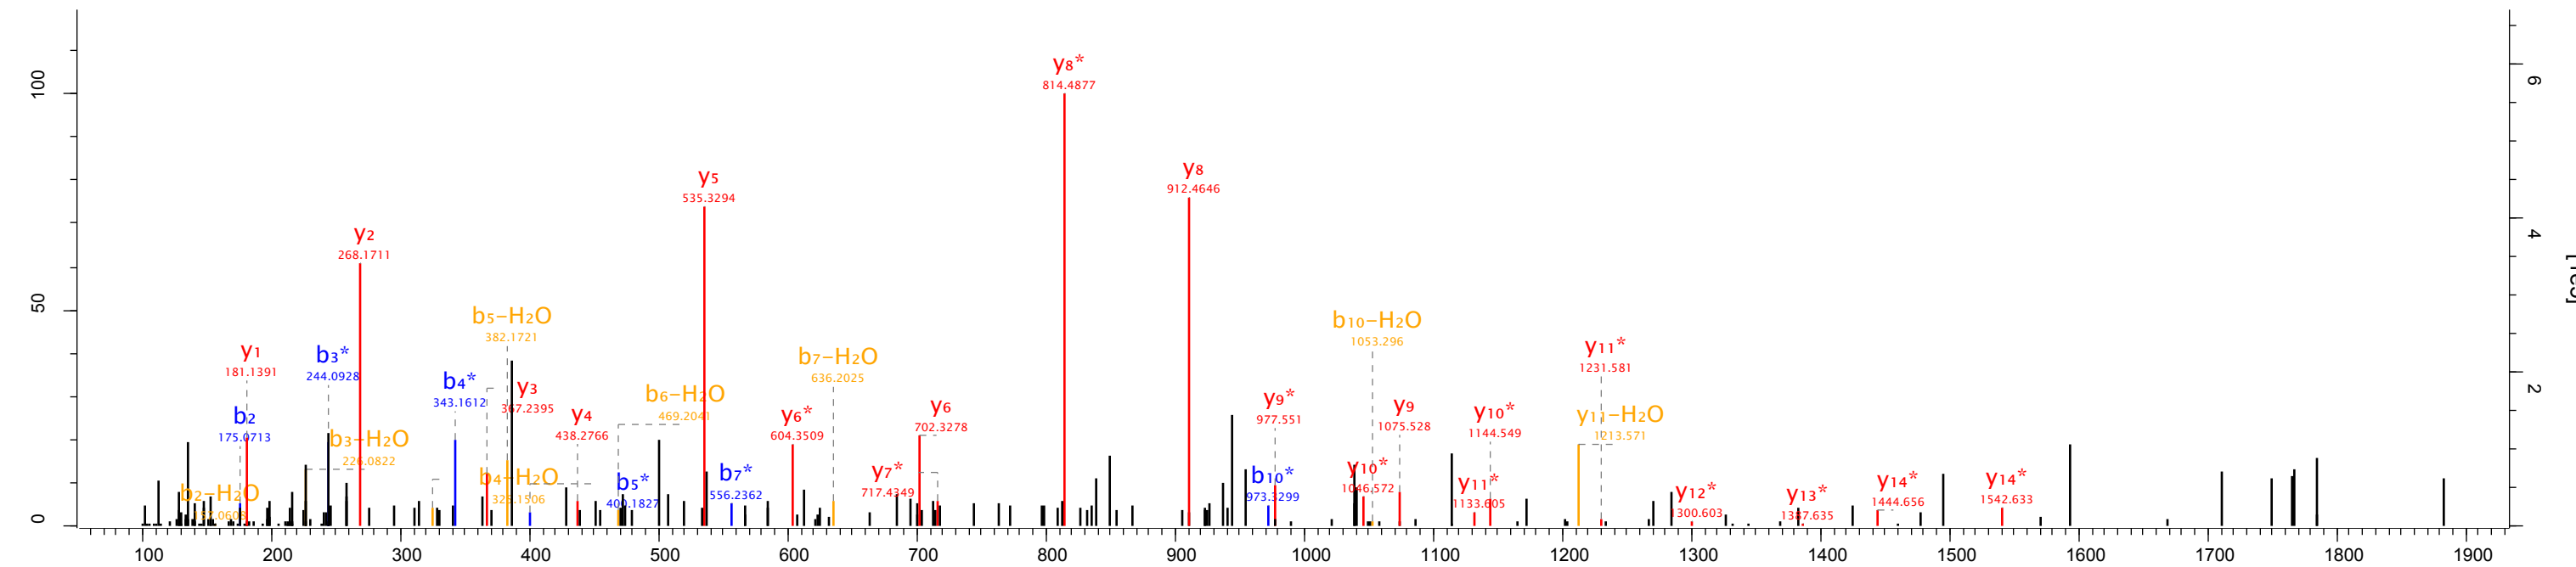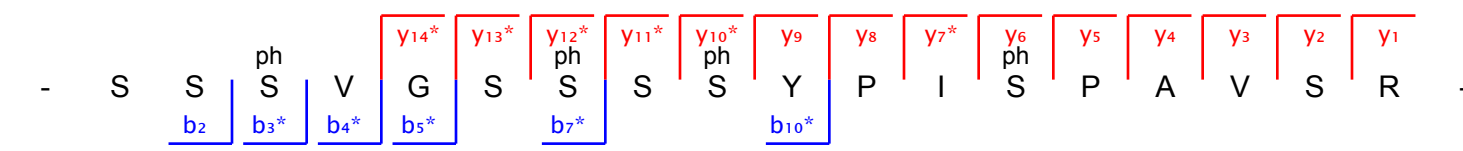

Raw file: 20150812\_A375SR\_Phospho\_BR1\_02  
 Scan: 15390 Method: FTMS; HCD Score: 121.24 m/z: 1112.33 Gene names: CBX5

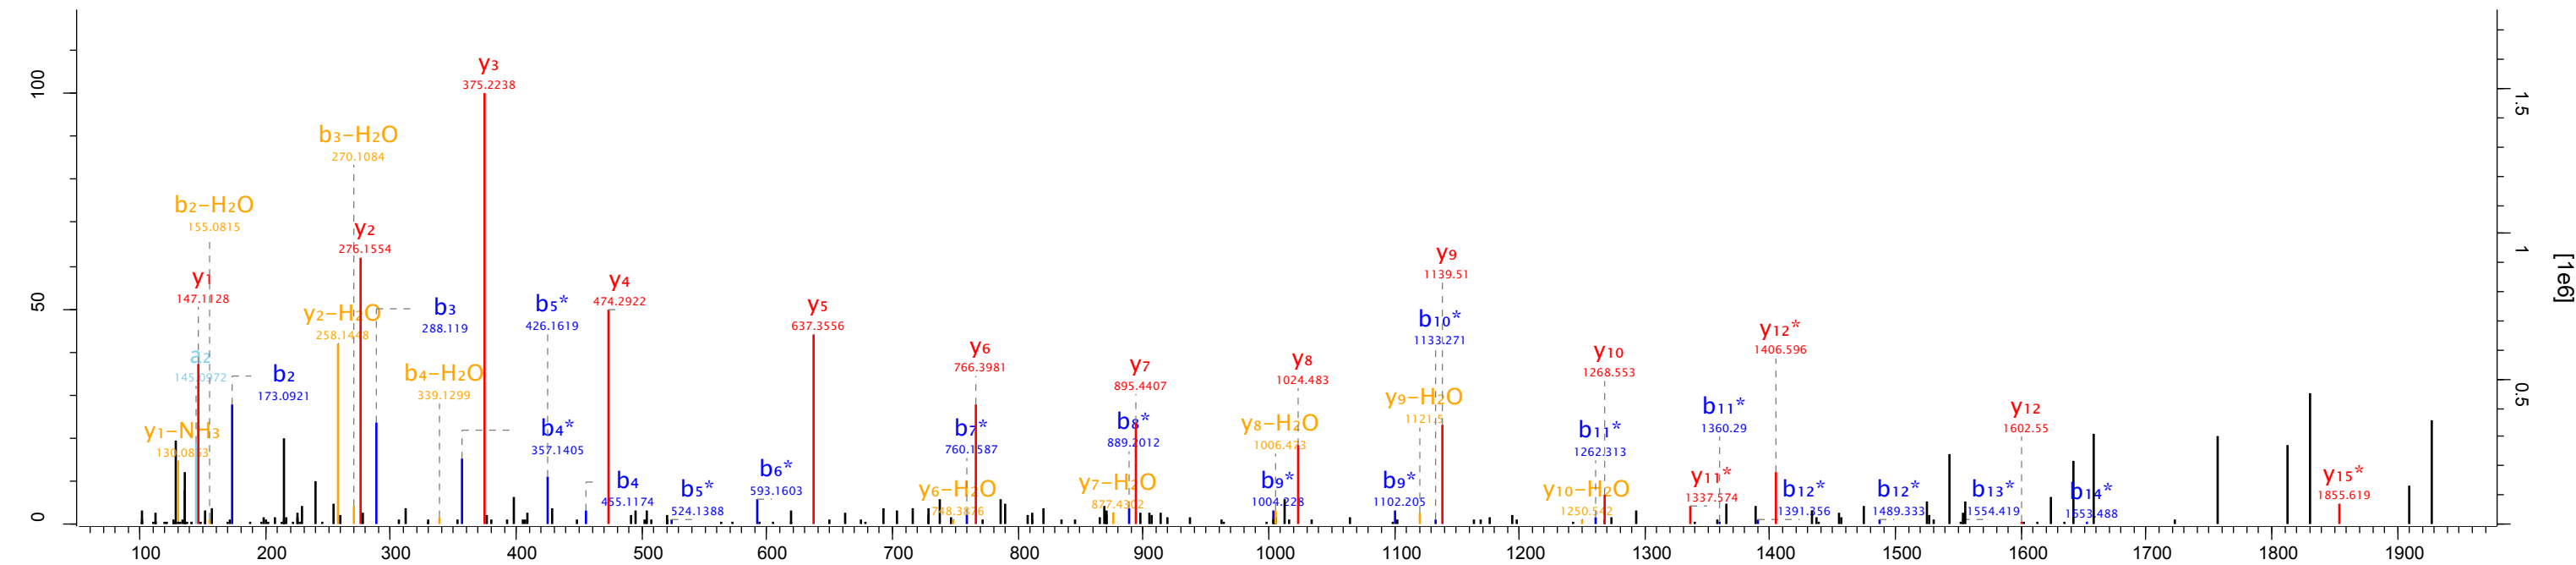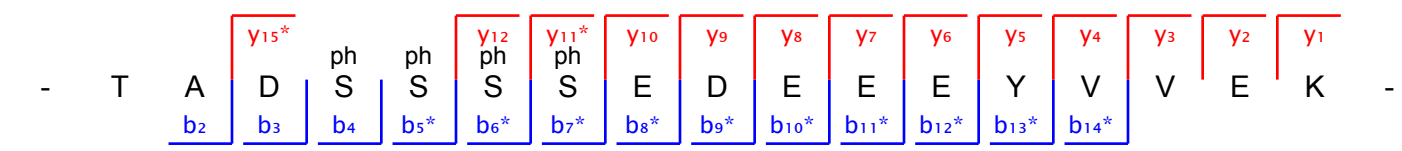

Raw file 20150812\_A375SR\_Phospho\_BR1\_02 Scan 15600 Method FTMS; HCD Score 123.54 m/z 838.31 Gene names EEF2K

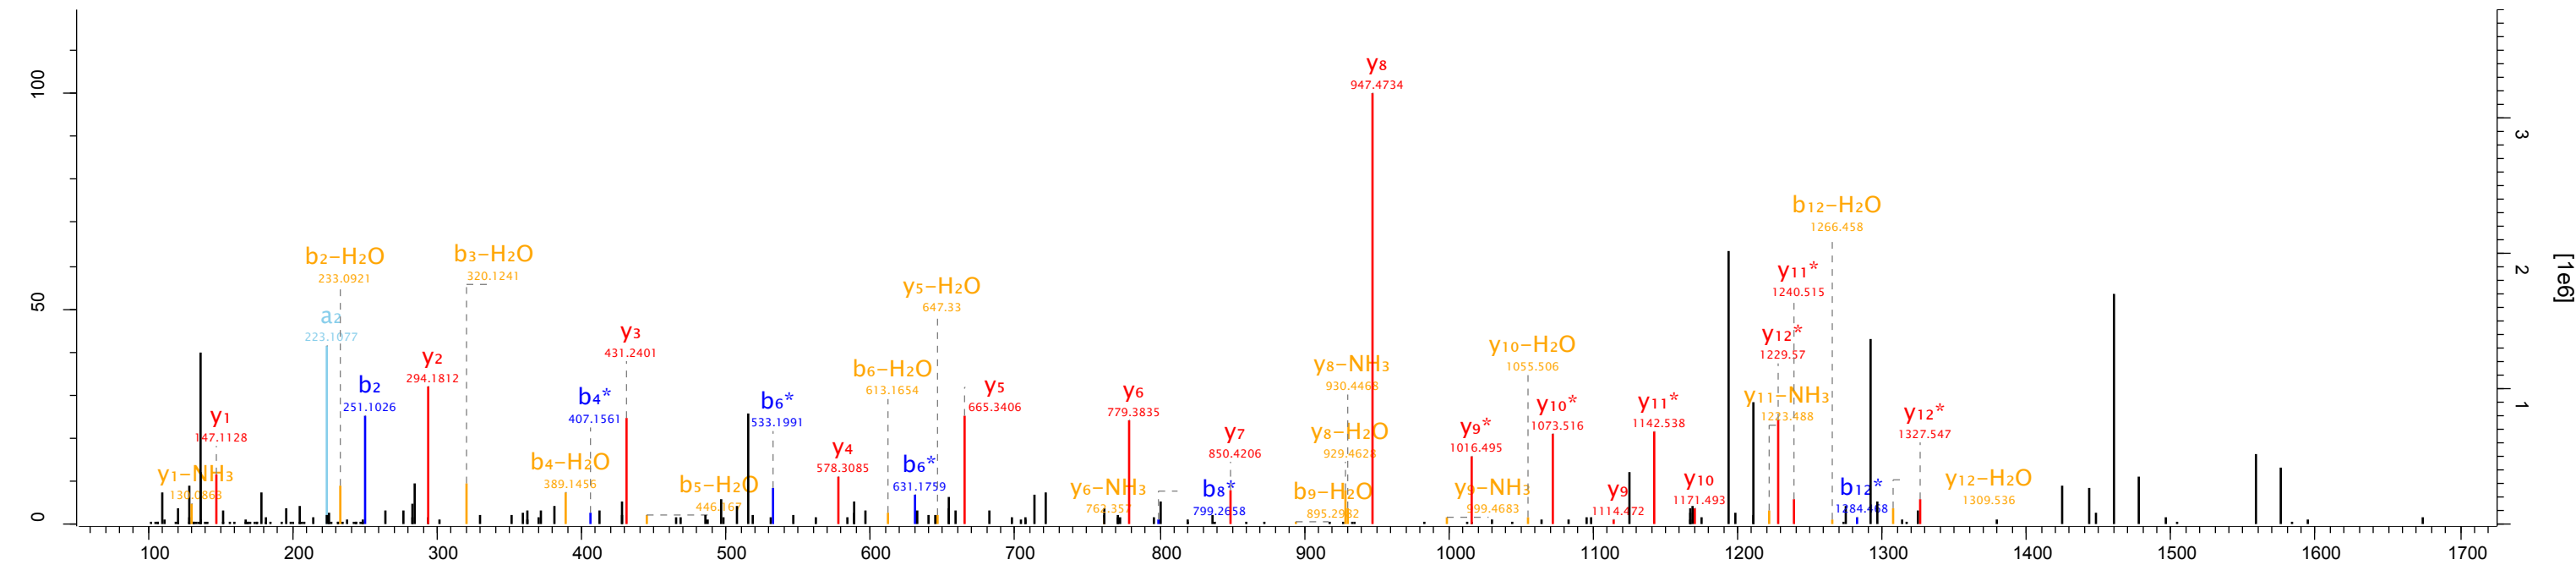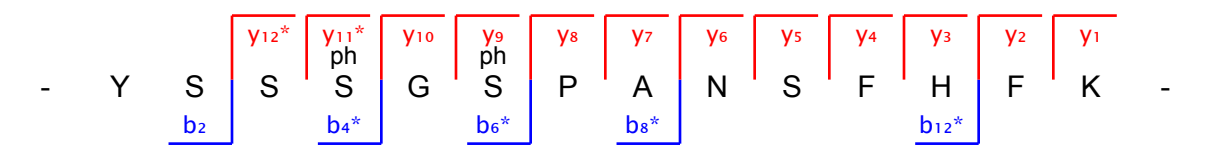

Raw file 20150812\_A375SR\_Phospho\_BR1\_02 Scan 15860 Method FTMS; HCD Score 133.7 m/z 931.35 Gene names ANLN

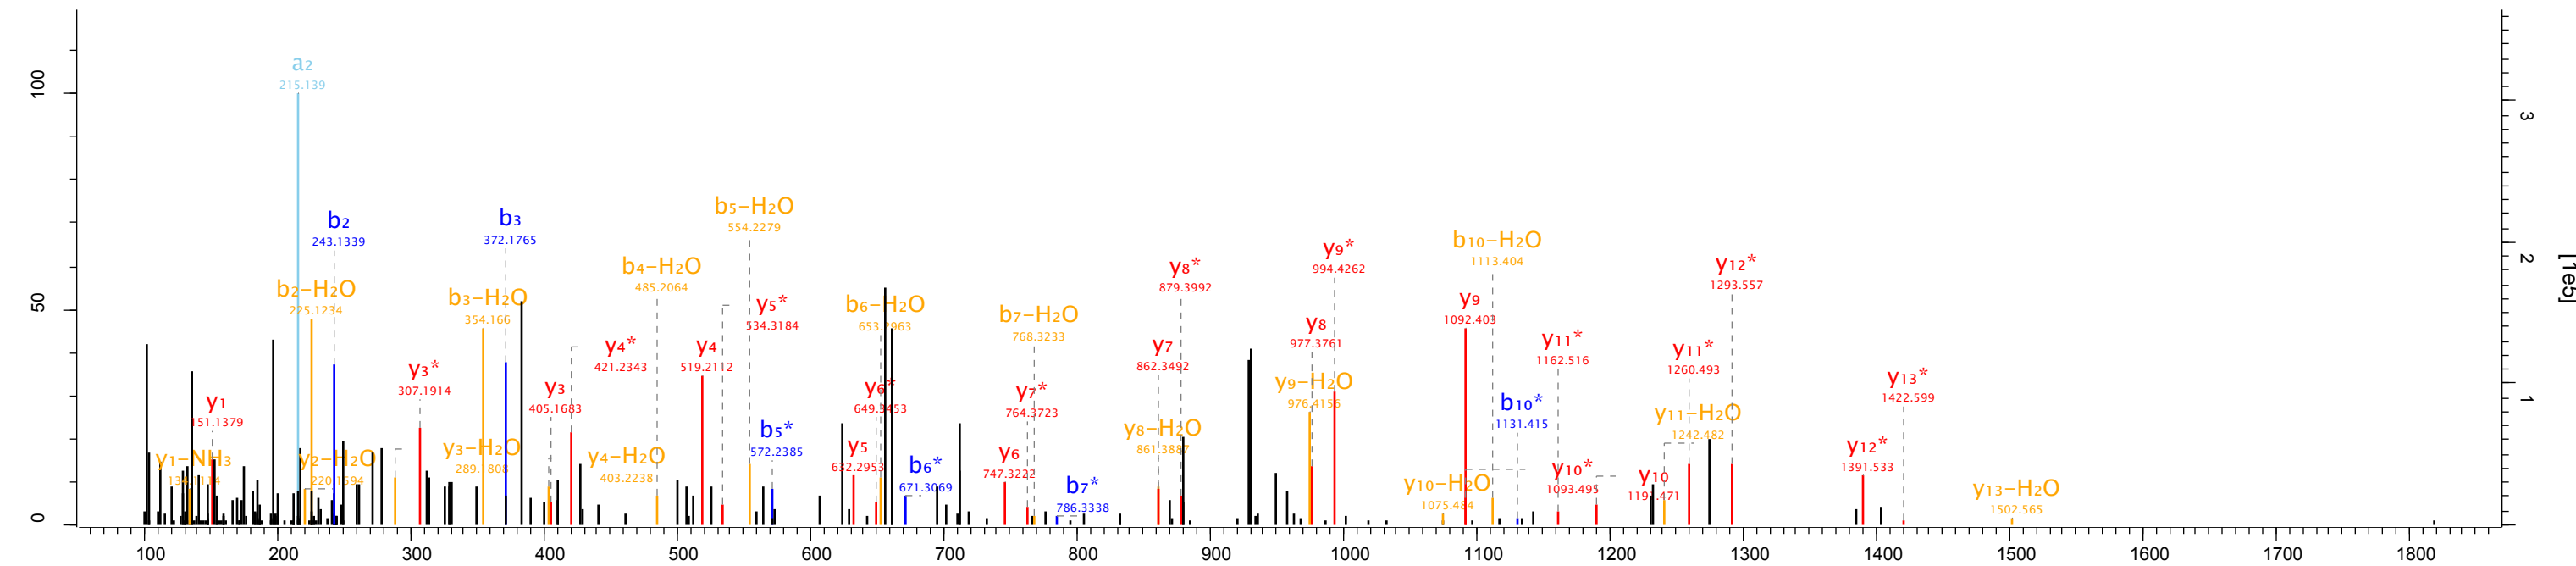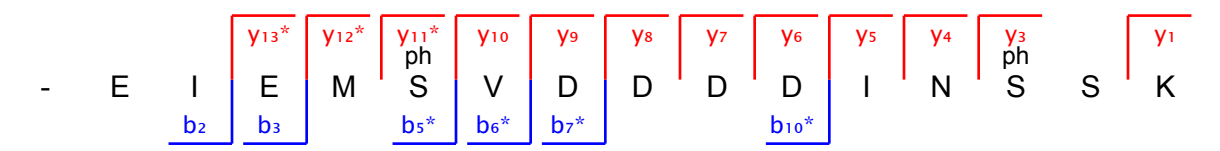

Raw file 20150812\_A375SR\_Phospho\_BR1\_02 Scan 16170 Method FTMS; HCD Score 119.62 m/z 722.7 Gene names KRT80

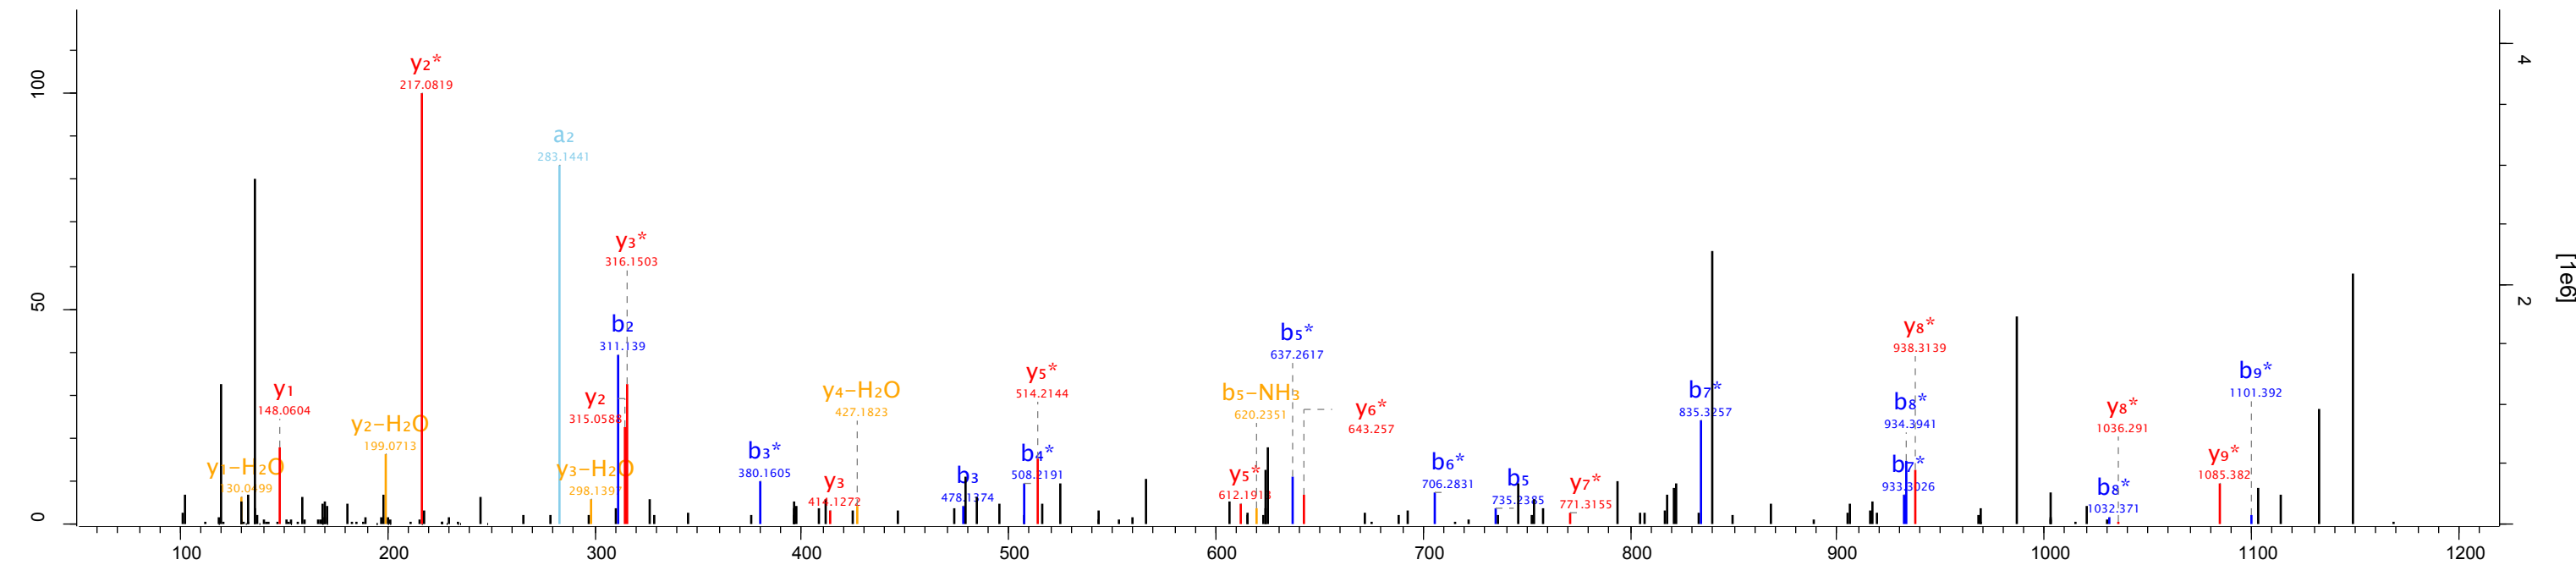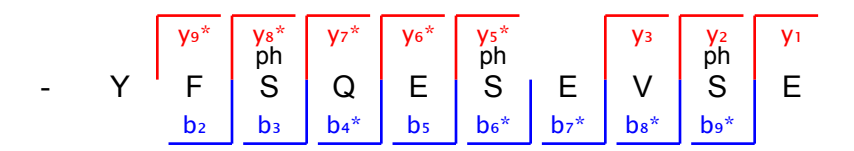

Raw file: 20150812\_A375SR\_Phospho\_BR1\_02  
 Scan: 16200 Method: FTMS; HCD Score: 56.31 m/z: 734.22 Gene names: LLGL1

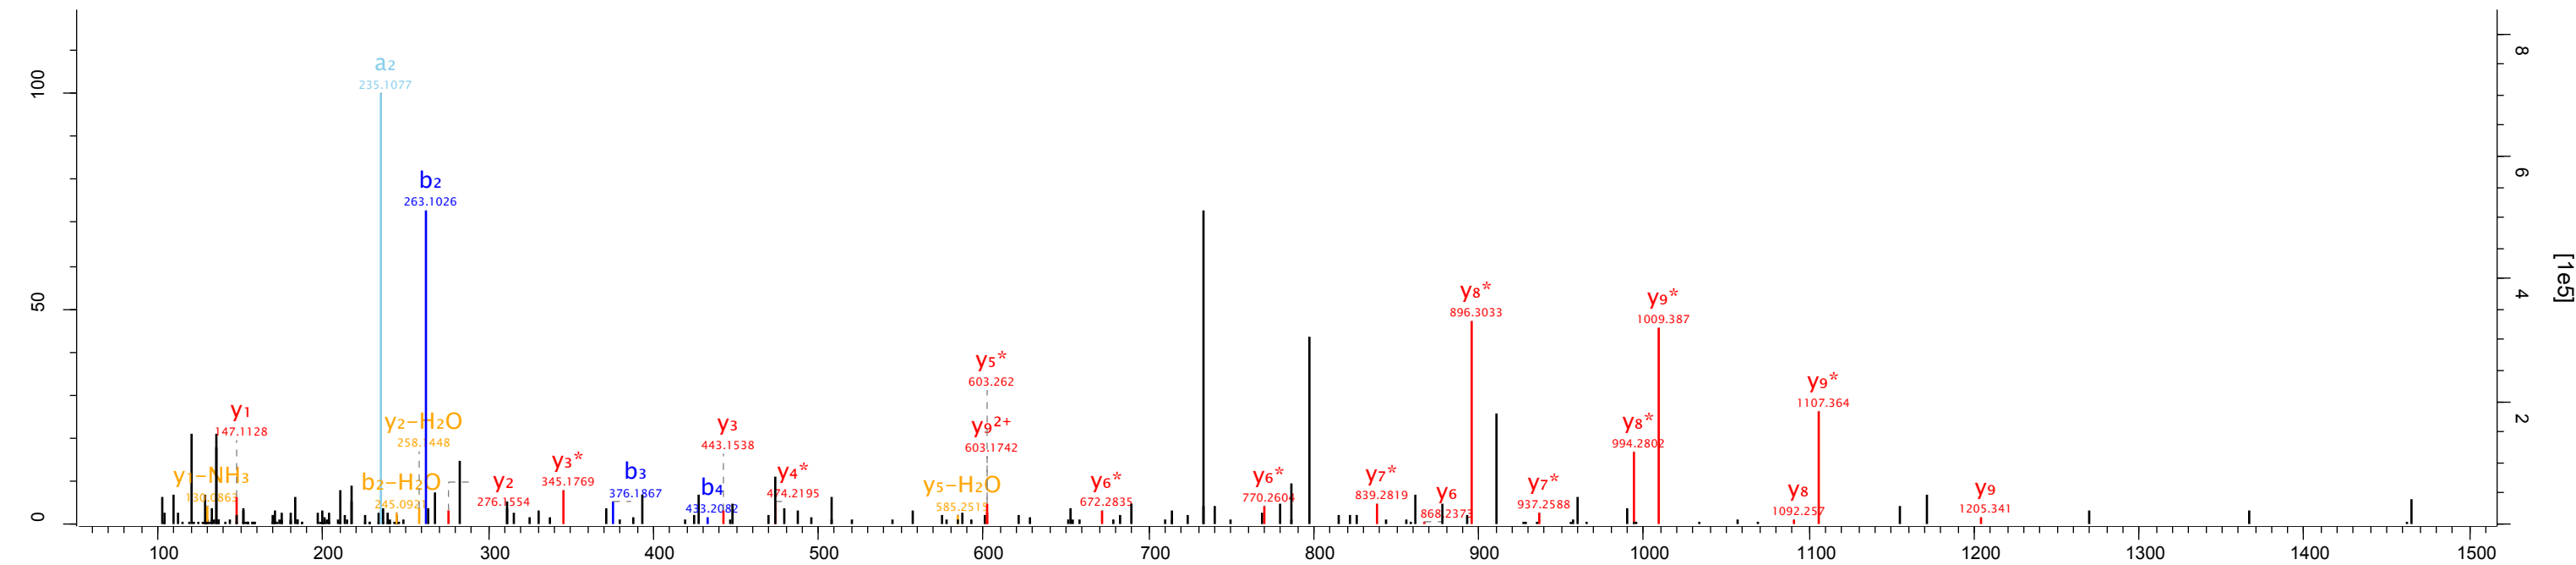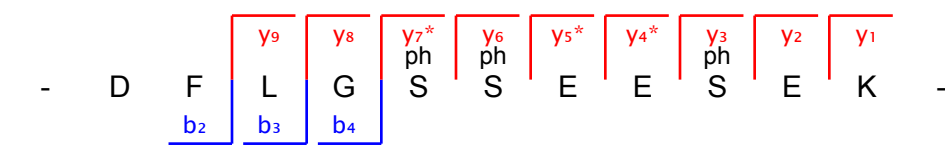

Raw file 20150812\_A375SR\_Phospho\_BR1\_02 Scan 16320 Method FTMS; HCD Score 84.18 m/z 801.72 Gene names CHAMP1

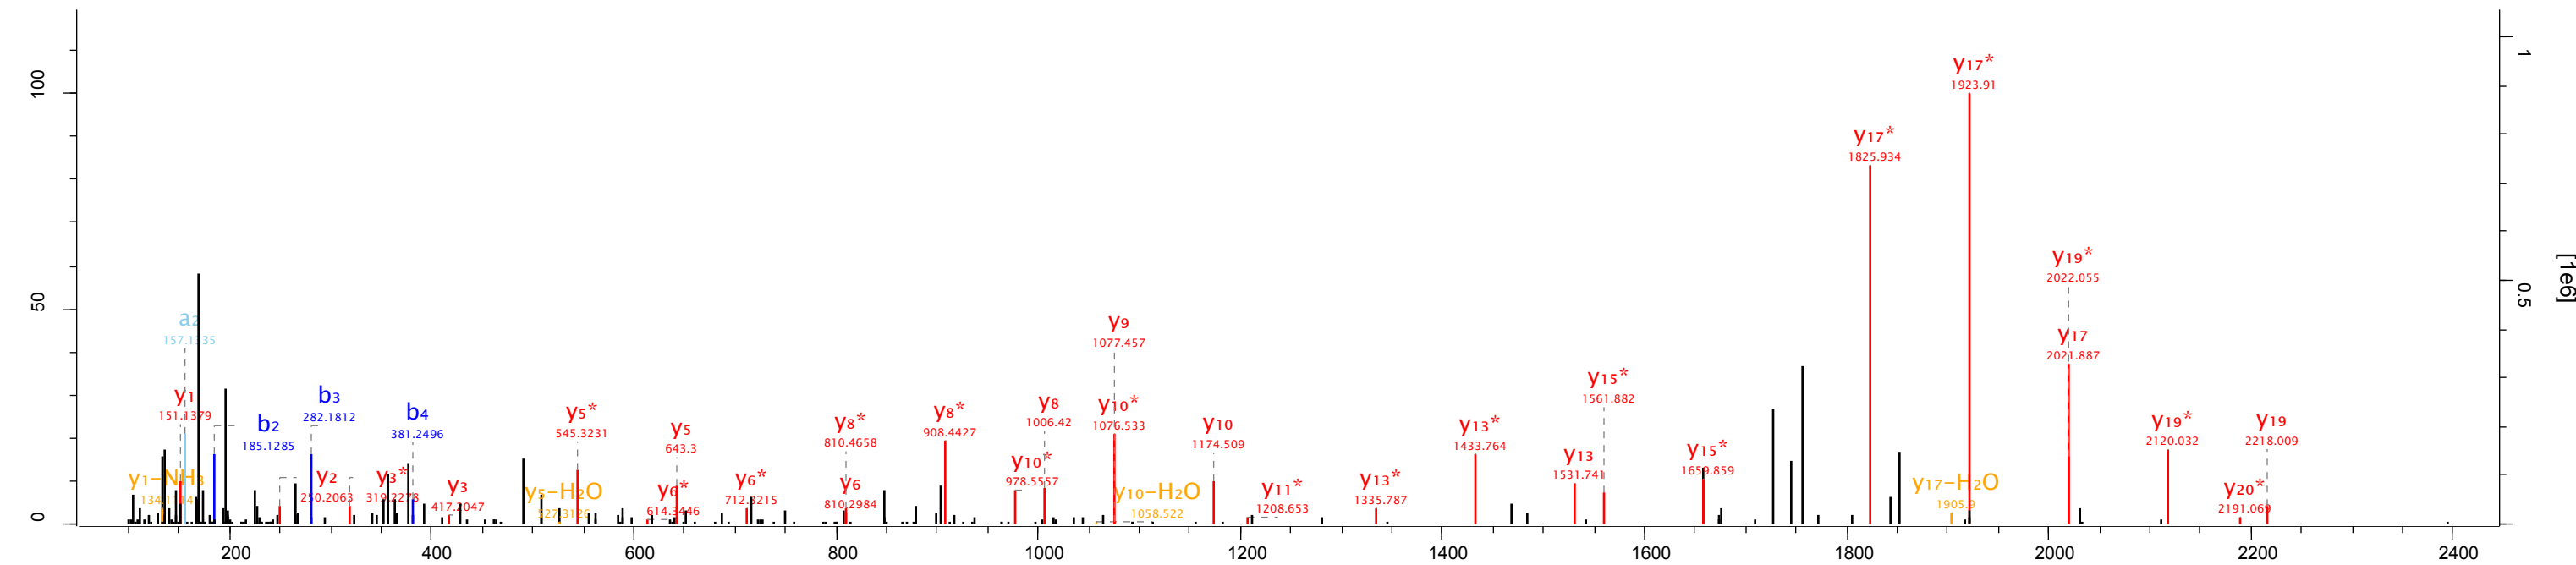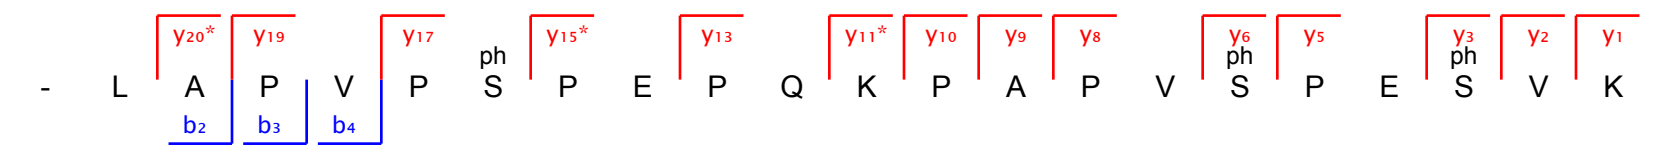

Raw file: 20150812\_A375SR\_Phospho\_BR1\_02  
 Scan: 16540 Method: FTMS; HCD Score: 155.16 m/z: 947.36 Gene names: MCM2

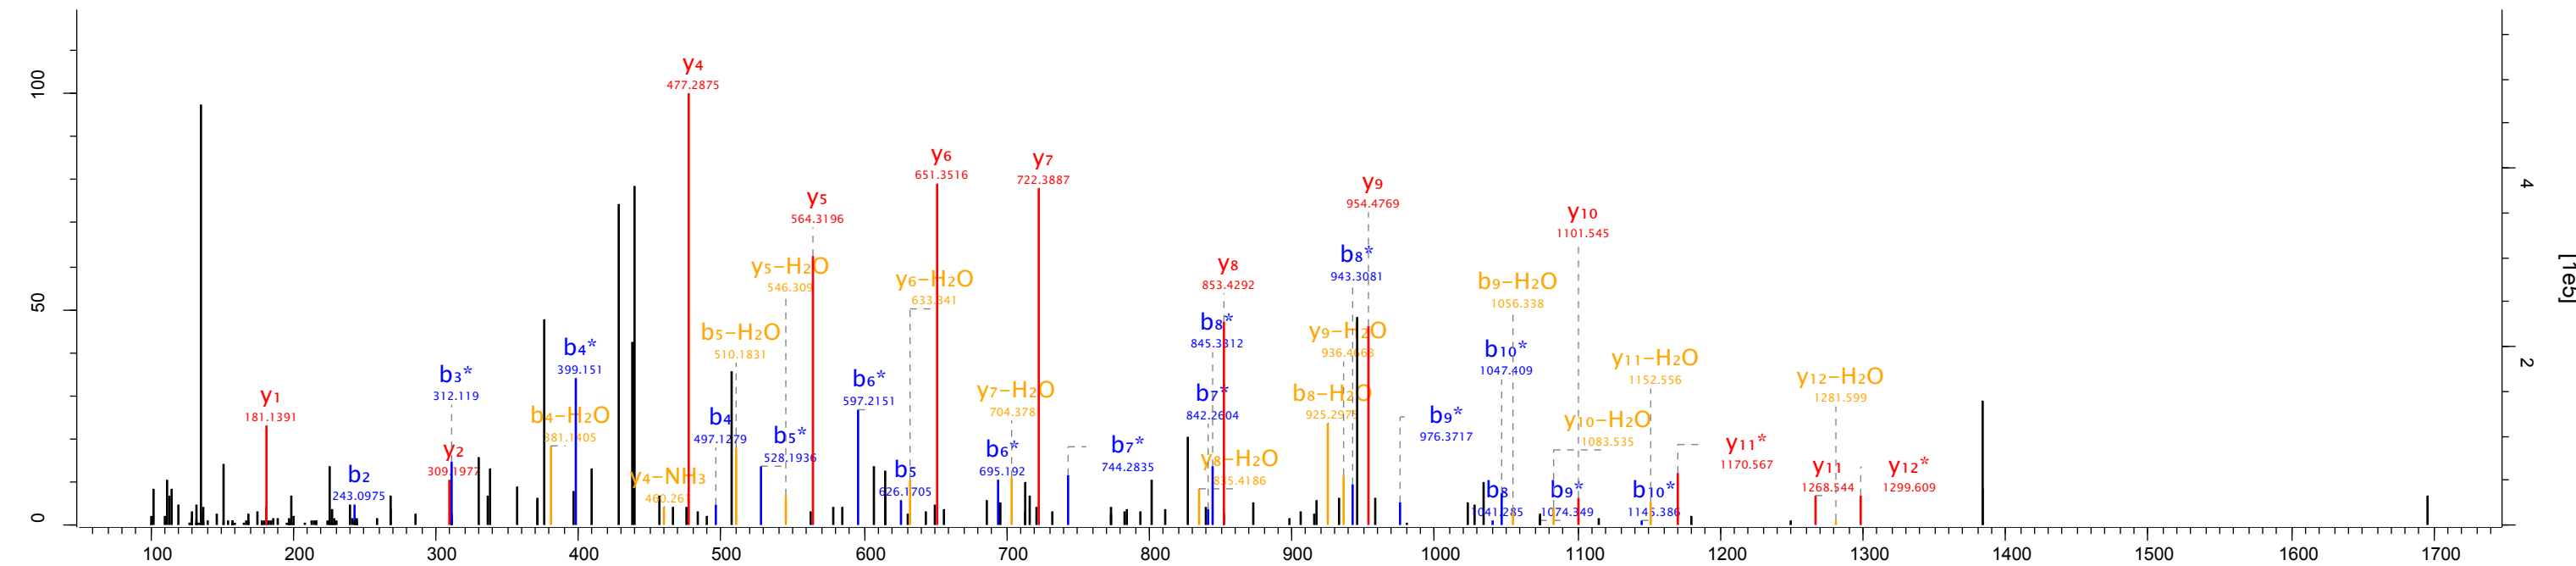

ac - A E S S E S F T M A S S P A Q R -  
 b<sub>2</sub> b<sub>3</sub><sup>\*</sup> b<sub>4</sub> b<sub>5</sub> b<sub>6</sub><sup>\*</sup> b<sub>7</sub><sup>\*</sup> b<sub>8</sub> b<sub>9</sub><sup>\*</sup> b<sub>10</sub><sup>\*</sup> y<sub>12</sub><sup>\*</sup> y<sub>11</sub> ph y<sub>10</sub> y<sub>9</sub> y<sub>8</sub> y<sub>7</sub> y<sub>6</sub> y<sub>5</sub> y<sub>4</sub> y<sub>2</sub> y<sub>1</sub>



Raw file  
20150812\_A375SR\_Phospho\_BR1\_02

Scan 16610 Method FTMS; HCD Score 93.69 m/z 1149.25 Gene names FOXK2

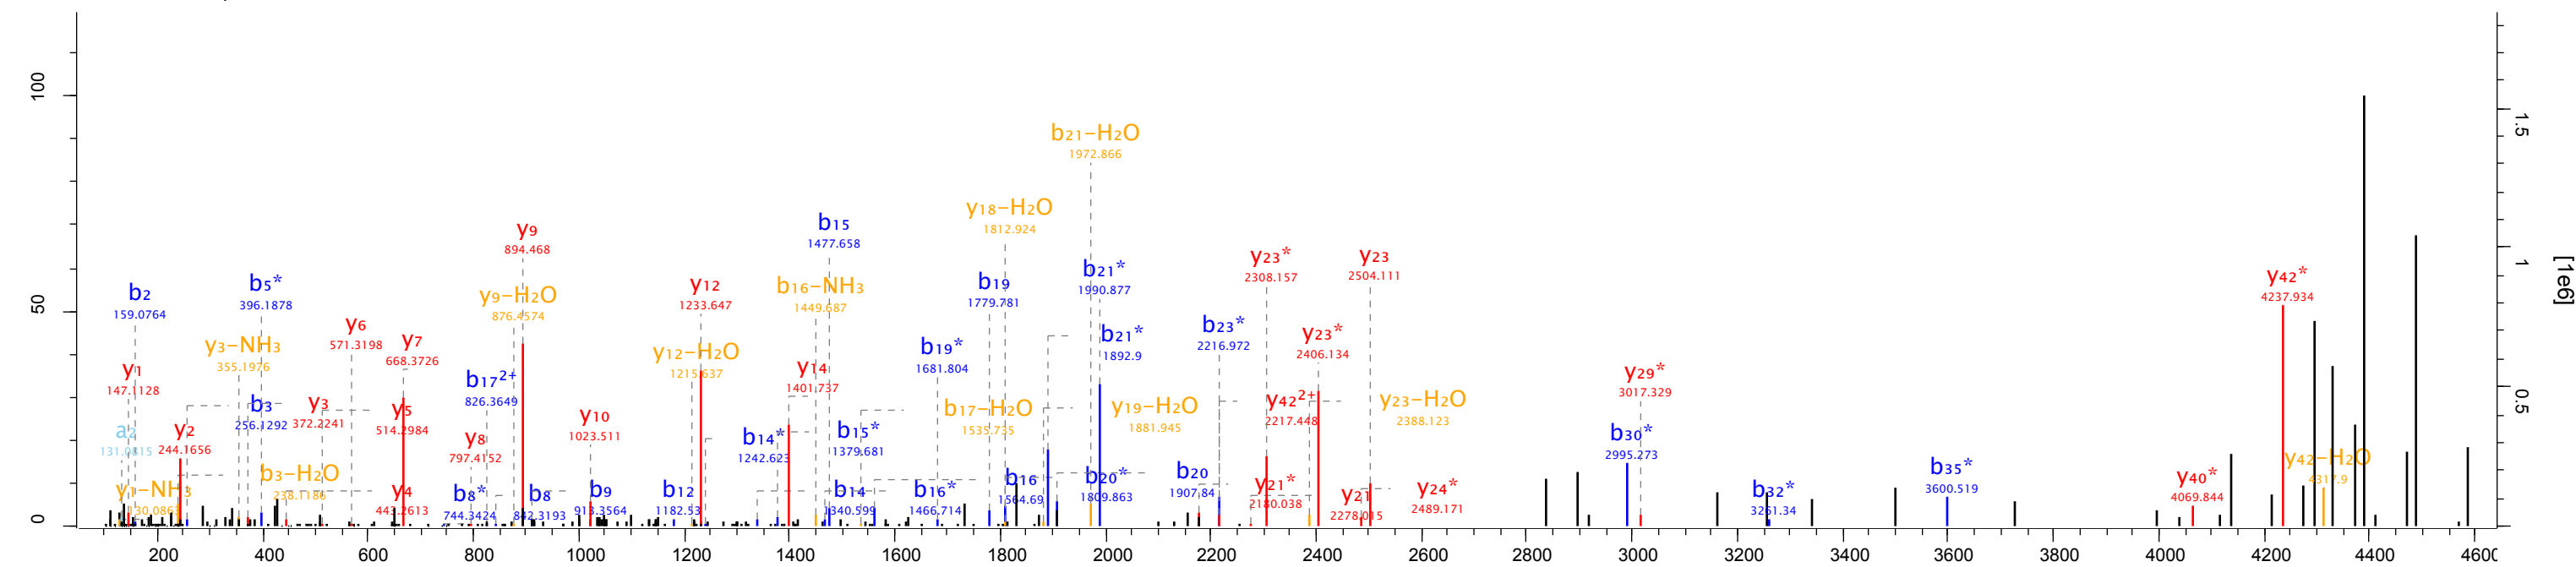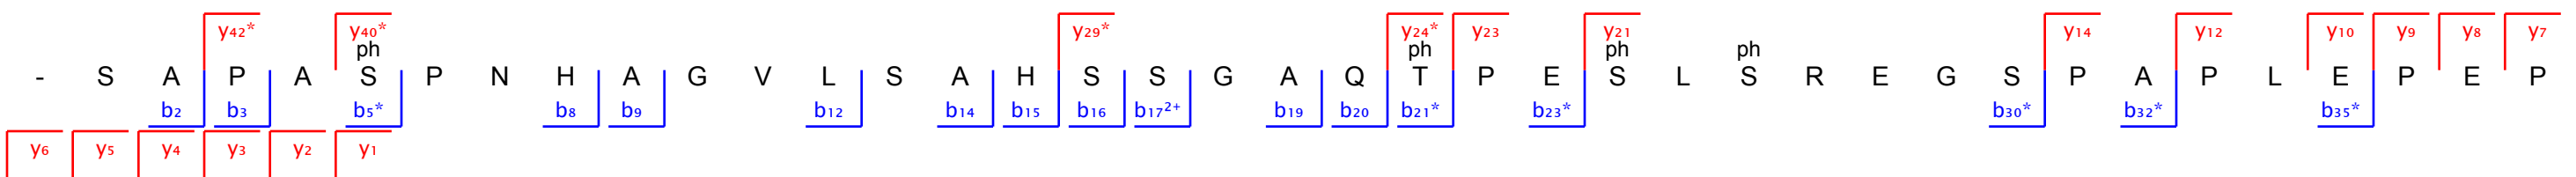

Raw file 20150812\_A375SR\_Phospho\_BR1\_02 Scan 17060 Method FTMS; HCD Score 166.57 m/z 1036.92 Gene names MLLT4

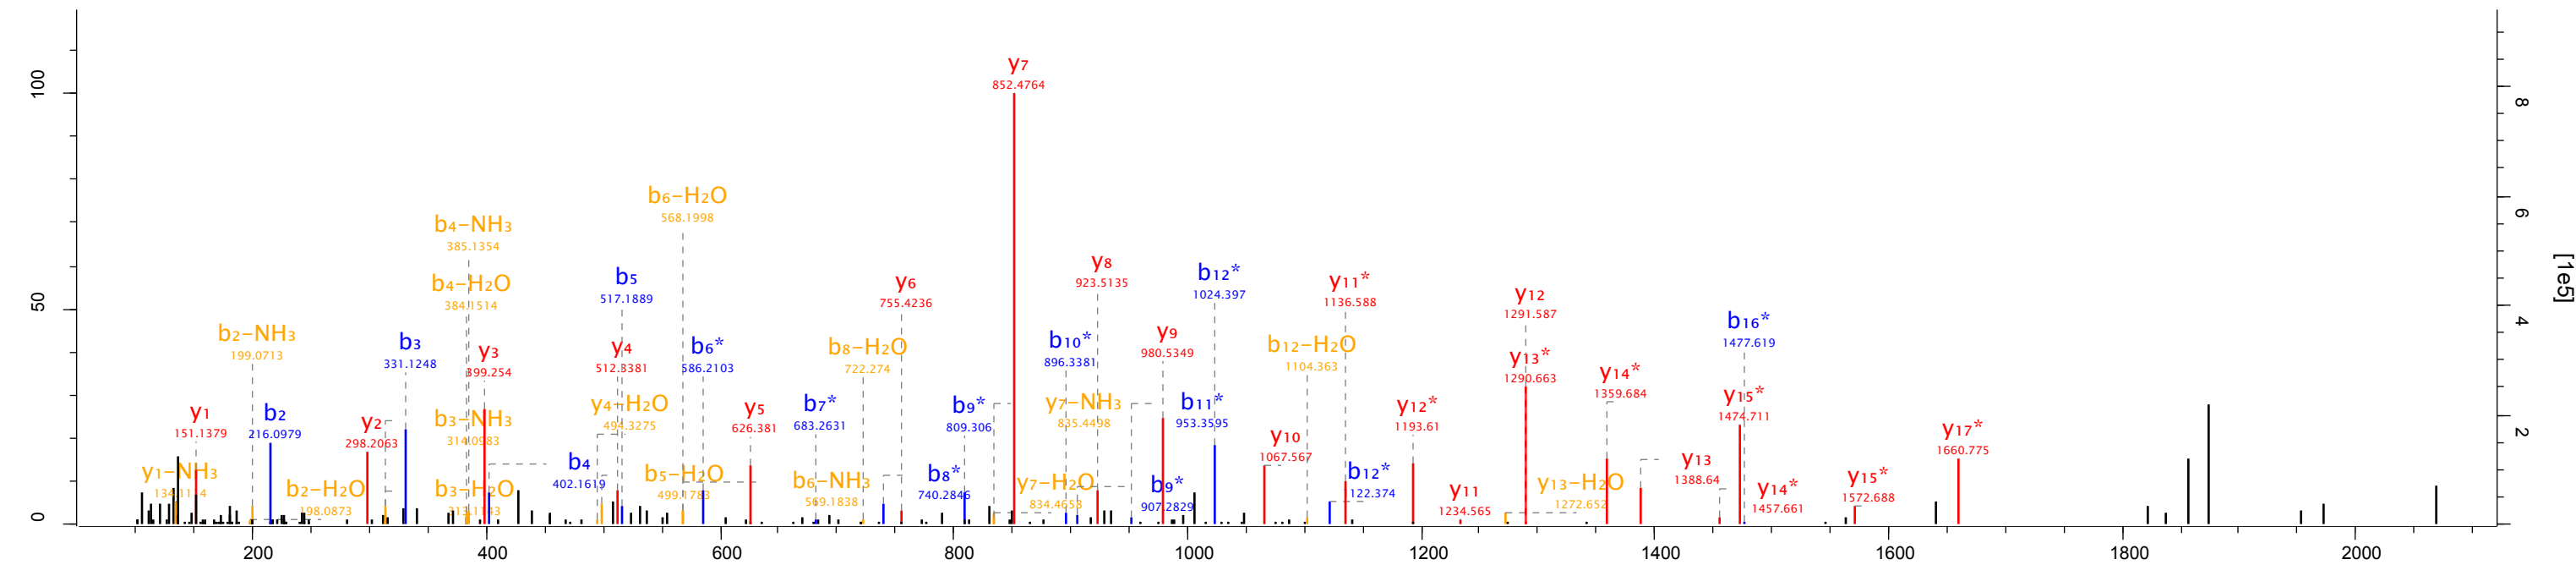

- S Q D A D S P G S S G A P E N L T F K -

b<sub>2</sub>
b<sub>3</sub>
b<sub>4</sub>
b<sub>5</sub>
b<sub>6</sub>\*
b<sub>7</sub>\*
b<sub>8</sub>\*
b<sub>9</sub>\*
b<sub>10</sub>\*
b<sub>11</sub>\*
b<sub>12</sub>\*
b<sub>16</sub>\*

y<sub>17</sub>\*
y<sub>15</sub>\*
y<sub>14</sub>\*
y<sub>13</sub>
y<sub>12</sub>
y<sub>11</sub>
y<sub>10</sub>
y<sub>9</sub>
y<sub>8</sub>
y<sub>7</sub>
y<sub>6</sub>
y<sub>5</sub>
y<sub>4</sub>
y<sub>3</sub>
y<sub>2</sub>
y<sub>1</sub>

Raw file 20150812\_A375SR\_Phospho\_BR1\_02 Scan 17130 Method FTMS; HCD Score 186.67 m/z 1190.55 Gene names BAG3

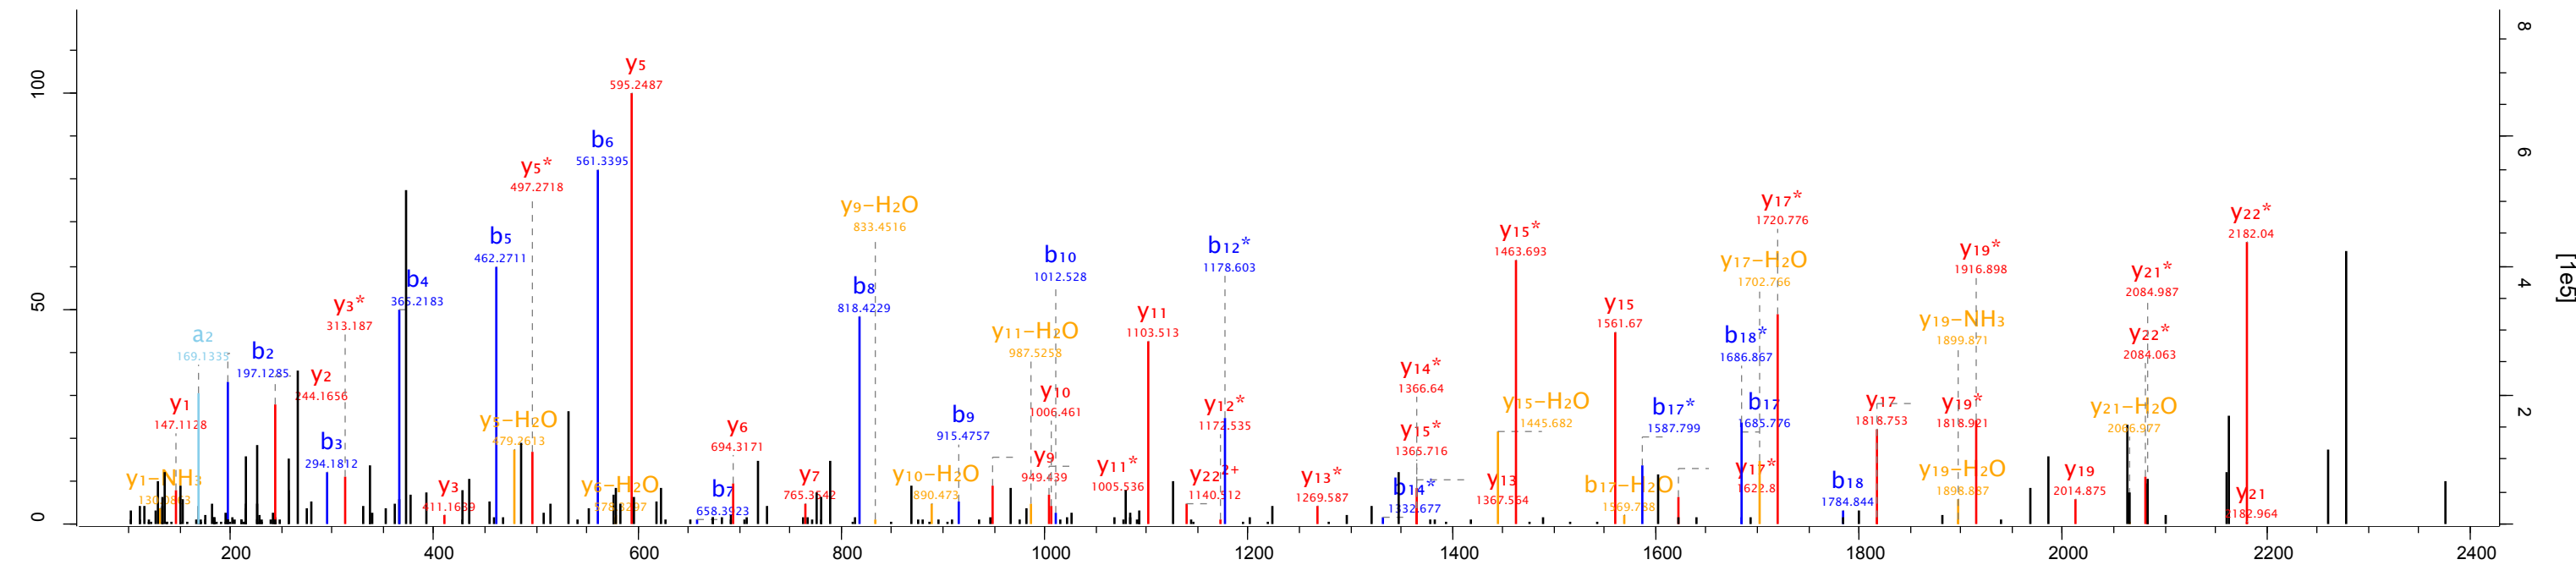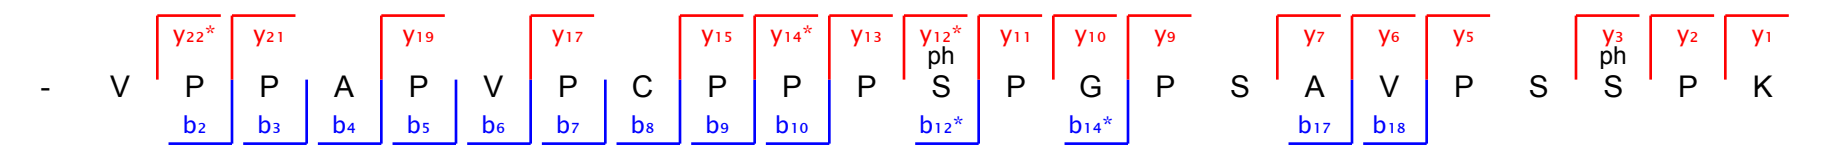

Raw file 20150812\_A375SR\_Phospho\_BR1\_02 Scan 17470 Method FTMS; HCD Score 87.11 m/z 1032.11 Gene names SRRM2

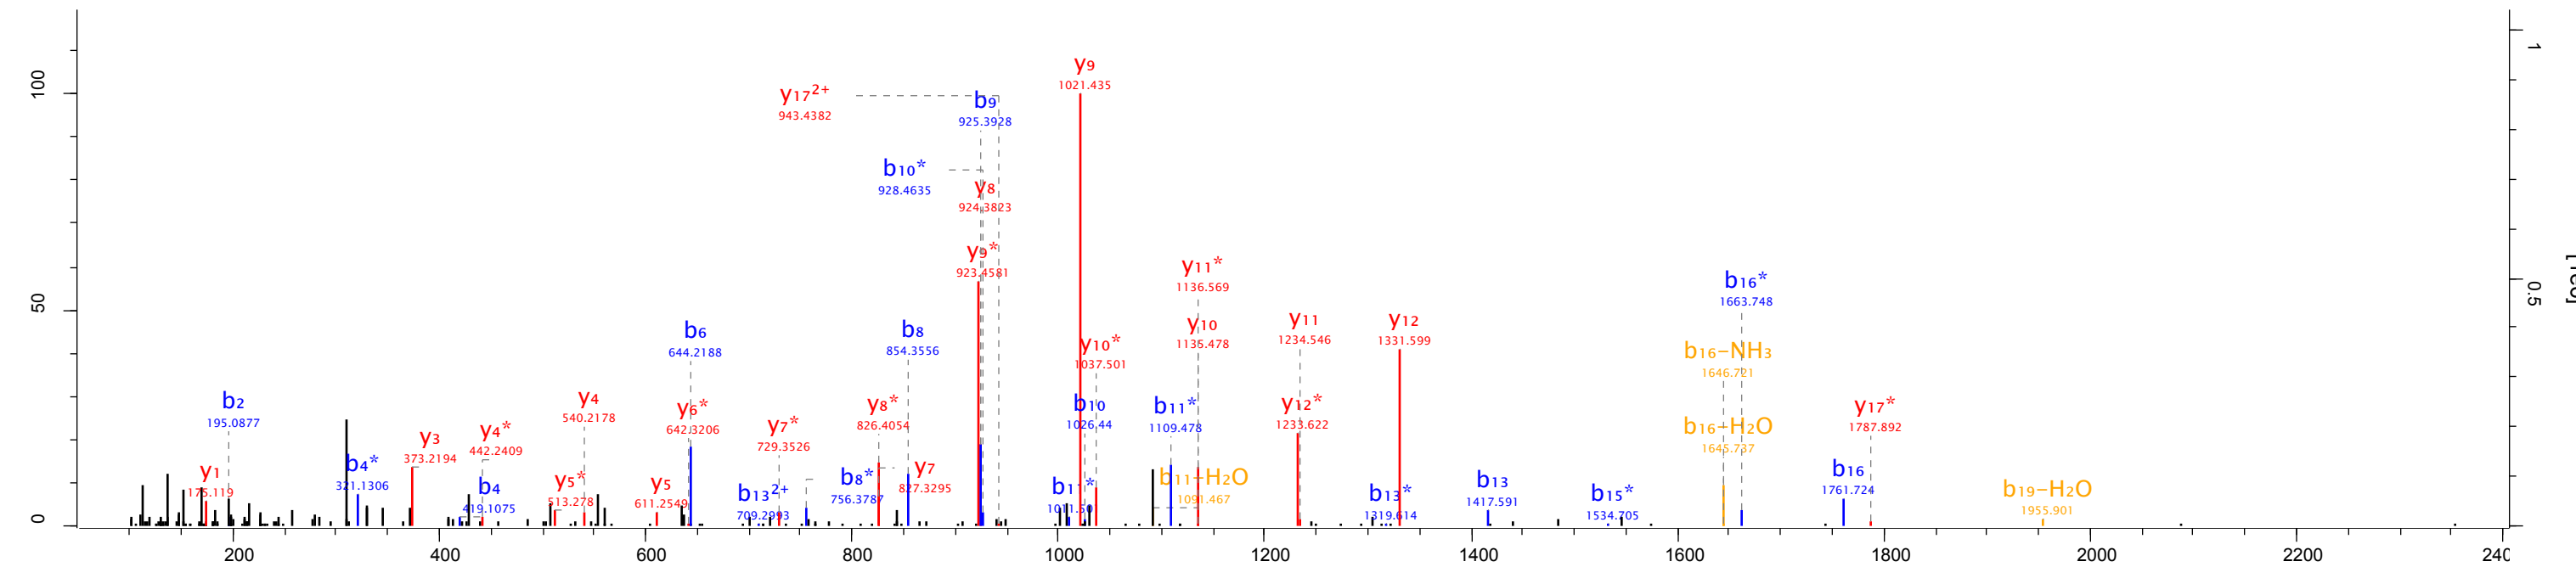

- H G G ph S P Q P L A T T P L S Q E P V N P P S E A S ph P T R -

b<sub>2</sub>
b<sub>4</sub>
b<sub>6</sub>
b<sub>8</sub>
b<sub>9</sub>
b<sub>10</sub>
b<sub>11</sub>\*
b<sub>13</sub>
b<sub>15</sub>\*
b<sub>16</sub>
y<sub>1</sub>
y<sub>3</sub>
y<sub>4</sub>
y<sub>5</sub>
y<sub>6</sub>\*
y<sub>7</sub>
y<sub>8</sub>
y<sub>9</sub>
y<sub>10</sub>
y<sub>11</sub>
y<sub>12</sub>
y<sub>17</sub>\*

Raw file 20150812\_A375SR\_Phospho\_BR1\_02 Scan 17550 Method FTMS; HCD Score 62.78 m/z 922.37 Gene names FAM169A

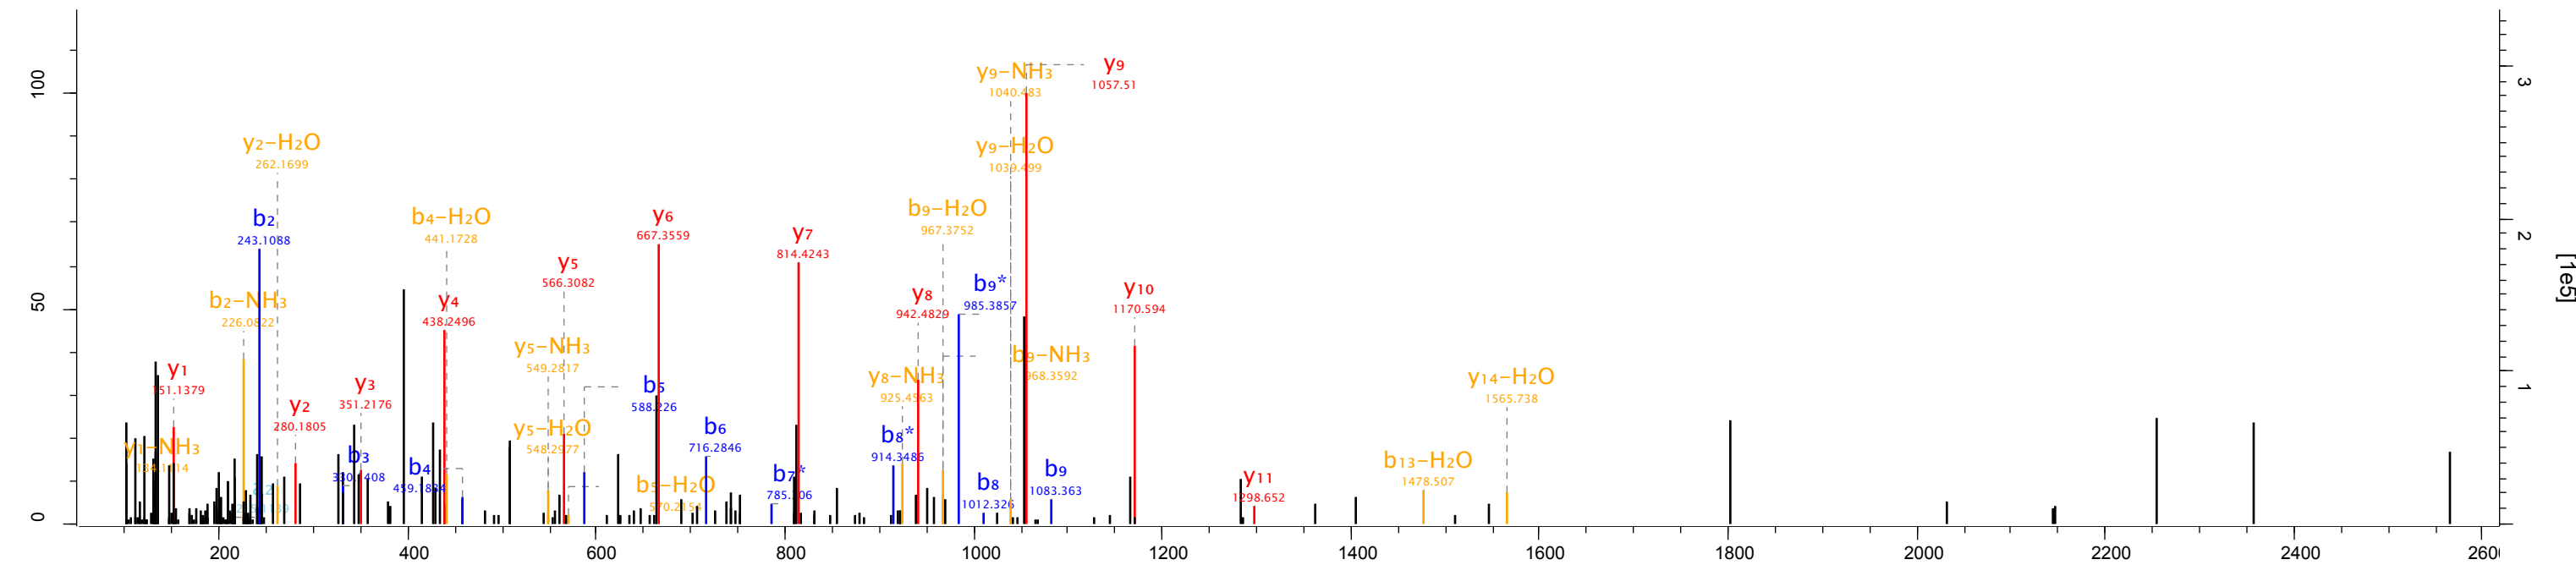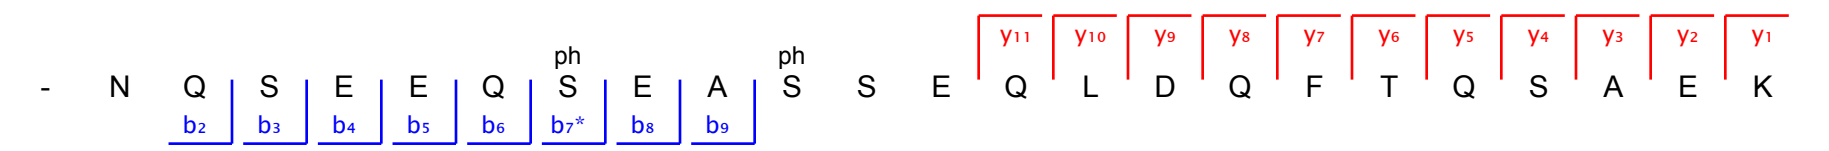

Raw file 20150812\_A375SR\_Phospho\_BR1\_02 Scan 17590 Method FTMS; HCD Score 168.79 m/z 1081.43 Gene names TOP2B

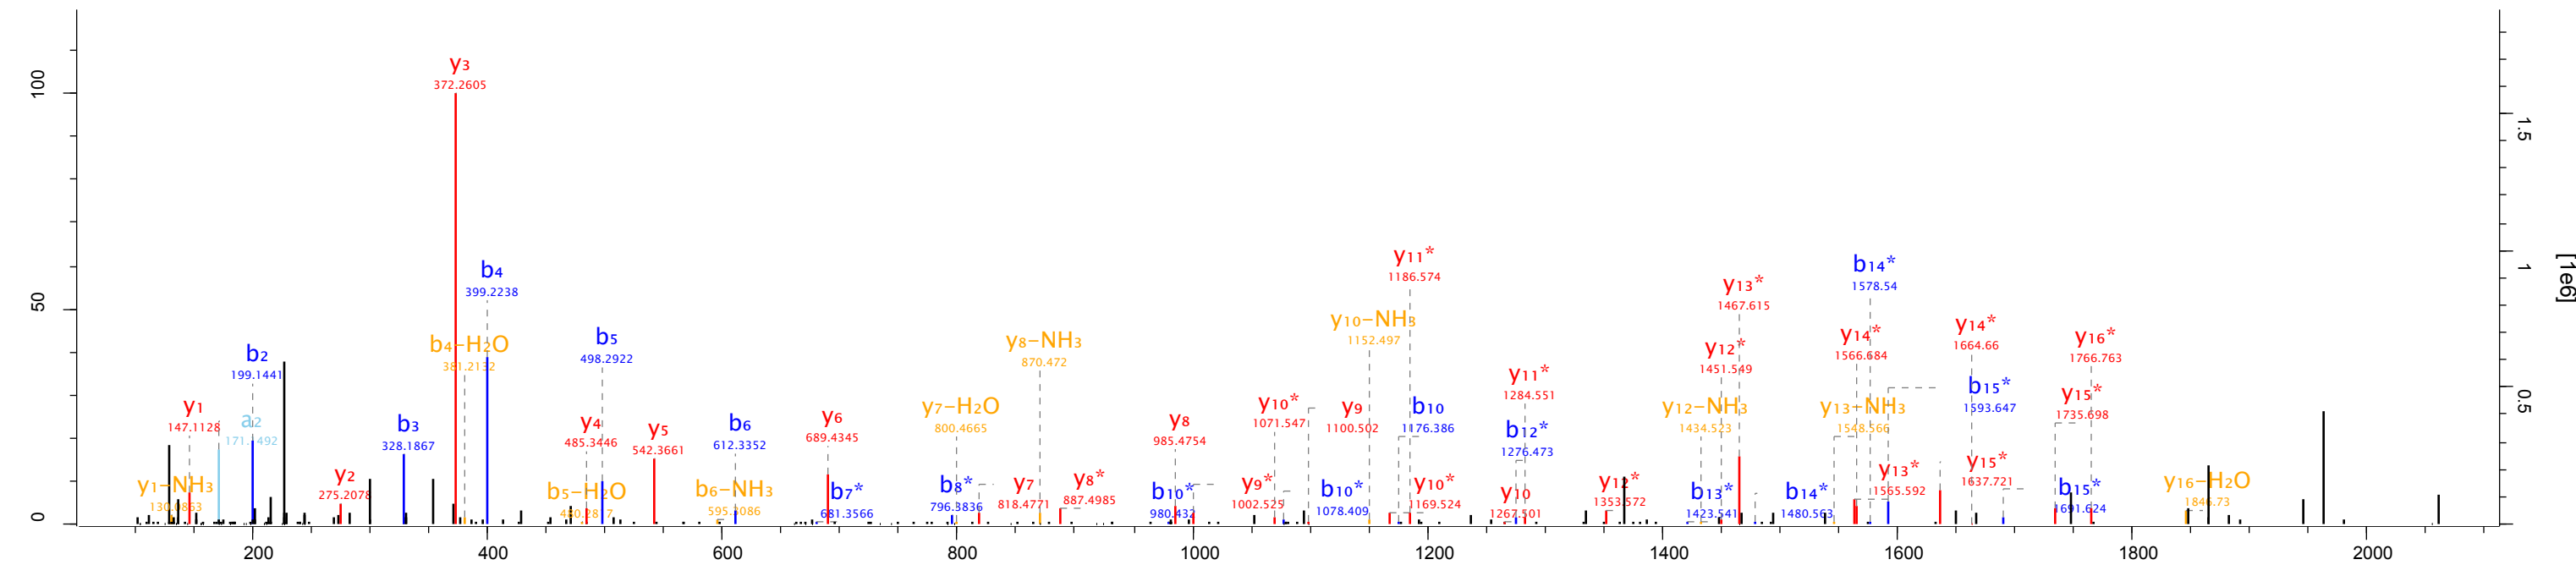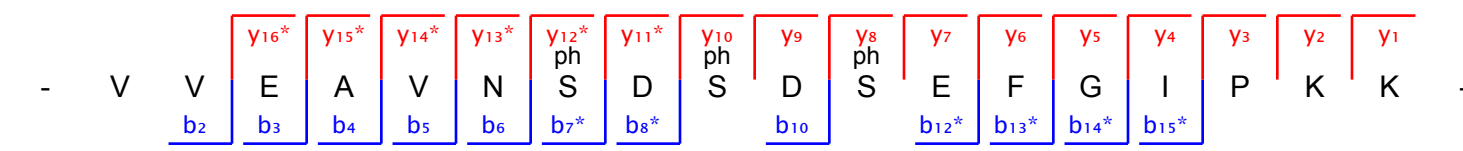

Raw file

Scan Method Score m/z Gene names

20150812\_A375SR\_Phospho\_BR1\_02

17690 FTMS; HCD 96.16 966.13 SRP72

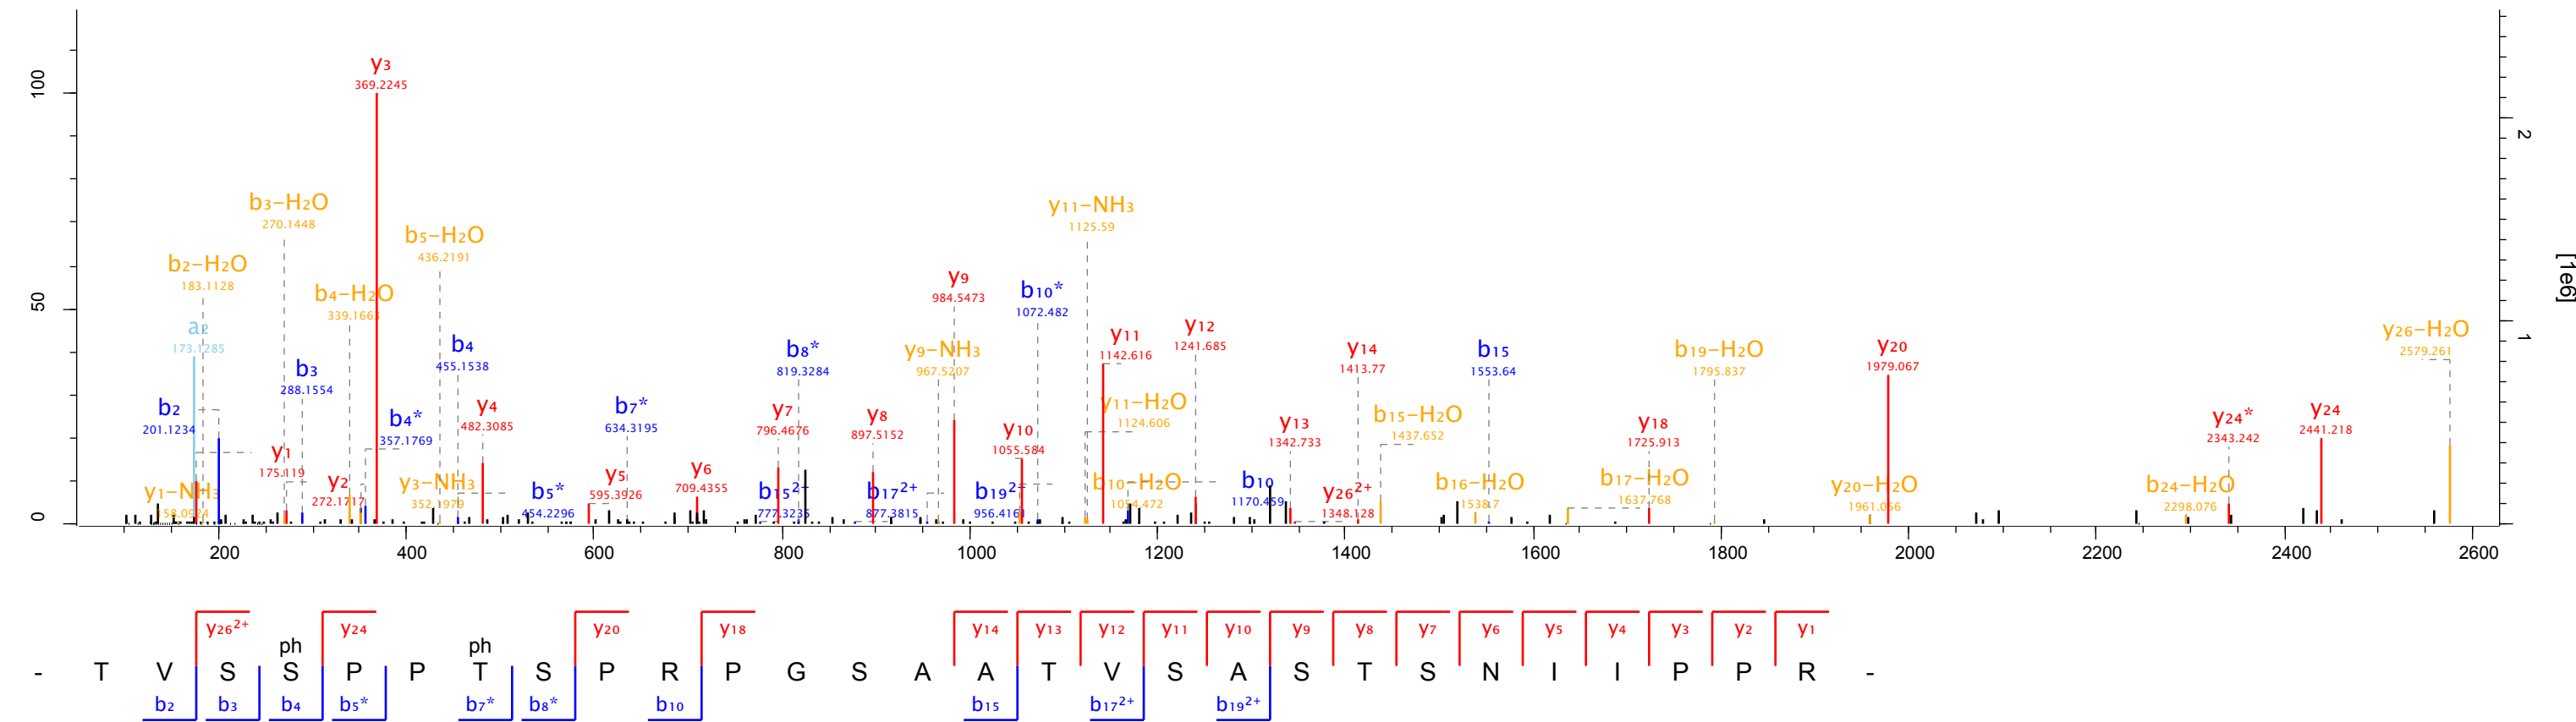

Raw file: 20150812\_A375SR\_Phospho\_BR1\_02  
 Scan: 17740  
 Method: FTMS; HCD  
 Score: 50.74  
 m/z: 1300.93  
 Gene names: MDC1

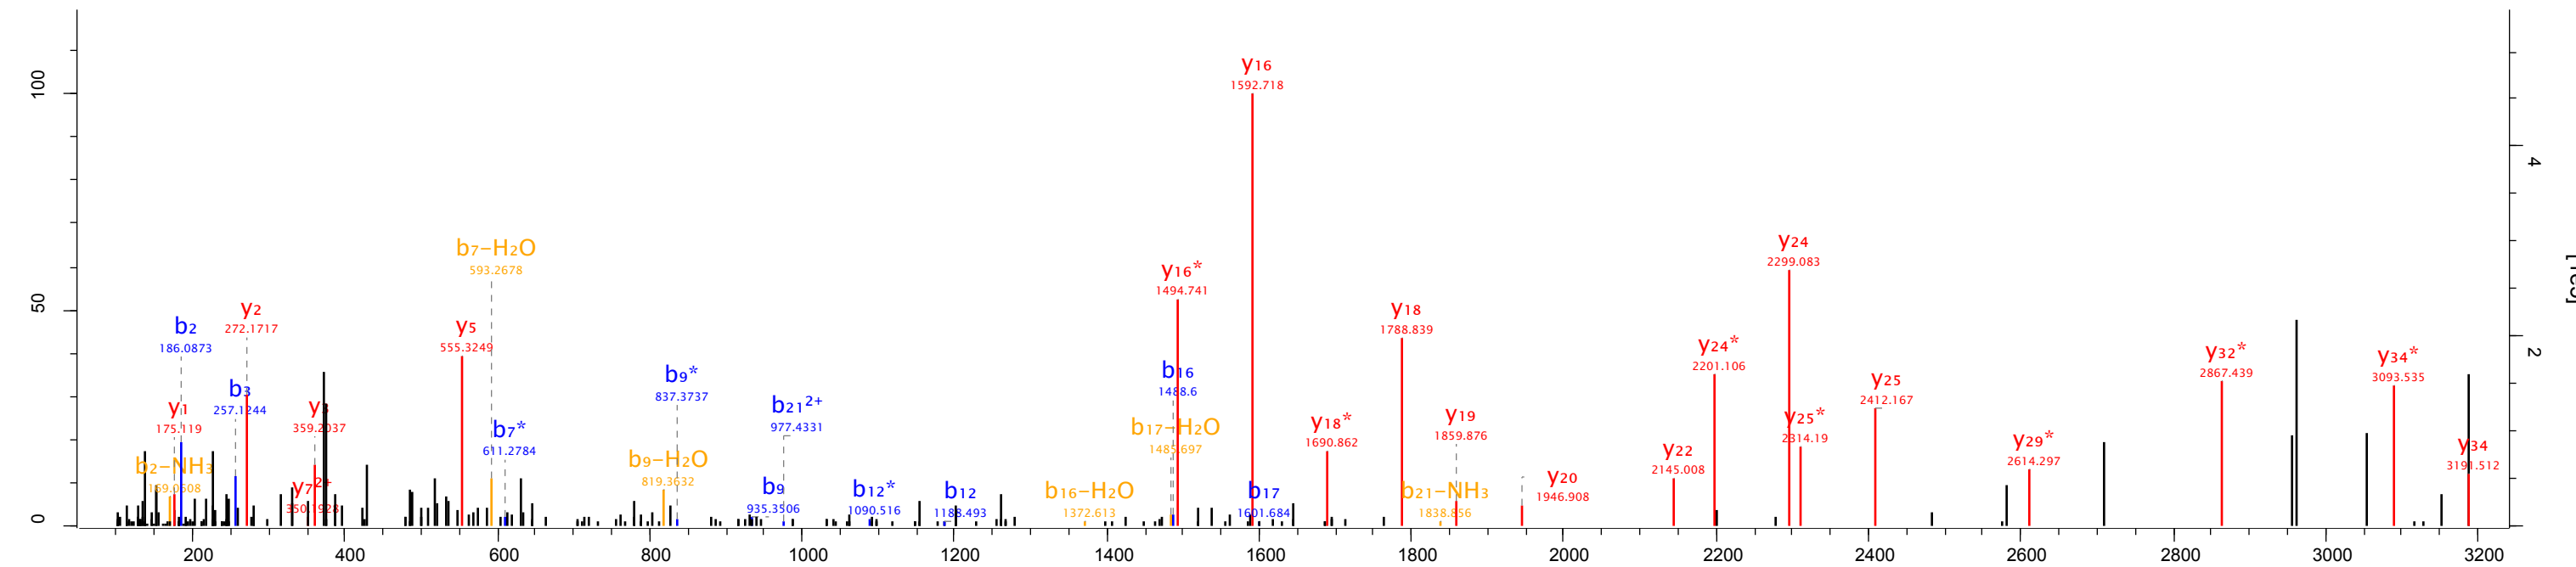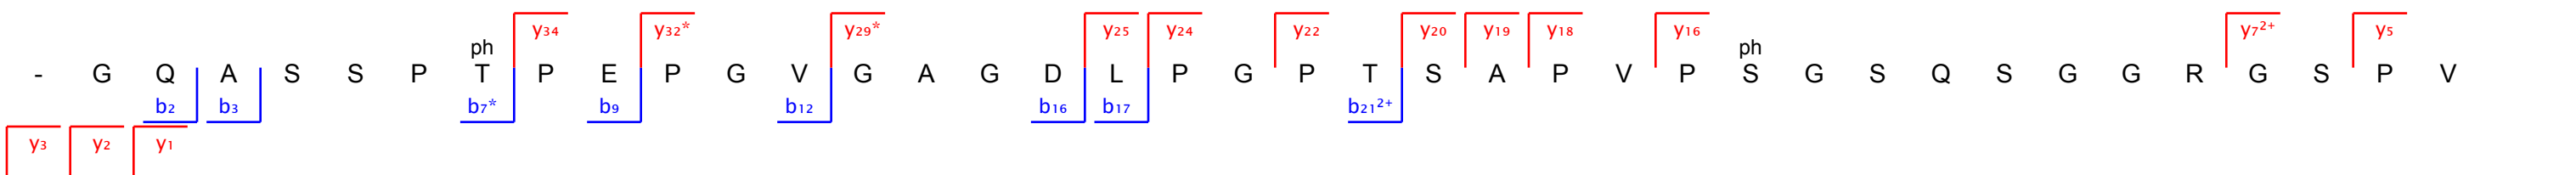



Raw file: 20150812\_A375SR\_Phospho\_BR1\_02  
 Scan: 18000 Method: FTMS; HCD Score: 104.67 m/z: 1106.91 Gene names: OSBP

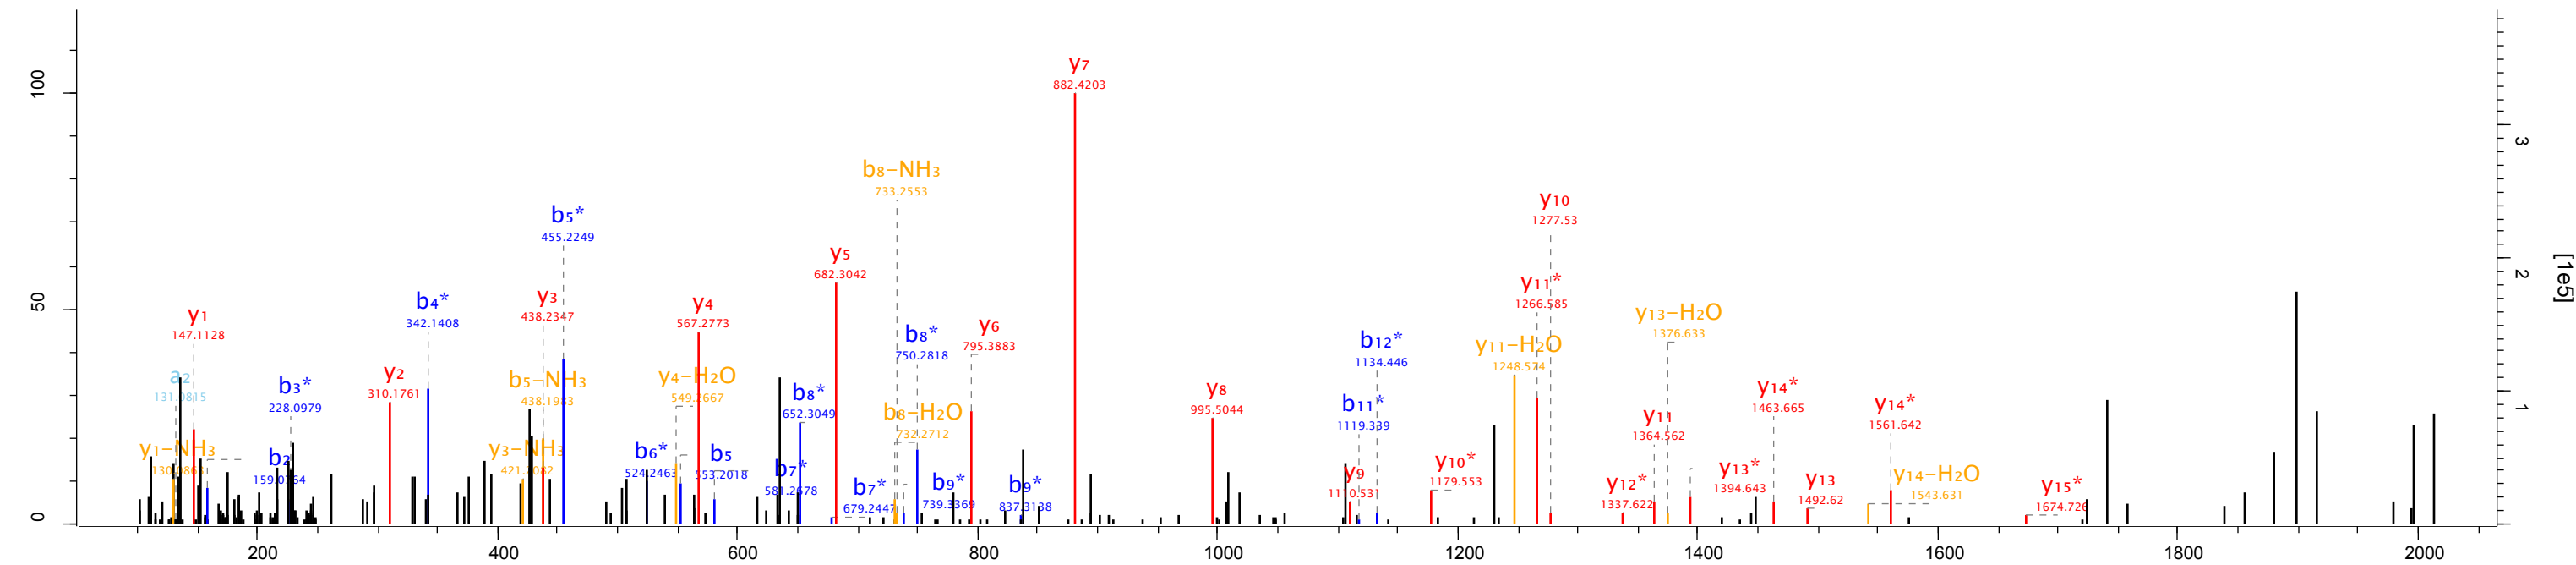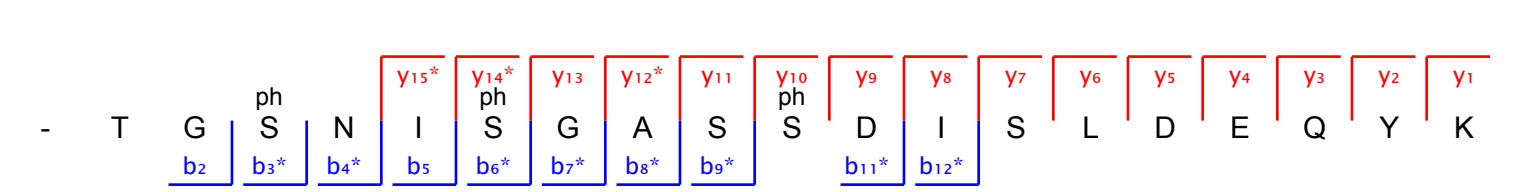

Raw file 20150812\_A375SR\_Phospho\_BR1\_02 Scan 18020 Method FTMS; HCD Score 160.1 m/z 1027.89 Gene names AKT1

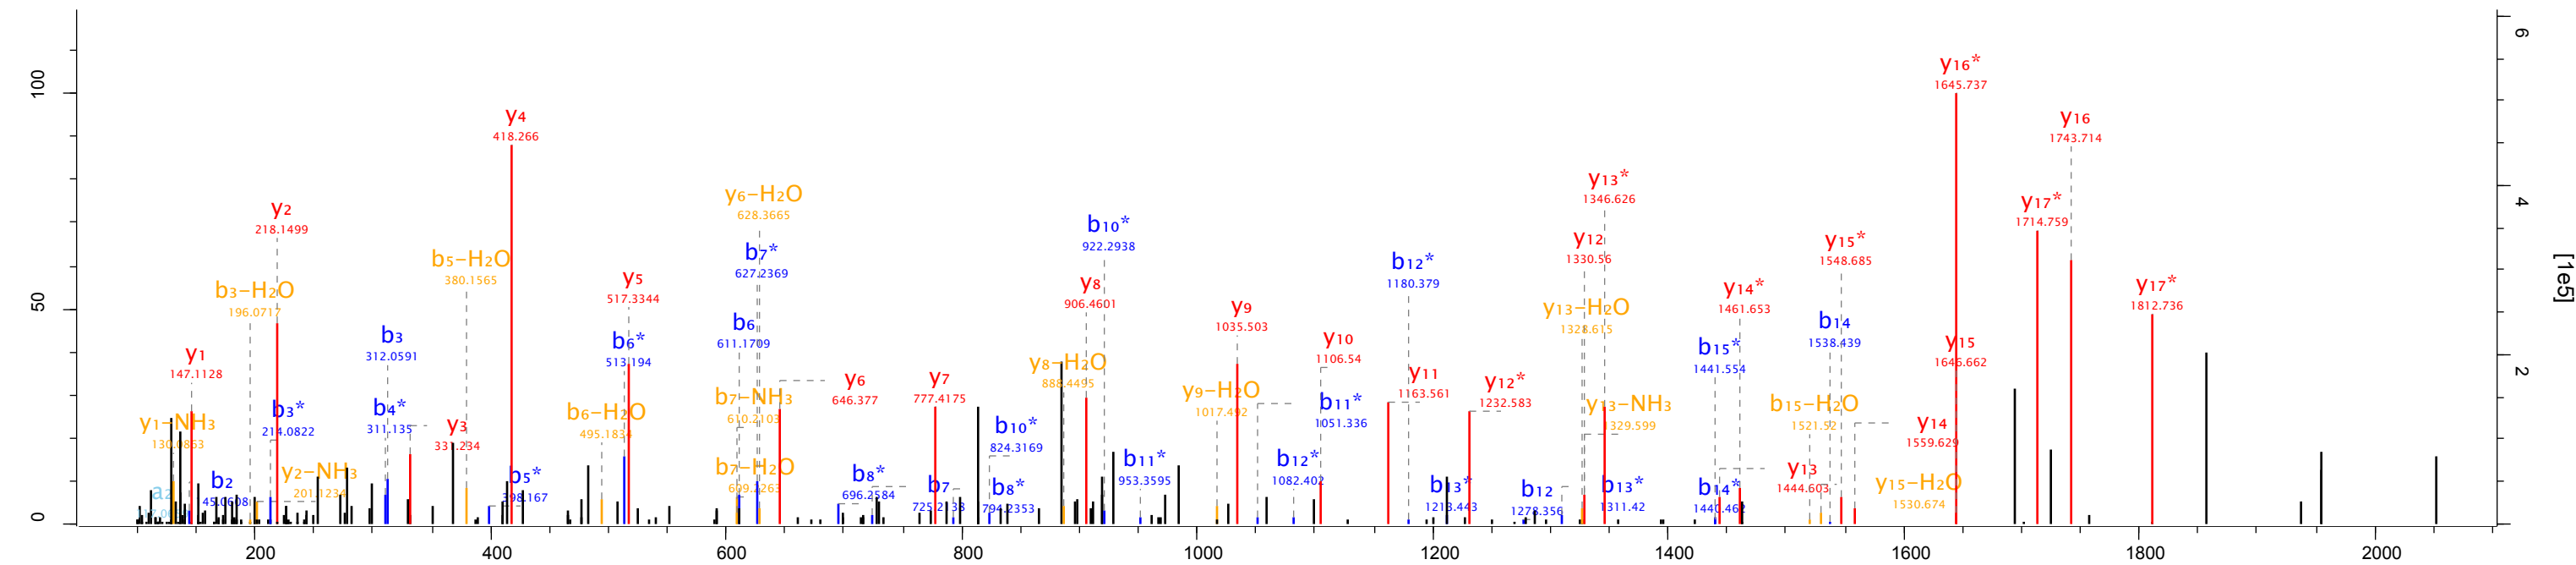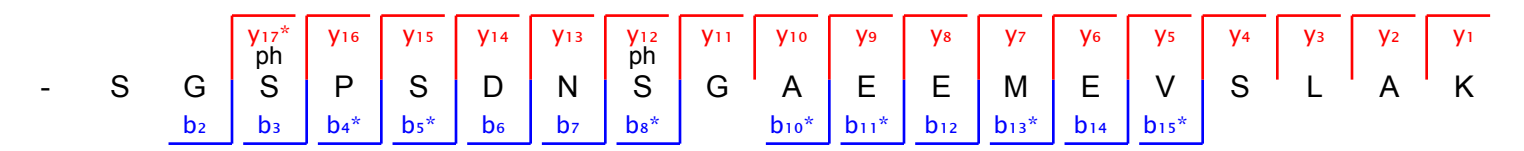

Raw file 20150812\_A375SR\_Phospho\_BR1\_02 Scan 18110 Method FTMS; HCD Score 141.06 m/z 881.34 Gene names ITGB4

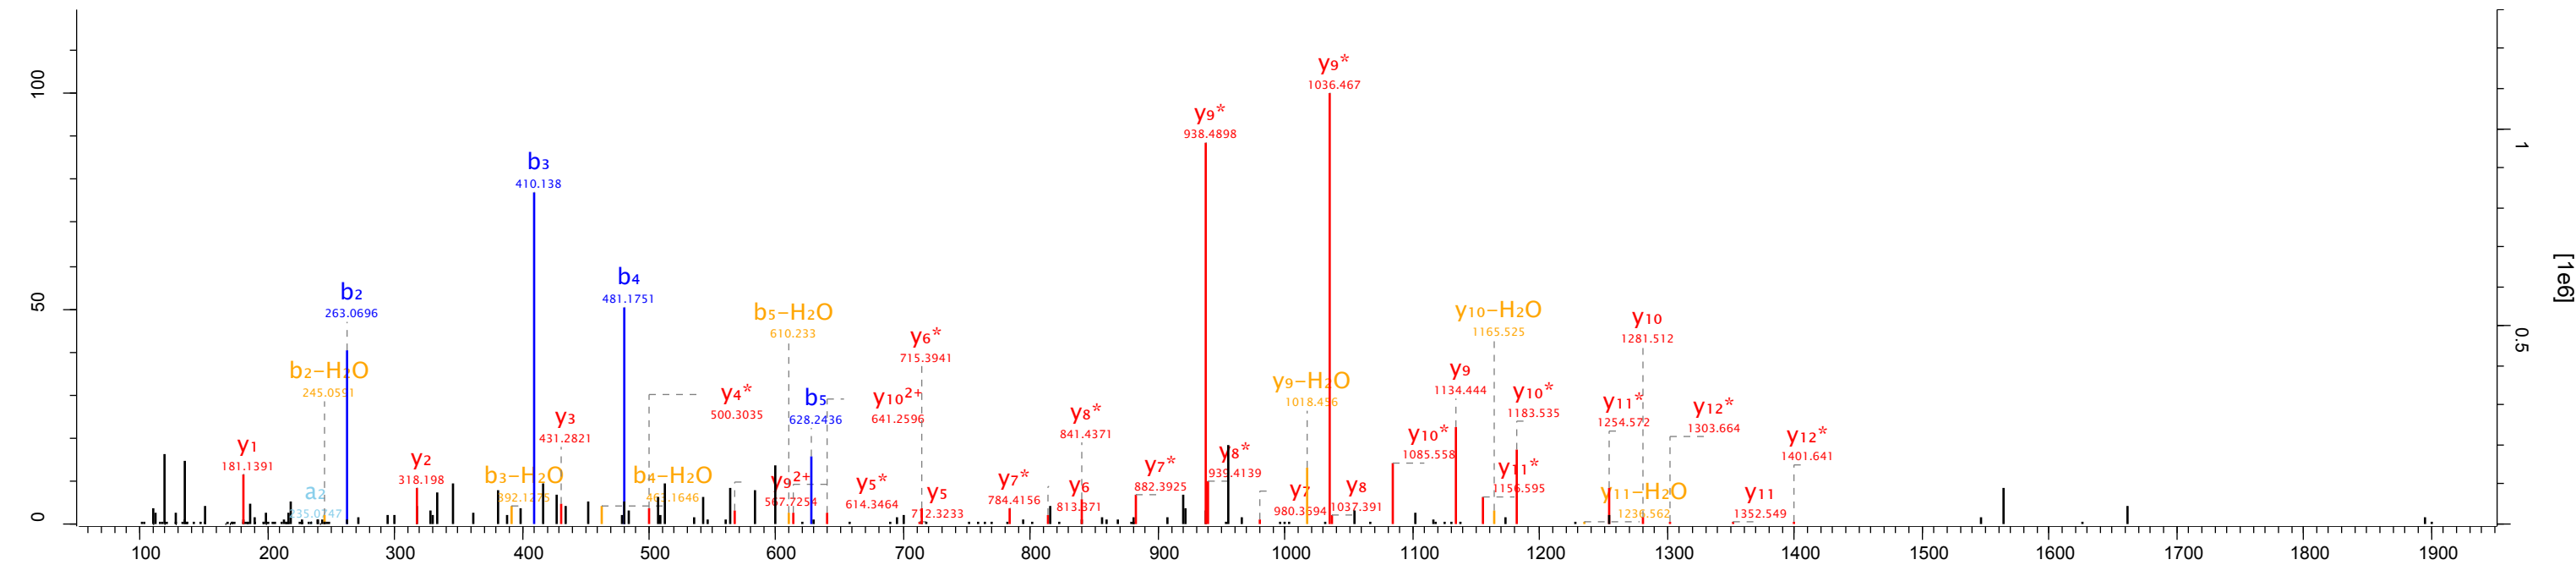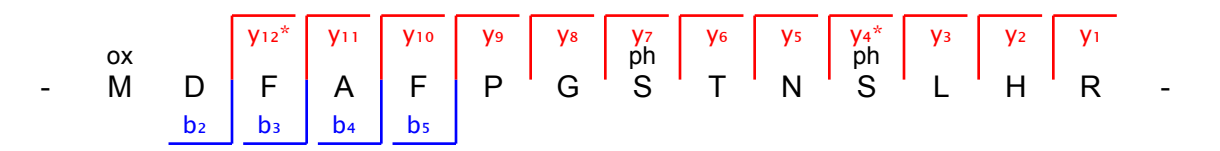

Raw file 20150812\_A375SR\_Phospho\_BR1\_02 Scan 18210 Method FTMS; HCD Score 158.85 m/z 811.01 Gene names GATAD2A

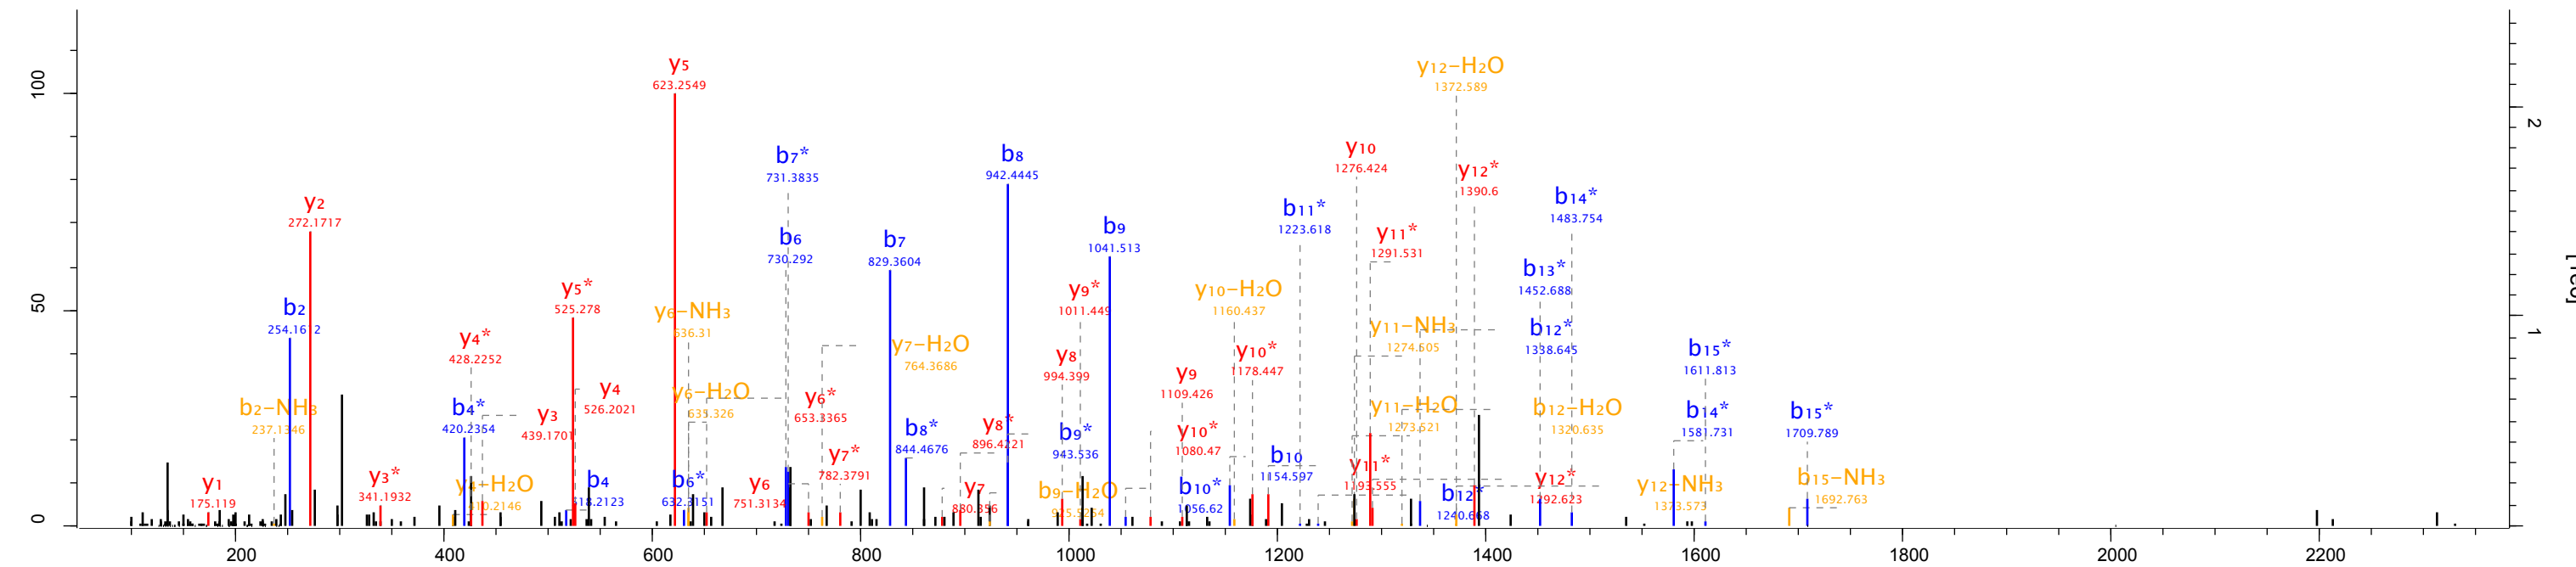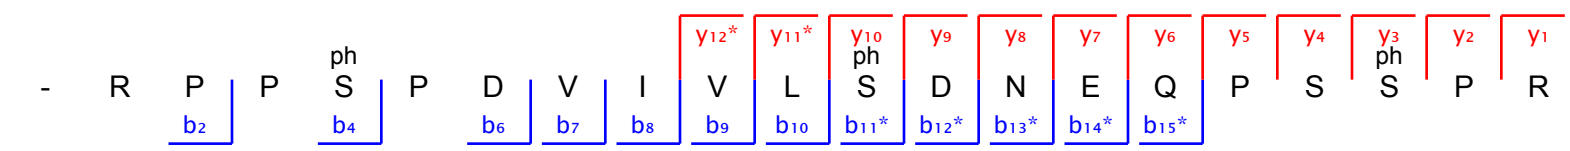

Raw file: 20150812\_A375SR\_Phospho\_BR1\_02  
 Scan: 18270 Method: FTMS; HCD Score: 74.81 m/z: 904.69 Gene names: MED1

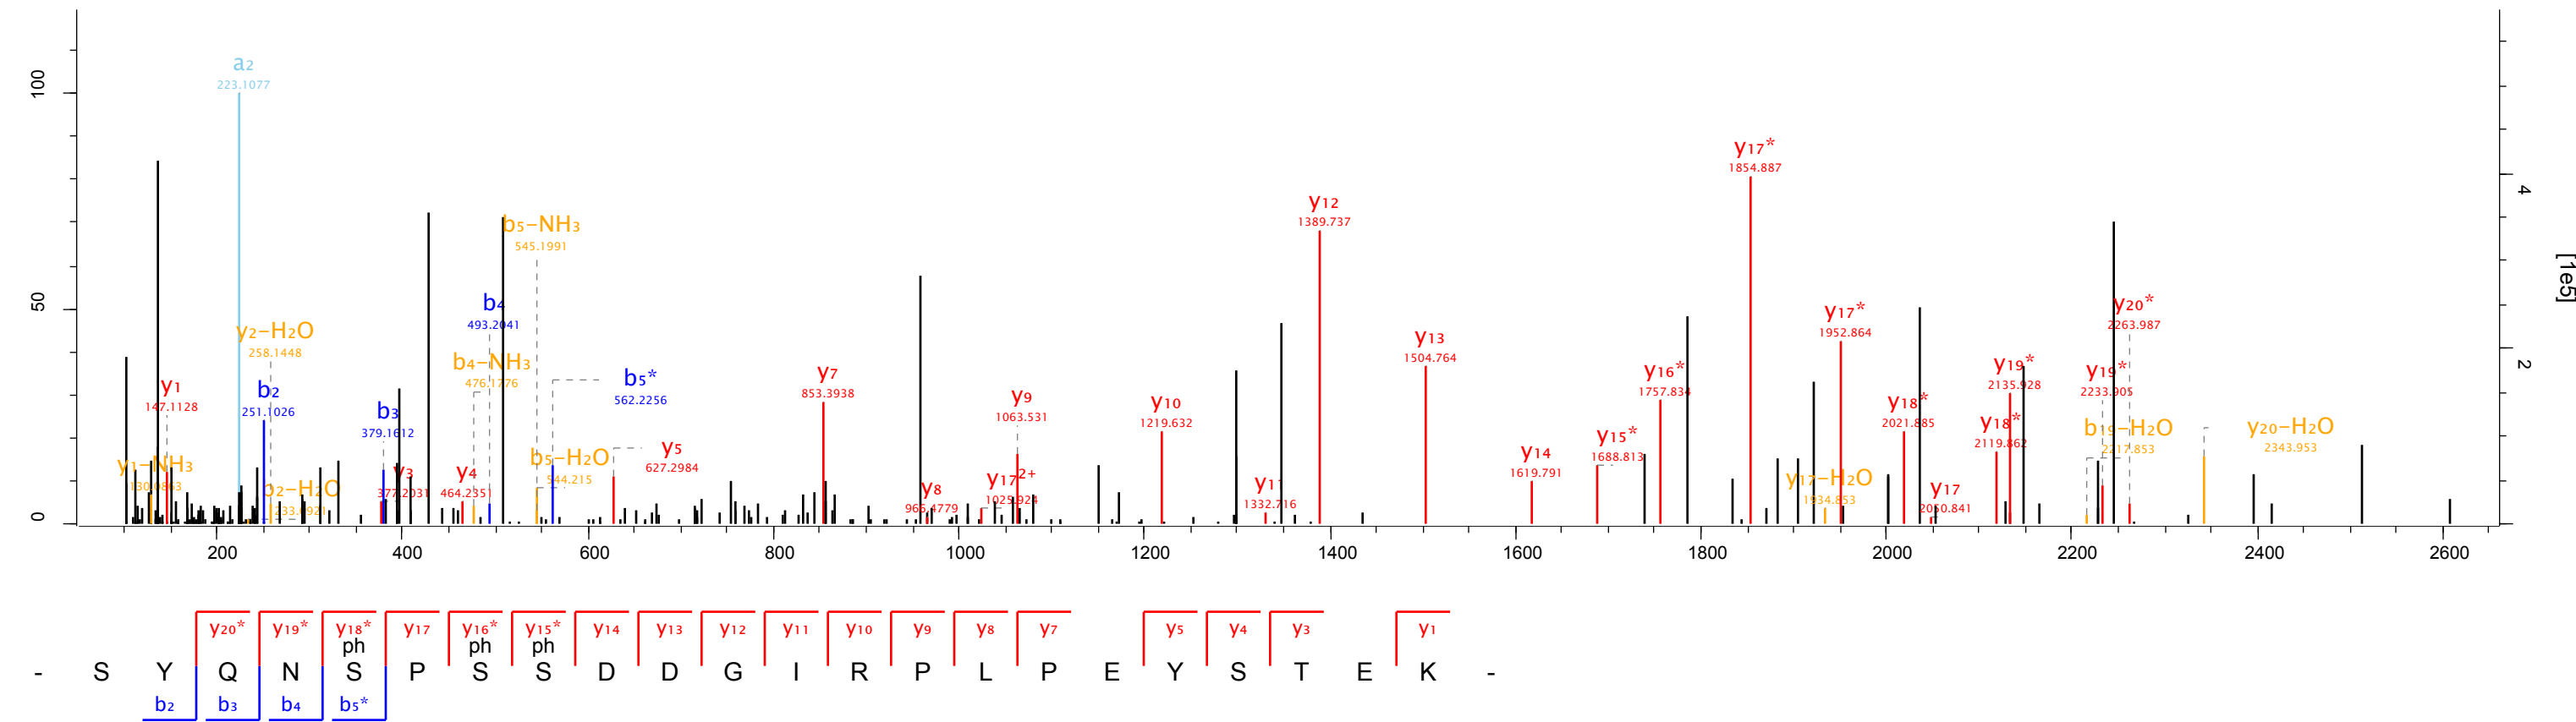

Raw file 20150812\_A375SR\_Phospho\_BR1\_02 Scan 18470 Method FTMS; HCD Score 148.14 m/z 994.4 Gene names RAF1

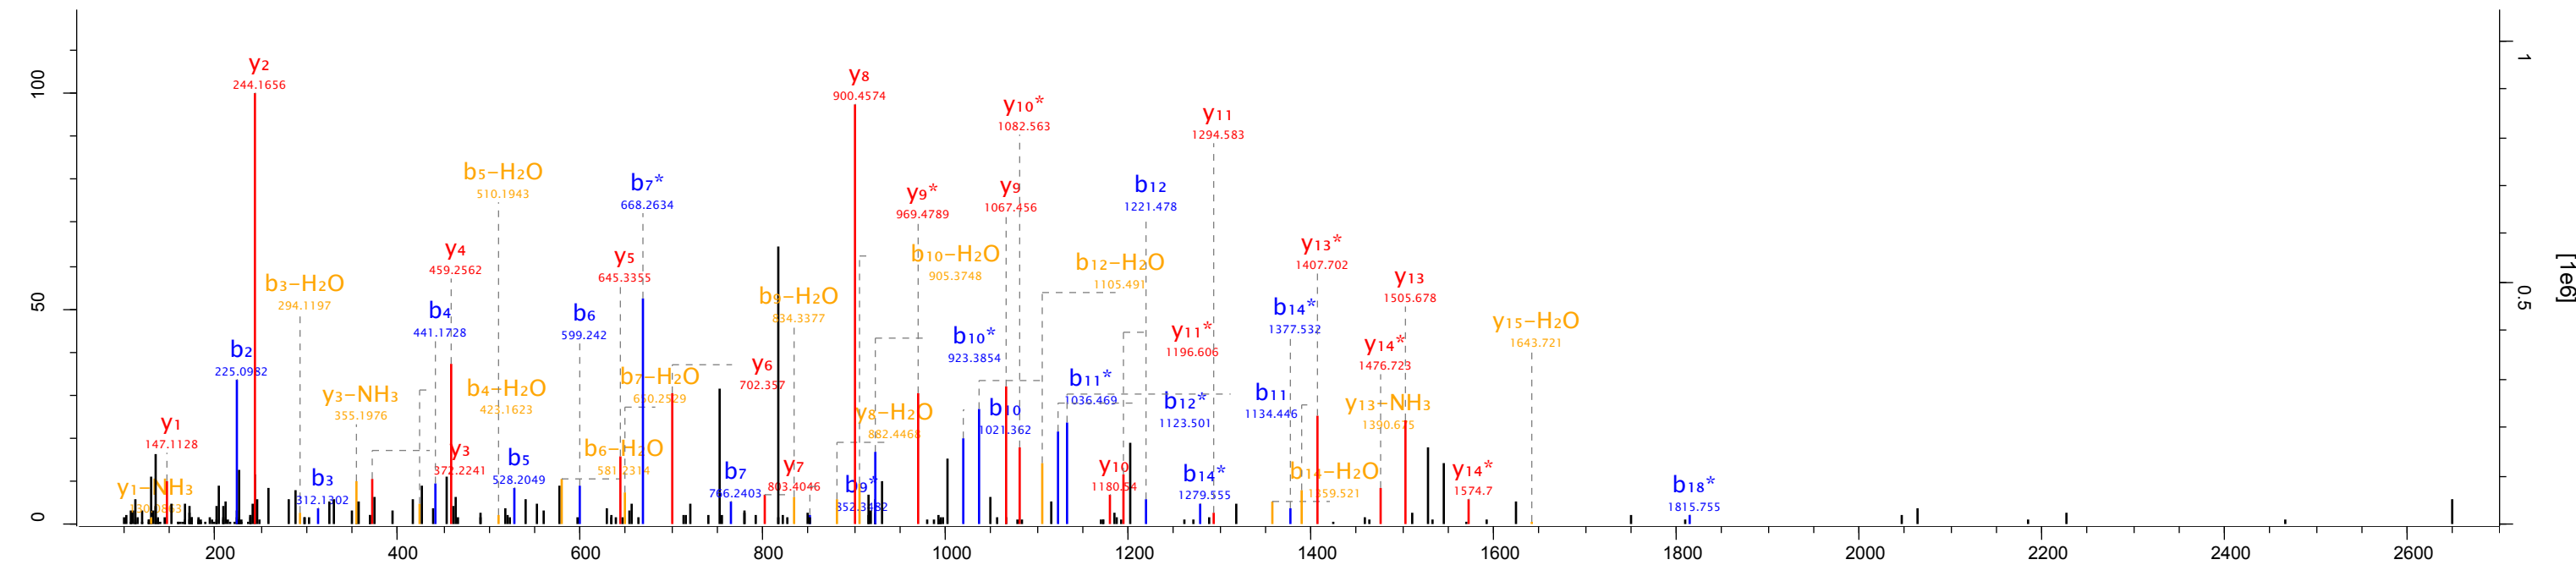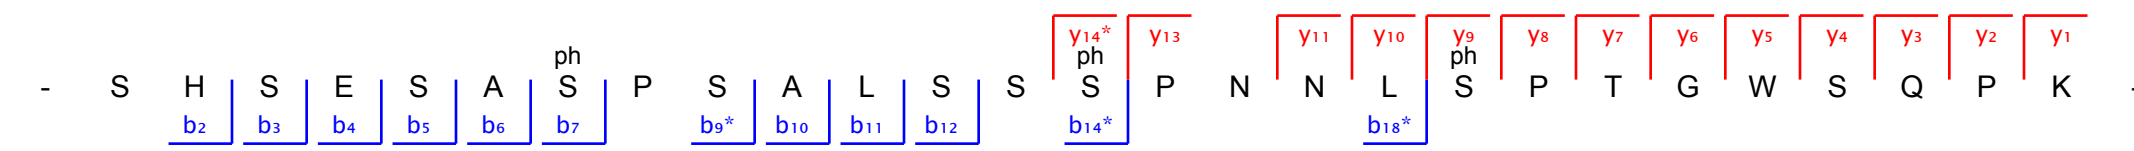

Raw file: 20150812\_A375SR\_Phospho\_BR1\_02  
 Scan: 18890 Method: FTMS; HCD Score: 184.14 m/z: 1027.89 Gene names: BMP2K

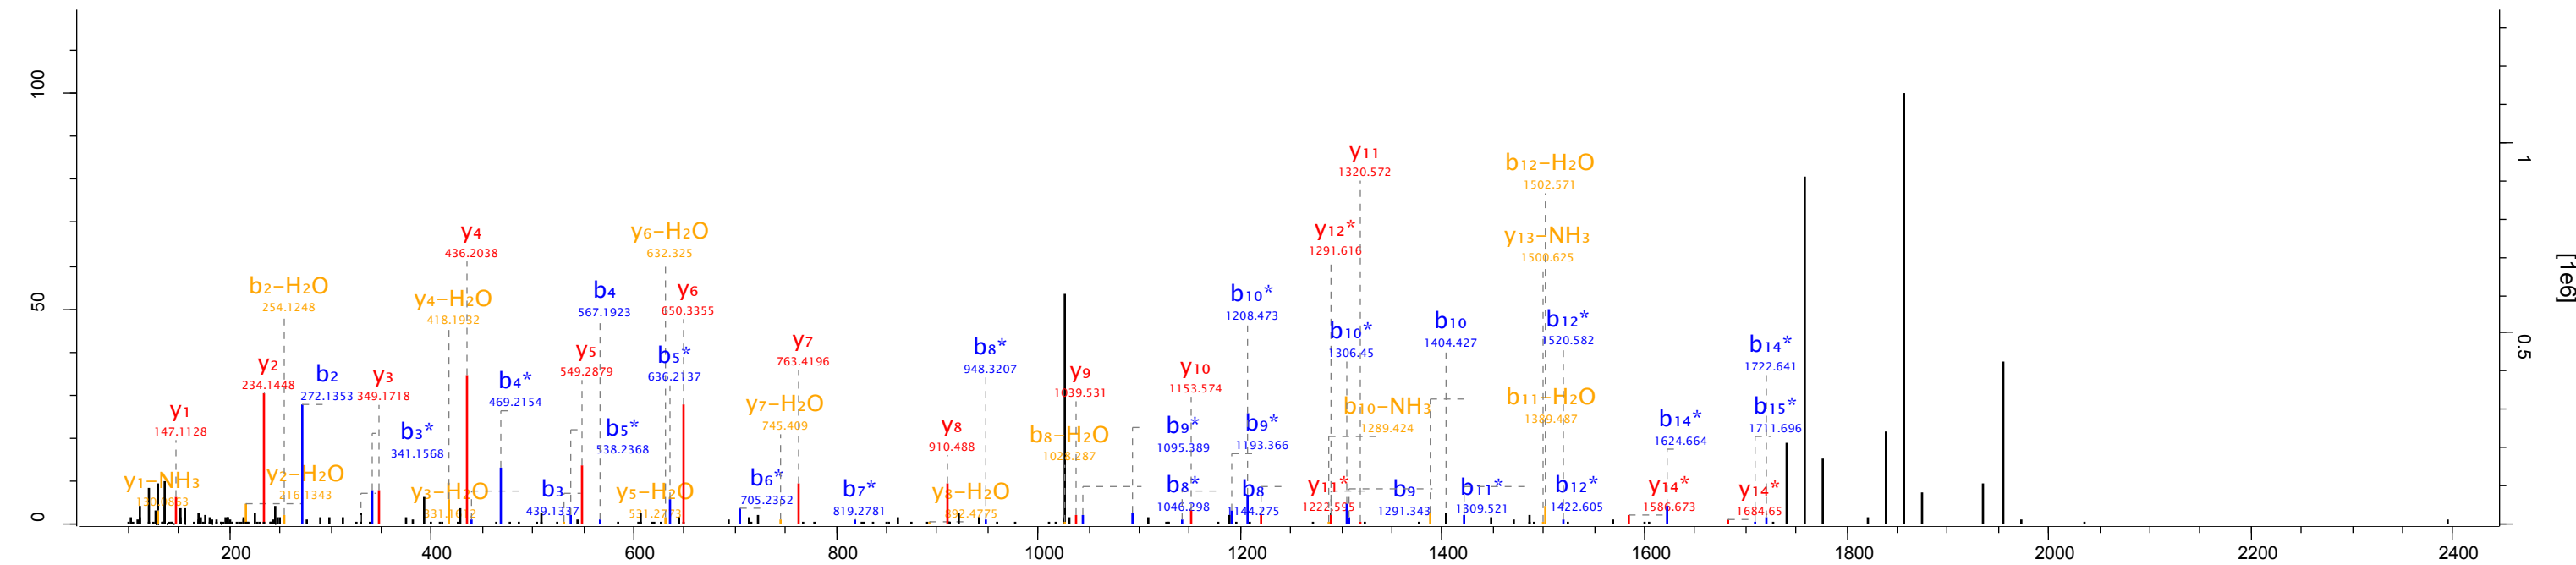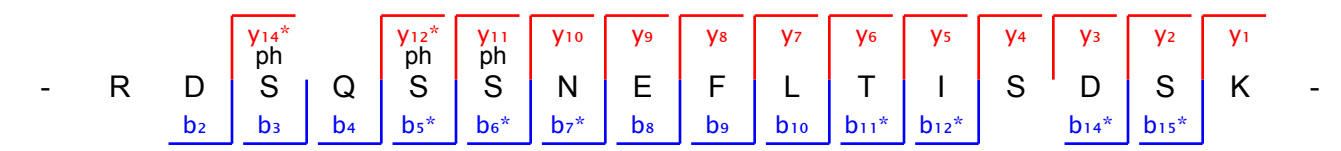

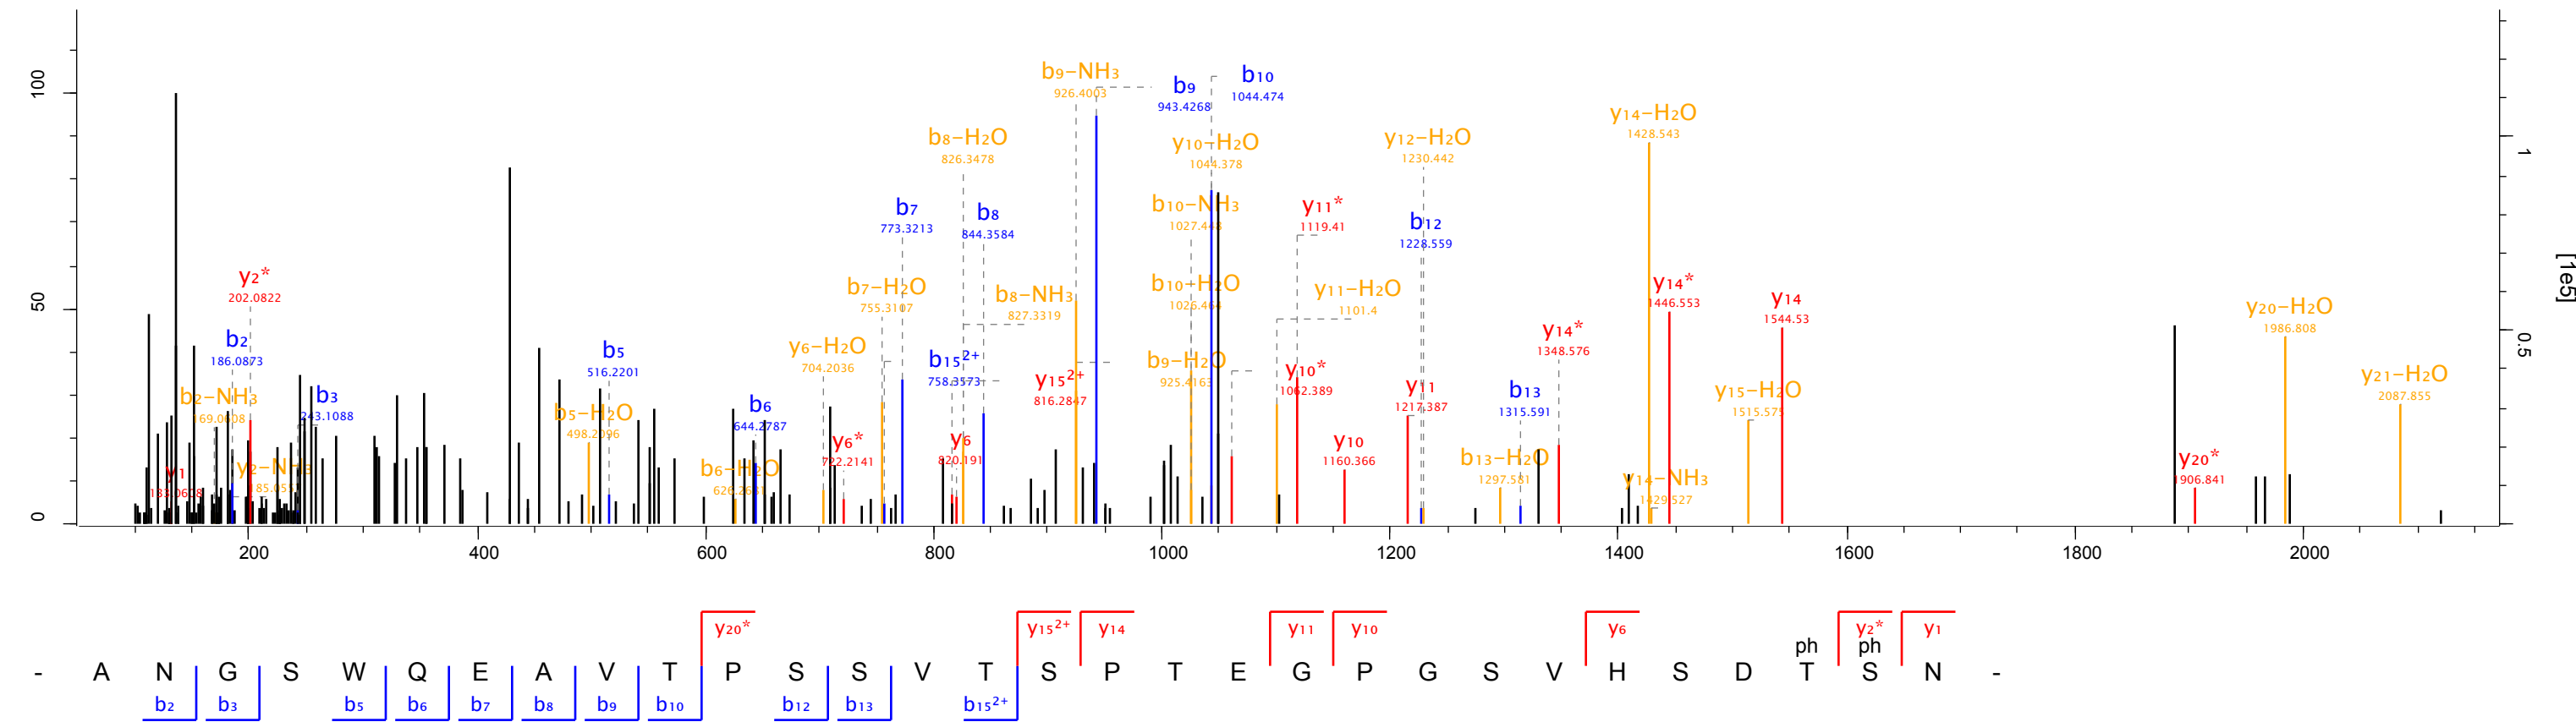



Raw file  
20150812\_A375SR\_Phospho\_BR1\_02

Scan 20080 Method FTMS; HCD Score 61.34 m/z 1150.15 Gene names SMARCA2

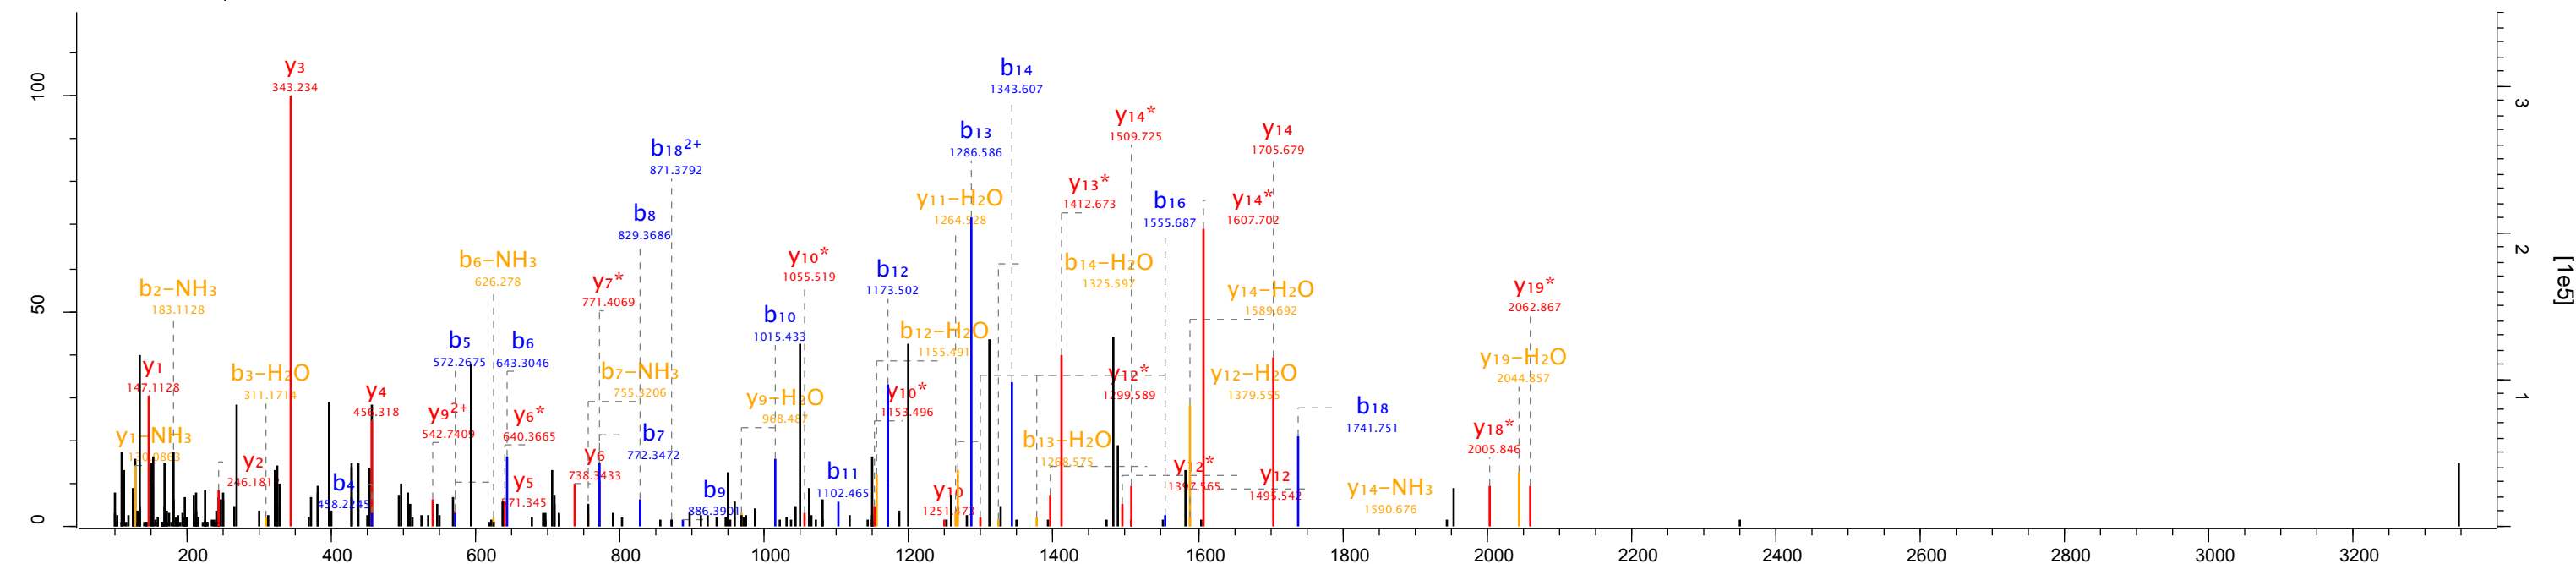

- K A E E N A E G G E S A L G P D G E P I D E S S Q M S D L P V K -

Fragmentation mapping below the sequence:

- Blue boxes (b-ions): b4 (E), b5 (N), b6 (A), b7 (E), b8 (G), b9 (G), b10 (E), b11 (S), b12 (A), b13 (L), b14 (G), b16 (D), b18 (E)
- Red boxes (y-ions): y19\* (G), y18\* (P), y14 (P), y13\* (I), y12 (D), y10 (S), y92+ (S), y7\* (M), y6 (S), y5 (D), y4 (L), y3 (P), y2 (V), y1 (K)

Raw file: 20150812\_A375SR\_Phospho\_BR1\_02  
 Scan: 20400 Method: FTMS; HCD Score: 75.9 m/z: 1019.45 Gene names: TPD52L2

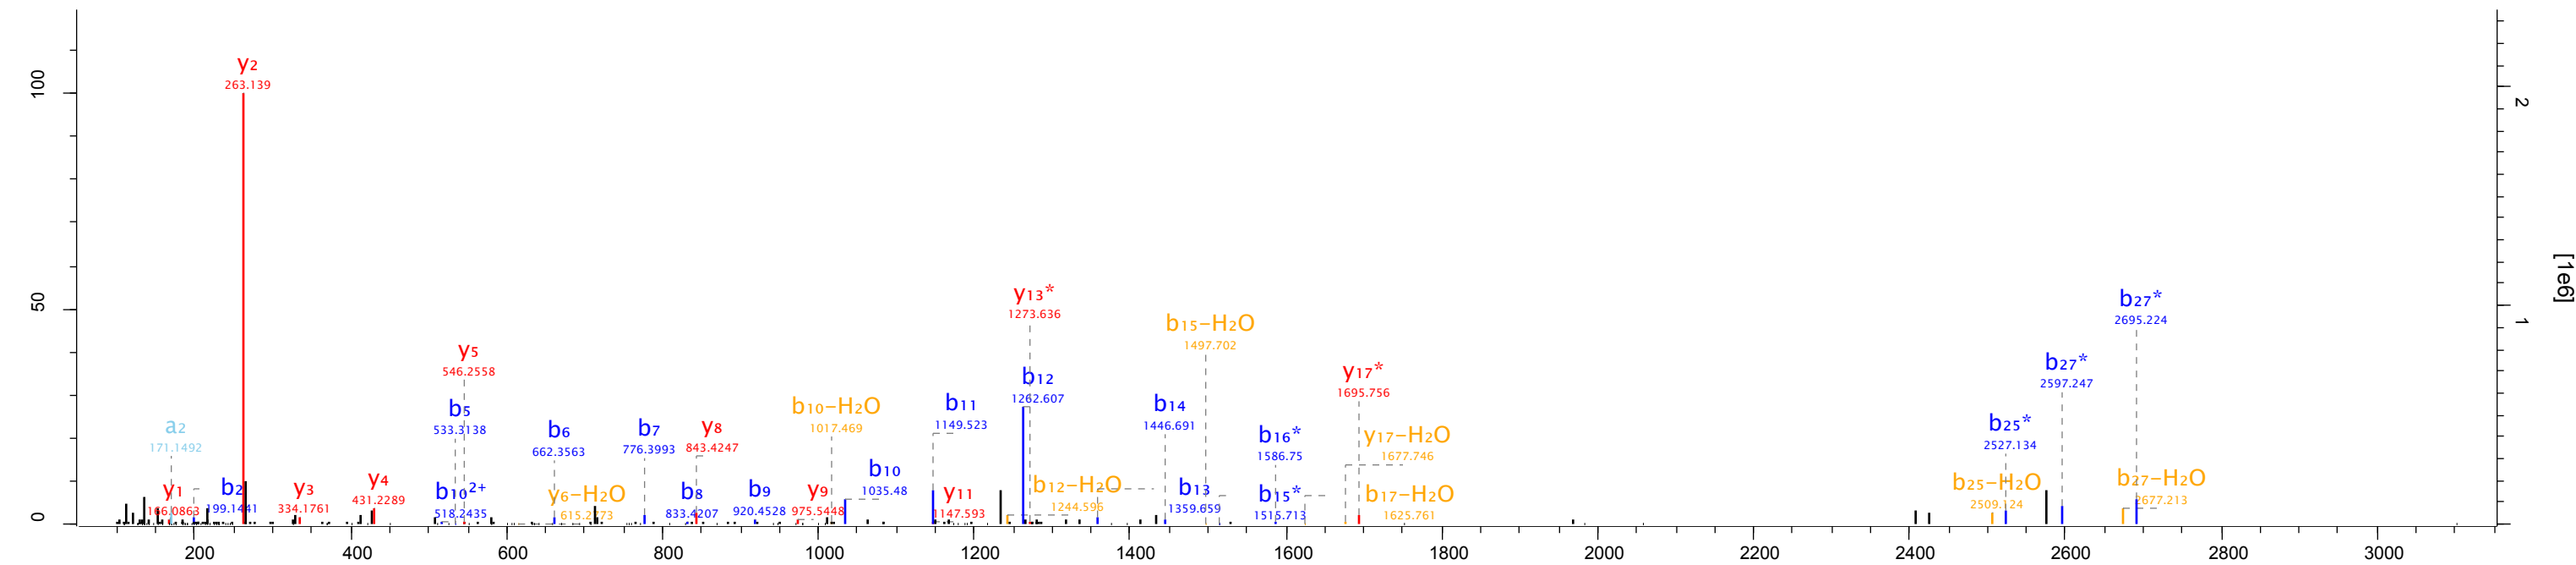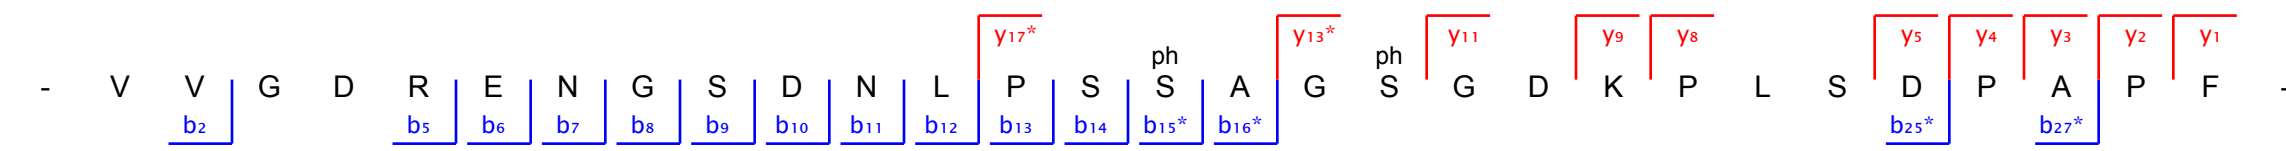

Raw file 20150812\_A375SR\_Phospho\_BR1\_02 Scan 20600 Method FTMS; HCD Score 67.9 m/z 792.31 Gene names CHAMP1

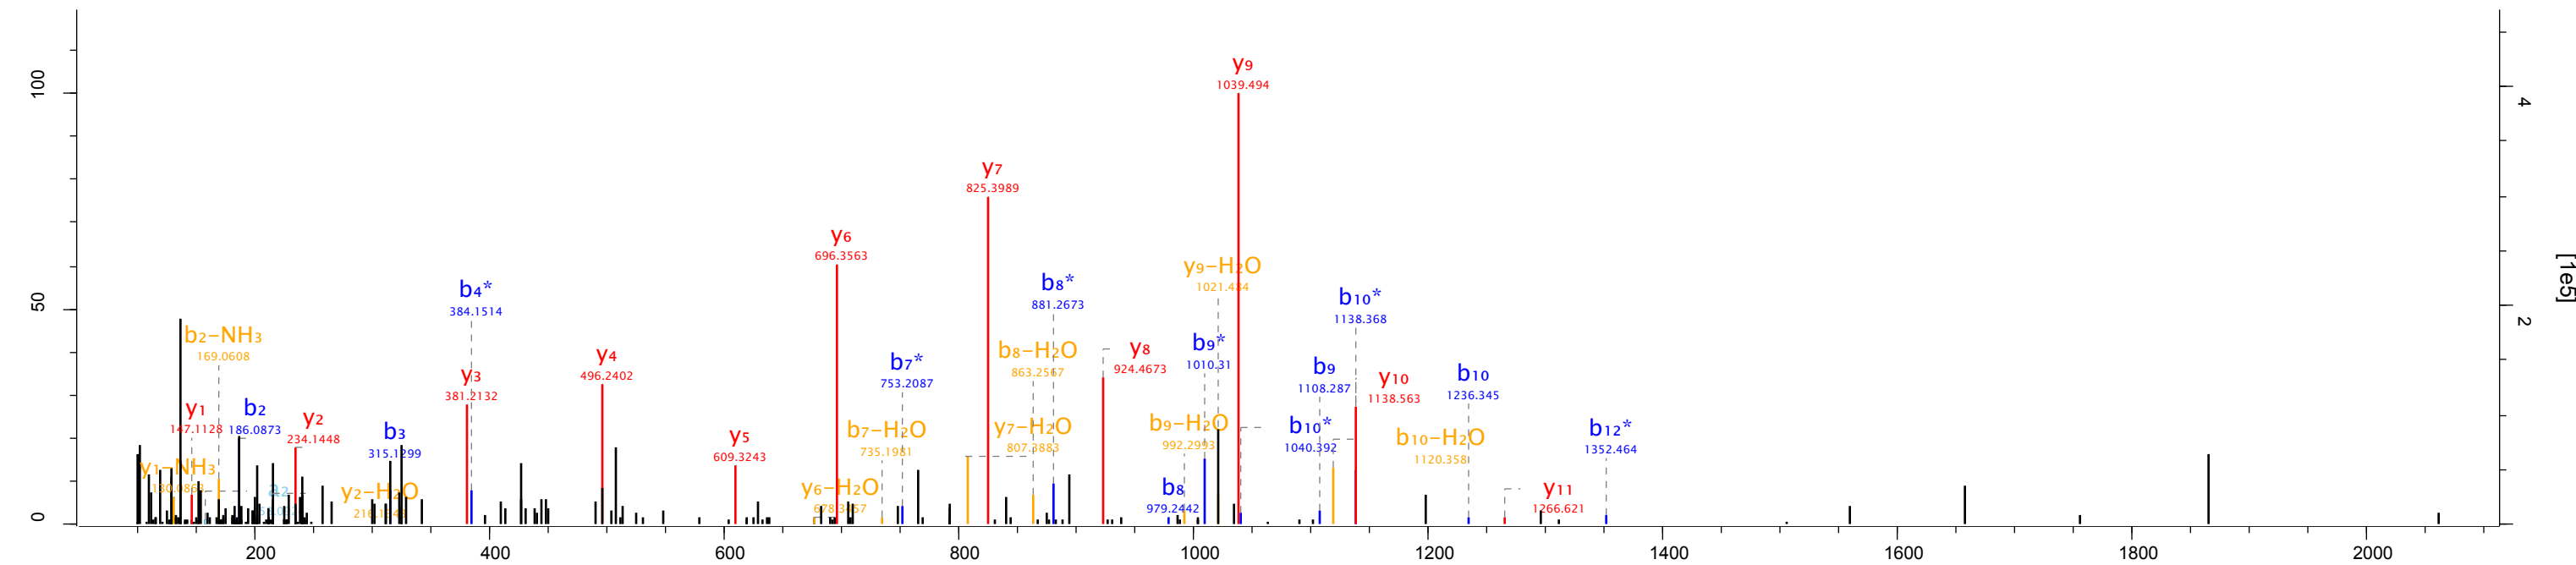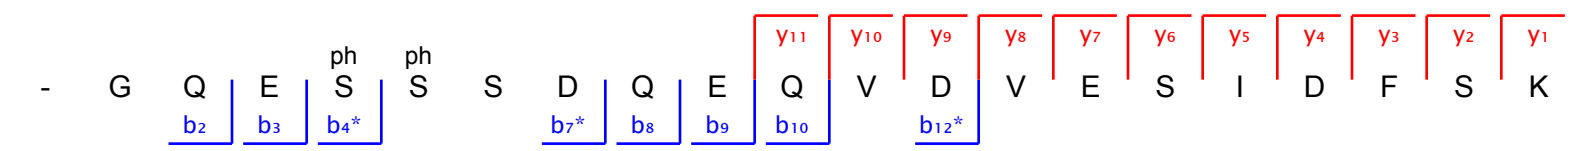

Raw file: 20150812\_A375SR\_Phospho\_BR1\_02  
 Scan: 20640 Method: FTMS; HCD Score: 164.01 m/z: 791.7 Gene names: ARHGEF11

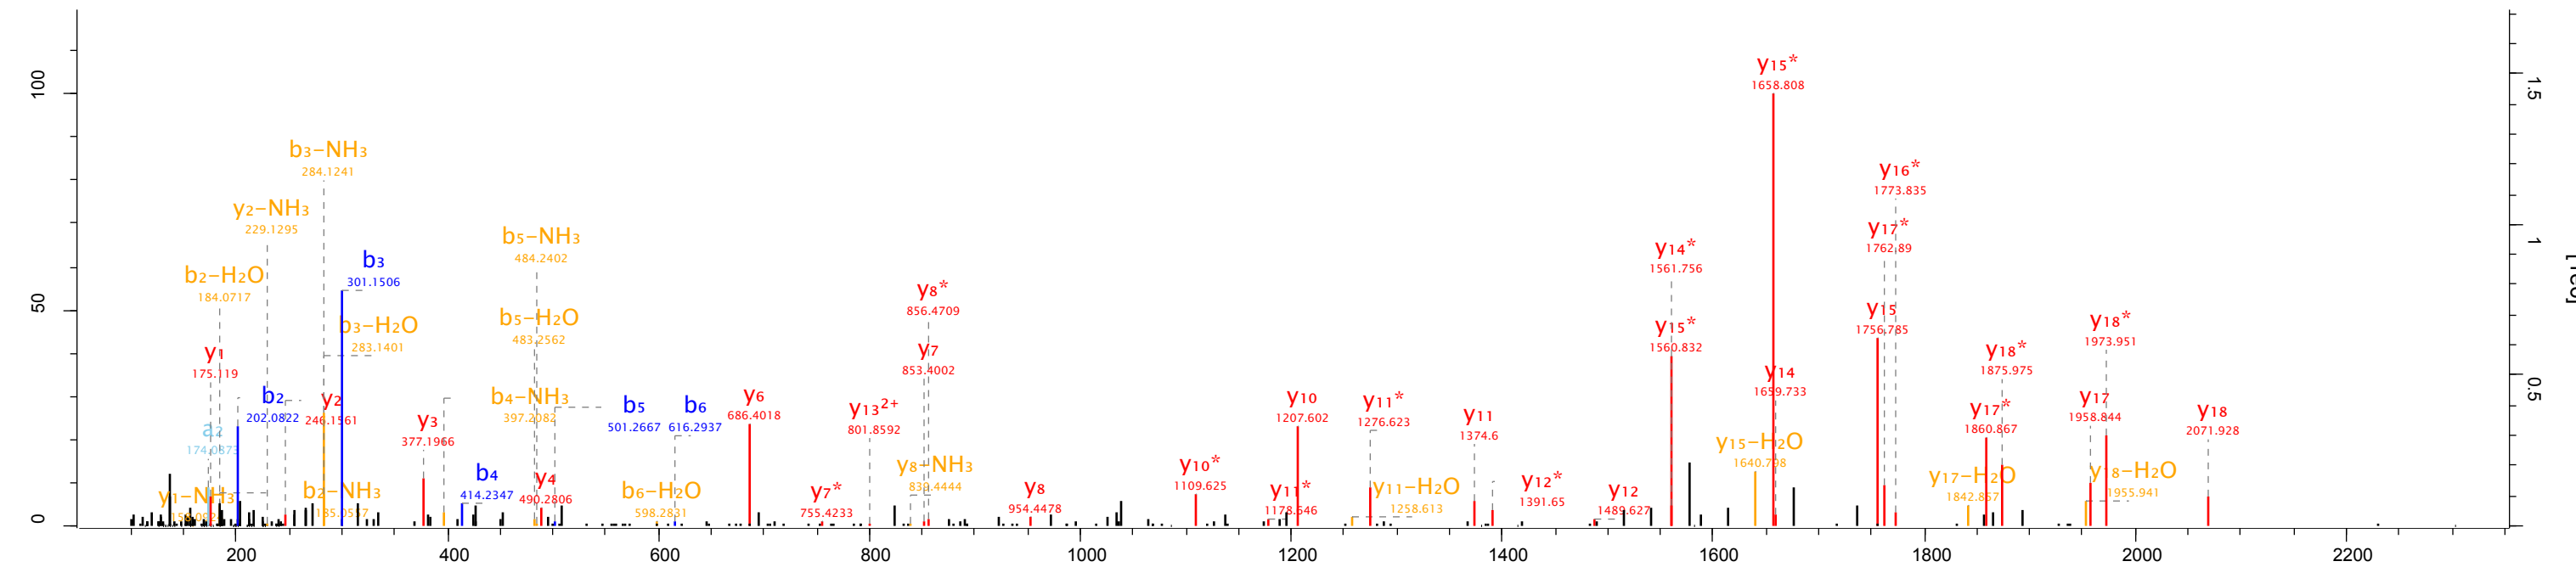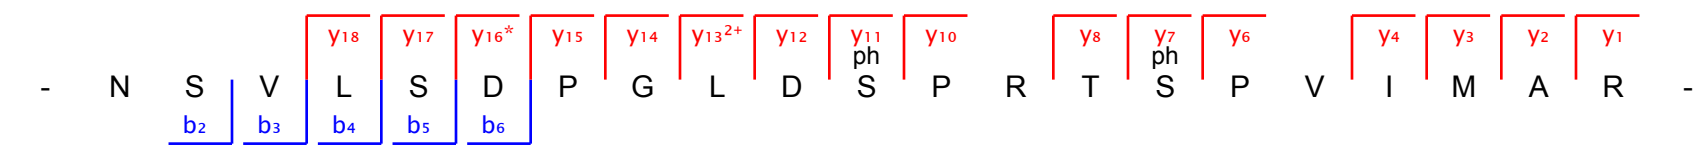

Raw file 20150812\_A375SR\_Phospho\_BR1\_02 Scan 20690 Method FTMS; HCD Score 52.02 m/z 953.04 Gene names NUP214

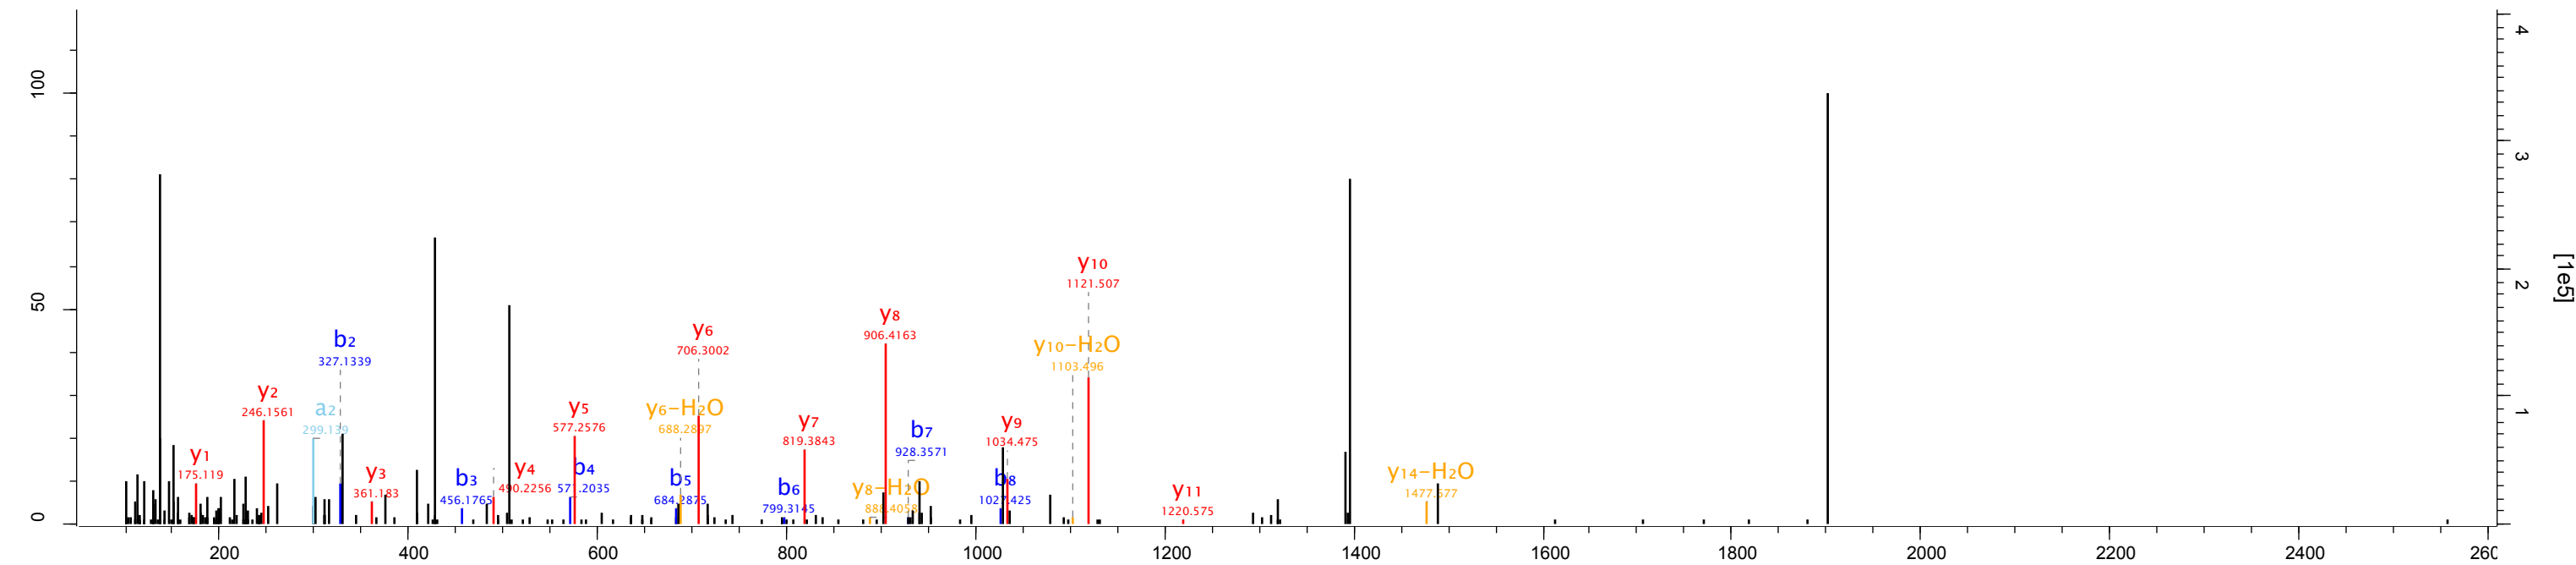

- Y Y E D L D E V ph S ph S T S S V S Q S L E S E D A R -

b<sub>2</sub>
b<sub>3</sub>
b<sub>4</sub>
b<sub>5</sub>
b<sub>6</sub>
b<sub>7</sub>
b<sub>8</sub>
y<sub>11</sub>
y<sub>10</sub>
y<sub>9</sub>
y<sub>8</sub>
y<sub>7</sub>
y<sub>6</sub>
y<sub>5</sub>
y<sub>4</sub>
y<sub>3</sub>
y<sub>2</sub>
y<sub>1</sub>

Raw file  
 20150812\_A375SR\_Phospho\_BR1\_02  
 Scan 20720 Method FTMS; HCD Score 56.01 m/z 910.88 Gene names RANBP9

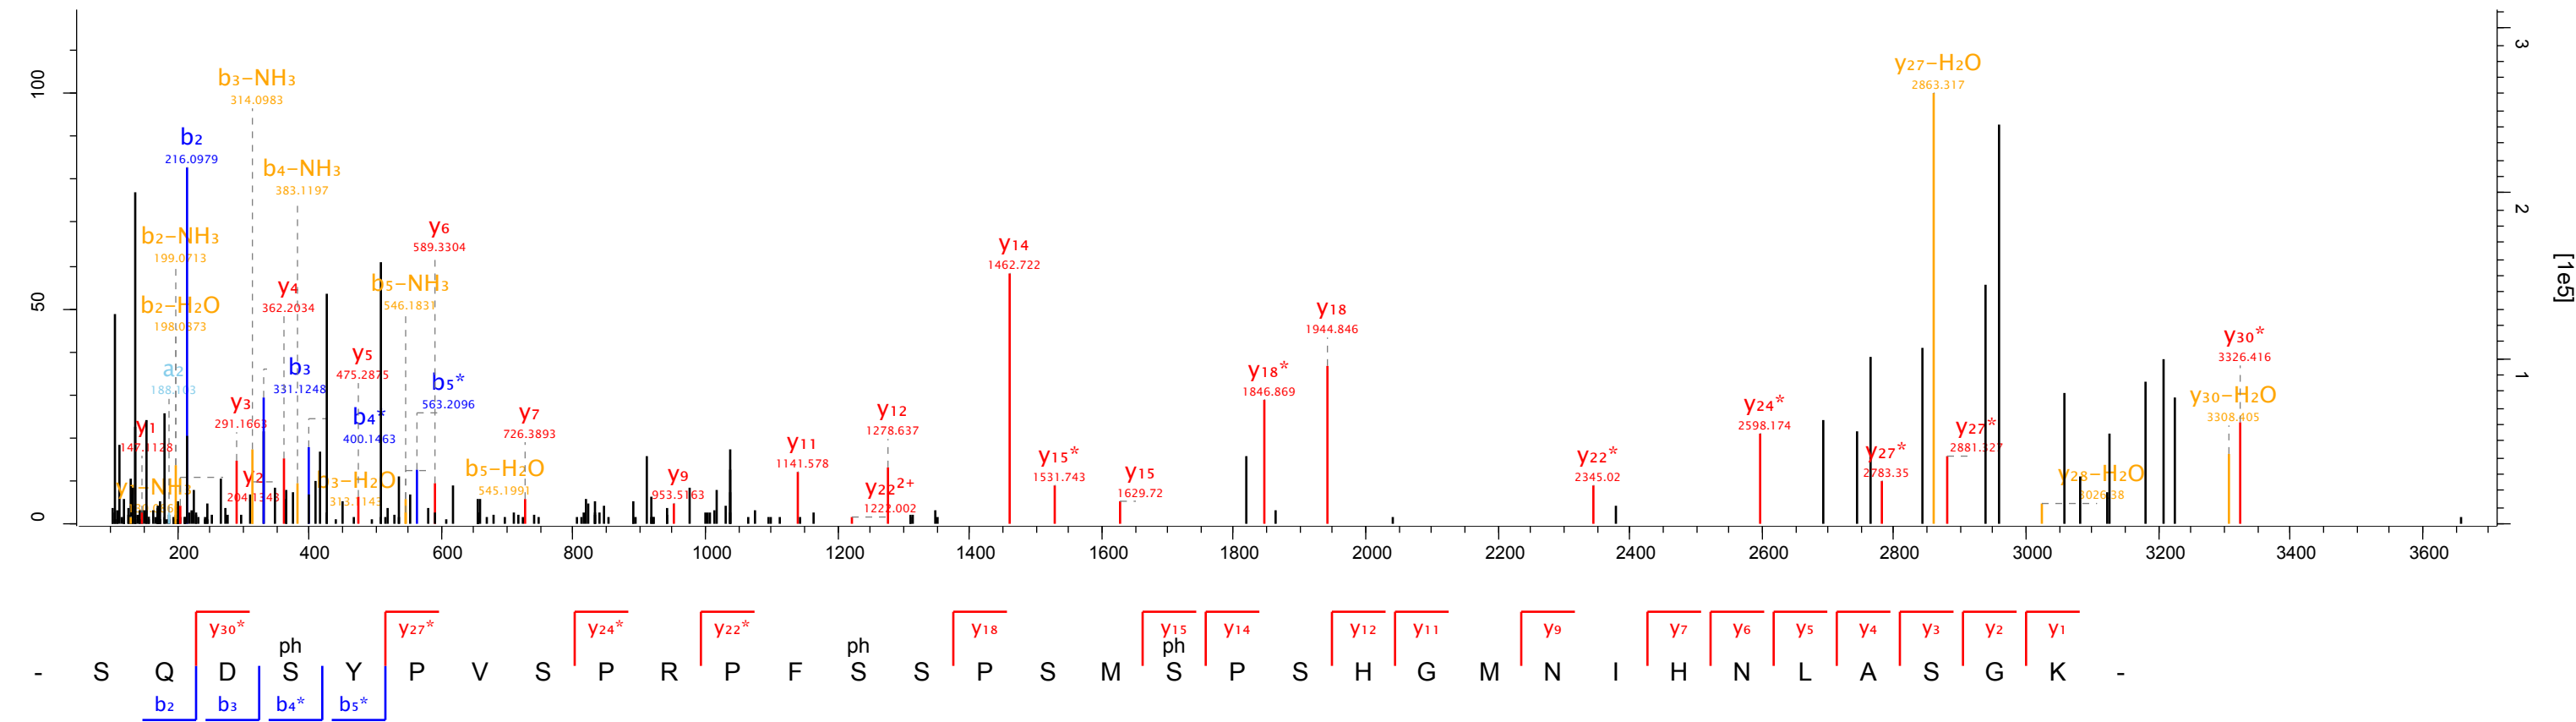

Raw file: 20150812\_A375SR\_Phospho\_BR1\_02  
 Scan: 21020 Method: FTMS; HCD Score: 61.96 m/z: 1125.48 Gene names: AFAP1

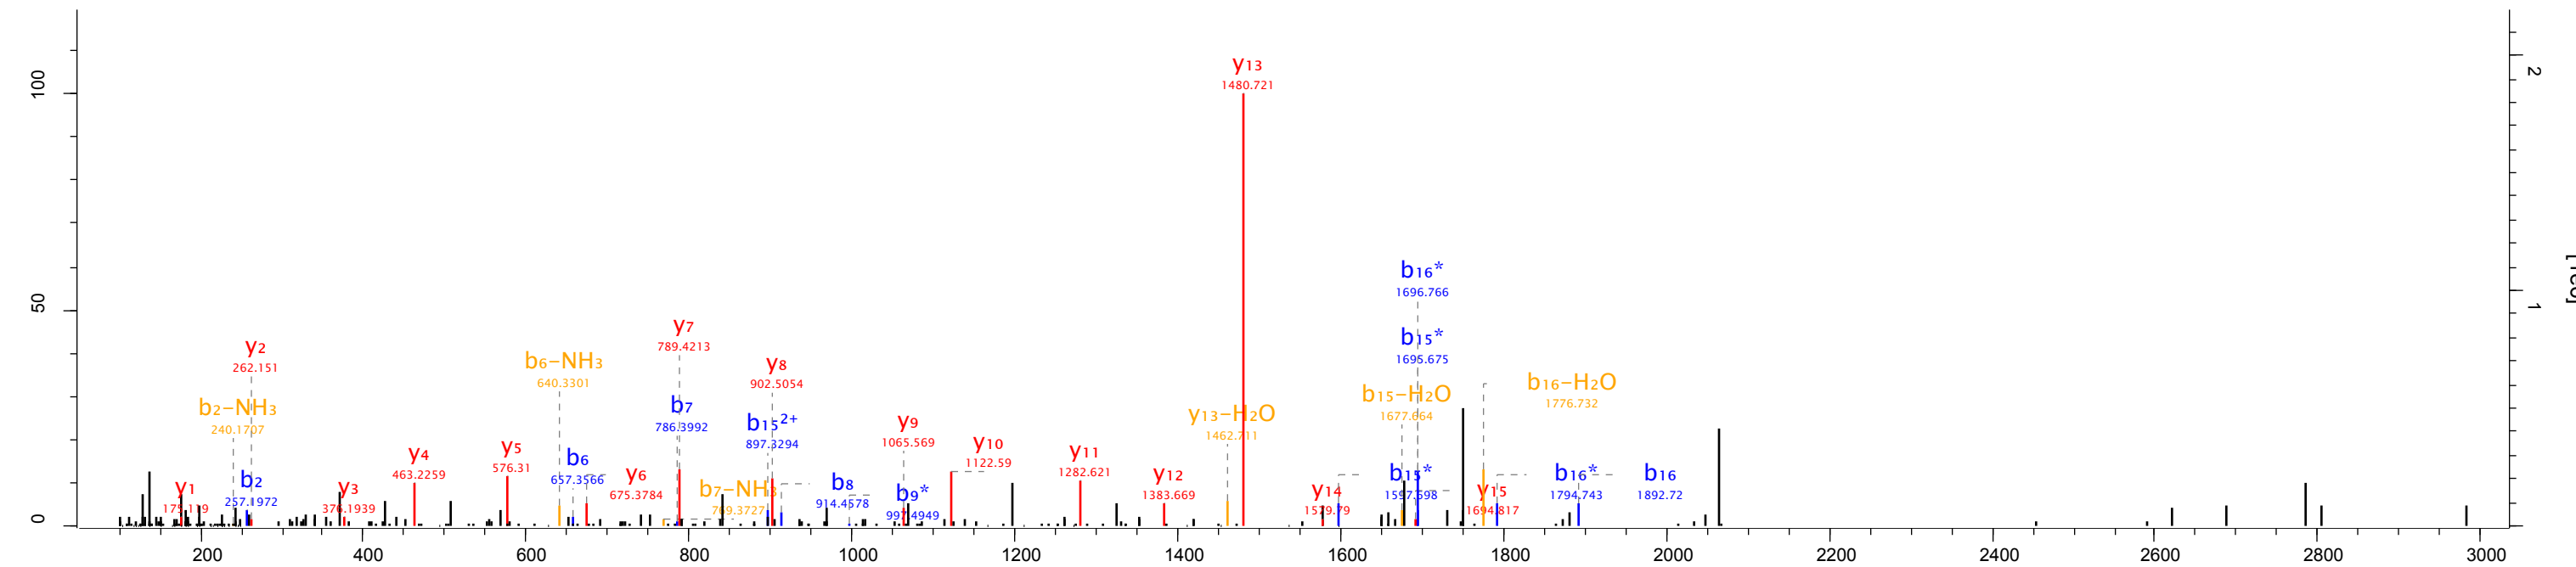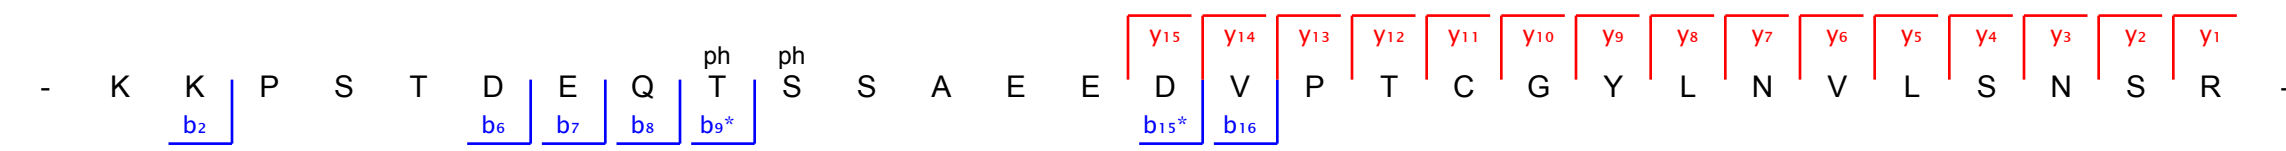

Raw file: 20150812\_A375SR\_Phospho\_BR1\_02  
 Scan: 21350 Method: FTMS; HCD Score: 57.85 m/z: 922.71 Gene names: SMARCAD1

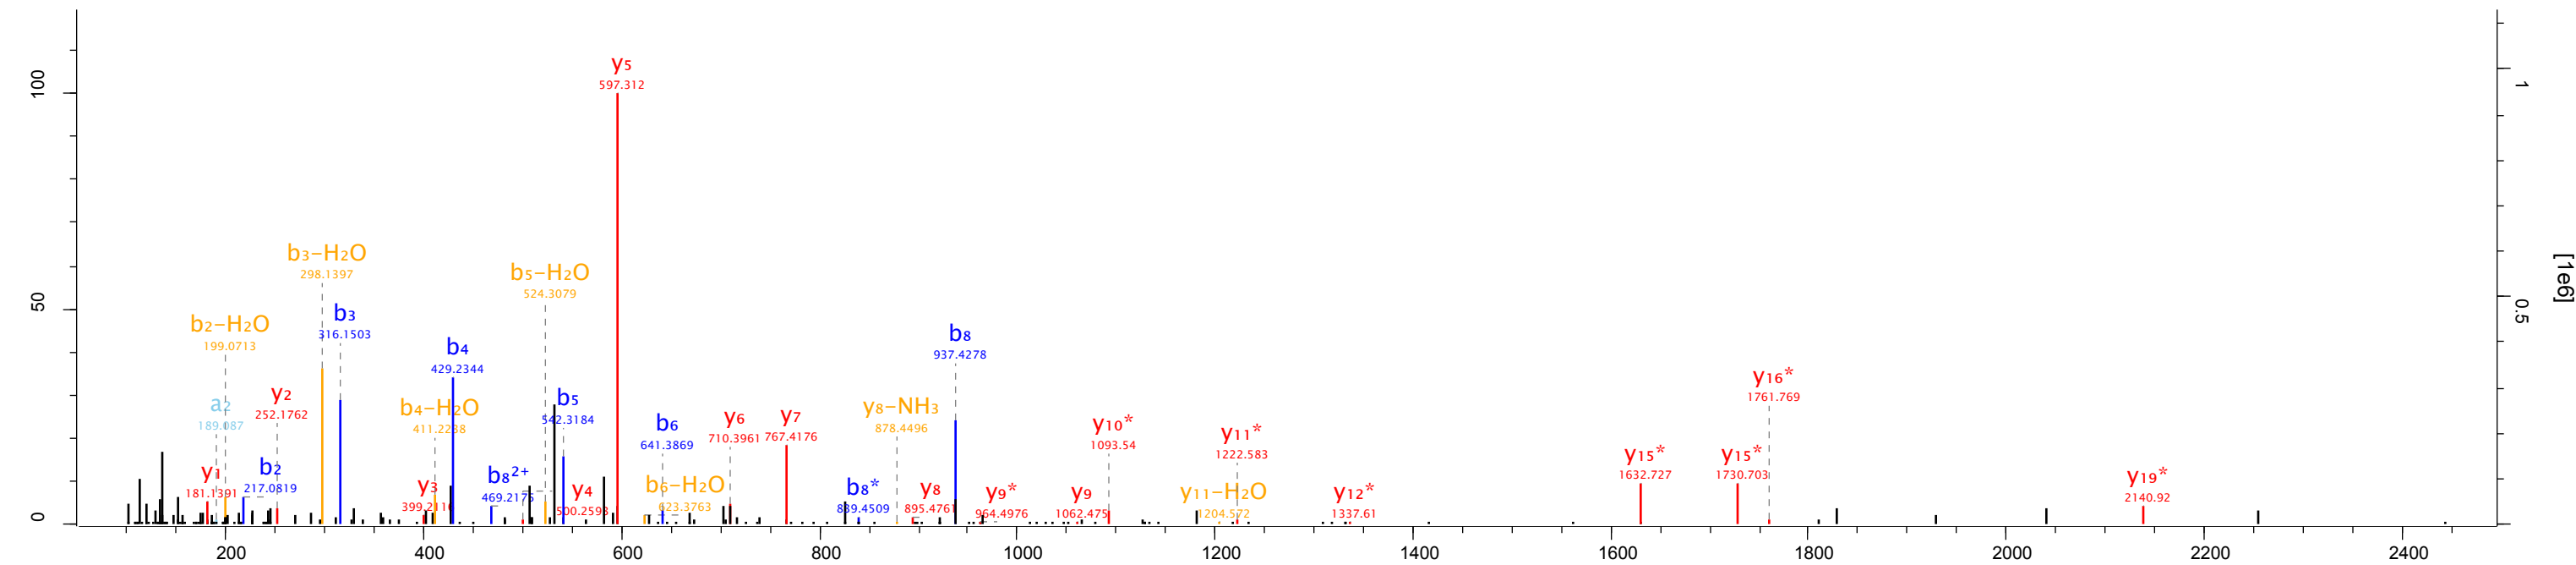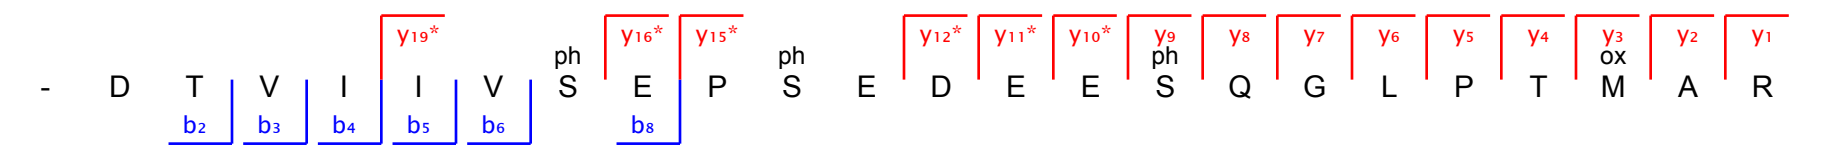





Raw file: 20150812\_A375SR\_Phospho\_BR1\_02  
 Scan: 23010 Method: FTMS; HCD Score: 101.92 m/z: 1090.8 Gene names: EIF3C;EIF3CL

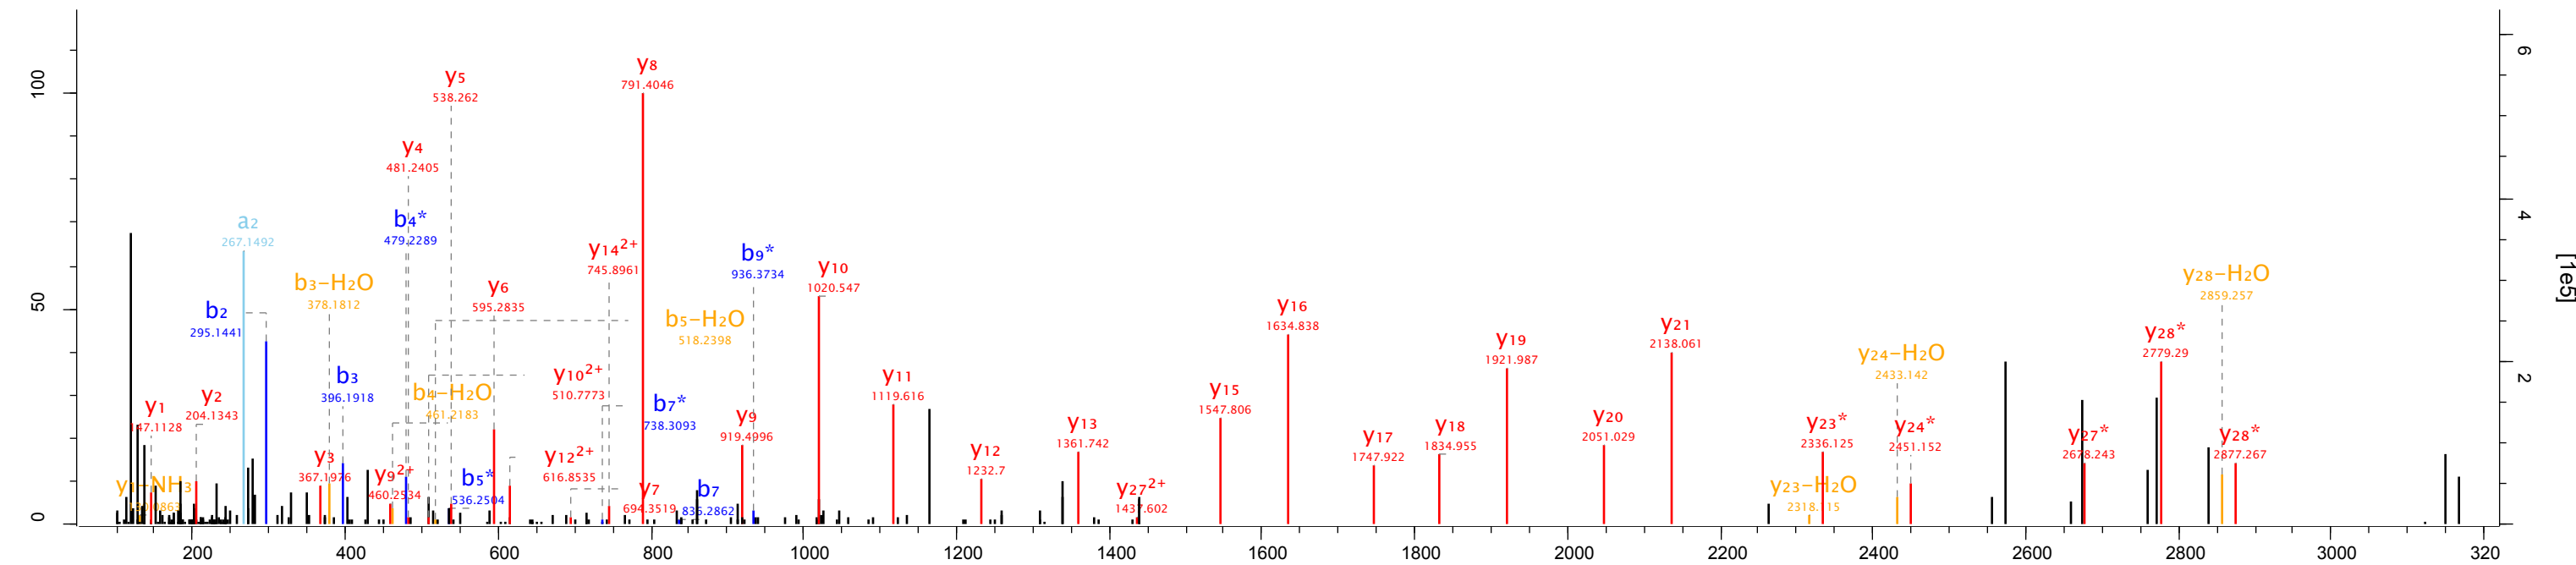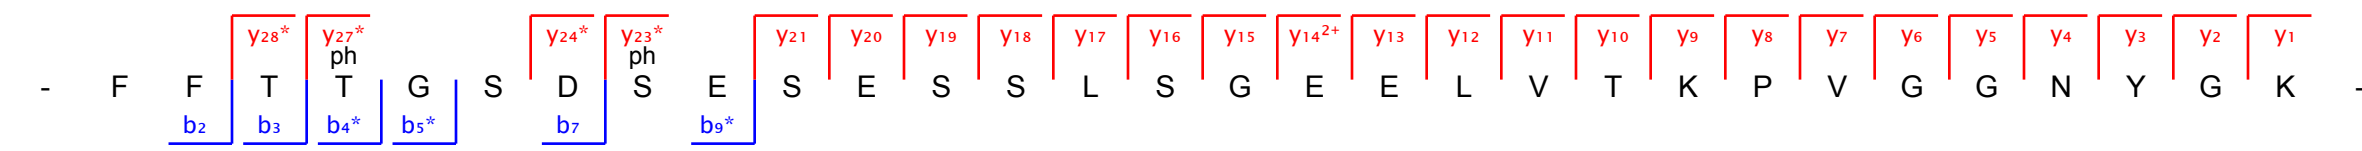

Raw file: 20150812\_A375SR\_Phospho\_BR1\_02  
 Scan: 23020 Method: FTMS; HCD Score: 60.98 m/z: 822.03 Gene names: ARHGEF11

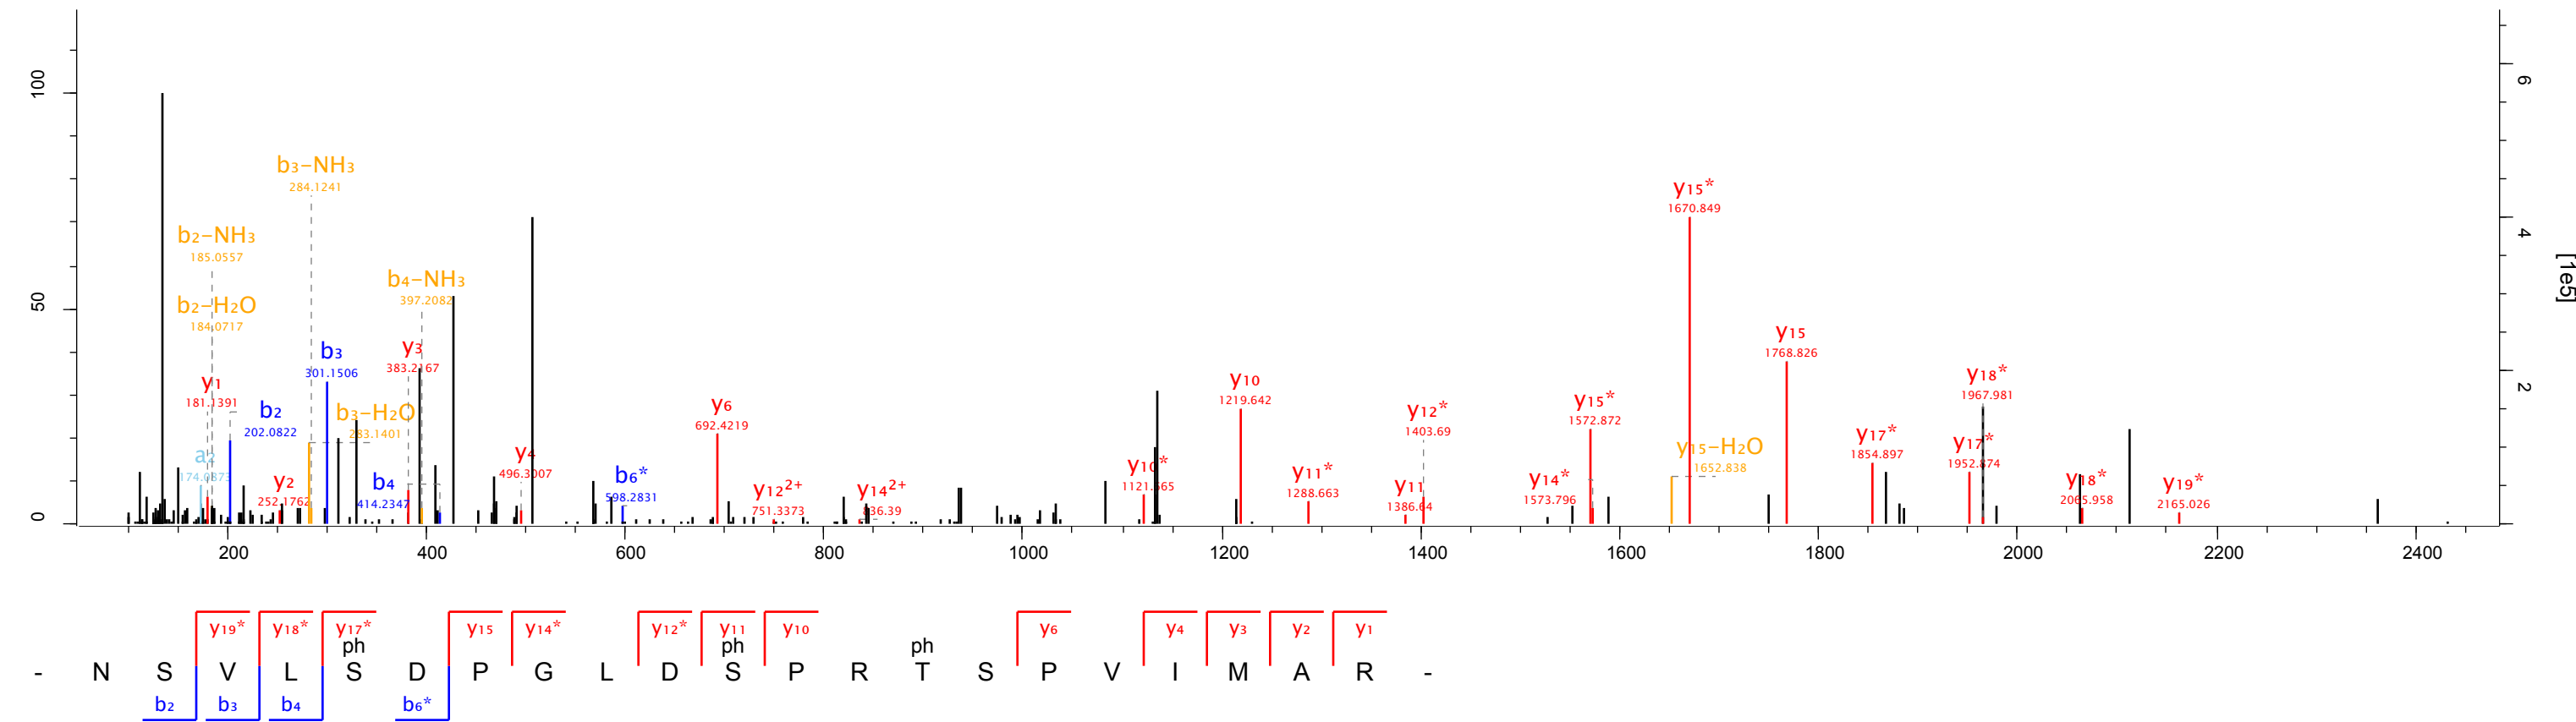

Raw file: 20150812\_A375SR\_Phospho\_BR1\_02  
 Scan: 2420 Method: FTMS; HCD Score: 75.11 m/z: 663.61 Gene names: EIF4B

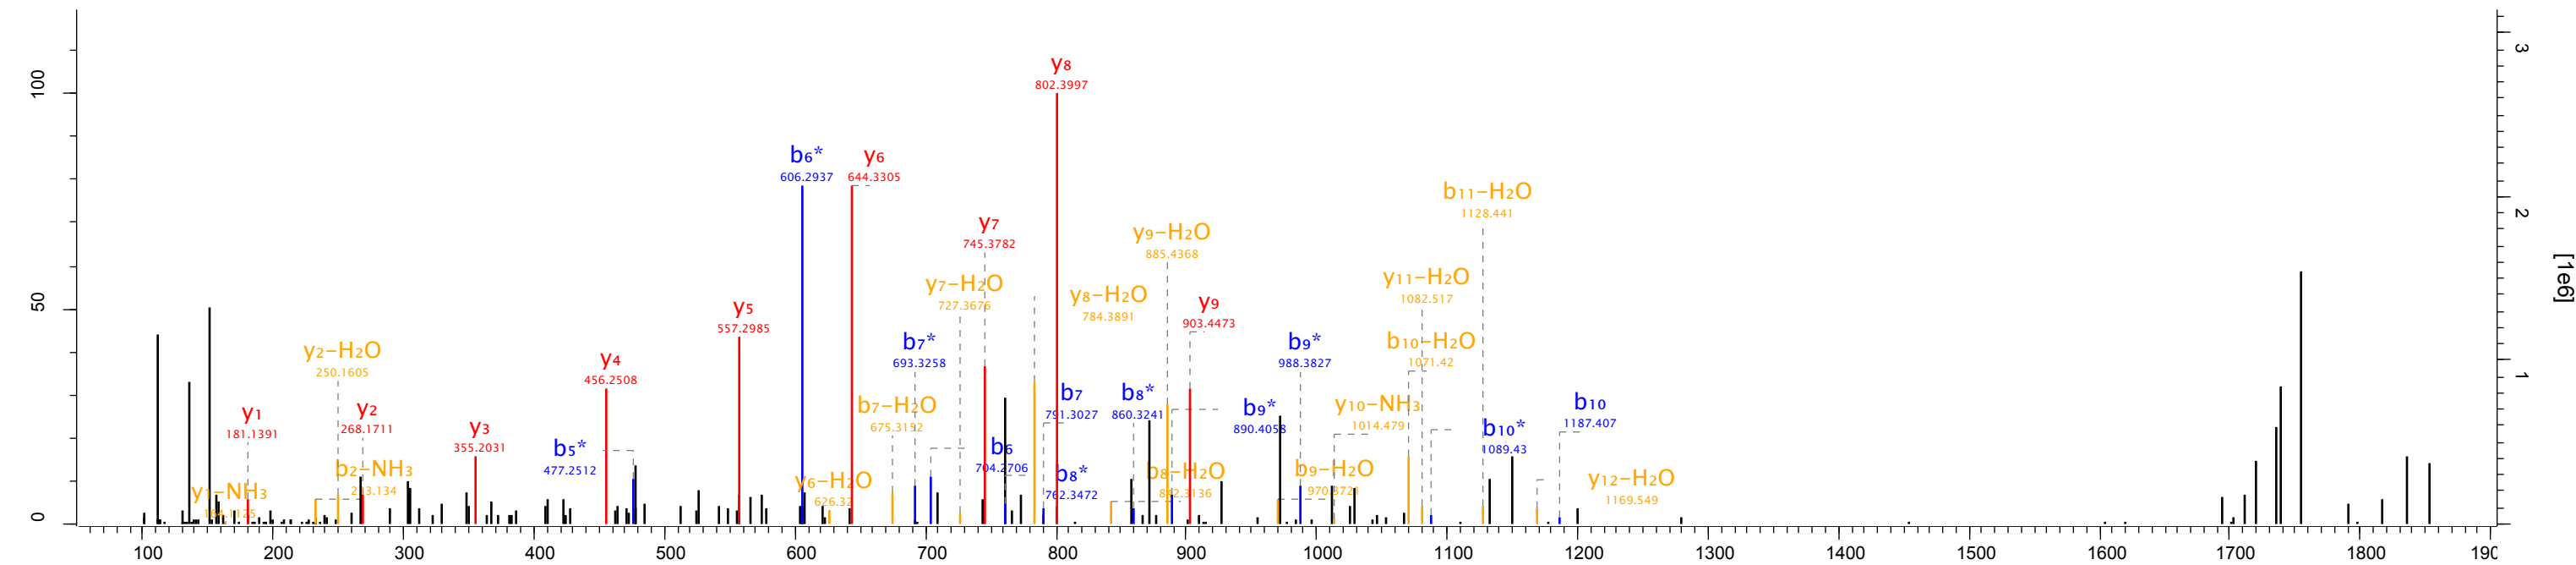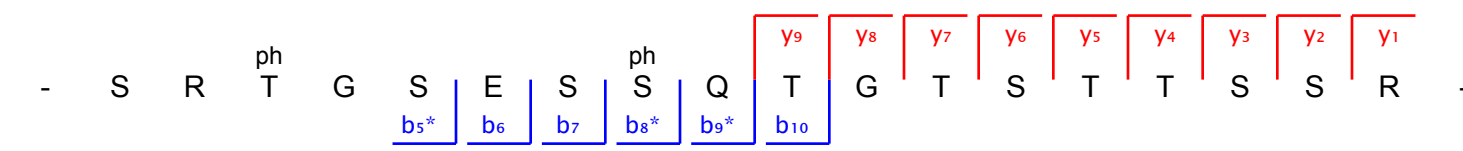

Raw file: 20150812\_A375SR\_Phospho\_BR1\_02  
 Scan: 26050 Method: FTMS; HCD Score: 91.28 m/z: 1120.48 Gene names: BAIAP2L1

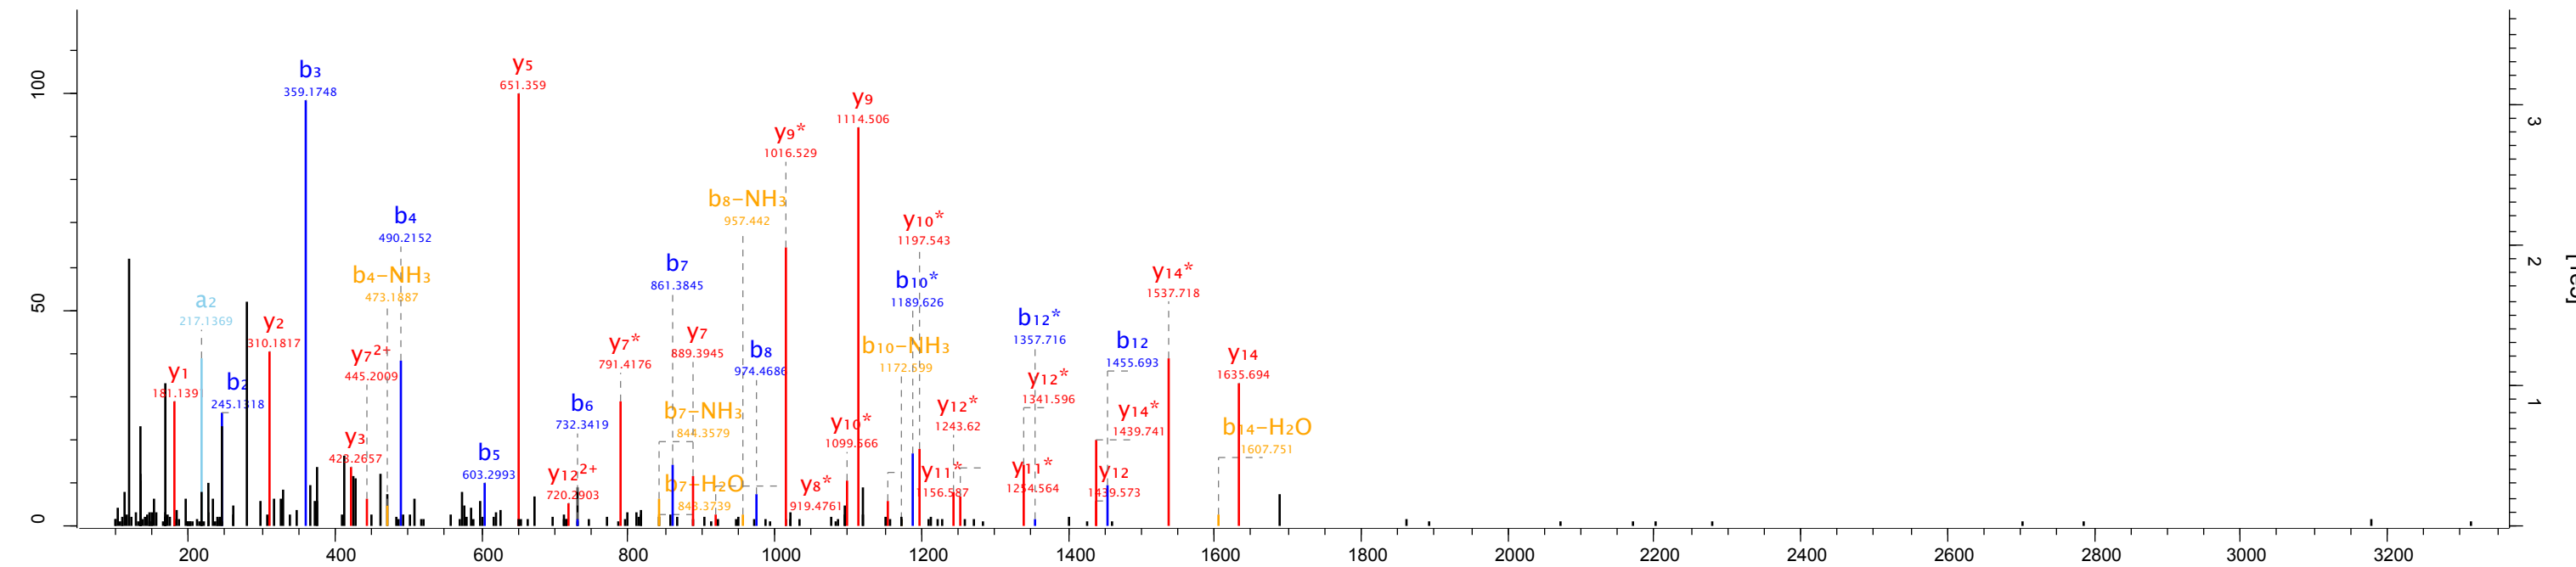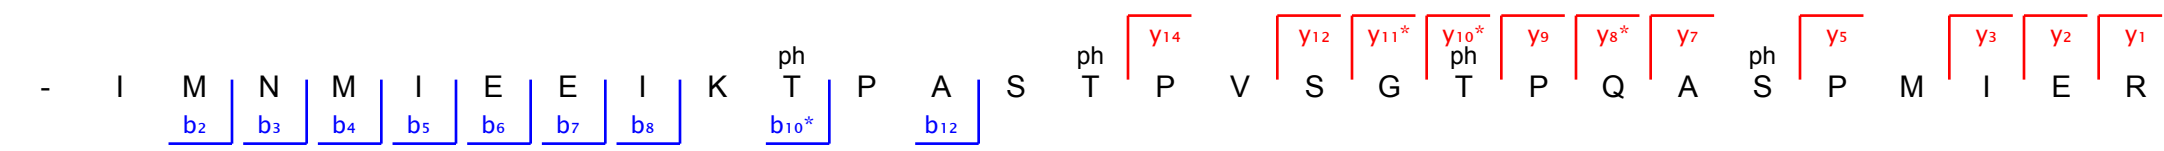

Raw file: 20150812\_A375SR\_Phospho\_BR1\_02  
 Scan: 3070 Method: FTMS; HCD Score: 118.19 m/z: 699.73 Gene names: TRA2A

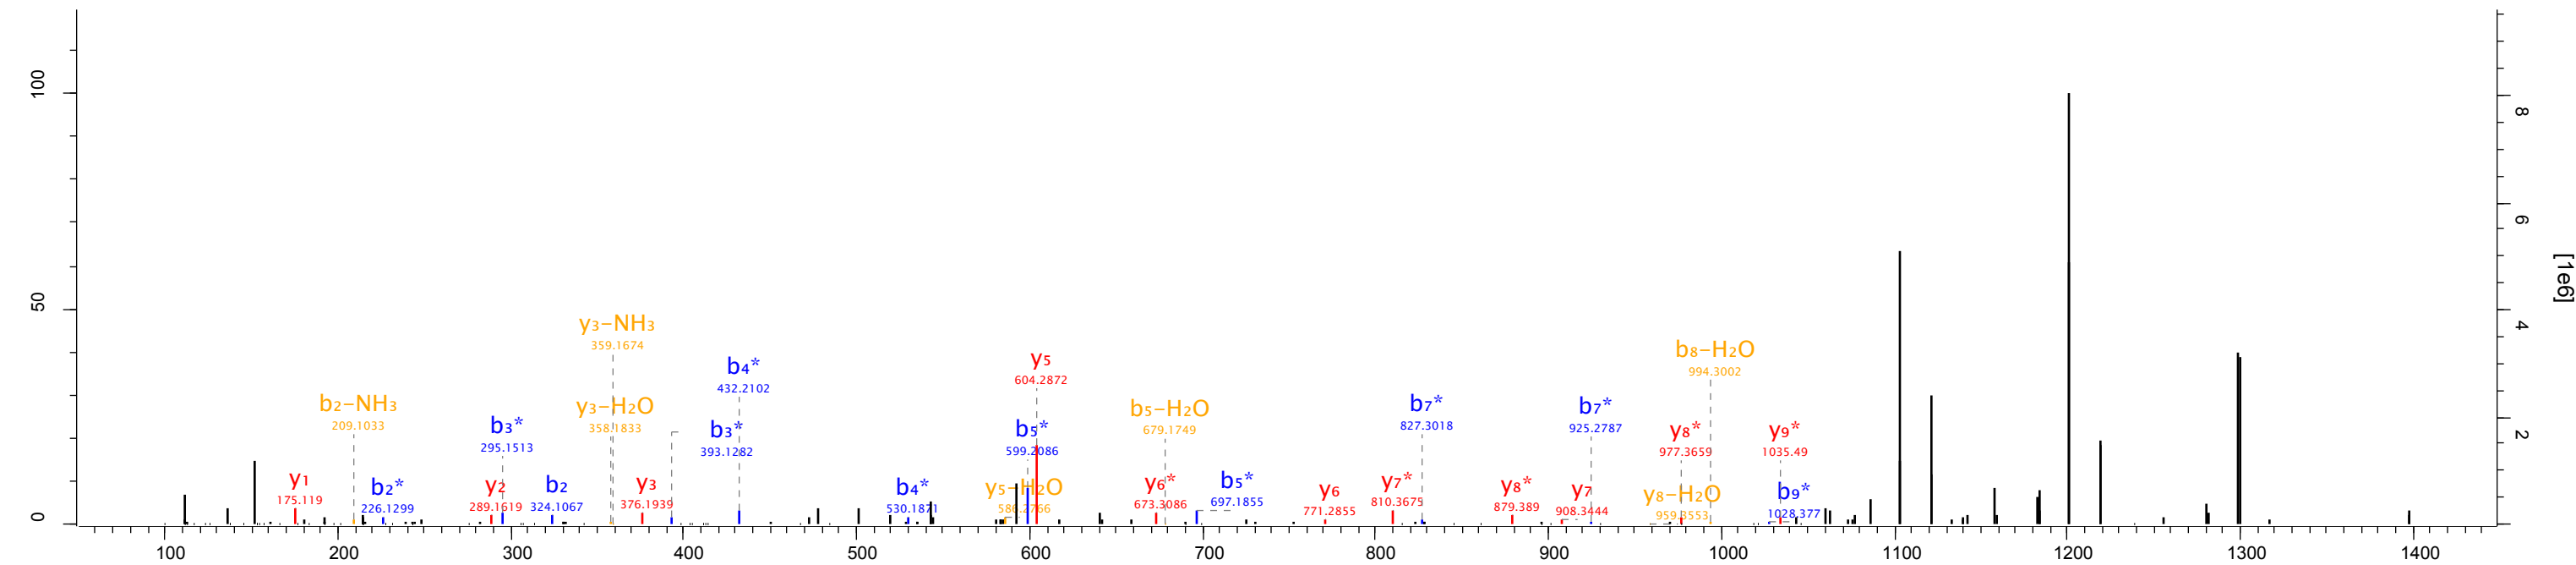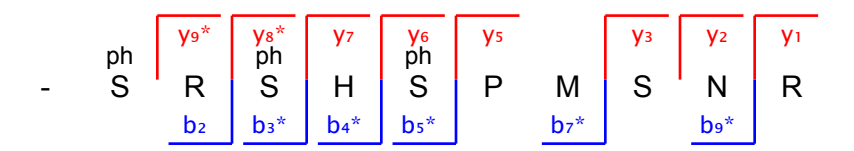

Raw file: 20150812\_A375SR\_Phospho\_BR1\_02  
 Scan: 3160 Method: FTMS; HCD Score: 120.9 m/z: 739.78 Gene names: RSL1D1

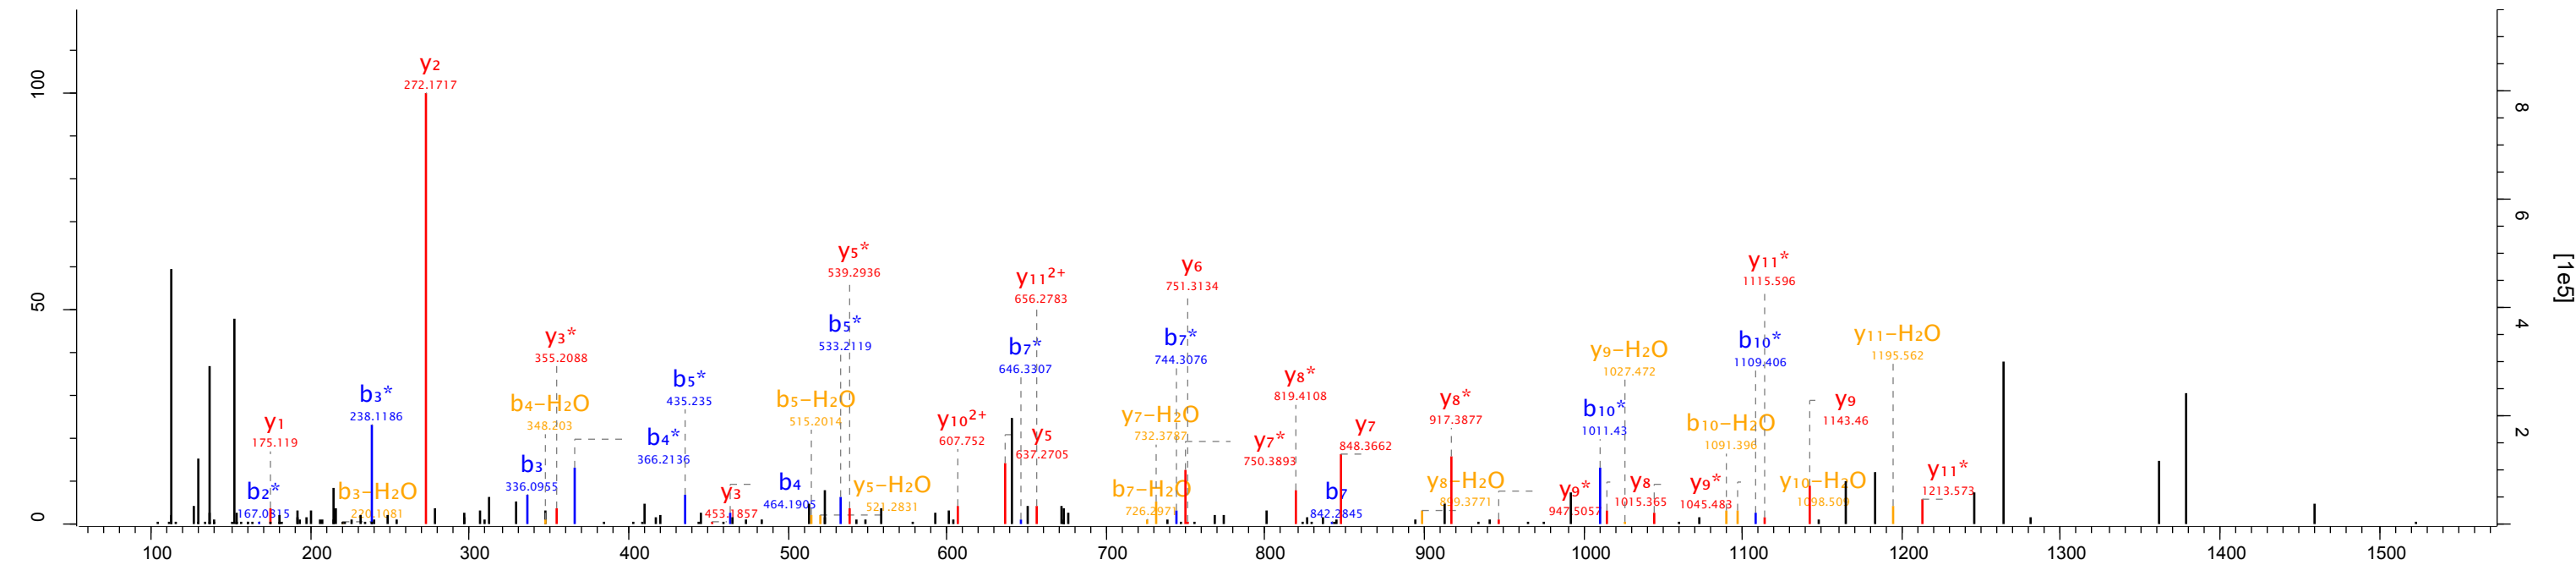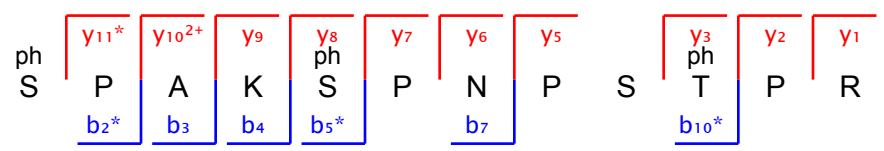

Raw file 20150812\_A375SR\_Phospho\_BR1\_02 Scan 3840 Method FTMS; HCD Score 76.41 m/z 682.74 Gene names CIR1

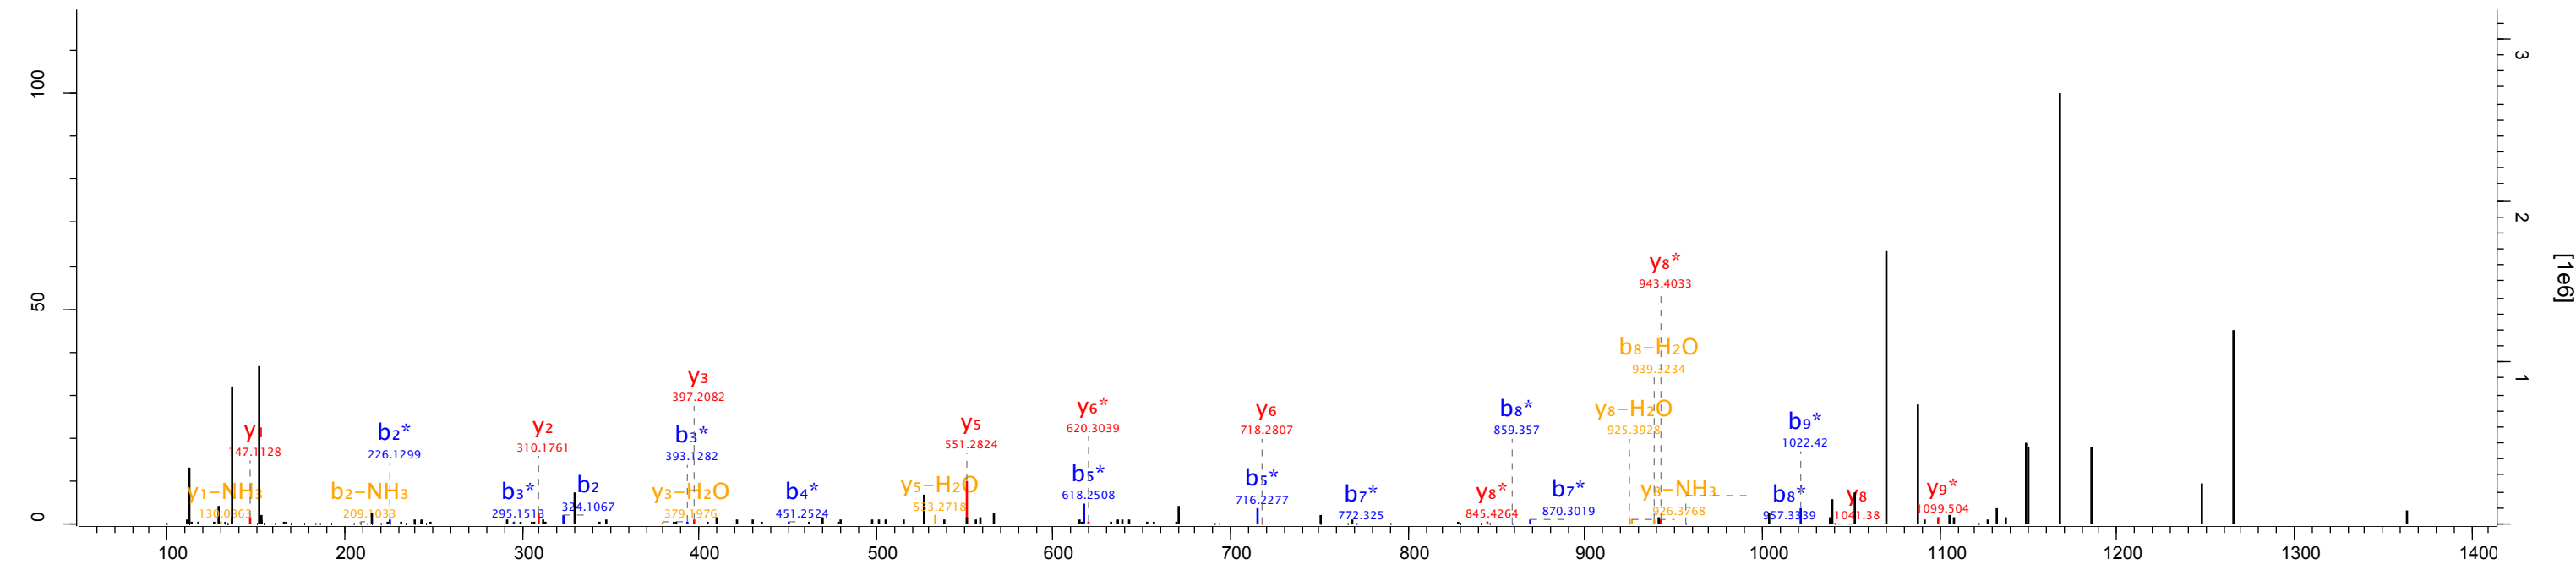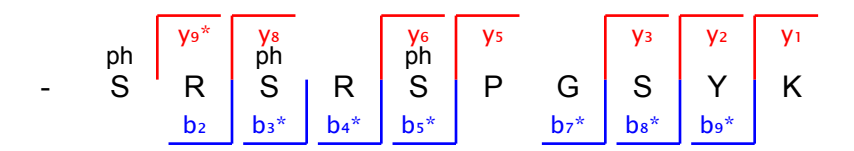



Raw file: 20150812\_A375SR\_Phospho\_BR1\_02  
 Scan: 4100 Method: FTMS; HCD Score: 96.52 m/z: 761.64 Gene names: MCM4

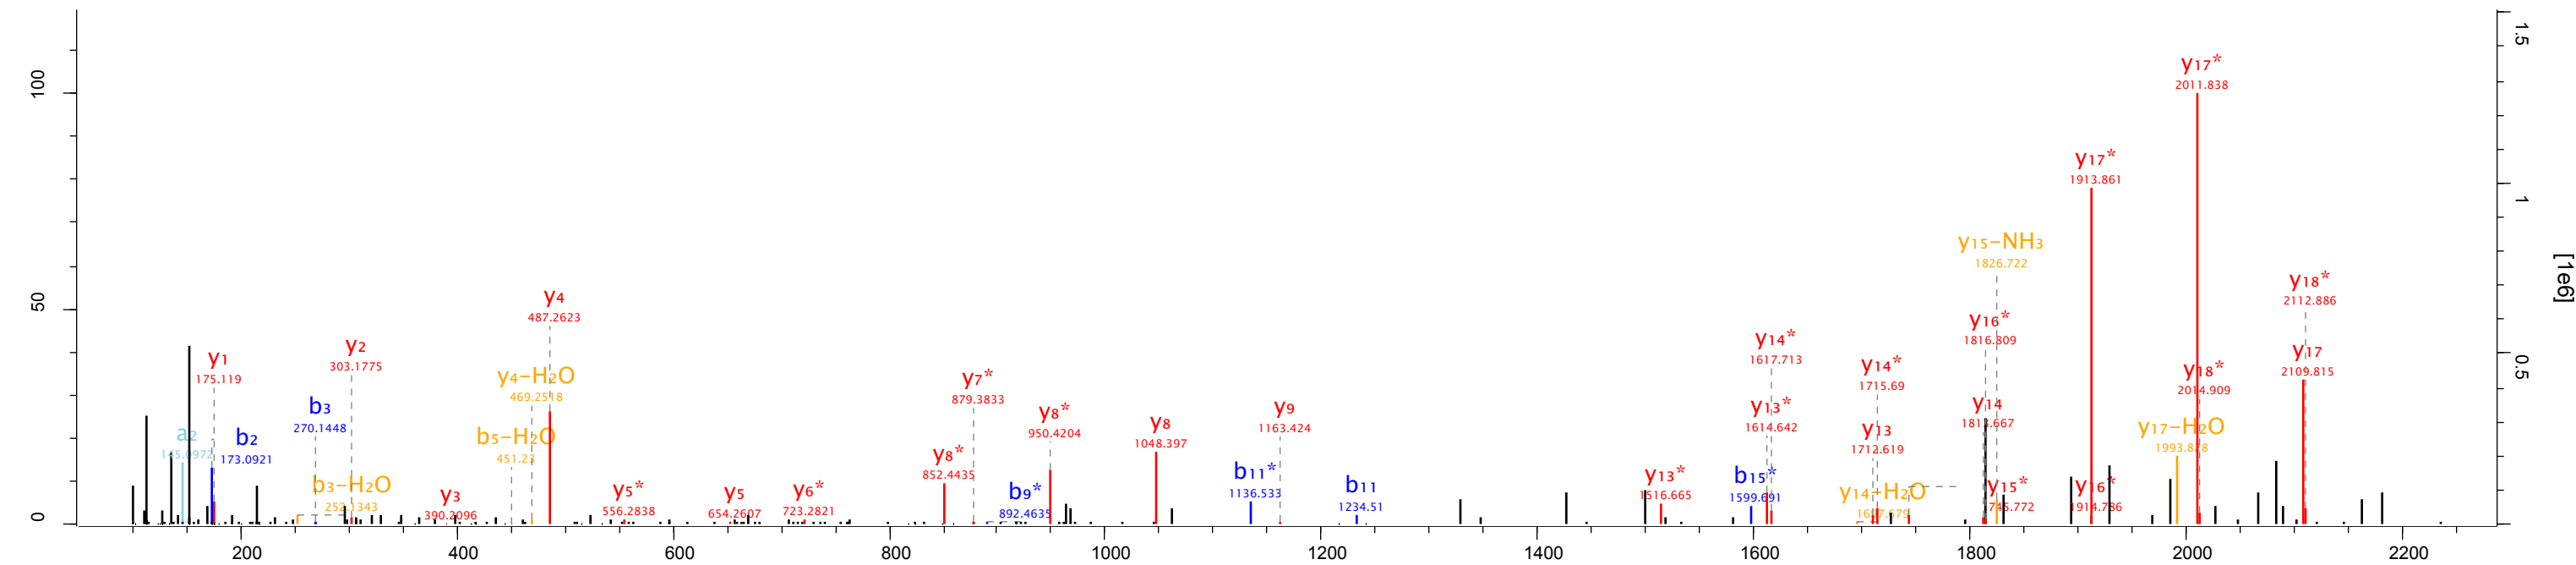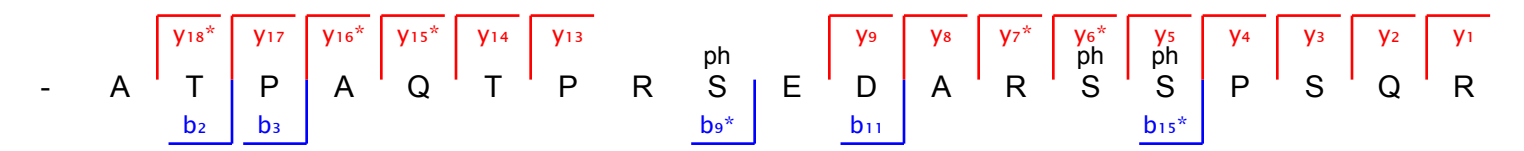

Raw file: 20150812\_A375SR\_Phospho\_BR1\_02  
 Scan: 4260 Method: FTMS; HCD Score: 90.35 m/z: 521.22 Gene names: SCAF11

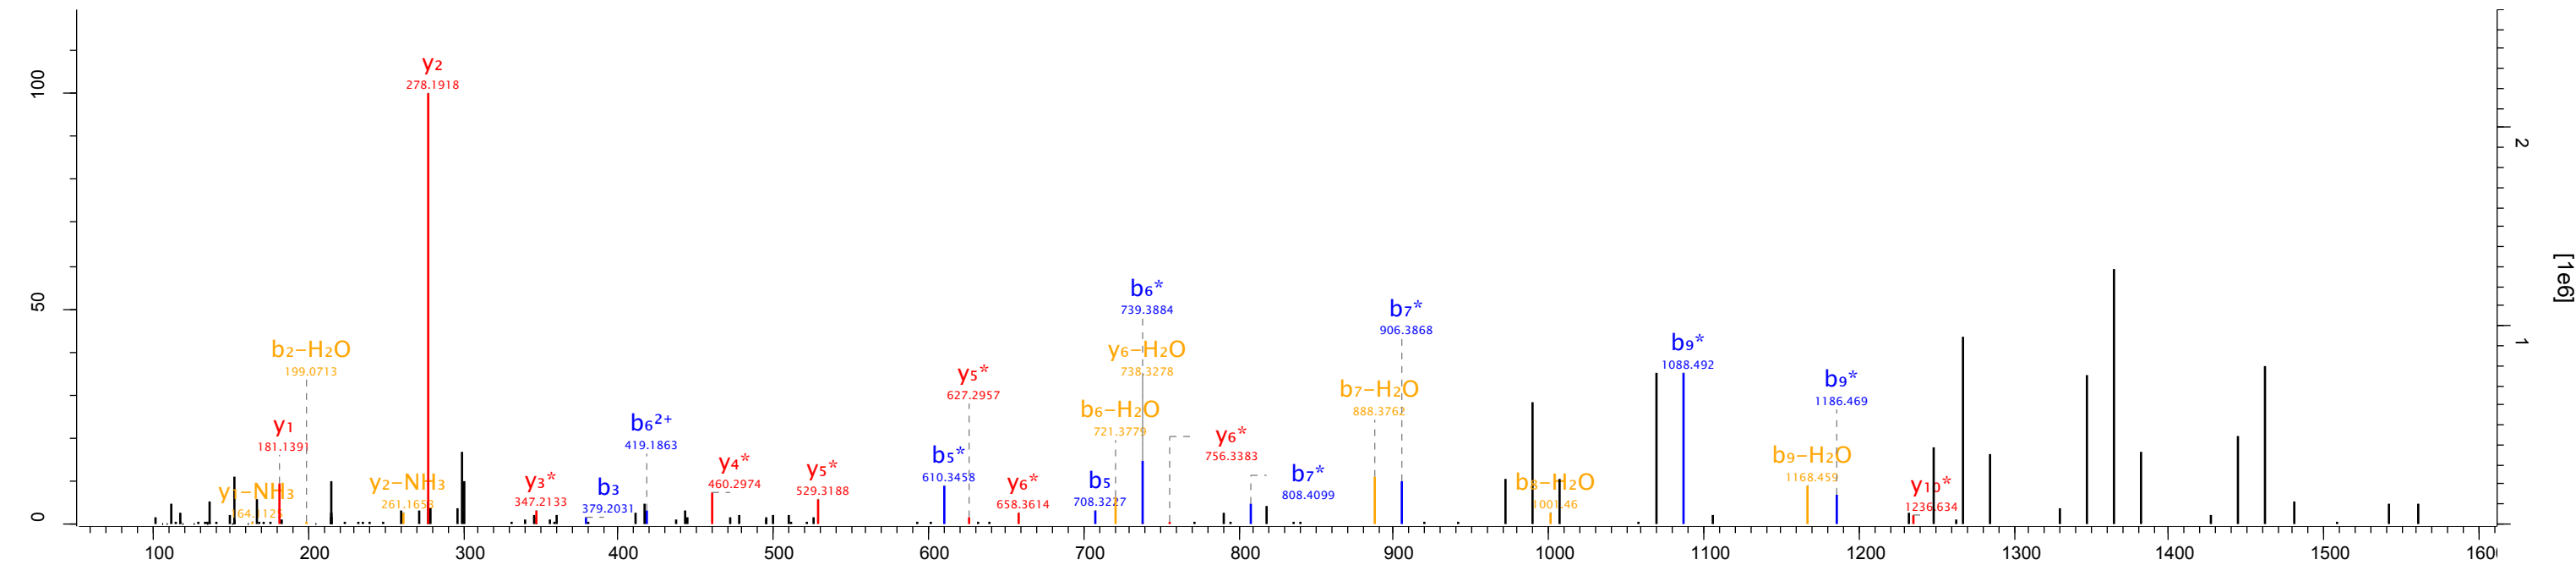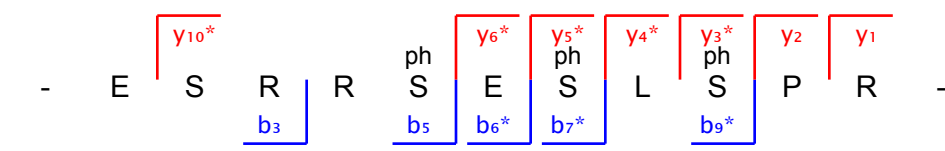

Raw file: 20150812\_A375SR\_Phospho\_BR1\_02  
 Scan: 4320 Method: FTMS; HCD Score: 157.83 m/z: 649.3 Gene names: SRRM1

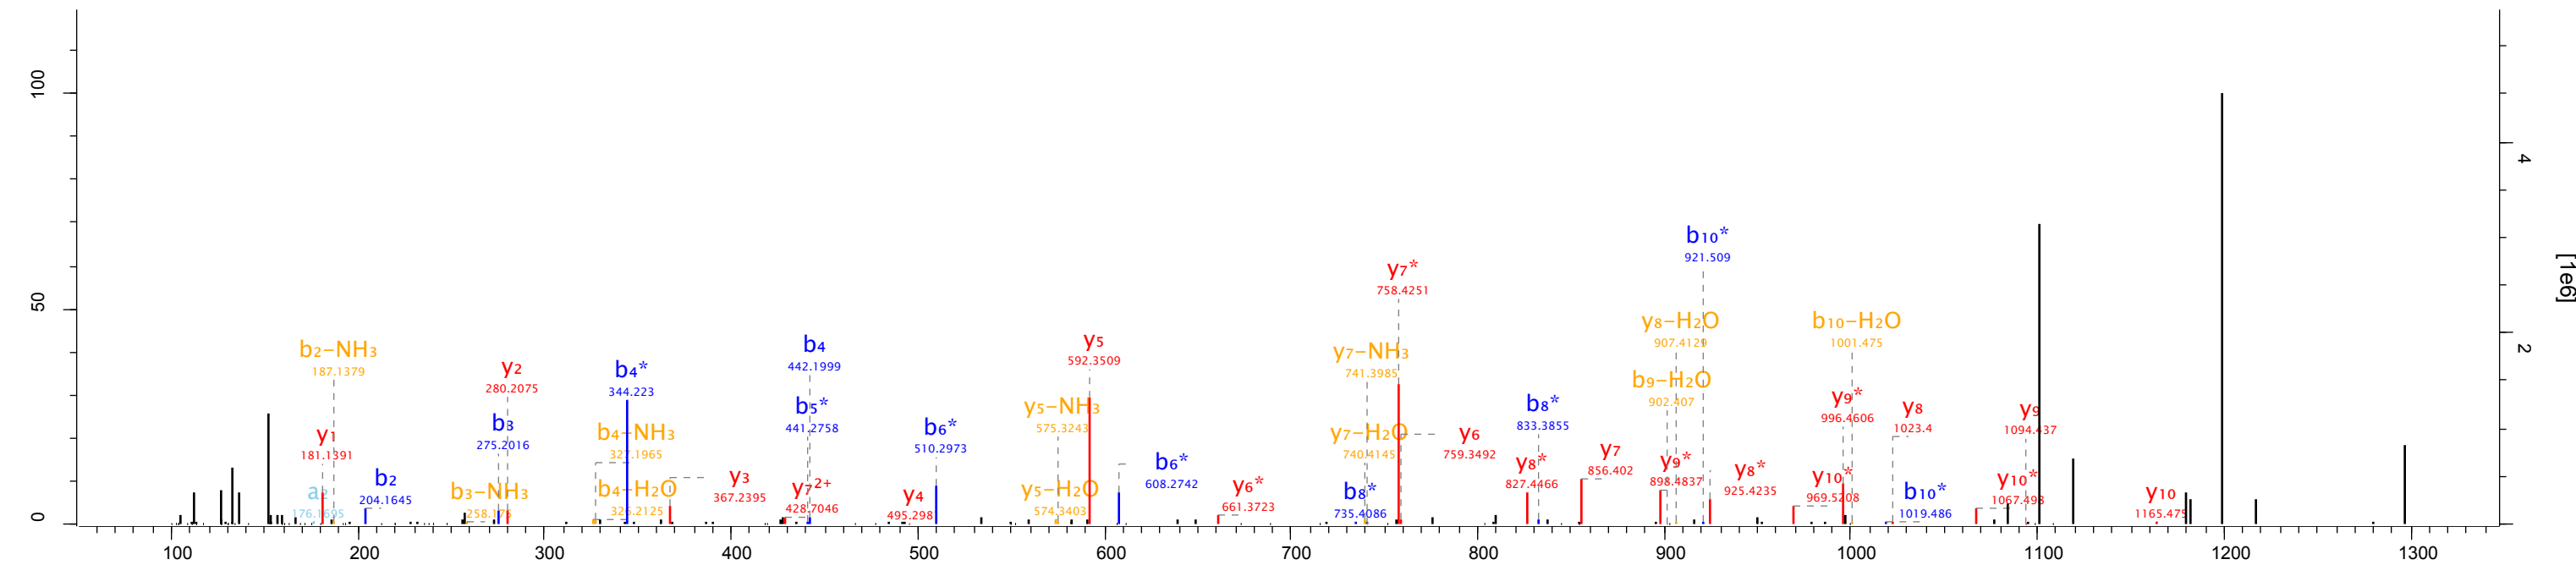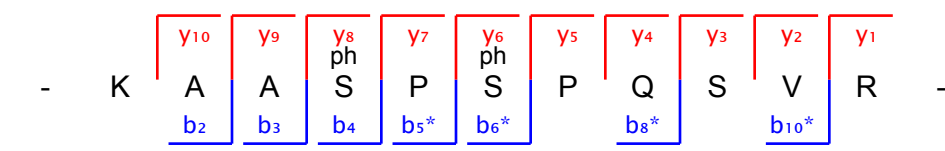

Raw file: 20150812\_A375SR\_Phospho\_BR1\_02  
 Scan: 4700 Method: FTMS; HCD Score: 112.48 m/z: 897.84 Gene names: ZC3H13

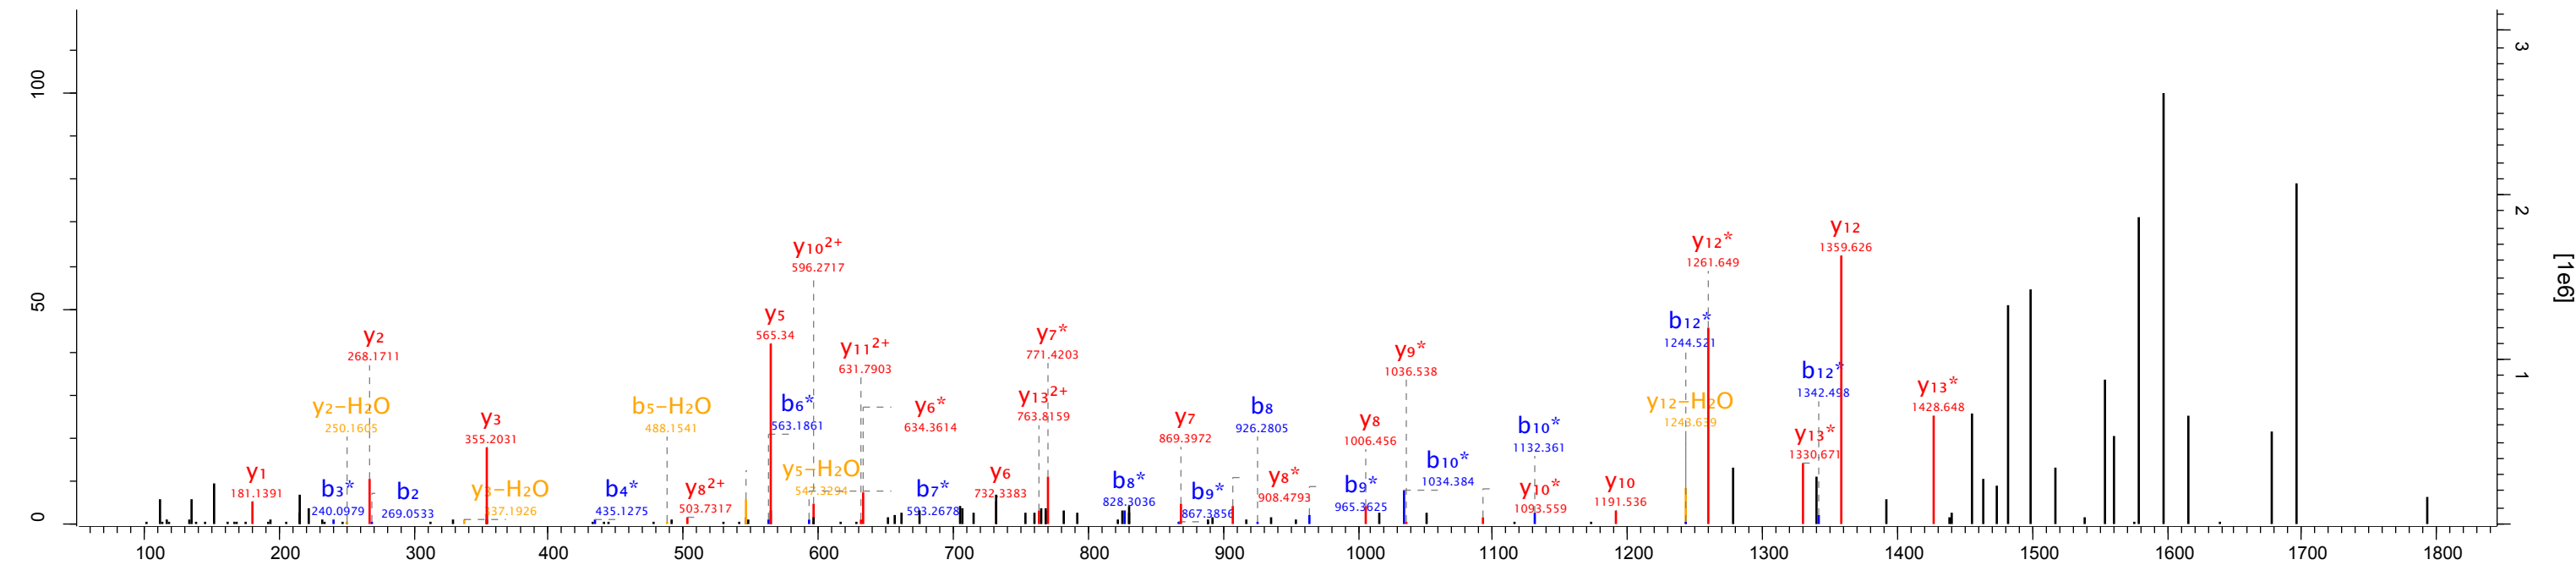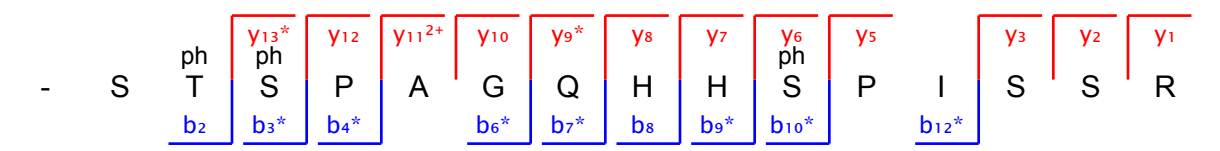

Raw file 20150812\_A375SR\_Phospho\_BR1\_02 Scan 6110 Method FTMS; HCD Score 152 m/z 839.29 Gene names ELF1

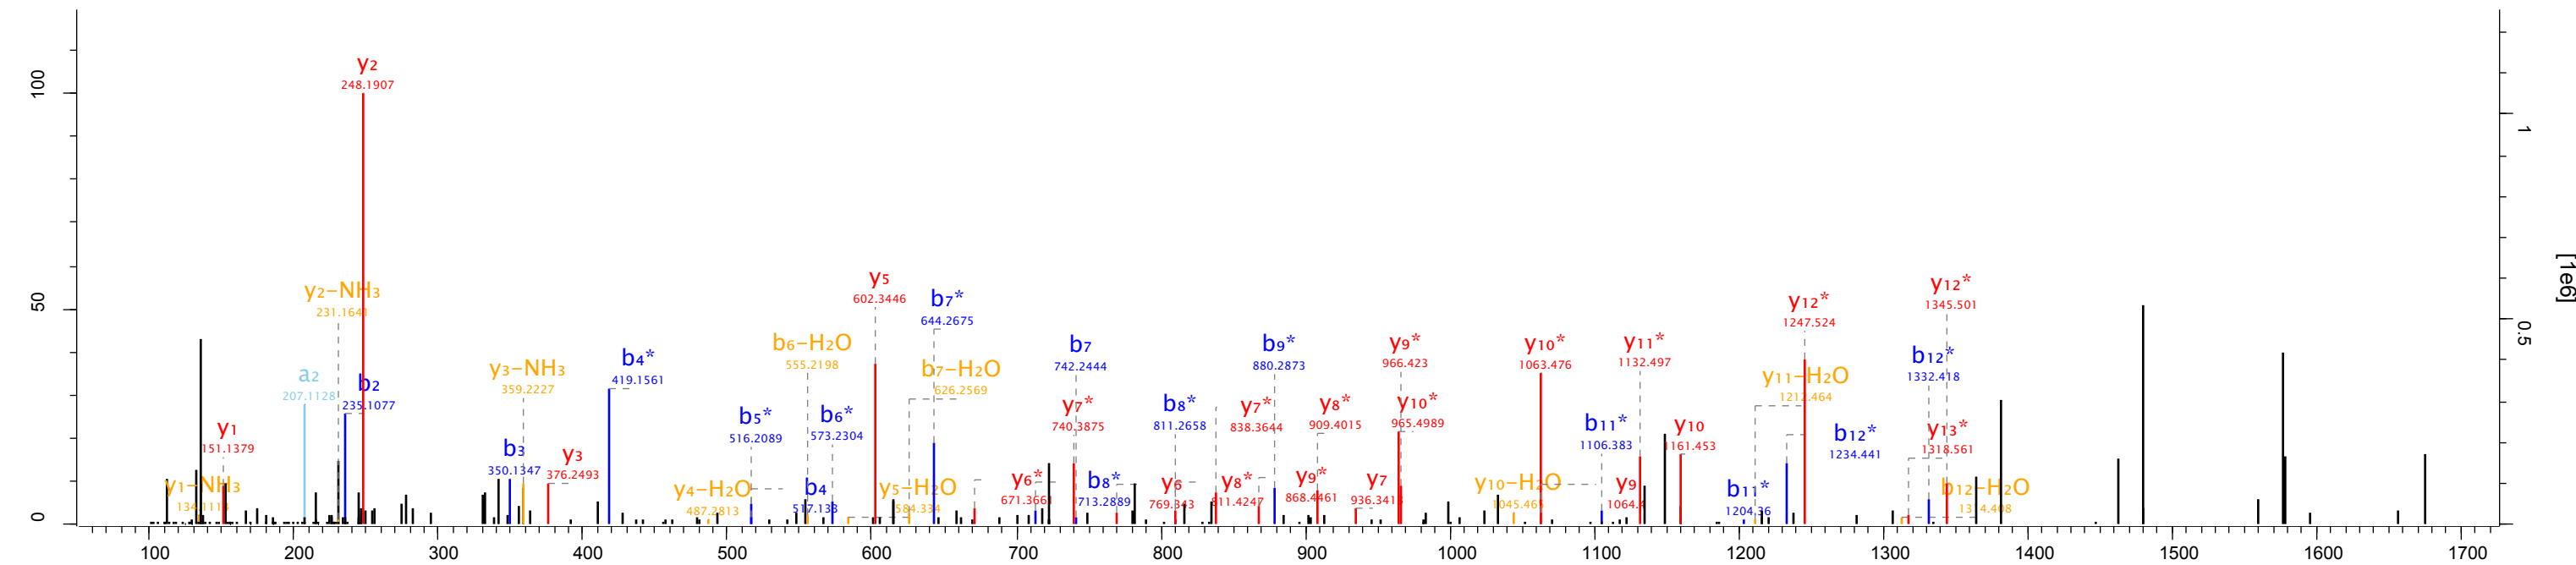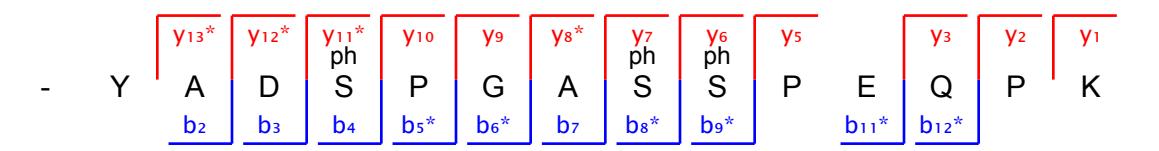

Raw file 20150812\_A375SR\_Phospho\_BR1\_02 Scan 6520 Method FTMS; HCD Score 51.26 m/z 637.59 Gene names FSD1

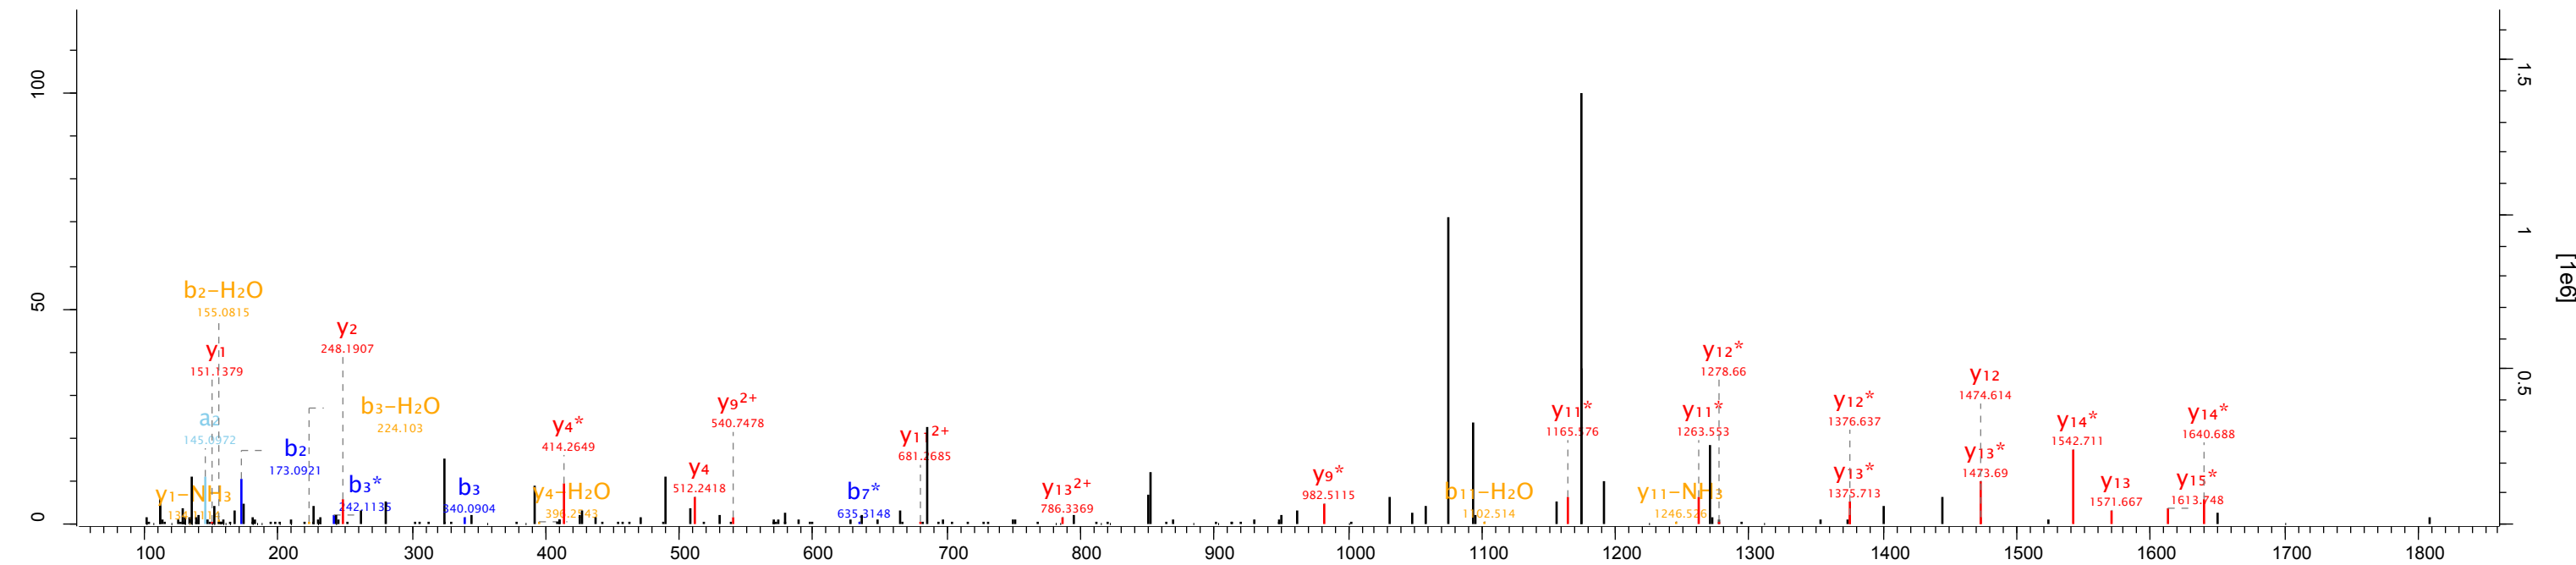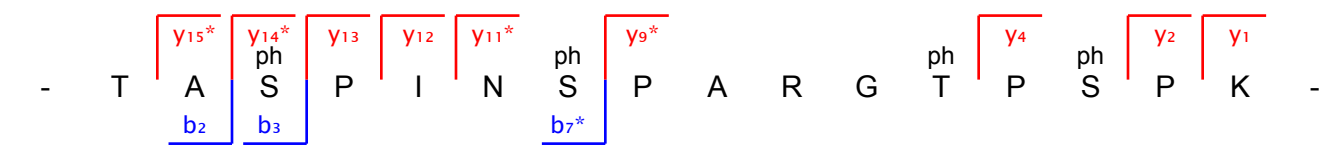

Raw file: 20150812\_A375SR\_Phospho\_BR1\_02  
 Scan: 6950 Method: FTMS; HCD Score: 106.86 m/z: 566.53 Gene names: CDK12

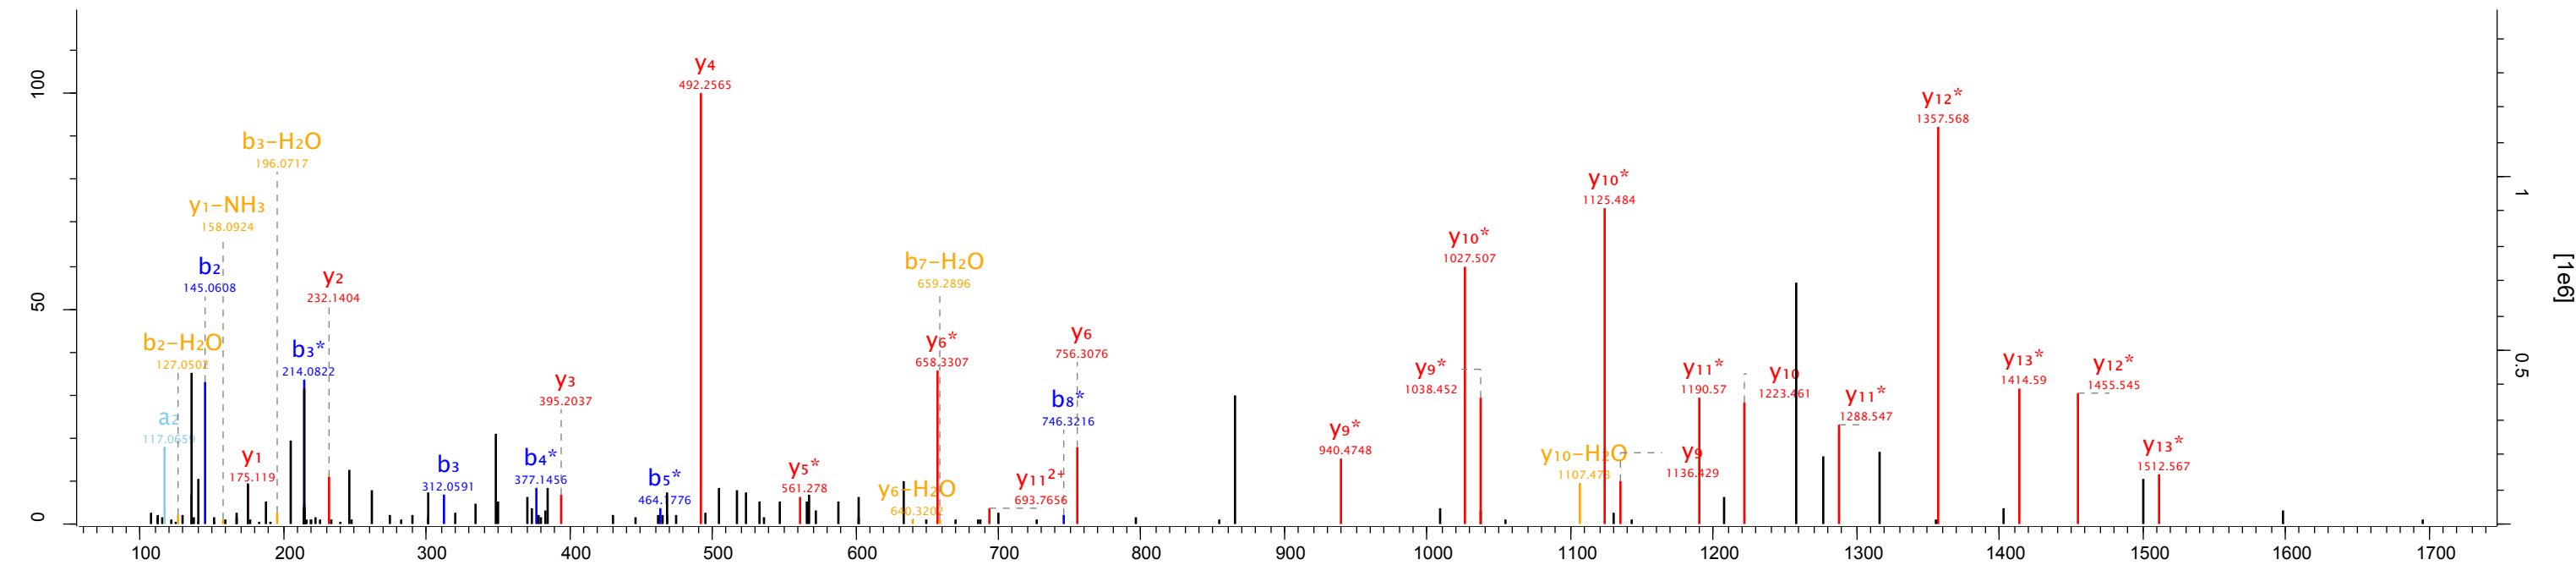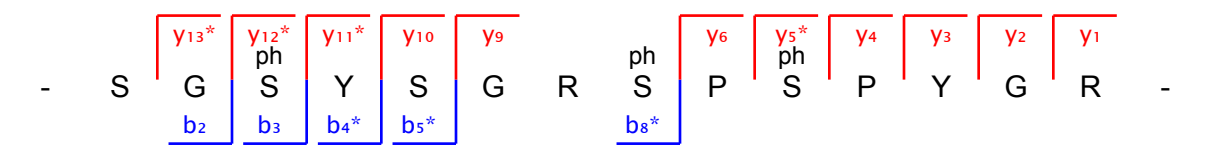

Raw file: 20150812\_A375SR\_Phospho\_BR1\_02  
 Scan: 7670 Method: FTMS; HCD Score: 65.18 m/z: 567.58 Gene names: SRRM1

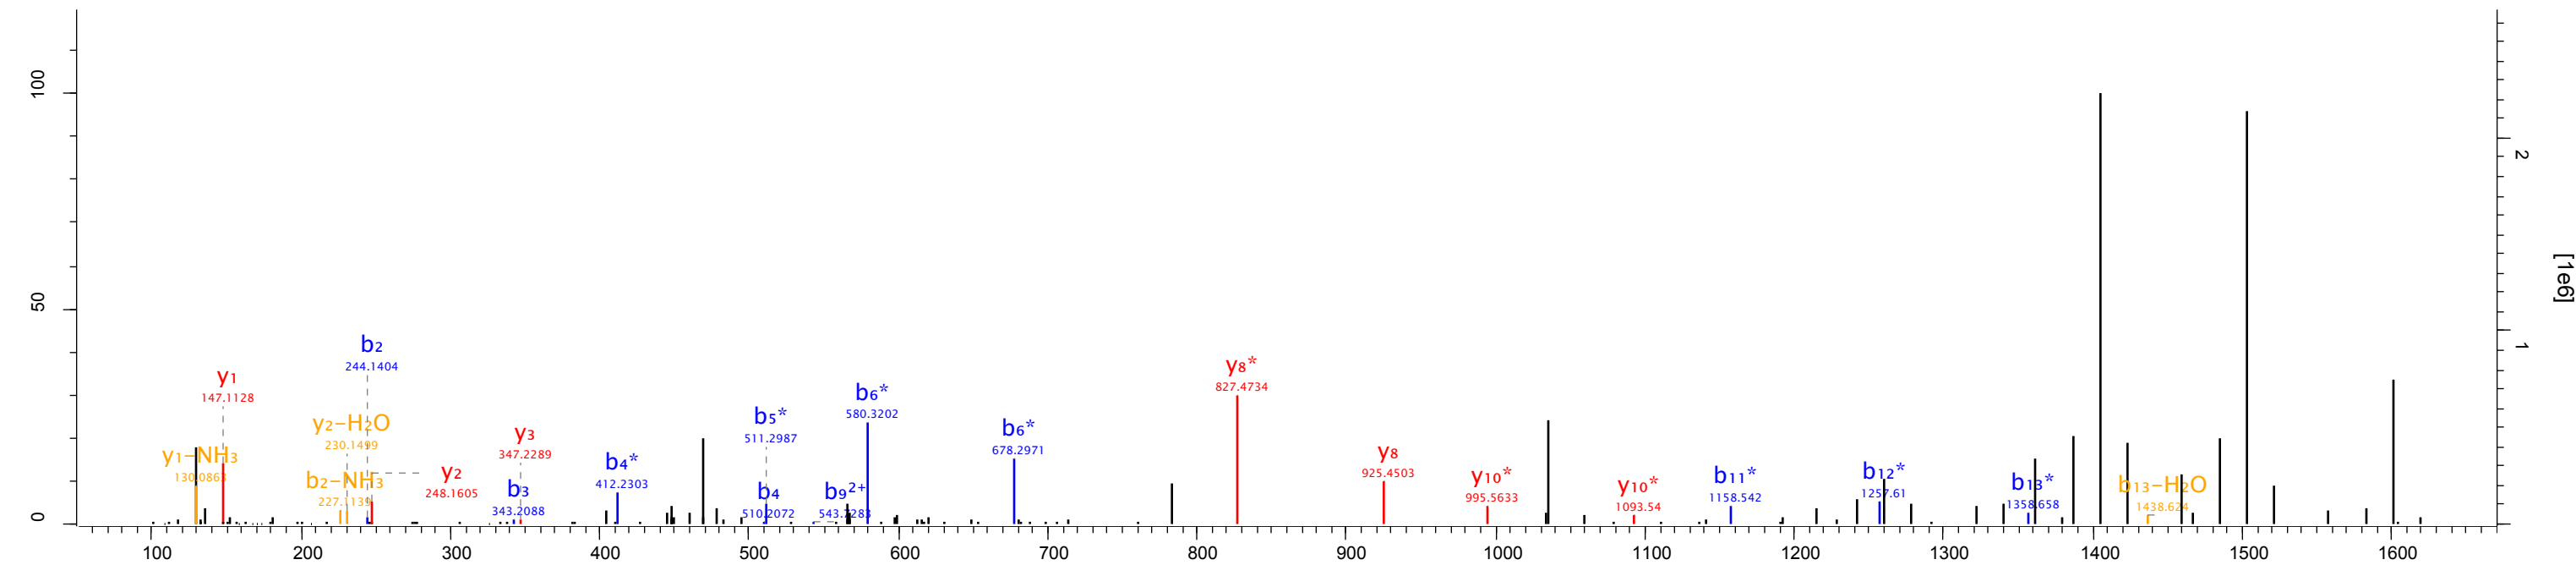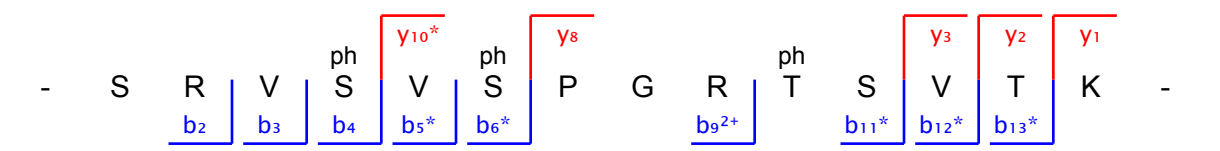



Raw file 20150812\_A375SR\_Phospho\_BR1\_02 Scan 7900 Method FTMS; HCD Score 152.38 m/z 693.96 Gene names GTF2F1

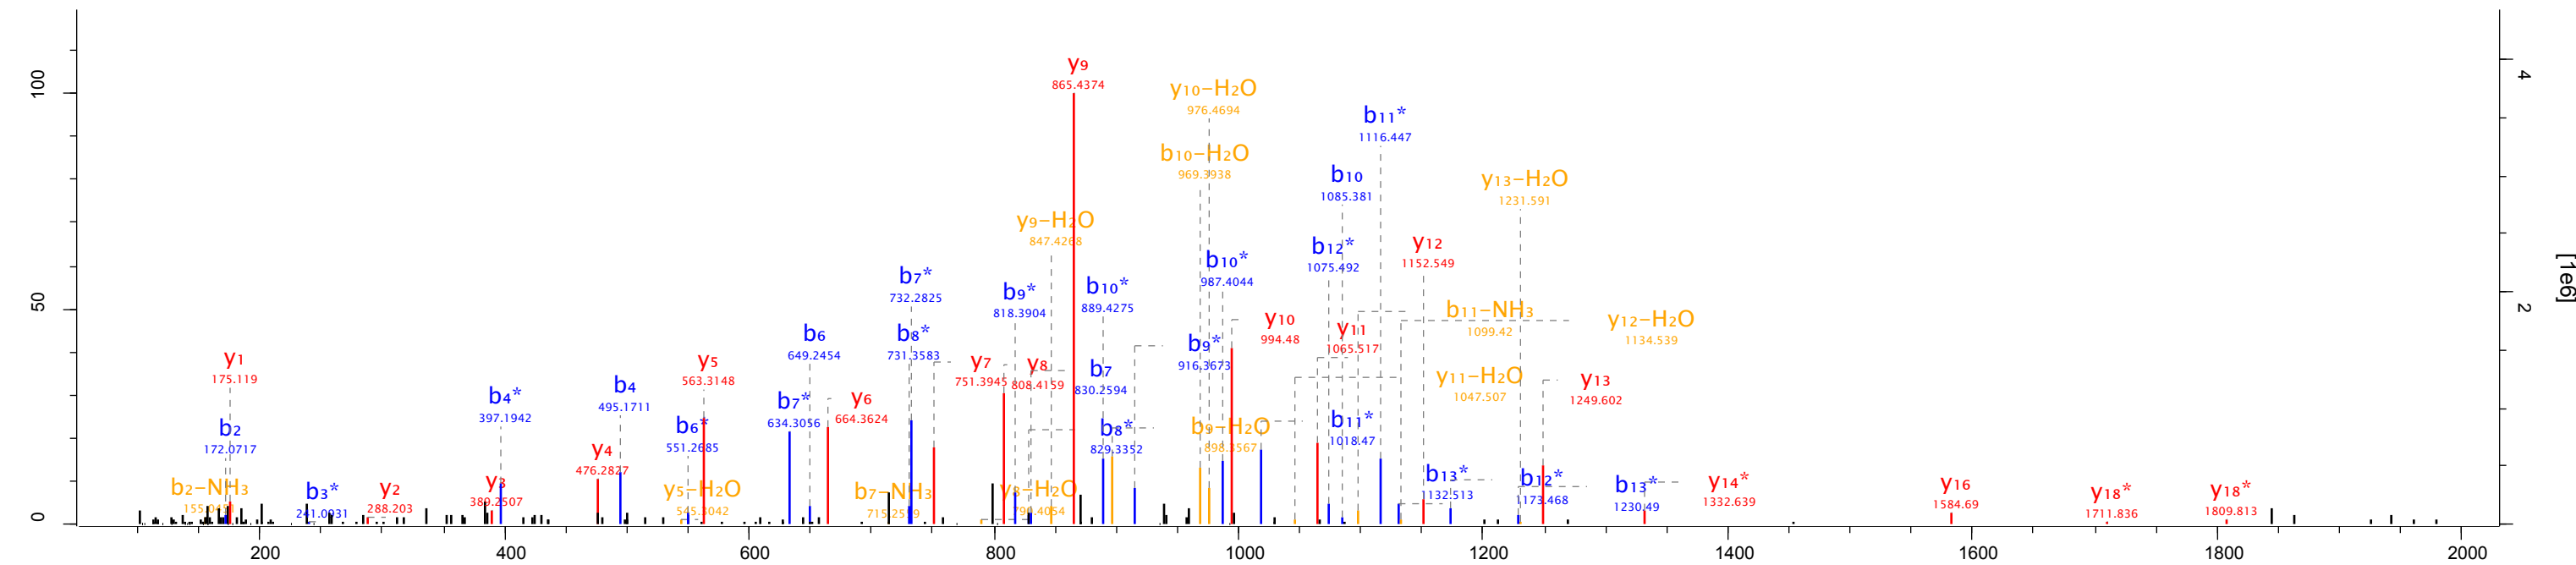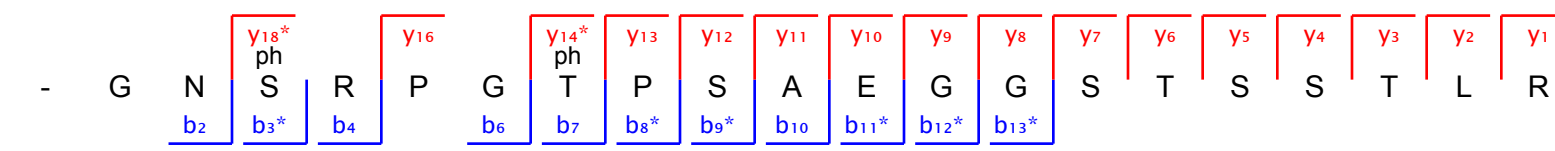

Raw file 20150812\_A375SR\_Phospho\_BR1\_02 Scan 8060 Method FTMS; HCD Score 128.06 m/z 730.66 Gene names DPYSL3

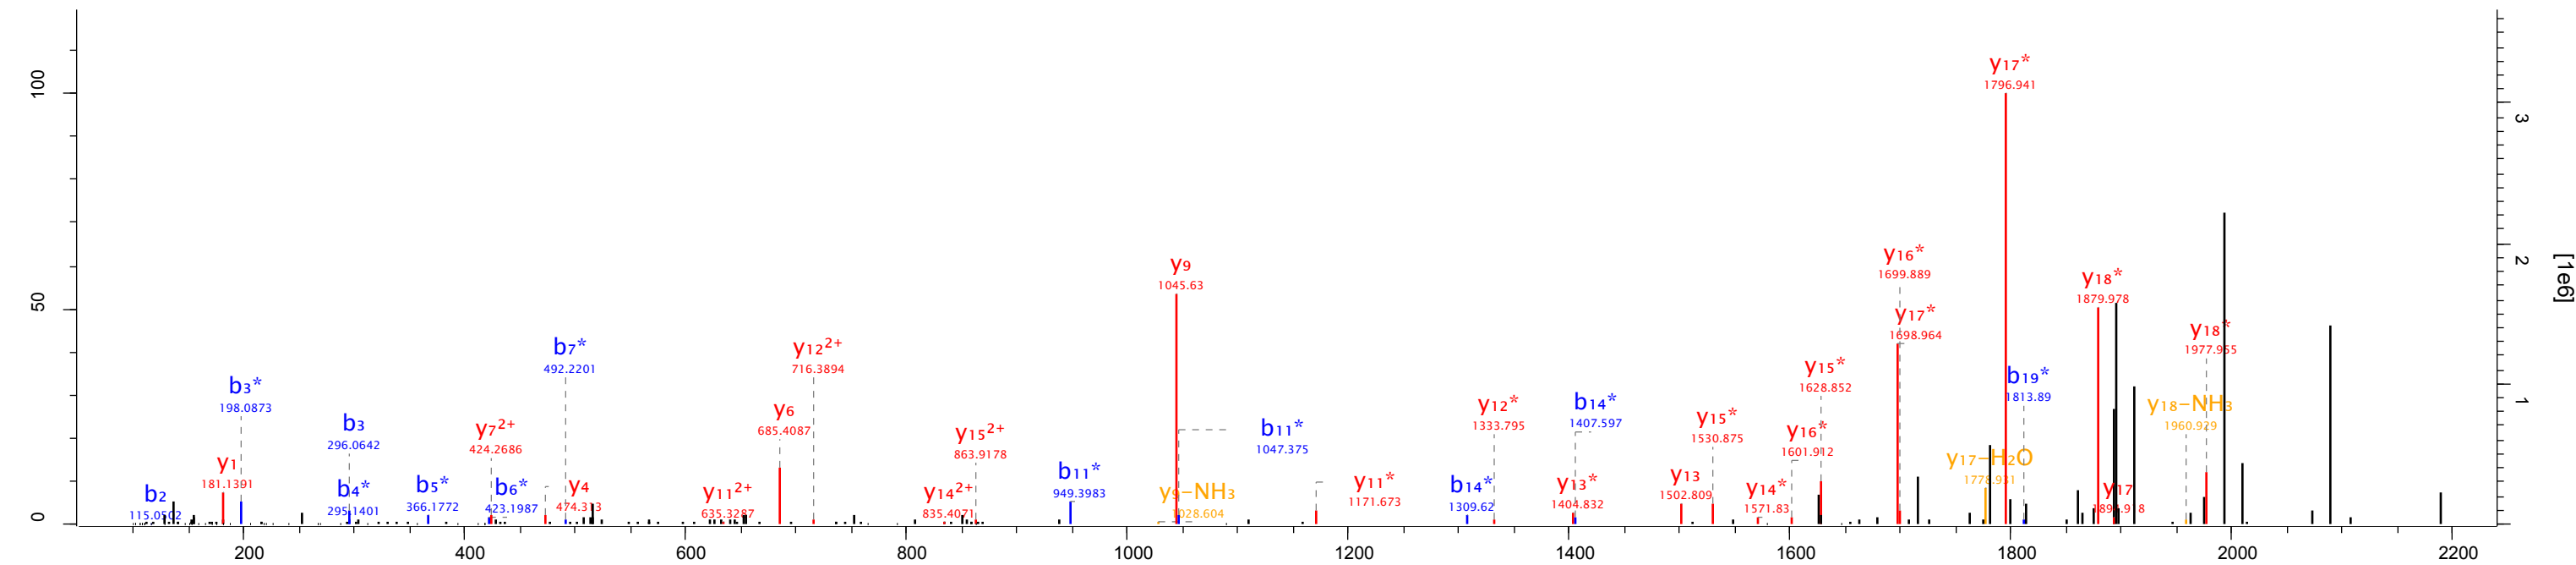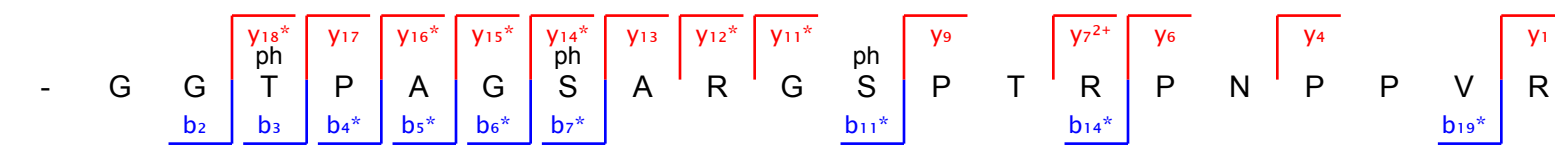

Raw file: 20150812\_A375SR\_Phospho\_BR1\_02  
 Scan: 8670 Method: FTMS; HCD Score: 125.51 m/z: 769.75 Gene names: ZMYM4

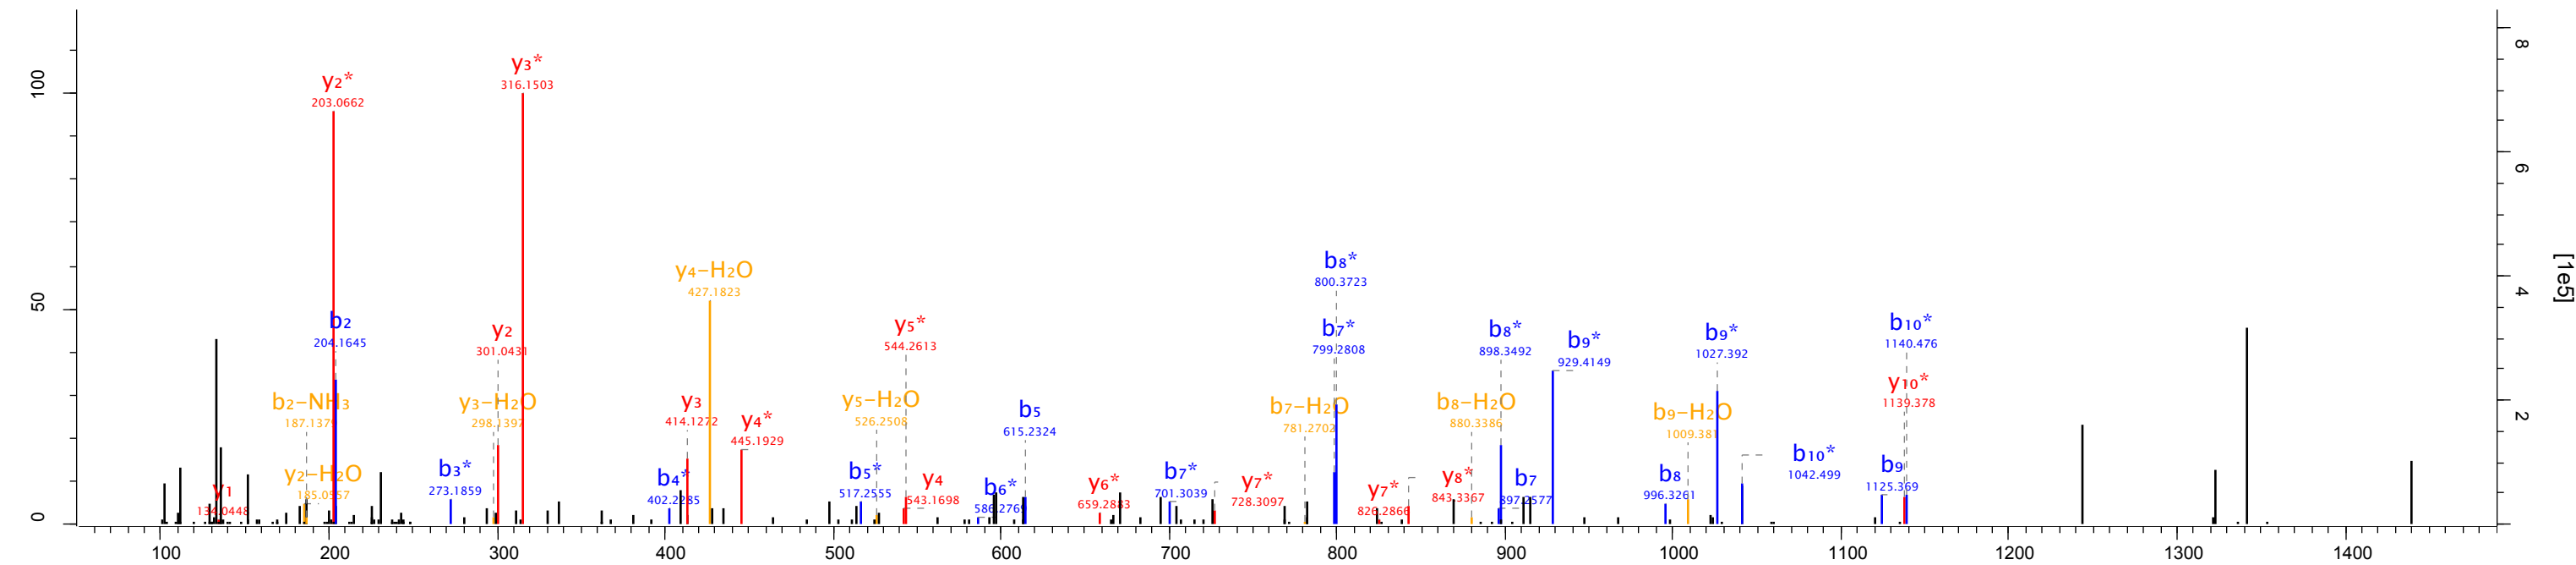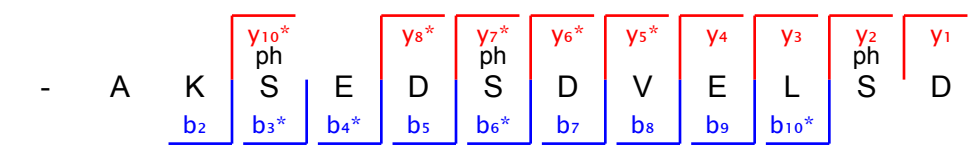

Raw file: 20150812\_A375SR\_Phospho\_BR1\_02  
 Scan: 9280 Method: FTMS; HCD Score: 188.9 m/z: 759.3 Gene names: CEP170

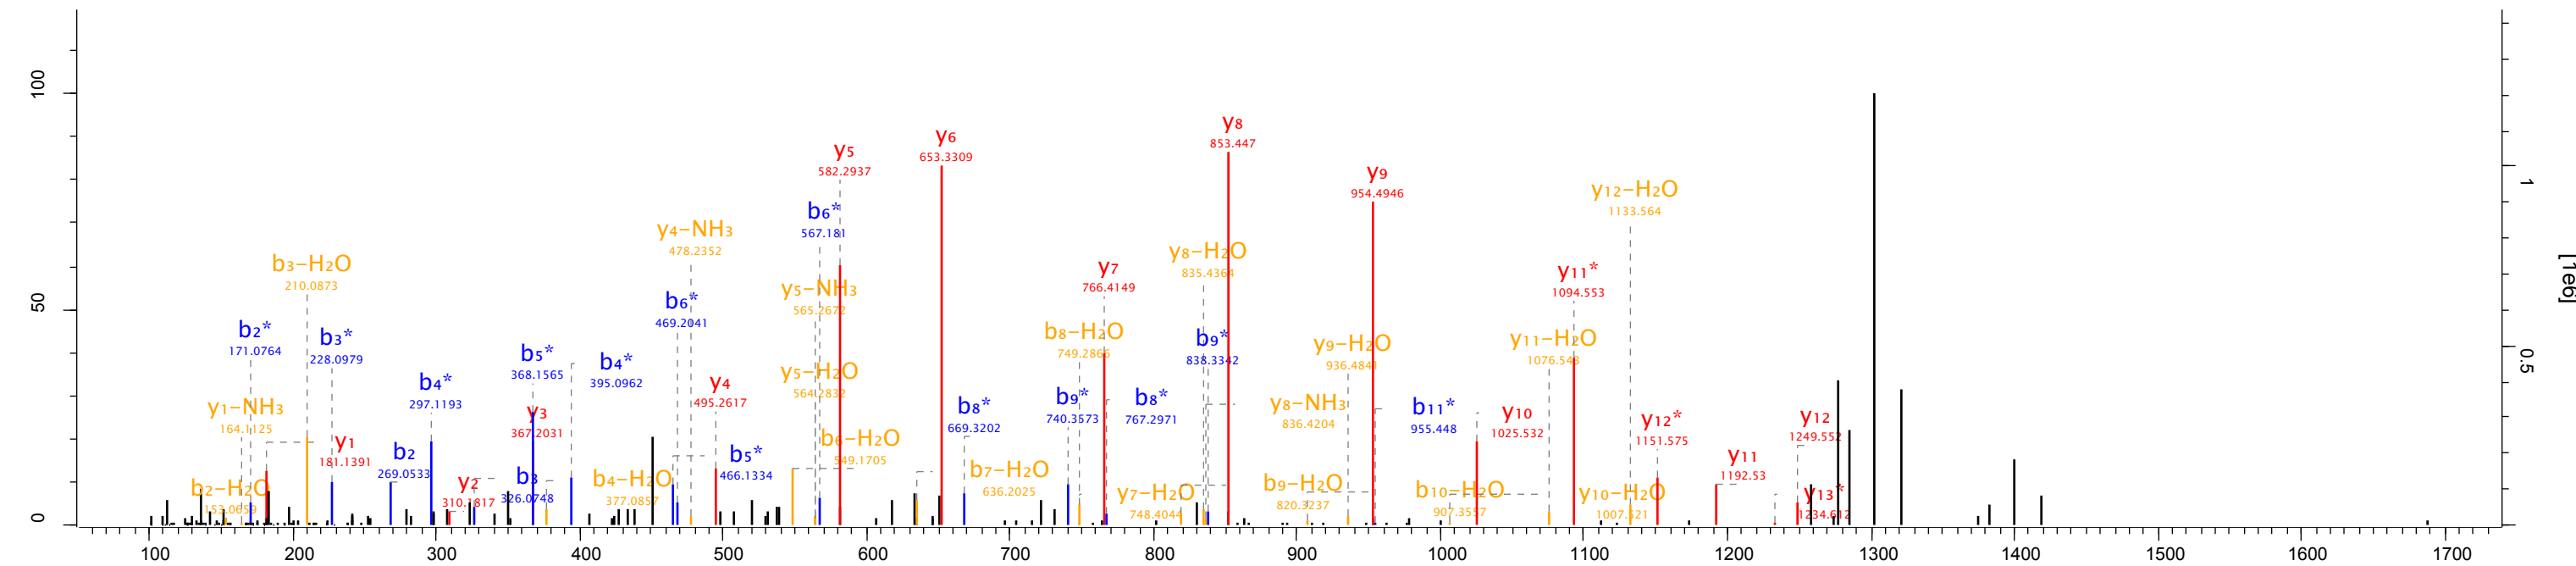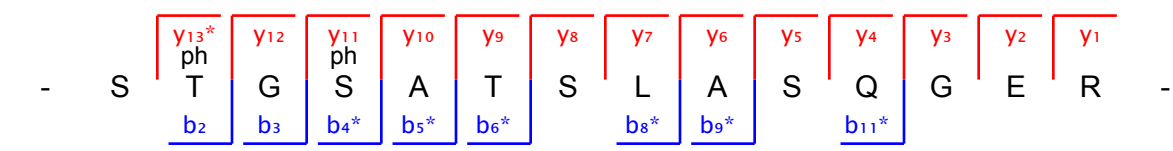

Raw file: 20150812\_A375SR\_Phospho\_BR1\_02  
 Scan: 9700 Method: FTMS; HCD Score: 135.31 m/z: 905.8 Gene names: DTD1

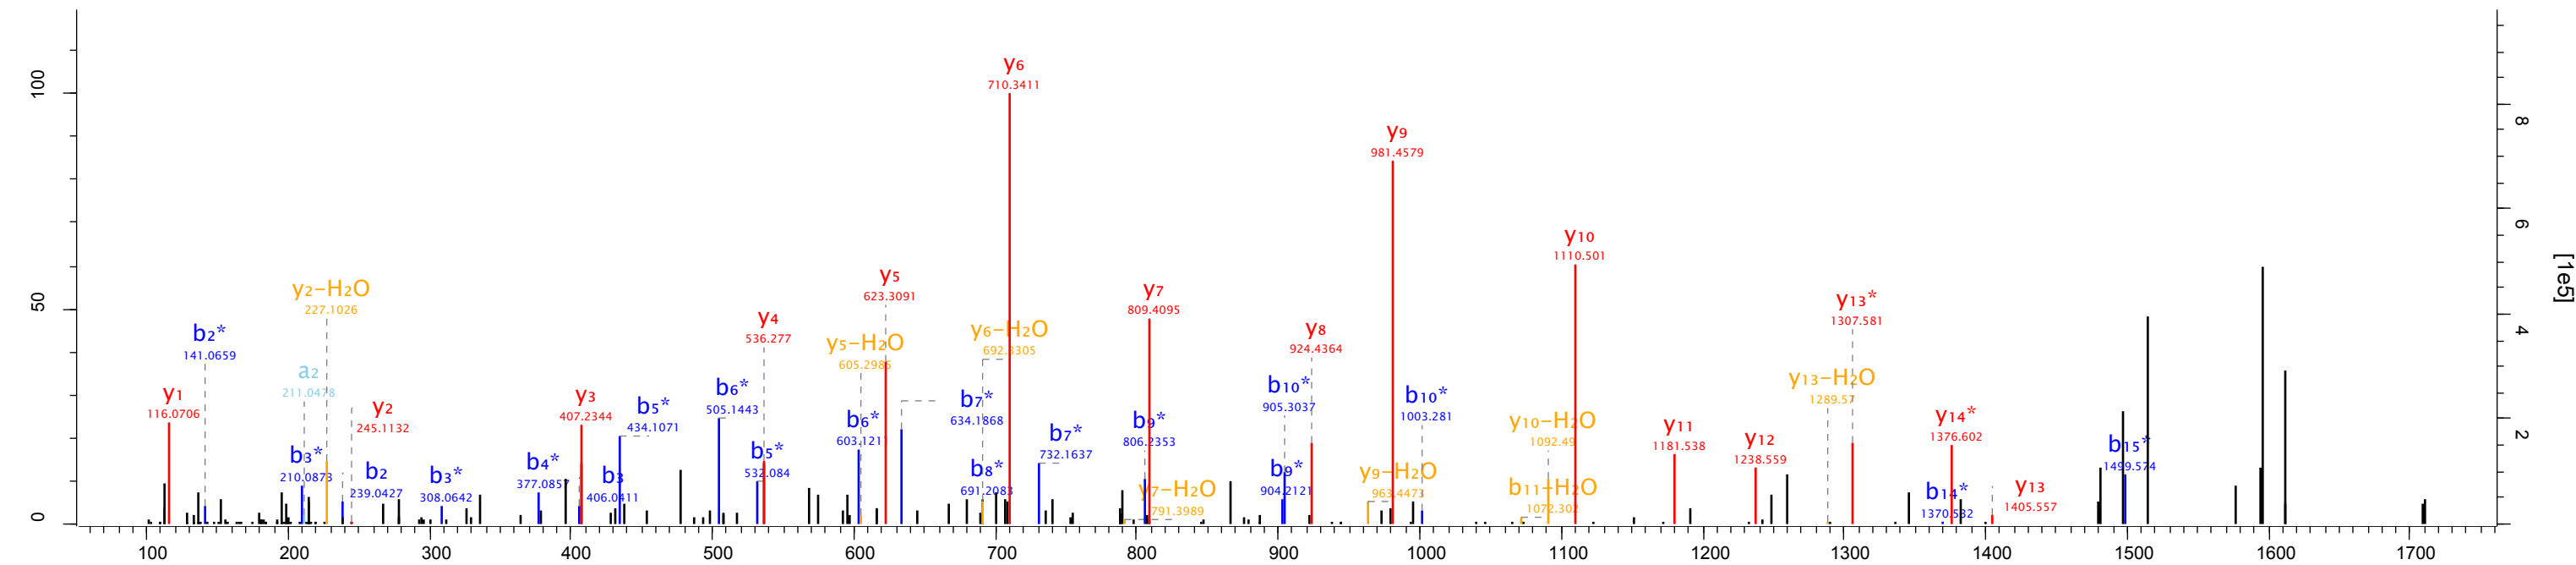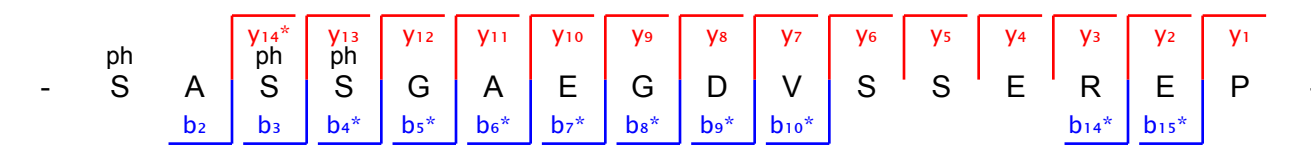

Raw file: 20150812\_A375SR\_Phospho\_BR1\_03  
 Scan: 10180 Method: FTMS; HCD Score: 232.27 m/z: 945.06 Gene names: SMC4

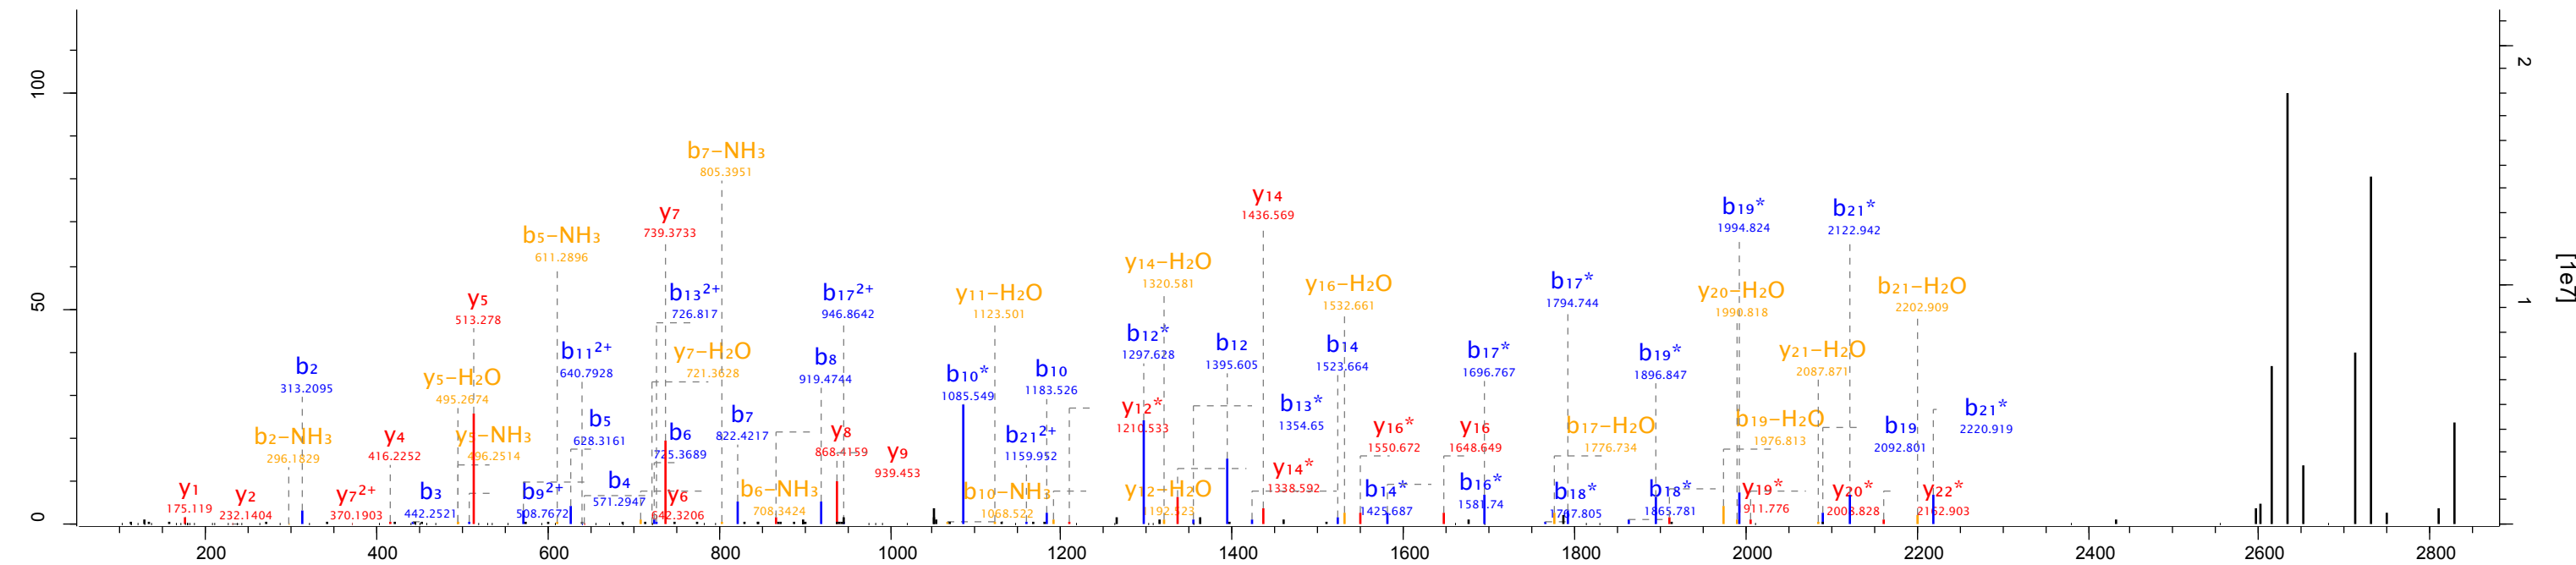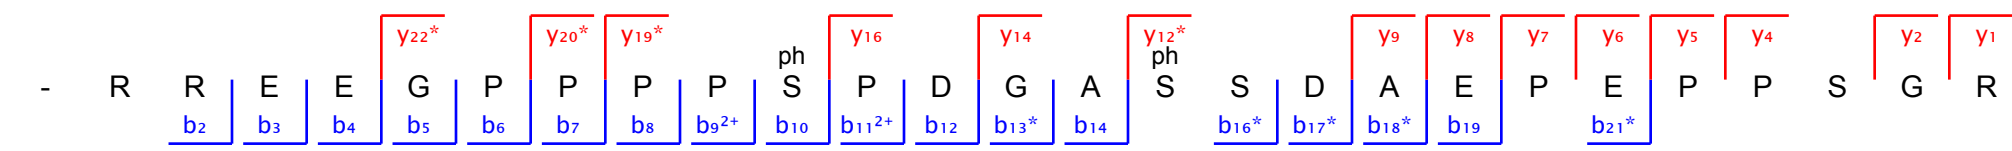

Raw file: 20150812\_A375SR\_Phospho\_BR1\_03  
 Scan: 10250 Method: FTMS; HCD Score: 118.52 m/z: 781.37 Gene names: KIF21A

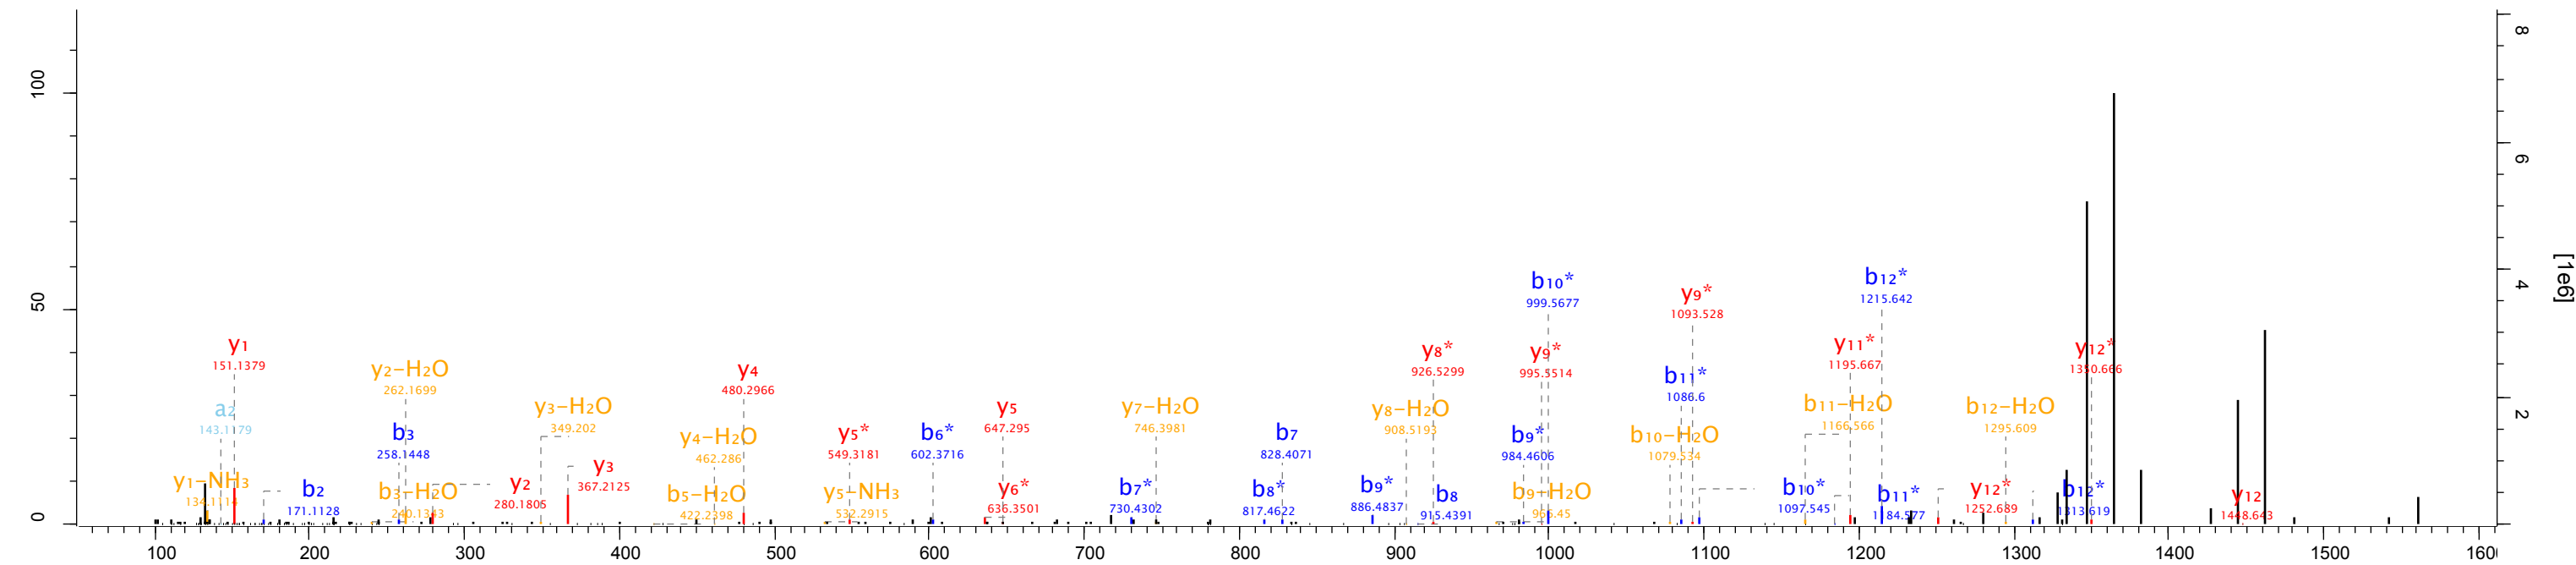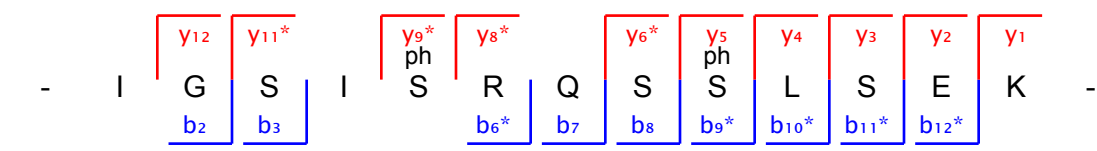

Raw file: 20150812\_A375SR\_Phospho\_BR1\_03  
 Scan: 10460 Method: FTMS; HCD Score: 135.58 m/z: 704.79 Gene names: PPP1R12A

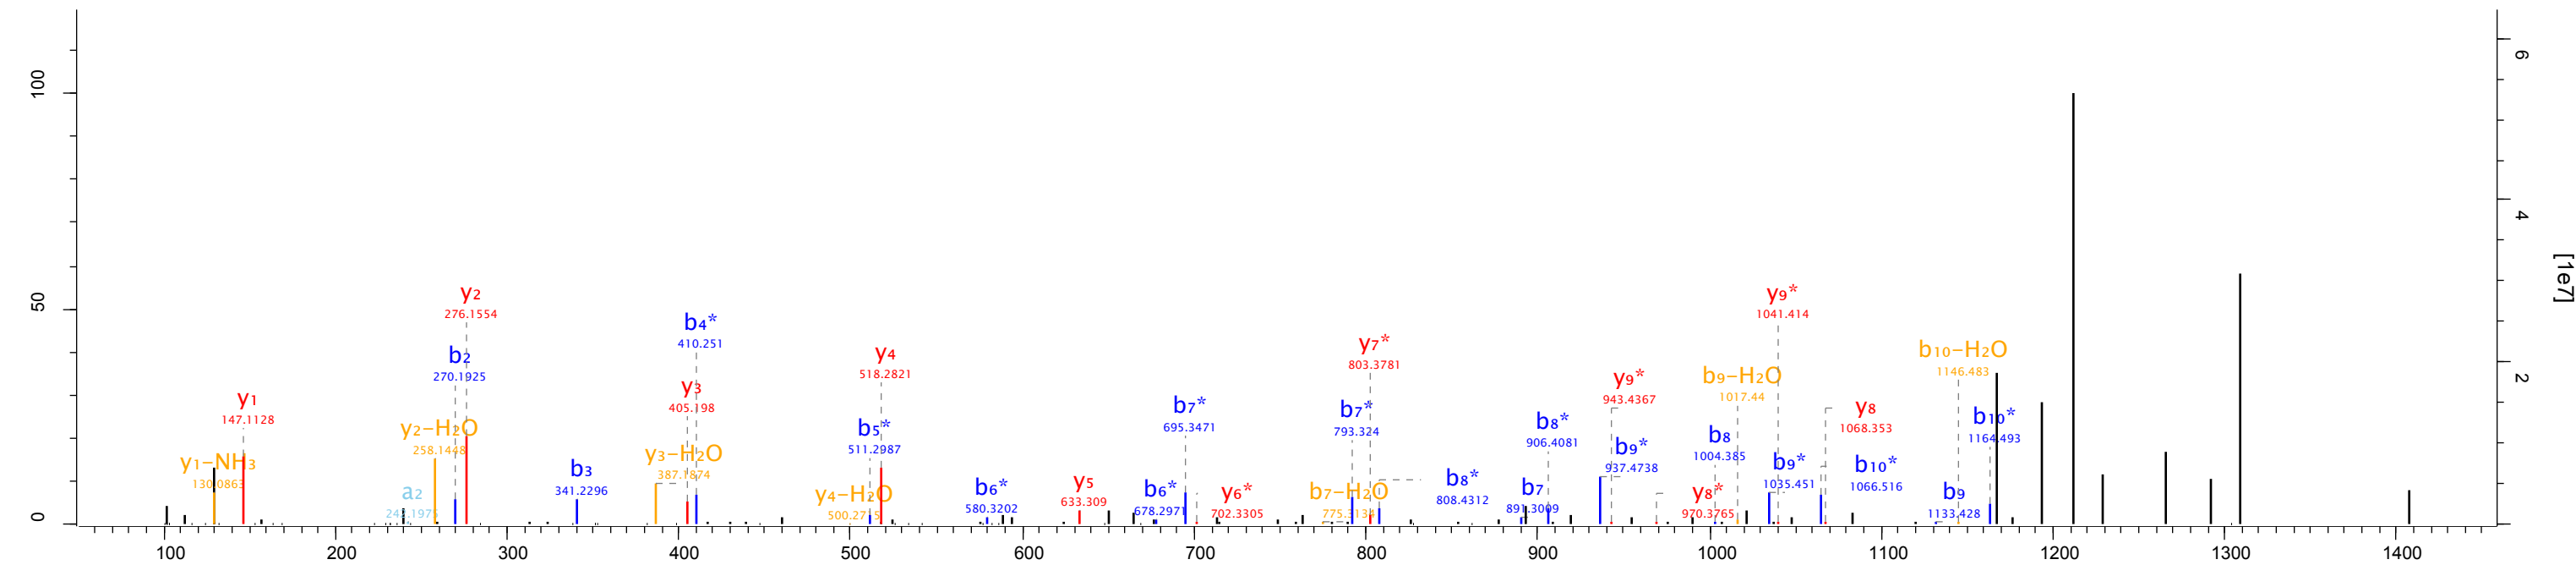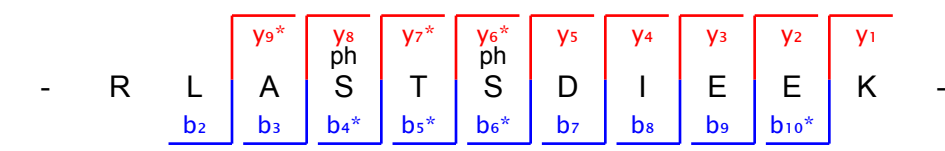



Raw file  
 20150812\_A375SR\_Phospho\_BR1\_03  
 Scan 10480 Method FTMS; HCD Score 218.04 m/z 1006 Gene names CAP1

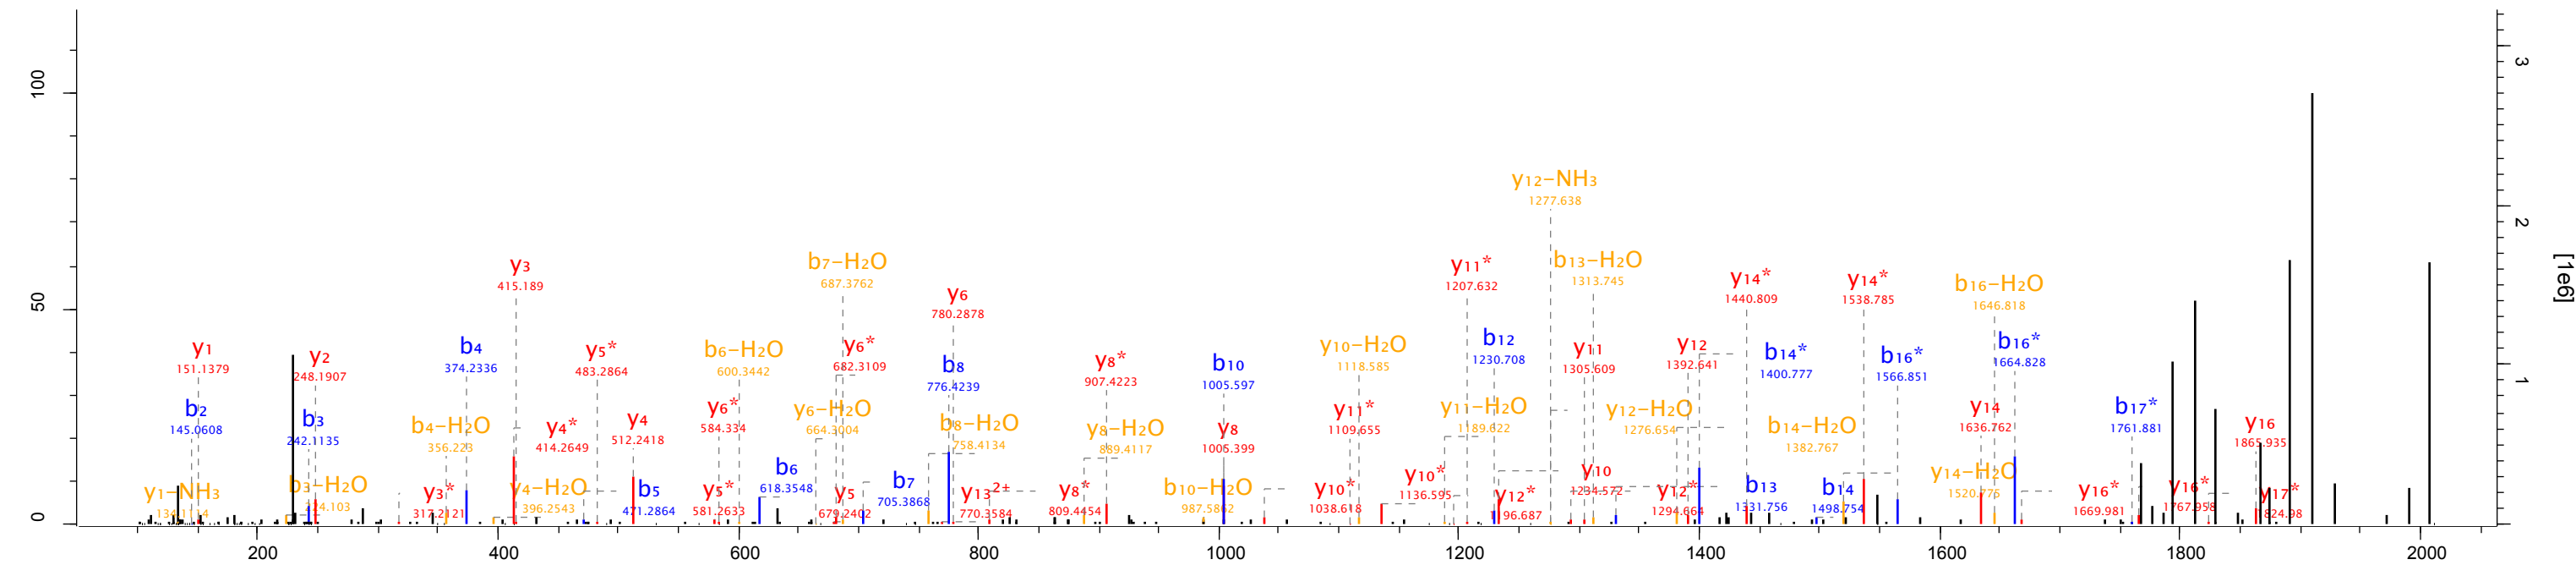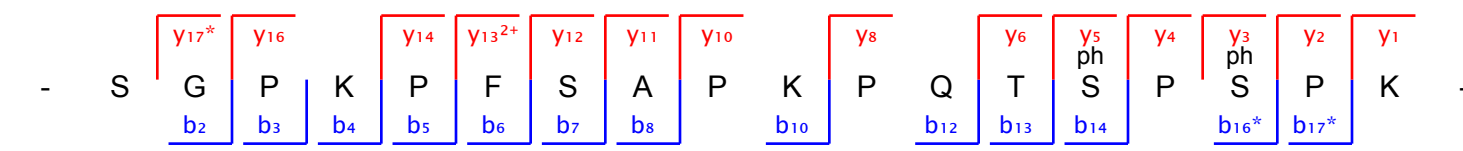

Raw file: 20150812\_A375SR\_Phospho\_BR1\_03  
 Scan: 10650 Method: FTMS; HCD Score: 139.57 m/z: 1070.98 Gene names: RERE

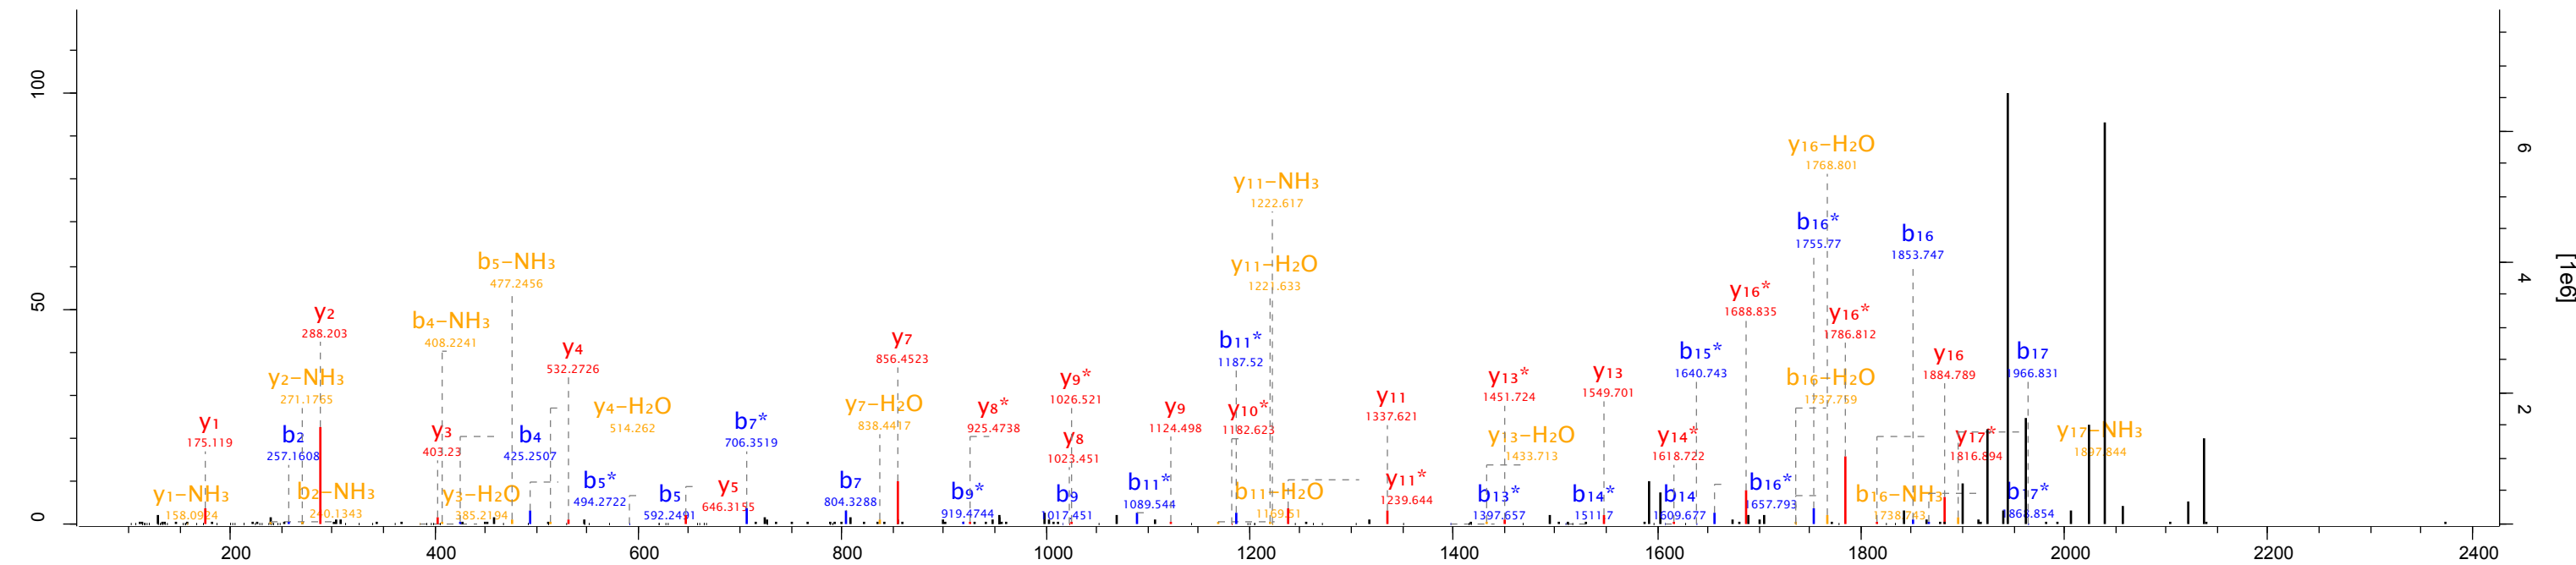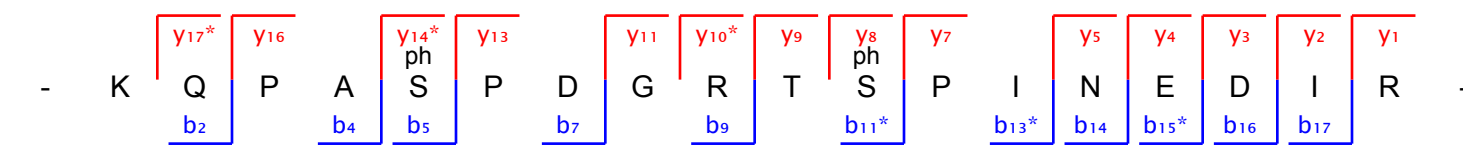

Raw file: 20150812\_A375SR\_Phospho\_BR1\_03  
 Scan: 10660 Method: FTMS; HCD Score: 80.39 m/z: 691.81 Gene names: DAP

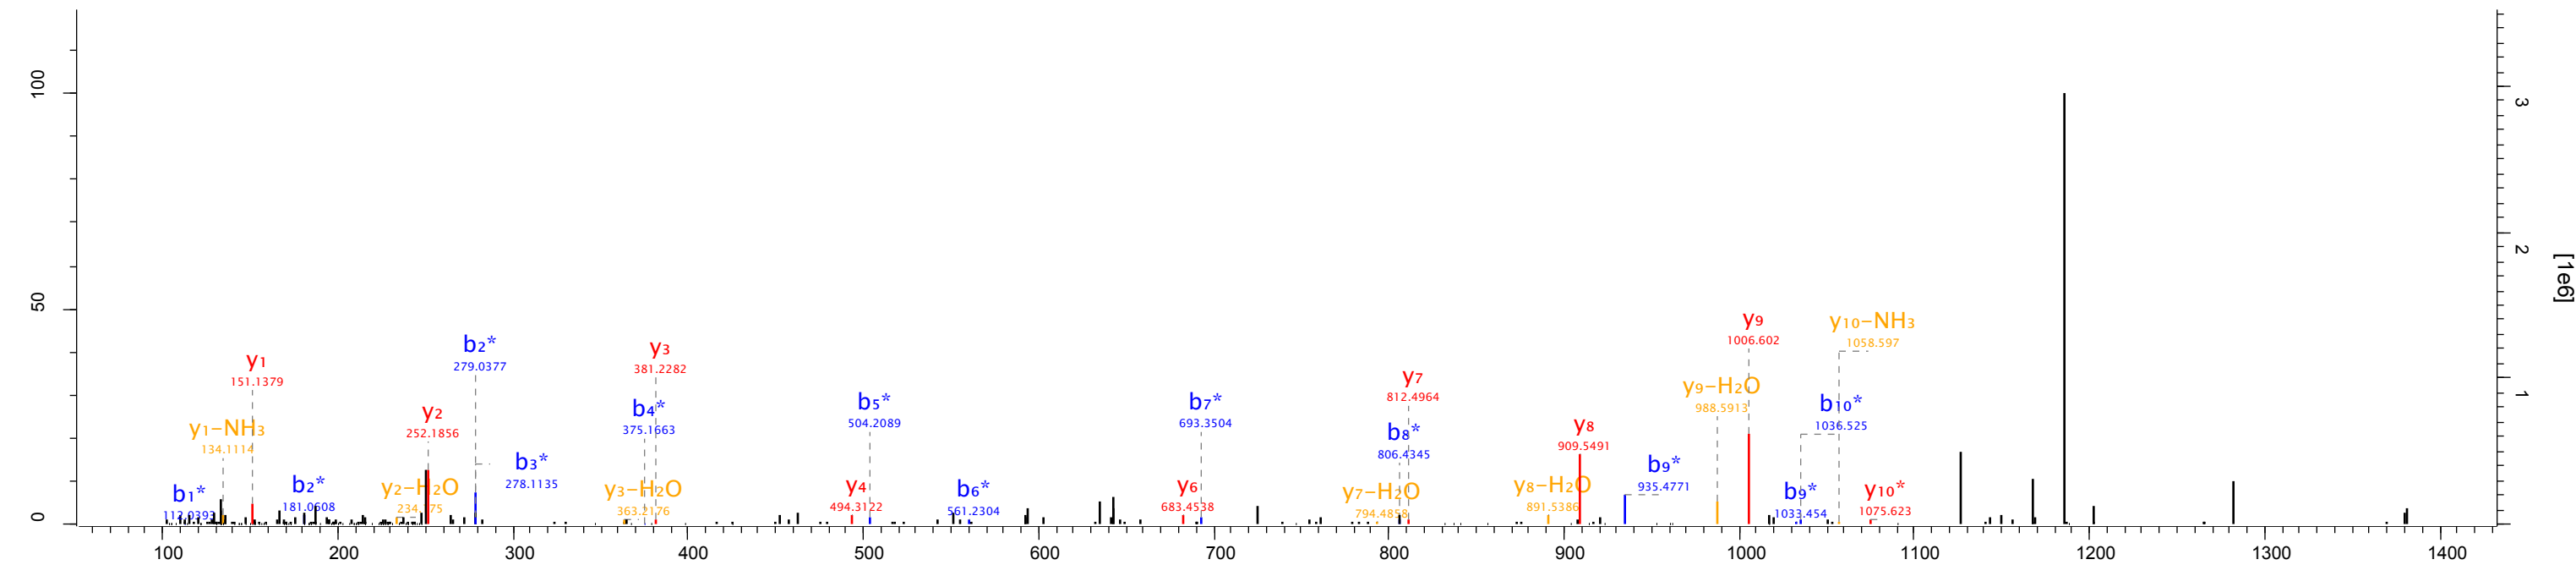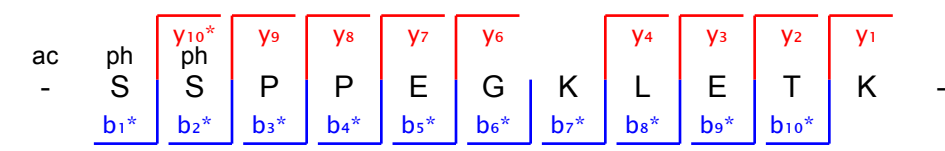

Raw file: 20150812\_A375SR\_Phospho\_BR1\_03  
 Scan: 10880 Method: FTMS; HCD Score: 120.54 m/z: 887.38 Gene names: PUM2

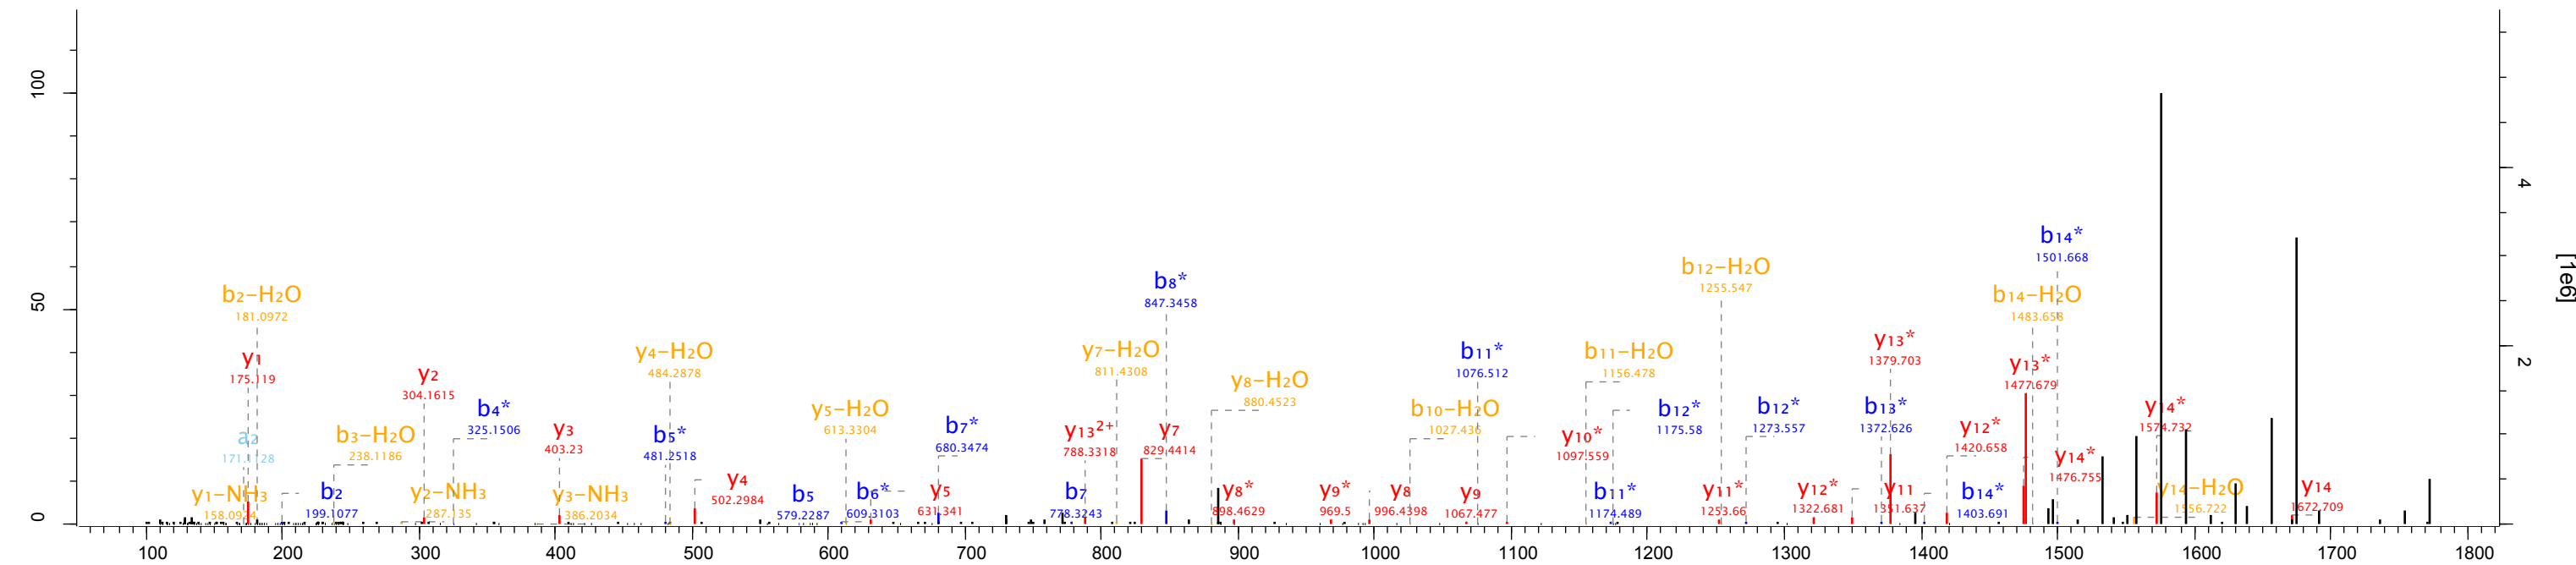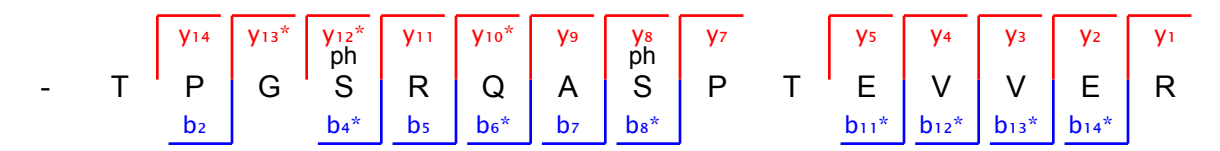

Raw file: 20150812\_A375SR\_Phospho\_BR1\_03  
 Scan: 10940 Method: FTMS; HCD Score: 237.5 m/z: 1094.48 Gene names: MEPCE

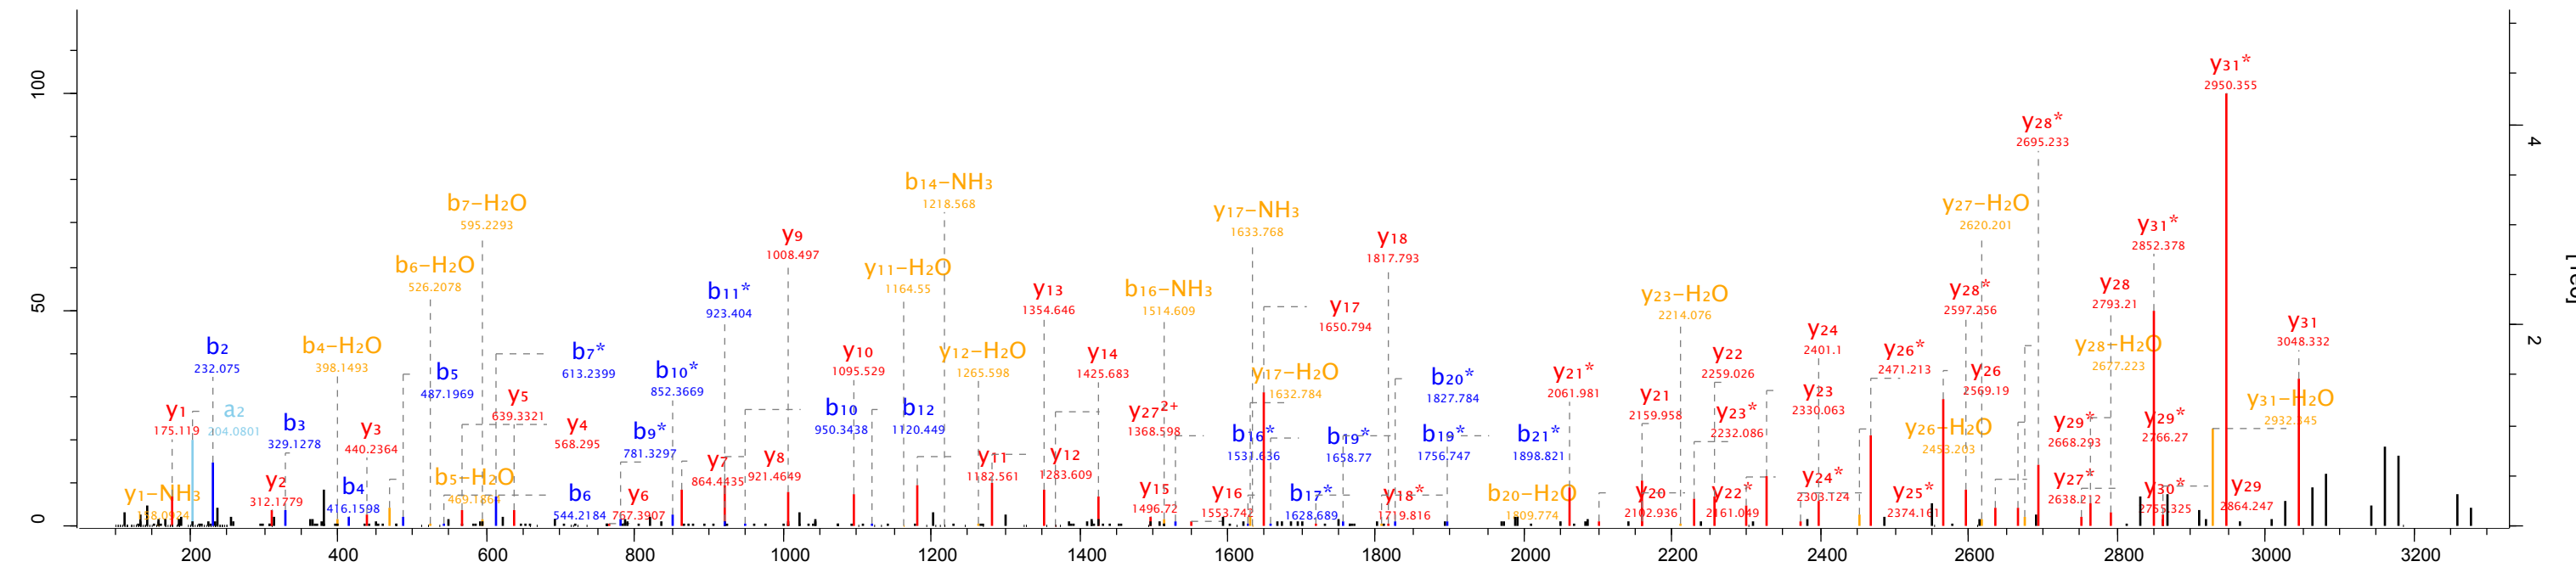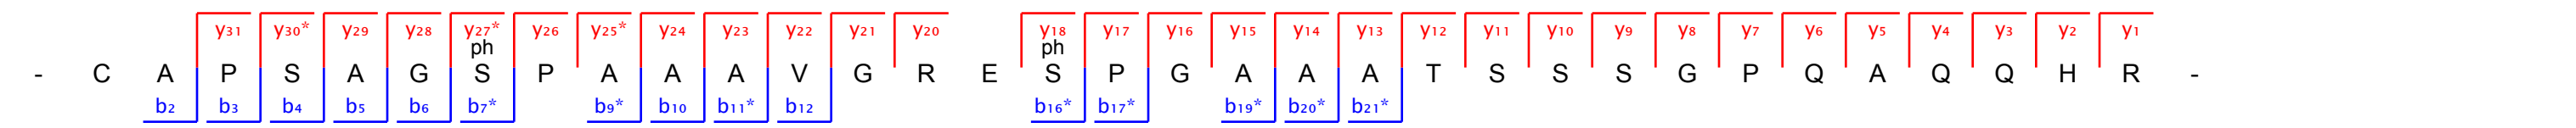

Raw file: 20150812\_A375SR\_Phospho\_BR1\_03  
 Scan: 11090 Method: FTMS; HCD Score: 435.68 m/z: 1084.91 Gene names: FNBP4

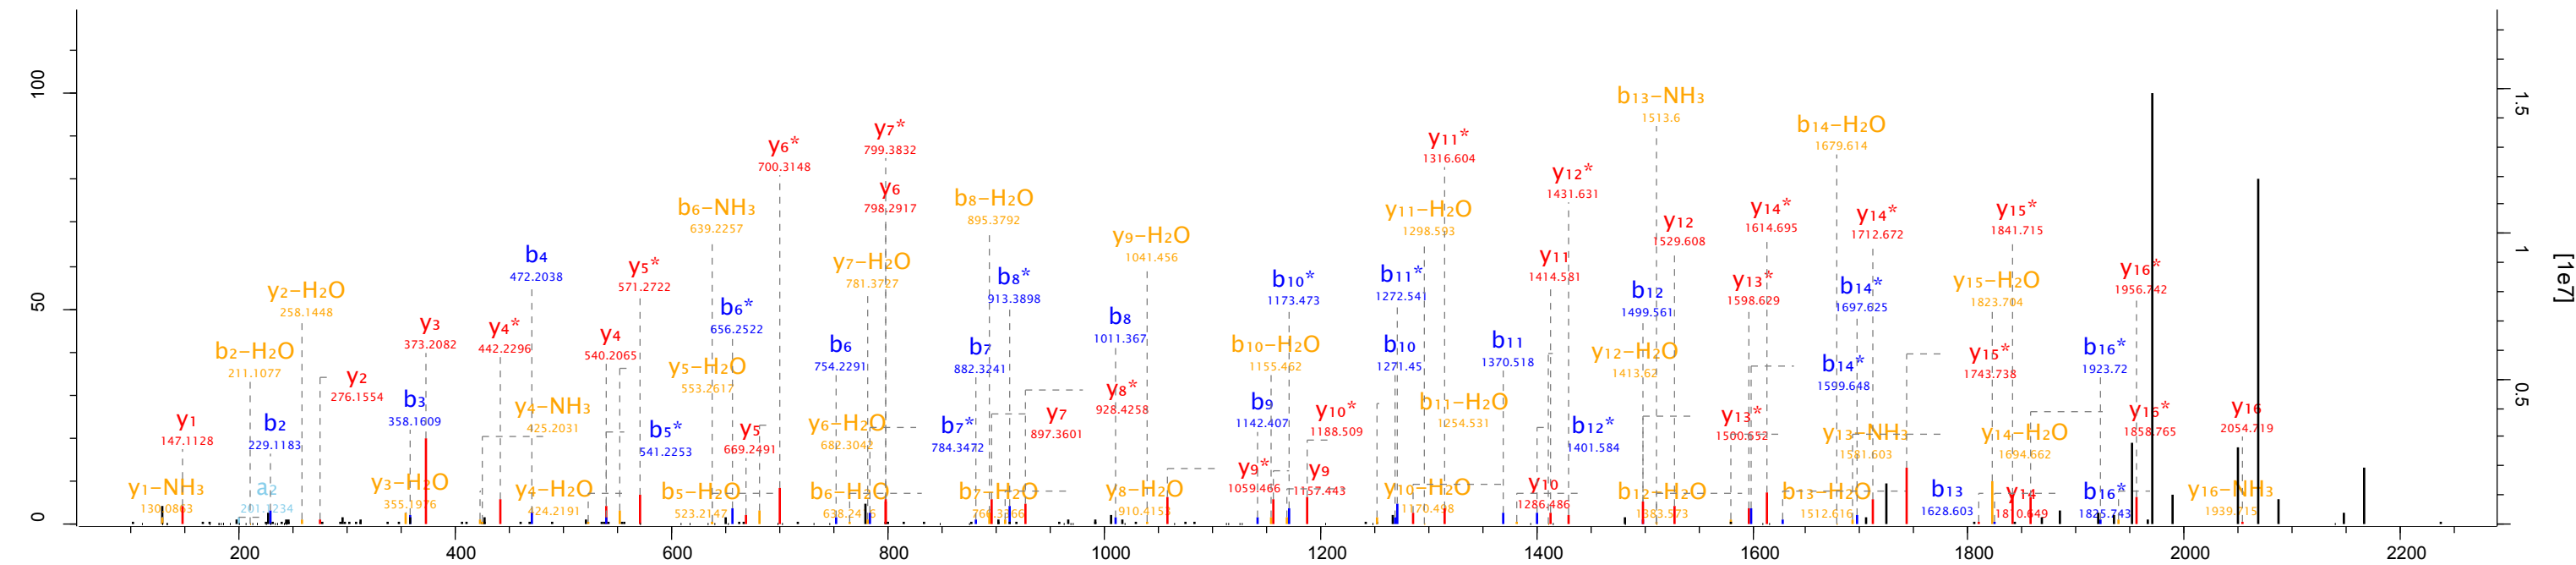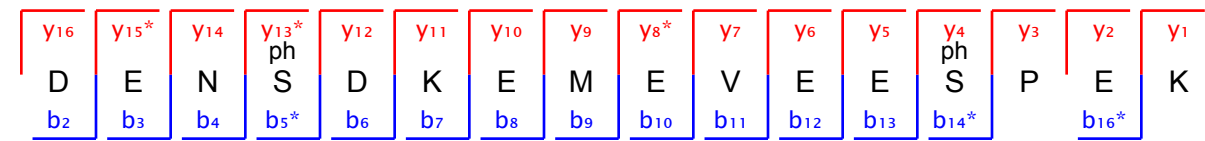

Raw file: 20150812\_A375SR\_Phospho\_BR1\_03  
 Scan: 11100 Method: FTMS; HCD Score: 291.24 m/z: 903.92 Gene names: IRS2

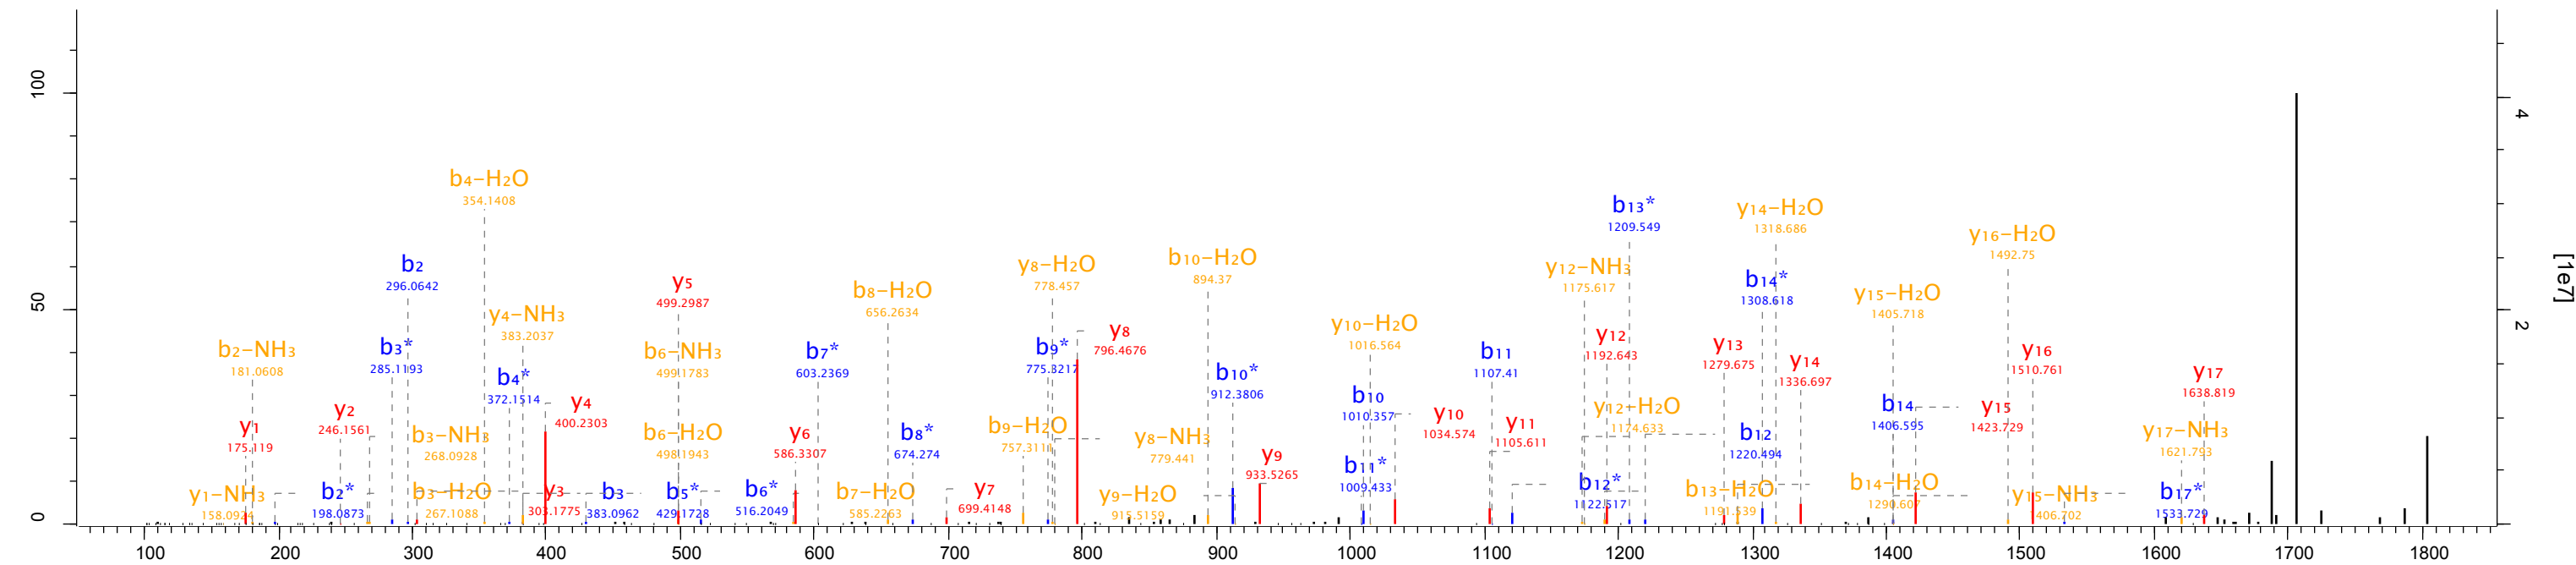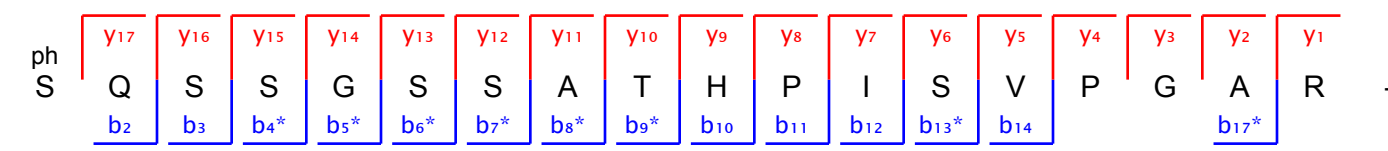

Raw file  
20150812\_A375SR\_Phospho\_BR1\_03

Scan 11180 Method FTMS; HCD Score 133.25 m/z 927.4 Gene names NDRG1

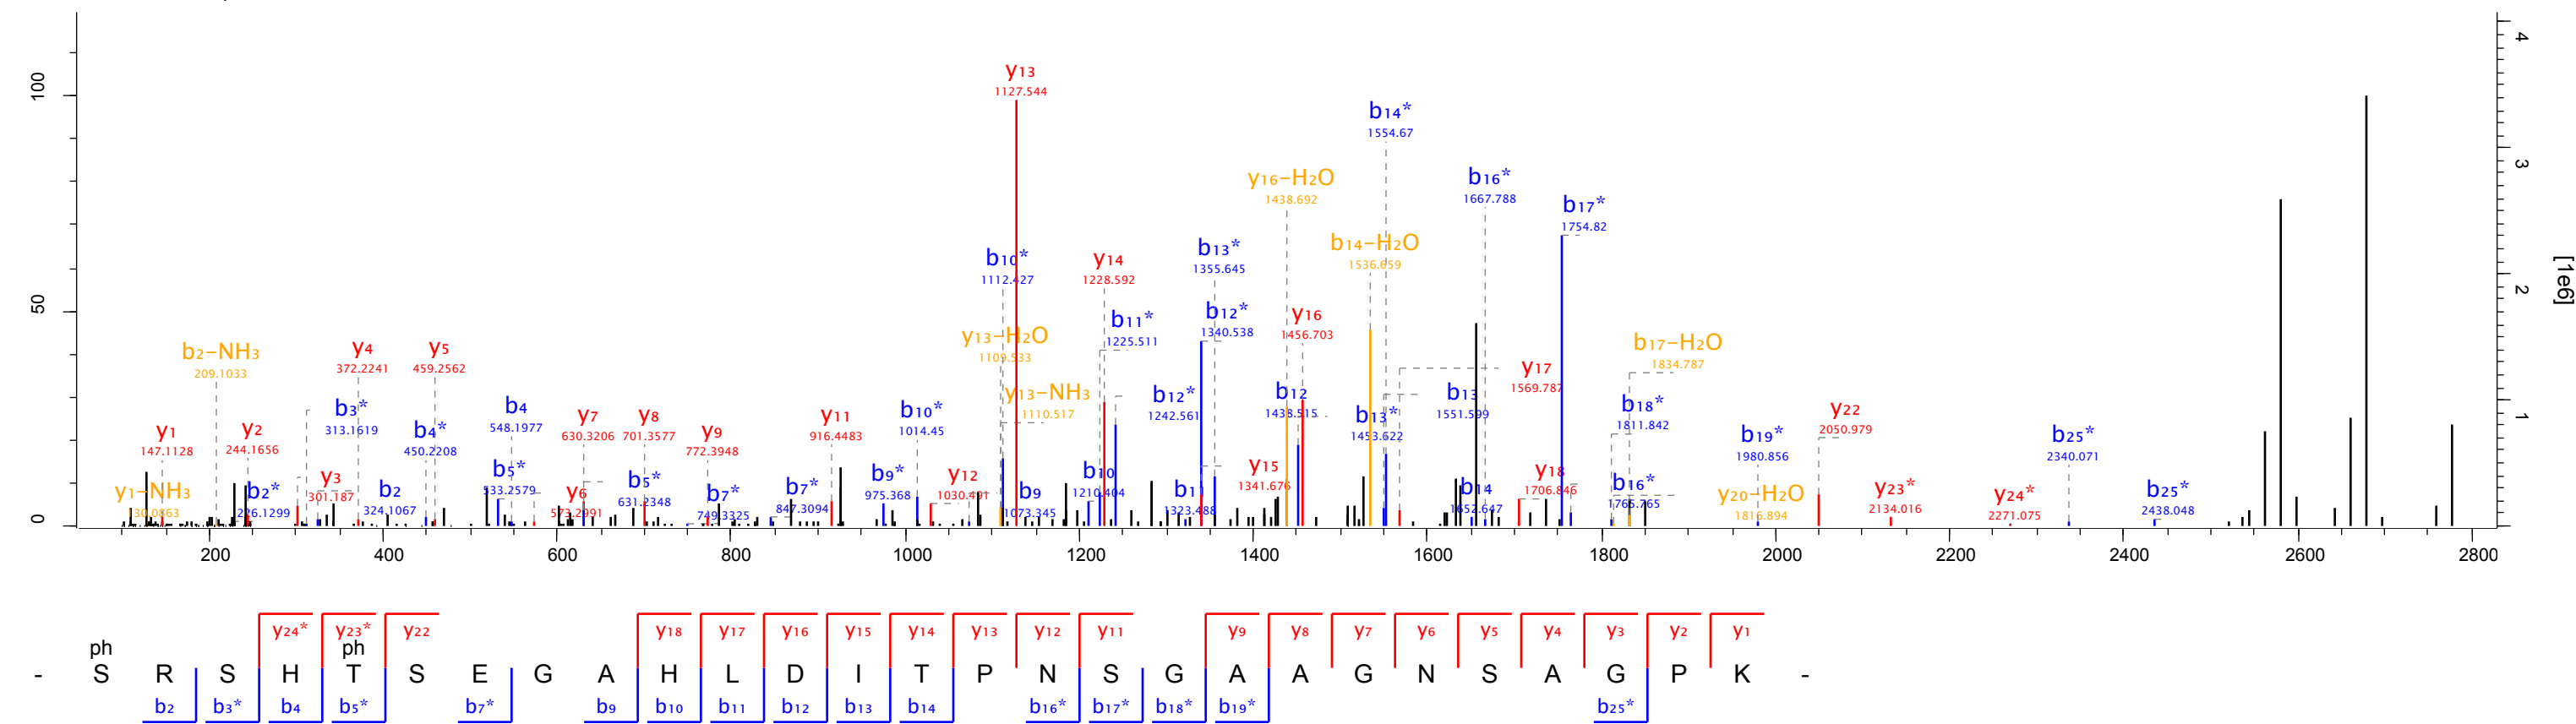



Raw file: 20150812\_A375SR\_Phospho\_BR1\_03  
 Scan: 11520 Method: FTMS; HCD Score: 211.67 m/z: 793.83 Gene names: TRPS1

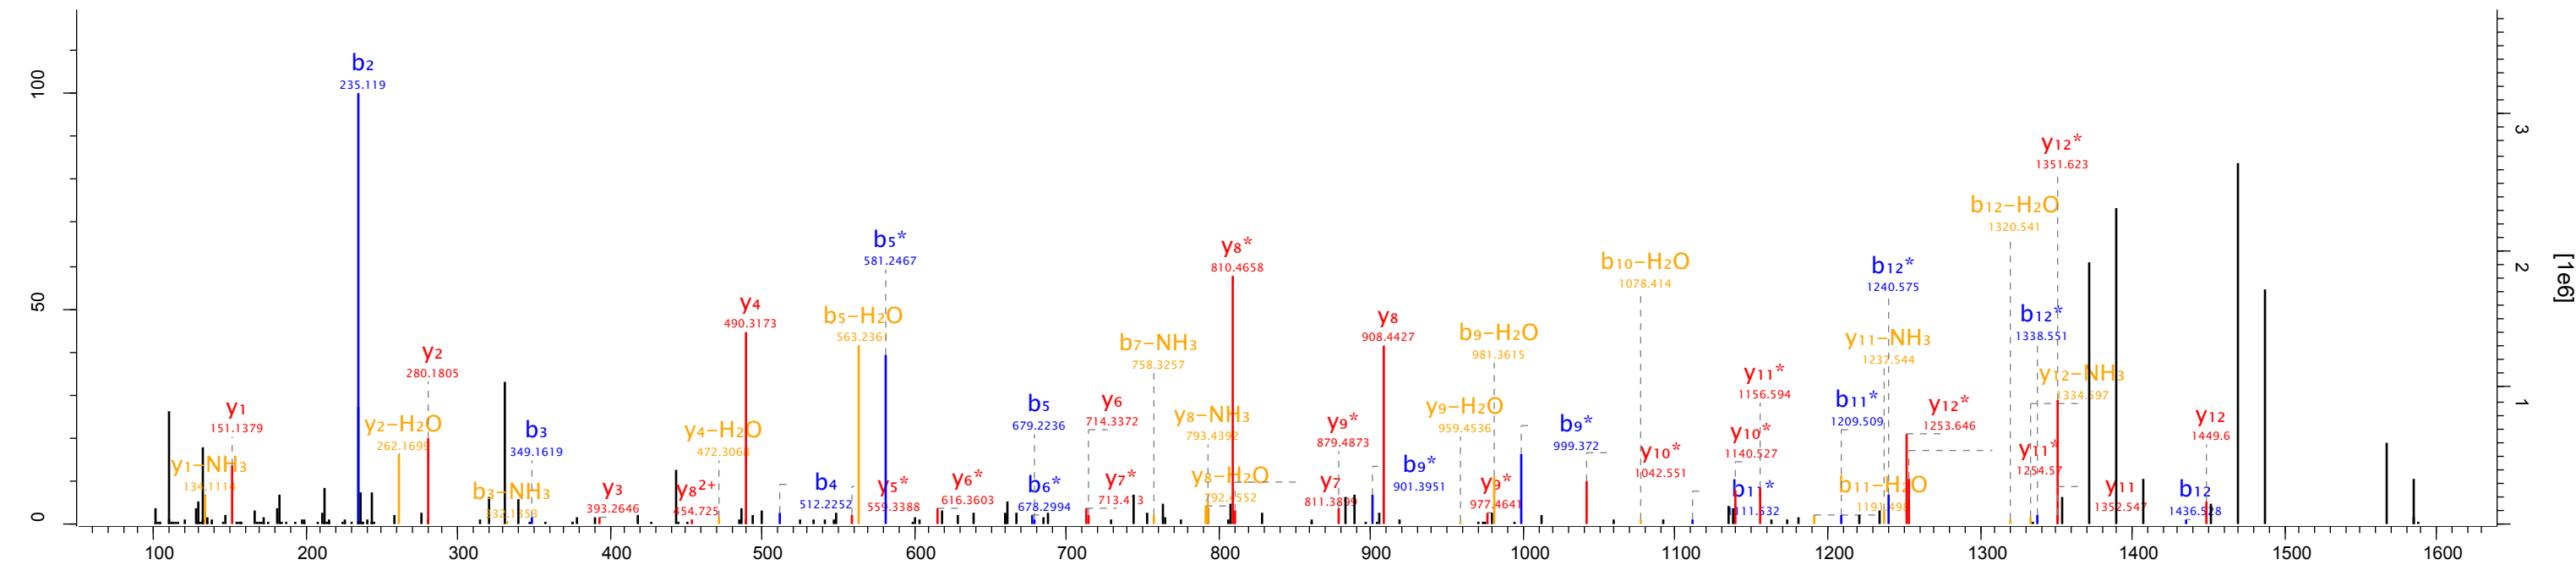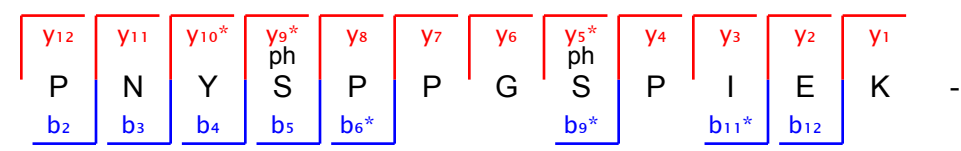

Raw file 20150812\_A375SR\_Phospho\_BR1\_03 Scan 11730 Method FTMS; HCD Score 172.74 m/z 985.43 Gene names KDM2B

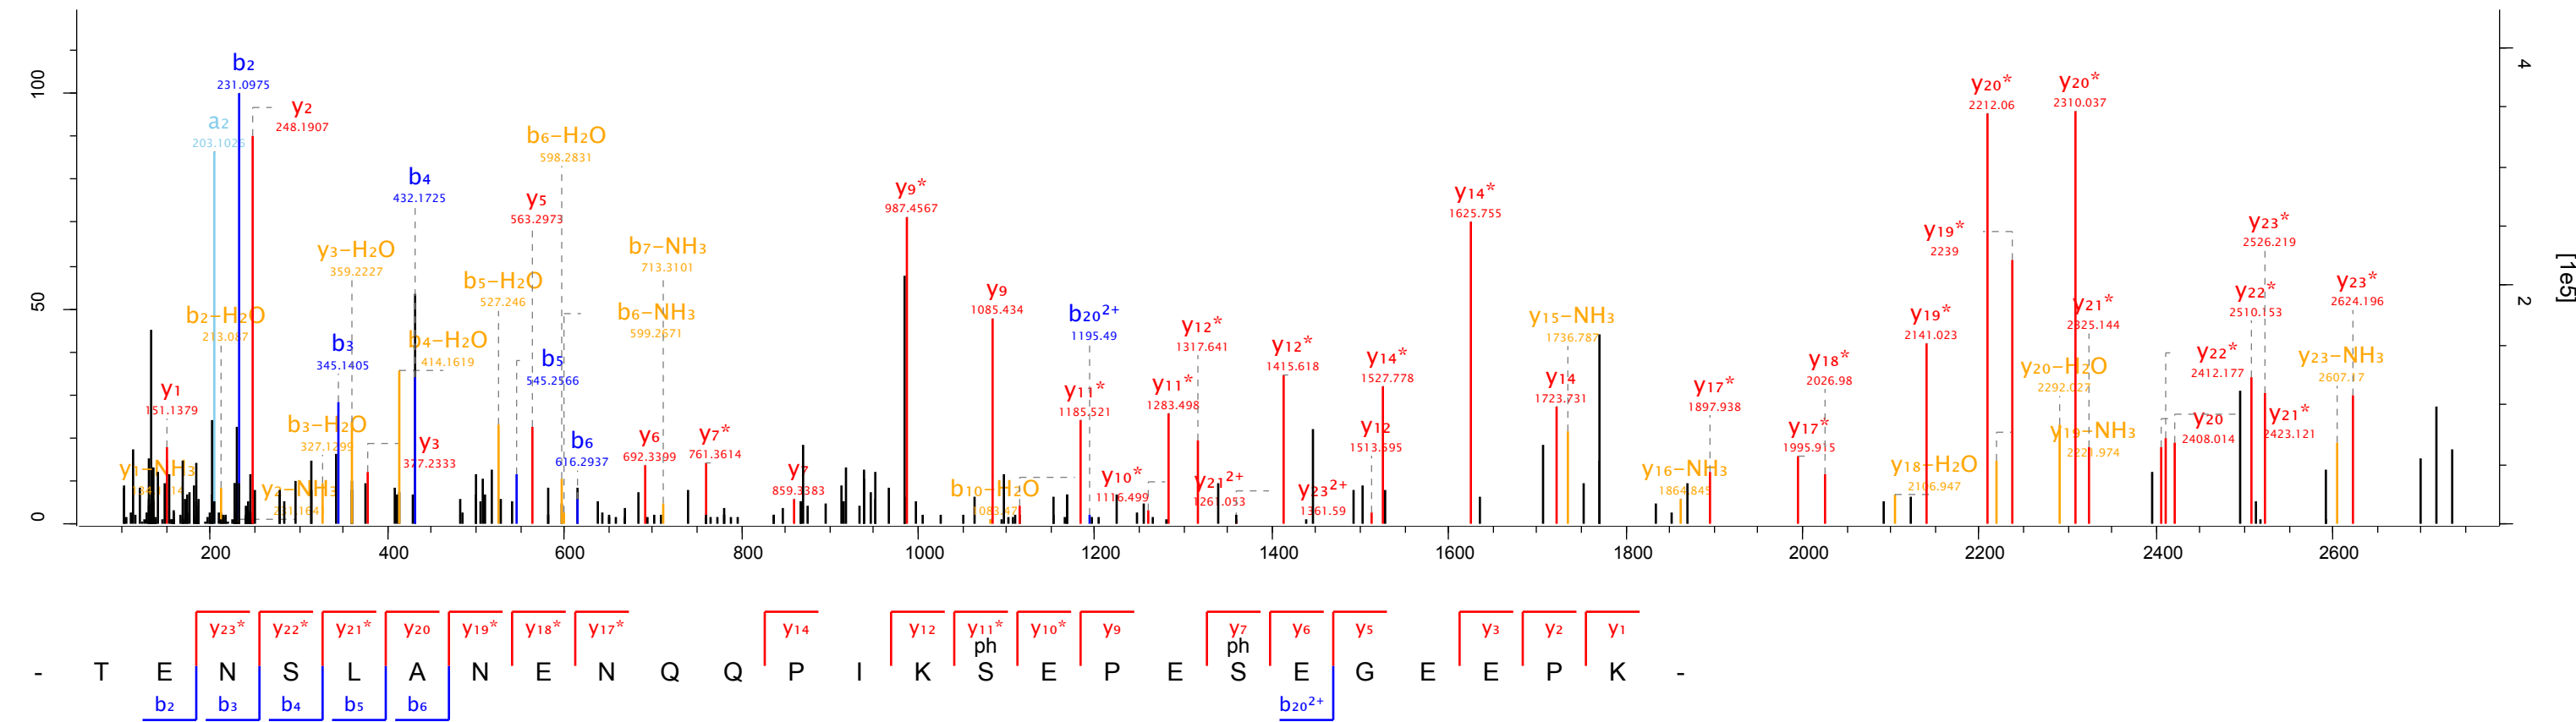



Raw file 20150812\_A375SR\_Phospho\_BR1\_03 Scan 12200 Method FTMS; HCD Score 199.79 m/z 882.74 Gene names ZNF532

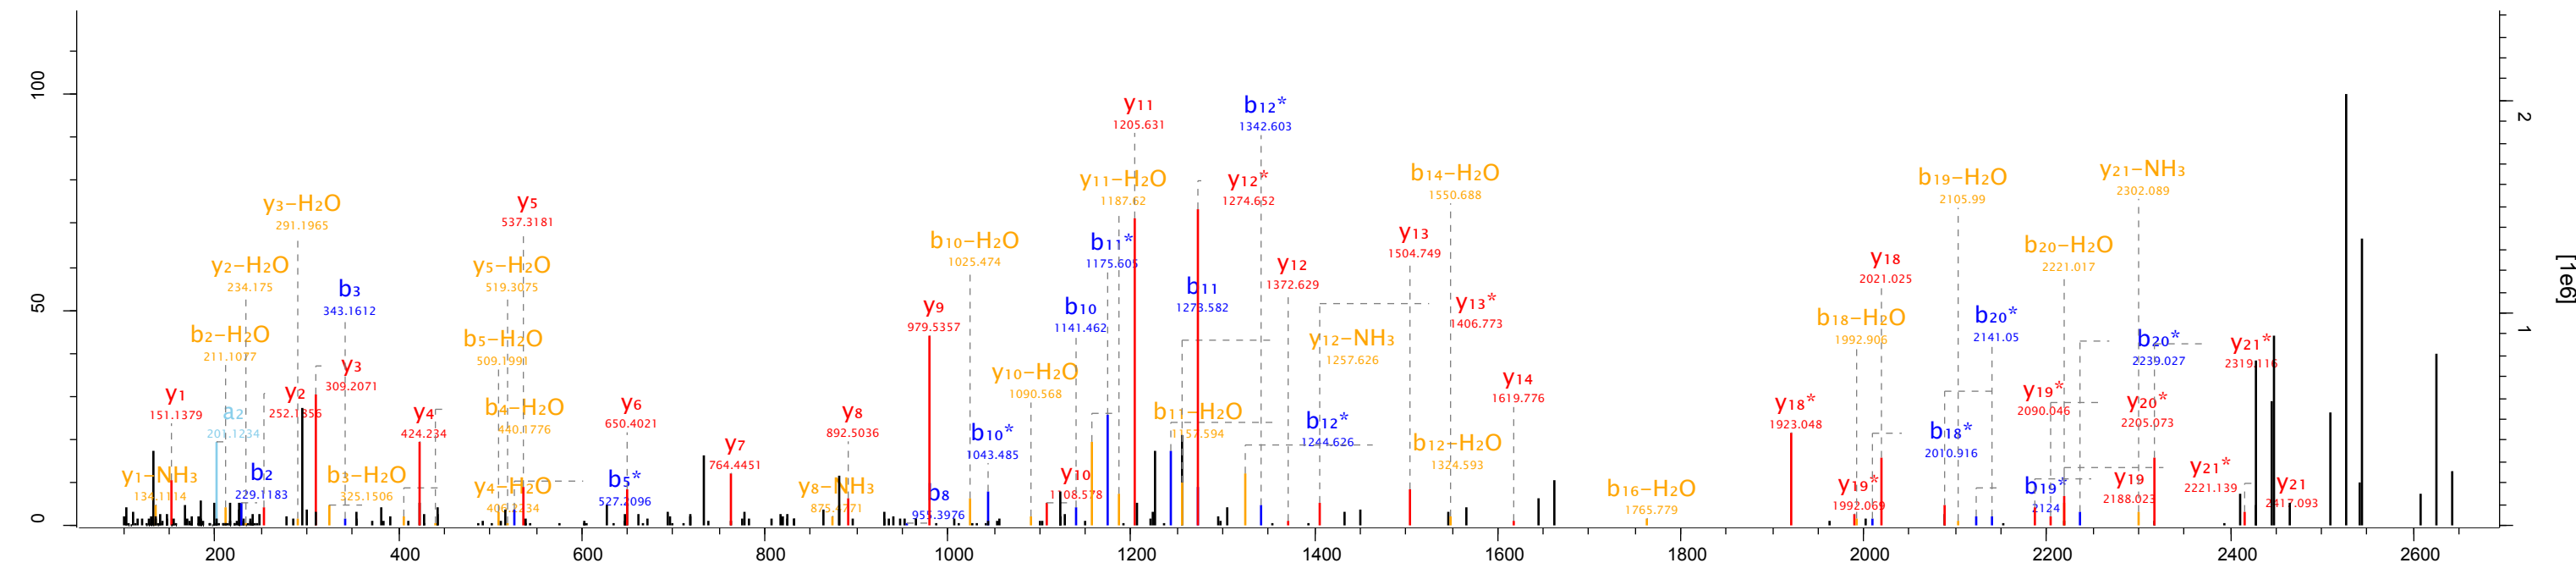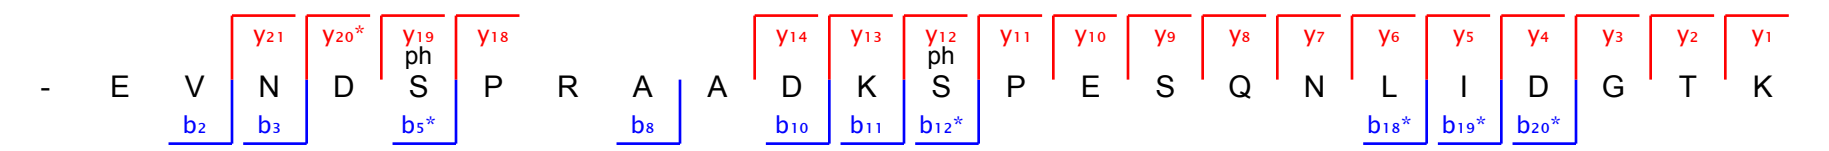

Raw file 20150812\_A375SR\_Phospho\_BR1\_03 Scan 12250 Method FTMS; HCD Score 135.03 m/z 791.32 Gene names ARHGAP12

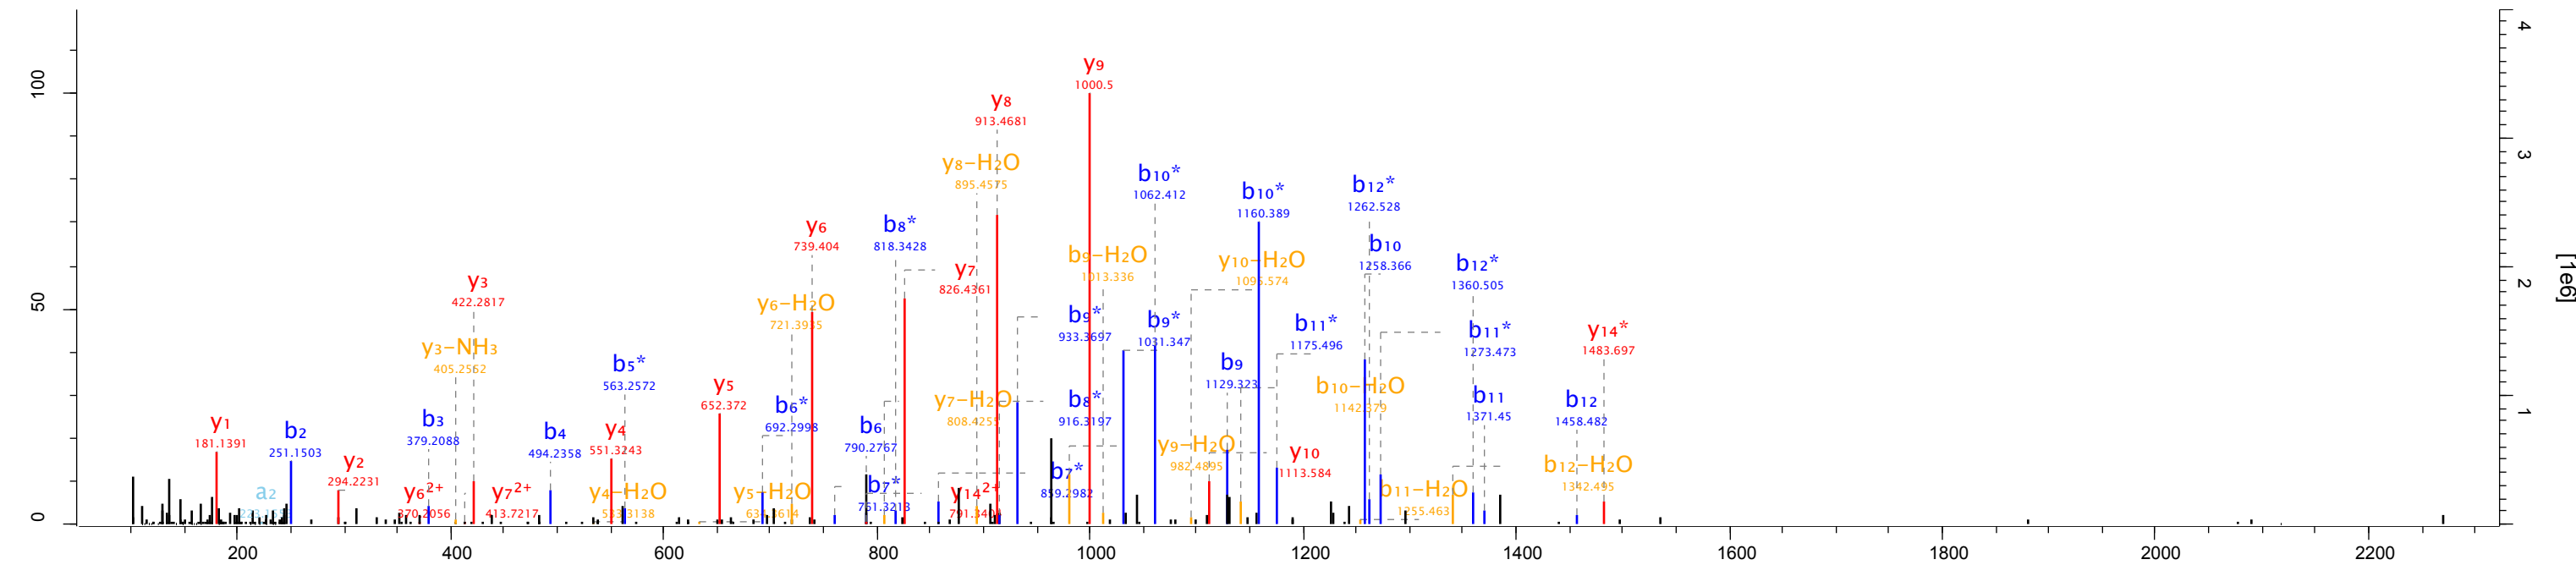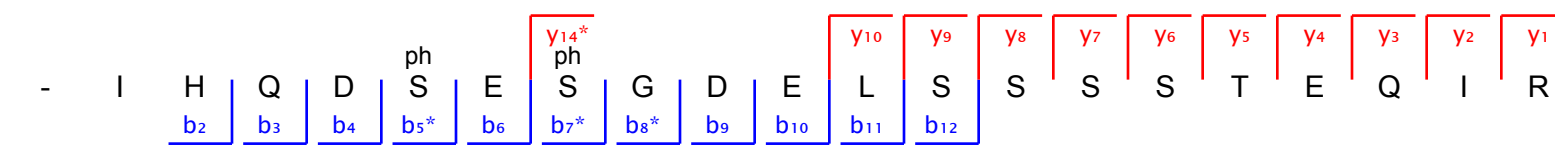

Raw file: 20150812\_A375SR\_Phospho\_BR1\_03  
 Scan: 12500 Method: FTMS; HCD Score: 226.74 m/z: 1047.96 Gene names: EPS15L1;SPATA22

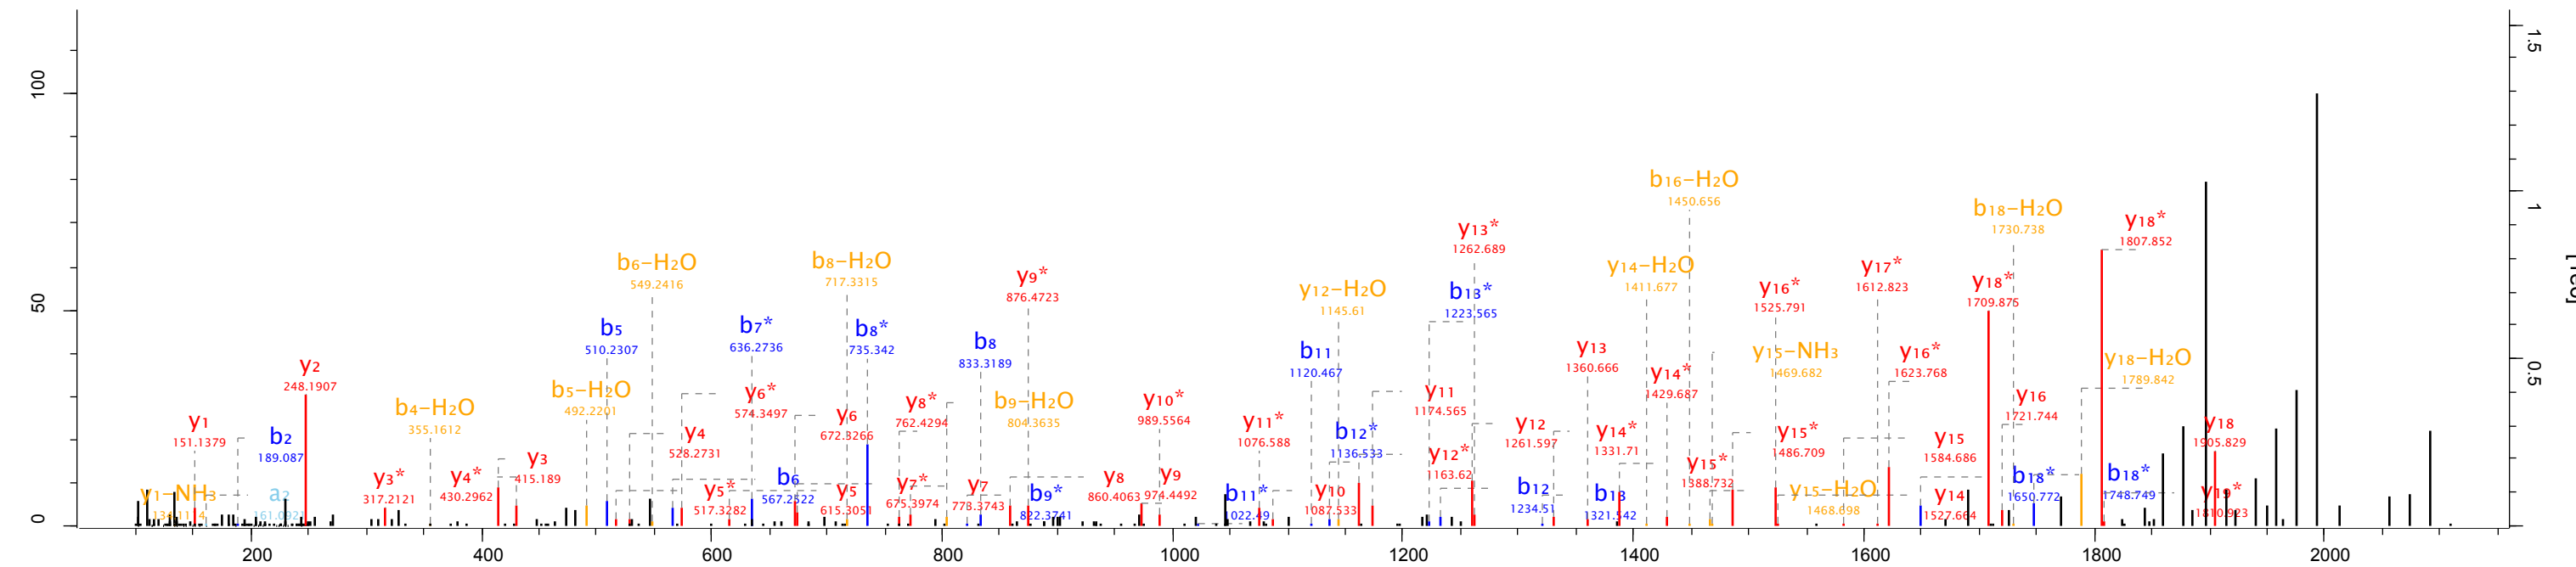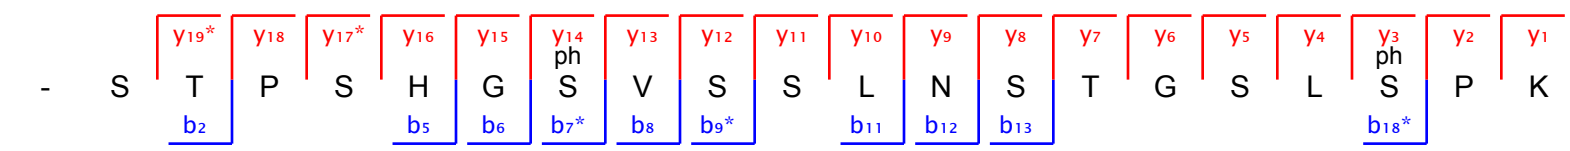

Raw file: 20150812\_A375SR\_Phospho\_BR1\_03  
 Scan: 12610 Method: FTMS; HCD Score: 328.19 m/z: 812.8 Gene names: GPATCH2

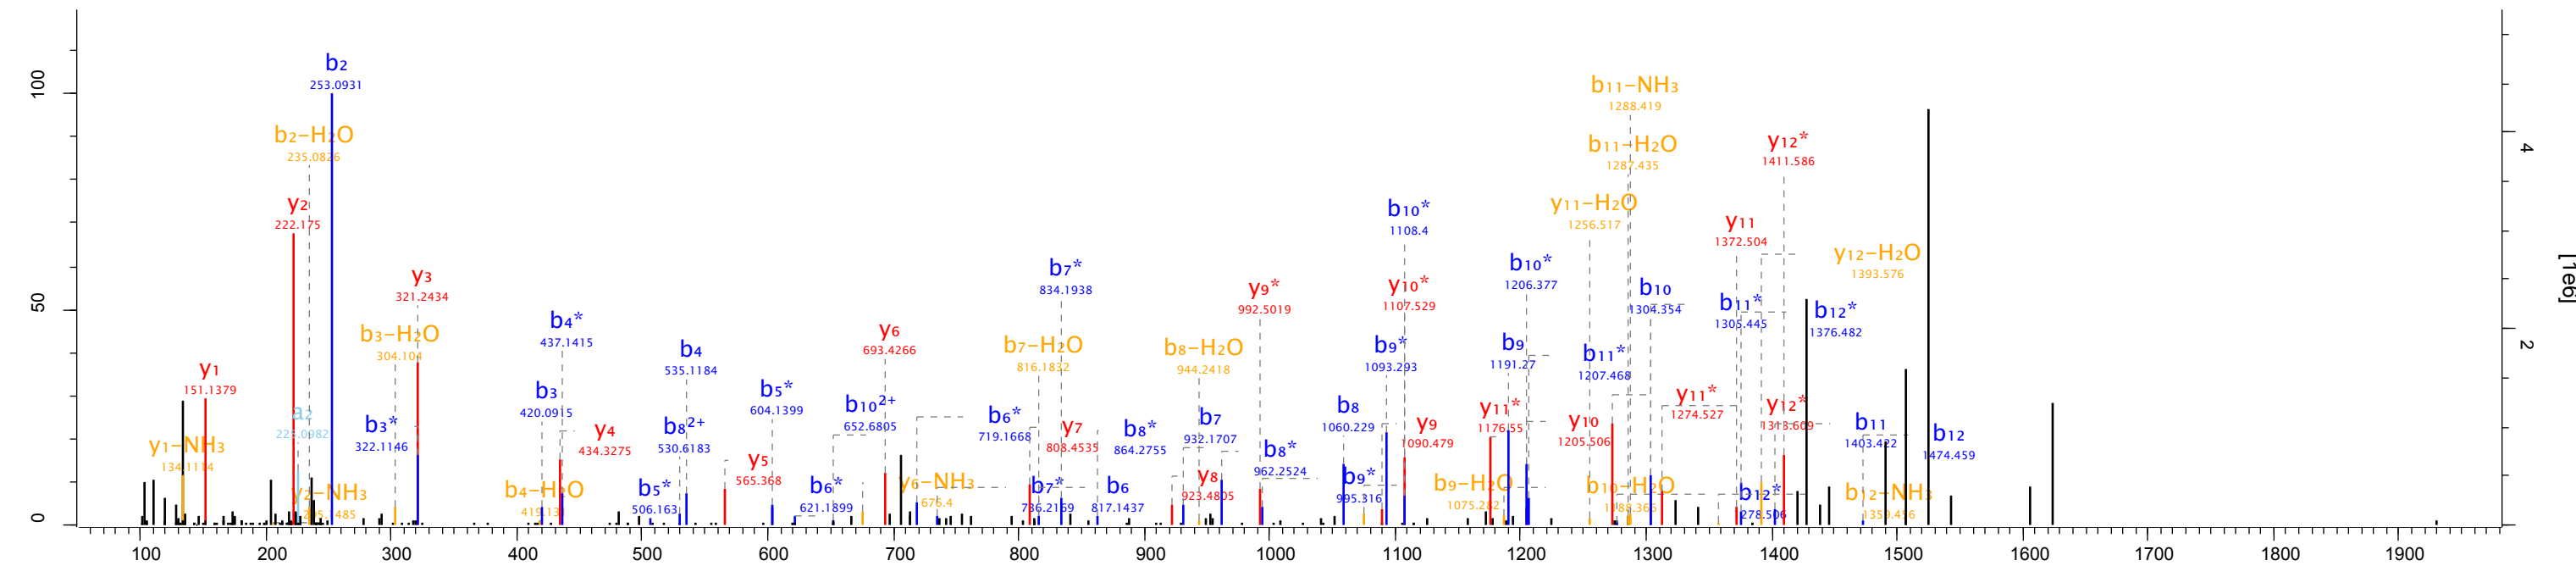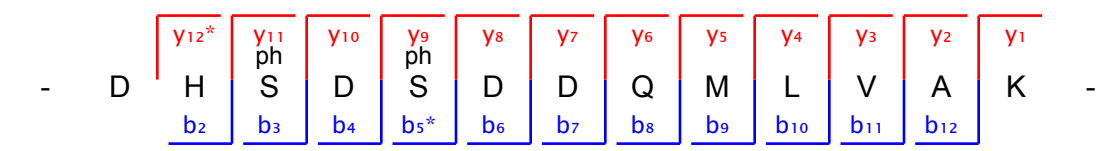

Raw file 20150812\_A375SR\_Phospho\_BR1\_03 Scan 12960 Method FTMS; HCD Score 179.5 m/z 690.27 Gene names SRSF10

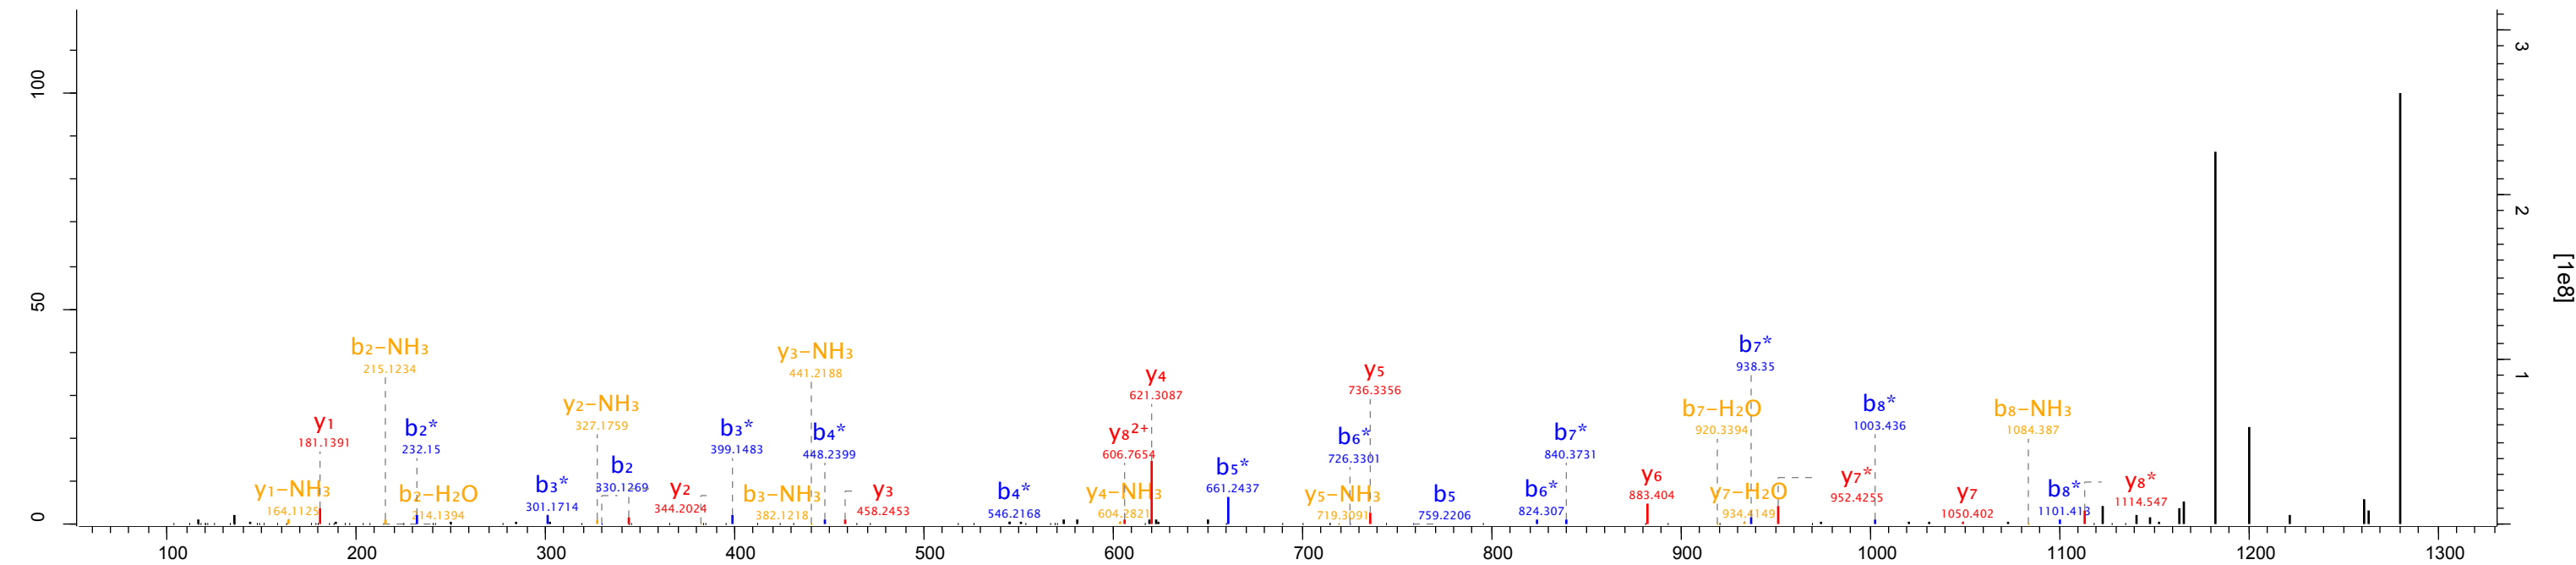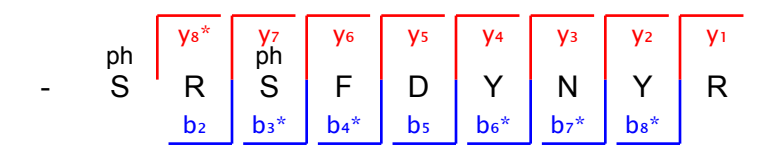



Raw file: 20150812\_A375SR\_Phospho\_BR1\_03  
 Scan: 13010  
 Method: FTMS; HCD  
 Score: 305.34  
 m/z: 1256.01  
 Gene names: BLOC1S3

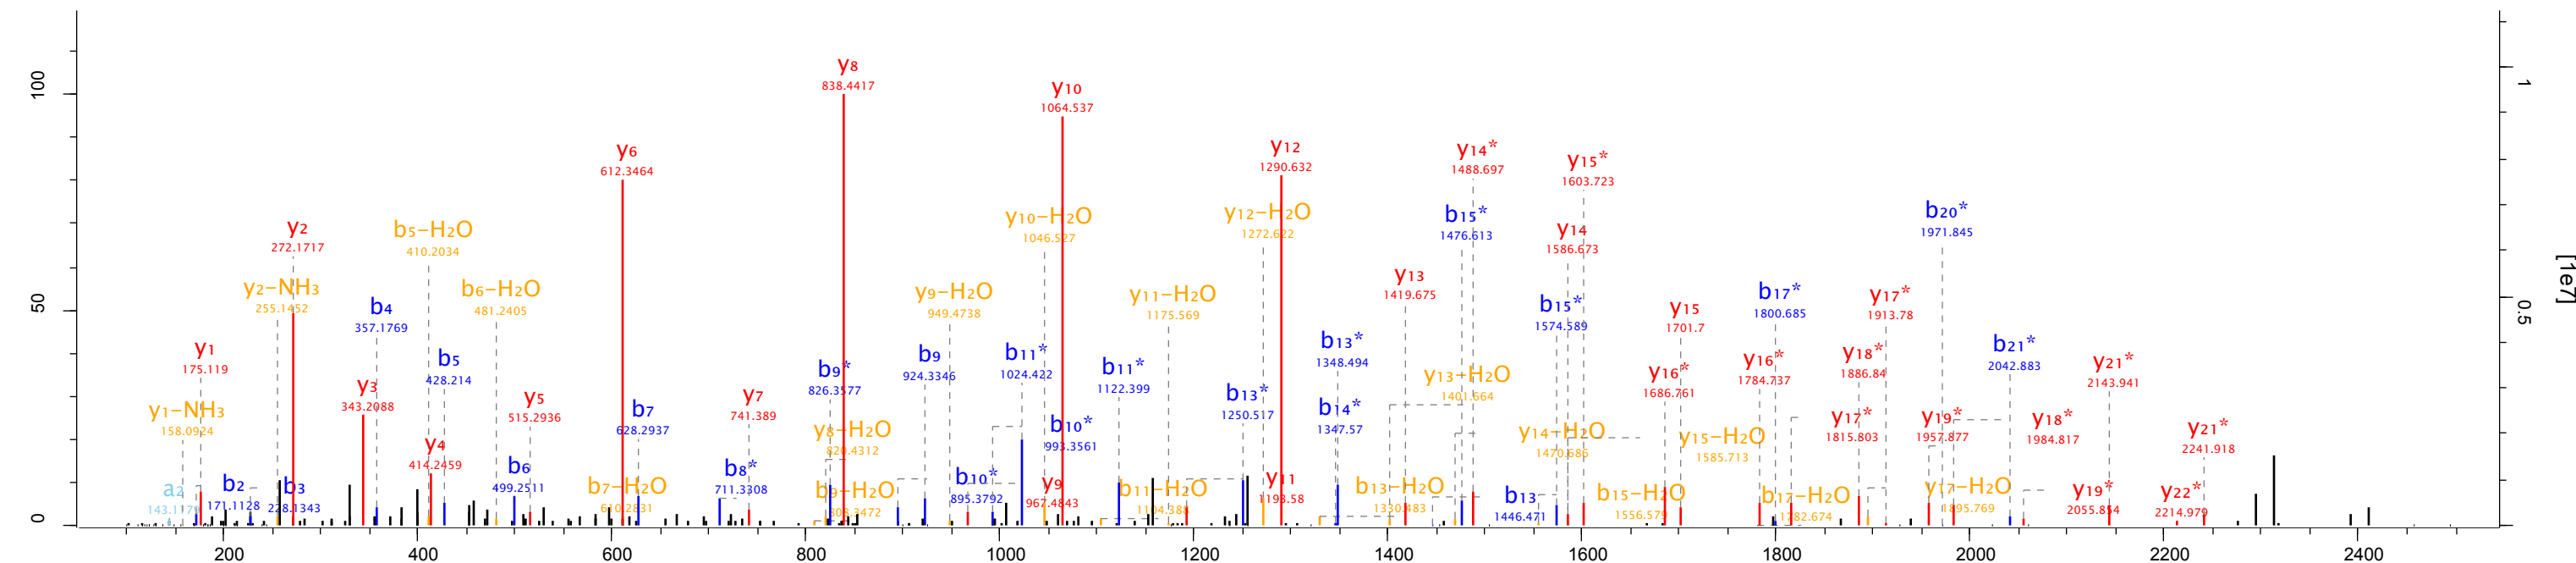

- V A G E A A E T D S E P E P T A A P R -

y22\*
y21\*
y19\*
y18\*
y17\*
y16\*  
ph
y15
y14  
ph
y13
y12
y11
y10
y9
y8
y7
y6
y5
y4
y3
y2
y1

b2
b3
b4
b5
b6
b7
b8\*
b9
b10\*
b11\*
b13
b14\*
b15\*
b17\*
b20\*
b21\*

Raw file: 20150812\_A375SR\_Phospho\_BR1\_03  
 Scan: 13050 Method: FTMS; HCD Score: 184.57 m/z: 907.9 Gene names: NFKB1

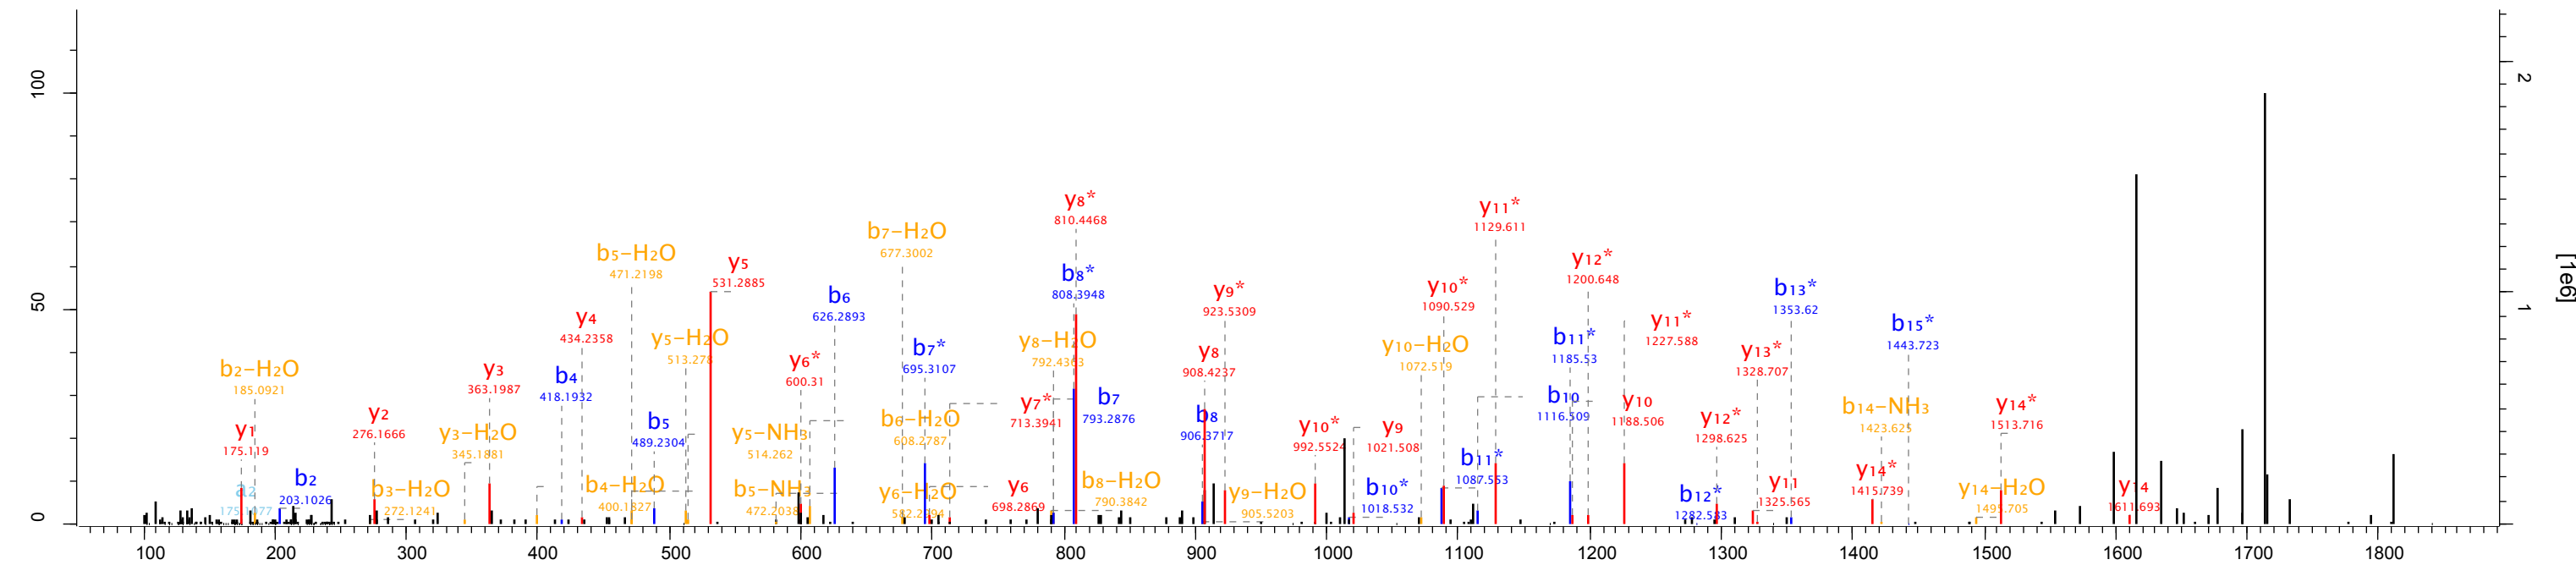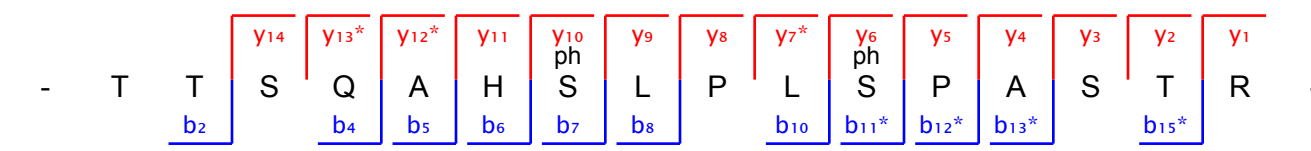

Raw file: 20150812\_A375SR\_Phospho\_BR1\_03  
 Scan: 13520 Method: FTMS; HCD Score: 214.95 m/z: 911.41 Gene names: CEP170

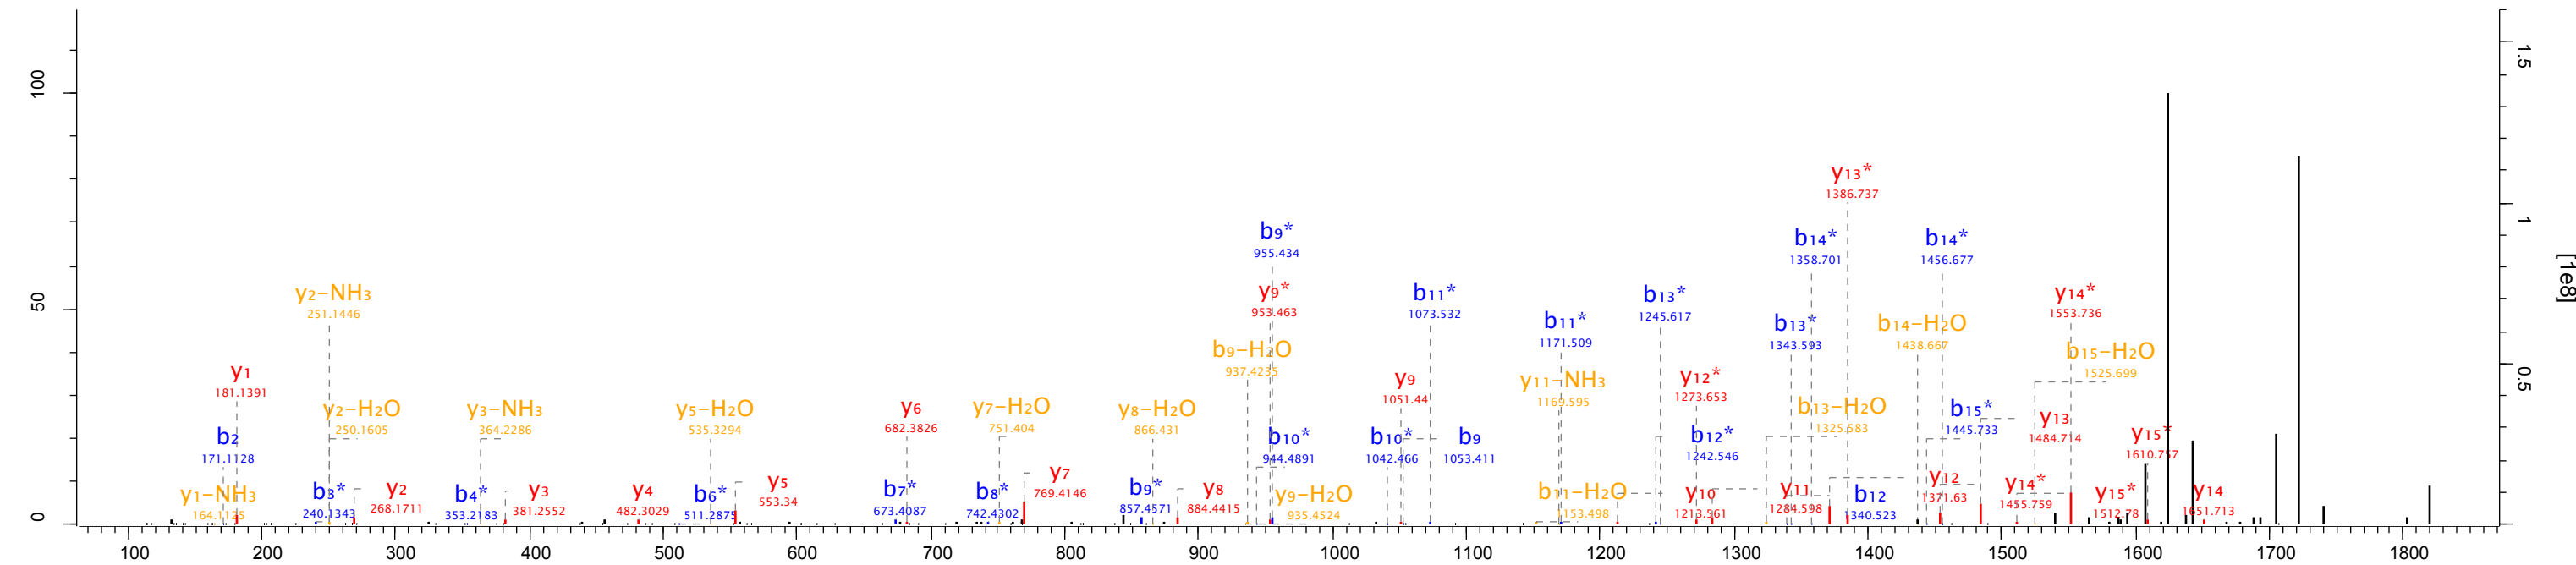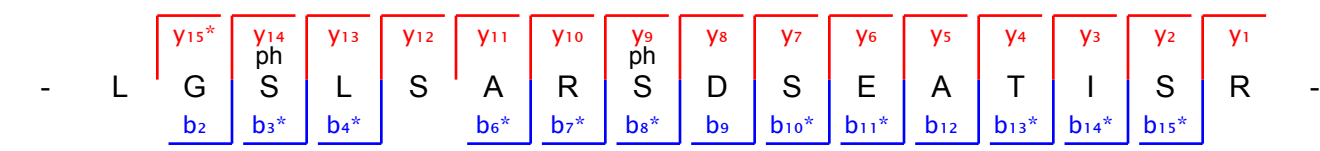

Raw file: 20150812\_A375SR\_Phospho\_BR1\_03  
 Scan: 14050 Method: FTMS; HCD Score: 228.29 m/z: 1276.88 Gene names: SRRM2

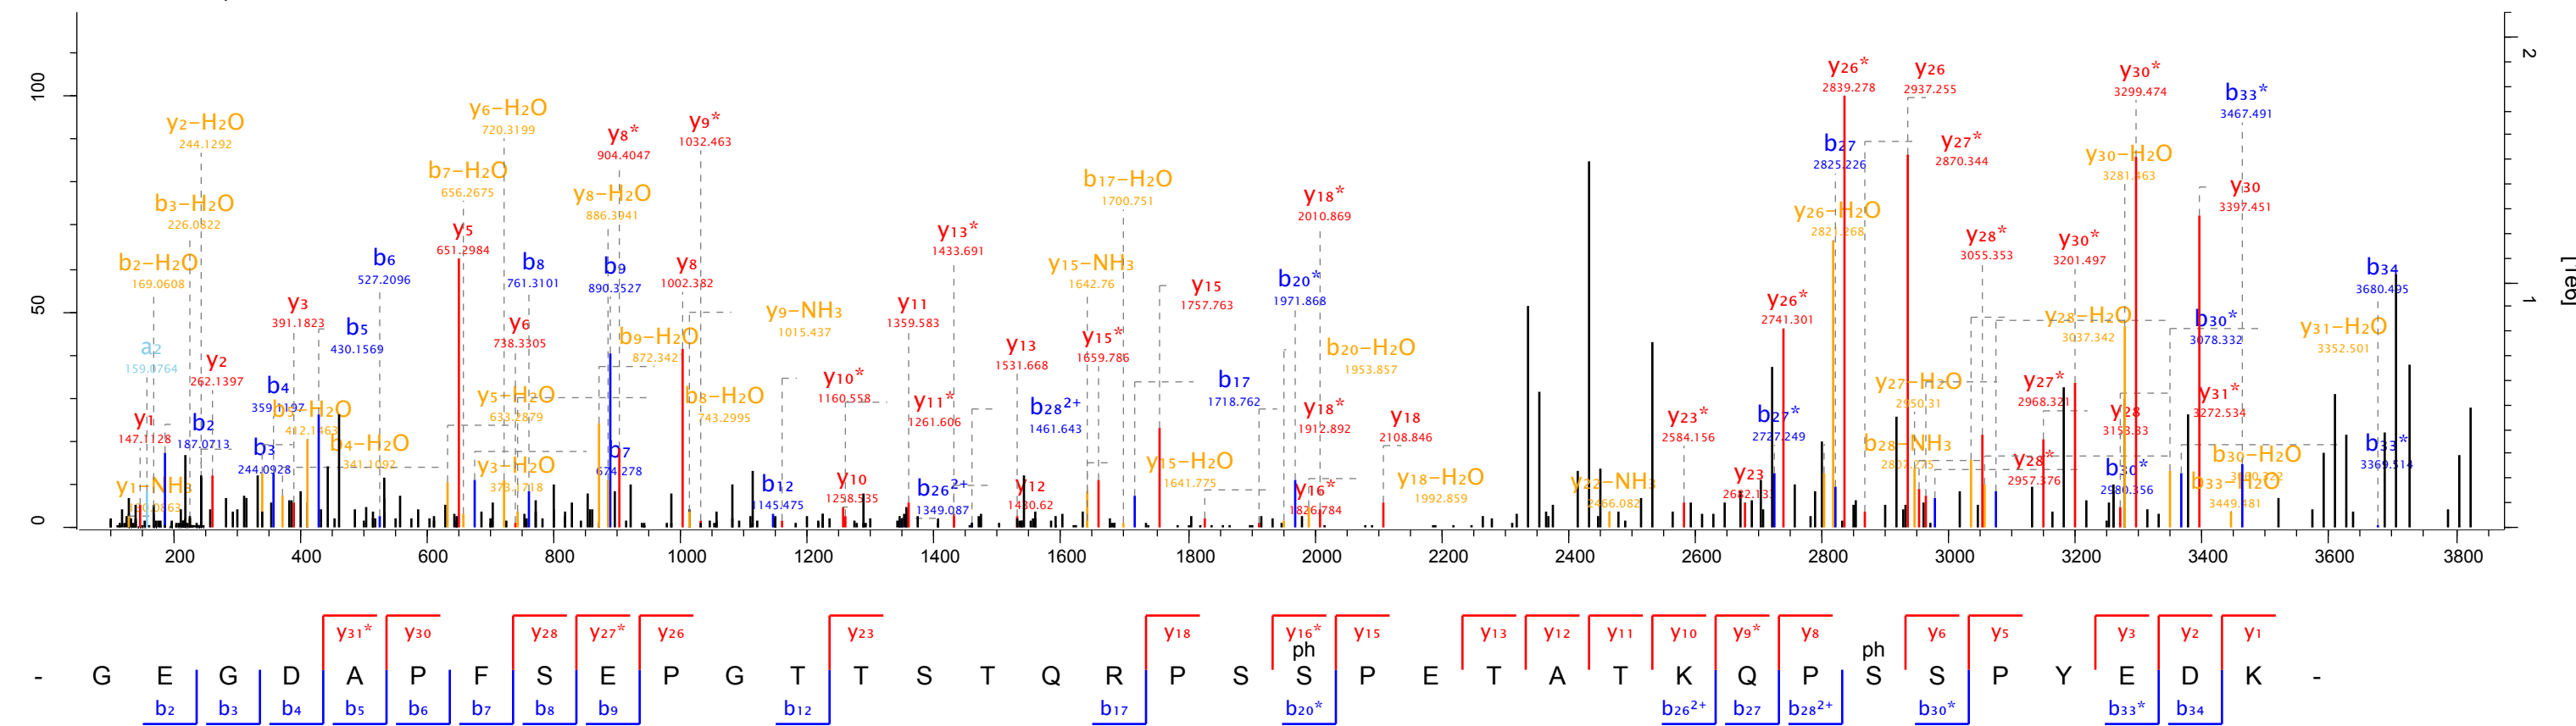

Raw file 20150812\_A375SR\_Phospho\_BR1\_03 Scan 14140 Method FTMS; HCD Score 147.45 m/z 959.87 Gene names CHD3

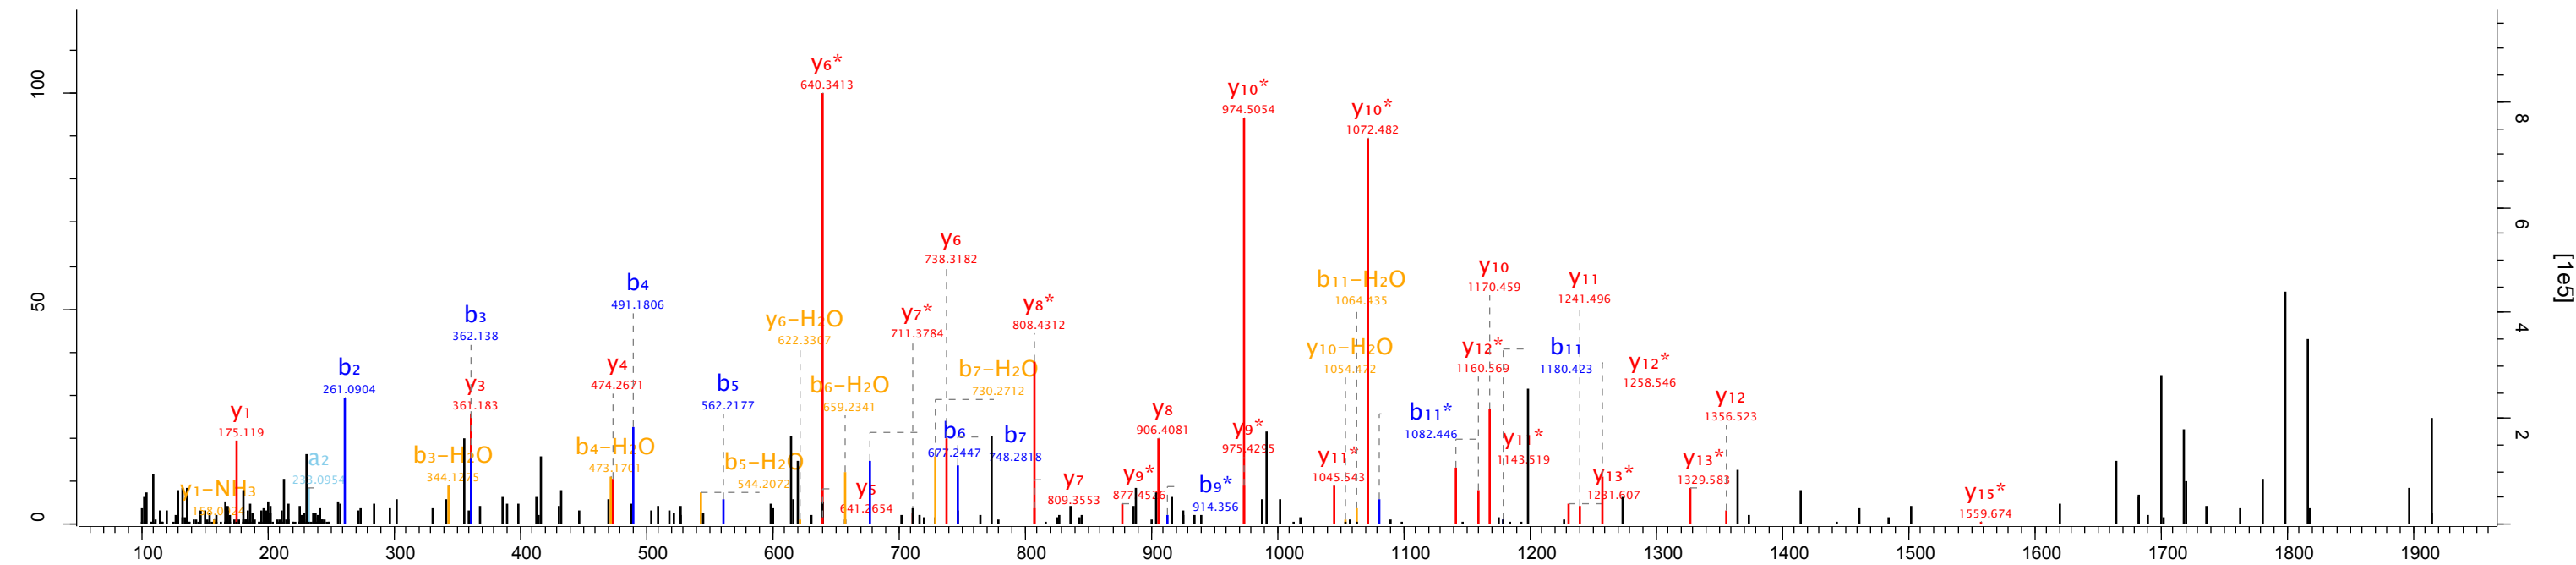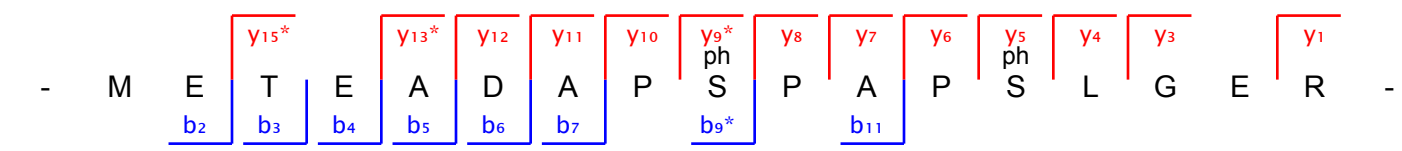

Raw file: 20150812\_A375SR\_Phospho\_BR1\_03  
 Scan: 14180 Method: FTMS; HCD Score: 60.13 m/z: 745.81 Gene names: HAUS6

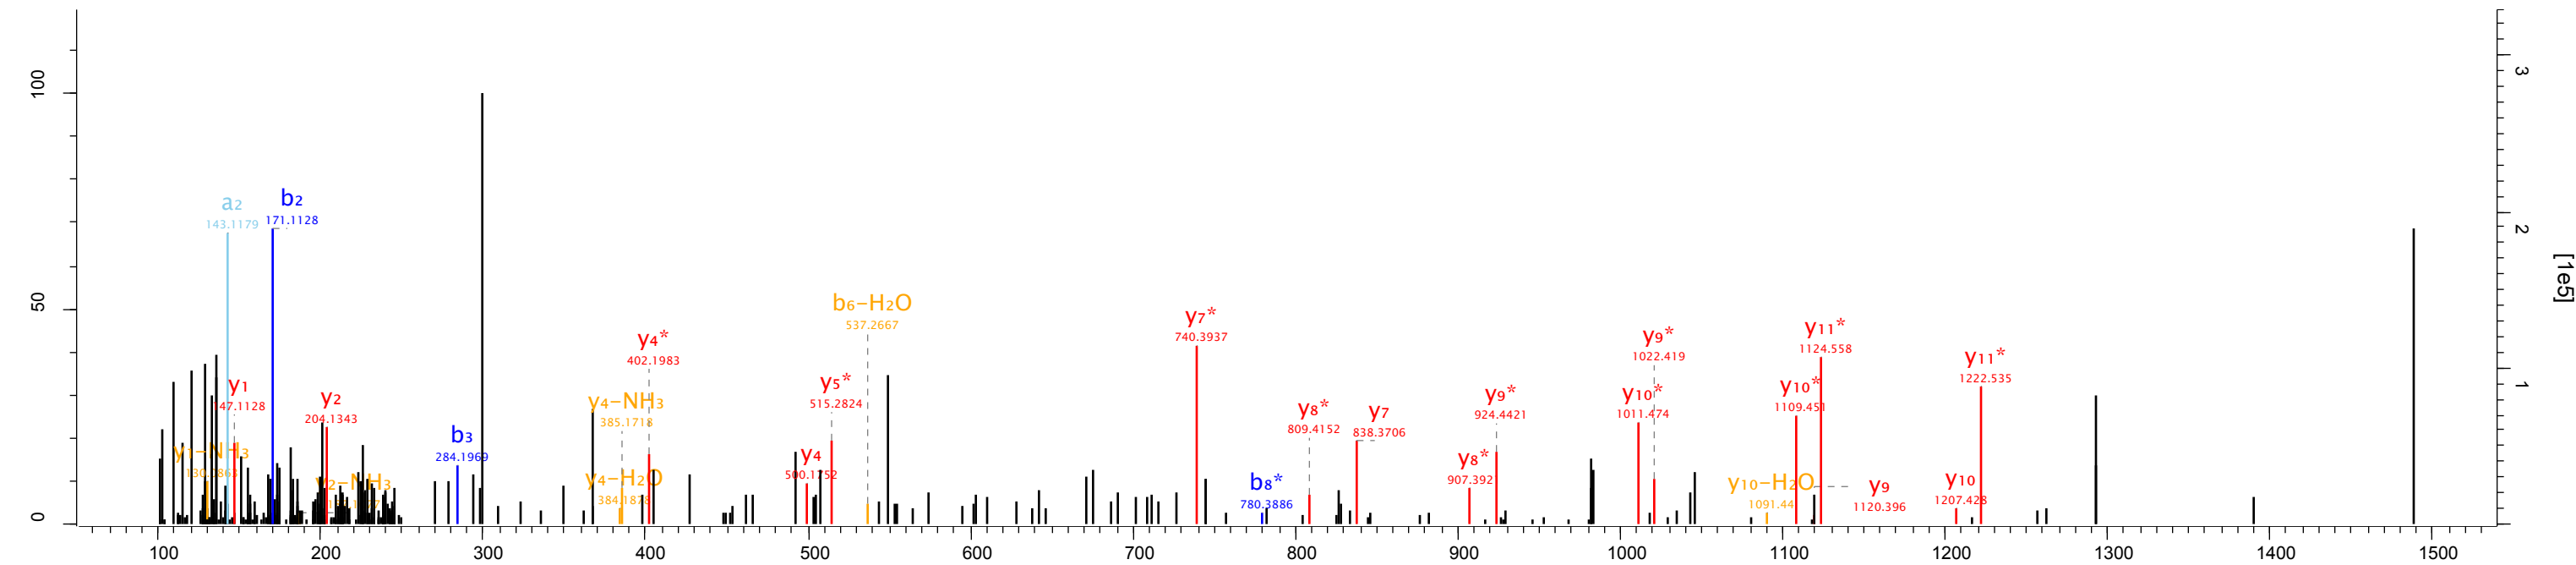

- A V L S D S P Q L S E G K -  
 (Fragmentation mapping: b2, b3, b8\* are blue; y11\*, y10, y9, y8\*ph, y7, y5\*, y4ph, y2, y1 are red)

Raw file 20150812\_A375SR\_Phospho\_BR1\_03 Scan 1420 Method FTMS; HCD Score 72.62 m/z 630.76 Gene names SRRM2

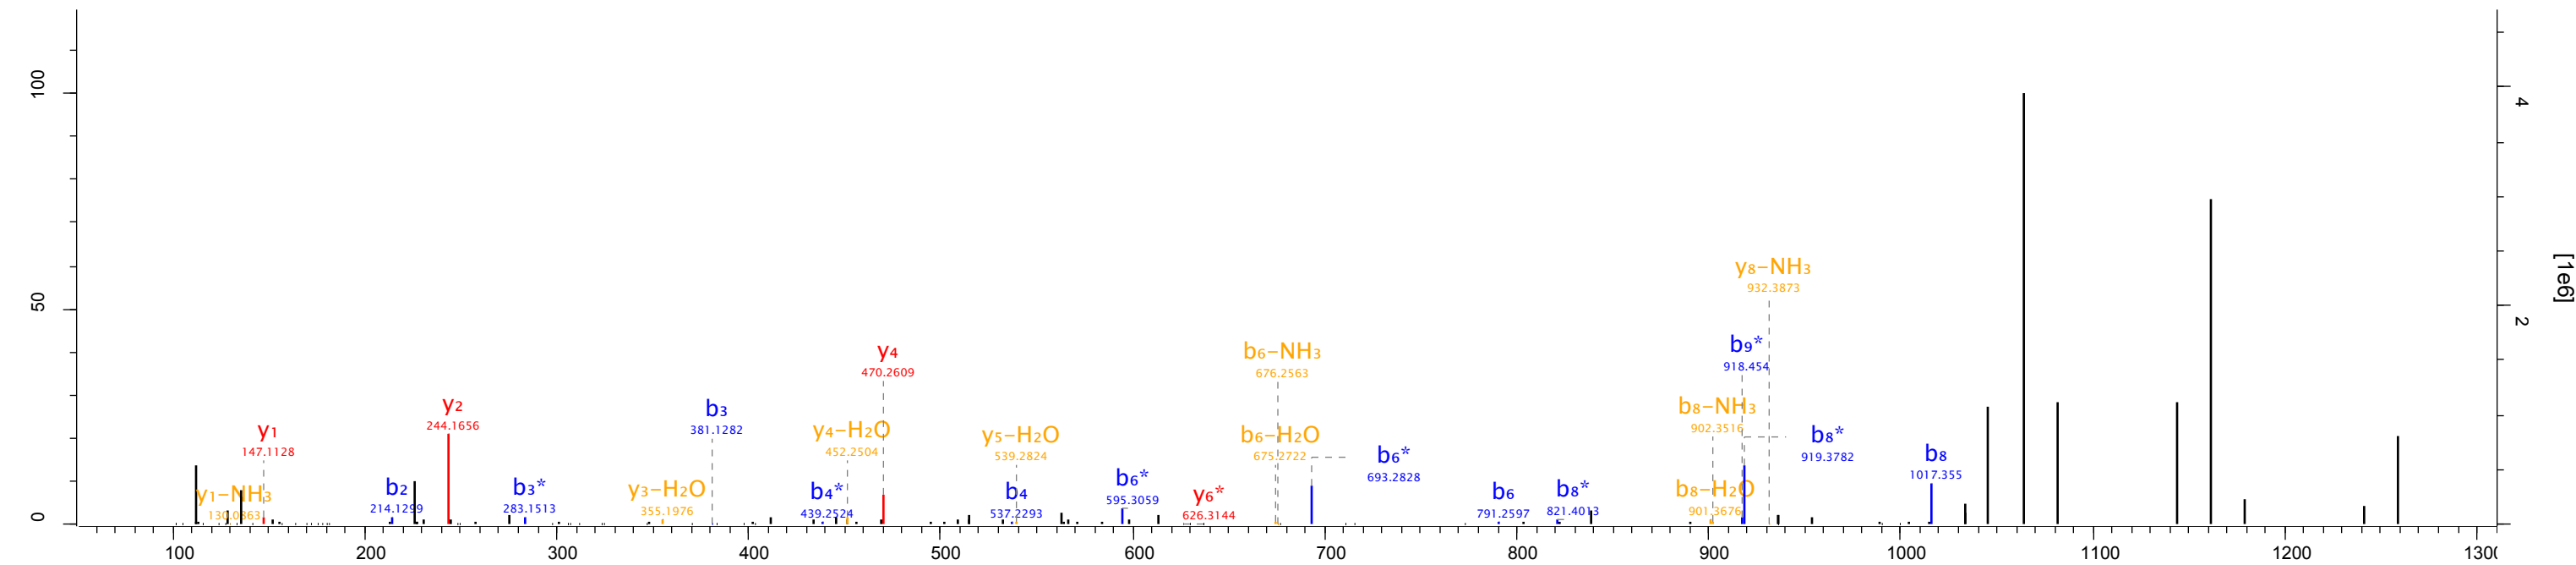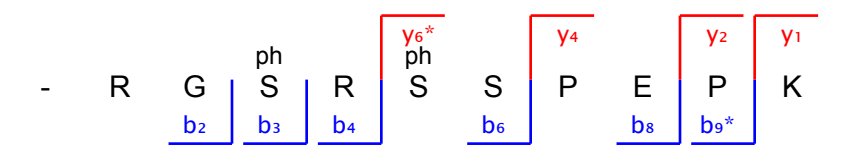

Raw file 20150812\_A375SR\_Phospho\_BR1\_03 Scan 14380 Method FTMS; HCD Score 104.55 m/z 662.28 Gene names MYCBP2

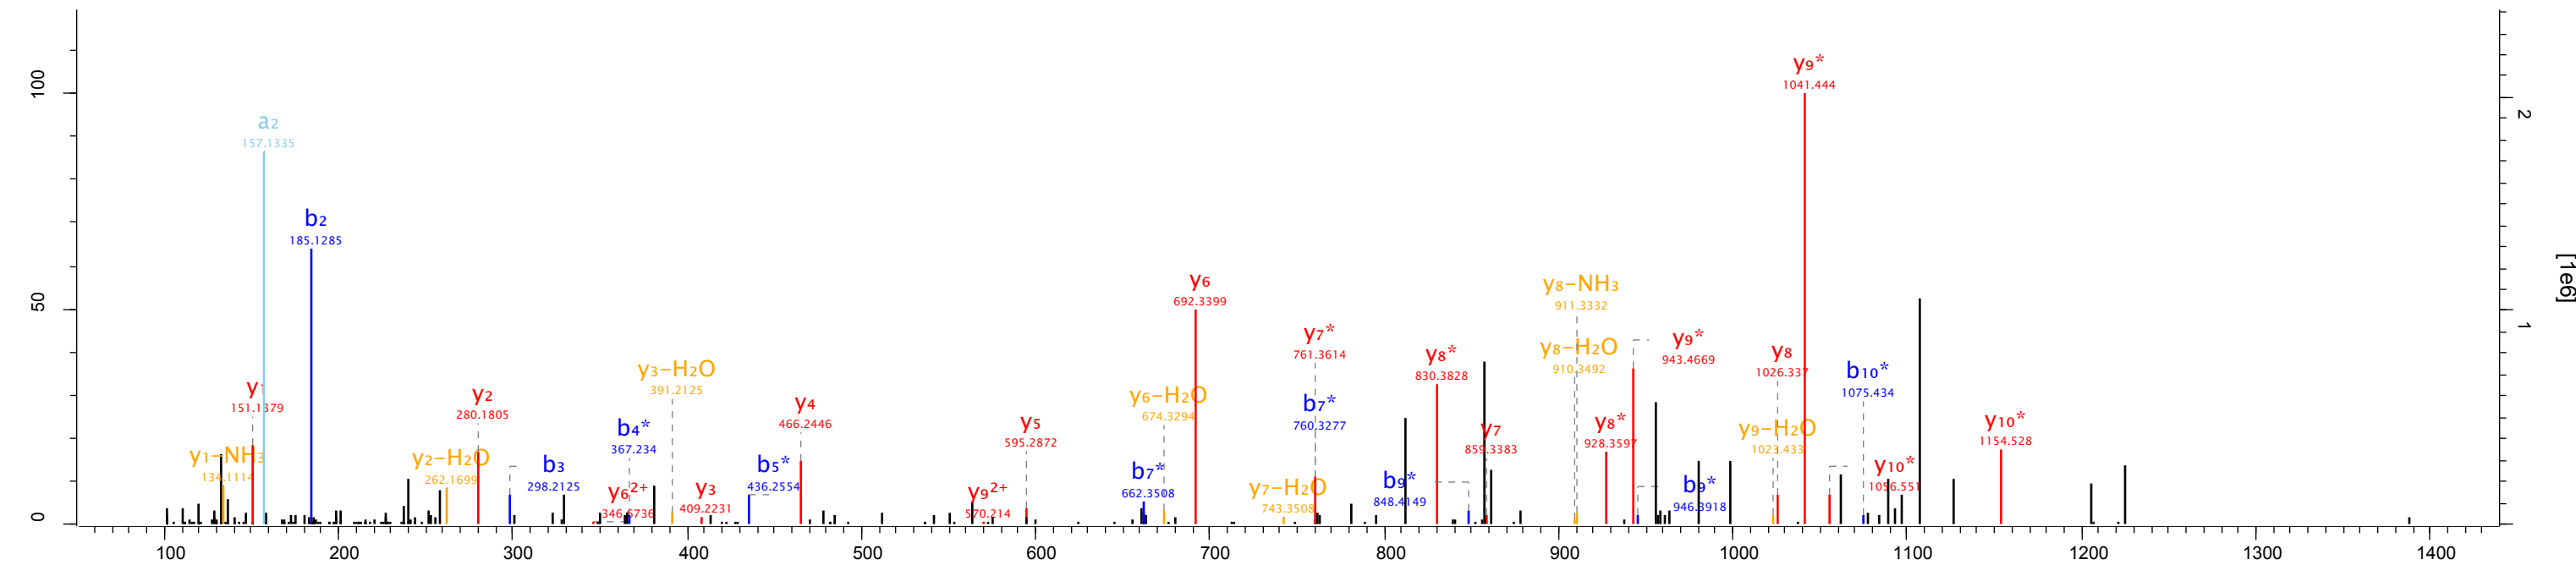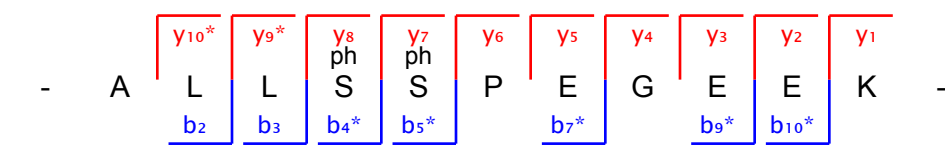



Raw file 20150812\_A375SR\_Phospho\_BR1\_03 Scan 1450 Method FTMS; HCD Score 50.36 m/z 966.89 Gene names CEP170

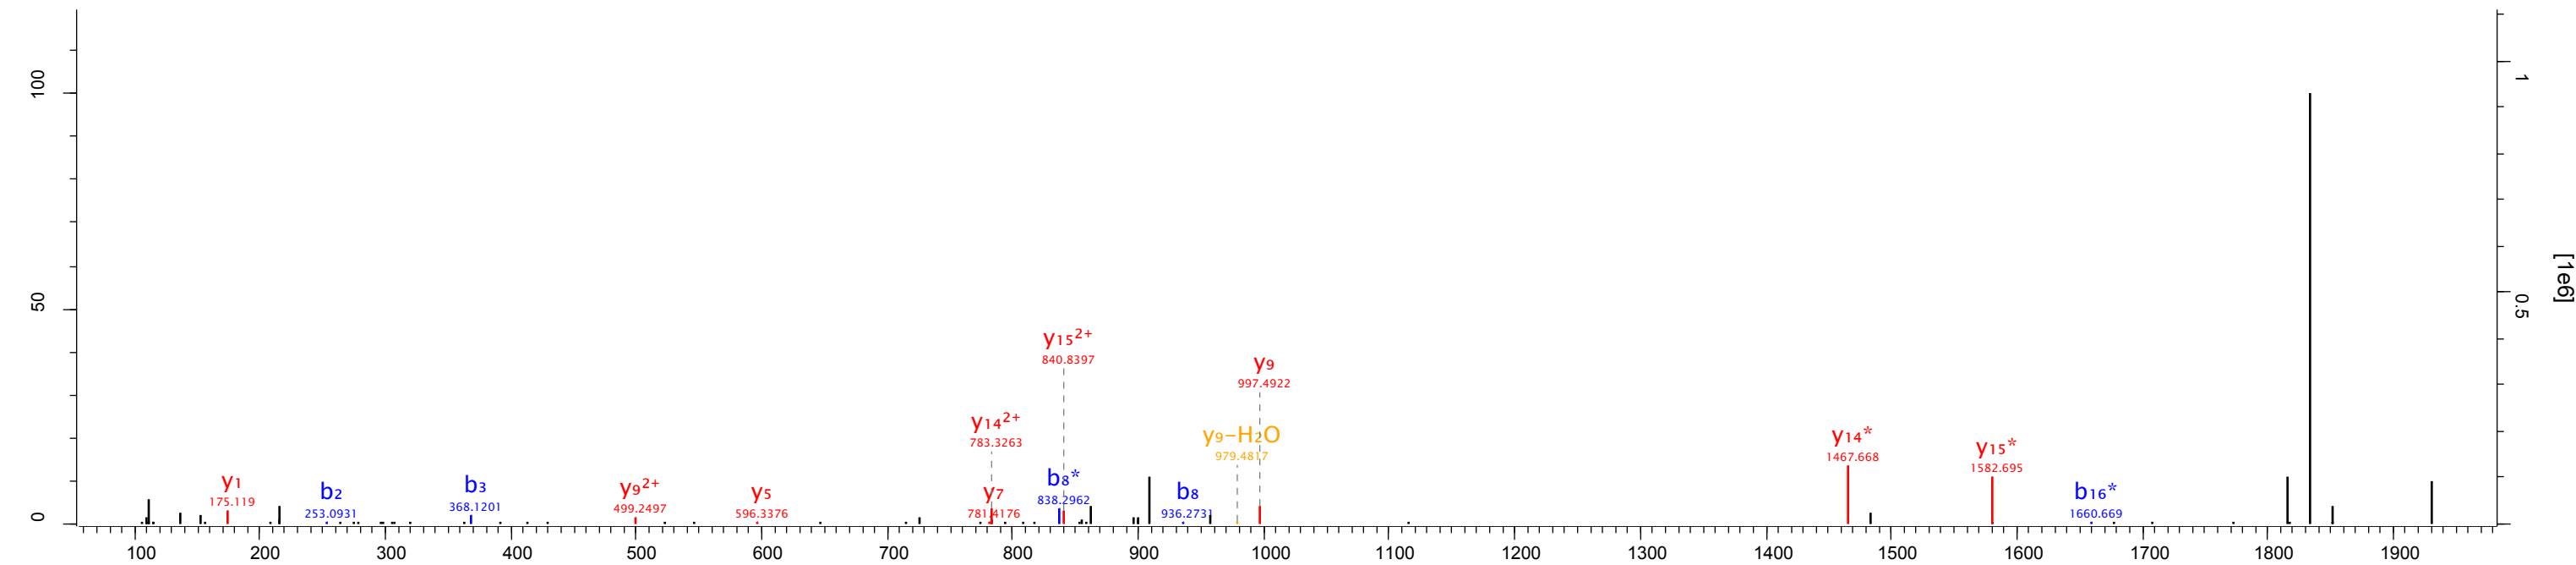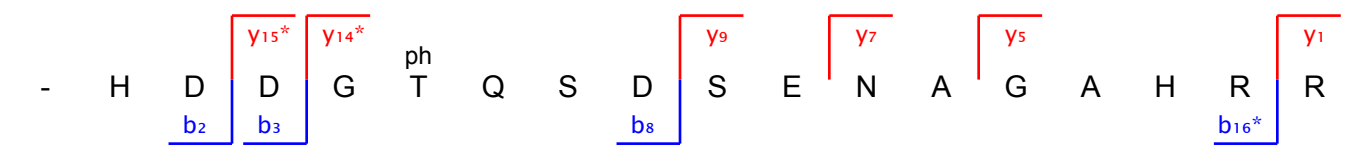

Raw file 20150812\_A375SR\_Phospho\_BR1\_03 Scan 14850 Method FTMS; HCD Score 62.08 m/z 658.27 Gene names RICTOR

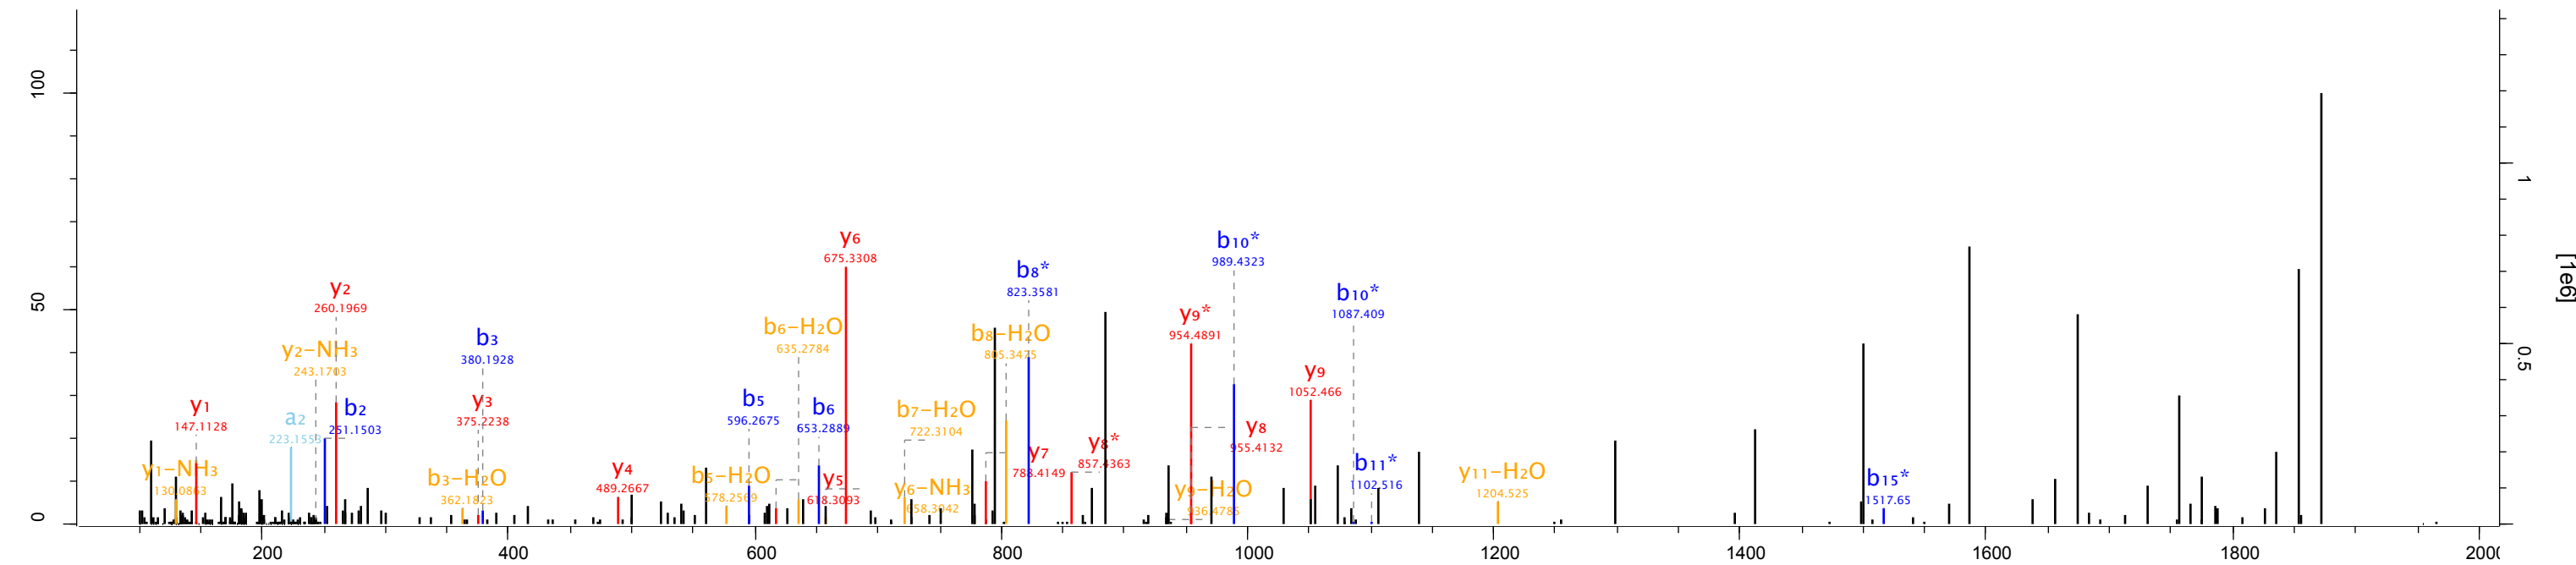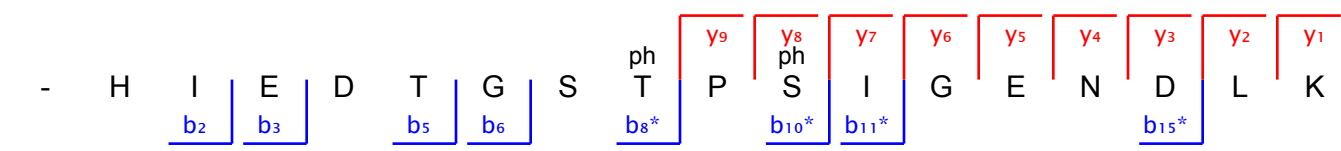

Raw file: 20150812\_A375SR\_Phospho\_BR1\_03  
 Scan: 1490 Method: FTMS; HCD Score: 208.89 m/z: 784.95 Gene names: NUCKS1

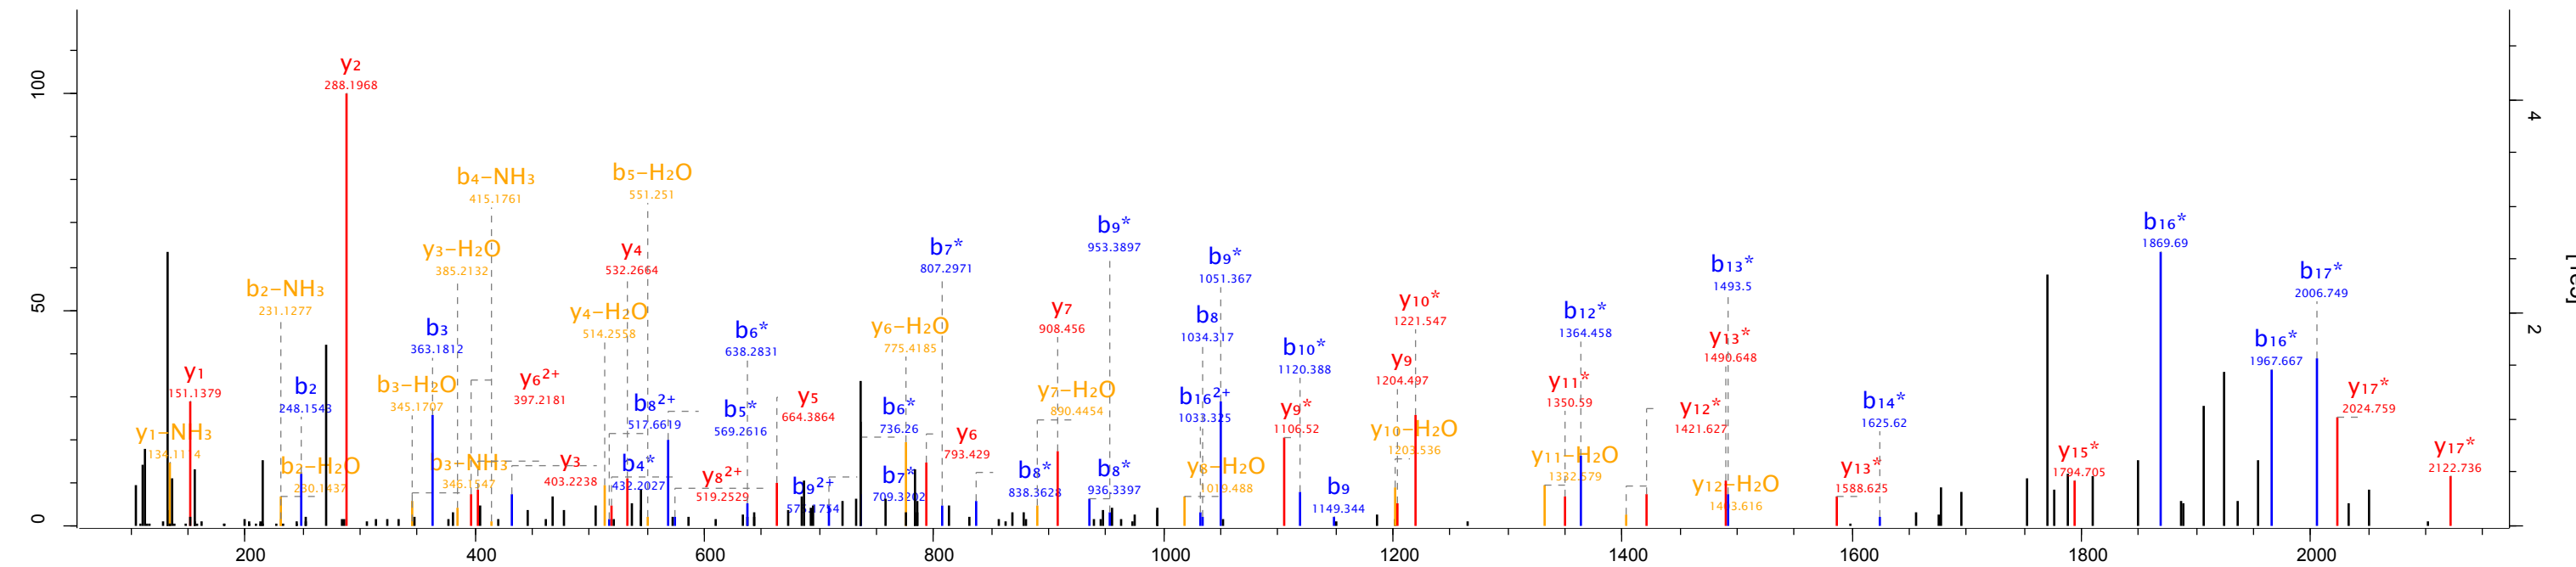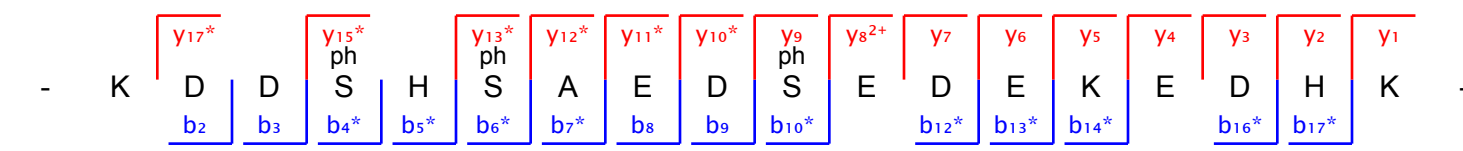

Raw file 20150812\_A375SR\_Phospho\_BR1\_03 Scan 14970 Method FTMS; HCD Score 112.23 m/z 1236.52 Gene names MARCKSL1

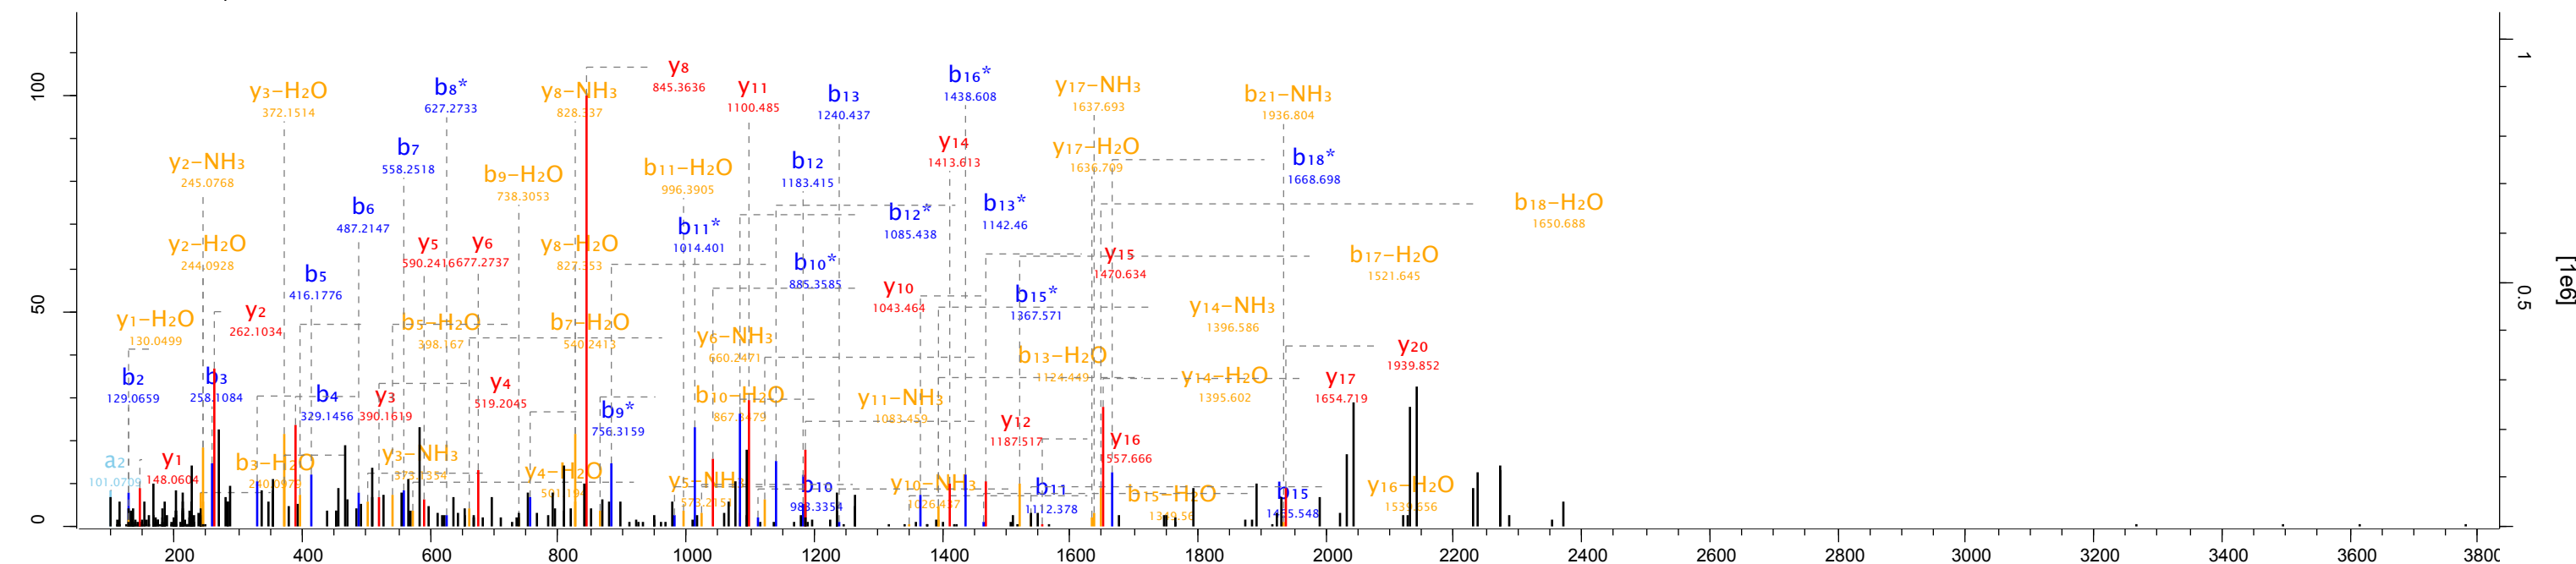

- G A E A S A A S E E E A G P Q A T E P S T P S G P E S G P T P A S A E Q N E

b<sub>2</sub>
b<sub>3</sub>
b<sub>4</sub>
b<sub>5</sub>
b<sub>6</sub>
b<sub>7</sub>
b<sub>8</sub><sup>\*</sup>
b<sub>9</sub><sup>\*</sup>
b<sub>10</sub>
b<sub>11</sub>
b<sub>12</sub>
b<sub>13</sub>
b<sub>15</sub>
b<sub>16</sub><sup>\*</sup>
b<sub>18</sub><sup>\*</sup>
y<sub>1</sub>
y<sub>2</sub>
y<sub>3</sub>
y<sub>4</sub>
y<sub>5</sub>
y<sub>6</sub>
y<sub>8</sub>
y<sub>10</sub>
y<sub>11</sub>
y<sub>12</sub>
y<sub>14</sub>
y<sub>15</sub>
y<sub>16</sub>
y<sub>17</sub>
y<sub>20</sub>

Raw file: 20150812\_A375SR\_Phospho\_BR1\_03  
 Scan: 15150 Method: FTMS; HCD Score: 194.59 m/z: 1094.96 Gene names: ARHGEF12

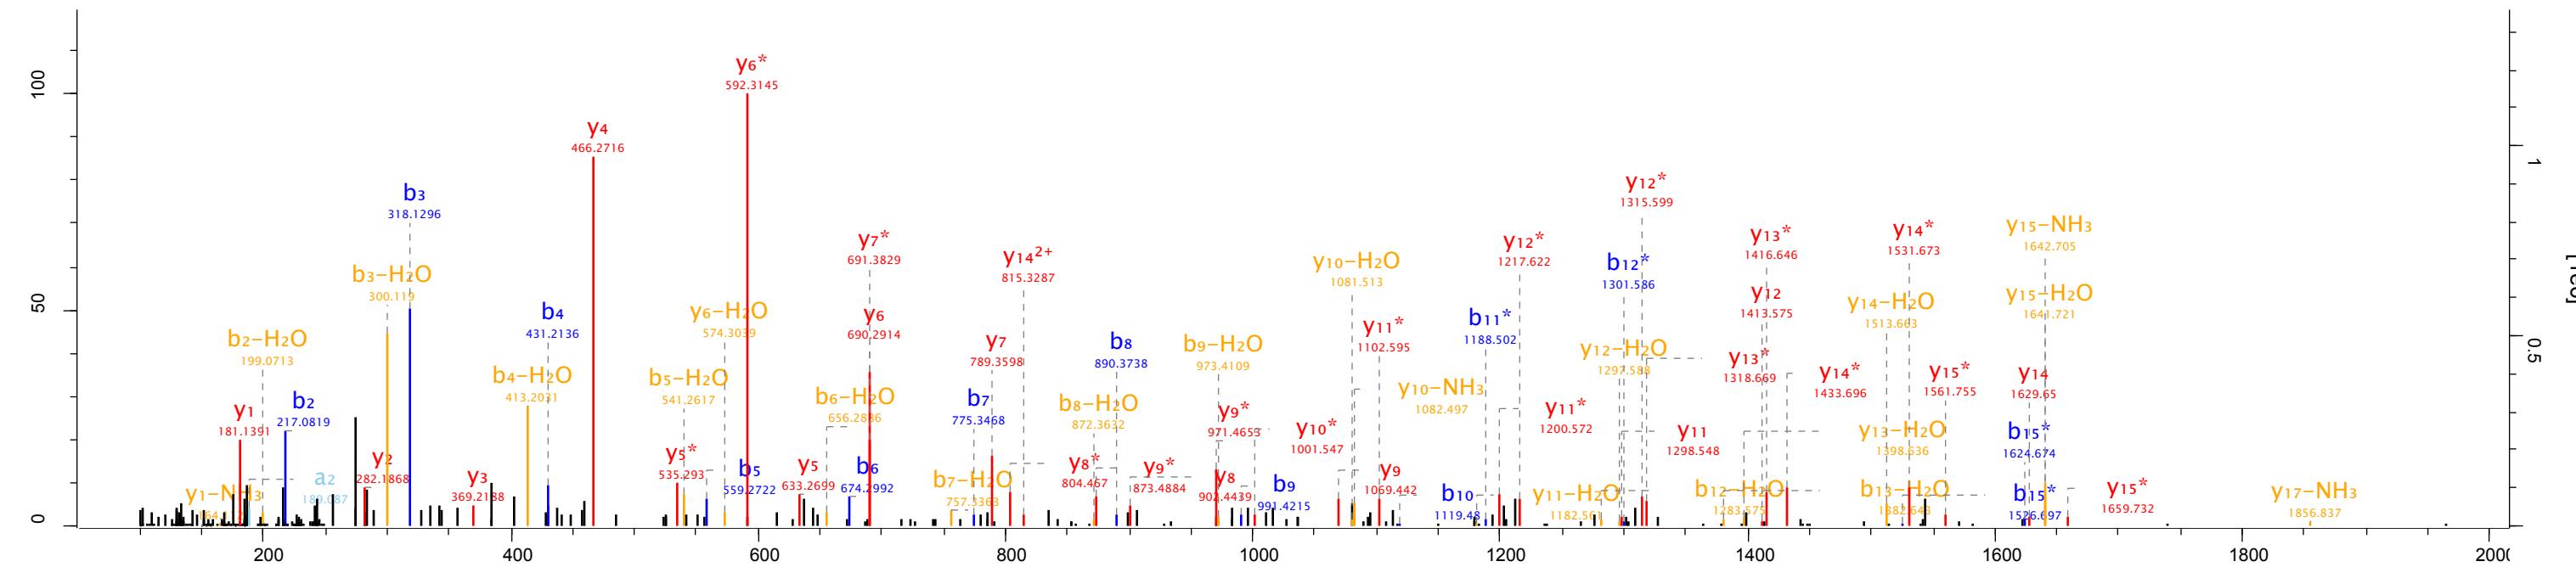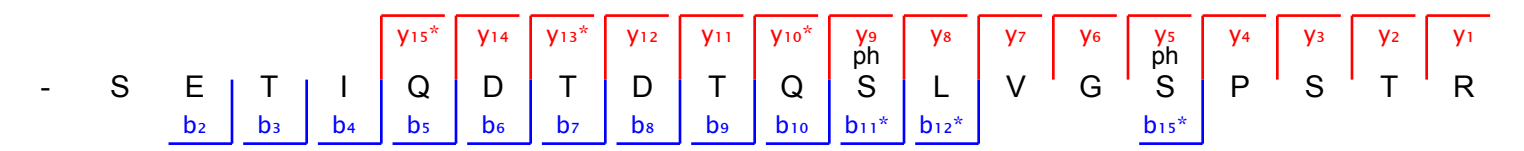

Raw file: 20150812\_A375SR\_Phospho\_BR1\_03  
 Scan: 15250 Method: FTMS; HCD Score: 195.07 m/z: 1087.47 Gene names: SP100

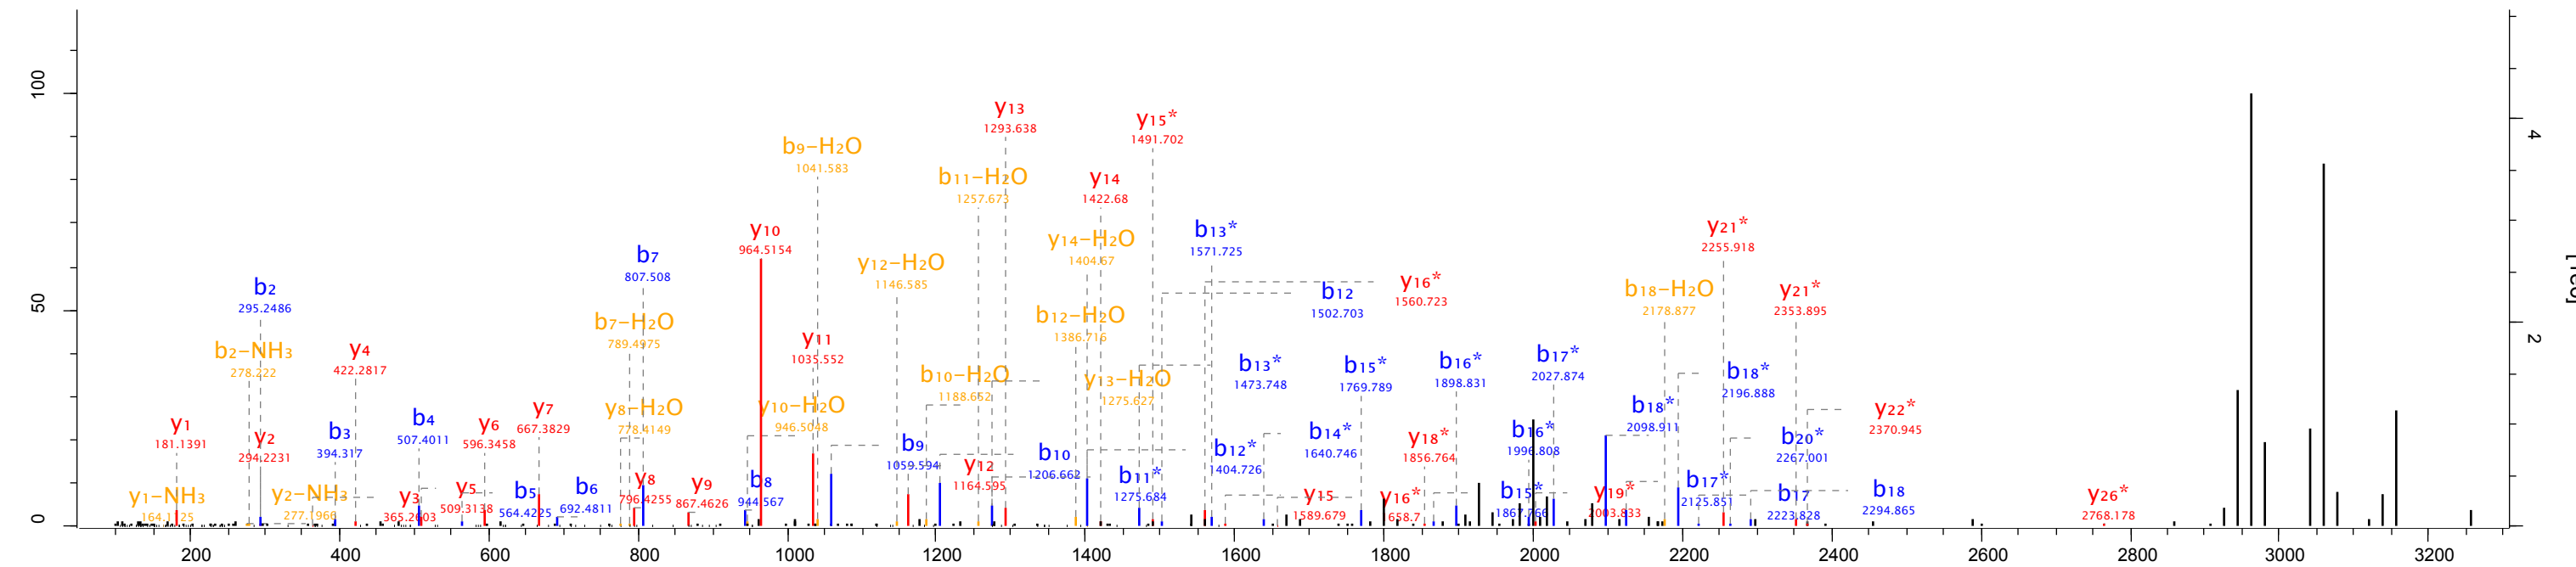

- K R V I G Q D H D F S E S S E E E A P A E A S S G A L R -  
 b<sub>2</sub> b<sub>3</sub> b<sub>4</sub> b<sub>5</sub> b<sub>6</sub> b<sub>7</sub> b<sub>8</sub> b<sub>9</sub> b<sub>10</sub> b<sub>11</sub>\* b<sub>12</sub> b<sub>13</sub>\* b<sub>14</sub>\* b<sub>15</sub>\* b<sub>16</sub>\* b<sub>17</sub> b<sub>18</sub> b<sub>20</sub>\*  
 y<sub>26</sub>\* y<sub>22</sub>\* y<sub>21</sub>\* y<sub>19</sub>\* y<sub>18</sub>\* y<sub>16</sub>\* y<sub>15</sub> ph y<sub>14</sub> y<sub>13</sub> y<sub>12</sub> y<sub>11</sub> y<sub>10</sub> y<sub>9</sub> y<sub>8</sub> y<sub>7</sub> y<sub>6</sub> y<sub>5</sub> y<sub>4</sub> y<sub>3</sub> y<sub>2</sub> y<sub>1</sub>

Raw file: 20150812\_A375SR\_Phospho\_BR1\_03  
 Scan: 15290 Method: FTMS; HCD Score: 79.63 m/z: 1062.46 Gene names: KAT7

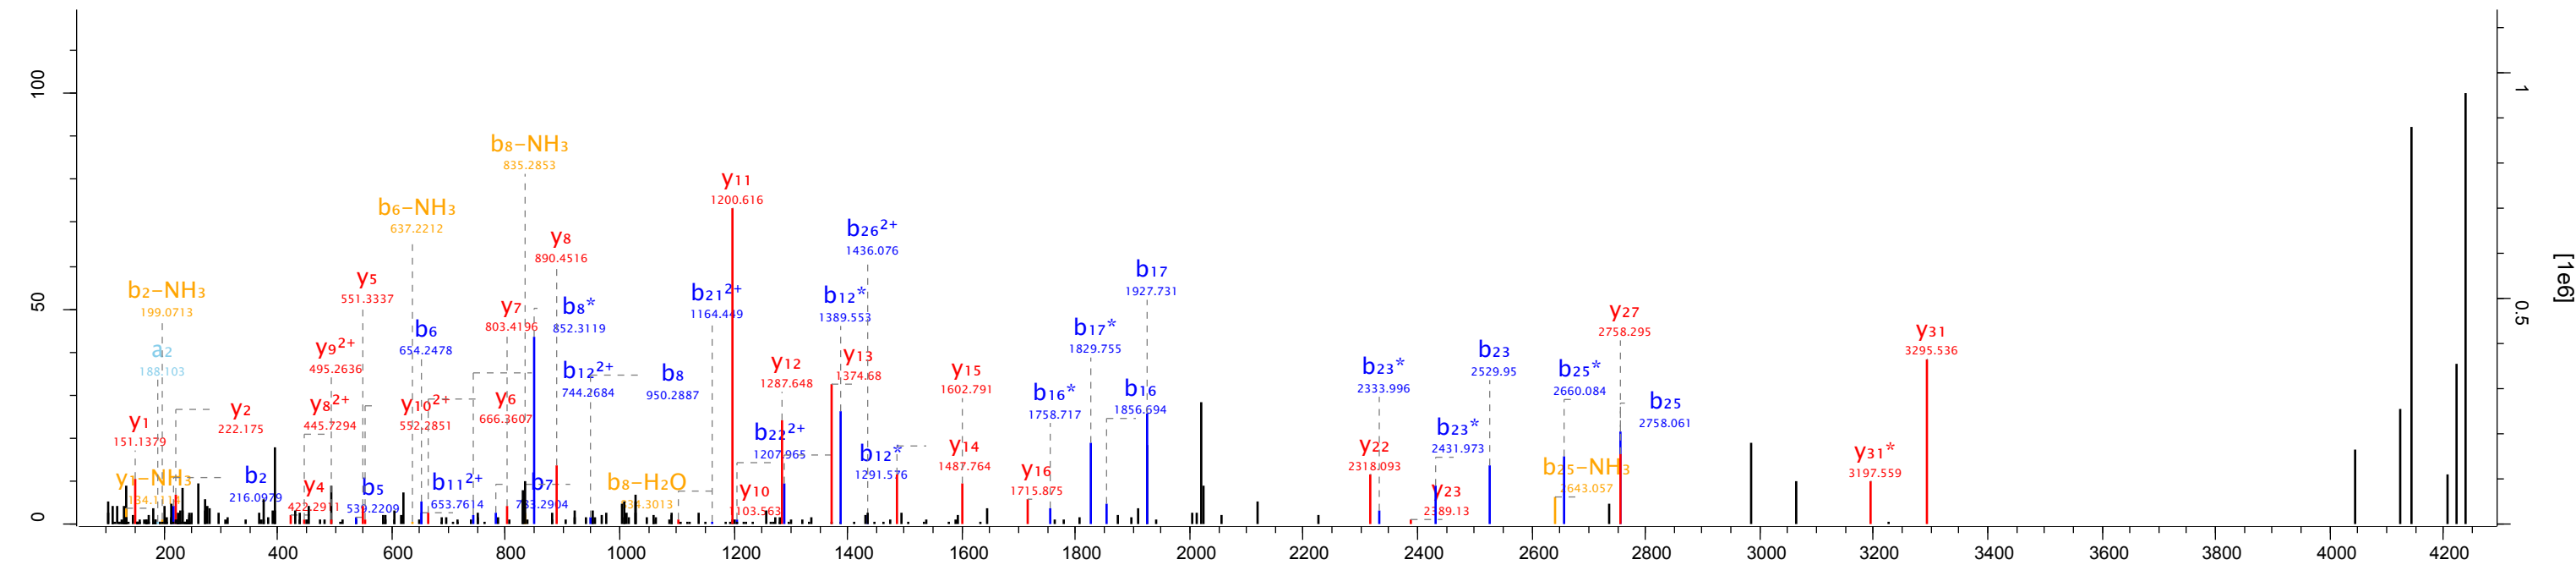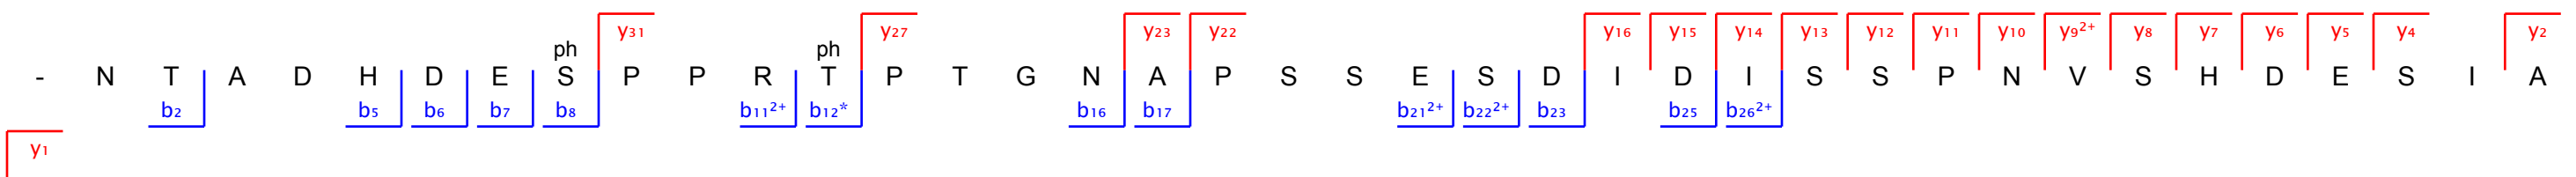

Raw file: 20150812\_A375SR\_Phospho\_BR1\_03  
 Scan: 15540 Method: FTMS; HCD Score: 293.12 m/z: 999.94 Gene names: SP100

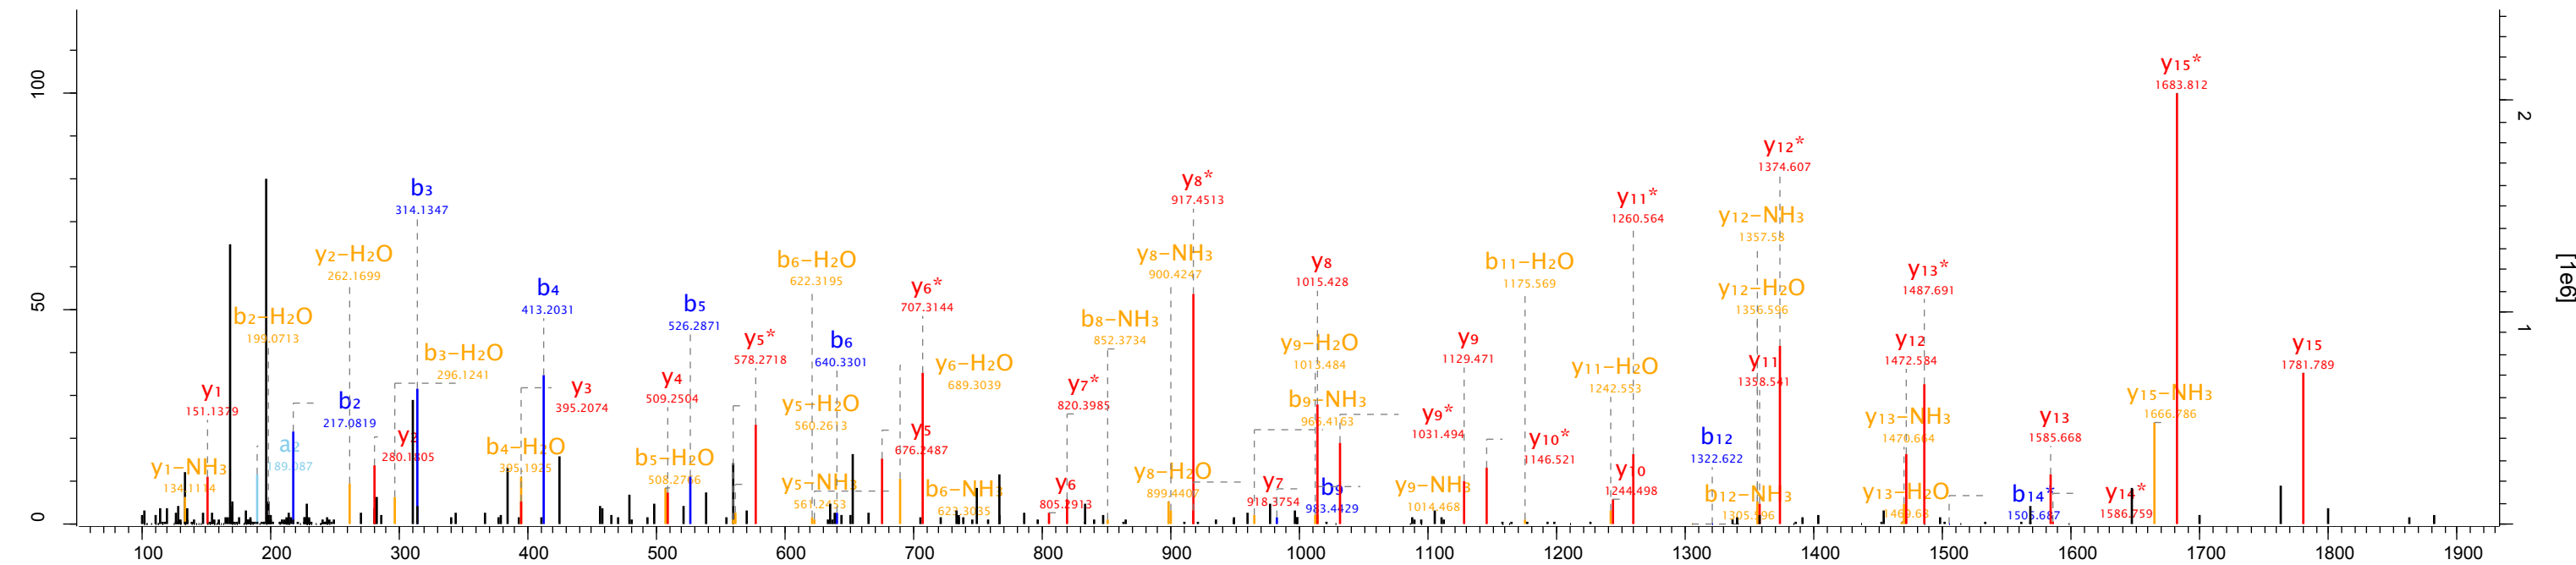

- S E P V I N N D N P L E S N D E K -

Fragmentation mapping (b and y ions):

- b2: E
- b3: P
- b4: V
- b5: I
- b6: N
- b9: N
- b12: E
- b14\*: S
- y1: K
- y2: E
- y3: D
- y4: N
- y5: S
- y6: E
- y7: L
- y8: P
- y9: N
- y10: D
- y11: N
- y12: I
- y13: V
- y14\*: P
- y15: E



Raw file: 20150812\_A375SR\_Phospho\_BR1\_03  
 Scan: 15660 Method: FTMS; HCD Score: 201.85 m/z: 892.34 Gene names: GRIPAP1

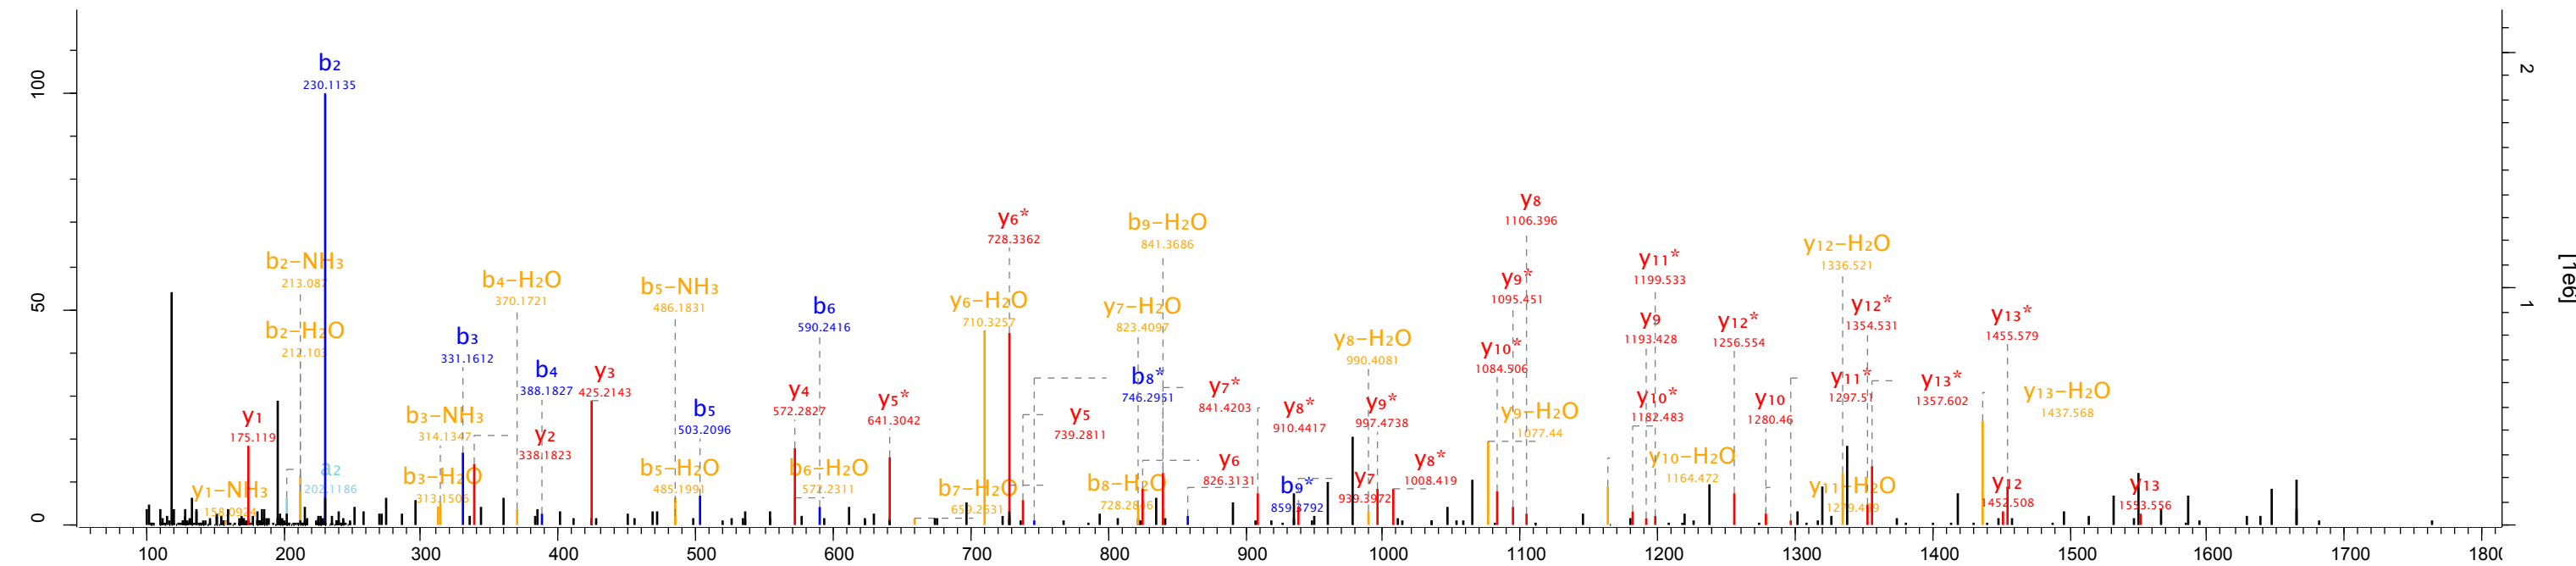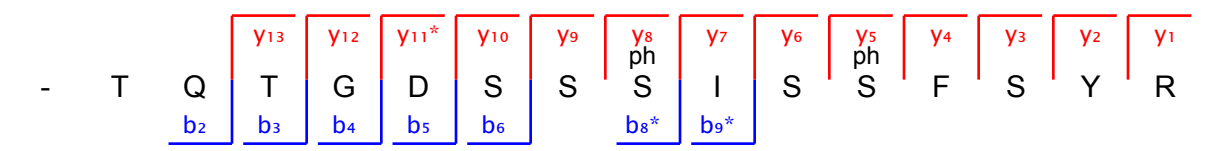

Raw file 20150812\_A375SR\_Phospho\_BR1\_03 Scan 15750 Method FTMS; HCD Score 52.77 m/z 774.28 Gene names CMTR1

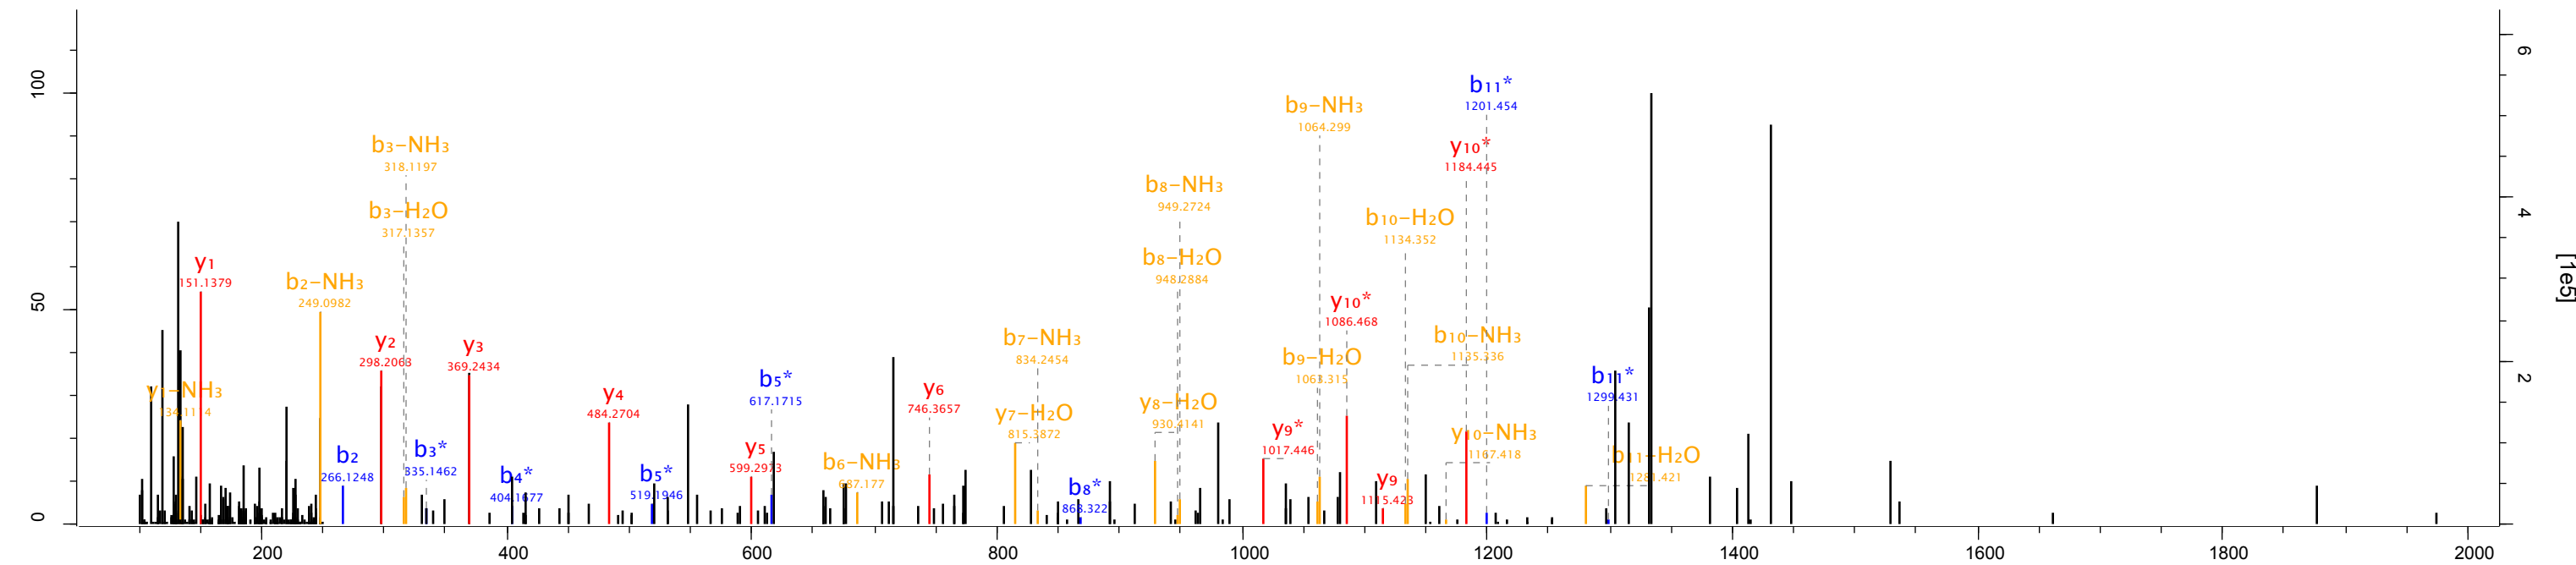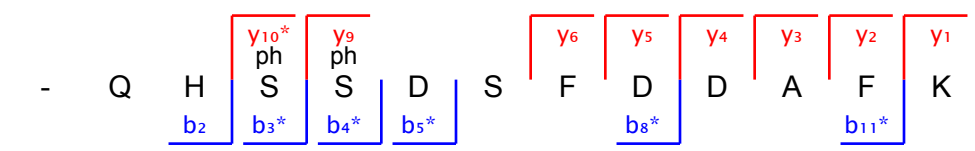

Raw file 20150812\_A375SR\_Phospho\_BR1\_03 Scan 16180 Method FTMS; HCD Score 105.46 m/z 865.32 Gene names CDK13

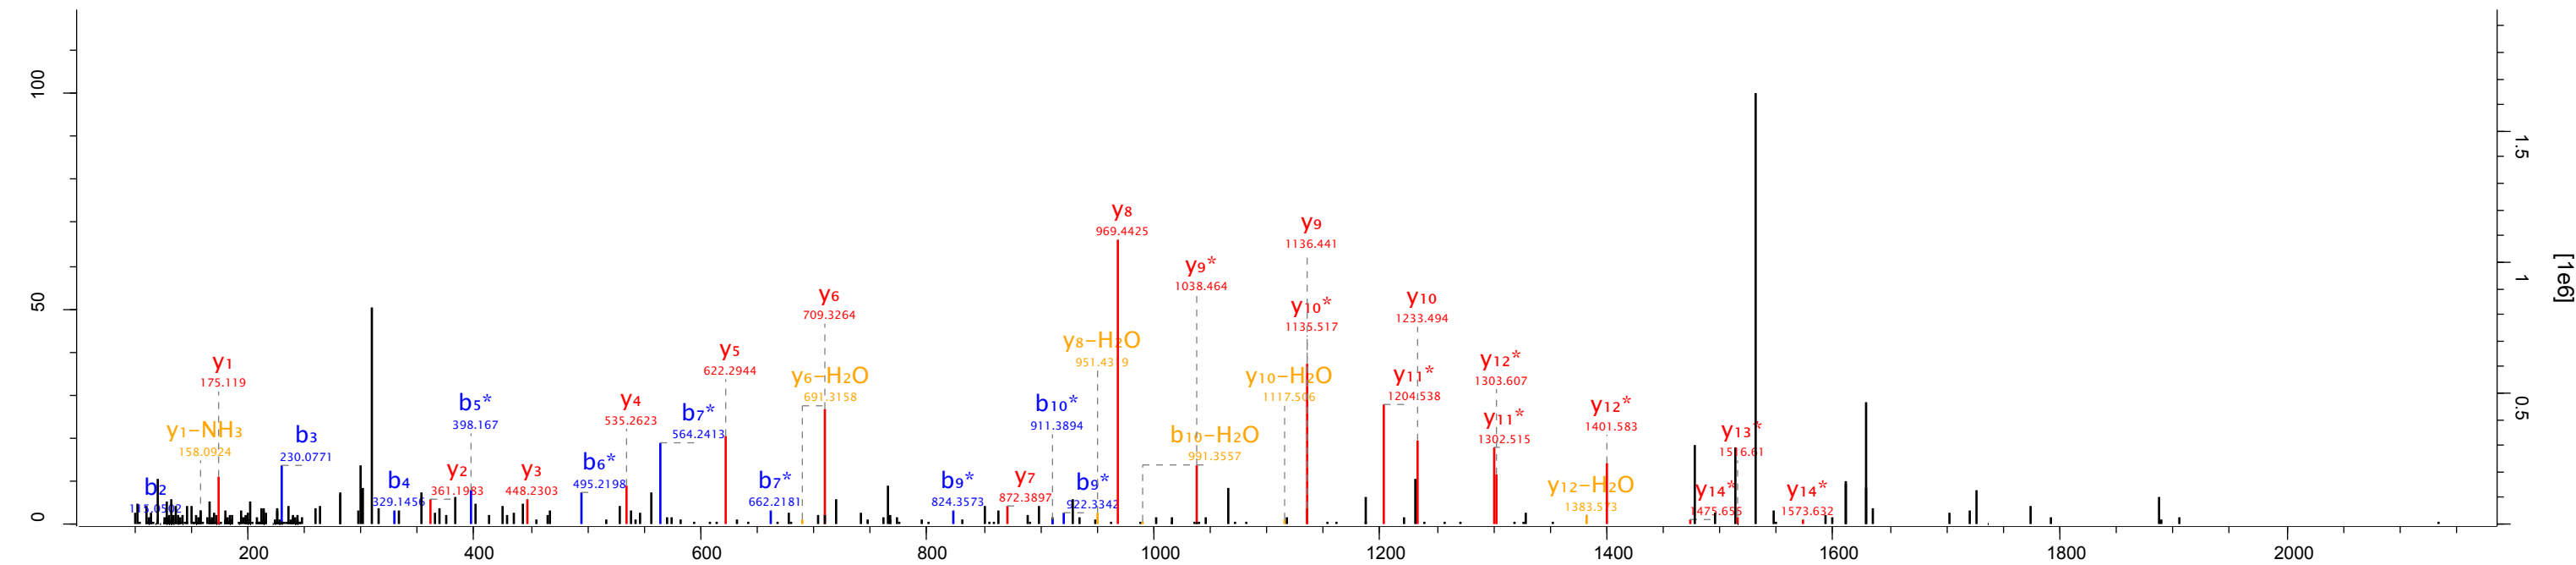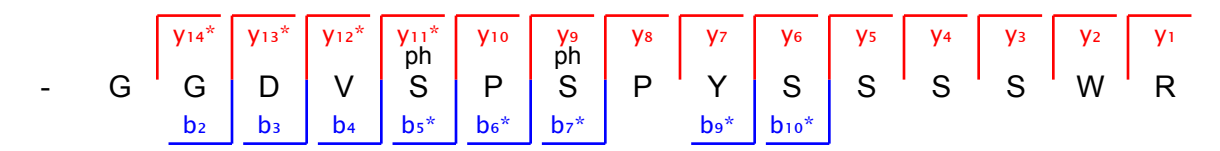

Raw file: 20150812\_A375SR\_Phospho\_BR1\_03  
 Scan: 16870 Method: FTMS; HCD Score: 302.79 m/z: 1182.49 Gene names: SERBP1

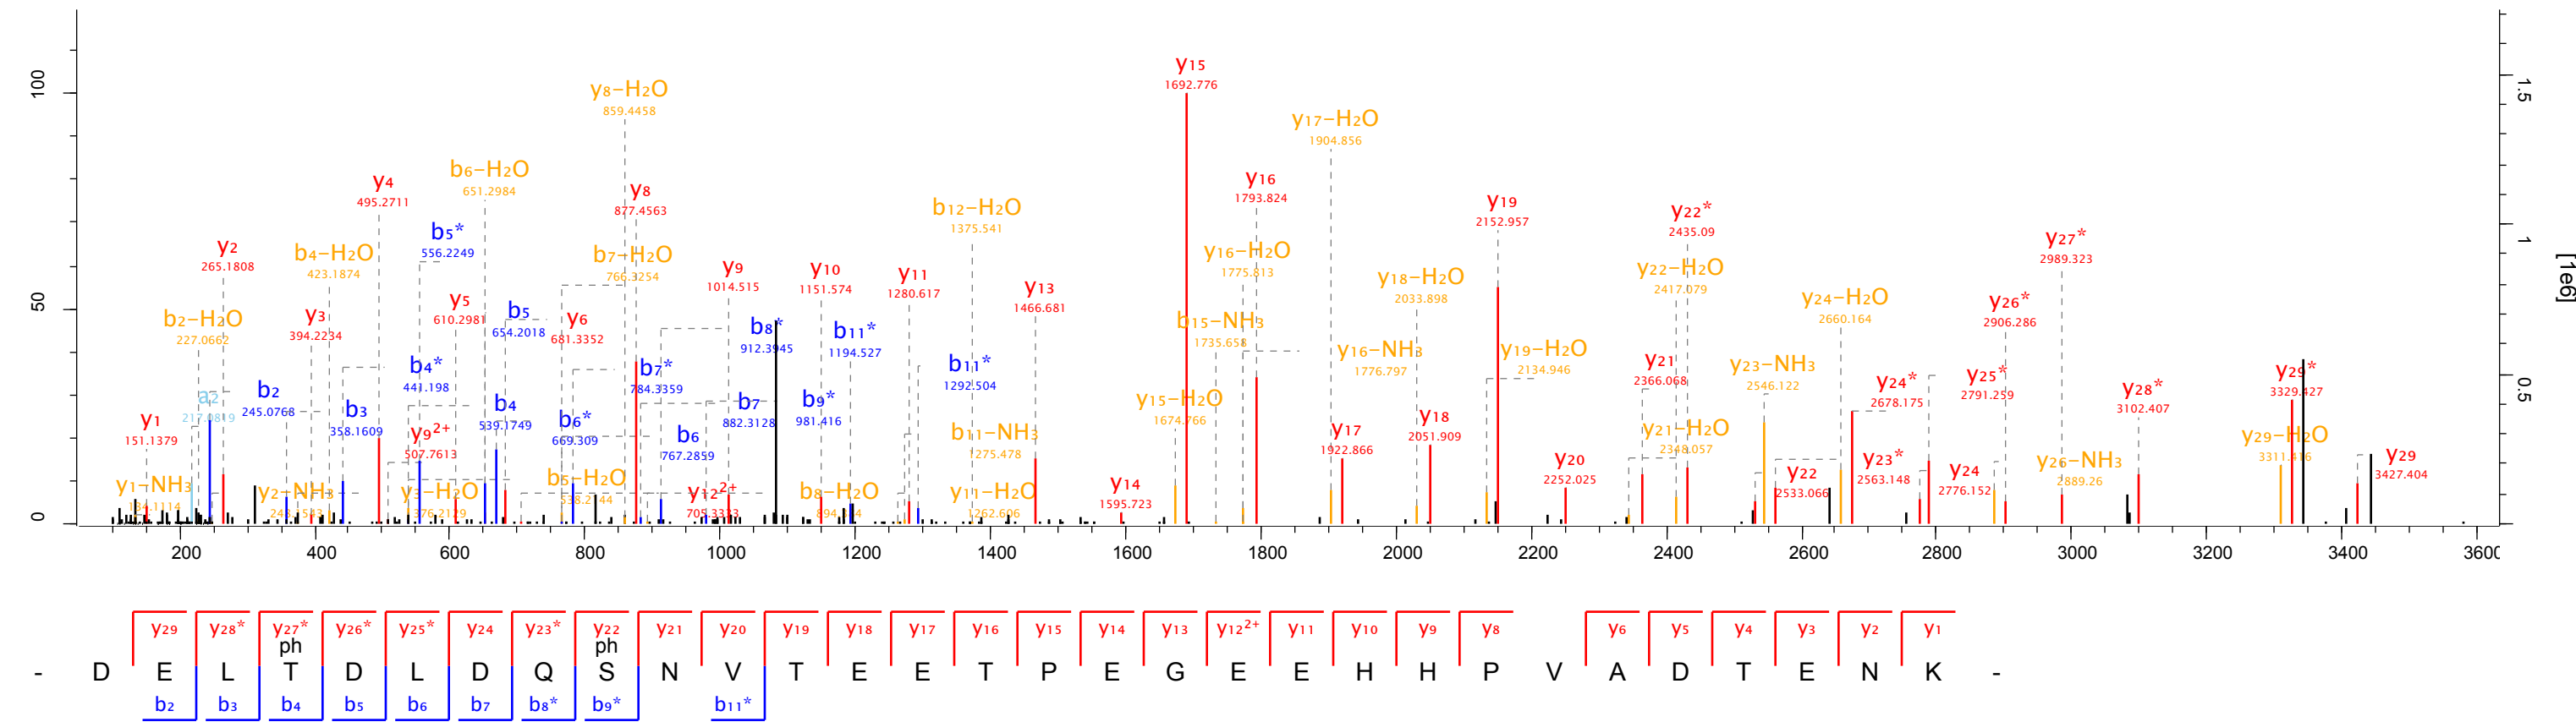

20150812\_A375SR\_Phospho\_BR1\_03

17210 FTMS; HCD 131.99 1090.15 GYS1

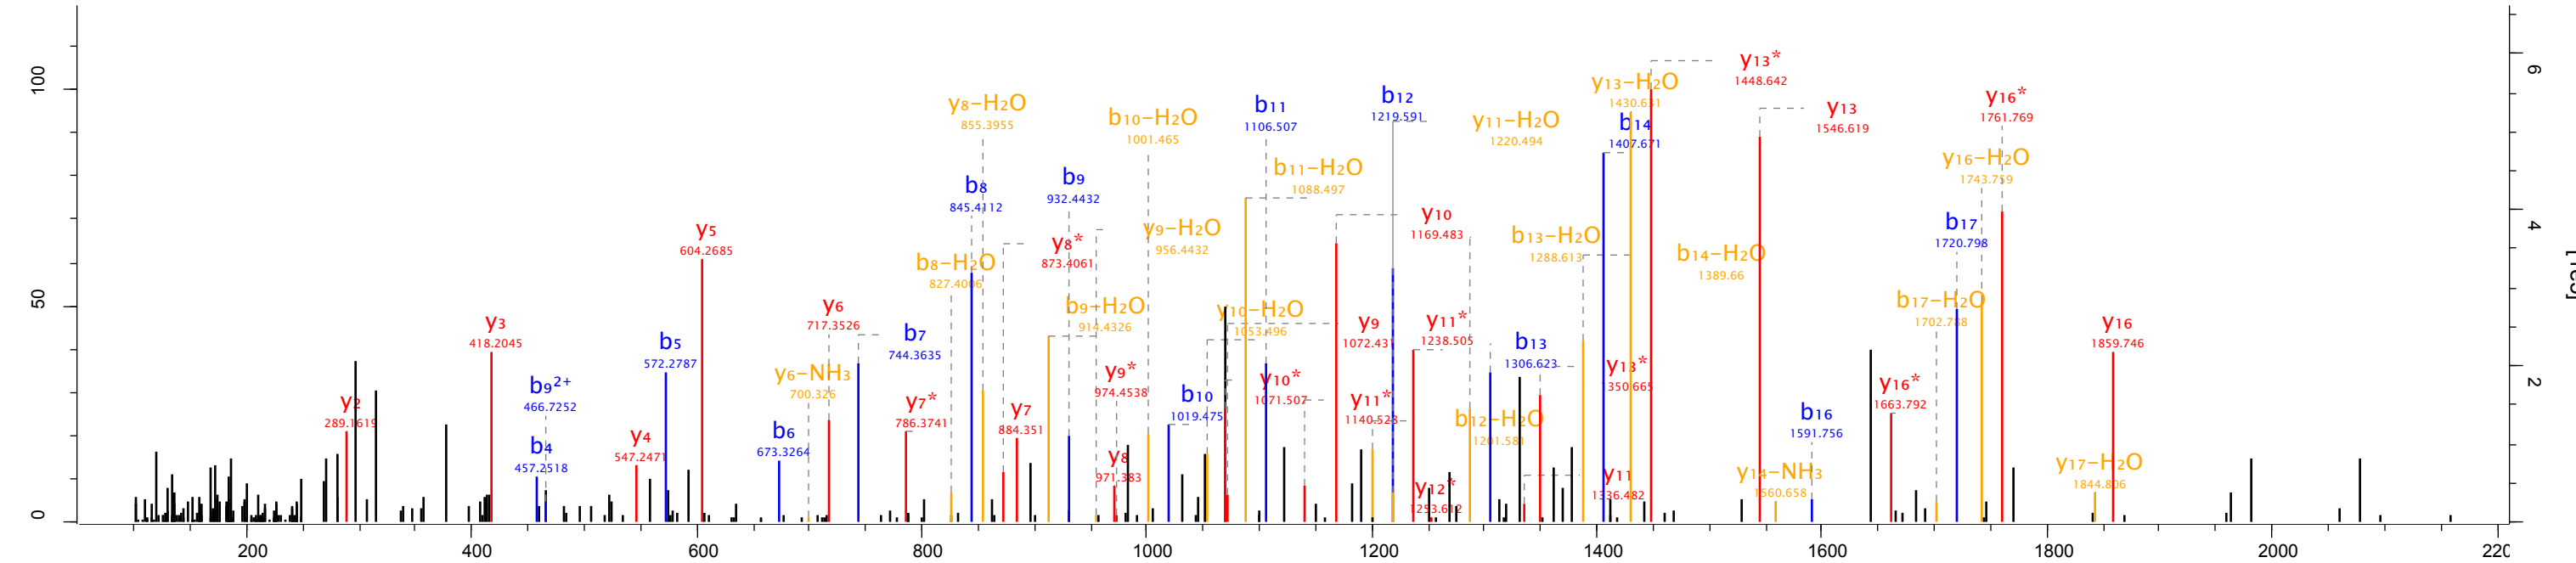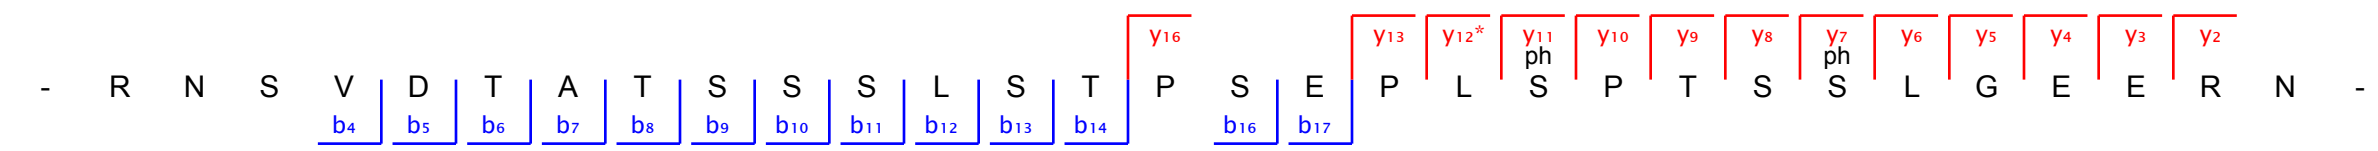

Raw file Scan Method Score m/z Gene names  
 20150812\_A375SR\_Phospho\_BR1\_03 17450 FTMS; HCD 200.95 781.38 CHAMP1

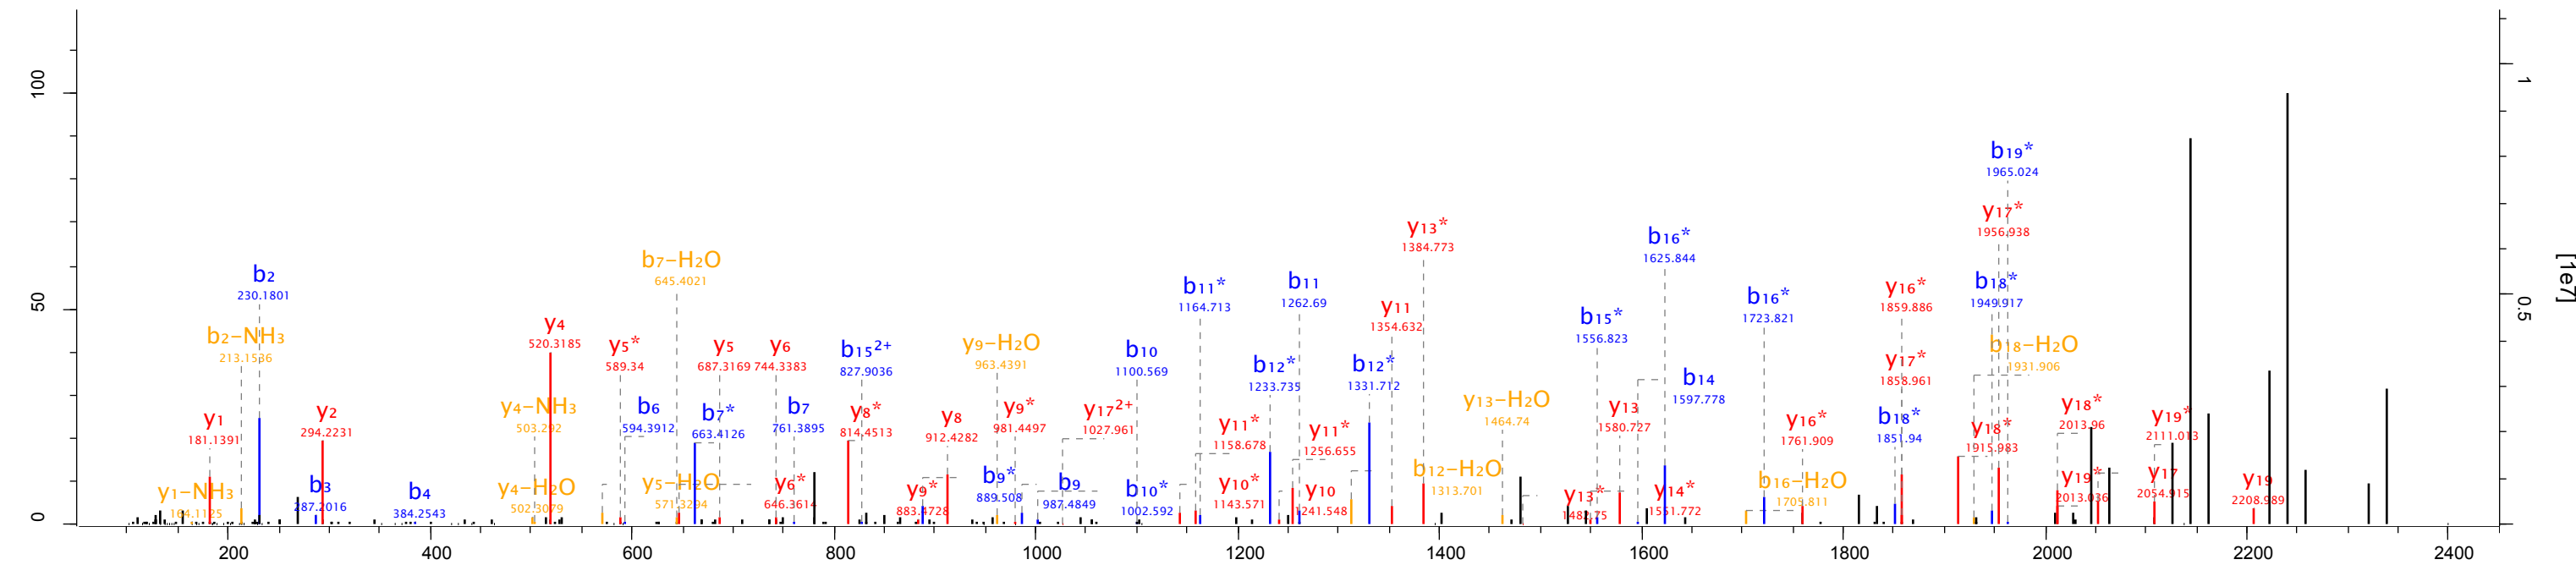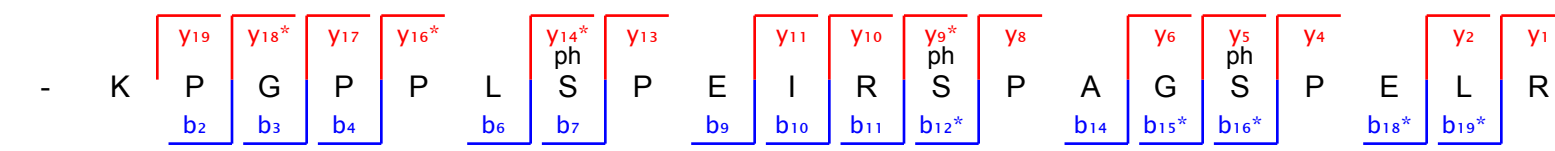

Raw file 20150812\_A375SR\_Phospho\_BR1\_03 Scan 17670 Method FTMS; HCD Score 244.87 m/z 859.38 Gene names CDC2L1;CDK11B;CDK11A

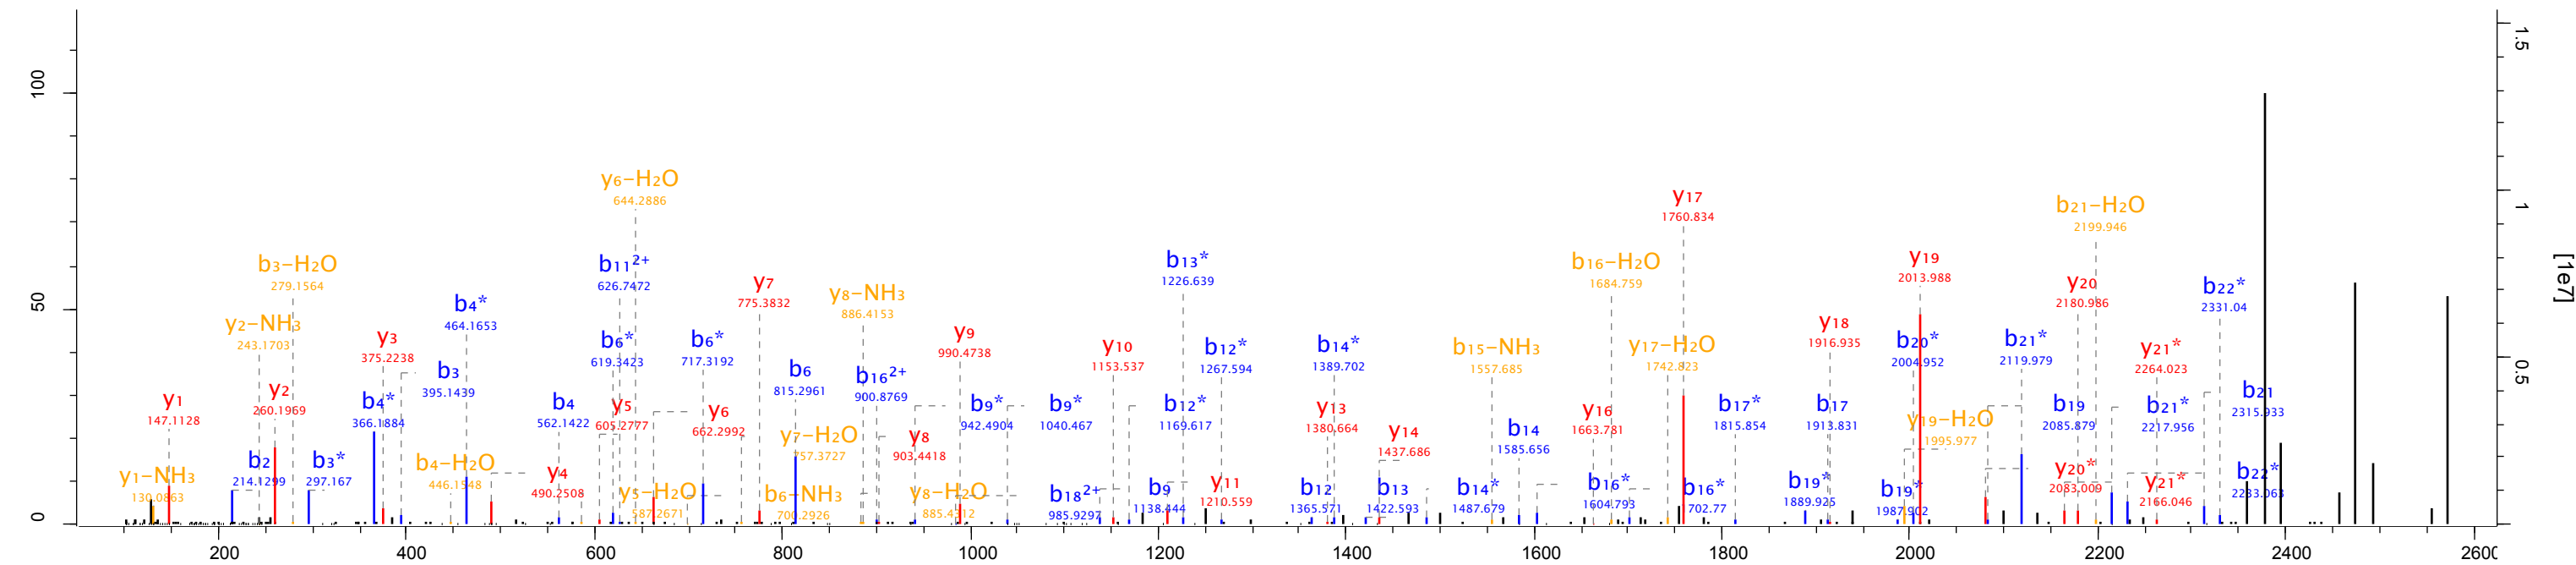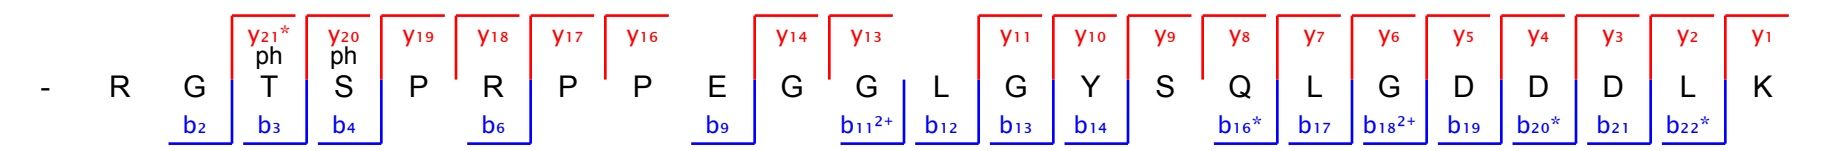

Raw file: 20150812\_A375SR\_Phospho\_BR1\_03  
 Scan: 17740 Method: FTMS; HCD Score: 230.48 m/z: 775.36 Gene names: NCOR2

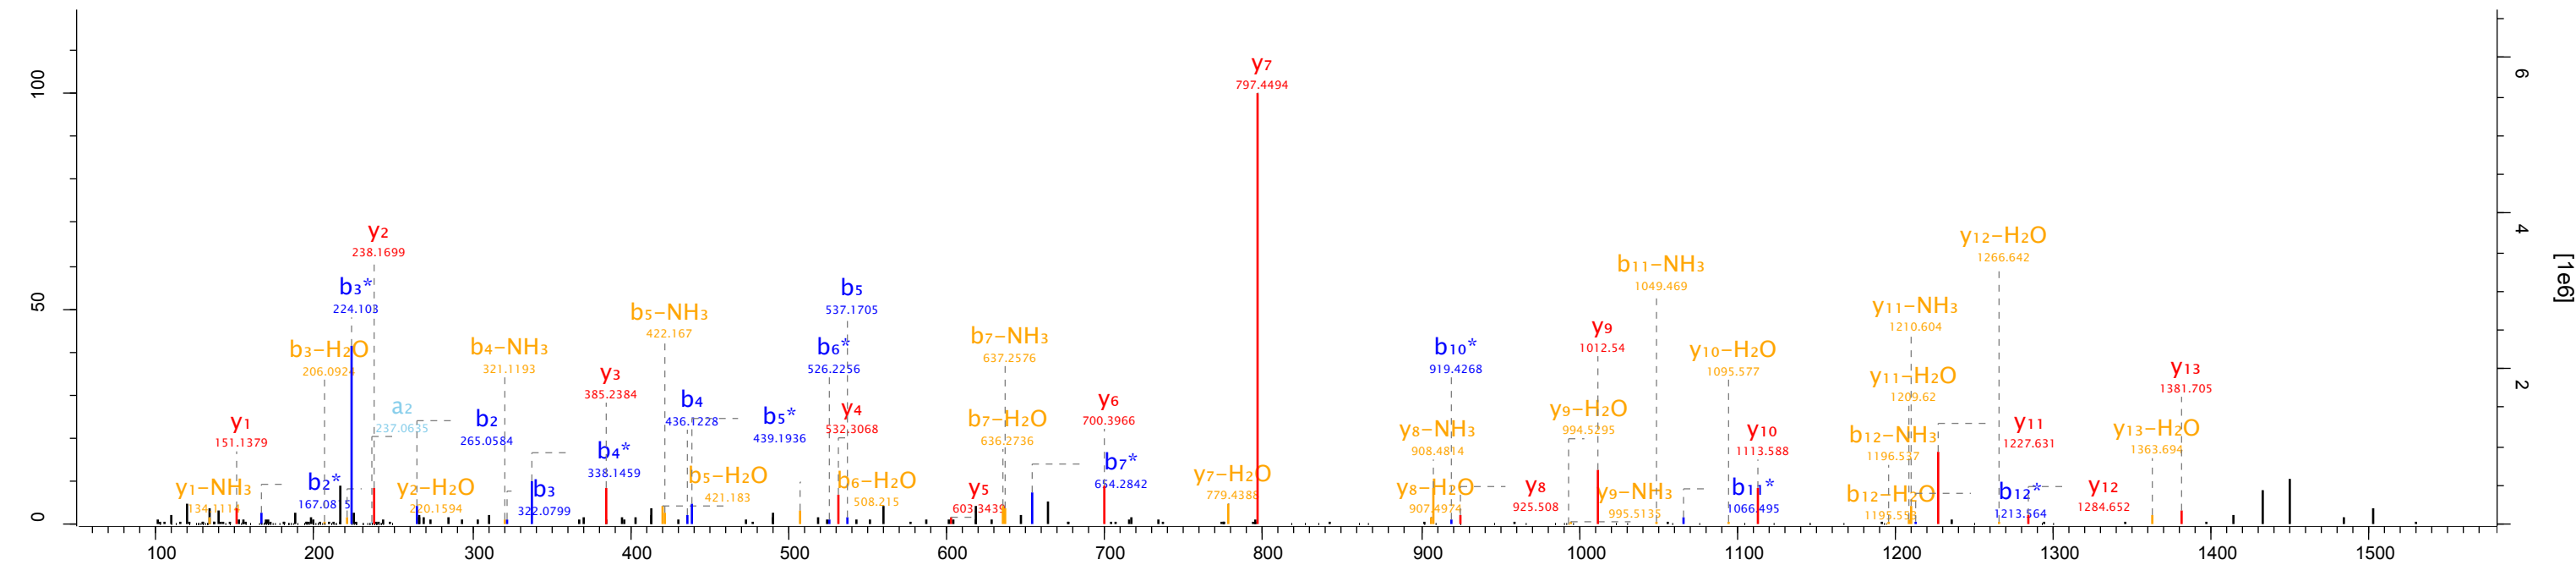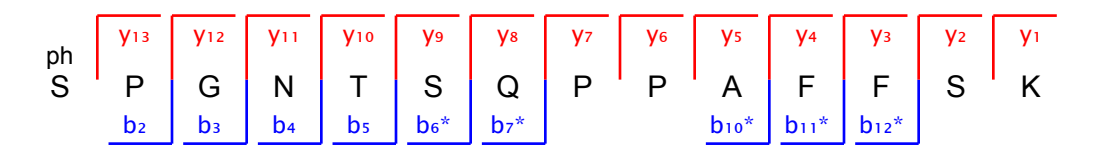



Raw file: 20150812\_A375SR\_Phospho\_BR1\_03  
 Scan: 18140 Method: FTMS; HCD Score: 257.32 m/z: 861.7 Gene names: MIER1

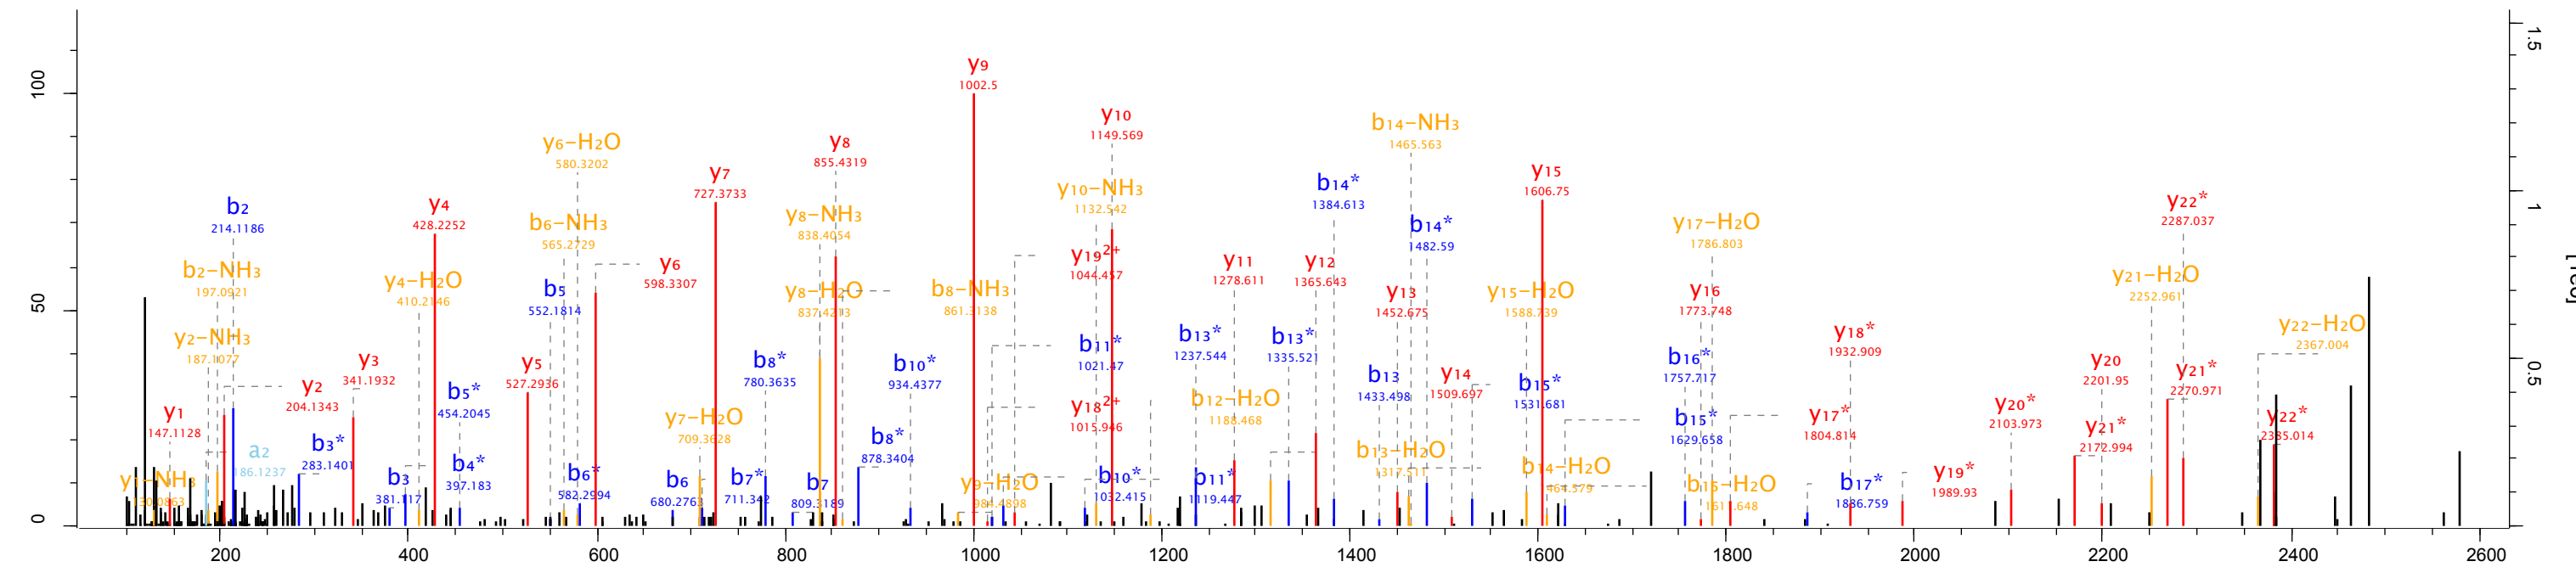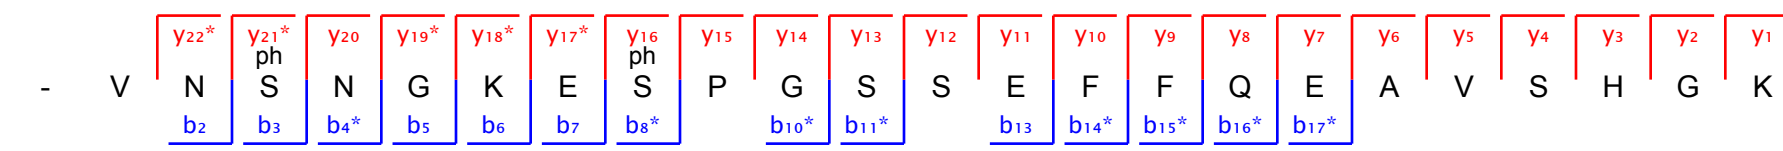

Raw file 20150812\_A375SR\_Phospho\_BR1\_03 Scan 18350 Method FTMS; HCD Score 239.49 m/z 654.82 Gene names TBC1D25

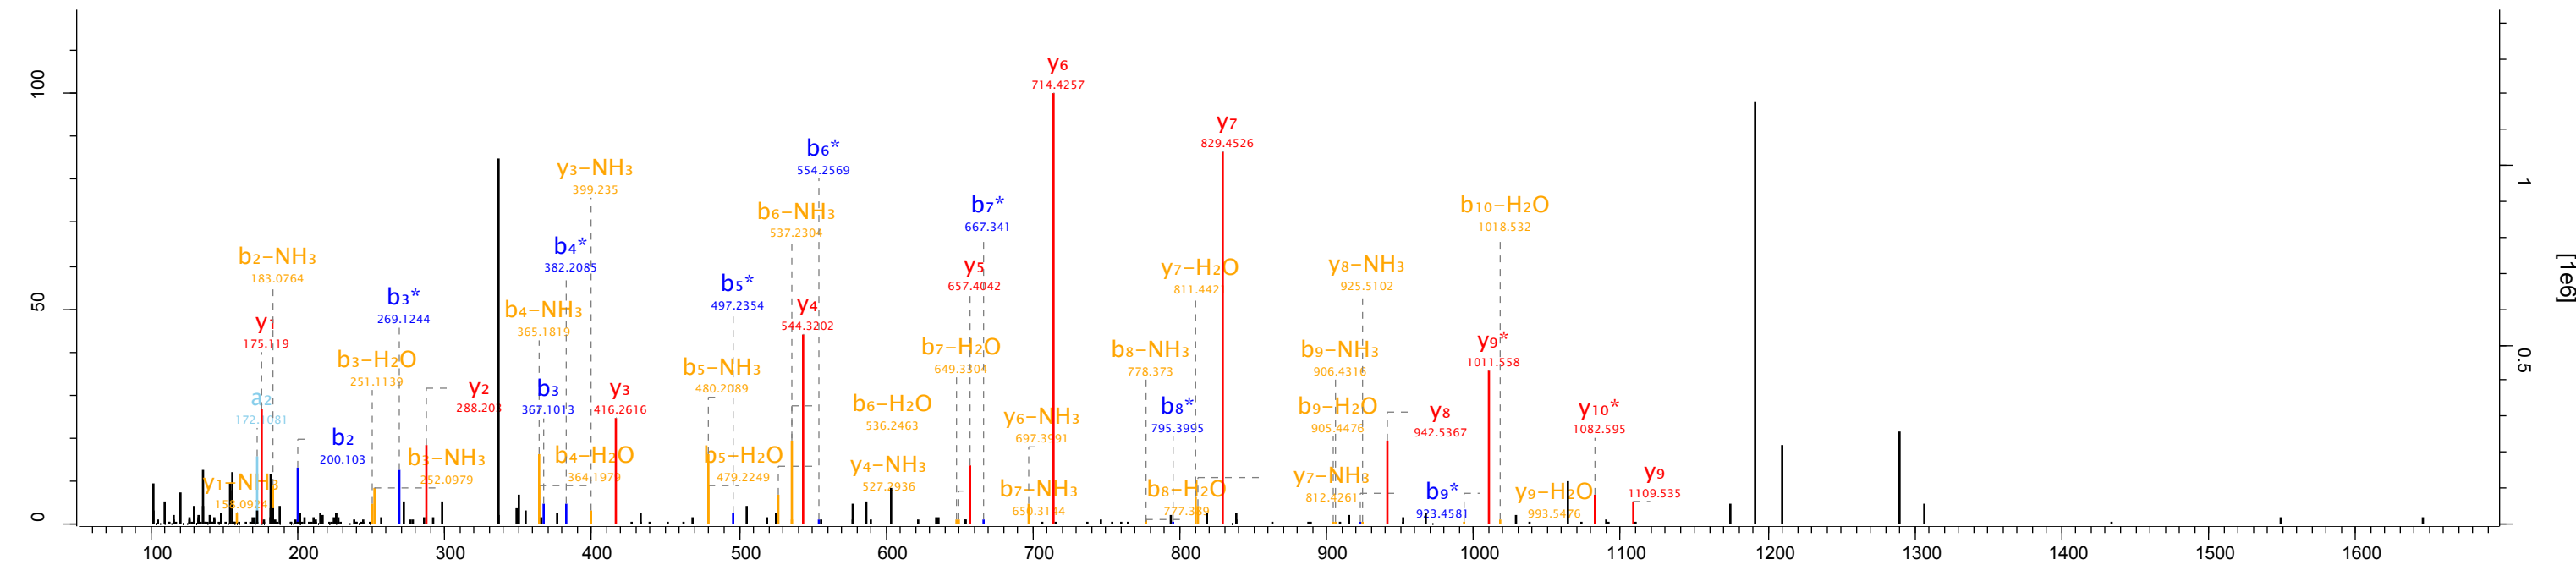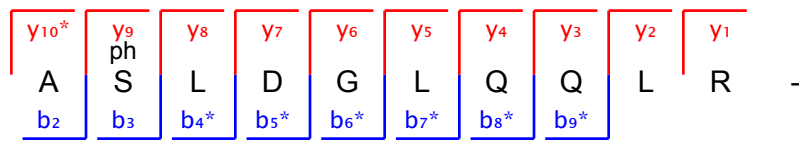

Raw file: 20150812\_A375SR\_Phospho\_BR1\_03  
 Scan: 18500 Method: FTMS; HCD Score: 104.48 m/z: 1099.51 Gene names: MAP7D1

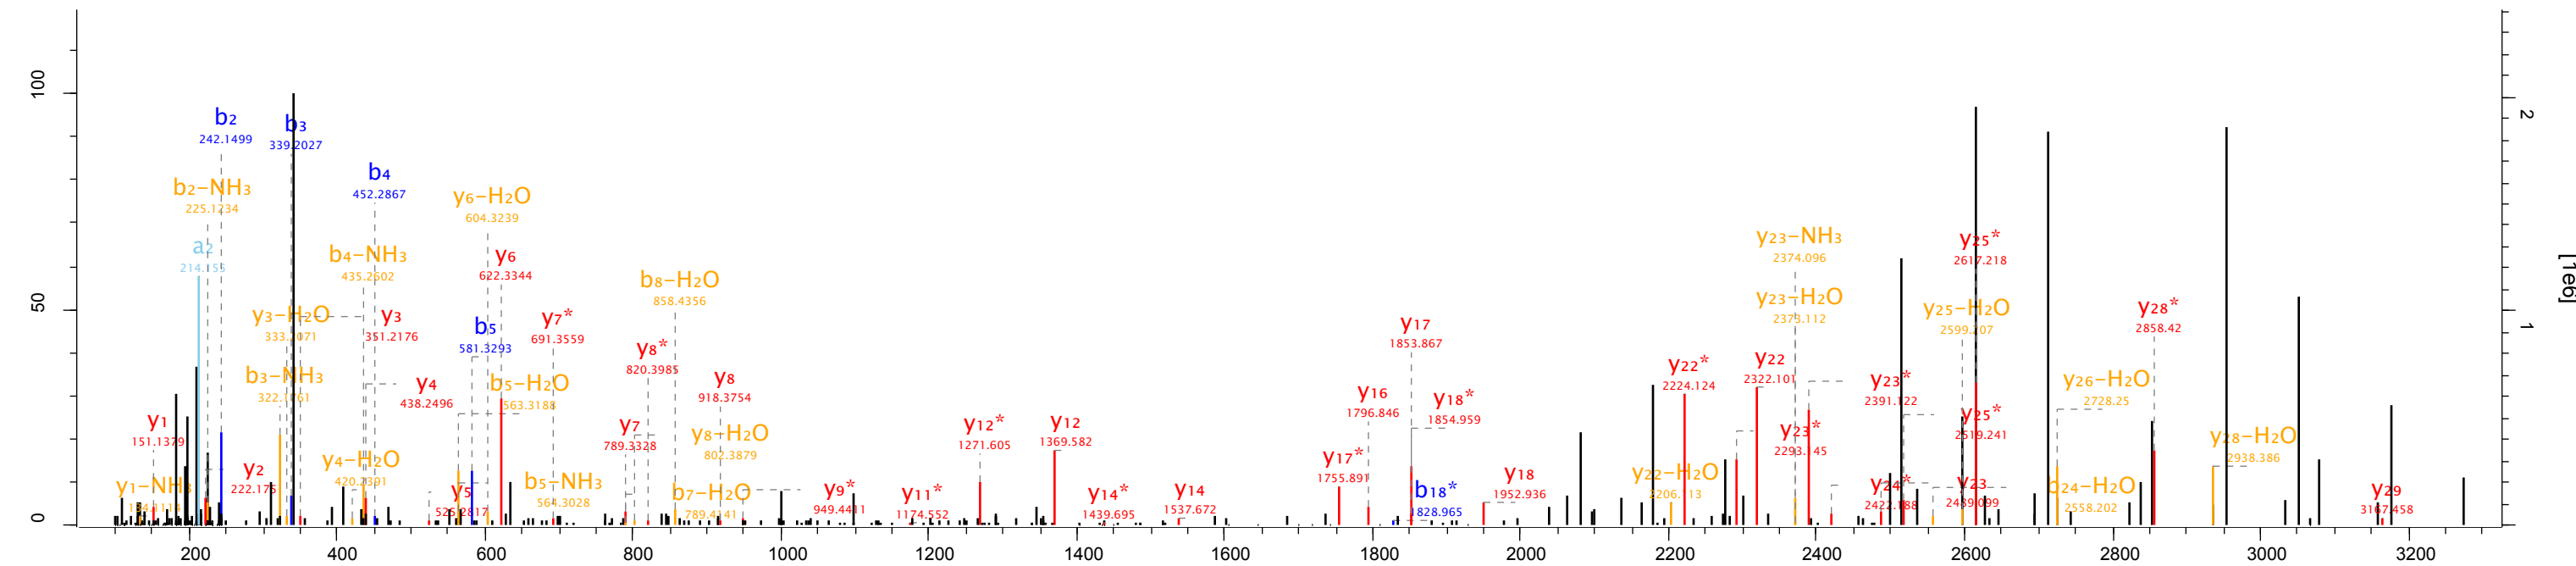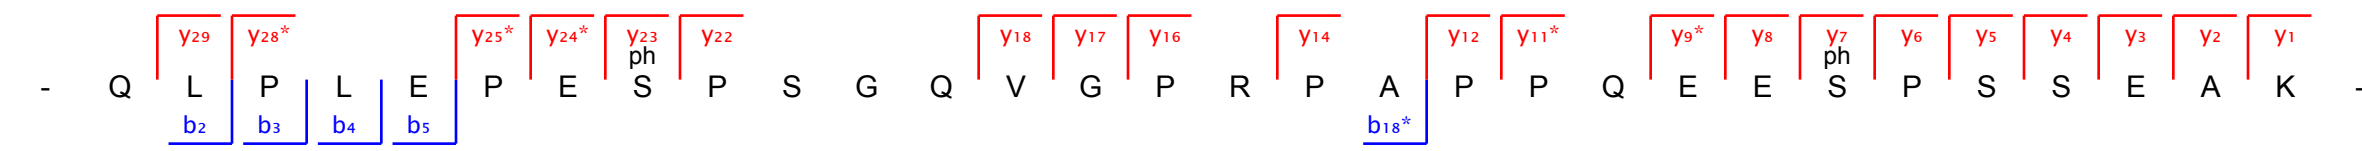

Raw file 20150812\_A375SR\_Phospho\_BR1\_03 Scan 18980 Method FTMS; HCD Score 171.71 m/z 678.3 Gene names MKI67

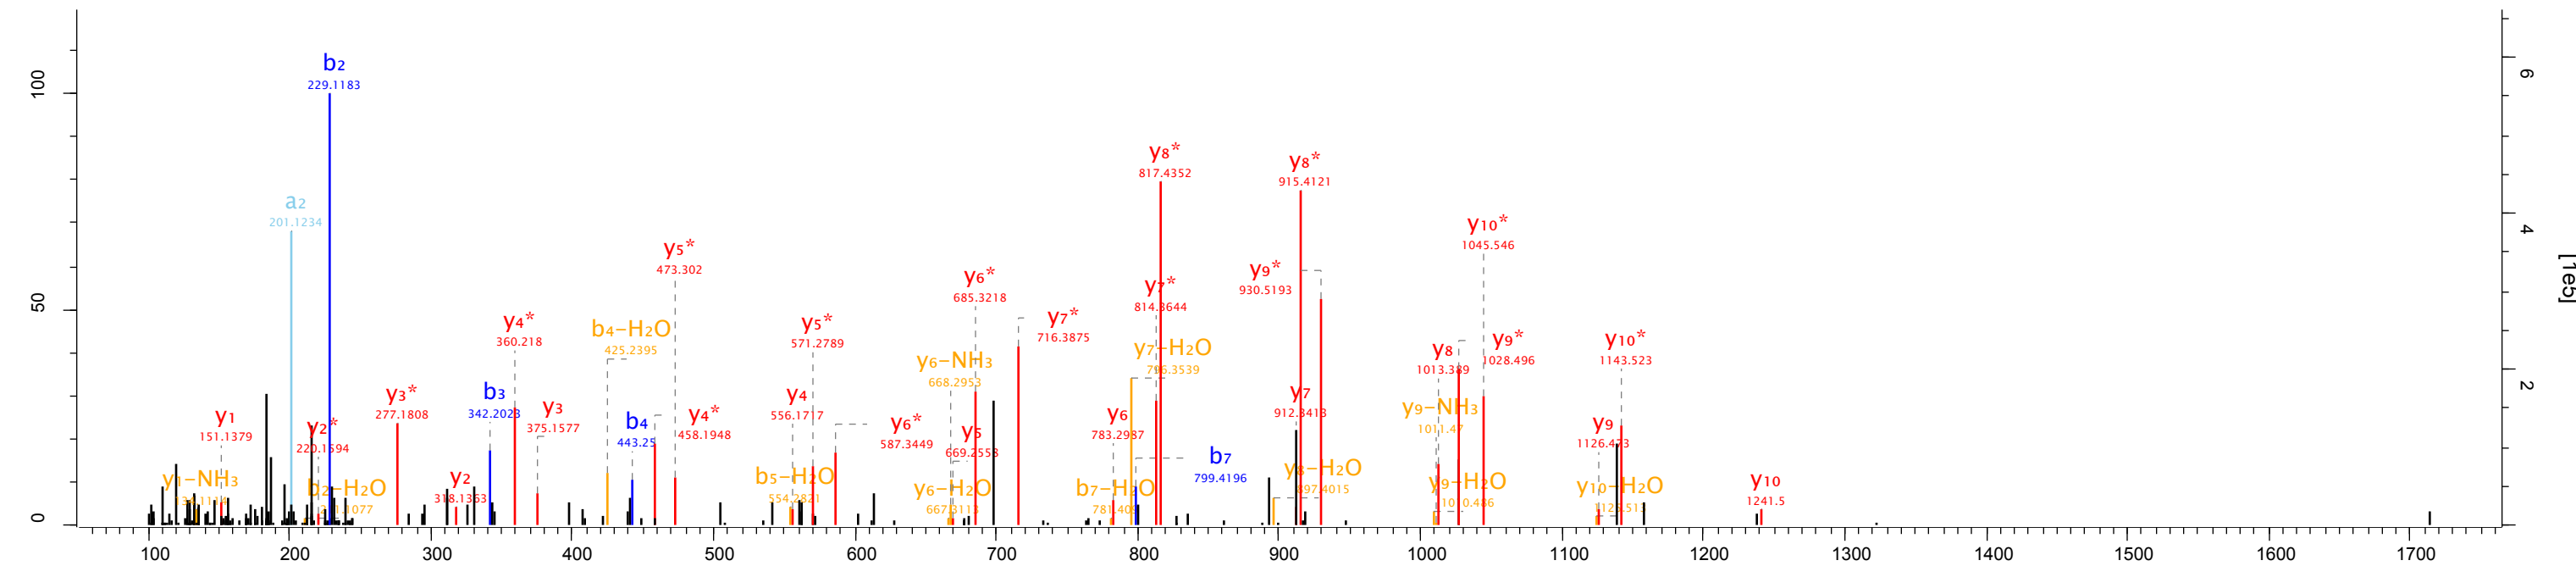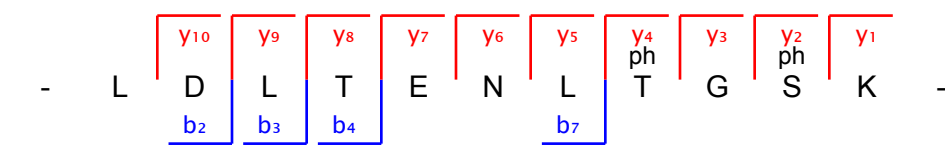

Raw file: 20150812\_A375SR\_Phospho\_BR1\_03  
 Scan: 19180 Method: FTMS; HCD Score: 229.1 m/z: 1112.92 Gene names: RAPGEF6

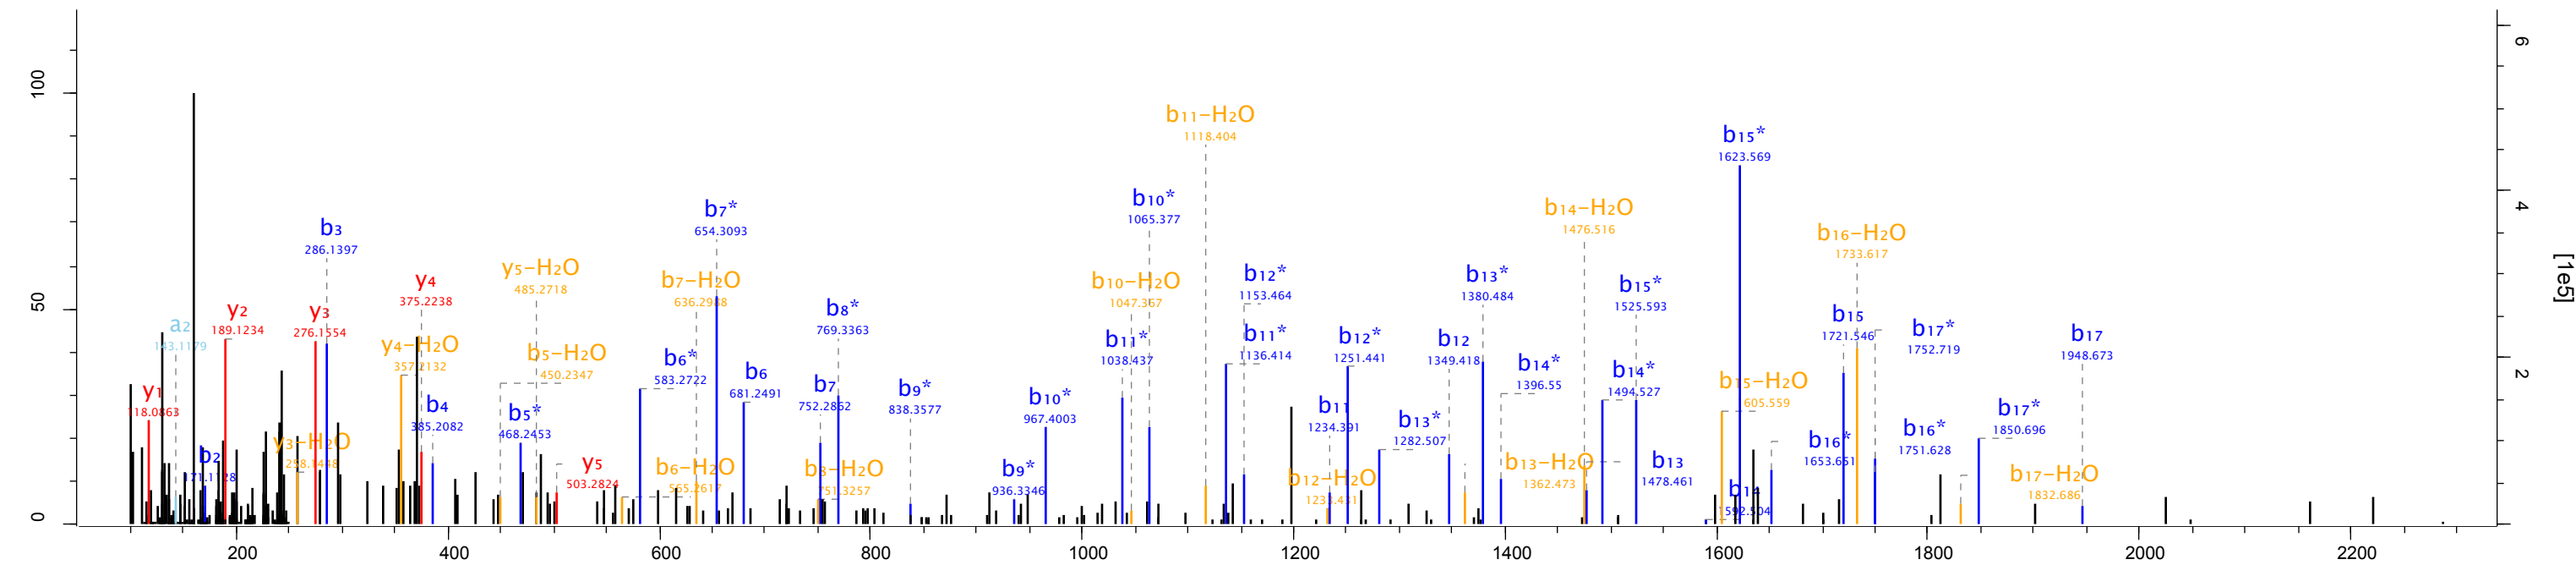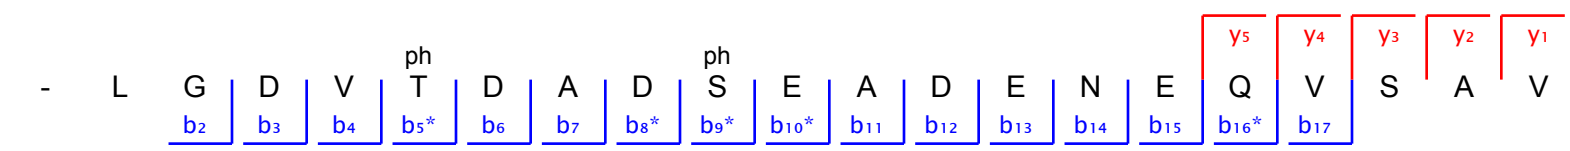

Raw file 20150812\_A375SR\_Phospho\_BR1\_03 Scan 19660 Method FTMS; HCD Score 70.83 m/z 832.41 Gene names PRKD1

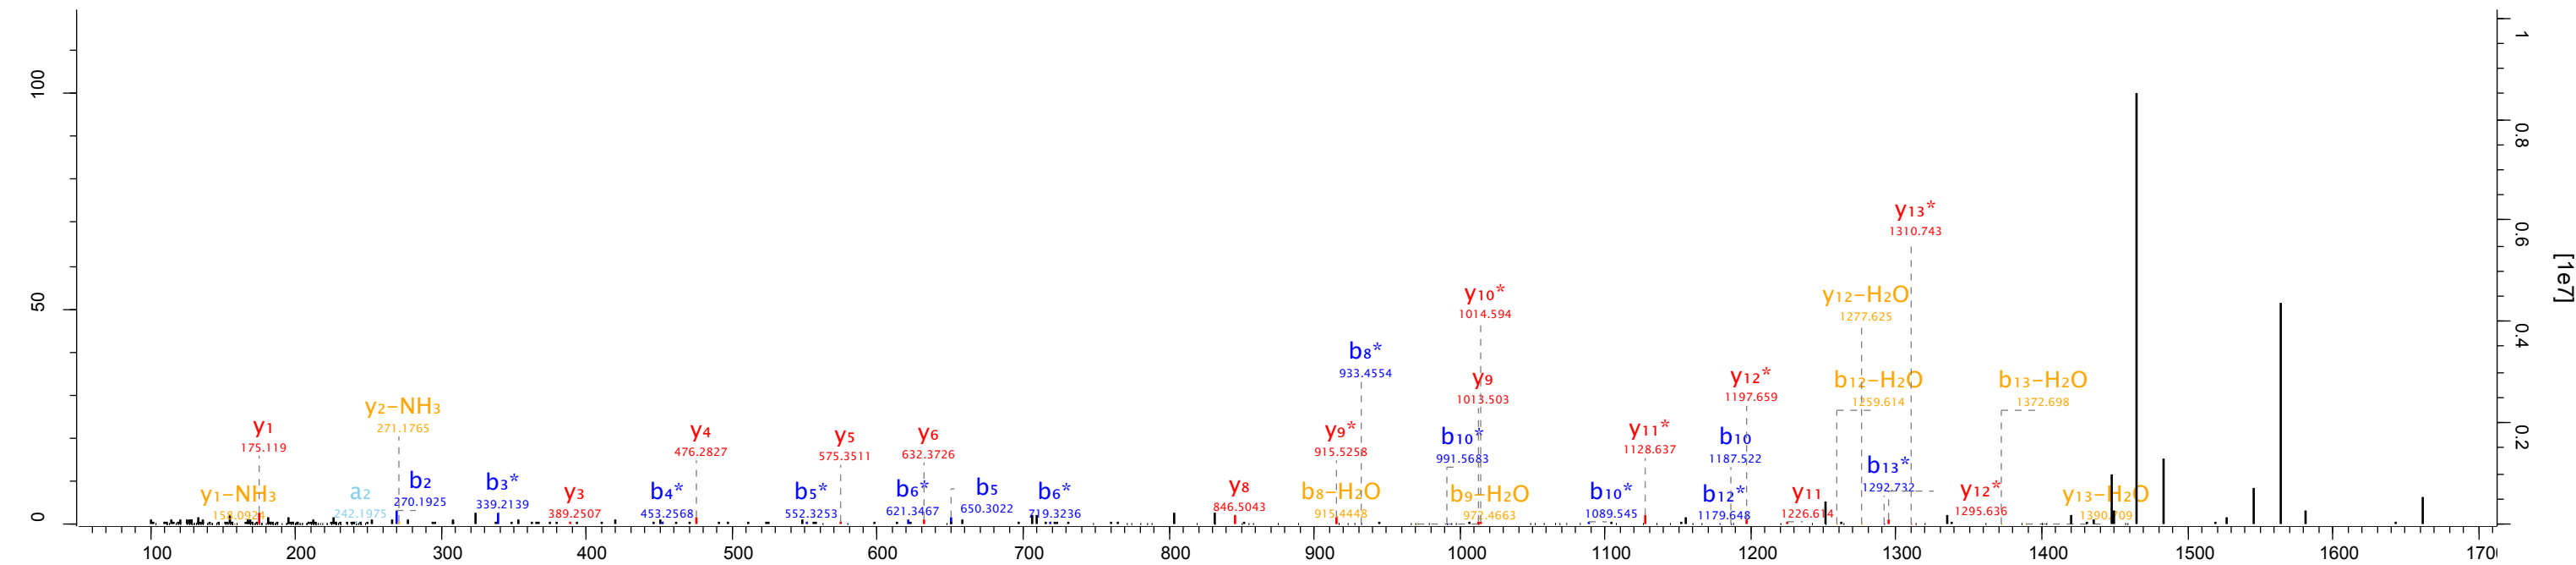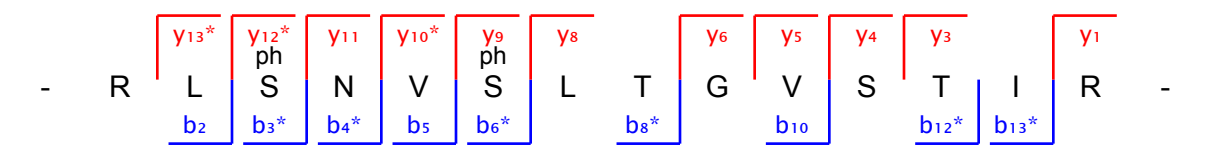

Raw file: 20150812\_A375SR\_Phospho\_BR1\_03  
 Scan: 19830 Method: FTMS; HCD Score: 163.9 m/z: 1256.22 Gene names: RBMS1

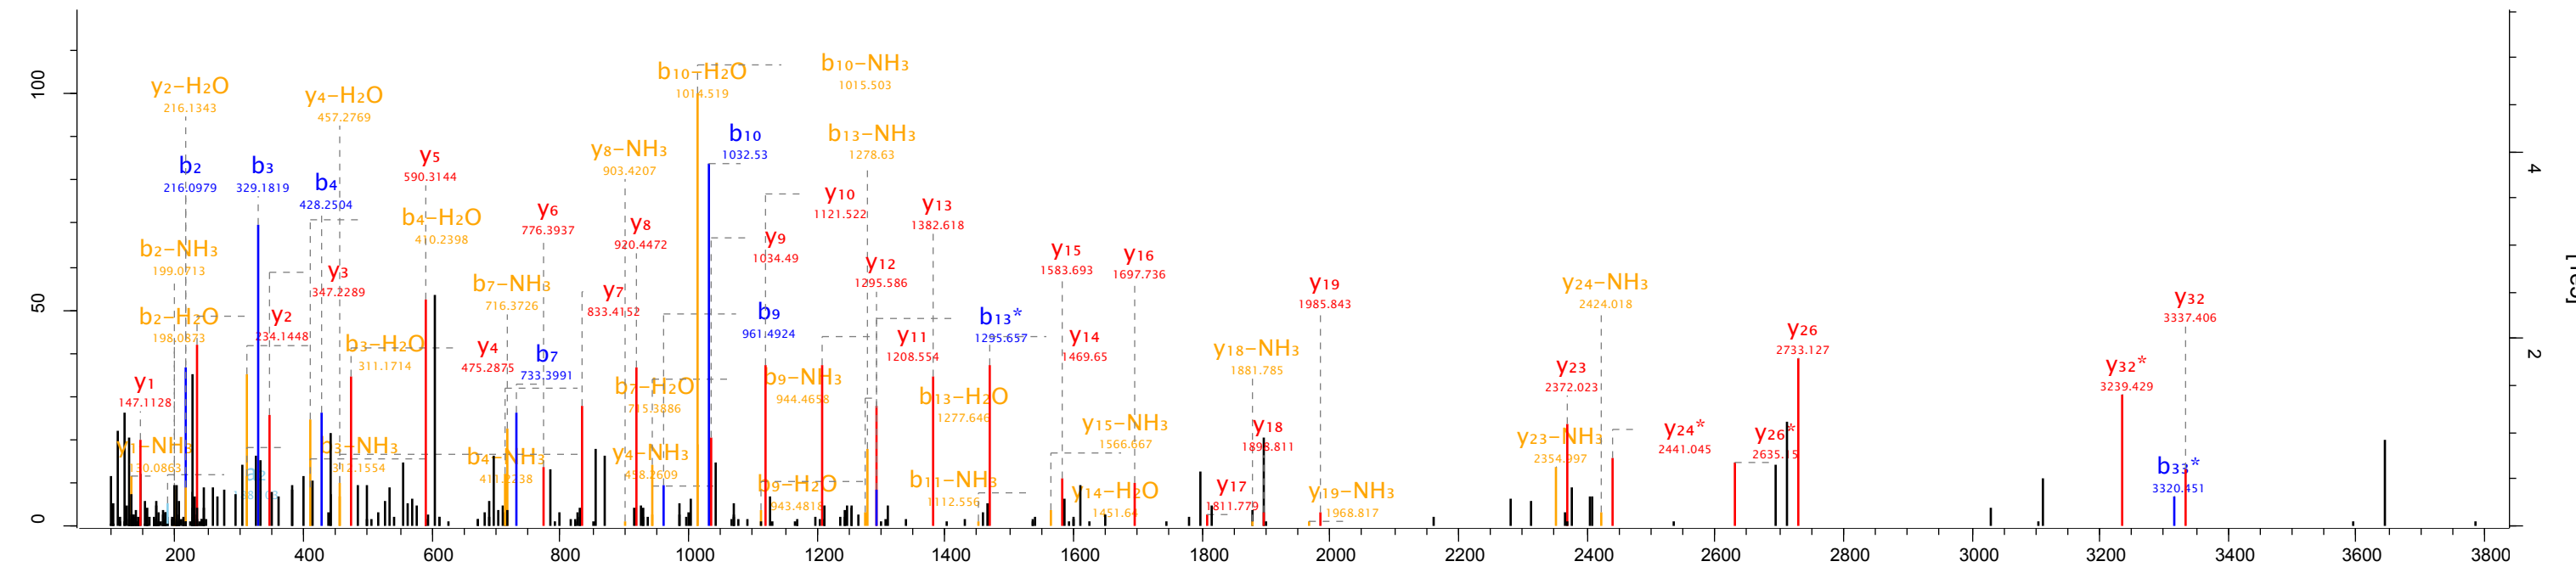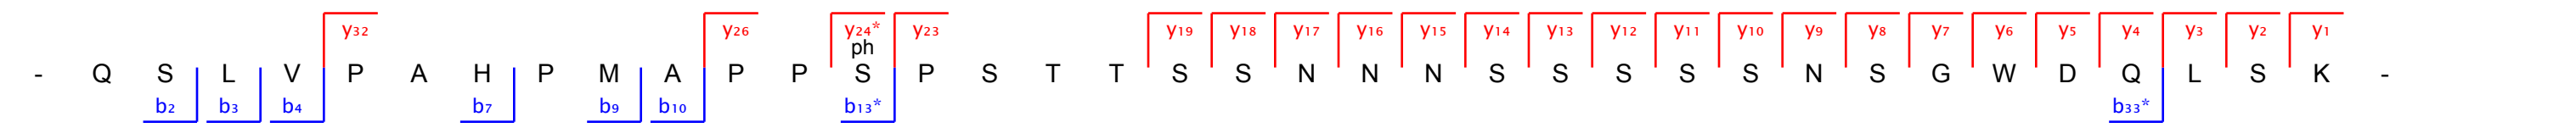

Raw file: 20150812\_A375SR\_Phospho\_BR1\_03  
 Scan: 19940 Method: FTMS; HCD Score: 94.39 m/z: 710.35 Gene names: DVL1P1;DVL1

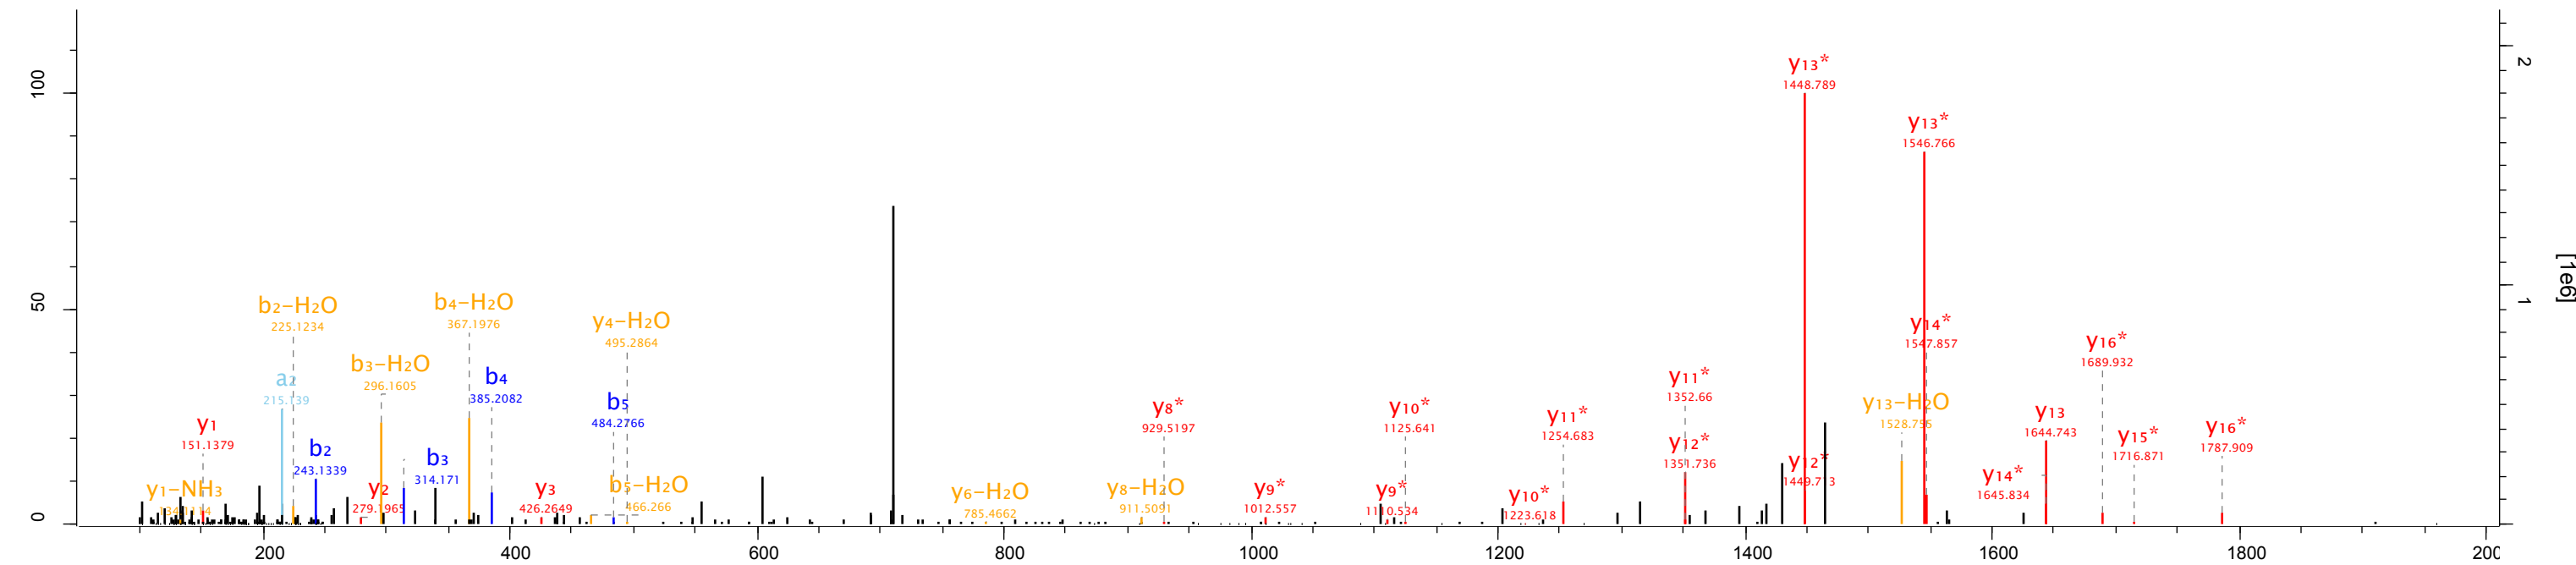

- E L A A V P P E L T G S R Q S F Q K -  
 (b<sub>2</sub> b<sub>3</sub> b<sub>4</sub> b<sub>5</sub>) (y<sub>16</sub>\* y<sub>15</sub>\* y<sub>14</sub>\* y<sub>13</sub> y<sub>12</sub>\* y<sub>11</sub>\* y<sub>10</sub>\* y<sub>9</sub>\* y<sub>8</sub>\*) (y<sub>3</sub> y<sub>2</sub> y<sub>1</sub>)



Raw file 20150812\_A375SR\_Phospho\_BR1\_03 Scan 20070 Method FTMS; HCD Score 308.55 m/z 1114.54 Gene names BCL9L

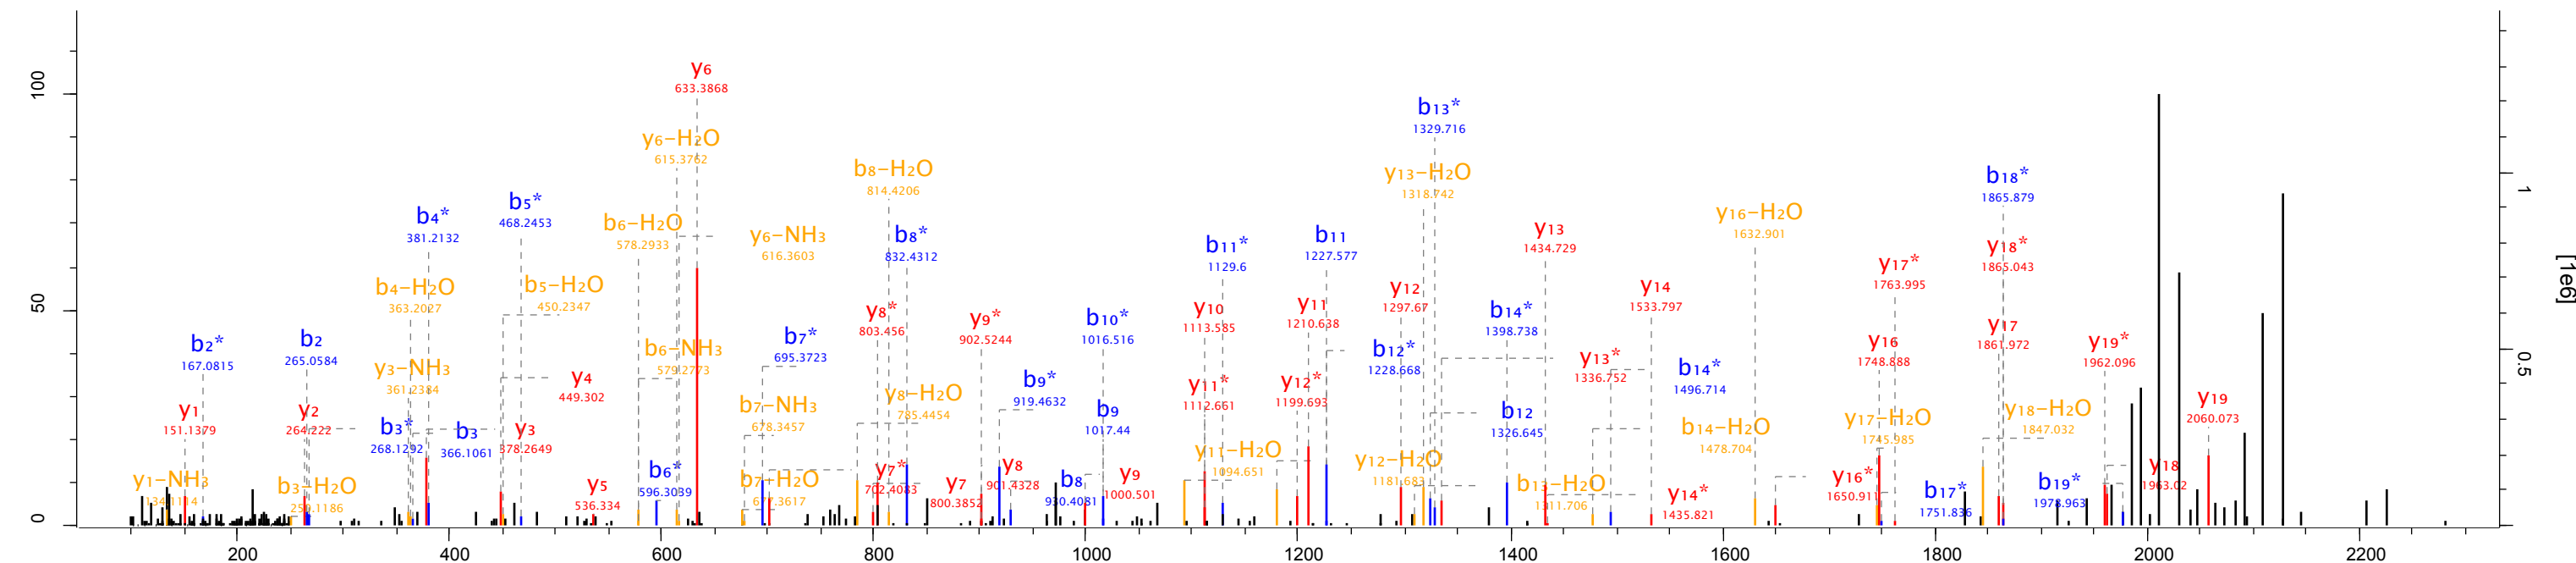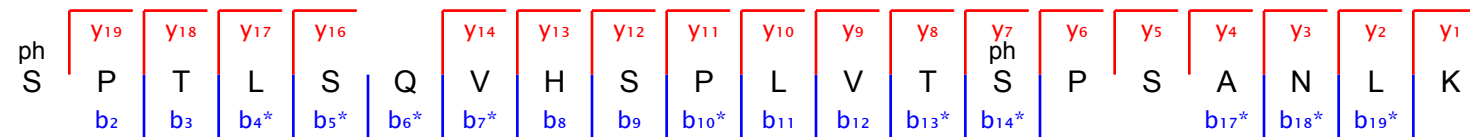

Raw file Scan Method Score m/z Gene names

20150812\_A375SR\_Phospho\_BR1\_03 20120 FTMS; HCD 91.75 1047.79 SENP6

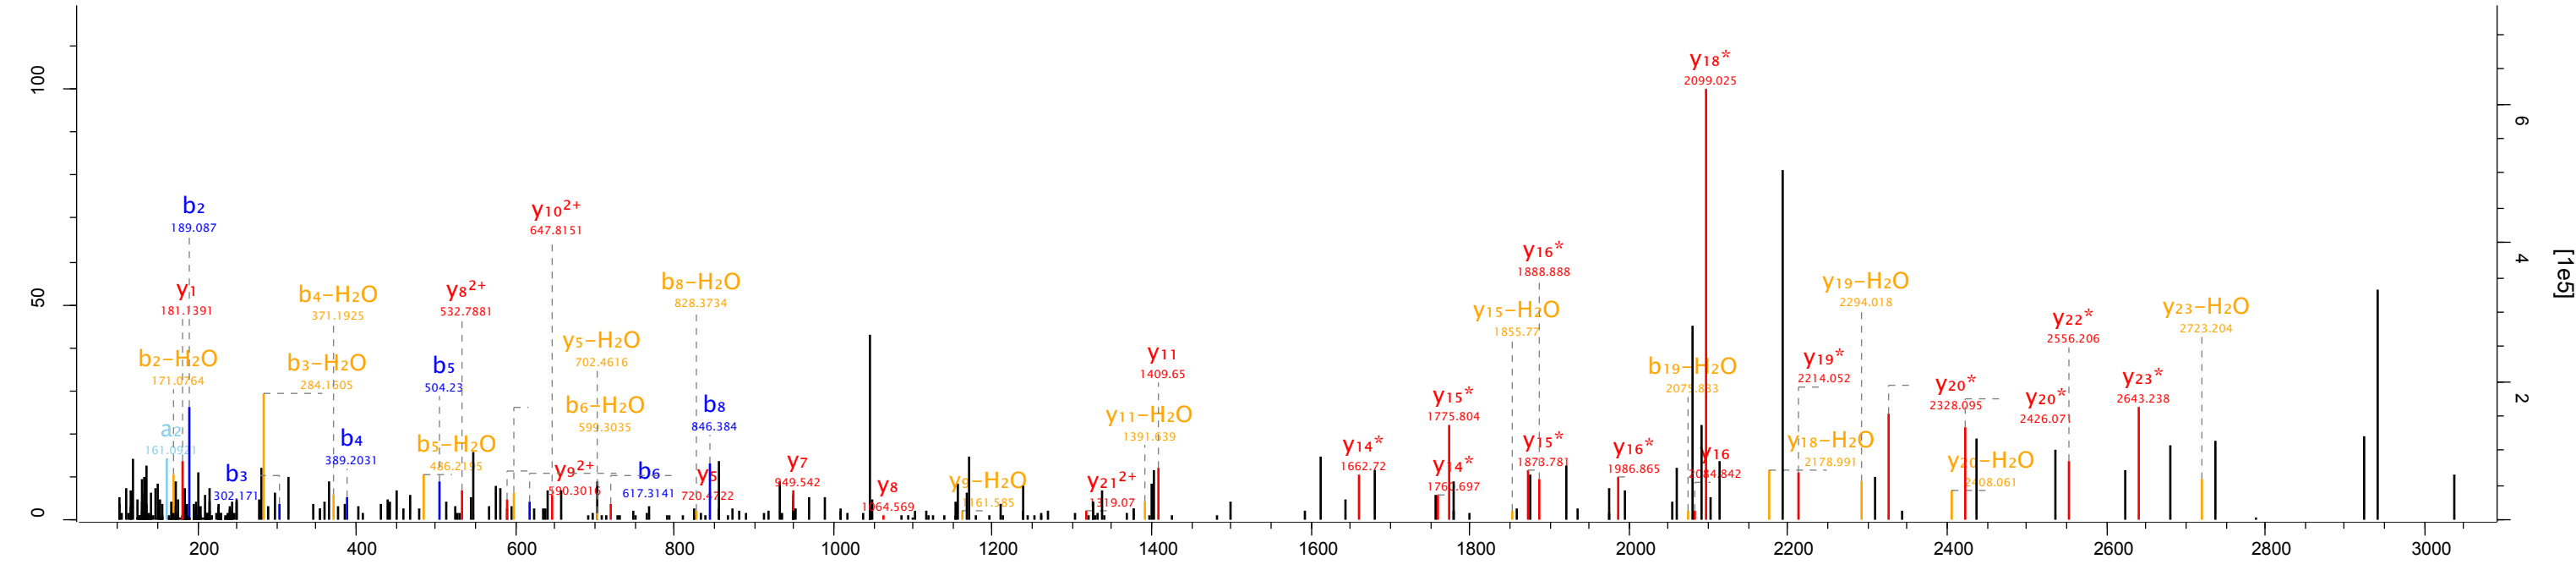

- T S L S D L N D P I I L S ph S D D D D D N D R T N R R -

b<sub>2</sub>
b<sub>3</sub>
b<sub>4</sub>
b<sub>5</sub>
b<sub>6</sub>
b<sub>8</sub>
y<sub>23</sub>\*
y<sub>22</sub>\*
y<sub>21</sub> 2+
y<sub>20</sub>\*
y<sub>19</sub>\*
y<sub>18</sub>\*
y<sub>16</sub>
y<sub>15</sub>\*
y<sub>14</sub>\*
ph
S
y<sub>11</sub>
y<sub>10</sub> 2+
y<sub>9</sub> 2+
y<sub>8</sub>
y<sub>7</sub>
y<sub>5</sub>
y<sub>1</sub>

20150812\_A375SR\_Phospho\_BR1\_03 20180 FTMS; HCD 195.7 999.9 CDCA7L

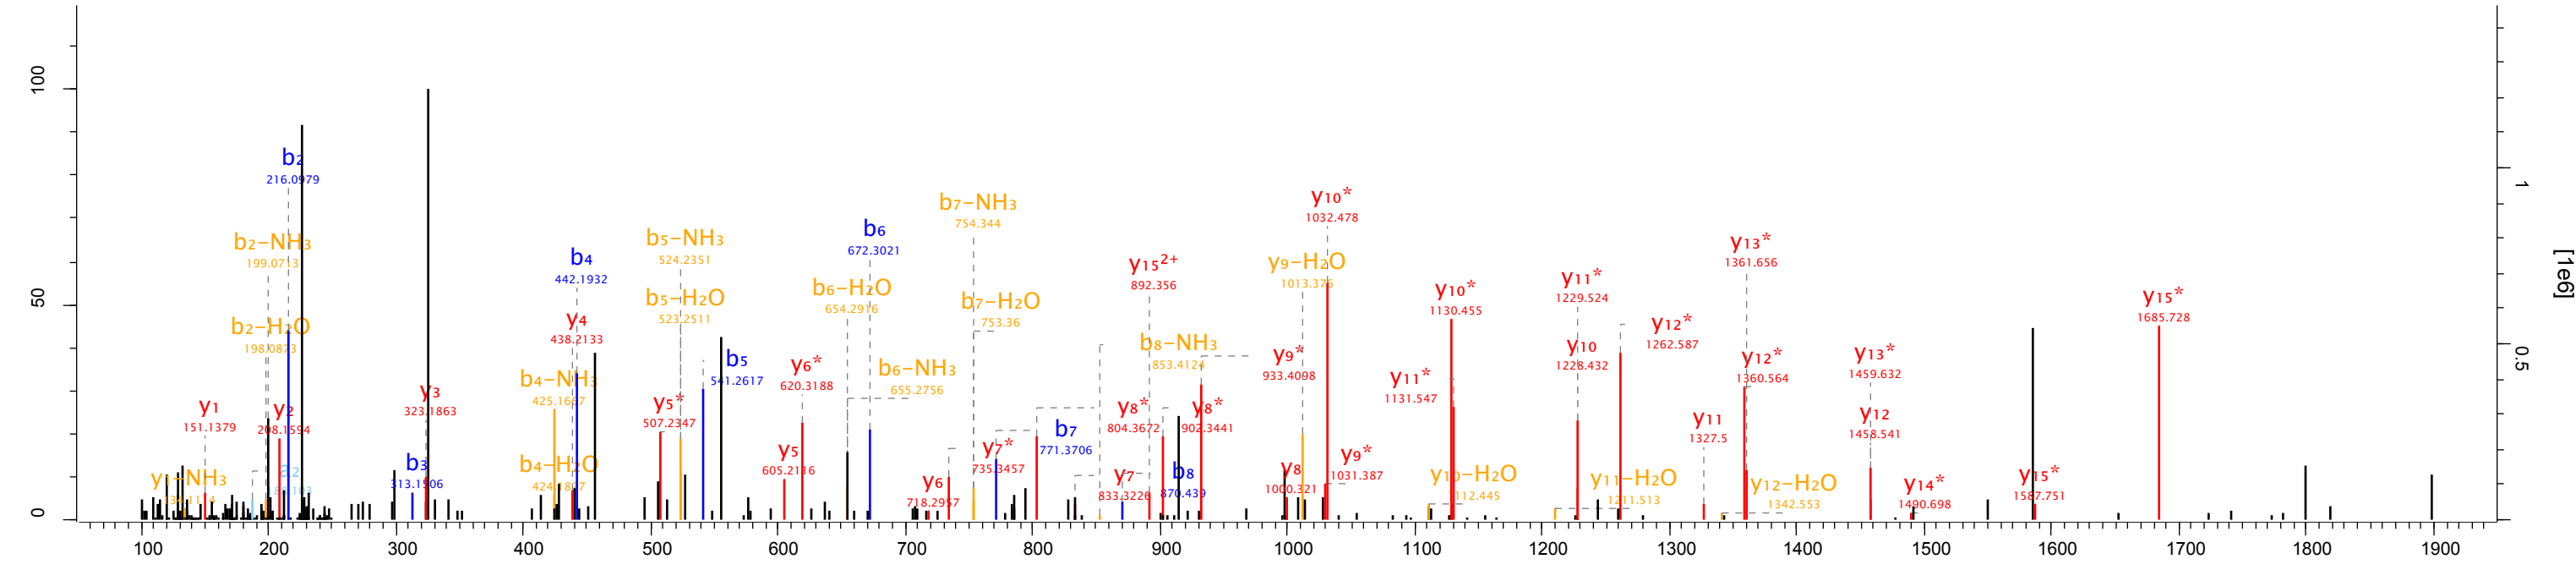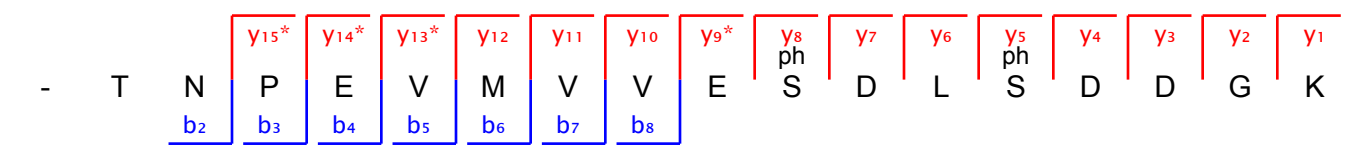

Raw file  
20150812\_A375SR\_Phospho\_BR1\_03

Scan 20230 Method FTMS; HCD Score 250.7 m/z 1095.21 Gene names PHLD82

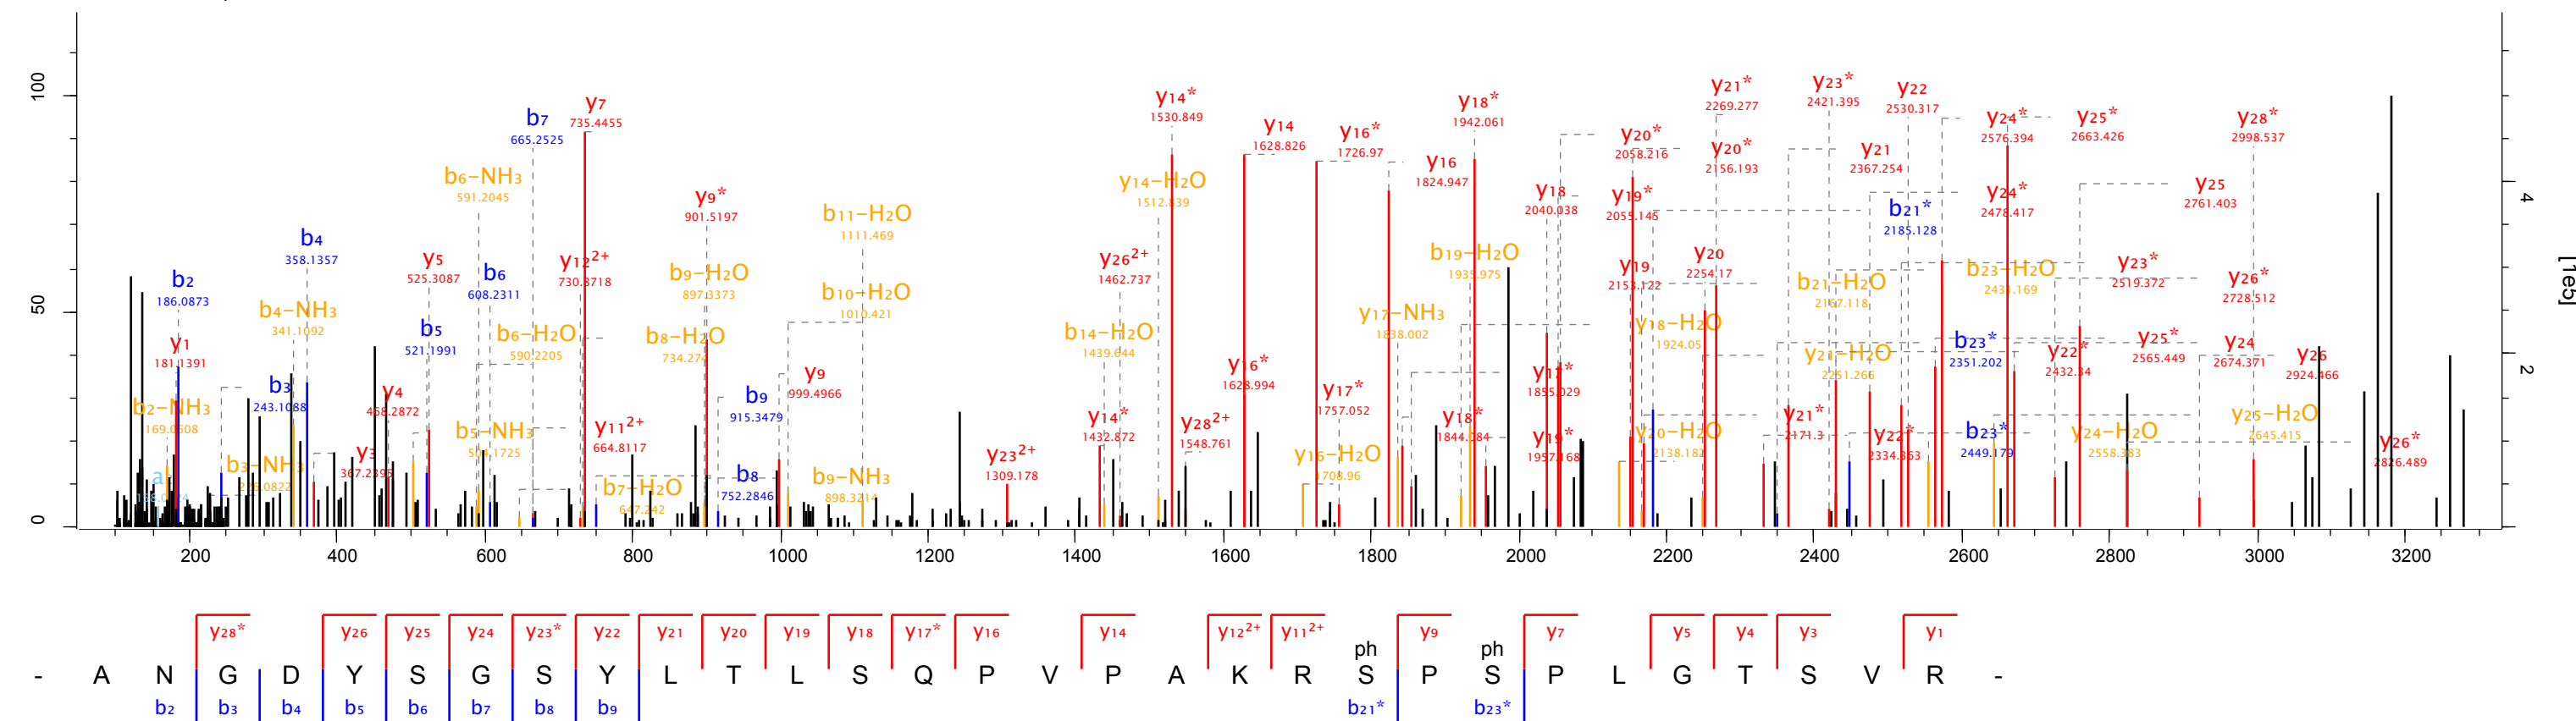

Raw file 20150812\_A375SR\_Phospho\_BR1\_03 Scan 20340 Method FTMS; HCD Score 171.25 m/z 716.35 Gene names AHCTF1

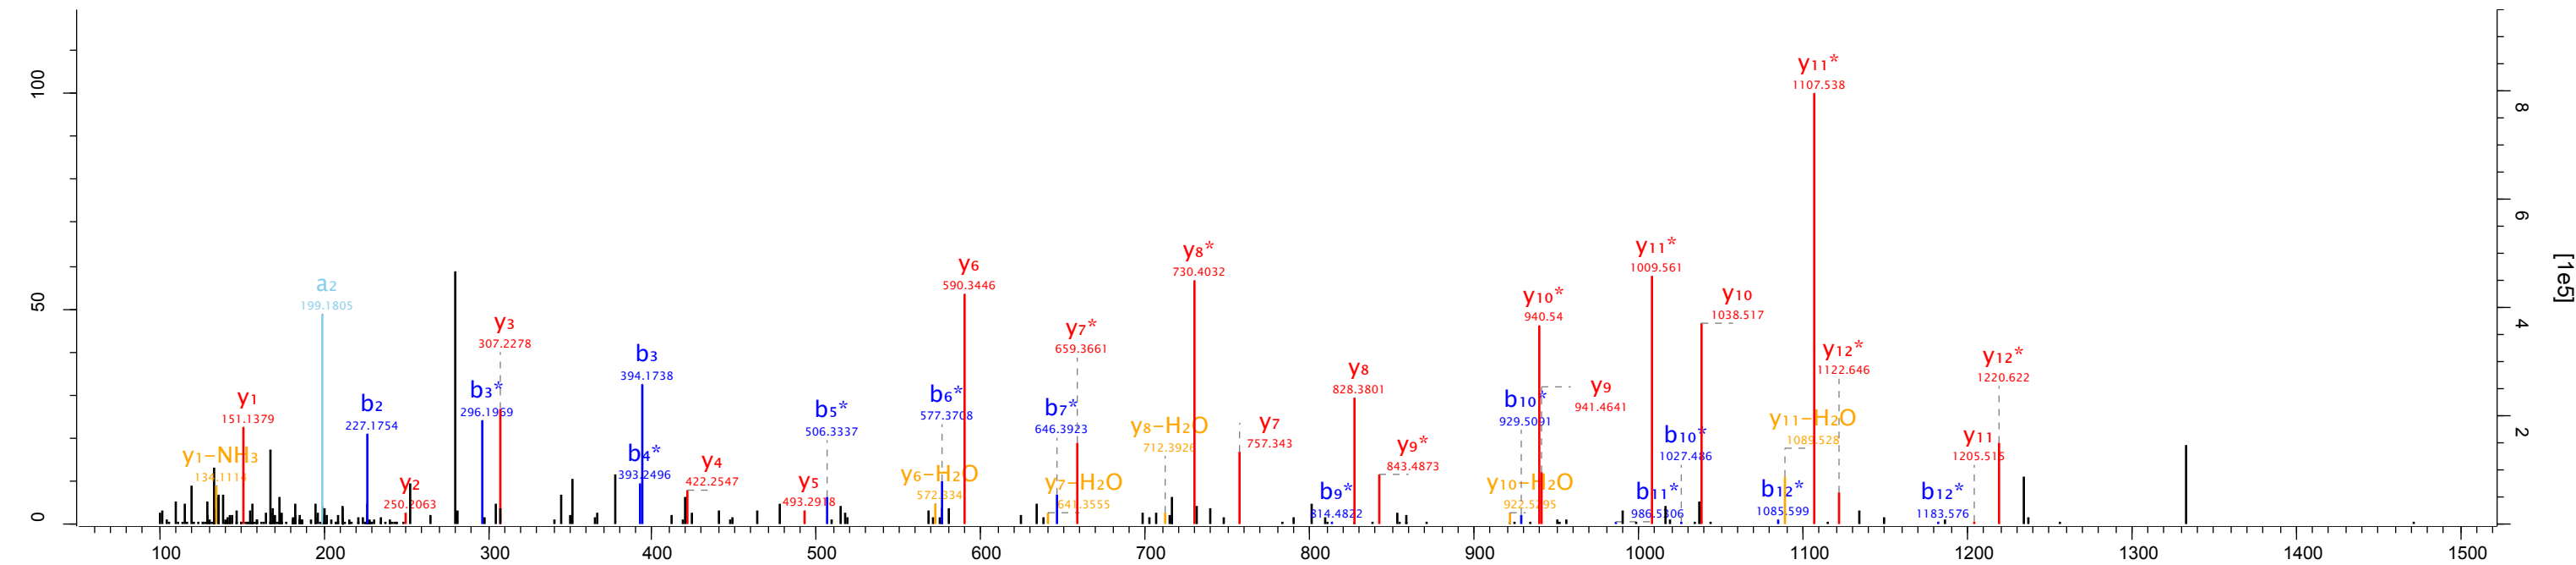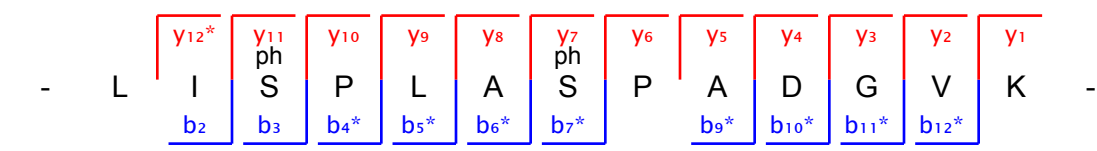

Raw file  
 20150812\_A375SR\_Phospho\_BR1\_03  
 Scan 20480 Method FTMS; HCD Score 75.78 m/z 993.47 Gene names TAF9

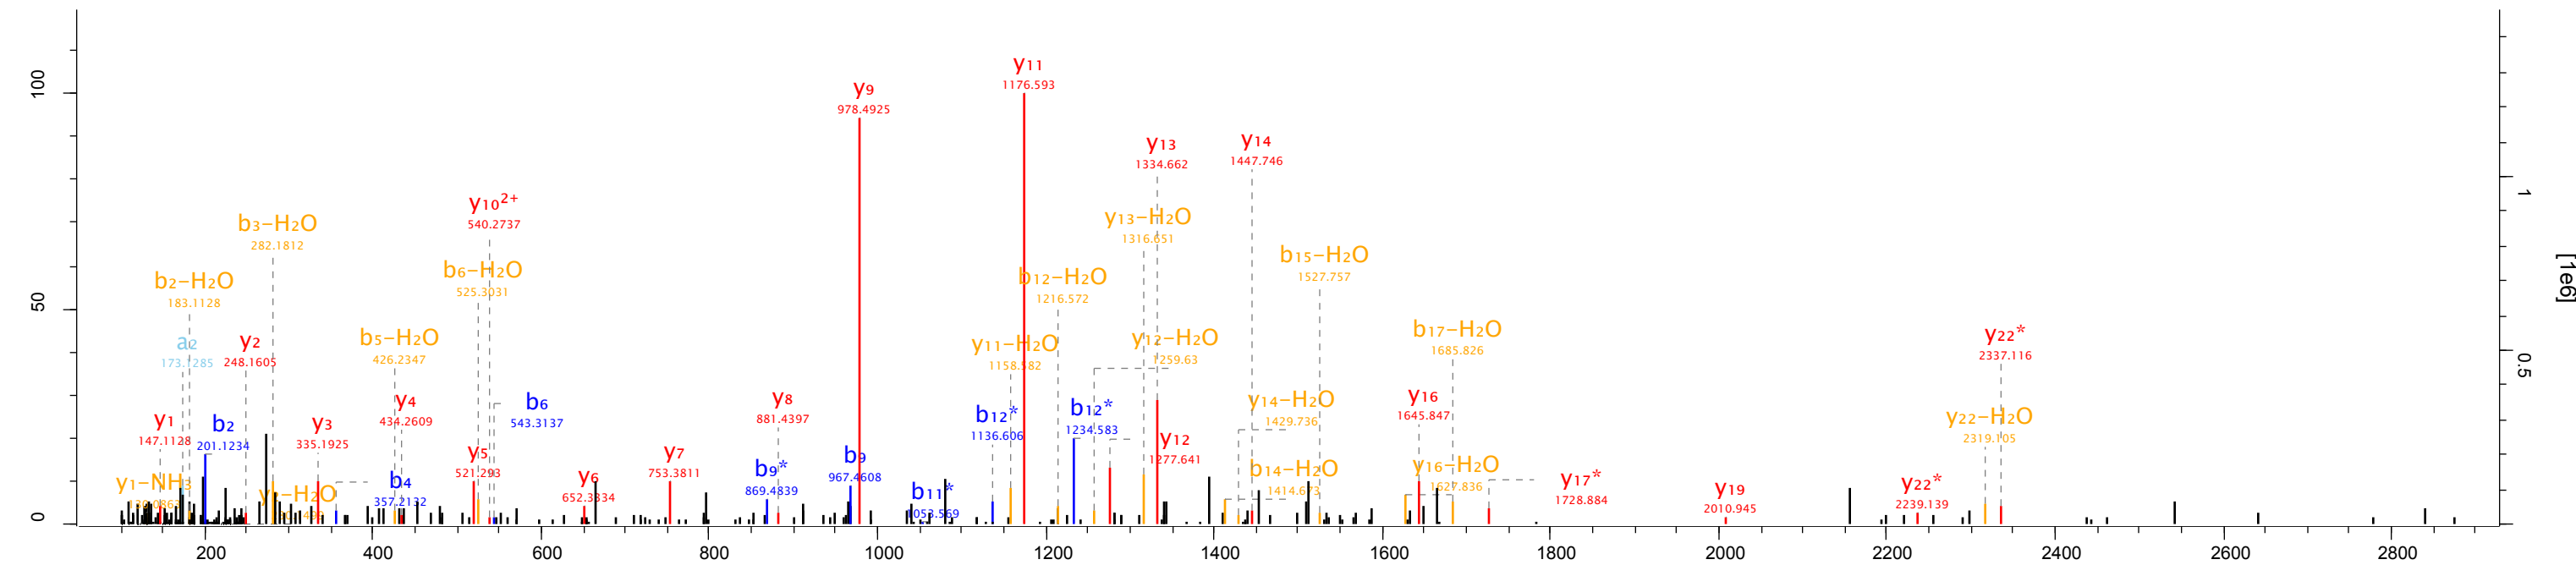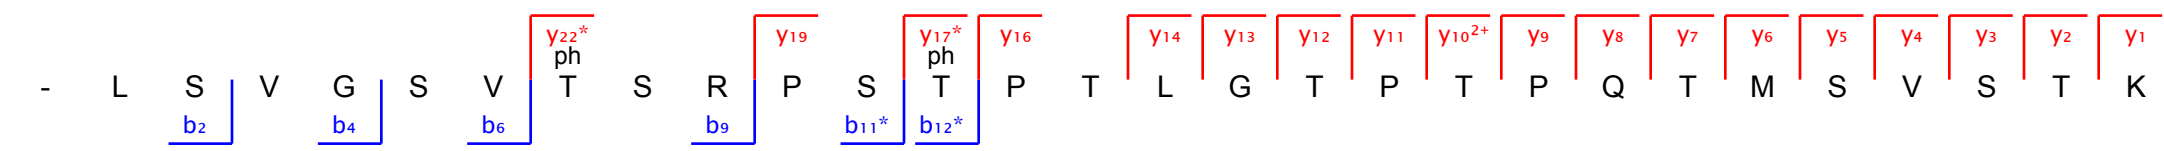

Raw file 20150812\_A375SR\_Phospho\_BR1\_03 Scan 20930 Method FTMS; HCD Score 158.37 m/z 957.39 Gene names MAST3

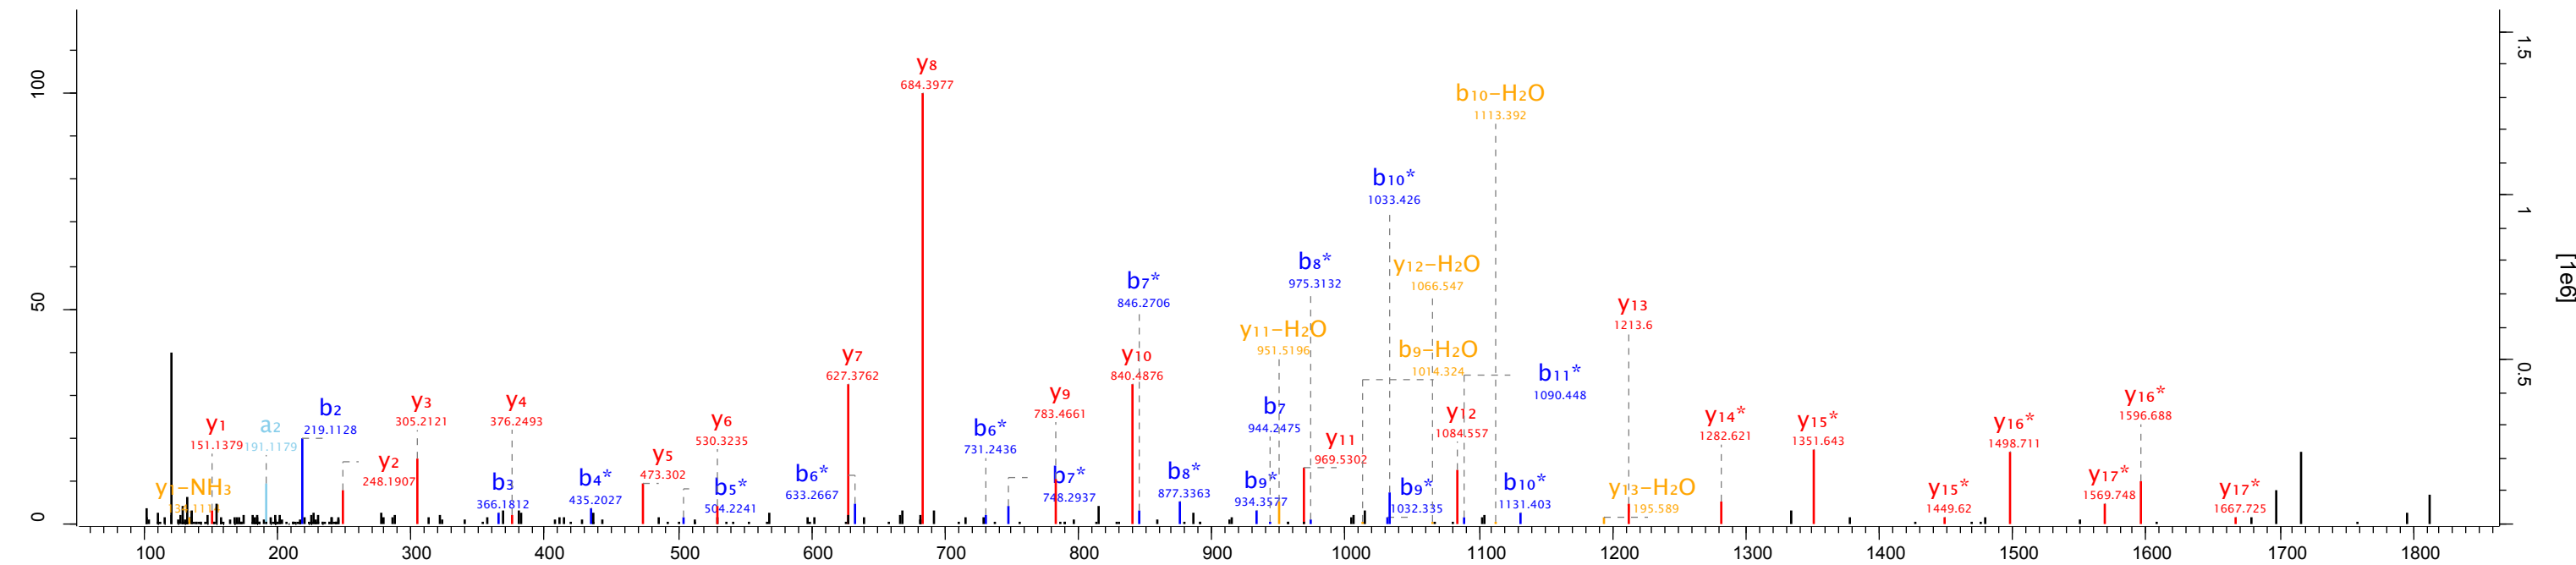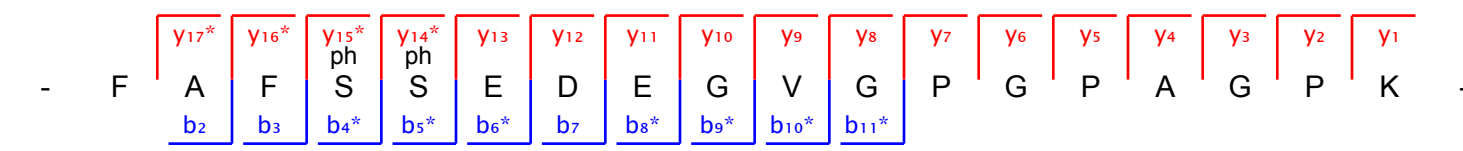

Raw file: 20150812\_A375SR\_Phospho\_BR1\_03  
 Scan: 21330 Method: FTMS; HCD Score: 110.44 m/z: 911.13 Gene names: RANBP9

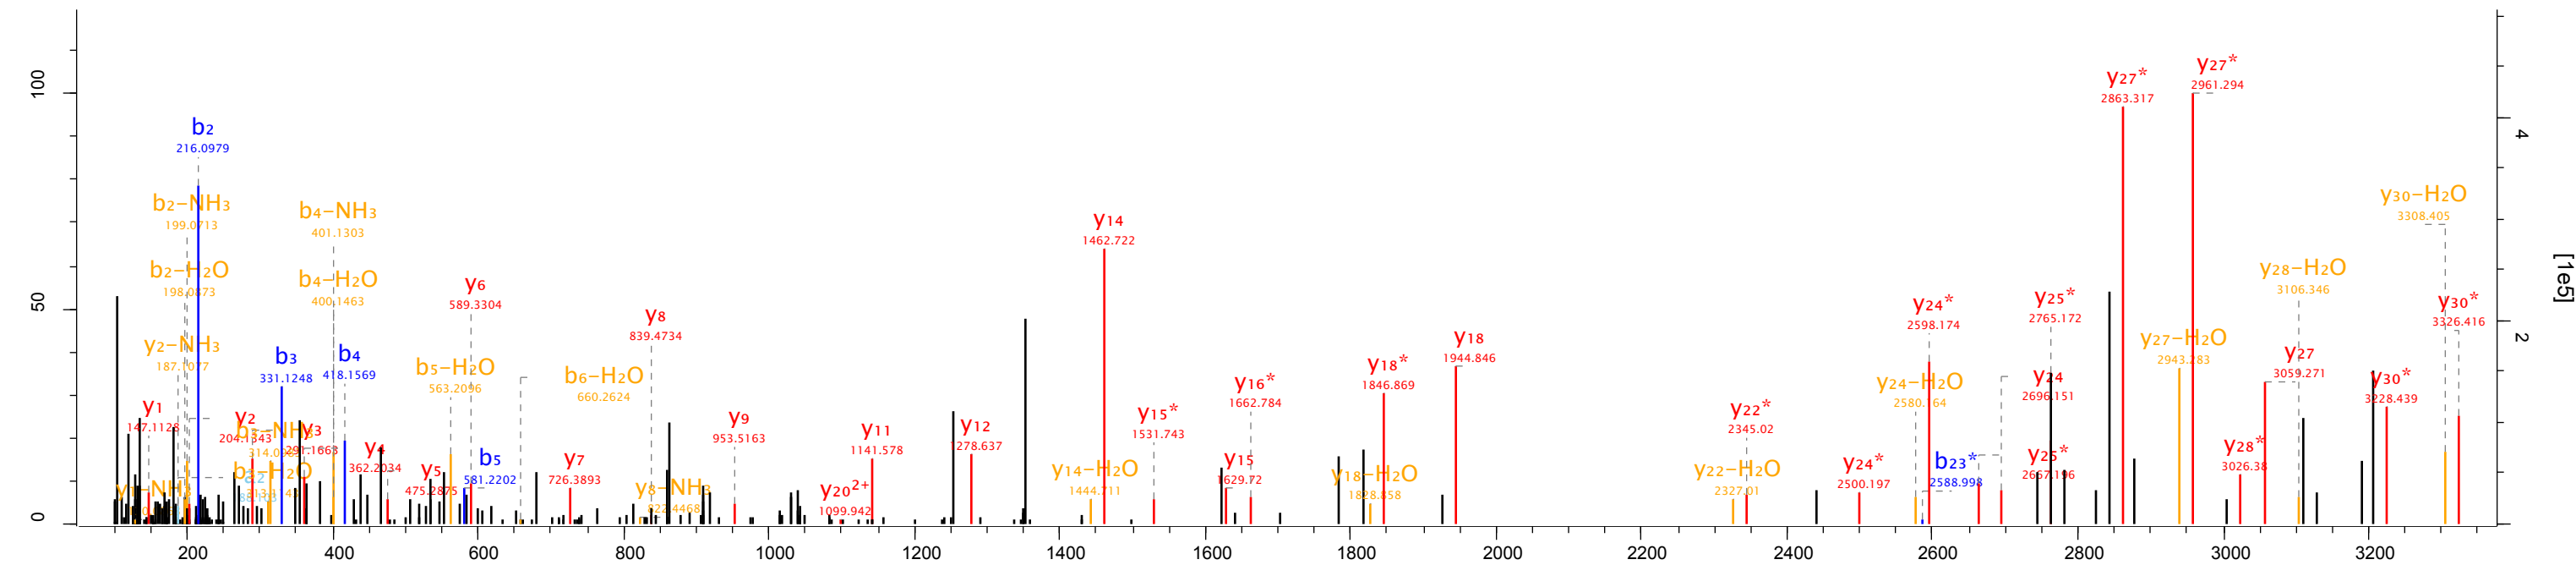

Sequence: - S Q D S Y P V S P R P F S S P S M S P S H G M N I H N L A S G K -

Fragmentation sites (b and y ions) are indicated by brackets below the sequence:

- b<sub>2</sub> (S-Q)
- b<sub>3</sub> (Q-D)
- b<sub>4</sub> (D-S)
- b<sub>5</sub> (S-Y)
- b<sub>23</sub>\* (M)
- y<sub>1</sub> (D)
- y<sub>2</sub> (S)
- y<sub>3</sub> (Y)
- y<sub>4</sub> (P)
- y<sub>5</sub> (V)
- y<sub>6</sub> (S)
- y<sub>7</sub> (P)
- y<sub>8</sub> (R)
- y<sub>9</sub> (P)
- y<sub>11</sub> (F)
- y<sub>12</sub> (S)
- y<sub>14</sub> (P)
- y<sub>15</sub> (S)
- y<sub>16</sub>\* (M)
- y<sub>18</sub> (S)
- y<sub>20<sup>2+</sup> (S)</sub>
- y<sub>22</sub>\* (P)
- y<sub>24</sub> (S)
- y<sub>25</sub>\* (P)
- y<sub>27</sub> (M)
- y<sub>28</sub>\* (N)
- y<sub>30</sub>\* (I)



Raw file: 20150812\_A375SR\_Phospho\_BR1\_03  
 Scan: 21460 Method: FTMS; HCD Score: 122.13 m/z: 1371.64 Gene names: NUMB

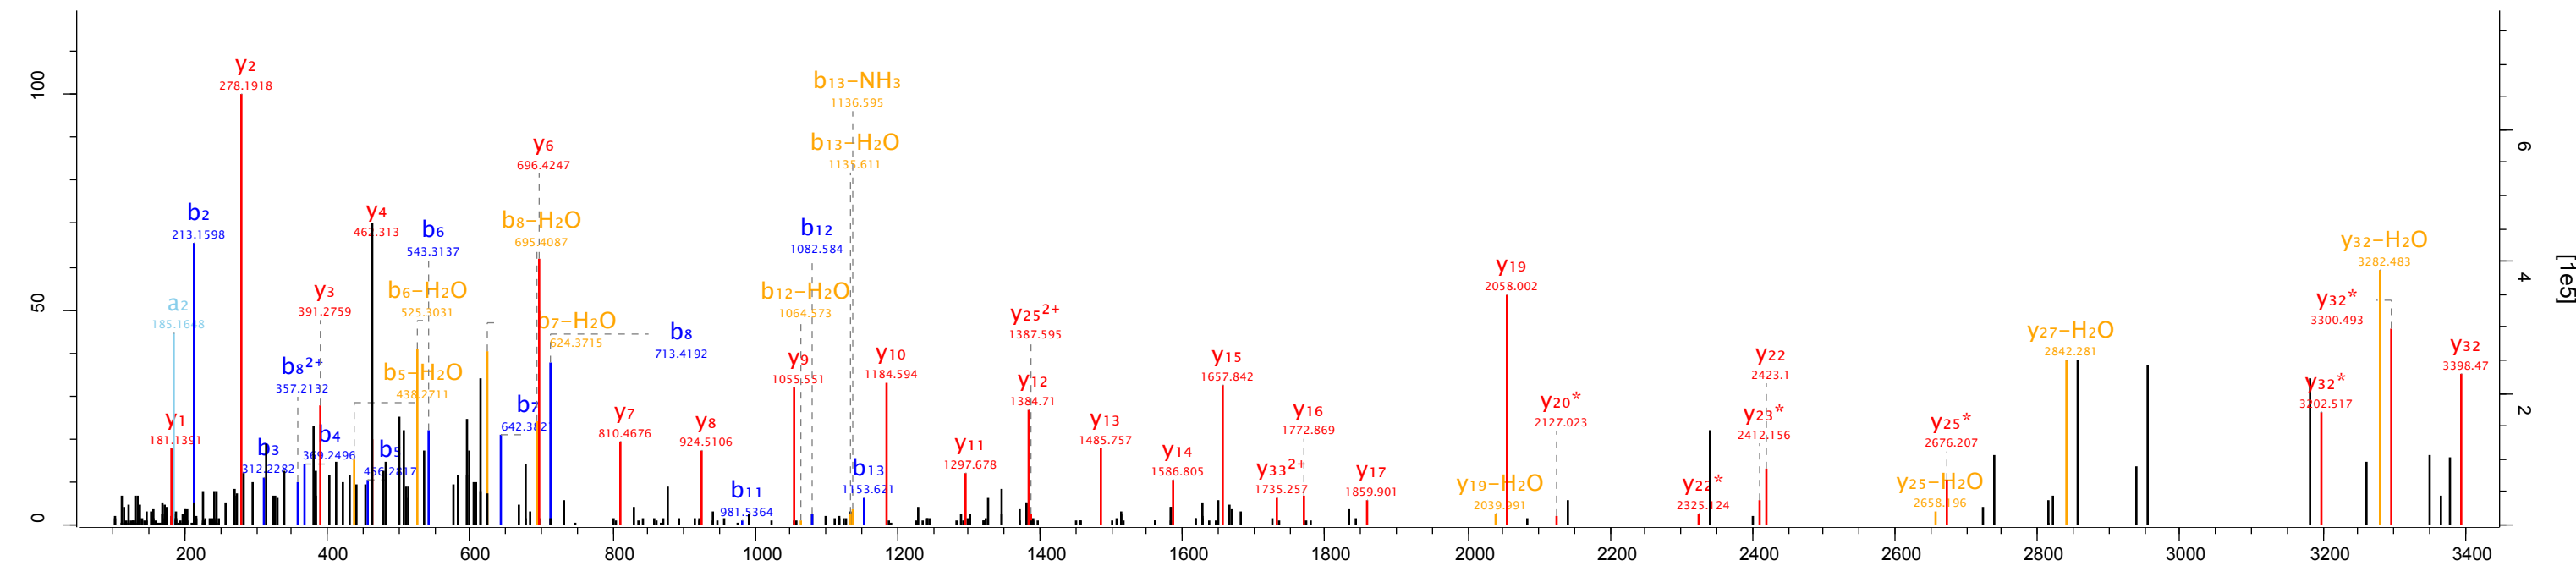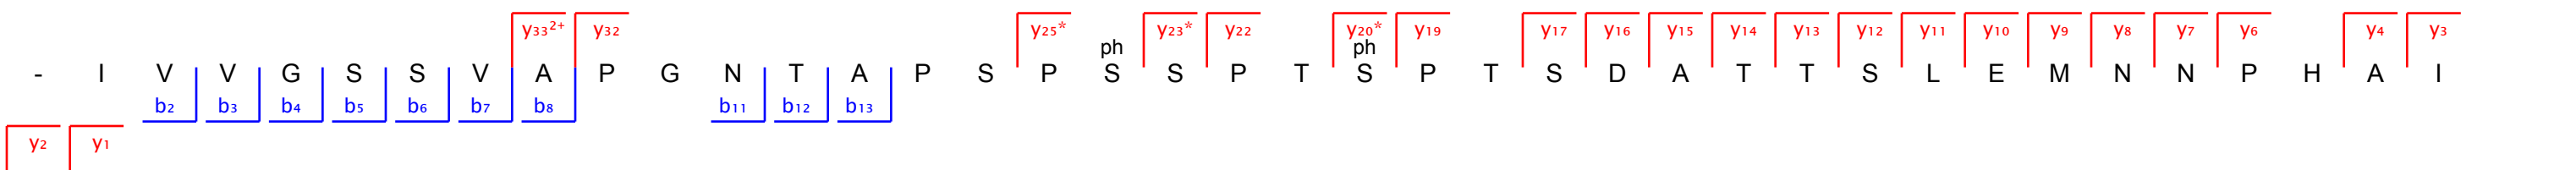

Raw file Scan Method Score m/z Gene names  
 20150812\_A375SR\_Phospho\_BR1\_03 21580 FTMS; HCD 337.98 1422.57 EAPP

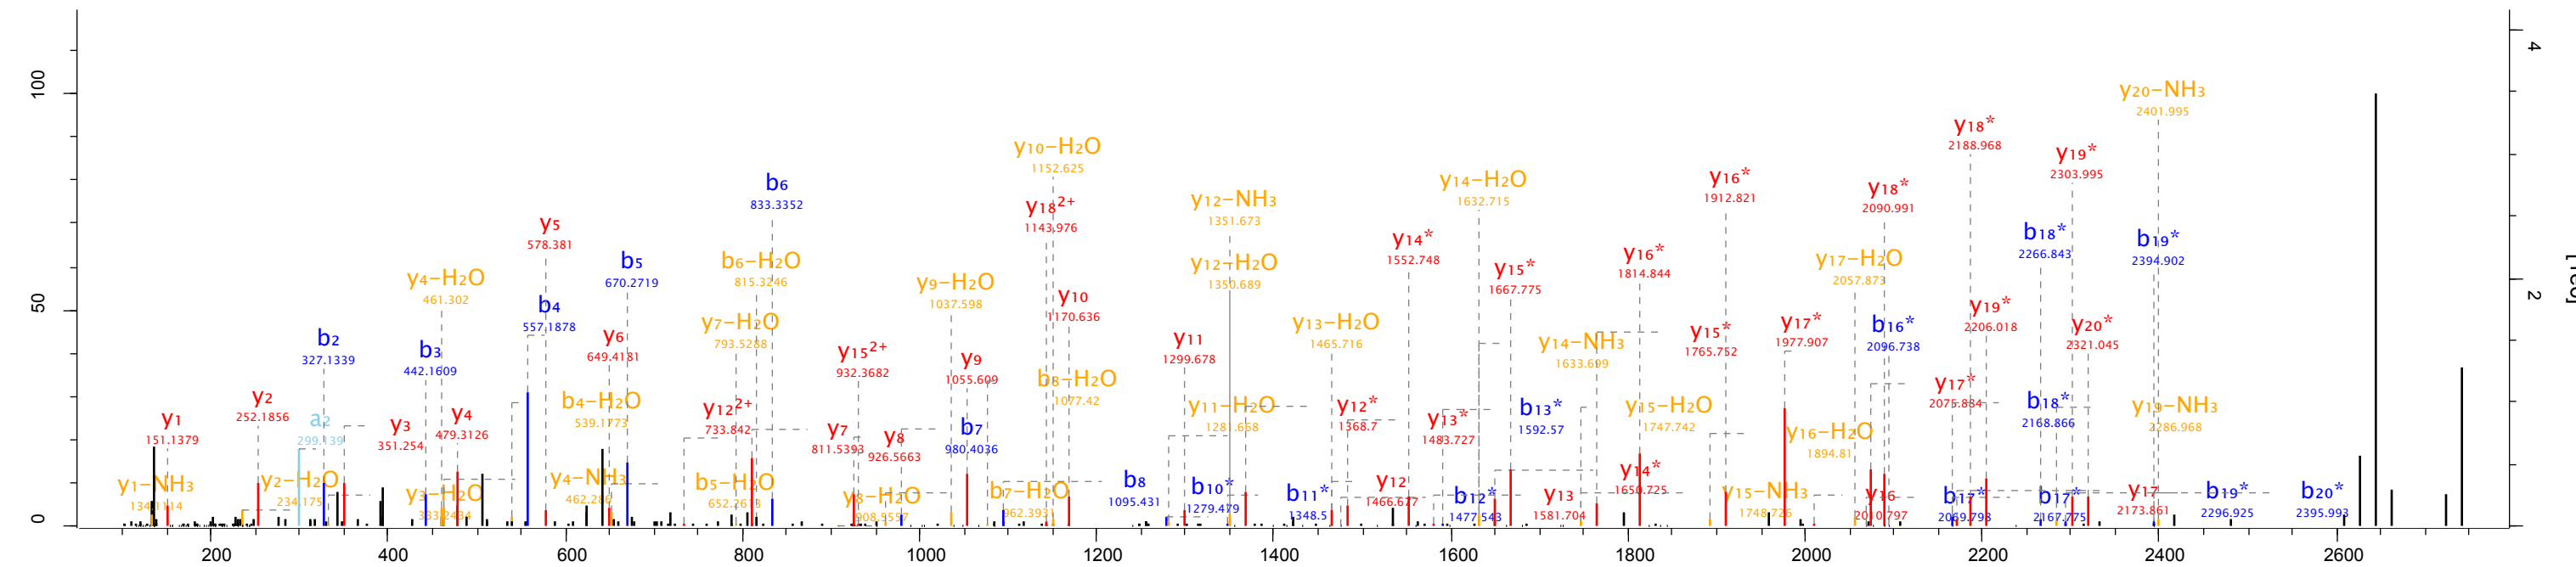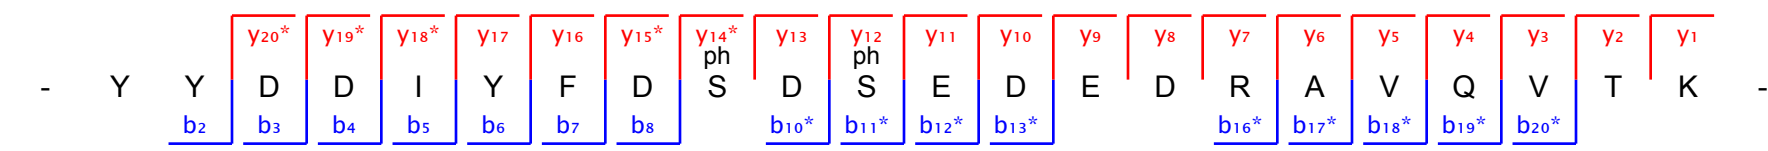

Raw file: 20150812\_A375SR\_Phospho\_BR1\_03  
 Scan: 22100 Method: FTMS; HCD Score: 111.55 m/z: 728.32 Gene names: RPS6KC1

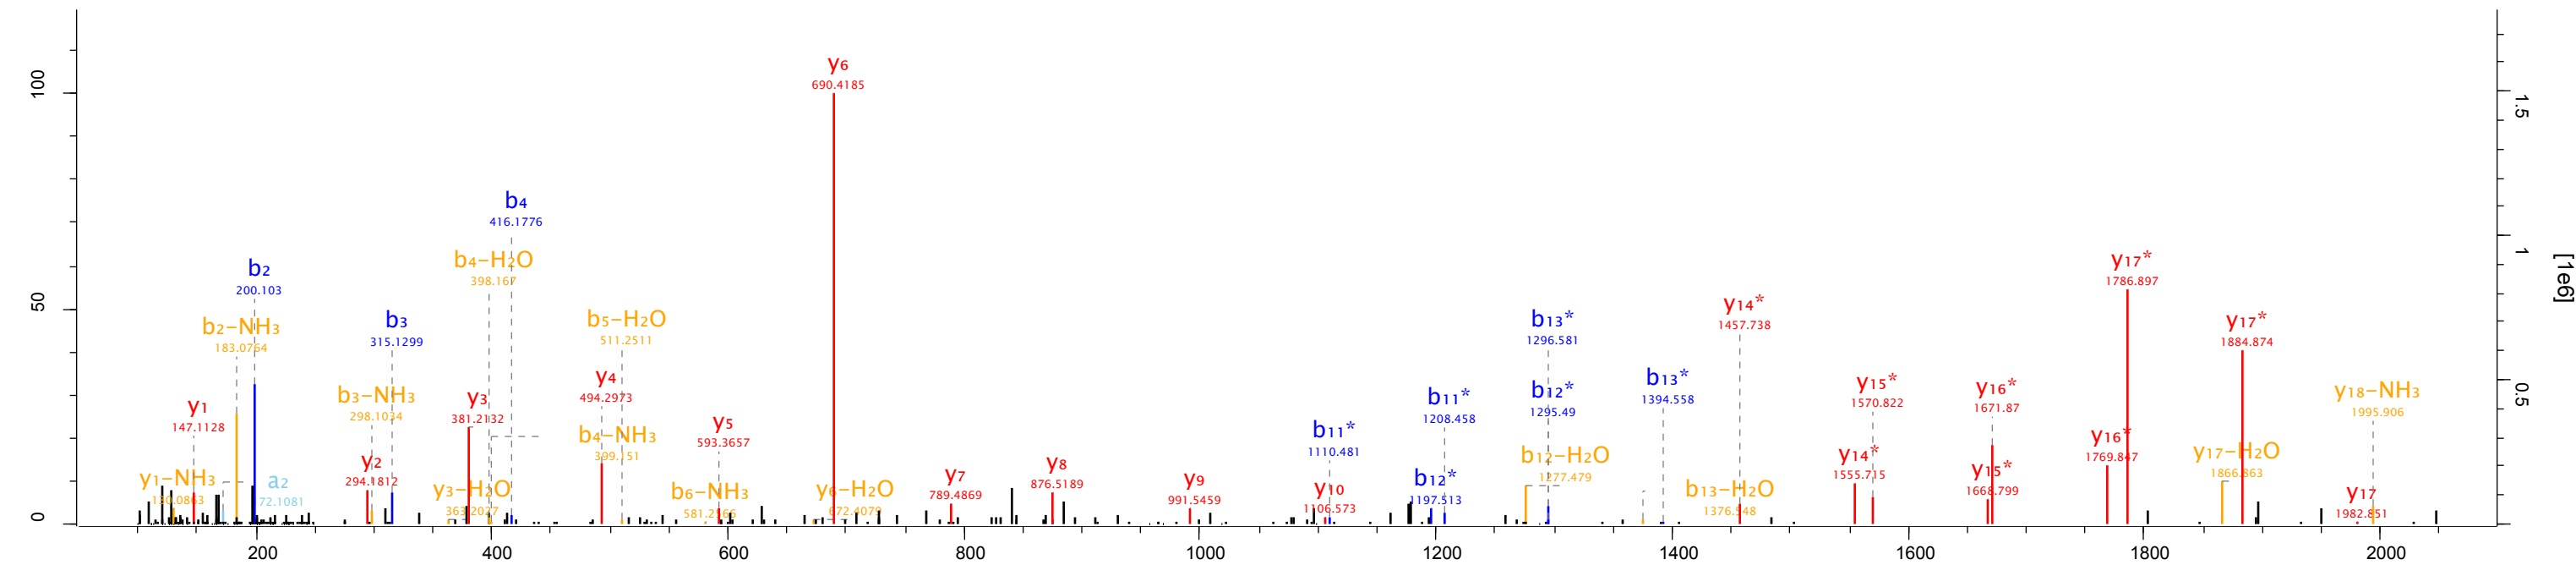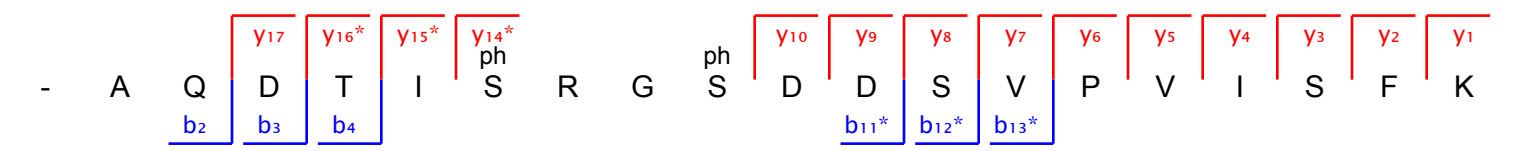

Raw file: 20150812\_A375SR\_Phospho\_BR1\_03  
 Scan: 22120 Method: FTMS; HCD Score: 218.84 m/z: 840.35 Gene names: FAM21C;FAM21A

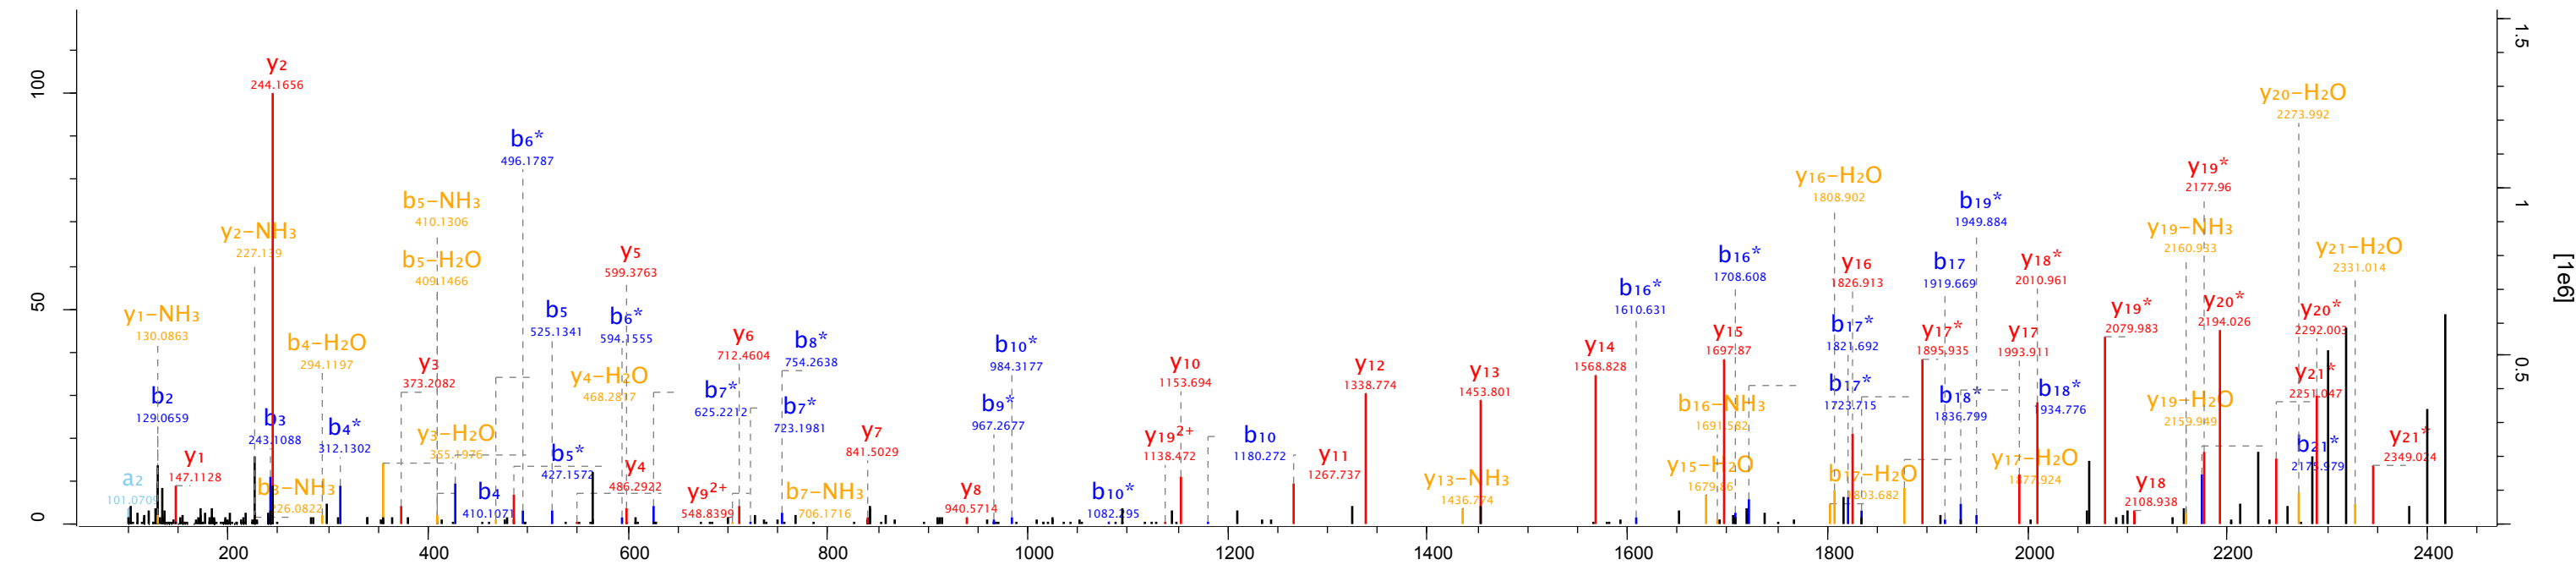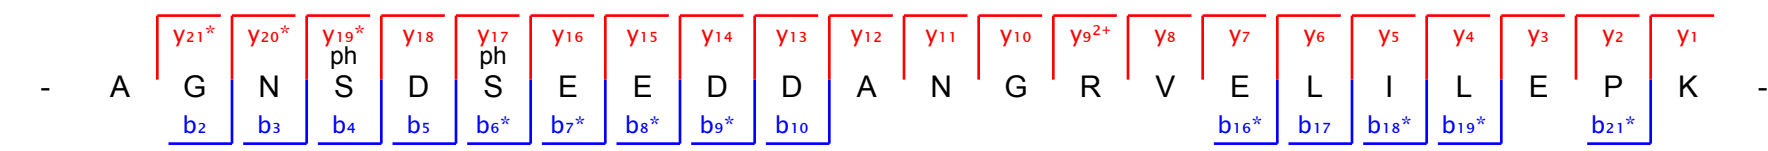

Raw file: 20150812\_A375SR\_Phospho\_BR1\_03  
 Scan: 22160 Method: FTMS; HCD Score: 145.69 m/z: 724.36 Gene names: MARCKS

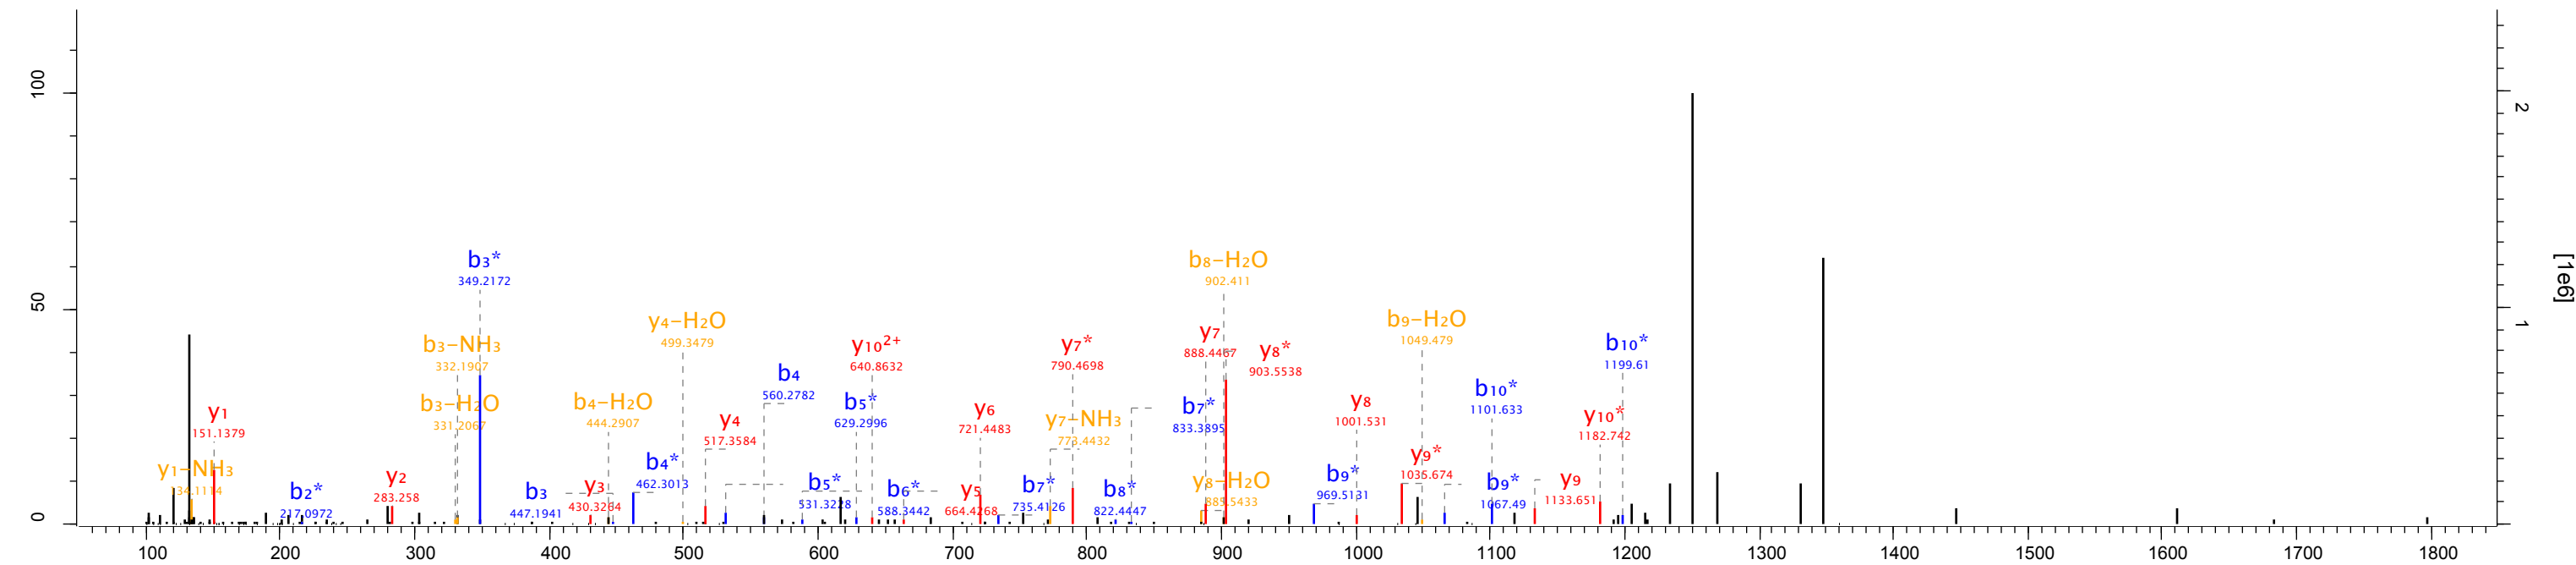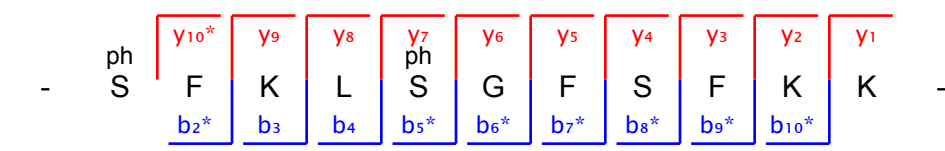

Raw file: 20150812\_A375SR\_Phospho\_BR1\_03  
 Scan: 22450 Method: FTMS; HCD Score: 249.5 m/z: 994.11 Gene names: UIMC1

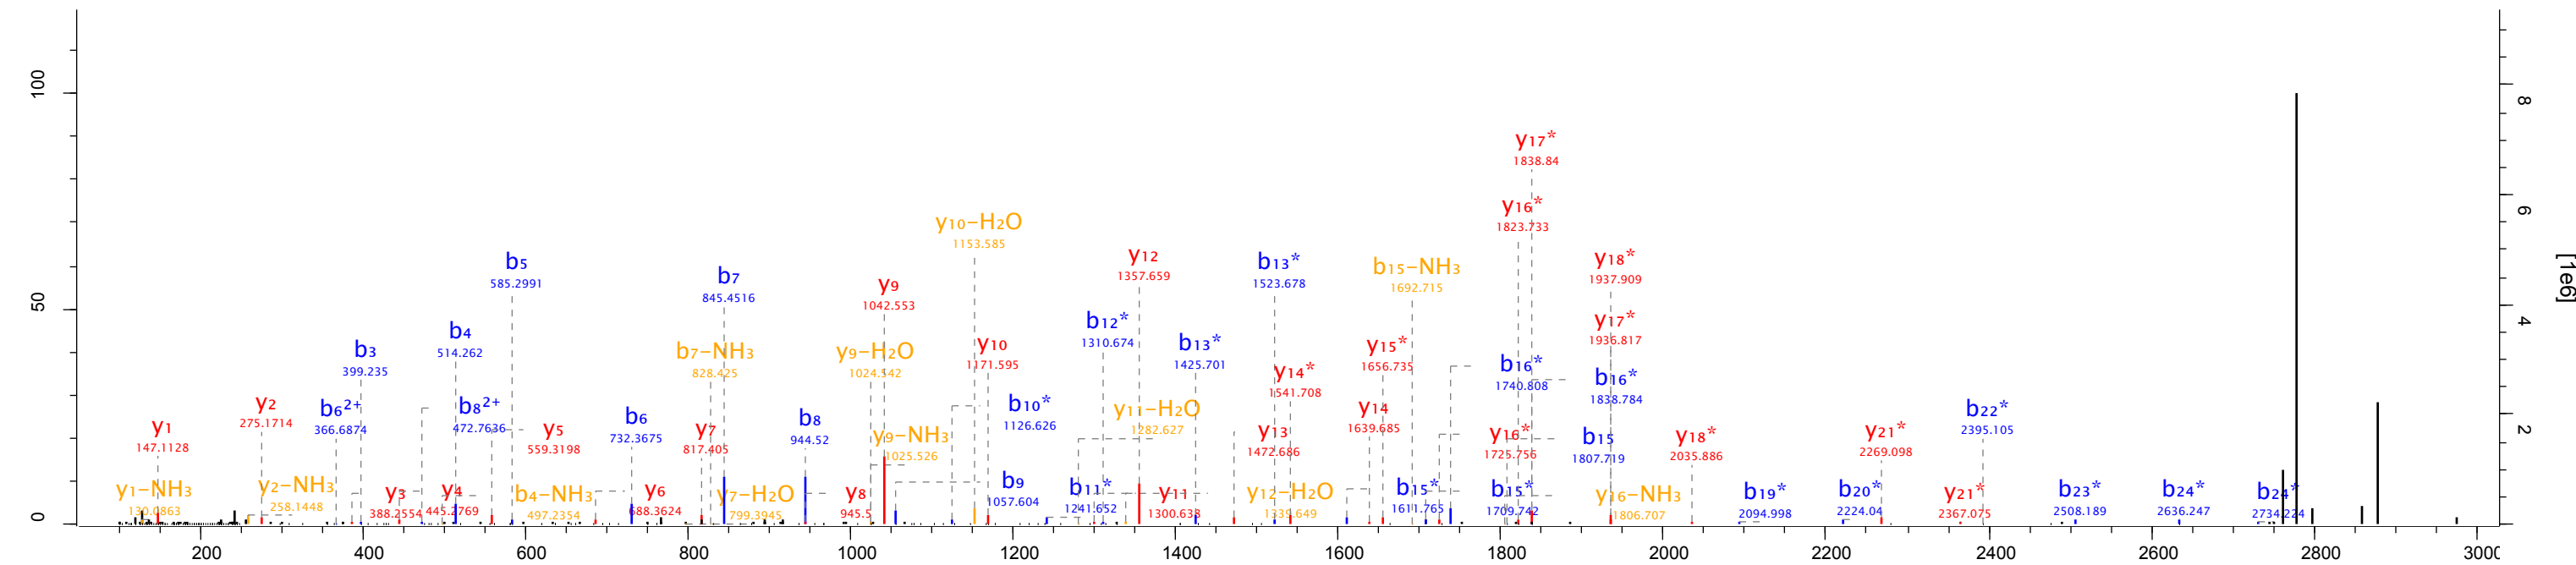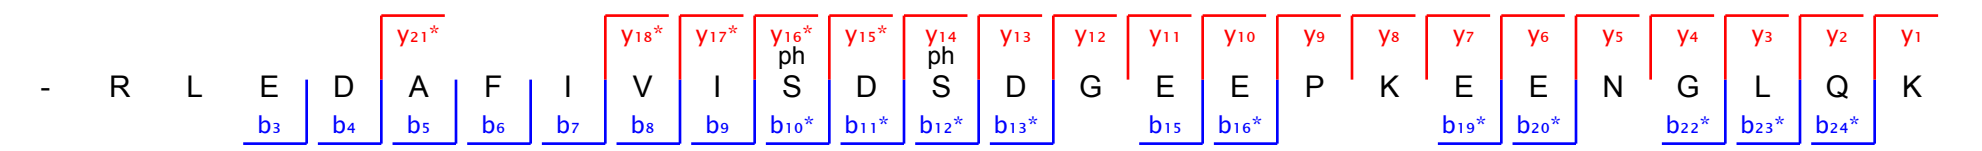

Raw file 20150812\_A375SR\_Phospho\_BR1\_03 Scan 22740 Method FTMS; HCD Score 73.23 m/z 1041.77 Gene names SHB

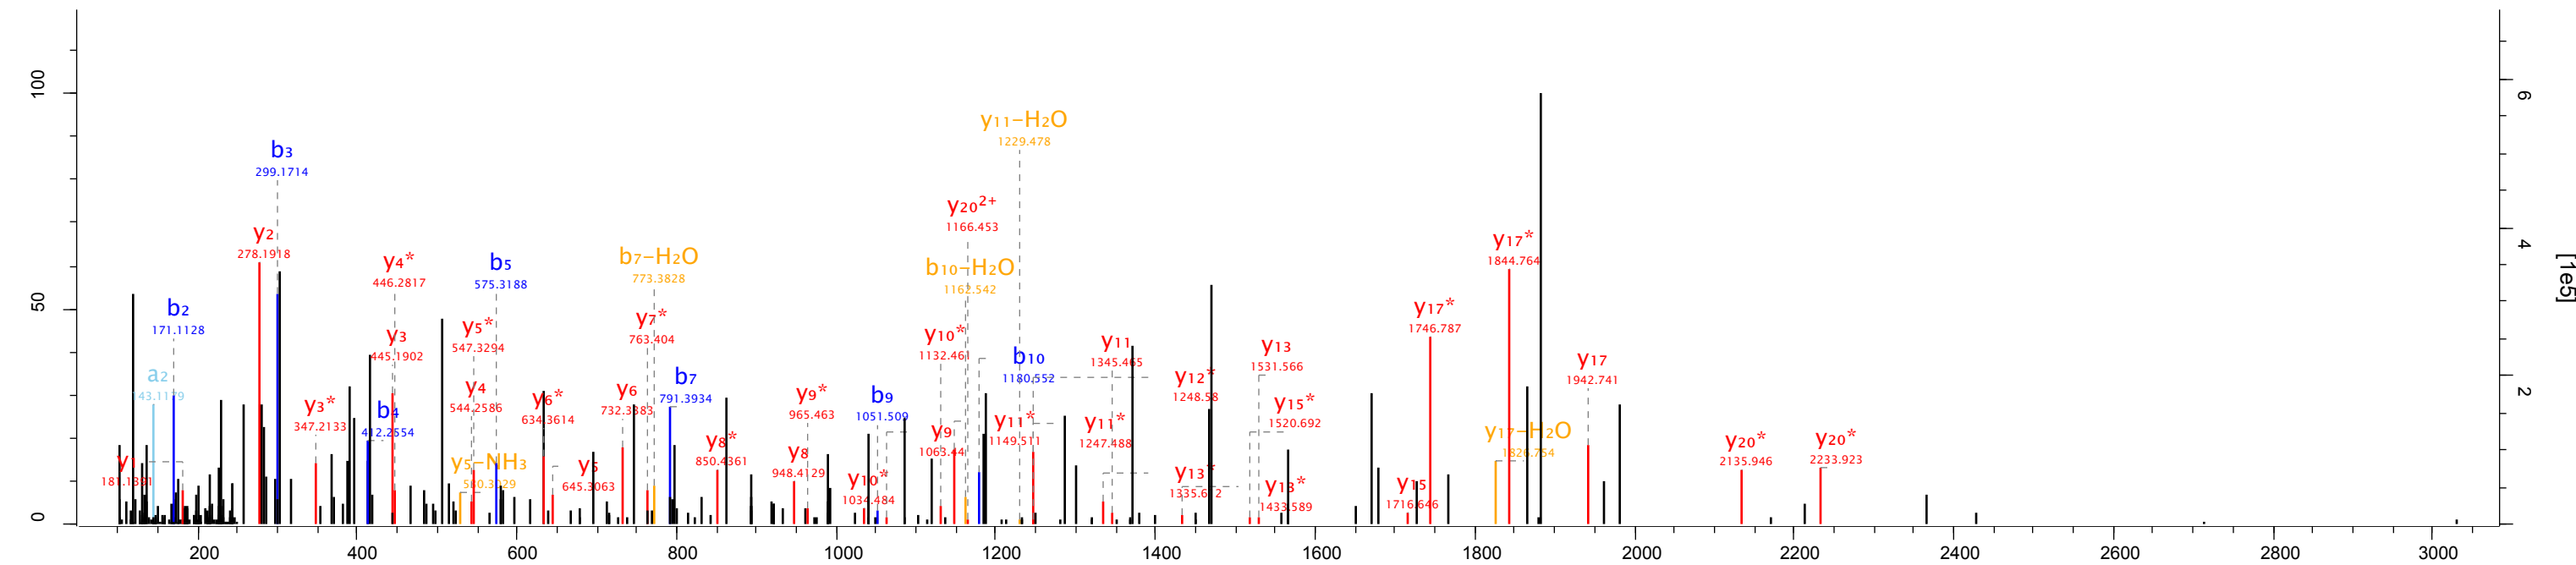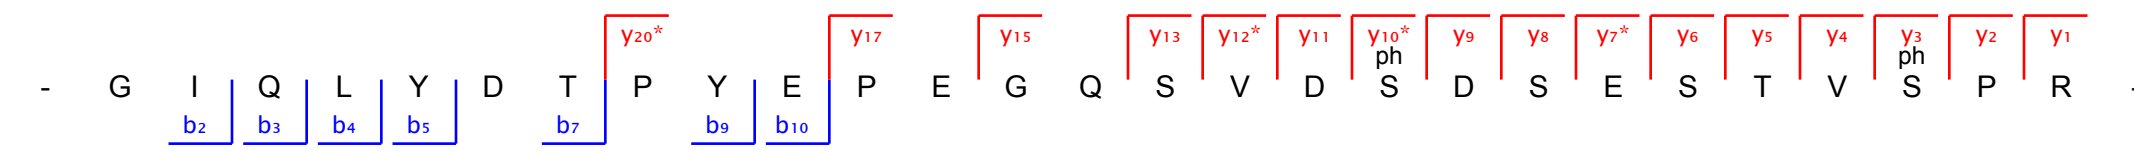

Raw file: 20150812\_A375SR\_Phospho\_BR1\_03  
 Scan: 23480 Method: FTMS; HCD Score: 78.68 m/z: 1077.49 Gene names: TACC2

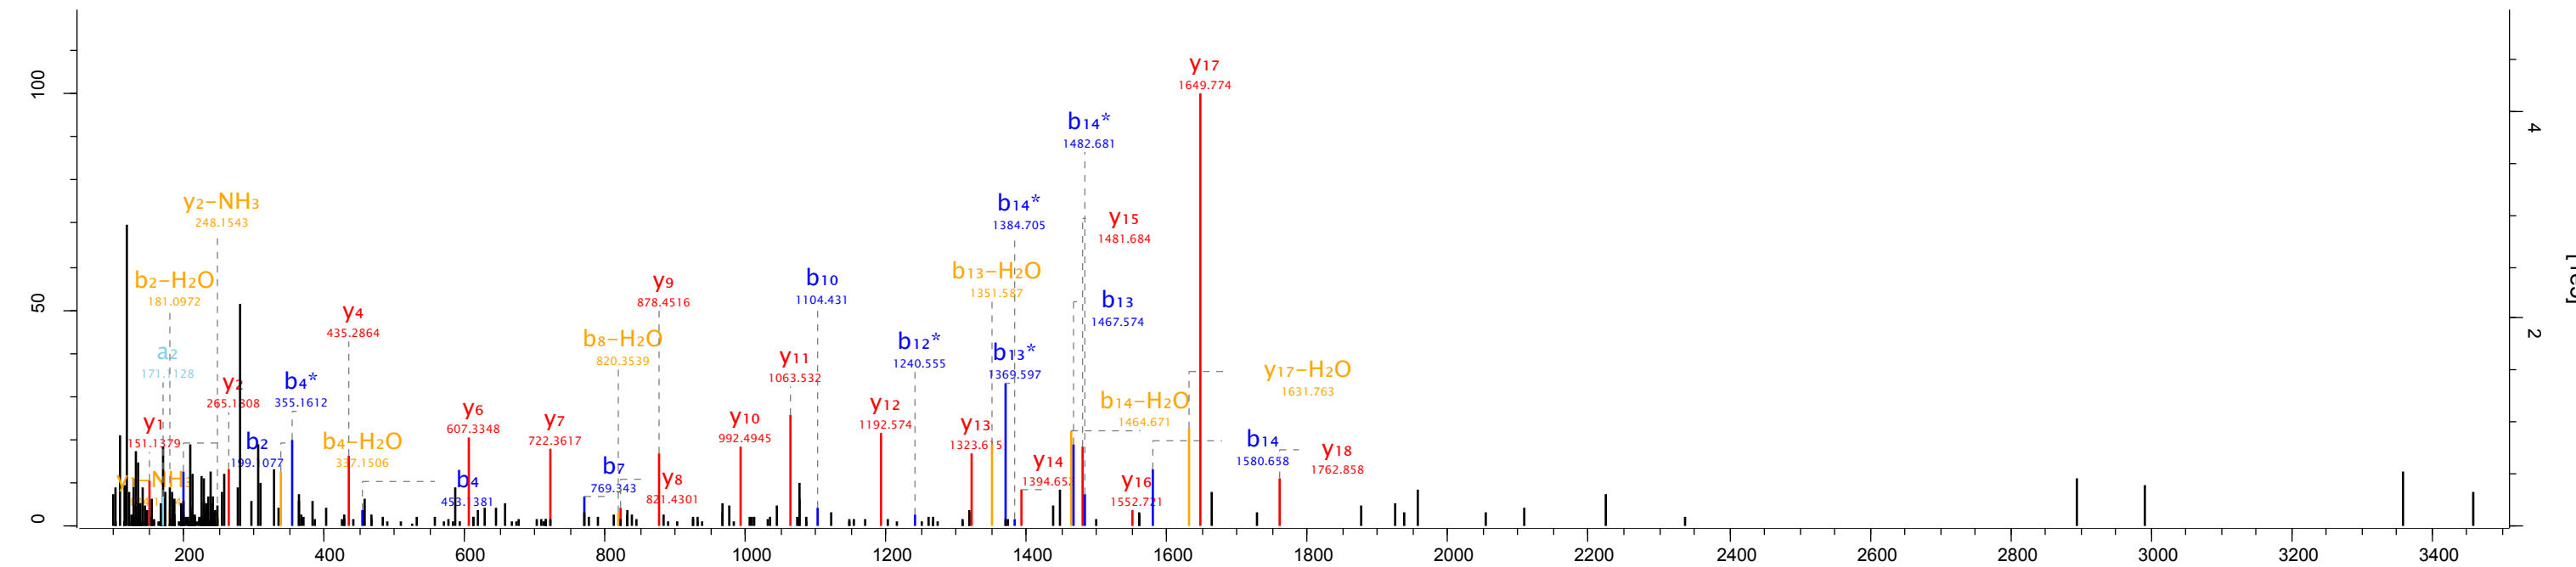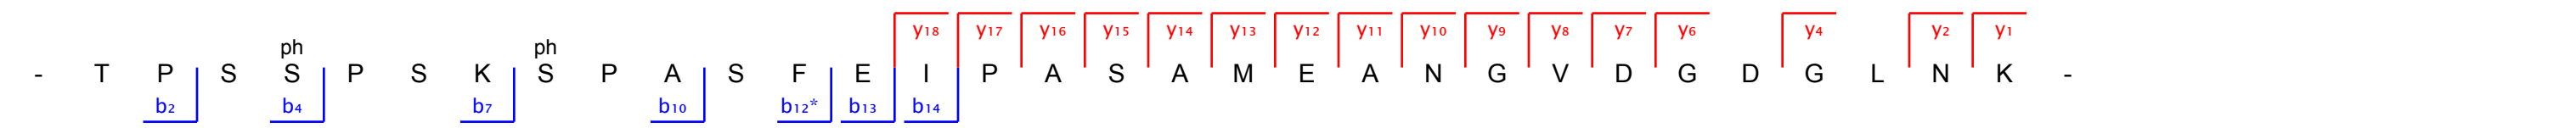



Raw file 20150812\_A375SR\_Phospho\_BR1\_03 Scan 24360 Method FTMS; HCD Score 194.06 m/z 1332.57 Gene names SMARCAD1

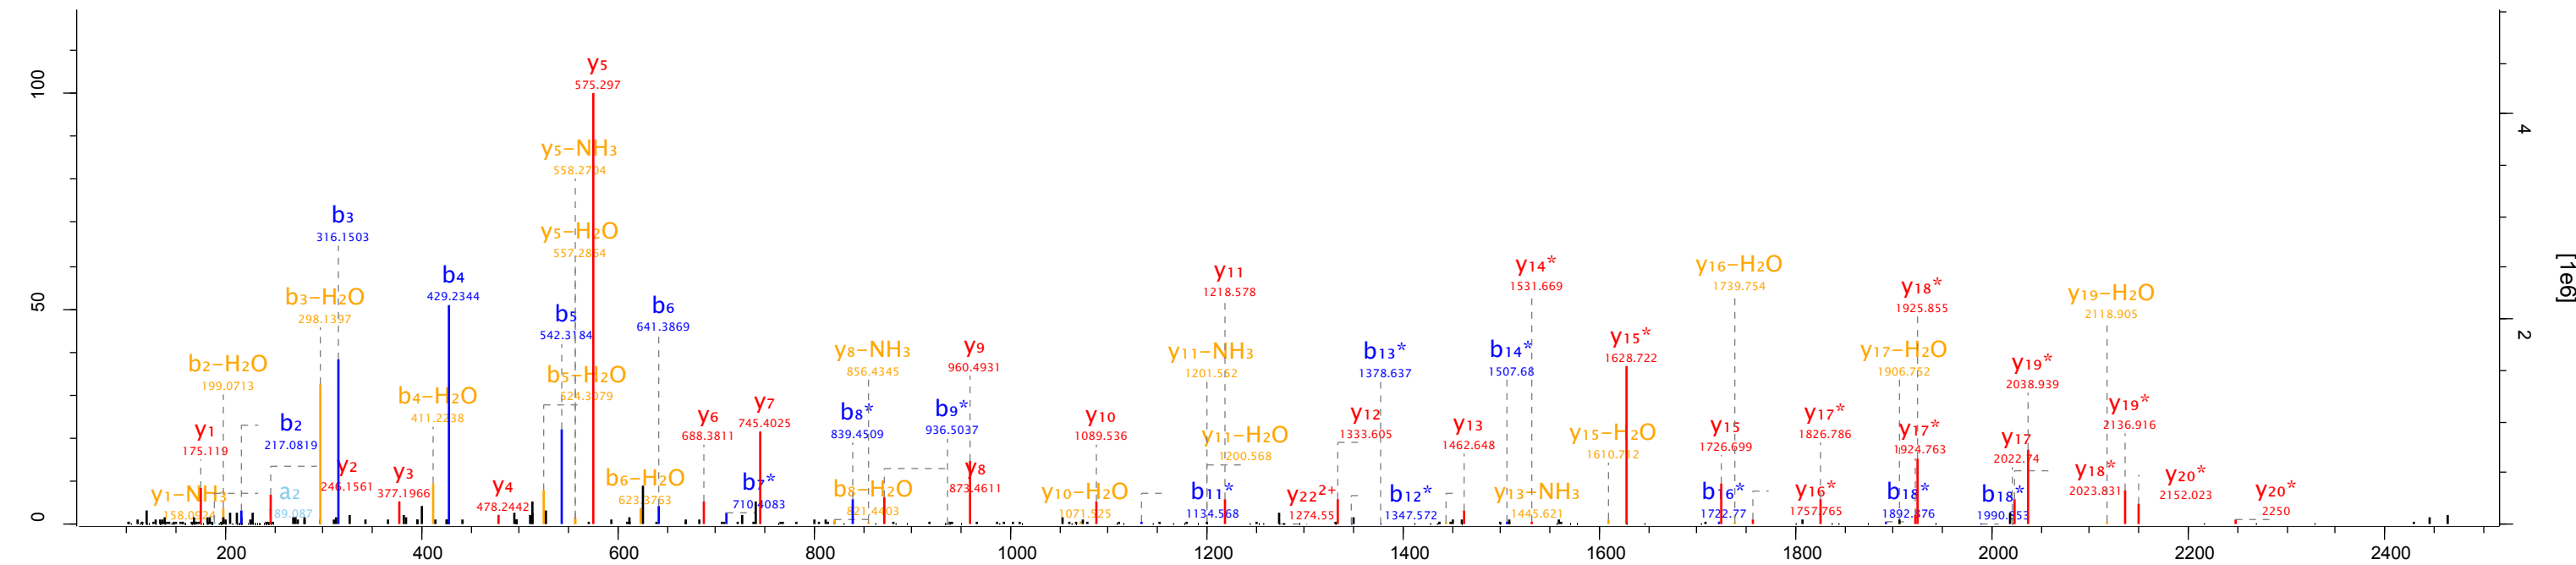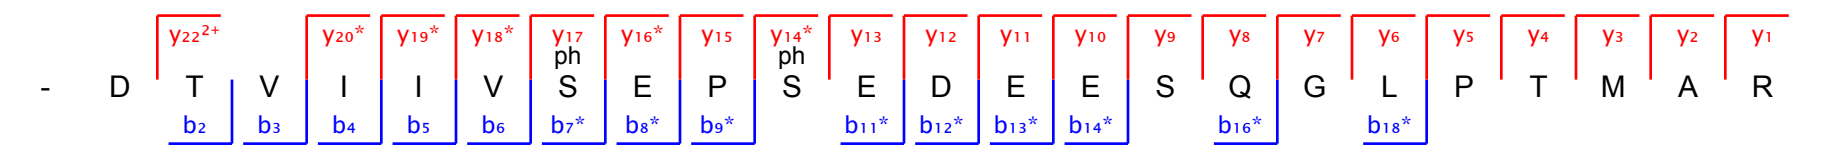

Raw file Scan Method m/z Gene names  
 20150812\_A375SR\_Phospho\_BR1\_03 24440 FTMS; HCD 176.14 1089.98 TMEM230

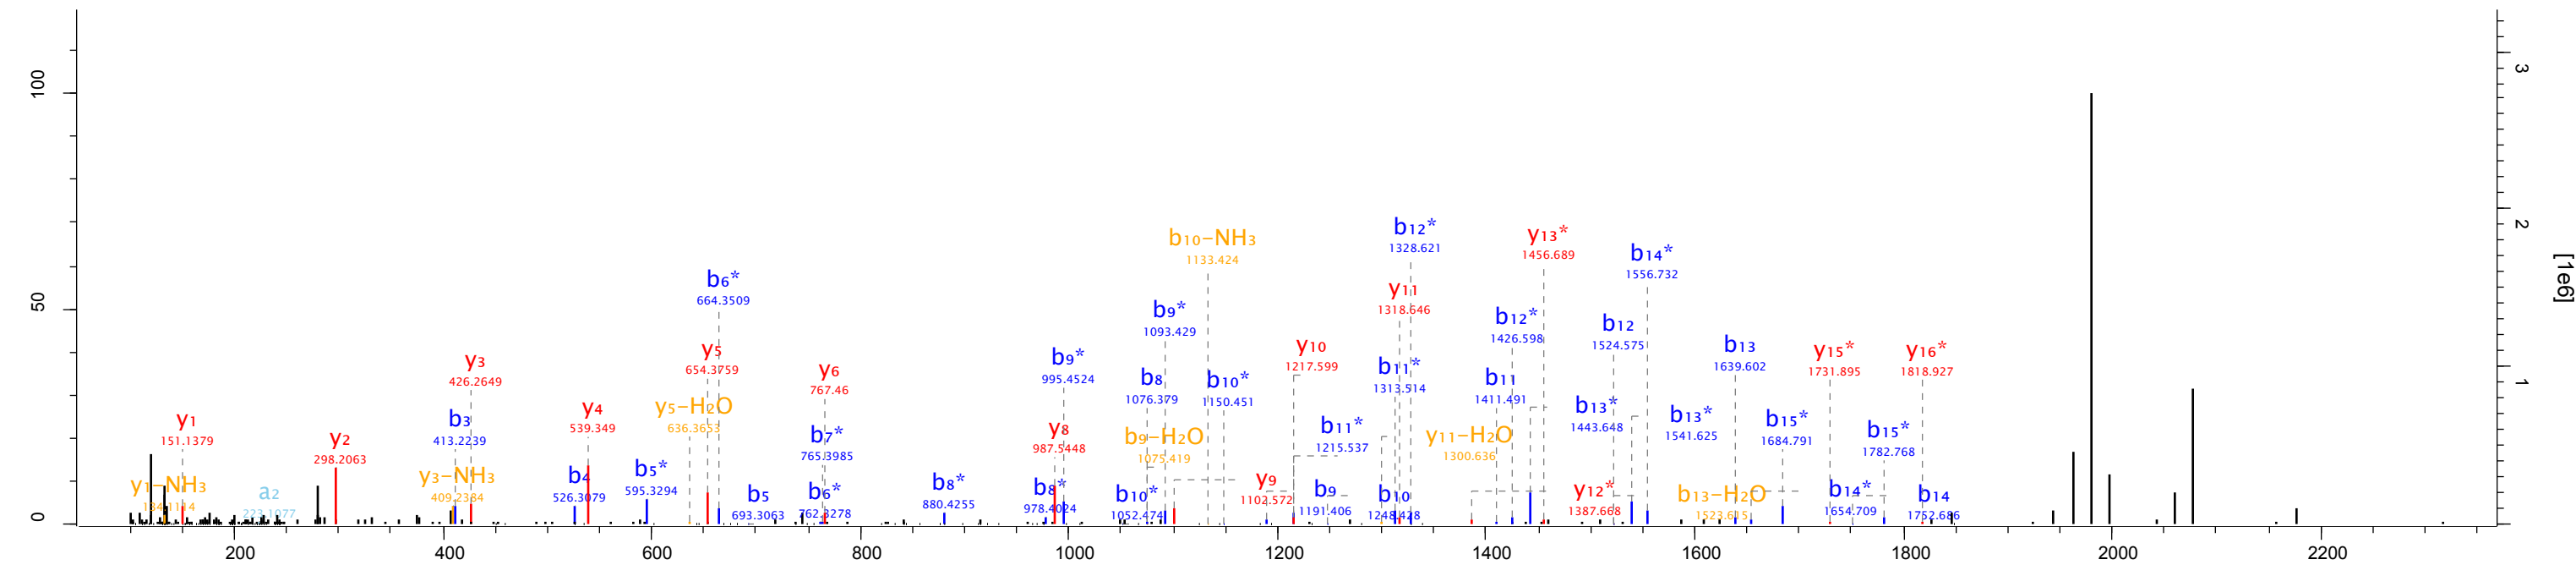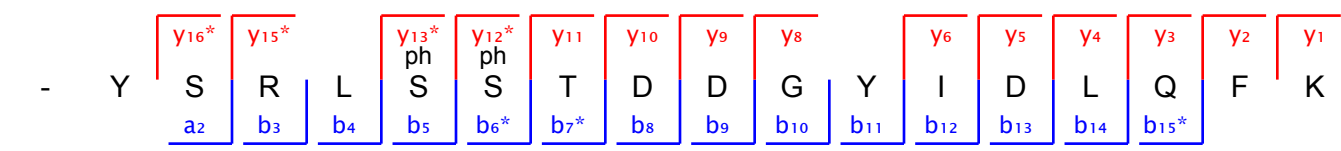

Raw file Scan Method Score m/z Gene names  
 20150812\_A375SR\_Phospho\_BR1\_03 24850 FTMS; HCD 225.31 1085.13 GPATCH1

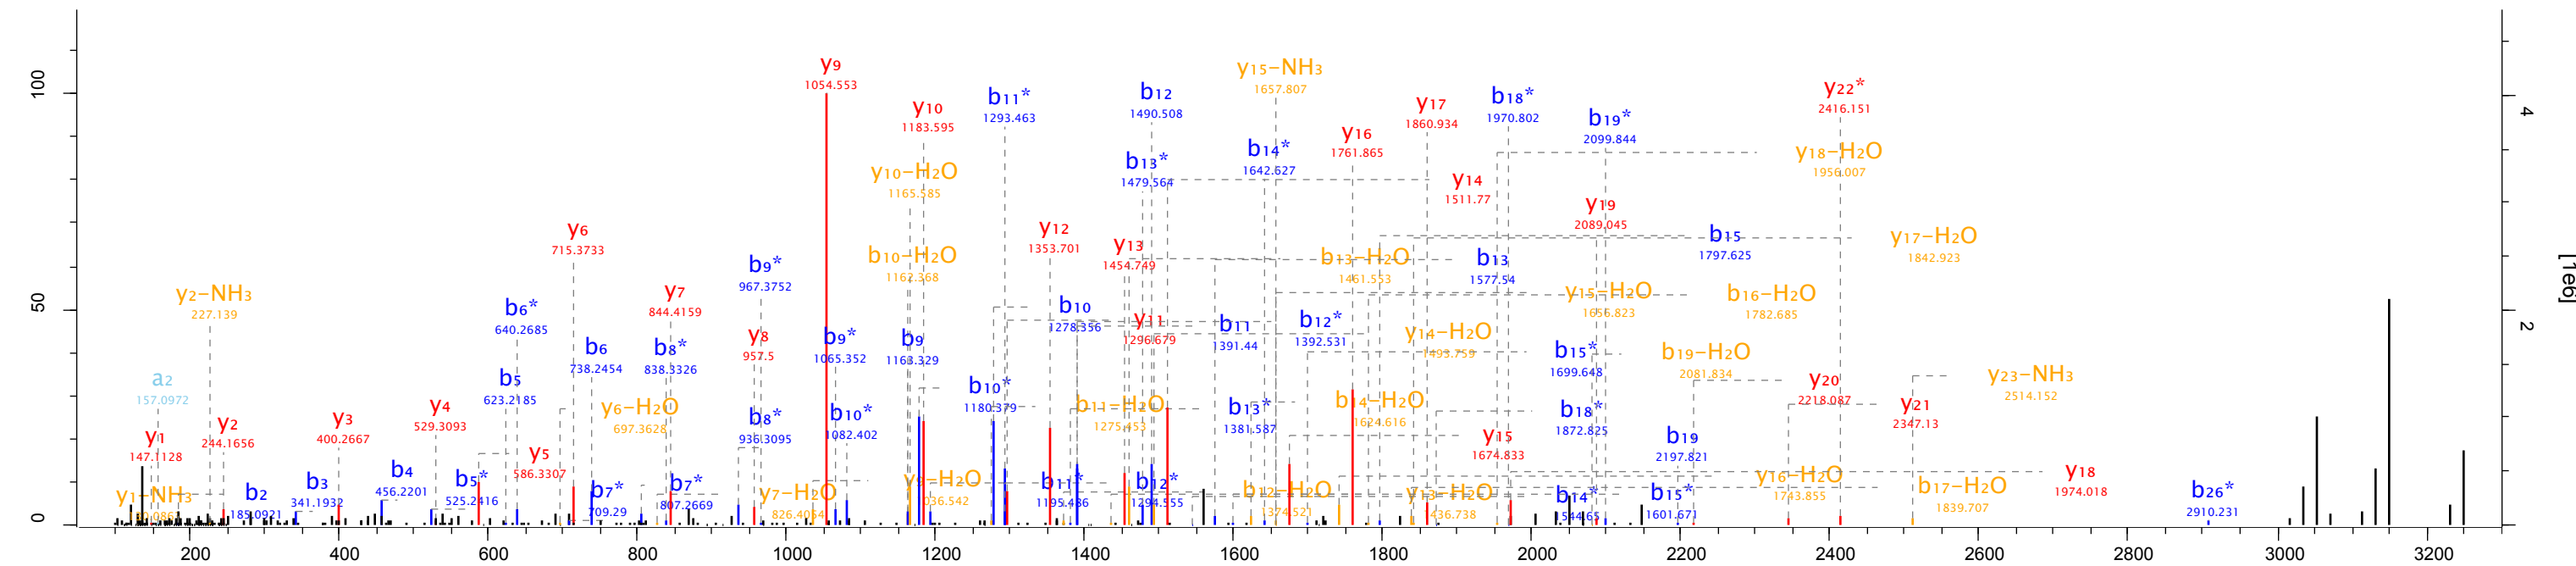

ac  
 - A A R D ph S D Y<sup>22\*</sup>ph S E E D L V S Y G T G L E P L E E G E R P K -  
 b<sub>2</sub> b<sub>3</sub> b<sub>4</sub> b<sub>5</sub> b<sub>6</sub> b<sub>7\*</sub> b<sub>8\*</sub> b<sub>9</sub> b<sub>10</sub> b<sub>11</sub> b<sub>12</sub> b<sub>13</sub> b<sub>14\*</sub> b<sub>15</sub> b<sub>18\*</sub> b<sub>19</sub> b<sub>26\*</sub>

Raw file 20150812\_A375SR\_Phospho\_BR1\_03 Scan 24980 Method FTMS; HCD Score 97.08 m/z 1080.78 Gene names PCM1

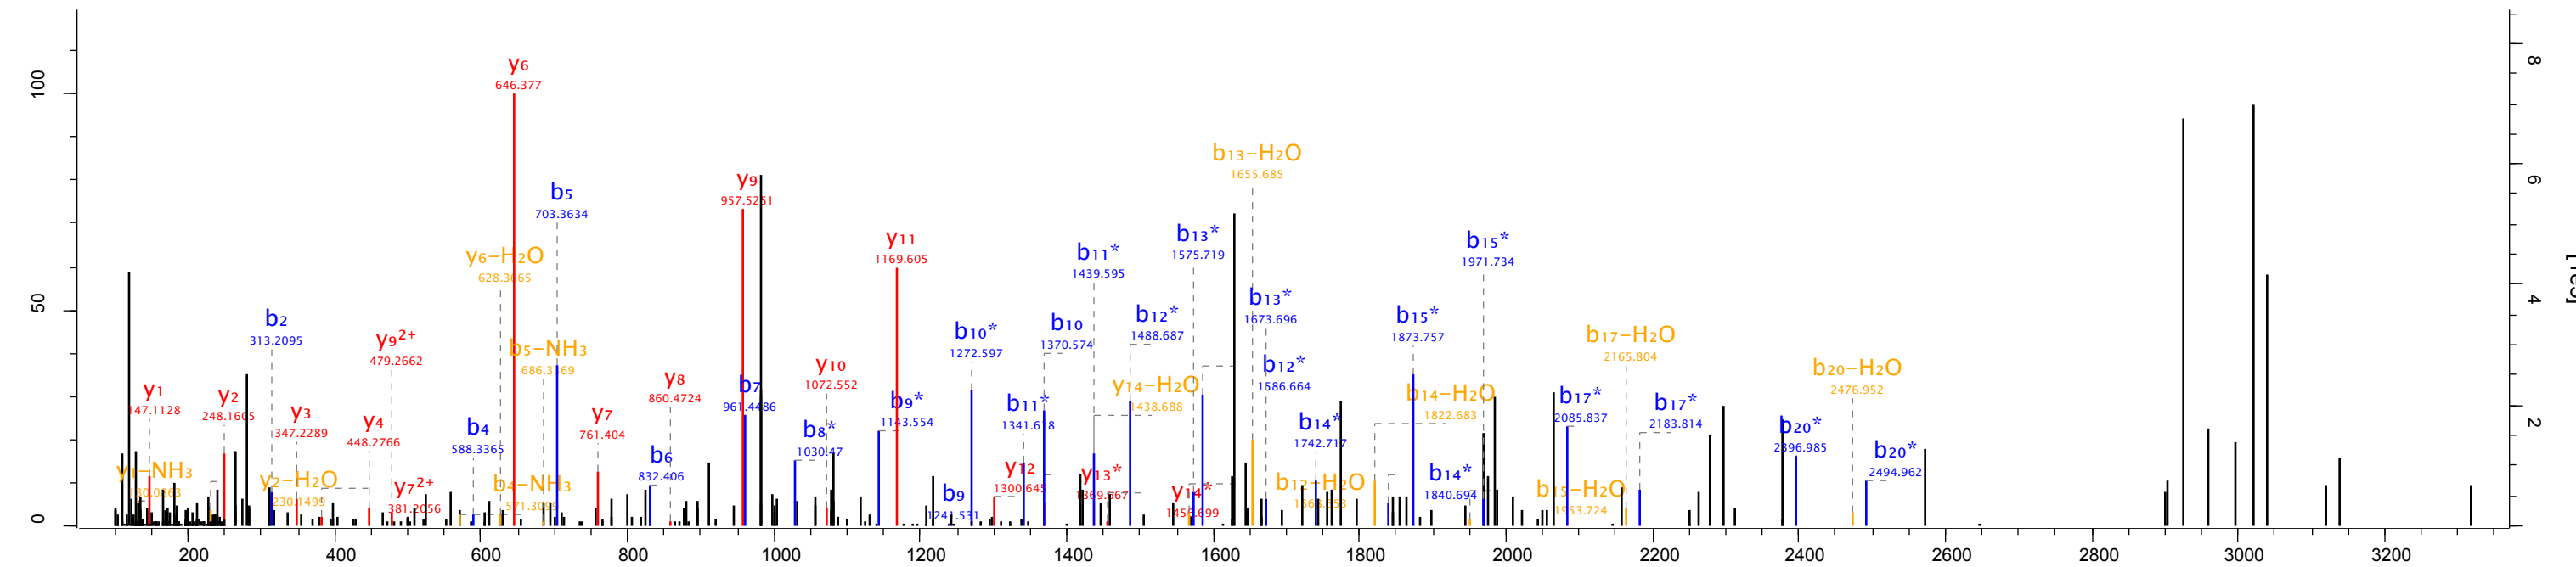

- R R Q F D E E S L E S F S S M P D P V D P T T V T K -

b<sub>2</sub>
b<sub>4</sub>
b<sub>5</sub>
b<sub>6</sub>
b<sub>7</sub>
b<sub>8</sub><sup>\*</sup>
b<sub>9</sub>
b<sub>10</sub>
b<sub>11</sub><sup>\*</sup>
b<sub>12</sub><sup>\*</sup>
b<sub>13</sub><sup>\*</sup>
b<sub>14</sub><sup>\*</sup>
b<sub>15</sub><sup>\*</sup>
b<sub>17</sub><sup>\*</sup>
b<sub>20</sub><sup>\*</sup>
y<sub>14</sub><sup>\*</sup>
y<sub>13</sub><sup>\*</sup>
y<sub>12</sub>
y<sub>11</sub>
y<sub>10</sub>
y<sub>9</sub>
y<sub>8</sub>
y<sub>7</sub>
y<sub>6</sub>
y<sub>4</sub>
y<sub>3</sub>
y<sub>2</sub>
y<sub>1</sub>

Raw file: 20150812\_A375SR\_Phospho\_BR1\_03  
 Scan: 2500 Method: FTMS; HCD Score: 187.61 m/z: 989.39 Gene names: EIF4B

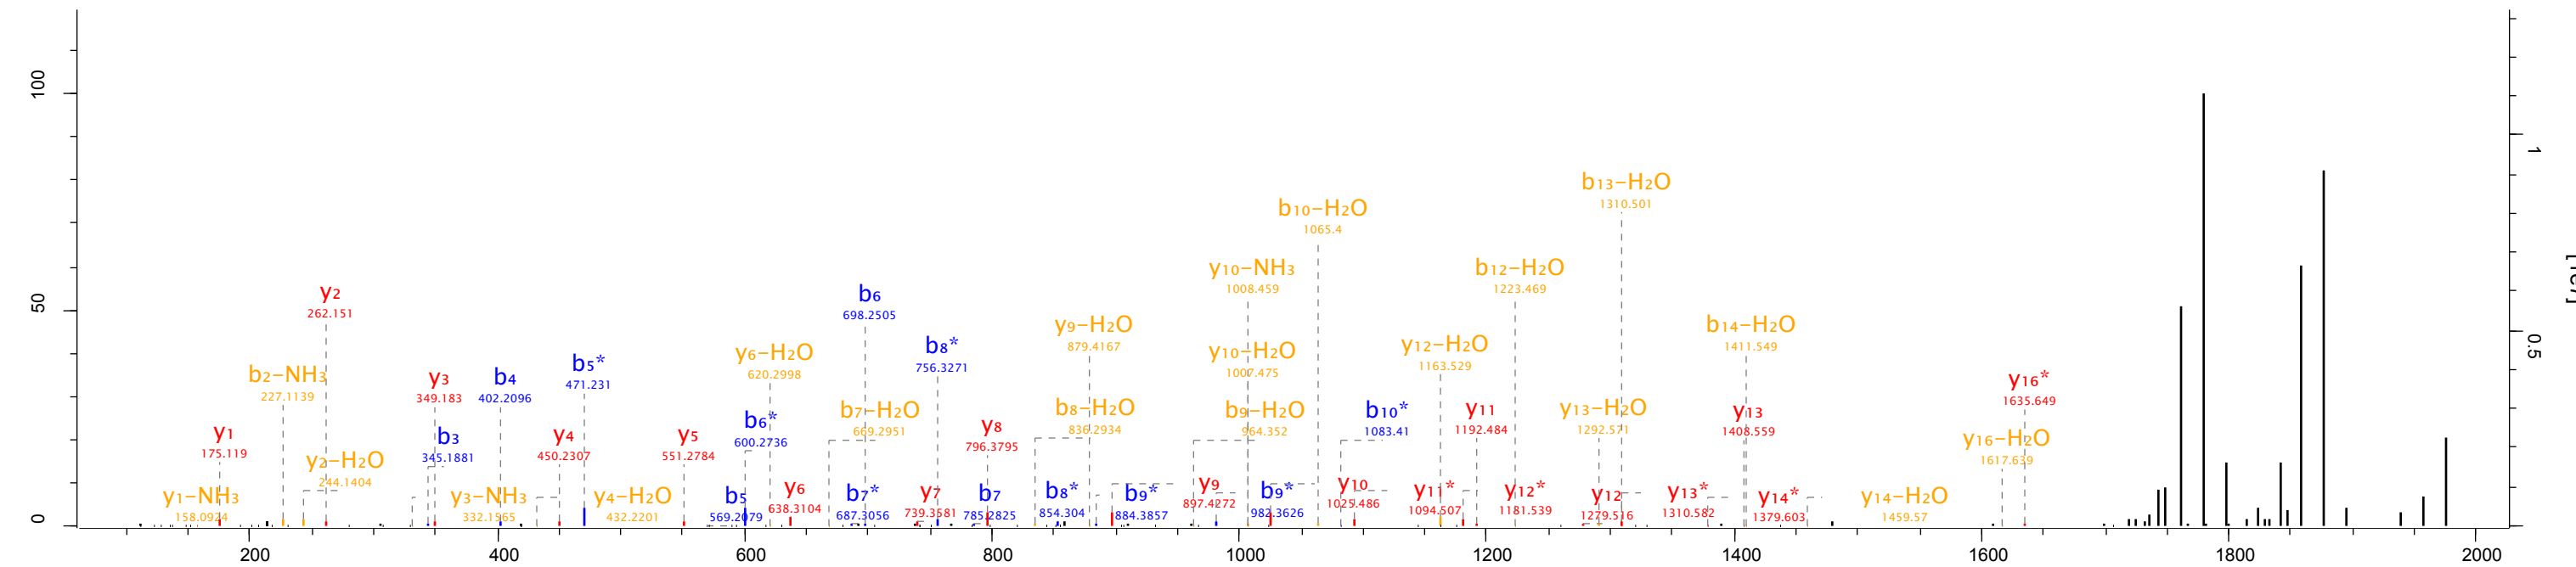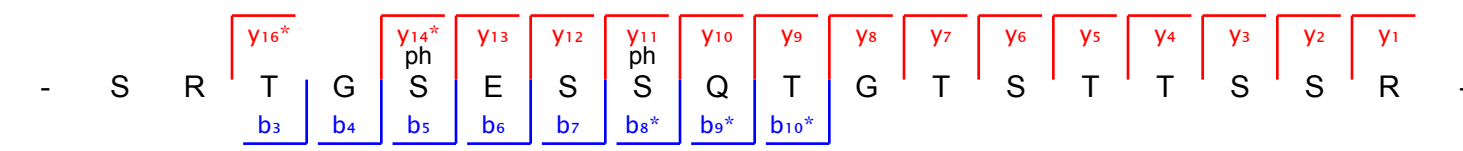

Raw file Scan Method Score m/z Gene names  
 20150812\_A375SR\_Phospho\_BR1\_03 25120 FTMS; HCD 216.64 1092.01 TRIOBP

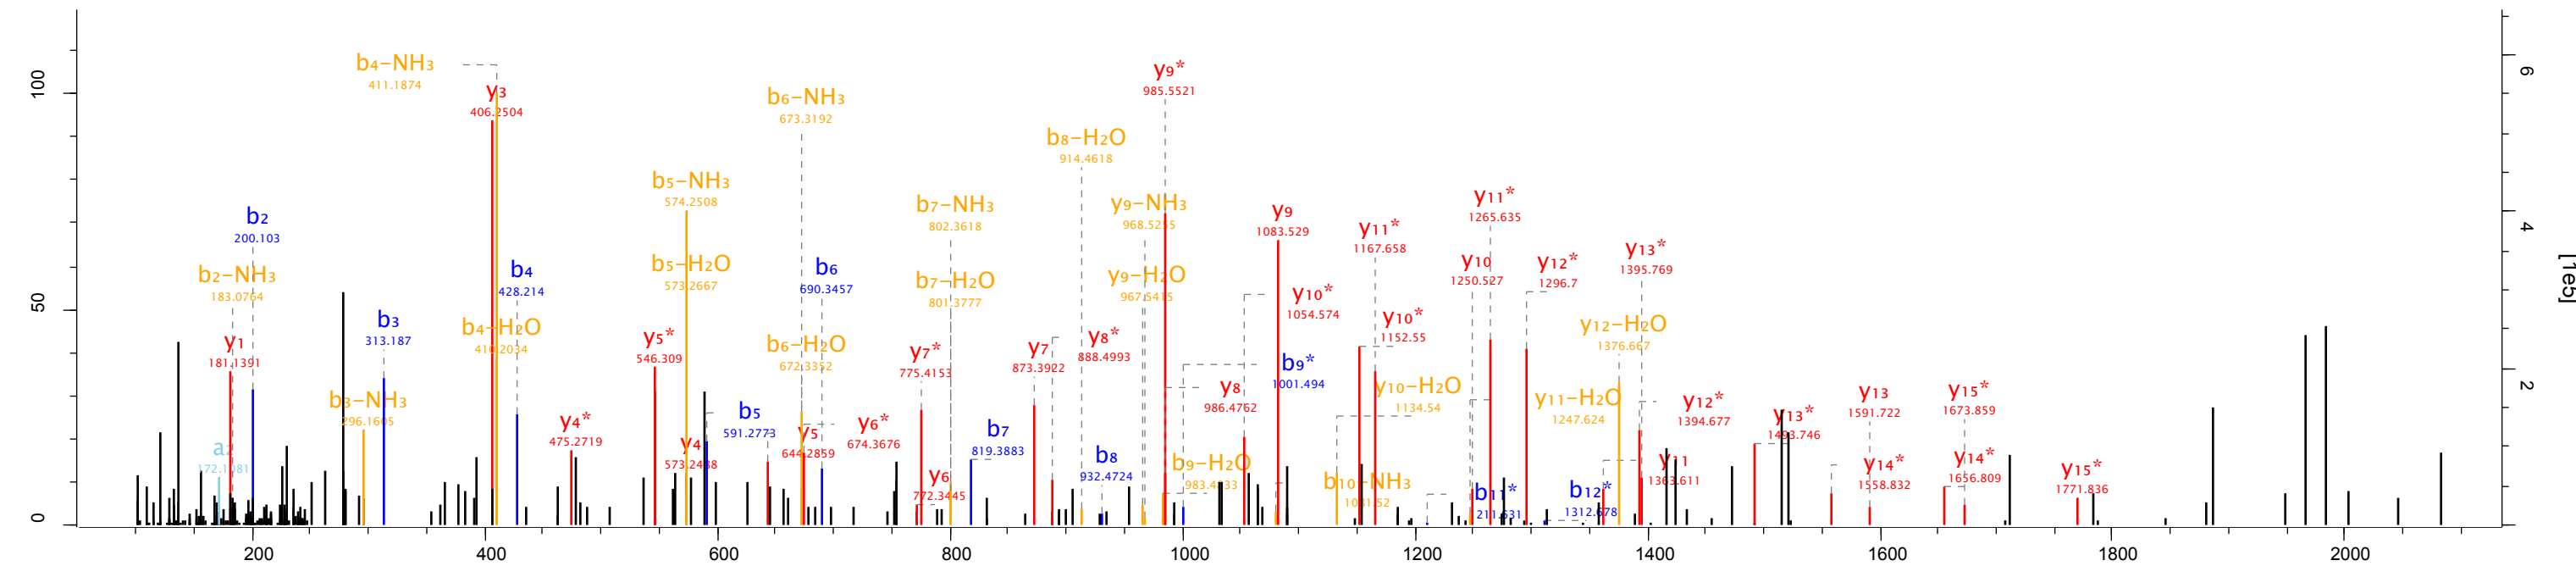

- Q A L D Y V E L S P L T Q A S P Q R -

b<sub>2</sub>
b<sub>3</sub>
b<sub>4</sub>
b<sub>5</sub>
b<sub>6</sub>
b<sub>7</sub>
b<sub>8</sub>
b<sub>9</sub>\*
b<sub>11</sub>\*
b<sub>12</sub>\*
y<sub>15</sub>\*
y<sub>14</sub>\*
y<sub>13</sub>
y<sub>12</sub>\*
y<sub>11</sub>
y<sub>10</sub>ph
y<sub>9</sub>
y<sub>8</sub>
y<sub>7</sub>
y<sub>6</sub>
y<sub>5</sub>
y<sub>4</sub>ph
y<sub>3</sub>
y<sub>1</sub>

Raw file 20150812\_A375SR\_Phospho\_BR1\_03 Scan 25220 Method FTMS; HCD Score 81.18 m/z 942.79 Gene names ATAT1

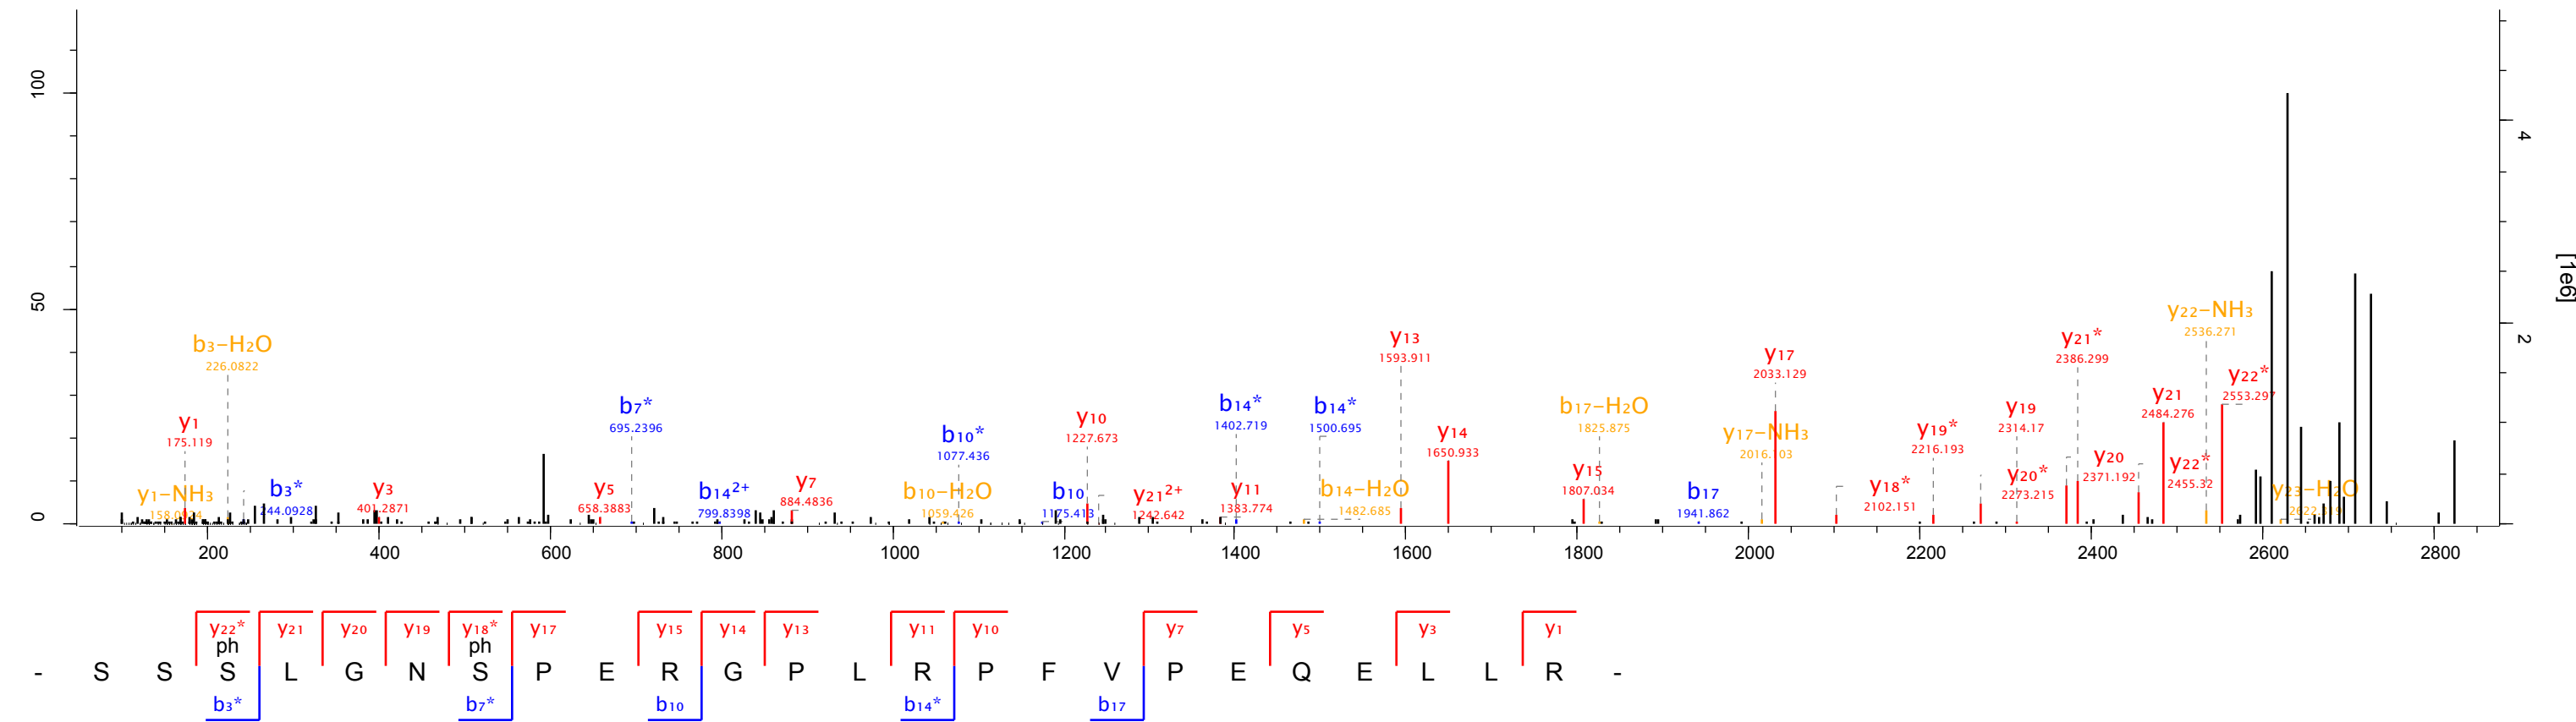

Raw file 20150812\_A375SR\_Phospho\_BR1\_03 Scan 25690 Method FTMS; HCD Score 149.62 m/z 1118.13 Gene names C19orf24

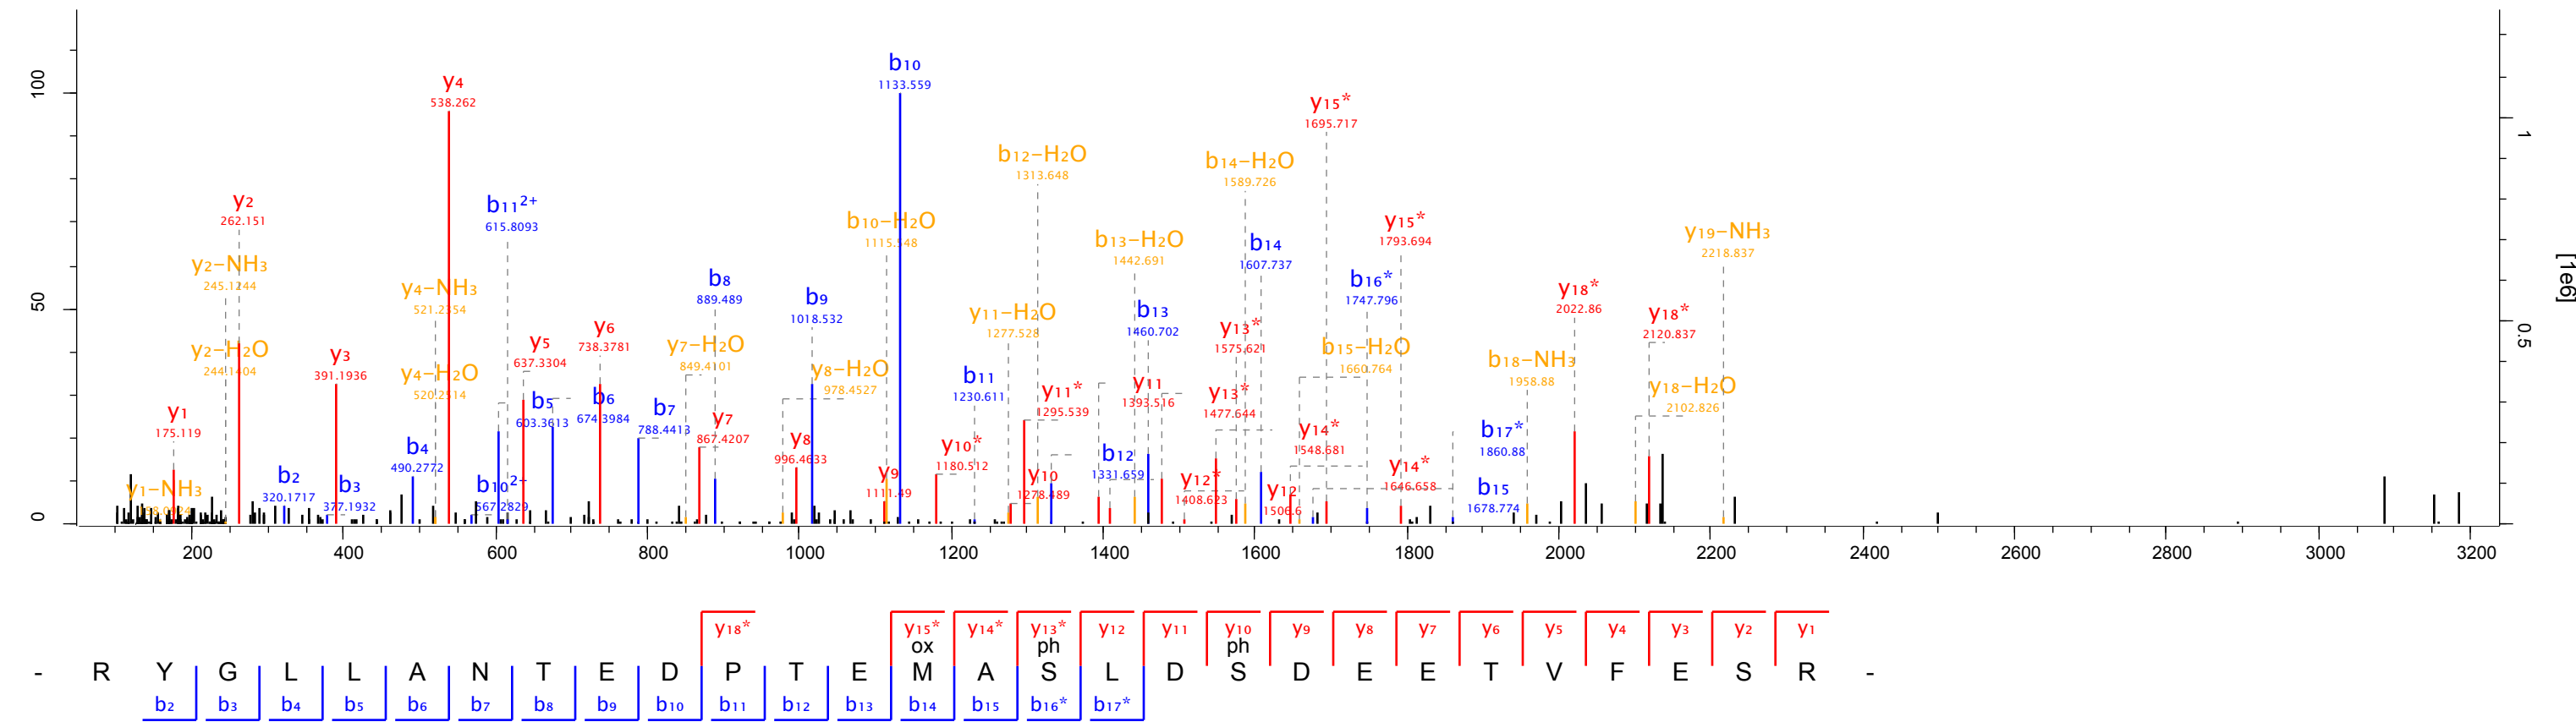



Raw file: 20150812\_A375SR\_Phospho\_BR1\_03  
 Scan: 26020 Method: FTMS; HCD Score: 147.49 m/z: 818.72 Gene names: TNK1

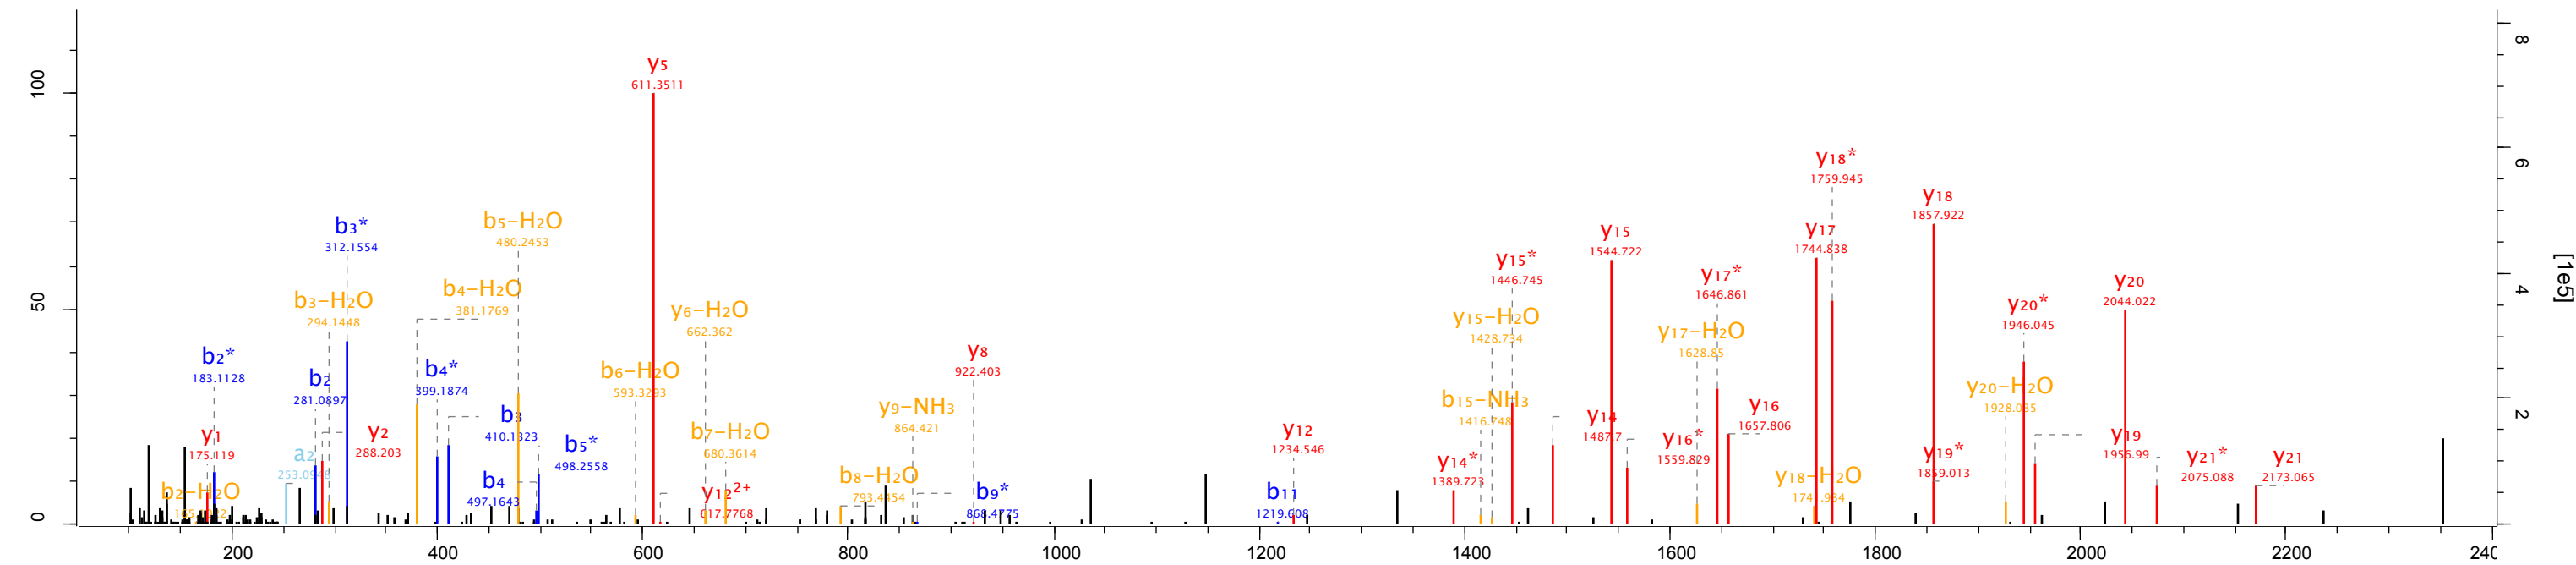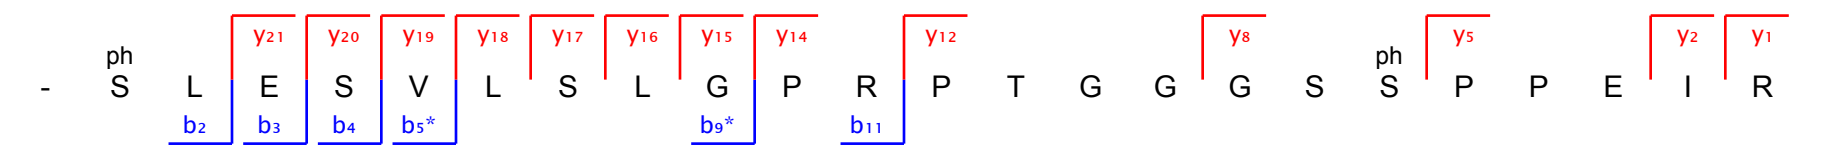

Raw file Scan Method Score m/z Gene names  
 20150812\_A375SR\_Phospho\_BR1\_03 26470 FTMS; HCD 133.82 982.71 GRIPAP1

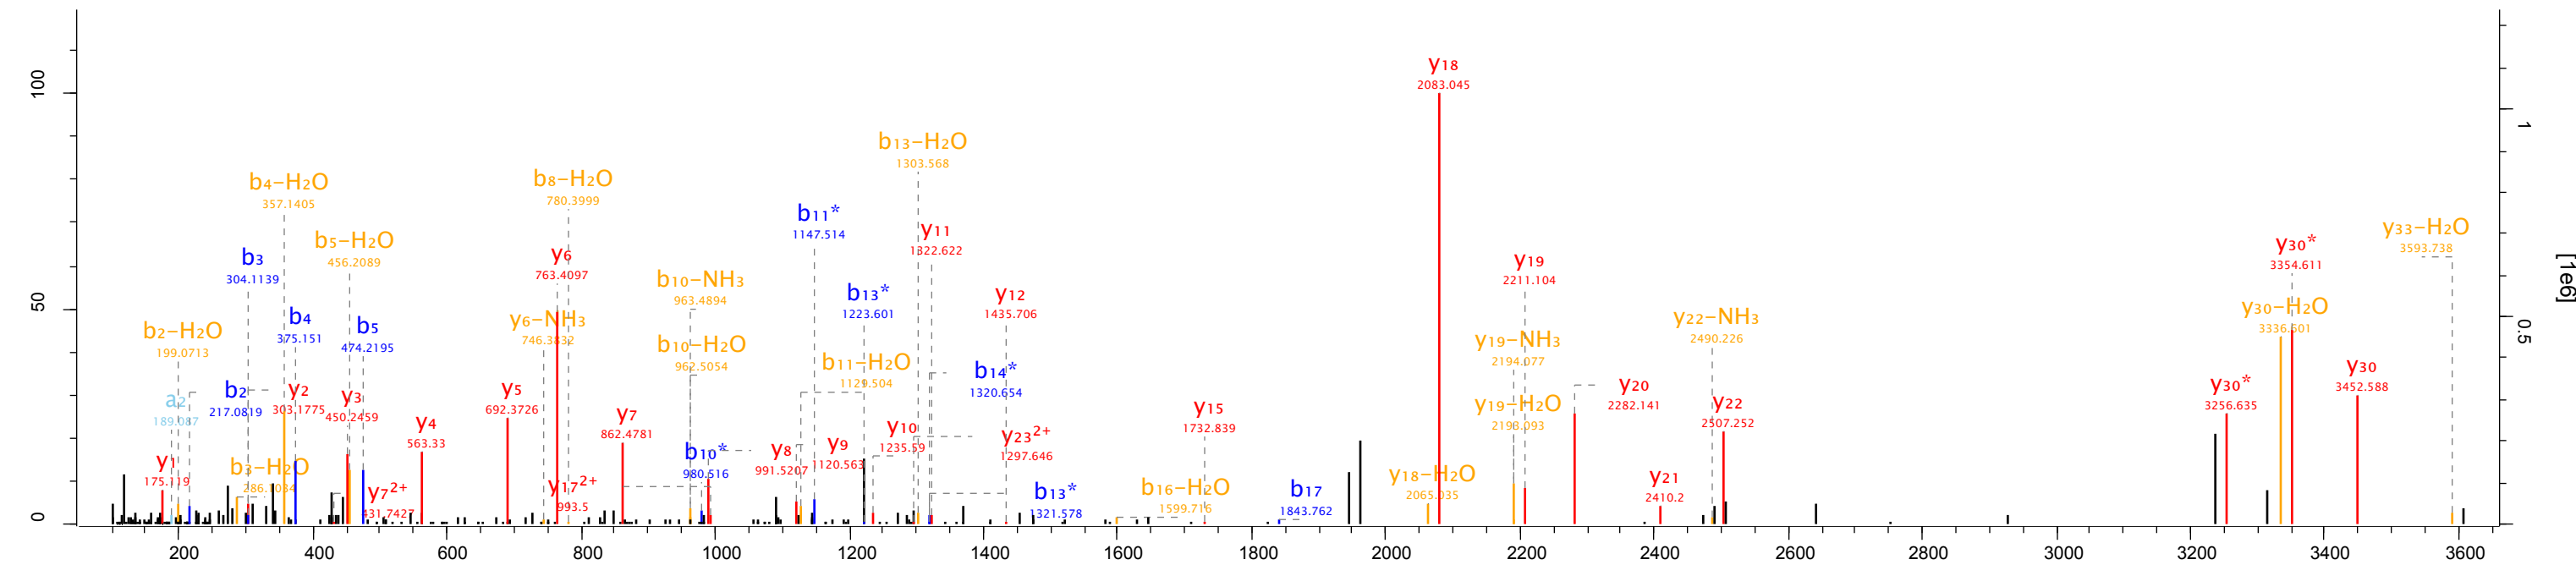

- E S S A V P A R S L S S S P Q A Q P P R P A E L S D E E V A E L F Q R -

b<sub>2</sub>
b<sub>3</sub>
b<sub>4</sub>
b<sub>5</sub>
b<sub>10</sub>\*
b<sub>11</sub>\*
b<sub>13</sub>\*
b<sub>14</sub>\*
b<sub>17</sub>
y<sub>1</sub>
y<sub>2</sub>
y<sub>3</sub>
y<sub>4</sub>
y<sub>5</sub>
y<sub>6</sub>
y<sub>7</sub>
y<sub>8</sub>
y<sub>9</sub>
y<sub>10</sub>
y<sub>11</sub>
y<sub>12</sub>
y<sub>15</sub>
y<sub>17</sub><sup>2+</sup>
y<sub>18</sub>
y<sub>19</sub>
y<sub>20</sub>
y<sub>21</sub>
y<sub>22</sub>
y<sub>23</sub><sup>2+</sup>
y<sub>30</sub>\*

Raw file: 20150812\_A375SR\_Phospho\_BR1\_03  
 Scan: 2670 Method: FTMS; HCD Score: 69.82 m/z: 395.84 Gene names: NKTR

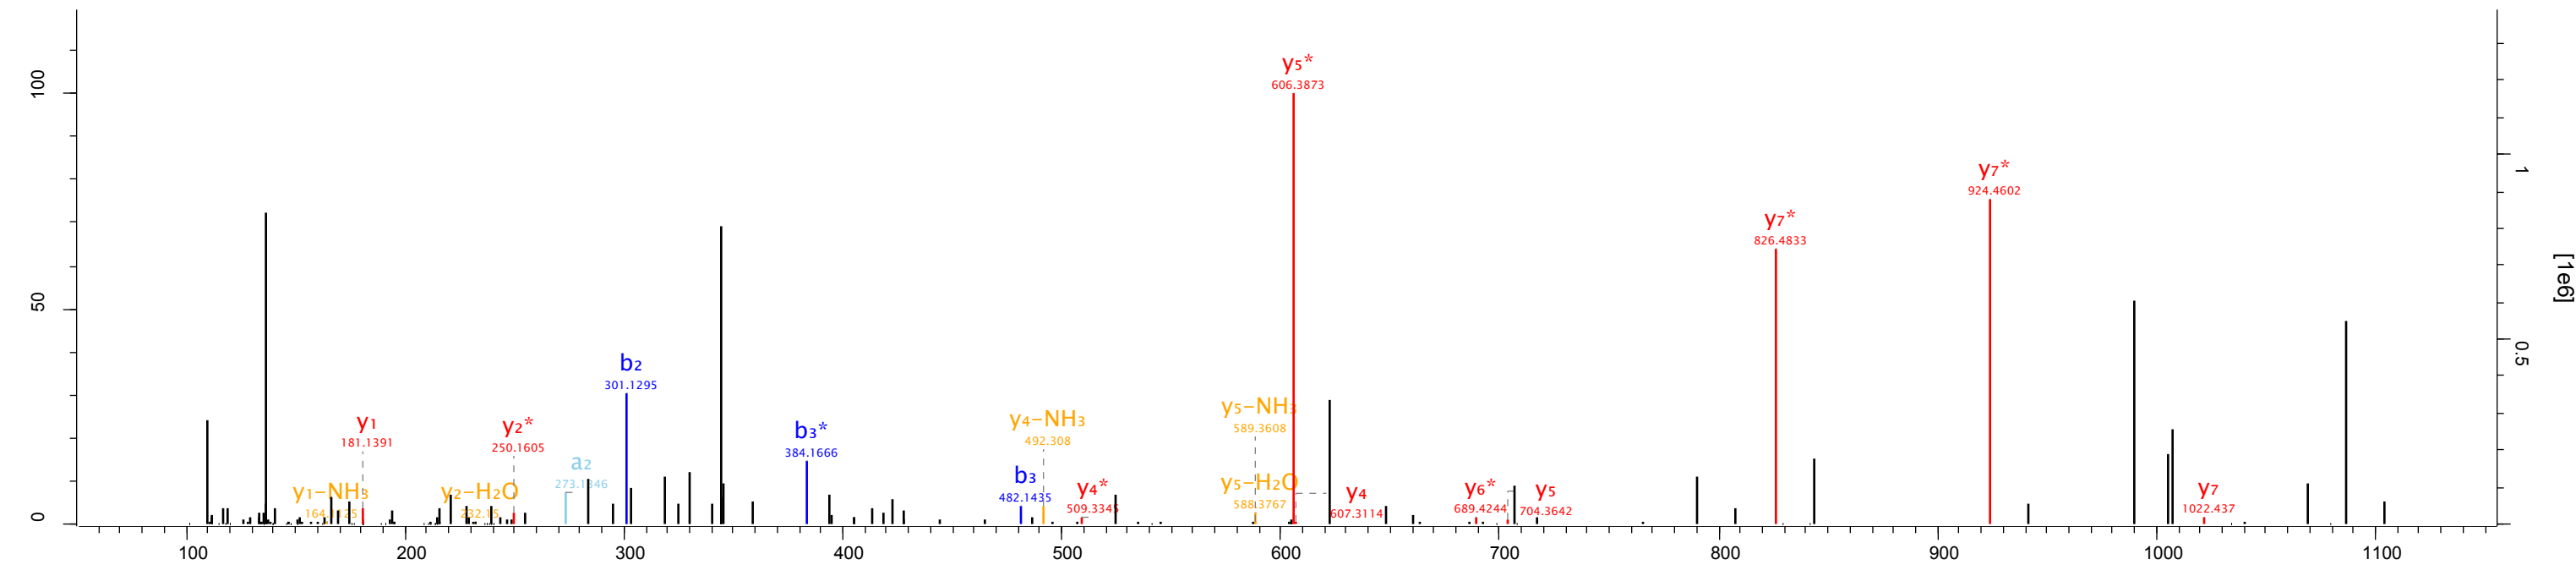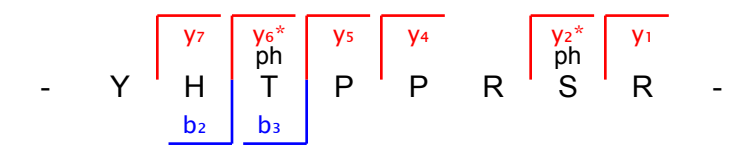

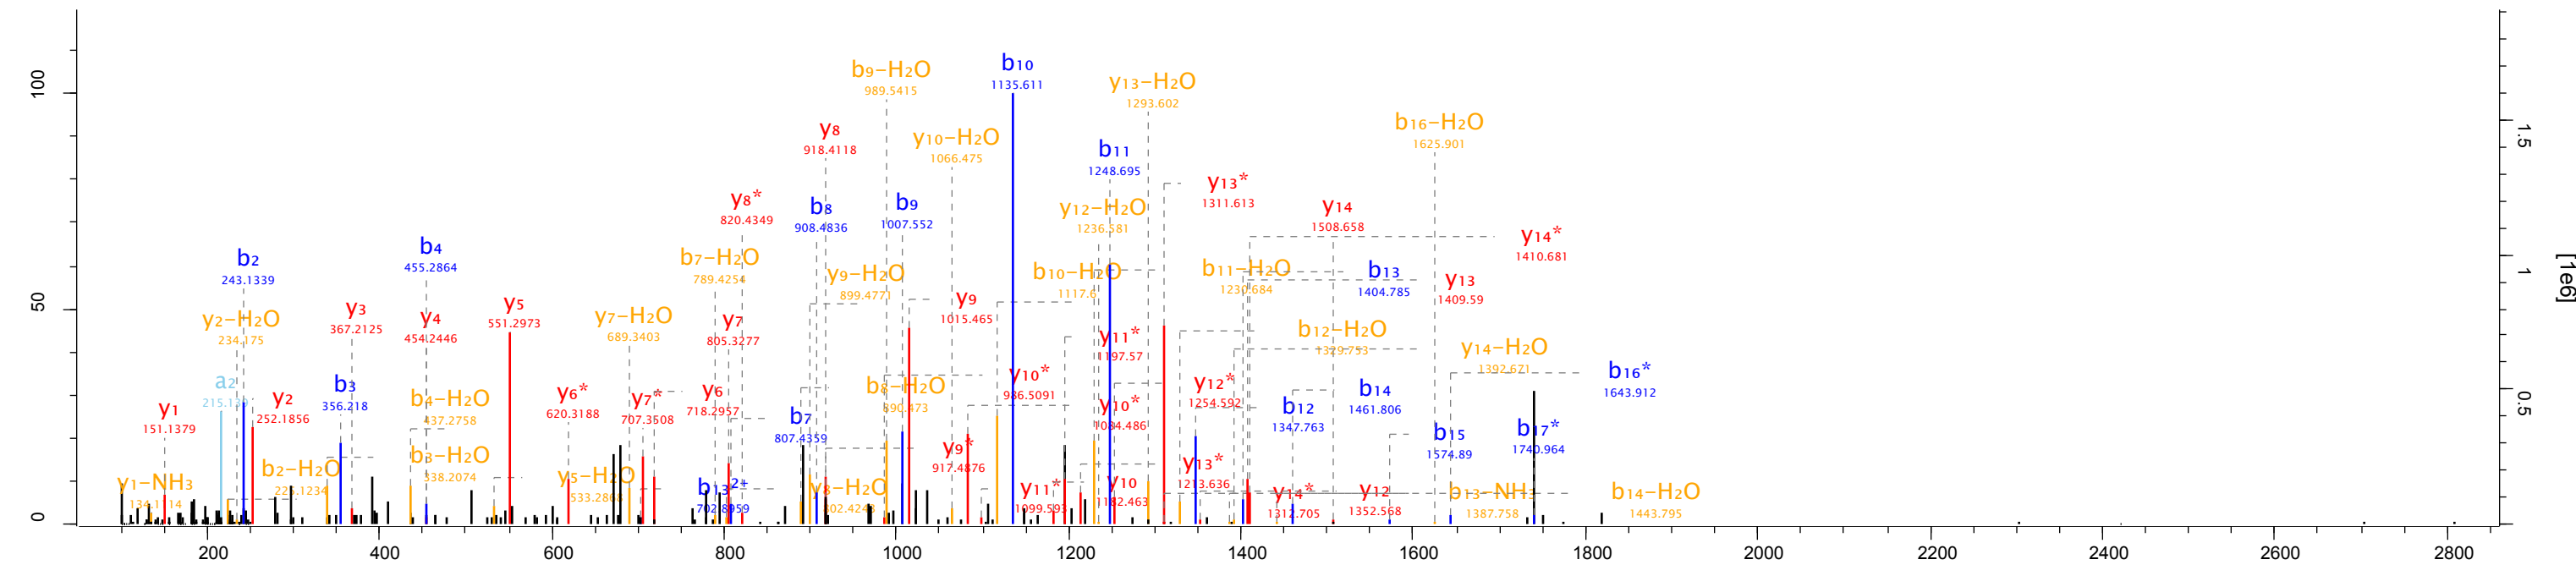

- E L L V S Q H T V Q L V G G L S P L S S P S D T K -

Fragmentation labels below the sequence:

- b<sub>2</sub> (under L)
- b<sub>3</sub> (under L)
- b<sub>4</sub> (under V)
- b<sub>7</sub> (under H)
- b<sub>8</sub> (under T)
- b<sub>9</sub> (under V)
- b<sub>10</sub> (under Q)
- b<sub>11</sub> (under L)
- b<sub>12</sub> (under V)
- b<sub>13</sub> (under G)
- b<sub>14</sub> (under G)
- b<sub>15</sub> (under L)
- b<sub>16</sub><sup>\*</sup> (under S)
- b<sub>17</sub><sup>\*</sup> (under P)
- y<sub>1</sub> (under K)
- y<sub>2</sub> (under T)
- y<sub>3</sub> (under D)
- y<sub>4</sub> (under S)
- y<sub>5</sub> (under P)
- y<sub>6</sub> (under S)
- y<sub>7</sub> (under S)
- y<sub>8</sub> (under L)
- y<sub>9</sub> (under P)
- y<sub>10</sub> (under S)
- y<sub>11</sub><sup>\*</sup> (under L)
- y<sub>12</sub> (under G)
- y<sub>13</sub> (under G)
- y<sub>14</sub> (under V)

Raw file: 20150812\_A375SR\_Phospho\_BR1\_03  
 Scan: 26820 Method: FTMS; HCD Score: 77.96 m/z: 1261.25 Gene names: FAM129A

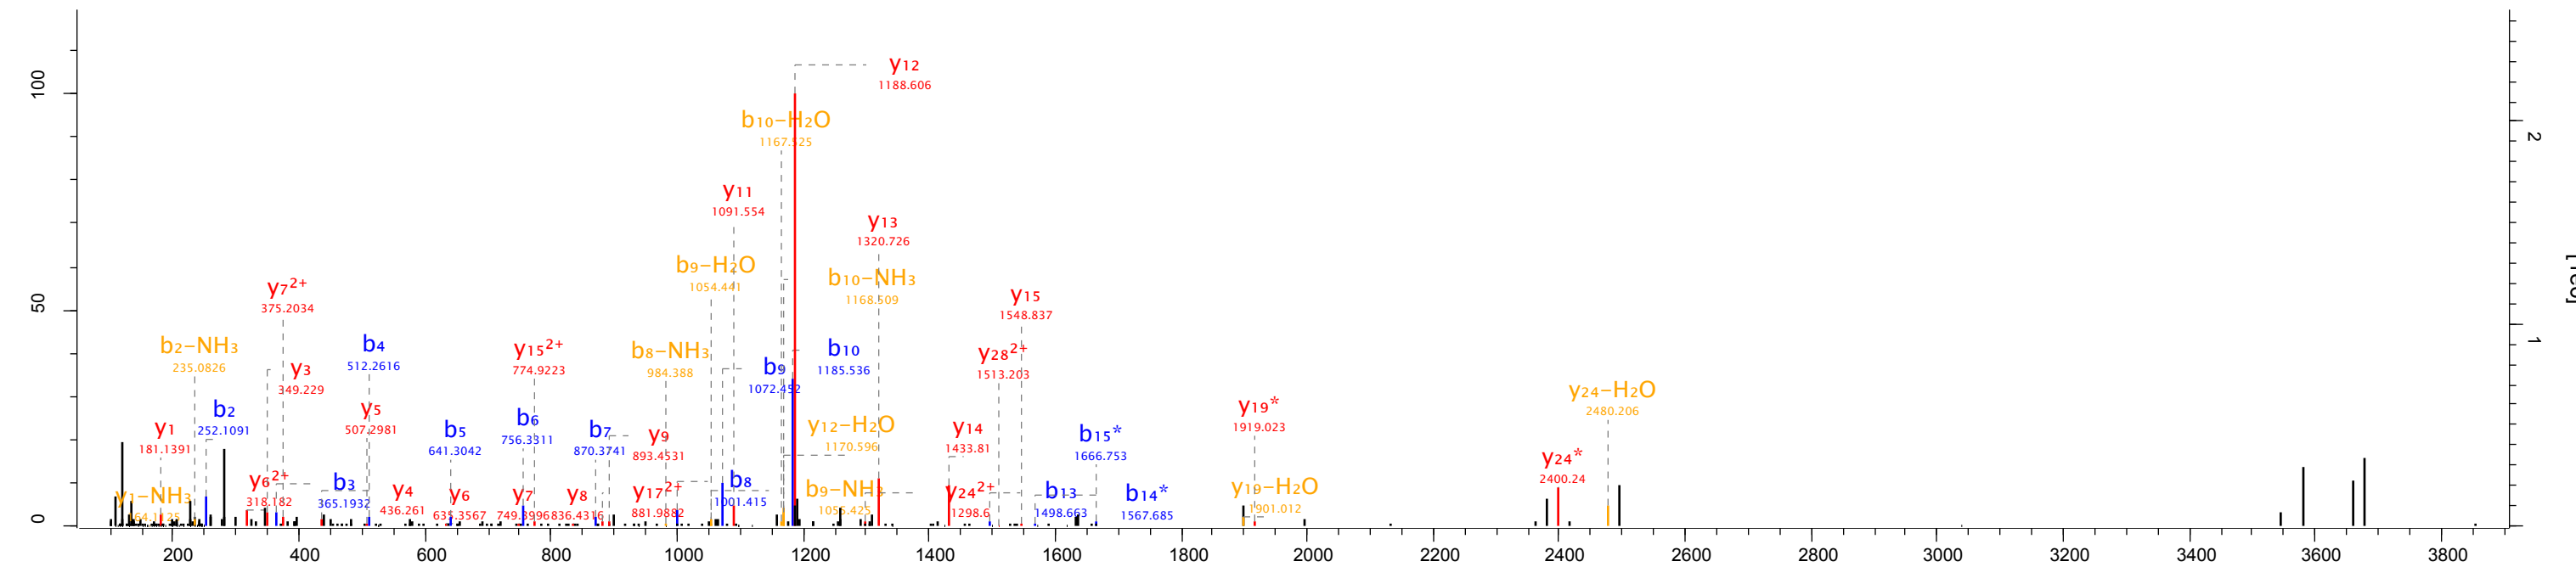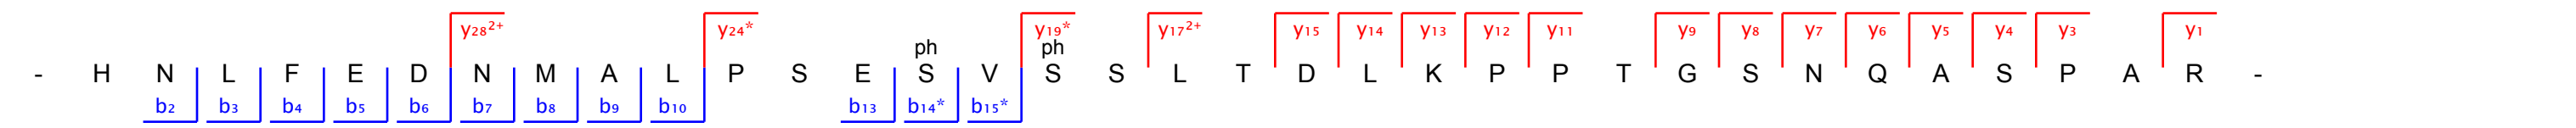

Raw file: 20150812\_A375SR\_Phospho\_BR1\_03  
 Scan: 27240 Method: FTMS; HCD Score: 131.65 m/z: 1425 Gene names: CCDC6

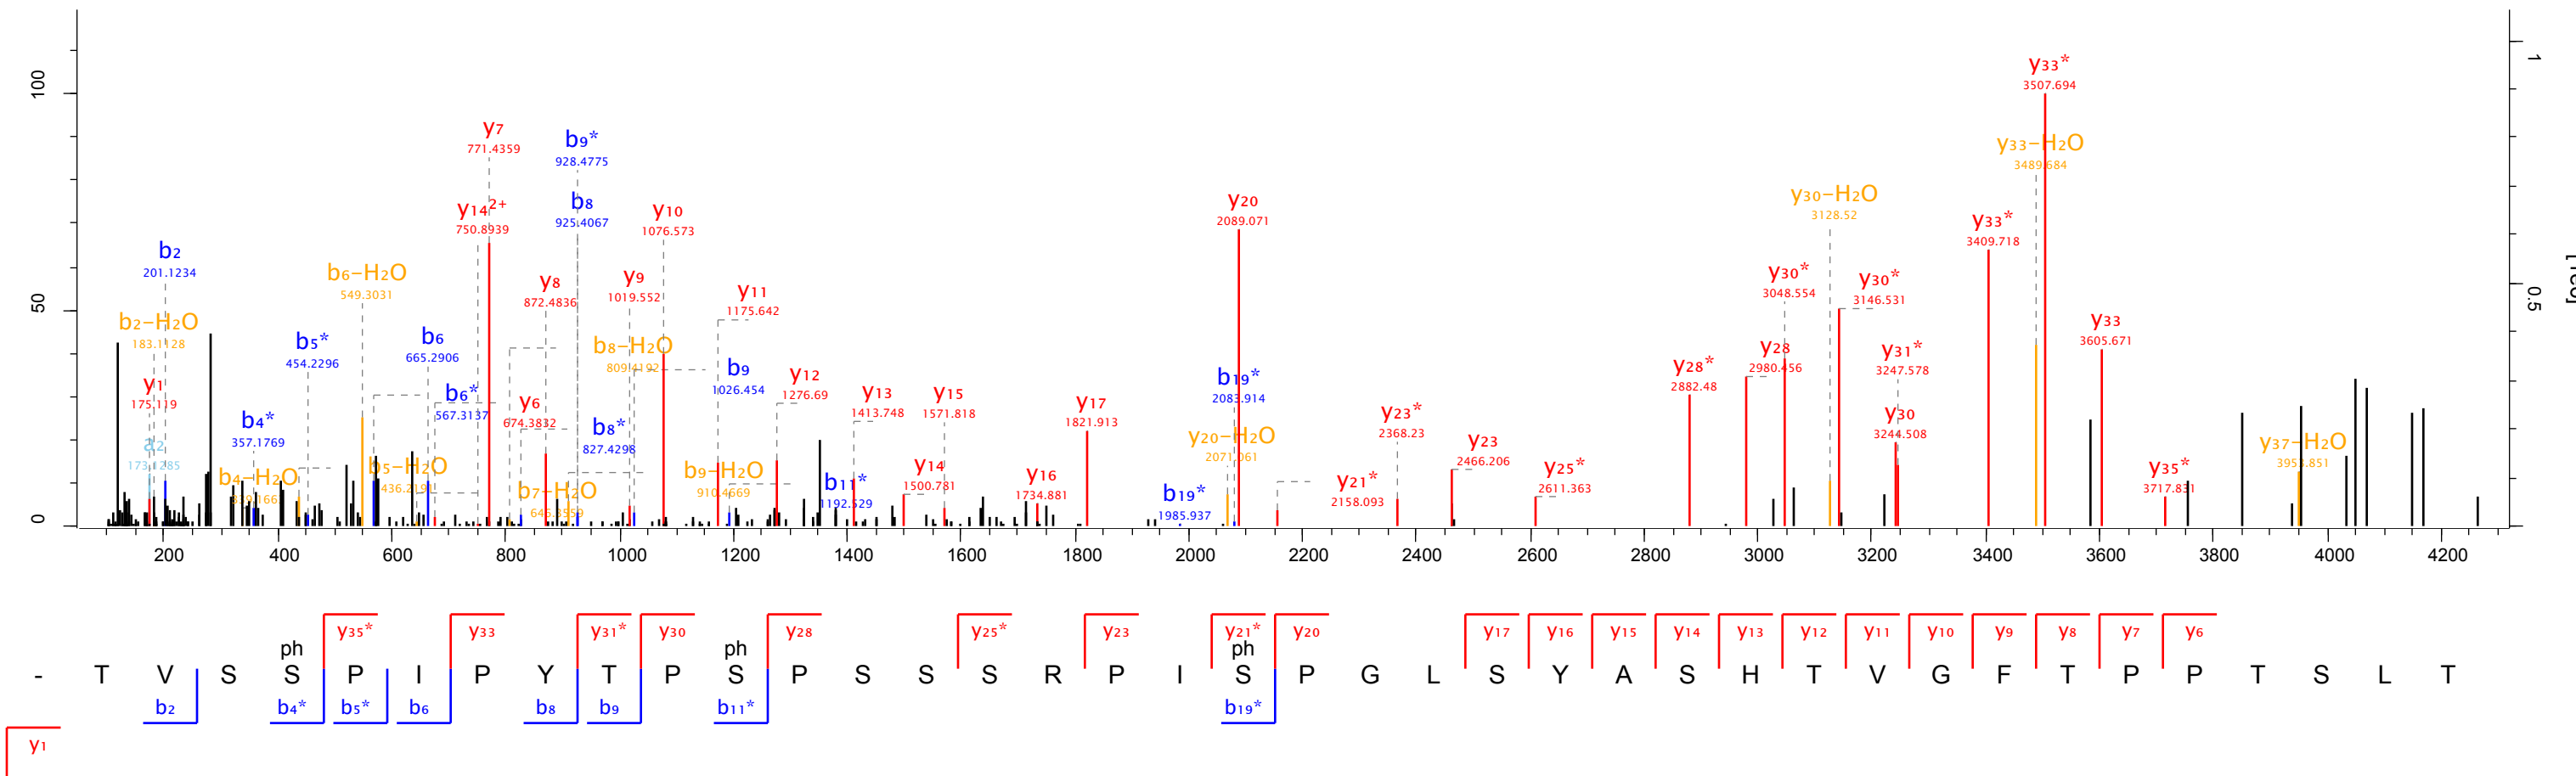

Raw file  
20150812\_A375SR\_Phospho\_BR1\_03

Scan 27430 Method FTMS; HCD Score 76.97 m/z 939.42 Gene names GIT1

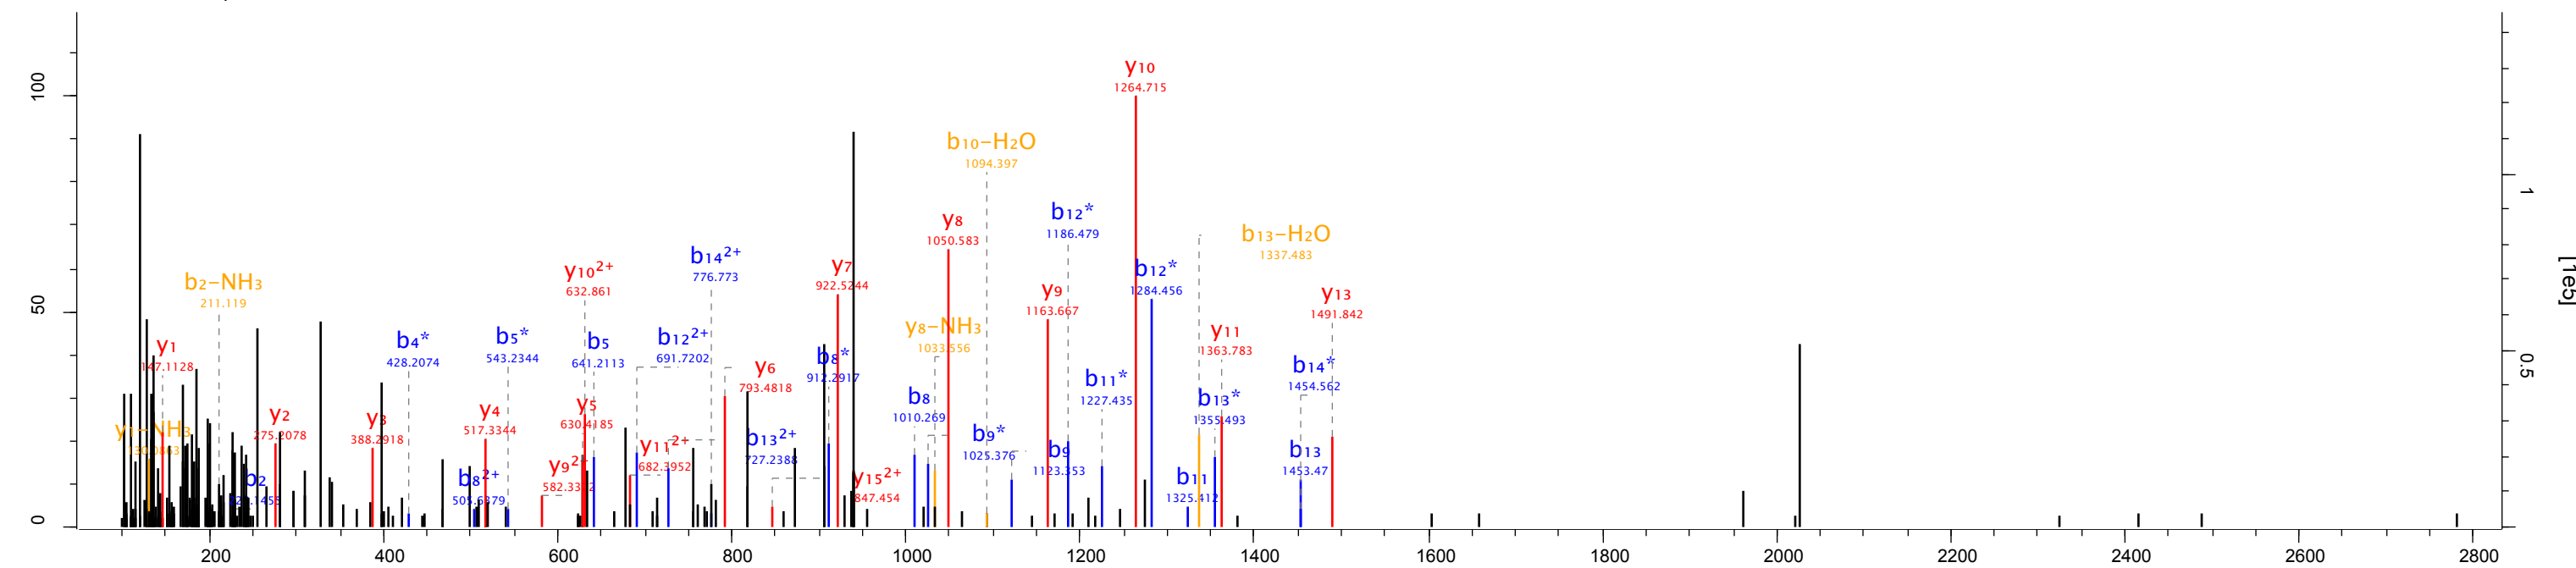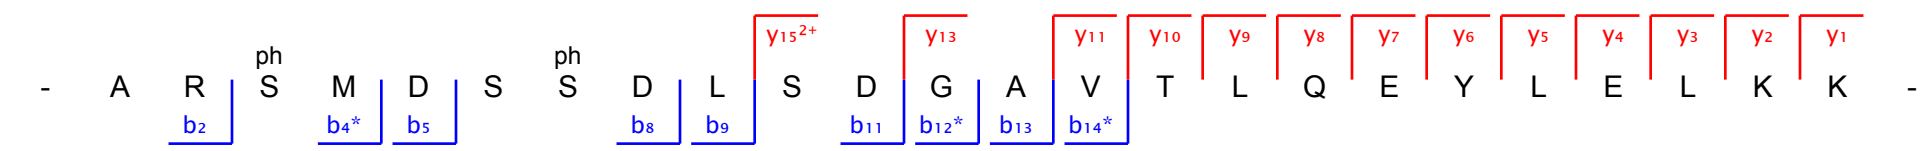

Raw file 20150812\_A375SR\_Phospho\_BR1\_03 Scan 28090 Method FTMS; HCD Score 45.1 m/z 1011.96 Gene names NPM3

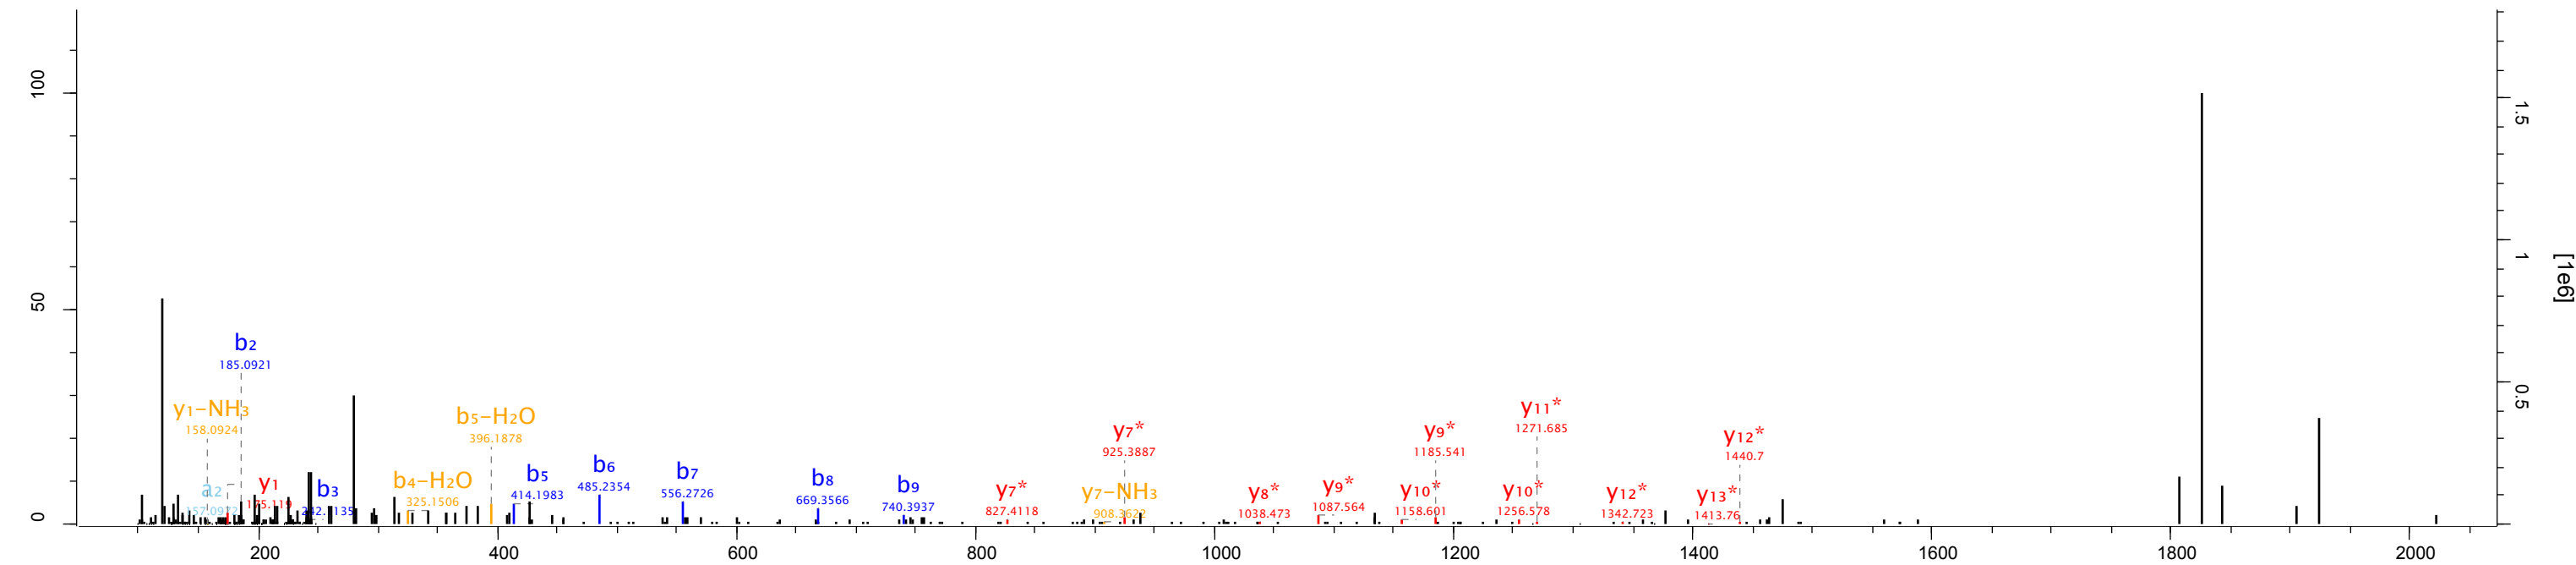

ac - A A G T A A A L A F L S Q E S R T R -

b<sub>2</sub>
b<sub>3</sub>
b<sub>5</sub>
b<sub>6</sub>
b<sub>7</sub>
b<sub>8</sub>
b<sub>9</sub>
y<sub>13</sub>\*
y<sub>12</sub>\*
y<sub>11</sub>\*
y<sub>10</sub>\*
y<sub>9</sub>\*
y<sub>8</sub>\*
y<sub>7</sub>\*
y<sub>1</sub>



Raw file Scan Method Score m/z Gene names

20150812\_A375SR\_Phospho\_BR1\_03 28520 FTMS; HCD 53.33 1025.77 SHROOM1

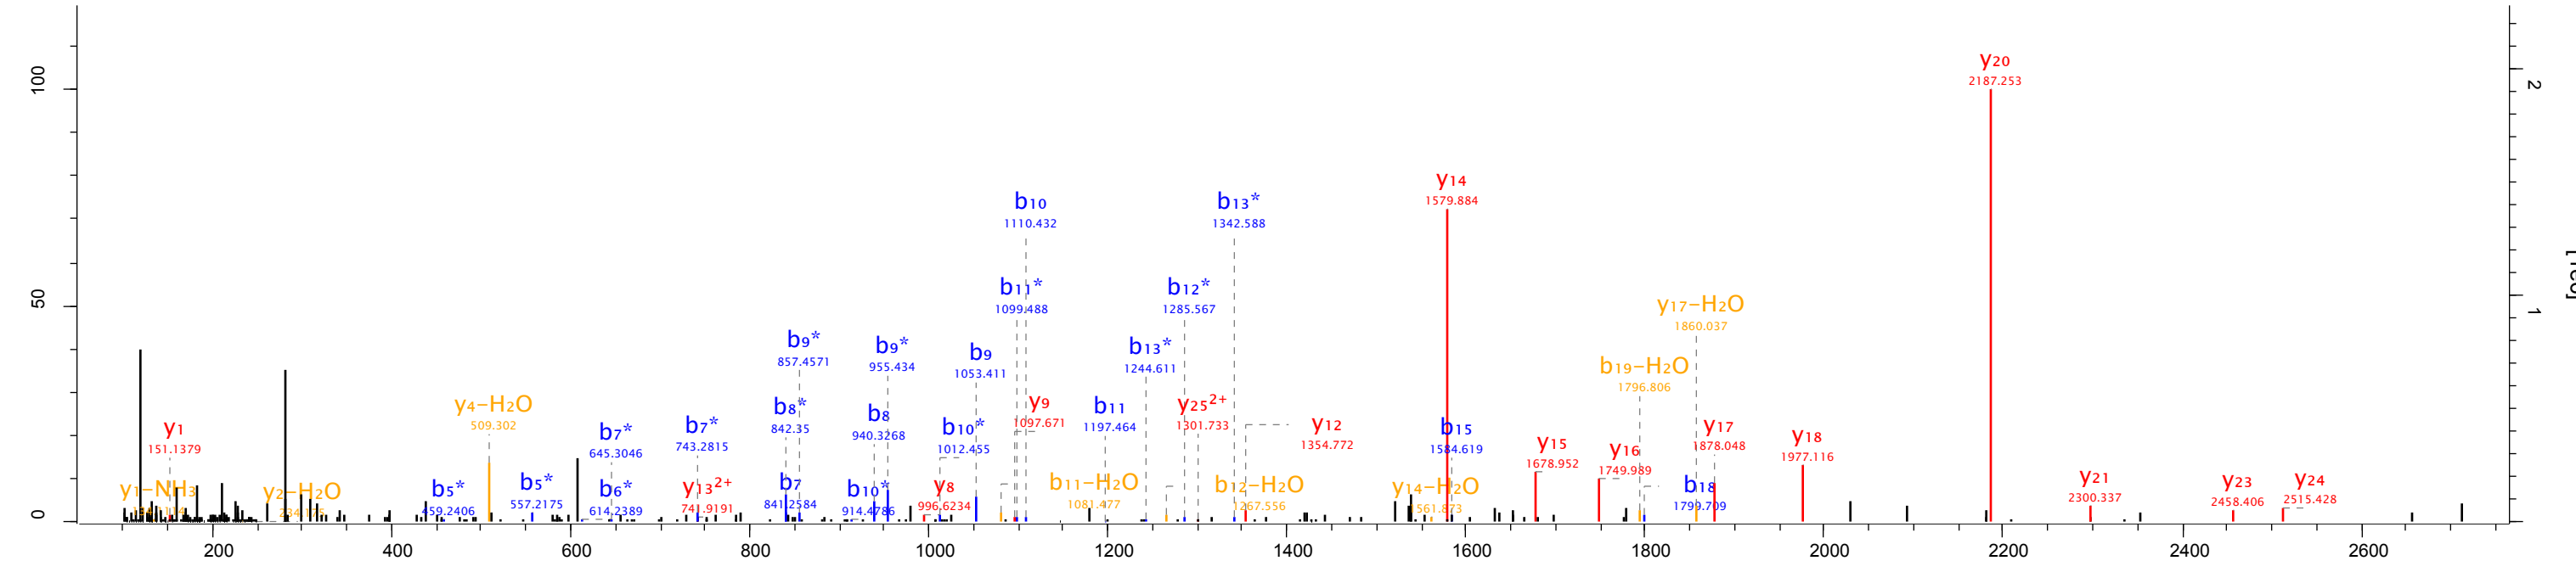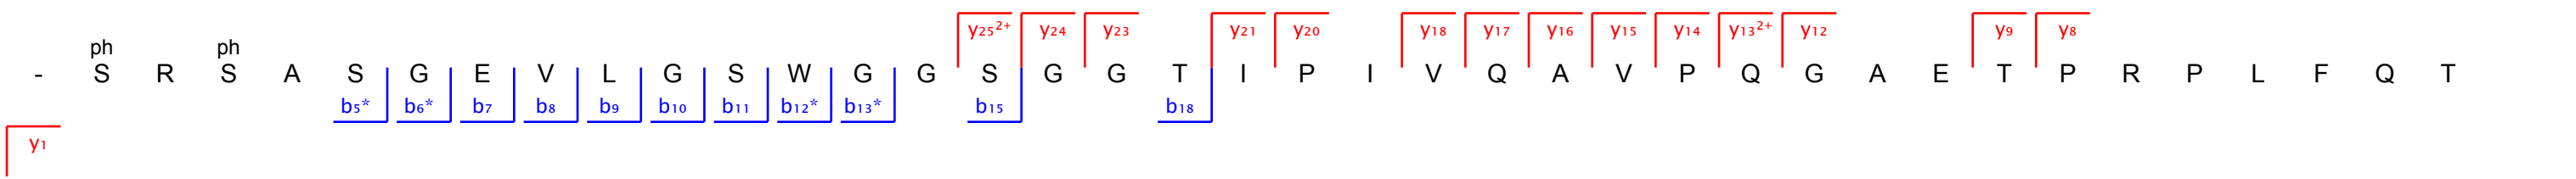

Raw file 20150812\_A375SR\_Phospho\_BR1\_03 Scan 28560 Method FTMS; HCD Score 64.65 m/z 1012.49 Gene names KMT2C

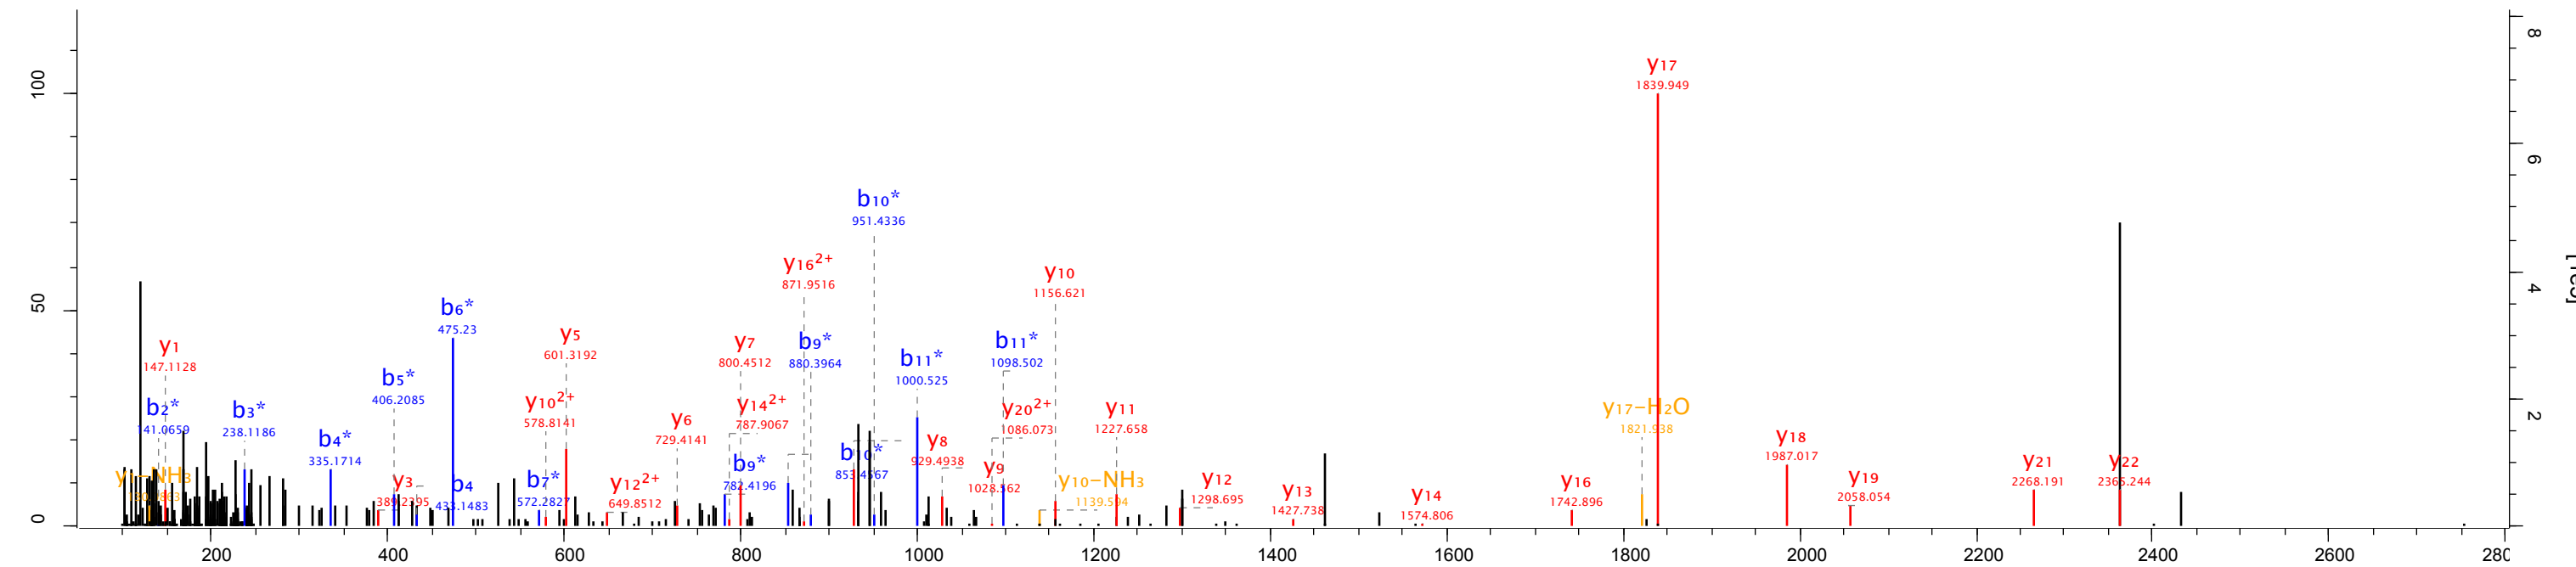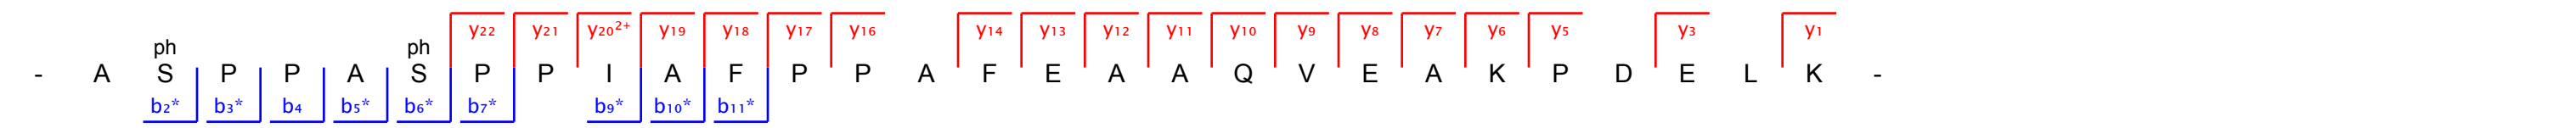

Raw file: 20150812\_A375SR\_Phospho\_BR1\_03  
 Scan: 28610 Method: FTMS; HCD Score: 73.37 m/z: 1127.81 Gene names: MICAL3

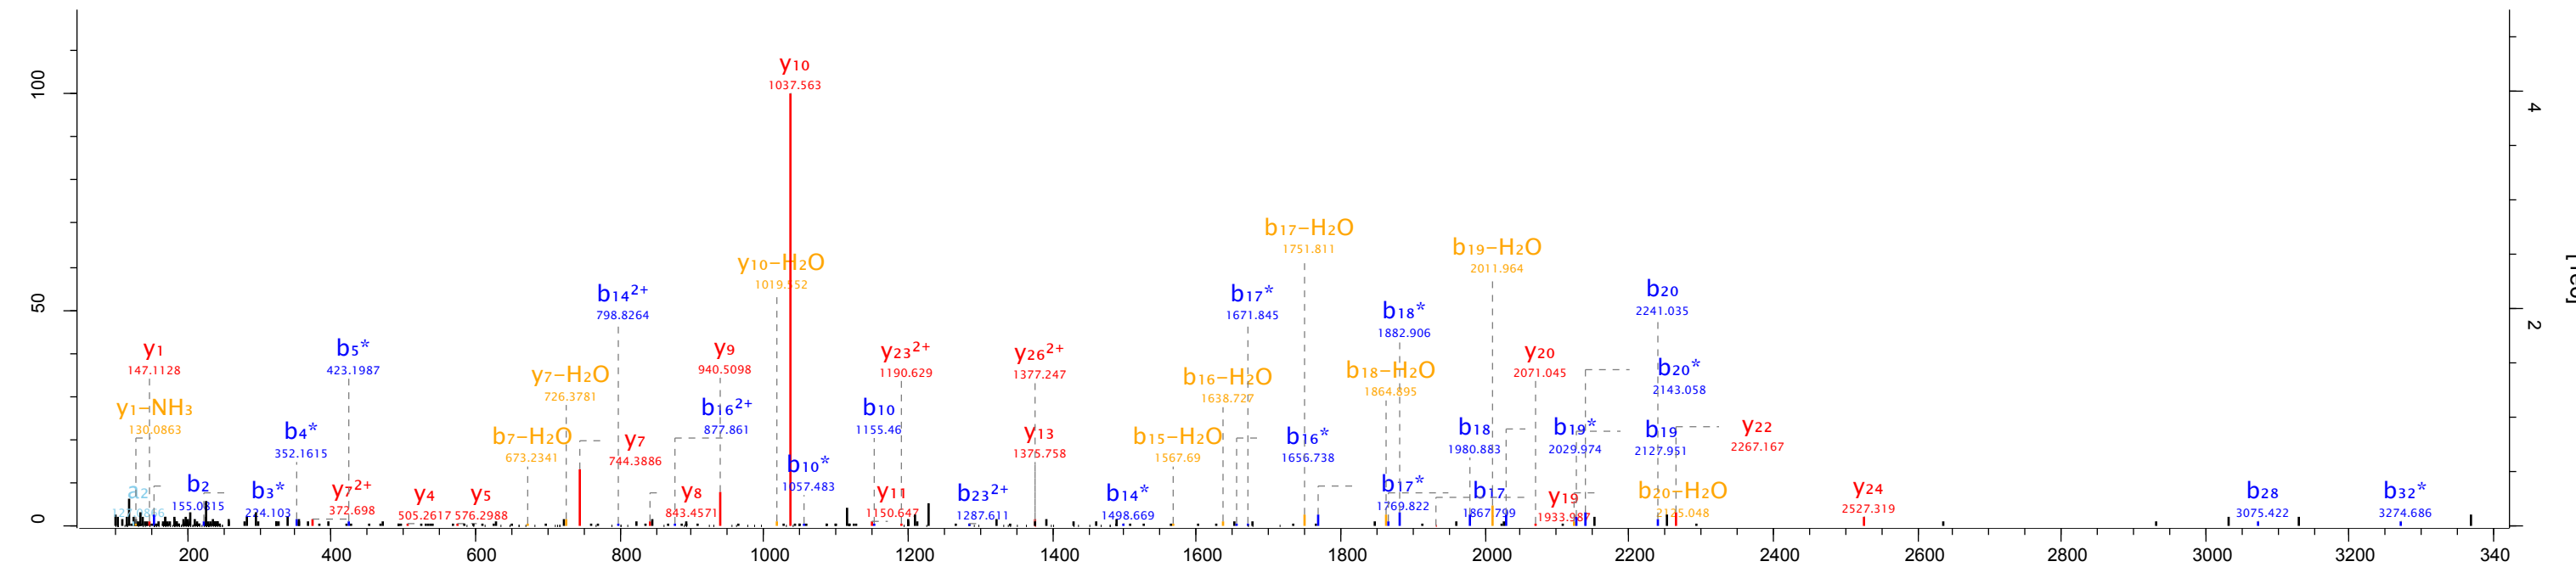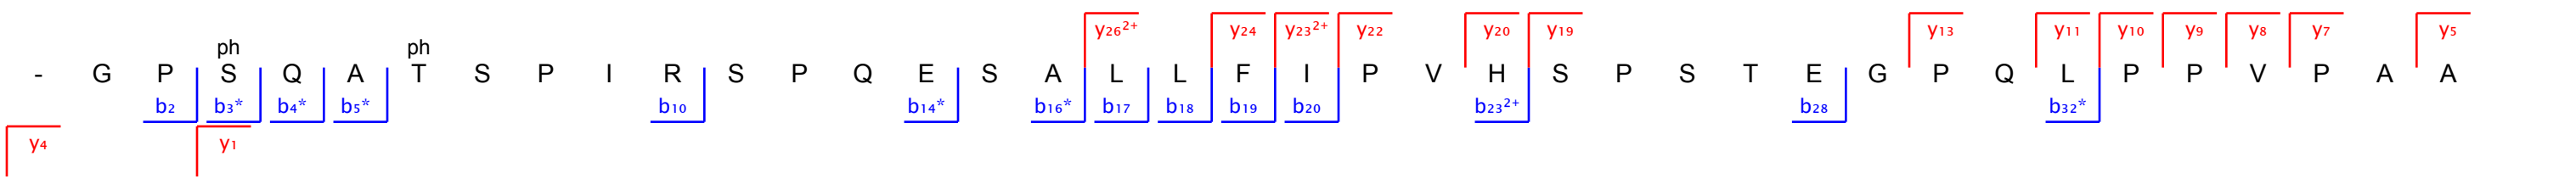

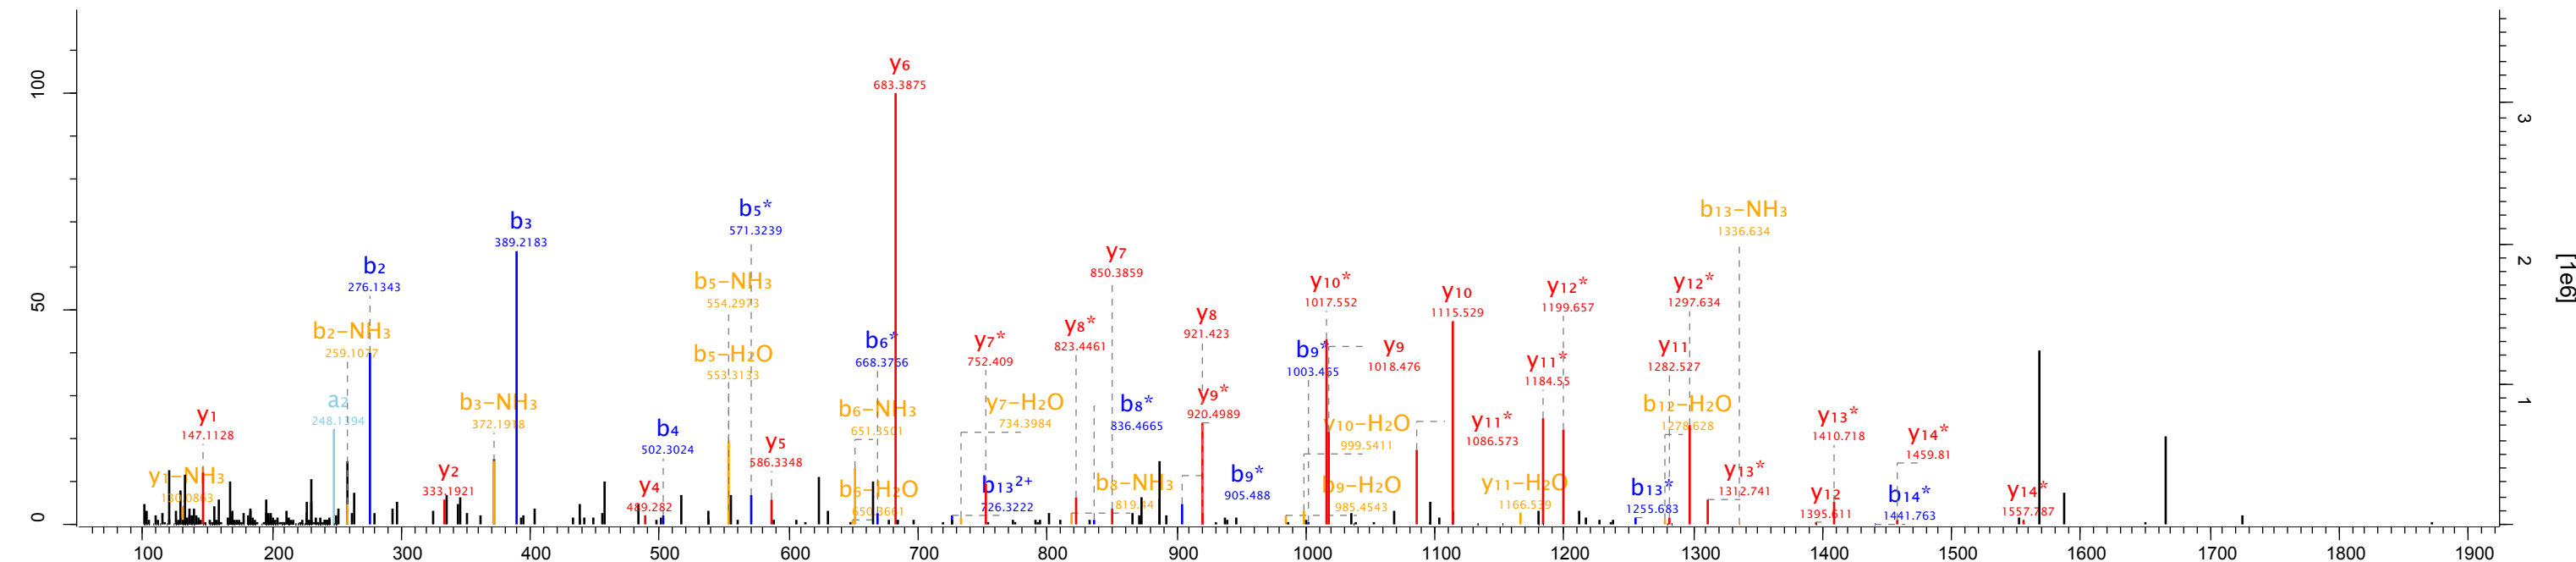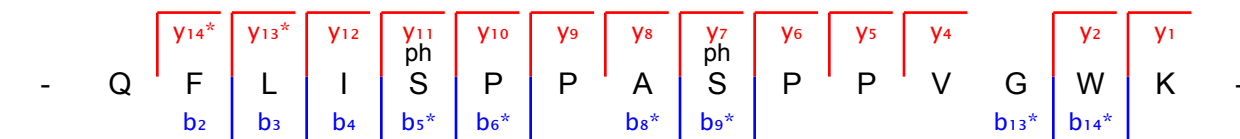

Raw file: 20150812\_A375SR\_Phospho\_BR1\_03  
 Scan: 2990 Method: FTMS; HCD Score: 81.88 m/z: 605.88 Gene names: GYS1

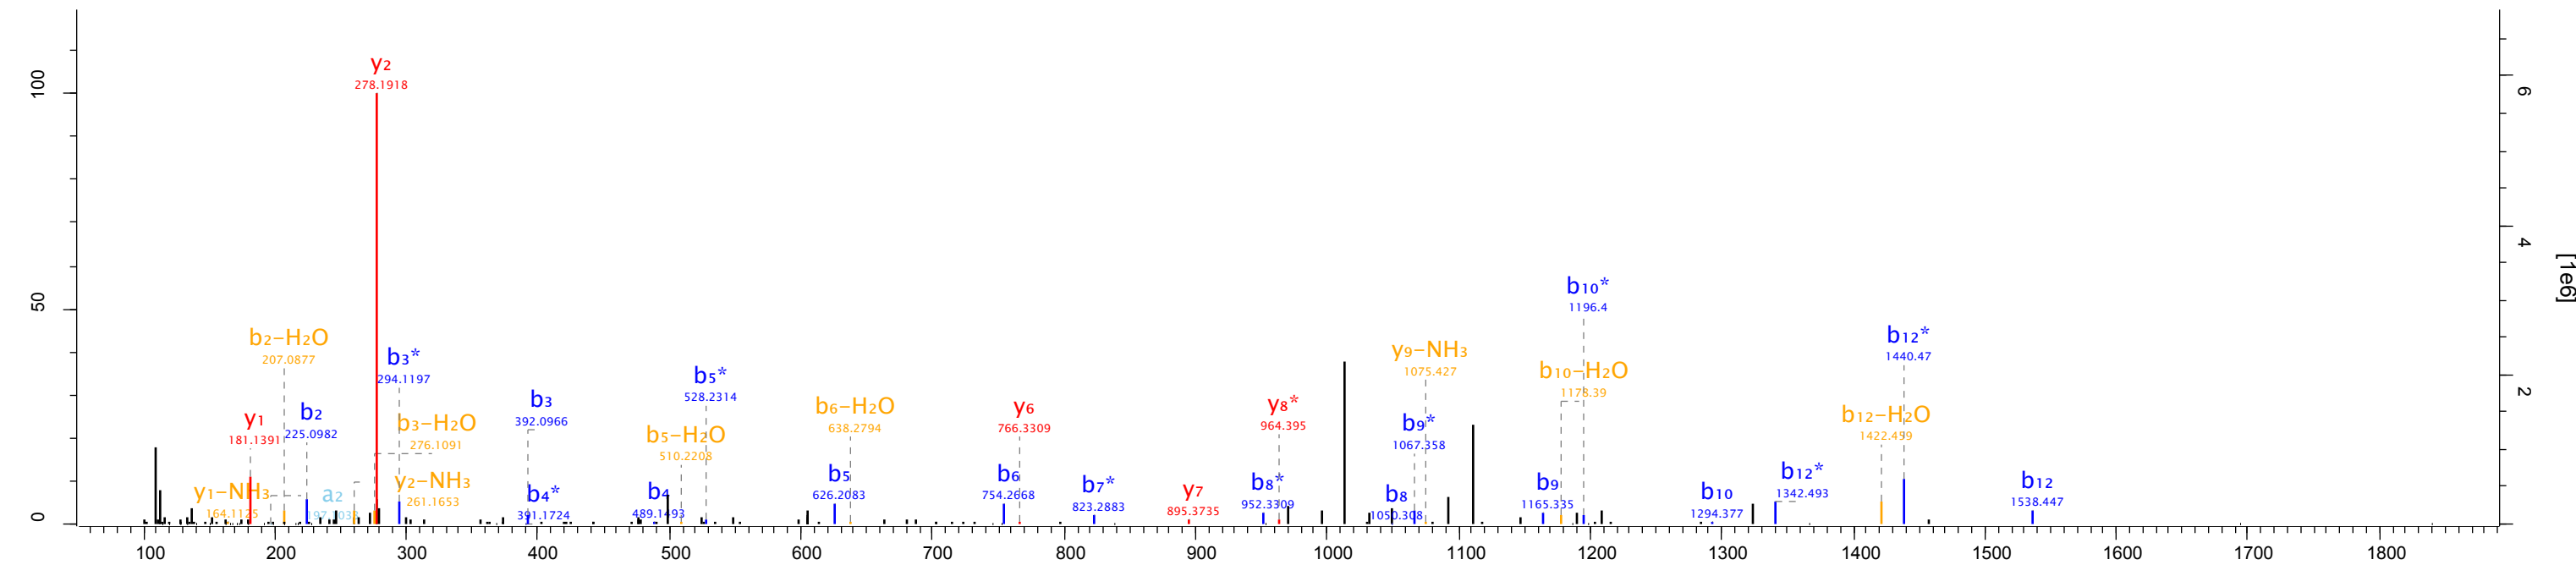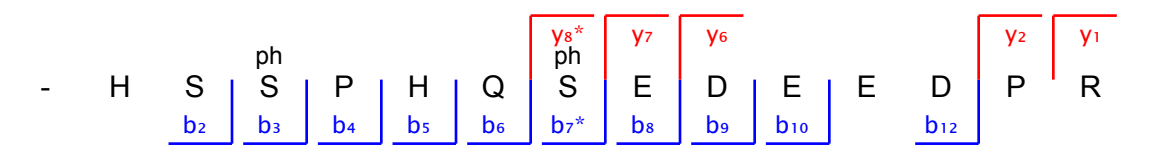

Raw file: 20150812\_A375SR\_Phospho\_BR1\_03  
 Scan: 3030 Method: FTMS; HCD Score: 103.11 m/z: 457.53 Gene names: BUD13

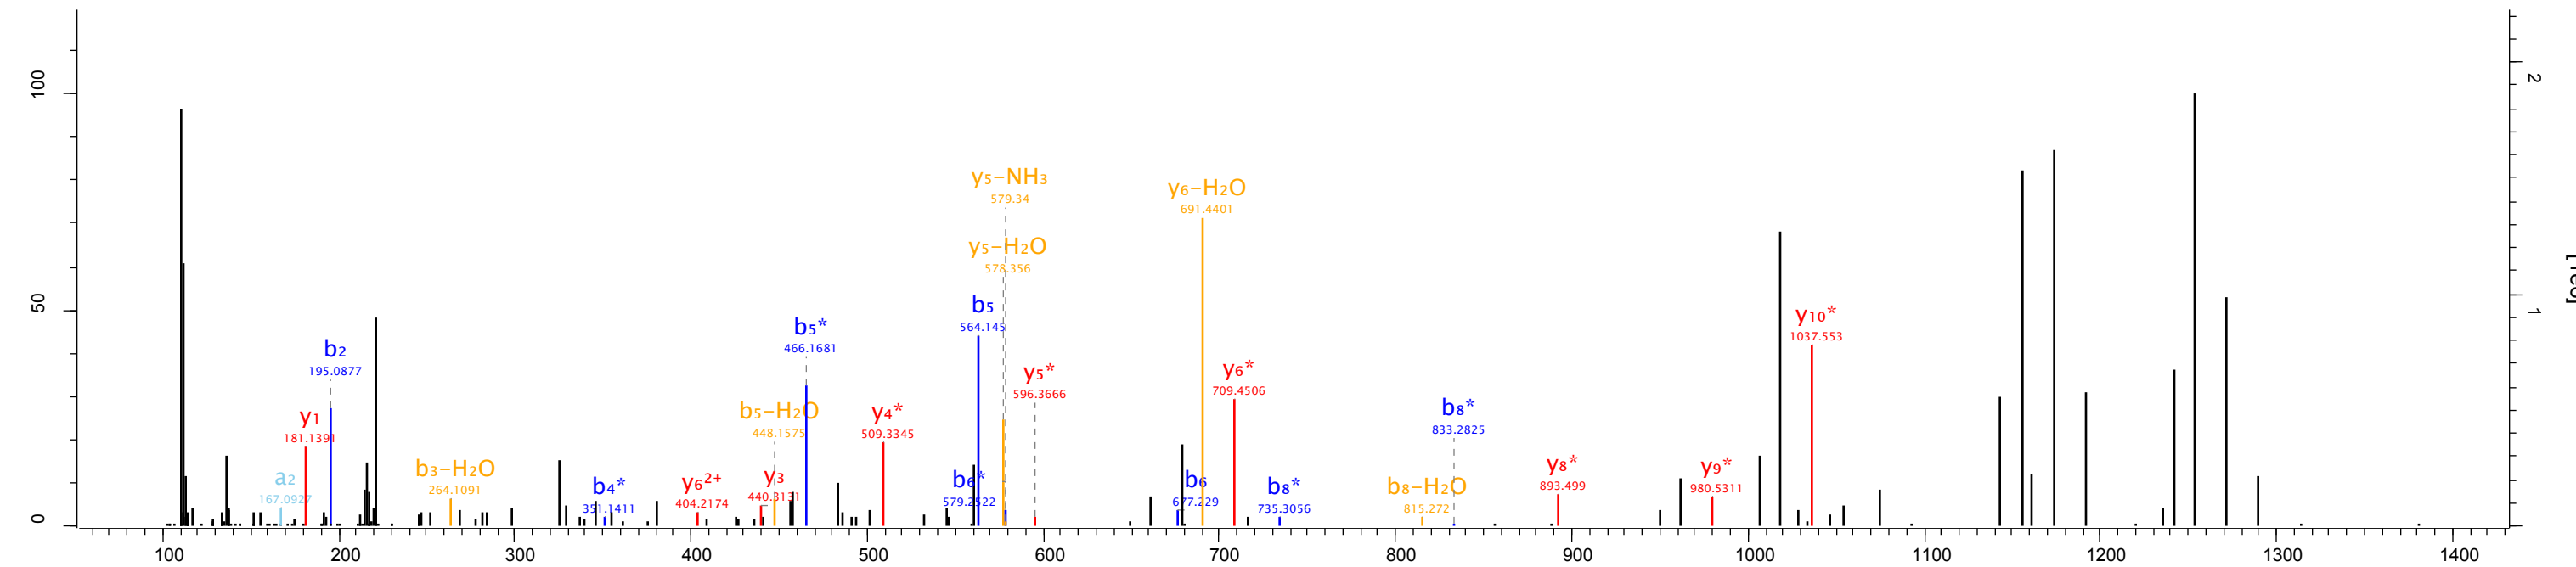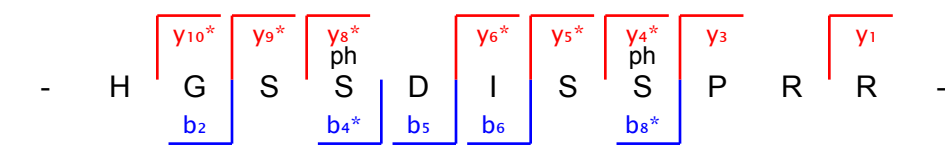

Raw file 20150812\_A375SR\_Phospho\_BR1\_03 Scan 3190 Method FTMS; HCD Score 176.7 m/z 818.32 Gene names PCMI

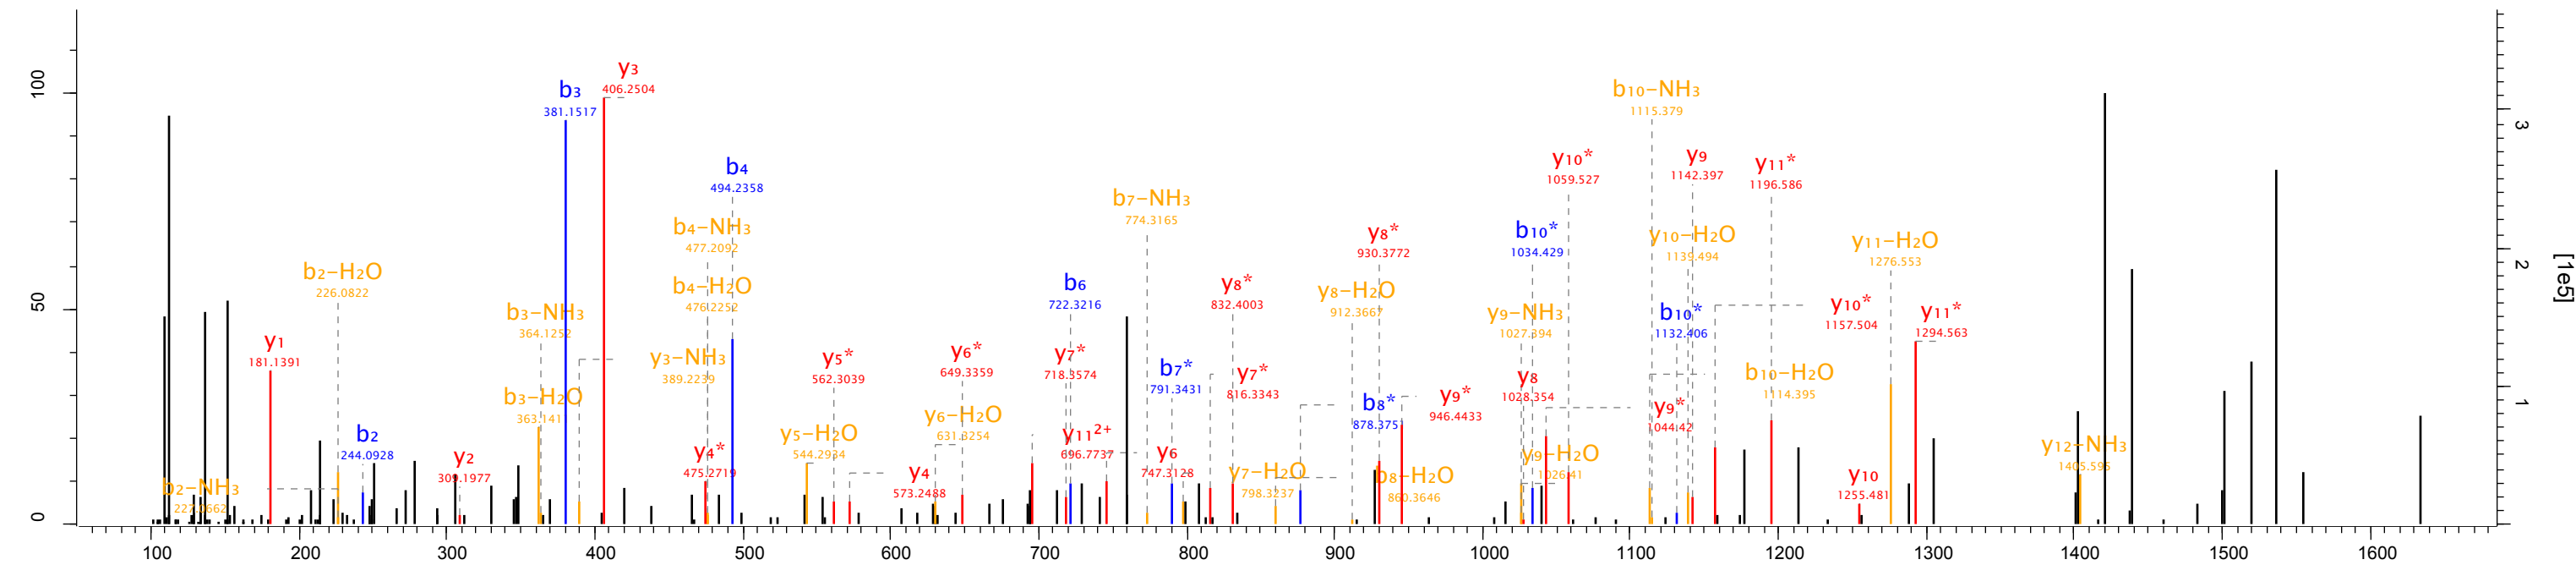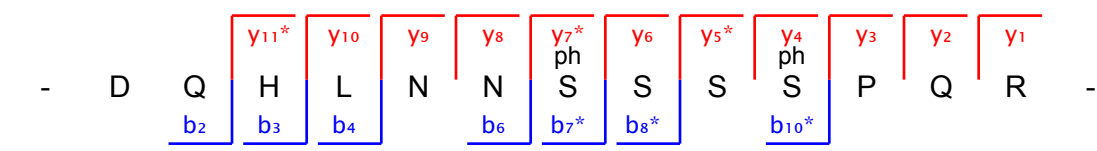

Raw file 20150812\_A375SR\_Phospho\_BR1\_03 Scan 3290 Method FTMS; HCD Score 85.29 m/z 674.81 Gene names PBRM1

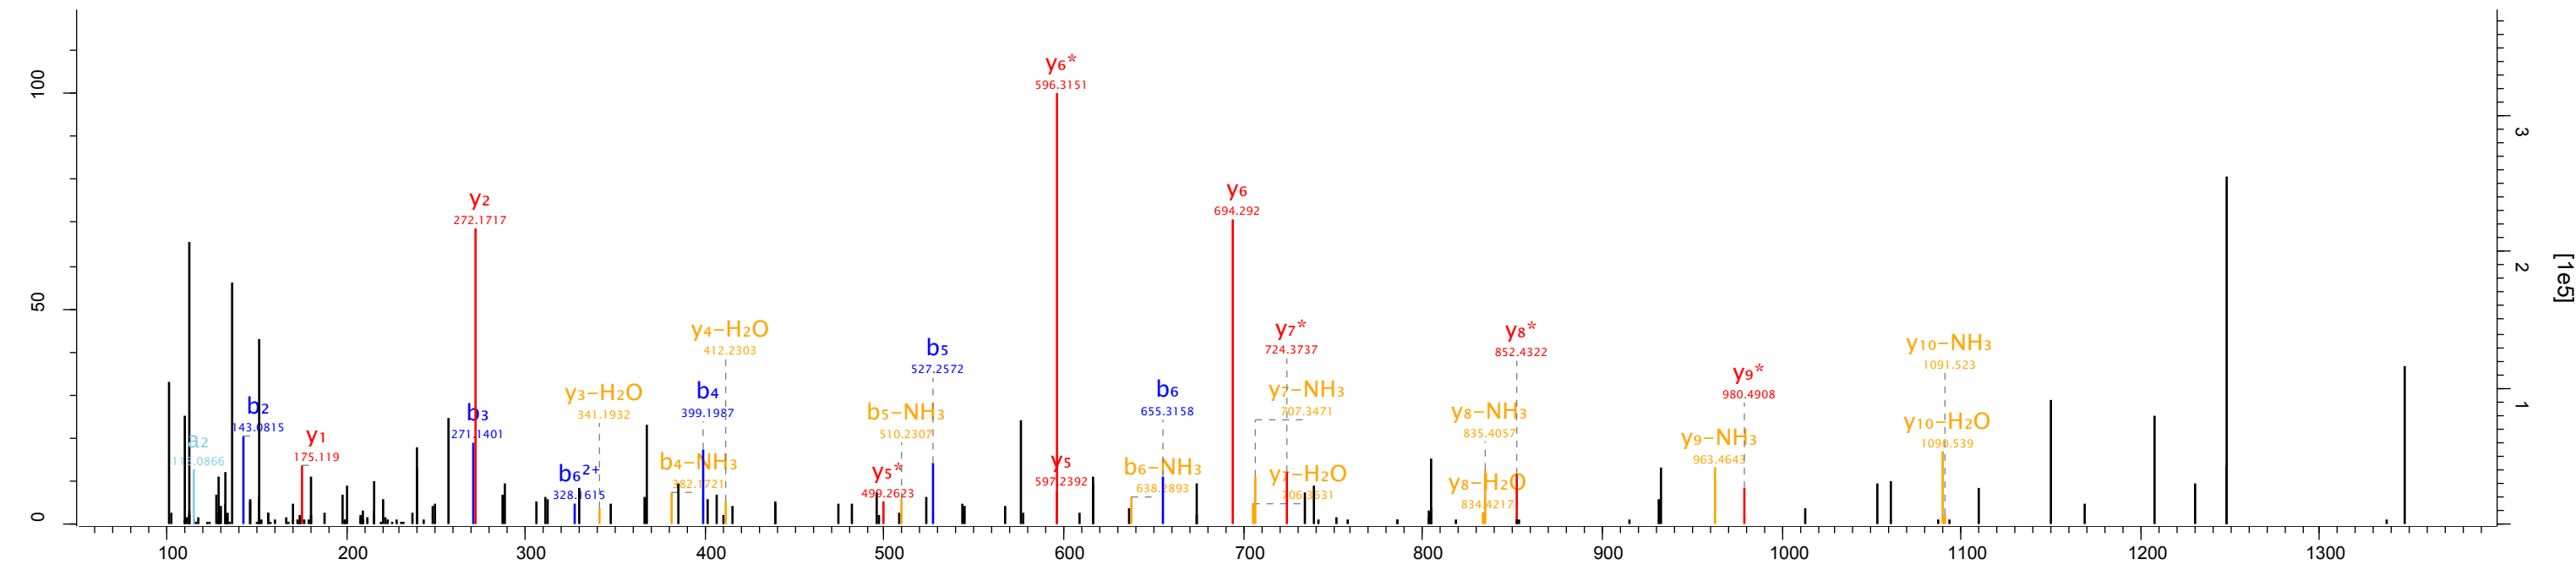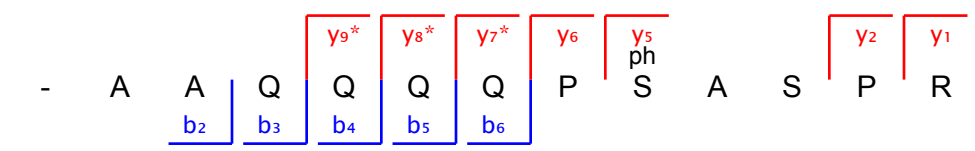



Raw file: 20150812\_A375SR\_Phospho\_BR1\_03  
 Scan: 3620 Method: FTMS; HCD Score: 367.26 m/z: 1066.91 Gene names: HNRNPD

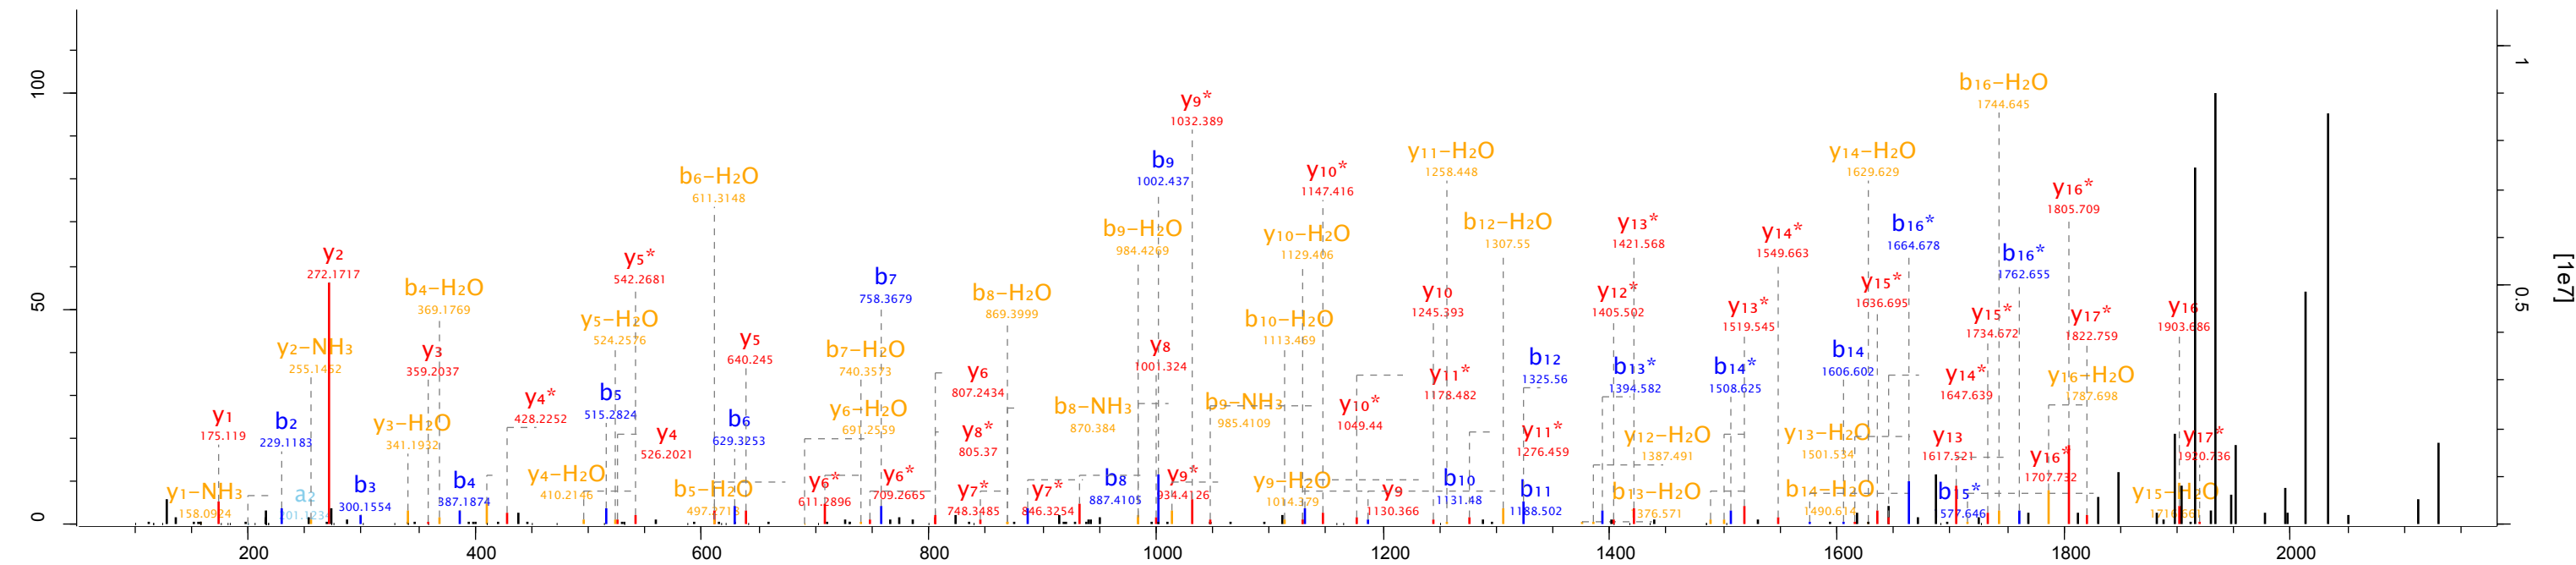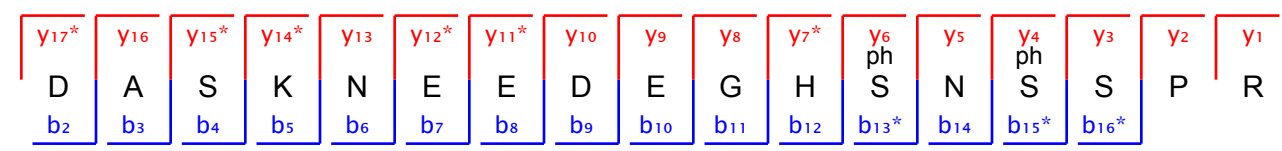

Raw file: 20150812\_A375SR\_Phospho\_BR1\_03  
 Scan: 3680 Method: FTMS; HCD Score: 93.86 m/z: 588.23 Gene names: SRSF5

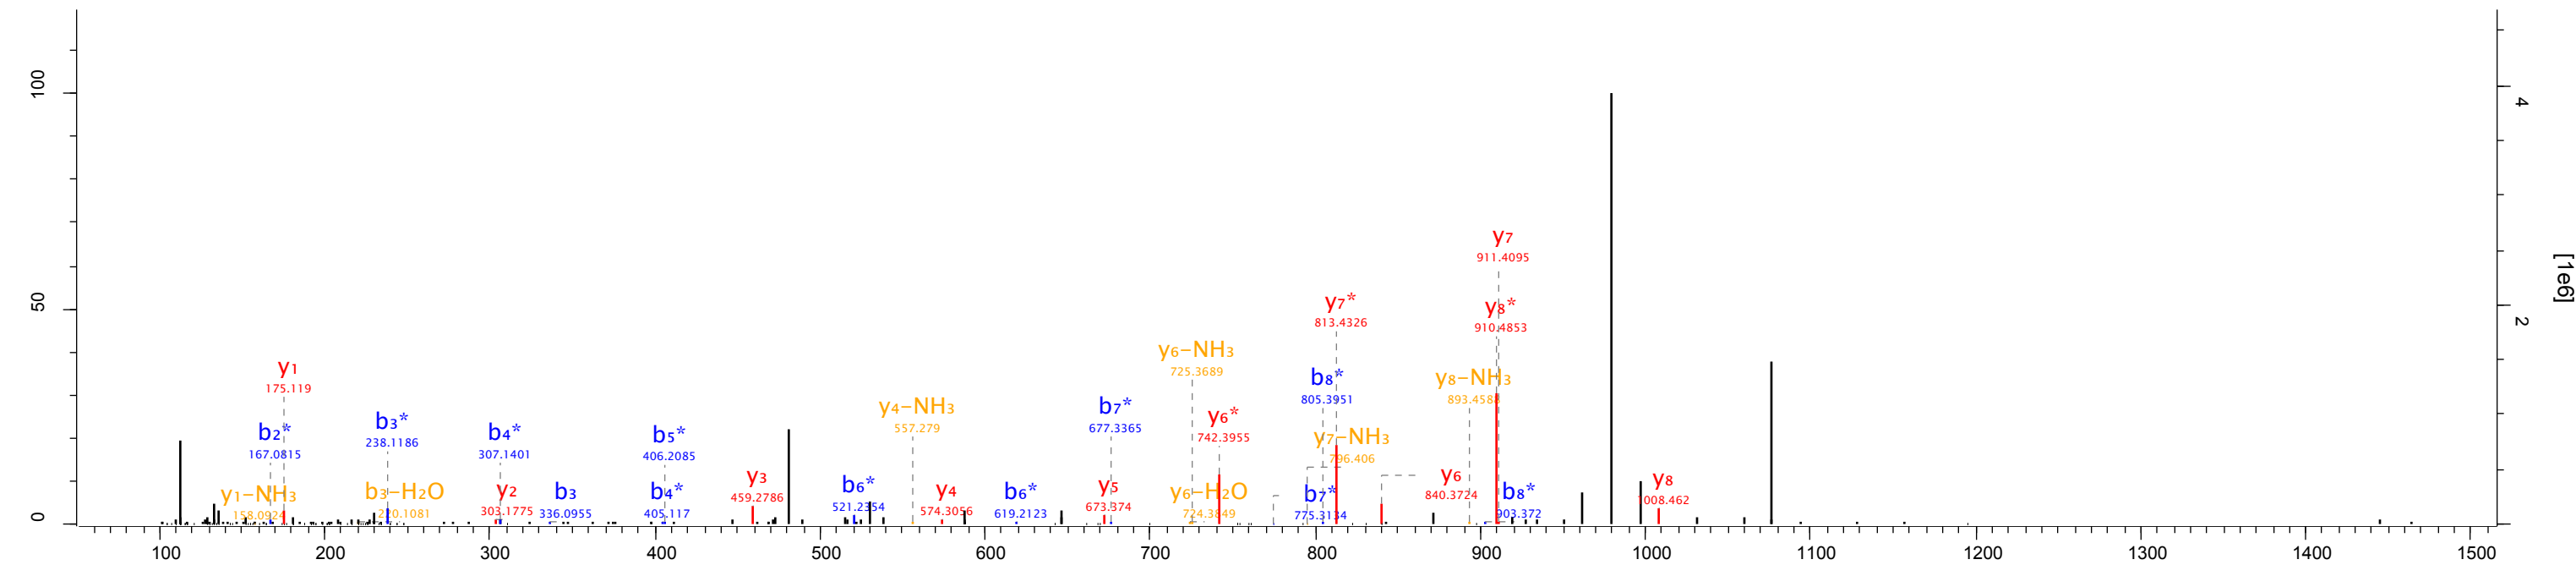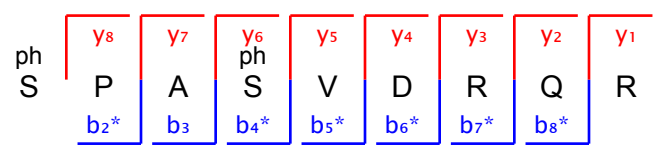

Raw file  
 20150812\_A375SR\_Phospho\_BR1\_03  
 Scan 5190 Method FTMS; HCD Score 60.13 m/z 840.38 Gene names CAST

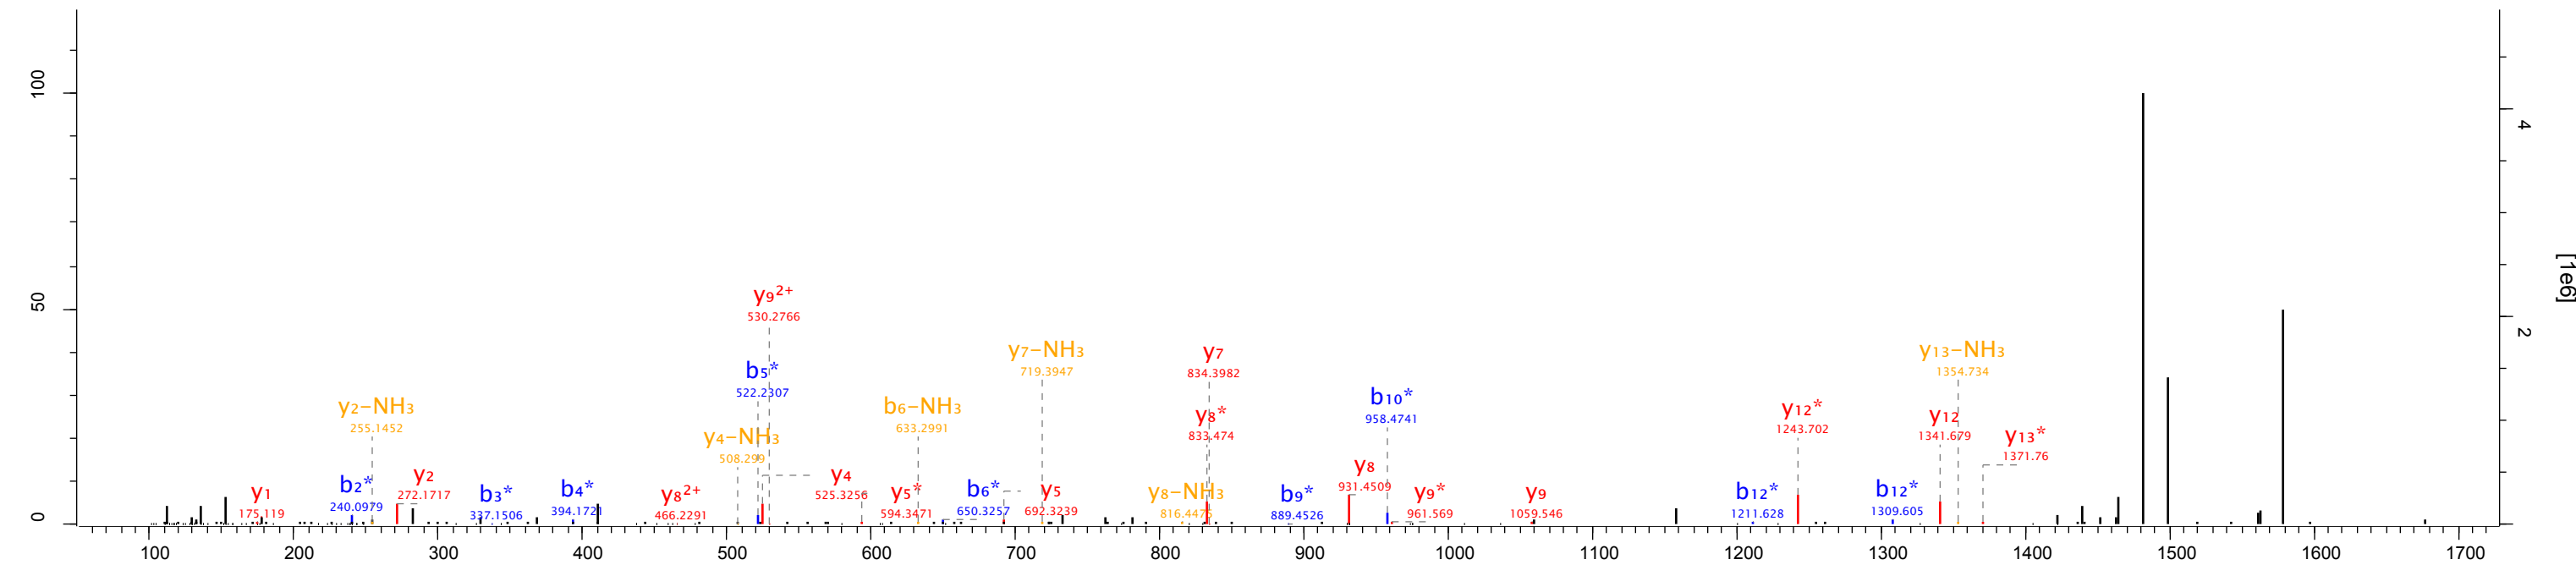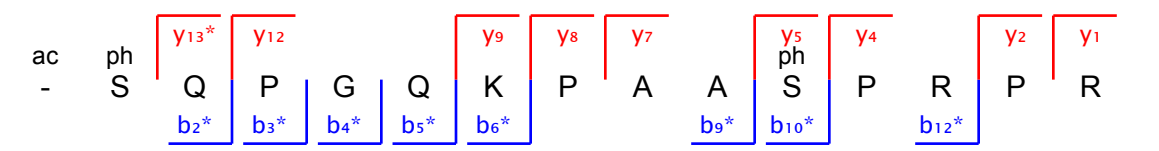

Raw file Scan Method Score m/z Gene names  
 20150812\_A375SR\_Phospho\_BR1\_03 5500 FTMS; HCD 171.07 620.8 RANBP2

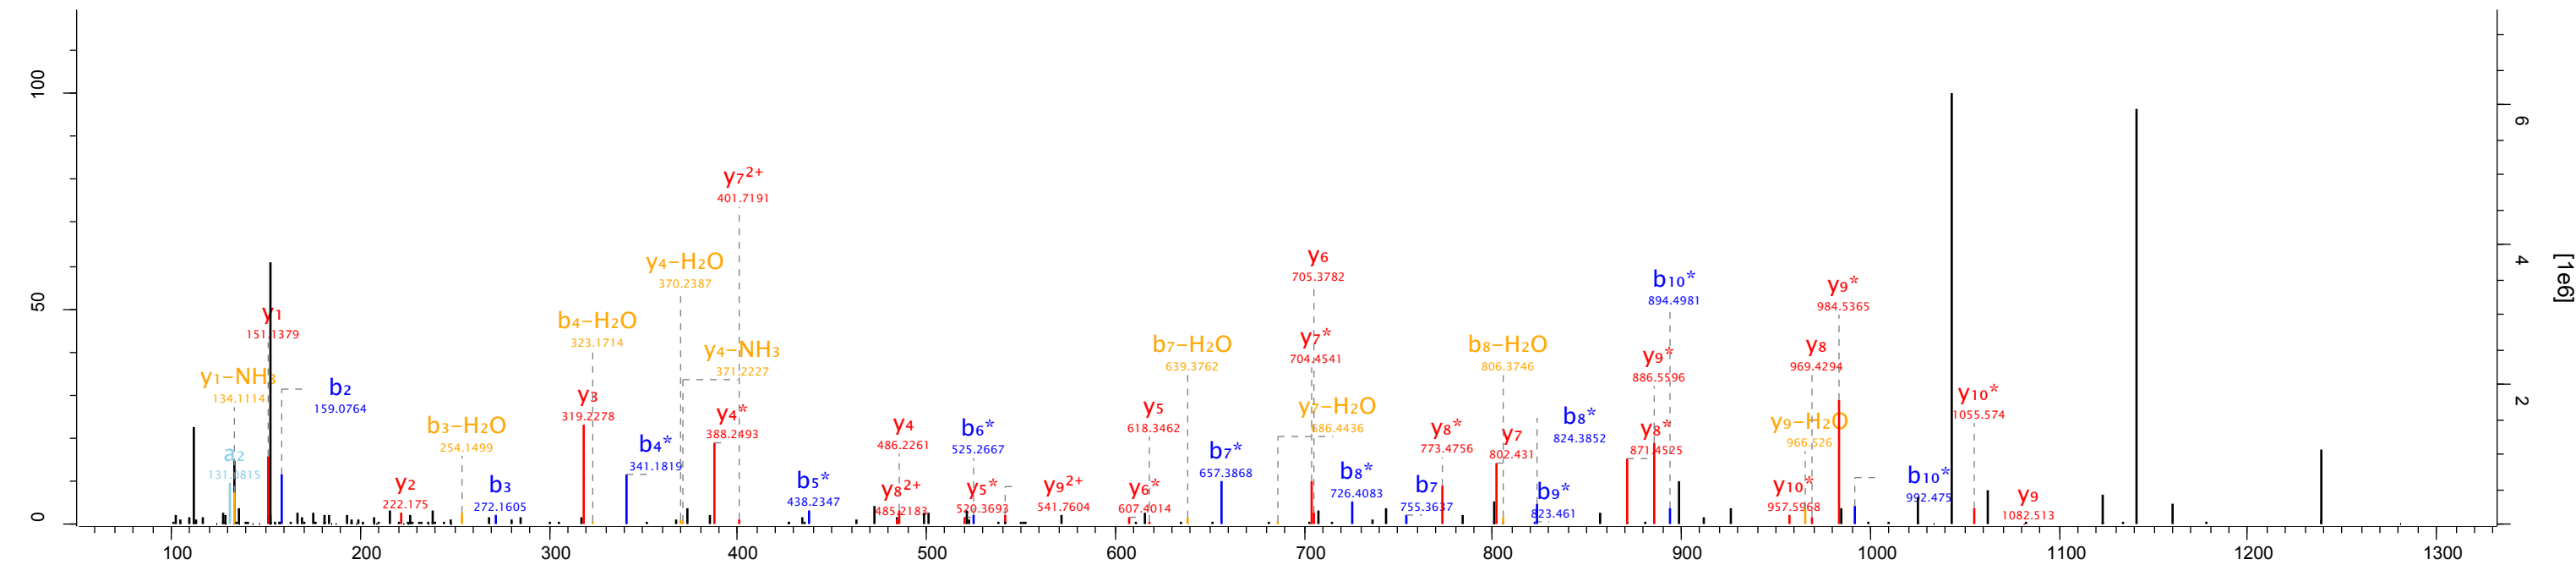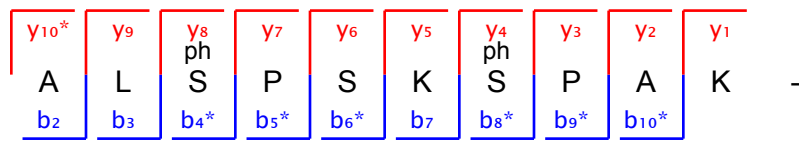

Raw file: 20150812\_A375SR\_Phospho\_BR1\_03  
 Scan: 6130 Method: FTMS; HCD Score: 96.29 m/z: 670.34 Gene names: MYBBP1A

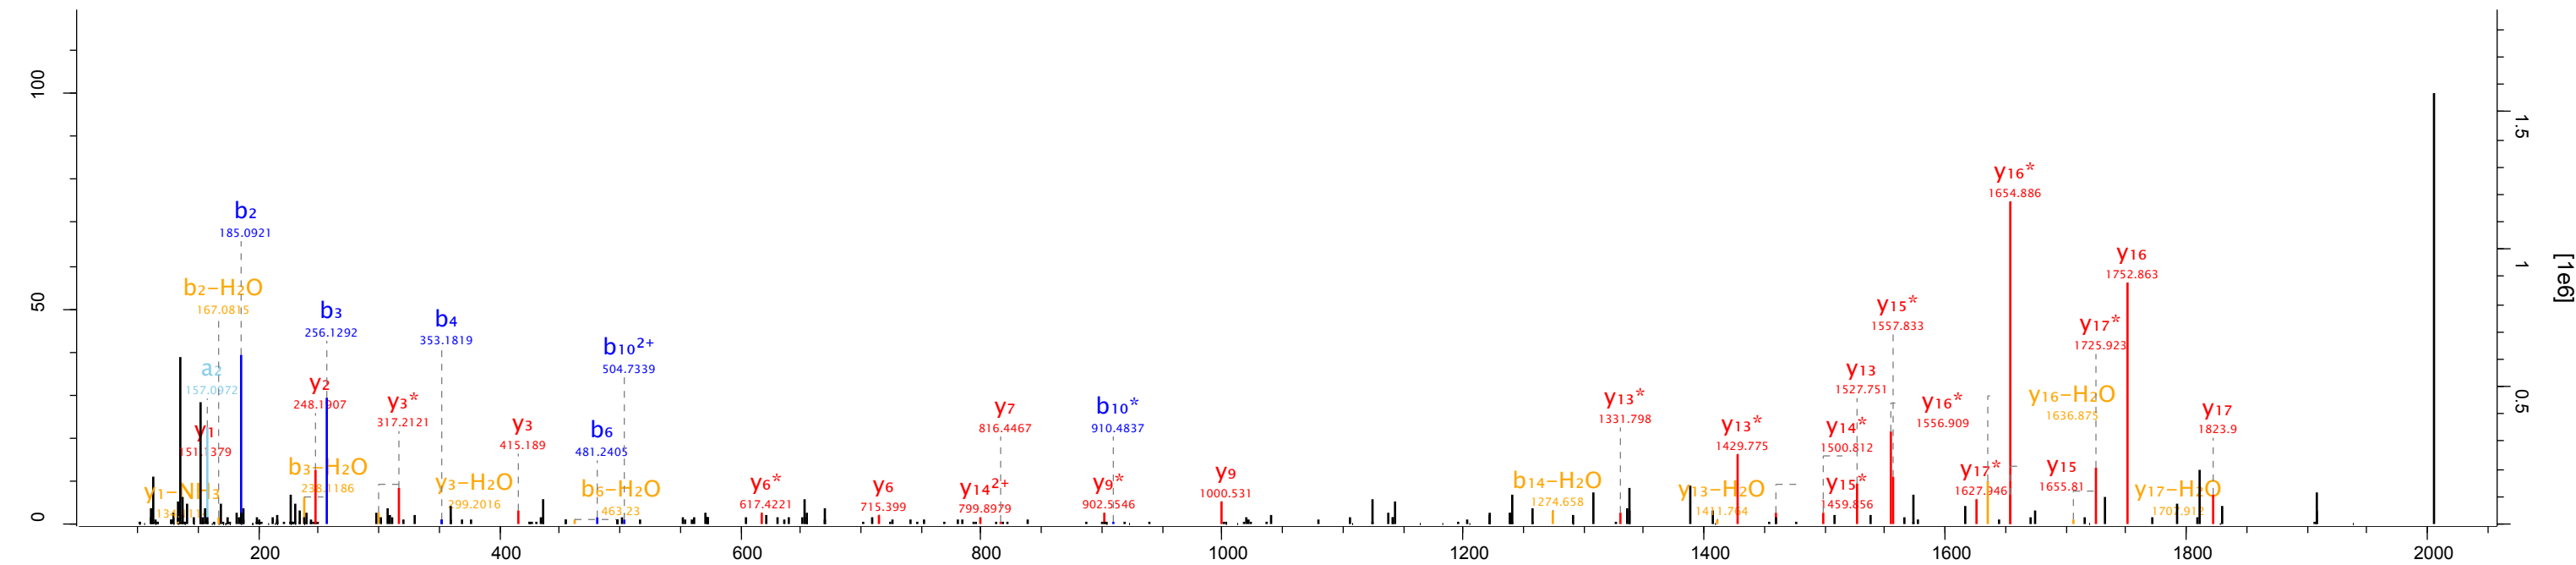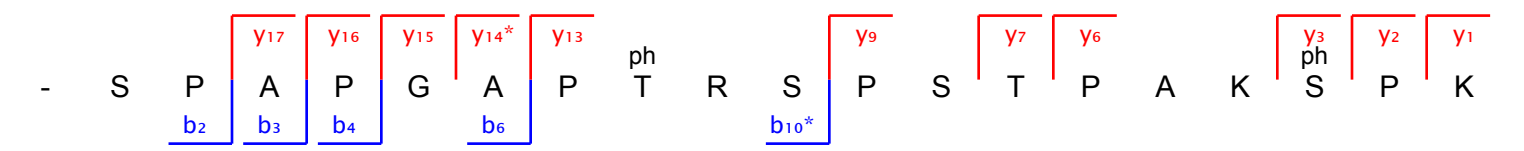

Raw file 20150812\_A375SR\_Phospho\_BR1\_03 Scan 6320 Method FTMS; HCD Score 121.44 m/z 583.55 Gene names ZCCHC2

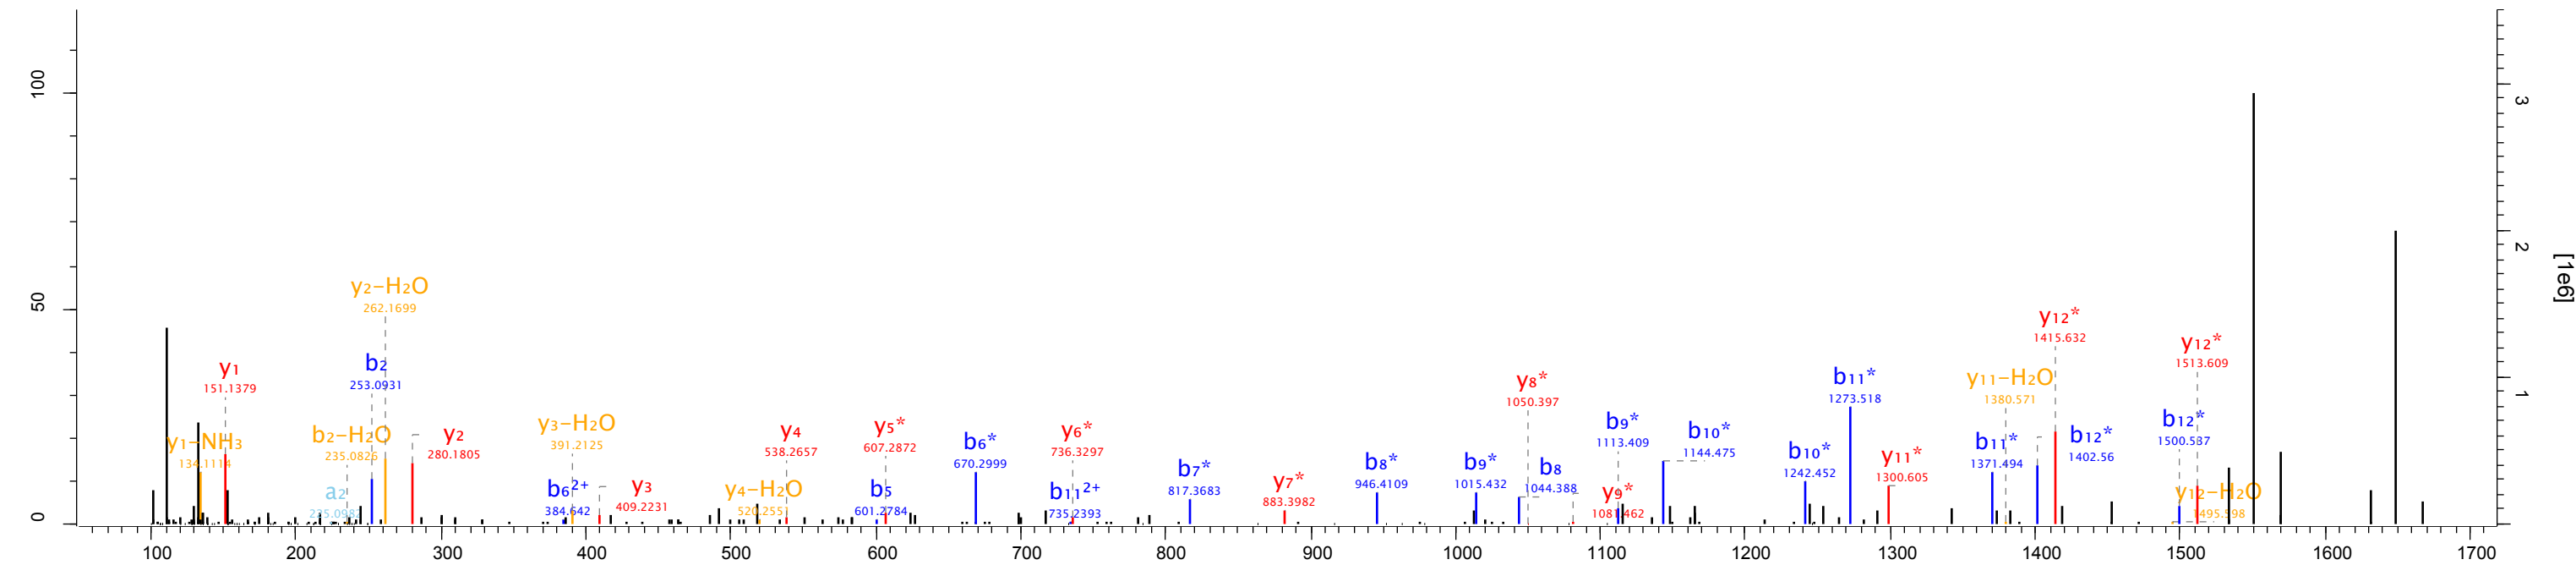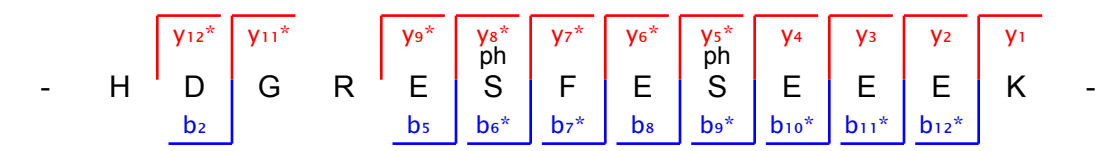

Raw file: 20150812\_A375SR\_Phospho\_BR1\_03  
 Scan: 6380 Method: FTMS; HCD Score: 323.04 m/z: 1067.42 Gene names: XR2

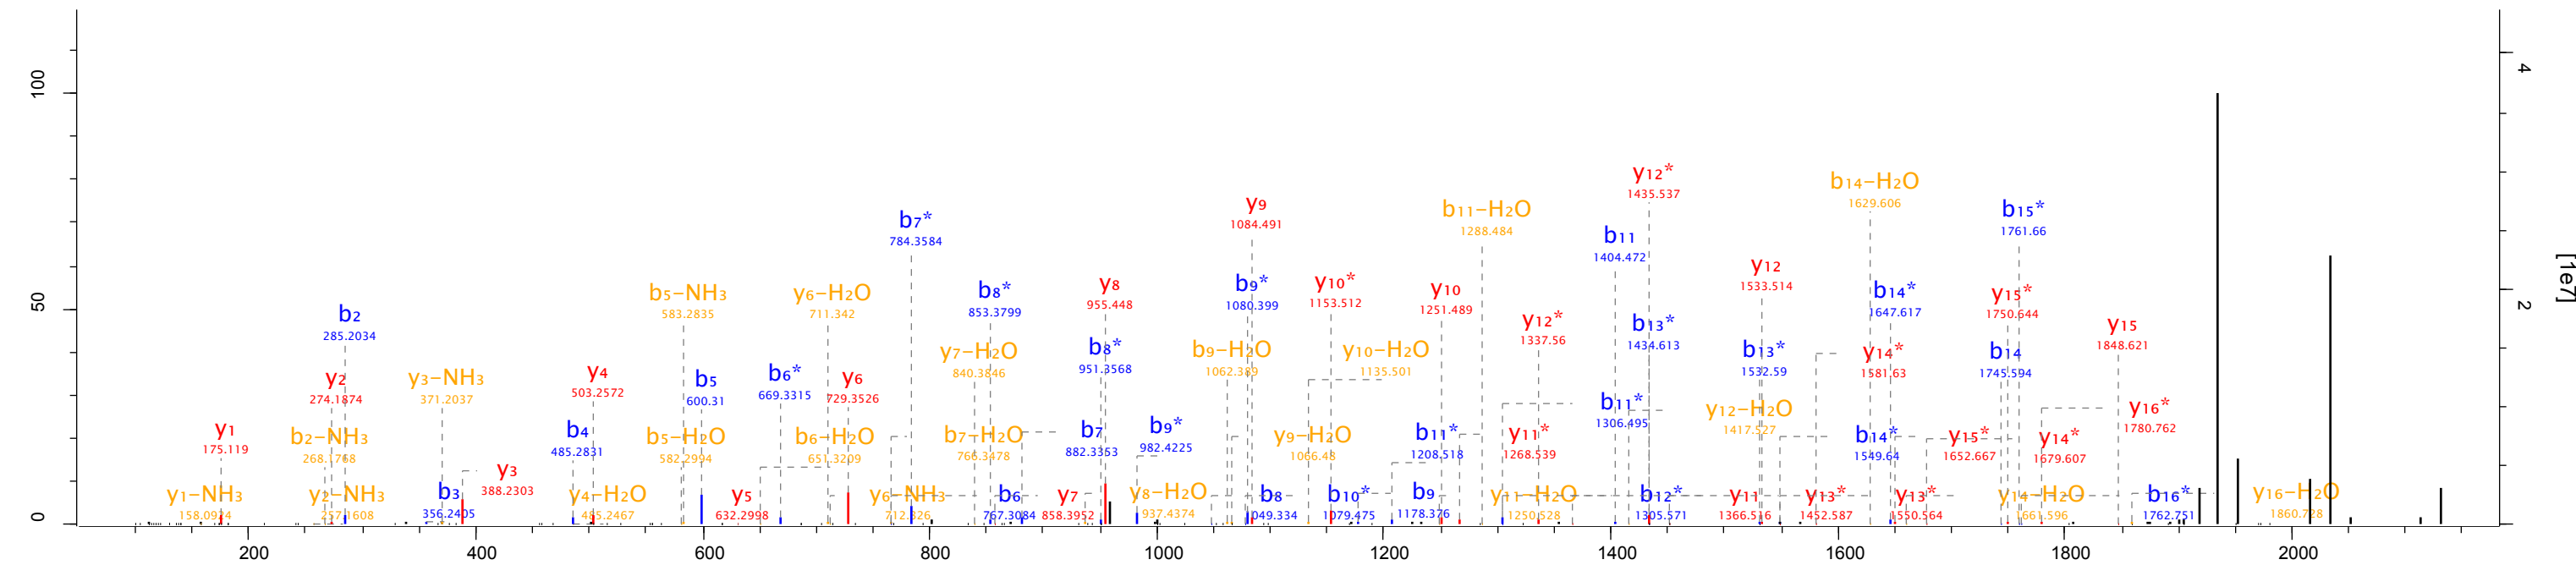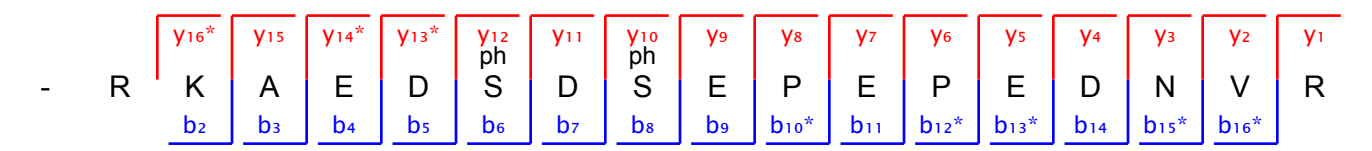

Raw file  
20150812\_A375SR\_Phospho\_BR1\_03

Scan 6480 Method FTMS; HCD Score 141.23 m/z 764.3 Gene names SH3BP2

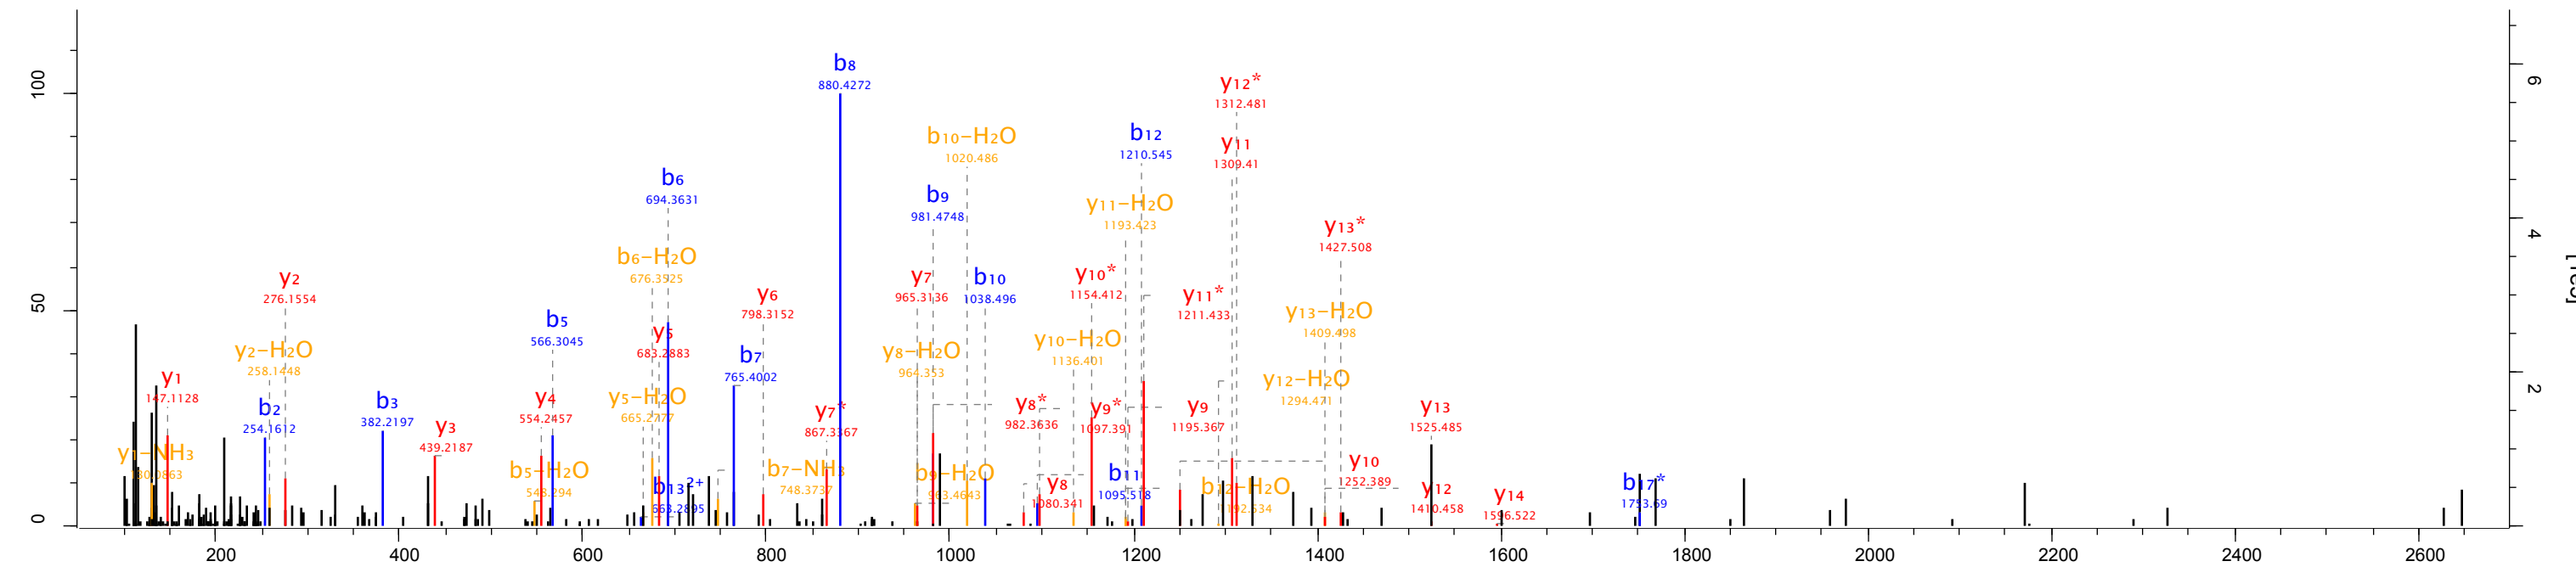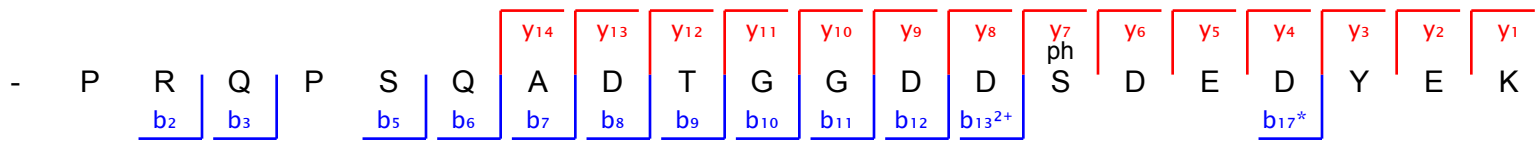



Raw file: 20150812\_A375SR\_Phospho\_BR1\_03  
 Scan: 6590 Method: FTMS; HCD Score: 54.14 m/z: 671.81 Gene names: NIFK

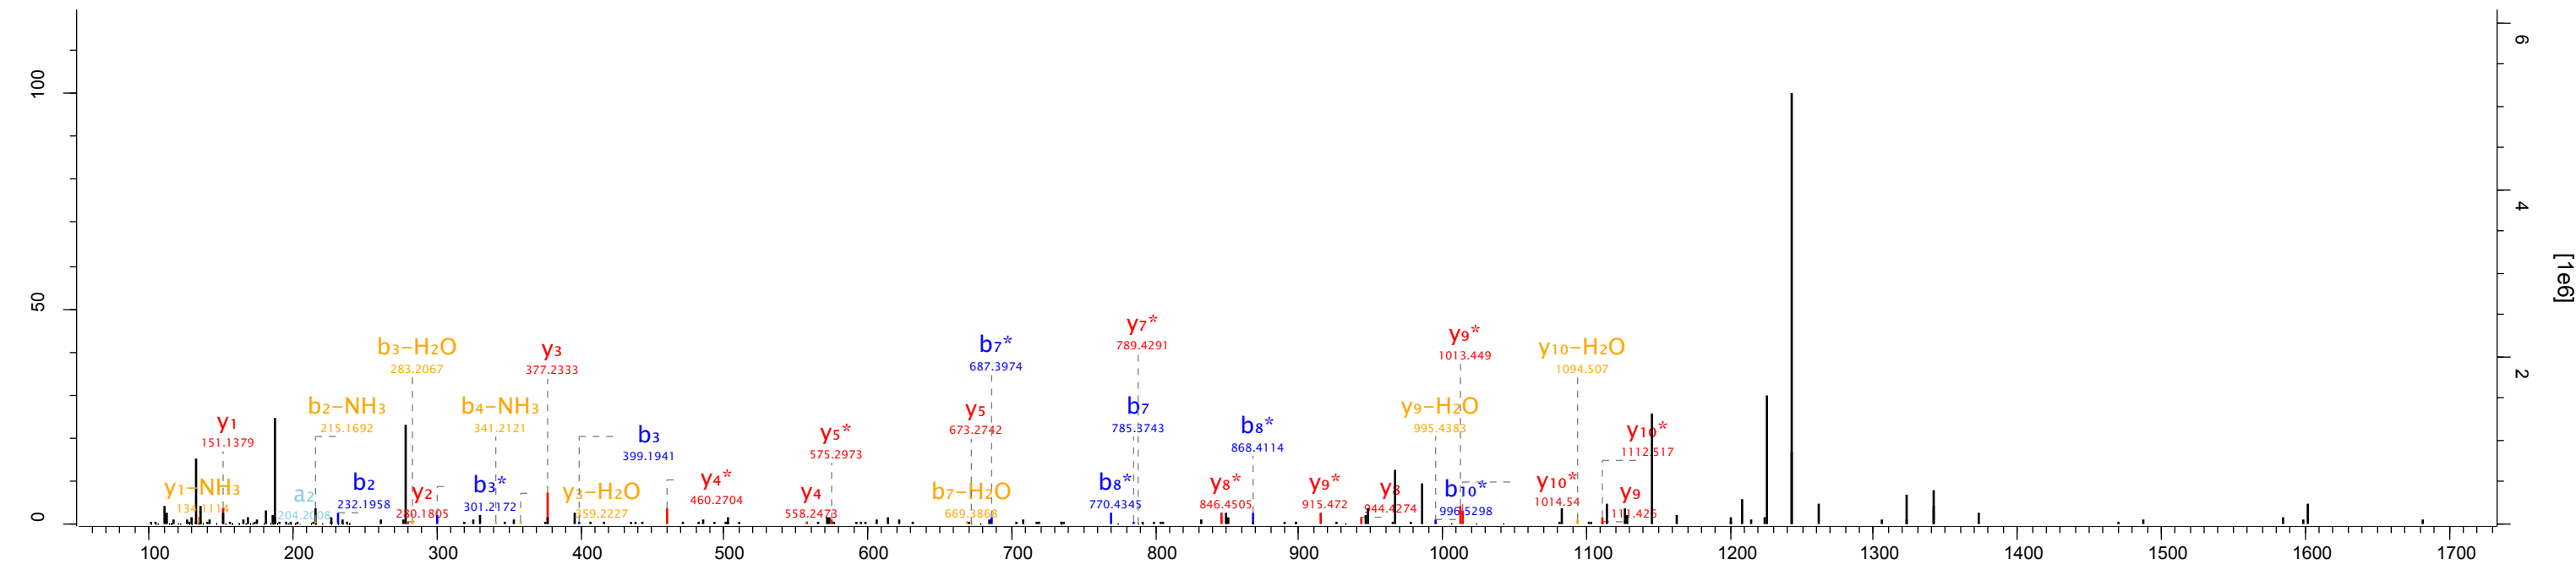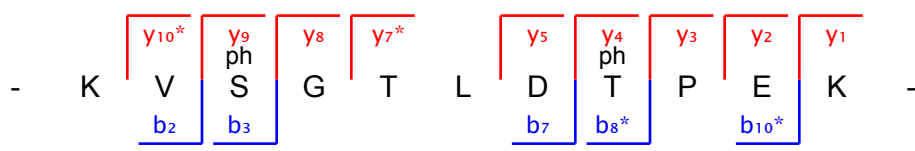

Raw file: 20150812\_A375SR\_Phospho\_BR1\_03  
 Scan: 6610 Method: FTMS; HCD Score: 173.74 m/z: 740.31 Gene names: ZNF608

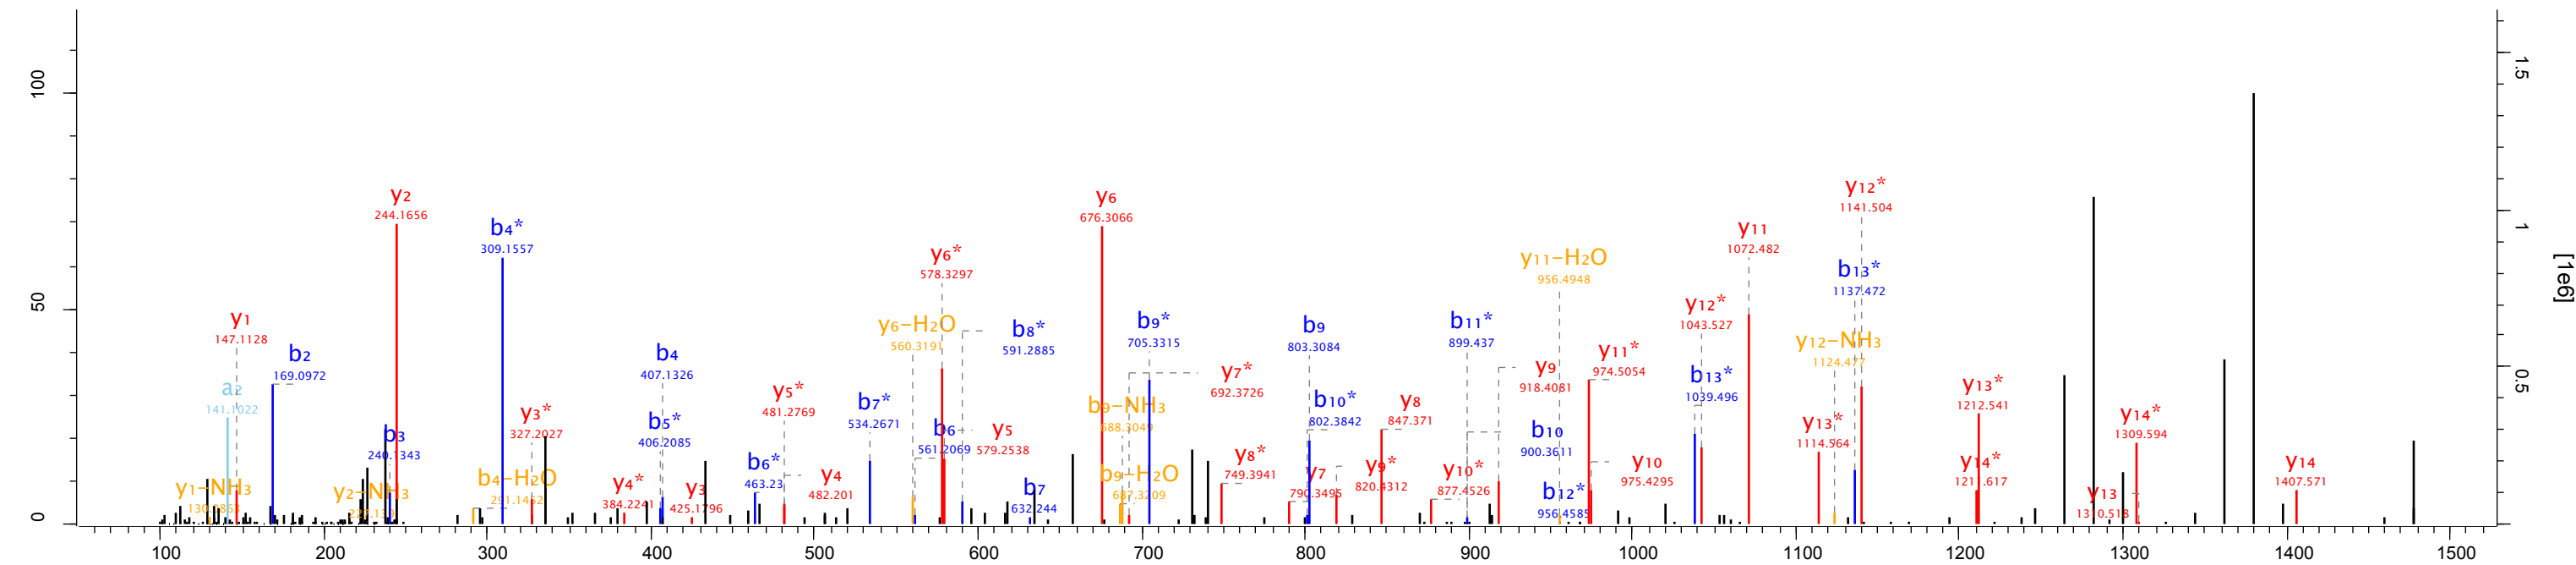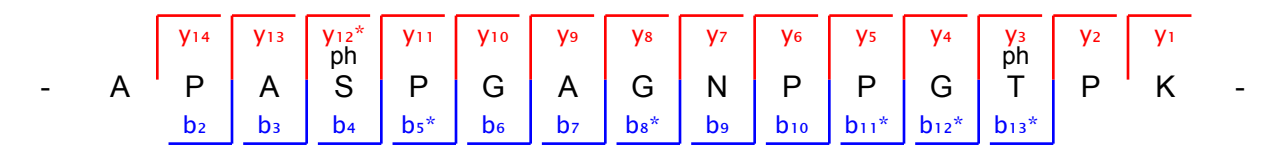

Raw file: 20150812\_A375SR\_Phospho\_BR1\_03  
 Scan: 7500 Method: FTMS; HCD Score: 96.49 m/z: 676.77 Gene names: RPRD2

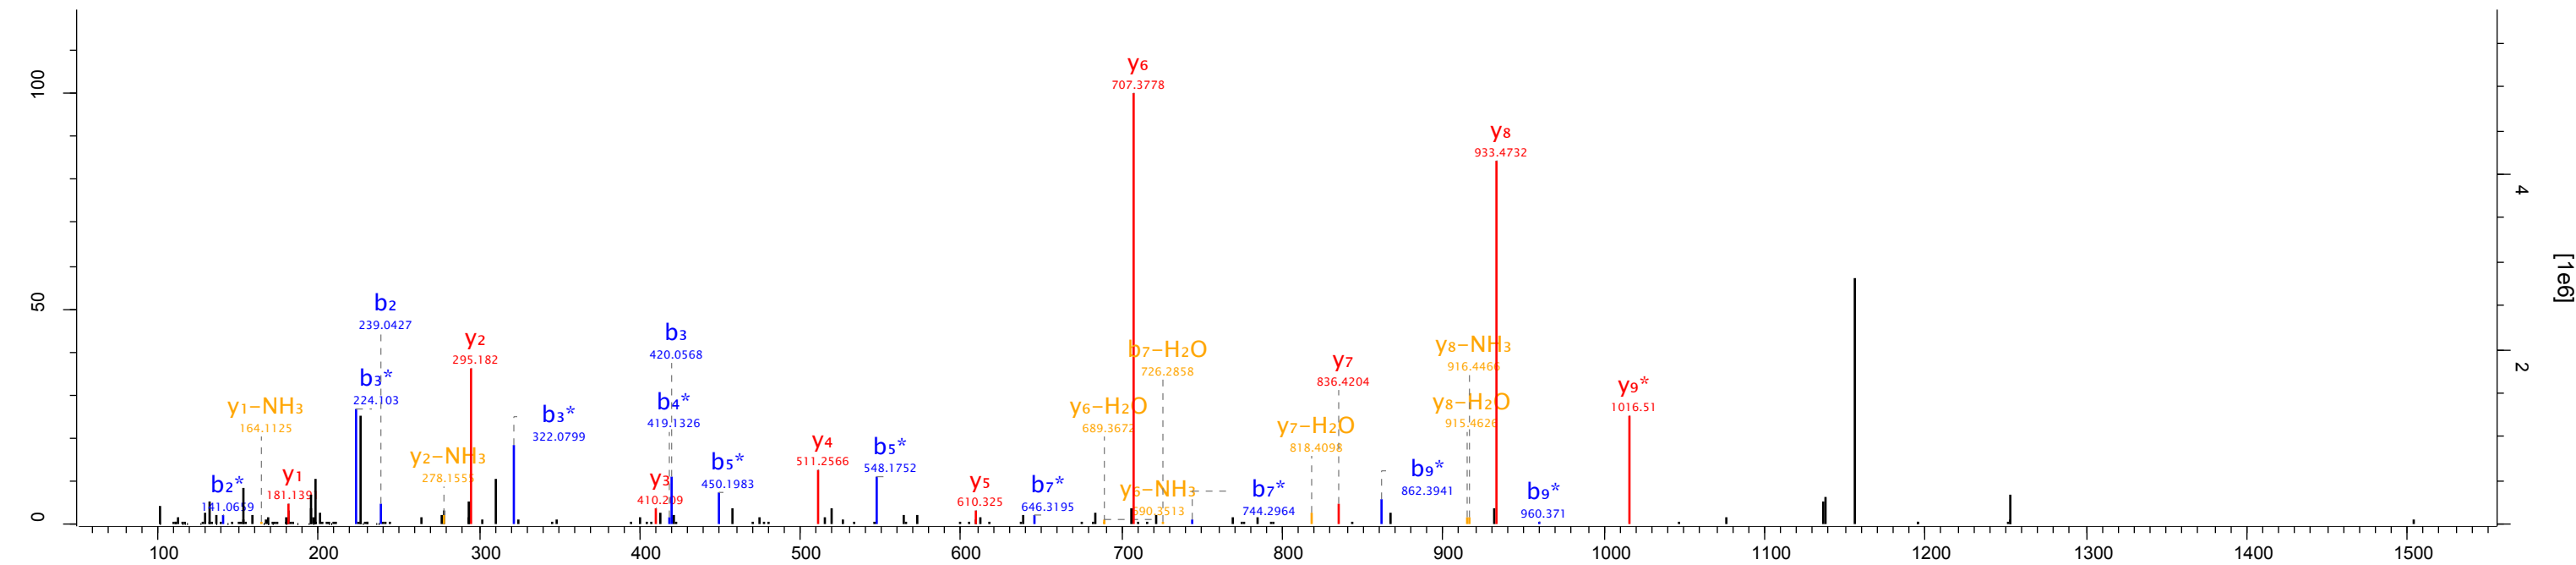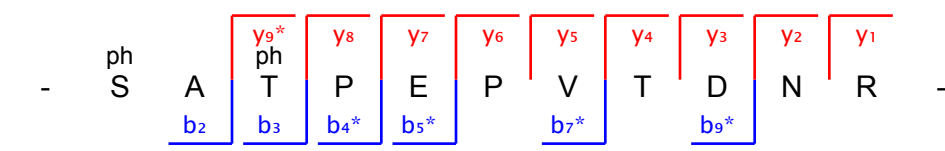

Raw file: 20150812\_A375SR\_Phospho\_BR1\_03  
 Scan: 8260 Method: FTMS; HCD Score: 198.01 m/z: 767.8 Gene names: SF3B1

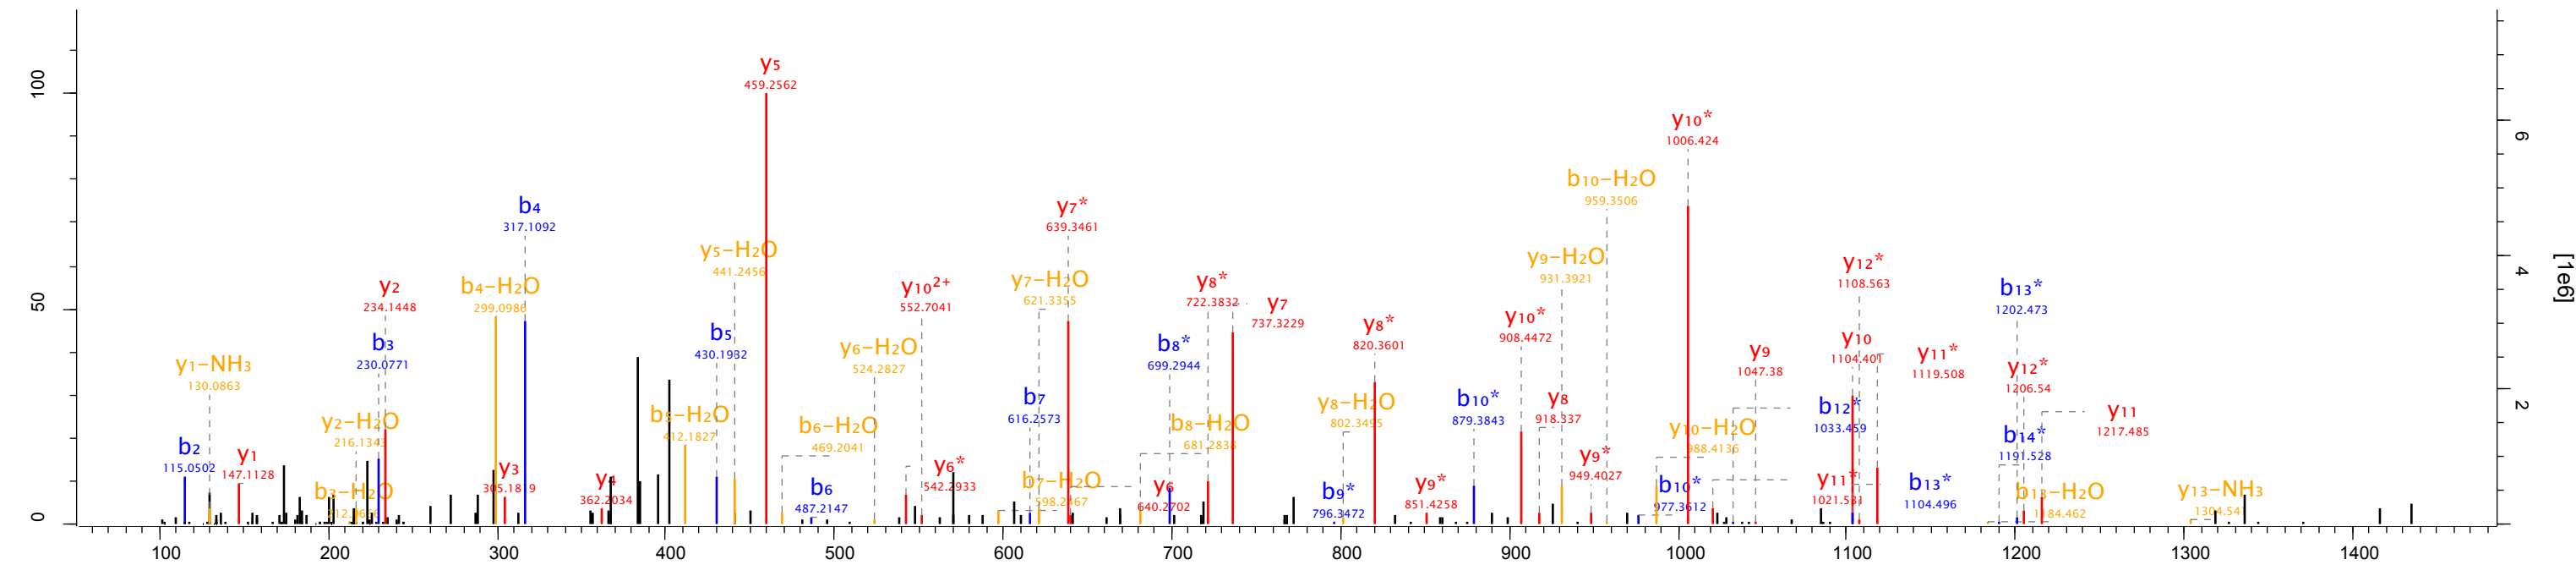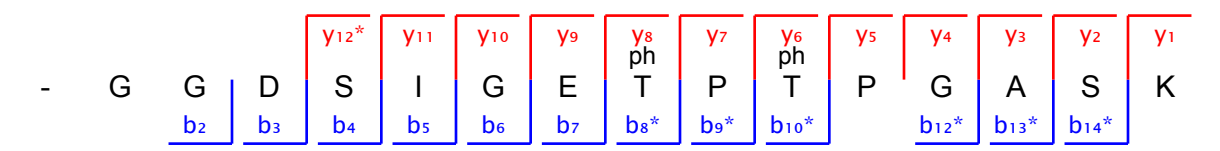

Raw file: 20150812\_A375SR\_Phospho\_BR1\_03  
 Scan: 8400 Method: FTMS; HCD Score: 96.31 m/z: 692.98 Gene names: HIVEP2

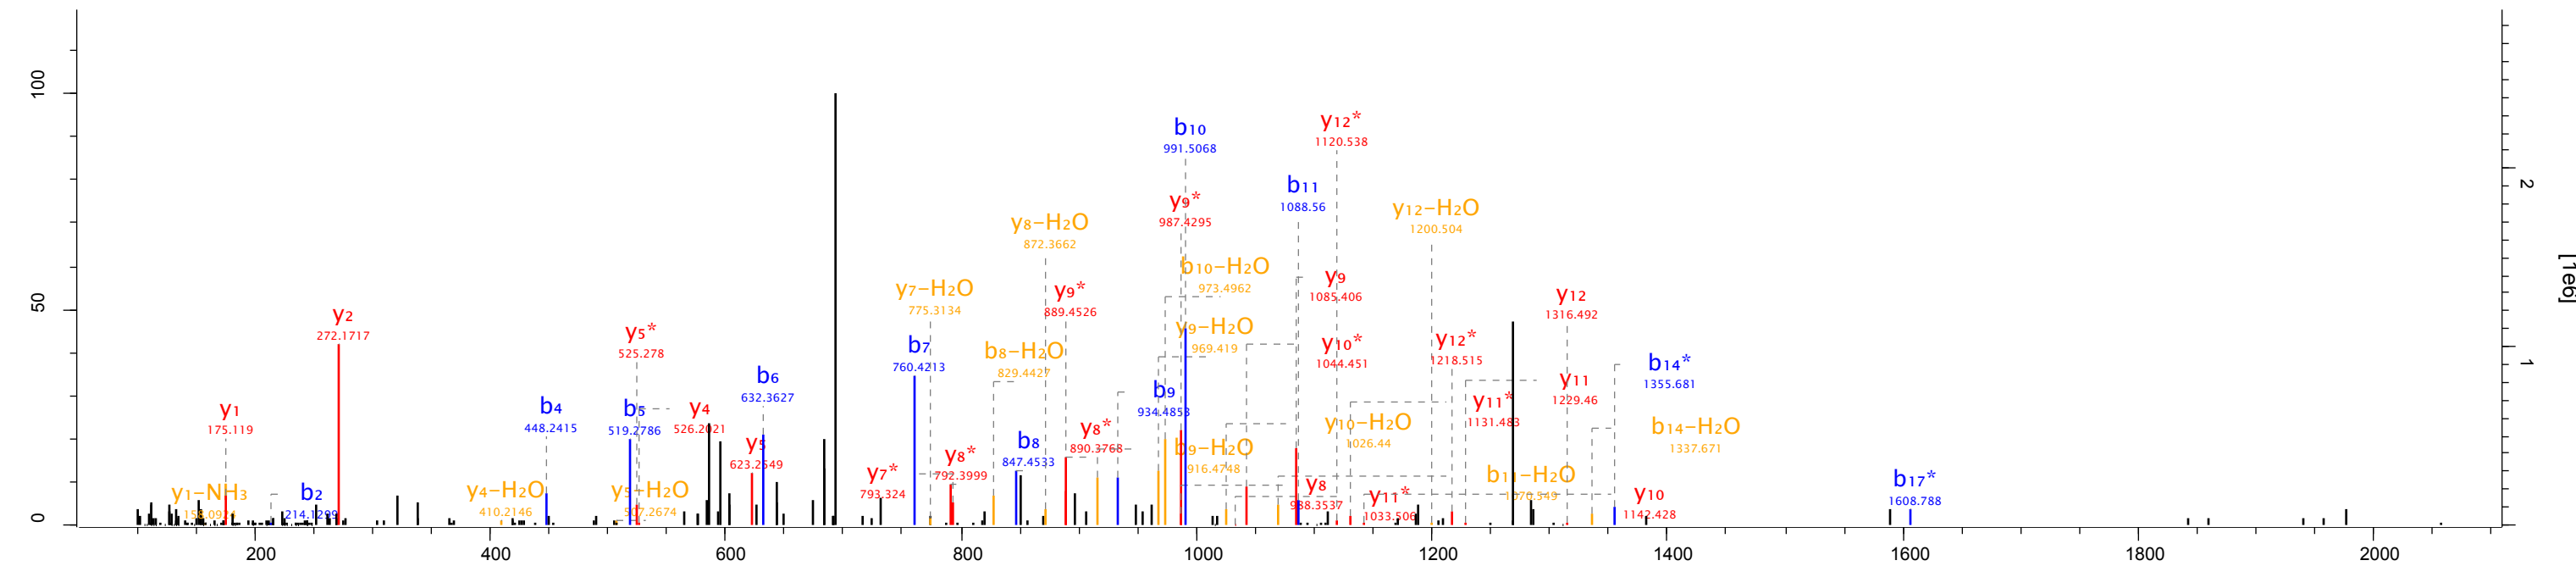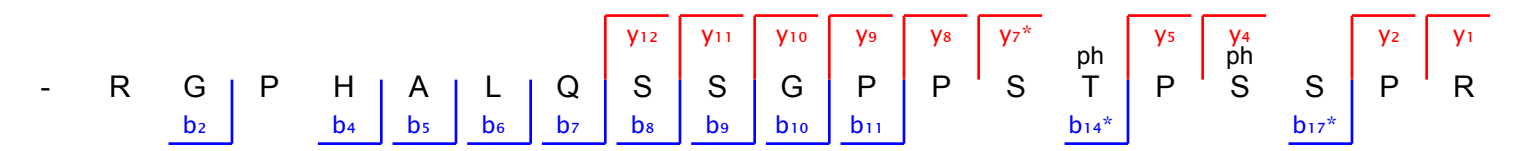

Raw file: 20150812\_A375SR\_Phospho\_BR1\_03  
 Scan: 8510 Method: FTMS; HCD Score: 191.56 m/z: 994.93 Gene names: SF3B1

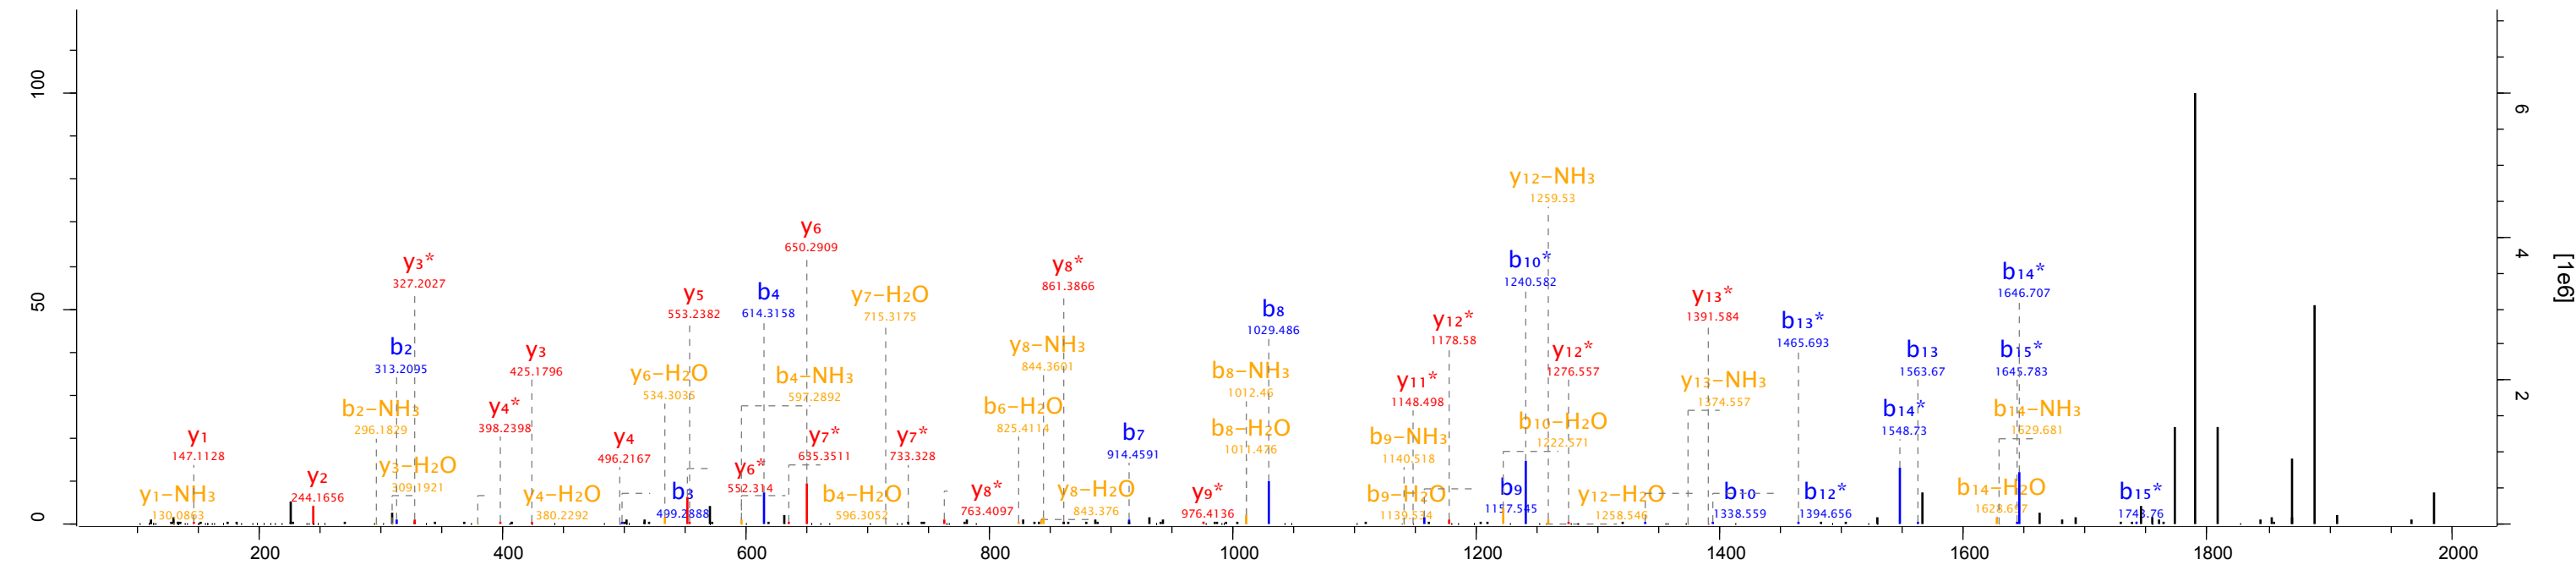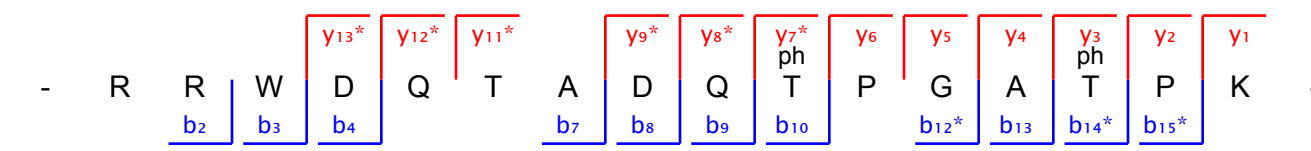

Raw file: 20150812\_A375SR\_Phospho\_BR1\_03  
 Scan: 8870 Method: FTMS; HCD Score: 111.72 m/z: 711.66 Gene names: CIC

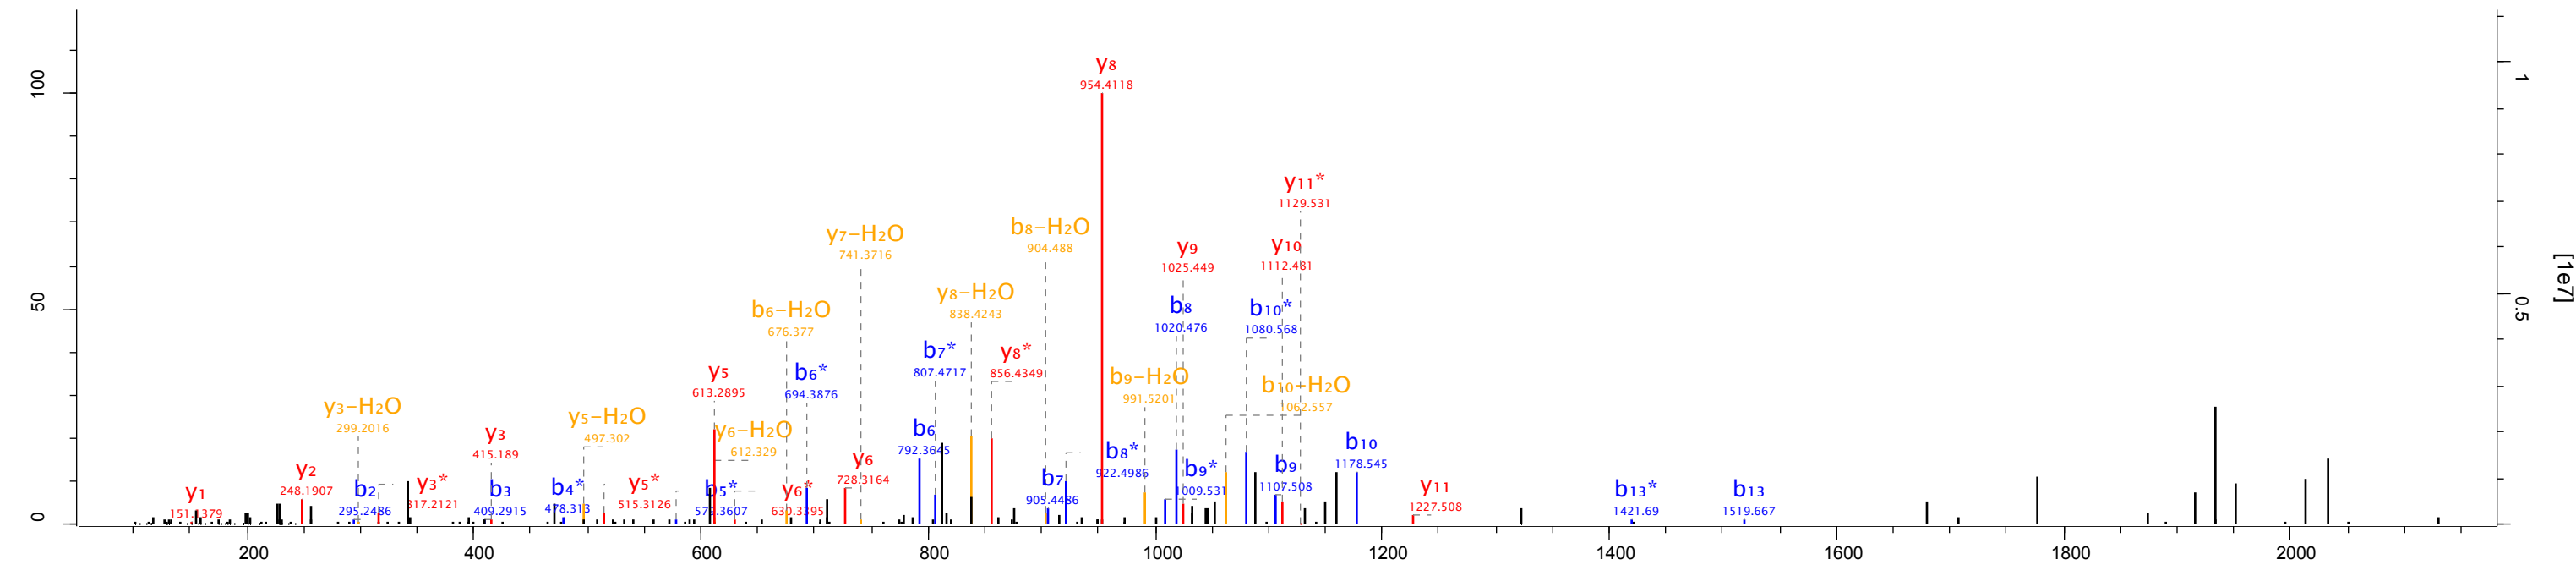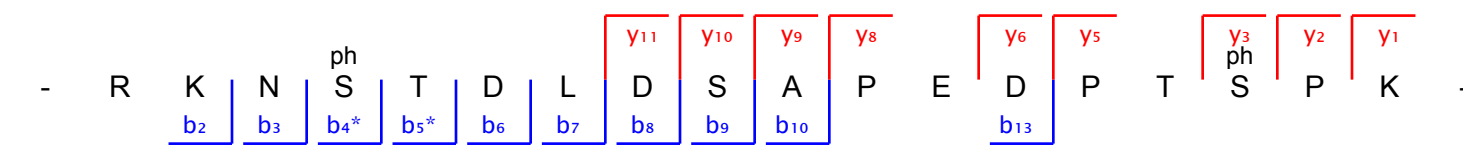

Raw file: 20150812\_A375SR\_Phospho\_BR1\_03  
 Scan: 8940 Method: FTMS; HCD Score: 137.89 m/z: 879.13 Gene names: CAMK4

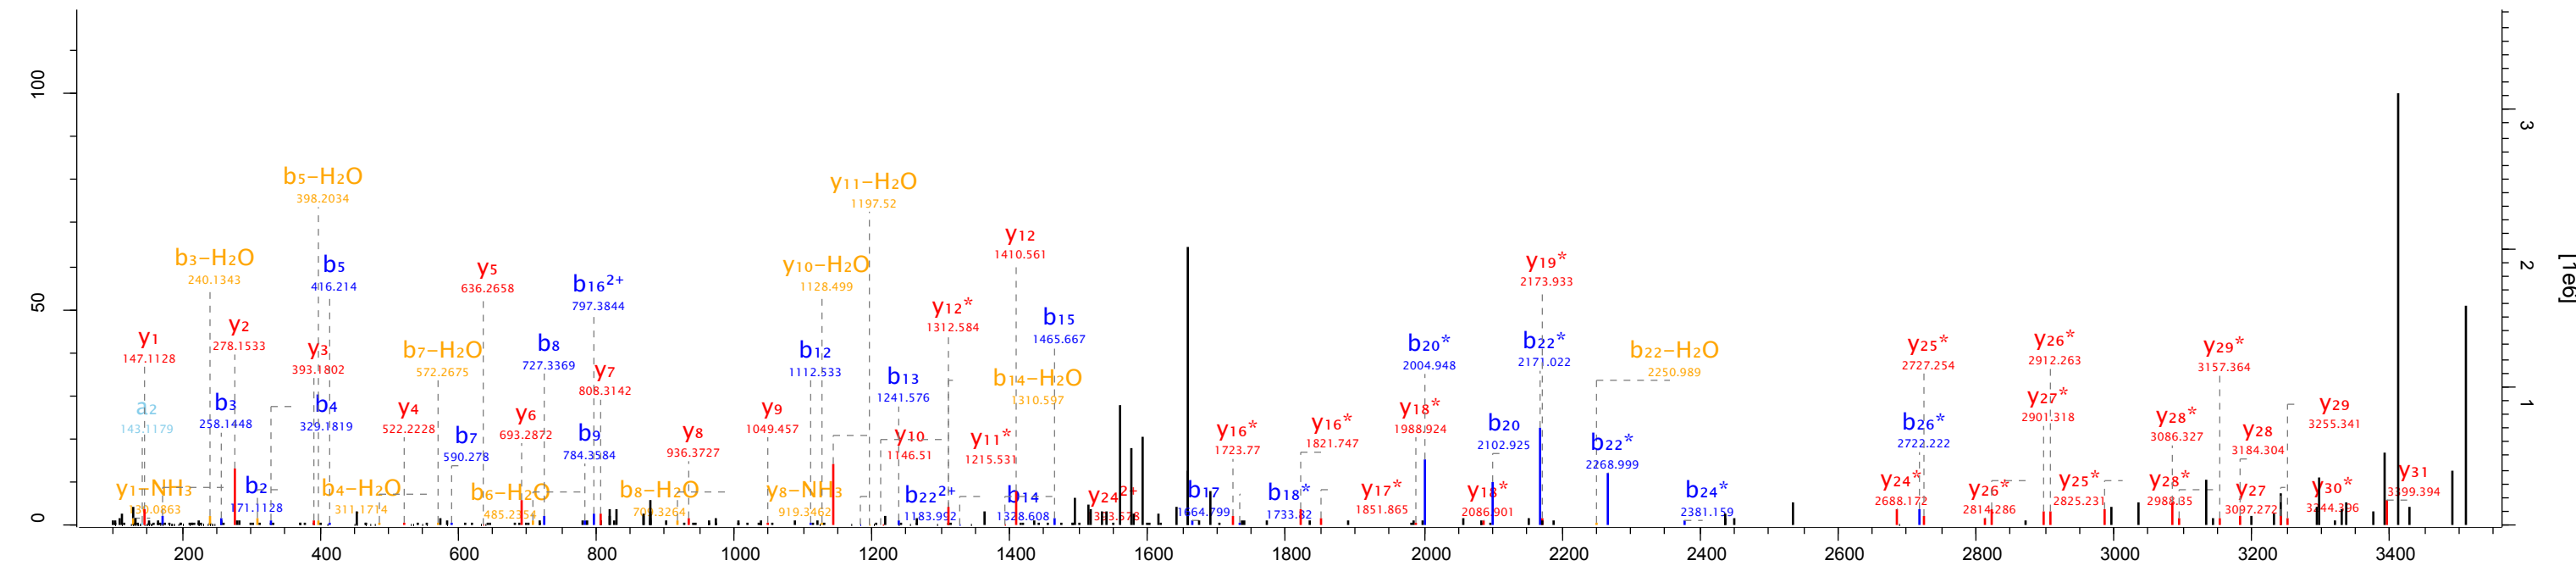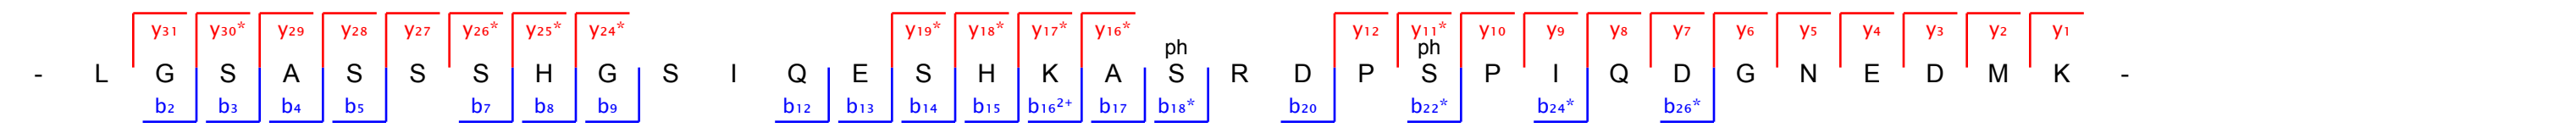



Raw file: 20150812\_A375SR\_Phospho\_BR1\_03  
 Scan: 9260 Method: FTMS; HCD Score: 153.63 m/z: 800.04 Gene names: CEP170

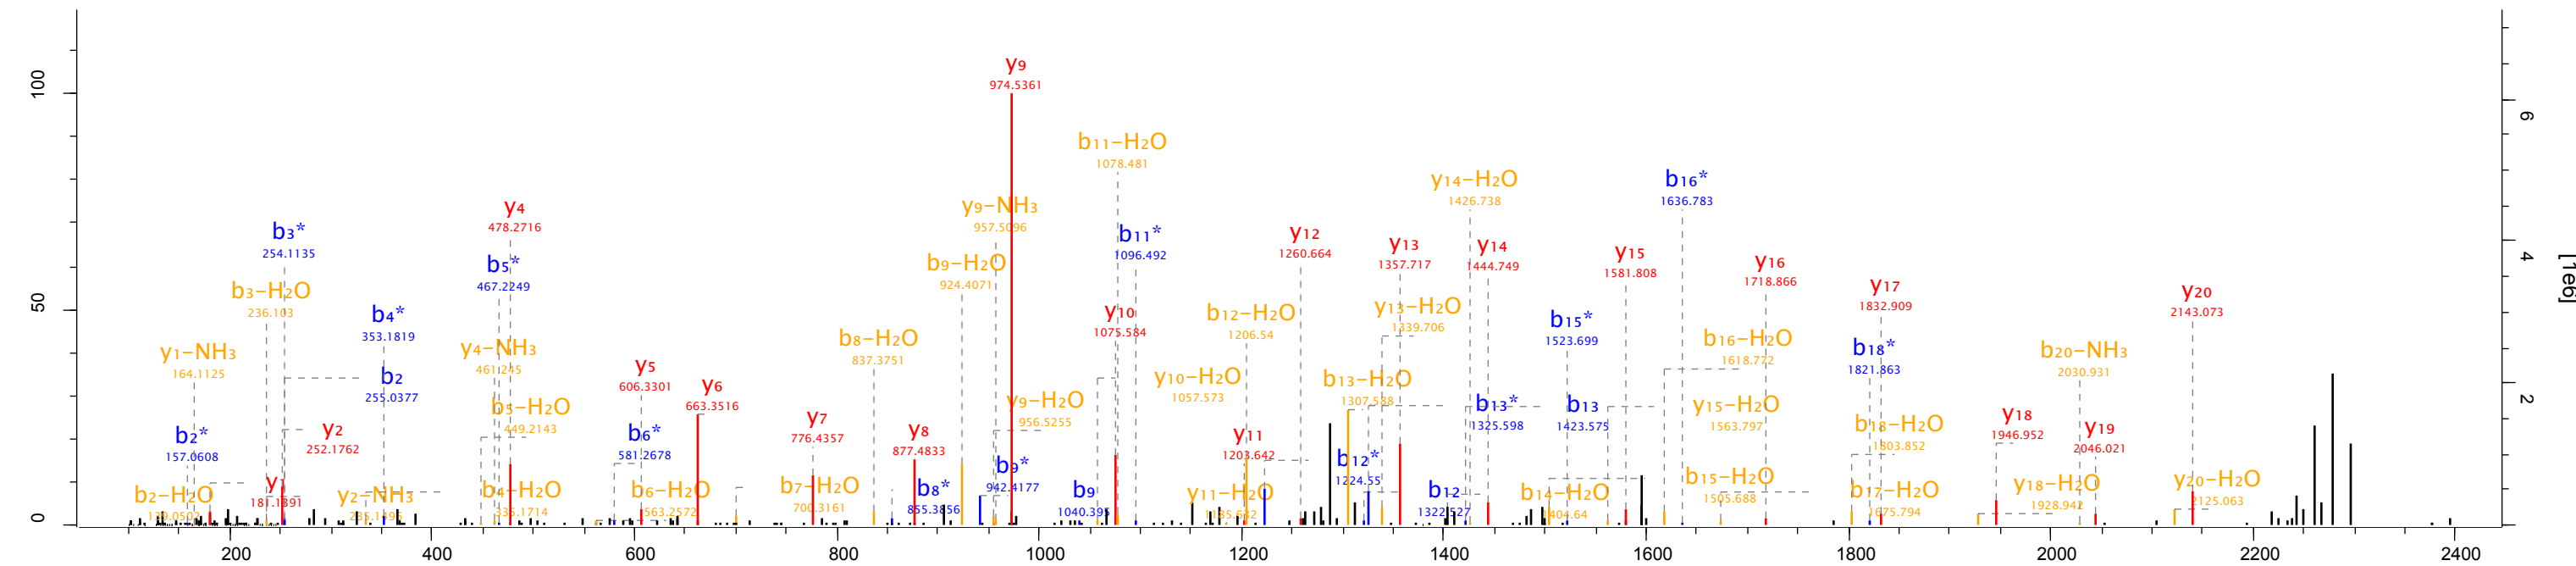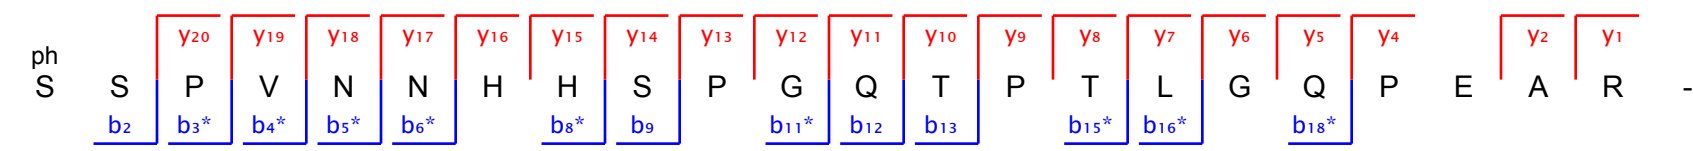

Raw file: 20150812\_A375SR\_Phospho\_BR1\_03  
 Scan: 9270 Method: FTMS; HCD Score: 242.5 m/z: 1082.47 Gene names: FNBP1

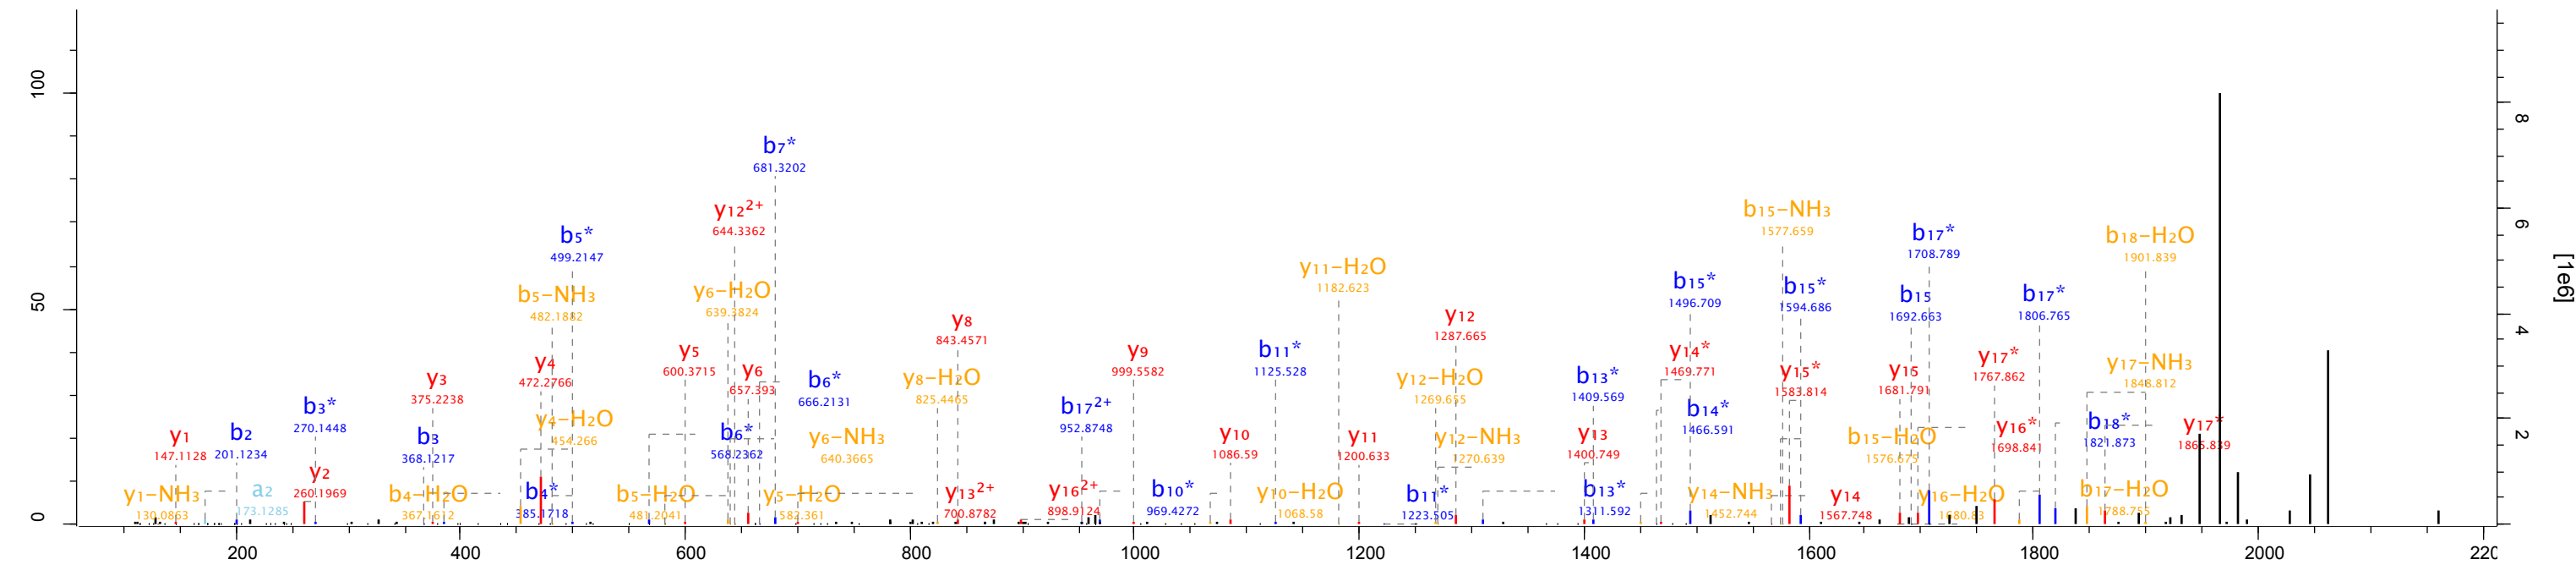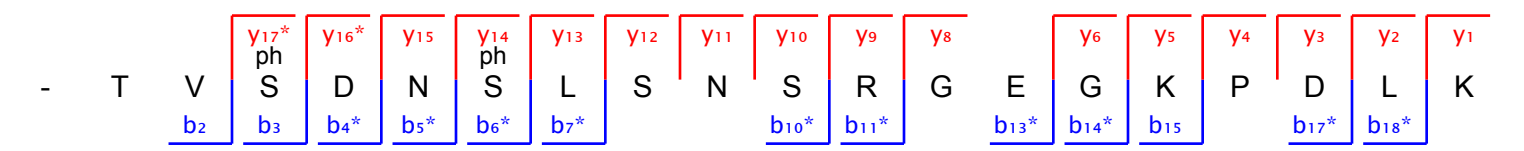

Raw file Scan Method Score m/z Gene names

20150812\_A375SR\_Phospho\_BR1\_03 9420 FTMS; HCD 156.17 722.28 KIF4A

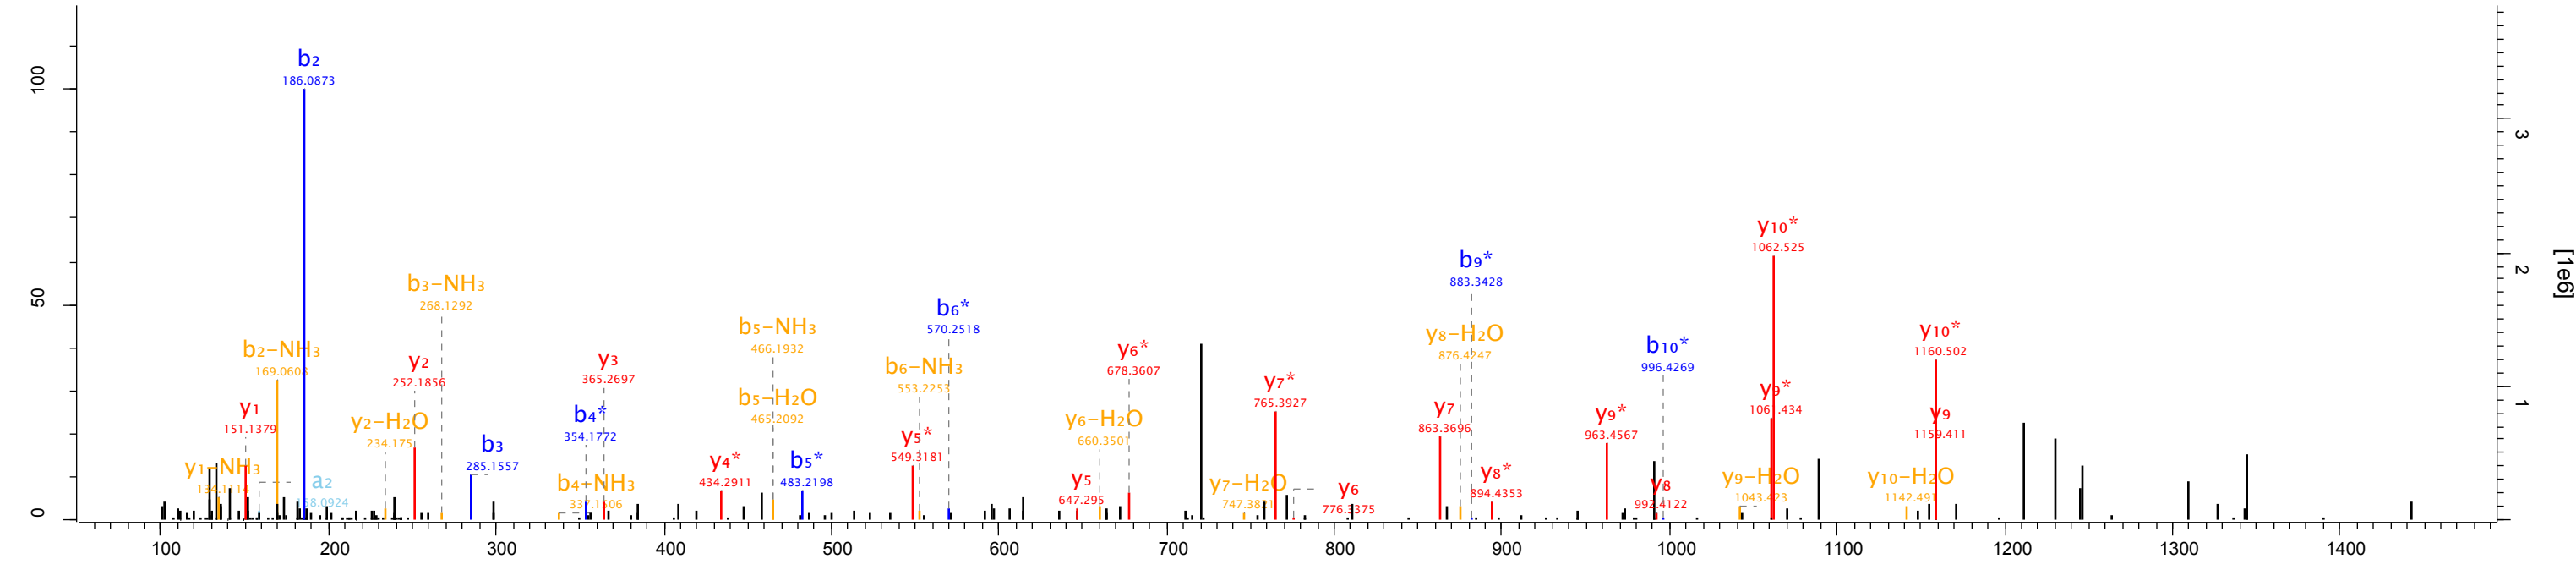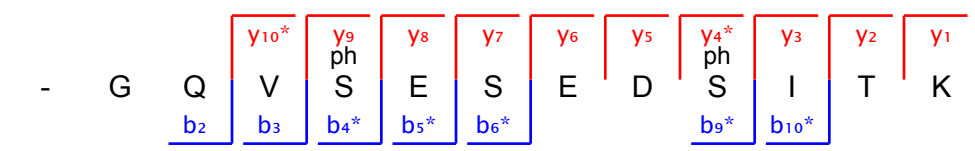

Raw file: 20150812\_A375SR\_Phospho\_BR1\_03  
 Scan: 9590 Method: FTMS; HCD Score: 74.36 m/z: 769.34 Gene names: SRRM2

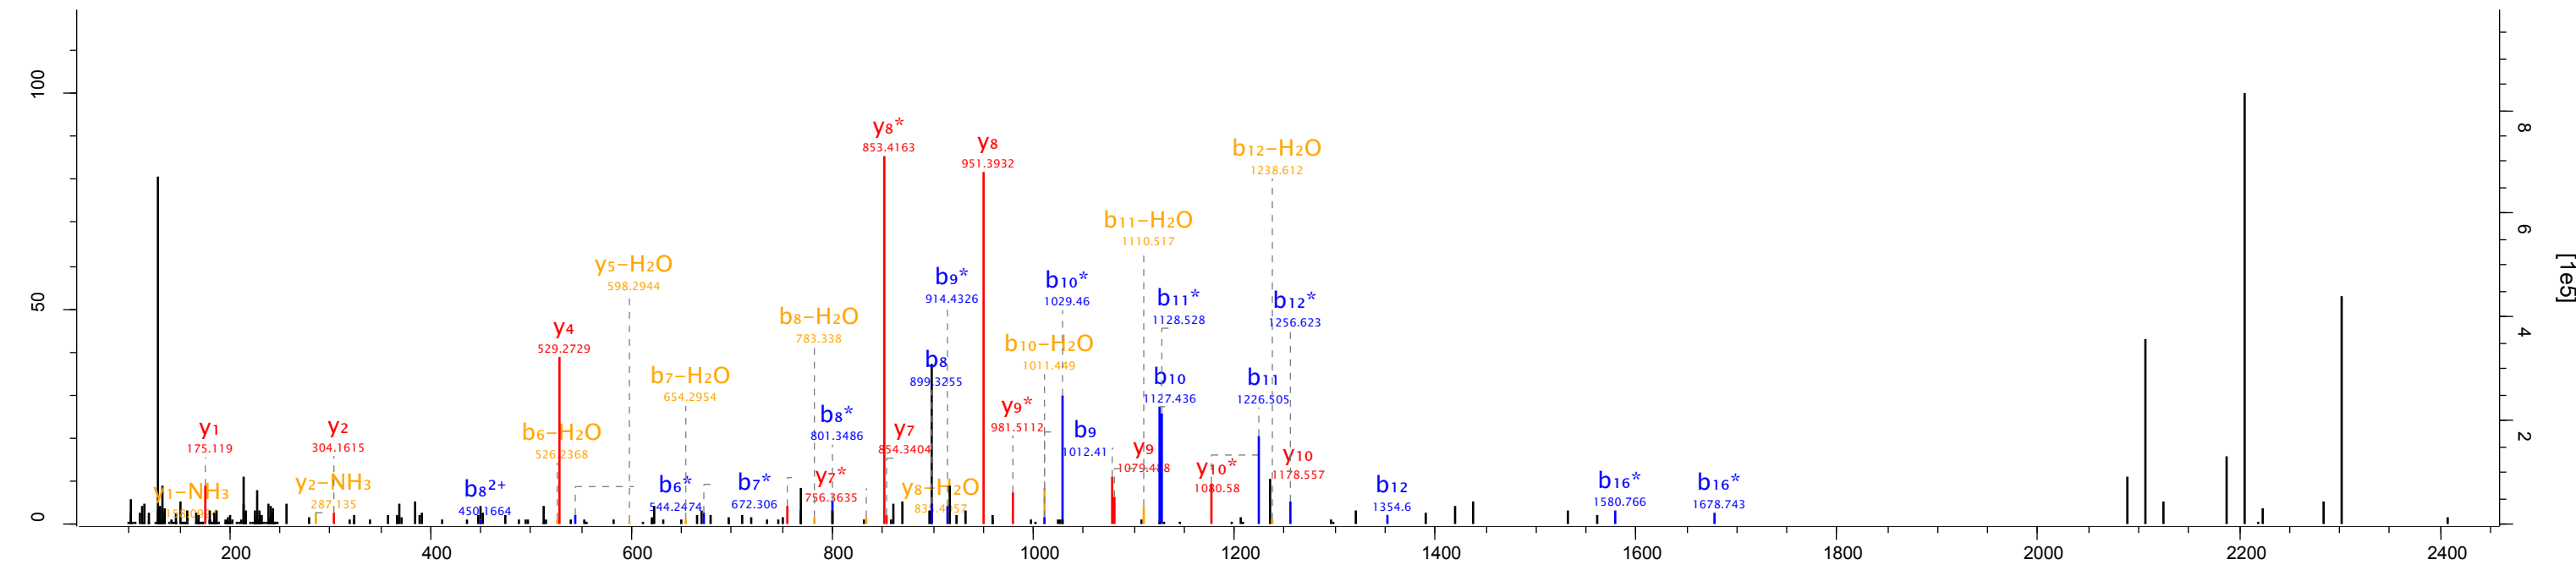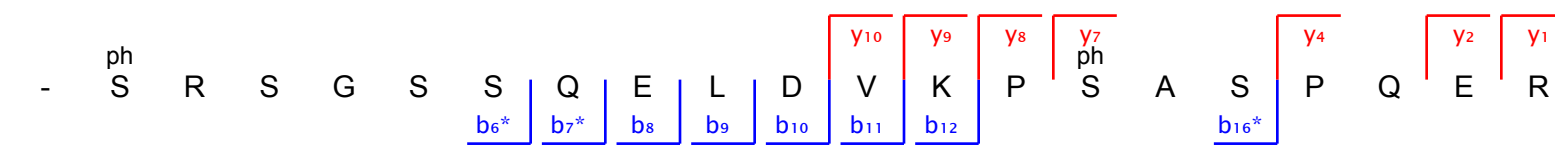

Raw file: 20150812\_A375SR\_Phospho\_BR1\_03  
 Scan: 9720 Method: FTMS; HCD Score: 101.89 m/z: 946.9 Gene names: CCDC82

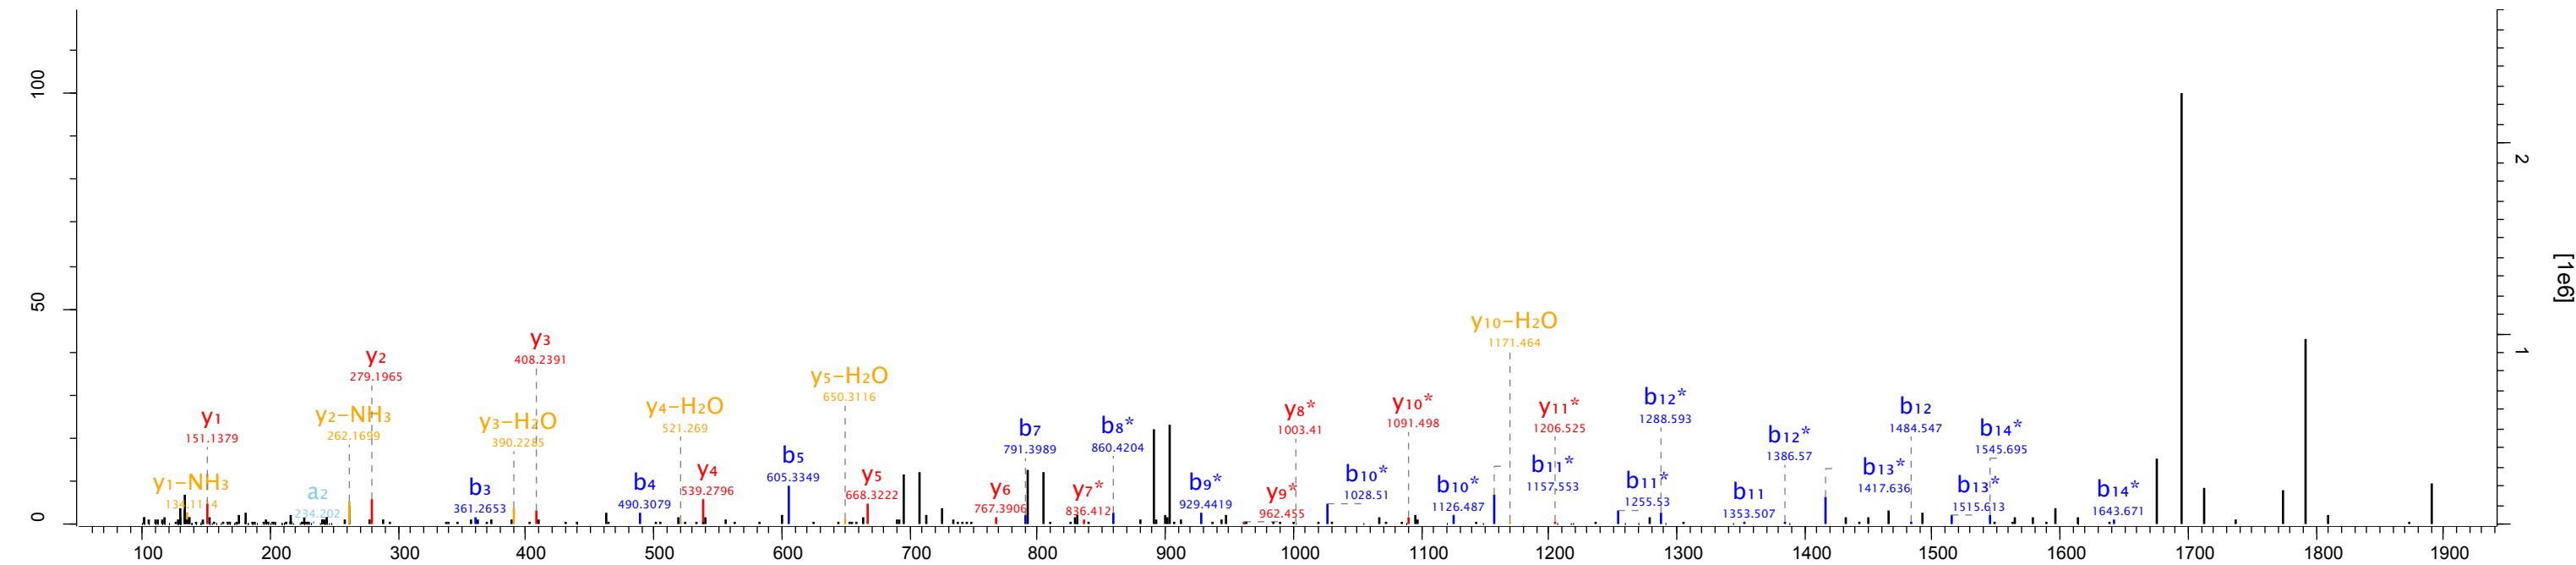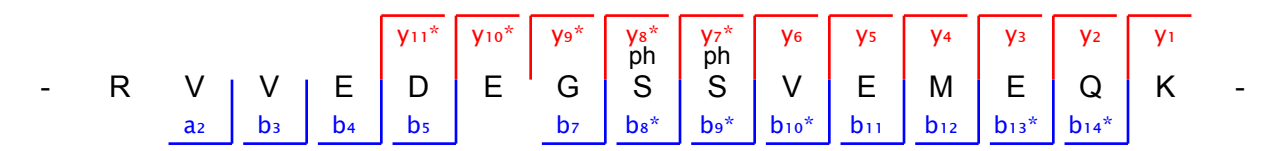

Raw file: 20150812\_A375SR\_Phospho\_BR1\_03  
 Scan: 9770 Method: FTMS; HCD Score: 155.11 m/z: 945.4 Gene names: NHS

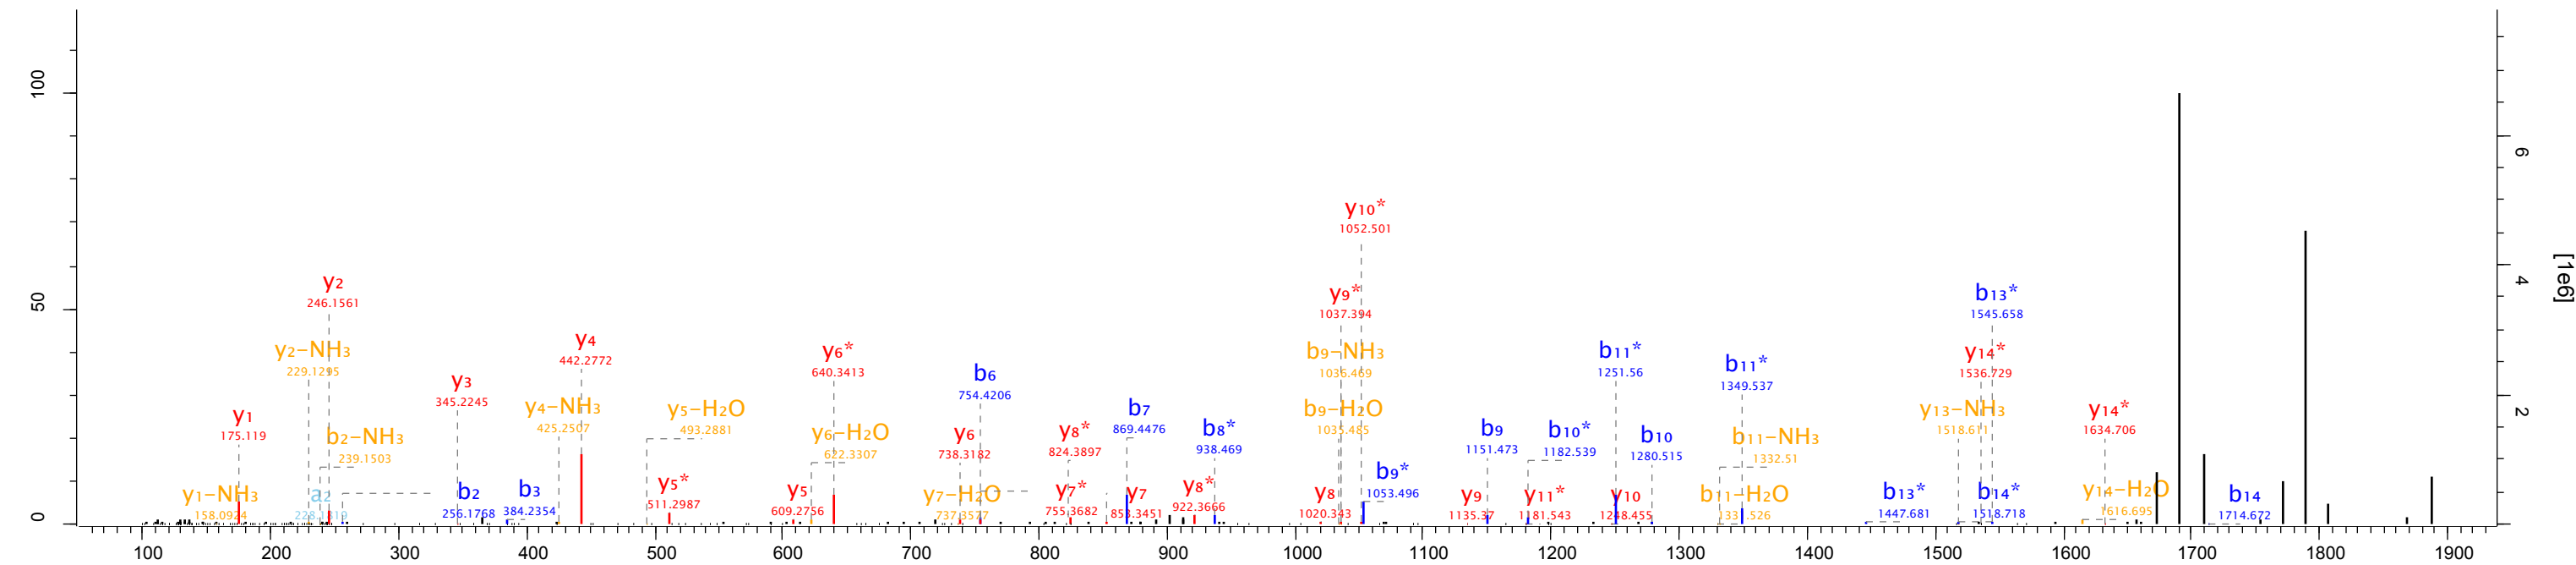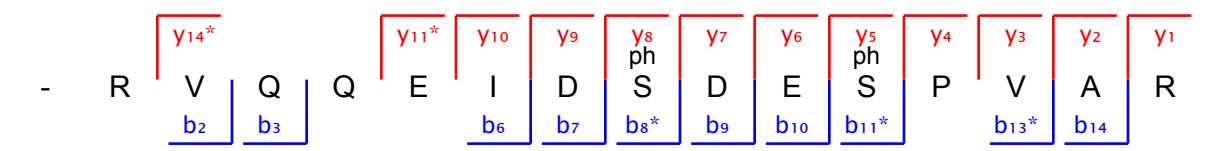

Raw file 20150812\_A375SR\_Phospho\_BR1\_03 Scan 9800 Method FTMS; HCD Score 50.99 m/z 705.62 Gene names DDHD1

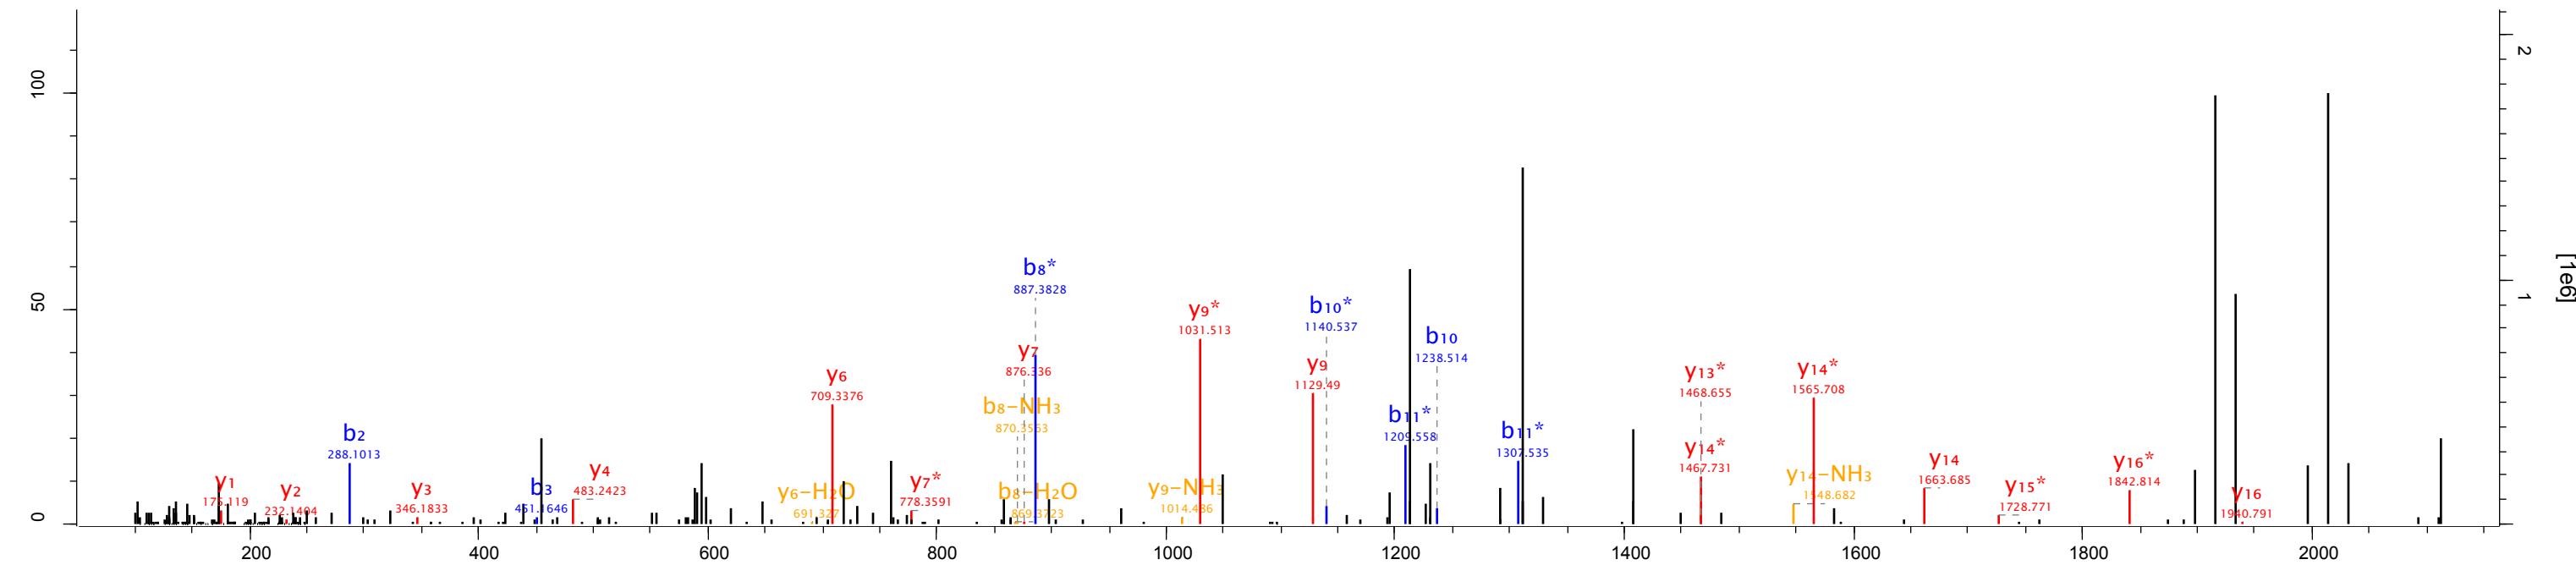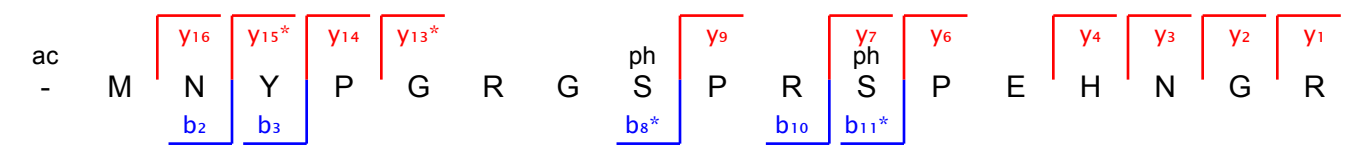

Raw file 20150812\_A375SR\_Phospho\_BR1\_03 Scan 9990 Method FTMS; HCD Score 80.36 m/z 490.23 Gene names DOT1L

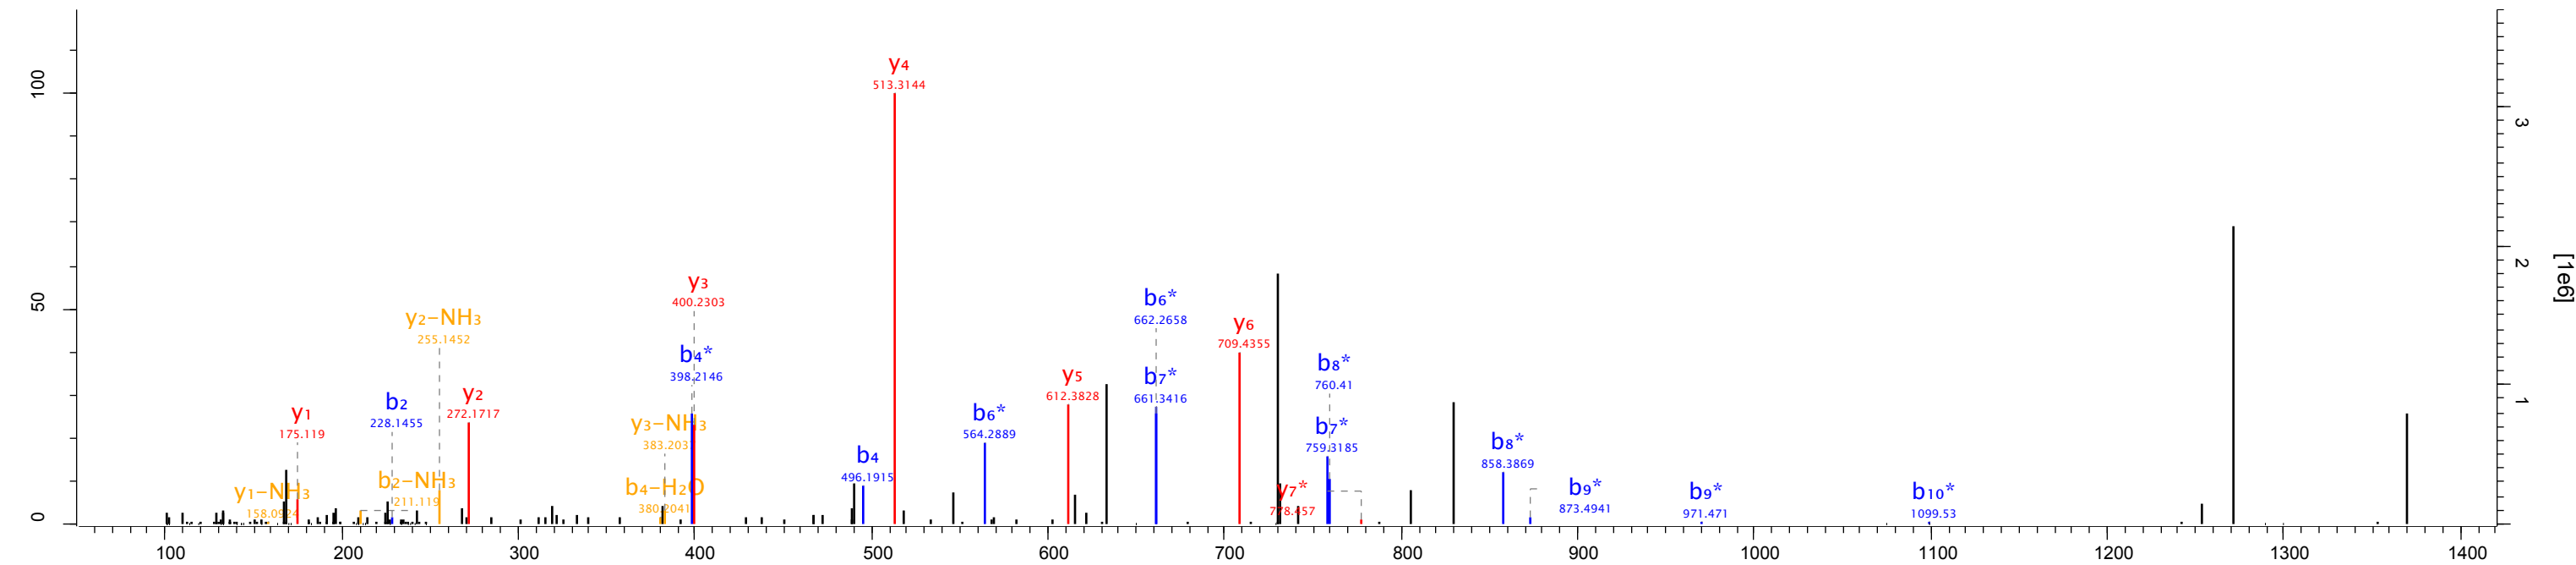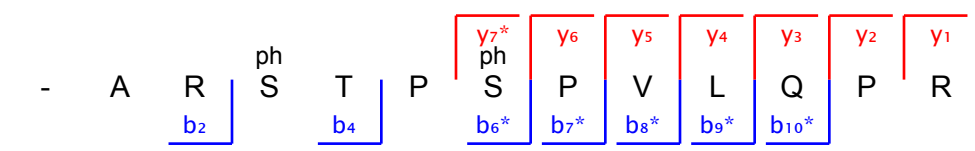



Raw file: 20150812\_A375SR\_Phospho\_BR1\_04  
 Scan: 10070 Method: FTMS; HCD Score: 103.44 m/z: 617.75 Gene names: SORBS2

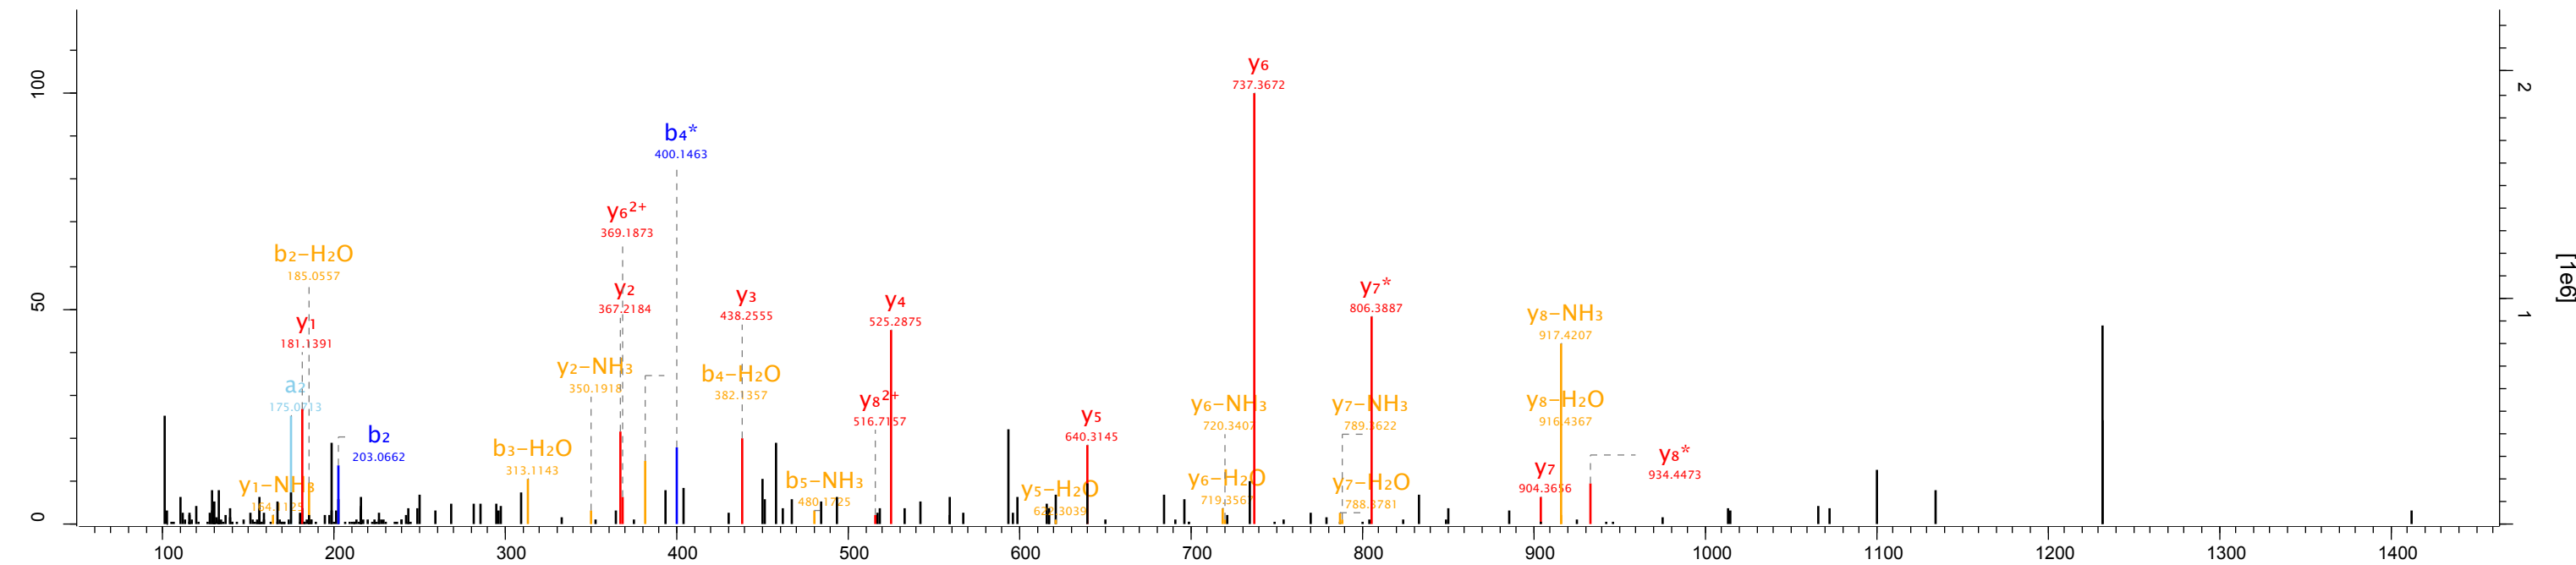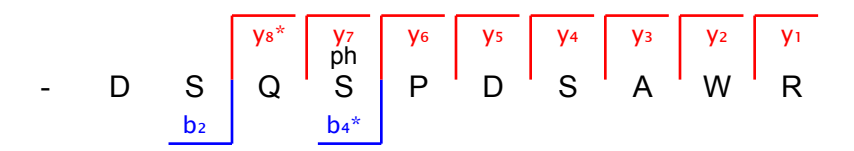

Raw file: 20150812\_A375SR\_Phospho\_BR1\_04  
 Scan: 10220 Method: FTMS; HCD Score: 190.26 m/z: 592.25 Gene names: TRPS1

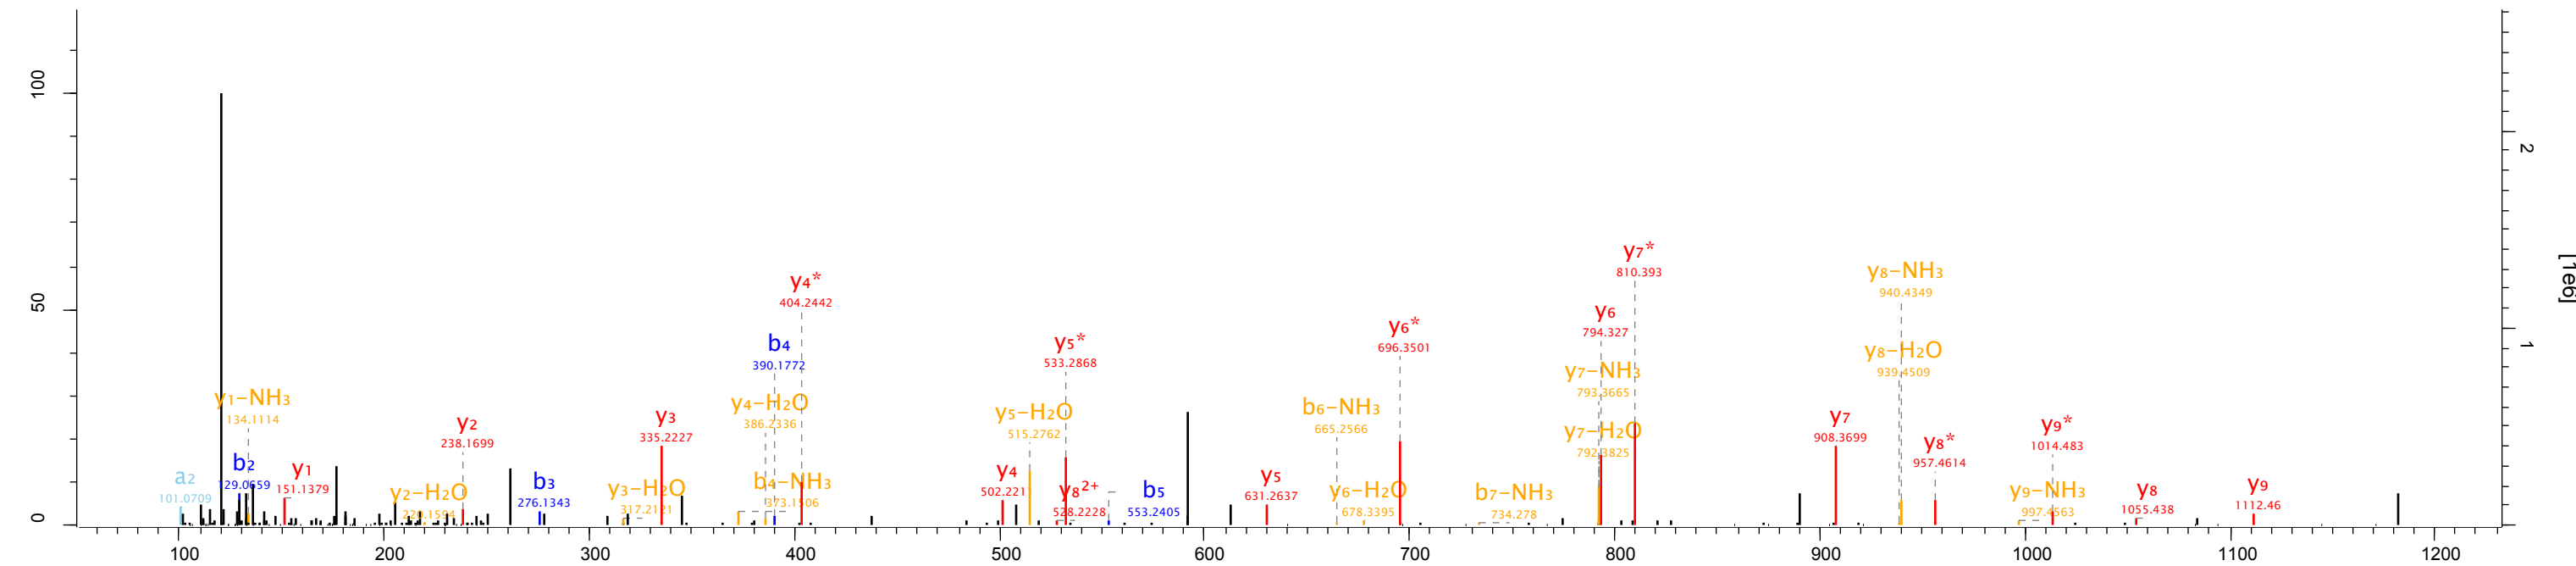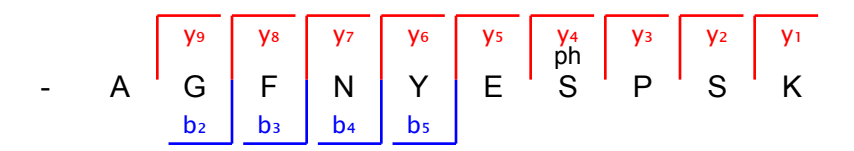

Raw file: 20150812\_A375SR\_Phospho\_BR1\_04  
 Scan: 10610 Method: FTMS; HCD Score: 336.32 m/z: 1057.44 Gene names: EIF5B

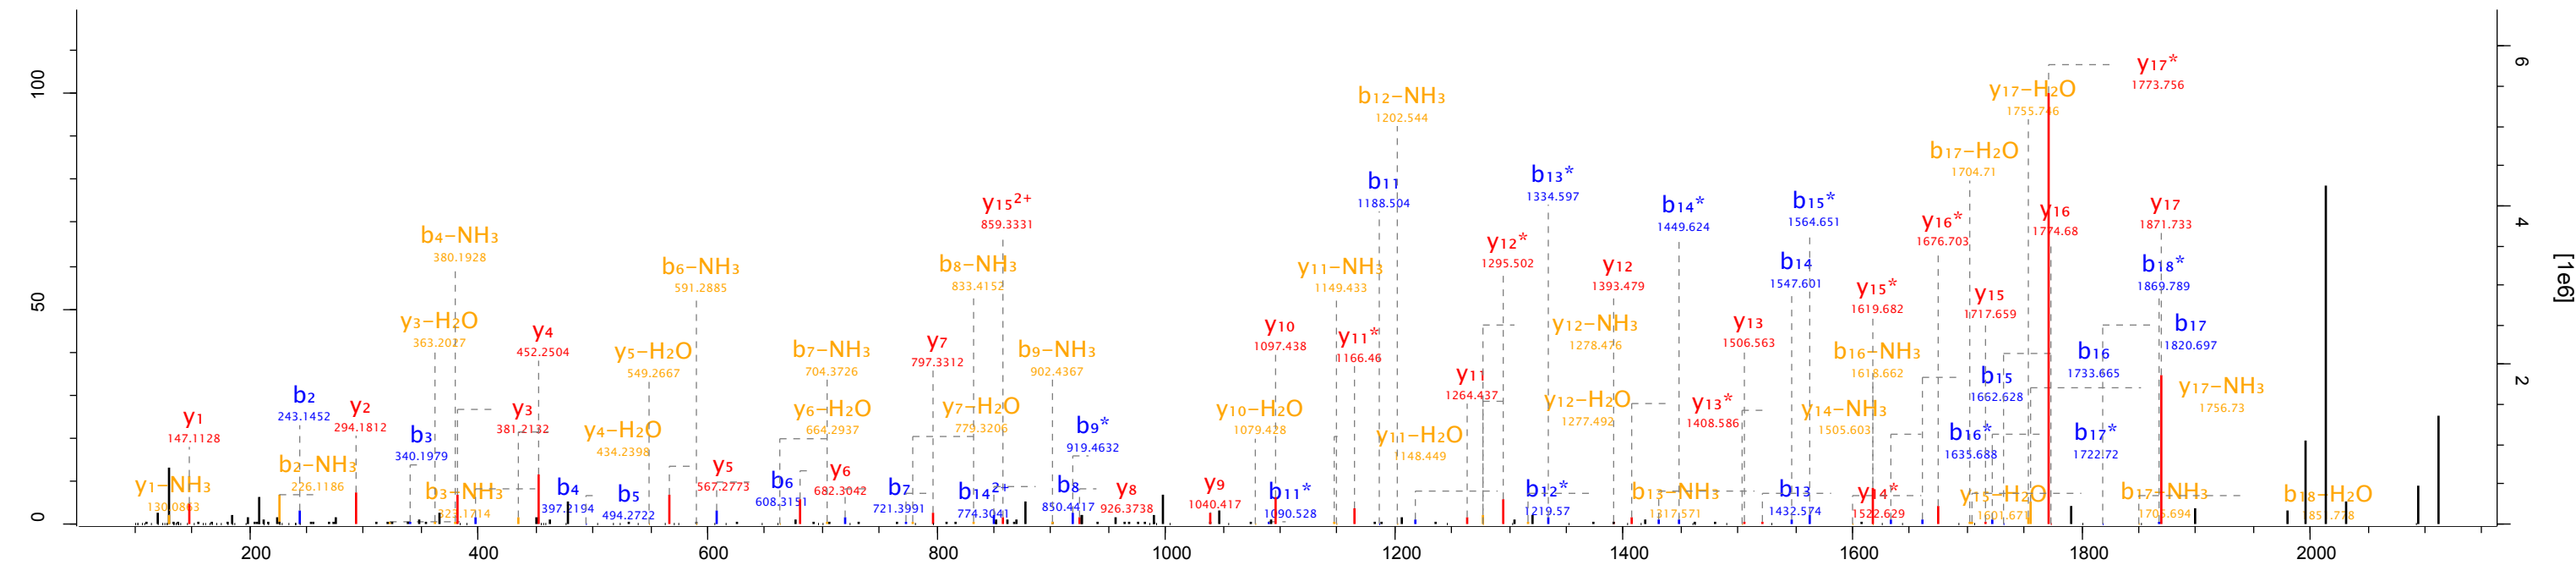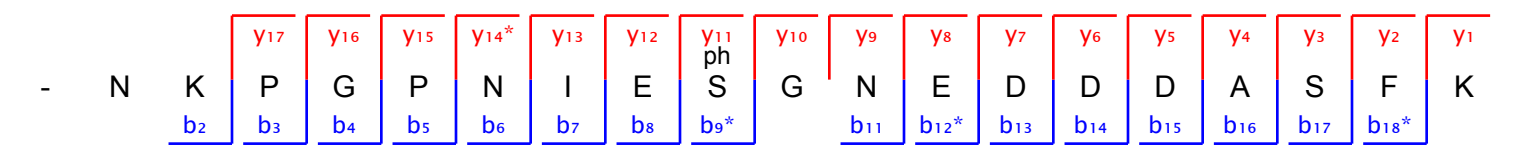

Raw file 20150812\_A375SR\_Phospho\_BR1\_04 Scan 10680 Method FTMS; HCD Score 232.32 m/z 961.46 Gene names YEATS2

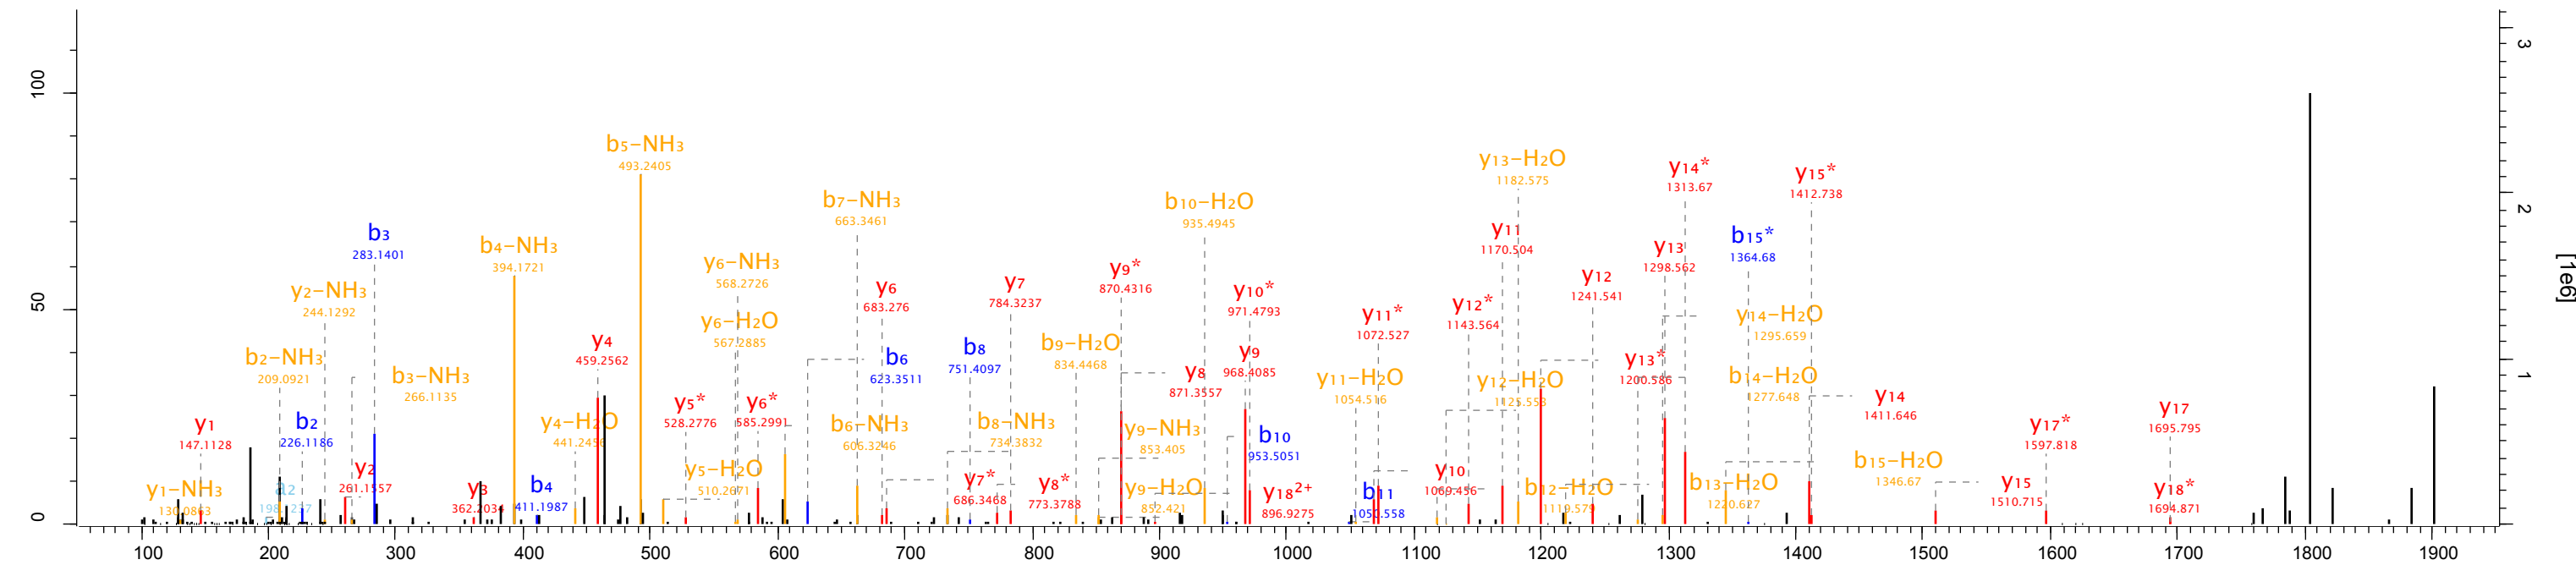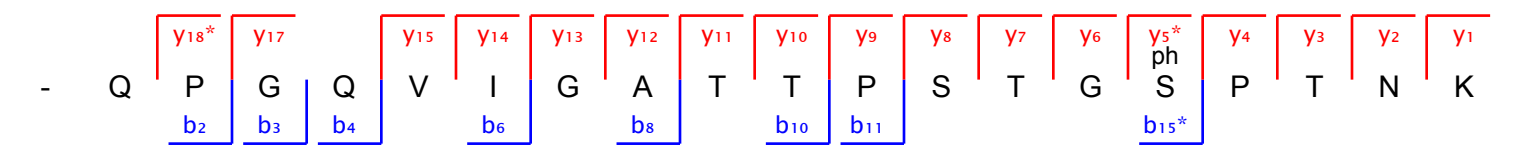

Raw file: 20150812\_A375SR\_Phospho\_BR1\_04  
 Scan: 10840 Method: FTMS; HCD Score: 119.5 m/z: 796.39 Gene names: MAP4K4

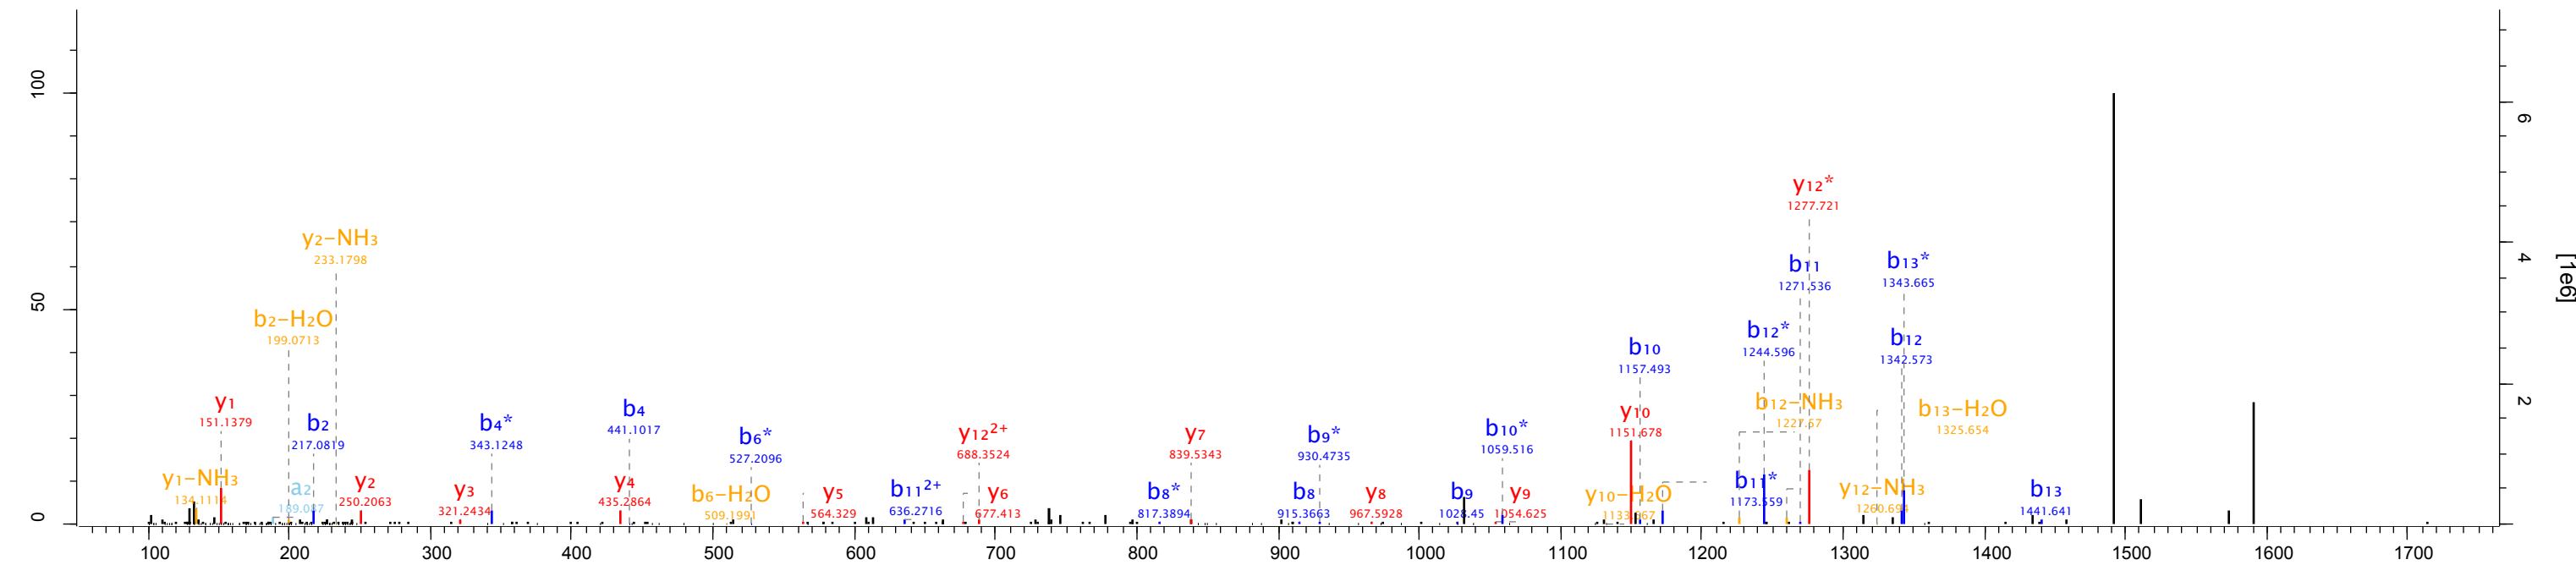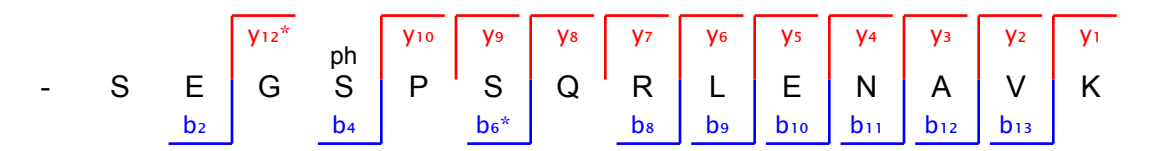

Raw file 20150812\_A375SR\_Phospho\_BR1\_04 Scan 11290 Method FTMS; HCD Score 88.33 m/z 794.38 Gene names MAP7D1

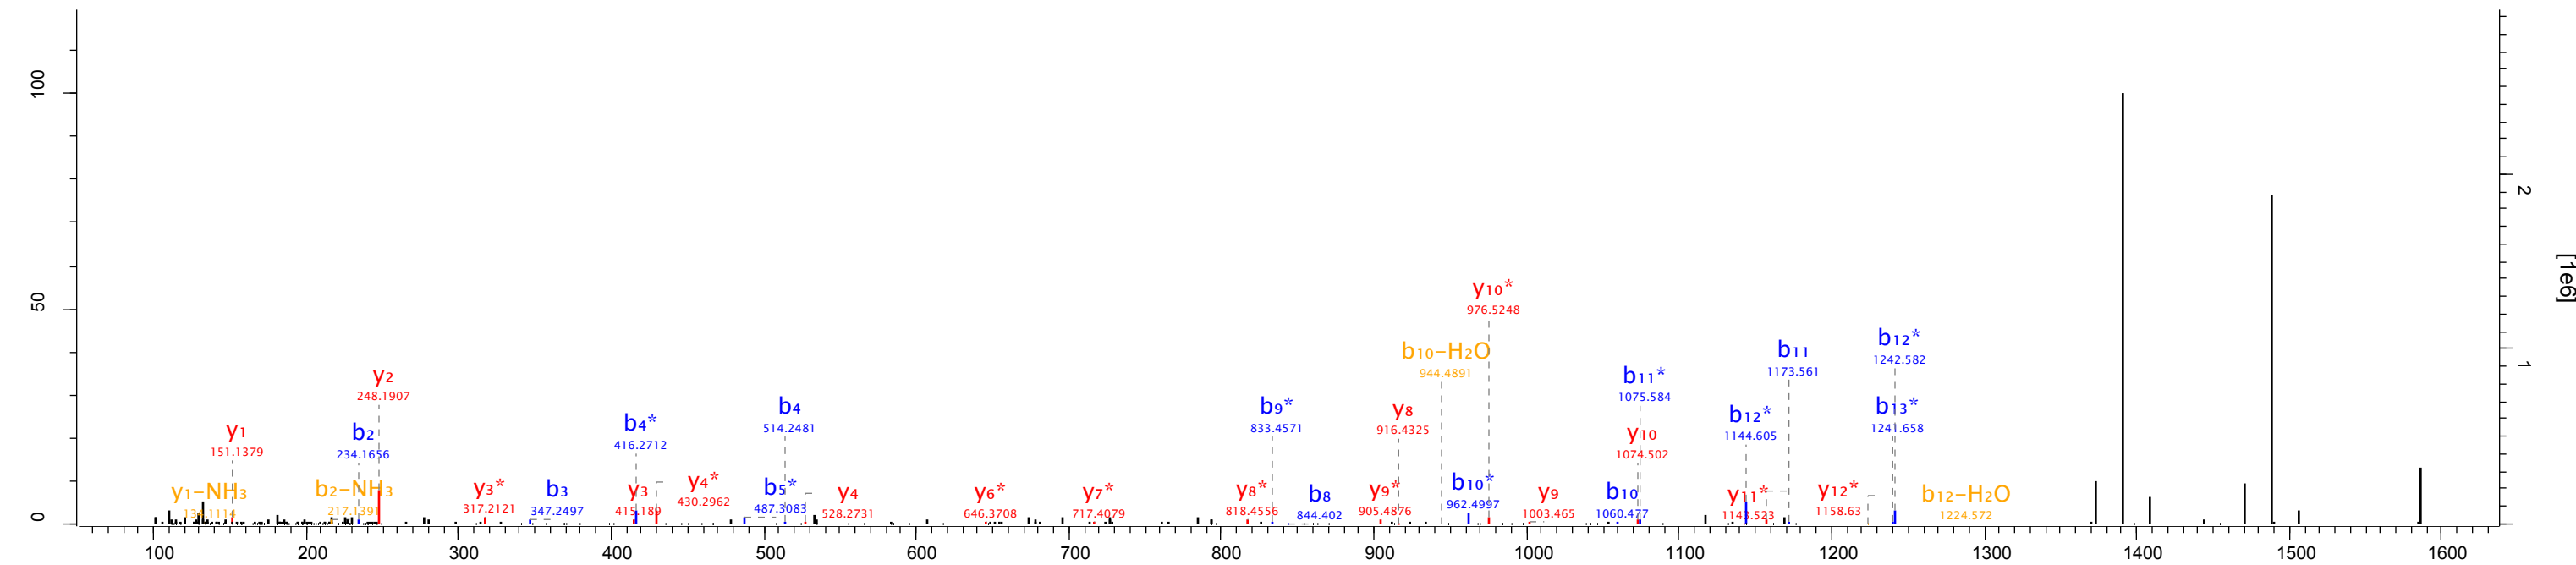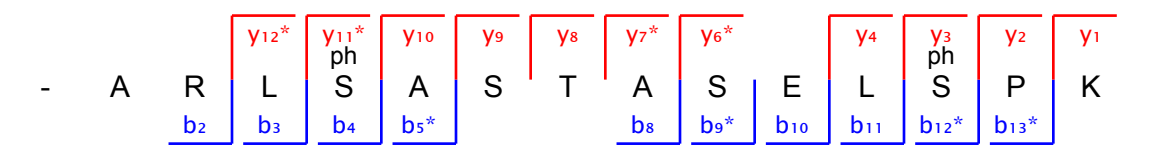

Raw file 20150812\_A375SR\_Phospho\_BR1\_04 Scan 11700 Method FTMS; HCD Score 145.43 m/z 747.36 Gene names COBLL1

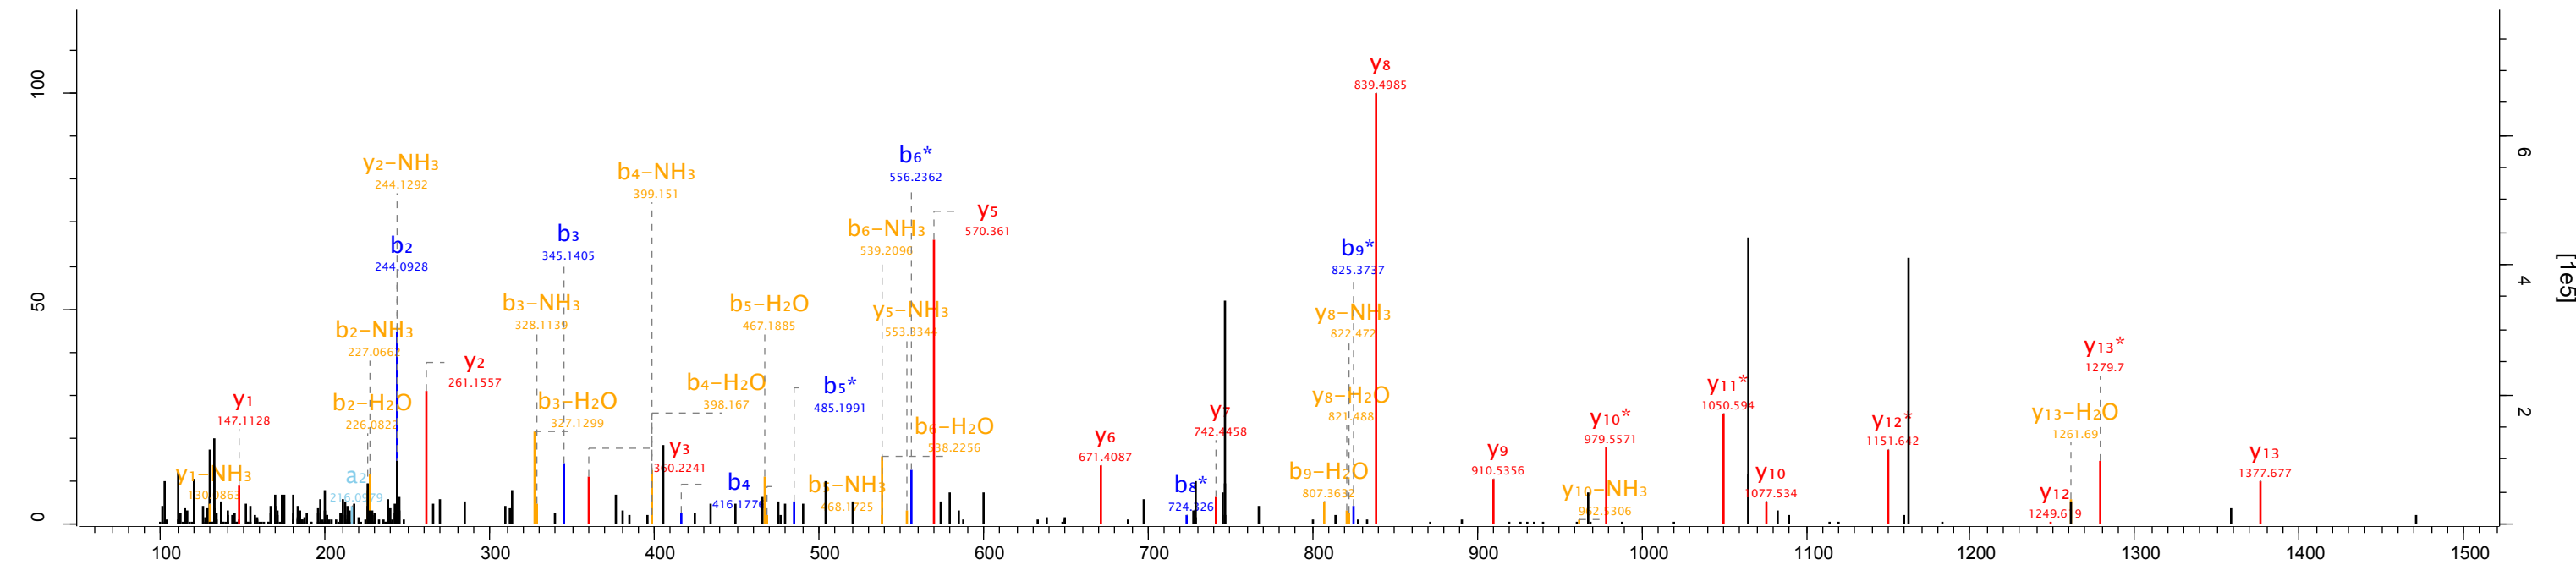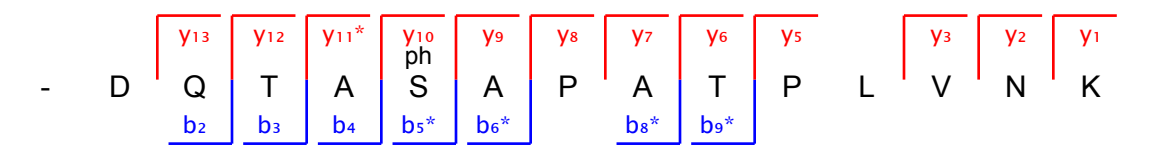





Raw file 20150812\_A375SR\_Phospho\_BR1\_04 Scan 11880 Method FTMS; HCD Score 338.42 m/z 1027.4 Gene names CTNND1

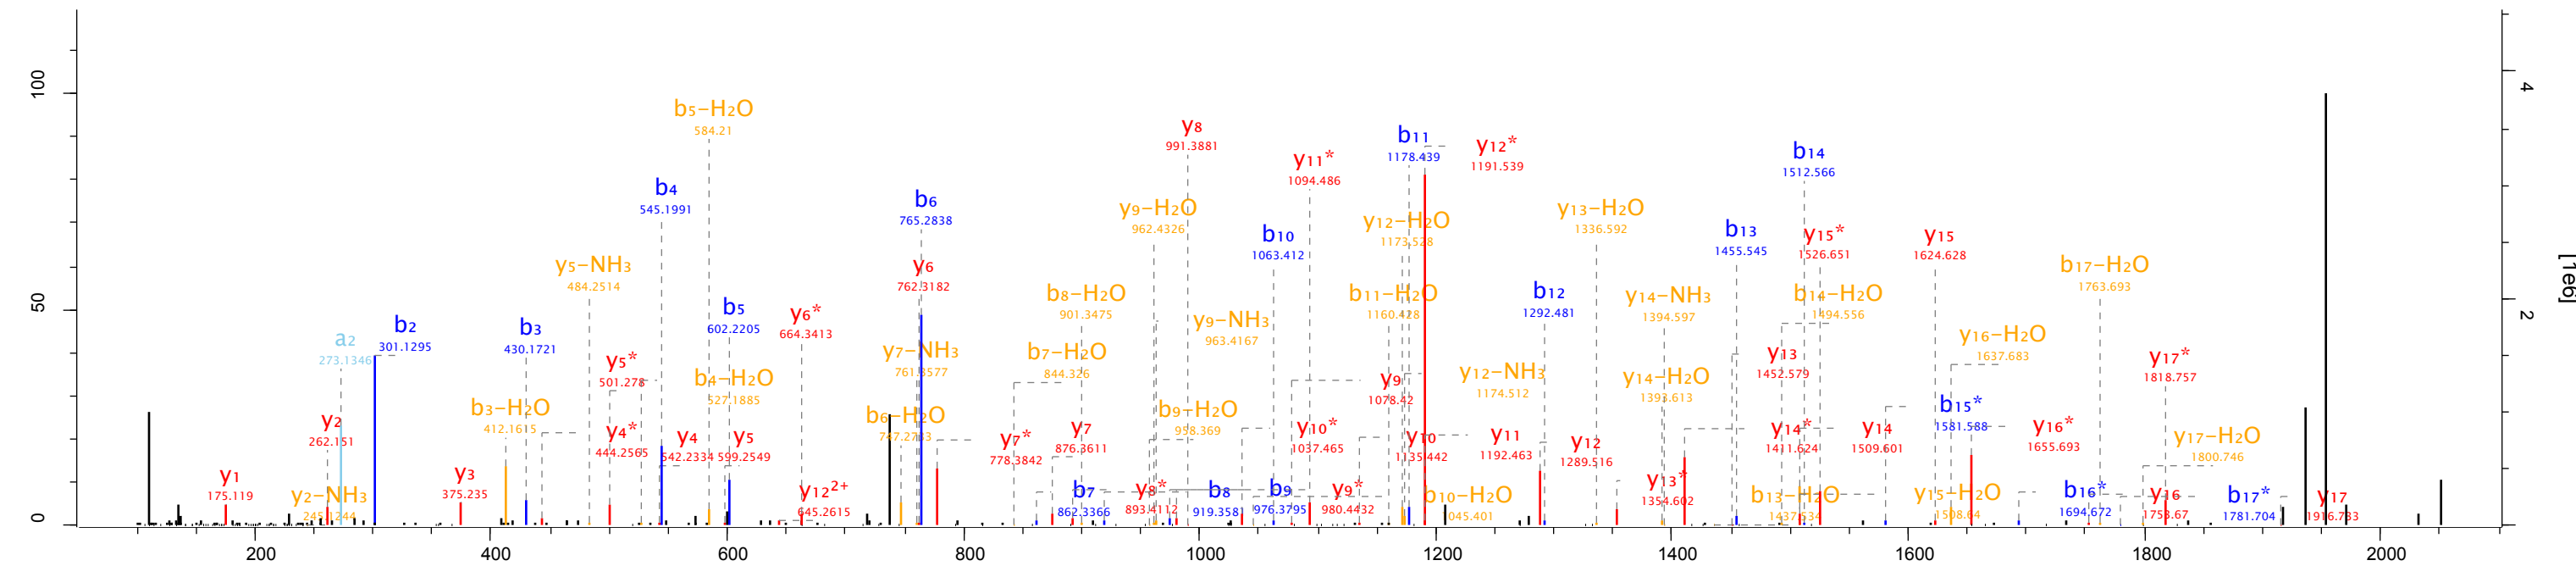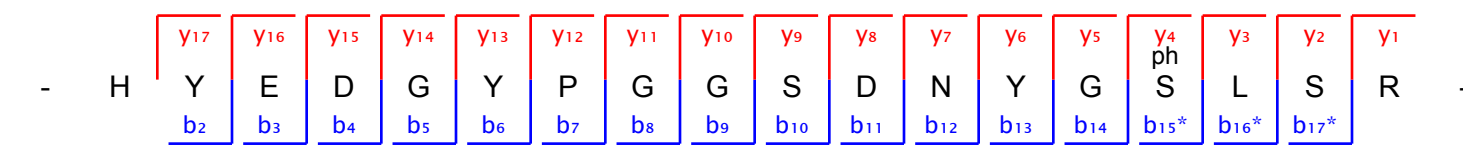

Raw file 20150812\_A375SR\_Phospho\_BR1\_04 Scan 11900 Method FTMS; HCD Score 144.92 m/z 616.78 Gene names DST

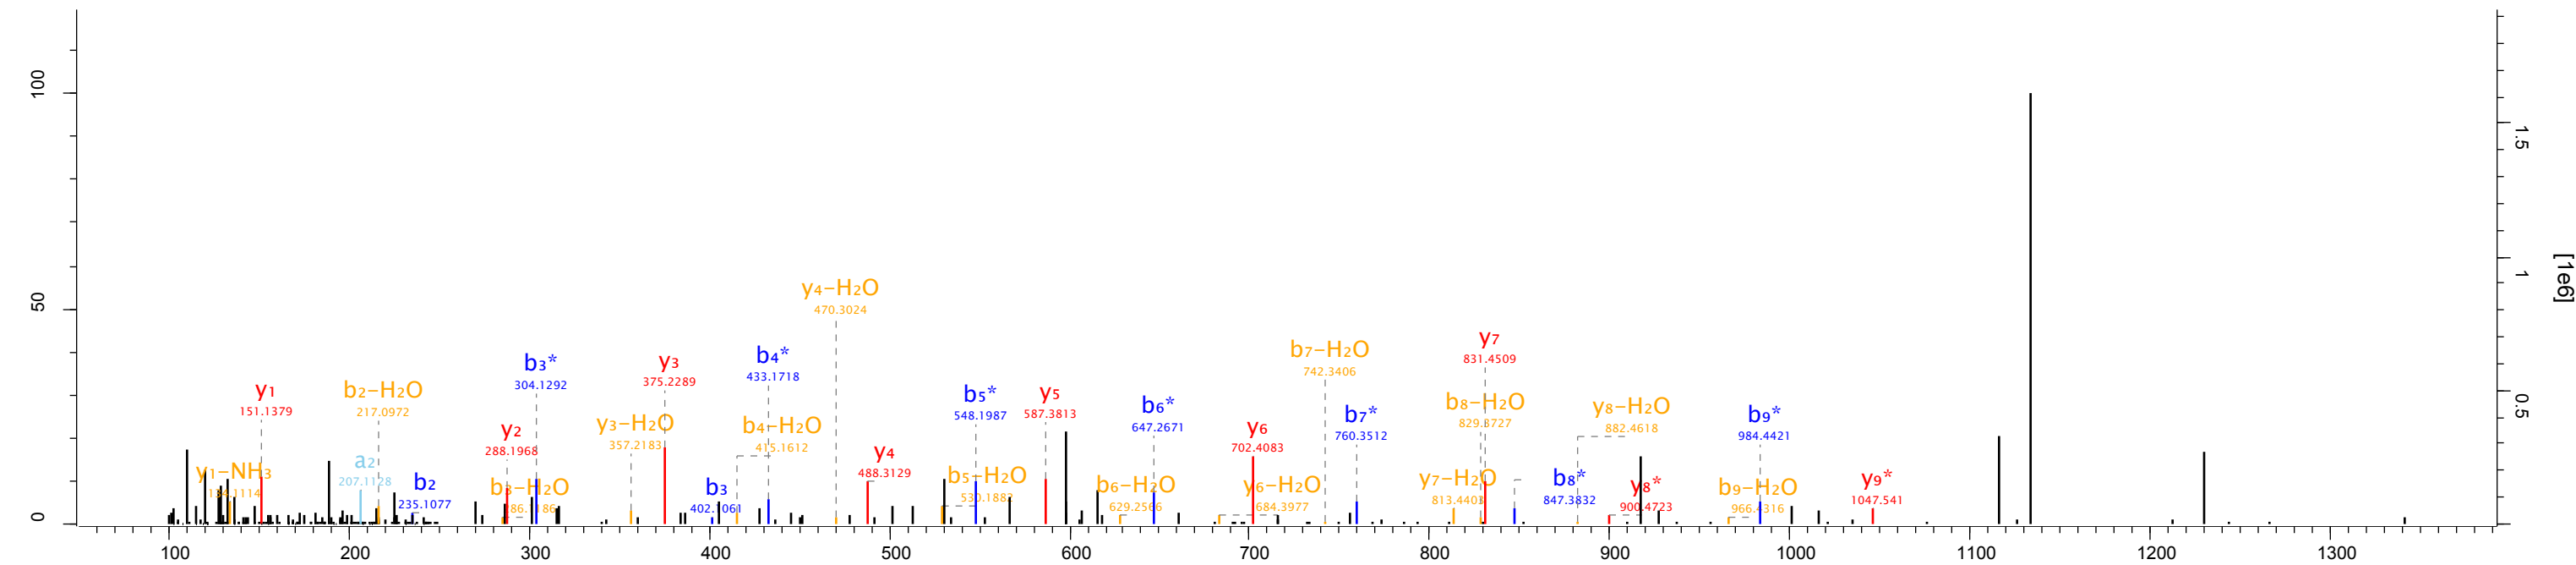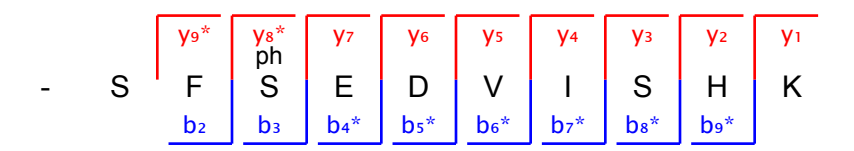

Raw file: 20150812\_A375SR\_Phospho\_BR1\_04  
 Scan: 1200 Method: FTMS; HCD Score: 108.23 m/z: 625.27 Gene names: SRRM1

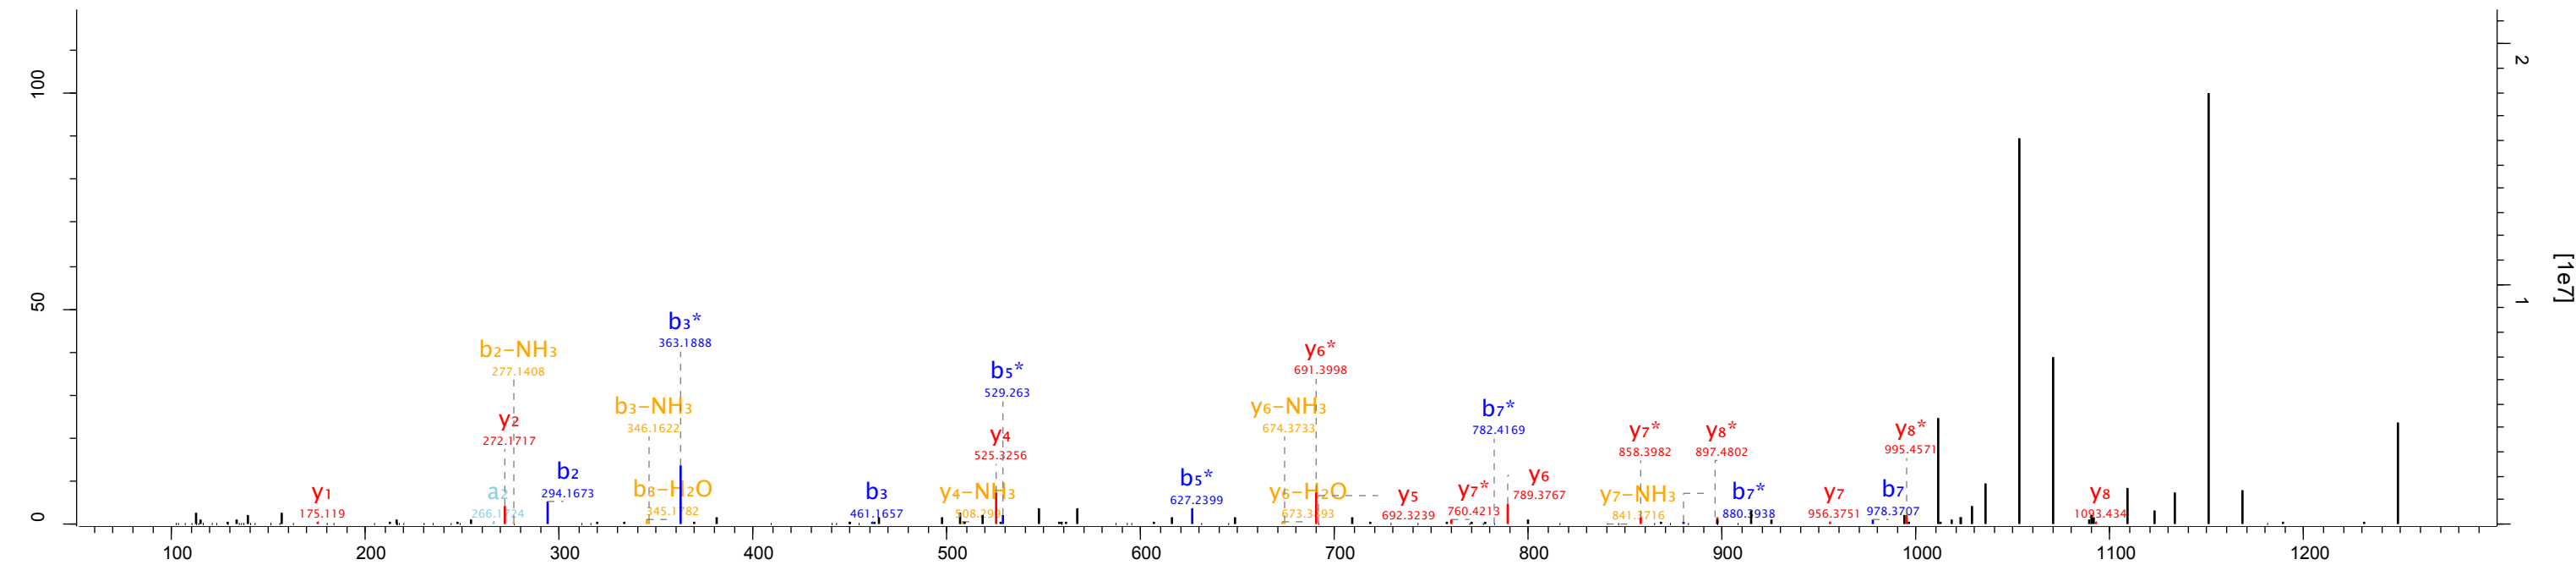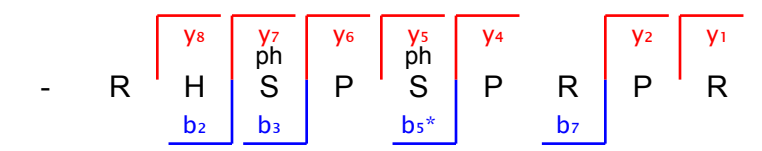

Raw file: 20150812\_A375SR\_Phospho\_BR1\_04  
 Scan: 12360 Method: FTMS; HCD Score: 161.49 m/z: 886.69 Gene names: BCLAF1

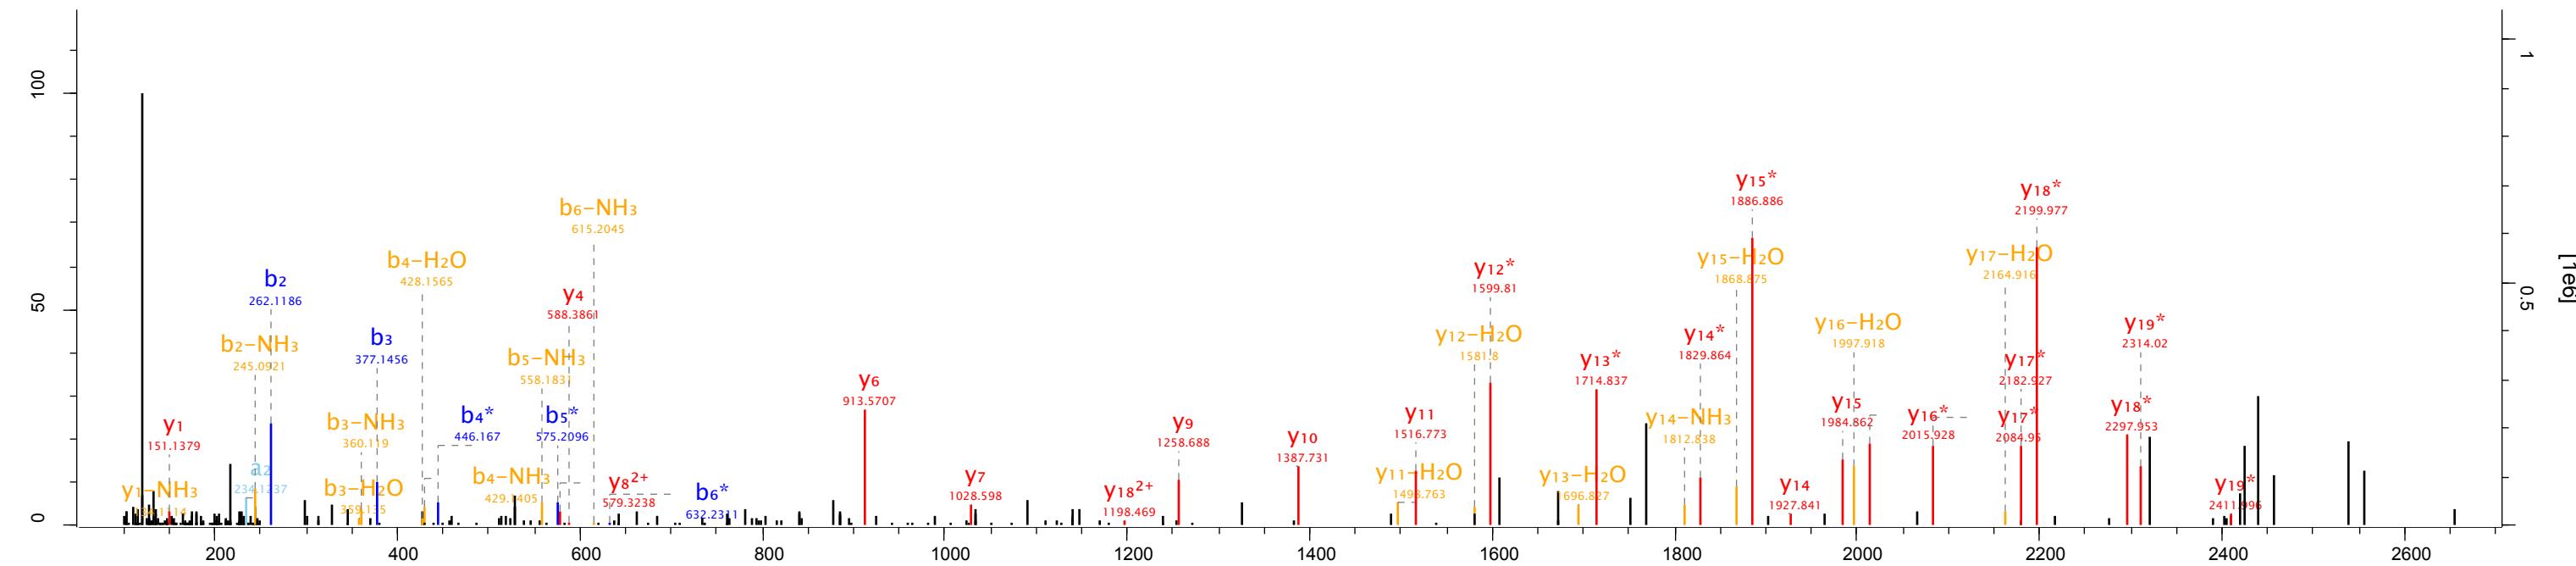

- F N D S E G D D T E E T E D Y R Q F R K -

Fragmentation labels below the sequence:

- b2 (under N)
- b3 (under D)
- b4\* (under S)
- b5\* (under E)
- b6\* (under G)
- y1 (under K)
- y4 (under Q)
- y6 (under Y)
- y7 (under D)
- y8<sup>2+</sup> (under E)
- y9 (under T)
- y10 (under E)
- y11 (under T)
- y12\* (under D)
- y13\* (under D)
- y14 (under D)
- y15 (under G)
- y16\* (under E)
- y17\* (under S)
- y18\* (under D)
- y19\* (under N)

Raw file Scan Method Score m/z Gene names  
 20150812\_A375SR\_Phospho\_BR1\_04 12510 FTMS; HCD 136.57 636.85 AHNAK

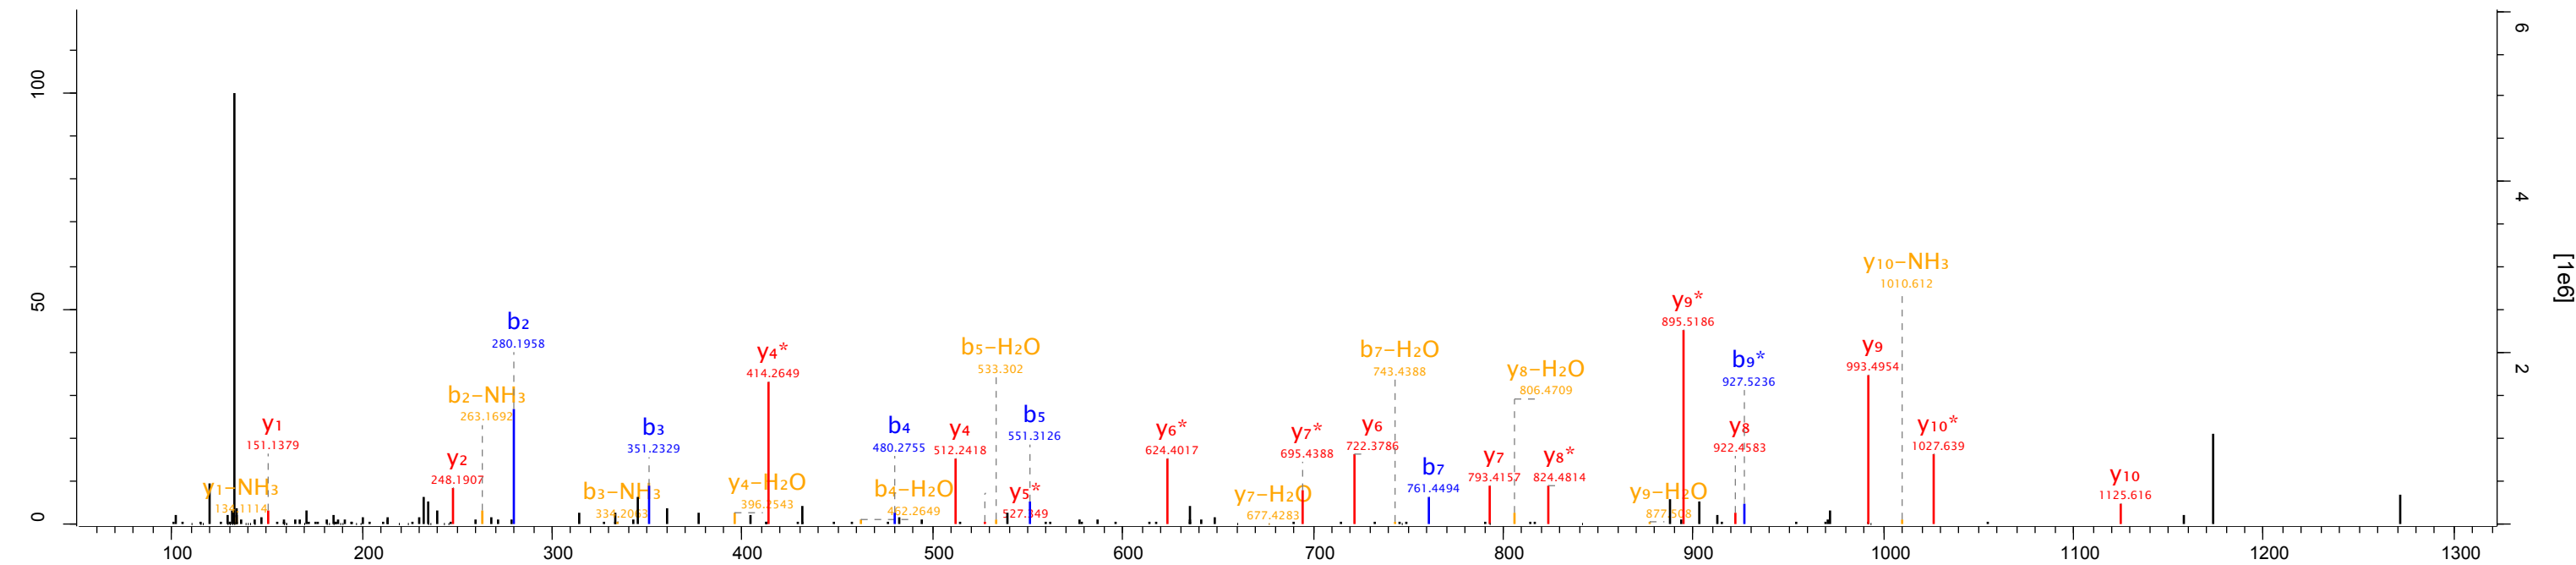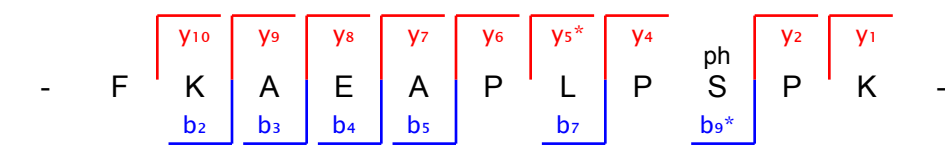

Raw file Scan Method Score m/z Gene names  
 20150812\_A375SR\_Phospho\_BR1\_04 12740 FTMS; HCD 74.97 741.65 ZNF217

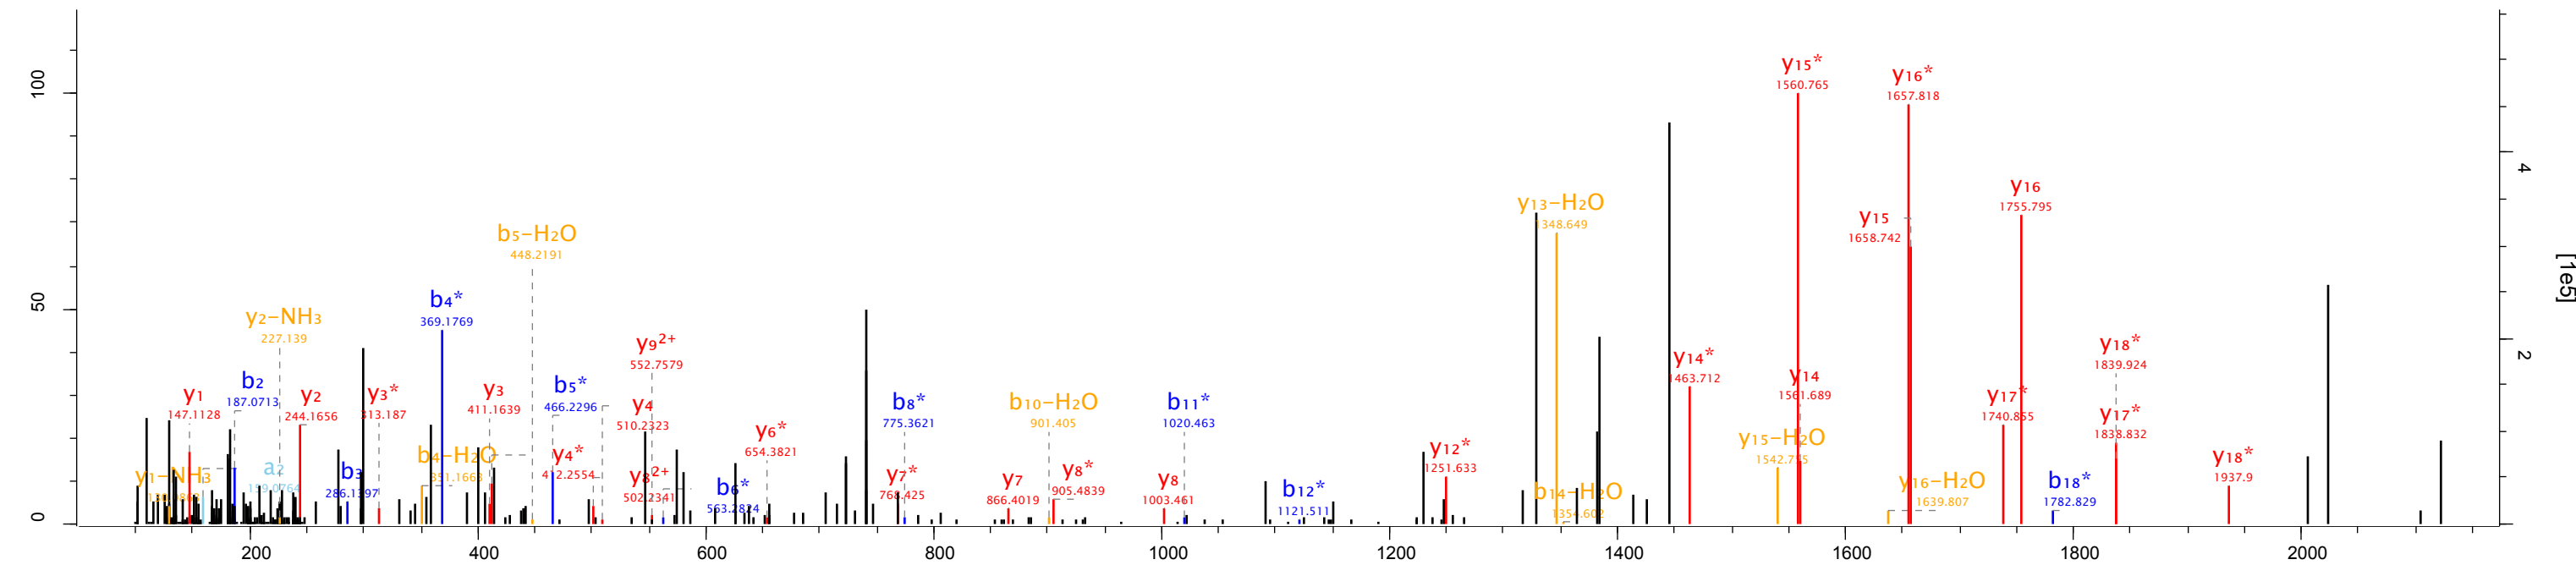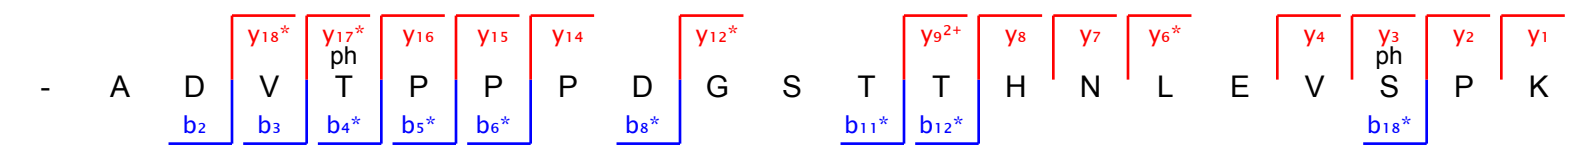

Raw file 20150812\_A375SR\_Phospho\_BR1\_04 Scan 13610 Method FTMS; HCD Score 153.63 m/z 945.37 Gene names RIC8A

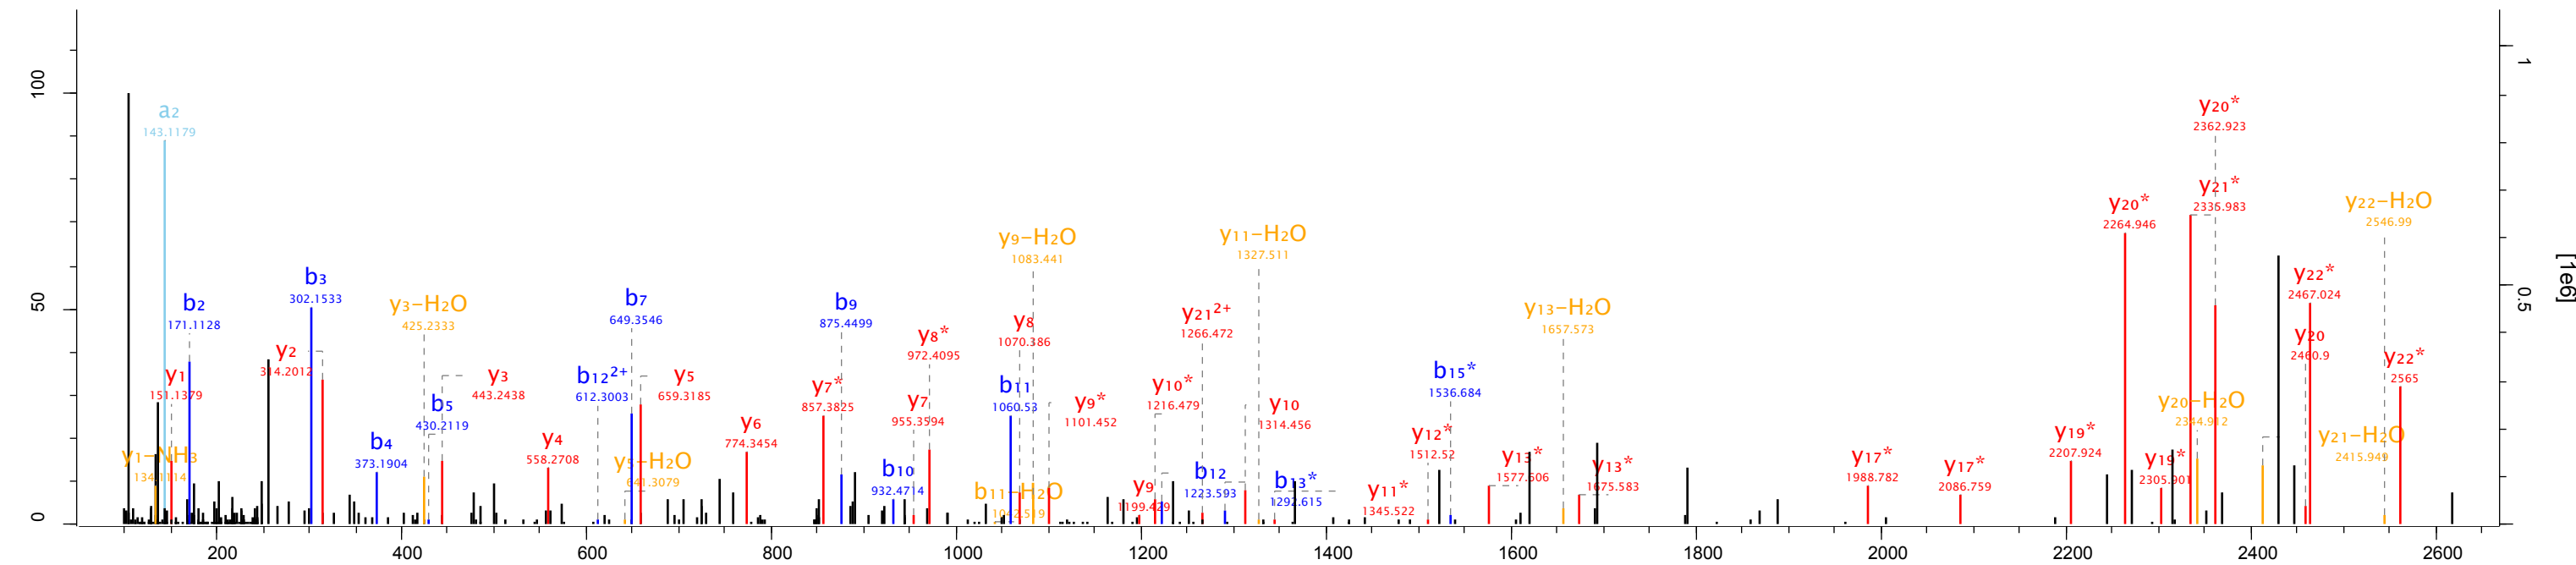

- G L M A G G R P E G Q Y S E D E D T D T D E Y K -

b<sub>2</sub>
b<sub>3</sub>
b<sub>4</sub>
b<sub>5</sub>
b<sub>7</sub>
b<sub>9</sub>
b<sub>10</sub>
b<sub>11</sub>
b<sub>12</sub>
b<sub>13</sub><sup>\*</sup>
b<sub>15</sub><sup>\*</sup>
y<sub>17</sub><sup>\*</sup>
y<sub>19</sub><sup>\*</sup>
y<sub>20</sub>
y<sub>21</sub><sup>\*</sup>
y<sub>22</sub><sup>\*</sup>
y<sub>13</sub><sup>\*</sup>
y<sub>12</sub><sup>\*</sup>
y<sub>11</sub><sup>\*</sup>
y<sub>10</sub>
y<sub>9</sub>
y<sub>8</sub>
y<sub>7</sub>
y<sub>6</sub>
y<sub>5</sub>
y<sub>4</sub>
y<sub>3</sub>
y<sub>2</sub>
y<sub>1</sub>

Raw file: 20150812\_A375SR\_Phospho\_BR1\_04  
 Scan: 13760 Method: FTMS; HCD Score: 447.04 m/z: 1217.47 Gene names: BCLAF1

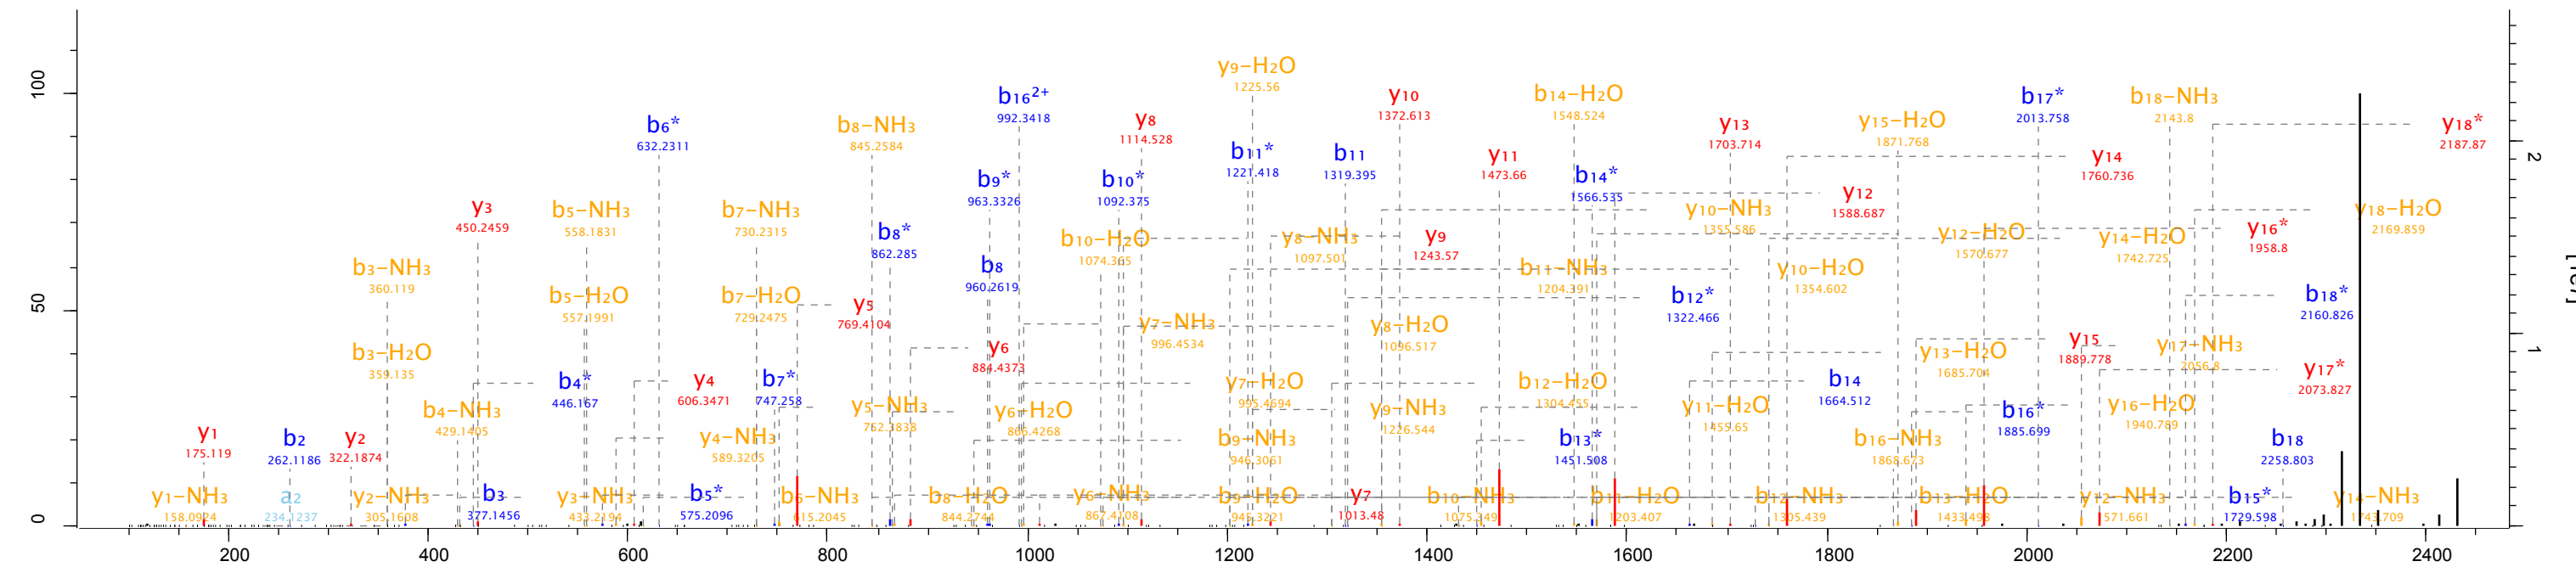

|   |   |      |      |      |     |     |     |     |     |      |     |      |      |     |      |      |      |     |    |   |
|---|---|------|------|------|-----|-----|-----|-----|-----|------|-----|------|------|-----|------|------|------|-----|----|---|
| - | F | y18* | y17* | y16* | y15 | y14 | y13 | y12 | y11 | y10  | y9  | y8   | y7   | y6  | y5   | y4   | y3   | y2  | y1 | - |
|   |   | N    | D    | S    | E   | G   | D   | D   | T   | E    | E   | T    | E    | D   | Y    | R    | Q    | F   | R  |   |
|   |   | b2   | b3   | b4*  | b5* | b6* | b7* | b8  | b9* | b10* | b11 | b12* | b13* | b14 | b15* | b16* | b17* | b18 |    |   |



Raw file: 20150812\_A375SR\_Phospho\_BR1\_04  
 Scan: 13850 Method: FTMS; HCD Score: 257.71 m/z: 993.4 Gene names: SRSF10

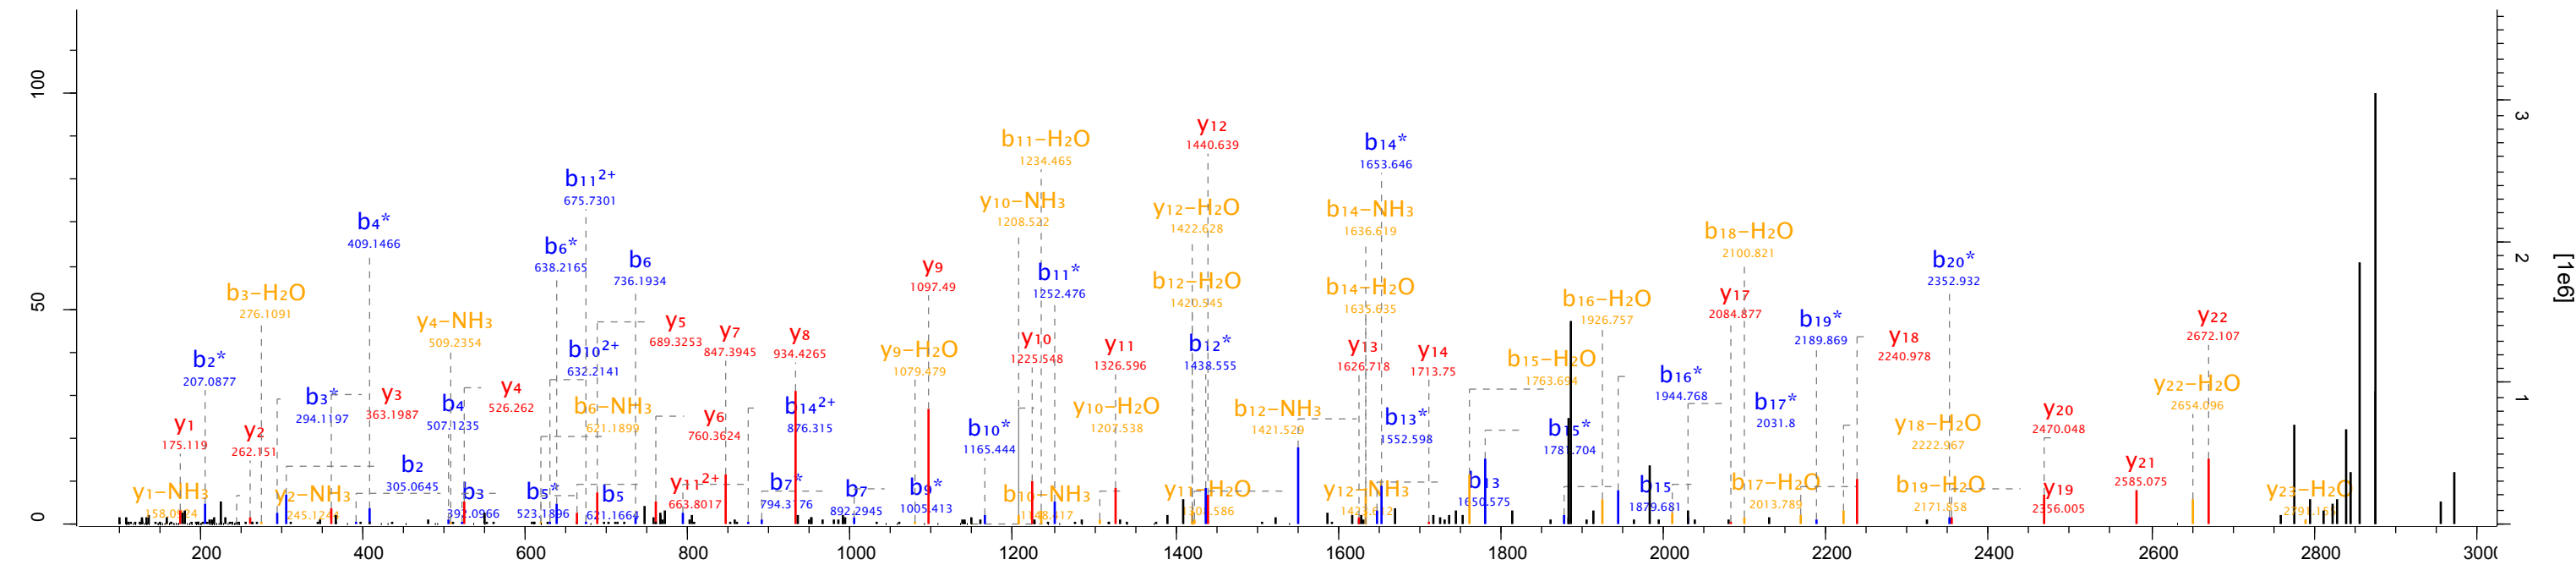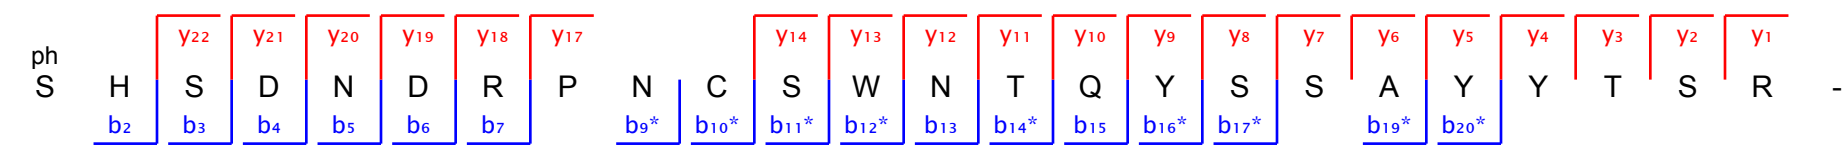

Raw file  
20150812\_A375SR\_Phospho\_BR1\_04

Scan 14070 Method FTMS; HCD Score 207.7 m/z 1101.95 Gene names JUNB

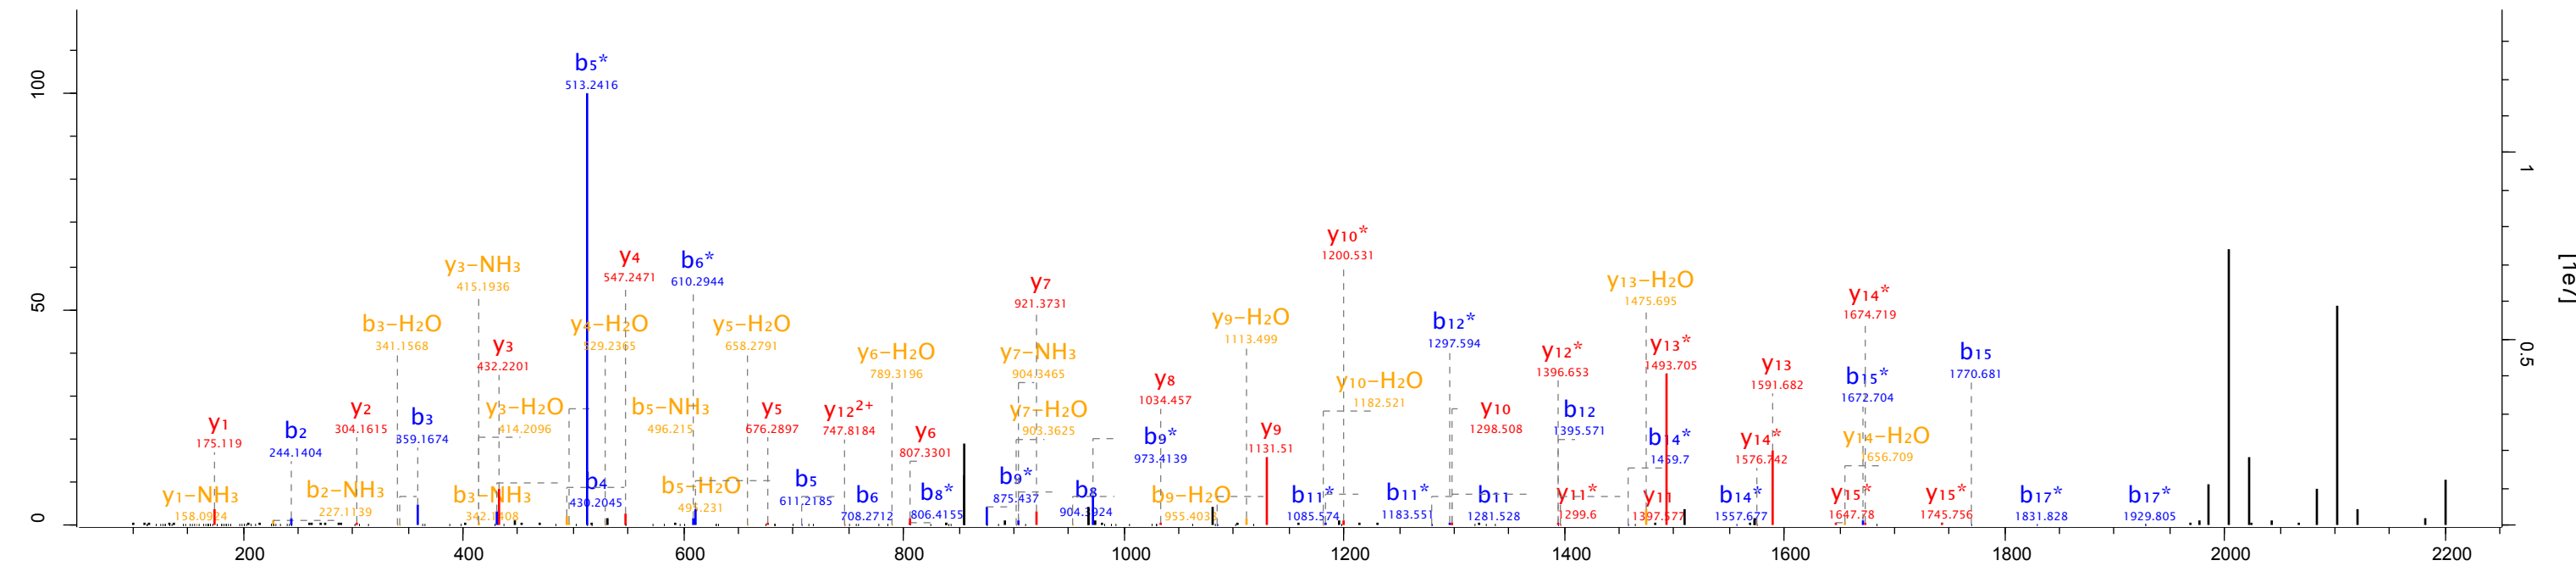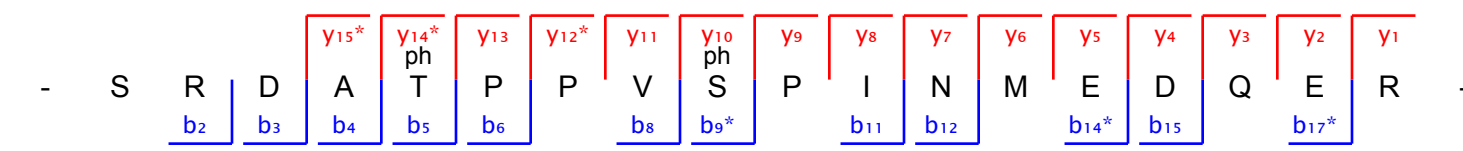

Raw file: 20150812\_A375SR\_Phospho\_BR1\_04  
 Scan: 1440 Method: FTMS; HCD Score: 115.56 m/z: 554.61 Gene names: BTBD10

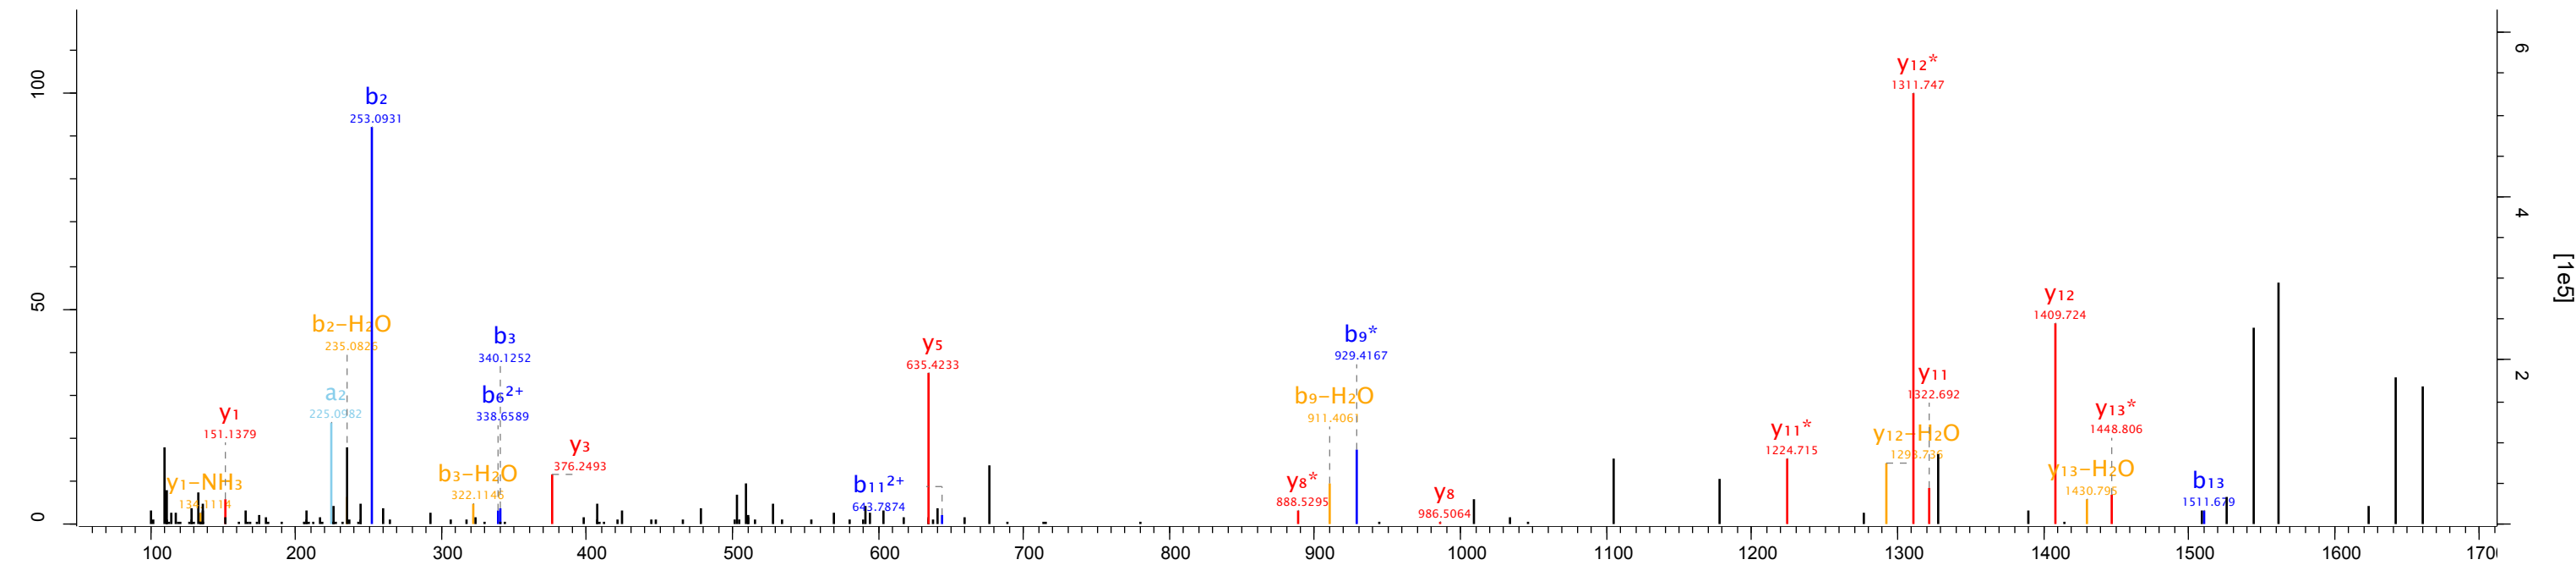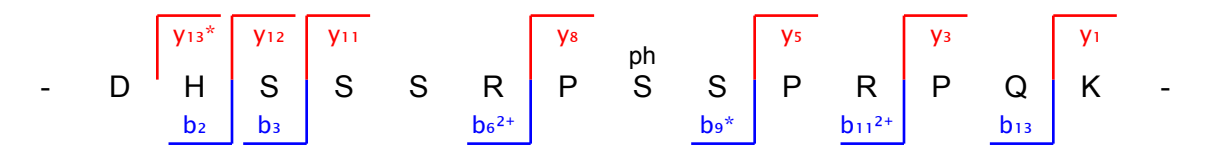

Raw file: 20150812\_A375SR\_Phospho\_BR1\_04  
 Scan: 1480 Method: FTMS; HCD Score: 68.41 m/z: 599.29 Gene names: GPATCH4

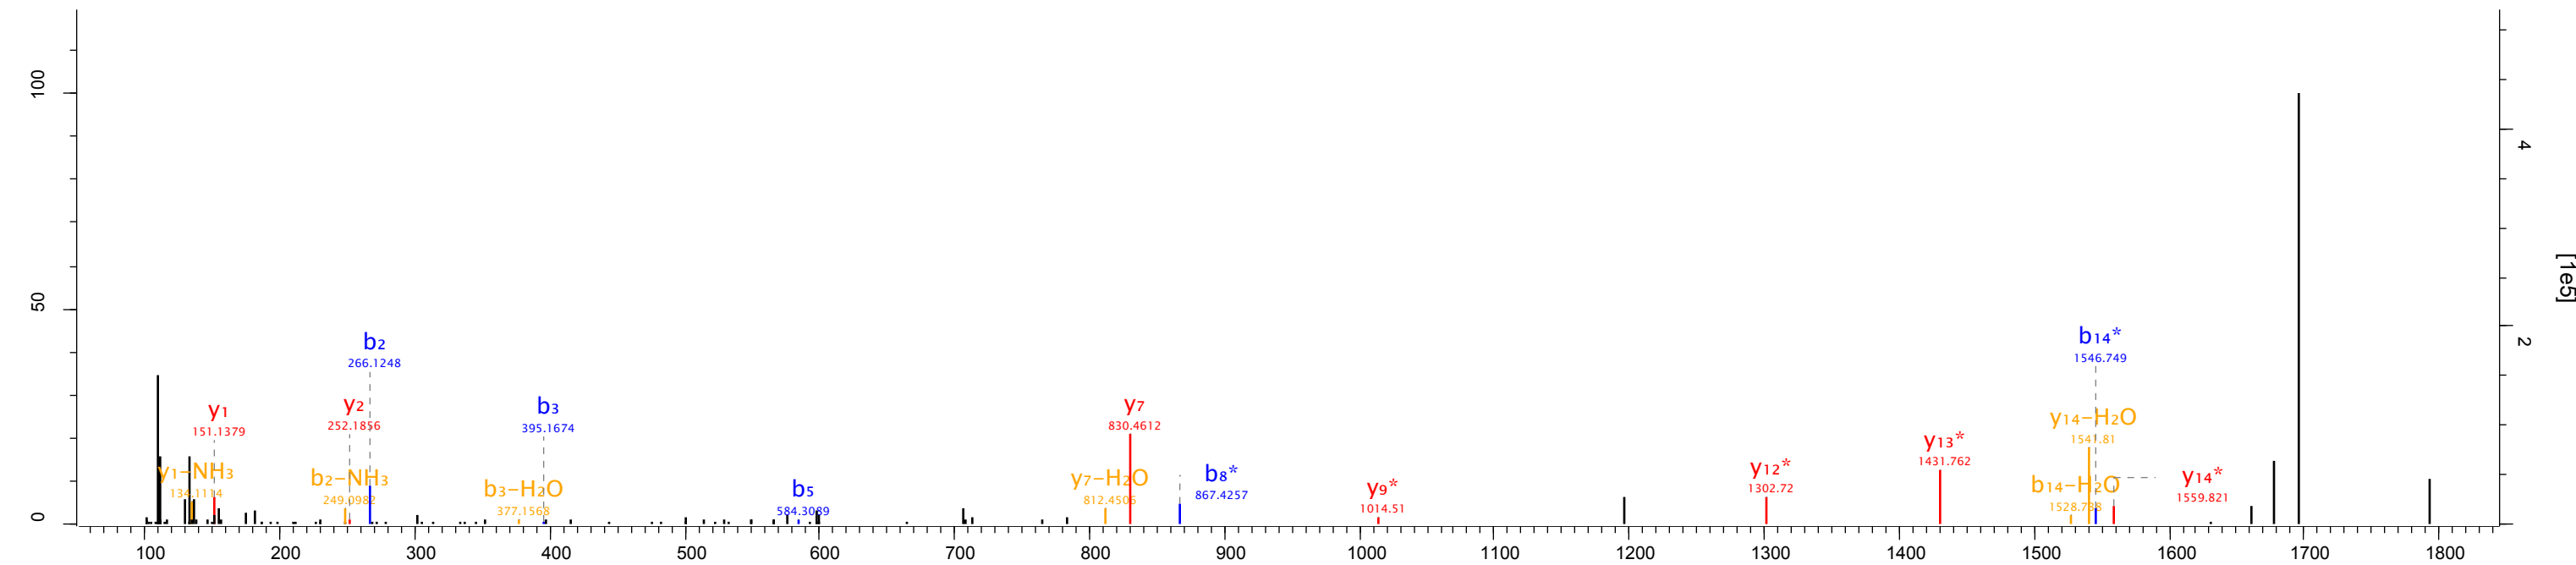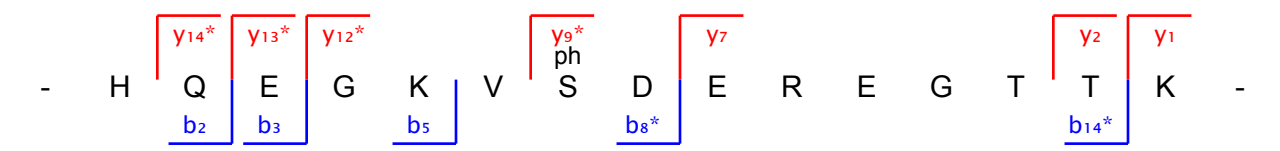

Raw file: 20150812\_A375SR\_Phospho\_BR1\_04  
 Scan: 15050 Method: FTMS; HCD Score: 102.8 m/z: 878.41 Gene names: UNG;DKFZp781L1143

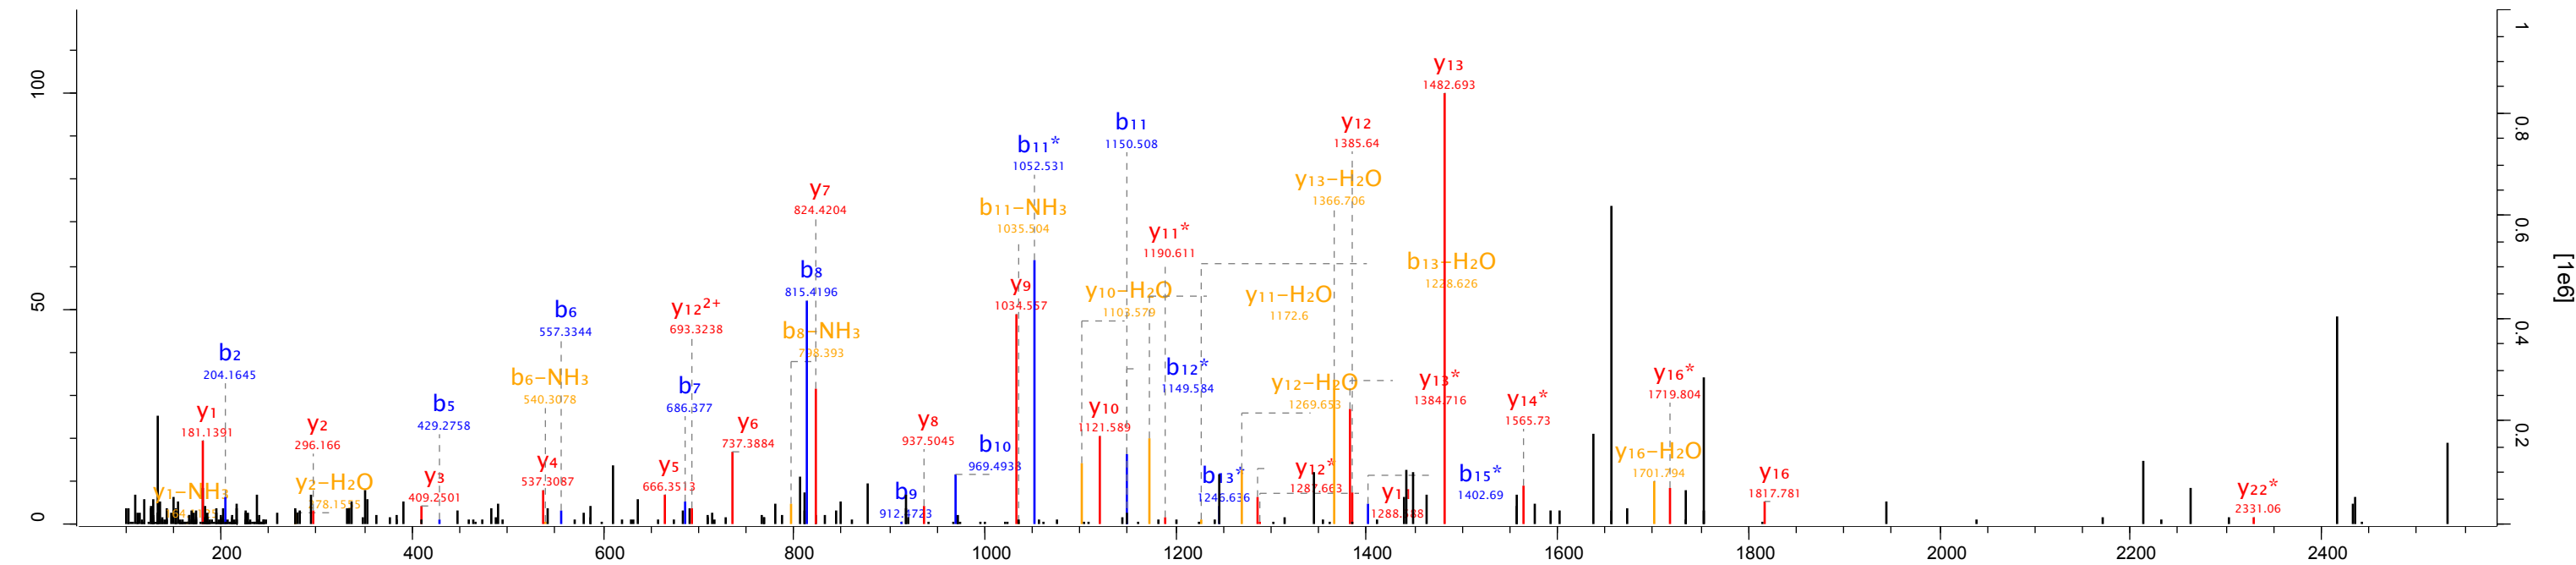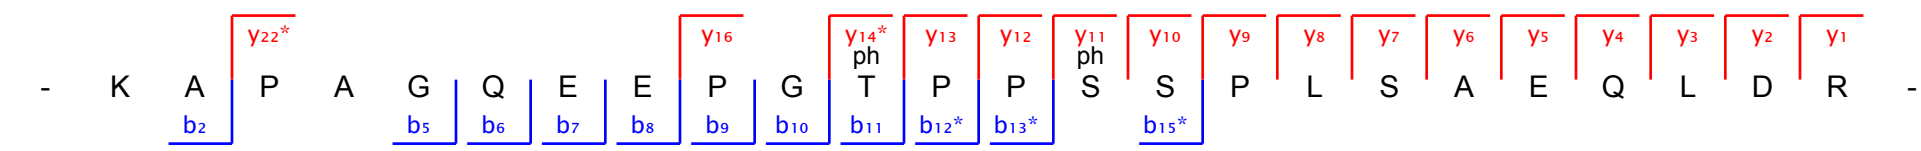

Raw file Scan Method Score m/z Gene names  
 20150812\_A375SR\_Phospho\_BR1\_04 15230 FTMS; HCD 139.19 991.84 TCOF1

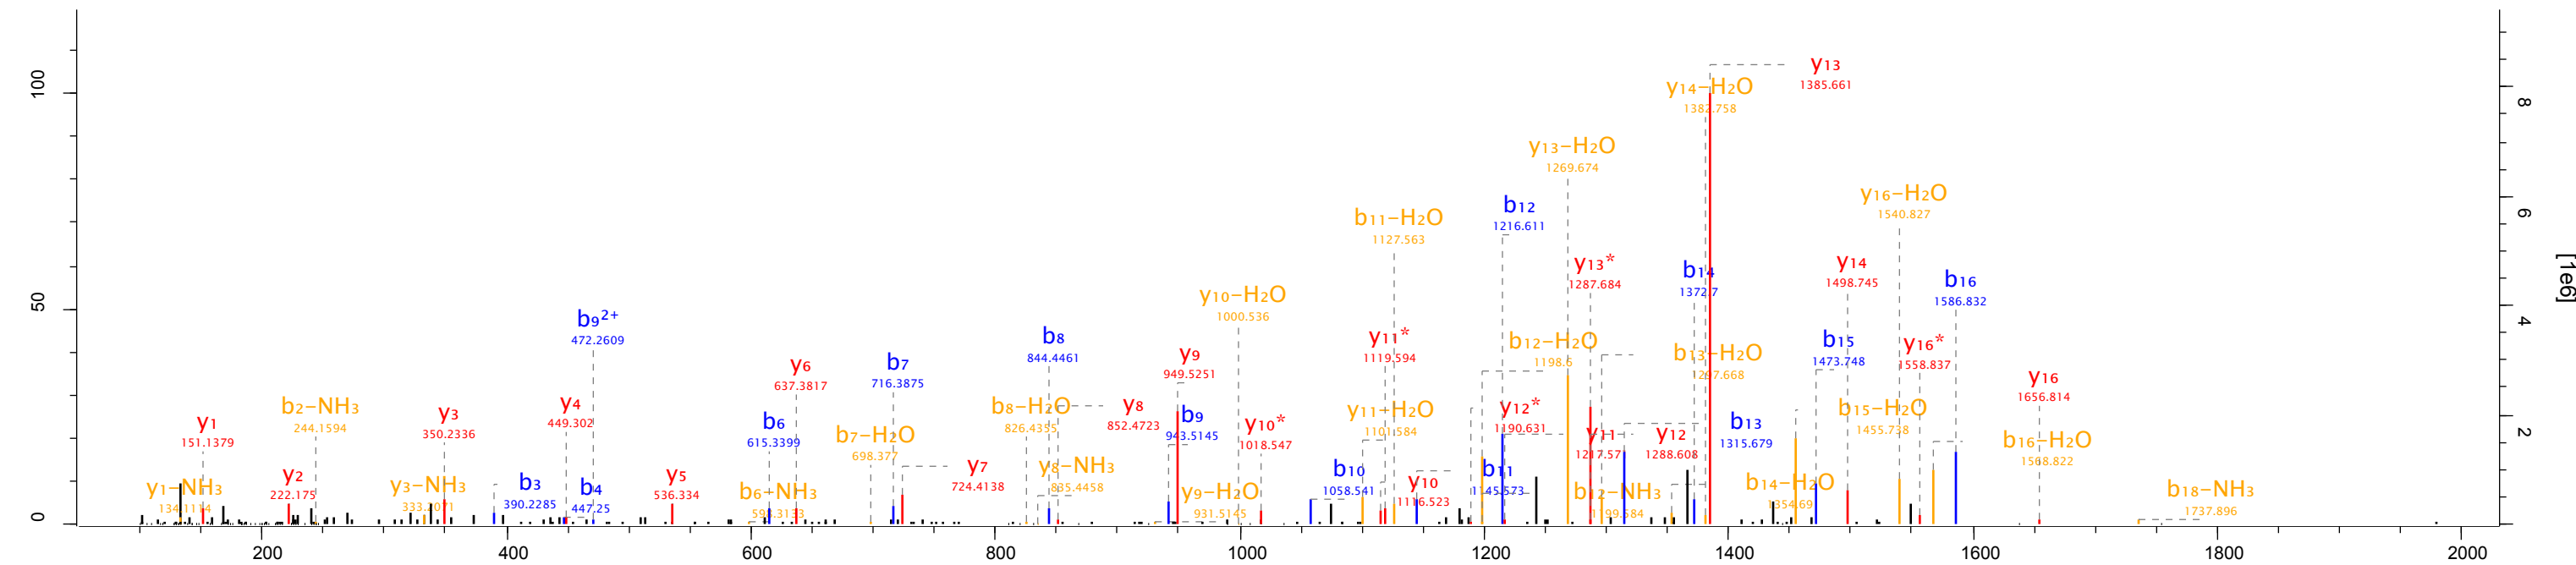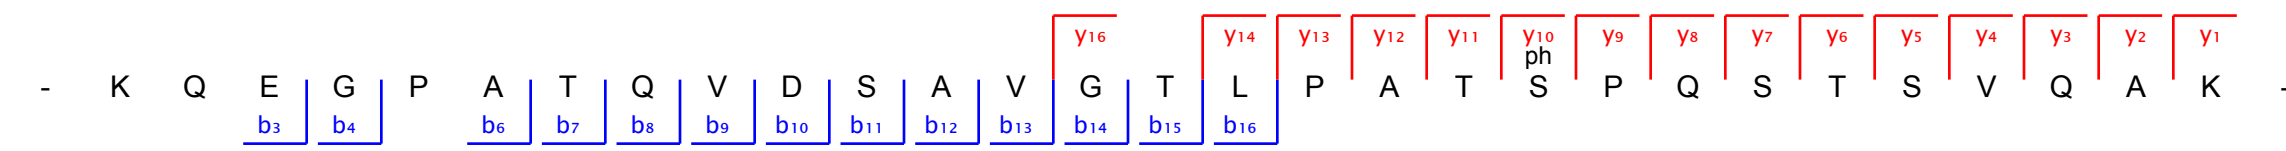

Raw file: 20150812\_A375SR\_Phospho\_BR1\_04  
 Scan: 15320 Method: FTMS; HCD Score: 214.42 m/z: 1006.47 Gene names: ARHGAP17

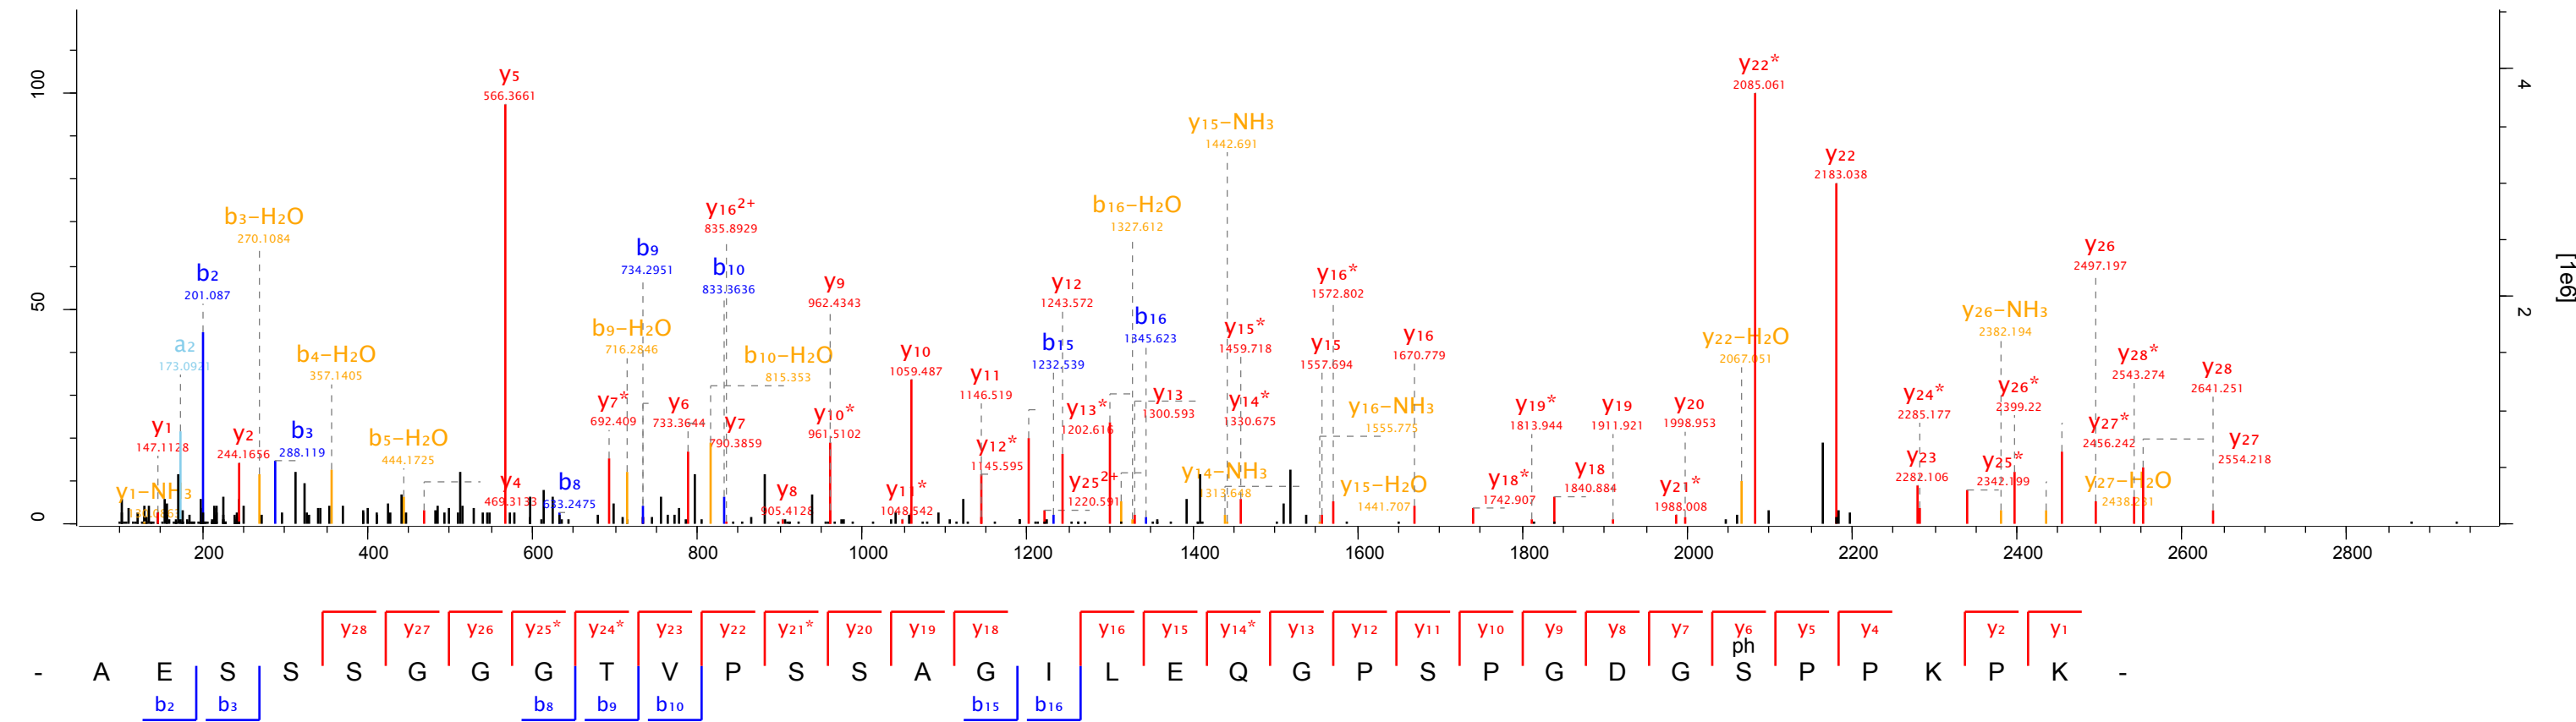

Raw file: 20150812\_A375SR\_Phospho\_BR1\_04  
 Scan: 15370 Method: FTMS; HCD Score: 148.89 m/z: 983.94 Gene names: UNK

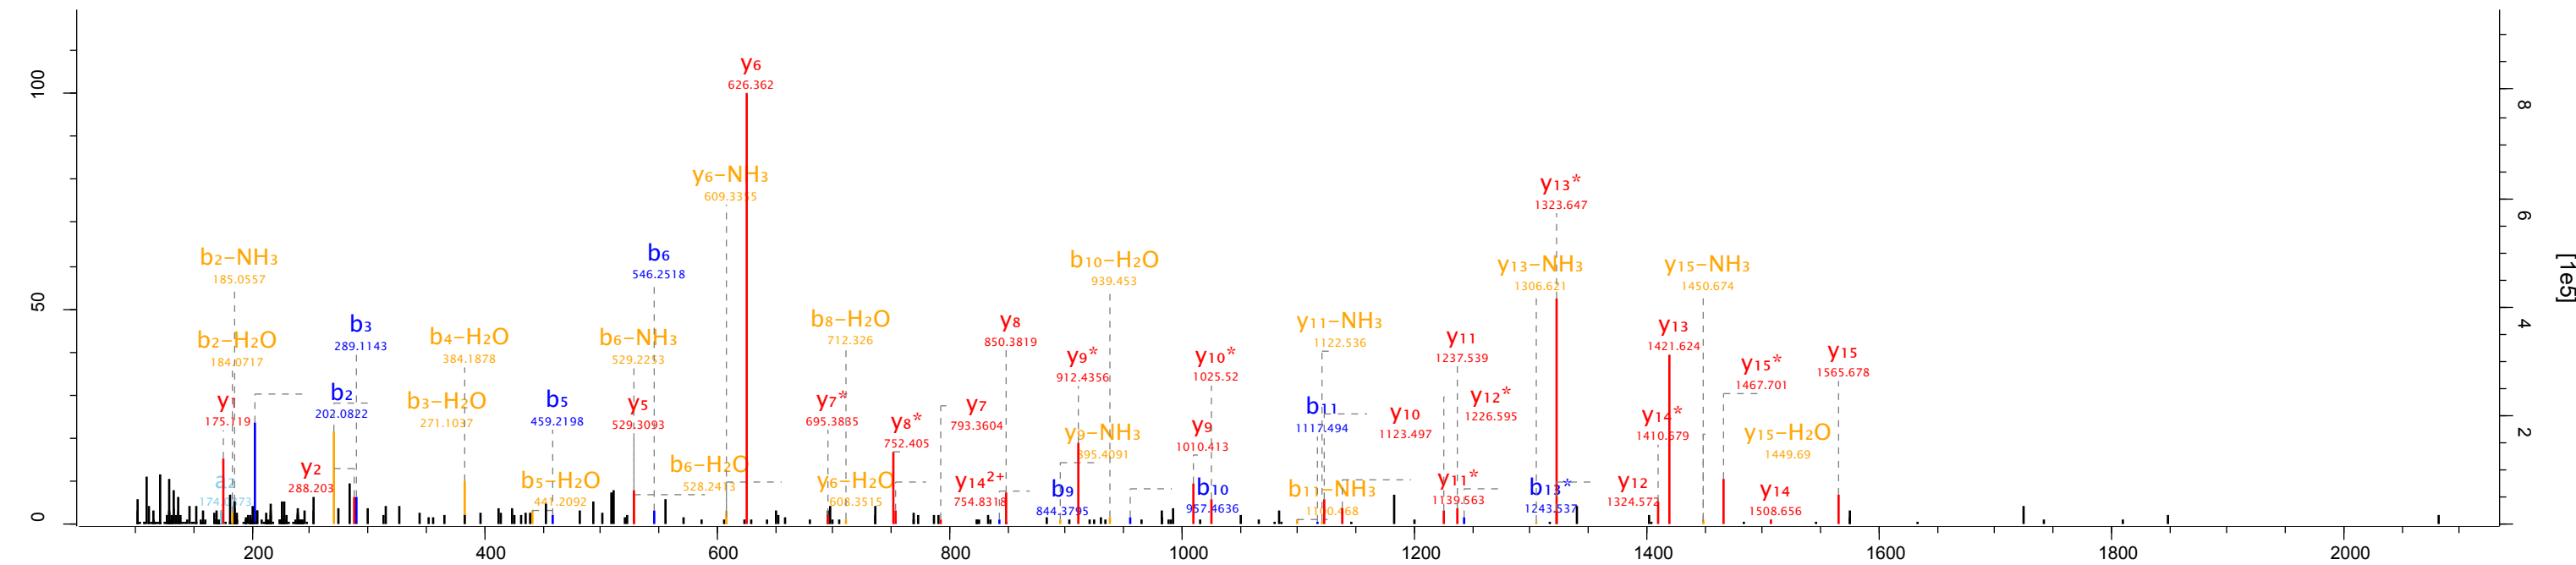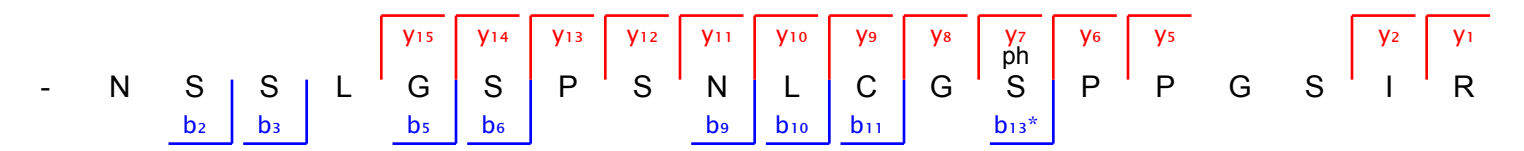



Raw file  
 20150812\_A375SR\_Phospho\_BR1\_04  
 Scan 15470 Method FTMS; HCD Score 241.9 m/z 1343.65 Gene names TCOF1

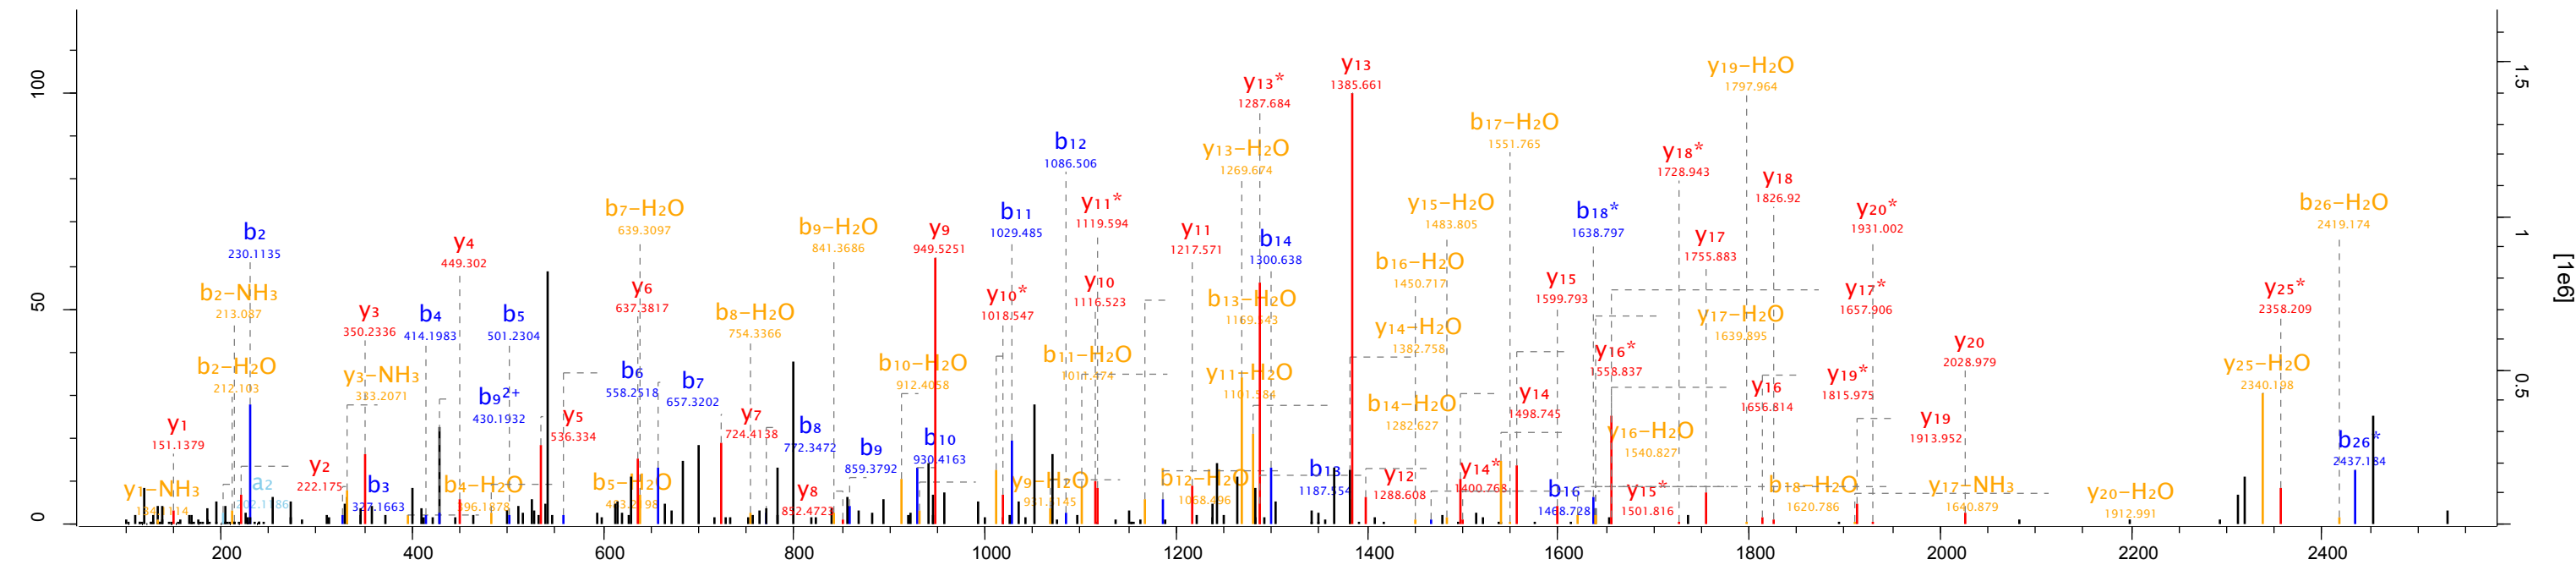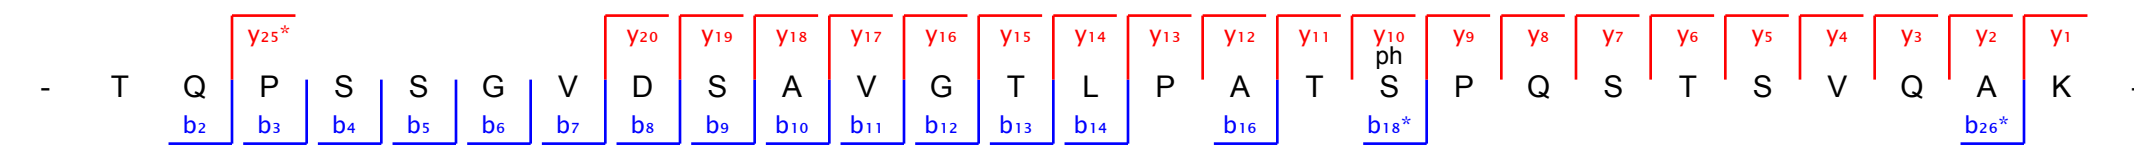

Raw file: 20150812\_A375SR\_Phospho\_BR1\_04  
 Scan: 15580 Method: FTMS; HCD Score: 221.34 m/z: 1042.53 Gene names: AKT1S1

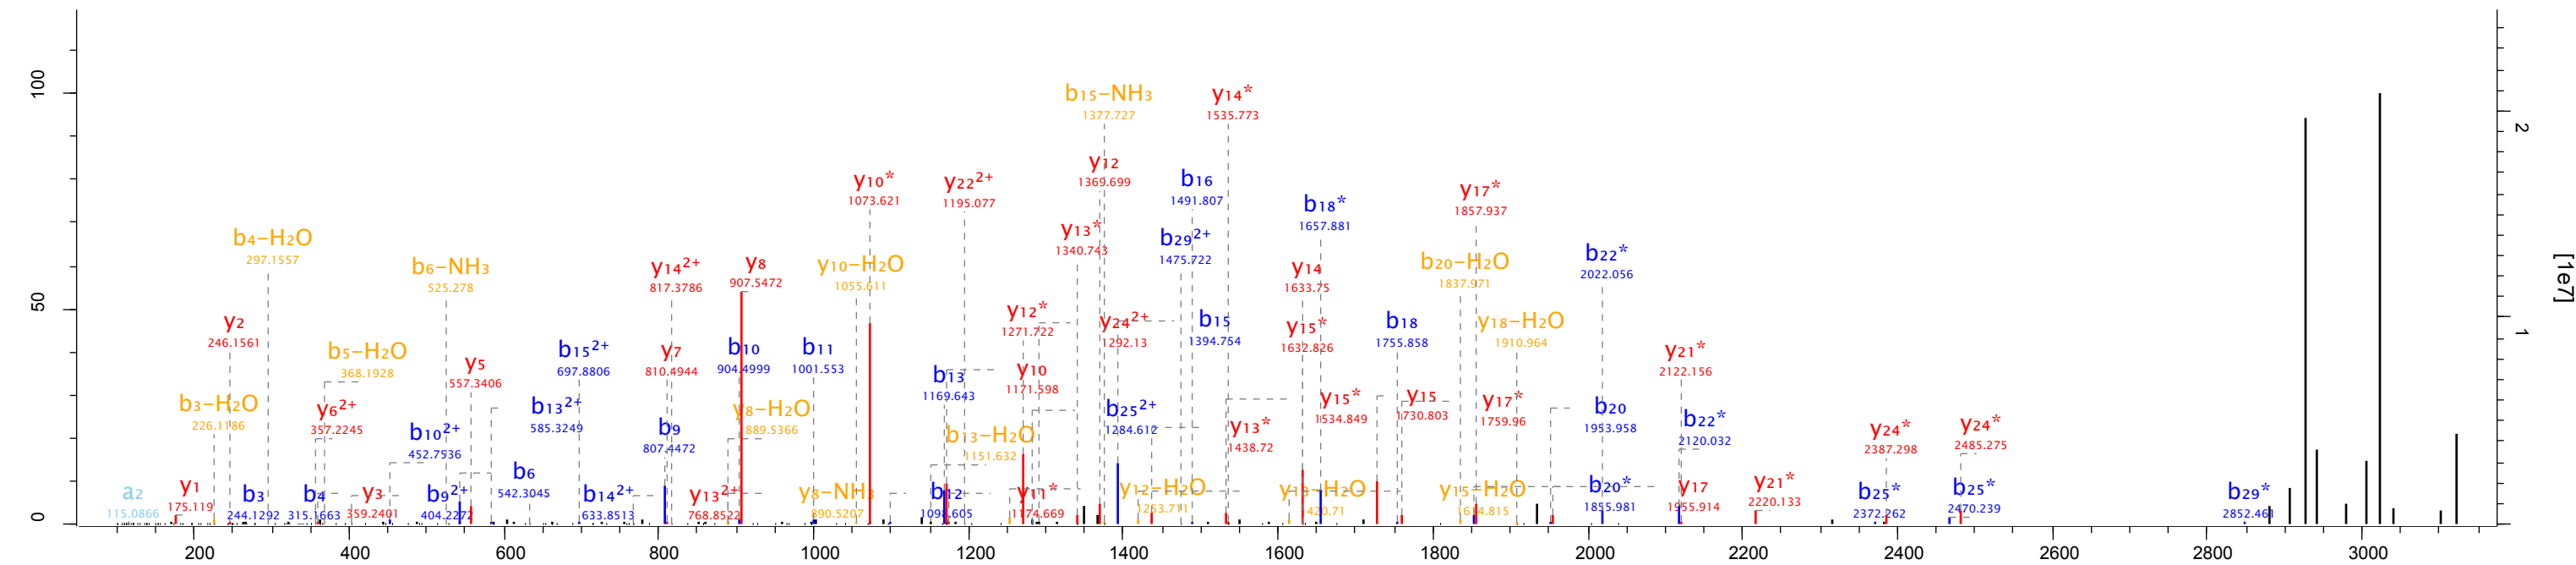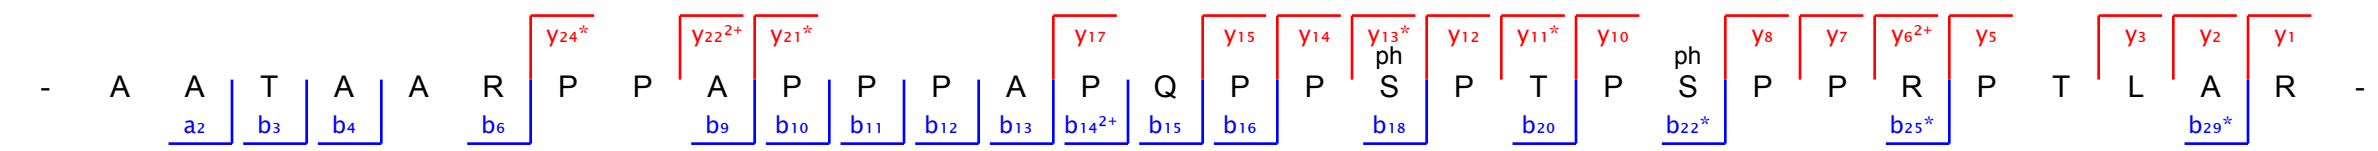

Raw file 20150812\_A375SR\_Phospho\_BR1\_04 Scan 15610 Method FTMS; HCD Score 229.6 m/z 1200.58 Gene names NSFL1C

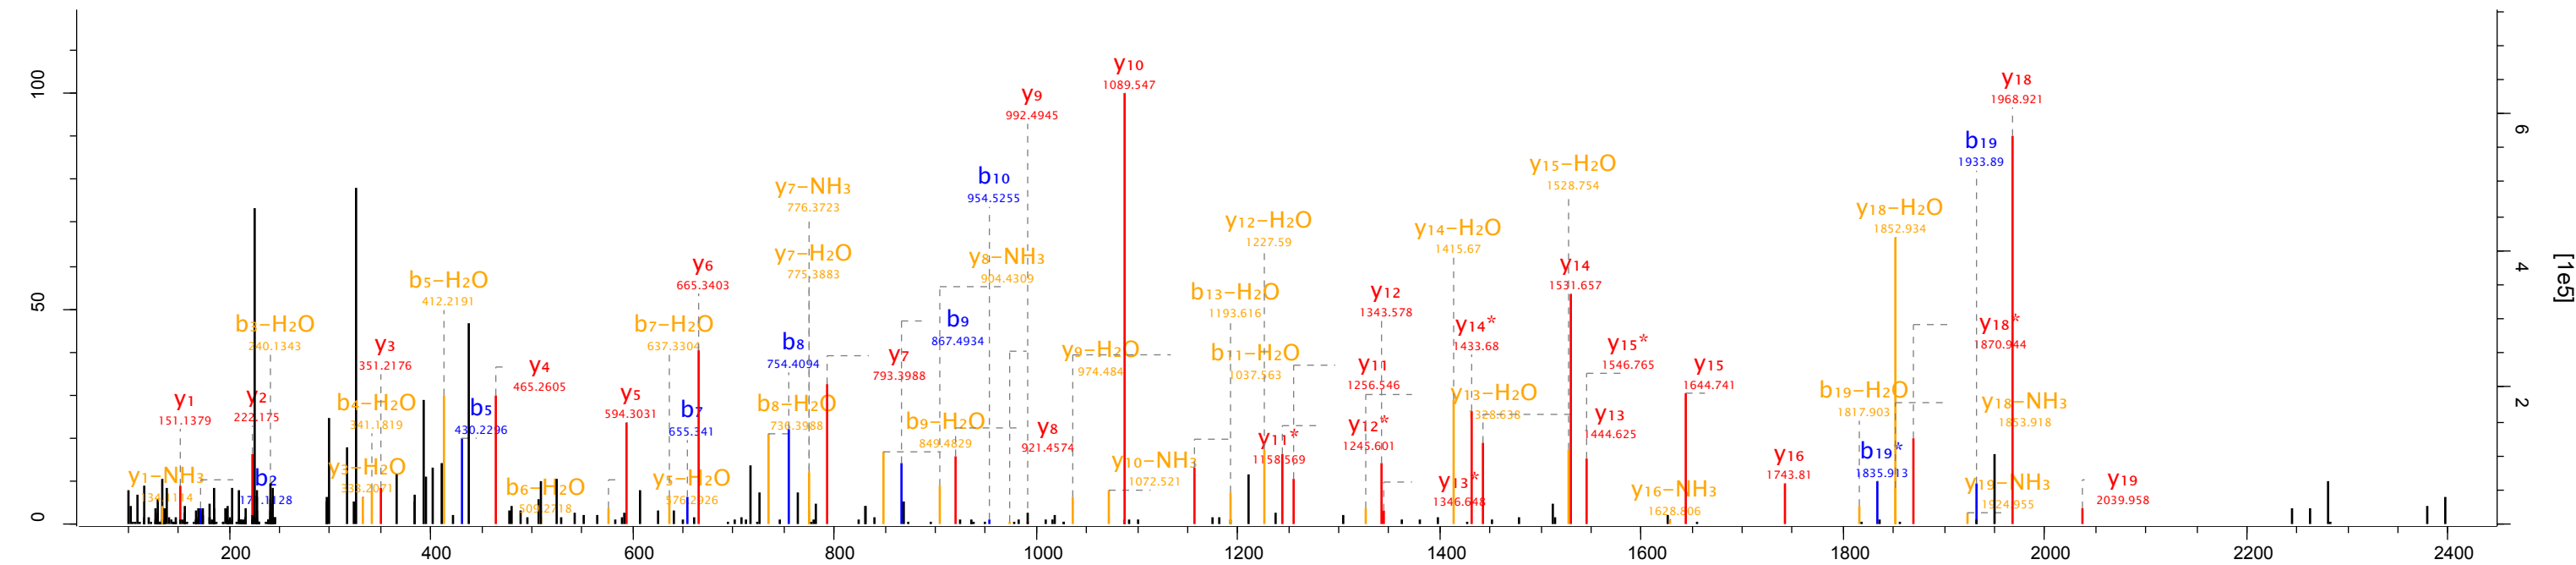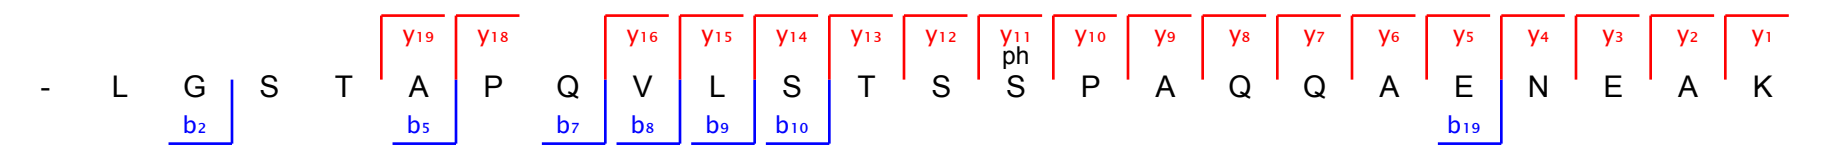

Raw file Scan Method Score m/z Gene names  
 20150812\_A375SR\_Phospho\_BR1\_04 16290 FTMS; HCD 250.38 1031.49 CPSF4

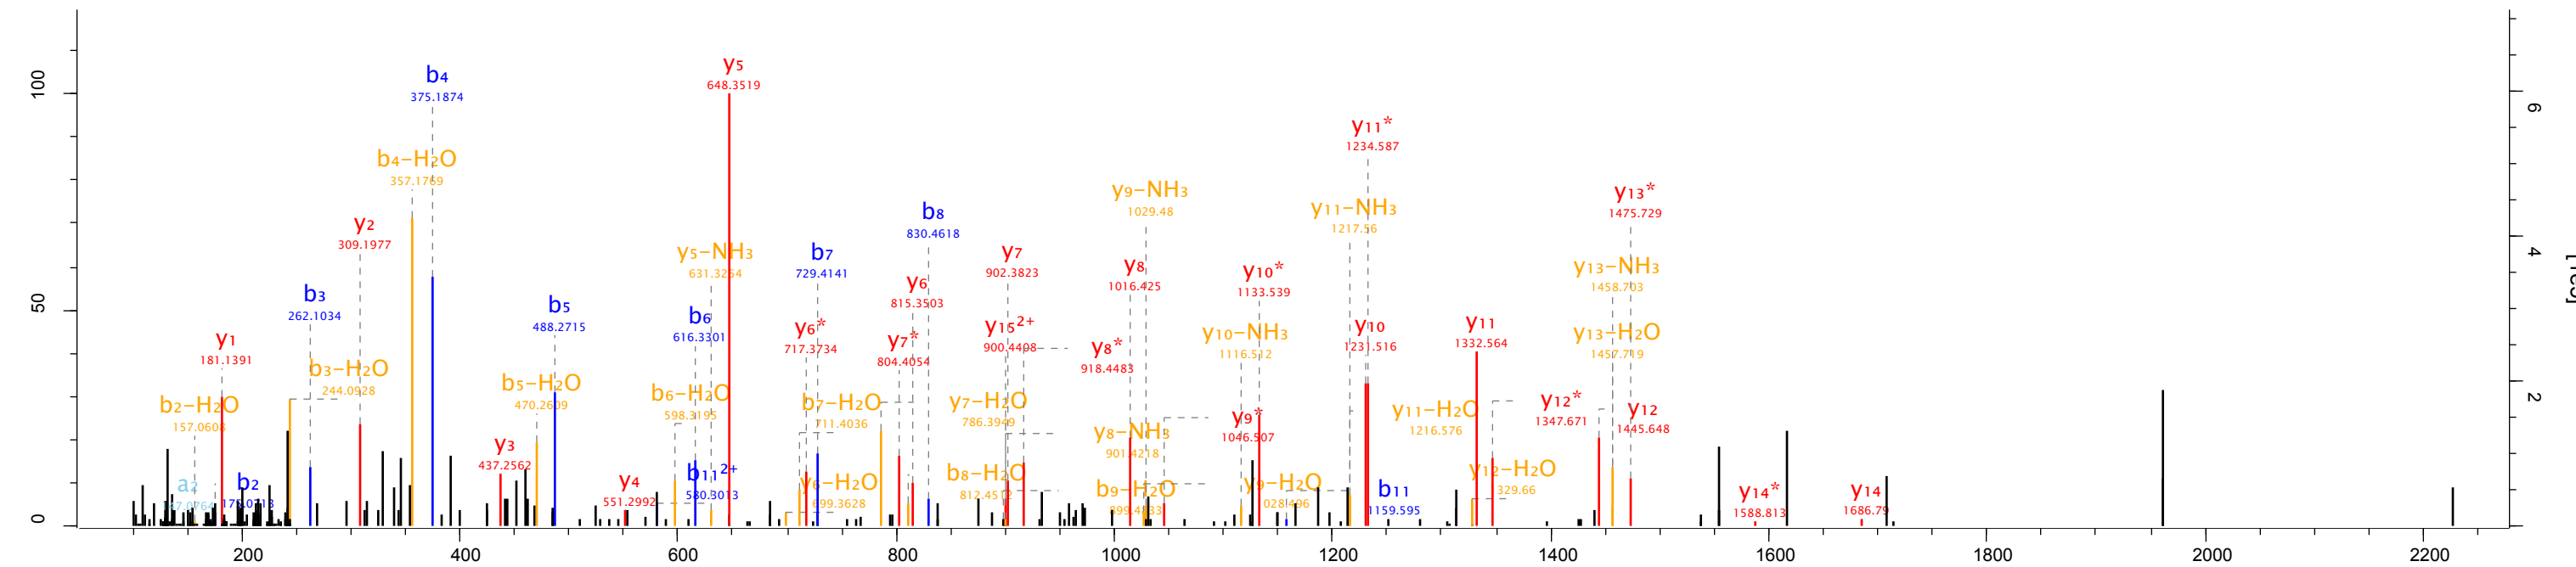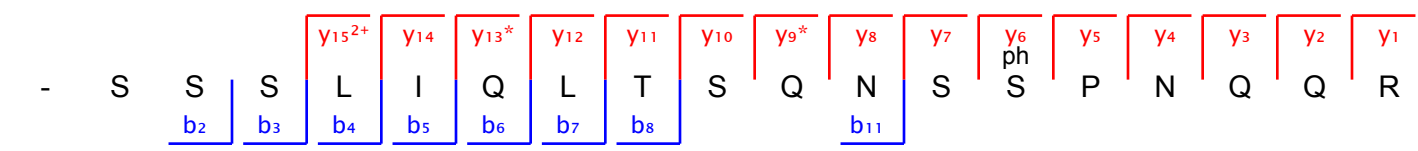

Raw file 20150812\_A375SR\_Phospho\_BR1\_04 Scan 16550 Method FTMS; HCD Score 255.63 m/z 956.93 Gene names MTX3

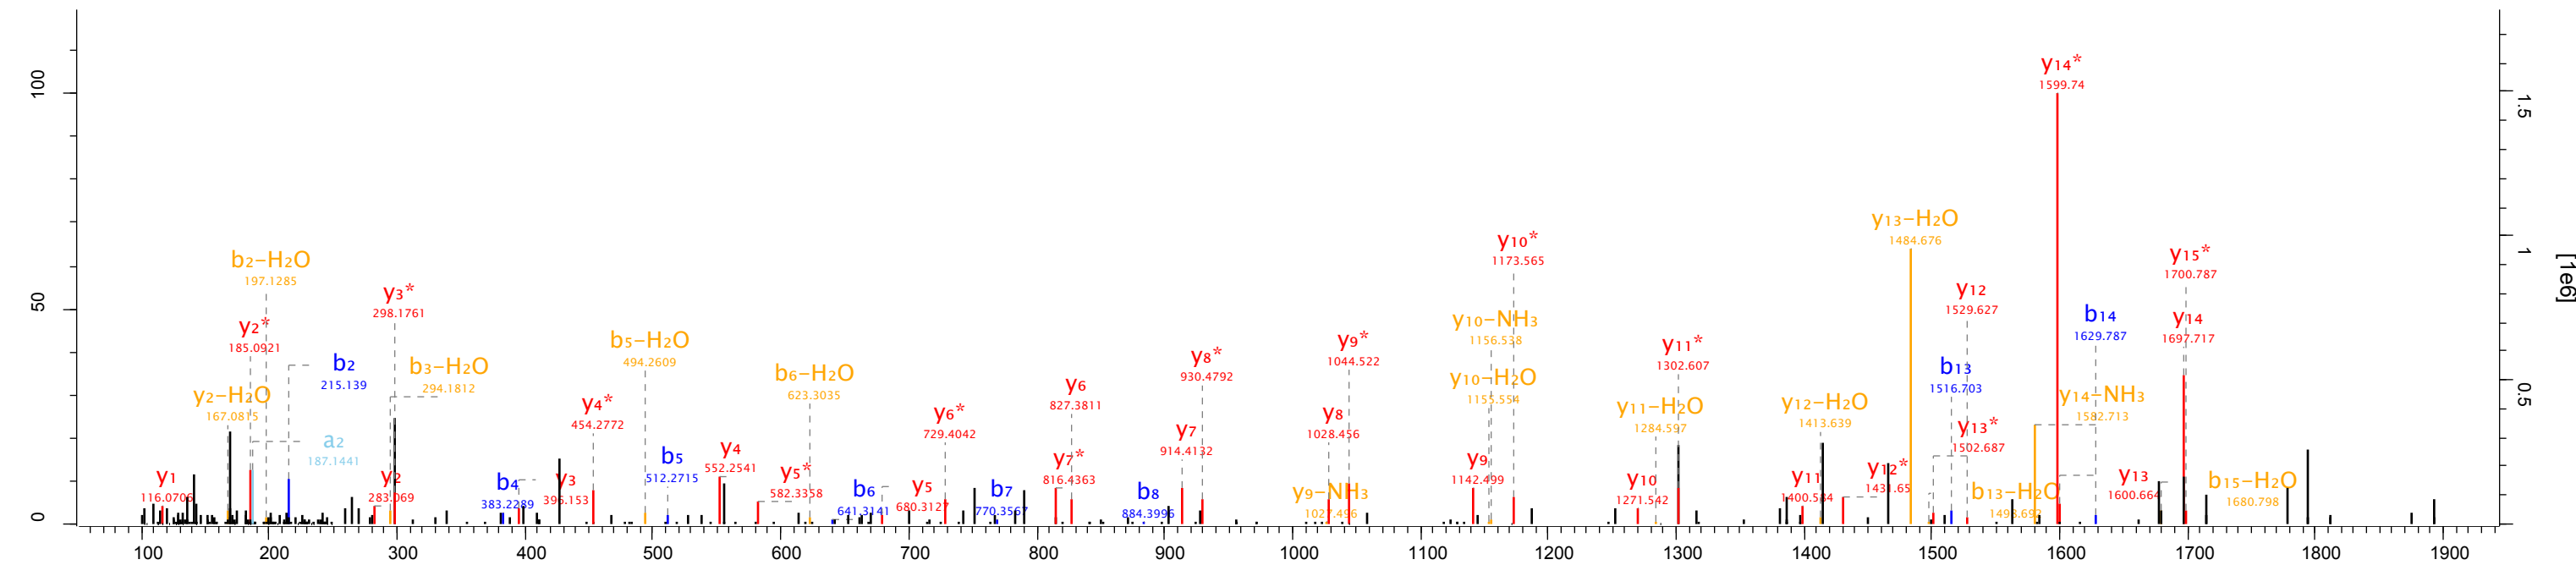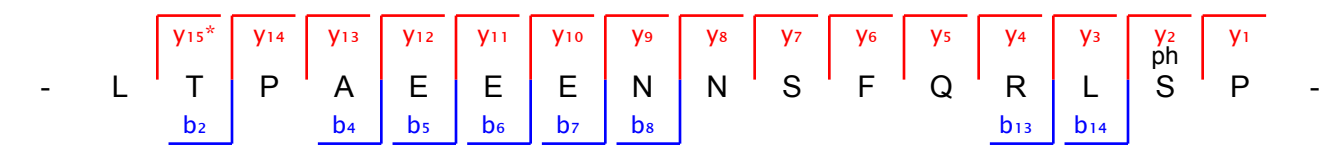

Raw file Scan Method Score m/z Gene names  
 20150812\_A375SR\_Phospho\_BR1\_04 17270 FTMS;HCD 258.62 935.1 SRRM2

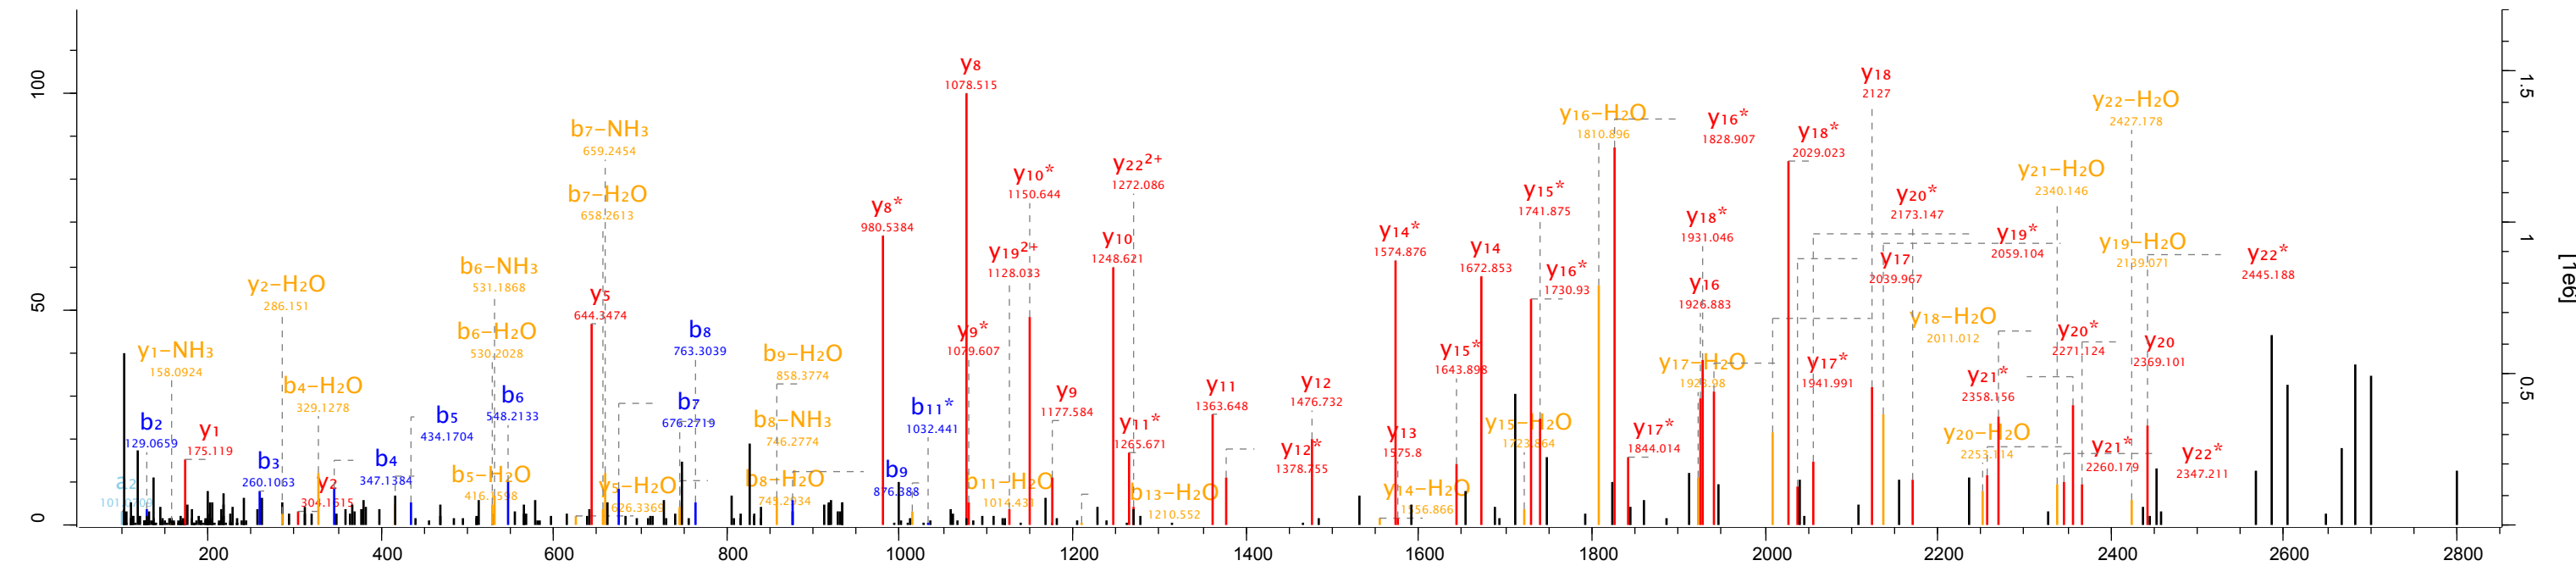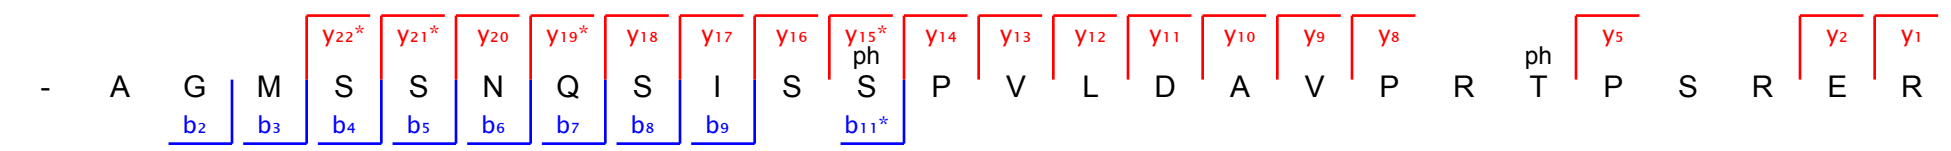

Raw file: 20150812\_A375SR\_Phospho\_BR1\_04  
 Scan: 17480 Method: FTMS; HCD Score: 102.36 m/z: 1206.57 Gene names: ELL

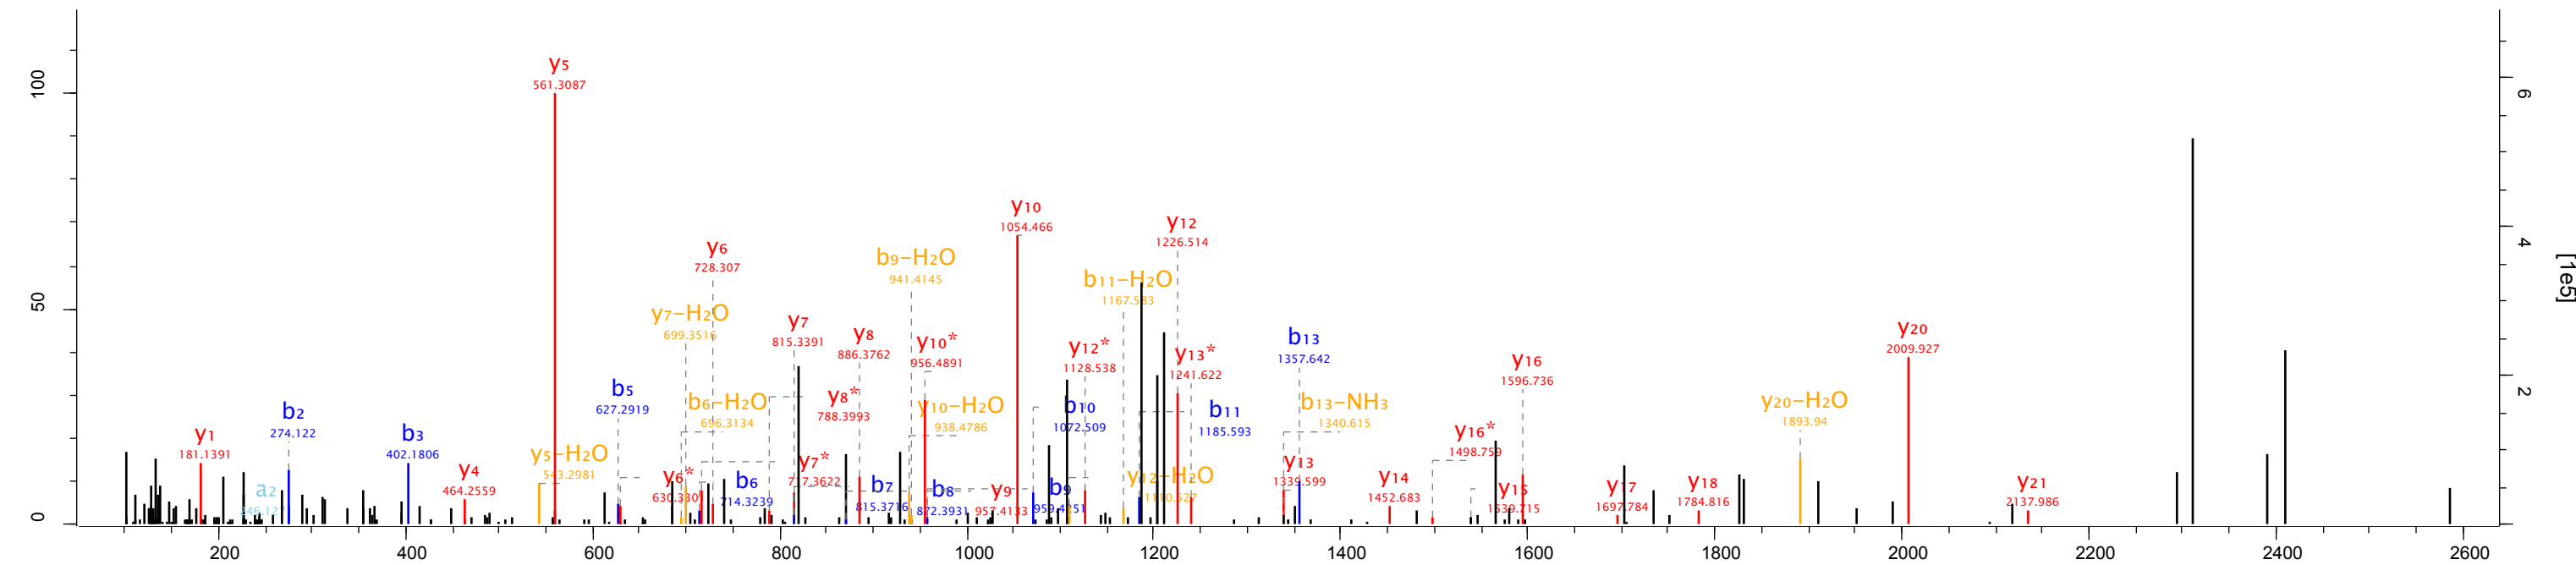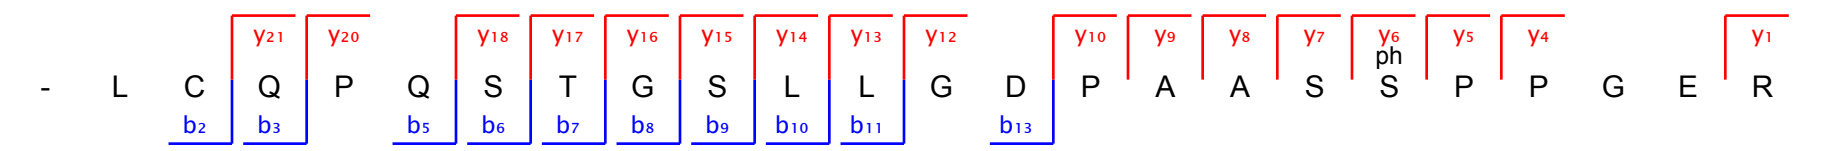

Raw file: 20150812\_A375SR\_Phospho\_BR1\_04  
 Scan: 1790 Method: FTMS; HCD Score: 117.01 m/z: 632.94 Gene names: EIF4B

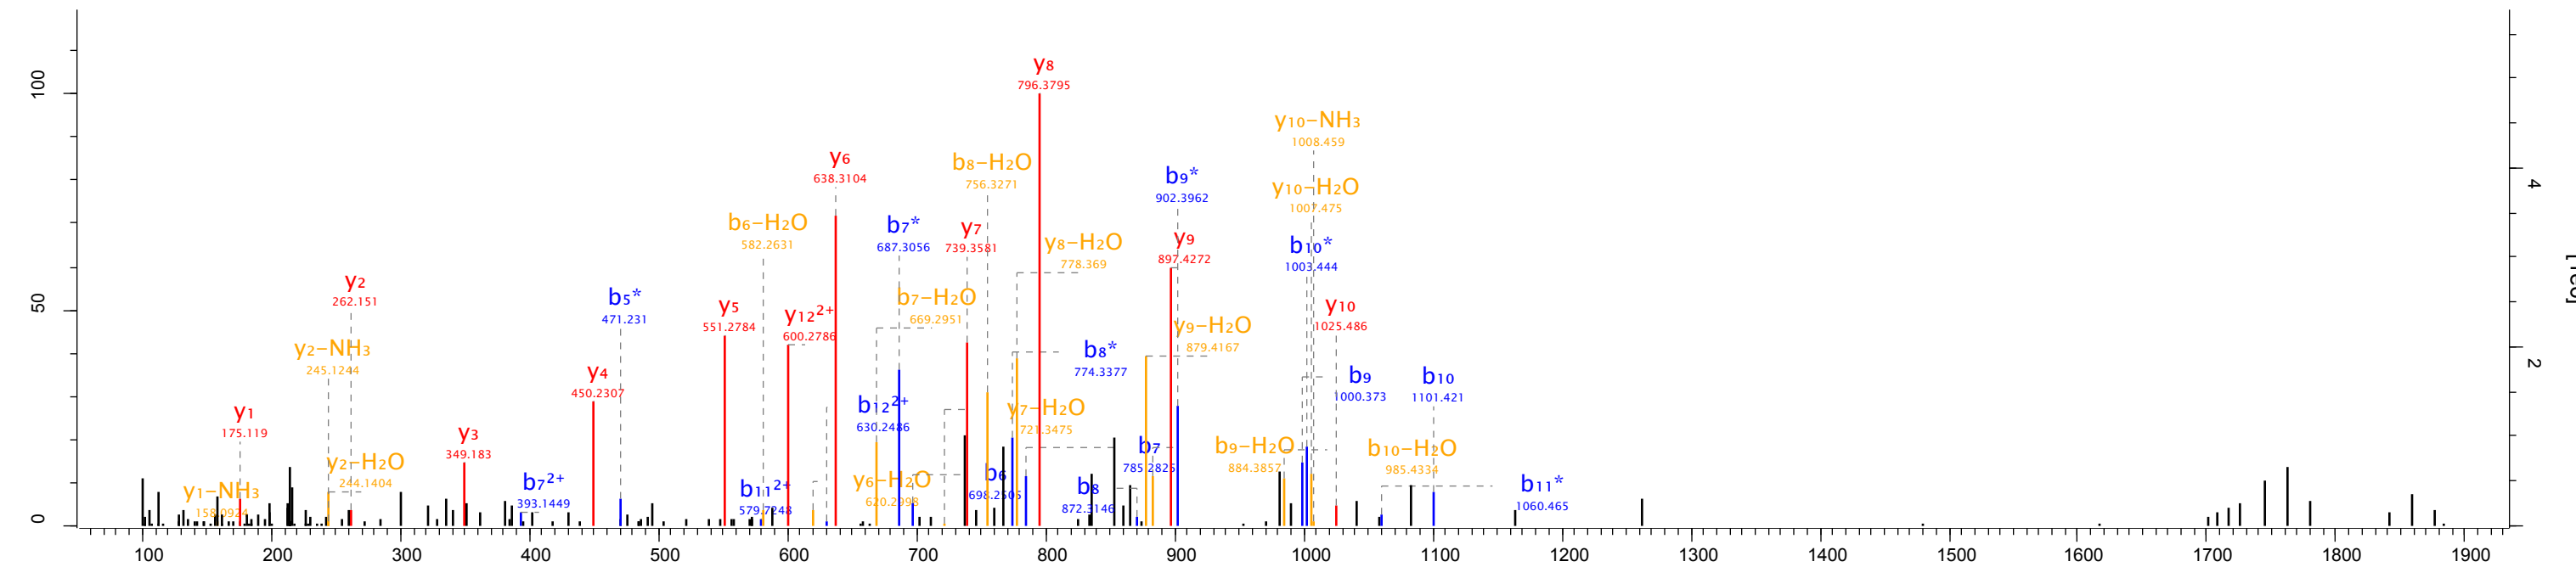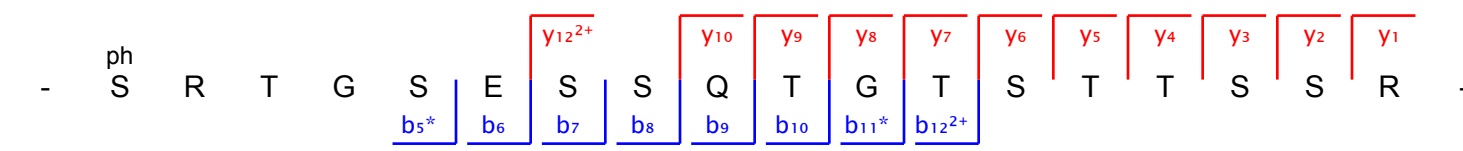



Raw file 20150812\_A375SR\_Phospho\_BR1\_04 Scan 1810 Method FTMS; HCD Score 62.66 m/z 531.56 Gene names SOX6

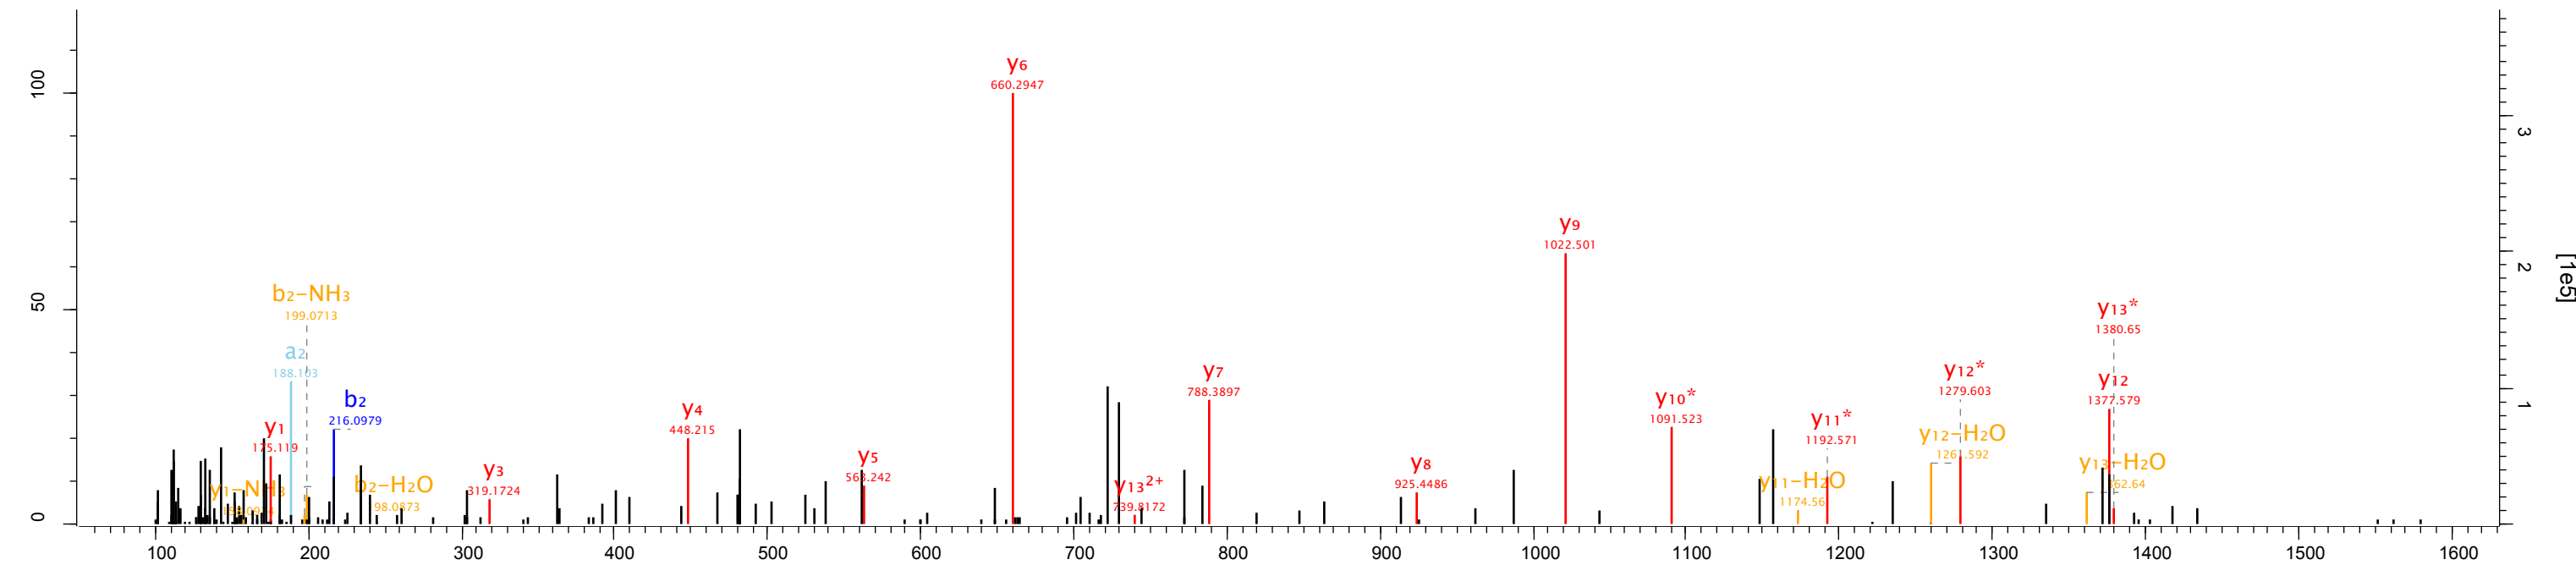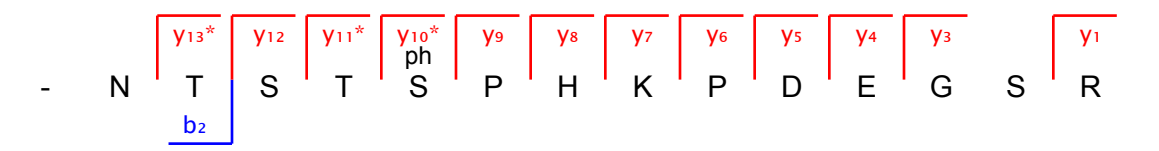

Raw file: 20150812\_A375SR\_Phospho\_BR1\_04  
 Scan: 18550 Method: FTMS; HCD Score: 186.92 m/z: 1109.81 Gene names: PFAFH1B2

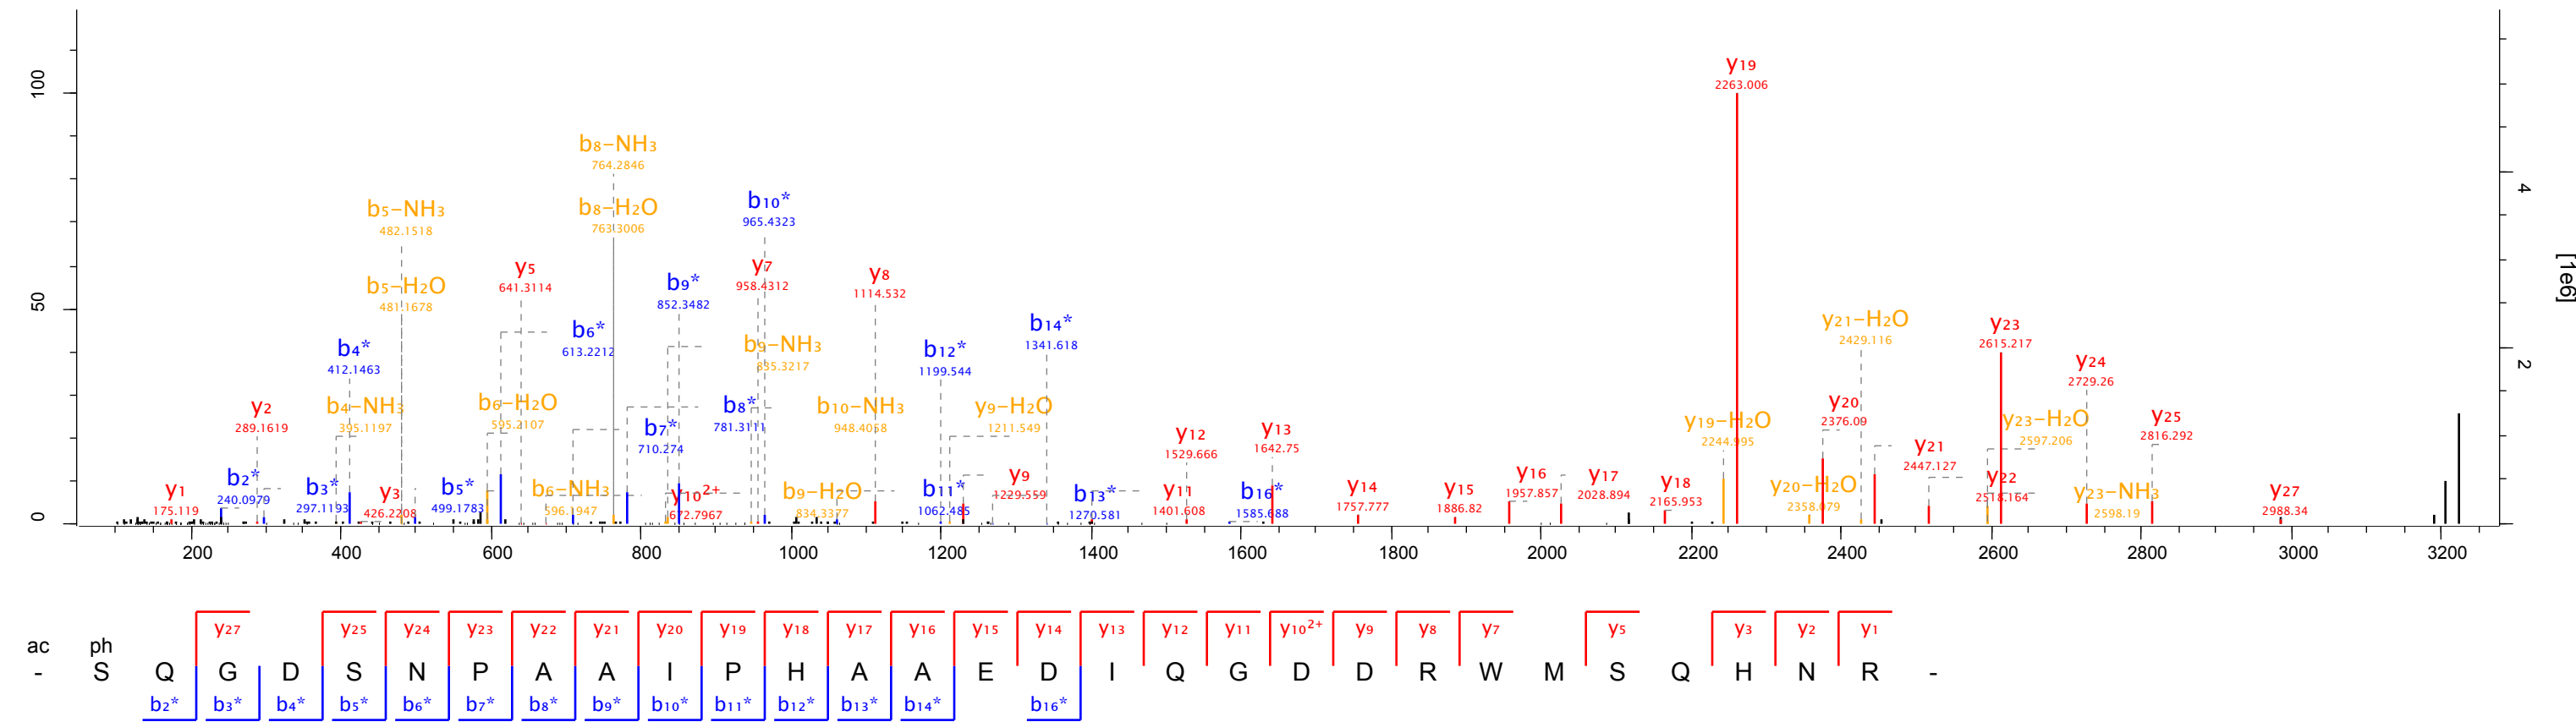

Raw file 20150812\_A375SR\_Phospho\_BR1\_04 Scan 18750 Method FTMS; HCD Score 143.35 m/z 961.4 Gene names PLEC

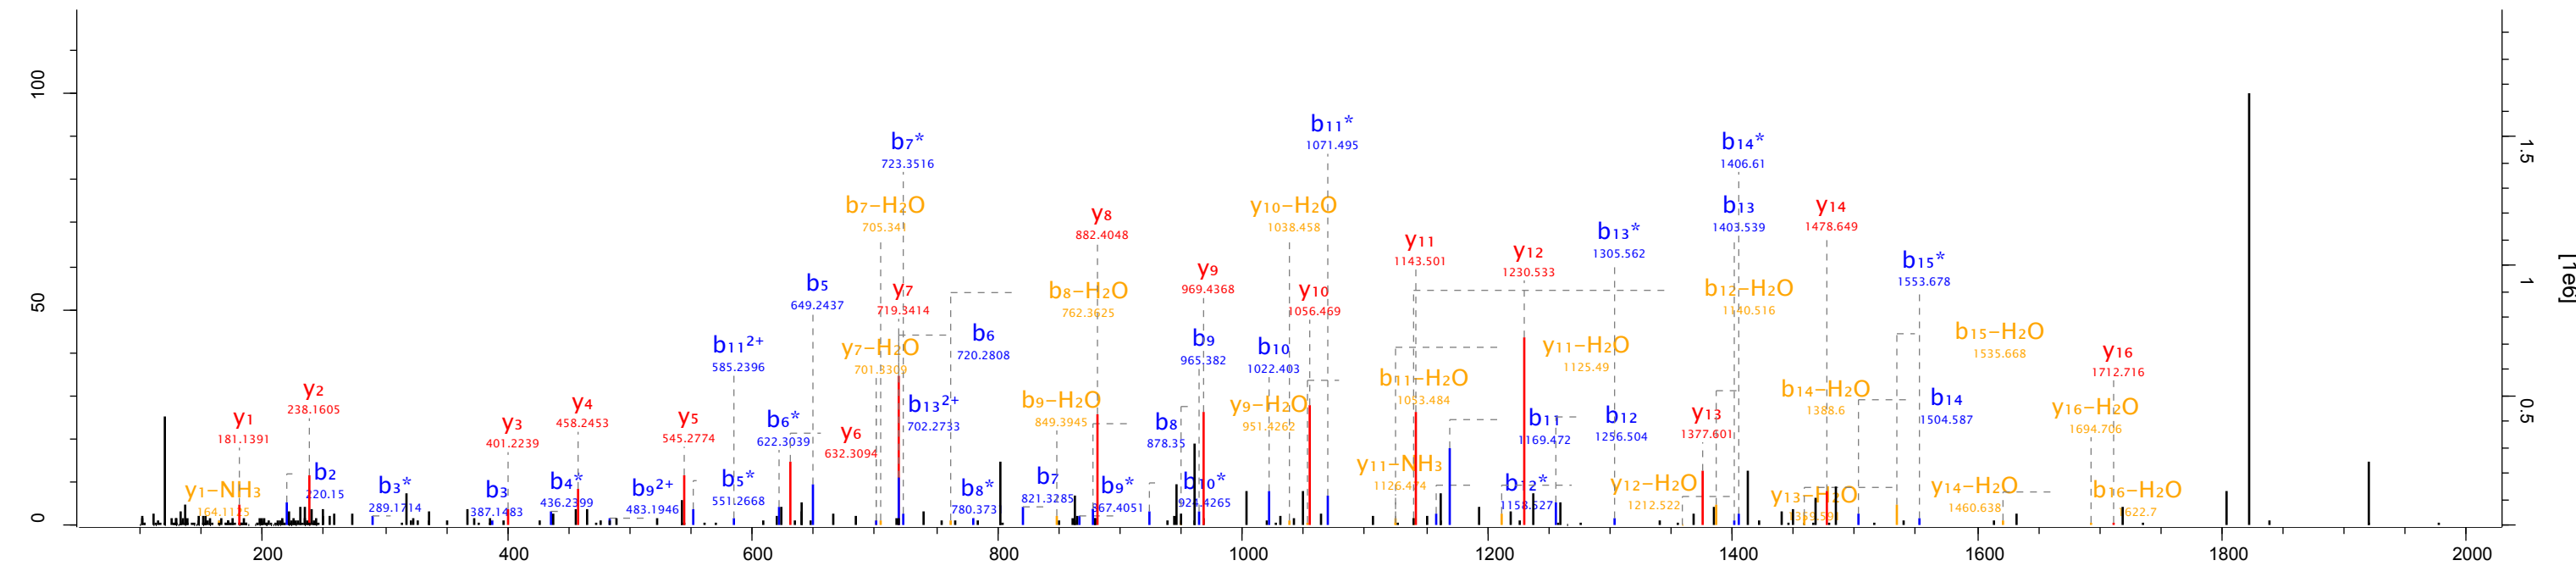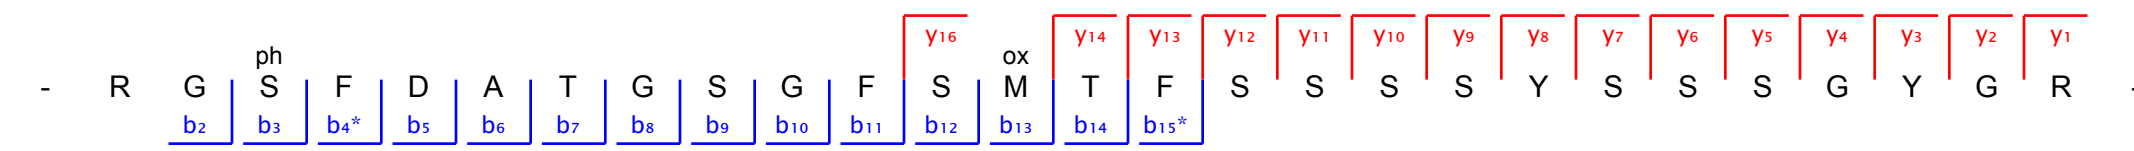

Raw file: 20150812\_A375SR\_Phospho\_BR1\_04  
 Scan: 19670 Method: FTMS; HCD Score: 80.81 m/z: 1096.48 Gene names: MAP1B

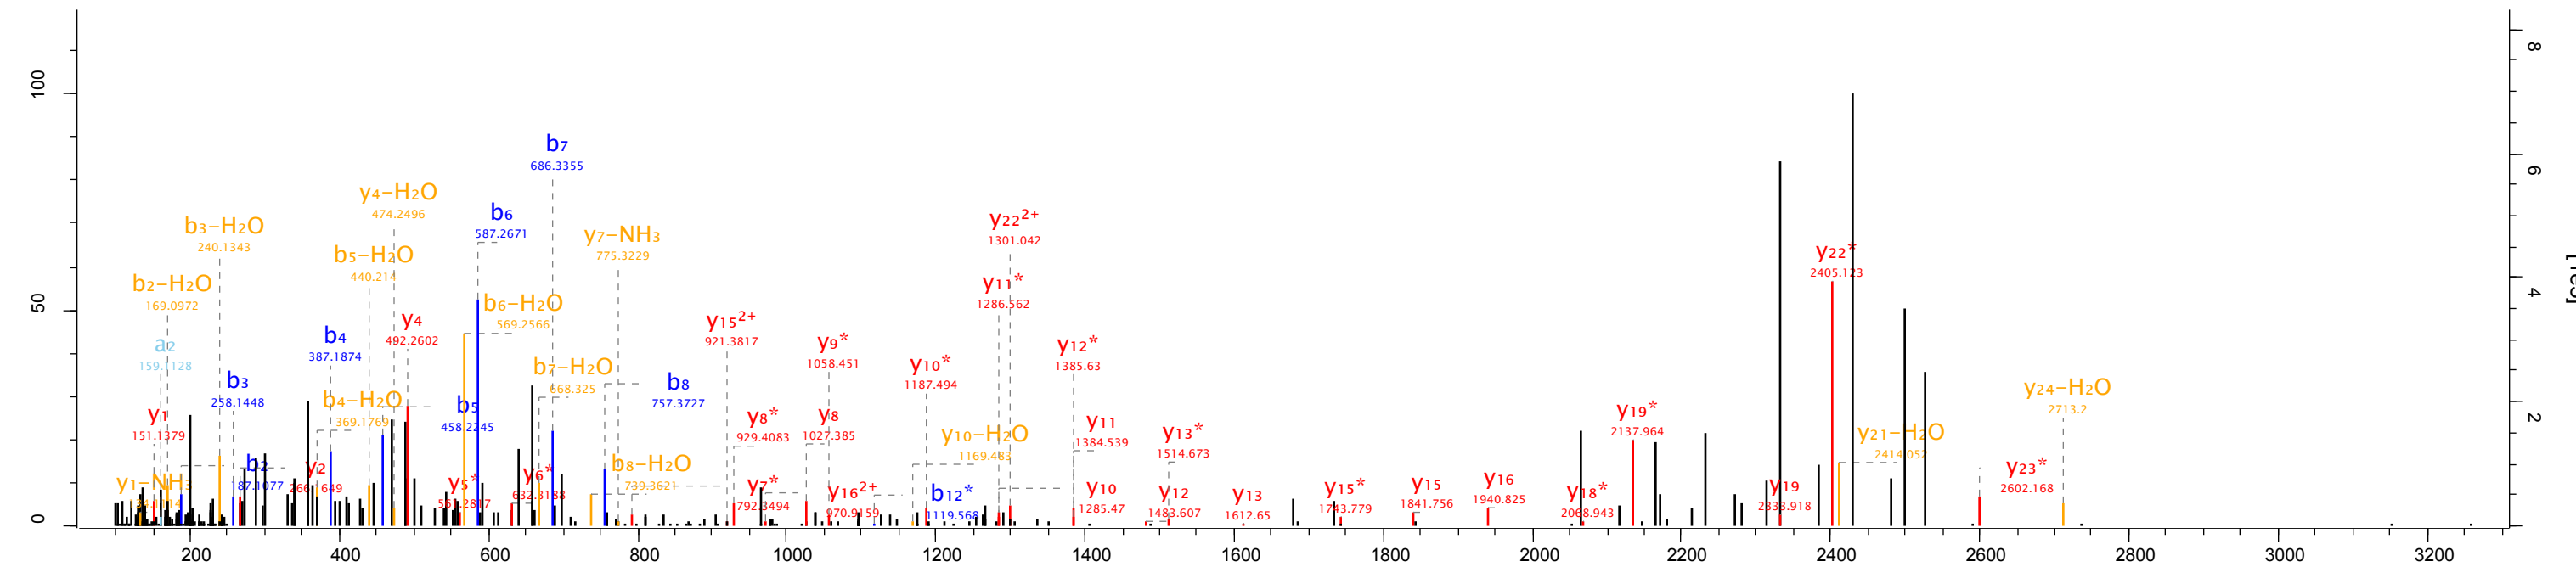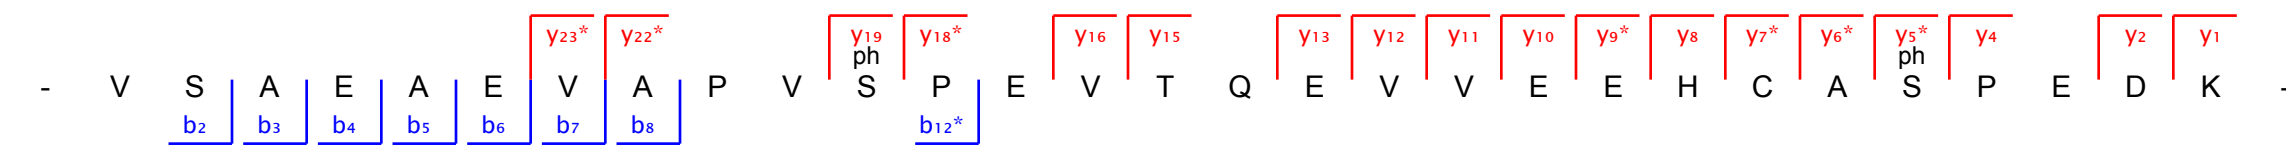



Raw file

20150812\_A375SR\_Phospho\_BR1\_04

| Scan  | Method    | Score | m/z     | Gene names |
|-------|-----------|-------|---------|------------|
| 20660 | FTMS; HCD | 70.09 | 1140.01 | TAB3       |

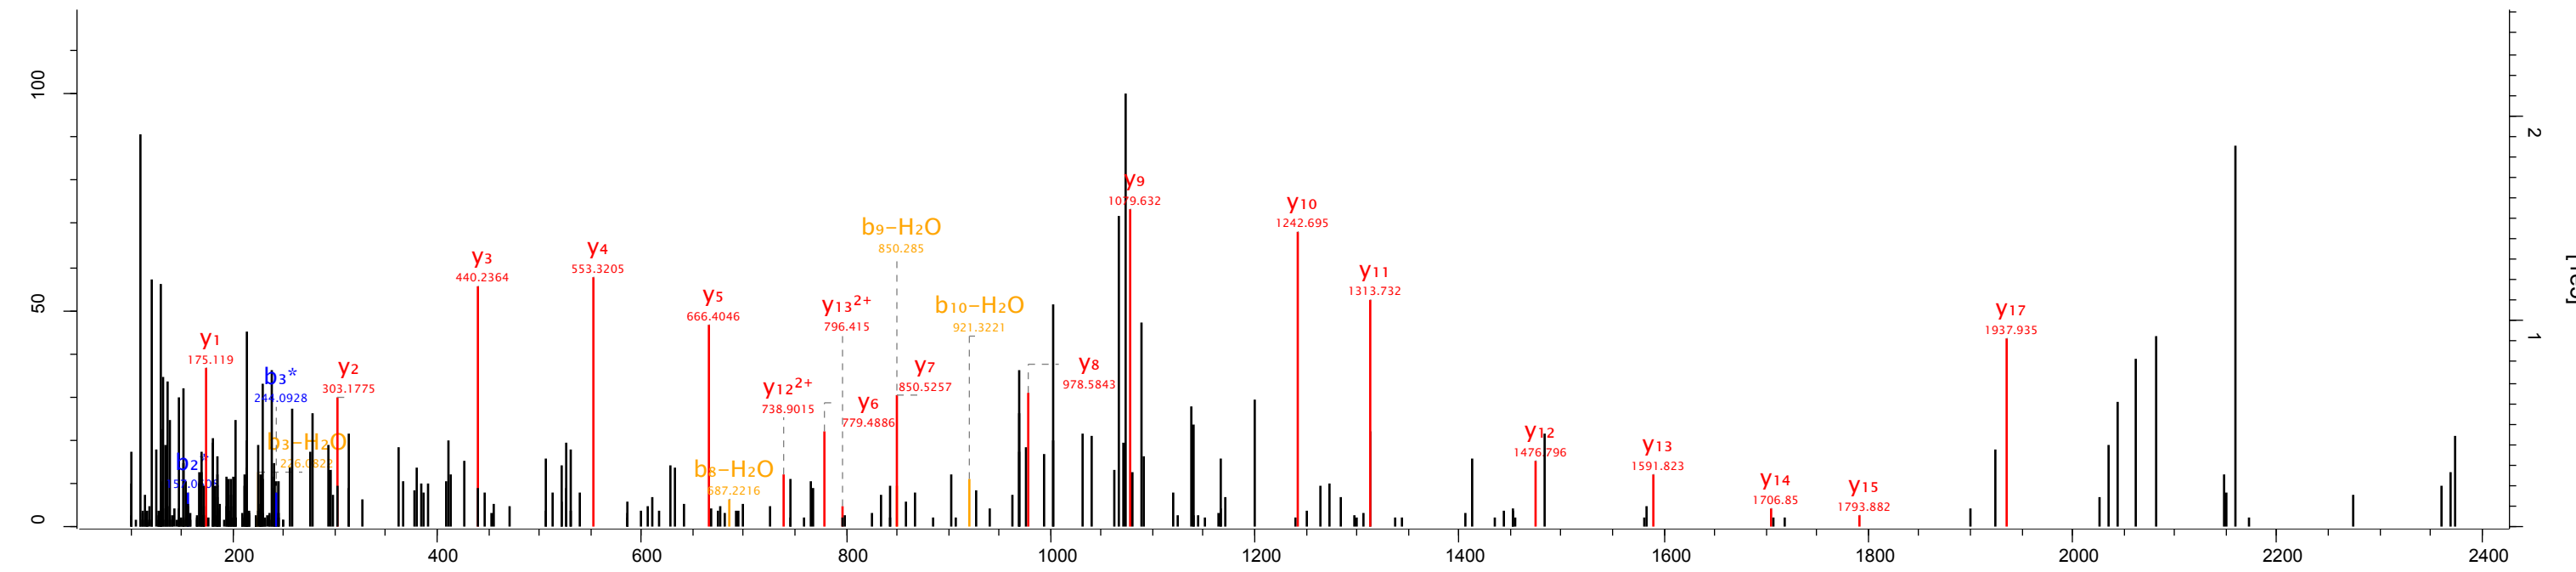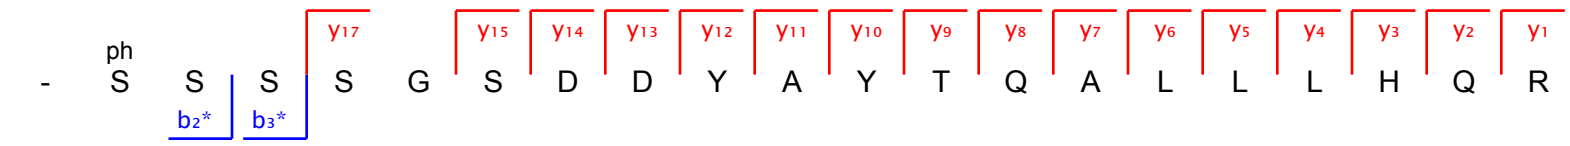

Raw file: 20150812\_A375SR\_Phospho\_BR1\_04  
 Scan: 2170 Method: FTMS; HCD Score: 151.89 m/z: 800.81 Gene names: CASP2

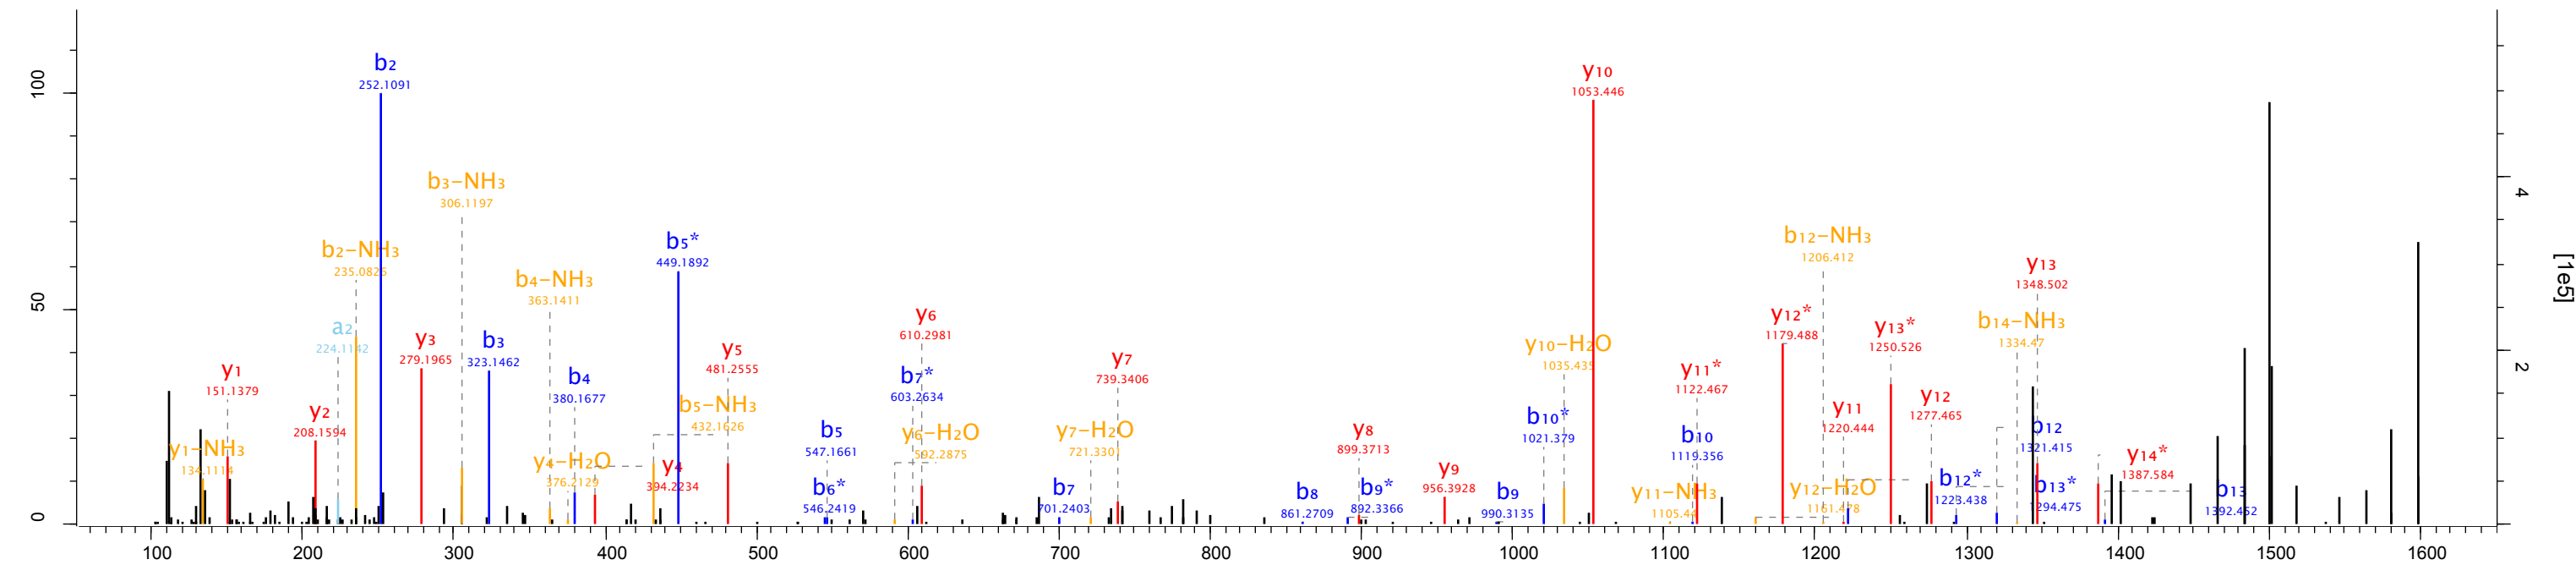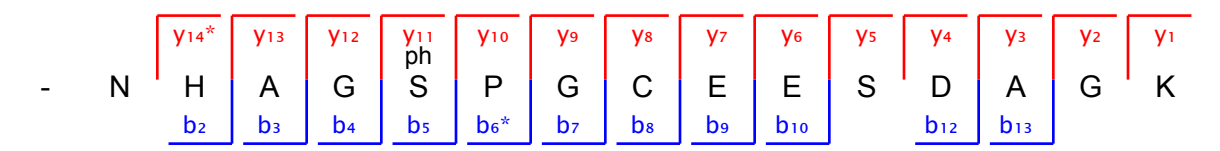

Raw file: 20150812\_A375SR\_Phospho\_BR1\_04  
 Scan: 21960 Method: FTMS; HCD Score: 81.88 m/z: 932.97 Gene names: SMCR8

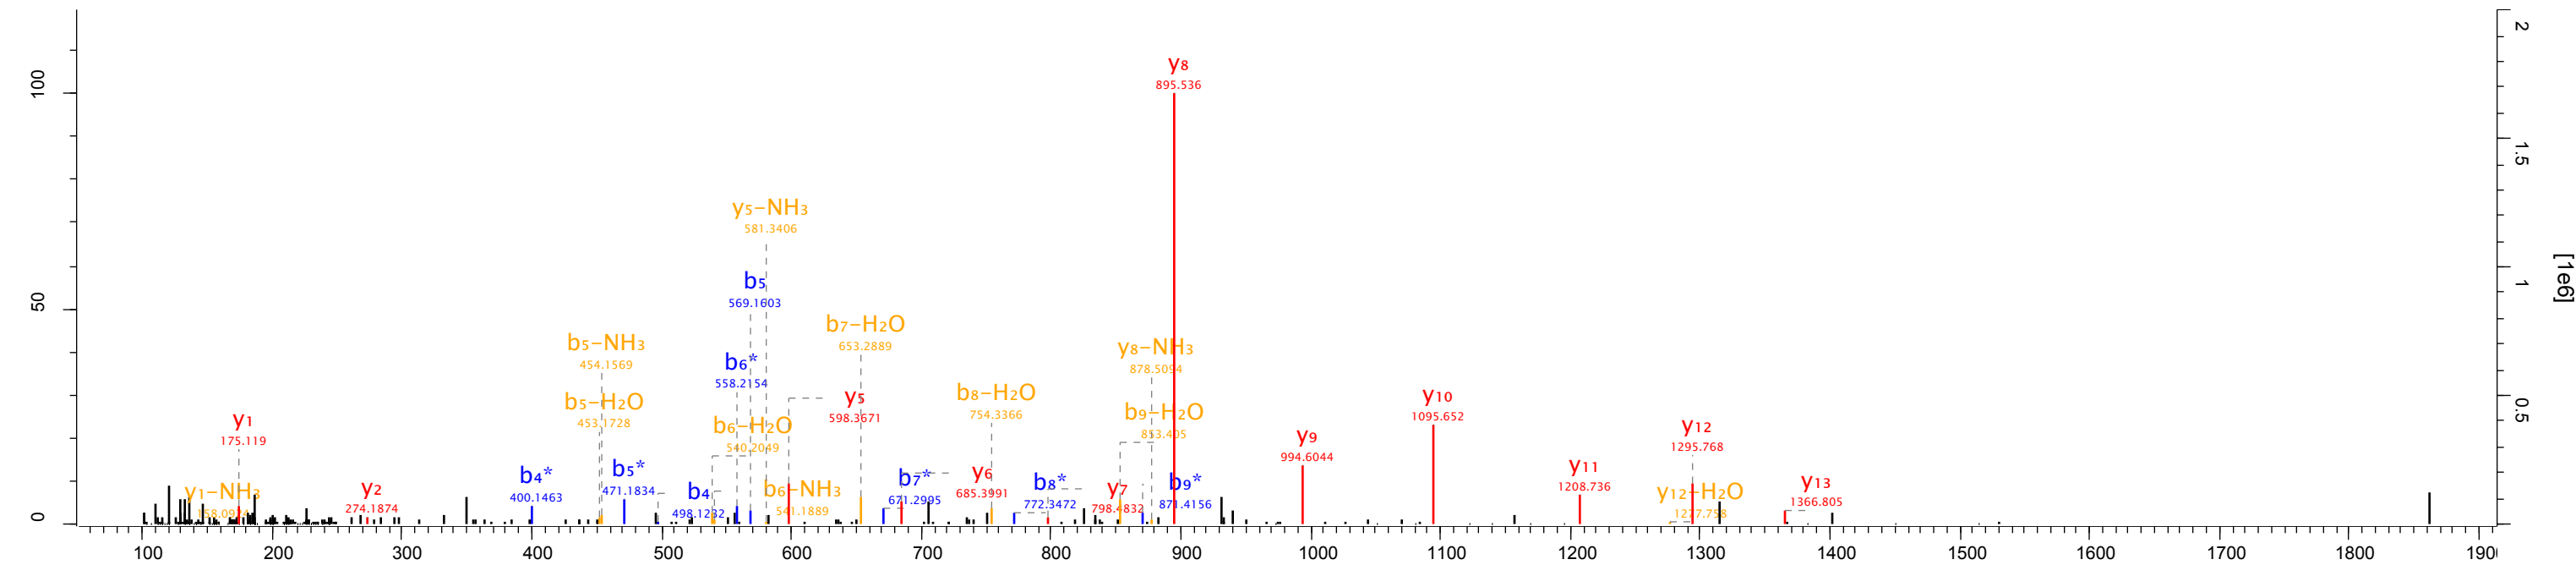

Sequence: - ph S D S Q A S L T V P L S P Q V V R -  
 Fragmentation sites: b4, b5, b6\*, b7\*, b8\*, b9\* (blue boxes); y1, y2, y5, y6, y8, y9, y10, y11, y12, y13 (red boxes)



Raw file 20150812\_A375SR\_Phospho\_BR1\_04 Scan 22040 Method FTMS; HCD Score 133.94 m/z 1075 Gene names ZNF593

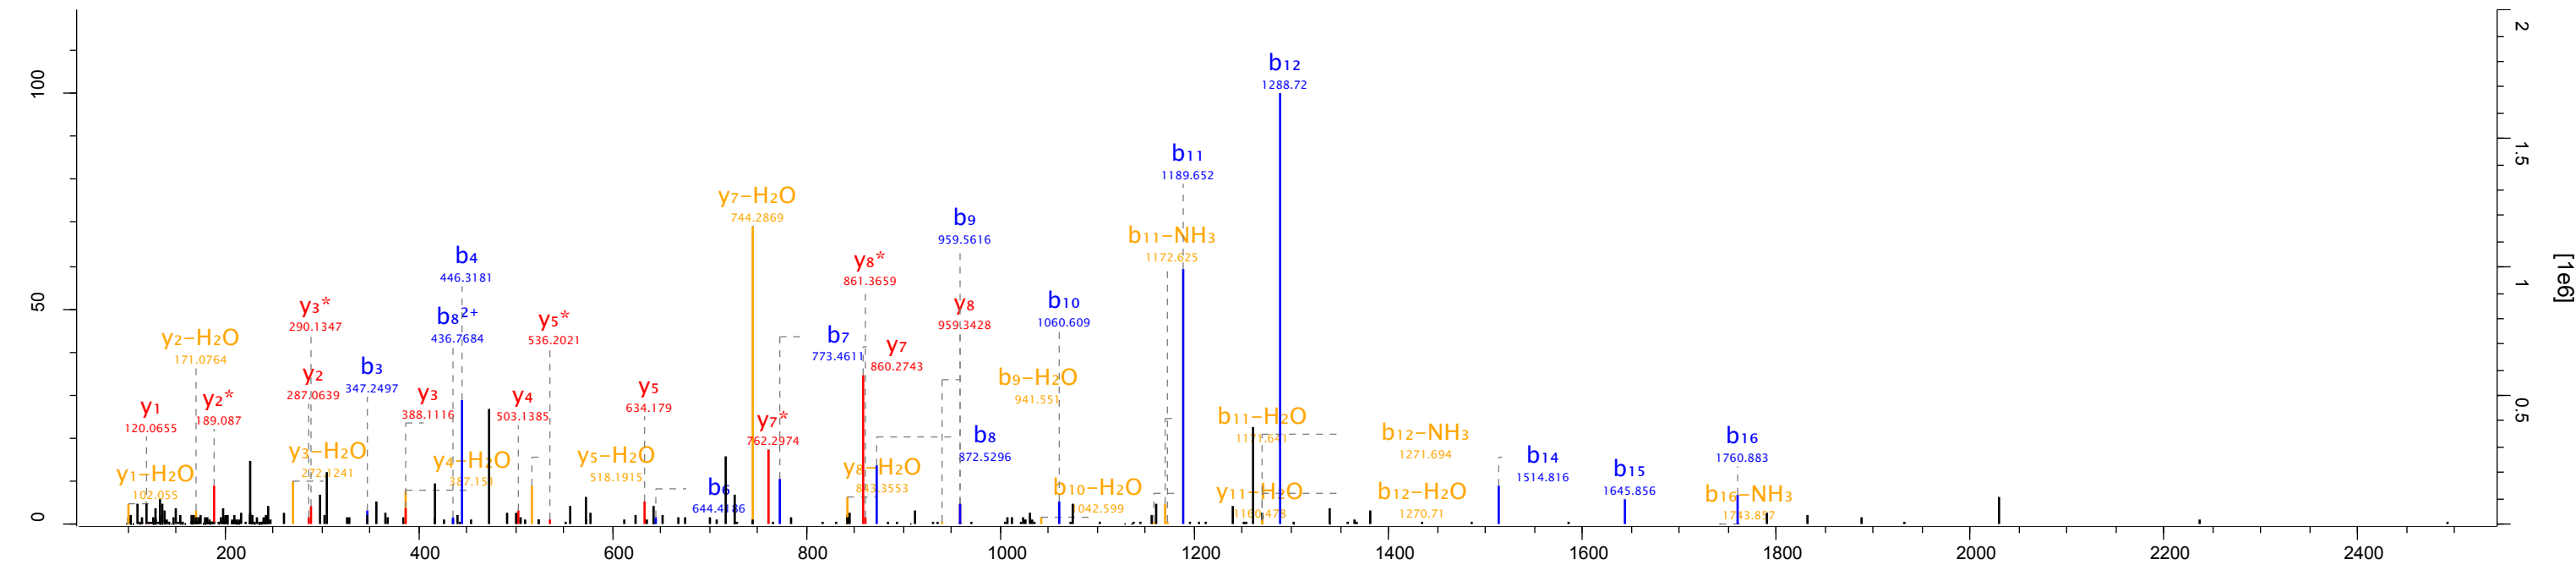

- R L A V P T E V P E M D T S T -

b3
b4
b6
b7
b8
b9
b10
b11
b12
b14
b15
b16
y8
y7
y5
y4
y3
y2<sub>ph</sub>
y1

Raw file: 20150812\_A375SR\_Phospho\_BR1\_04  
 Scan: 22630 Method: FTMS; HCD Score: 116.51 m/z: 1134.88 Gene names: AKAP12

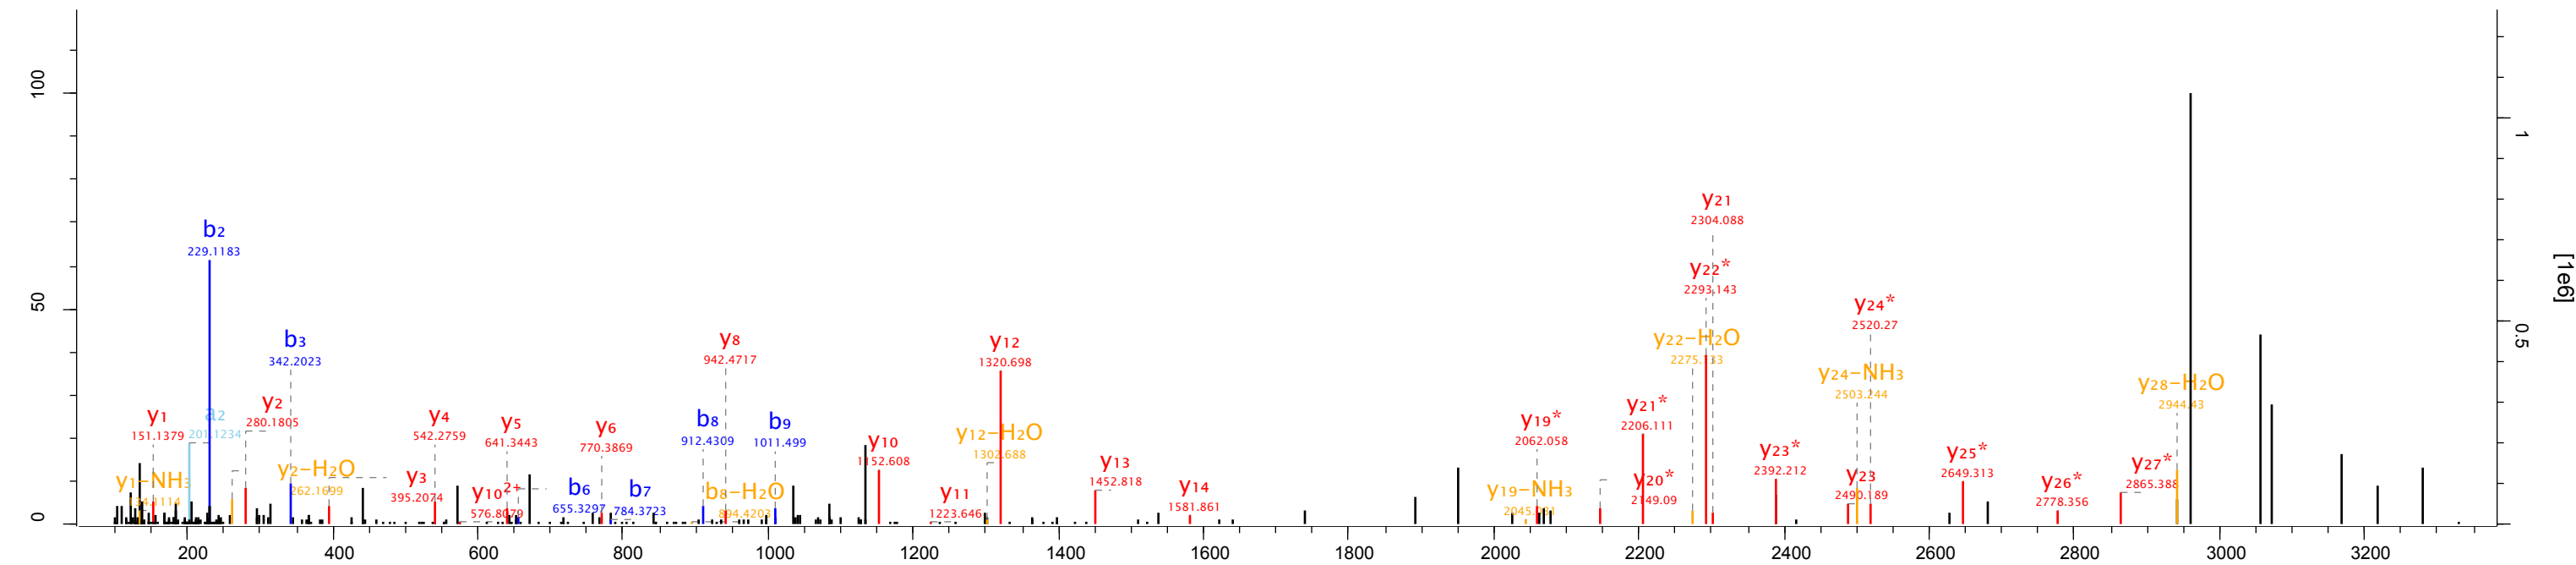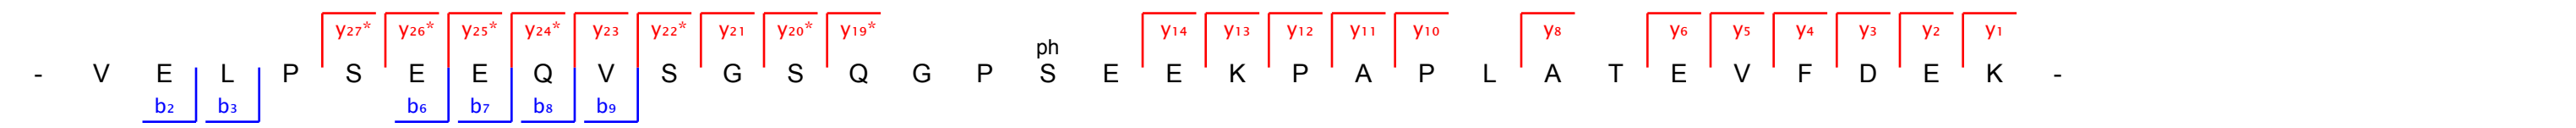

Raw file 20150812\_A375SR\_Phospho\_BR1\_04 Scan 2320 Method FTMS; HCD Score 153.27 m/z 653.3 Gene names ELMSAN1

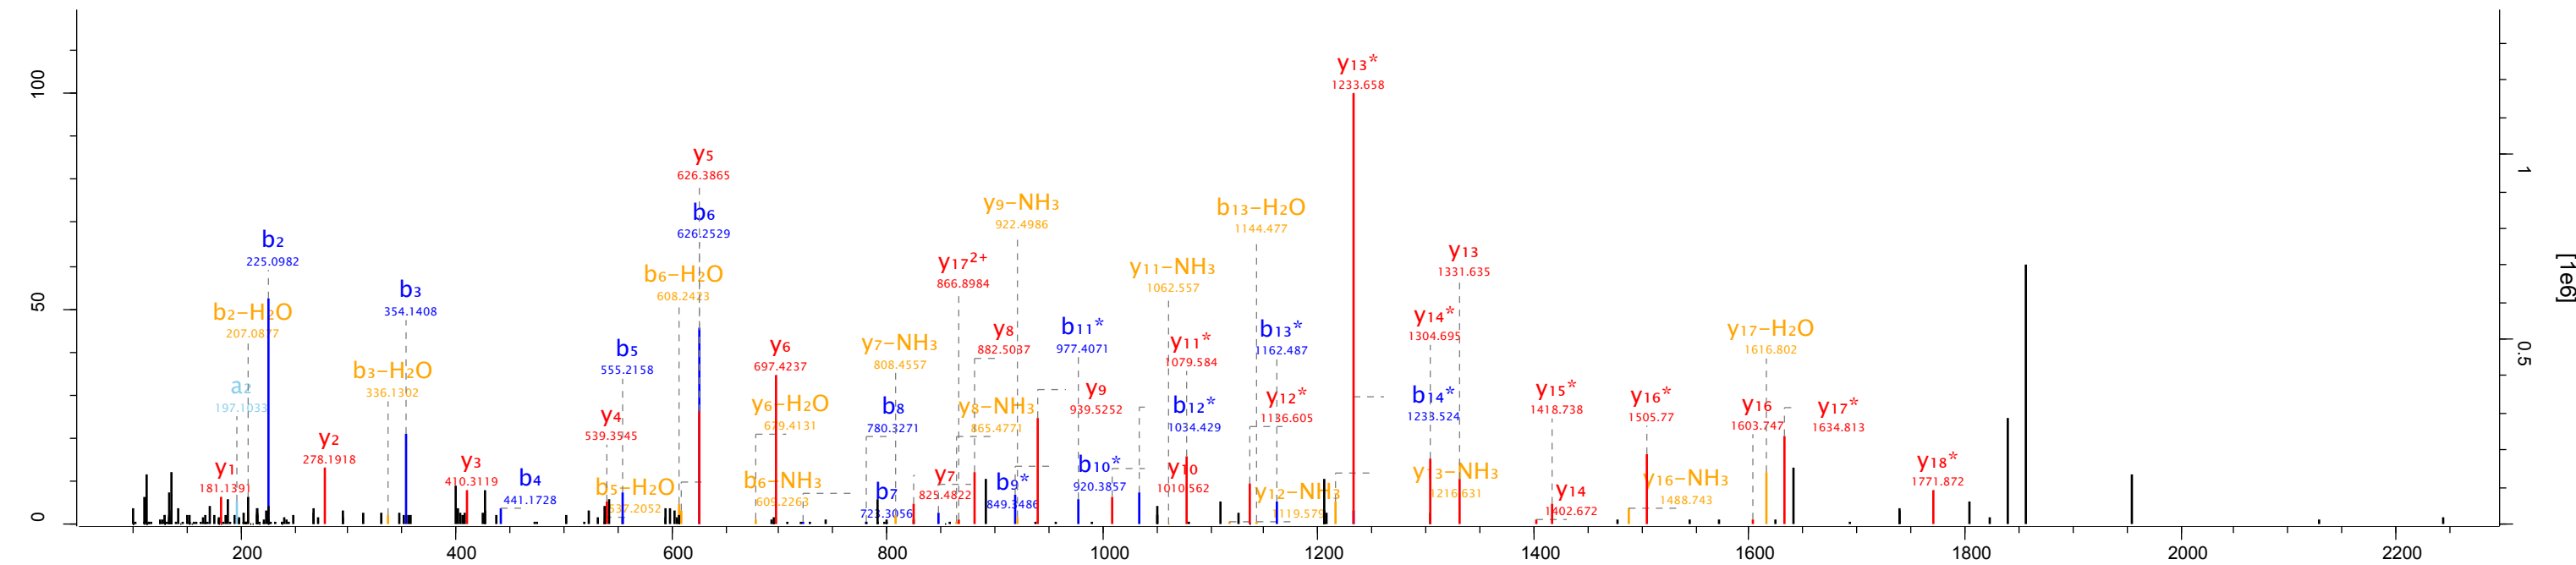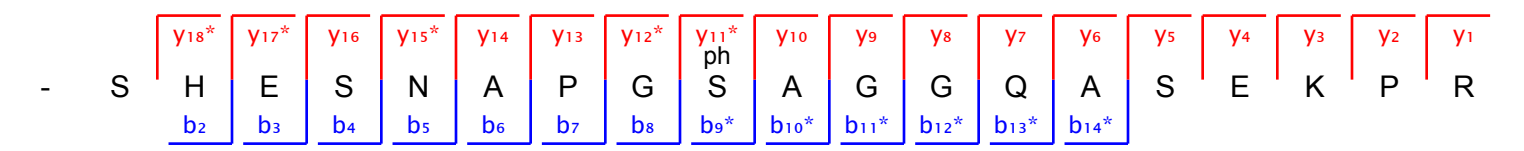

Raw file 20150812\_A375SR\_Phospho\_BR1\_04 Scan 24440 Method FTMS; HCD Score 65.83 m/z 883.76 Gene names SUGP2

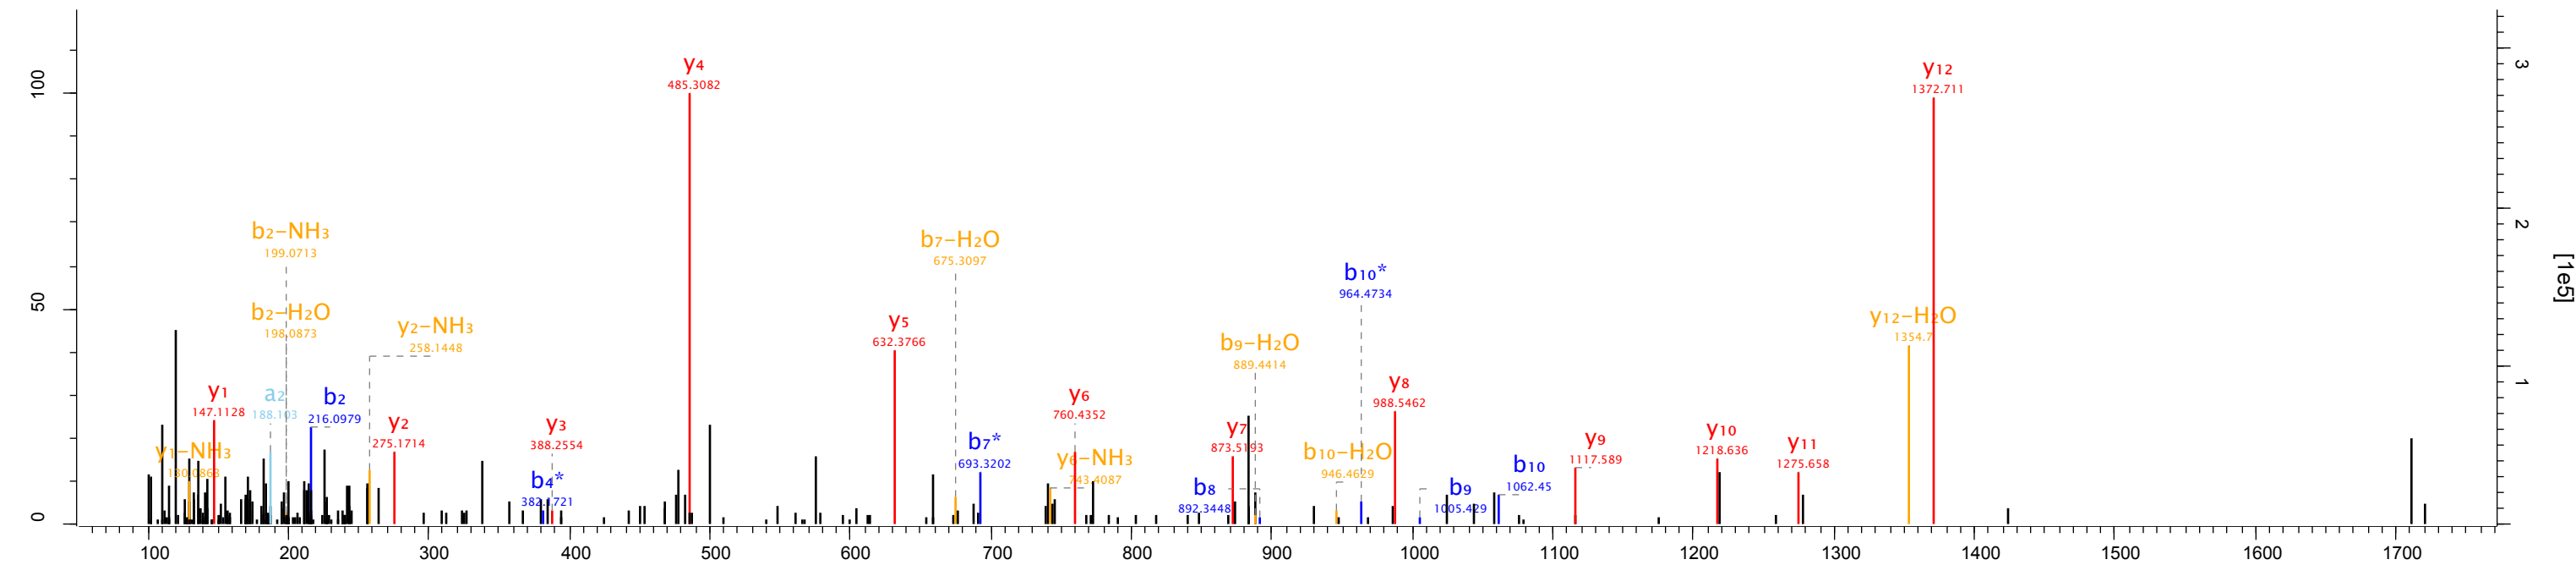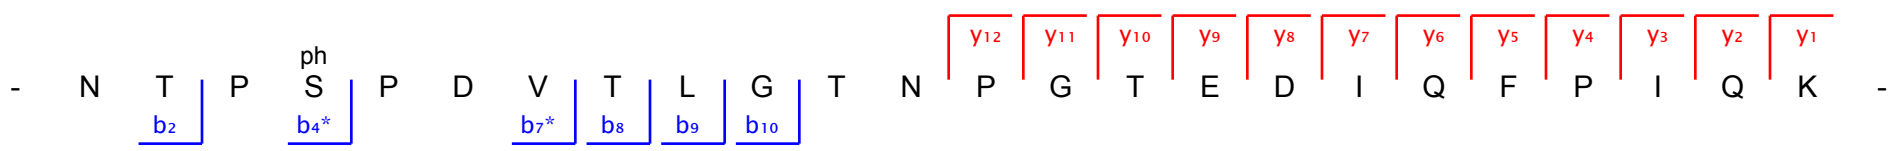

Raw file: 20150812\_A375SR\_Phospho\_BR1\_04  
 Scan: 2500 Method: FTMS; HCD Score: 166.56 m/z: 806.81 Gene names: BUD13

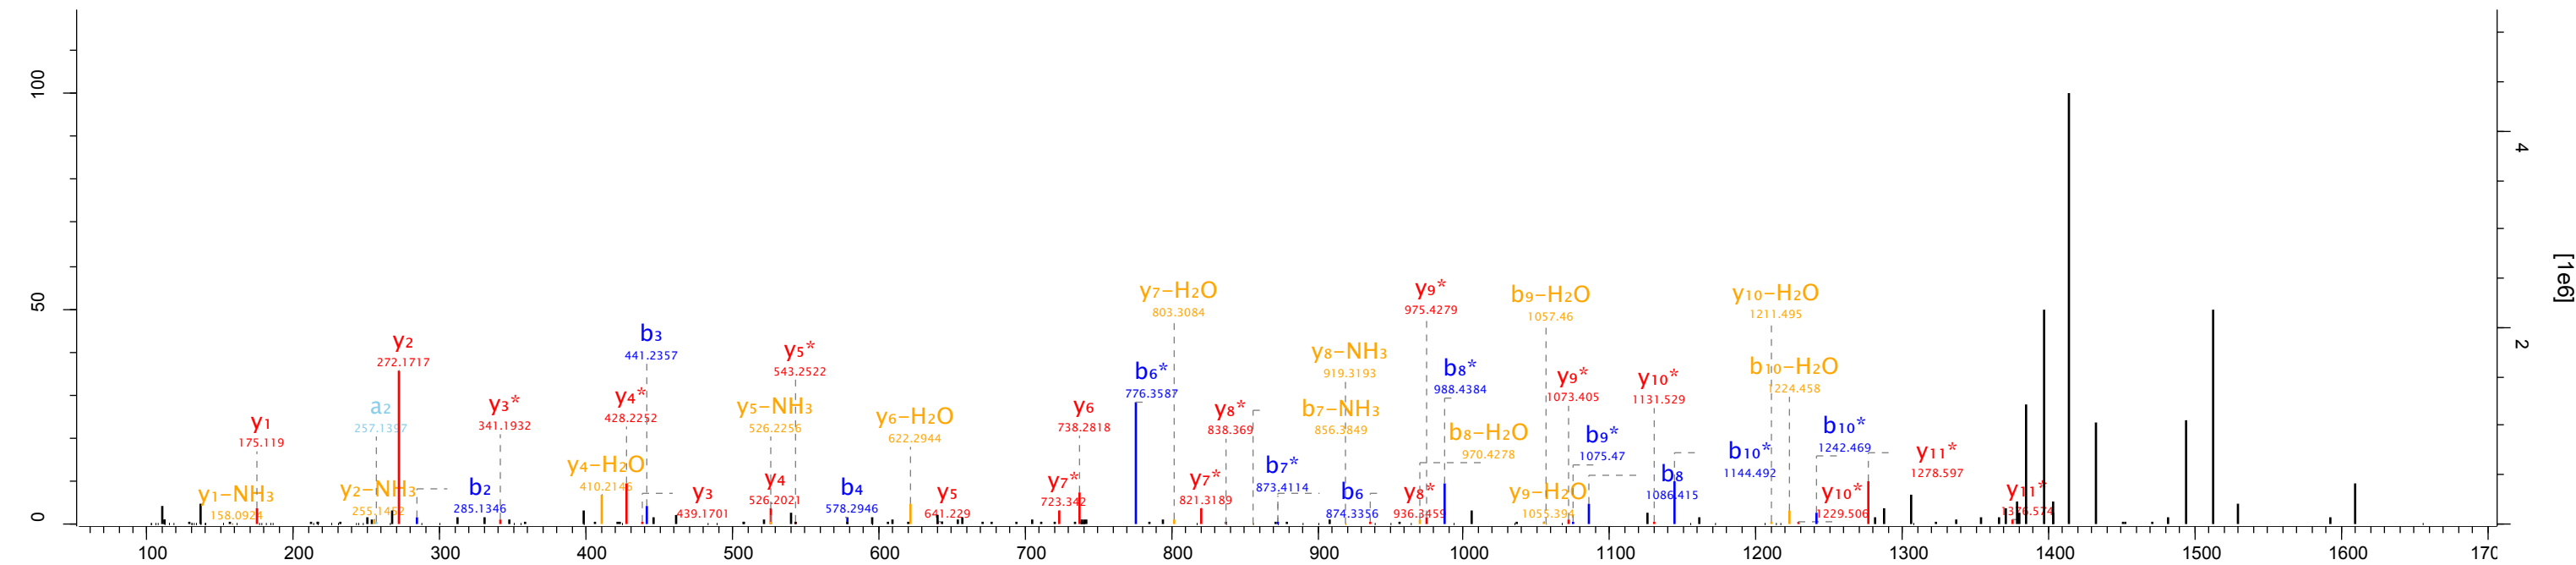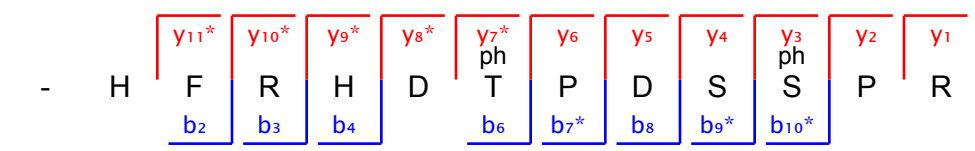

Raw file  
20150812\_A375SR\_Phospho\_BR1\_04

Scan 25040 Method FTMS; HCD Score 138.03 m/z 657.32 Gene names SRRM2

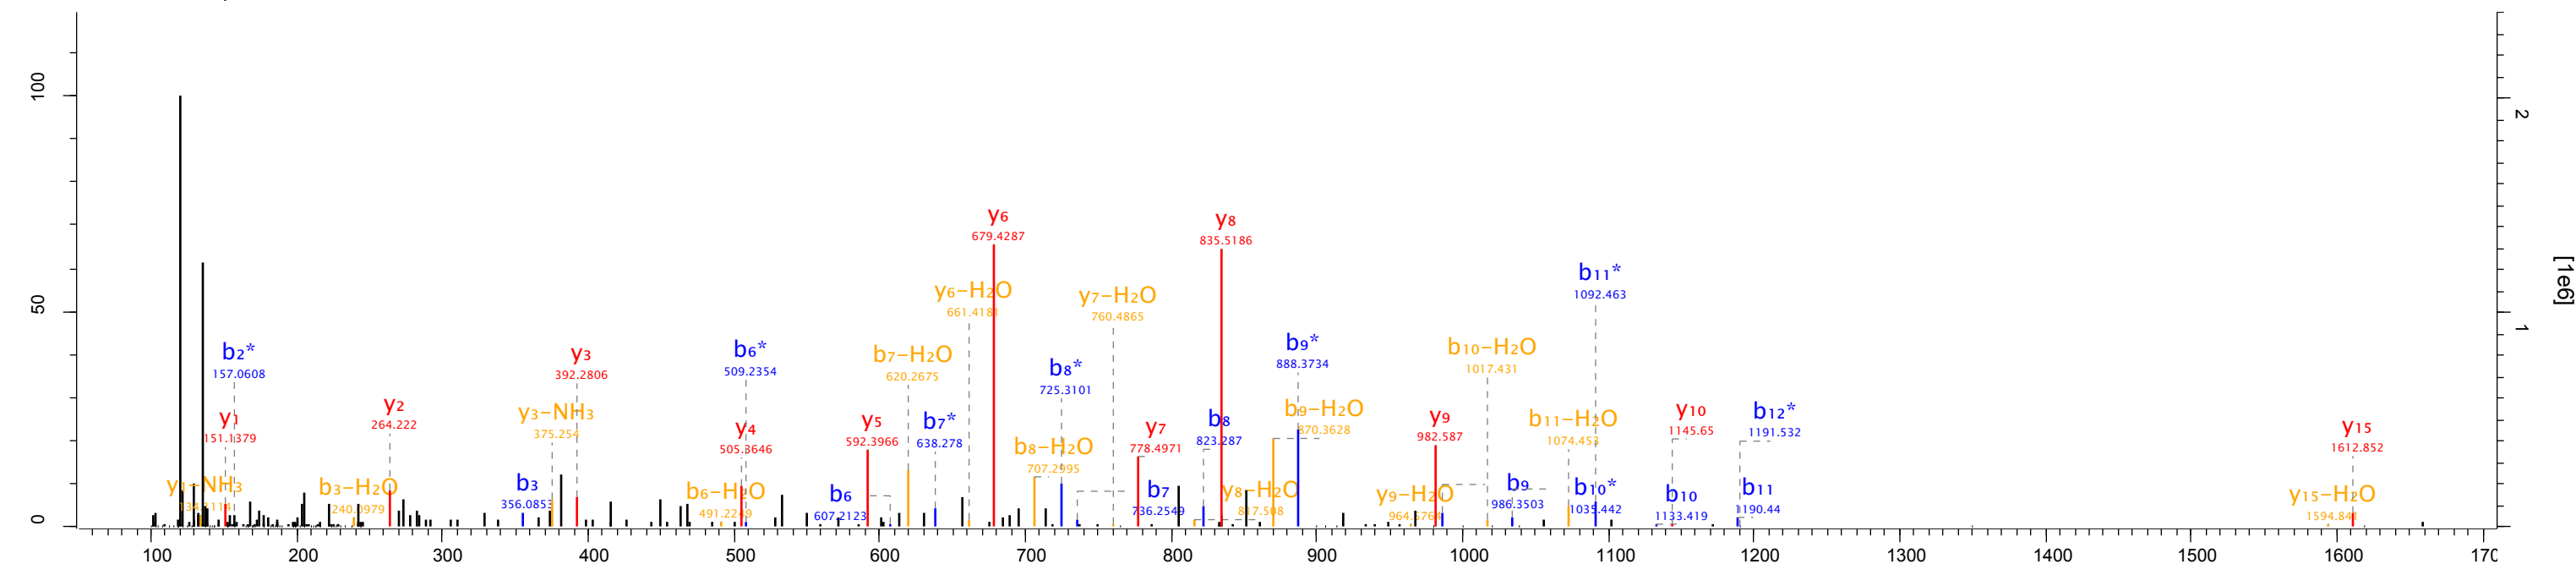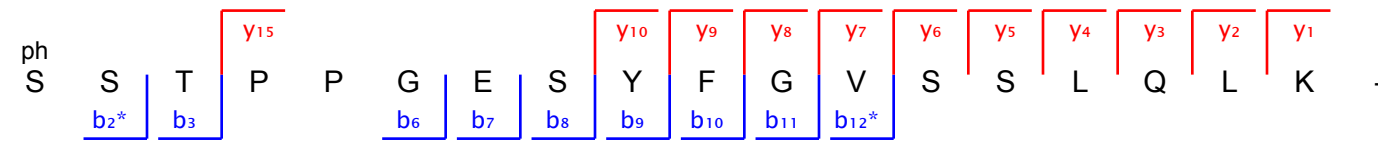

Raw file: 20150812\_A375SR\_Phospho\_BR1\_04  
 Scan: 25800 Method: FTMS; HCD Score: 178.78 m/z: 1043.14 Gene names: LIMA1;TRMT1

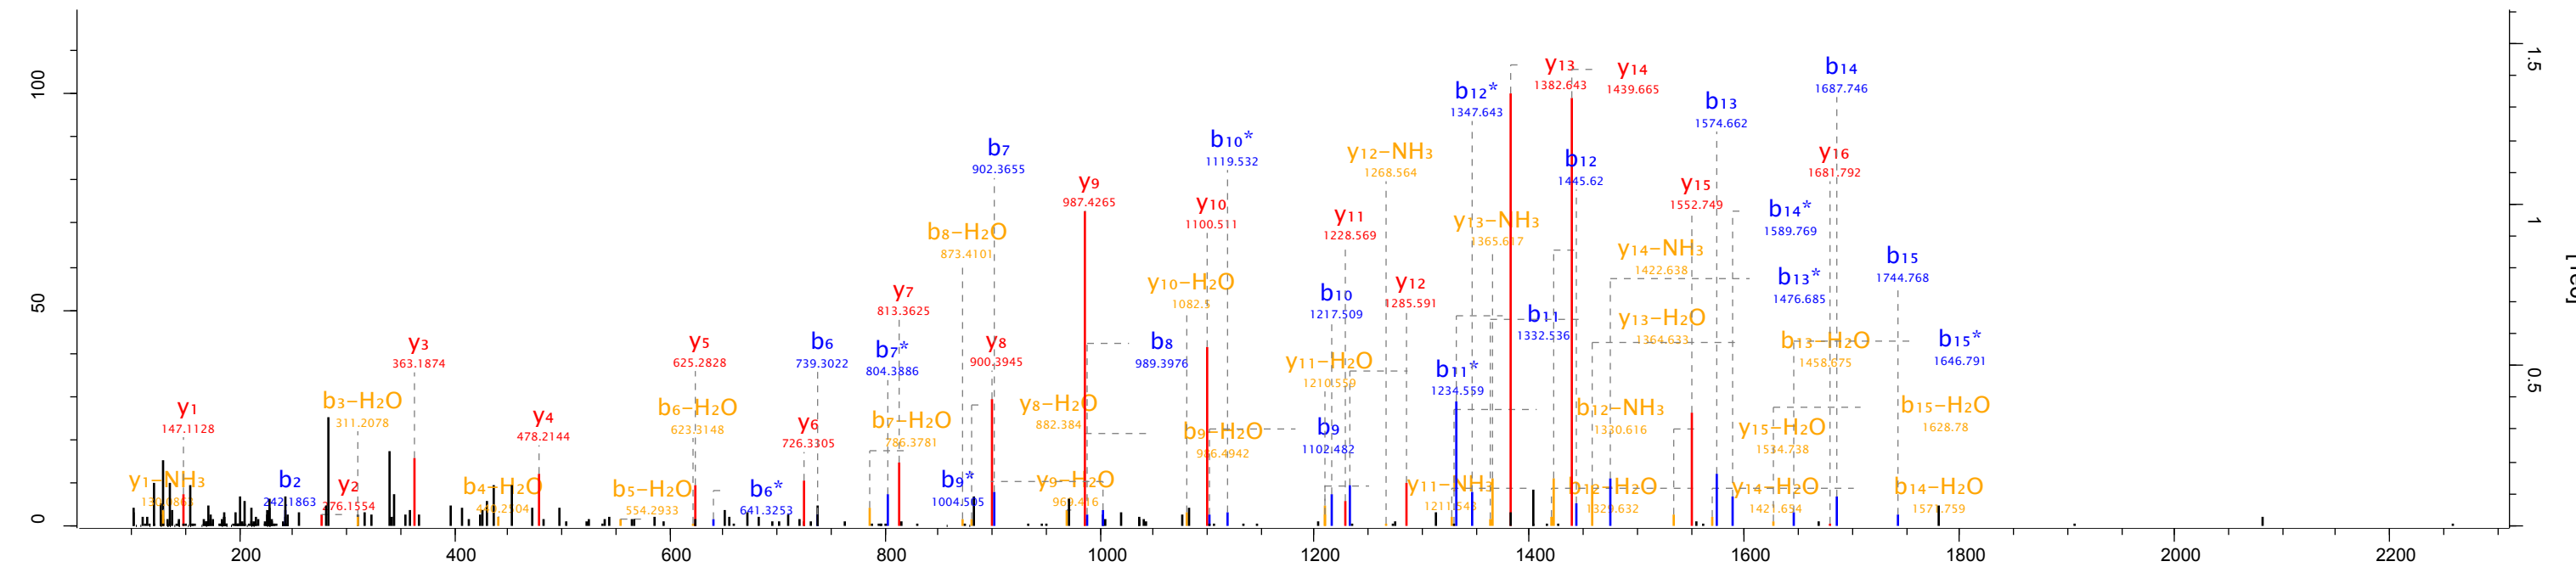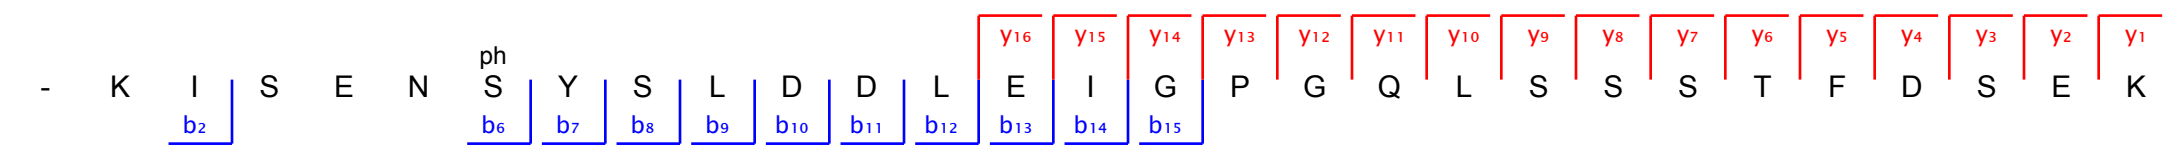

Raw file: 20150812\_A375SR\_Phospho\_BR1\_04  
 Scan: 2670 Method: FTMS; HCD Score: 246.95 m/z: 760.8 Gene names: SGTA

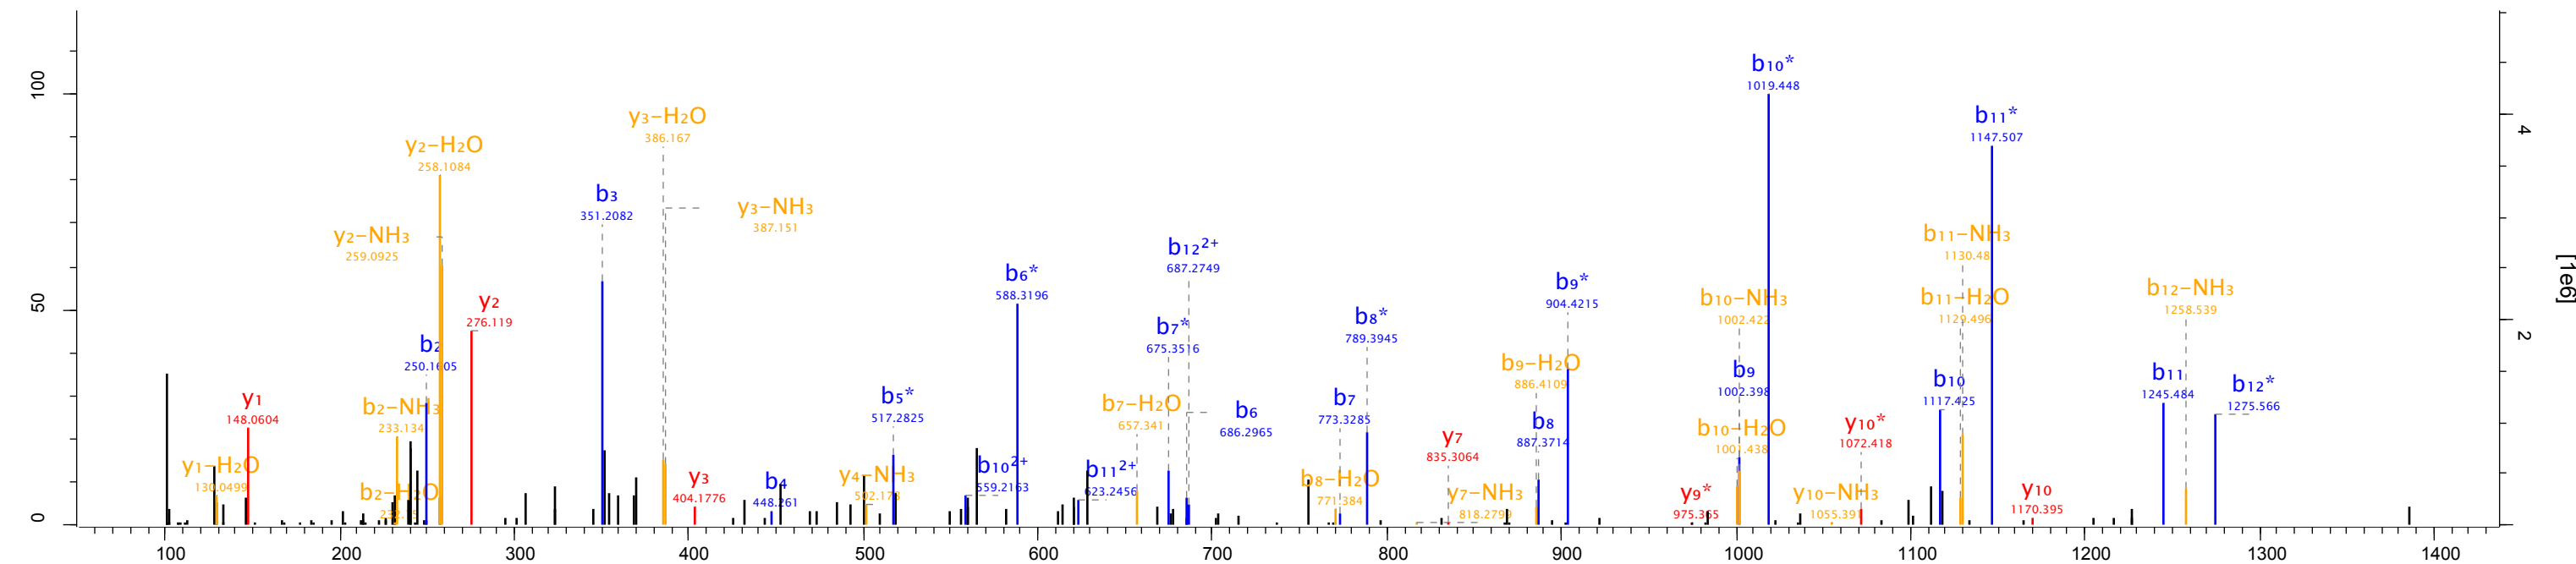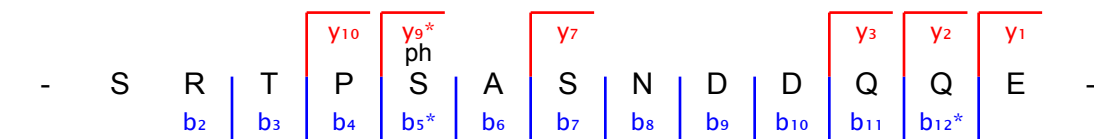



Raw file: 20150812\_A375SR\_Phospho\_BR1\_04  
 Scan: 2730 Method: FTMS; HCD Score: 331.8 m/z: 885.37 Gene names: USP16

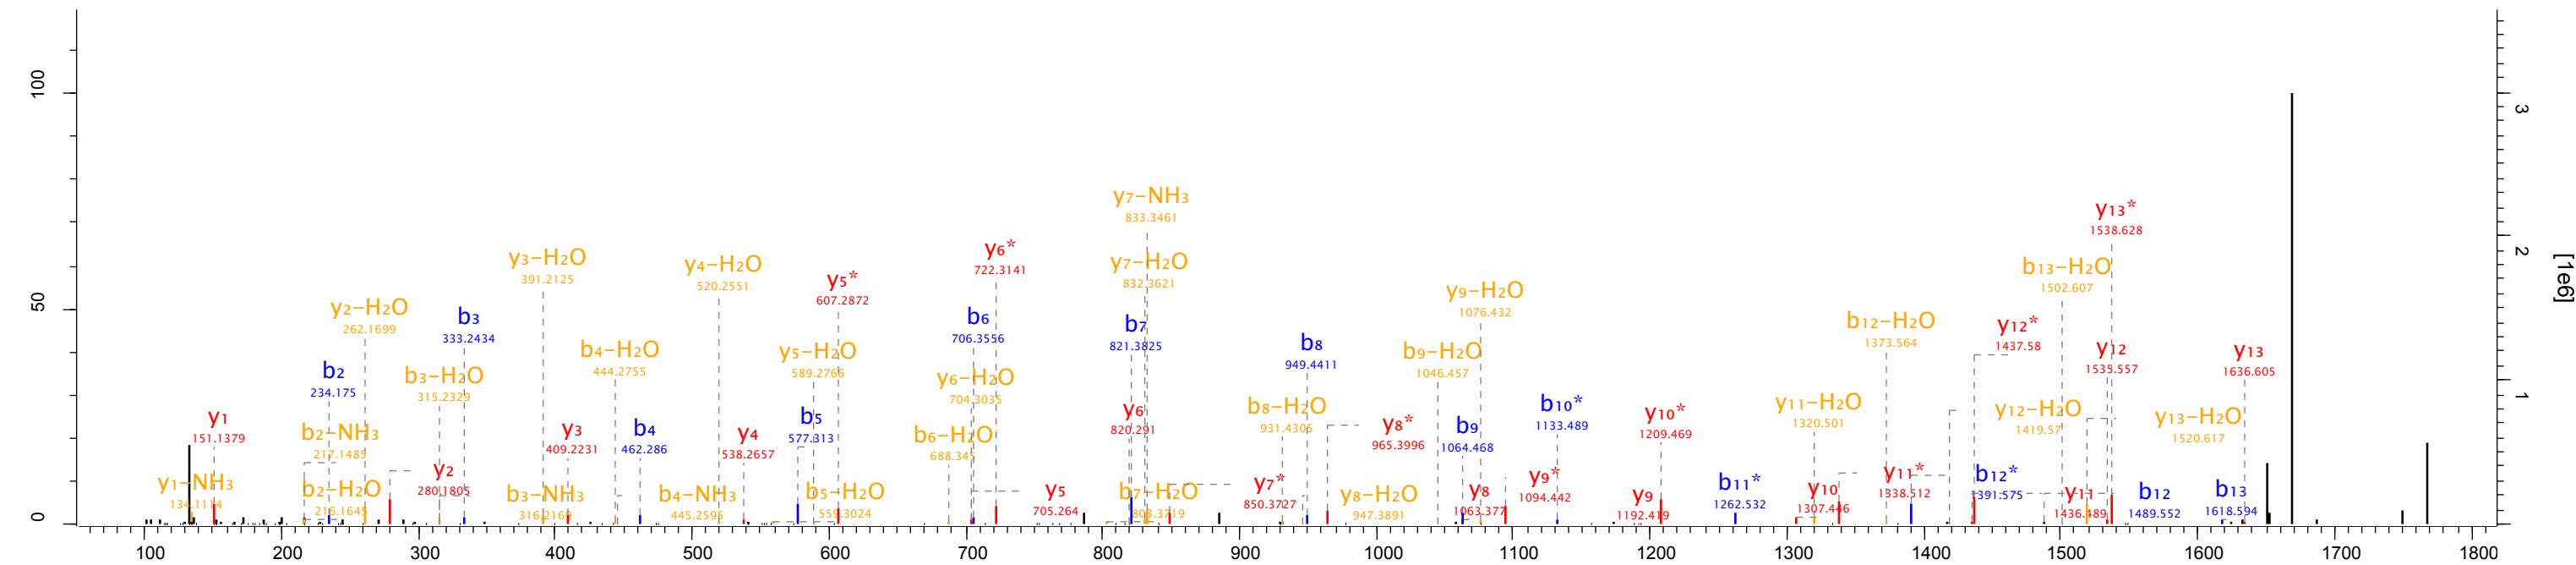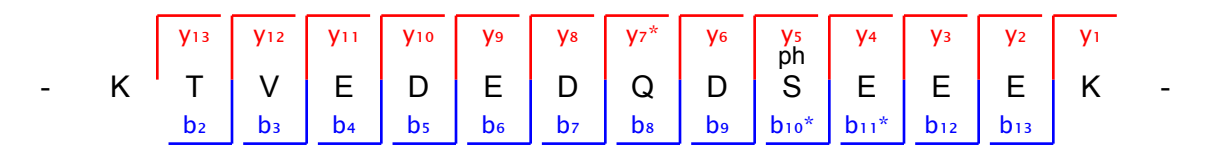

Raw file: 20150812\_A375SR\_Phospho\_BR1\_04  
 Scan: 2890 Method: FTMS; HCD Score: 190.24 m/z: 731.79 Gene names: SMARCA4

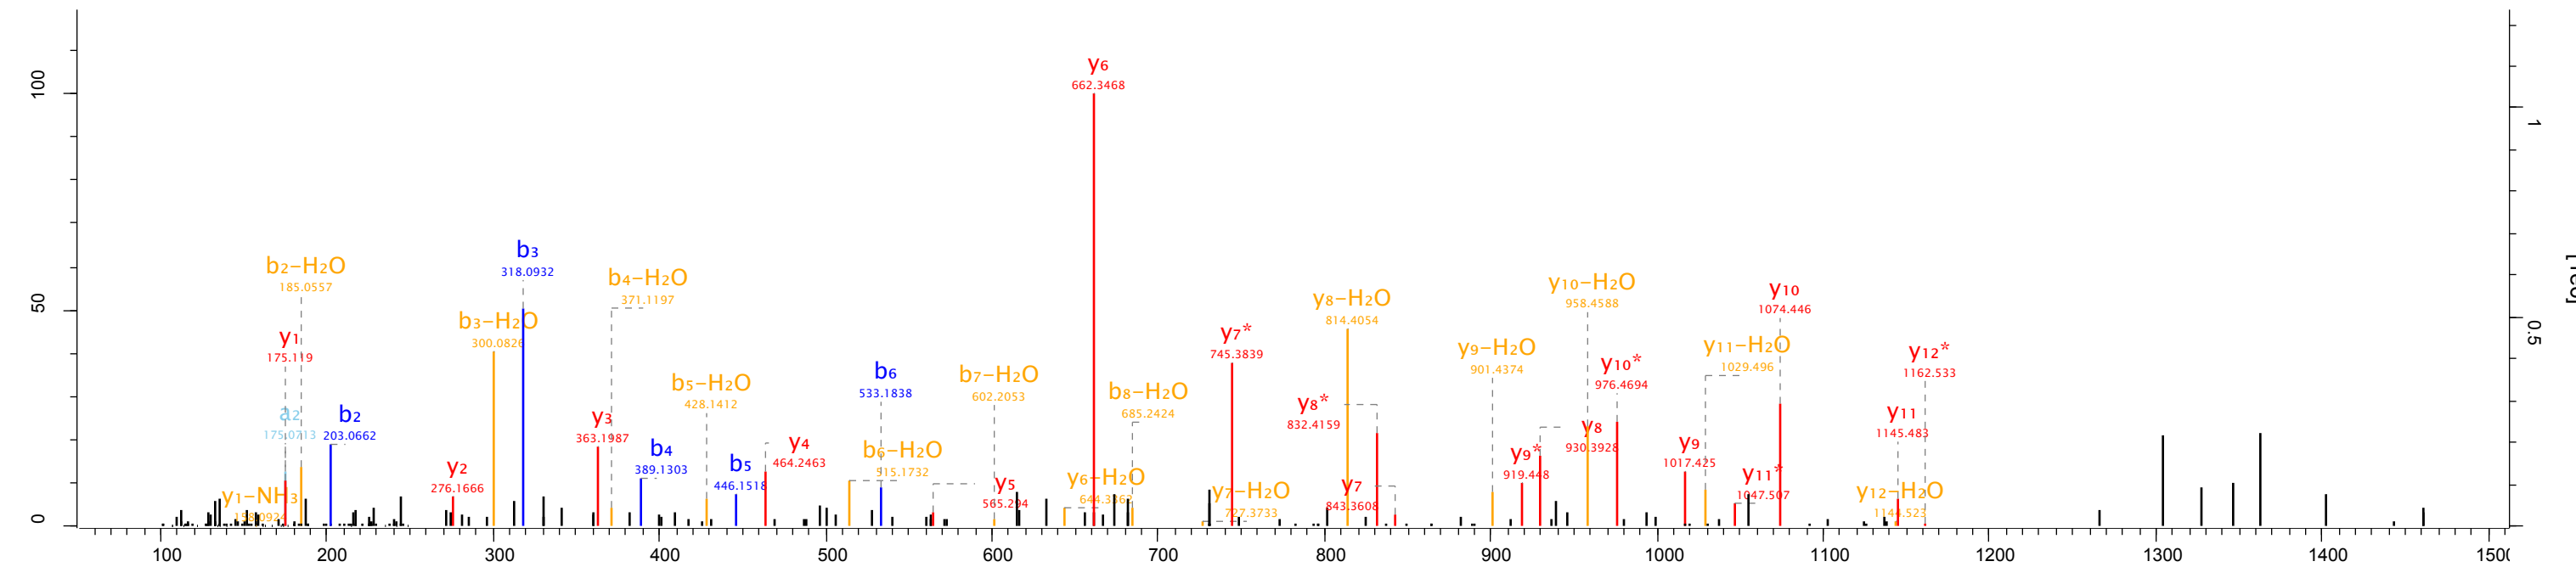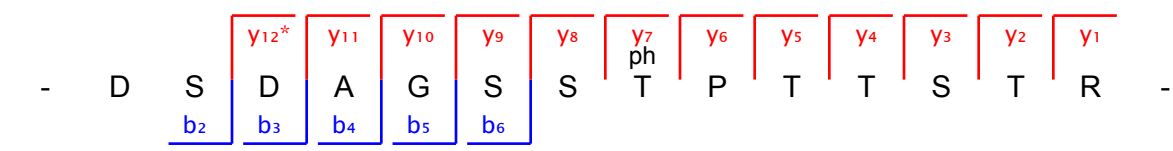

Raw file Scan Method Score m/z Gene names

20150812\_A375SR\_Phospho\_BR1\_04 3100 FTMS; HCD 113.43 549.74 SRSF6

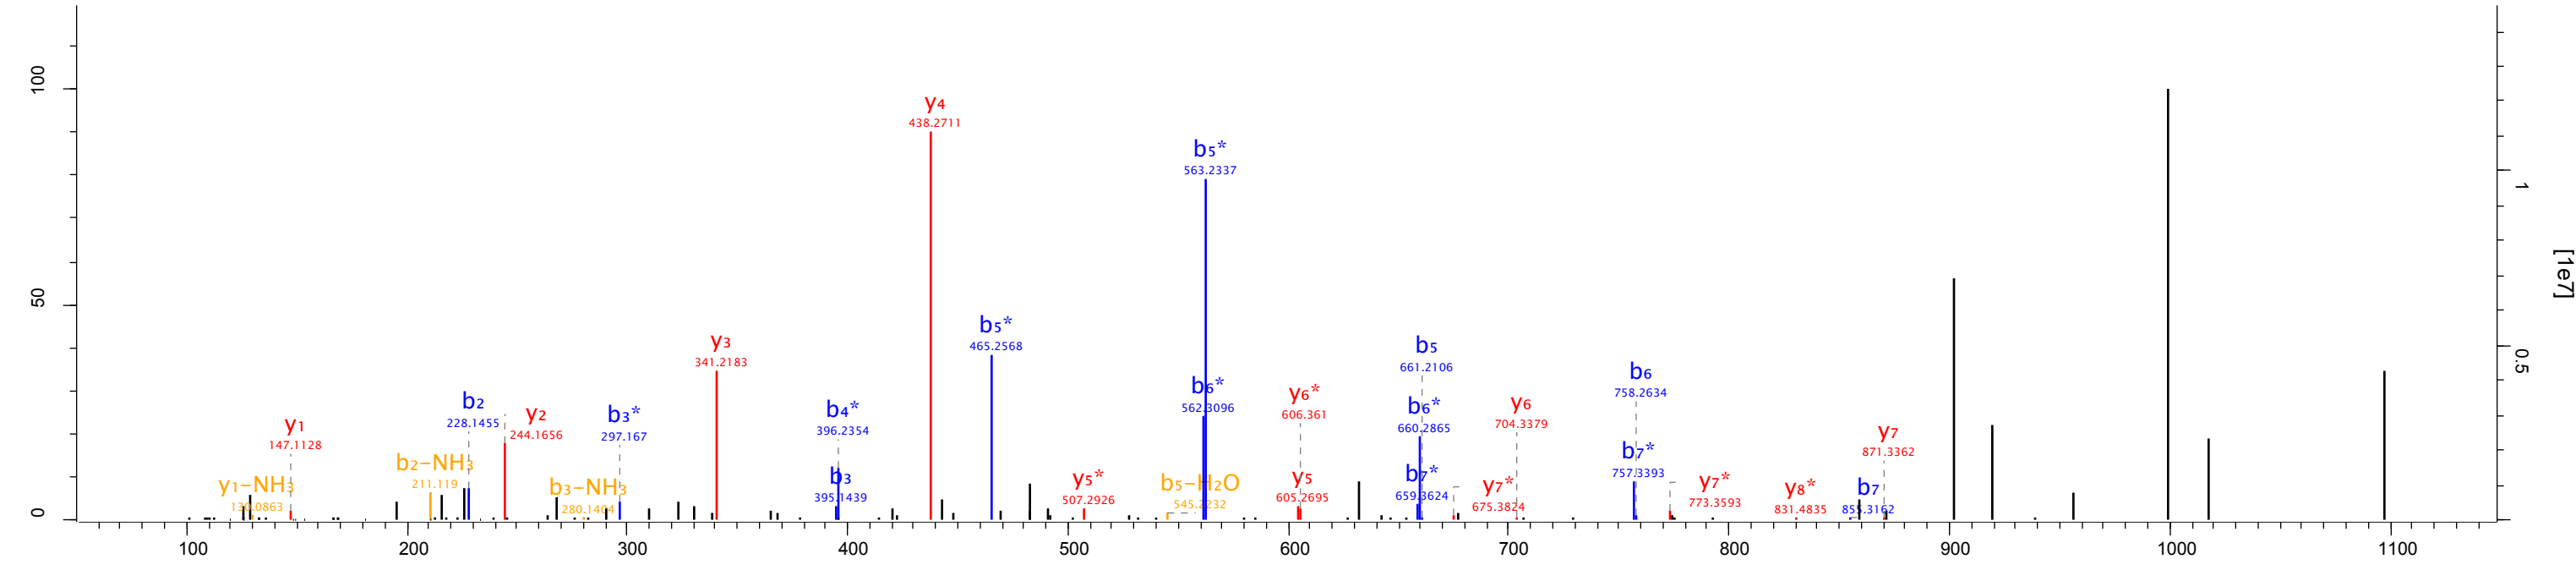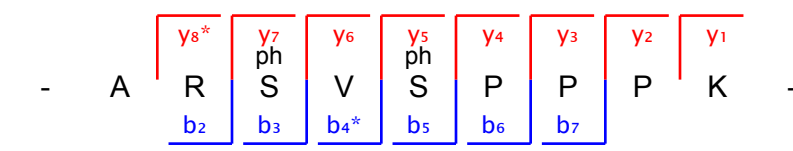

Raw file: 20150812\_A375SR\_Phospho\_BR1\_04  
 Scan: 4160 Method: FTMS; HCD Score: 188.85 m/z: 741.32 Gene names: RBMX2

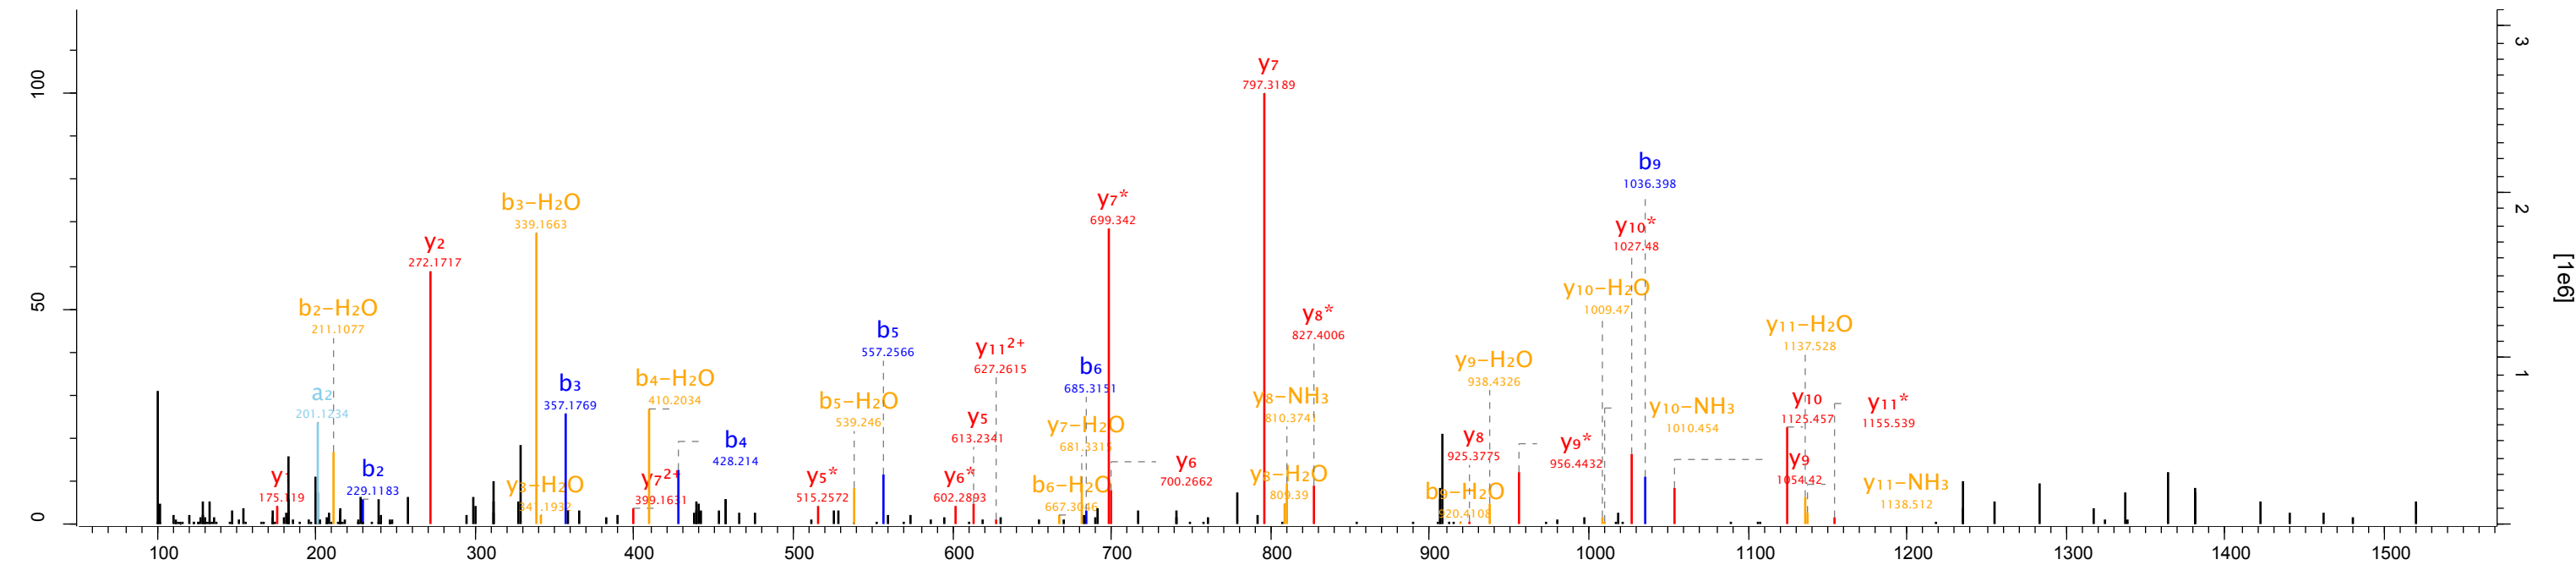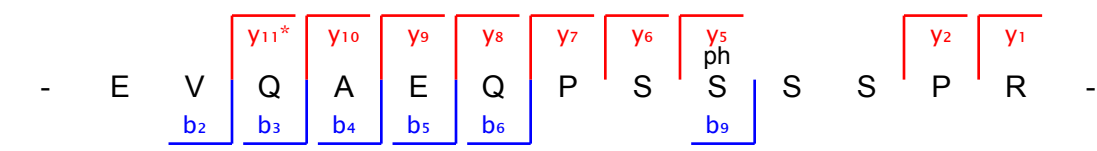

Raw file: 20150812\_A375SR\_Phospho\_BR1\_04  
 Scan: 4620 Method: FTMS; HCD Score: 132.5 m/z: 757.86 Gene names: PJA2

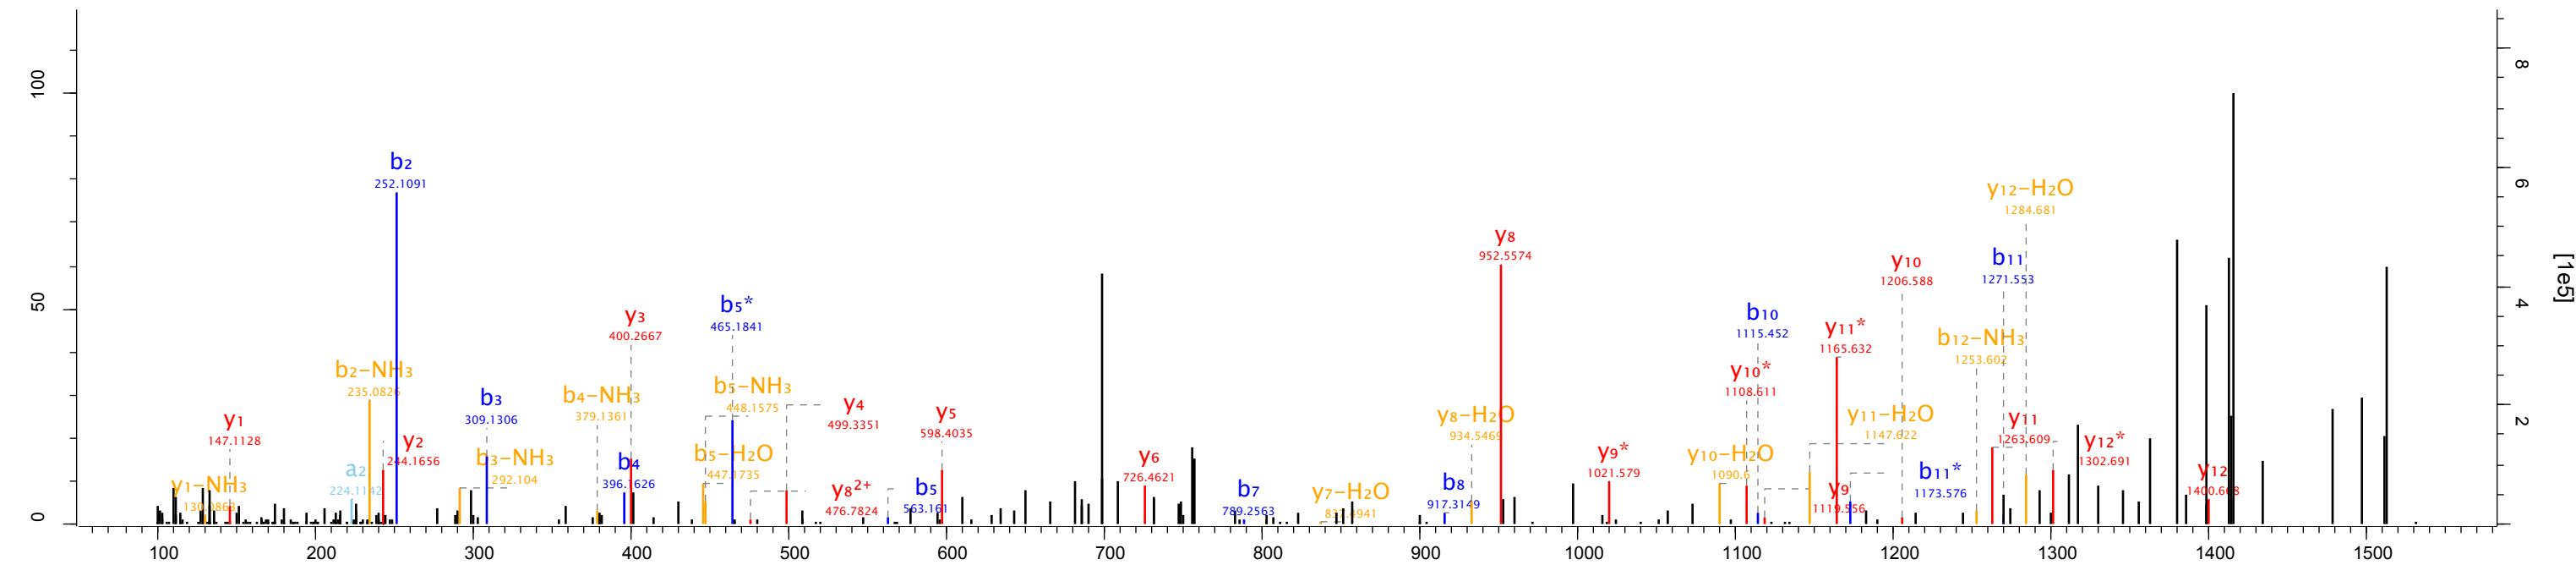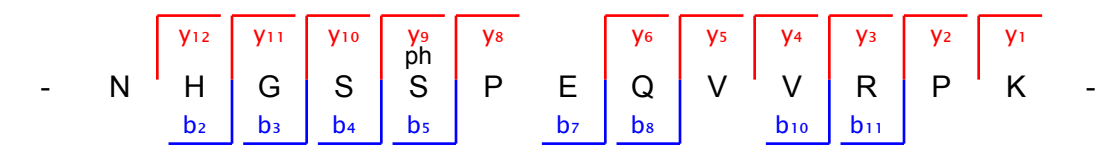

Raw file: 20150812\_A375SR\_Phospho\_BR1\_04  
 Scan: 4830 Method: FTMS; HCD Score: 191.98 m/z: 788.34 Gene names: MED19

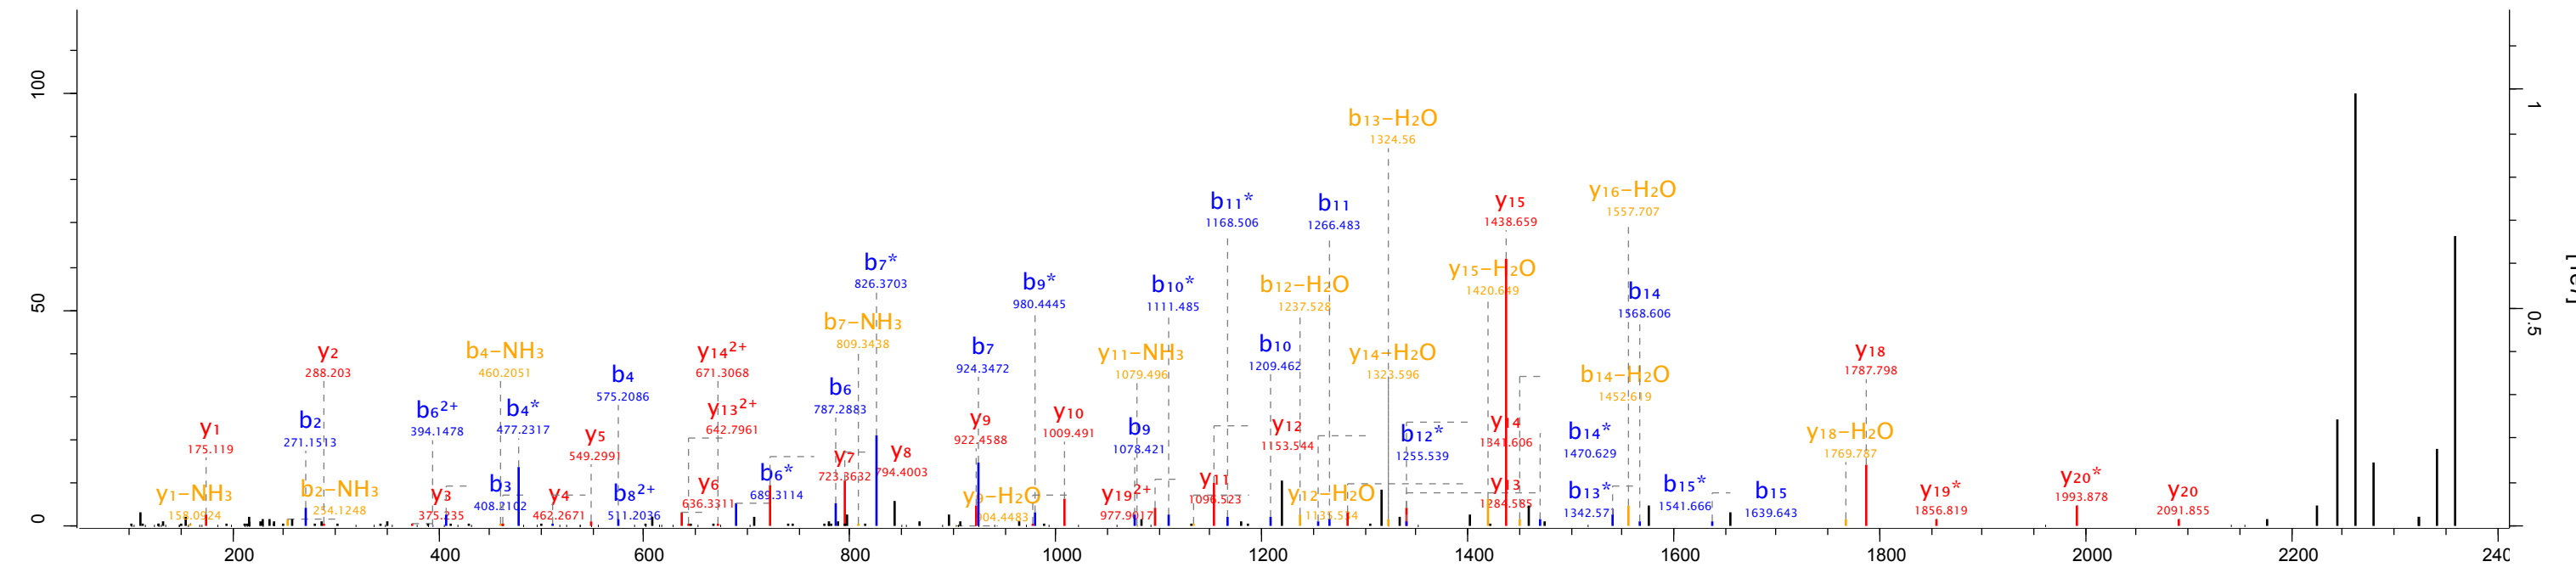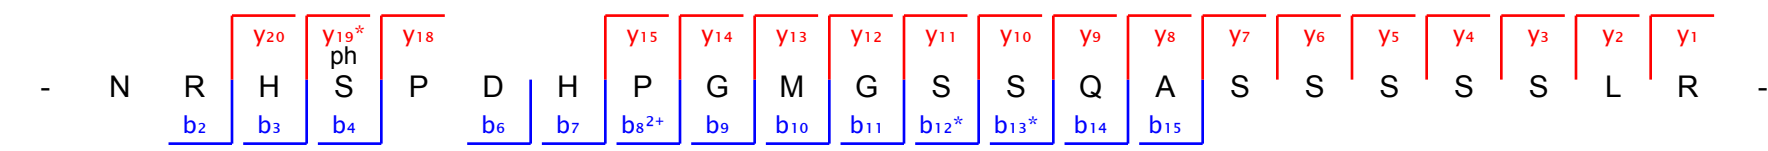

Raw file: 20150812\_A375SR\_Phospho\_BR1\_04  
 Scan: 5000 Method: FTMS; HCD Score: 124.07 m/z: 585.26 Gene names: VCL

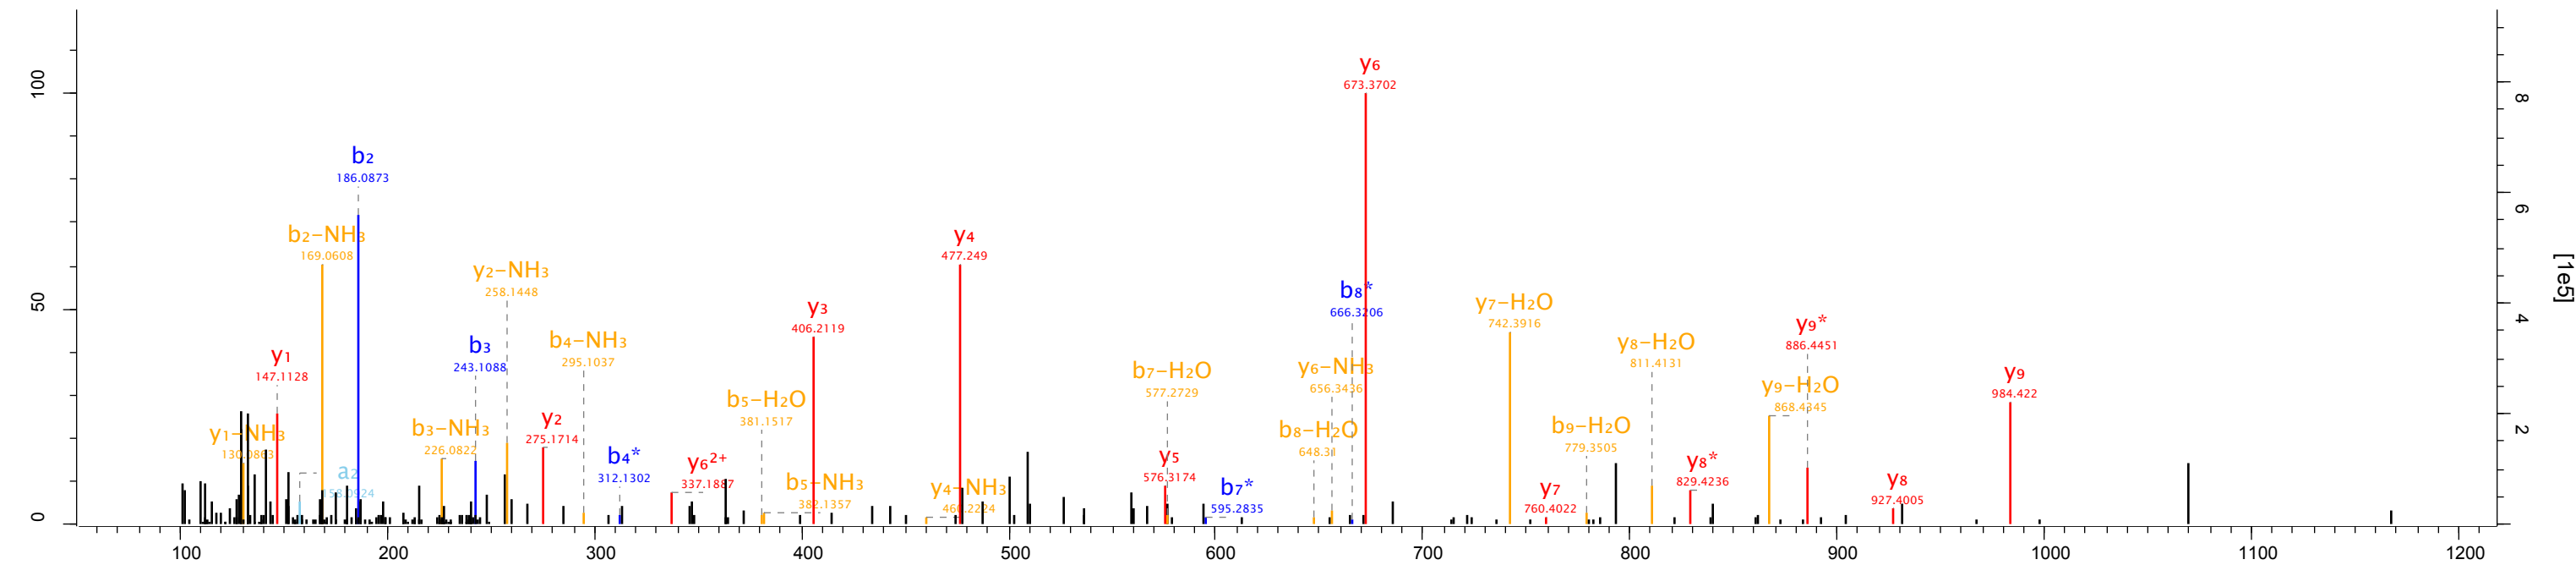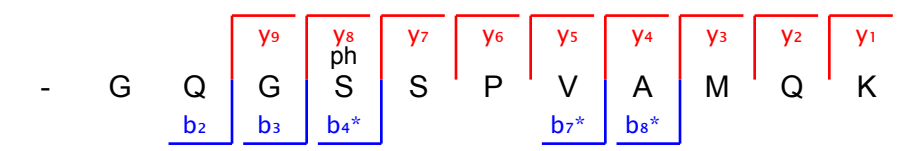

Raw file: 20150812\_A375SR\_Phospho\_BR1\_04  
 Scan: 5030 Method: FTMS; HCD Score: 242.01 m/z: 696.8 Gene names: CCDC82

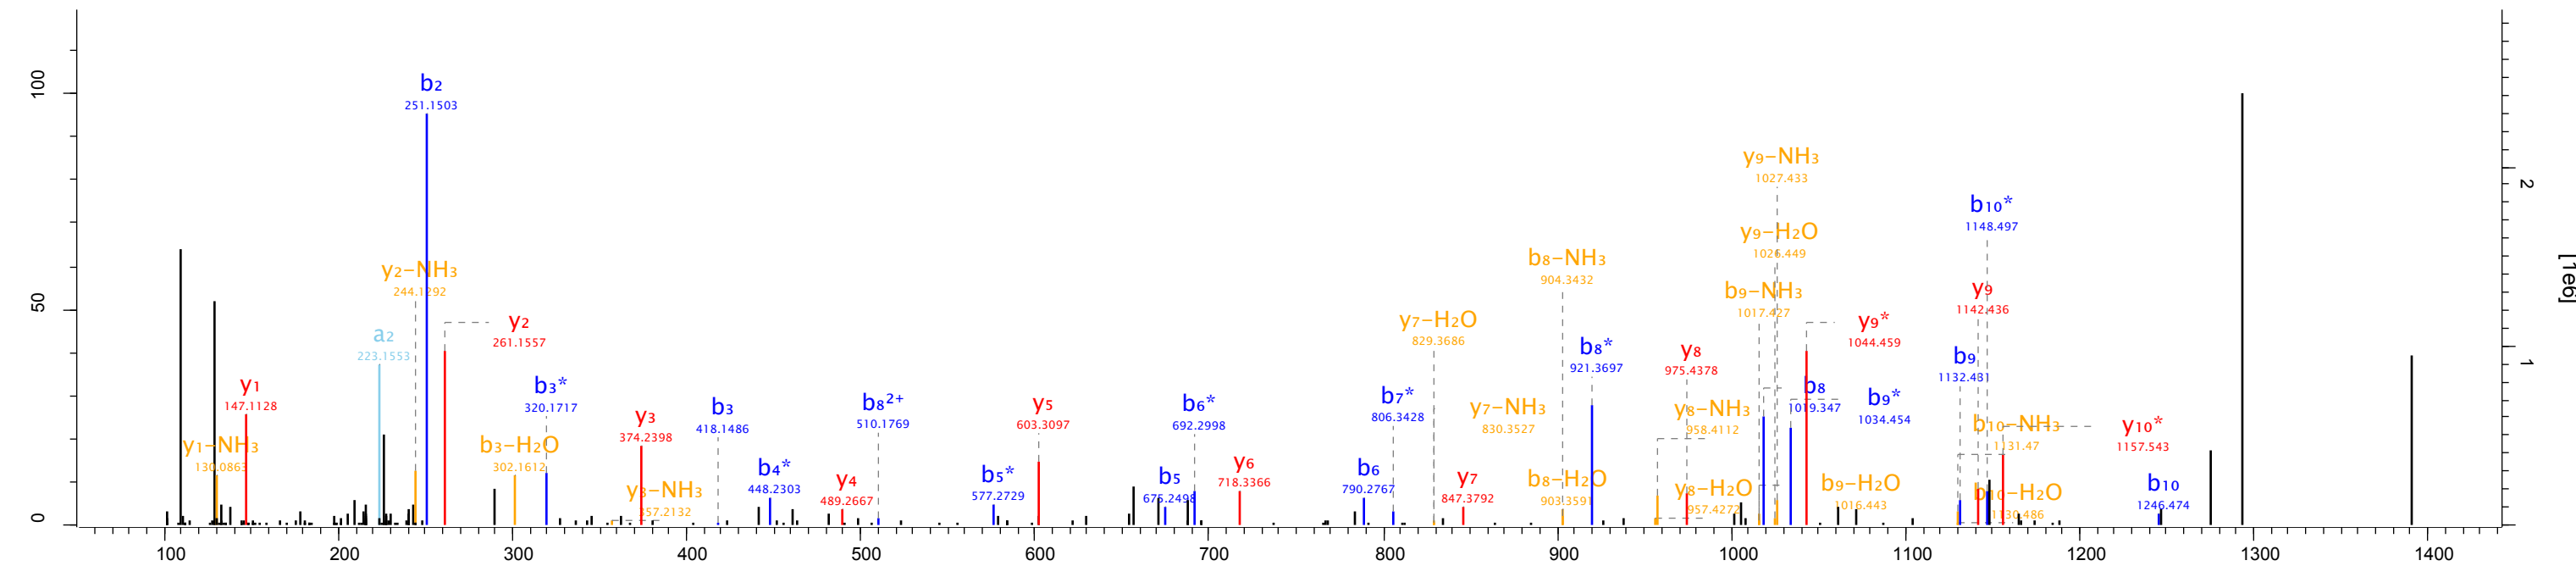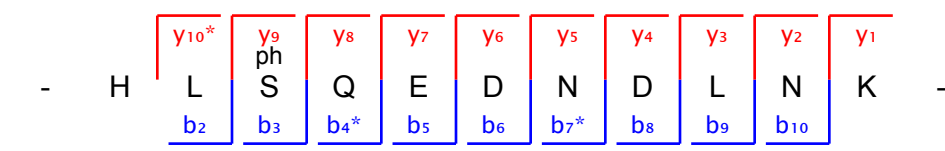



Raw file 20150812\_A375SR\_Phospho\_BR1\_04 Scan 6050 Method FTMS; HCD Score 77.13 m/z 763.35 Gene names FAM64A

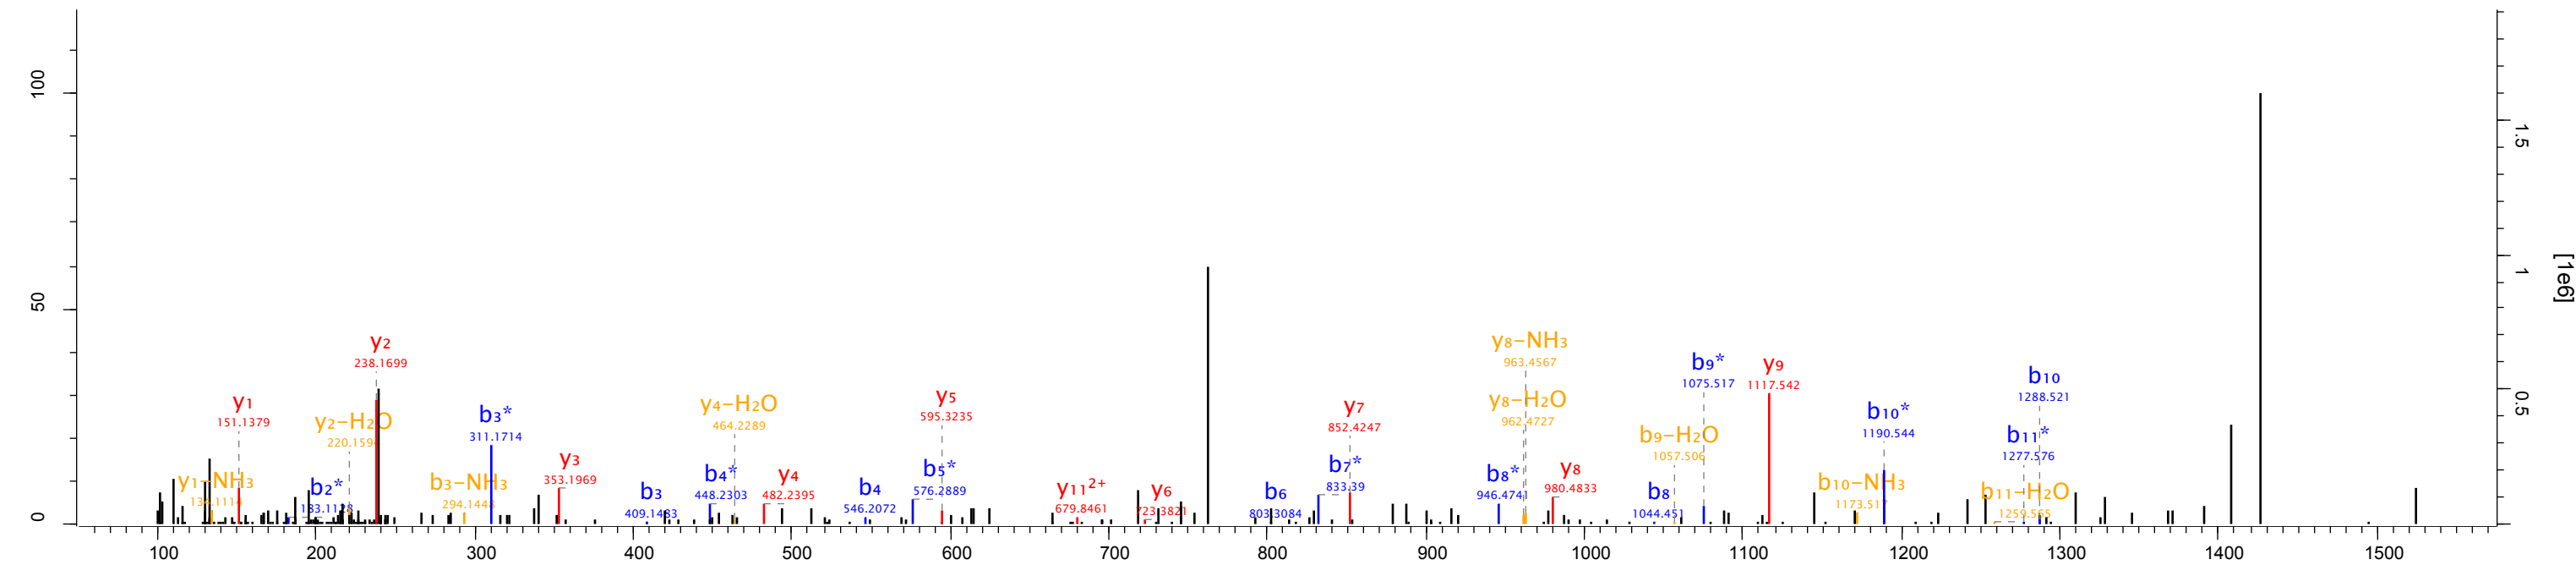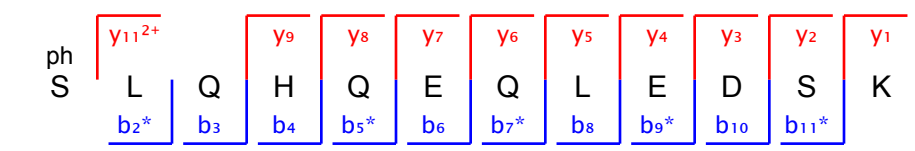

Raw file: 20150812\_A375SR\_Phospho\_BR1\_04  
 Scan: 6340 Method: FTMS; HCD Score: 112.55 m/z: 528.3 Gene names: SMARCA2

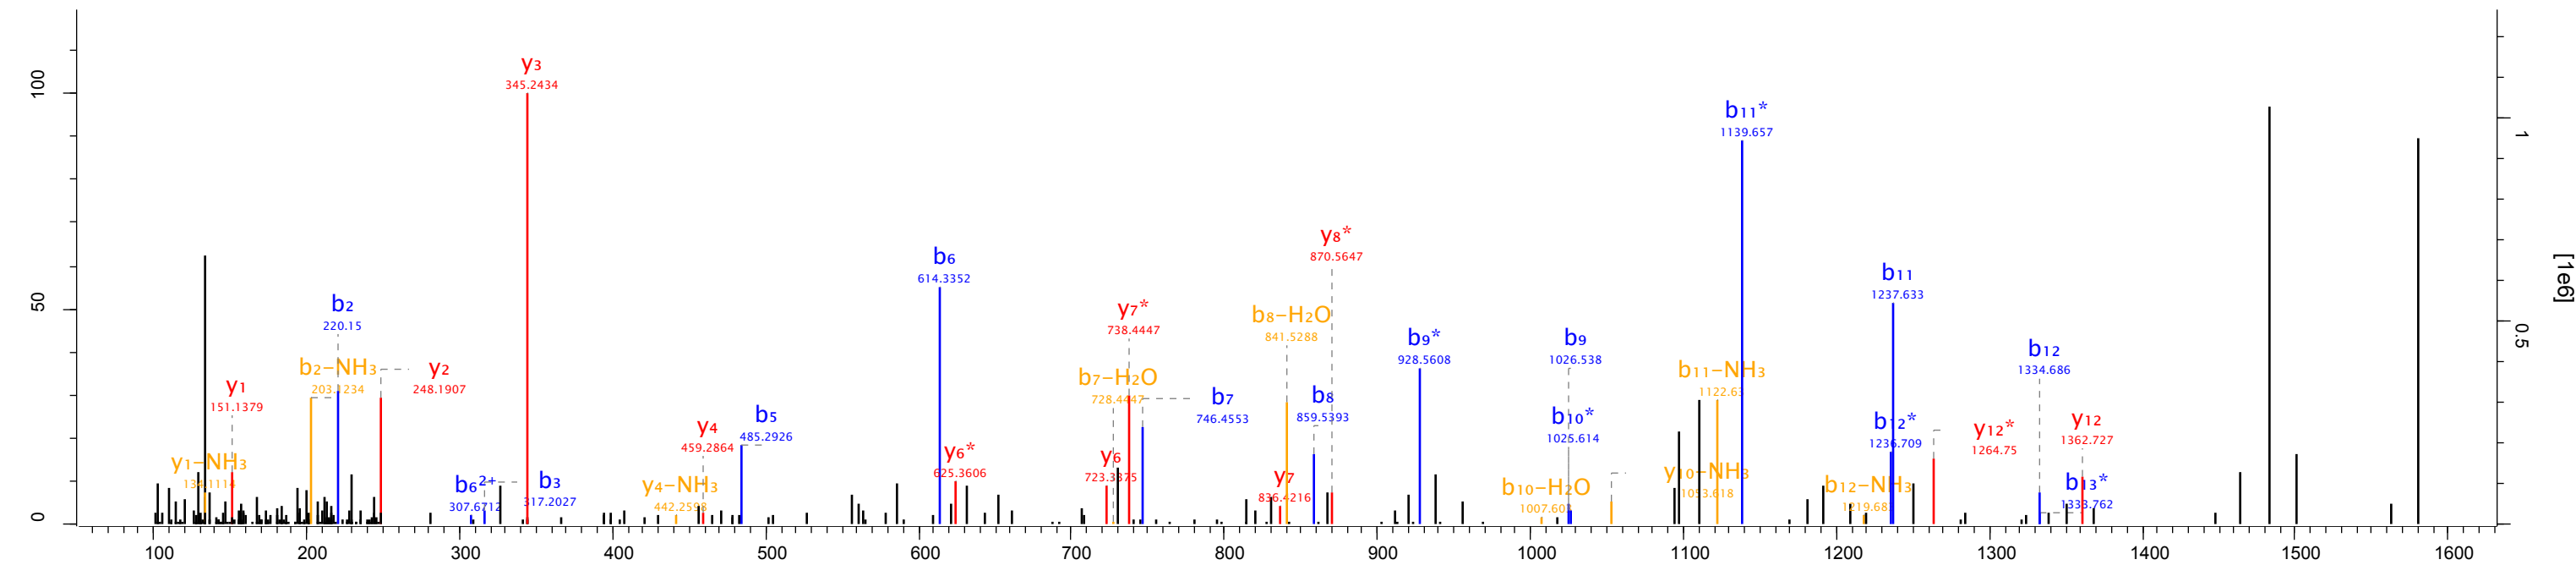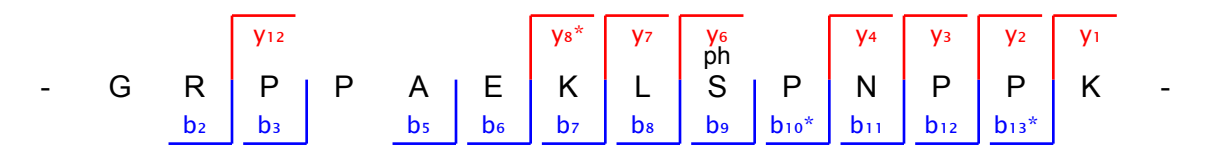

Raw file: 20150812\_A375SR\_Phospho\_BR1\_04  
 Scan: 6490 Method: FTMS; HCD Score: 133.95 m/z: 526.9 Gene names: SRSF1

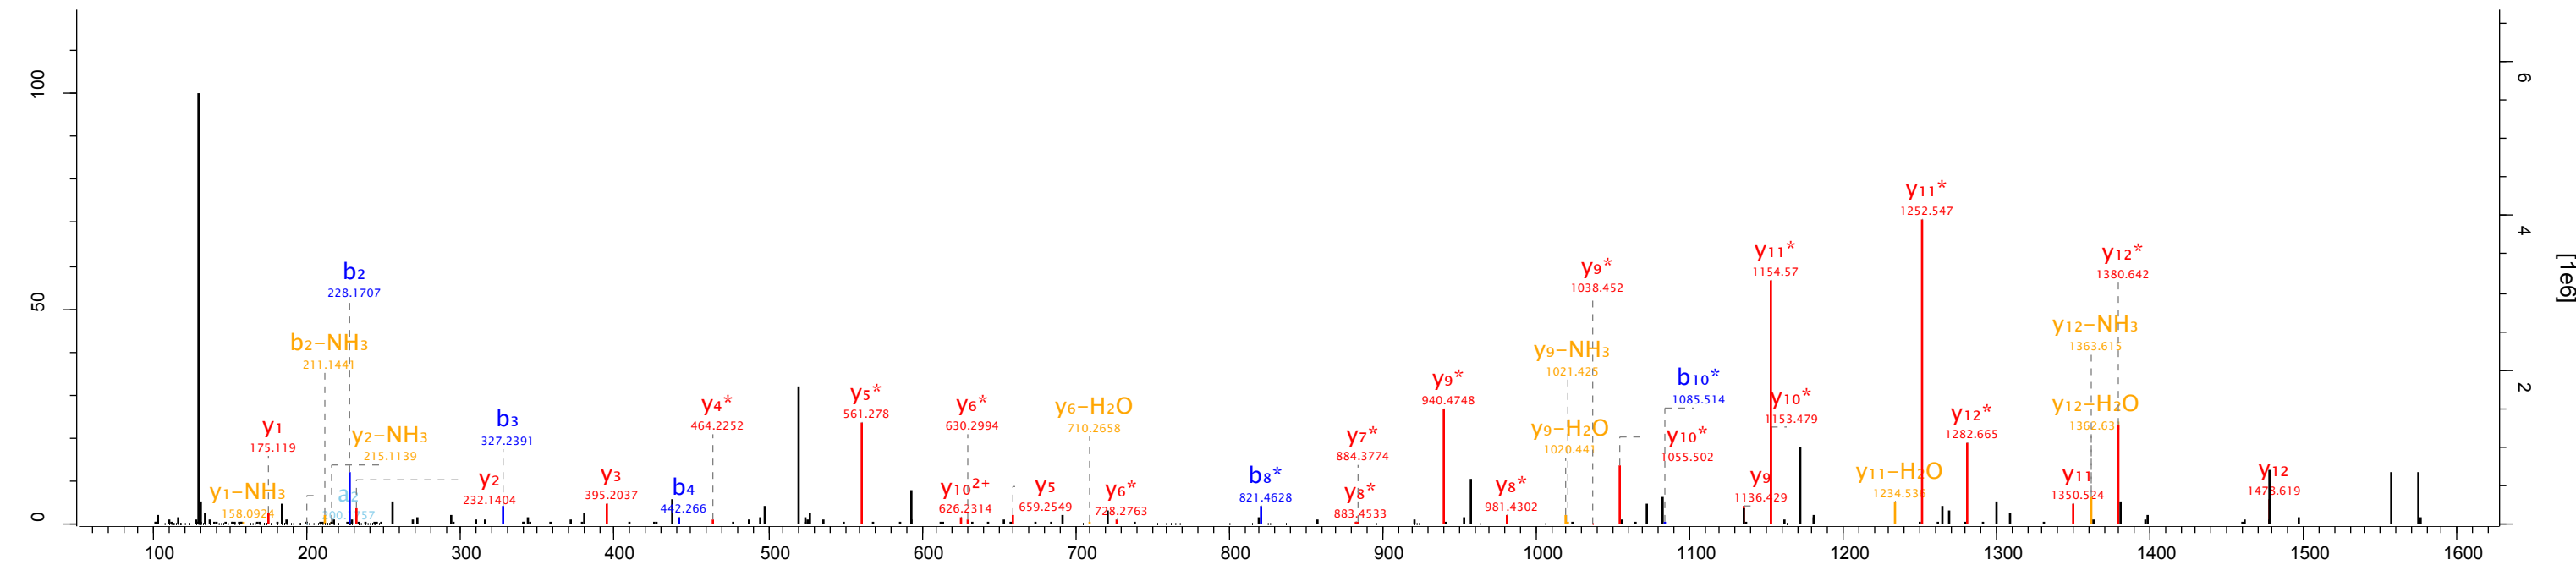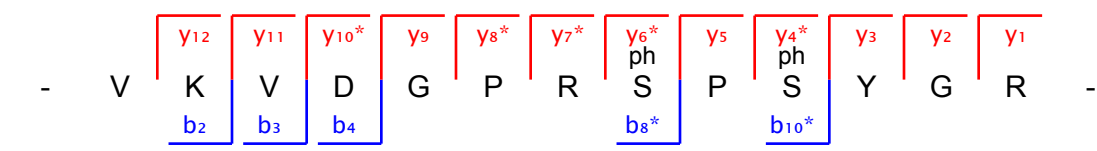

Raw file Scan Method Score m/z Gene names  
 20150812\_A375SR\_Phospho\_BR1\_04 6530 FTMS; HCD 280.85 1032.9 POLR3E

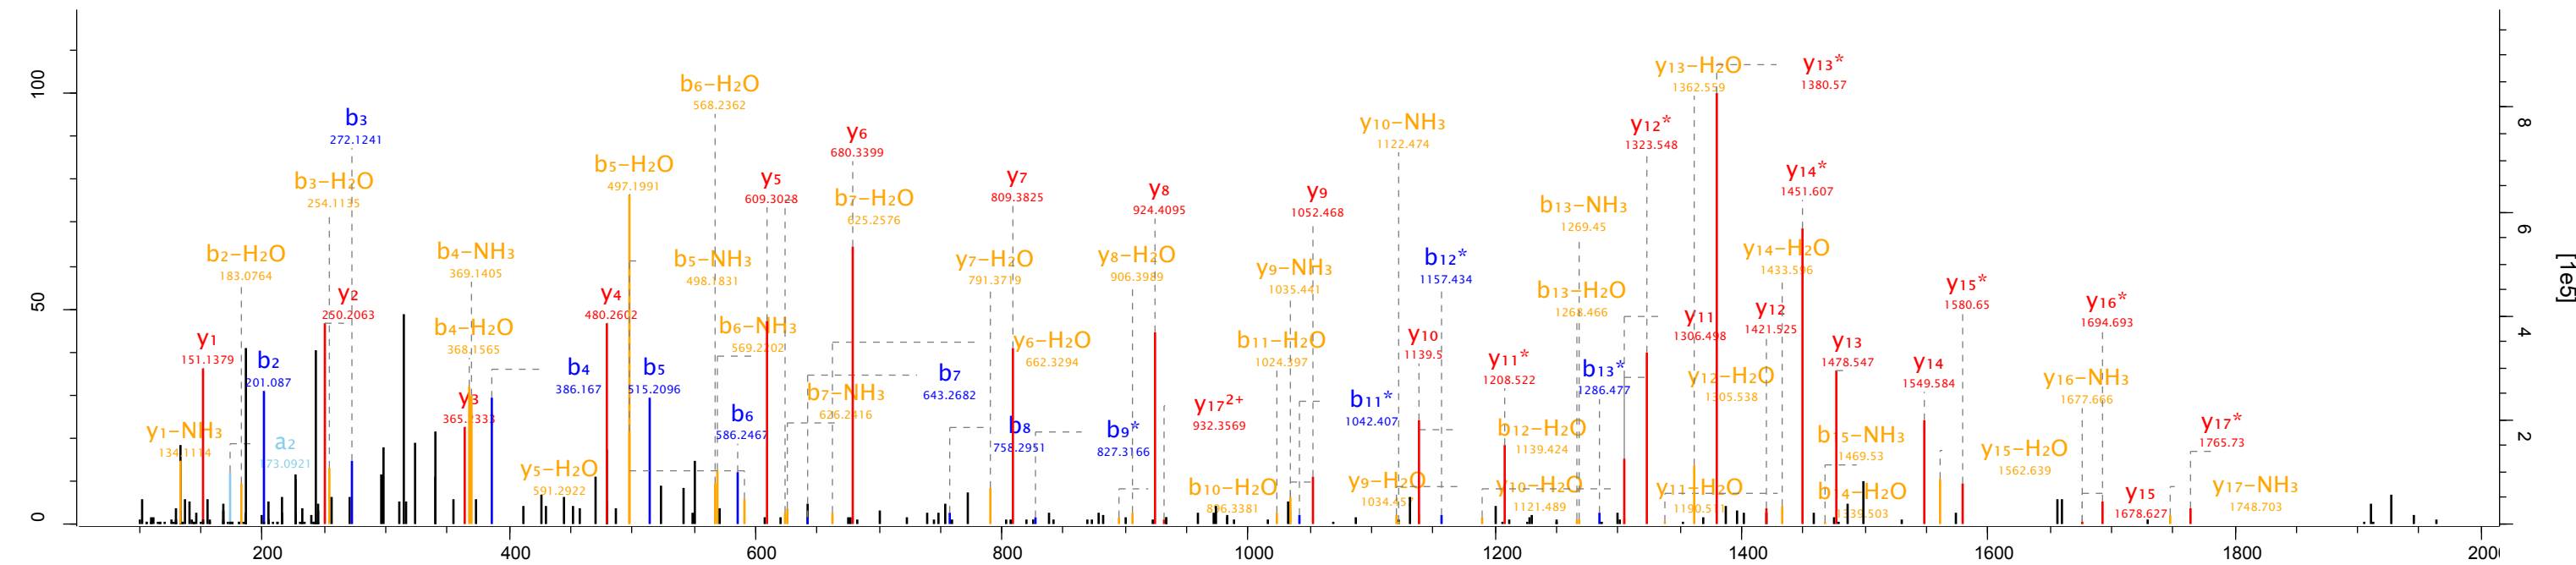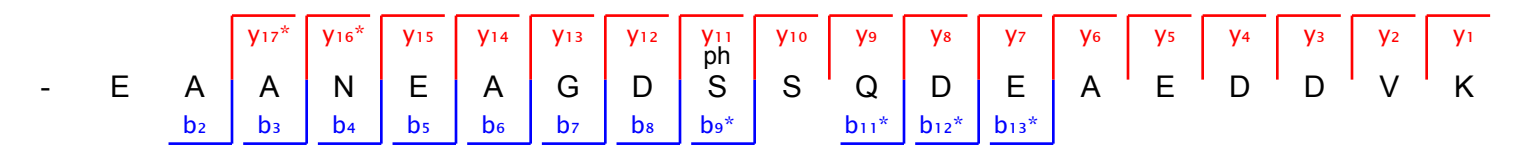

Raw file: 20150812\_A375SR\_Phospho\_BR1\_04  
 Scan: 6540 Method: FTMS; HCD Score: 205.23 m/z: 824.84 Gene names: DDX24

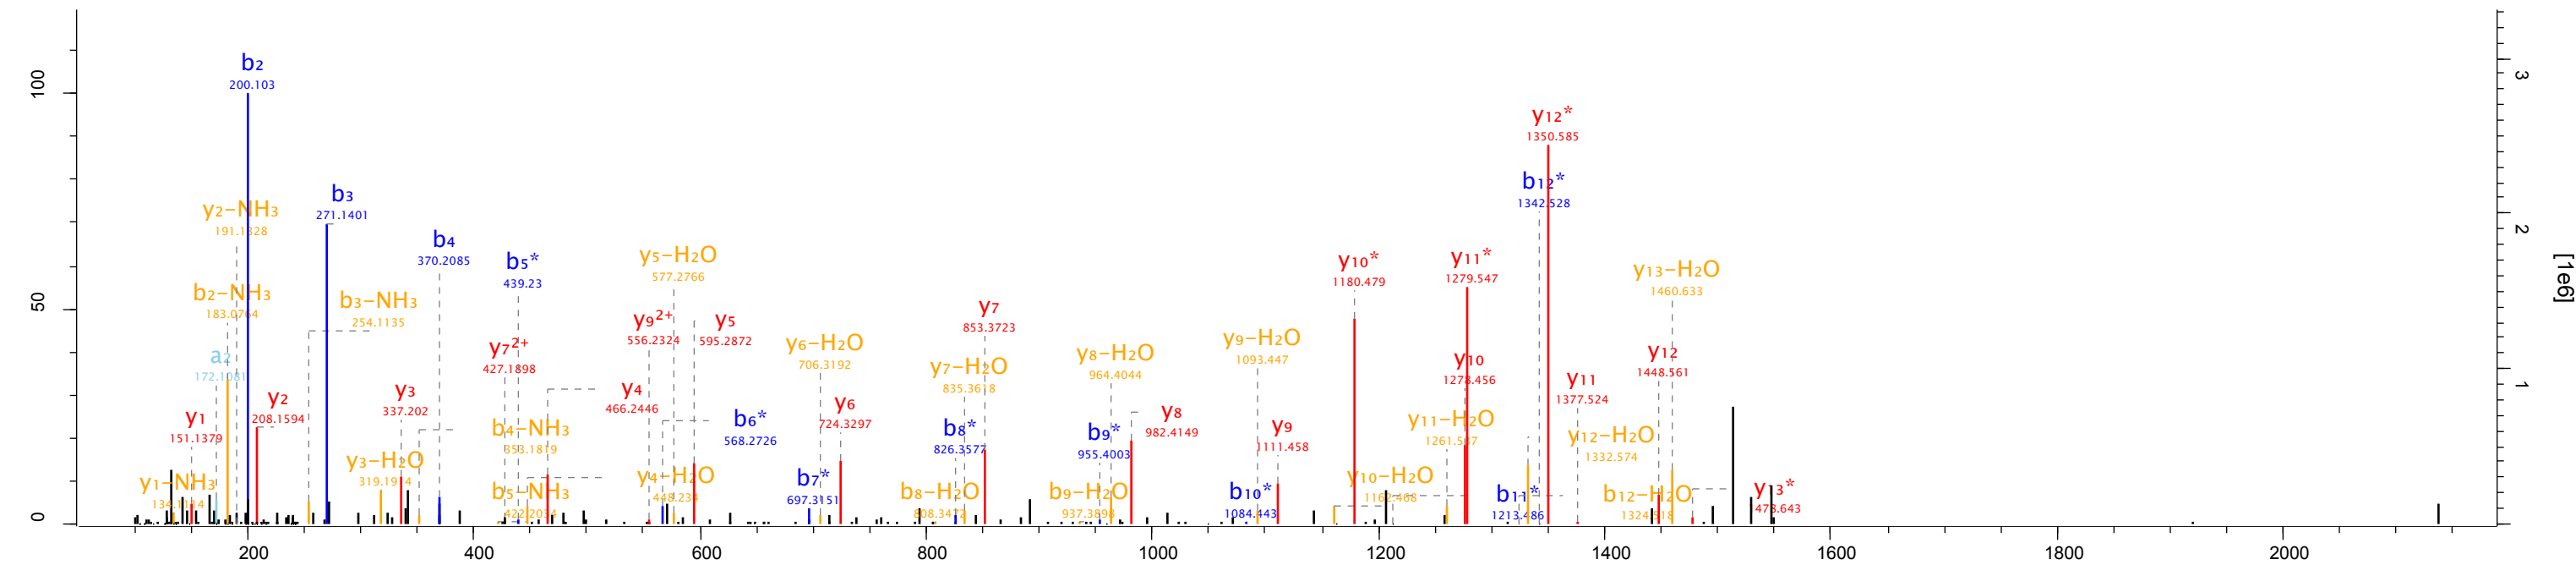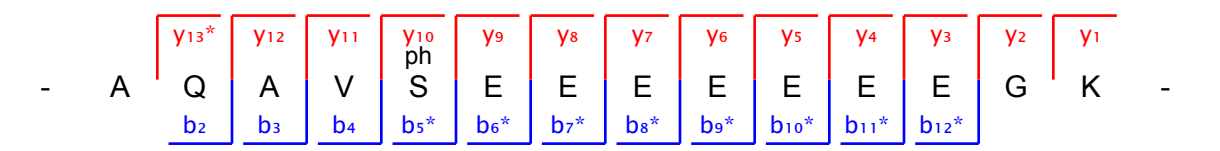

Raw file: 20150812\_A375SR\_Phospho\_BR1\_04  
 Scan: 6800 Method: FTMS; HCD Score: 165.47 m/z: 880.86 Gene names: PDCD4

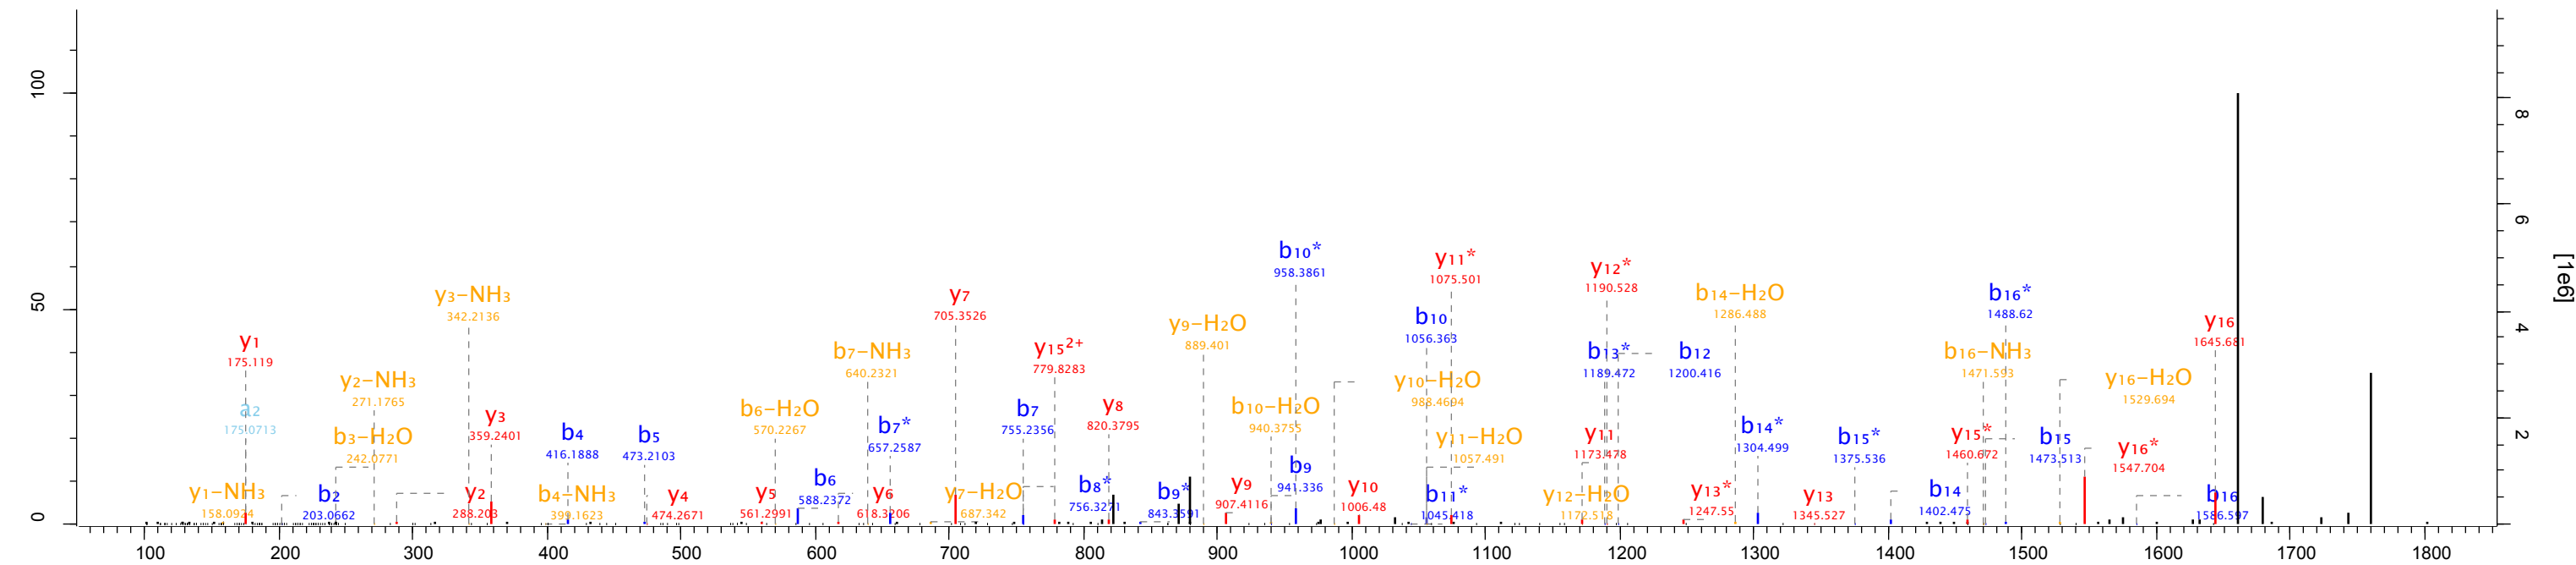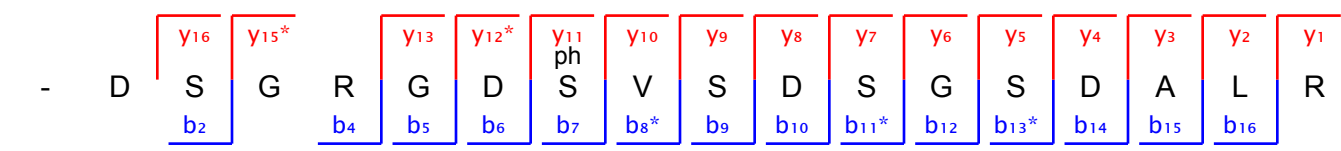

Raw file: 20150812\_A375SR\_Phospho\_BR1\_04  
 Scan: 6840 Method: FTMS; HCD Score: 73.92 m/z: 573.75 Gene names: WDR20

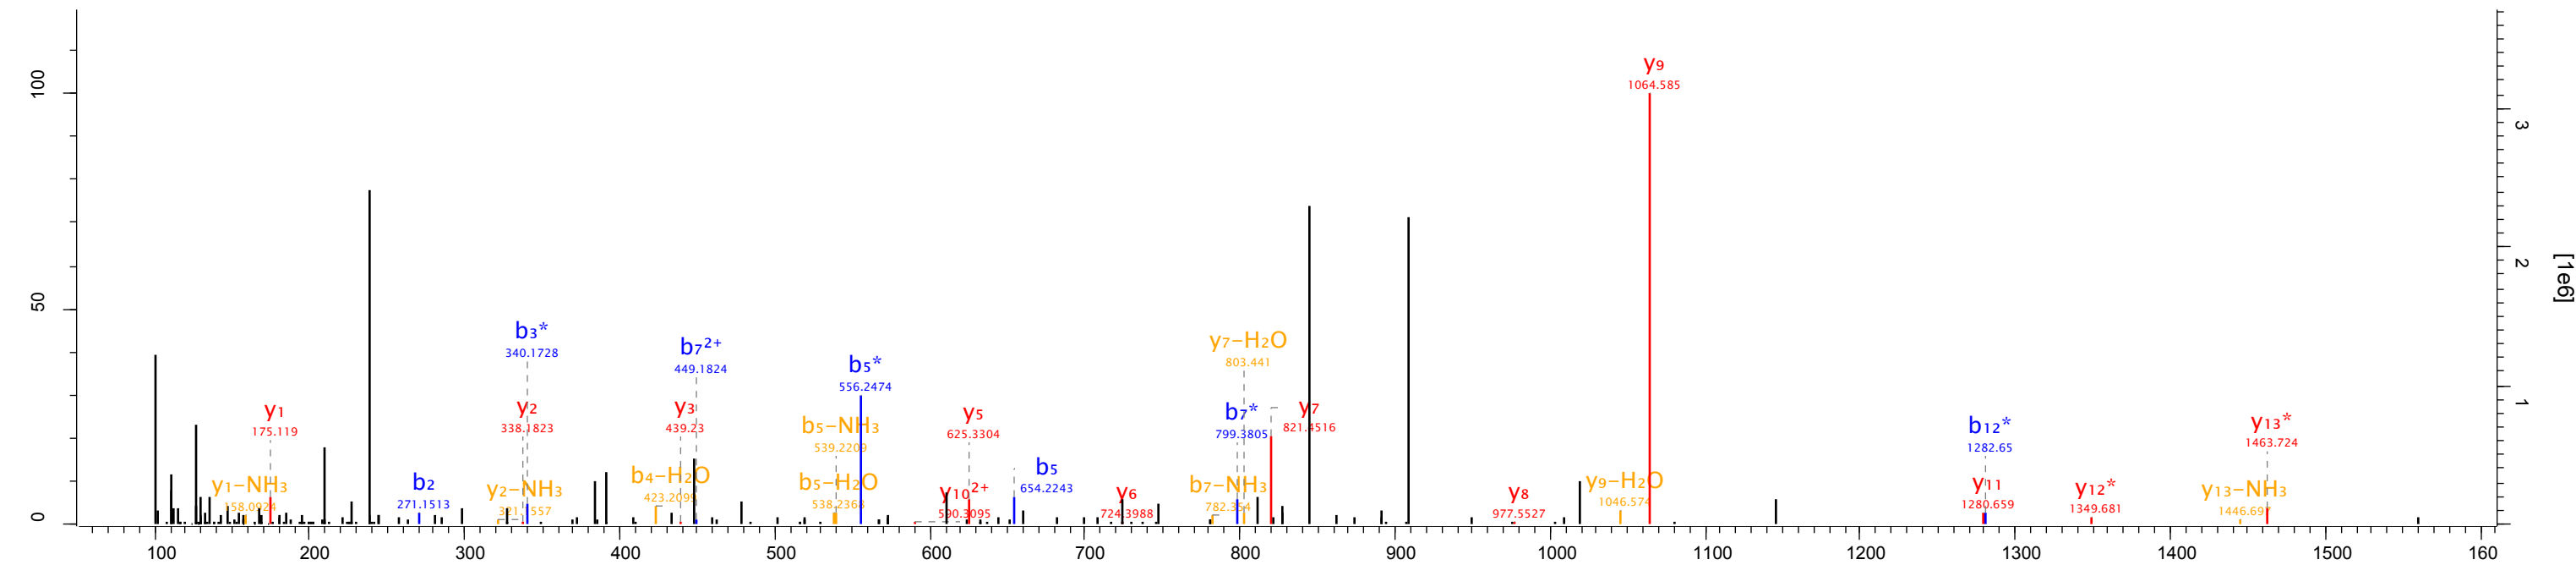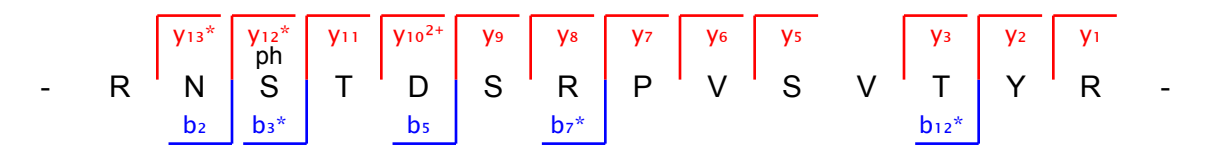

Raw file: 20150812\_A375SR\_Phospho\_BR1\_04  
 Scan: 7260 Method: FTMS; HCD Score: 141.88 m/z: 614.27 Gene names: SRRM1

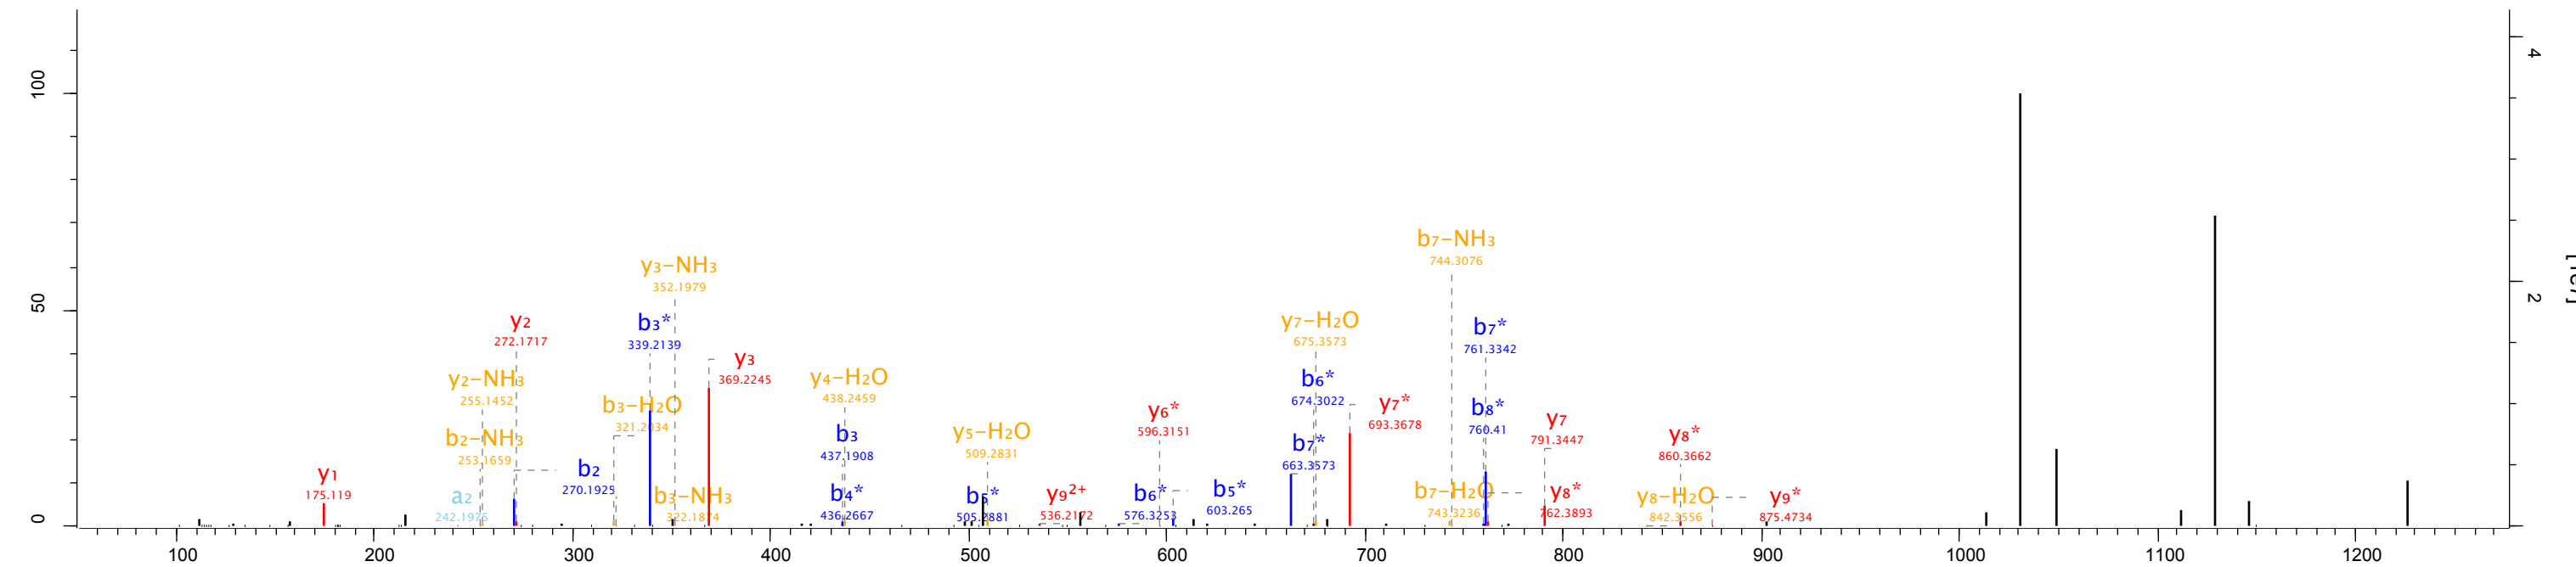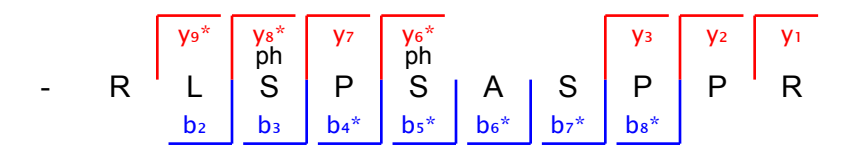



Raw file: 20150812\_A375SR\_Phospho\_BR1\_04  
 Scan: 7370 Method: FTMS; HCD Score: 124.36 m/z: 929.93 Gene names: TANC1

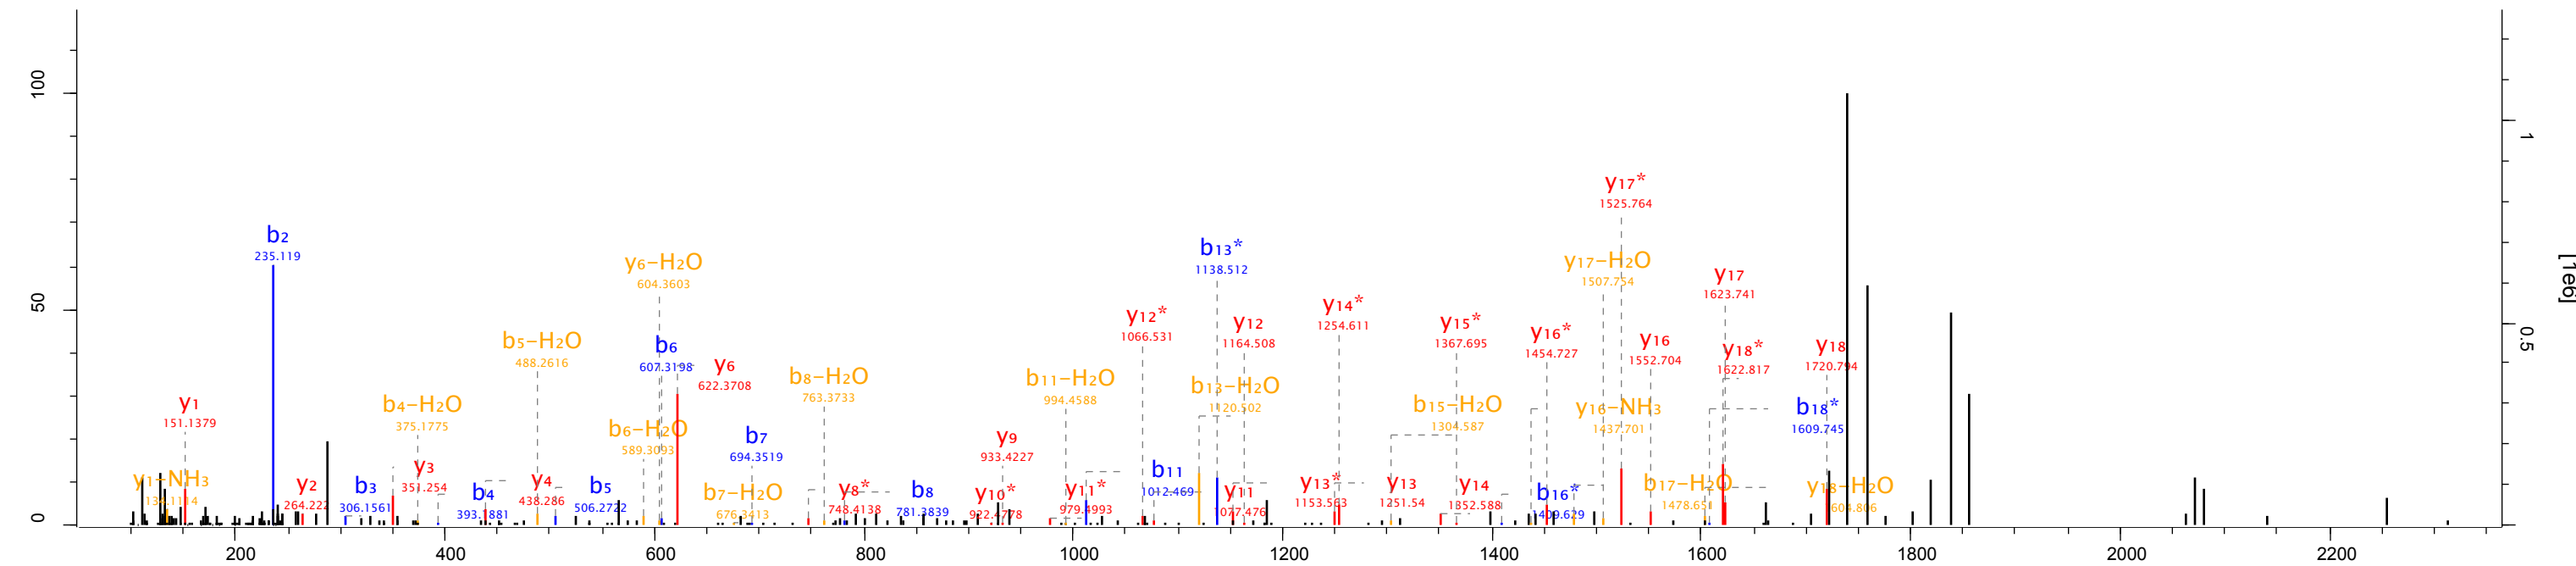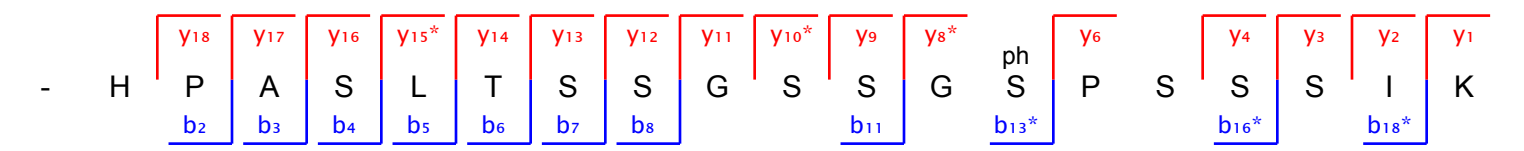

Raw file 20150812\_A375SR\_Phospho\_BR1\_04 Scan 7650 Method FTMS; HCD Score 44.09 m/z 619.04 Gene names MYC

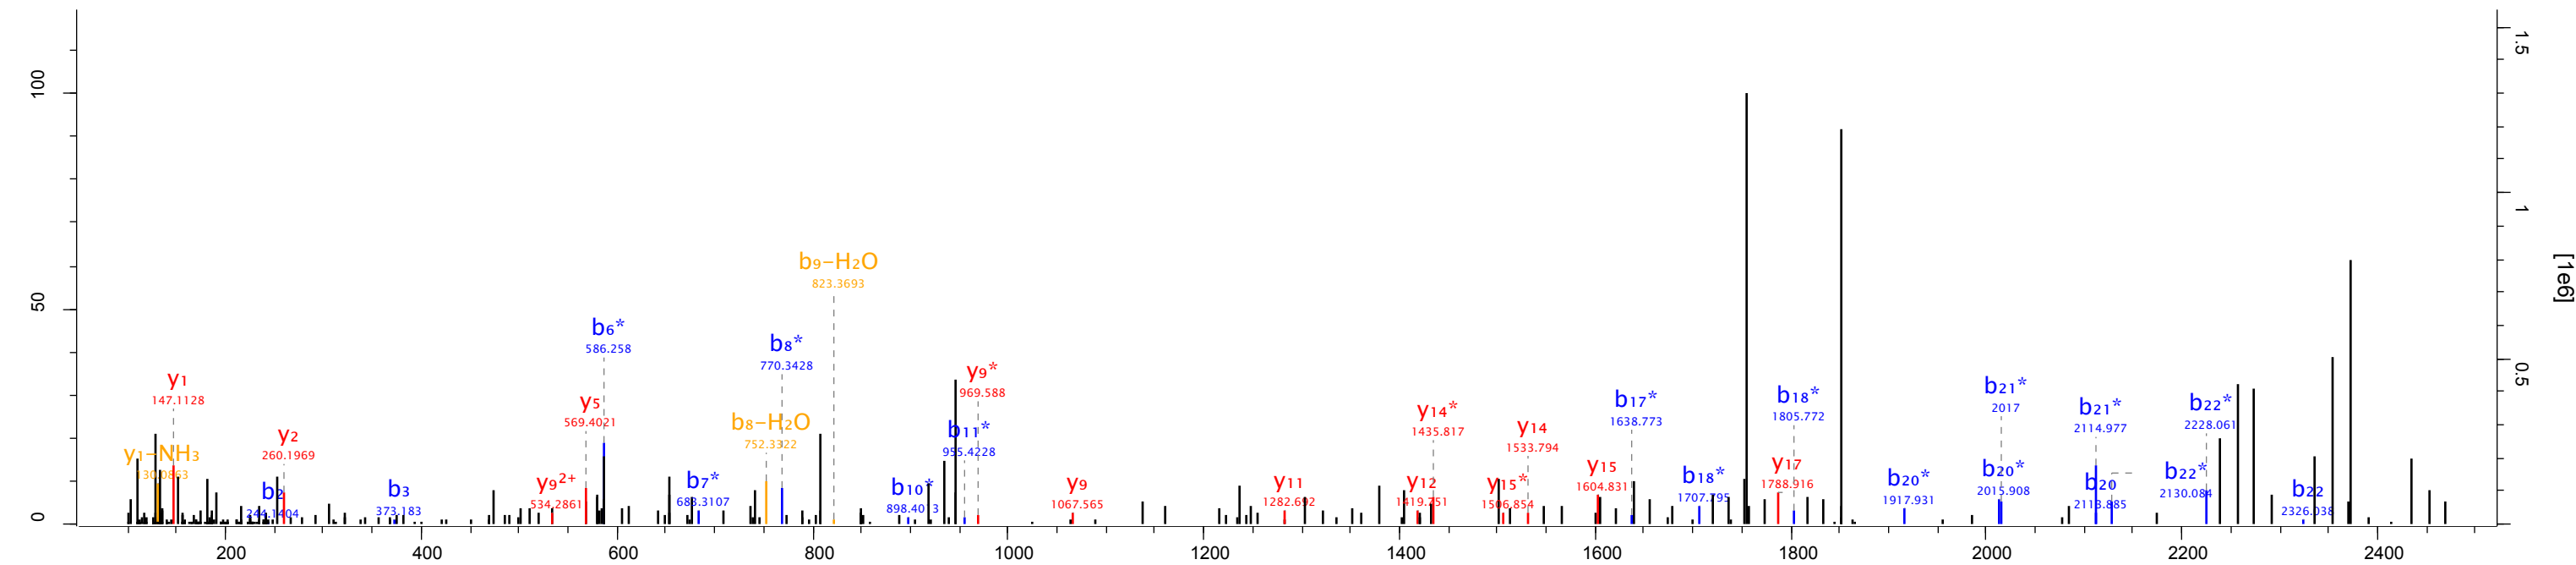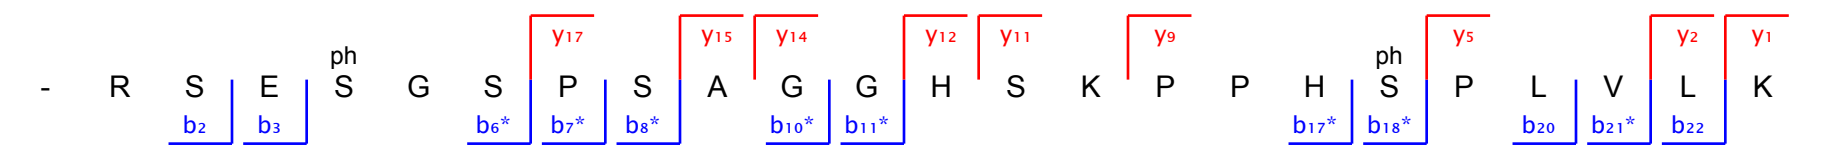

Raw file: 20150812\_A375SR\_Phospho\_BR1\_04  
 Scan: 7770 Method: FTMS; HCD Score: 75.38 m/z: 502.24 Gene names: MKI67

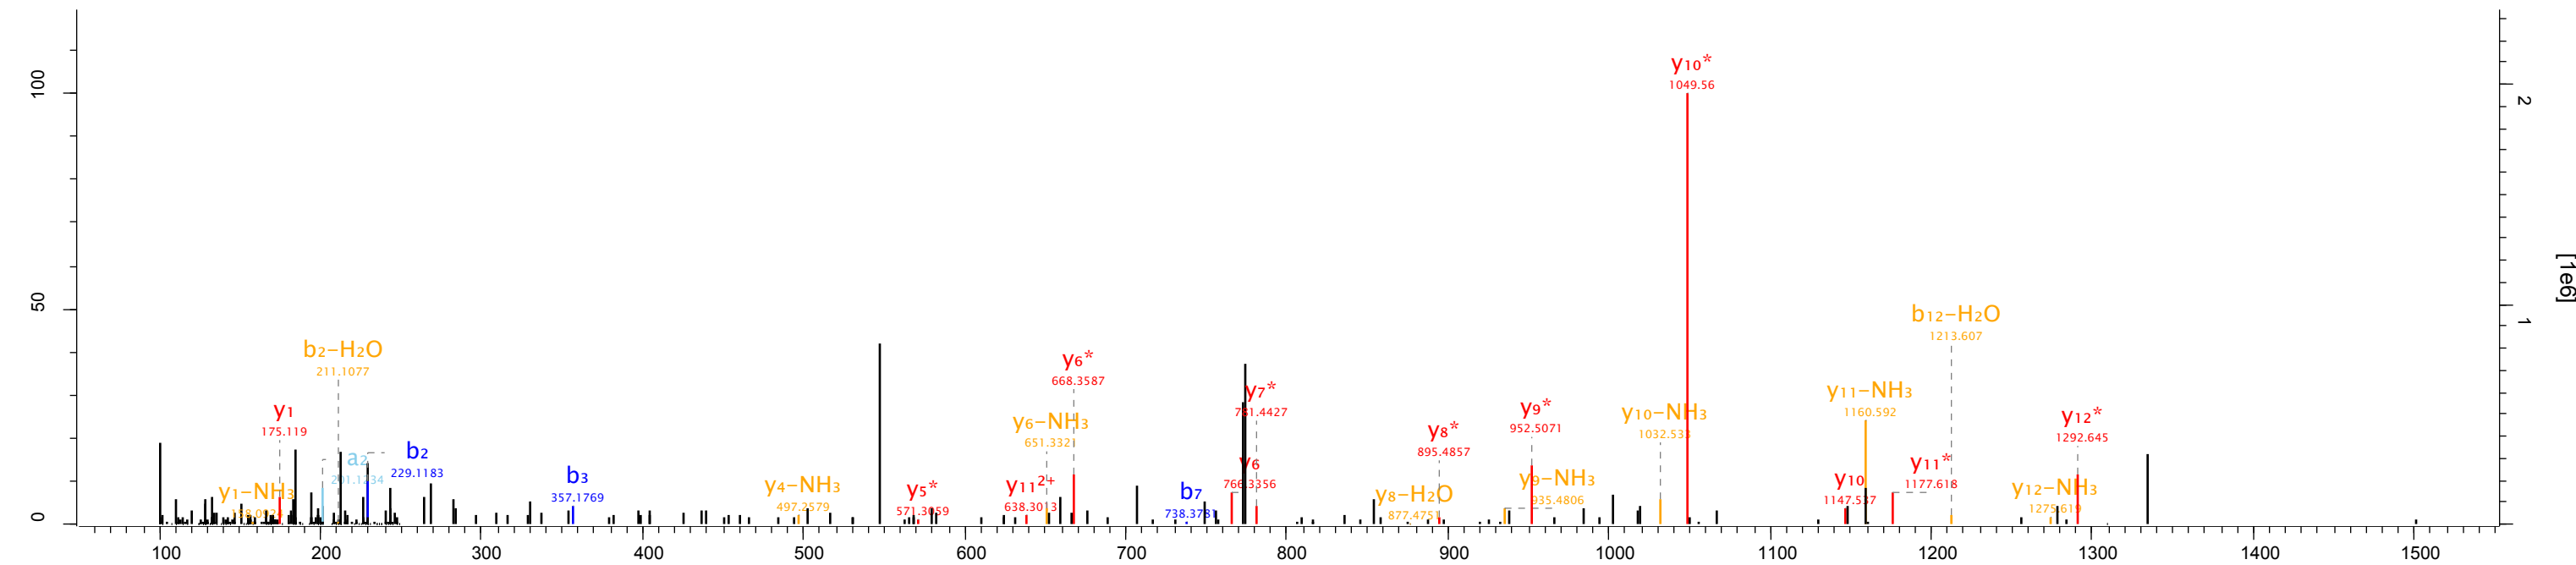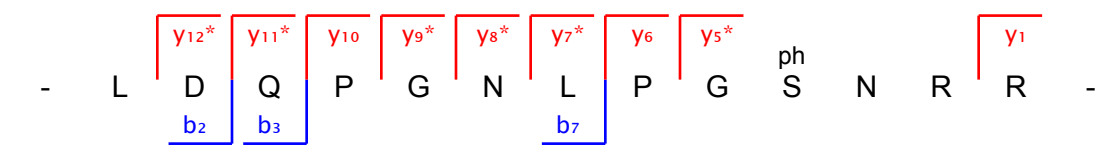

Raw file  
20150812\_A375SR\_Phospho\_BR1\_04

Scan 7890 Method FTMS; HCD Score 44.76 m/z 827.35 Gene names APBB2

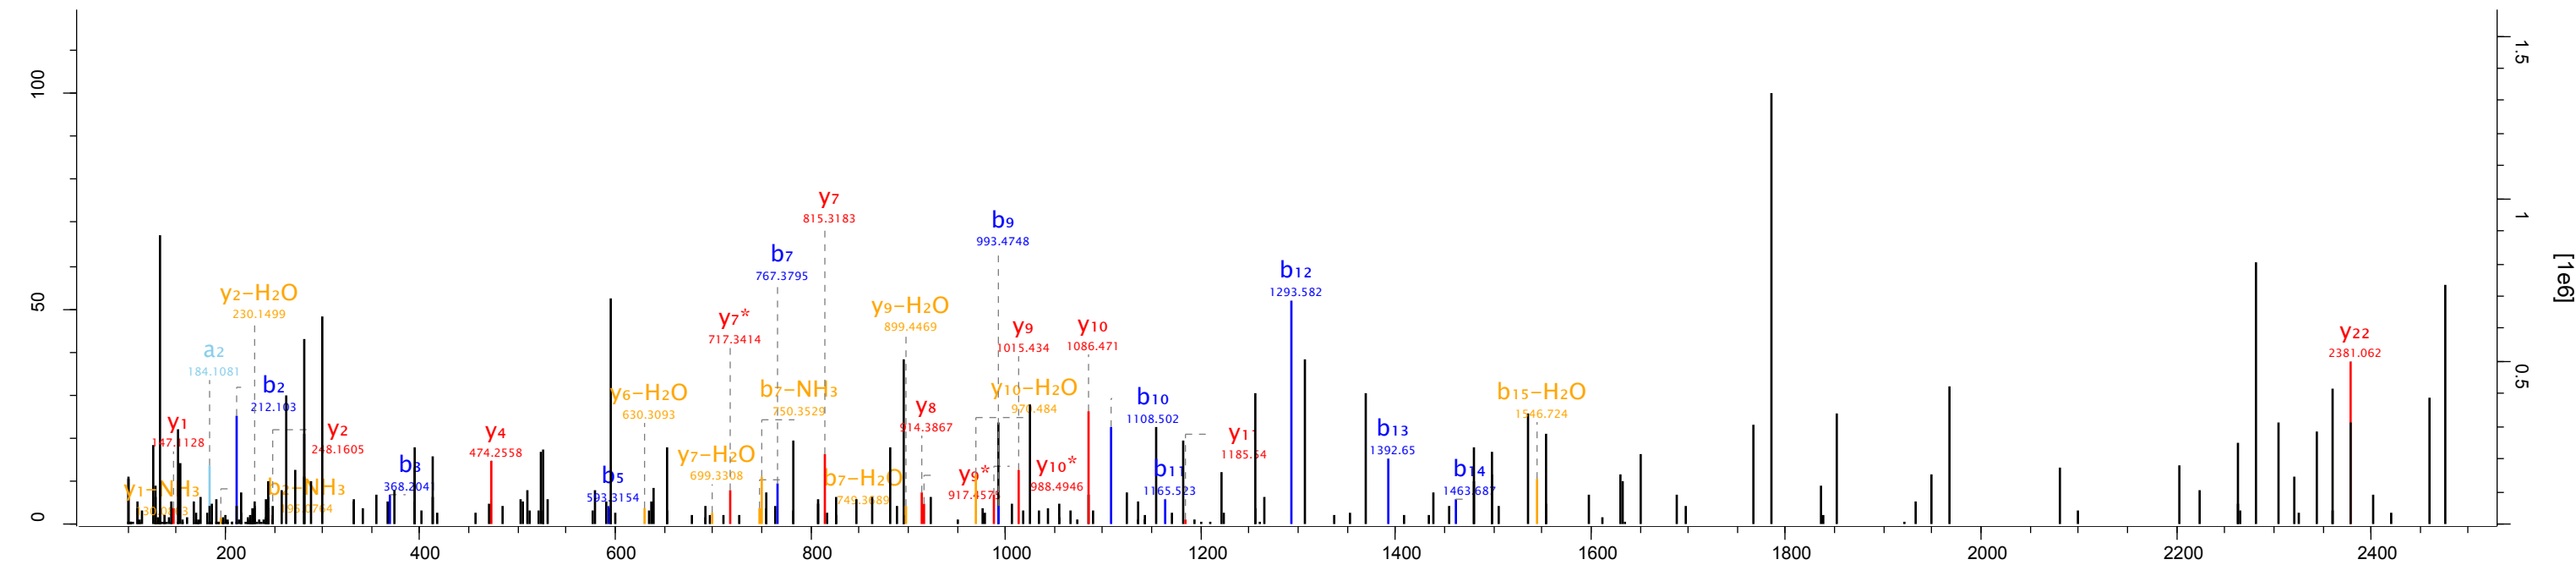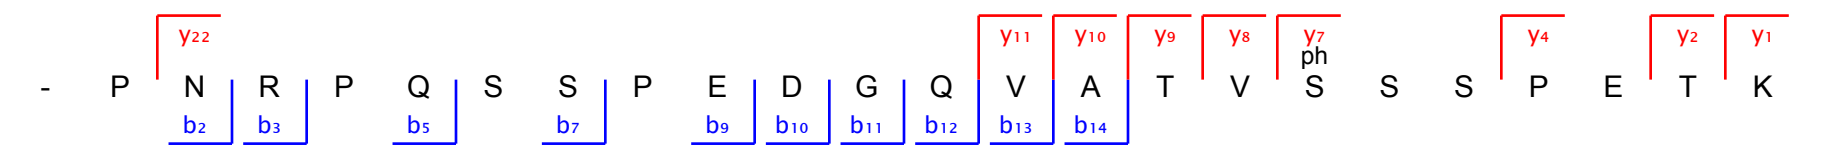

Raw file: 20150812\_A375SR\_Phospho\_BR1\_04  
 Scan: 7980 Method: FTMS; HCD Score: 142.98 m/z: 513.23 Gene names: LMO7

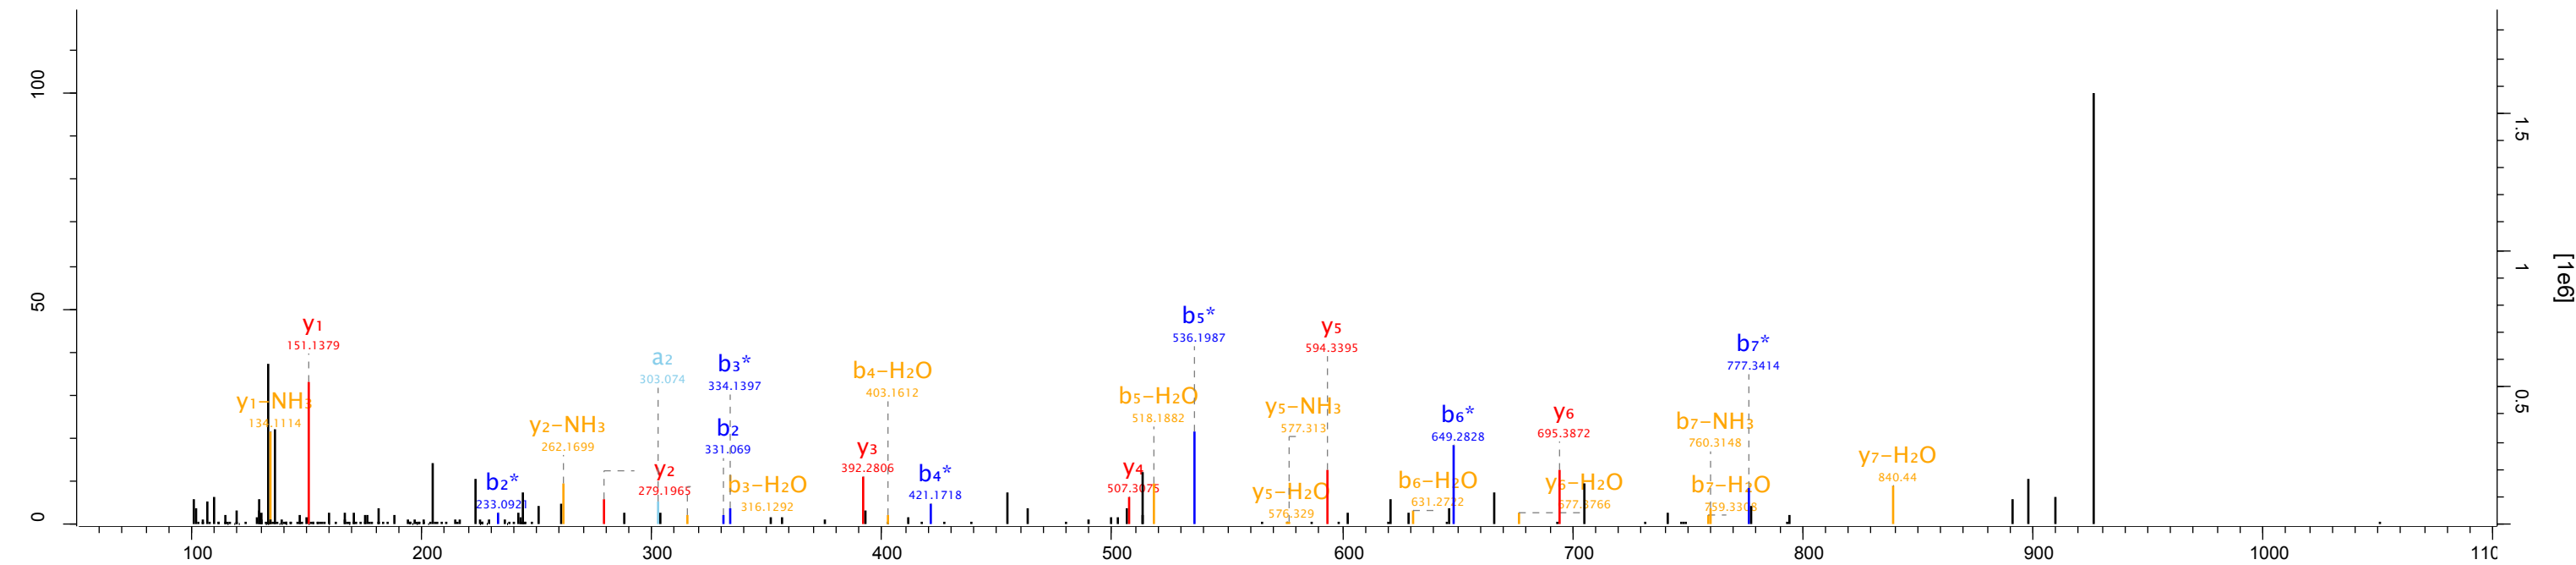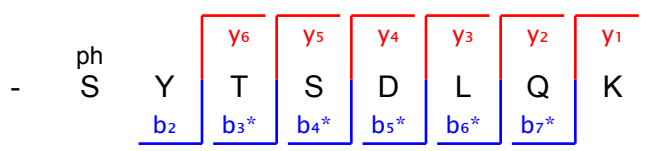

Raw file 20150812\_A375SR\_Phospho\_BR1\_04 Scan 8150 Method FTMS; HCD Score 156.15 m/z 845.83 Gene names TFAP2C

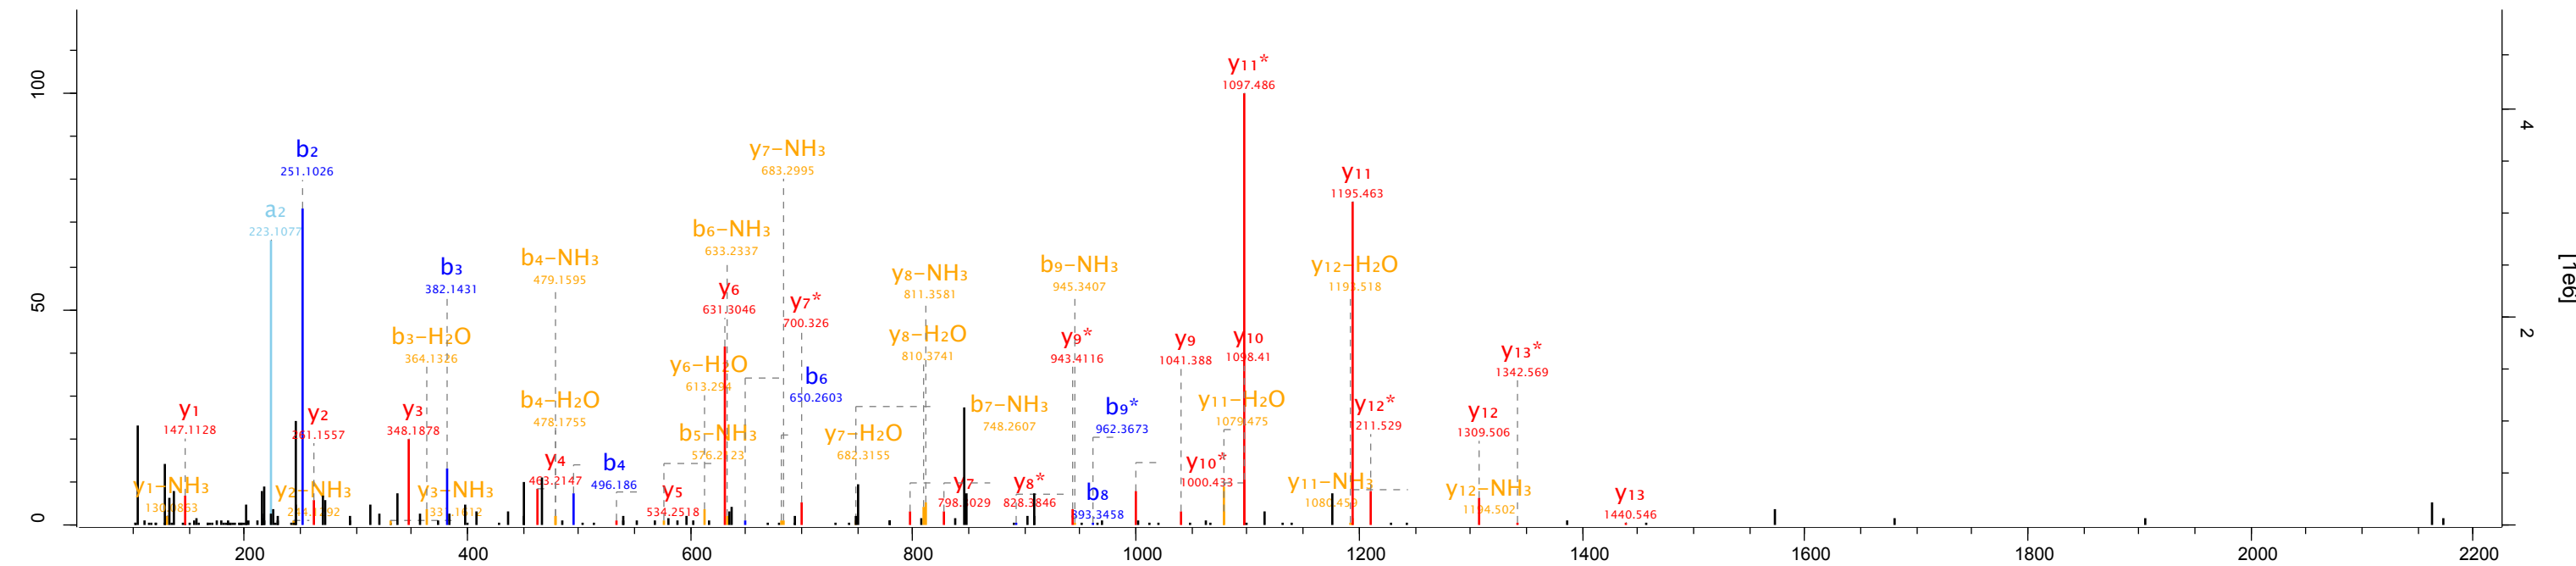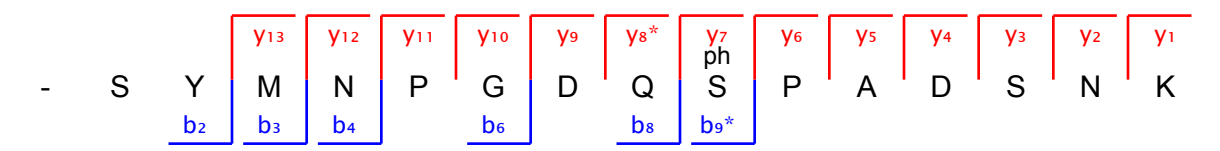

Raw file: 20150812\_A375SR\_Phospho\_BR1\_04  
 Scan: 8590 Method: FTMS; HCD Score: 163.4 m/z: 771.31 Gene names: ADRM1

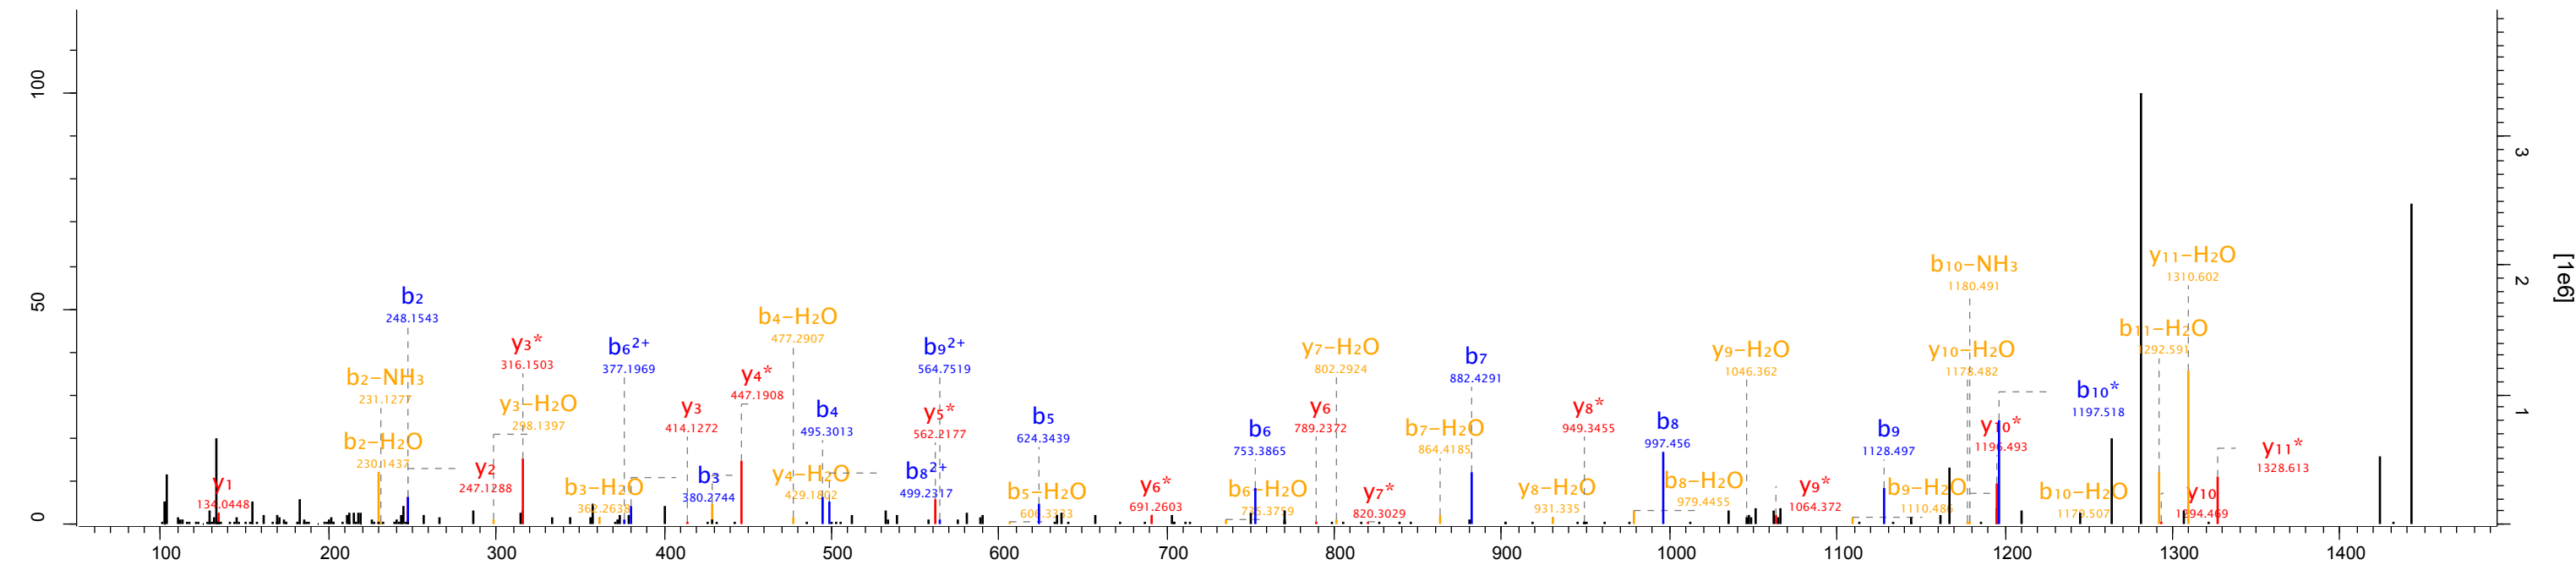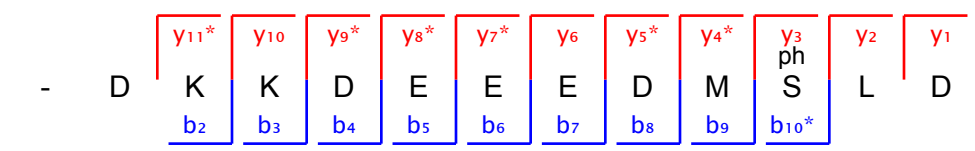

Raw file: 20150812\_A375SR\_Phospho\_BR1\_04  
 Scan: 8860 Method: FTMS; HCD Score: 128.11 m/z: 740.86 Gene names: DOT1L

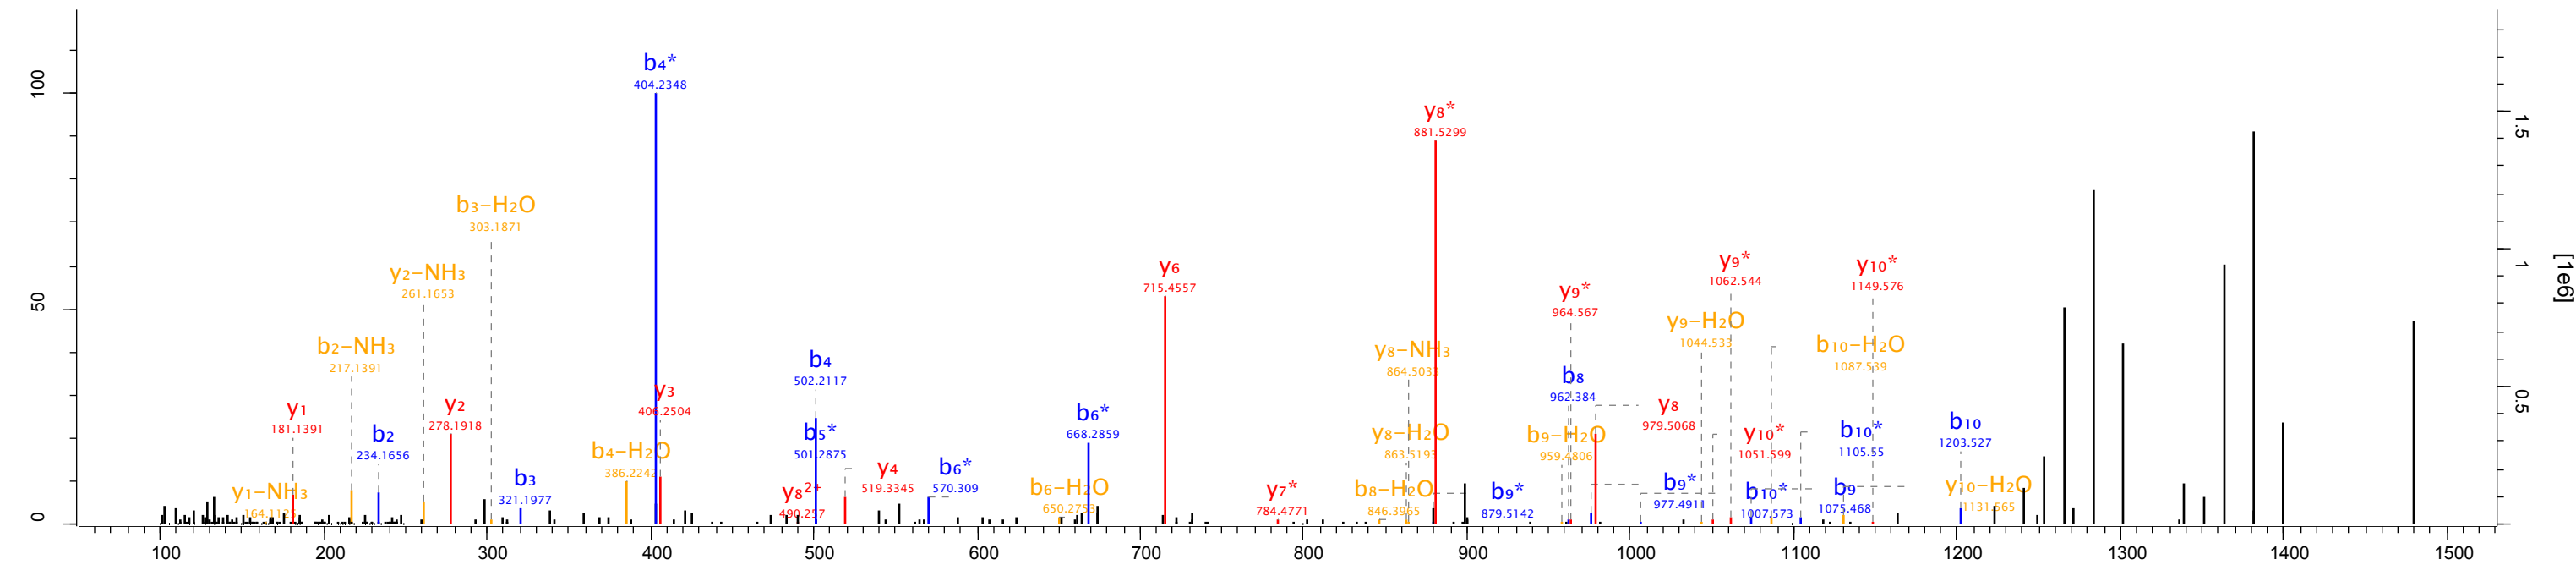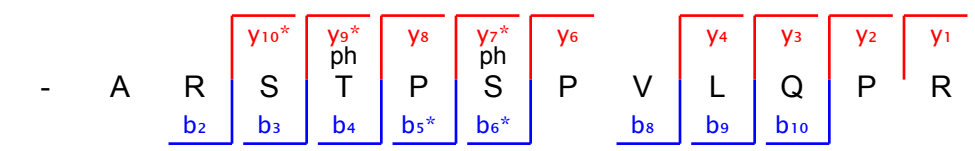



Raw file: 20150812\_A375SR\_Phospho\_BR1\_04  
 Scan: 9860 Method: FTMS; HCD Score: 198.48 m/z: 901.9 Gene names: SNW1

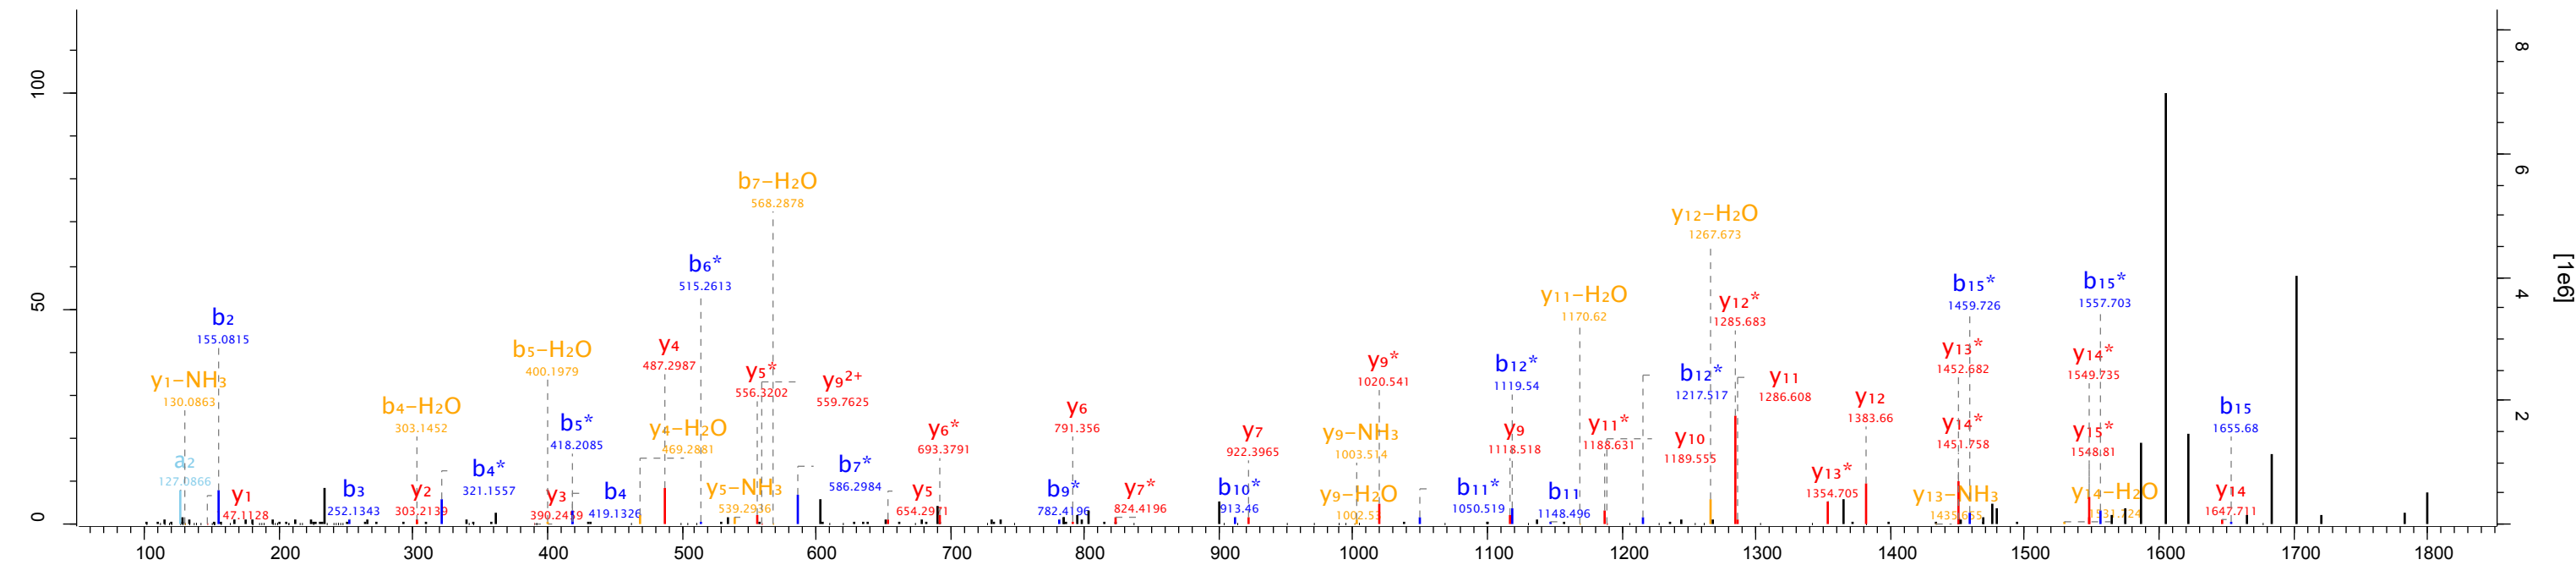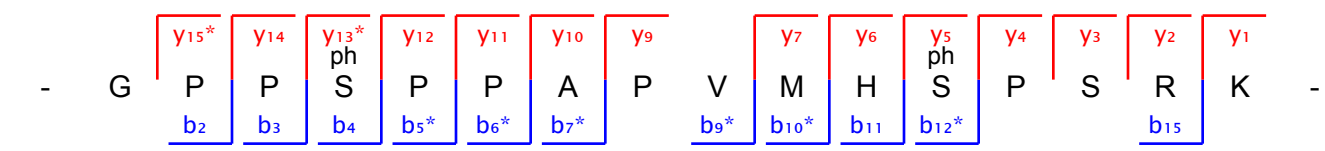

Raw file Scan Method Score m/z Gene names  
 20150812\_A375SR\_Phospho\_BR1\_05 11200 FTMS; HCD 86.87 741.87 AIM1

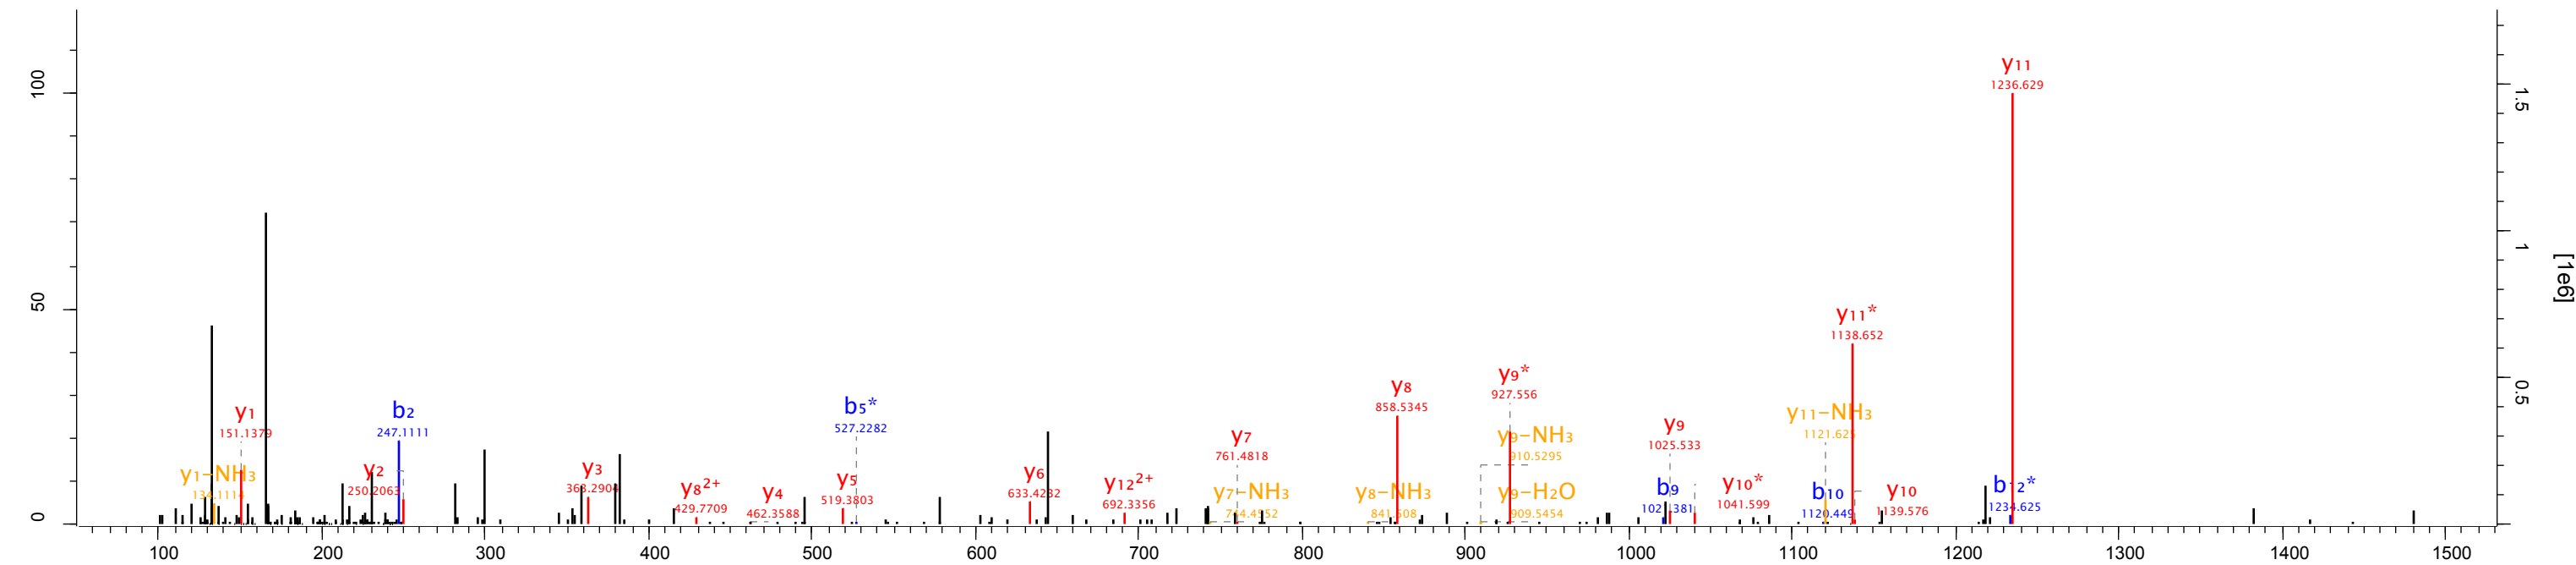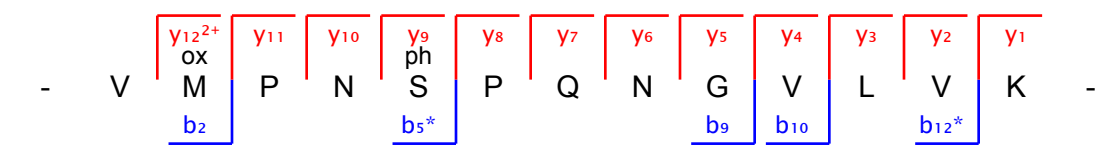

Raw file: 20150812\_A375SR\_Phospho\_BR1\_05  
 Scan: 11800 Method: FTMS; HCD Score: 75.1 m/z: 486.73 Gene names: IKBKAP

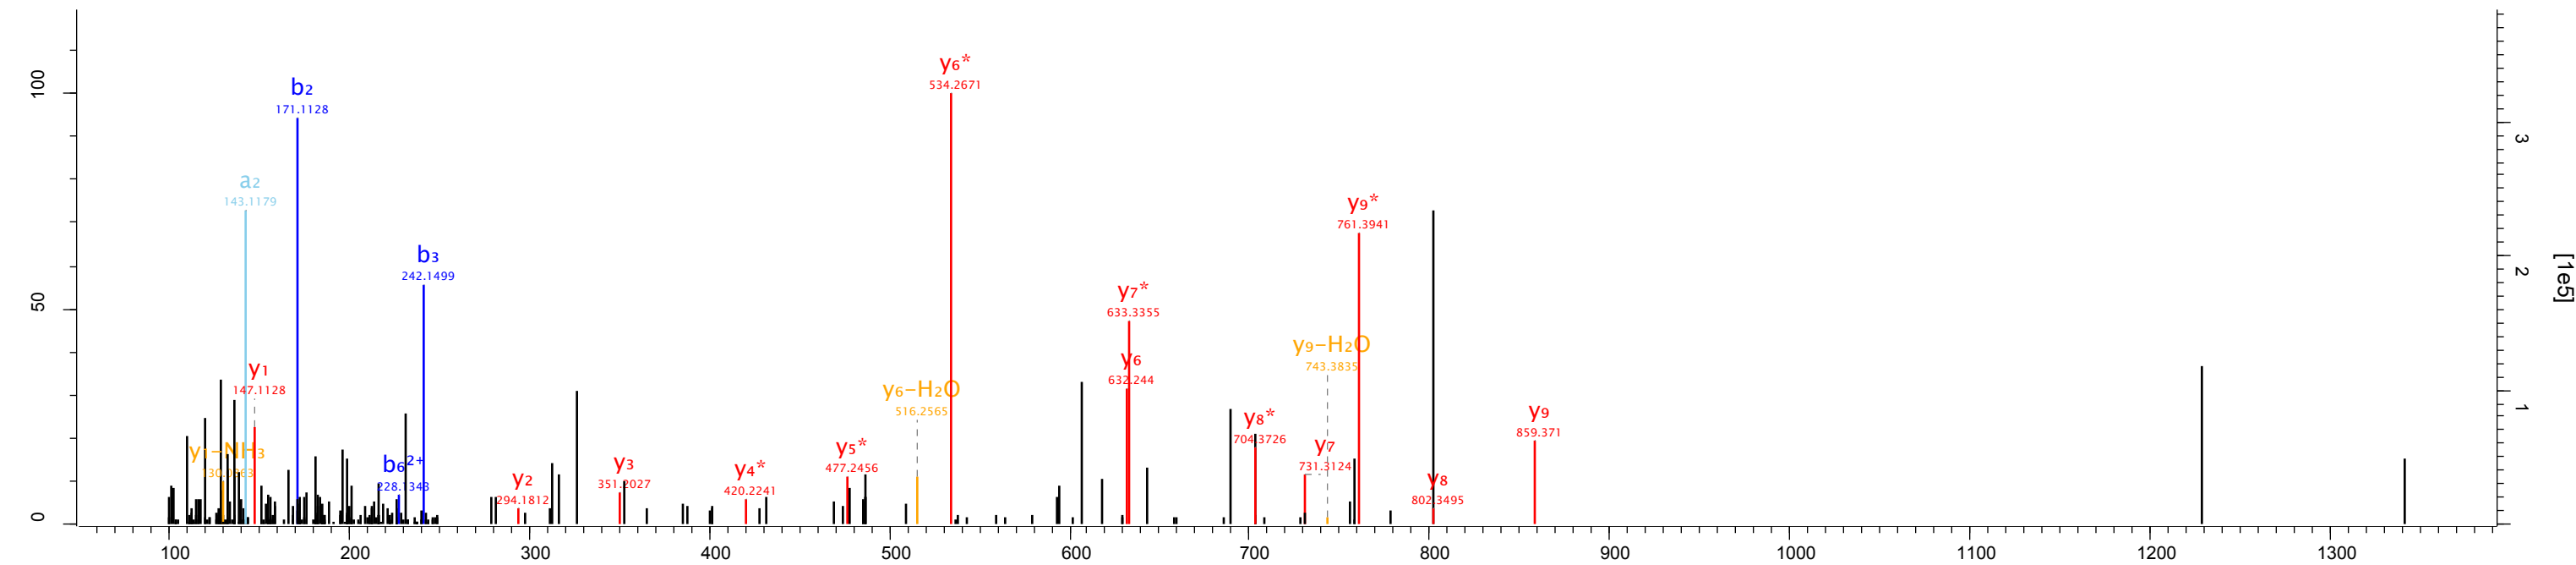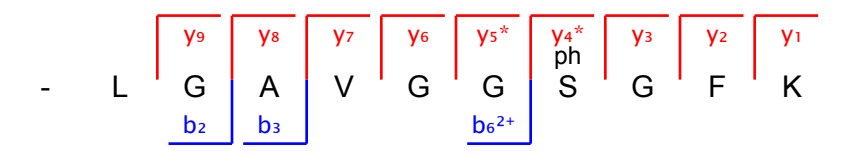

Raw file 20150812\_A375SR\_Phospho\_BR1\_05 Scan 11980 Method FTMS; HCD Score 82.66 m/z 601.92 Gene names NDRG3

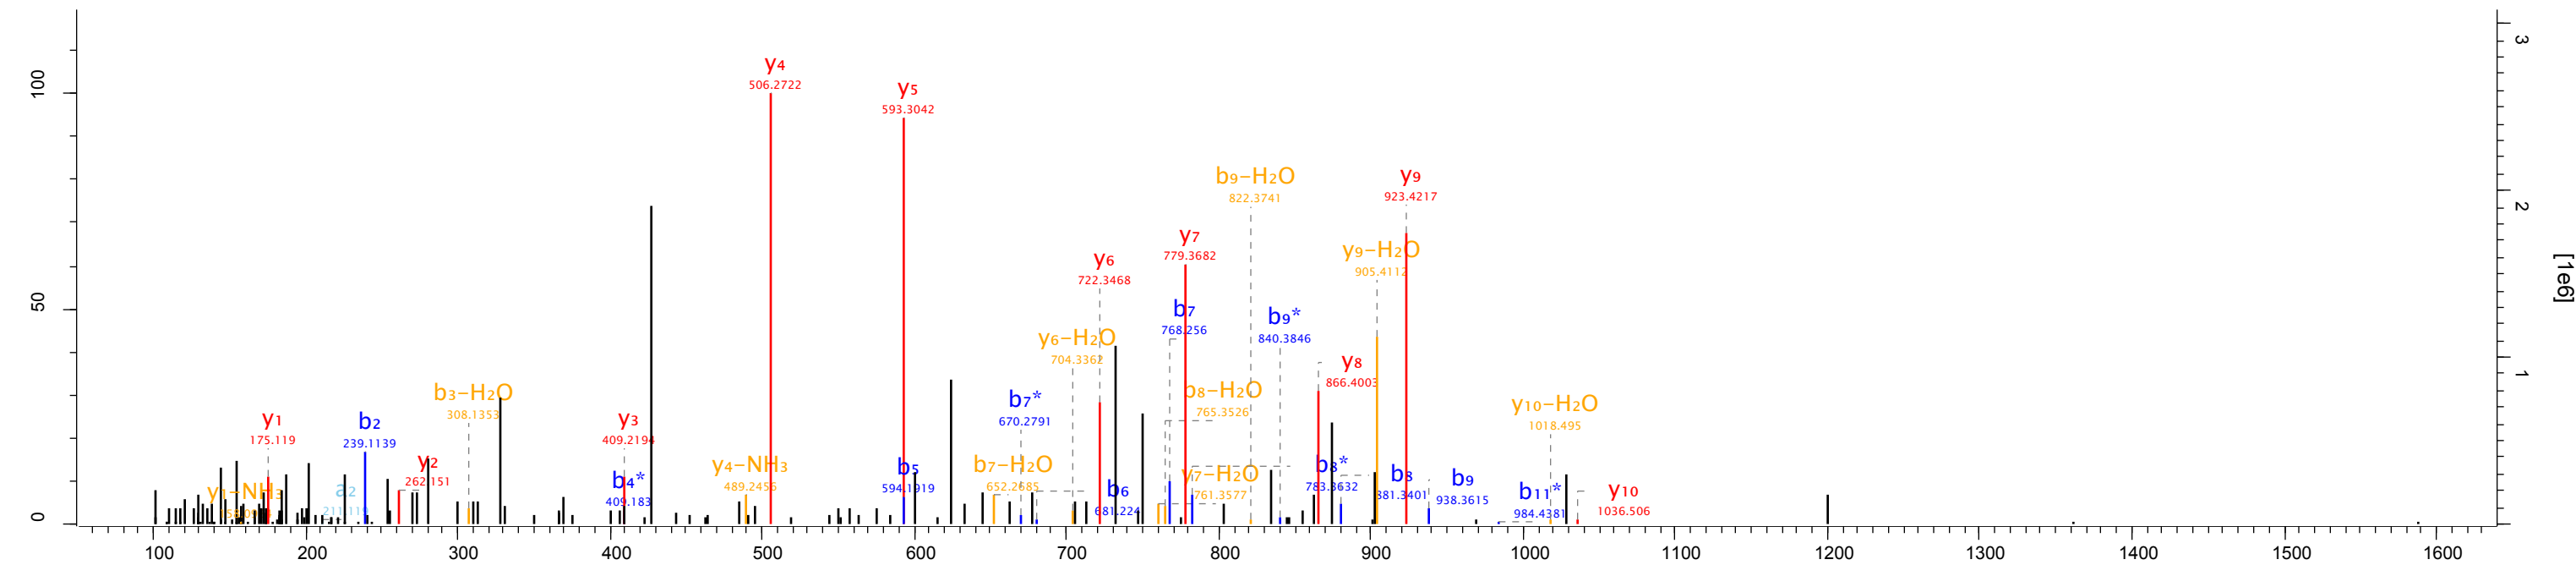

- T H S ph T S S S L G S G E S P F S R -  
 b2 b4\* b5 b6 b7 b8 b9 b11\*

Raw file 20150812\_A375SR\_Phospho\_BR1\_05 Scan 12630 Method FTMS; HCD Score 145.03 m/z 852.39 Gene names CLASP2

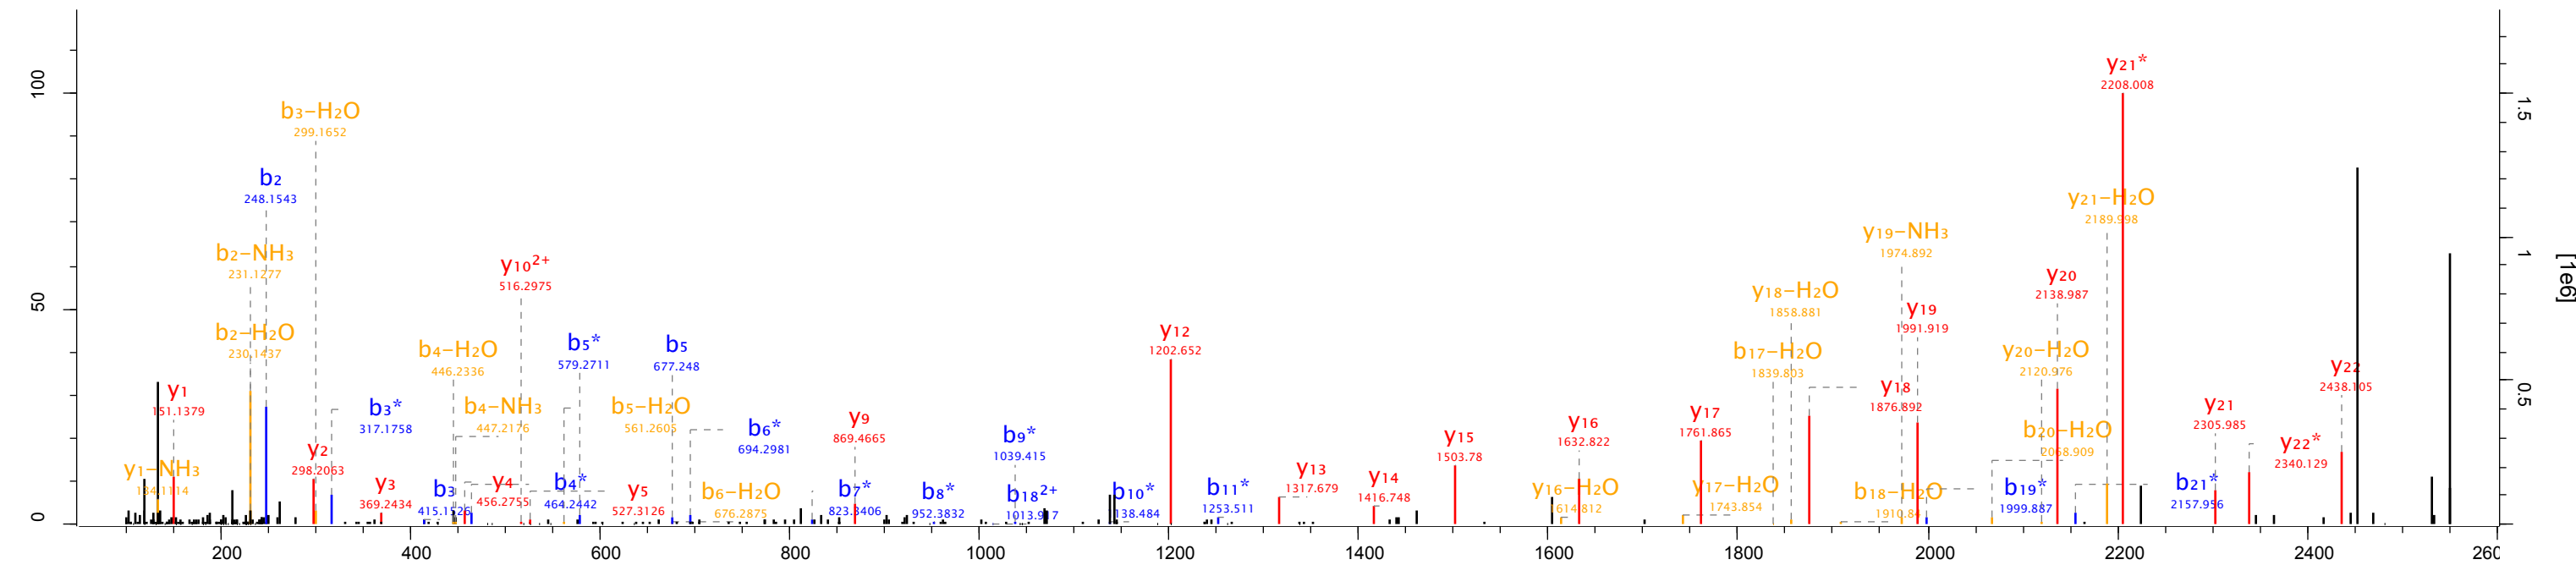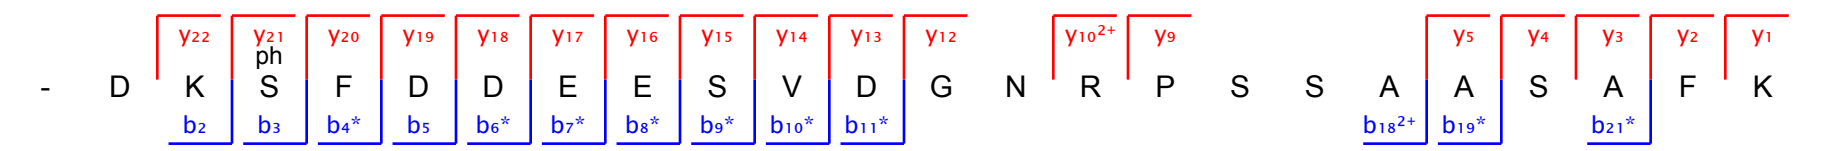

Raw file: 20150812\_A375SR\_Phospho\_BR1\_05  
 Scan: 13210 Method: FTMS; HCD Score: 124.37 m/z: 756.37 Gene names: SOX13

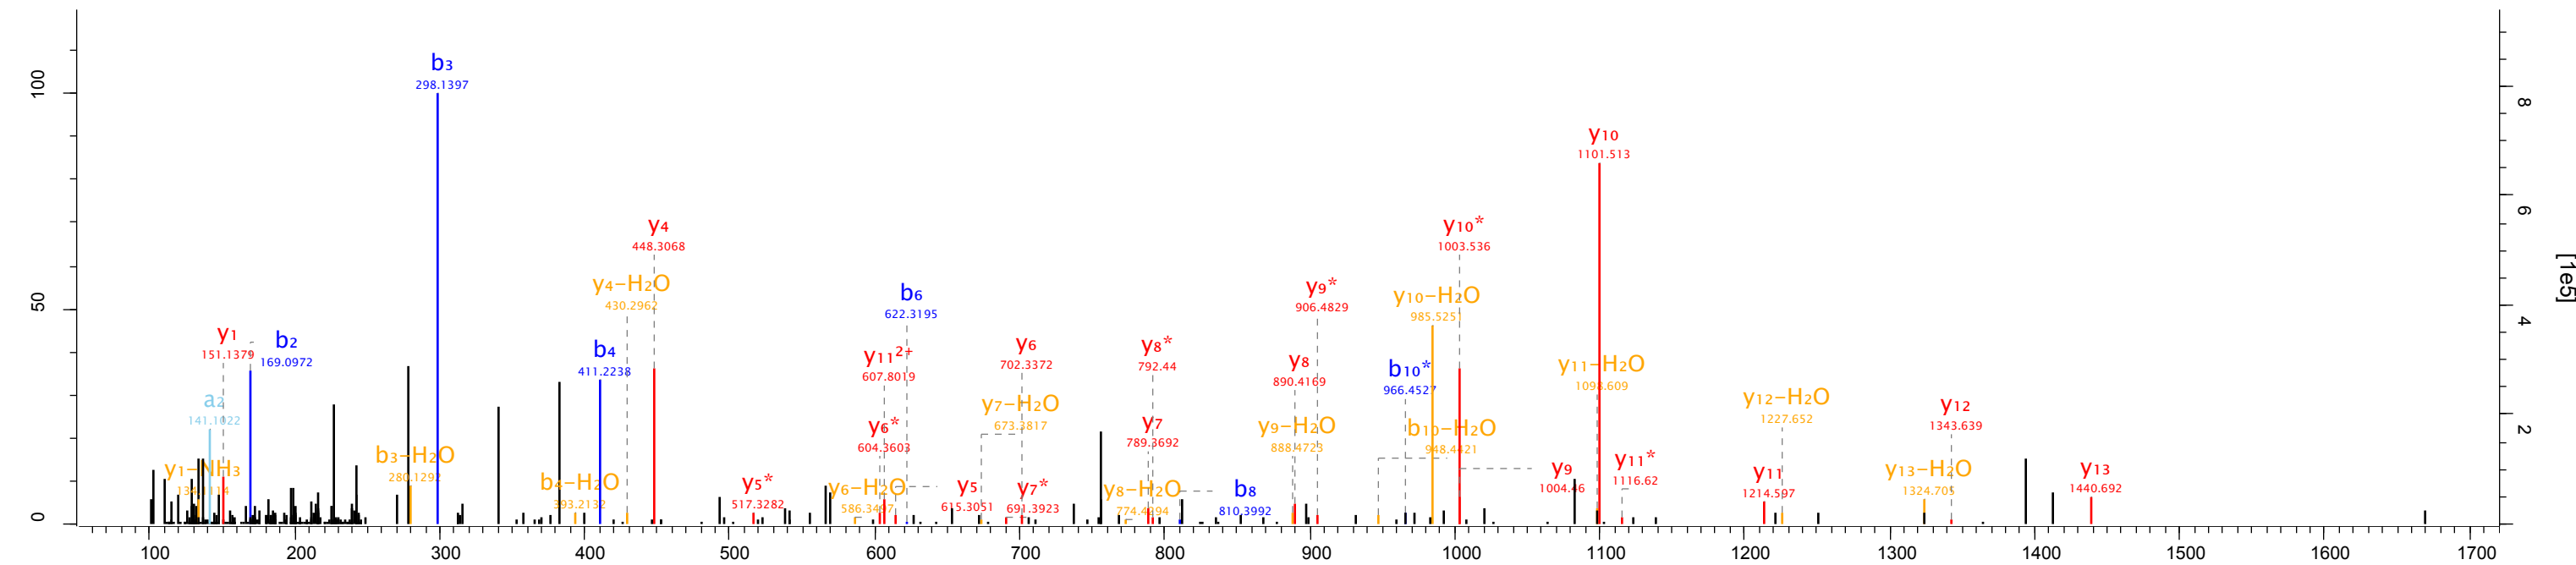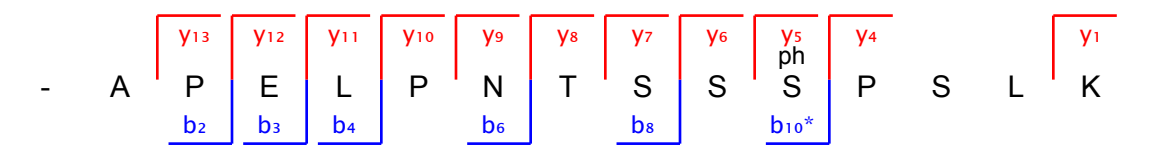

Raw file 20150812\_A375SR\_Phospho\_BR1\_05 Scan 13250 Method FTMS; HCD Score 85.01 m/z 660.34 Gene names FLYWCH1

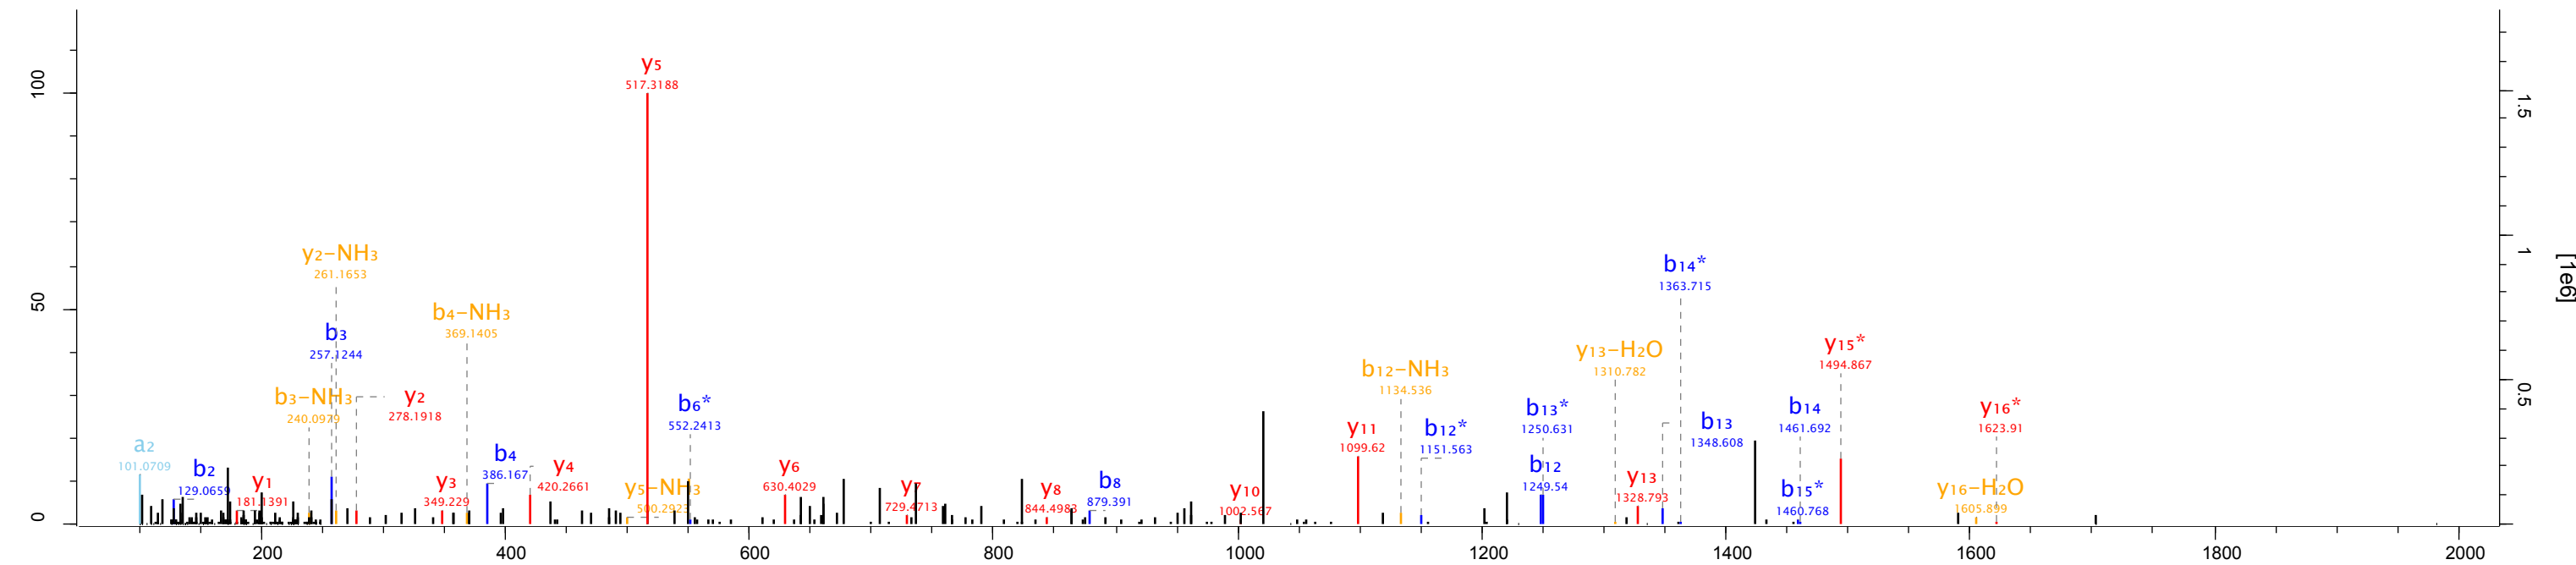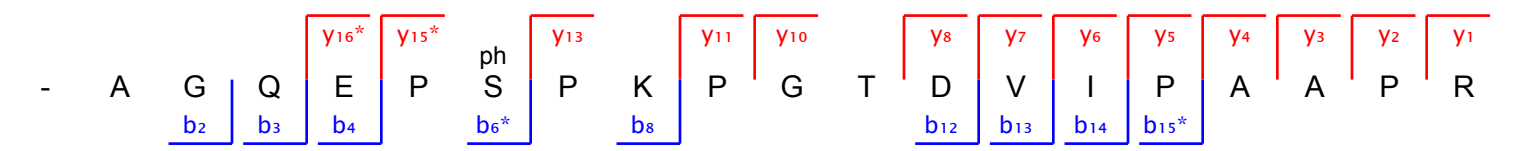

Raw file: 20150812\_A375SR\_Phospho\_BR1\_05  
 Scan: 13300 Method: FTMS; HCD Score: 124.38 m/z: 704.25 Gene names: PCYT1A

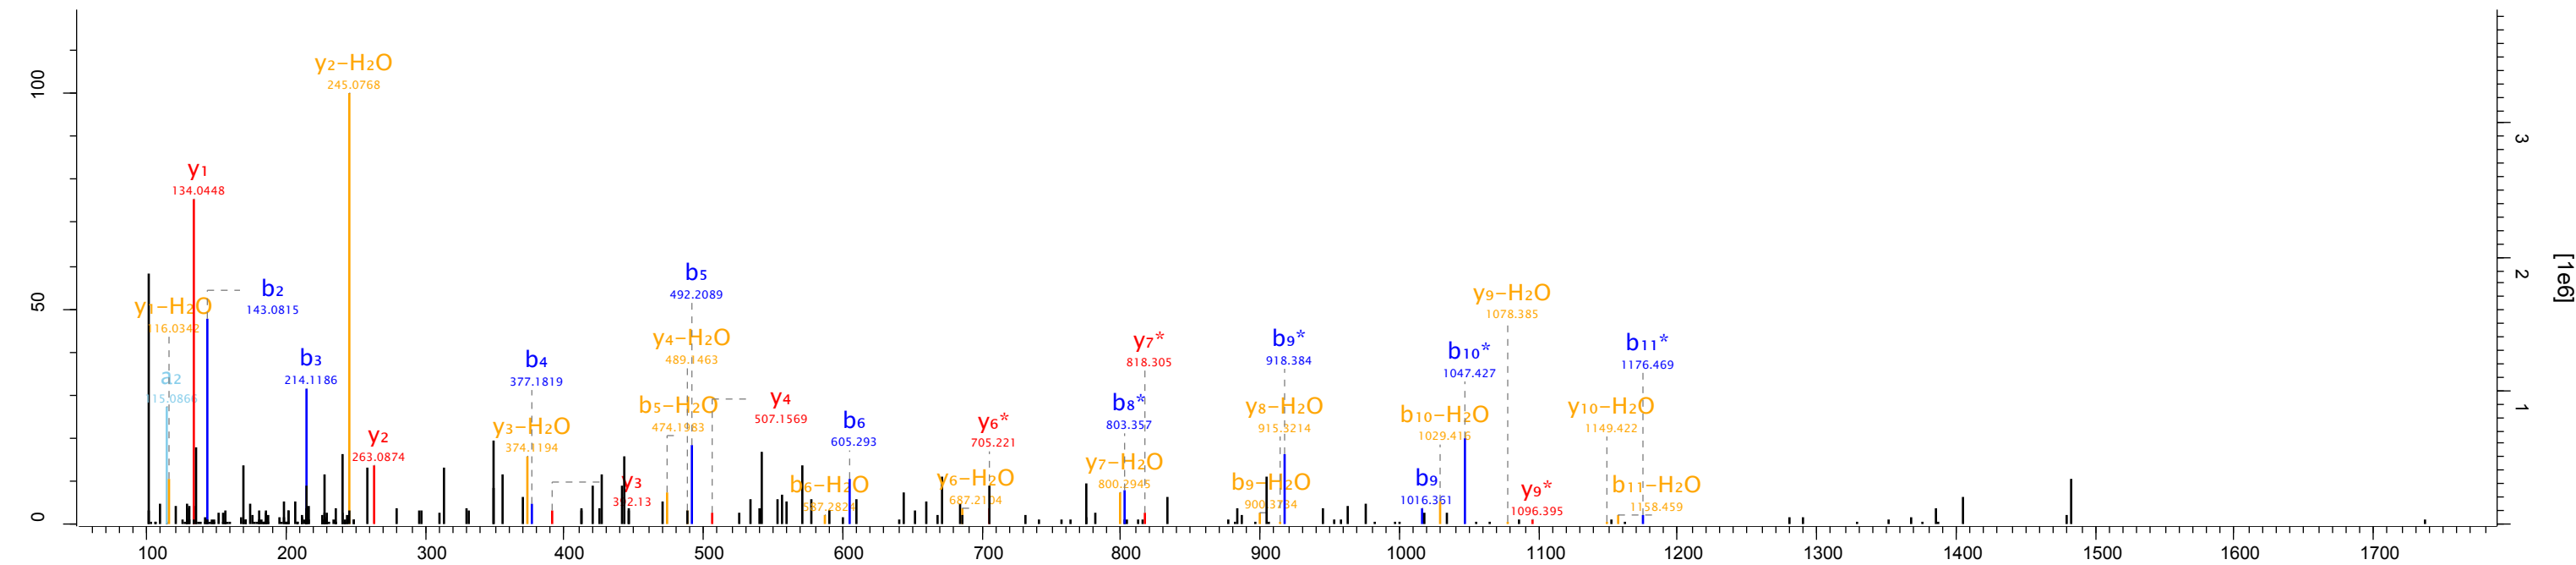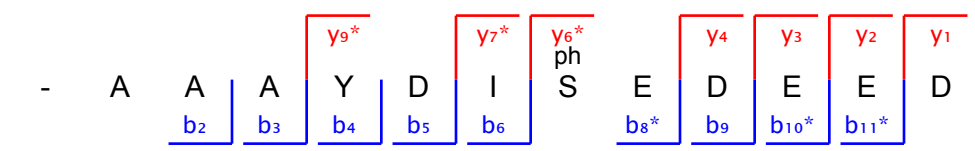



Raw file 20150812\_A375SR\_Phospho\_BR1\_05 Scan 13520 Method FTMS; HCD Score 78.51 m/z 684.29 Gene names ZNF768

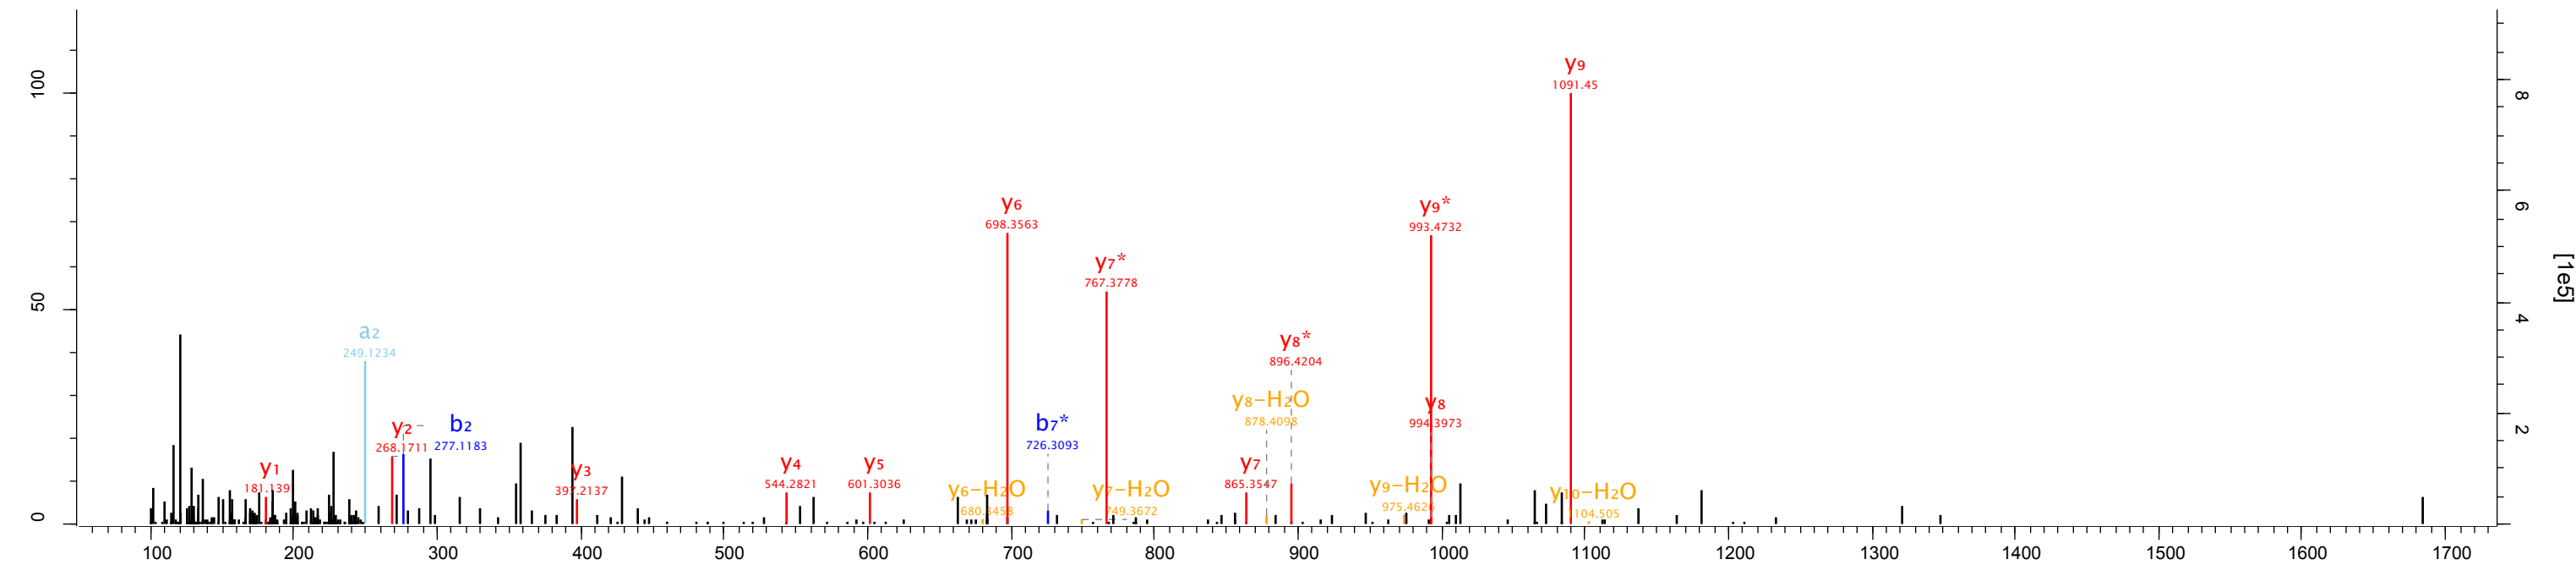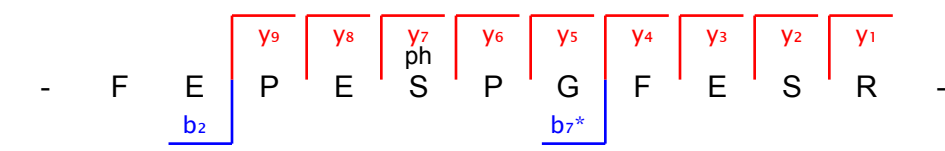

Raw file 20150812\_A375SR\_Phospho\_BR1\_05 Scan 13560 Method FTMS; HCD Score 128.74 m/z 741.84 Gene names TBX3

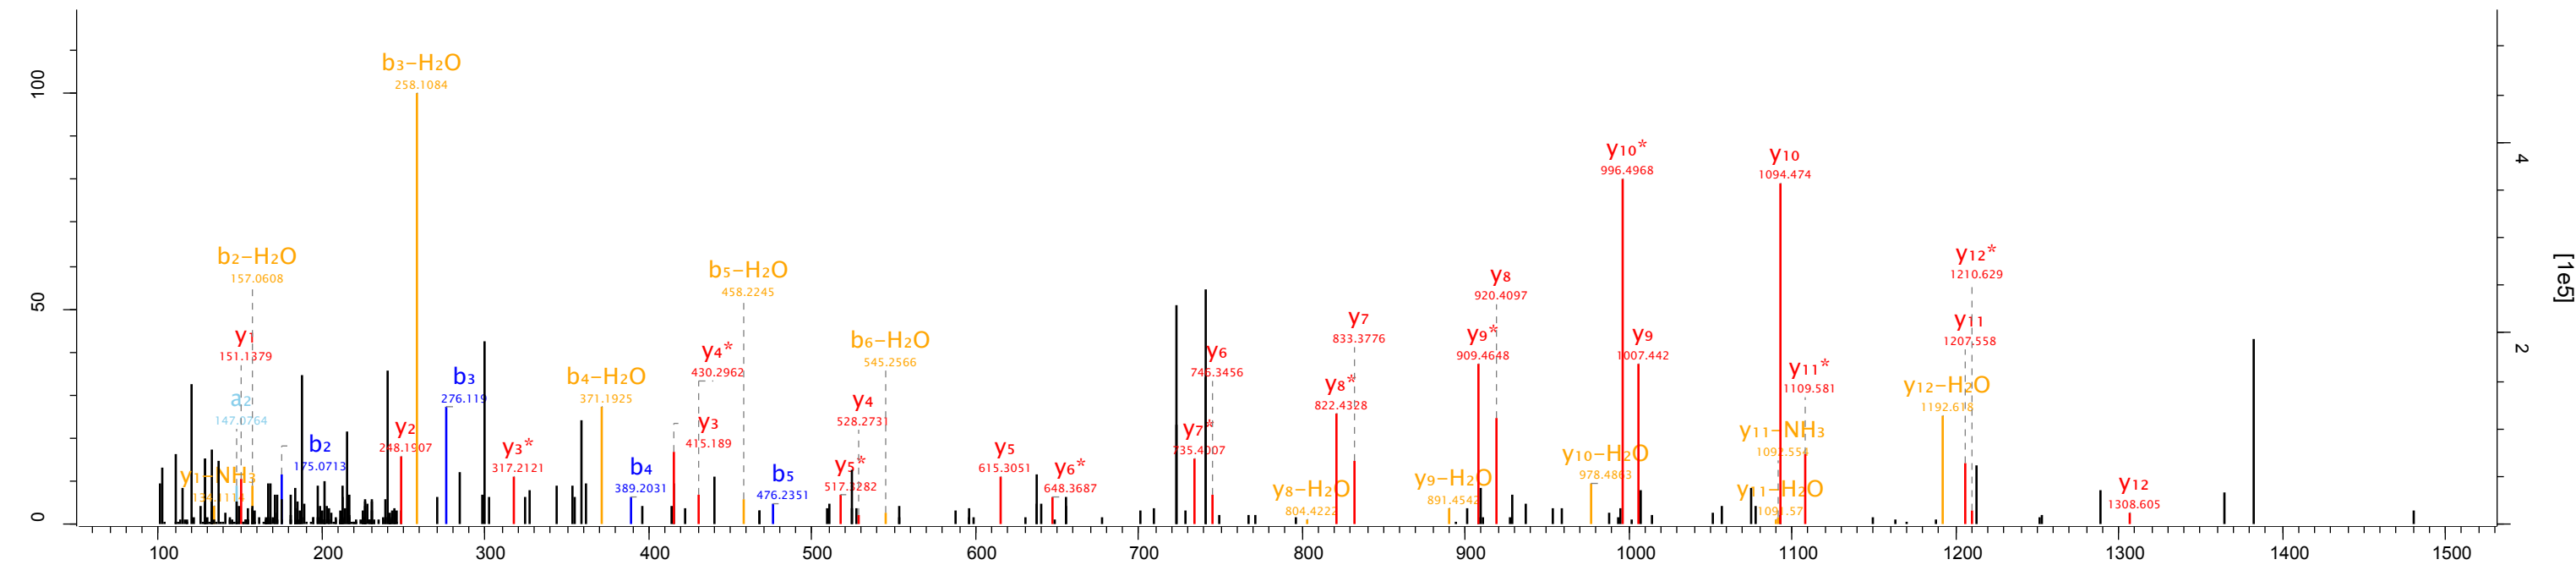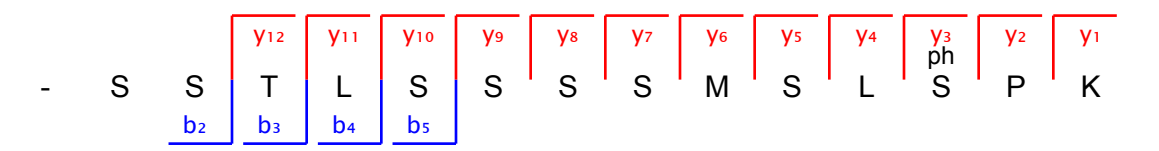

Raw file: 20150812\_A375SR\_Phospho\_BR1\_05  
 Scan: 13880 Method: FTMS; HCD Score: 148.15 m/z: 887.89 Gene names: RANBP3;ZNF8

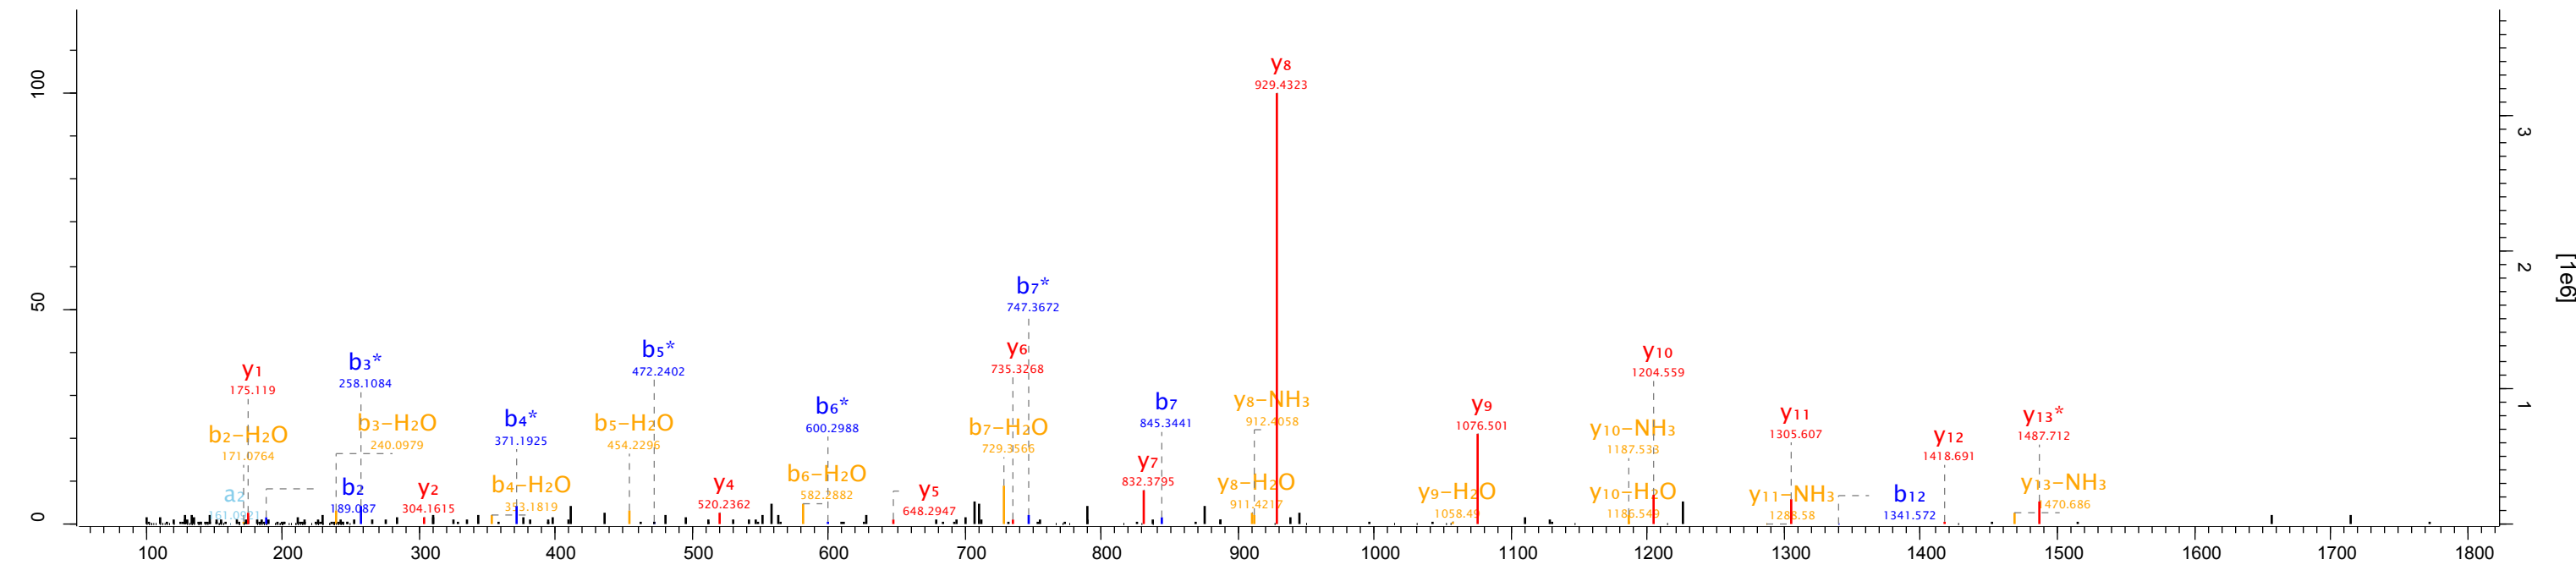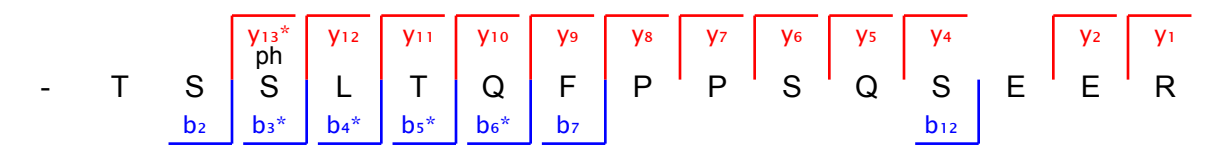

Raw file 20150812\_A375SR\_Phospho\_BR1\_05 Scan 13930 Method FTMS; HCD Score 78.71 m/z 642.63 Gene names BAG2

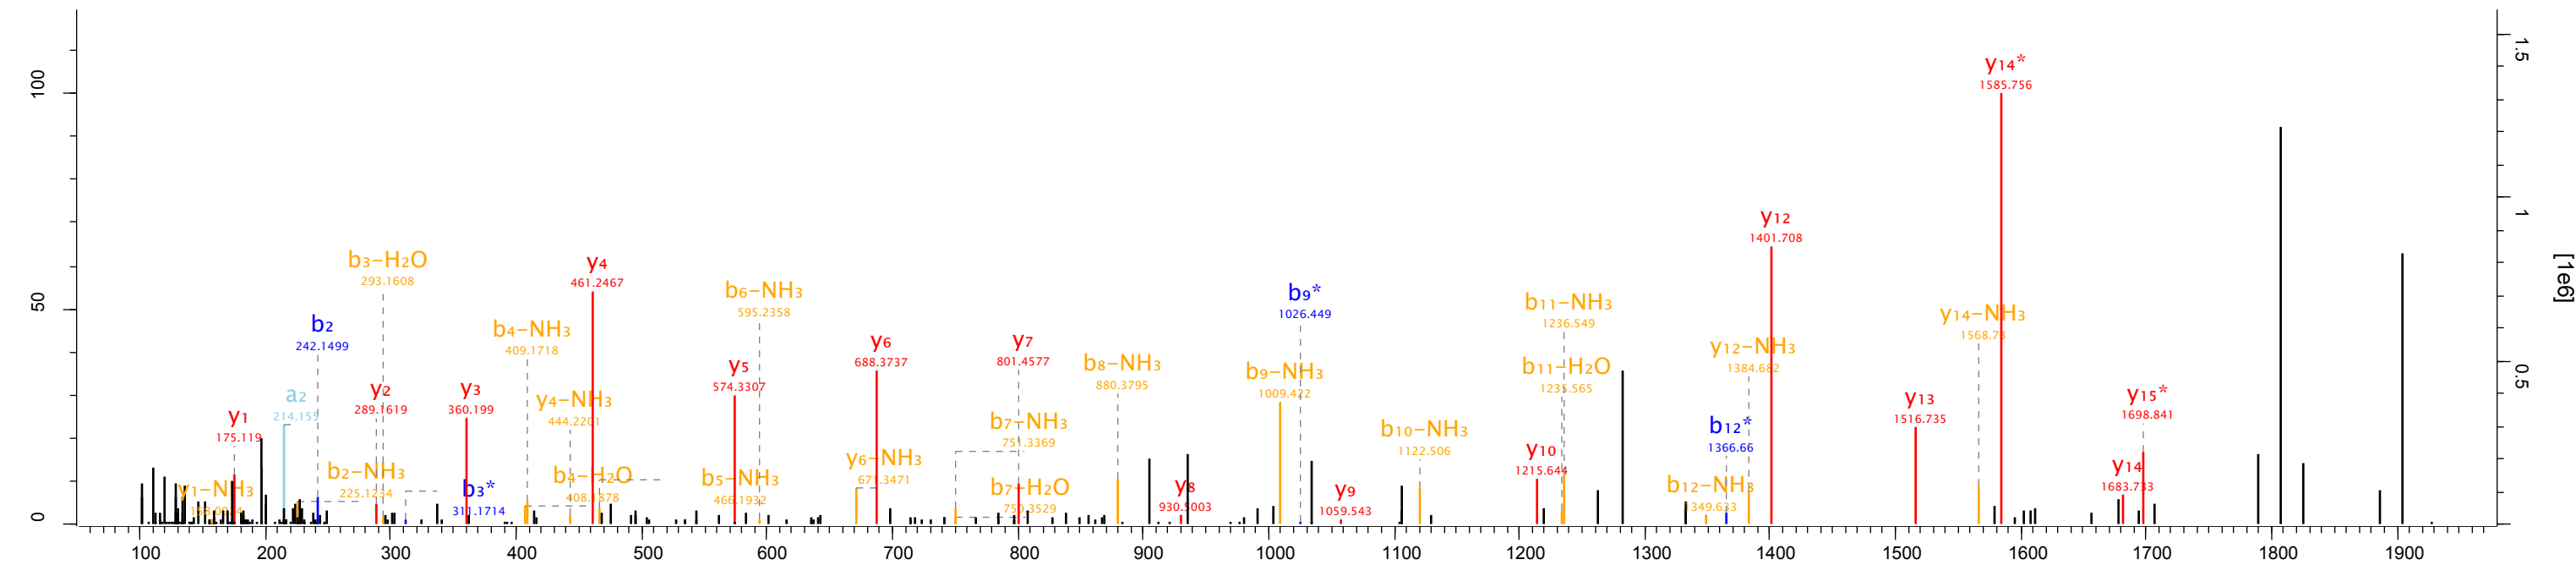

- Q I S D G E R E E L N L T A N R -

b2 b3\* b9\* b12\*

Raw file: 20150812\_A375SR\_Phospho\_BR1\_05  
 Scan: 1430 Method: FTMS; HCD Score: 101.38 m/z: 571.24 Gene names: C9orf40

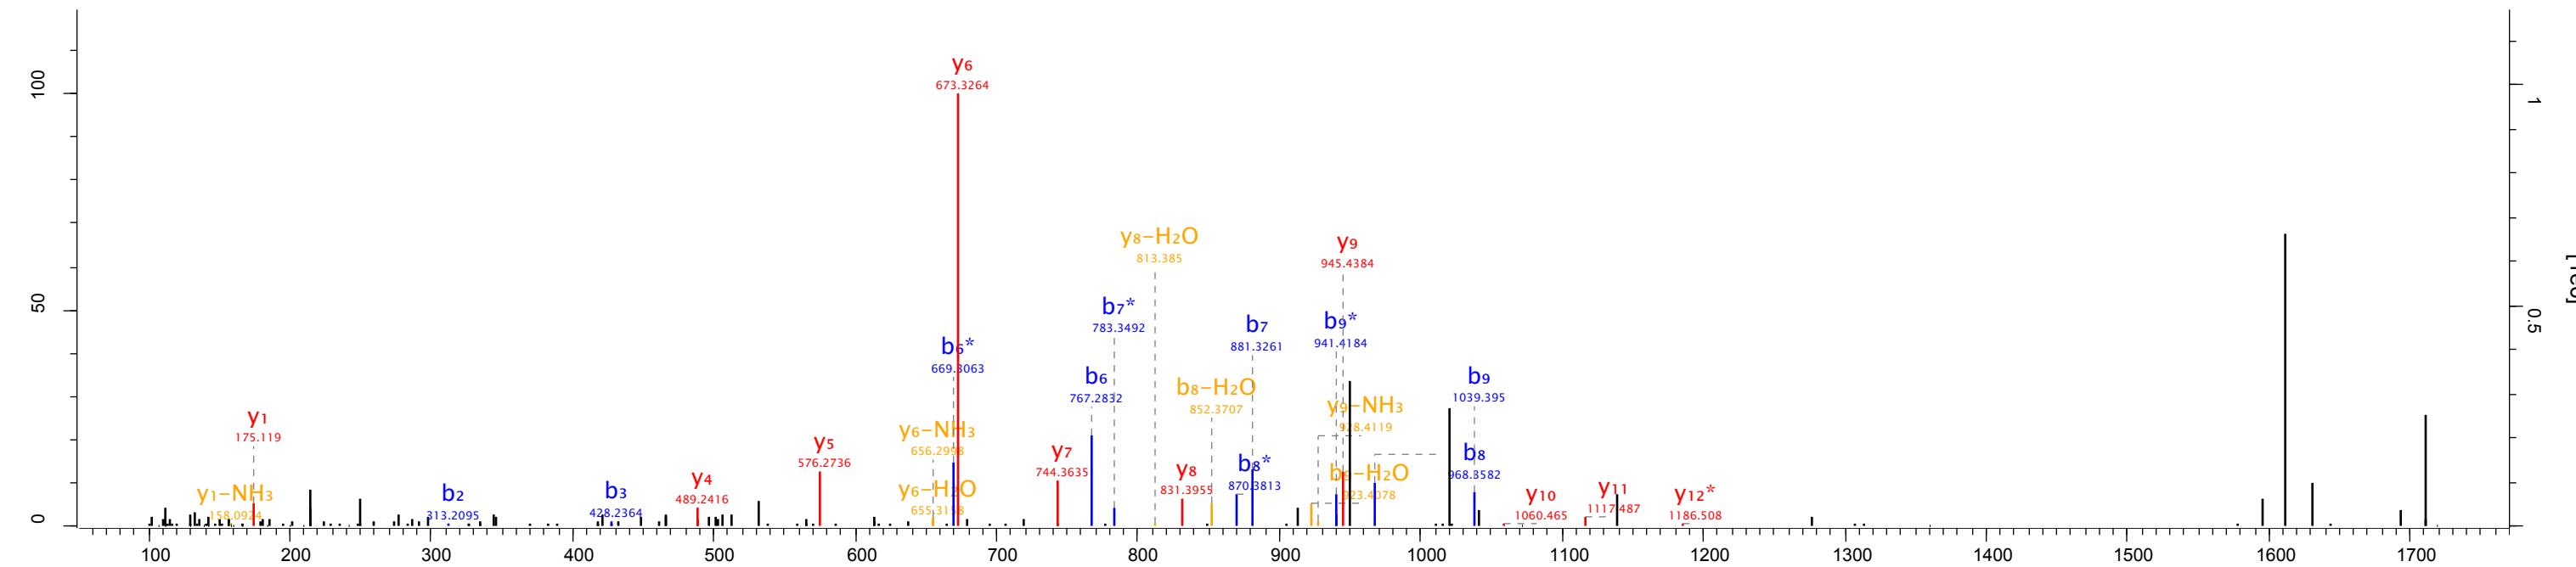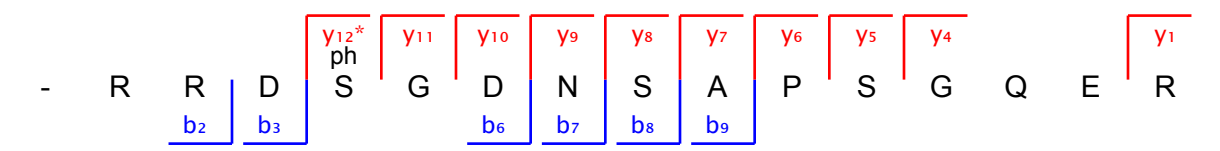

Raw file  
 20150812\_A375SR\_Phospho\_BR1\_05  
 Scan 14770 Method FTMS; HCD Score 195.46 m/z 810.35 Gene names PPP1R12C

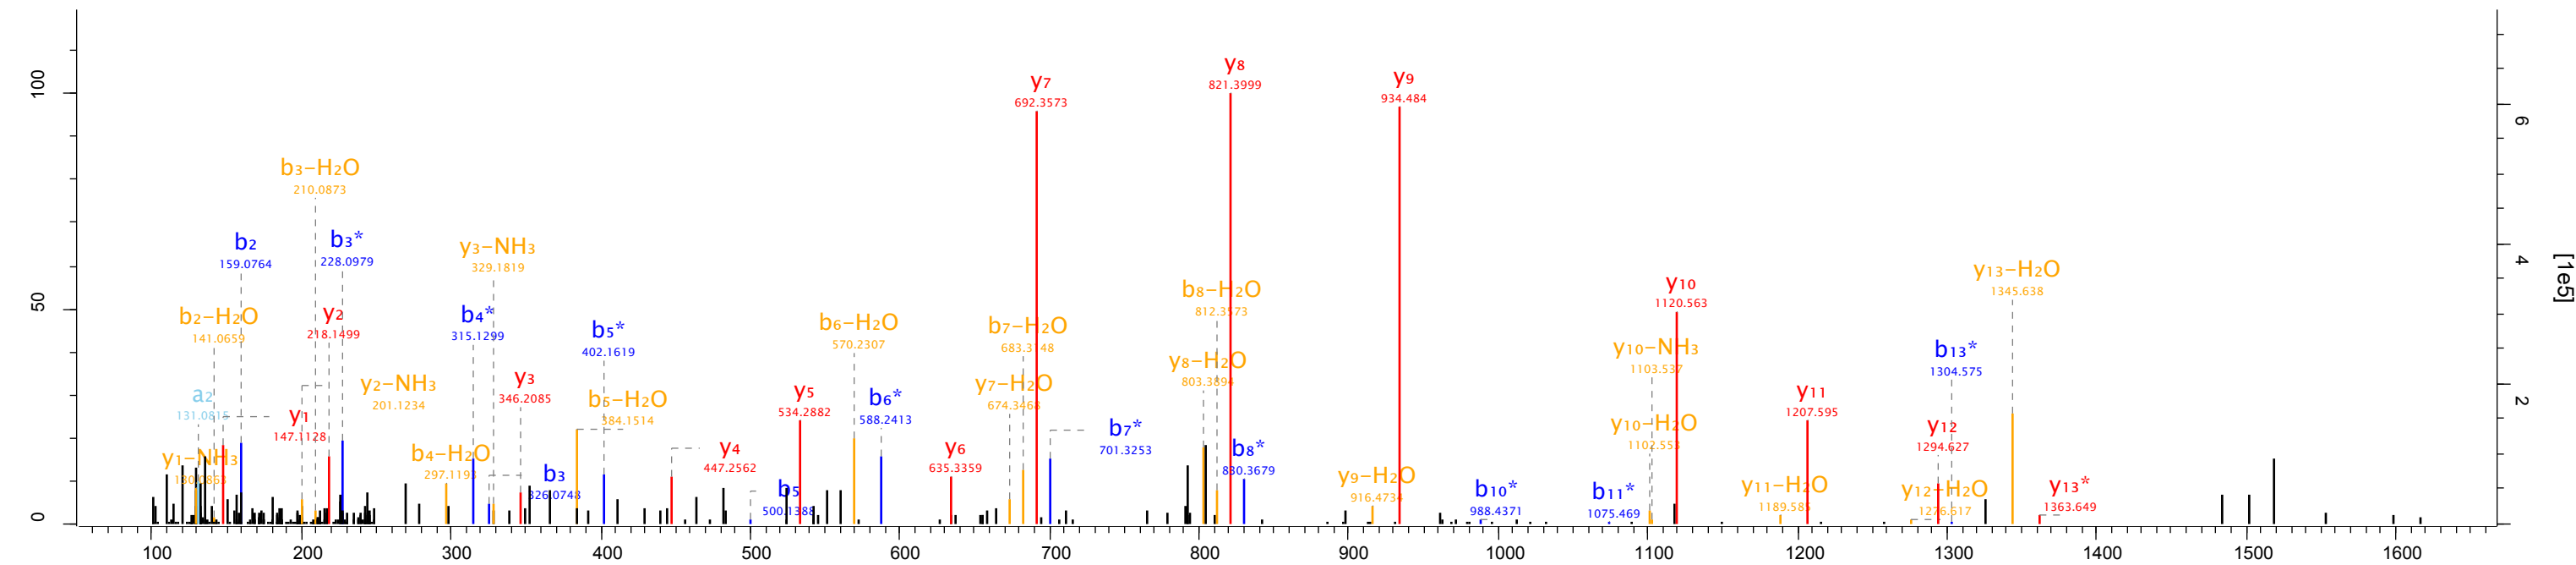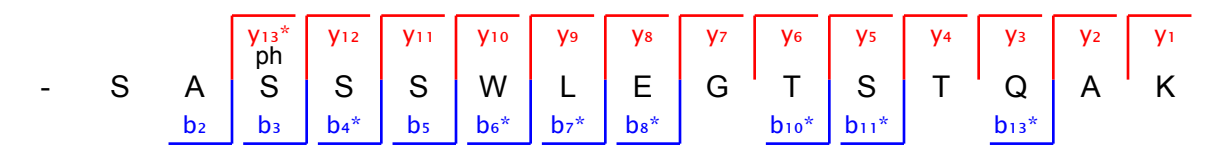

Raw file 20150812\_A375SR\_Phospho\_BR1\_05 Scan 15050 Method FTMS; HCD Score 76.21 m/z 877.74 Gene names IRS2

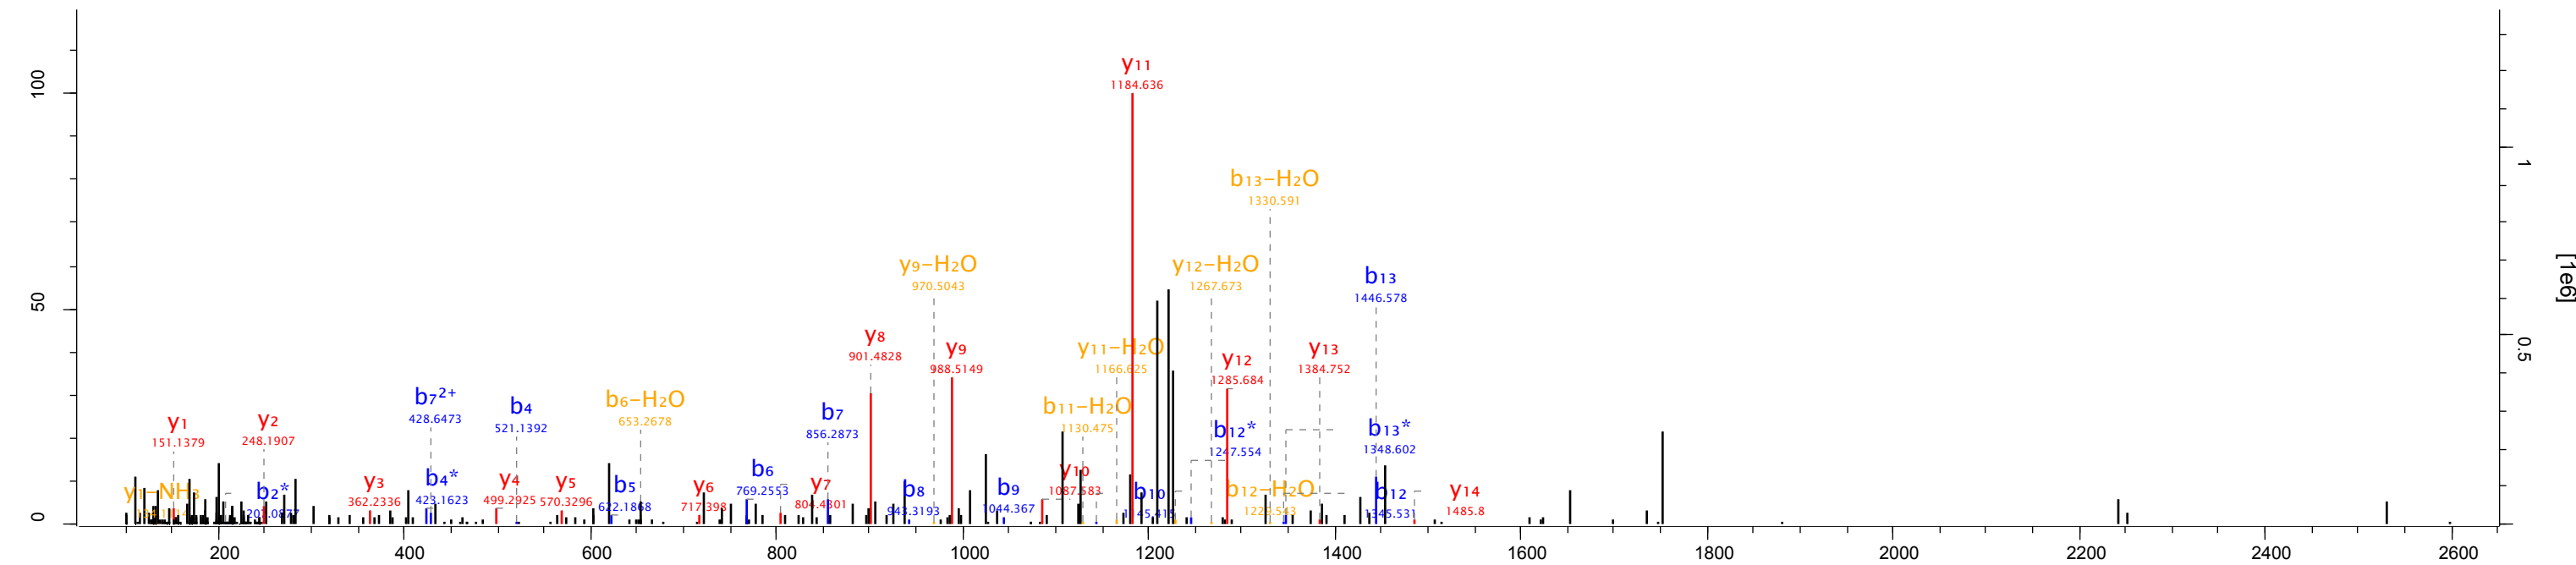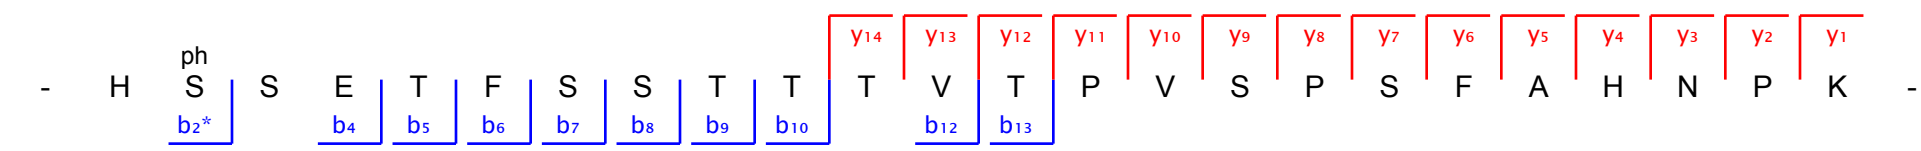

Raw file 20150812\_A375SR\_Phospho\_BR1\_05 Scan 15190 Method FTMS; HCD Score 250.86 m/z 824.88 Gene names OSBPL11

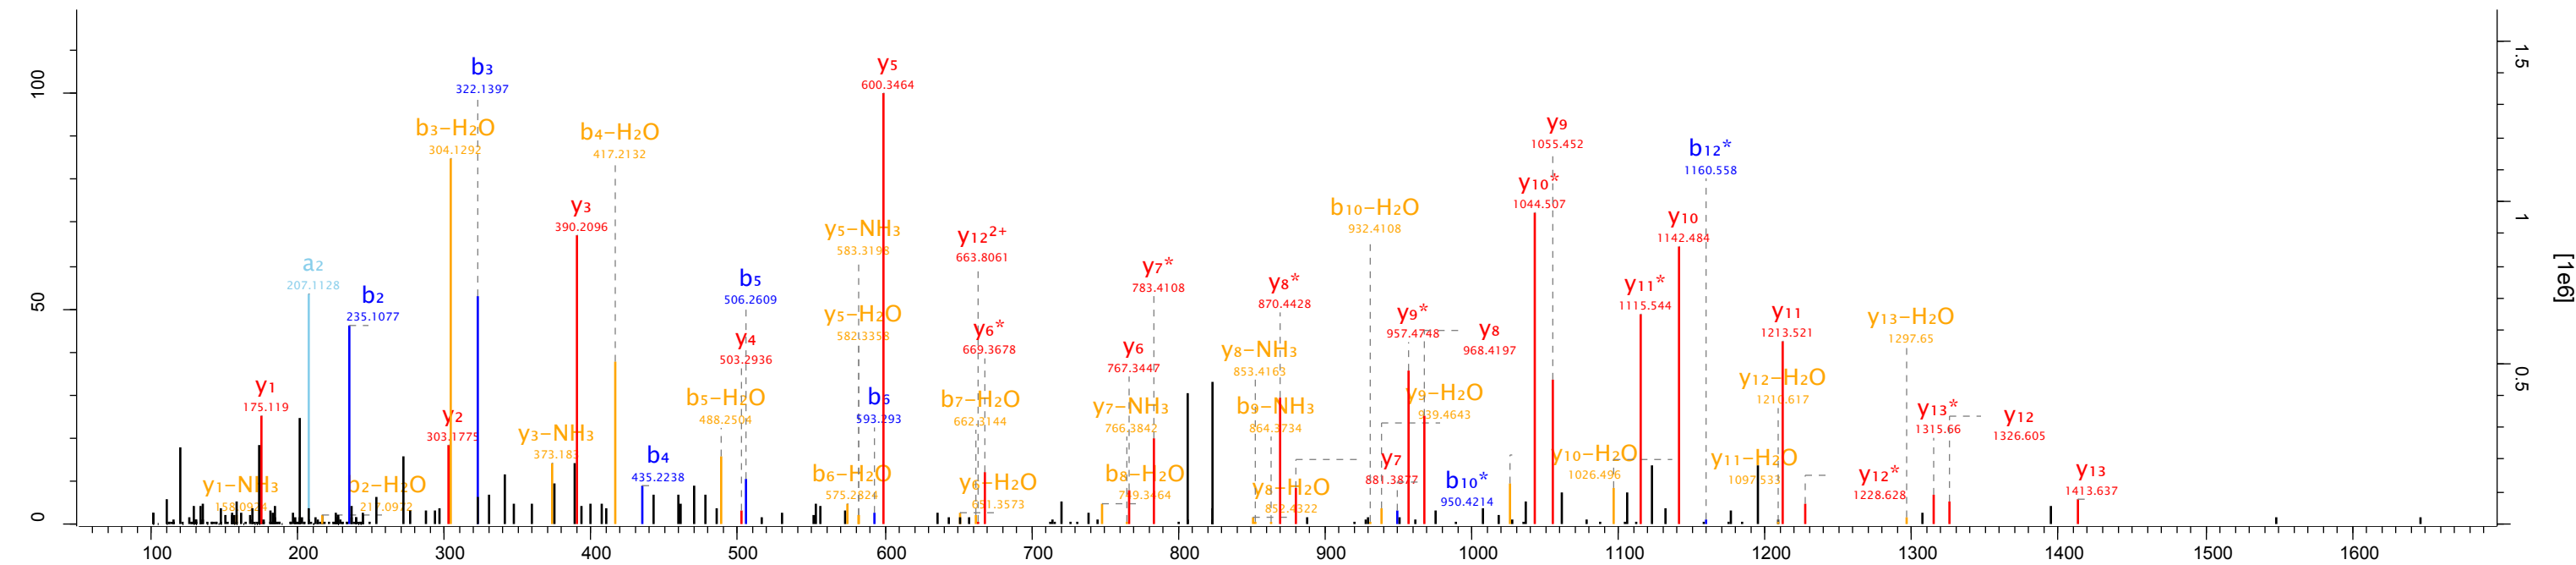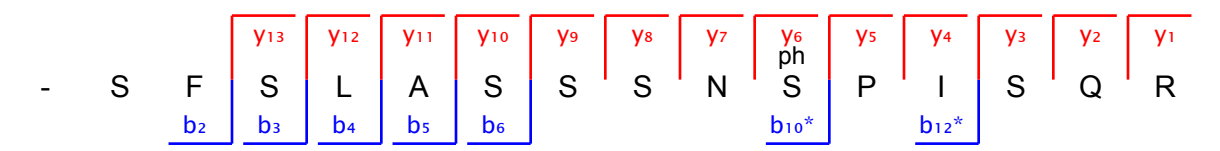



Raw file 20150812\_A375SR\_Phospho\_BR1\_05 Scan 15600 Method FTMS; HCD Score 265.86 m/z 828 Gene names BAD

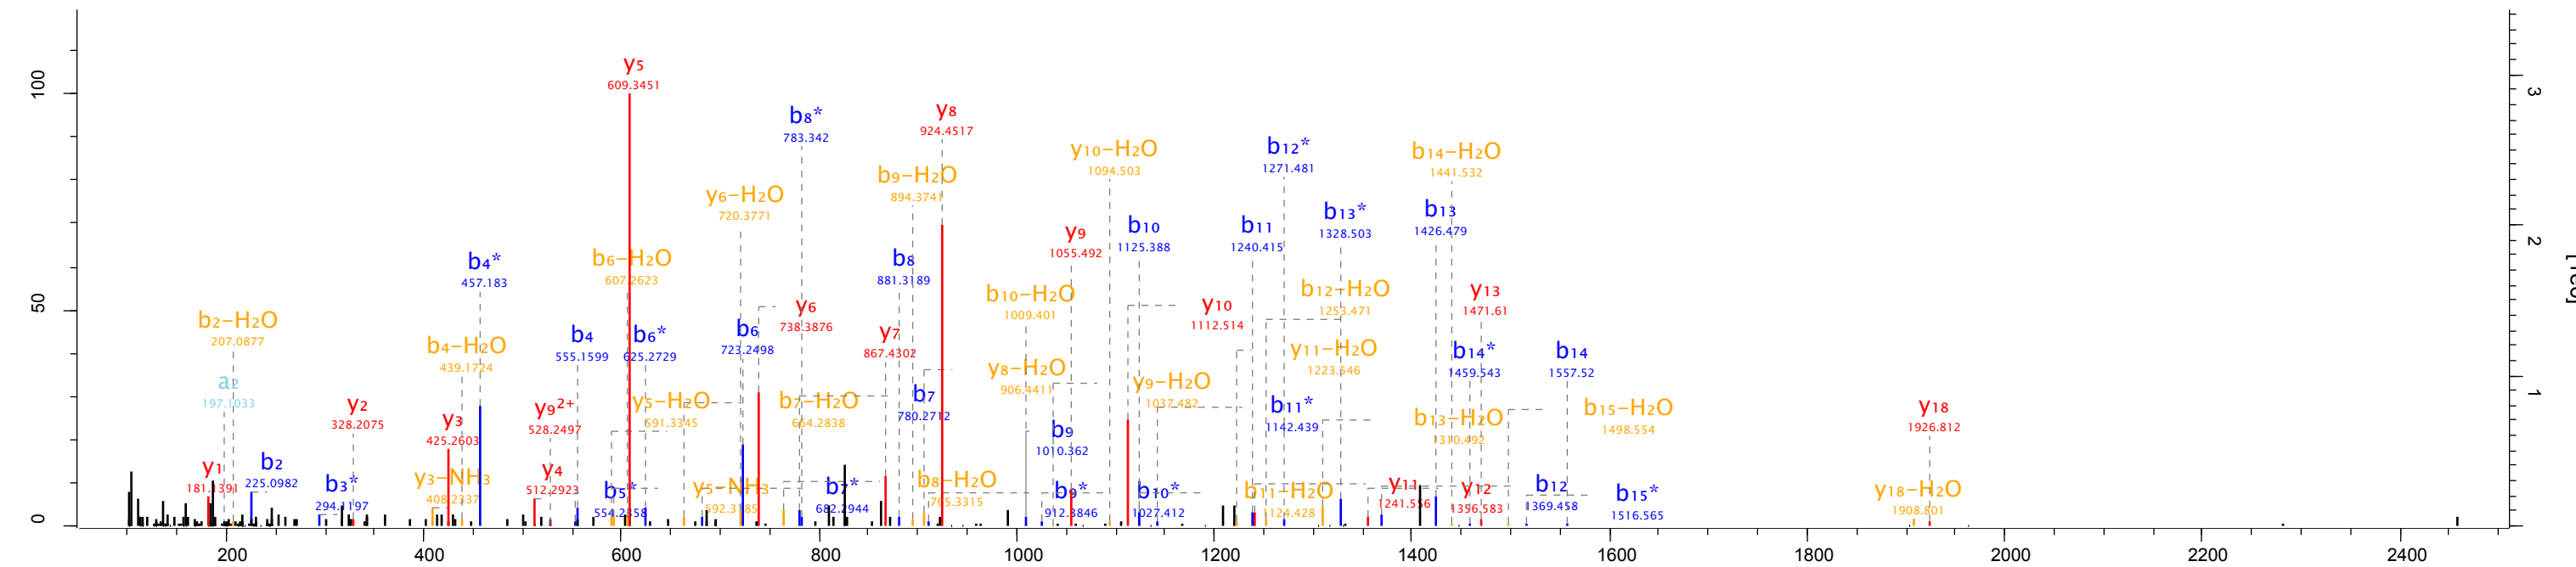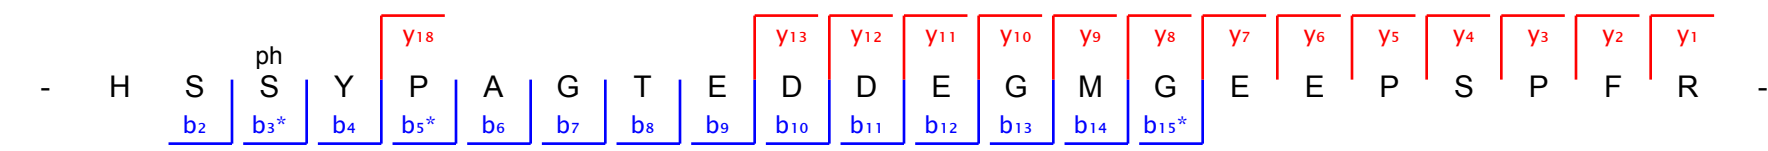

Raw file 20150812\_A375SR\_Phospho\_BR1\_05 Scan 15700 Method FTMS; HCD Score 191.93 m/z 762.31 Gene names ERCC5;BIVM-ERCC5

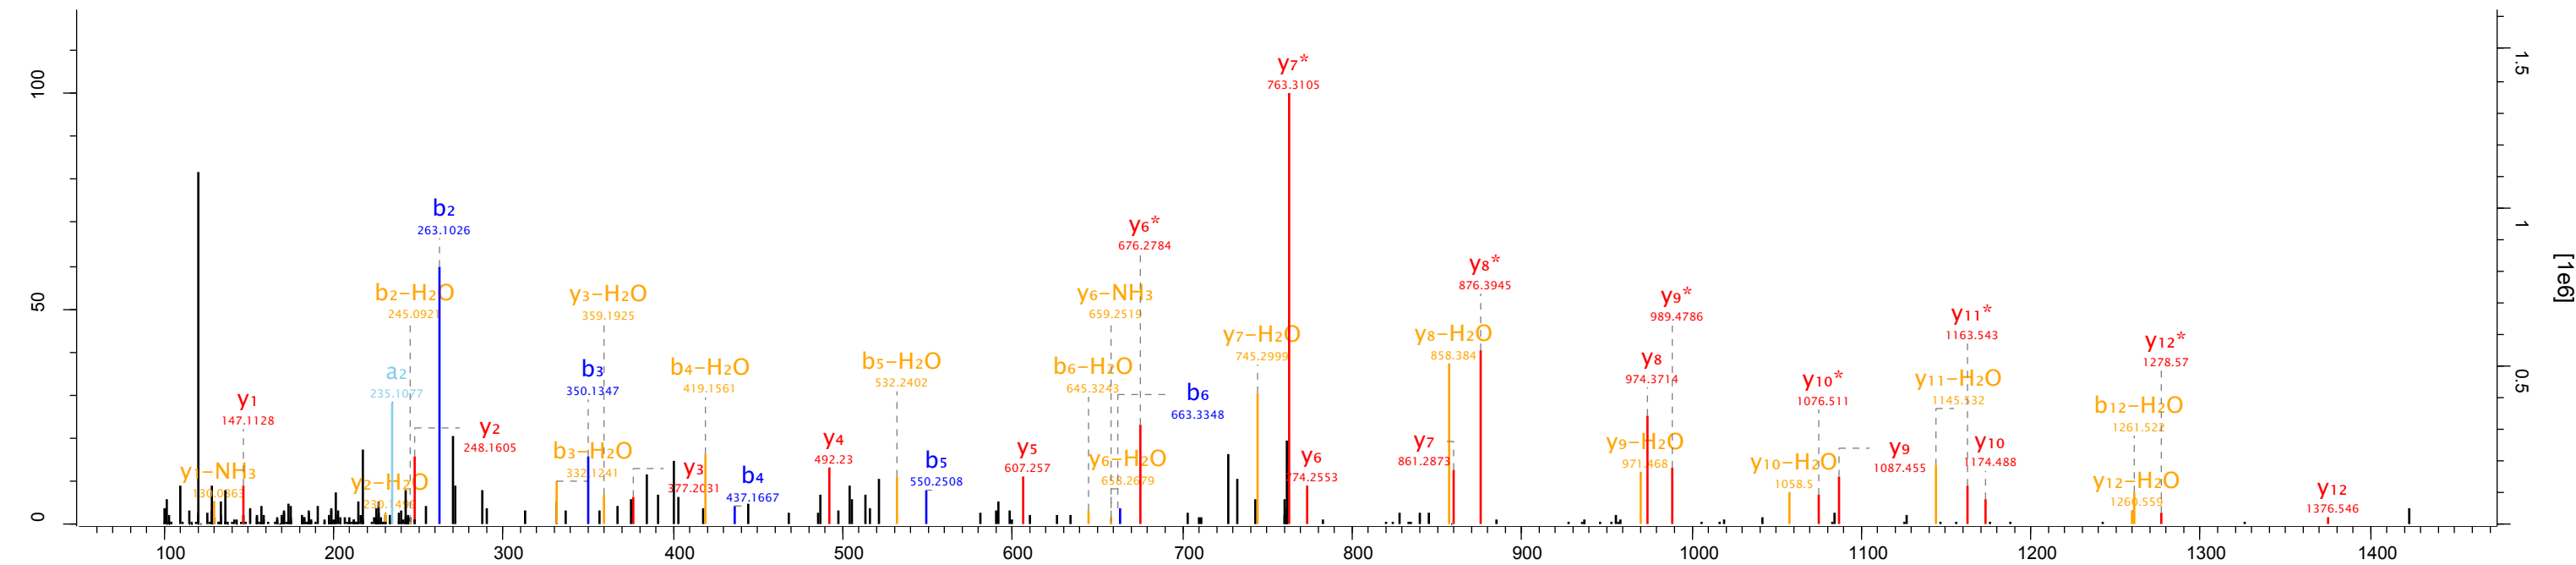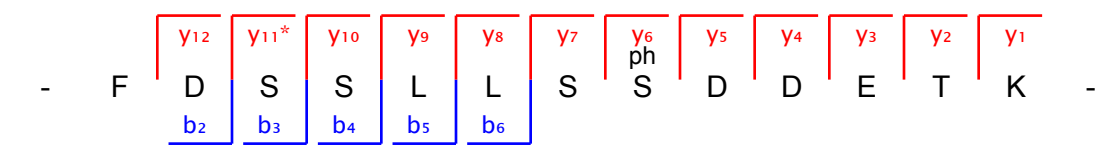

Raw file: 20150812\_A375SR\_Phospho\_BR1\_05  
 Scan: 1600 Method: FTMS; HCD Score: 142.17 m/z: 790.85 Gene names: CDC20

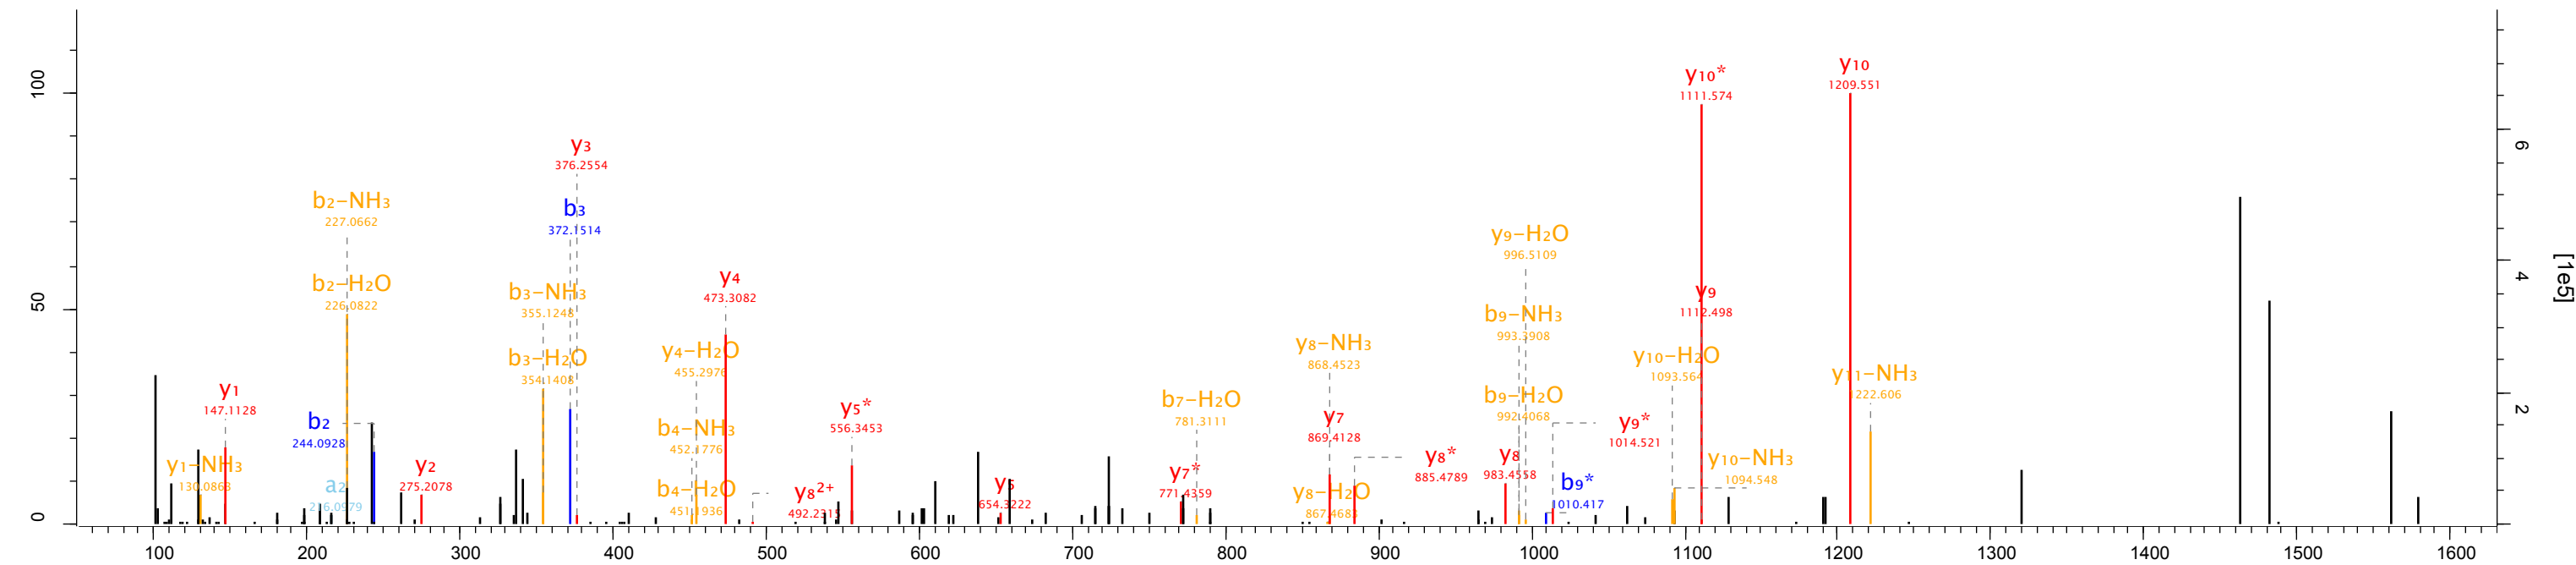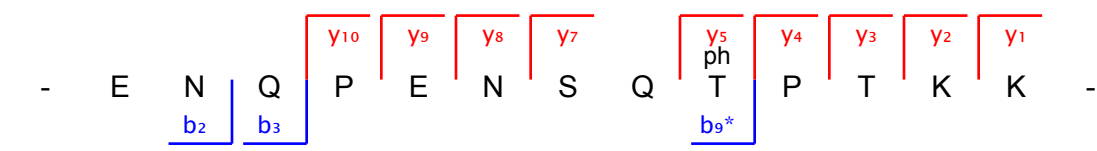

Raw file: 20150812\_A375SR\_Phospho\_BR1\_05  
 Scan: 16020 Method: FTMS; HCD Score: 86.55 m/z: 677.81 Gene names: PAK2

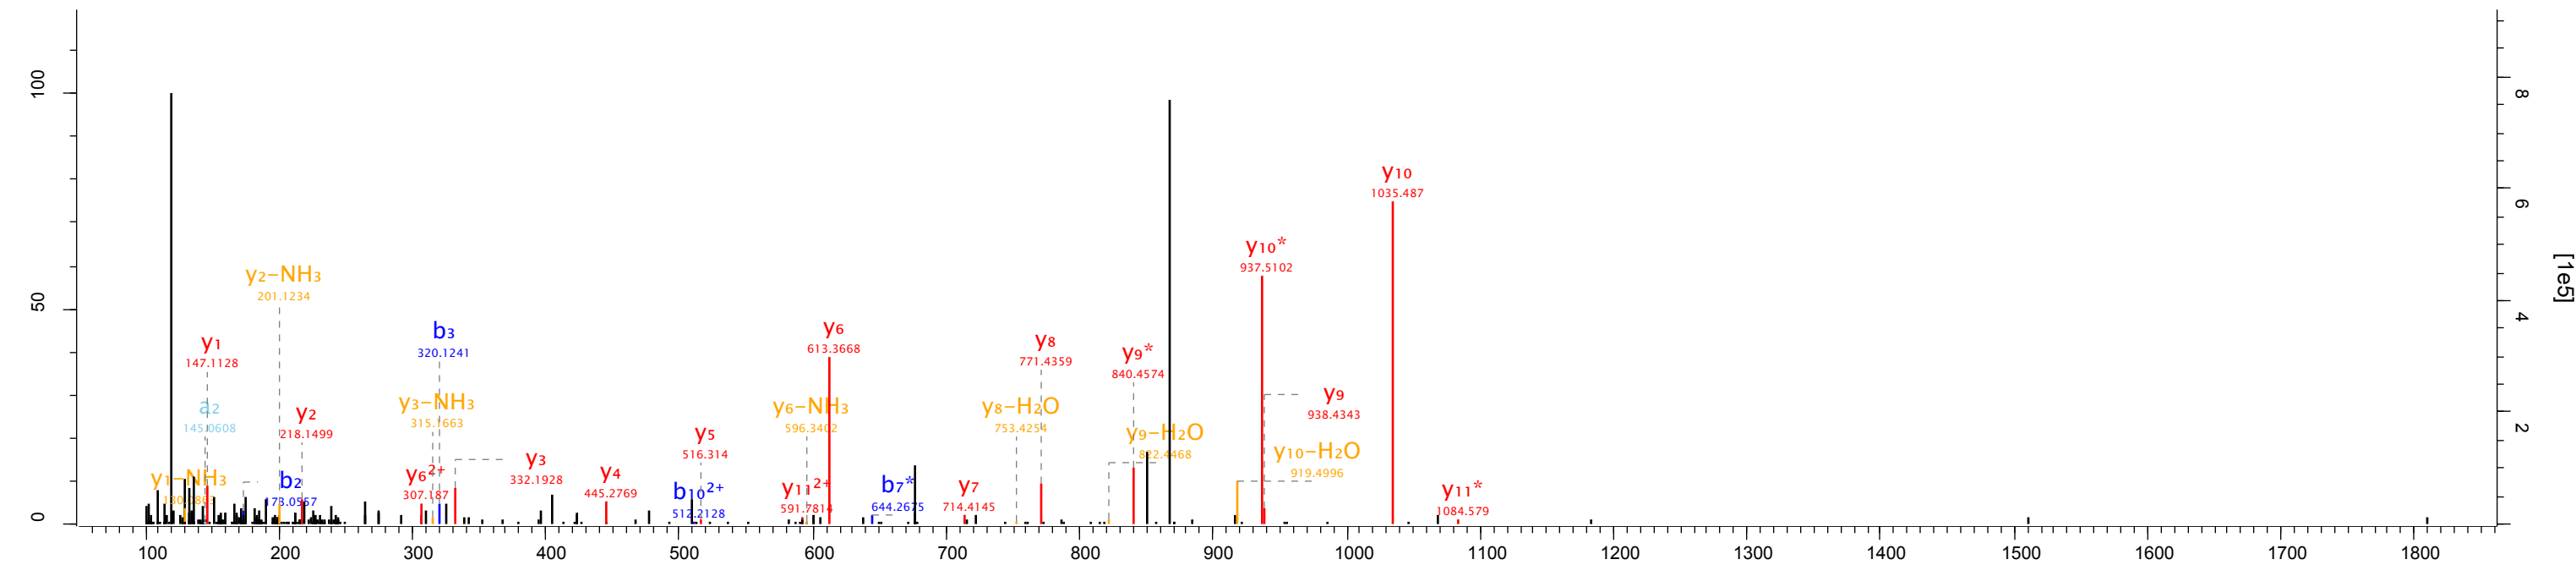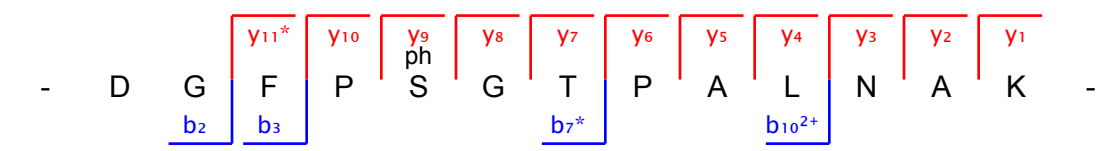

Raw file: 20150812\_A375SR\_Phospho\_BR1\_05  
 Scan: 16170 Method: FTMS; HCD Score: 239.73 m/z: 981.93 Gene names: KPNA2;POU2F2

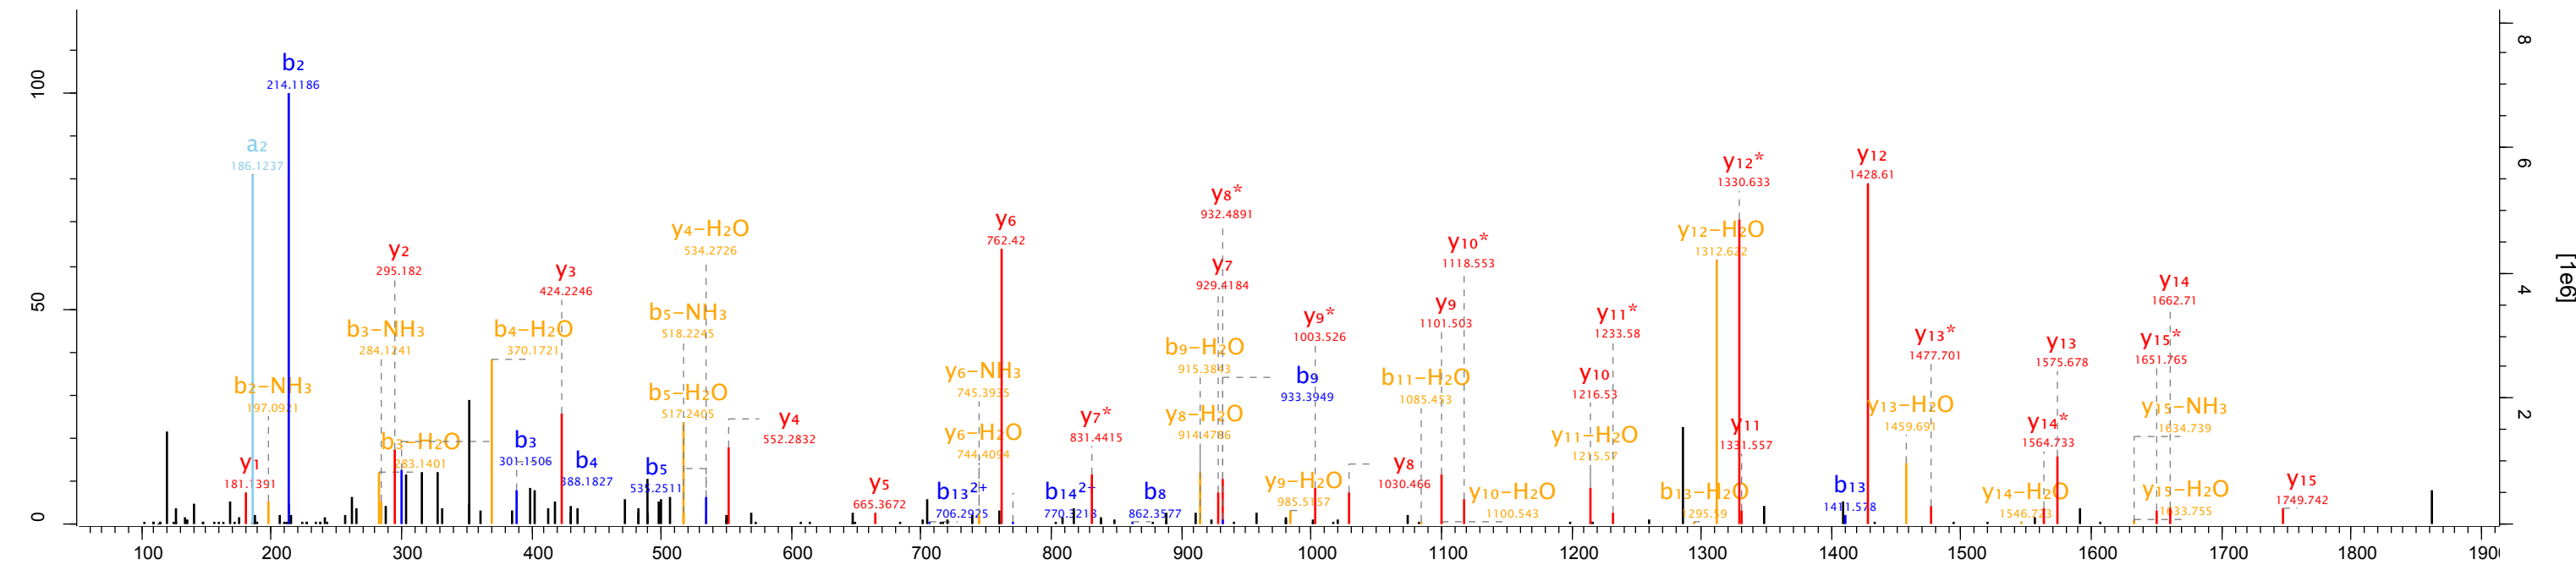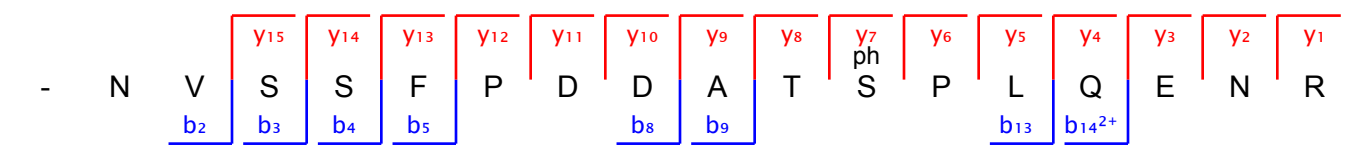

Raw file 20150812\_A375SR\_Phospho\_BR1\_05 Scan 16310 Method FTMS; HCD Score 155.06 m/z 935.46 Gene names BAZZA

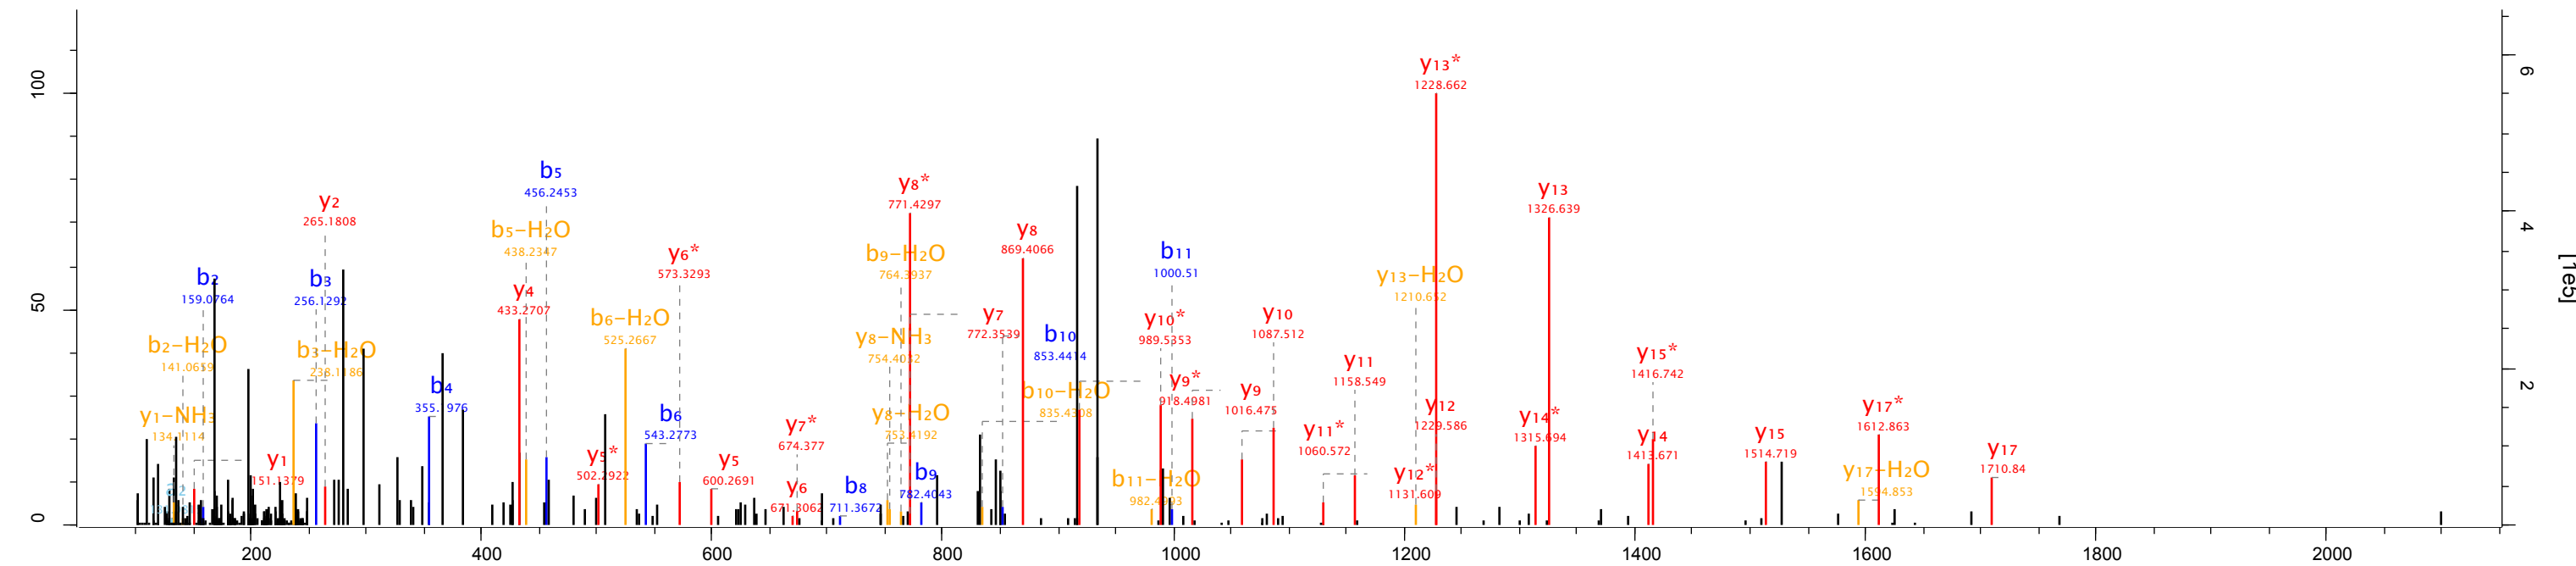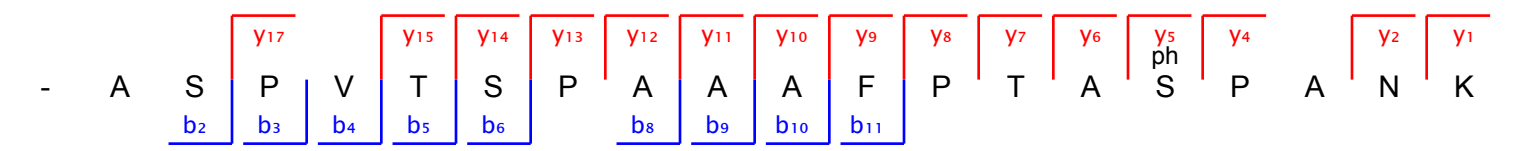

Raw file: 20150812\_A375SR\_Phospho\_BR1\_05  
 Scan: 16380 Method: FTMS; HCD Score: 151.5 m/z: 1069.51 Gene names: MAP7D1

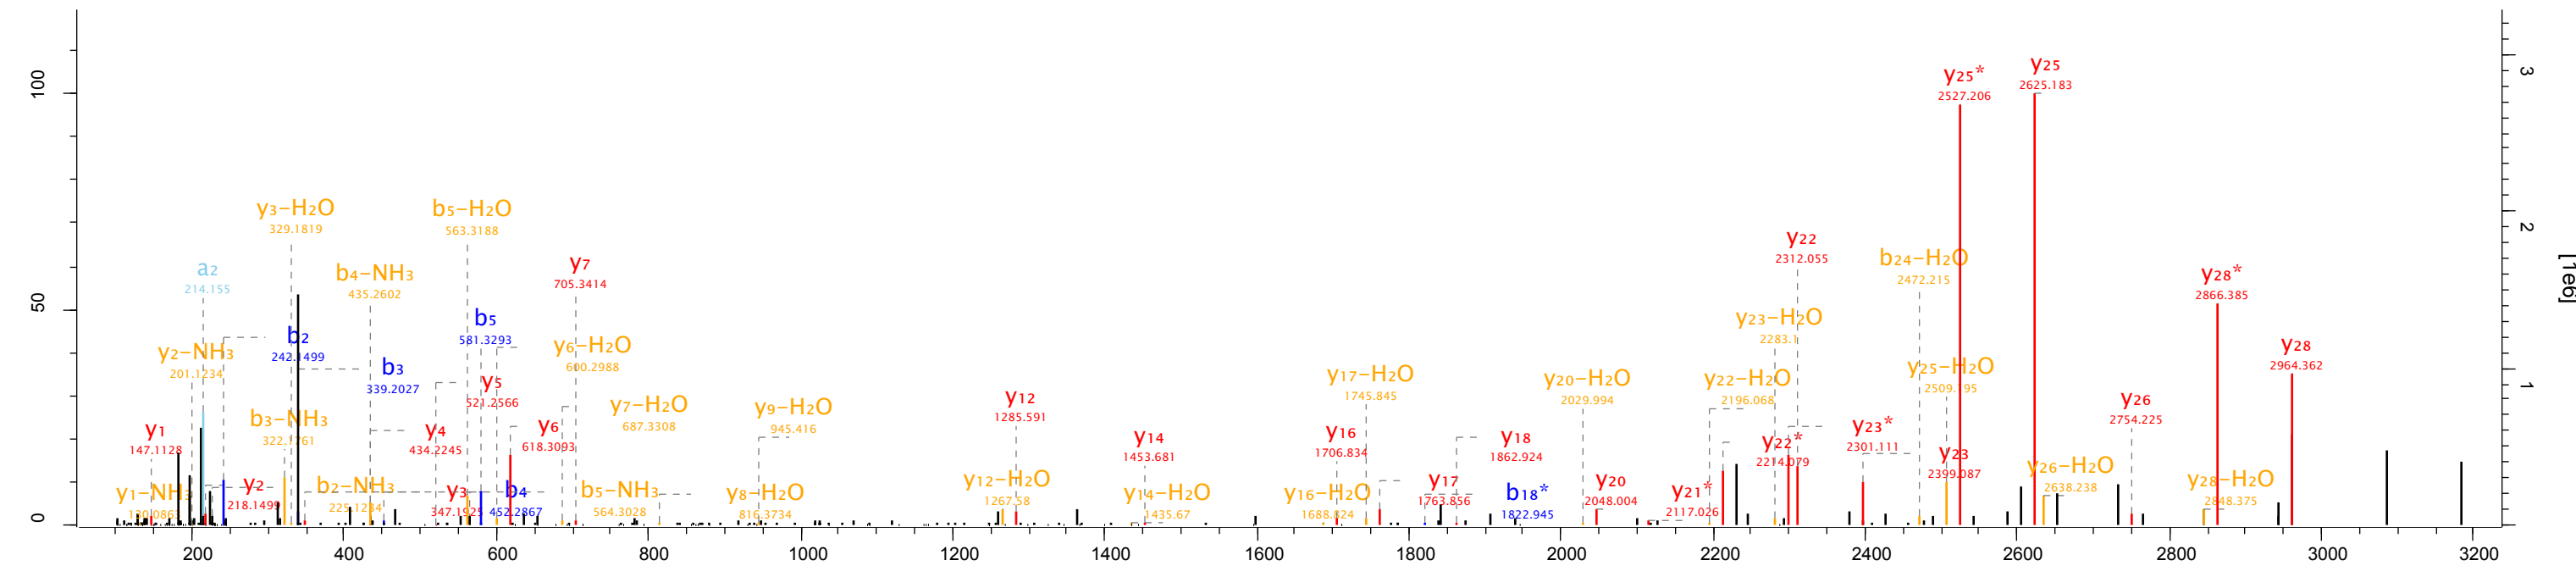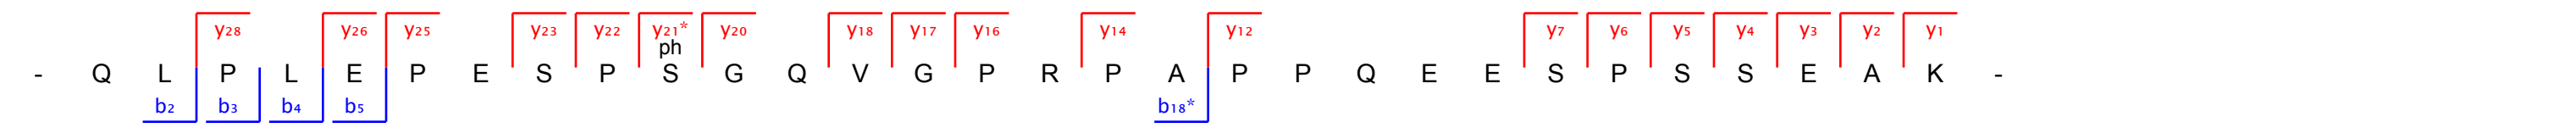

Raw file: 20150812\_A375SR\_Phospho\_BR1\_05  
 Scan: 1720 Method: FTMS; HCD Score: 308.21 m/z: 774.86 Gene names: CBX3

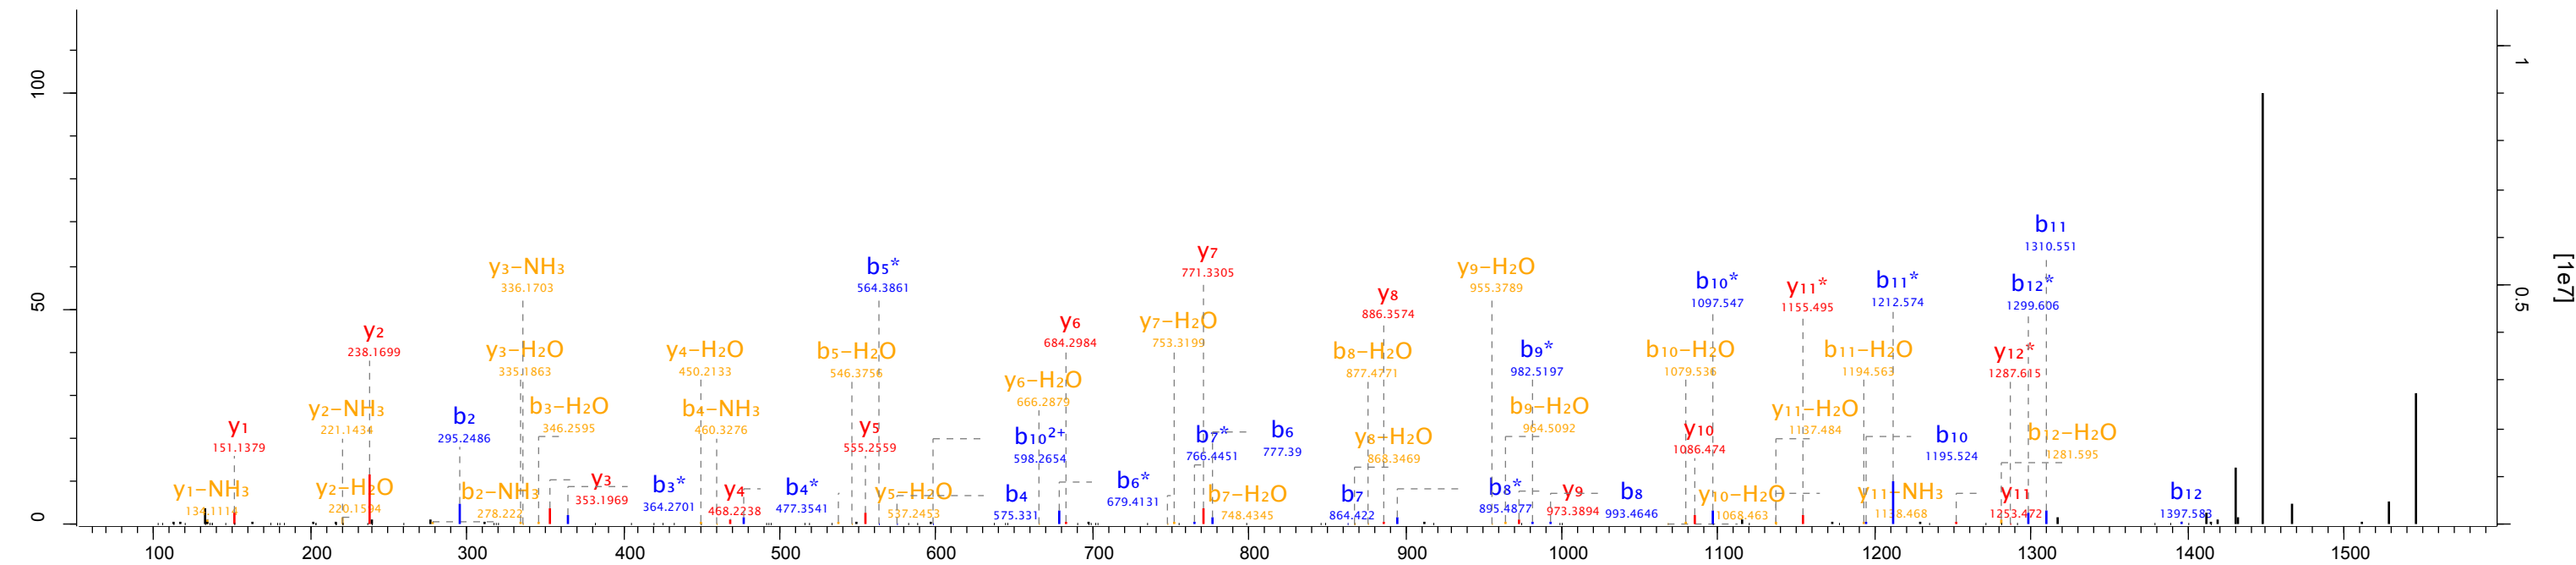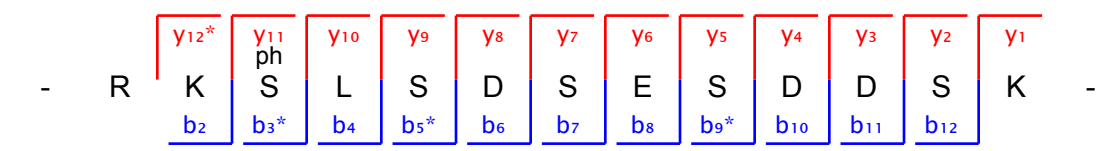



Raw file 20150812\_A375SR\_Phospho\_BR1\_05 Scan 17290 Method FTMS; HCD Score 107.98 m/z 549.91 Gene names GPBP1L1

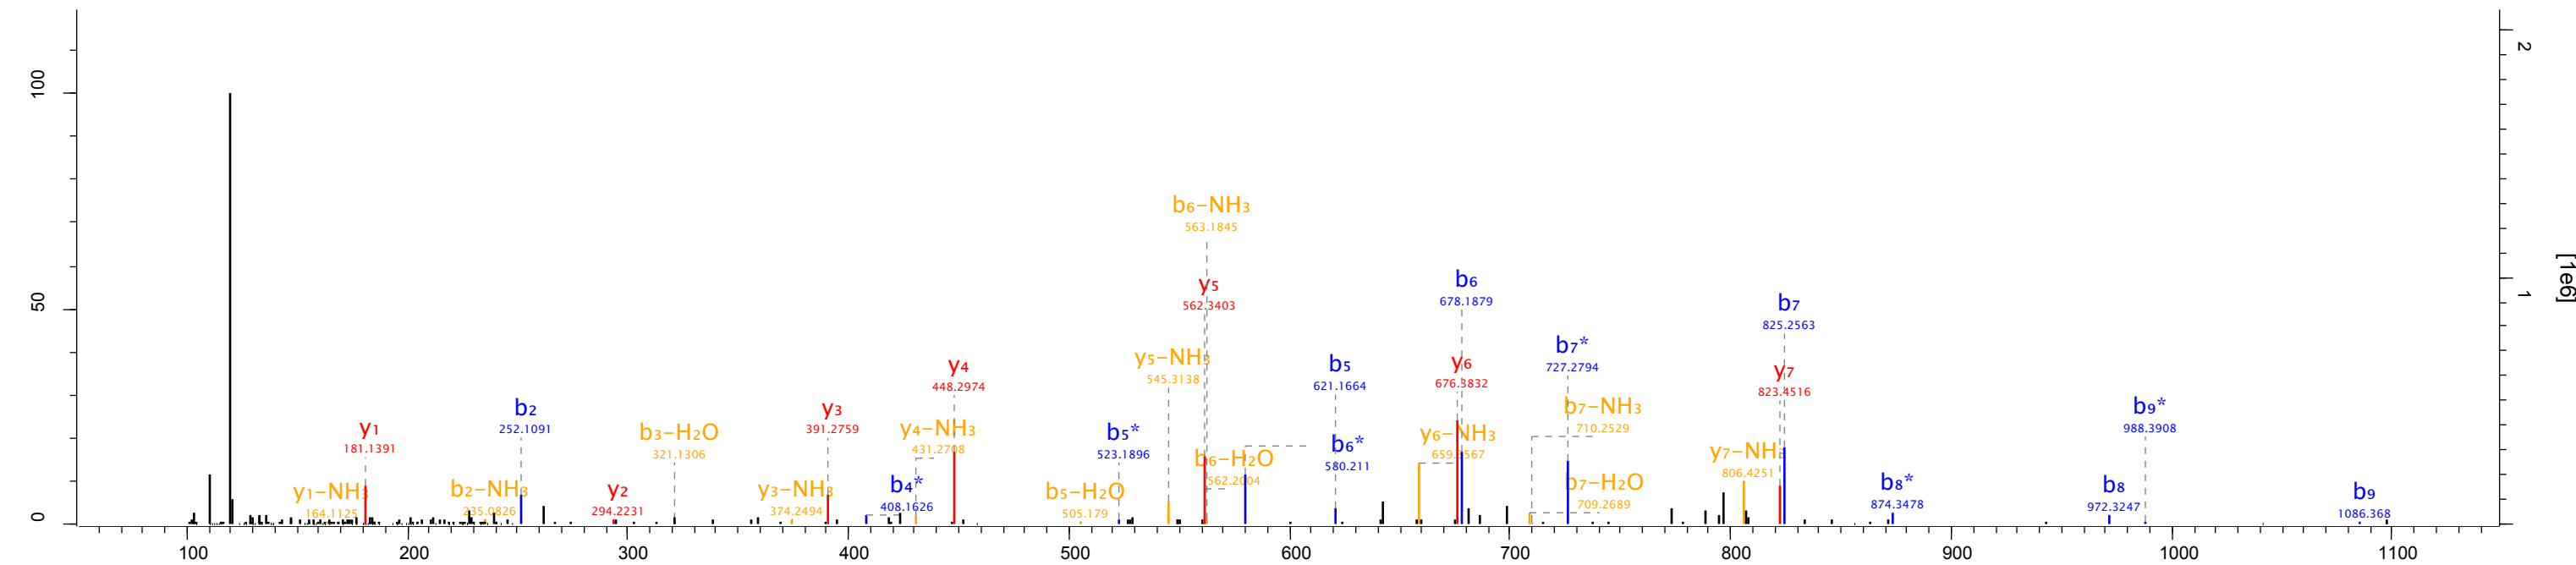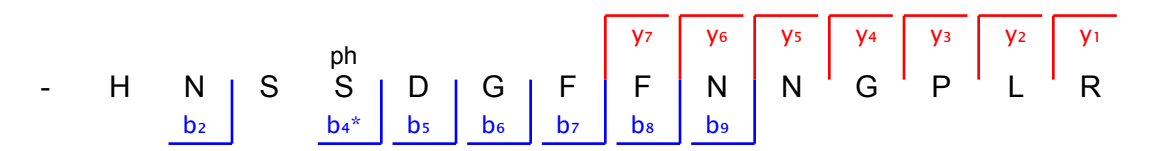

Raw file 20150812\_A375SR\_Phospho\_BR1\_05 Scan 1730 Method FTMS; HCD Score 67.46 m/z 335.51 Gene names CACTIN

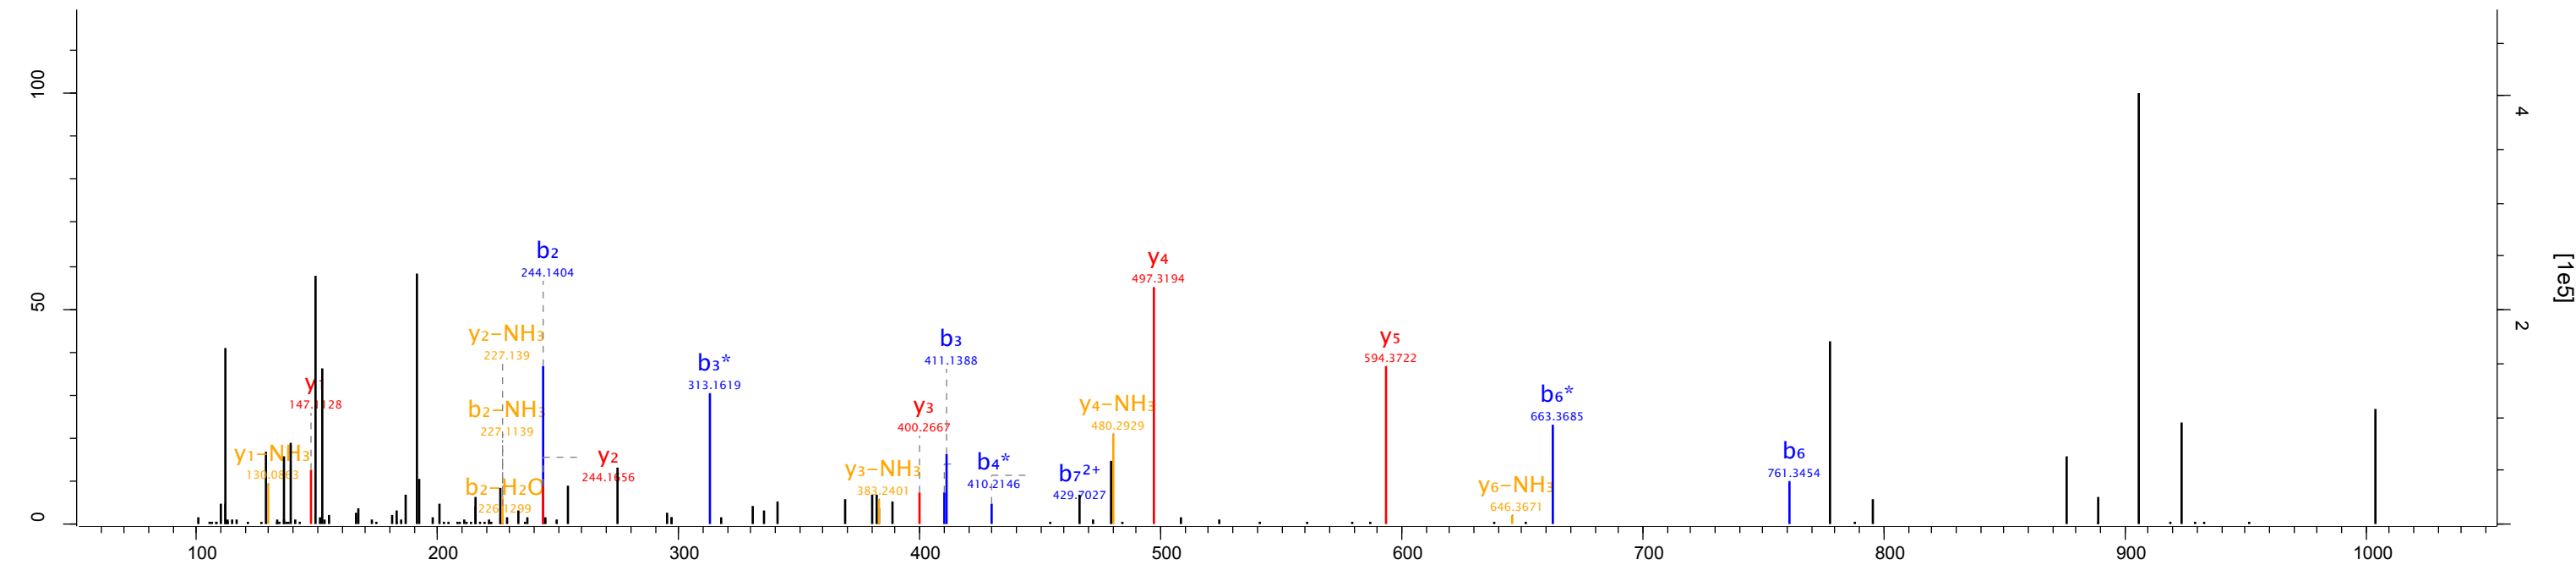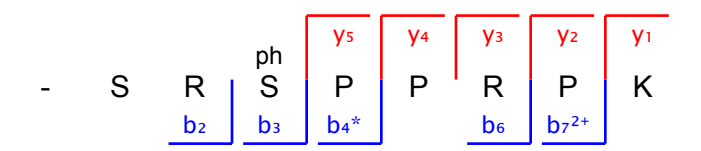

Raw file 20150812\_A375SR\_Phospho\_BR1\_05 Scan 17830 Method FTMS; HCD Score 175.42 m/z 698.66 Gene names DDX1

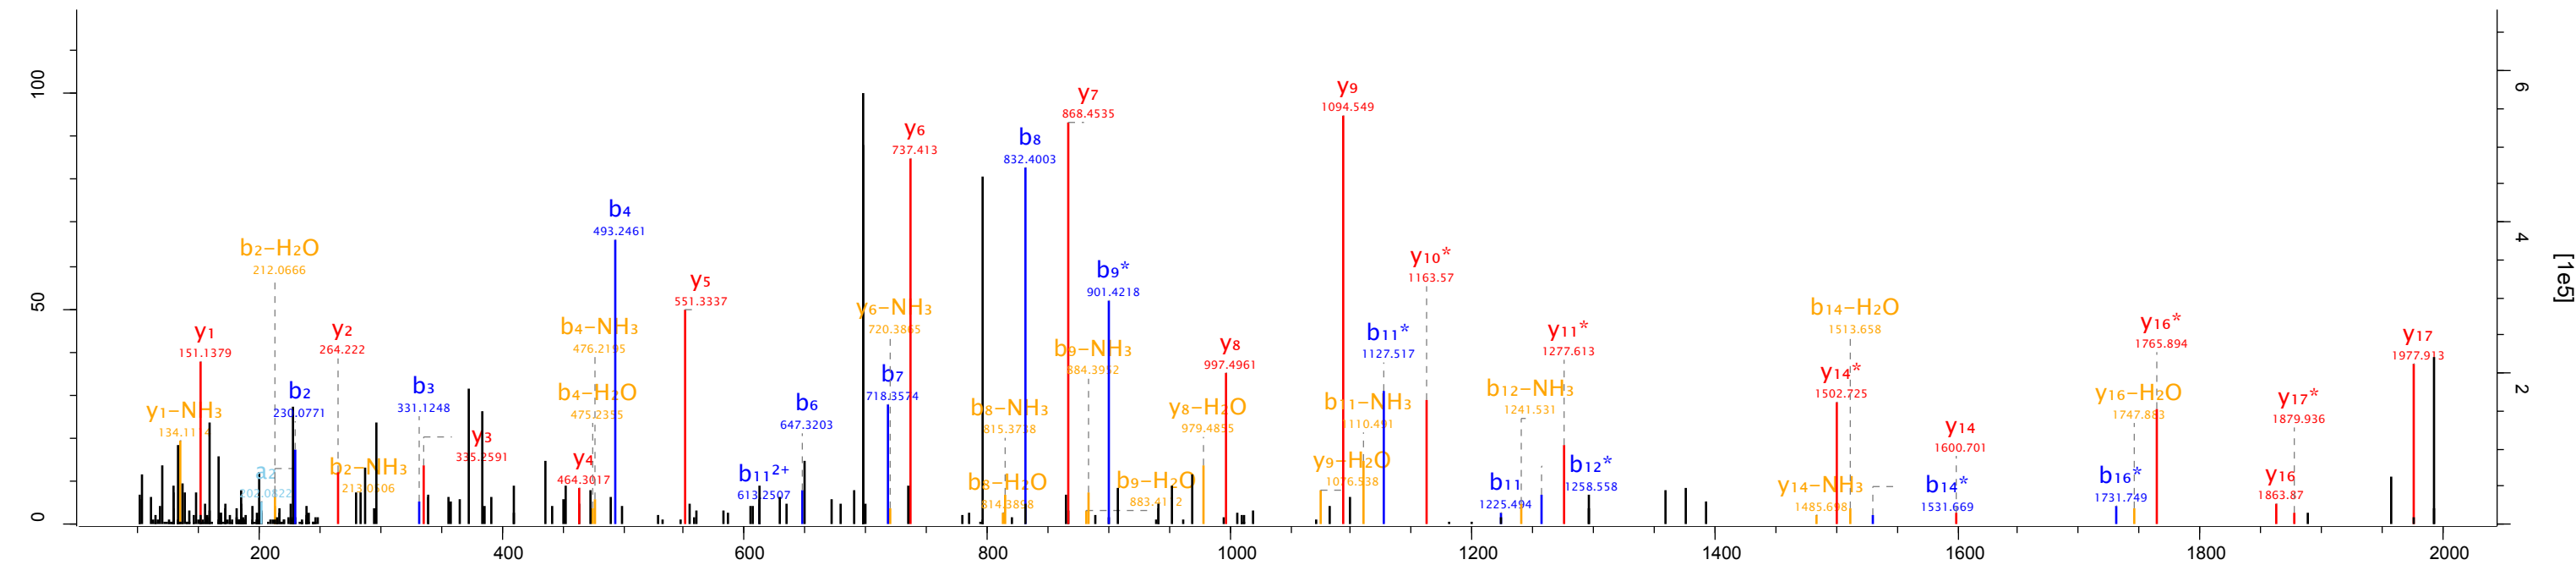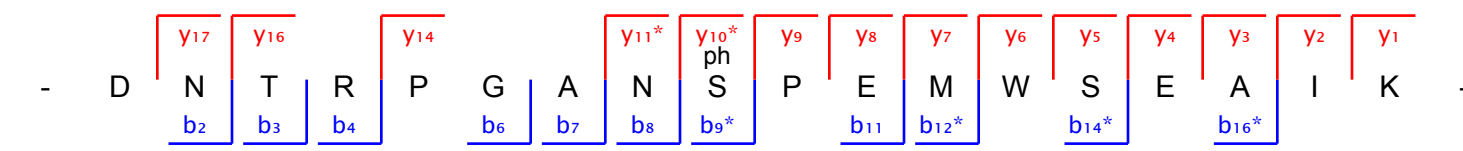

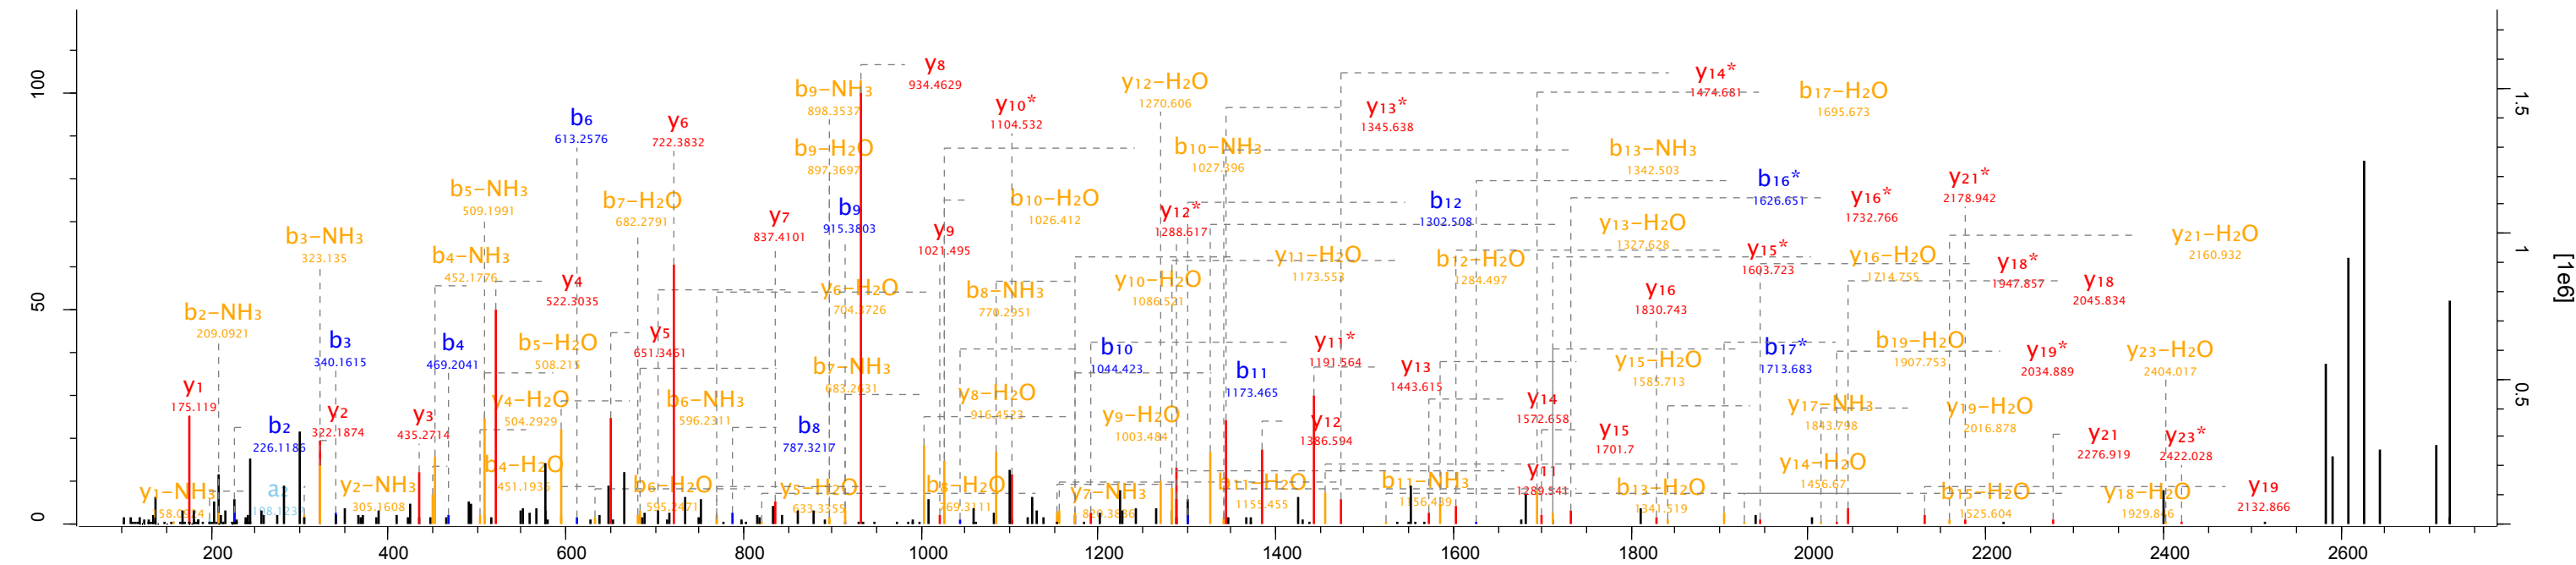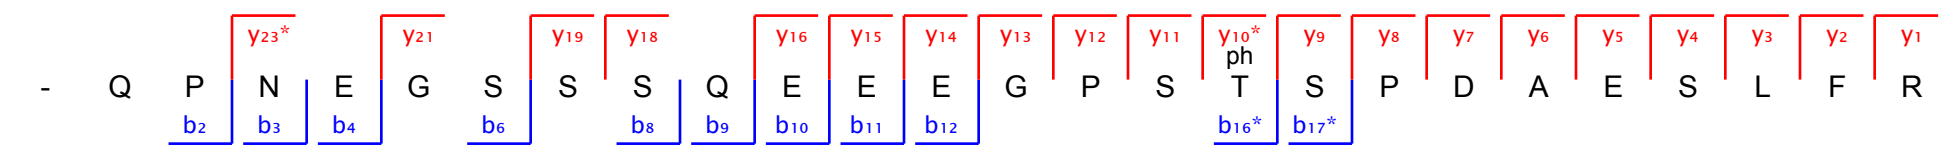

Raw file: 20150812\_A375SR\_Phospho\_BR1\_05  
 Scan: 18230 Method: FTMS; HCD Score: 120.34 m/z: 1067.53 Gene names: MVP

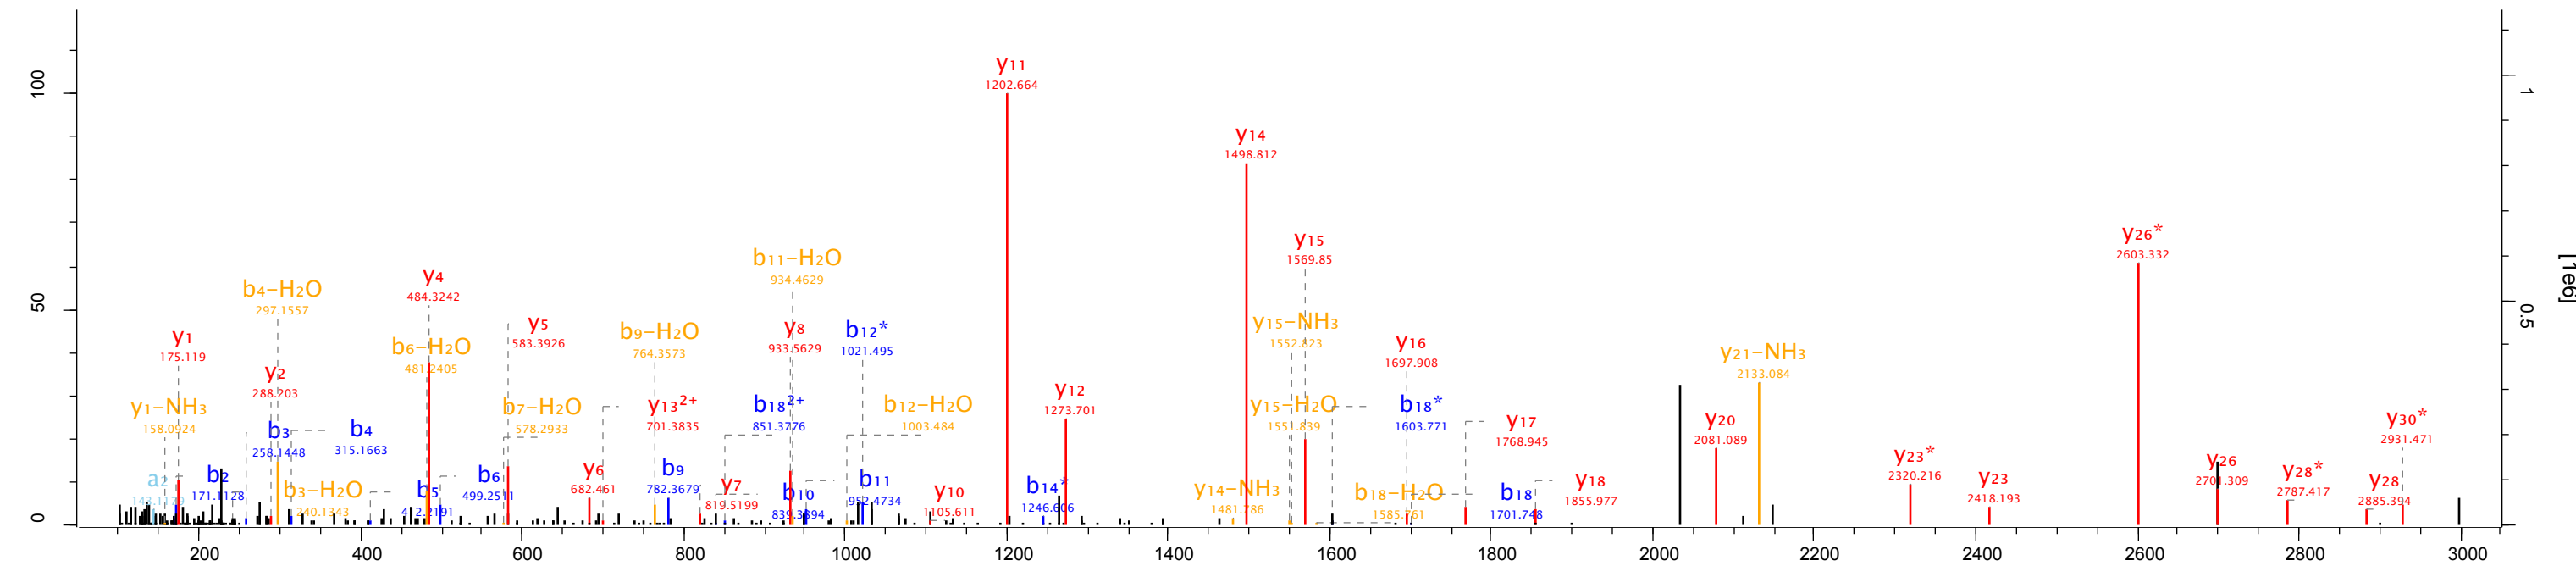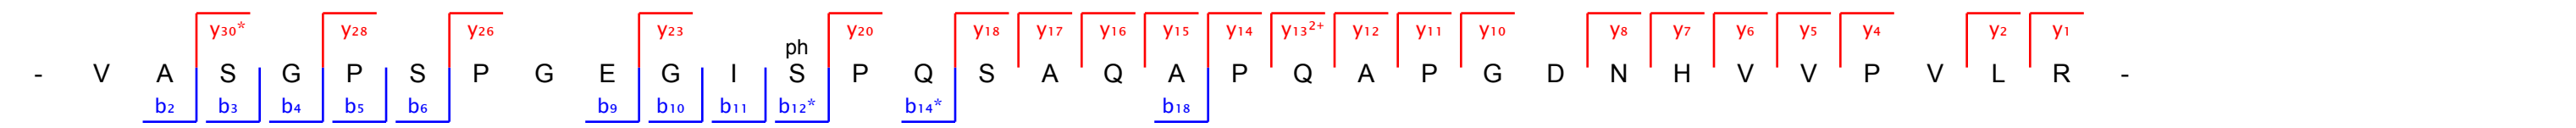

Raw file 20150812\_A375SR\_Phospho\_BR1\_05 Scan 18410 Method FTMS; HCD Score 235.26 m/z 863.91 Gene names TPR

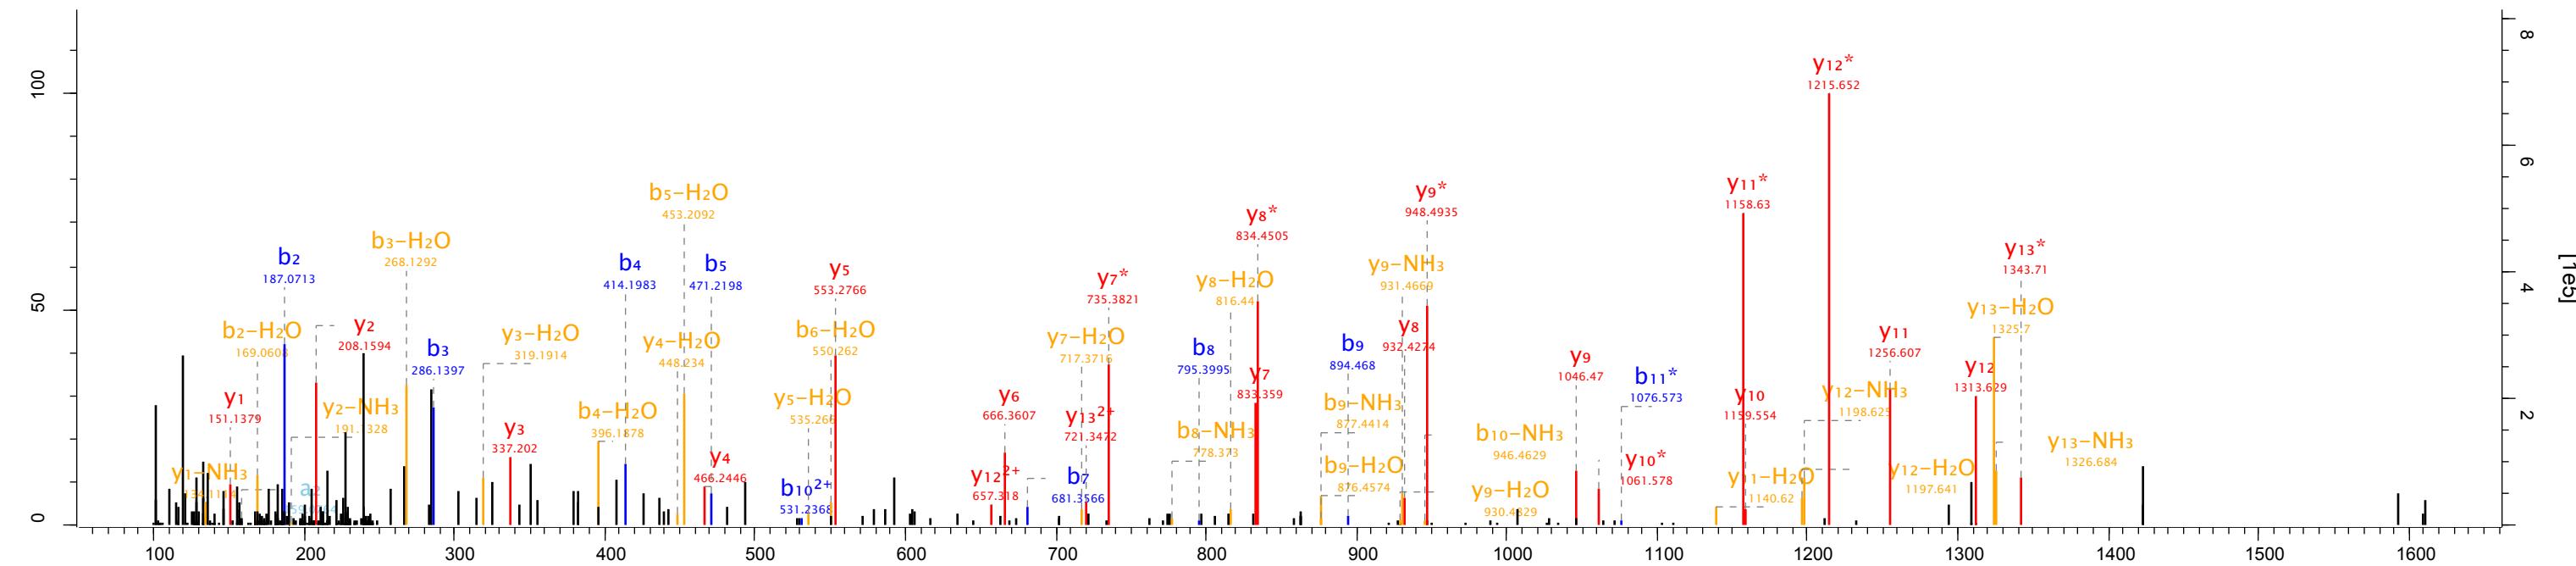

- E G V Q G P L N V S E E G K -  
 b2 b3 b4 b5 b7 b8 b9 b10<sup>2+</sup> b11\* y13\* y12 y11 y10 y9 y8 y7<sup>ph</sup> y6 y5 y4 y3 y2 y1

Raw file 20150812\_A375SR\_Phospho\_BR1\_05 Scan 18650 Method FTMS; HCD Score 124.46 m/z 597.27 Gene names XRCC6

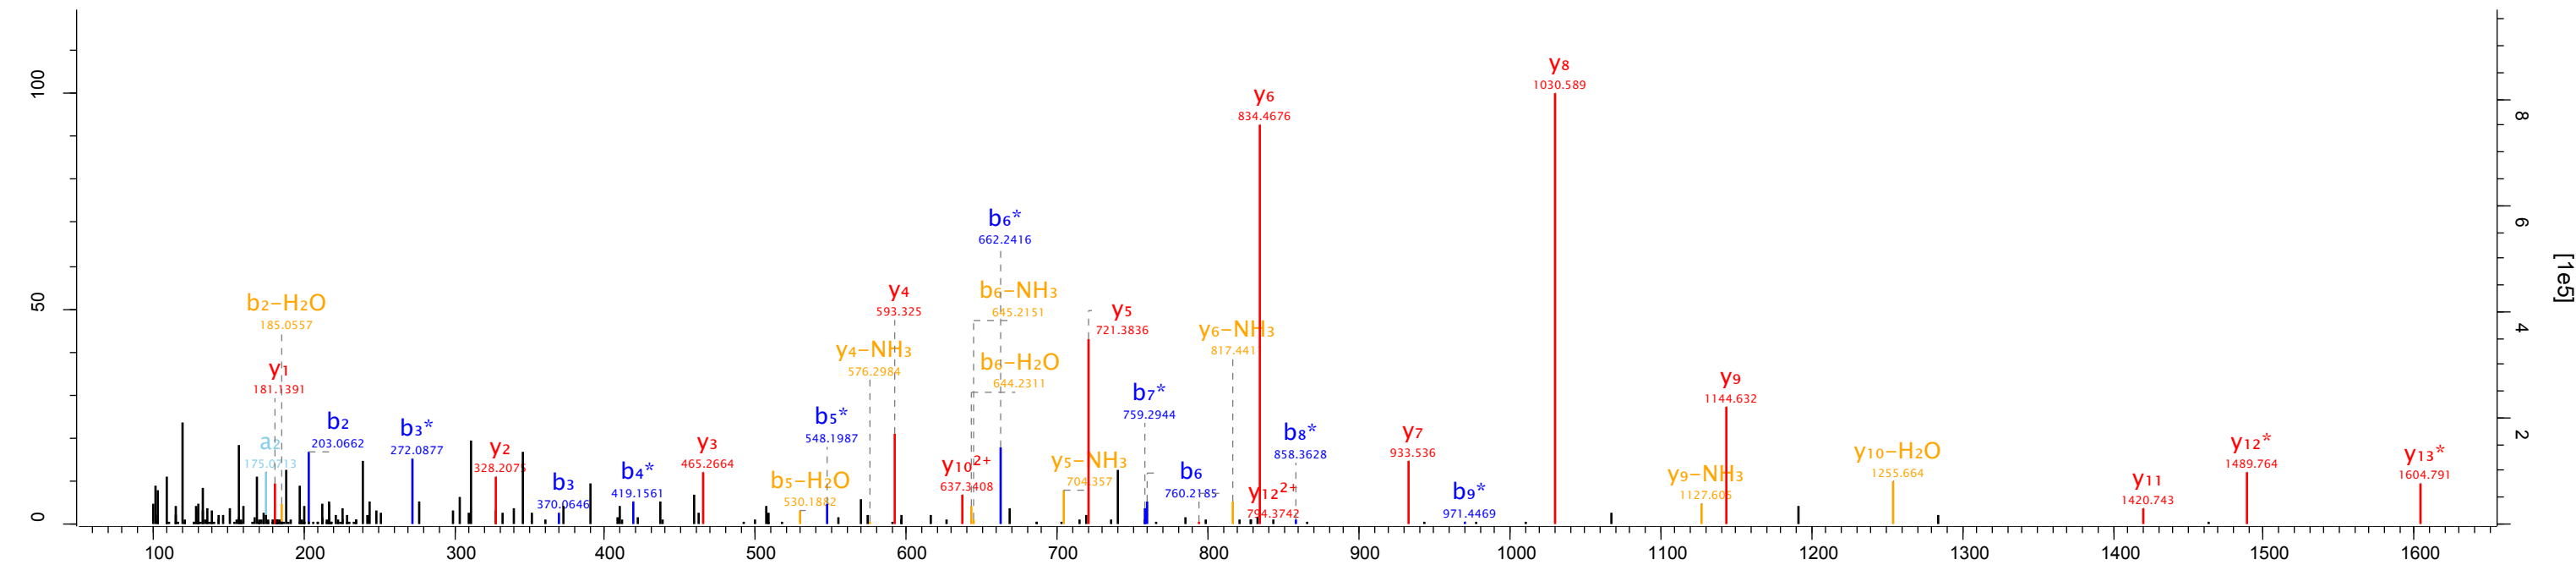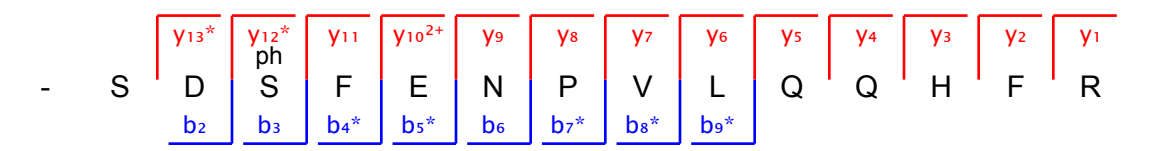

Raw file 20150812\_A375SR\_Phospho\_BR1\_05 Scan 18680 Method FTMS; HCD Score 107.34 m/z 1080.78 Gene names LIMA1;TRMT1

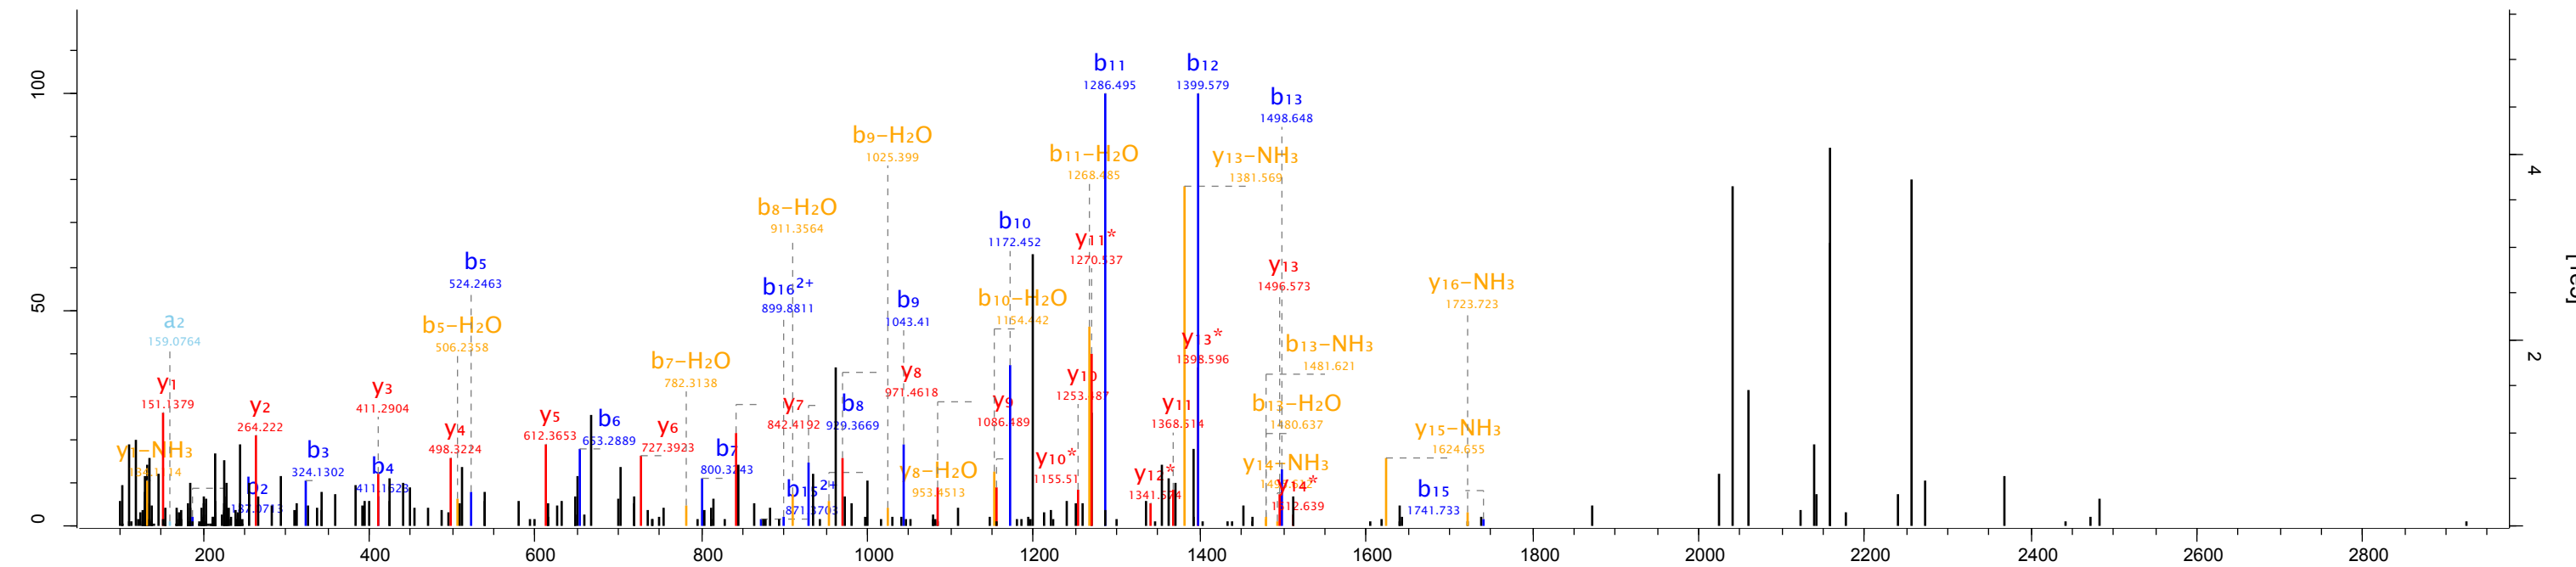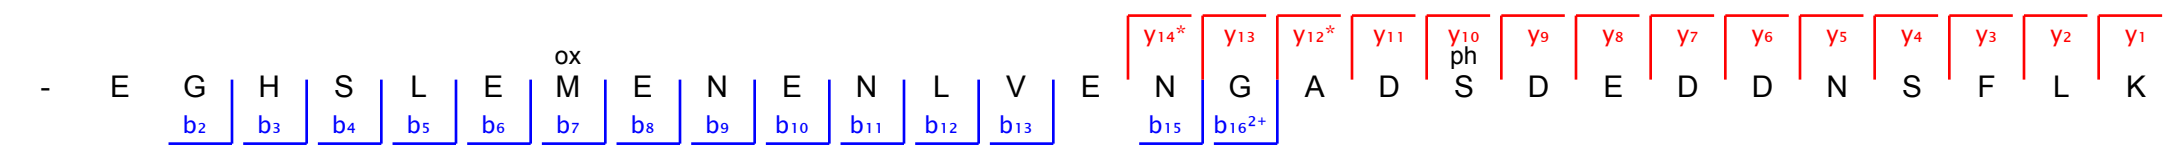



Raw file 20150812\_A375SR\_Phospho\_BR1\_05 Scan 18800 Method FTMS; HCD Score 138.23 m/z 566.77 Gene names RBM14

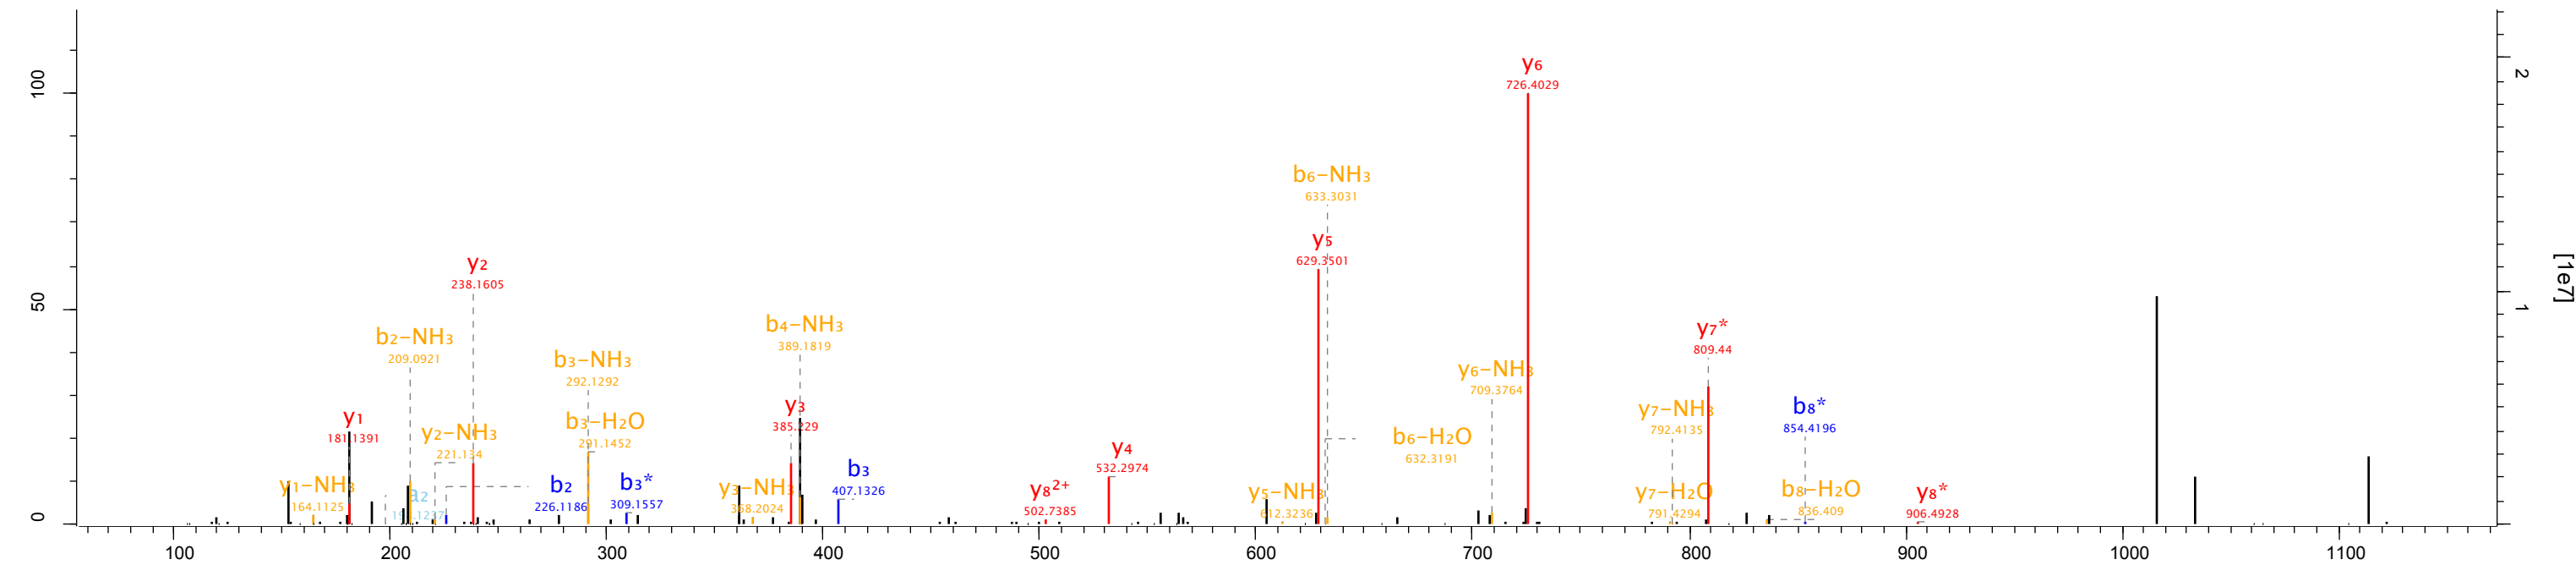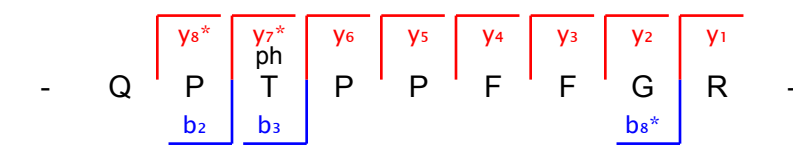

Raw file 20150812\_A375SR\_Phospho\_BR1\_05 Scan 18920 Method FTMS; HCD Score 174.06 m/z 887.39 Gene names MATR3

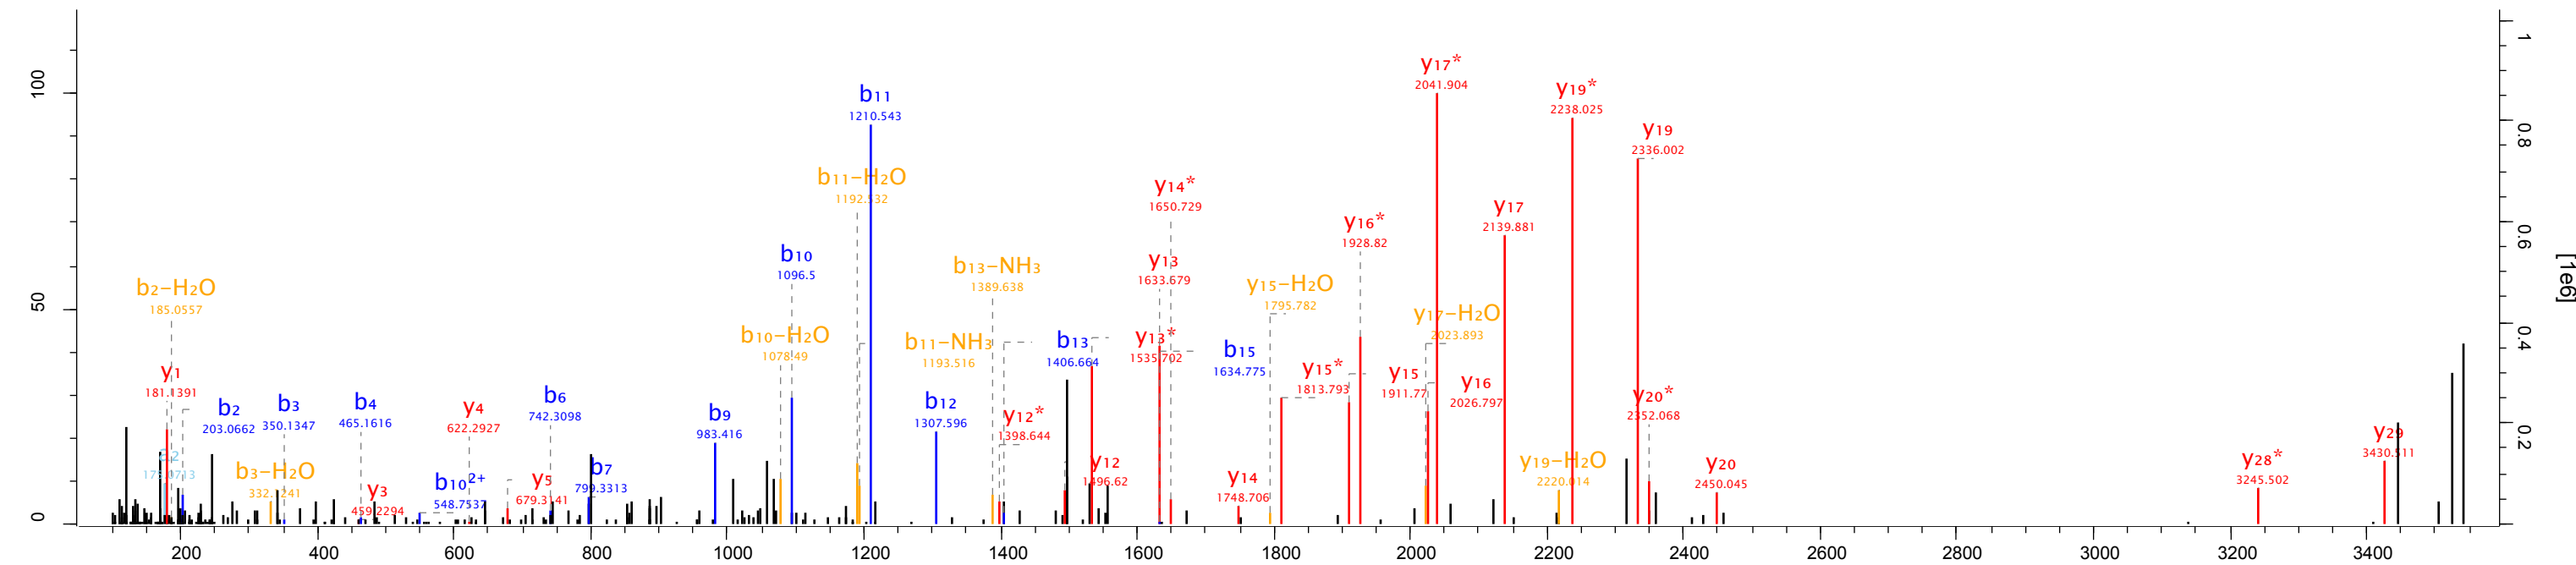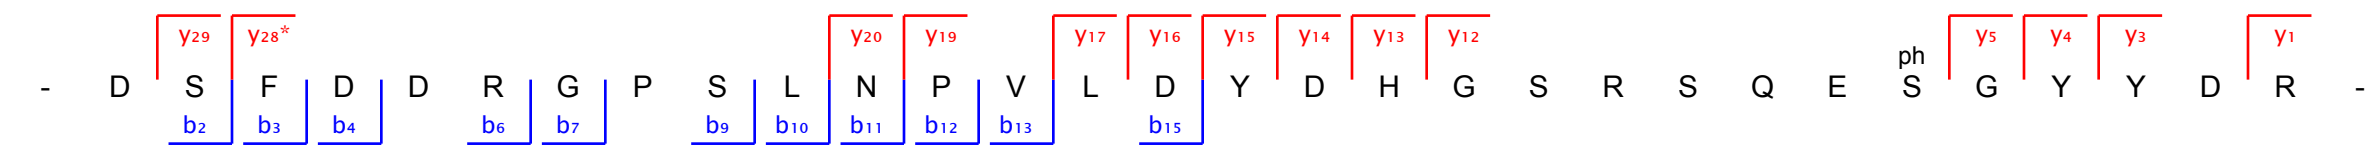

20150812\_A375SR\_Phospho\_BR1\_05 1920 FTMS; HCD 139.11 599.27 SORBS3

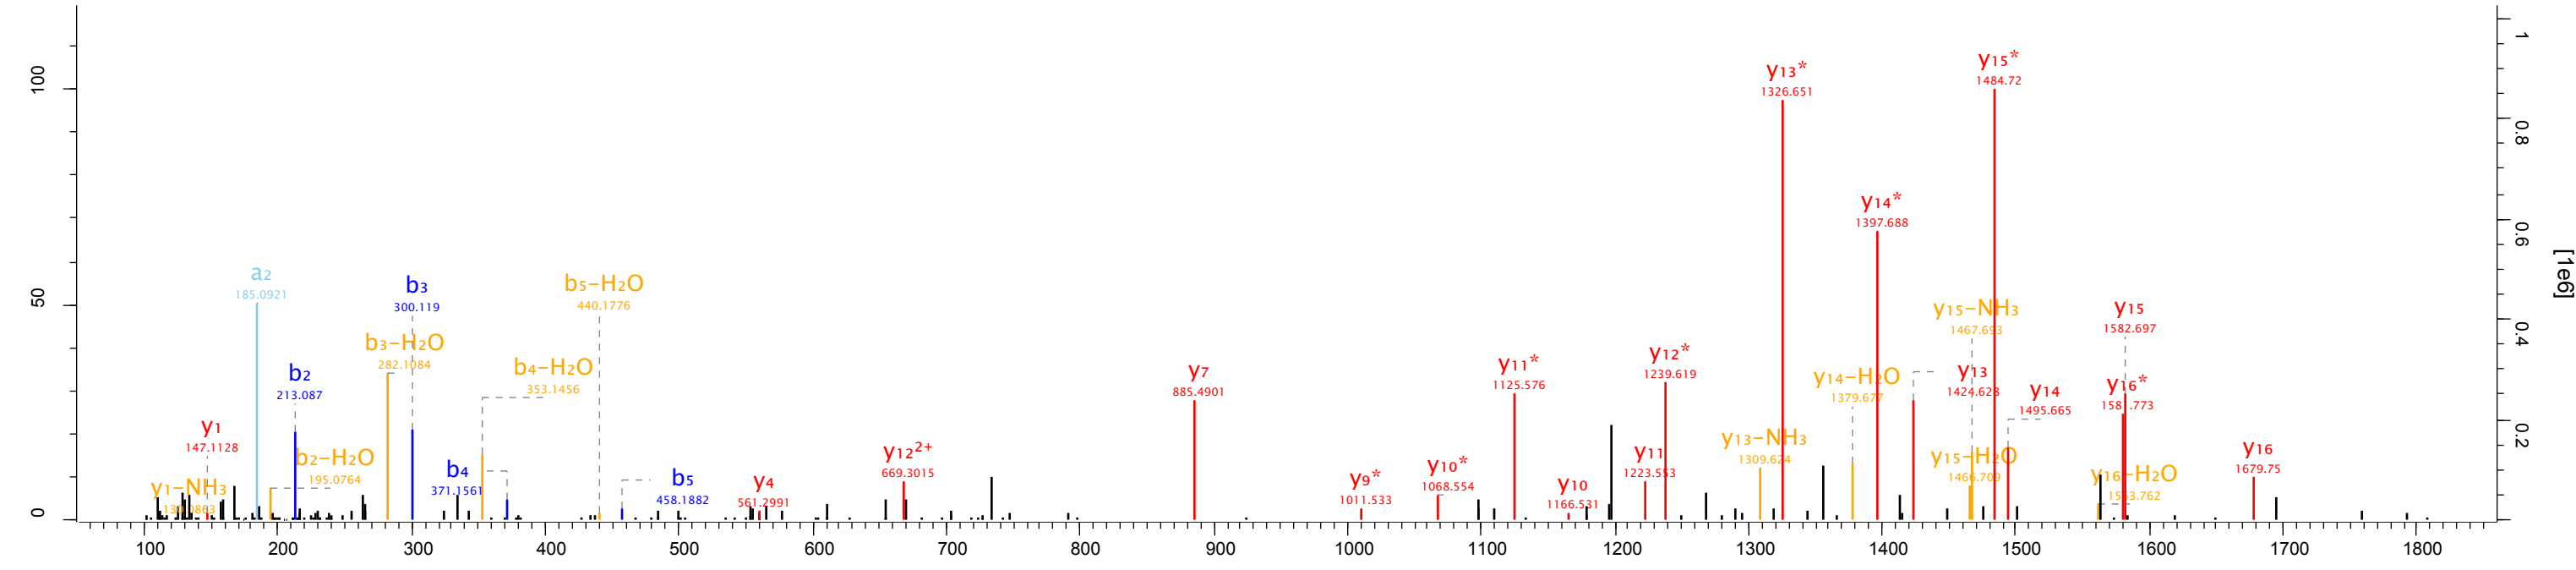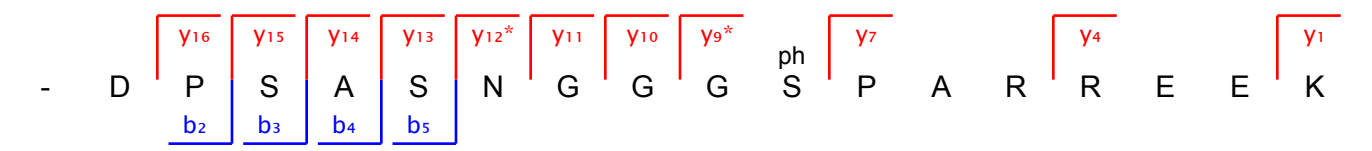

Raw file 20150812\_A375SR\_Phospho\_BR1\_05 Scan 20020 Method FTMS; HCD Score 135.54 m/z 926.98 Gene names ZFYVE16

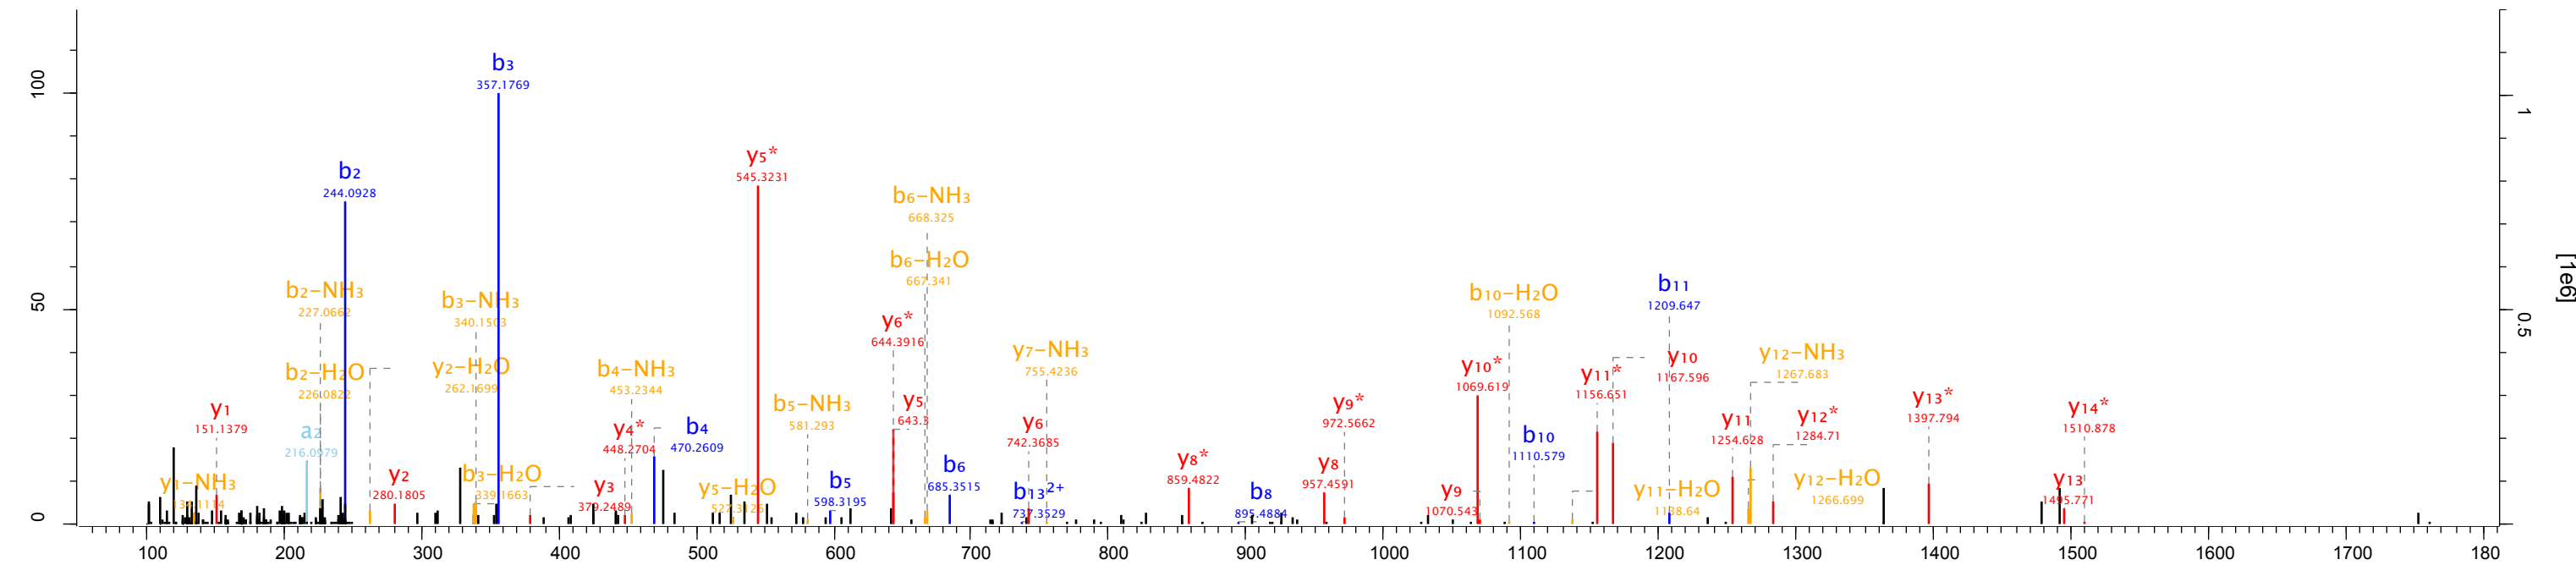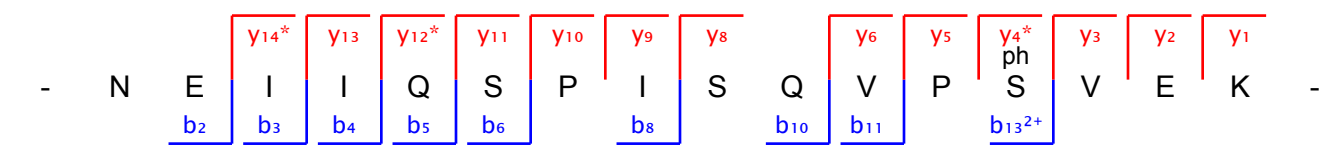

Raw file Scan Method Score m/z Gene names  
 20150812\_A375SR\_Phospho\_BR1\_05 21260 FTMS; HCD 208.42 1259.23 RBM14

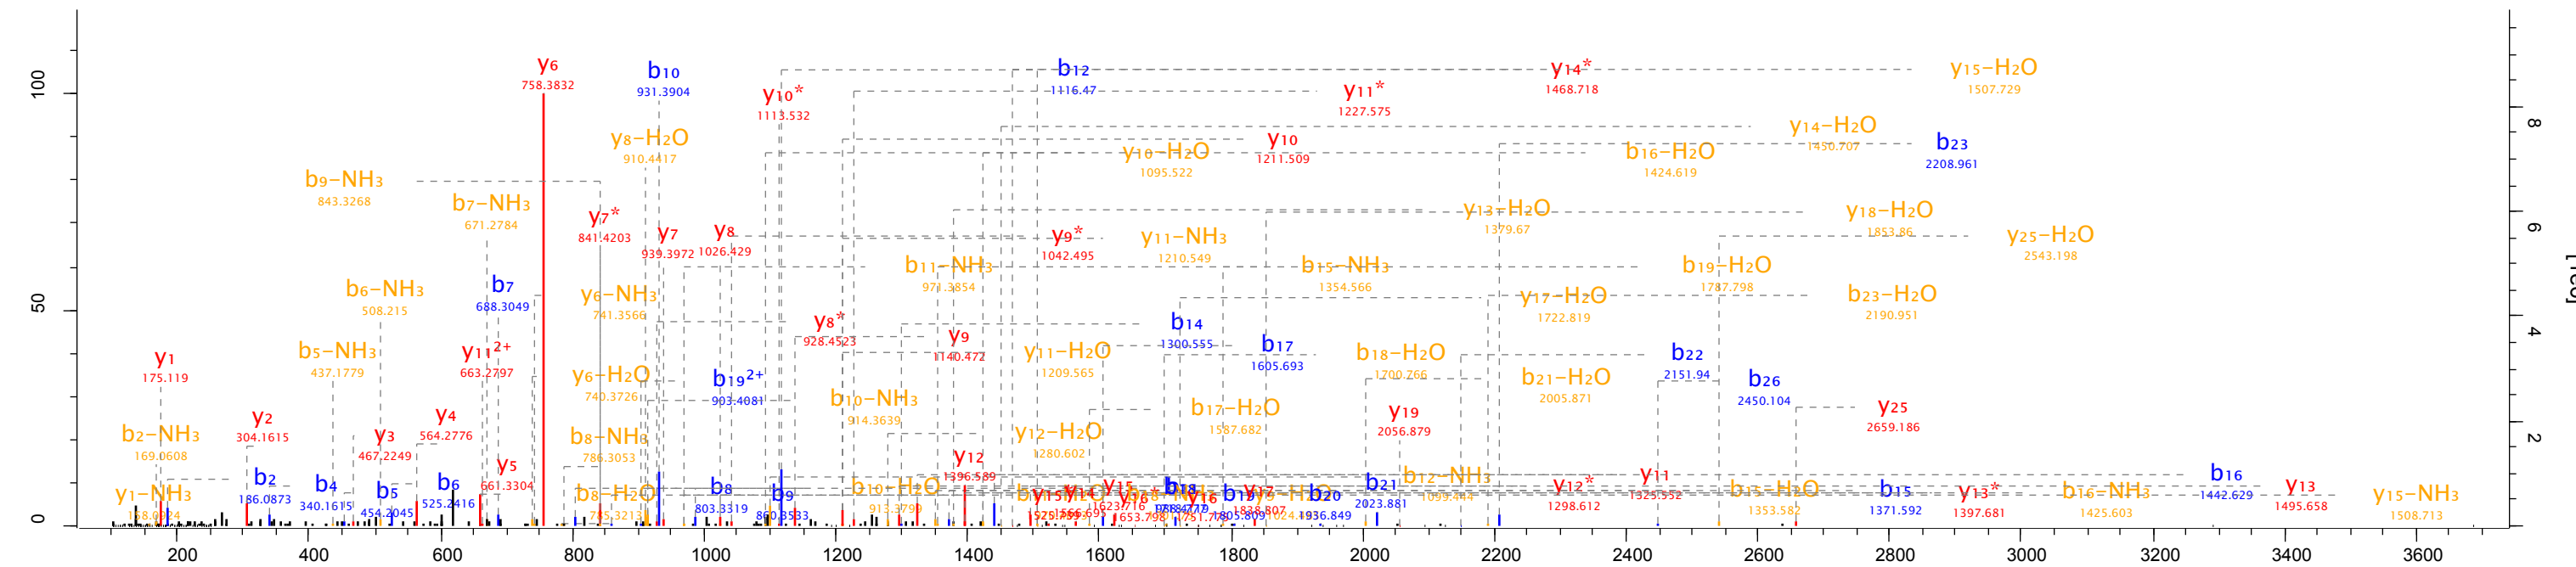

- G Q P G N A Y D G A G Q P S A A Y L S M S Q G A V A N A N S T P P P Y E R -

Fragmentation sites are indicated by boxes below the sequence:

- Blue boxes (b ions): b2 (Q), b4 (G), b5 (N), b6 (A), b7 (Y), b8 (D), b9 (G), b10 (A), b11 (G), b12 (Q), b14 (S), b15 (A), b16 (A), b17 (Y), b18 (L), b19 (S), b20 (M), b21 (S), b22 (Q), b23 (G), b26 (A).
- Red boxes (y ions): y1 (R), y2 (E), y3 (P), y4 (P), y5 (P), y6 (T), y7 (S), y8 (N), y9 (A), y10 (A), y11 (N), y12 (A), y13 (V), y14 (A), y15 (G), y16 (Q), y17 (S), y19 (S), y25 (P).



Raw file: 20150812\_A375SR\_Phospho\_BR1\_05  
 Scan: 22140 Method: FTMS; HCD Score: 85.2 m/z: 1283.27 Gene names: CHAF1B

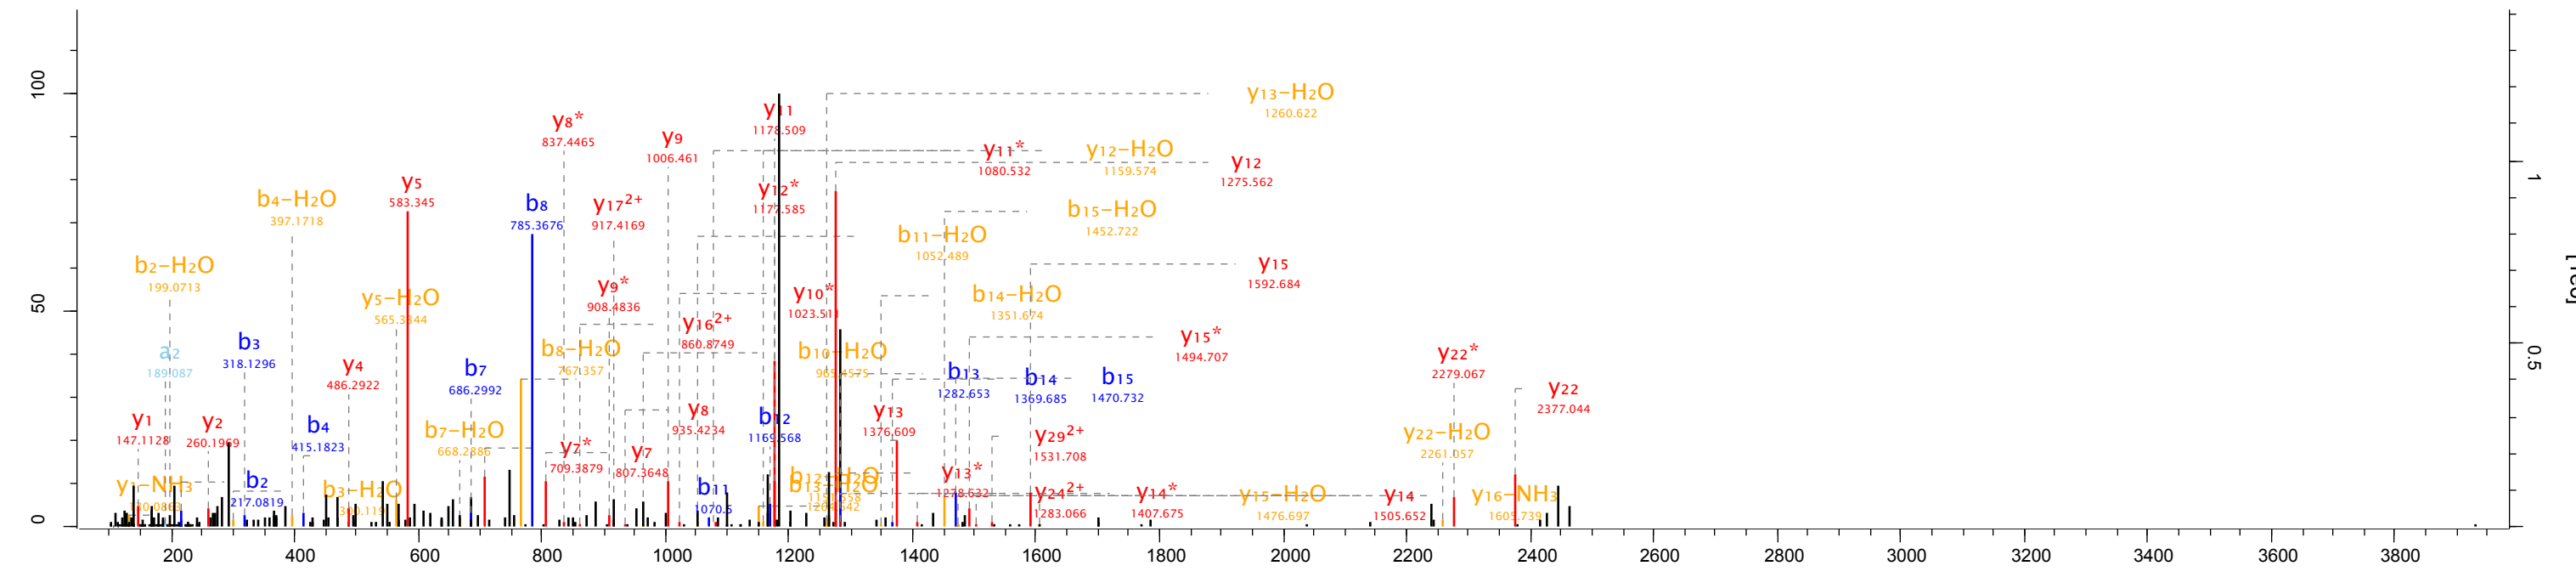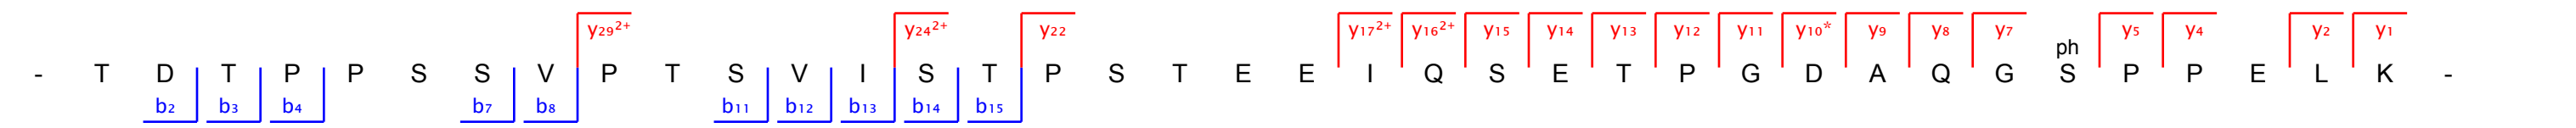

Raw file: 20150812\_A375SR\_Phospho\_BR1\_05  
 Scan: 22330 Method: FTMS; HCD Score: 143.72 m/z: 1101.93 Gene names: UCKL1

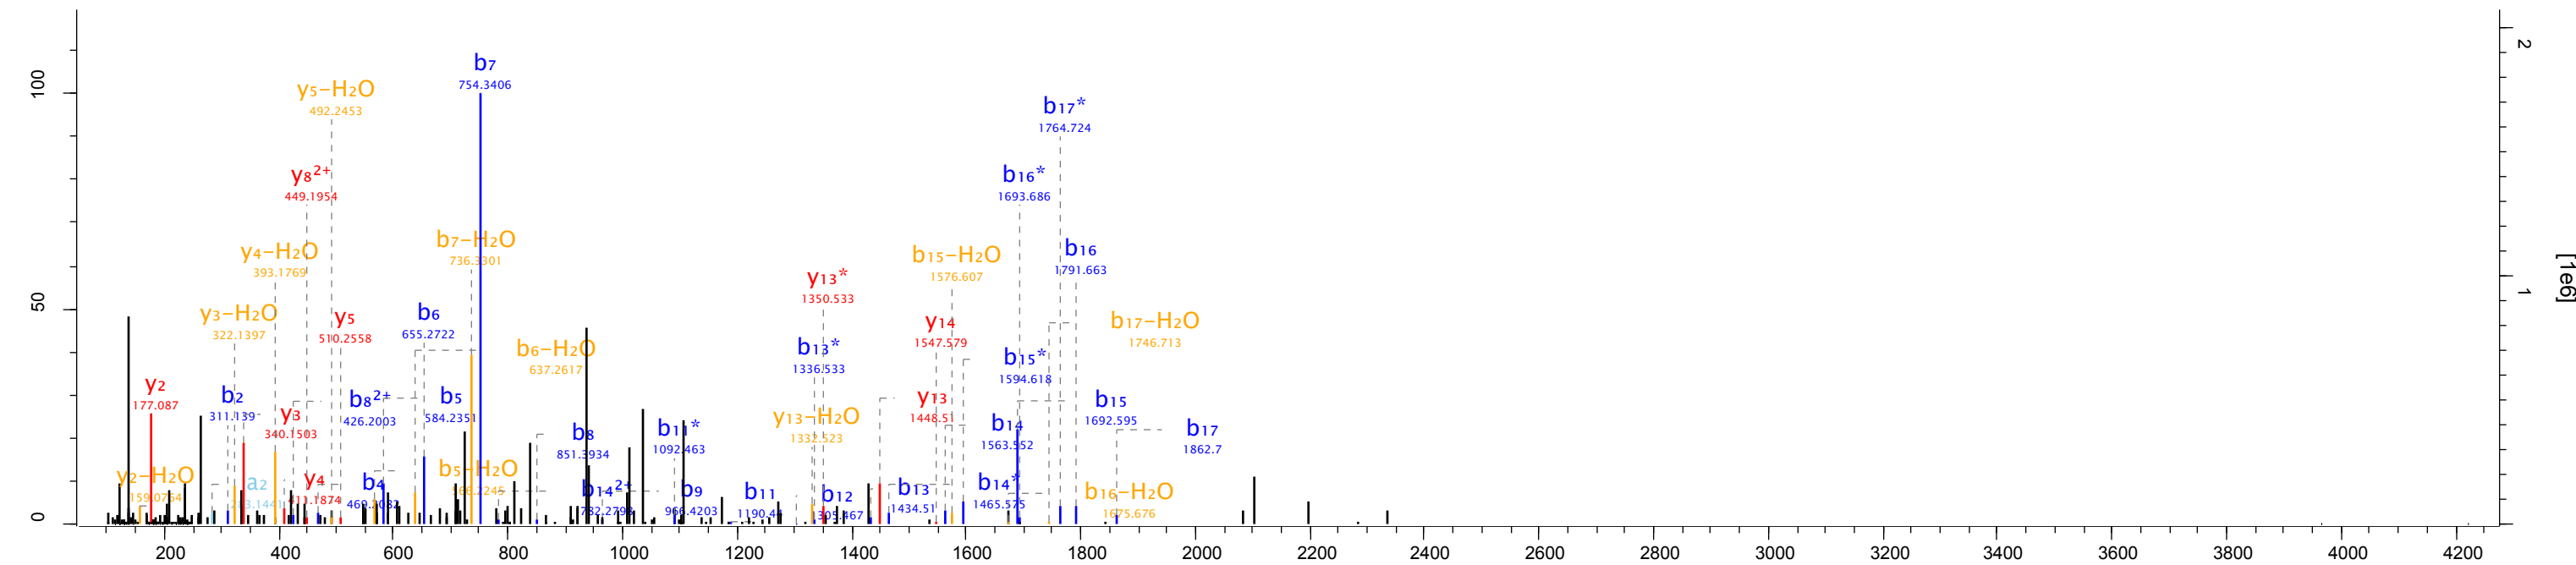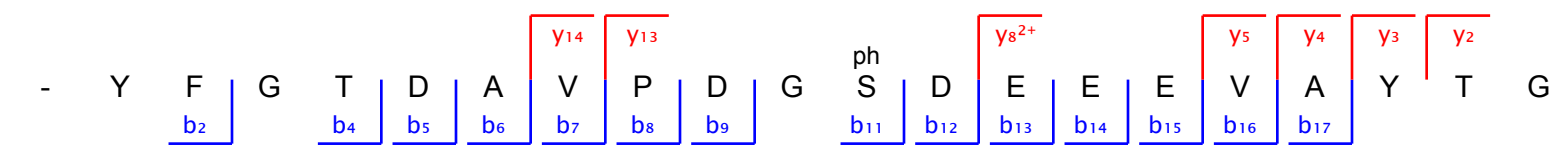



Raw file: 20150812\_A375SR\_Phospho\_BR1\_05  
 Scan: 2300 Method: FTMS; HCD Score: 158.86 m/z: 579.26 Gene names: SRSF9

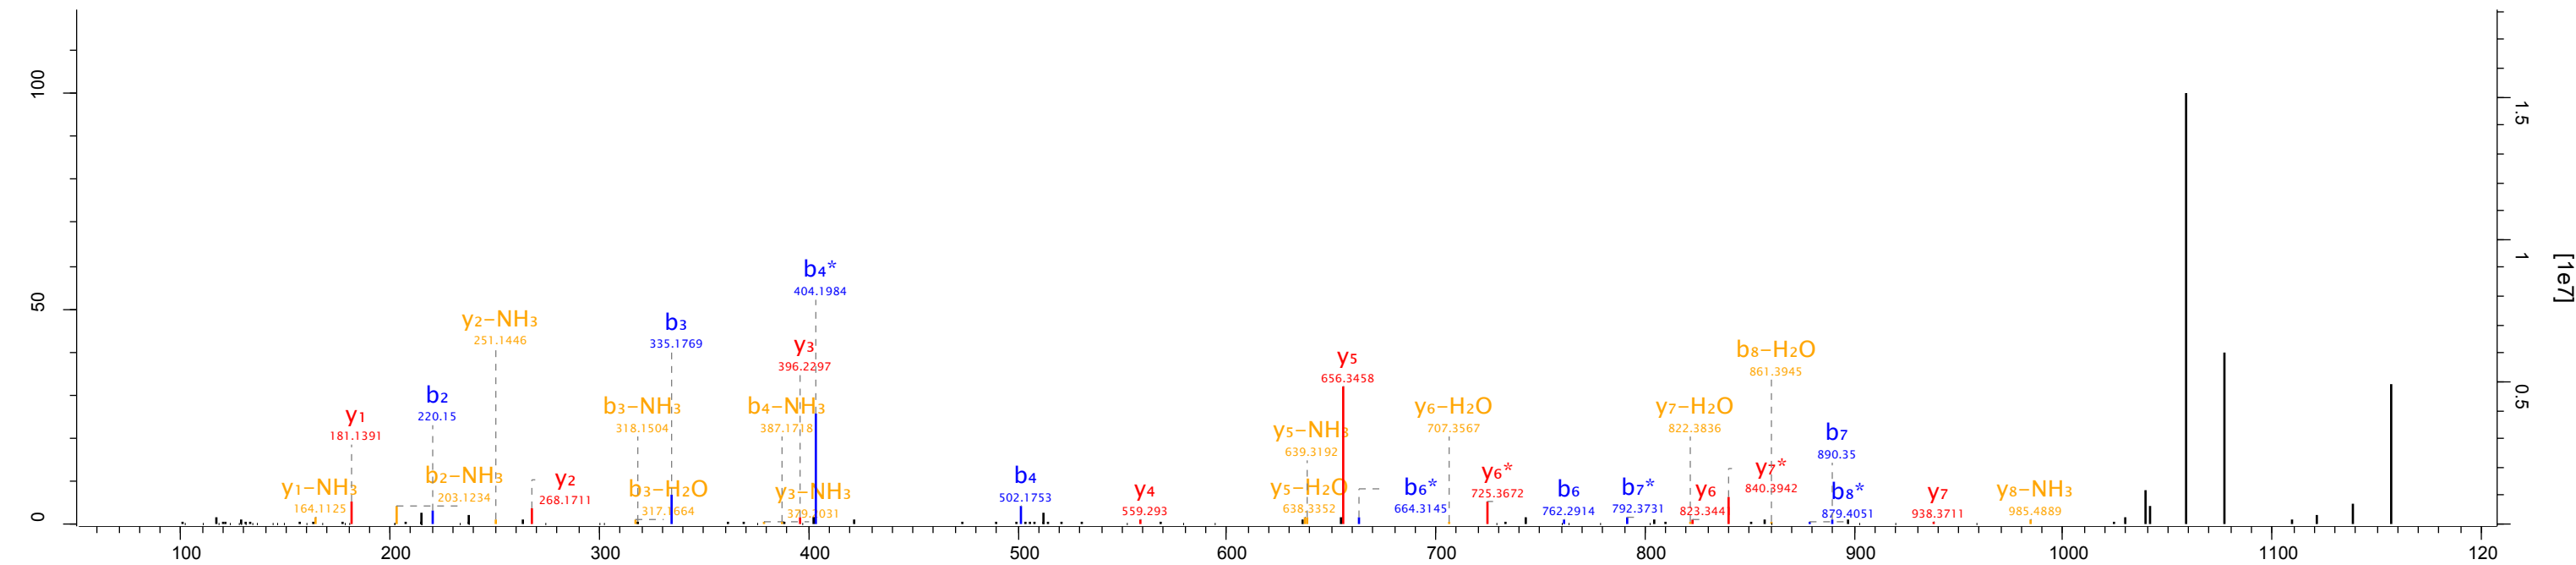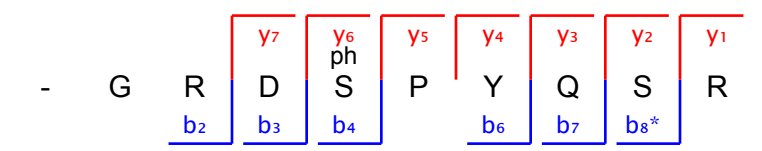

Raw file: 20150812\_A375SR\_Phospho\_BR1\_05  
 Scan: 23140 Method: FTMS; HCD Score: 68.66 m/z: 1233.09 Gene names: EIF6

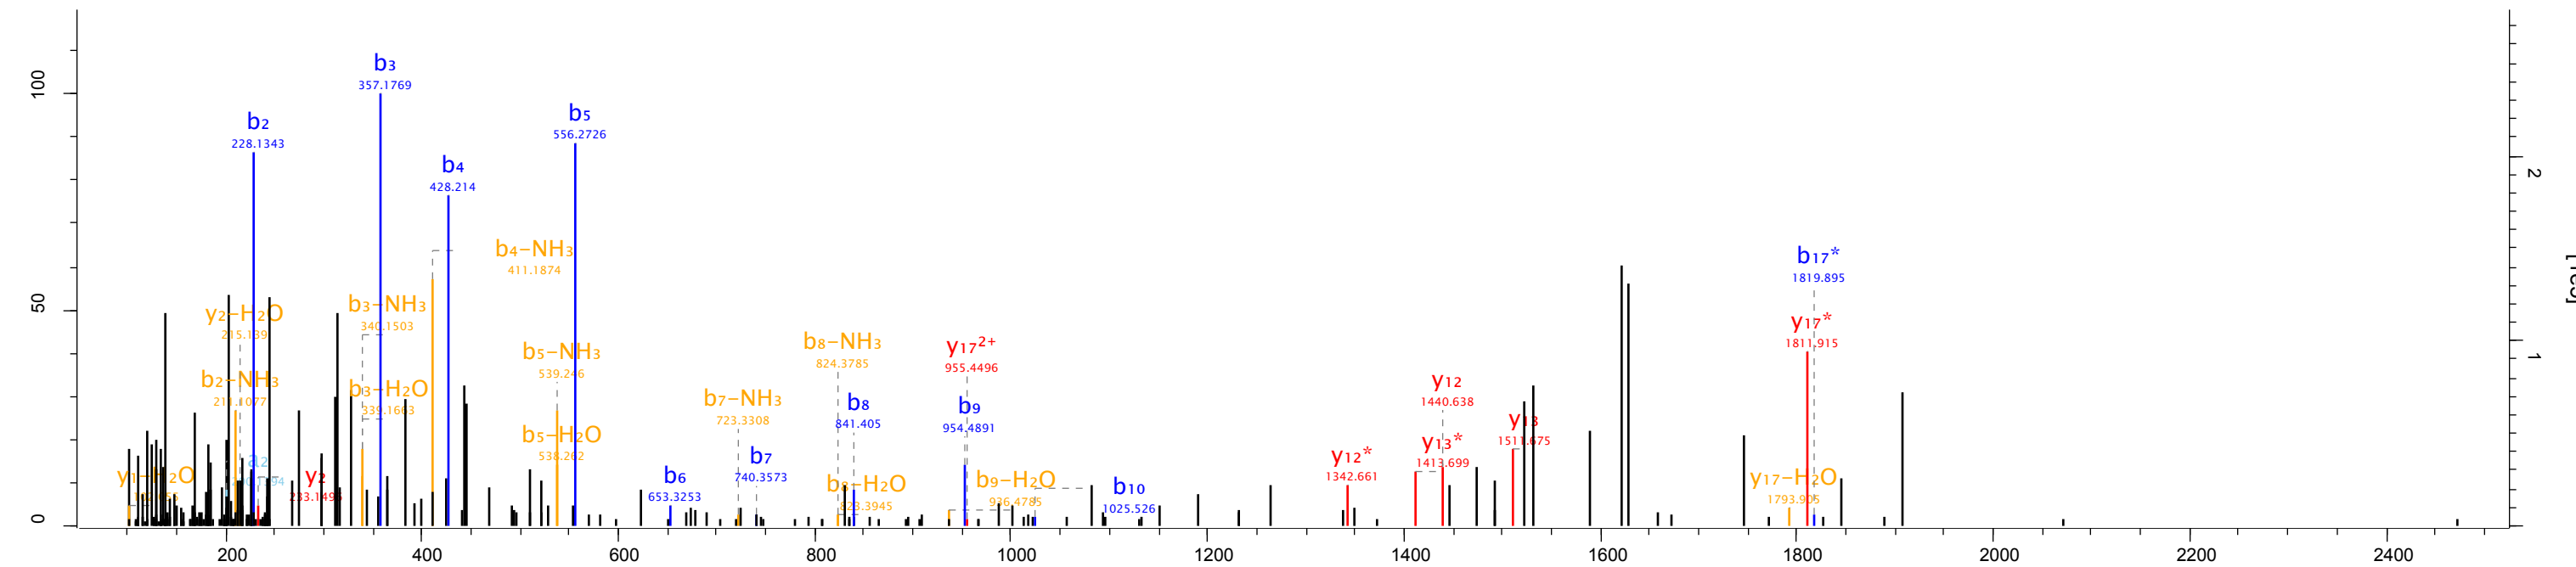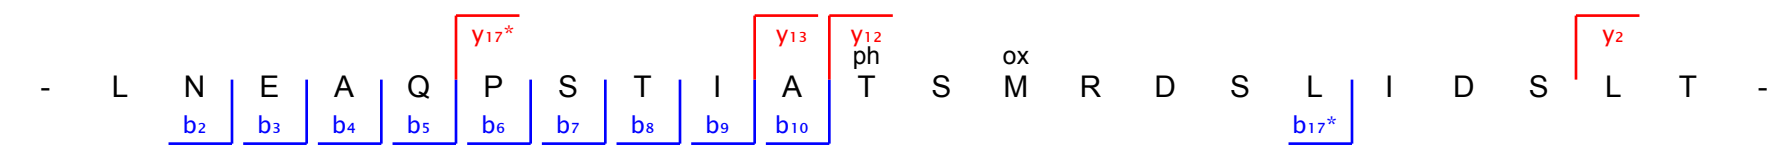

Raw file 20150812\_A375SR\_Phospho\_BR1\_05 Scan 26470 Method FTMS; HCD Score 52.72 m/z 666.37 Gene names CEP170

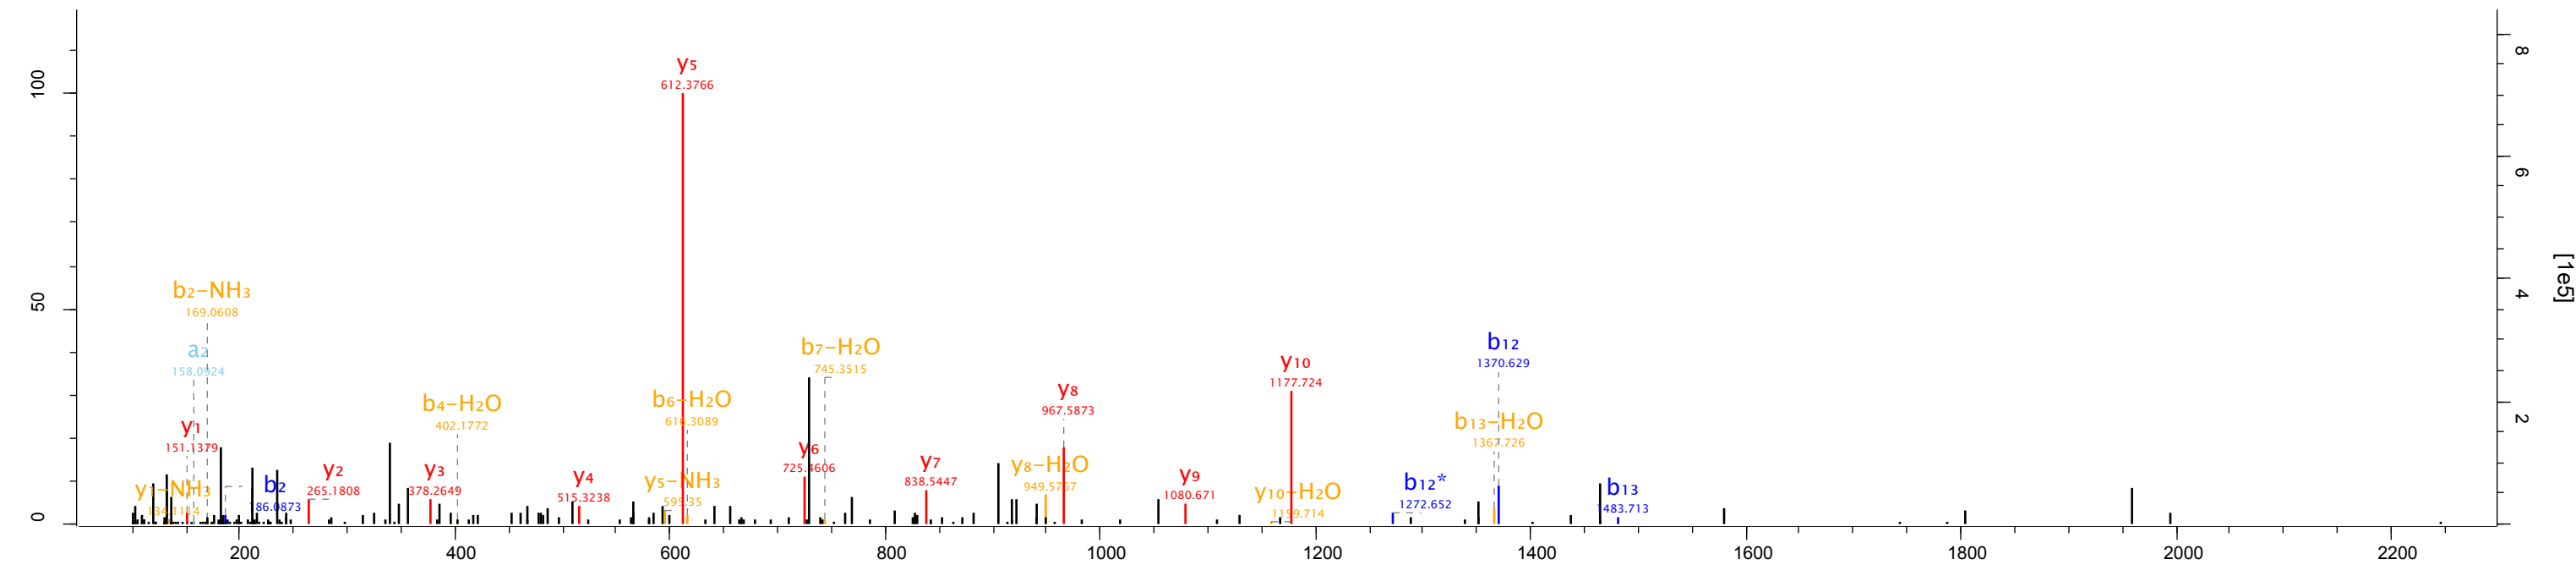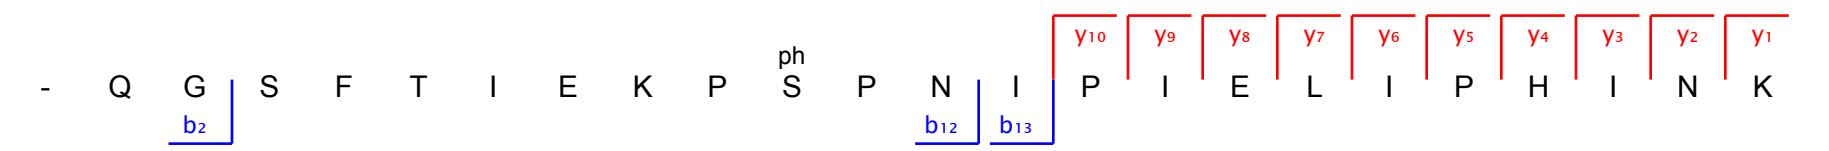

Raw file: 20150812\_A375SR\_Phospho\_BR1\_05  
 Scan: 2790 Method: FTMS; HCD Score: 107.65 m/z: 524.58

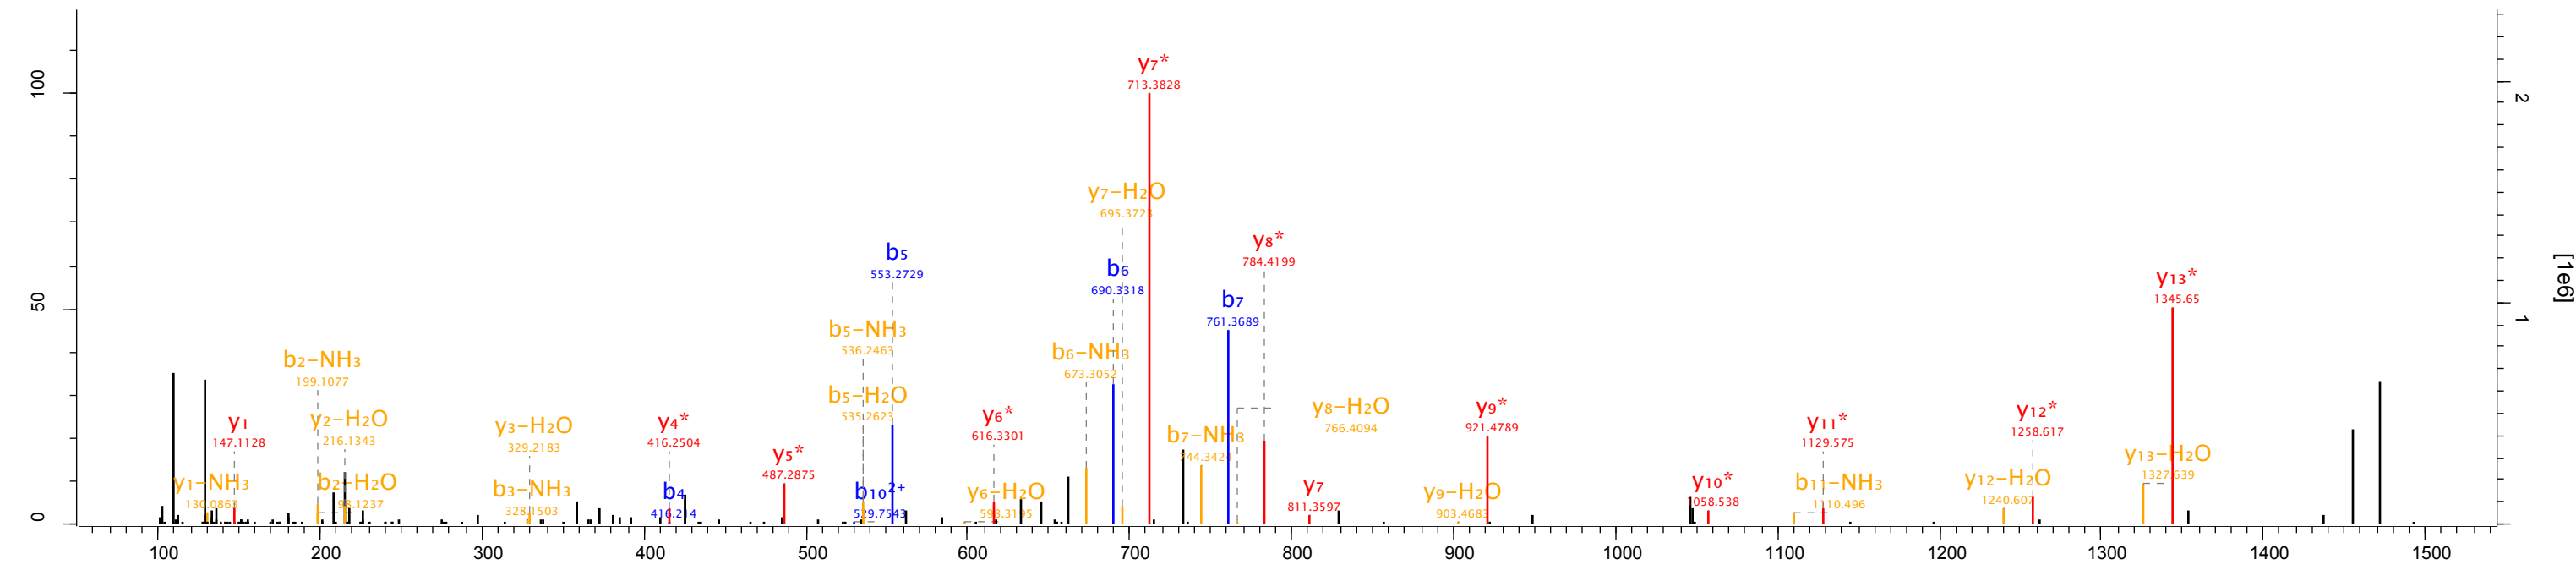

- K S E A H H A P E A S L S K -

Fragmentation sites (b-ions): b4, b5, b6, b7, b10<sup>2+</sup>

Fragmentation sites (y-ions): y1, y4\*, y5\*, y6\*, y7, y8\*, y9\*, y10\*, y11\*, y12\*, y13\*

Raw file 20150812\_A375SR\_Phospho\_BR1\_05 Scan 27990 Method FTMS; HCD Score 87.79 m/z 826.09 Gene names RMI1

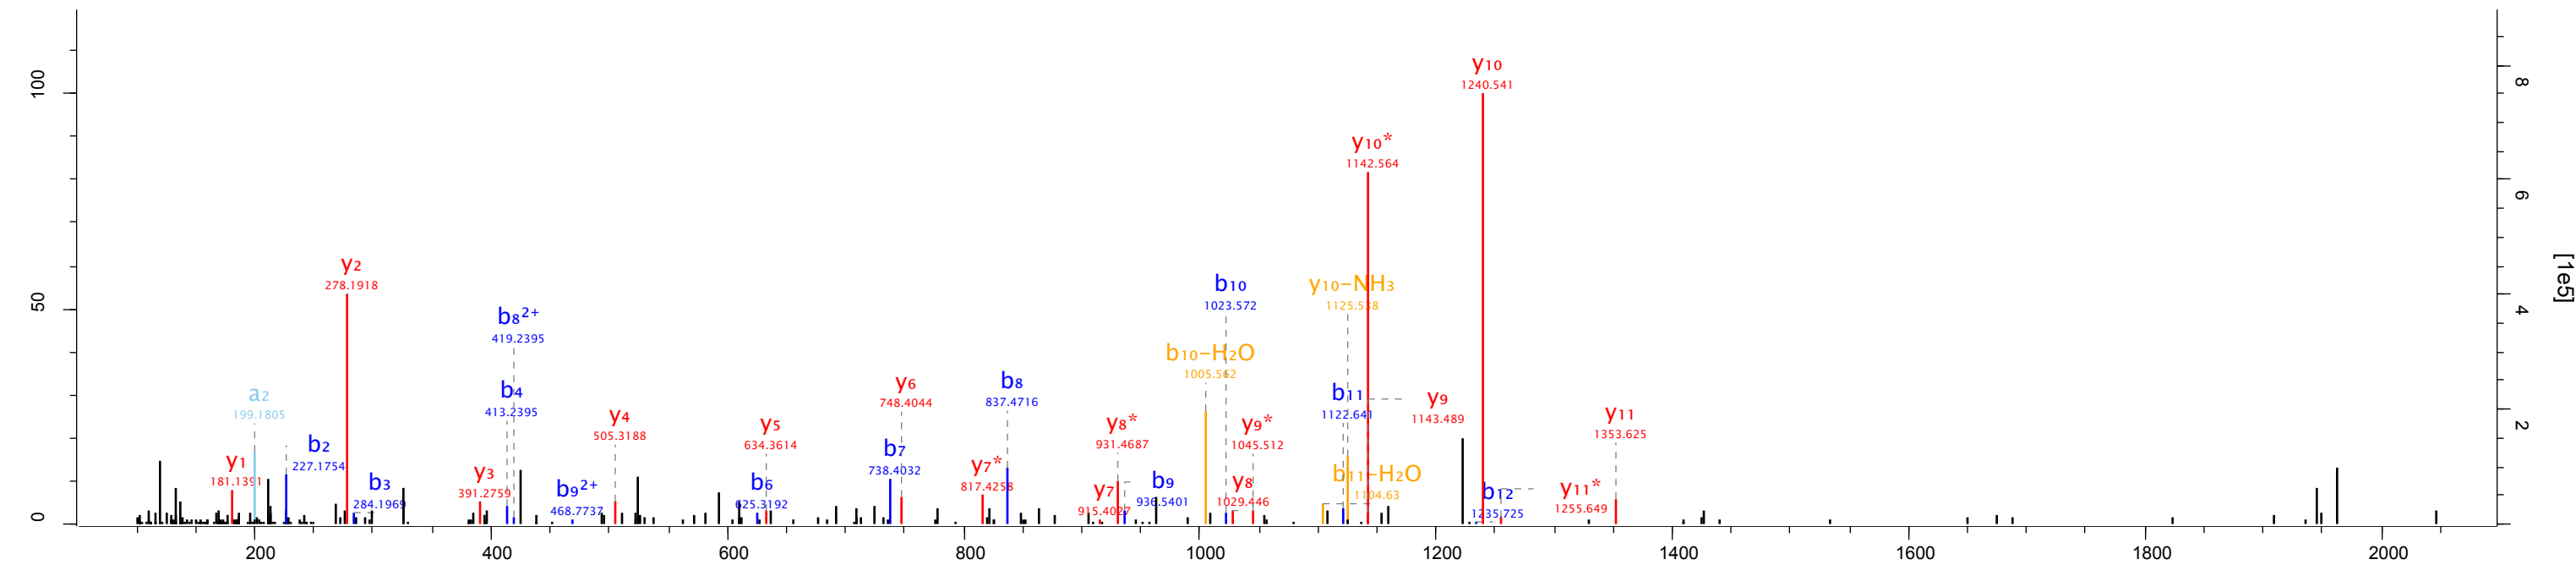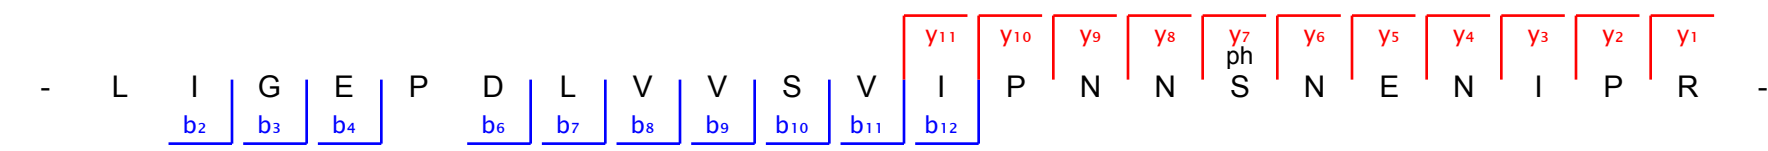

Raw file: 20150812\_A375SR\_Phospho\_BR1\_05  
 Scan: 2950 Method: FTMS; HCD Score: 226.85 m/z: 595.75 Gene names: CWC22

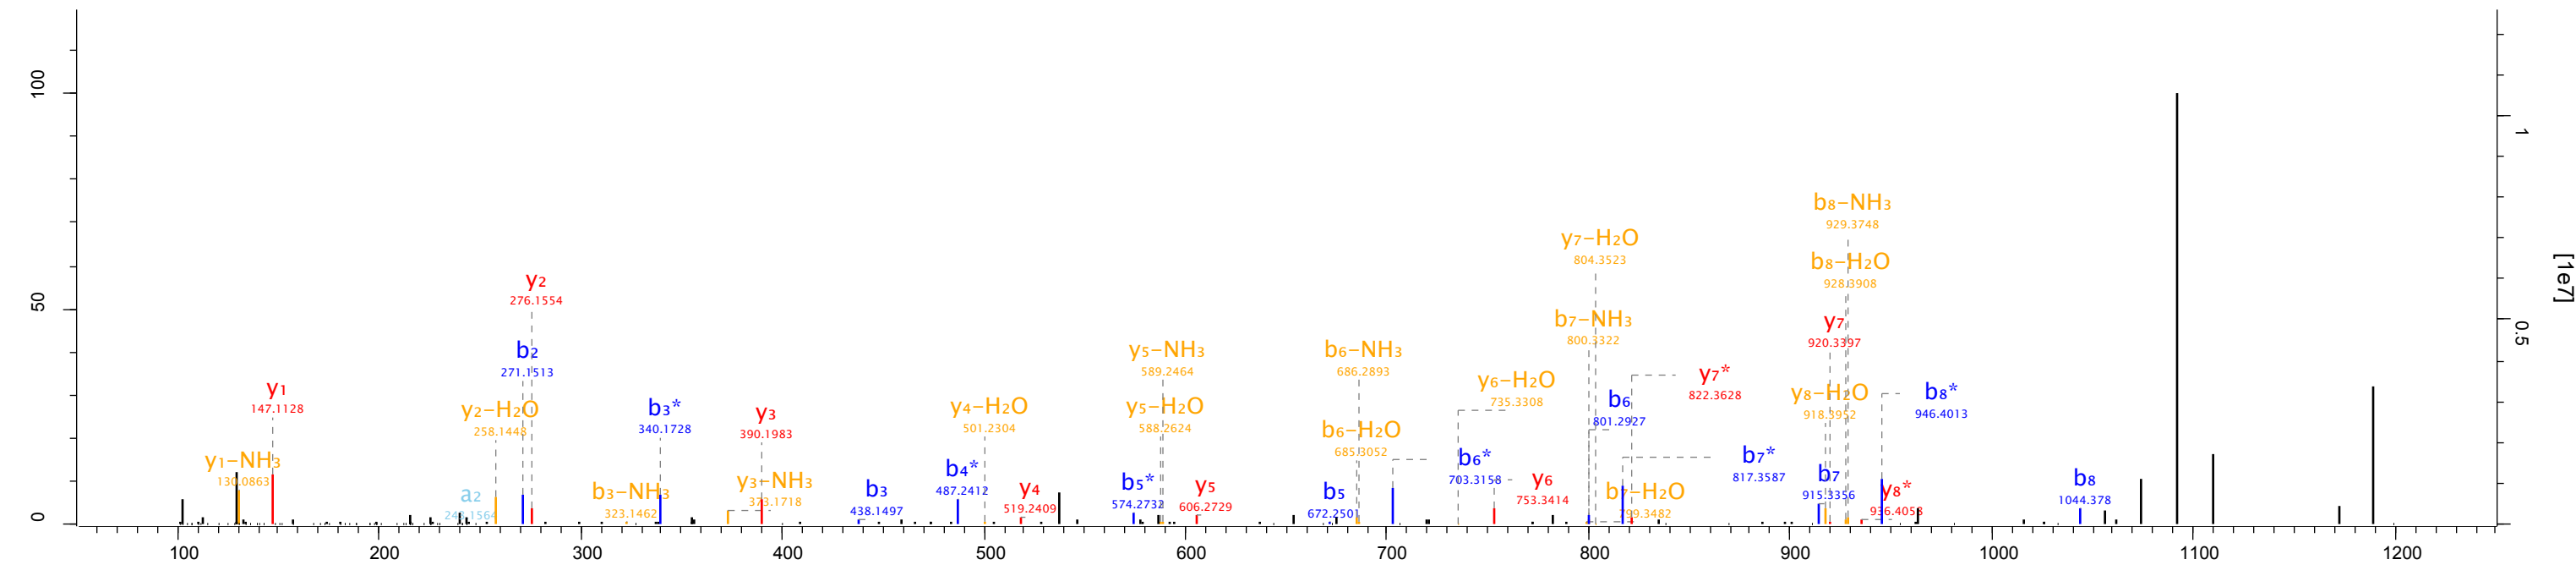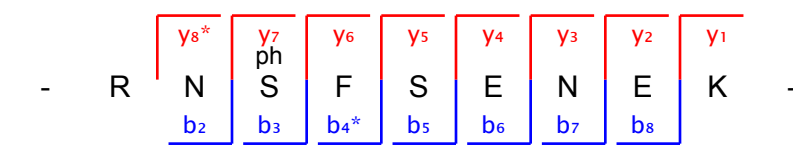

Raw file: 20150812\_A375SR\_Phospho\_BR1\_05  
 Scan: 3050 Method: FTMS; HCD Score: 157.57 m/z: 528.58 Gene names: LRWD1

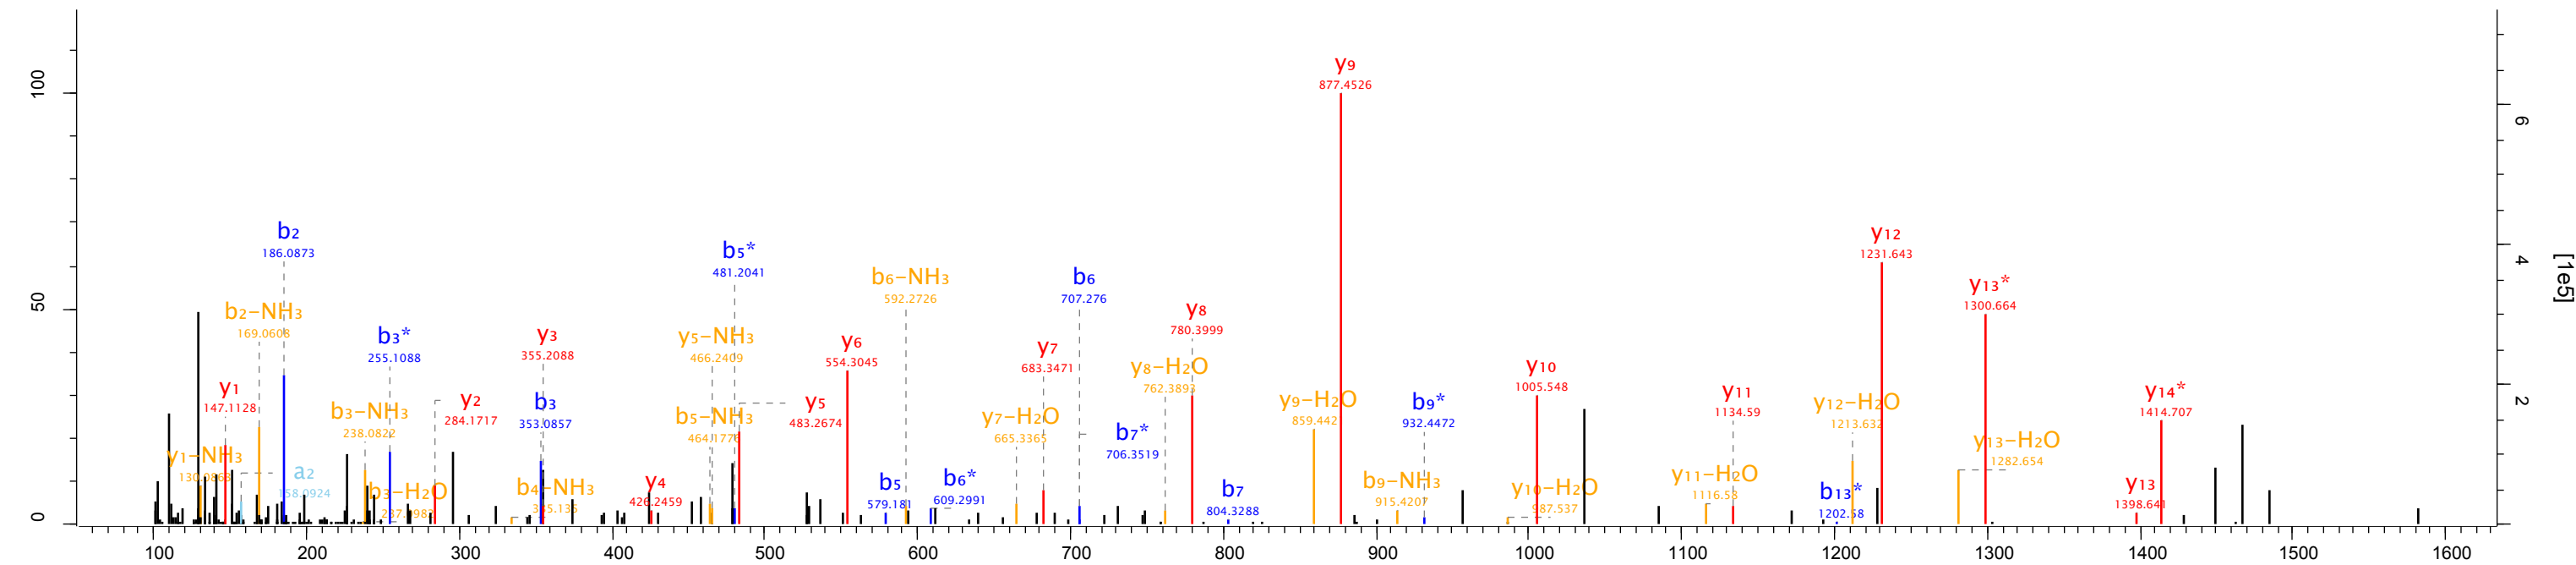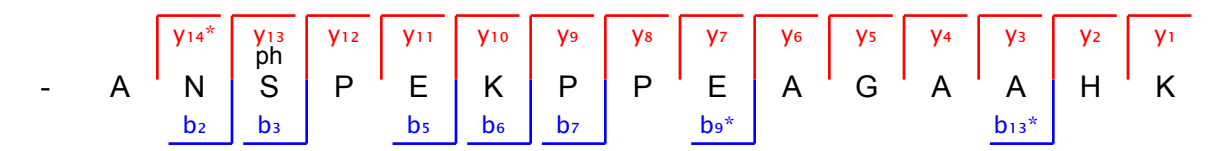

Raw file: 20150812\_A375SR\_Phospho\_BR1\_05  
 Scan: 3080 Method: FTMS; HCD Score: 72.03 m/z: 621.27 Gene names: RFTN1

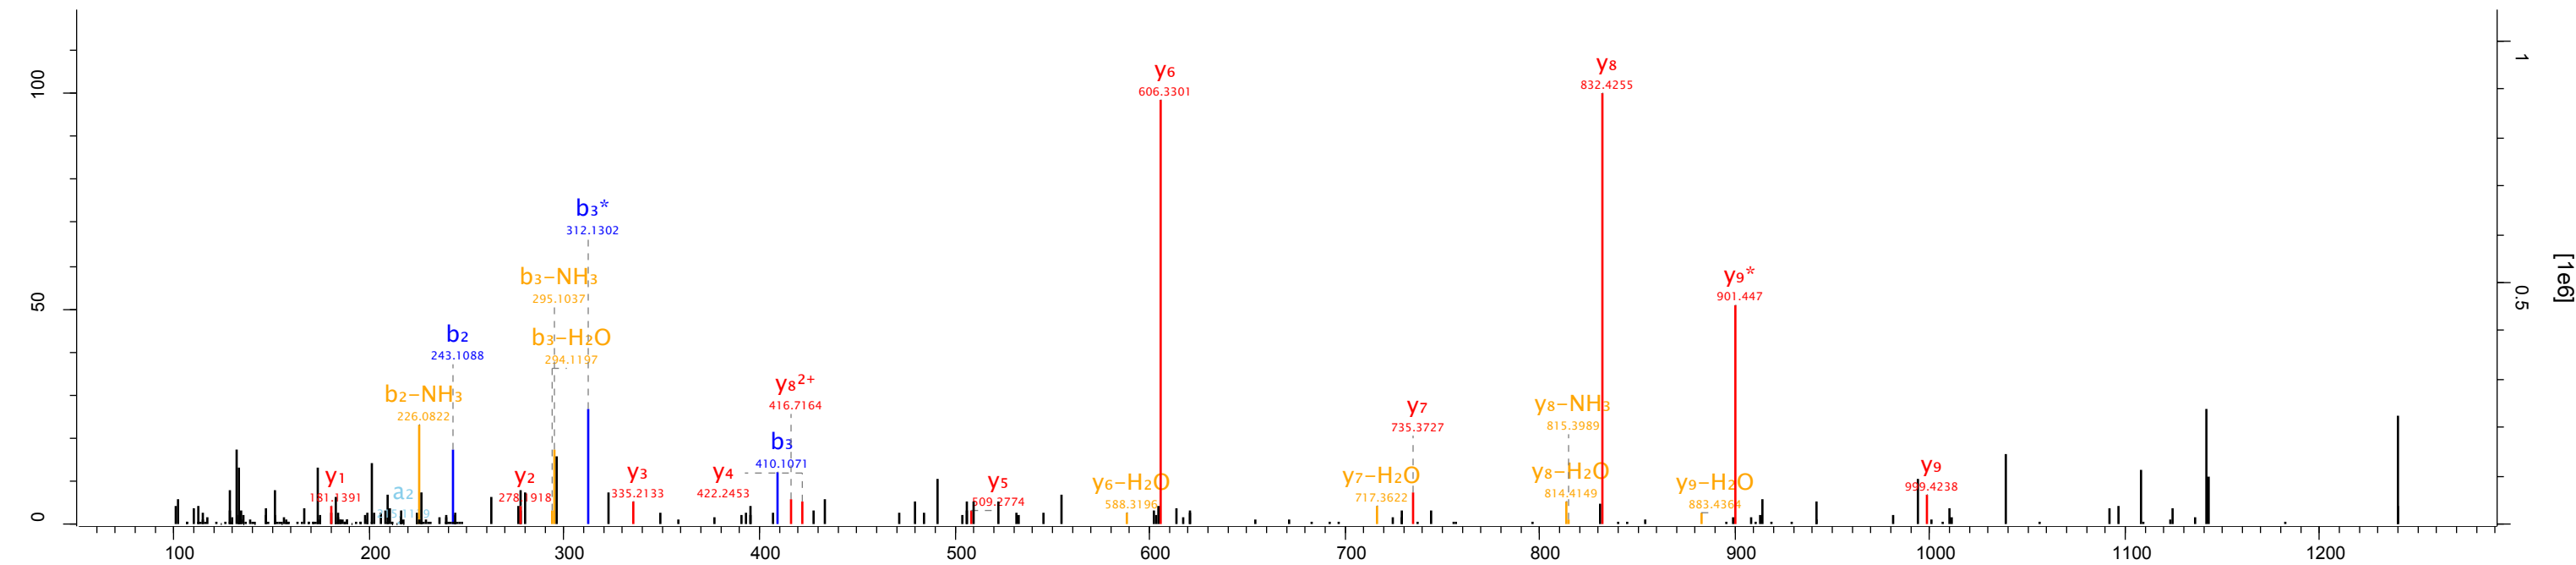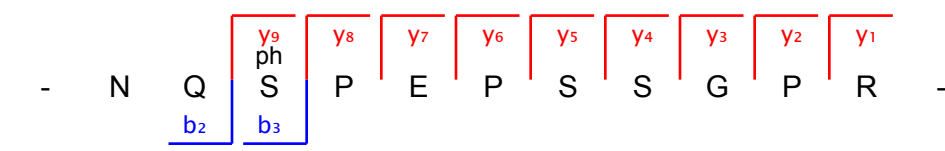



Raw file: 20150812\_A375SR\_Phospho\_BR1\_05  
 Scan: 3090 Method: FTMS; HCD Score: 139.51 m/z: 601.6 Gene names: NCOR2

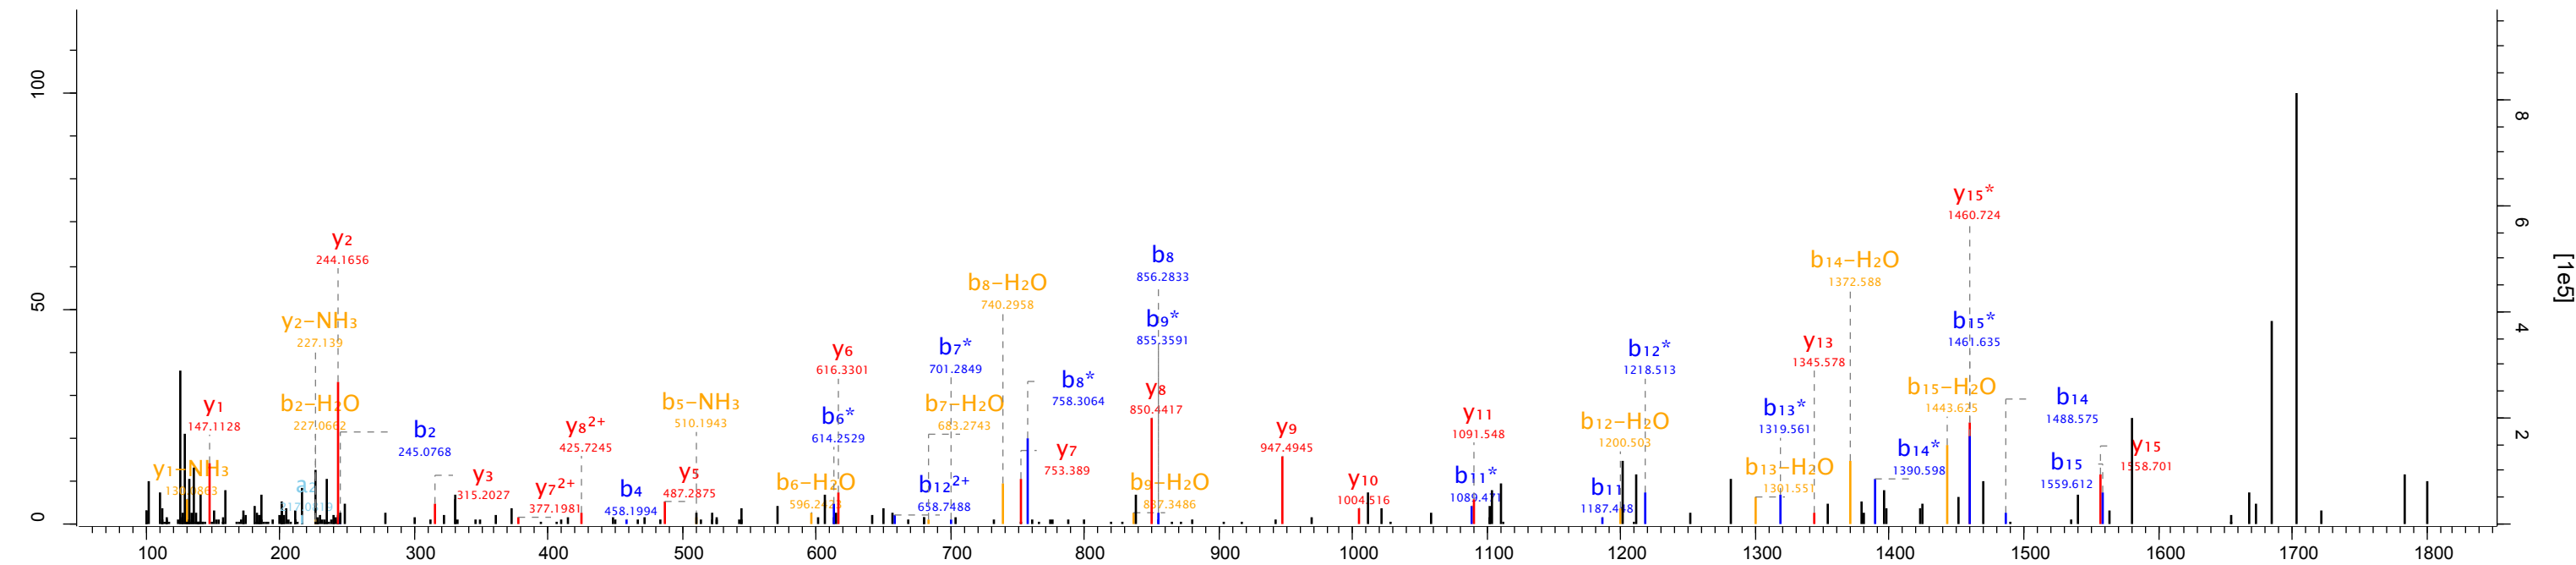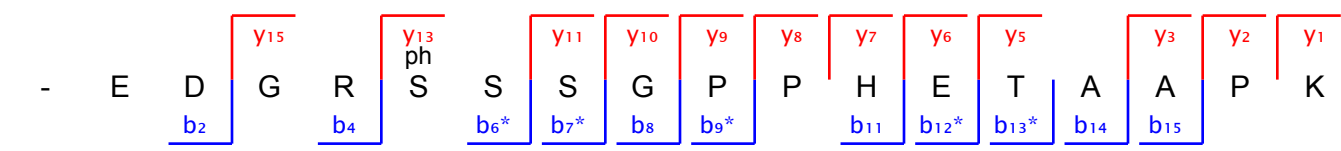

Raw file: 20150812\_A375SR\_Phospho\_BR1\_05  
 Scan: 3140 Method: FTMS; HCD Score: 116.58 m/z: 642.77 Gene names: HNRNPL

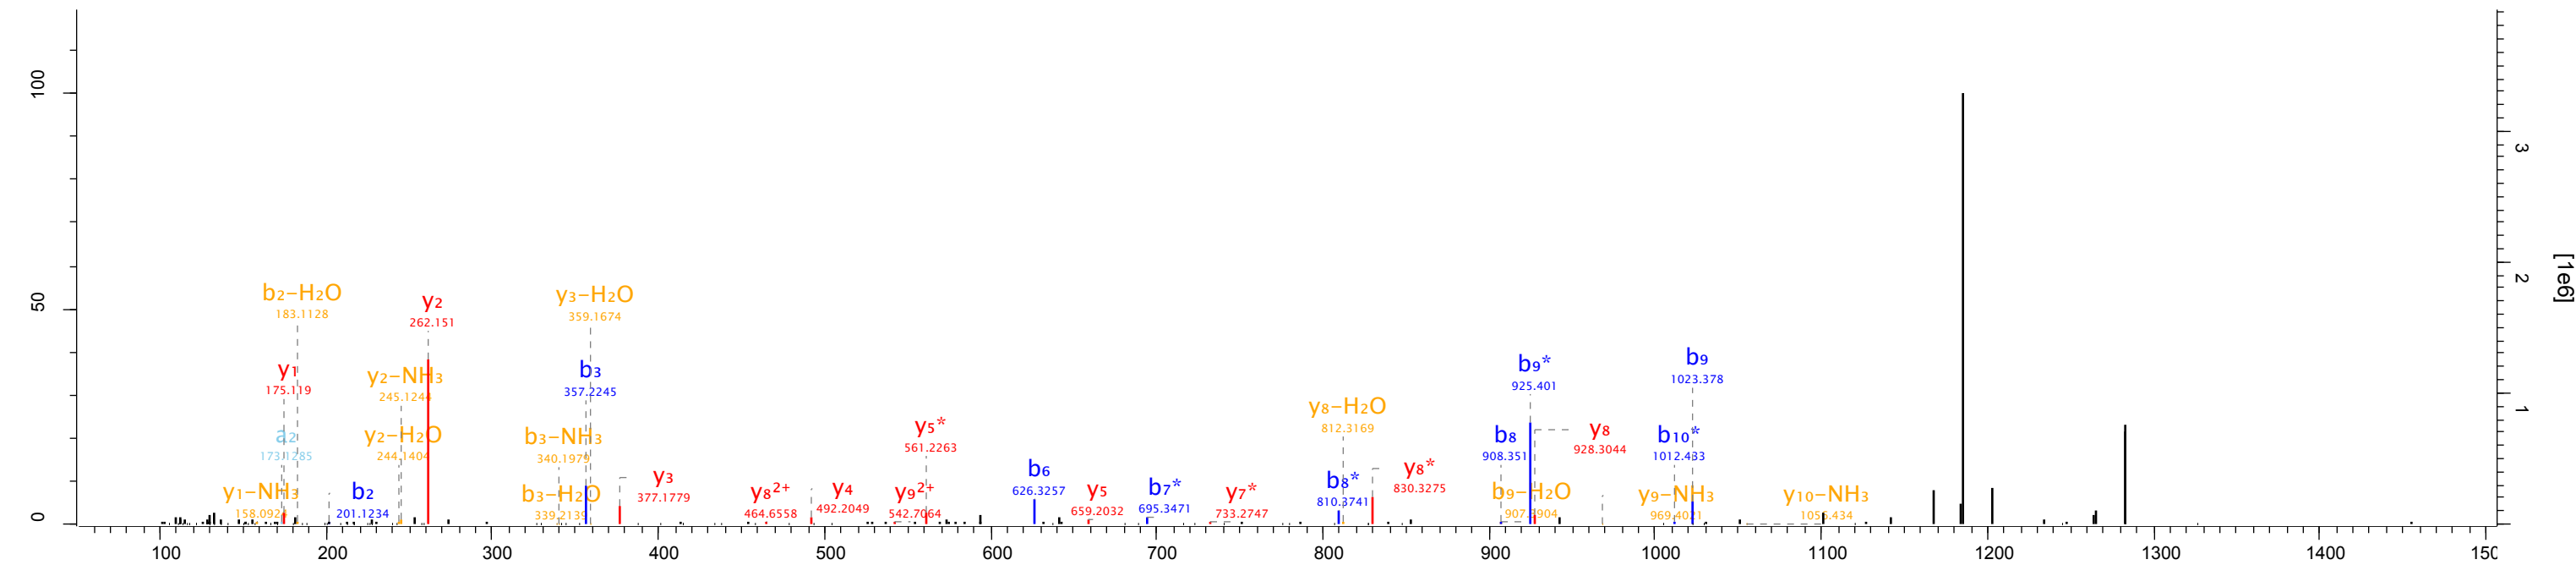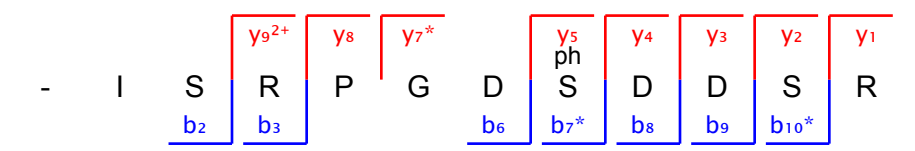

Raw file 20150812\_A375SR\_Phospho\_BR1\_05 Scan 3270 Method FTMS; HCD Score 89.31 m/z 760.35 Gene names BCLAF1

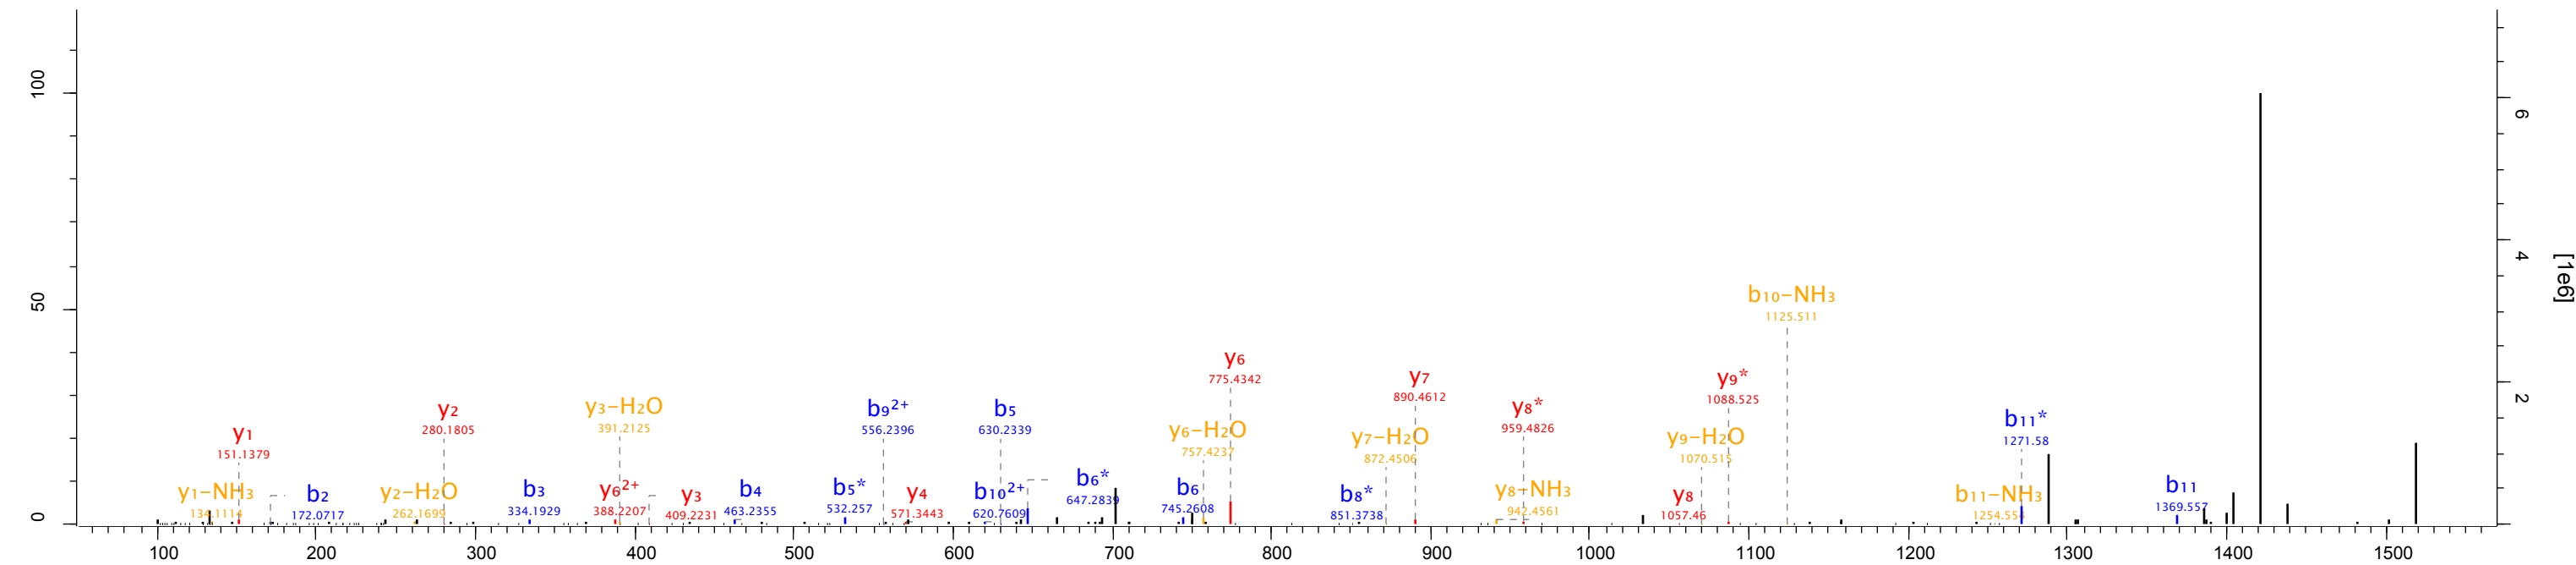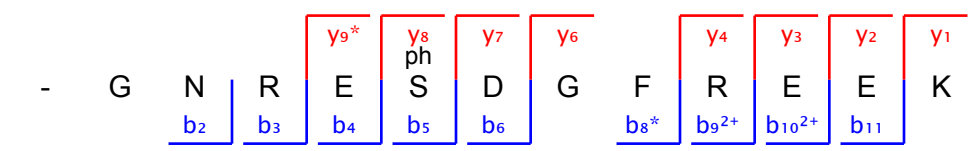

20150812\_A375SR\_Phospho\_BR1\_05 3580 FTMS; HCD 347.59 822.65 ZC3H18

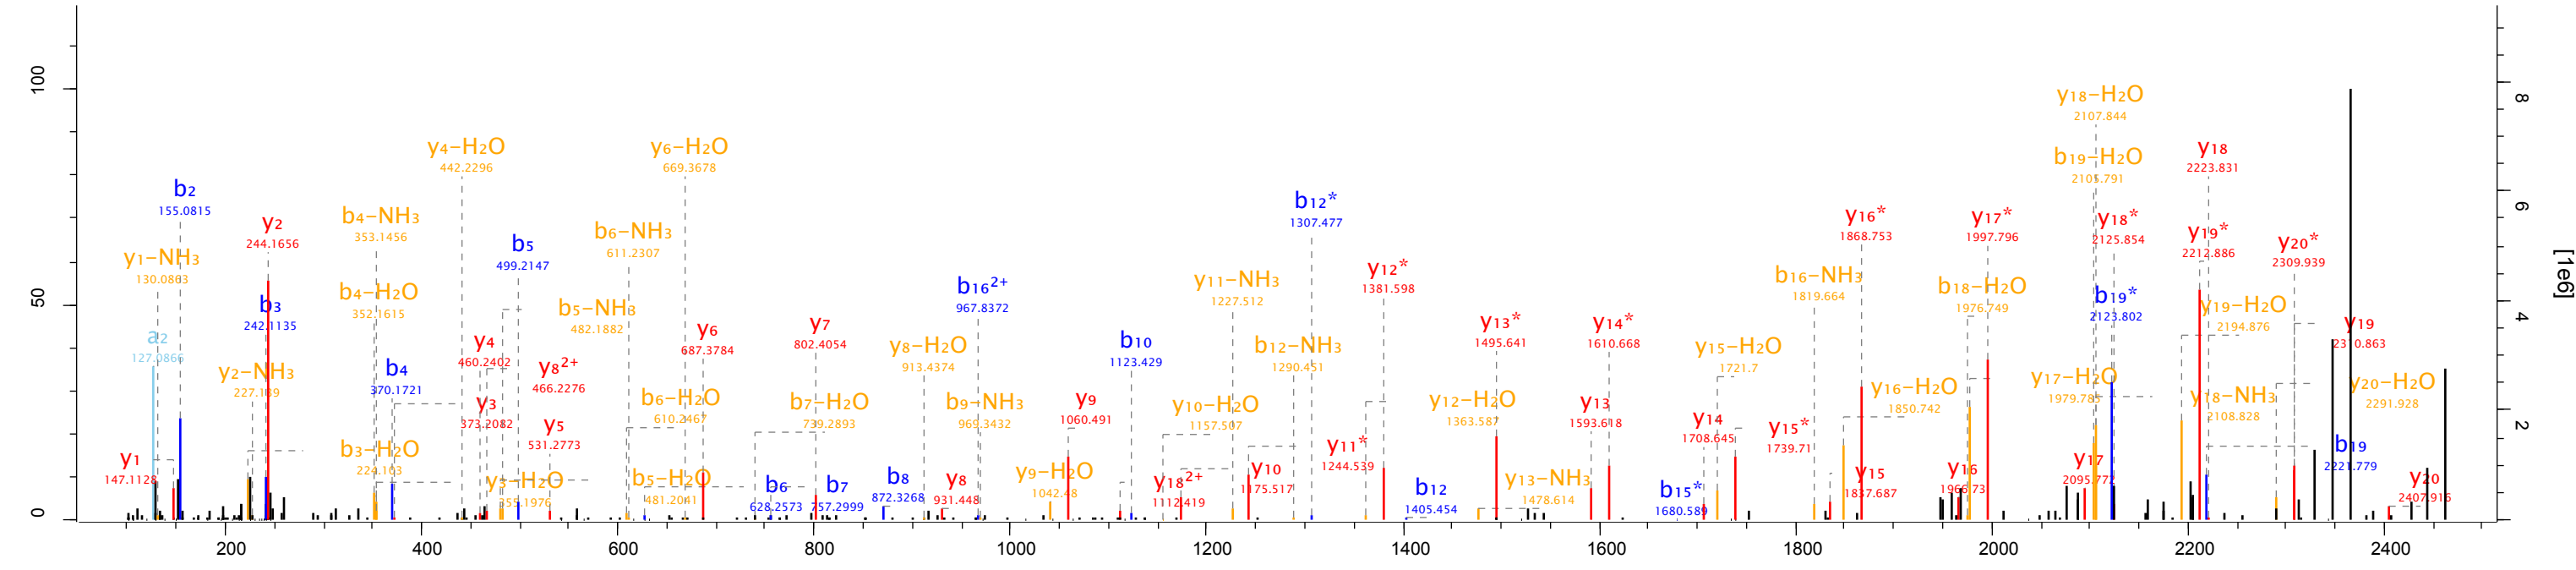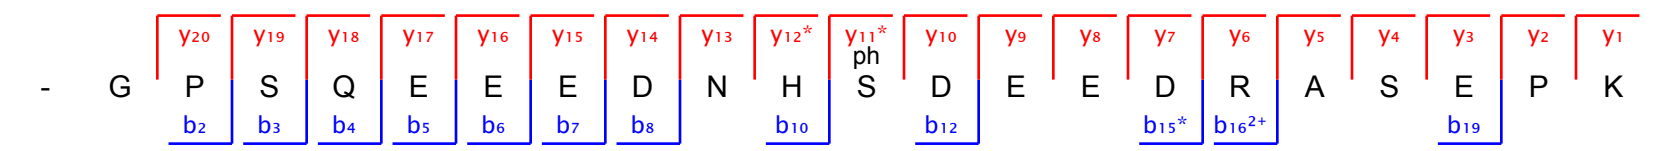

Raw file 20150812\_A375SR\_Phospho\_BR1\_05 Scan 3680 Method FTMS; HCD Score 177.85 m/z 741.32 Gene names CDC42BPB

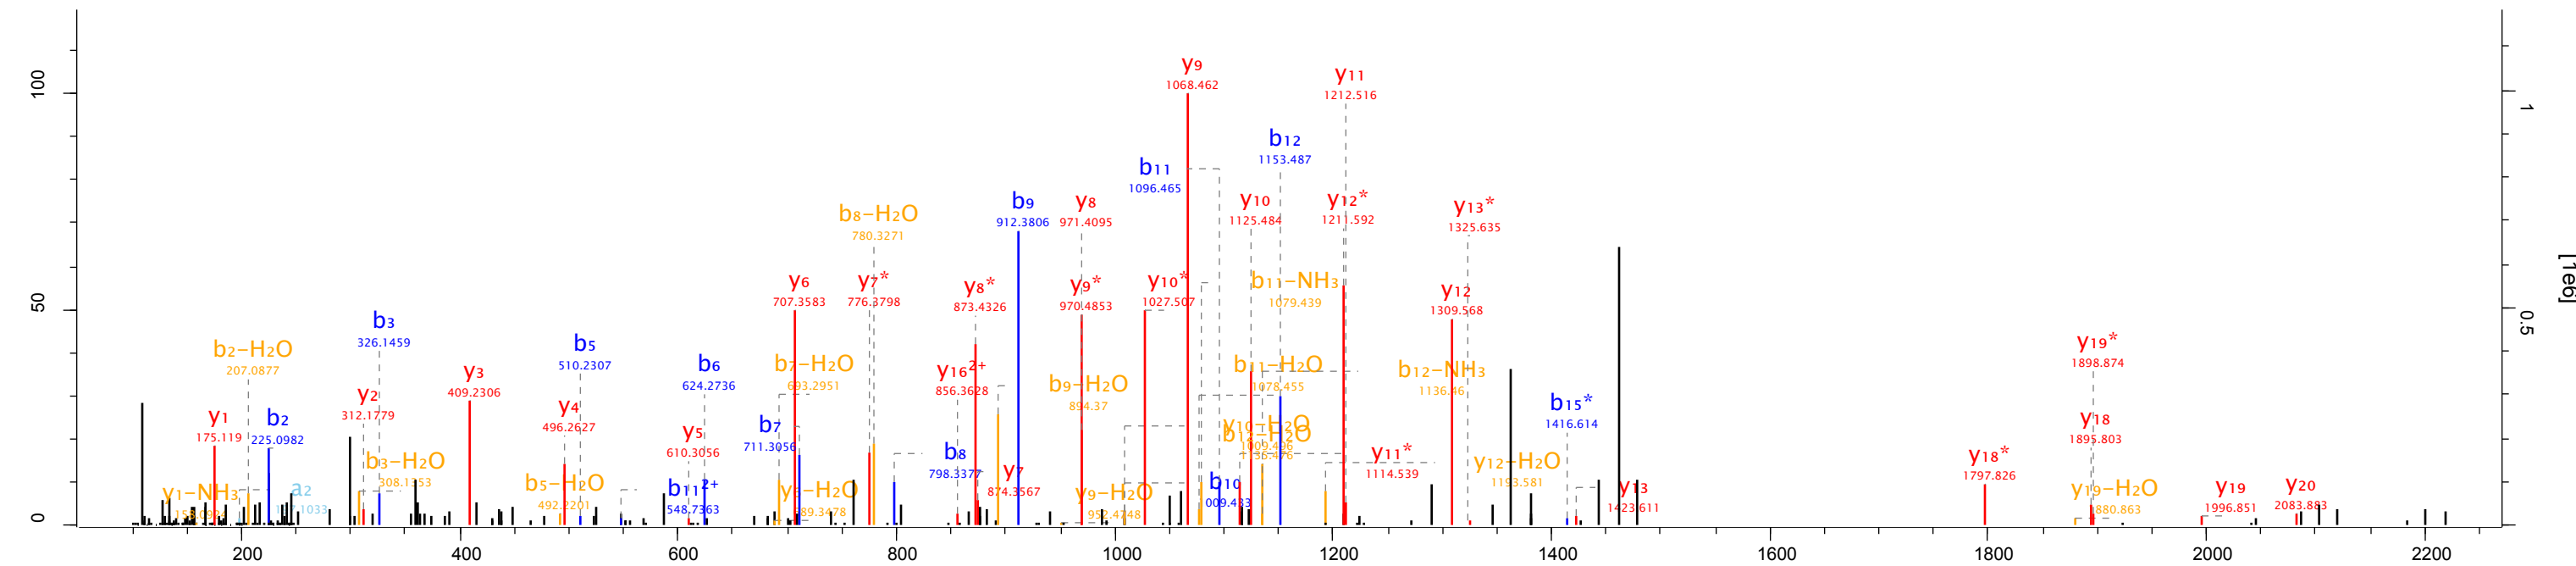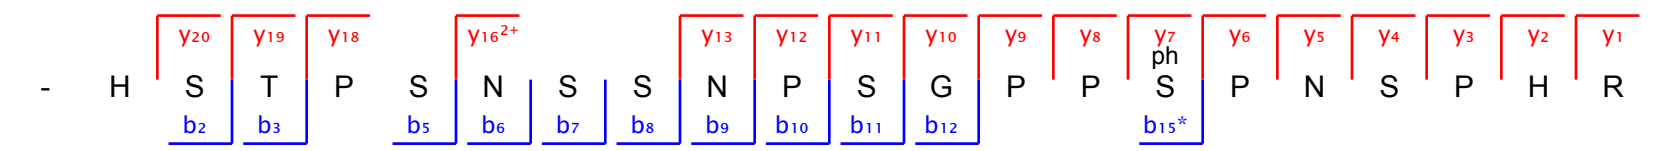

Raw file: 20150812\_A375SR\_Phospho\_BR1\_05  
 Scan: 3710 Method: FTMS; HCD Score: 153.21 m/z: 698.26 Gene names: SSH3

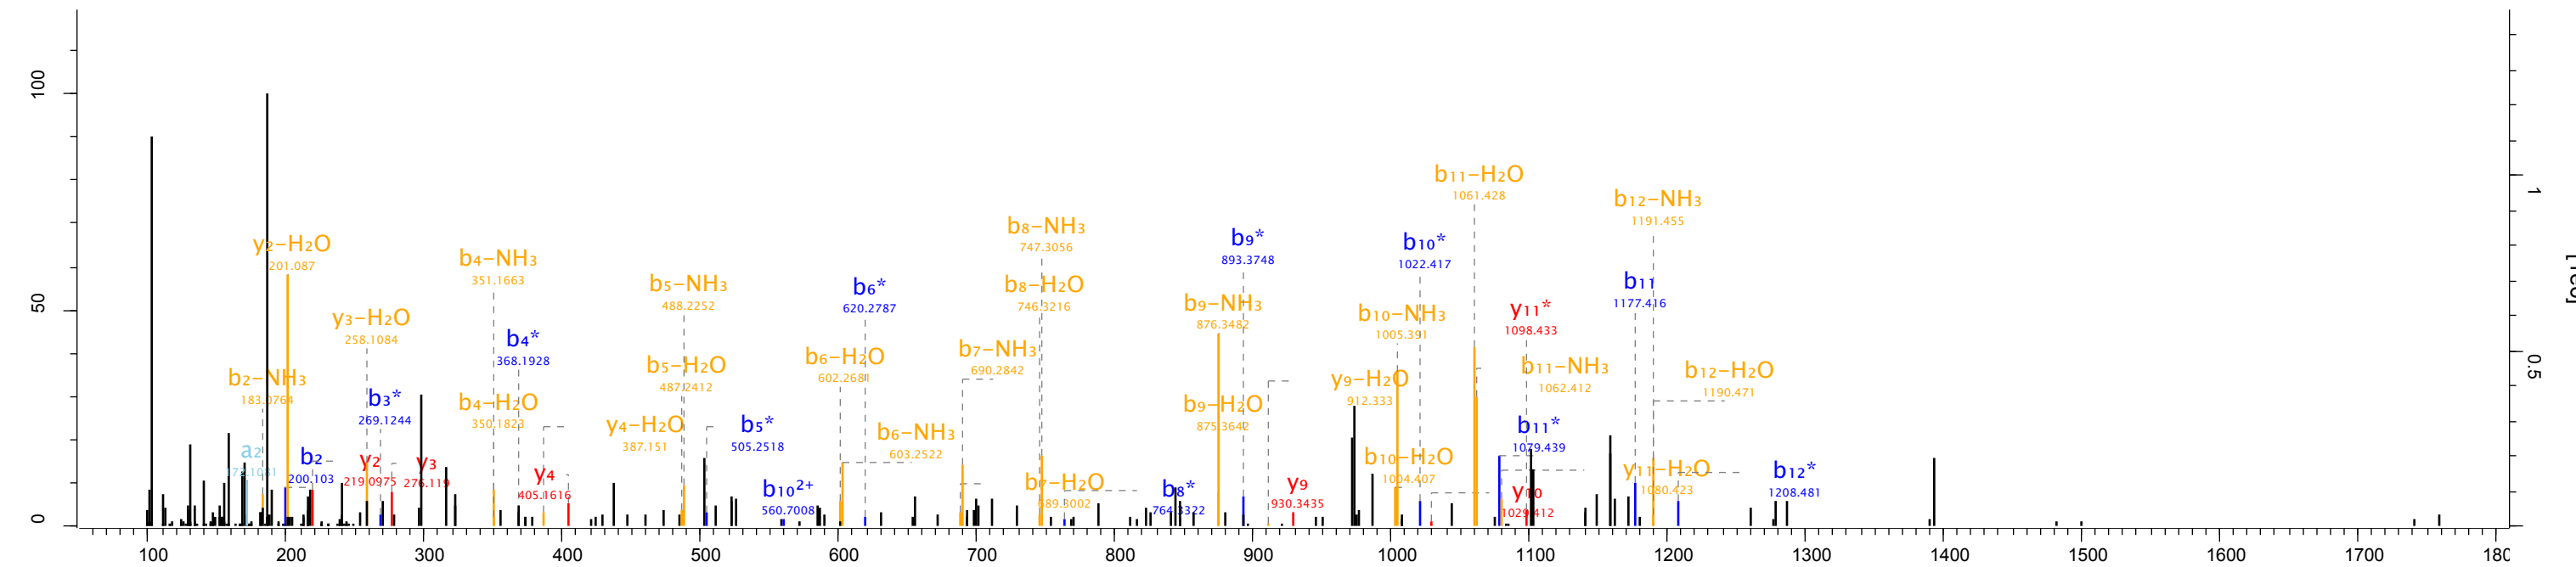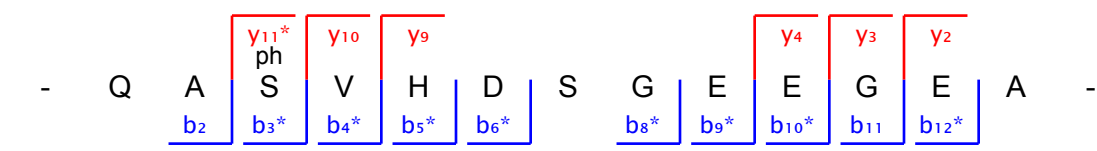

Raw file: 20150812\_A375SR\_Phospho\_BR1\_05  
 Scan: 3820 Method: FTMS; HCD Score: 128.21 m/z: 474.74 Gene names: TP53BP1

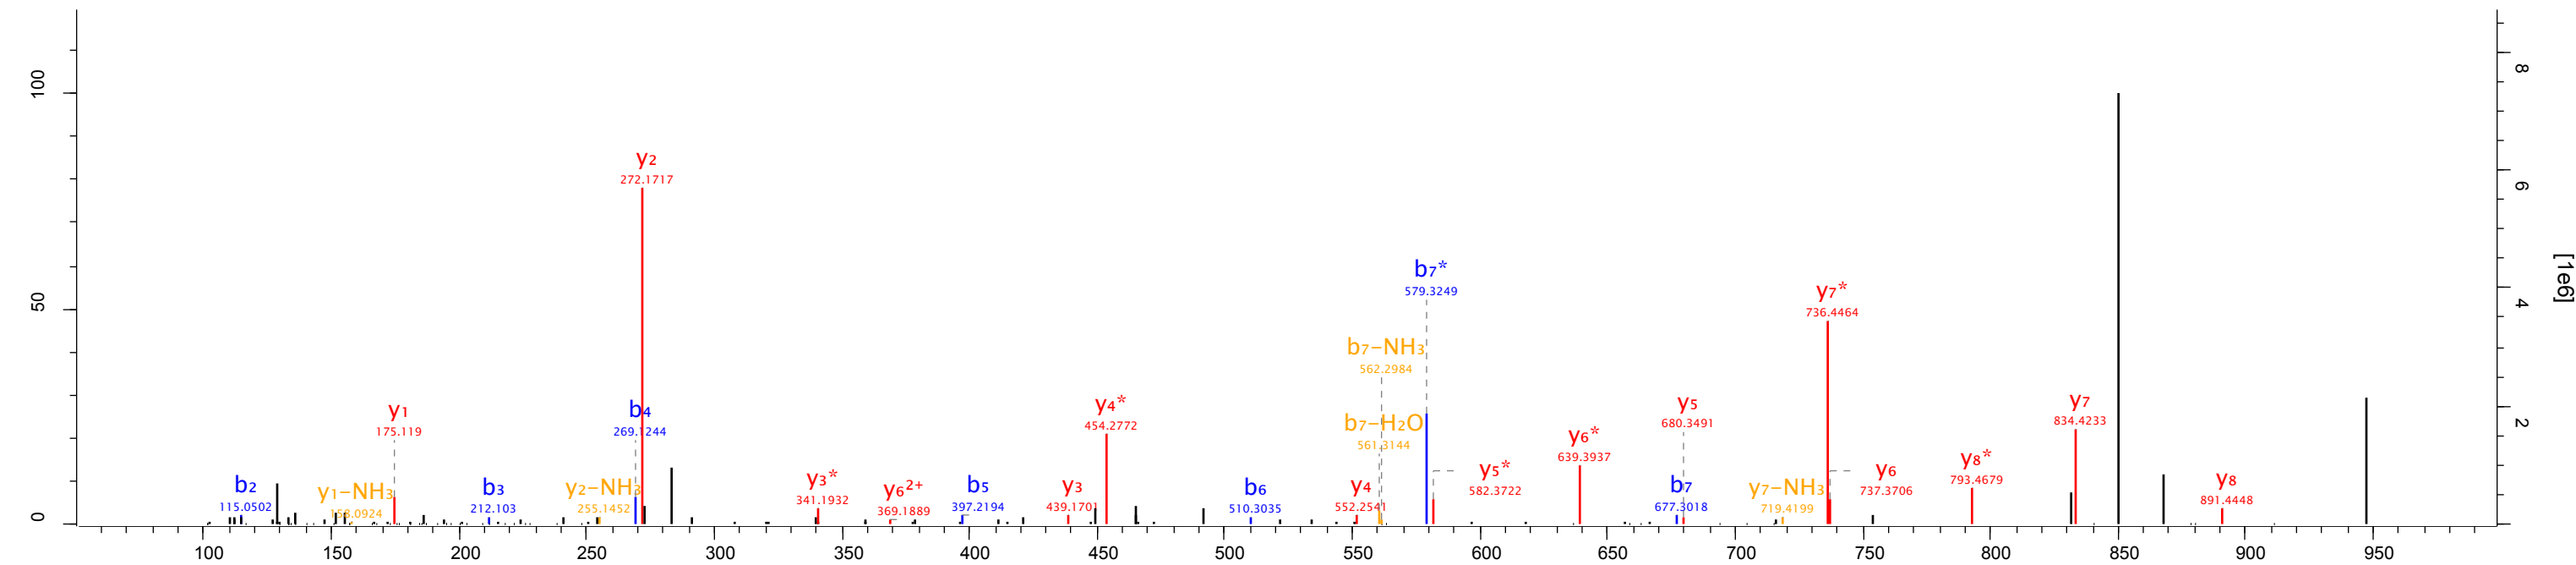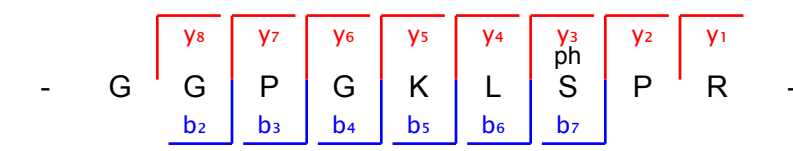

Raw file: 20150812\_A375SR\_Phospho\_BR1\_05  
 Scan: 3860 Method: FTMS; HCD Score: 90.16 m/z: 563.77 Gene names: CSNK1E

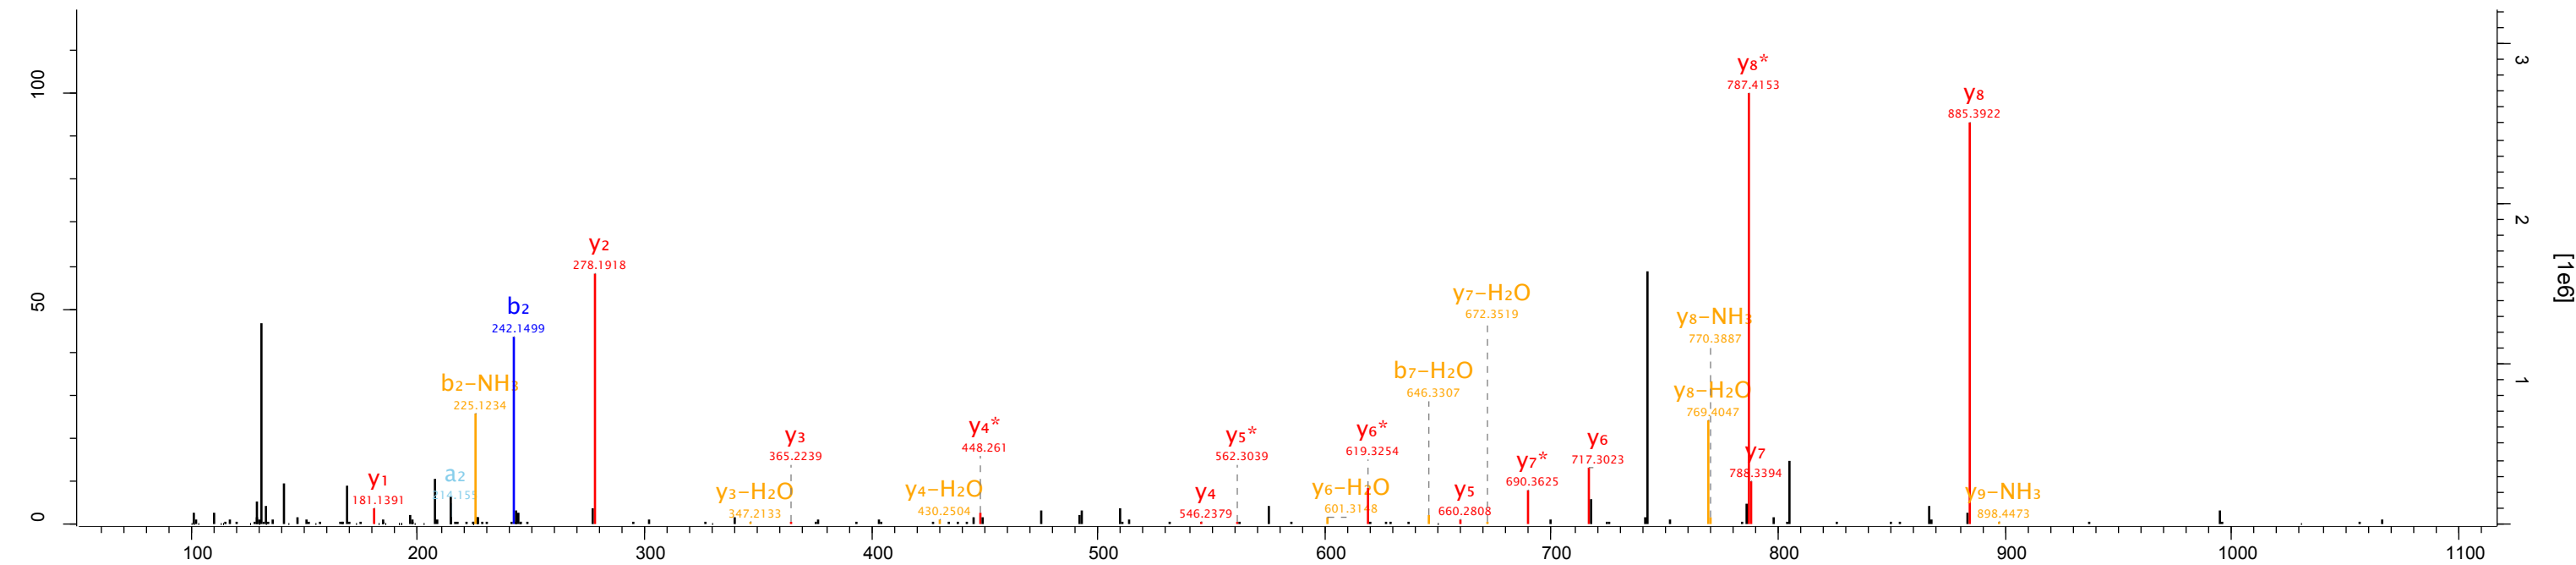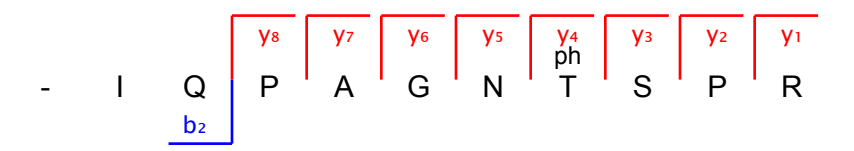



Raw file 20150812\_A375SR\_Phospho\_BR1\_05 Scan 4810 Method FTMS; HCD Score 115.04 m/z 488.25 Gene names SRRM1

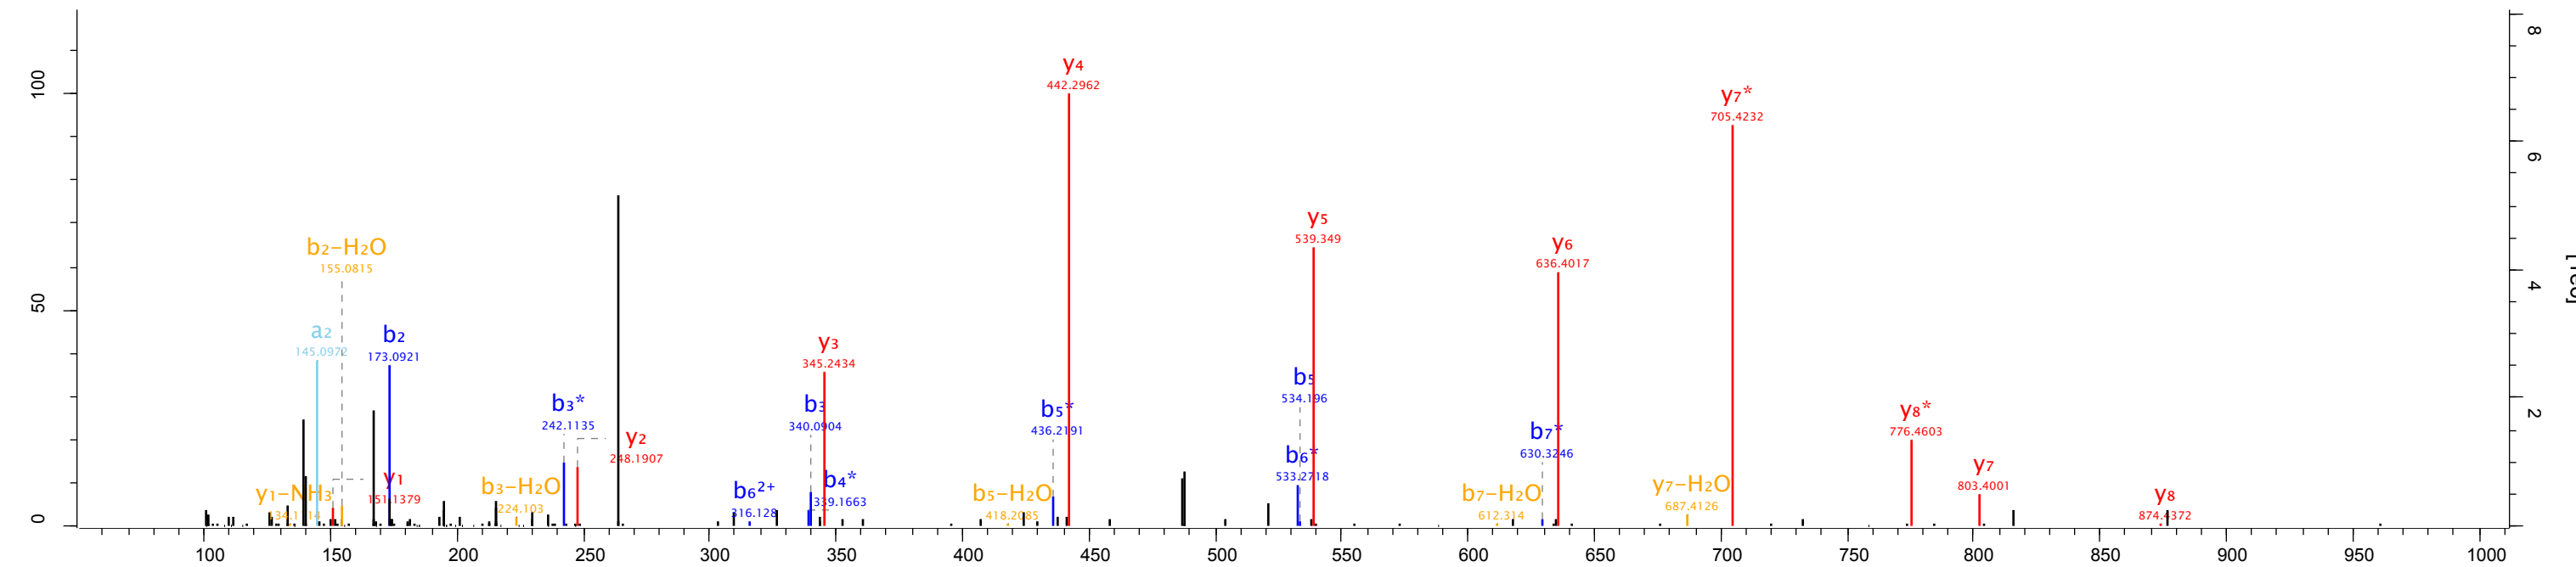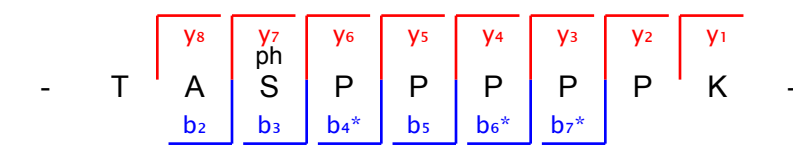

Raw file 20150812\_A375SR\_Phospho\_BR1\_05 Scan 5080 Method FTMS; HCD Score 40.5 m/z 581.6 Gene names IRS1

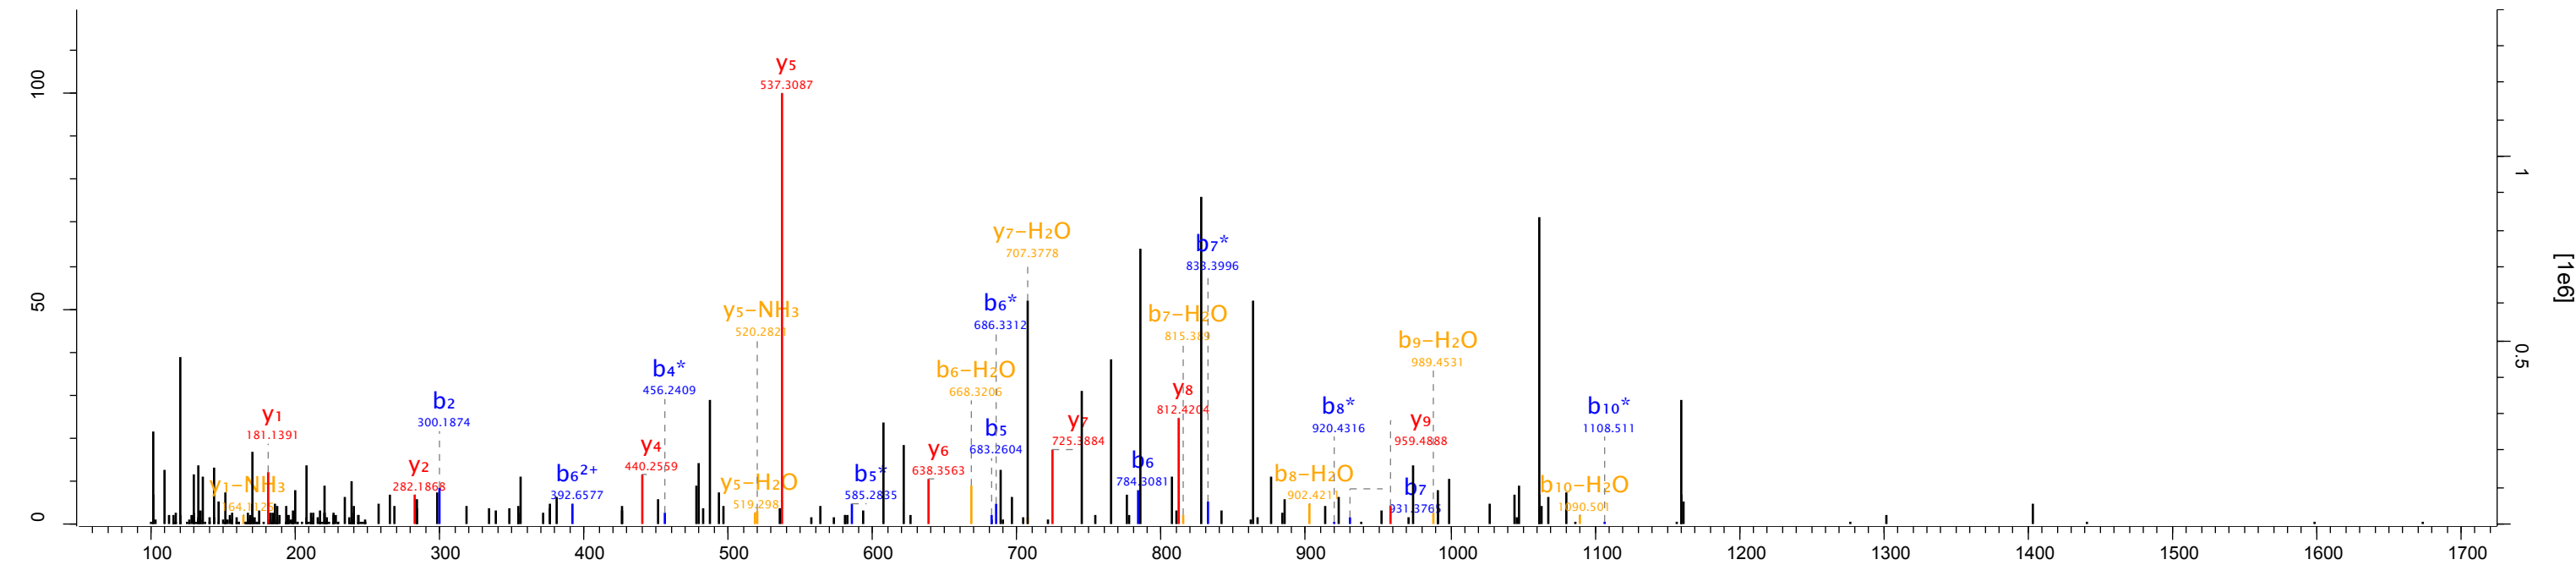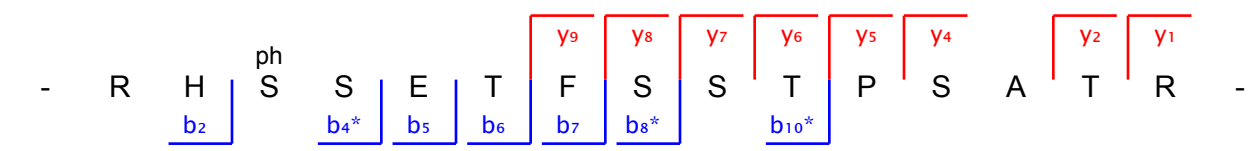

Raw file: 20150812\_A375SR\_Phospho\_BR1\_05  
 Scan: 5390 Method: FTMS; HCD Score: 145.23 m/z: 442.21 Gene names: PTPN14

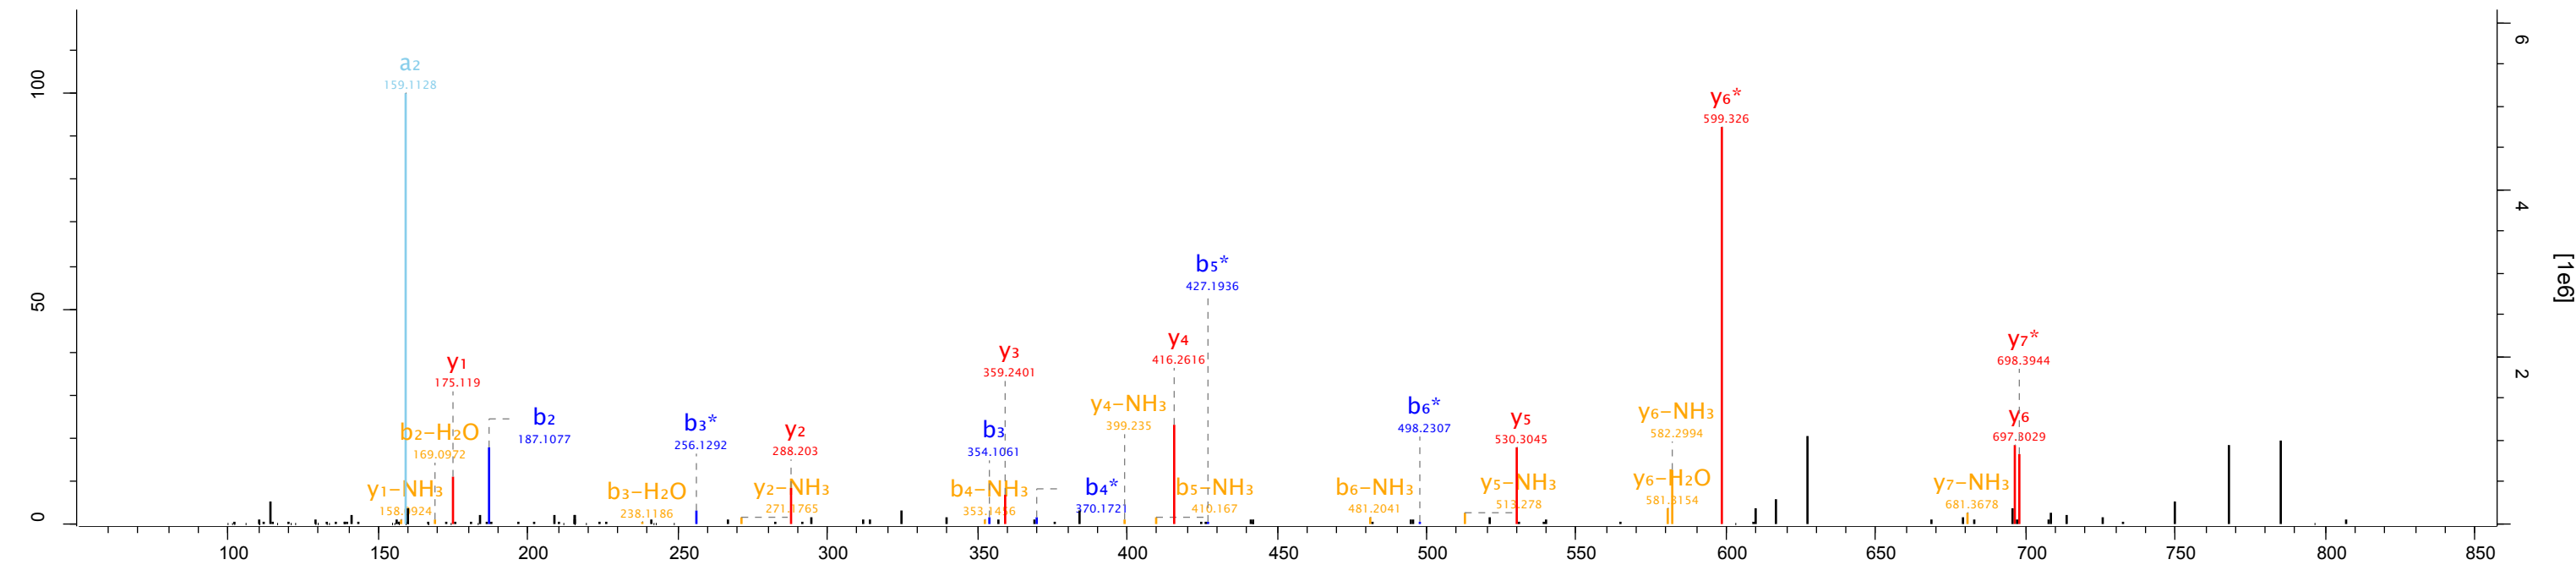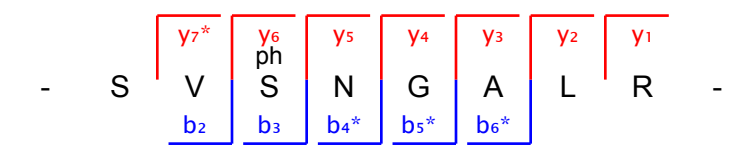

Raw file: 20150812\_A375SR\_Phospho\_BR1\_05  
 Scan: 6450 Method: FTMS; HCD Score: 142.1 m/z: 609.31 Gene names: ACIN1

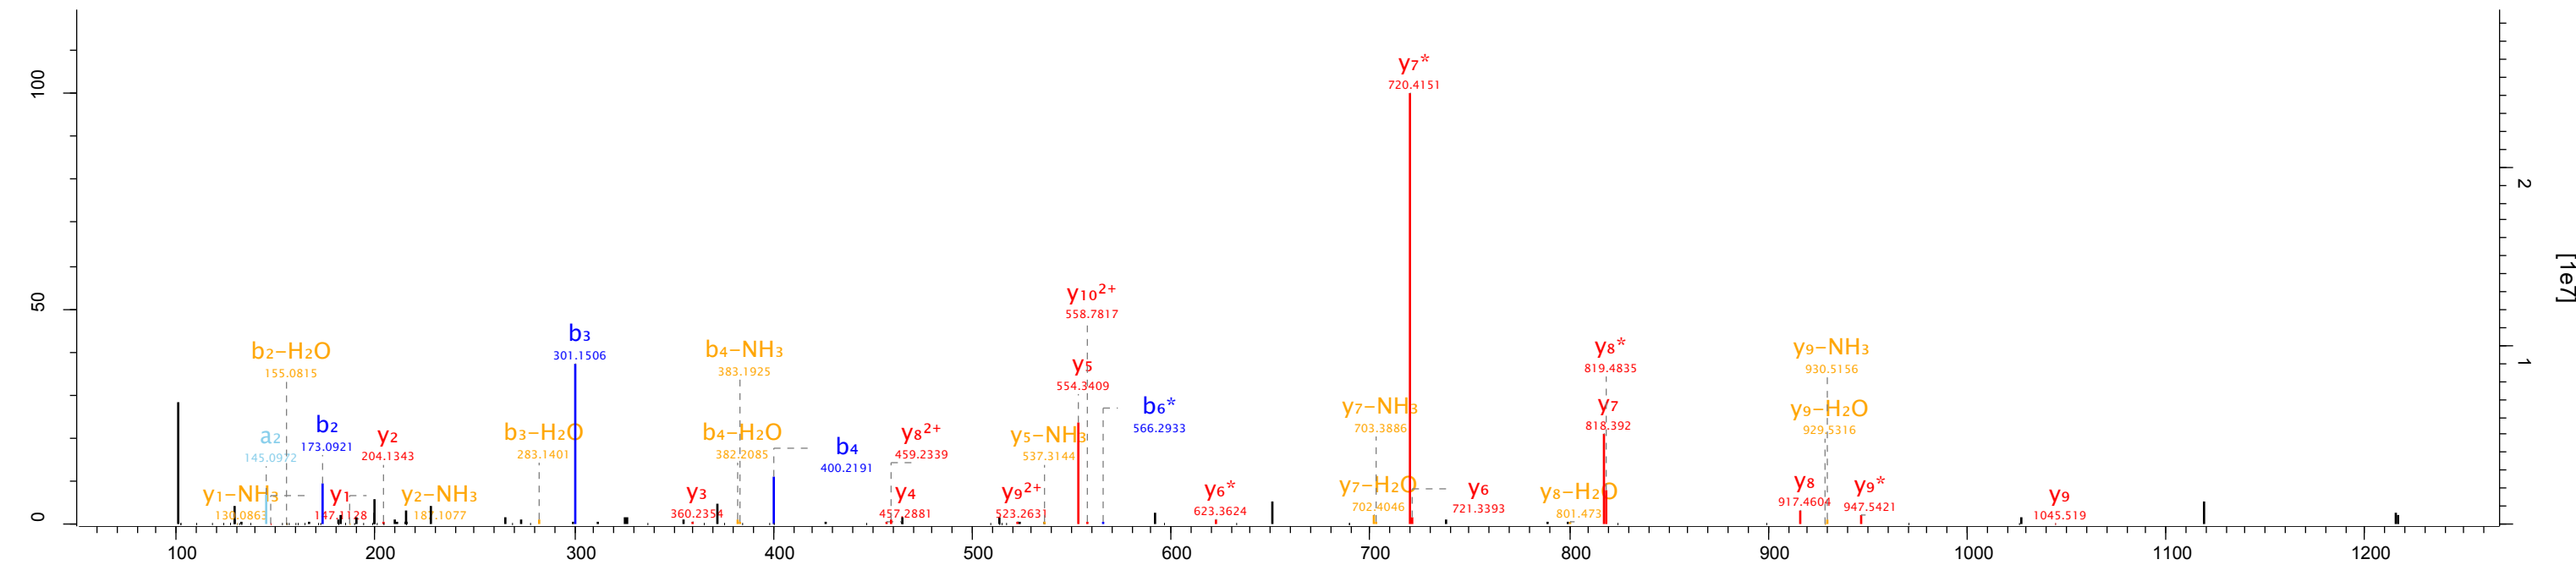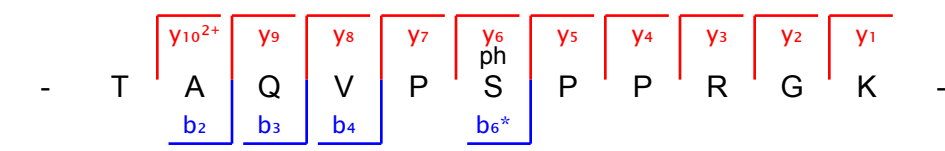

Raw file: 20150812\_A375SR\_Phospho\_BR1\_05  
 Scan: 7410 Method: FTMS; HCD Score: 248.6 m/z: 601.77 Gene names: KLC1

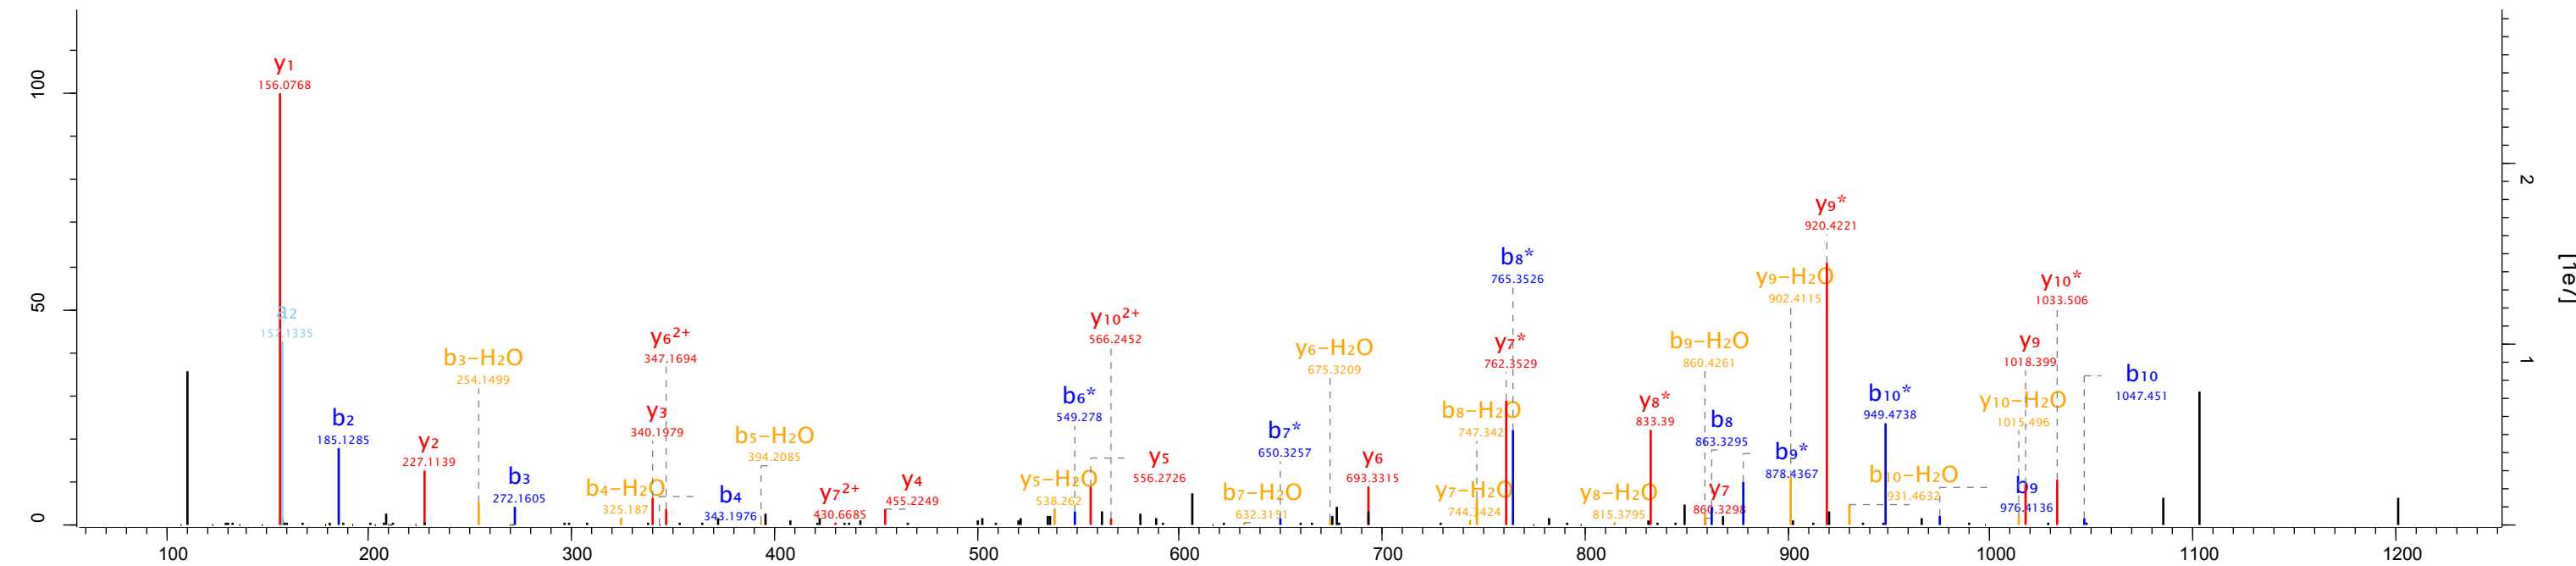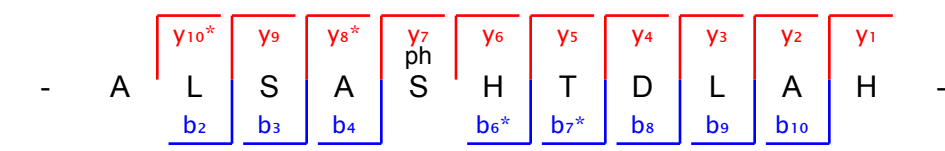

Raw file 20150812\_A375SR\_Phospho\_BR1\_05 Scan 7900 Method FTMS; HCD Score 117.2 m/z 650.76 Gene names BUD13

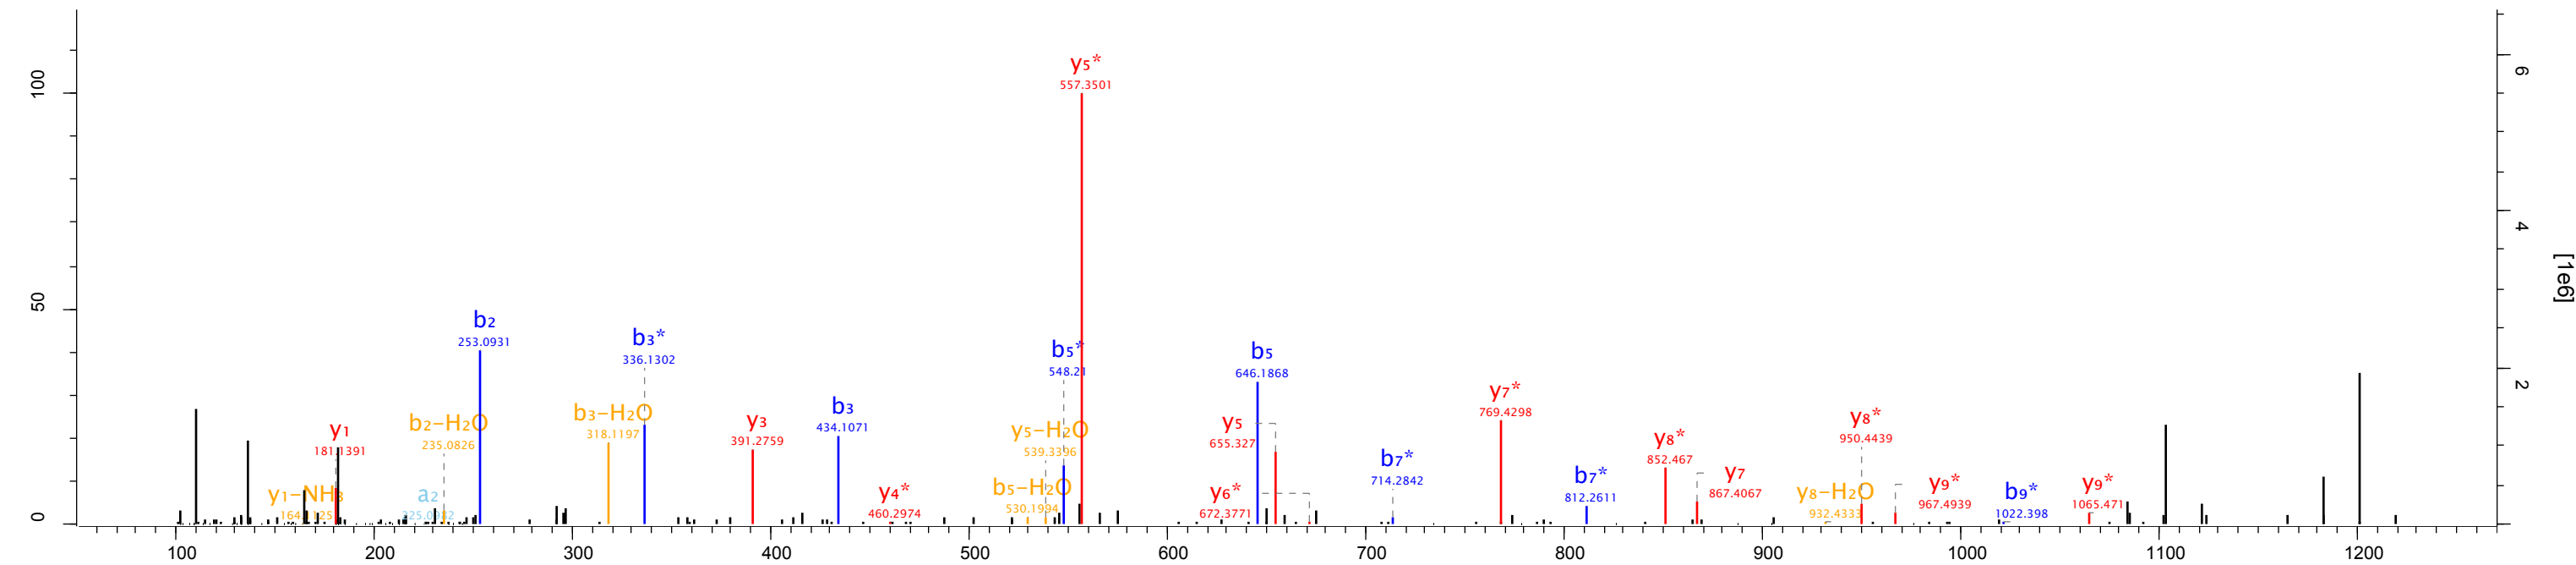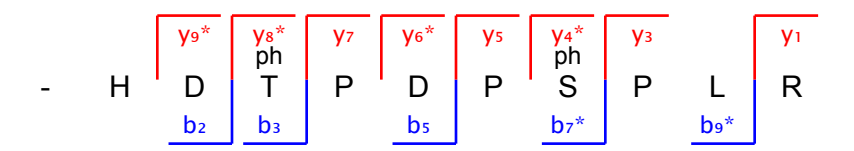

Raw file Scan Method Score m/z Gene names  
 20150812\_A375SR\_Phospho\_BR1\_05 8100 FTMS; HCD 256.02 956.11 BAT3;BAG6

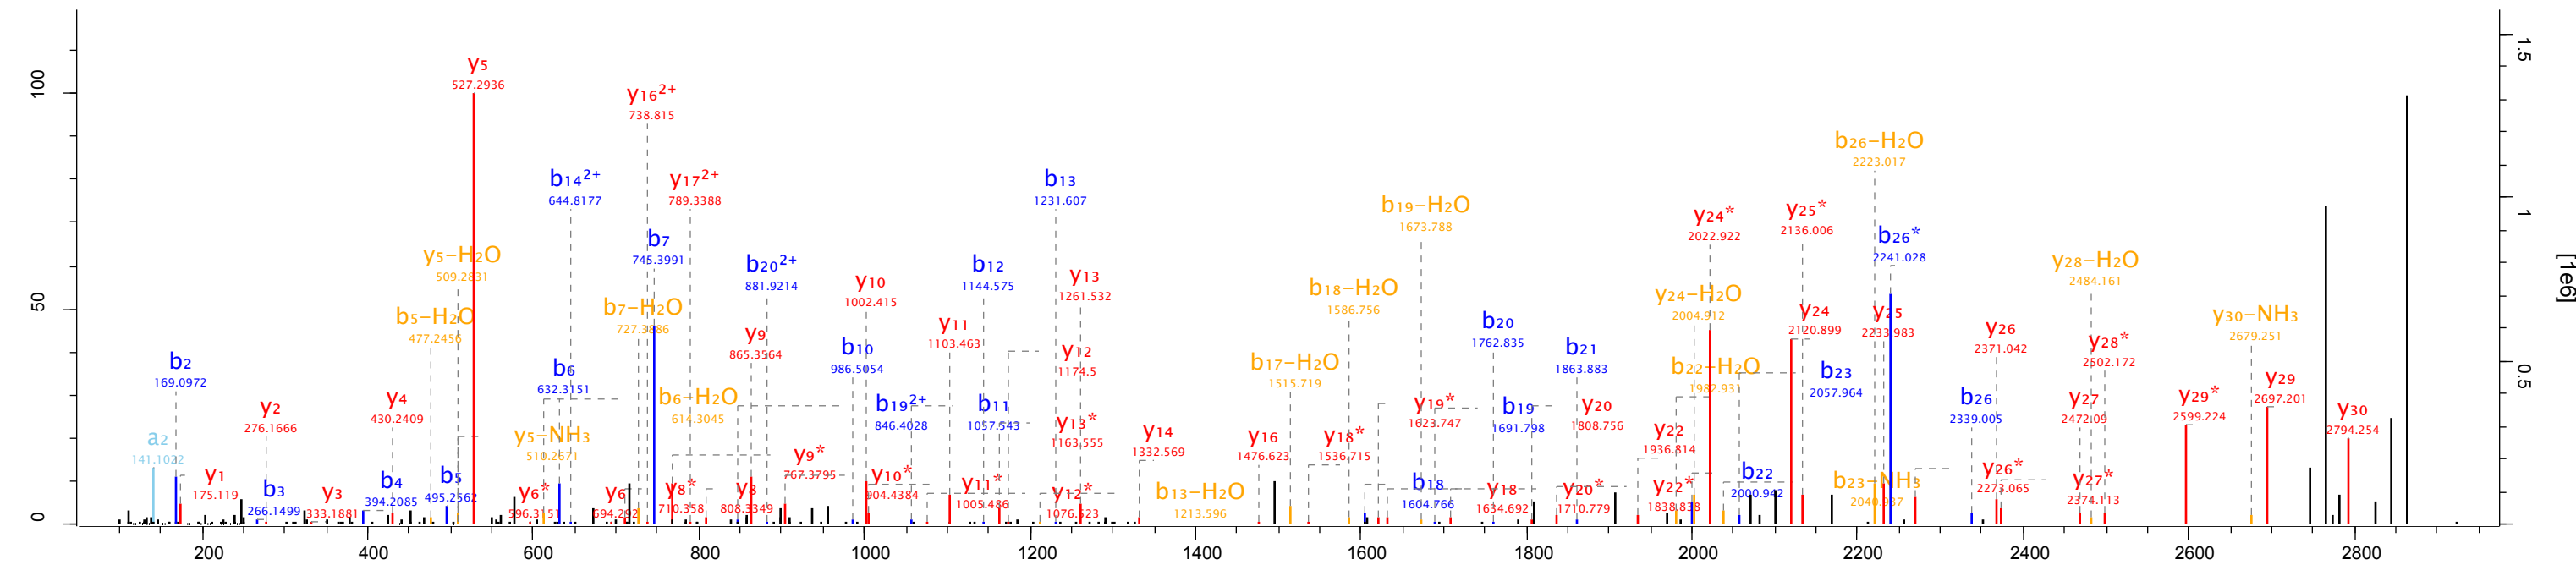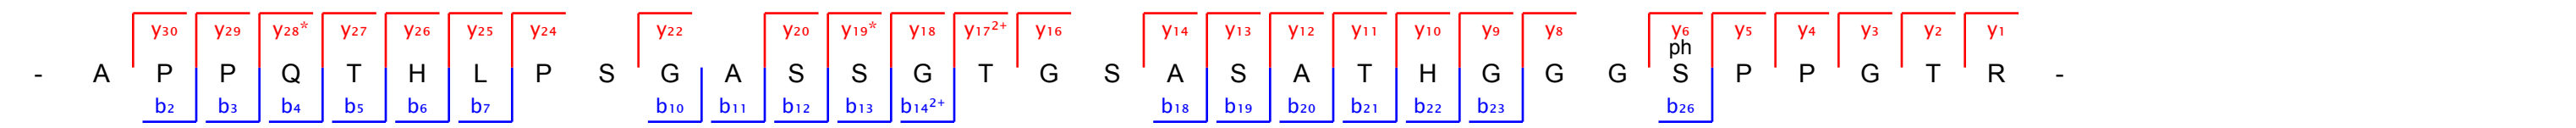

Raw file: 20150812\_A375SR\_Phospho\_BR1\_05  
 Scan: 8890 Method: FTMS; HCD Score: 129.77 m/z: 582.28 Gene names: FNBP1L

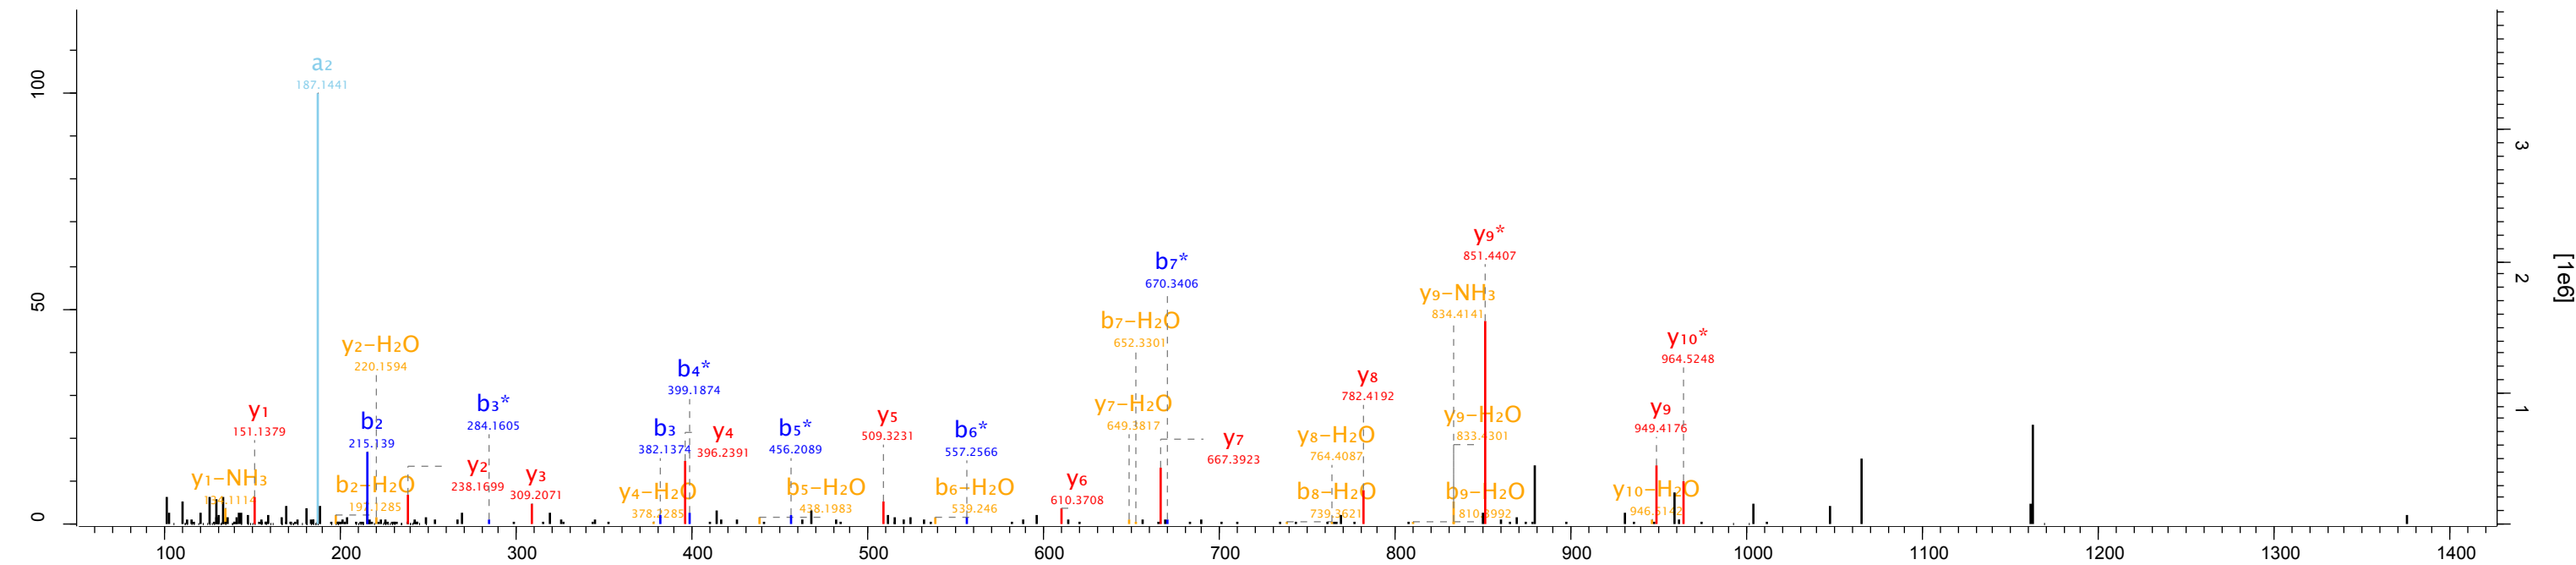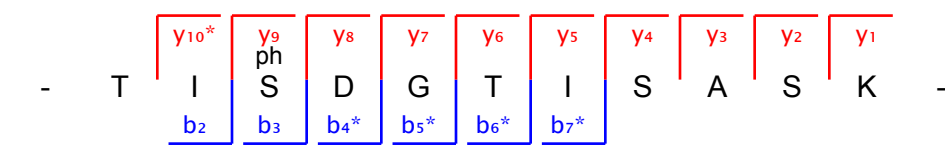



Raw file: 20150812\_A375SR\_Phospho\_BR1\_05  
 Scan: 9350 Method: FTMS; HCD Score: 265.53 m/z: 923.96 Gene names: APBB2

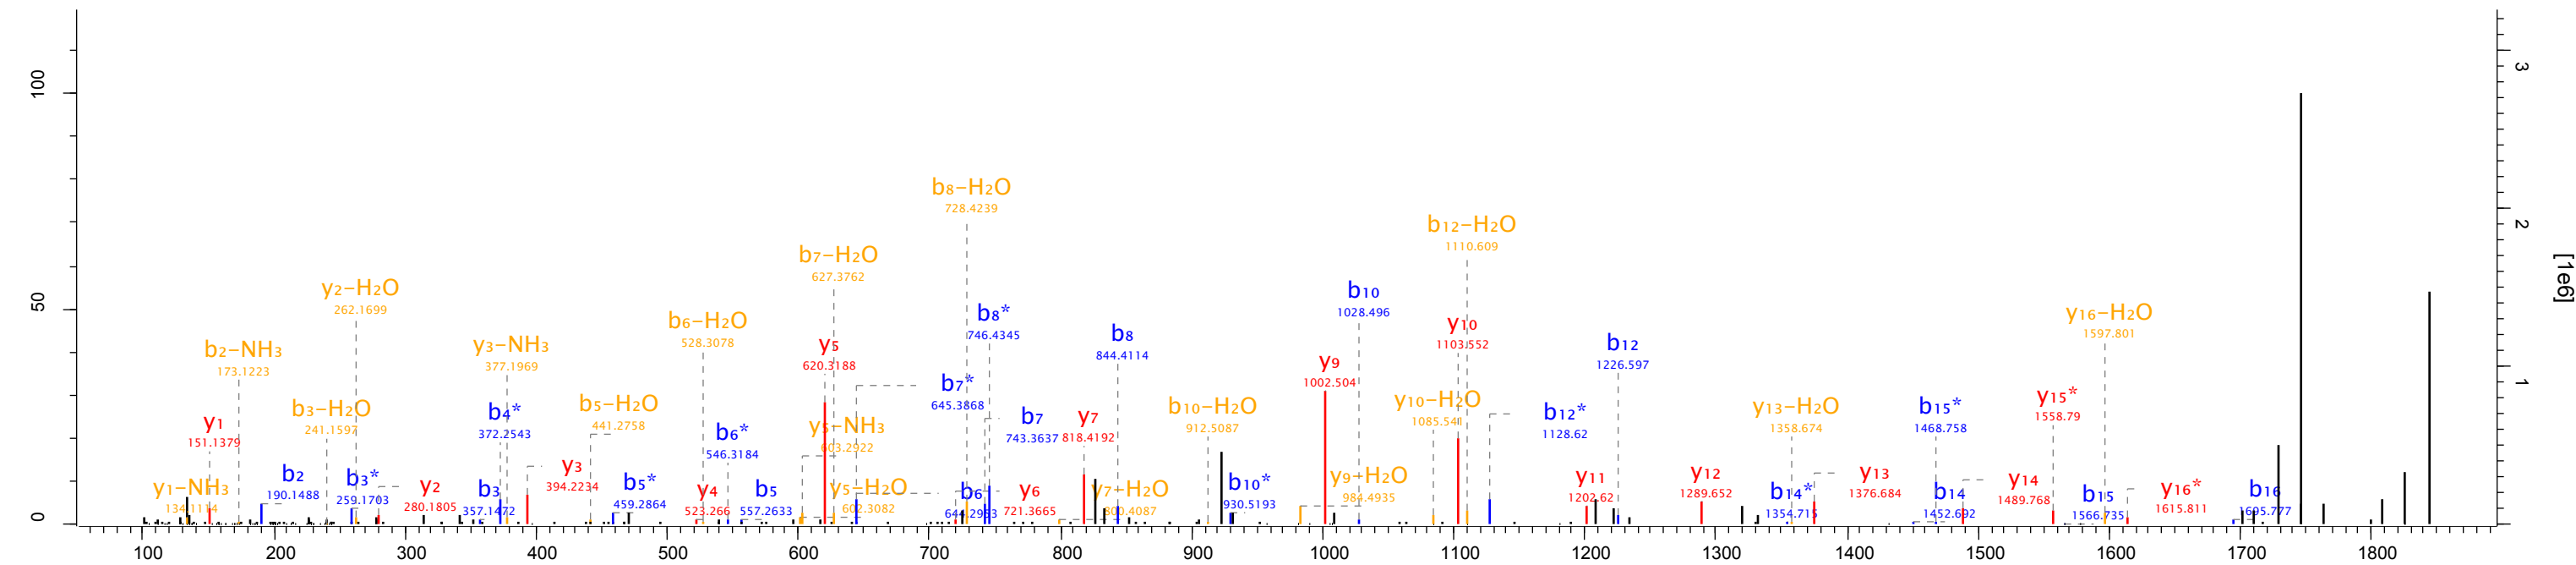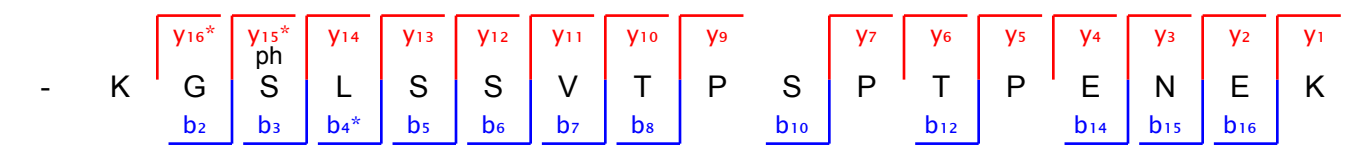

Raw file 20150812\_A375SR\_Phospho\_BR1\_05 Scan 9600 Method FTMS; HCD Score 194.63 m/z 888.9 Gene names WDHD1

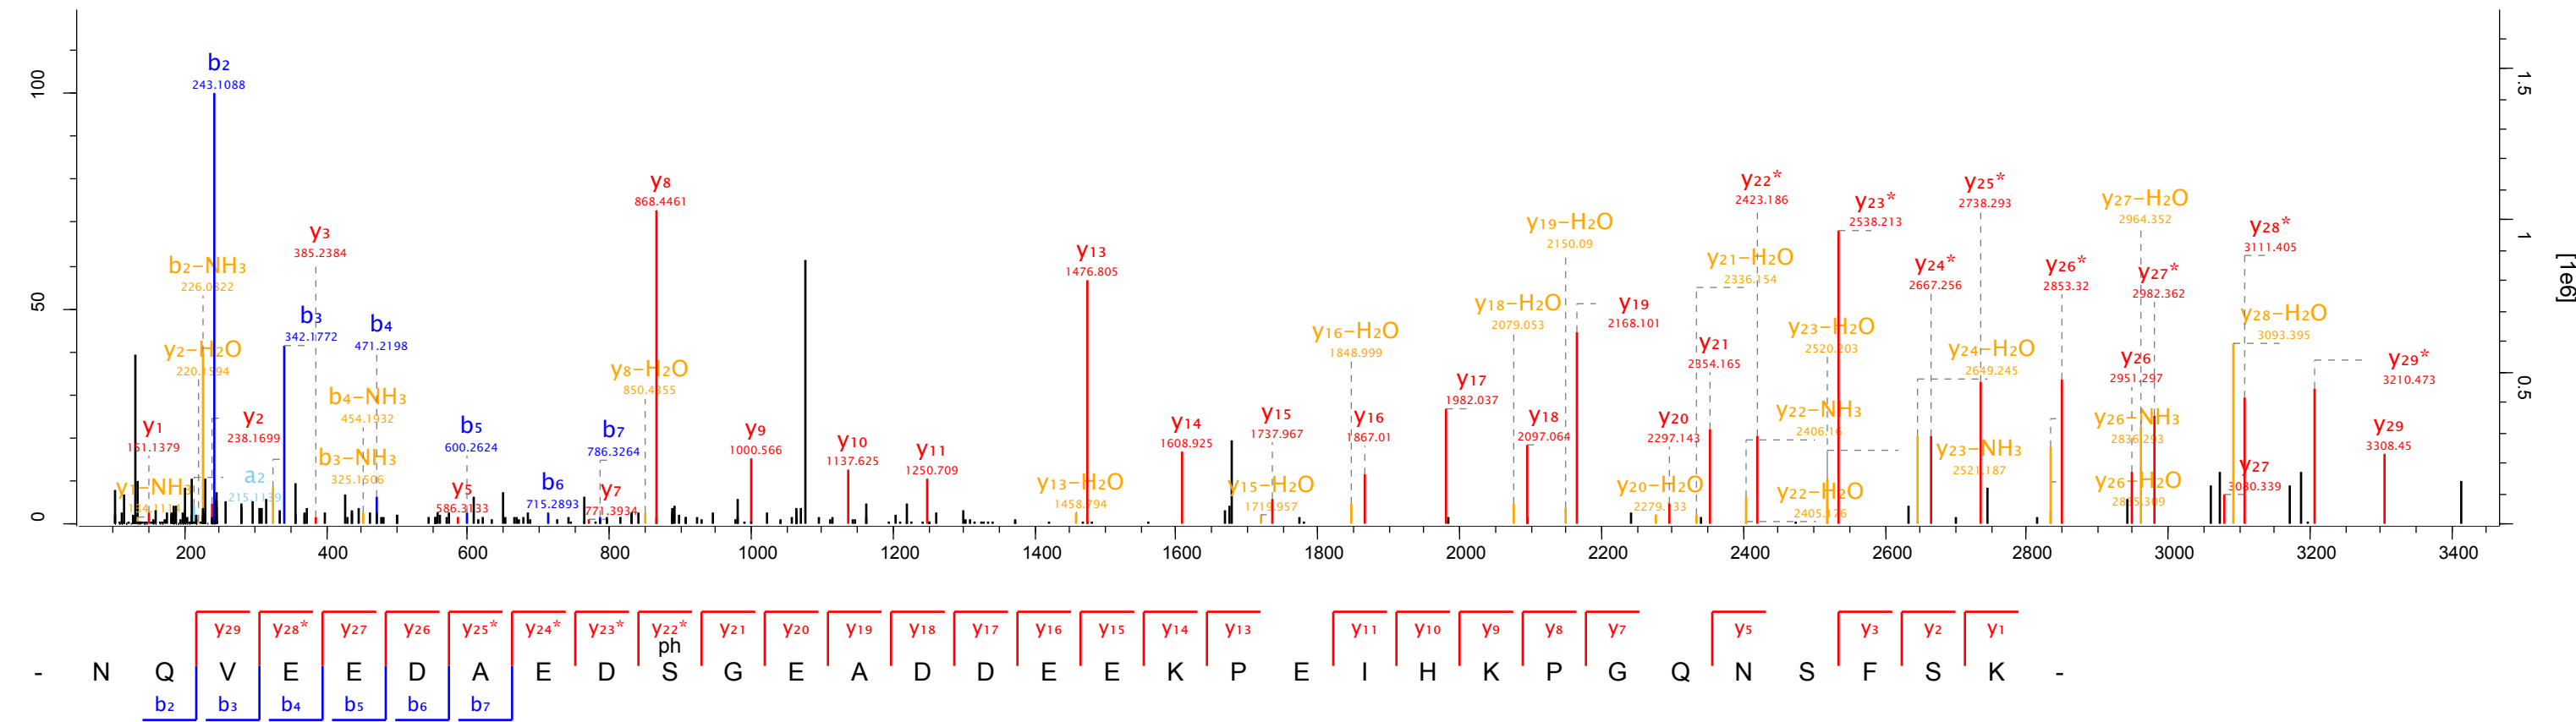

Raw file  
20150812\_A375SR\_Phospho\_BR1\_06

Scan: 10060  
Method: FTMS; HCD  
Score: 117.8  
m/z: 860.67  
Gene names: RBMX;RBMXL1

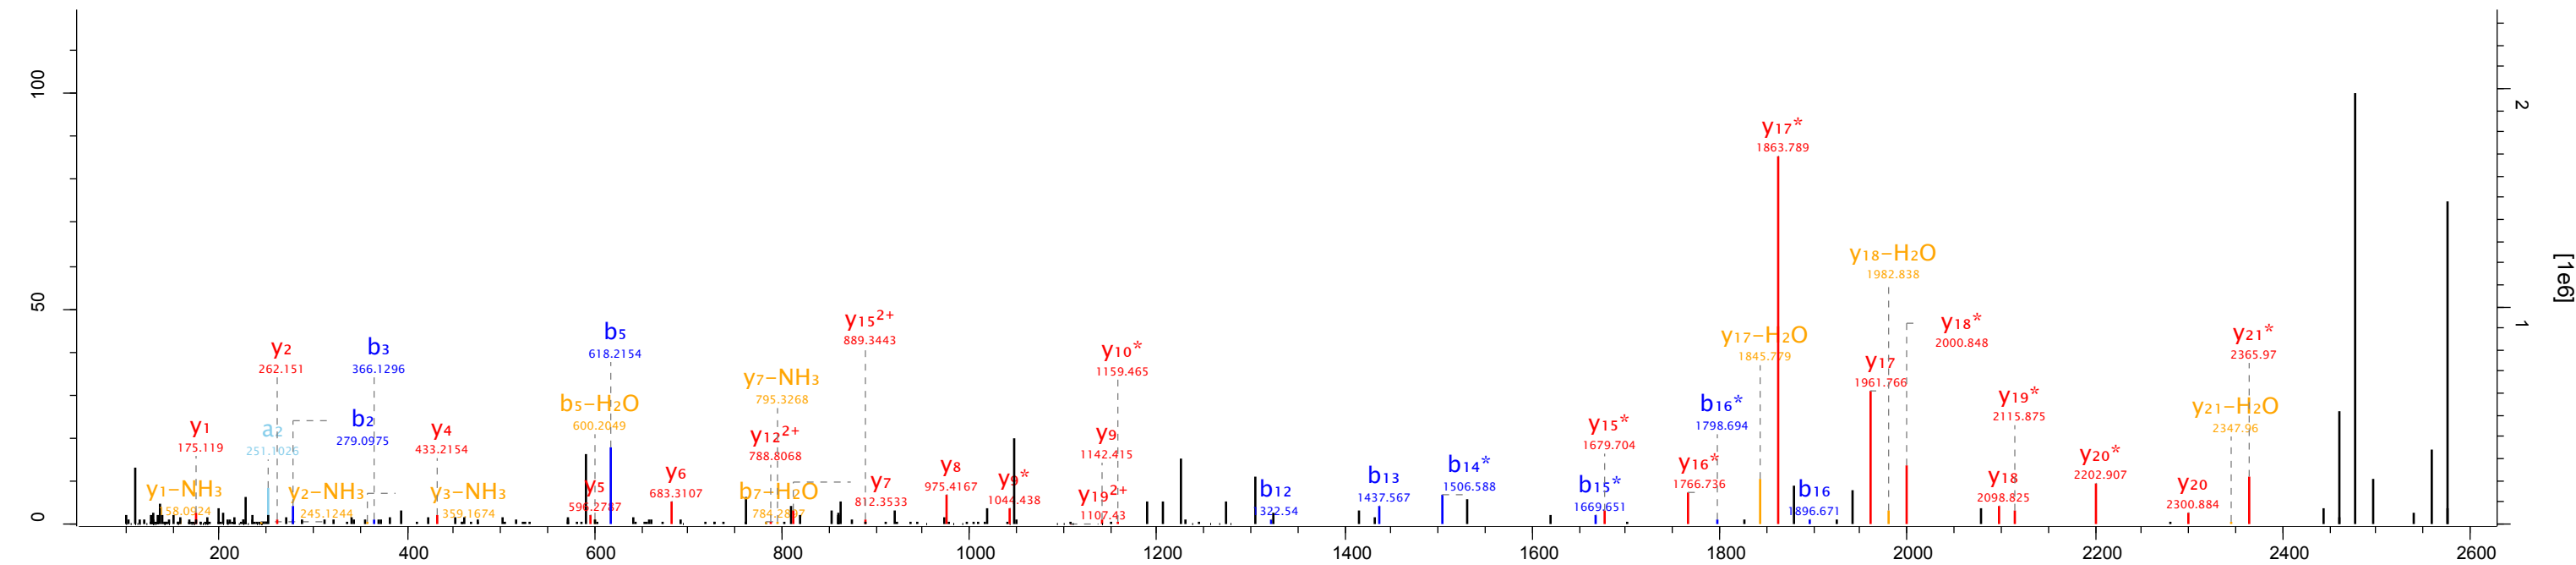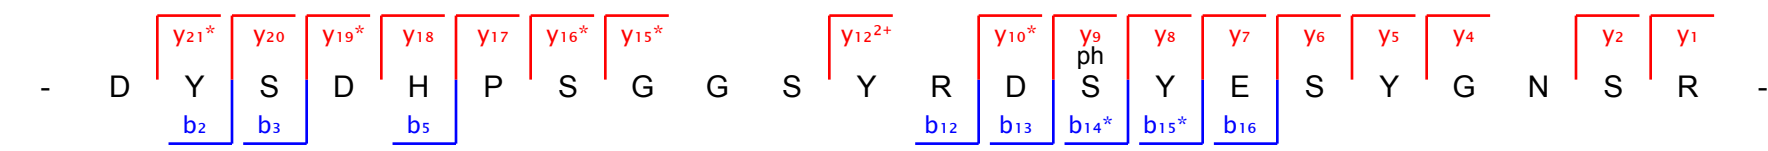

Raw file: 20150812\_A375SR\_Phospho\_BR1\_06  
 Scan: 10450 Method: FTMS; HCD Score: 141.05 m/z: 636.95 Gene names: ARHGEF18

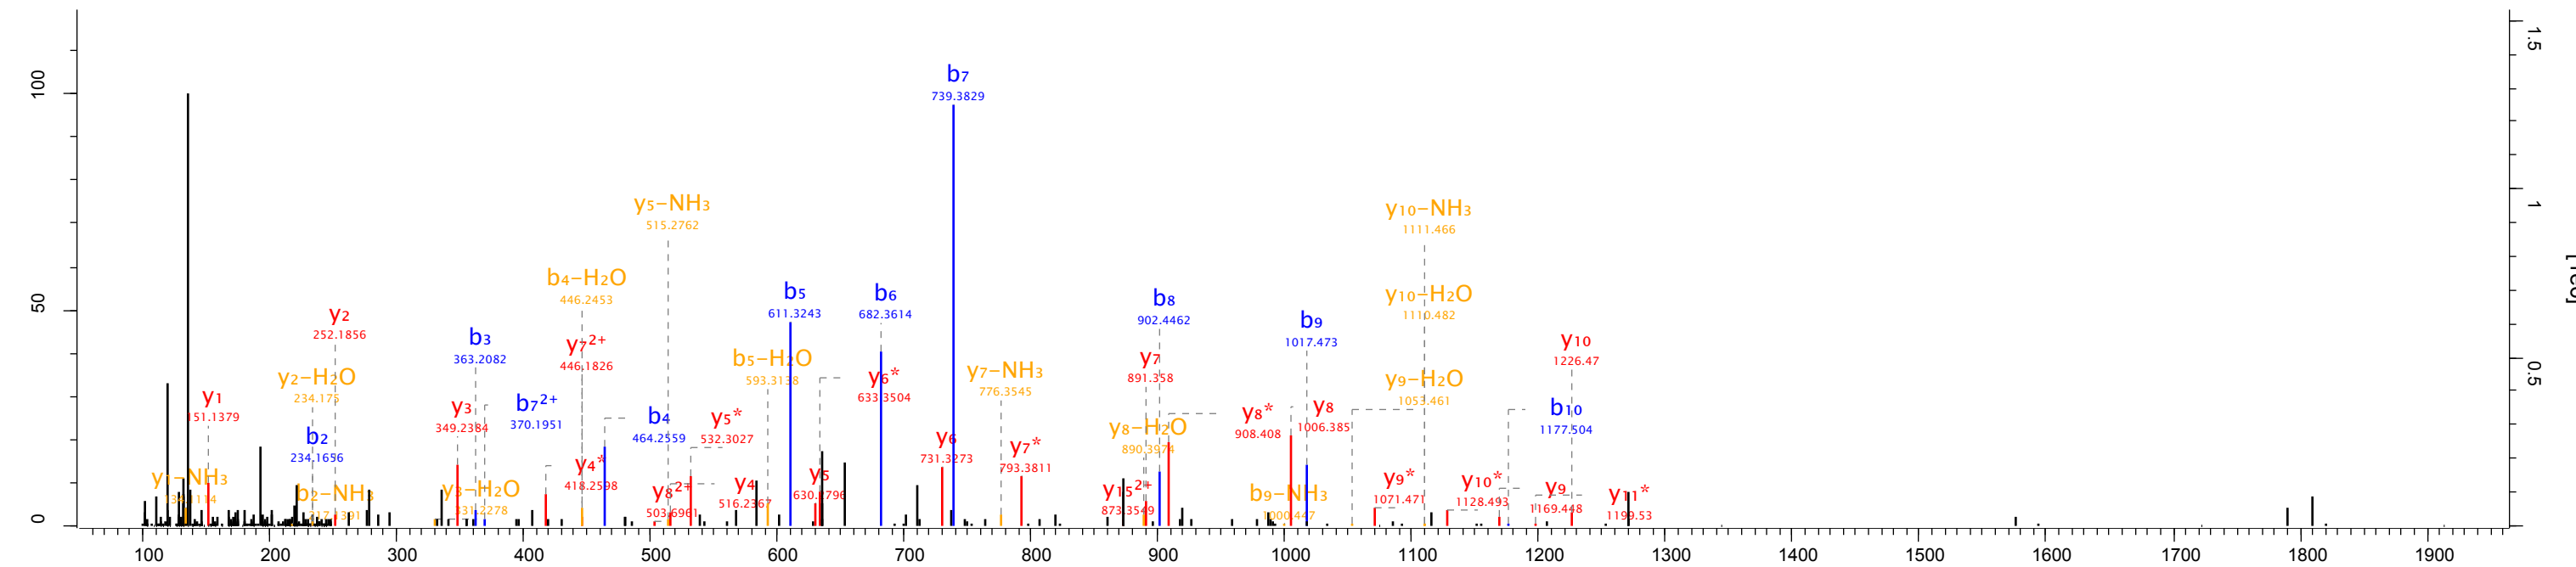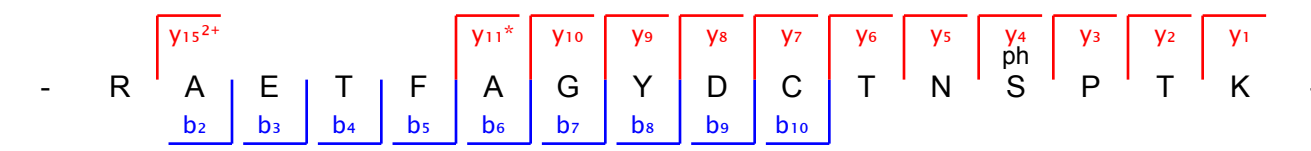

Raw file 20150812\_A375SR\_Phospho\_BR1\_06 Scan 10540 Method FTMS; HCD Score 156.58 m/z 574.25 Gene names SVIL

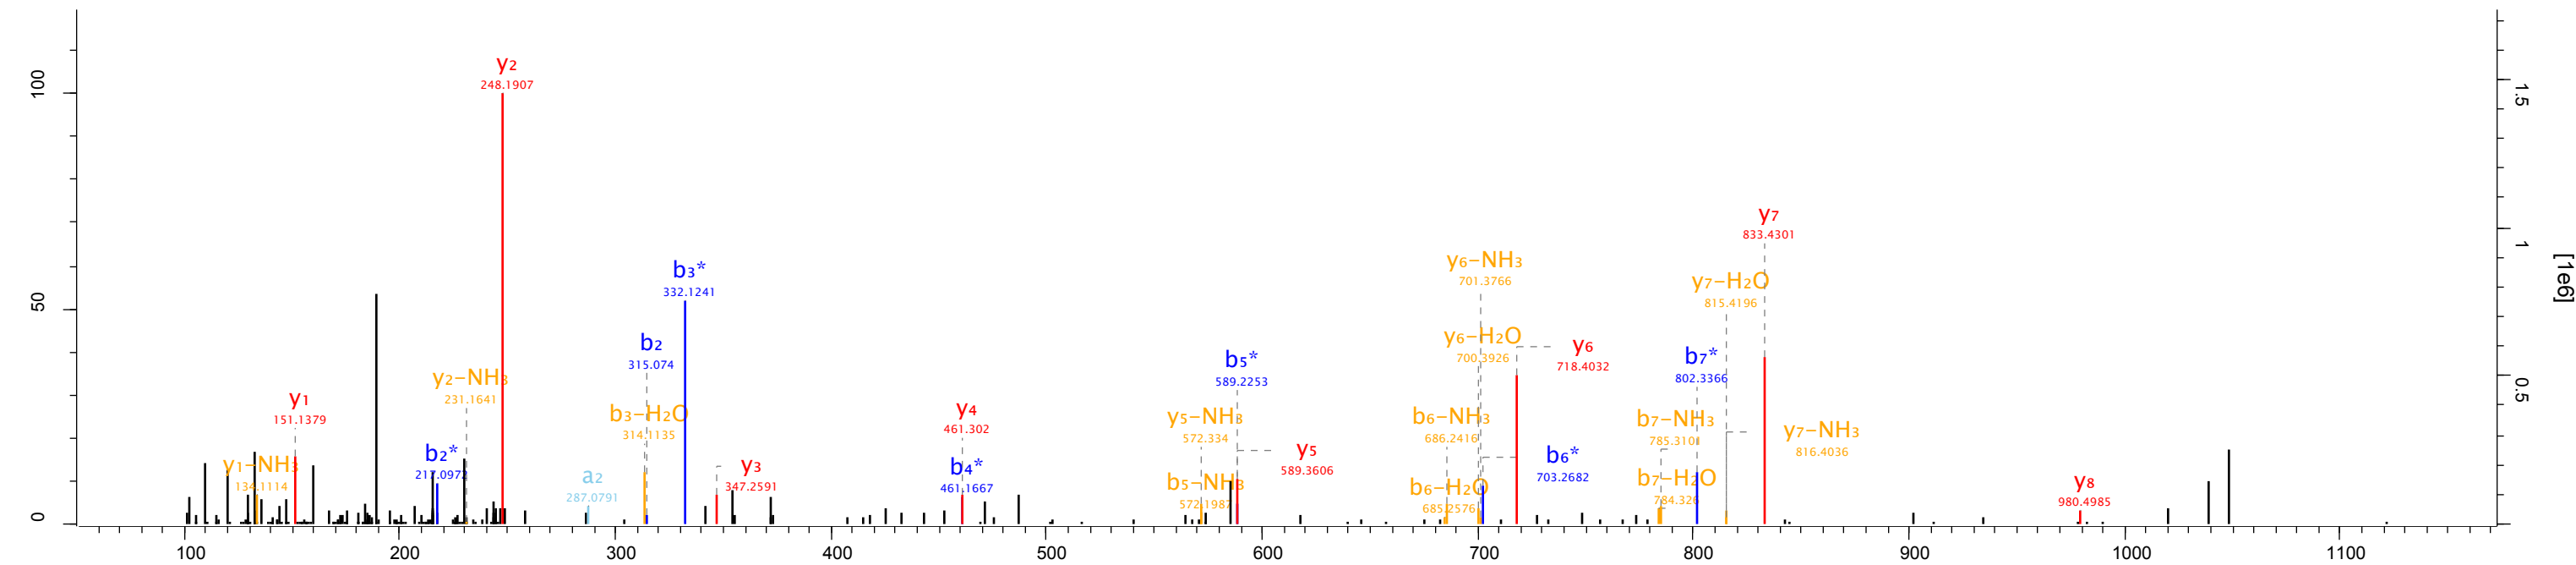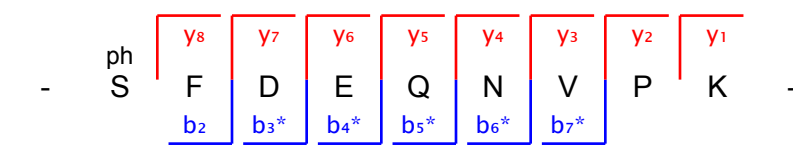

Raw file  
20150812\_A375SR\_Phospho\_BR1\_06

Scan 10680 Method FTMS; HCD Score 218.63 m/z 821.38 Gene names NDRG1

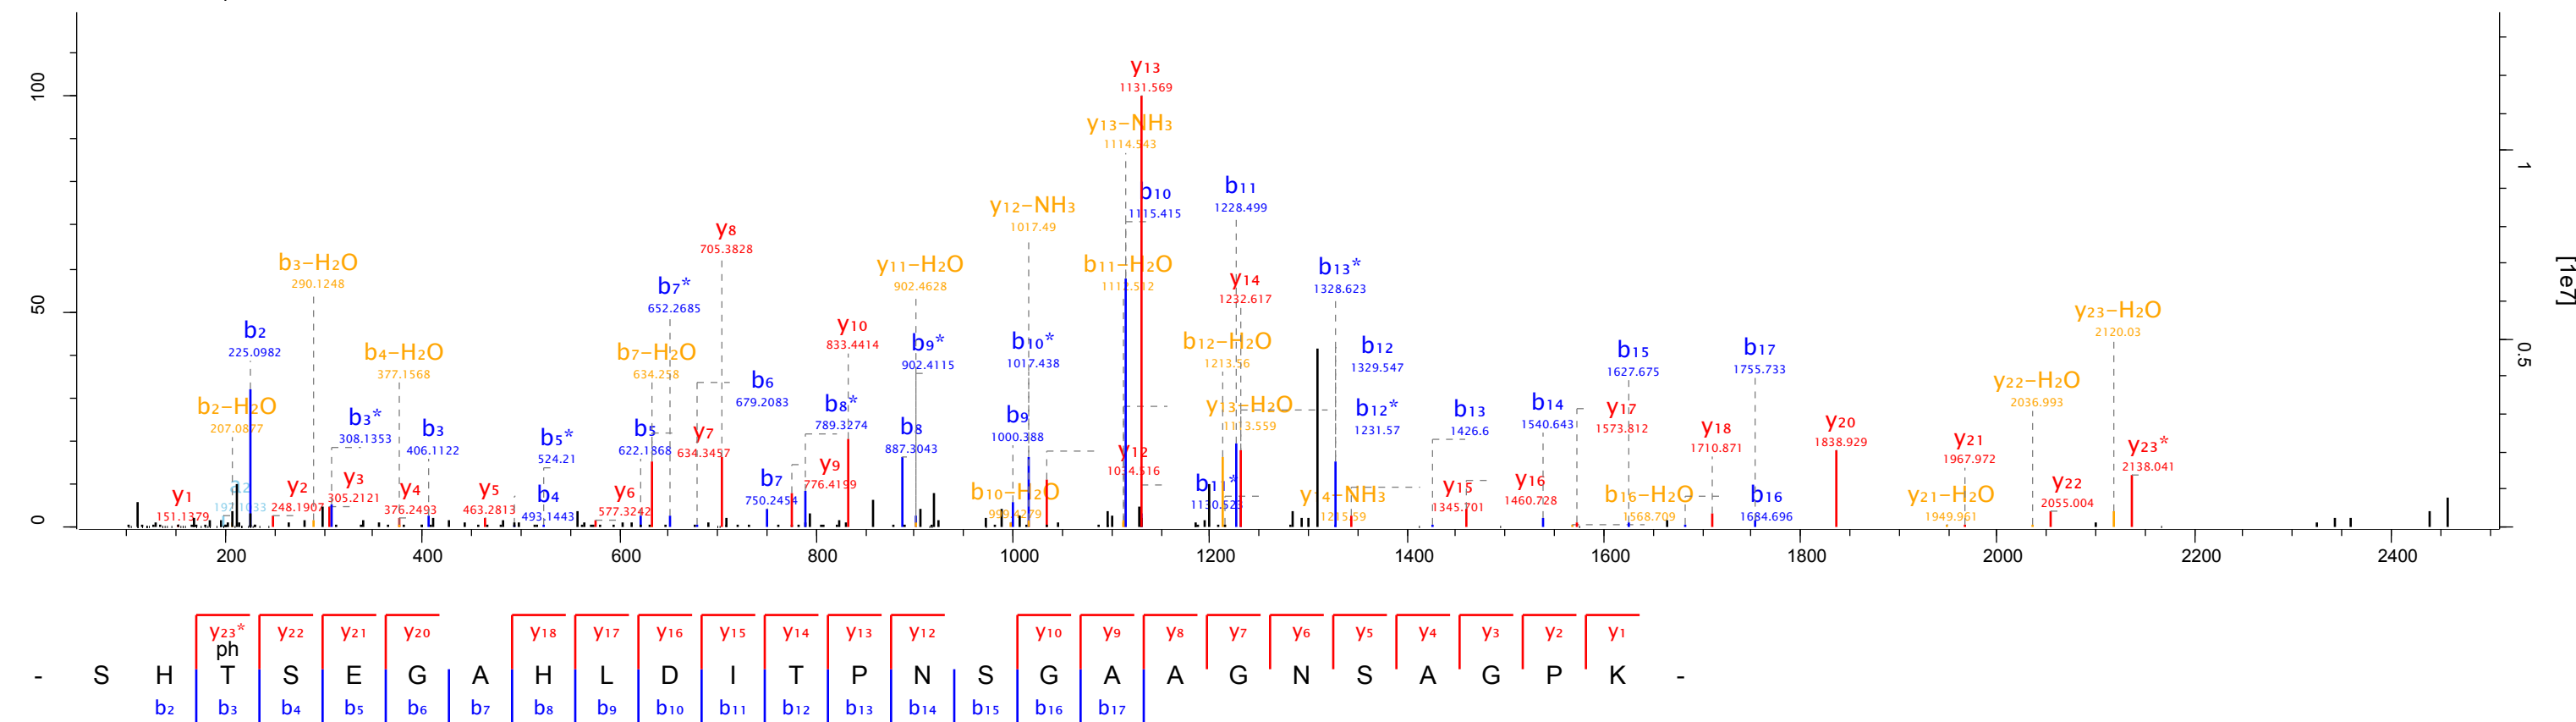

Raw file 20150812\_A375SR\_Phospho\_BR1\_06 Scan 10780 Method FTMS; HCD Score 262.34 m/z 992.46 Gene names ANLN

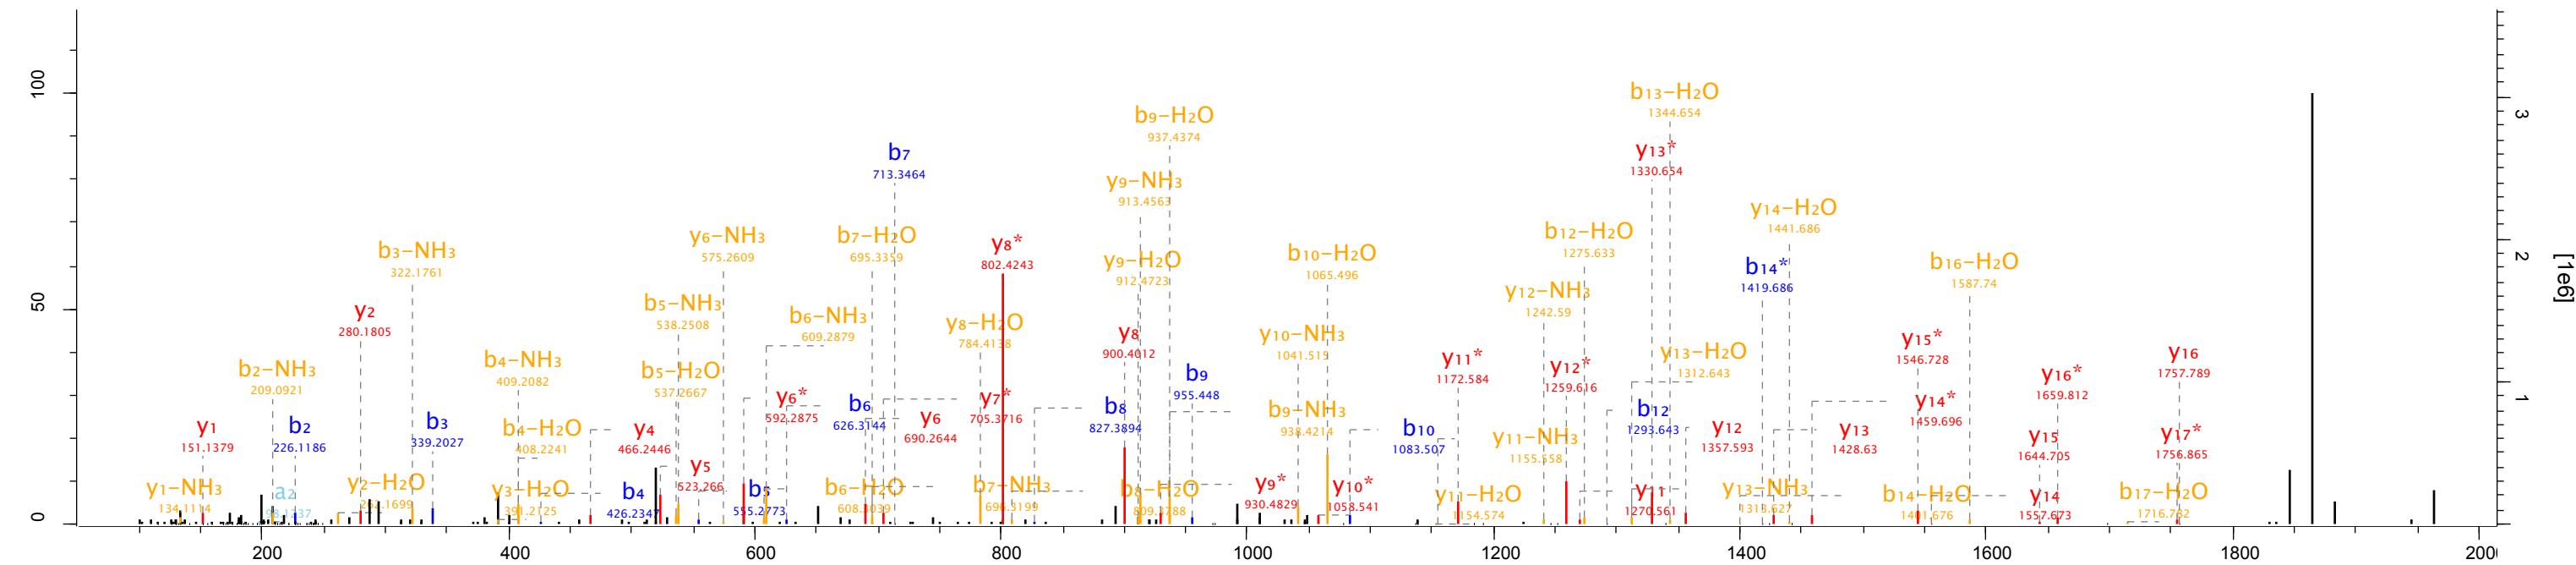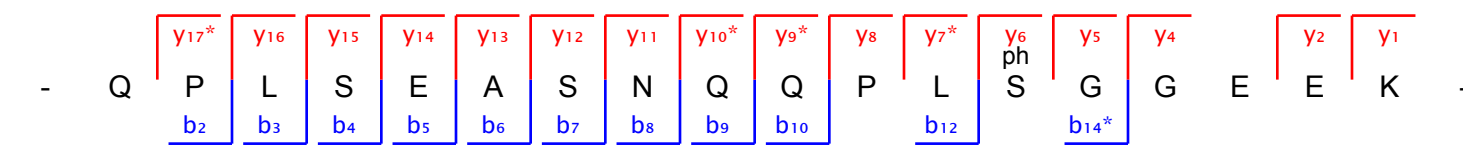

Raw file: 20150812\_A375SR\_Phospho\_BR1\_06  
 Scan: 1200 Method: FTMS; HCD Score: 152 m/z: 664.77 Gene names: NCAPH

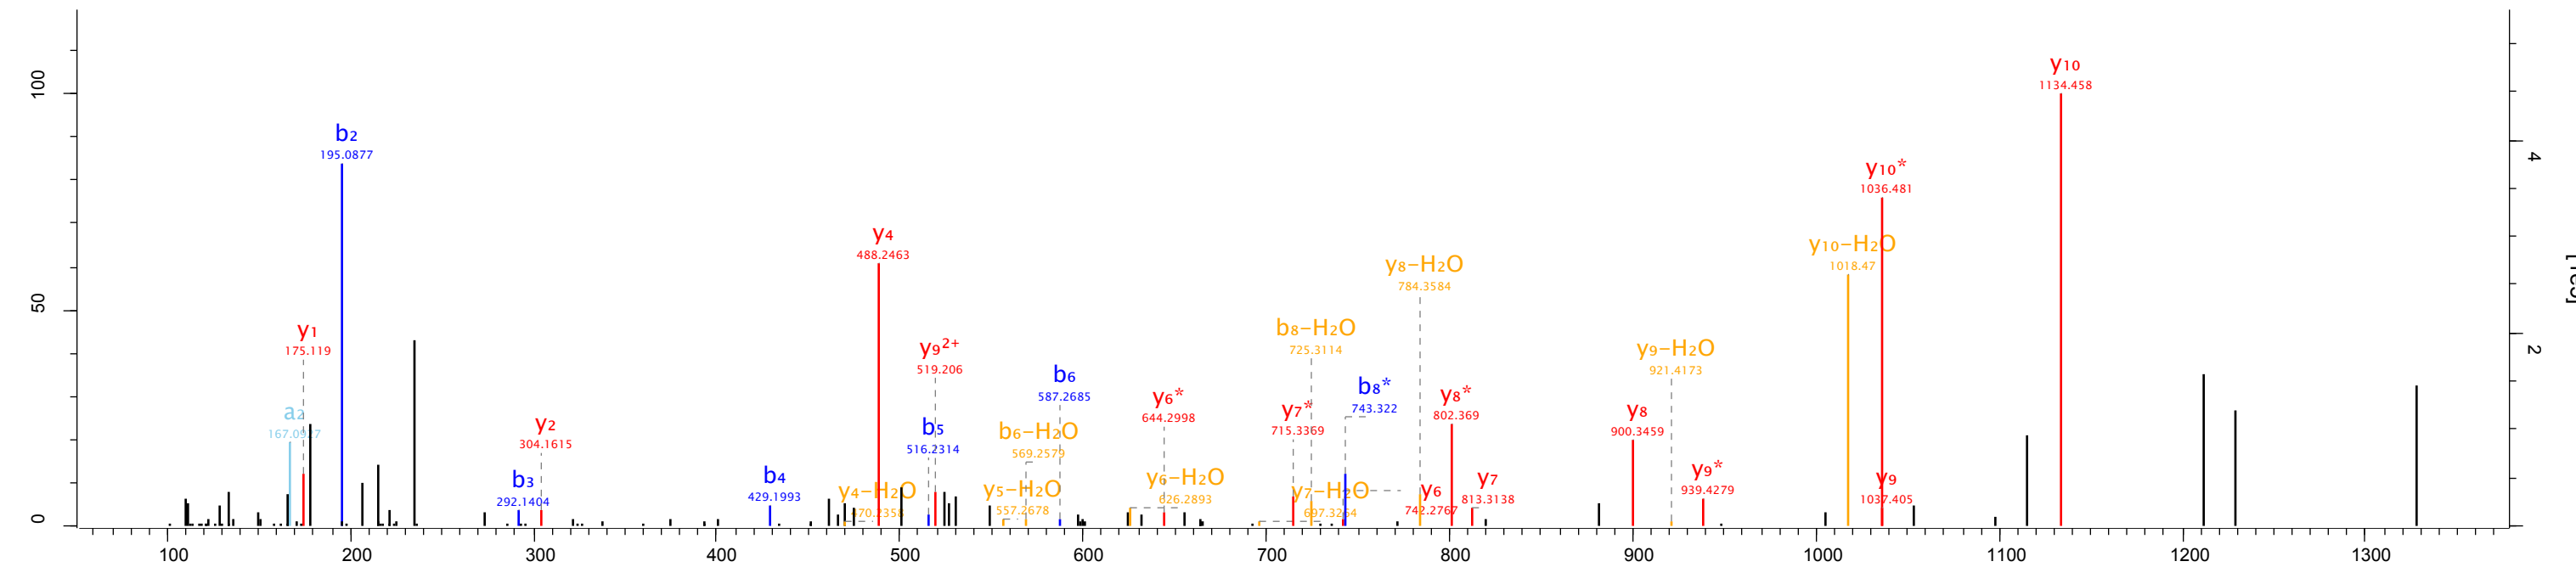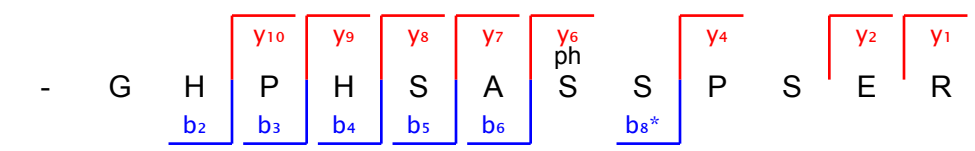



Raw file 20150812\_A375SR\_Phospho\_BR1\_06 Scan 12160 Method FTMS; HCD Score 162.13 m/z 619.33 Gene names ADNP

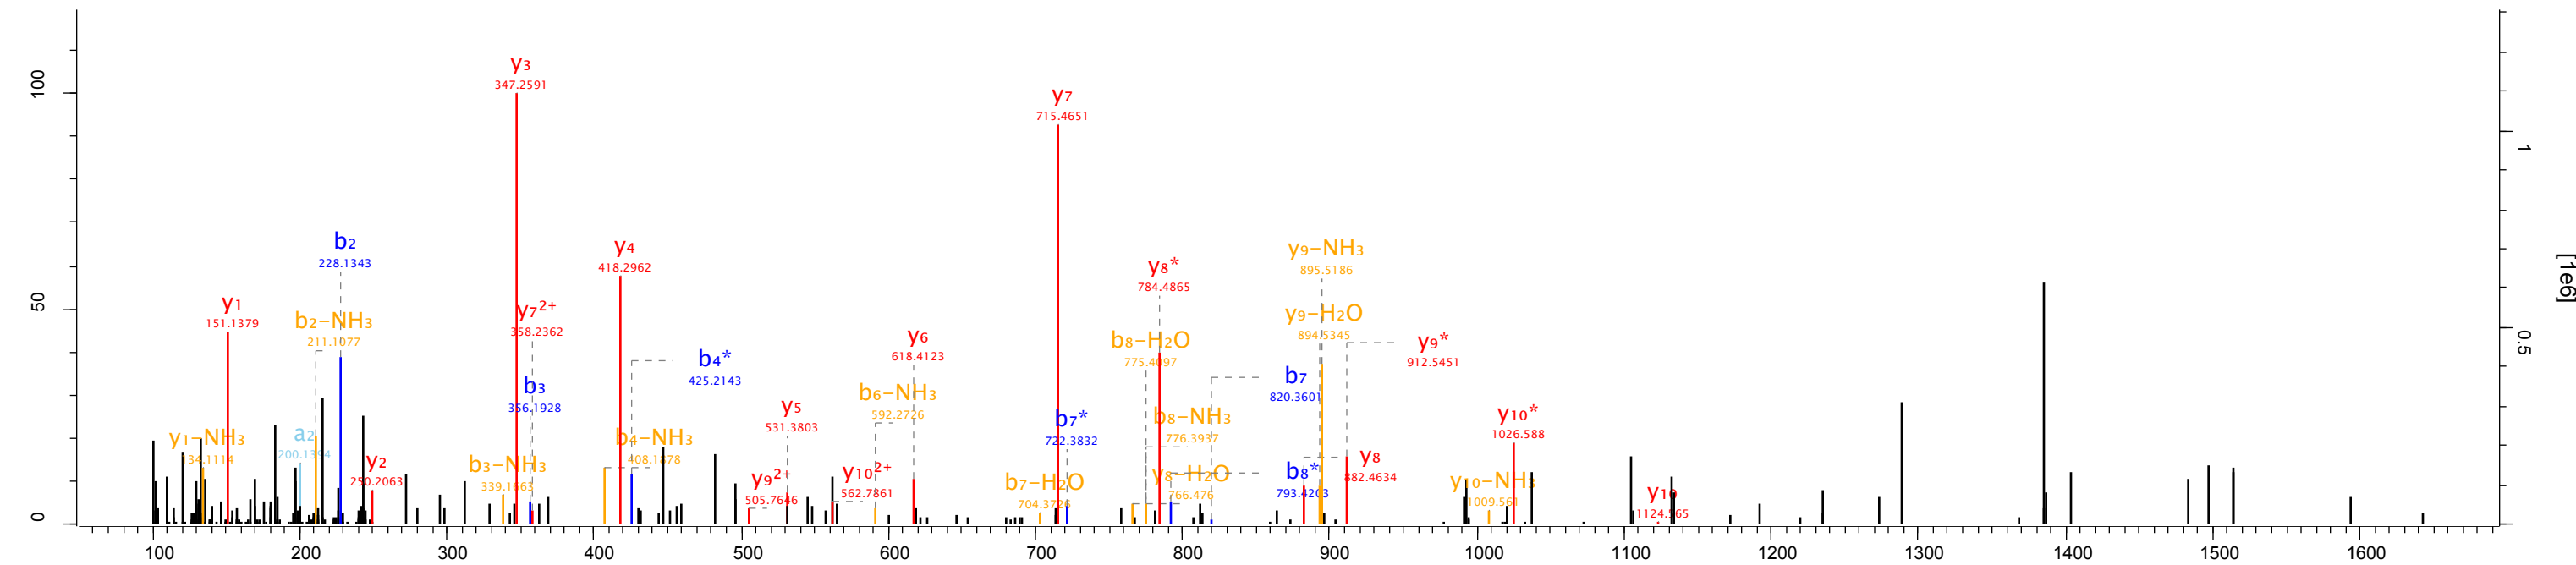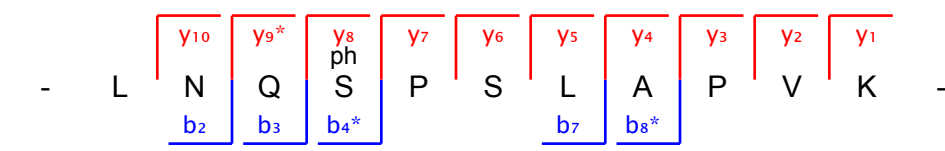

Raw file 20150812\_A375SR\_Phospho\_BR1\_06 Scan 12300 Method FTMS; HCD Score 127.53 m/z 632.84 Gene names ZNF106

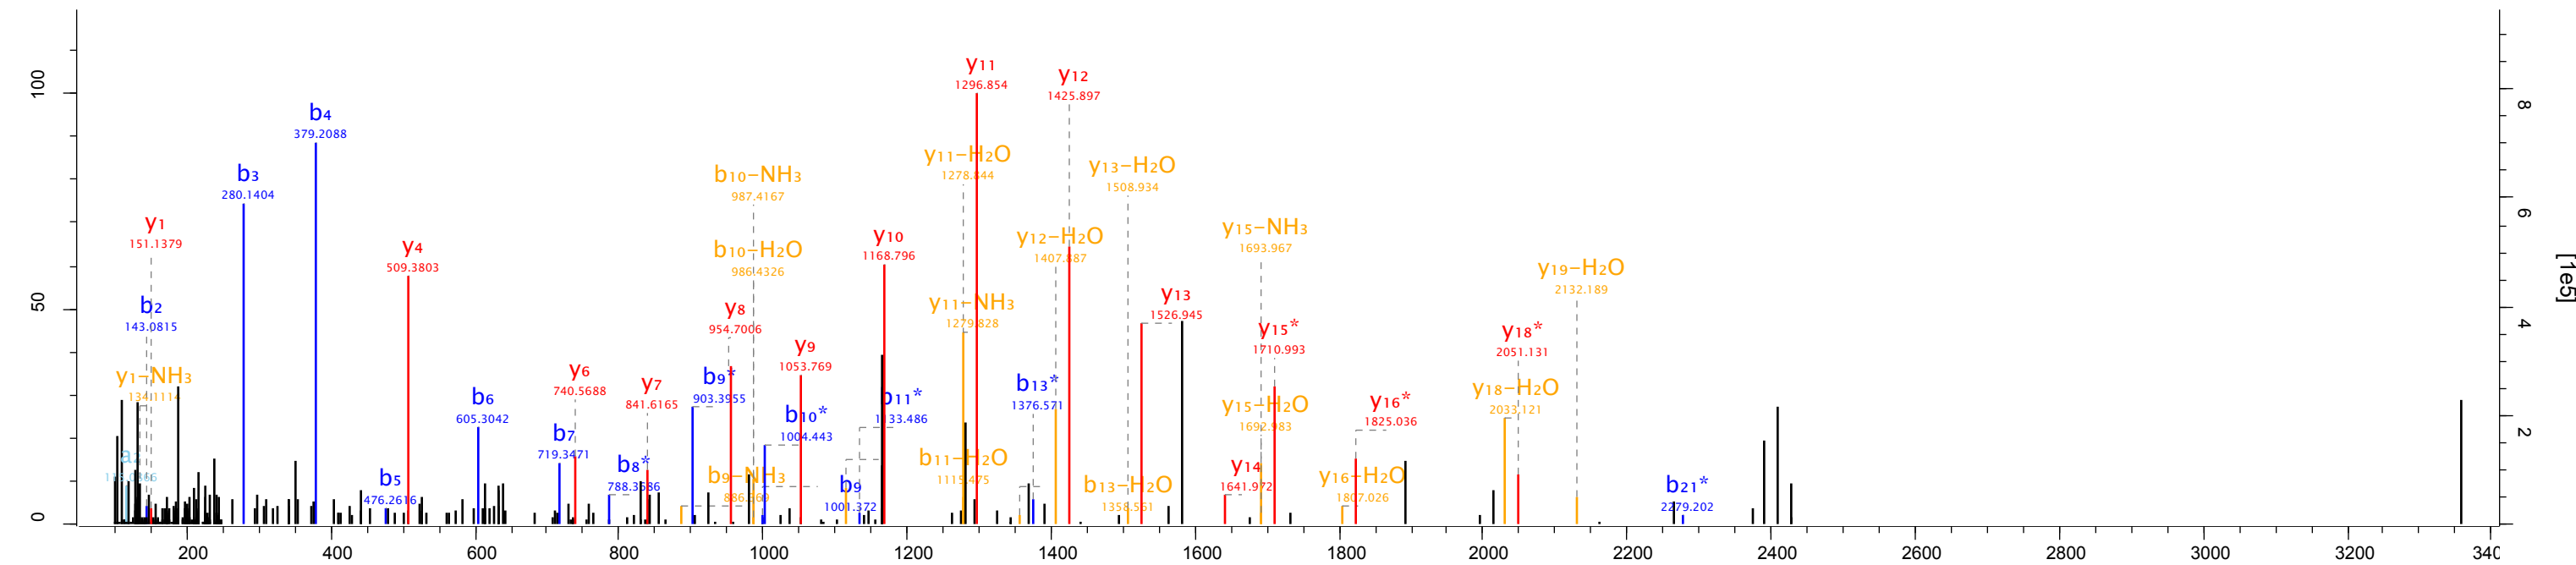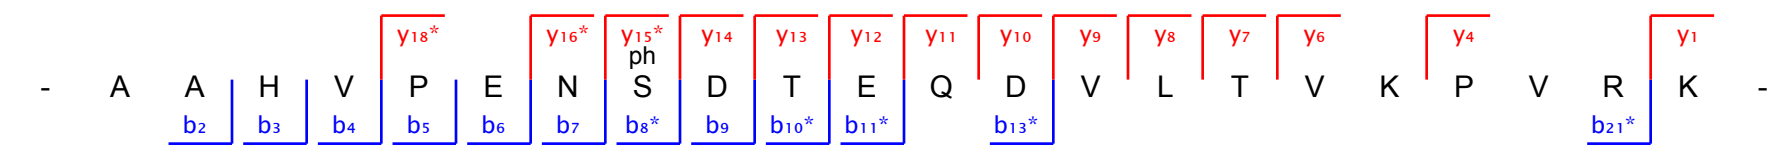

Raw file: 20150812\_A375SR\_Phospho\_BR1\_06  
 Scan: 1260 Method: FTMS; HCD Score: 69.82 m/z: 553.7 Gene names: EEF1D

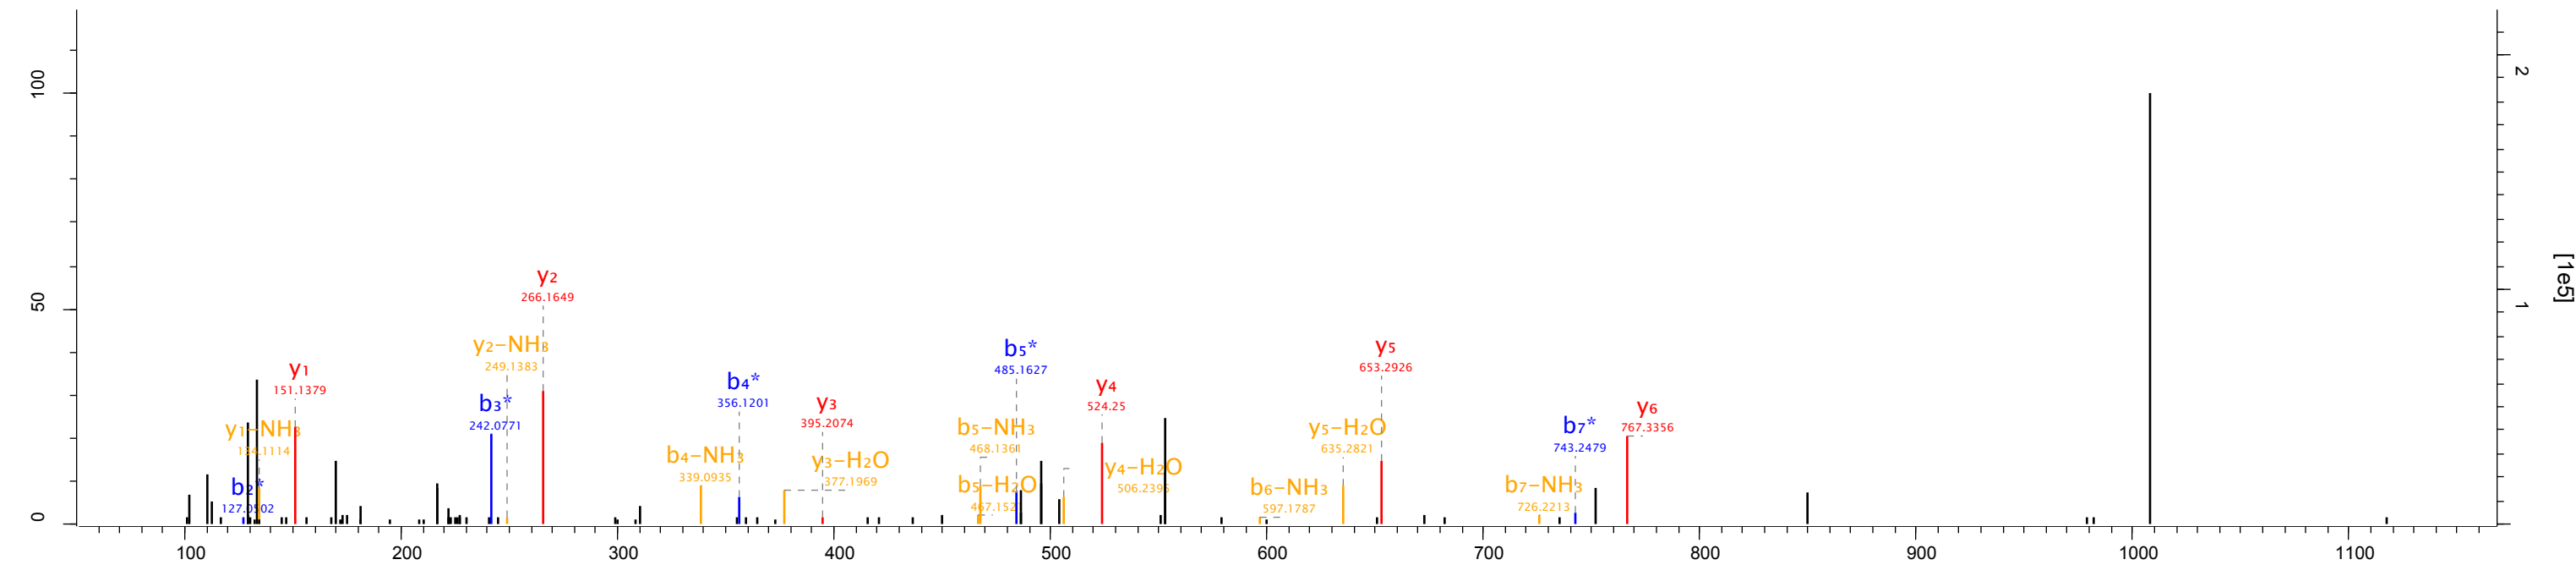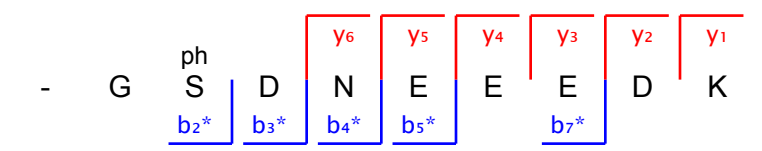

Raw file Scan Method Score m/z Gene names  
 20150812\_A375SR\_Phospho\_BR1\_06 13150 FTMS; HCD 247.85 722.99 SERBP1

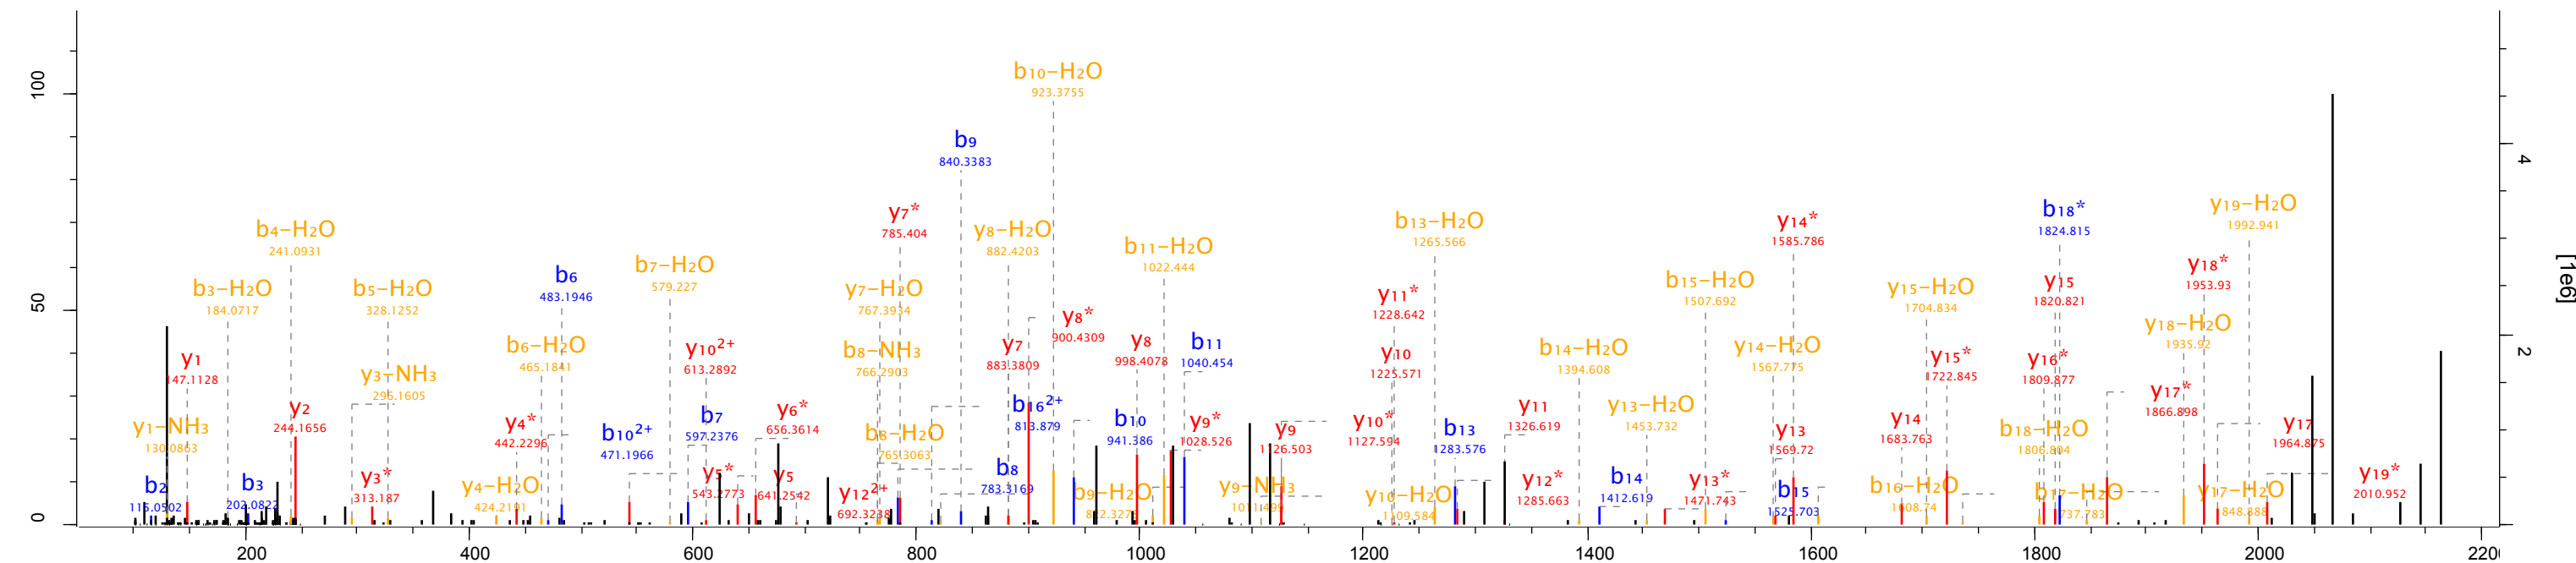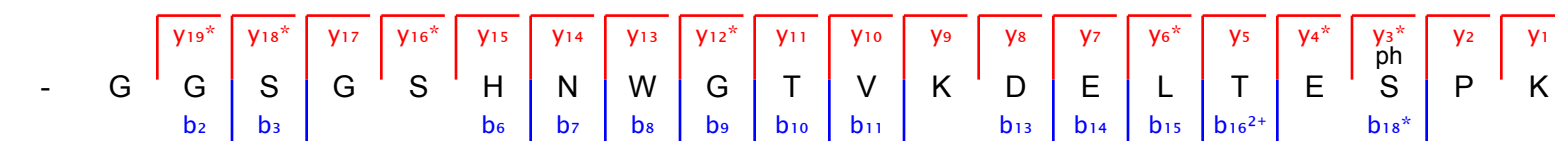

Raw file: 20150812\_A375SR\_Phospho\_BR1\_06  
 Scan: 13560 Method: FTMS; HCD Score: 166.49 m/z: 831.86 Gene names: LIMCH1

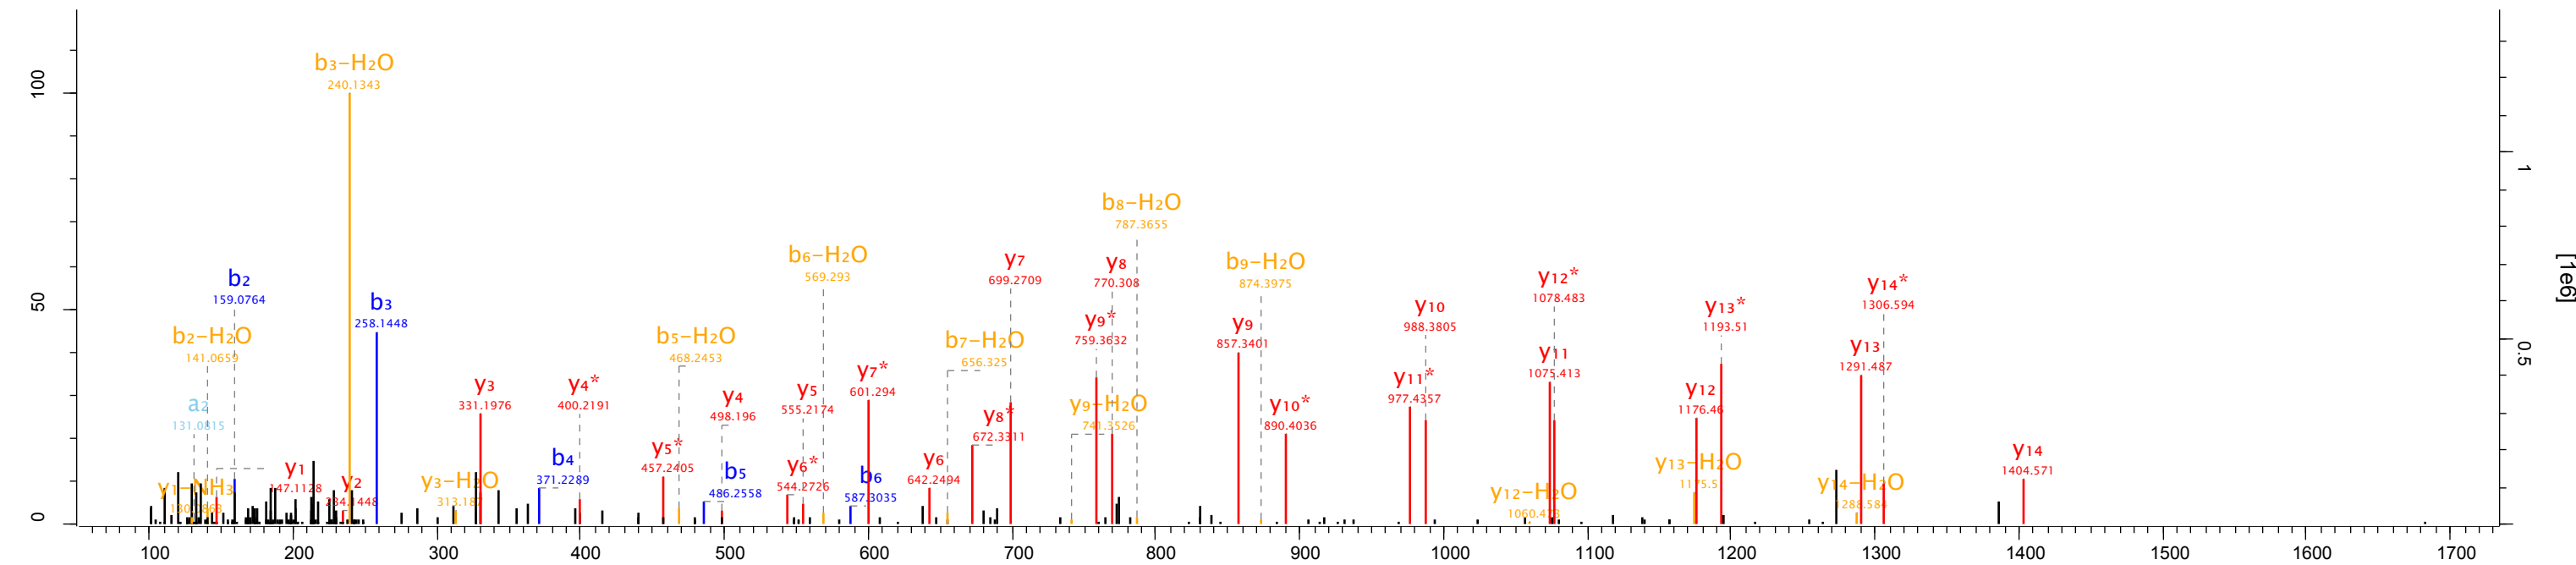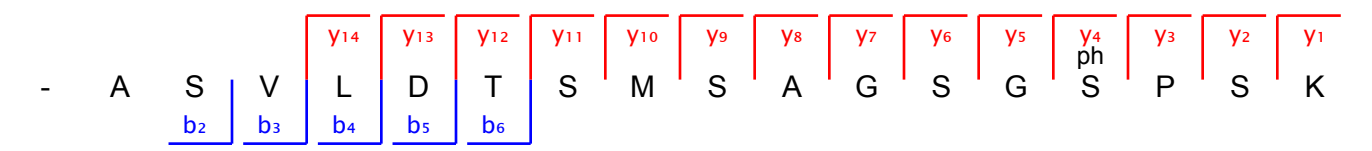

Raw file: 20150812\_A375SR\_Phospho\_BR1\_06  
 Scan: 13660 Method: FTMS; HCD Score: 123.59 m/z: 750.89 Gene names: ERCC6-PGBD3;ERCC6

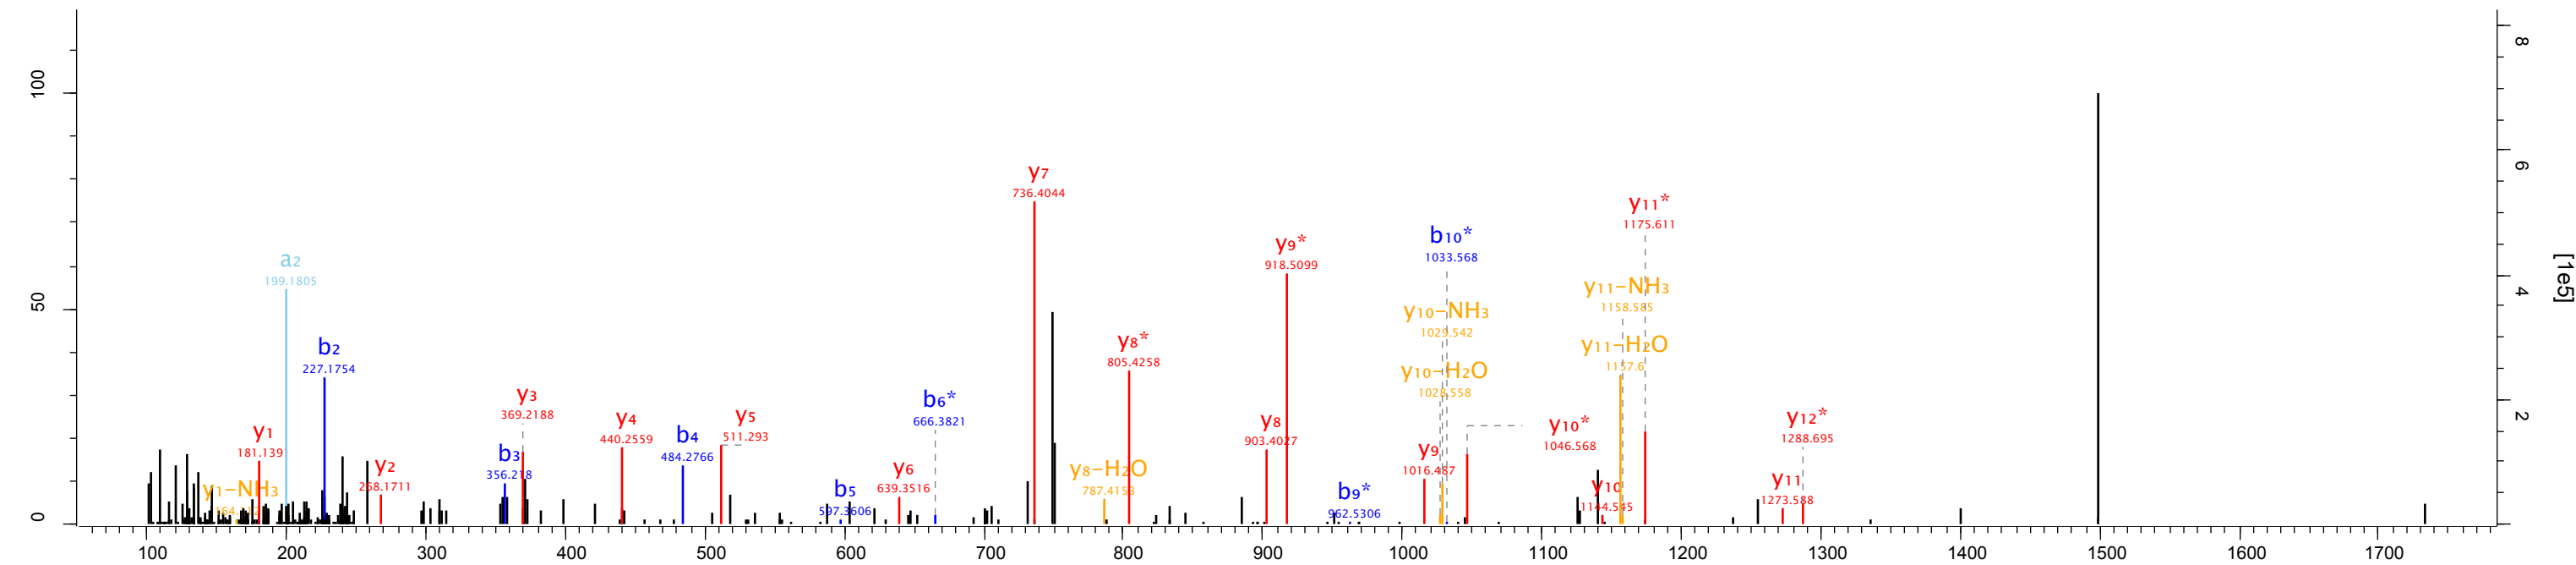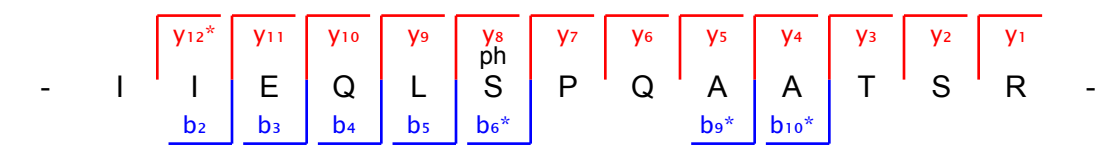

Raw file: 20150812\_A375SR\_Phospho\_BR1\_06  
 Scan: 14270 Method: FTMS; HCD Score: 165.17 m/z: 835.79 Gene names: STAU1

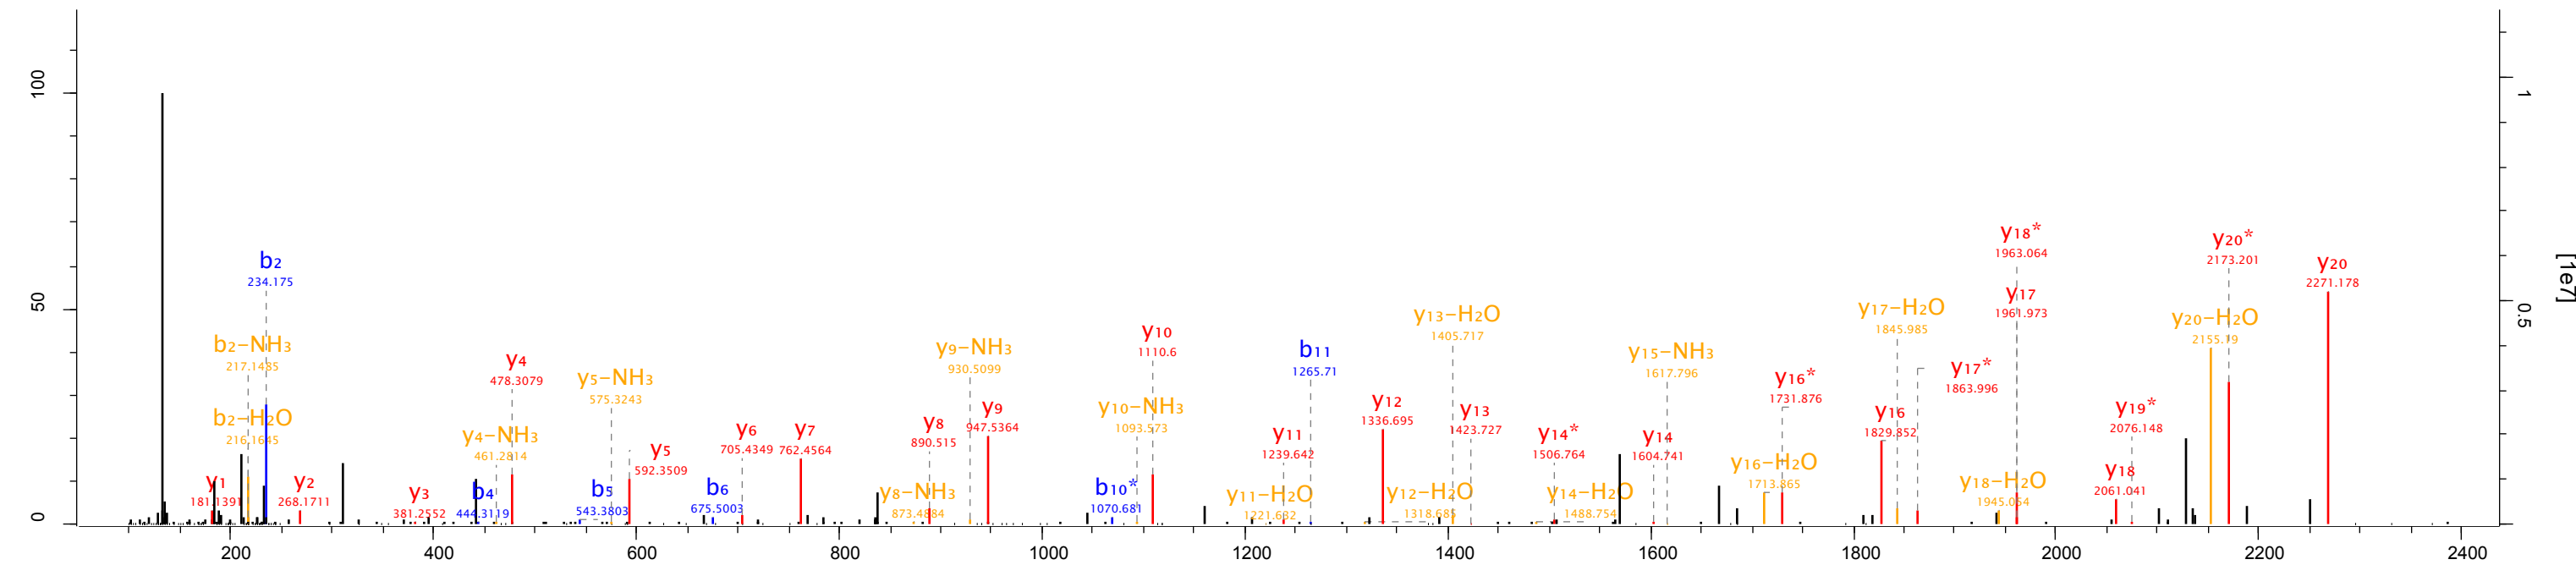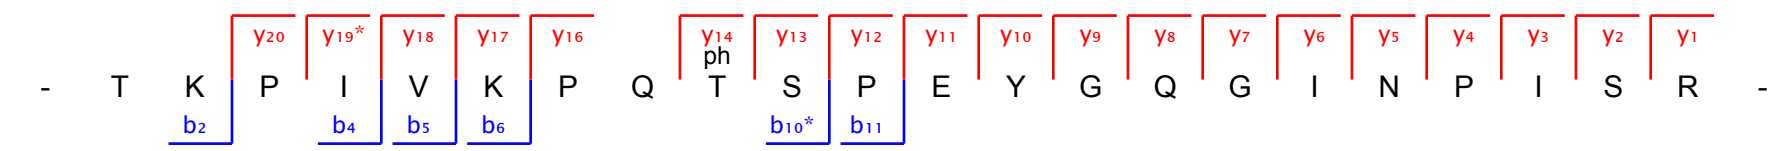

Raw file: 20150812\_A375SR\_Phospho\_BR1\_06  
 Scan: 15020 Method: FTMS; HCD Score: 85.81 m/z: 614.28 Gene names: ACSS2

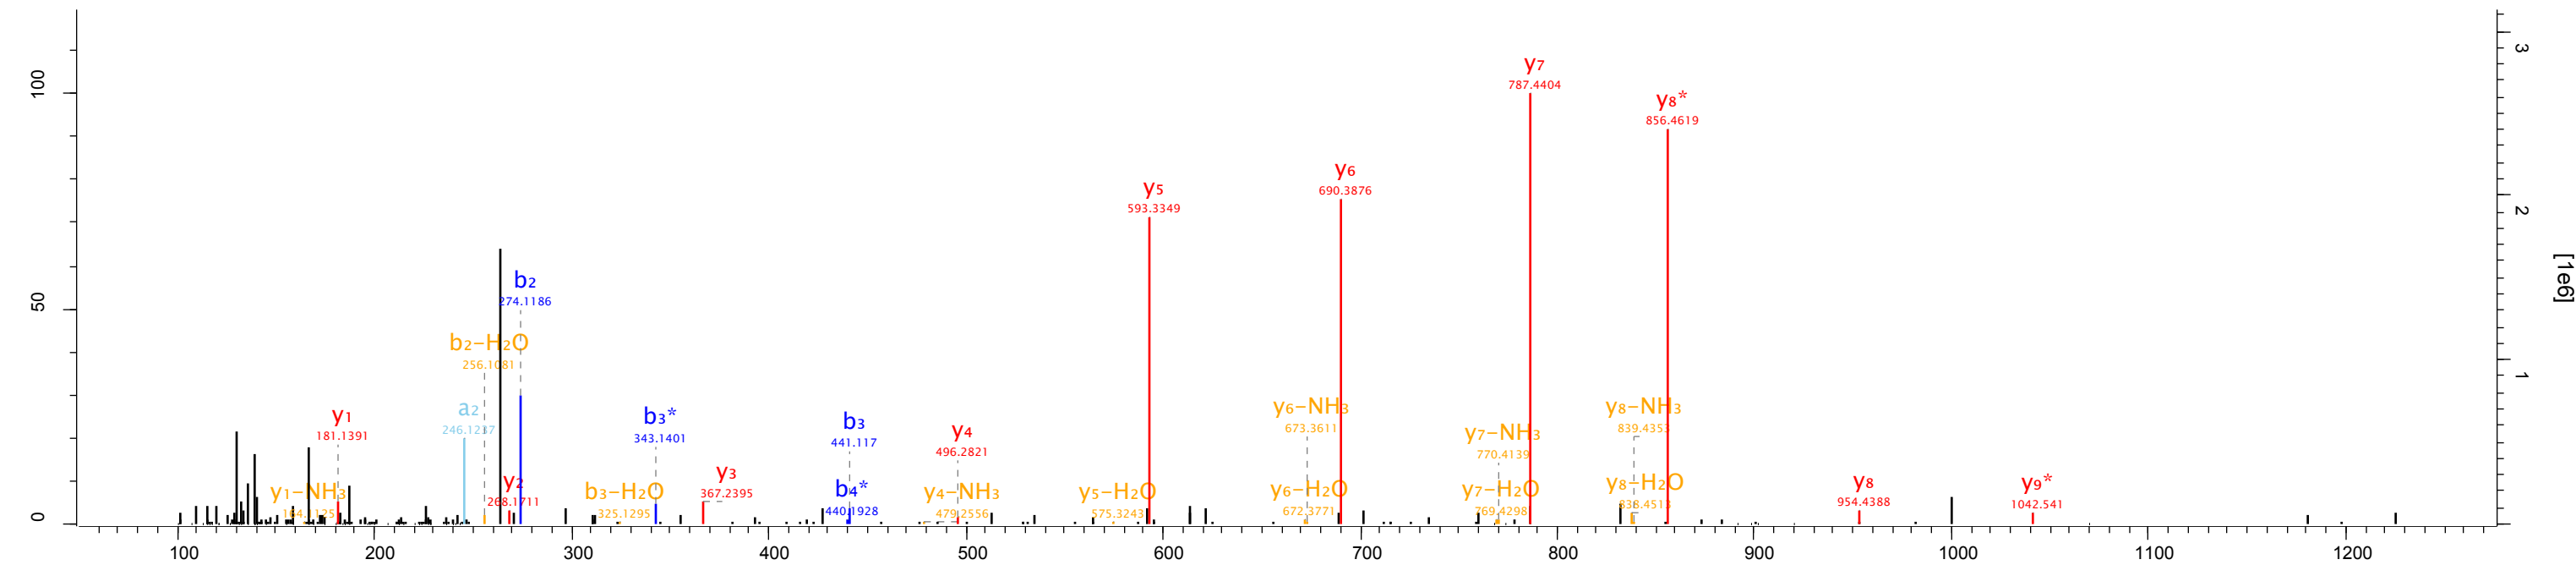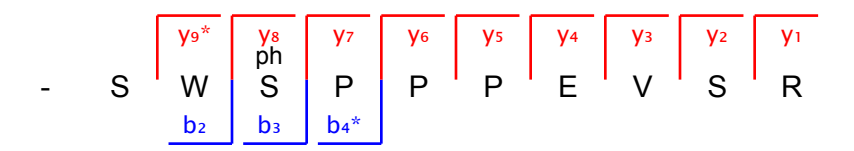



Raw file  
20150812\_A375SR\_Phospho\_BR1\_06

Scan 1530 Method FTMS; HCD Score 192.01 m/z 906.41 Gene names LMNA

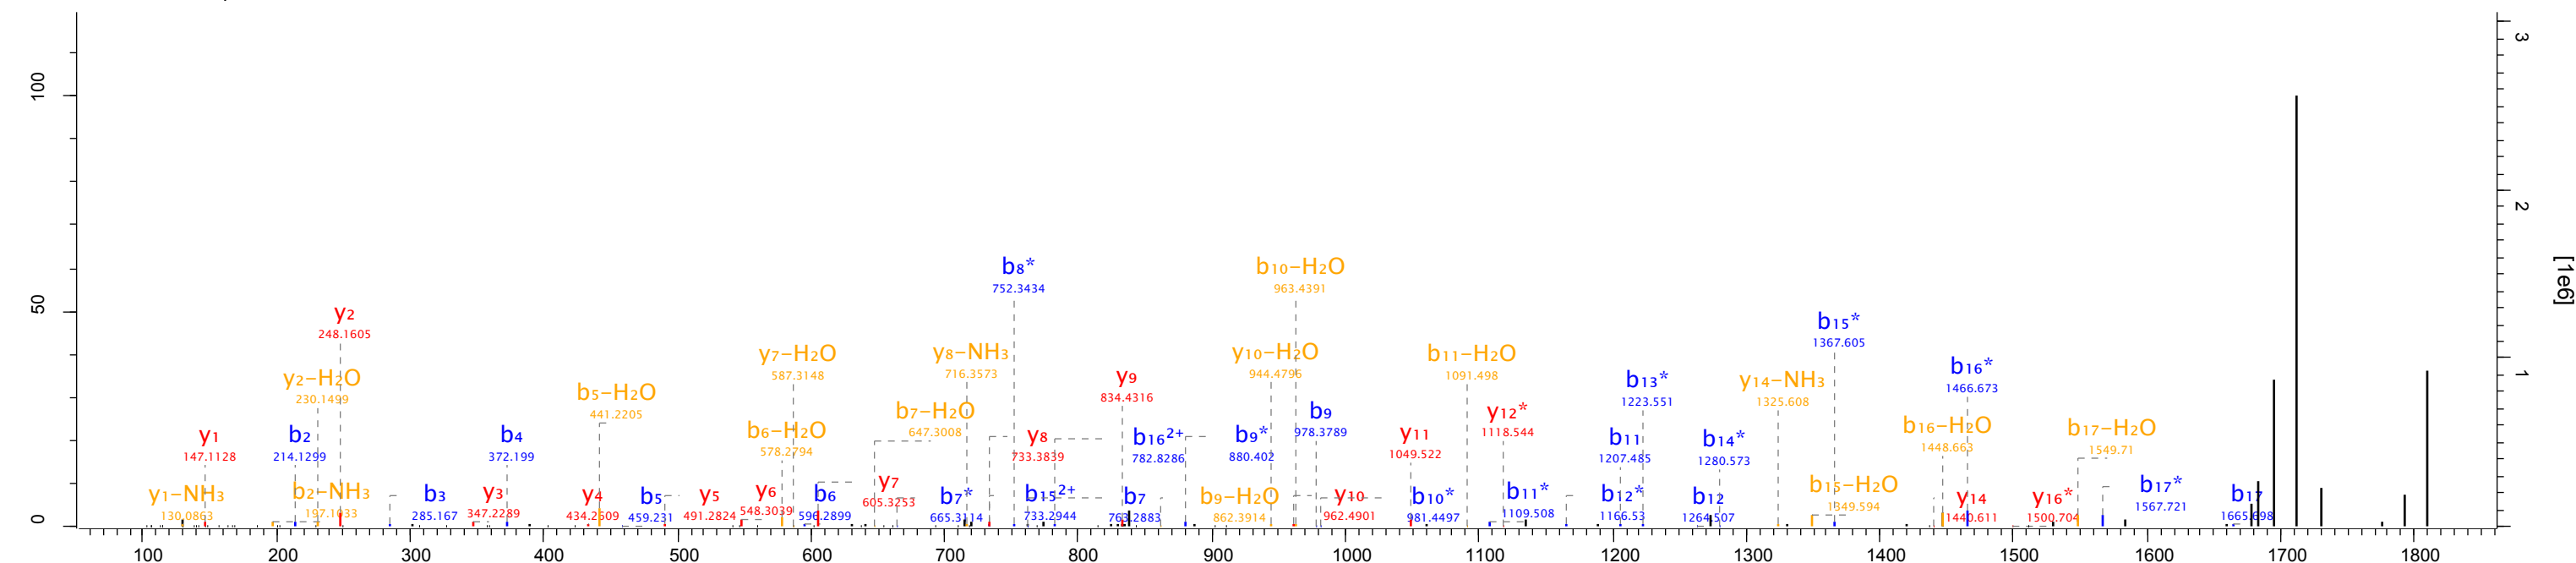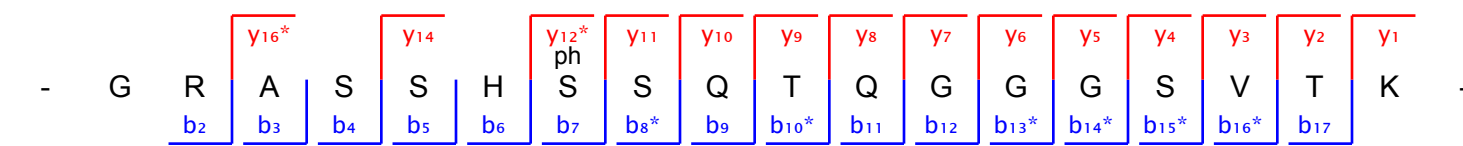

Raw file: 20150812\_A375SR\_Phospho\_BR1\_06  
 Scan: 1640 Method: FTMS; HCD Score: 53.56 m/z: 549.59 Gene names: BTBD10

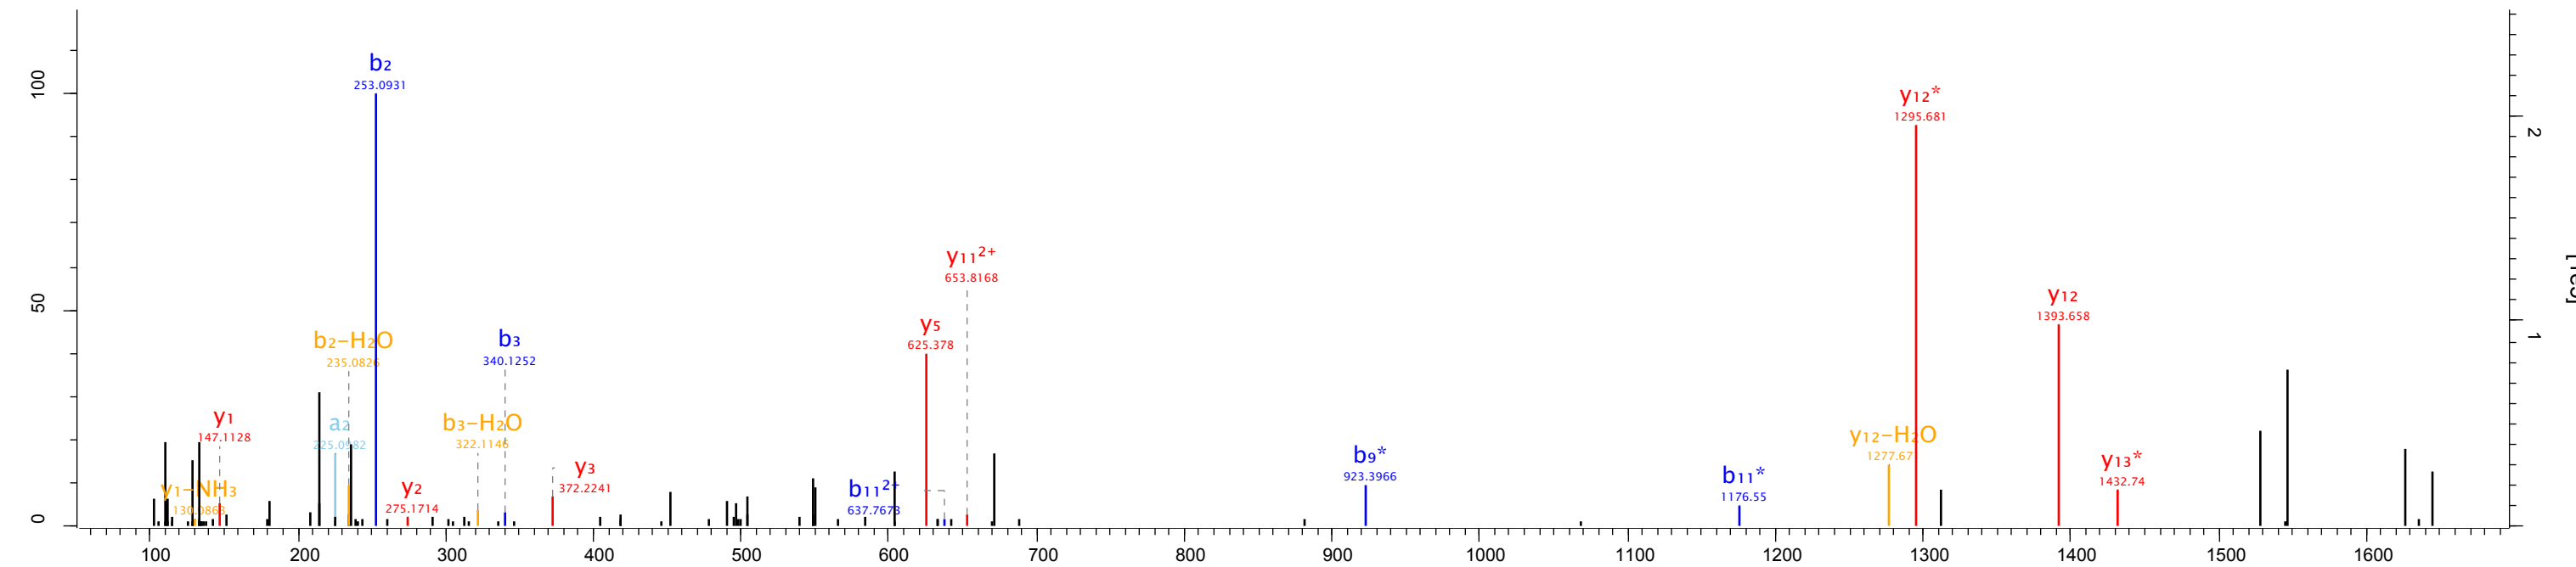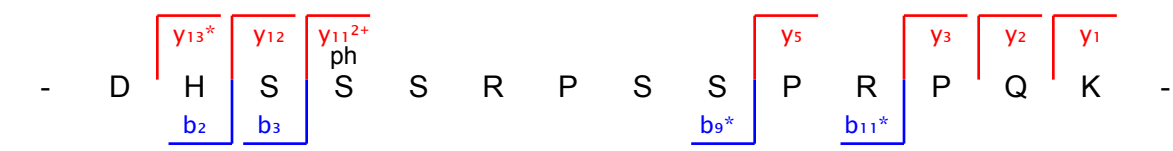

Raw file 20150812\_A375SR\_Phospho\_BR1\_06 Scan 17430 Method FTMS; HCD Score 65.23 m/z 796.37 Gene names ATXN2

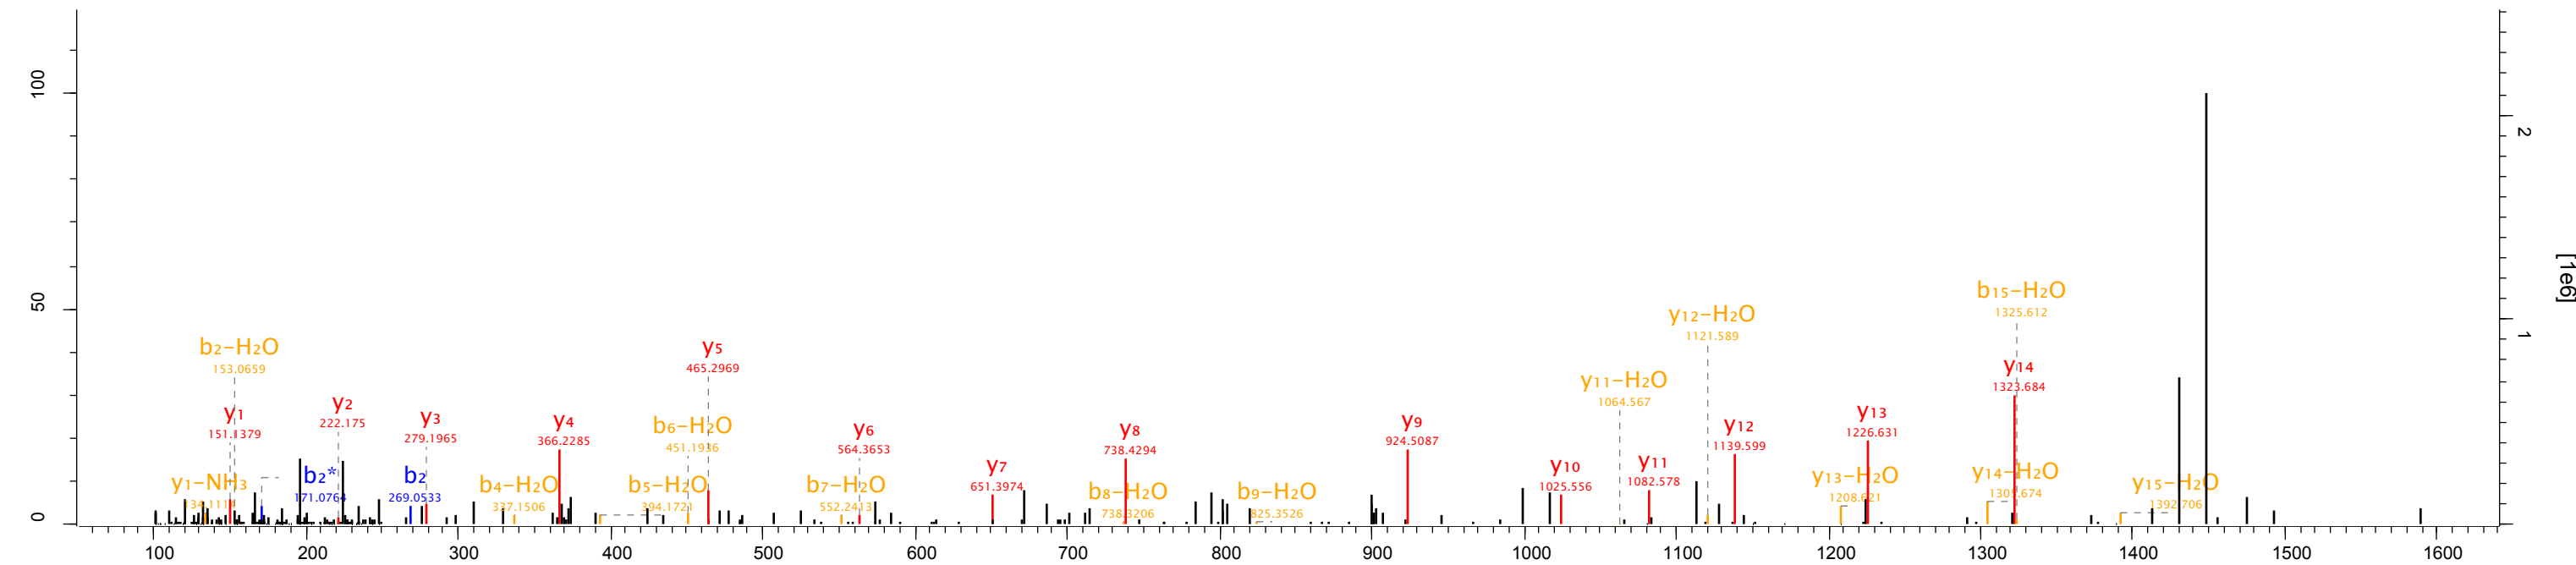

Sequence: - pH T S P S G G T W S S V V S G A K -  
 Fragmentation: b2 (blue), y1-y15 (red)

Raw file: 20150812\_A375SR\_Phospho\_BR1\_06  
 Scan: 18360 Method: FTMS; HCD Score: 112.06 m/z: 772.84 Gene names: SHB

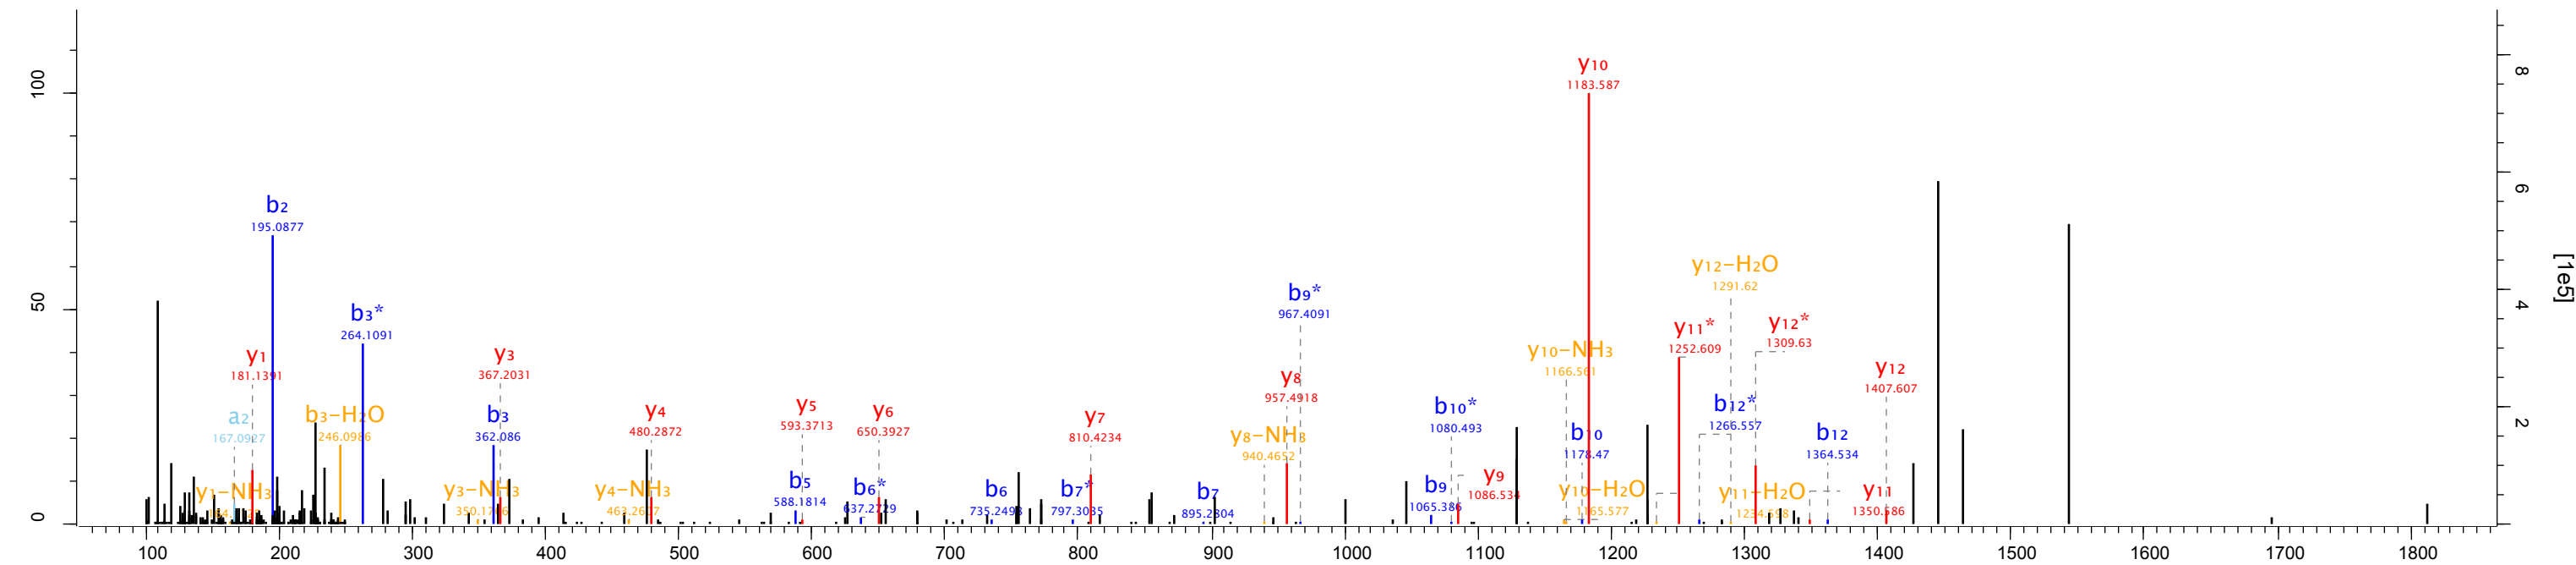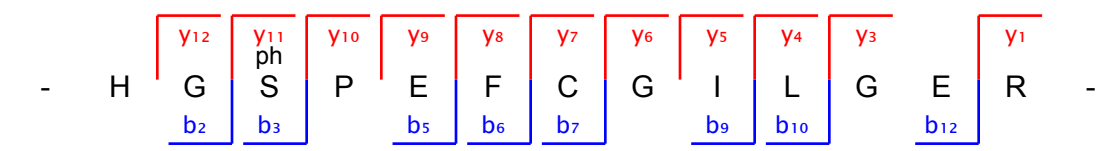

Raw file  
20150812\_A375SR\_Phospho\_BR1\_06

Scan 18760 Method FTMS; HCD Score 102.03 m/z 842.74 Gene names CHAMP1

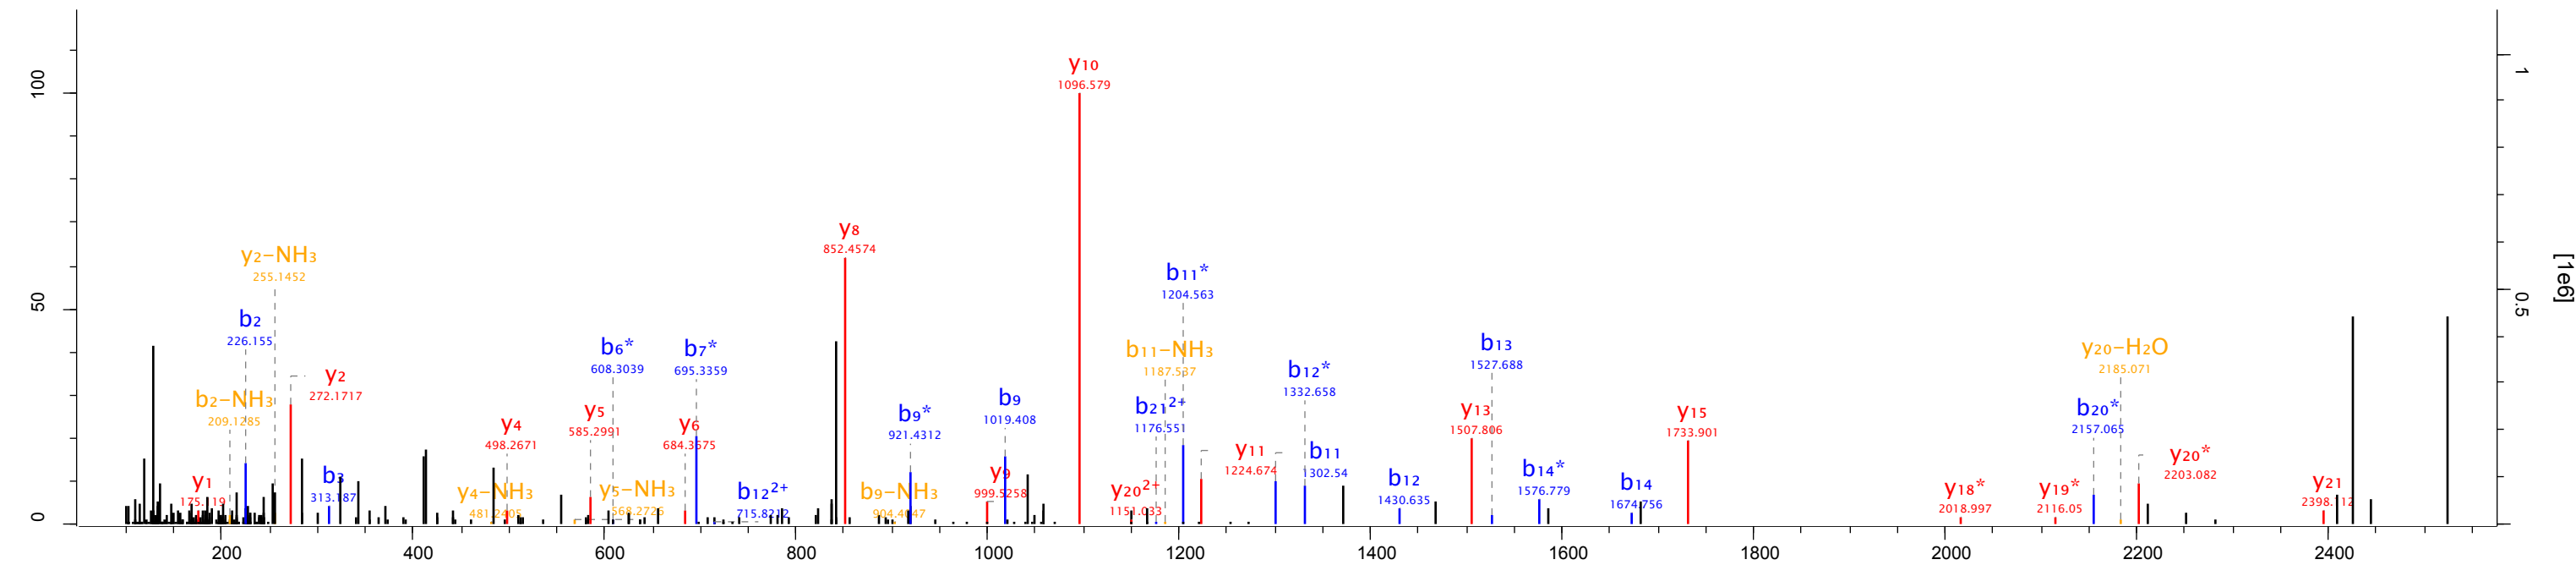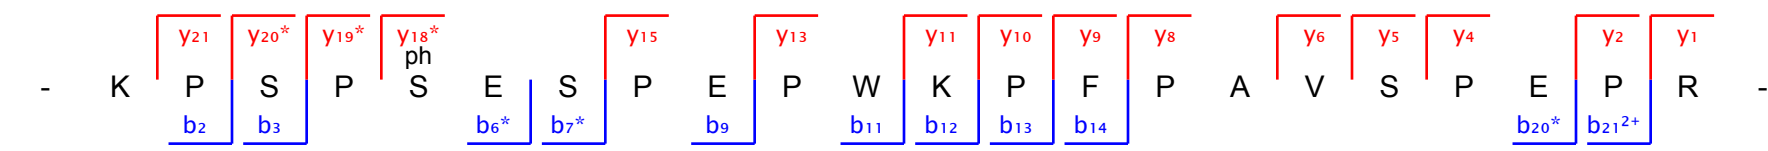

Raw file: 20150812\_A375SR\_Phospho\_BR1\_06  
 Scan: 20290 Method: FTMS; HCD Score: 123.36 m/z: 1244.56 Gene names: WRAP53

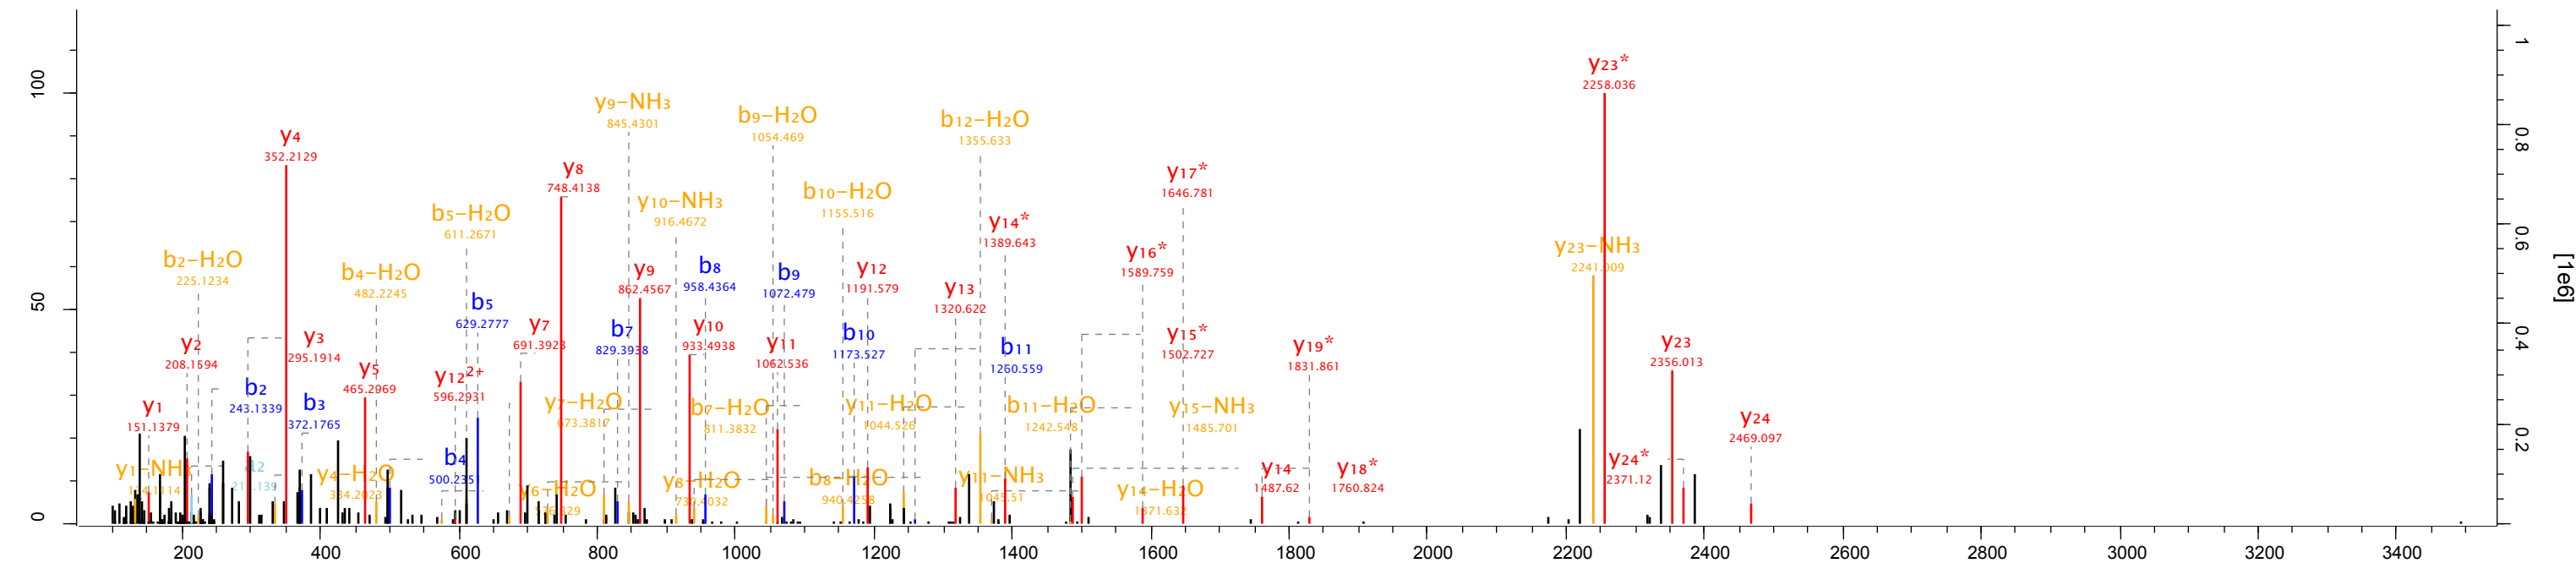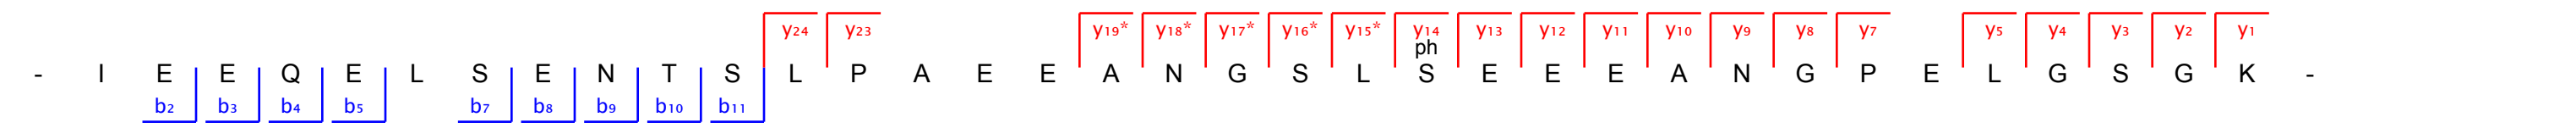

Raw file: 20150812\_A375SR\_Phospho\_BR1\_06  
 Scan: 2040 Method: FTMS; HCD Score: 133.28 m/z: 482.92 Gene names: SLAIN2

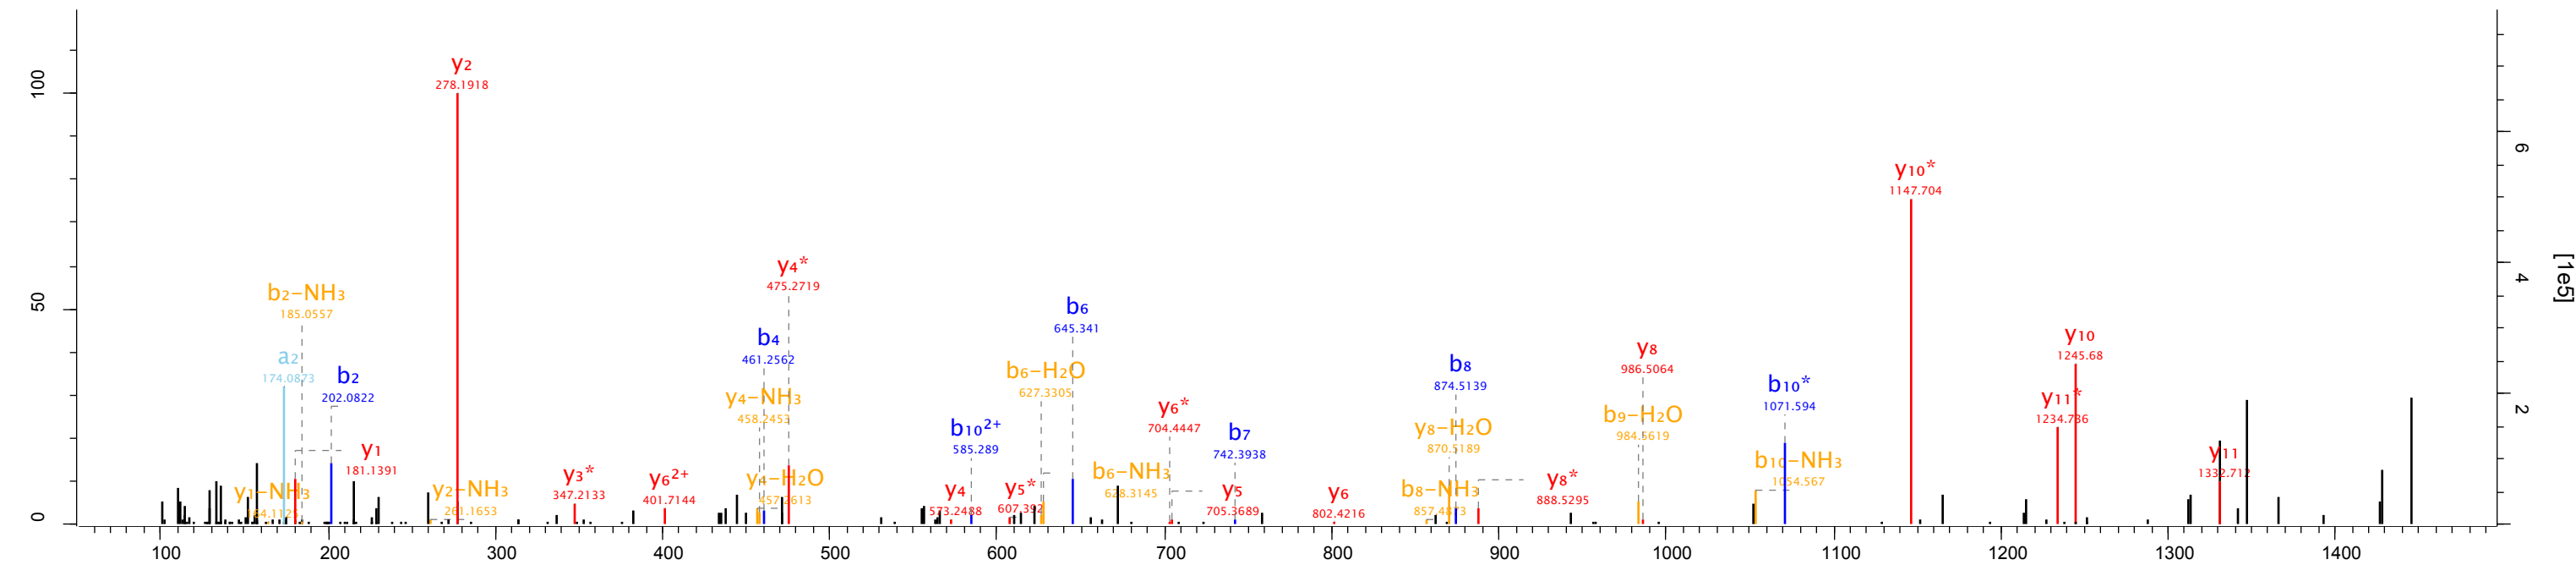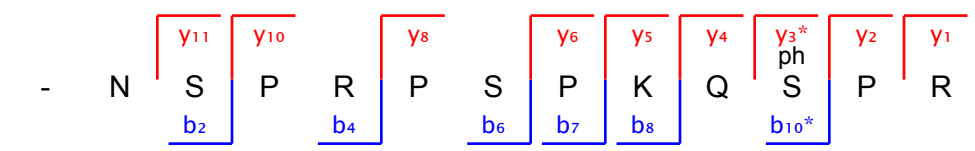

Raw file: 20150812\_A375SR\_Phospho\_BR1\_06  
 Scan: 21390  
 Method: FTMS; HCD  
 Score: 154.32  
 m/z: 1209.89  
 Gene names: SQSTM1

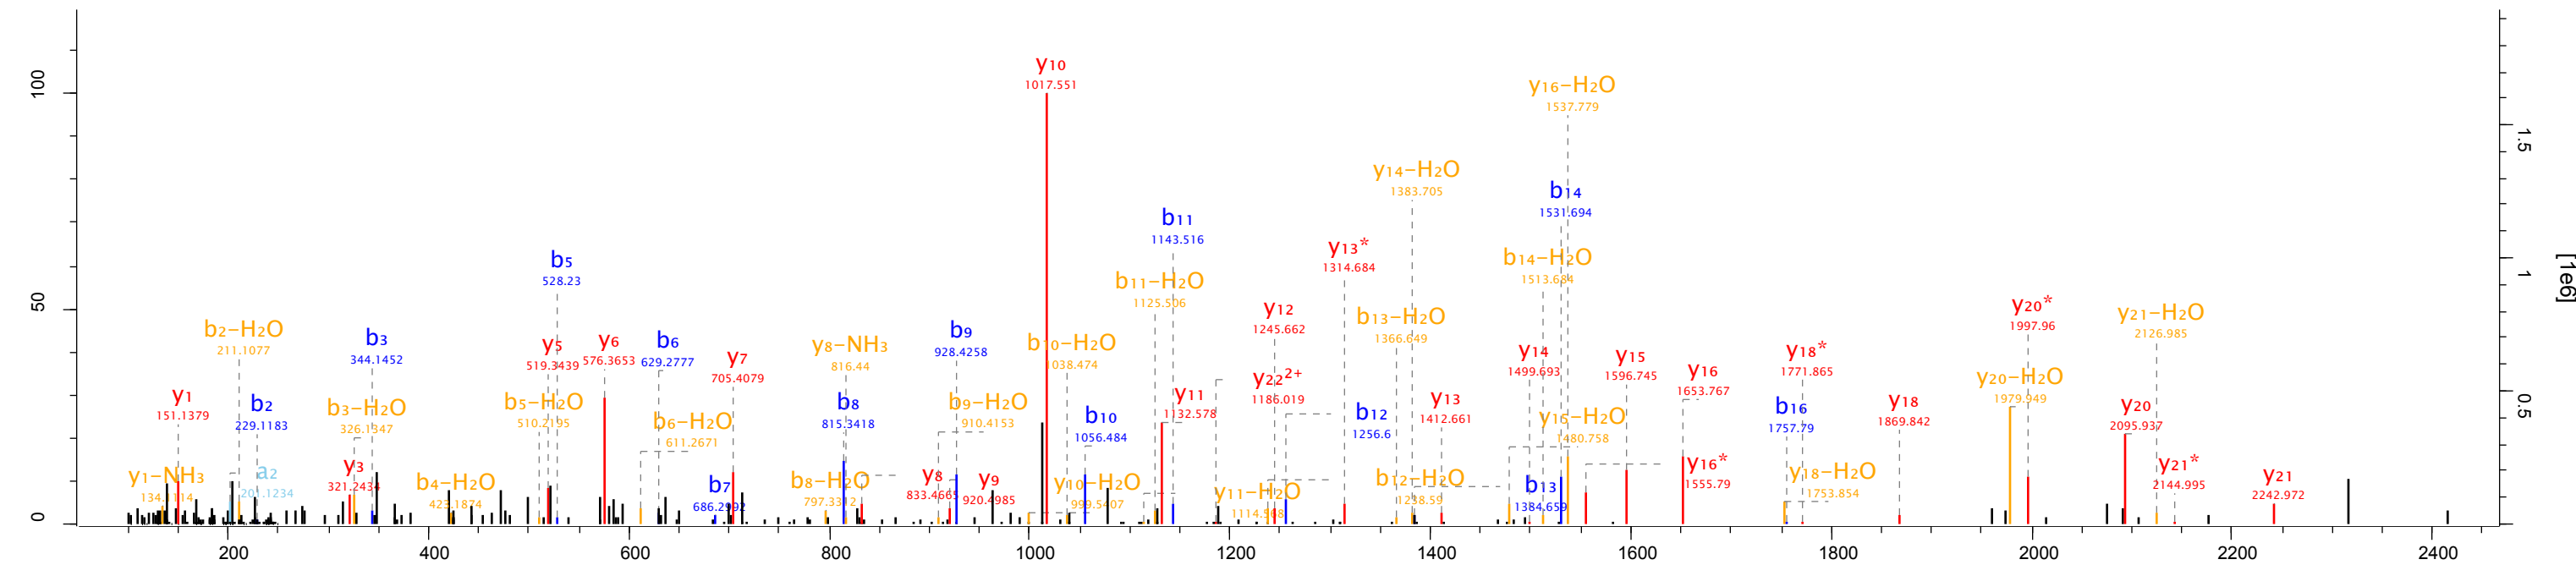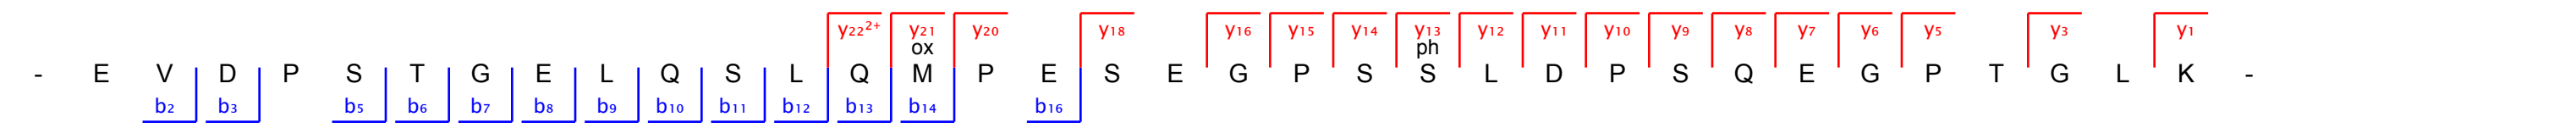



Raw file 20150812\_A375SR\_Phospho\_BR1\_06 Scan 21450 Method FTMS; HCD Score 88.18 m/z 782.76 Gene names ZNF579

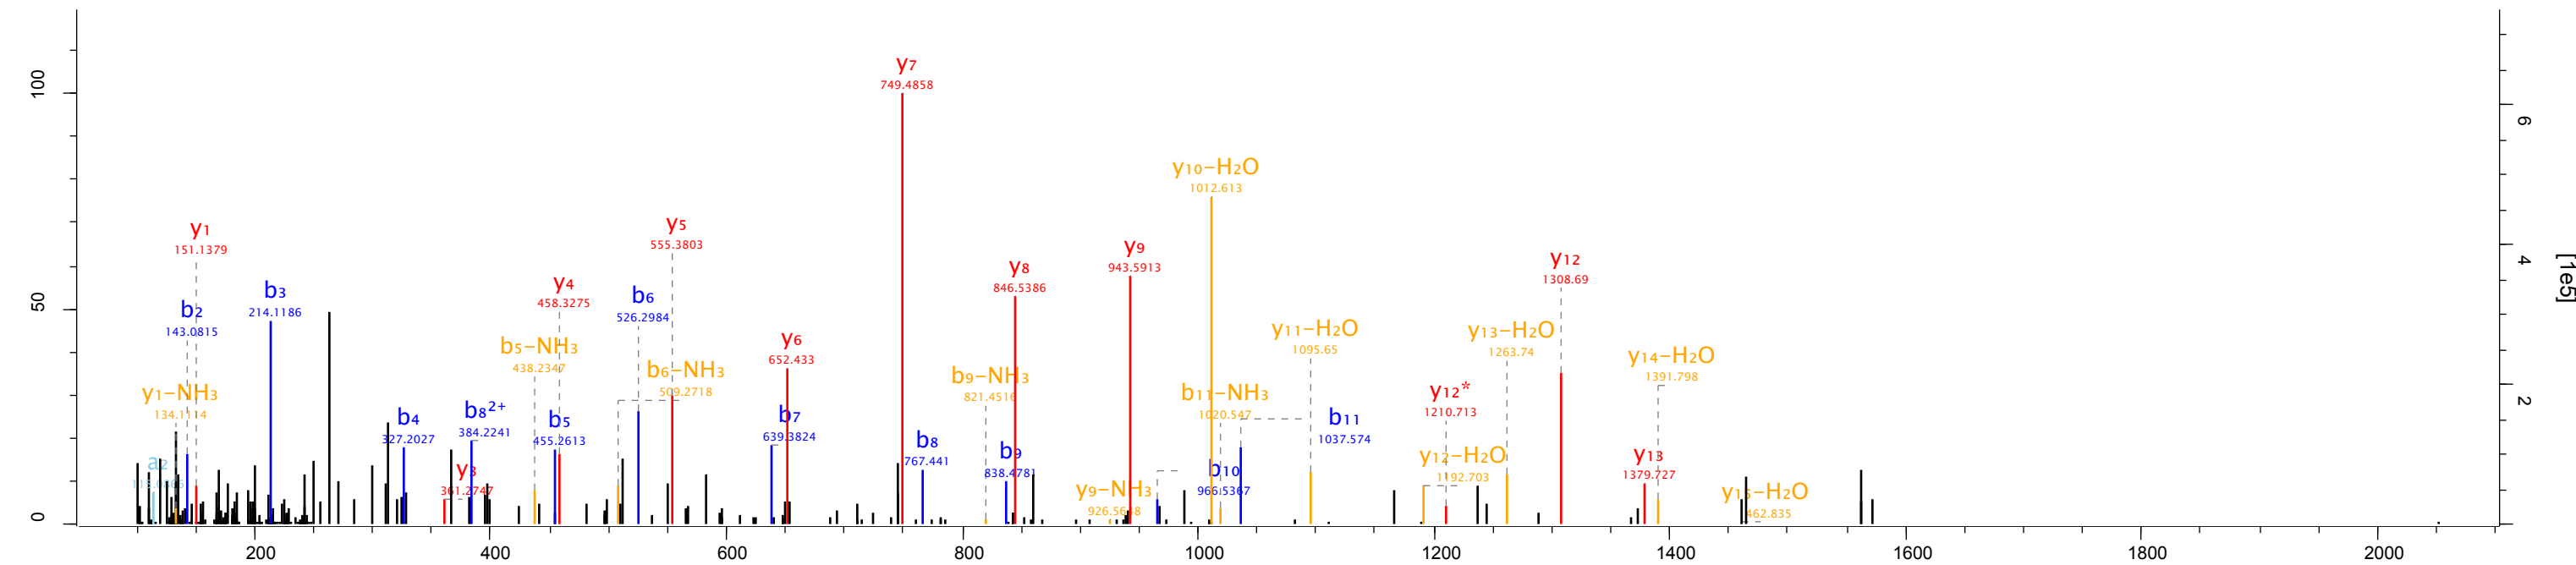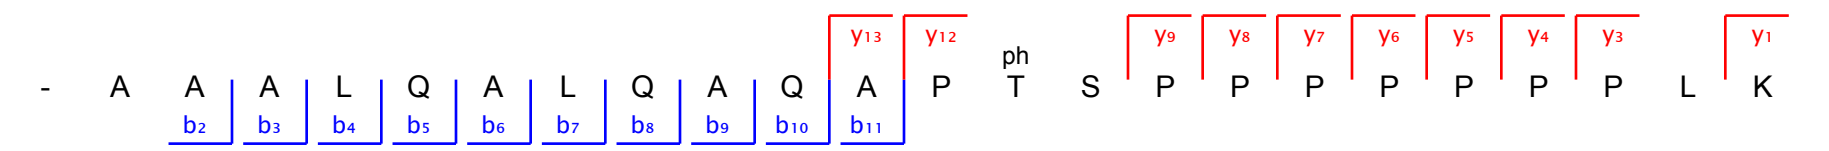

Raw file  
20150812\_A375SR\_Phospho\_BR1\_06

Scan 21830 Method FTMS; HCD Score 151.66 m/z 1300.6 Gene names TOM1L1

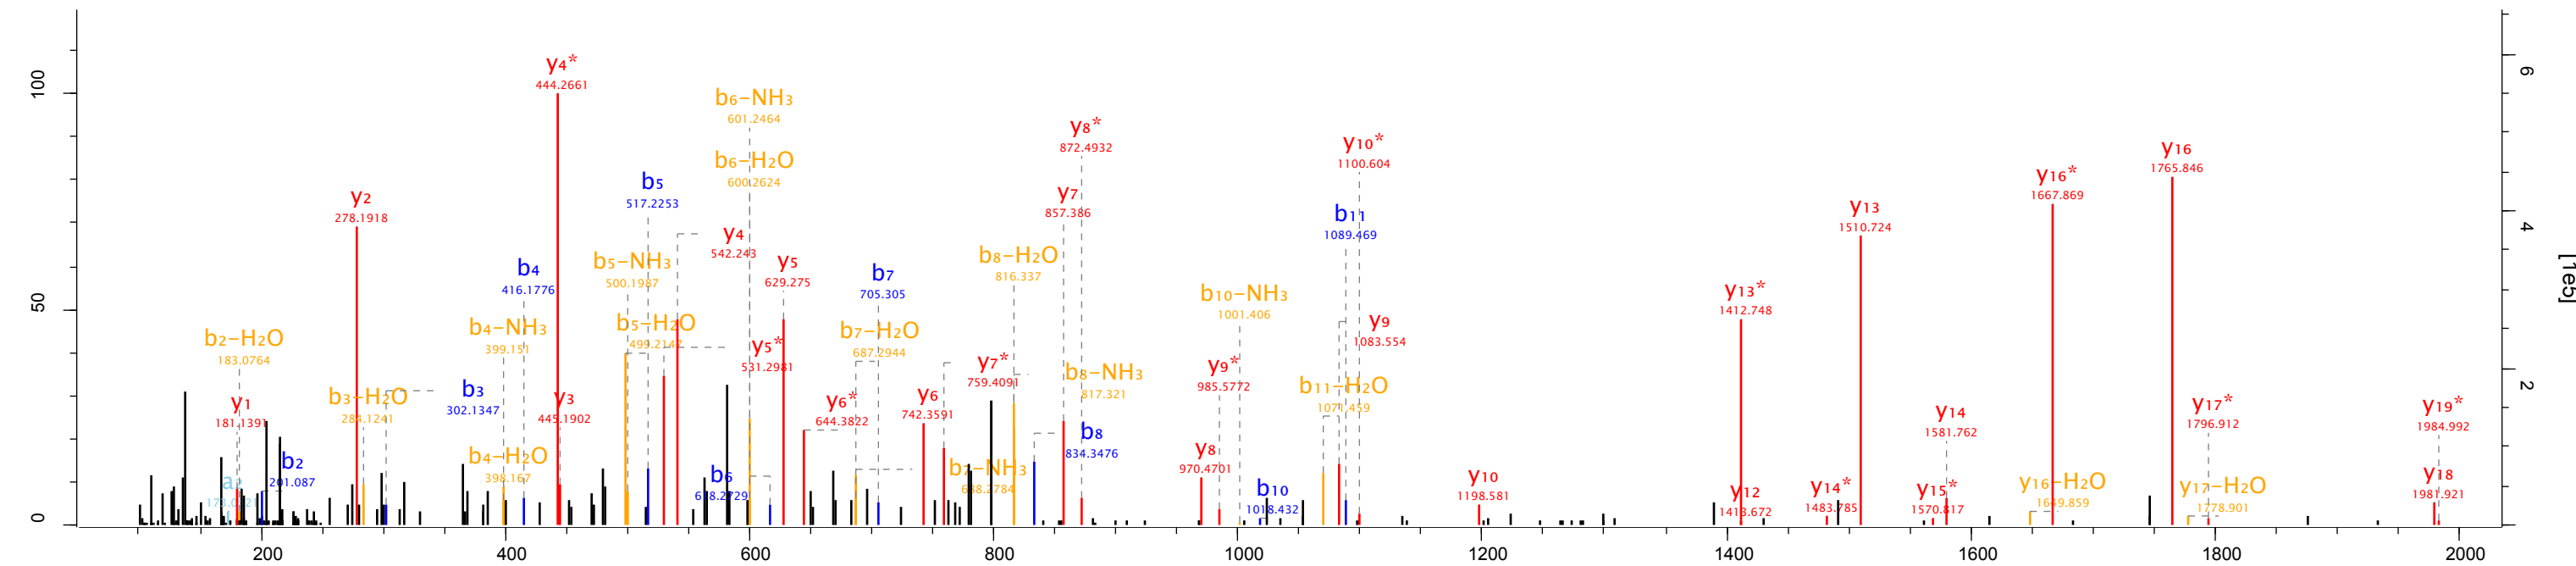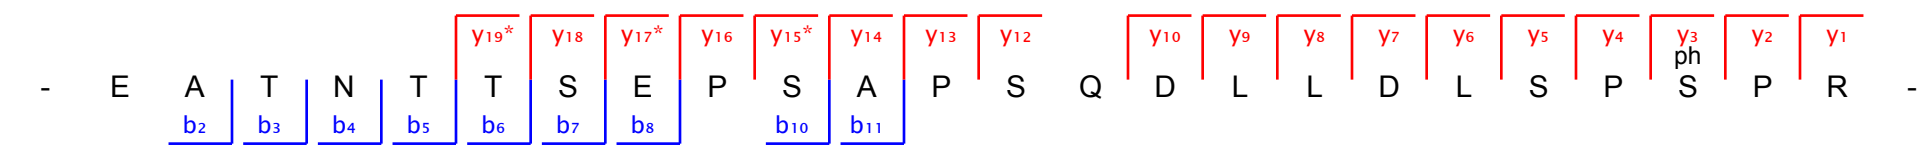

Raw file: 20150812\_A375SR\_Phospho\_BR1\_06  
 Scan: 2350 Method: FTMS; HCD Score: 125.72 m/z: 484.24 Gene names: NPM1

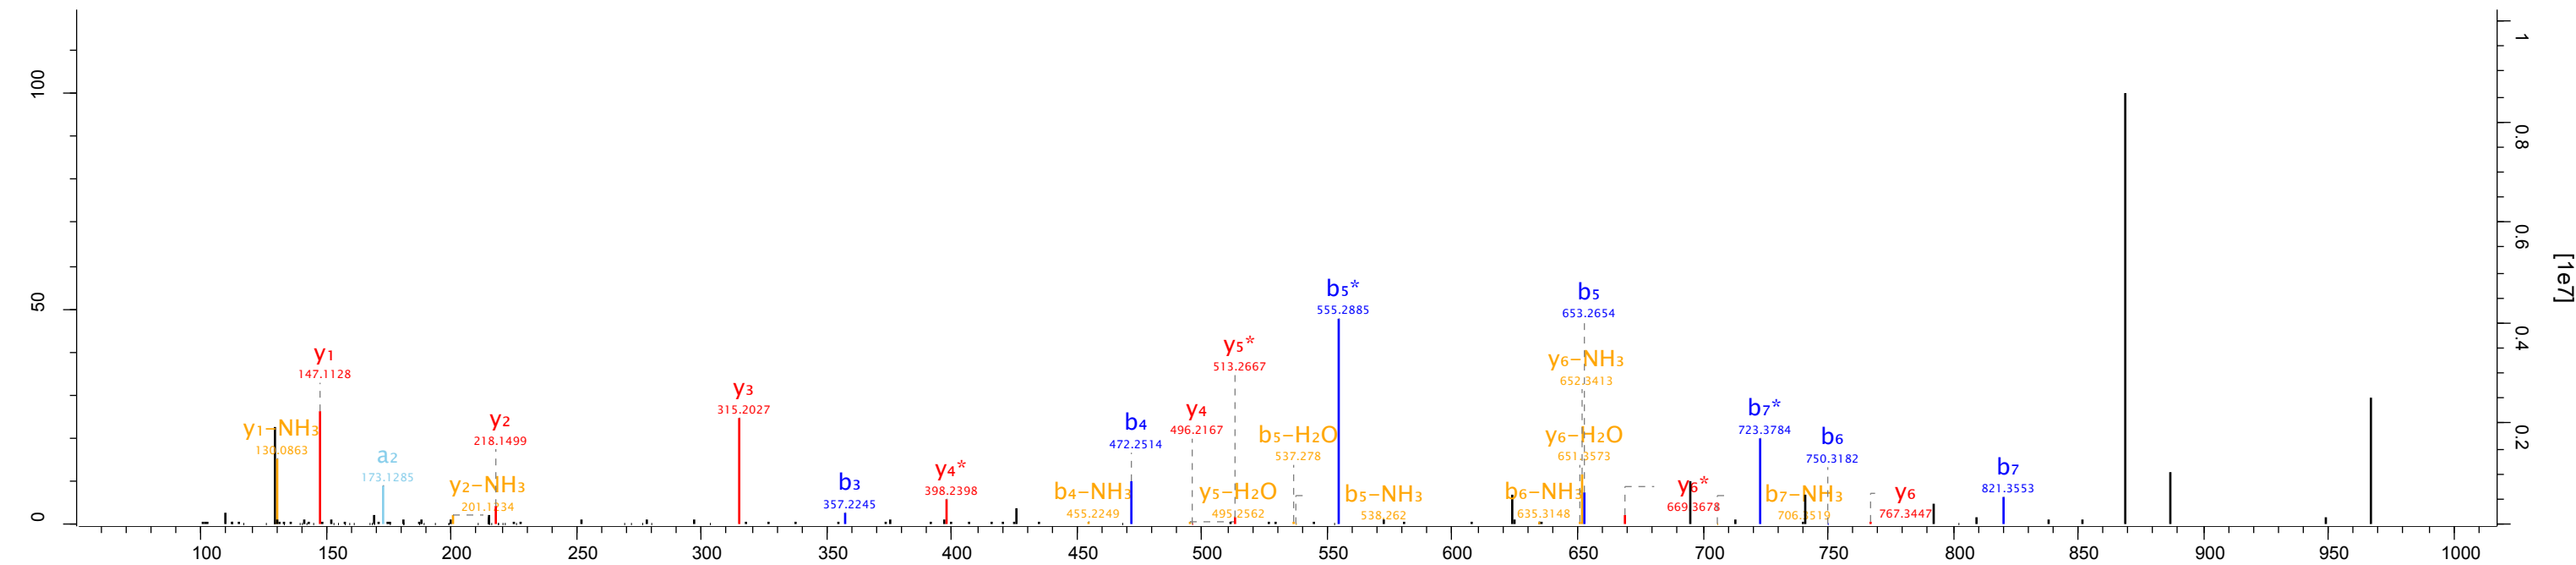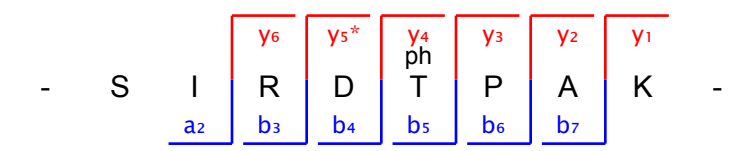

Raw file  
20150812\_A375SR\_Phospho\_BR1\_06

Scan 24470 Method FTMS; HCD Score 231.16 m/z 871.77 Gene names EIF3F

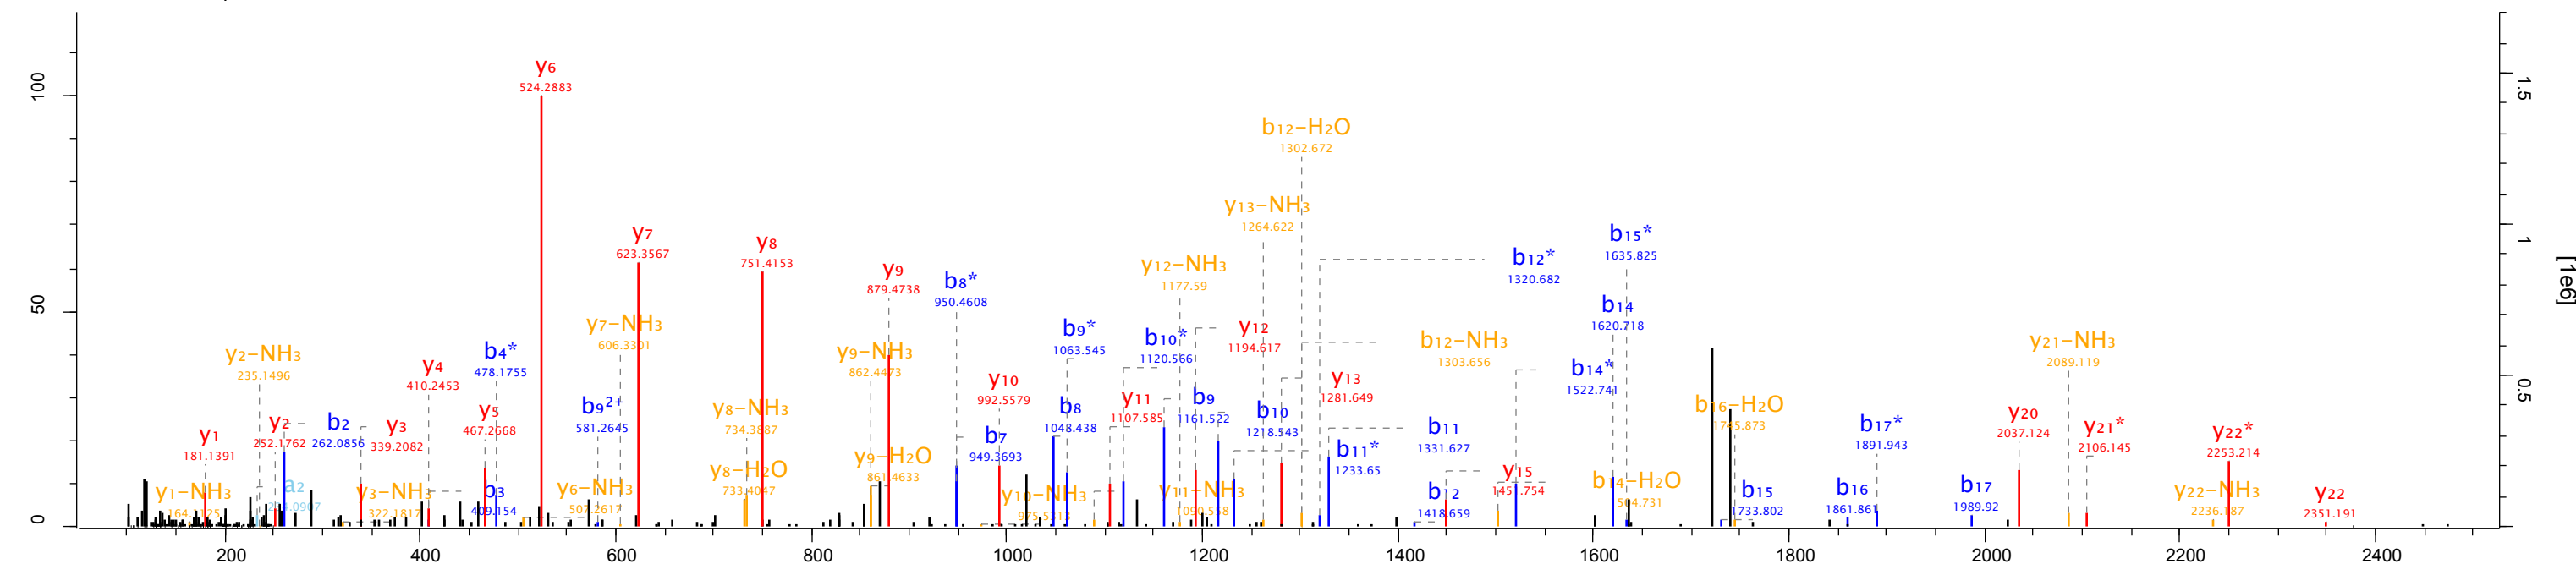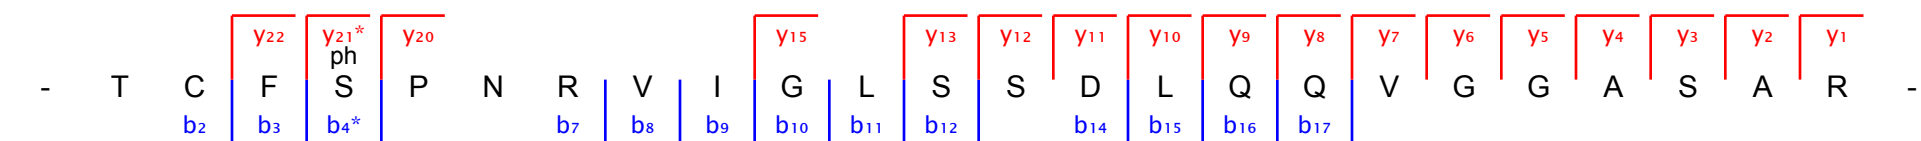

Raw file: 20150812\_A375SR\_Phospho\_BR1\_06  
 Scan: 2560 Method: FTMS; HCD Score: 128.09 m/z: 593.29 Gene names: AFAP1

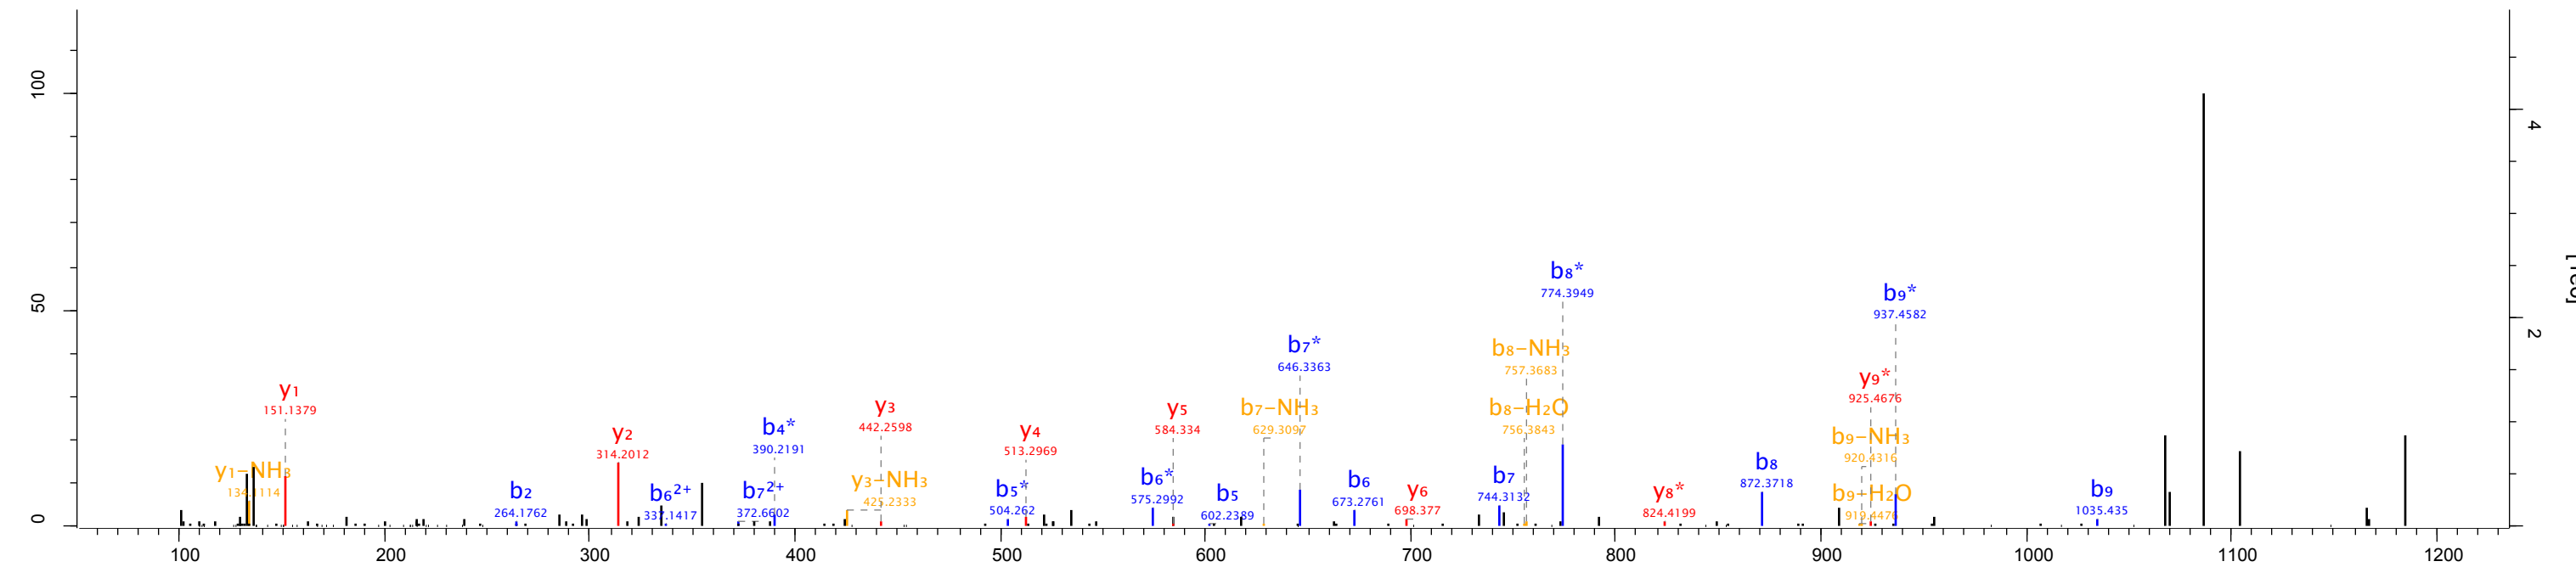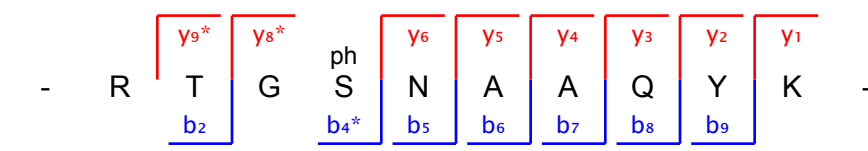

Raw file: 20150812\_A375SR\_Phospho\_BR1\_06  
 Scan: 26440 Method: FTMS; HCD Score: 63.87 m/z: 816.7 Gene names: SRRM2

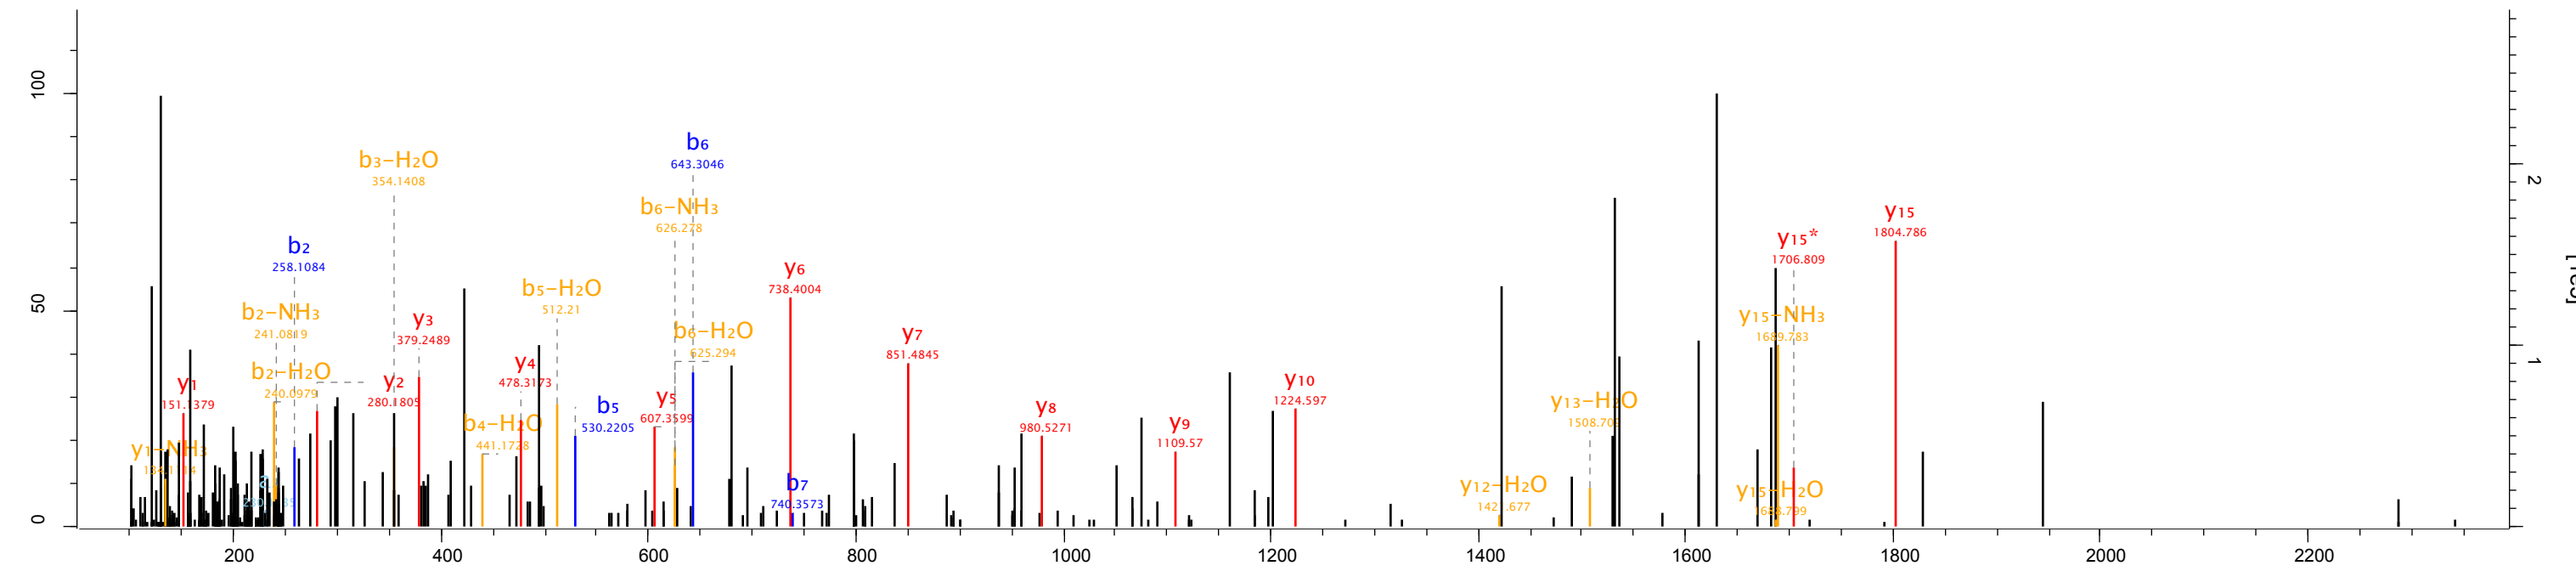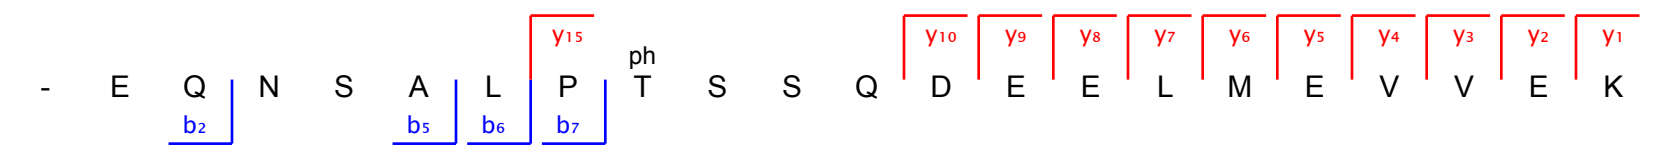

Raw file Scan Method Score m/z Gene names

20150812\_A375SR\_Phospho\_BR1\_06 27250 FTMS; HCD 80.67 1033.54 AHNAK

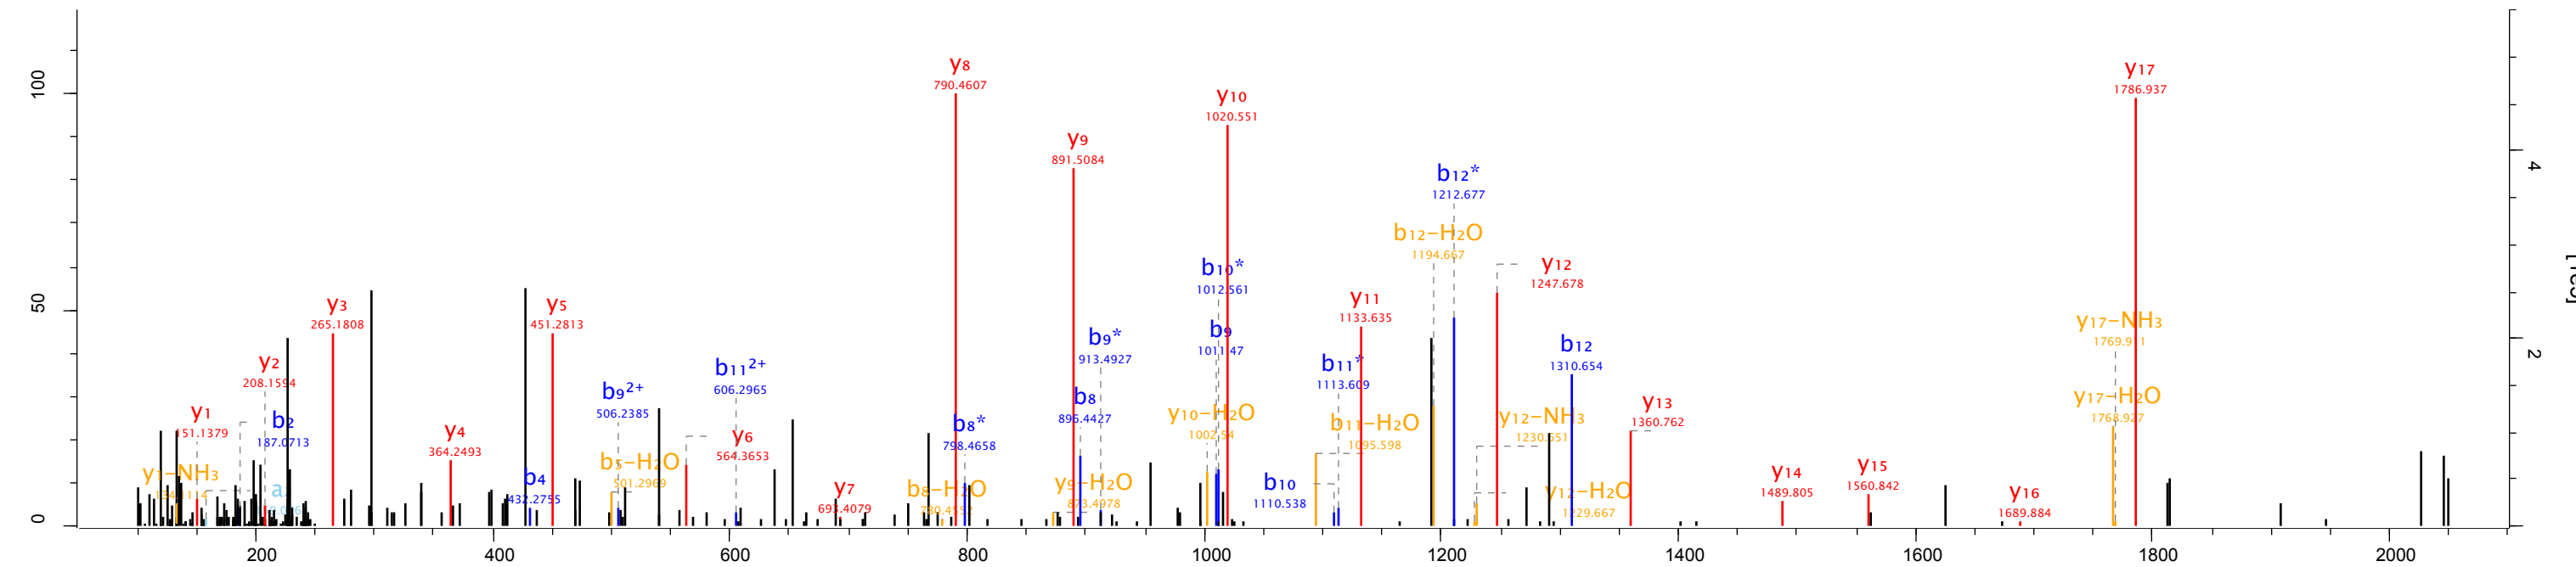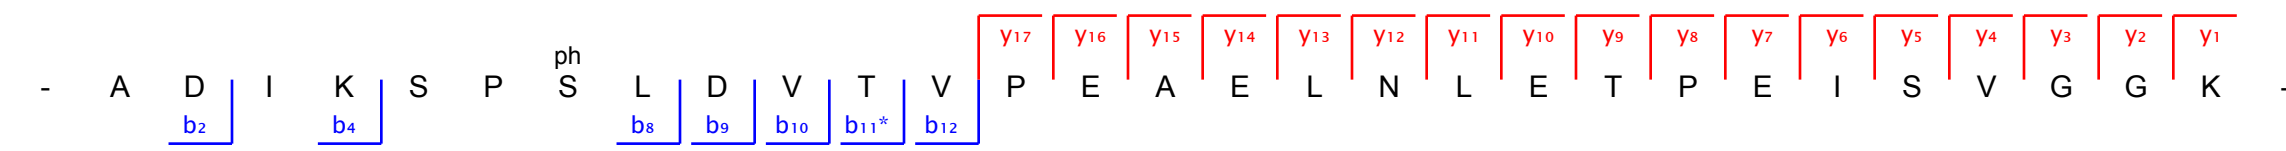

Raw file: 20150812\_A375SR\_Phospho\_BR1\_06  
 Scan: 3480 Method: FTMS; HCD Score: 126.56 m/z: 607.77 Gene names: WAC

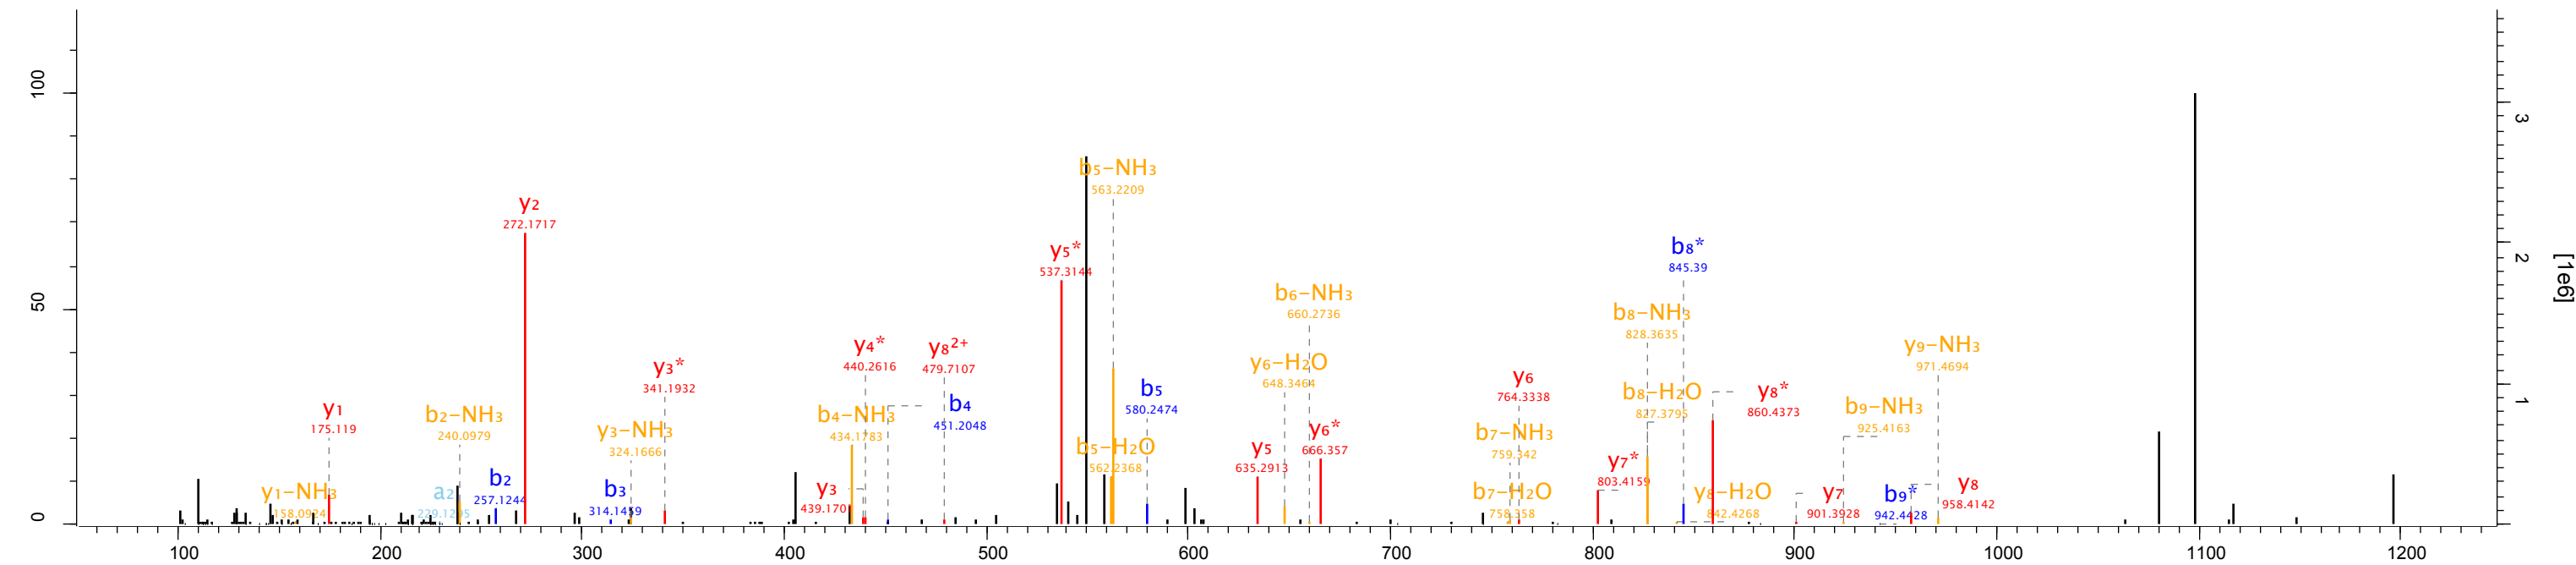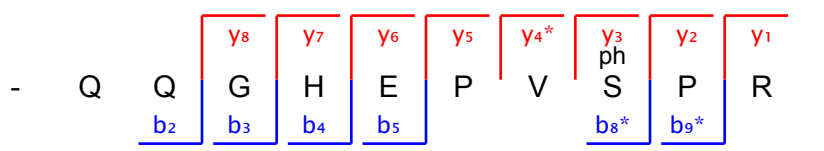



Raw file: 20150812\_A375SR\_Phospho\_BR1\_06  
 Scan: 4000 Method: FTMS; HCD Score: 110.84 m/z: 639.32 Gene names: GPATCH8

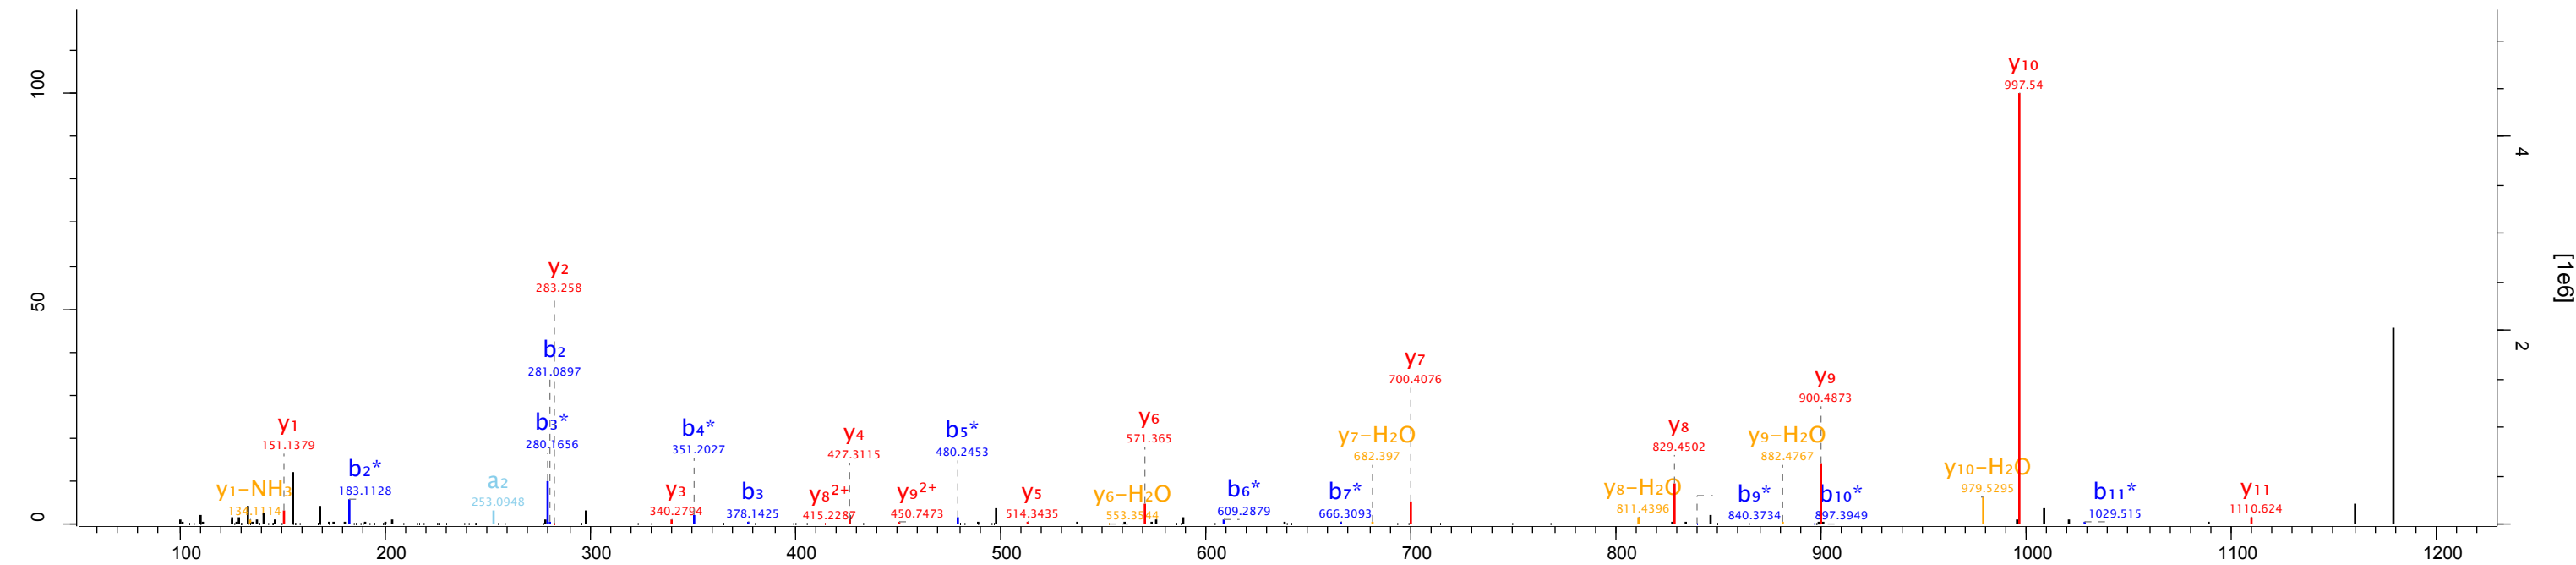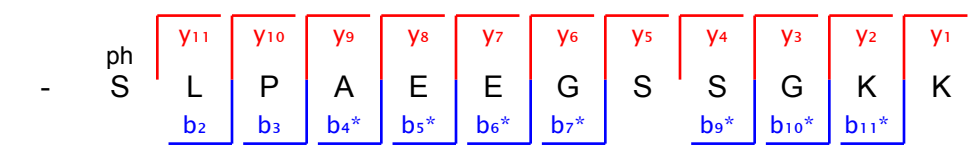

Raw file: 20150812\_A375SR\_Phospho\_BR1\_06  
 Scan: 4130 Method: FTMS; HCD Score: 143.25 m/z: 789.85 Gene names: CXorf38

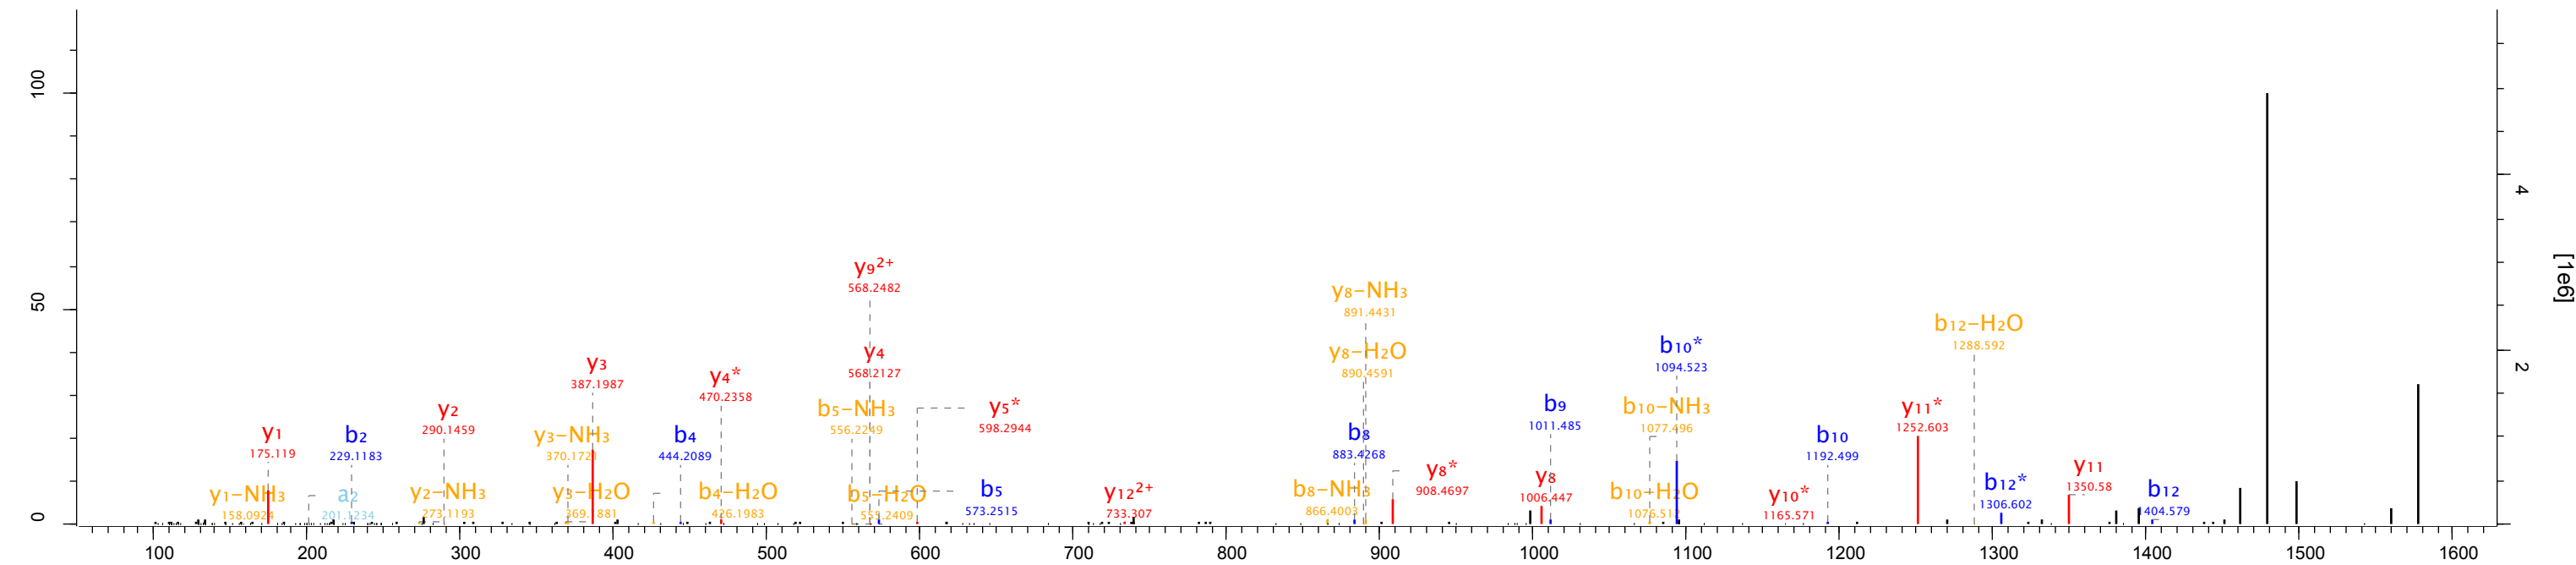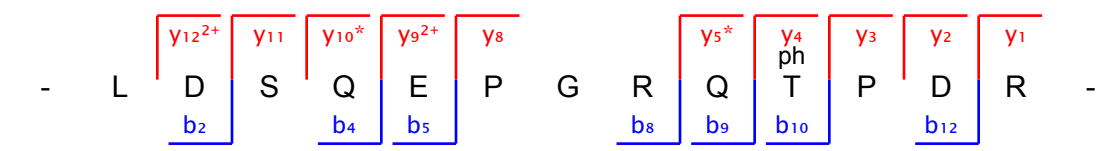

Raw file: 20150812\_A375SR\_Phospho\_BR1\_06  
 Scan: 5400 Method: FTMS; HCD Score: 139.58 m/z: 733.82 Gene names: PPFIA1

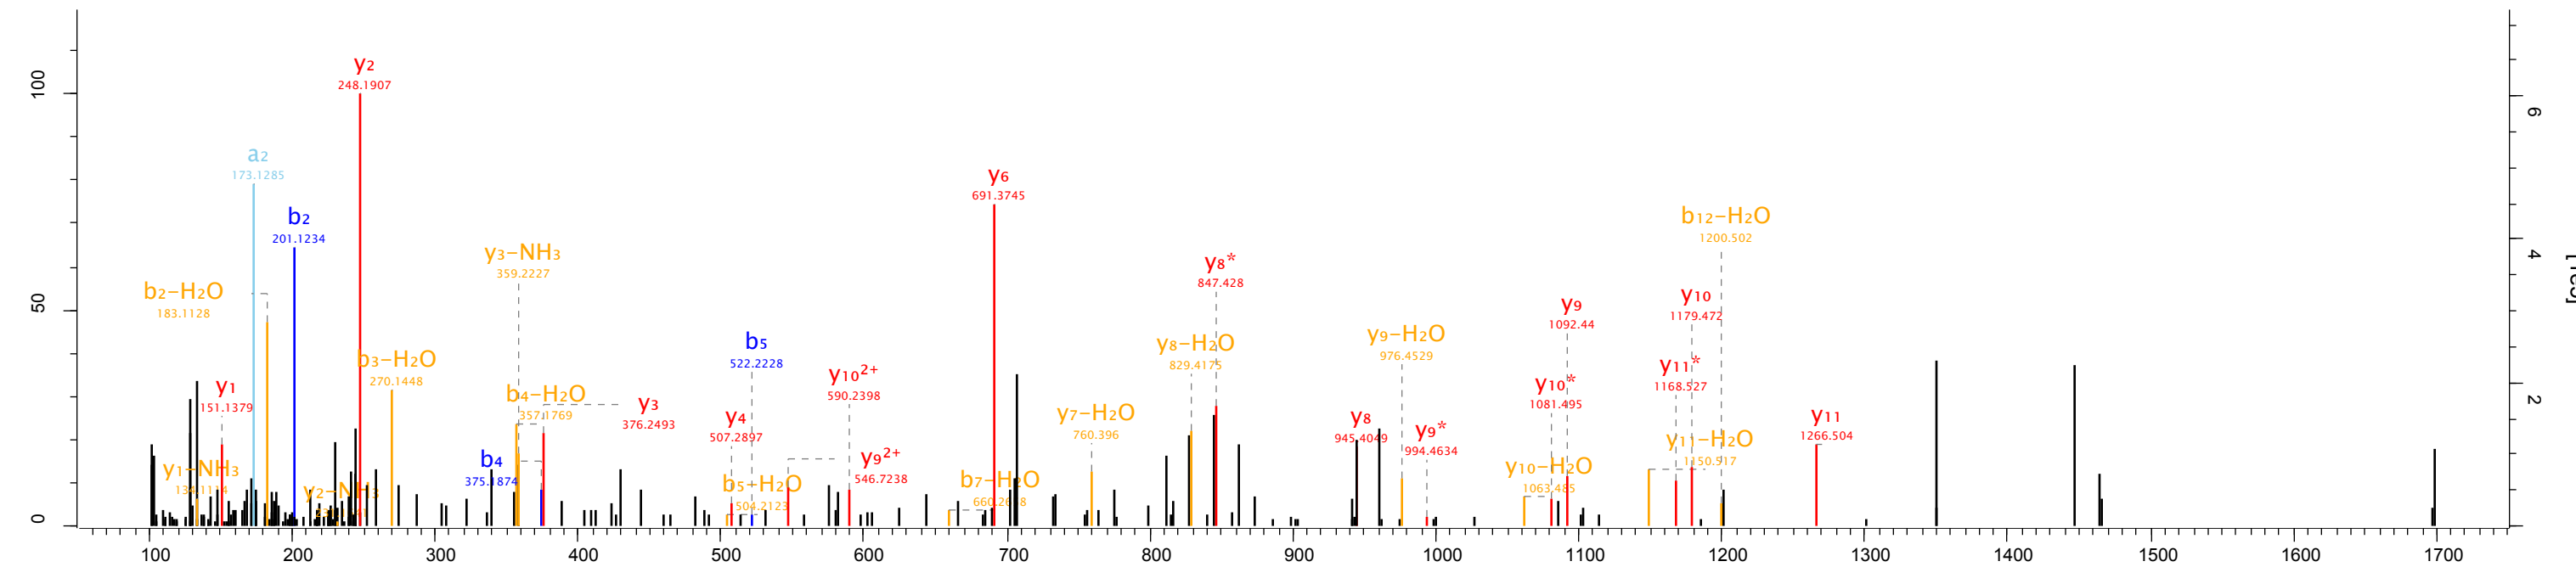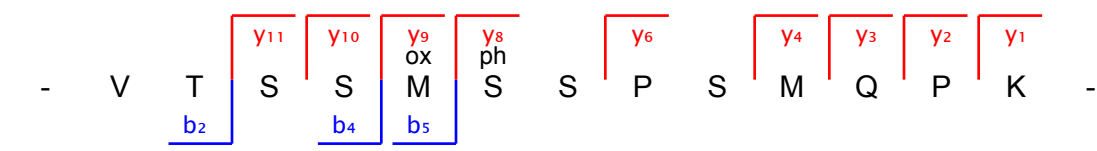

Raw file: 20150812\_A375SR\_Phospho\_BR1\_06  
 Scan: 5430 Method: FTMS; HCD Score: 96.6 m/z: 599.24 Gene names: RASA3

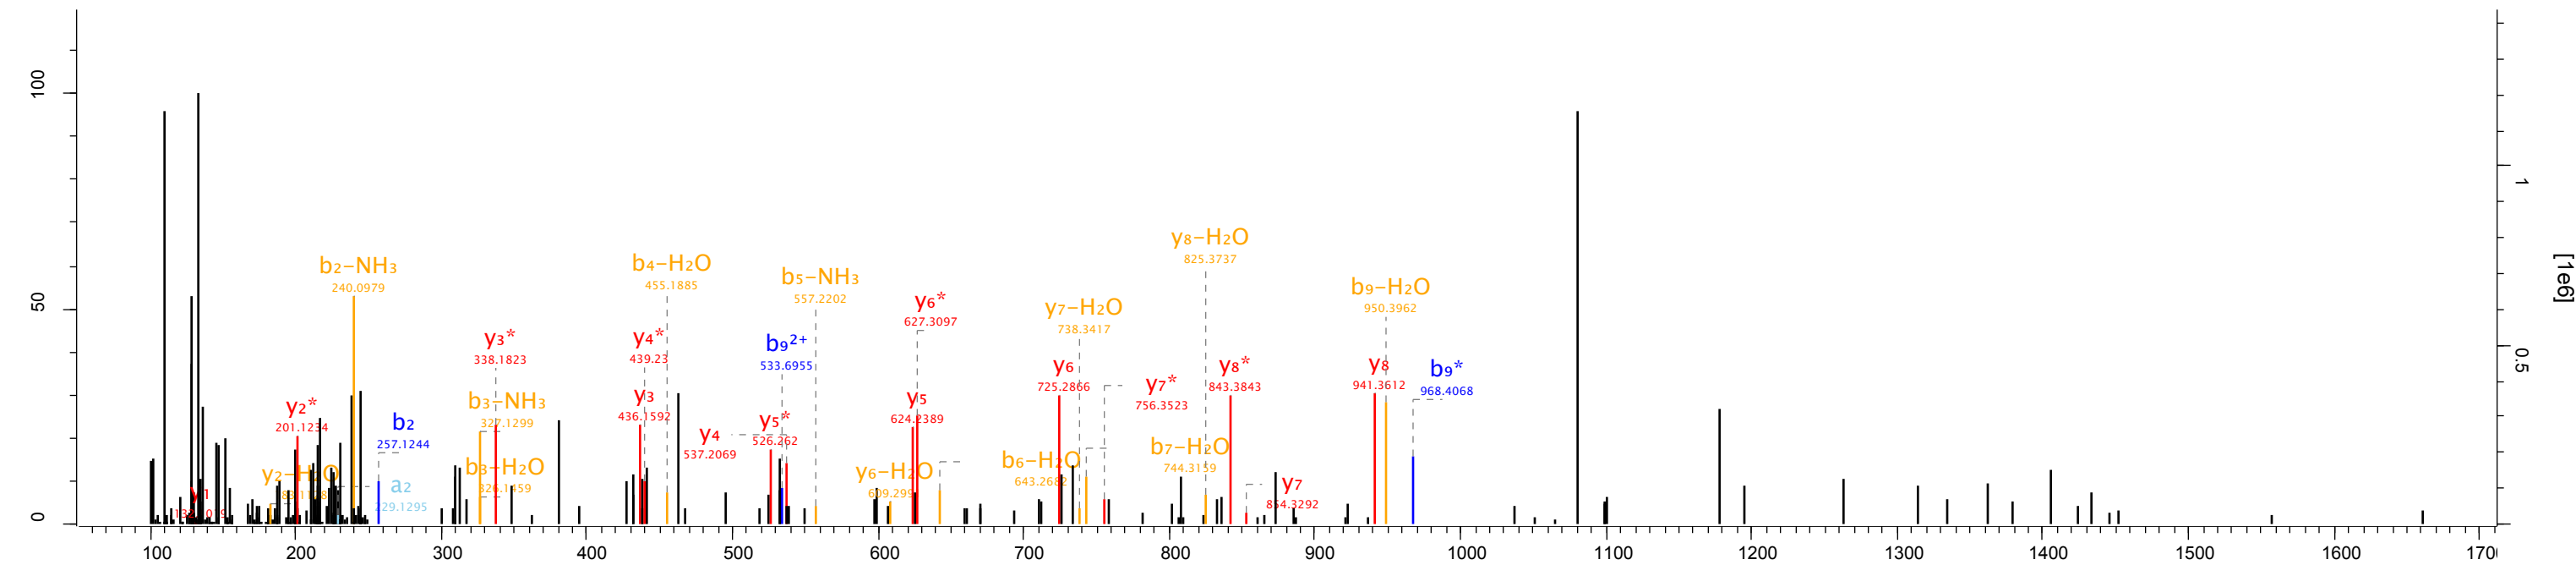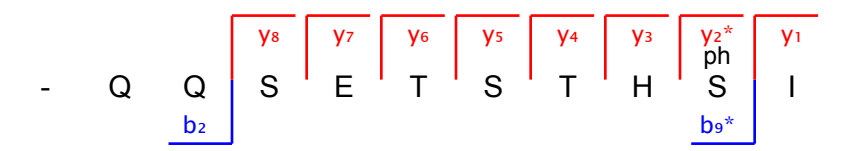

Raw file: 20150812\_A375SR\_Phospho\_BR1\_06  
 Scan: 5620 Method: FTMS; HCD Score: 73.95 m/z: 473.25 Gene names: UBAC1

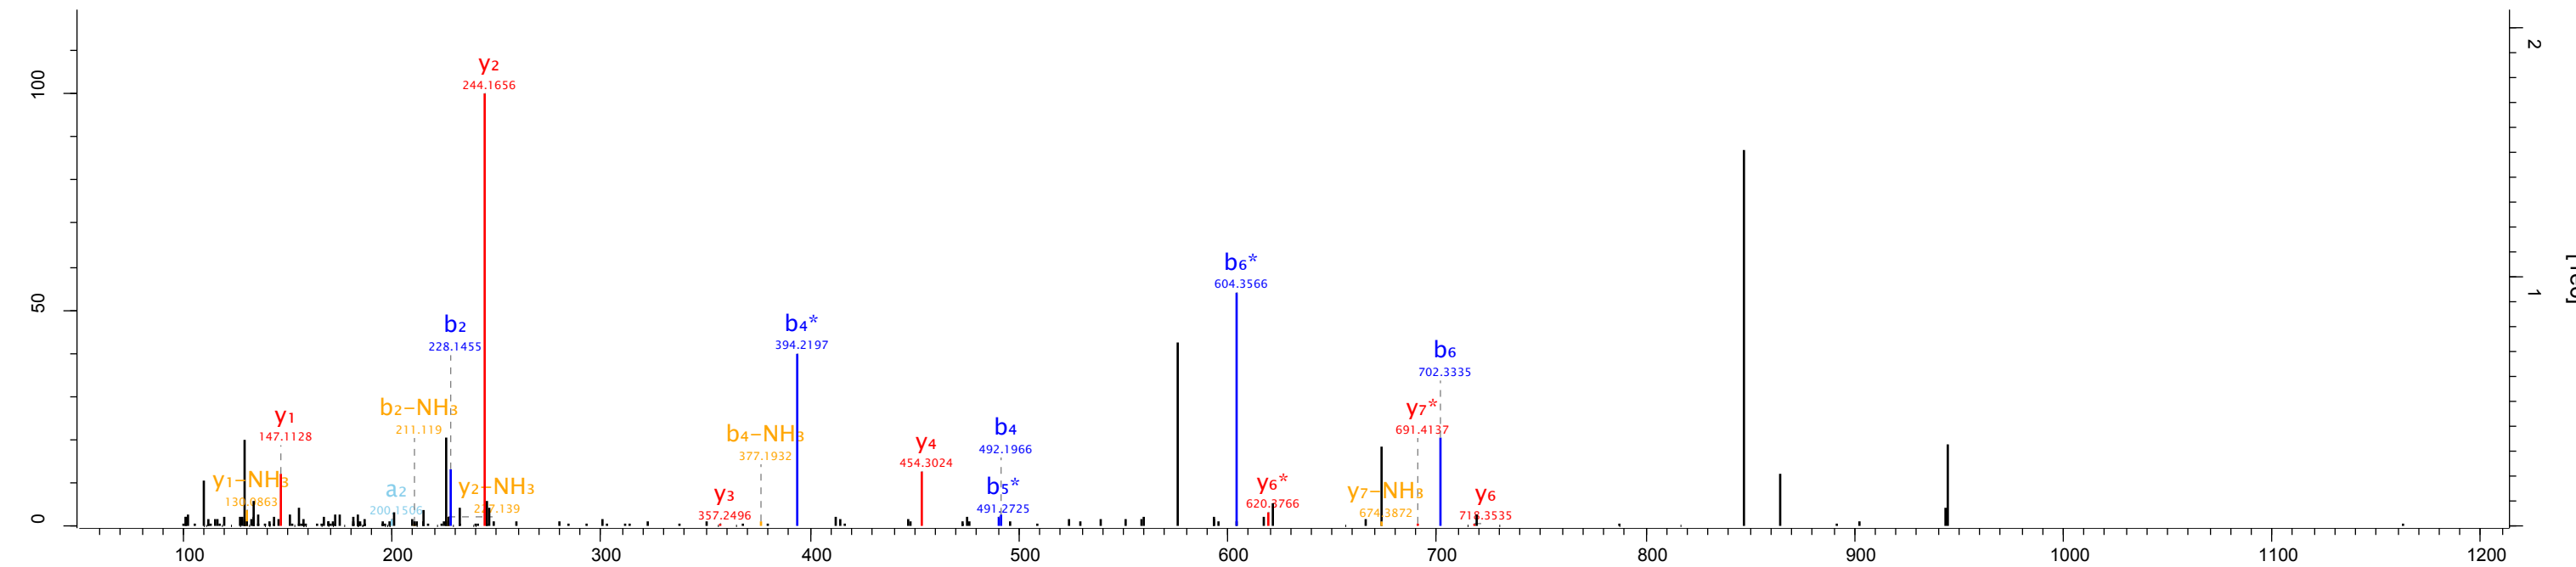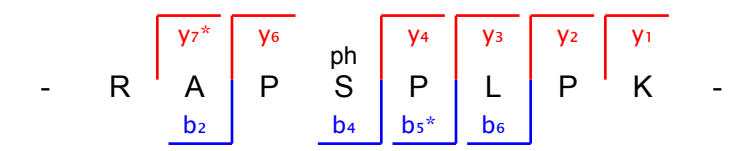

Raw file: 20150812\_A375SR\_Phospho\_BR1\_06  
 Scan: 5730 Method: FTMS; HCD Score: 185.46 m/z: 823.86 Gene names: GPS1

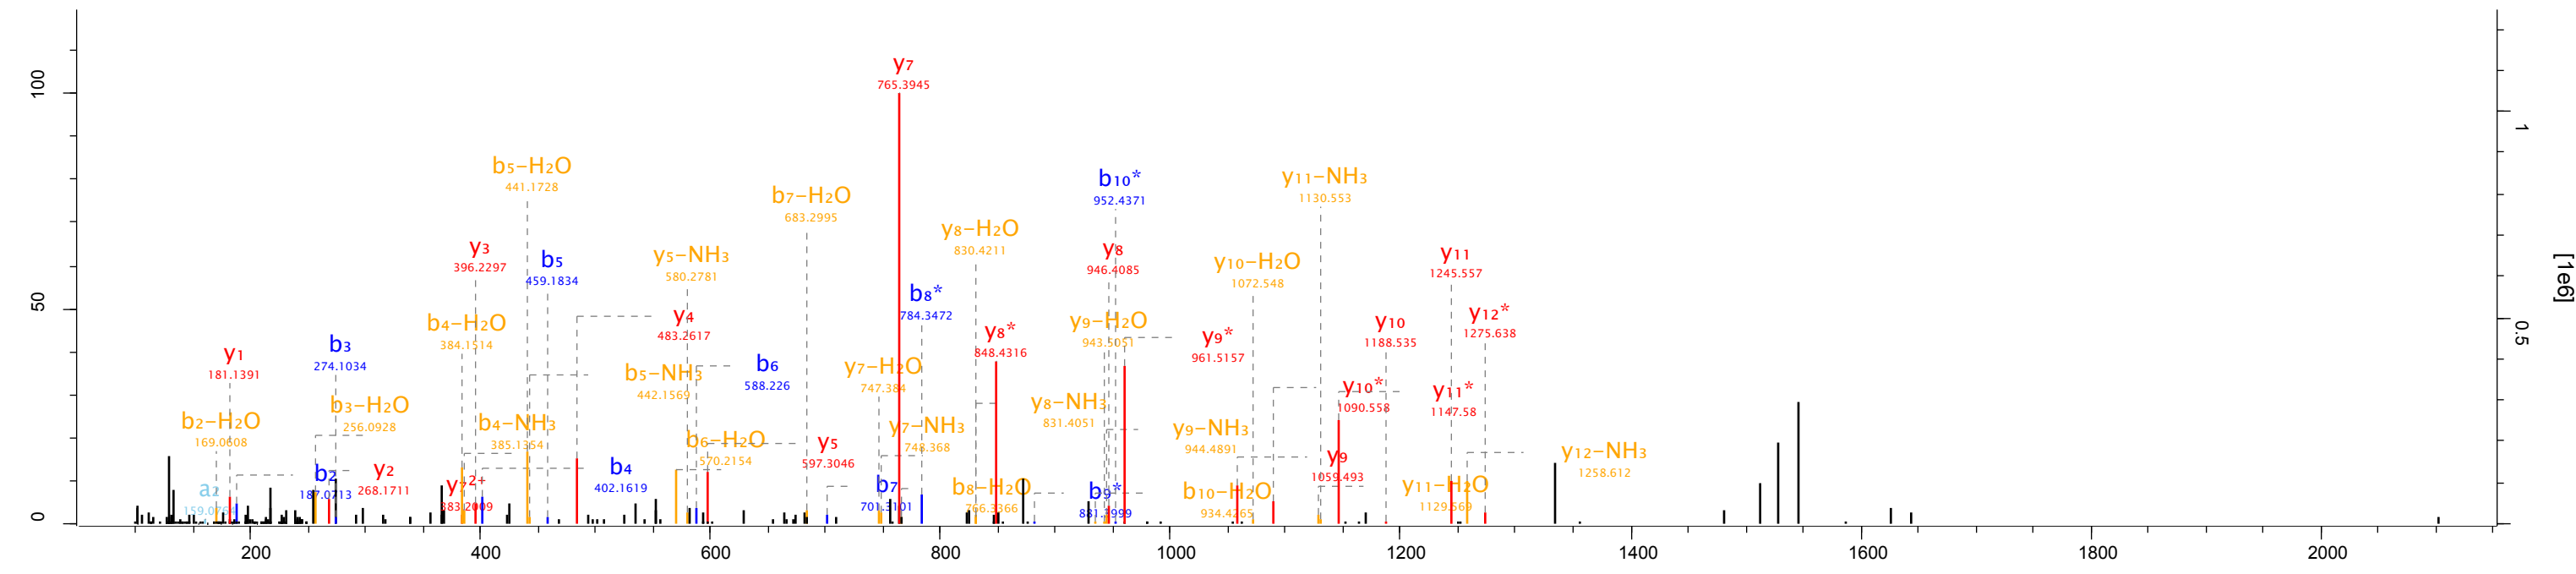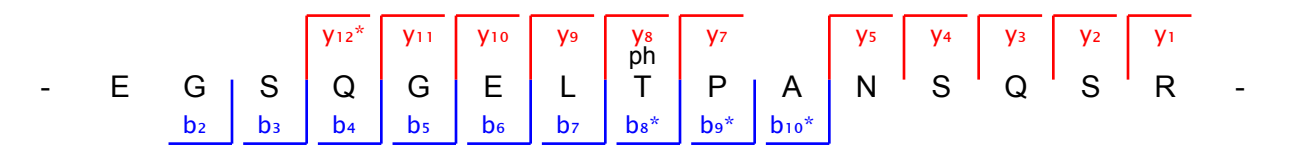

Raw file Scan Method Score m/z Gene names  
 20150812\_A375SR\_Phospho\_BR1\_06 6260 FTMS; HCD 173.6 525.73 NOLC1

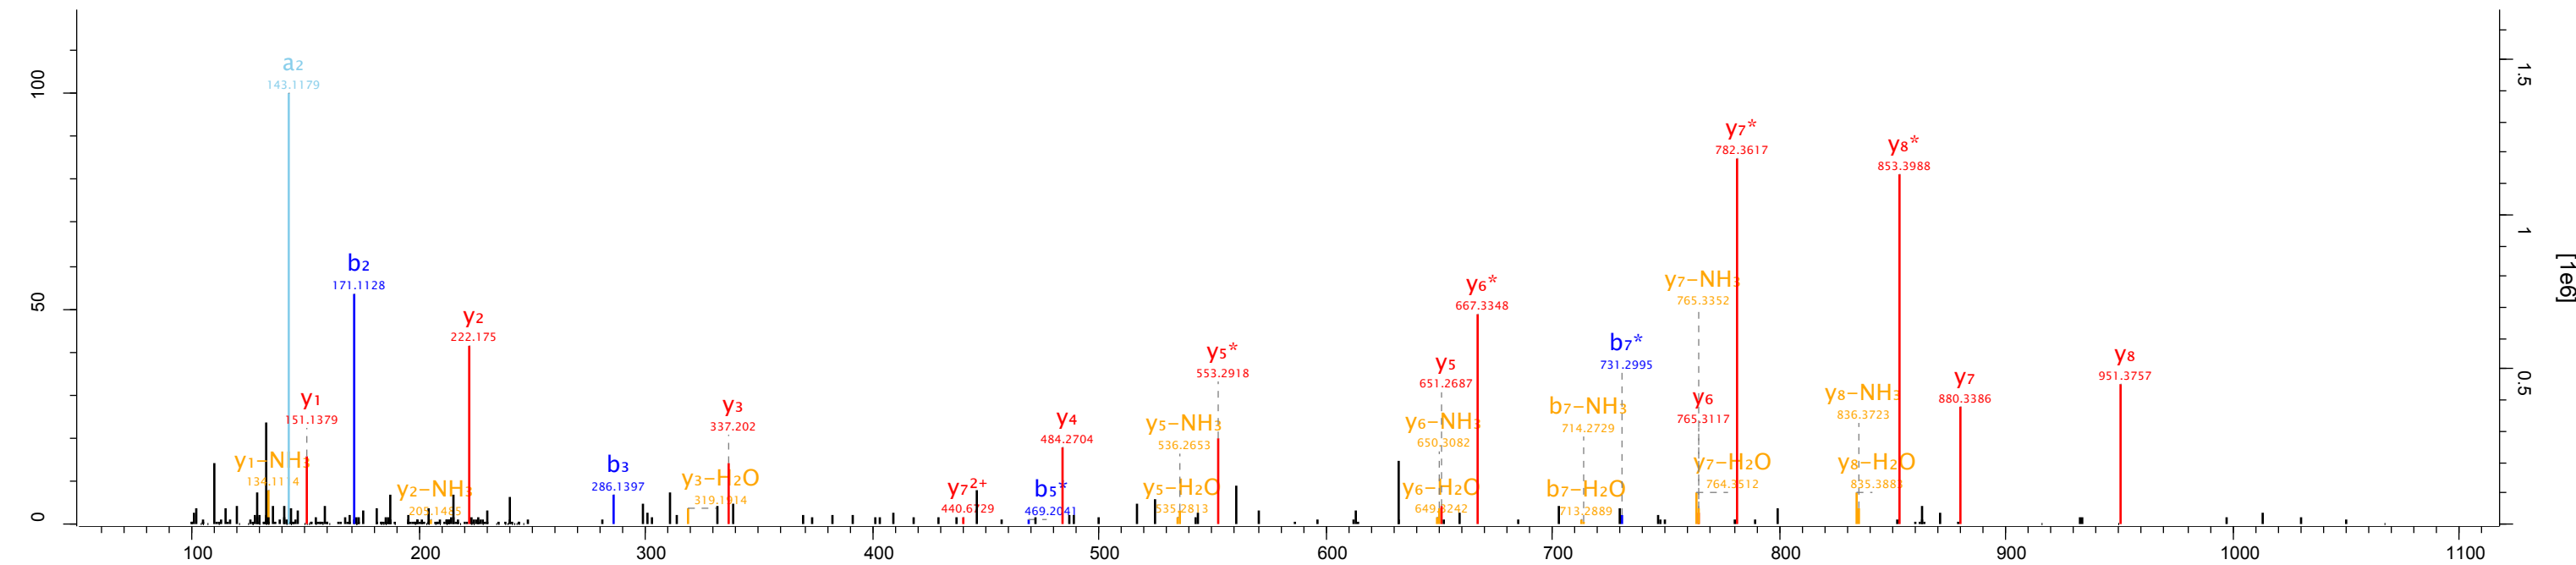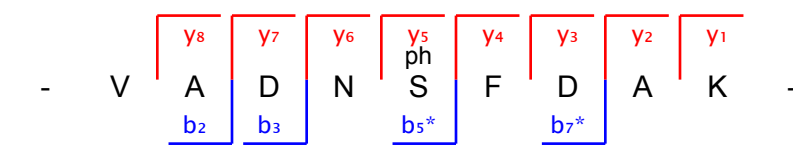

Raw file: 20150812\_A375SR\_Phospho\_BR1\_06  
 Scan: 6520 Method: FTMS; HCD Score: 130.89 m/z: 822.9 Gene names: CHAF1B

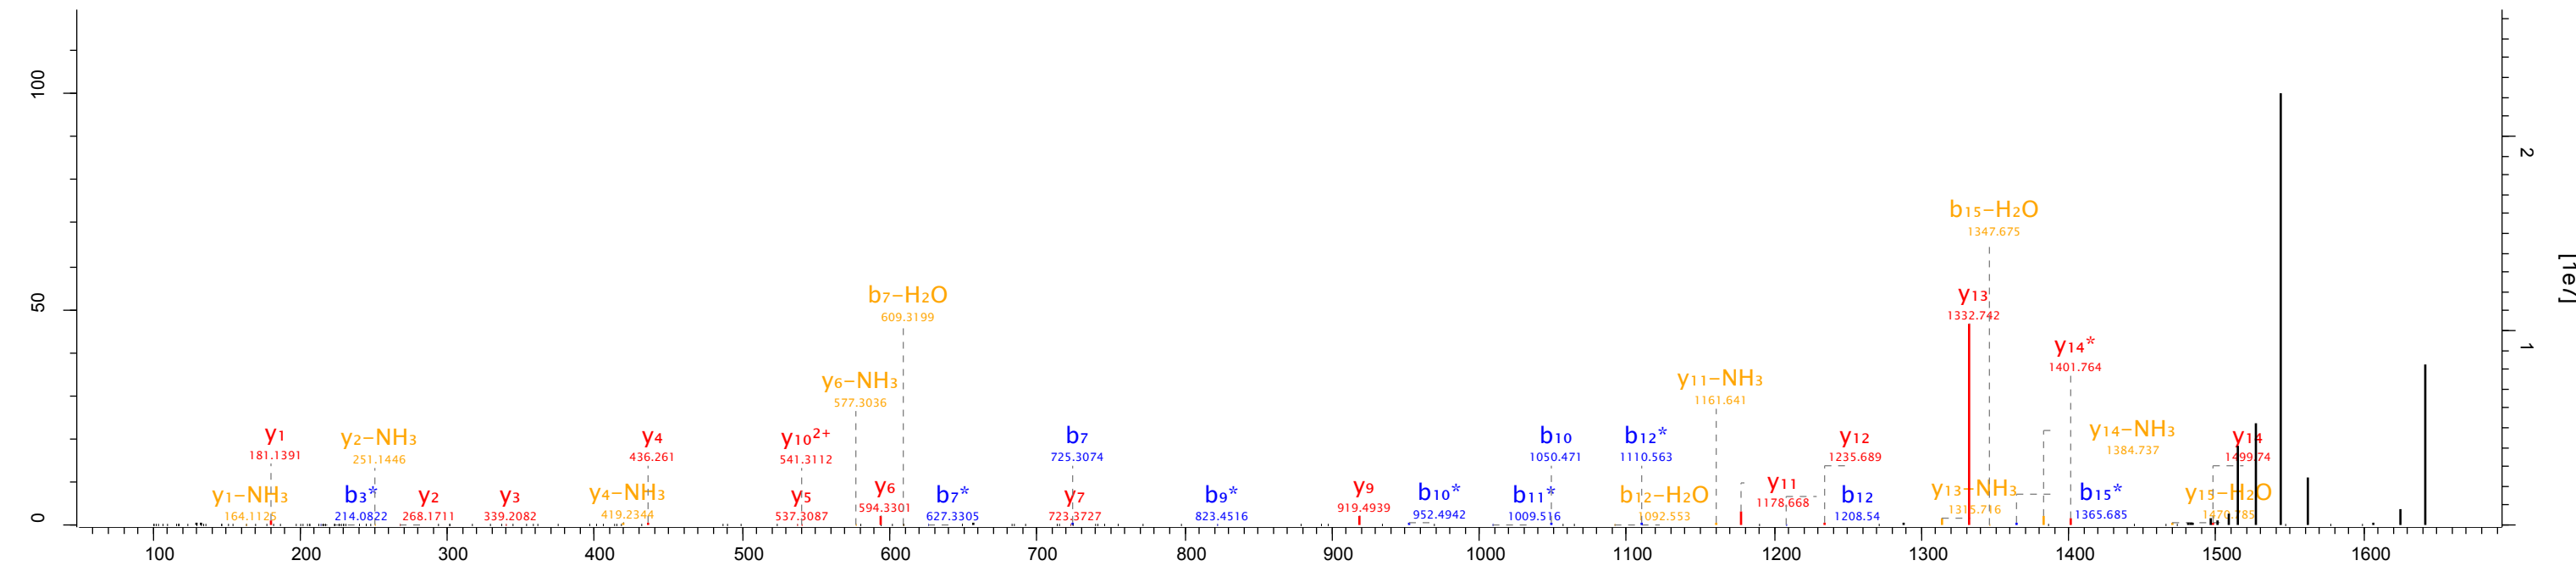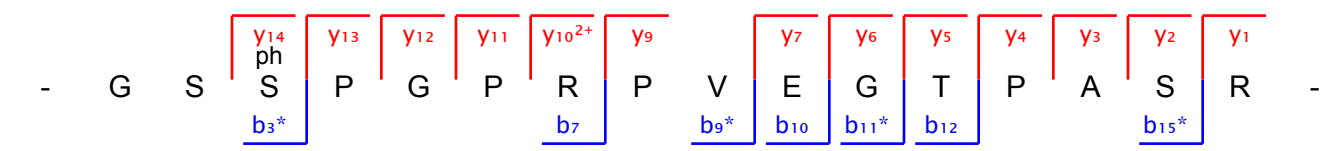



Raw file 20150812\_A375SR\_Phospho\_BR1\_06 Scan 6940 Method FTMS; HCD Score 52.5 m/z 809.37

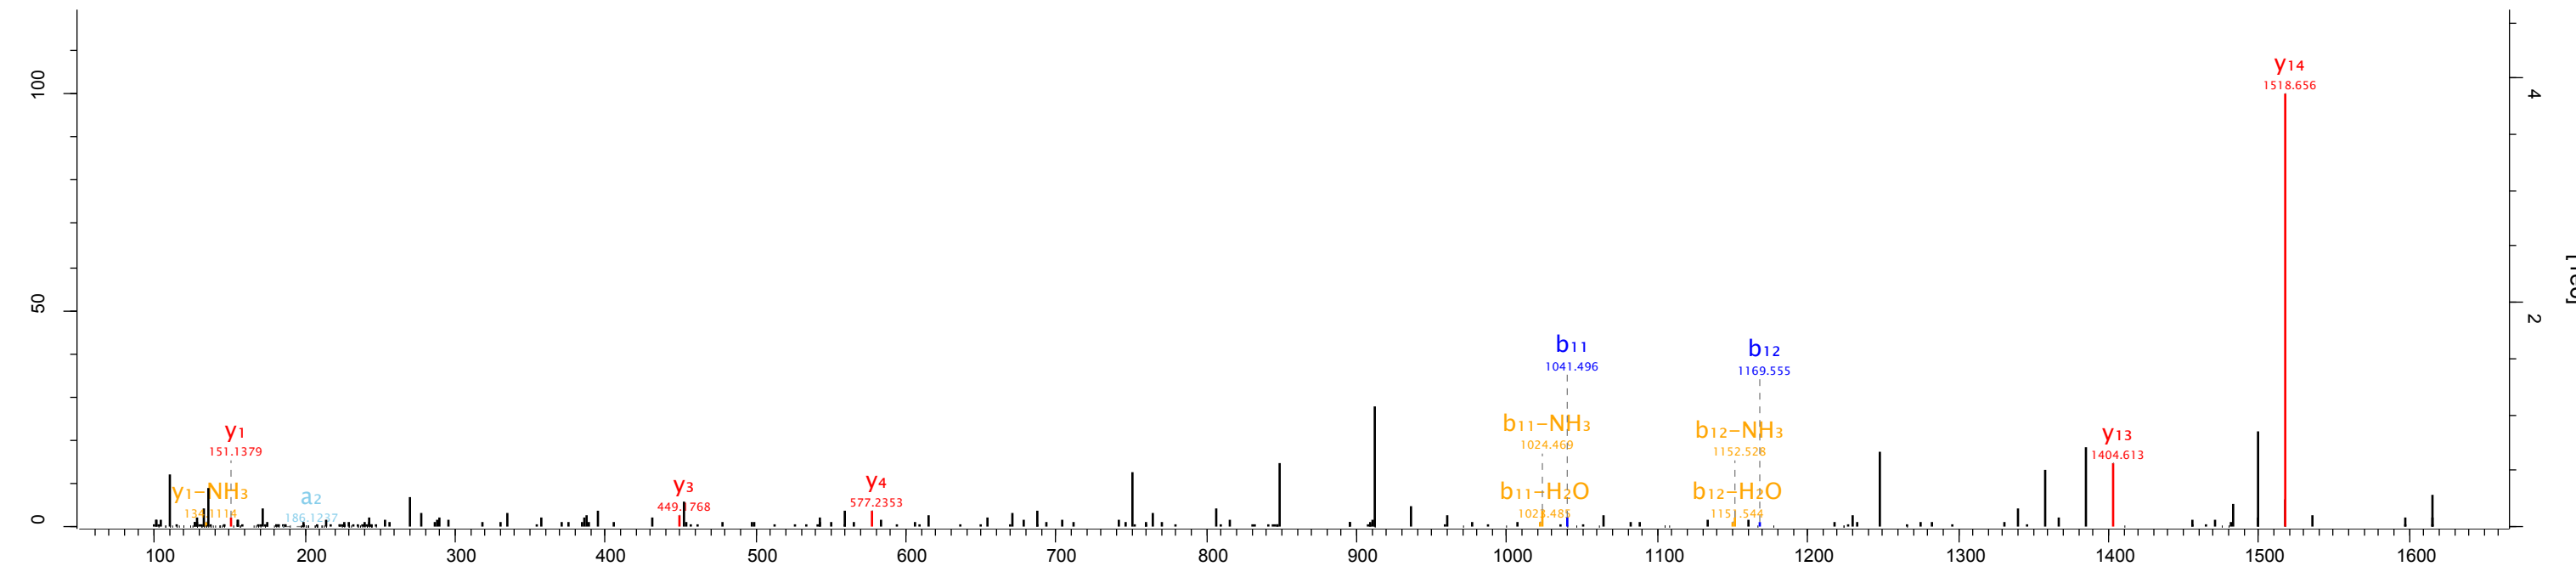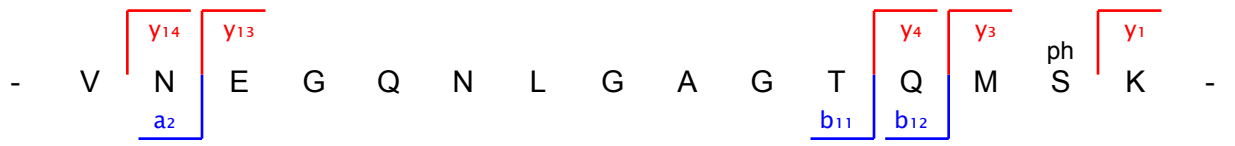

Raw file: 20150812\_A375SR\_Phospho\_BR1\_06  
 Scan: 7130 Method: FTMS; HCD Score: 349.1 m/z: 1164.46 Gene names: MAP1B

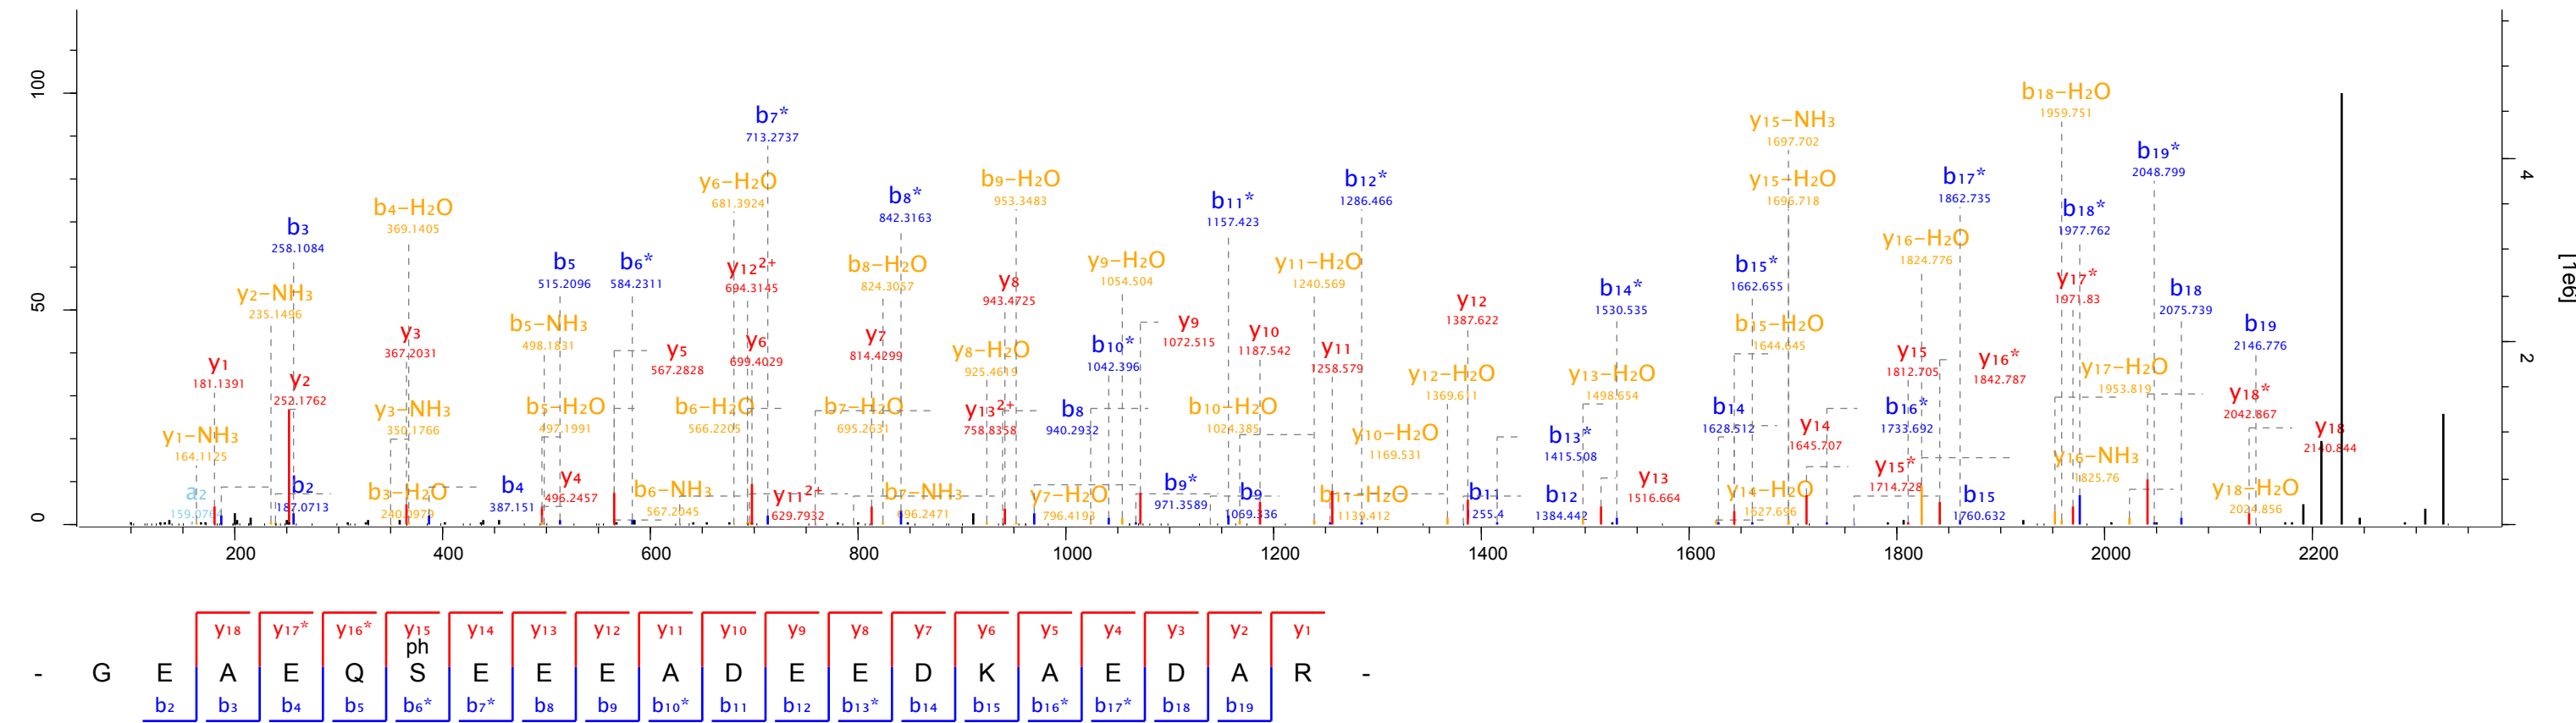

Raw file: 20150812\_A375SR\_Phospho\_BR1\_06  
 Scan: 8350 Method: FTMS; HCD Score: 284.84 m/z: 734.32 Gene names: TCOF1

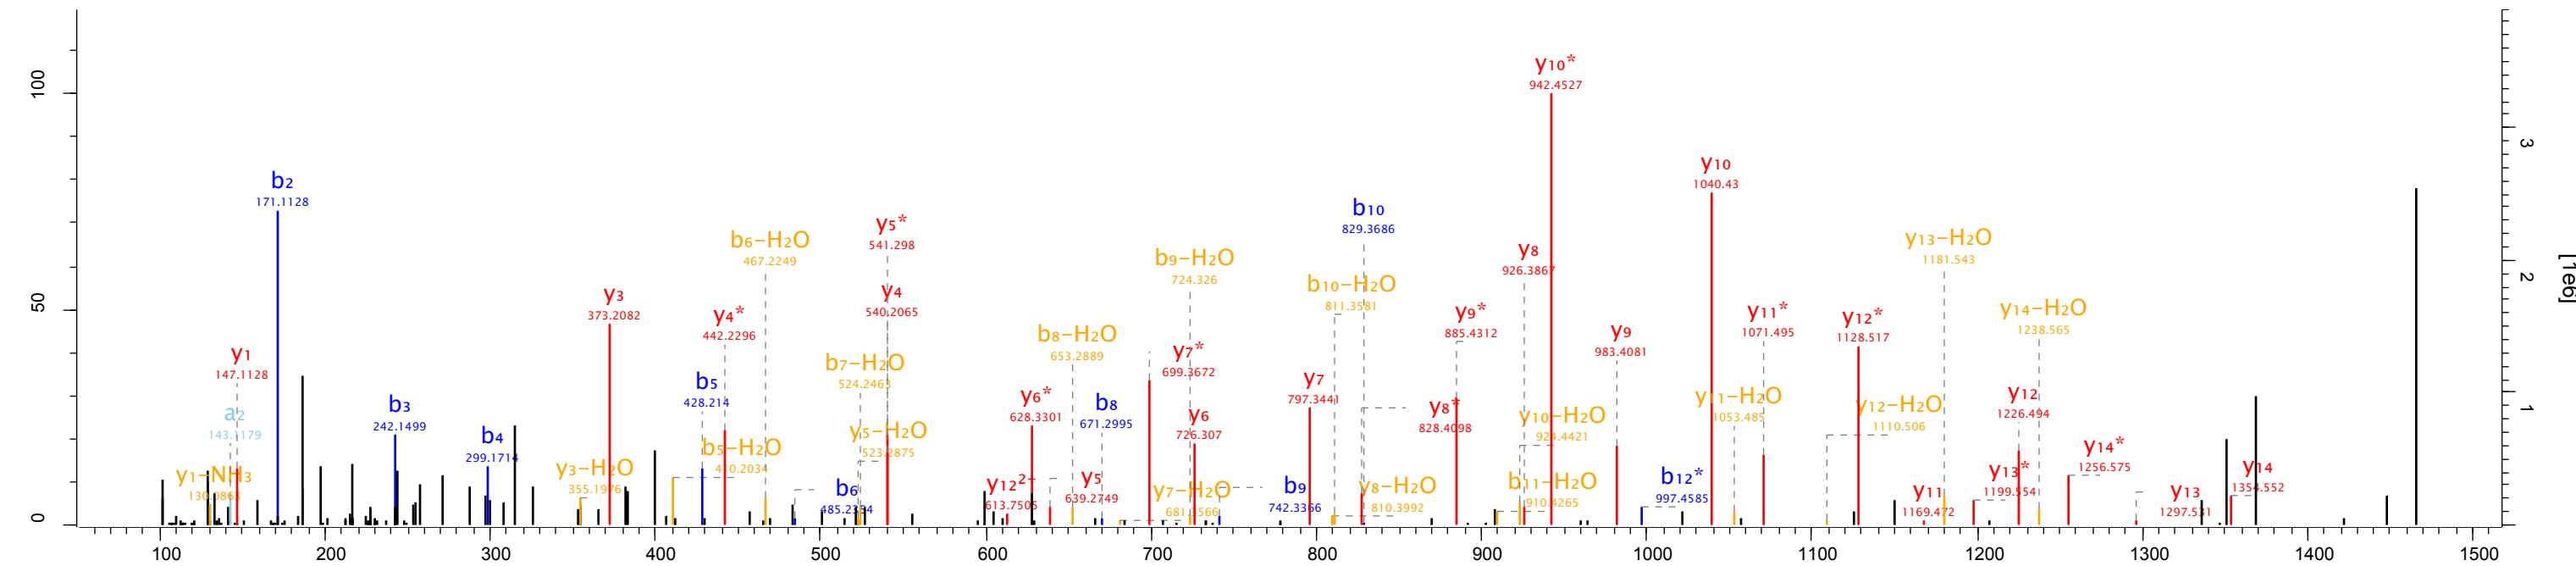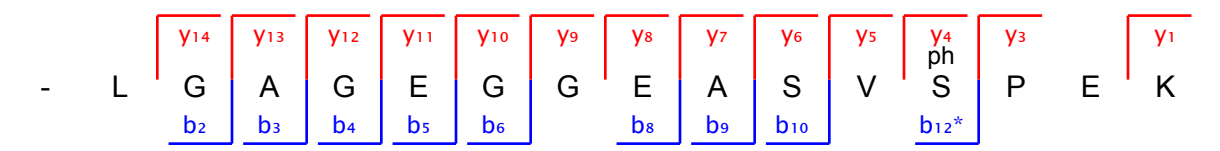

Raw file: 20150812\_A375SR\_Phospho\_BR1\_06  
 Scan: 9660 Method: FTMS; HCD Score: 343.21 m/z: 944.4 Gene names: EIF5B

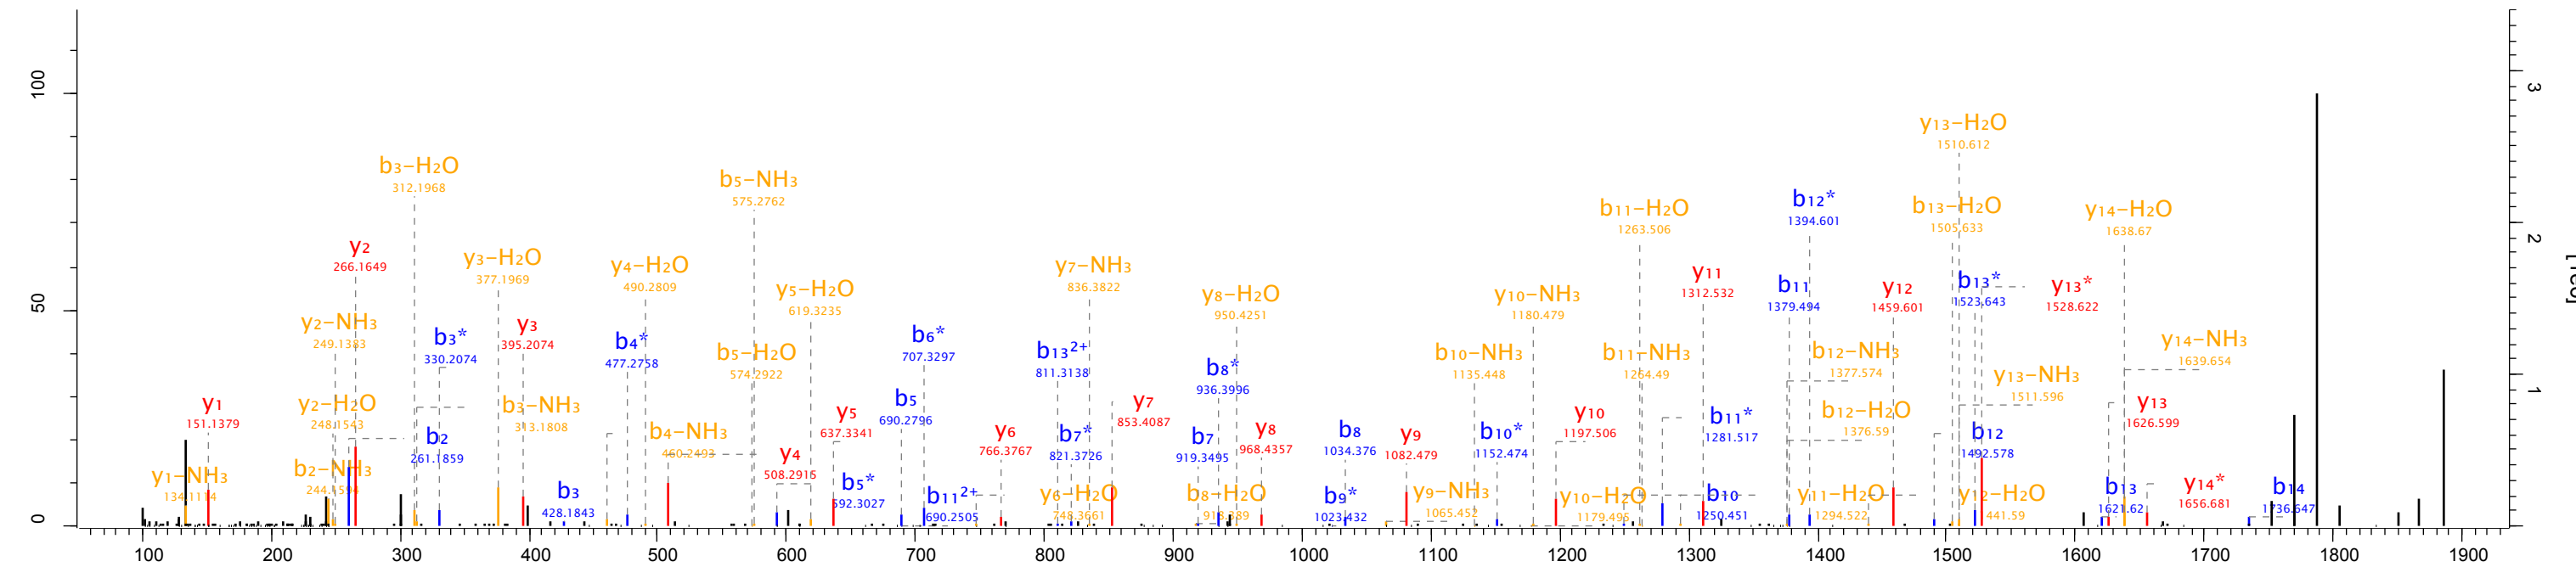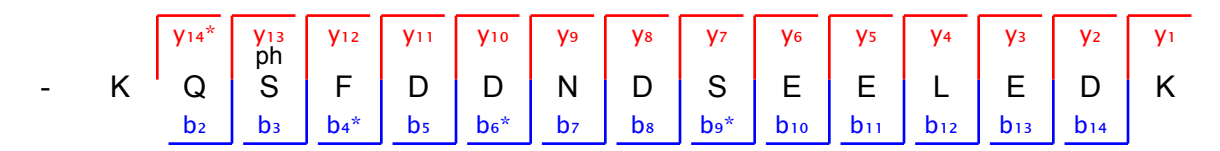

Raw file: 20150812\_A375SR\_Phospho\_BR1\_07  
 Scan: 13240 Method: FTMS; HCD Score: 214.54 m/z: 790.85 Gene names: FOXK1

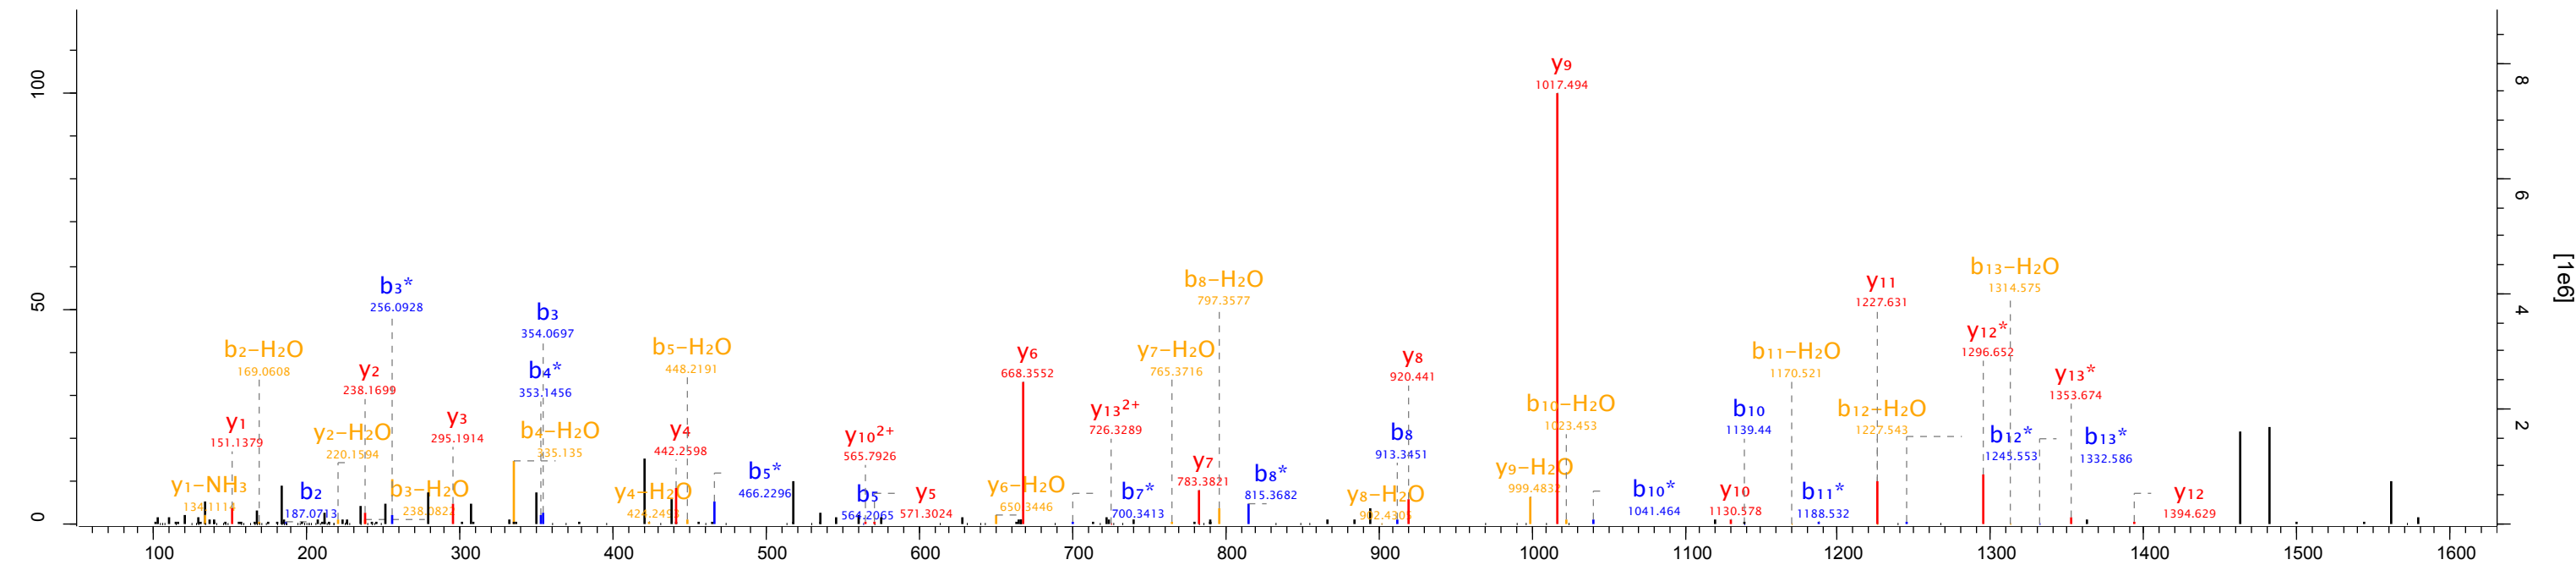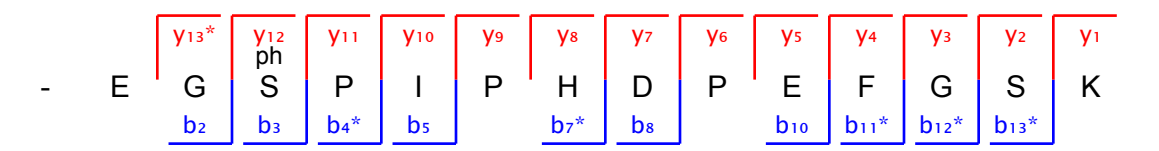

Raw file 20150812\_A375SR\_Phospho\_BR1\_07 Scan 14030 Method FTMS; HCD Score 73.67 m/z 727.69 Gene names RAB11FIP5

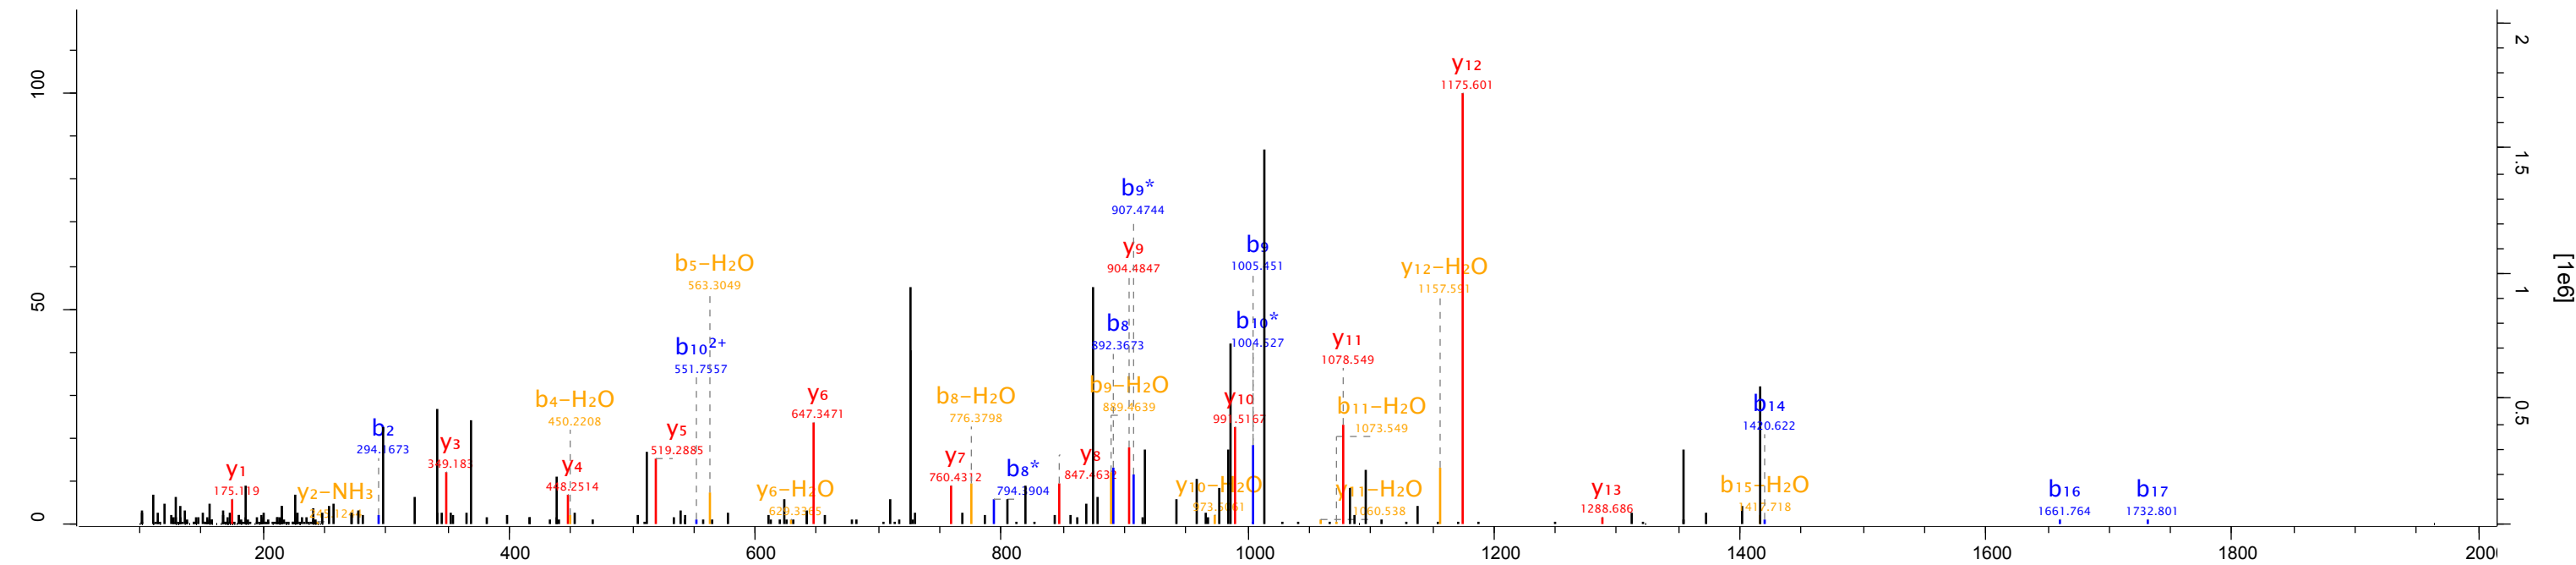

- H R S S I S G ph S L P S S G S L Q A V S S R -

b<sub>2</sub>
b<sub>8</sub>
b<sub>9</sub>
b<sub>10</sub><sup>\*</sup>
b<sub>14</sub>
b<sub>16</sub>
b<sub>17</sub>
y<sub>1</sub>
y<sub>3</sub>
y<sub>4</sub>
y<sub>5</sub>
y<sub>6</sub>
y<sub>7</sub>
y<sub>8</sub>
y<sub>9</sub>
y<sub>10</sub>
y<sub>11</sub>
y<sub>12</sub>
y<sub>13</sub>

Raw file: 20150812\_A375SR\_Phospho\_BR1\_07  
 Scan: 17940 Method: FTMS; HCD Score: 261.78 m/z: 708.32 Gene names: LARP1

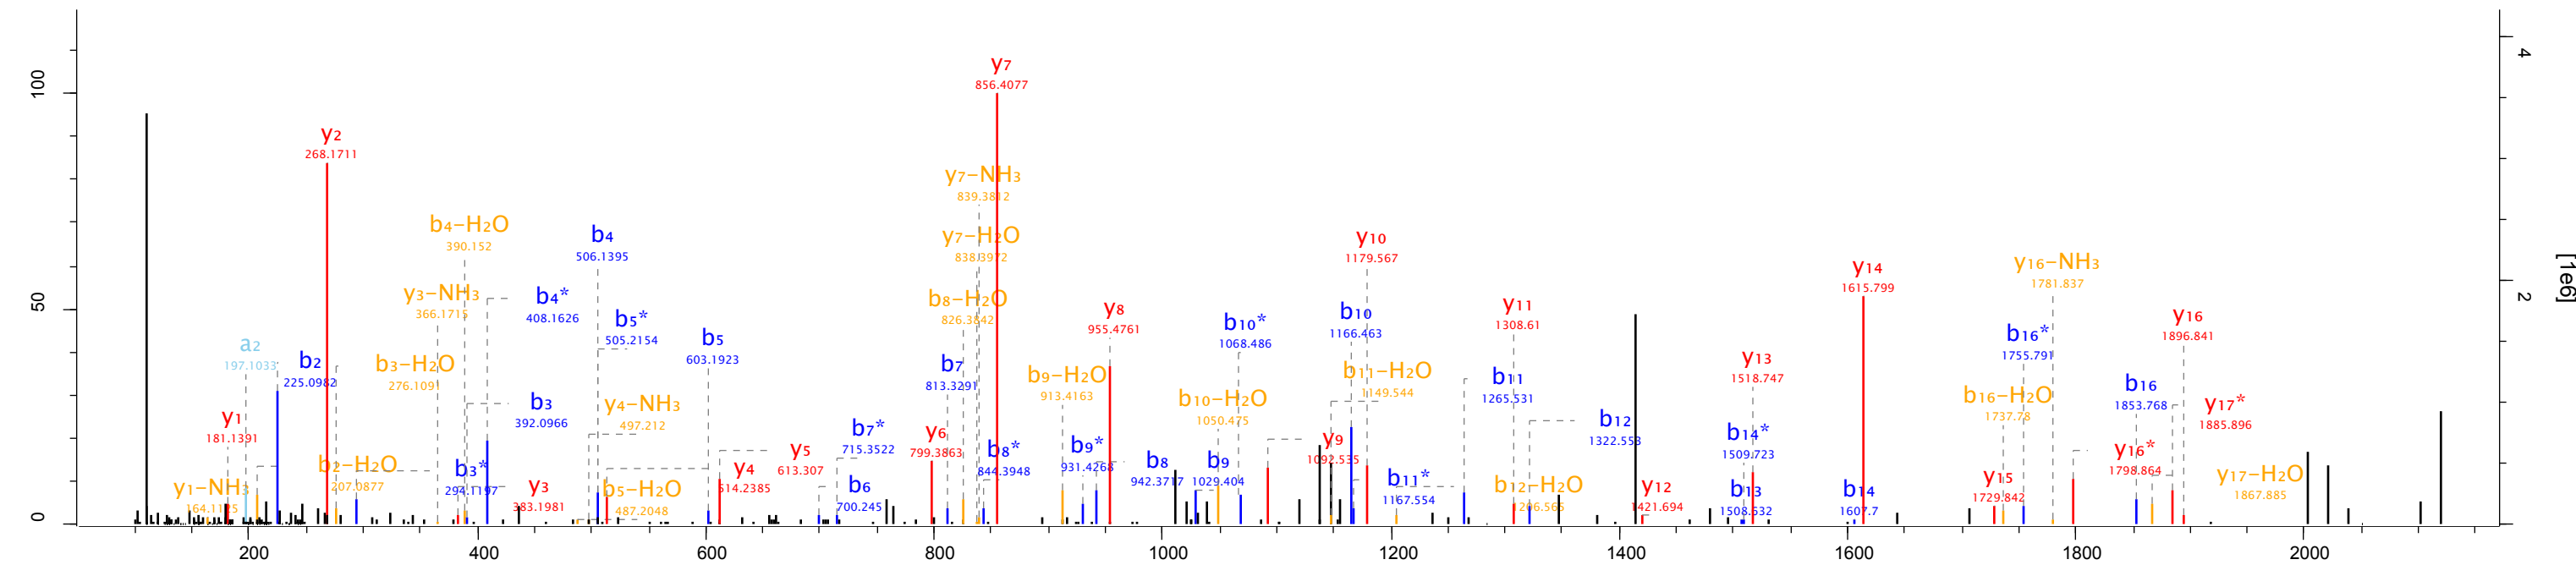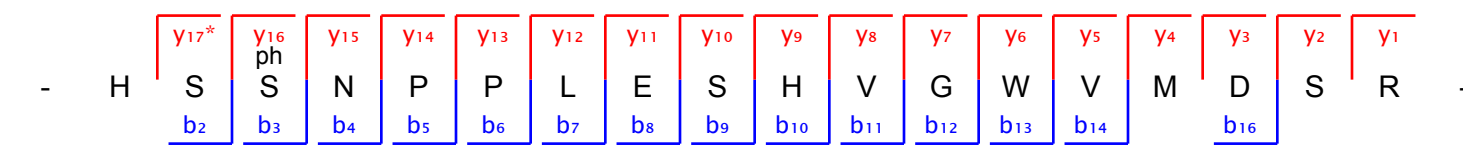

Raw file 20150812\_A375SR\_Phospho\_BR1\_07 Scan 18280 Method FTMS; HCD Score 47.16 m/z 849.73 Gene names NASP

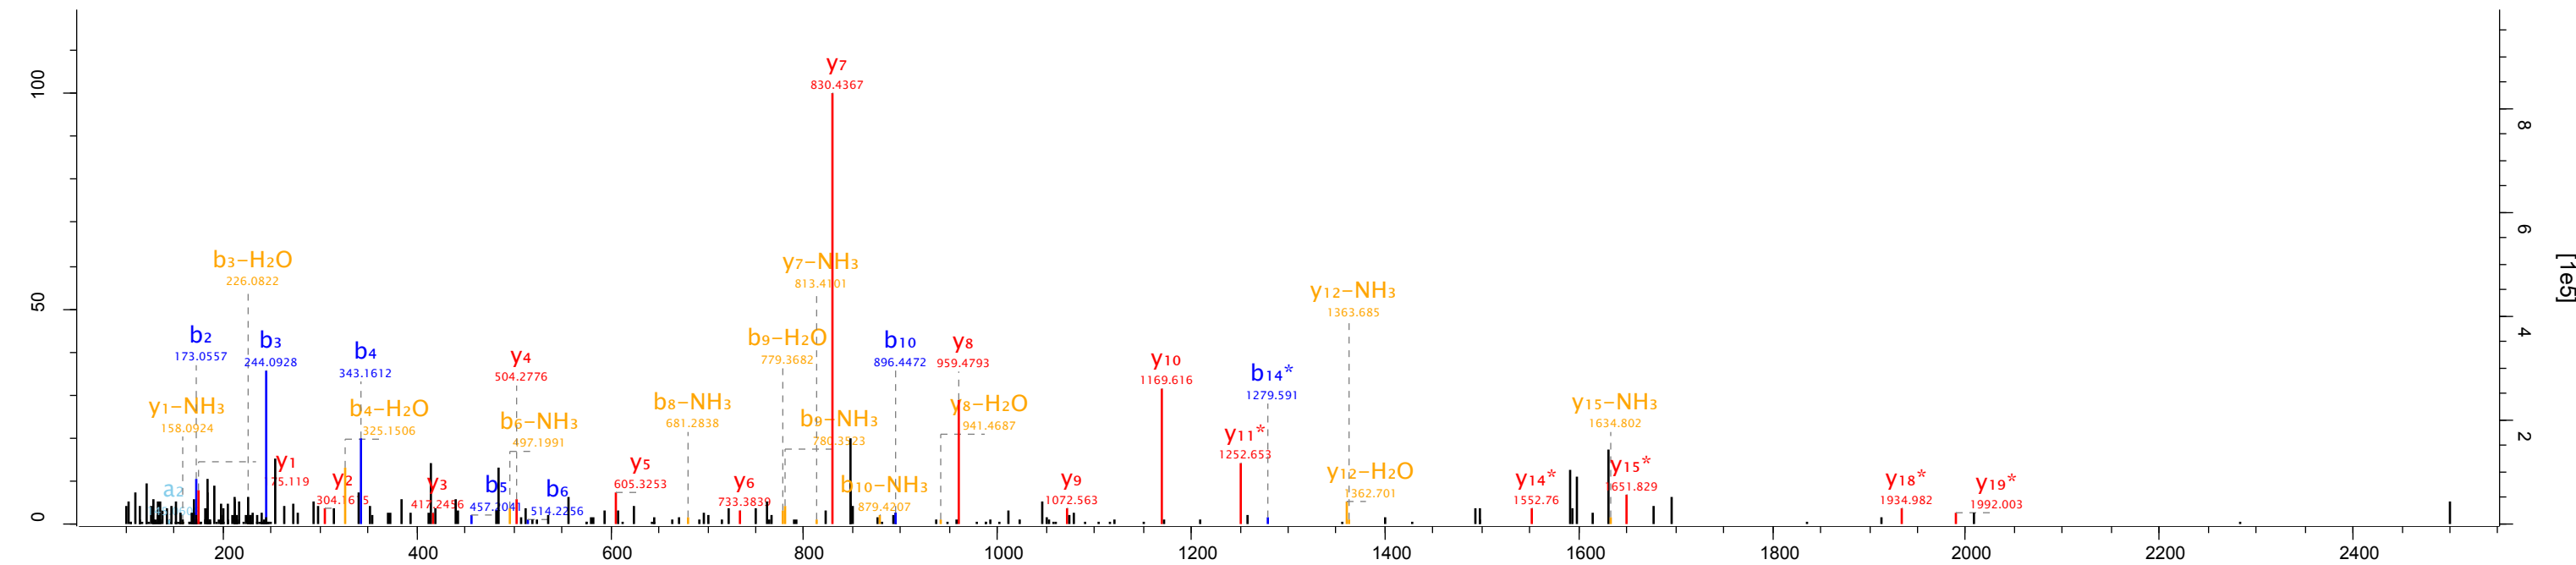

- D G A V N G P S V V G D Q T P I E P Q T S I E R -

b<sub>2</sub>
b<sub>3</sub>
b<sub>4</sub>
b<sub>5</sub>
b<sub>6</sub>
y<sub>19</sub>\*
y<sub>18</sub>\*
y<sub>15</sub>\*
y<sub>14</sub>\*
y<sub>11</sub>\*
ph
y<sub>10</sub>
y<sub>9</sub>
y<sub>8</sub>
y<sub>7</sub>
y<sub>6</sub>
y<sub>5</sub>
y<sub>4</sub>
y<sub>3</sub>
y<sub>2</sub>
y<sub>1</sub>
b<sub>14</sub>\*



Raw file 20150812\_A375SR\_Phospho\_BR1\_07 Scan 20200 Method FTMS; HCD Score 46.32 m/z 742.35 Gene names BDP1

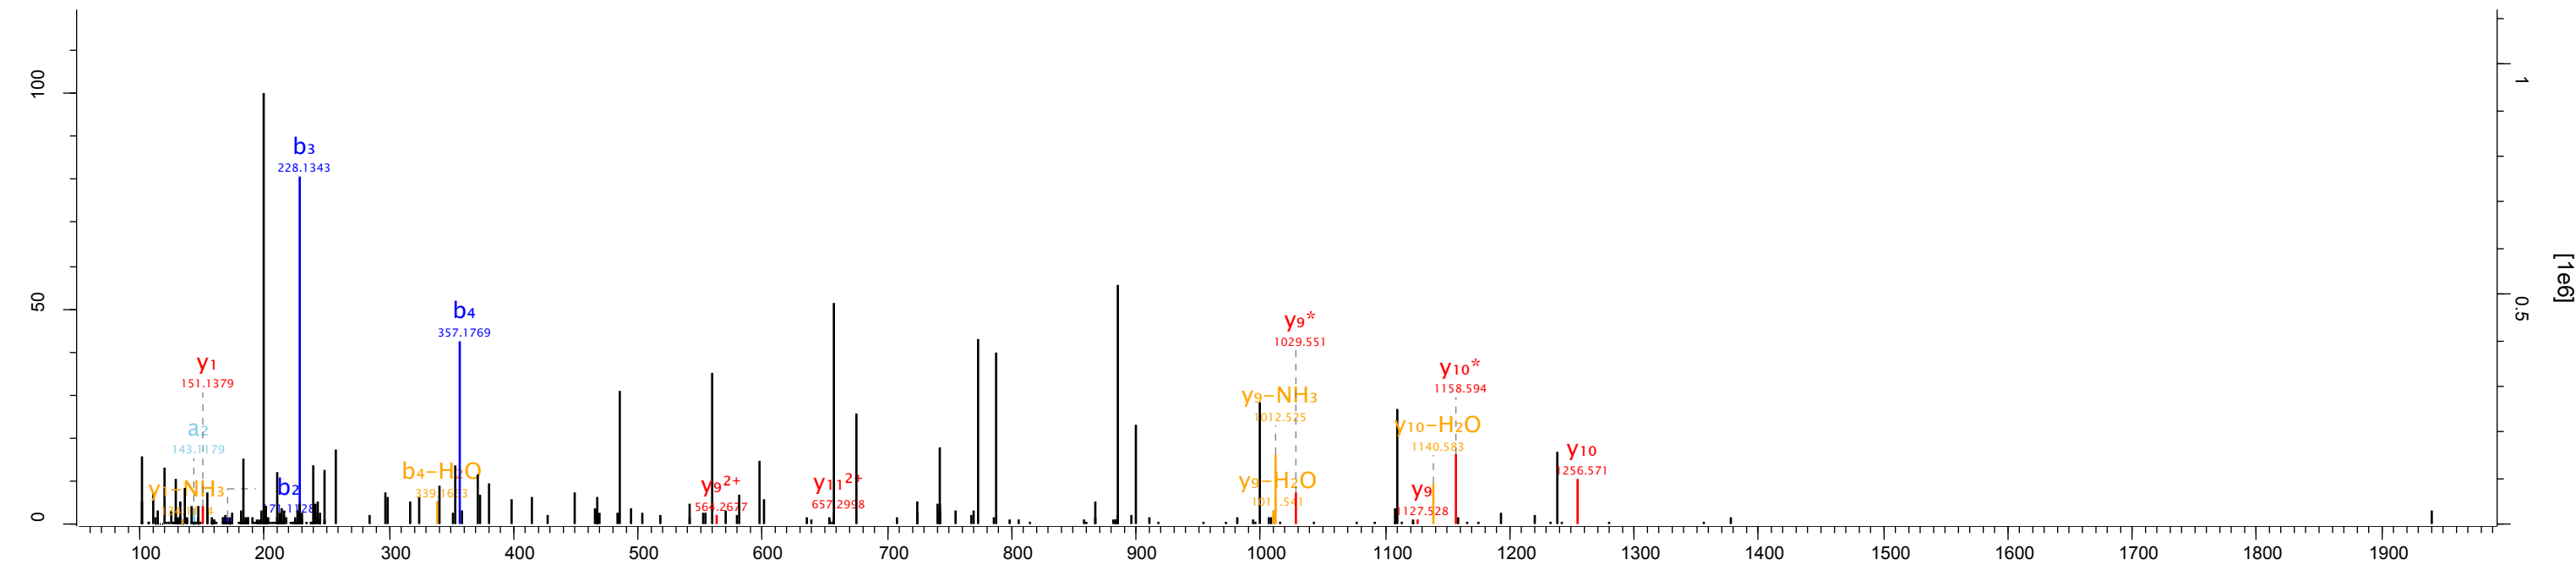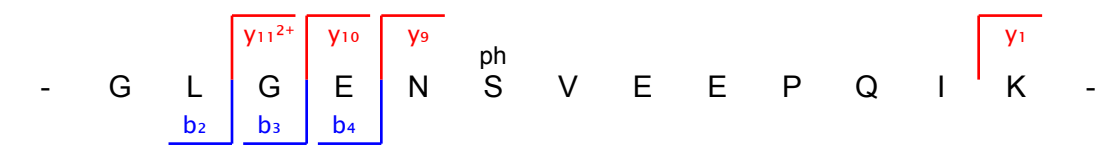

Raw file 20150812\_A375SR\_Phospho\_BR1\_07 Scan 25840 Method FTMS; HCD Score 144.27 m/z 859.98 Gene names TERF2

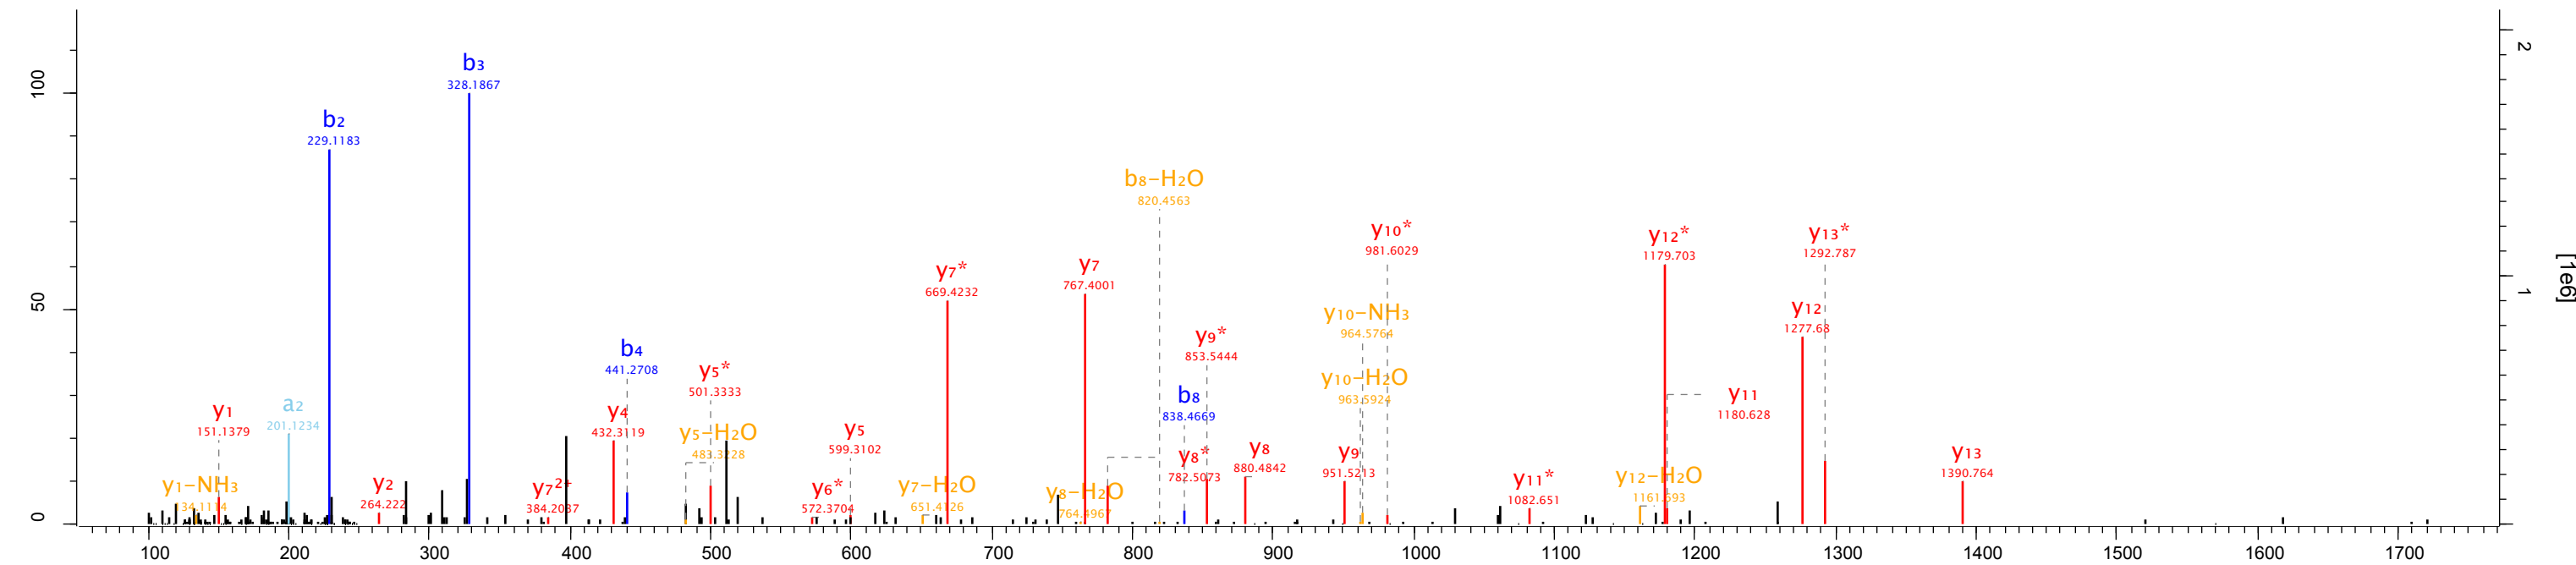

- D L V L P T Q A L P A S P A L K -  
 b2 b3 b4 b8

Raw file: 20150812\_A375SR\_Phospho\_BR1\_07  
 Scan: 2860 Method: FTMS; HCD Score: 83.86 m/z: 613.78 Gene names: TRPS1

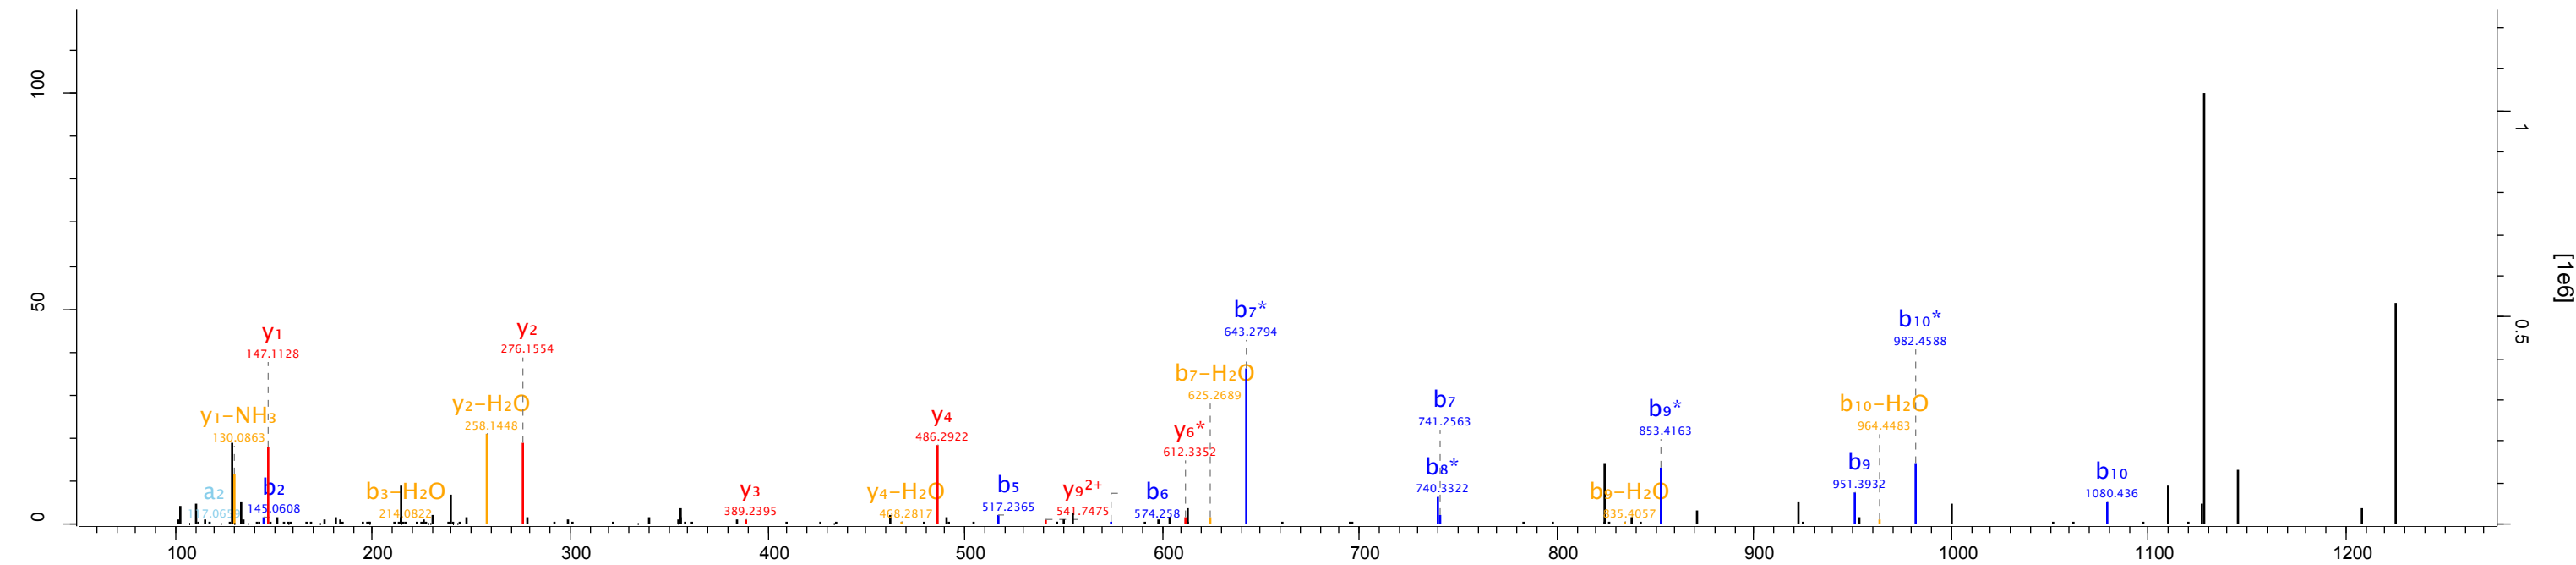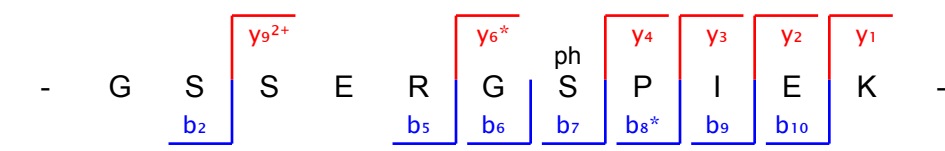

Raw file: 20150812\_A375SR\_Phospho\_BR1\_07  
 Scan: 6340 Method: FTMS; HCD Score: 193.54 m/z: 729.81 Gene names: PUM2

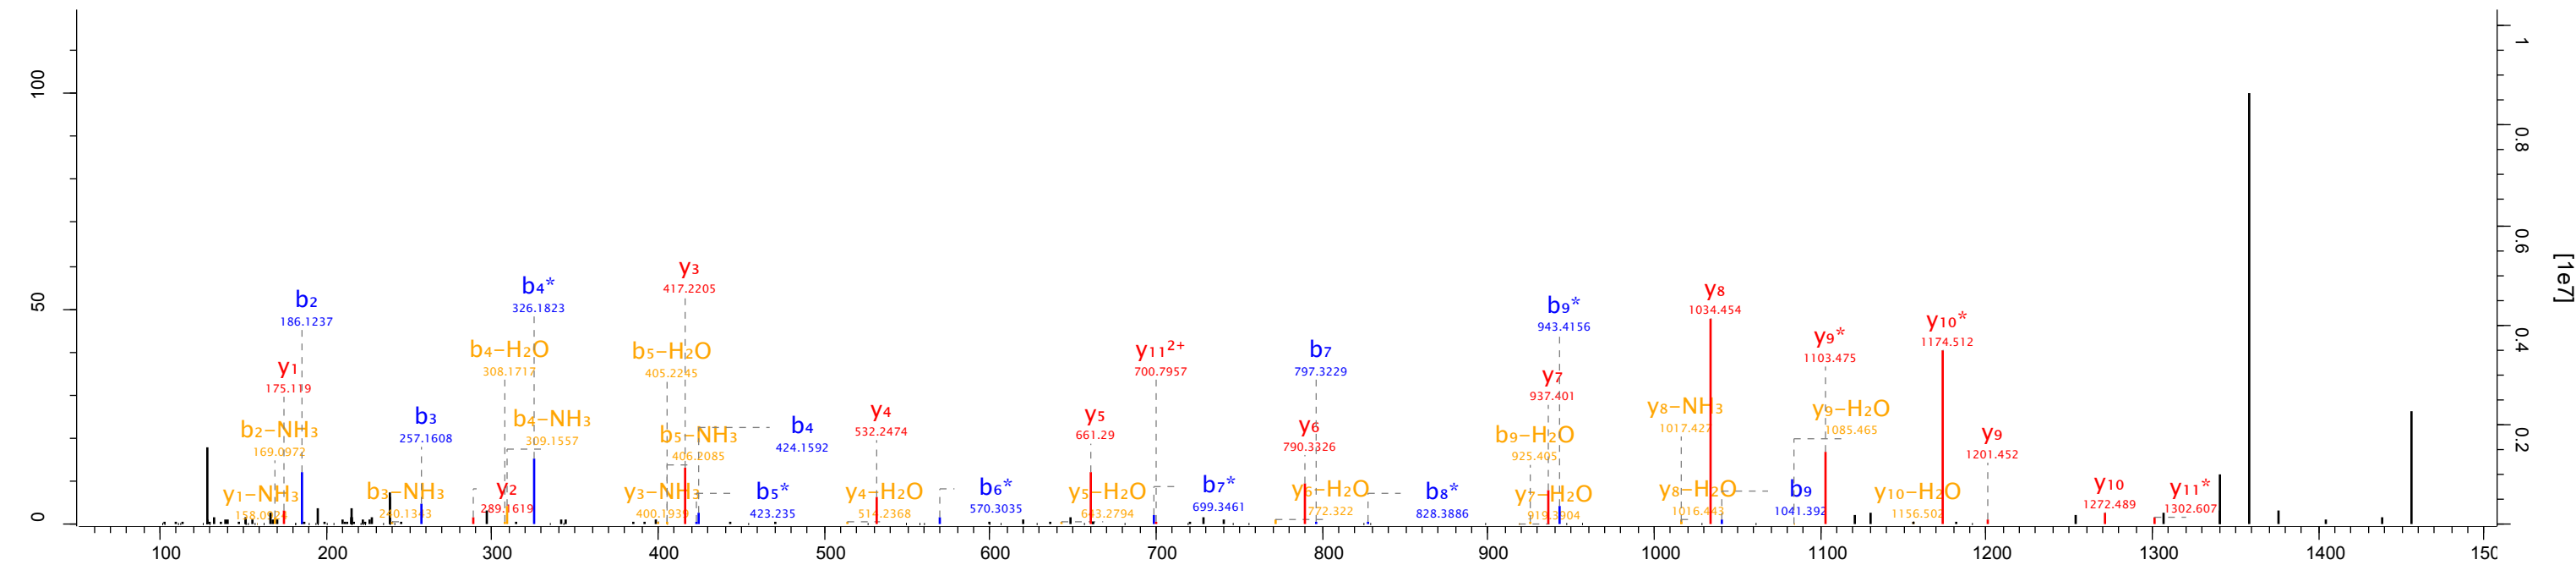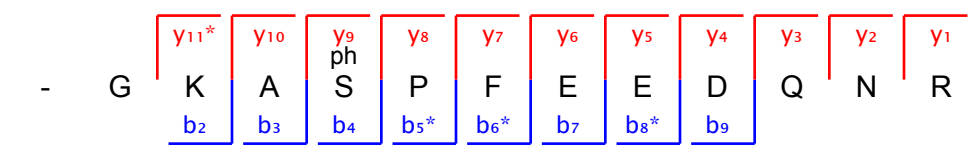

Raw file 20150812\_A375SR\_Phospho\_BR1\_07 Scan 6460 Method FTMS; HCD Score 143.64 m/z 596.31 Gene names RYBP

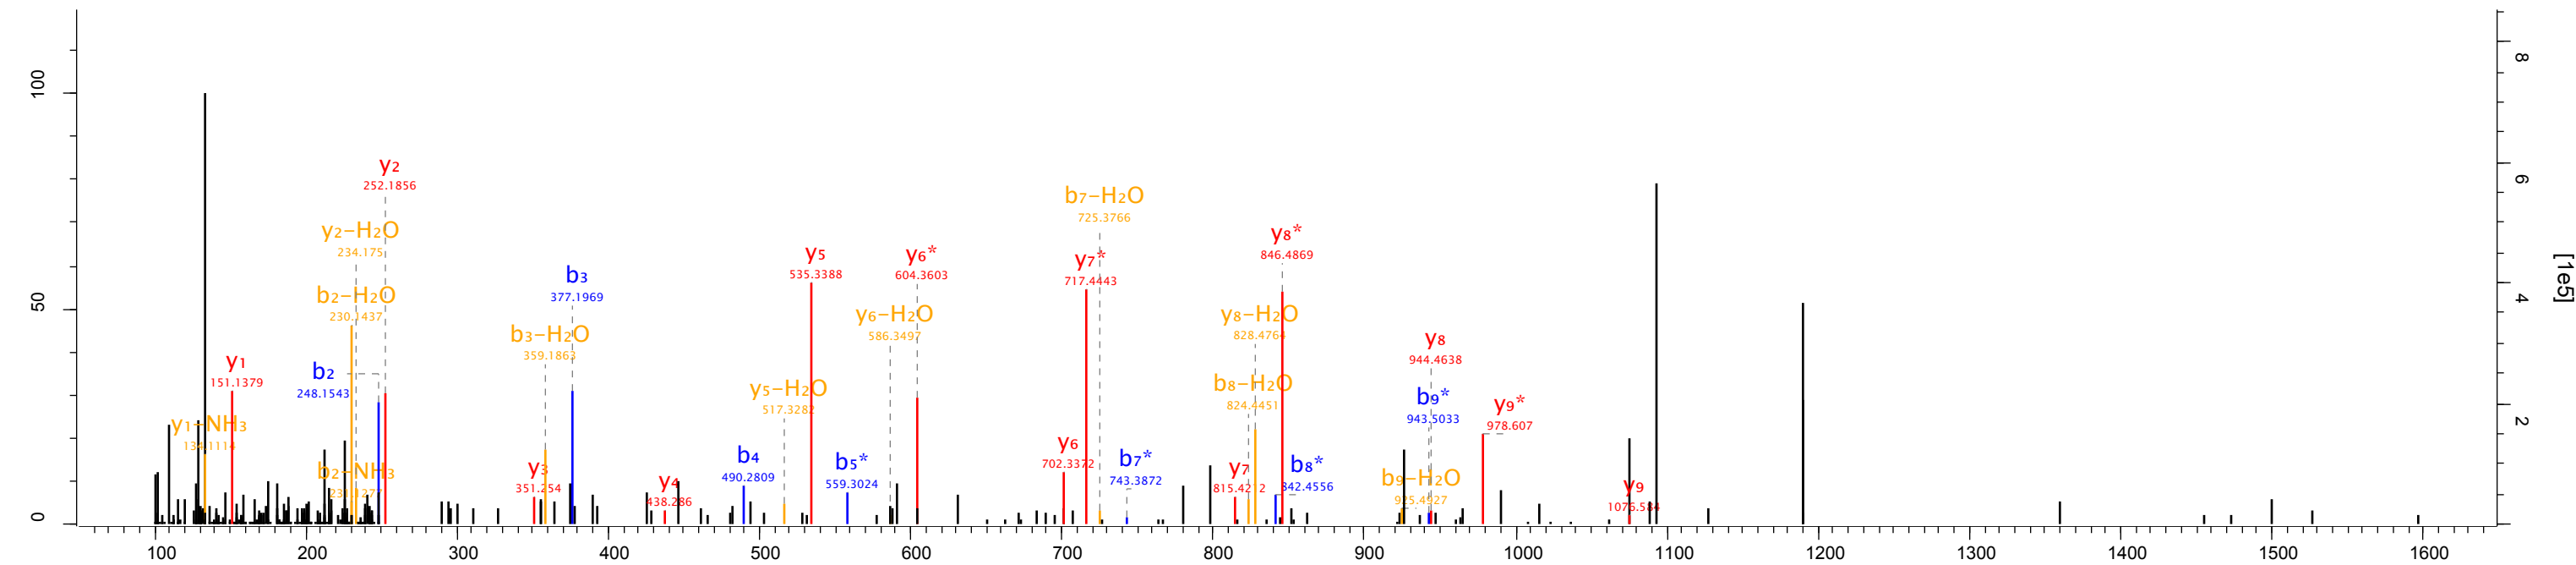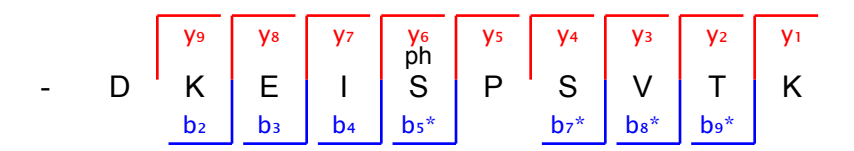

Raw file  
20150812\_A375SR\_Phospho\_BR1\_07

Scan 6560 Method FTMS; HCD Score 302.53 m/z 1115.93 Gene names RBM33

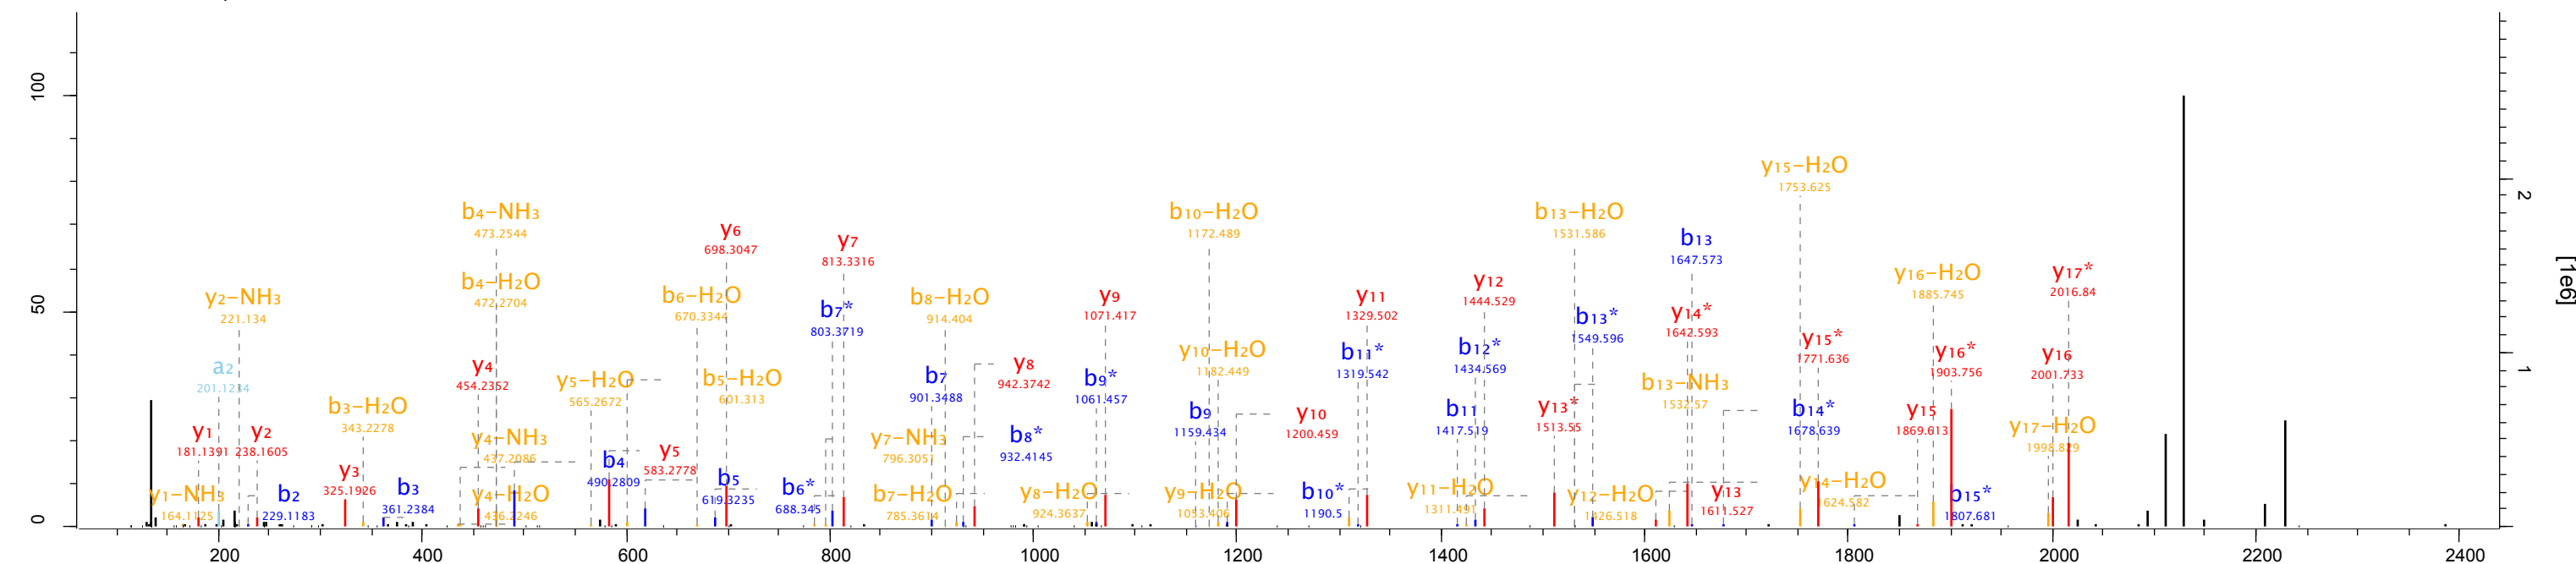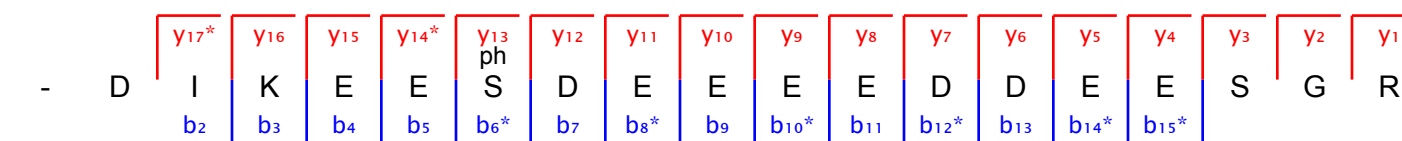

Raw file: 20150812\_A375SR\_Phospho\_BR1\_07  
 Scan: 7980 Method: FTMS; HCD Score: 92.78 m/z: 543.77 Gene names: MIEF1

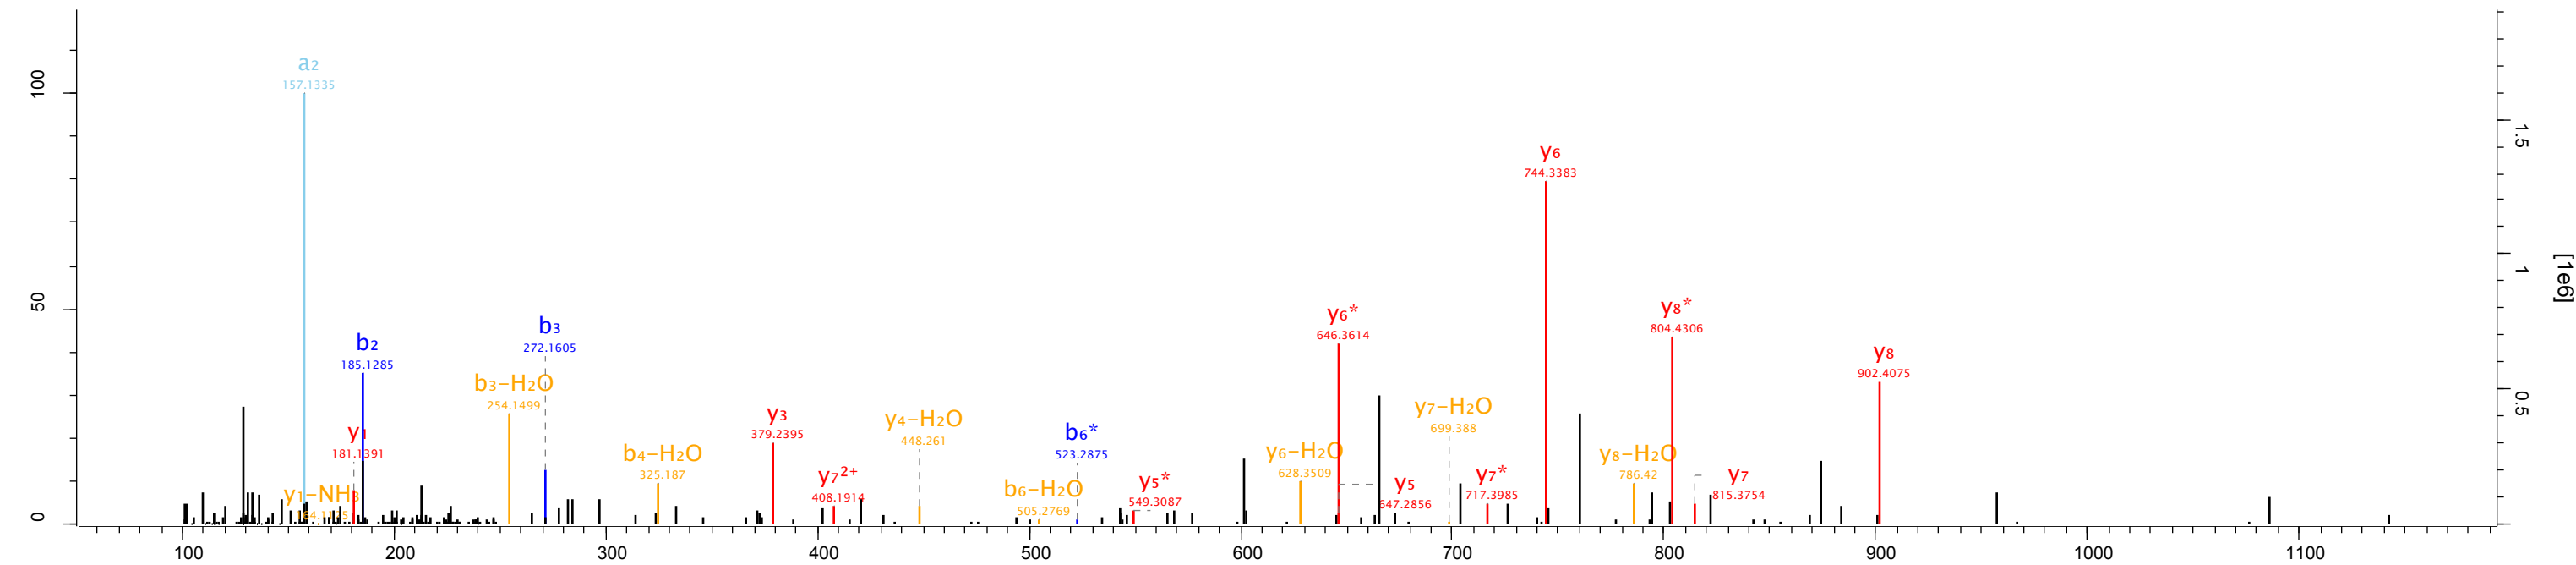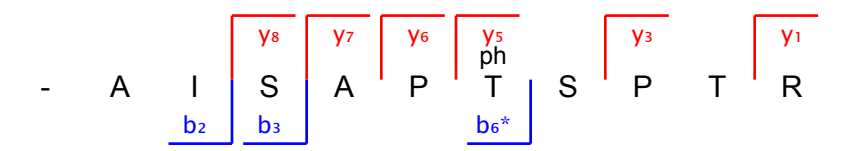

Raw file 20150812\_A375SR\_Phospho\_BR1\_07 Scan 8720 Method FTMS; HCD Score 196.36 m/z 671.64 Gene names OPTN

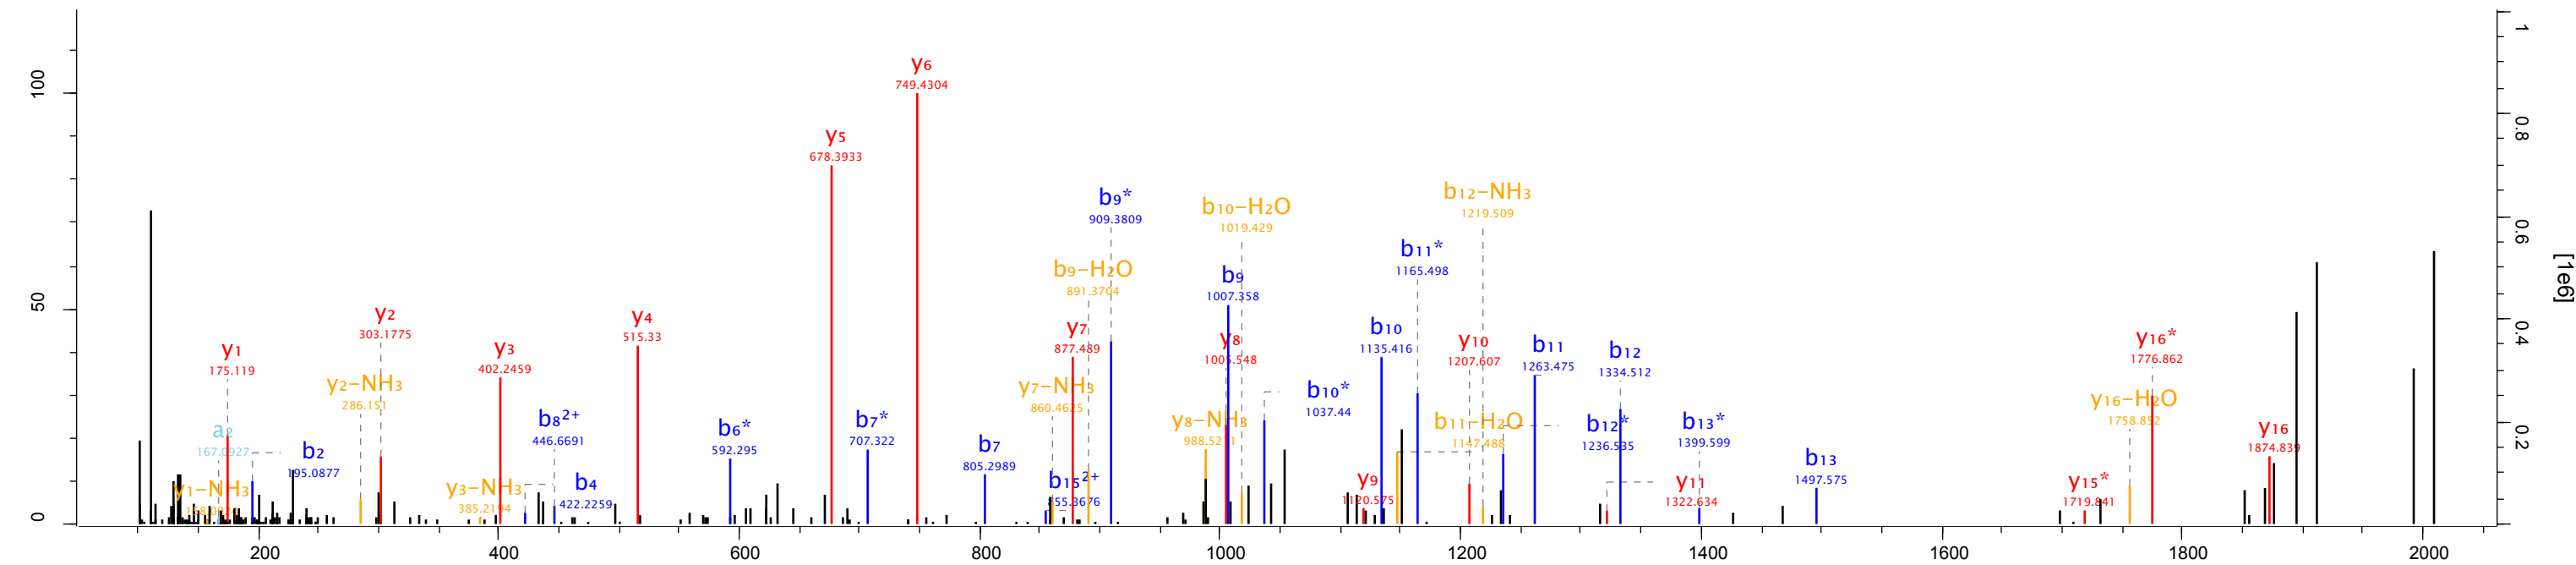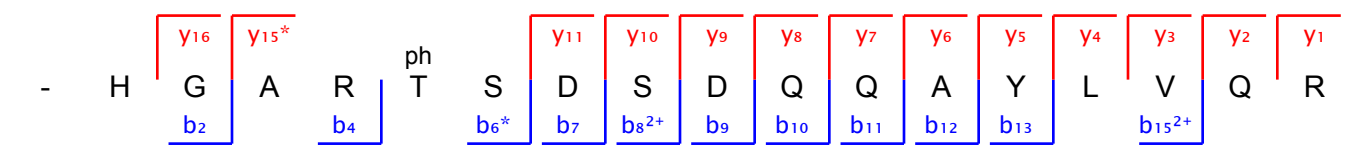



Raw file: 20150812\_A375SR\_Phospho\_BR1\_07  
 Scan: 9960 Method: FTMS; HCD Score: 133.51 m/z: 924.92 Gene names: LITAF;TLE3

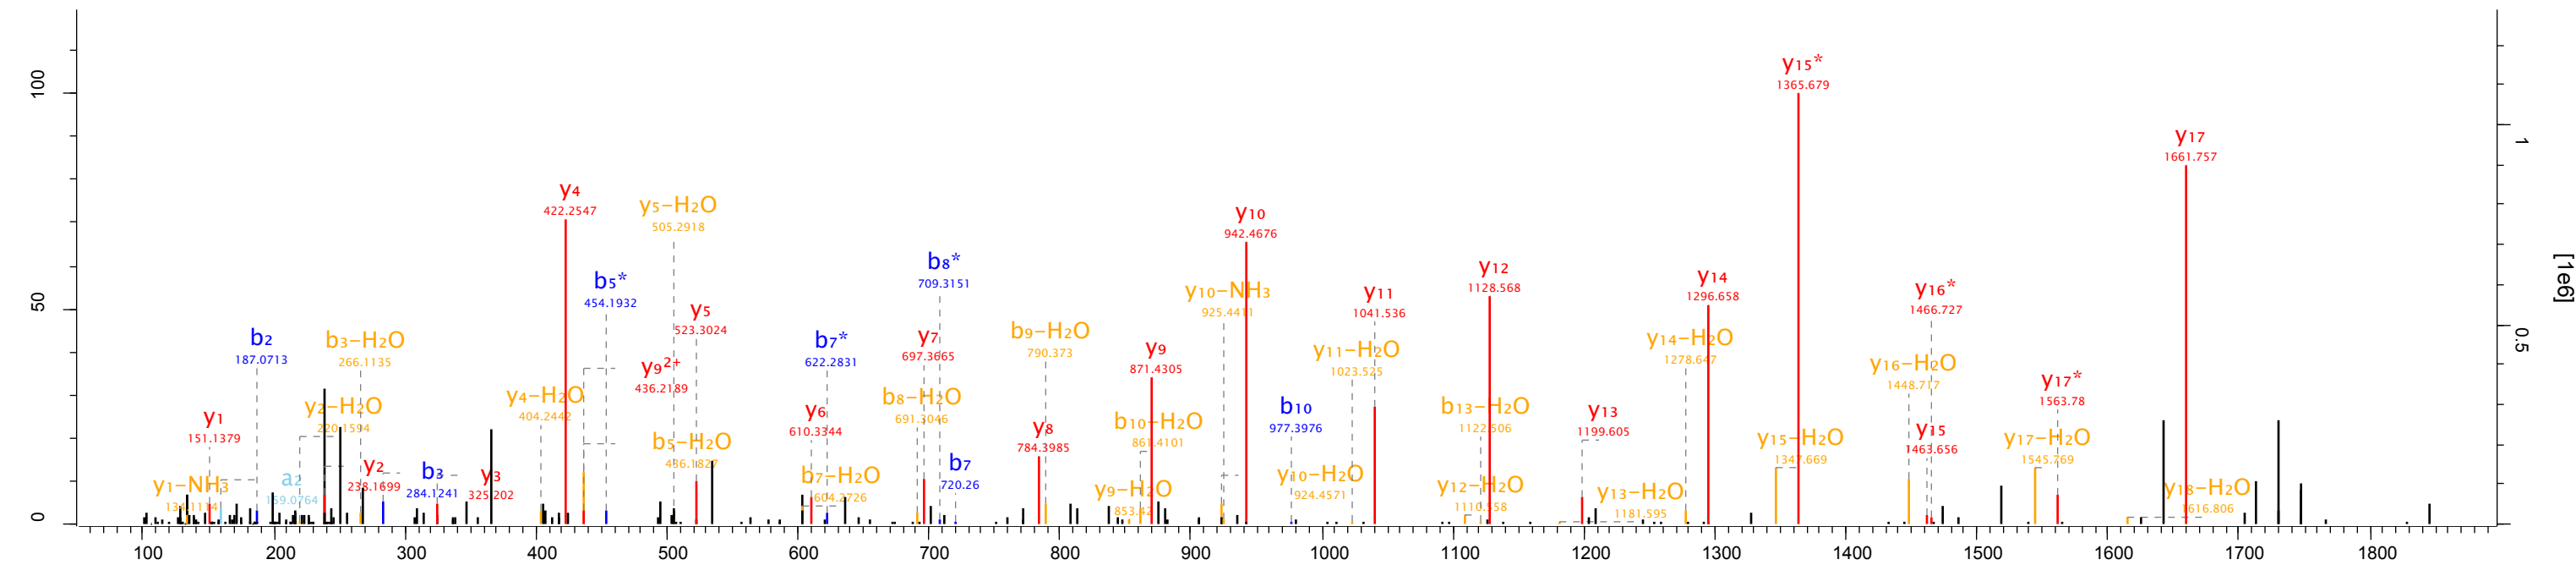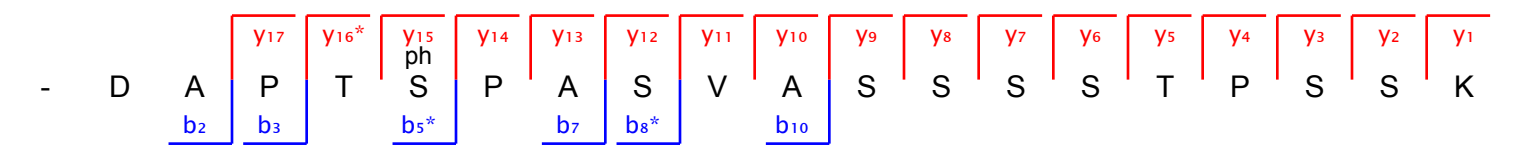

Raw file Scan Method Score m/z Gene names  
 20150812\_A375SR\_Phospho\_BR1\_08 11010 FTMS; HCD 337.33 994.91 ZRANB2

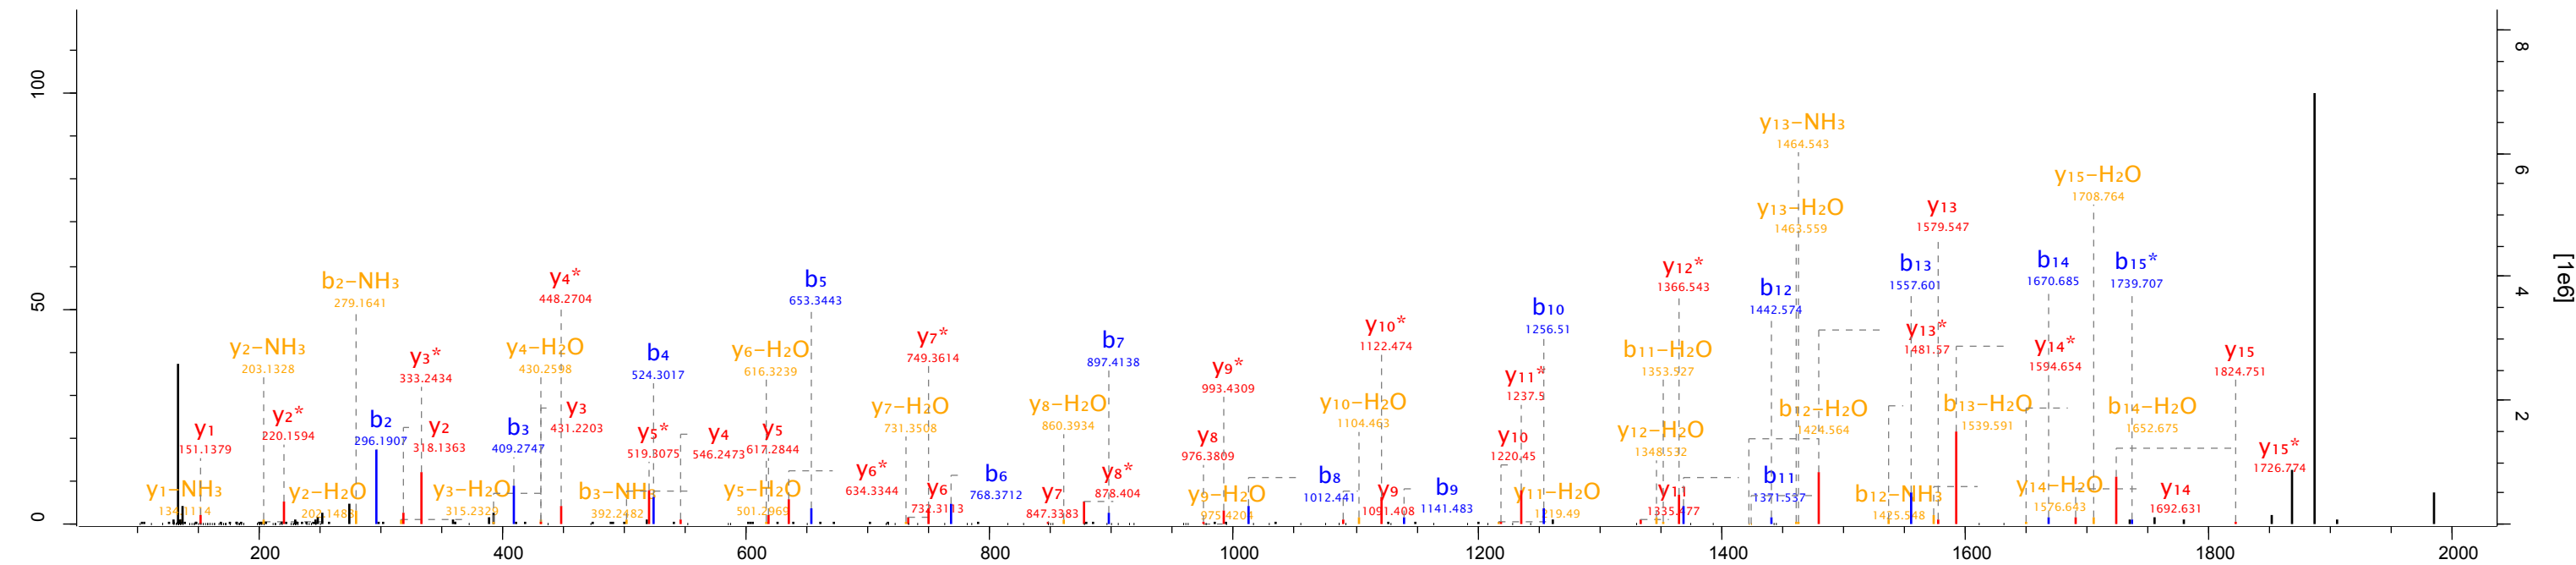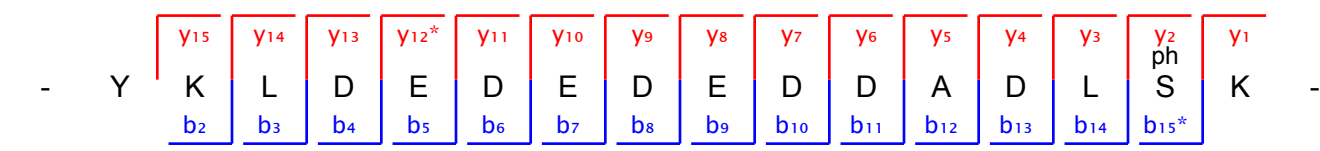

Raw file: 20150812\_A375SR\_Phospho\_BR1\_08  
 Scan: 11150 Method: FTMS; HCD Score: 60.73 m/z: 929.97 Gene names: USP1

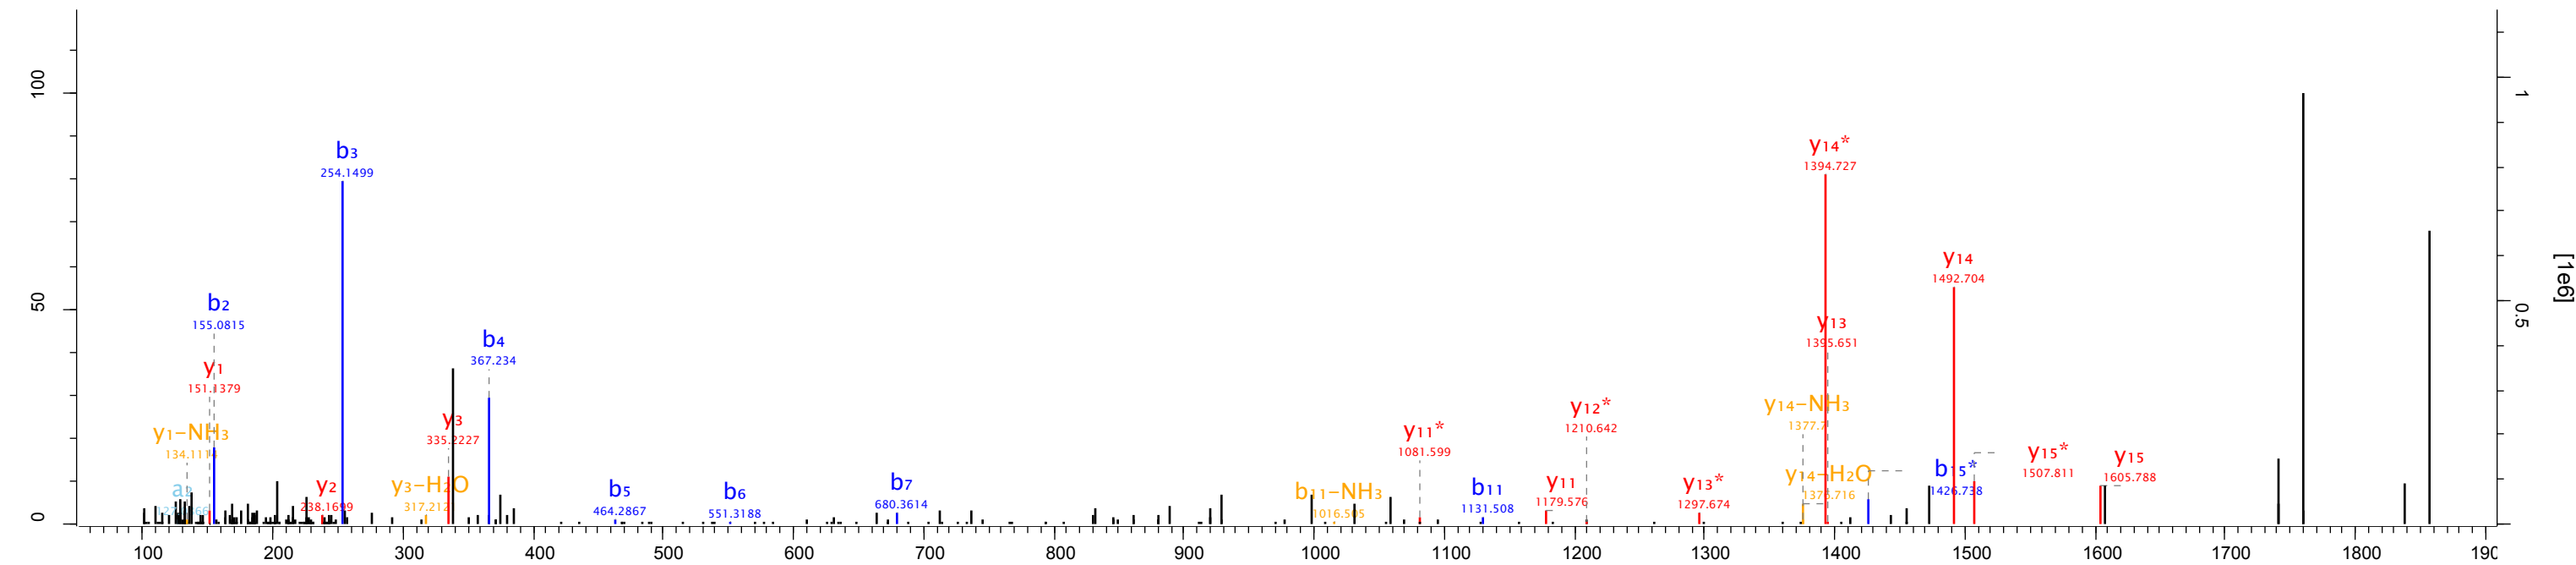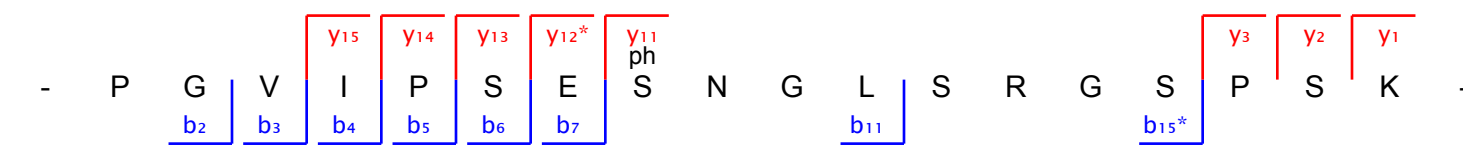

Raw file 20150812\_A375SR\_Phospho\_BR1\_08 Scan 12290 Method FTMS; HCD Score 256.23 m/z 951.47 Gene names FLNA

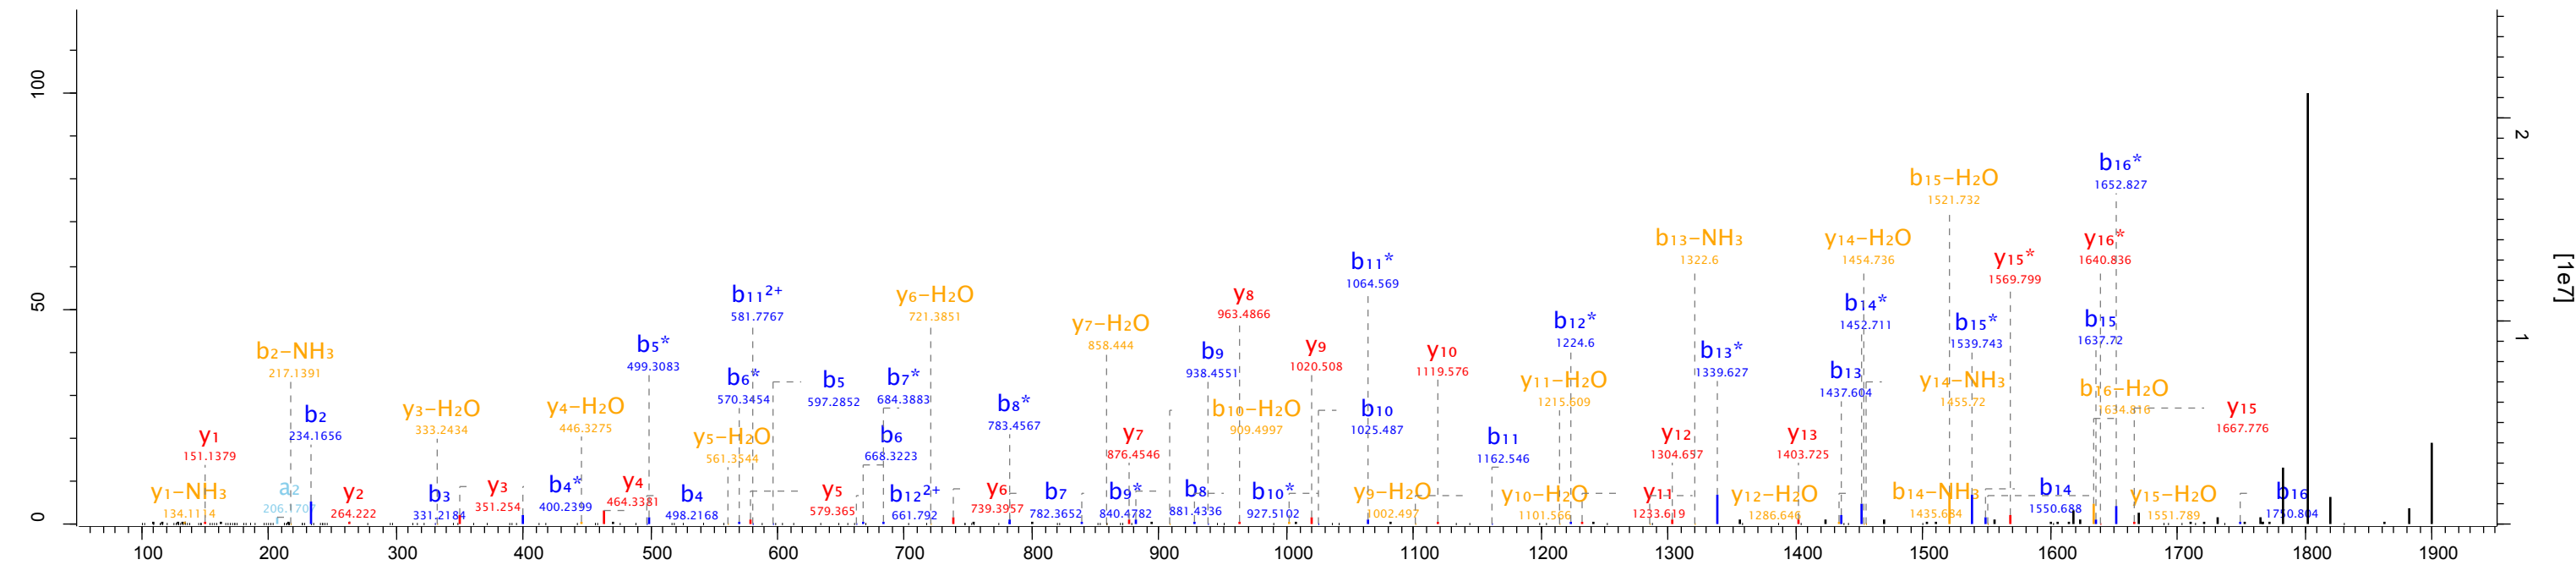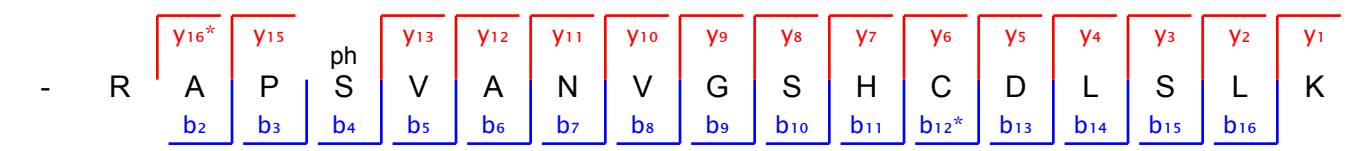

Raw file Scan Method Score m/z Gene names  
 20150812\_A375SR\_Phospho\_BR1\_08 12430 FTMS; HCD 88.2 825.37 SND1

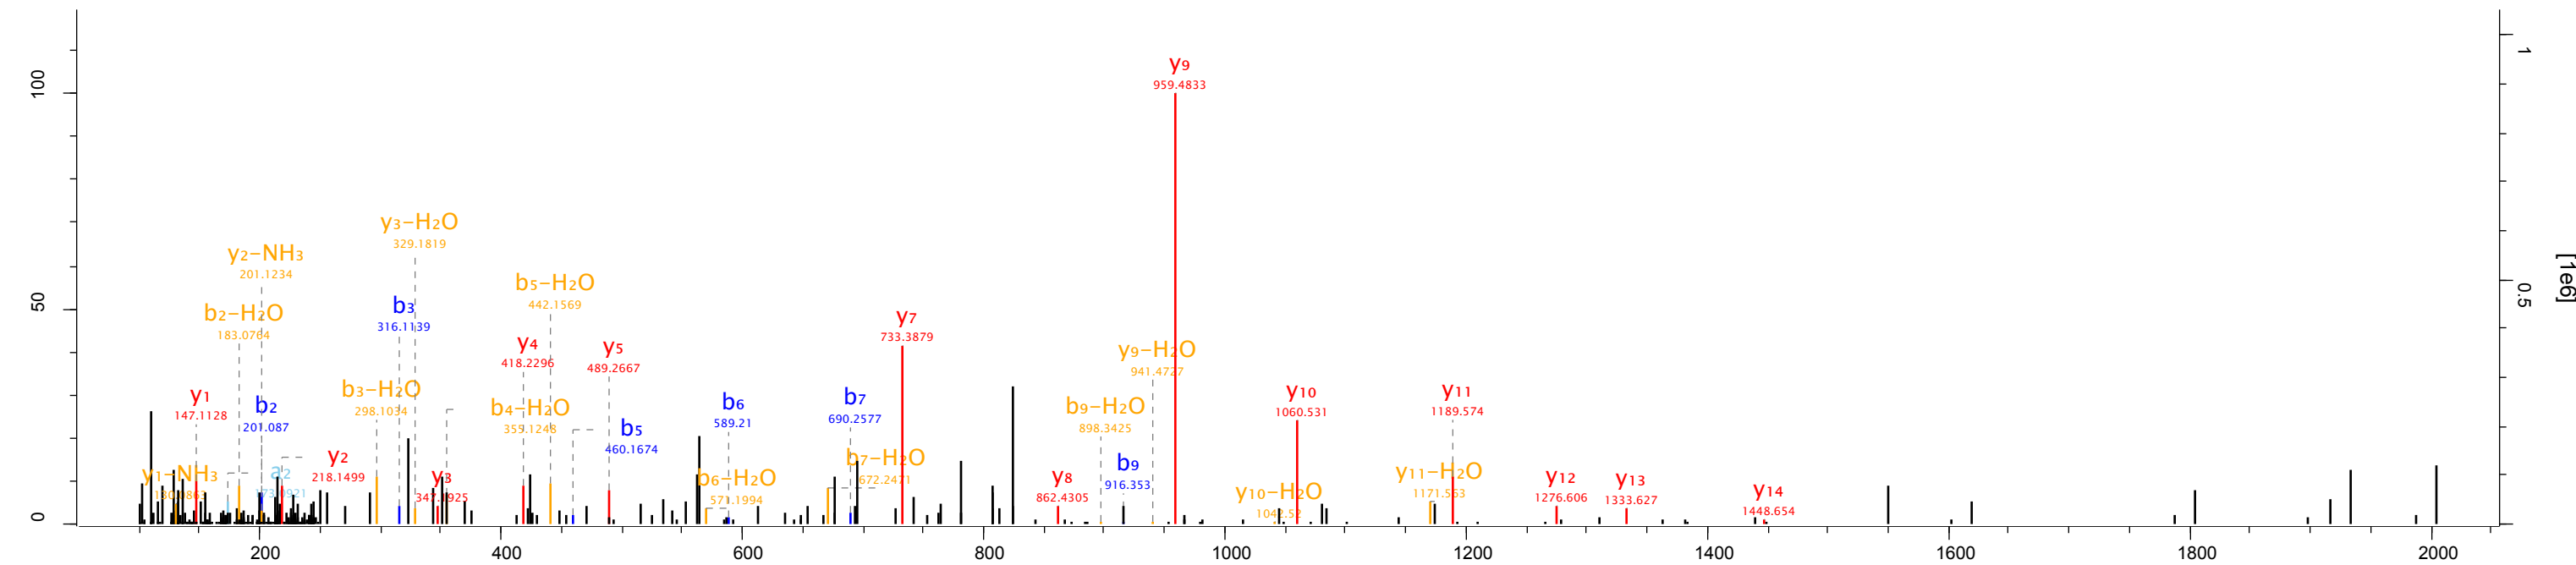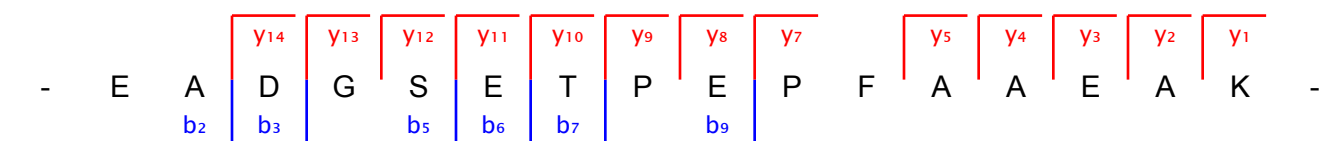

Raw file: 20150812\_A375SR\_Phospho\_BR1\_08  
 Scan: 12830 Method: FTMS; HCD Score: 69.07 m/z: 777.99 Gene names: SMAP

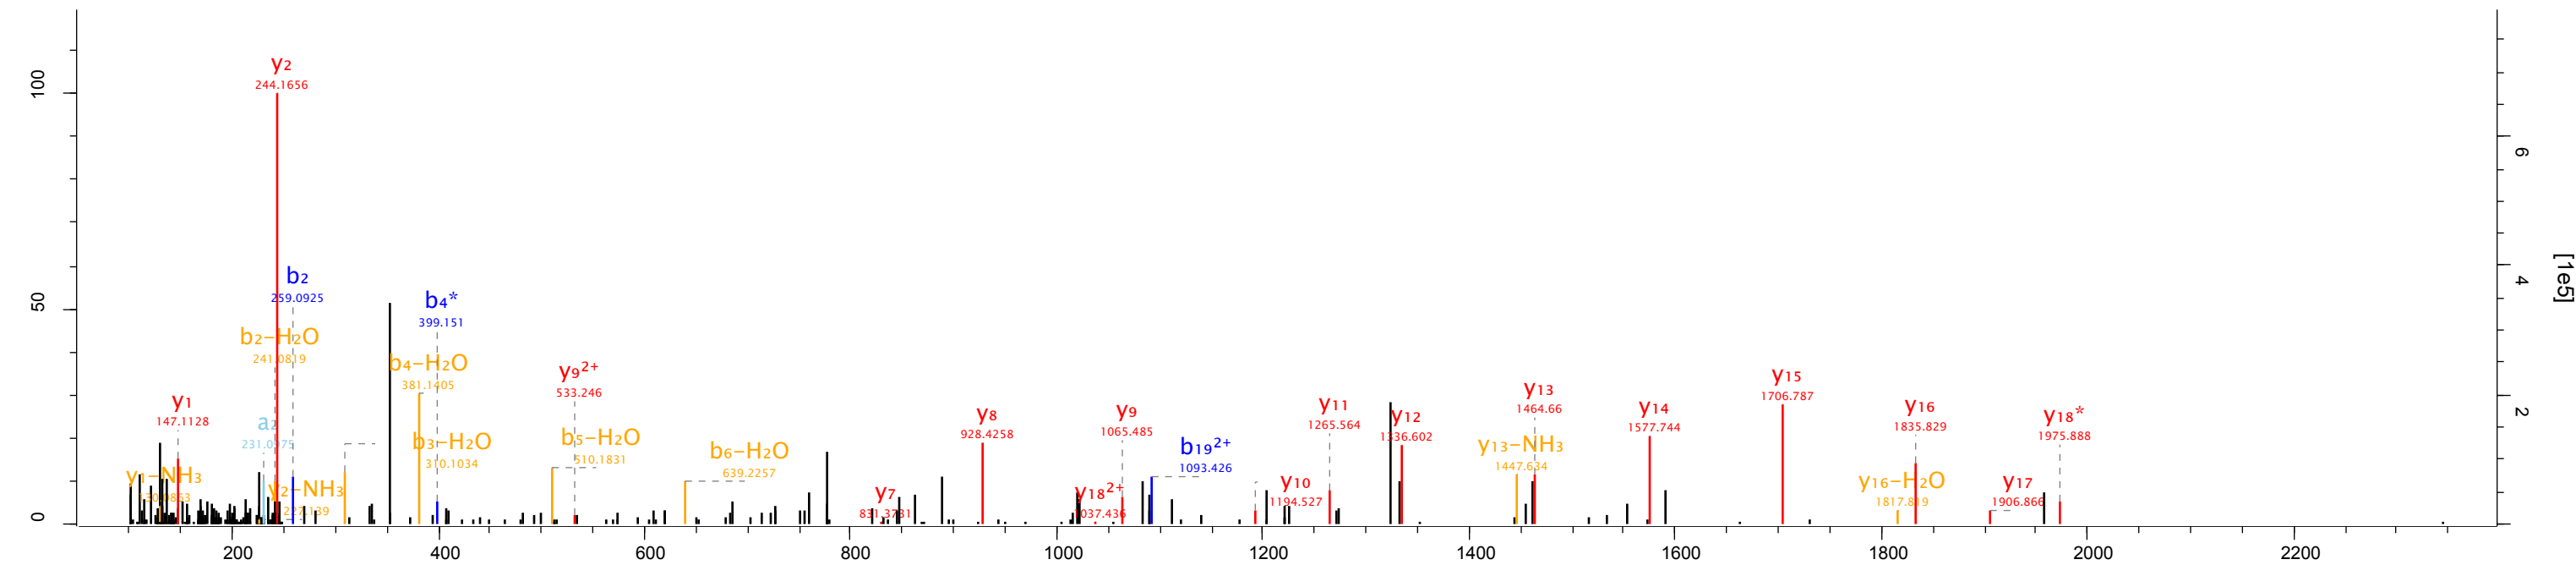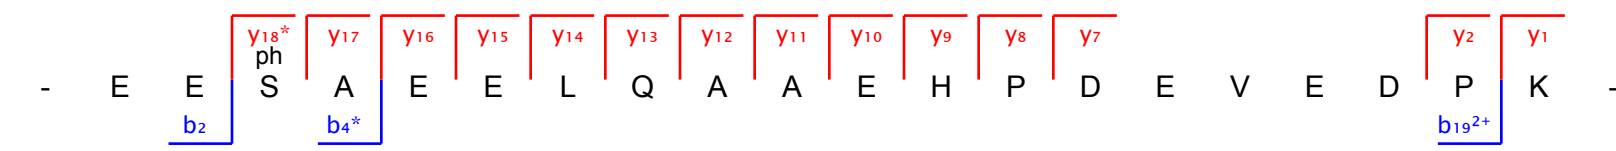

Raw file 20150812\_A375SR\_Phospho\_BR1\_08 Scan 13000 Method FTMS; HCD Score 146.19 m/z 735.35 Gene names RB1

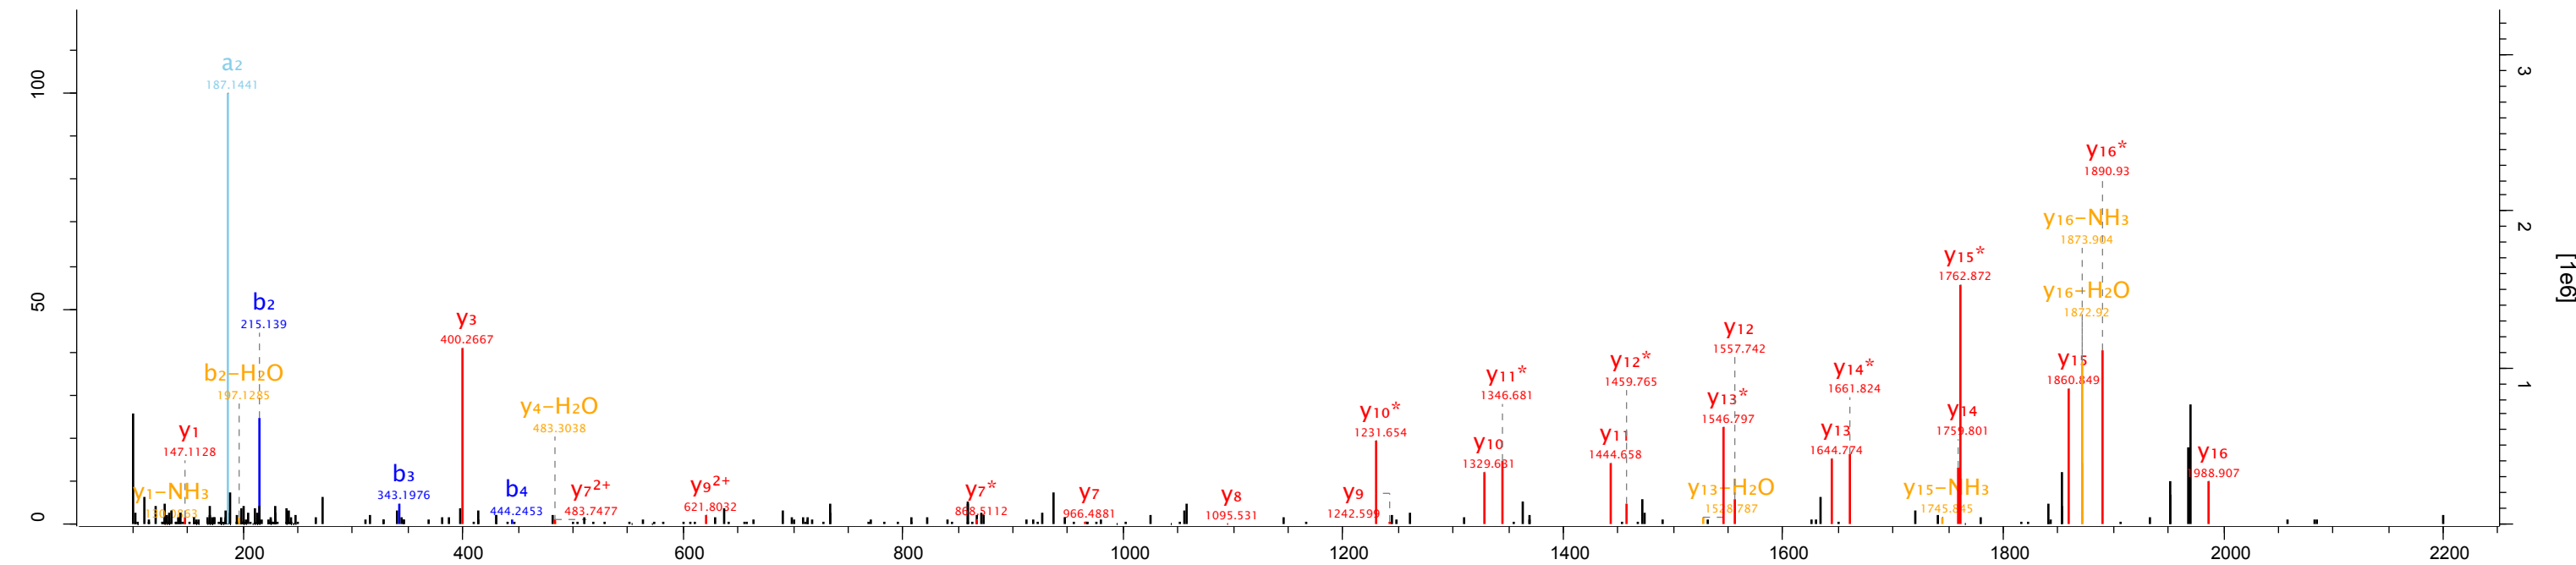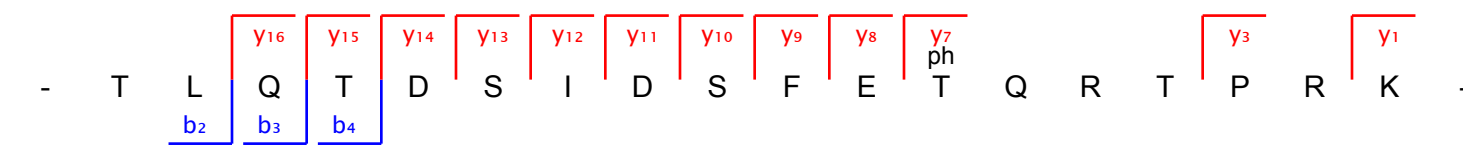

Raw file 20150812\_A375SR\_Phospho\_BR1\_08 Scan 13470 Method FTMS; HCD Score 62.06 m/z 619.32 Gene names AJUBA

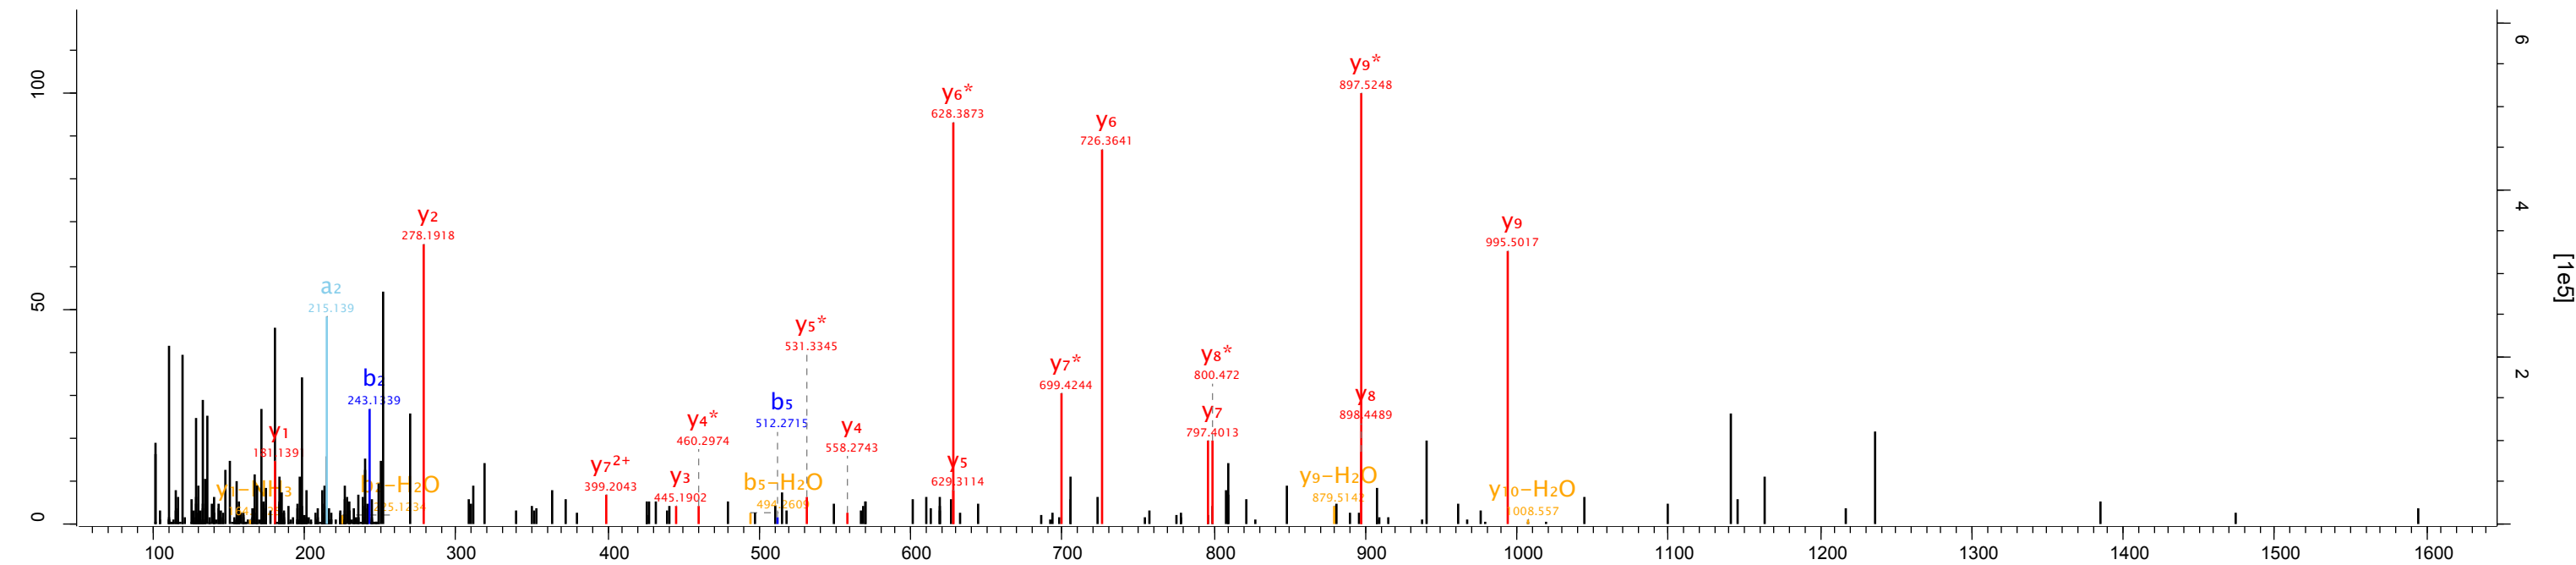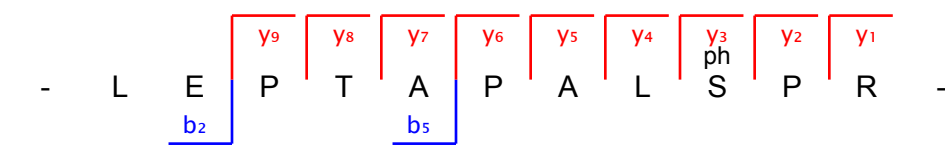



Raw file 20150812\_A375SR\_Phospho\_BR1\_08 Scan 14980 Method FTMS; HCD Score 164.8 m/z 706.84 Gene names ALDOA

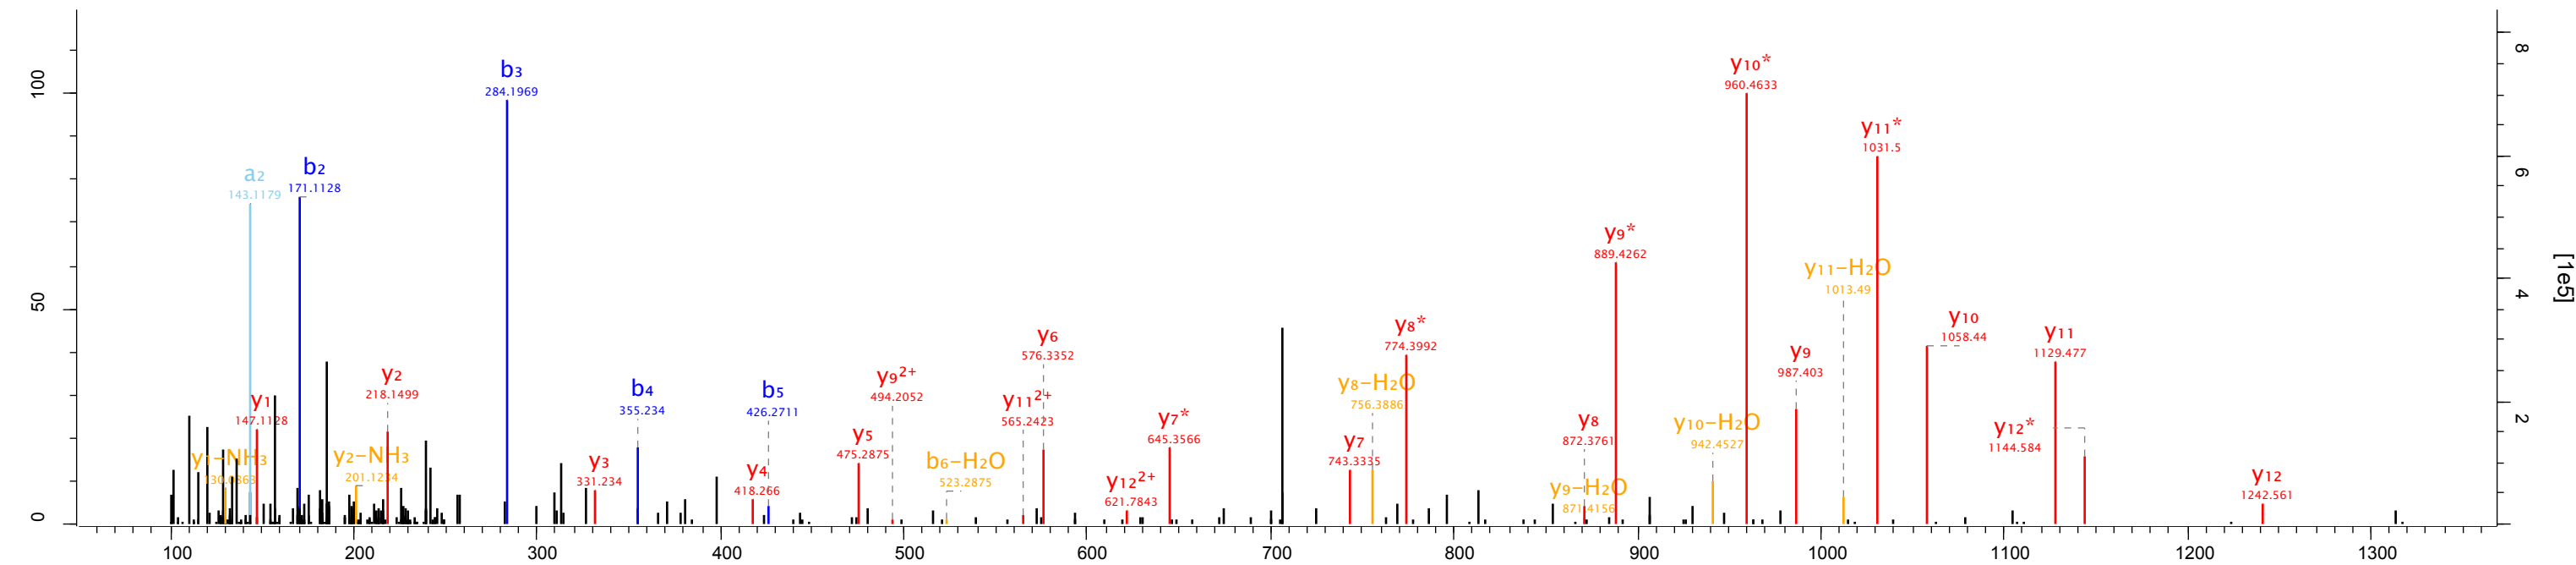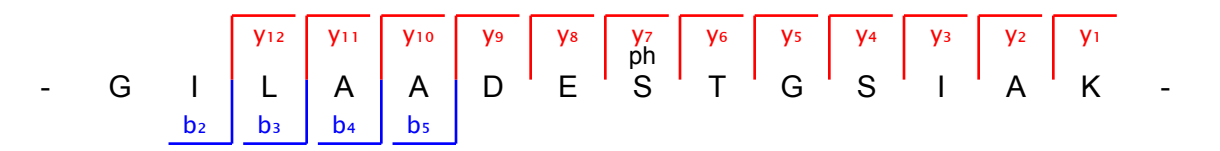

Raw file: 20150812\_A375SR\_Phospho\_BR1\_08  
 Scan: 15740 Method: FTMS; HCD Score: 81.88 m/z: 959.92 Gene names: SYNRG

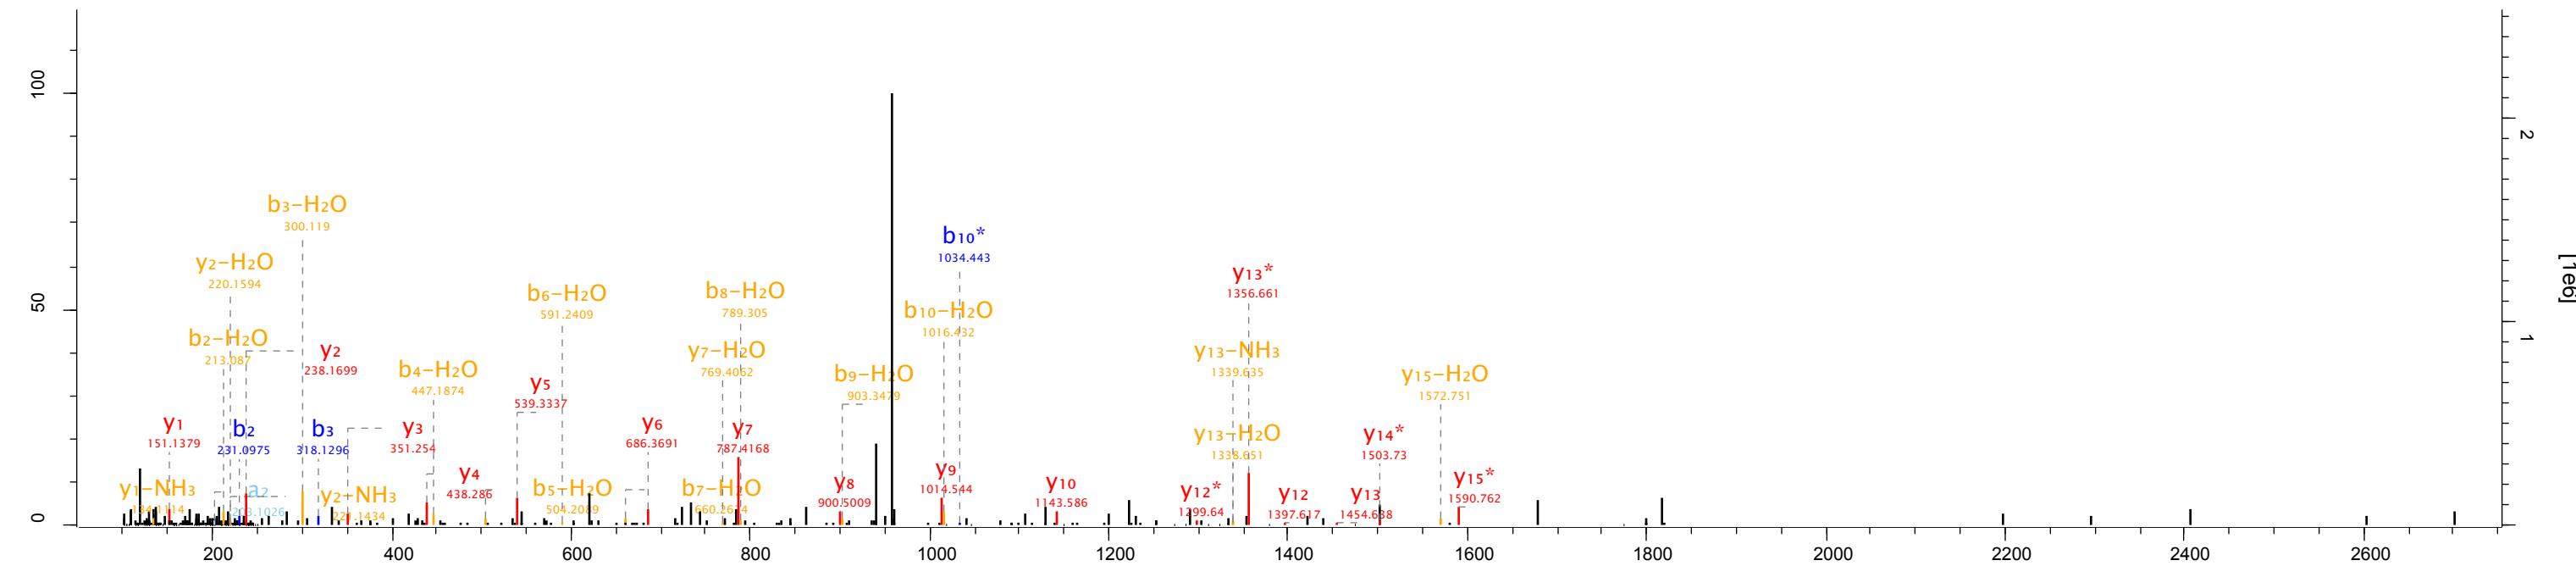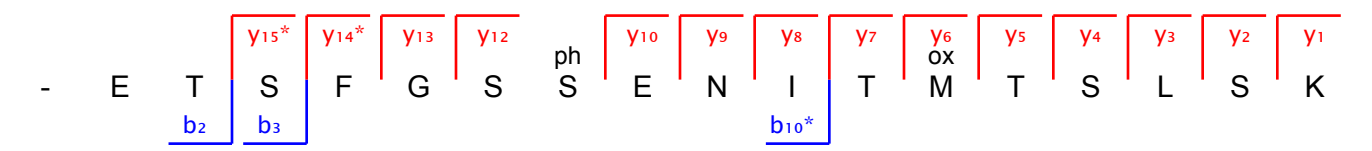

Raw file  
20150812\_A375SR\_Phospho\_BR1\_08

Scan 16580 Method FTMS; HCD Score 158.05 m/z 824.41 Gene names NEMF

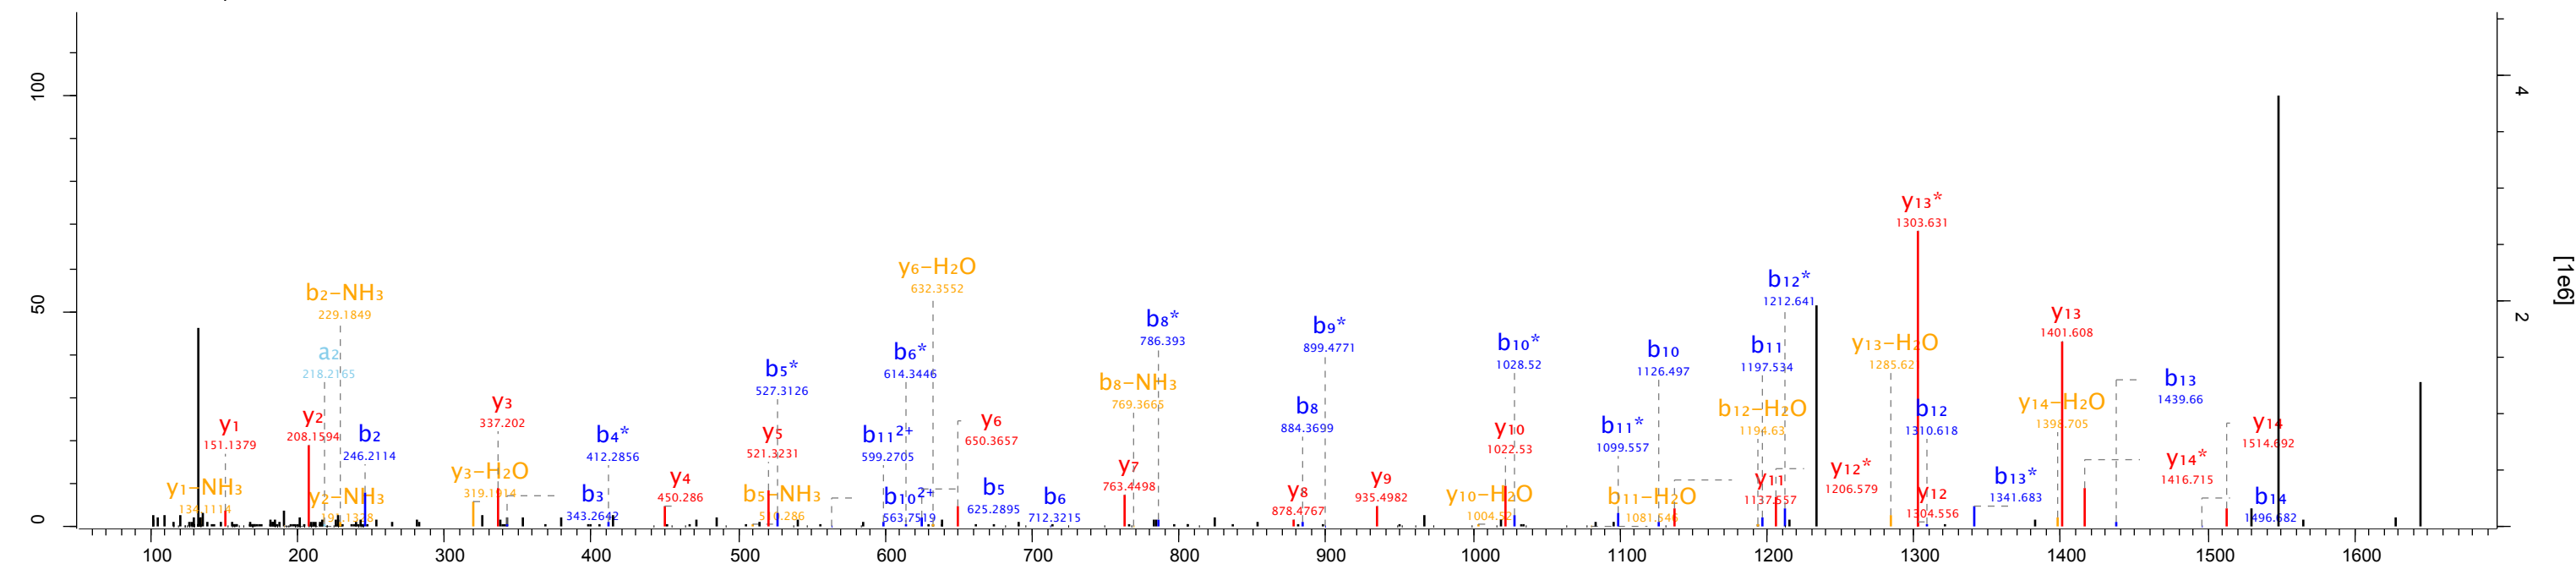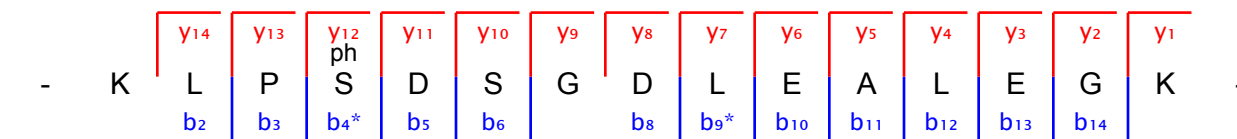

Raw file Scan Method Score m/z Gene names  
 20150812\_A375SR\_Phospho\_BR1\_08 17420 FTMS; HCD 240.41 724.08 SP100

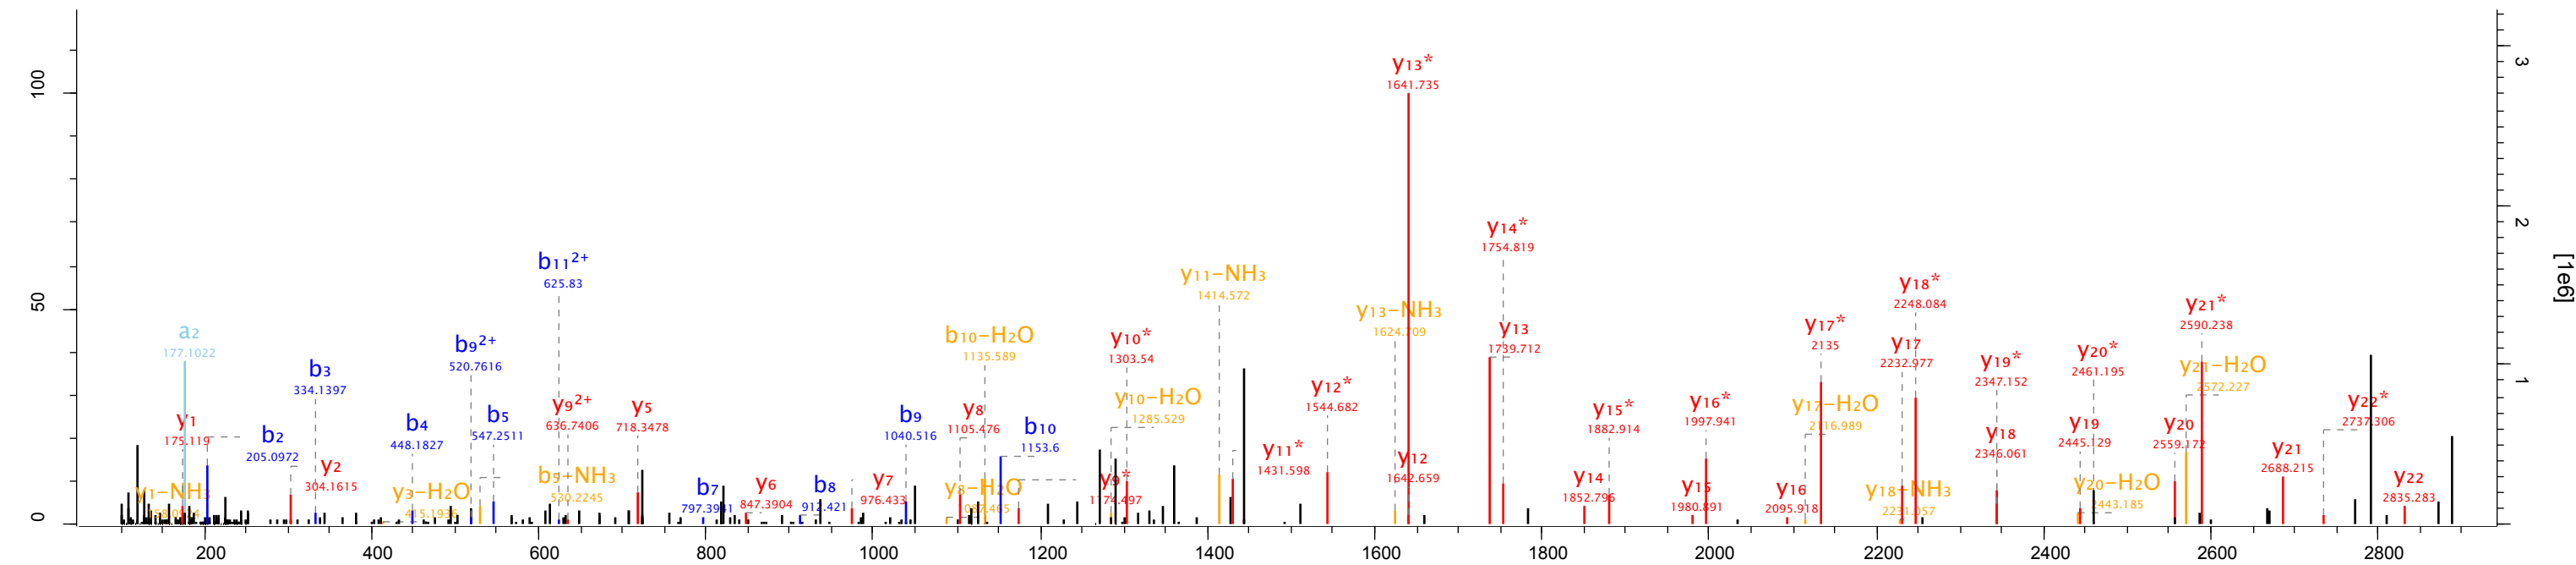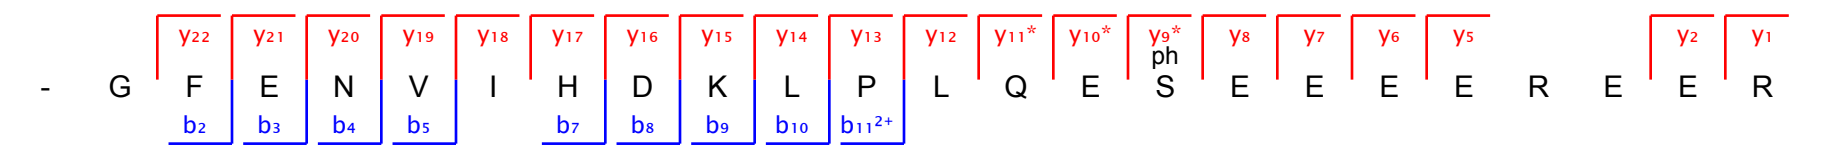

Raw file: 20150812\_A375SR\_Phospho\_BR1\_08  
 Scan: 1860 Method: FTMS; HCD Score: 48.05 m/z: 680.31 Gene names: TNKS1BP1

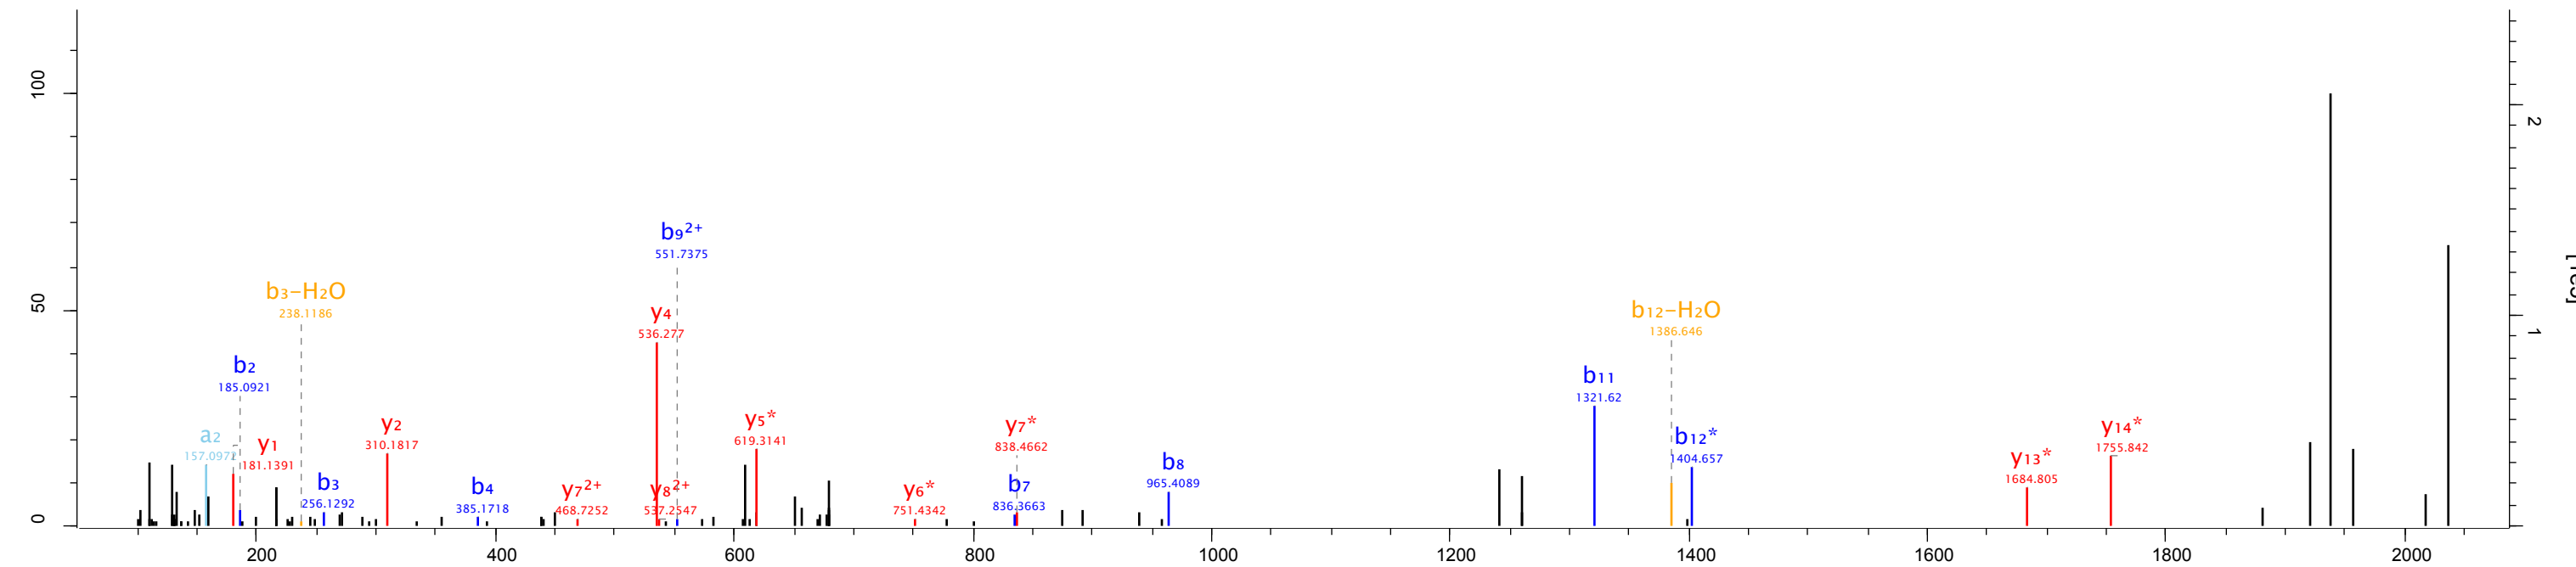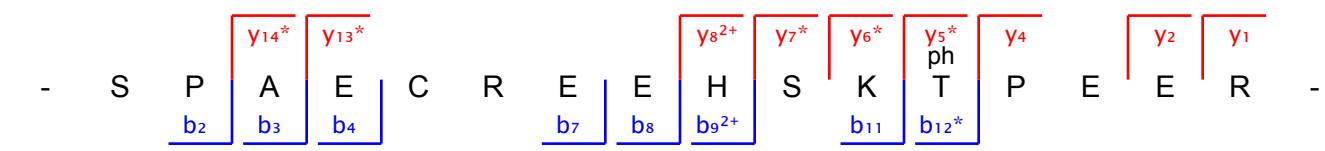



Raw file: 20150812\_A375SR\_Phospho\_BR1\_08  
 Scan: 18750 Method: FTMS; HCD Score: 447.14 m/z: 1084.48 Gene names: MYH10

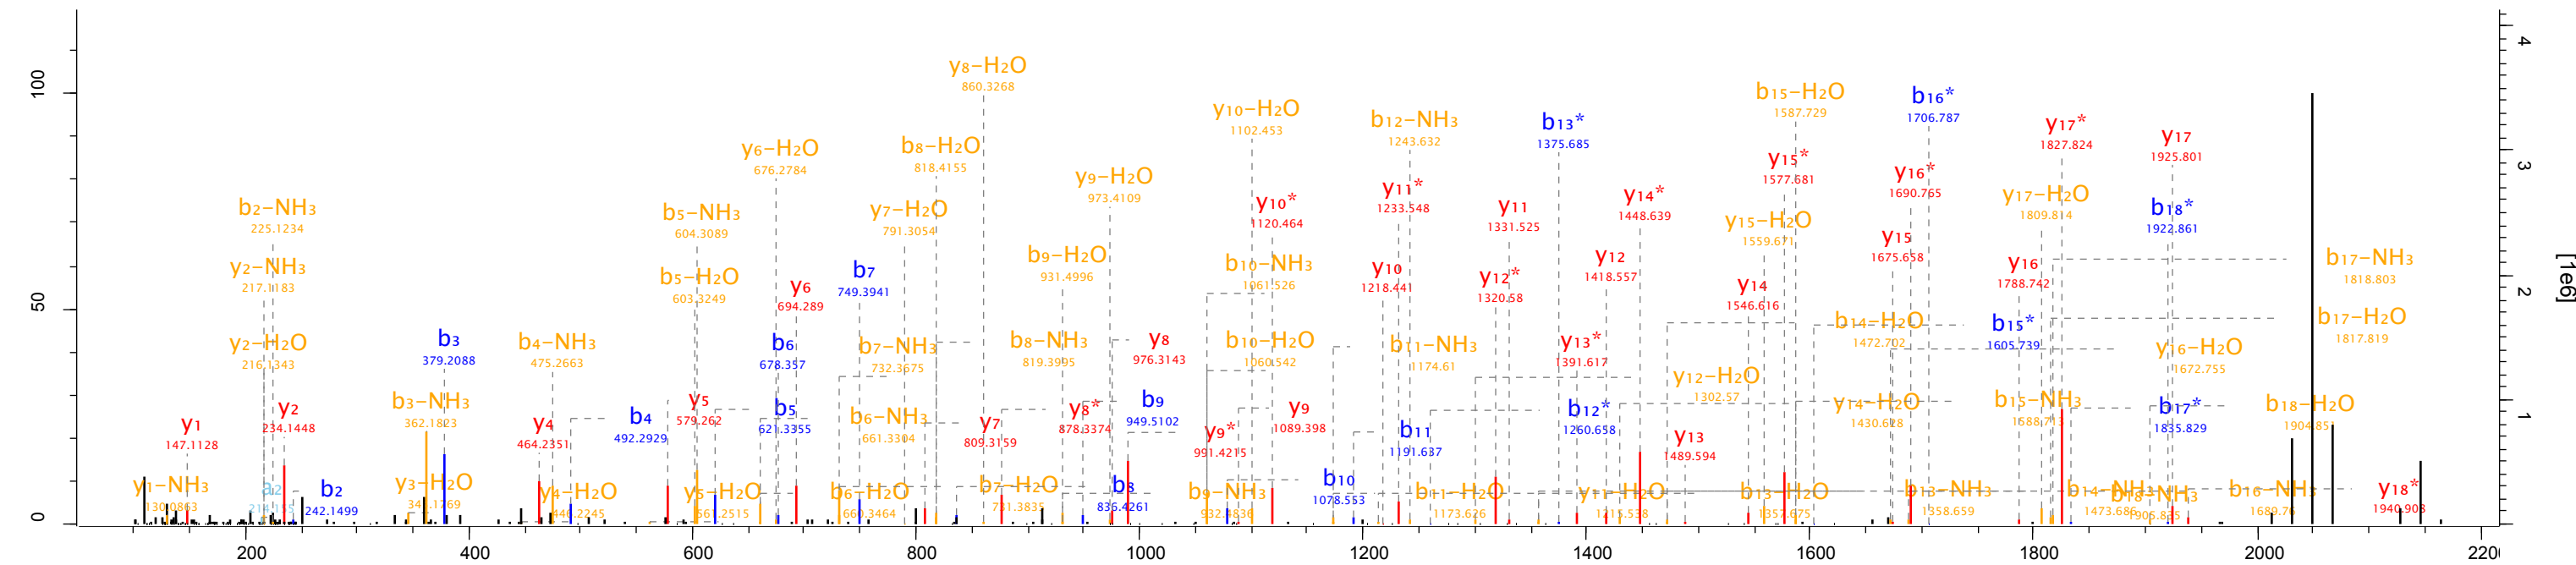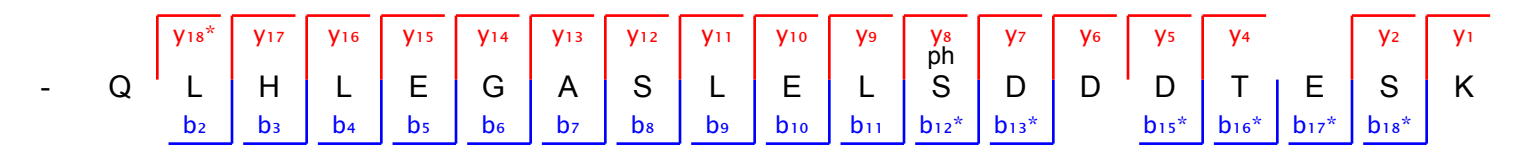

Raw file  
20150812\_A375SR\_Phospho\_BR1\_08

Scan 19690 Method FTMS; HCD Score 118.44 m/z 811.43 Gene names UMPS

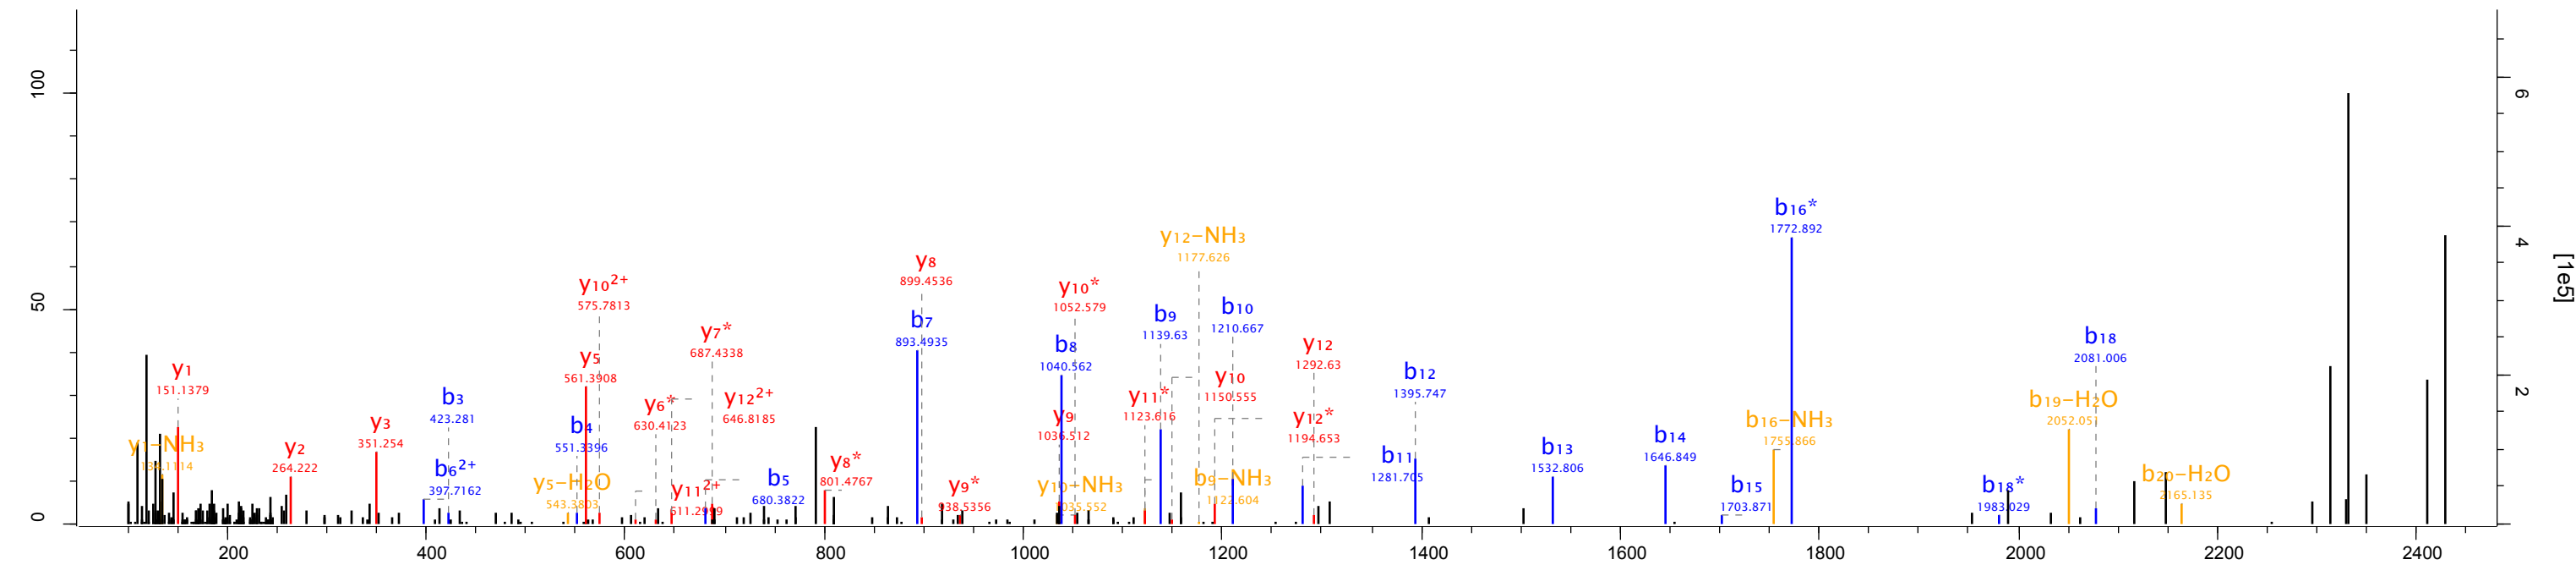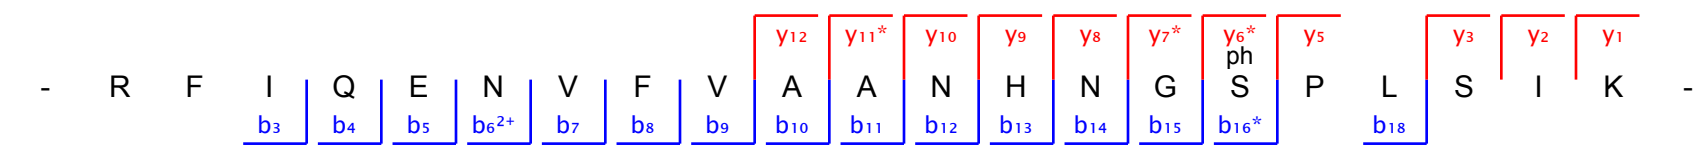



Raw file  
20150812\_A375SR\_Phospho\_BR1\_08

Scan 21030 Method FTMS; HCD Score 178.69 m/z 719.41 Gene names PTRF

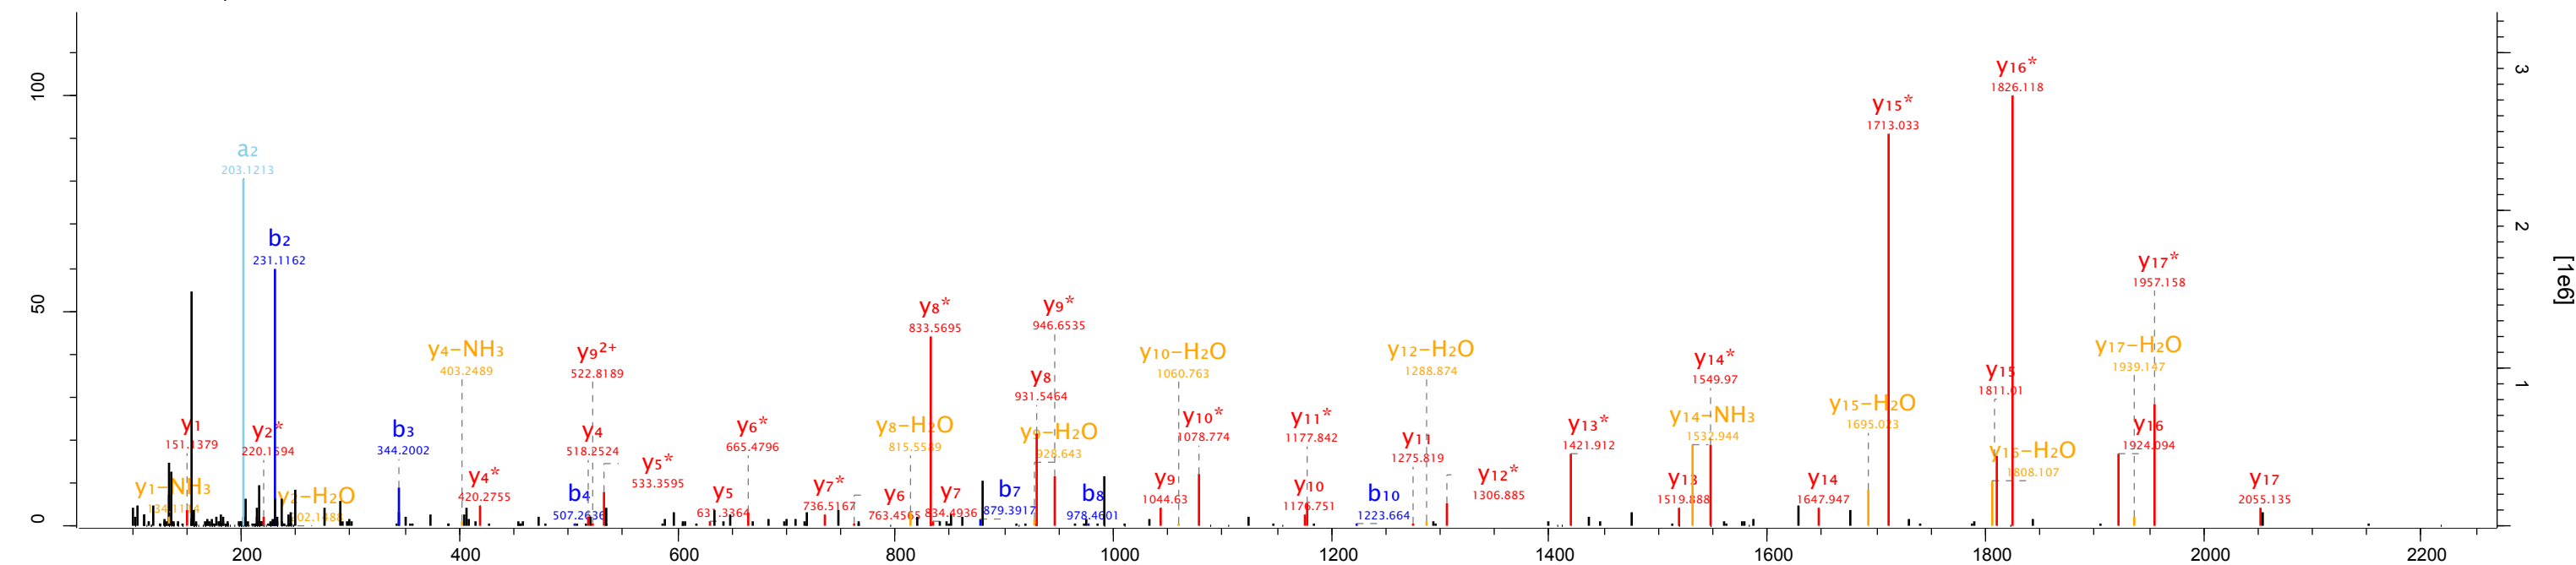

- V M I Y Q D E V K L P A K L S I S K -

Fragmentation mapping (b and y ions):

| Ion Type | Residue | m/z      |
|----------|---------|----------|
| b2       | M       | 151.379  |
| b3       | I       | 220.1594 |
| b4       | Y       | 231.1162 |
| b7       | E       | 507.2636 |
| b8       | V       | 879.3917 |
| b10      | L       | 978.4601 |
| y1       | K       | 1044.63  |
| y2*      | S       | 1176.751 |
| y4*      | D       | 420.2755 |
| y5*      | E       | 533.3595 |
| y6*      | L       | 665.4796 |
| y7*      | A       | 736.5167 |
| y8*      | P       | 833.5695 |
| y9*      | L       | 946.6535 |
| y10*     | L       | 1078.774 |
| y11*     | S       | 1177.842 |
| y12*     | I       | 1306.885 |
| y13*     | S       | 1421.912 |
| y14*     | S       | 1549.97  |
| y15*     | S       | 1713.033 |
| y16*     | K       | 1826.118 |
| y17*     | K       | 1957.158 |

Raw file  
 20150812\_A375SR\_Phospho\_BR1\_08  
 Scan 21880 Method FTMS; HCD Score 168.11 m/z 998.46 Gene names BRD9

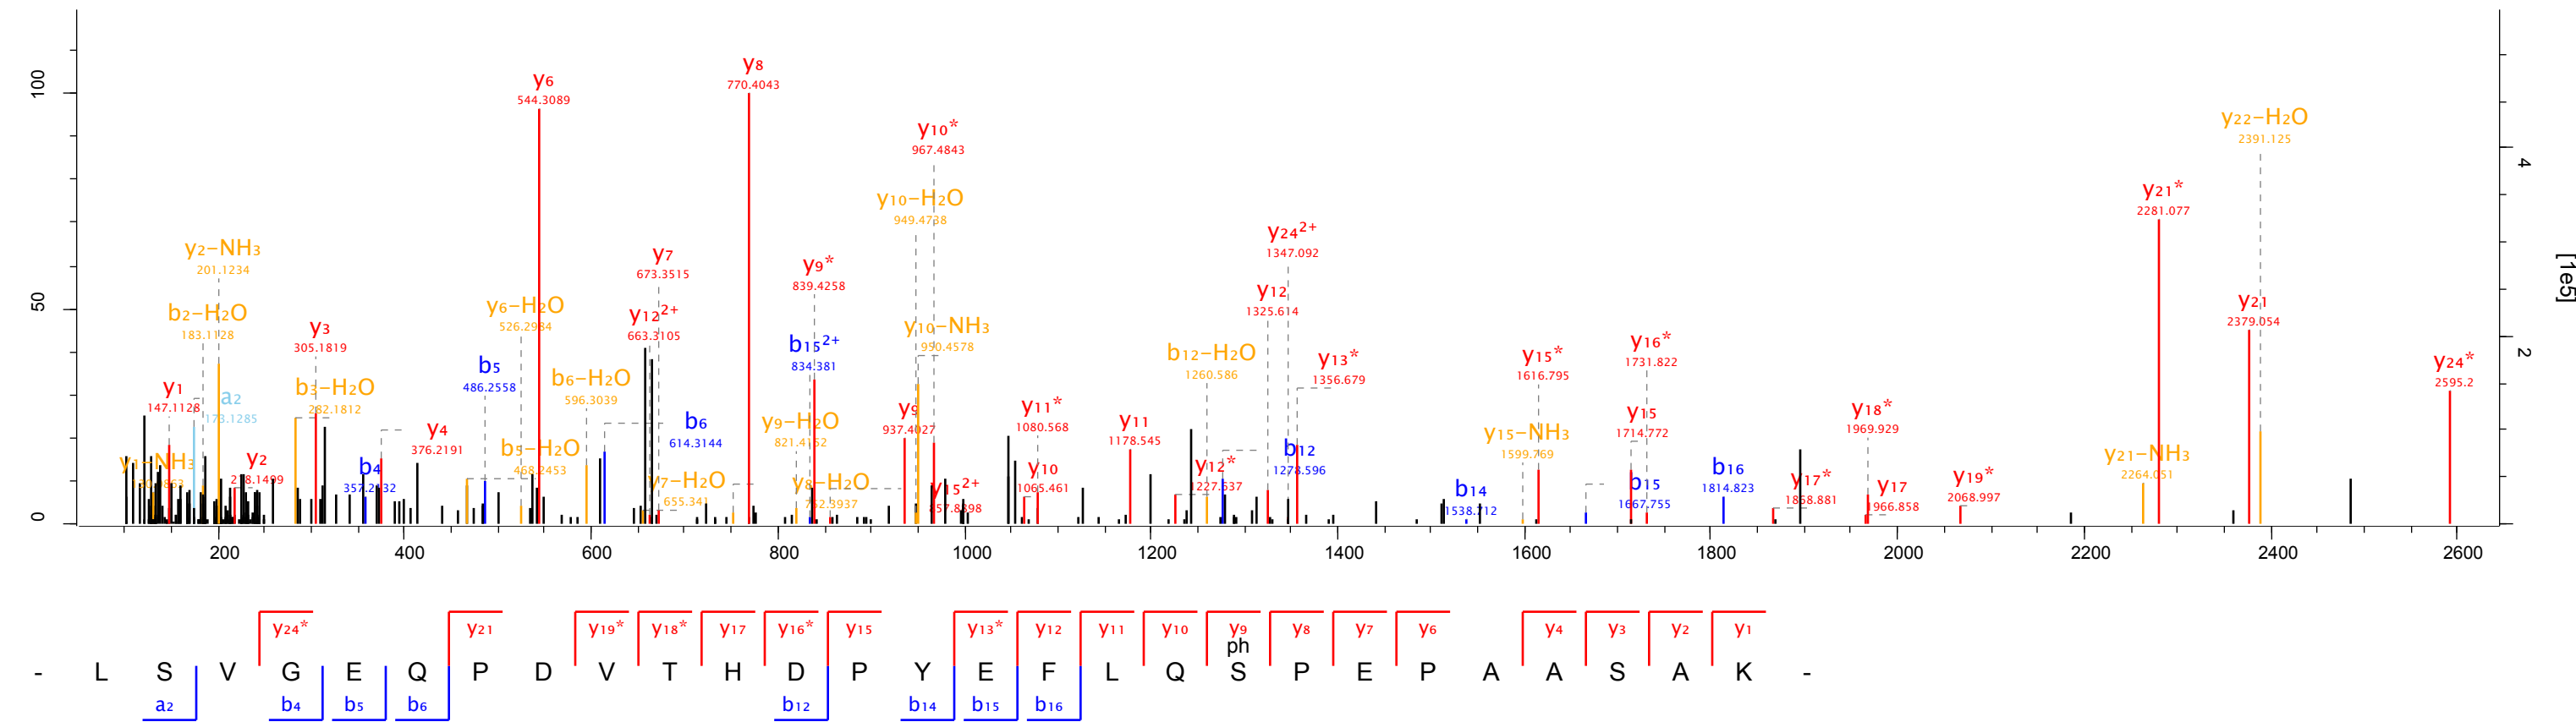

Raw file: 20150812\_A375SR\_Phospho\_BR1\_08  
 Scan: 2240 Method: FTMS; HCD Score: 123.42 m/z: 468.26 Gene names: MAP7D1

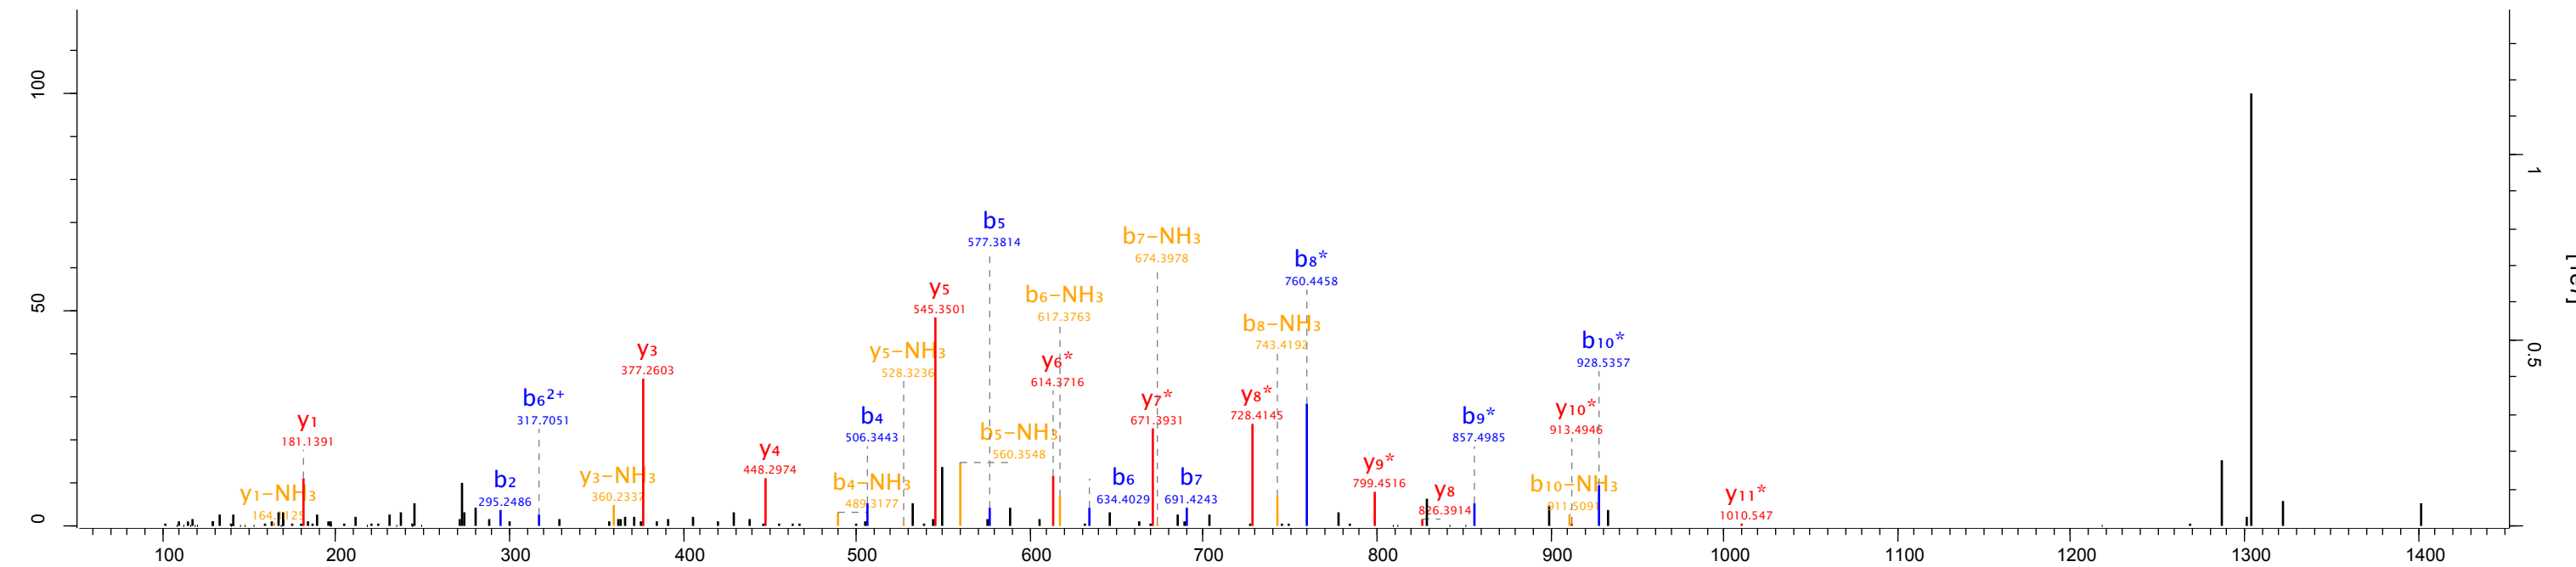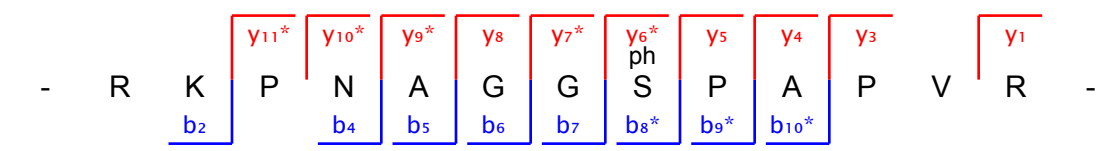

Raw file  
20150812\_A375SR\_Phospho\_BR1\_08

Scan 24290 Method FTMS; HCD Score 108.9 m/z 1014.17 Gene names HIP1

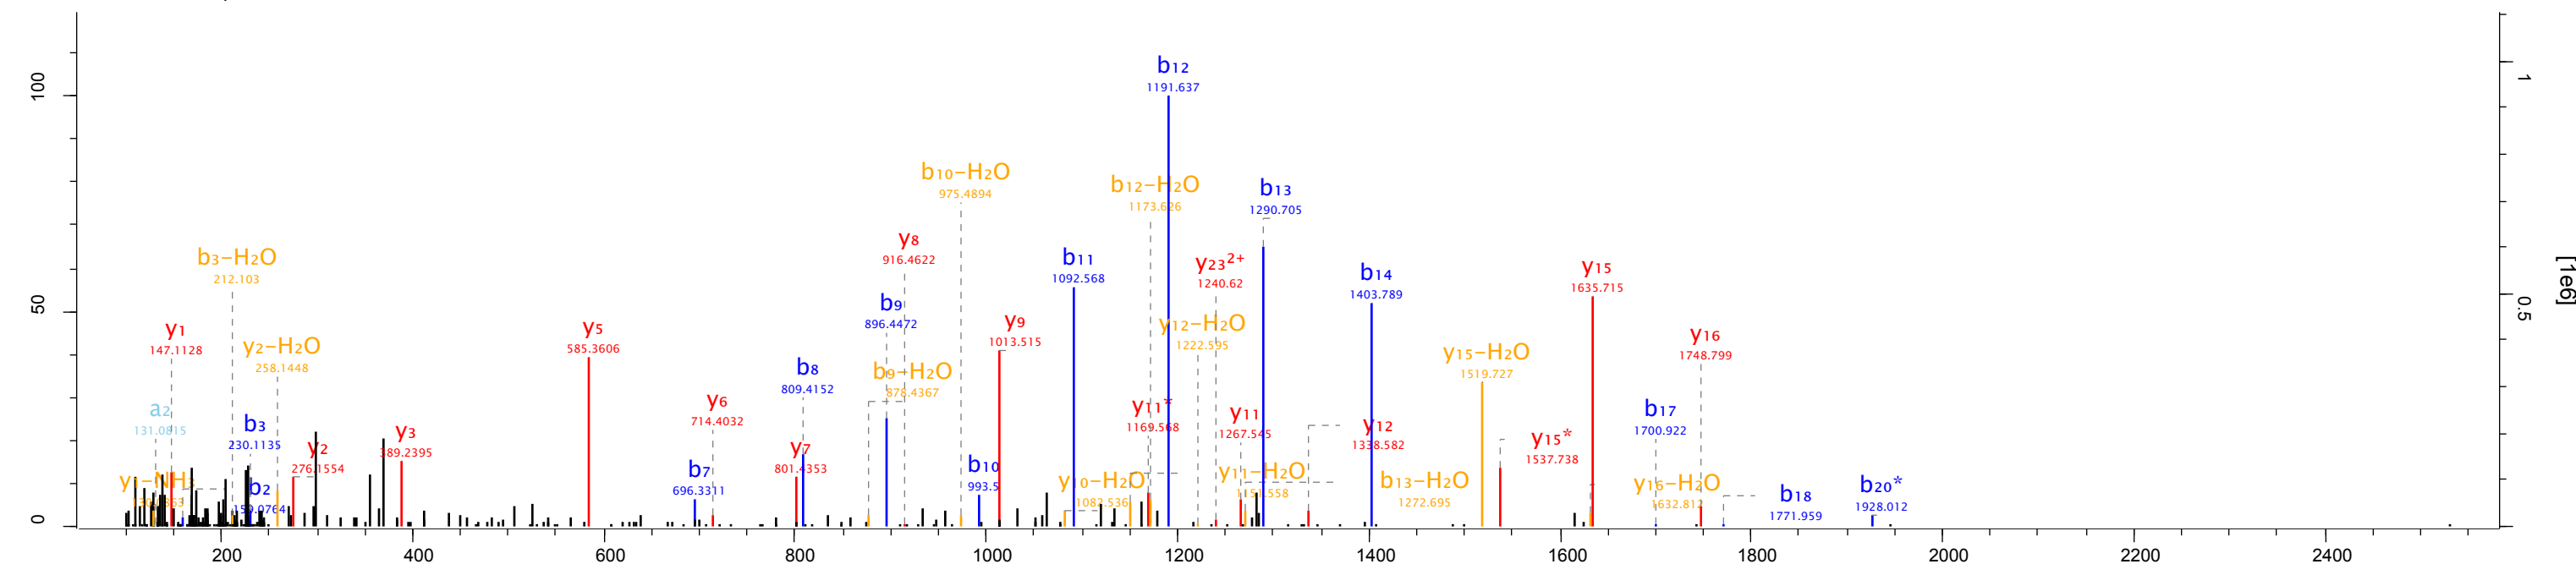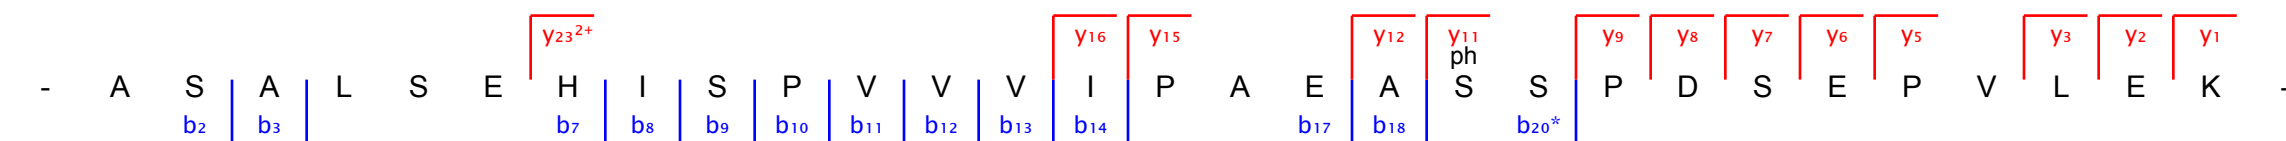

Raw file: 20150812\_A375SR\_Phospho\_BR1\_08  
 Scan: 2460 Method: FTMS; HCD Score: 66.04 m/z: 616.65 Gene names: ARAF

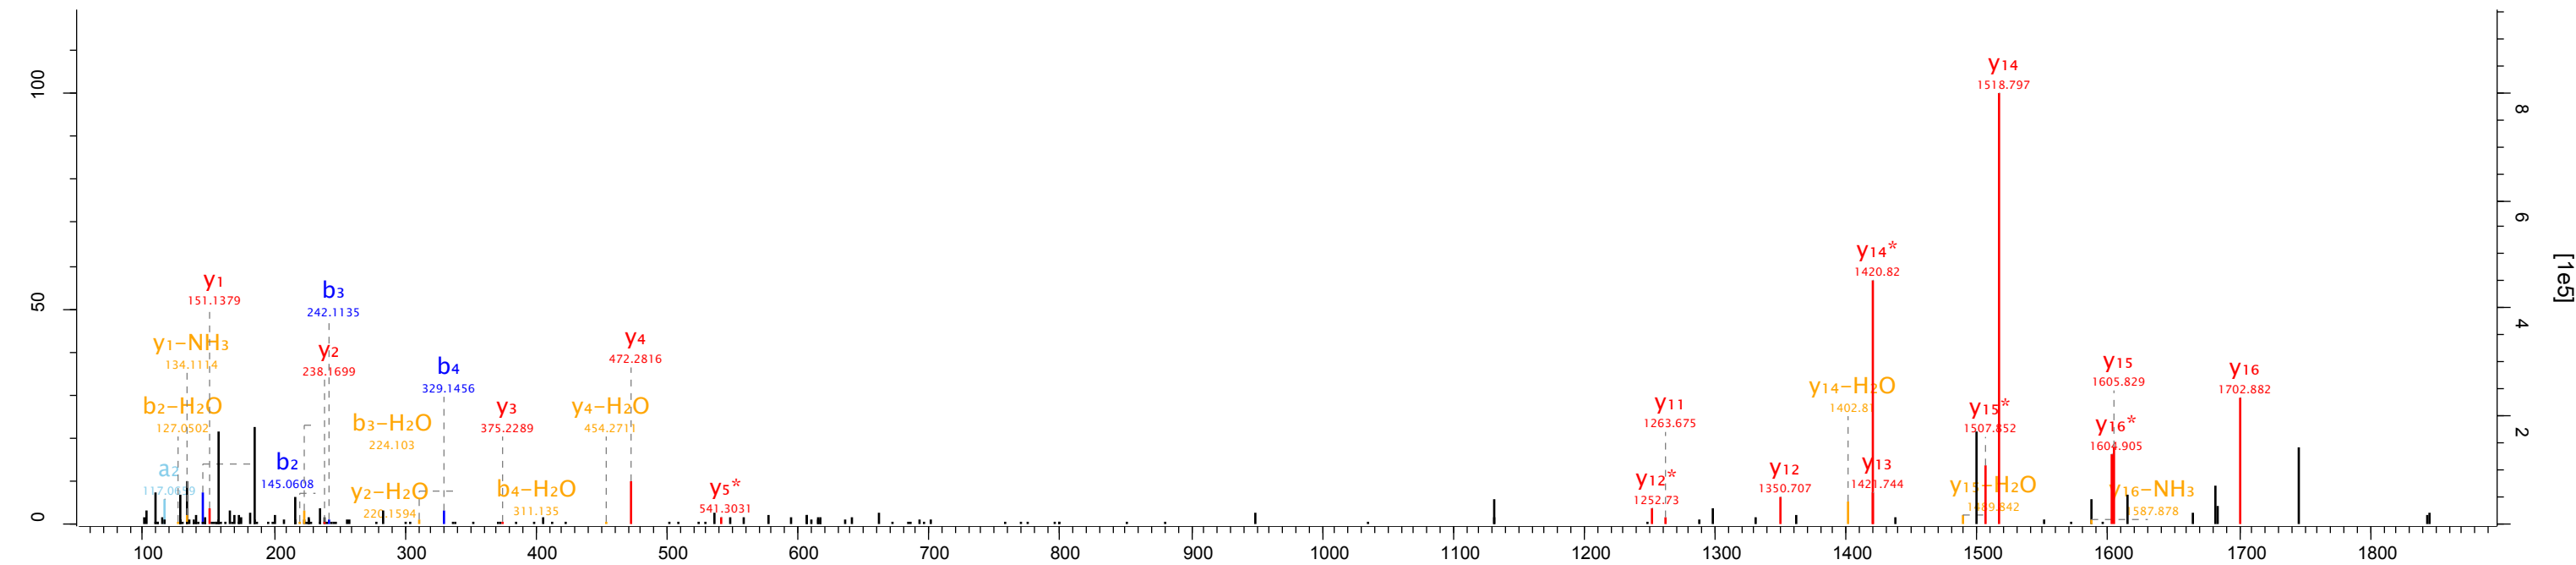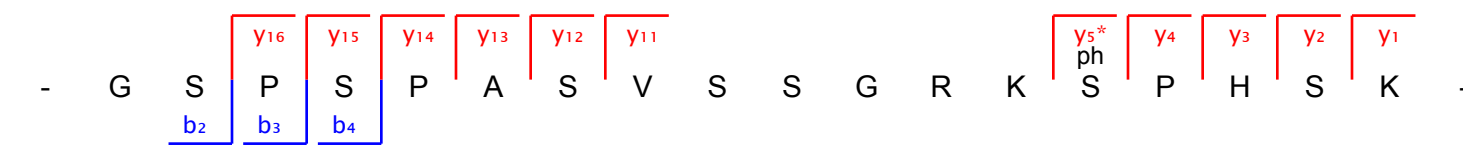

Raw file Scan Method Score m/z Gene names  
 20150812\_A375SR\_Phospho\_BR1\_08 2470 FTMS; HCD 66.39 439.24 AGGF1

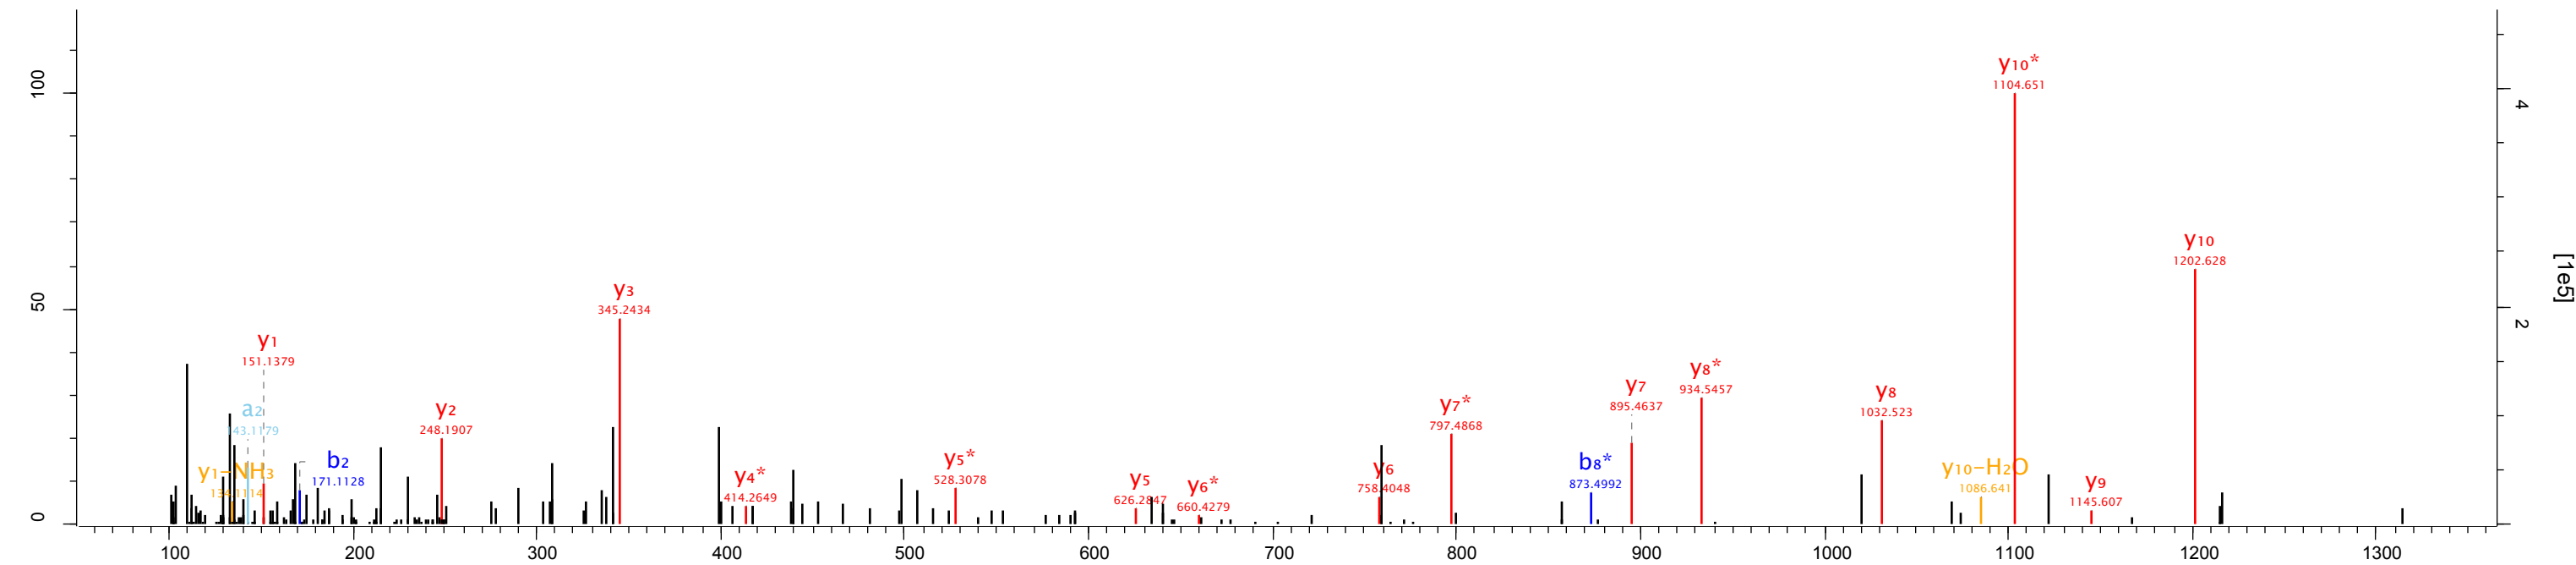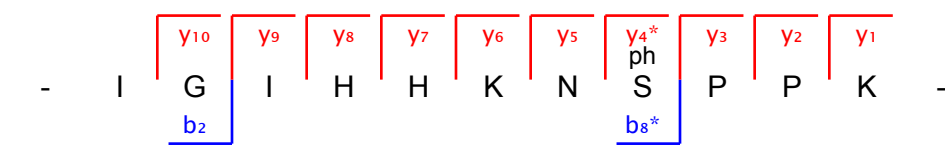

Raw file 20150812\_A375SR\_Phospho\_BR1\_08 Scan 27050 Method FTMS; HCD Score 58.11 m/z 850.49 Gene names KCTD15

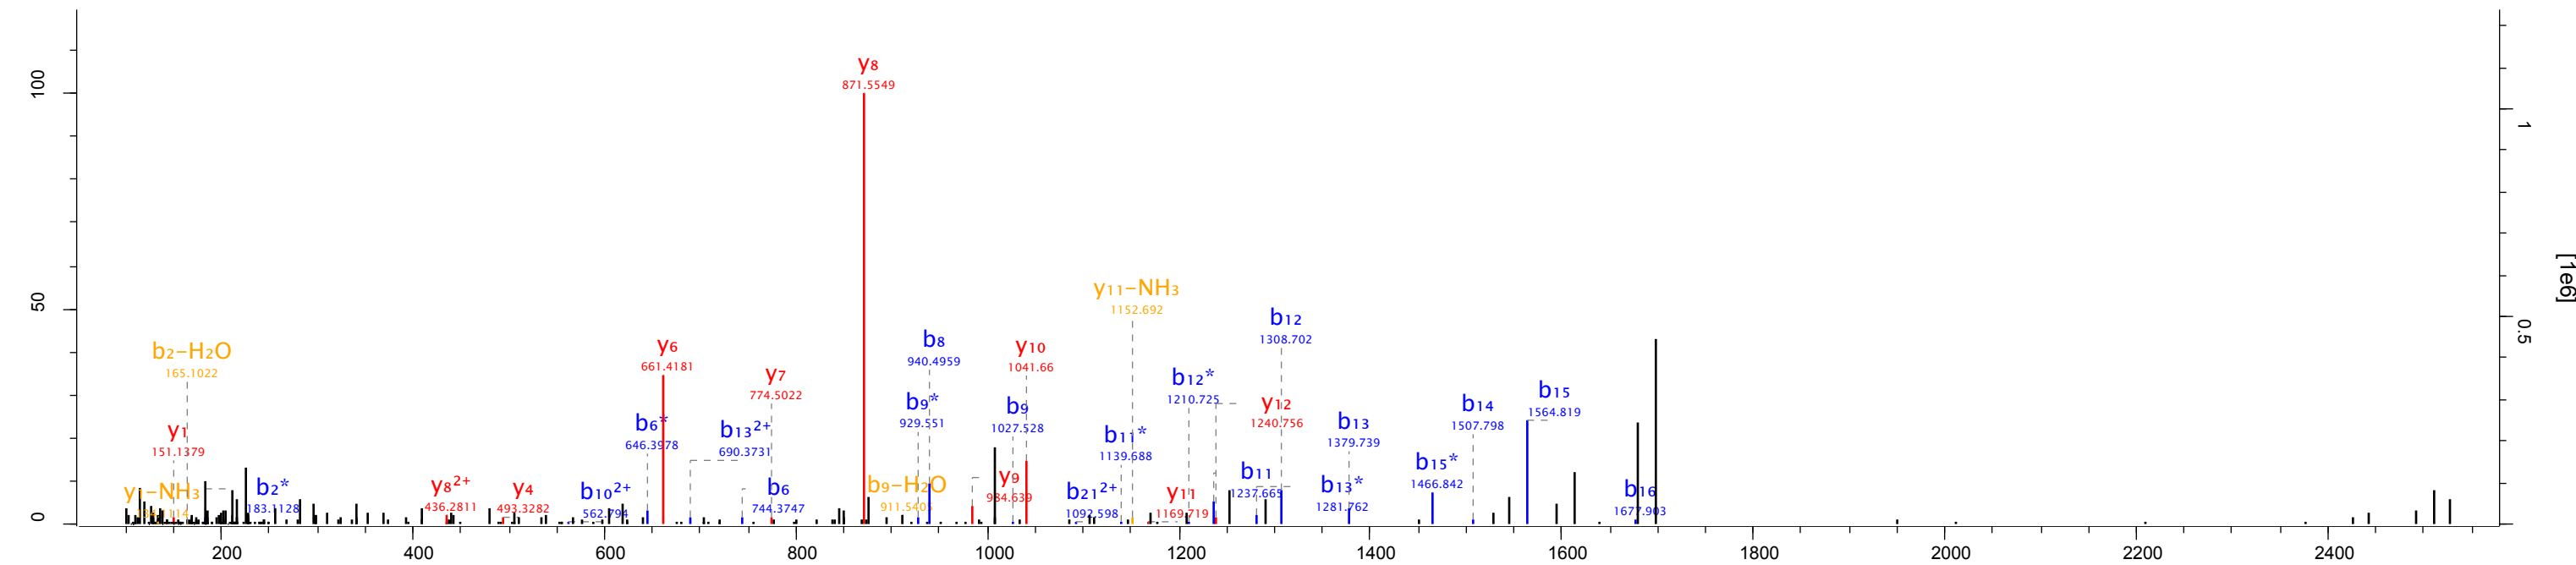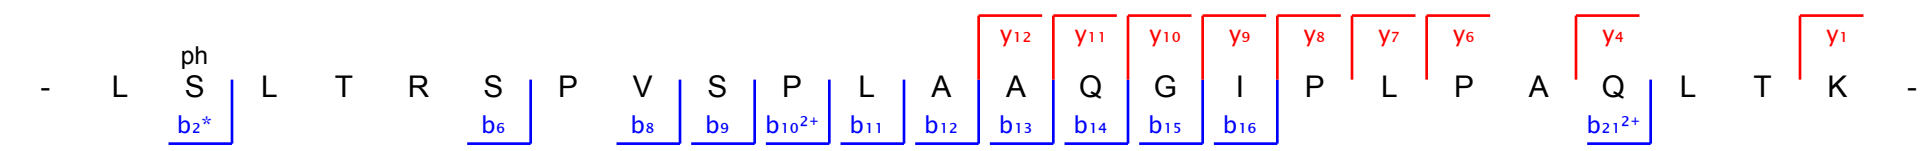

Raw file: 20150812\_A375SR\_Phospho\_BR1\_08  
 Scan: 2950 Method: FTMS; HCD Score: 101.39 m/z: 421.88 Gene names: KATNB1

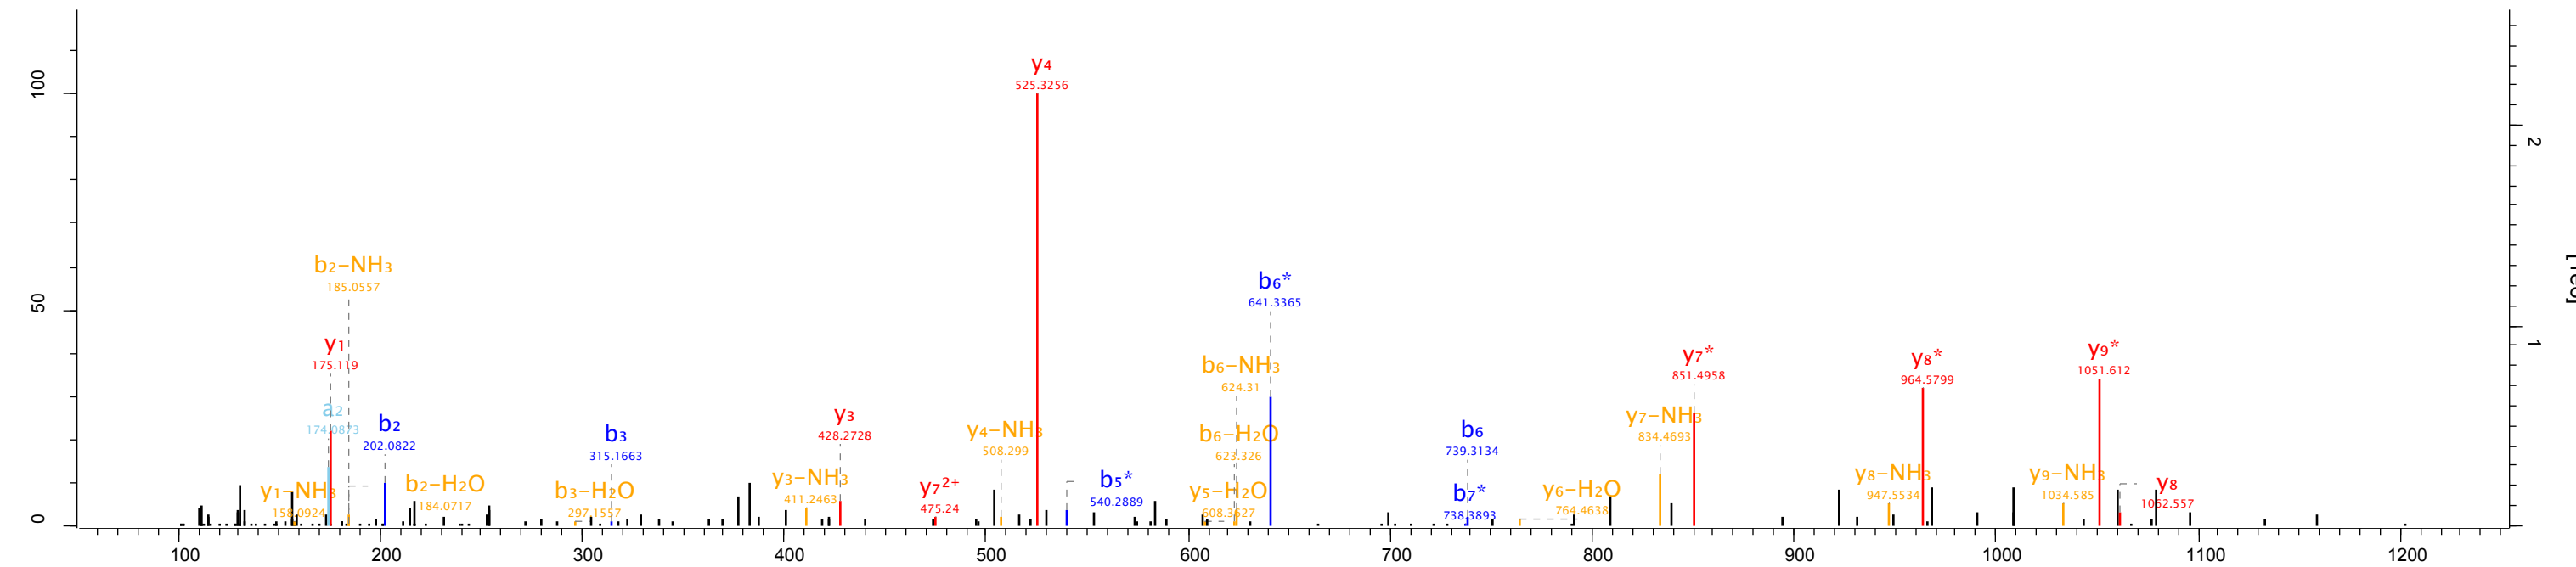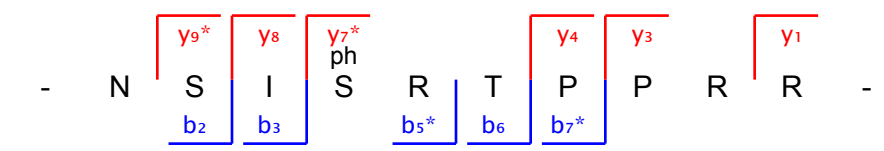



Raw file: 20150812\_A375SR\_Phospho\_BR1\_08  
 Scan: 3230 Method: FTMS; HCD Score: 122.63 m/z: 466.89 Gene names: CAMSAP2

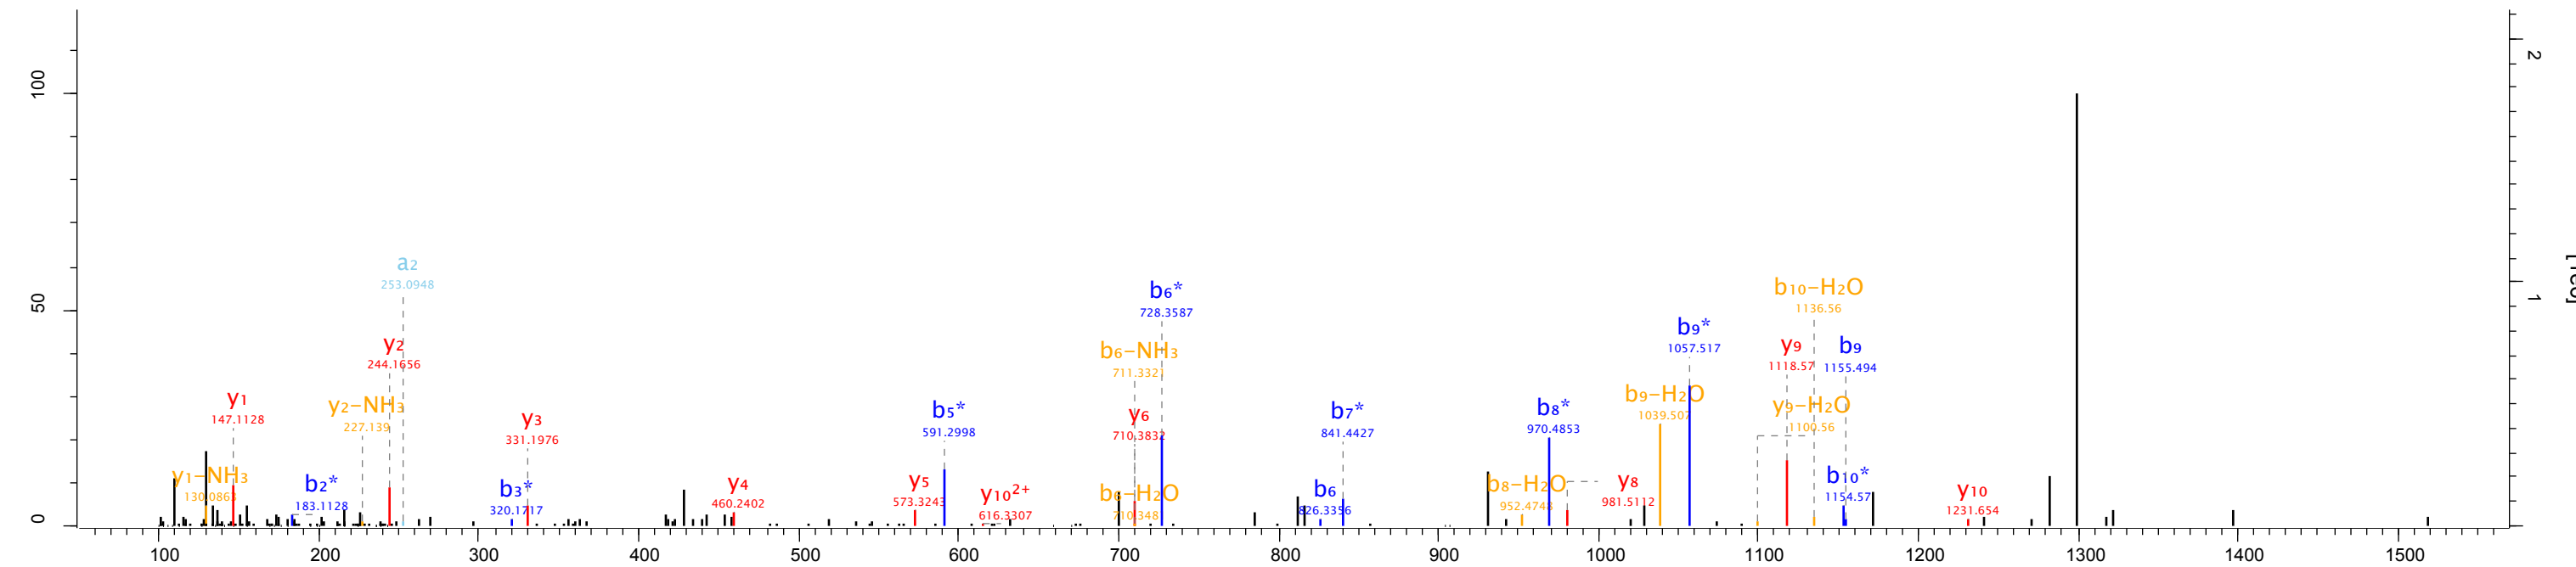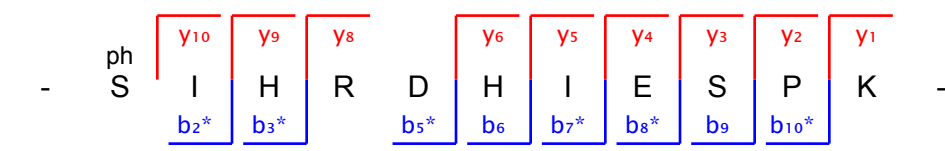

Raw file: 20150812\_A375SR\_Phospho\_BR1\_08  
 Scan: 4070 Method: FTMS; HCD Score: 94.23 m/z: 622.3 Gene names: SEC16A

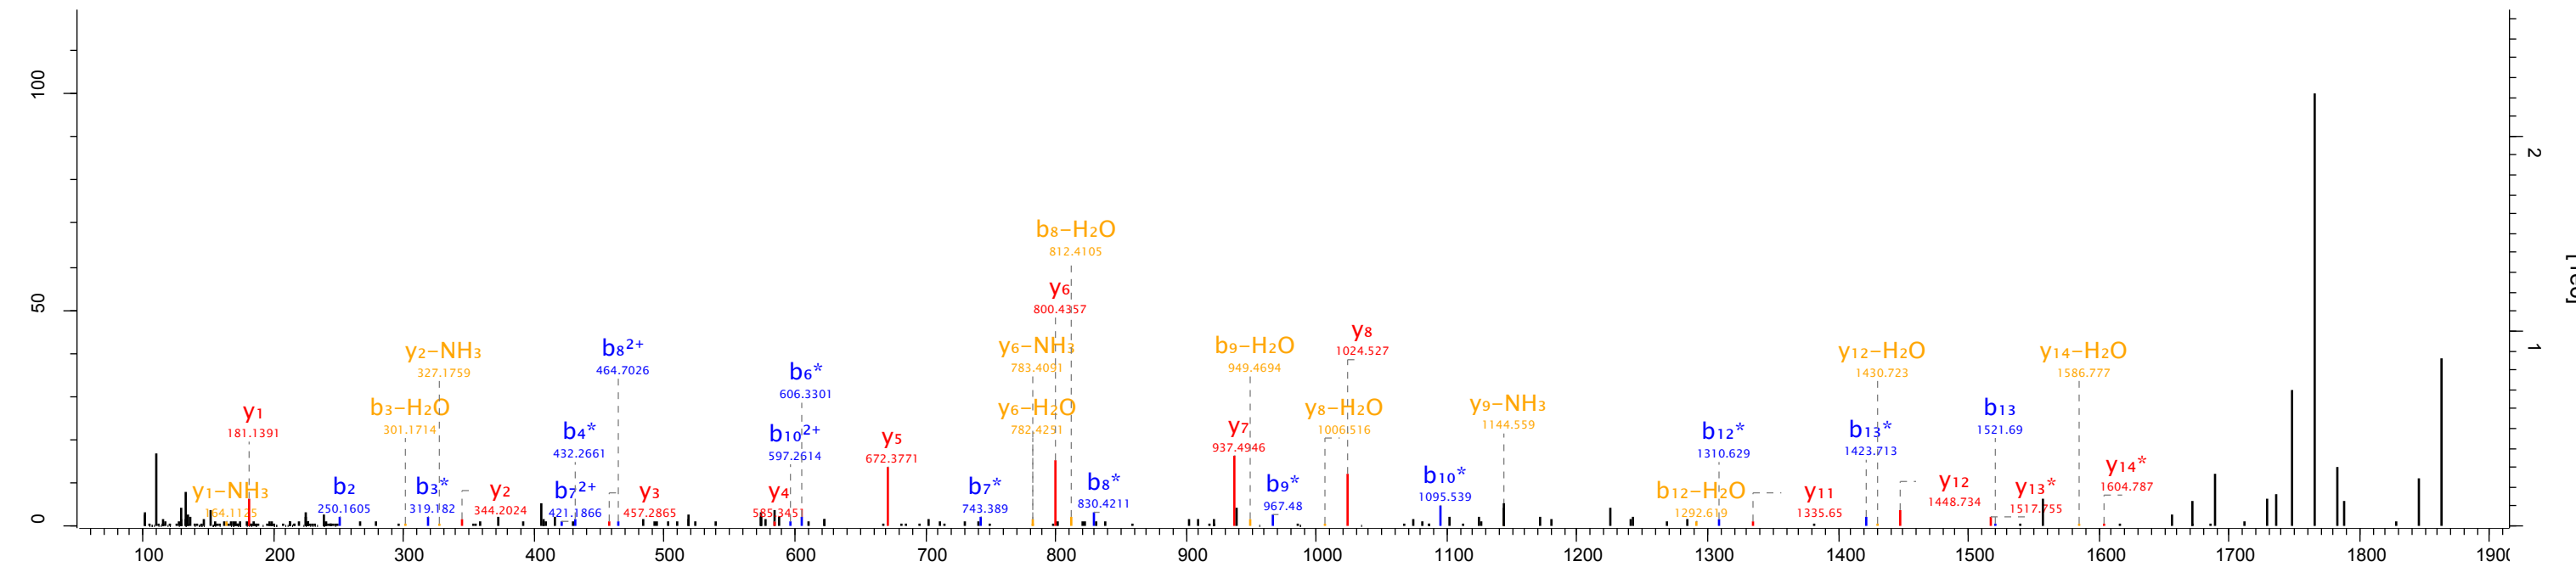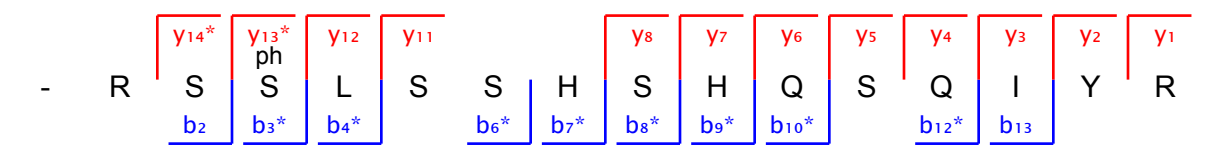

Raw file: 20150812\_A375SR\_Phospho\_BR1\_08  
 Scan: 4850 Method: FTMS; HCD Score: 124.99 m/z: 536.59 Gene names: WDR11

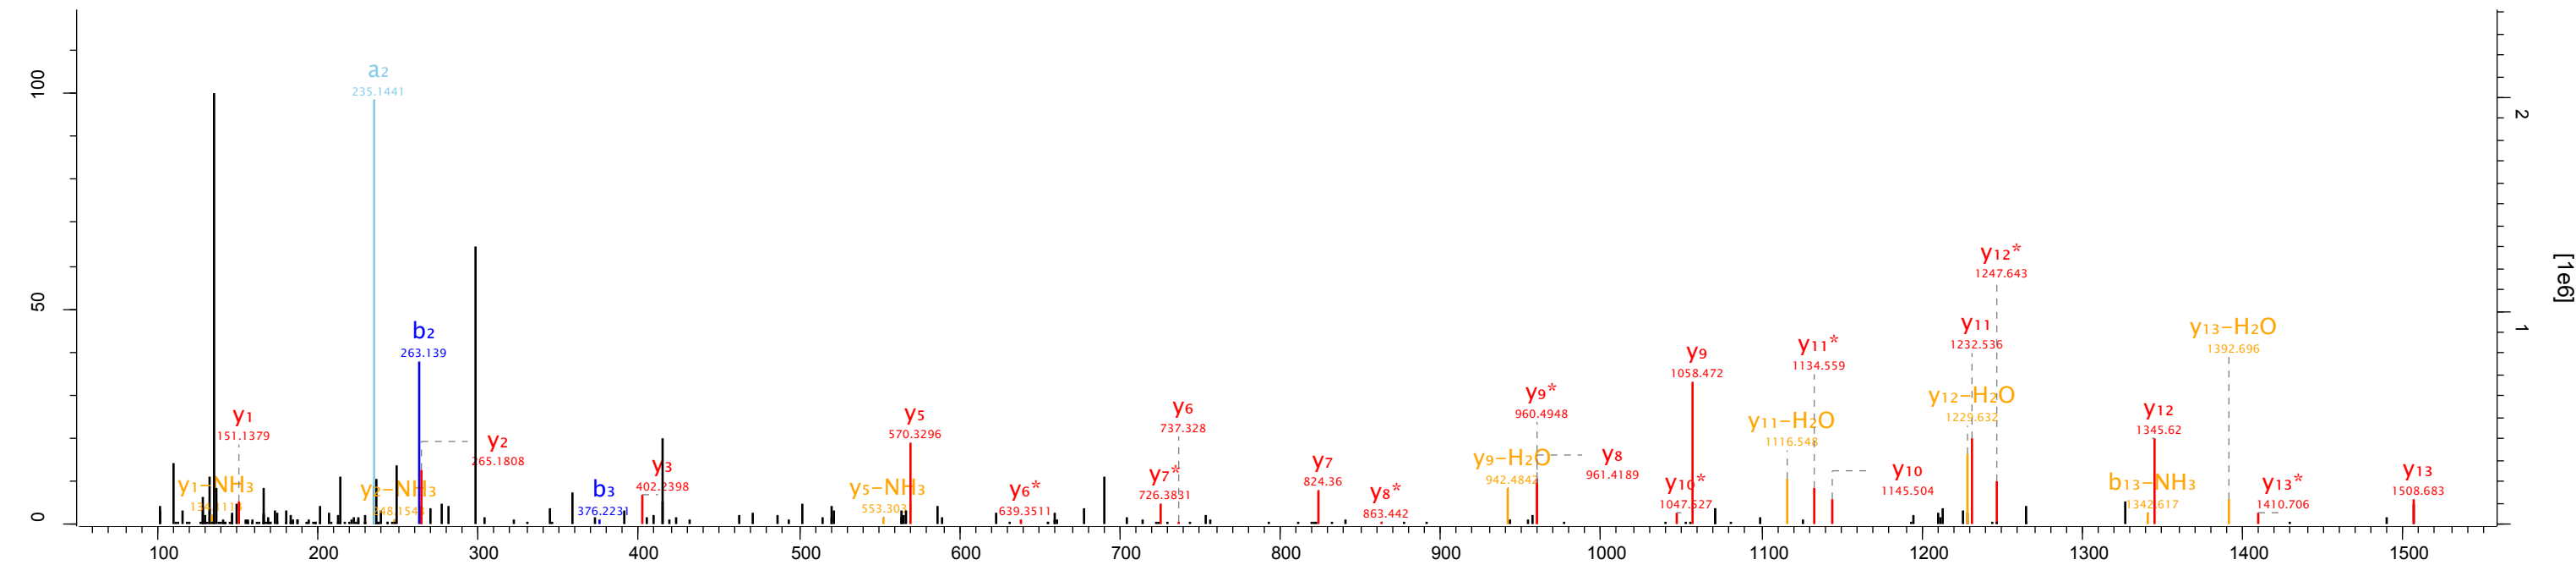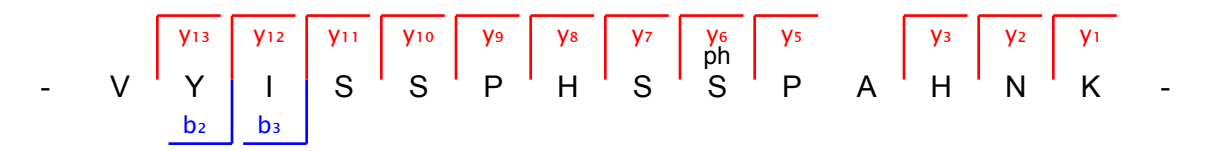

Raw file: 20150812\_A375SR\_Phospho\_BR1\_08  
 Scan: 4890 Method: FTMS; HCD Score: 285.09 m/z: 925.43 Gene names: SEC61B

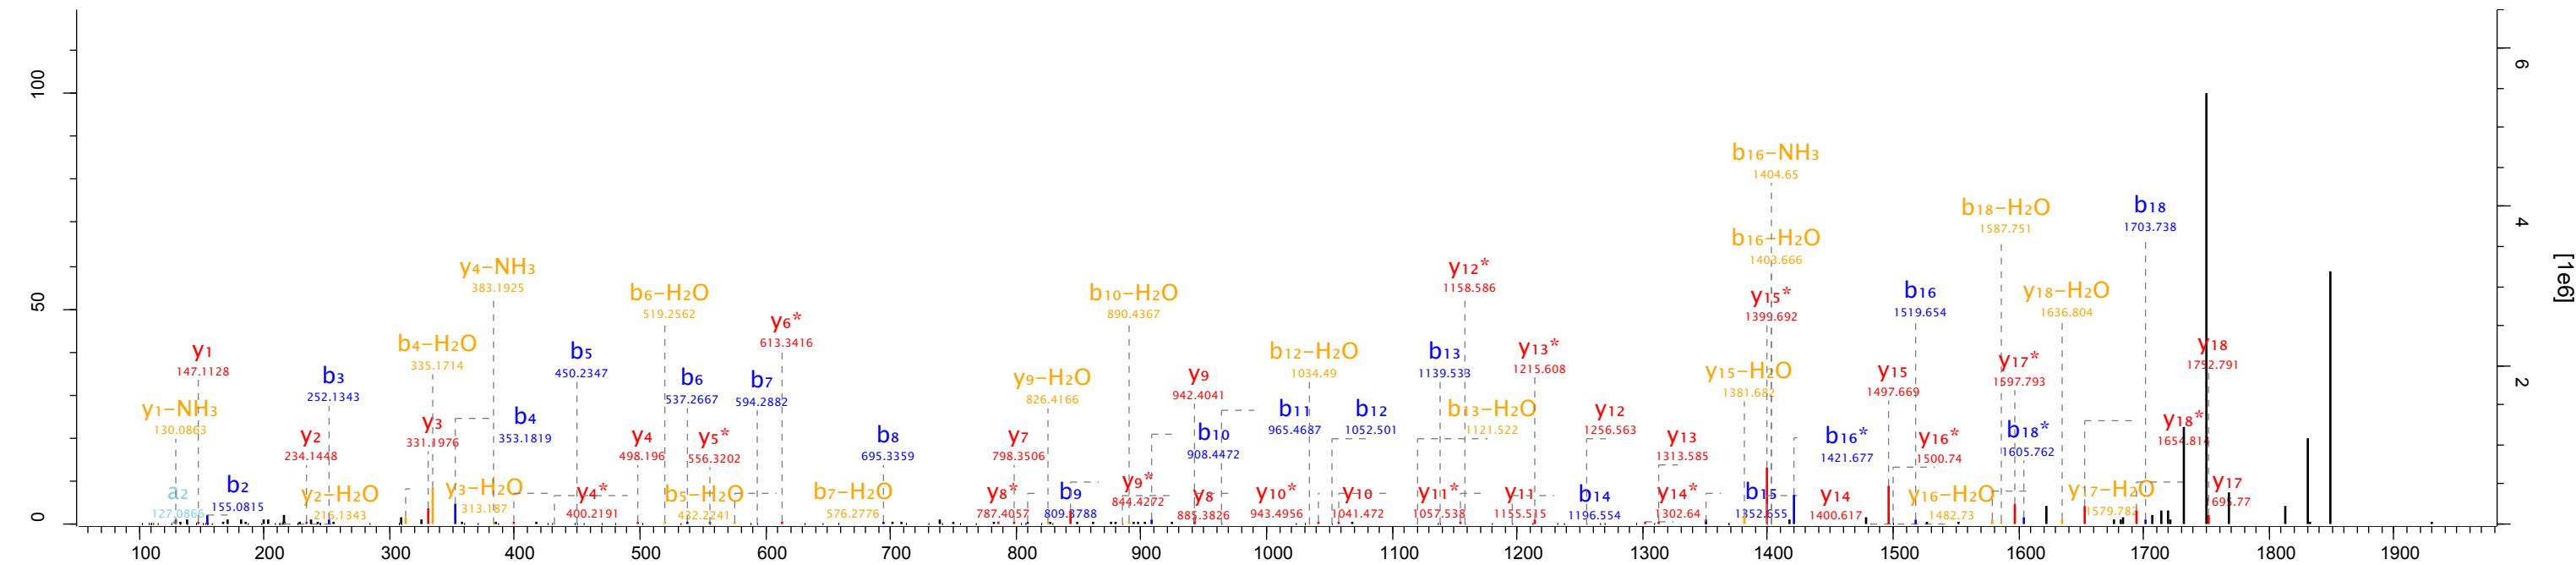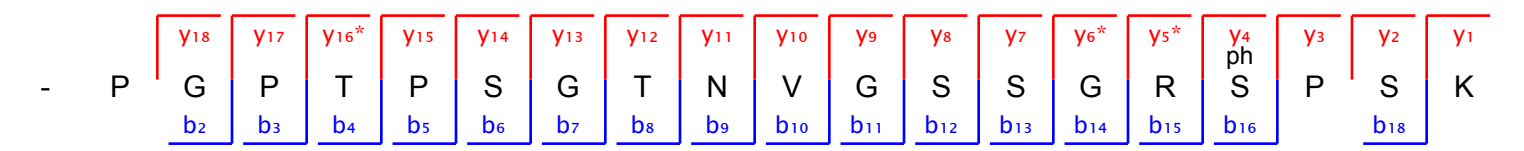

Raw file: 20150812\_A375SR\_Phospho\_BR1\_08  
 Scan: 7940 Method: FTMS; HCD Score: 166.47 m/z: 934.39 Gene names: CAMK2D

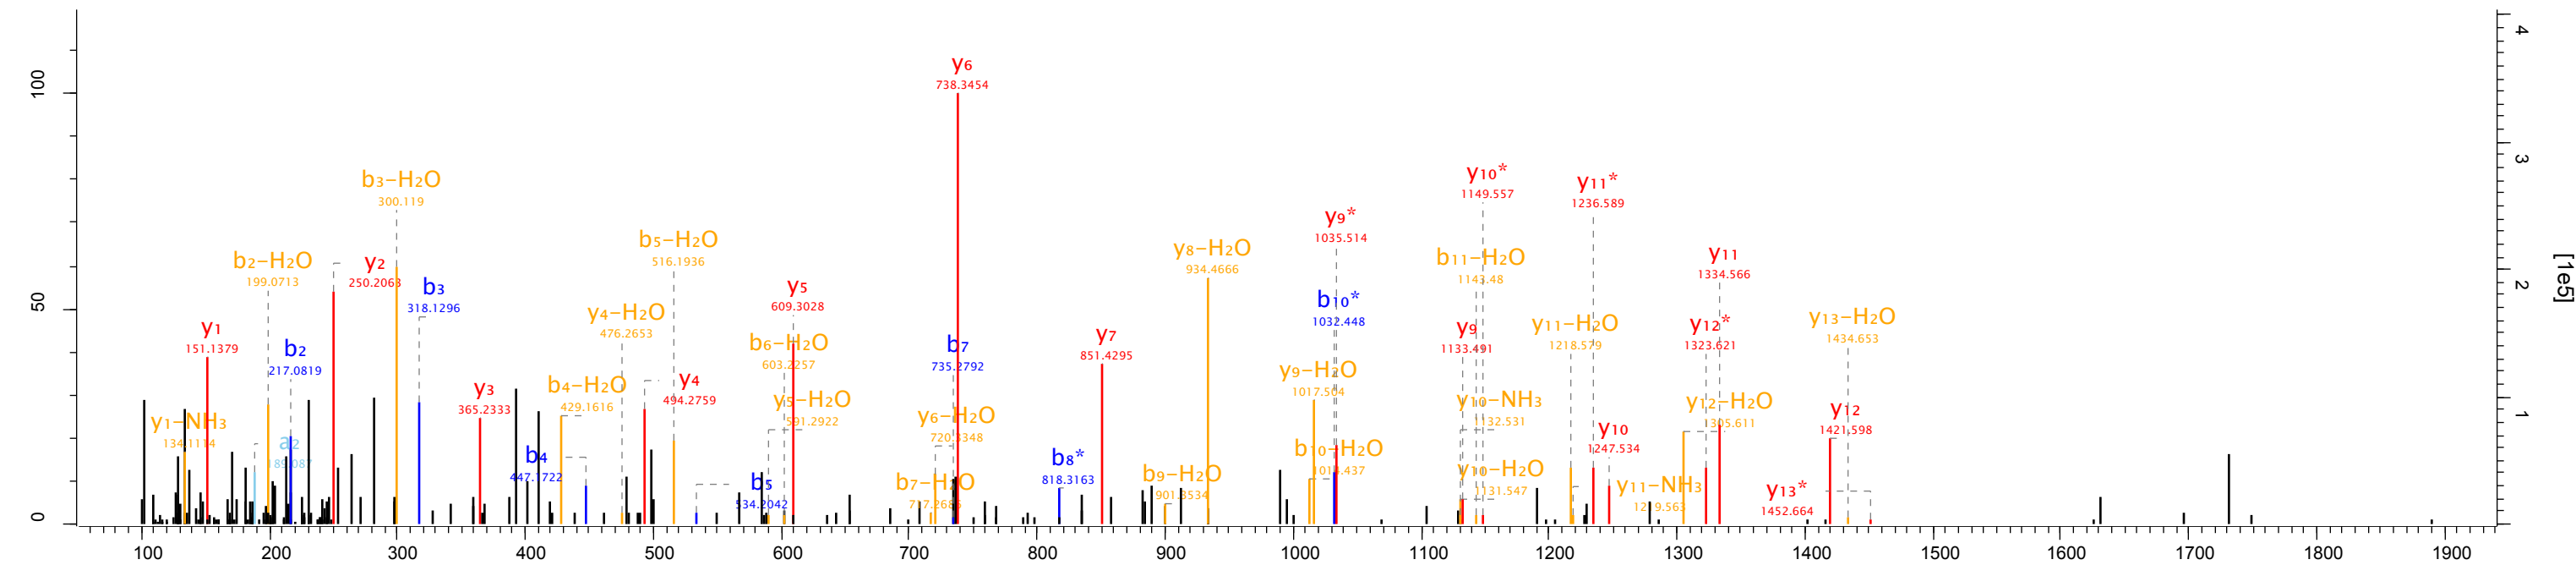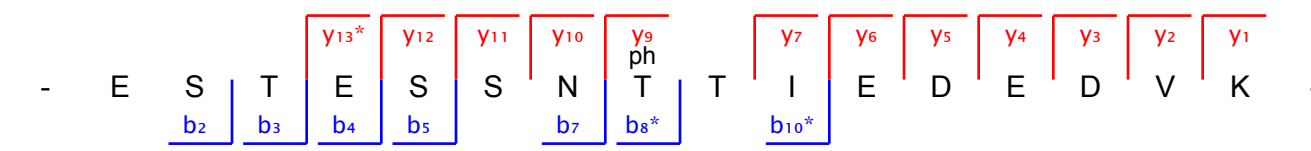

Raw file: 20150812\_A375SR\_Phospho\_BR1\_08  
 Scan: 8160 Method: FTMS; HCD Score: 179.9 m/z: 690.82 Gene names: MIER2

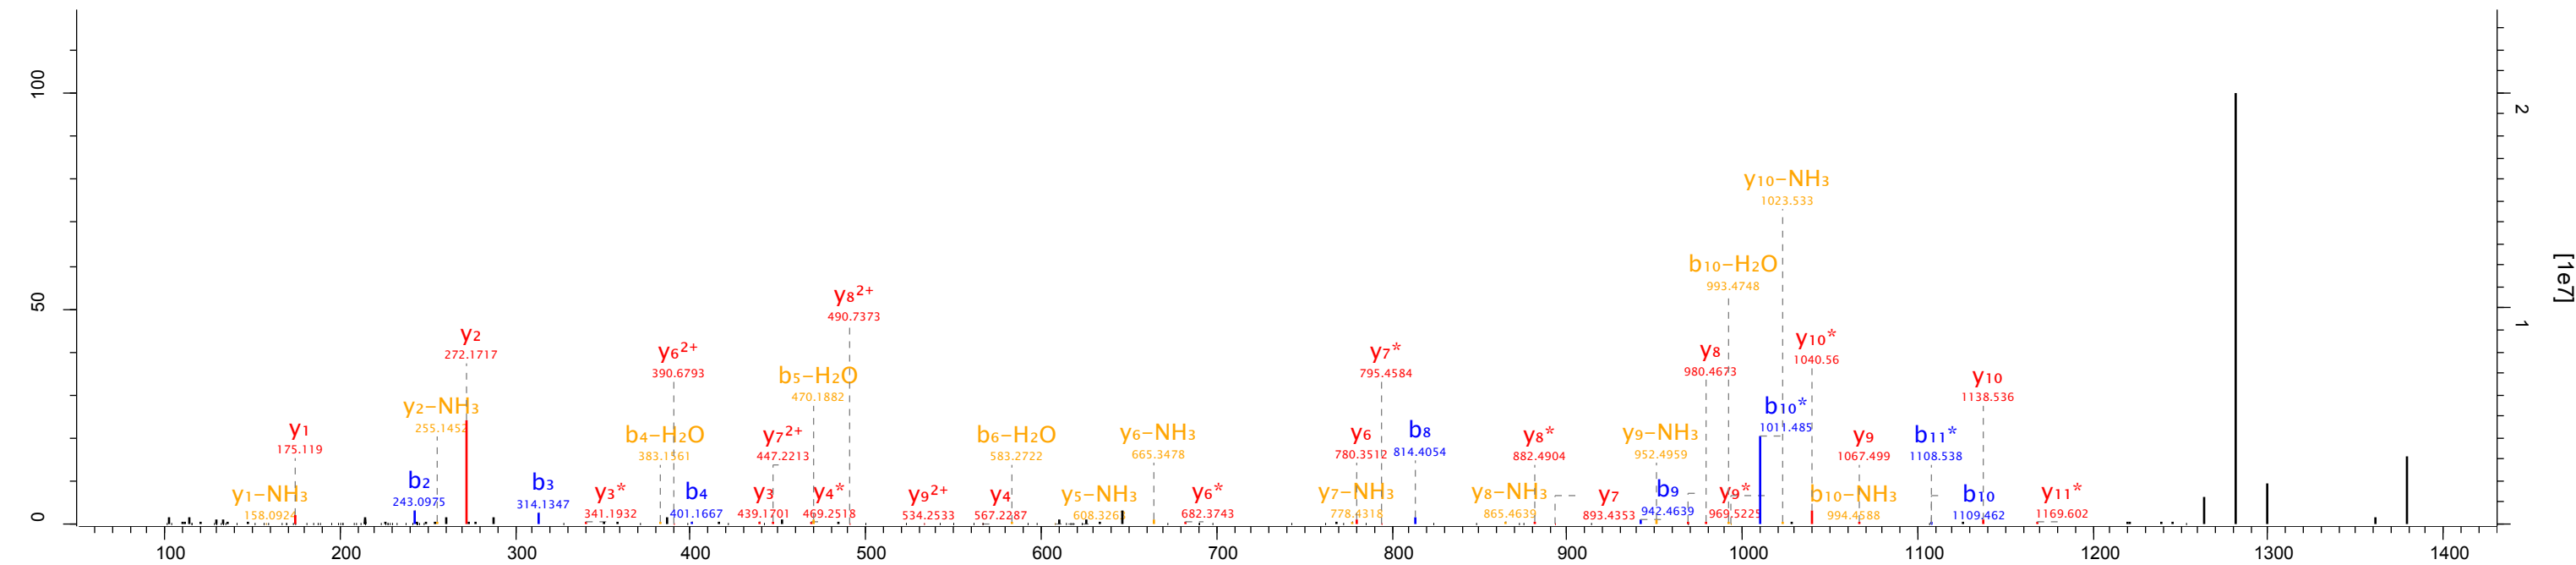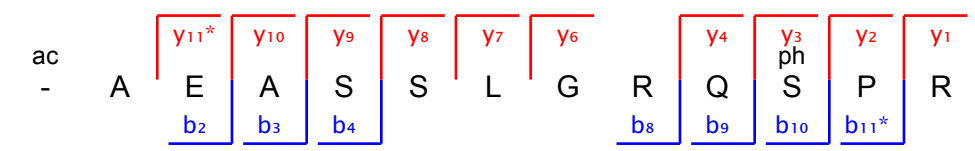

Raw file: 20150812\_A375SR\_Phospho\_BR1\_08  
 Scan: 8270 Method: FTMS; HCD Score: 139.75 m/z: 708.36 Gene names: NEK9

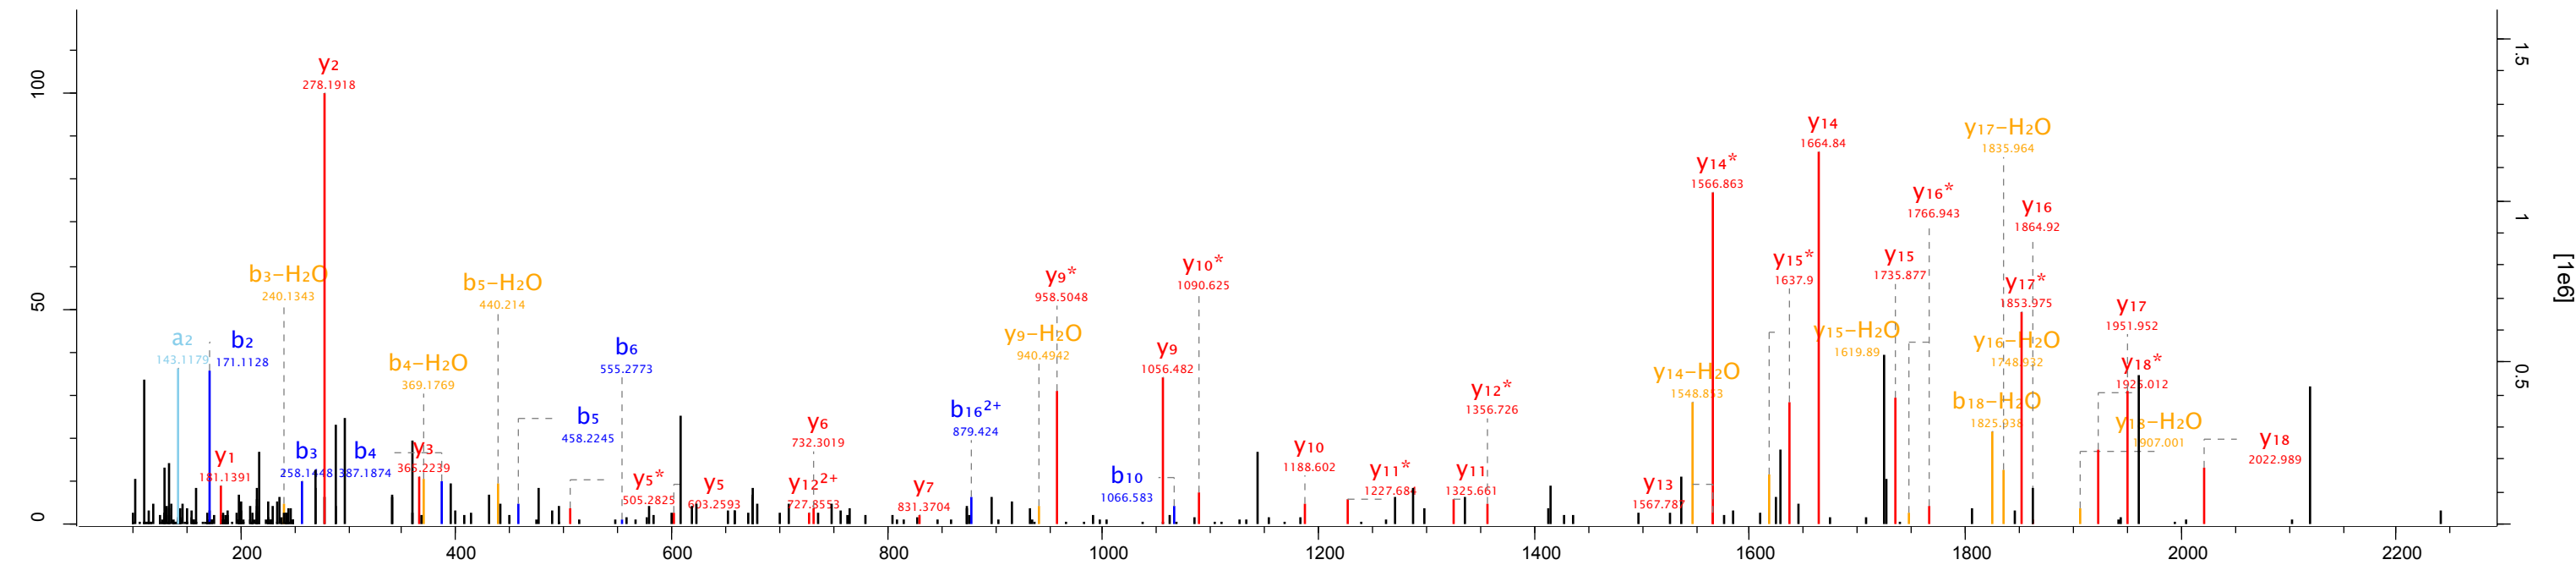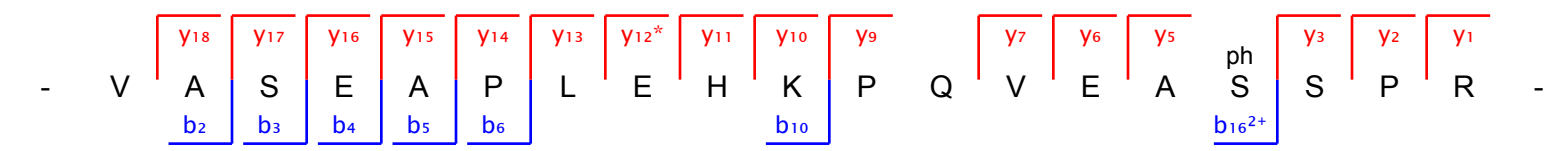

Raw file  
20150812\_A375SR\_Phospho\_BR1\_08

Scan 9540 Method FTMS; HCD Score 332.61 m/z 858.33 Gene names MAP1A

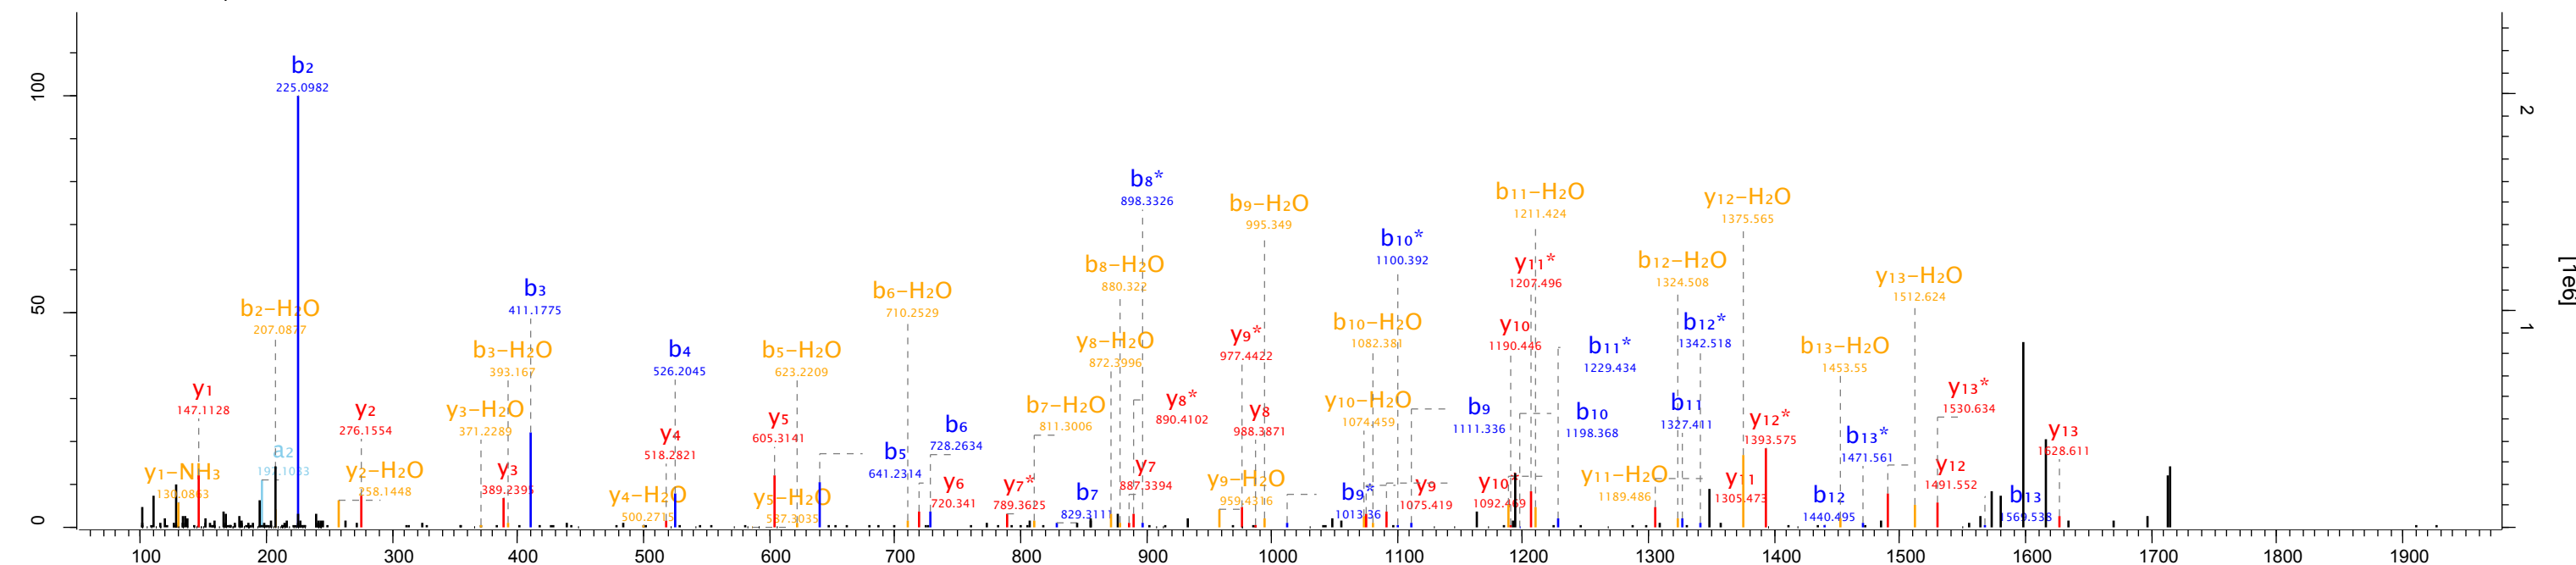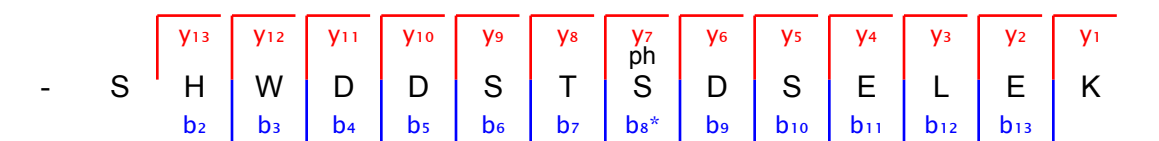



Raw file: 20150812\_A375SR\_Phospho\_BR1\_08  
 Scan: 9970 Method: FTMS; HCD Score: 140.59 m/z: 693.35 Gene names: RBM23

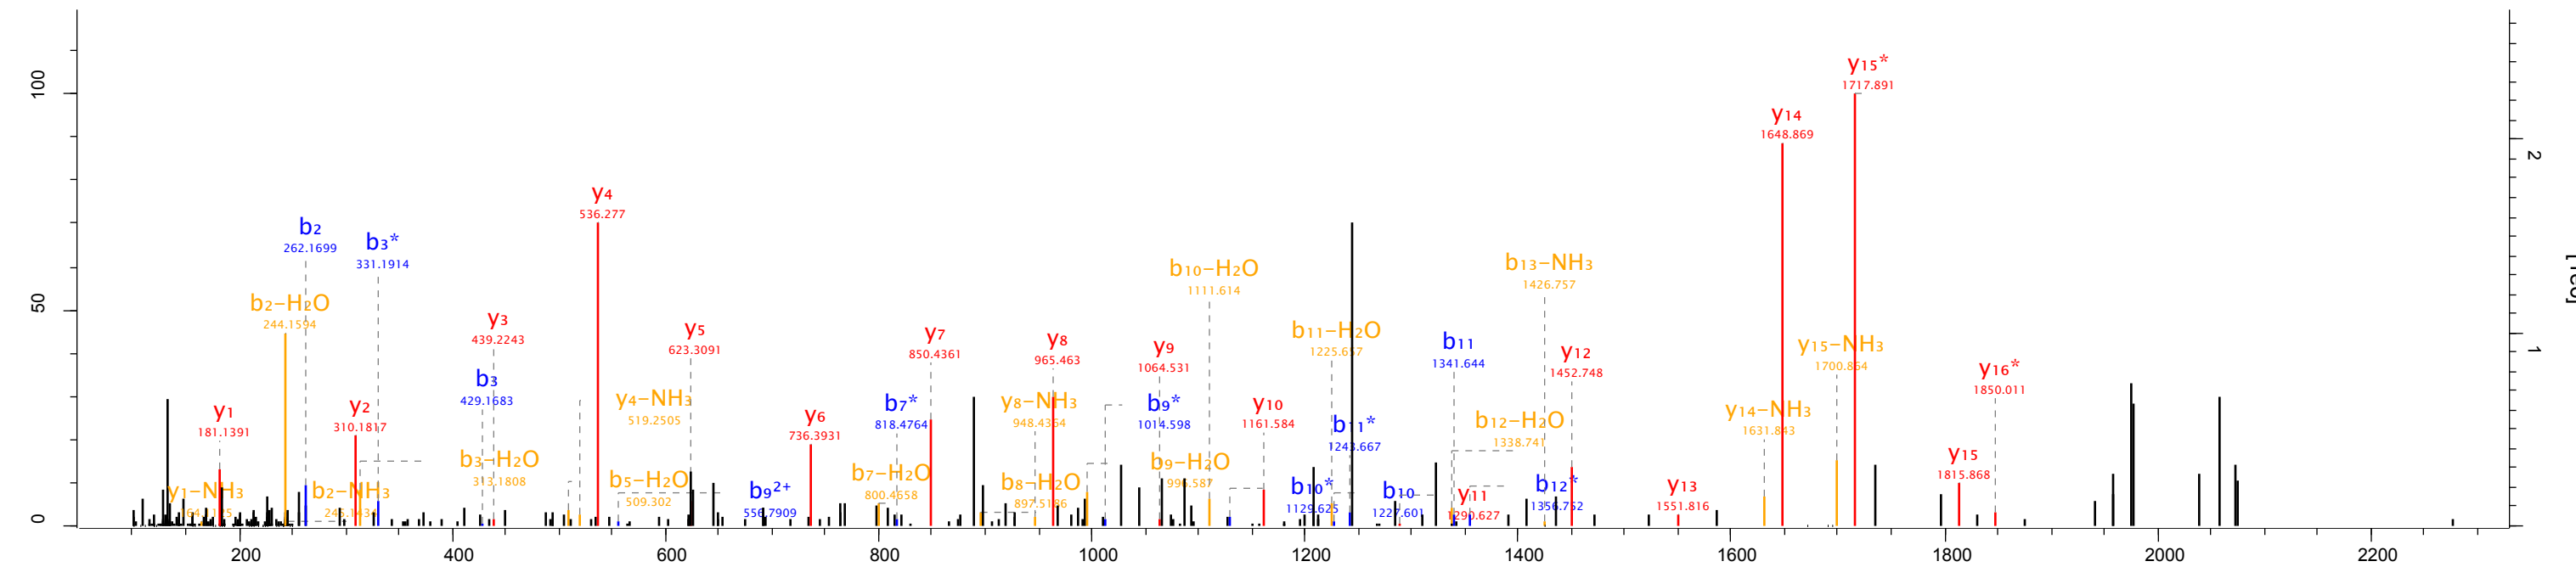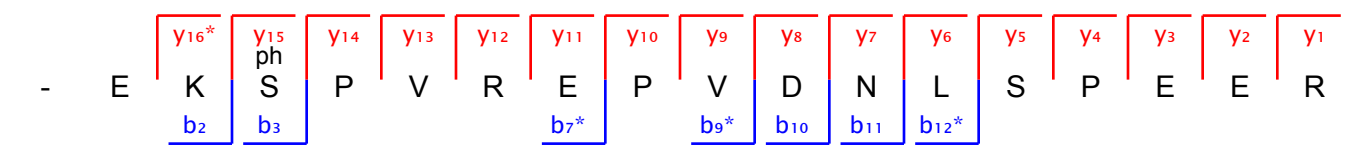

Raw file 20150812\_A375SR\_Phospho\_BR1\_09 Scan 10250 Method FTMS; HCD Score 240.42 m/z 925.95 Gene names ADD3

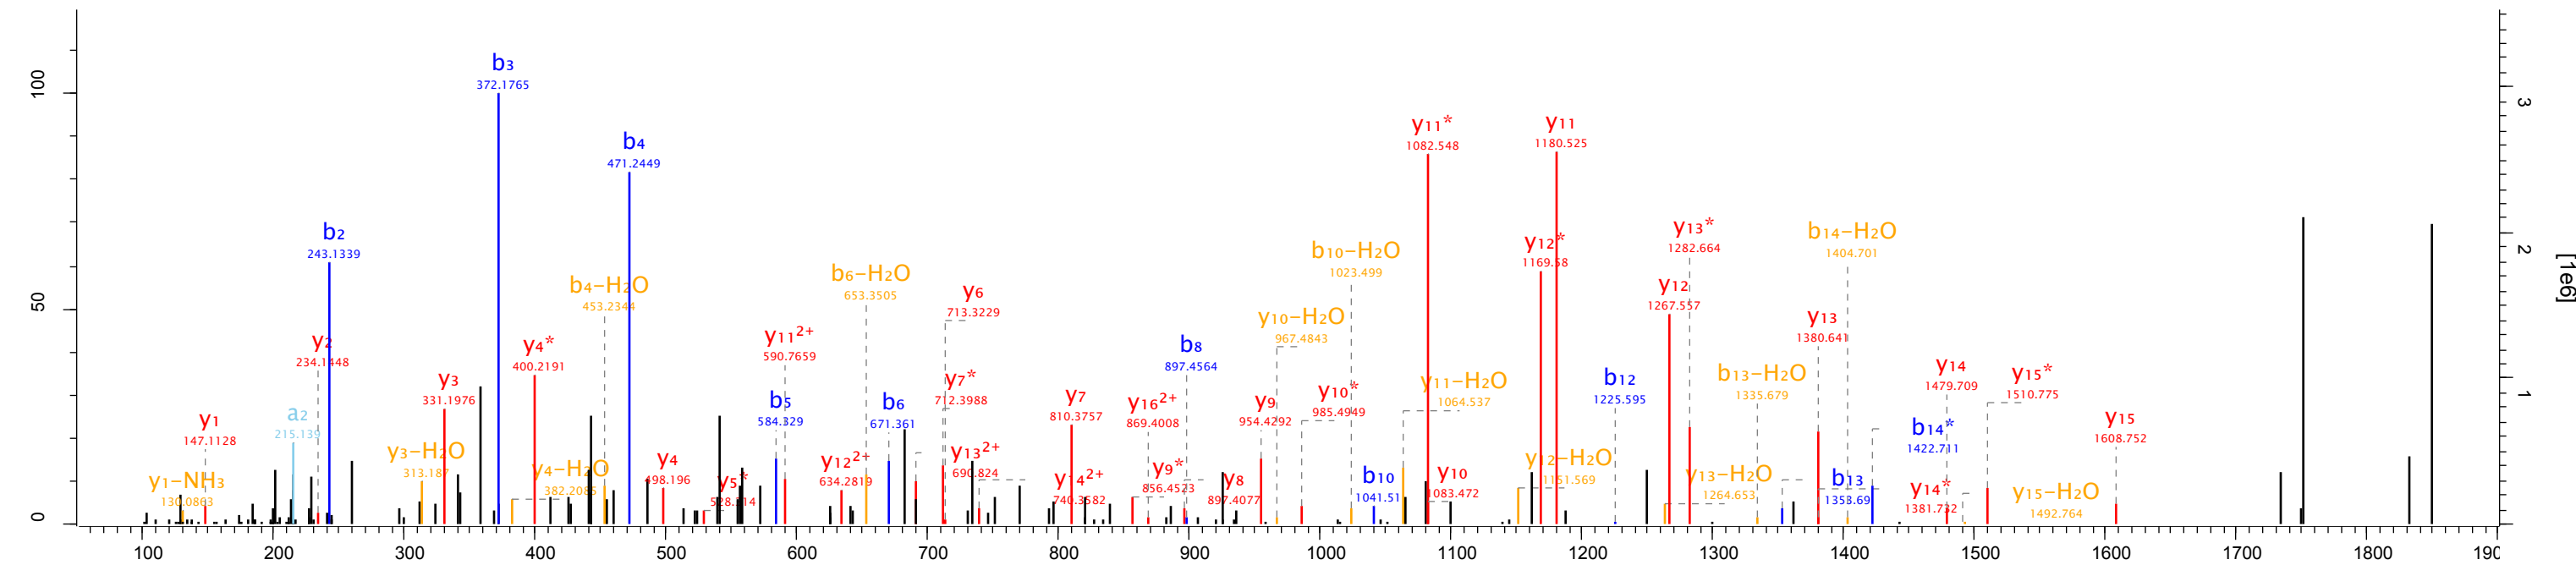

- I y16<sup>2+</sup> y15 y14 y13 y12 y11 y10 y9 y8 y7 y6 y5\* y4<sup>ph</sup> y3 y2 y1 -

b2 b3 b4 b5 b6 P b8 G S P b10 S K b13 b14\* P S K -

Raw file 20150812\_A375SR\_Phospho\_BR1\_09 Scan 11660 Method FTMS; HCD Score 208.84 m/z 850.38 Gene names SOX5

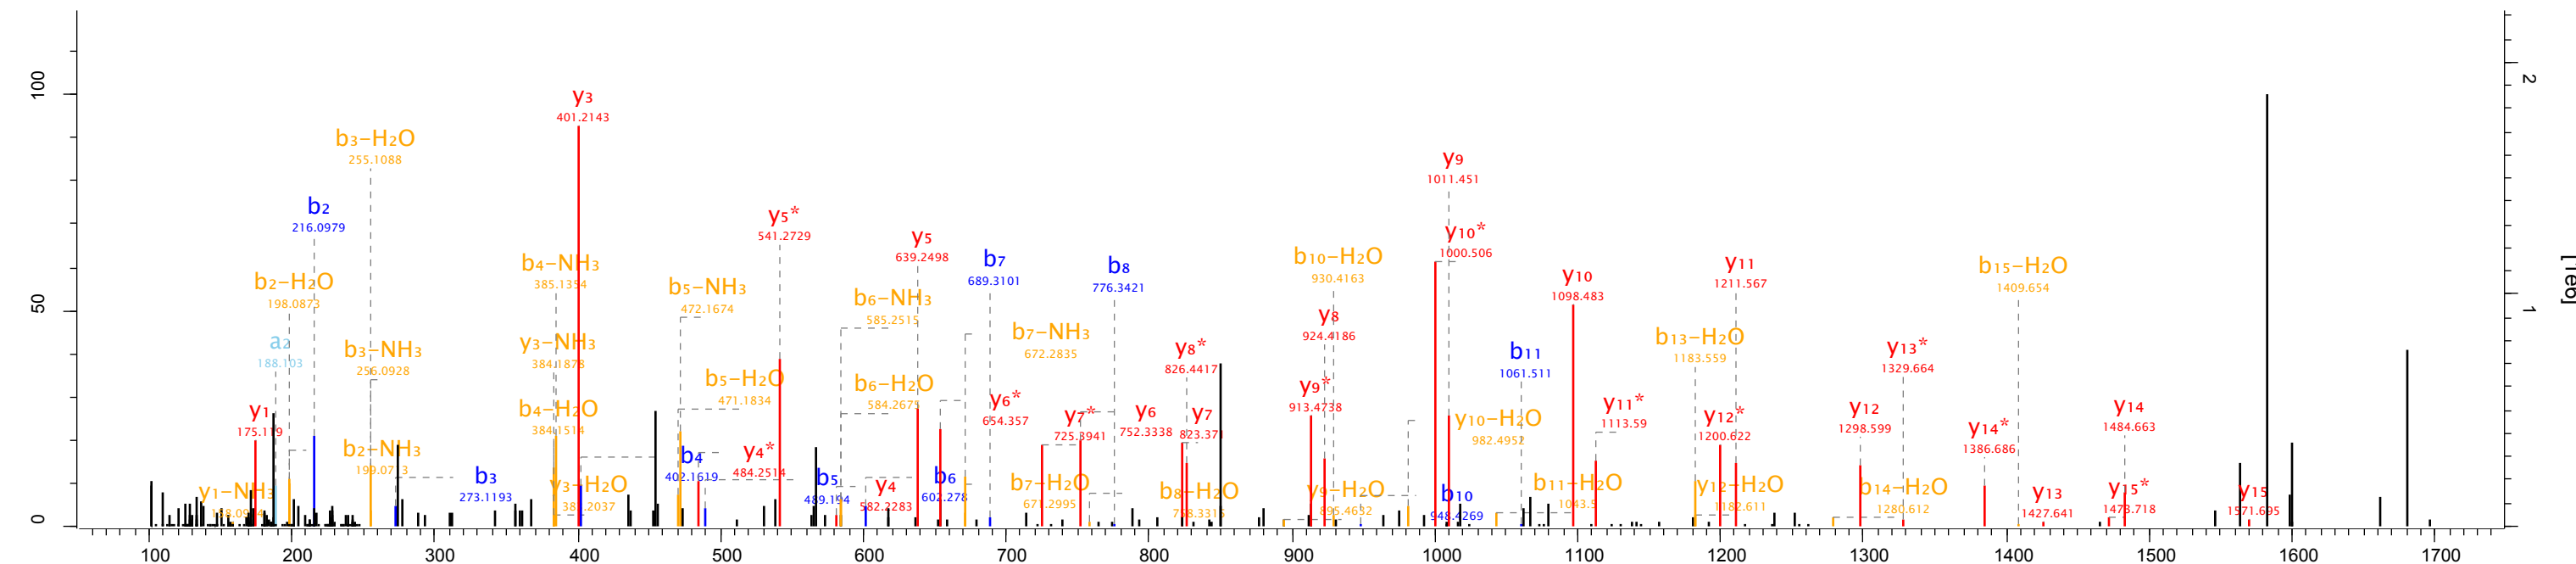

- Q S G E S L S S T A L G T P E R -

y<sub>15</sub>
y<sub>14</sub>
y<sub>13</sub>
y<sub>12</sub>
y<sub>11</sub>
y<sub>10</sub>
y<sub>9</sub>
y<sub>8</sub>
y<sub>7</sub>
y<sub>6</sub>
y<sub>5</sub>
y<sub>4</sub>  
ph
y<sub>3</sub>
y<sub>1</sub>

b<sub>2</sub>
b<sub>3</sub>
b<sub>4</sub>
b<sub>5</sub>
b<sub>6</sub>
b<sub>7</sub>
b<sub>8</sub>
b<sub>10</sub>
b<sub>11</sub>

Raw file Scan Method Score m/z Gene names  
 20150812\_A375SR\_Phospho\_BR1\_09 12280 FTMS; HCD 347.67 962.1 TFIP11

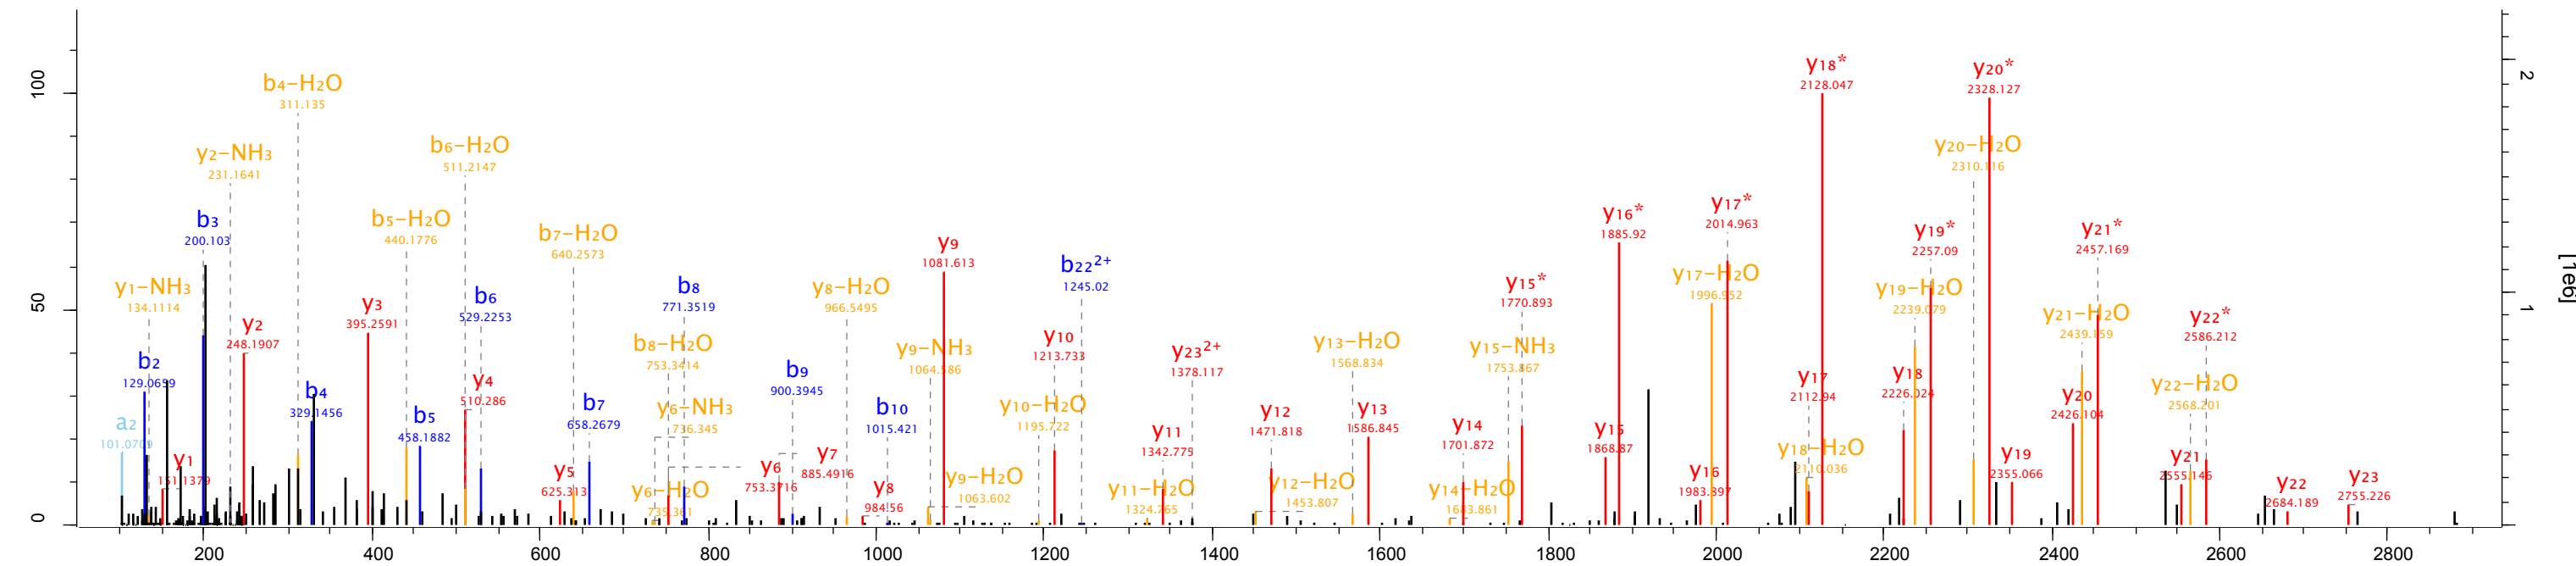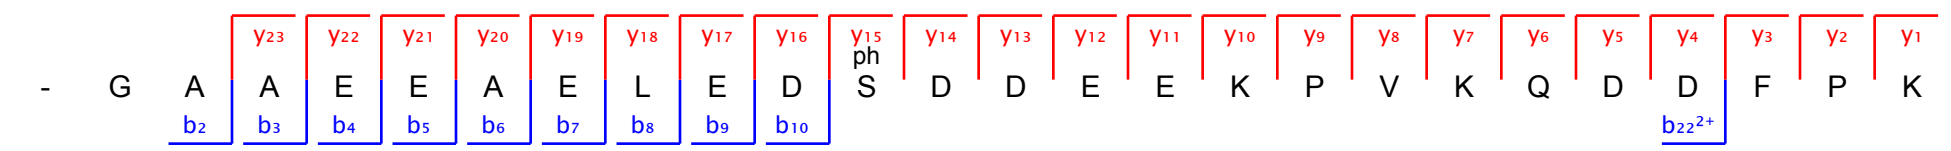



Raw file 20150812\_A375SR\_Phospho\_BR1\_09 Scan 17310 Method FTMS; HCD Score 138.25 m/z 716.71 Gene names BCL9L

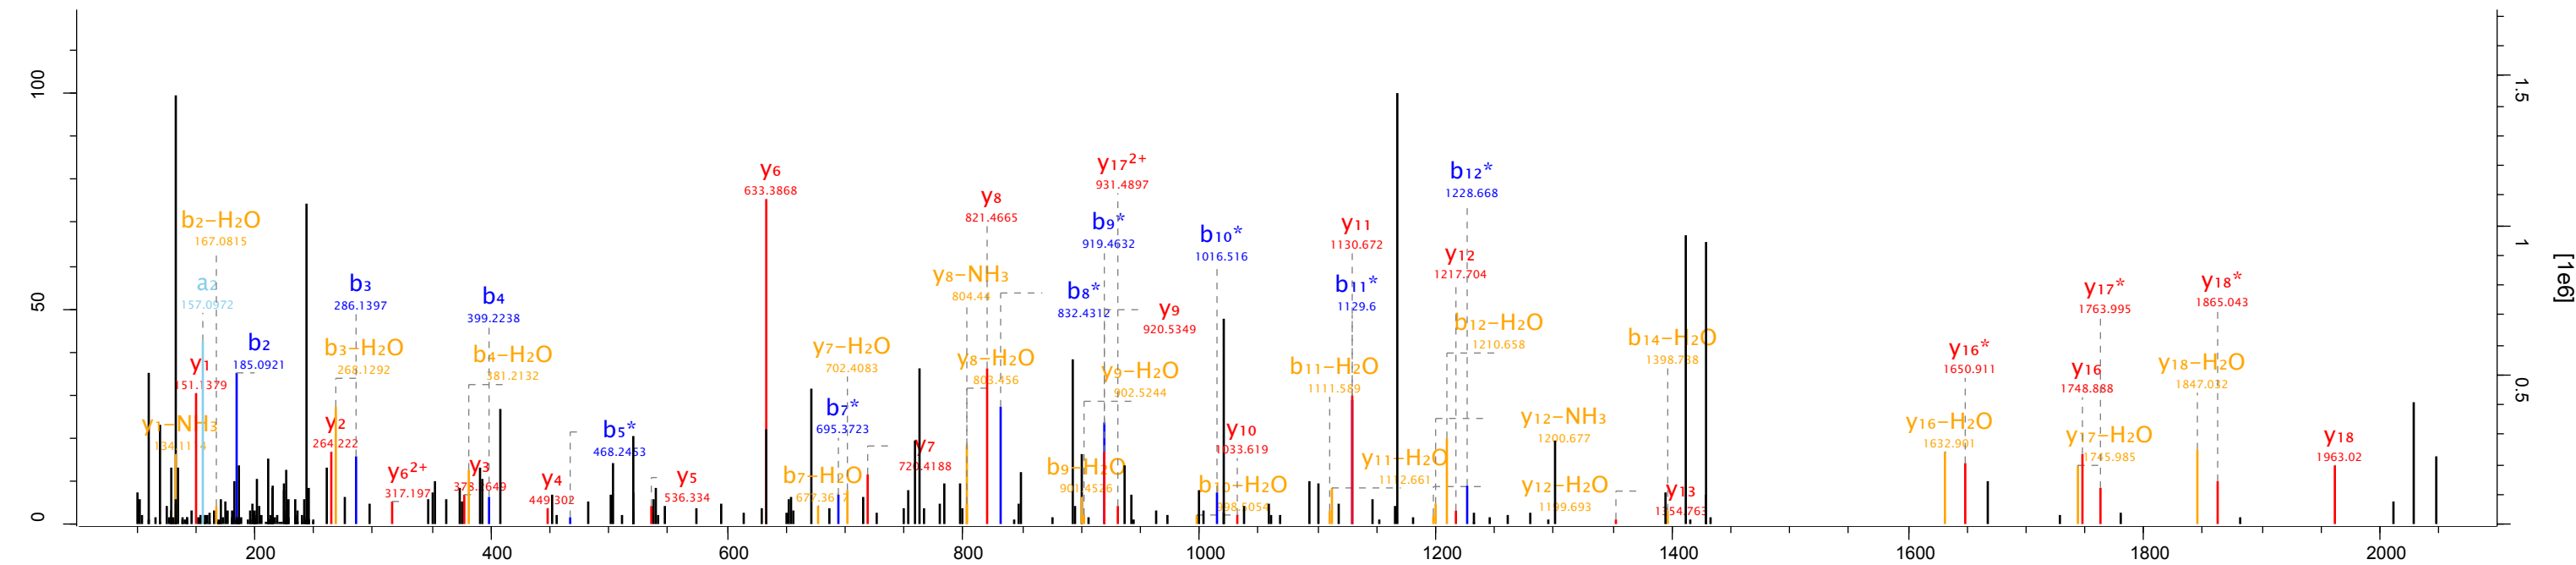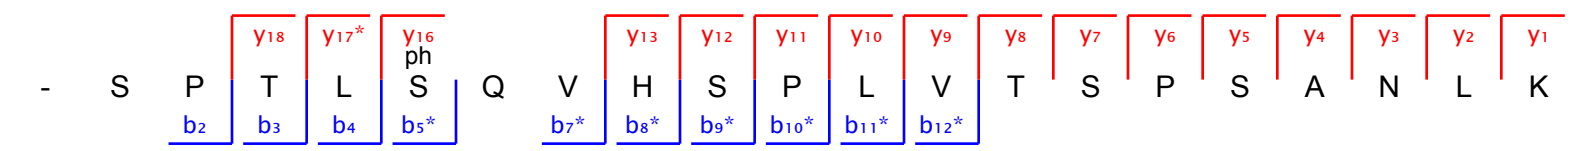

Raw file: 20150812\_A375SR\_Phospho\_BR1\_09  
 Scan: 17770 Method: FTMS; HCD Score: 124.98 m/z: 924.09 Gene names: DOCK7

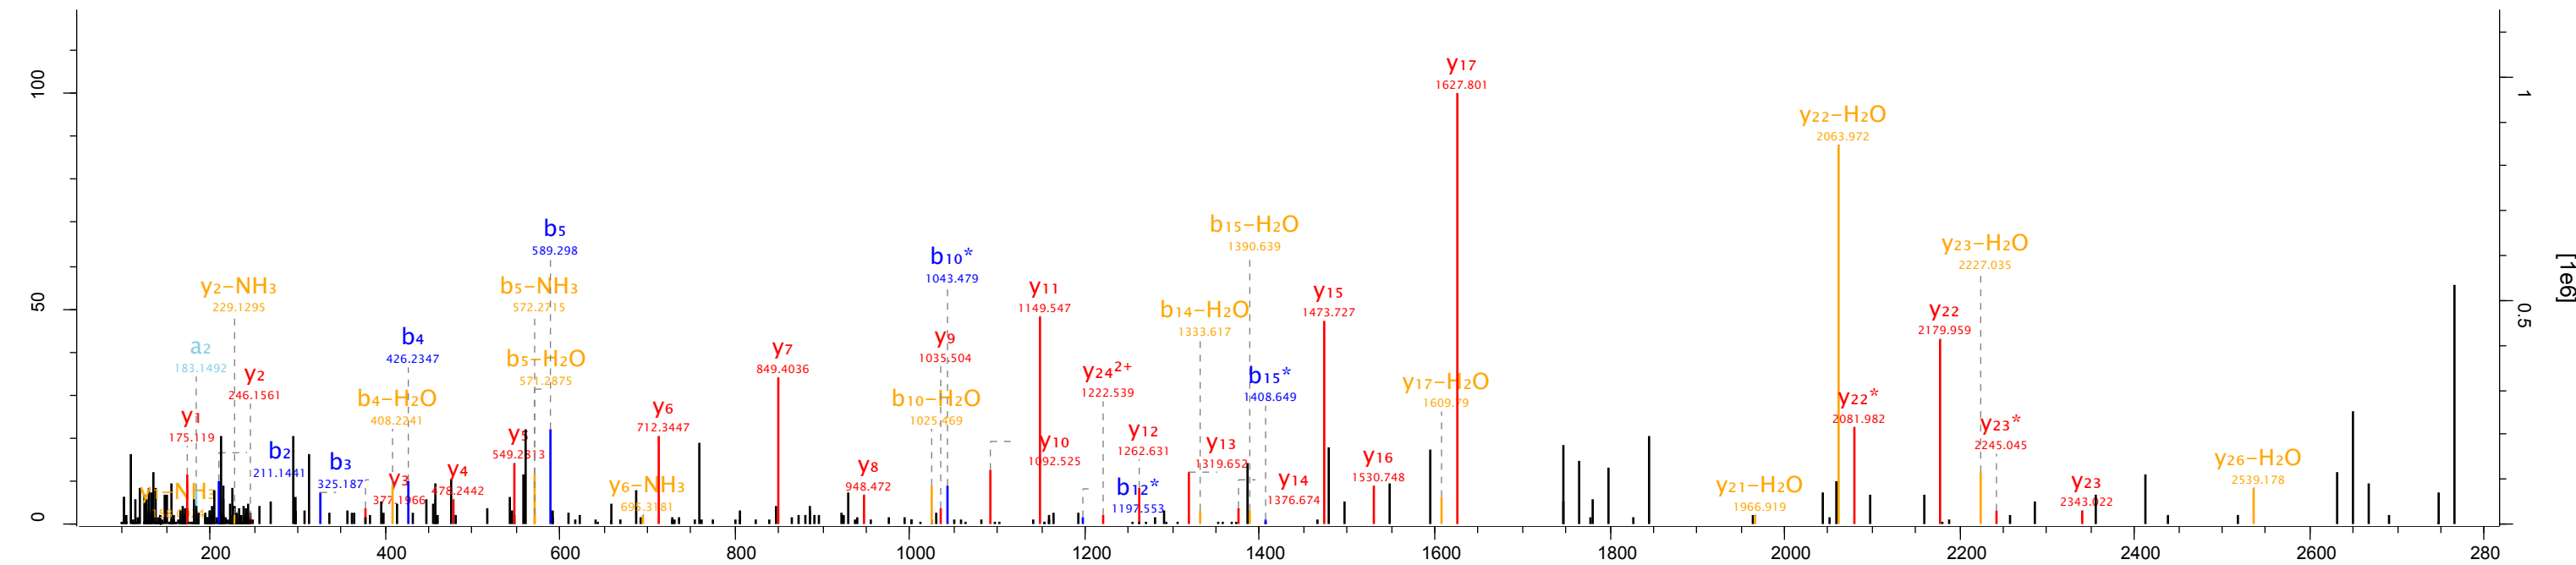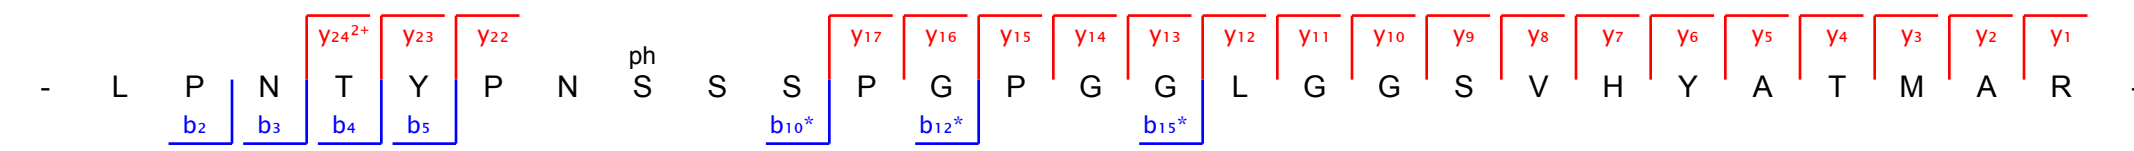

Raw file: 20150812\_A375SR\_Phospho\_BR1\_09  
 Scan: 20340 Method: FTMS; HCD Score: 142.6 m/z: 990.49 Gene names: PHRF1

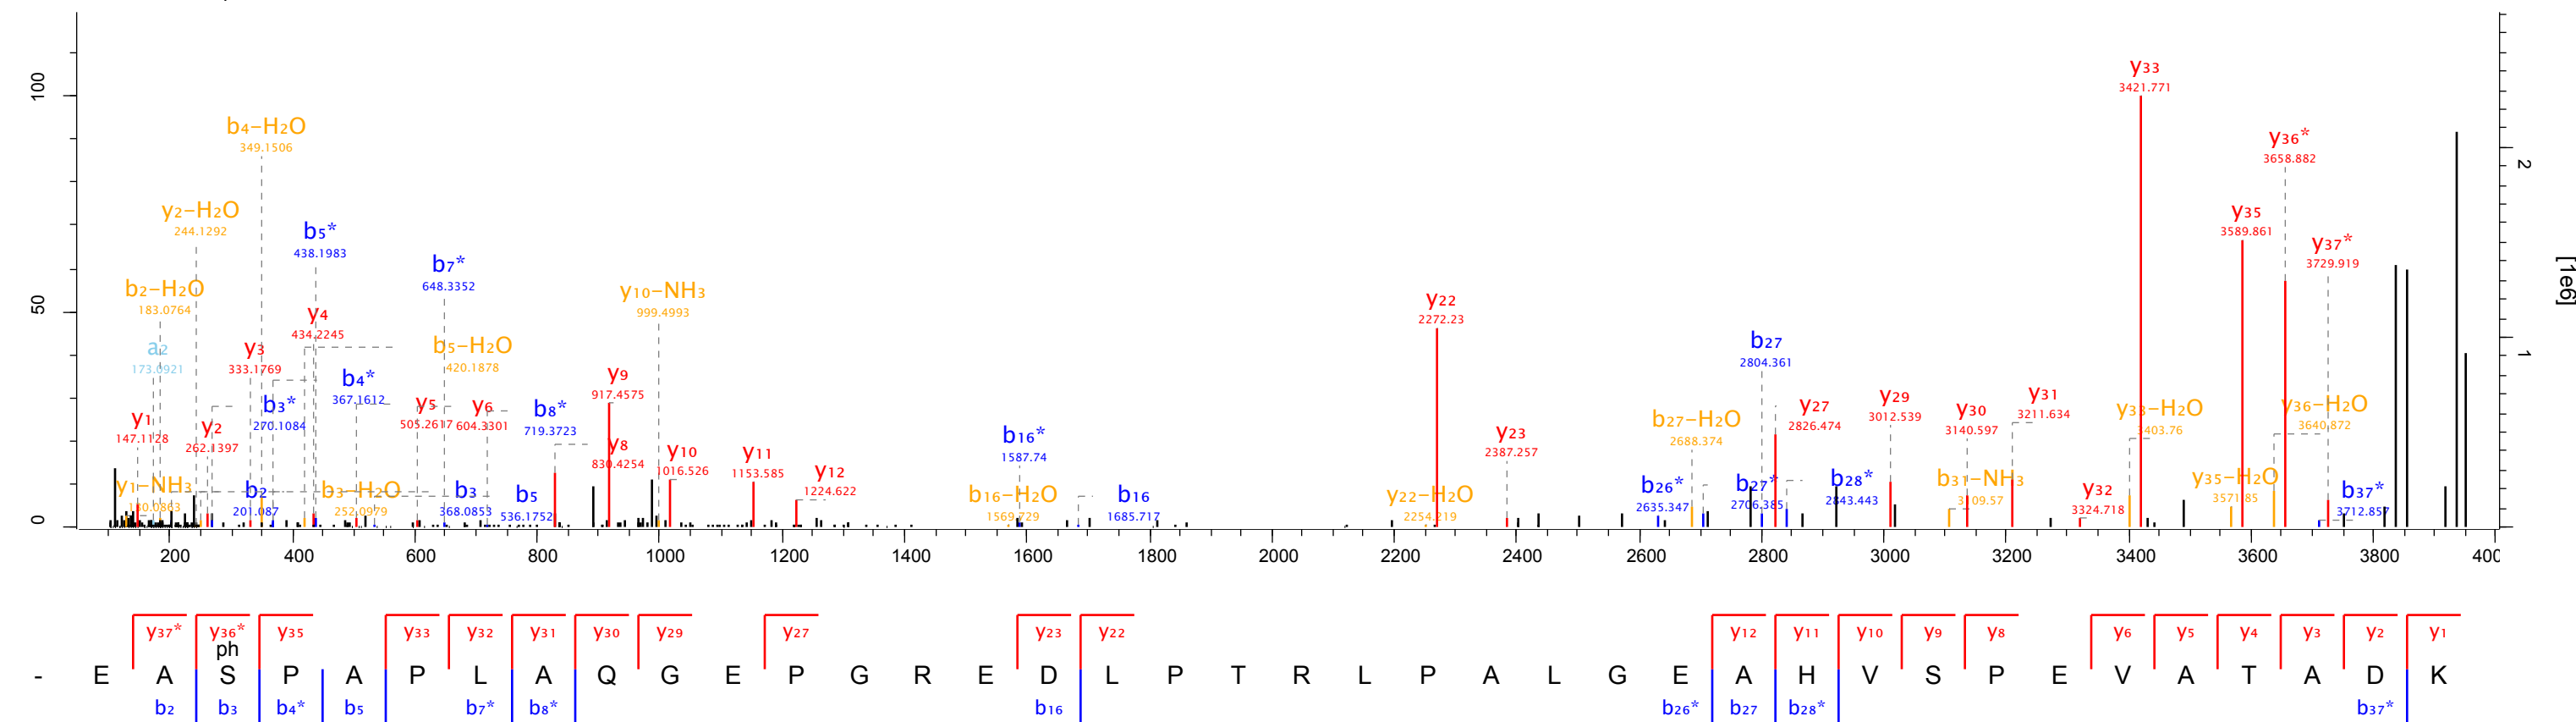



Raw file: 20150812\_A375SR\_Phospho\_BR1\_09  
 Scan: 22900 Method: FTMS; HCD Score: 81.76 m/z: 706.71 Gene names: POLDIP3;PDIP46

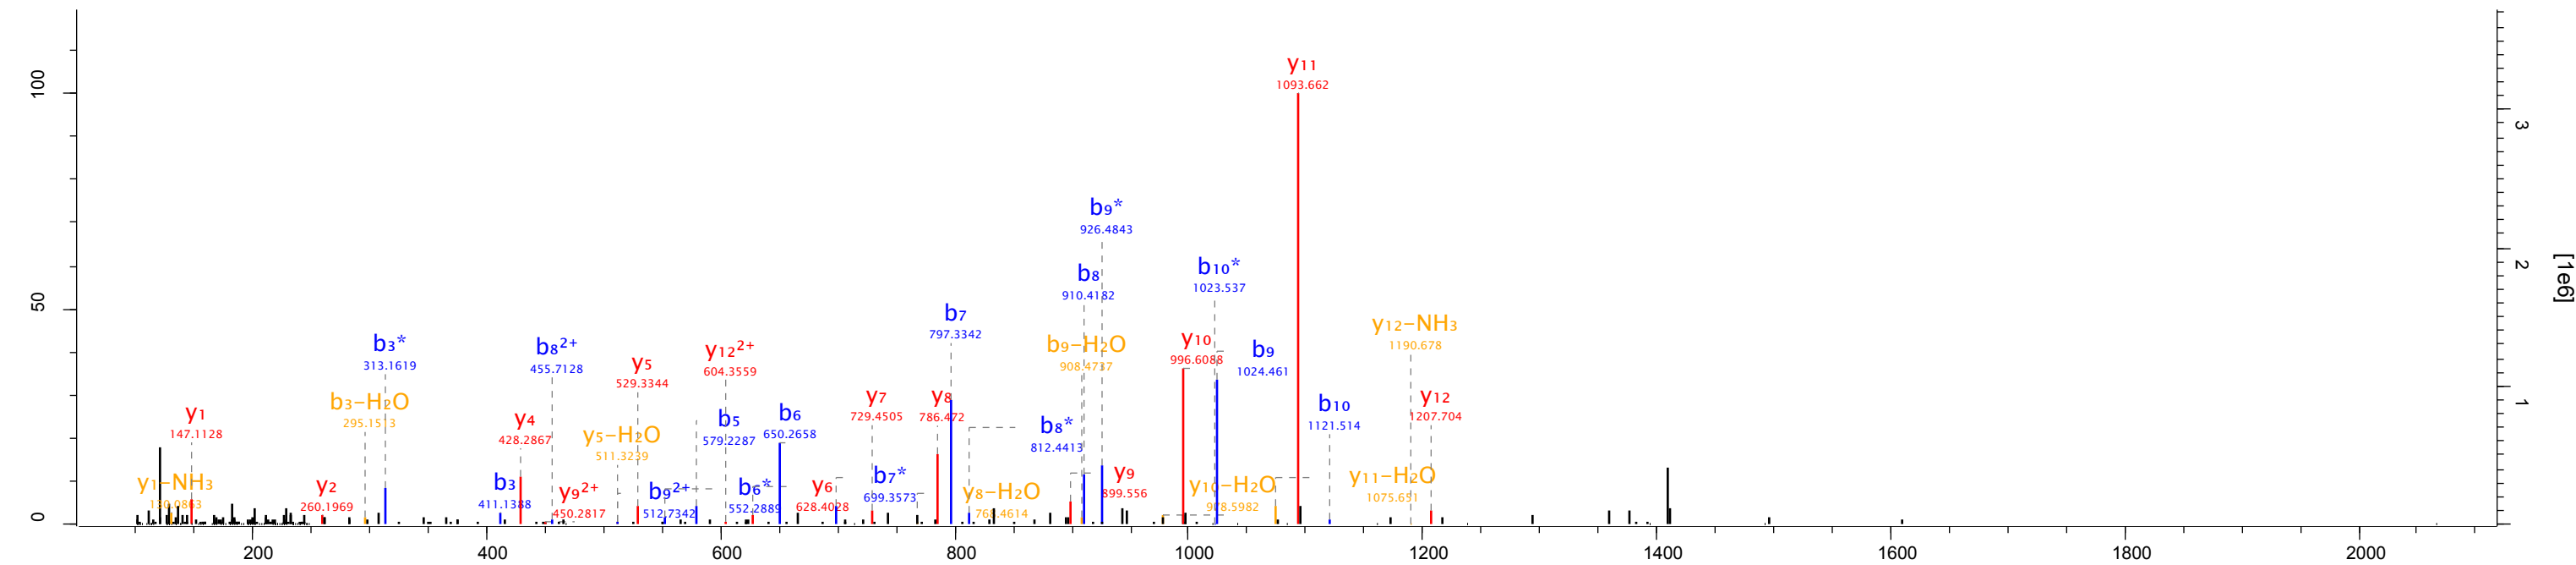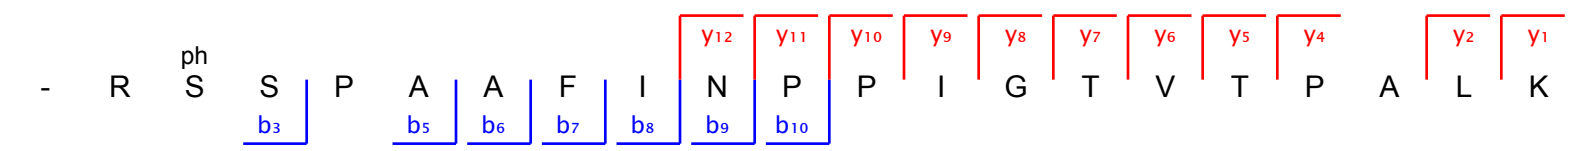

Raw file: 20150812\_A375SR\_Phospho\_BR1\_09  
 Scan: 23830 Method: FTMS; HCD Score: 133.75 m/z: 1299.09 Gene names: AHNAK

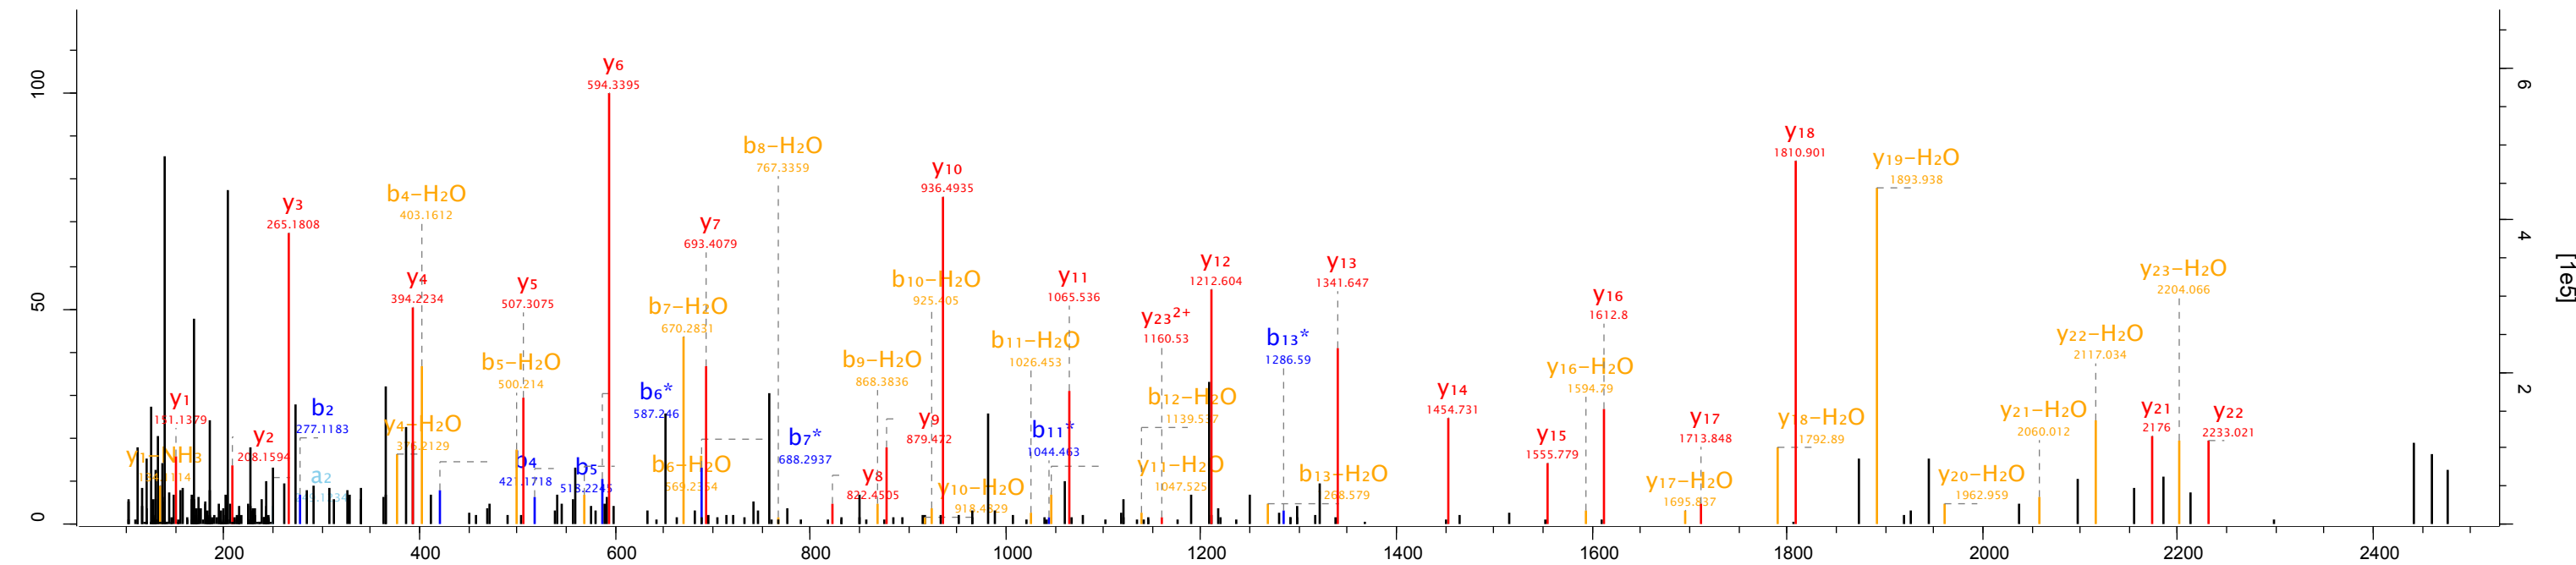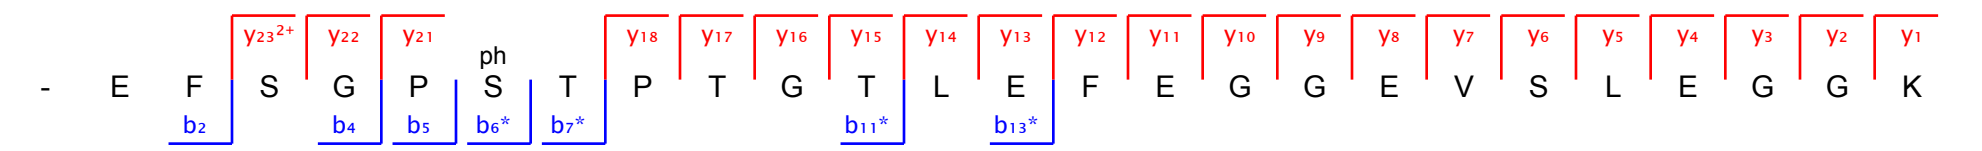

Raw file: 20150812\_A375SR\_Phospho\_BR1\_09  
 Scan: 2410 Method: FTMS; HCD Score: 163.44 m/z: 624.29 Gene names: CHAMP1

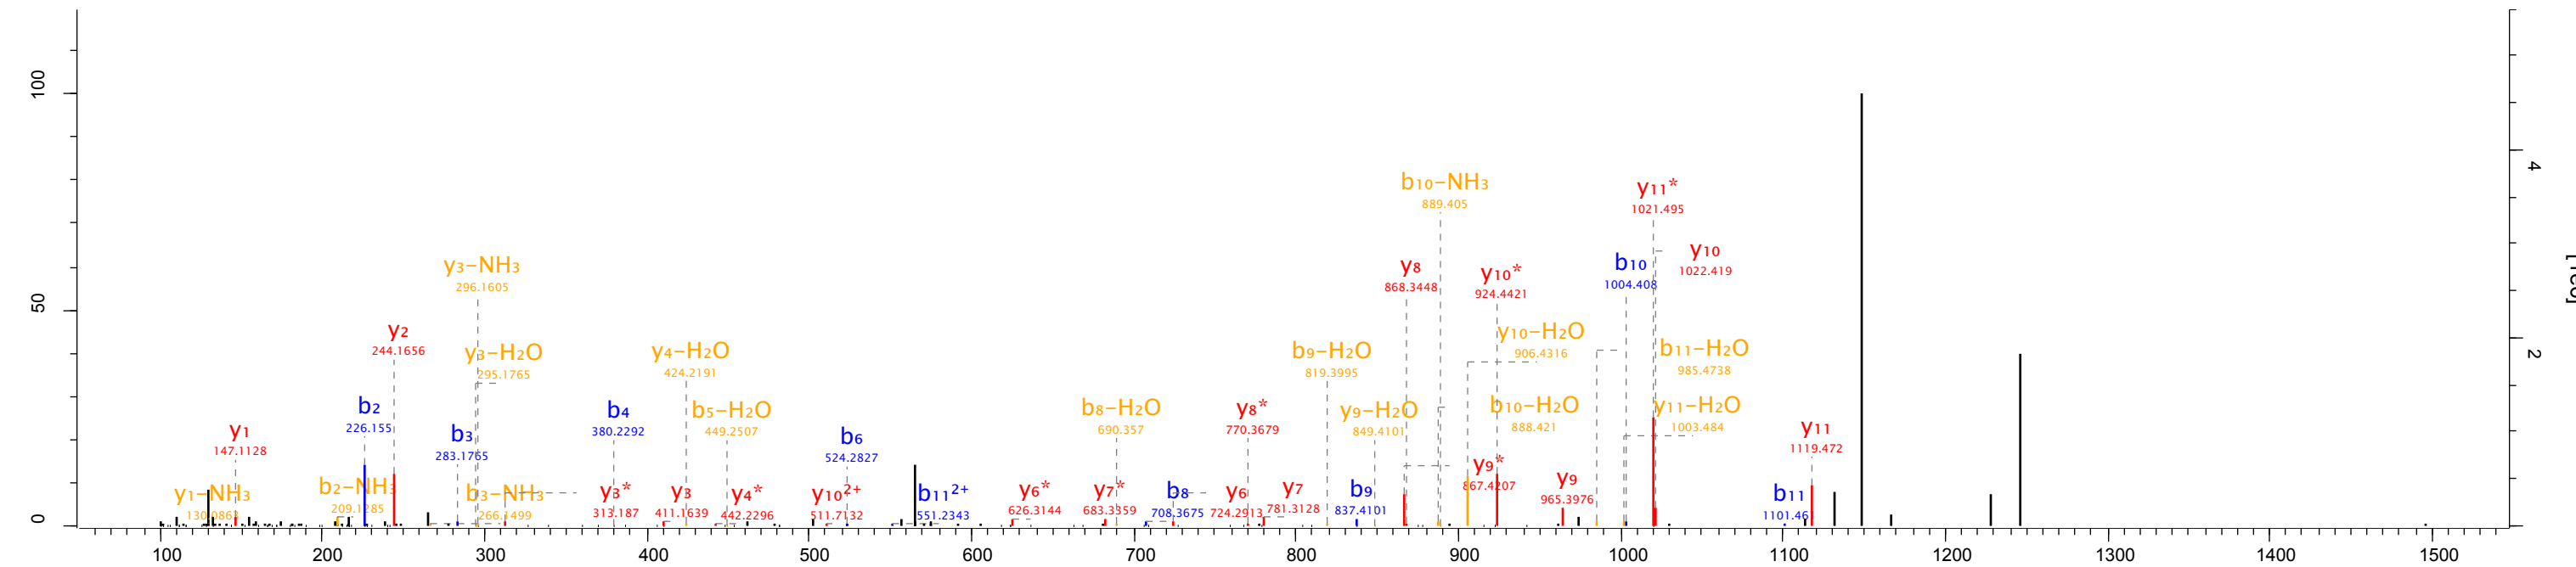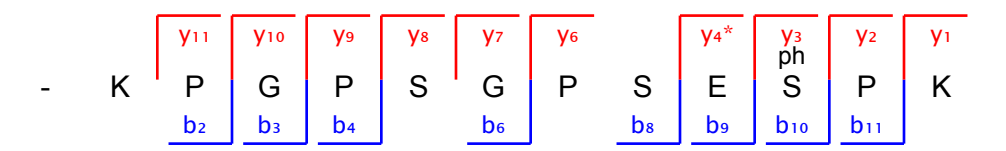

Raw file 20150812\_A375SR\_Phospho\_BR1\_09 Scan 3210 Method FTMS; HCD Score 71.6 m/z 529.27 Gene names MLLT4

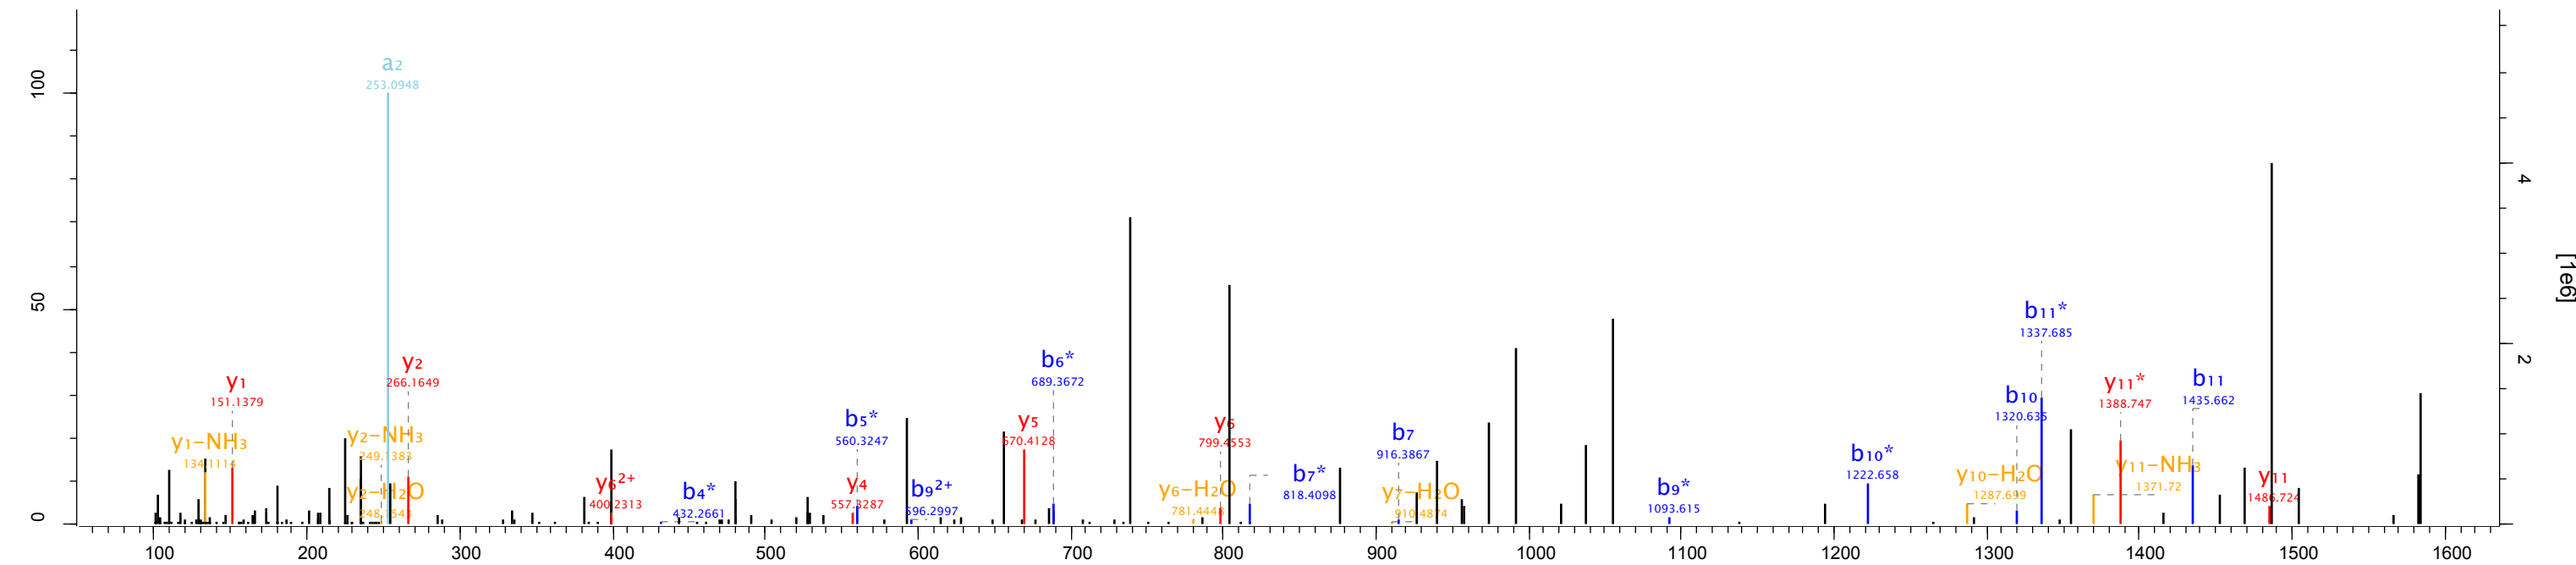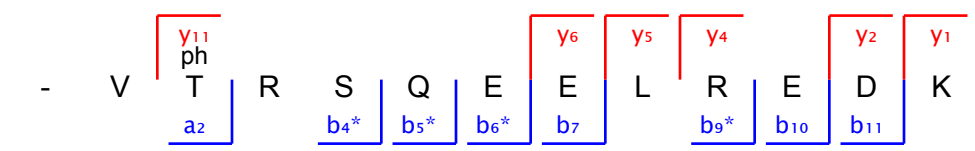

Raw file 20150812\_A375SR\_Phospho\_BR1\_09 Scan 4090 Method FTMS; HCD Score 70.55 m/z 586.31 Gene names KLHDC7B

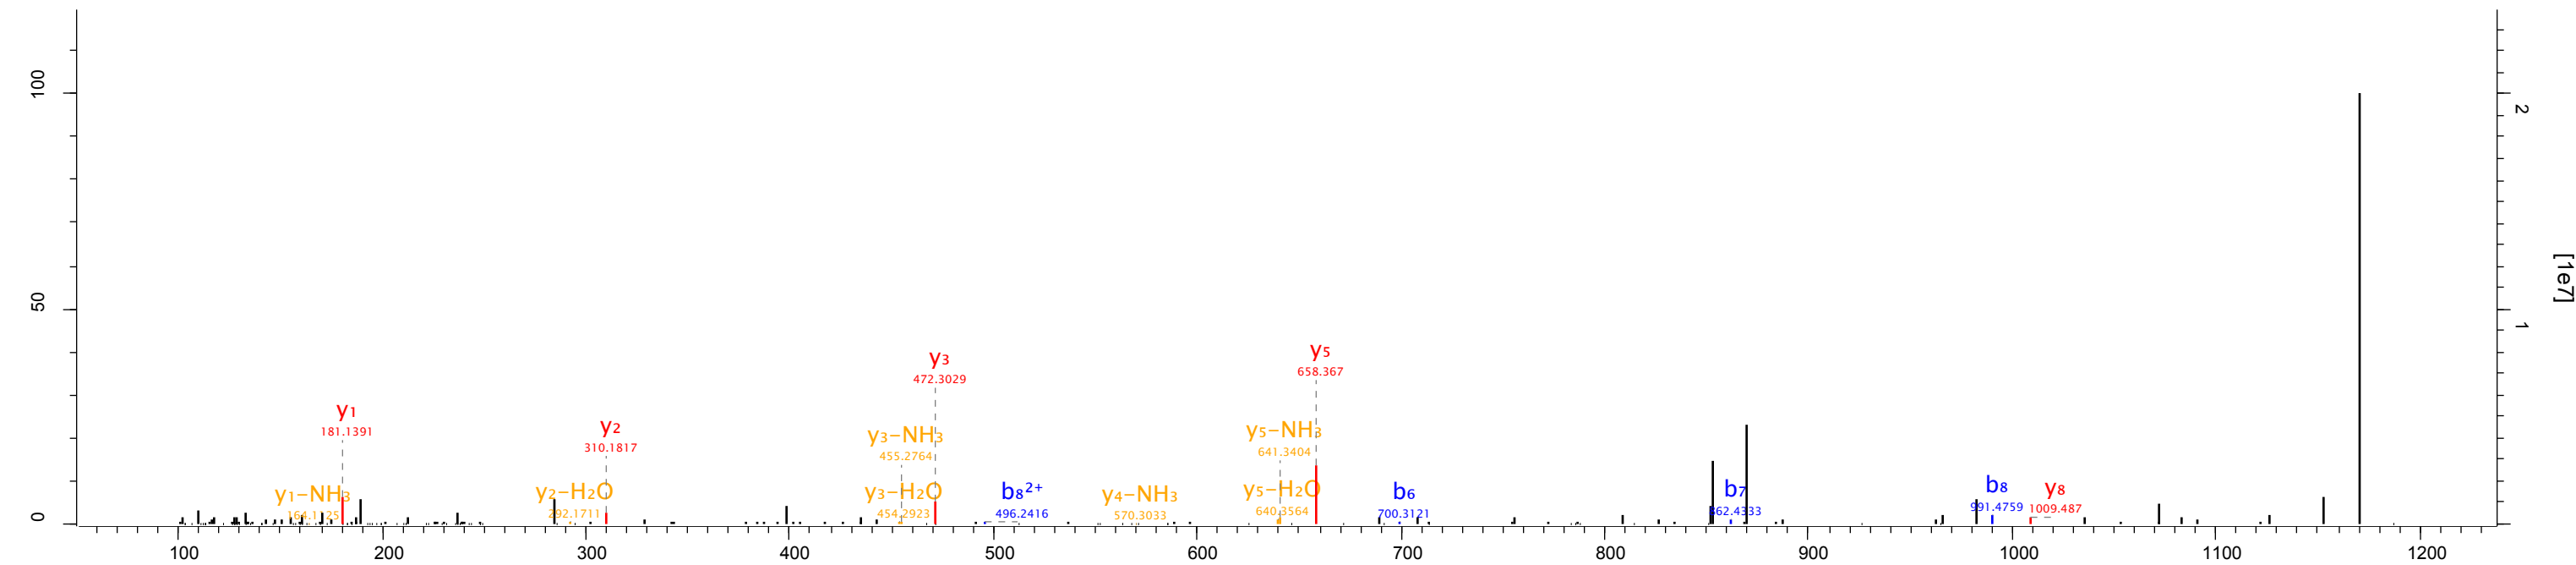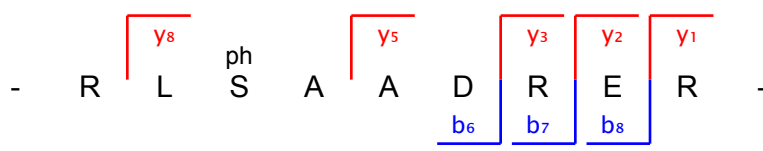

Raw file: 20150812\_A375SR\_Phospho\_BR1\_09  
 Scan: 4100 Method: FTMS; HCD Score: 90.69 m/z: 528.24 Gene names: ATXN2L

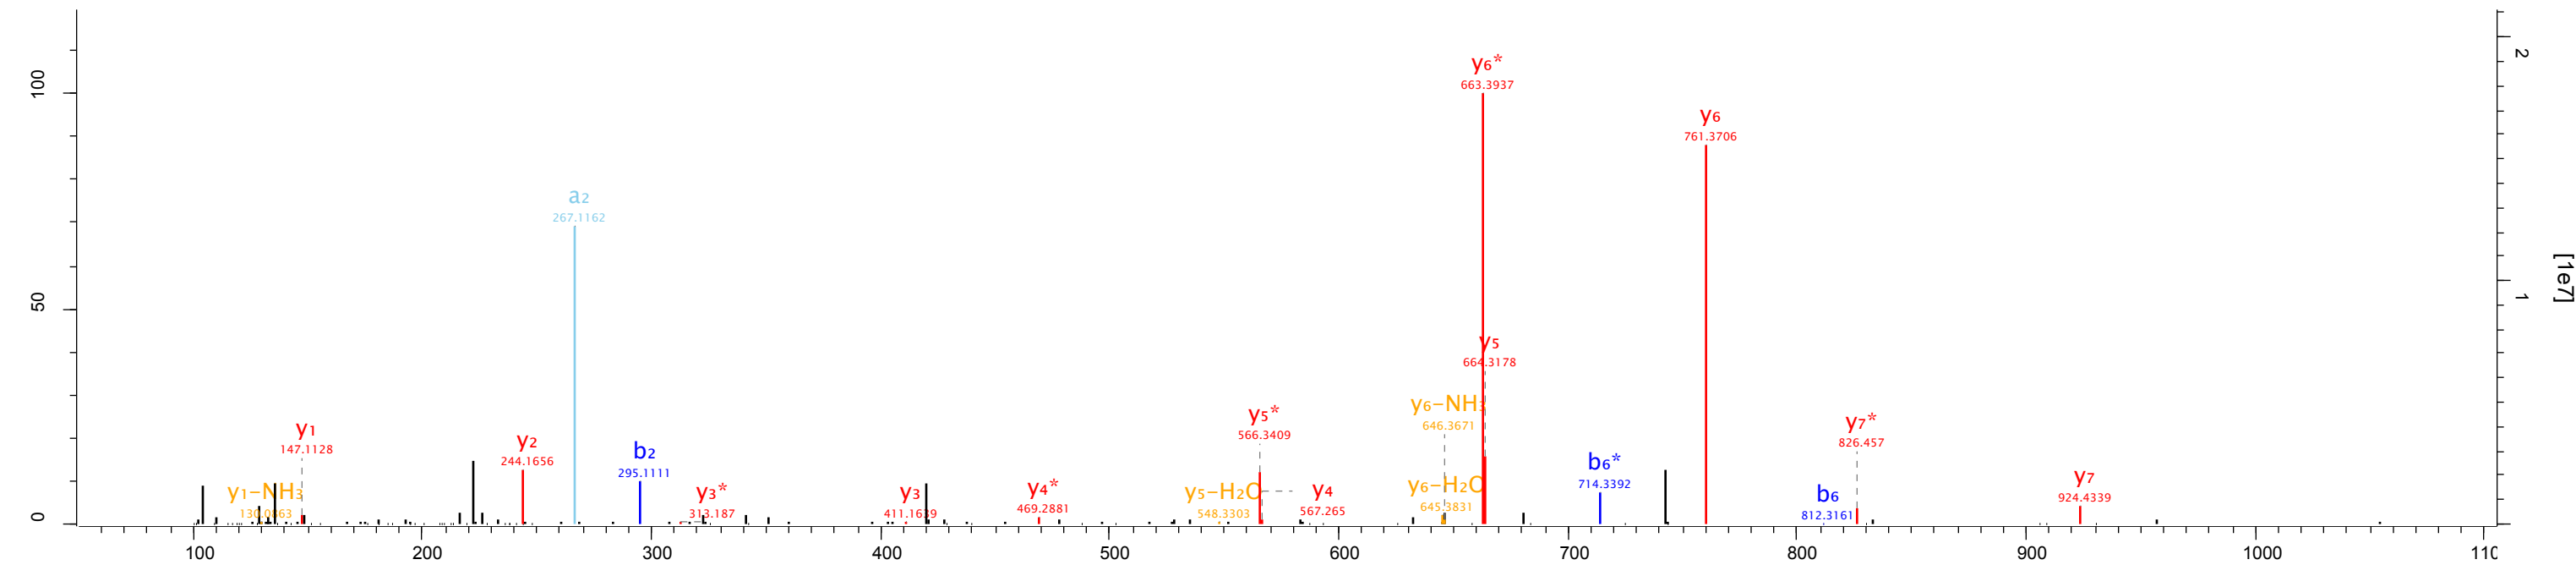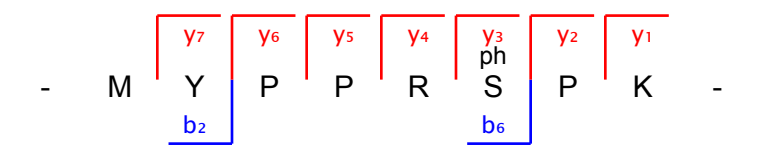

Raw file 20150812\_A375SR\_Phospho\_BR1\_09 Scan 5820 Method FTMS; HCD Score 252.28 m/z 779.7 Gene names TCEAL4

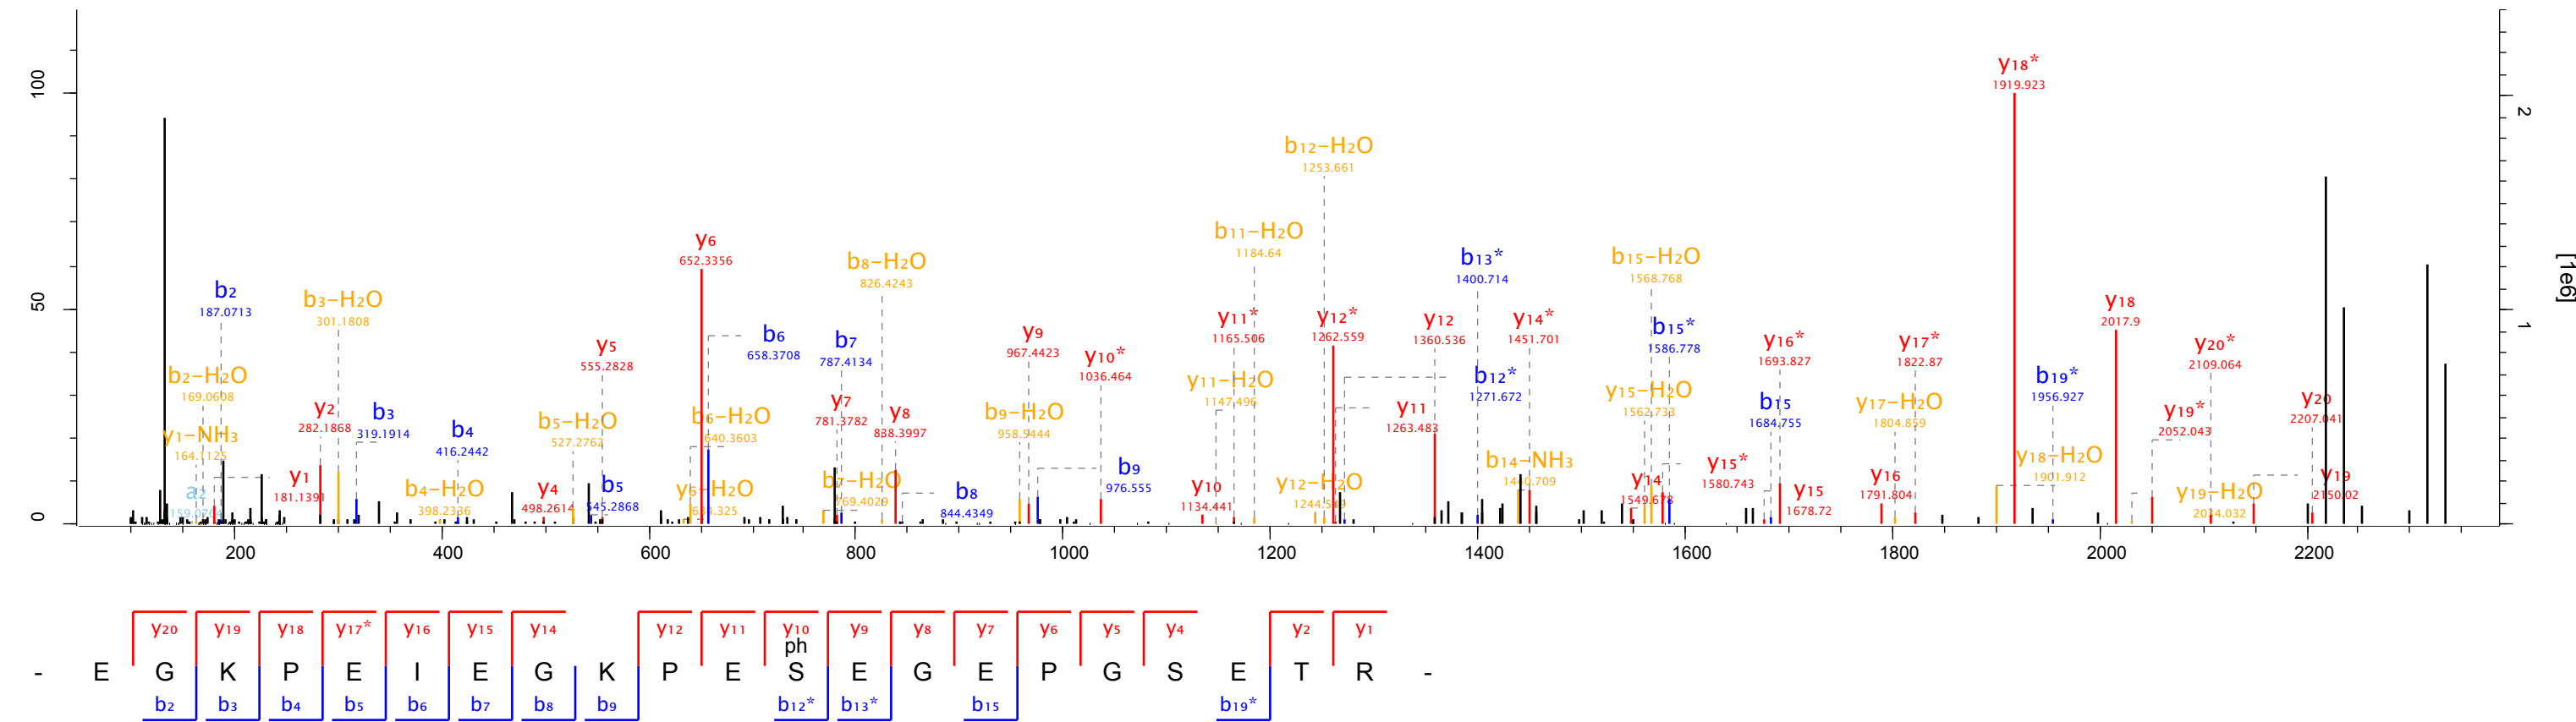

Raw file 20150812\_A375SR\_Phospho\_BR1\_09 Scan 6230 Method FTMS; HCD Score 93.62 m/z 549.75 Gene names PLEKHA4

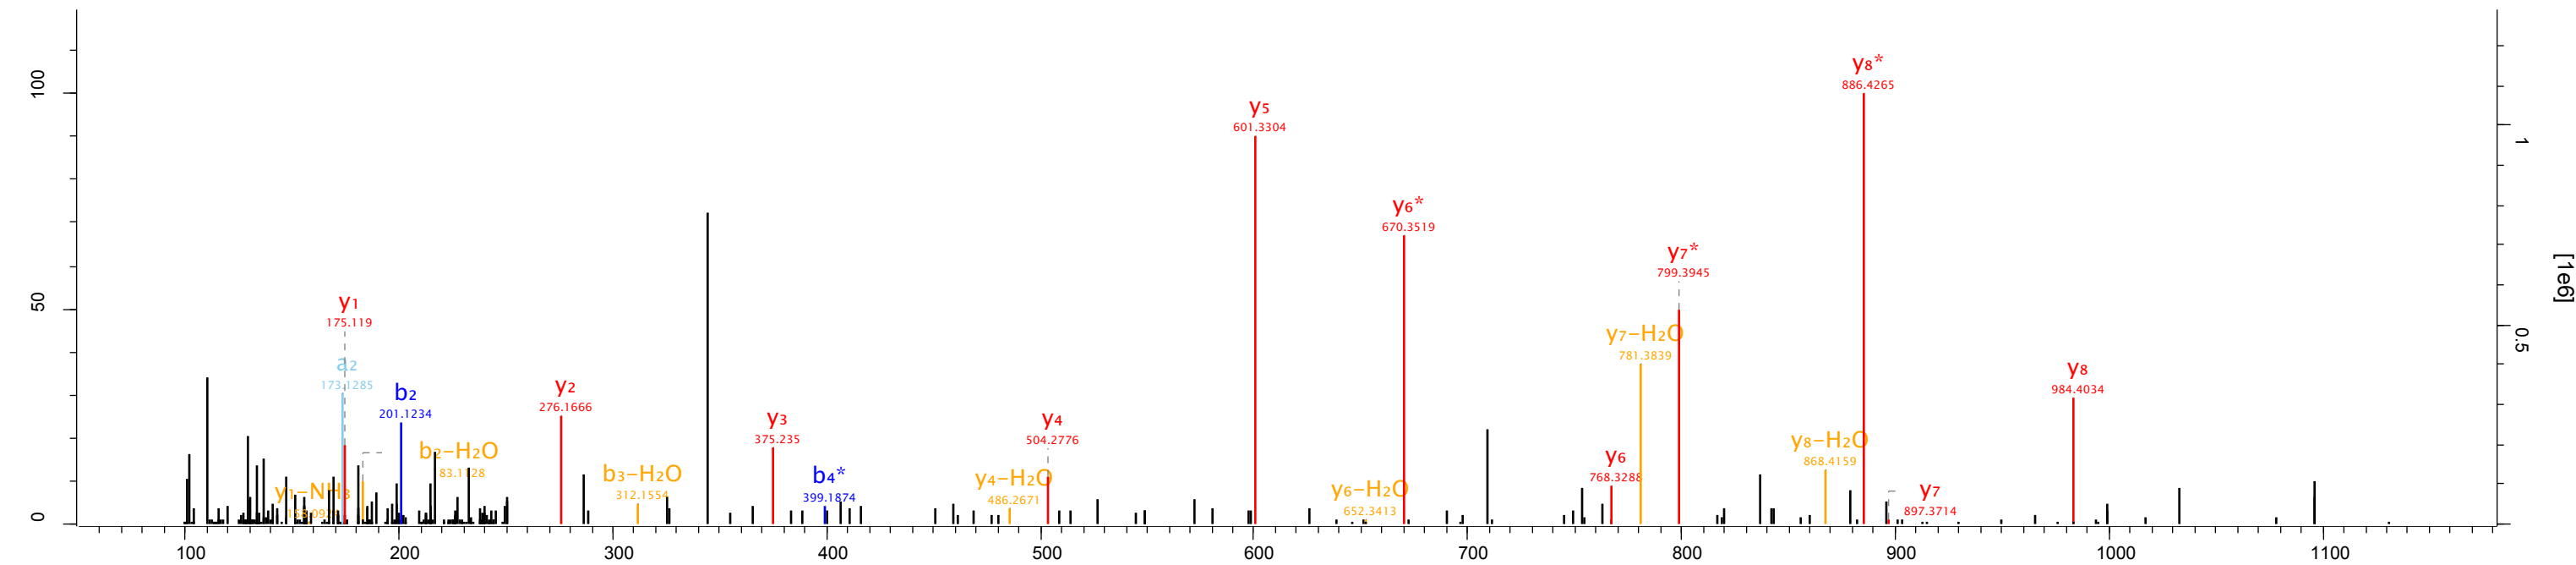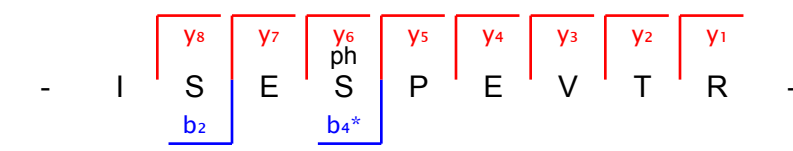



Raw file: 20150812\_A375SR\_Phospho\_BR1\_09  
 Scan: 7440 Method: FTMS; HCD Score: 162.68 m/z: 506.22 Gene names: NPM1

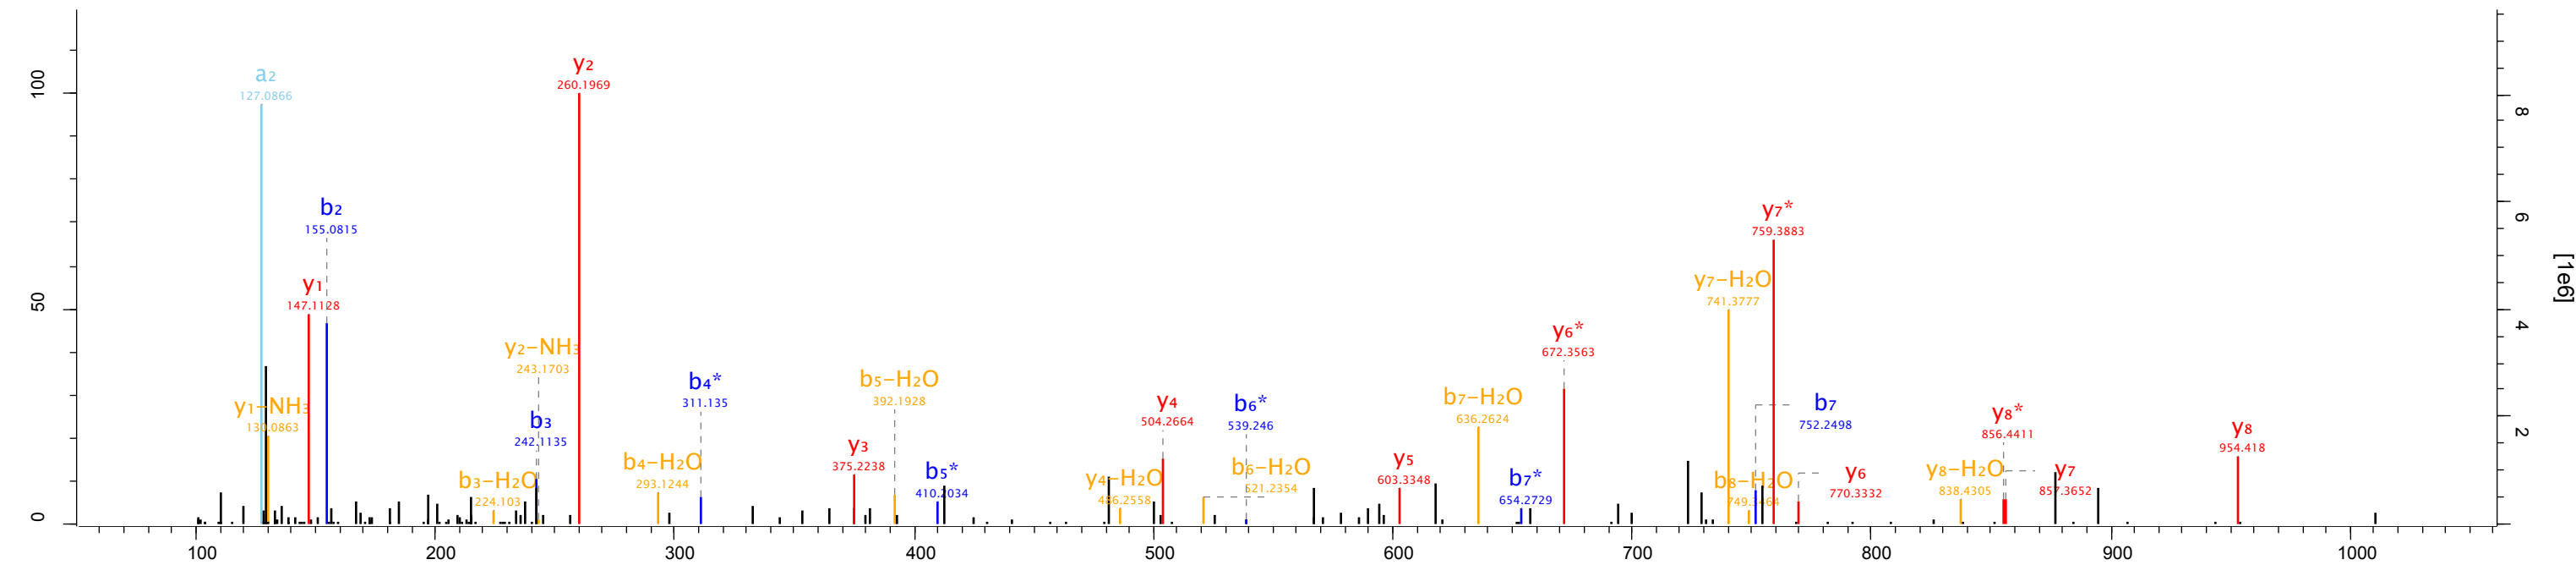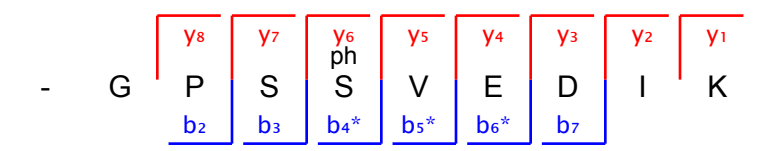

Raw file 20150812\_A375SR\_Phospho\_BR1\_10 Scan 12010 Method FTMS; HCD Score 241.29 m/z 870.01 Gene names STK3

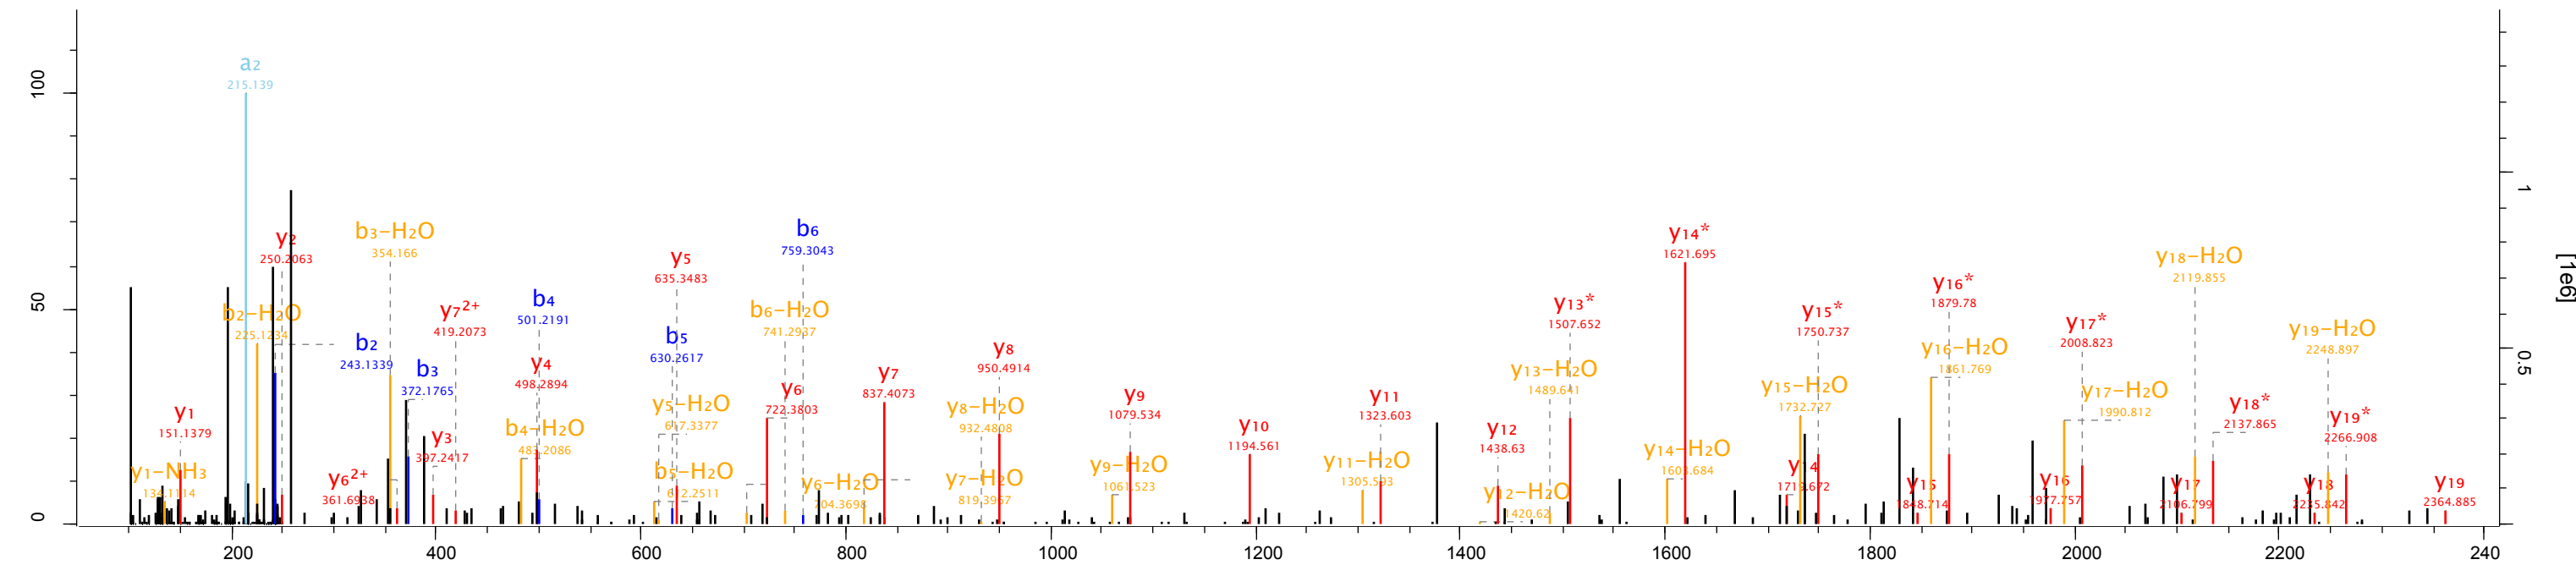

- E L E E E E E N S D E D E L D S H T M V K -

Fragmentation mapping (b and y ions):

- b<sub>2</sub> (blue box) covers L
- b<sub>3</sub> (blue box) covers E
- b<sub>4</sub> (blue box) covers E
- b<sub>5</sub> (blue box) covers E
- b<sub>6</sub> (blue box) covers E
- y<sub>1</sub> (red box) covers K
- y<sub>2</sub> (red box) covers V
- y<sub>3</sub> (red box) covers M
- y<sub>4</sub> (red box) covers T
- y<sub>5</sub> (red box) covers H
- y<sub>6</sub> (red box) covers S
- y<sub>7</sub> (red box) covers D
- y<sub>8</sub> (red box) covers L
- y<sub>9</sub> (red box) covers E
- y<sub>10</sub> (red box) covers D
- y<sub>11</sub> (red box) covers E
- y<sub>12</sub> (red box) covers D
- y<sub>13</sub>\* (red box) covers S
- y<sub>14</sub> (red box) covers N
- y<sub>15</sub> (red box) covers E
- y<sub>16</sub> (red box) covers E
- y<sub>17</sub> (red box) covers E
- y<sub>18</sub> (red box) covers E
- y<sub>19</sub> (red box) covers L

Raw file 20150812\_A375SR\_Phospho\_BR1\_10 Scan 13600 Method FTMS; HCD Score 100.9 m/z 643.97 Gene names ANXA2;ANXA2P2

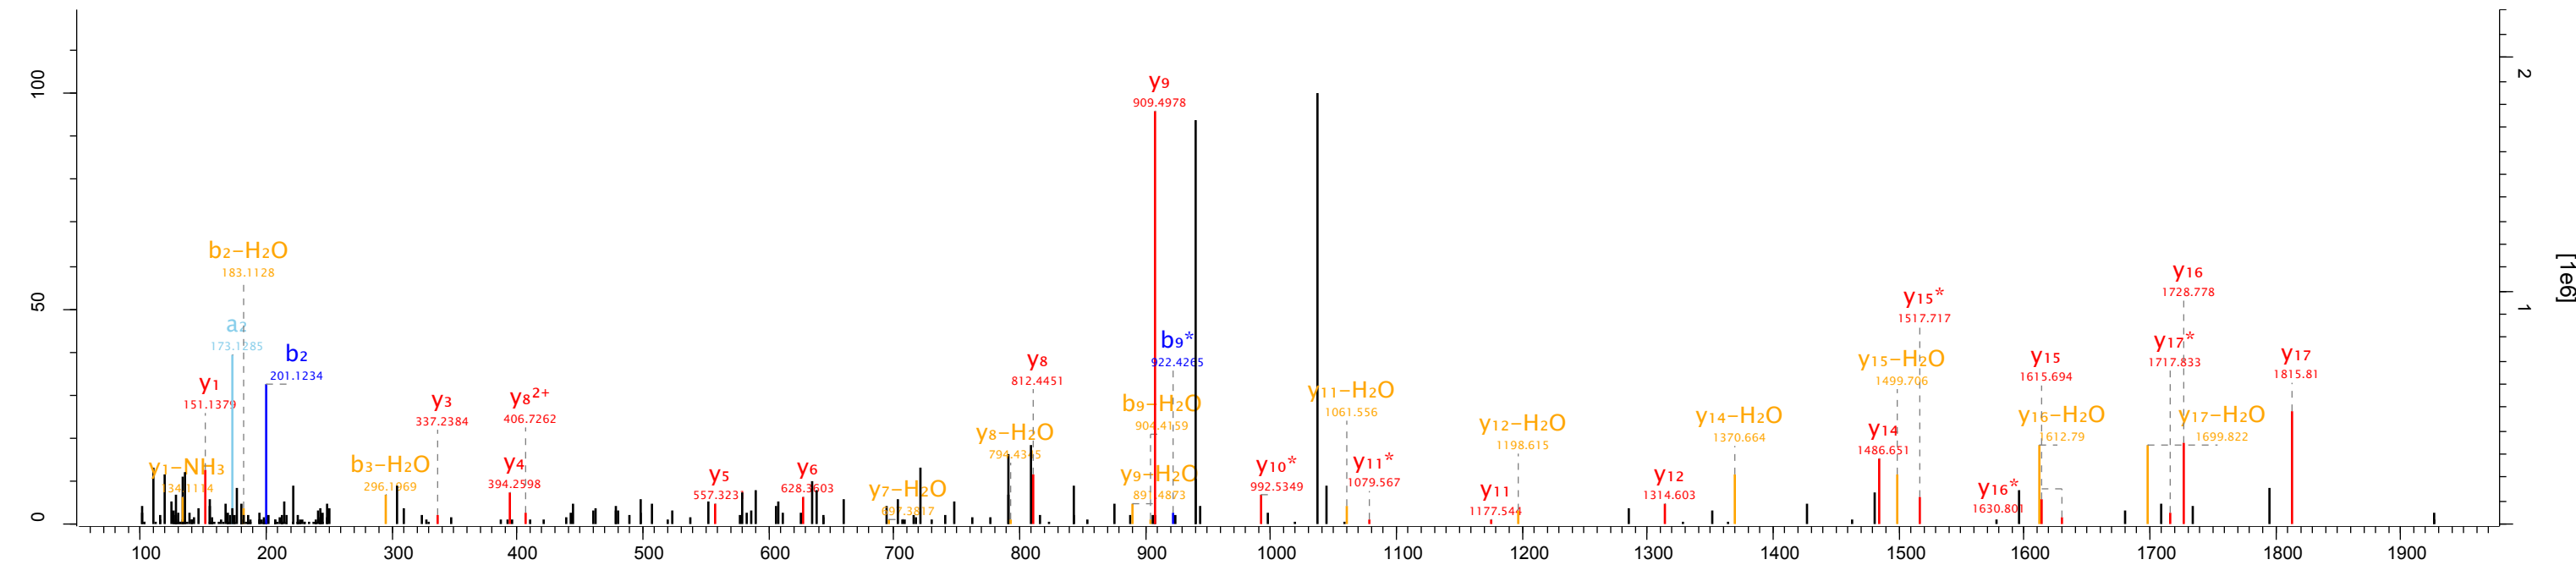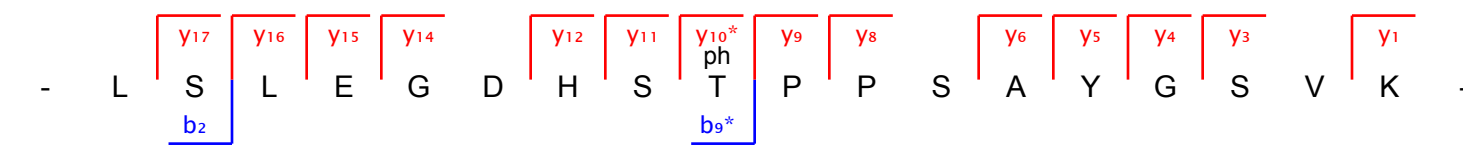

Raw file 20150812\_A375SR\_Phospho\_BR1\_10 Scan 15890 Method FTMS; HCD Score 281.4 m/z 1205.83 Gene names RALY

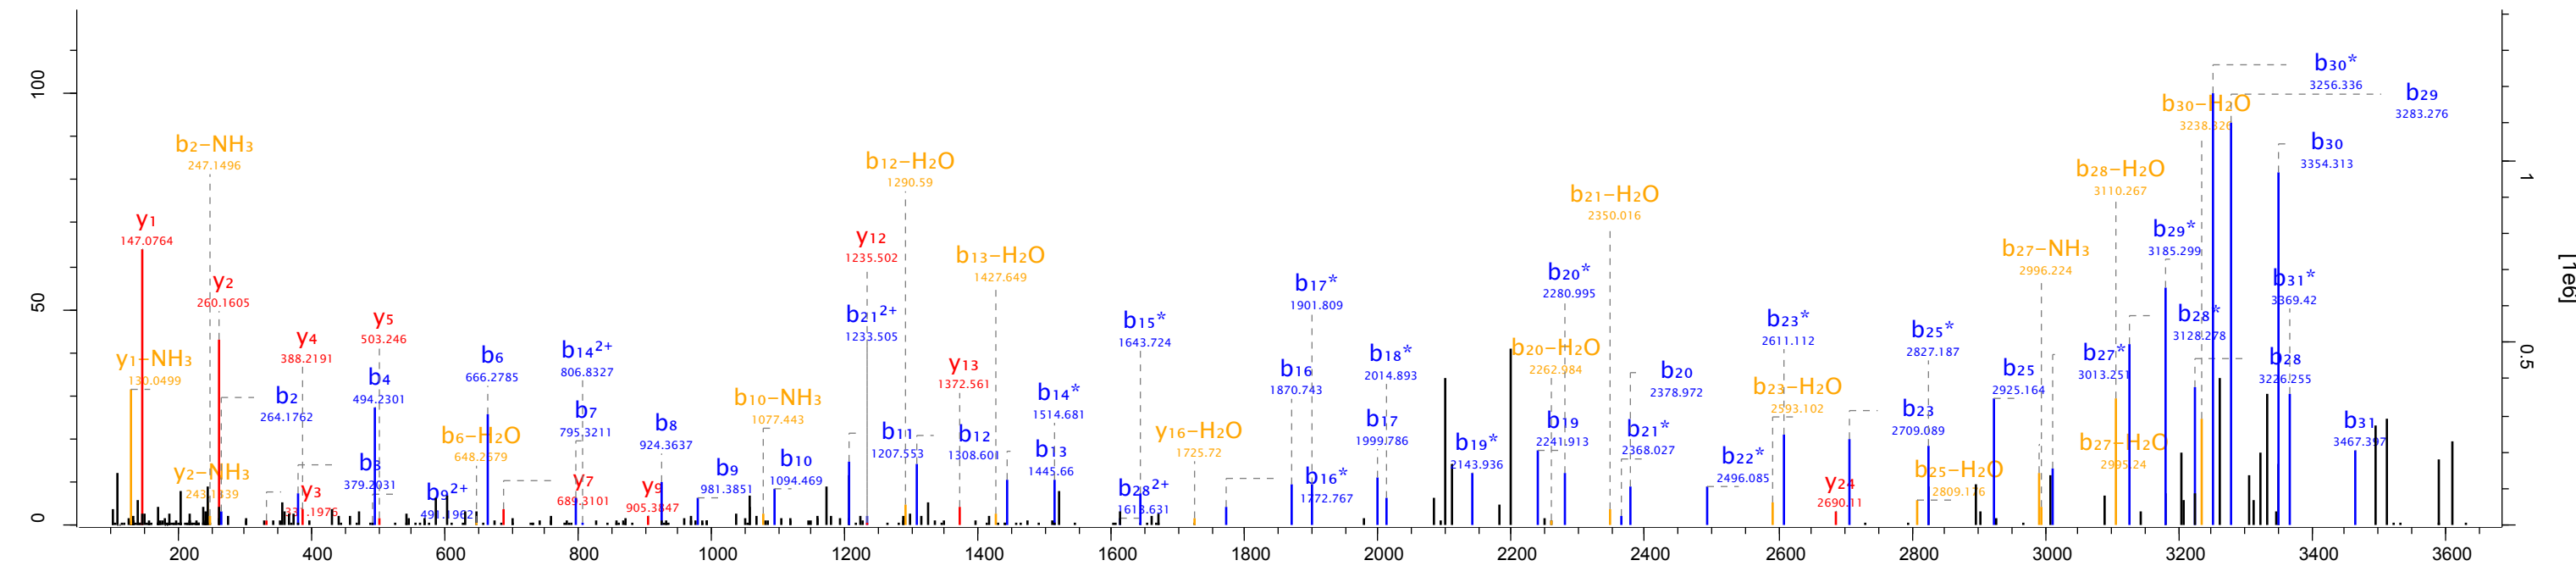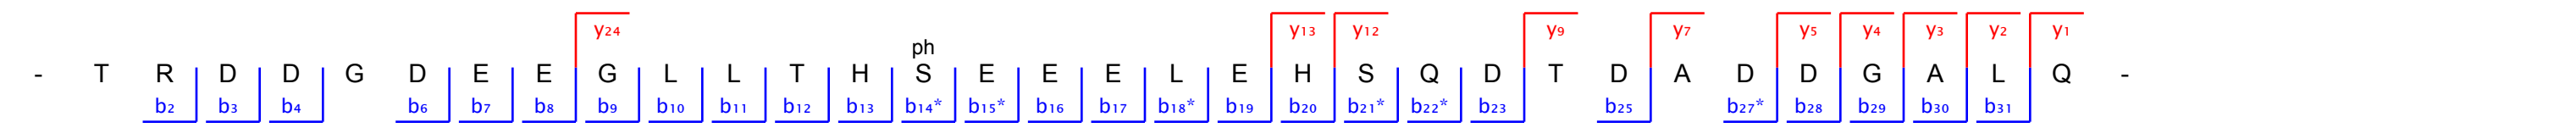

Raw file 20150812\_A375SR\_Phospho\_BR1\_10 Scan 17550 Method FTMS; HCD Score 105.37 m/z 909.43 Gene names TP53BP1

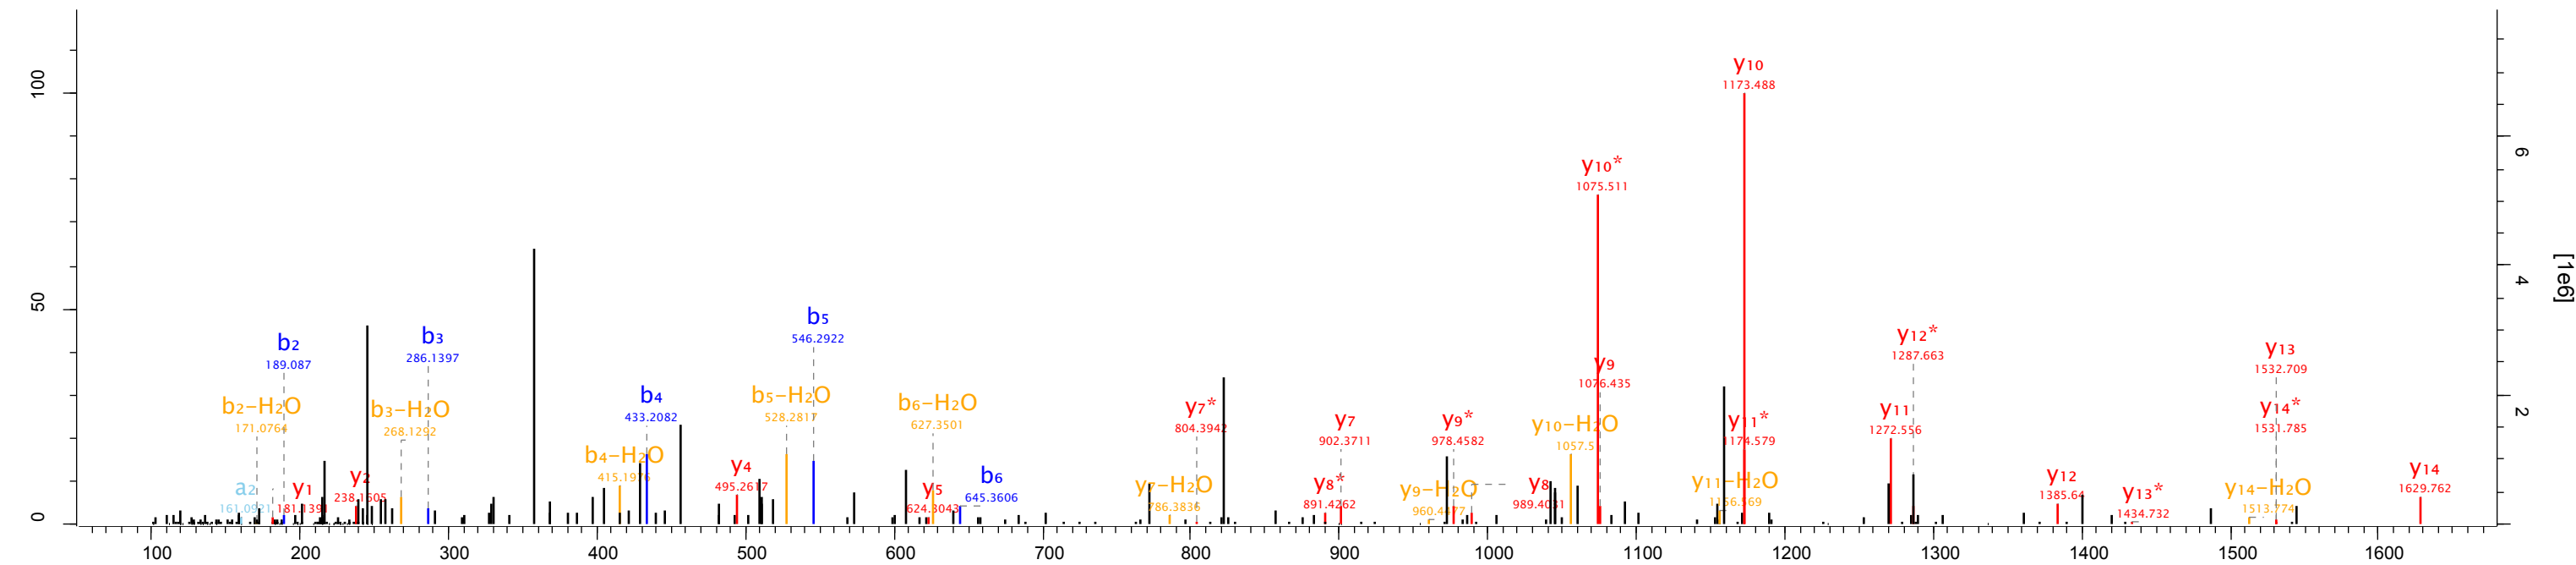

- S T P F I V P S S P ph T E Q E G R -

b<sub>2</sub>
y<sub>14</sub>
y<sub>13</sub>
y<sub>12</sub>
y<sub>11</sub>
y<sub>10</sub>
y<sub>9</sub>
y<sub>8</sub>
y<sub>7</sub>
y<sub>5</sub>
y<sub>4</sub>
y<sub>2</sub>
y<sub>1</sub>

Raw file 20150812\_A375SR\_Phospho\_BR1\_10 Scan 20840 Method FTMS; HCD Score 166.49 m/z 840.04 Gene names PRPF4B

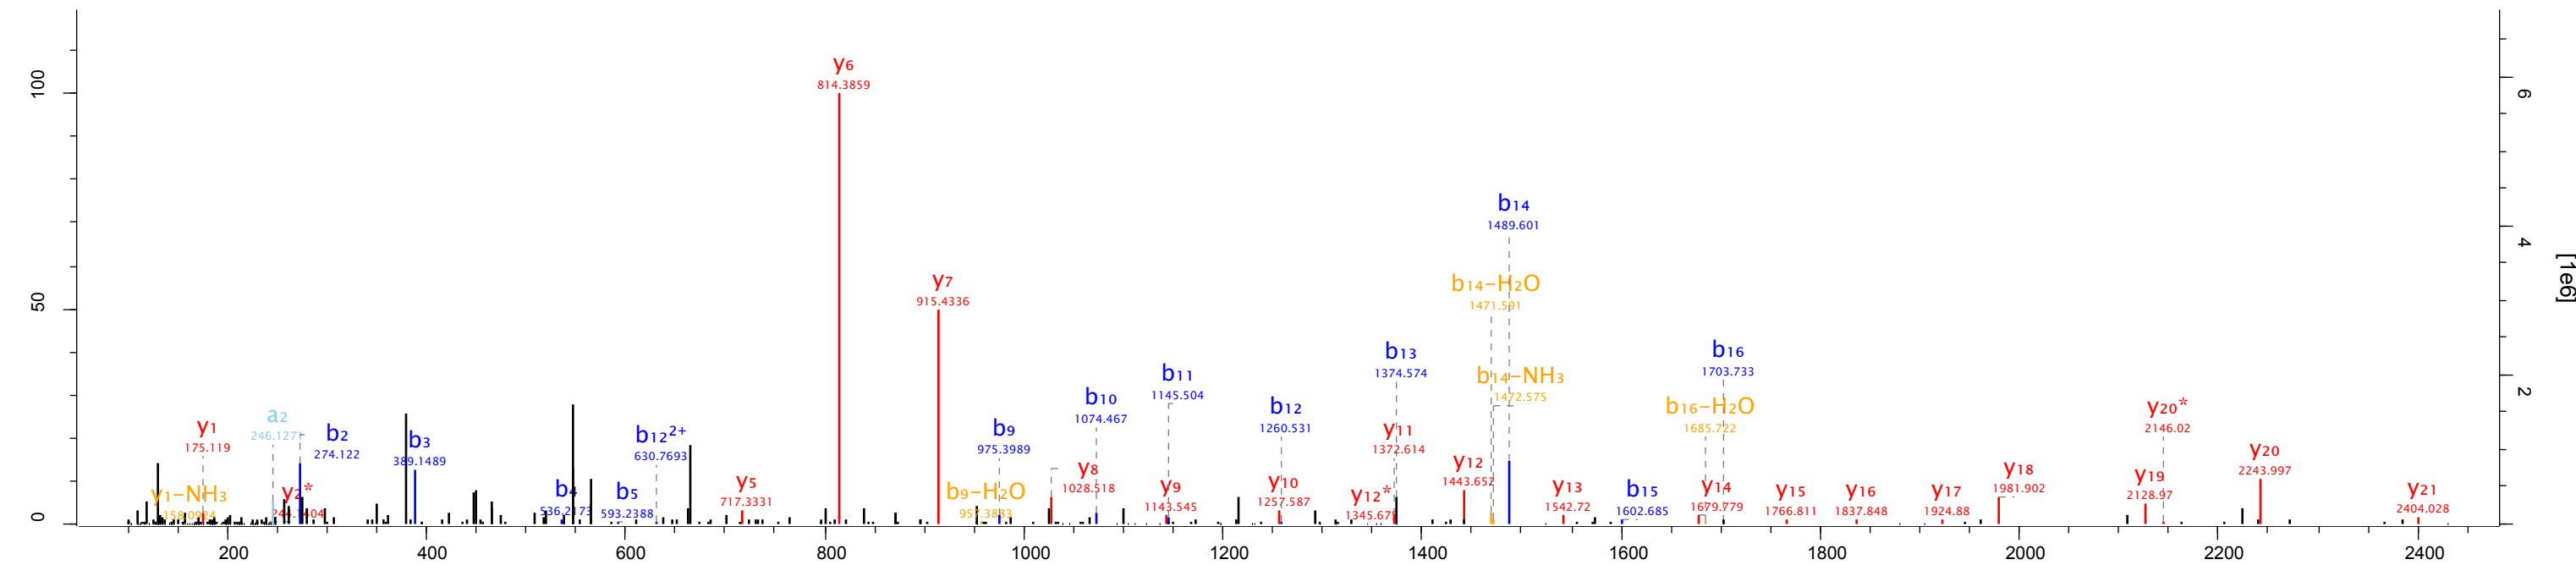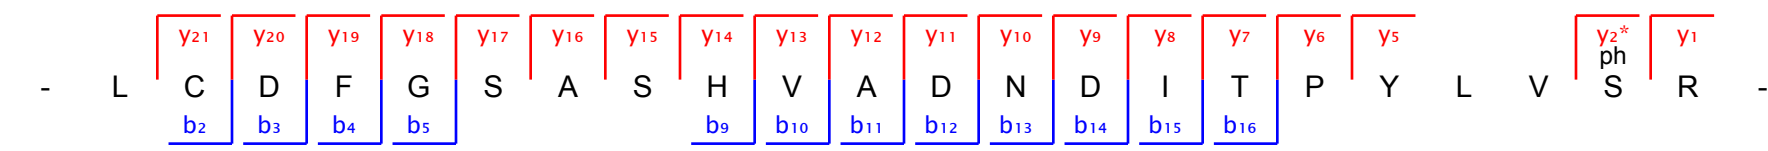

Raw file: 20150812\_A375SR\_Phospho\_BR1\_10  
 Scan: 21940 Method: FTMS; HCD Score: 77.51 m/z: 806.39 Gene names: GIT1

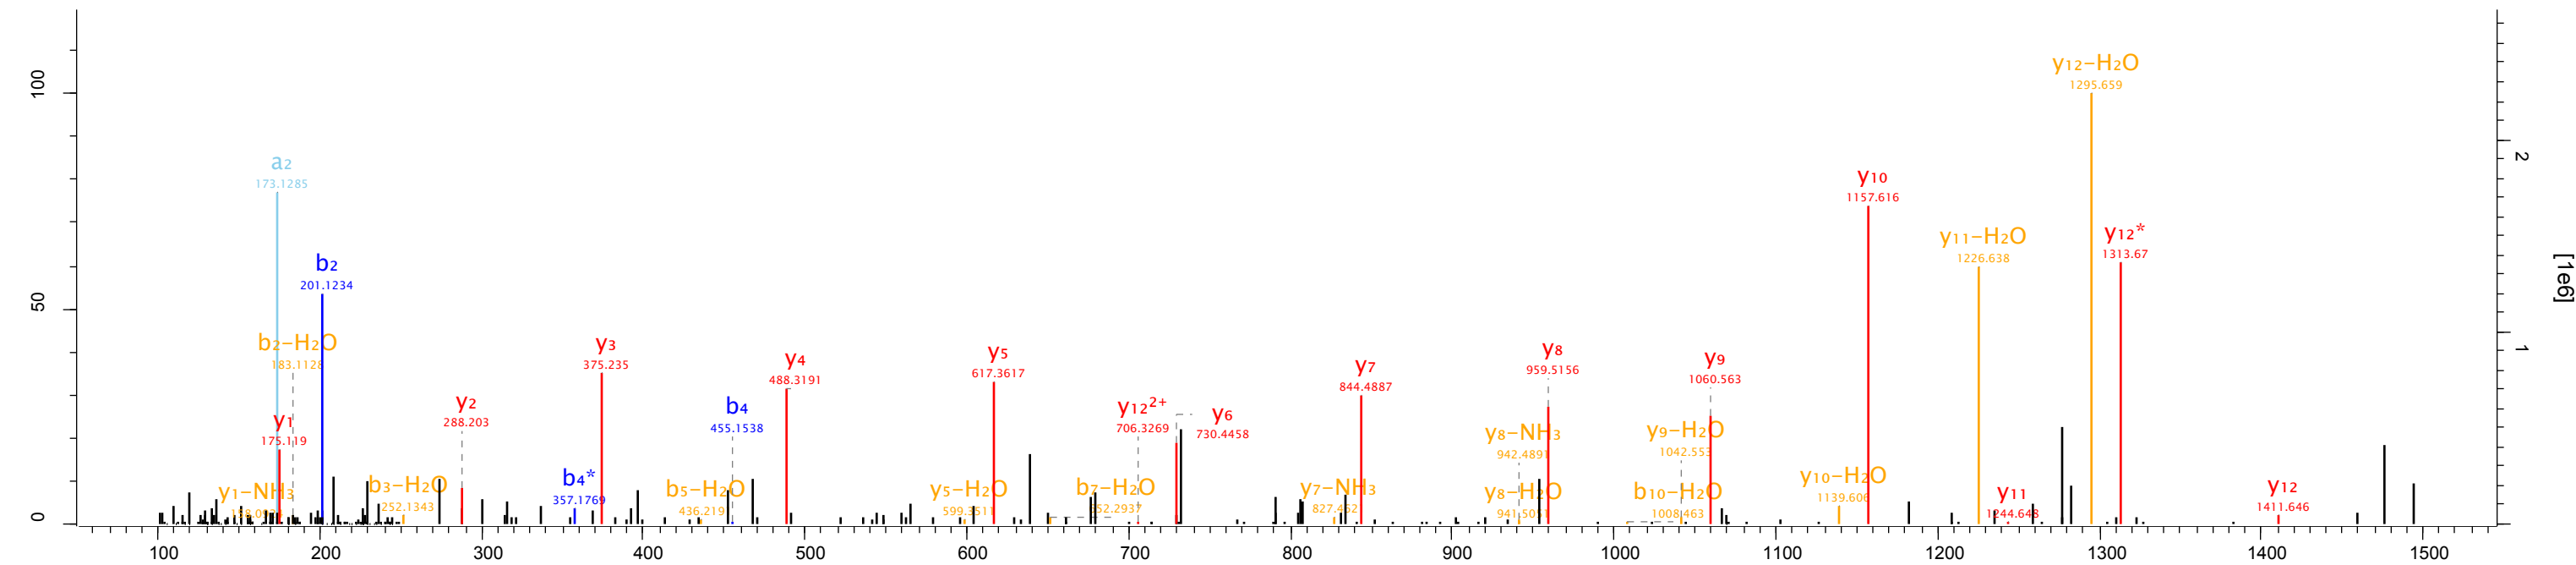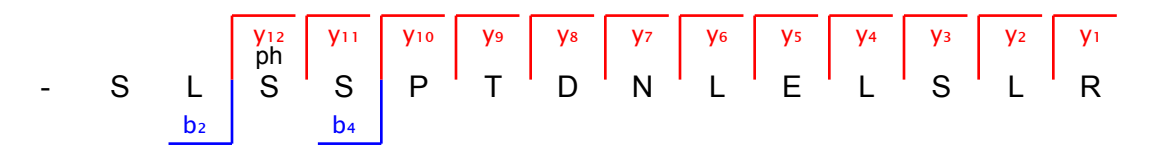

Raw file Scan Method Score m/z Gene names  
 20150812\_A375SR\_Phospho\_BR1\_10 24160 FTMS; HCD 293.33 968.92 MAPK11P1L

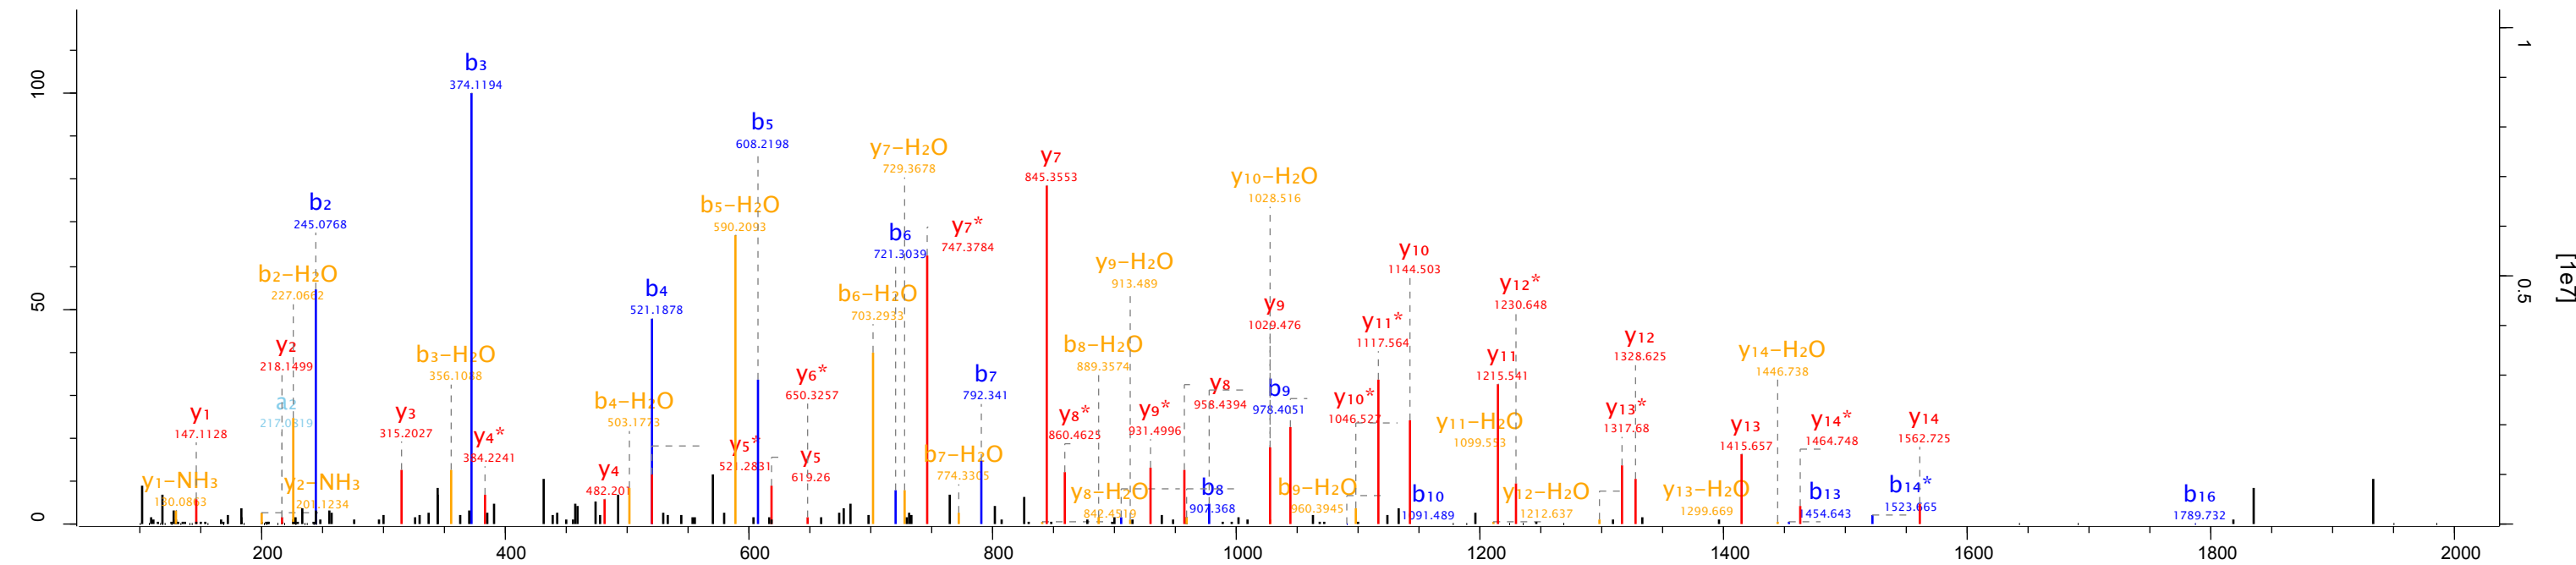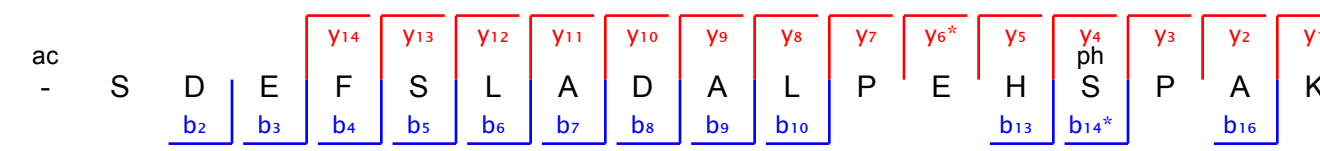



Raw file: 20150812\_A375SR\_Phospho\_BR1\_10  
 Scan: 4630 Method: FTMS; HCD Score: 181.51 m/z: 655.33 Gene names: RBM15

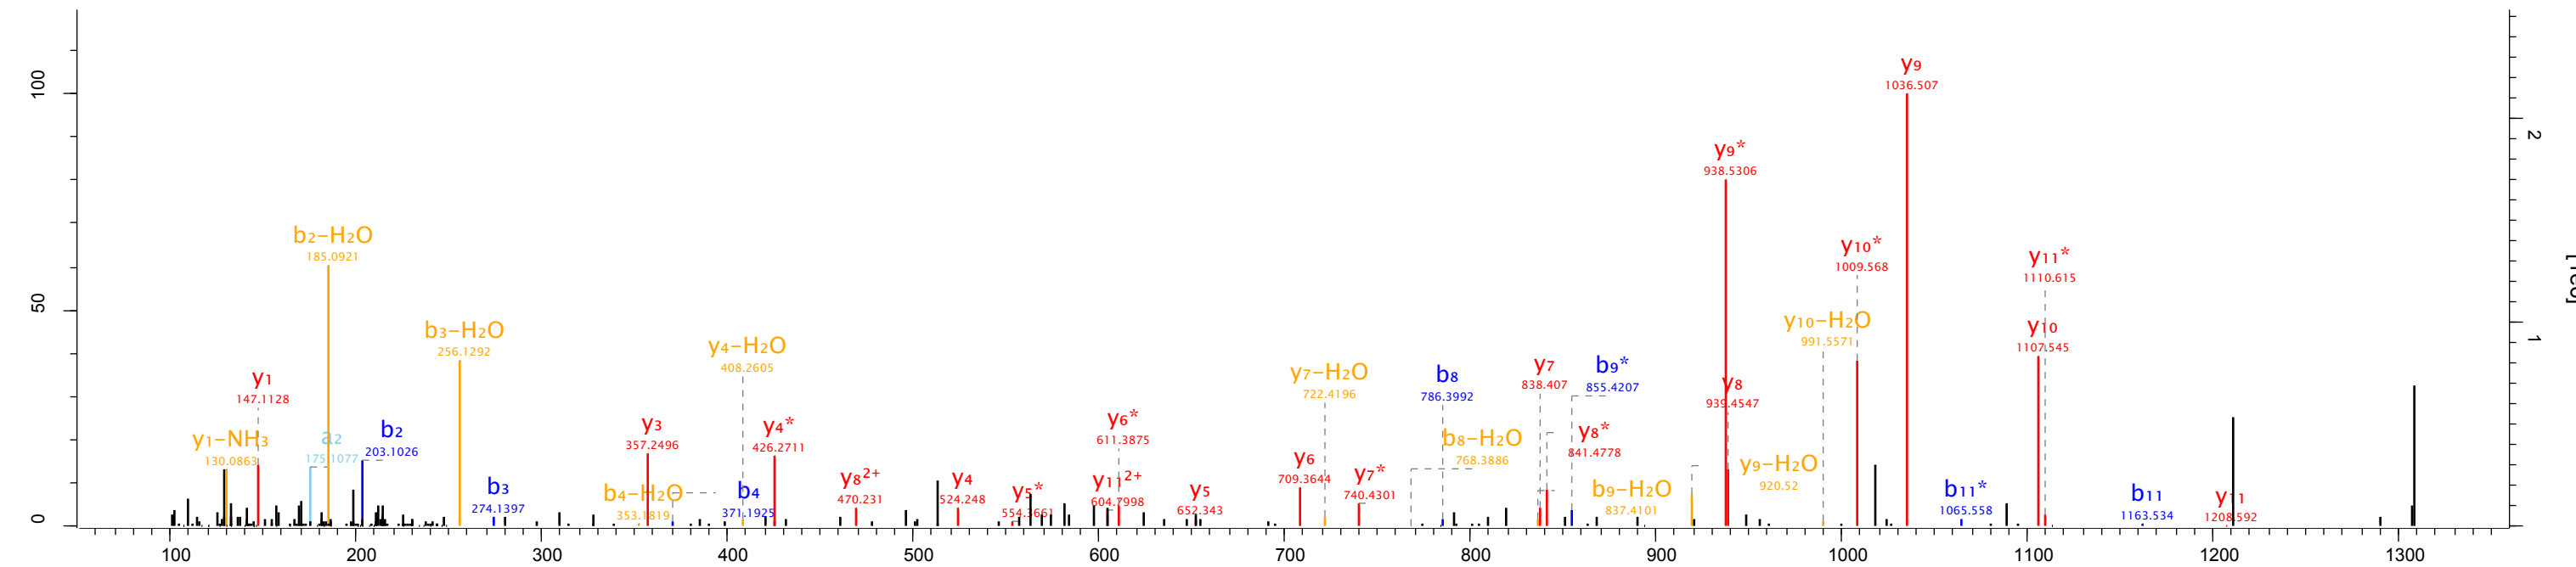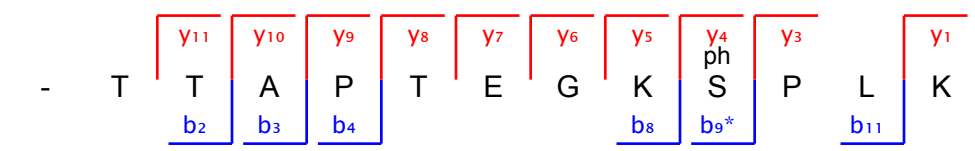

20150812\_A375SR\_Phospho\_BR1\_10 5740 FTMS; HCD 62.68 430.22 ATXN2

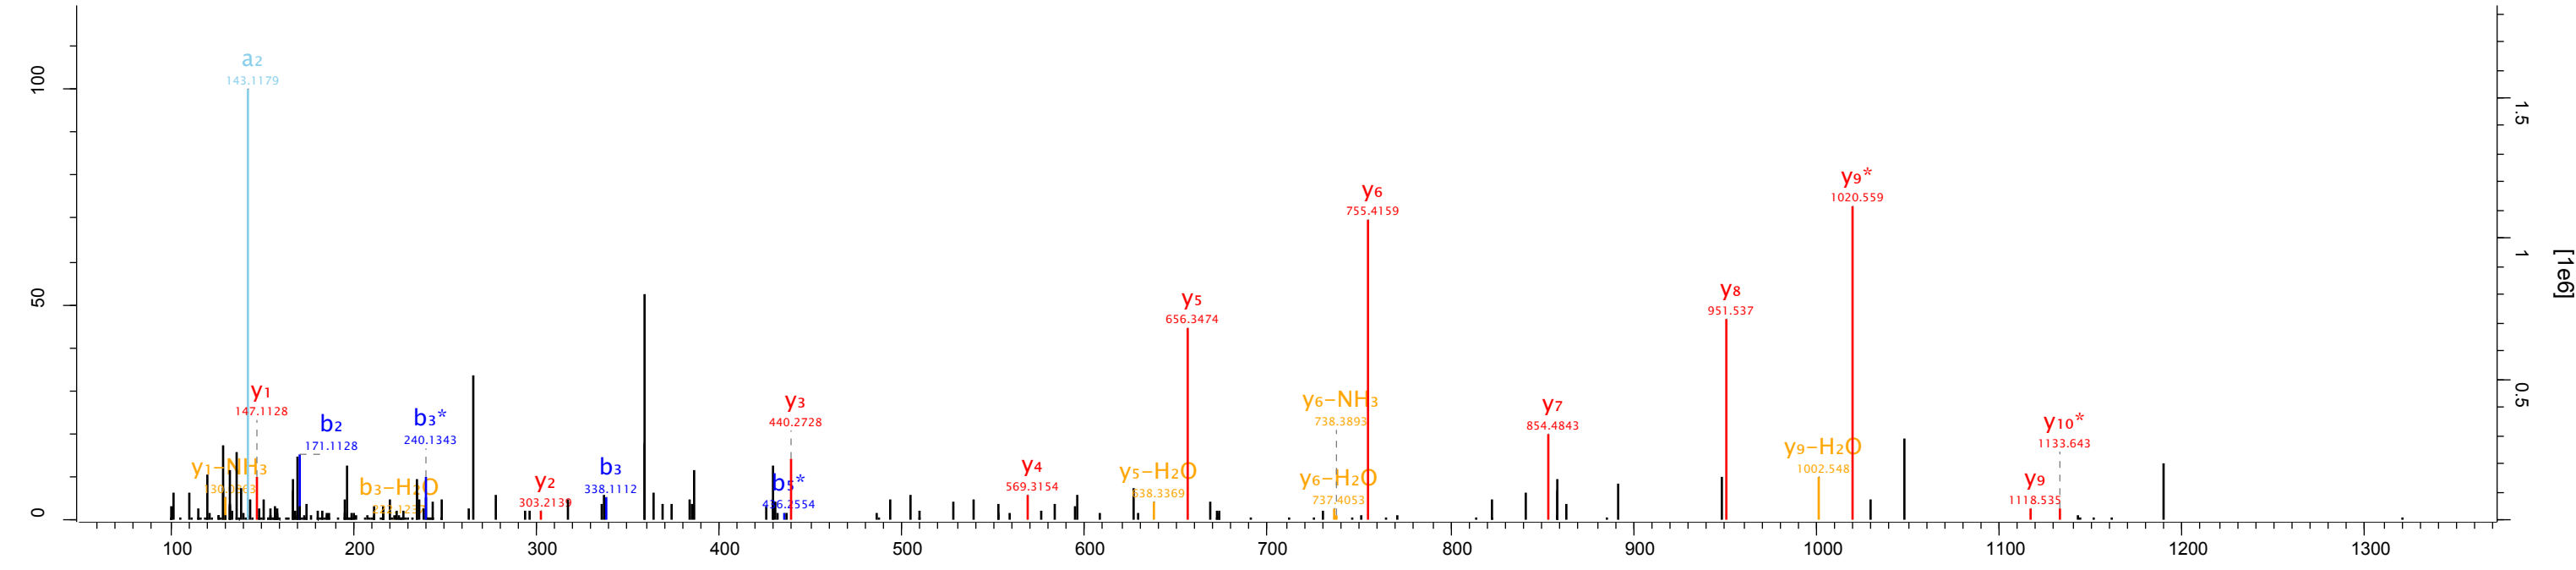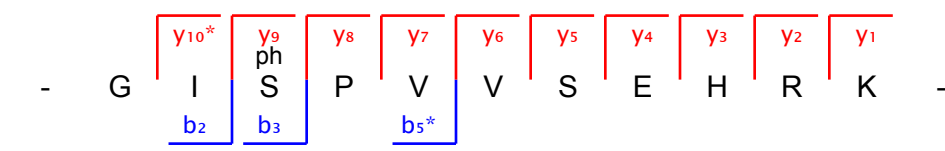

Raw file: 20150812\_A375SR\_Phospho\_BR1\_10  
 Scan: 9460 Method: FTMS; HCD Score: 152.32 m/z: 716.85 Gene names: GGCT

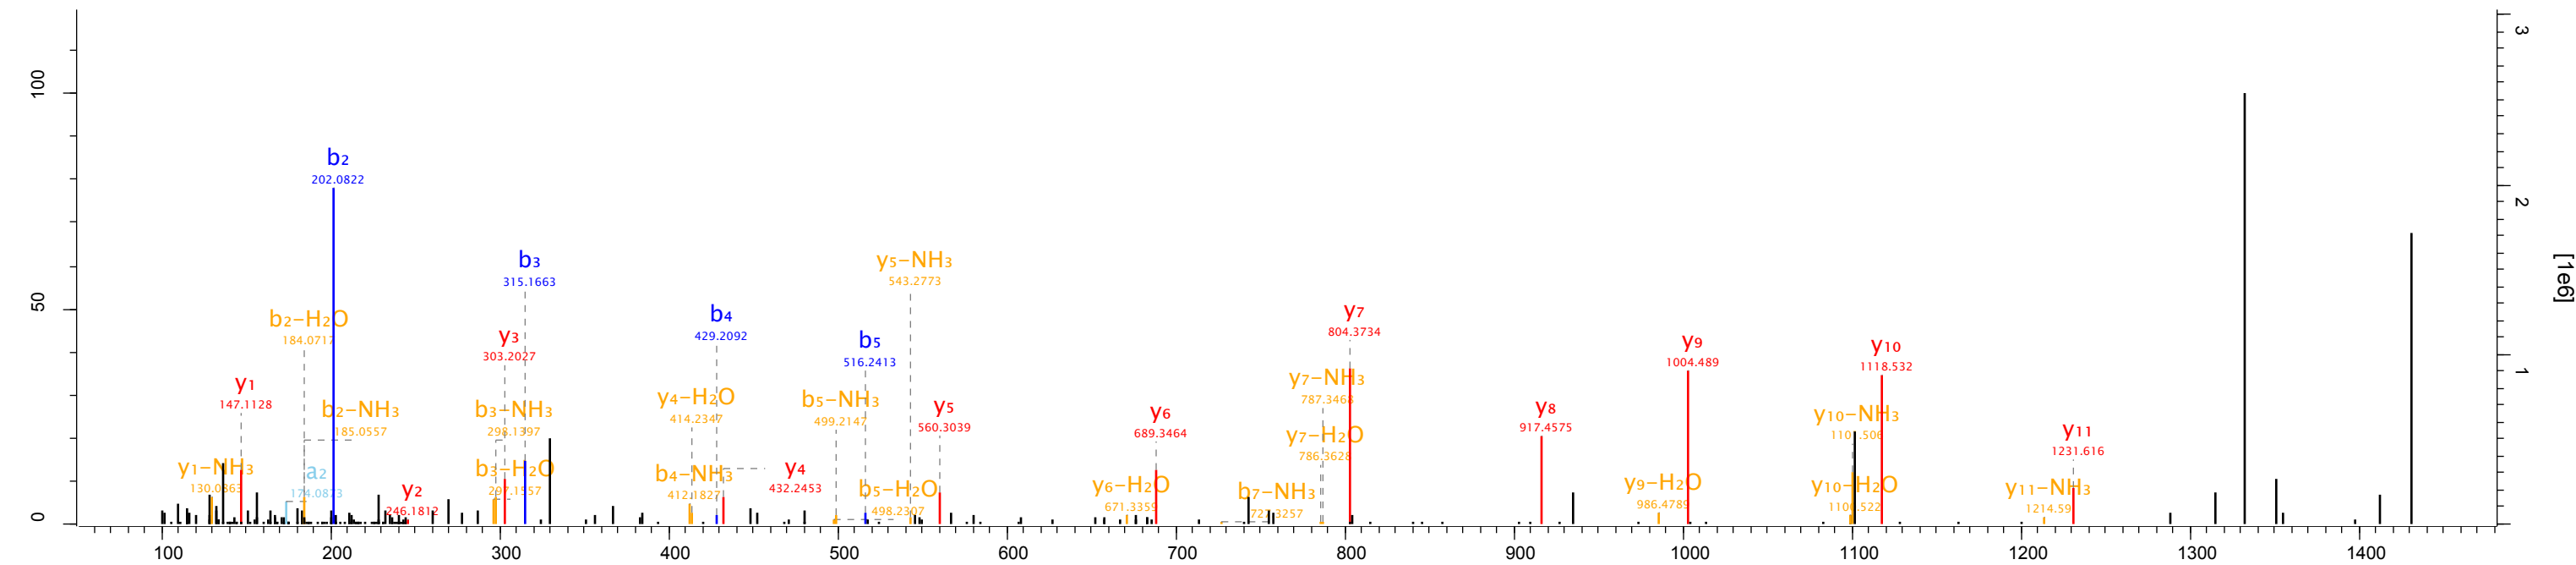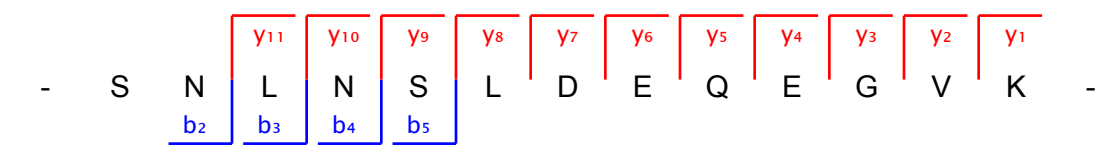

Raw file 20150812\_A375SR\_Phospho\_BR1\_01 Scan 12031 Method FTMS; HCD Score 42.64 m/z 812.84 Gene names PI4KA

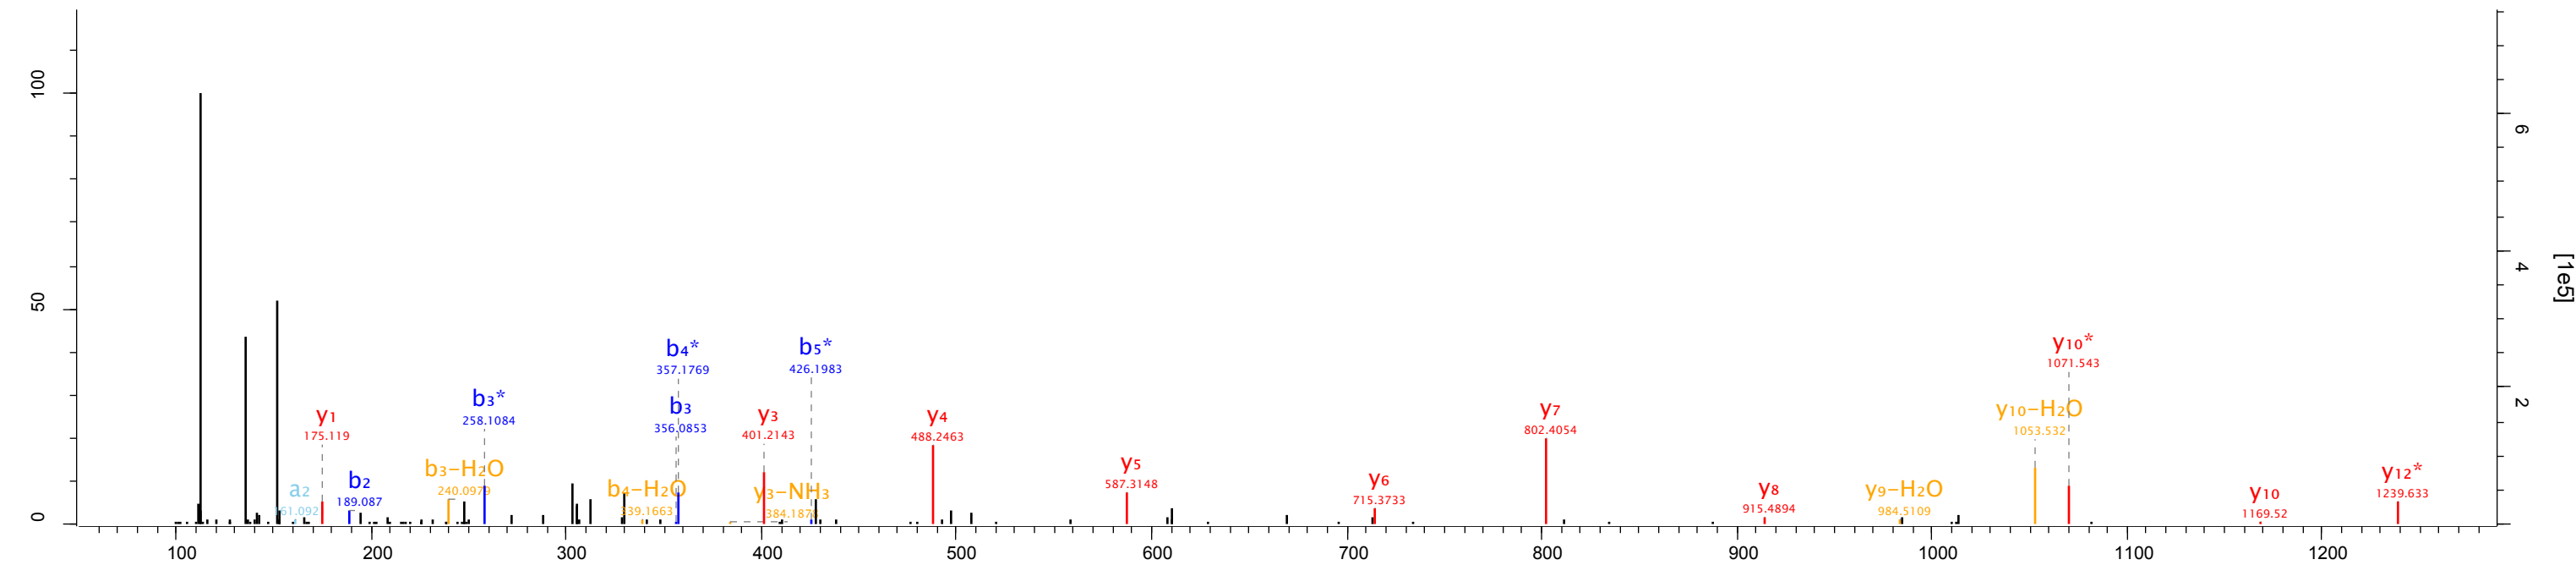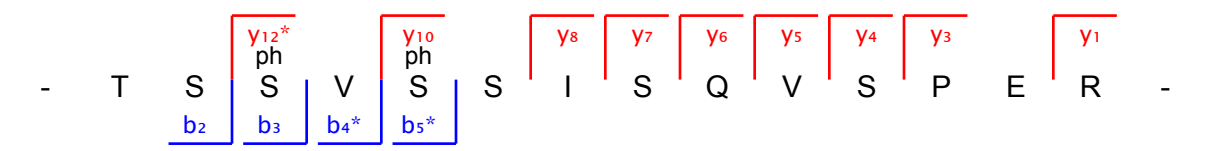

Raw file: 20150812\_A375SR\_Phospho\_BR1\_01  
 Scan: 15351 Method: FTMS; HCD Score: 69.02 m/z: 1144.83 Gene names: PRRC2C

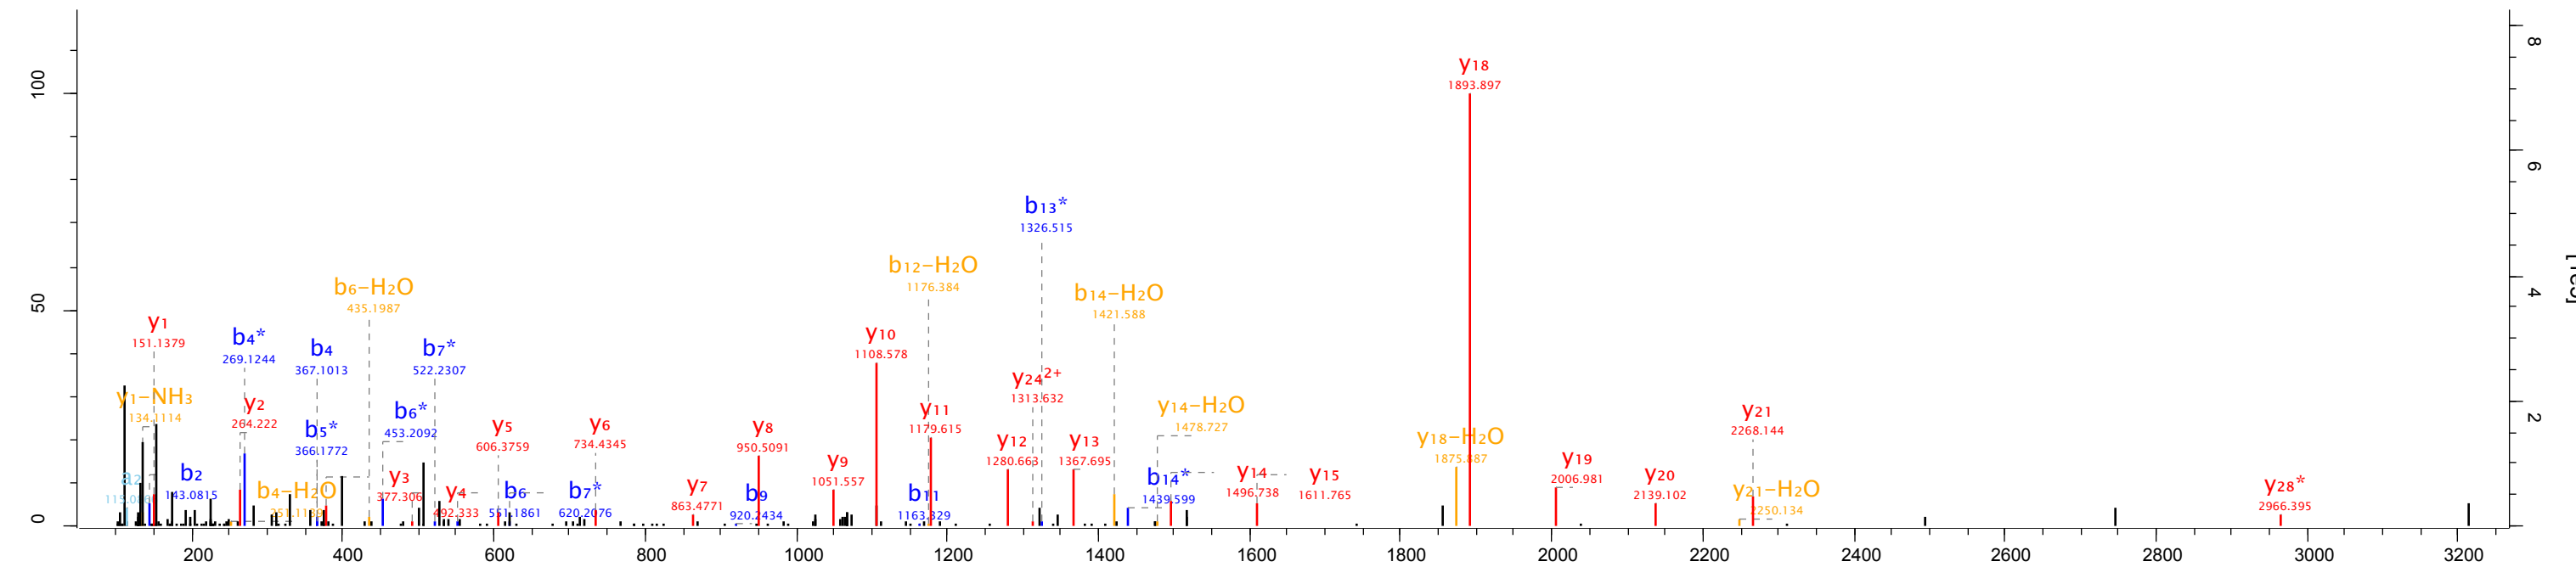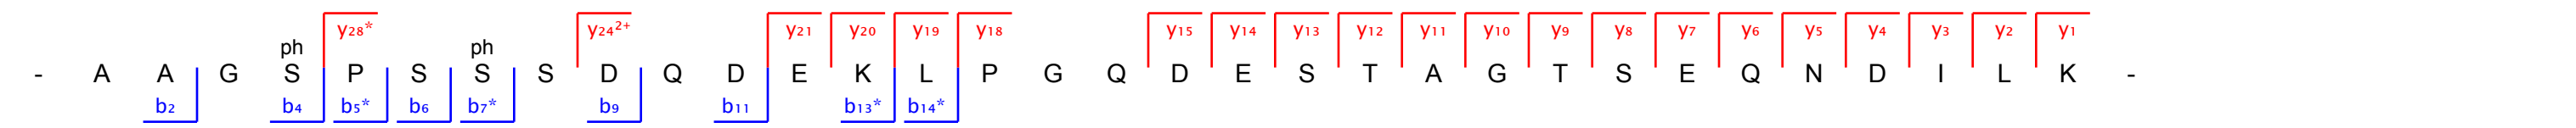

Raw file: 20150812\_A375SR\_Phospho\_BR1\_01  
 Scan: 3391 Method: FTMS; HCD Score: 71.93 m/z: 749.64 Gene names: SRRM2

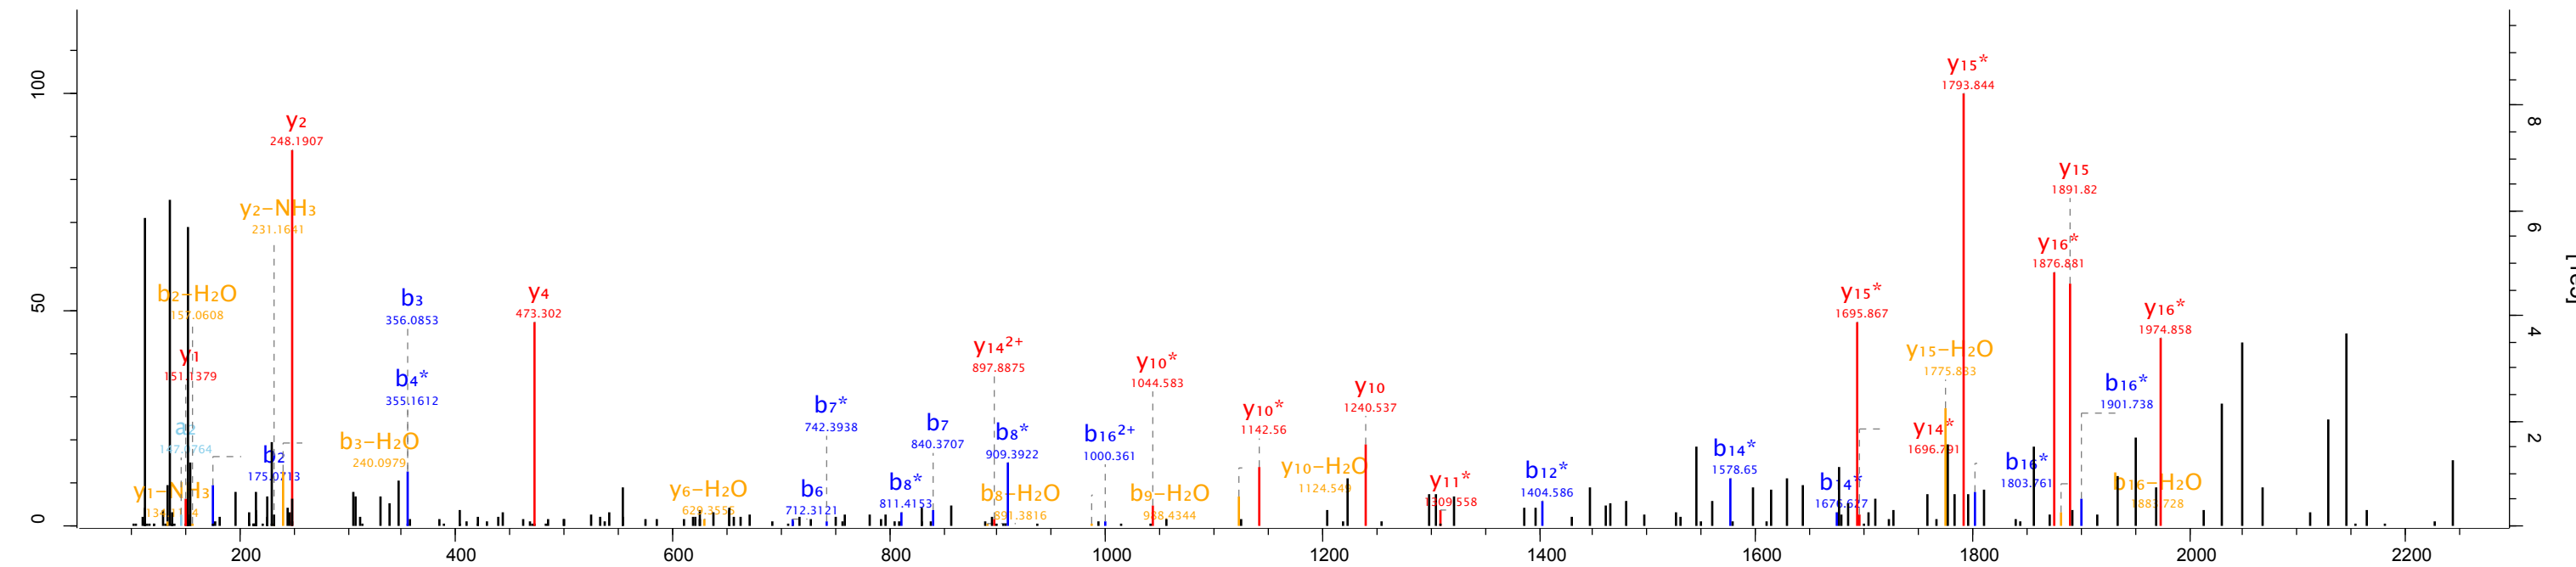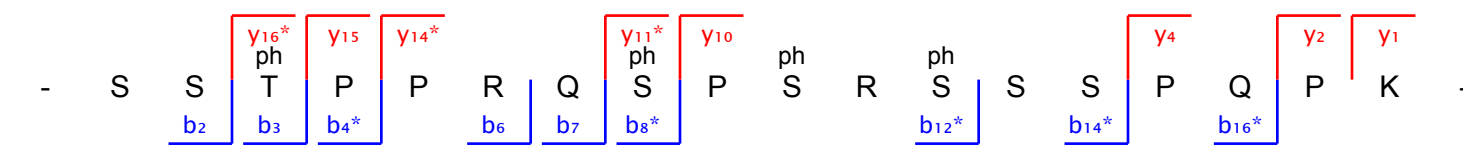

Raw file 20150812\_A375SR\_Phospho\_BR1\_01 Scan 5271 Method FTMS; HCD Score 54.07 m/z 891.81 Gene names CLIP2

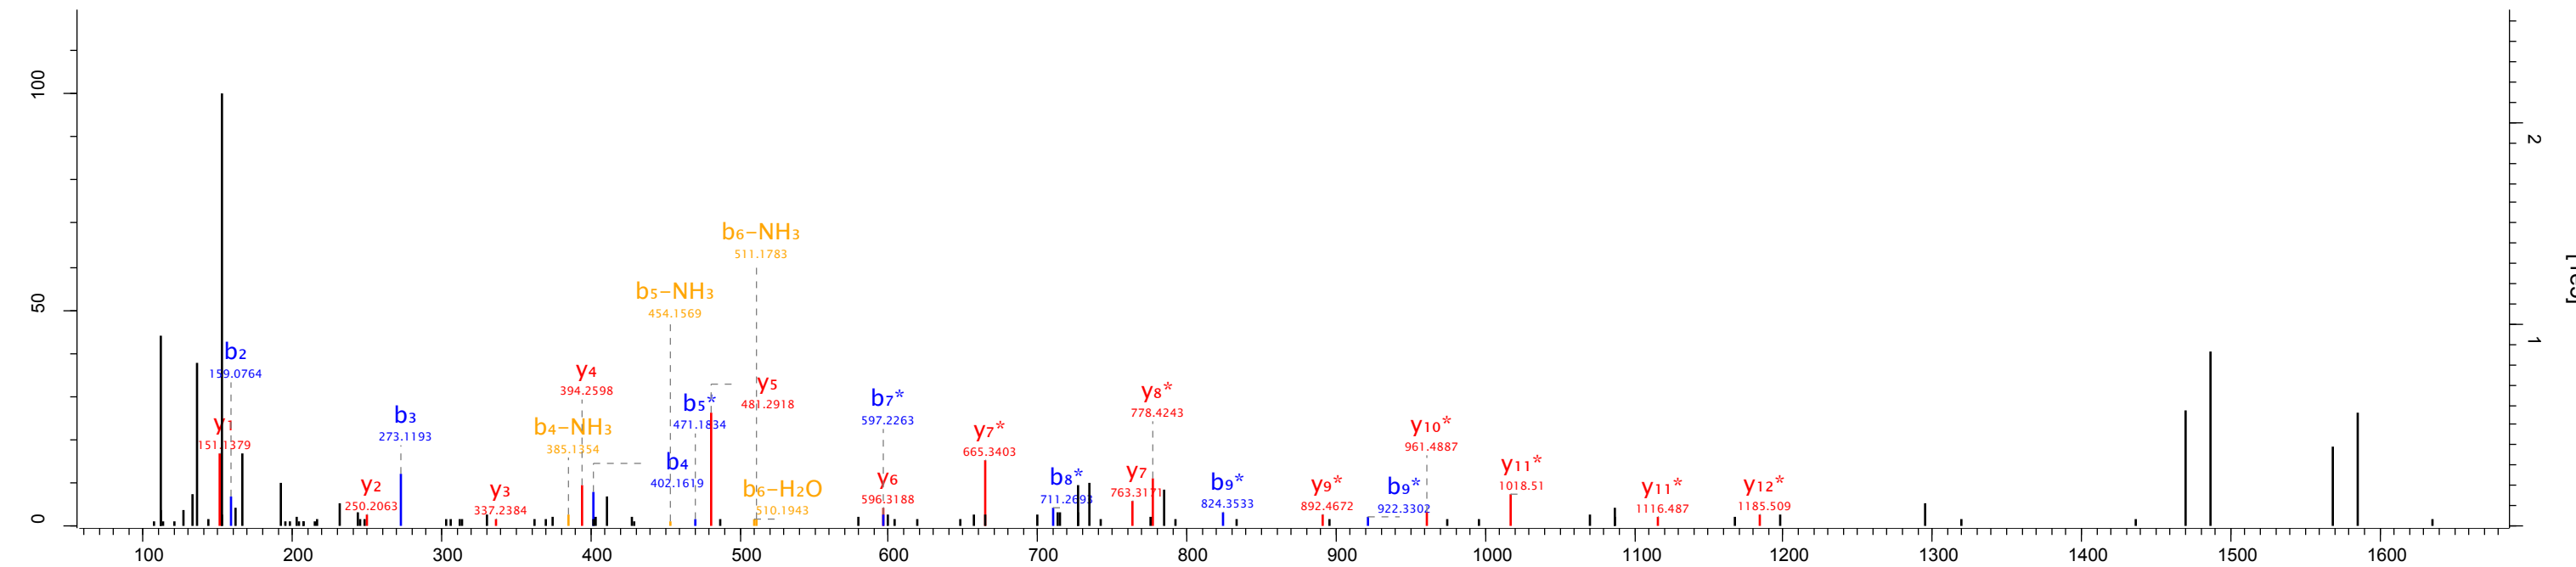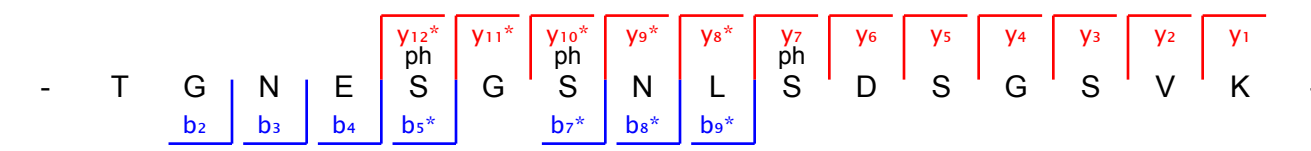

Raw file: 20150812\_A375SR\_Phospho\_BR1\_01  
 Scan: 6581 Method: FTMS; HCD Score: 71.3 m/z: 699.27 Gene names: SRRM2

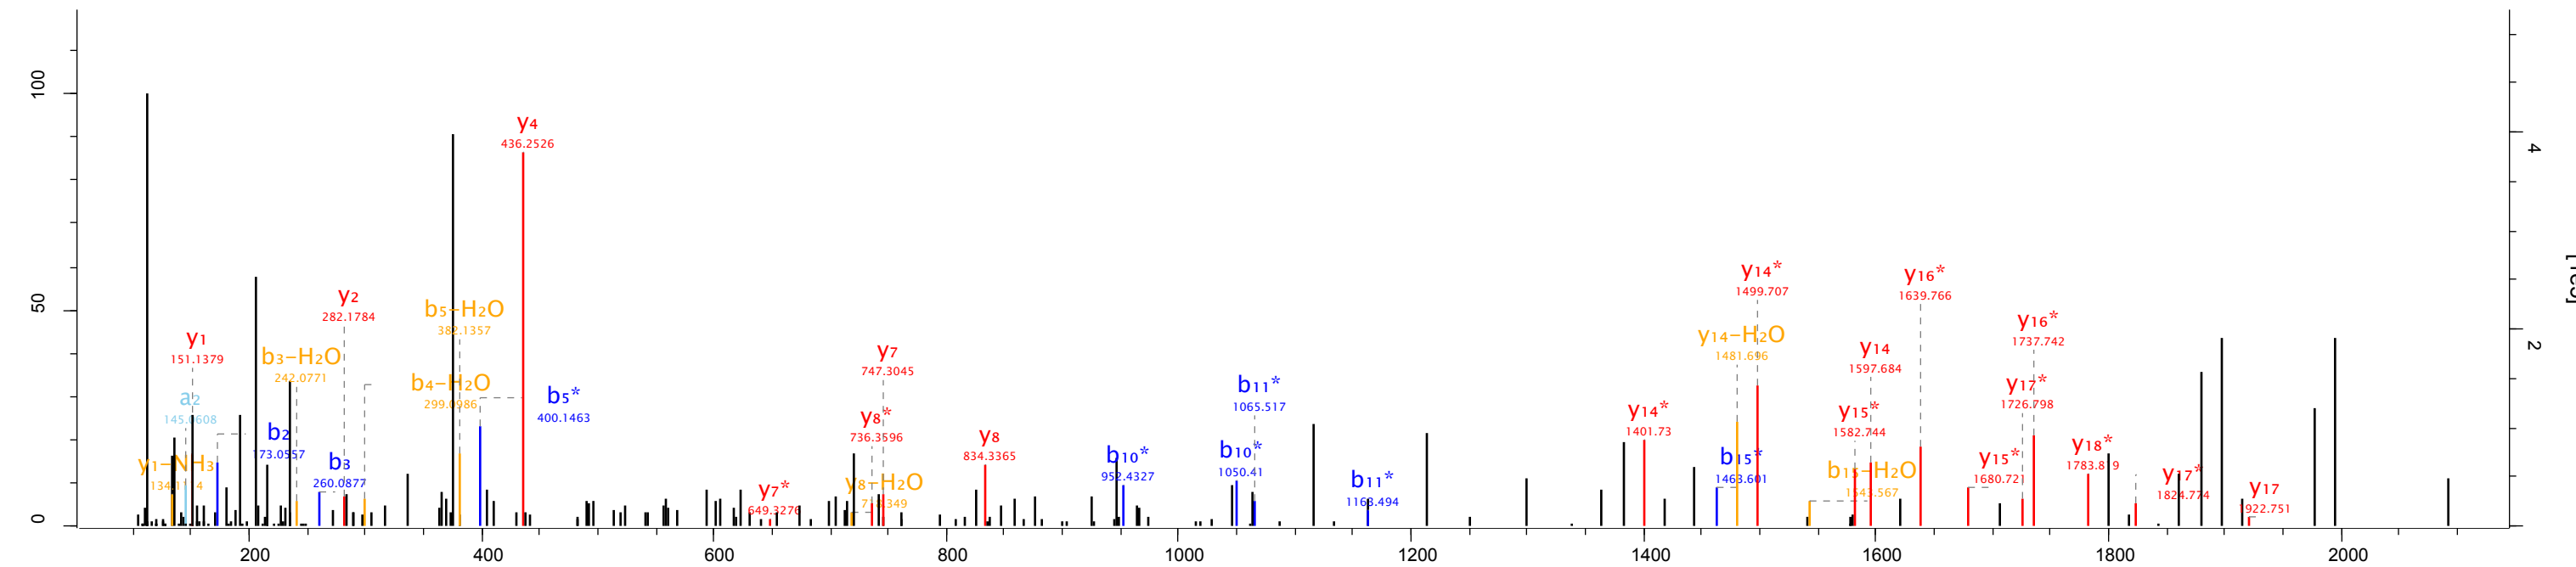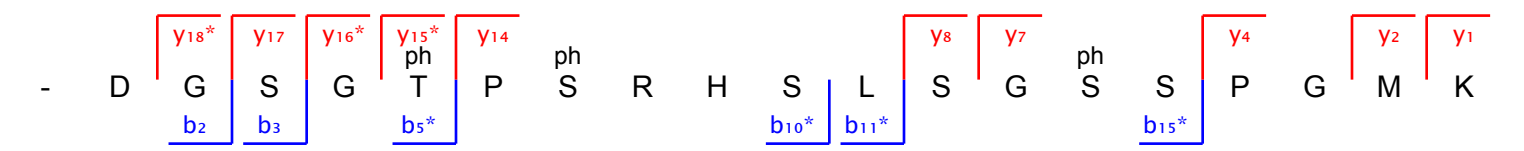



Raw file 20150812\_A375SR\_Phospho\_BR1\_01 Scan 7411 Method FTMS; HCD Score 54 m/z 1307.05 Gene names UBAP2L

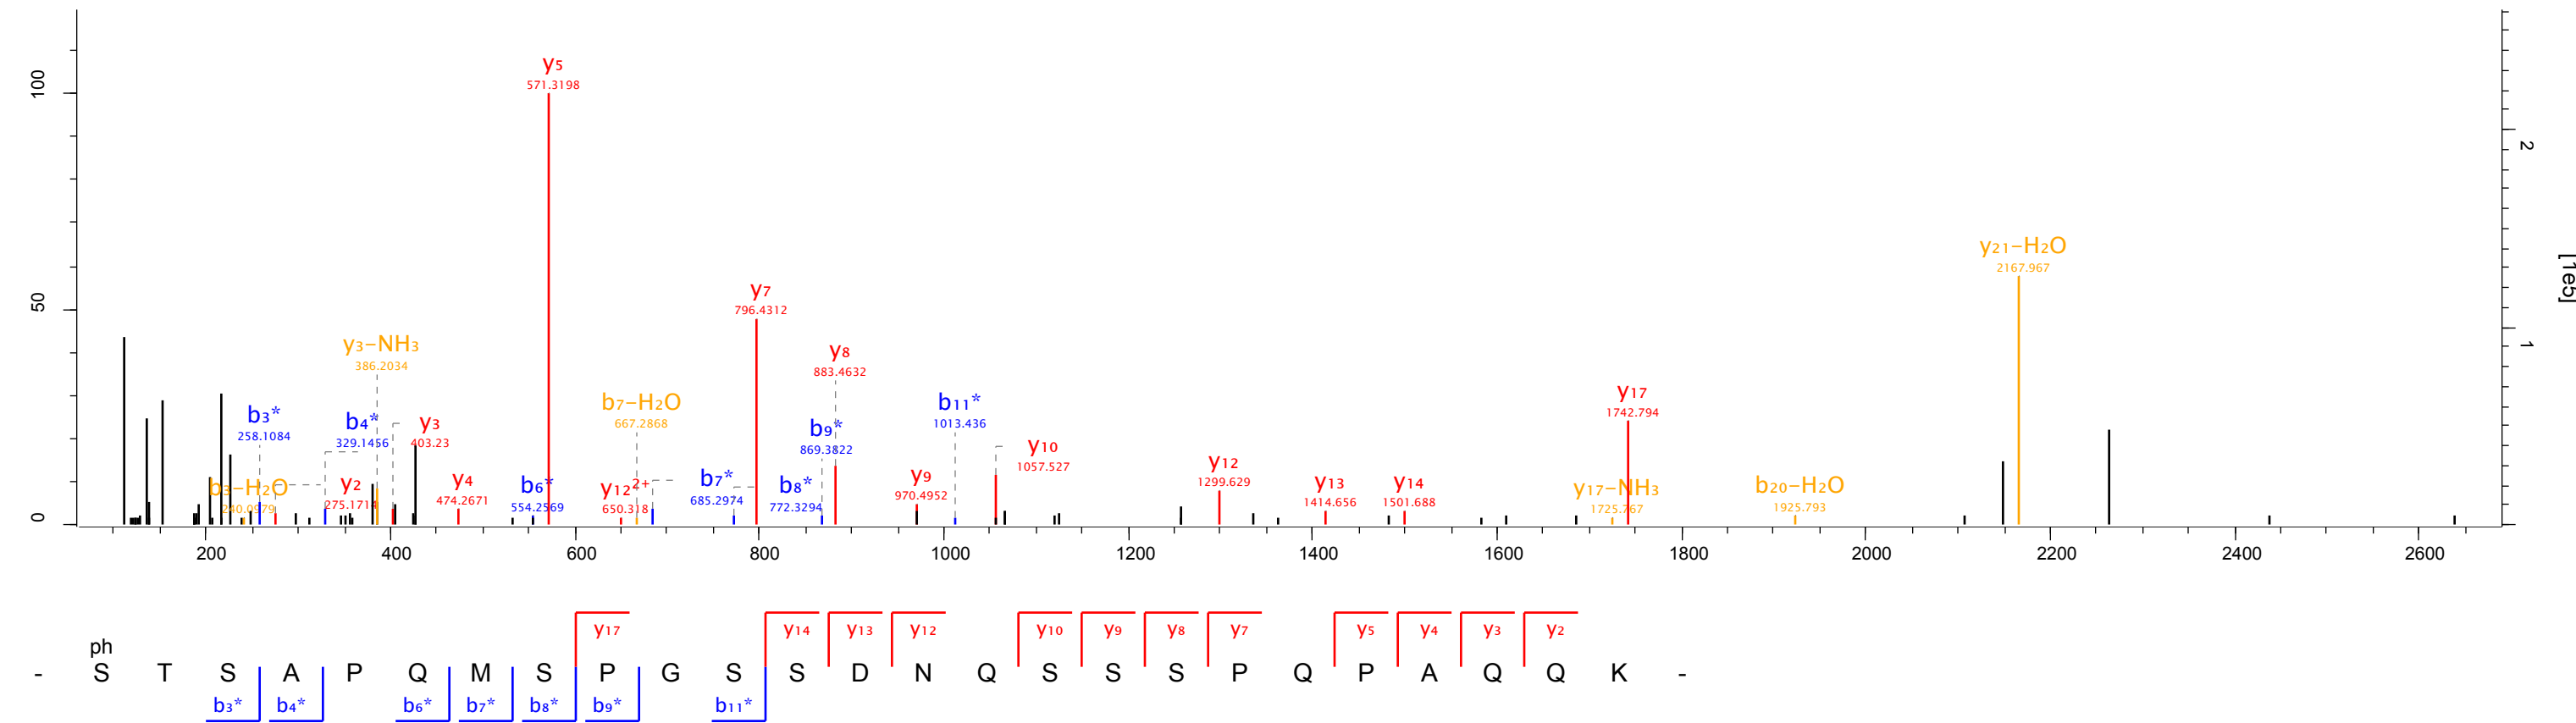

Raw file: 20150812\_A375SR\_Phospho\_BR1\_01  
 Scan: 7761 Method: FTMS; HCD Score: 74.52 m/z: 1144.88 Gene names: CLSPN

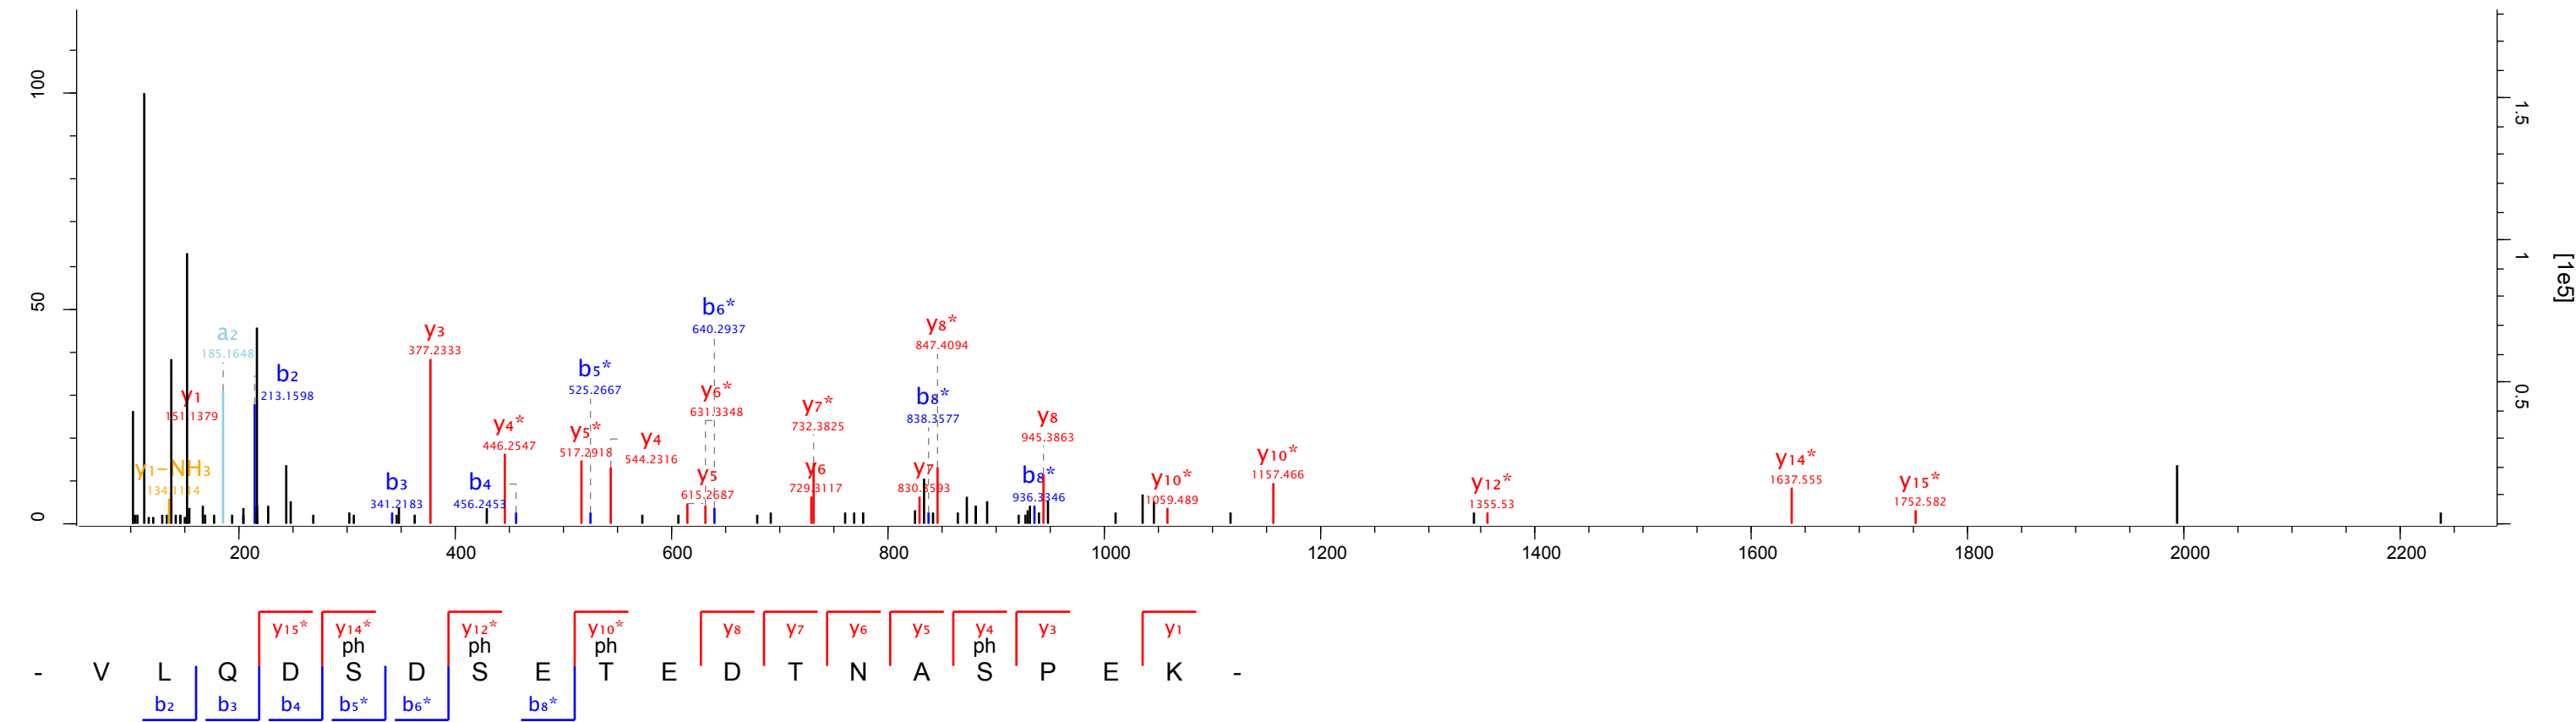

Raw file: 20150812\_A375SR\_Phospho\_BR1\_01  
 Scan: 8521 Method: FTMS; HCD Score: 160.03 m/z: 726.76 Gene names: IWS1

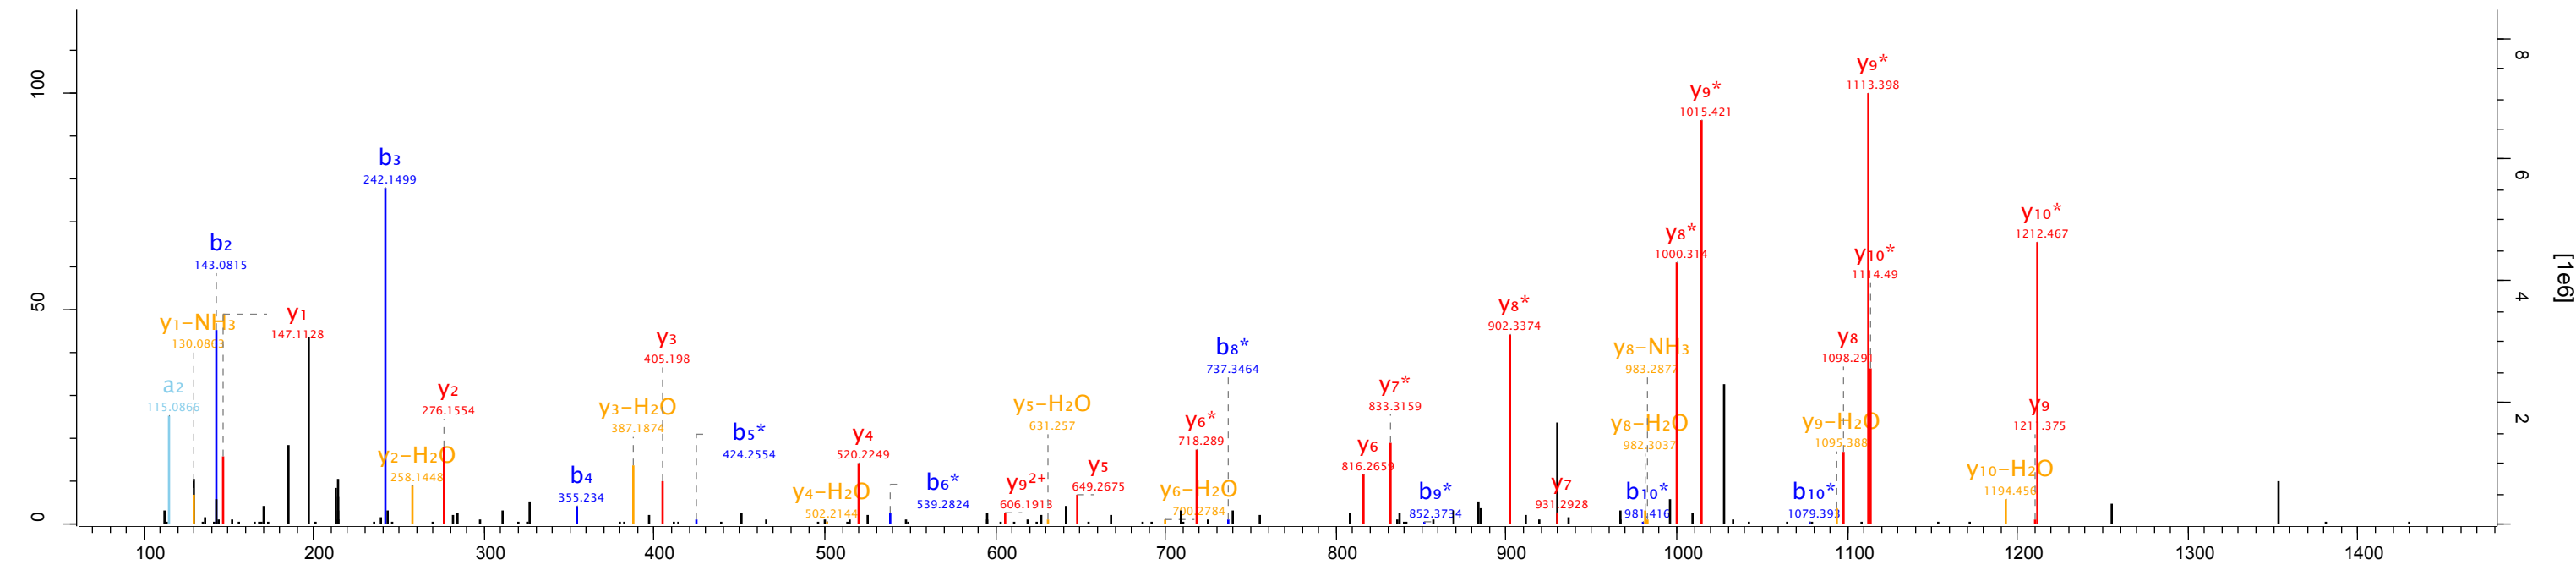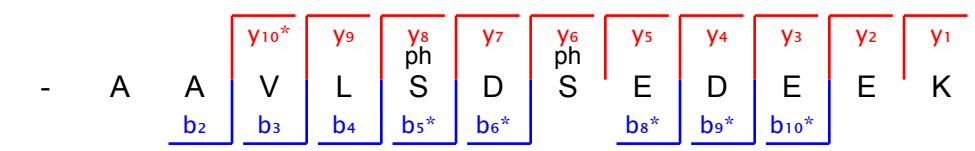

Raw file 20150812\_A375SR\_Phospho\_BR1\_02 Scan 10271 Method FTMS; HCD Score 109.79 m/z 670.27 Gene names CDK12

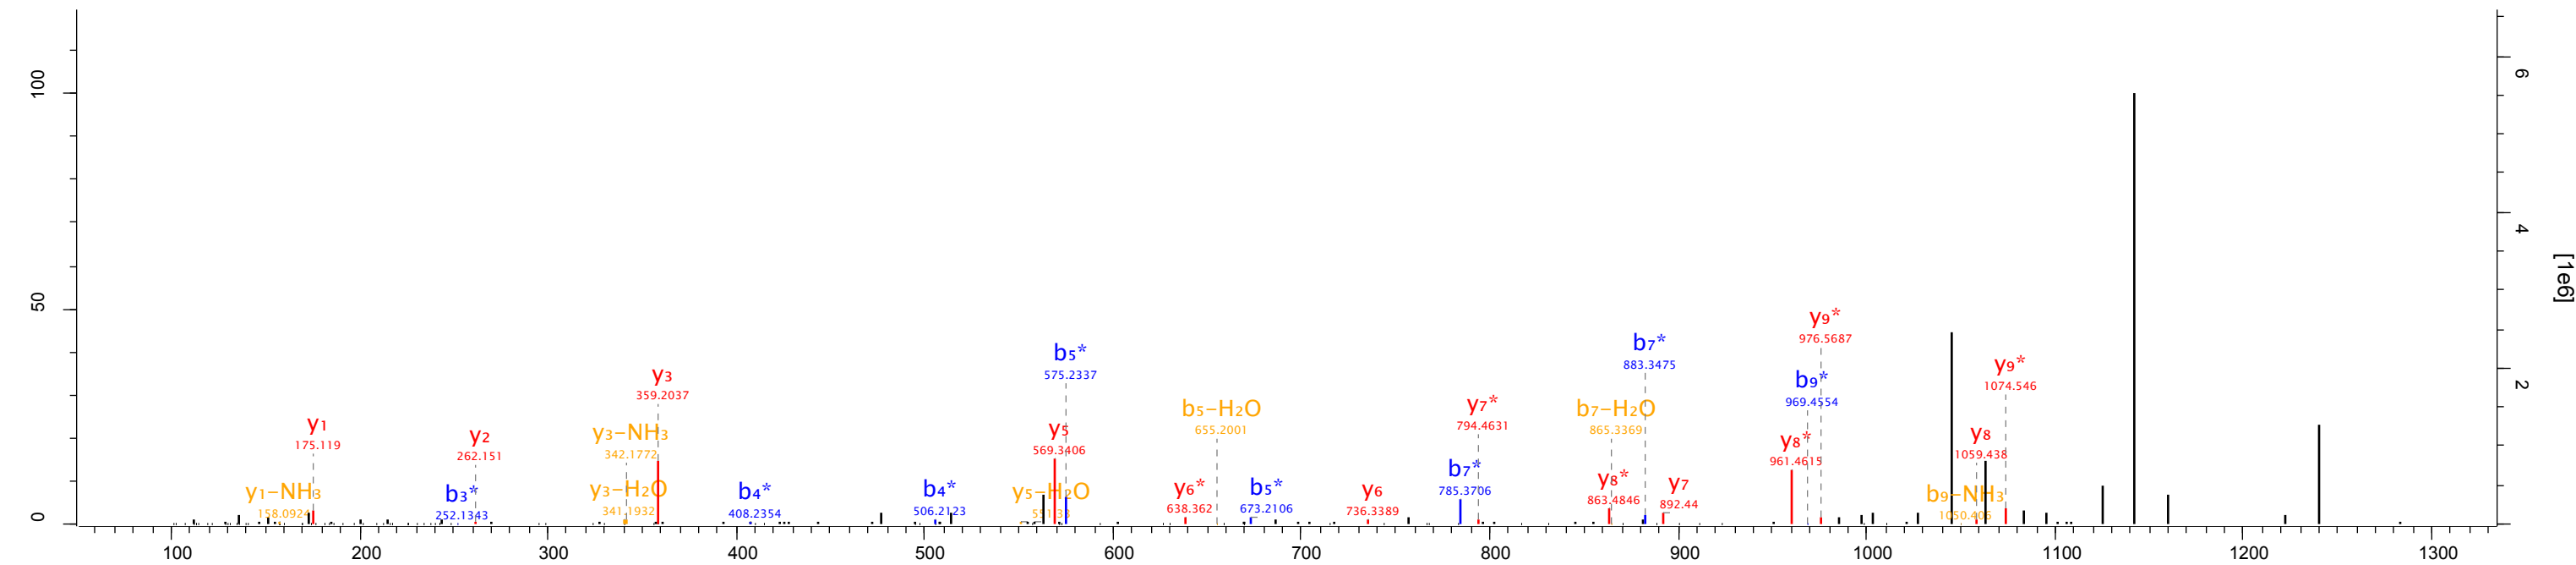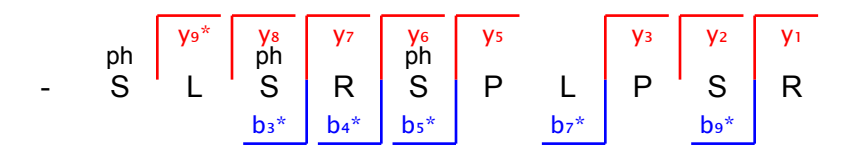

Raw file: 20150812\_A375SR\_Phospho\_BR1\_02  
 Scan: 10391 Method: FTMS; HCD Score: 127.16 m/z: 776.96 Gene names: HDAC1

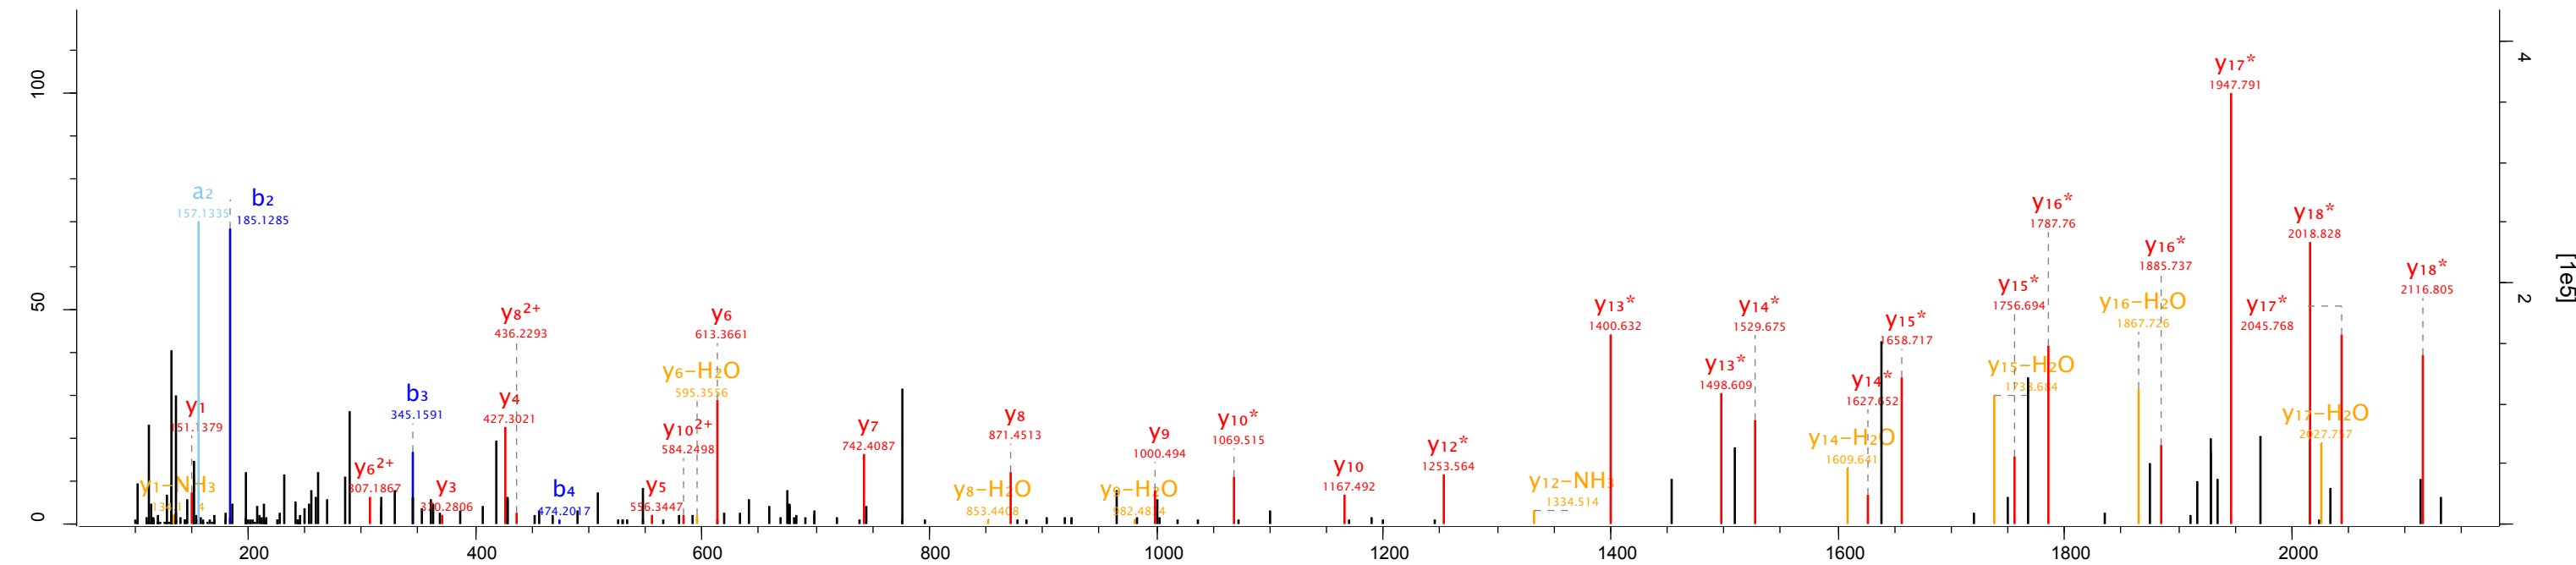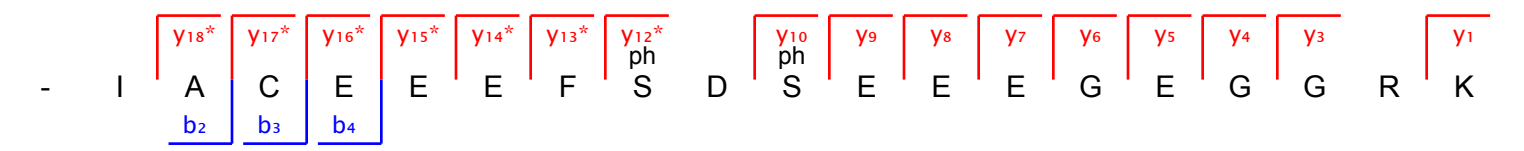

Raw file 20150812\_A375SR\_Phospho\_BR1\_02 Scan 11051 Method FTMS; HCD Score 65.2 m/z 898.31 Gene names IRS2

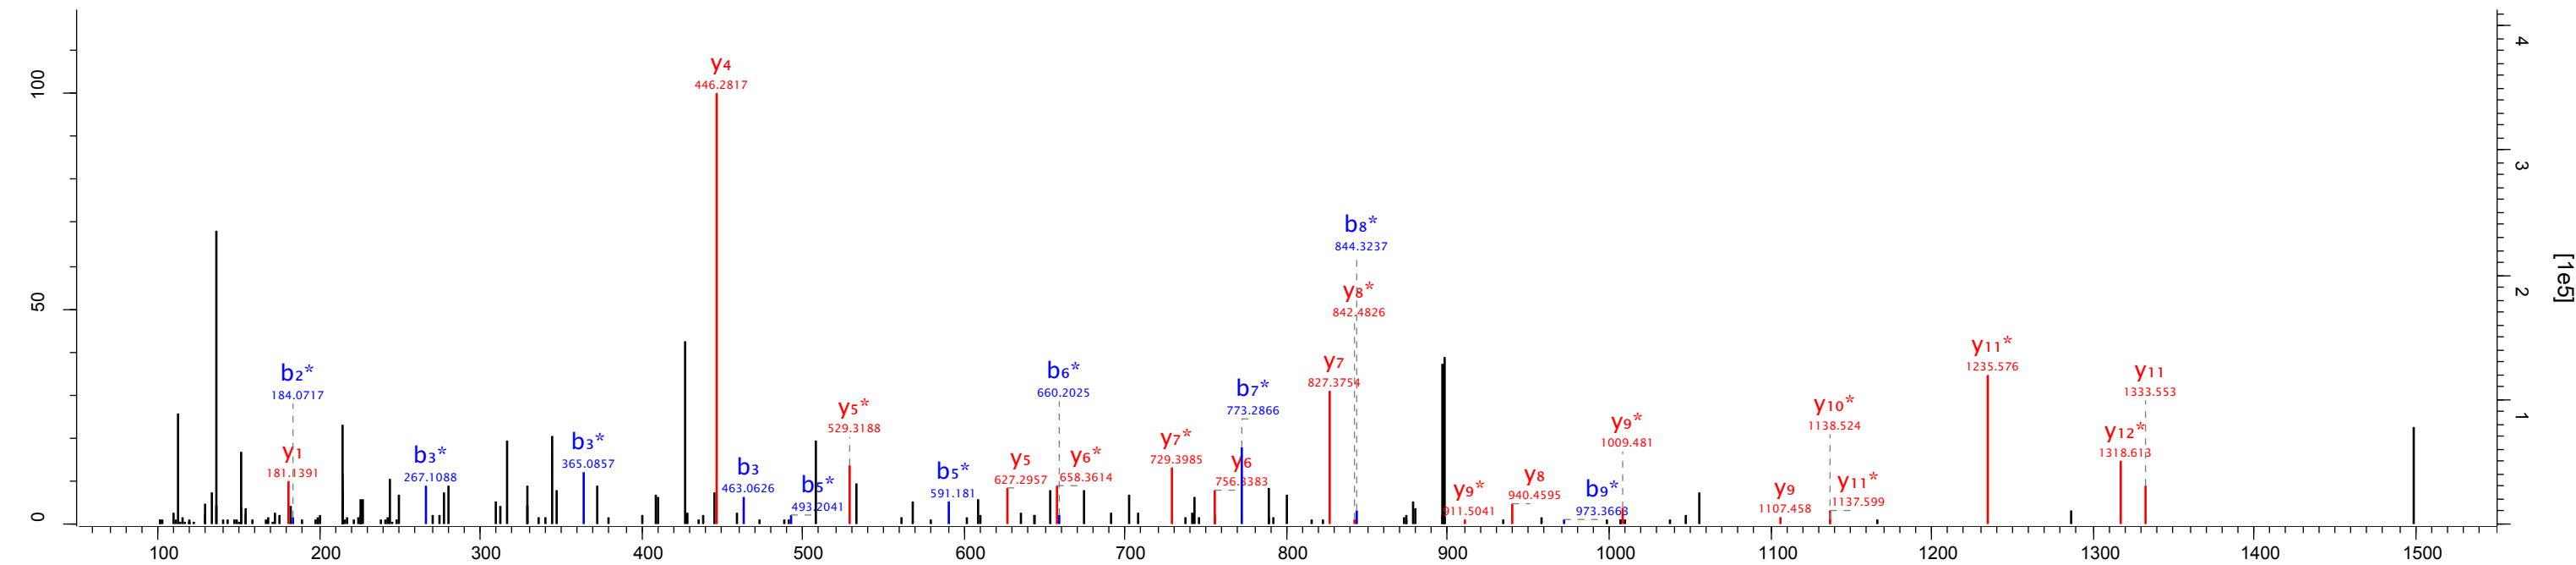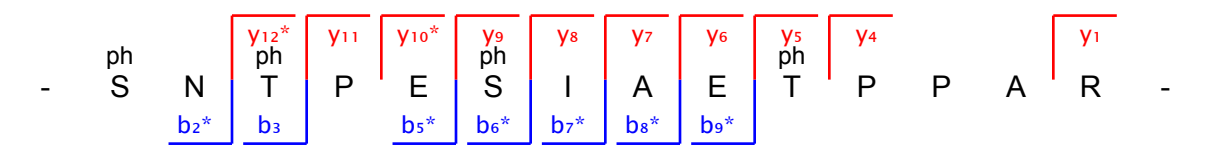

Raw file: 20150812\_A375SR\_Phospho\_BR1\_02  
 Scan: 11111 Method: FTMS; HCD Score: 104.81 m/z: 813.28 Gene names: HIRIP3

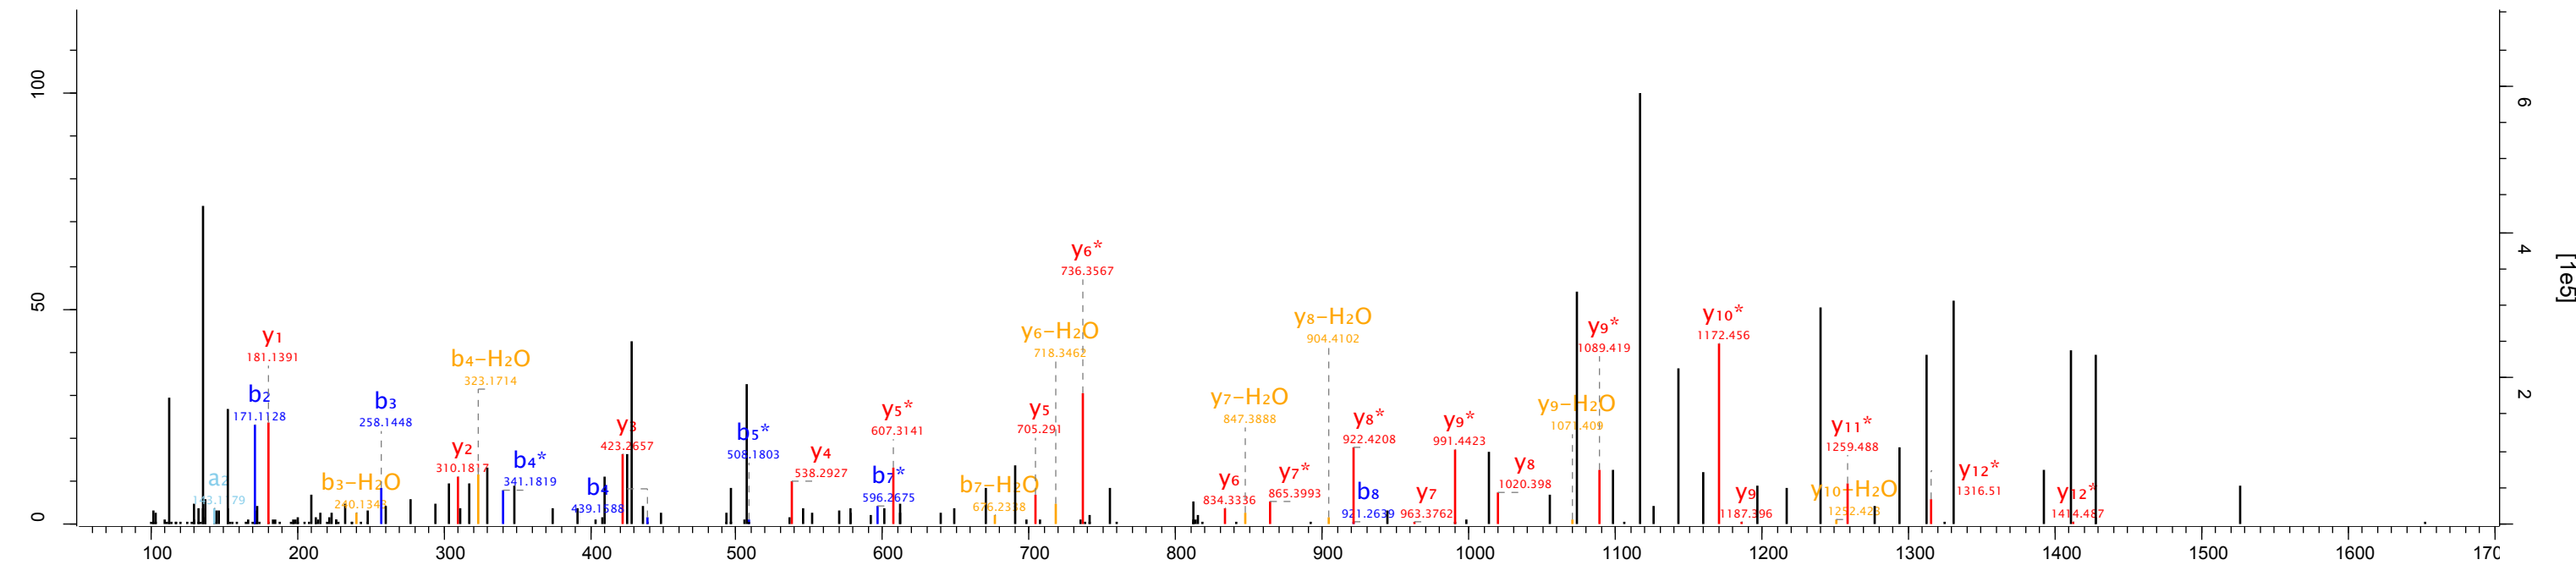

- L G S T S G E E S D L E R -  
 b2 b3 b4 b5\* b7\* b8

Raw file: 20150812\_A375SR\_Phospho\_BR1\_02  
 Scan: 11641  
 Method: FTMS; HCD  
 Score: 55.43  
 m/z: 1138.39  
 Gene names: FAM120A

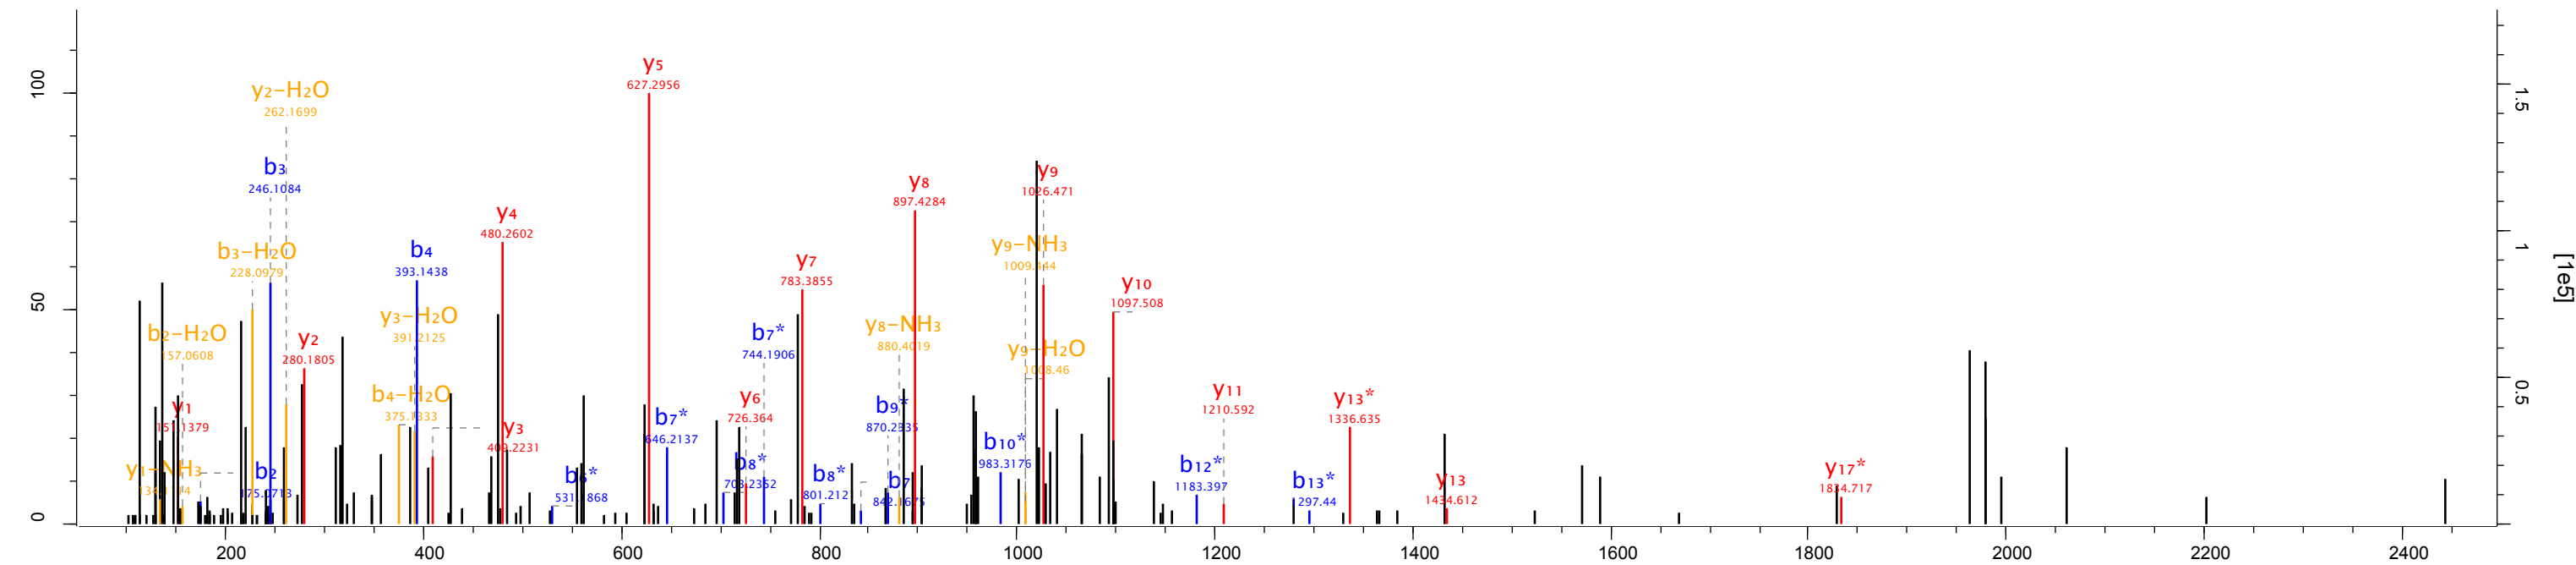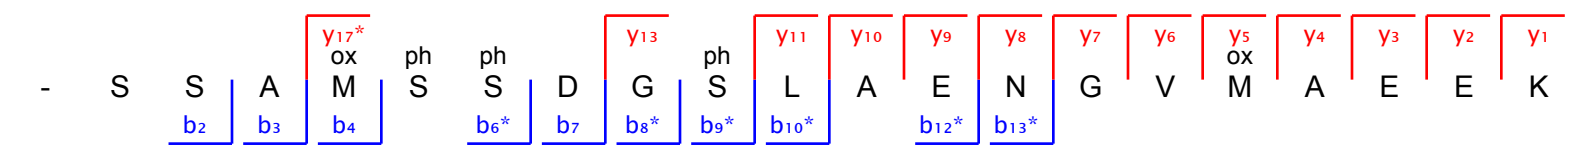



Raw file 20150812\_A375SR\_Phospho\_BR1\_02 Scan 11711 Method FTMS; HCD Score 103.41 m/z 861.7 Gene names DUS3L

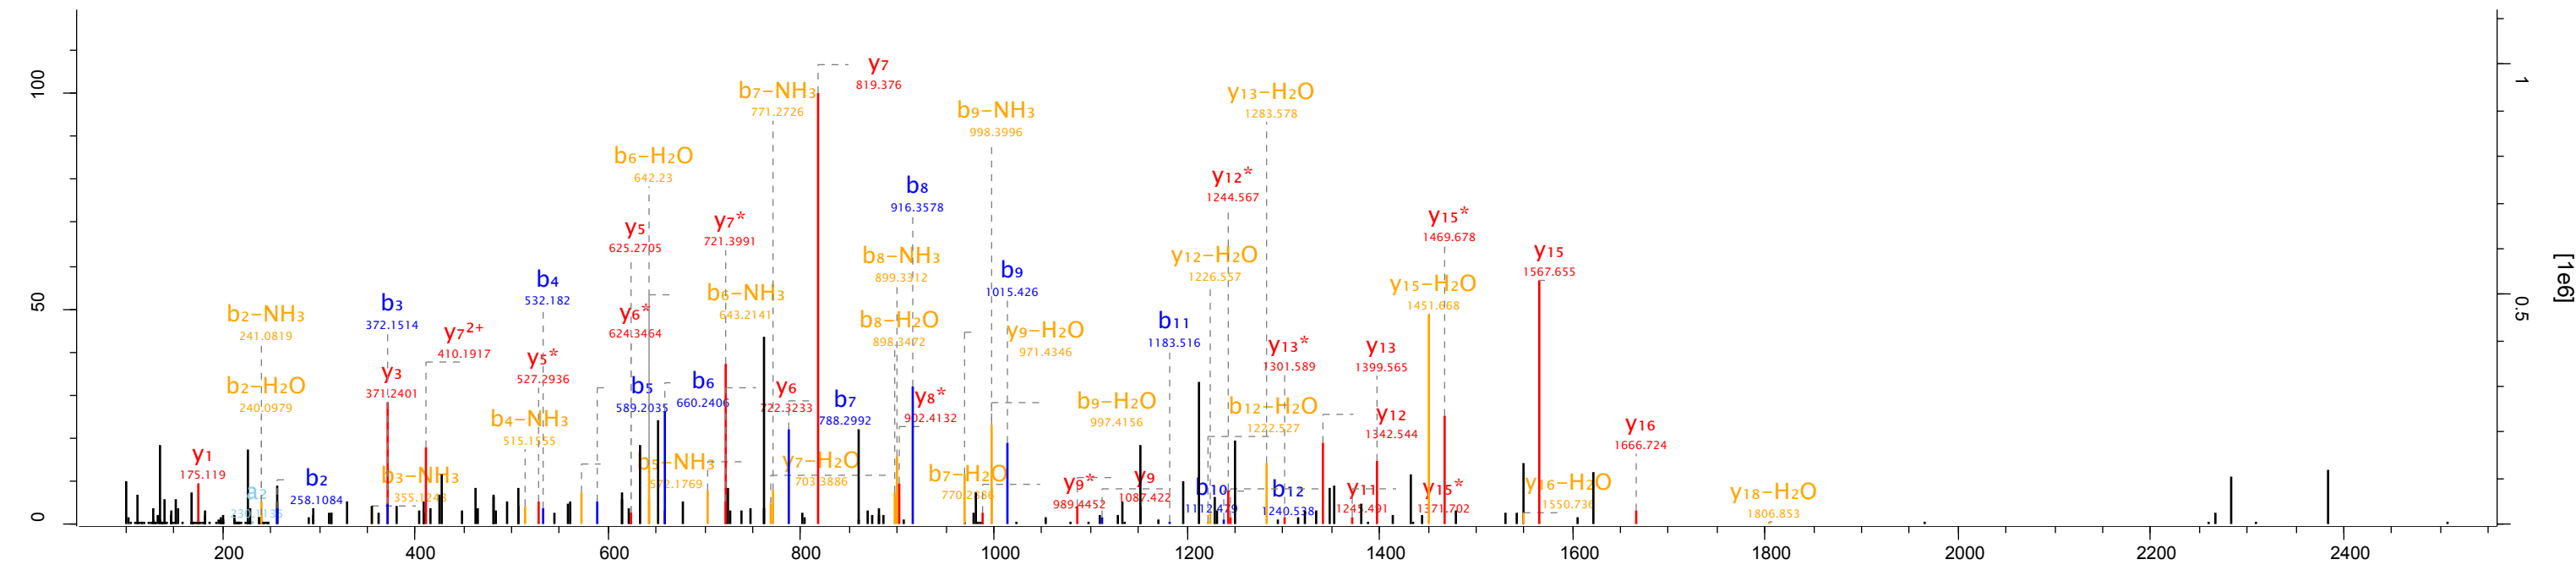

- Q E N C G A Q Q V P A G P G T S T P P S S P V R -

b<sub>2</sub>
b<sub>3</sub>
b<sub>4</sub>
b<sub>5</sub>
b<sub>6</sub>
b<sub>7</sub>
b<sub>8</sub>
b<sub>9</sub>
b<sub>10</sub>
b<sub>11</sub>
b<sub>12</sub>
y<sub>16</sub>
y<sub>15</sub>
y<sub>13</sub>
y<sub>12</sub>
y<sub>11</sub>
y<sub>9</sub>
y<sub>8</sub><sup>\*</sup>
y<sub>7</sub>
y<sub>6</sub>
y<sub>5</sub>
y<sub>5</sub><sup>ph</sup>
y<sub>3</sub>
y<sub>1</sub>

Raw file: 20150812\_A375SR\_Phospho\_BR1\_02  
 Scan: 11751 Method: FTMS; HCD Score: 202.11 m/z: 1159.47 Gene names: SF3B2

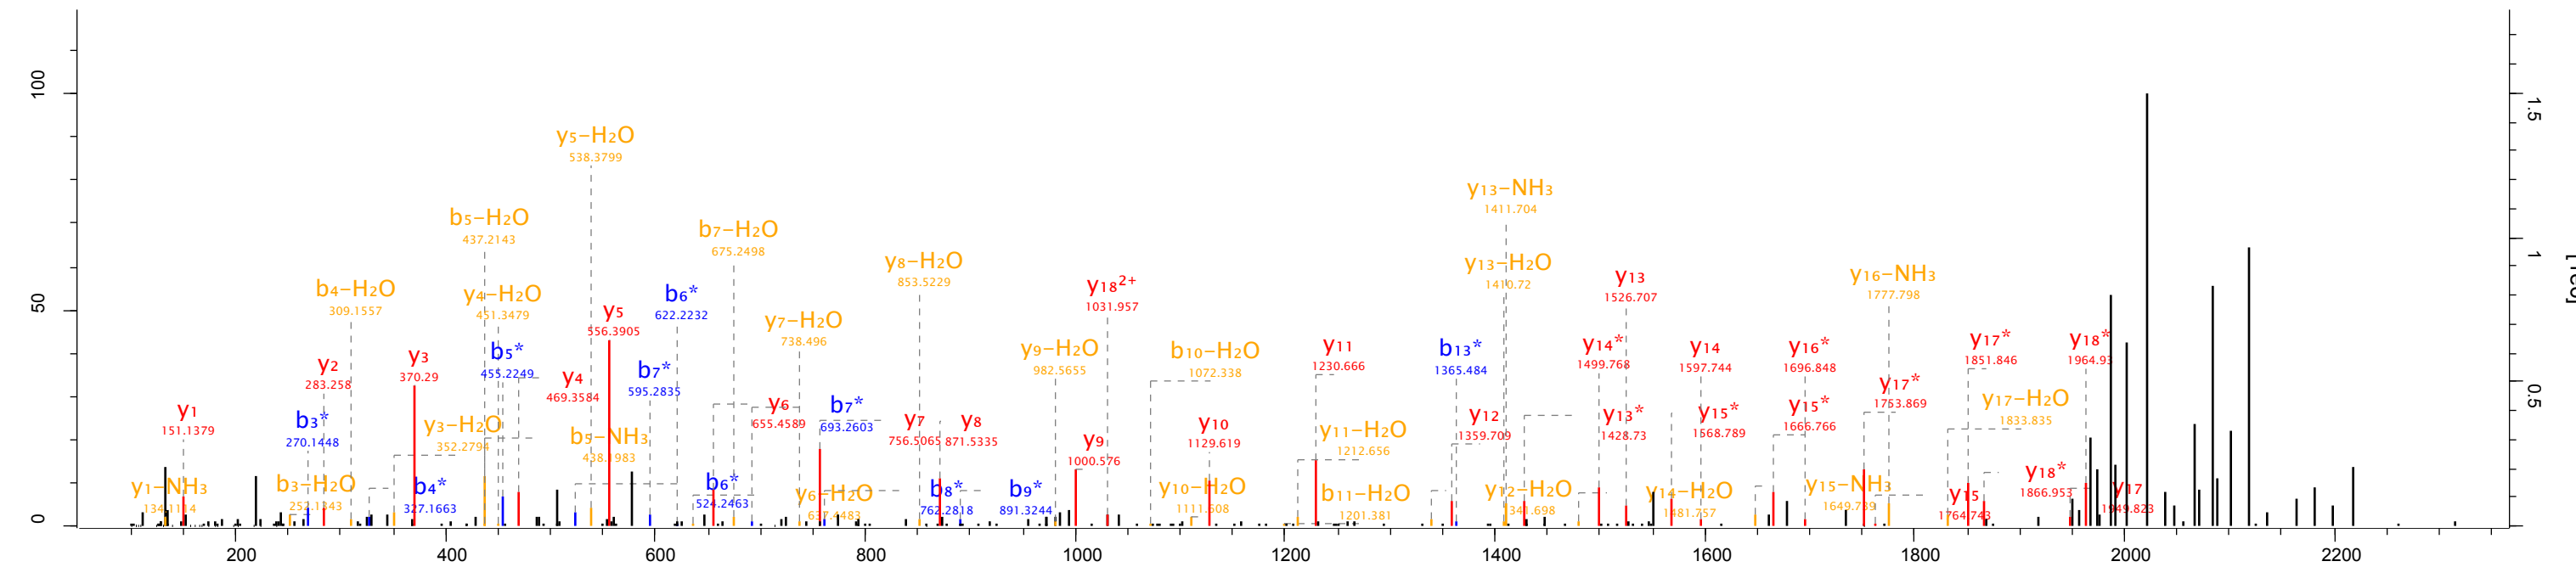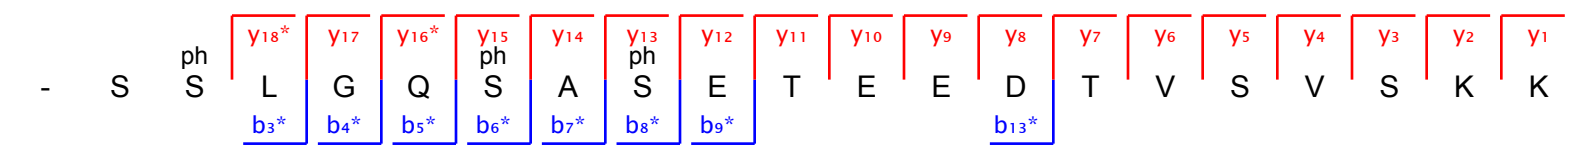



Raw file  
20150812\_A375SR\_Phospho\_BR1\_02

Scan 12411 Method FTMS; HCD Score 122.53 m/z 713.64 Gene names NDRG3

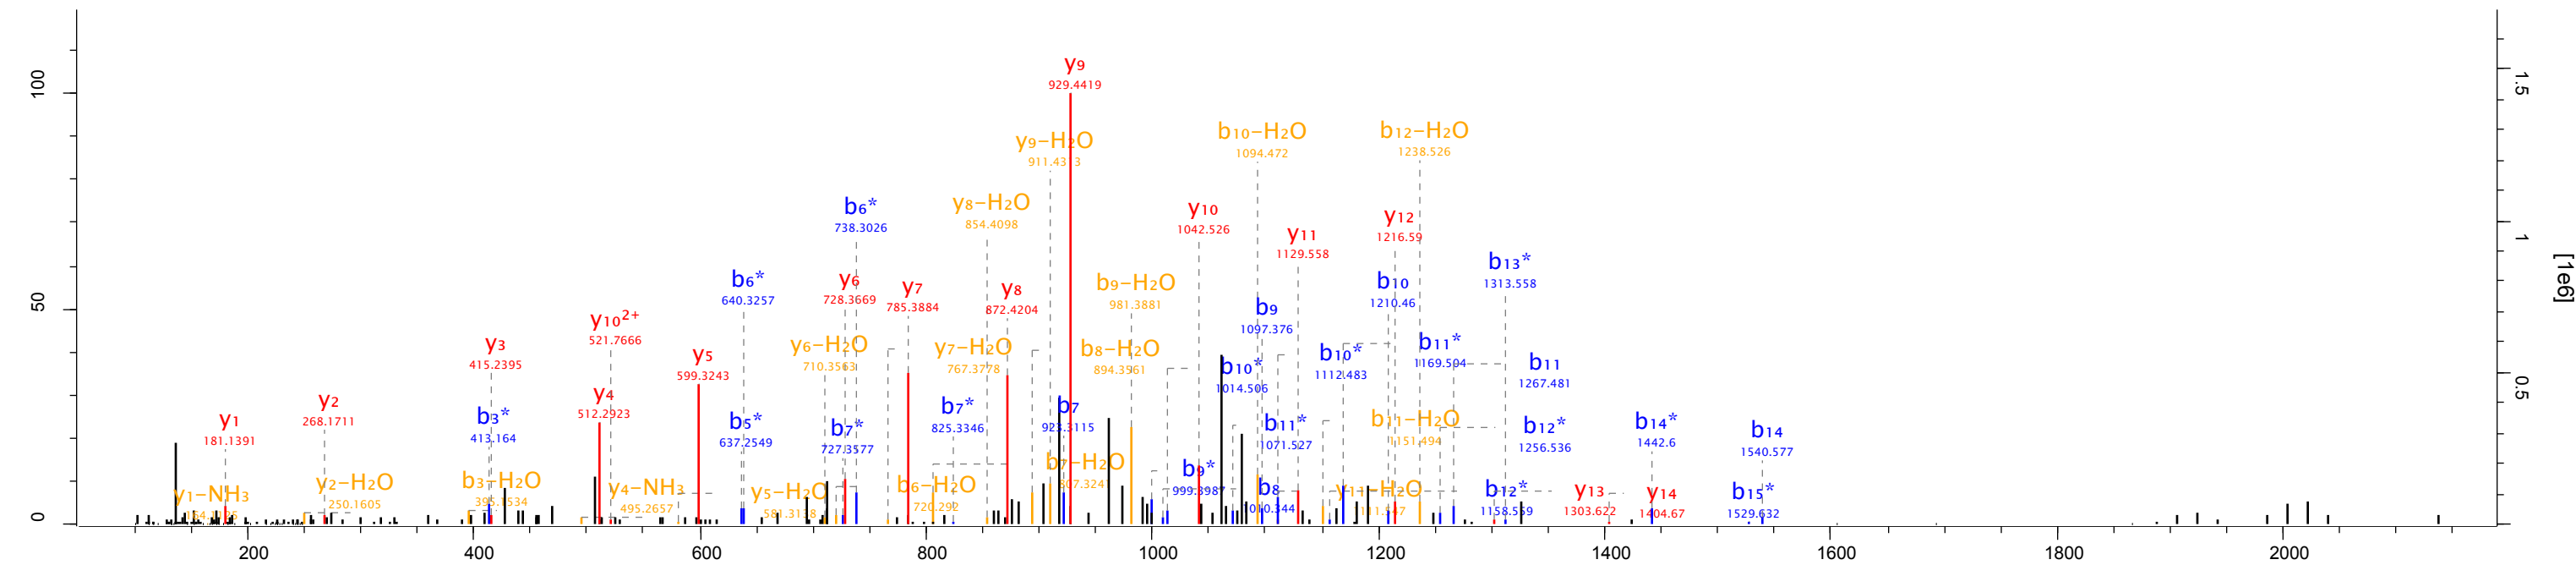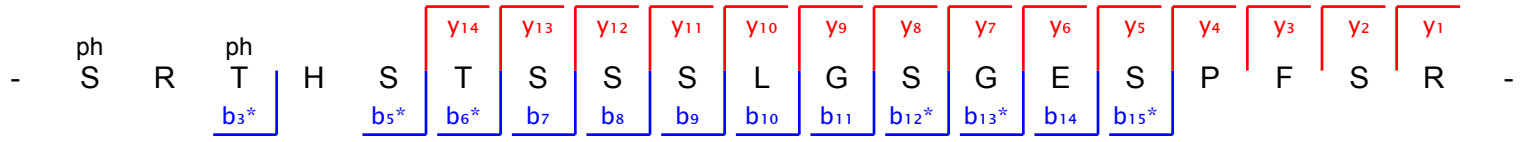

Raw file: 20150812\_A375SR\_Phospho\_BR1\_02  
 Scan: 12521 Method: FTMS; HCD Score: 160.84 m/z: 1108.84 Gene names: RRP9

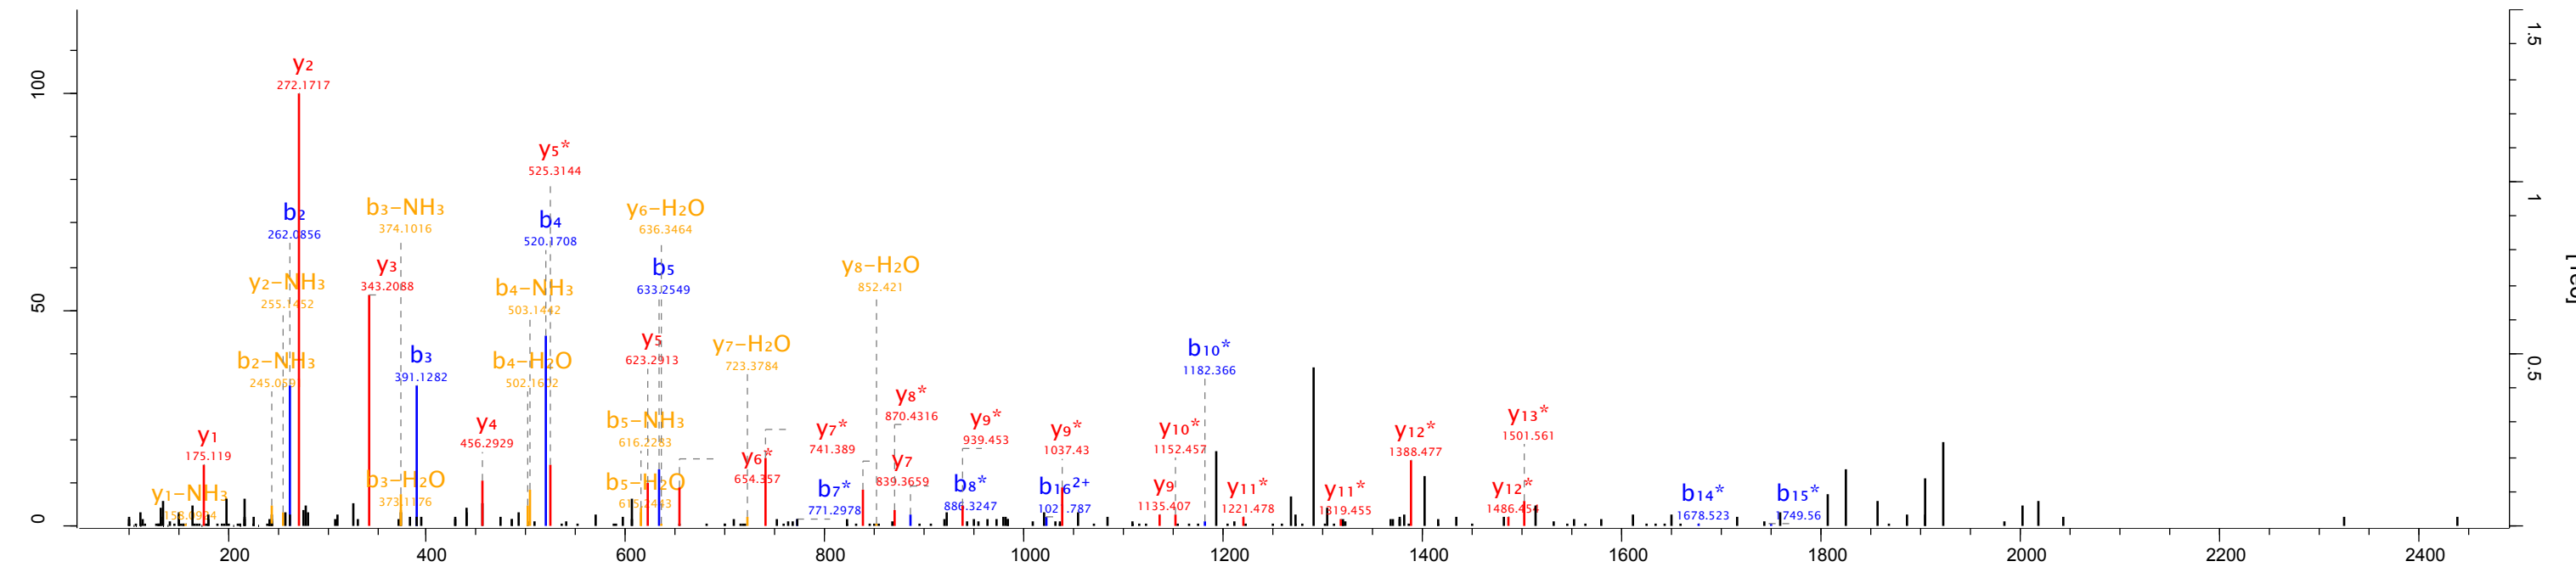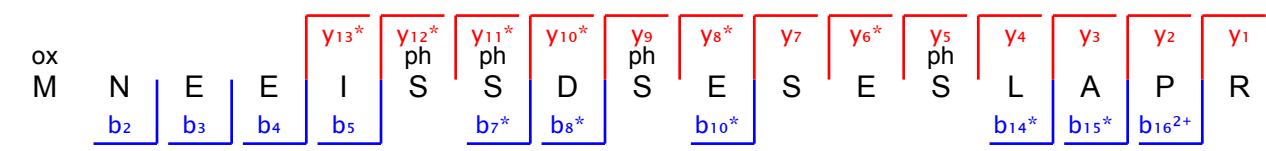

Raw file: 20150812\_A375SR\_Phospho\_BR1\_02  
 Scan: 13231 Method: FTMS; HCD Score: 116.33 m/z: 969.83 Gene names: COMMD3-BMI1; BMI1

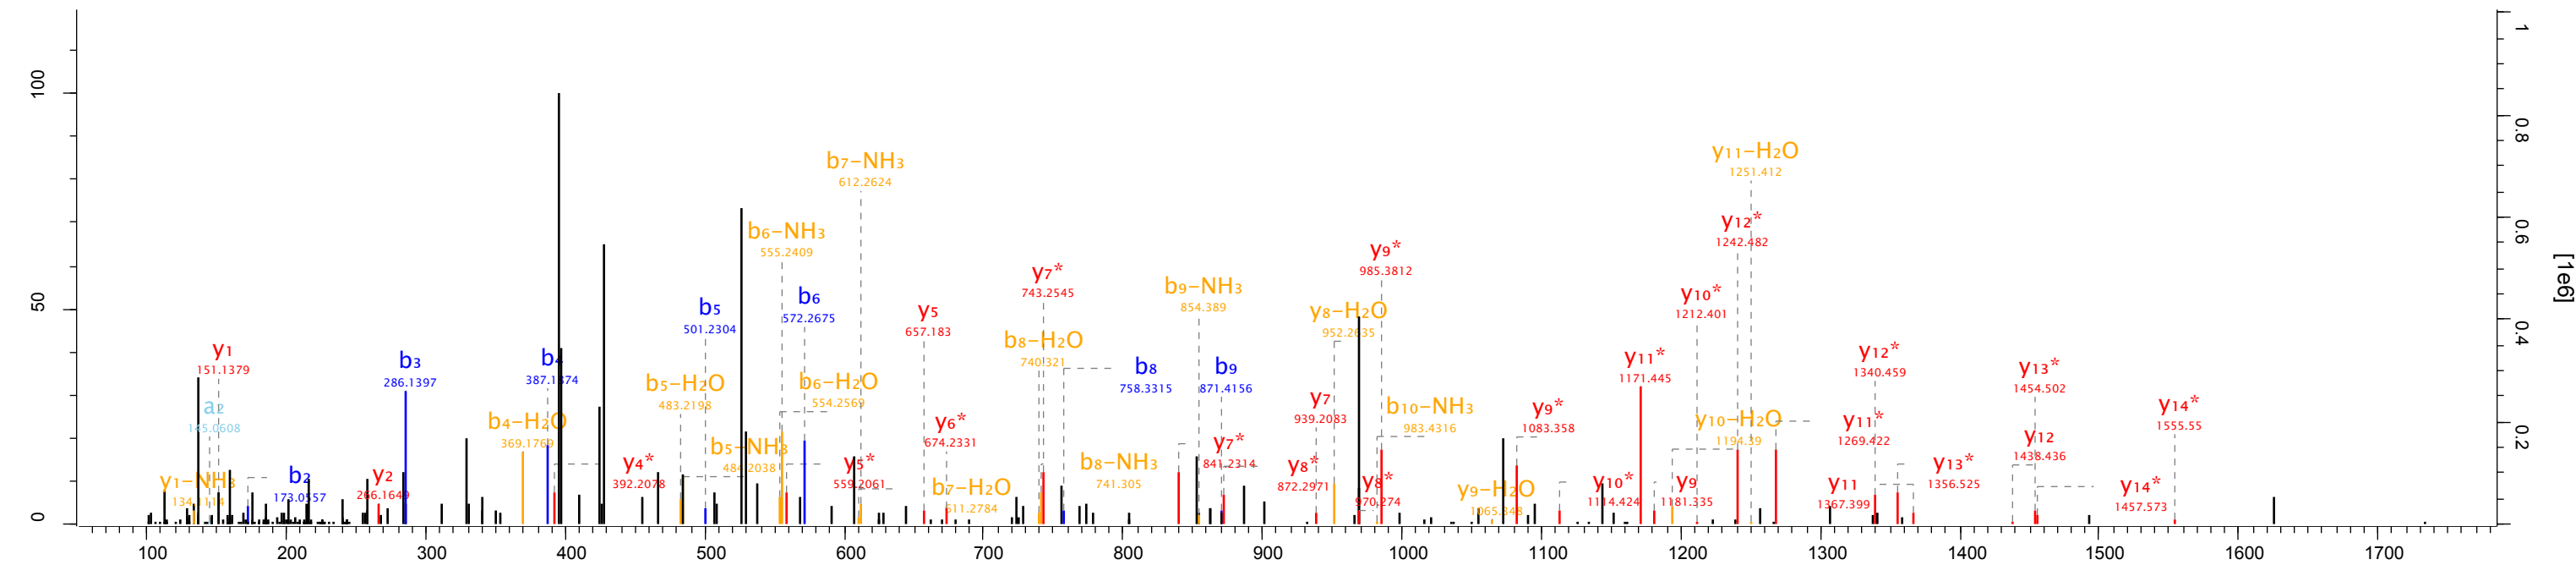

- D G L T N A G E L E S D S G S D K -

Fragmentation scheme showing b and y ions for the peptide sequence: D G L T N A G E L E S D S G S D K. The b ions (blue) are b2, b3, b4, b5, b6, b8, b9. The y ions (red) are y1, y2, y4\*, y5, y6\*, y7, y7-ph, y8\*, y9, y9-ph, y10\*, y11, y11-ph, y12, y12-ph, y13\*, y14\*, y14-ph.

Raw file 20150812\_A375SR\_Phospho\_BR1\_02 Scan 13421 Method FTMS; HCD Score 89.34 m/z 745.26 Gene names AFAP1

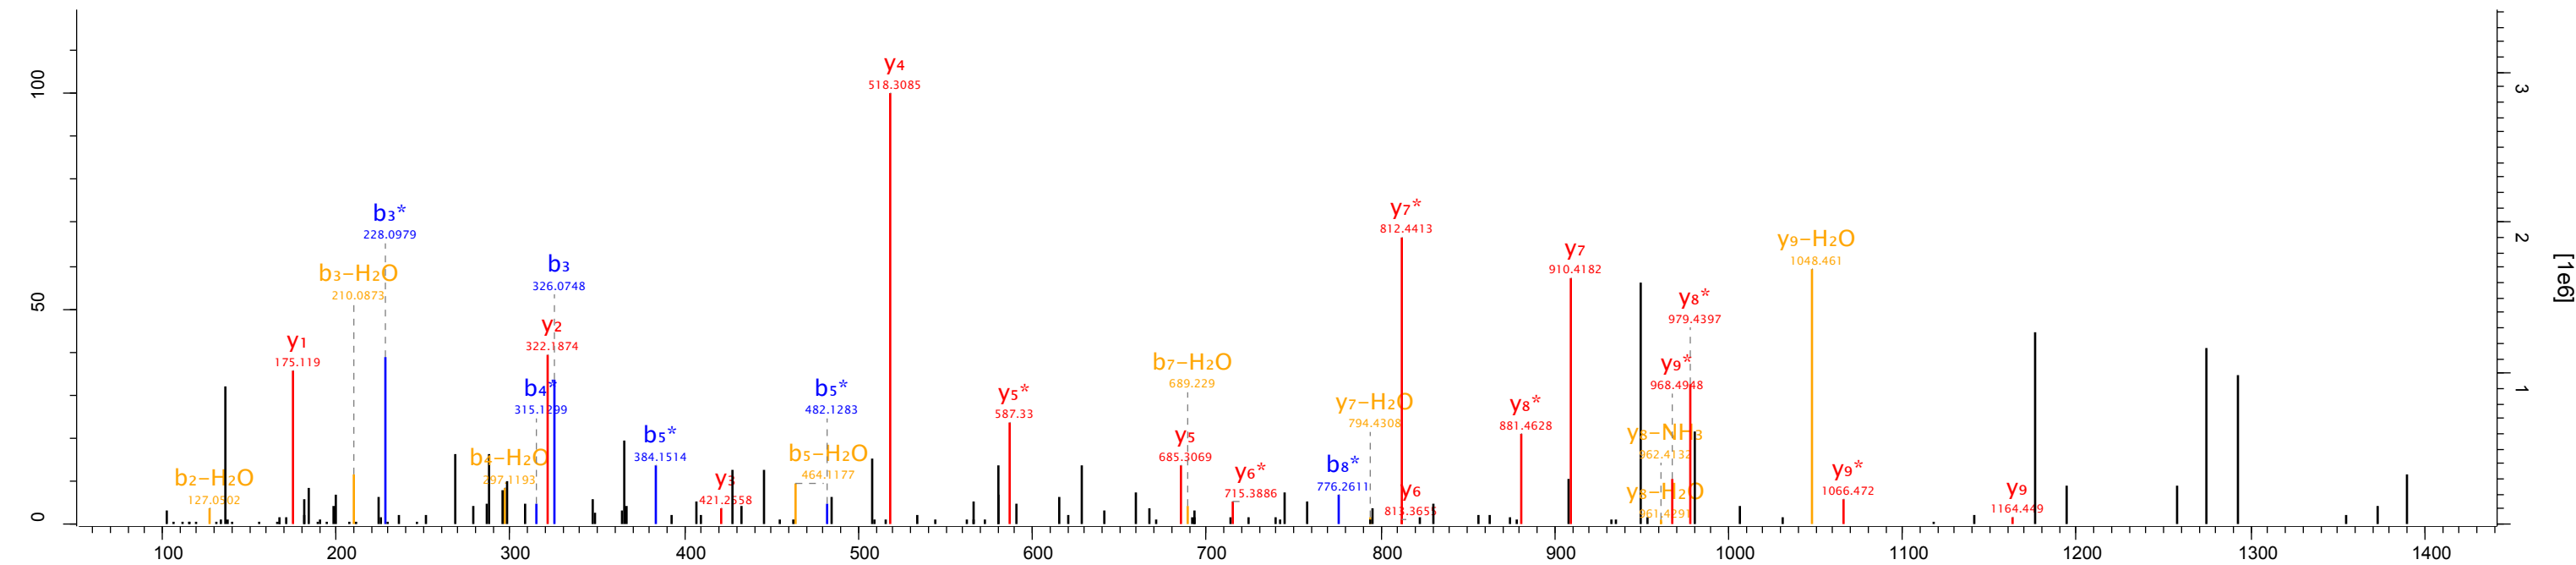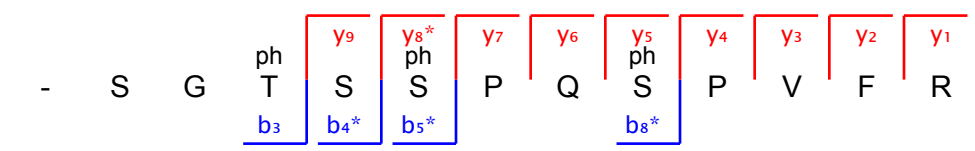

Raw file 20150812\_A375SR\_Phospho\_BR1\_02 Scan 13451 Method FTMS; HCD Score 247.96 m/z 1261.98 Gene names UTP18

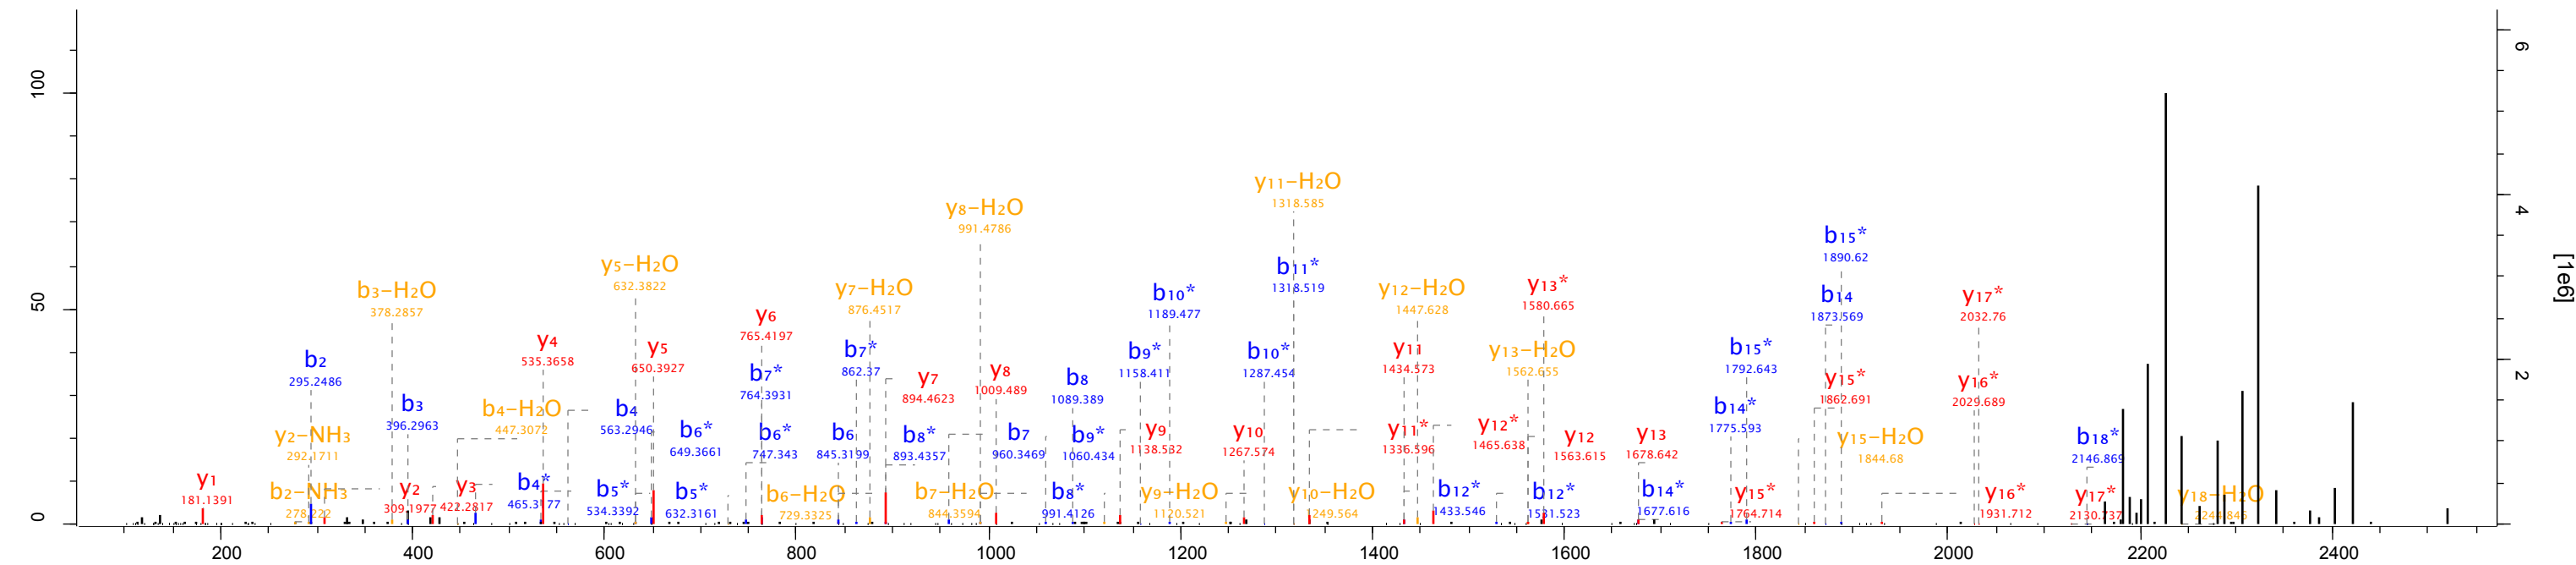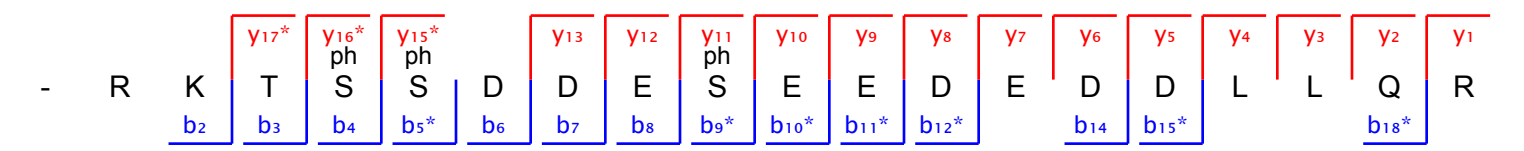





Raw file  
 20150812\_A375SR\_Phospho\_BR1\_02  
 Scan 13711 Method FTMS; HCD Score 178.88 m/z 979.72 Gene names FOXX2

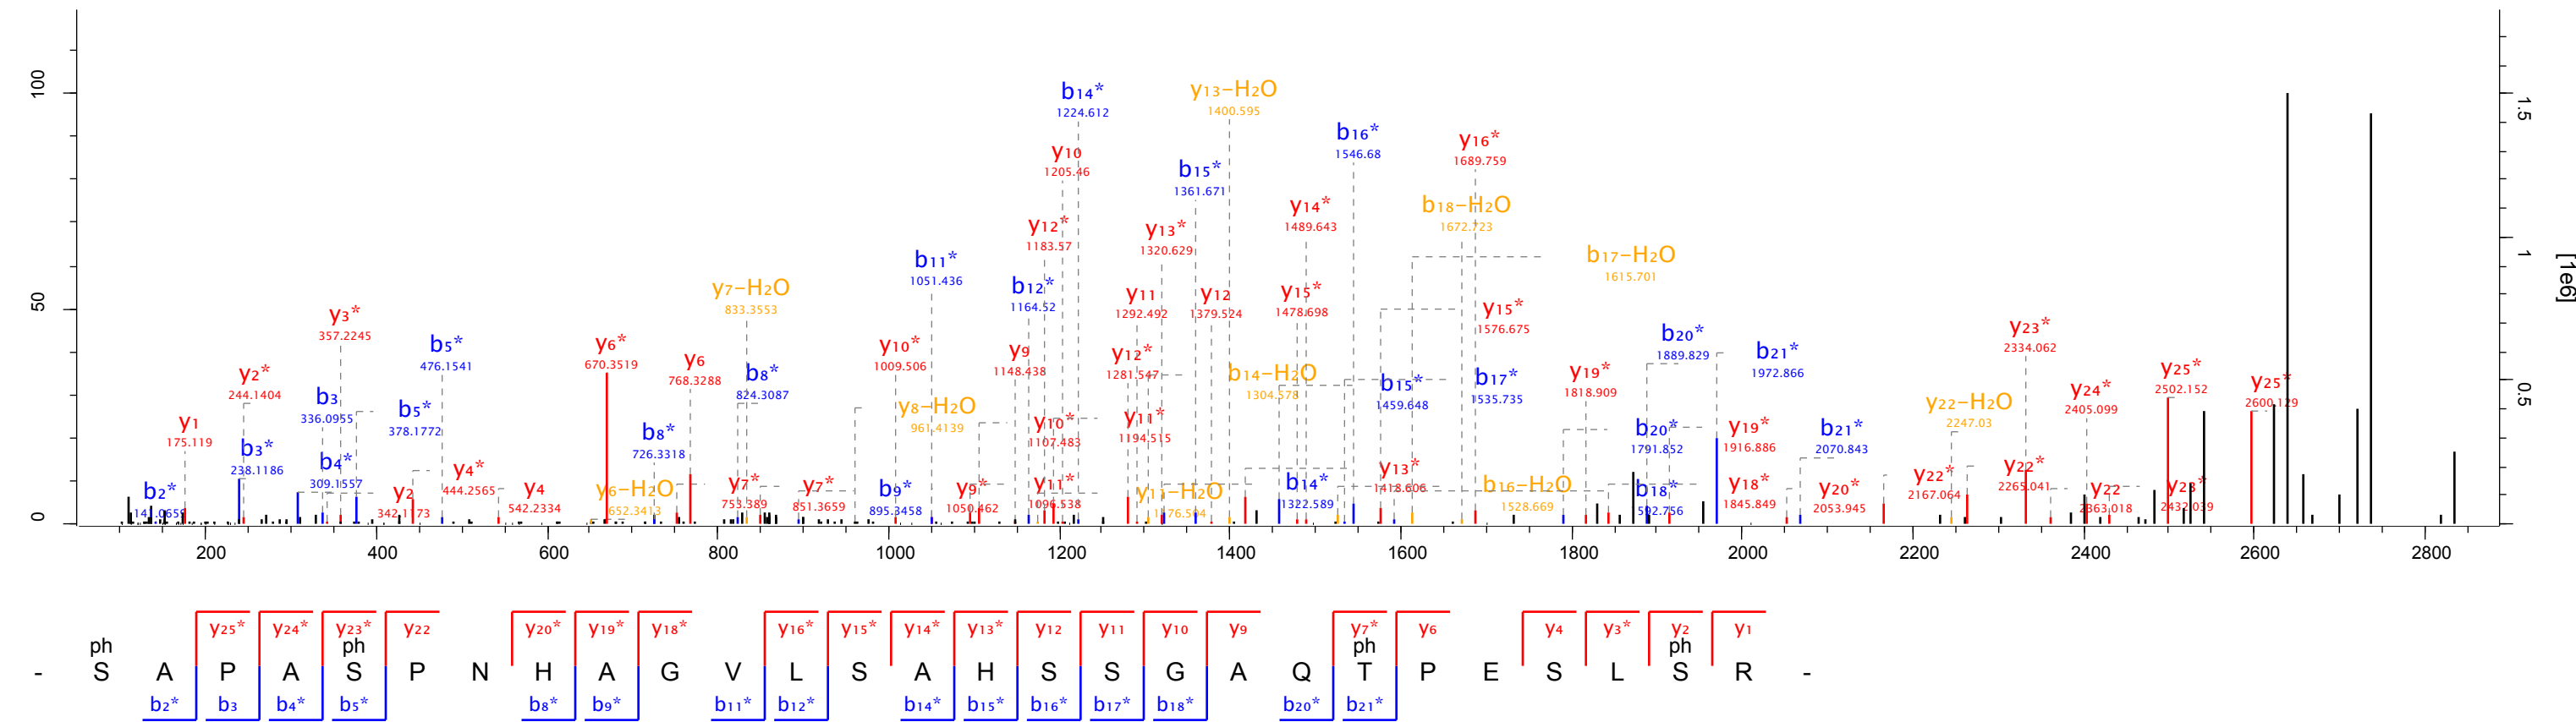

Raw file Scan Method Score m/z Gene names  
 20150812\_A375SR\_Phospho\_BR1\_02 14231 FTMS; HCD 138.13 899.69 BRPF3

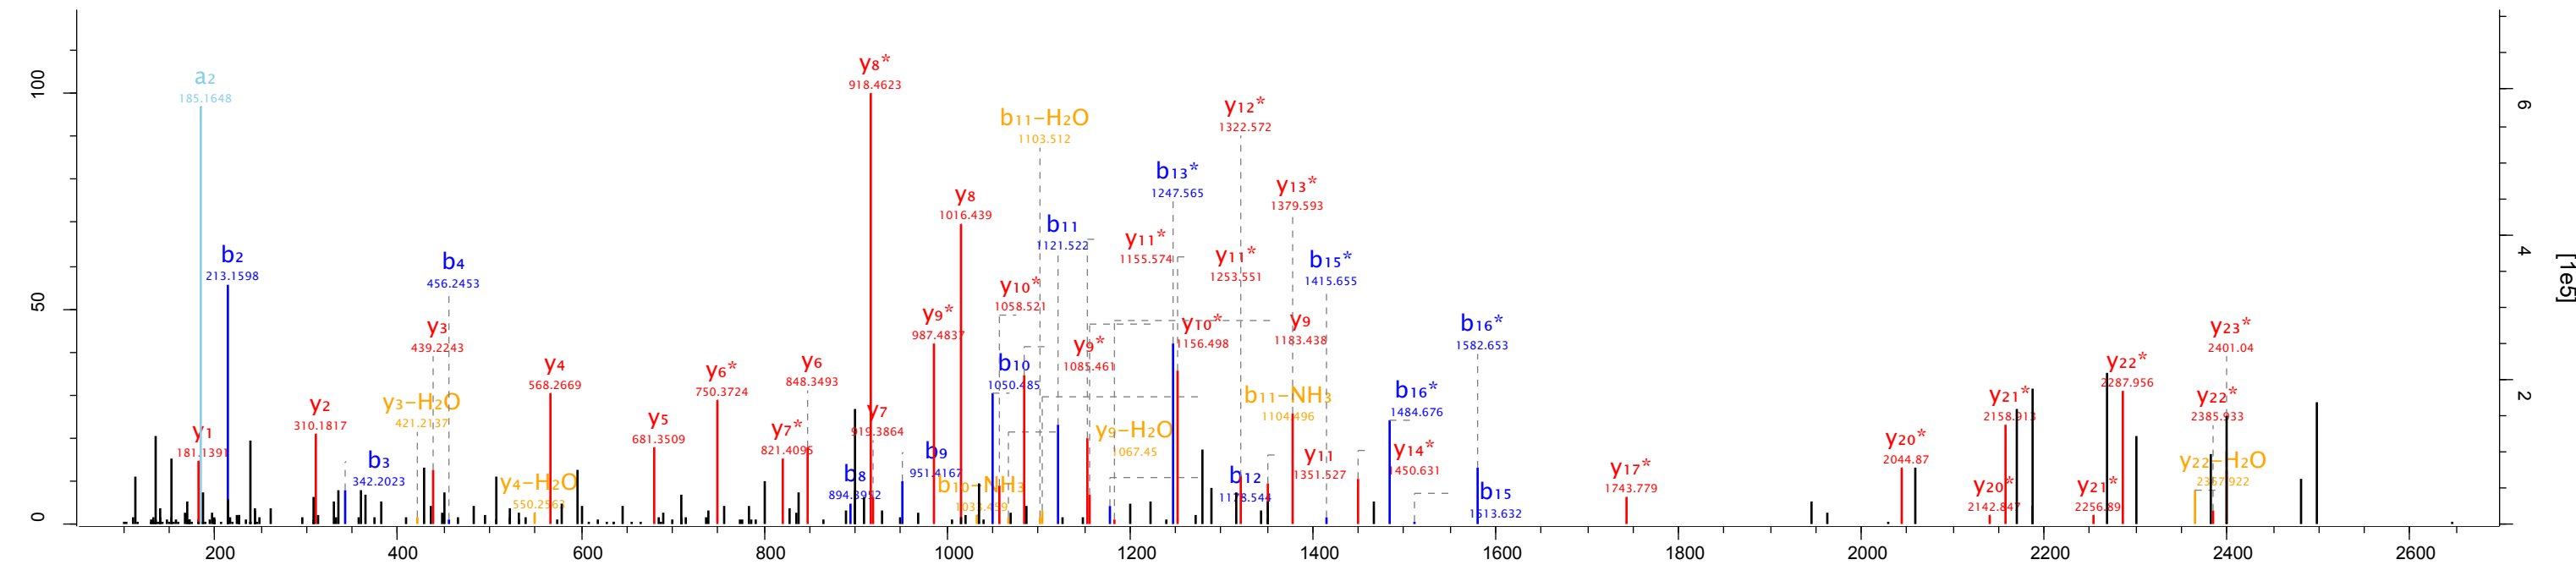

- V L E N G E D H G V A G S P A S P A S I E E E R -

b<sub>2</sub>
b<sub>3</sub>
b<sub>4</sub>
b<sub>8</sub>
b<sub>9</sub>
b<sub>10</sub>
b<sub>11</sub>
b<sub>12</sub>
b<sub>13</sub><sup>\*</sup>
b<sub>15</sub>
b<sub>16</sub><sup>\*</sup>
y<sub>17</sub><sup>\*</sup>
y<sub>14</sub><sup>\*</sup>
y<sub>13</sub><sup>\*</sup>
y<sub>12</sub><sup>\*</sup>
ph
S
y<sub>11</sub>
y<sub>10</sub><sup>\*</sup>
y<sub>9</sub>
ph
S
y<sub>8</sub>
y<sub>7</sub>
y<sub>6</sub>
ph
S
y<sub>5</sub>
y<sub>4</sub>
y<sub>3</sub>
y<sub>2</sub>
y<sub>1</sub>

Raw file 20150812\_A375SR\_Phospho\_BR1\_02 Scan 14391 Method FTMS; HCD Score 82.03 m/z 979.41 Gene names IFI16

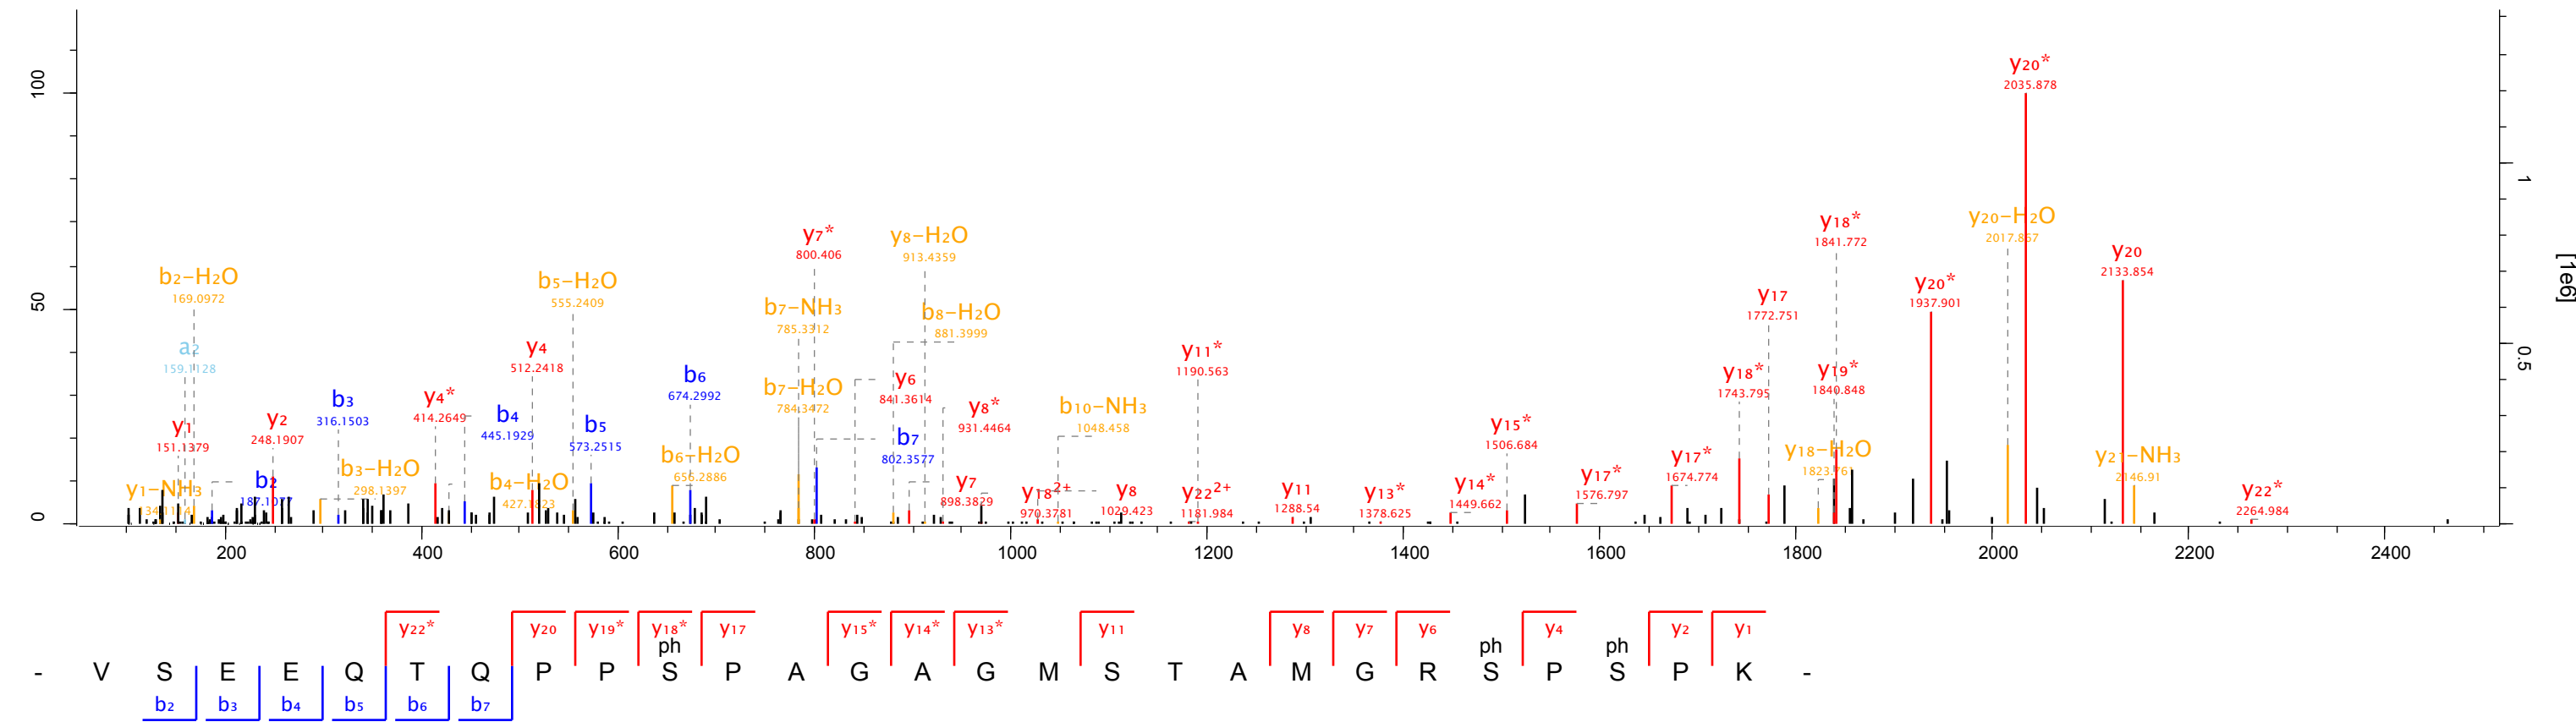

Raw file: 20150812\_A375SR\_Phospho\_BR1\_02  
 Scan: 14651 Method: FTMS; HCD Score: 127.29 m/z: 780.29 Gene names: SRRM2

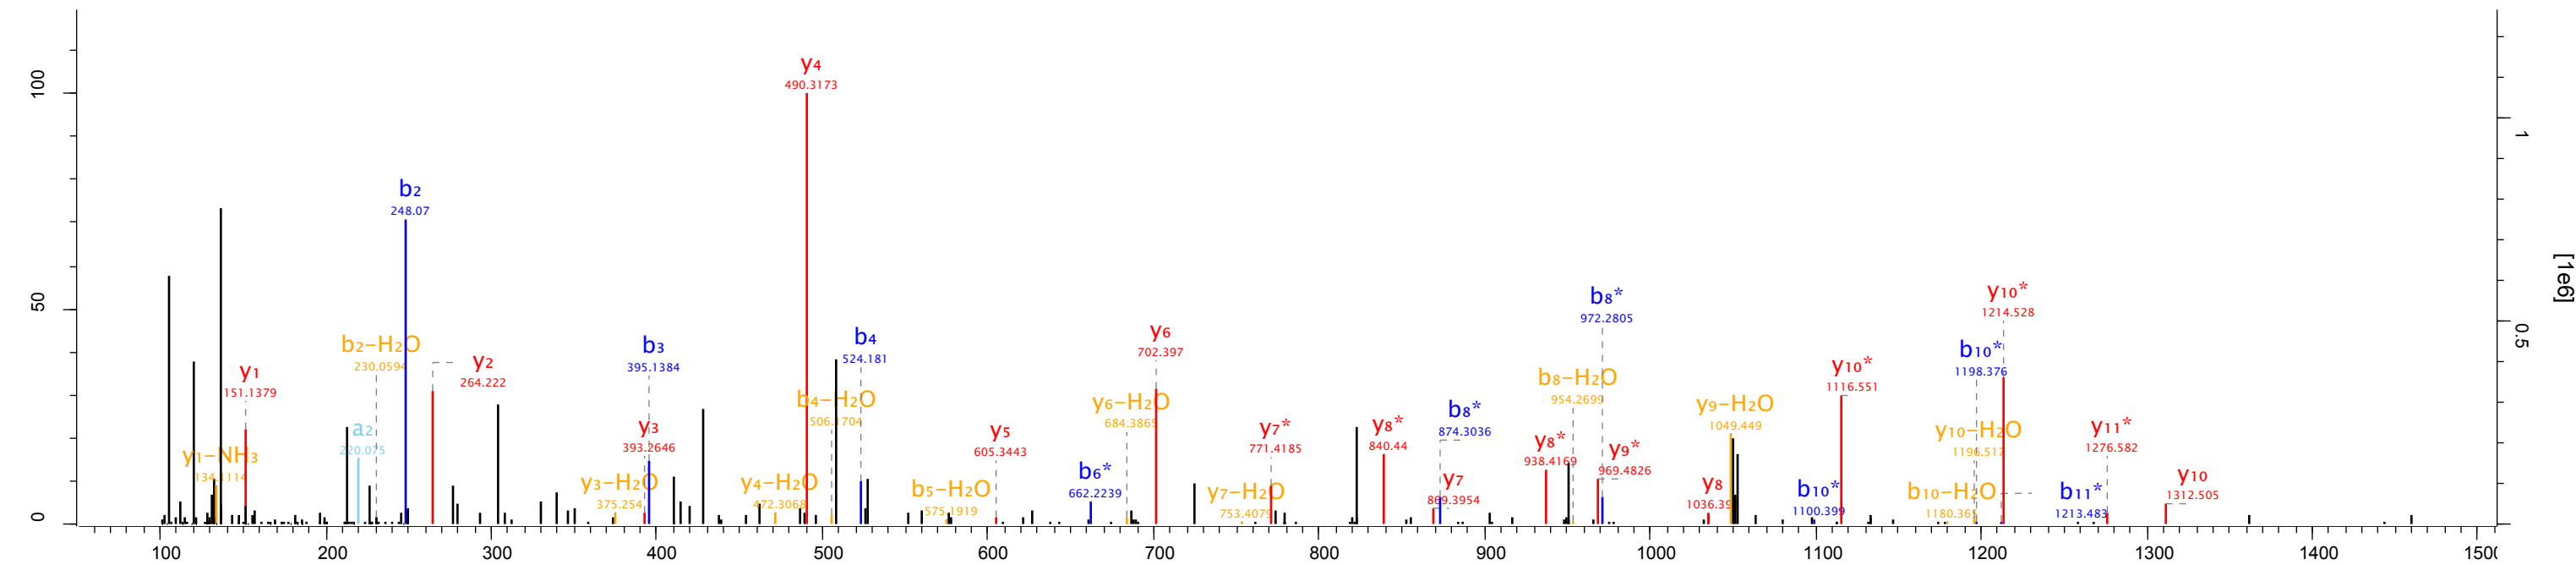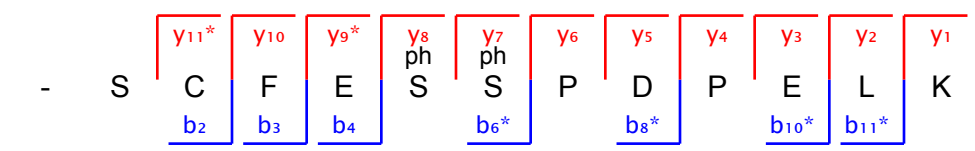

Raw file 20150812\_A375SR\_Phospho\_BR1\_02 Scan 15031 Method FTMS; HCD Score 191.45 m/z 975.38 Gene names PLEC

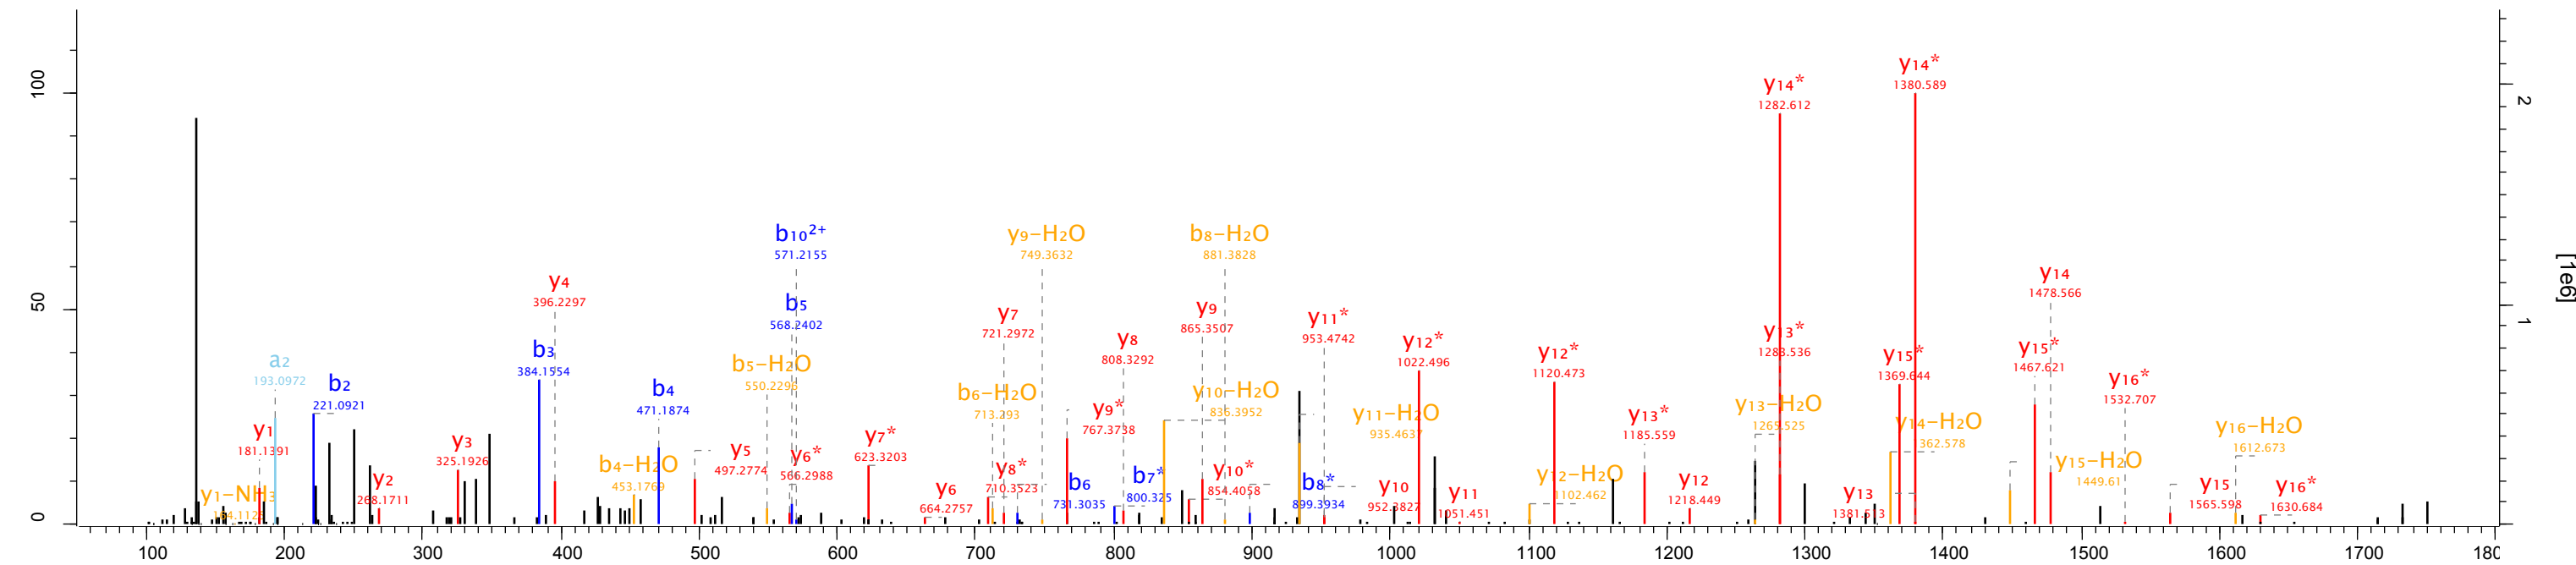

- G Y Y S P Y S V S G S G S T A G S R -

b<sub>2</sub>
b<sub>3</sub>
b<sub>4</sub>
b<sub>5</sub>
b<sub>6</sub>
b<sub>7</sub>\*
b<sub>8</sub>\*
b<sub>10</sub><sup>2+</sup>
y<sub>16</sub>\*
y<sub>15</sub>
y<sub>14</sub>
y<sub>13</sub>
y<sub>12</sub><sup>ph</sup>
y<sub>11</sub>
y<sub>10</sub>
y<sub>9</sub>
y<sub>8</sub>
y<sub>7</sub>
y<sub>6</sub><sup>ph</sup>
y<sub>5</sub>
y<sub>4</sub>
y<sub>3</sub>
y<sub>2</sub>
y<sub>1</sub>

Raw file 20150812\_A375SR\_Phospho\_BR1\_02 Scan 15151 Method FTMS; HCD Score 174.06 m/z 1145.94 Gene names NFIX

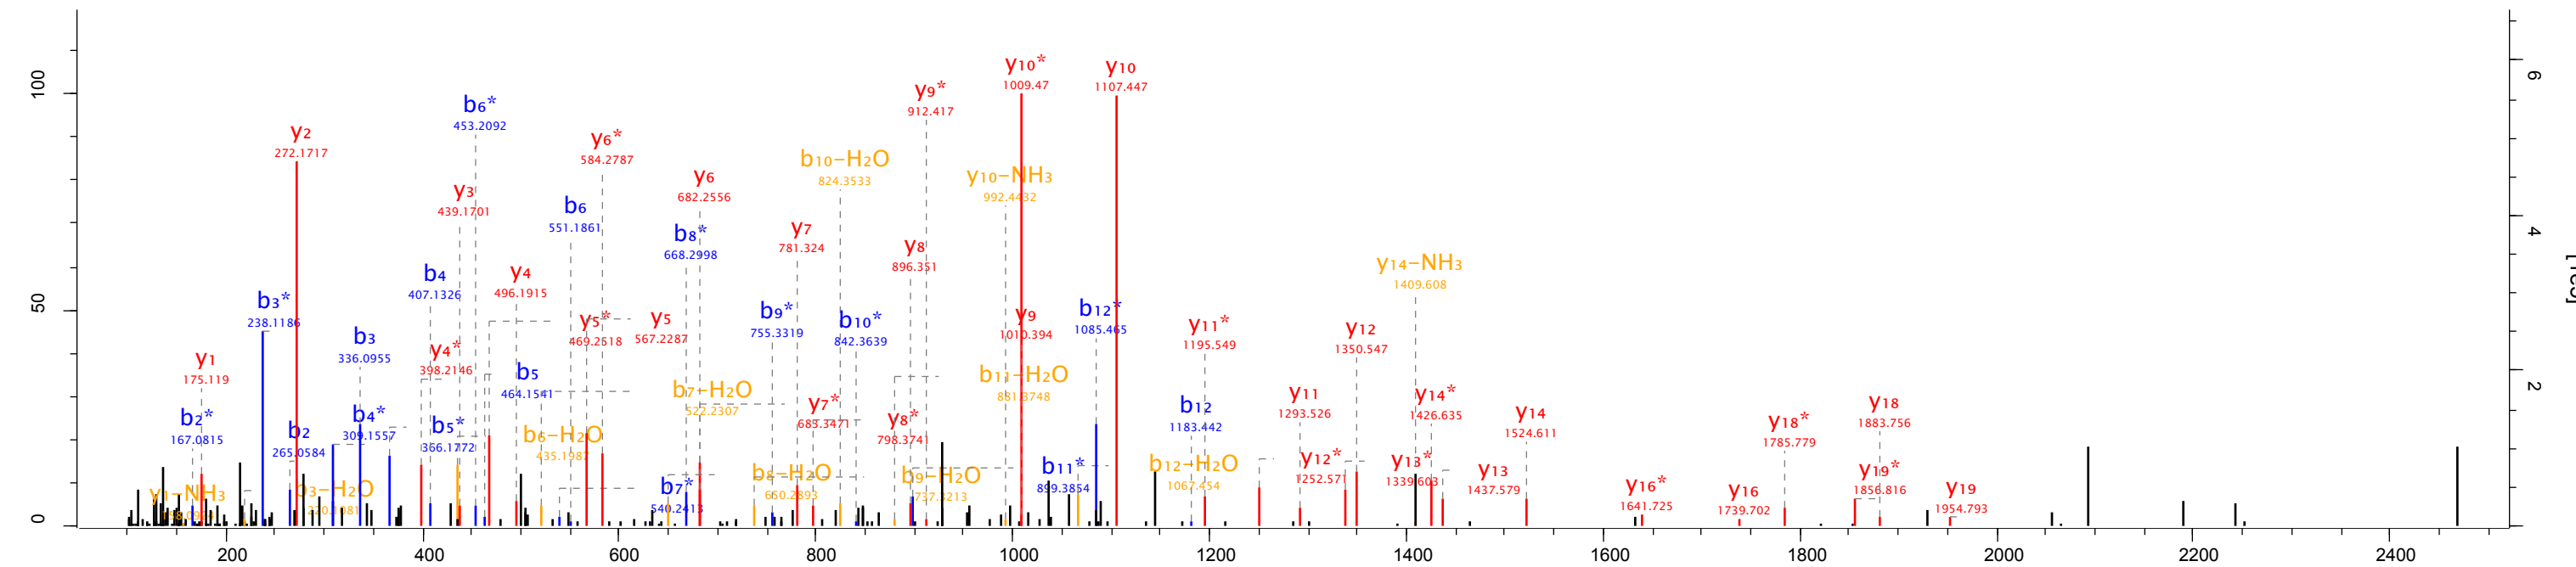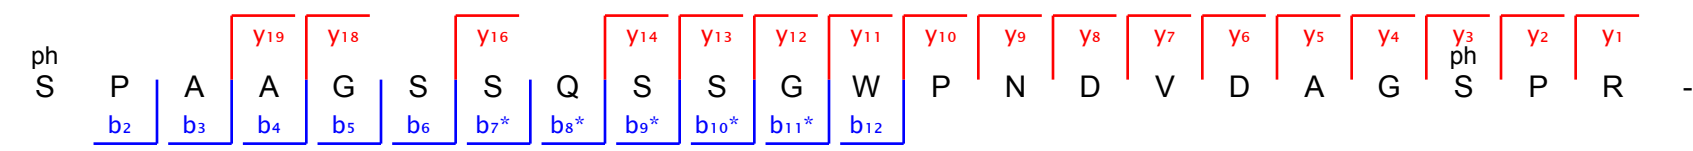

Raw file Scan Method m/z Gene names  
 20150812\_A375SR\_Phospho\_BR1\_02 15441 FTMS; HCD 182.21 908.34 RAD9A

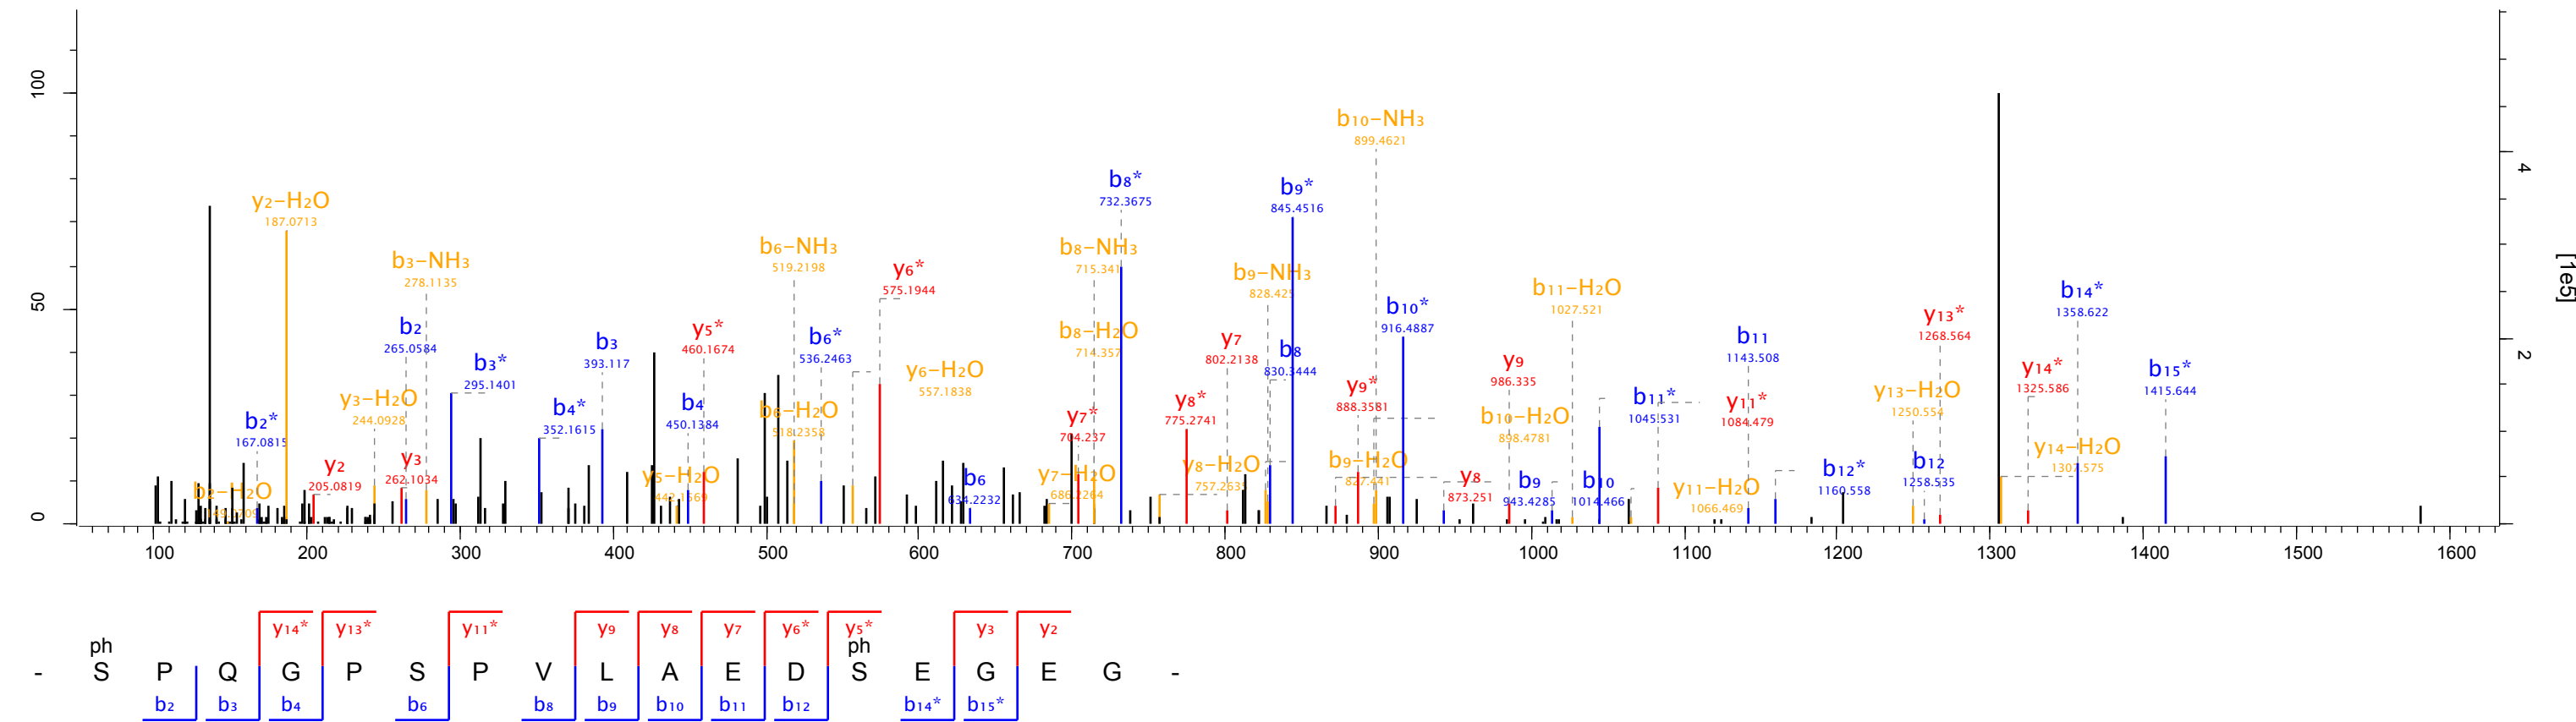



Raw file 20150812\_A375SR\_Phospho\_BR1\_02 Scan 15671 Method FTMS; HCD Score 133.16 m/z 958.35 Gene names OXR1

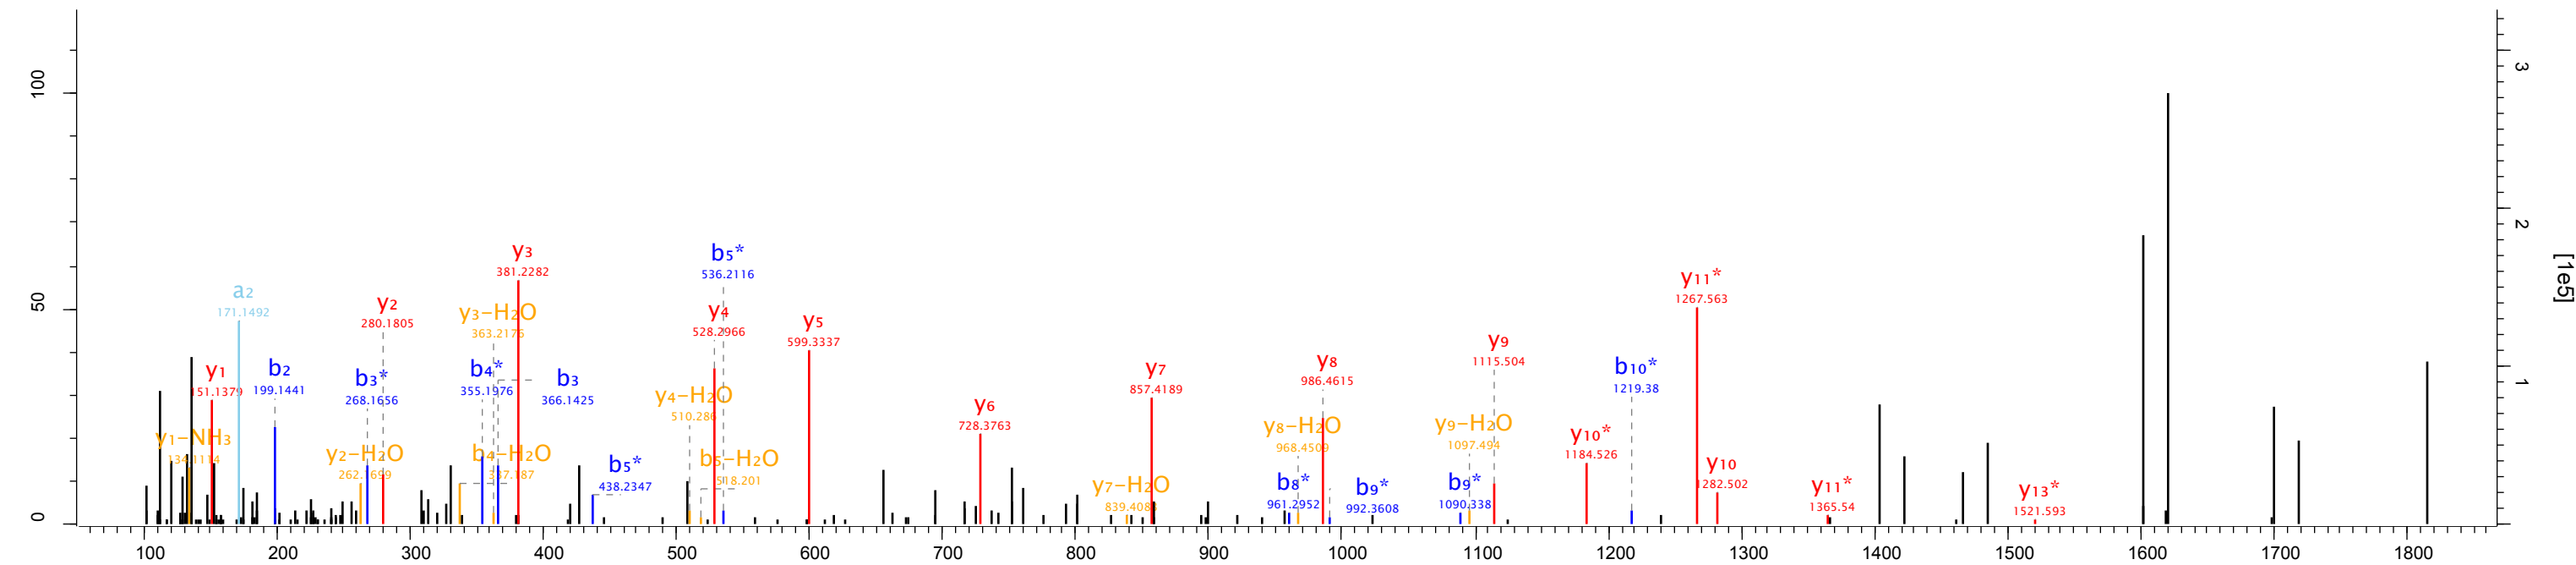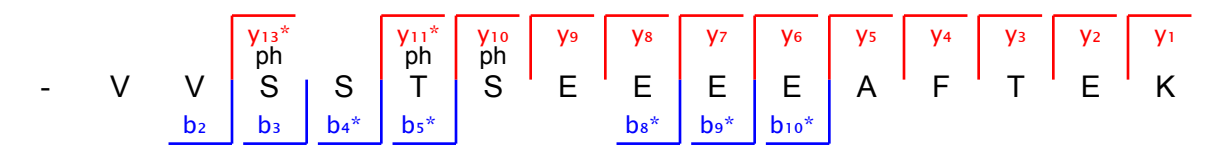

Raw file 20150812\_A375SR\_Phospho\_BR1\_02 Scan 15721 Method FTMS; HCD Score 230.67 m/z 918.36 Gene names OXR1

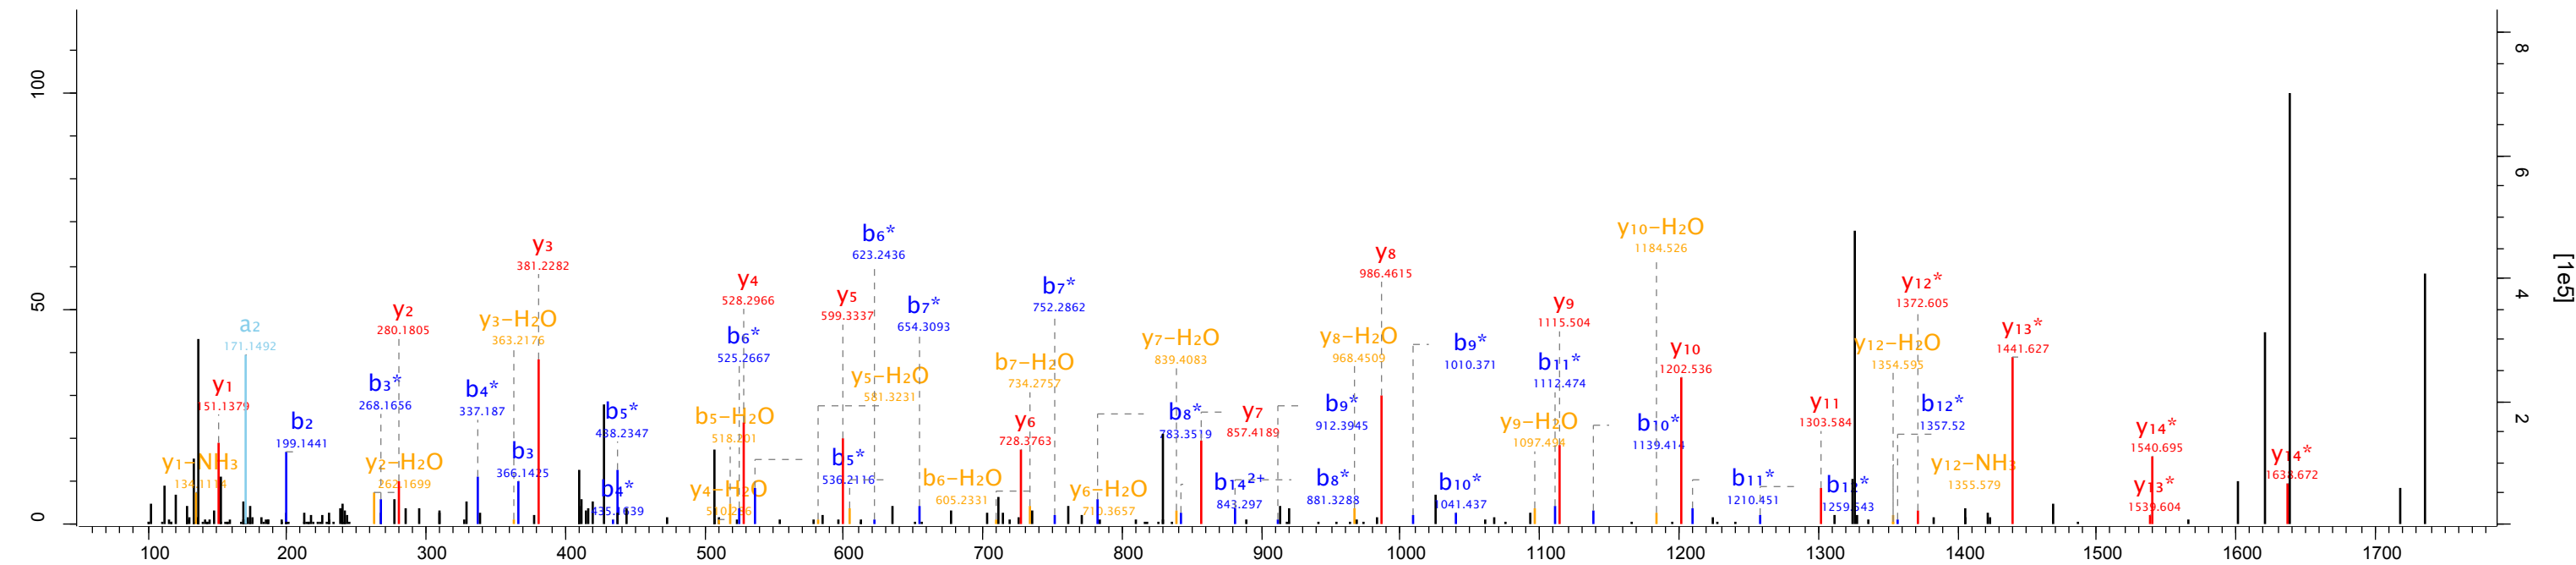

- V V V S S E E E E A F T E K -

y14\*
y13\*
y12\*
y11
y10
y9
y8
y7
y6
y5
y4
y3
y2
y1

b2
b3
b4\*
b5\*
b6\*
b7\*
b8\*
b9\*
b10\*
b11\*
b12\*
b14<sup>2+</sup>

Raw file  
20150812\_A375SR\_Phospho\_BR1\_02

Scan 16161 Method FTMS; HCD Score 193.04 m/z 1013.07 Gene names SCAF1

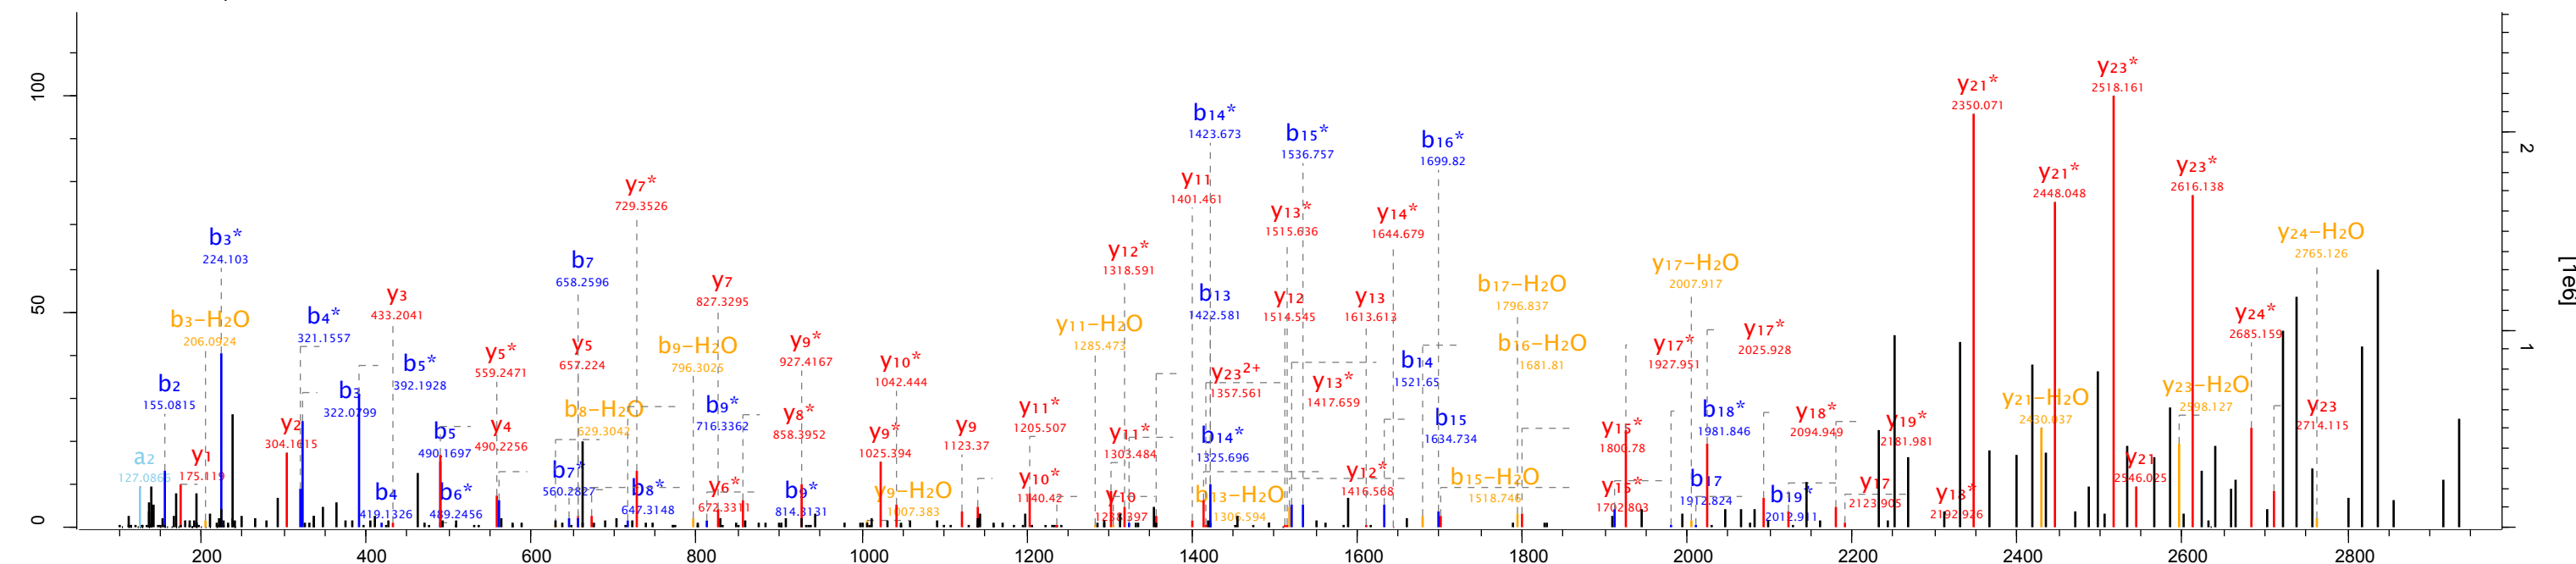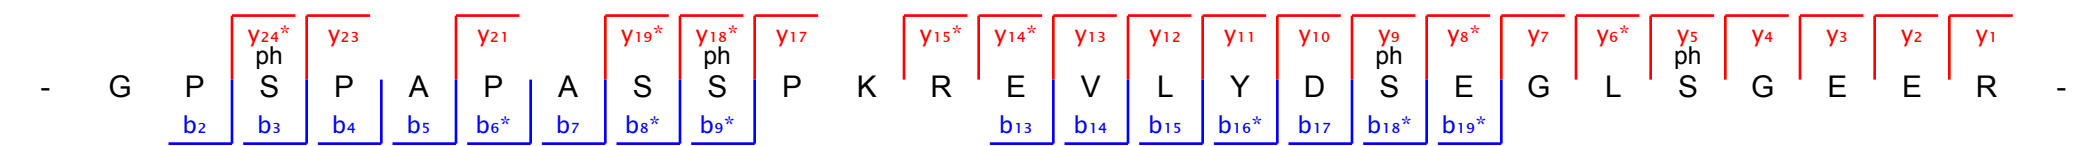

Raw file 20150812\_A375SR\_Phospho\_BR1\_02 Scan 16541 Method FTMS; HCD Score 138.8 m/z 968.35 Gene names SFMBT1

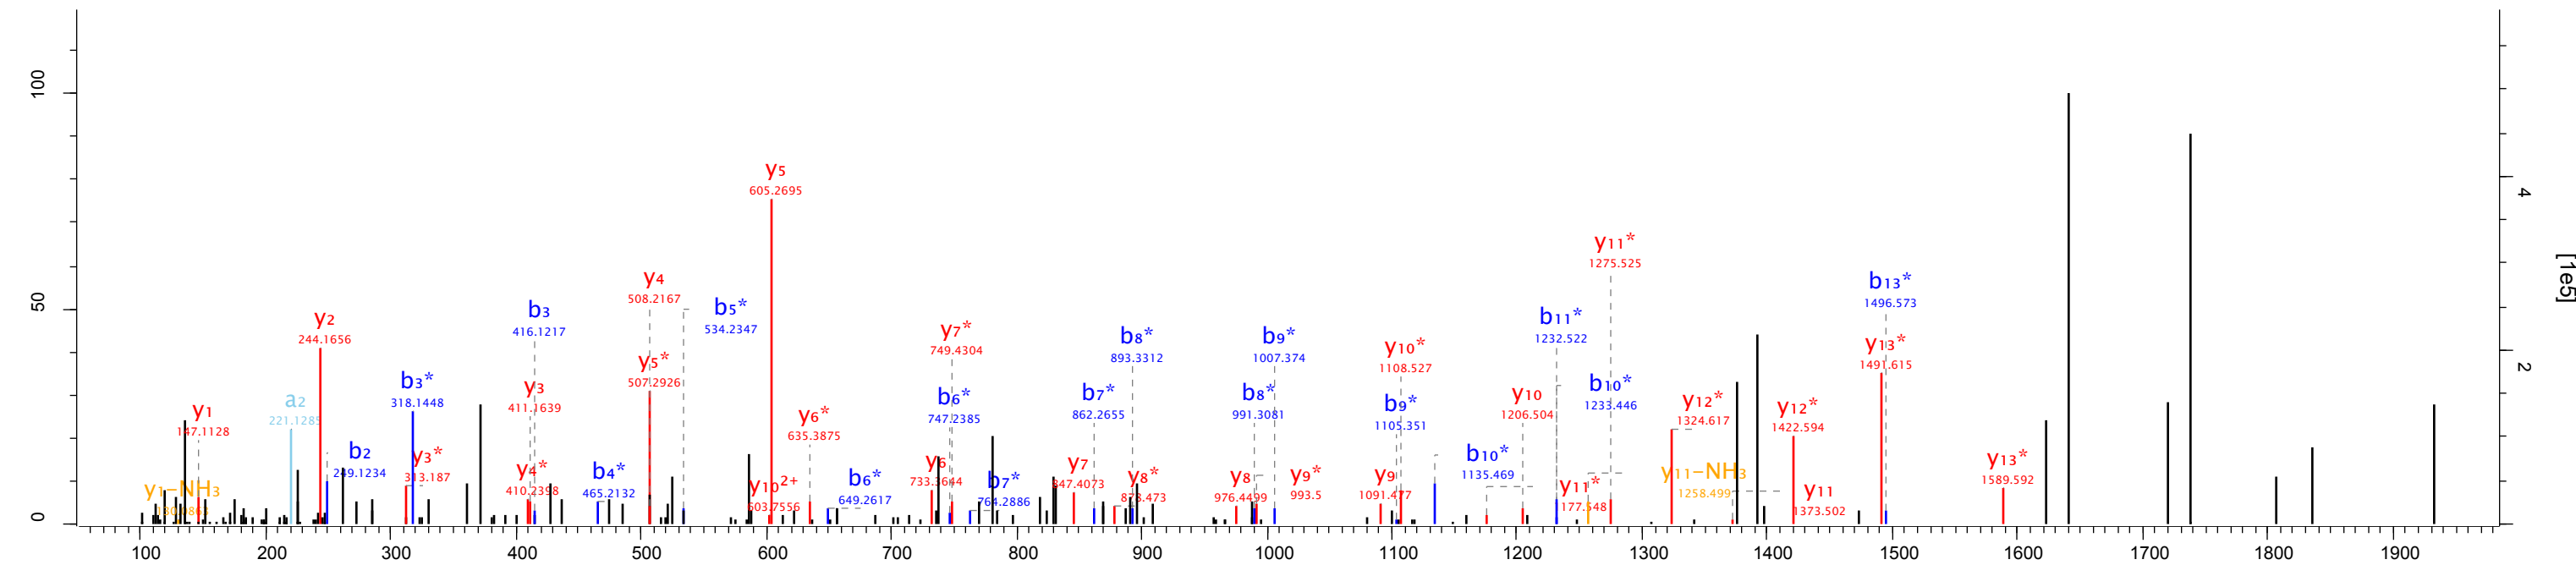

- T F y13\*  
ph  
S y12\*  
F y11  
ph  
S y10  
D y9  
D y8  
E y7  
N y6  
K y5  
P y4  
P y3  
ph  
S y2  
P y1  
K -

b2 b3 b4\* b5\* b6\* b7\* b8\* b9\* b10\* b11\* b13\*

Raw file 20150812\_A375SR\_Phospho\_BR1\_02 Scan 16831 Method FTMS; HCD Score 103.71 m/z 842.33 Gene names FARP1

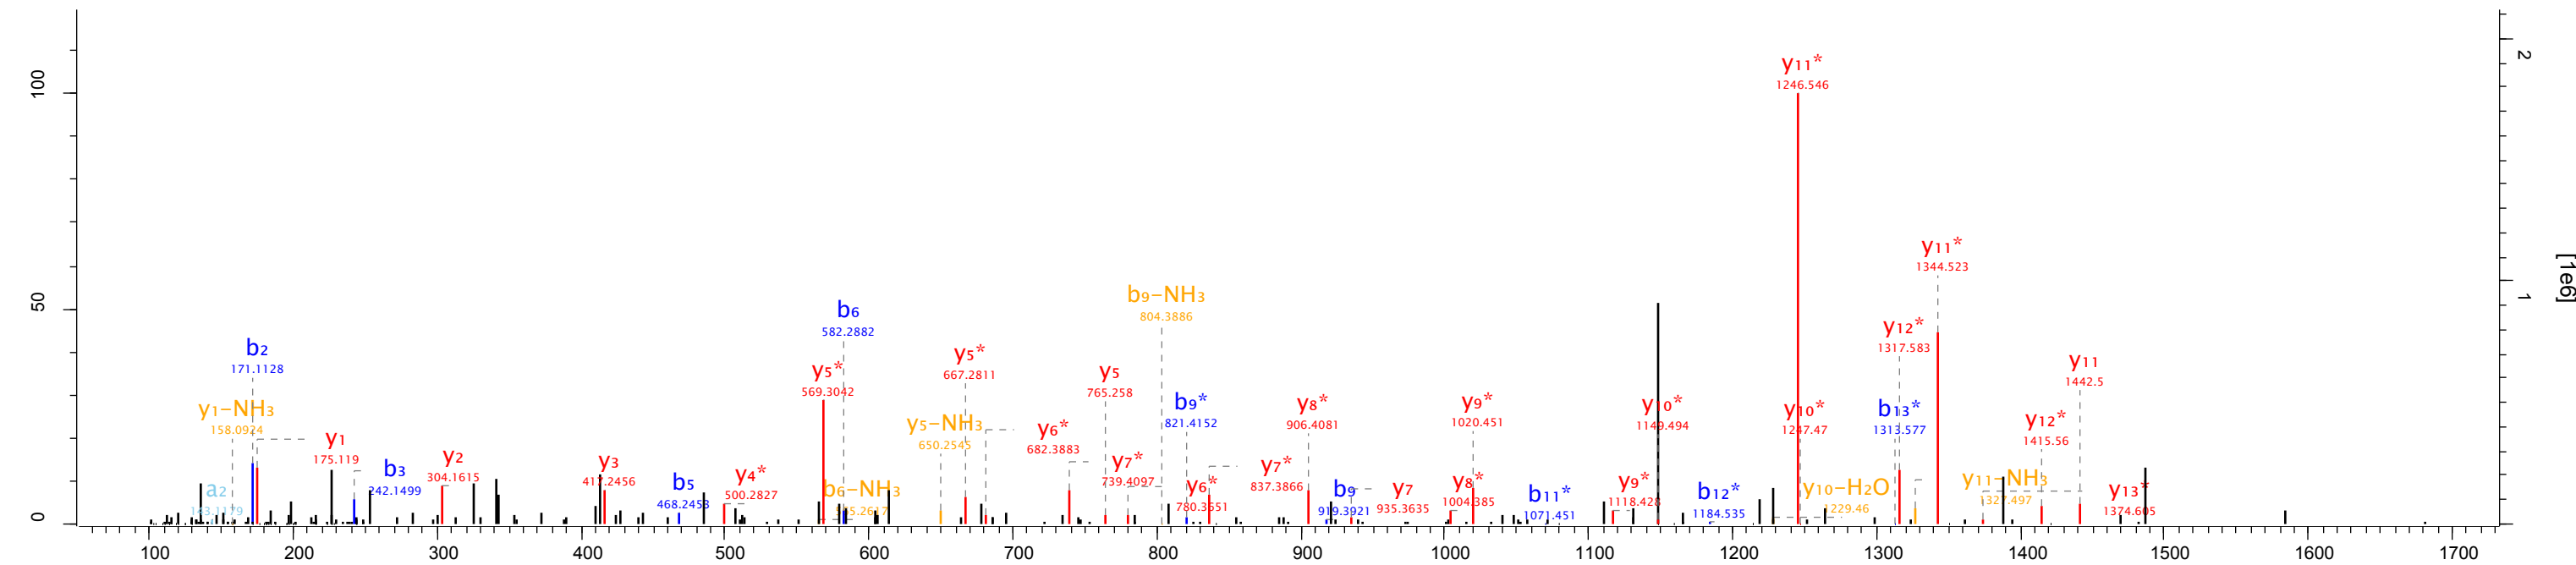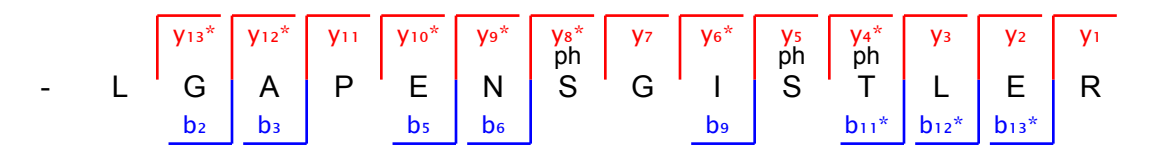

Raw file: 20150812\_A375SR\_Phospho\_BR1\_02  
 Scan: 17111  
 Method: FTMS; HCD  
 Score: 130.16  
 m/z: 907.35  
 Gene names: OSBPPL1

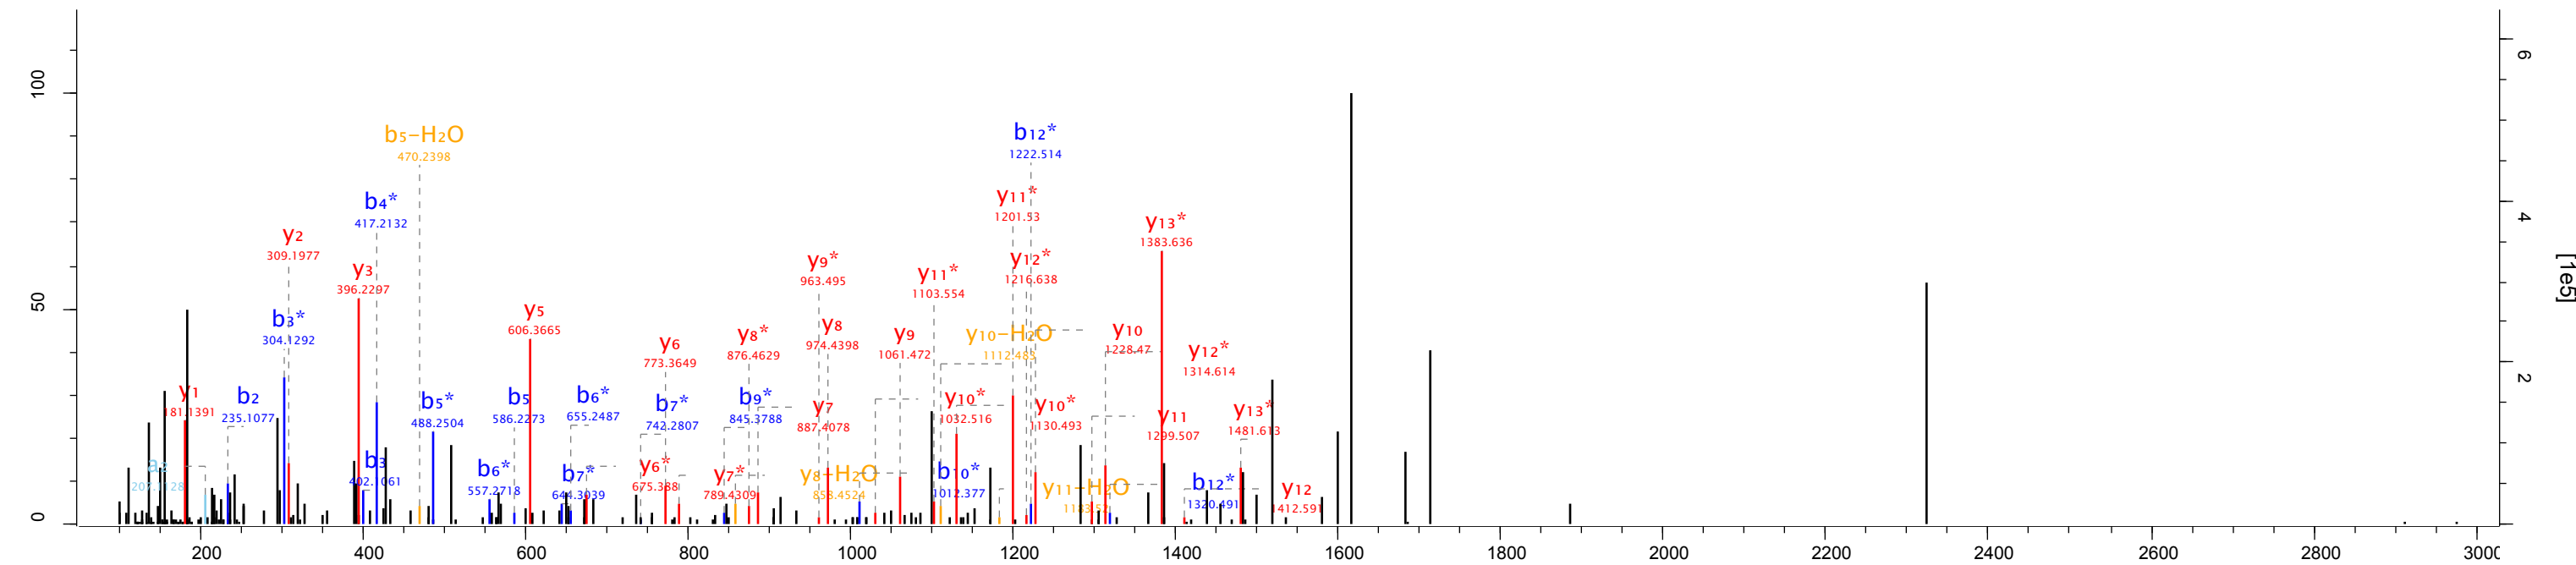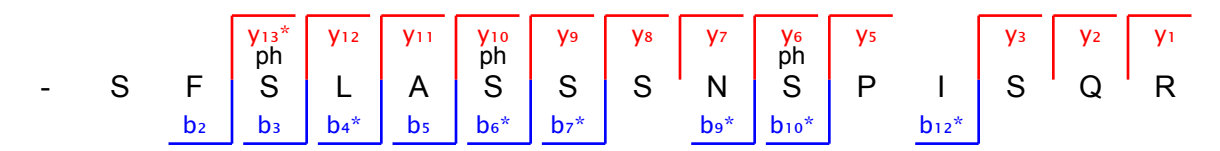

Raw file 20150812\_A375SR\_Phospho\_BR1\_02 Scan 17151 Method FTMS; HCD Score 134.88 m/z 657.78 Gene names RBM15

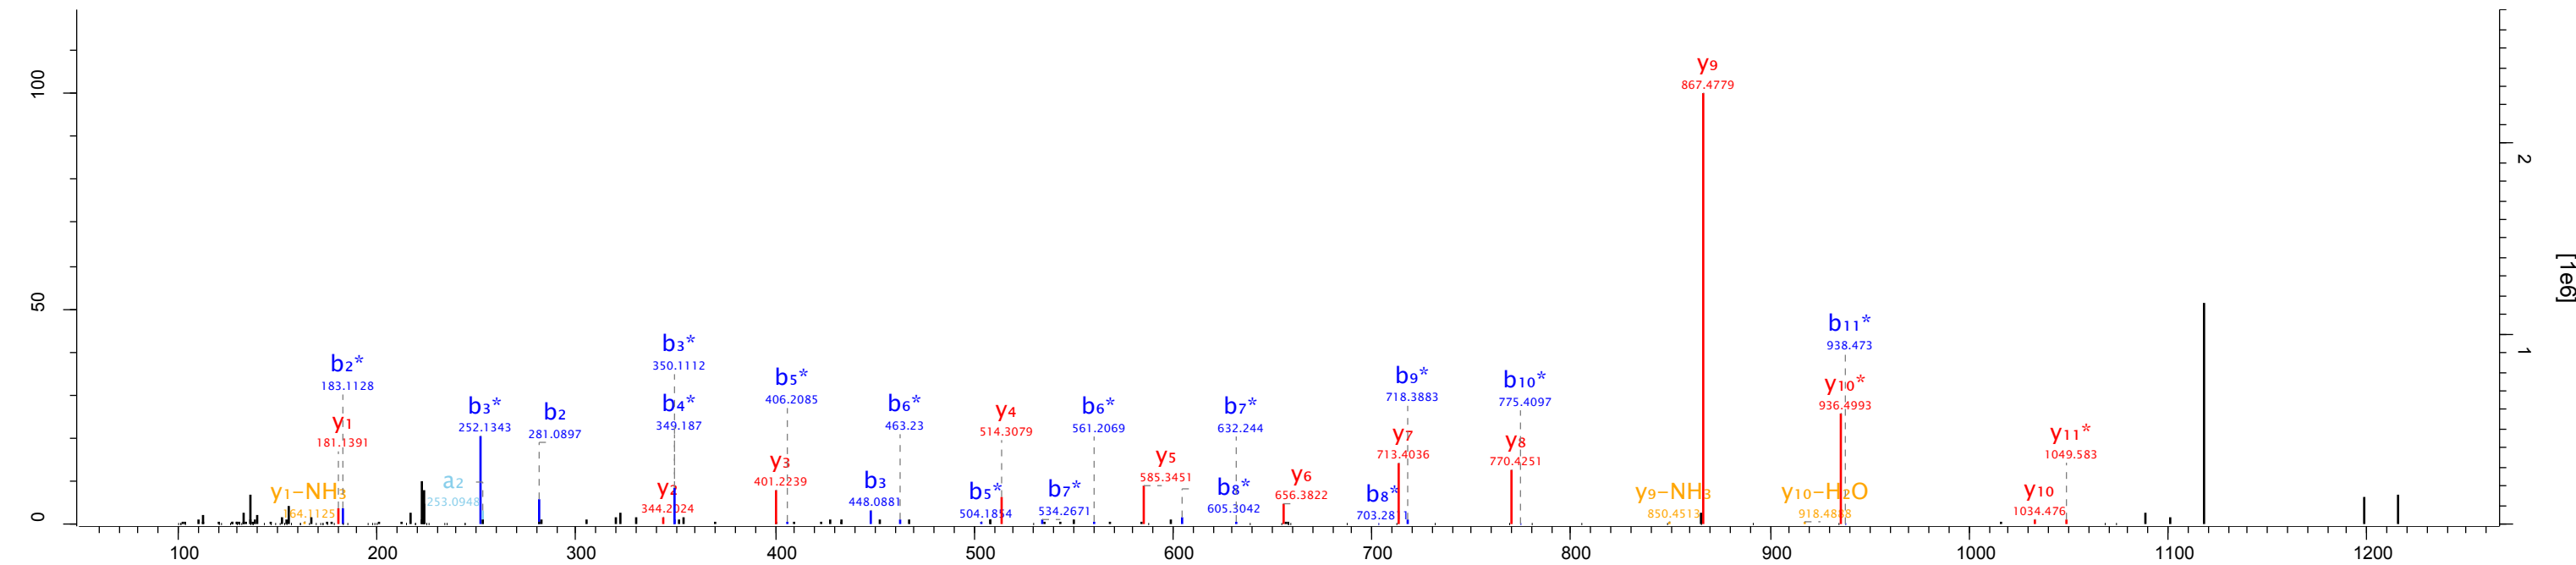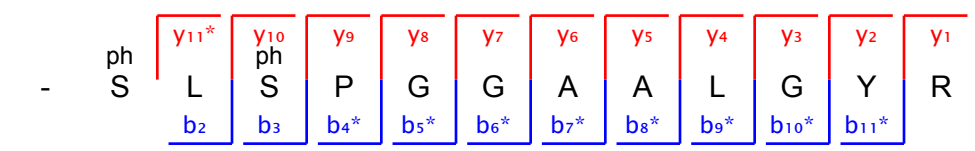

Raw file: 20150812\_A375SR\_Phospho\_BR1\_02  
 Scan: 17701 Method: FTMS; HCD Score: 193.57 m/z: 1162.46 Gene names: DKC1

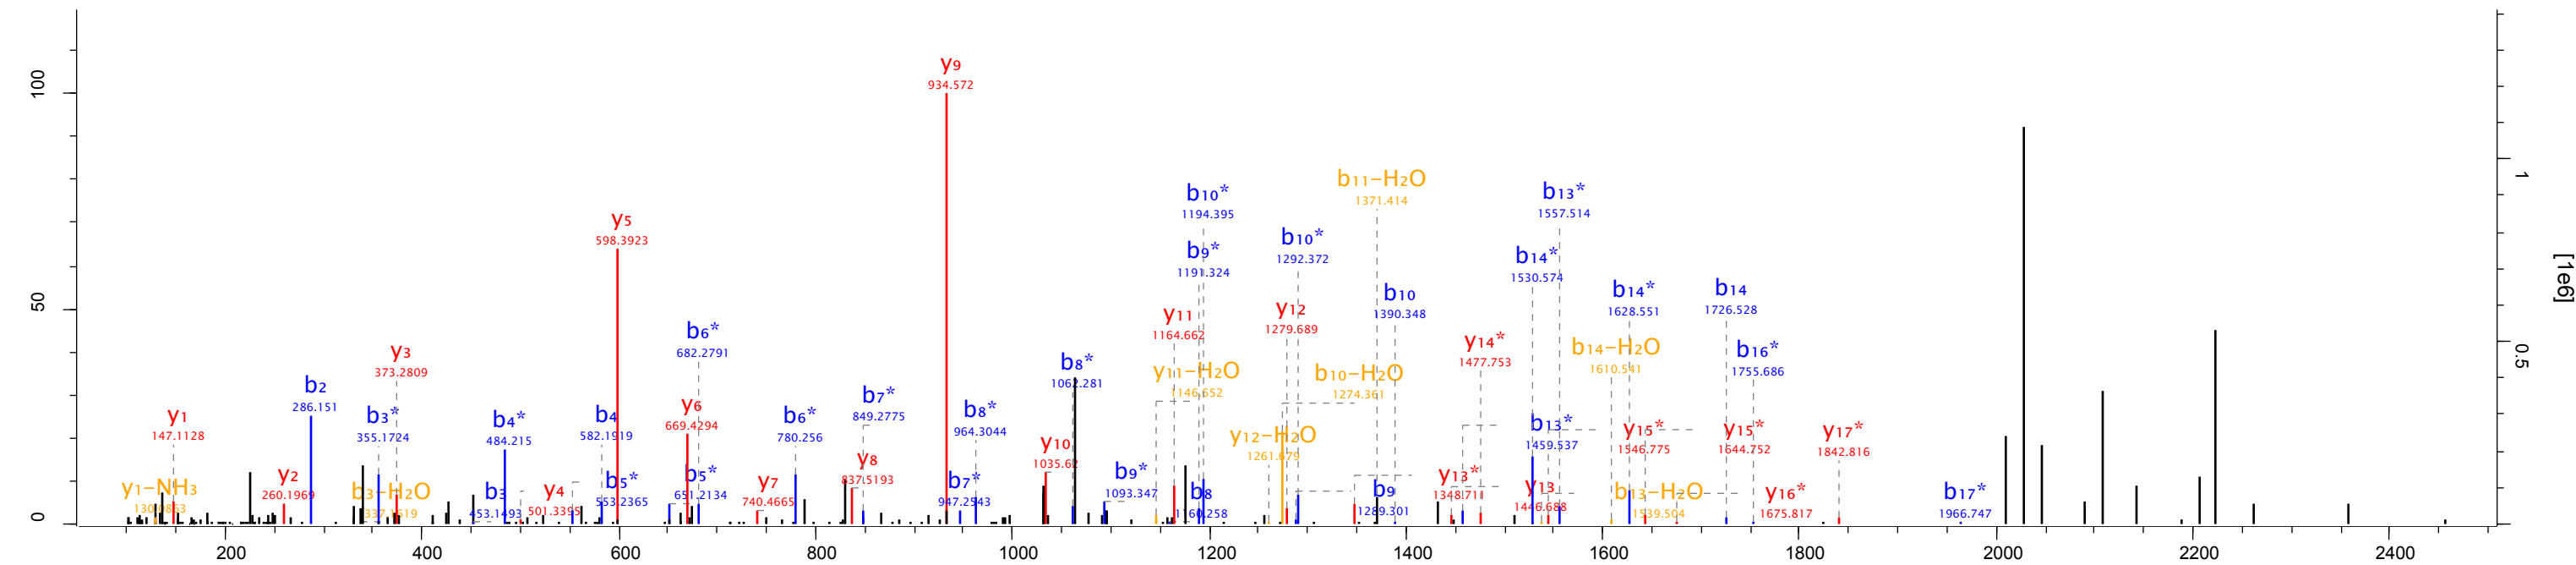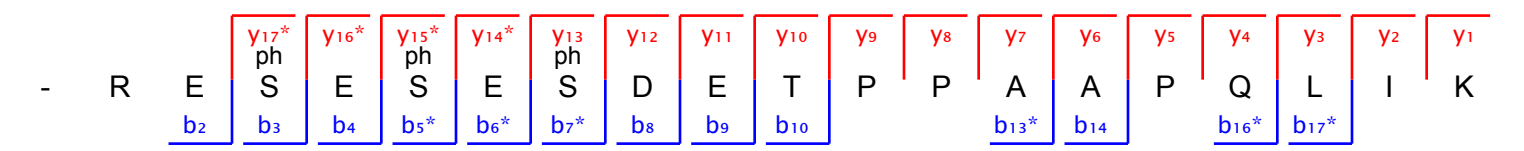



Raw file: 20150812\_A375SR\_Phospho\_BR1\_02  
 Scan: 18541 Method: FTMS; HCD Score: 103.53 m/z: 990.82 Gene names: RPL22L1

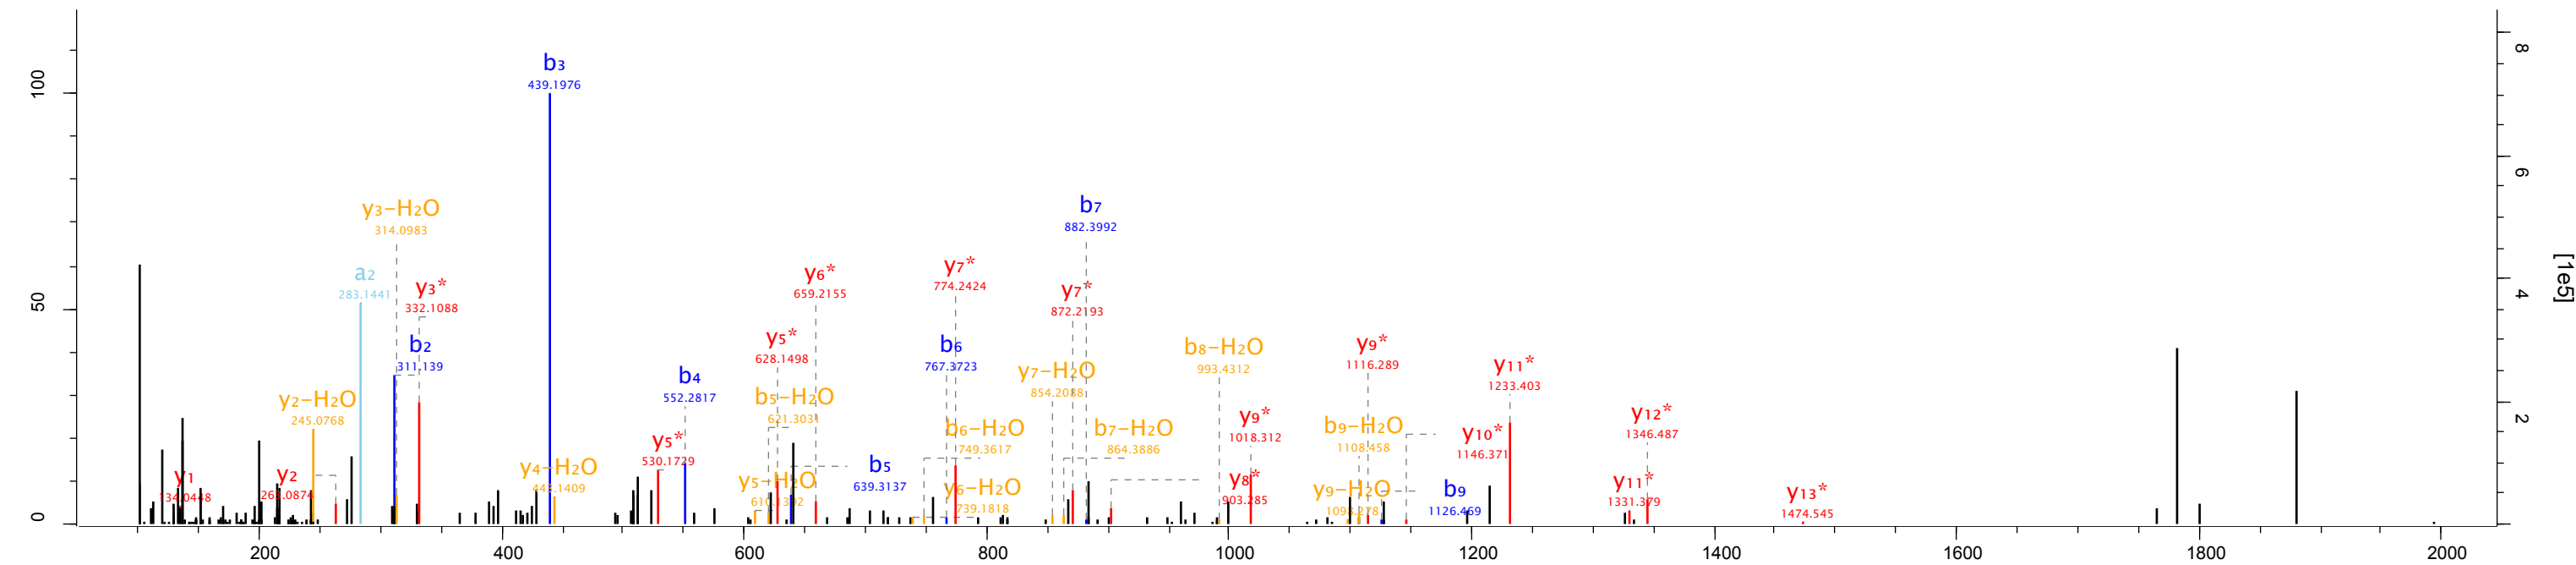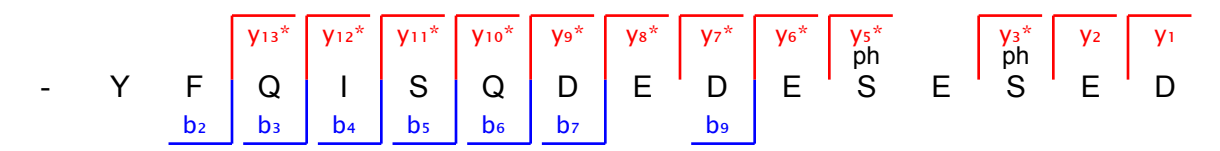

Raw file: 20150812\_A375SR\_Phospho\_BR1\_02  
 Scan: 18931 Method: FTMS; HCD Score: 200.79 m/z: 1226.48 Gene names: RIOK2

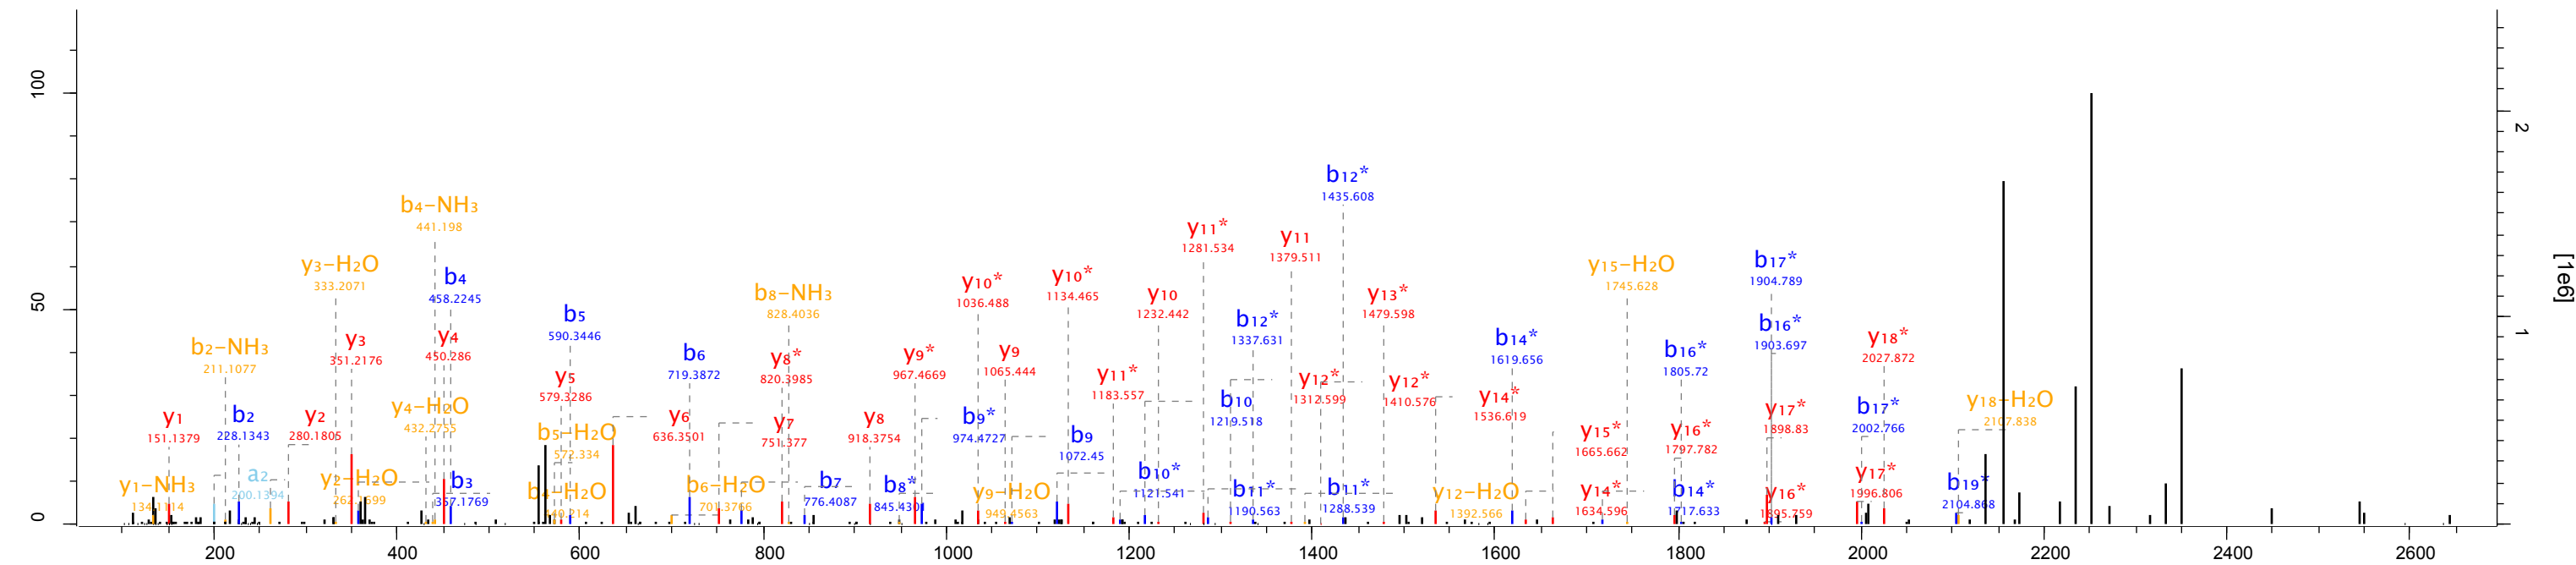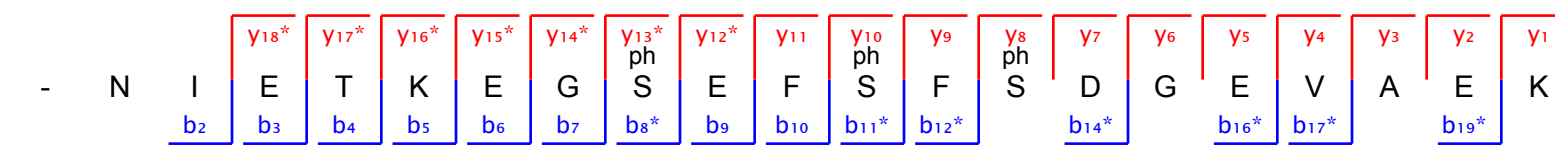

Raw file: 20150812\_A375SR\_Phospho\_BR1\_02  
 Scan: 19061 Method: FTMS; HCD Score: 109.17 m/z: 1238.02 Gene names: USP34

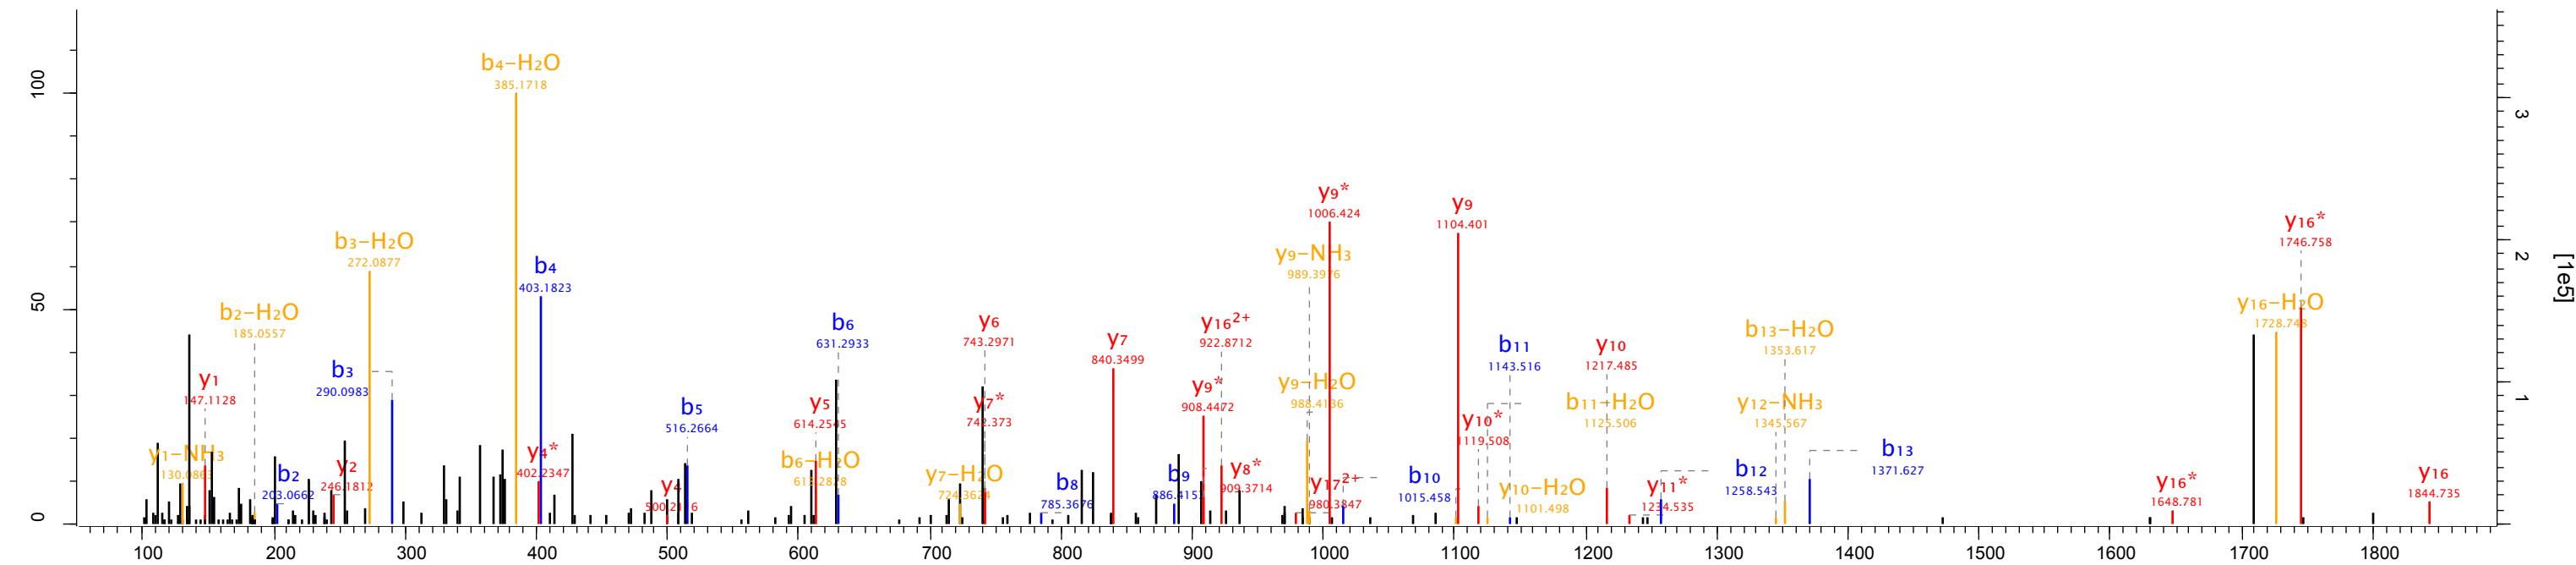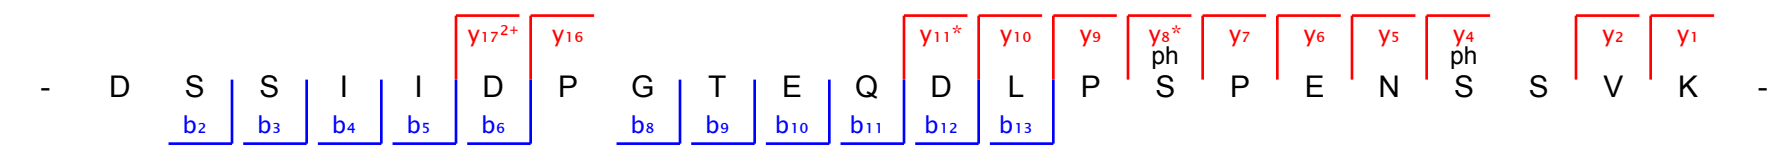

Raw file: 20150812\_A375SR\_Phospho\_BR1\_02  
 Scan: 19931 Method: FTMS; HCD Score: 110.94 m/z: 1303.5 Gene names: C11orf57

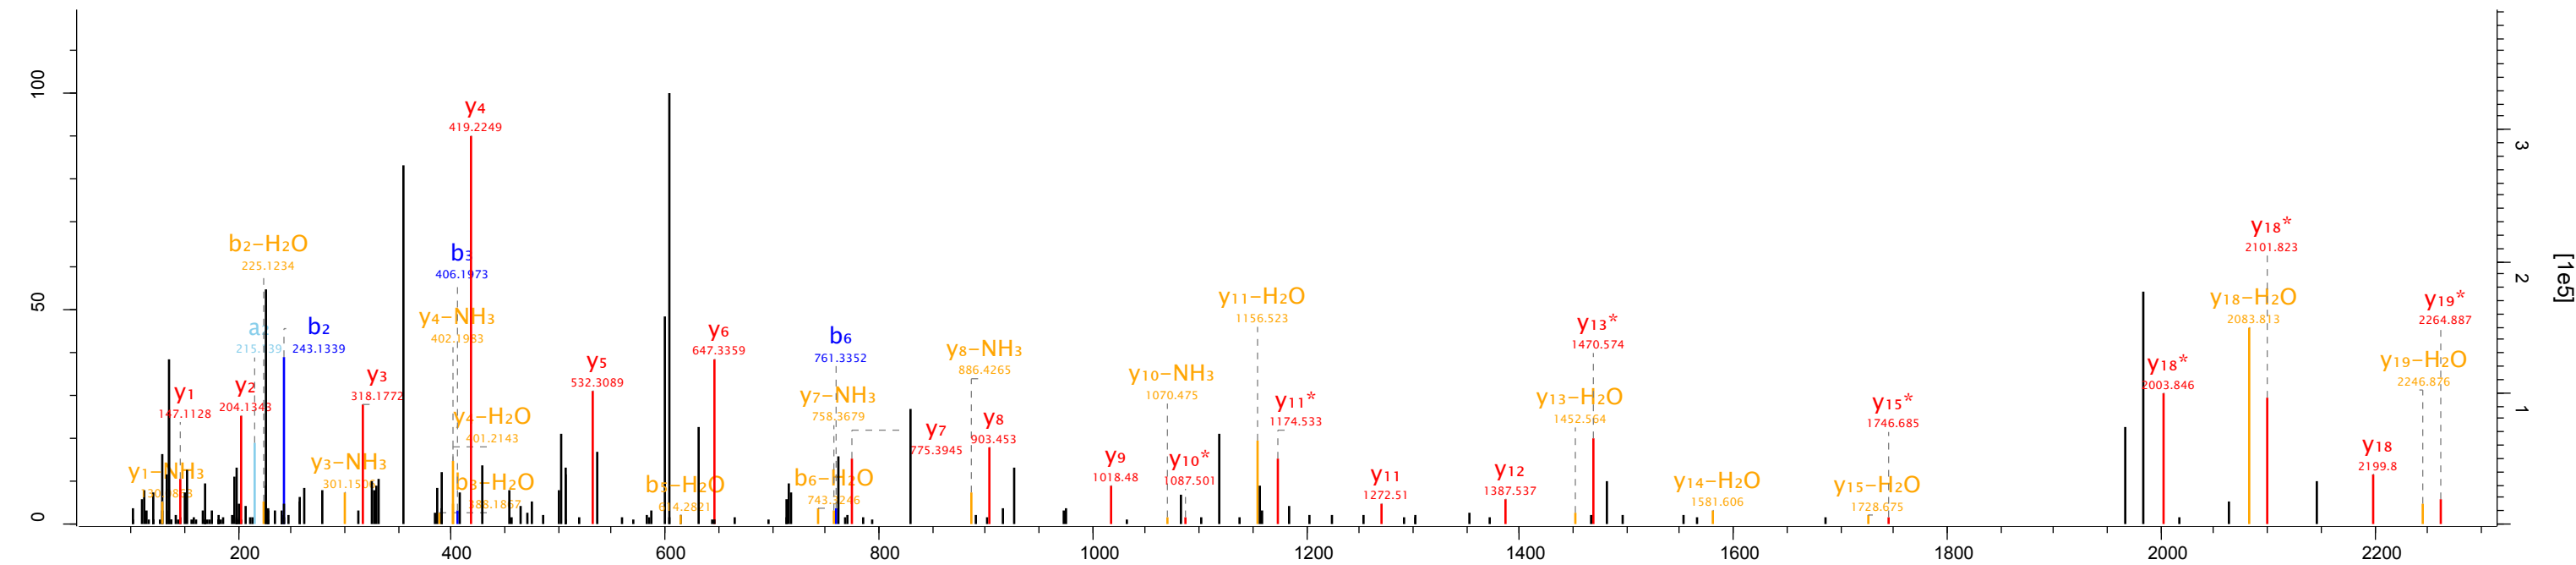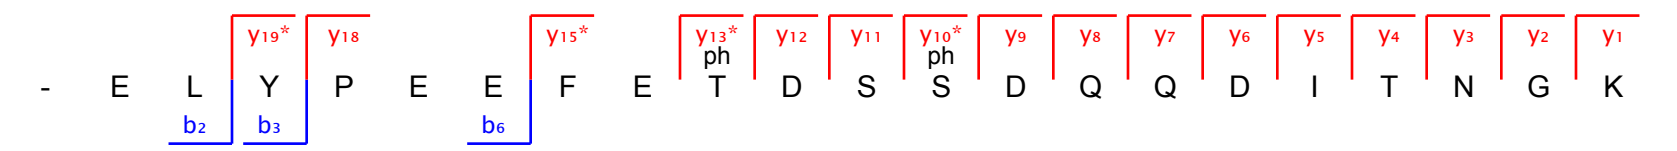

Raw file 20150812\_A375SR\_Phospho\_BR1\_02 Scan 20831 Method FTMS; HCD Score 41.05 m/z 1045.09 Gene names PRRX1

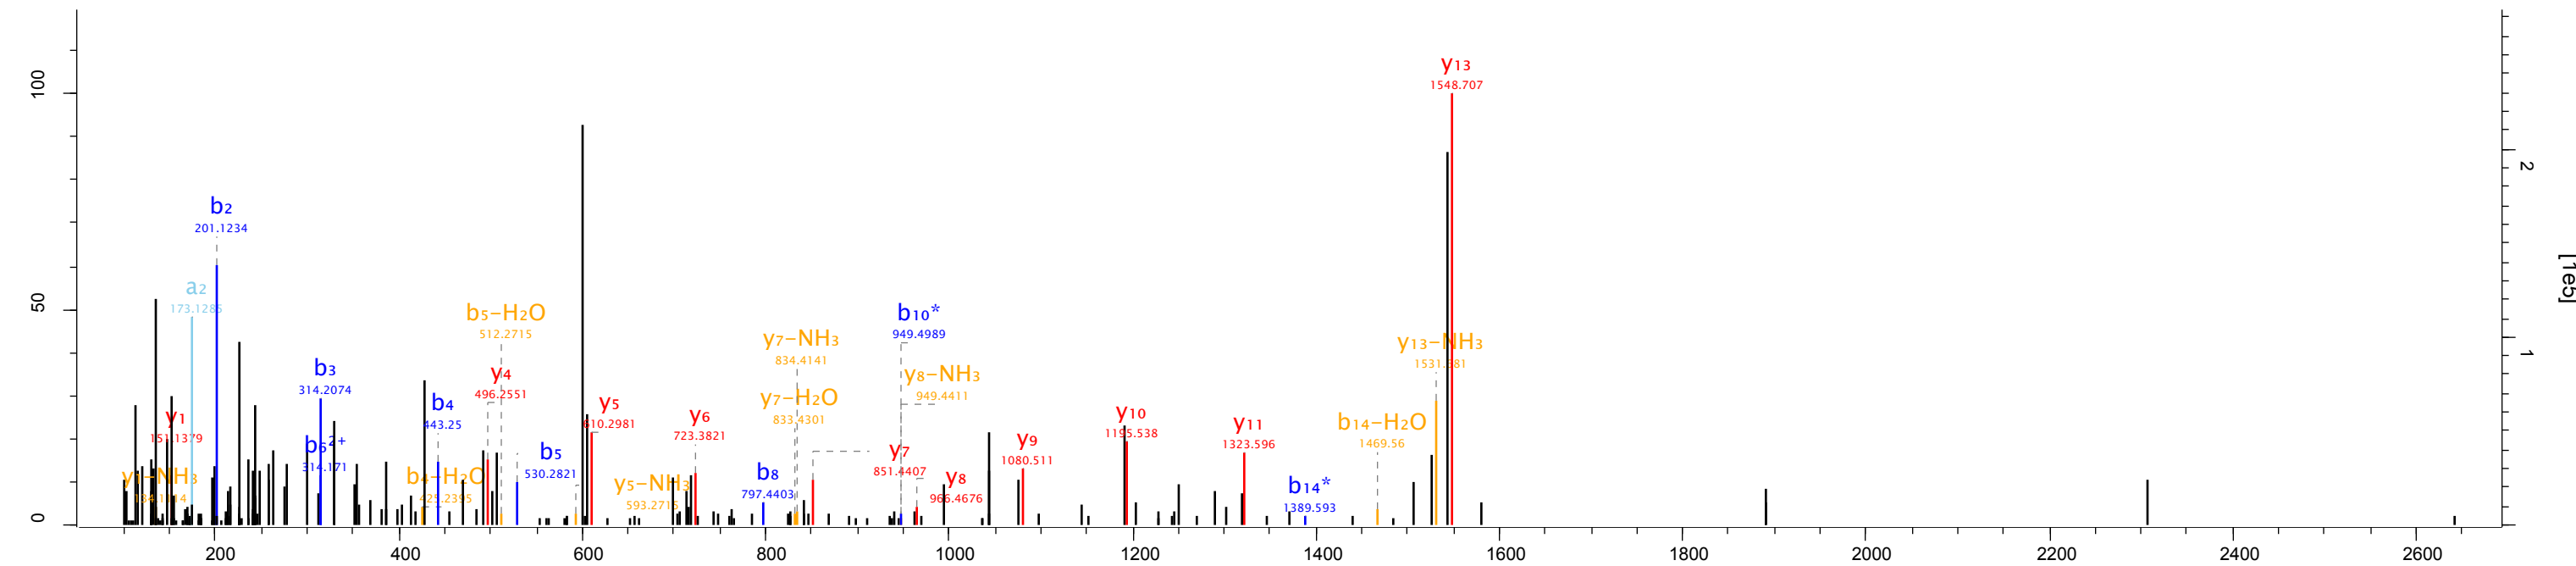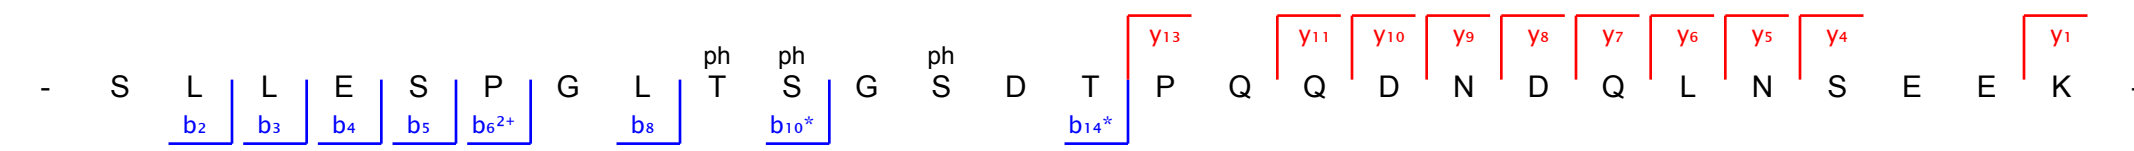

Raw file  
20150812\_A375SR\_Phospho\_BR1\_02

Scan 20981 Method FTMS; HCD Score 47.1 m/z 1208.52 Gene names SPAG9

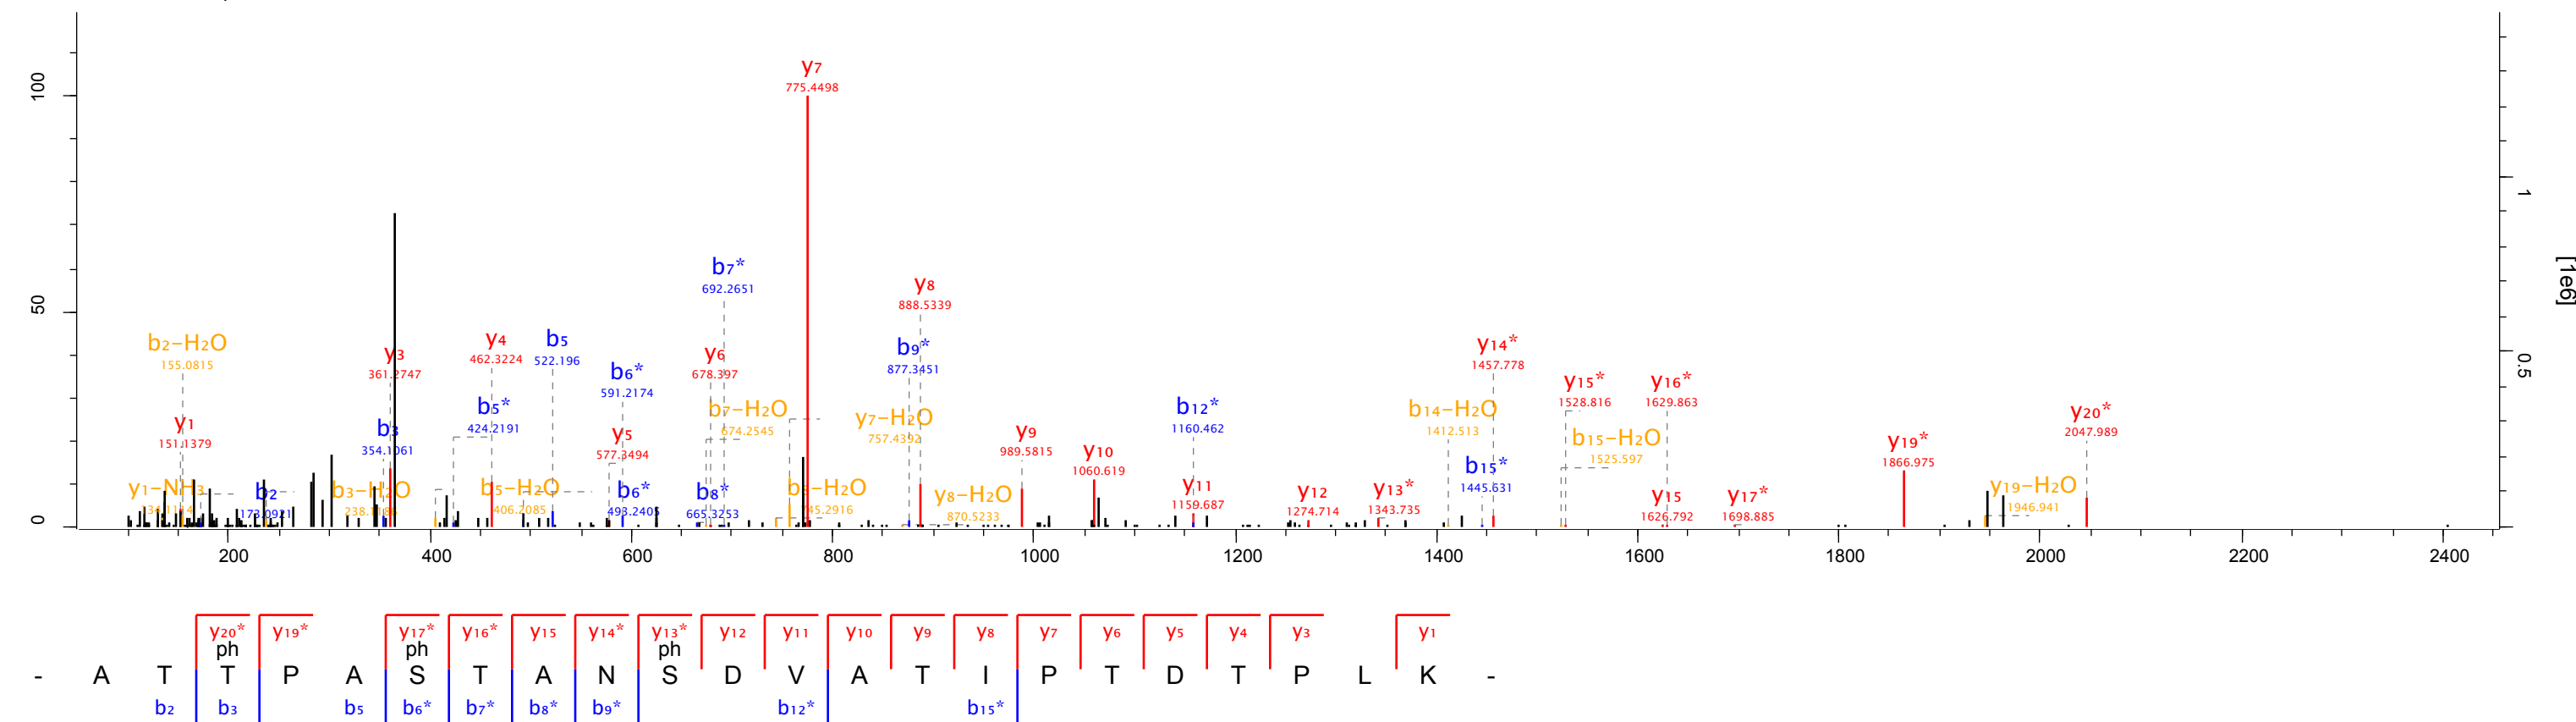

Raw file 20150812\_A375SR\_Phospho\_BR1\_02 Scan 21341 Method FTMS; HCD Score 40.68 m/z 1019.78 Gene names SSFA2

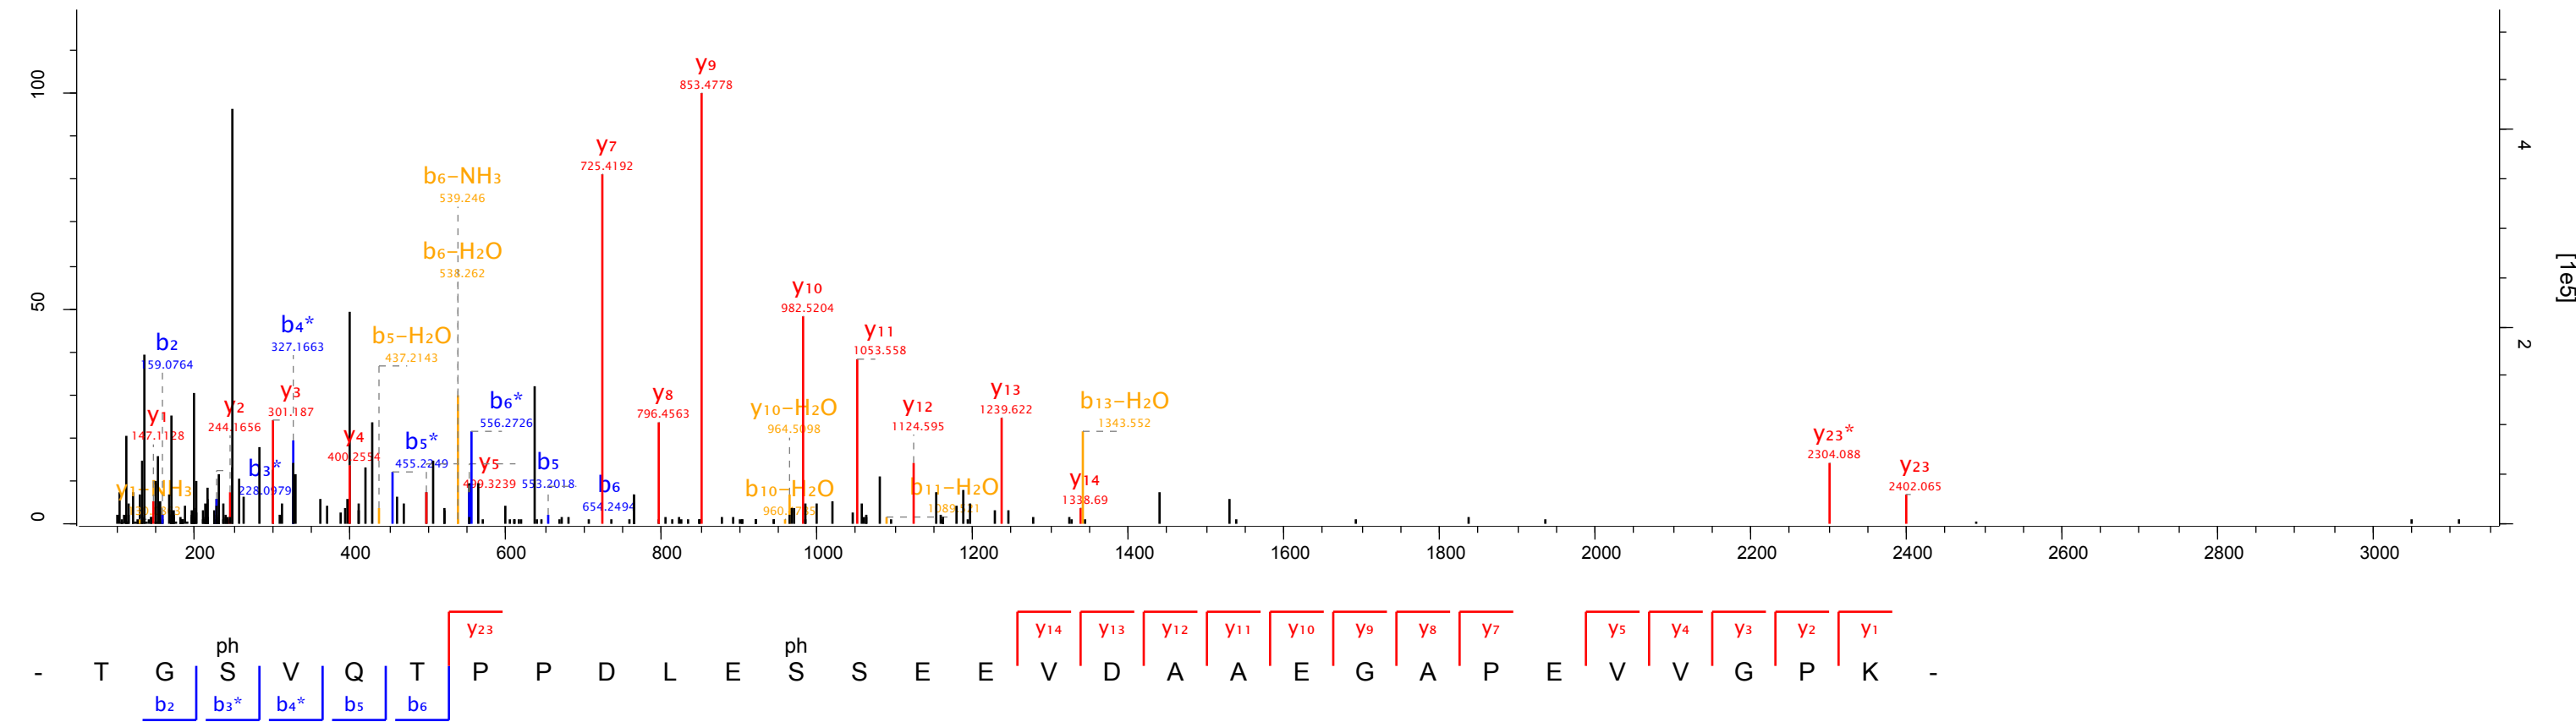

Raw file: 20150812\_A375SR\_Phospho\_BR1\_02  
 Scan: 21721 Method: FTMS; HCD Score: 107.59 m/z: 1496.96 Gene names: MAP4K4

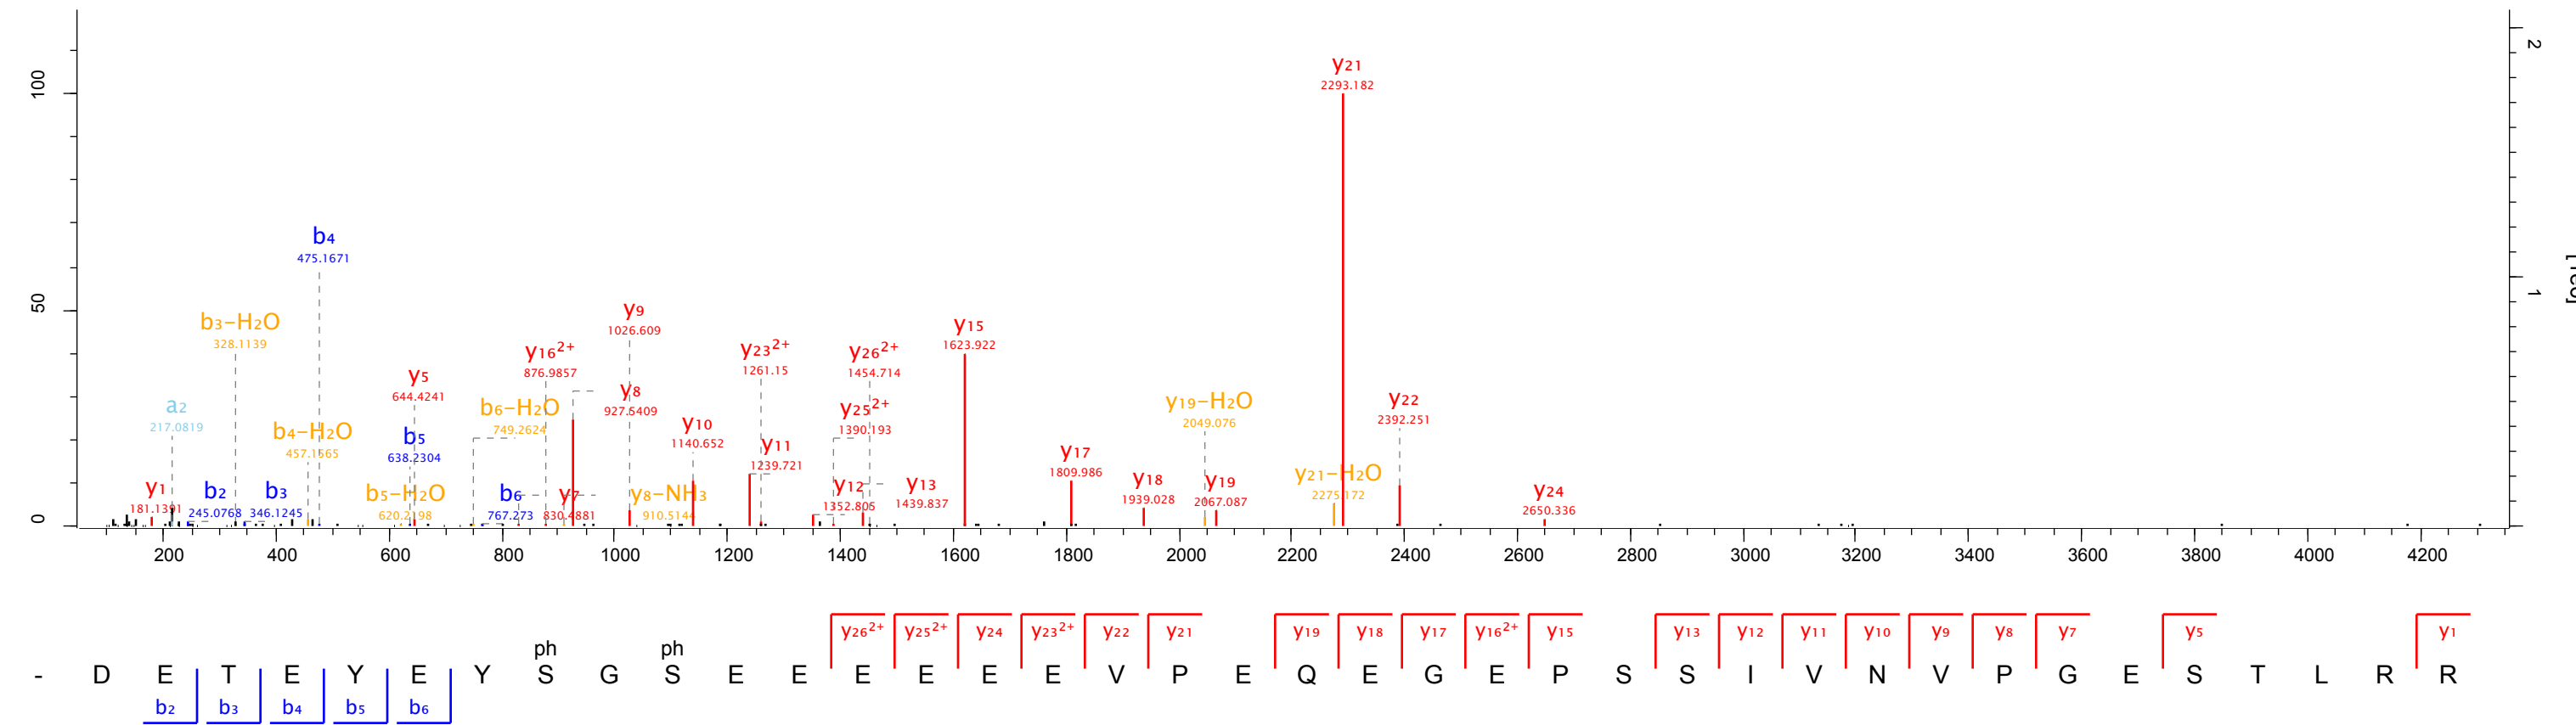



Raw file 20150812\_A375SR\_Phospho\_BR1\_02 Scan 21801 Method FTMS; HCD Score 123.35 m/z 1122.93 Gene names PDXDC1

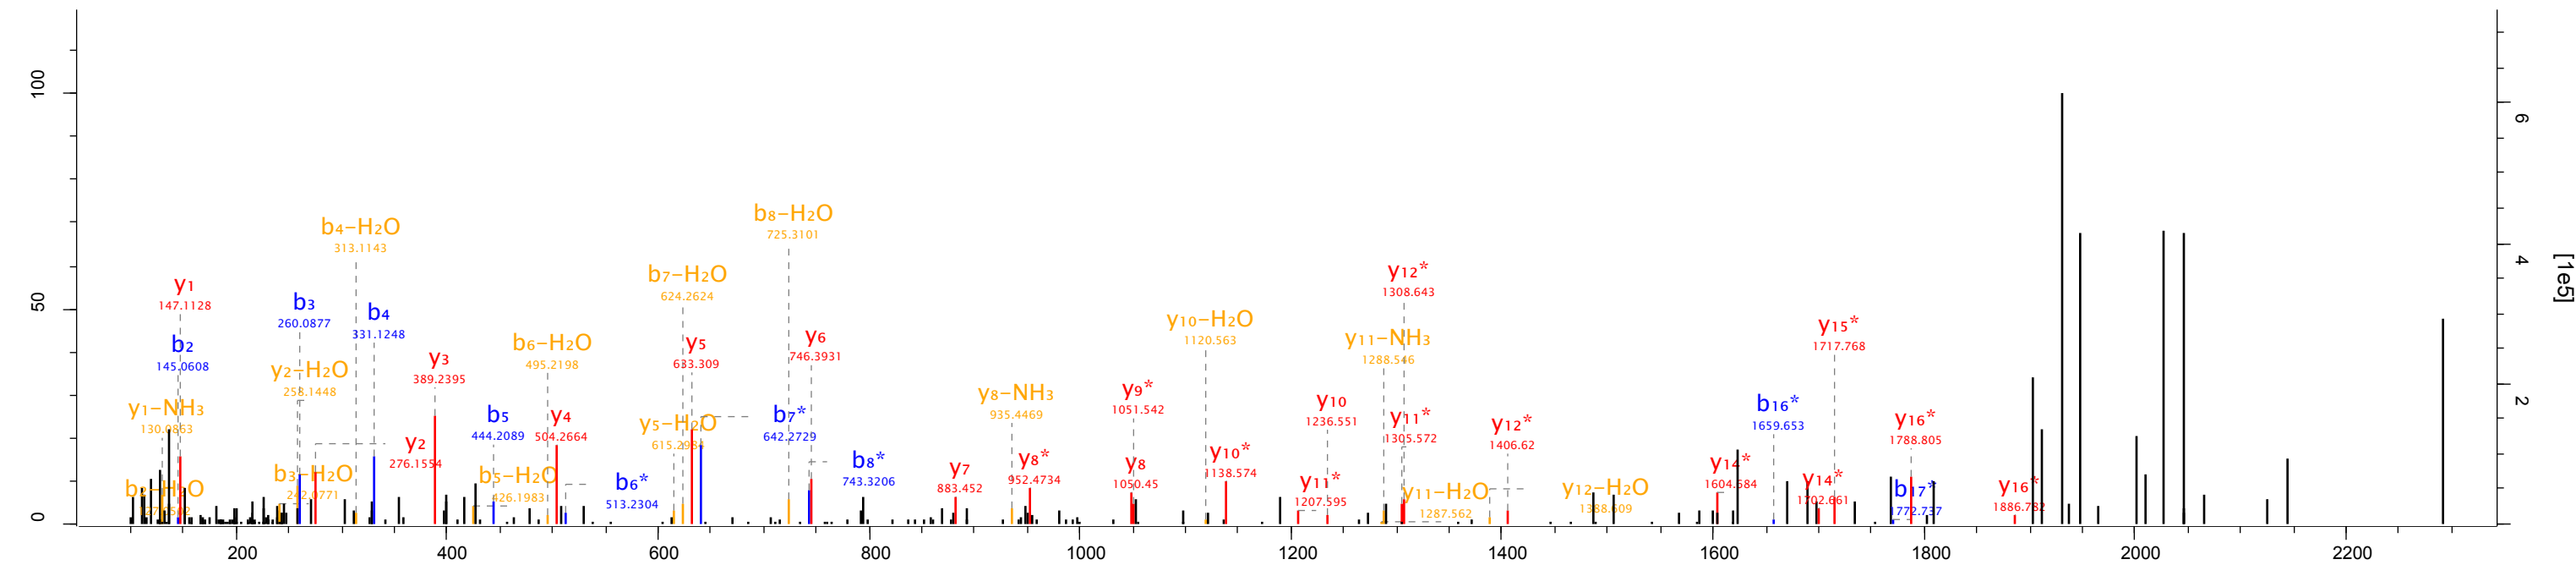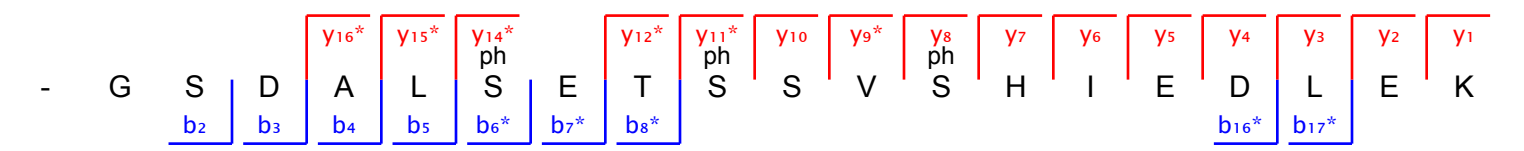



Raw file Scan Method m/z Gene names  
 20150812\_A375SR\_Phospho\_BR1\_02 22431 FTMS; HCD 132.67 968.44 AGGF1

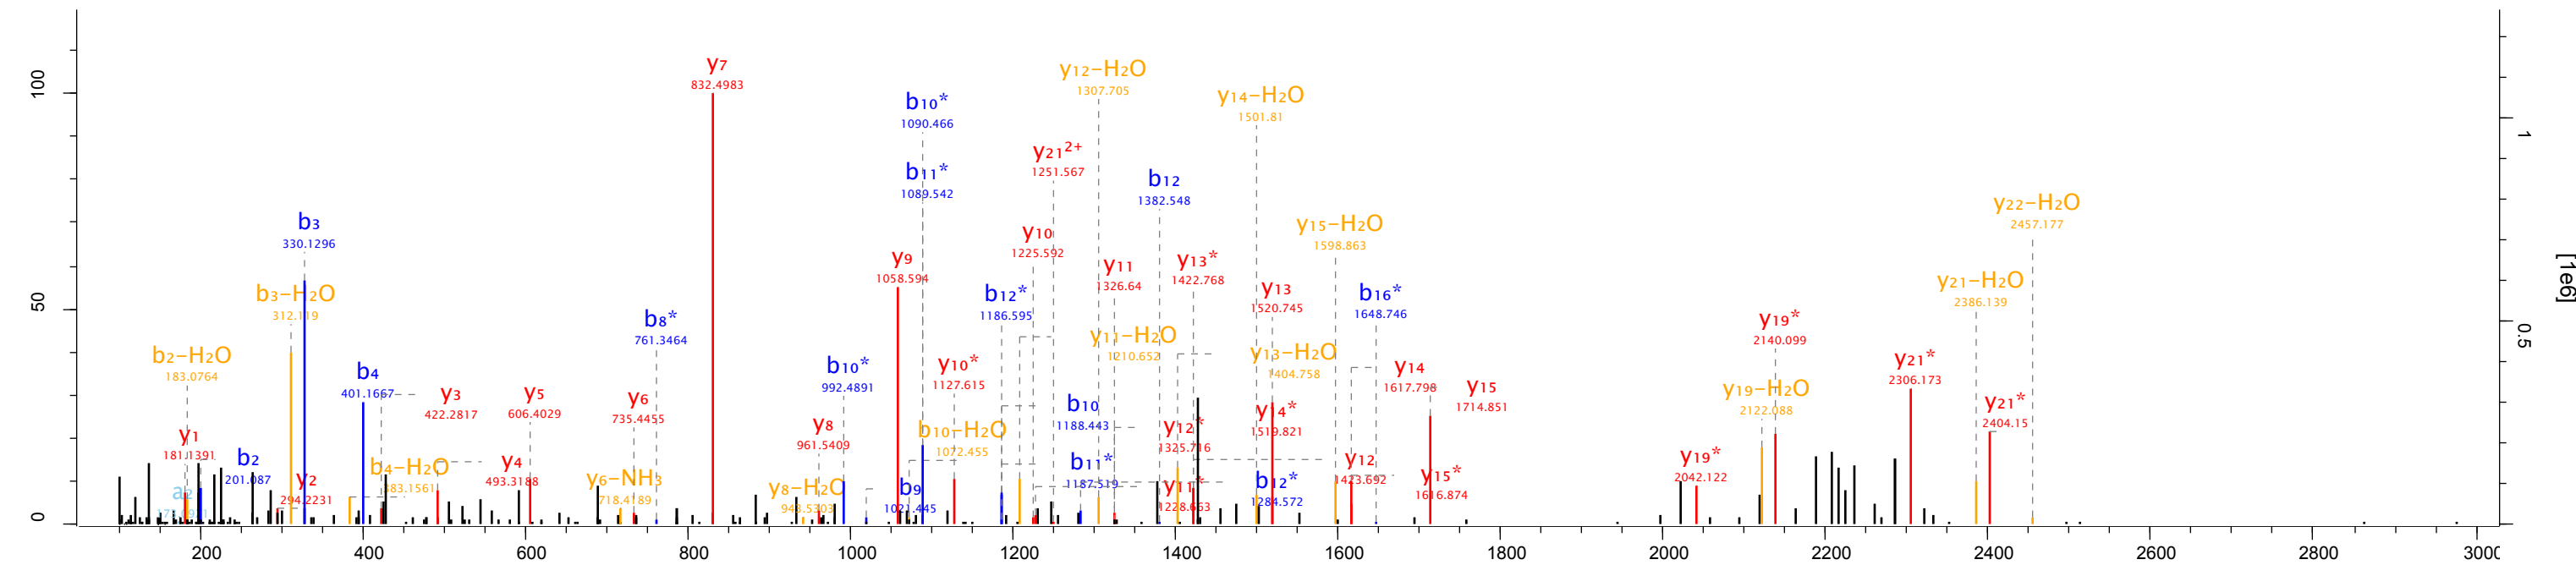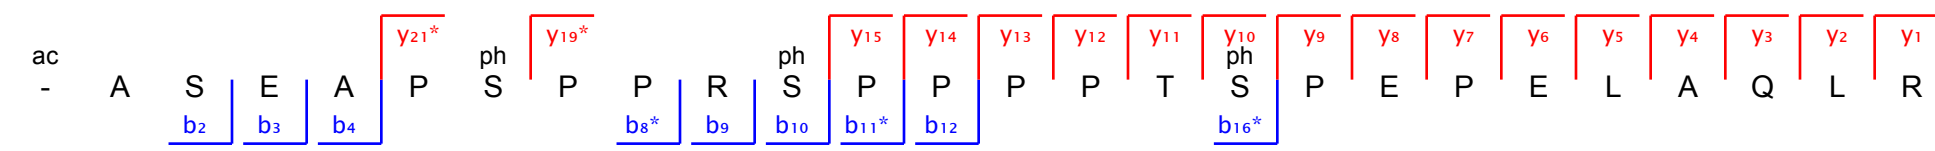

Raw file Scan Method Score m/z Gene names  
 20150812\_A375SR\_Phospho\_BR1\_02 22891 FTMS; HCD 120.66 919.36 CRAMP1L

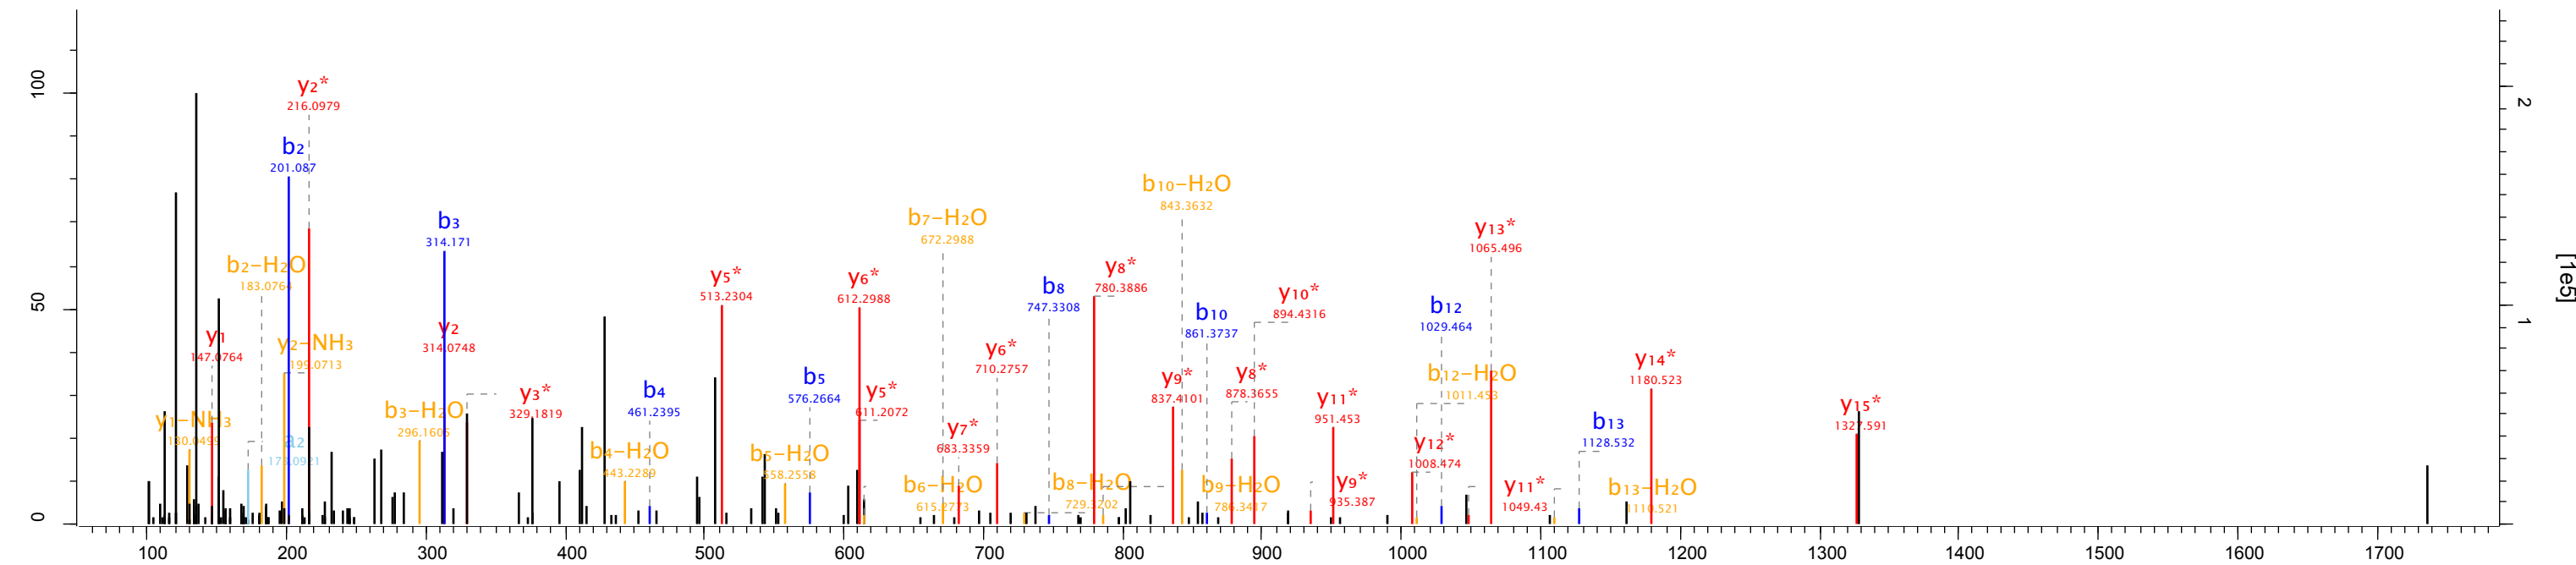

- E A L F D G G G G P A V S D L S Q -

b<sub>2</sub>
b<sub>3</sub>
b<sub>4</sub>
b<sub>5</sub>
b<sub>8</sub>
b<sub>10</sub>
b<sub>12</sub>
b<sub>13</sub>

y<sub>15</sub>\*
y<sub>14</sub>\*
y<sub>13</sub>\*
y<sub>12</sub>\*
y<sub>11</sub>\*
y<sub>10</sub>\*
y<sub>9</sub>\*
y<sub>8</sub>\*
y<sub>7</sub>\*
y<sub>6</sub>\*
y<sub>5</sub>\*
y<sub>3</sub>\*
y<sub>2</sub> ph
y<sub>1</sub>



Raw file 20150812\_A375SR\_Phospho\_BR1\_02 Scan 24981 Method FTMS; HCD Score 65.92 m/z 915.72 Gene names SNX29

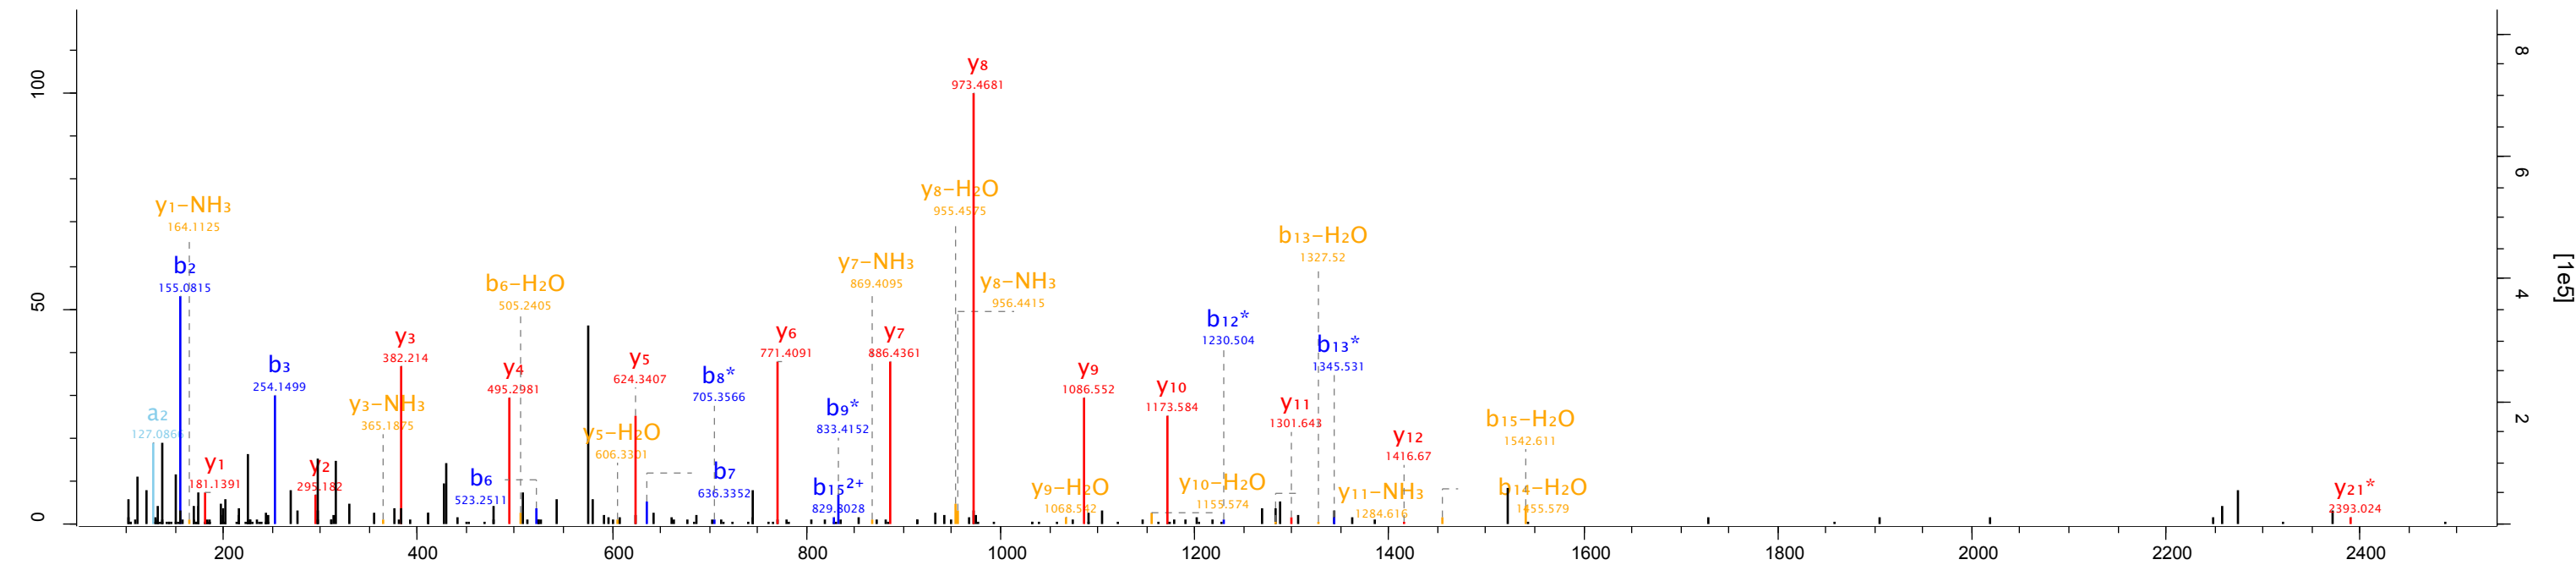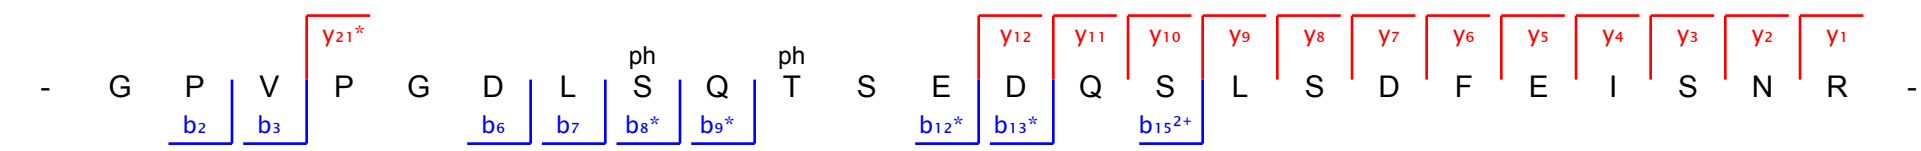

Raw file  
20150812\_A375SR\_Phospho\_BR1\_02

Scan 24991 Method FTMS; HCD Score 64.73 m/z 1372.58 Gene names SNX29

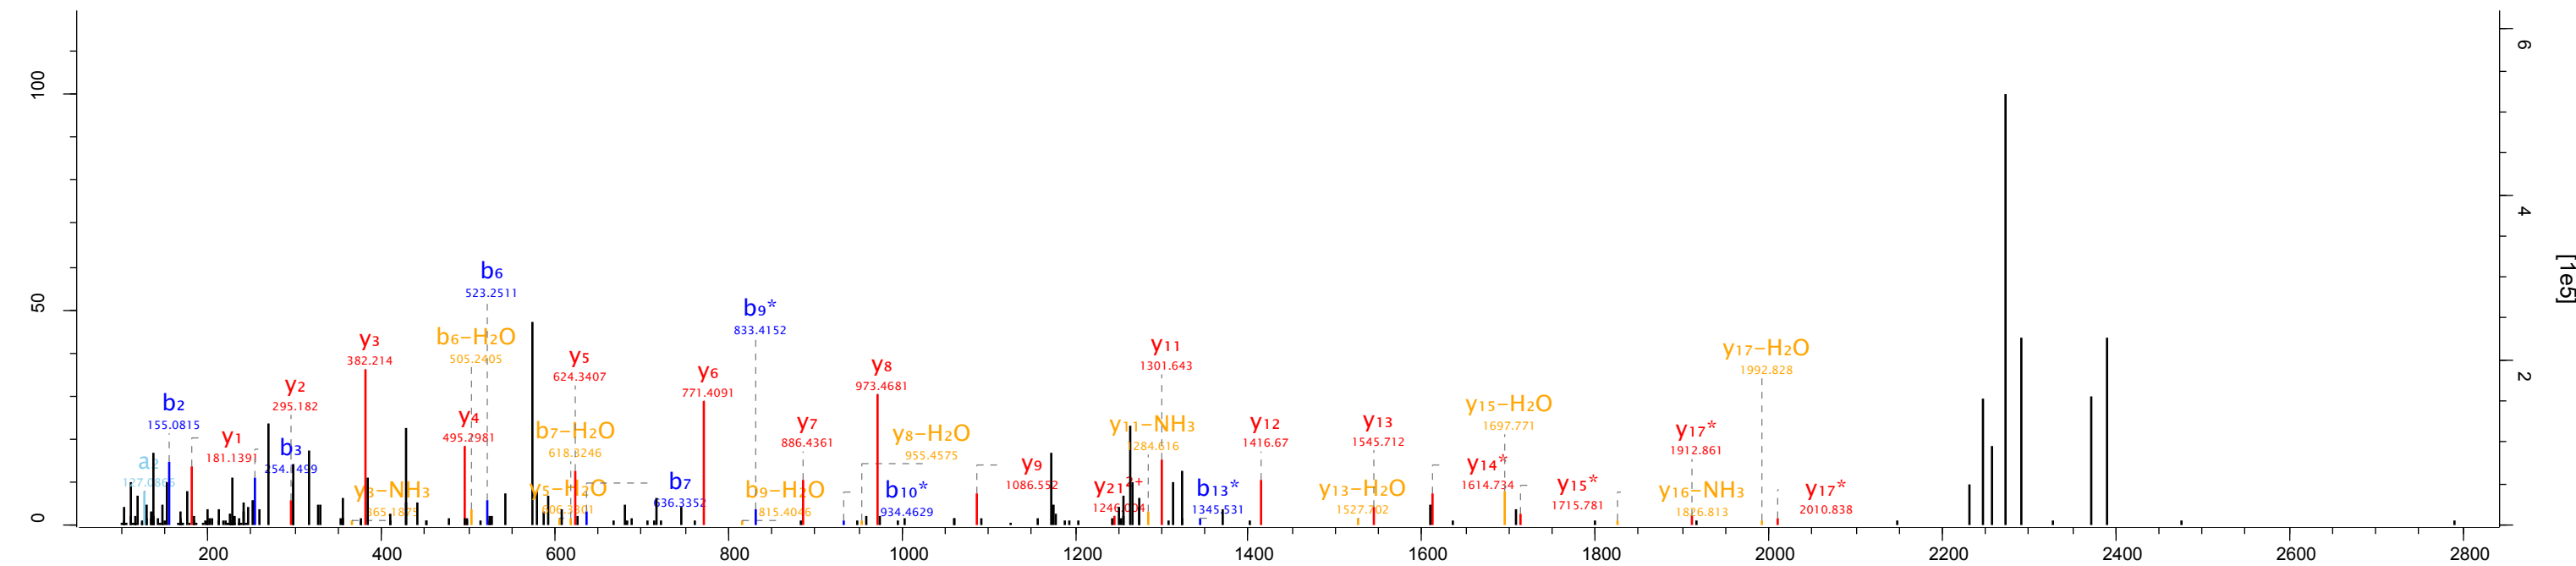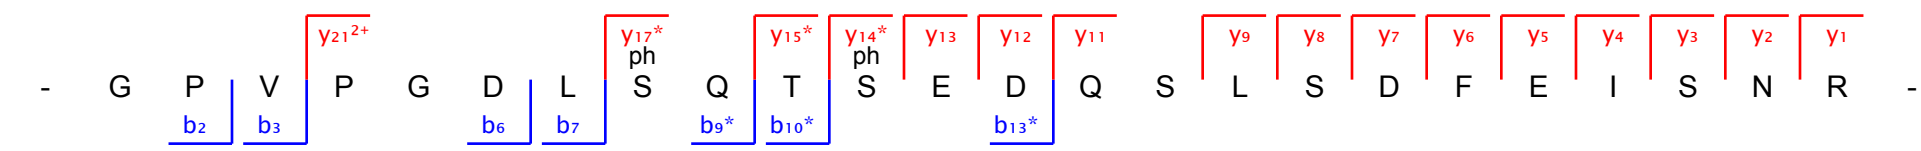

Raw file 20150812\_A375SR\_Phospho\_BR1\_02 Scan 25051 Method FTMS; HCD Score 68.78 m/z 1376.25 Gene names DCP1A

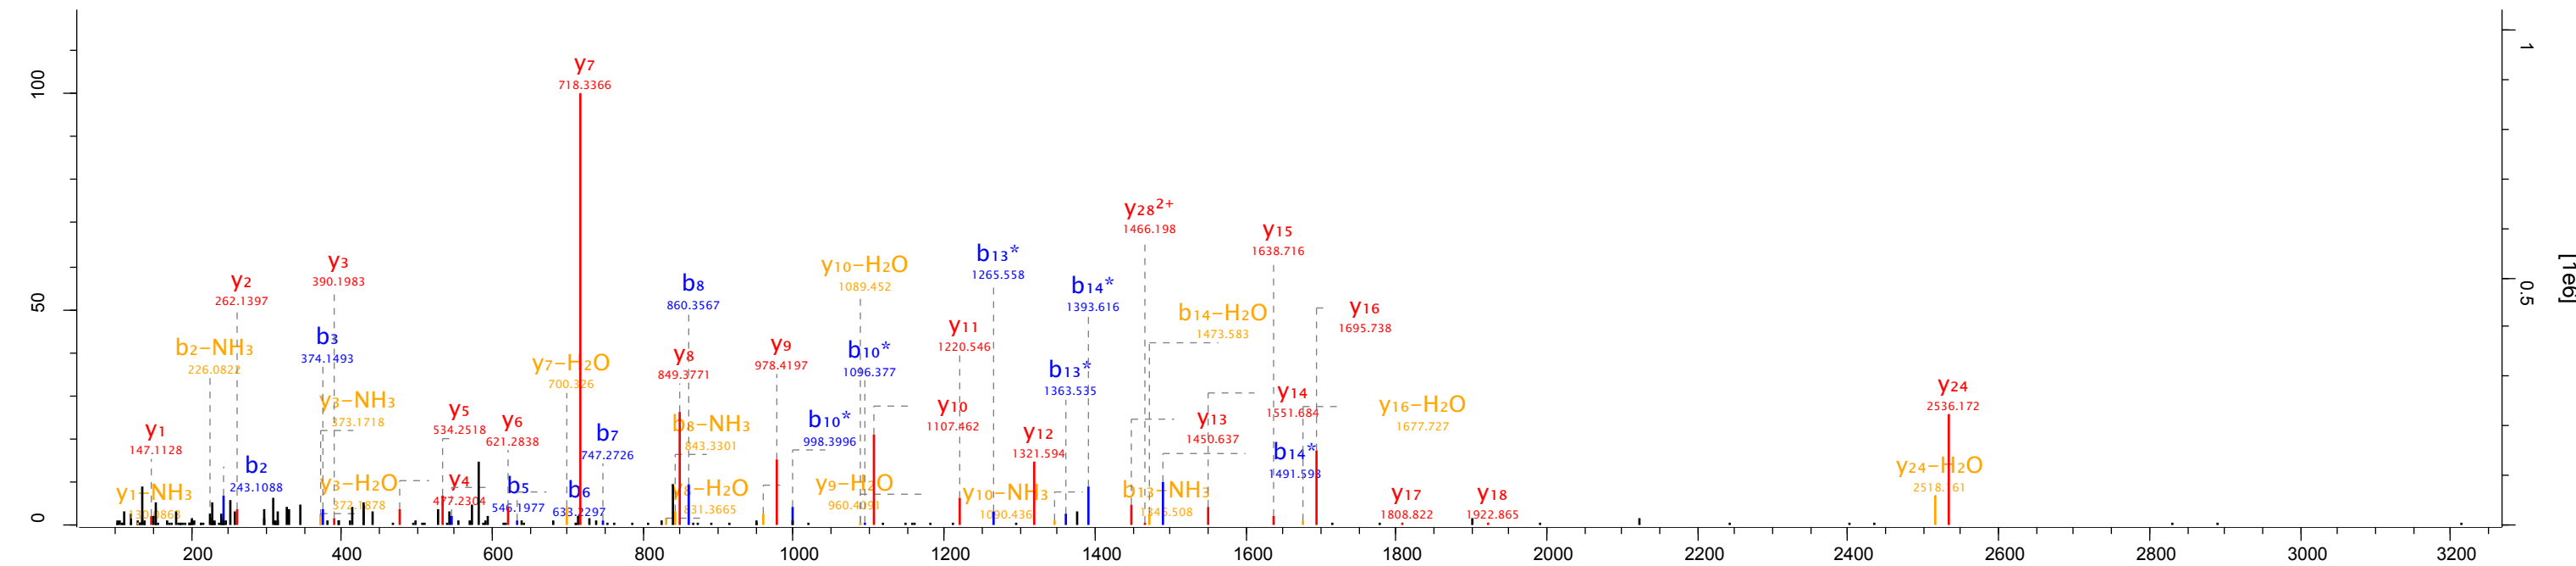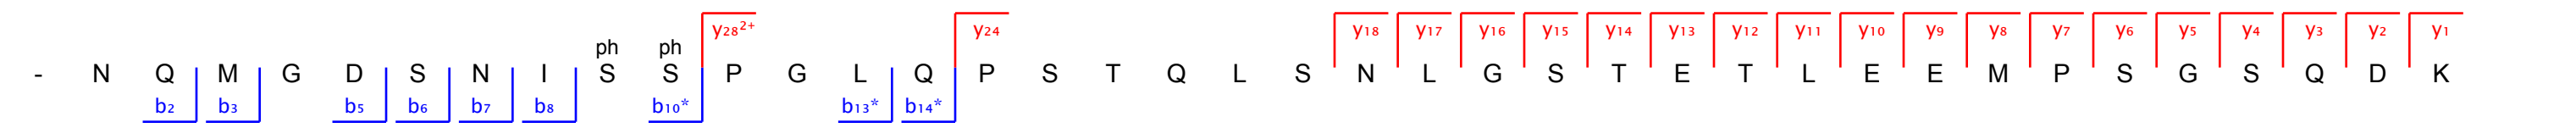



Raw file  
 20150812\_A375SR\_Phospho\_BR1\_02  
 Scan 2661 Method FTMS; HCD Score 87.55 m/z 671.76 Gene names SRRM2

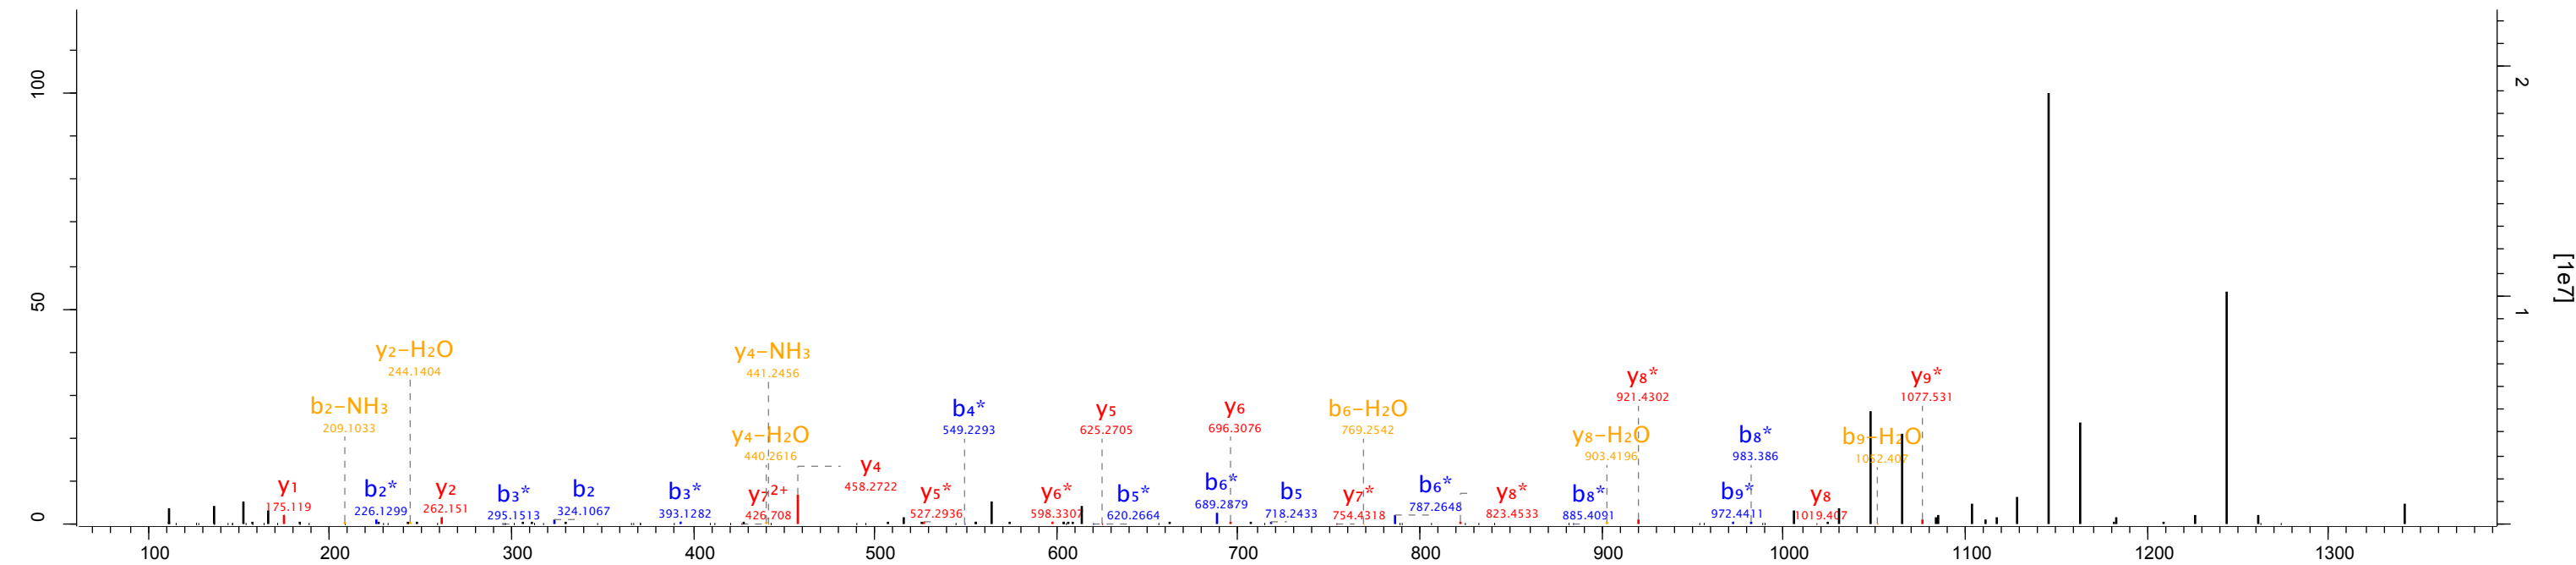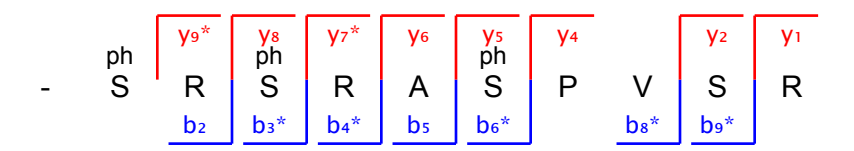

Raw file: 20150812\_A375SR\_Phospho\_BR1\_02  
 Scan: 2741 Method: FTMS; HCD Score: 73.25 m/z: 712.74 Gene names: SRRM2

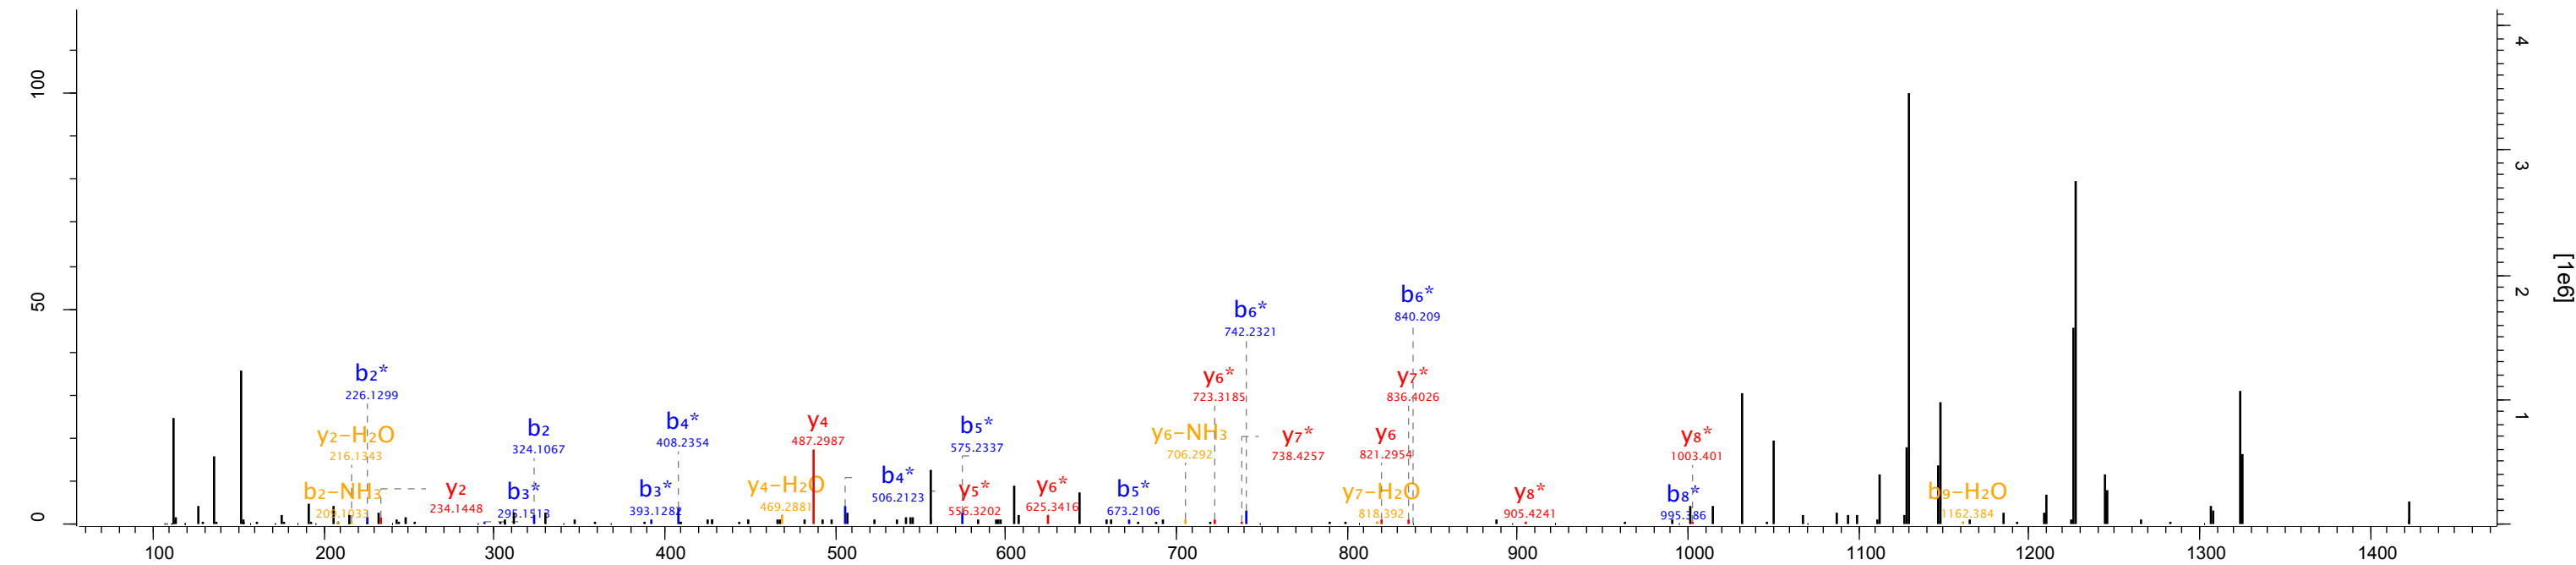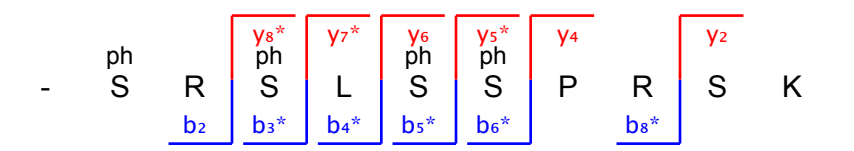

Raw file  
20150812\_A375SR\_Phospho\_BR1\_02

Scan 28411 Method FTMS; HCD Score 98.6 m/z 1322.61 Gene names PPAN

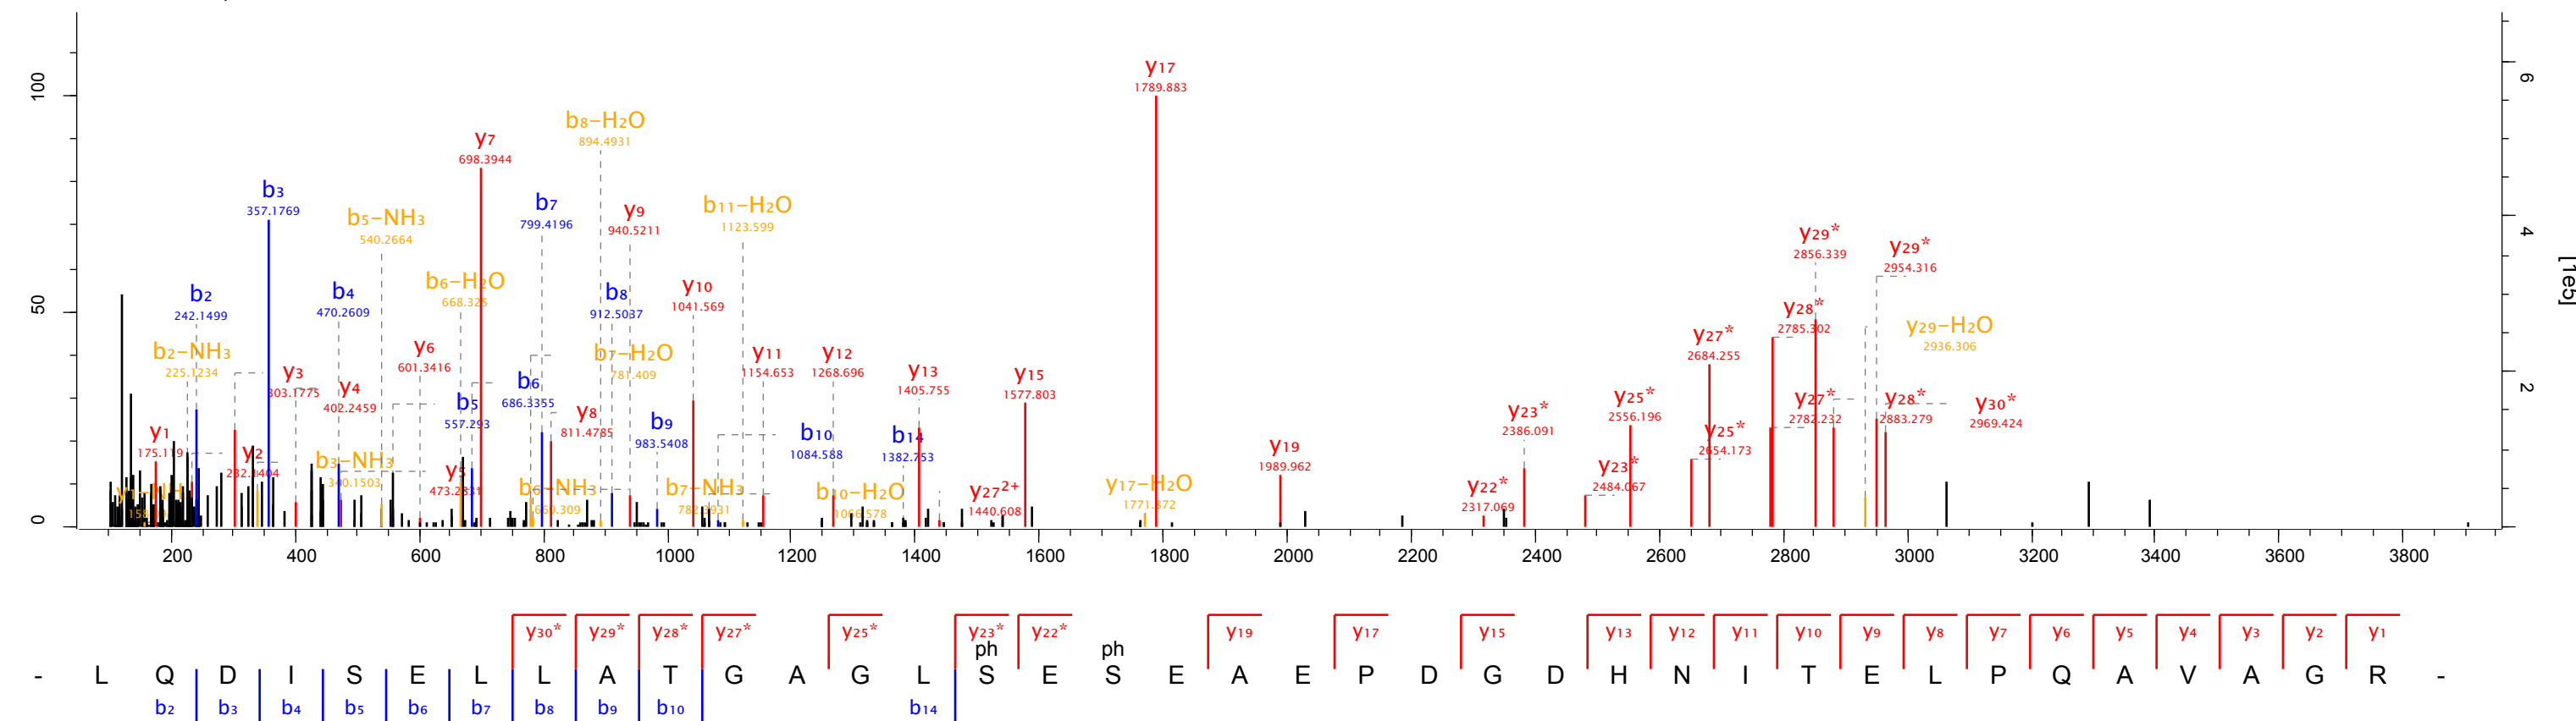

Raw file: 20150812\_A375SR\_Phospho\_BR1\_02  
 Scan: 4081 Method: FTMS; HCD Score: 224.89 m/z: 874.32 Gene names: YBX1

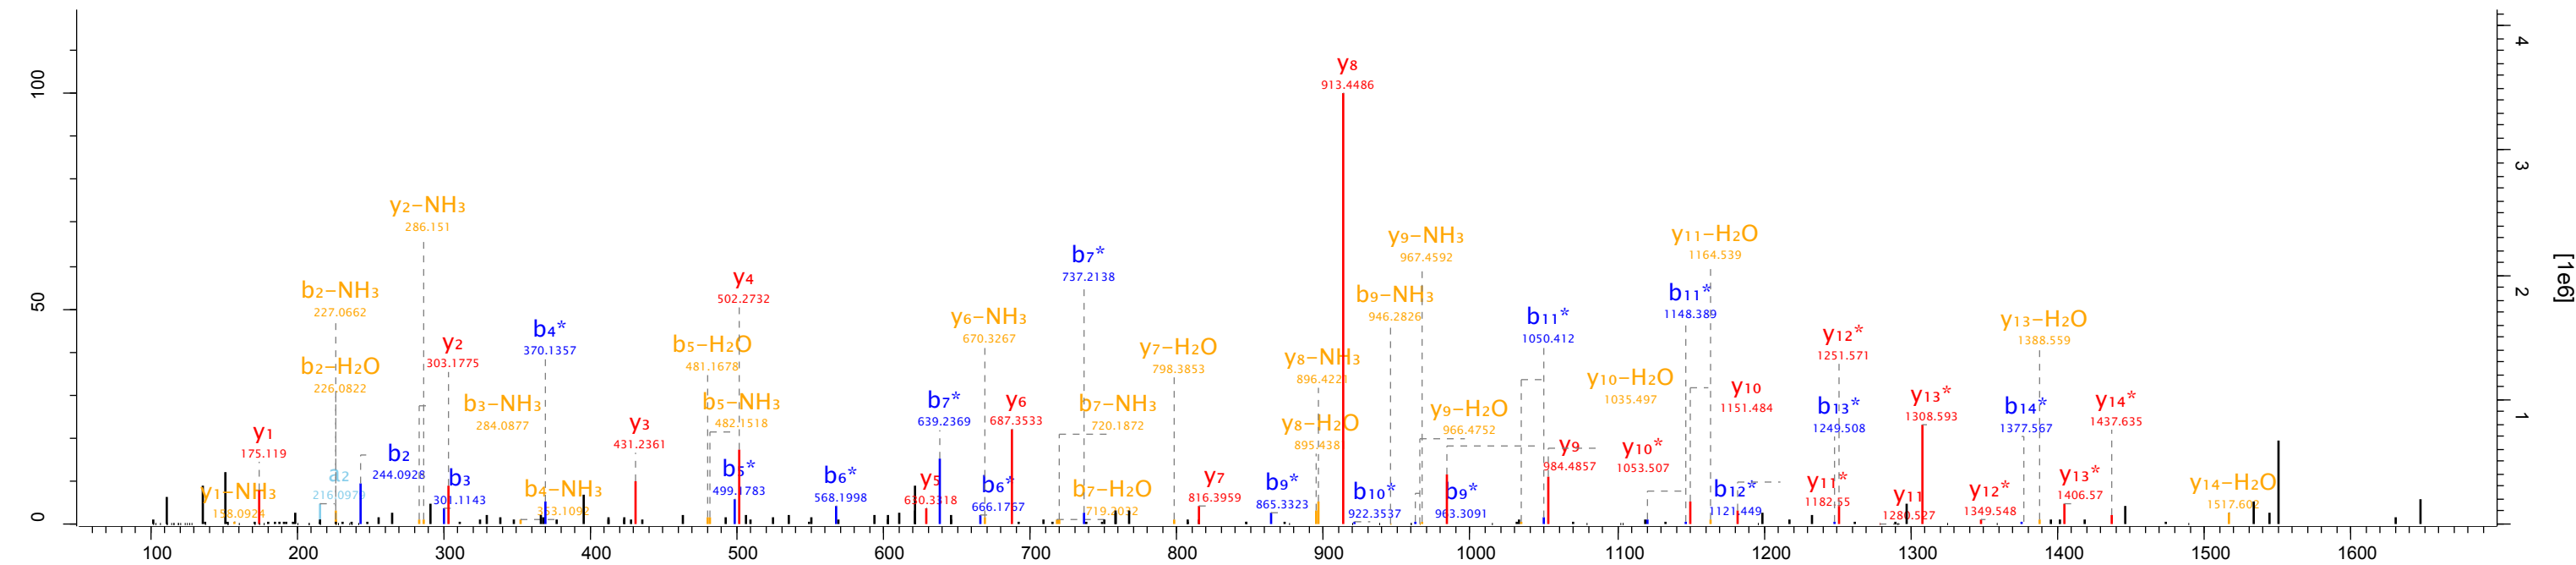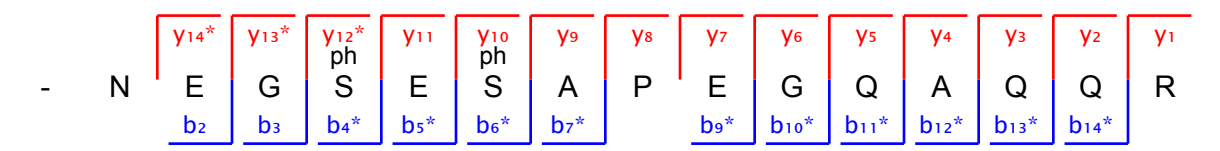

Raw file: 20150812\_A375SR\_Phospho\_BR1\_02  
 Scan: 4351 Method: FTMS; HCD Score: 163.6 m/z: 893.35 Gene names: SRRM1

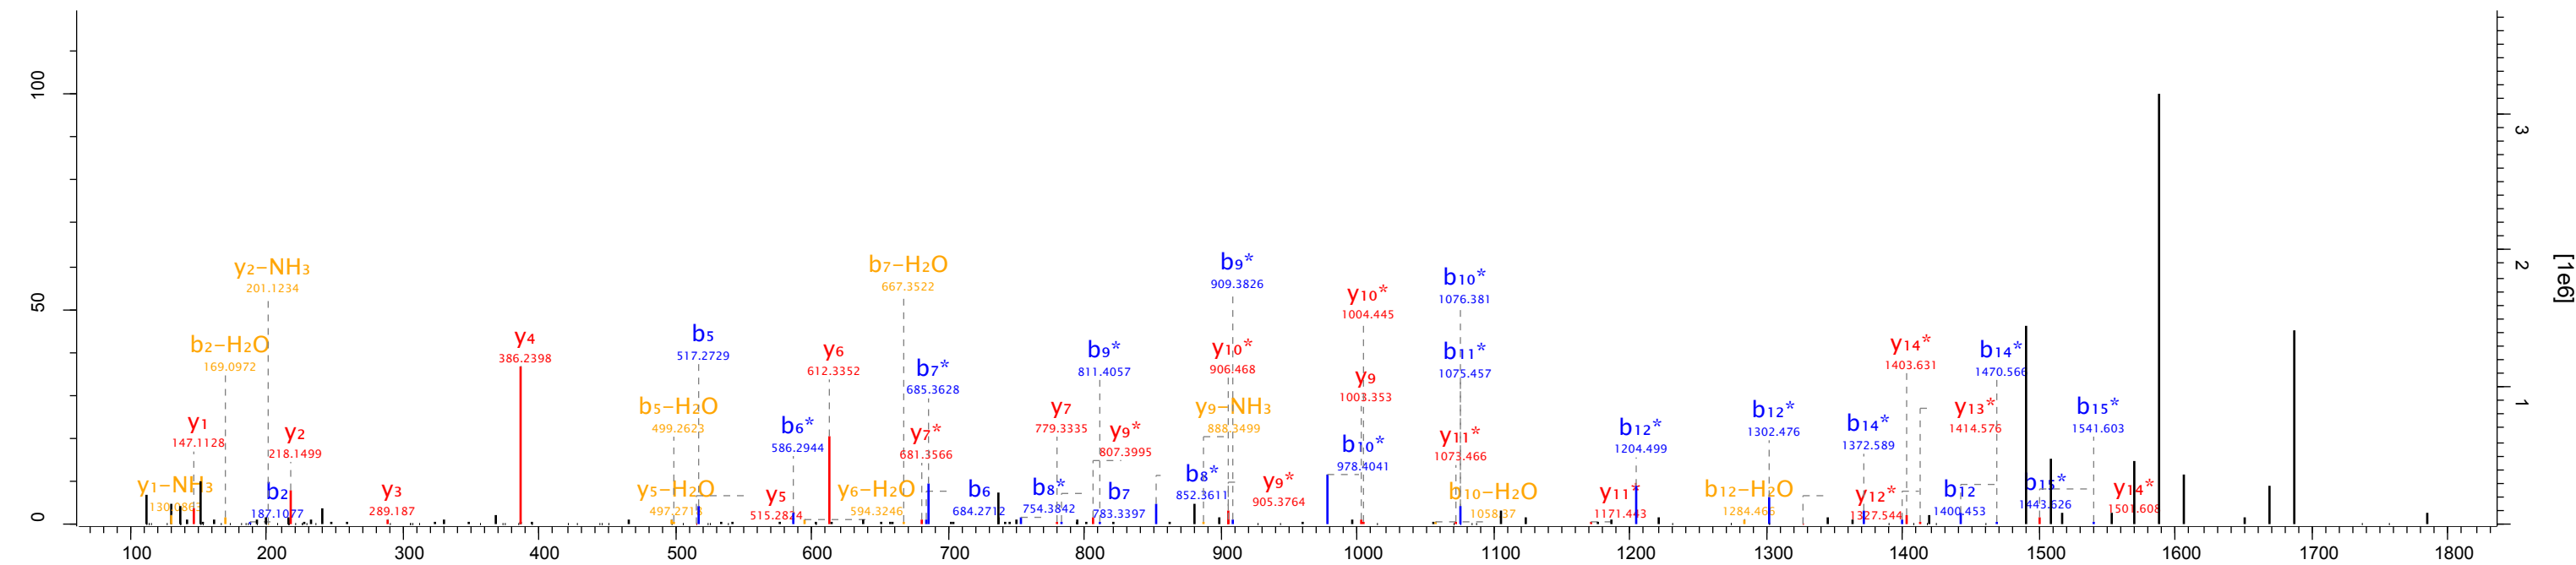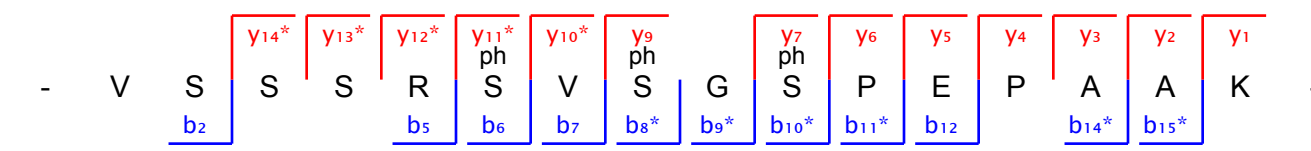

Raw file: 20150812\_A375SR\_Phospho\_BR1\_02  
 Scan: 4631 Method: FTMS; HCD Score: 195.95 m/z: 1114.43 Gene names: SRRM2

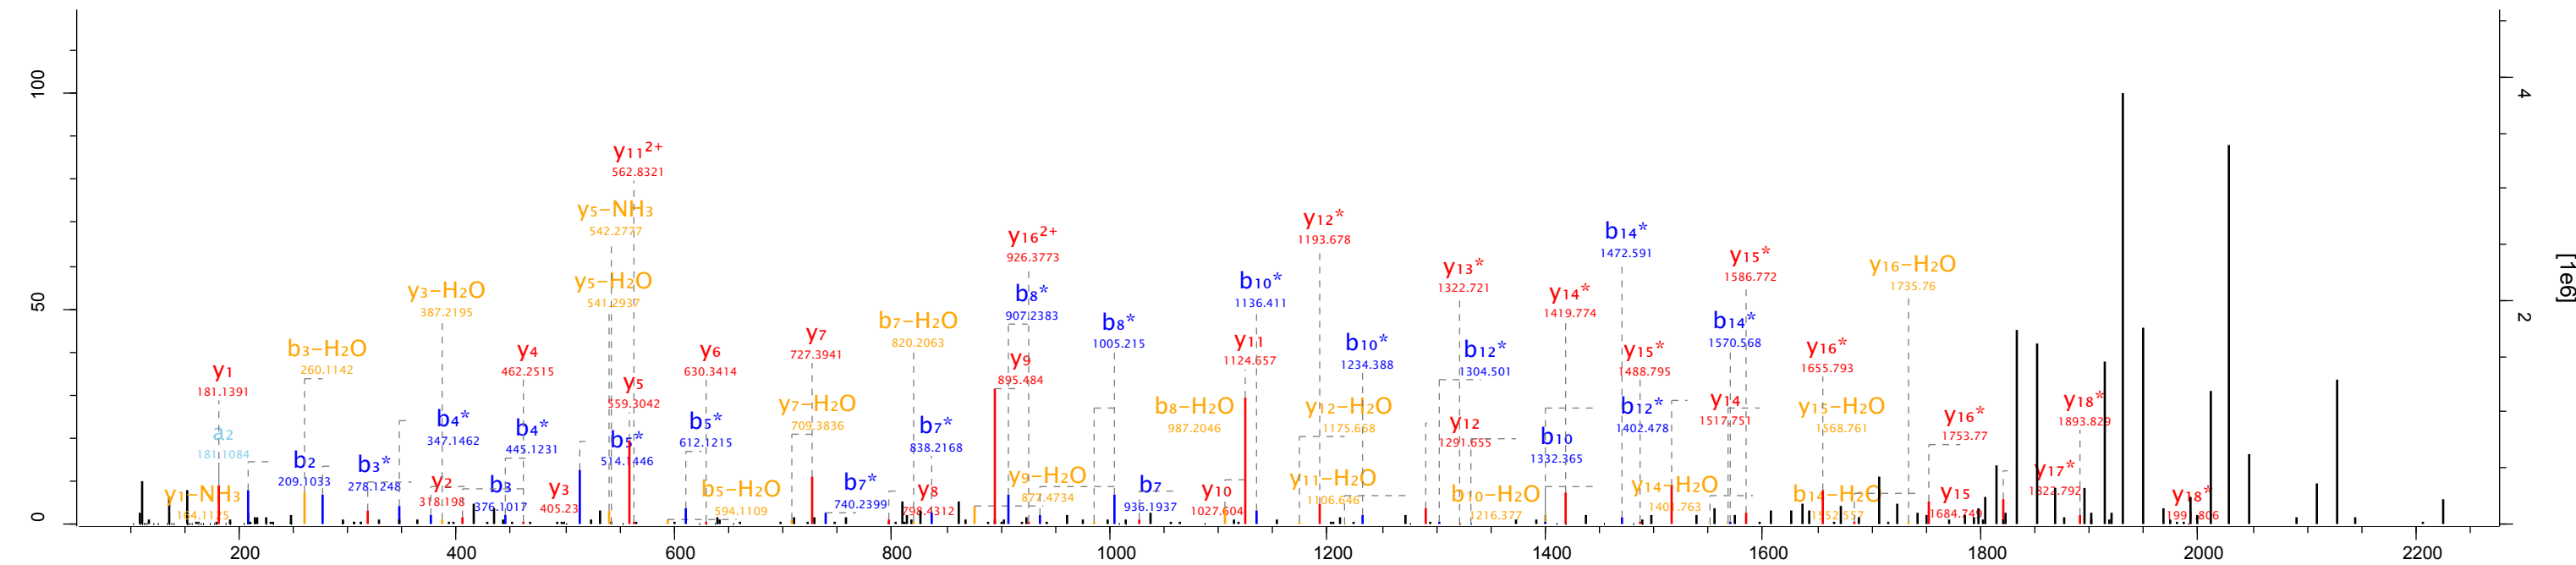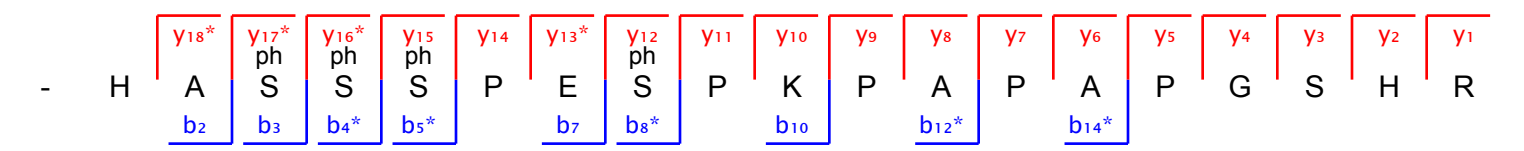

Raw file: 20150812\_A375SR\_Phospho\_BR1\_02  
 Scan: 4861 Method: FTMS; HCD Score: 177.8 m/z: 878.4 Gene names: DYNC1LI2

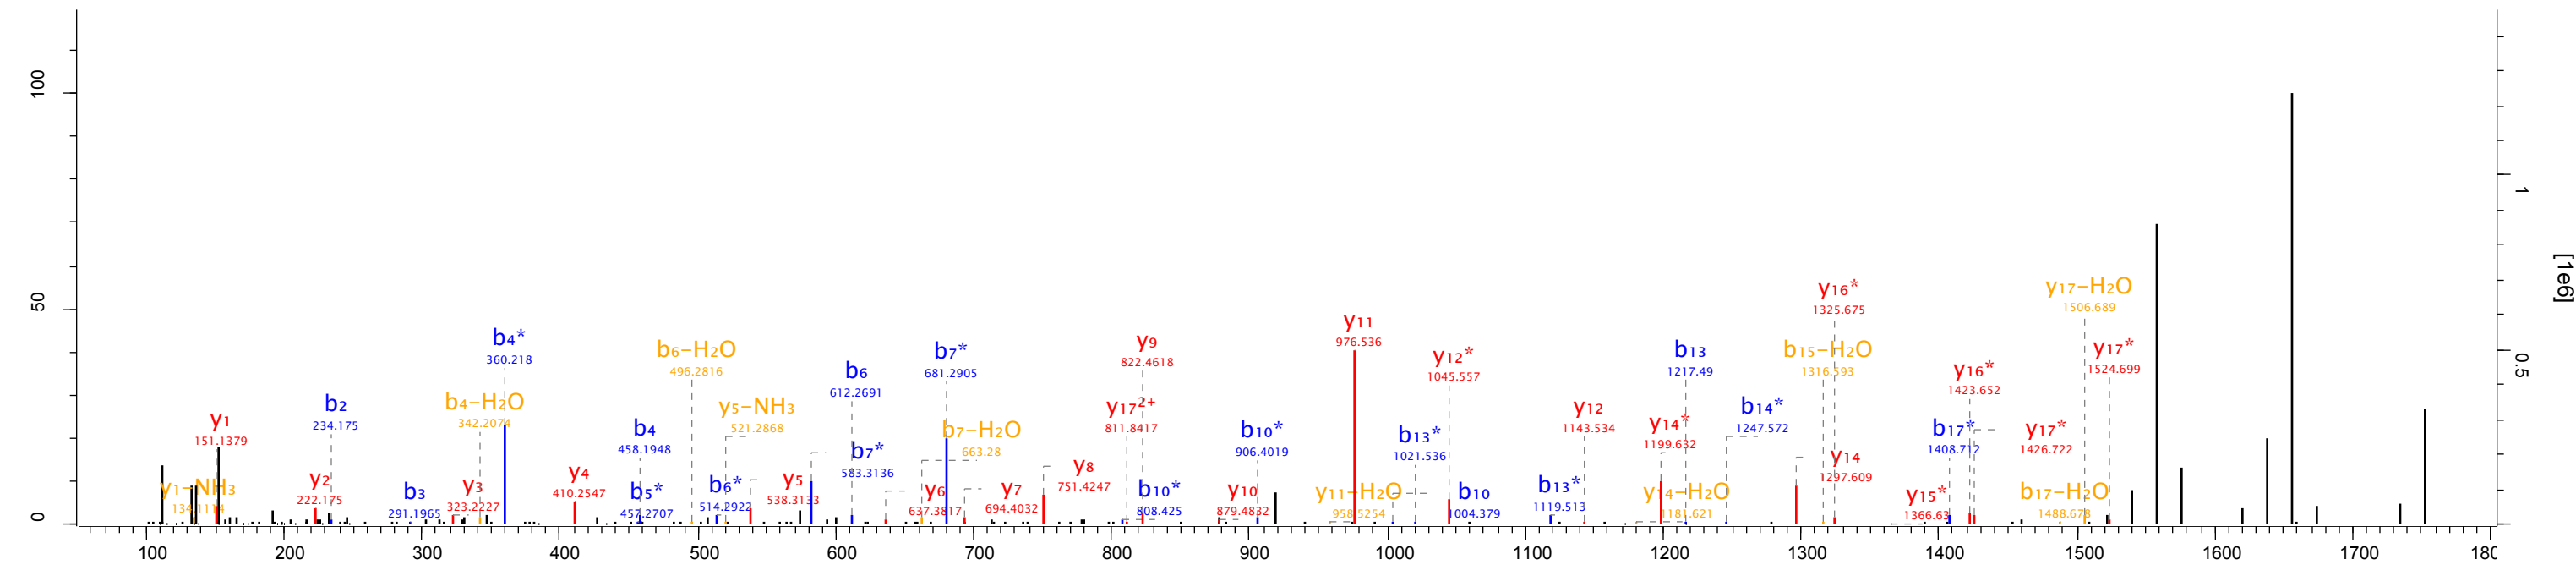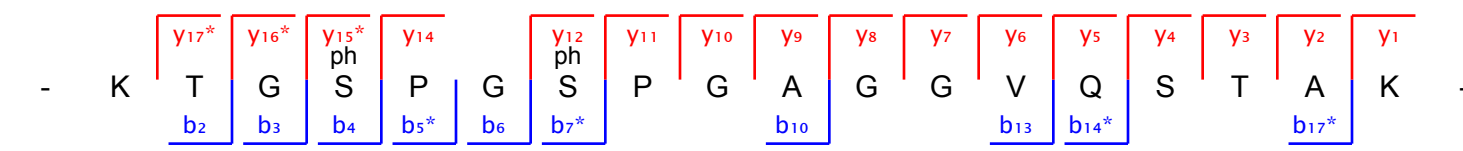

Raw file: 20150812\_A375SR\_Phospho\_BR1\_02  
 Scan: 4961 Method: FTMS; HCD Score: 112.55 m/z: 674.92 Gene names: SRRM1

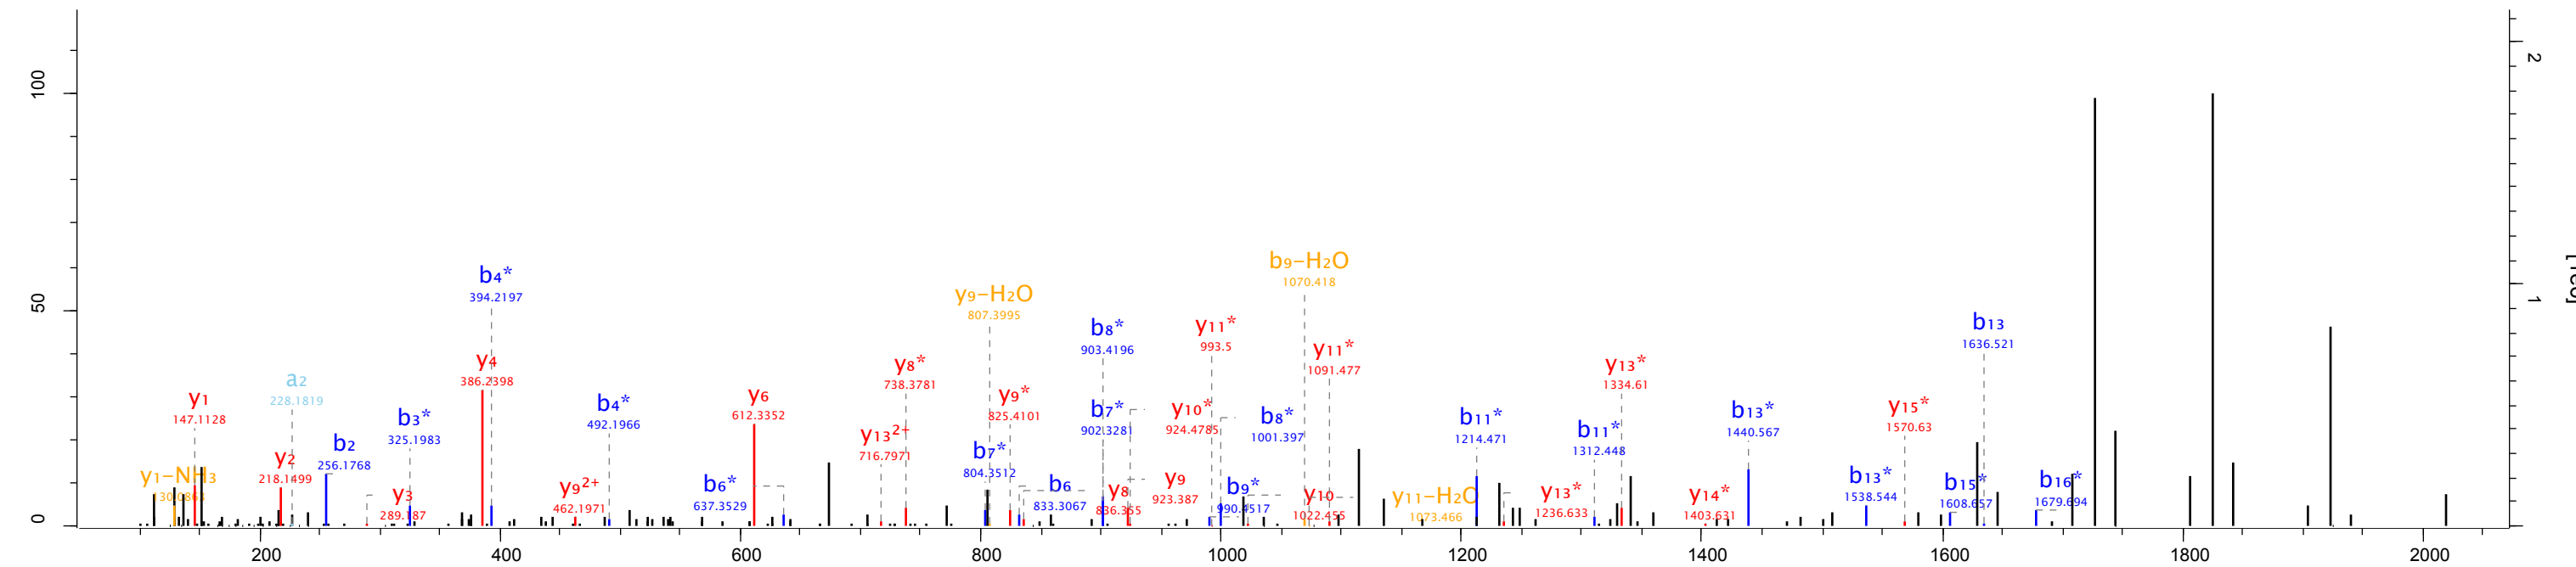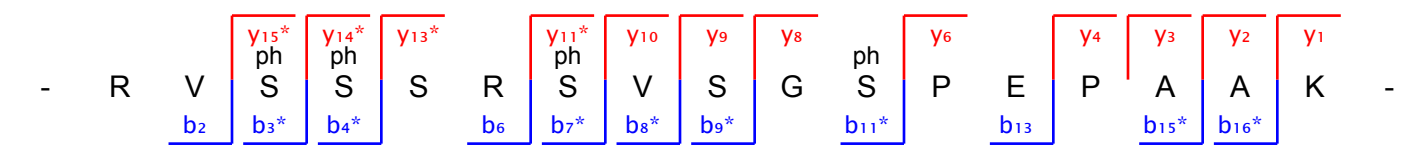



Raw file: 20150812\_A375SR\_Phospho\_BR1\_02  
 Scan: 5051 Method: FTMS; HCD Score: 290.79 m/z: 985.88 Gene names: GTF3C1

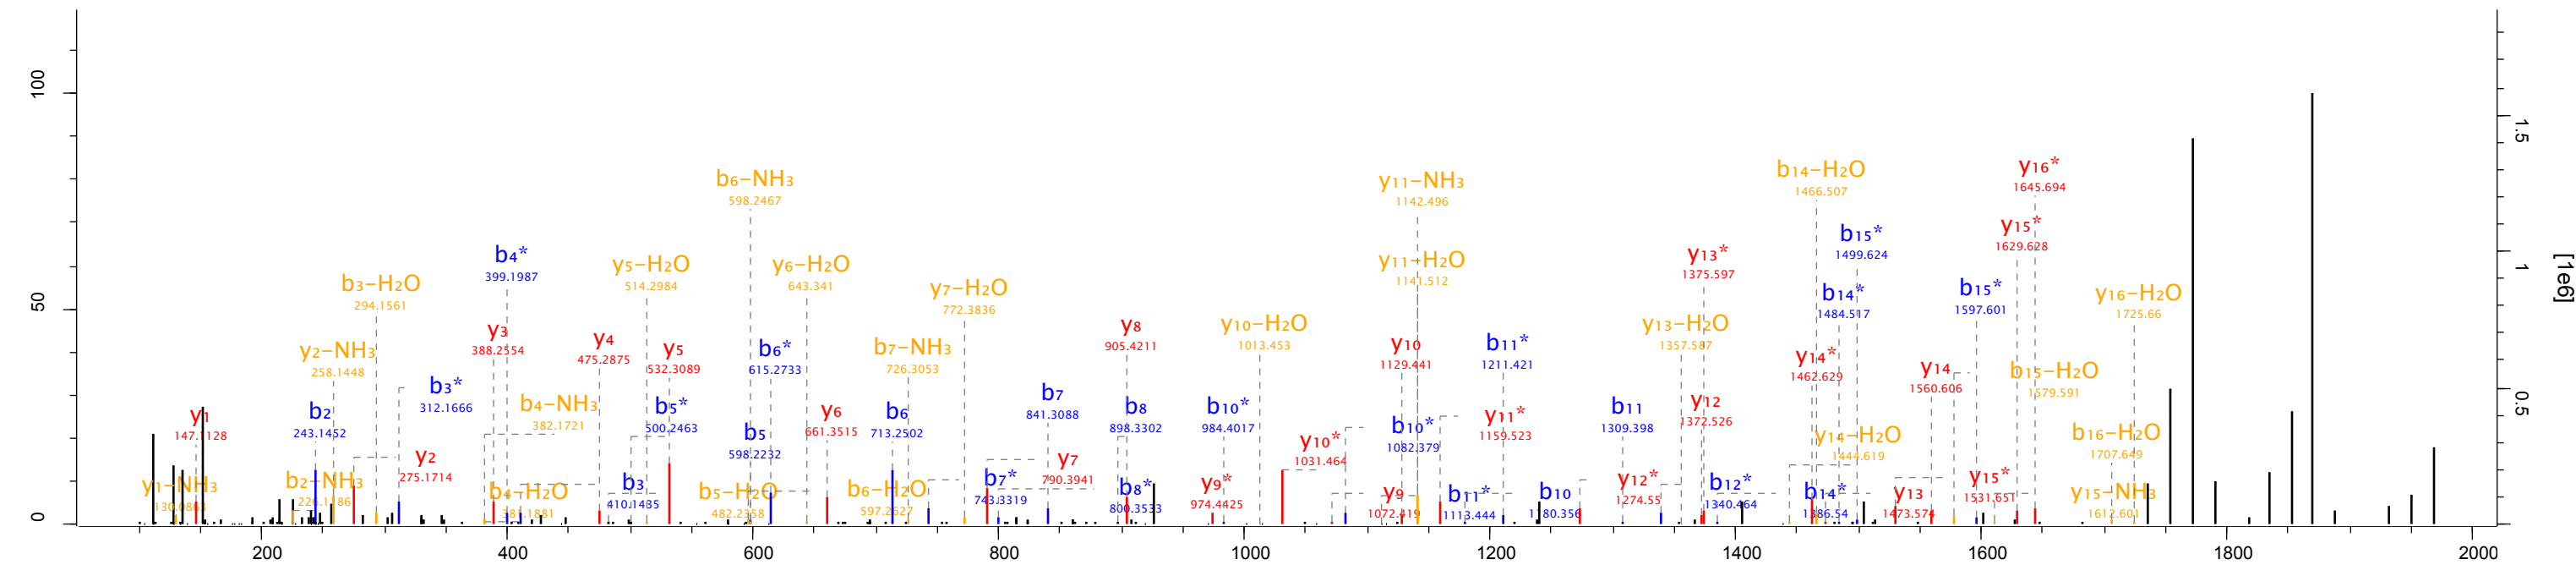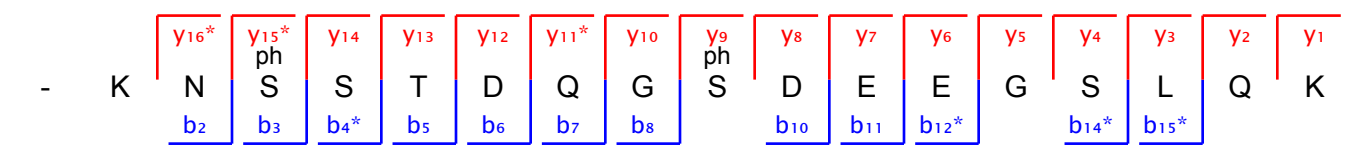

Raw file: 20150812\_A375SR\_Phospho\_BR1\_02  
 Scan: 5571 Method: FTMS; HCD Score: 86.53 m/z: 723.65 Gene names: MYBBP1A

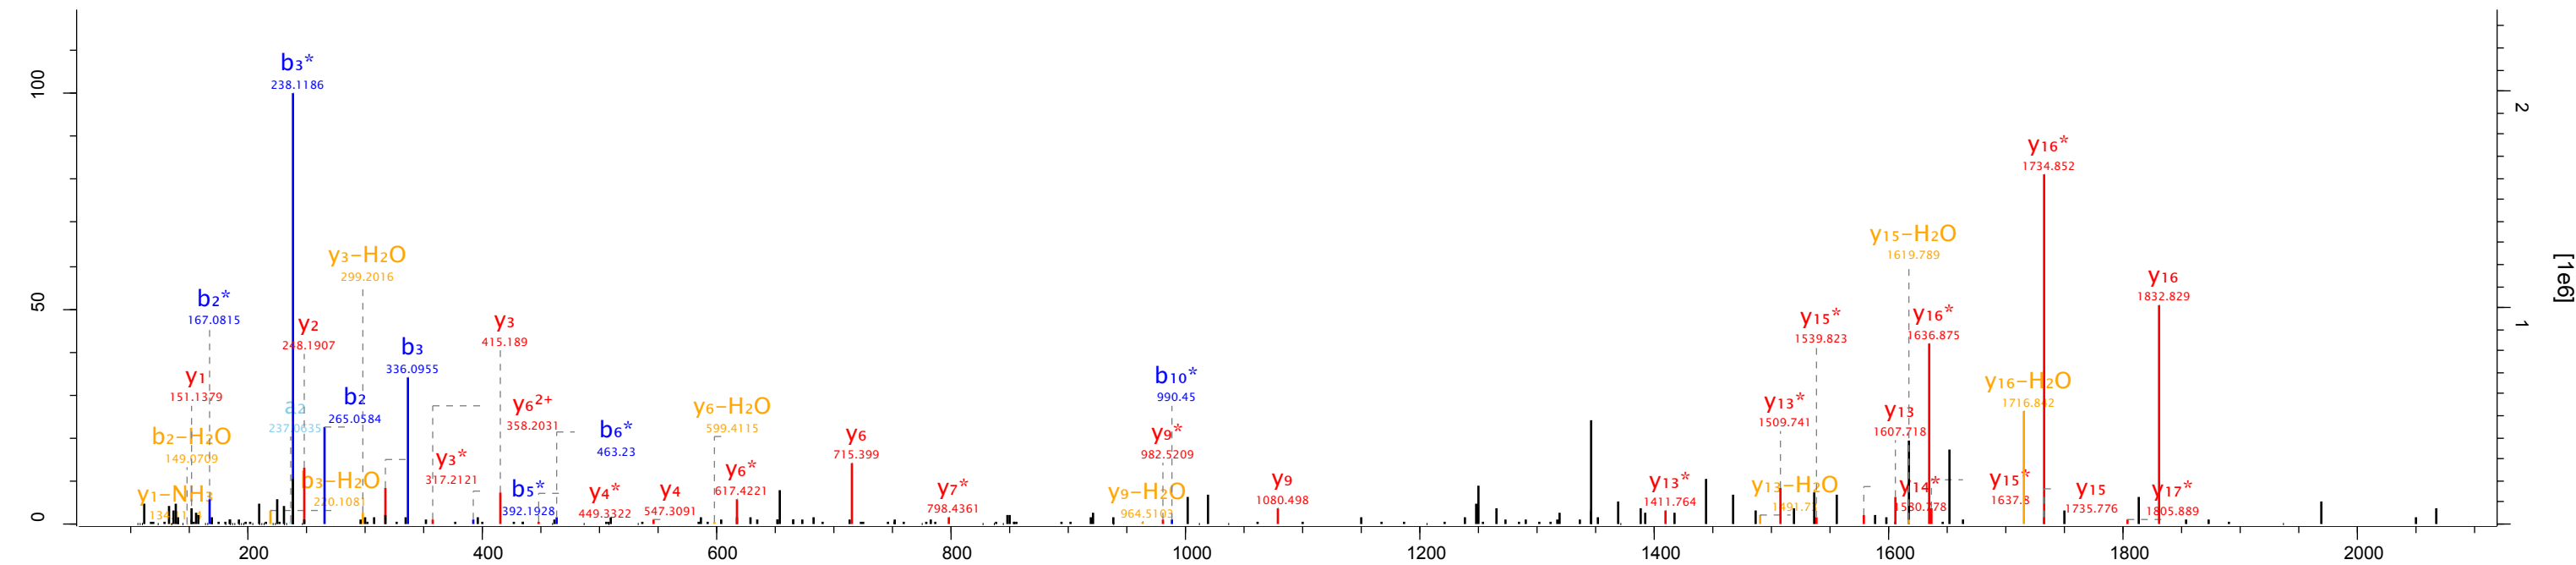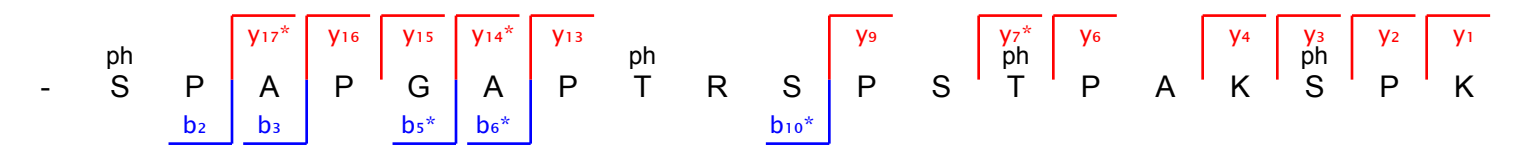

Raw file: 20150812\_A375SR\_Phospho\_BR1\_02  
 Scan: 5621 Method: FTMS; HCD Score: 245.67 m/z: 743.32 Gene names: SRRM2

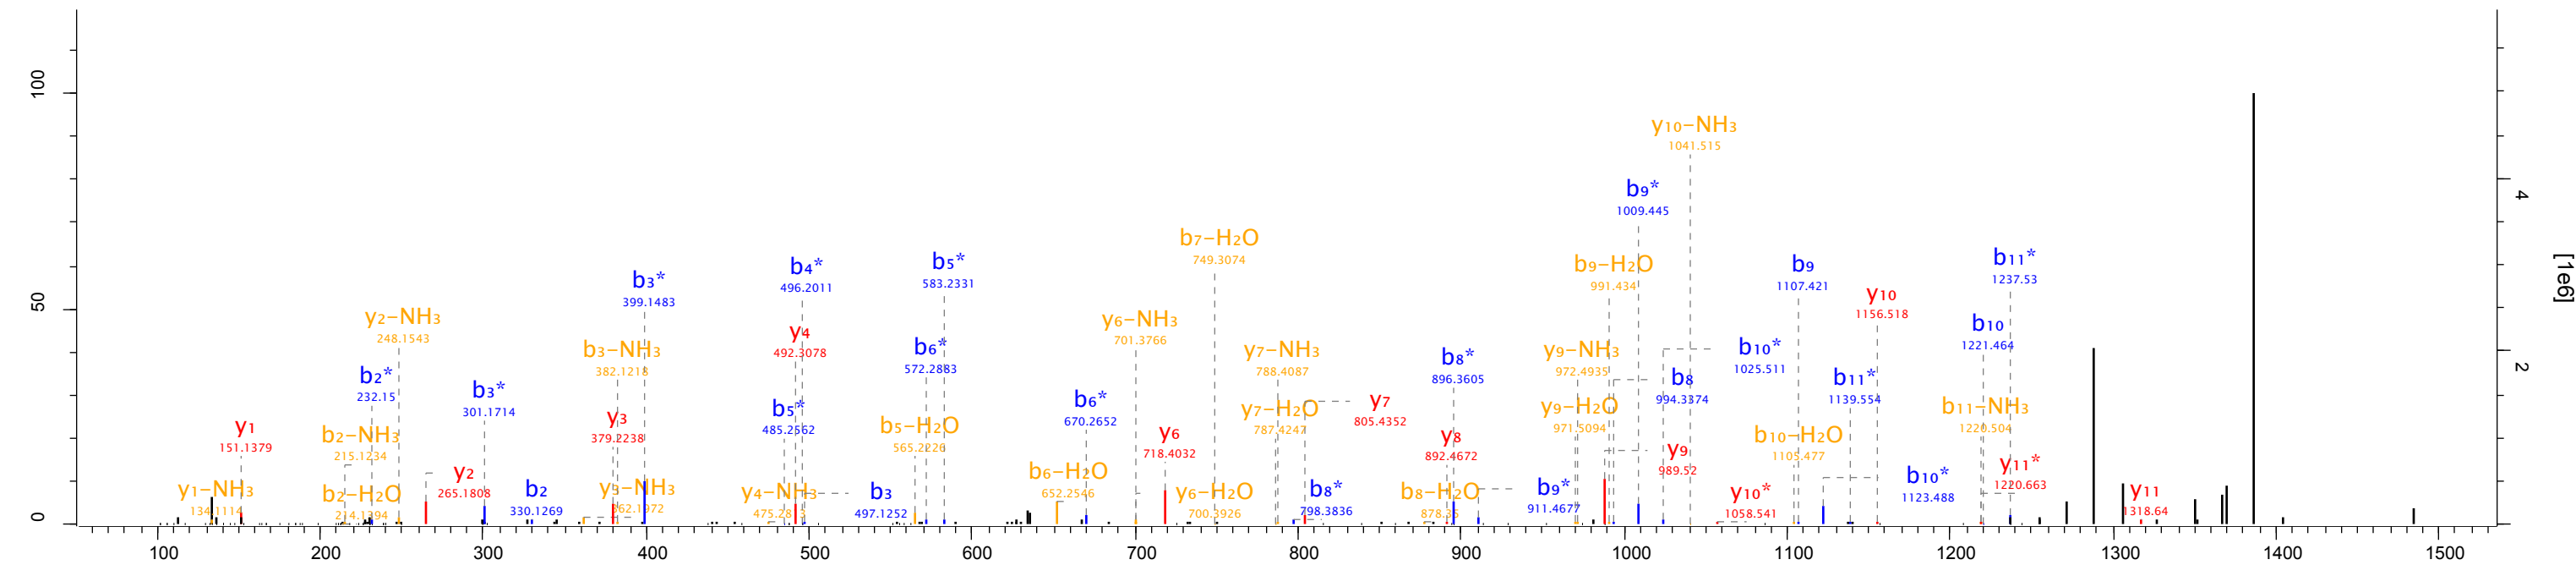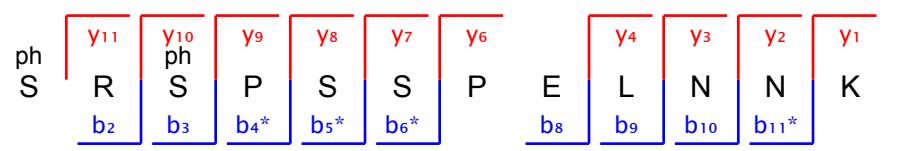

Raw file: 20150812\_A375SR\_Phospho\_BR1\_02  
 Scan: 5681 Method: FTMS; HCD Score: 116.24 m/z: 807.94 Gene names: PRRC2C

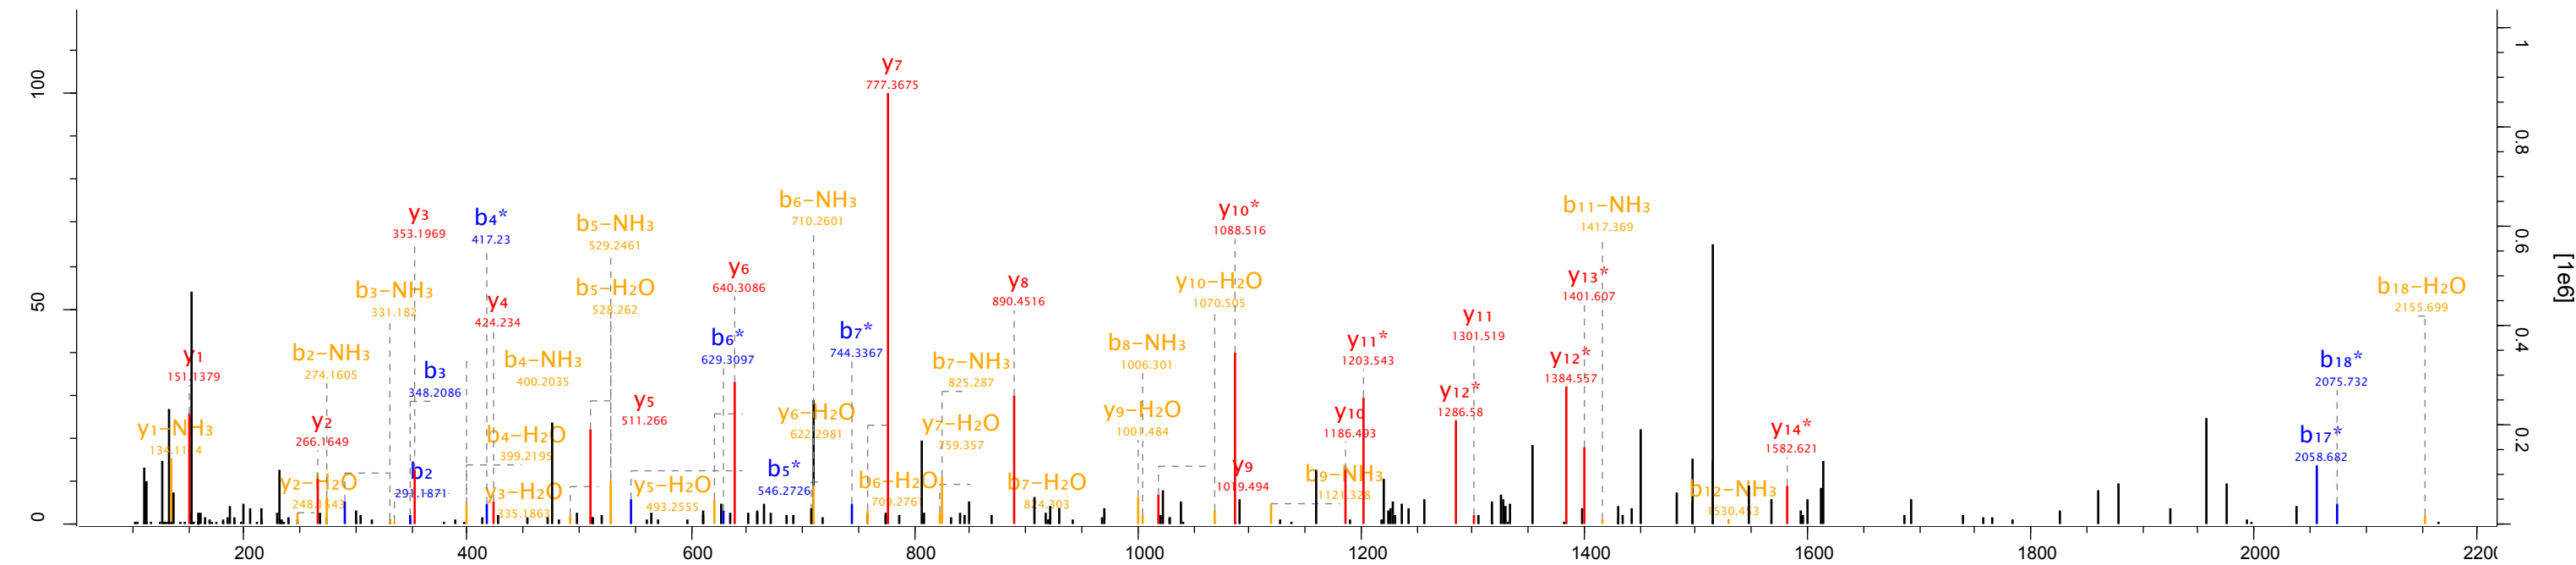

- Q R G S E T D T D S E I H E S A S D K -  
 b2 b3 b4\* b5\* b6\* b7\* b17\* b18\*

Raw file: 20150812\_A375SR\_Phospho\_BR1\_02  
 Scan: 5831 Method: FTMS; HCD Score: 138.44 m/z: 640.24 Gene names: LIMCH1

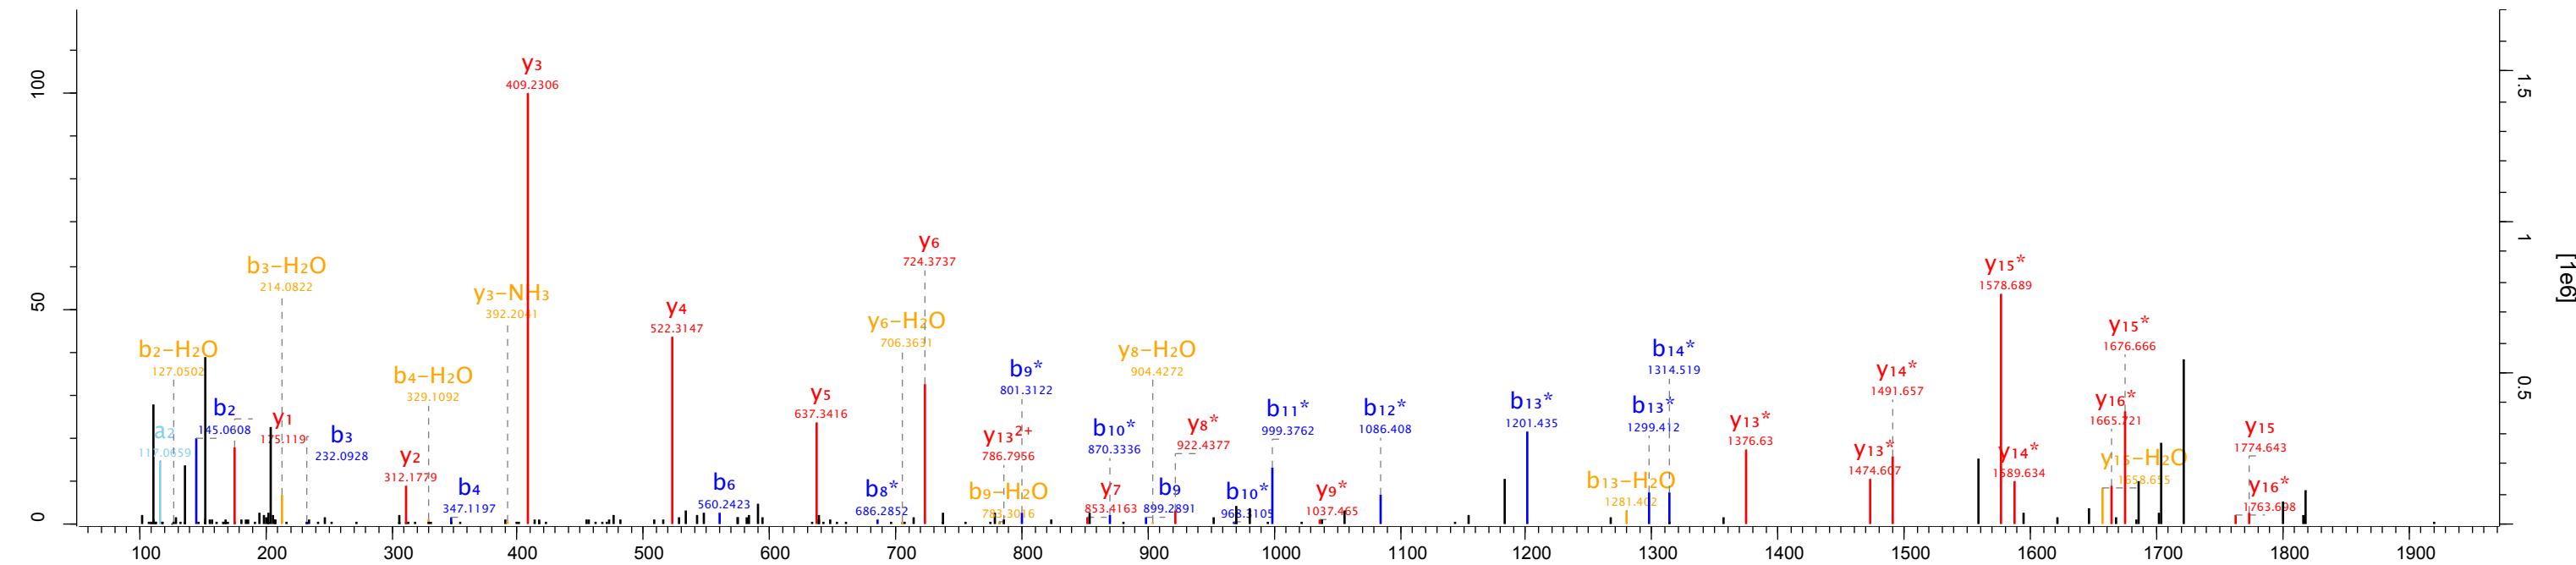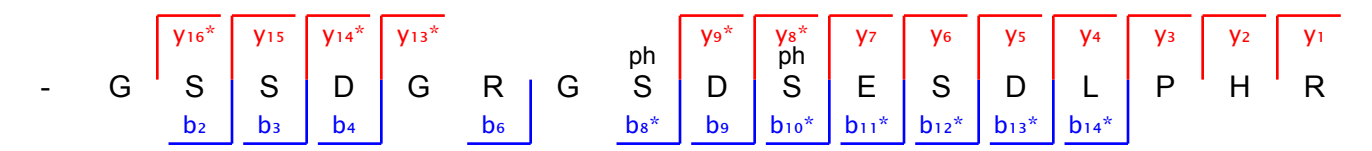

Raw file: 20150812\_A375SR\_Phospho\_BR1\_02  
 Scan: 5861 Method: FTMS; HCD Score: 113.89 m/z: 1016.82 Gene names: TOP2A

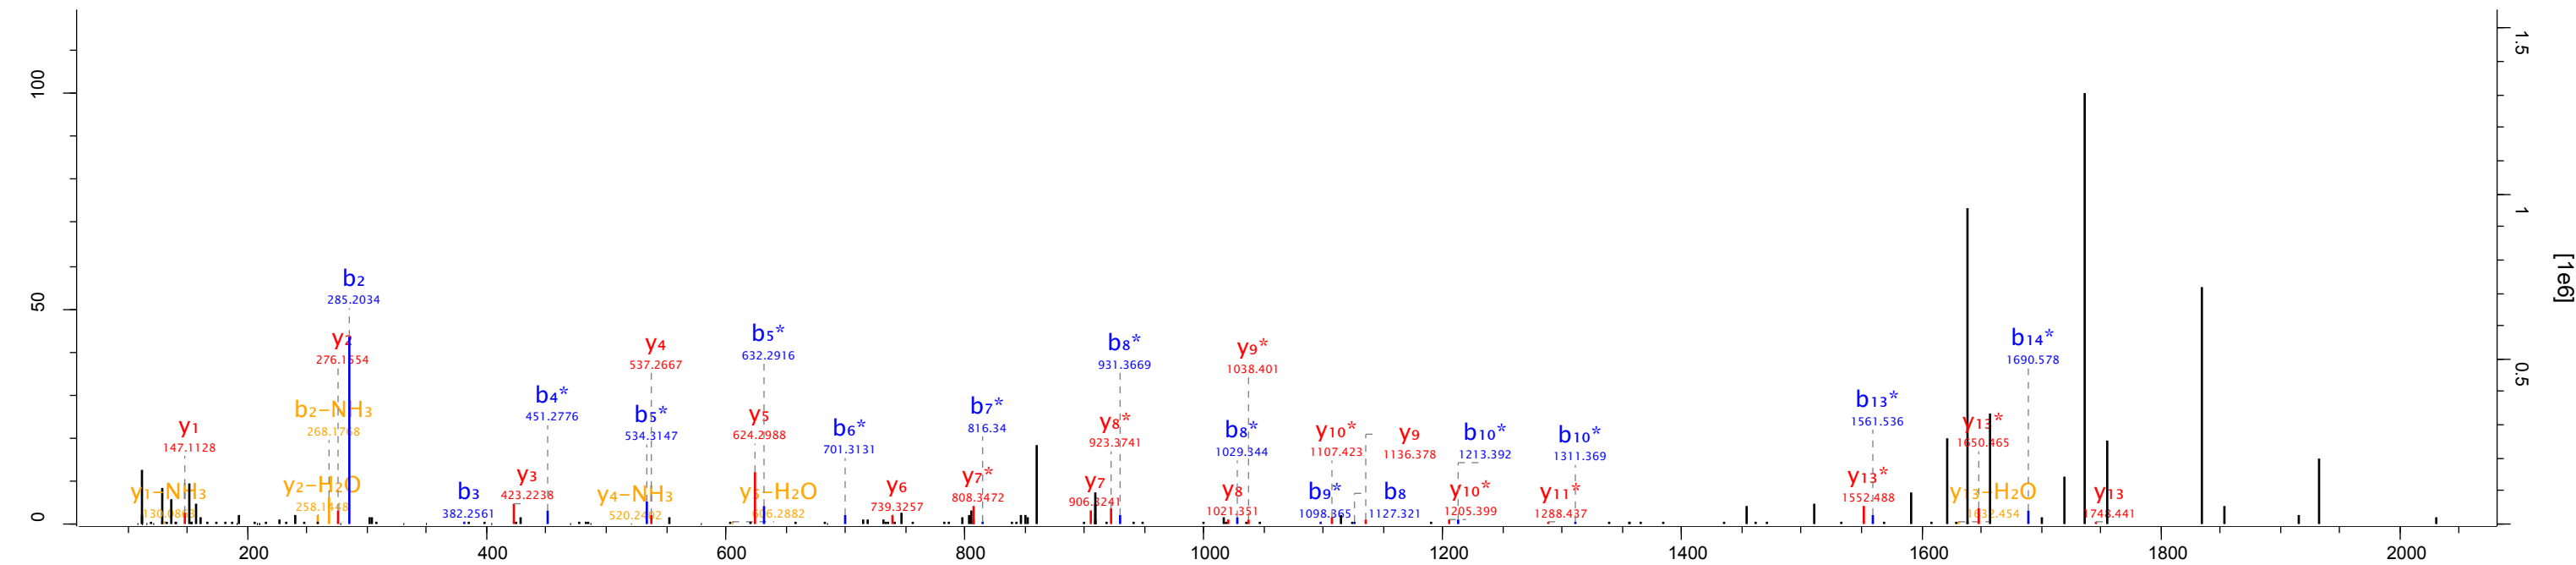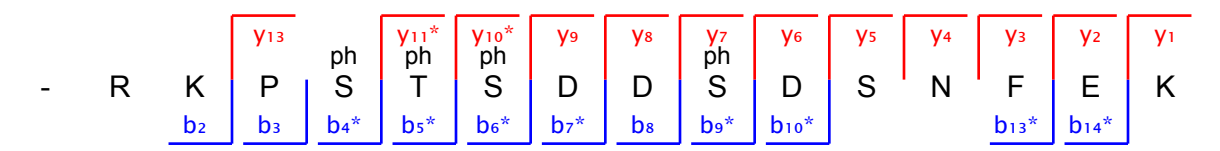

Raw file: 20150812\_A375SR\_Phospho\_BR1\_02  
 Scan: 6201 Method: FTMS; HCD Score: 134.15 m/z: 1068.35 Gene names: MAK16

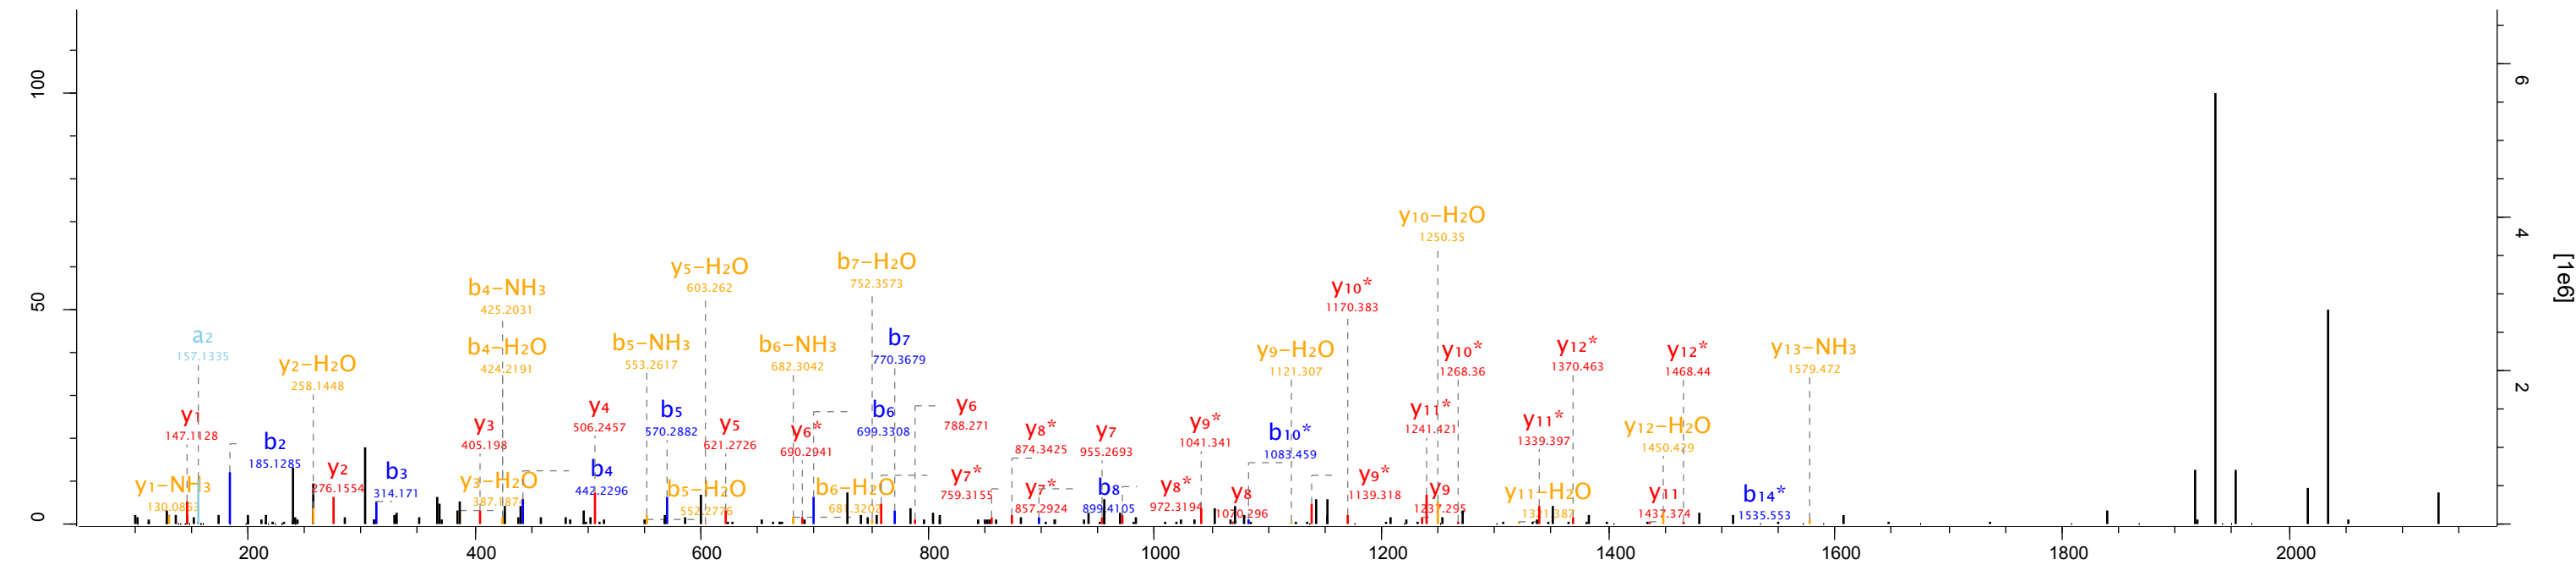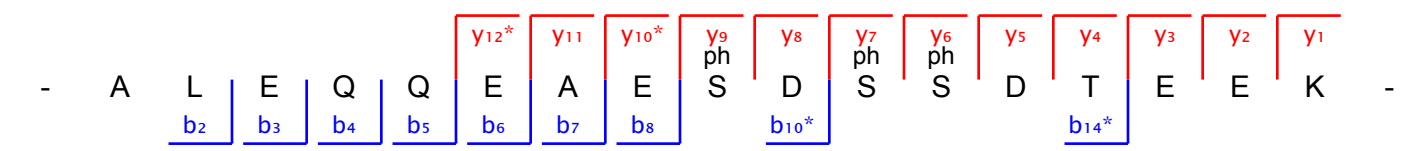

Raw file: 20150812\_A375SR\_Phospho\_BR1\_02  
 Scan: 6361 Method: FTMS; HCD Score: 43.79 m/z: 859.36 Gene names: FBRS

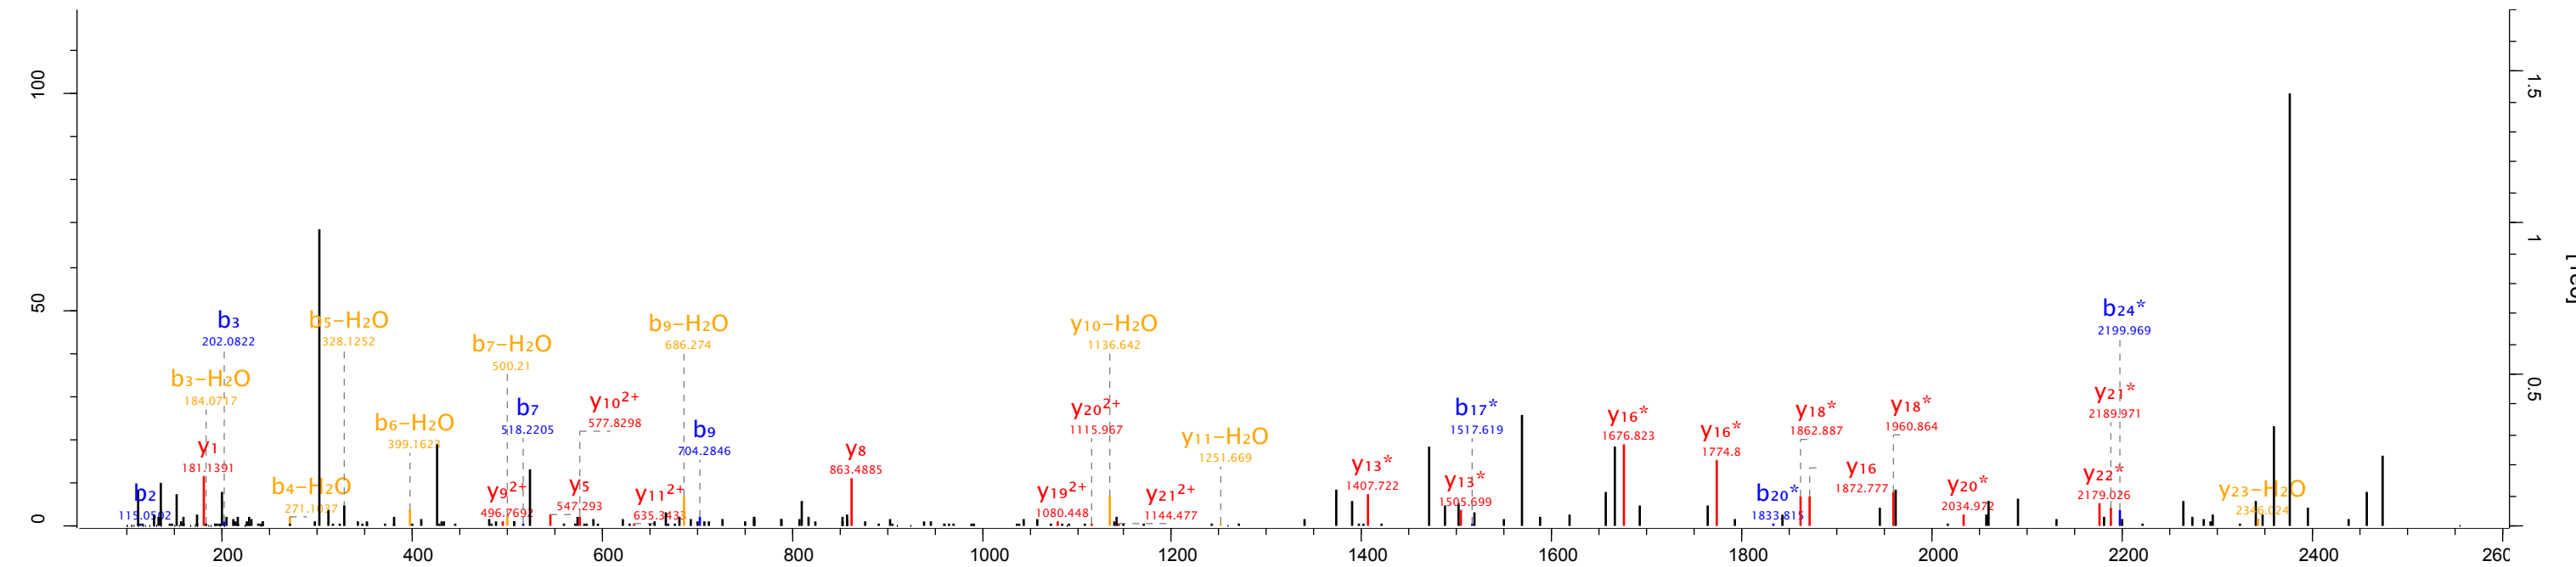

- G G S S G A T G E P G D S ph S D R E P G R P P G D R -

b<sub>2</sub>
b<sub>3</sub>
b<sub>7</sub>
b<sub>9</sub>
b<sub>17</sub>\*
b<sub>20</sub>\*
b<sub>24</sub>\*





Raw file  
20150812\_A375SR\_Phospho\_BR1\_02

Scan 6741 Method FTMS; HCD Score 159.47 m/z 827.85 Gene names SPECC1

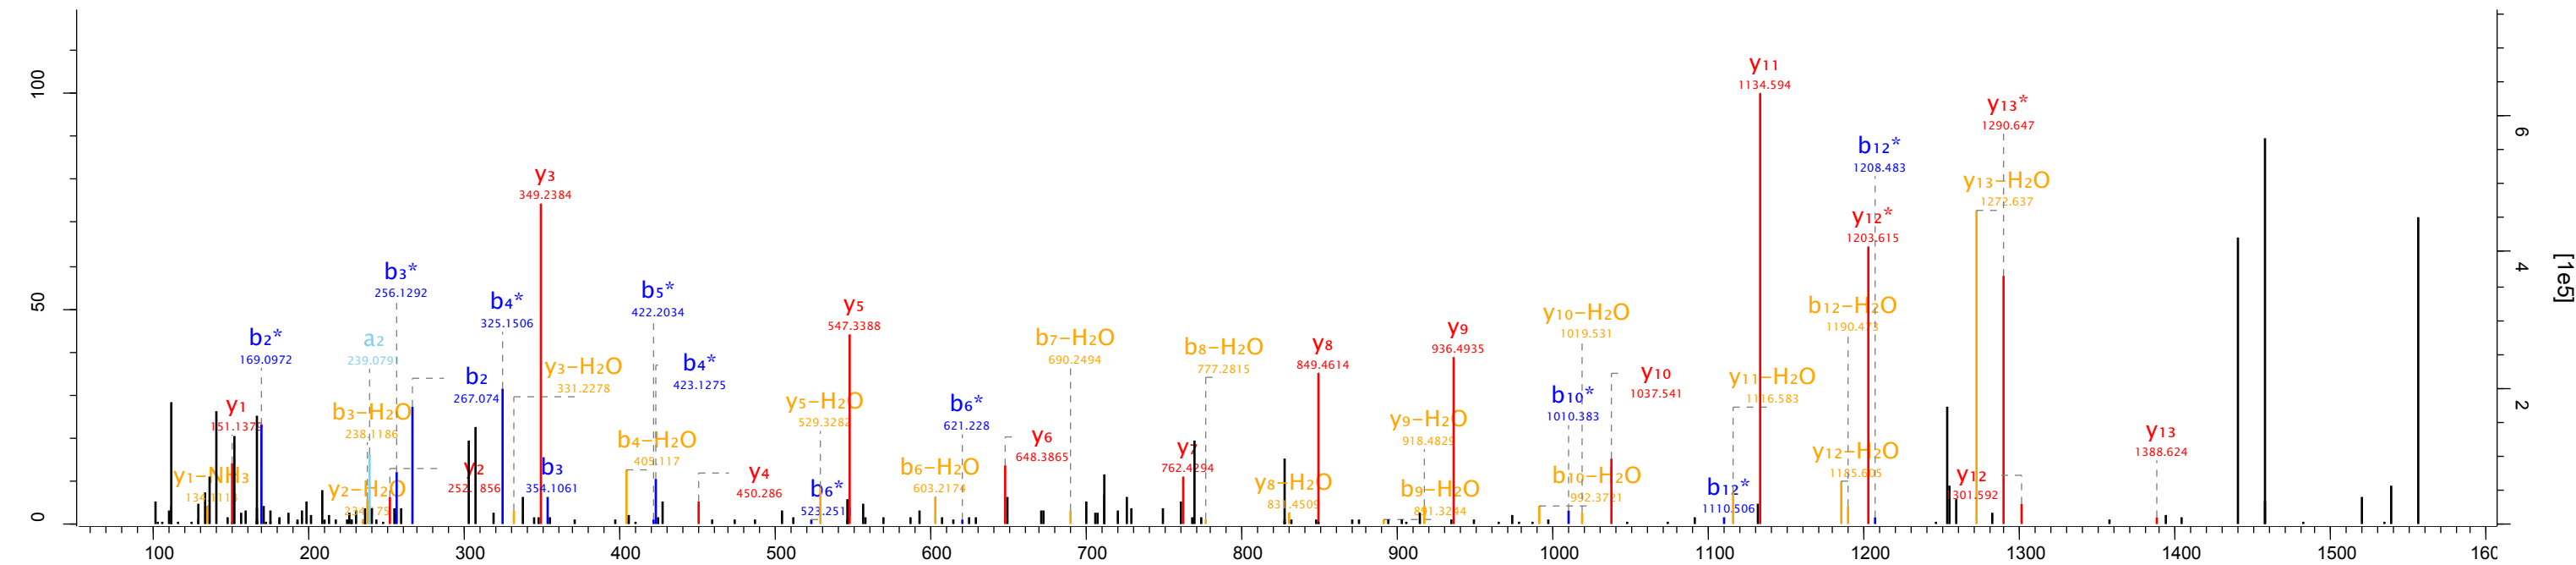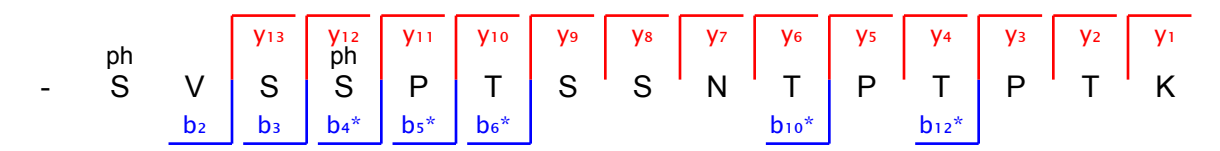

Raw file: 20150812\_A375SR\_Phospho\_BR1\_02  
 Scan: 6861 Method: FTMS; HCD Score: 222.39 m/z: 850.33 Gene names: EEF2K

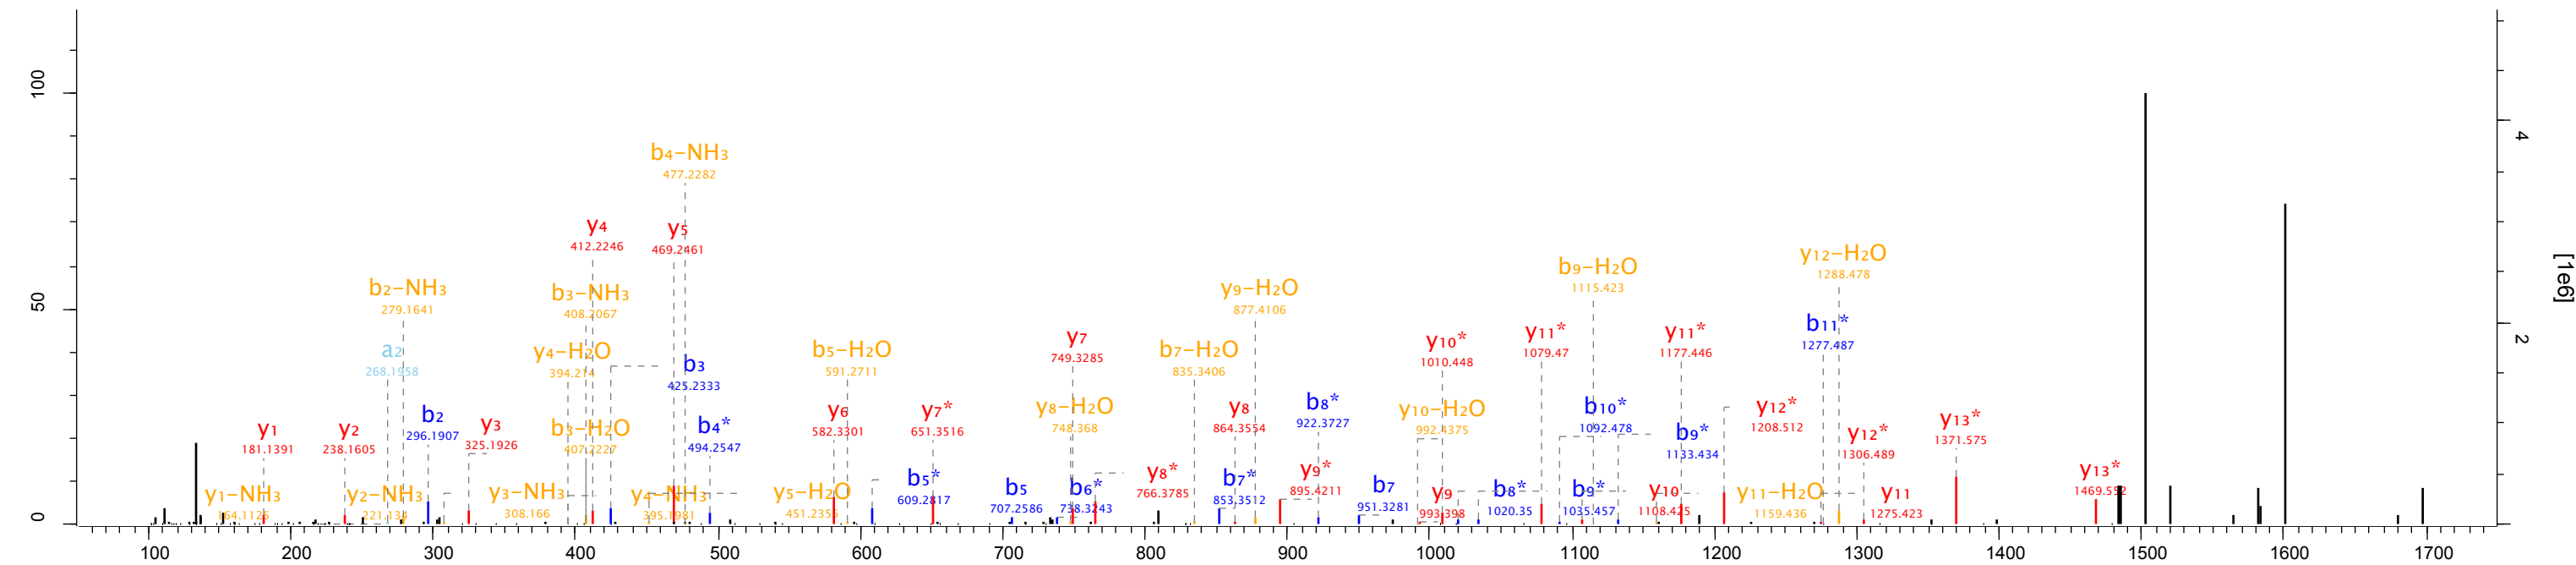

Sequence: K Y E S D E D S L G S S G R -

Fragmentation mapping (b and y ions):

- Y<sub>13</sub>\* (b<sub>2</sub>)
- Y<sub>12</sub>\* (b<sub>3</sub>)
- Y<sub>11</sub> ph (b<sub>4</sub>\*)
- Y<sub>10</sub> (b<sub>5</sub>)
- Y<sub>9</sub> (b<sub>6</sub>\*)
- Y<sub>8</sub> (b<sub>7</sub>)
- Y<sub>7</sub> ph (b<sub>8</sub>\*)
- Y<sub>6</sub> (b<sub>9</sub>\*)
- Y<sub>5</sub> (b<sub>10</sub>\*)
- Y<sub>4</sub> (b<sub>11</sub>\*)

Raw file: 20150812\_A375SR\_Phospho\_BR1\_02  
 Scan: 6991 Method: FTMS; HCD Score: 129.77 m/z: 942.76 Gene names: LEO1

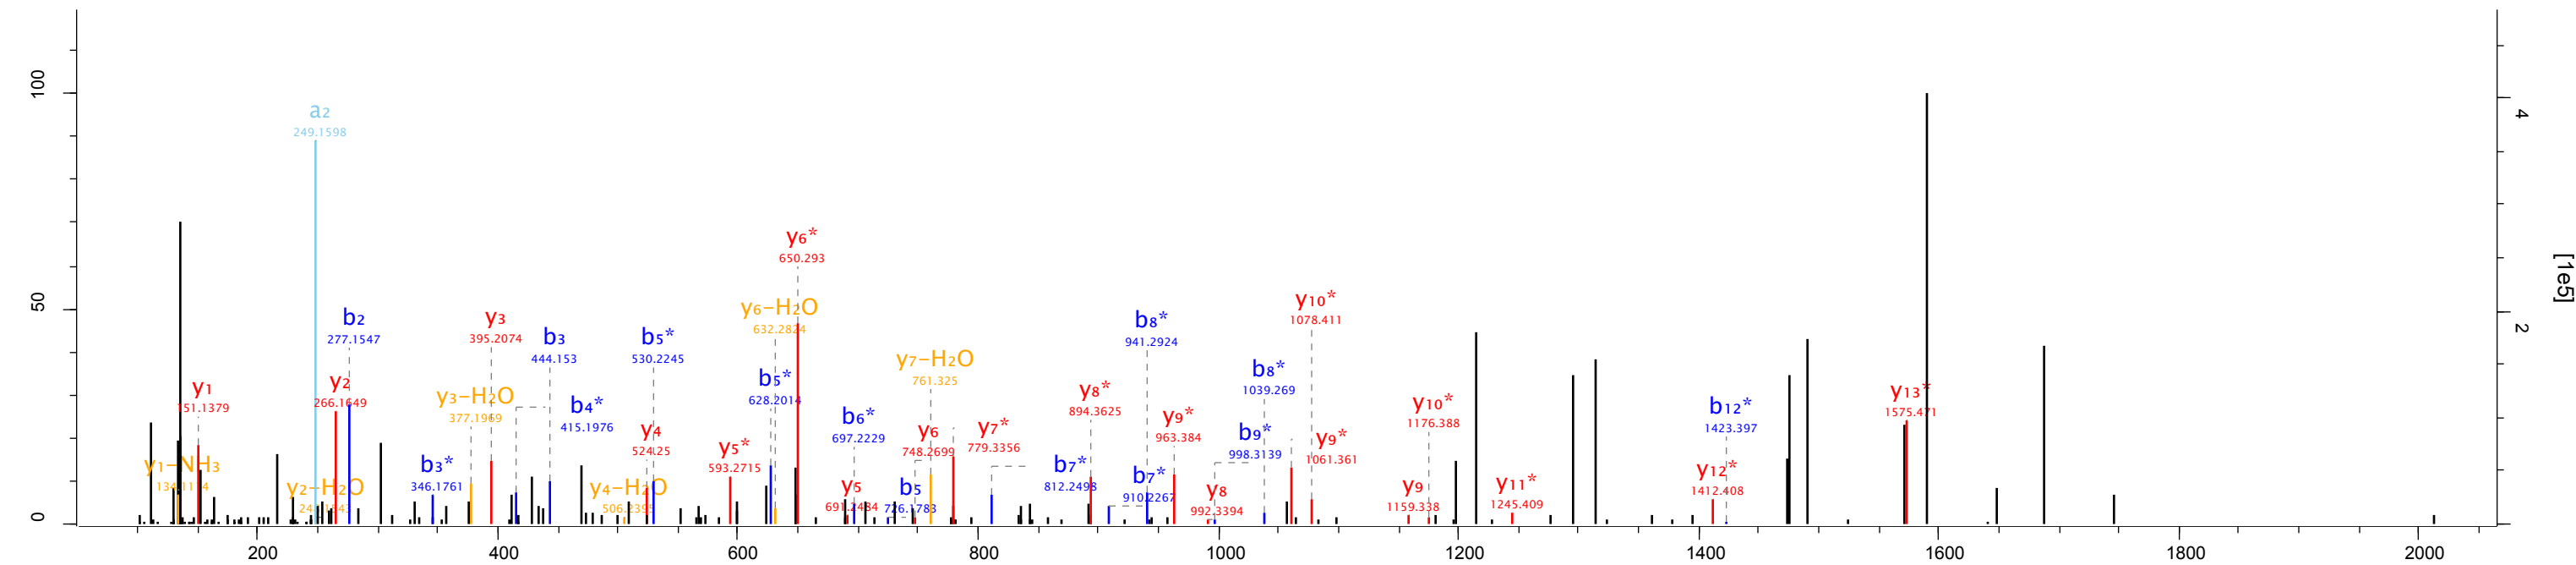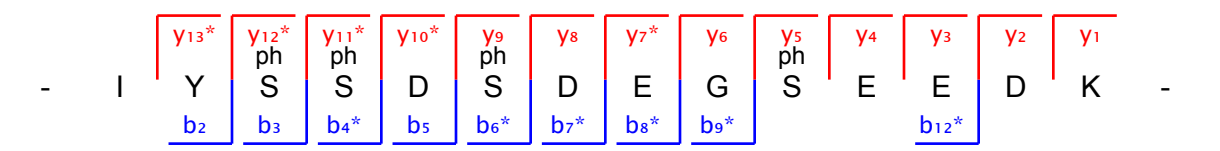

Raw file: 20150812\_A375SR\_Phospho\_BR1\_02  
 Scan: 7021 Method: FTMS; HCD Score: 304.75 m/z: 1017.85 Gene names: ZC3H13

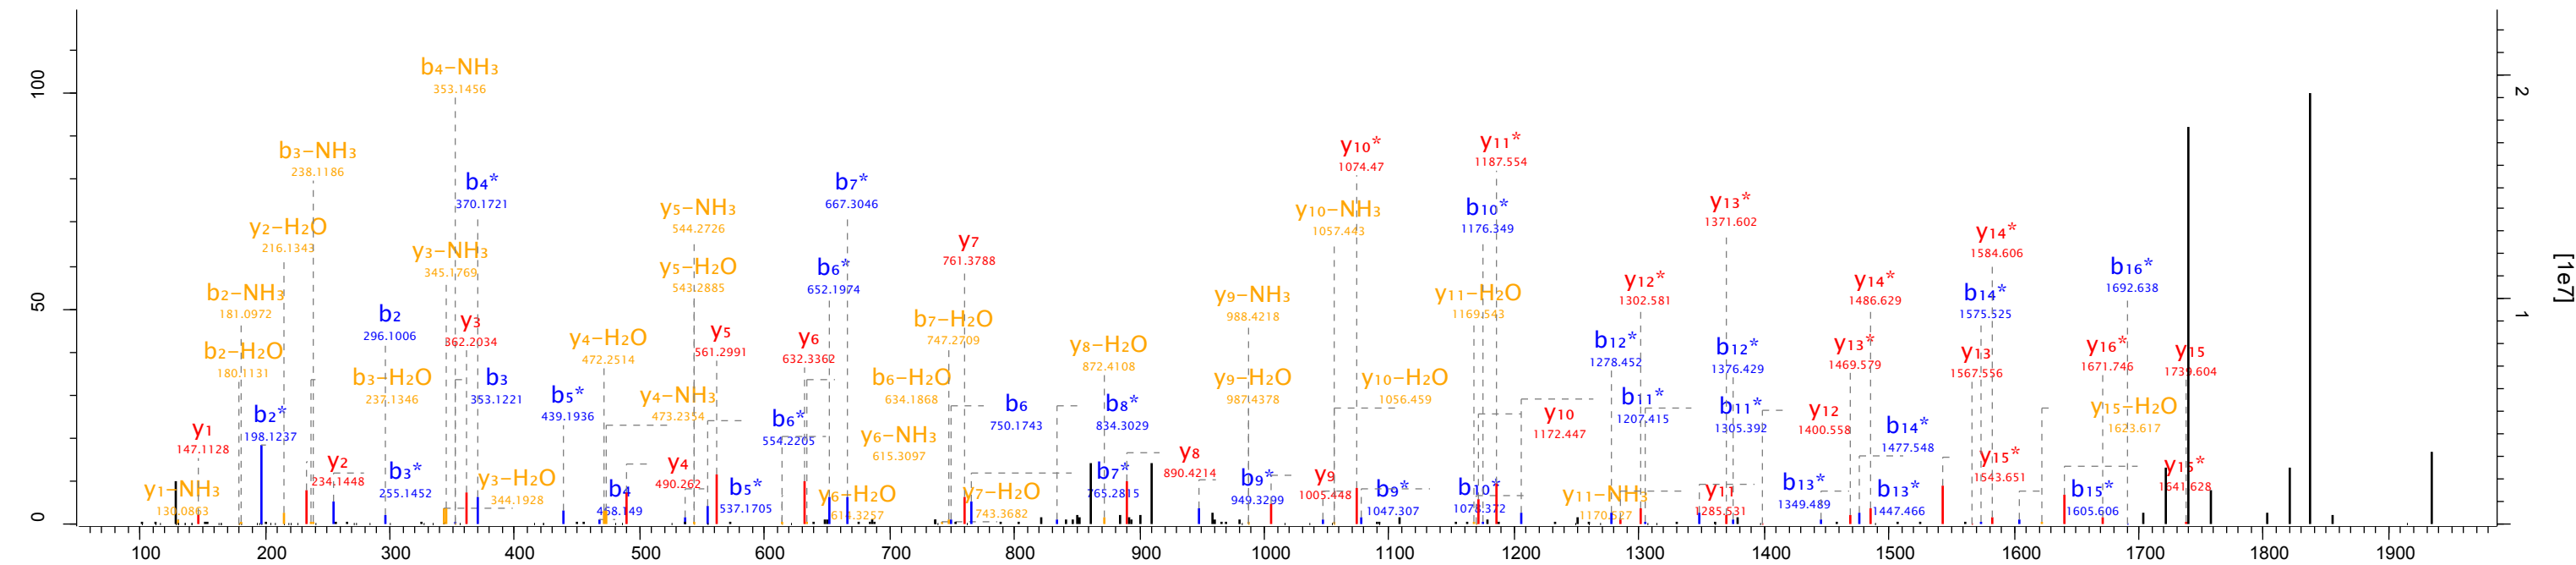

| ph | y16* | y15 | y14* | y13 | y12 | y11 | y10 | y9  | y8   | y7   | y6   | y5   | y4   | y3   | y2   | y1 |
|----|------|-----|------|-----|-----|-----|-----|-----|------|------|------|------|------|------|------|----|
| S  | K    | G   | D    | S   | D   | I   | S   | D   | E    | E    | A    | A    | Q    | Q    | S    | K  |
| S  | b2   | b3  | b4   | b5* | b6  | b7* | b8* | b9* | b10* | b11* | b12* | b13* | b14* | b15* | b16* | -  |

Raw file: 20150812\_A375SR\_Phospho\_BR1\_02  
 Scan: 7041 Method: FTMS; HCD Score: 155.75 m/z: 838.32 Gene names: MAPKAPK5

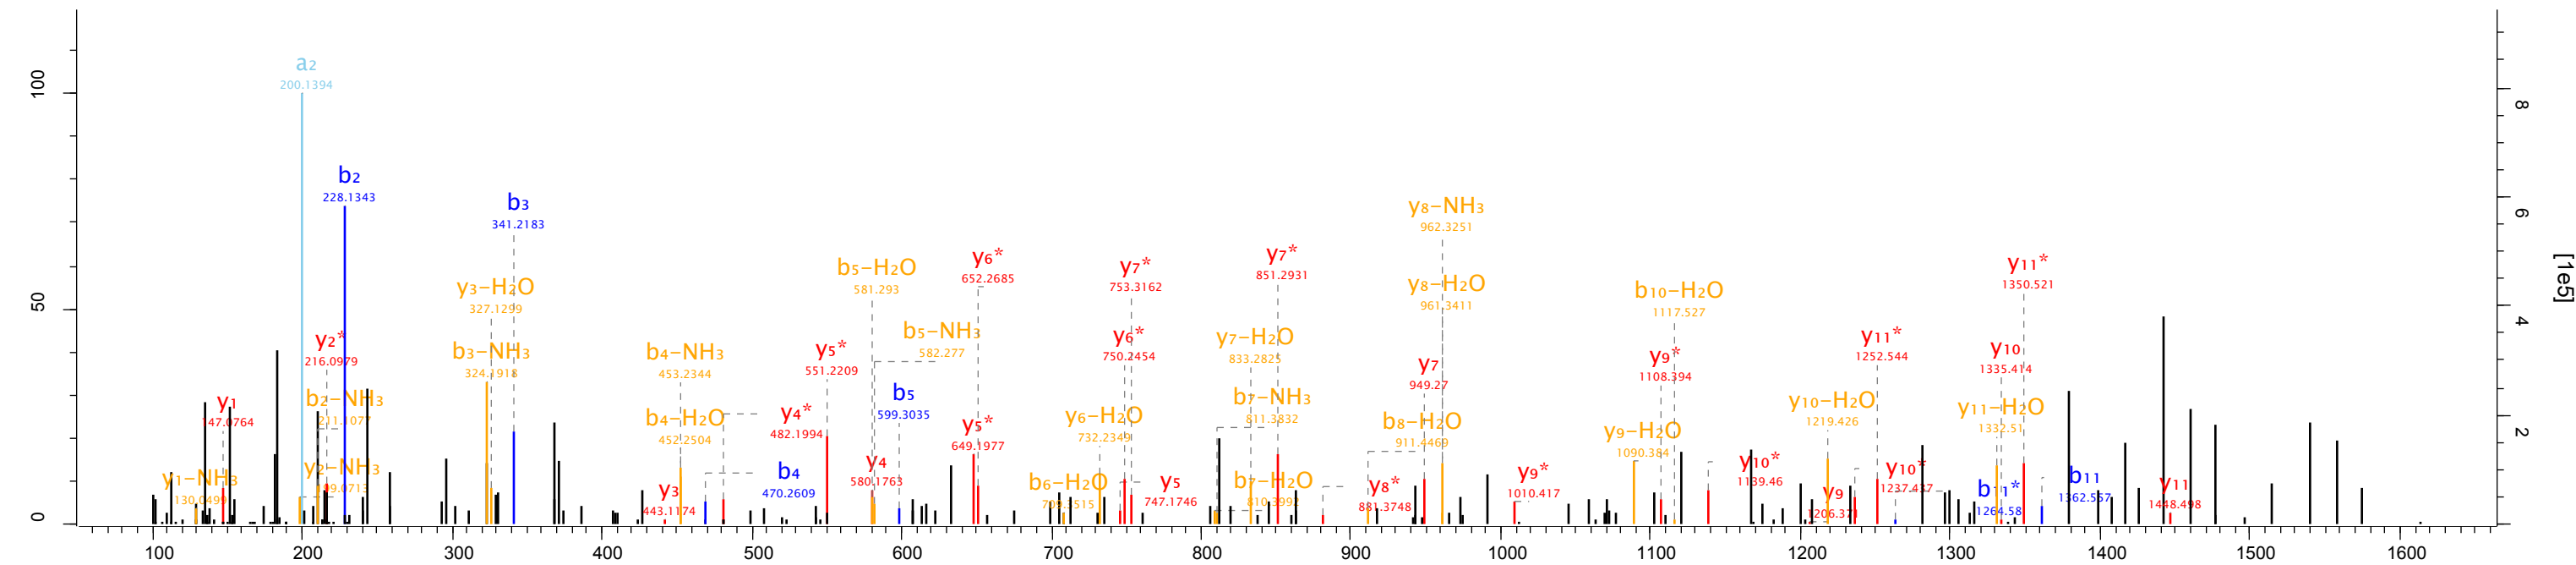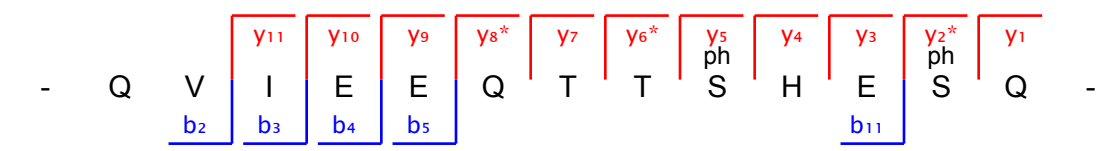

Raw file: 20150812\_A375SR\_Phospho\_BR1\_02  
 Scan: 7341 Method: FTMS; HCD Score: 196.19 m/z: 644.25 Gene names: ANKRD17

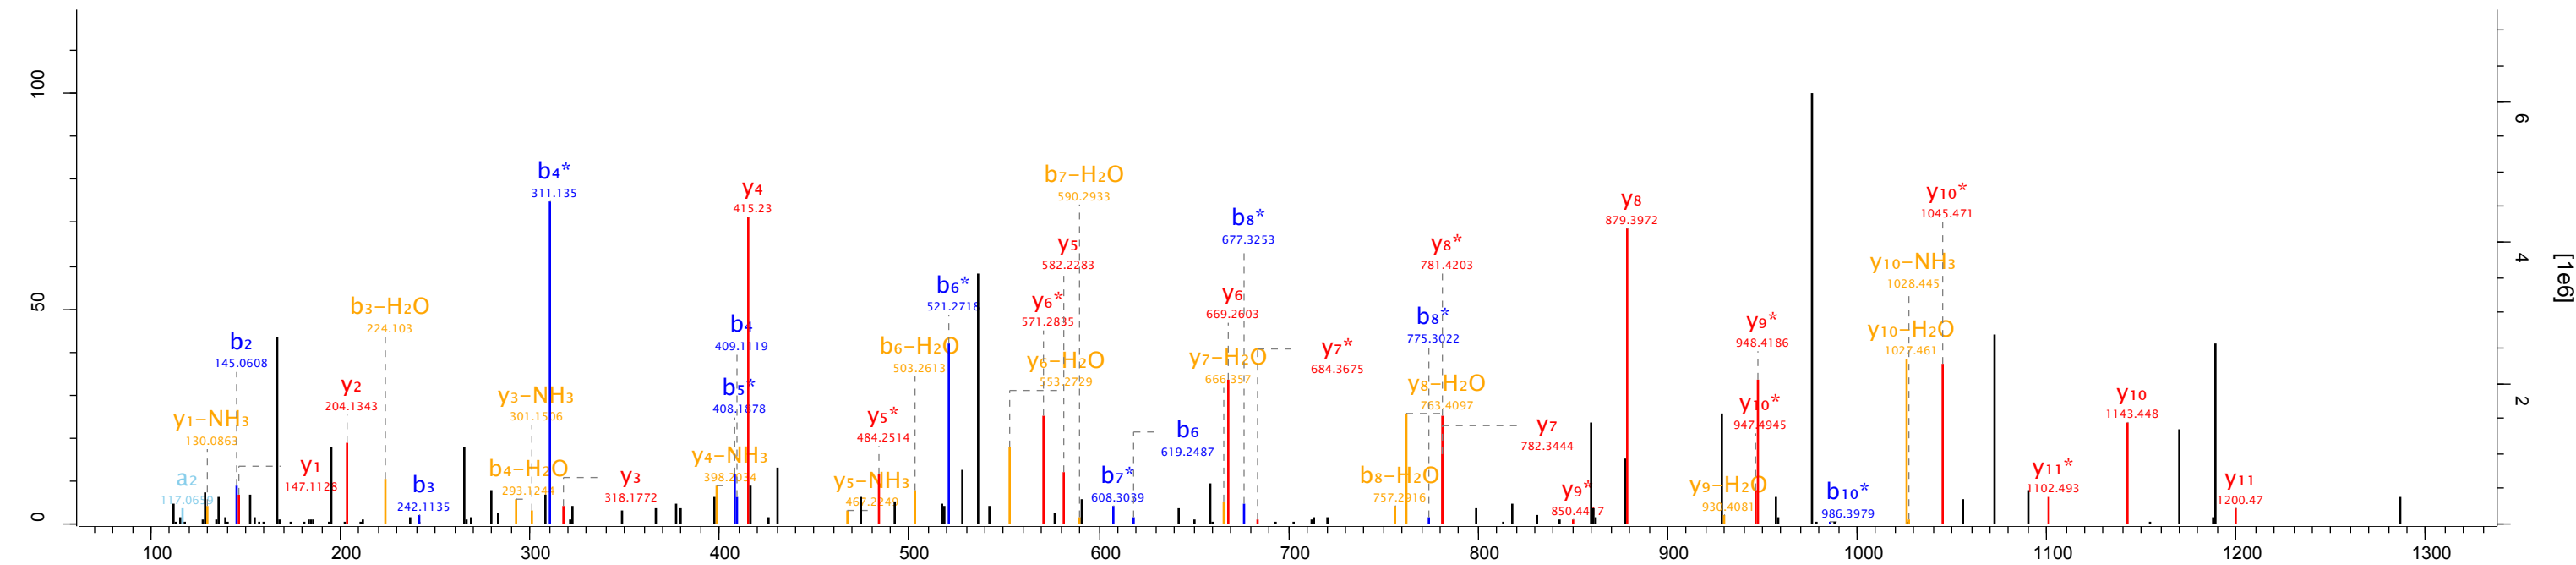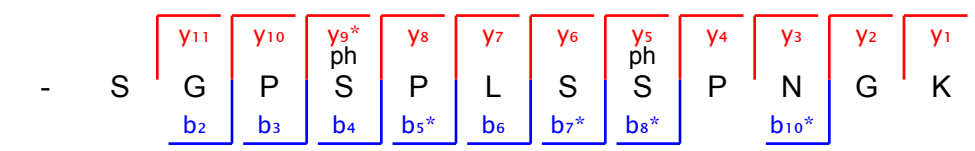

Raw file 20150812\_A375SR\_Phospho\_BR1\_02 Scan 7761 Method FTMS; HCD Score 256.03 m/z 1349.05 Gene names UBAP2L

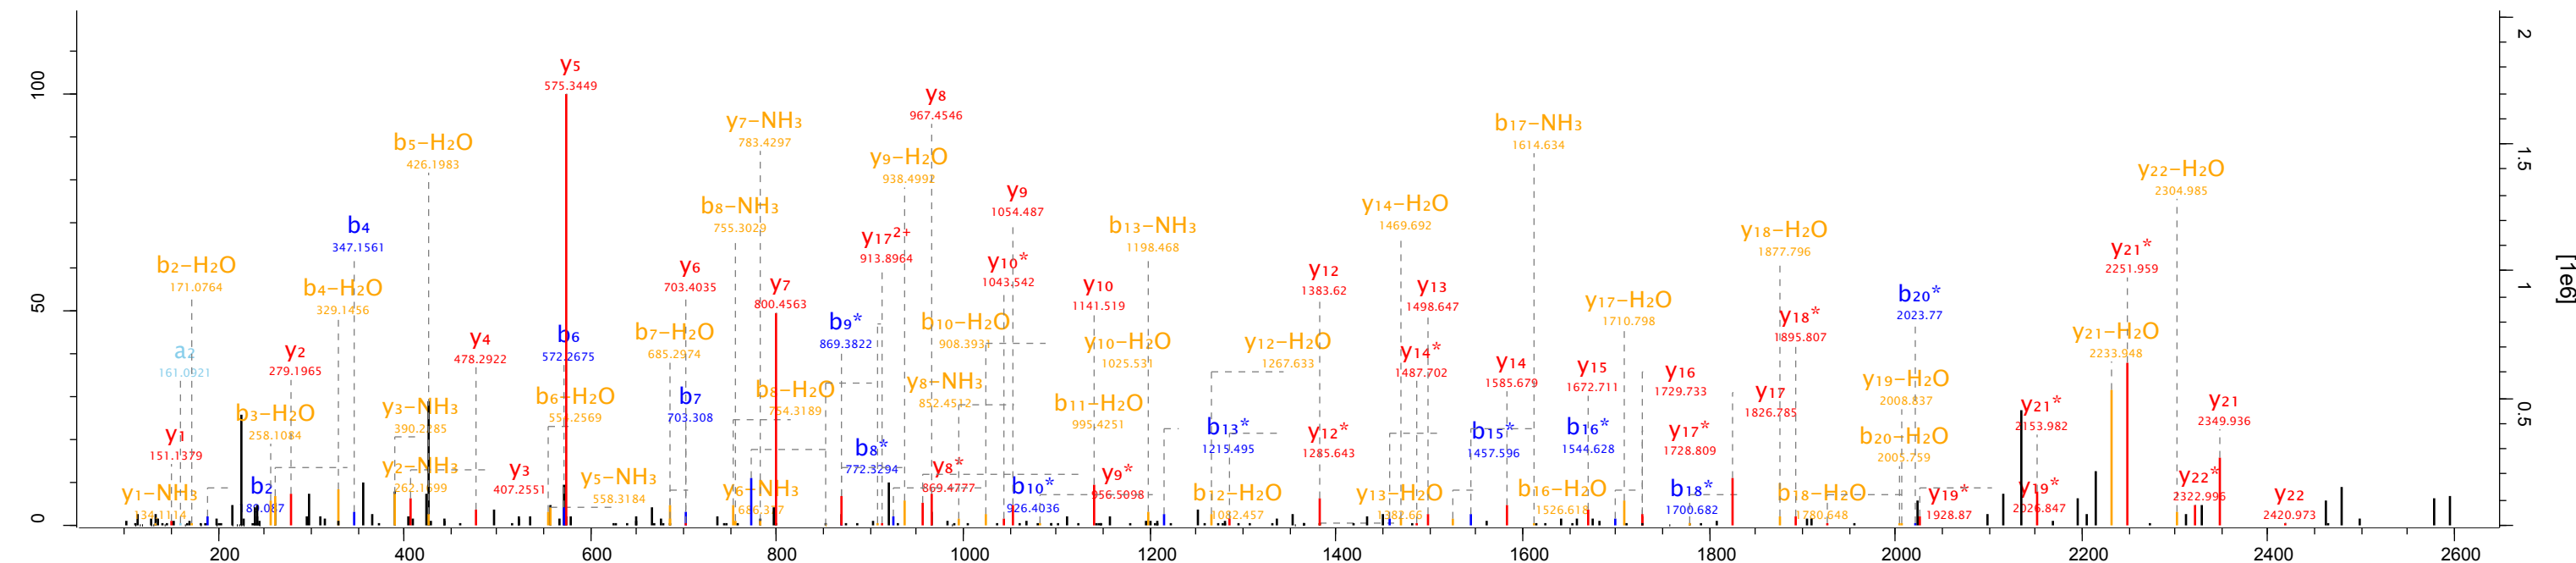

- S T S A P Q M S ph S P G S S D N Q S S ph S P Q A Q Q K -

Fragmentation mapping (b-ions in blue, y-ions in red):

- b<sub>2</sub> (under T)
- b<sub>4</sub> (under A)
- b<sub>6</sub> (under Q)
- b<sub>7</sub> (under M)
- b<sub>8</sub><sup>\*</sup> (under S<sub>ph</sub>)
- b<sub>9</sub><sup>\*</sup> (under P)
- b<sub>10</sub><sup>\*</sup> (under G)
- b<sub>13</sub><sup>\*</sup> (under D)
- b<sub>15</sub><sup>\*</sup> (under N)
- b<sub>16</sub><sup>\*</sup> (under Q)
- b<sub>18</sub><sup>\*</sup> (under S<sub>ph</sub>)
- b<sub>20</sub><sup>\*</sup> (under P)
- y<sub>1</sub> (under K)
- y<sub>2</sub> (under Q)
- y<sub>3</sub> (under A)
- y<sub>4</sub> (under P)
- y<sub>5</sub> (under S)
- y<sub>6</sub> (under Q)
- y<sub>7</sub> (under P)
- y<sub>8</sub> (under S<sub>ph</sub>)
- y<sub>9</sub> (under S)
- y<sub>10</sub> (under S)
- y<sub>12</sub> (under N)
- y<sub>13</sub> (under D)
- y<sub>14</sub> (under S)
- y<sub>15</sub> (under S)
- y<sub>16</sub> (under G)
- y<sub>17</sub> (under P)
- y<sub>18</sub><sup>\*</sup> (under S<sub>ph</sub>)
- y<sub>19</sub><sup>\*</sup> (under M)
- y<sub>21</sub> (under A)
- y<sub>22</sub> (under Q)



Raw file: 20150812\_A375SR\_Phospho\_BR1\_02  
 Scan: 7821 Method: FTMS; HCD Score: 243.16 m/z: 802.34 Gene names: MRGBP

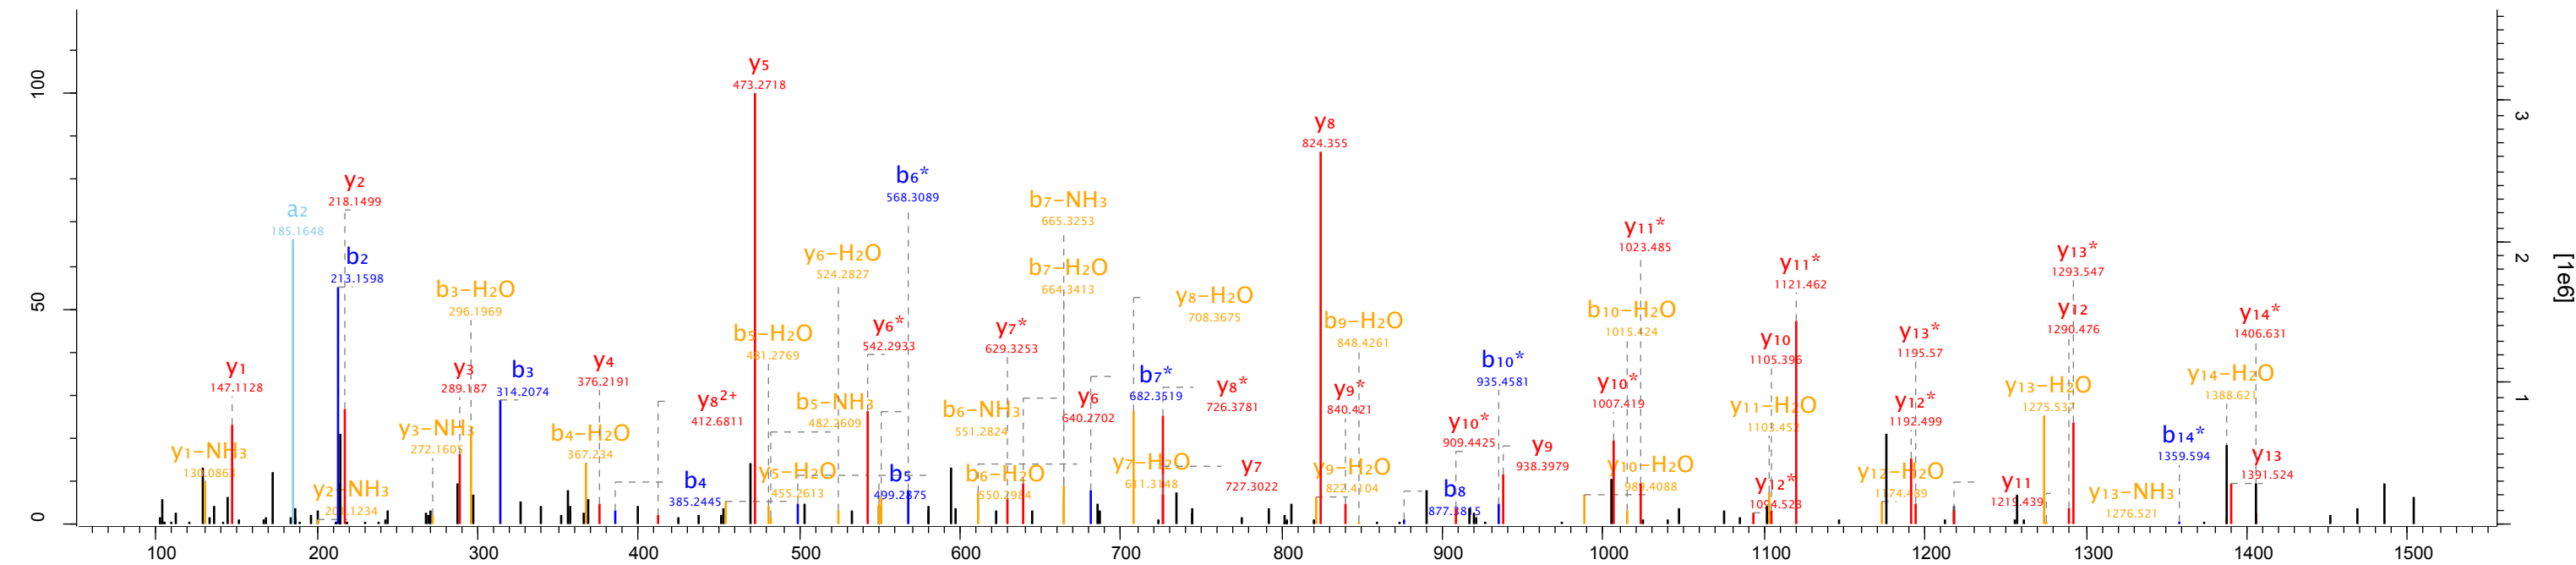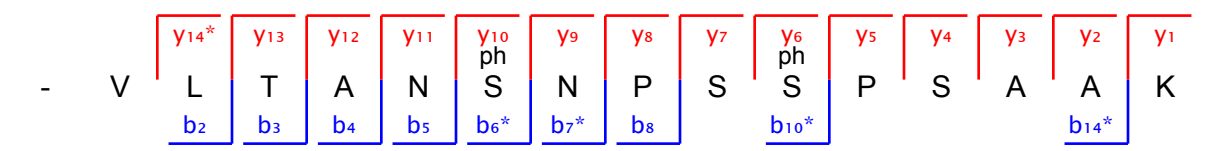

Raw file: 20150812\_A375SR\_Phospho\_BR1\_02  
 Scan: 8461 Method: FTMS; HCD Score: 94.56 m/z: 962.84 Gene names: PRRC2B

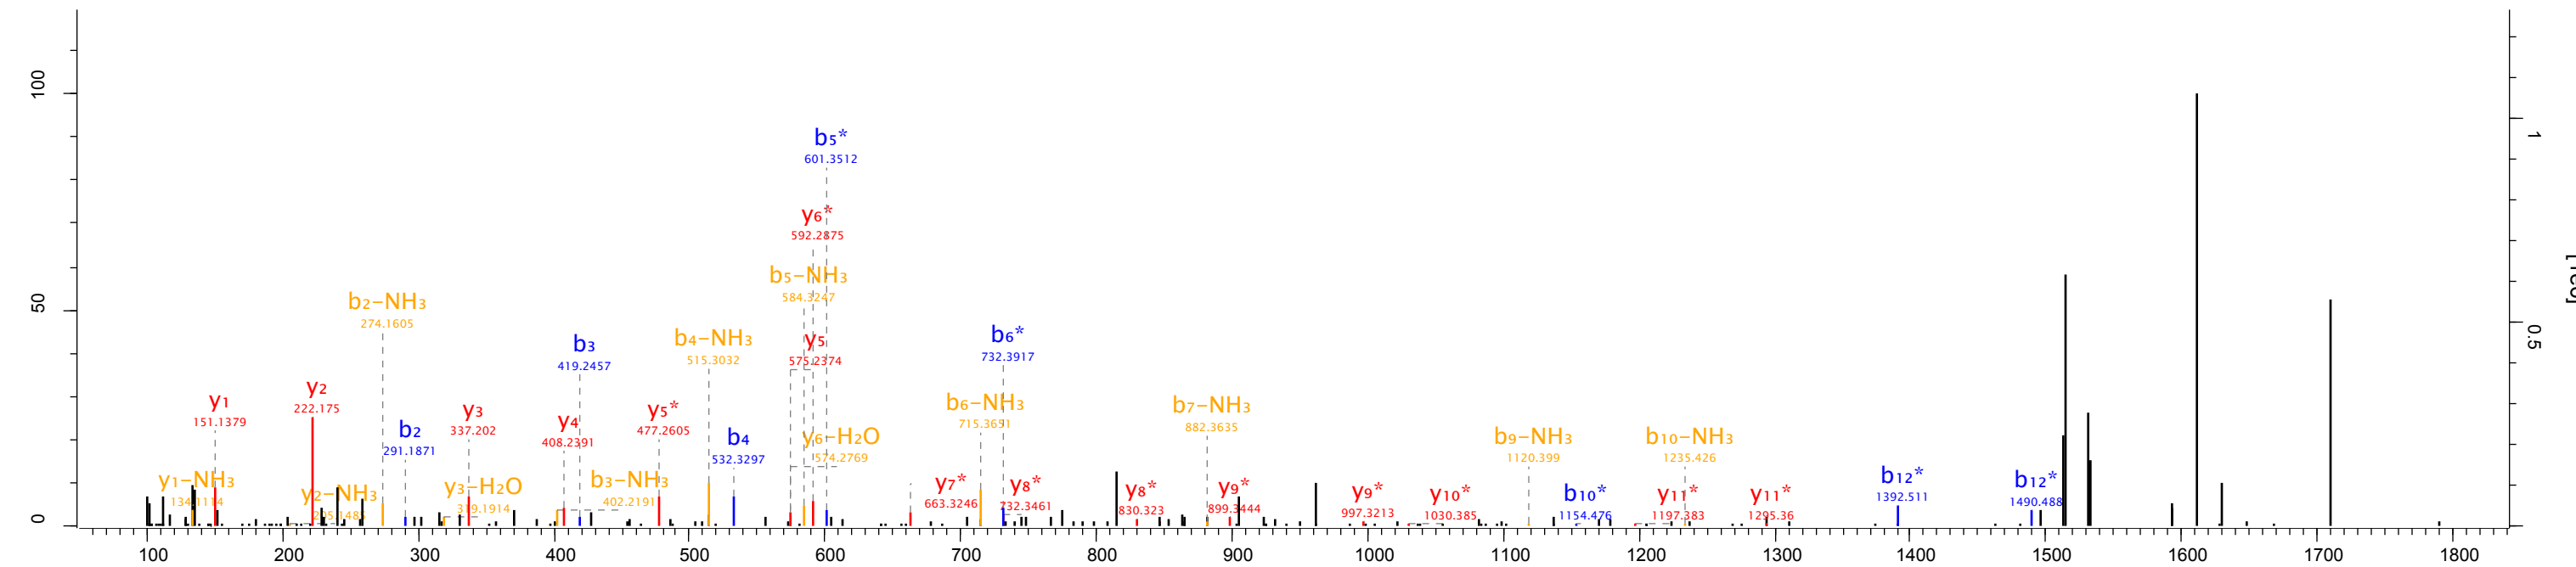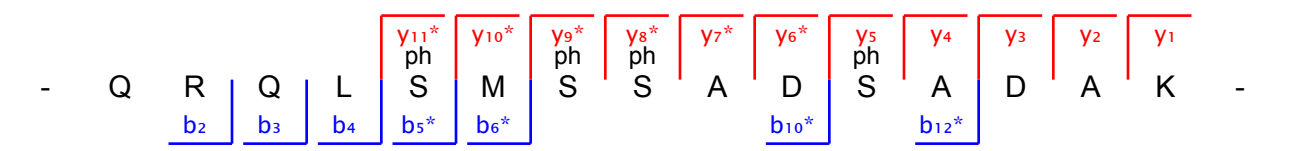

Raw file: 20150812\_A375SR\_Phospho\_BR1\_02  
 Scan: 8631 Method: FTMS; HCD Score: 66.56 m/z: 1088.92 Gene names: SNAPC1

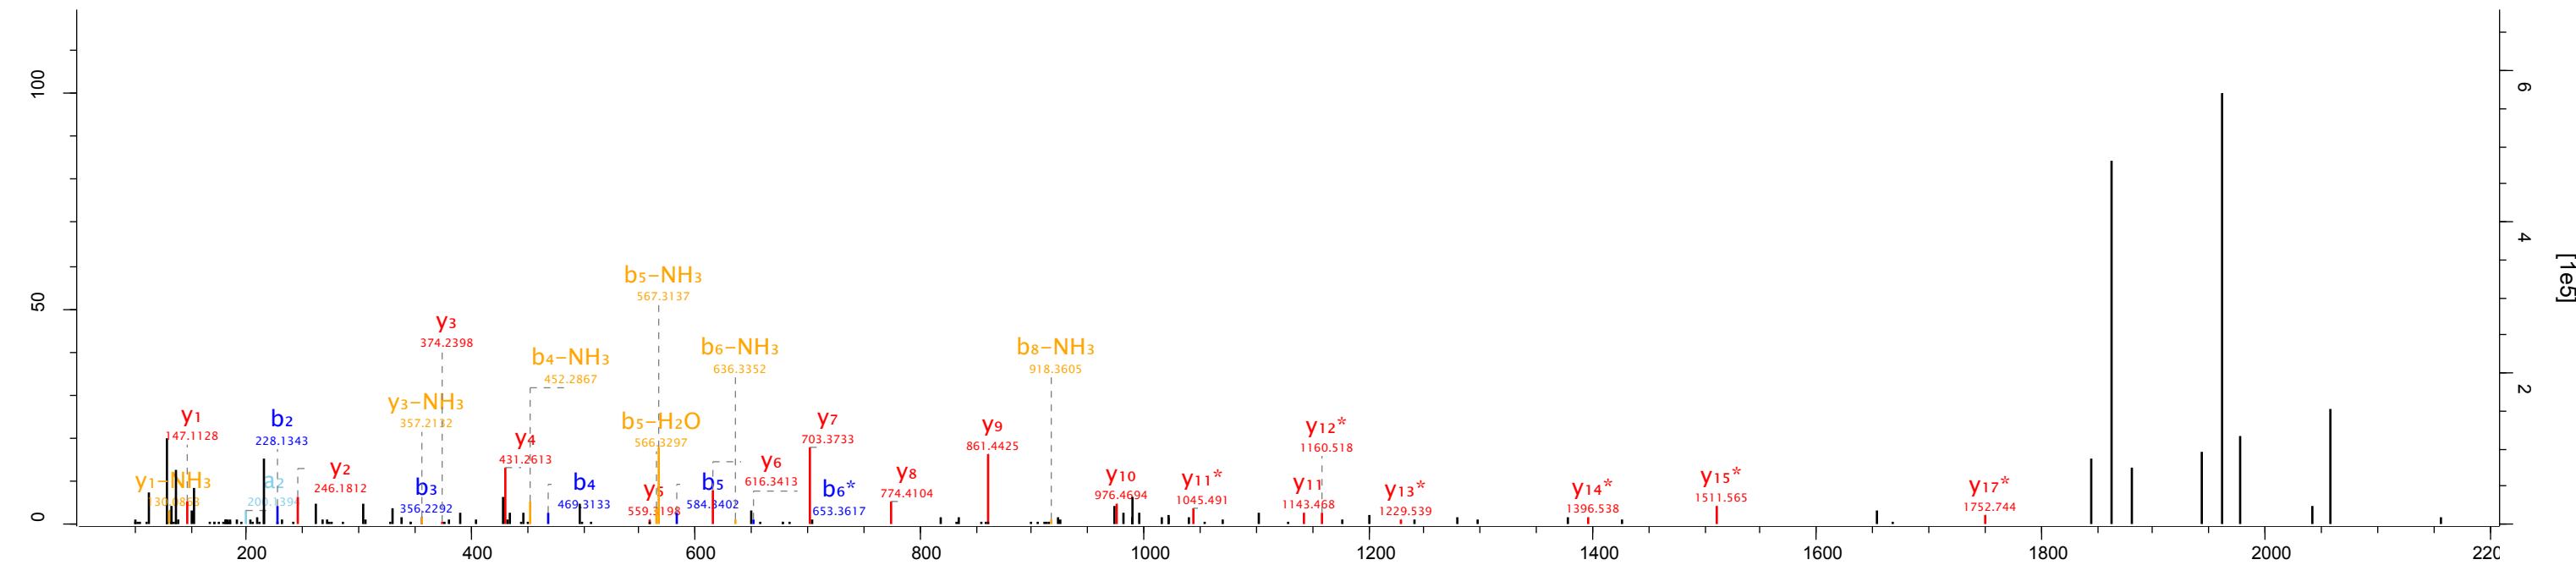

Protein sequence: - Q V K L D S S D S A S G Q G Q V K -

Fragmentation labels below the sequence:

- b2 (under V)
- b3 (under K)
- b4 (under L)
- b5 (under D)
- b6\* (under S)
- y17\* (above K)
- y15\* (above D)
- y14\* (above S)
- y13\* (above S)
- y12\* (above D)
- y11 (above S)
- y10 (above D)
- y9 (above S)
- y8 (above A)
- y7 (above S)
- y6 (above G)
- y5 (above Q)
- y4 (above G)
- y3 (above Q)
- y2 (above V)
- y1 (above K)

Raw file: 20150812\_A375SR\_Phospho\_BR1\_02  
 Scan: 9011 Method: FTMS; HCD Score: 158.75 m/z: 1113.86 Gene names: HOXC10

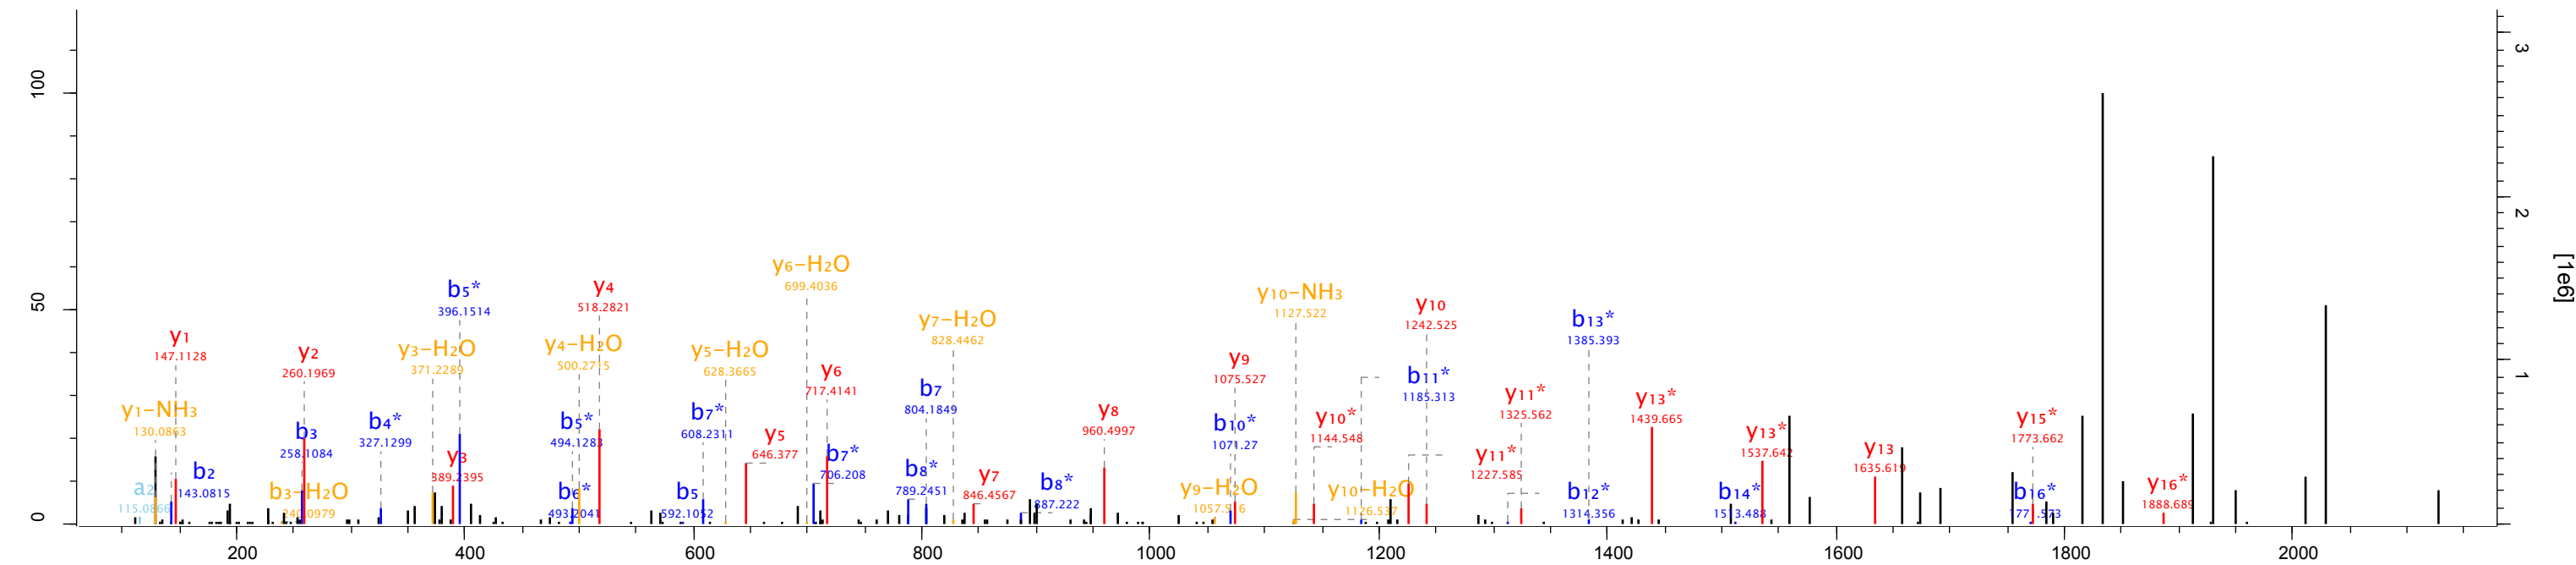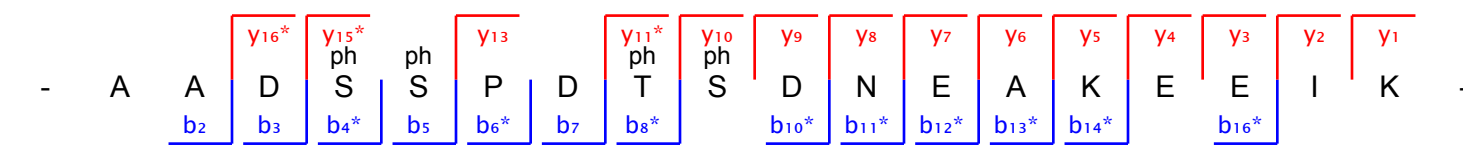

Raw file: 20150812\_A375SR\_Phospho\_BR1\_02  
 Scan: 9231 Method: FTMS; HCD Score: 166.49 m/z: 1074.94 Gene names: CDV3

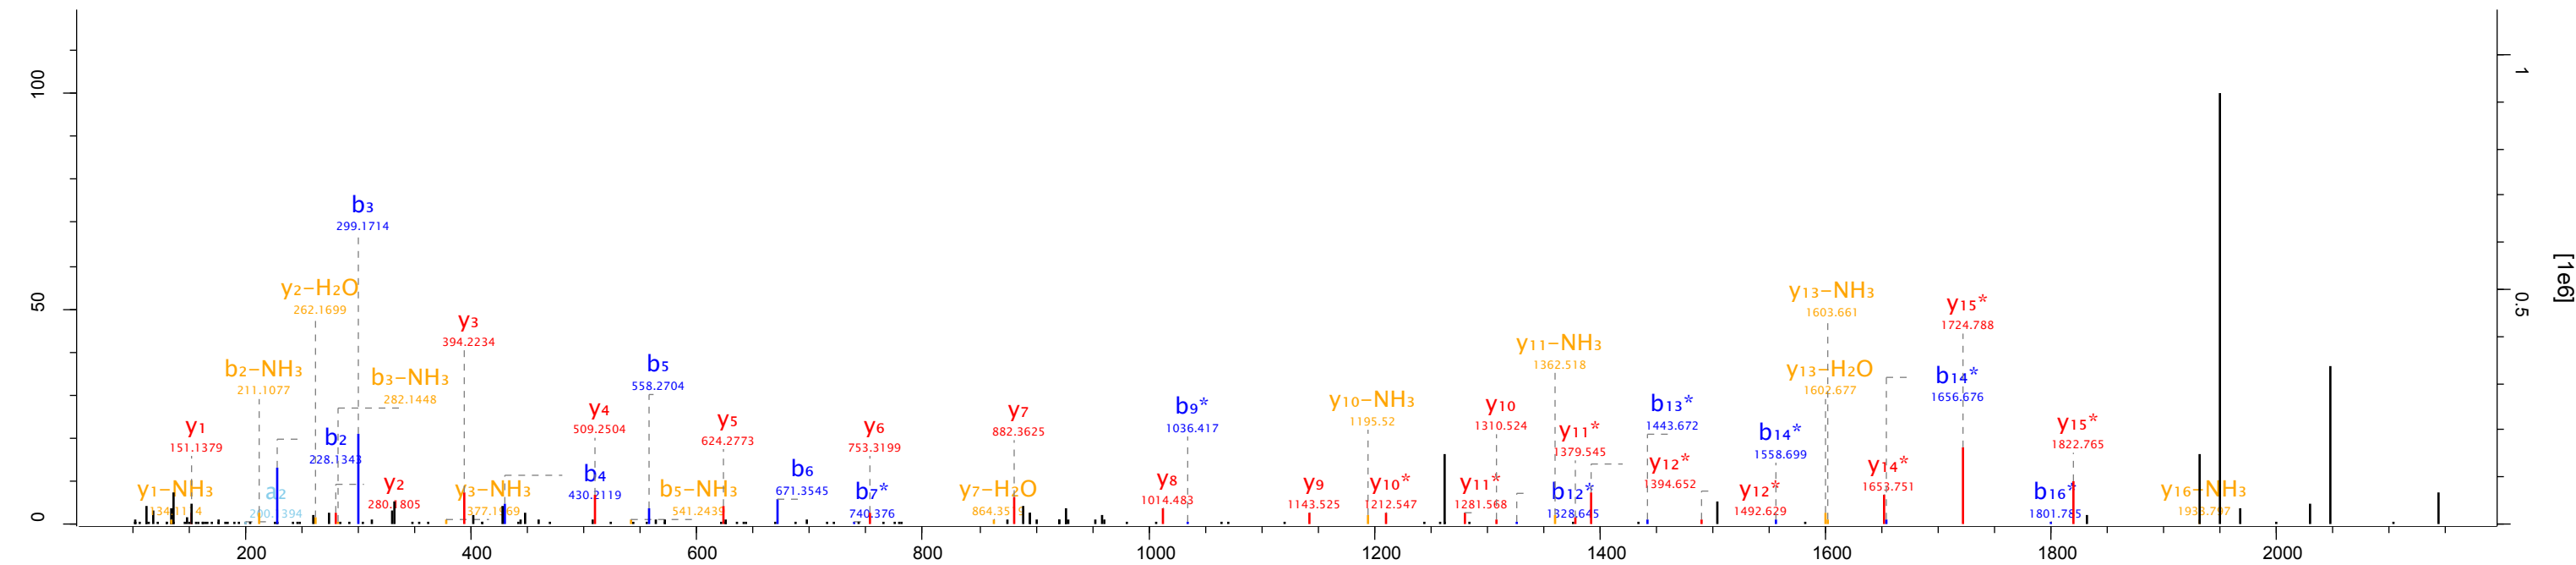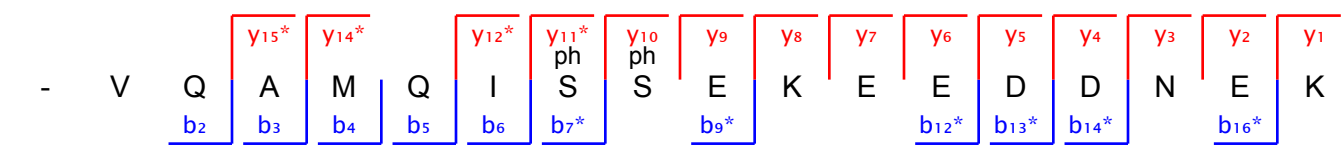

Raw file 20150812\_A375SR\_Phospho\_BR1\_02 Scan 9281 Method FTMS; HCD Score 84.91 m/z 1160.45 Gene names CCDC9

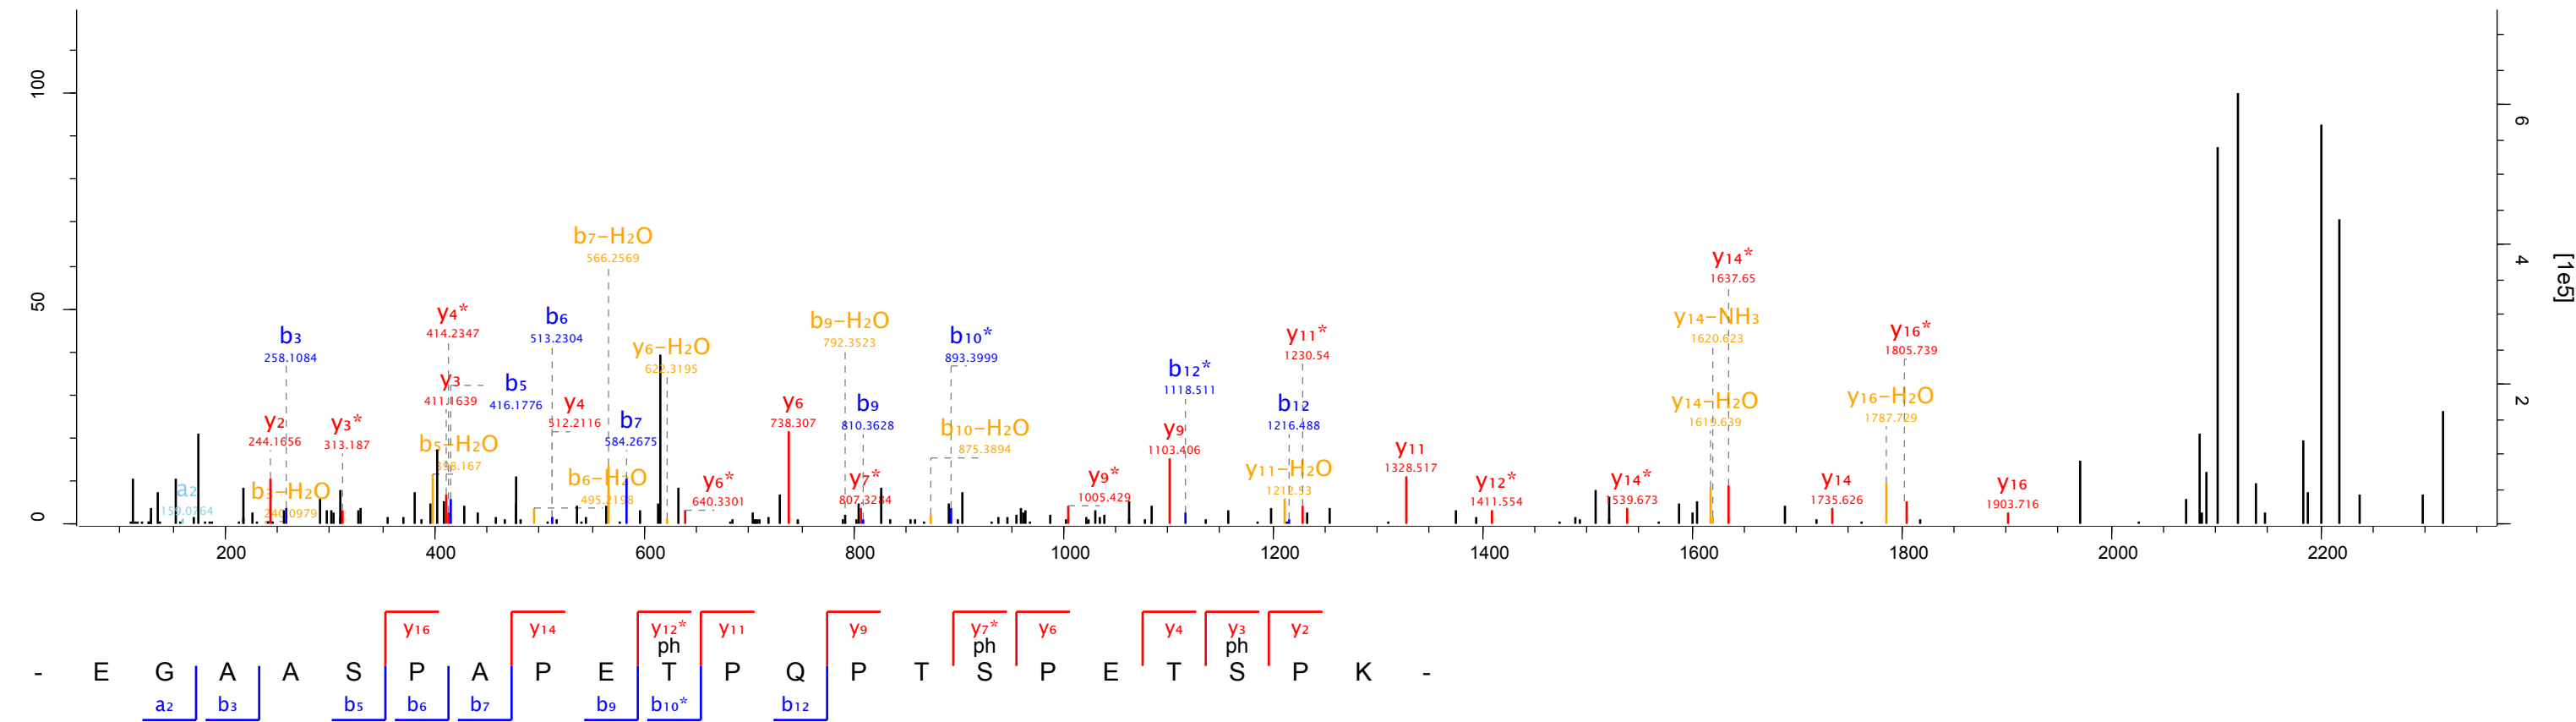

Raw file  
20150812\_A375SR\_Phospho\_BR1\_02

Scan 9791 Method FTMS; HCD Score 260.03 m/z 920.42 Gene names SPTBN1

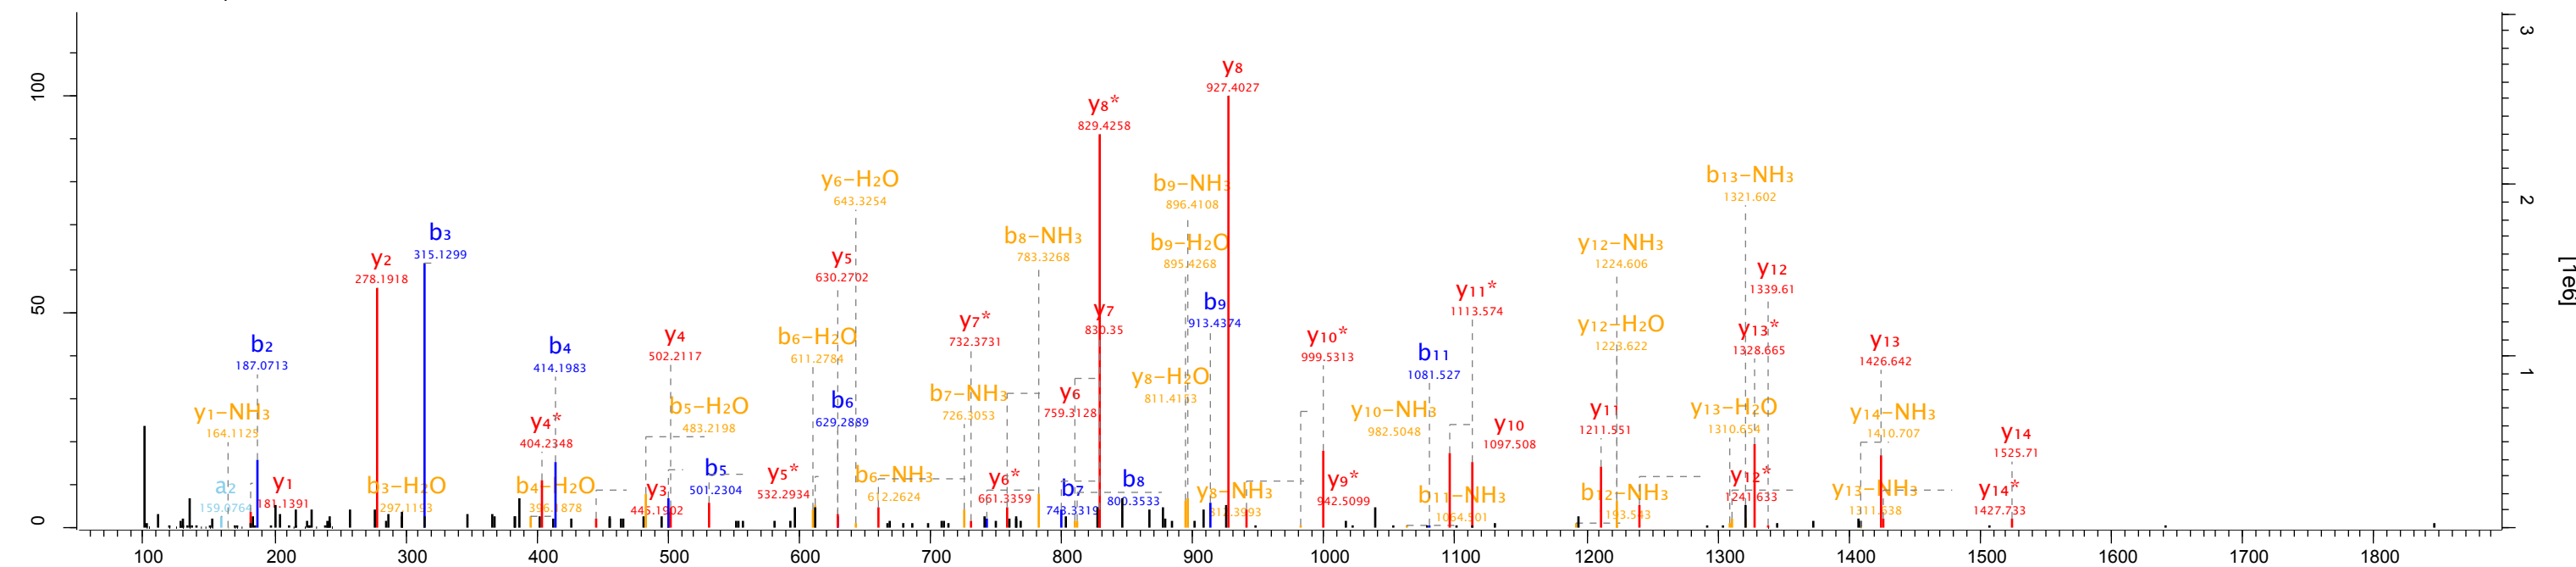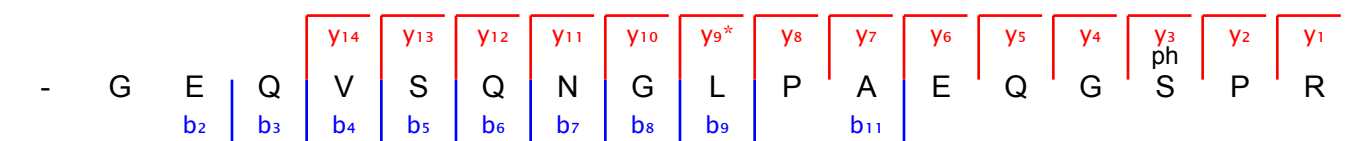

Raw file: 20150812\_A375SR\_Phospho\_BR1\_02  
 Scan: 9901 Method: FTMS; HCD Score: 316.19 m/z: 1291.5 Gene names: PPP1R2;PPP1R2P3

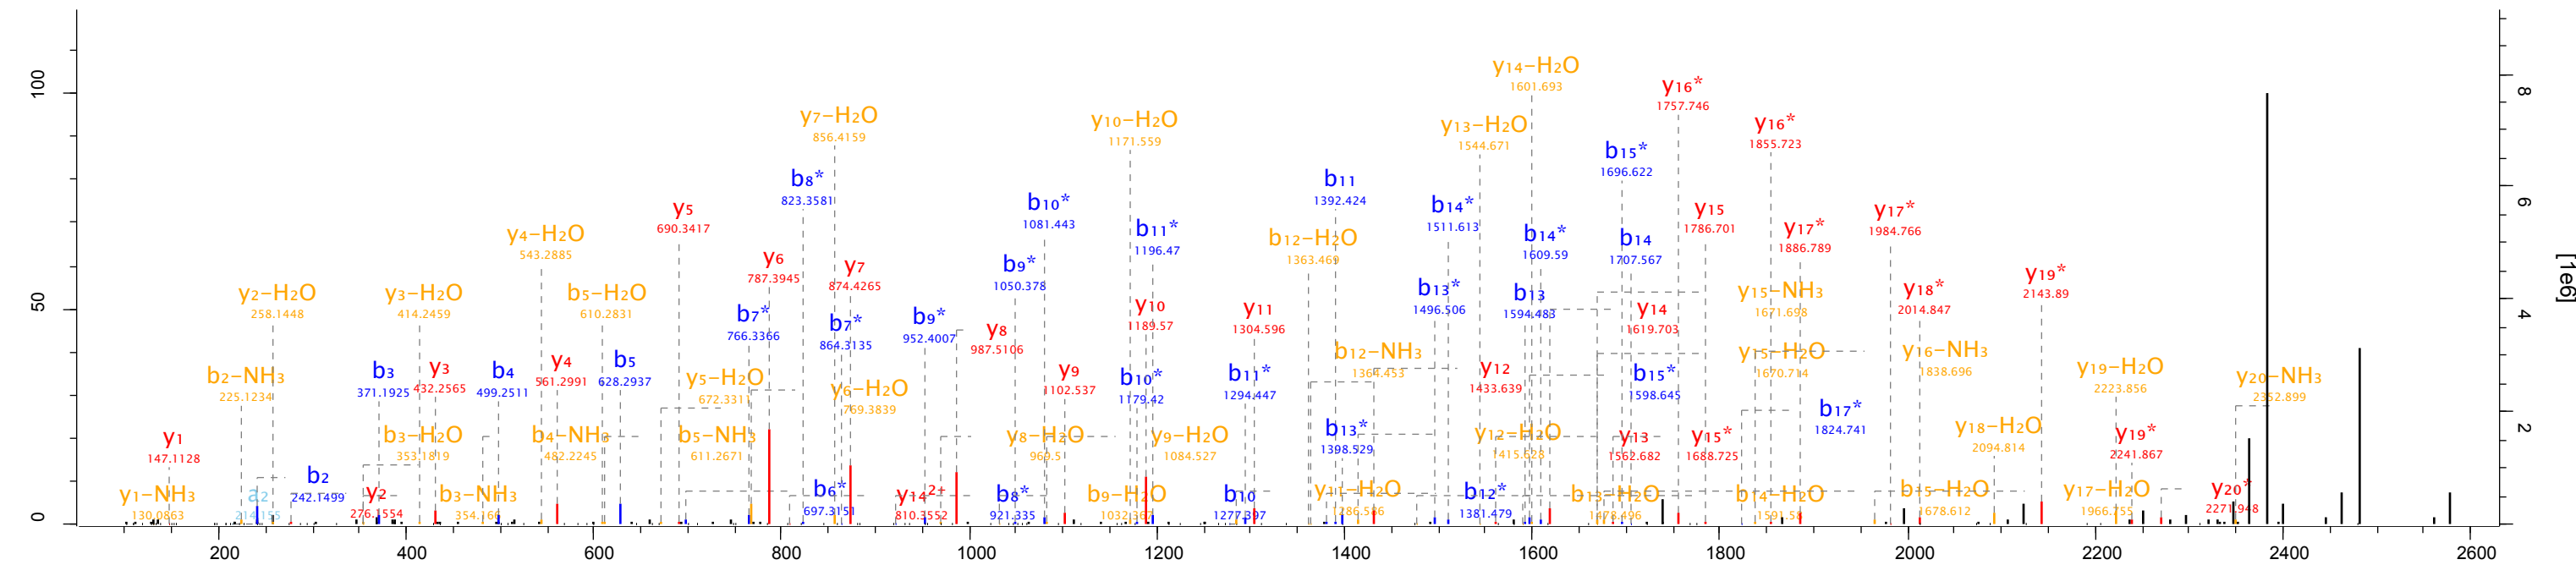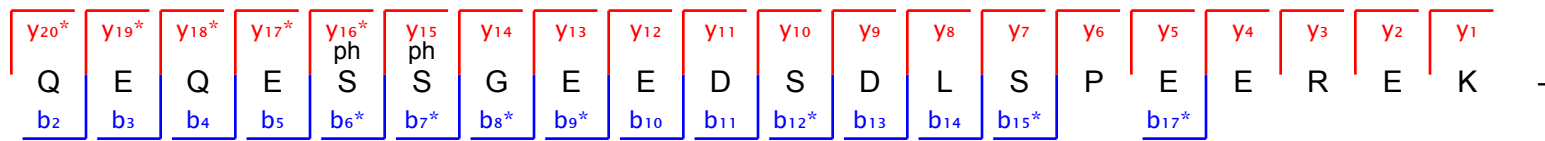



Raw file 20150812\_A375SR\_Phospho\_BR1\_03 Scan 10661 Method FTMS; HCD Score 205.87 m/z 783.81 Gene names DUT

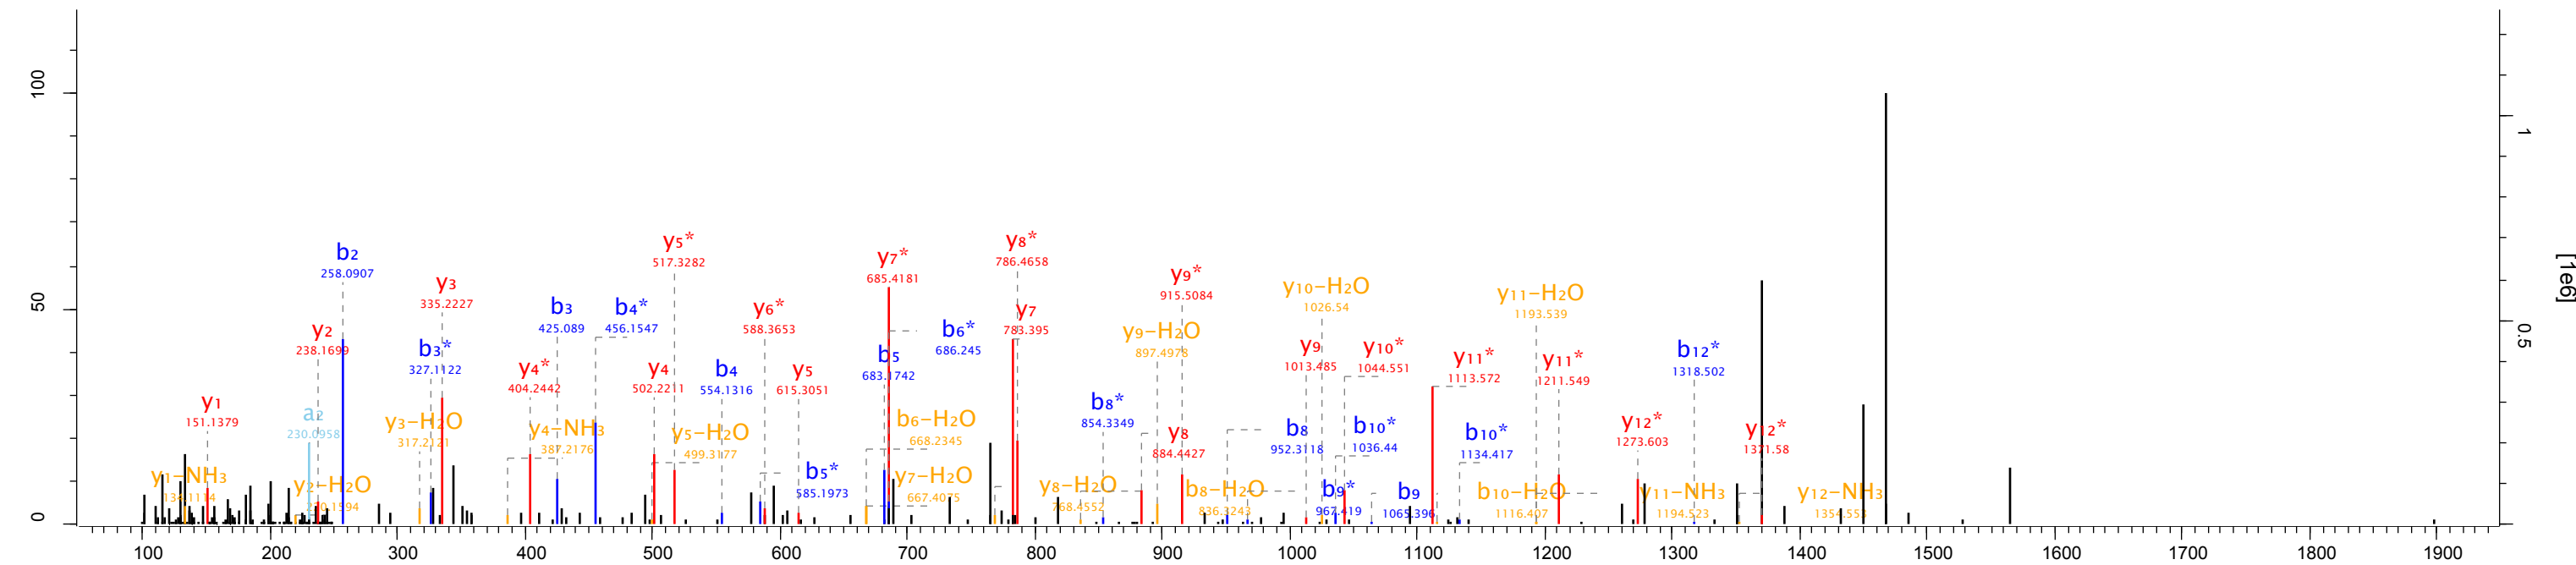

- P C S E E T P A I S P S K -

y<sub>12</sub>\*
y<sub>11</sub><sup>ph</sup>\*
y<sub>10</sub>\*
y<sub>9</sub>
y<sub>8</sub>
y<sub>7</sub>
y<sub>6</sub>\*
y<sub>5</sub>
y<sub>4</sub><sup>ph</sup>
y<sub>3</sub>
y<sub>2</sub>
y<sub>1</sub>

b<sub>2</sub>
b<sub>3</sub>
b<sub>4</sub>
b<sub>5</sub>
b<sub>6</sub>\*
b<sub>8</sub>
b<sub>9</sub>
b<sub>10</sub>\*
b<sub>12</sub>\*

Raw file Scan Method Score m/z Gene names  
 20150812\_A375SR\_Phospho\_BR1\_03 10731 FTMS; HCD 143.33 850.36 POLR2A

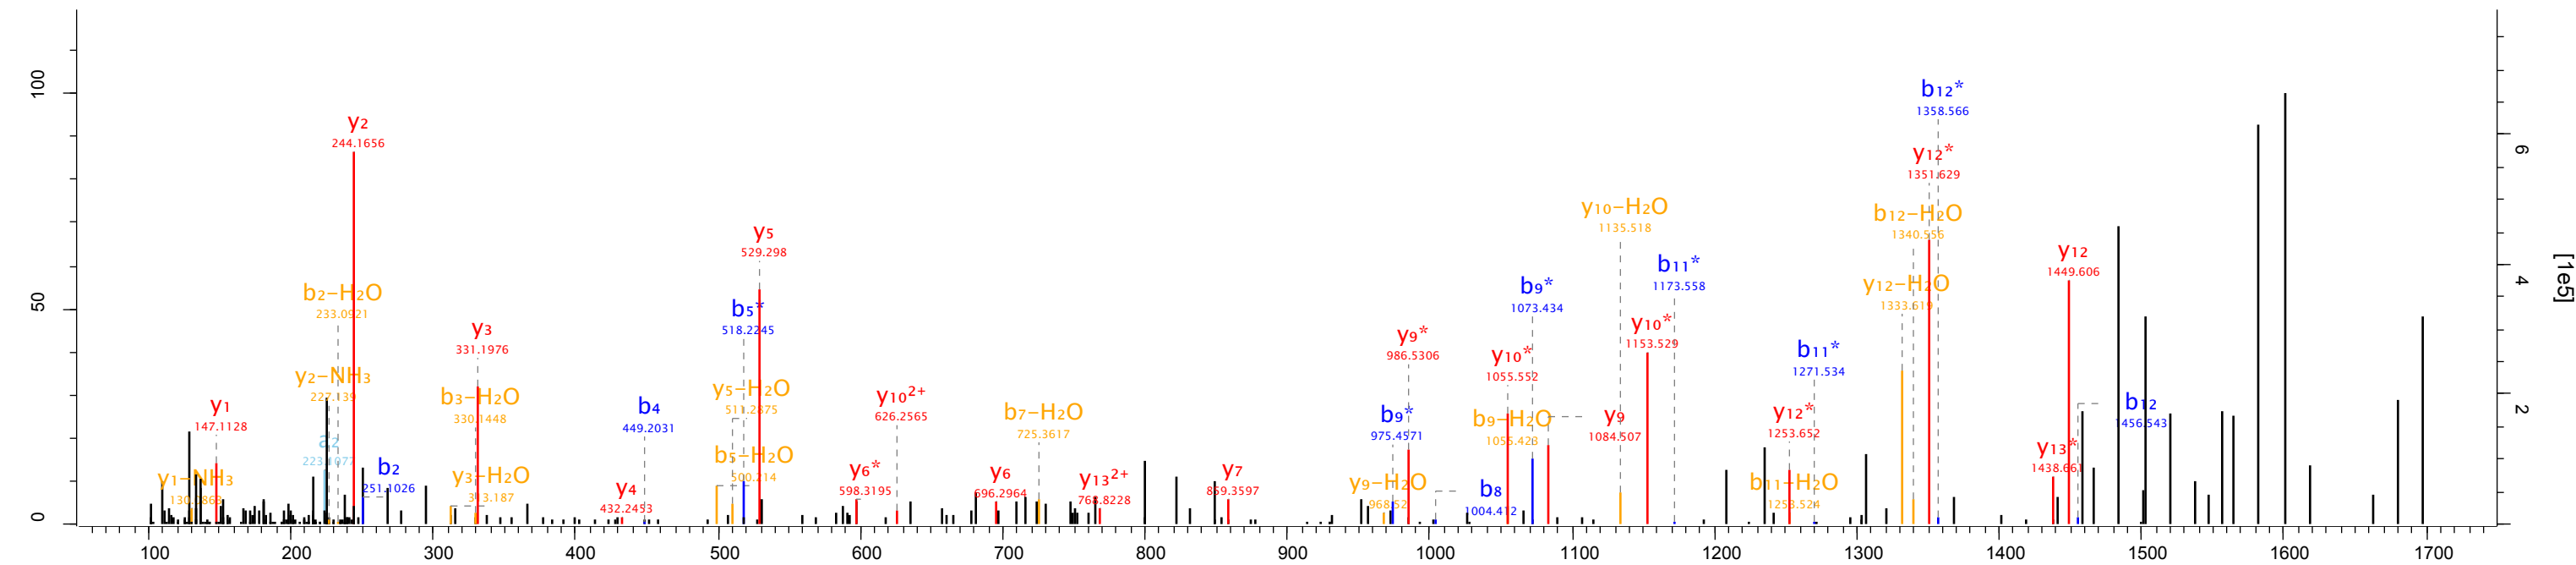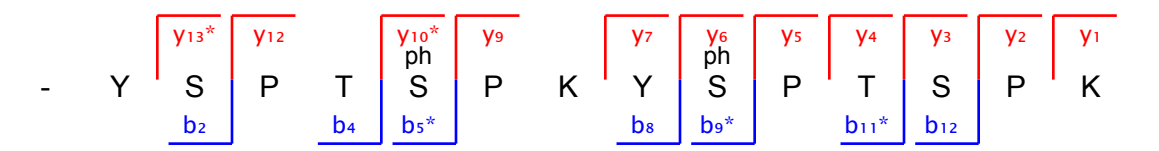

Raw file: 20150812\_A375SR\_Phospho\_BR1\_03  
 Scan: 10931 Method: FTMS; HCD Score: 128.74 m/z: 860.89 Gene names: SRSF1

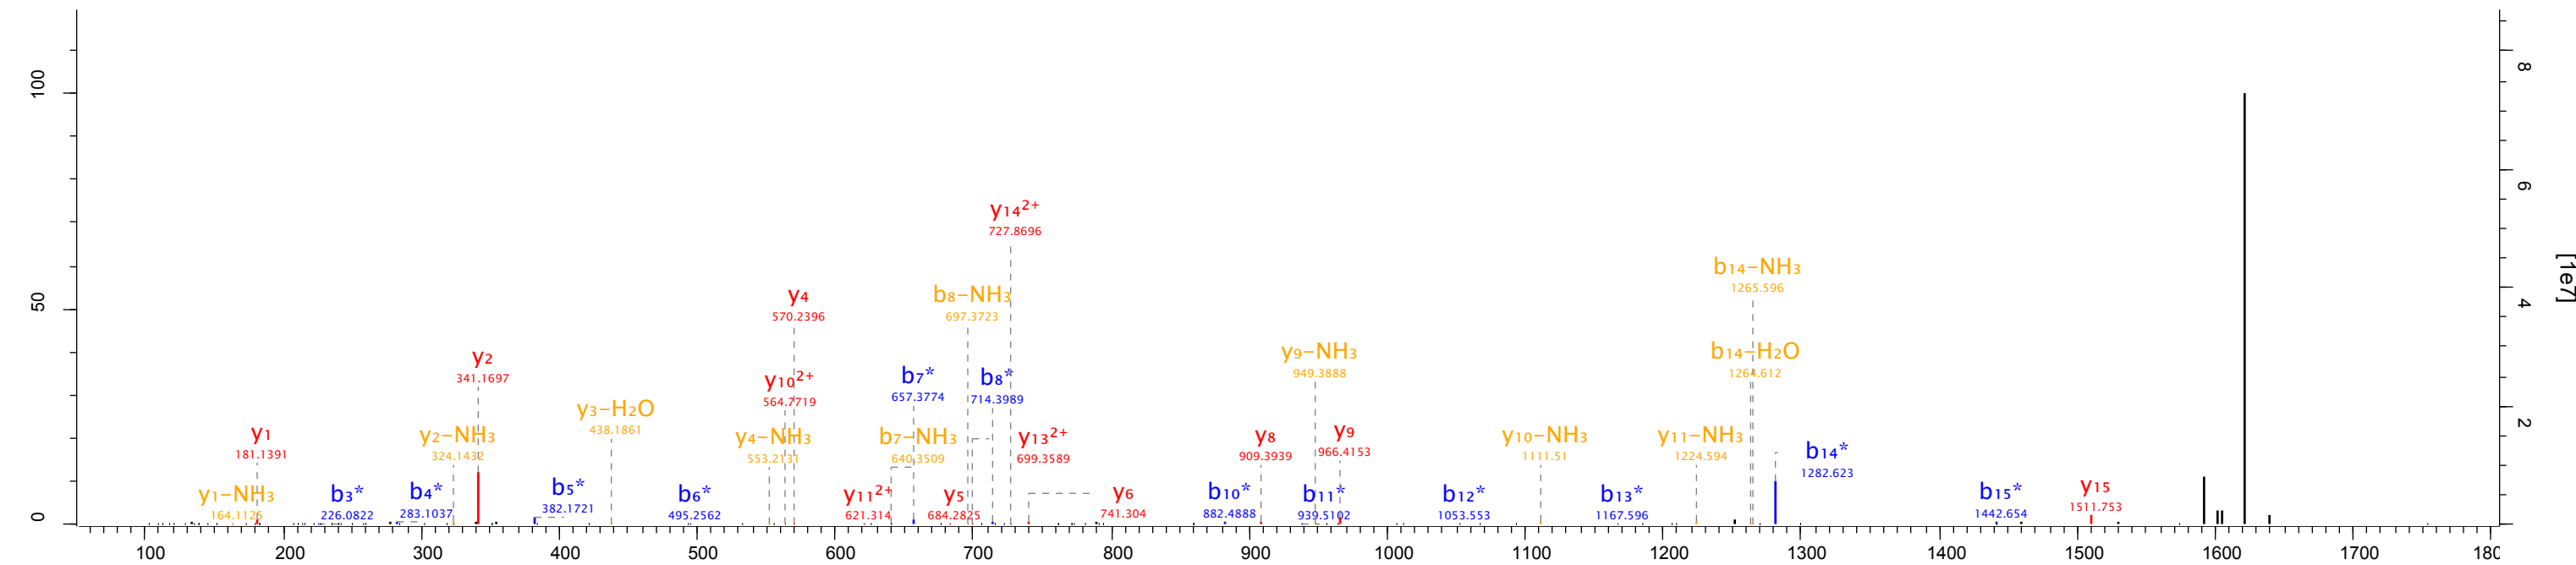

ac - S G G G V I R G P A G N N D C R -

Fragmentation mapping (b and y ions) is shown below the sequence:

- Red boxes (y ions): y15 (G), y14<sup>2+</sup> (G), y13<sup>2+</sup> (G), y11<sup>2+</sup> (I), y10<sup>2+</sup> (R), y9 (G), y8 (P)
- Blue boxes (b ions): b3\* (G), b4\* (G), b5\* (V), b6\* (I), b7\* (R), b8\* (G), b10\* (A), b11\* (G), b12\* (N), b13\* (N), b14\* (D), b15\* (C)

Raw file Scan Method Score m/z Gene names  
 20150812\_A375SR\_Phospho\_BR1\_03 10951 FTMS; HCD 101.46 649.96 YAP1

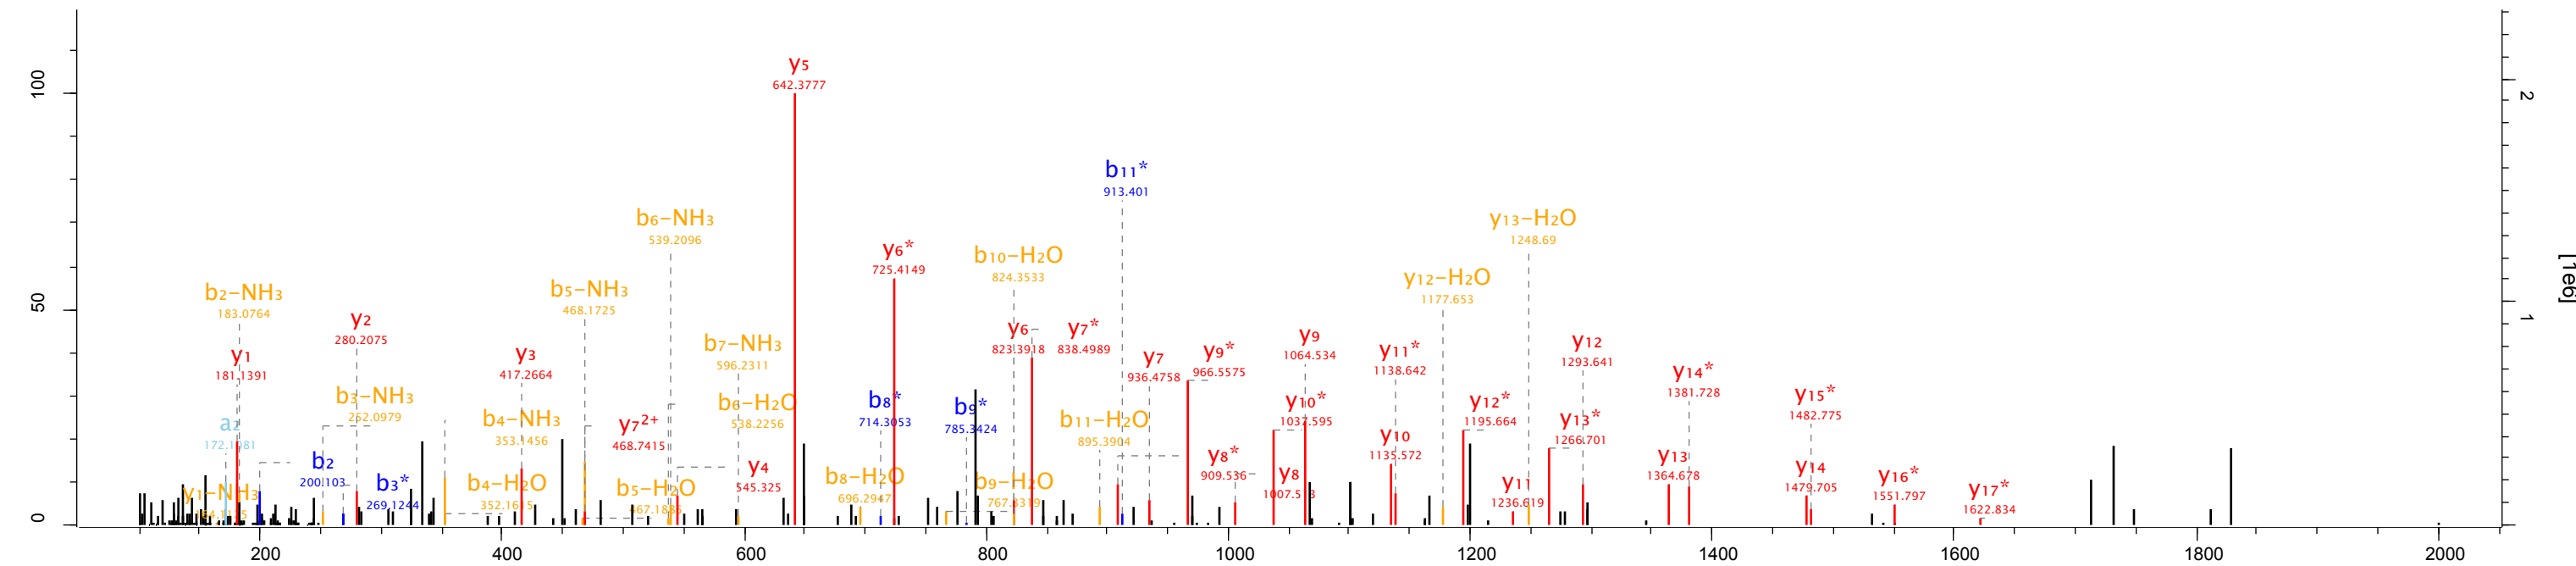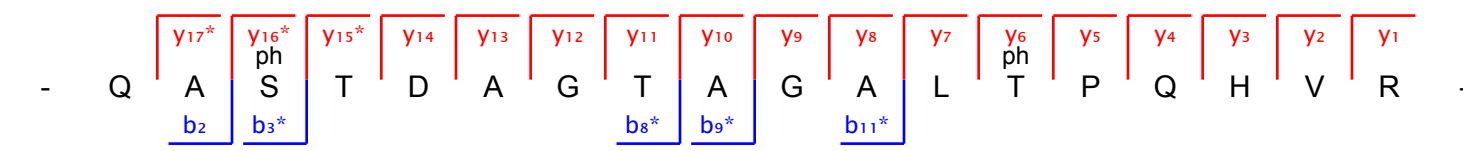

Raw file: 20150812\_A375SR\_Phospho\_BR1\_03  
 Scan: 10991 Method: FTMS; HCD Score: 136.53 m/z: 897.37 Gene names: SYNPO

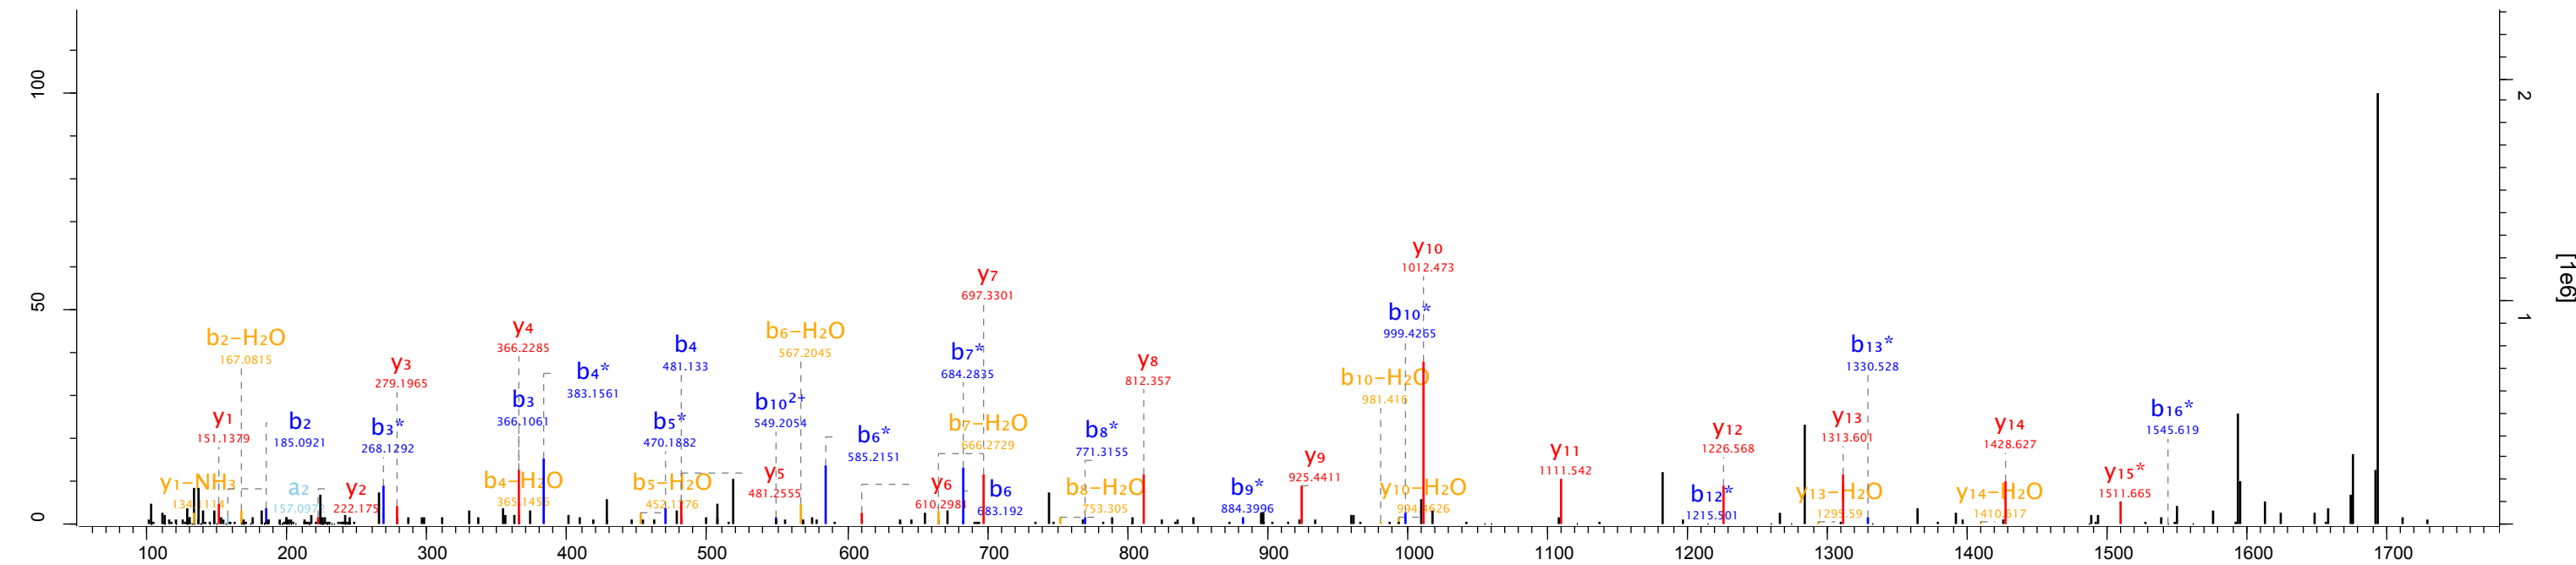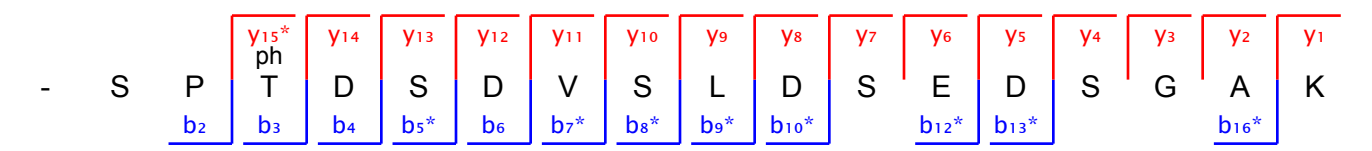

Raw file 20150812\_A375SR\_Phospho\_BR1\_03 Scan 11311 Method FTMS; HCD Score 111.22 m/z 689.31 Gene names VAV2

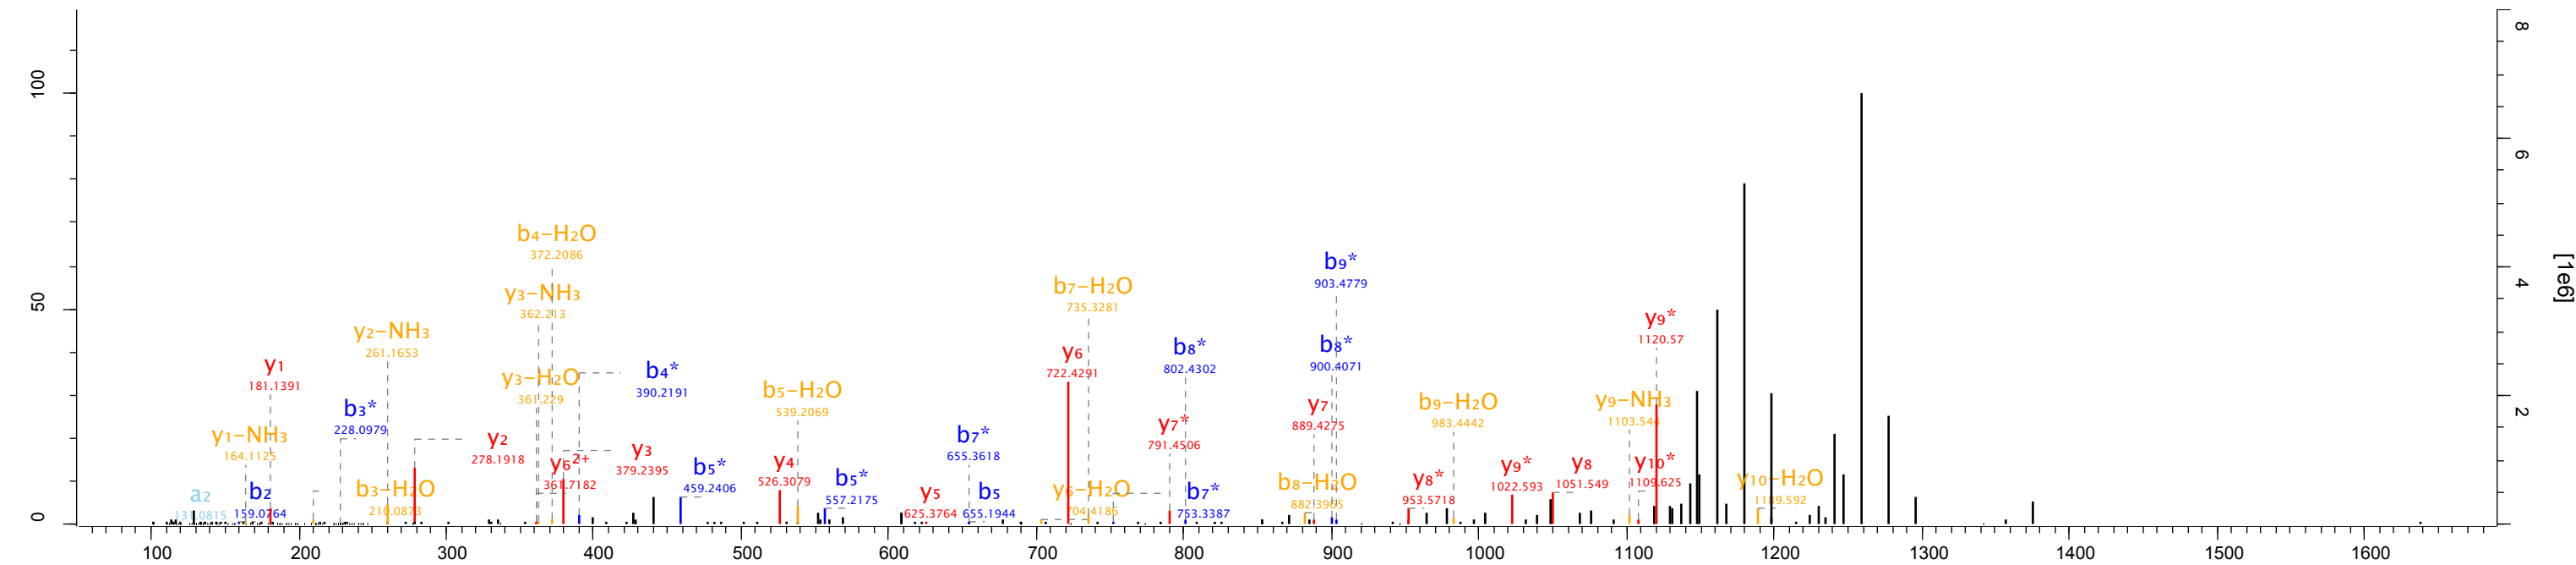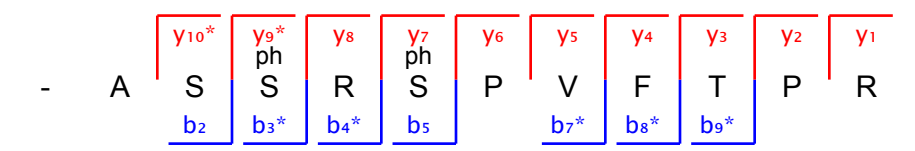

Raw file: 20150812\_A375SR\_Phospho\_BR1\_03  
 Scan: 11481 Method: FTMS; HCD Score: 152.66 m/z: 817.8 Gene names: PPFIA1

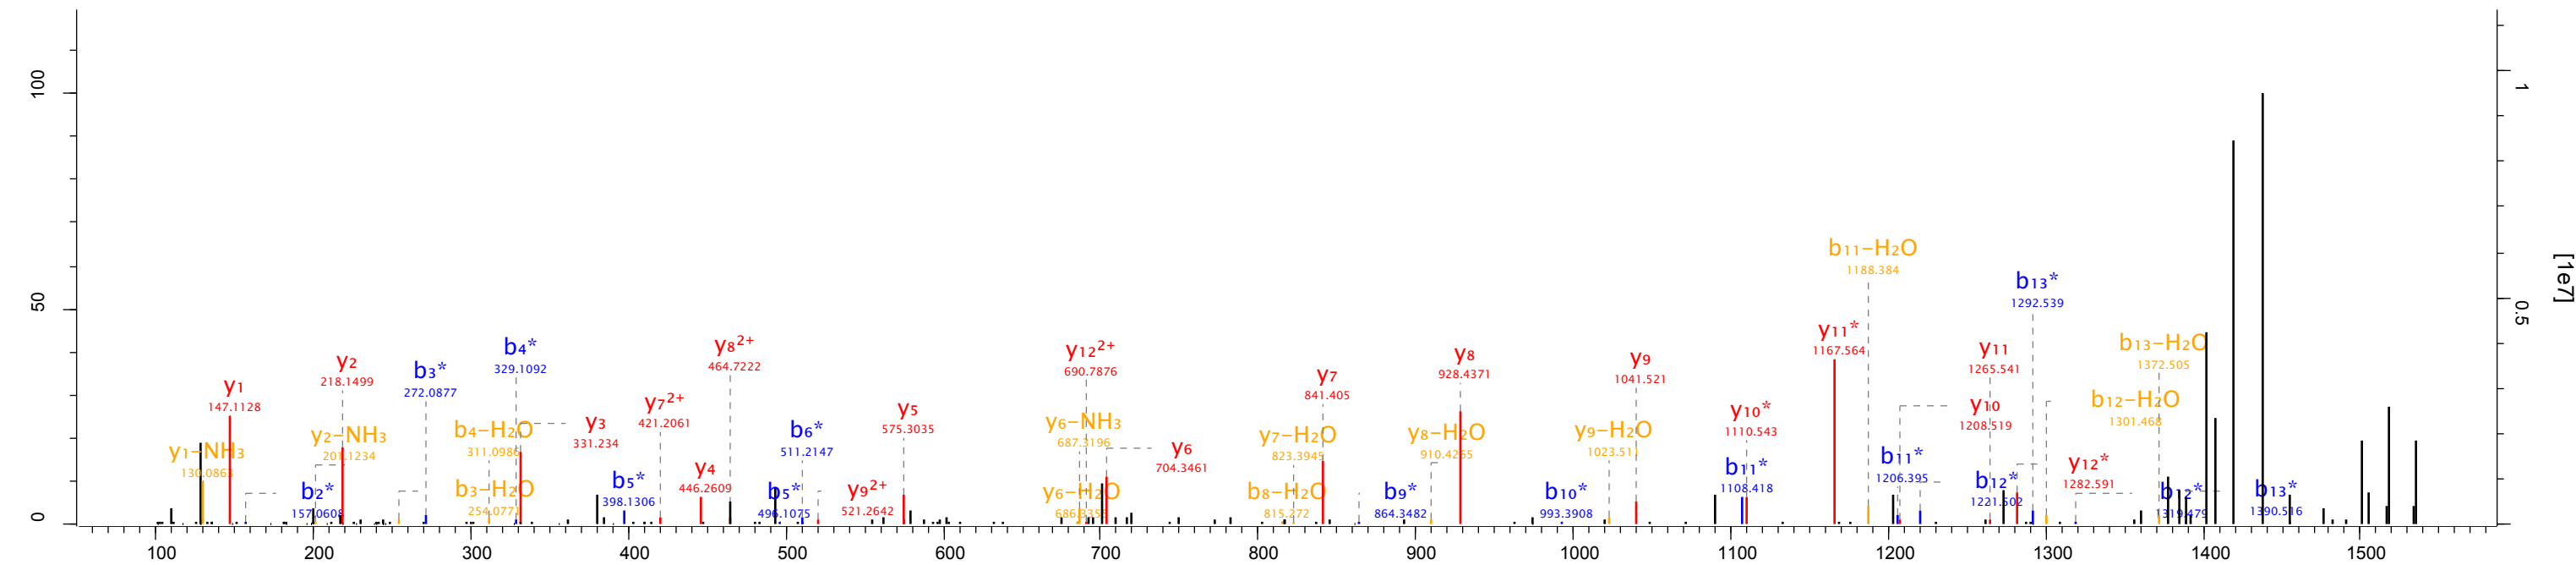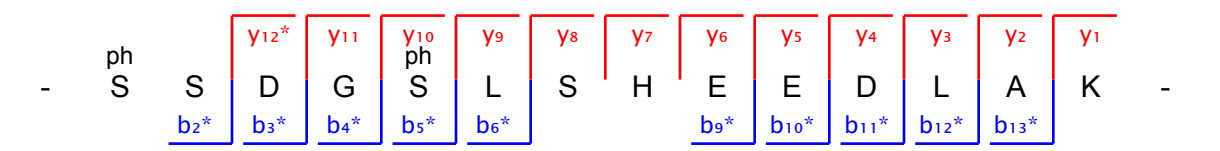

Raw file: 20150812\_A375SR\_Phospho\_BR1\_03  
 Scan: 11501 Method: FTMS; HCD Score: 85.28 m/z: 598.27 Gene names: DENND4C

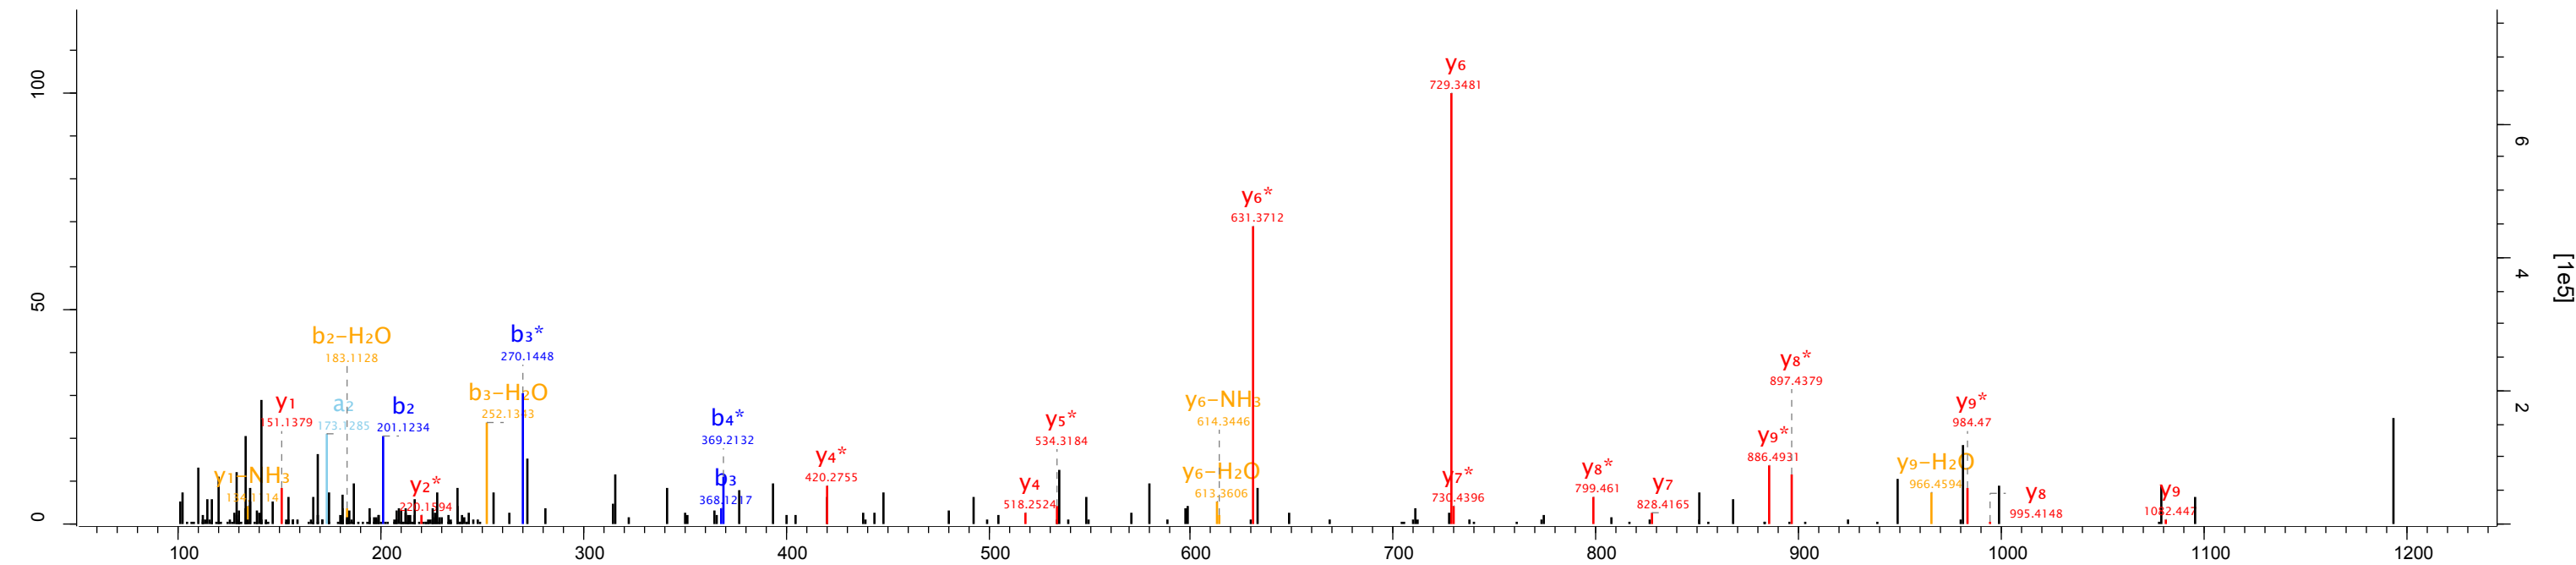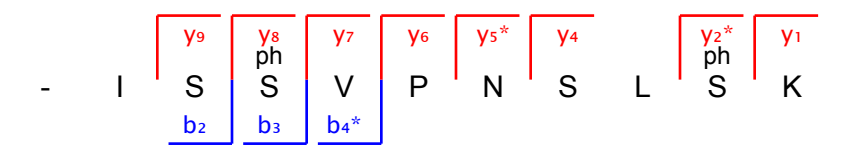



Raw file 20150812\_A375SR\_Phospho\_BR1\_03 Scan 11551 Method FTMS; HCD Score 183.47 m/z 1159.53 Gene names MAP7D1

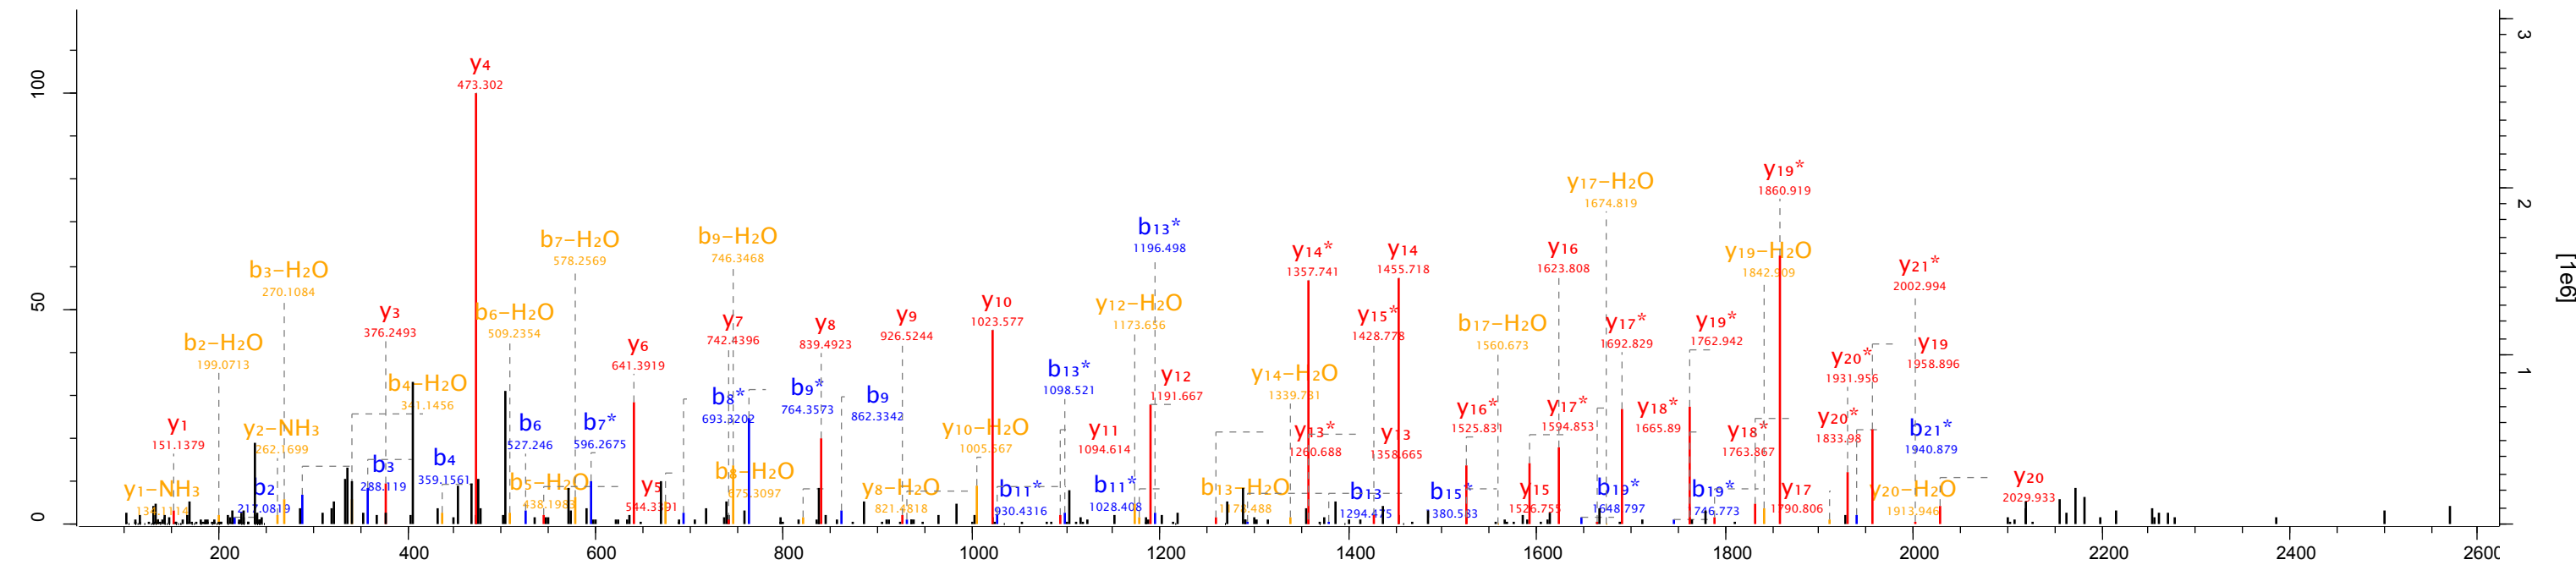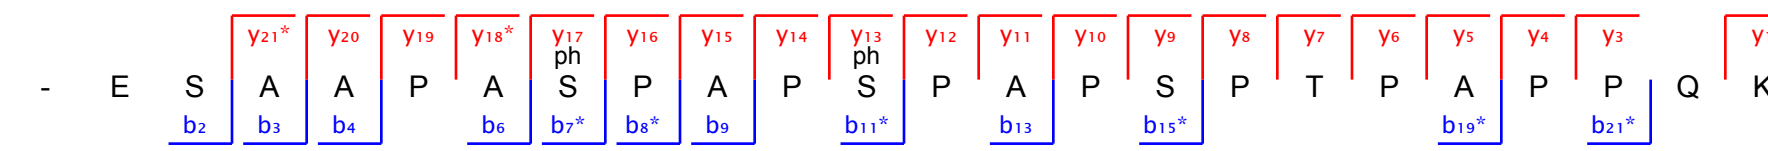

Raw file Scan Method Score m/z Gene names  
 20150812\_A375SR\_Phospho\_BR1\_03 11561 FTMS; HCD 266.99 881.82 MYO18A

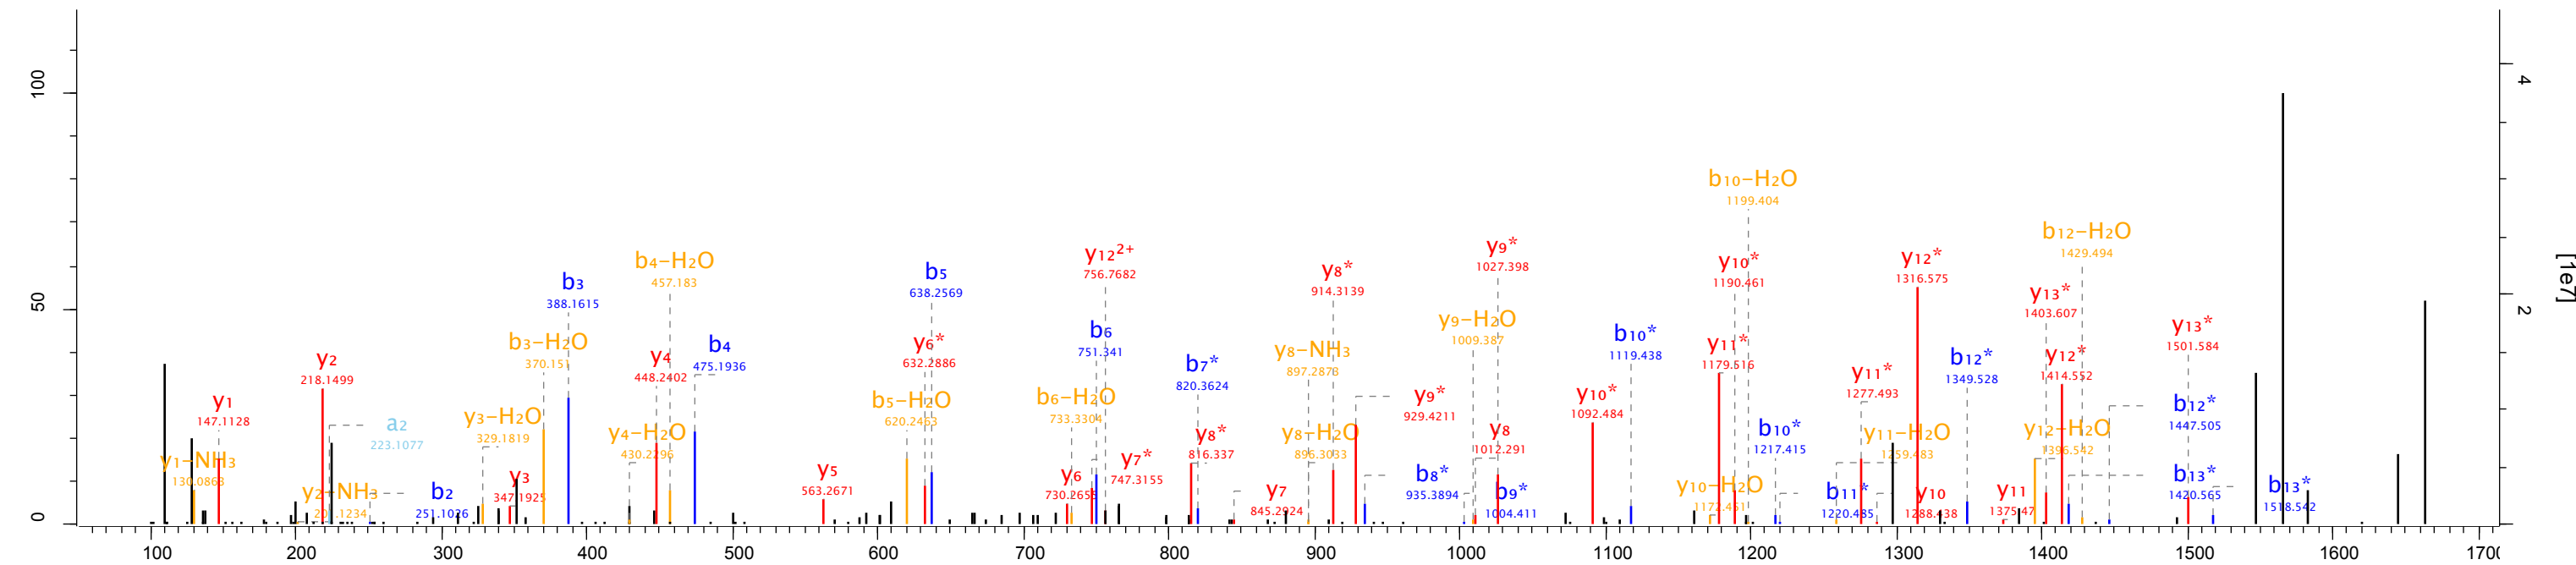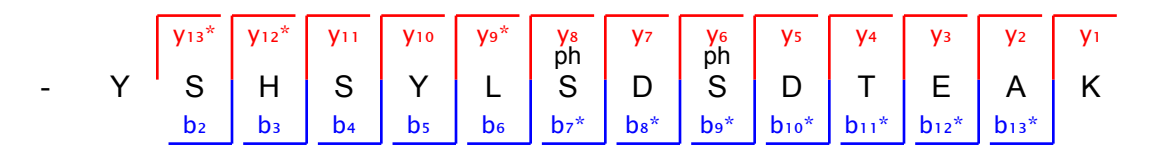

Raw file 20150812\_A375SR\_Phospho\_BR1\_03 Scan 11801 Method FTMS; HCD Score 178.77 m/z 940.9 Gene names BCLAF1

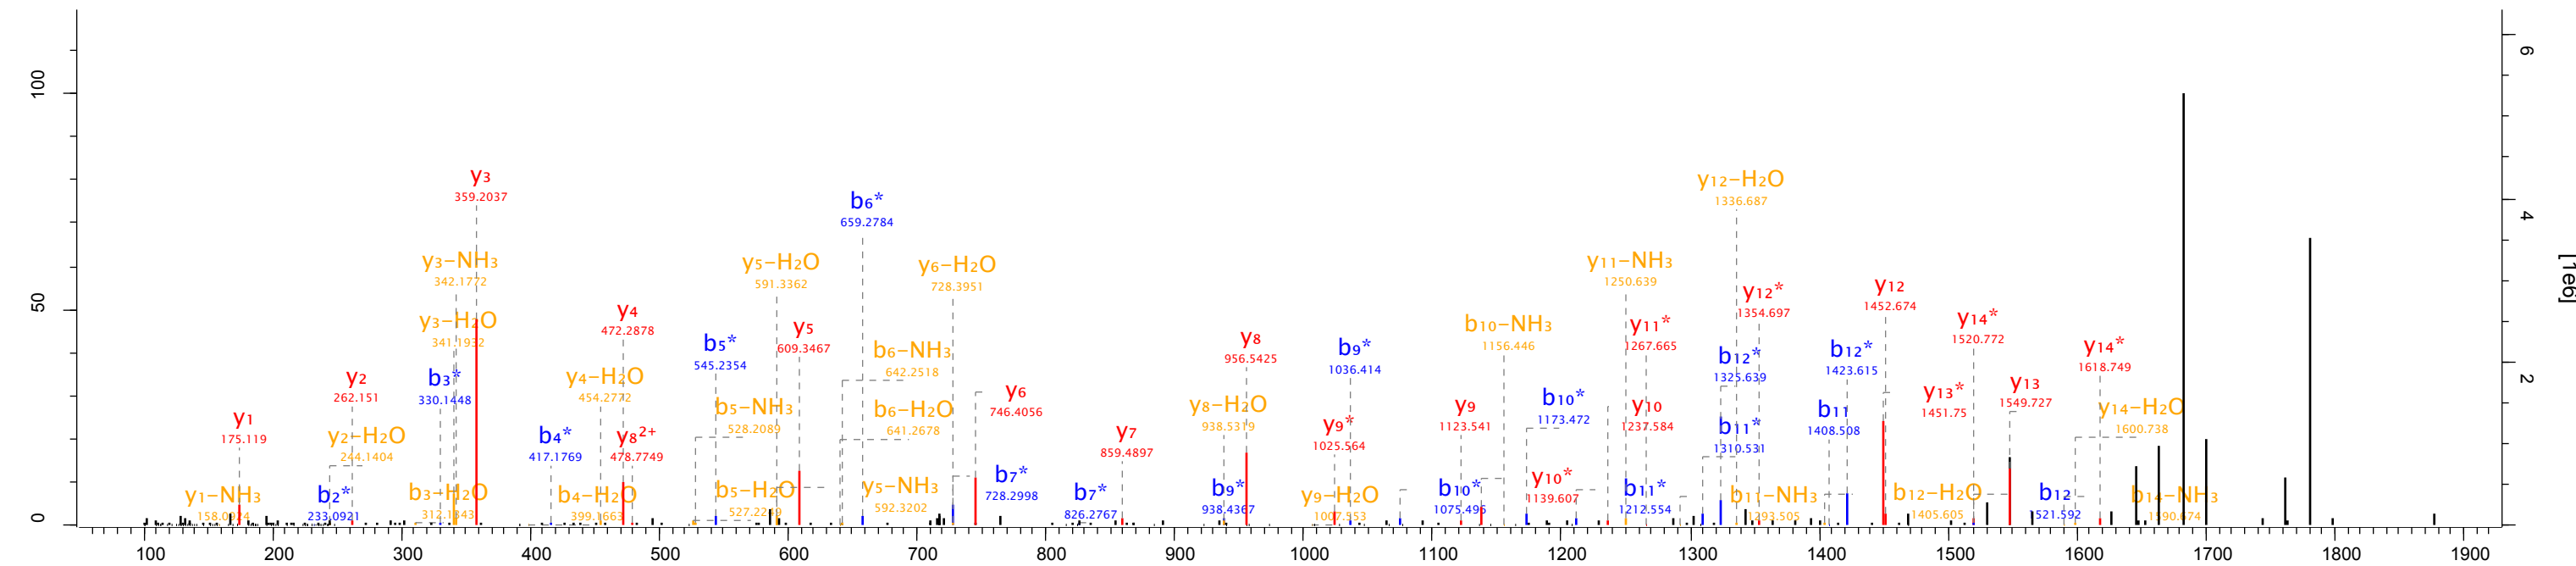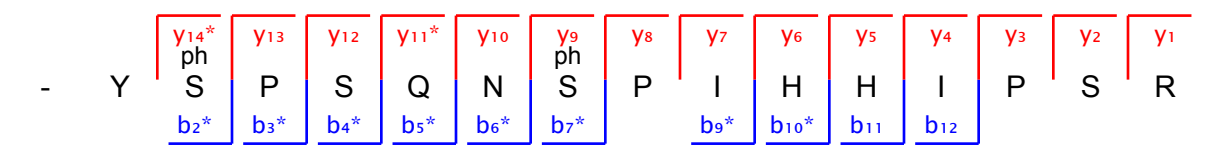

Raw file: 20150812\_A375SR\_Phospho\_BR1\_03  
 Scan: 11881 Method: FTMS; HCD Score: 168.39 m/z: 920.84 Gene names: ZC3H13

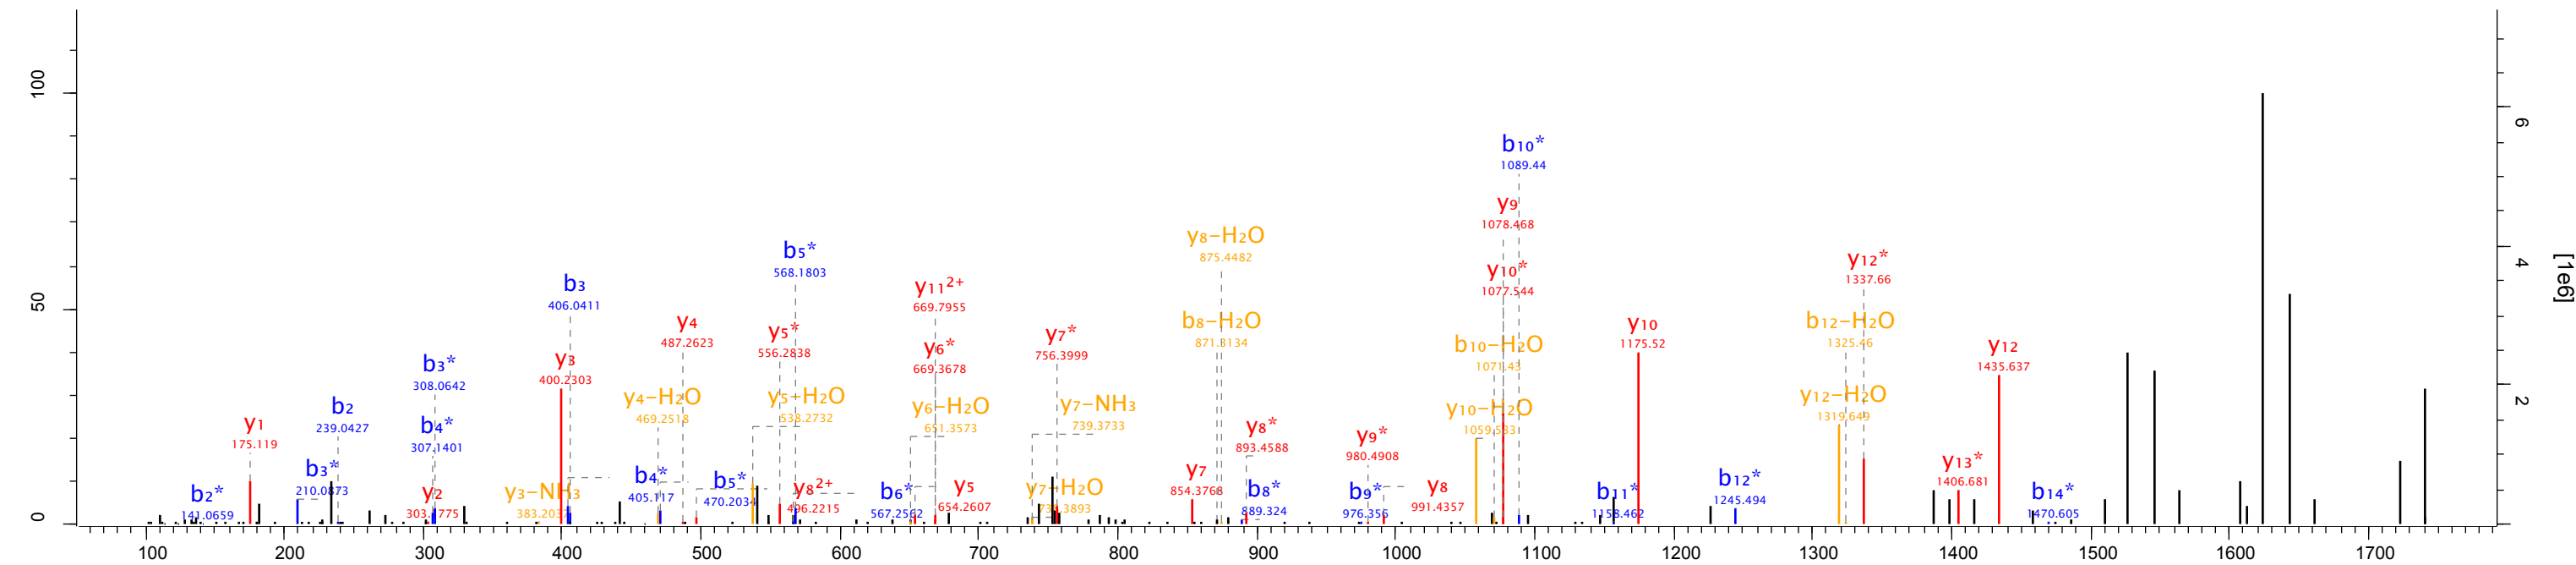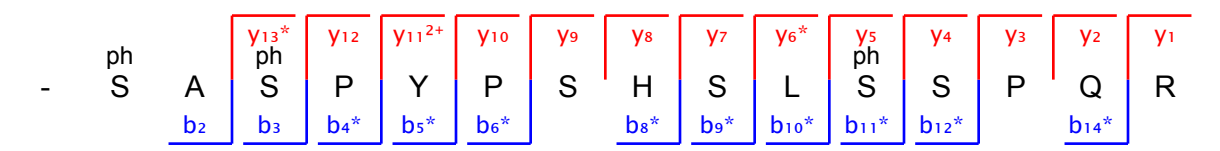

Raw file 20150812\_A375SR\_Phospho\_BR1\_03 Scan 12211 Method FTMS; HCD Score 117.21 m/z 611.78 Gene names SUDS3

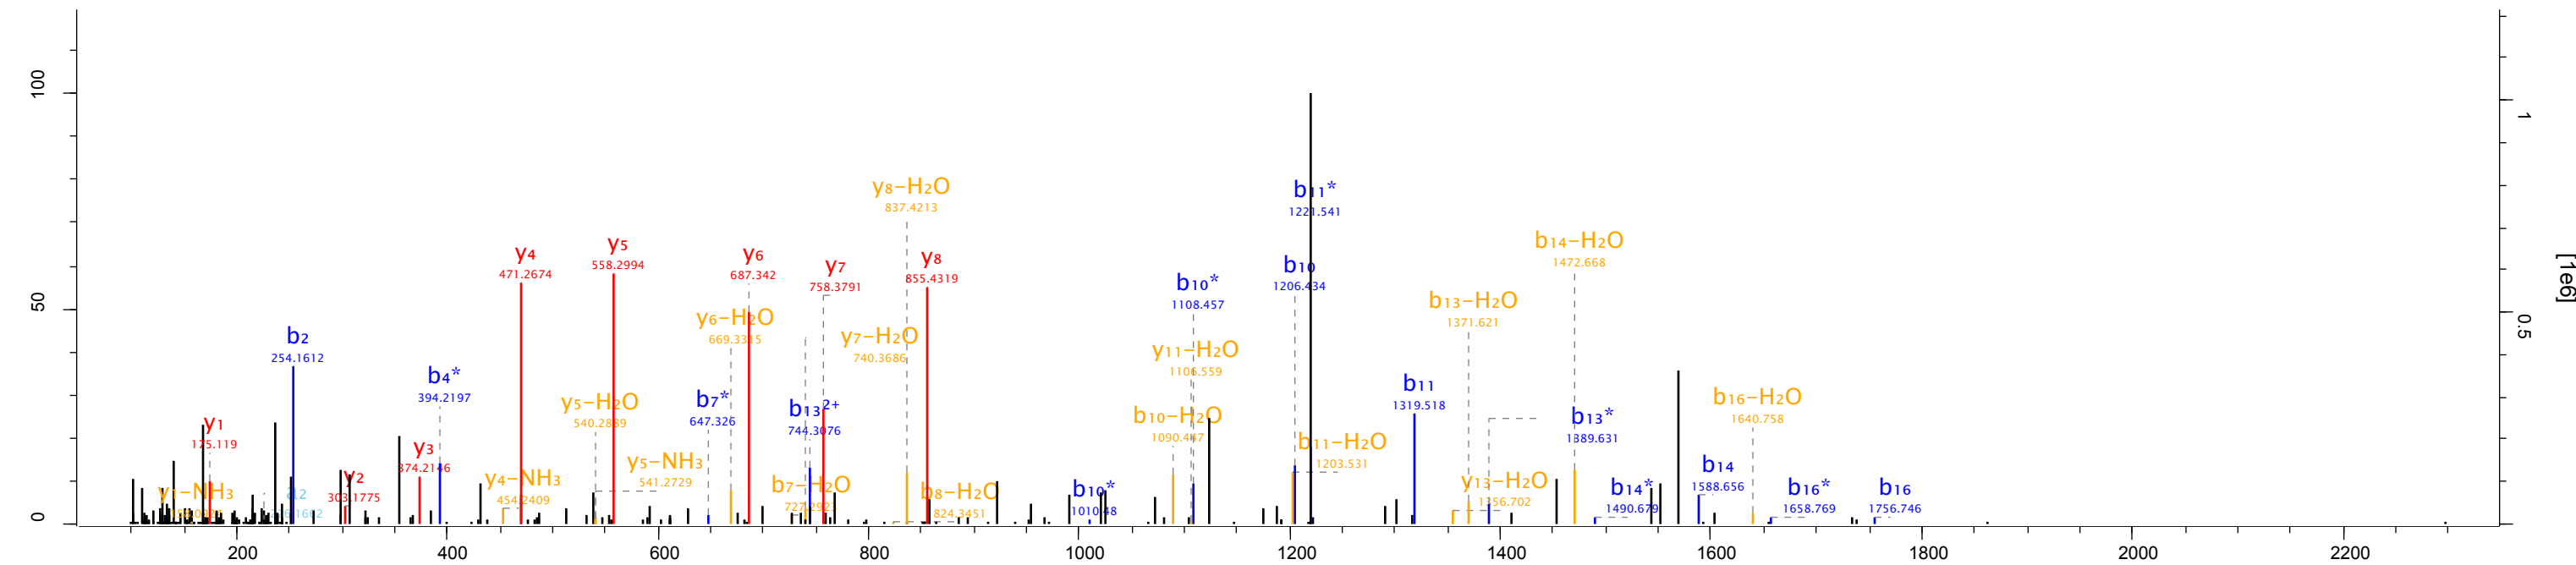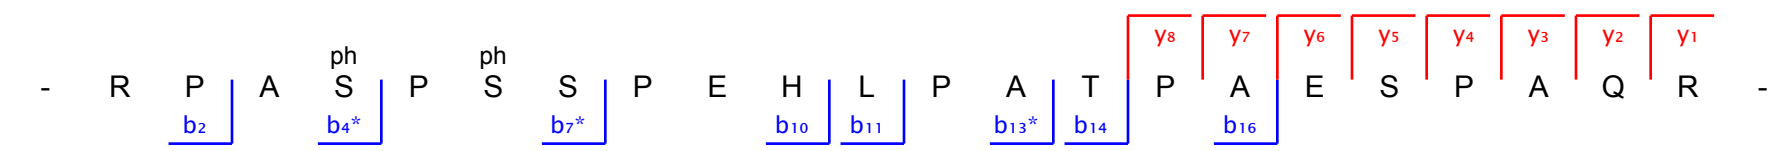

Raw file 20150812\_A375SR\_Phospho\_BR1\_03 Scan 12341 Method FTMS; HCD Score 182.22 m/z 818.34 Gene names IRS2

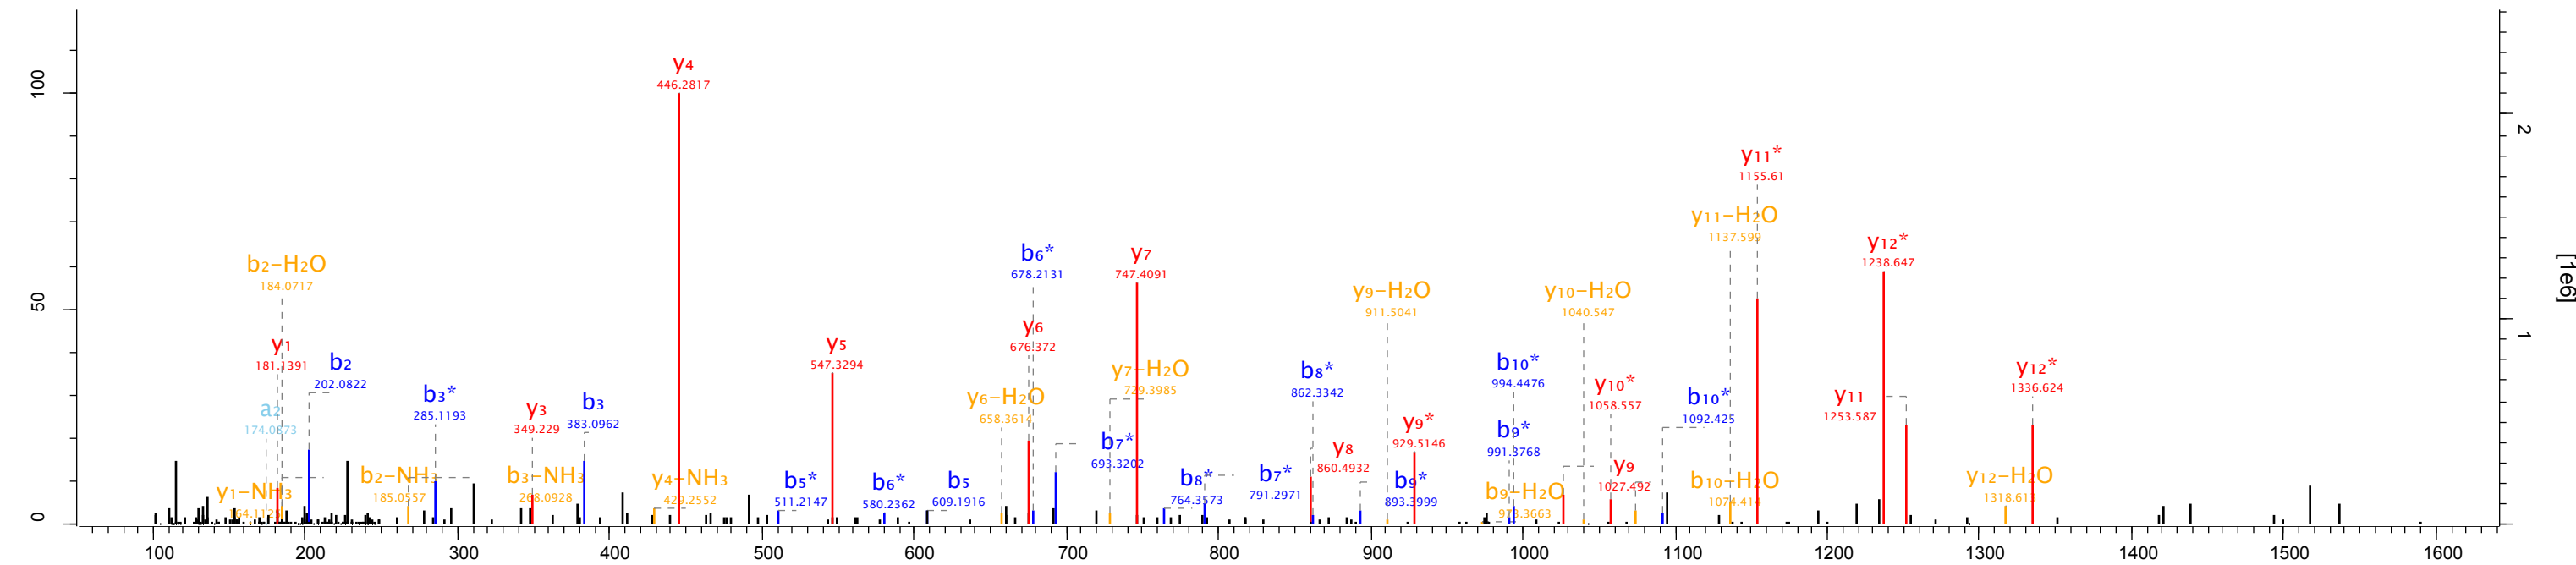

- S N T P E S I A E T P P A R -

b2 b3 b5 b6\* b7\* b8\* b9\* b10\*

y12\* ph y11 y10\* y9 ph y8 y7 y6 y5 y4 y3 y1

Raw file 20150812\_A375SR\_Phospho\_BR1\_03 Scan 12731 Method FTMS; HCD Score 295.15 m/z 1235.55 Gene names CCDC86

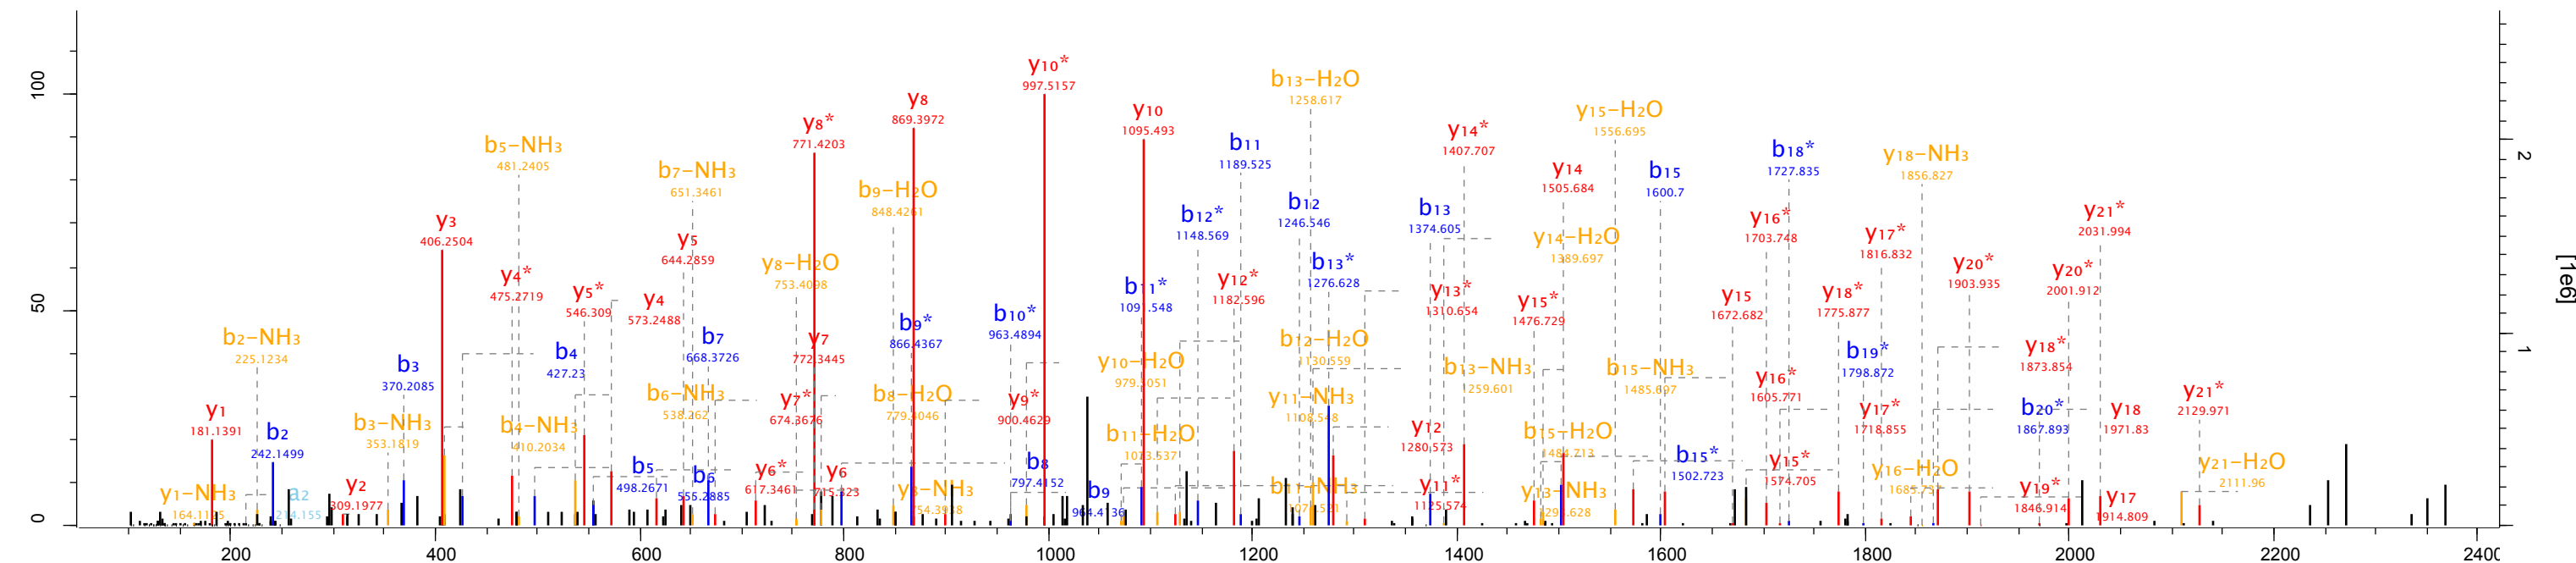

- L Q Q Q G A G L E S P Q G Q P E P G A A S P Q R -

b<sub>2</sub>
b<sub>3</sub>
b<sub>4</sub>
b<sub>5</sub>
b<sub>6</sub>
b<sub>7</sub>
b<sub>8</sub>
b<sub>9</sub>
b<sub>10</sub>\*
b<sub>11</sub>
b<sub>12</sub>
b<sub>13</sub>
b<sub>15</sub>
b<sub>18</sub>\*
b<sub>19</sub>\*
b<sub>20</sub>\*

y<sub>21</sub>\*
y<sub>20</sub>\*
y<sub>19</sub>\*
y<sub>18</sub>
y<sub>17</sub>
y<sub>16</sub>\*
y<sub>15</sub>
y<sub>14</sub>
y<sub>13</sub>\*
y<sub>12</sub>
y<sub>11</sub>\*
y<sub>10</sub>
y<sub>9</sub>\*
y<sub>8</sub>
y<sub>7</sub>
y<sub>6</sub>
y<sub>5</sub>
y<sub>4</sub>
y<sub>3</sub>
y<sub>2</sub>
y<sub>1</sub>

Raw file 20150812\_A375SR\_Phospho\_BR1\_03 Scan 12941 Method FTMS; HCD Score 191.44 m/z 1090.93 Gene names NFIC

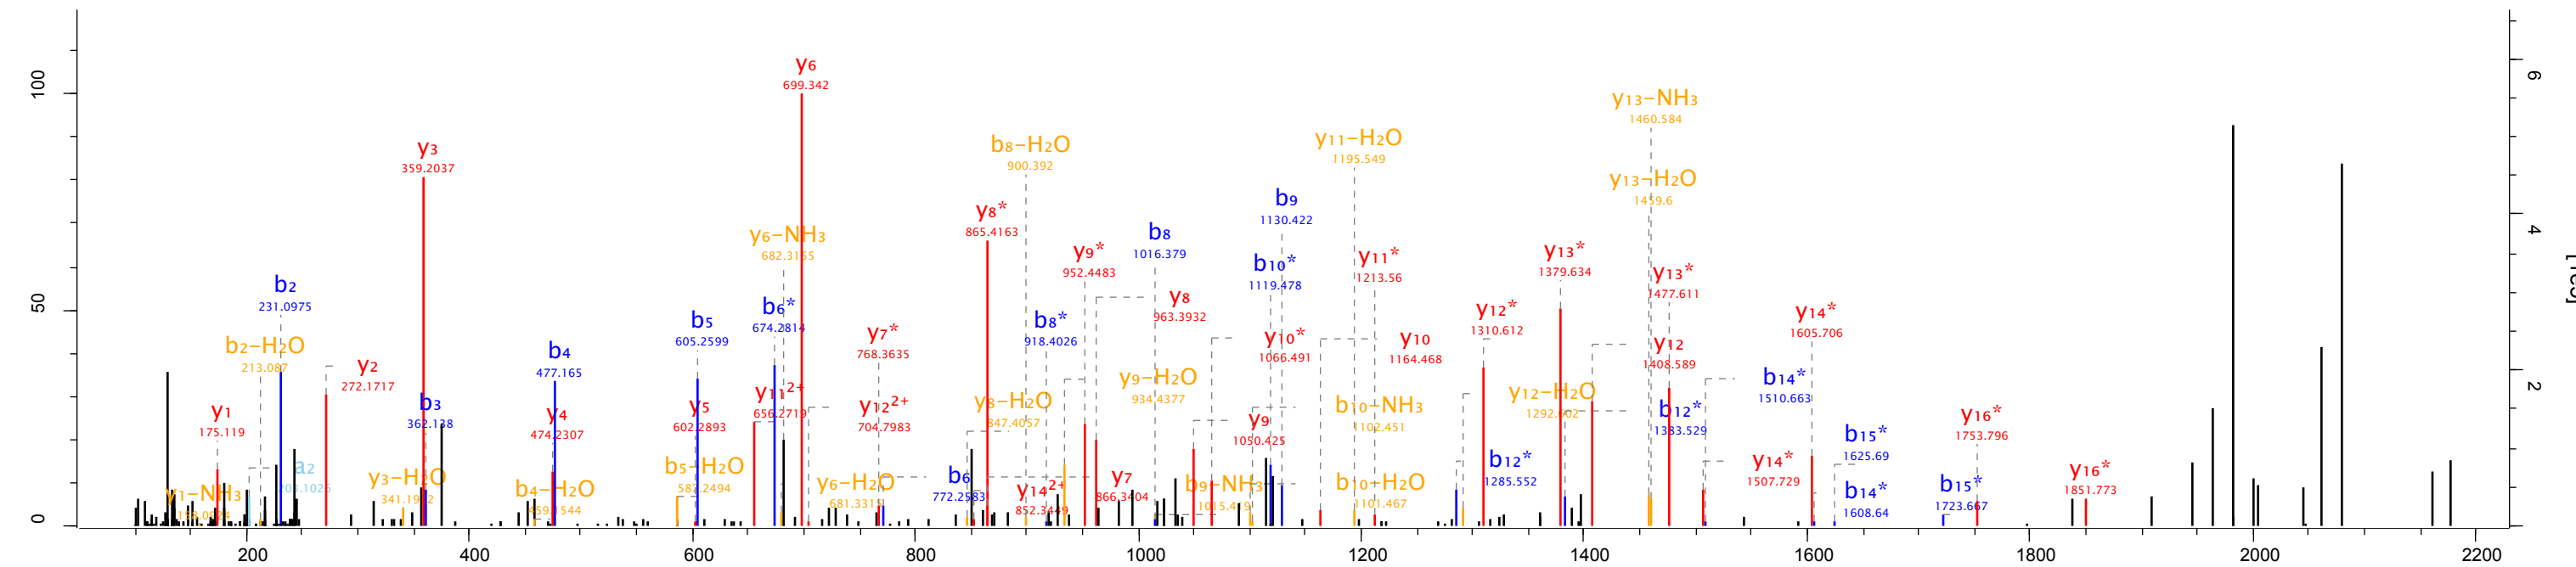

- T E M D K S P F N S P S P Q D S P R -

Fragmentation mapping (b-ions in blue, y-ions in red):

- b2: E
- b3: M
- b4: D
- b5: K
- b6: S
- b8: F
- b9: N
- b10\*: S
- b12\*: S
- b14\*: Q
- b15\*: D
- y1: R
- y2: P
- y3: S
- y4: D
- y5: Q
- y6: P
- y7: S
- y8: P
- y9: S
- y10: N
- y11\*: F
- y12: P
- y13\*: S
- y14\*: P
- y16\*: R



Raw file: 20150812\_A375SR\_Phospho\_BR1\_03  
 Scan: 13111 Method: FTMS; HCD Score: 346.44 m/z: 1122.44 Gene names: NOL8

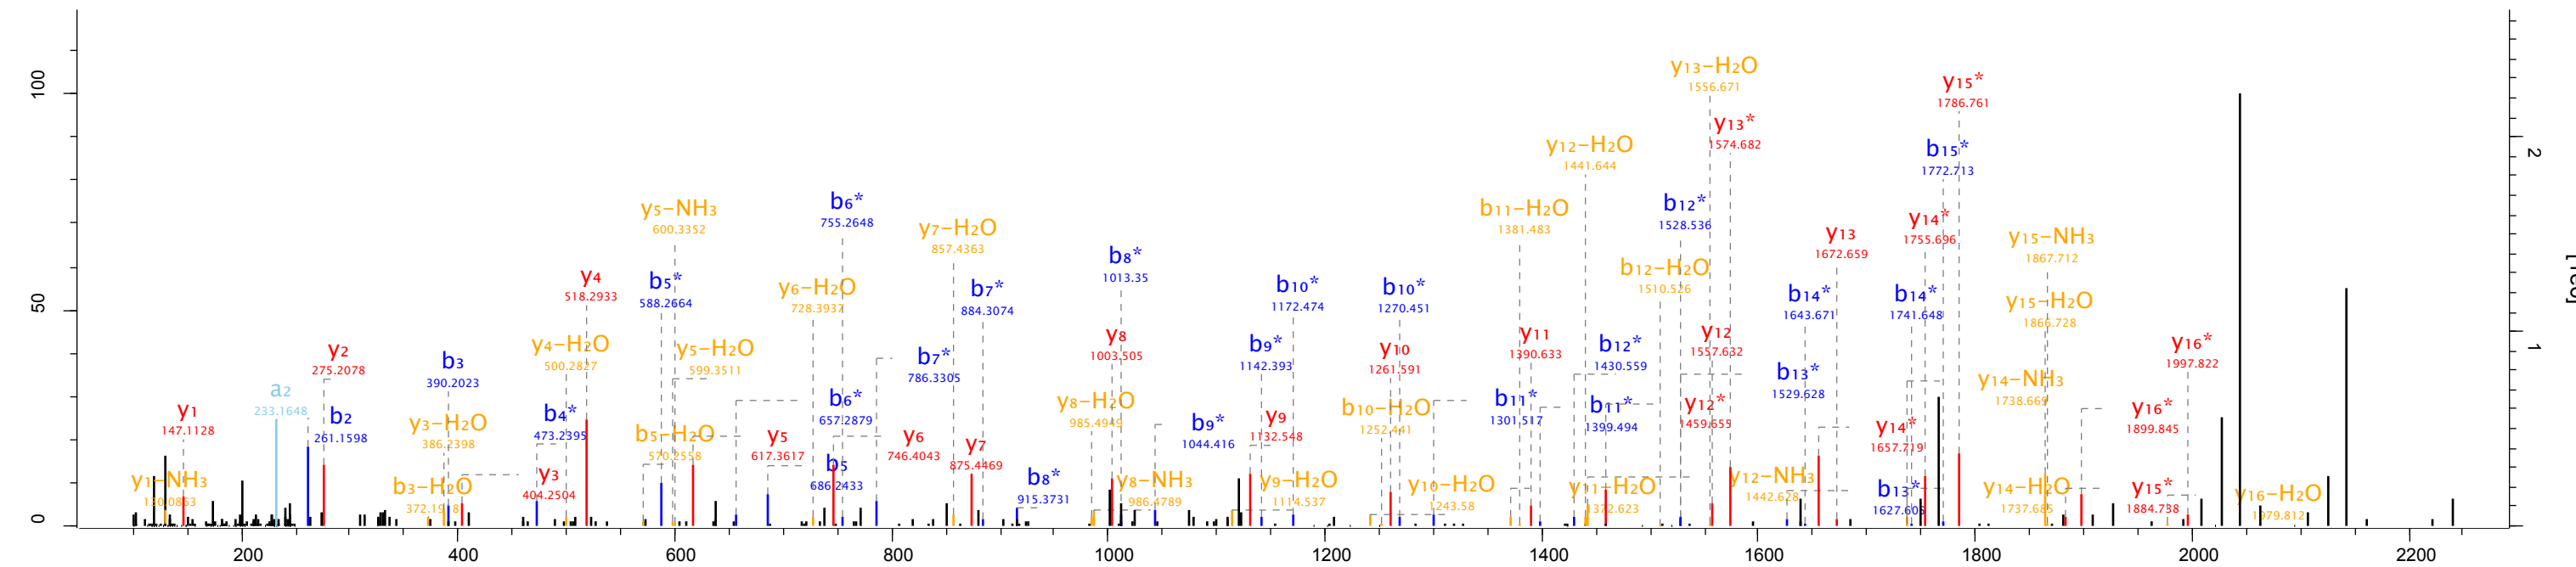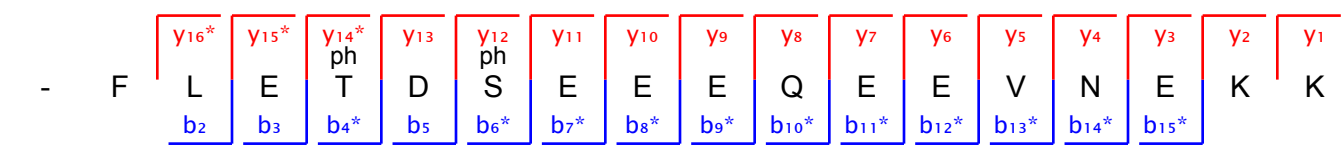

Raw file 20150812\_A375SR\_Phospho\_BR1\_03 Scan 13301 Method FTMS; HCD Score 50.29 m/z 668.96 Gene names ZC3H13

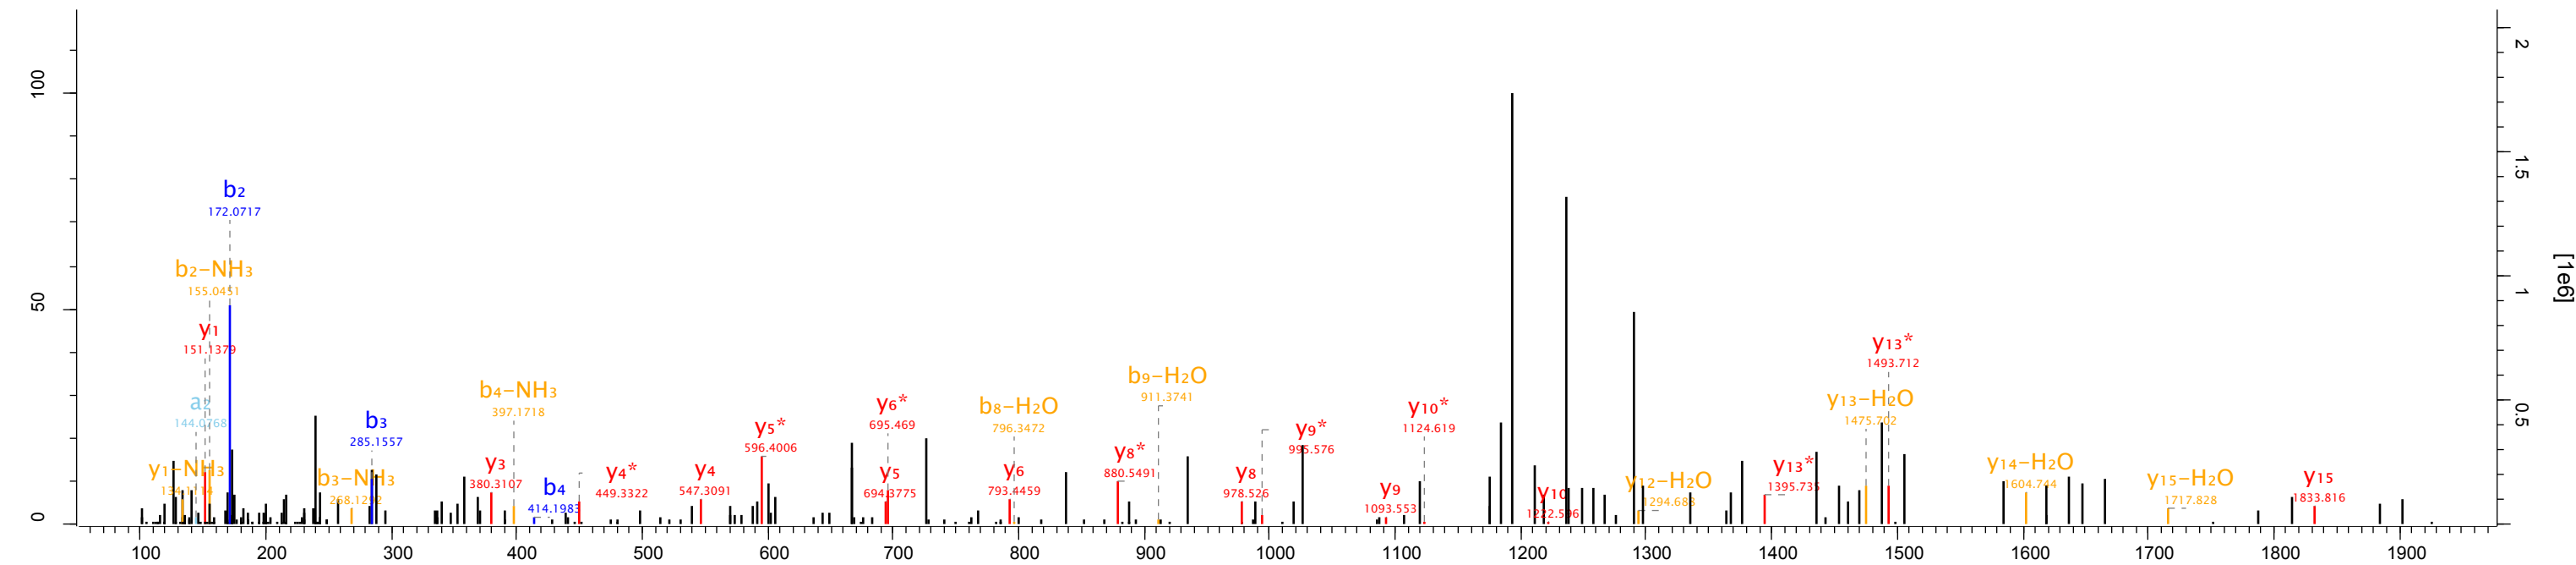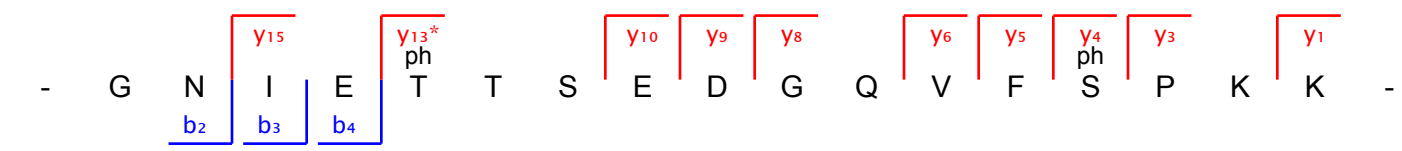

Raw file 20150812\_A375SR\_Phospho\_BR1\_03 Scan 13421 FTMS; HCD Score 220.96 m/z 761.66 Gene names ZBTB21

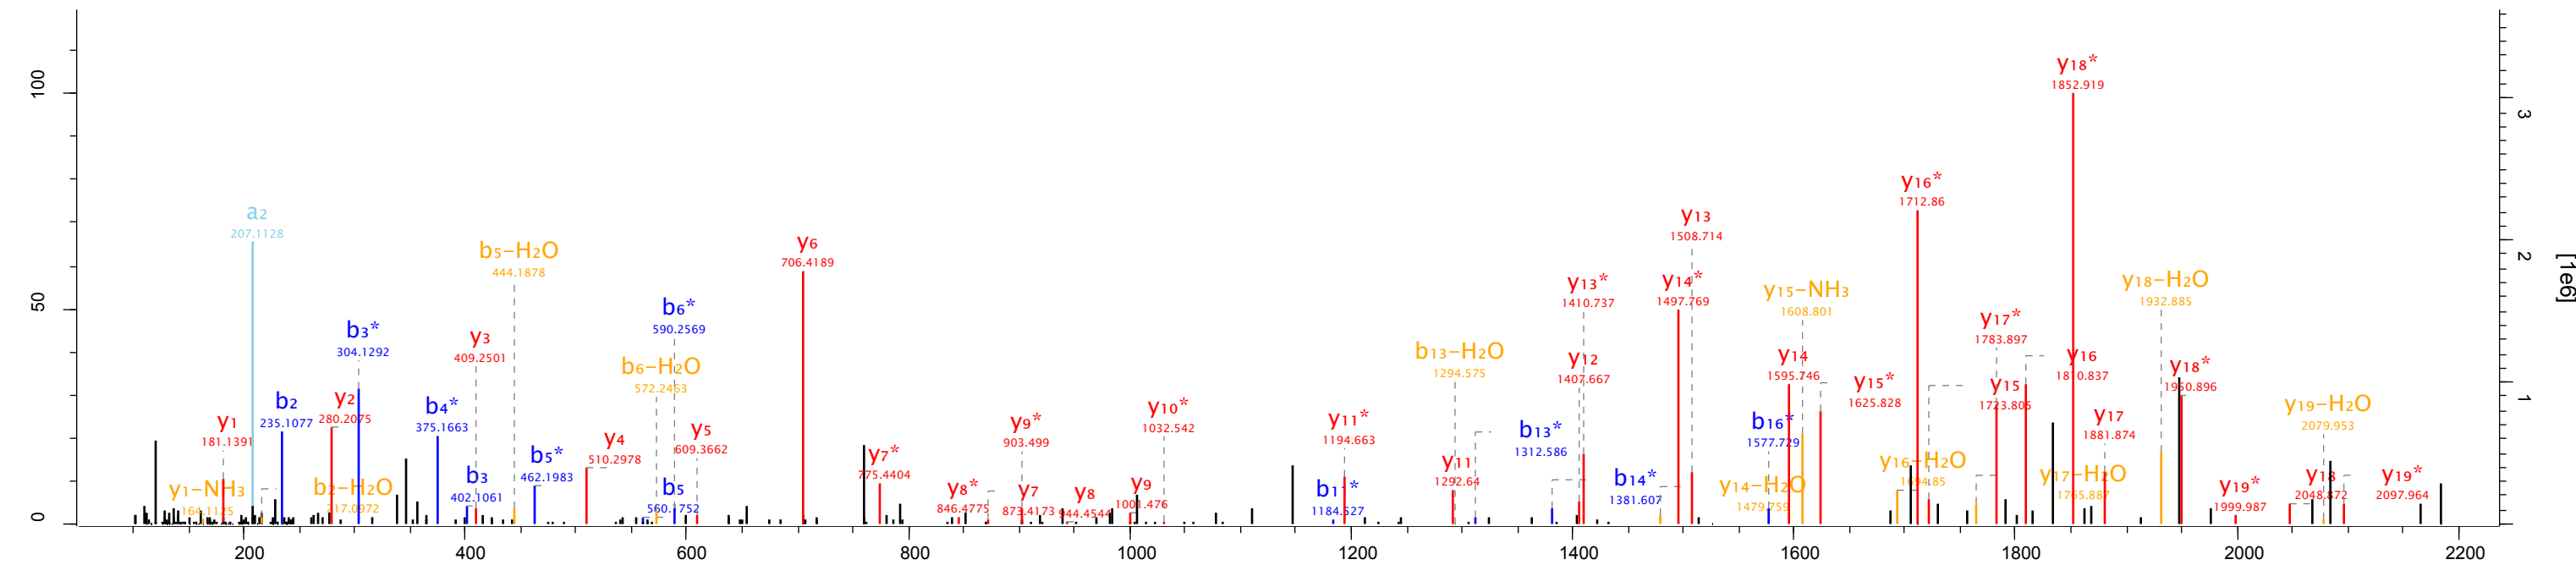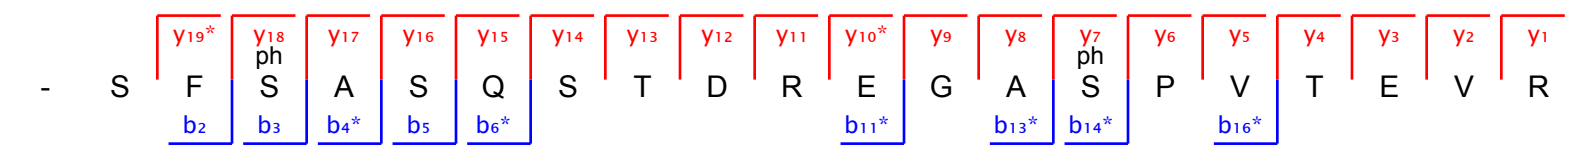

Raw file: 20150812\_A375SR\_Phospho\_BR1\_03  
 Scan: 13501 Method: FTMS; HCD Score: 103.96 m/z: 994.93 Gene names: MAP1B

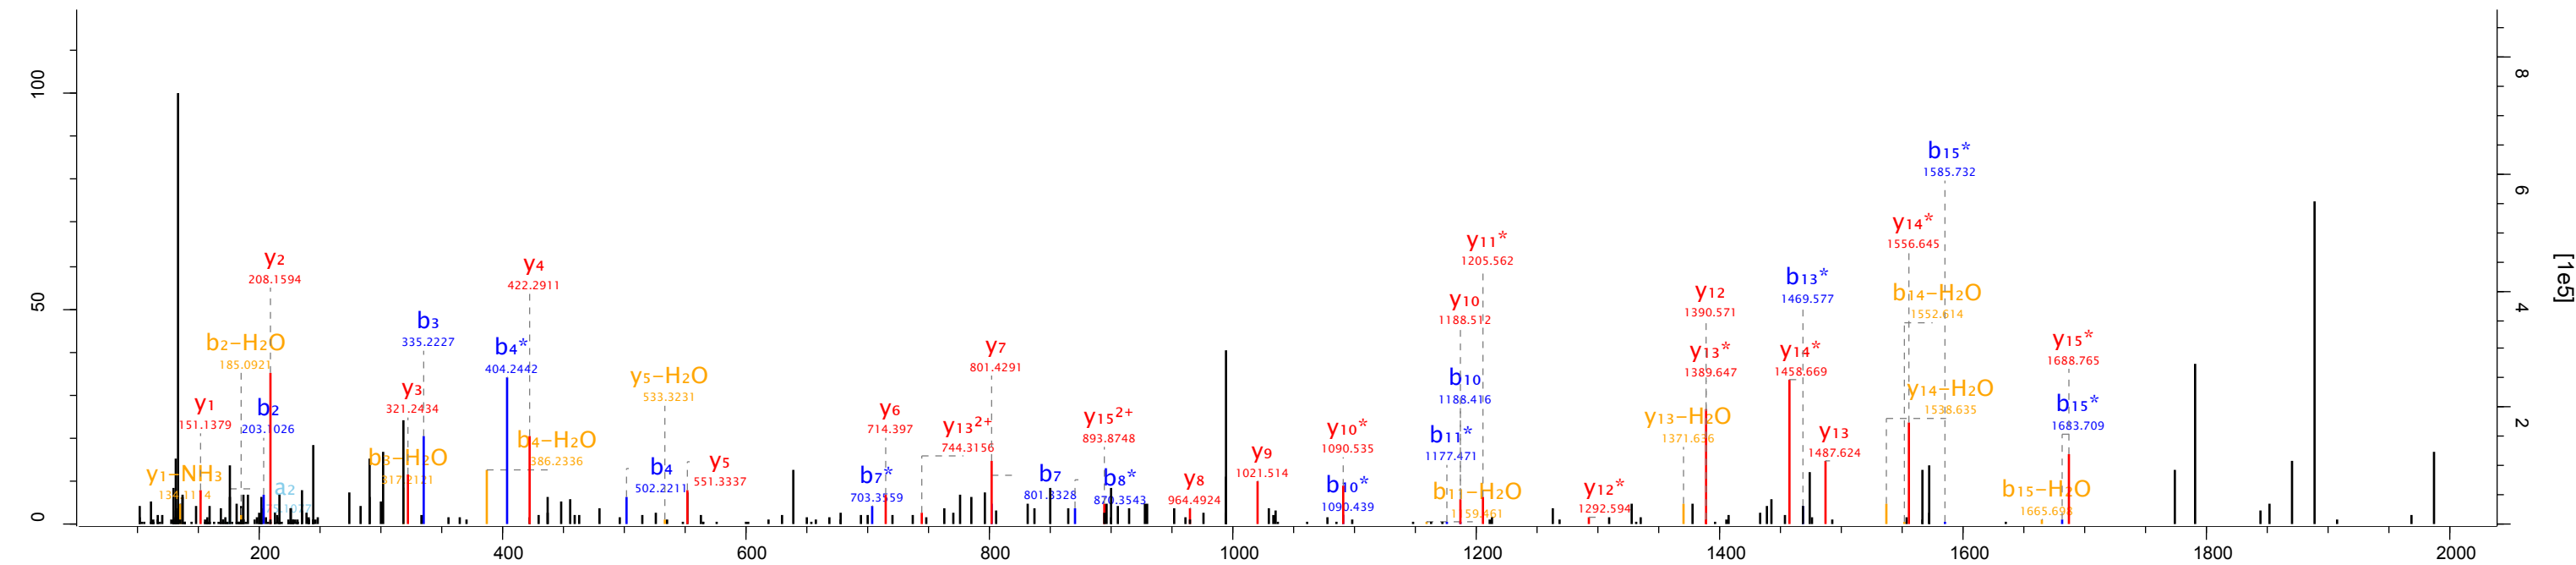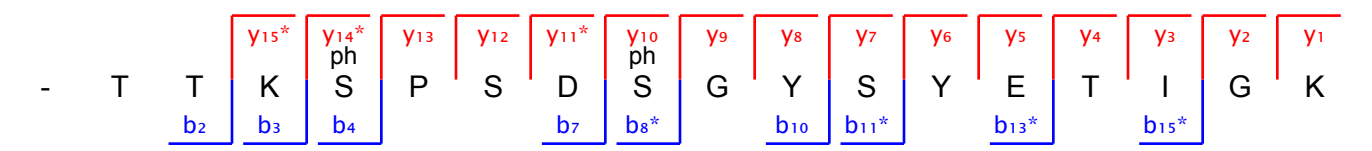

Raw file  
20150812\_A375SR\_Phospho\_BR1\_03

Scan 13571 Method FTMS; HCD Score 158.06 m/z 796.33 Gene names PUM2

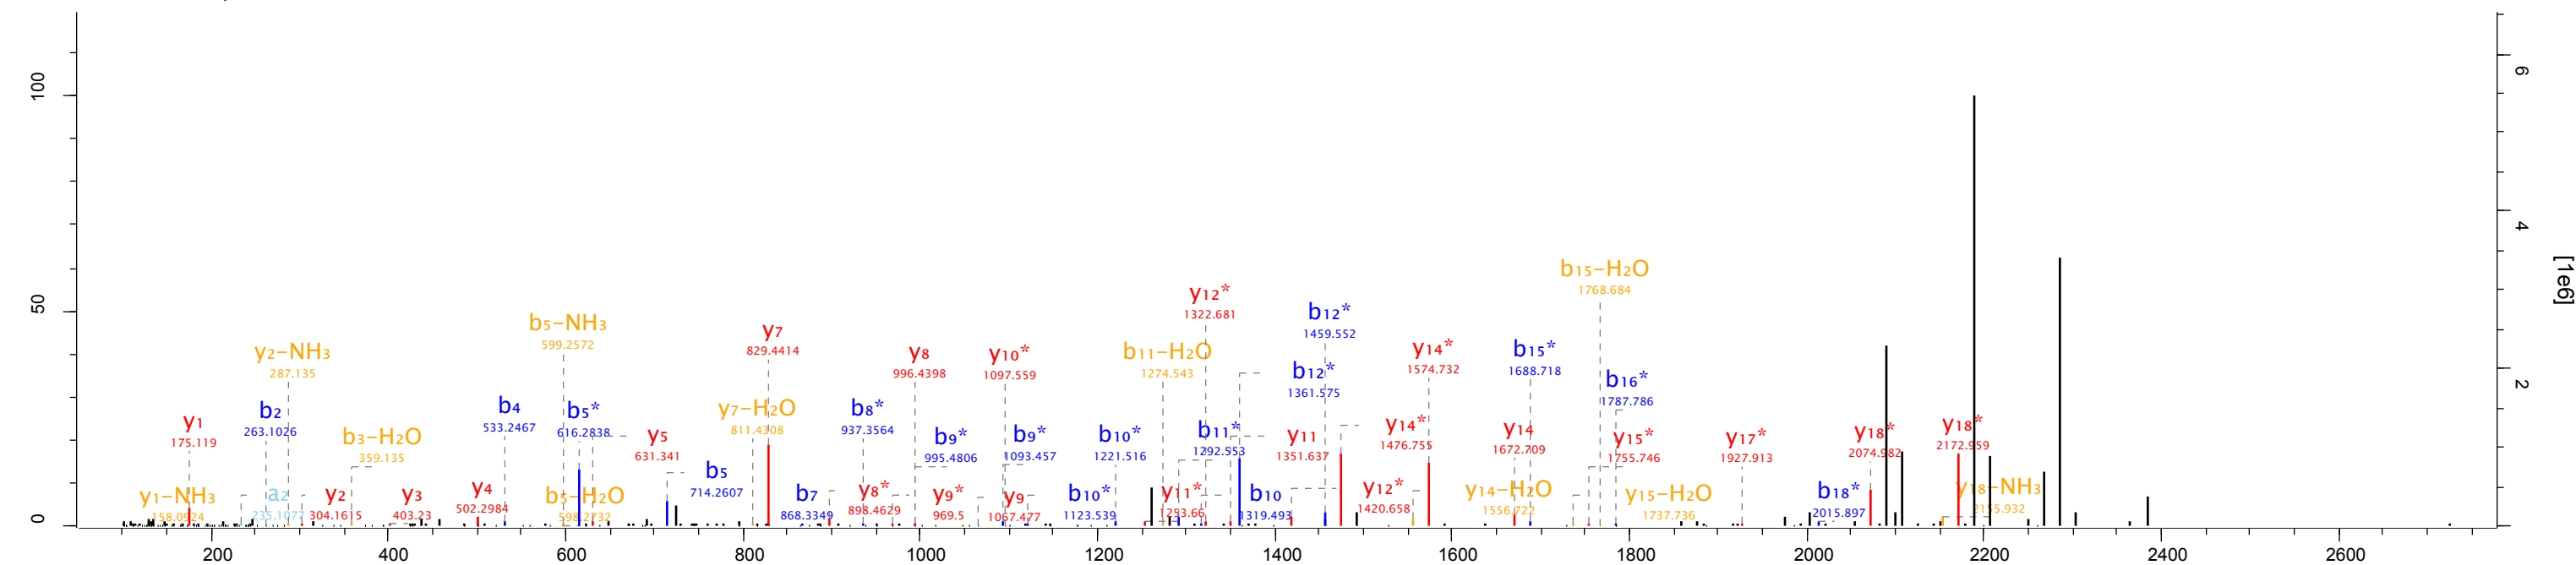

- D F N R P G S R Q A S P T E V V E R -

Fragmentation labels (red boxes): y18\*, y17\*, y15\*<sub>ph</sub>, y14, y12\*<sub>ph</sub>, y11, y10\*, y9, y8<sub>ph</sub>, y7, y5, y4, y3, y2, y1

Fragmentation labels (blue boxes): b2, b4, b5, b7, b8\*, b9\*, b10, b11\*, b12\*, b15\*, b16\*, b18\*

Raw file: 20150812\_A375SR\_Phospho\_BR1\_03  
 Scan: 13771 Method: FTMS; HCD Score: 313.15 m/z: 1026.9 Gene names: PRRC2B

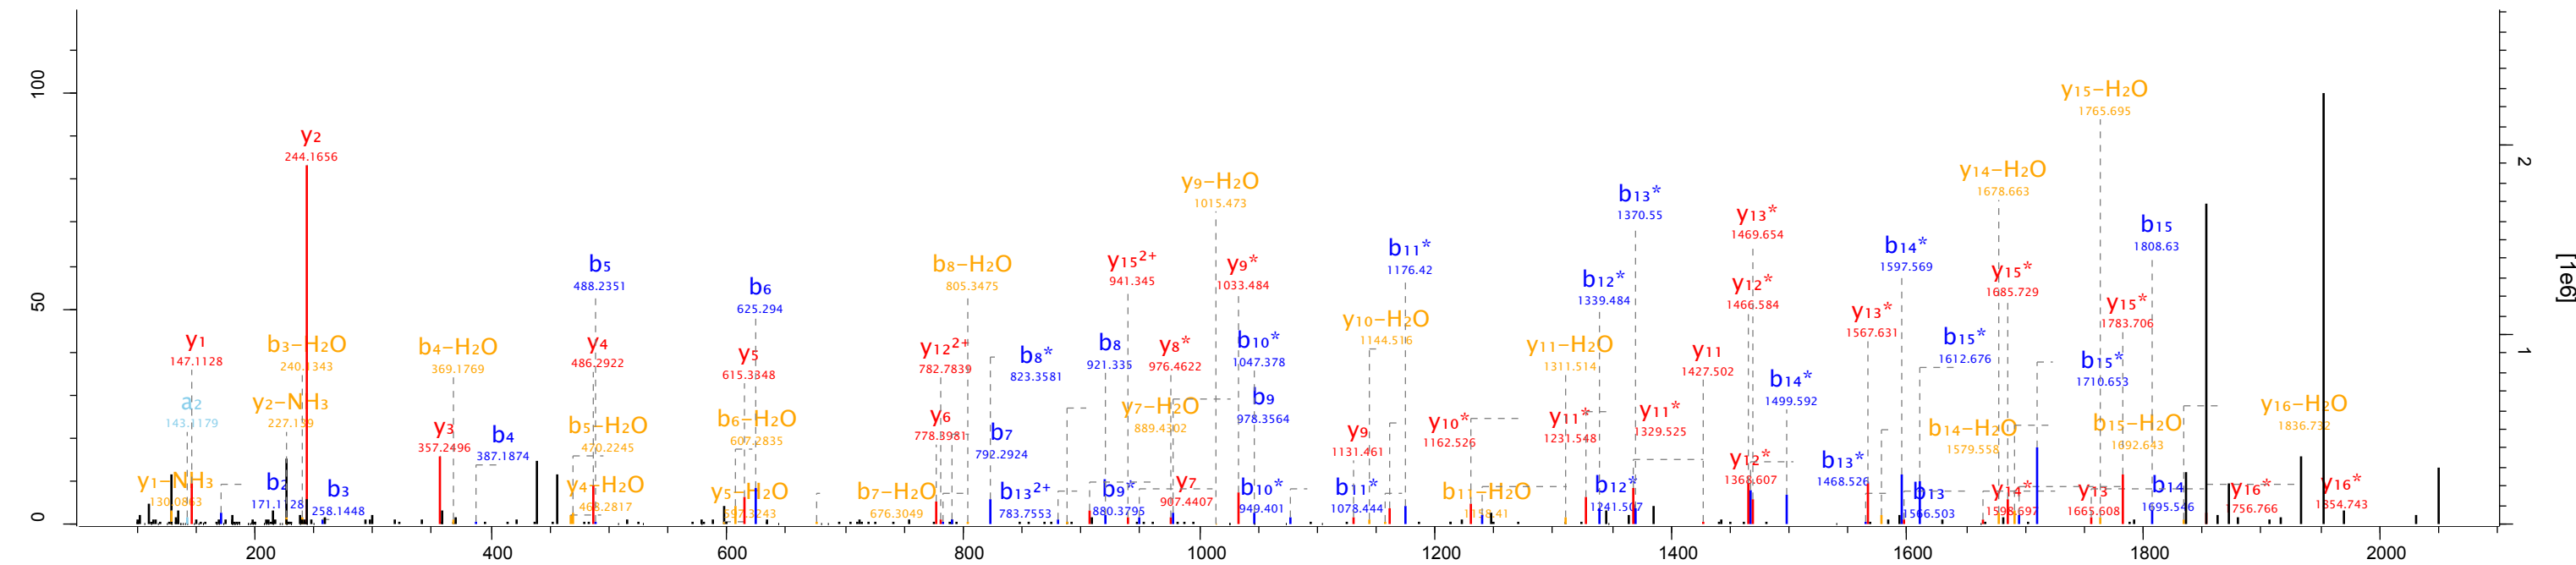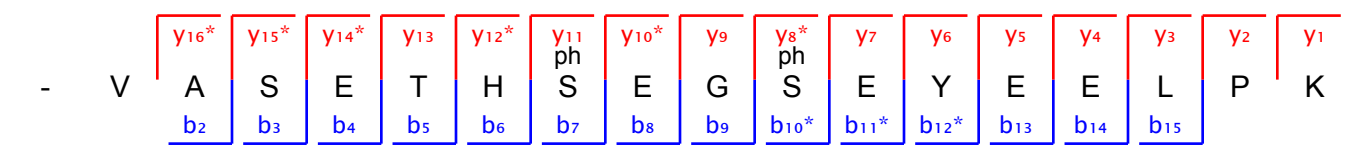

Raw file  
20150812\_A375SR\_Phospho\_BR1\_03

Scan 13871 Method FTMS; HCD Score 138.29 m/z 923.43 Gene names INCENP

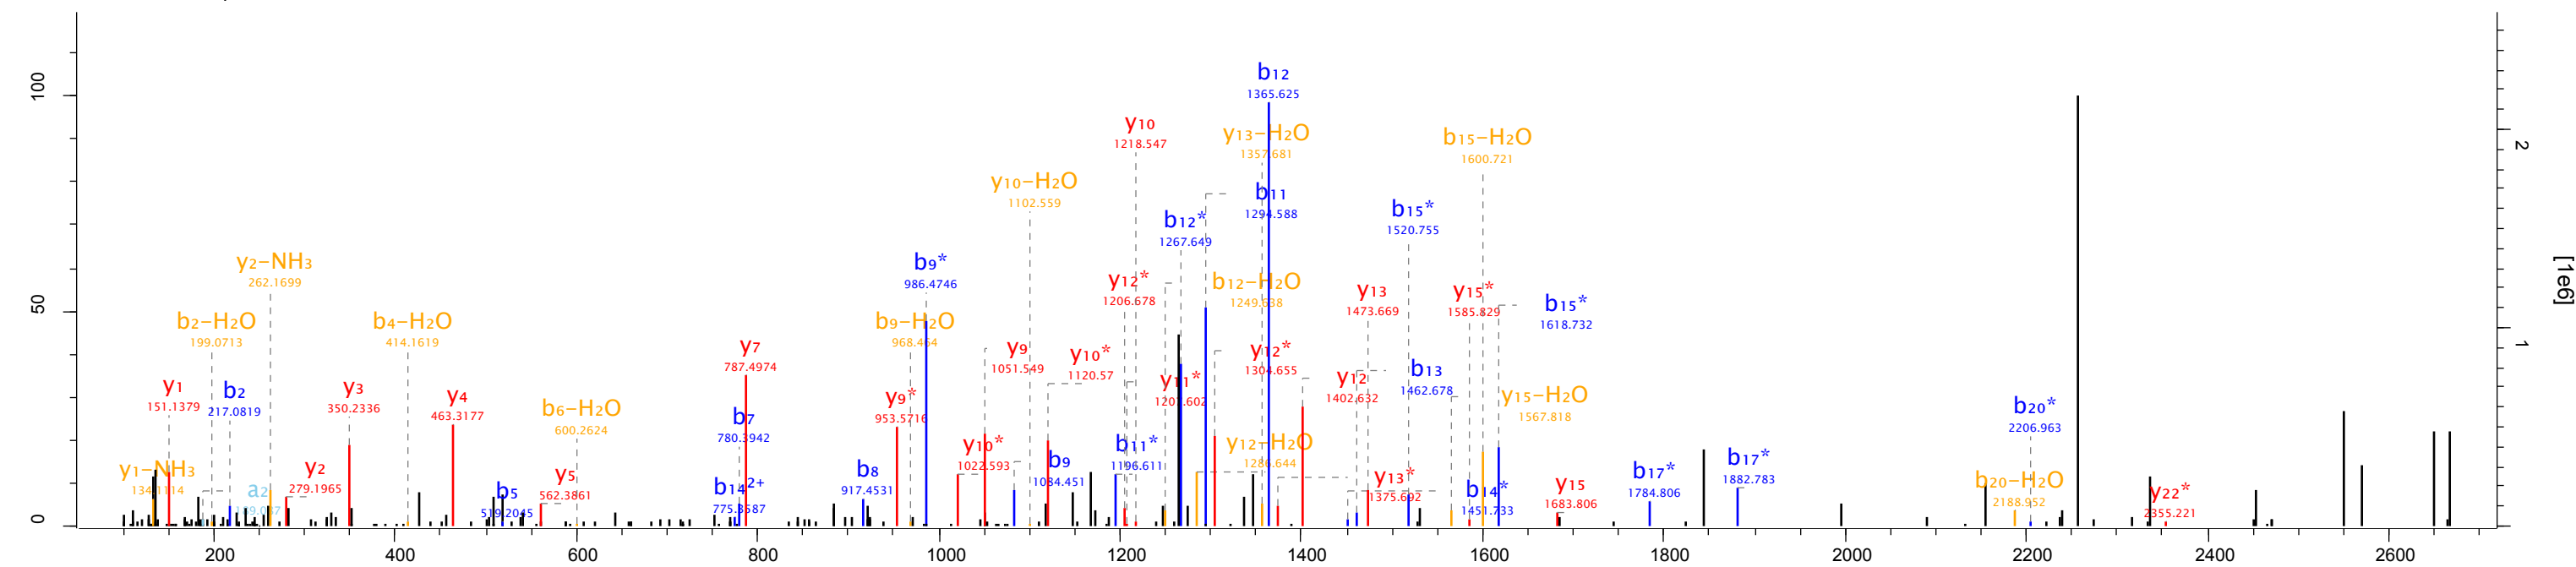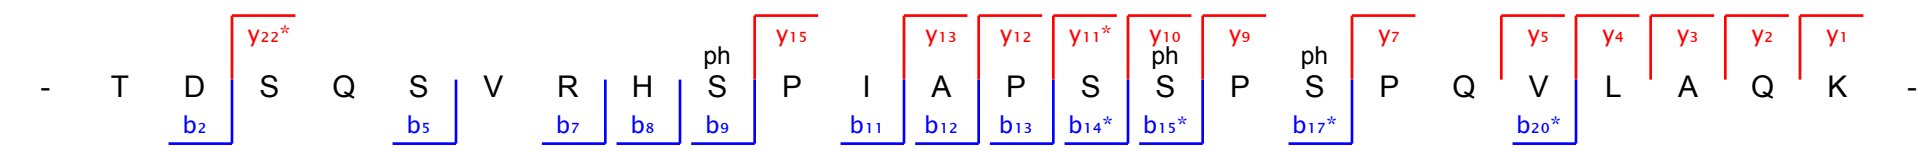

Raw file 20150812\_A375SR\_Phospho\_BR1\_03 Scan 13911 Method FTMS; HCD Score 130.89 m/z 833.86 Gene names TENC1

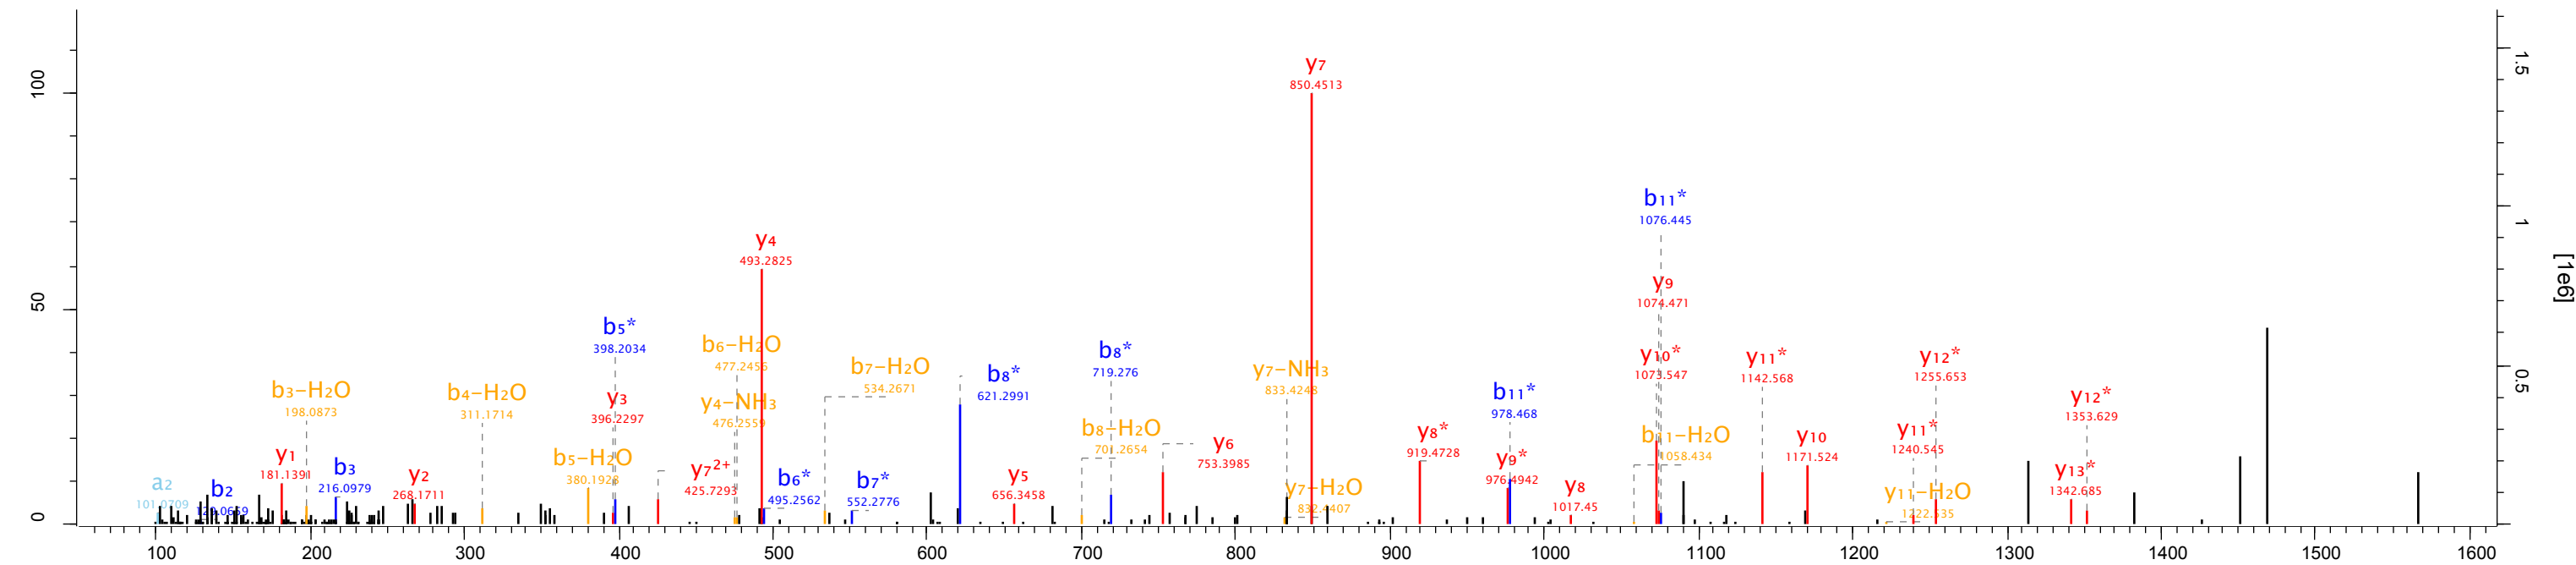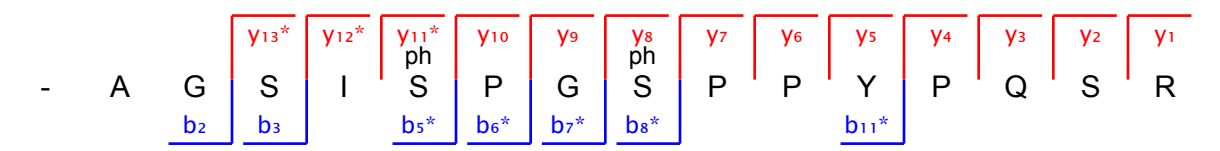



Raw file 20150812\_A375SR\_Phospho\_BR1\_03 Scan 13941 Method FTMS; HCD Score 88.11 m/z 651.8 Gene names RIF1

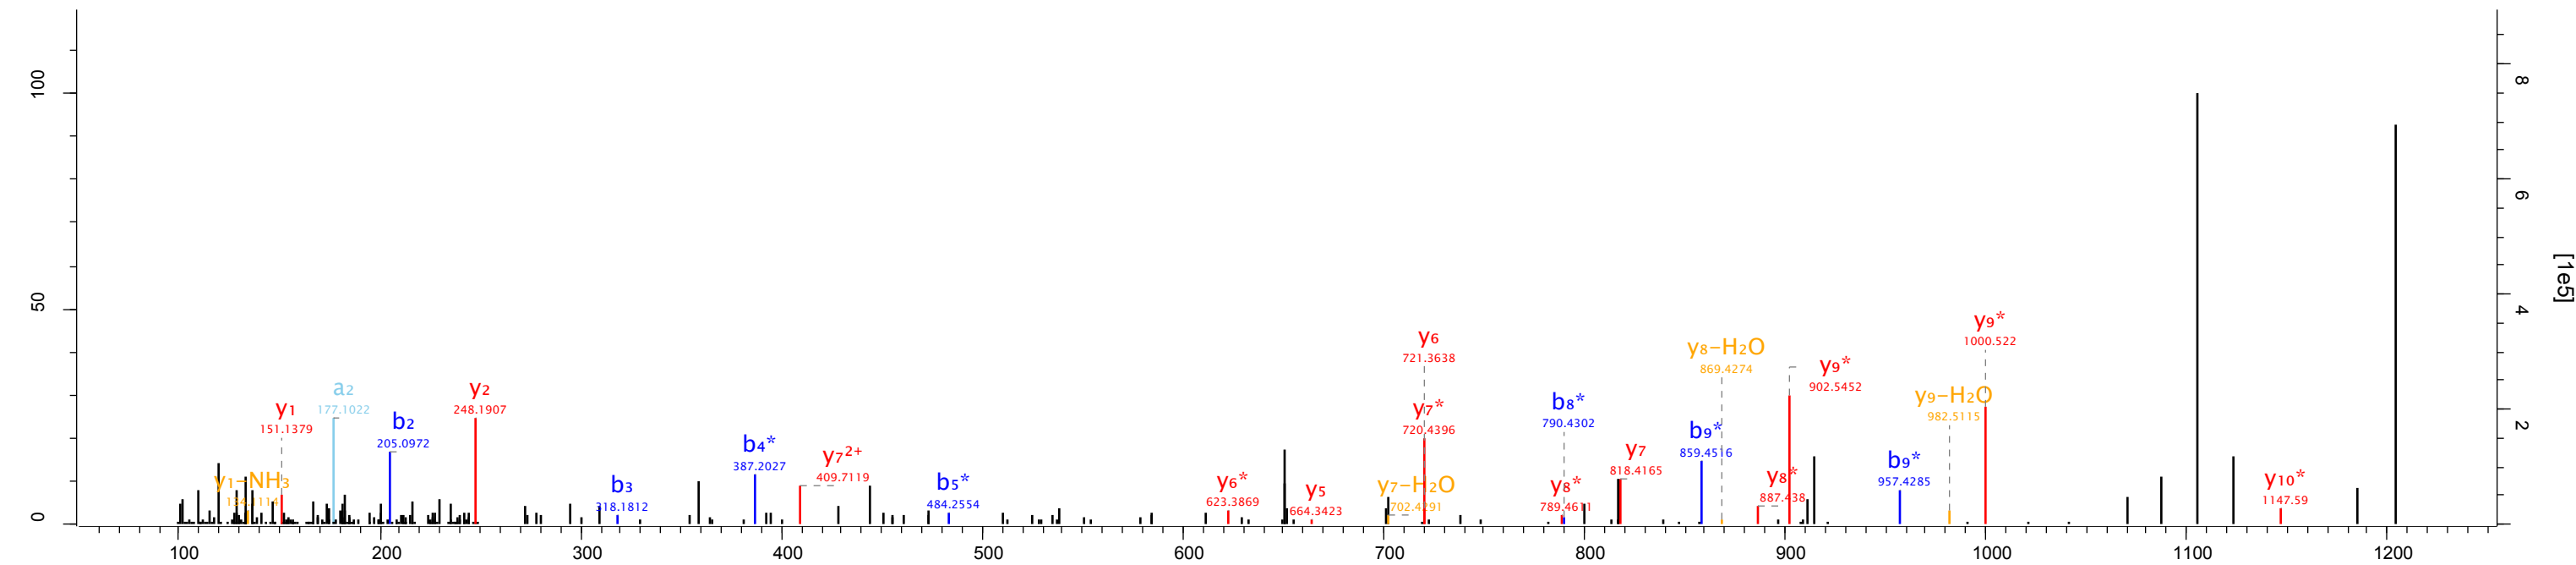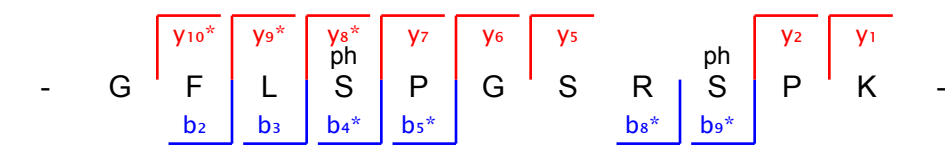



Raw file 20150812\_A375SR\_Phospho\_BR1\_03 Scan 14091 Method FTMS; HCD Score 51.03 m/z 1197.5 Gene names ILF3

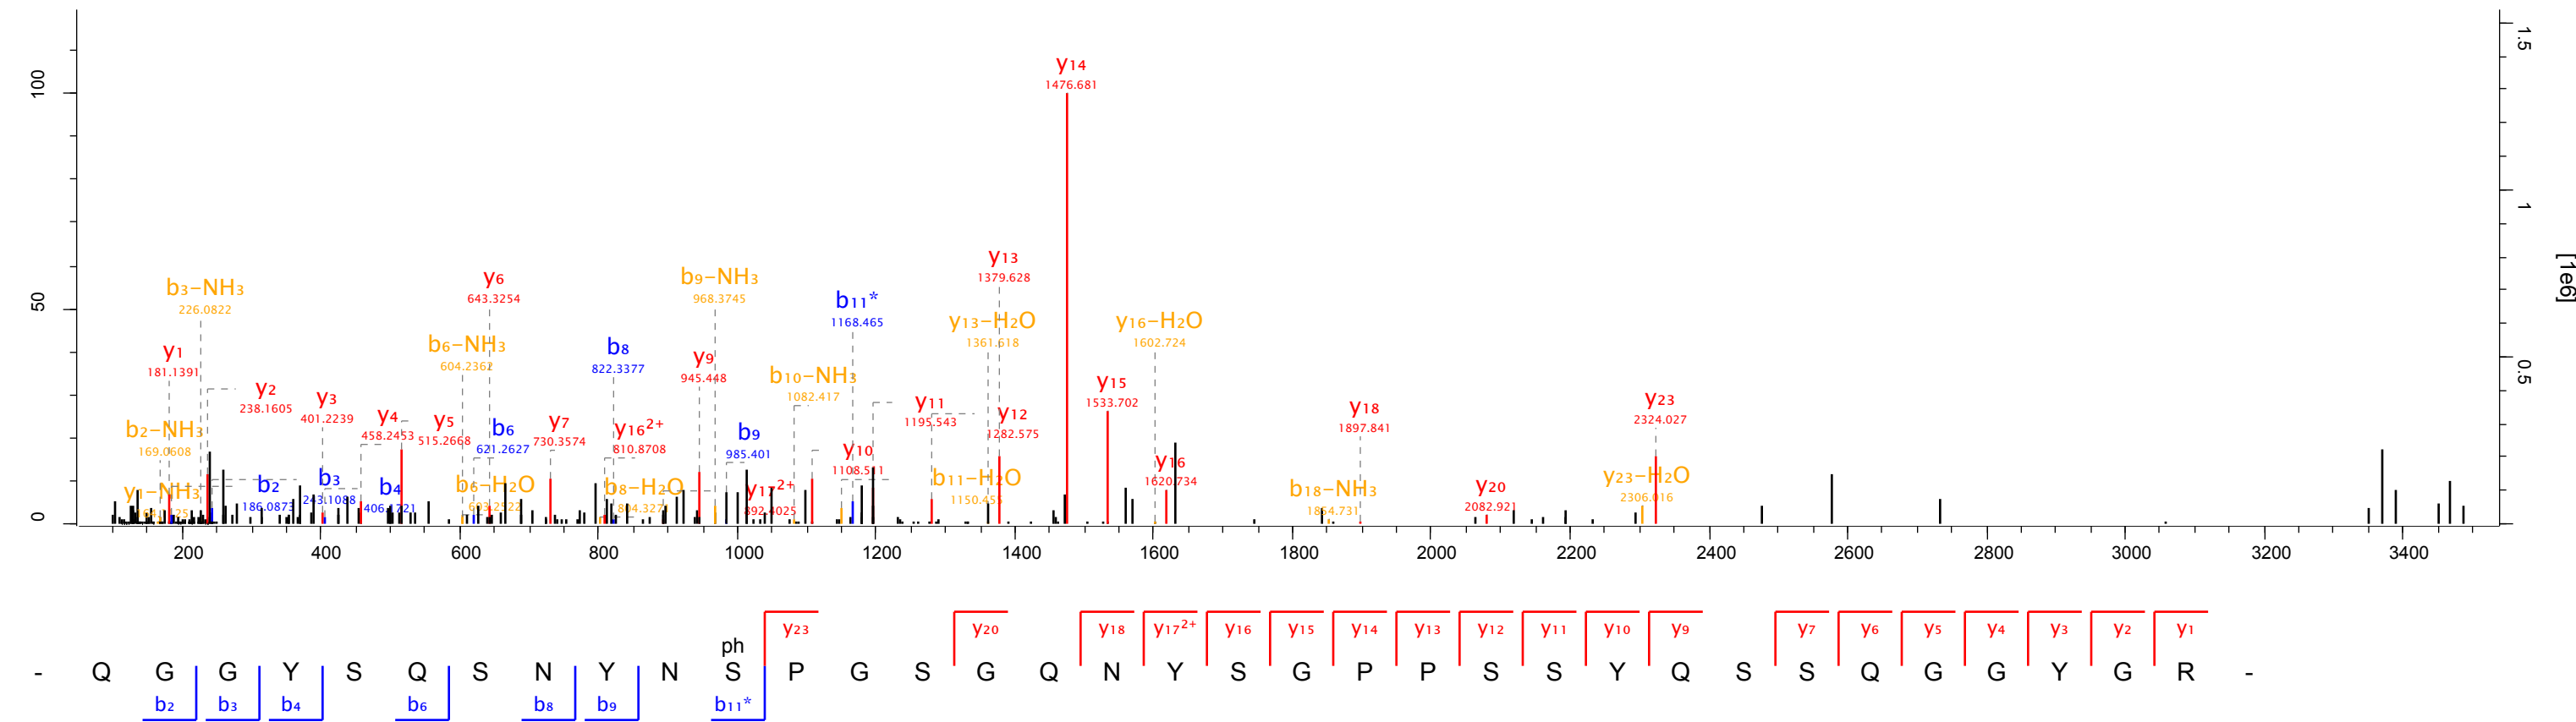

Raw file: 20150812\_A375SR\_Phospho\_BR1\_03  
 Scan: 14301 Method: FTMS; HCD Score: 148.38 m/z: 799.88 Gene names: KIAA1432

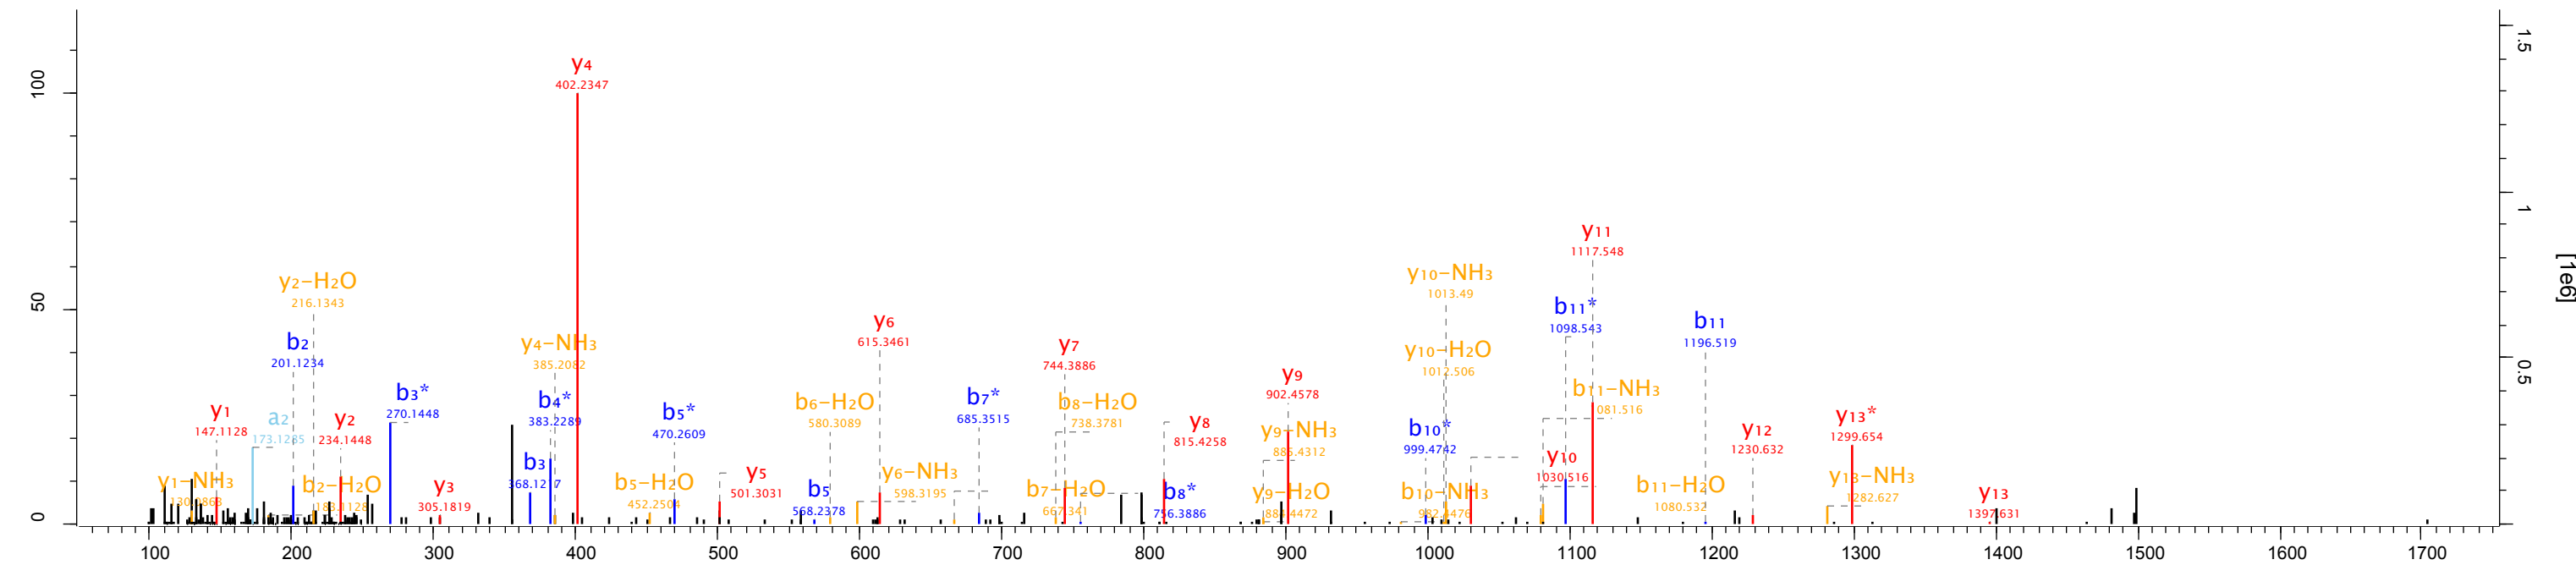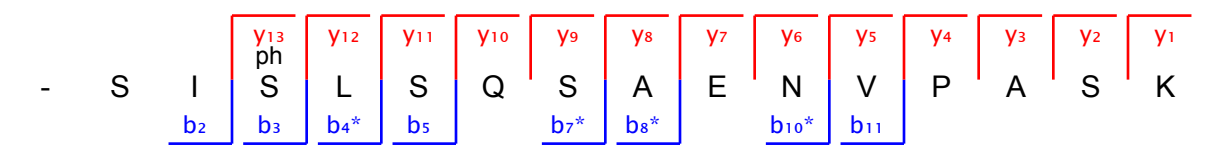

Raw file 20150812\_A375SR\_Phospho\_BR1\_03 Scan 14381 Method FTMS; HCD Score 73.83 m/z 817.28 Gene names CTU2

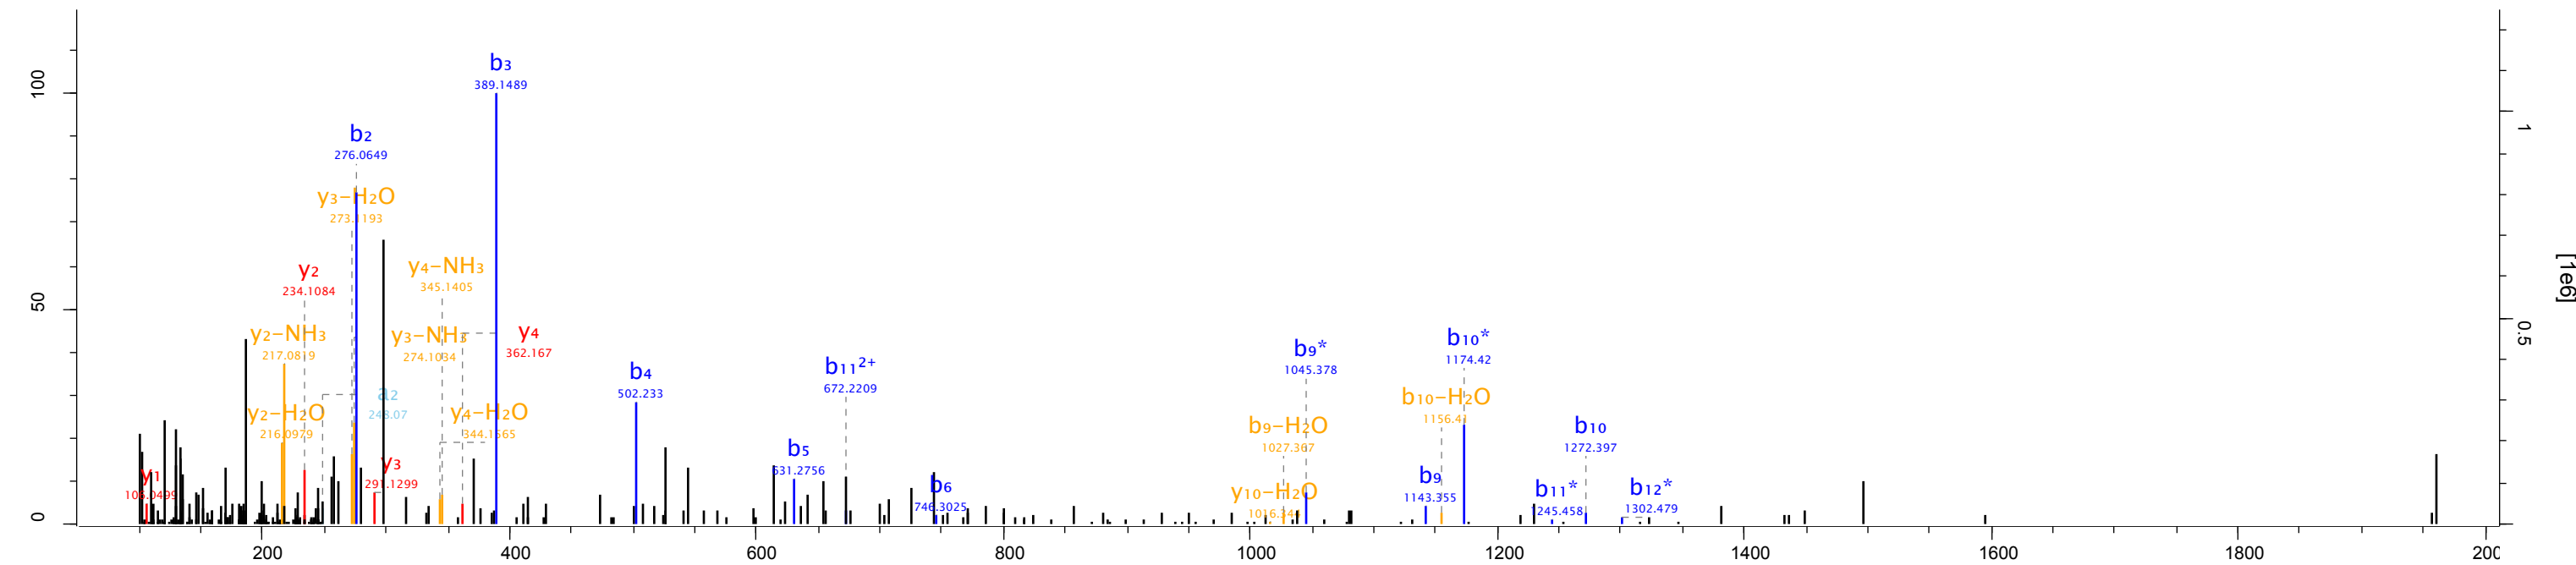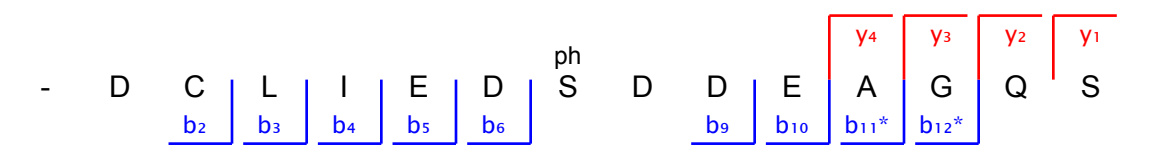

Raw file: 20150812\_A375SR\_Phospho\_BR1\_03  
 Scan: 14531 Method: FTMS; HCD Score: 171.33 m/z: 758.33 Gene names: DDB2

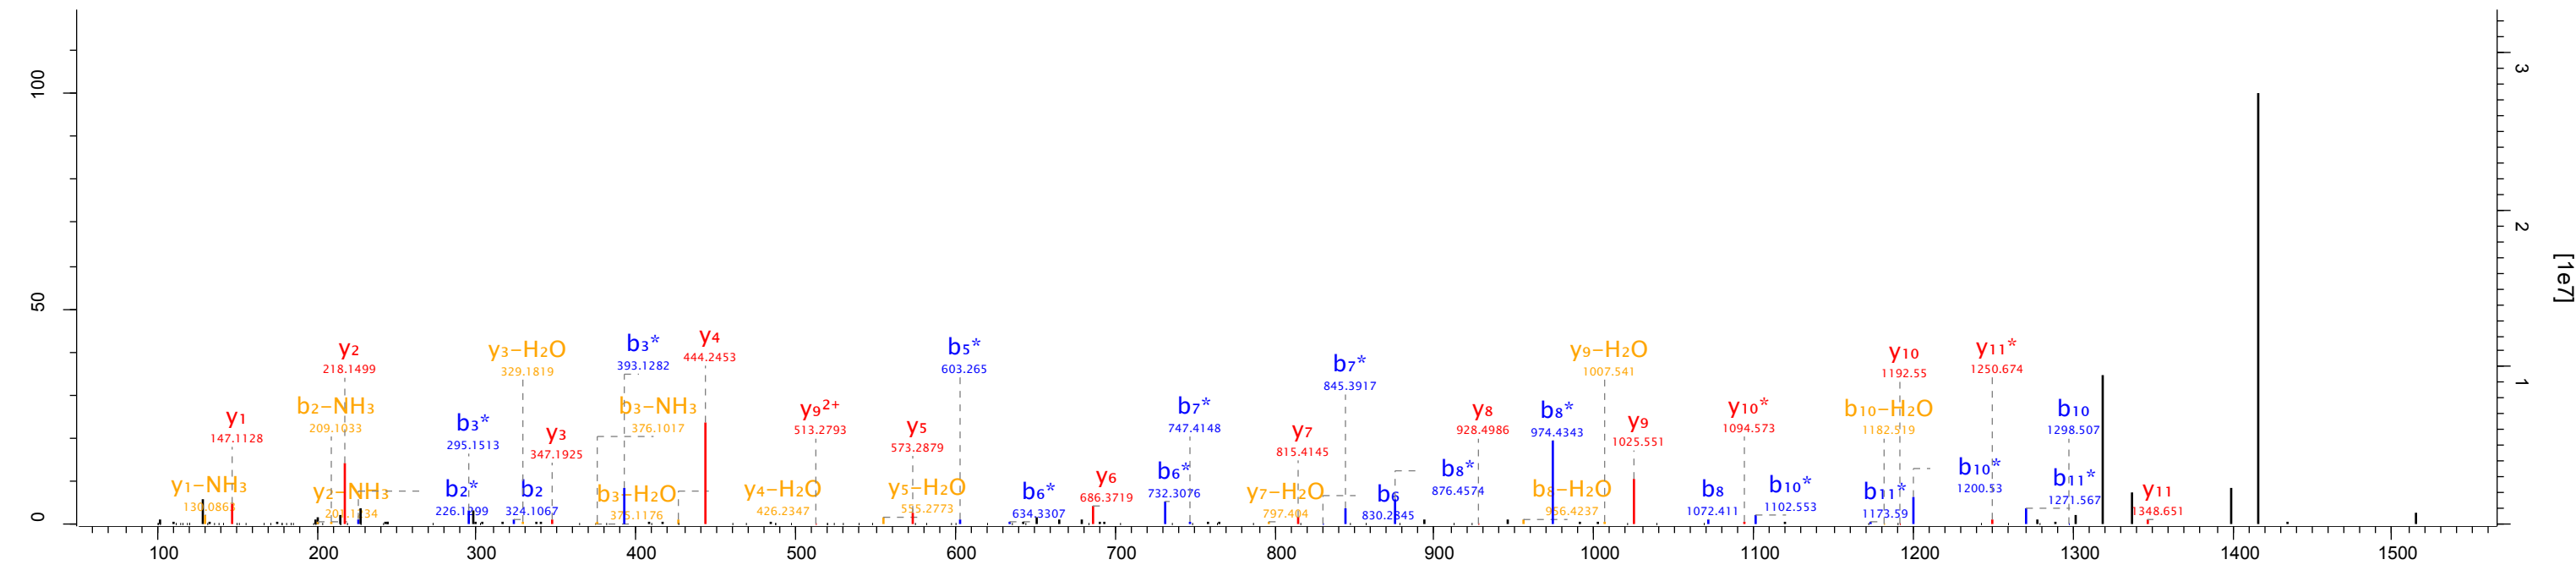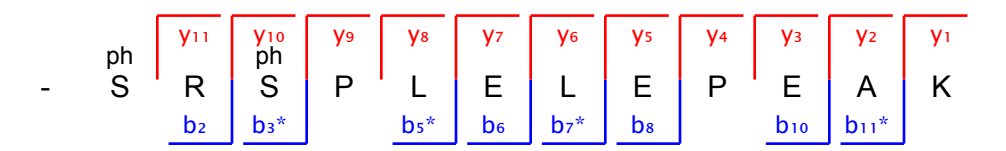

Raw file: 20150812\_A375SR\_Phospho\_BR1\_03  
 Scan: 14591 Method: FTMS; HCD Score: 124.39 m/z: 795.34 Gene names: ARHGEF10

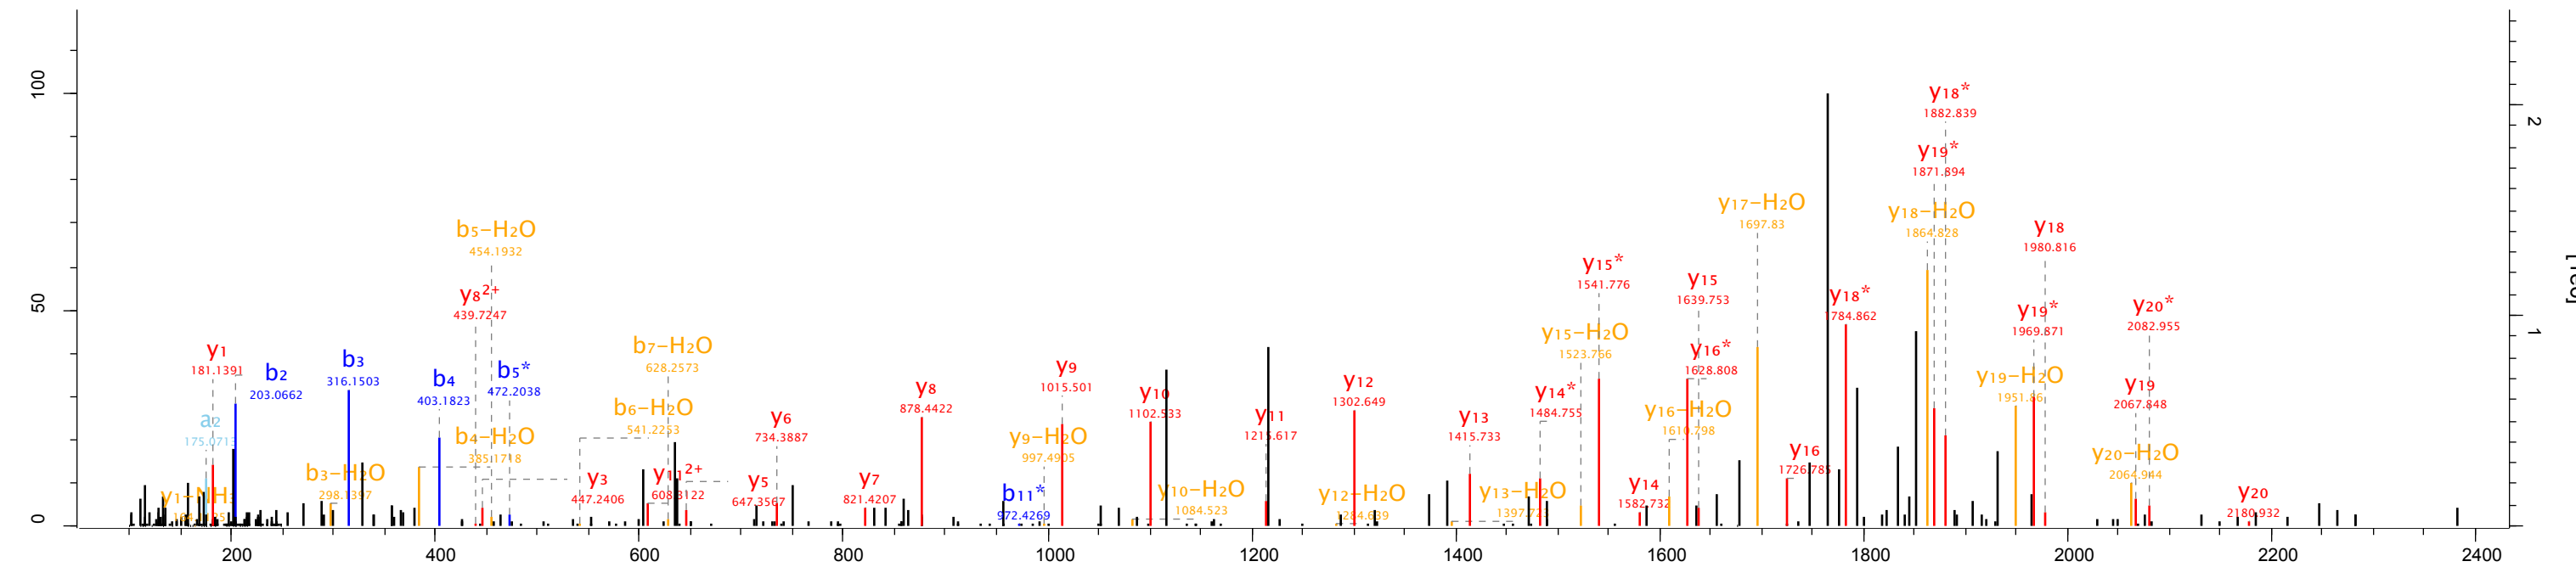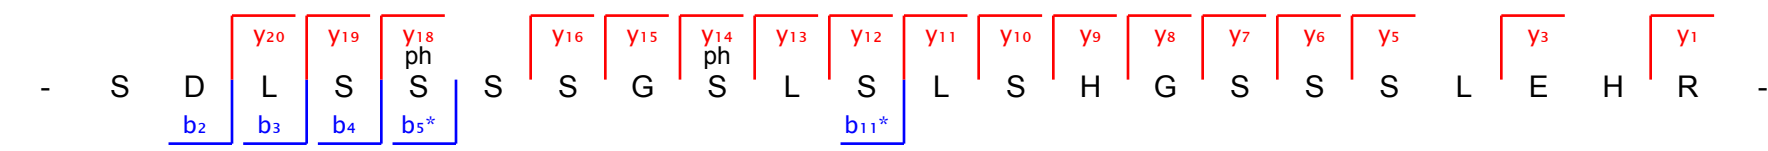

Raw file 20150812\_A375SR\_Phospho\_BR1\_03 Scan 14681 Method FTMS; HCD Score 99.87 m/z 763.86 Gene names PATL1

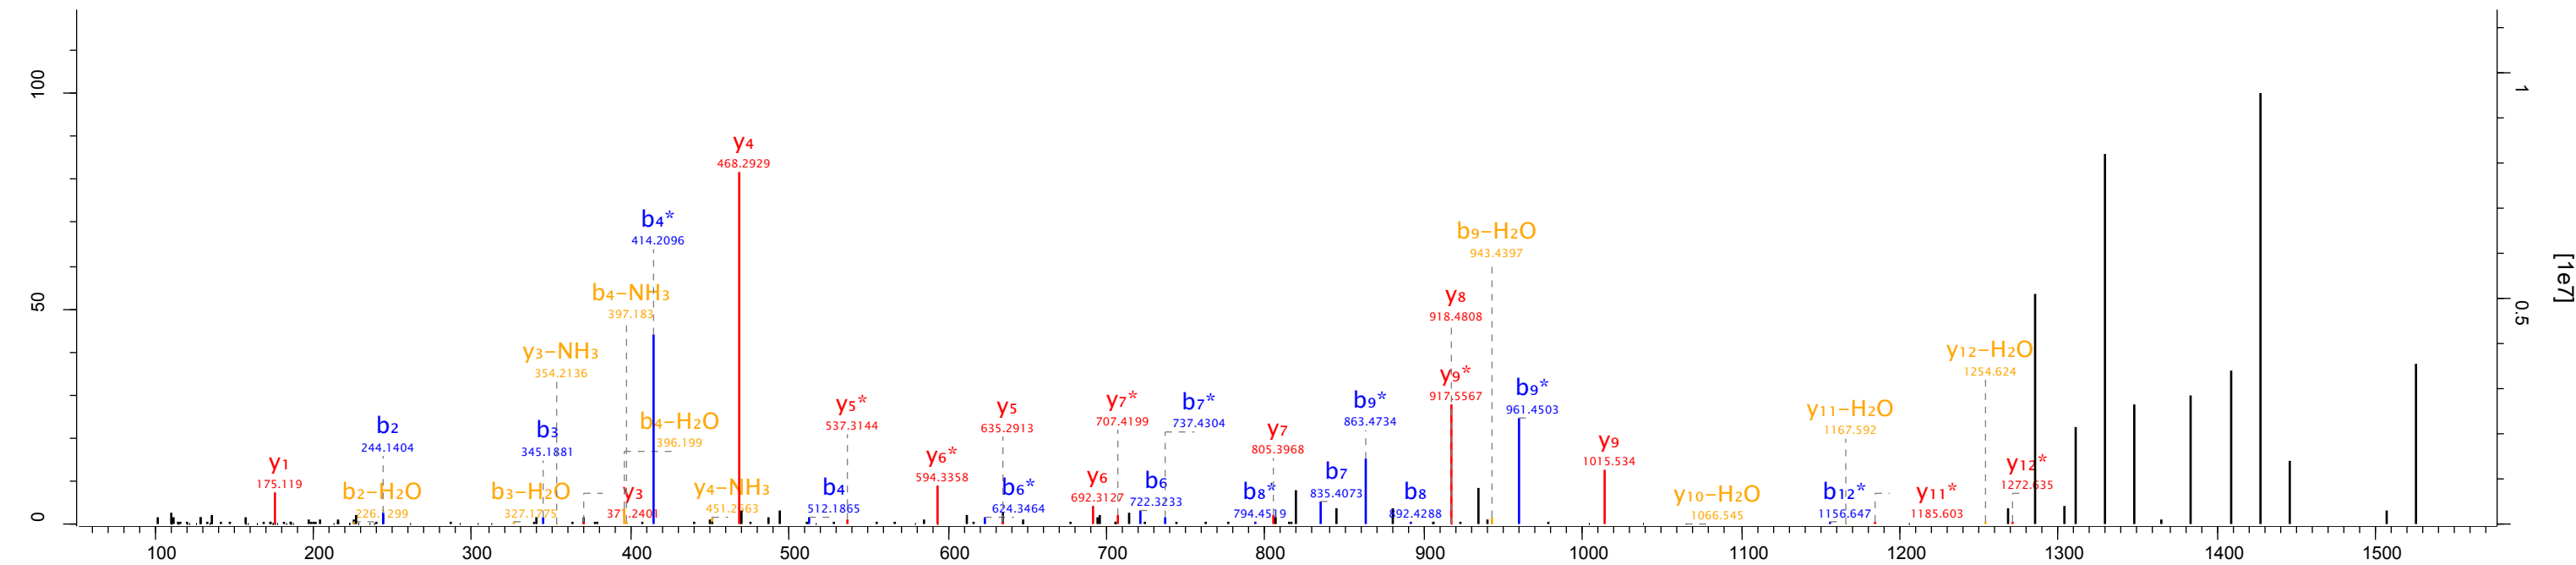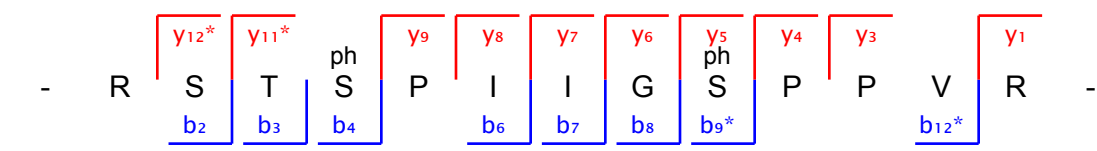



Raw file: 20150812\_A375SR\_Phospho\_BR1\_03  
 Scan: 14941 Method: FTMS; HCD Score: 243.86 m/z: 1194.06 Gene names: DKC1

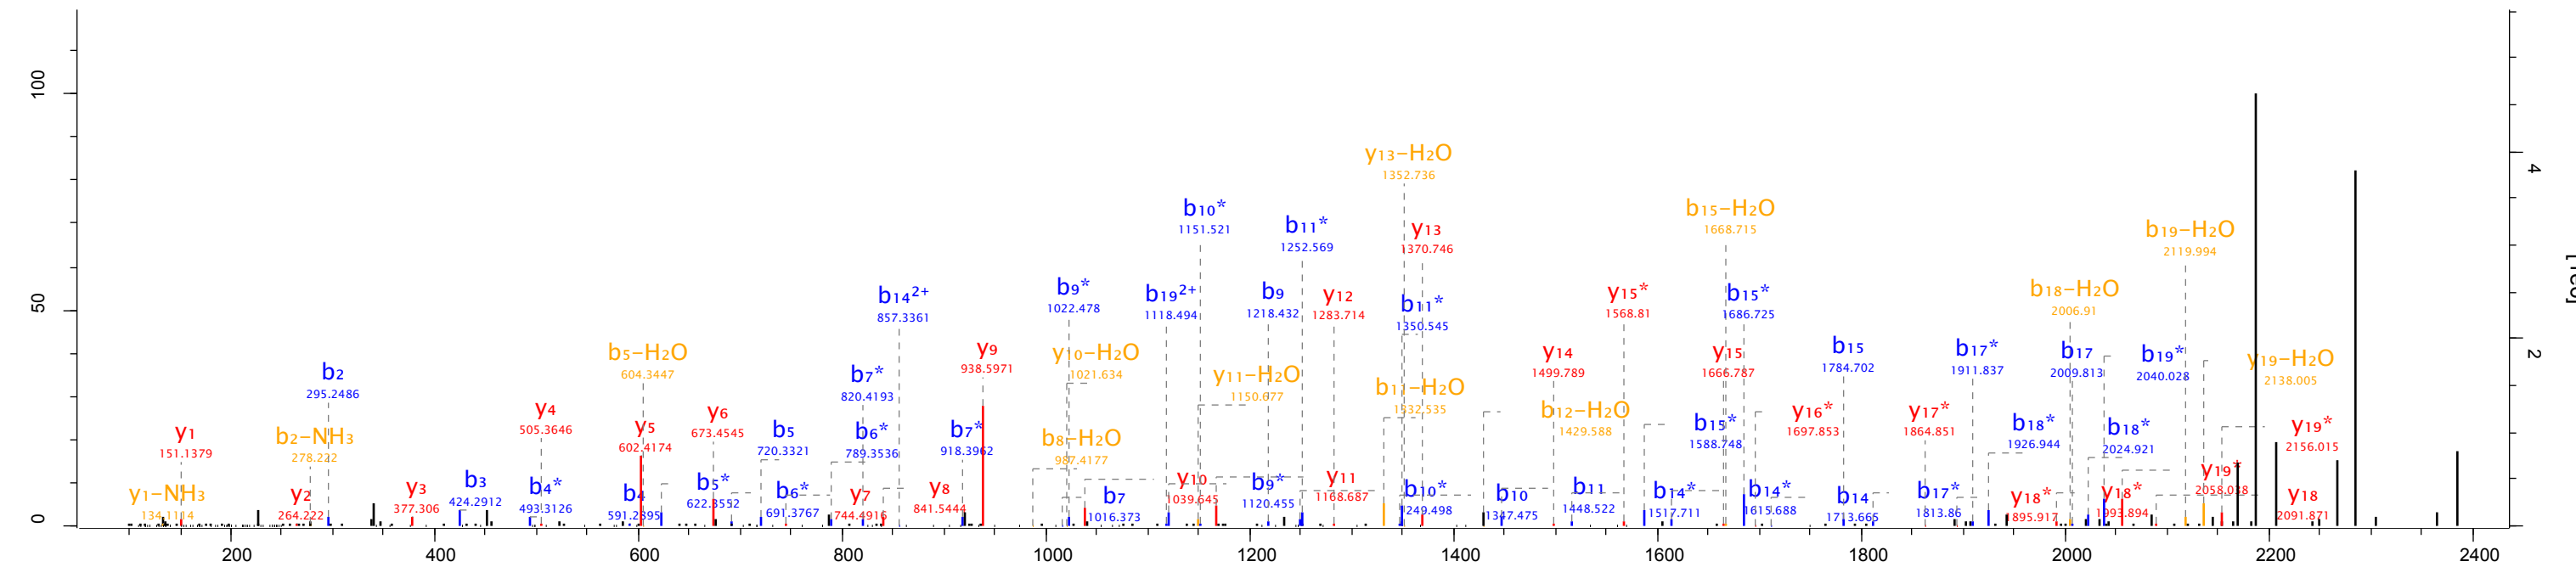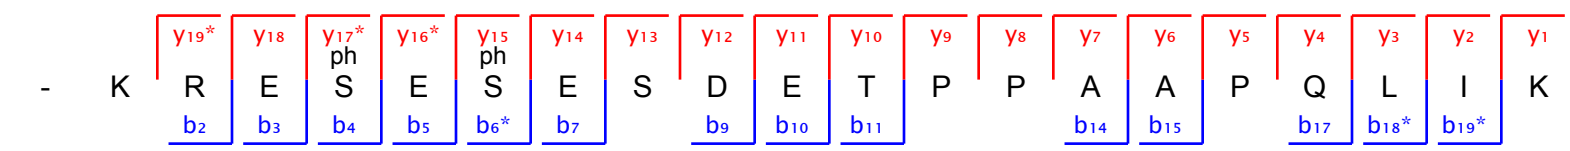

Raw file 20150812\_A375SR\_Phospho\_BR1\_03 Scan 15221 Method FTMS; HCD Score 63.2 m/z 847.4 Gene names ICE2

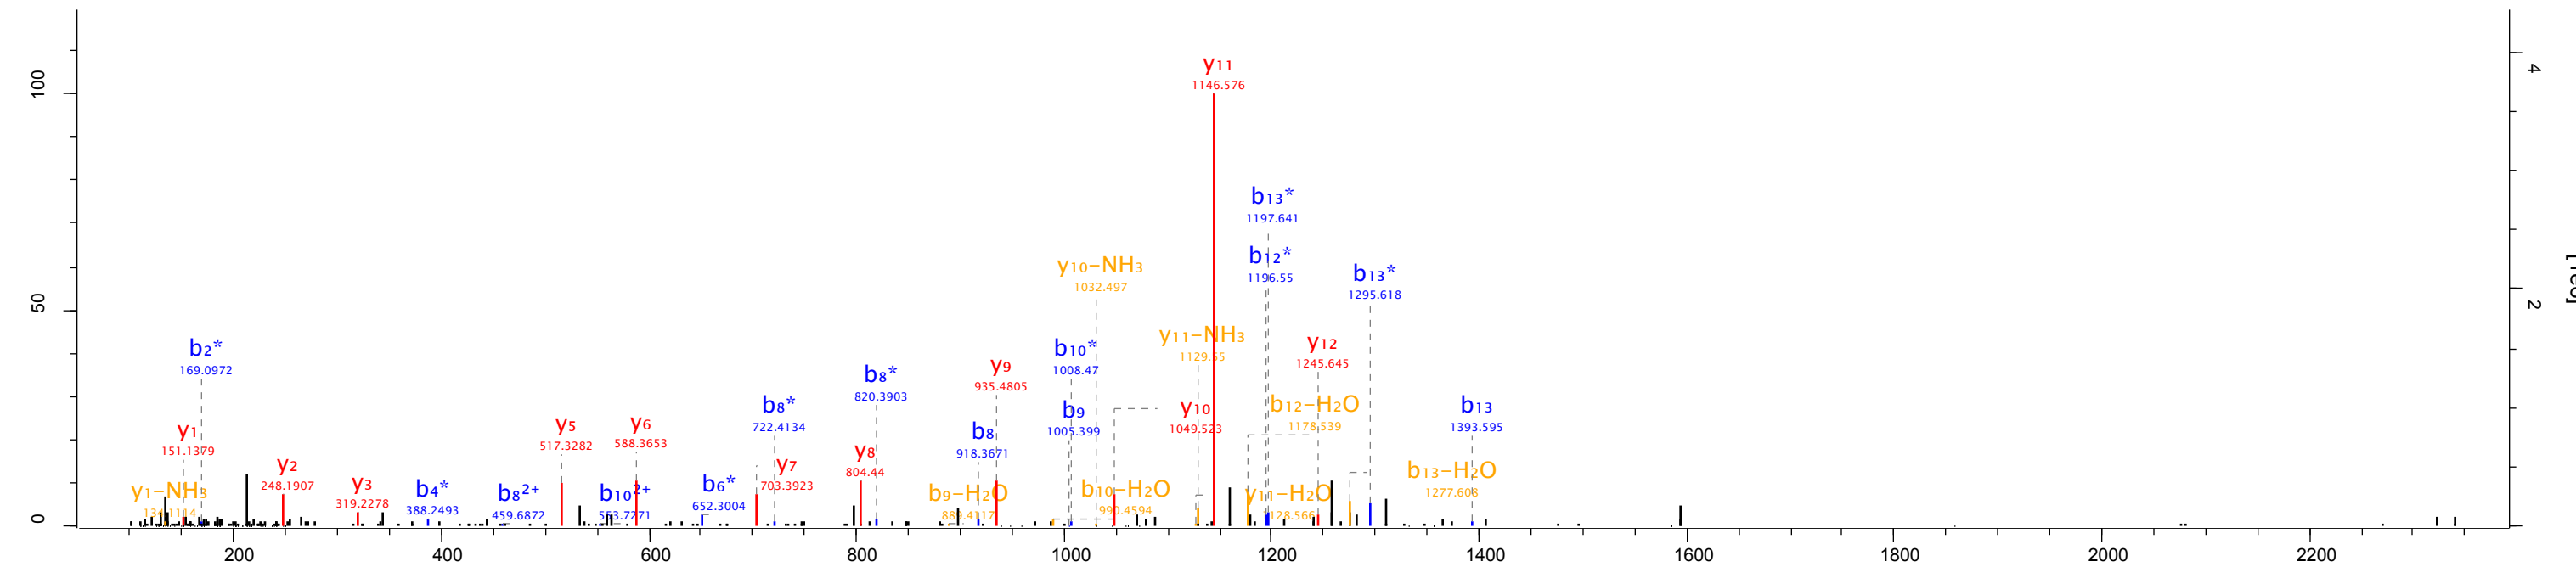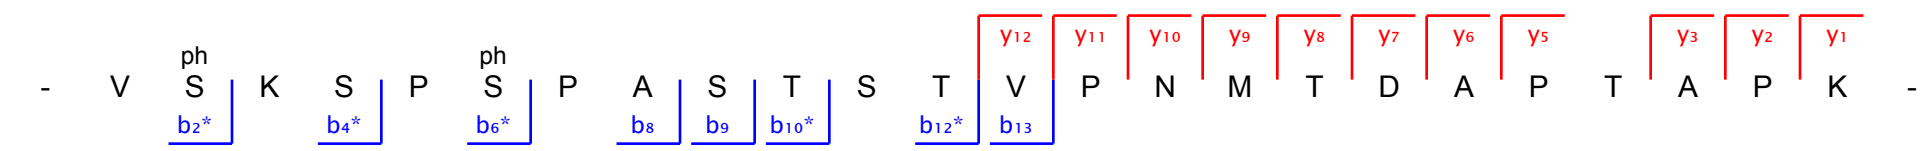

Raw file: 20150812\_A375SR\_Phospho\_BR1\_03  
 Scan: 15251 Method: FTMS; HCD Score: 202.77 m/z: 971.46 Gene names: USP15

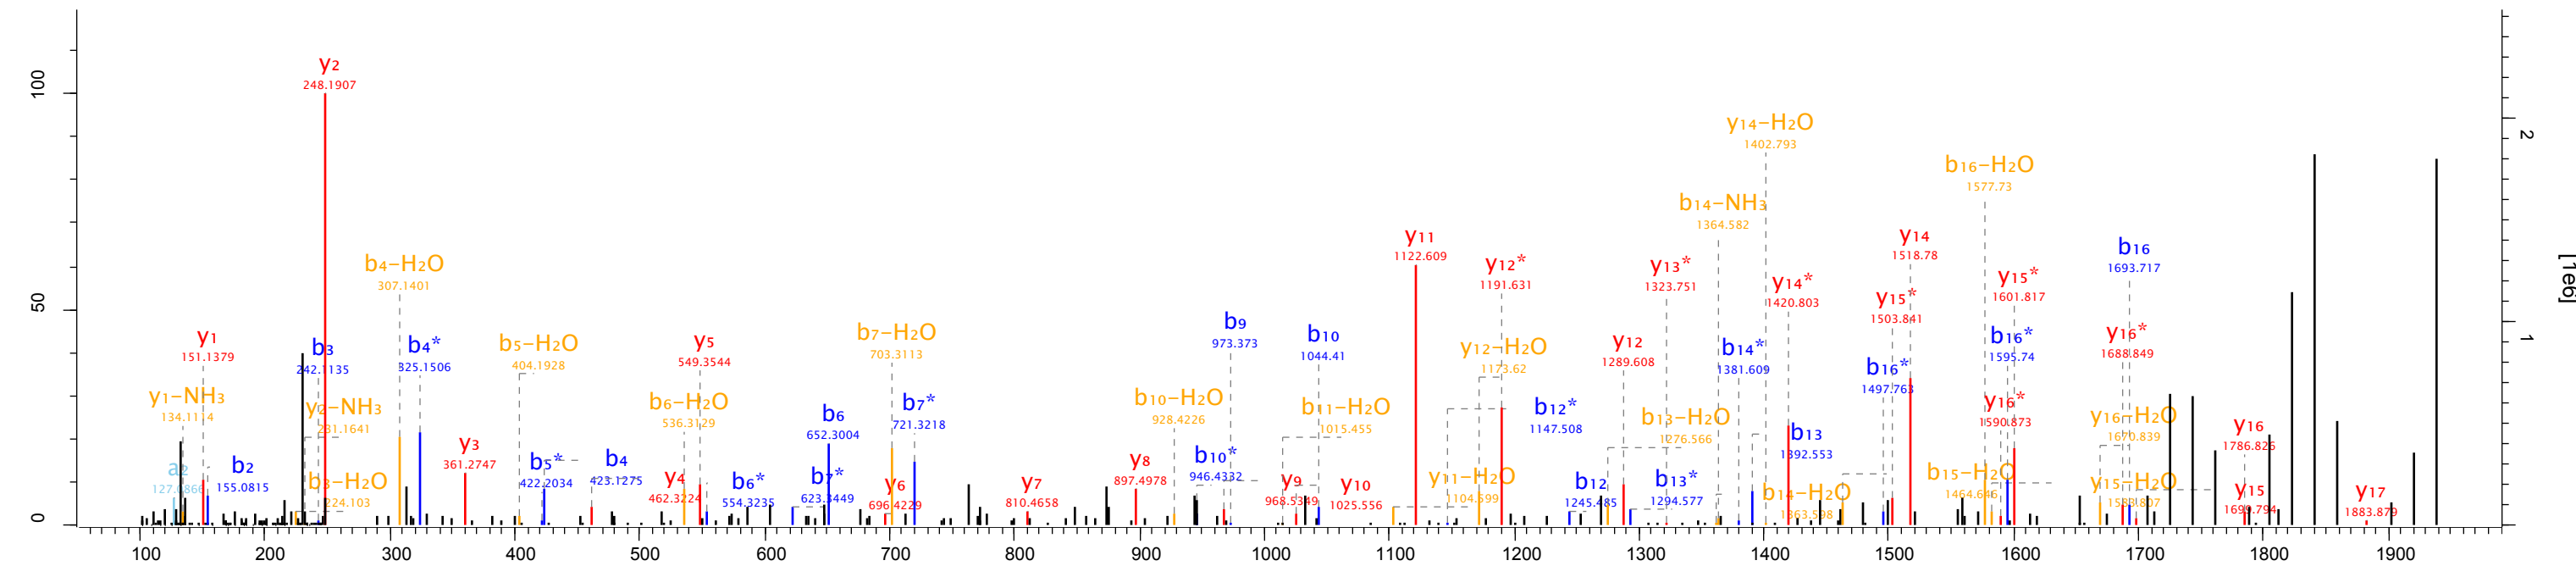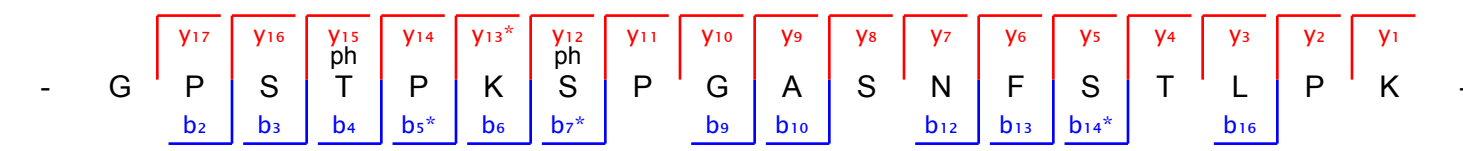

Raw file 20150812\_A375SR\_Phospho\_BR1\_03 Scan 15291 Method FTMS; HCD Score 309.29 m/z 889.38 Gene names ST13

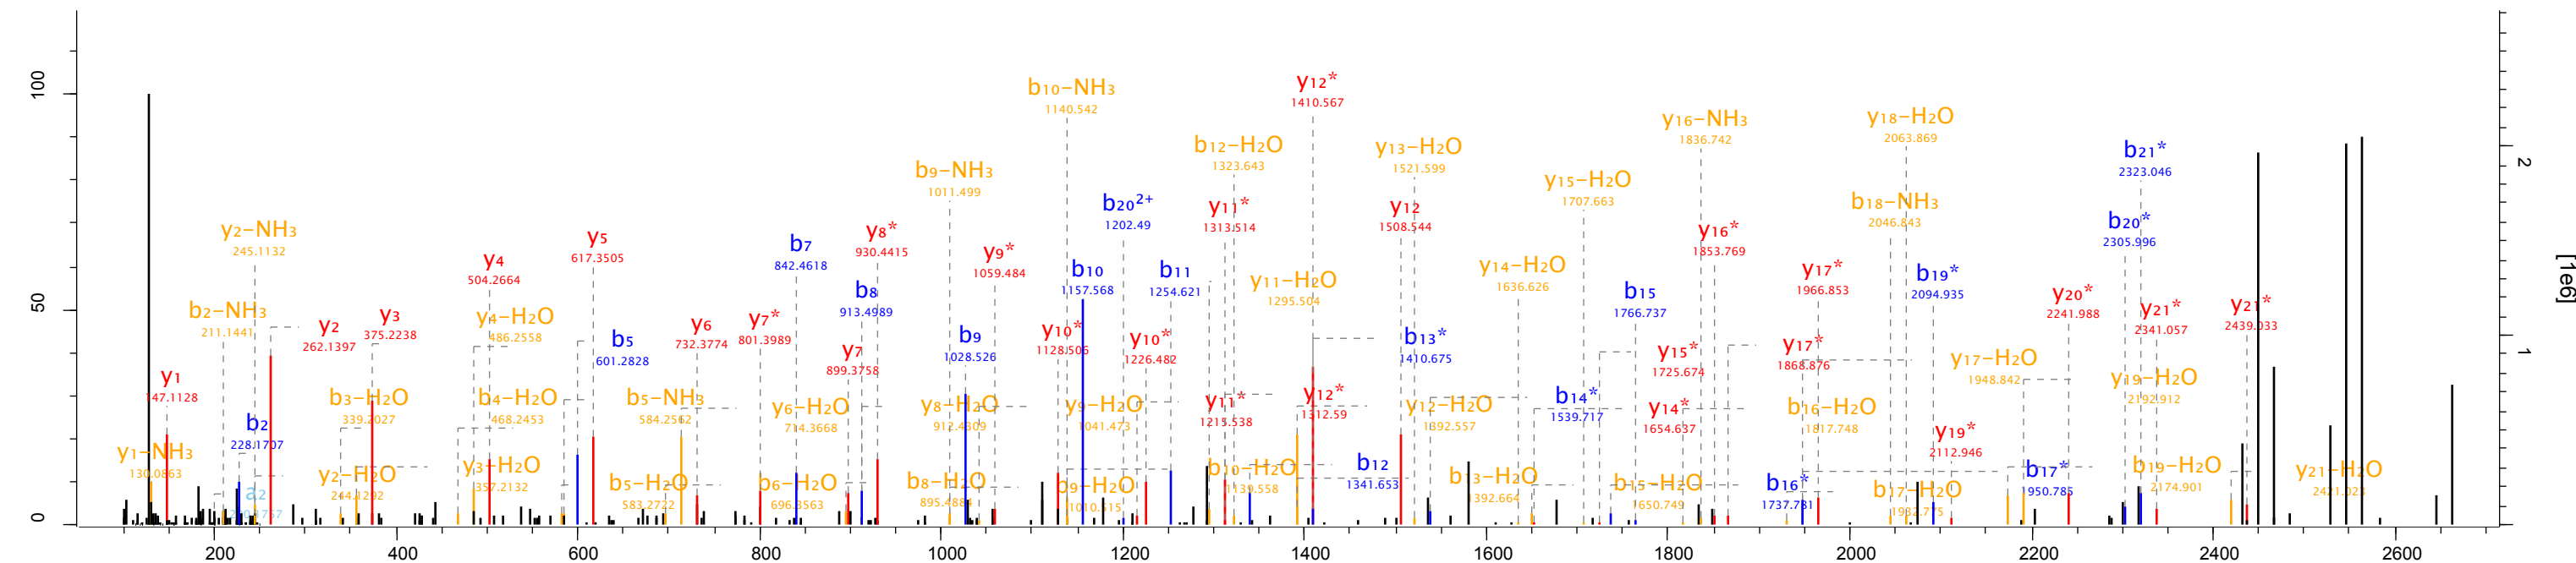

- K V E E D L K A D E P S S E E S D L E I D K -

y<sub>21</sub>\*
y<sub>20</sub>\*
y<sub>19</sub>\*
y<sub>17</sub>\*
y<sub>16</sub>\*
y<sub>15</sub>\*
y<sub>14</sub>\*
y<sub>12</sub>
y<sub>11</sub>\*
y<sub>10</sub>\*
ph
S
y<sub>9</sub>\*
y<sub>8</sub>\*
y<sub>7</sub>
ph
S
y<sub>6</sub>
y<sub>5</sub>
y<sub>4</sub>
y<sub>3</sub>
y<sub>2</sub>
y<sub>1</sub>

b<sub>2</sub>
b<sub>5</sub>
b<sub>7</sub>
b<sub>8</sub>
b<sub>9</sub>
b<sub>10</sub>
b<sub>11</sub>
b<sub>12</sub>
b<sub>13</sub>\*
b<sub>14</sub>\*
b<sub>15</sub>
b<sub>16</sub>\*
b<sub>17</sub>\*
b<sub>19</sub>\*
b<sub>20</sub>\*
b<sub>21</sub>\*

Raw file: 20150812\_A375SR\_Phospho\_BR1\_03  
 Scan: 1531 Method: FTMS; HCD Score: 85.85 m/z: 731.28 Gene names: NSRP1;CCDC55

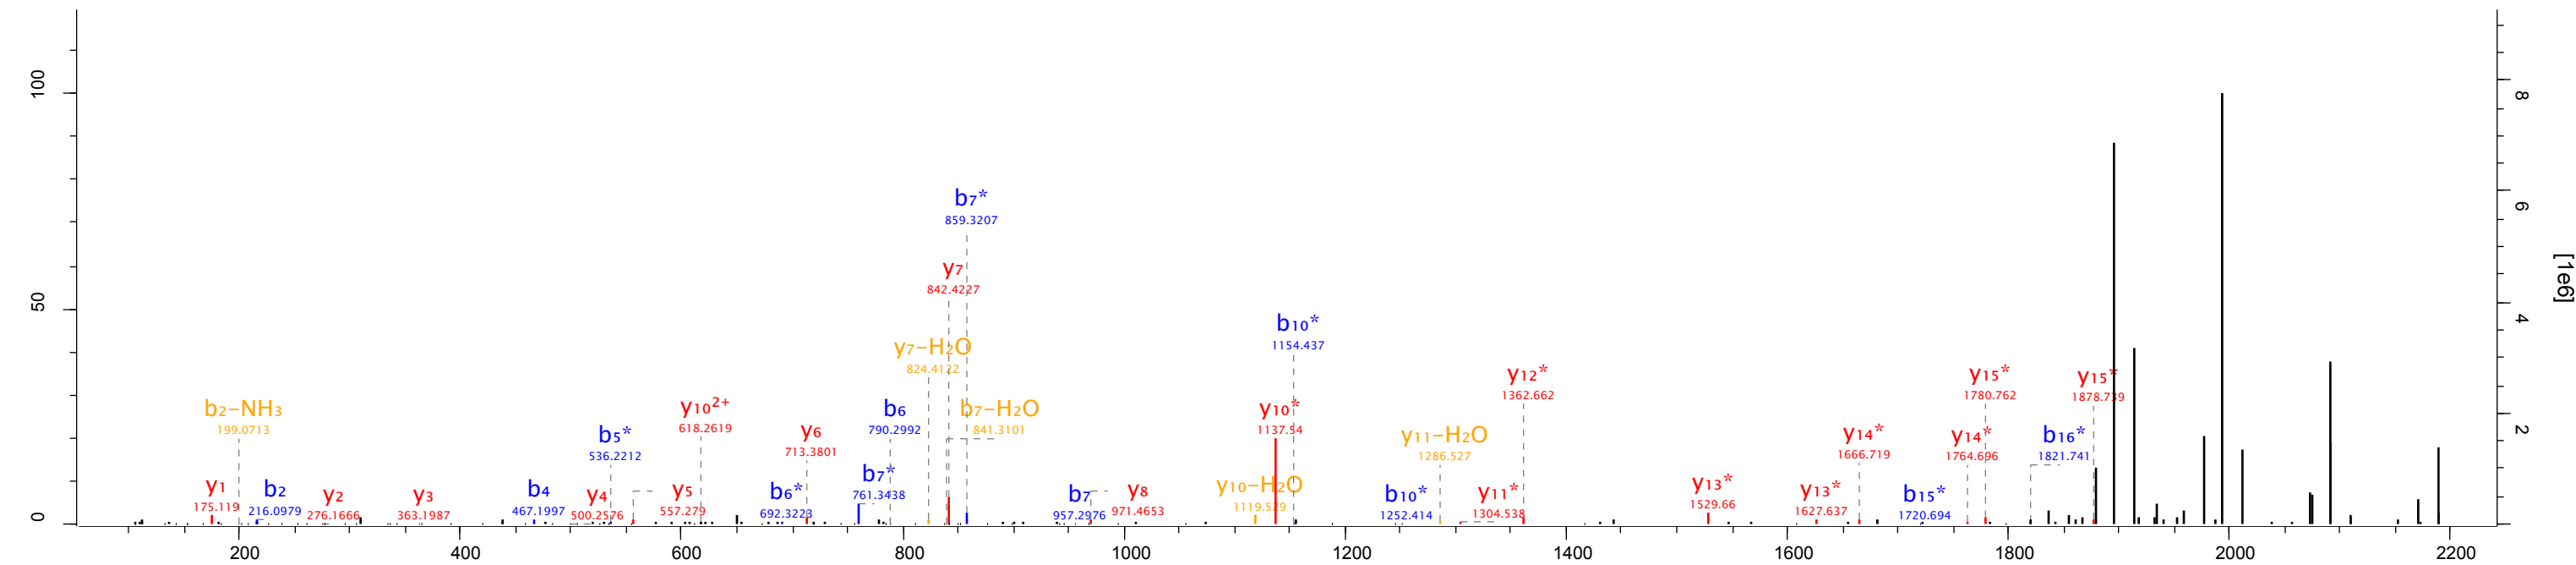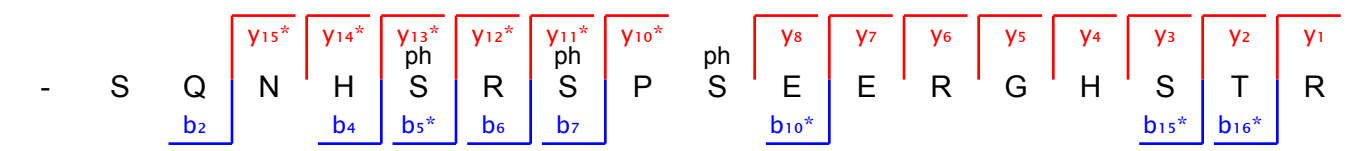

Raw file 20150812\_A375SR\_Phospho\_BR1\_03 Scan 15371 Method FTMS; HCD Score 220.52 m/z 950.39 Gene names SCAF1

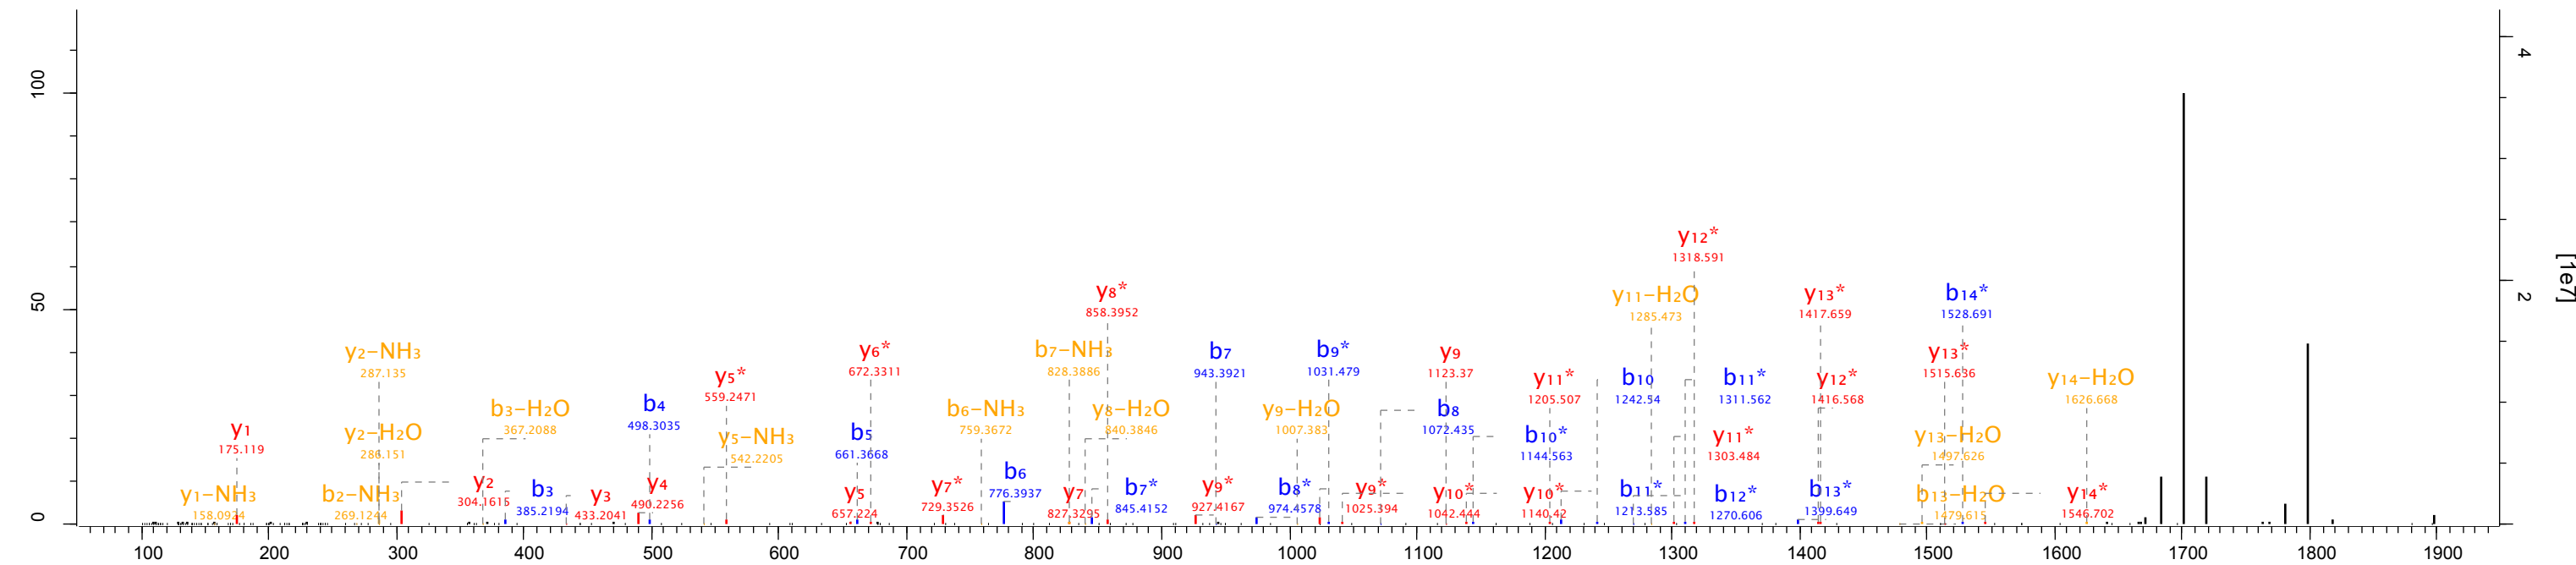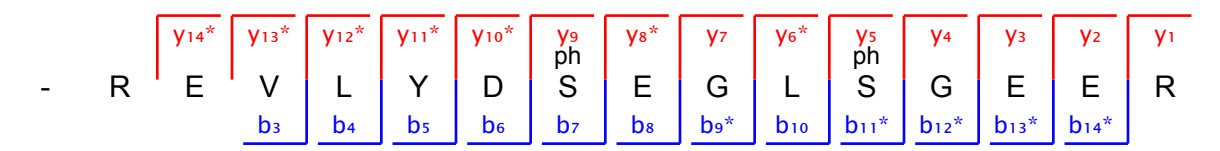

Raw file: 20150812\_A375SR\_Phospho\_BR1\_03  
 Scan: 15391 Method: FTMS; HCD Score: 157.14 m/z: 880.38 Gene names: GAB2

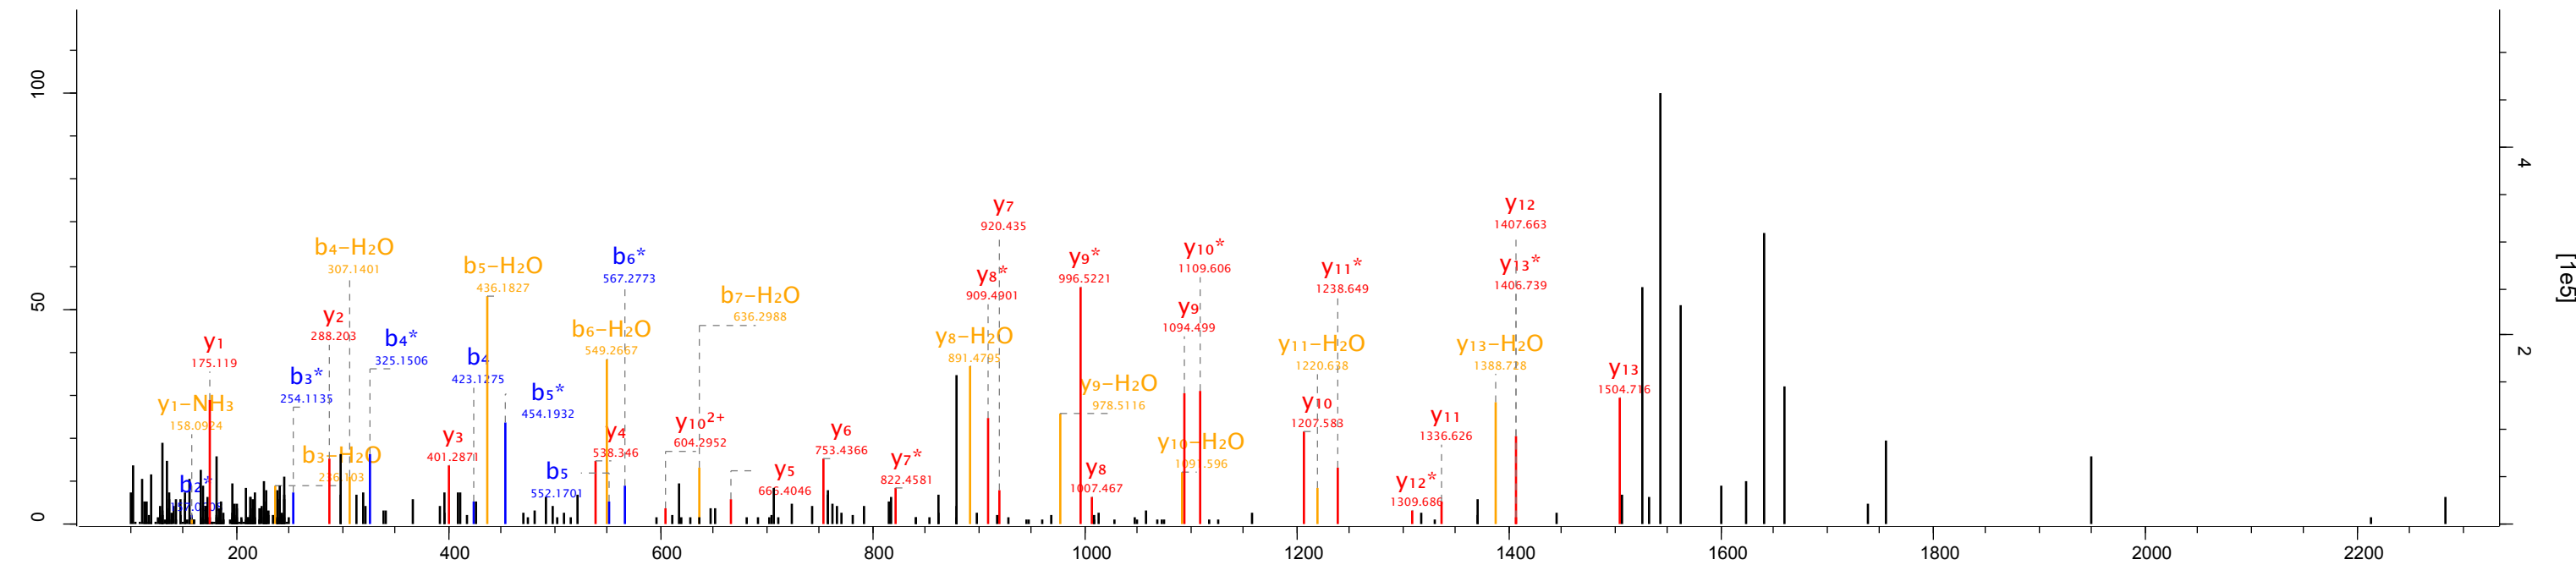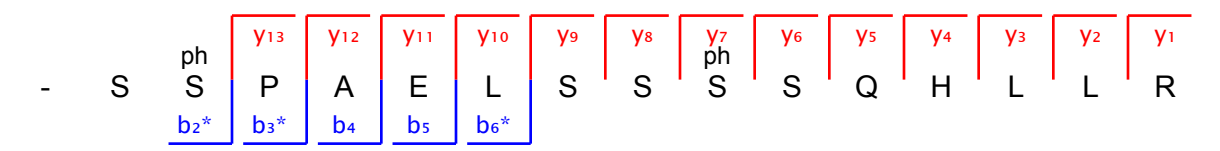

Raw file Scan Method m/z Gene names  
 20150812\_A375SR\_Phospho\_BR1\_03 15481 FTMS; HCD 171.87 710.55 PPP6R1

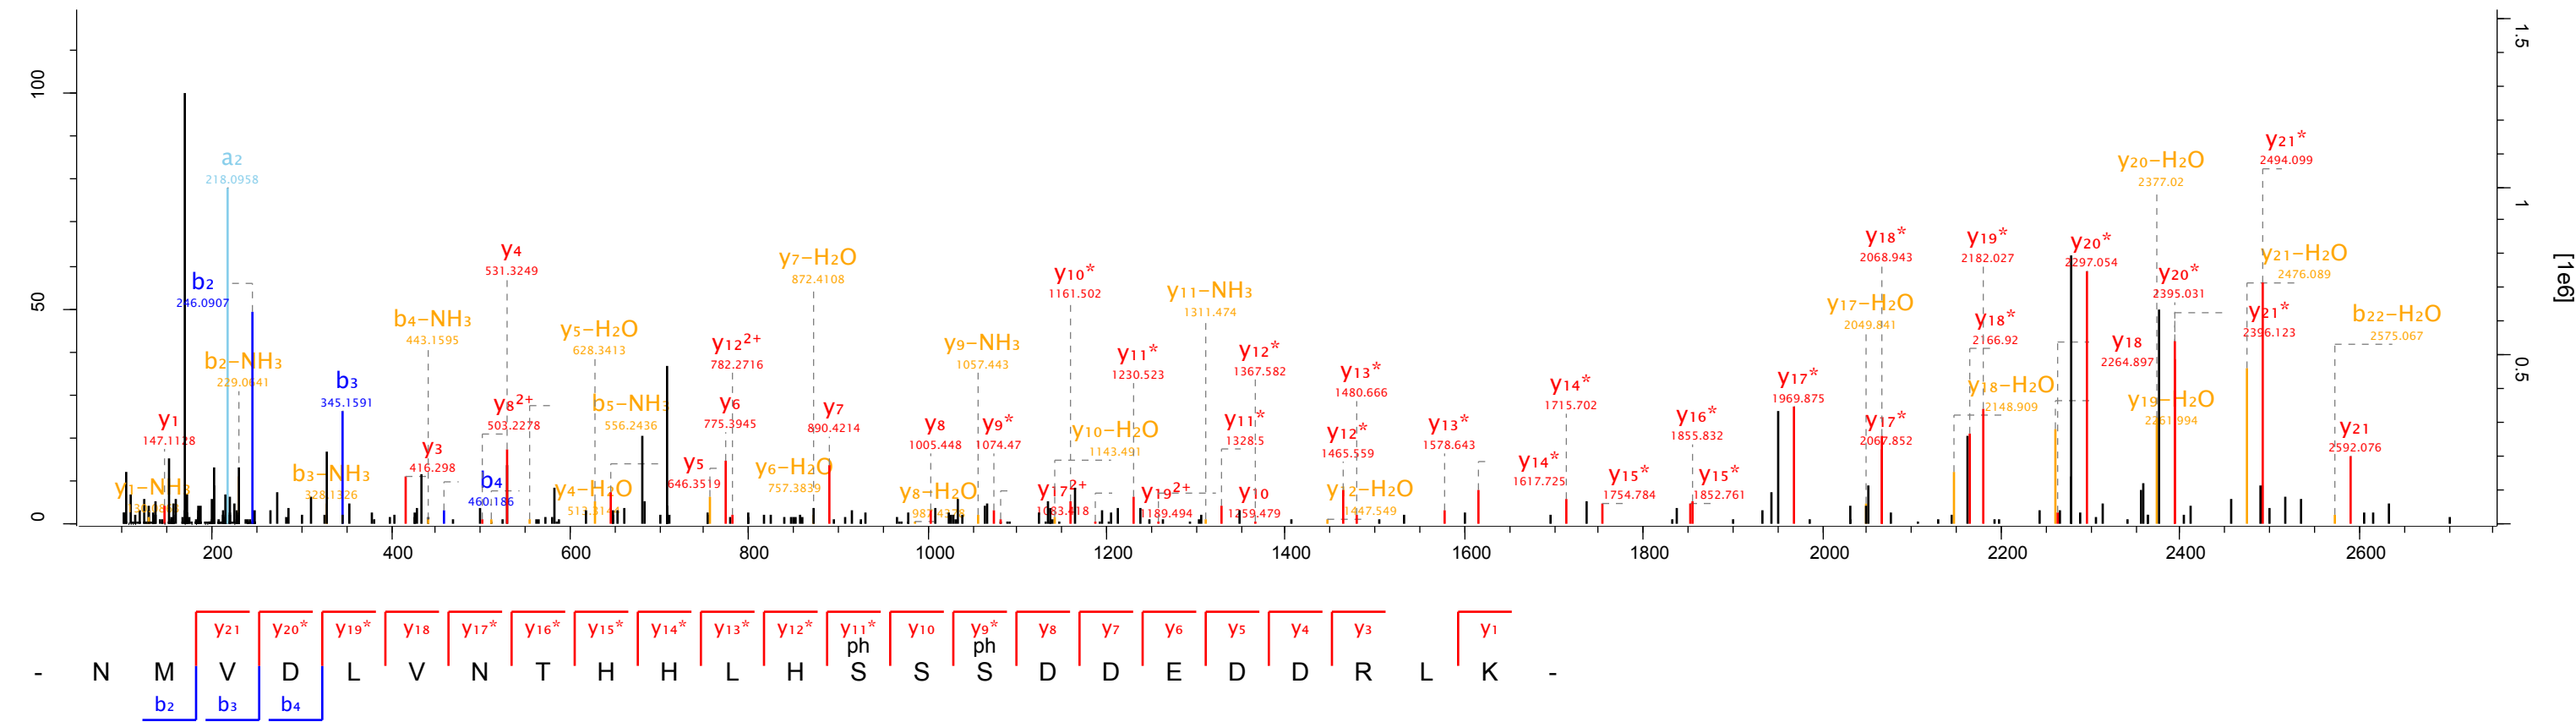



Raw file: 20150812\_A375SR\_Phospho\_BR1\_03  
 Scan: 15641 Method: FTMS; HCD Score: 76.36 m/z: 985.09 Gene names: FAM195A

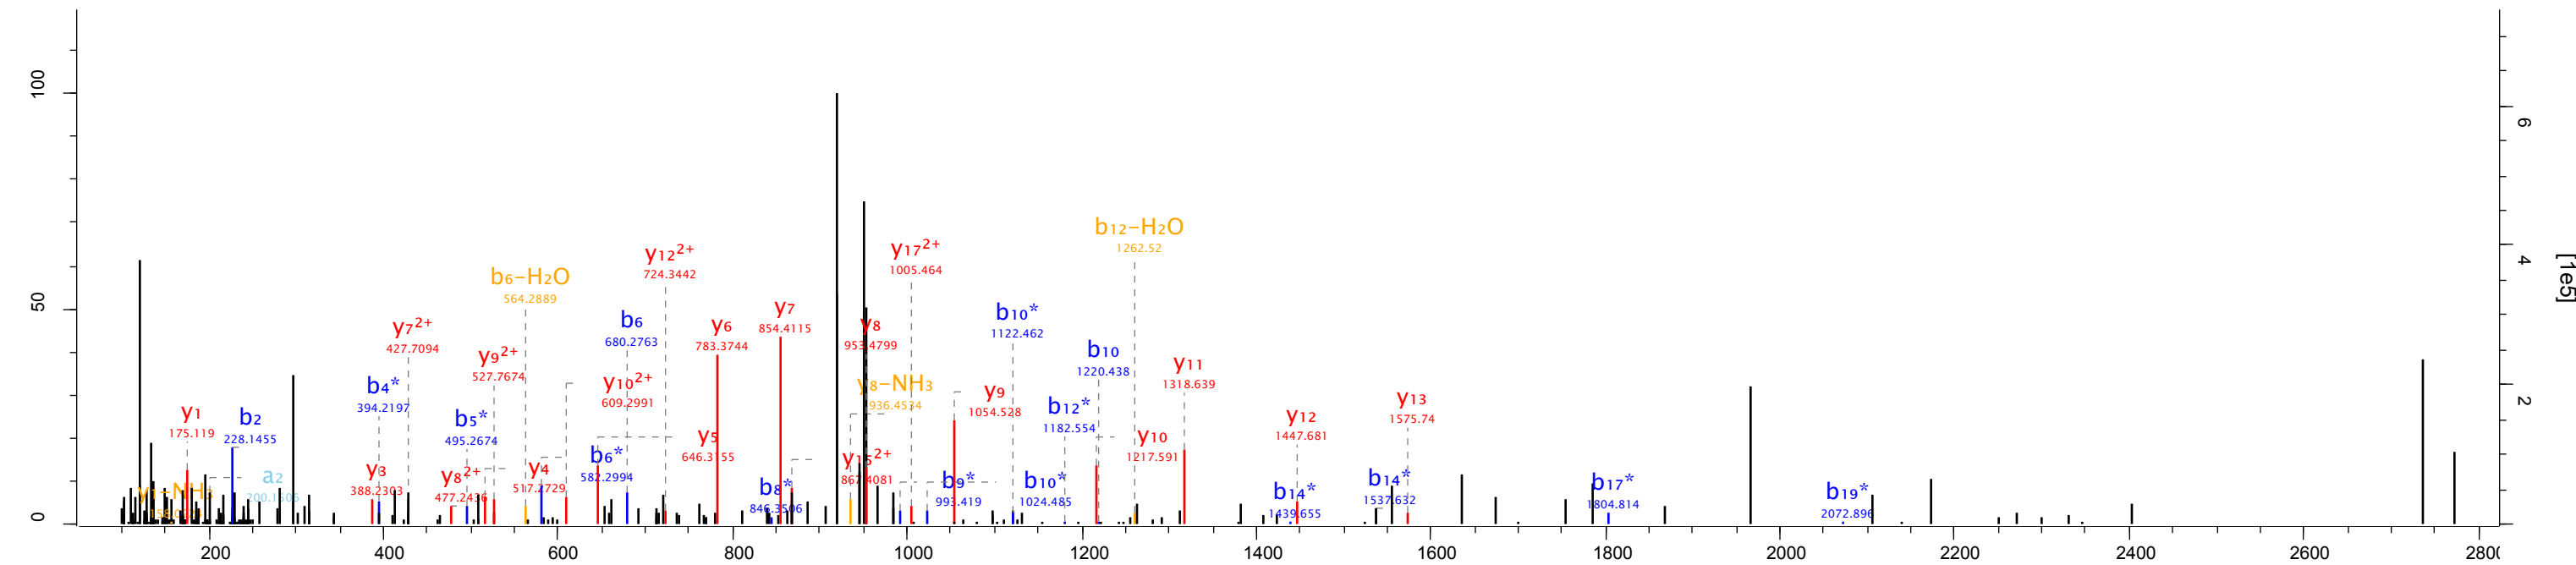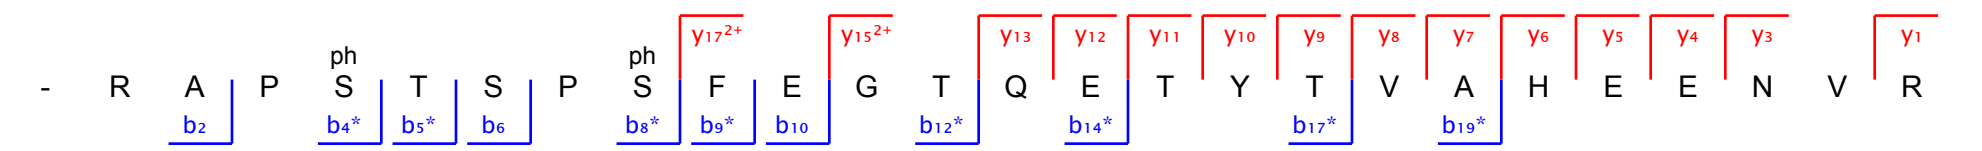

Raw file Scan Method Score m/z Gene names  
 20150812\_A375SR\_Phospho\_BR1\_03 15851 FTMS; HCD 156.08 820.34 SOX5

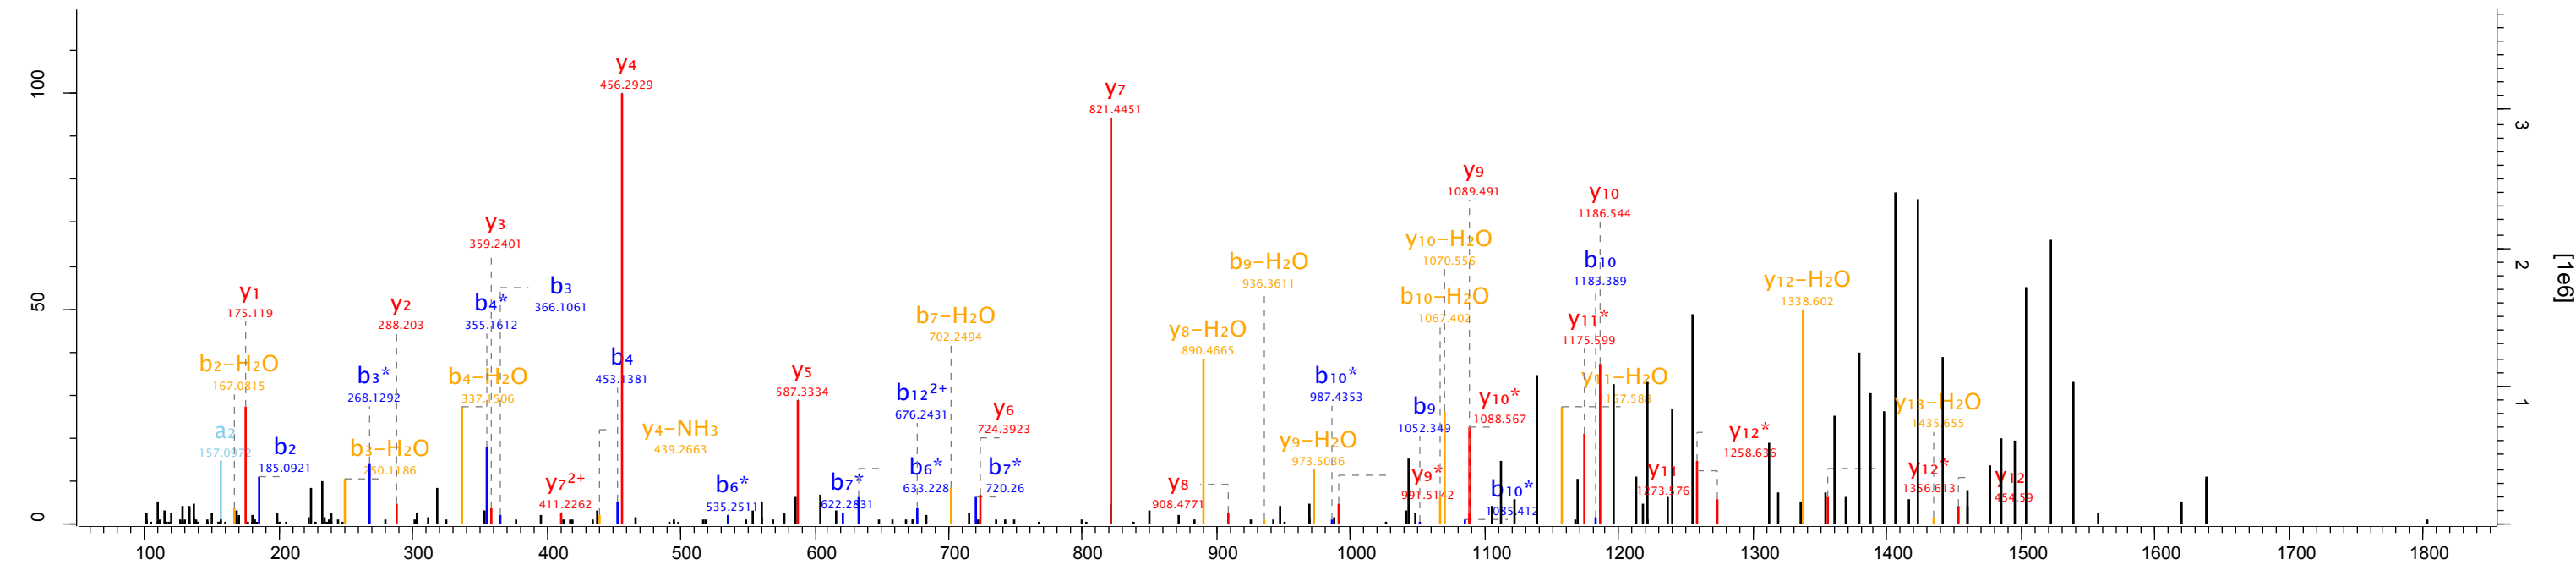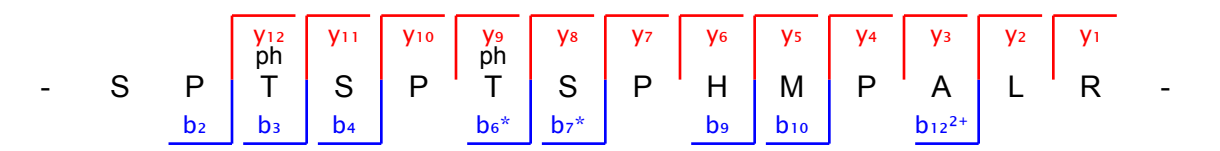

20150812\_A375SR\_Phospho\_BR1\_03 15911 FTMS; HCD 170.93 1218 POLR2A

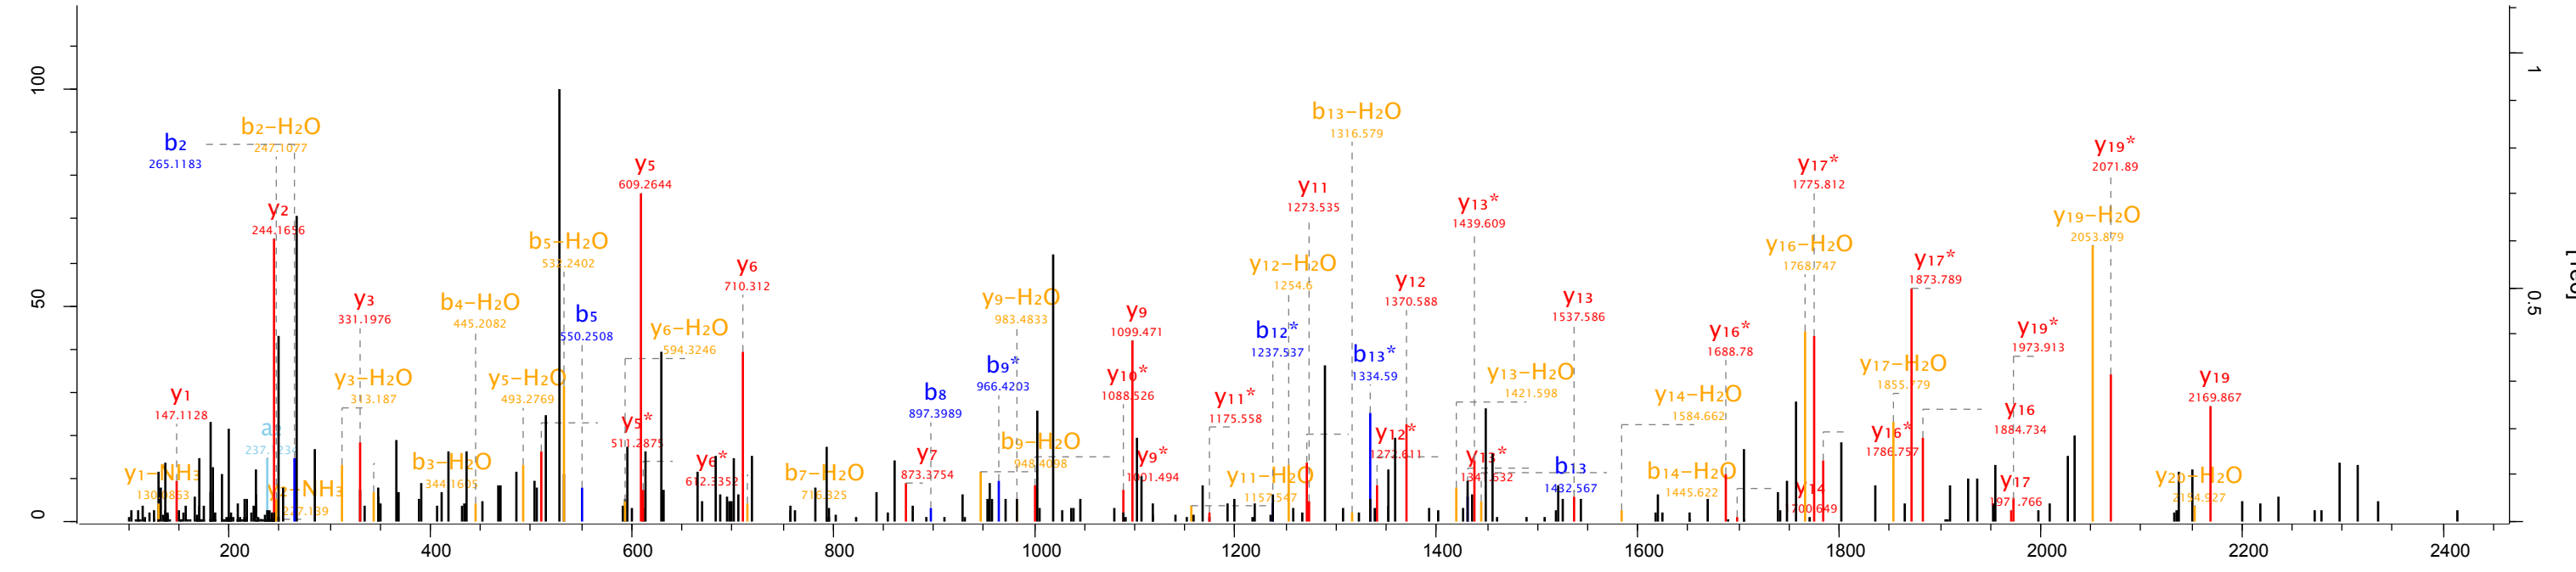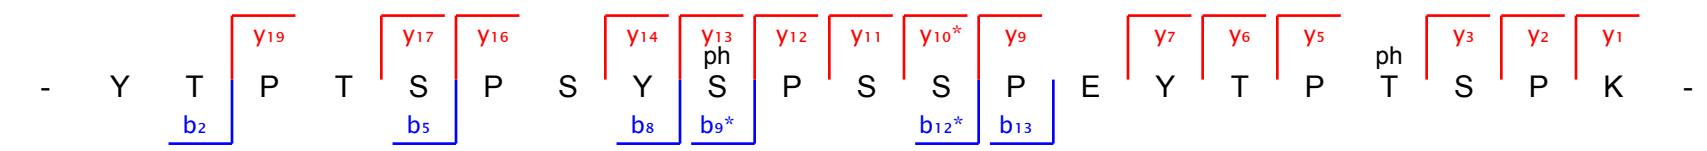

Raw file 20150812\_A375SR\_Phospho\_BR1\_03 Scan 15961 Method FTMS; HCD Score 265.64 m/z 1156.44 Gene names CDK12

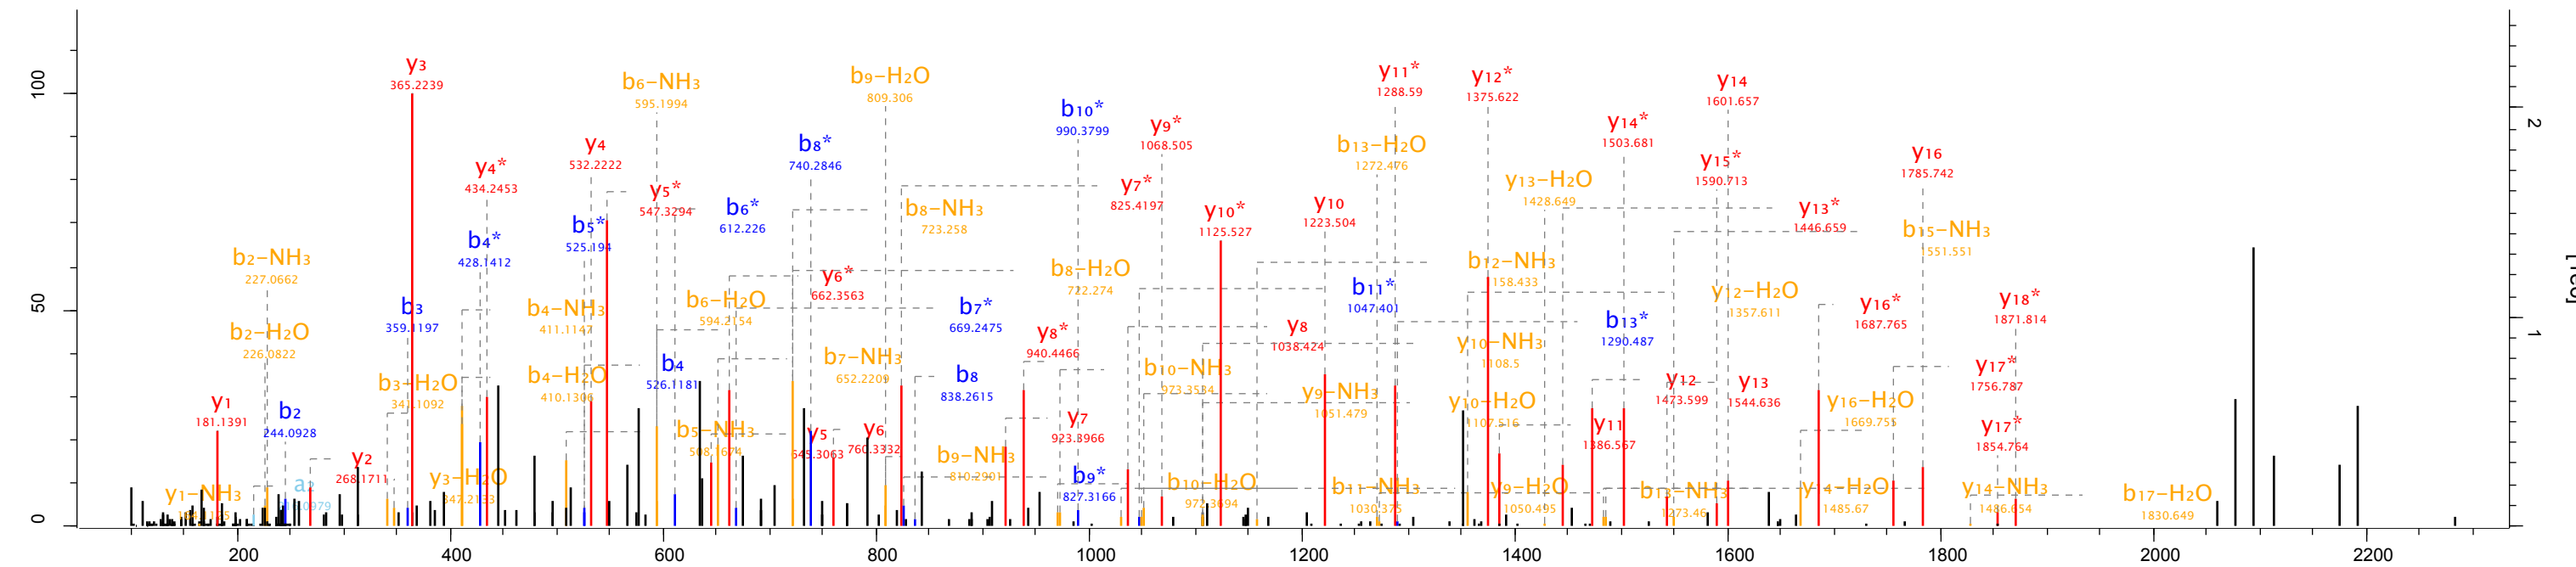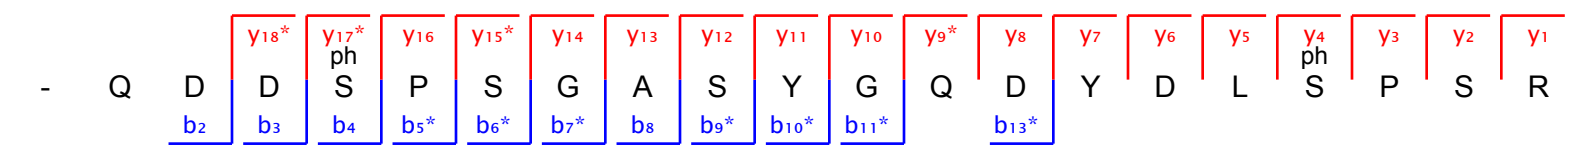

Raw file: 20150812\_A375SR\_Phospho\_BR1\_03  
 Scan: 16021 Method: FTMS; HCD Score: 125.77 m/z: 638.62 Gene names: SVIL

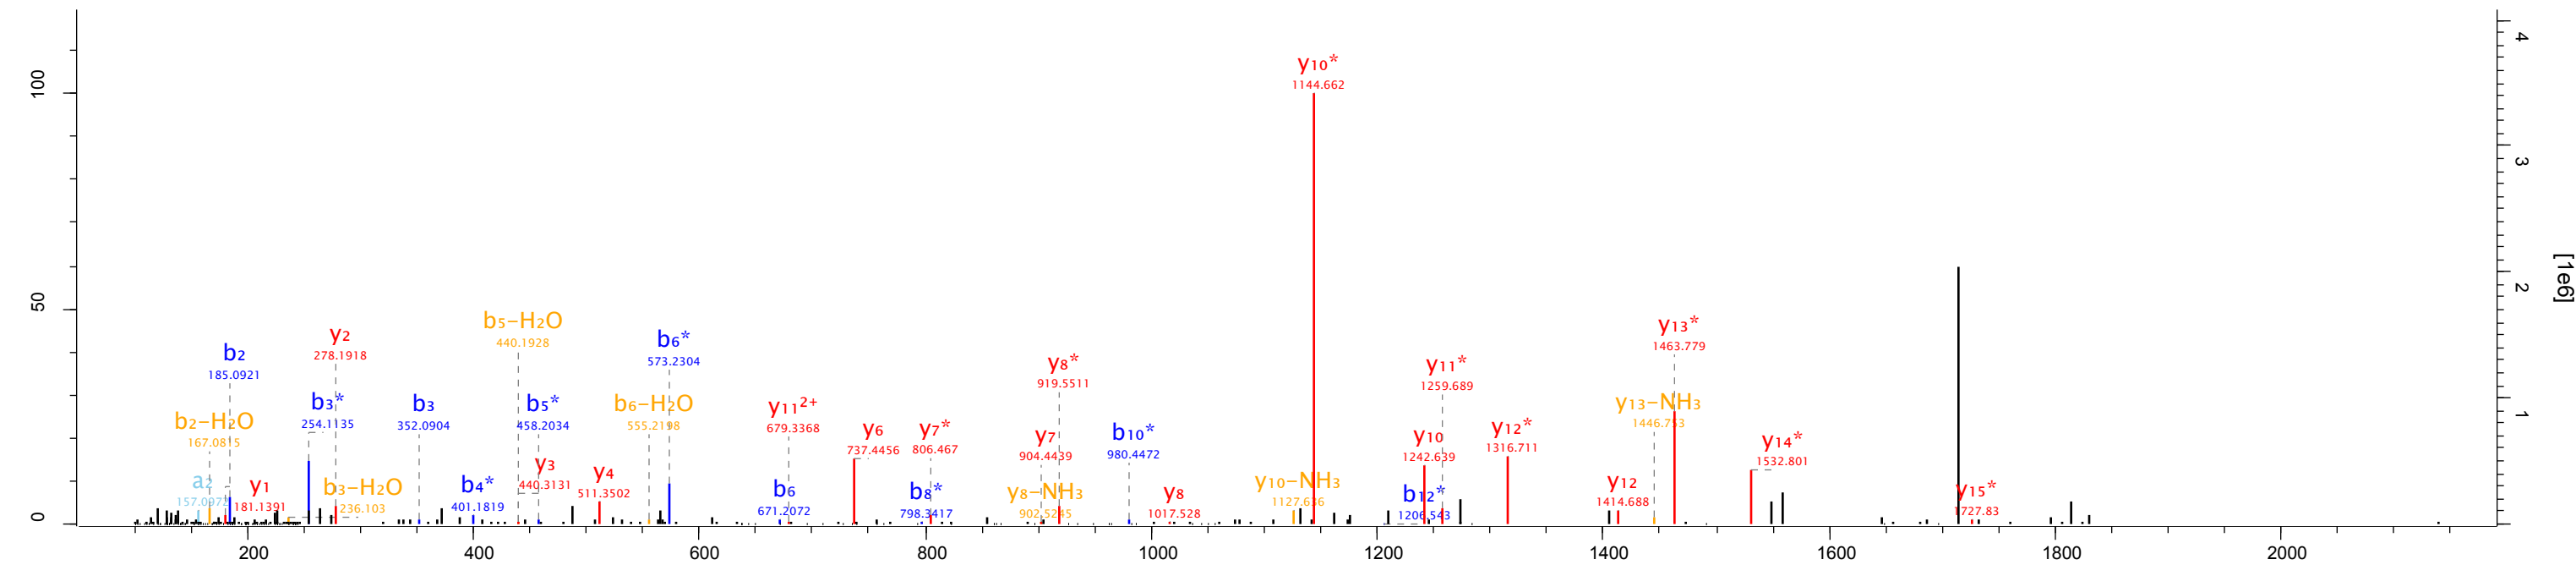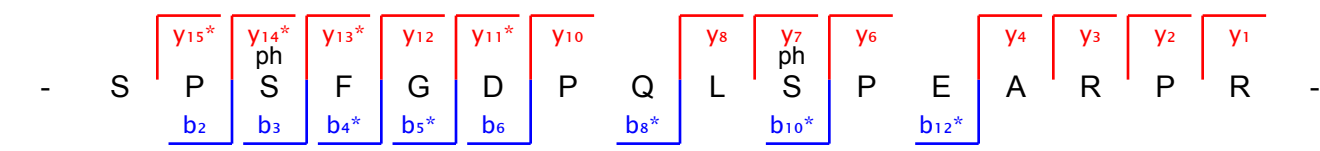

Raw file  
 20150812\_A375SR\_Phospho\_BR1\_03  
 Scan 16301 Method FTMS; HCD Score 63.8 m/z 859.08 Gene names SCML2

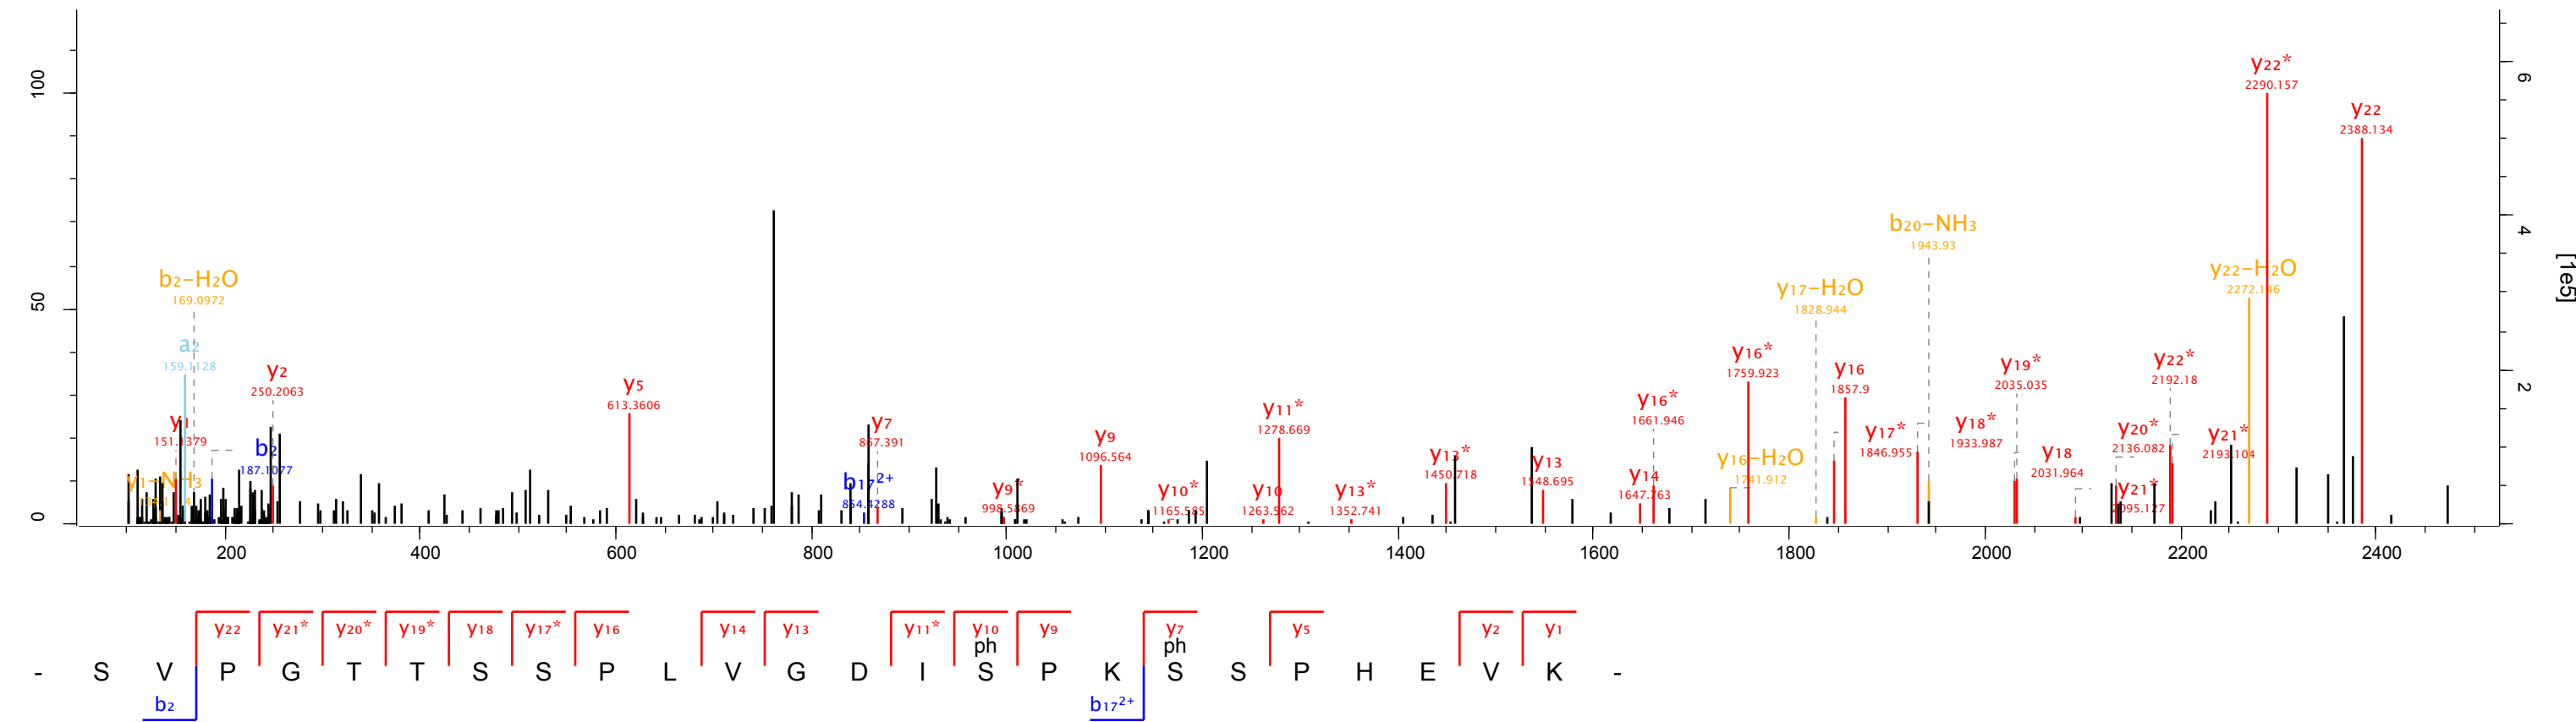

Raw file 20150812\_A375SR\_Phospho\_BR1\_03 Scan 16361 Method FTMS; HCD Score 114.71 m/z 1128.8 Gene names INF2

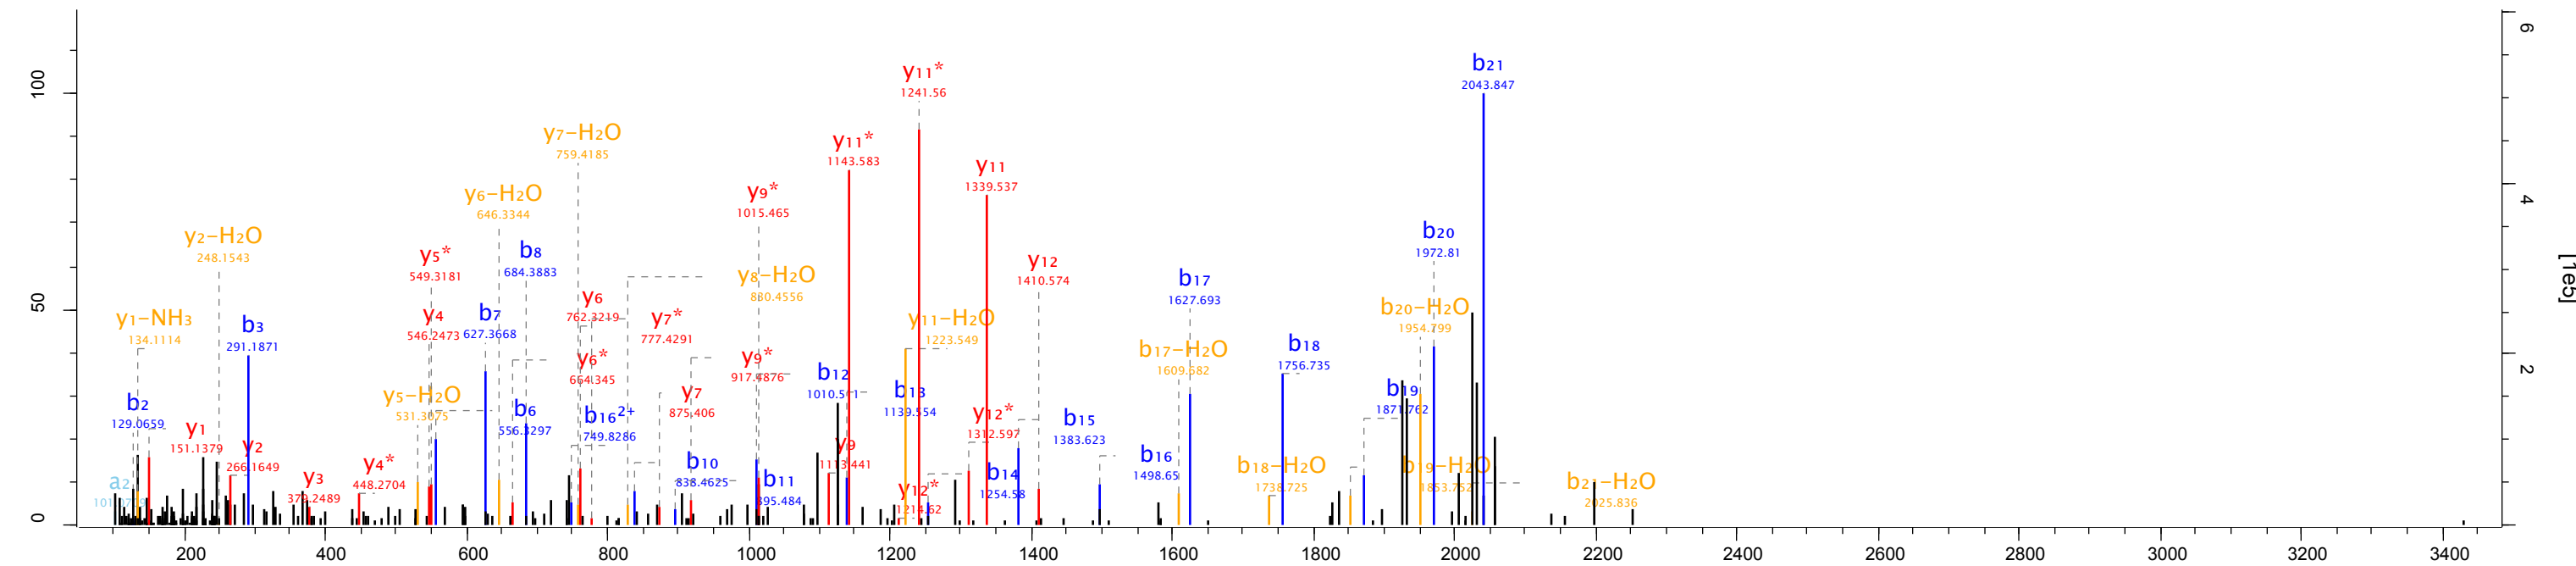

- G A R P P A A G P G G D E D E D E E D T A P E S A L D T S L D K -

b<sub>2</sub>
b<sub>3</sub>
b<sub>6</sub>
b<sub>7</sub>
b<sub>8</sub>
b<sub>10</sub>
b<sub>11</sub>
b<sub>12</sub>
b<sub>13</sub>
b<sub>14</sub>
b<sub>15</sub>
b<sub>16</sub>
b<sub>17</sub>
b<sub>18</sub>
b<sub>19</sub>
b<sub>20</sub>
b<sub>21</sub>
y<sub>12</sub>
y<sub>11</sub>
y<sub>9</sub>ph
y<sub>7</sub>
y<sub>6</sub>
y<sub>5</sub>\*
y<sub>4</sub>ph
y<sub>3</sub>
y<sub>2</sub>
y<sub>1</sub>

Raw file: 20150812\_A375SR\_Phospho\_BR1\_03  
 Scan: 16411 Method: FTMS; HCD Score: 74.15 m/z: 689.8 Gene names: DAB2

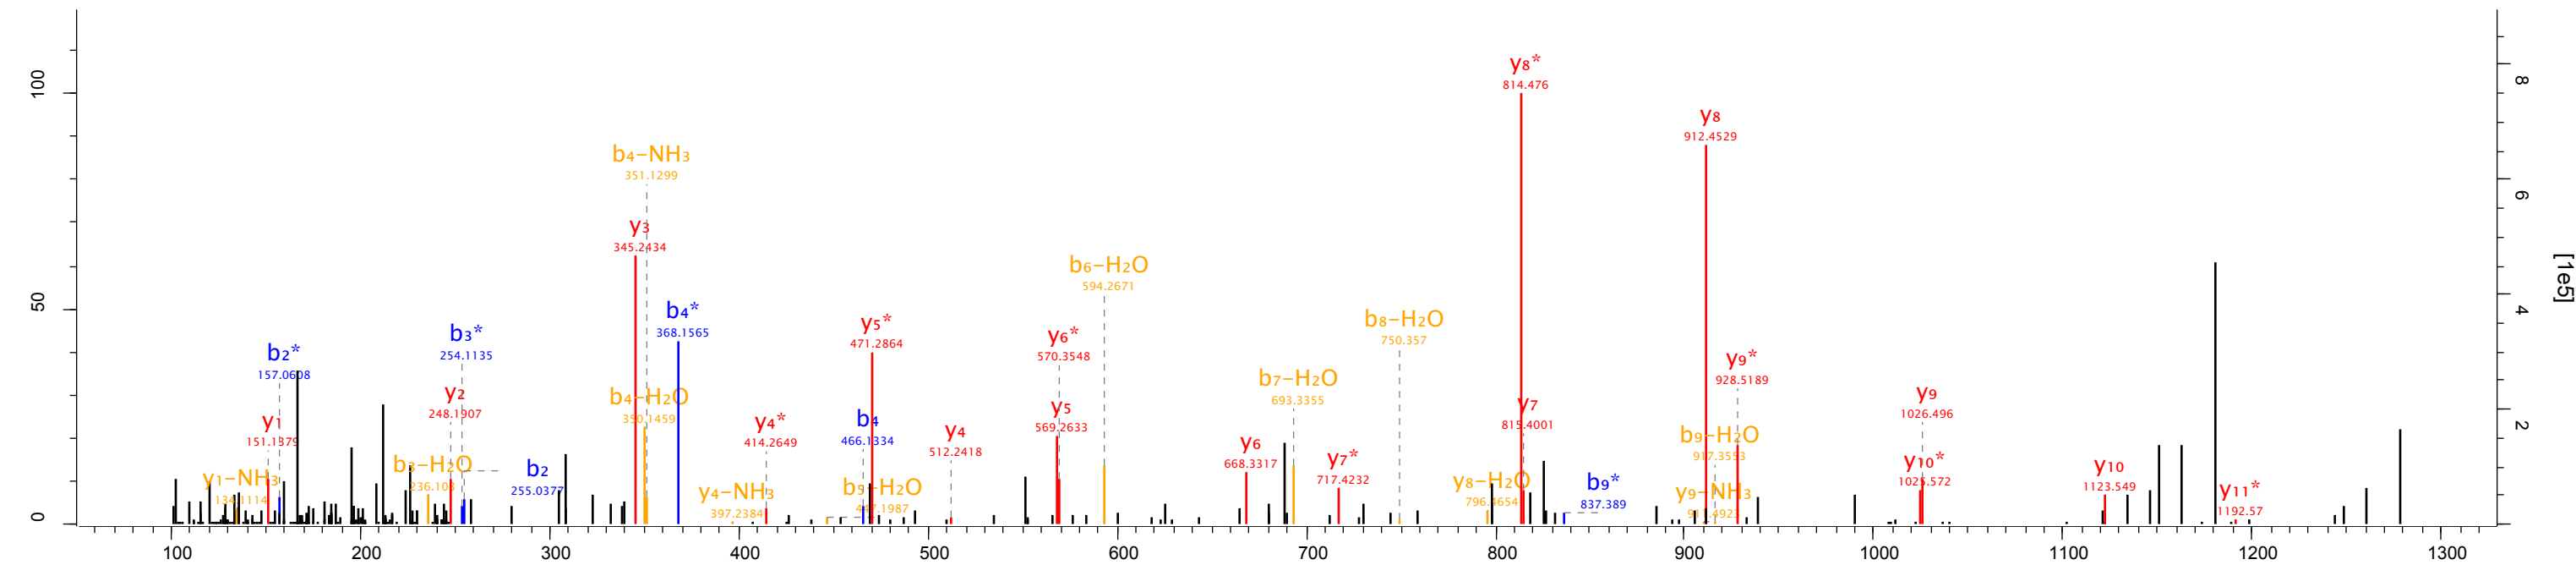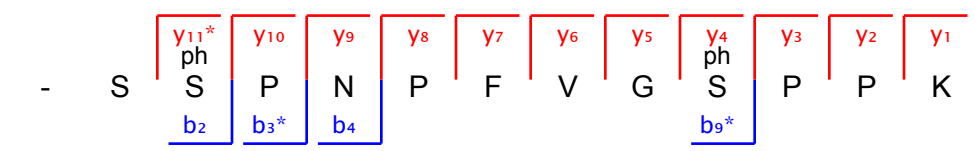



Raw file  
 20150812\_A375SR\_Phospho\_BR1\_03  
 Scan 16621 Method FTMS; HCD Score 198.63 m/z 962.16 Gene names SRRM1

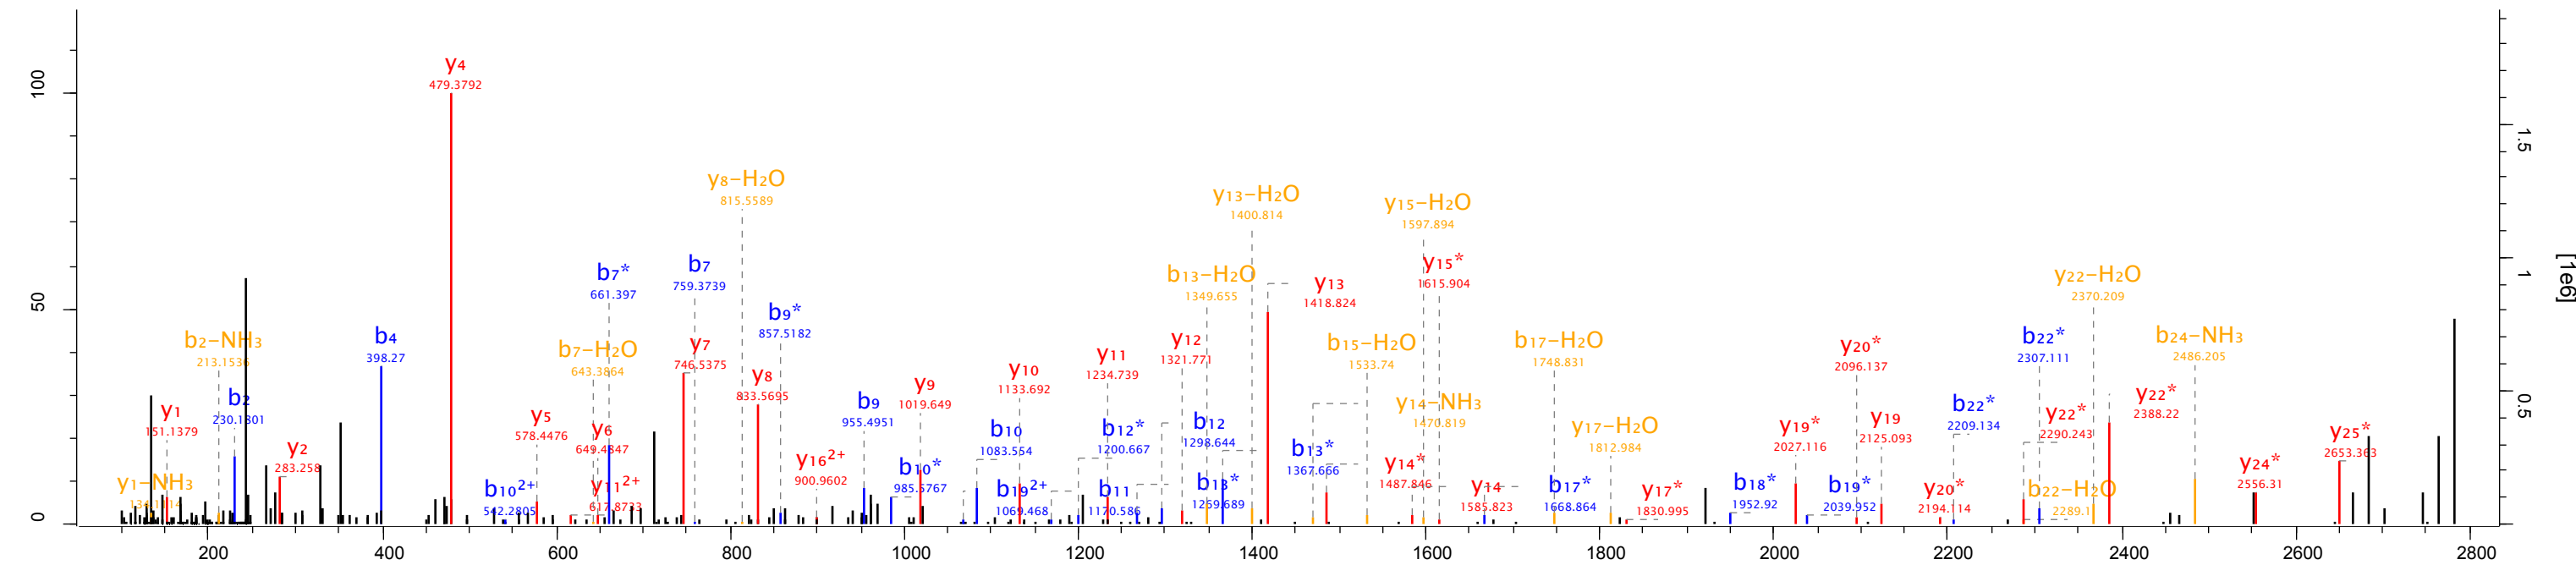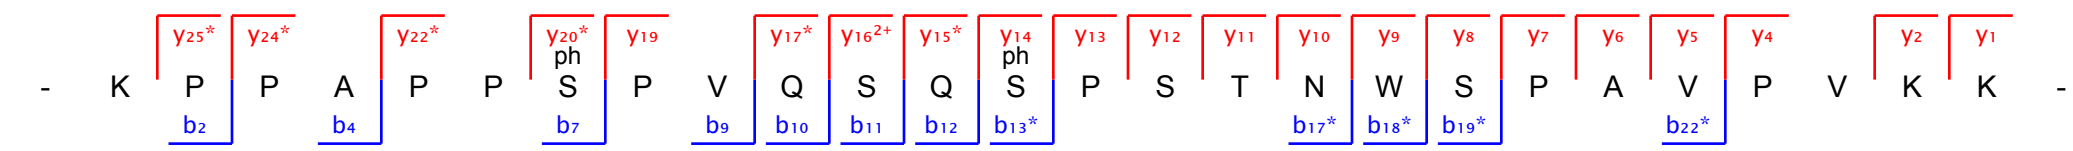

Raw file 20150812\_A375SR\_Phospho\_BR1\_03 Scan 16741 Method FTMS; HCD Score 173.43 m/z 972.36 Gene names MLLT1

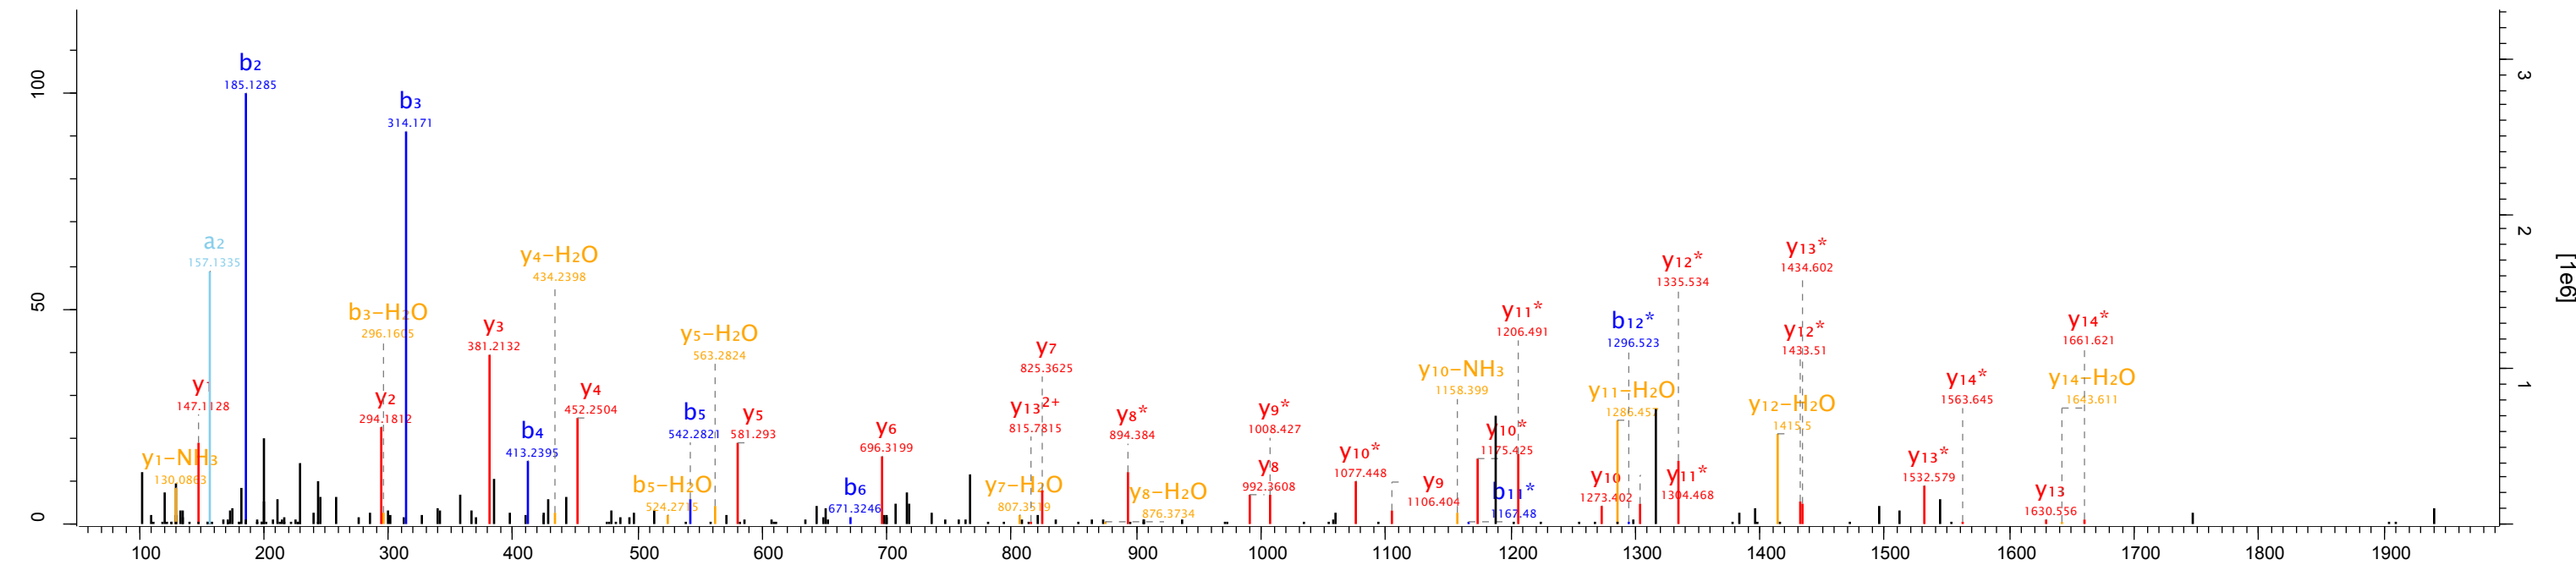

- A L E V E E S N S E D E A S F K -

Fragmentation mapping:

- b<sub>2</sub> (L)
- b<sub>3</sub> (E)
- b<sub>4</sub> (V)
- b<sub>5</sub> (E)
- b<sub>6</sub> (E)
- b<sub>11</sub><sup>\*</sup> (D)
- b<sub>12</sub><sup>\*</sup> (E)
- y<sub>1</sub> (K)
- y<sub>2</sub> (F)
- y<sub>3</sub> (S)
- y<sub>4</sub> (A)
- y<sub>5</sub> (E)
- y<sub>6</sub> (D)
- y<sub>7</sub> (E)
- y<sub>8</sub> (S)
- y<sub>9</sub> (N)
- y<sub>10</sub> (S)
- y<sub>11</sub><sup>\*</sup> (E)
- y<sub>12</sub><sup>\*</sup> (E)
- y<sub>13</sub><sup>\*</sup> (V)
- y<sub>14</sub><sup>\*</sup> (E)

Raw file 20150812\_A375SR\_Phospho\_BR1\_03 Scan 17101 Method FTMS; HCD Score 226.7 m/z 1045.48 Gene names TOP2B

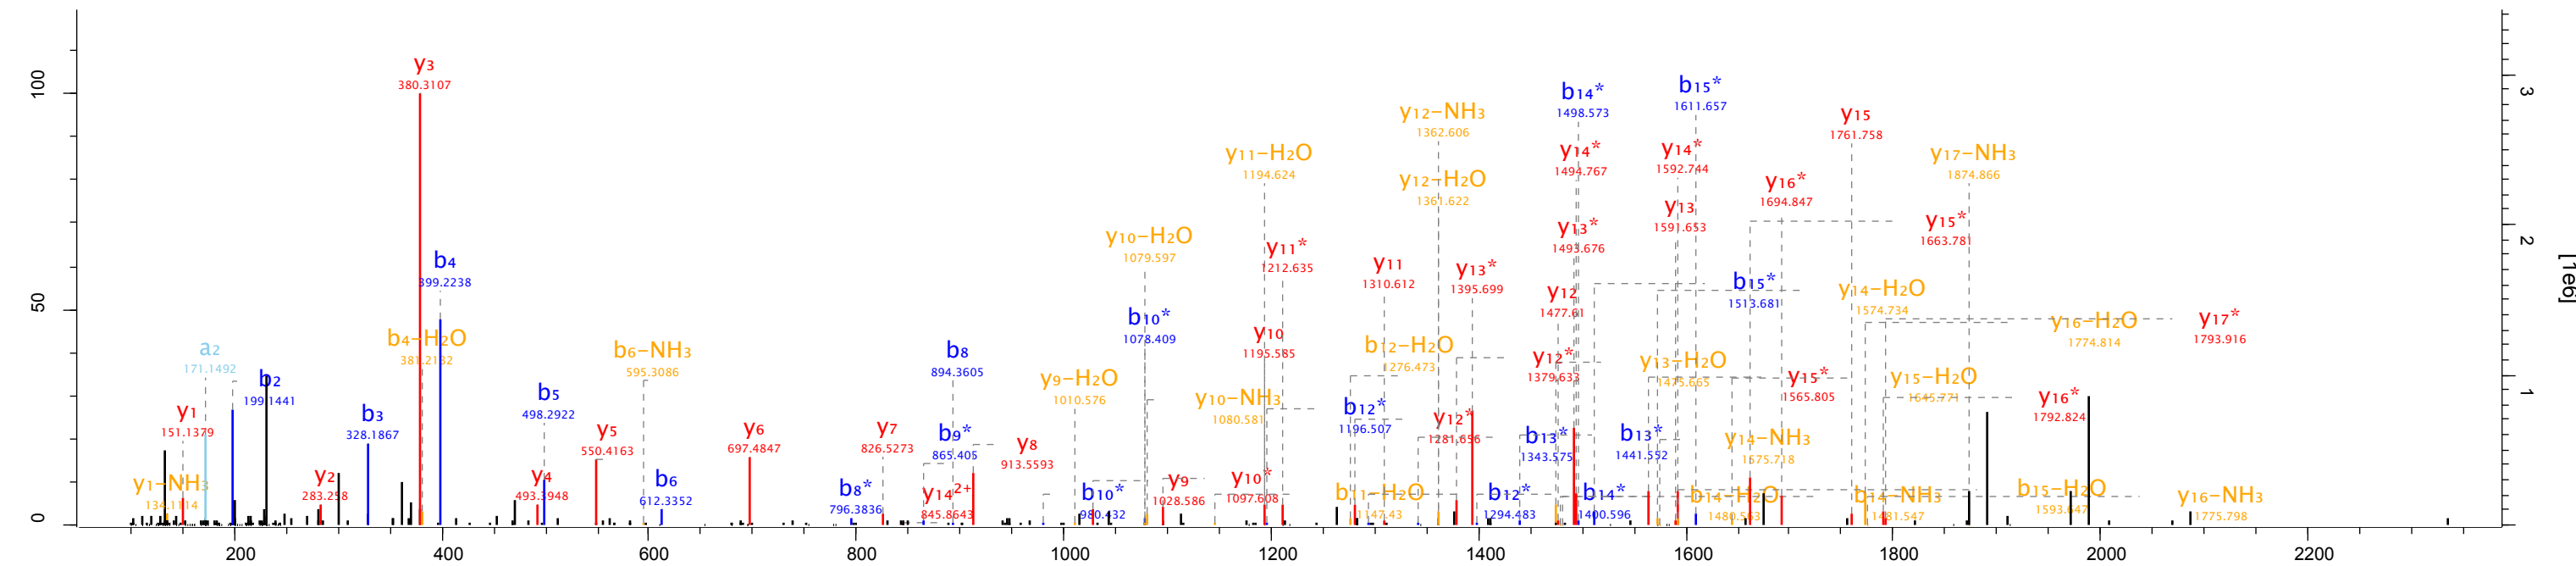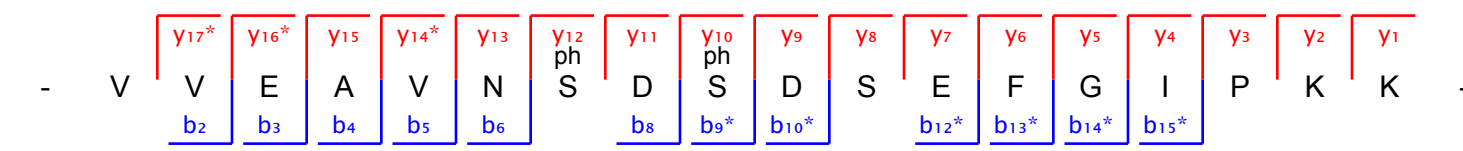

Raw file 20150812\_A375SR\_Phospho\_BR1\_03 Scan 17261 Method FTMS; HCD Score 83.72 m/z 835.82 Gene names PLEC

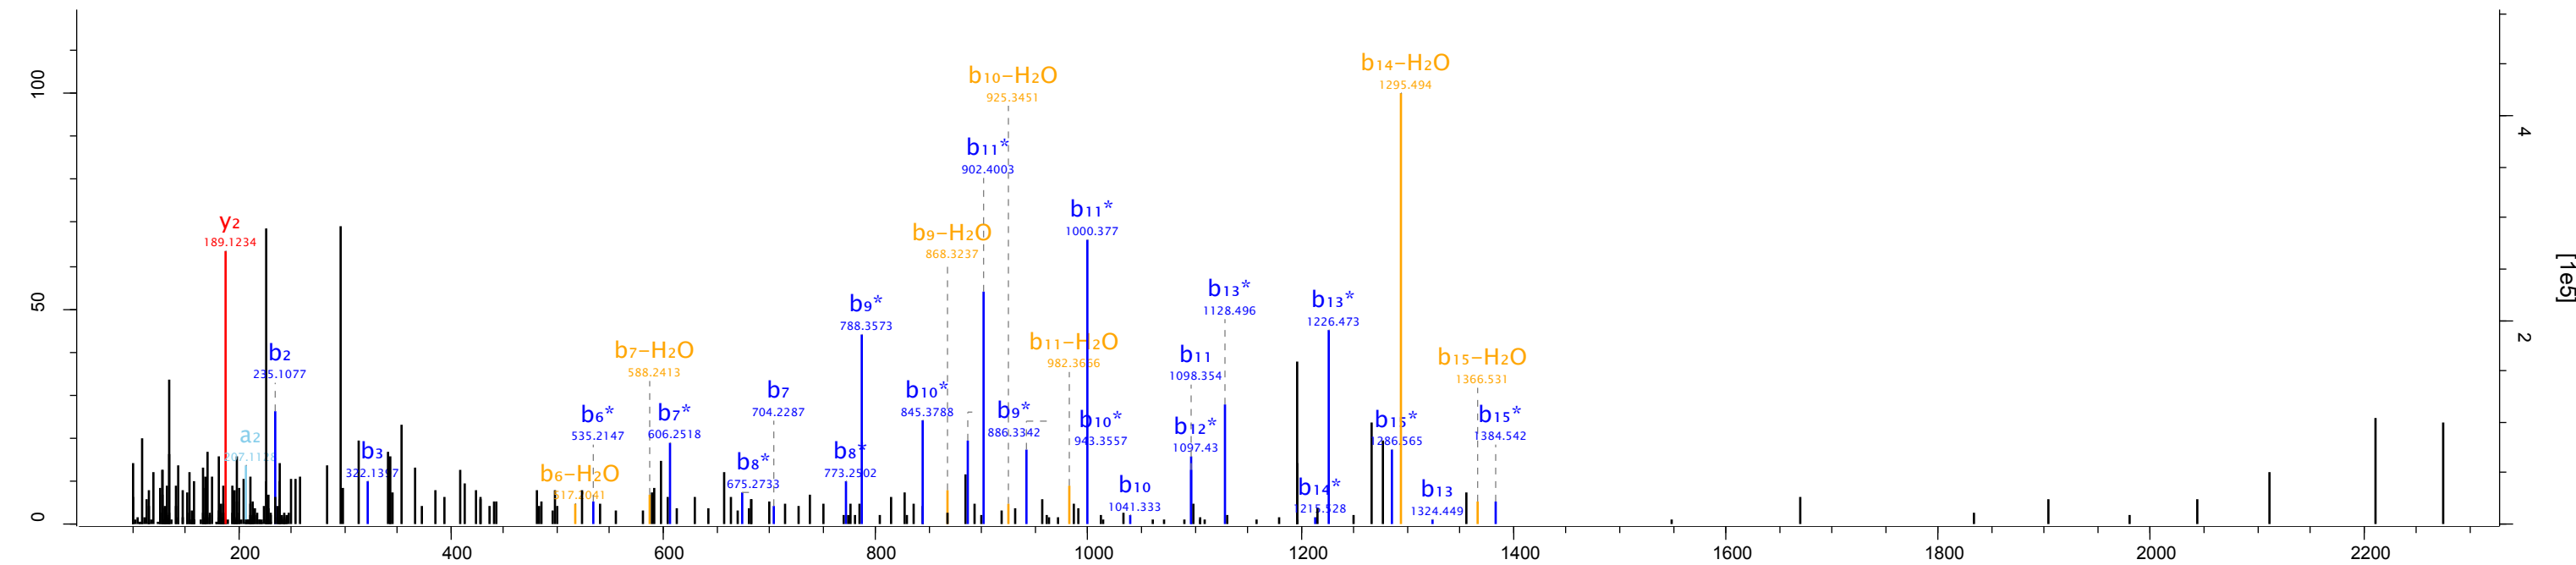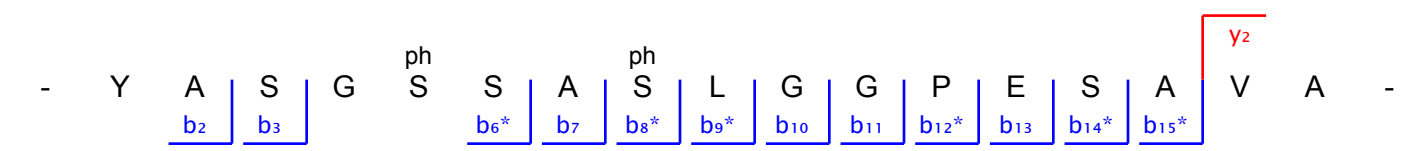

Raw file: 20150812\_A375SR\_Phospho\_BR1\_03  
 Scan: 1731 Method: FTMS; HCD Score: 113.05 m/z: 796.32 Gene names: TRA2B

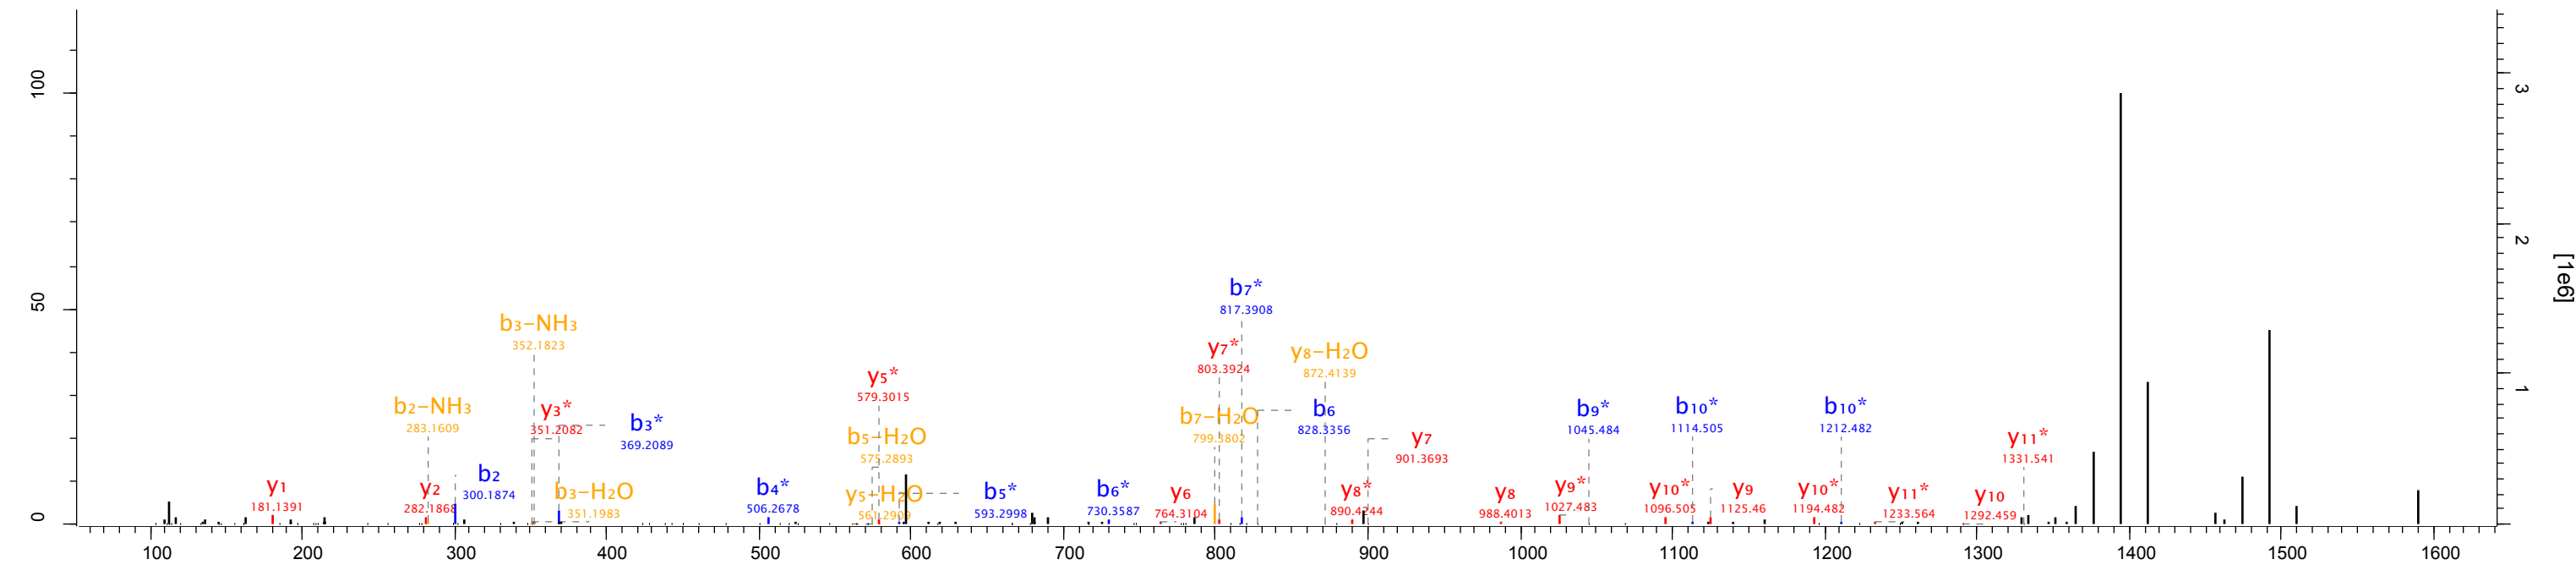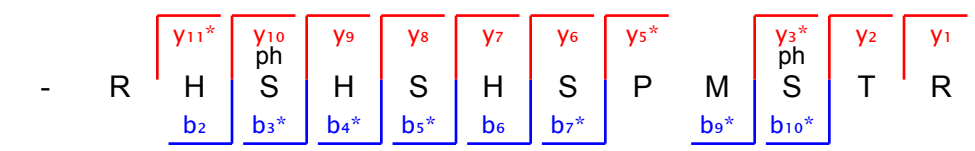

Raw file 20150812\_A375SR\_Phospho\_BR1\_03 Scan 17311 Method FTMS; HCD Score 161.61 m/z 894.43 Gene names RPRD2

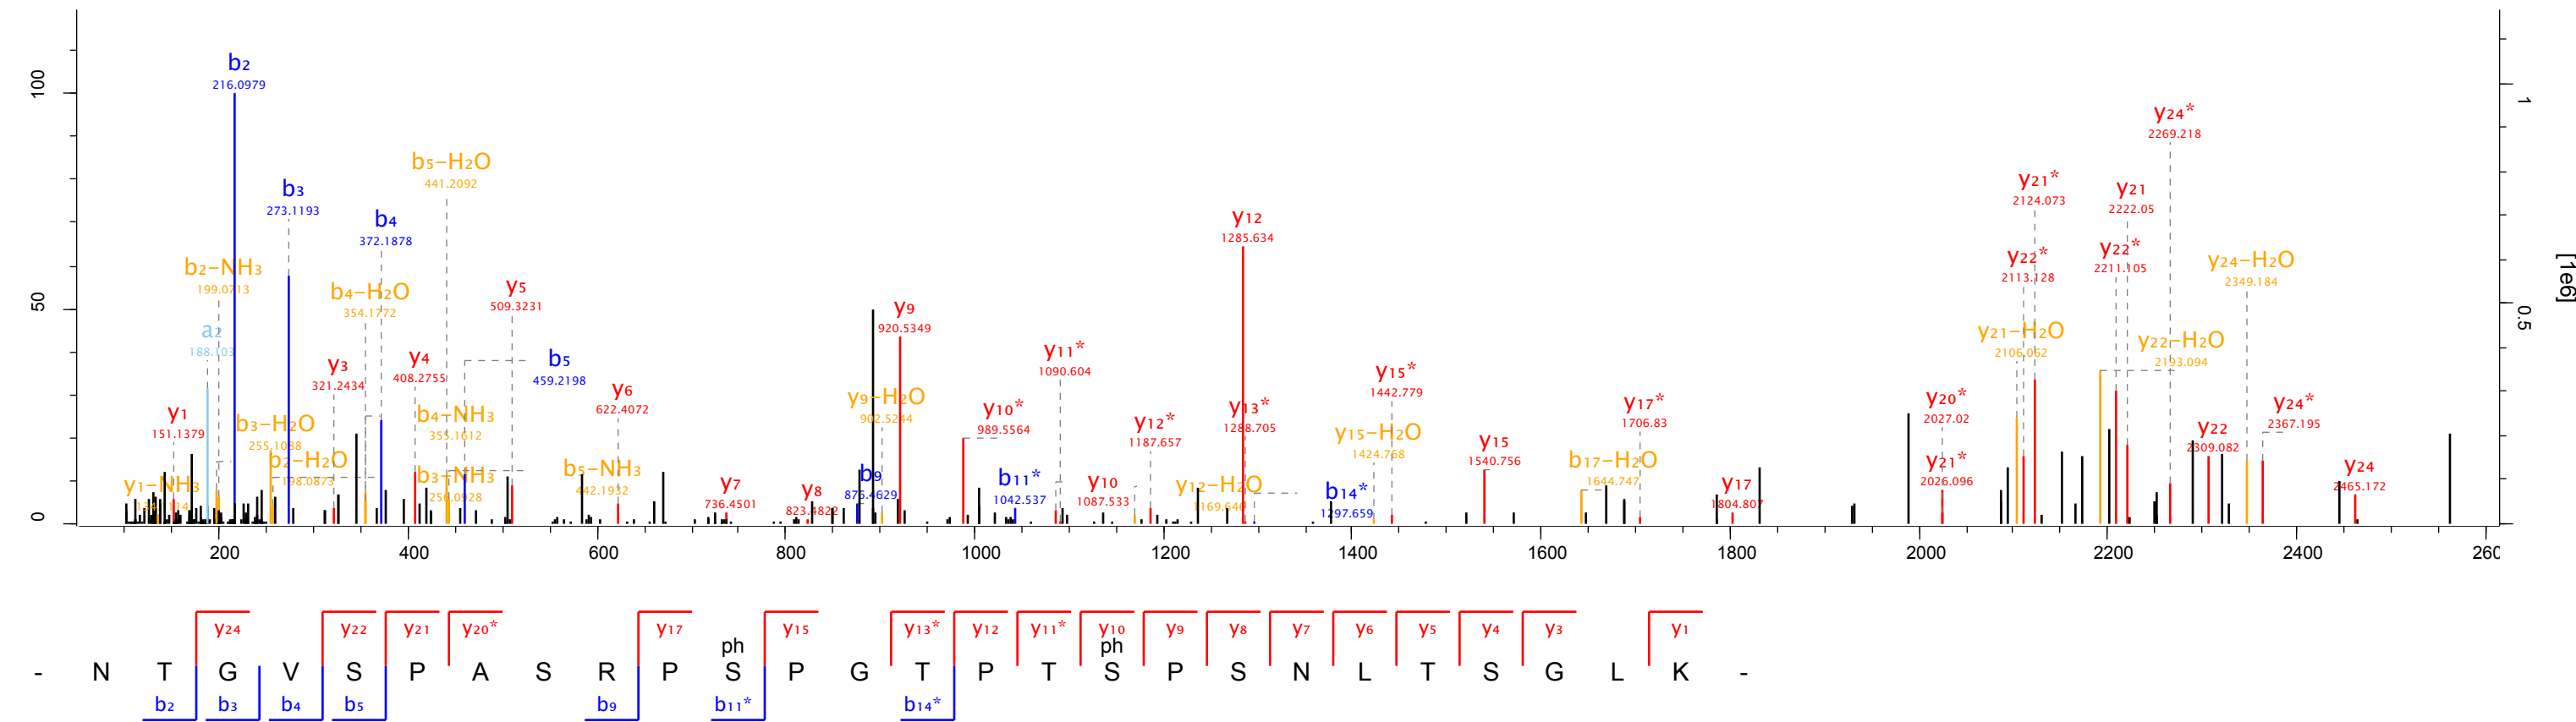

Raw file: 20150812\_A375SR\_Phospho\_BR1\_03  
 Scan: 17581 Method: FTMS; HCD Score: 95.44 m/z: 877.7 Gene names: MED1

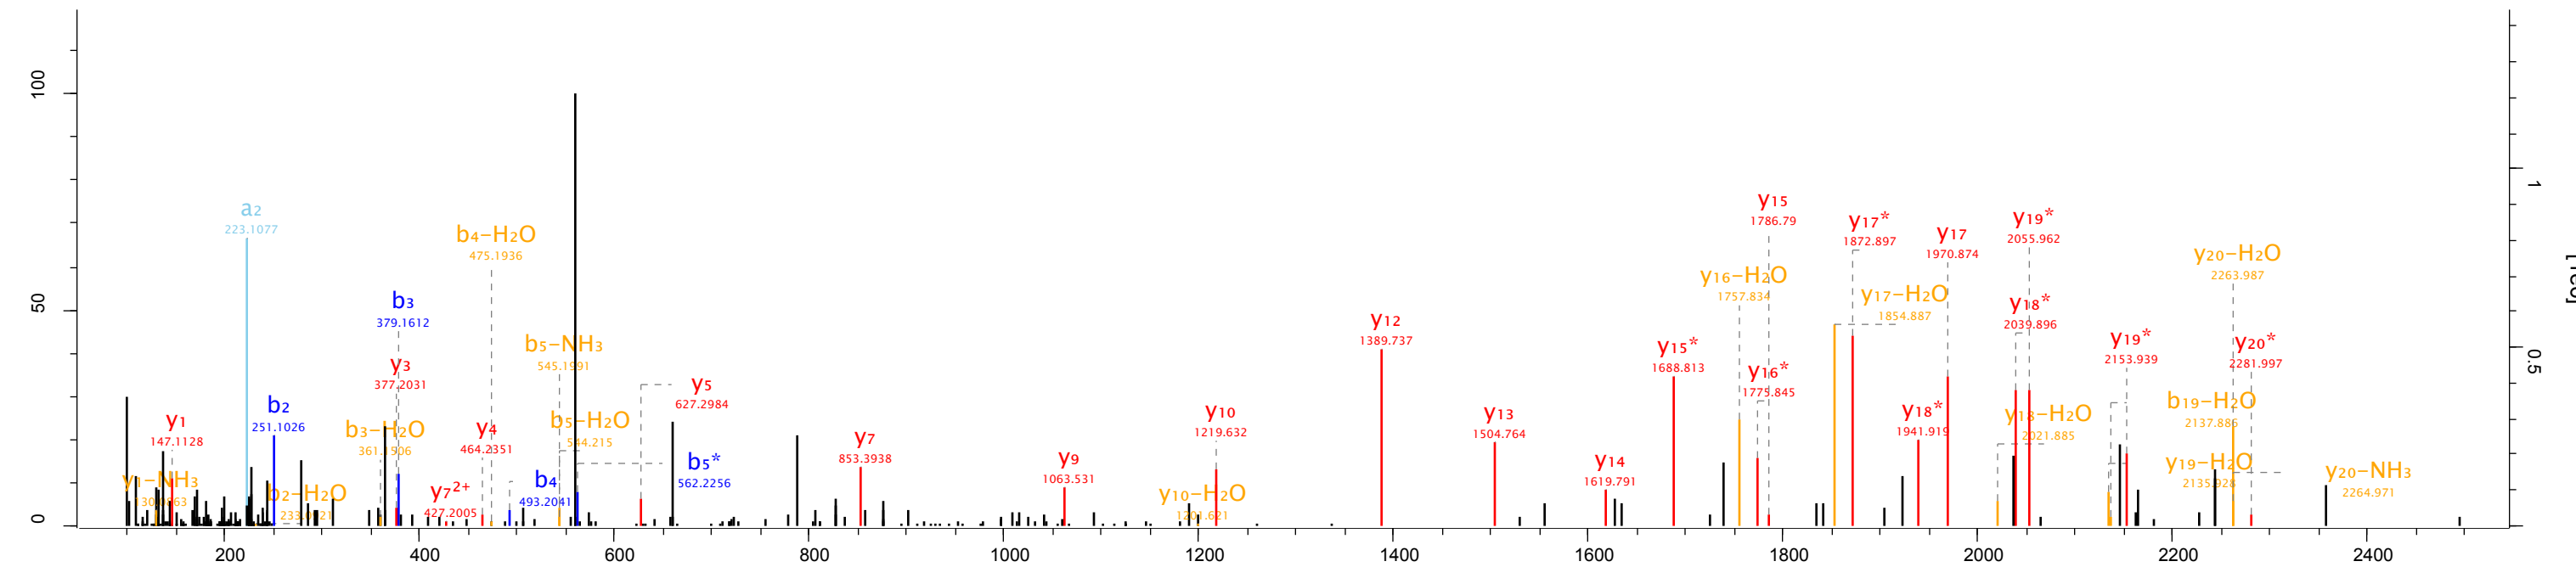

- S Y Q N S P S S D D G I R P L P E Y S T E K -  
 b2 b3 b4 b5\* y20\* y19\* y18\* ph y17 y16\* y15 ph y14 y13 y12 y10 y9 y7 y5 y4 y3 y1

Raw file: 20150812\_A375SR\_Phospho\_BR1\_03  
 Scan: 17921 Method: FTMS; HCD Score: 86.77 m/z: 1186.51 Gene names: MIER1

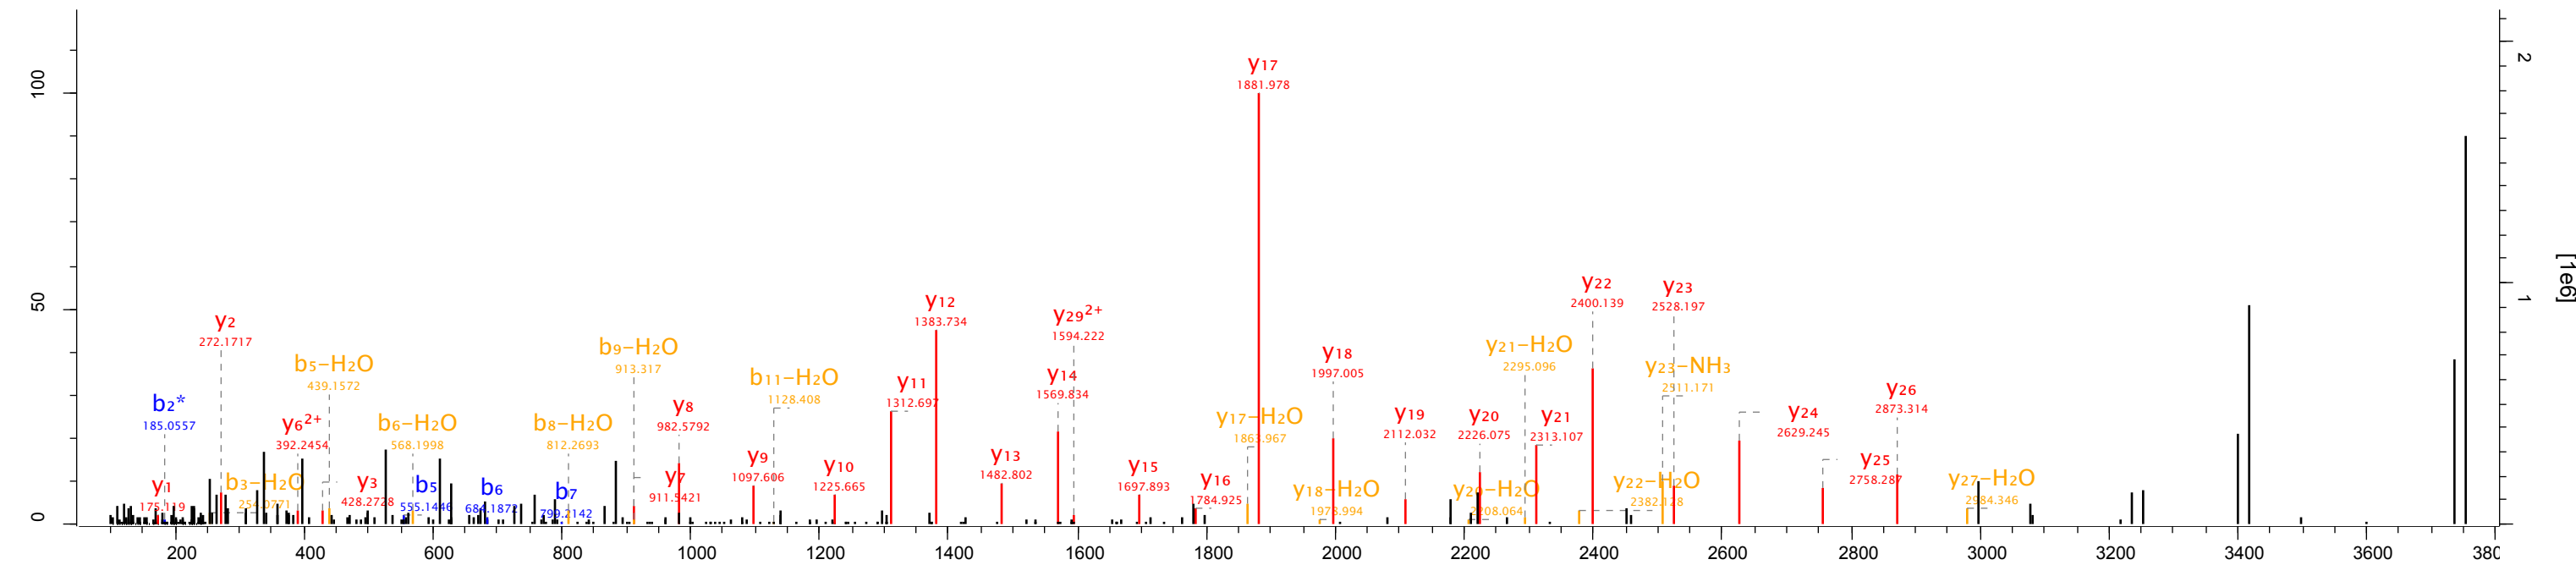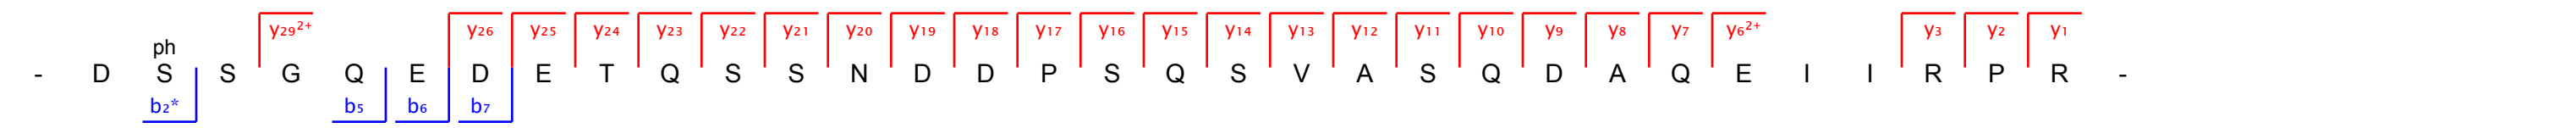



Raw file 20150812\_A375SR\_Phospho\_BR1\_03 Scan 17991 Method FTMS; HCD Score 144.27 m/z 989.89 Gene names INF2

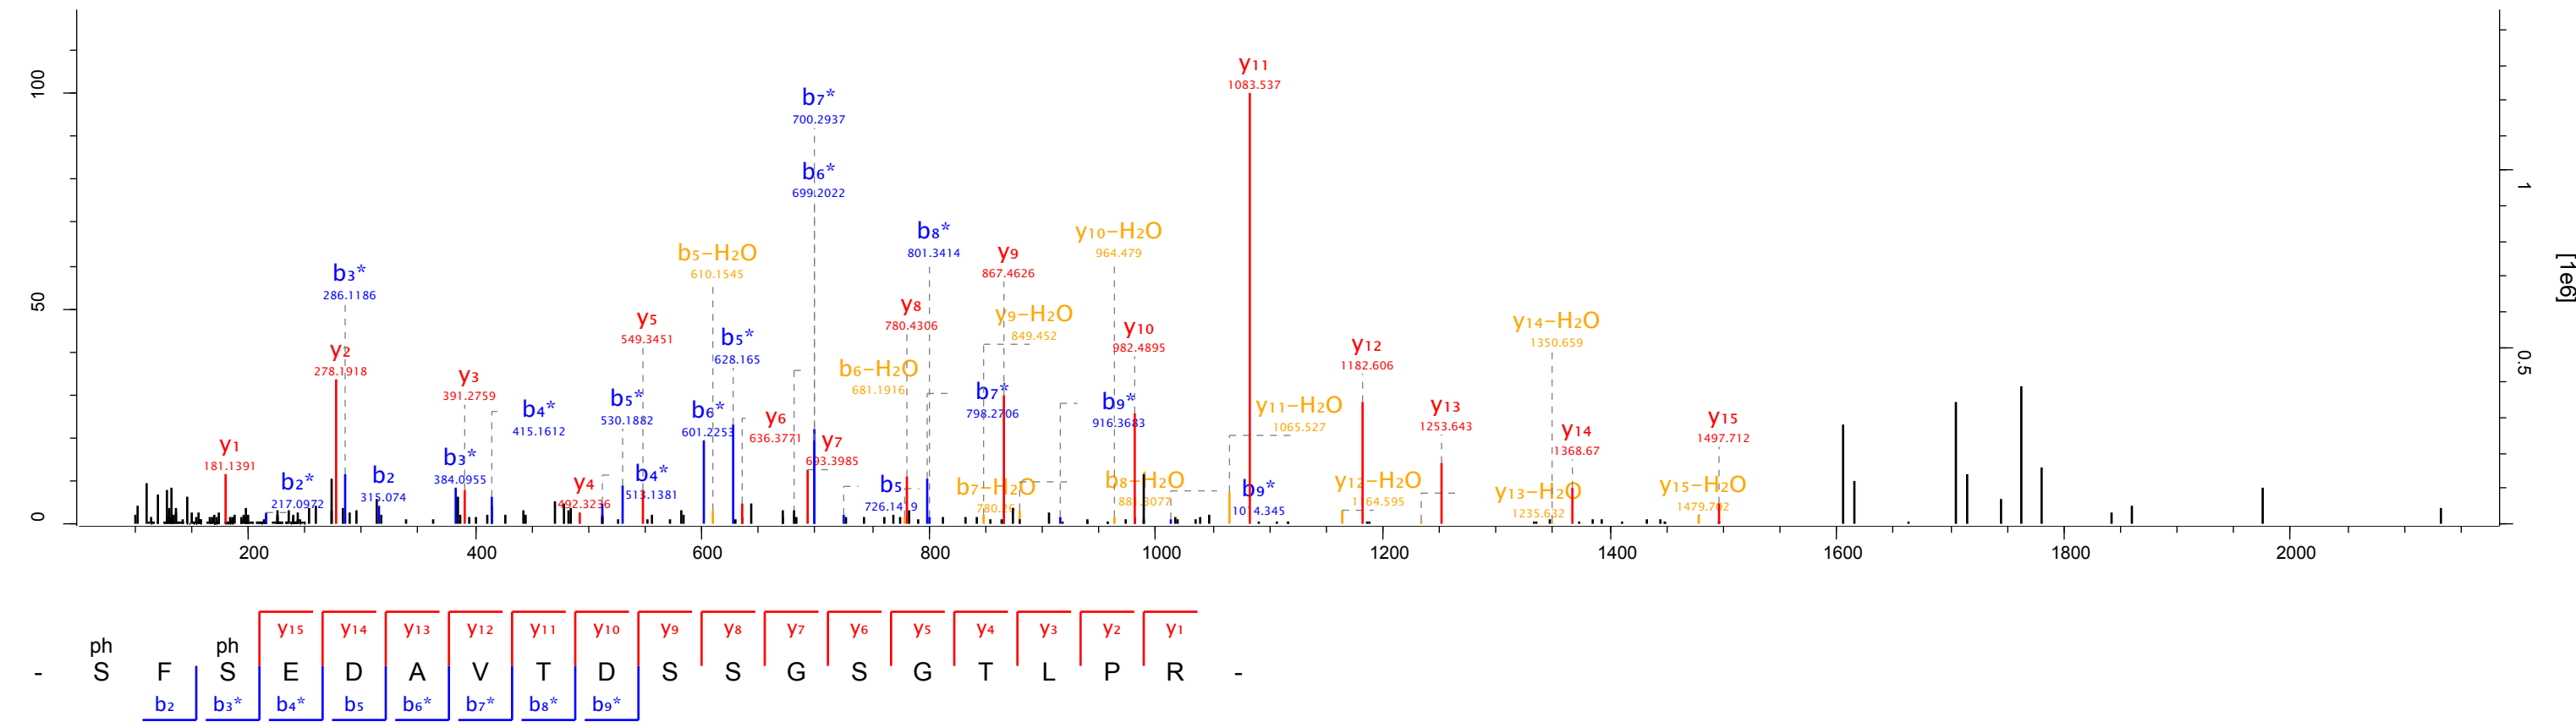

Raw file 20150812\_A375SR\_Phospho\_BR1\_03 Scan 18061 Method FTMS; HCD Score 173.46 m/z 1432.98 Gene names HNRNPC

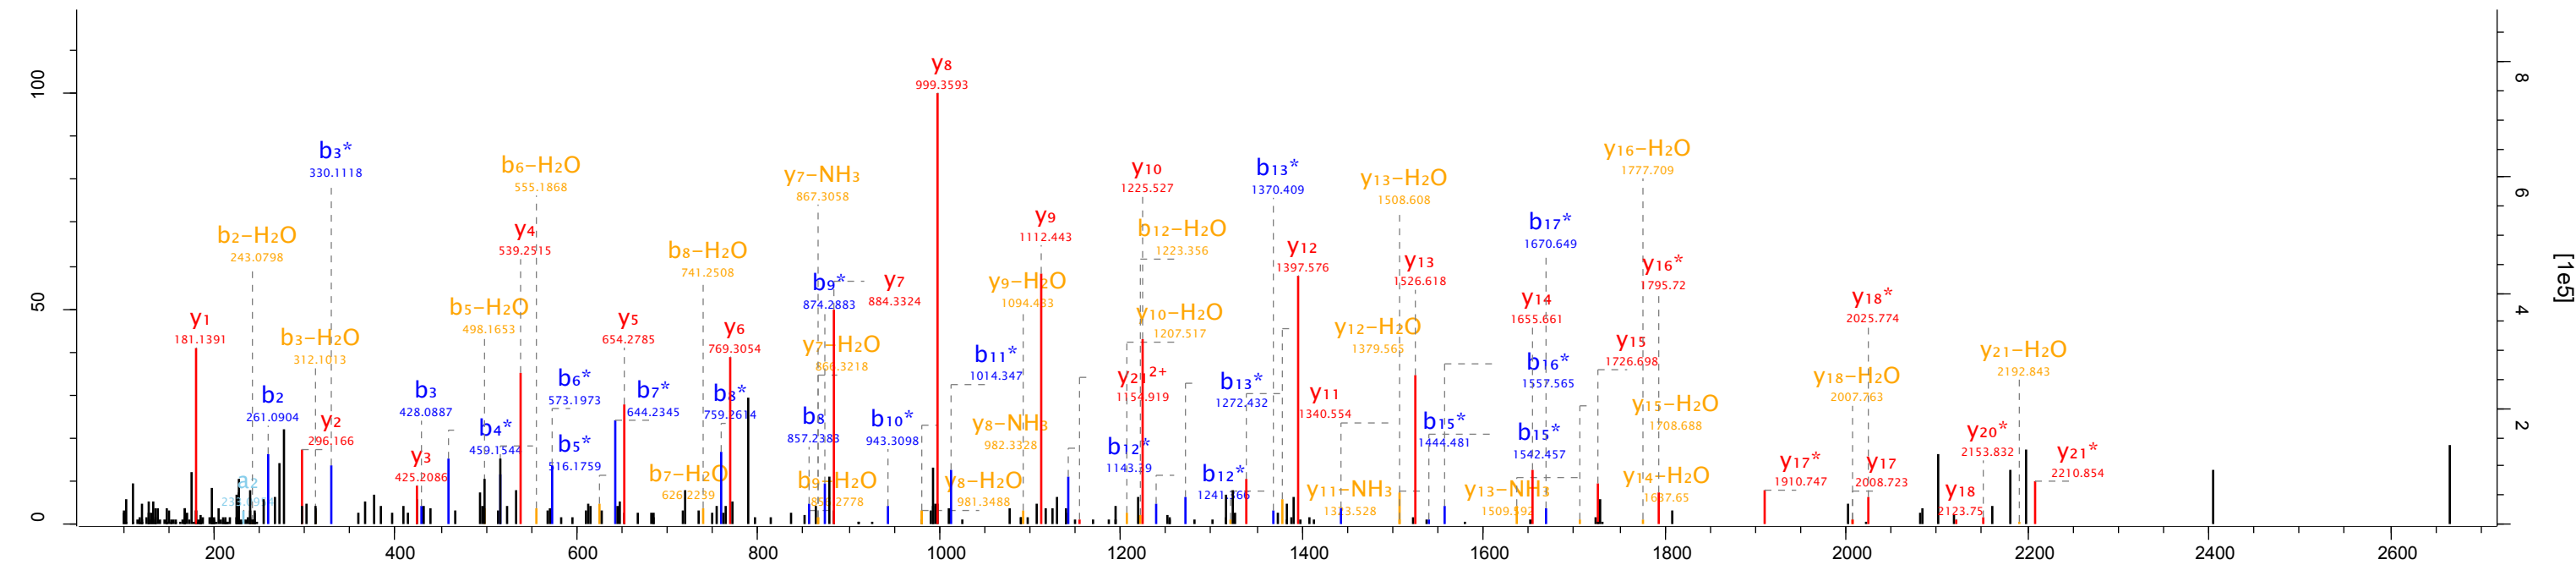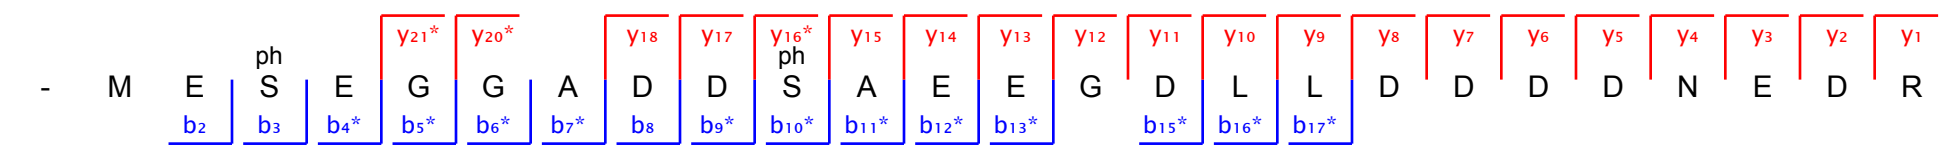

Raw file 20150812\_A375SR\_Phospho\_BR1\_03 Scan 18251 FTMS; HCD Score 68.59 m/z 1028.42 Gene names NUP98

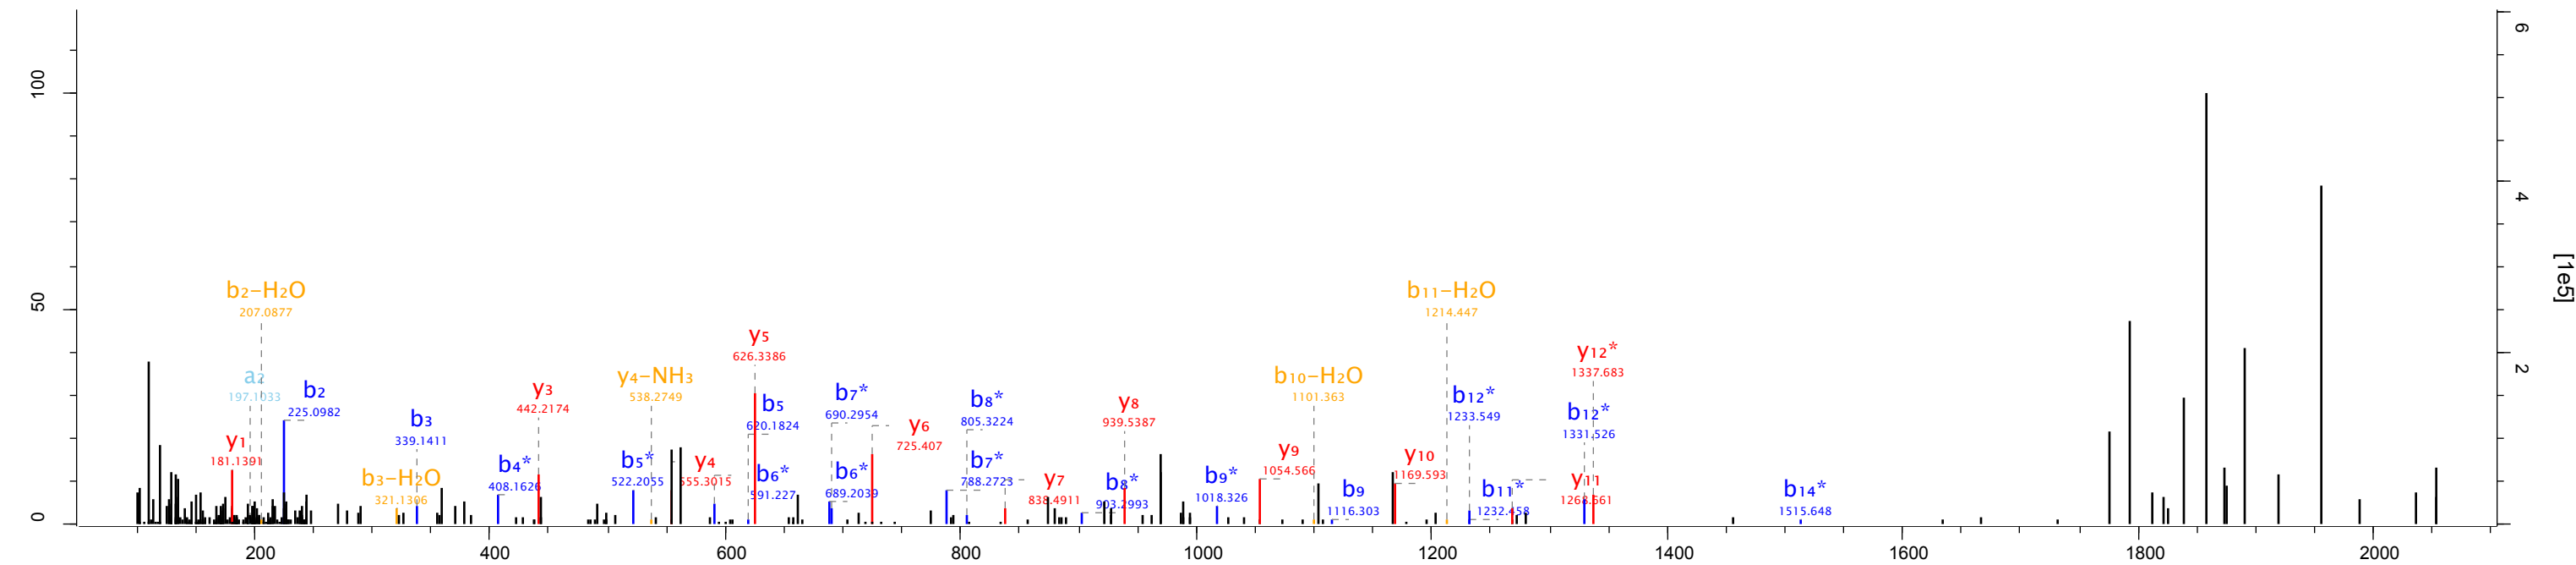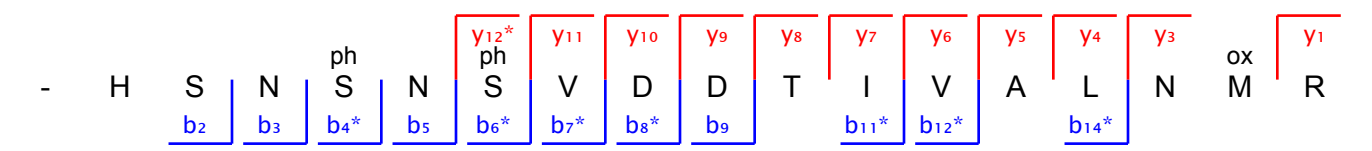

Raw file 20150812\_A375SR\_Phospho\_BR1\_03 Scan 18311 Method FTMS; HCD Score 192.36 m/z 1201.2 Gene names PHC2

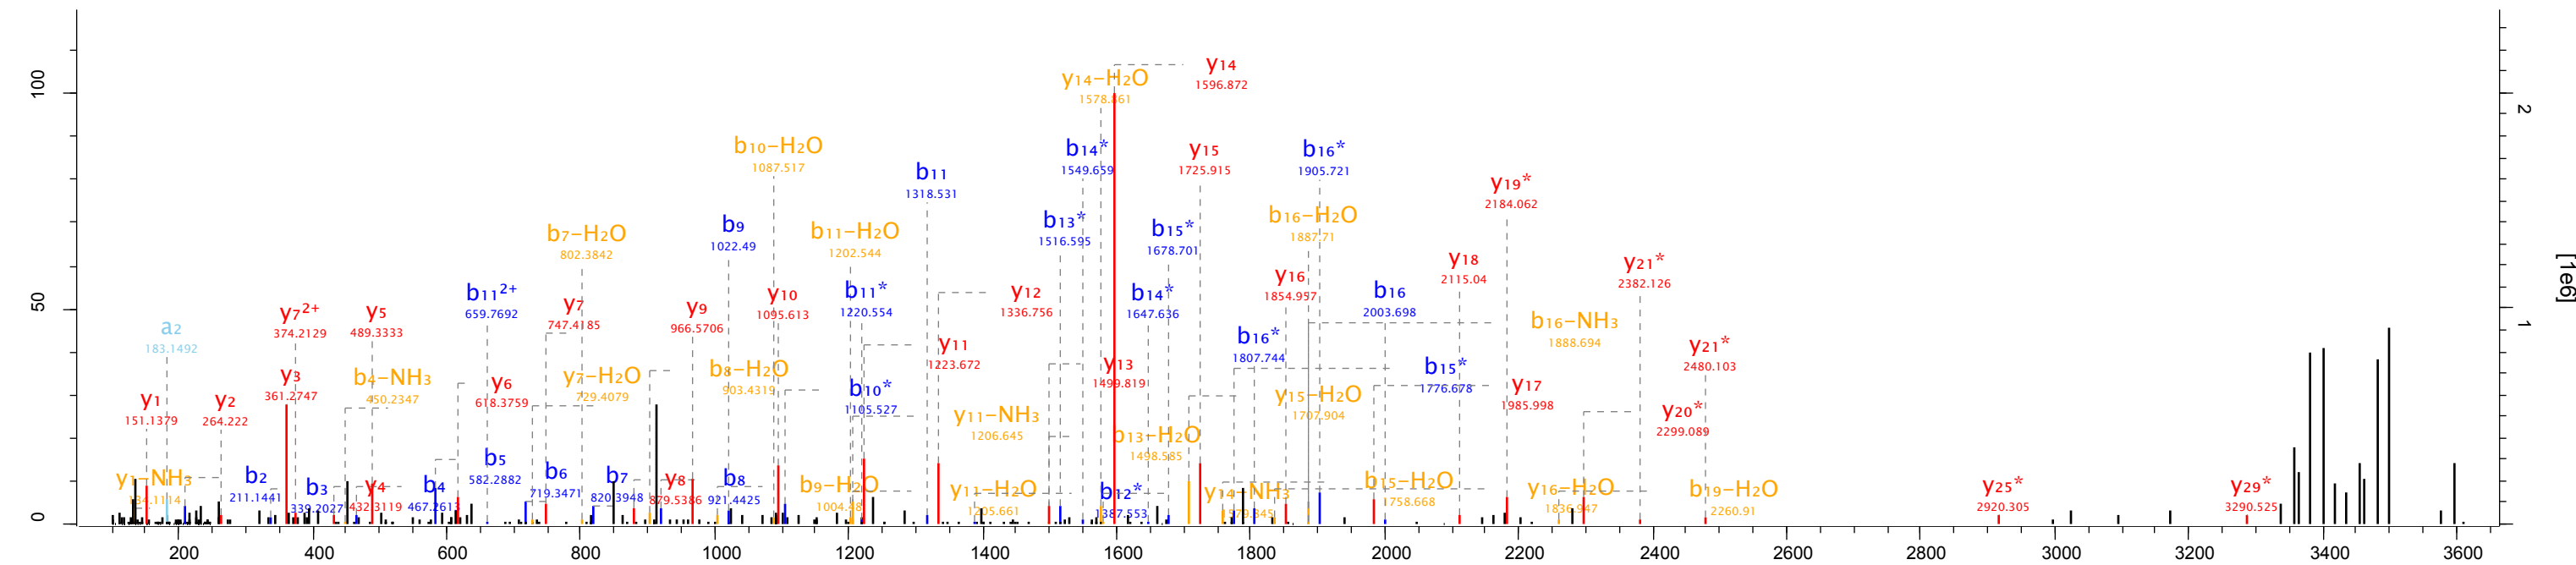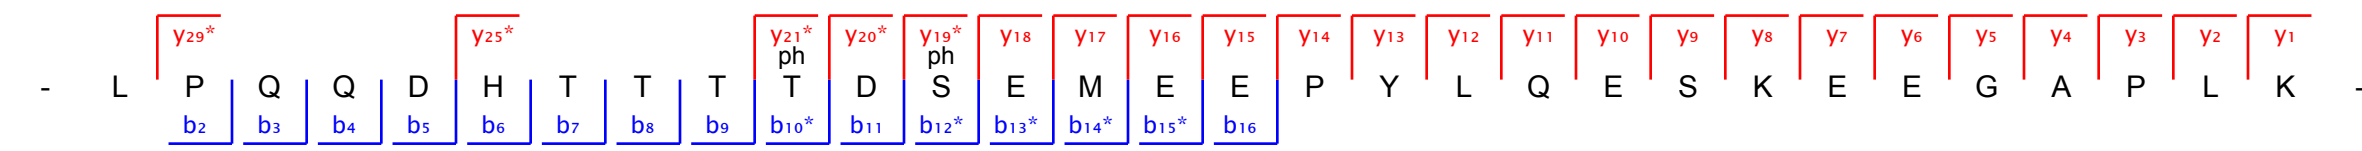



Raw file 20150812\_A375SR\_Phospho\_BR1\_03 Scan 18601 Method FTMS; HCD Score 175.65 m/z 1144.76 Gene names LARP1

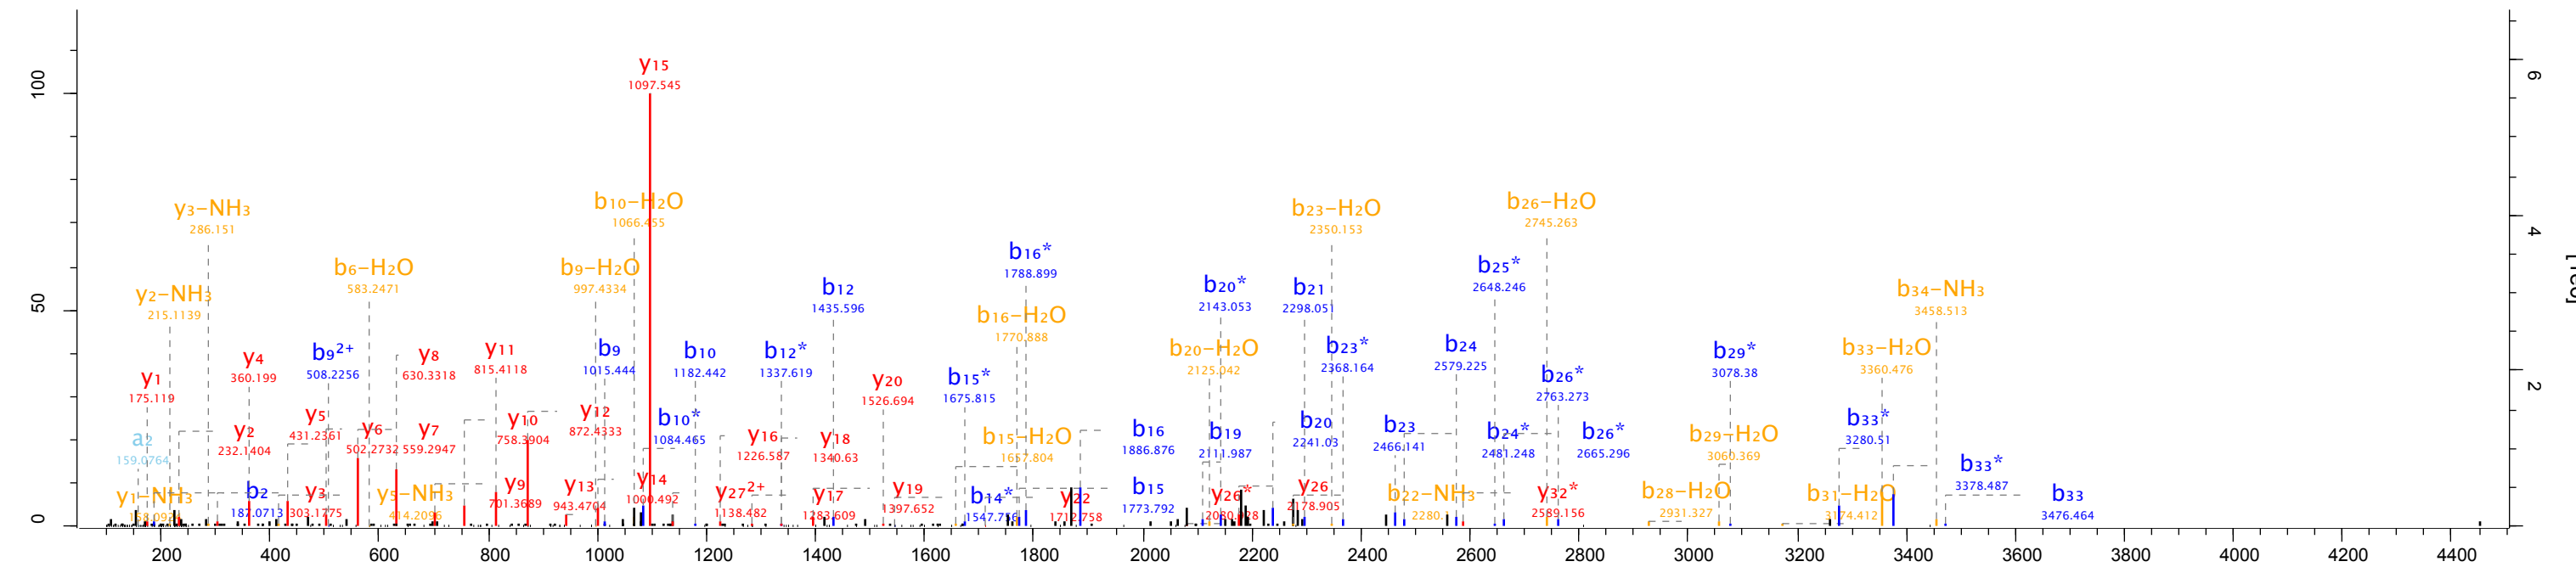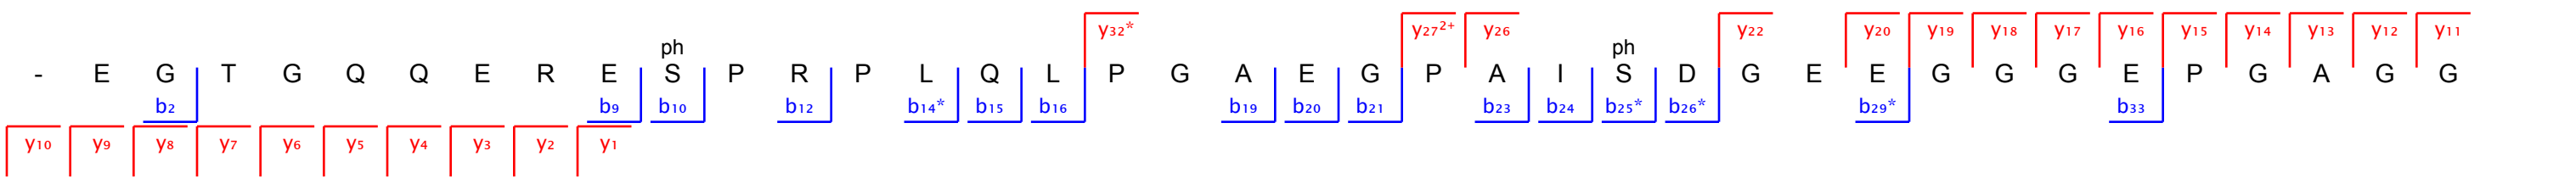

Raw file 20150812\_A375SR\_Phospho\_BR1\_03 Scan 18621 Method FTMS; HCD Score 135.73 m/z 526.72 Gene names SON

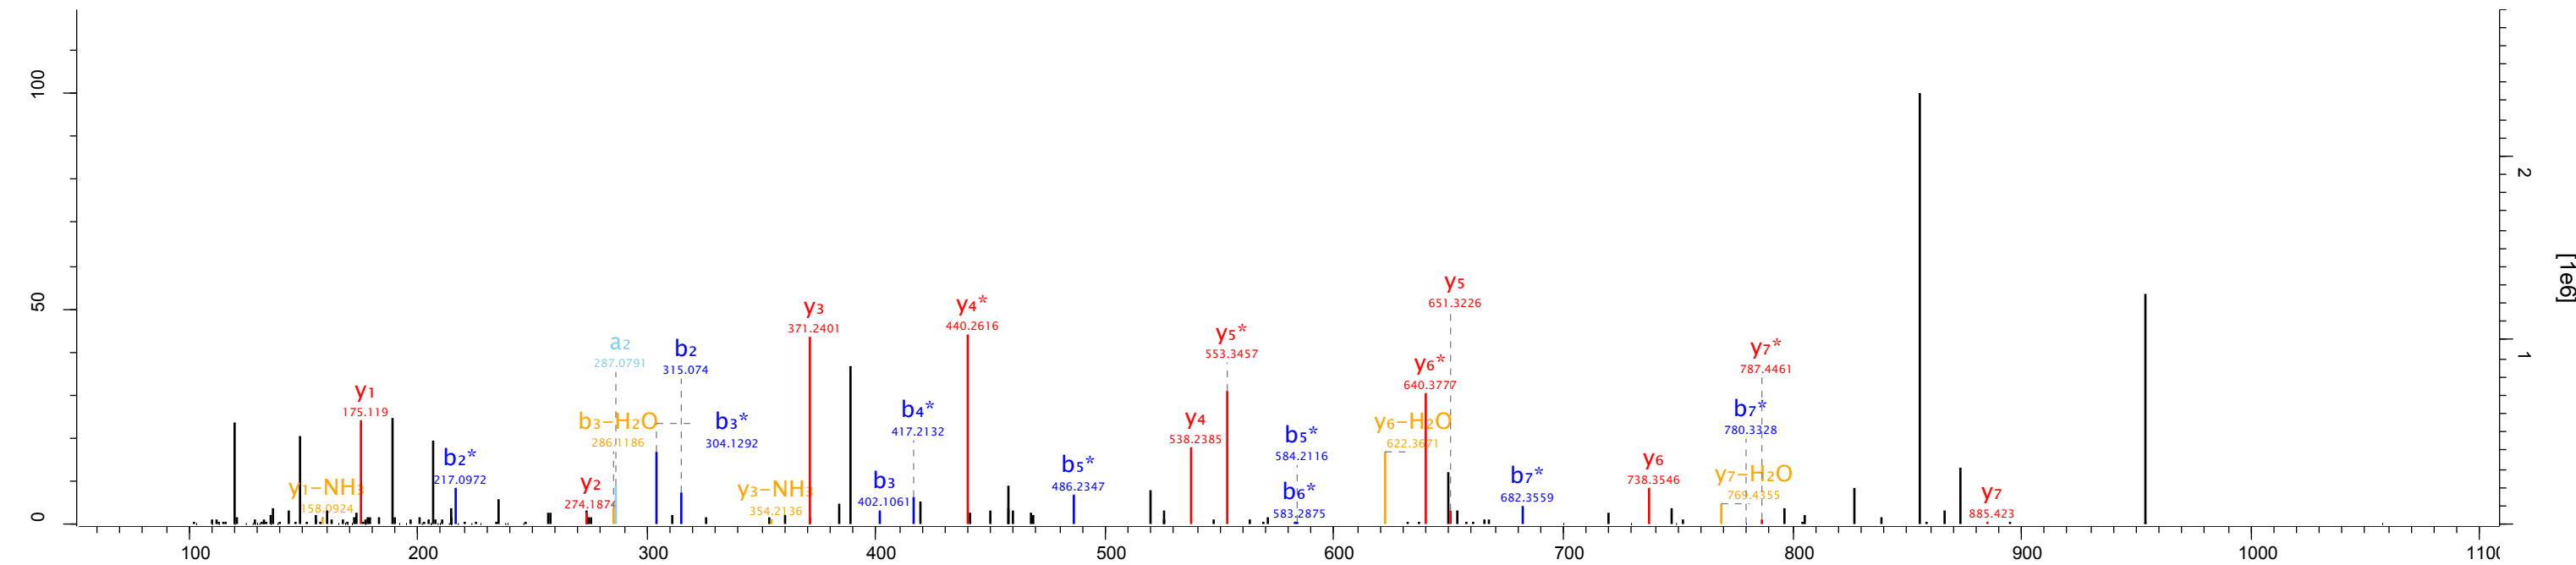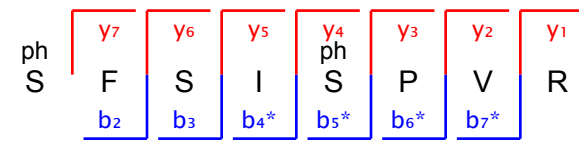

Raw file: 20150812\_A375SR\_Phospho\_BR1\_03  
 Scan: 18651 Method: FTMS; HCD Score: 220.88 m/z: 910.36 Gene names: SMG9

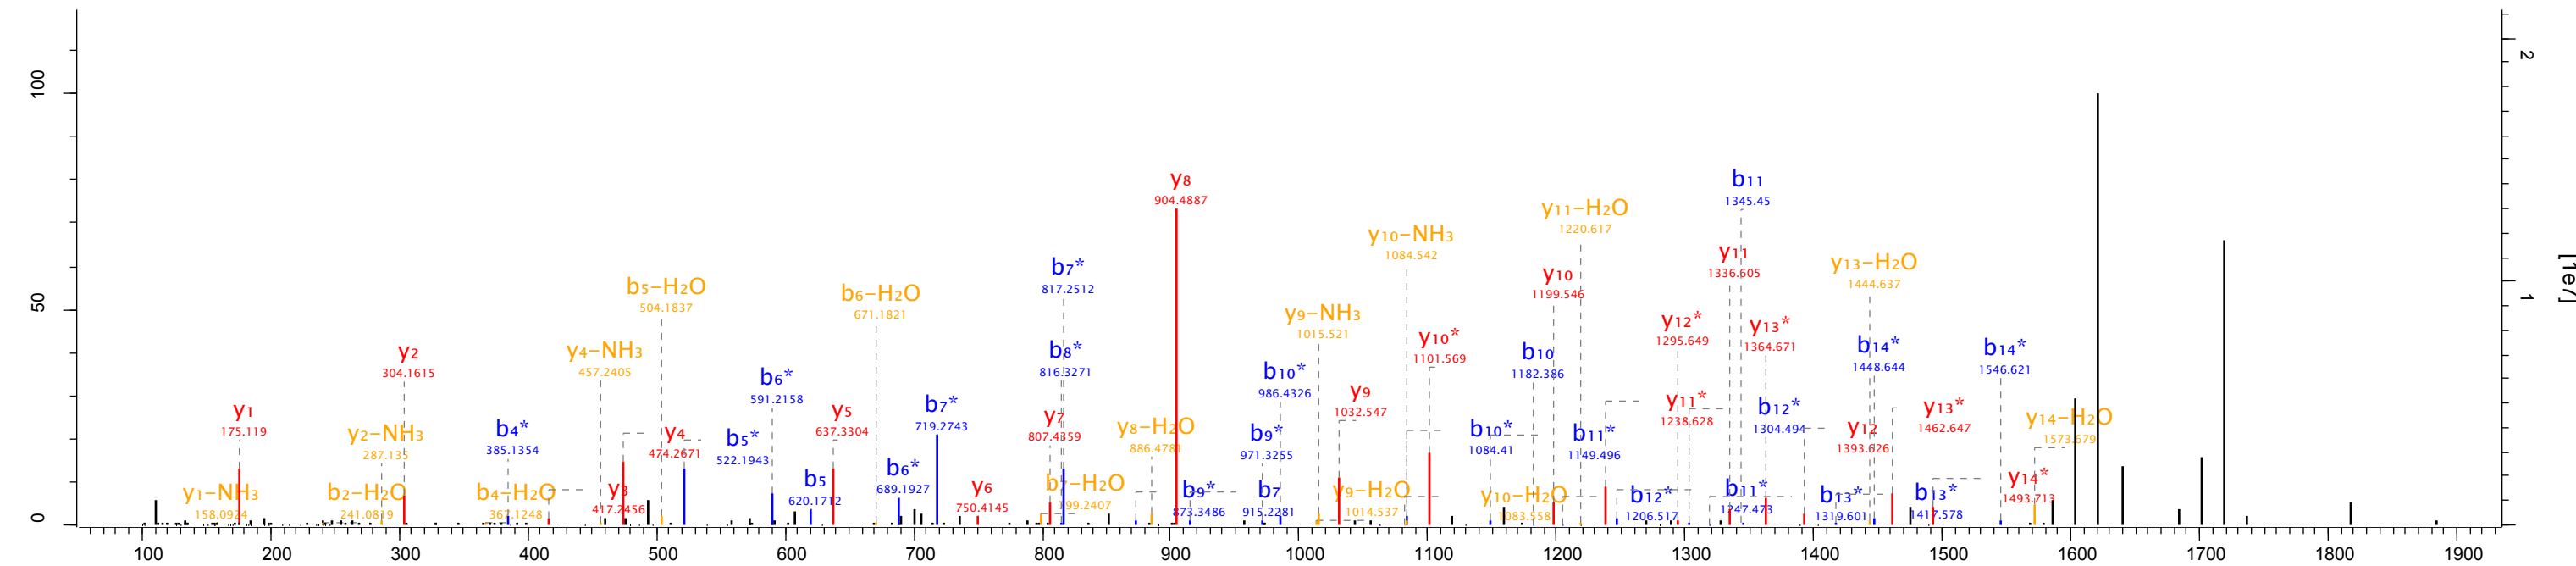

ac - S E S G H S Q P G L Y G I E R -

Fragmentation scheme showing amino acid sequence: S E S G H S Q P G L Y G I E R. The sequence is divided into two main regions: a red region (S E S G H S Q P G L Y G I E R) and a blue region (G H S Q P G L Y G I E R). The red region is labeled with y14\* through y1, and the blue region is labeled with b4\* through b14\*.



Raw file: 20150812\_A375SR\_Phospho\_BR1\_03  
 Scan: 18671 Method: FTMS; HCD Score: 159.06 m/z: 1111.89 Gene names: POLR2M;GCOM2;GCOM1;MYZAP

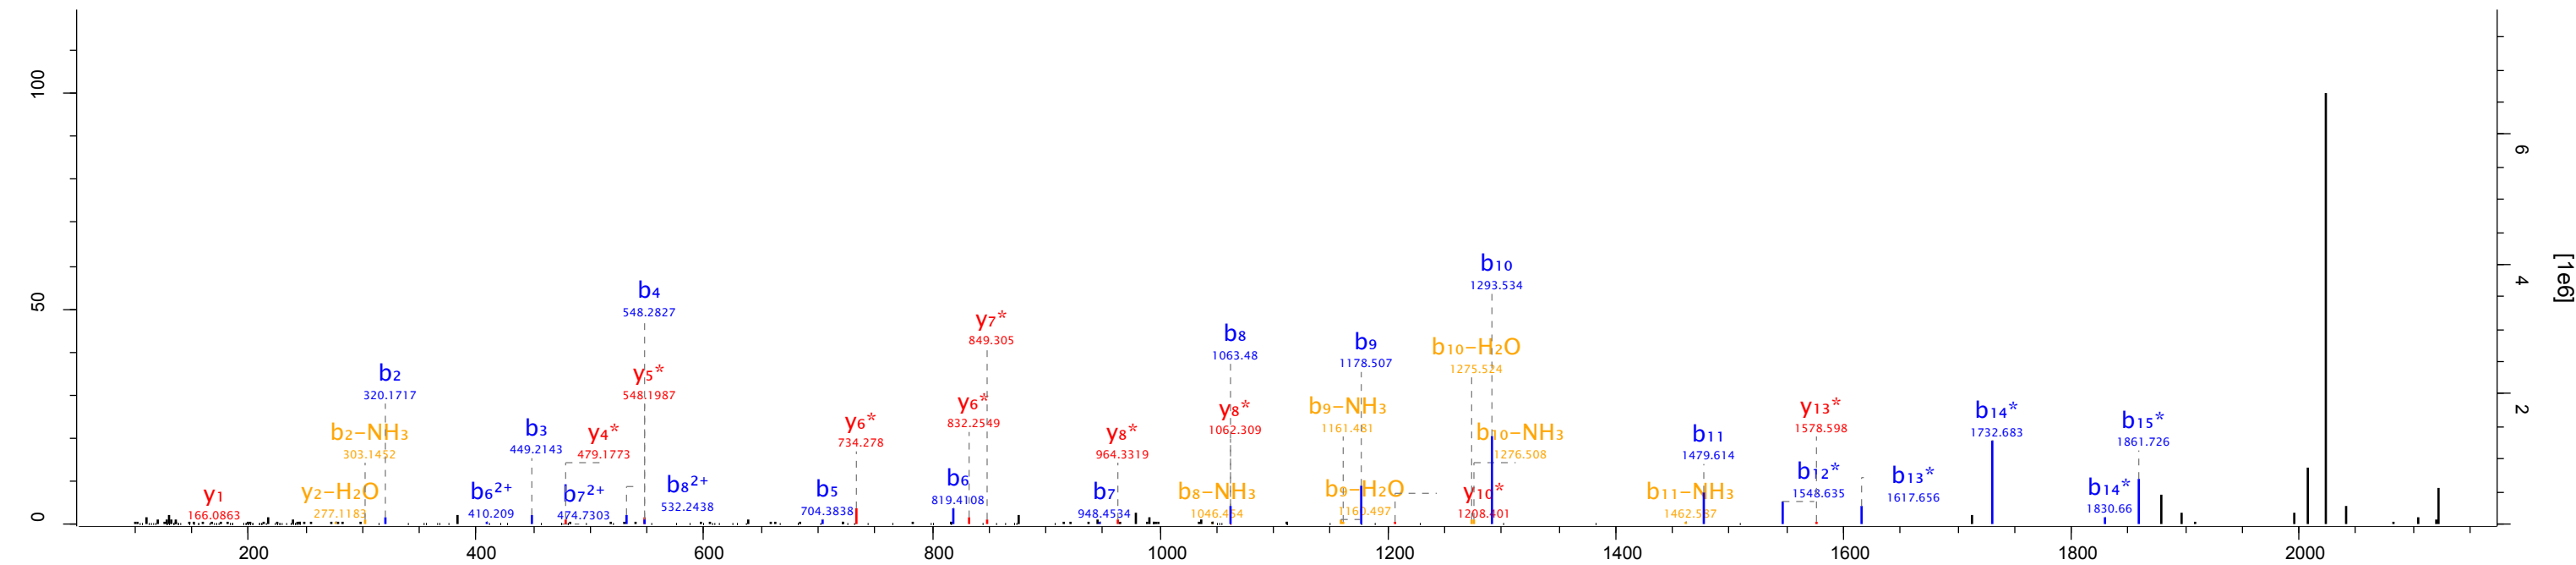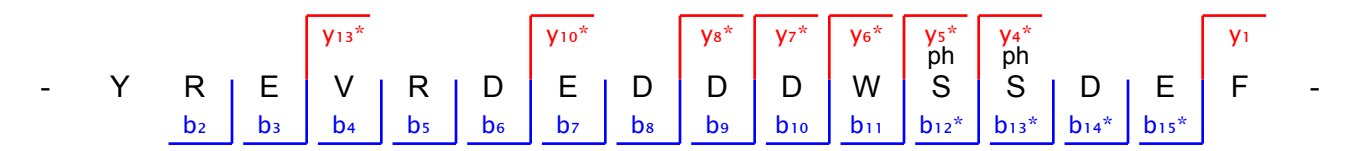

Raw file 20150812\_A375SR\_Phospho\_BR1\_03 Scan 18831 Method FTMS; HCD Score 81.48 m/z 872.41 Gene names MLLT10

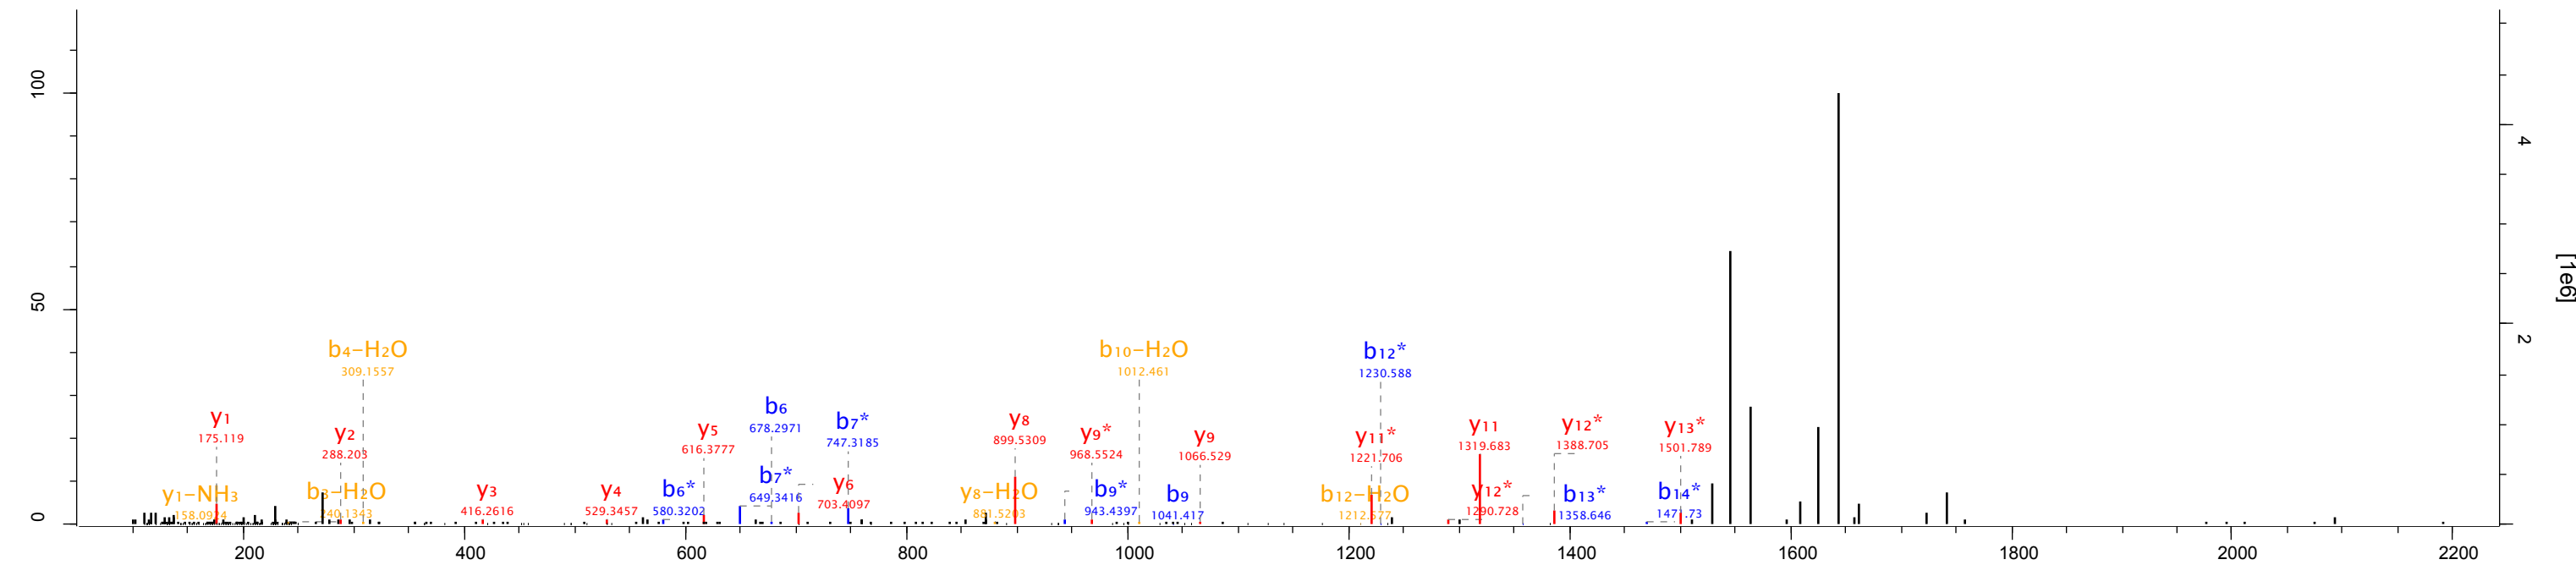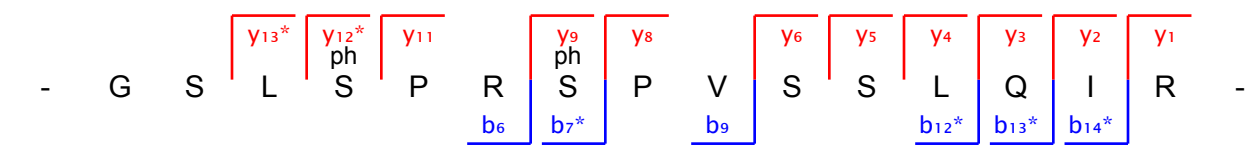

Raw file: 20150812\_A375SR\_Phospho\_BR1\_03  
 Scan: 19491 Method: FTMS; HCD Score: 315.87 m/z: 943.73 Gene names: FRA10AC1

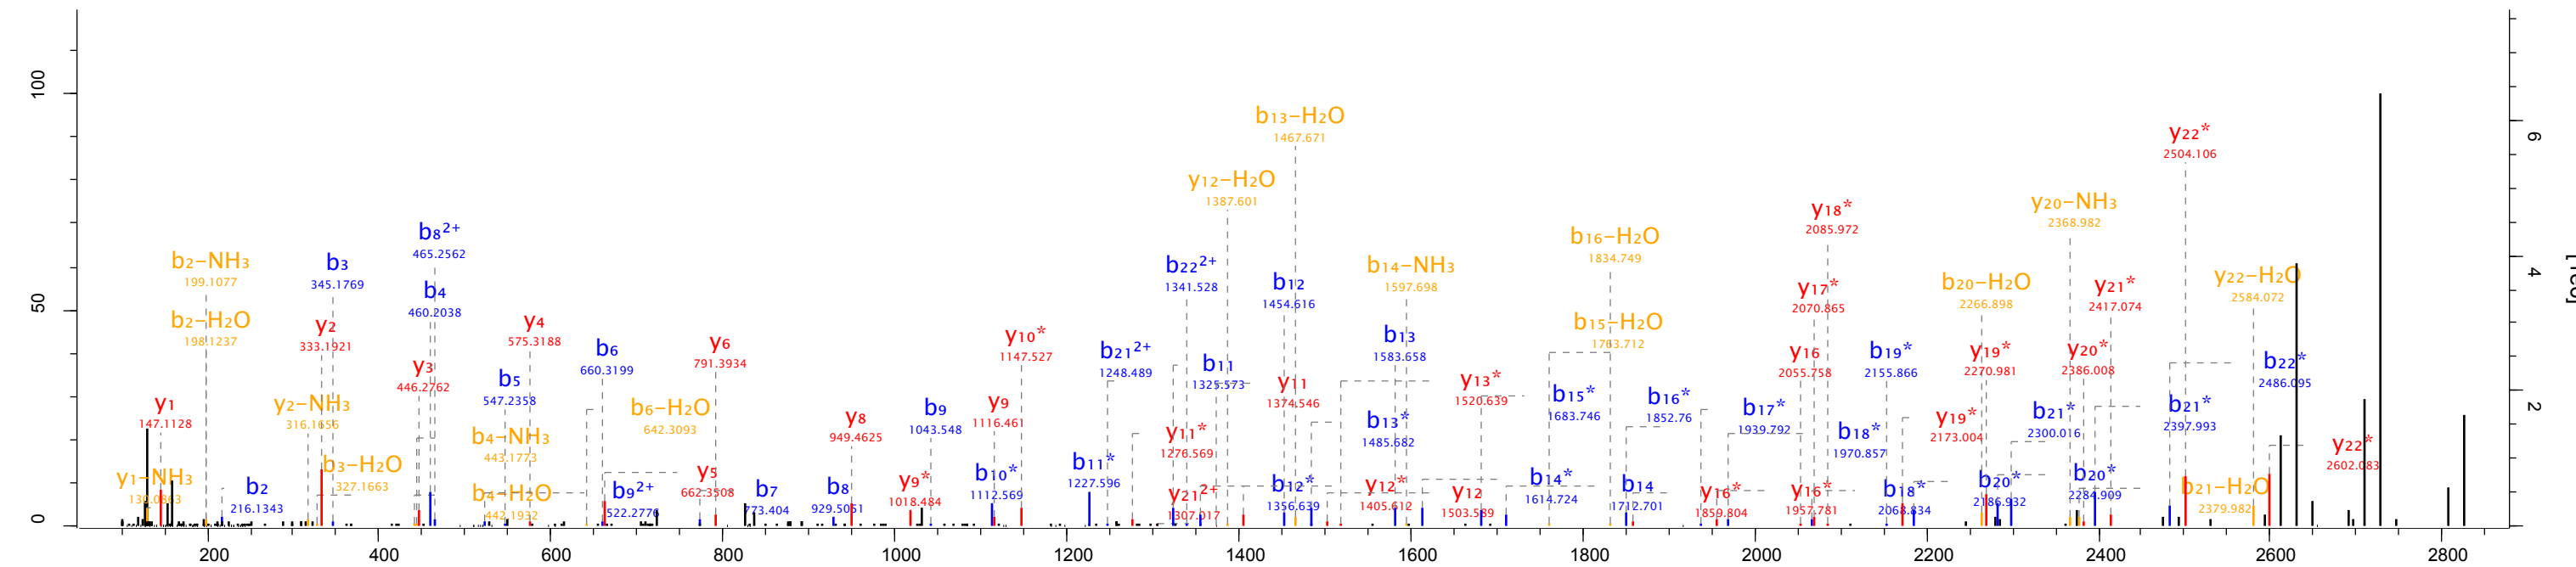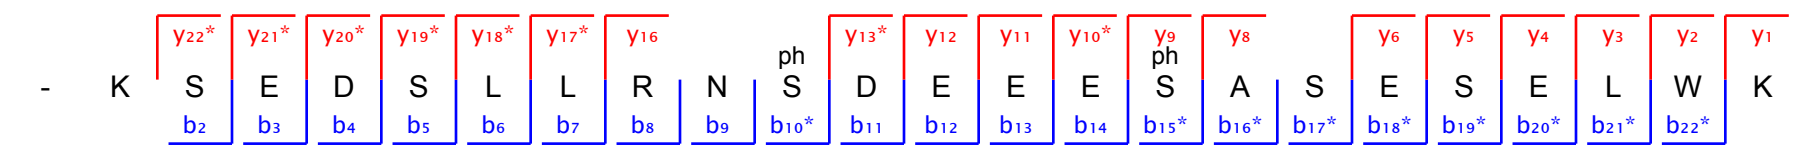

Raw file  
 20150812\_A375SR\_Phospho\_BR1\_03  
 Scan 19551 Method FTMS; HCD Score 156.61 m/z 1042.8 Gene names SRRM2

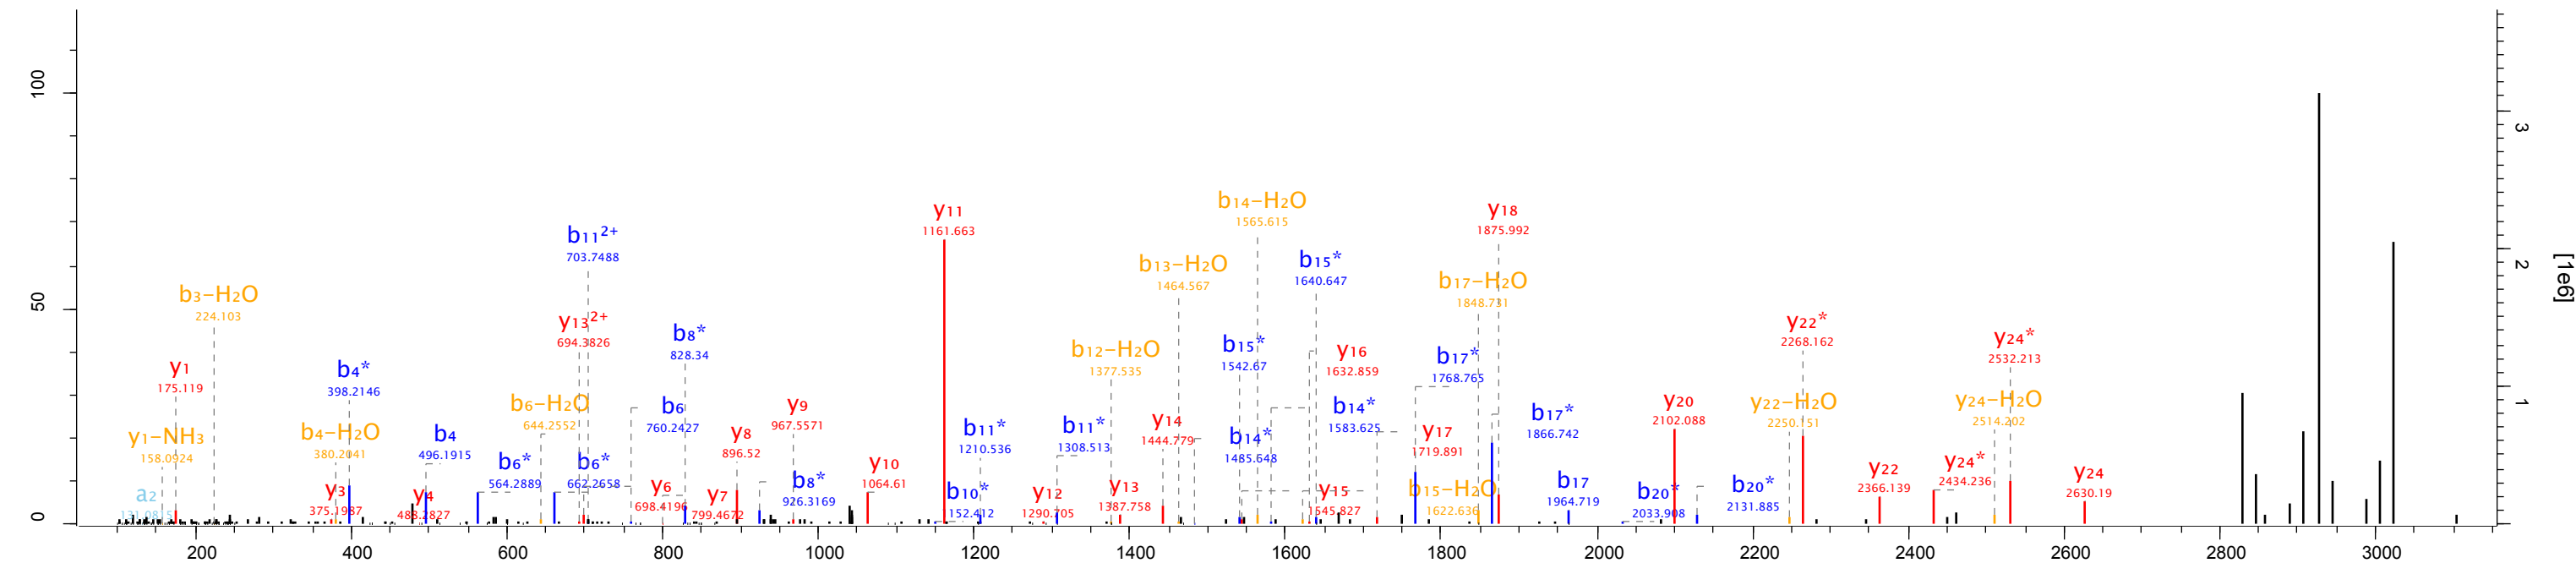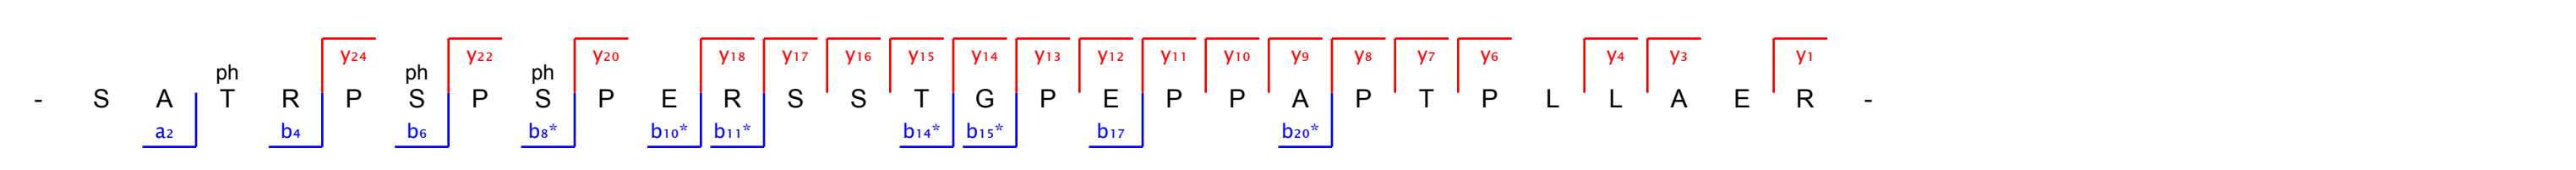

Raw file  
 20150812\_A375SR\_Phospho\_BR1\_03  
 Scan 19621 Method FTMS; HCD Score 149.65 m/z 1007.46 Gene names SOX10

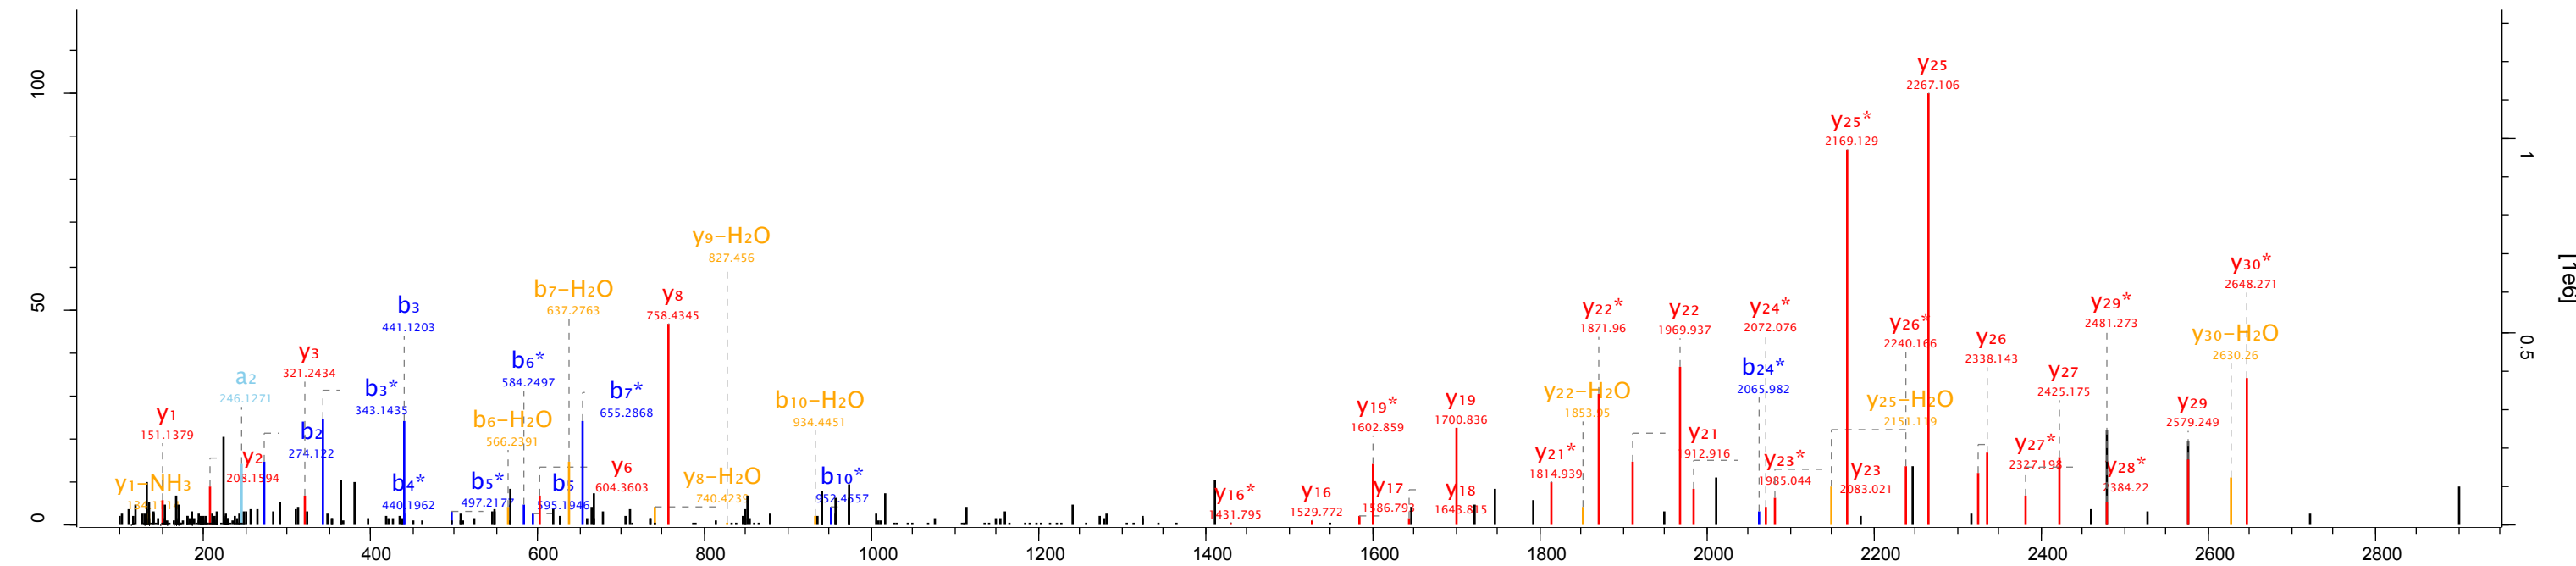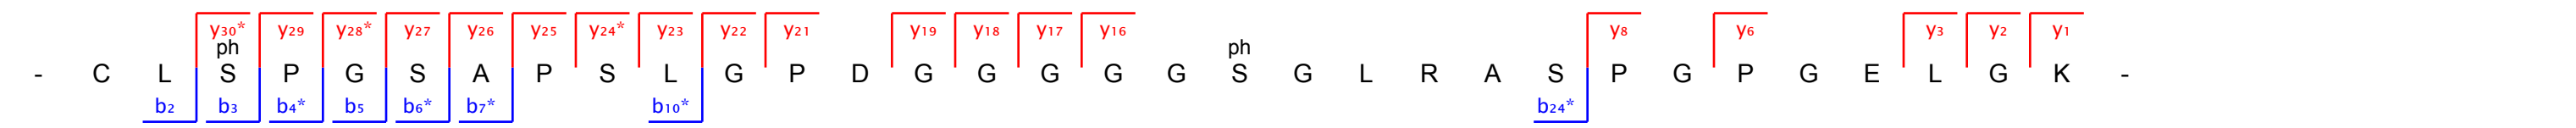

Raw file  
 20150812\_A375SR\_Phospho\_BR1\_03  
 Scan 1981 Method FTMS; HCD Score 45.21 m/z 617.26 Gene names ACIN1

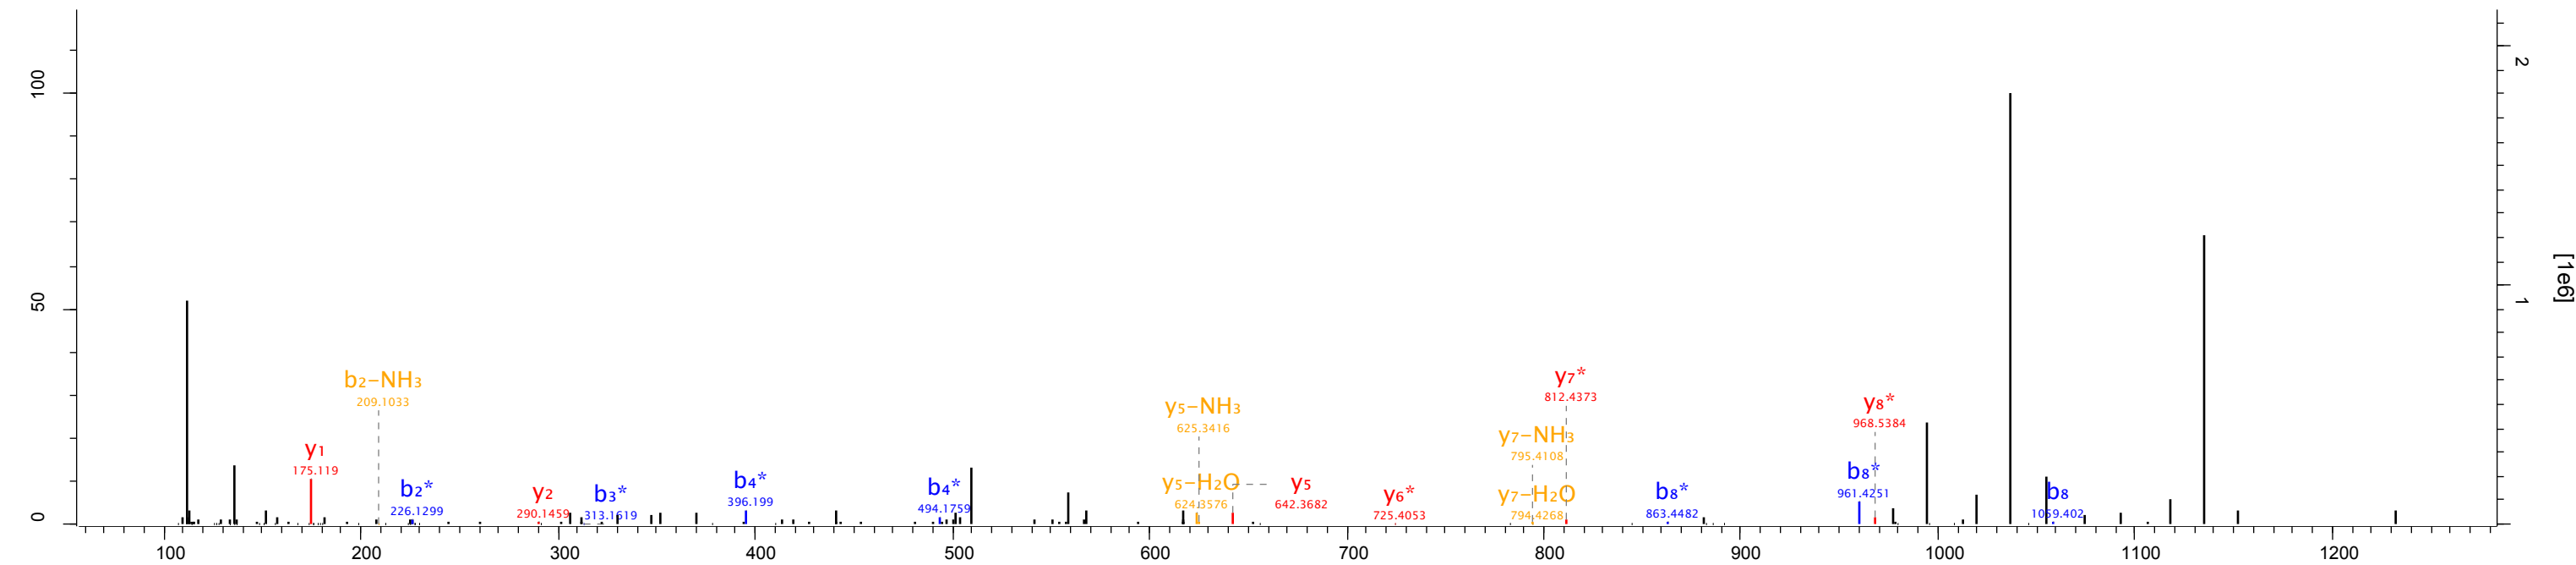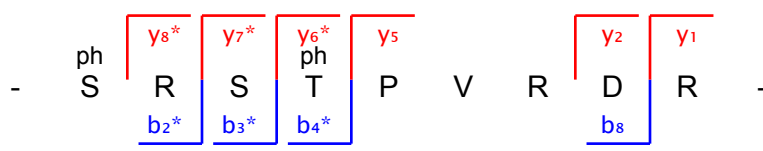

Raw file Scan Method Score m/z Gene names  
 20150812\_A375SR\_Phospho\_BR1\_03 19831 FTMS; HCD 59.82 1251.51 POLR2A

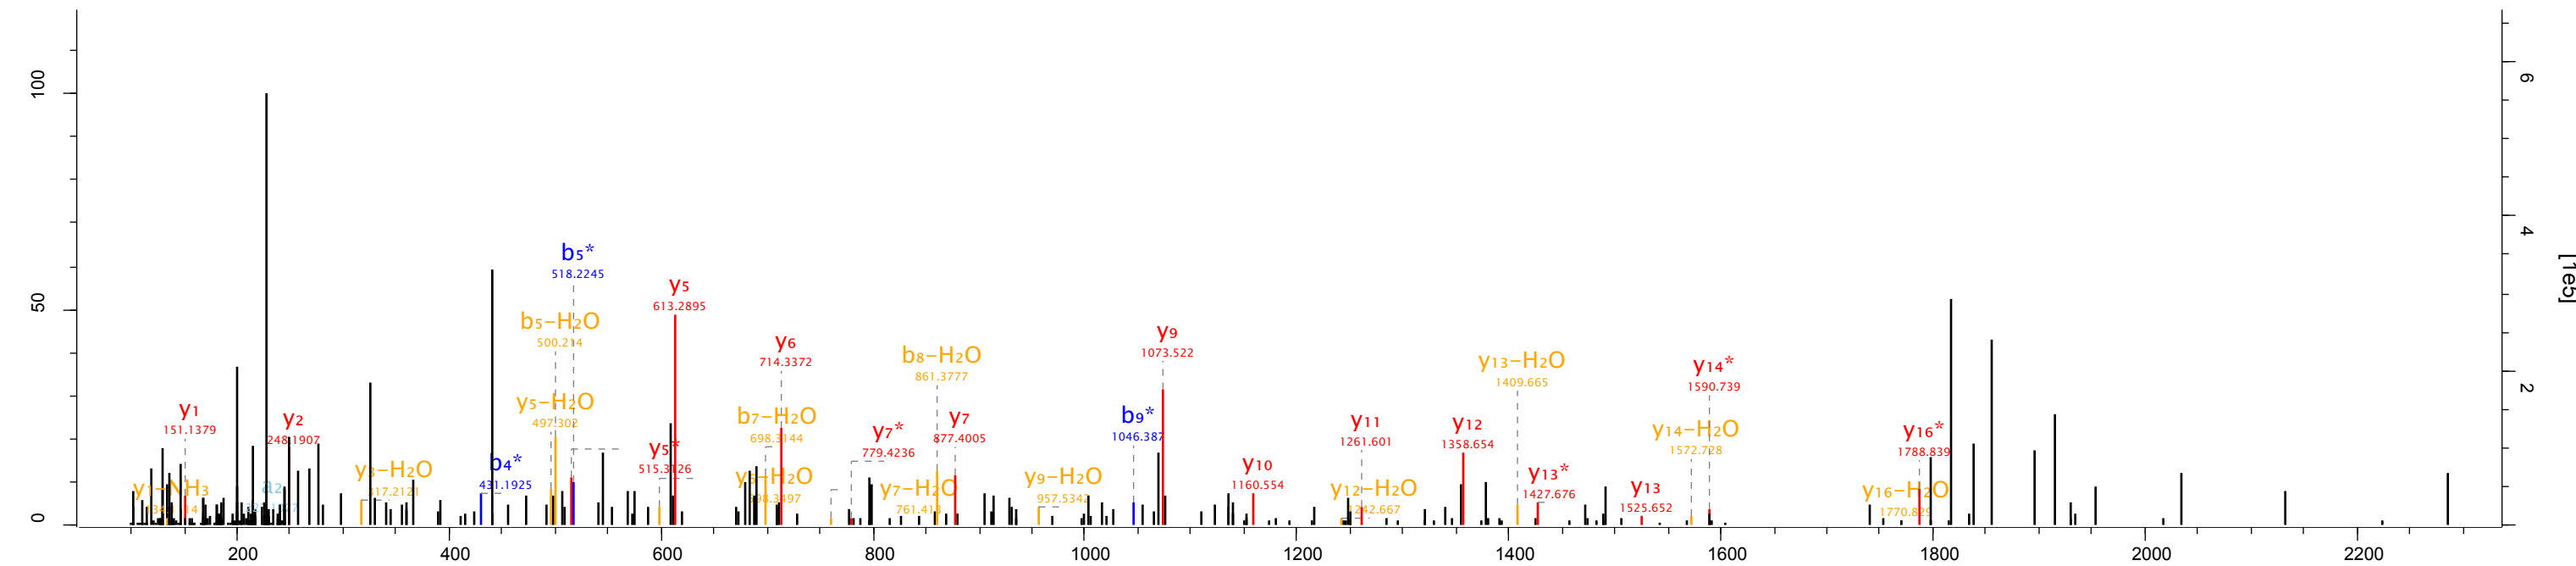

- Y S P ph T S P T Y ph S P T S P V Y T P ph T S P K -

Fragmentation labels below the sequence:

- Under S: a2
- Under ph: b4\*
- Under S: b5\*
- Under P: y16\*
- Under Y: y14\*
- Under ph: b9\*
- Under S: y13
- Under P: y12
- Under T: y11
- Under S: y10
- Under P: y9
- Under V: y7
- Under Y: y6
- Under T: y5
- Under ph: y2
- Under P: y1

Raw file 20150812\_A375SR\_Phospho\_BR1\_03 Scan 19951 Method FTMS; HCD Score 142.62 m/z 1221.55 Gene names CTTNBP2NL

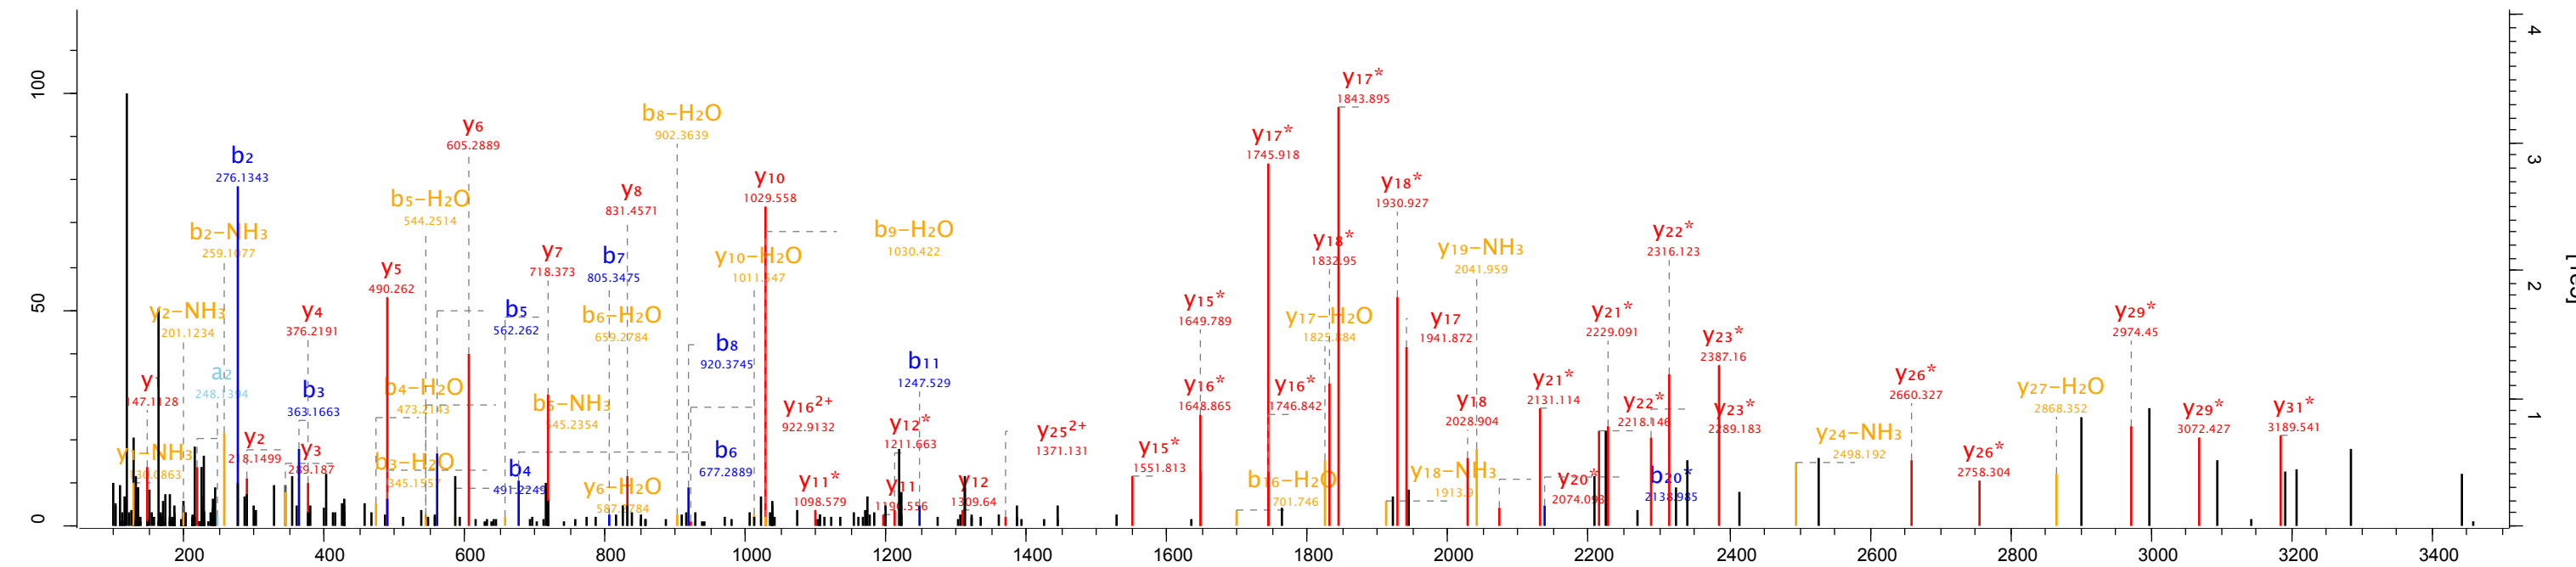

- F Q S Q A D Q D Q Q A S G L Q S P P S R D L S P T L I D N S A A K -

Fragmentation labels below the sequence:

- Red boxes: y<sub>31</sub>\*, y<sub>29</sub>\*, y<sub>26</sub>\*, y<sub>25</sub><sup>2+</sup>, y<sub>23</sub>\*, y<sub>22</sub>\*, y<sub>21</sub>\*, y<sub>20</sub>\*, y<sub>18</sub>, y<sub>17</sub>, y<sub>16</sub>\*, y<sub>15</sub>\*, y<sub>12</sub>, y<sub>11</sub>, y<sub>10</sub>, y<sub>8</sub>, y<sub>7</sub>, y<sub>6</sub>, y<sub>5</sub>, y<sub>4</sub>, y<sub>3</sub>, y<sub>2</sub>, y<sub>1</sub>
- Blue boxes: b<sub>2</sub>, b<sub>3</sub>, b<sub>4</sub>, b<sub>5</sub>, b<sub>6</sub>, b<sub>7</sub>, b<sub>8</sub>, b<sub>11</sub>, b<sub>20</sub>\*



Raw file 20150812\_A375SR\_Phospho\_BR1\_03 Scan 2031 Method FTMS; HCD Score 150.27 m/z 652.75 Gene names YTHDC1

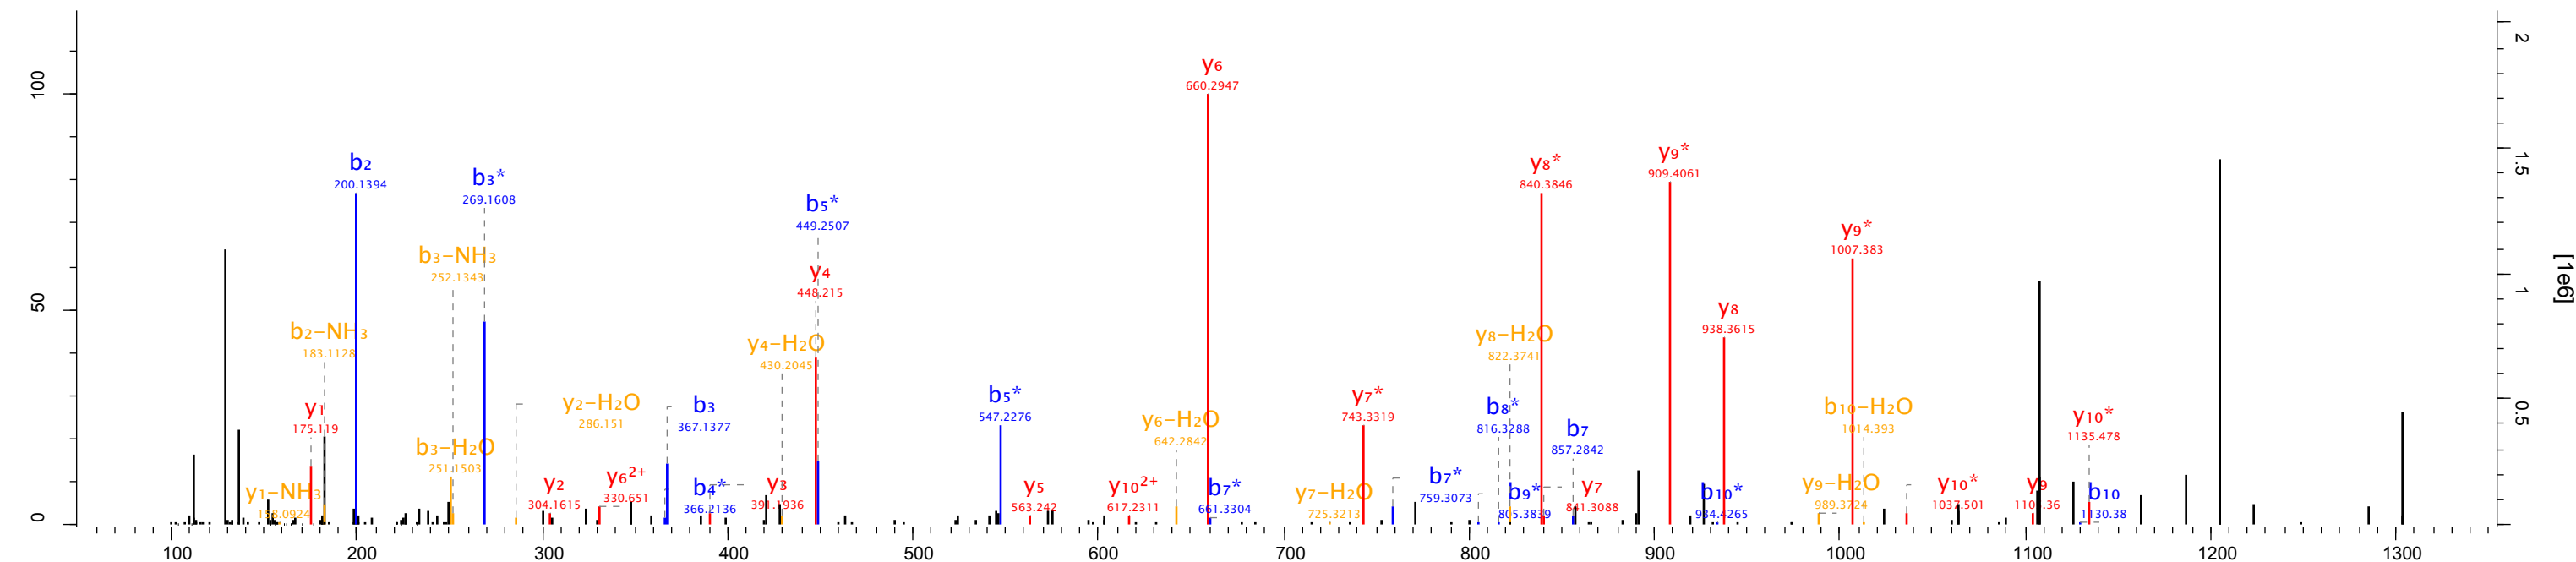

- A 

|                              |                              |                             |                              |                |                |                             |                             |                 |                |   |
|------------------------------|------------------------------|-----------------------------|------------------------------|----------------|----------------|-----------------------------|-----------------------------|-----------------|----------------|---|
| y <sub>10</sub> <sup>*</sup> | y <sub>9</sub> <sup>ph</sup> | y <sub>8</sub>              | y <sub>7</sub> <sup>ph</sup> | y <sub>6</sub> | y <sub>5</sub> | y <sub>4</sub>              | y <sub>3</sub>              | y <sub>2</sub>  | y <sub>1</sub> | - |
| K                            | S                            | P                           | T                            | P              | D              | G                           | S                           | E               | R              |   |
| b <sub>2</sub>               | b <sub>3</sub>               | b <sub>4</sub> <sup>*</sup> | b <sub>5</sub> <sup>*</sup>  |                | b <sub>7</sub> | b <sub>8</sub> <sup>*</sup> | b <sub>9</sub> <sup>*</sup> | b <sub>10</sub> |                |   |

Raw file: 20150812\_A375SR\_Phospho\_BR1\_03  
 Scan: 20531 Method: FTMS; HCD Score: 142.86 m/z: 1205.83 Gene names: RALY

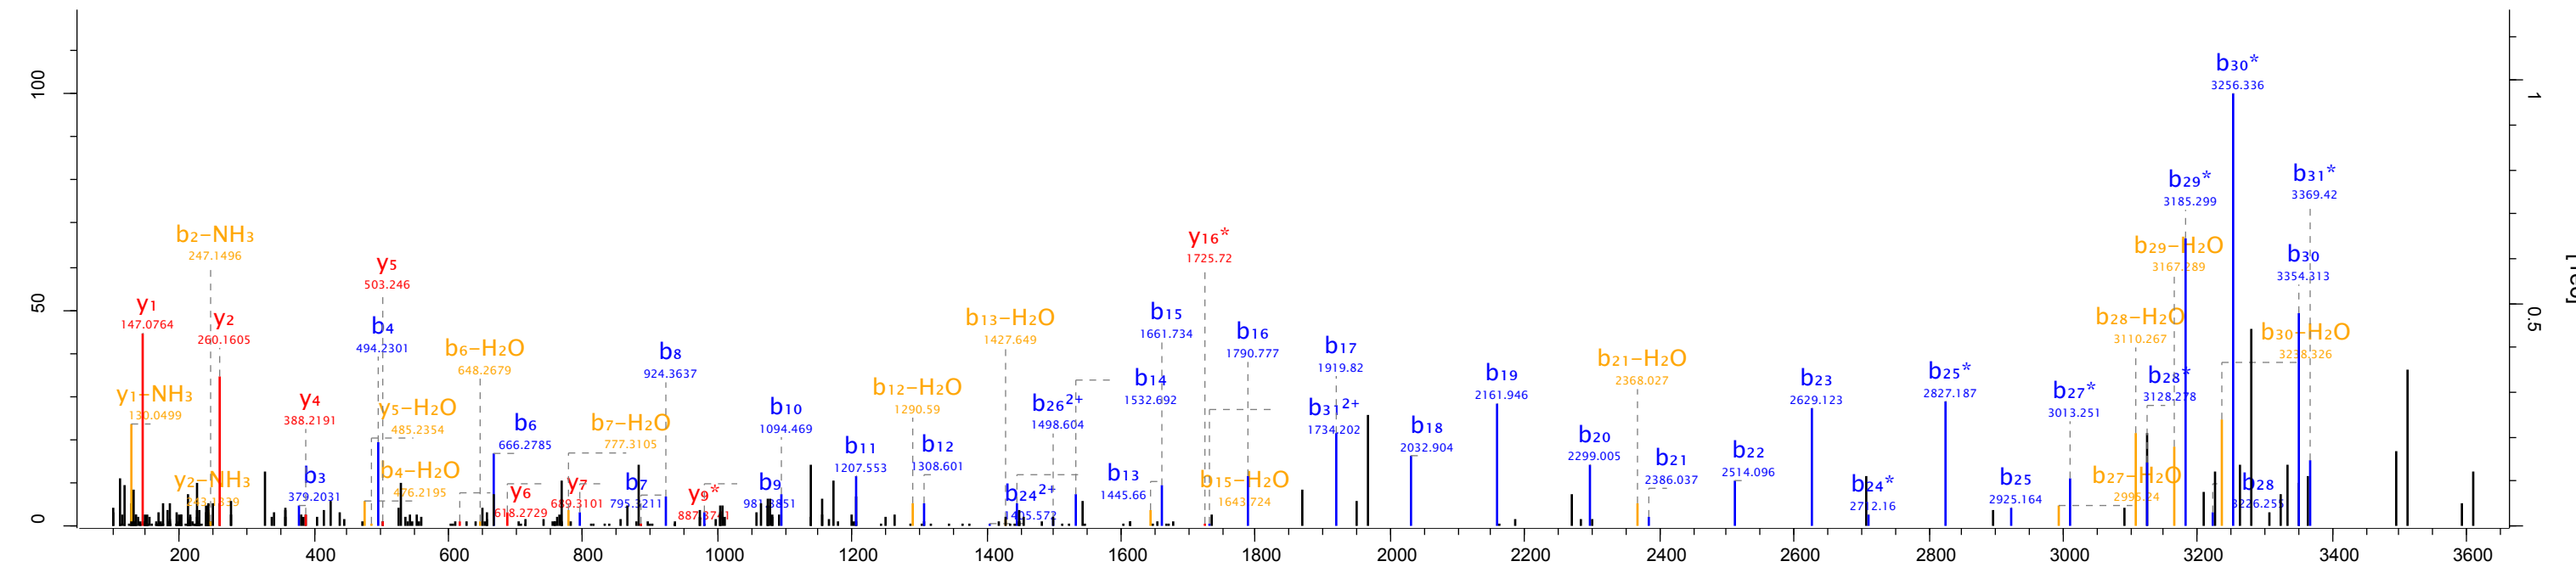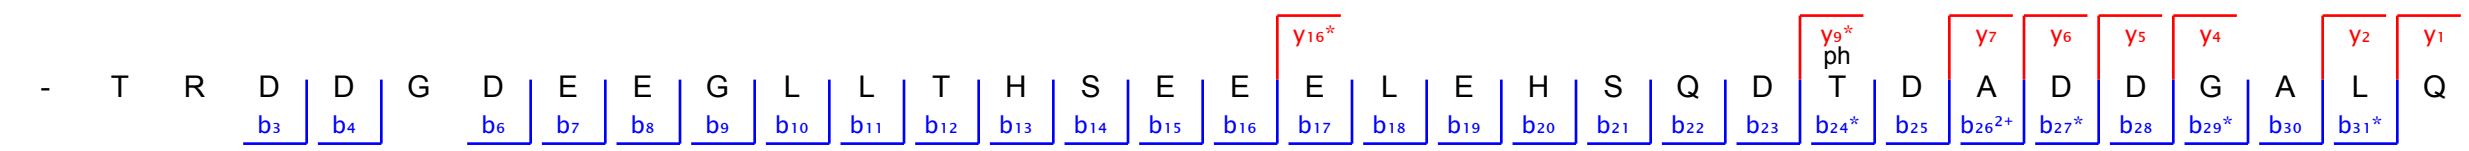

Raw file  
20150812\_A375SR\_Phospho\_BR1\_03

Scan 20741 Method FTMS; HCD Score 174.87 m/z 720.8 Gene names TOP2A

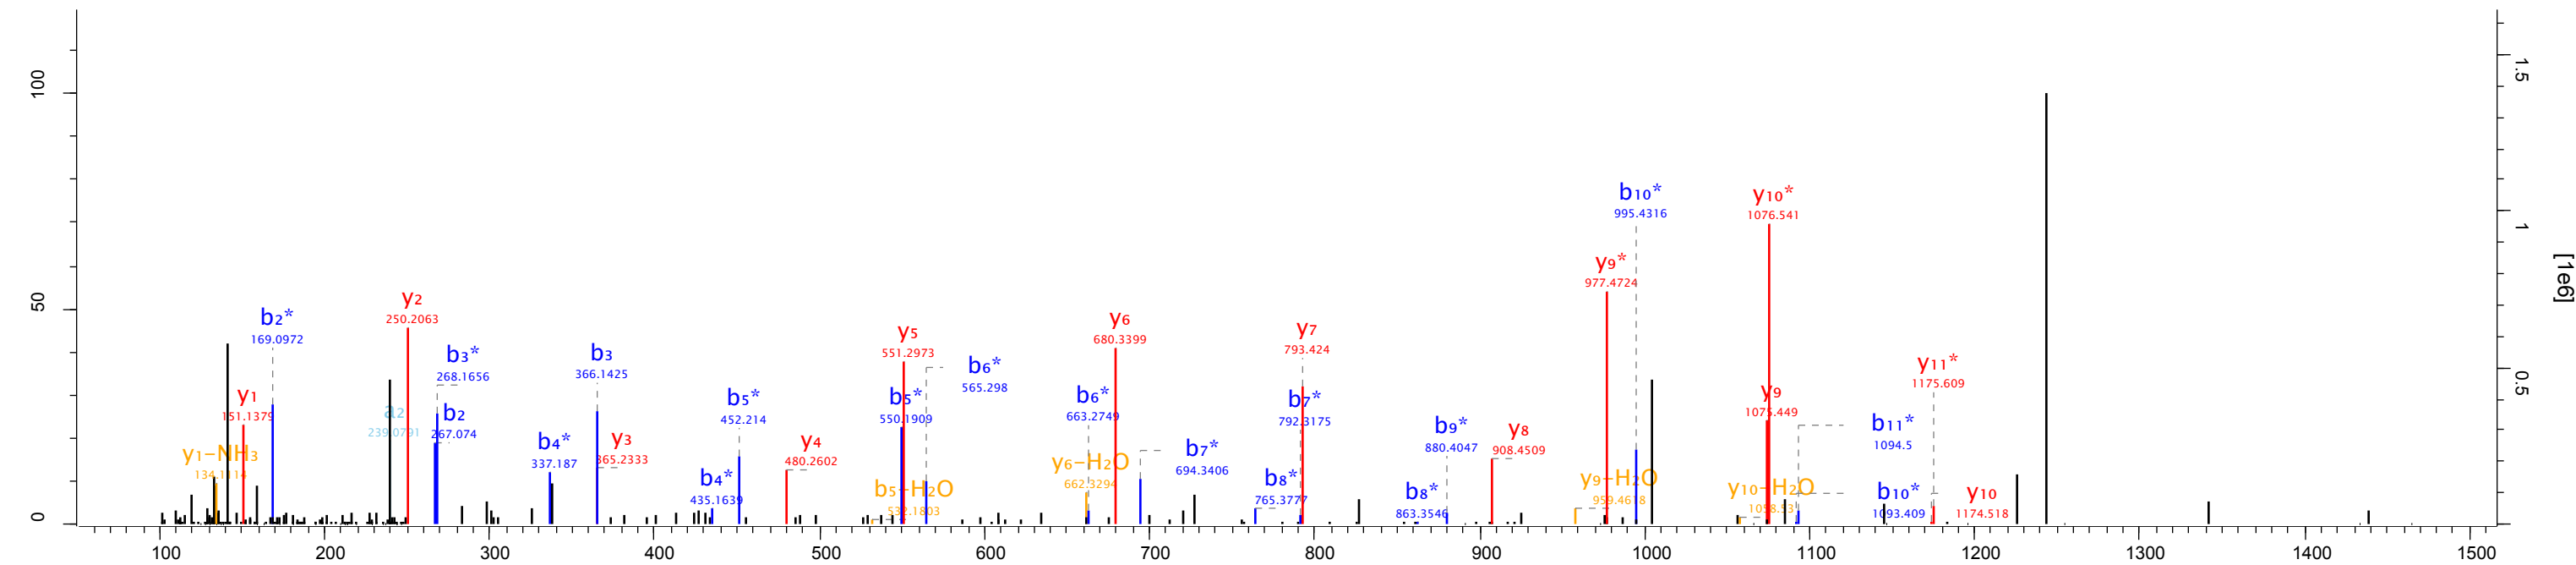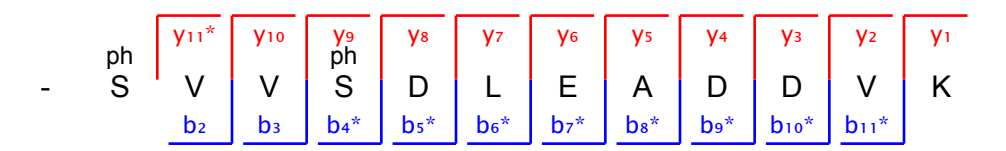

Raw file Scan Method Score m/z Gene names  
 20150812\_A375SR\_Phospho\_BR1\_03 21011 FTMS; HCD 192.52 873.42 ZMYND8

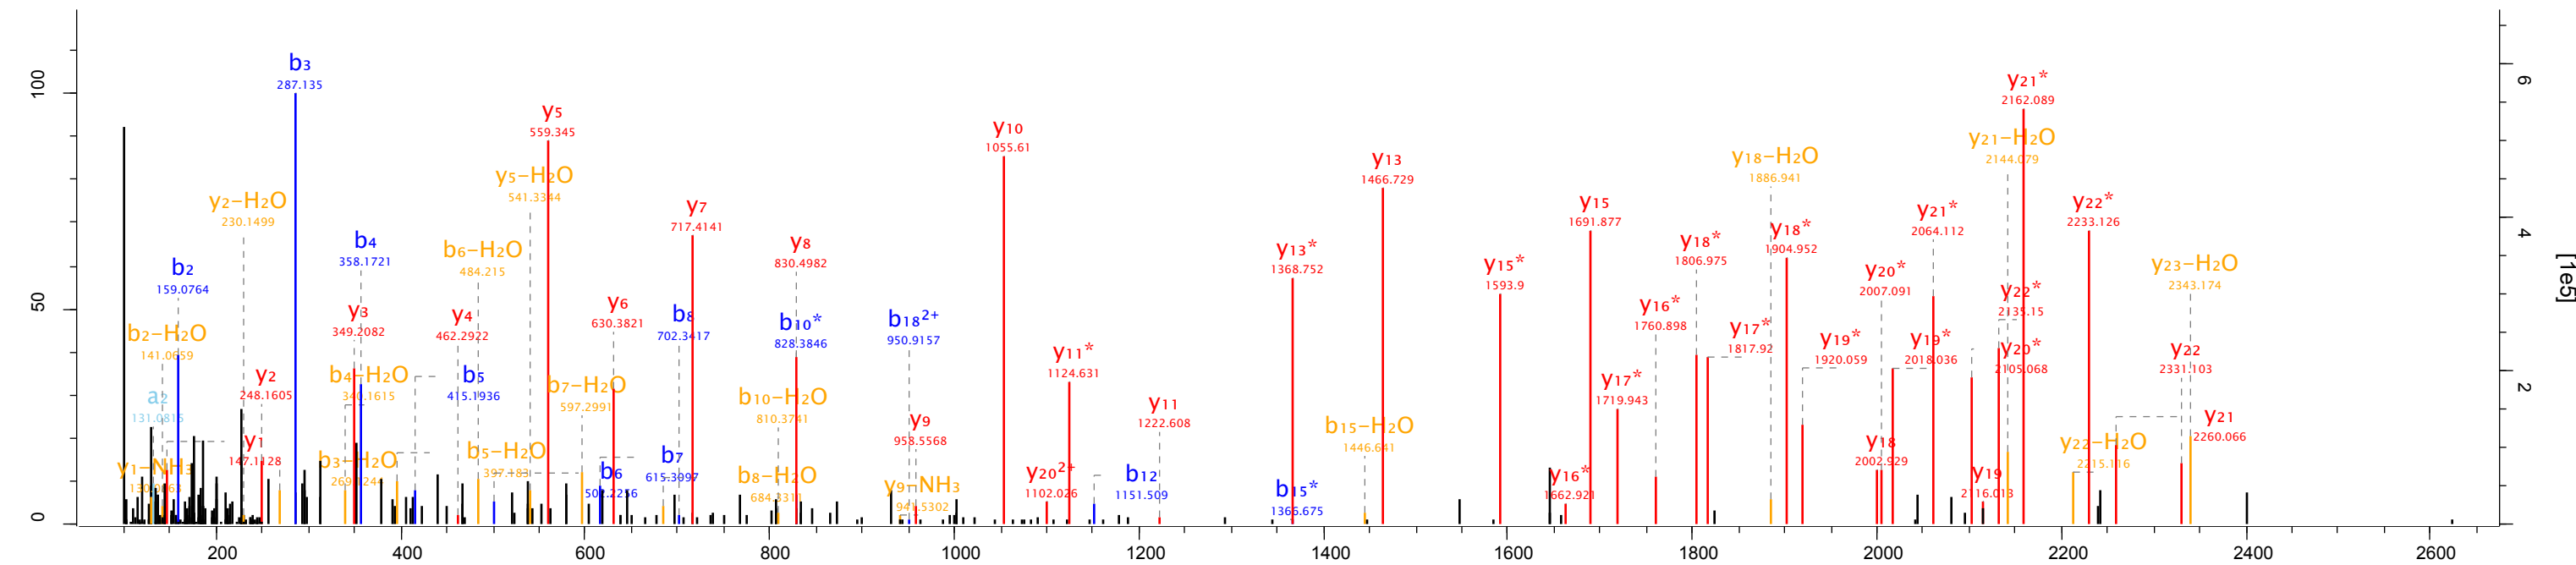

- T G Q A G S L S G S P K P F S P Q L S A P I T T K -

b<sub>2</sub>
b<sub>3</sub>
b<sub>4</sub>
b<sub>5</sub>
b<sub>6</sub>
b<sub>7</sub>
b<sub>8</sub>
b<sub>10</sub><sup>\*</sup>
b<sub>12</sub>
b<sub>15</sub><sup>\*</sup>
b<sub>18</sub><sup>2+</sup>
y<sub>1</sub>
y<sub>2</sub>
y<sub>3</sub>
y<sub>4</sub>
y<sub>5</sub>
y<sub>6</sub>
y<sub>7</sub>
y<sub>8</sub>
y<sub>9</sub>
y<sub>10</sub>
y<sub>11</sub>
y<sub>11</sub> ph
y<sub>15</sub>
y<sub>16</sub><sup>\*</sup> ph
y<sub>17</sub><sup>\*</sup>
y<sub>18</sub>
y<sub>19</sub>
y<sub>20</sub><sup>\*</sup>
y<sub>21</sub>
y<sub>22</sub>

Raw file: 20150812\_A375SR\_Phospho\_BR1\_03  
 Scan: 21651 Method: FTMS; HCD Score: 101.78 m/z: 683.32 Gene names: NKTR

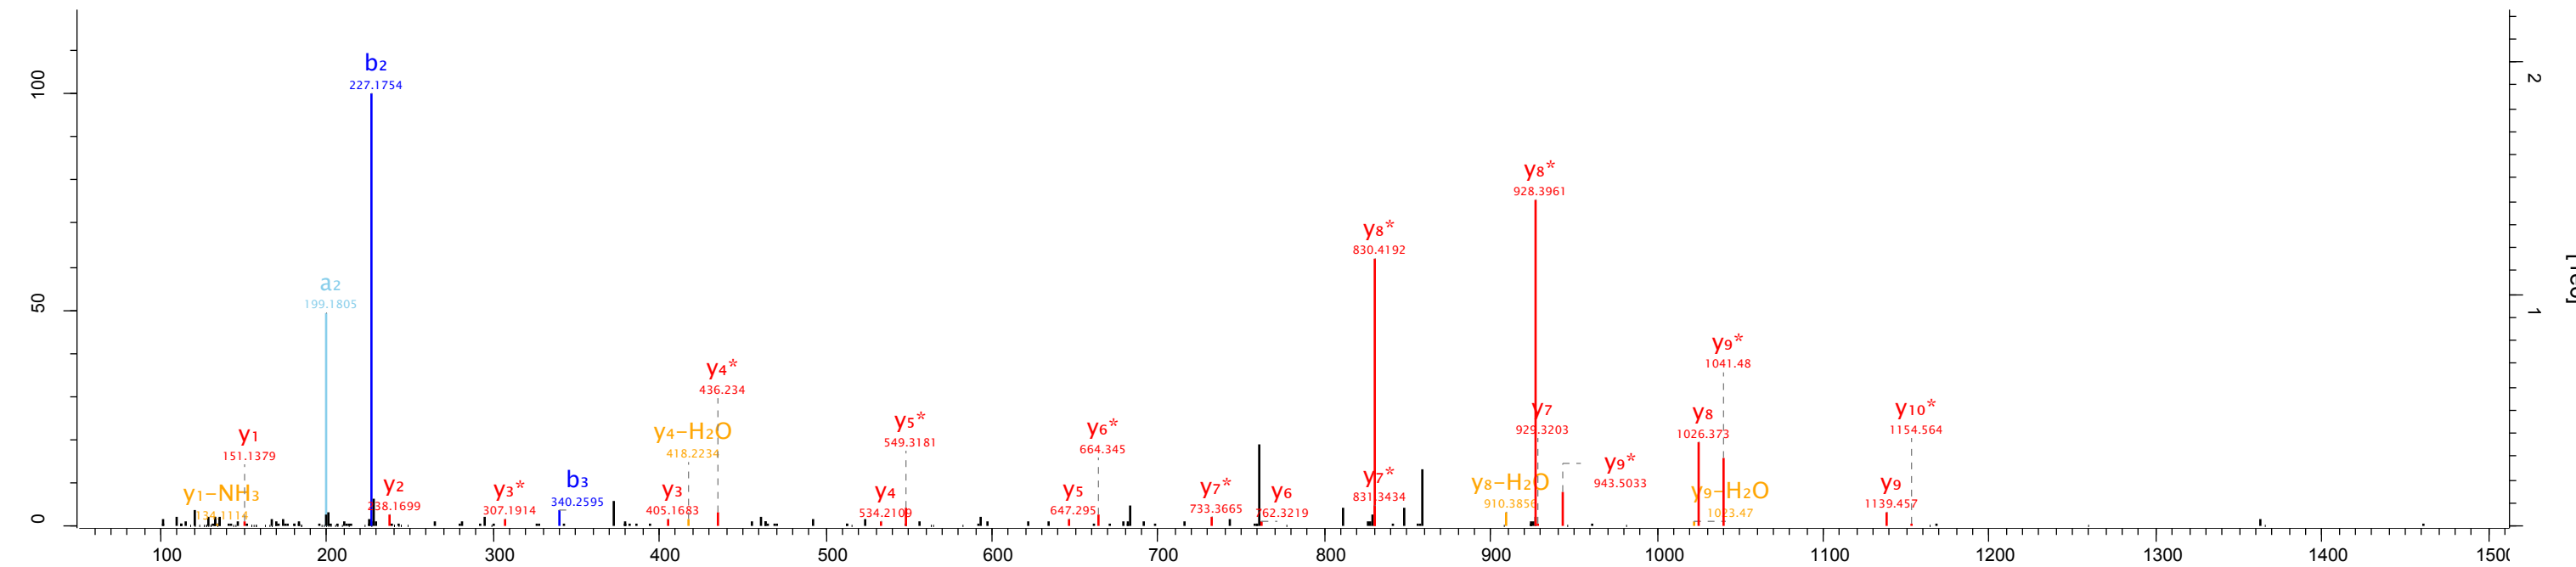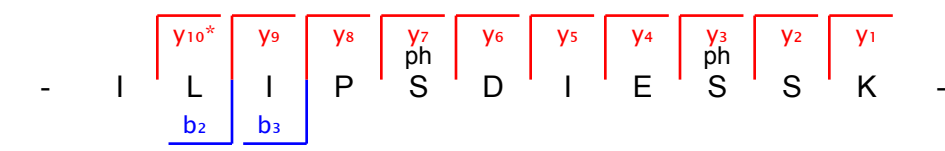

Raw file: 20150812\_A375SR\_Phospho\_BR1\_03  
 Scan: 21701 Method: FTMS; HCD Score: 117.21 m/z: 665.98 Gene names: TBX2

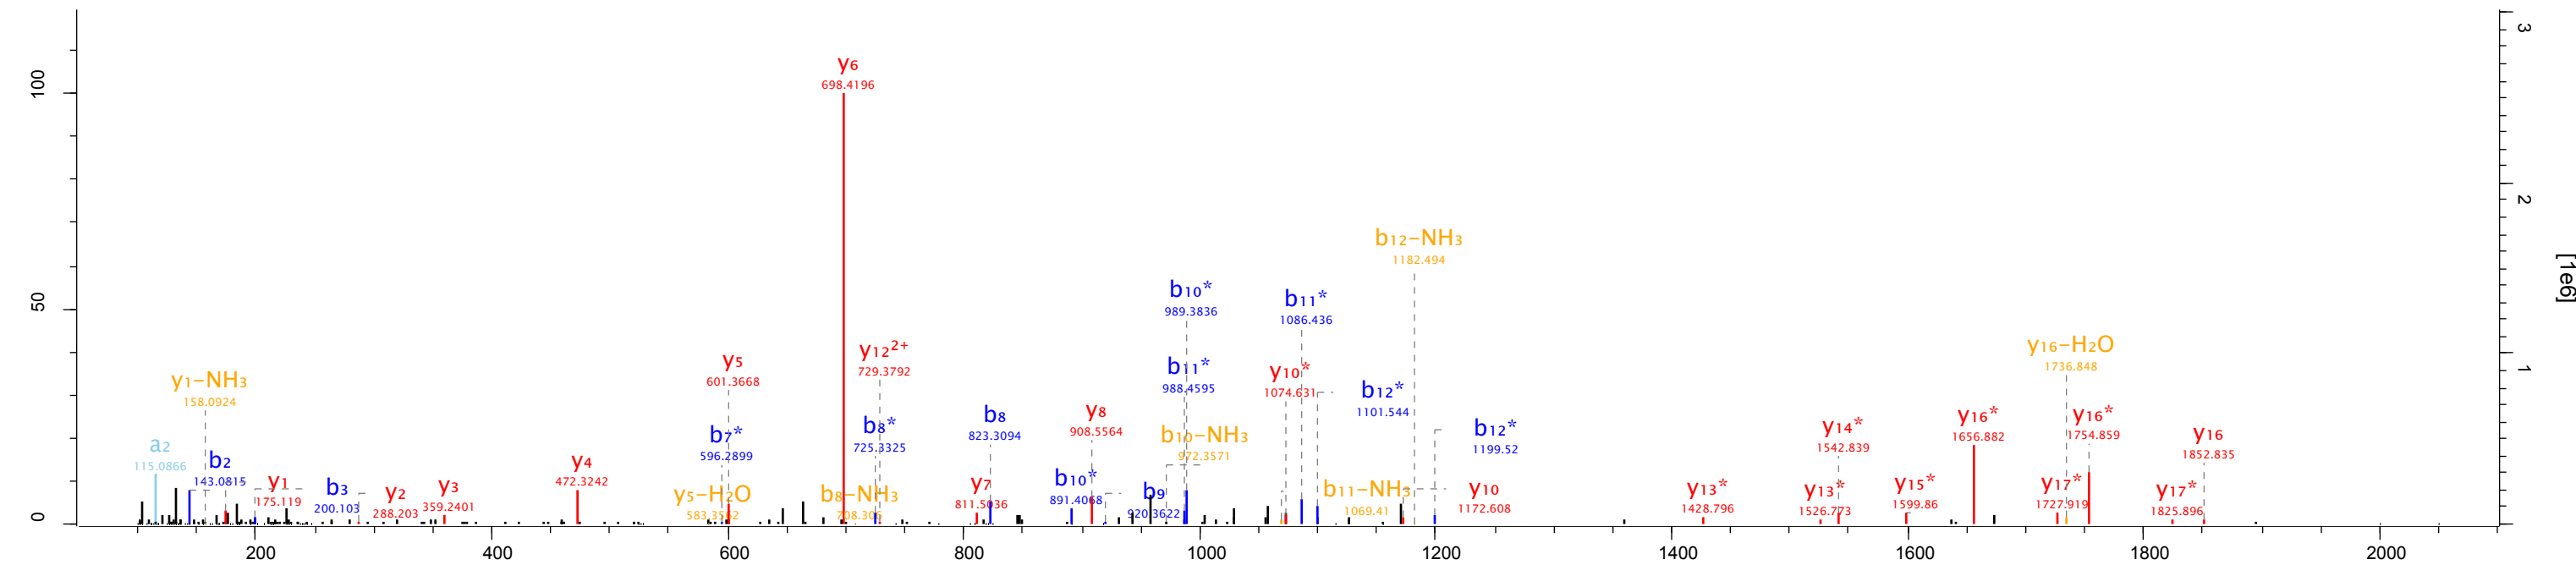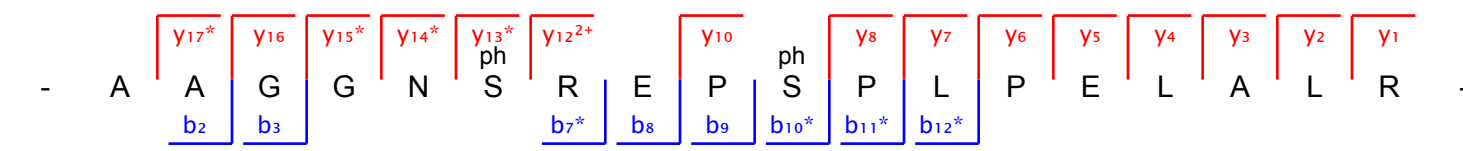

Raw file  
20150812\_A375SR\_Phospho\_BR1\_03

Scan 2181 Method FTMS; HCD Score 280.56 m/z 951.41 Gene names LMNA

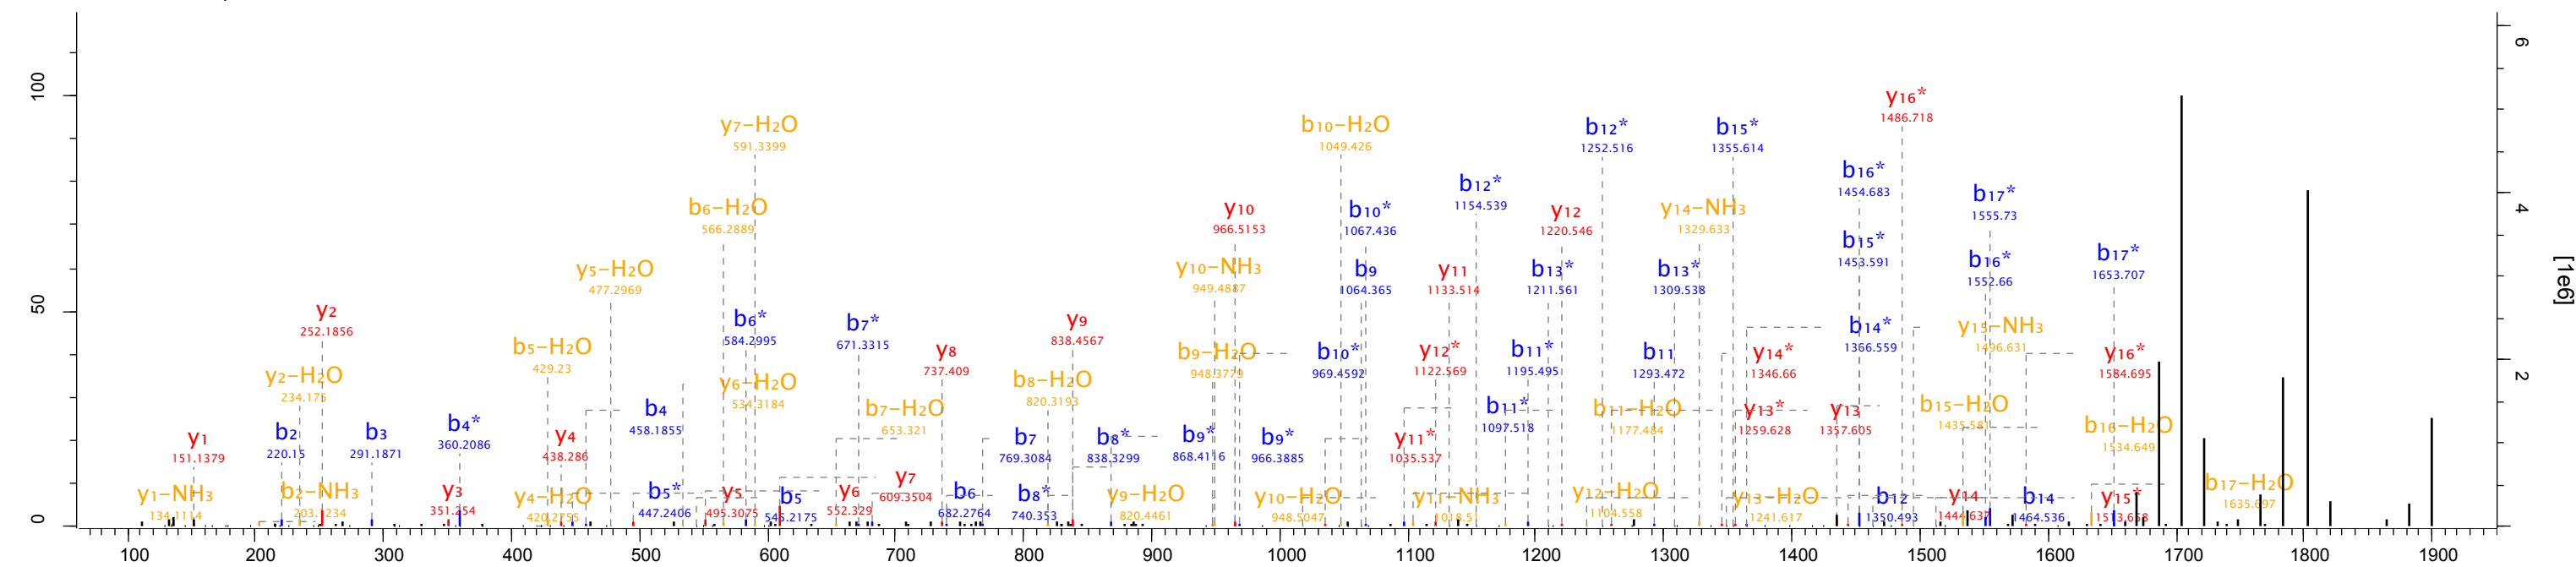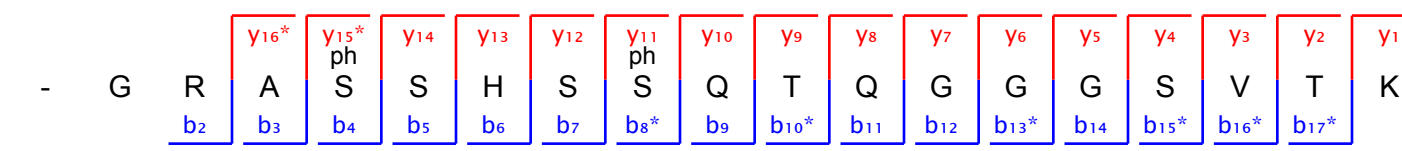

Raw file 20150812\_A375SR\_Phospho\_BR1\_03 Scan 22141 Method FTMS; HCD Score 46.42 m/z 1177.43 Gene names PIH1D3

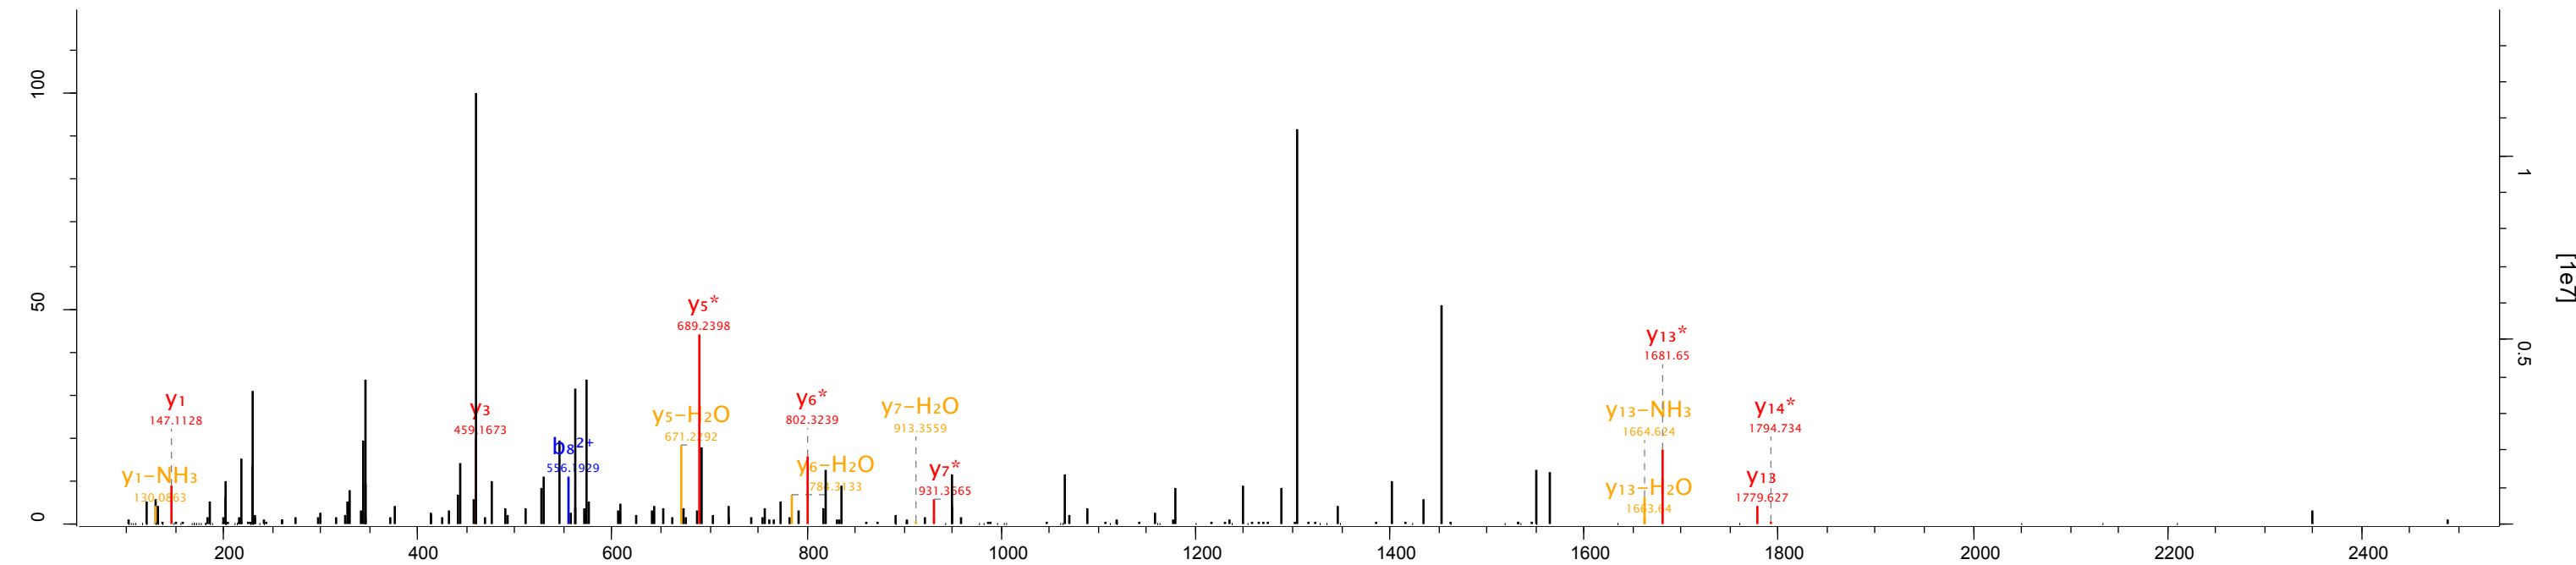

- A F Y Y14\* Y13 E T b8<sup>2+</sup> L Y7\* Y6\* Y5\* ph ox Y3 Y1 ph M K -



Raw file: 20150812\_A375SR\_Phospho\_BR1\_03  
 Scan: 22151 Method: FTMS; HCD Score: 310.52 m/z: 1377.06 Gene names: CPD

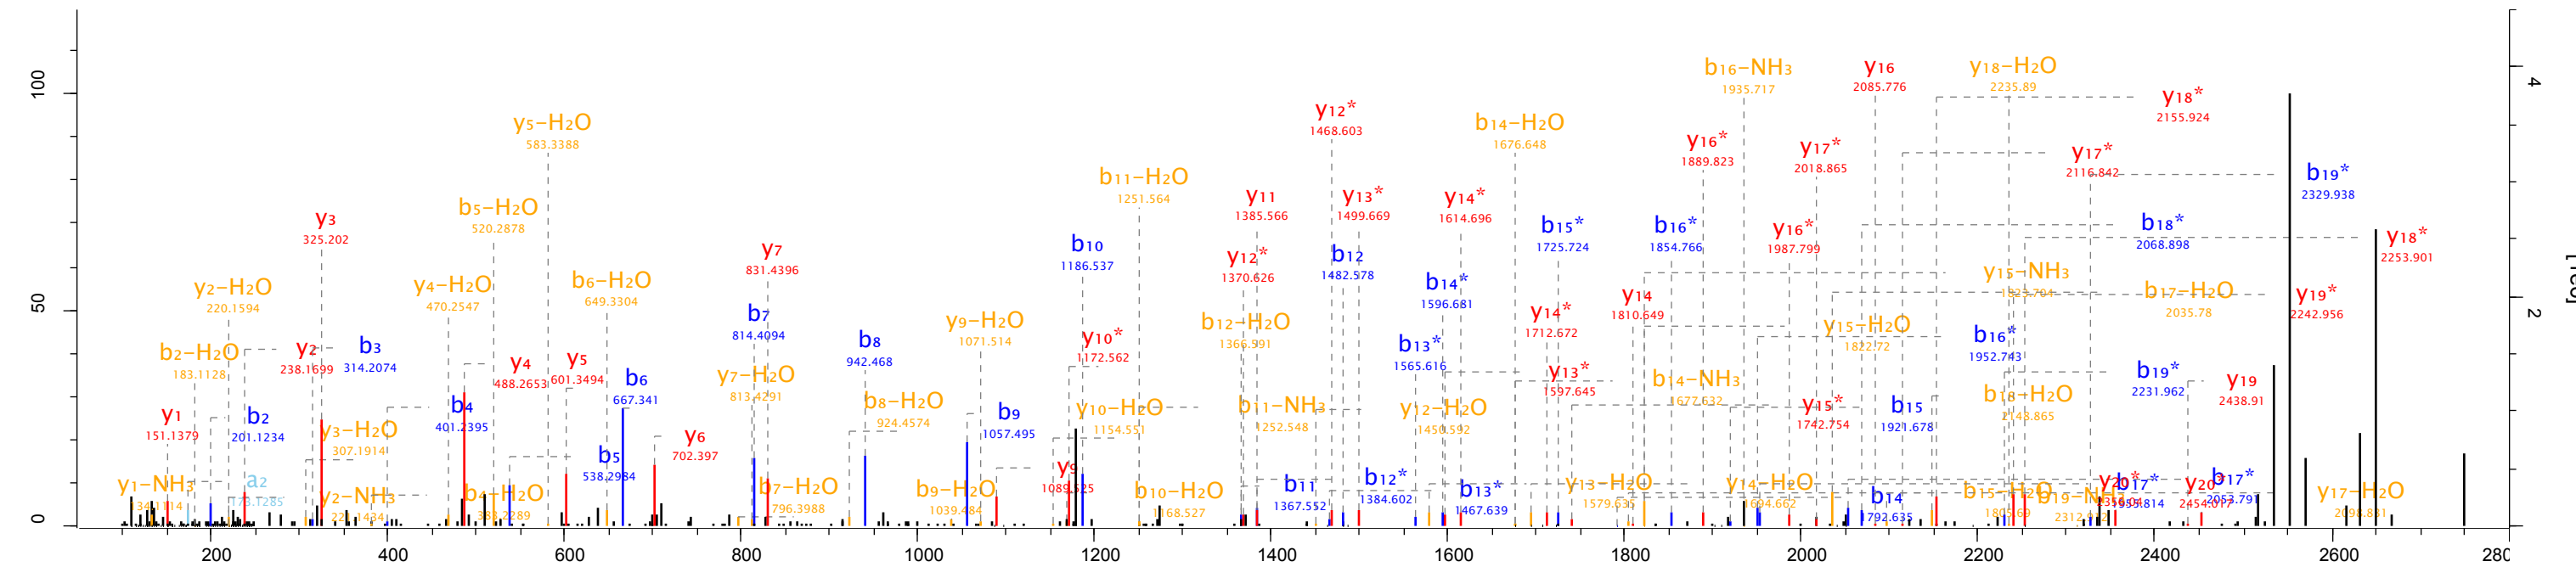

- S L L S H E F Q D E T D E E E T L Y S S K -  
 b<sub>2</sub> b<sub>3</sub> b<sub>4</sub> b<sub>5</sub> b<sub>6</sub> b<sub>7</sub> b<sub>8</sub> b<sub>9</sub> b<sub>10</sub> b<sub>11</sub> b<sub>12</sub> b<sub>13</sub>\* b<sub>14</sub> b<sub>15</sub> b<sub>16</sub>\* b<sub>17</sub>\* b<sub>18</sub>\* b<sub>19</sub>\*

Raw file  
20150812\_A375SR\_Phospho\_BR1\_03

Scan Method Score m/z Gene names  
22341 FTMS; HCD 66.38 966.78 FOXC1

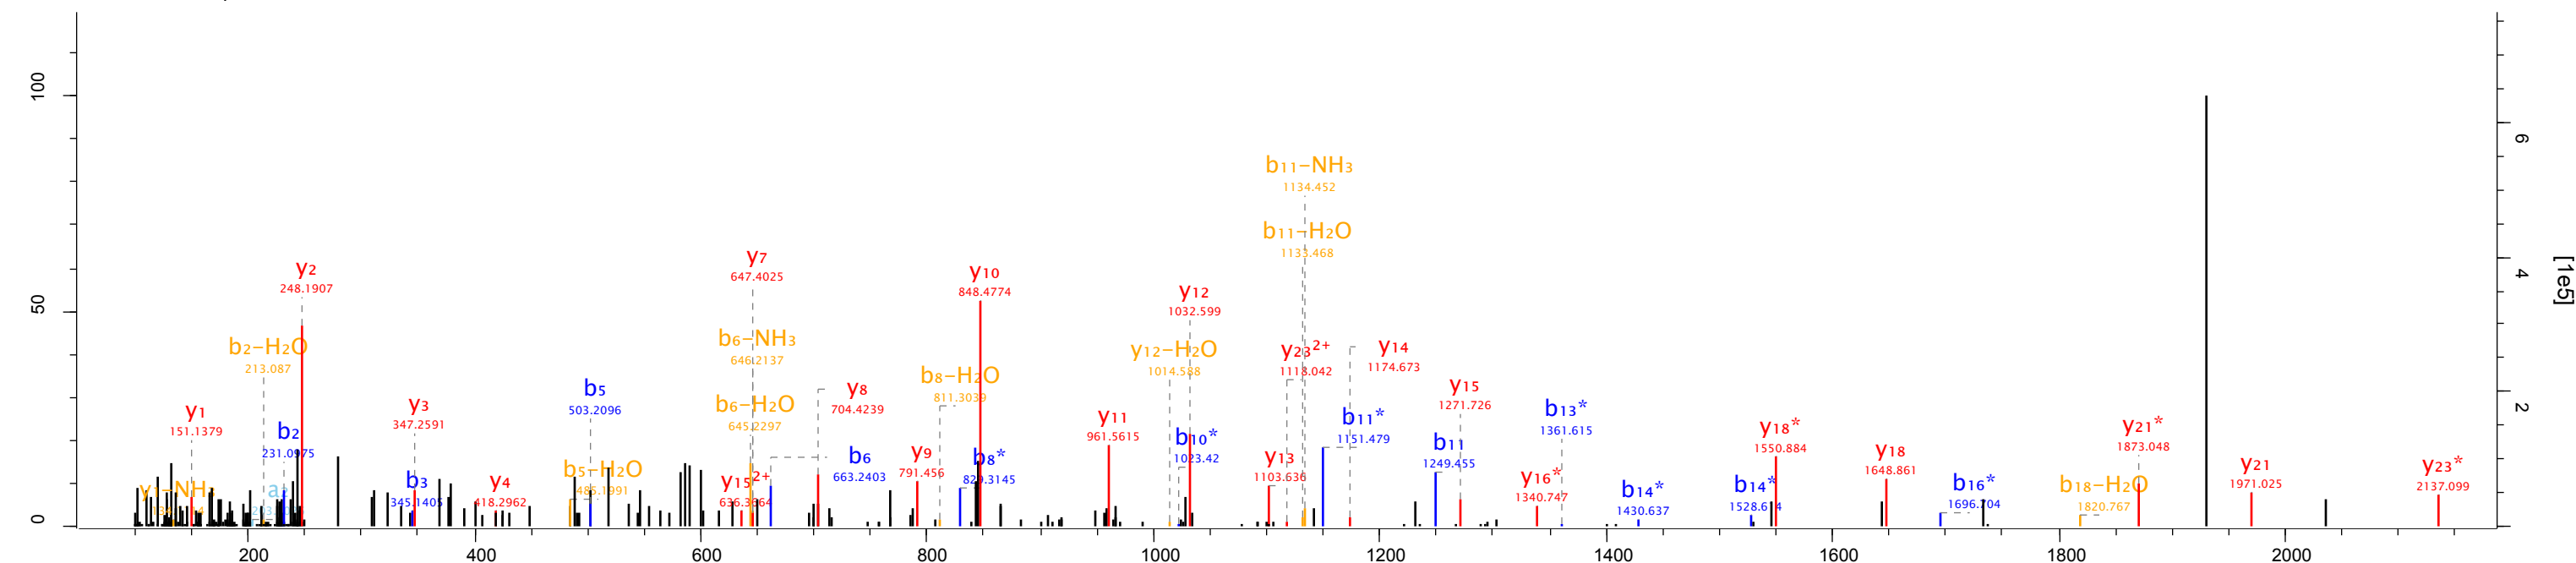

- T E N G T C P ph S P P Q P L S P A A A L G S G S A A A V P K -

Fragmentation mapping (b-ions in blue, y-ions in red):

- b<sub>2</sub> (E), b<sub>3</sub> (N), b<sub>5</sub> (T), b<sub>6</sub> (C), b<sub>8</sub>\* (ph), b<sub>10</sub>\* (P), b<sub>11</sub> (Q), b<sub>13</sub>\* (L), b<sub>14</sub>\* (S), b<sub>16</sub>\* (A)
- y<sub>1</sub> (K), y<sub>2</sub> (P), y<sub>3</sub> (V), y<sub>4</sub> (A), y<sub>7</sub> (S), y<sub>8</sub> (G), y<sub>9</sub> (S), y<sub>10</sub> (G), y<sub>11</sub> (L), y<sub>12</sub> (A), y<sub>13</sub> (A), y<sub>14</sub> (A), y<sub>15</sub> (P), y<sub>16</sub>\* (S), y<sub>18</sub> (P), y<sub>21</sub> (P), y<sub>23</sub>\* (P)

Raw file: 20150812\_A375SR\_Phospho\_BR1\_03  
 Scan: 2271 Method: FTMS; HCD Score: 108.06 m/z: 467.19 Gene names: ZC3H13

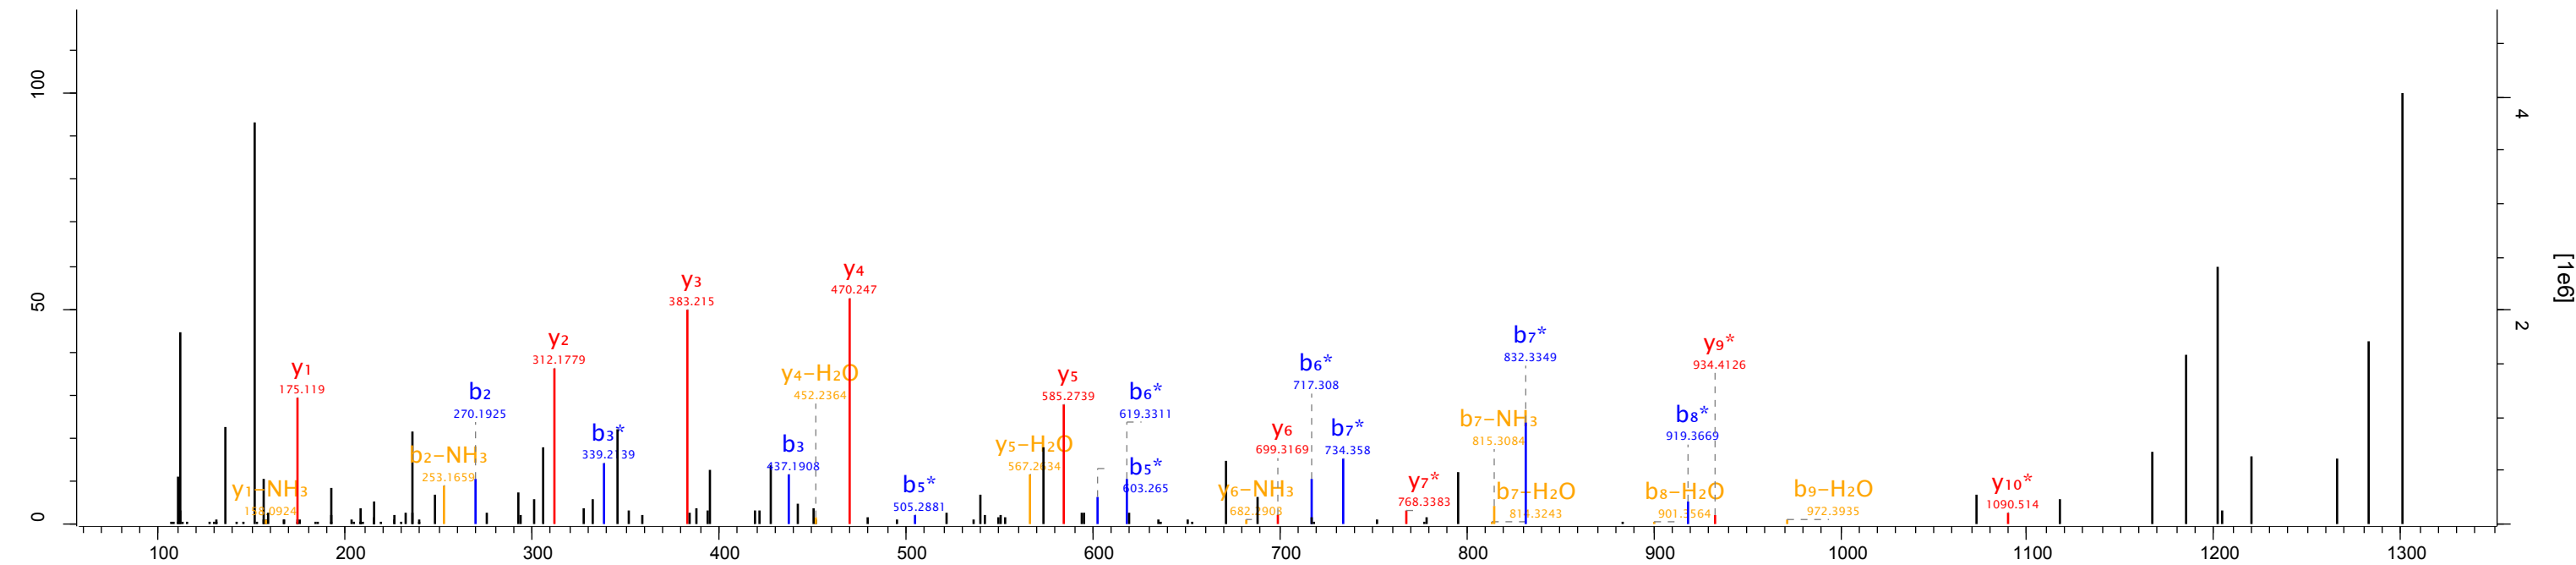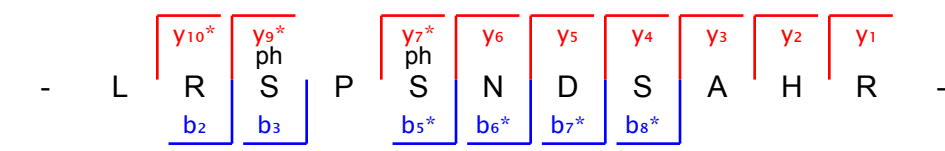

Raw file 20150812\_A375SR\_Phospho\_BR1\_03 Scan 22841 Method FTMS; HCD Score 162.81 m/z 660.33 Gene names PDZD2

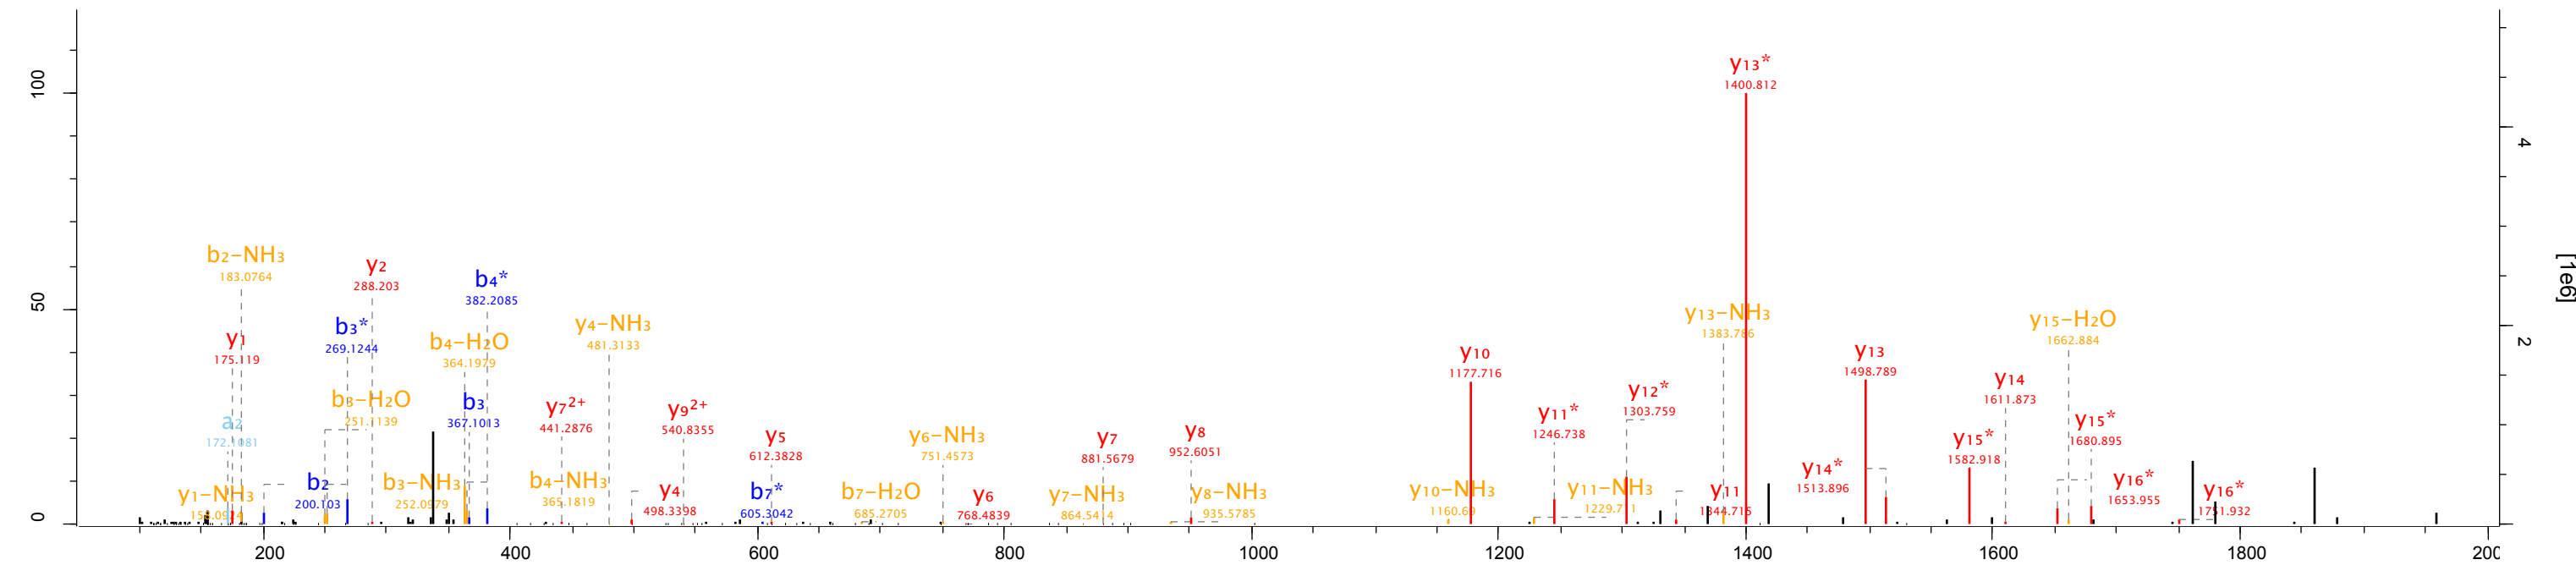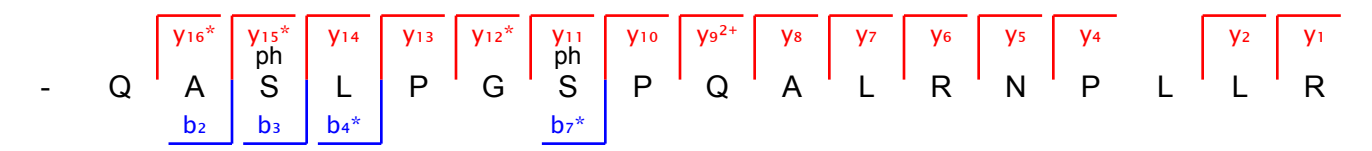

Raw file: 20150812\_A375SR\_Phospho\_BR1\_03  
 Scan: 23201 Method: FTMS; HCD Score: 220.86 m/z: 1098.83 Gene names: SIRT1

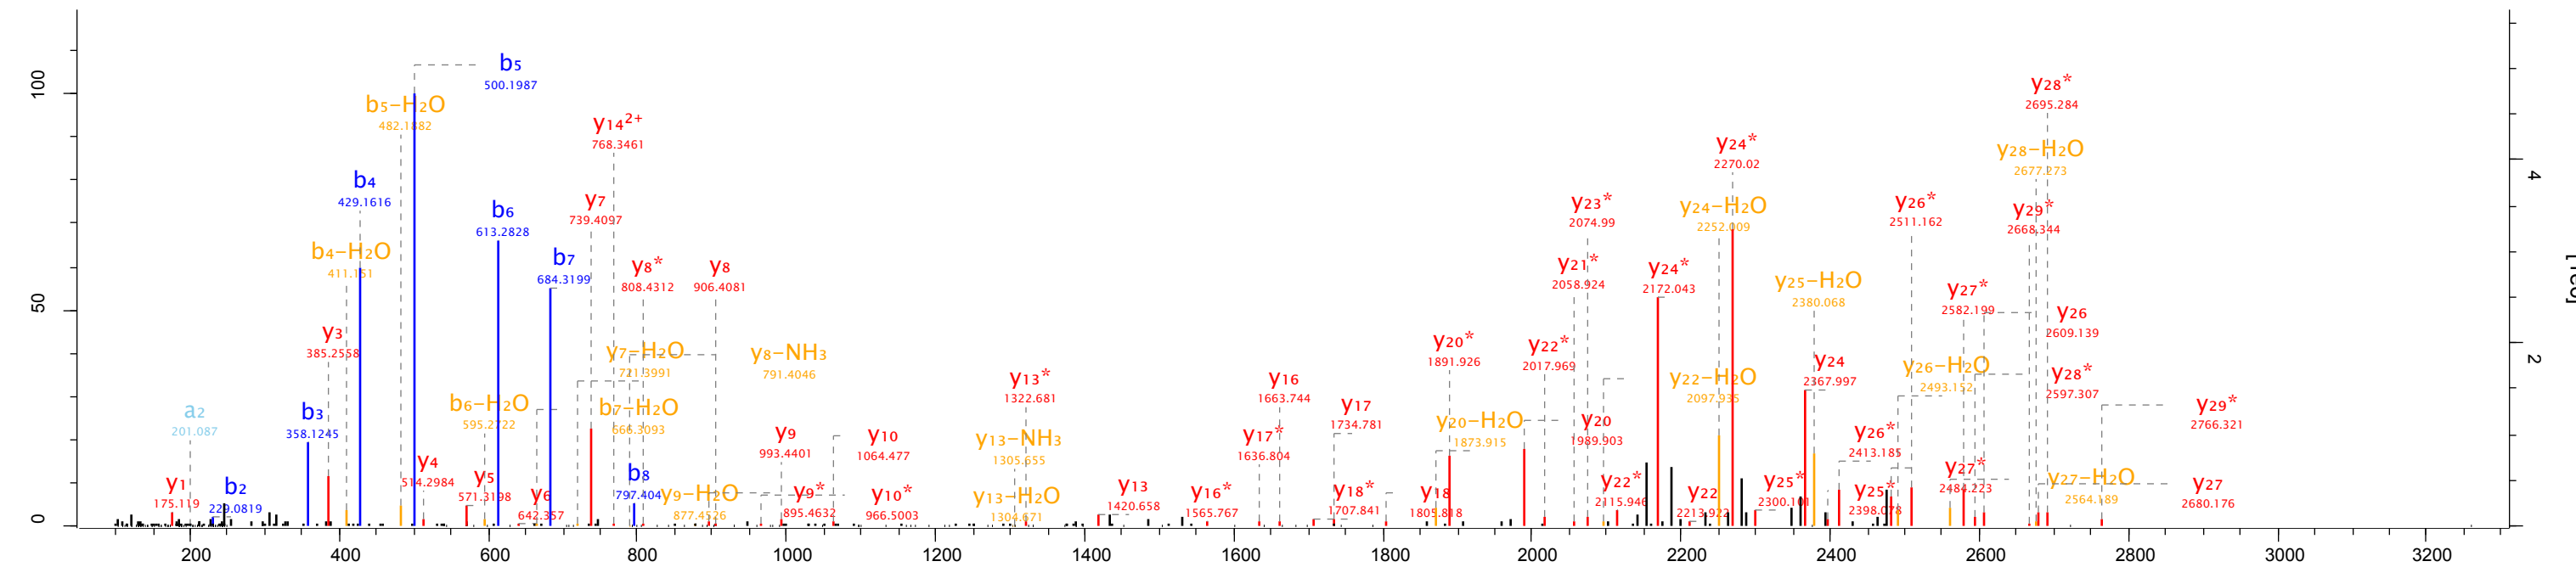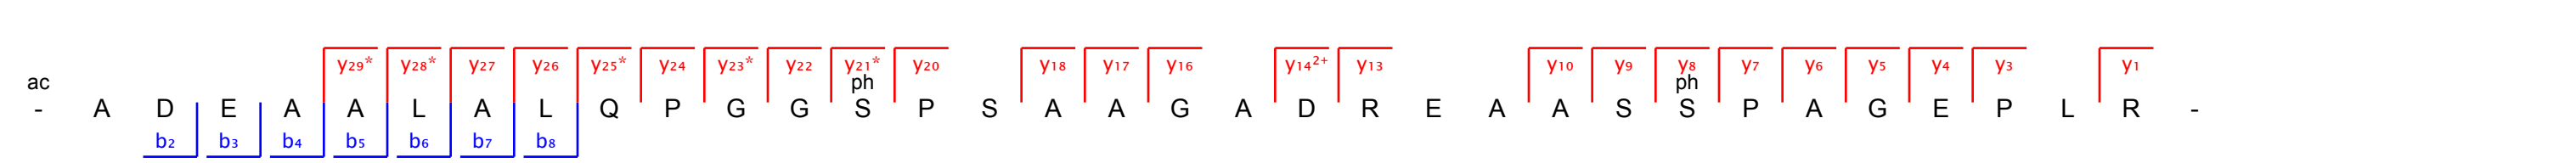

Raw file: 20150812\_A375SR\_Phospho\_BR1\_03  
 Scan: 2331 Method: FTMS; HCD Score: 128.21 m/z: 631.27 Gene names: BUD13

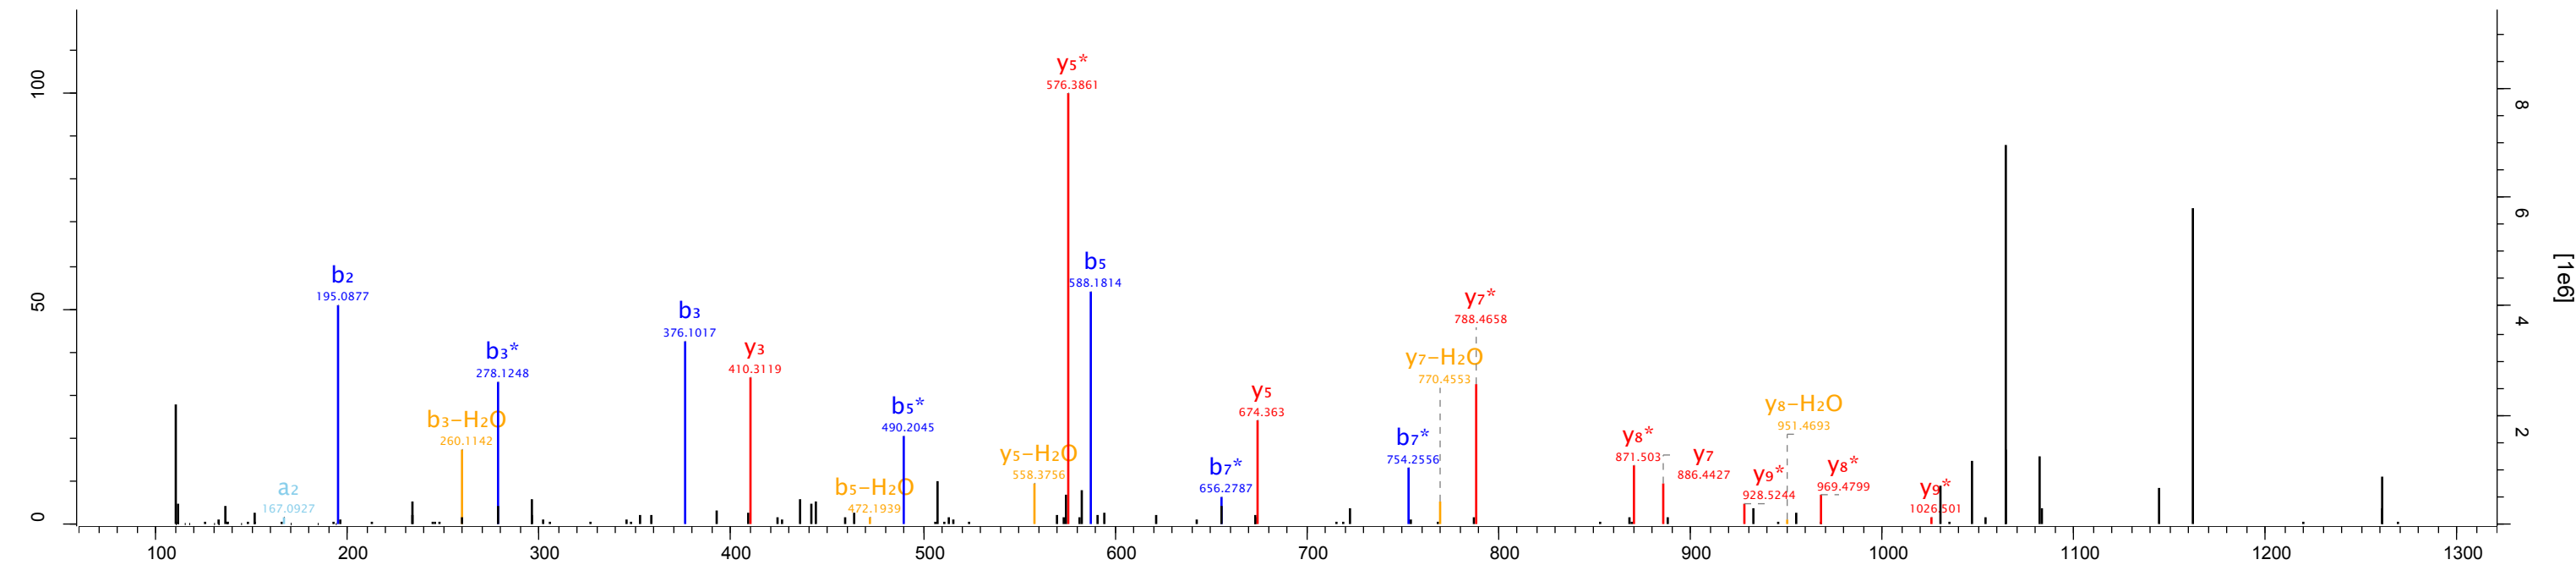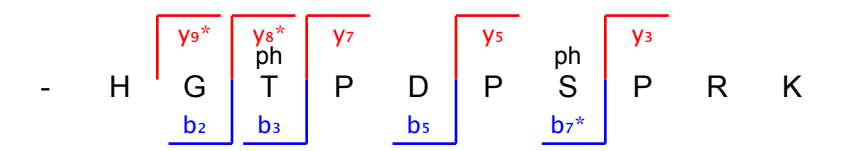

Raw file 20150812\_A375SR\_Phospho\_BR1\_03 Scan 23381 Method FTMS; HCD Score 192.1 m/z 852.73 Gene names EPB41L1

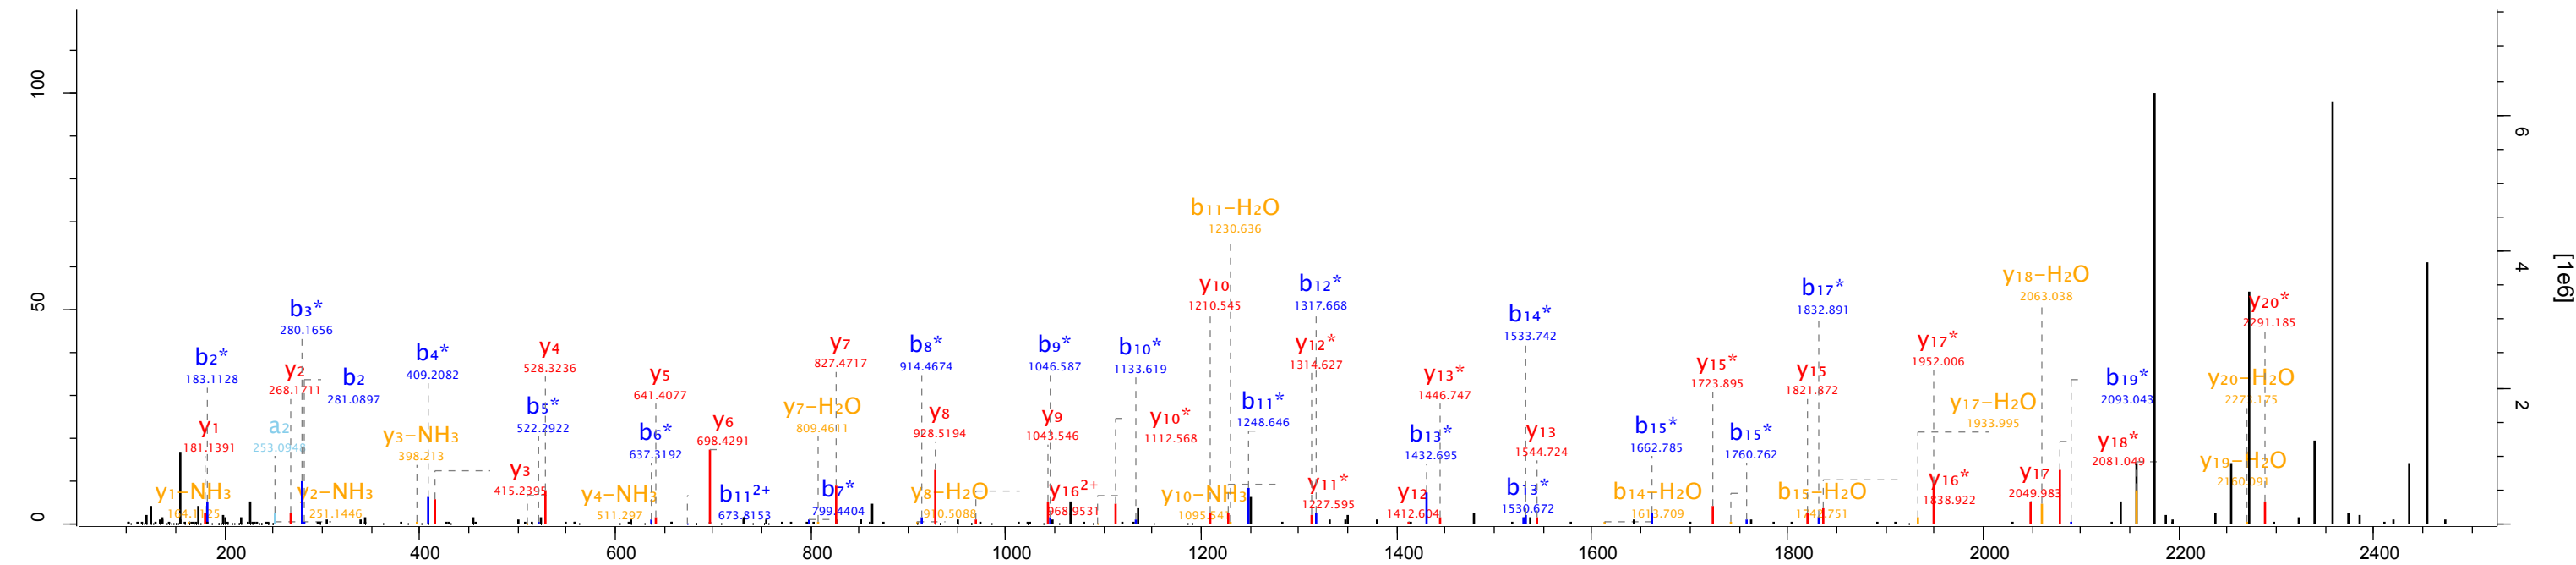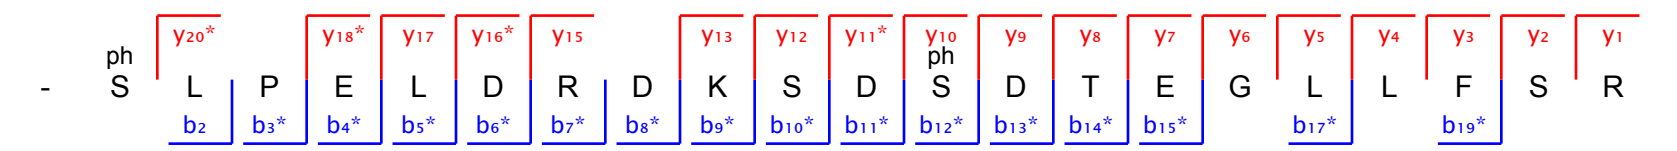





Raw file 20150812\_A375SR\_Phospho\_BR1\_03 Scan 2351 Method FTMS; HCD Score 76.81 m/z 562.92 Gene names PALLD

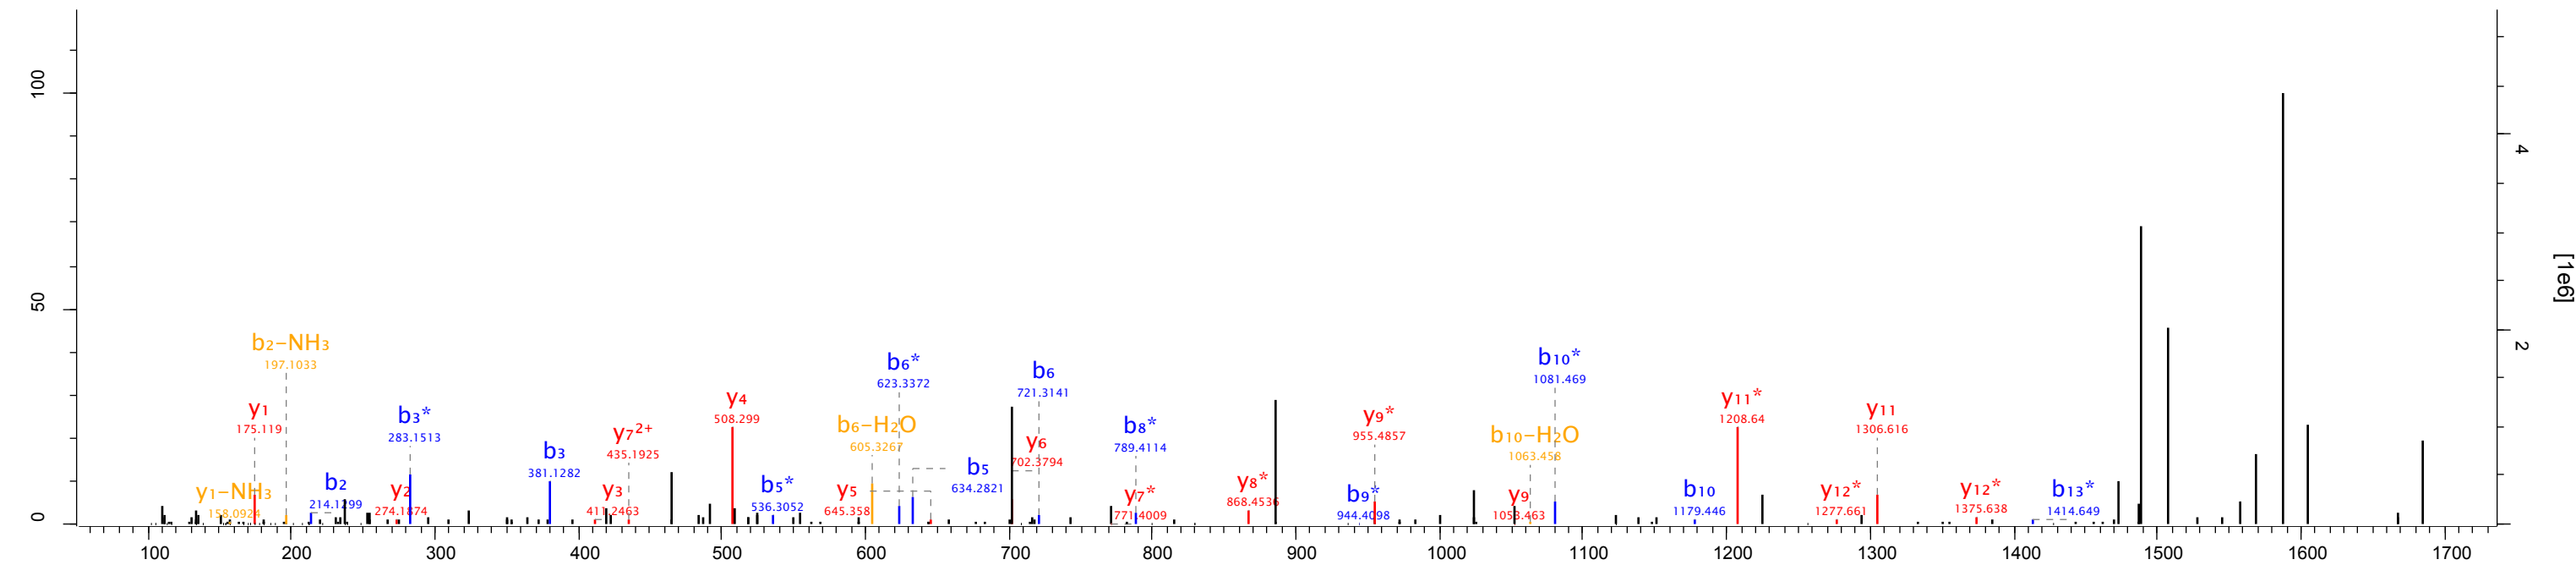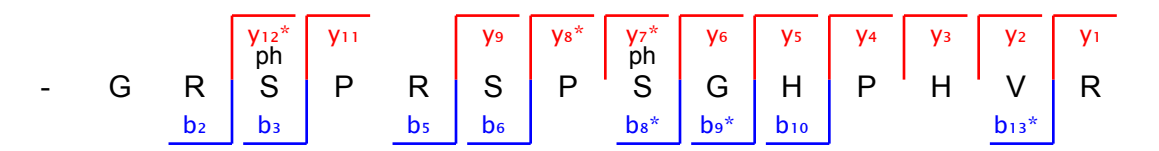

Raw file 20150812\_A375SR\_Phospho\_BR1\_03 Scan 23561 Method FTMS; HCD Score 226.44 m/z 1093.82 Gene names EIF3C;EIF3CL

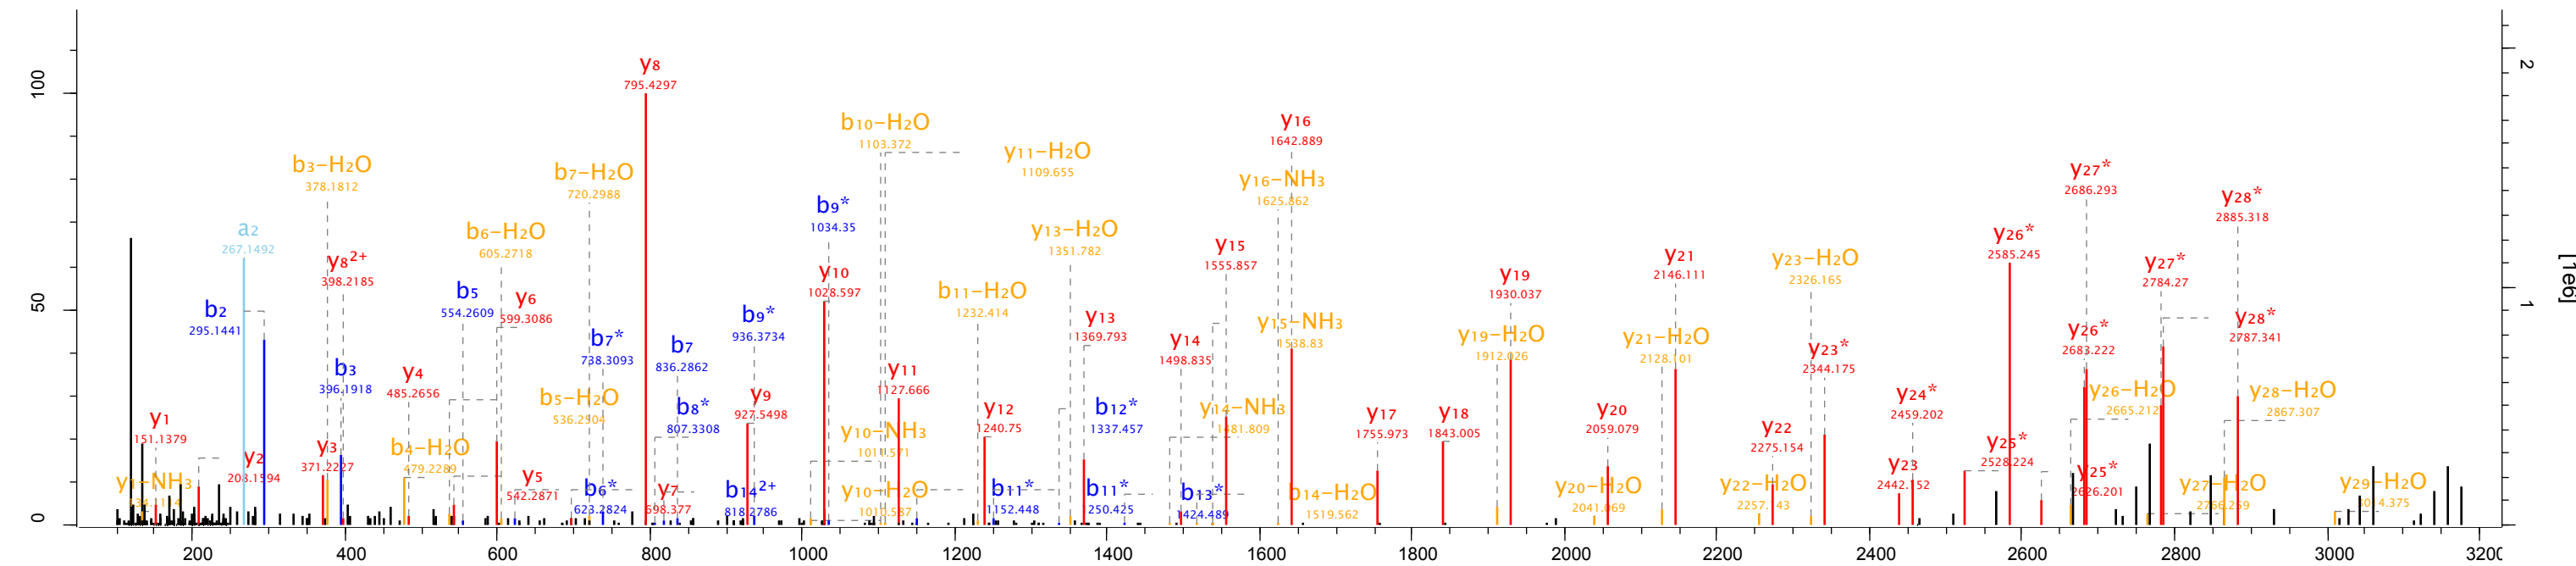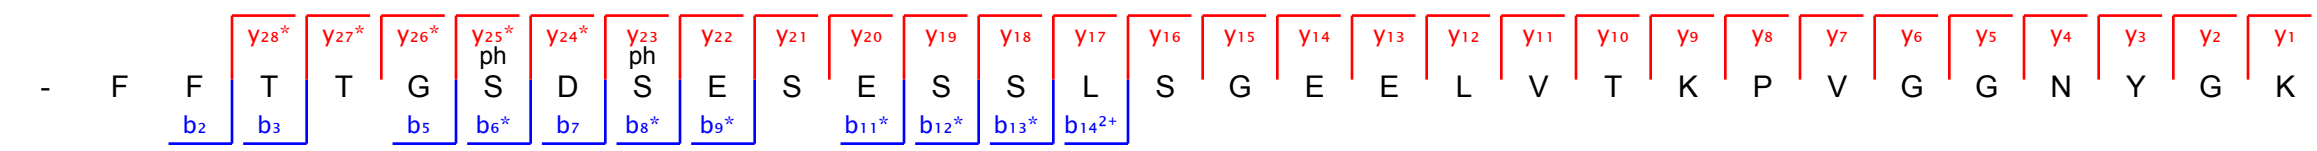

Raw file  
 20150812\_A375SR\_Phospho\_BR1\_03  
 Scan 23661 Method FTMS; HCD Score 113.11 m/z 1040.79 Gene names MAP1B

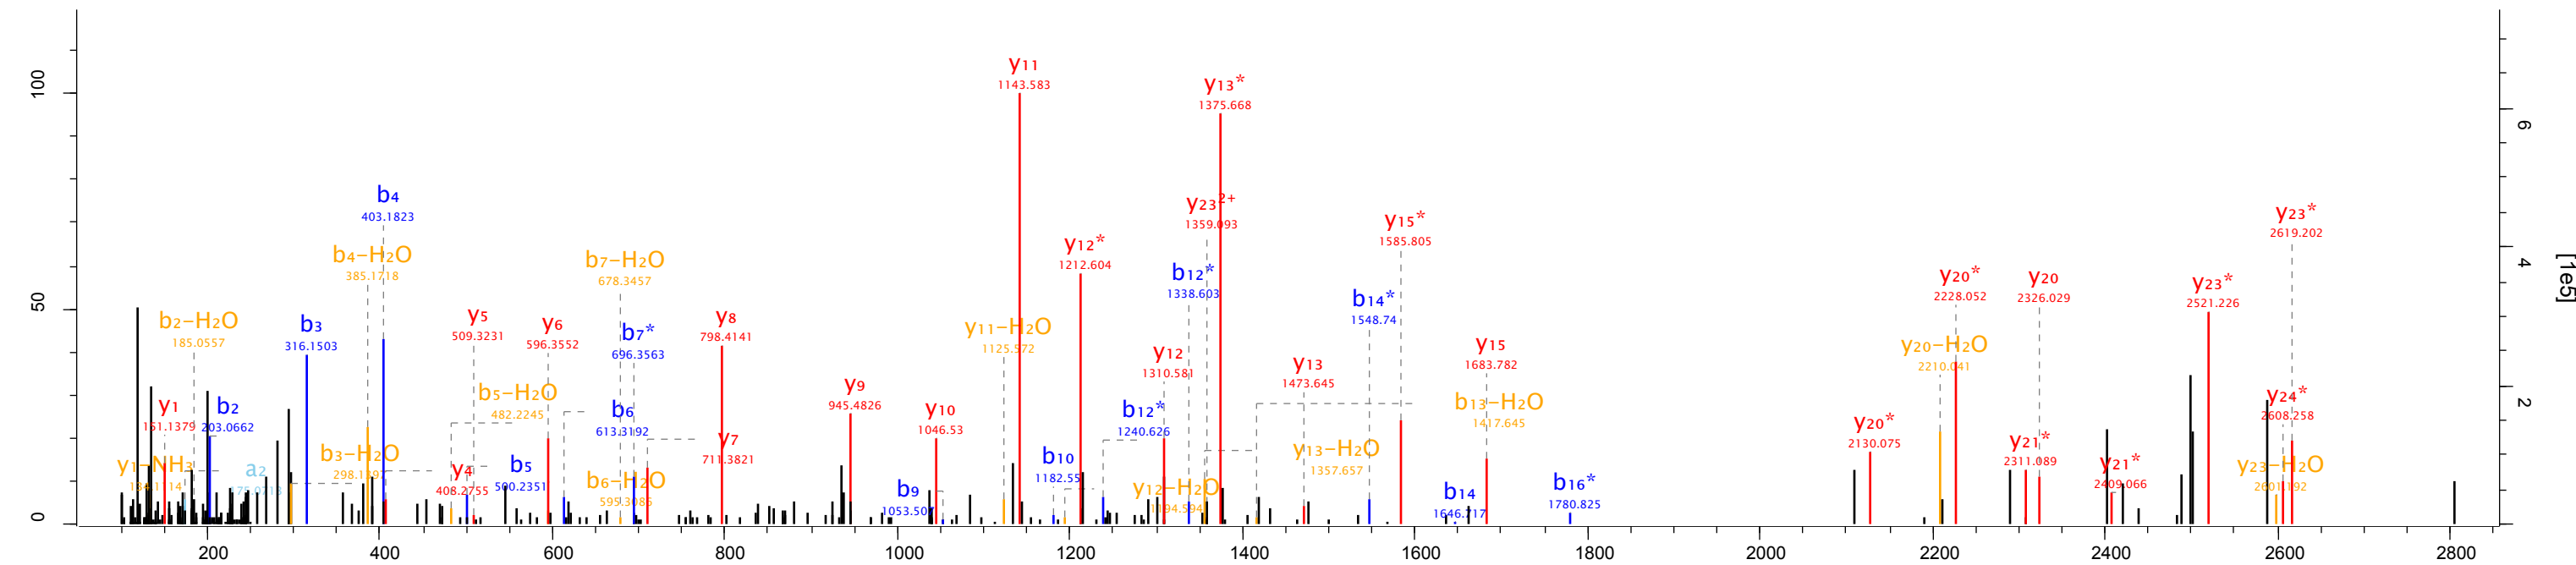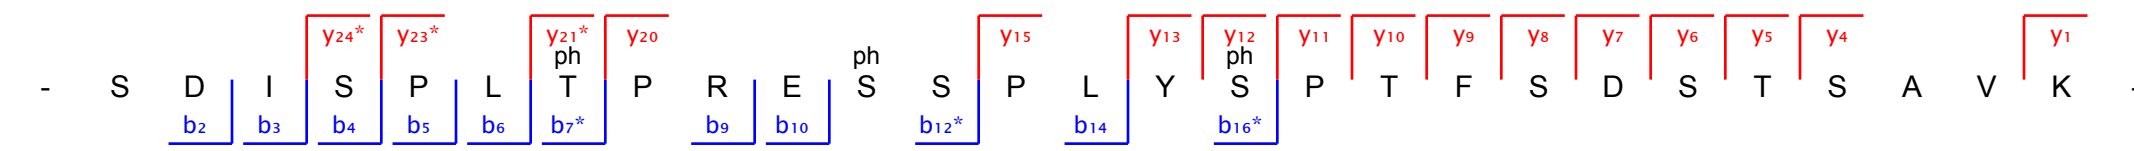

Raw file: 20150812\_A375SR\_Phospho\_BR1\_03  
 Scan: 23801 Method: FTMS; HCD Score: 156.03 m/z: 1327.04 Gene names: WAPAL

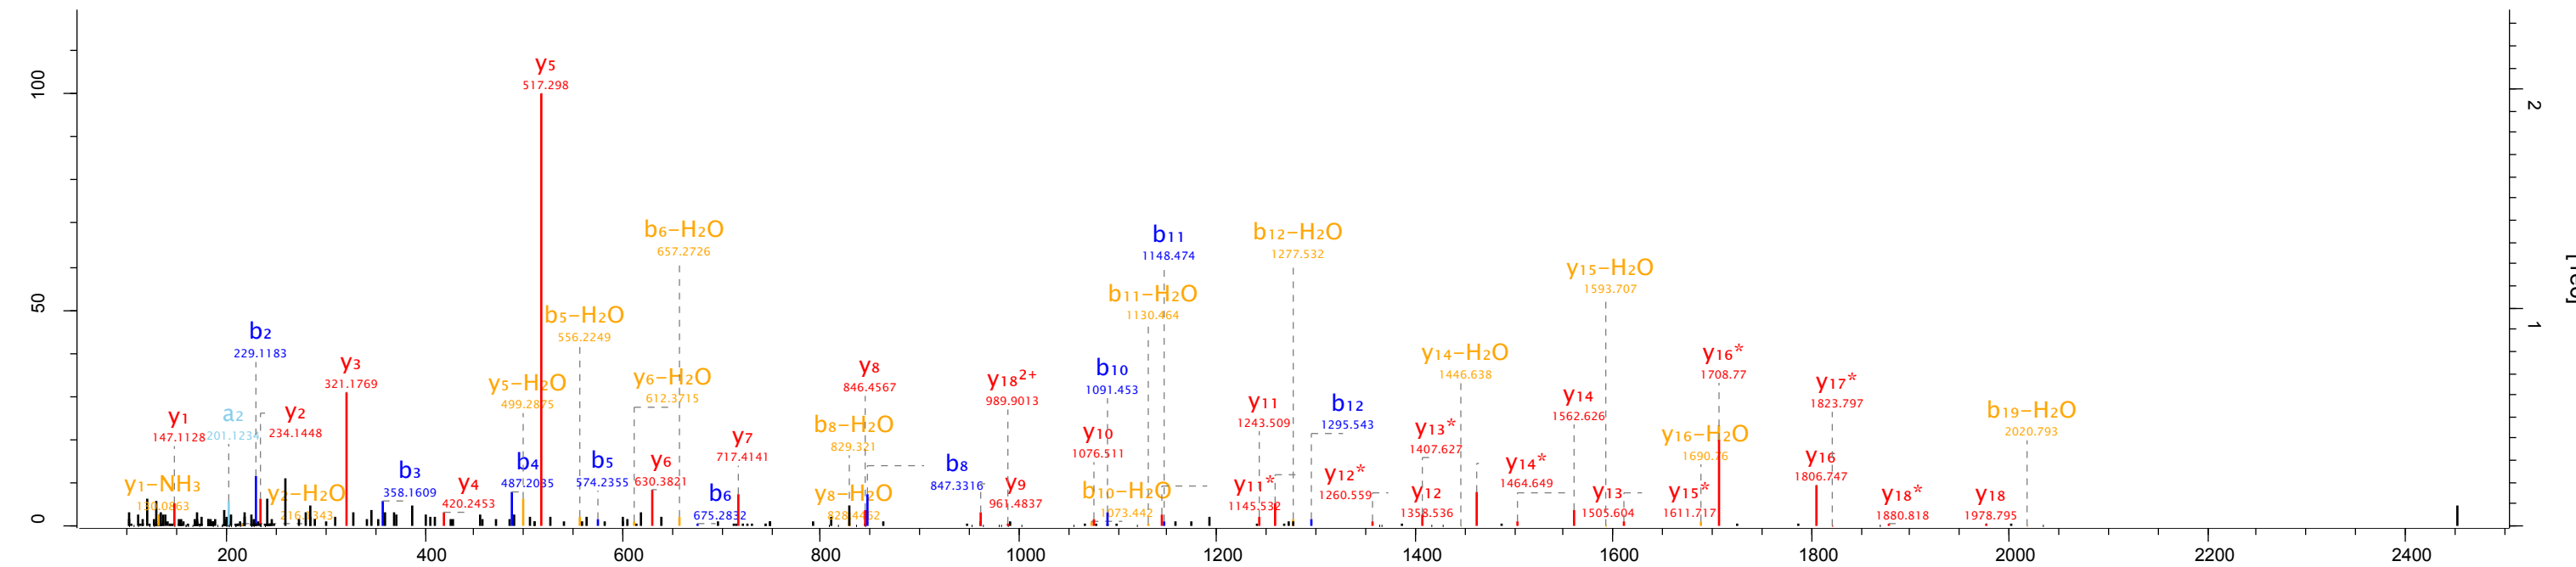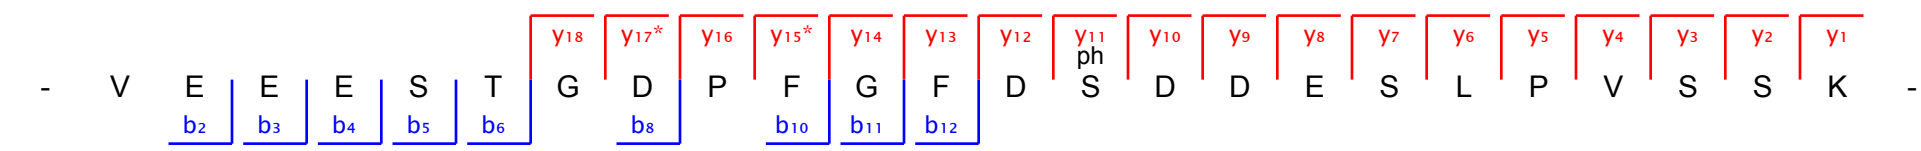

Raw file 20150812\_A375SR\_Phospho\_BR1\_03 Scan 23851 Method FTMS; HCD Score 149.12 m/z 720.83 Gene names ITPKB

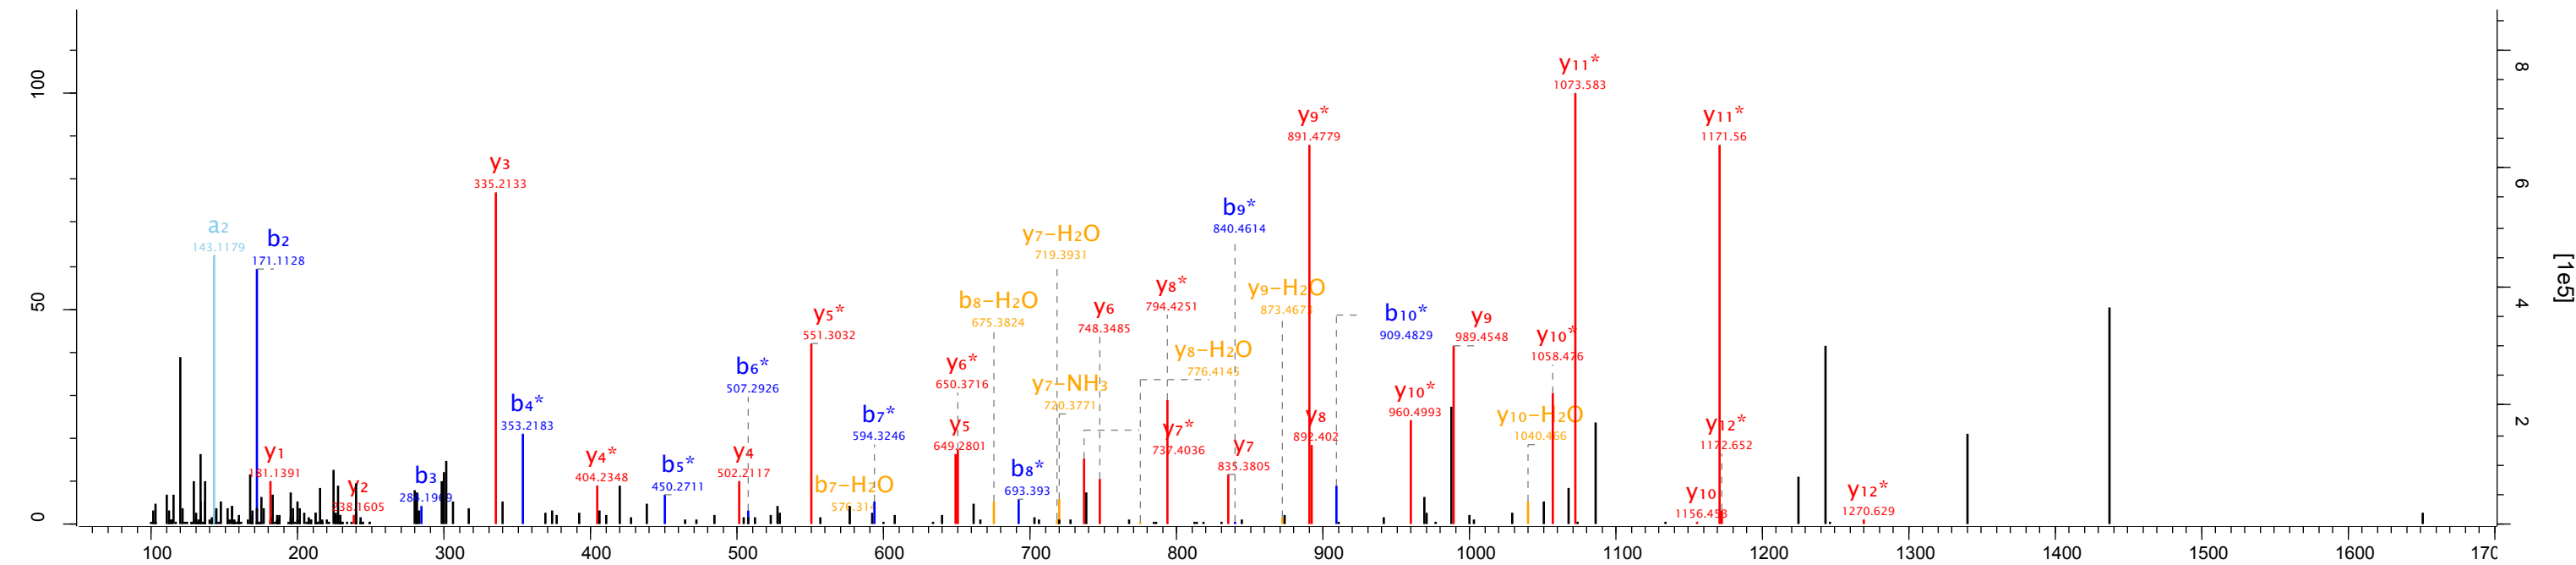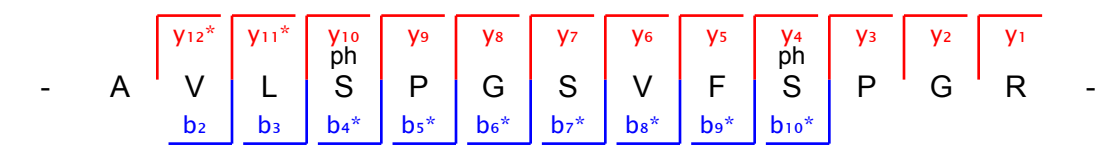

Raw file  
 20150812\_A375SR\_Phospho\_BR1\_03  
 Scan 24031 Method FTMS; HCD Score 242.36 m/z 874.78 Gene names SMARCA5

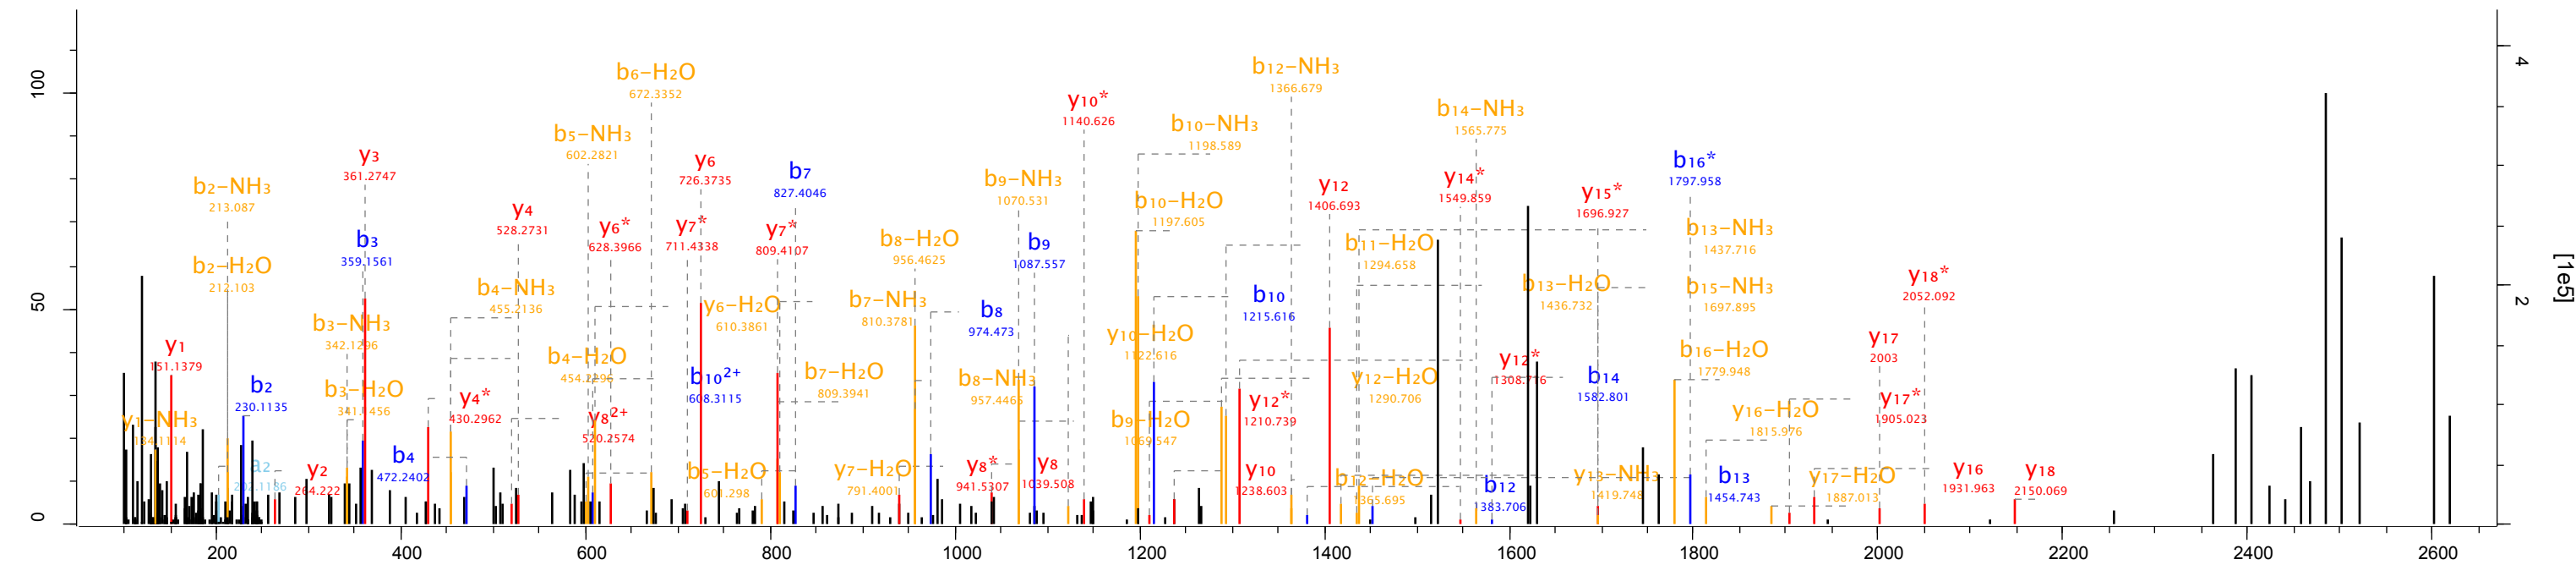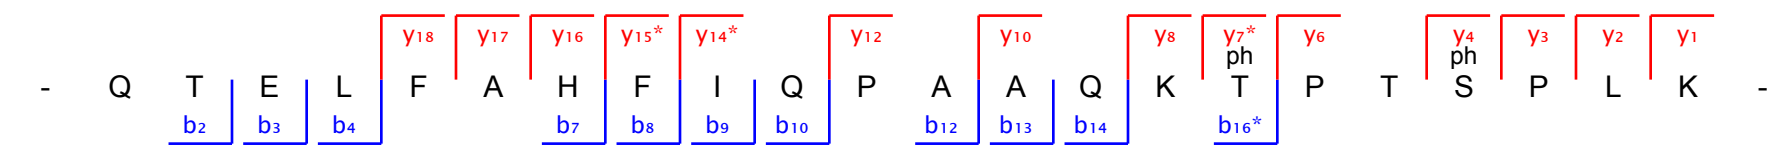

Raw file  
20150812\_A375SR\_Phospho\_BR1\_03

Scan 24501 Method FTMS; HCD Score 306.02 m/z 1242.5 Gene names HEXIM2

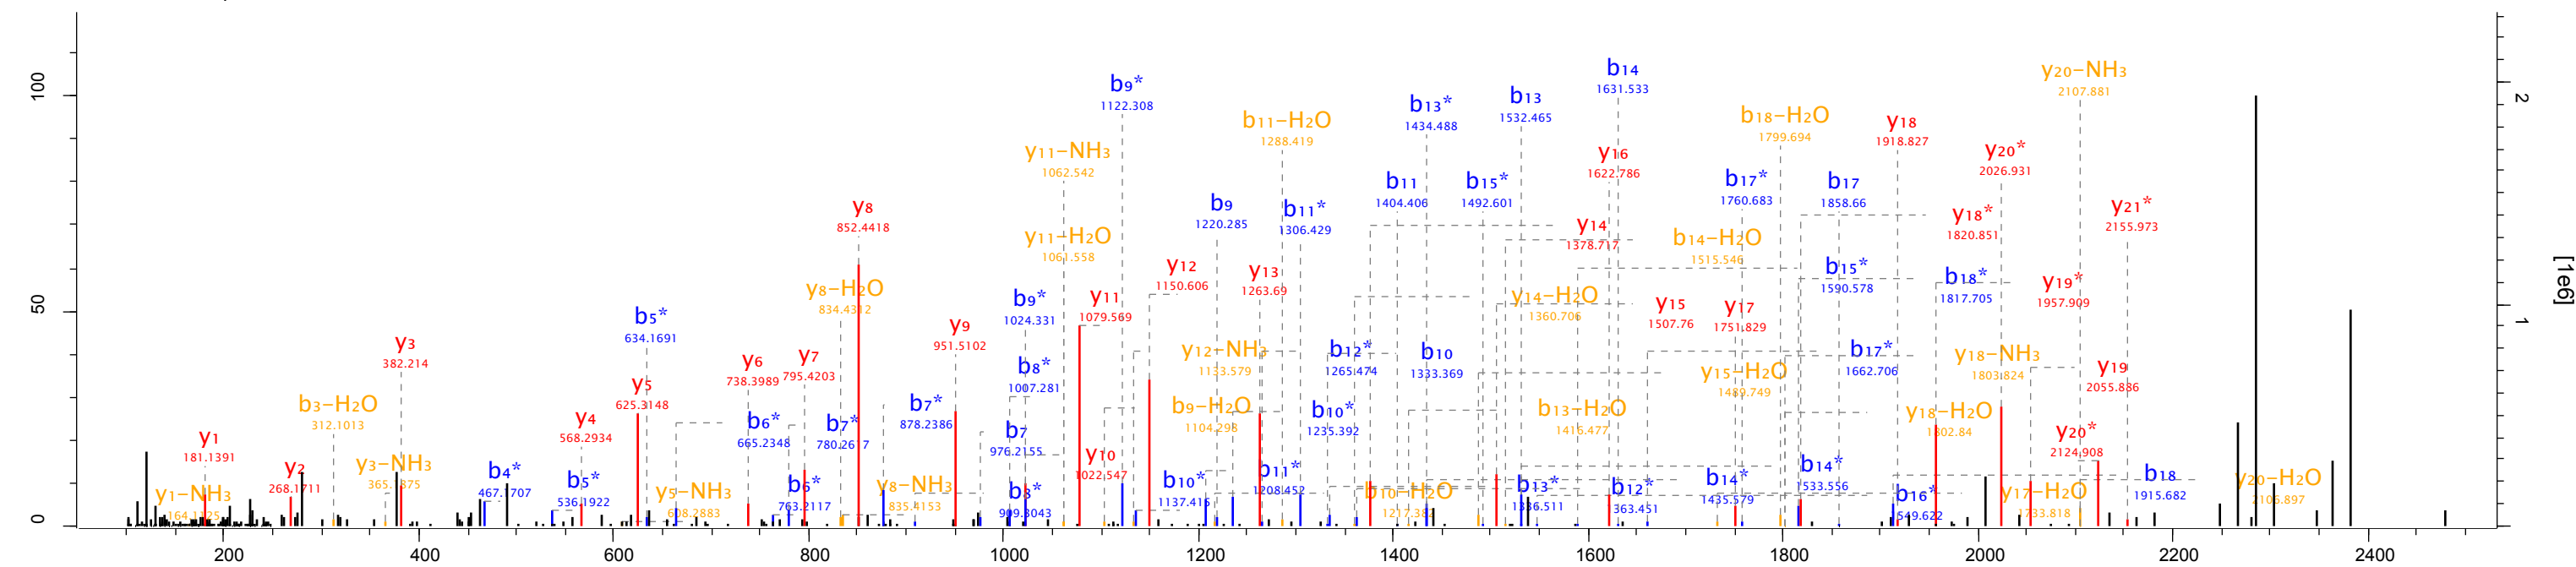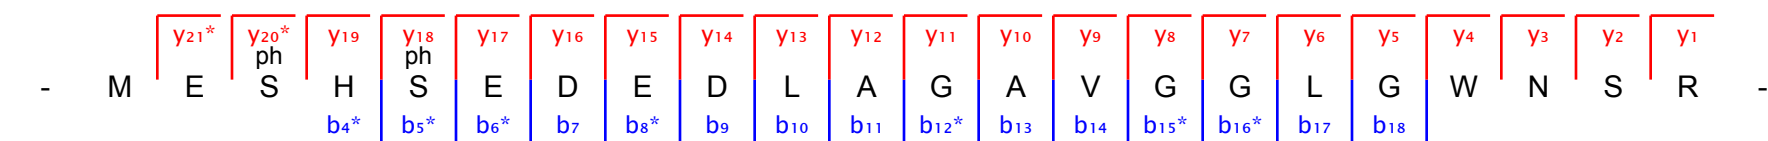

Raw file: 20150812\_A375SR\_Phospho\_BR1\_03  
 Scan: 25411 Method: FTMS; HCD Score: 185.57 m/z: 637.28 Gene names: CDC23

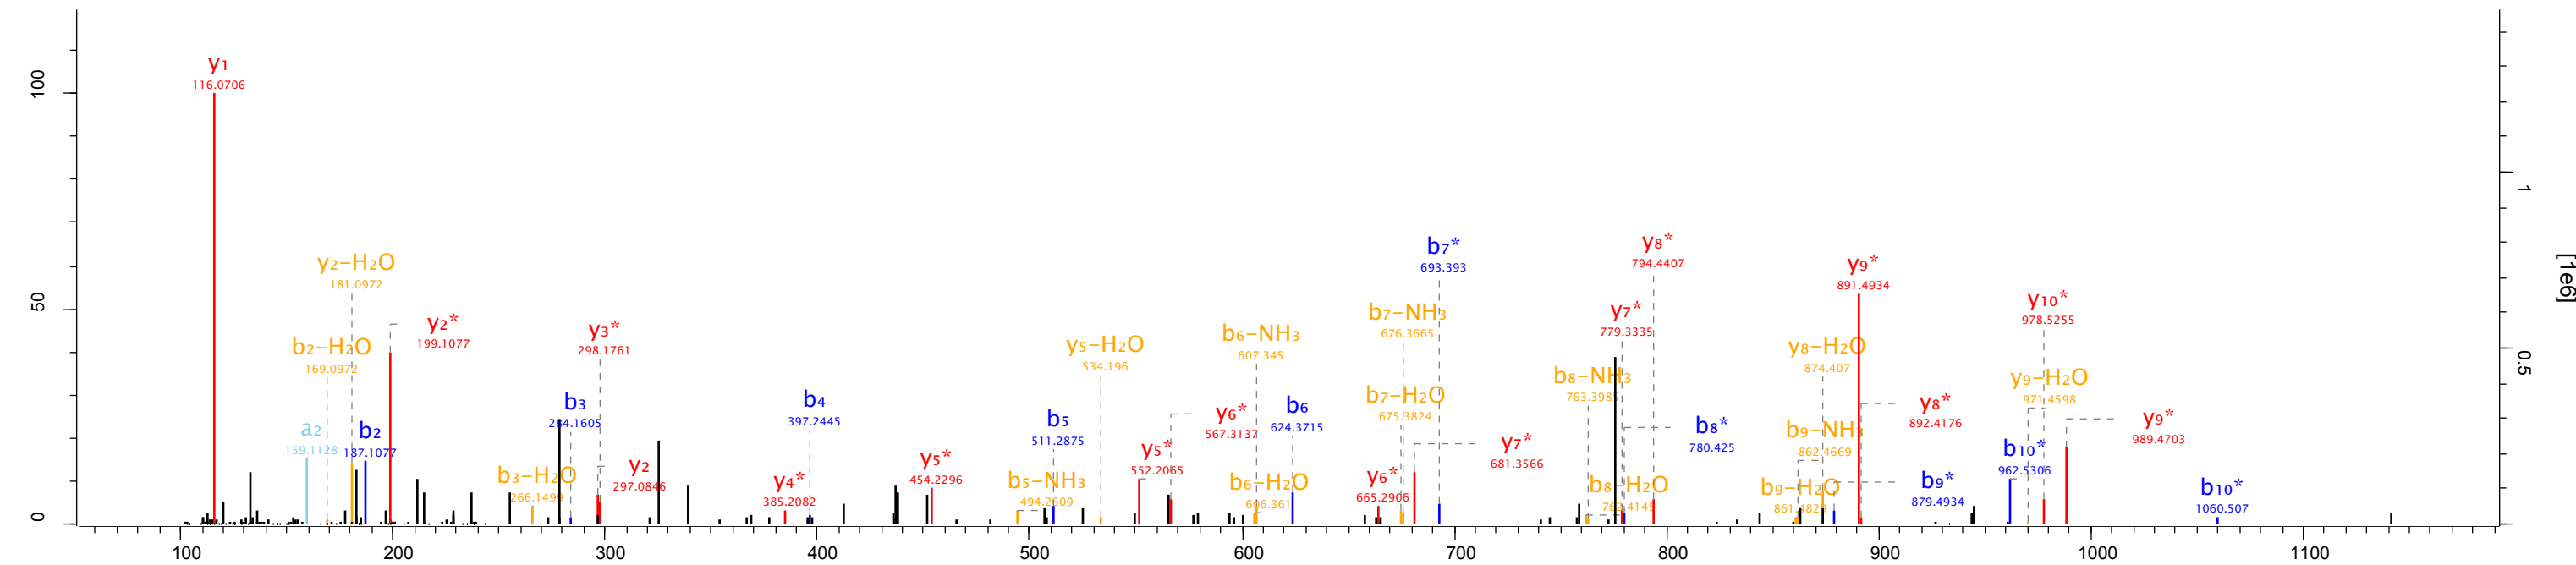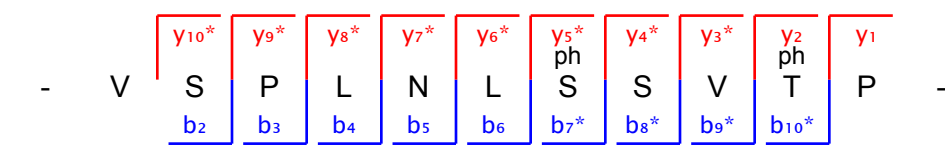



Raw file 20150812\_A375SR\_Phospho\_BR1\_03 Scan 25661 Method FTMS; HCD Score 126.83 m/z 1175.88 Gene names ZNF687

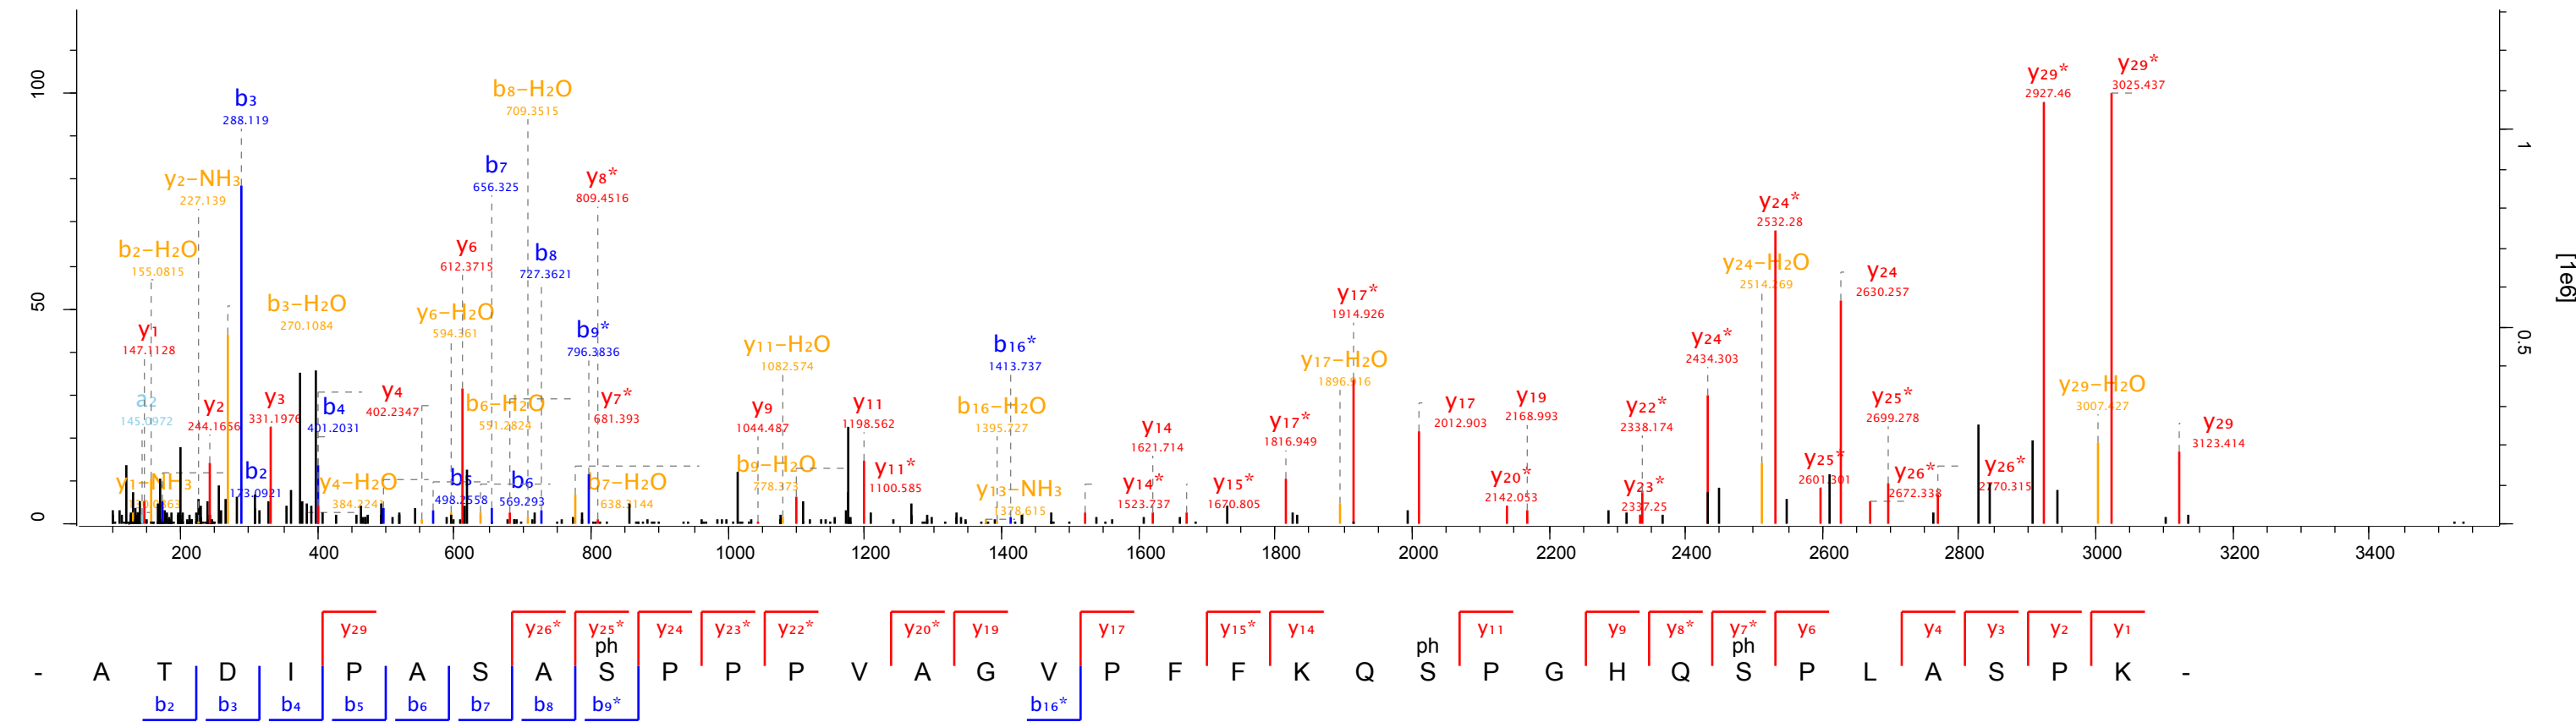

Raw file 20150812\_A375SR\_Phospho\_BR1\_03 Scan 26291 Method FTMS; HCD Score 117.05 m/z 966.74 Gene names SMG6

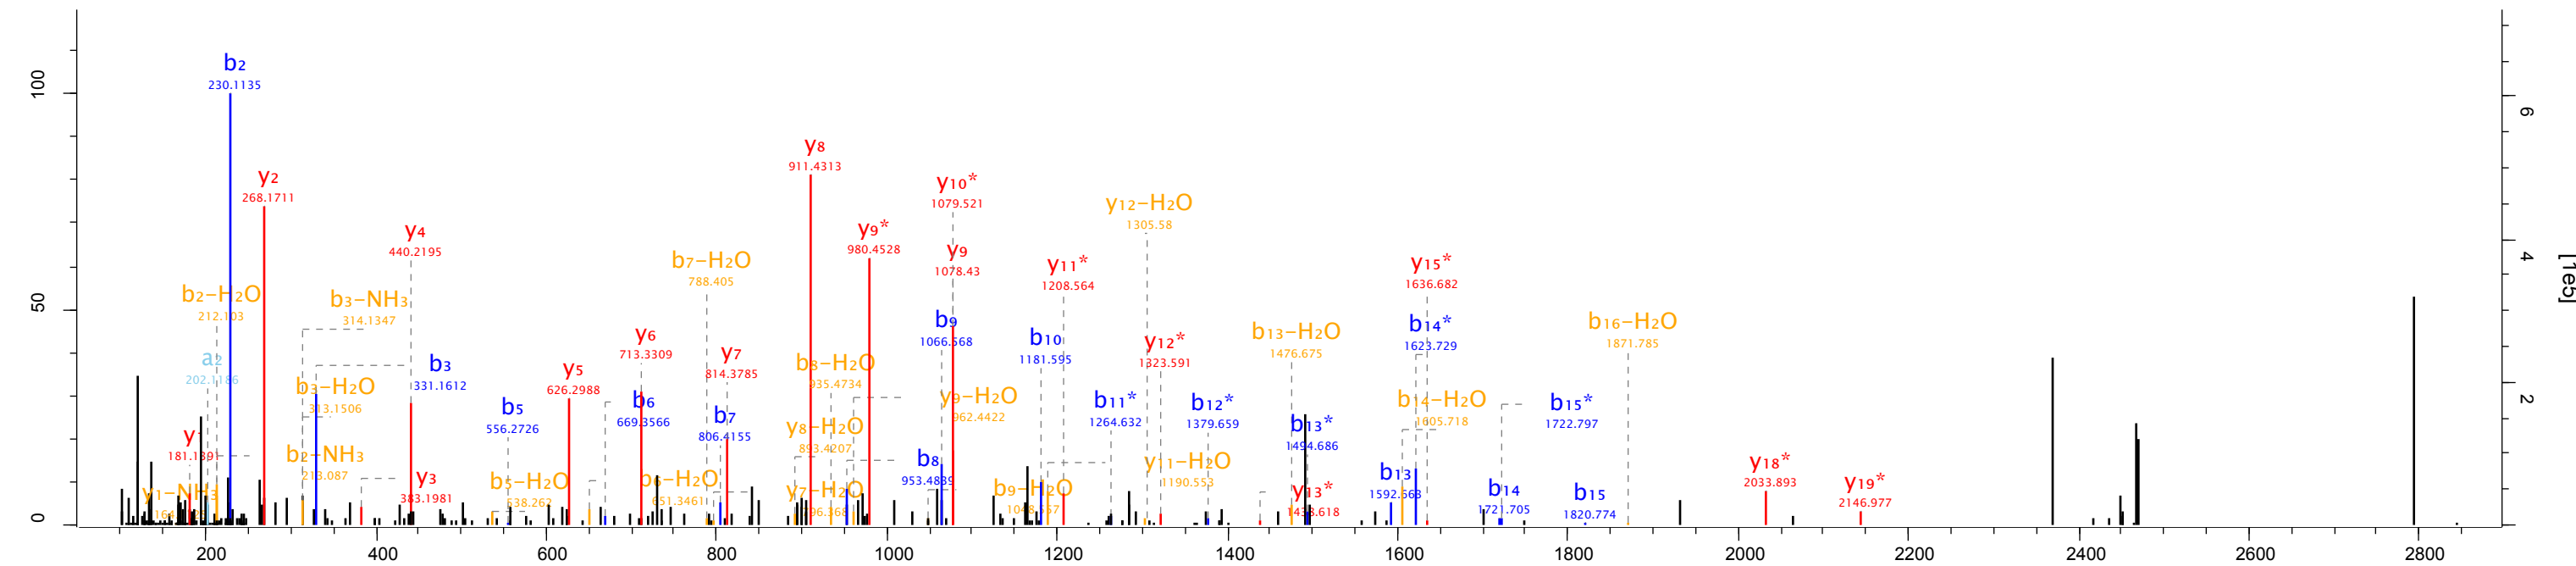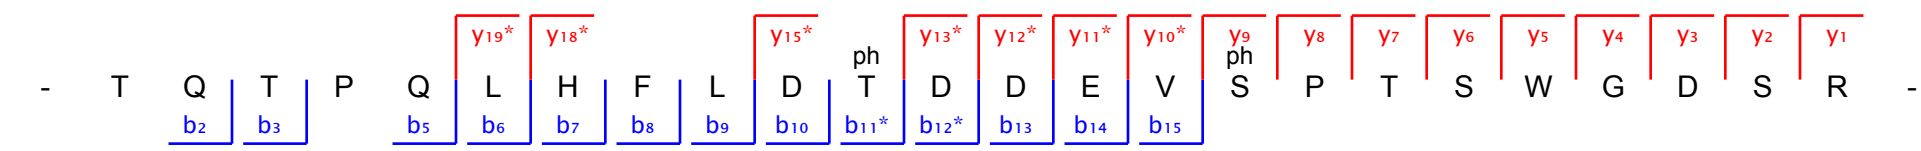

Raw file  
20150812\_A375SR\_Phospho\_BR1\_03

Scan 26371 Method FTMS; HCD Score 194.99 m/z 848.66 Gene names MICALL1

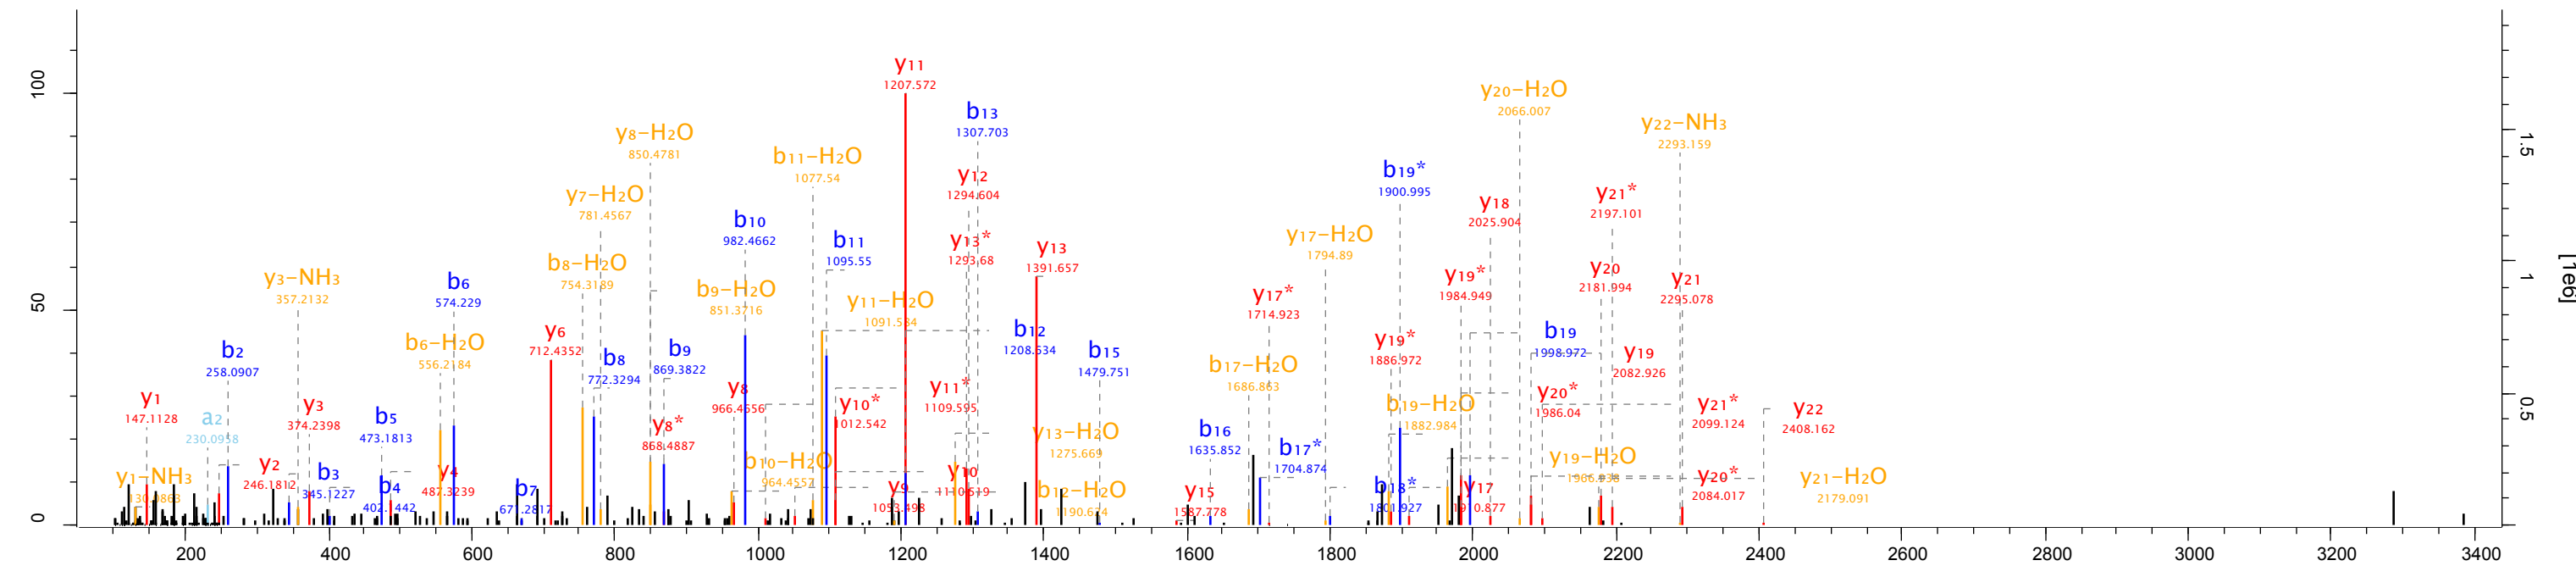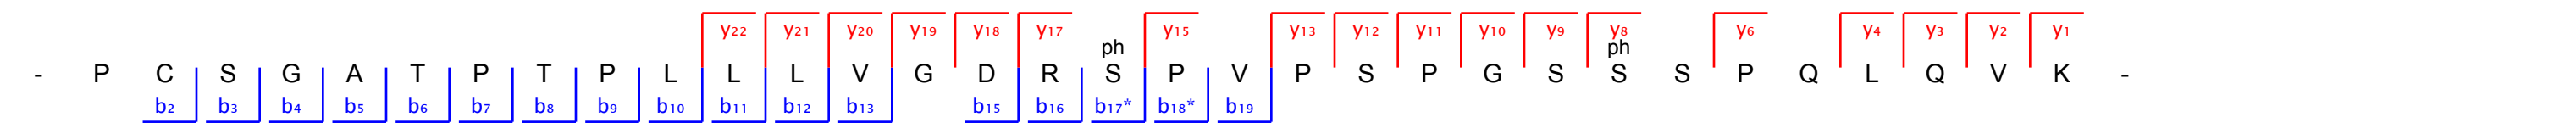

Raw file: 20150812\_A375SR\_Phospho\_BR1\_03  
 Scan: 26451 Method: FTMS; HCD Score: 199.76 m/z: 936.06 Gene names: EIF3J

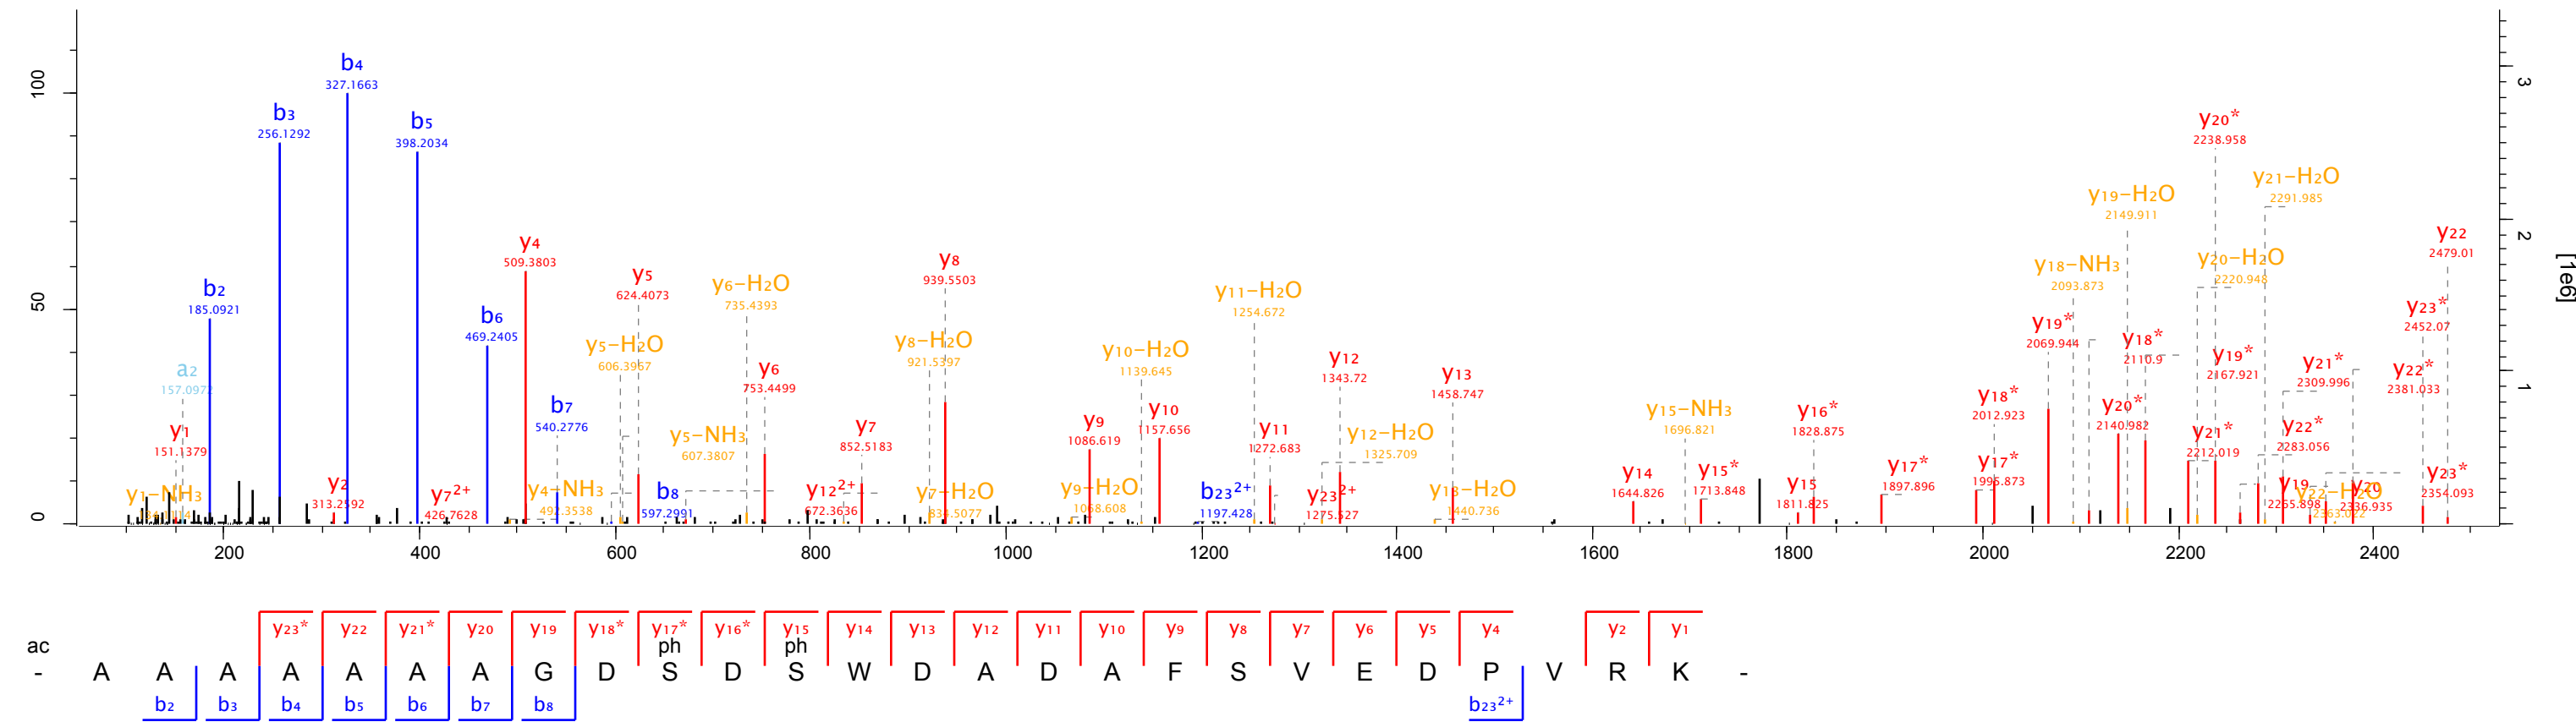

Raw file: 20150812\_A375SR\_Phospho\_BR1\_03  
 Scan: 2671 Method: FTMS; HCD Score: 64.1 m/z: 464.55 Gene names: SRSF3

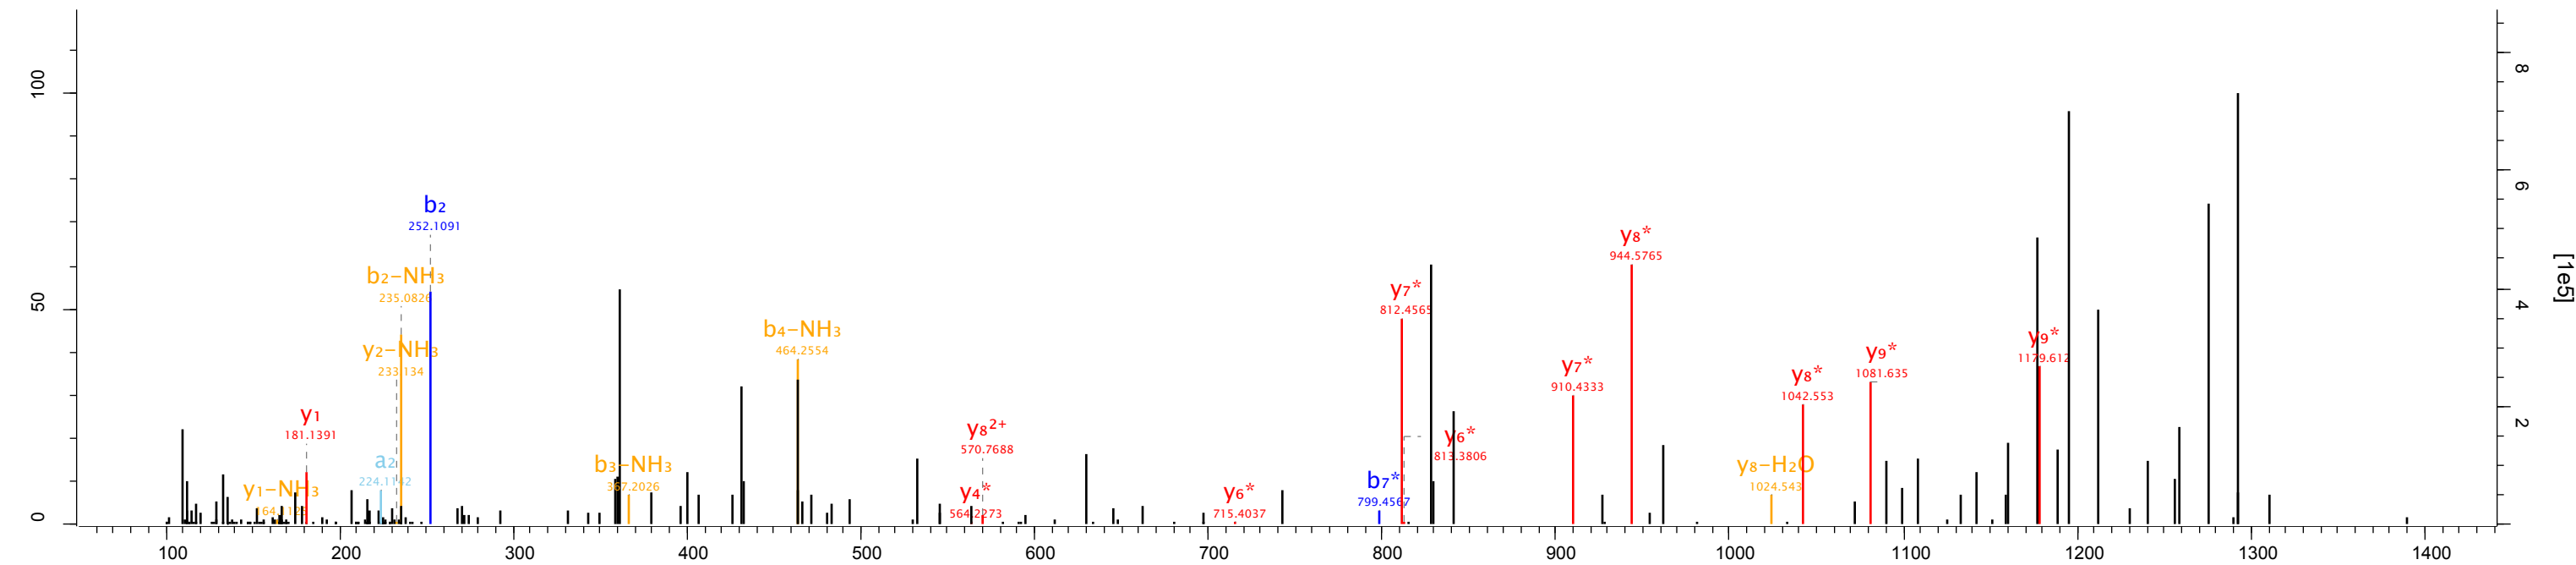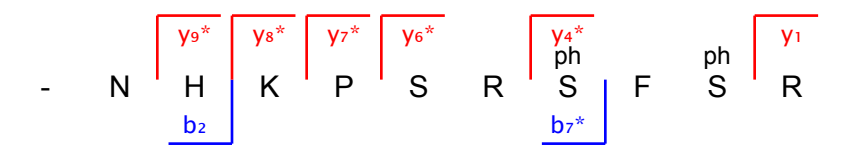

Raw file 20150812\_A375SR\_Phospho\_BR1\_03 Scan 27151 Method FTMS; HCD Score 47.73 m/z 976.1 Gene names SENP3

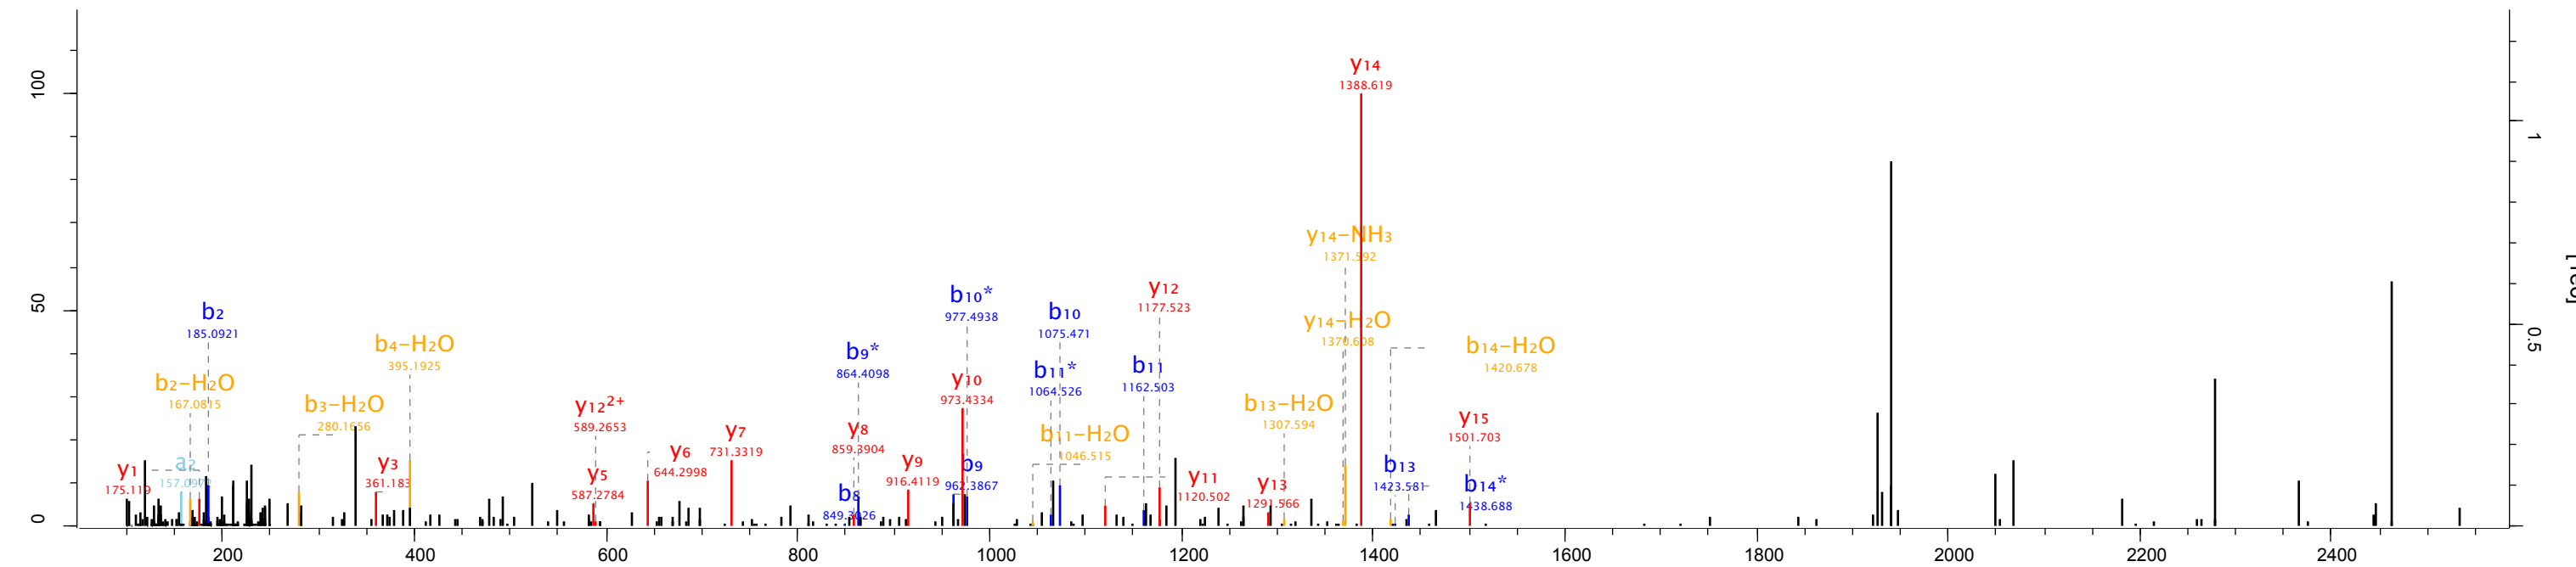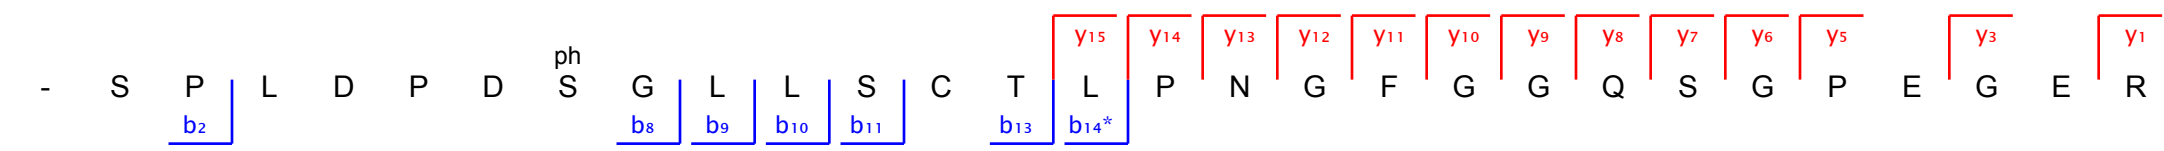

Raw file: 20150812\_A375SR\_Phospho\_BR1\_03  
 Scan: 27341 Method: FTMS; HCD Score: 99.6 m/z: 915.43 Gene names: EP400;EP400NL

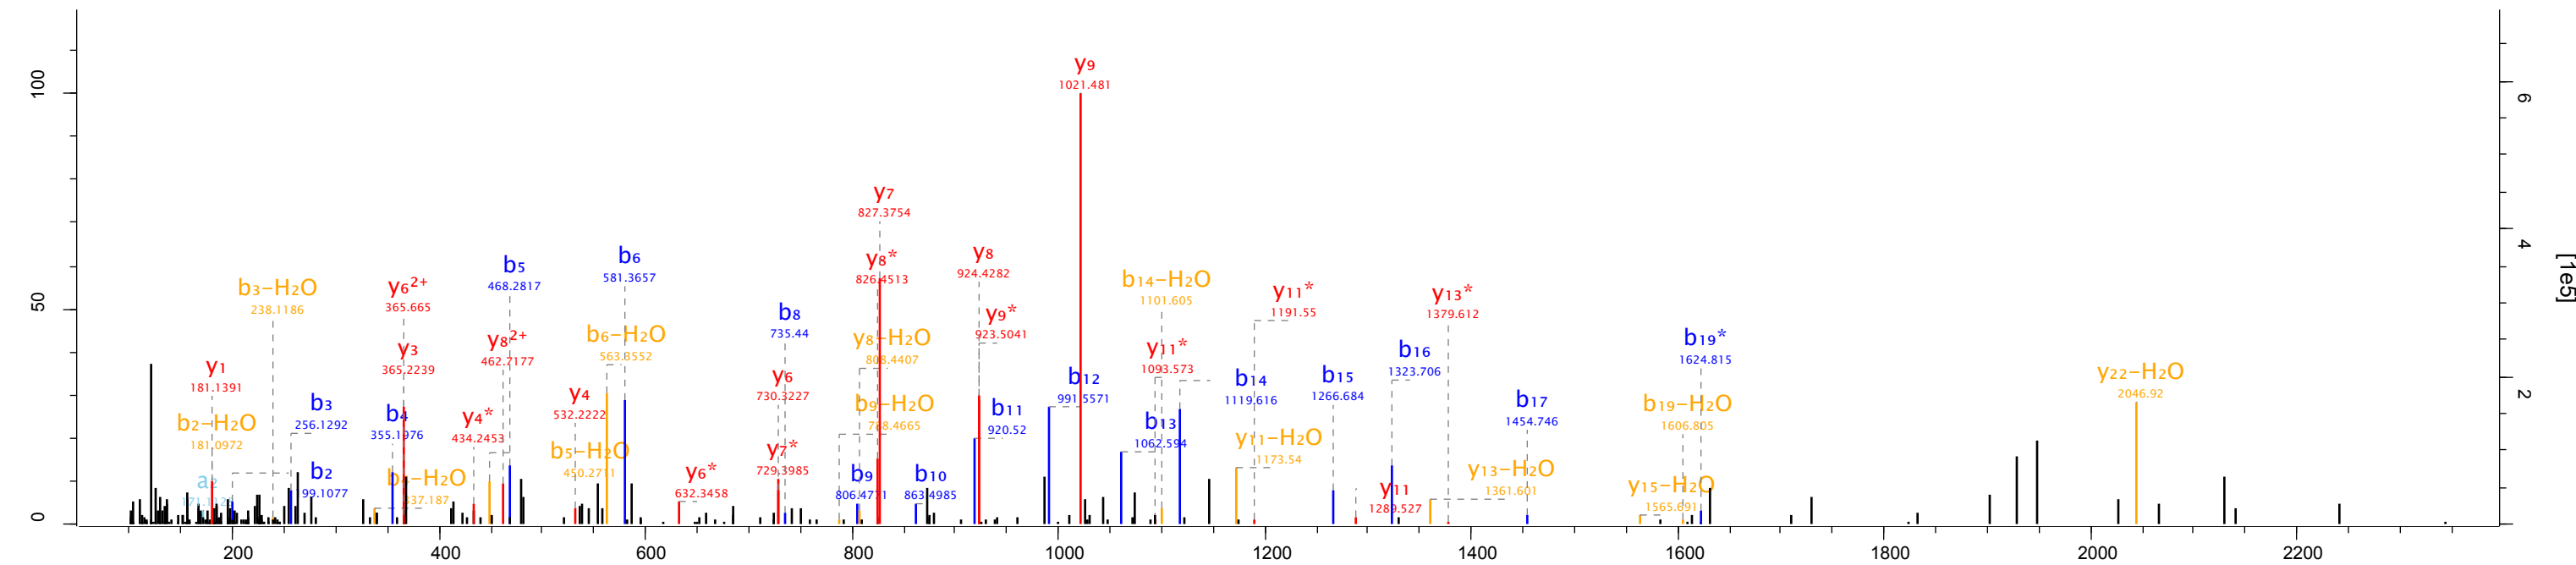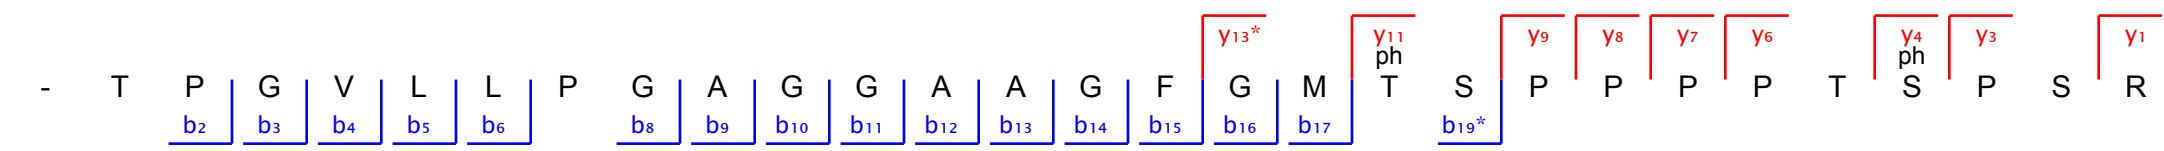

Raw file: 20150812\_A375SR\_Phospho\_BR1\_03  
 Scan: 30401 Method: FTMS; HCD Score: 215.84 m/z: 1055.35 Gene names: RPLP2;RPLP1

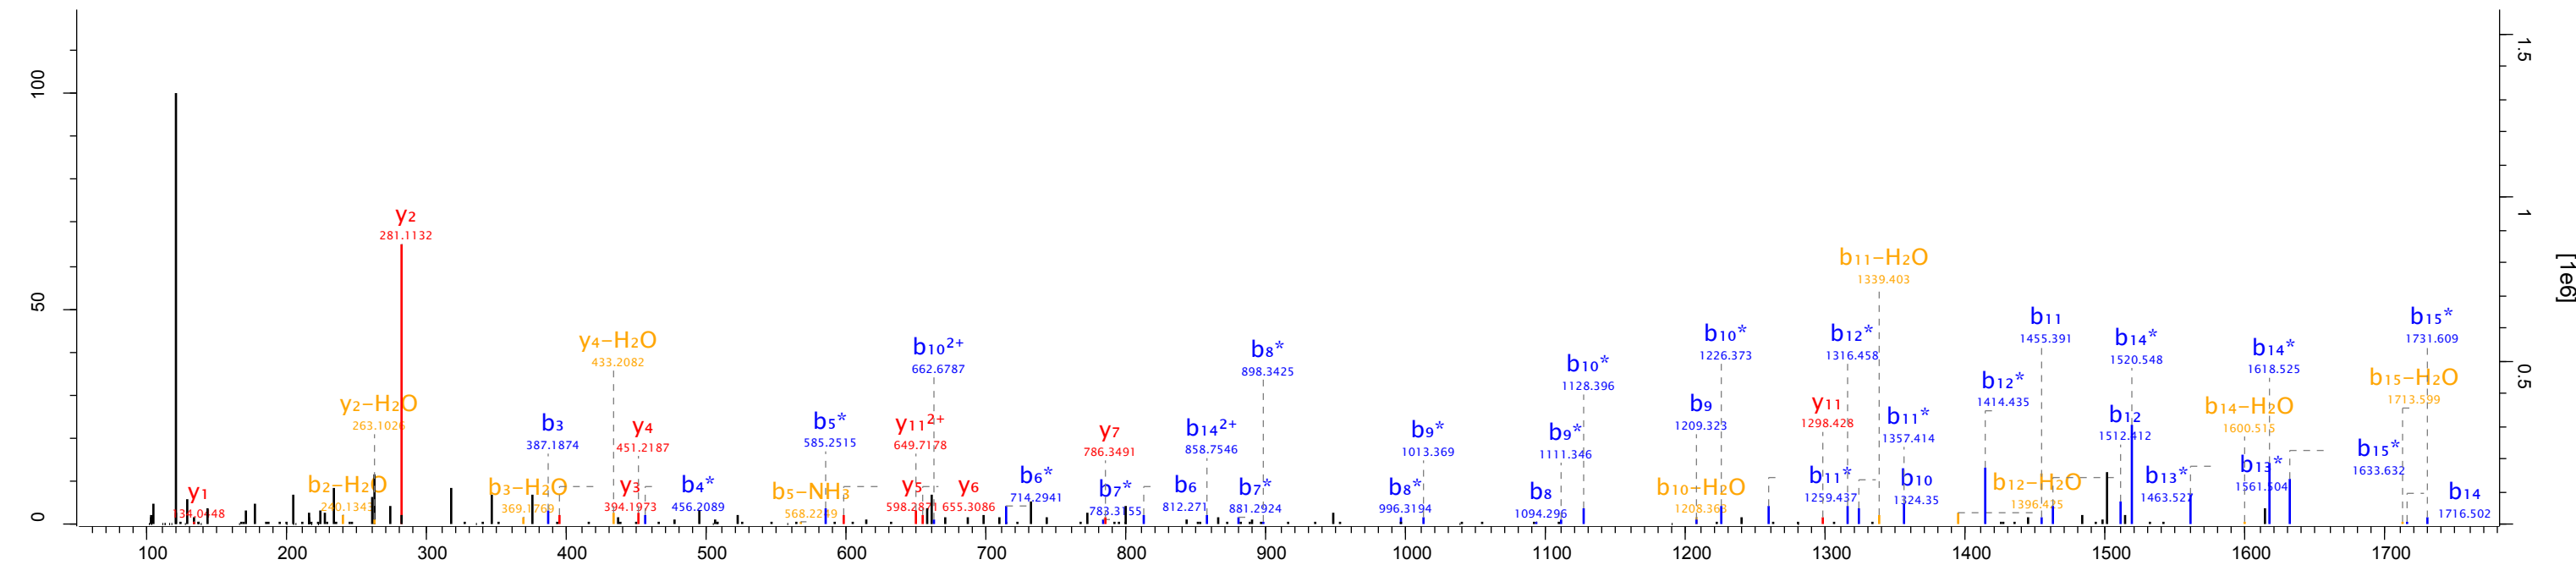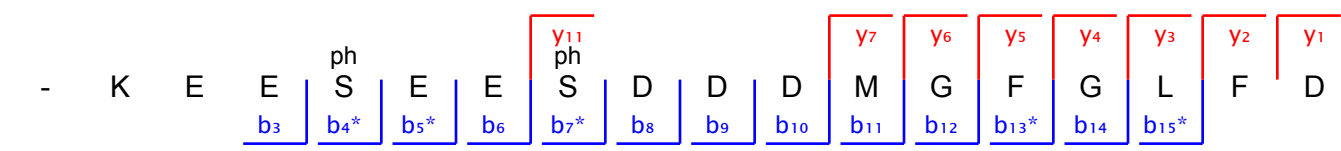





Raw file: 20150812\_A375SR\_Phospho\_BR1\_03  
 Scan: 3651 Method: FTMS; HCD Score: 77.42 m/z: 666.77 Gene names: PPP1R18

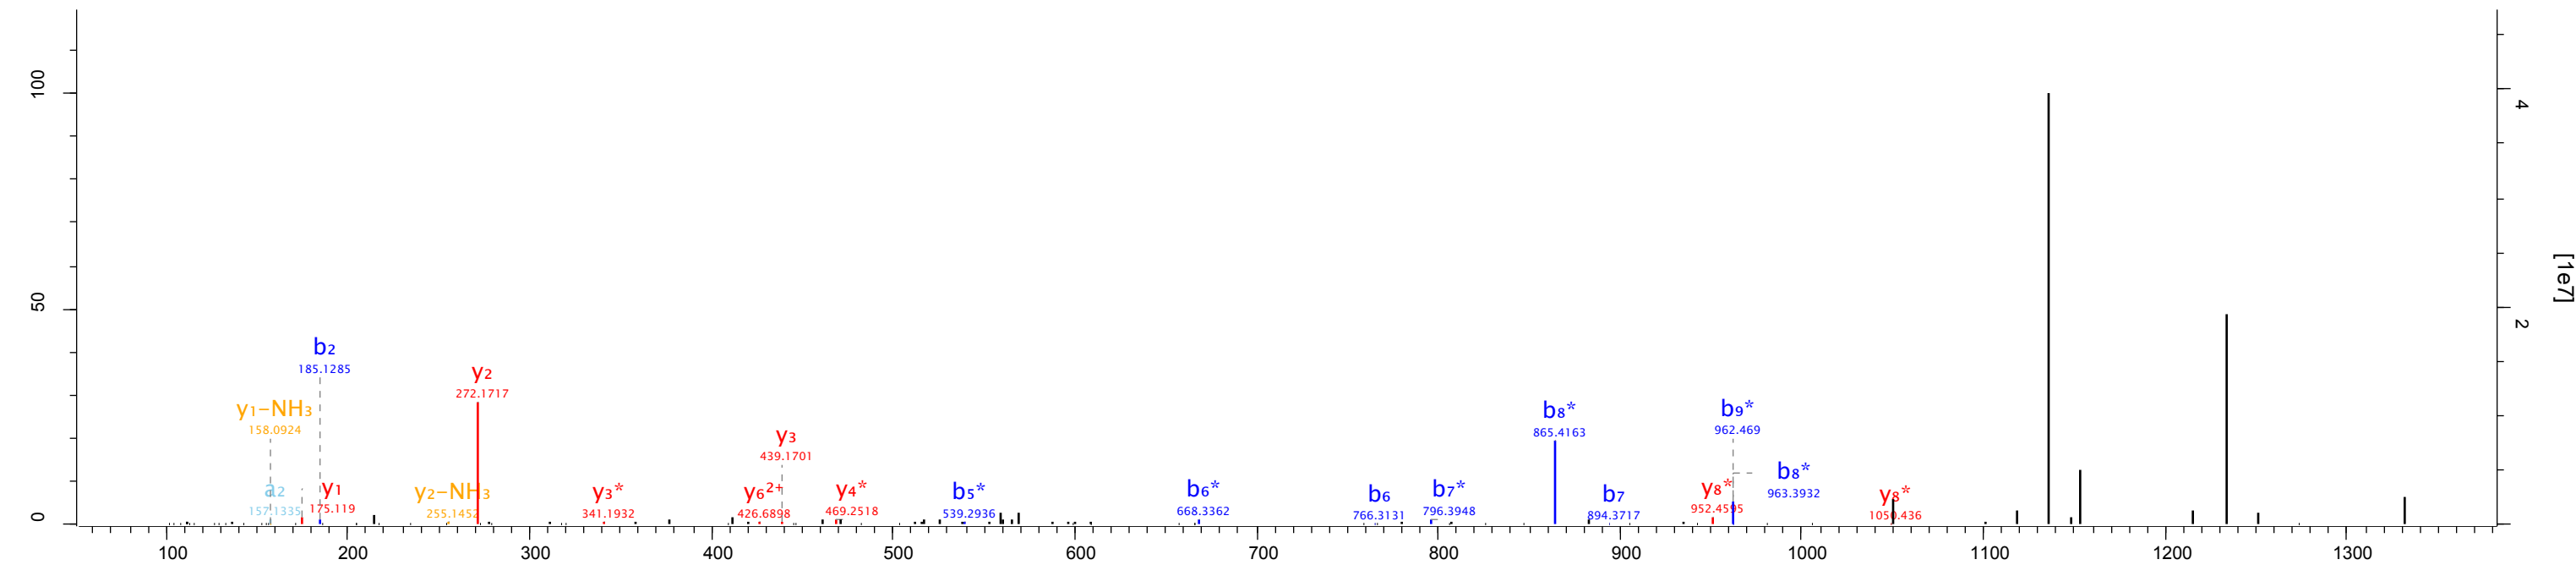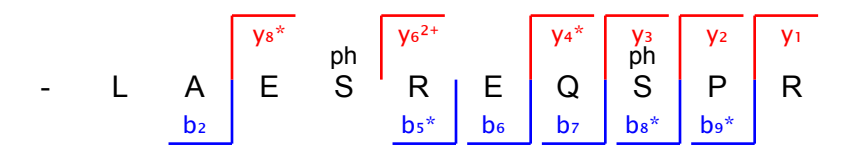

Raw file: 20150812\_A375SR\_Phospho\_BR1\_03  
 Scan: 3741 Method: FTMS; HCD Score: 207.38 m/z: 883.37 Gene names: PRPF38B

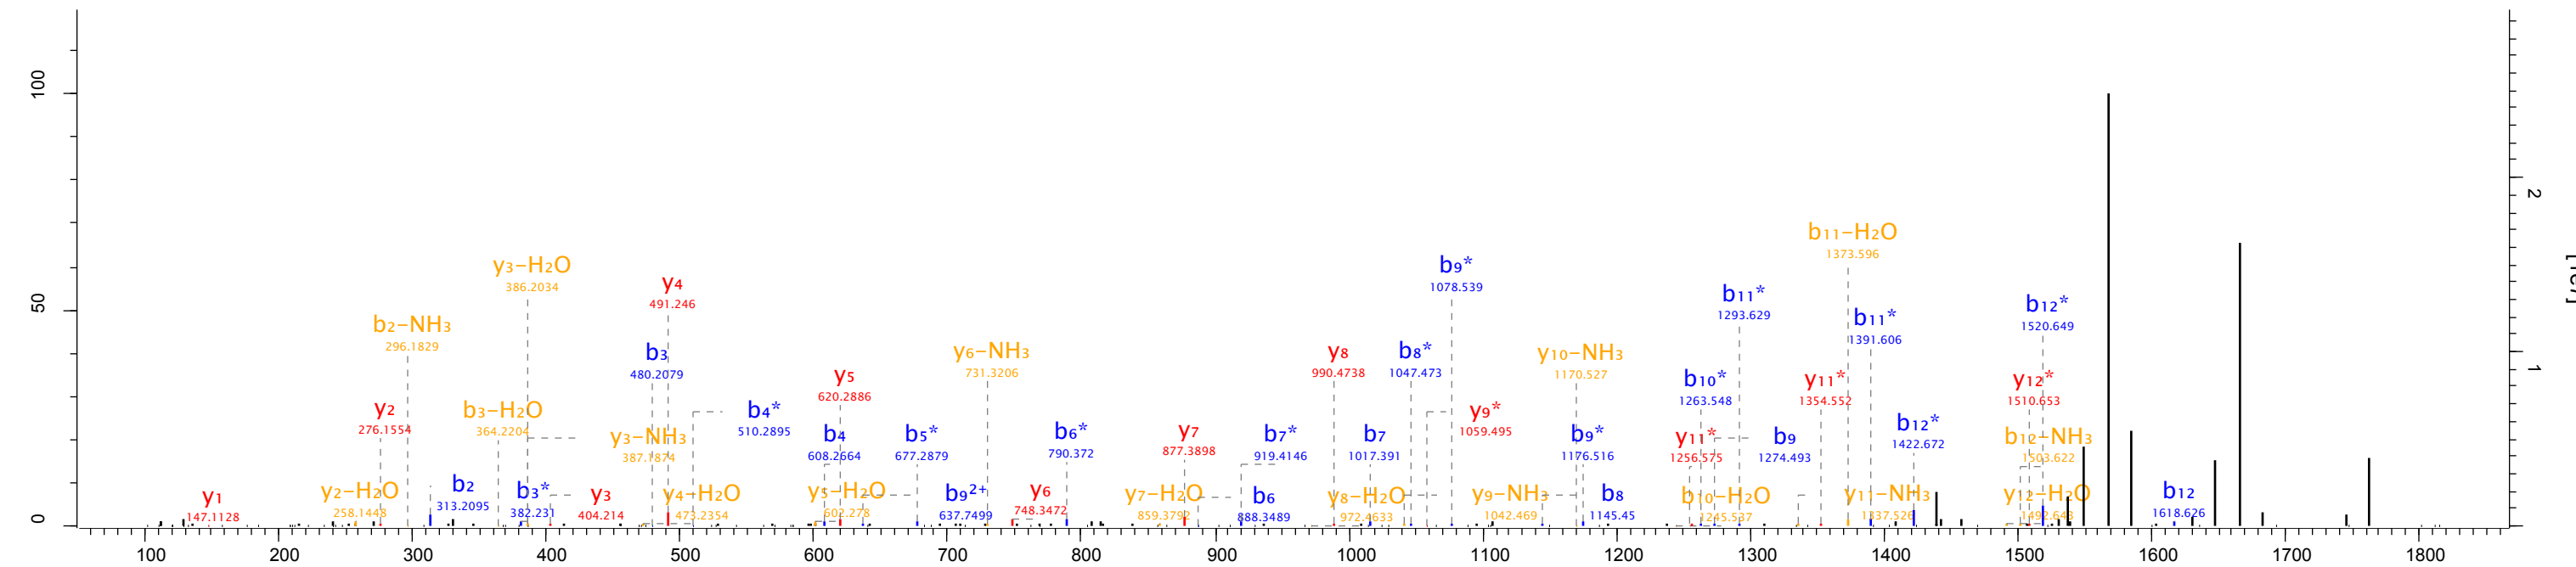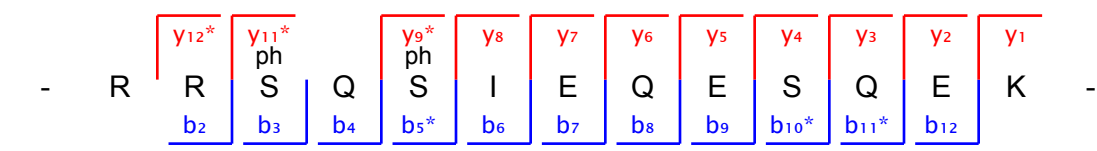

Raw file 20150812\_A375SR\_Phospho\_BR1\_03 Scan 3751 Method FTMS; HCD Score 307.54 m/z 852.84 Gene names SPTBN1

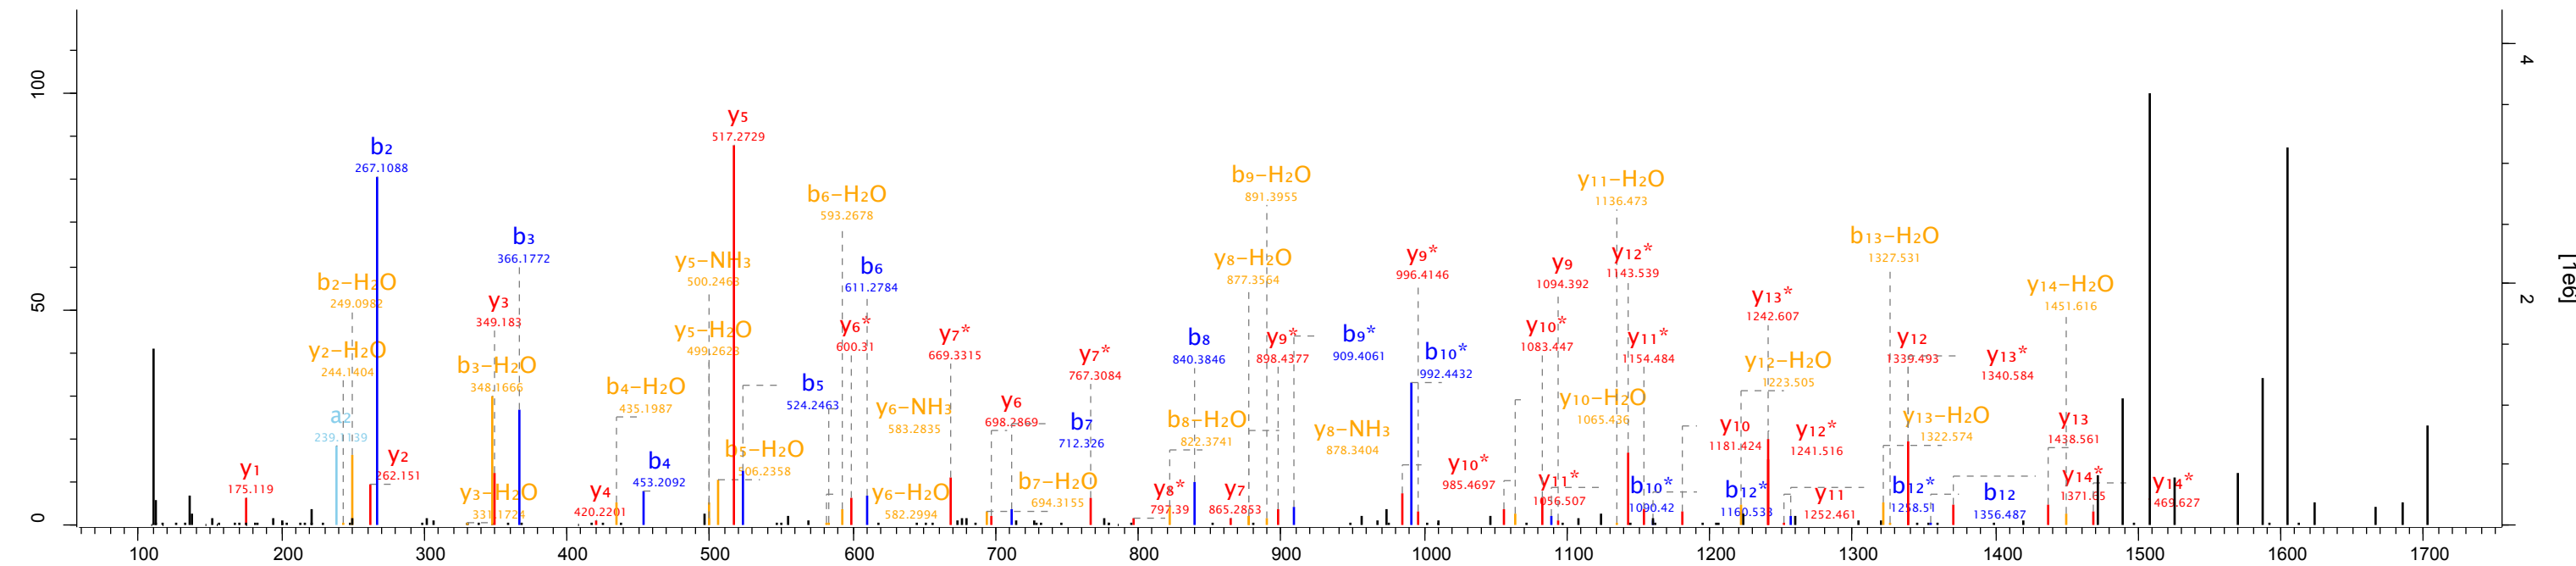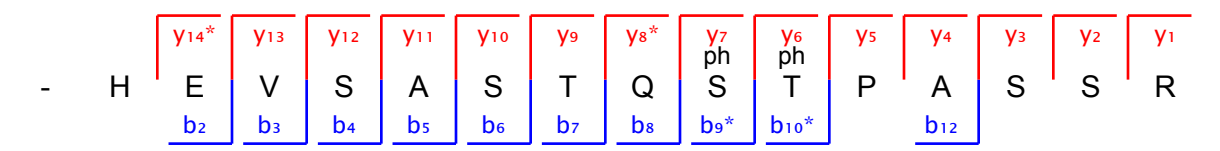

Raw file: 20150812\_A375SR\_Phospho\_BR1\_03  
 Scan: 3951 Method: FTMS; HCD Score: 198.99 m/z: 689.64 Gene names: SRRM2

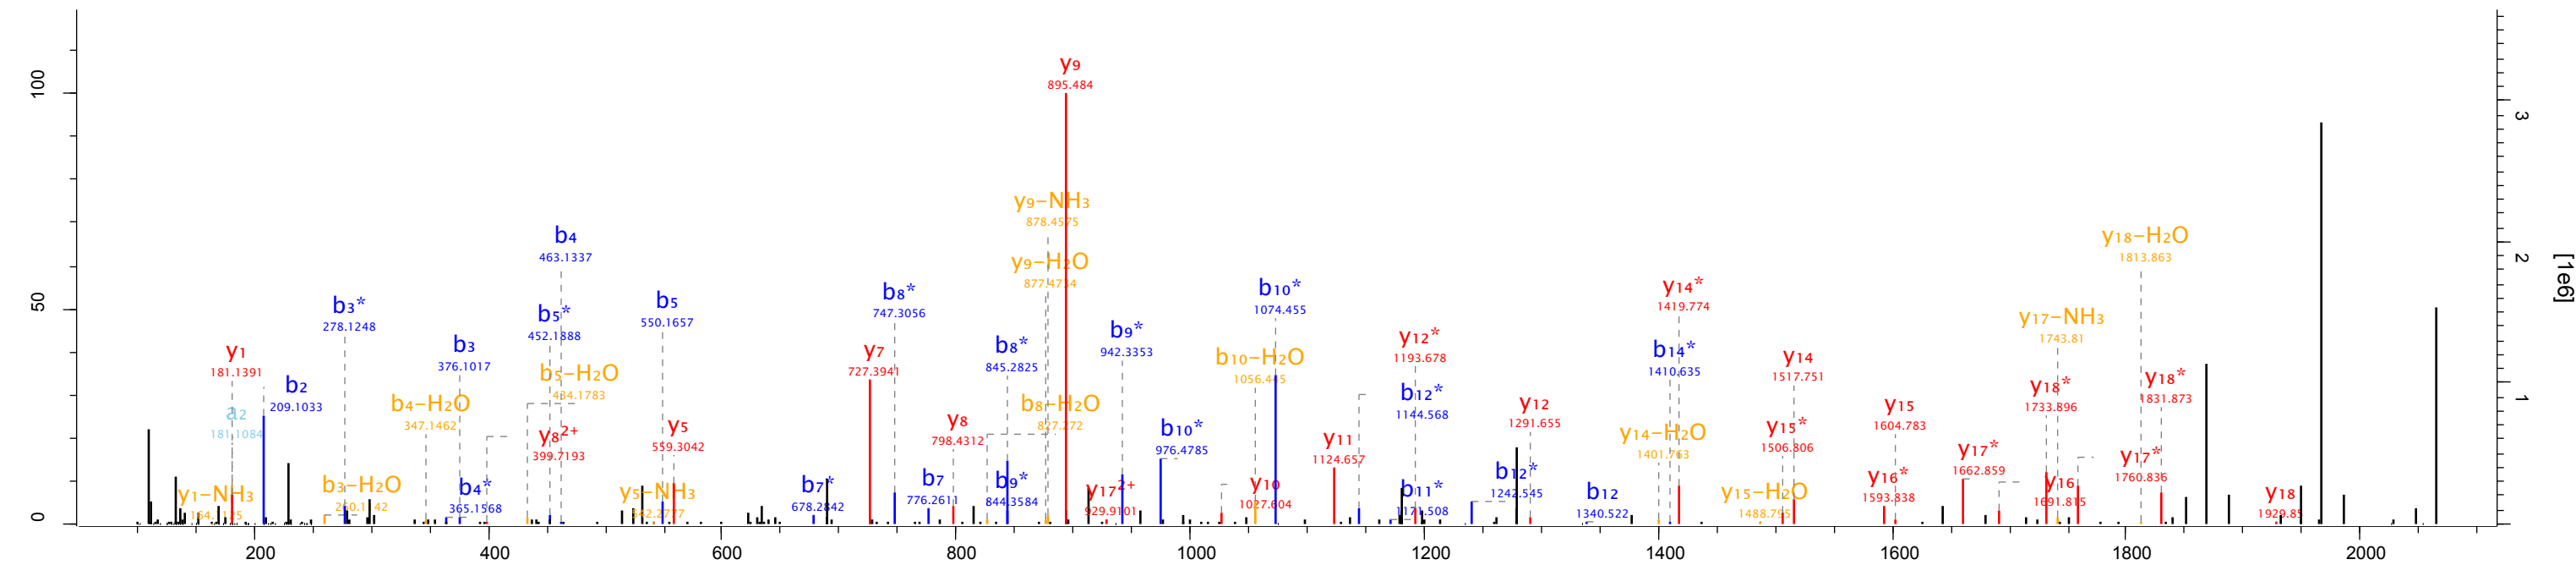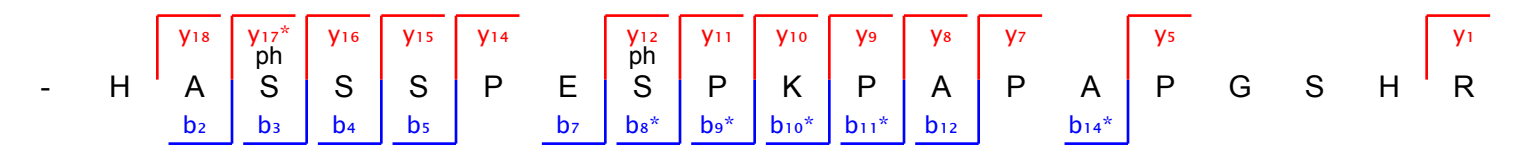

Raw file: 20150812\_A375SR\_Phospho\_BR1\_03  
 Scan: 3991 Method: FTMS; HCD Score: 230.3 m/z: 1053.9 Gene names: LEO1

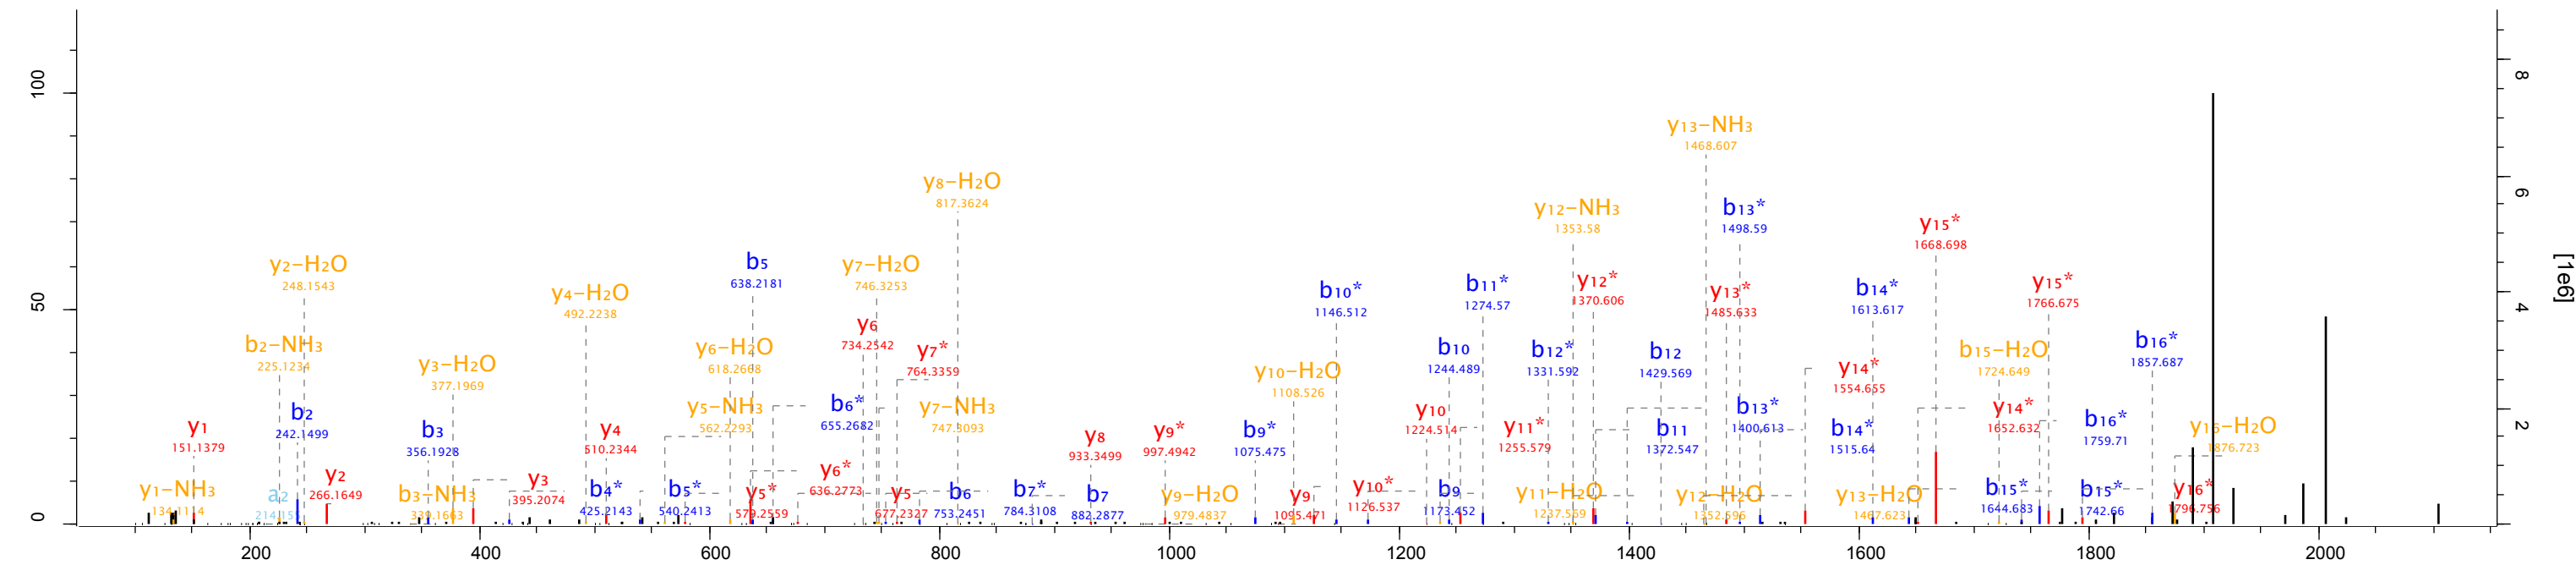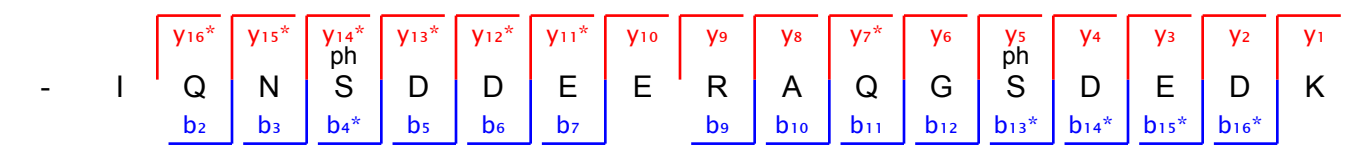

Raw file 20150812\_A375SR\_Phospho\_BR1\_03 Scan 4341 Method FTMS; HCD Score 83.4 m/z 627.58 Gene names IWS1

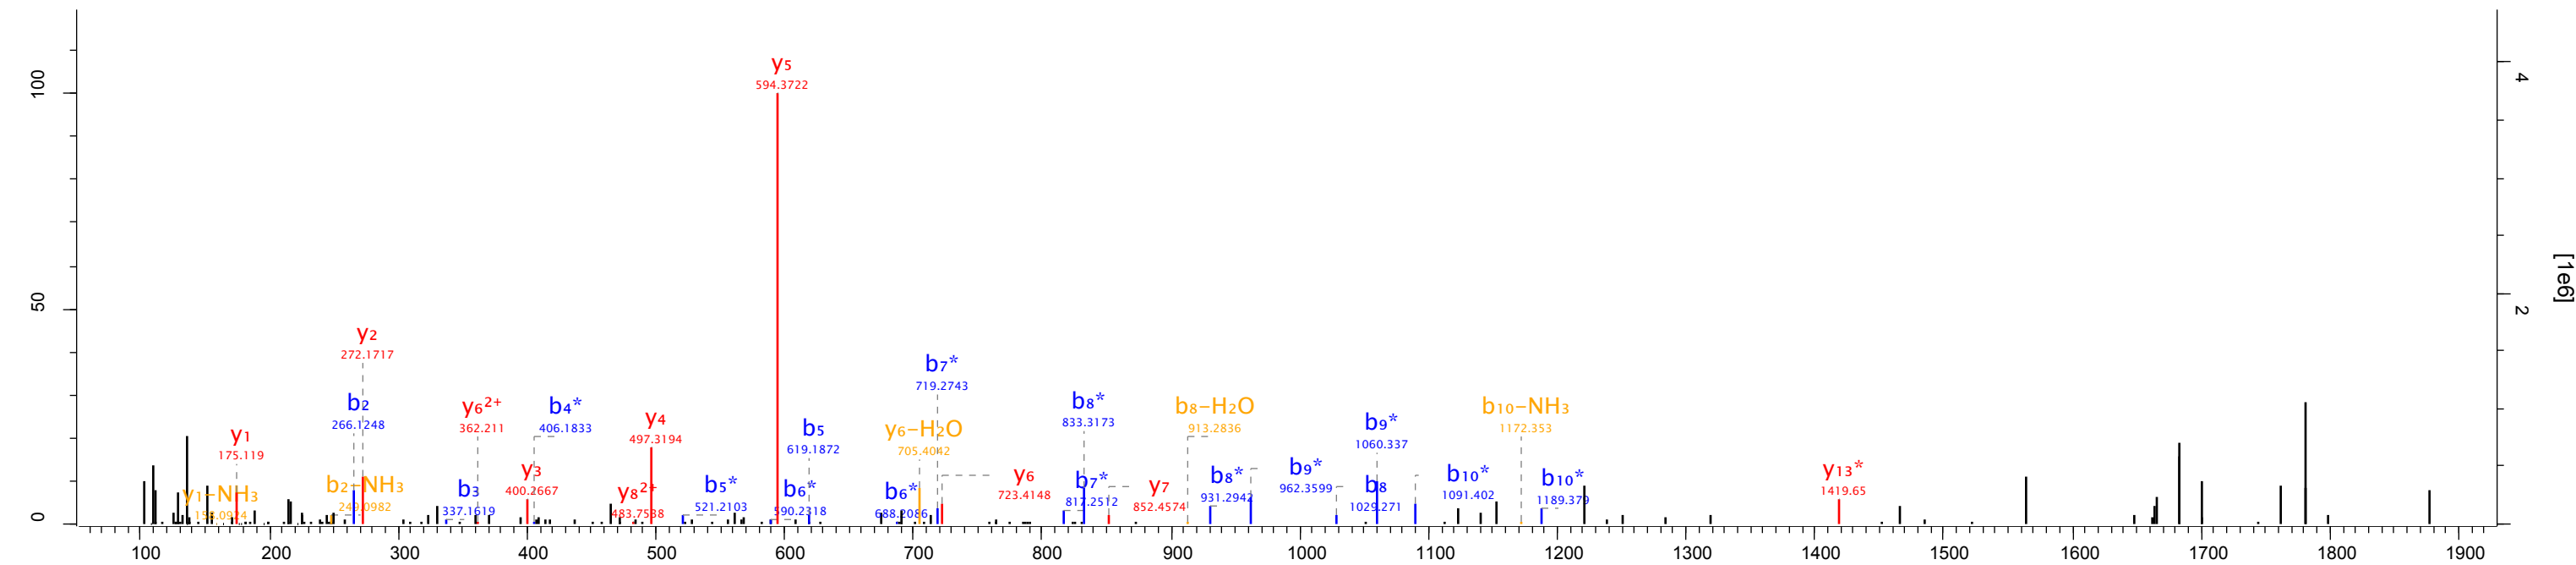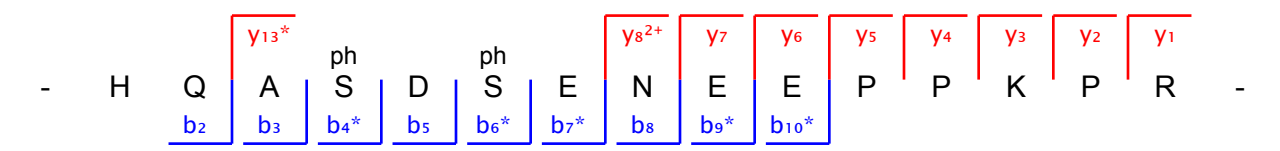

Raw file: 20150812\_A375SR\_Phospho\_BR1\_03  
 Scan: 4431 Method: FTMS; HCD Score: 102.89 m/z: 567.57 Gene names: POGZ

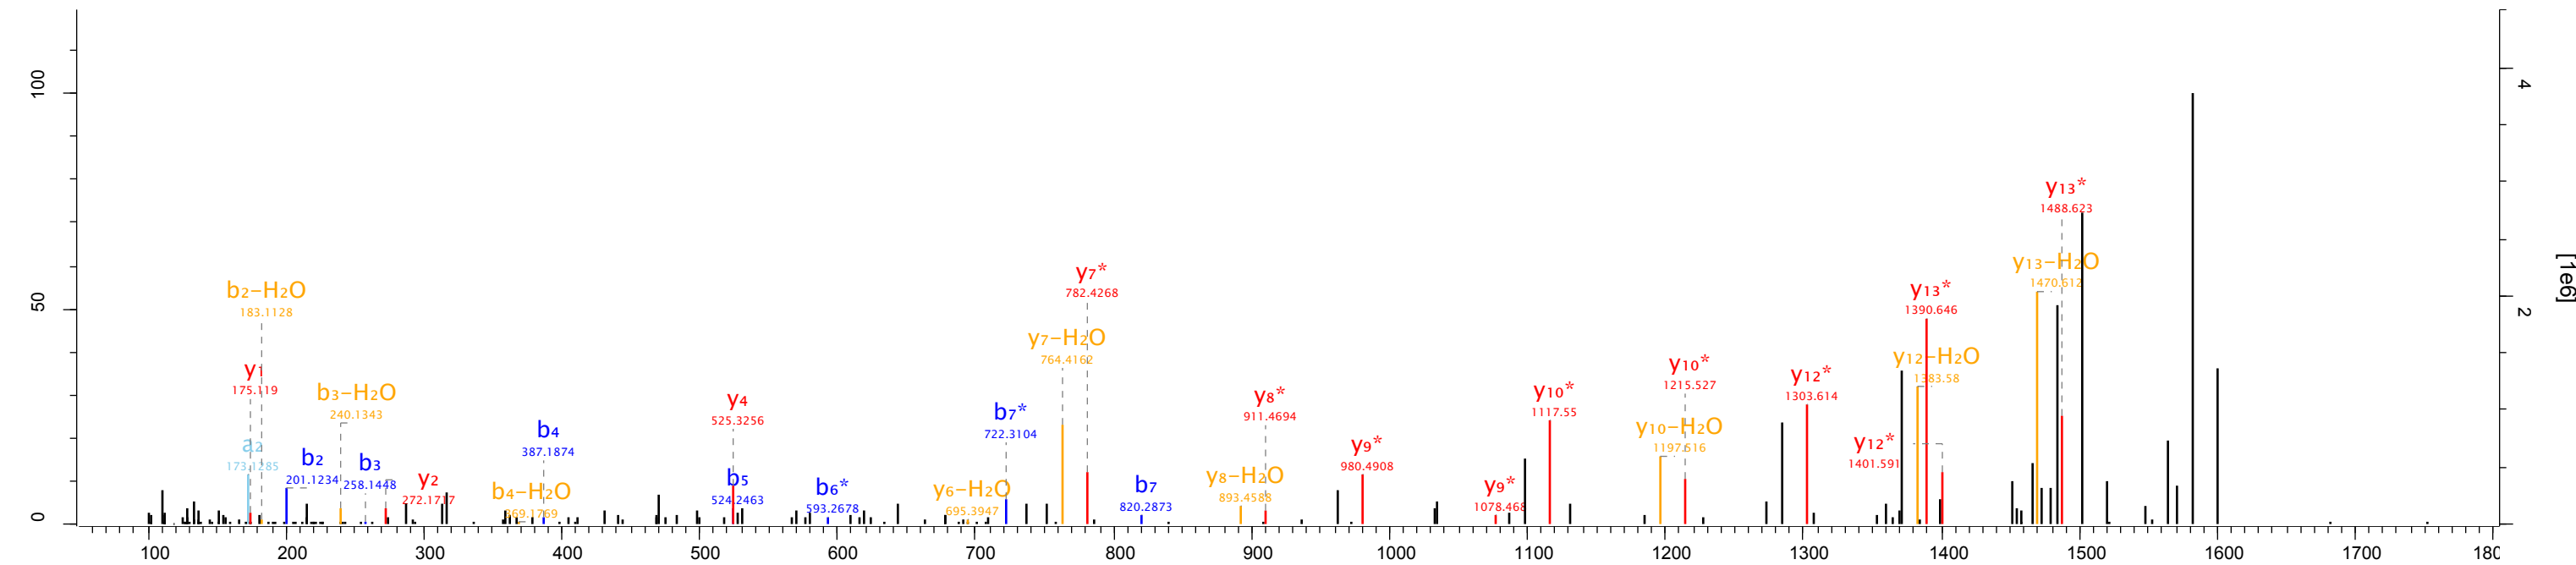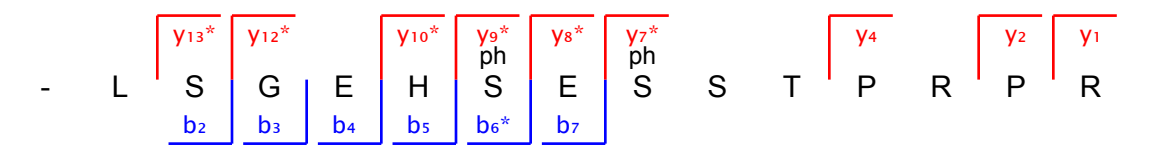



Raw file 20150812\_A375SR\_Phospho\_BR1\_03 Scan 4551 Method FTMS; HCD Score 203.14 m/z 861.7 Gene names SP4

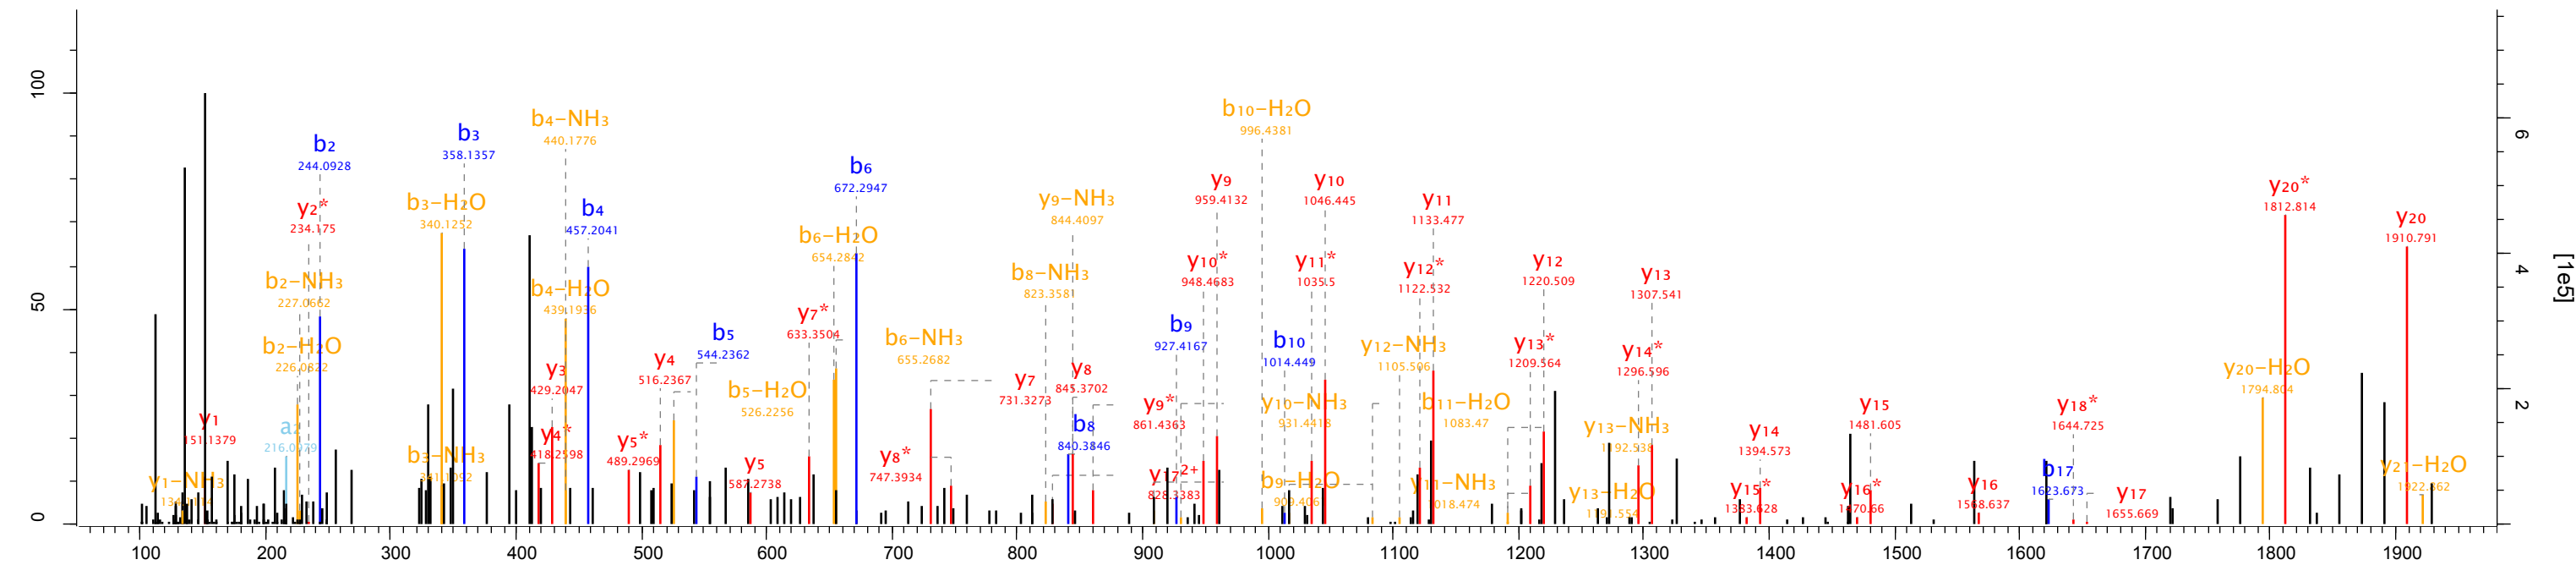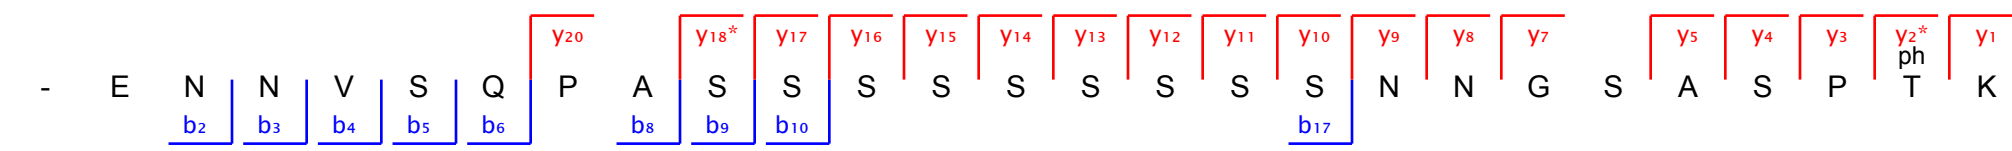

Raw file: 20150812\_A375SR\_Phospho\_BR1\_03  
 Scan: 4611 Method: FTMS; HCD Score: 63.73 m/z: 551.74 Gene names: CABLES1

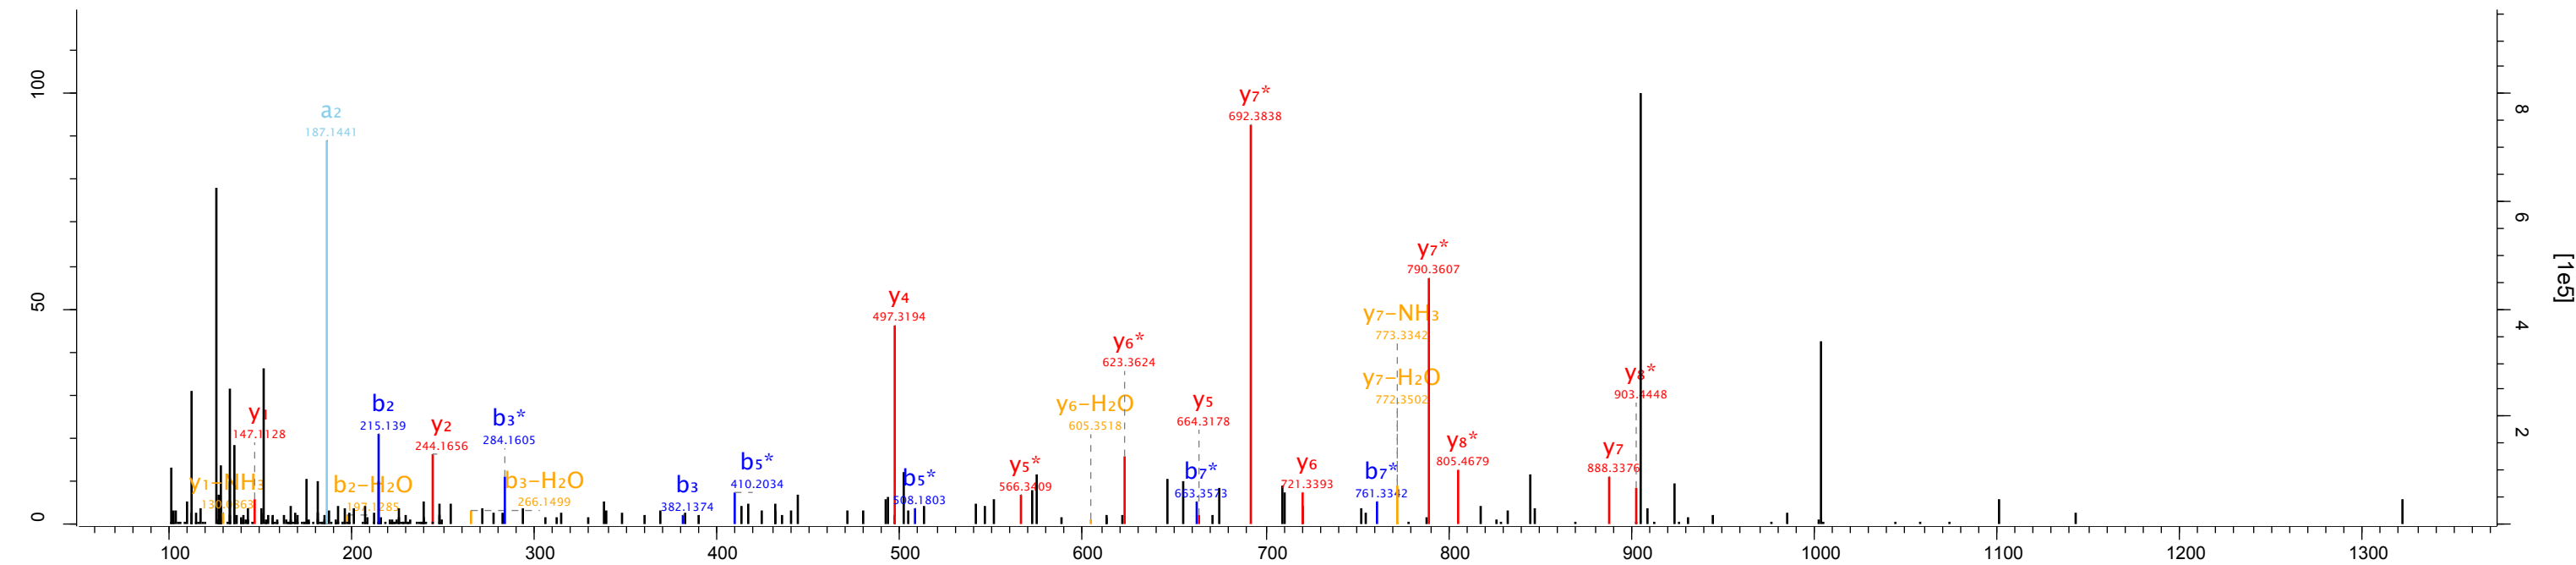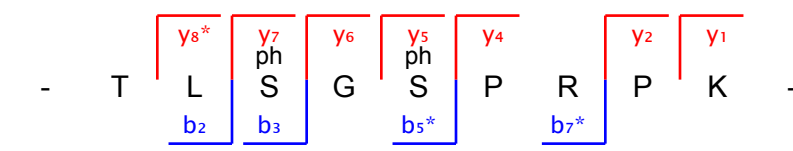

Raw file: 20150812\_A375SR\_Phospho\_BR1\_03  
 Scan: 4871 Method: FTMS; HCD Score: 165.16 m/z: 738.3 Gene names: SRRM2

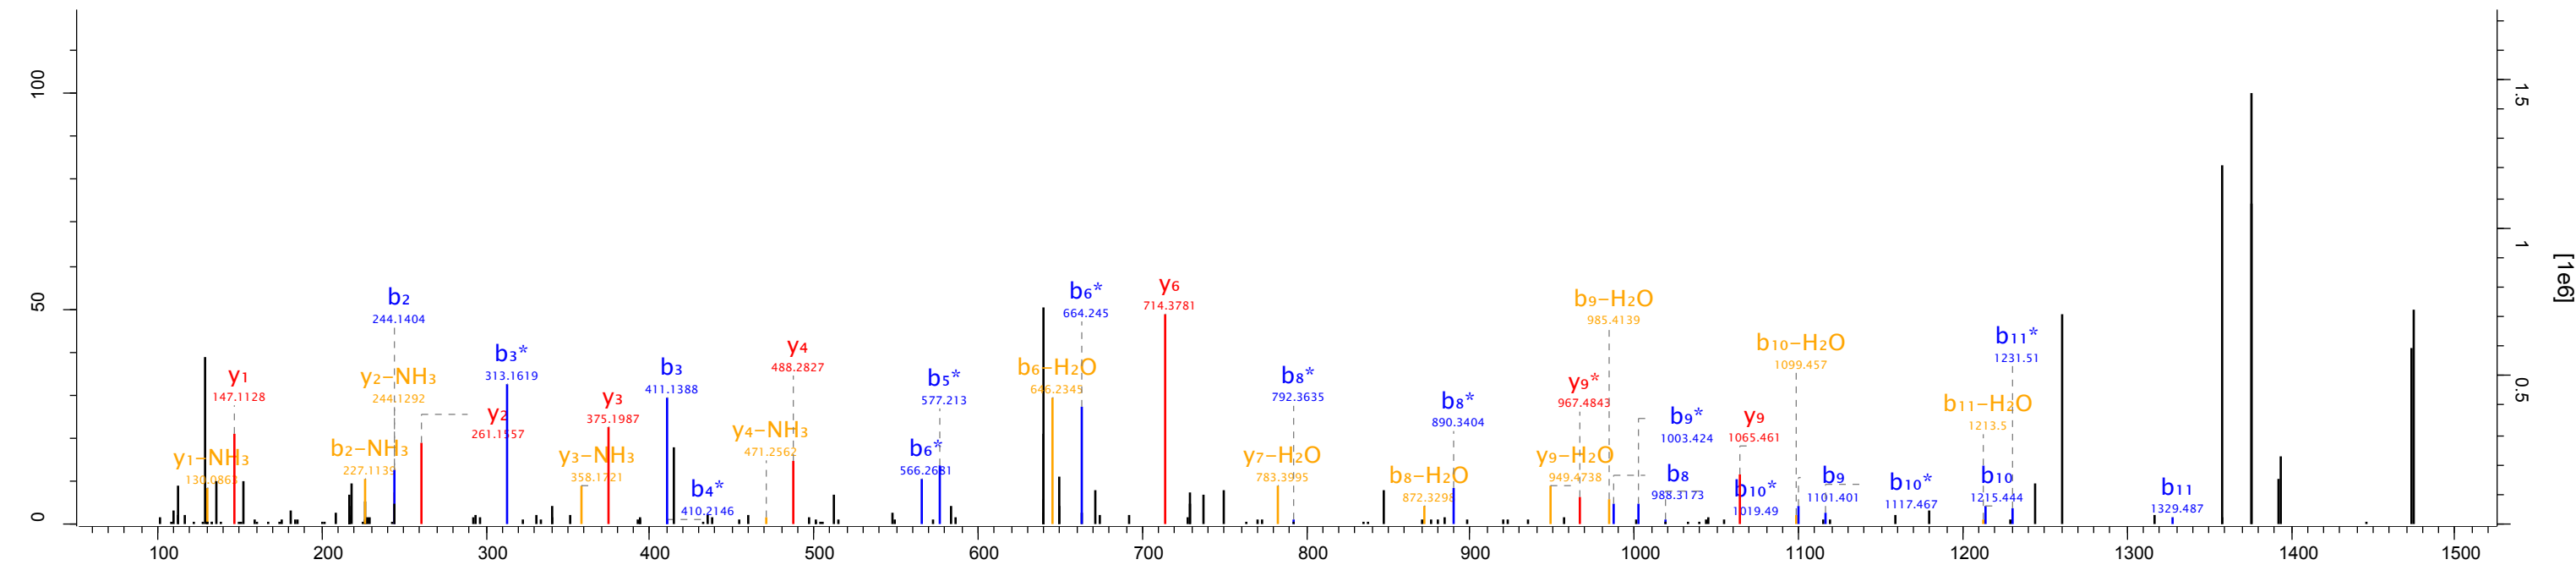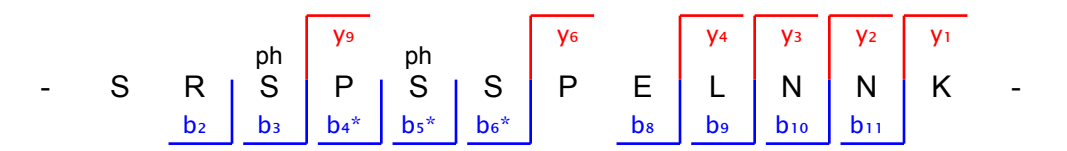

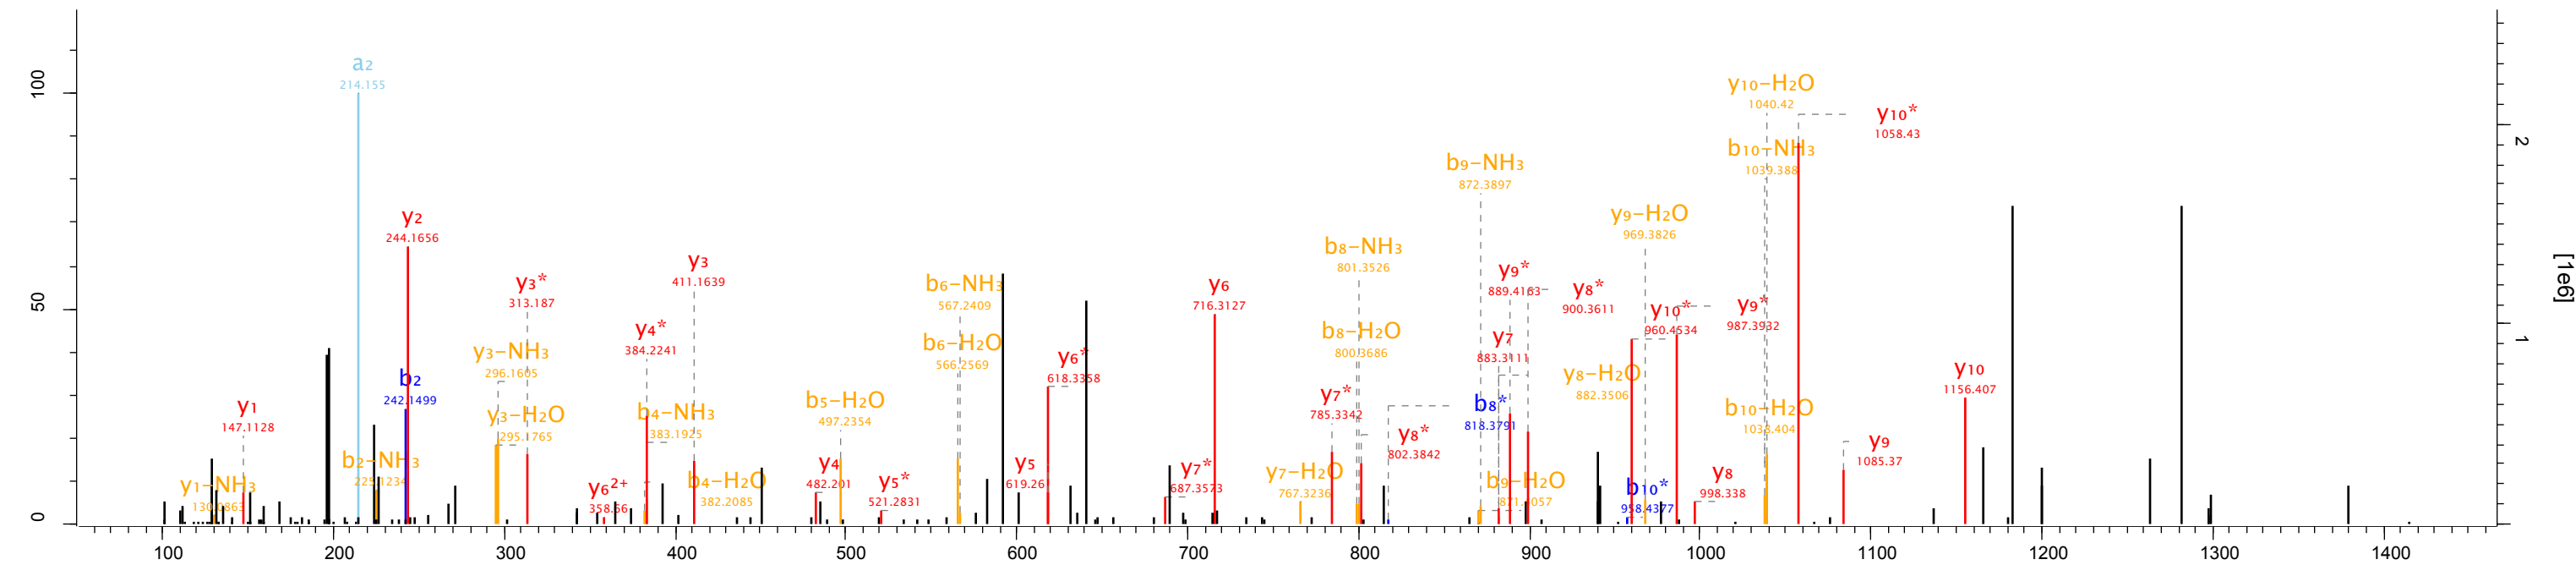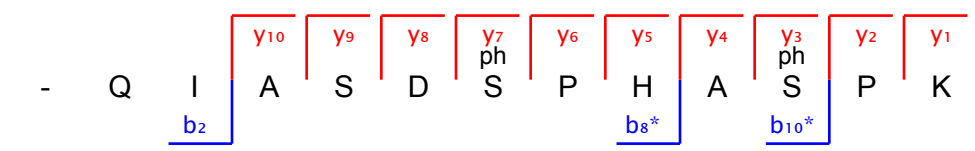

Raw file: 20150812\_A375SR\_Phospho\_BR1\_03  
 Scan: 5051 Method: FTMS; HCD Score: 134.52 m/z: 808.85 Gene names: MID1

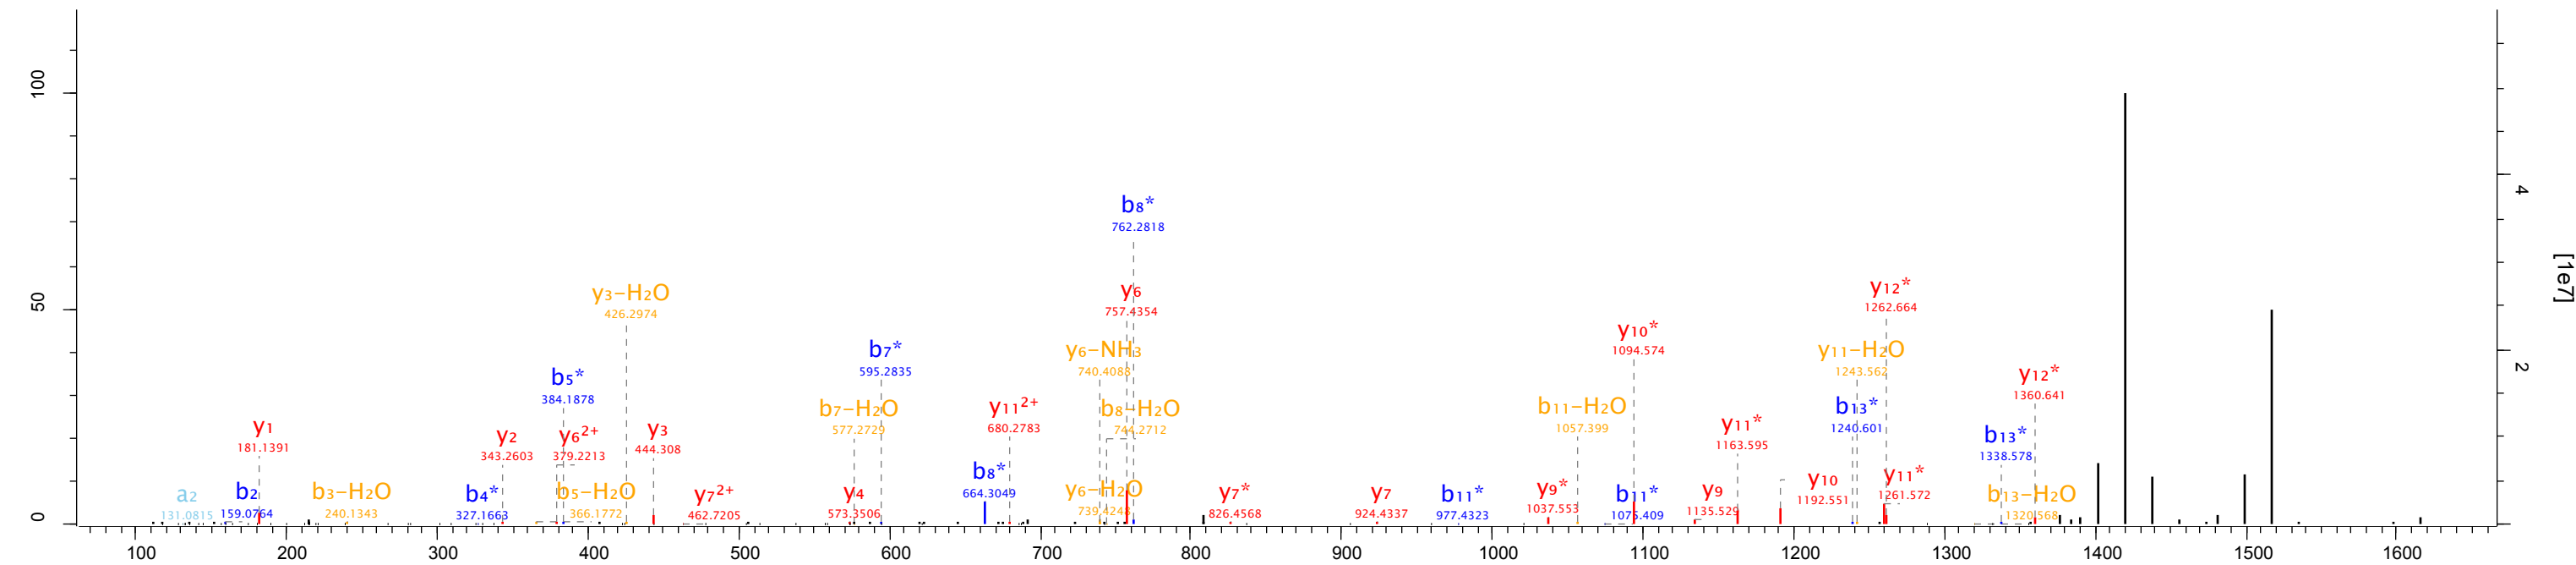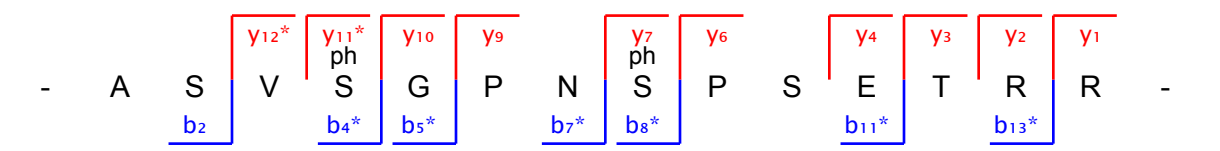

Raw file: 20150812\_A375SR\_Phospho\_BR1\_03  
 Scan: 5651 Method: FTMS; HCD Score: 73.93 m/z: 738.81 Gene names: LRRFIP1

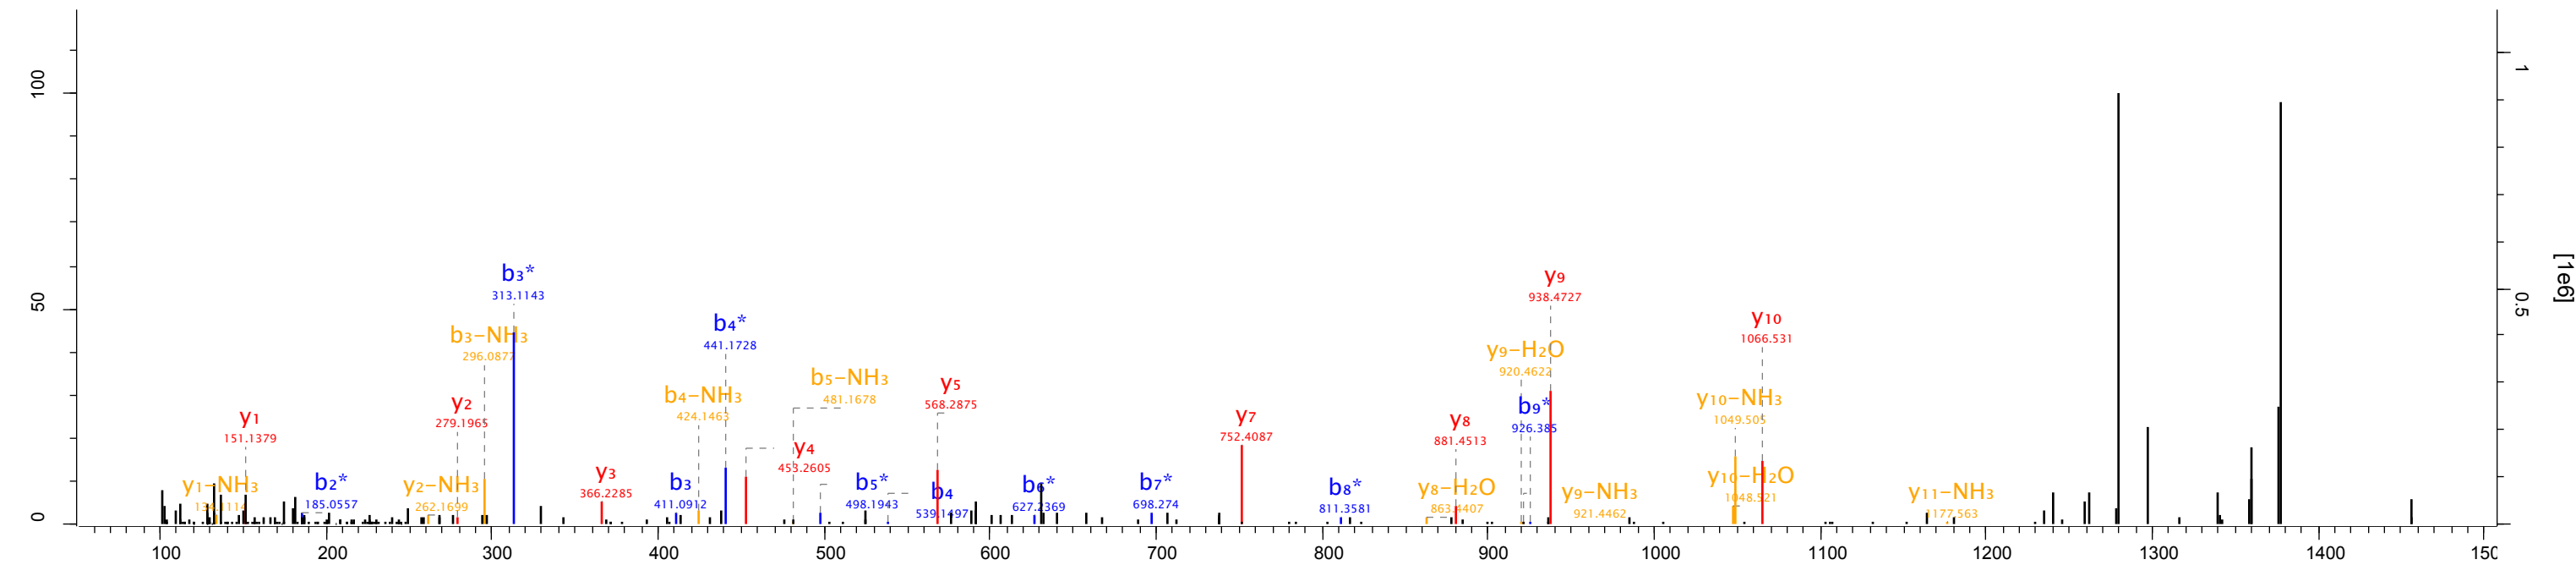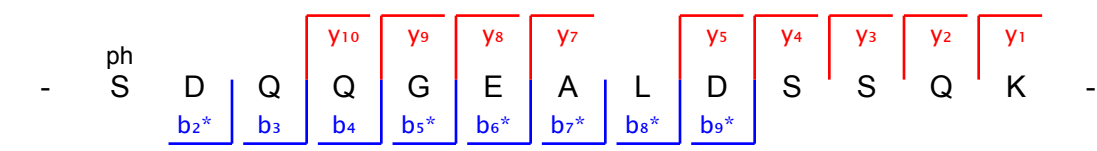

Raw file 20150812\_A375SR\_Phospho\_BR1\_03 Scan 6051 Method FTMS; HCD Score 95.67 m/z 736.31 Gene names HIRIP3

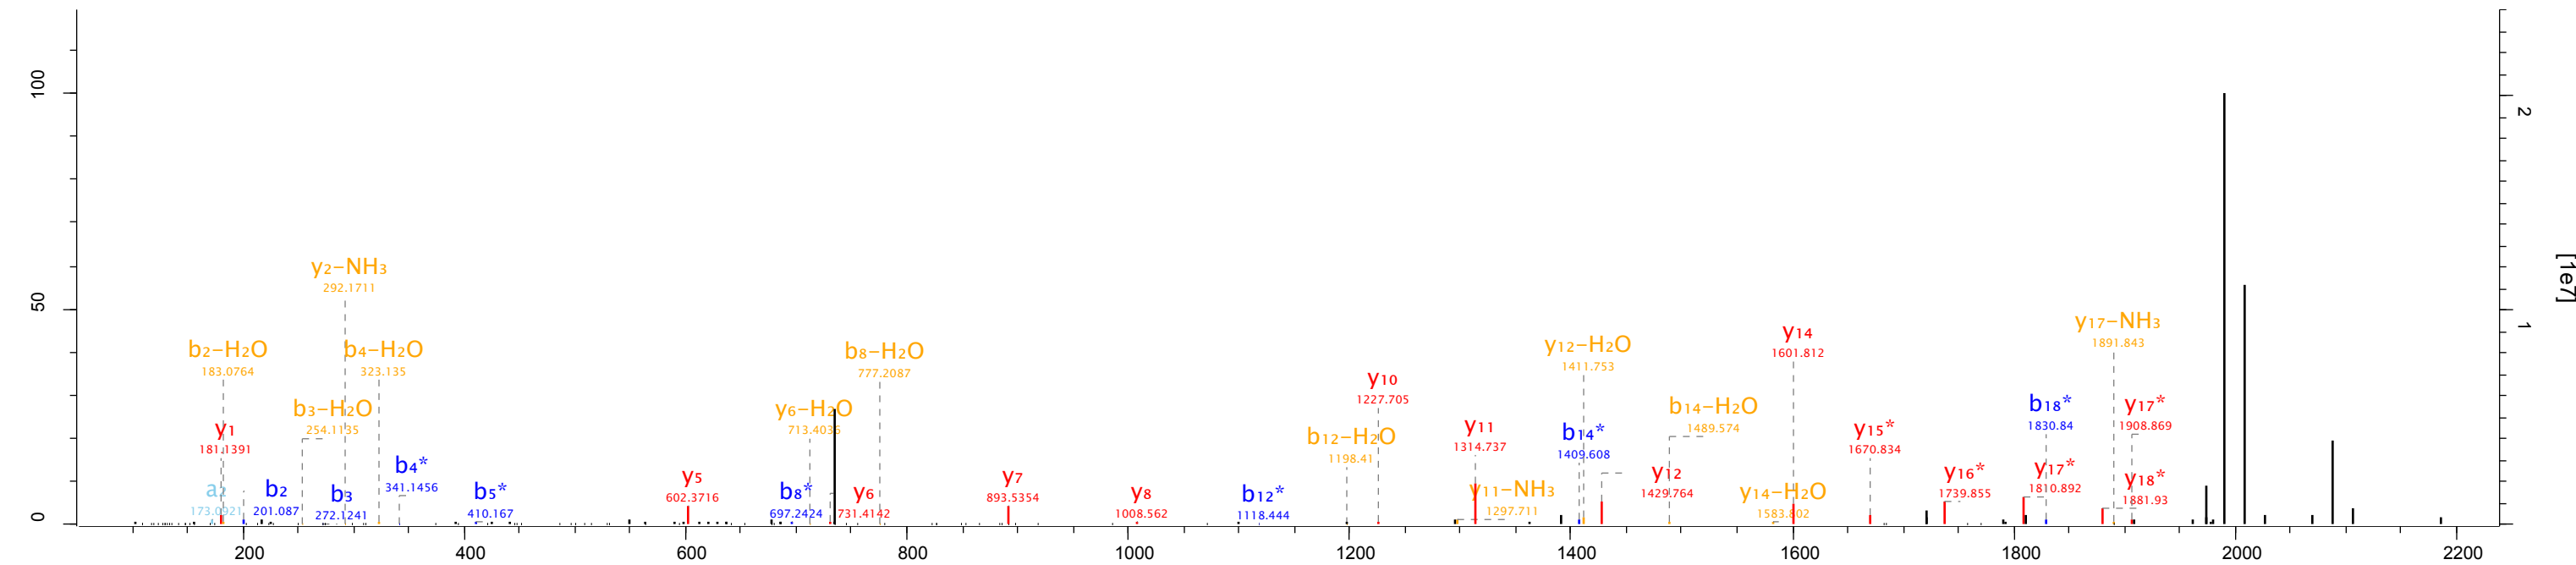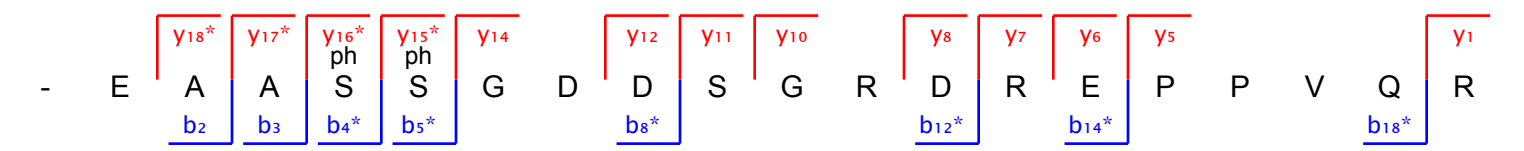

Raw file 20150812\_A375SR\_Phospho\_BR1\_03 Scan 6381 Method FTMS; HCD Score 171.3 m/z 798.34 Gene names SORBS2

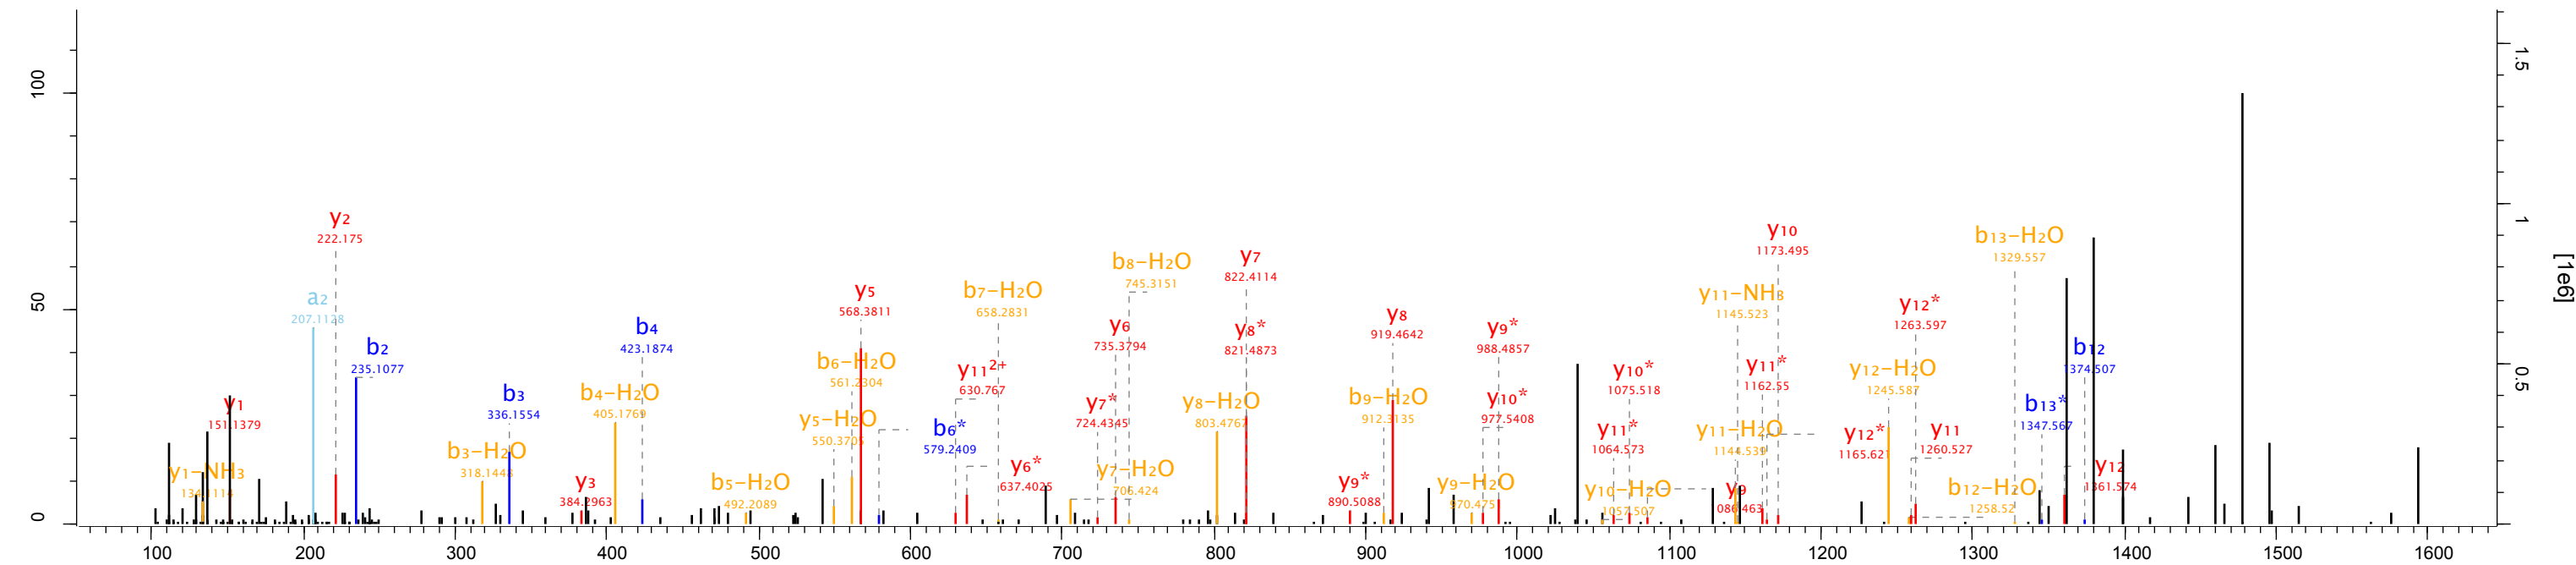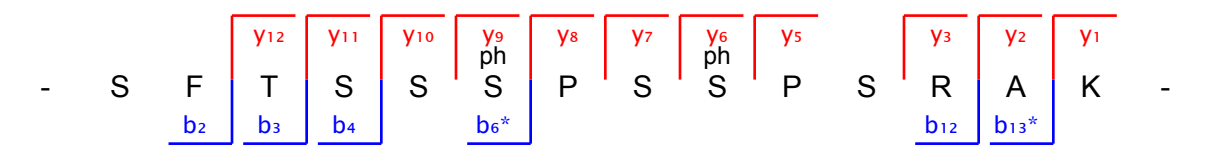



Raw file: 20150812\_A375SR\_Phospho\_BR1\_03  
 Scan: 6541 Method: FTMS; HCD Score: 89.47 m/z: 692.77 Gene names: RASAL2

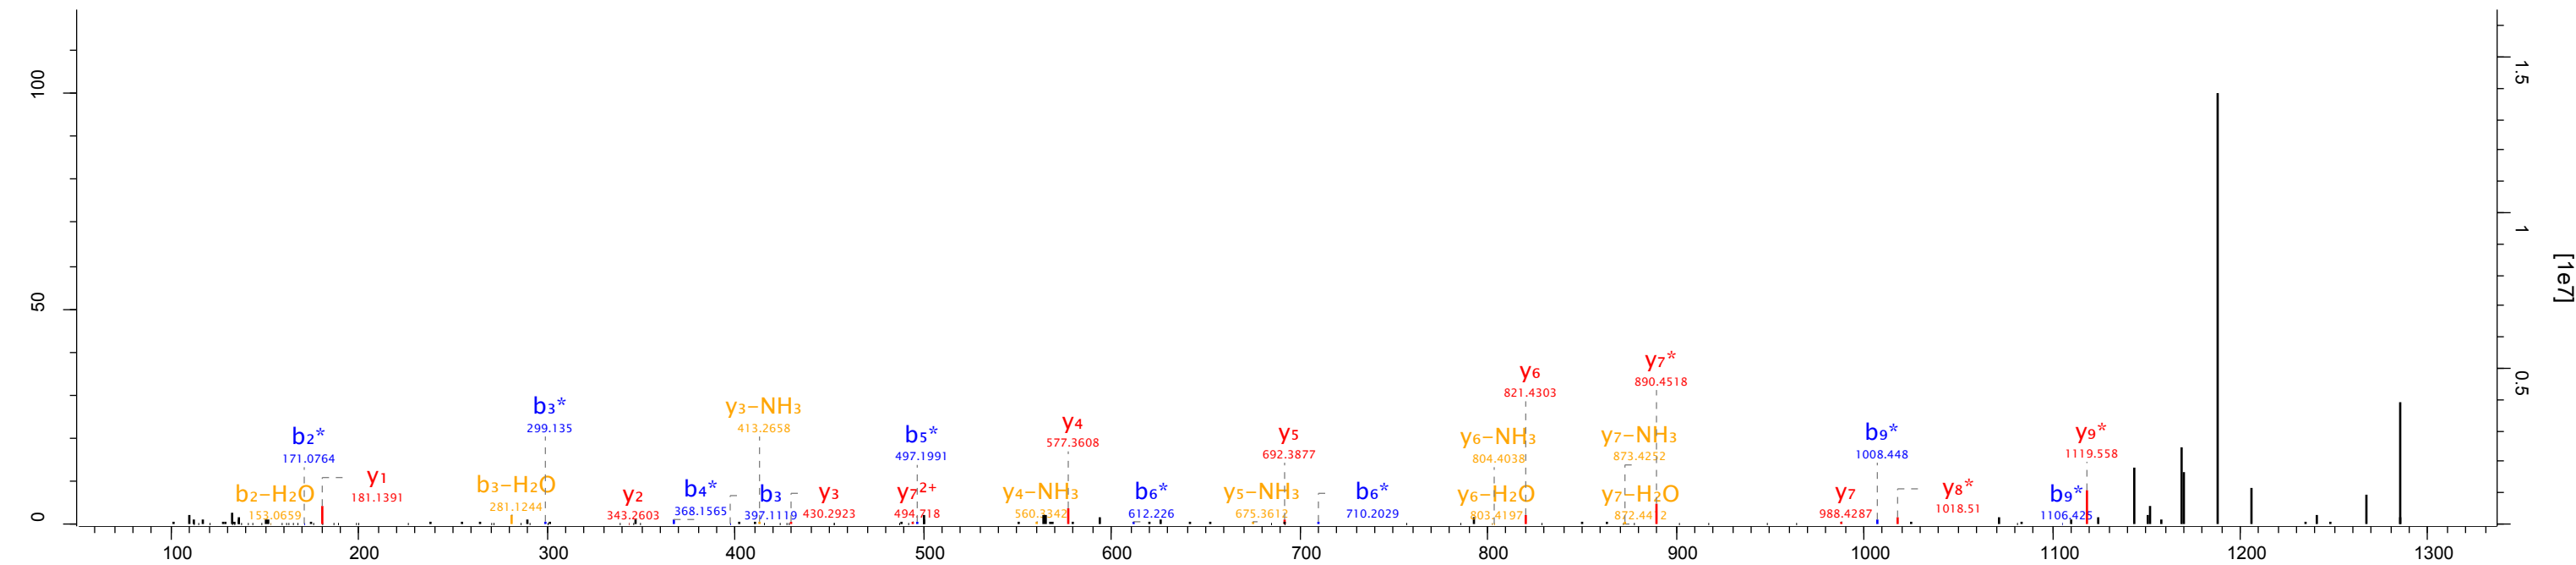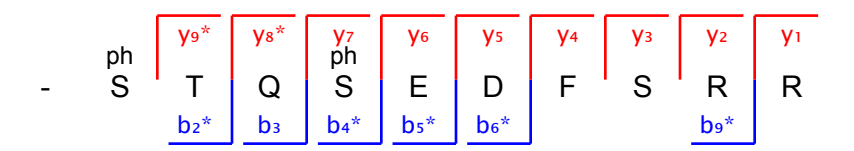

Raw file: 20150812\_A375SR\_Phospho\_BR1\_03  
 Scan: 6661 Method: FTMS; HCD Score: 220.76 m/z: 810.67 Gene names: ARRB1

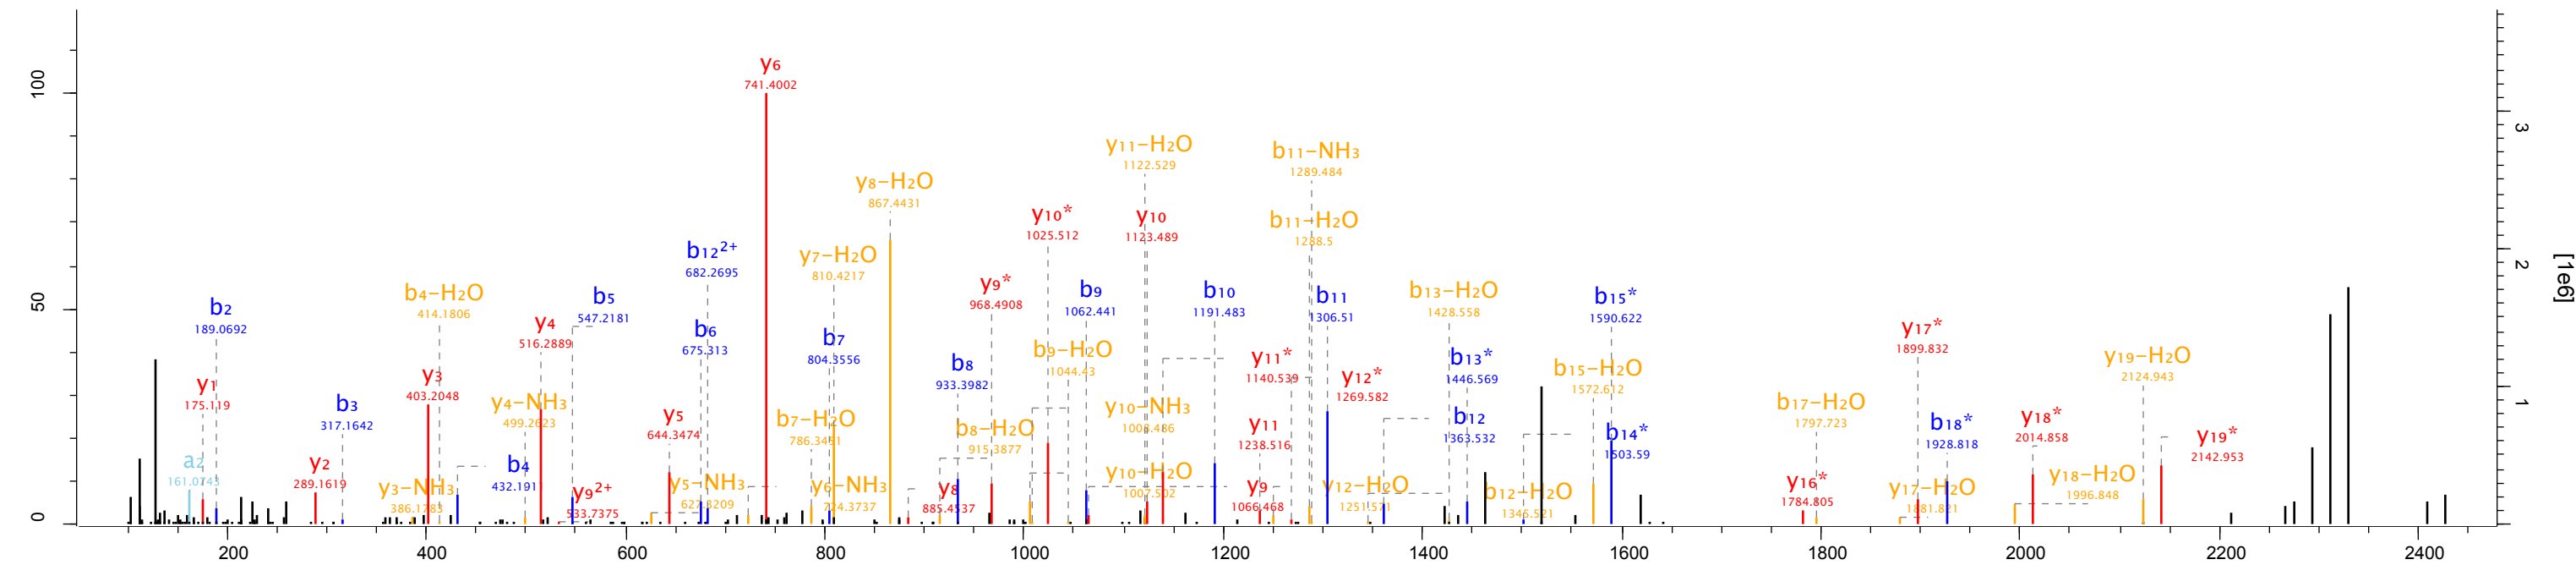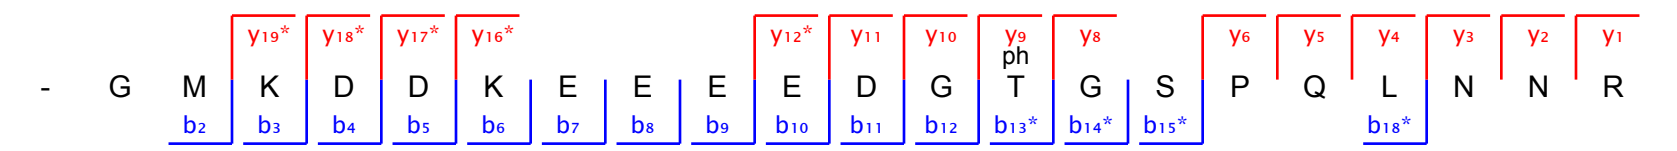

Raw file 20150812\_A375SR\_Phospho\_BR1\_03 Scan 6821 Method FTMS; HCD Score 65.24 m/z 403.85 Gene names LLGL1;SPATS2;LLGL2

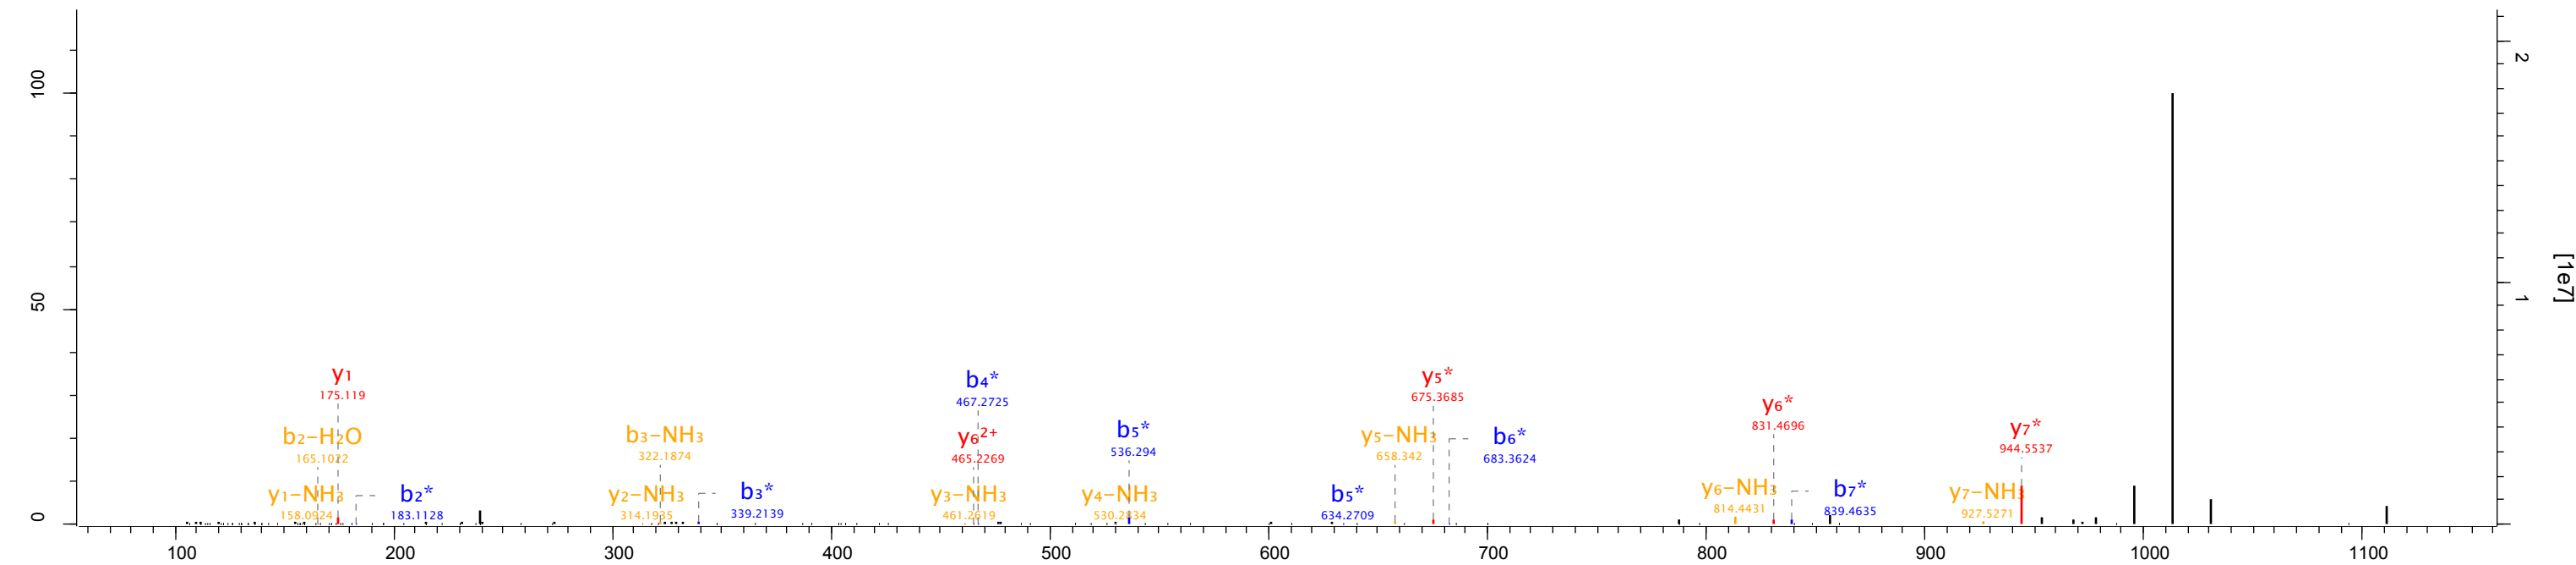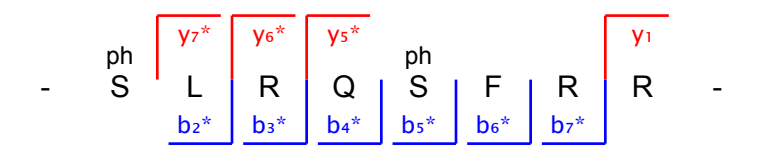



Raw file: 20150812\_A375SR\_Phospho\_BR1\_03  
 Scan: 7941 Method: FTMS; HCD Score: 111.81 m/z: 722.31 Gene names: CEP112

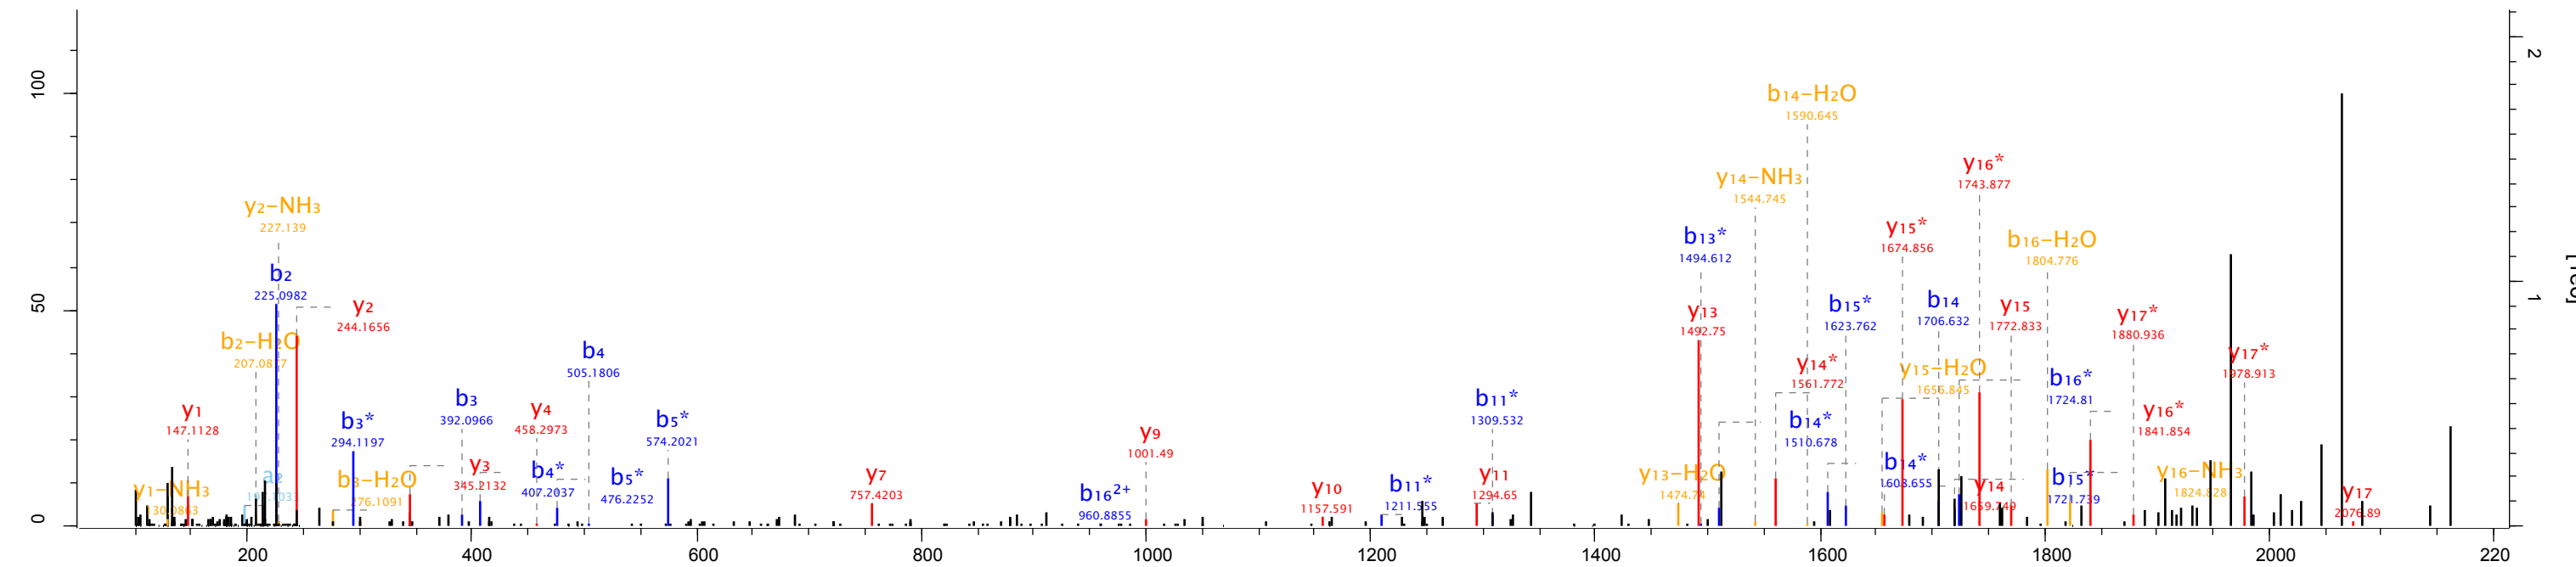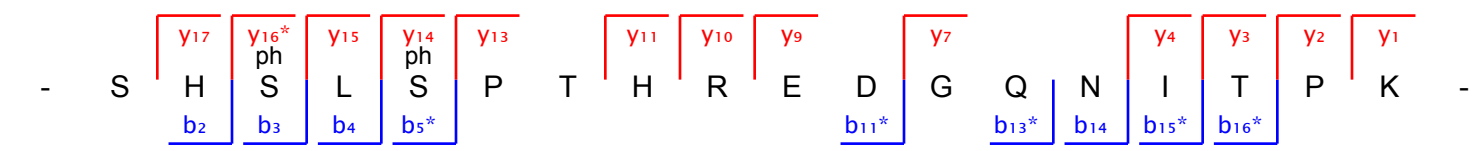

Raw file: 20150812\_A375SR\_Phospho\_BR1\_03  
 Scan: 7971 Method: FTMS; HCD Score: 179.85 m/z: 974.39 Gene names: SPANXB1

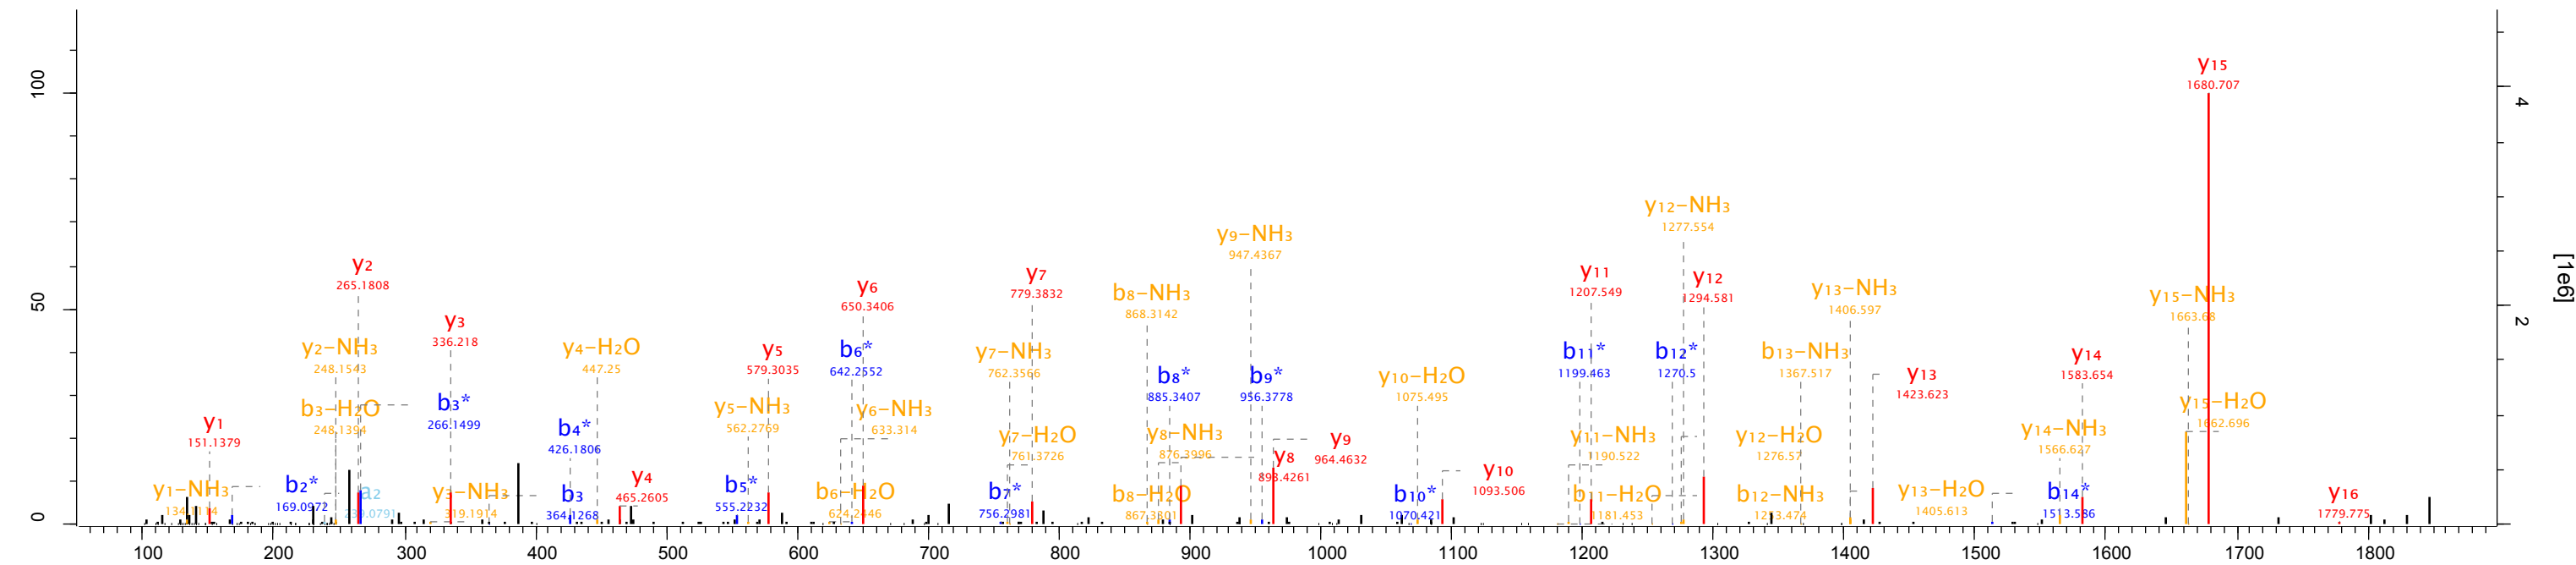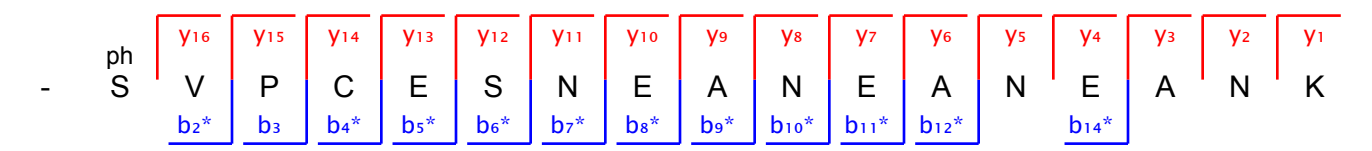

Raw file: 20150812\_A375SR\_Phospho\_BR1\_03  
 Scan: 8571 Method: FTMS; HCD Score: 65.18 m/z: 557.58 Gene names: YTHDC2

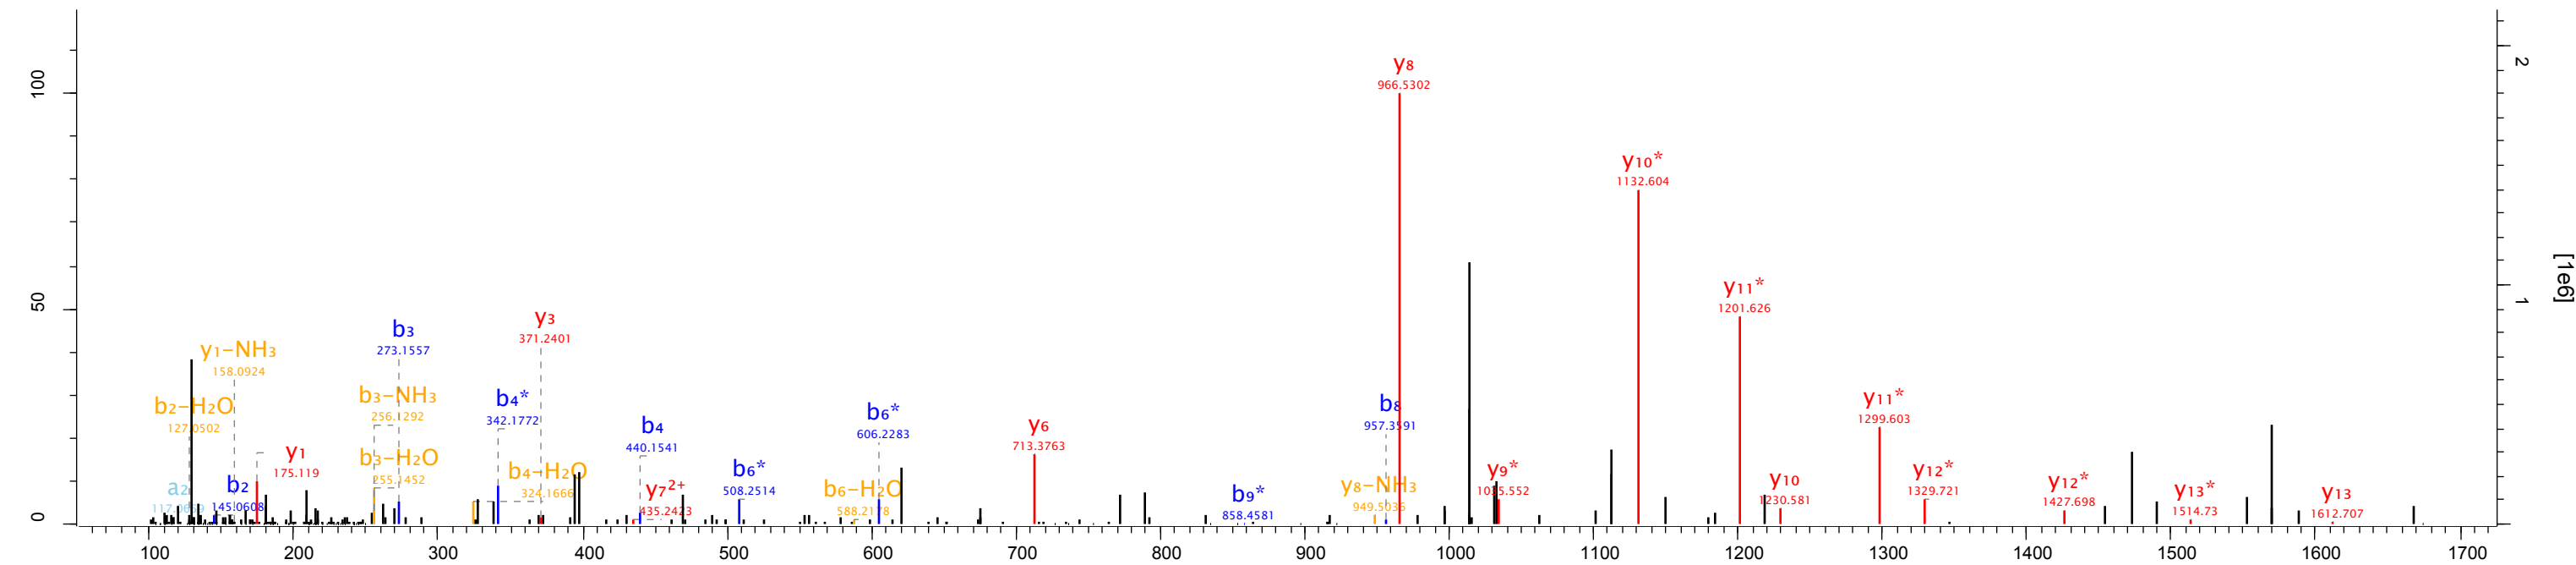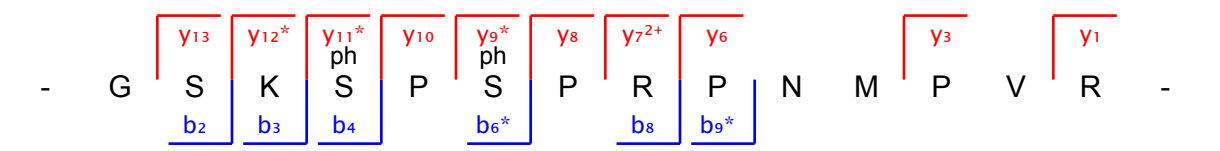

Raw file 20150812\_A375SR\_Phospho\_BR1\_03 Scan 8871 Method FTMS; HCD Score 177.21 m/z 989.89 Gene names YBX1

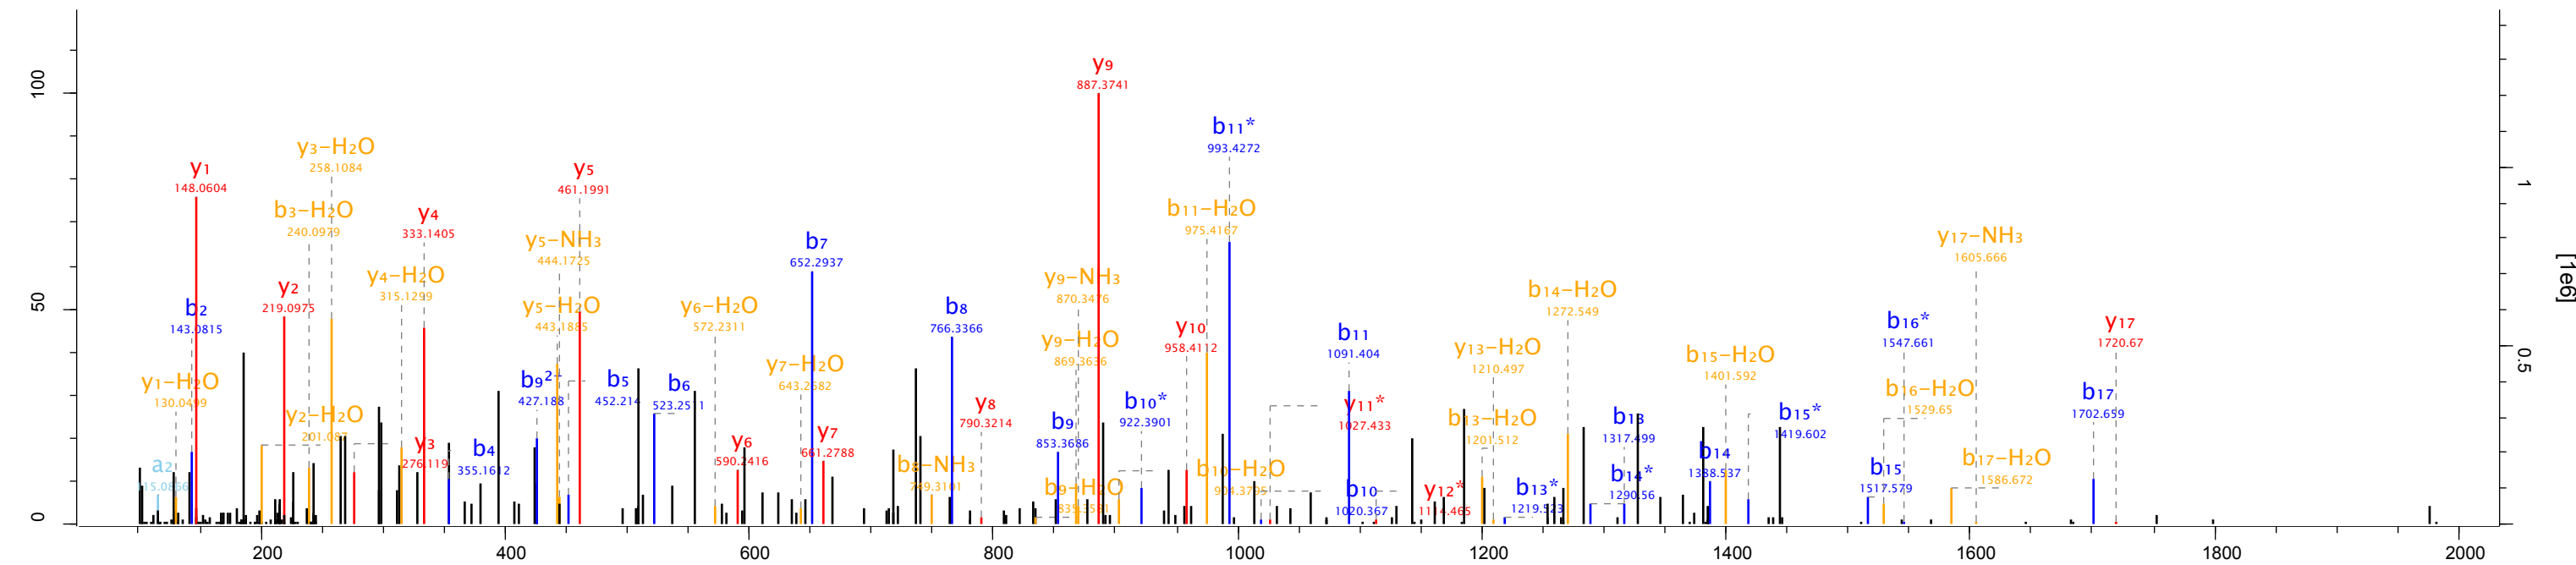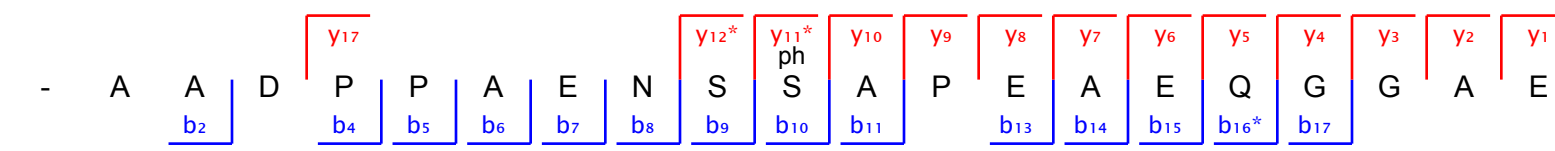



Raw file 20150812\_A375SR\_Phospho\_BR1\_03 Scan 8931 Method FTMS; HCD Score 164.46 m/z 820.36 Gene names TCF7L2

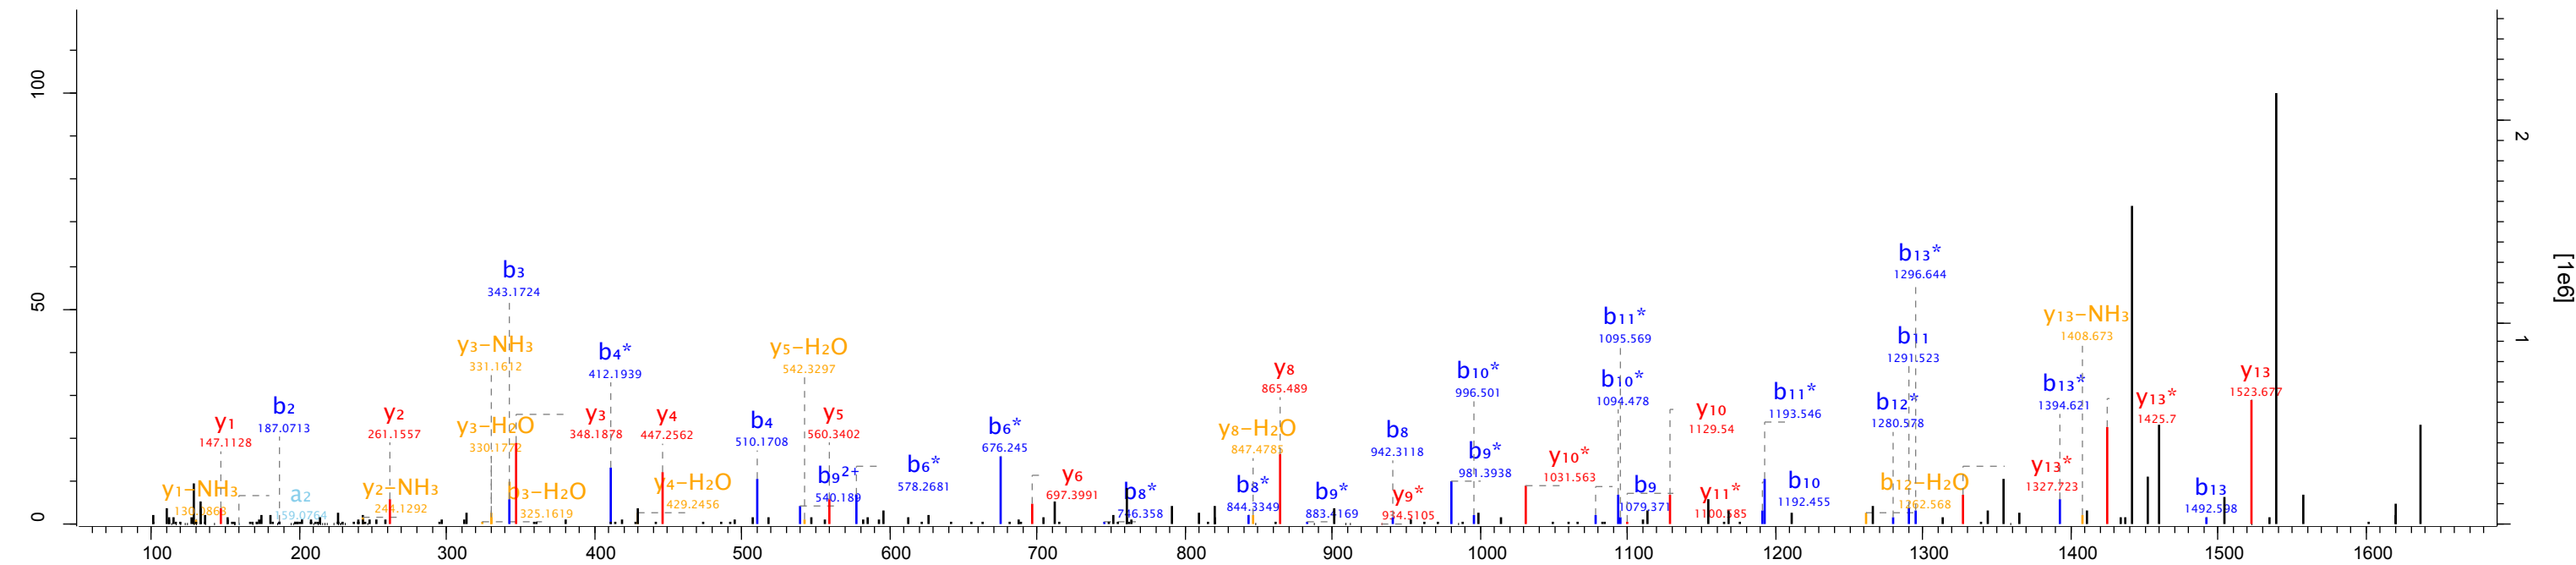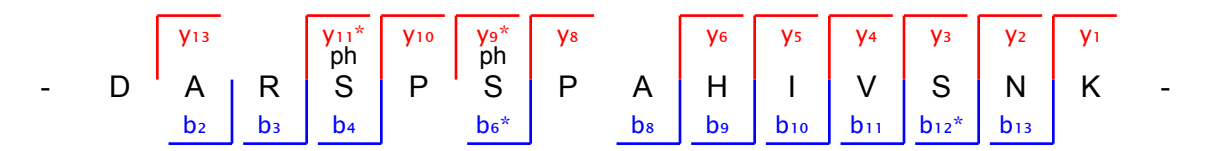

Raw file: 20150812\_A375SR\_Phospho\_BR1\_03  
 Scan: 8981 Method: FTMS; HCD Score: 209.75 m/z: 902.35 Gene names: HNRNPUL2;HNRNPUL2-BSCL2

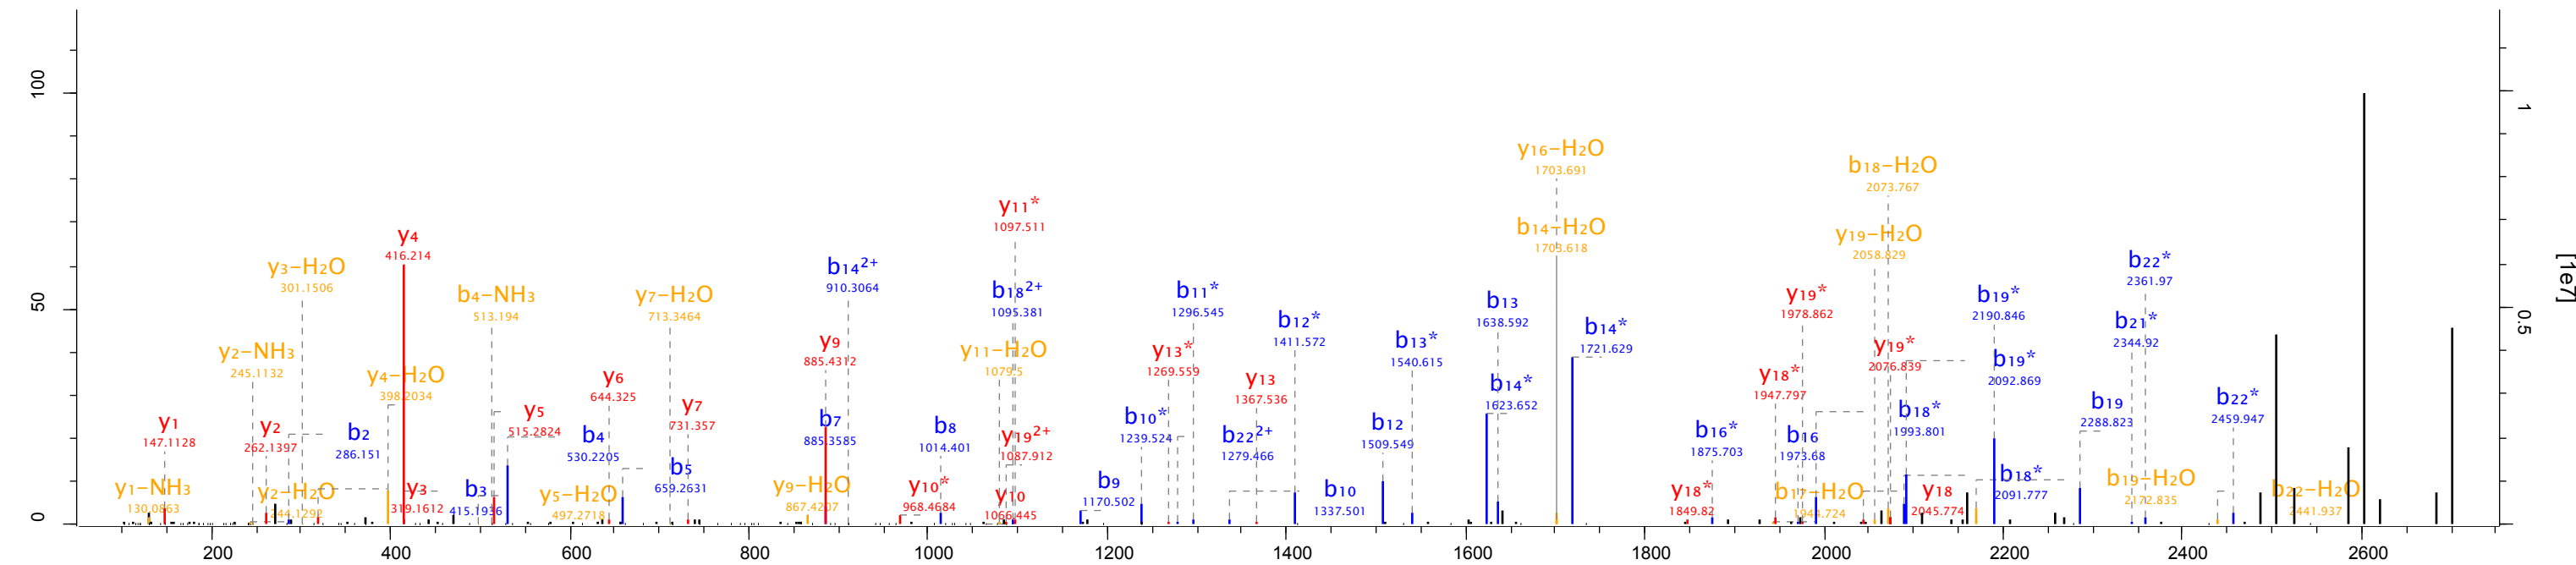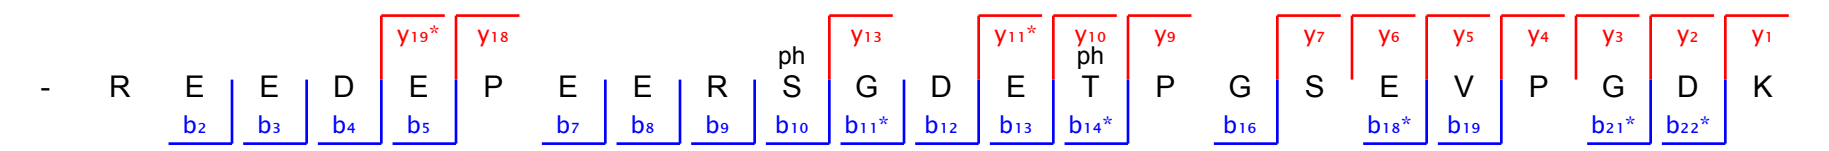

Raw file: 20150812\_A375SR\_Phospho\_BR1\_03  
 Scan: 9331 Method: FTMS; HCD Score: 275.55 m/z: 908.42 Gene names: NAV3

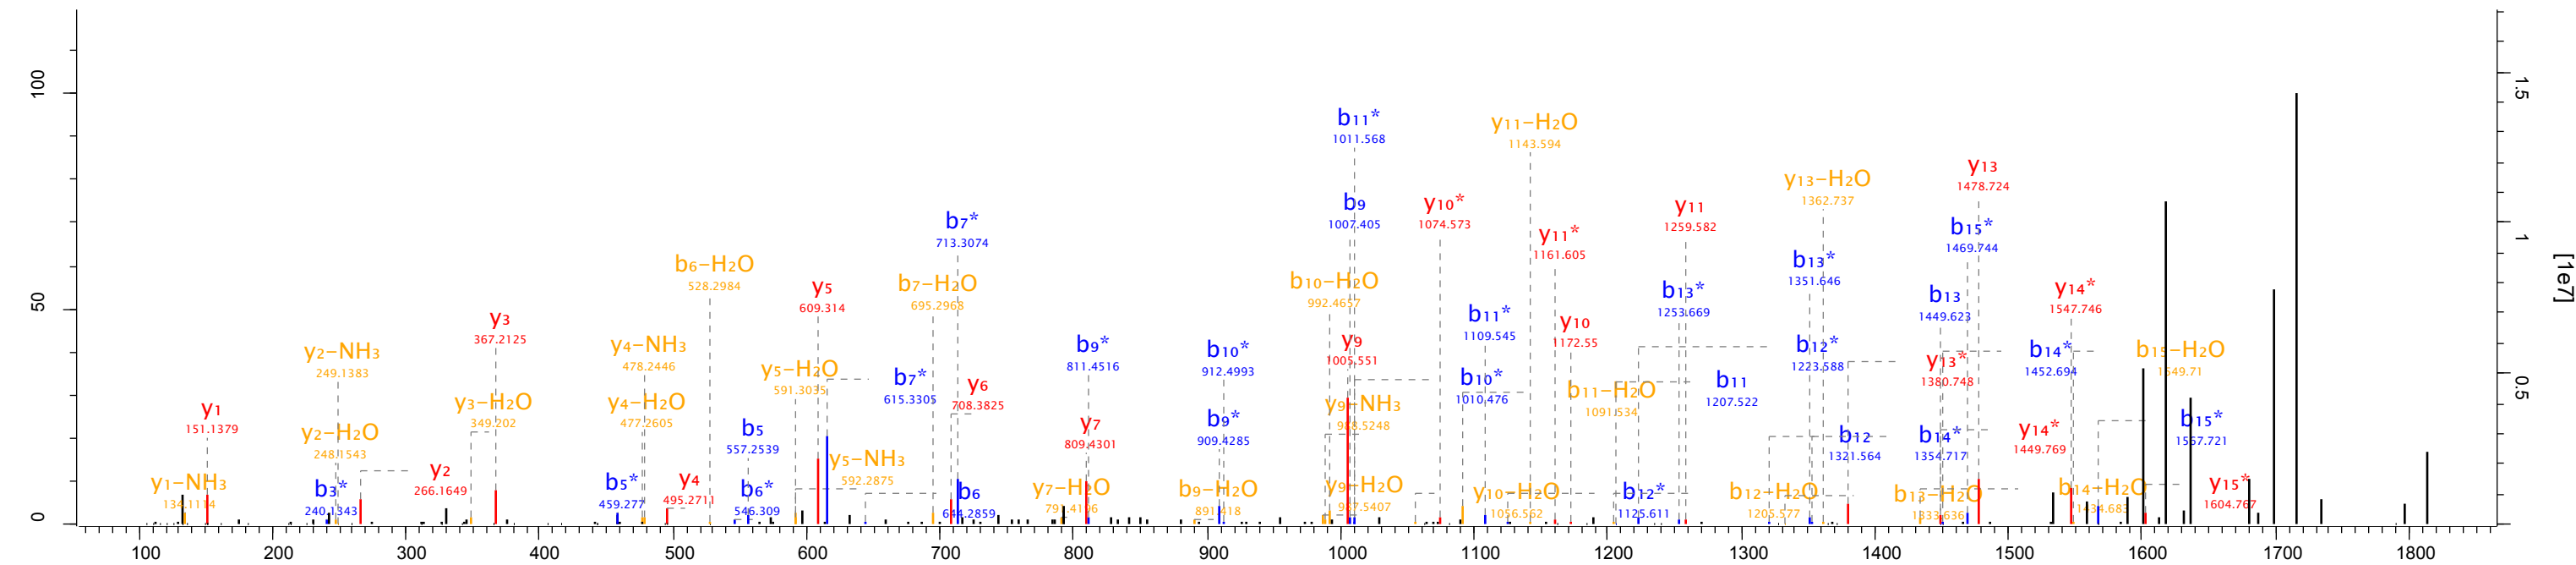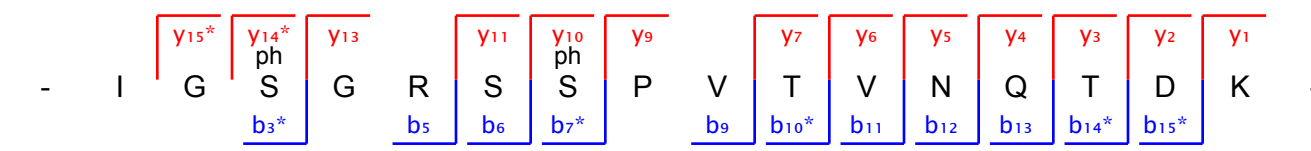

Raw file: 20150812\_A375SR\_Phospho\_BR1\_03  
 Scan: 9501 Method: FTMS; HCD Score: 241.06 m/z: 952.92 Gene names: SQSTM1

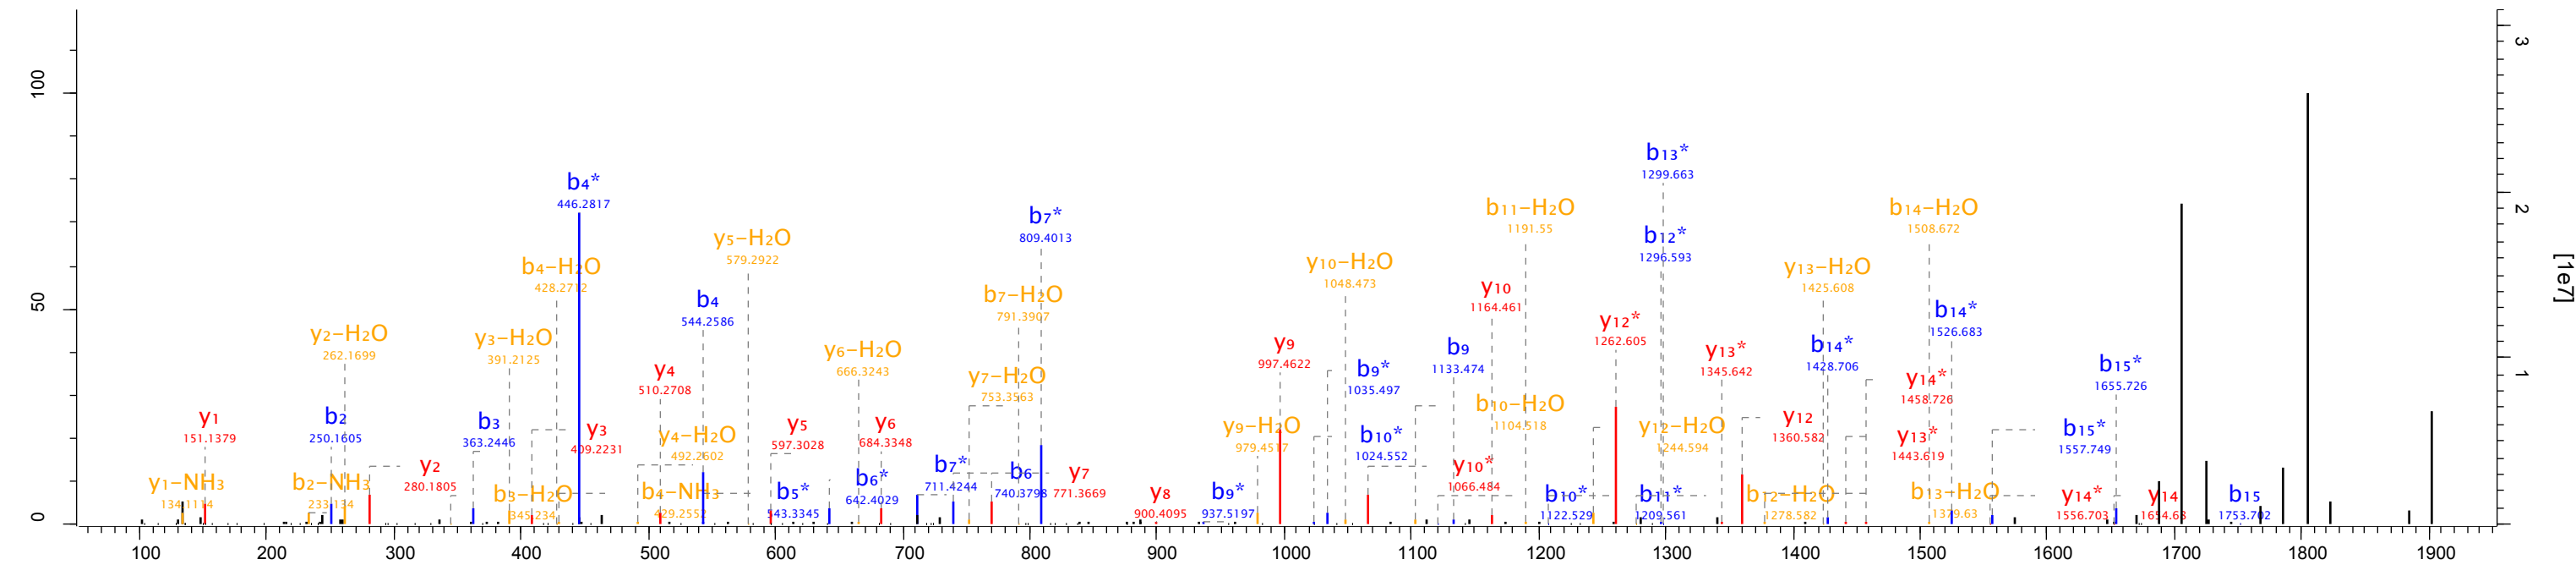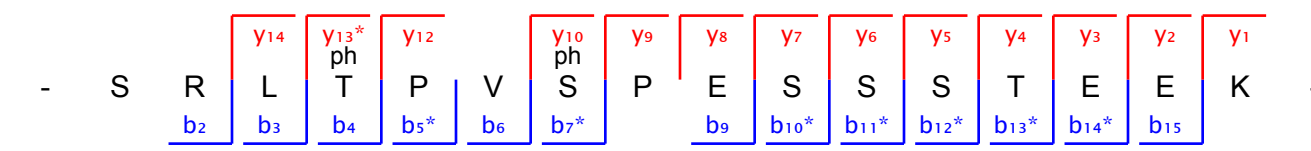

Raw file: 20150812\_A375SR\_Phospho\_BR1\_03  
 Scan: 9511 Method: FTMS; HCD Score: 387.37 m/z: 1148.5 Gene names: ADD1

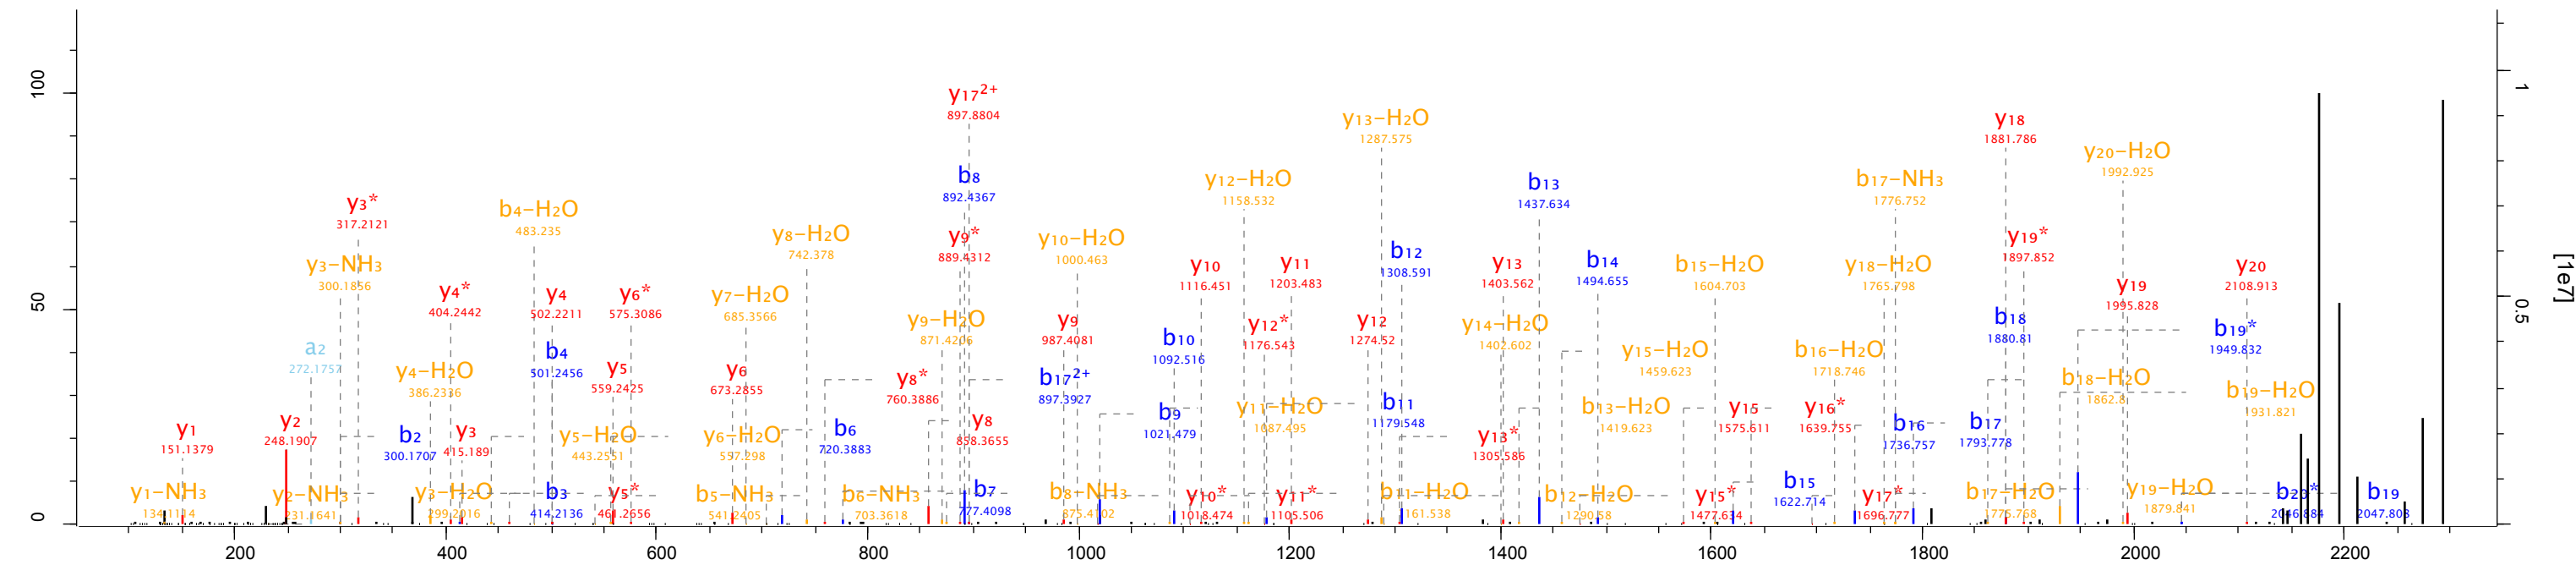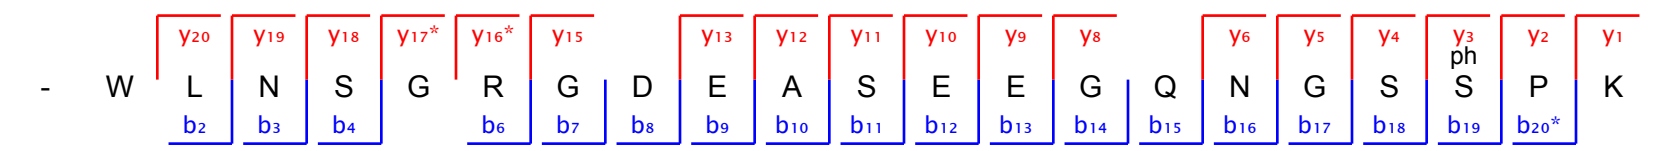

Raw file: 20150812\_A375SR\_Phospho\_BR1\_03  
 Scan: 9611 Method: FTMS; HCD Score: 144.79 m/z: 672.34 Gene names: AHNAK

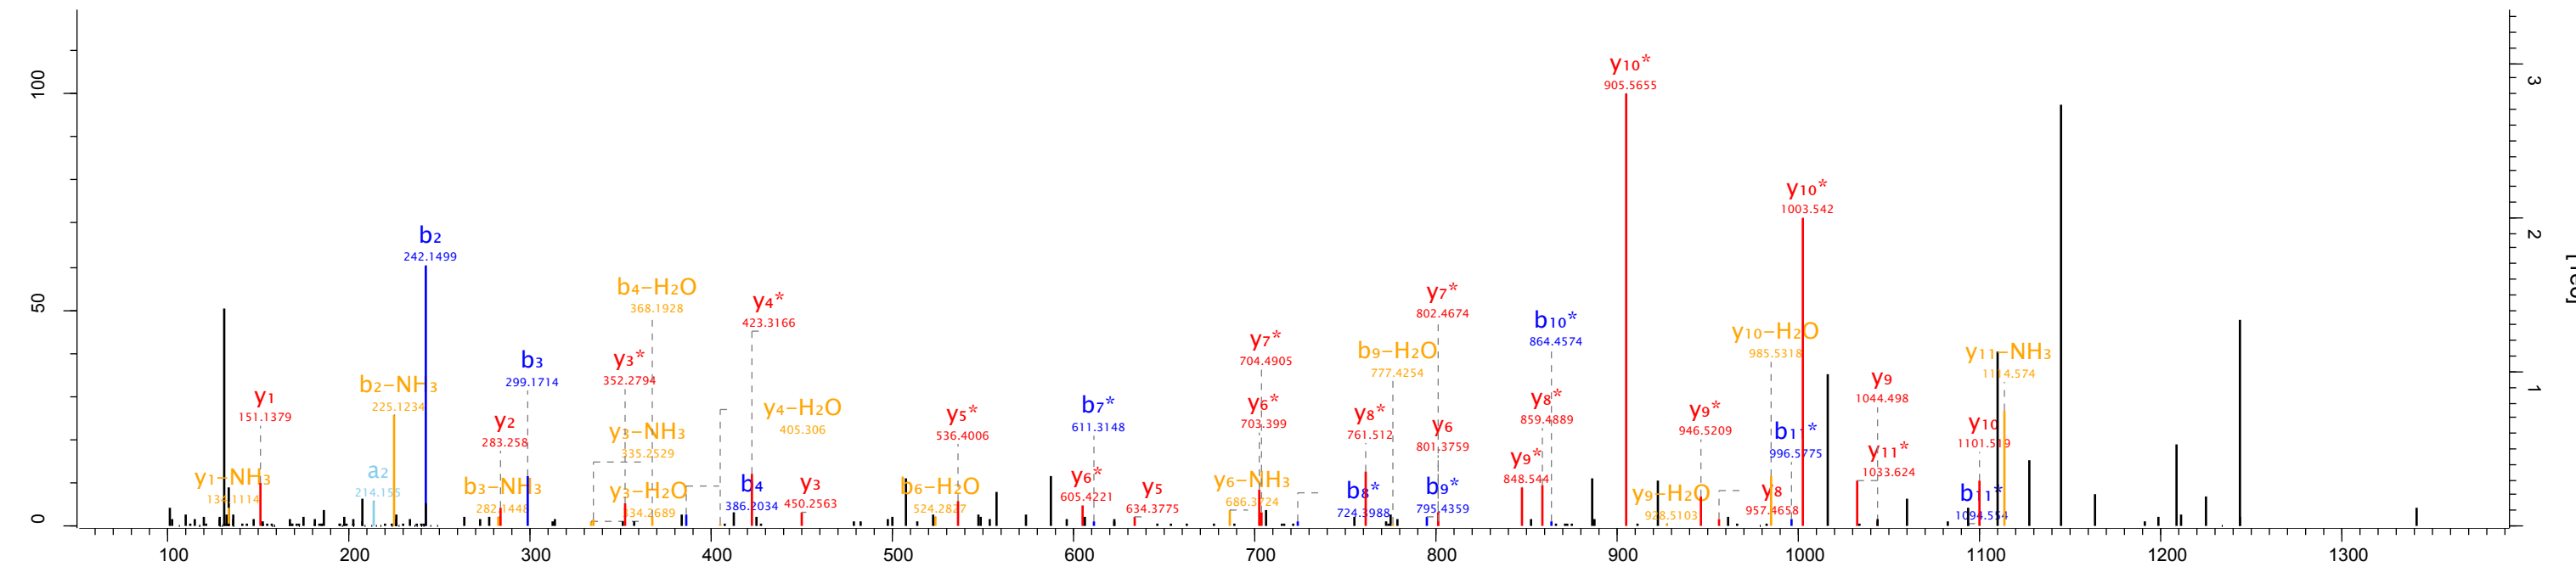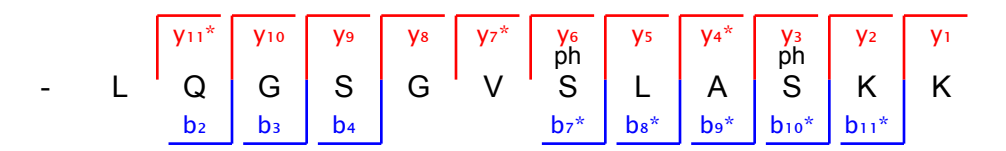

Raw file: 20150812\_A375SR\_Phospho\_BR1\_04  
 Scan: 10431 Method: FTMS; HCD Score: 95.2 m/z: 554.57 Gene names: GLIS3

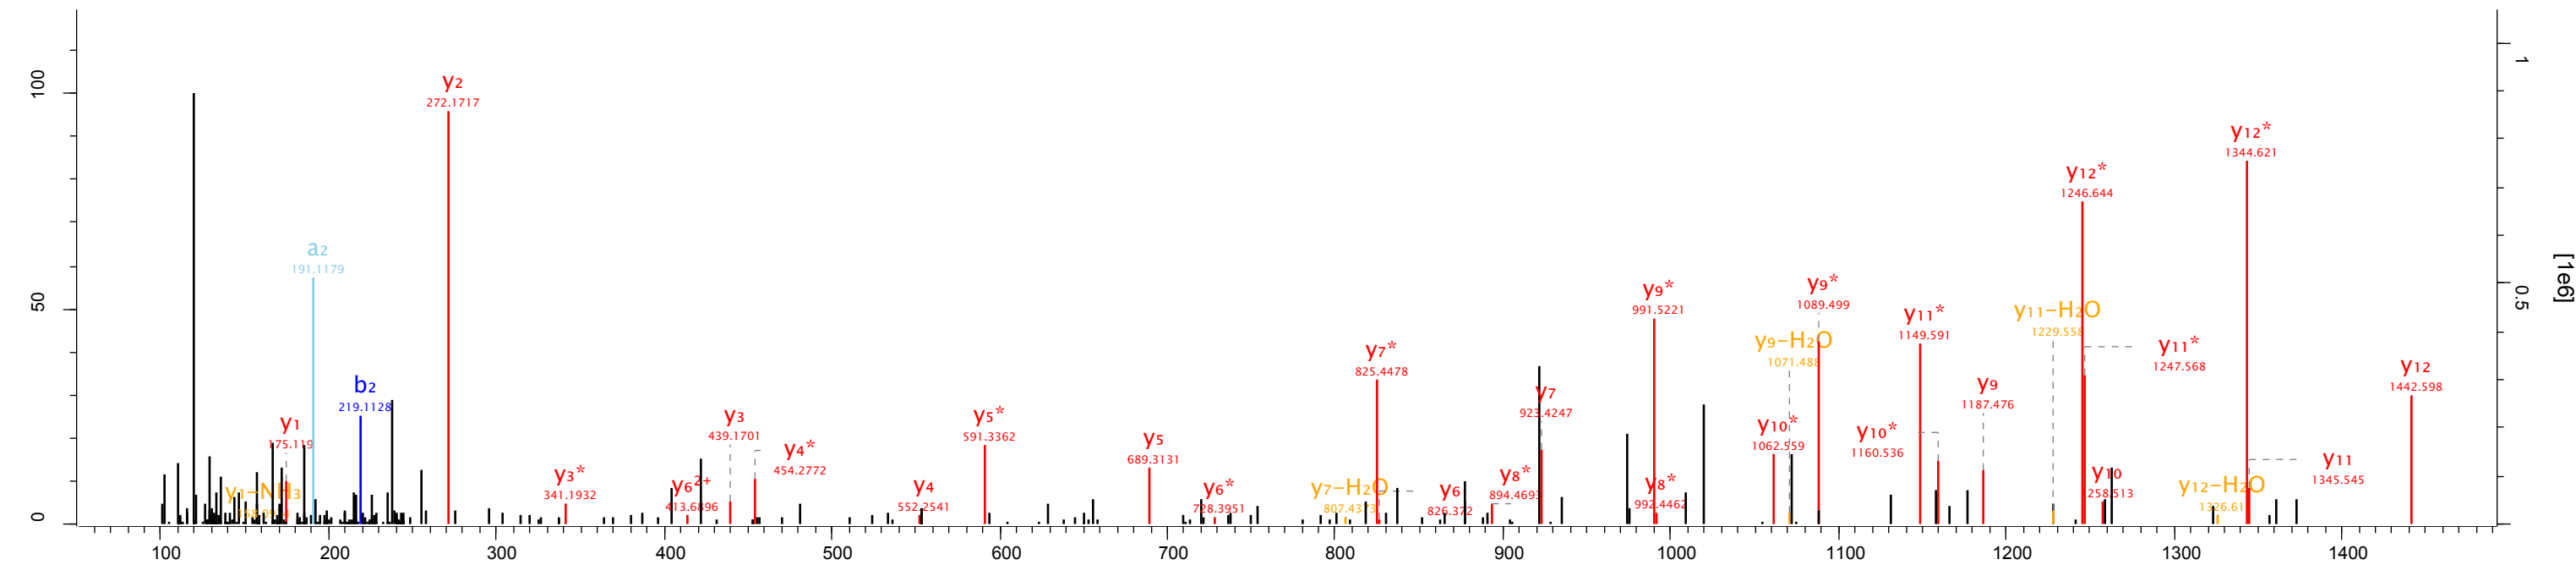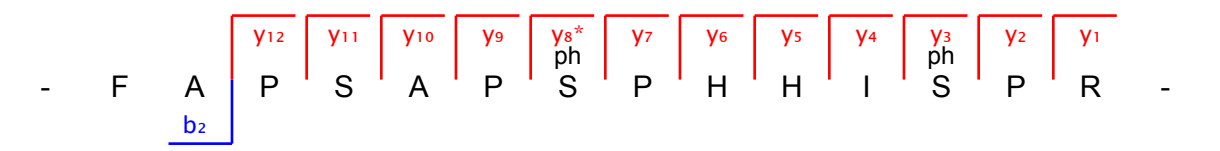

Raw file 20150812\_A375SR\_Phospho\_BR1\_04 Scan 11341 Method FTMS; HCD Score 81.06 m/z 785.71 Gene names CDCA3

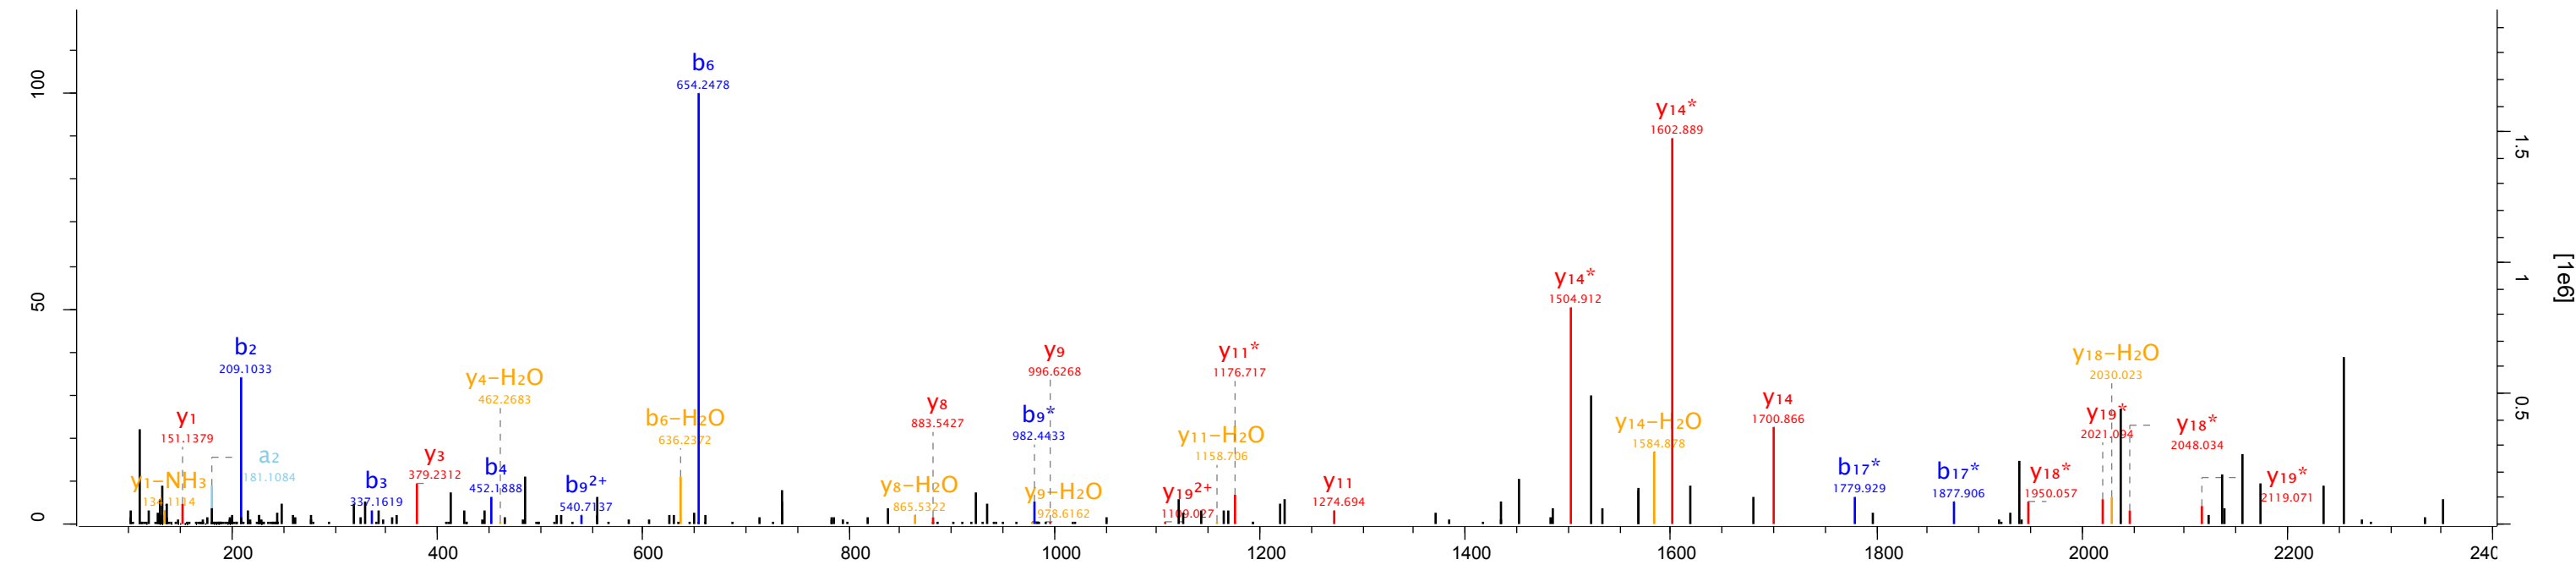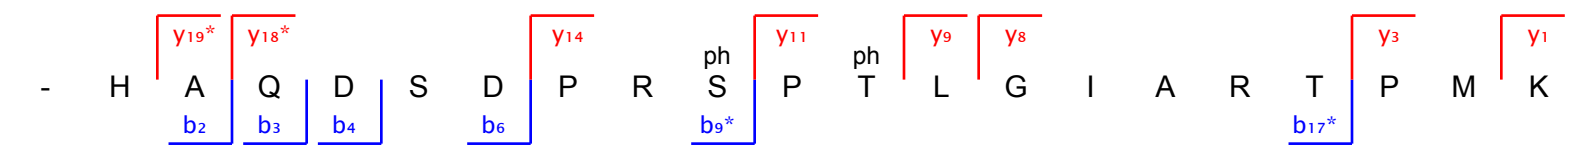



Raw file 20150812\_A375SR\_Phospho\_BR1\_04 Scan 11541 Method FTMS; HCD Score 86.21 m/z 726.33 Gene names BRAT1

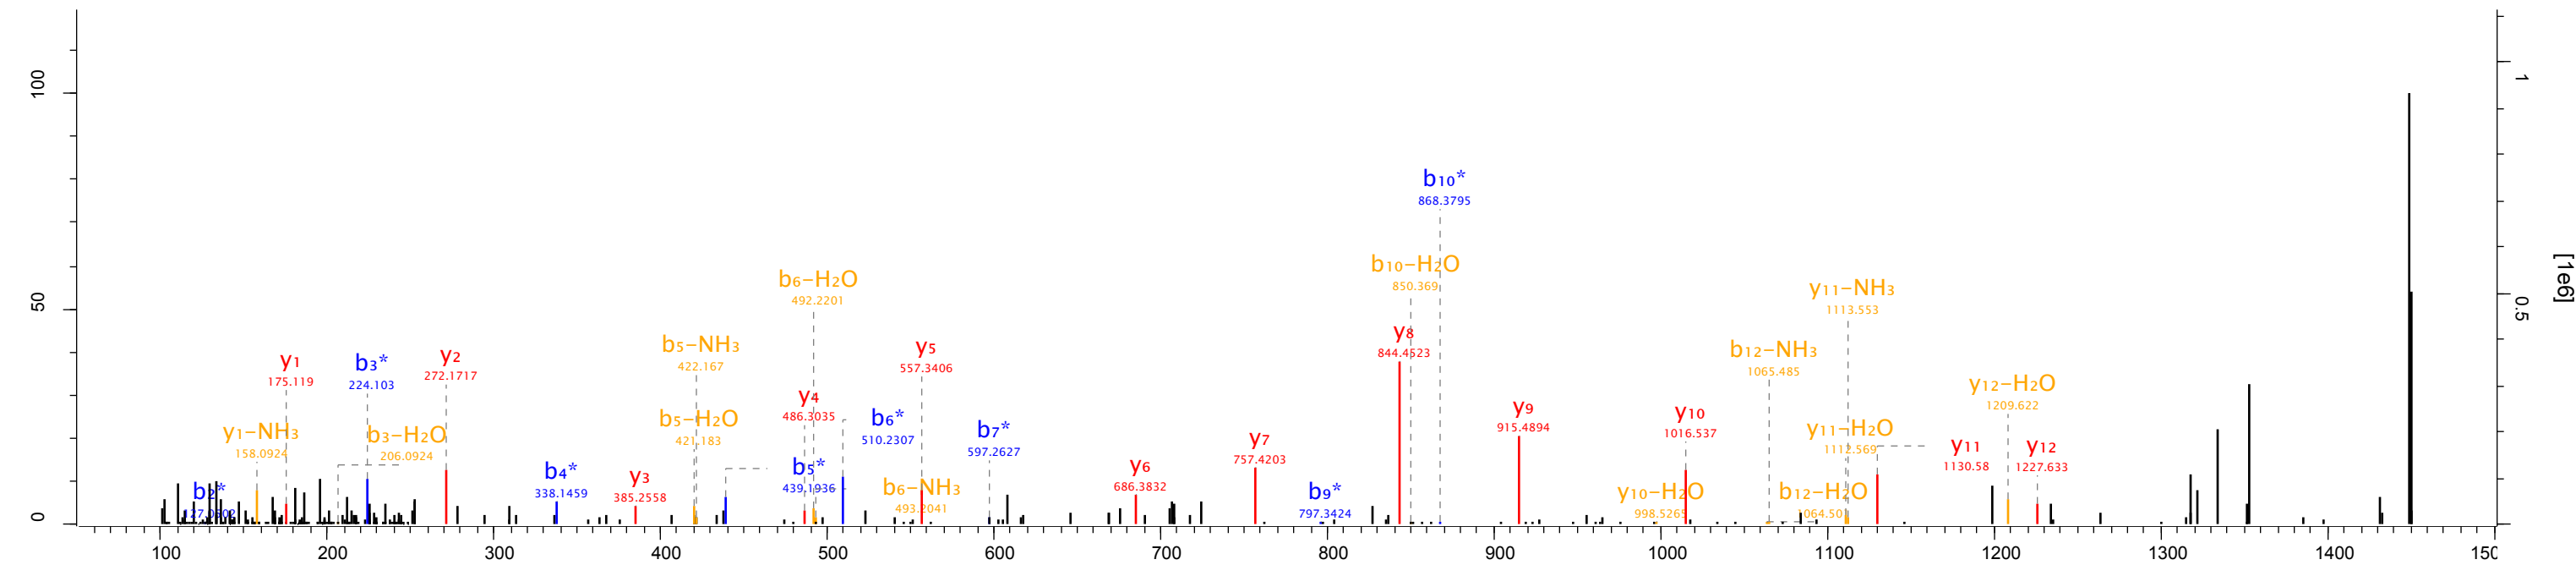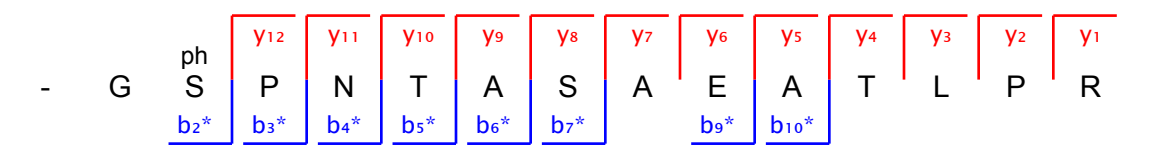

Raw file 20150812\_A375SR\_Phospho\_BR1\_04 Scan 11671 Method FTMS; HCD Score 291.08 m/z 1150.43 Gene names SF3B2

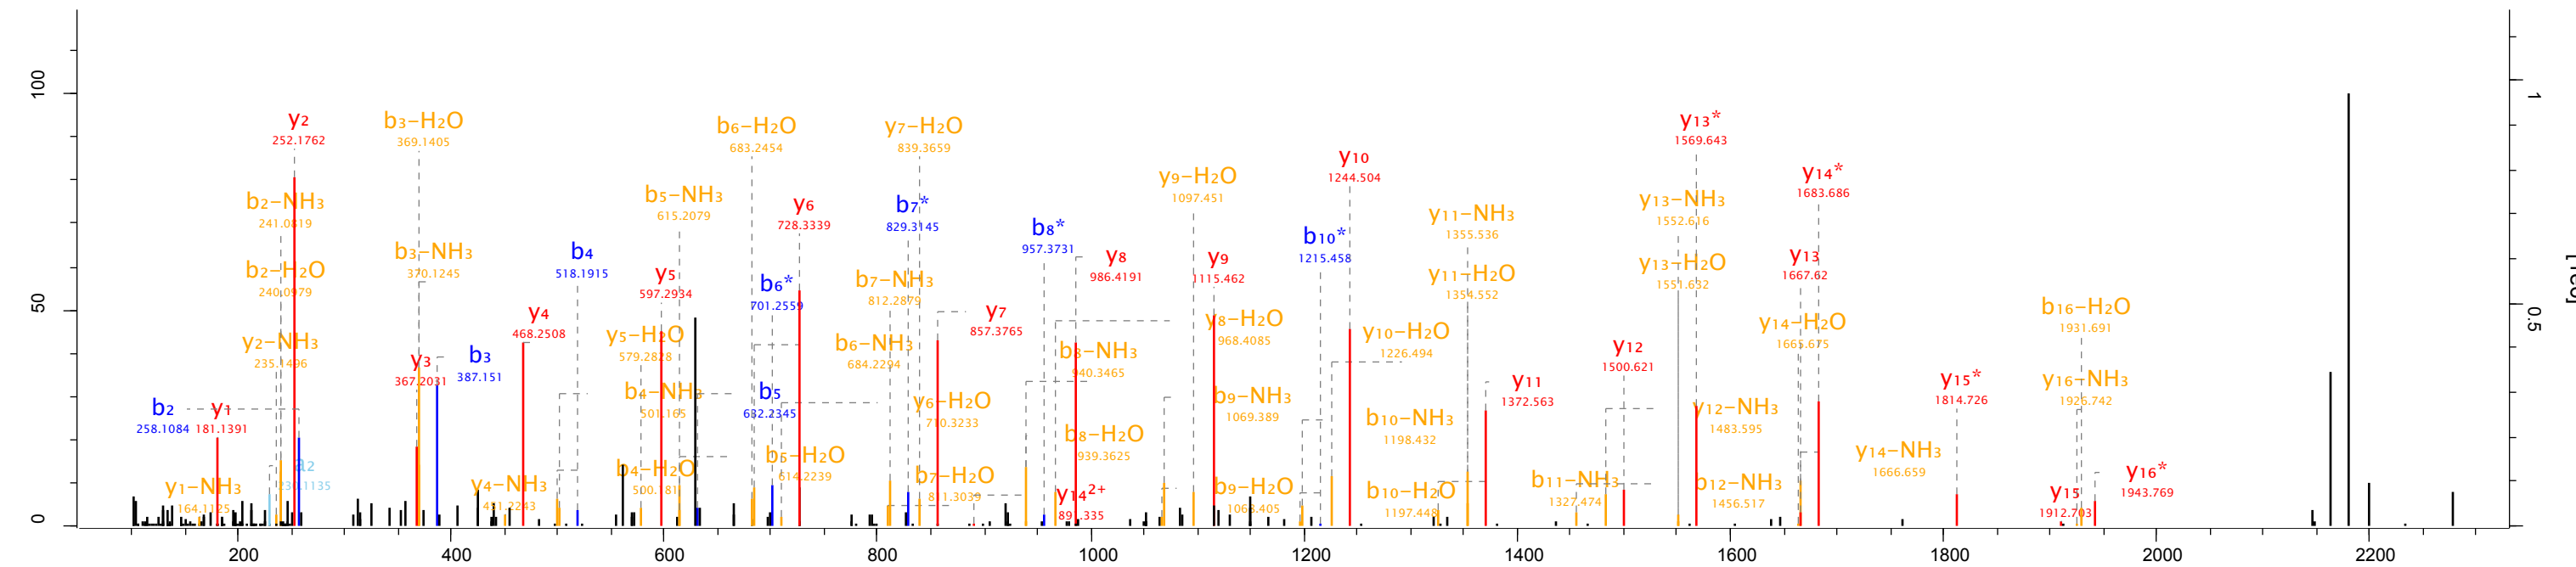

- Q E E E M N S Q Q E E E E M E T D A R -

b<sub>2</sub>
b<sub>3</sub>
b<sub>4</sub>
b<sub>5</sub>
b<sub>6</sub><sup>\*</sup>
b<sub>7</sub><sup>\*</sup>
b<sub>8</sub><sup>\*</sup>
b<sub>10</sub><sup>\*</sup>
y<sub>16</sub><sup>\*</sup>
y<sub>15</sub>
y<sub>14</sub><sup>\*</sup>
y<sub>13</sub>
y<sub>12</sub>
y<sub>11</sub>
y<sub>10</sub>
y<sub>9</sub>
y<sub>8</sub>
y<sub>7</sub>
y<sub>6</sub>
y<sub>5</sub>
y<sub>4</sub>
y<sub>3</sub>
y<sub>2</sub>
y<sub>1</sub>

Raw file: 20150812\_A375SR\_Phospho\_BR1\_04  
 Scan: 11741 Method: FTMS; HCD Score: 106.94 m/z: 859.42 Gene names: MKI67

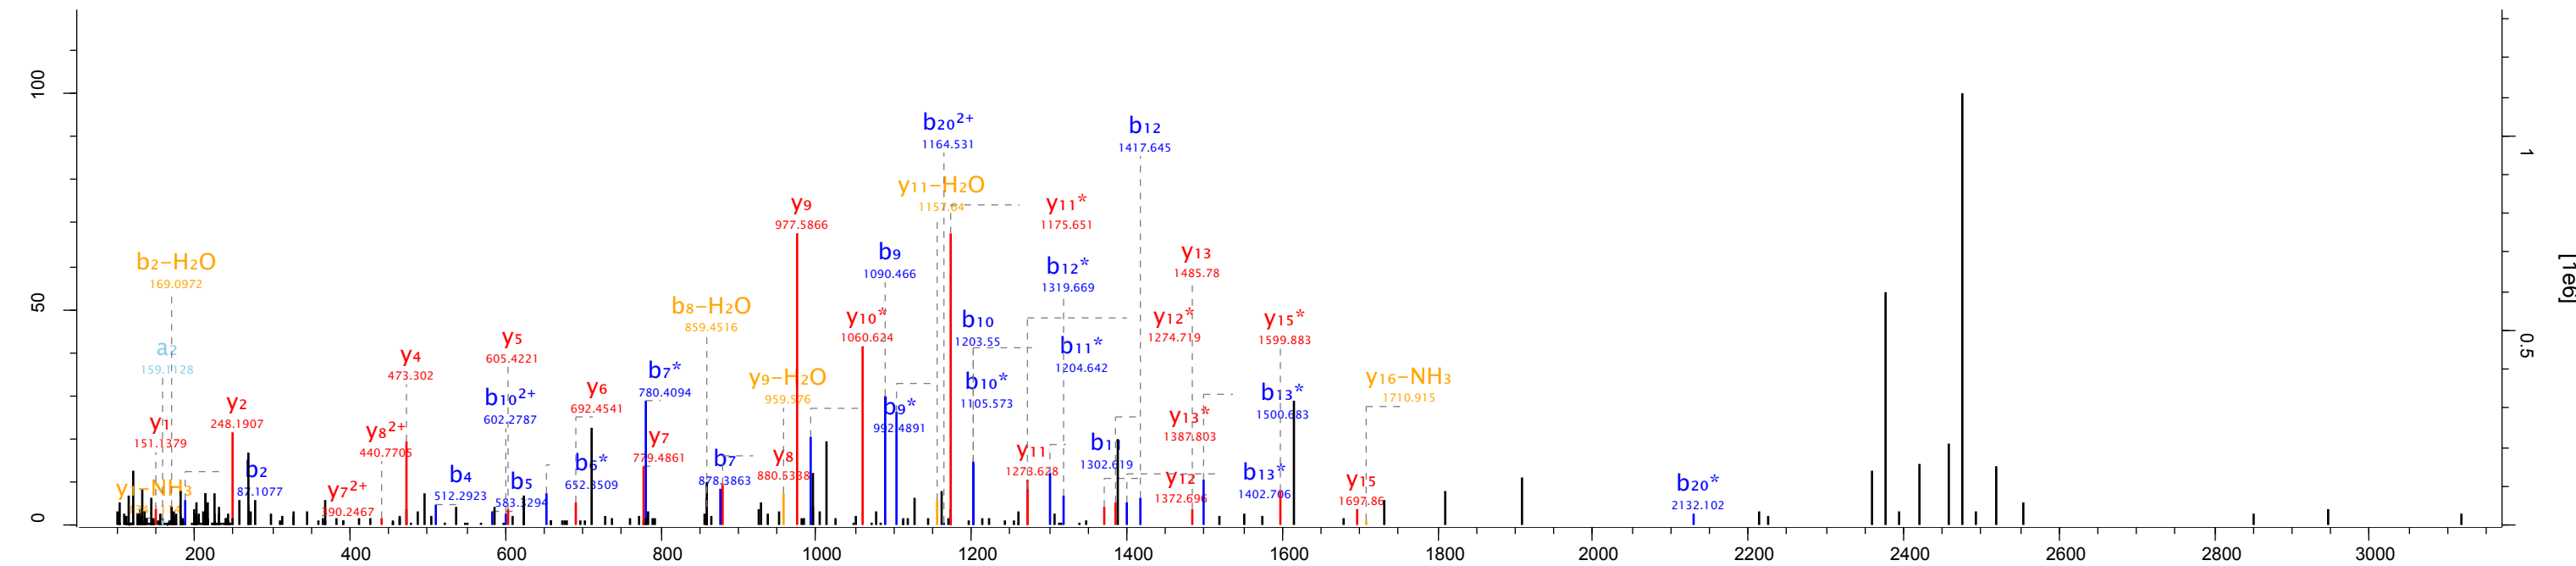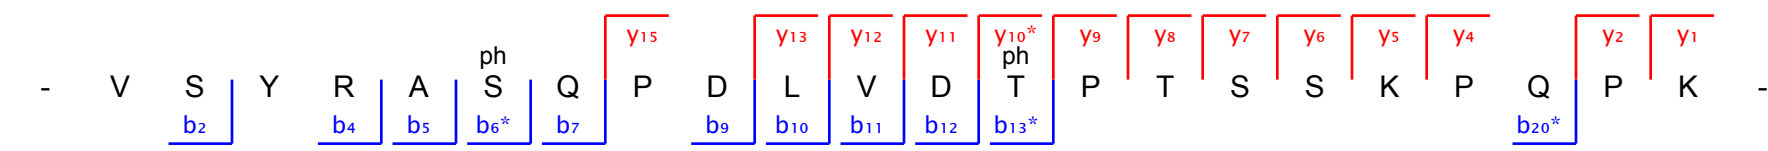

Raw file 20150812\_A375SR\_Phospho\_BR1\_04 Scan 11901 Method FTMS; HCD Score 93.5 m/z 635.31 Gene names CEP135

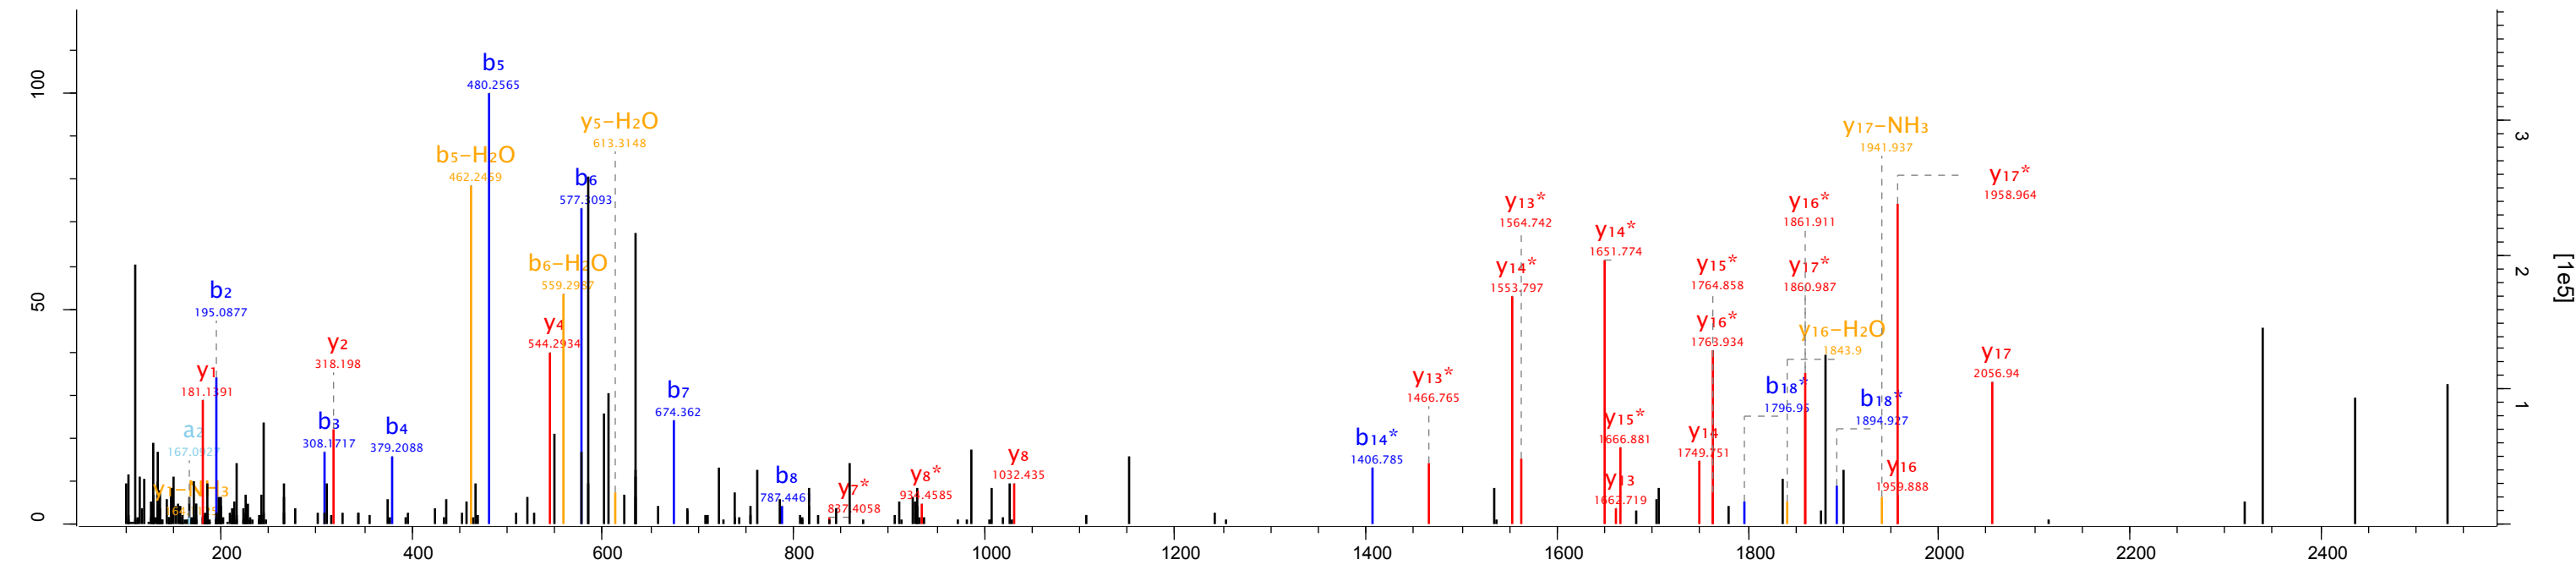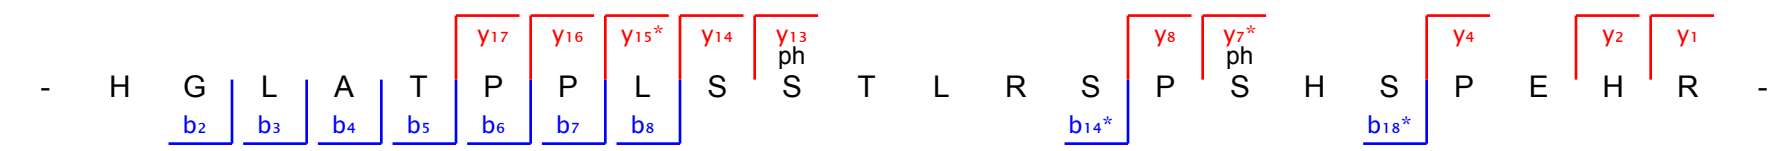



Raw file: 20150812\_A375SR\_Phospho\_BR1\_04  
 Scan: 12061  
 Method: FTMS; HCD  
 Score: 195.39  
 m/z: 1189.54  
 Gene names: TXLNA

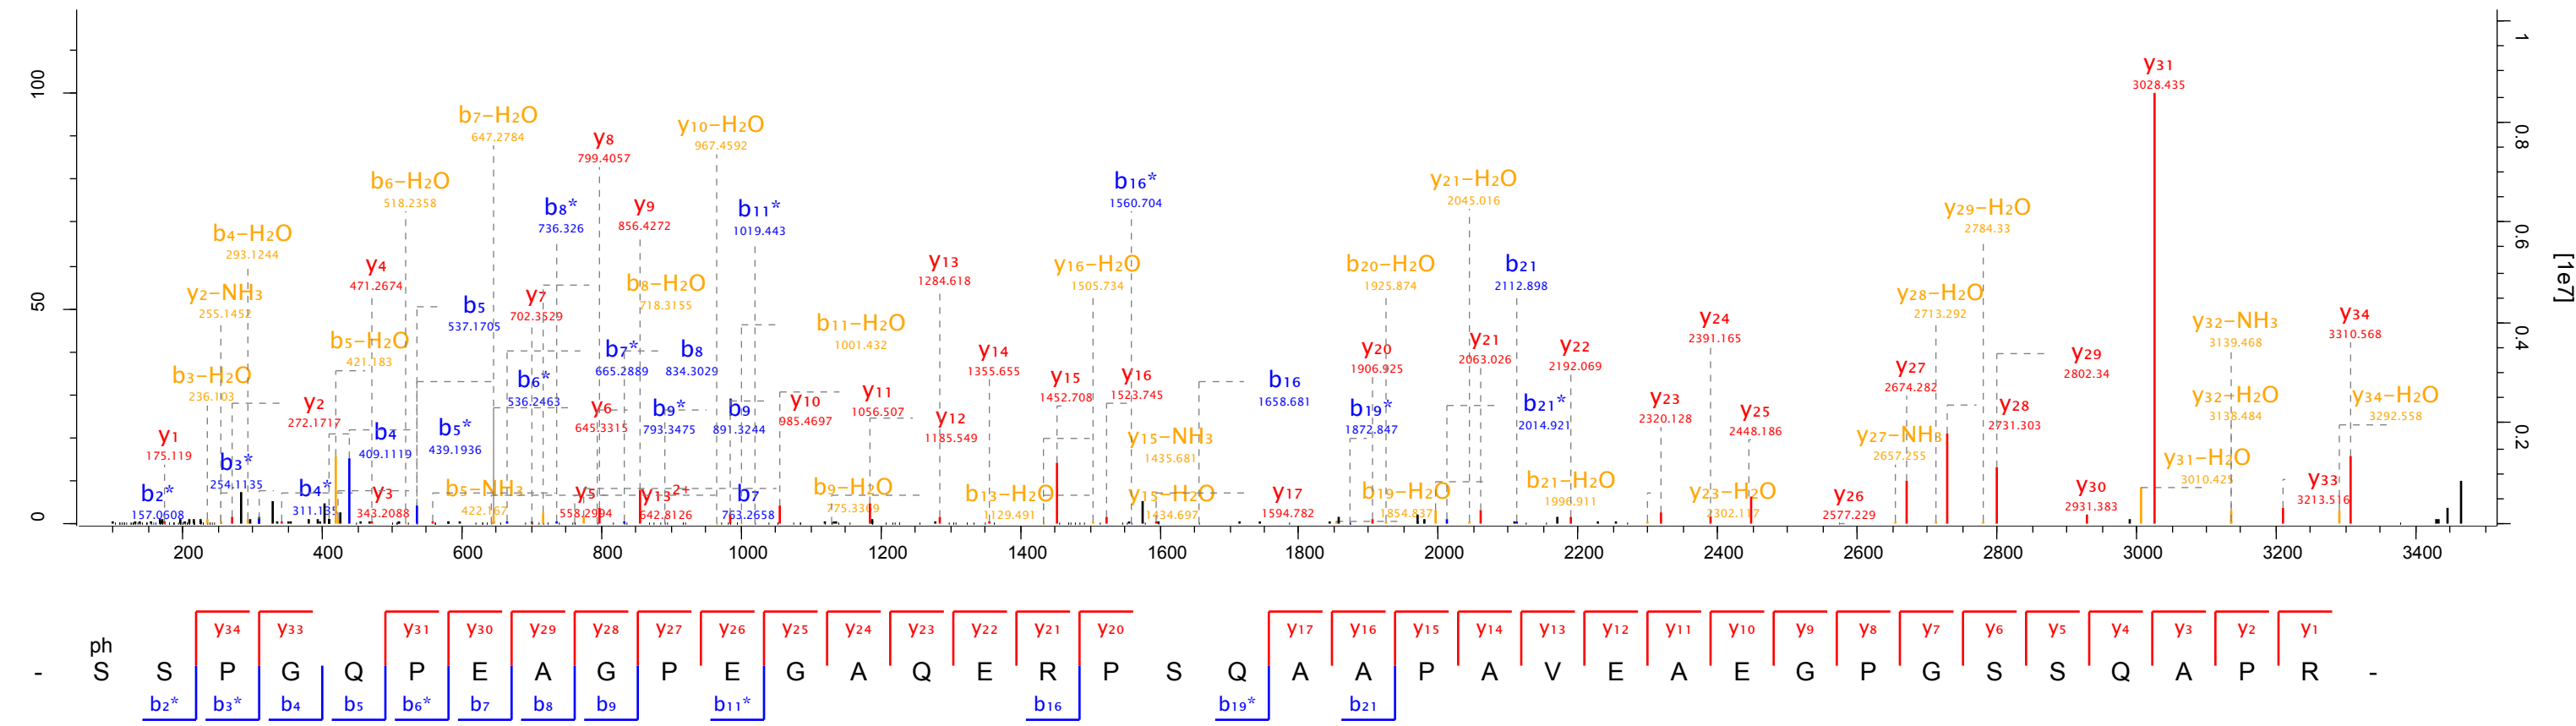

Raw file: 20150812\_A375SR\_Phospho\_BR1\_04  
 Scan: 12151 Method: FTMS; HCD Score: 275.92 m/z: 828 Gene names: FIP1L1

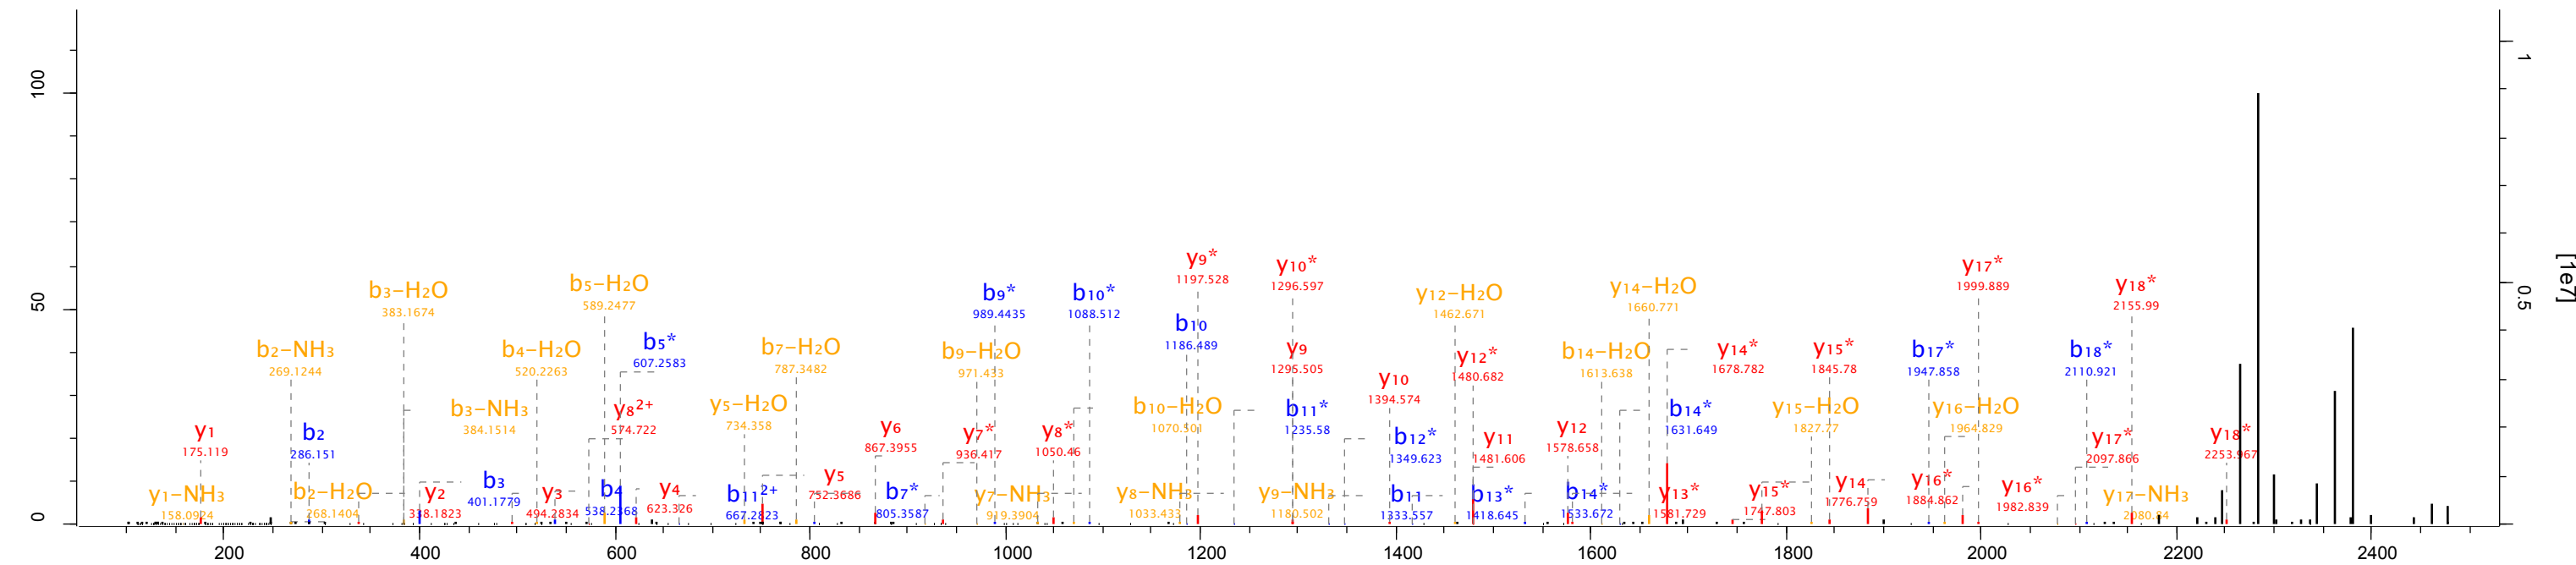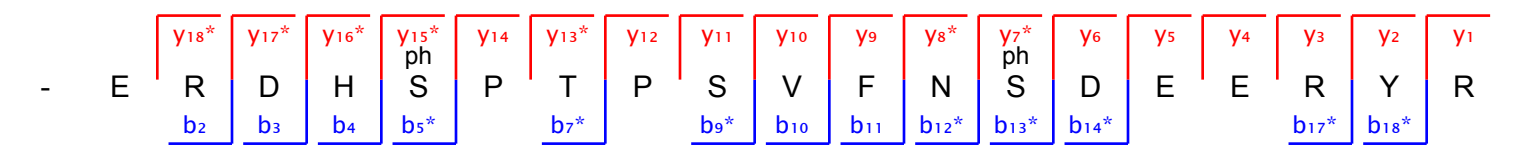

Raw file 20150812\_A375SR\_Phospho\_BR1\_04 Scan 12201 Method FTMS; HCD Score 181.05 m/z 749.37 Gene names NAV3

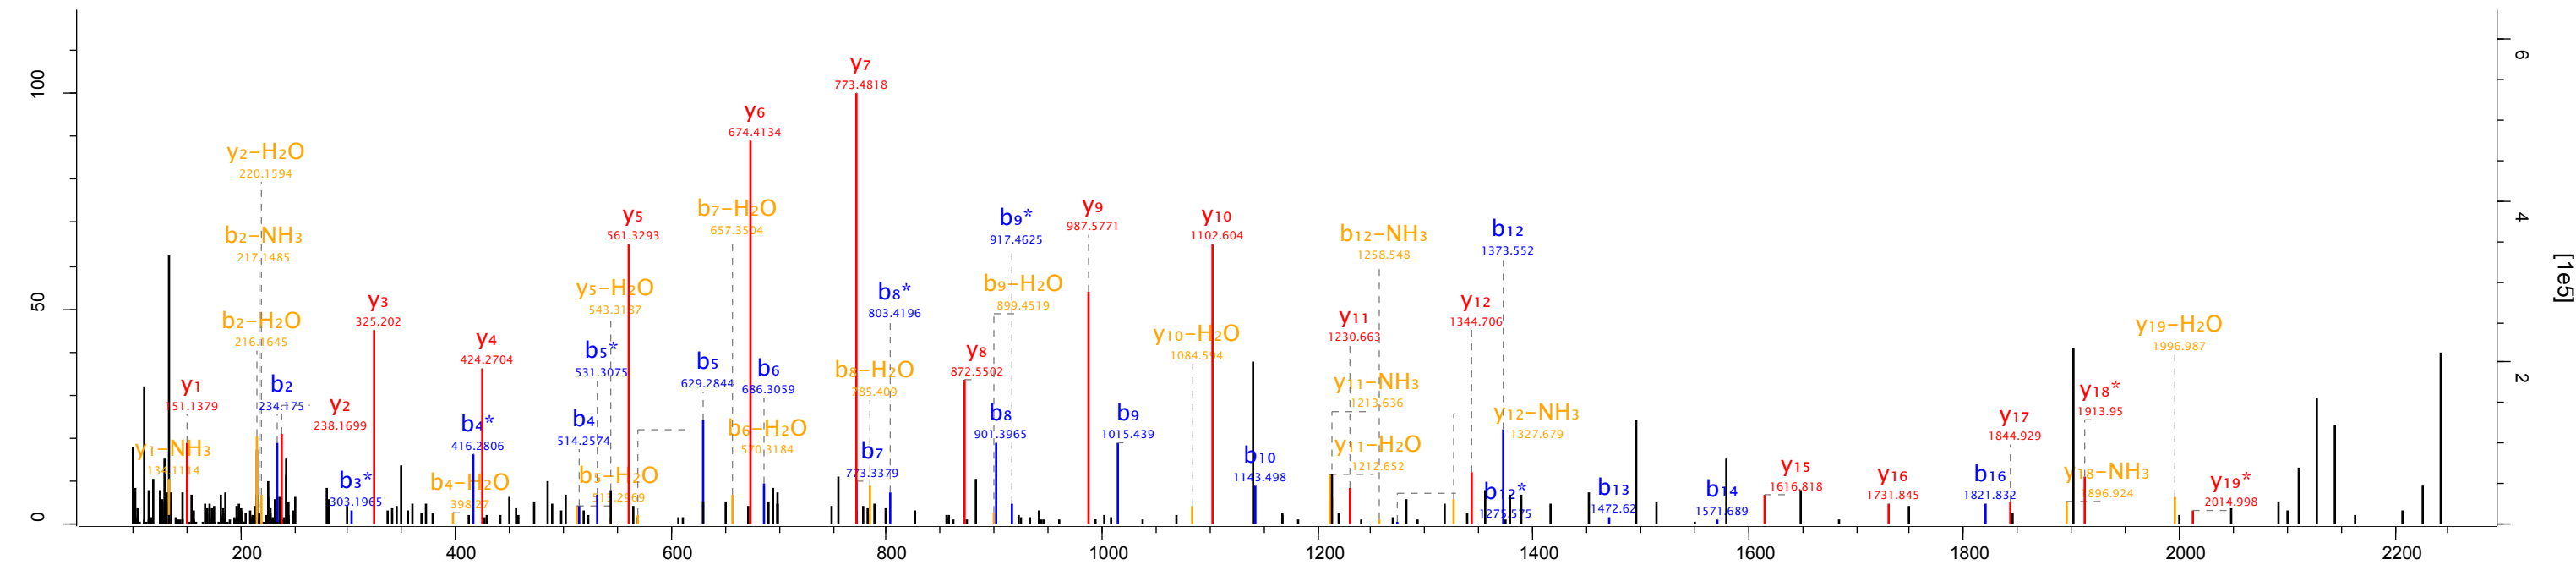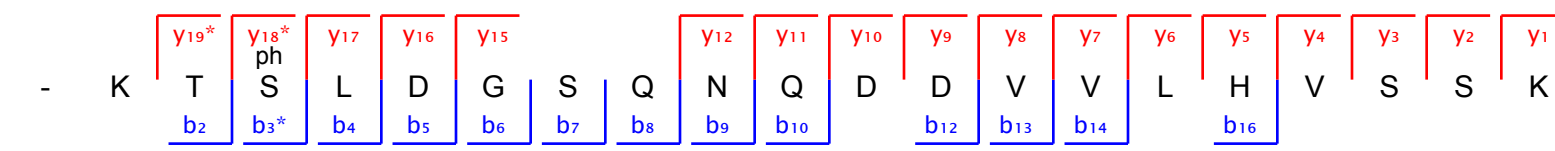



Raw file 20150812\_A375SR\_Phospho\_BR1\_04 Scan 12551 Method FTMS; HCD Score 348.68 m/z 892.93 Gene names CAMSAP2

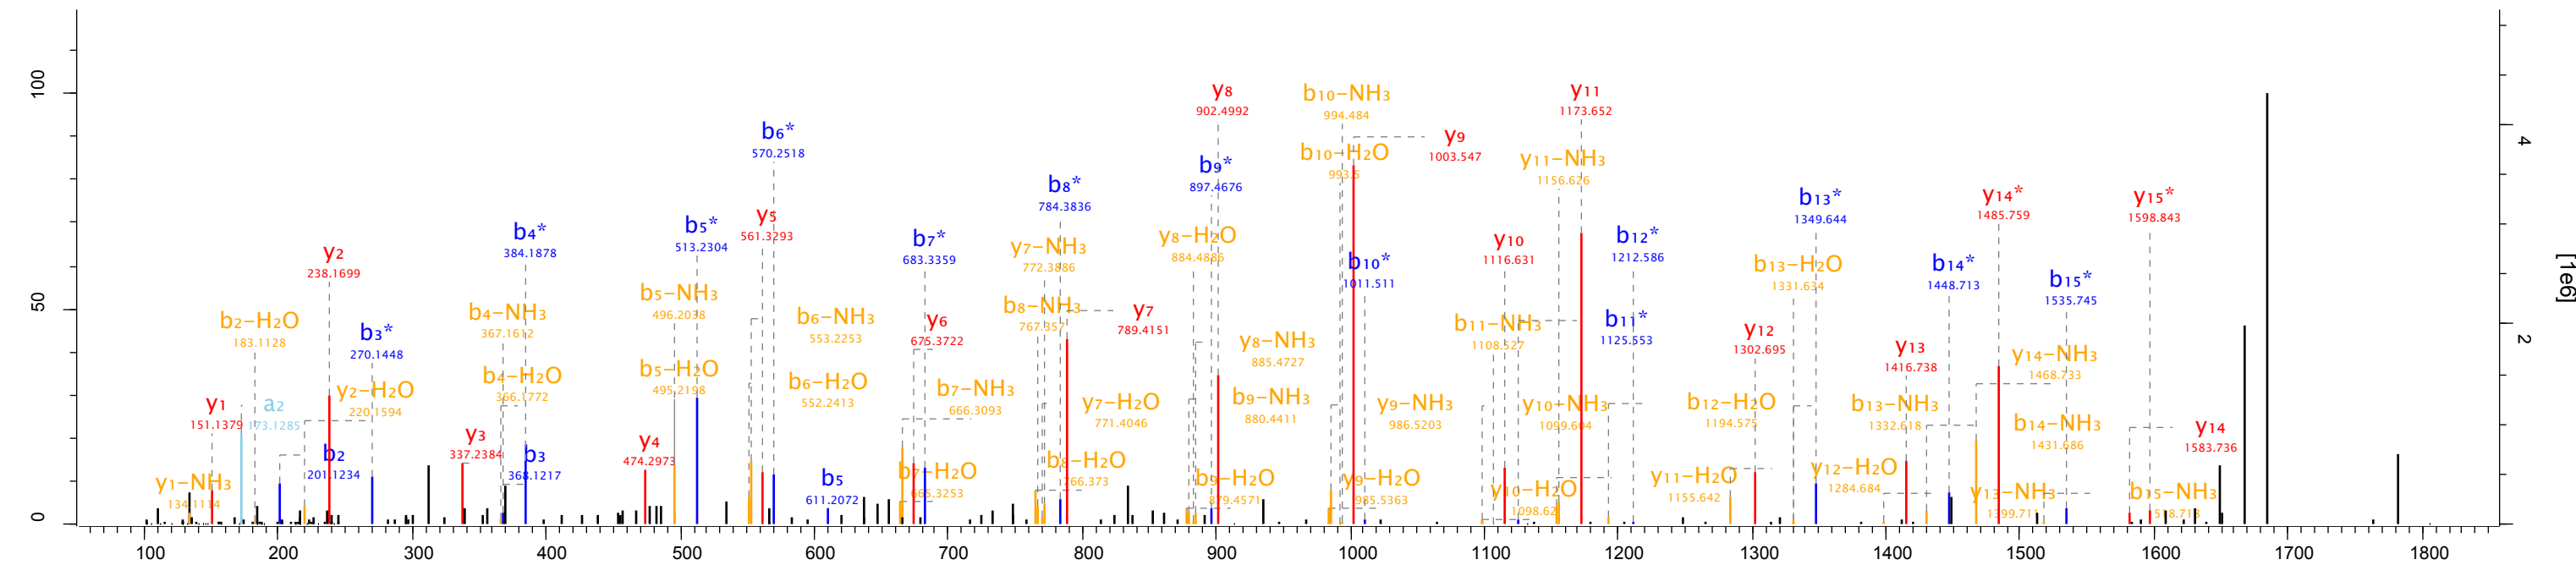

- S I S N E G L T L N N S H V S K -

y<sub>15</sub>\*
y<sub>14</sub>ph
y<sub>13</sub>
y<sub>12</sub>
y<sub>11</sub>
y<sub>10</sub>
y<sub>9</sub>
y<sub>8</sub>
y<sub>7</sub>
y<sub>6</sub>
y<sub>5</sub>
y<sub>4</sub>
y<sub>3</sub>
y<sub>2</sub>
y<sub>1</sub>

b<sub>2</sub>
b<sub>3</sub>
b<sub>4</sub>\*
b<sub>5</sub>
b<sub>6</sub>\*
b<sub>7</sub>\*
b<sub>8</sub>\*
b<sub>9</sub>\*
b<sub>10</sub>\*
b<sub>11</sub>\*
b<sub>12</sub>\*
b<sub>13</sub>\*
b<sub>14</sub>\*
b<sub>15</sub>\*

Raw file: 20150812\_A375SR\_Phospho\_BR1\_04  
 Scan: 13471 Method: FTMS; HCD Score: 76.82 m/z: 420.22 Gene names: RPS6KA1

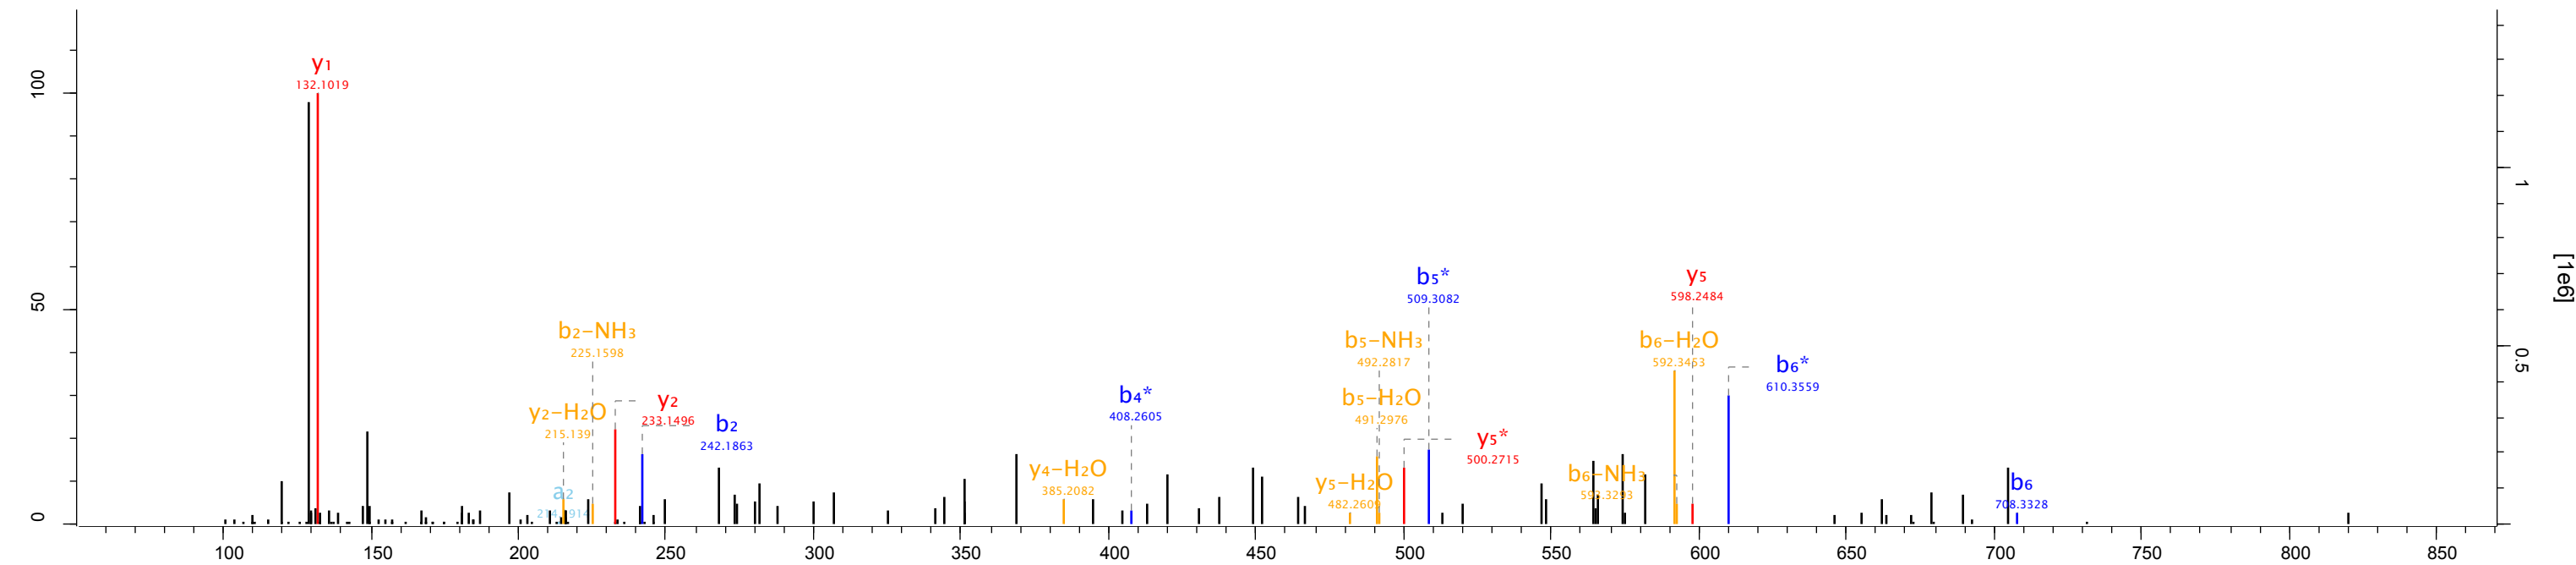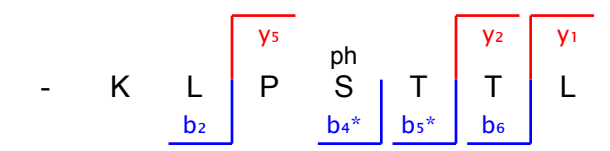

Raw file 20150812\_A375SR\_Phospho\_BR1\_04 Scan 13551 Method FTMS; HCD Score 108.18 m/z 791.86 Gene names TMSB10

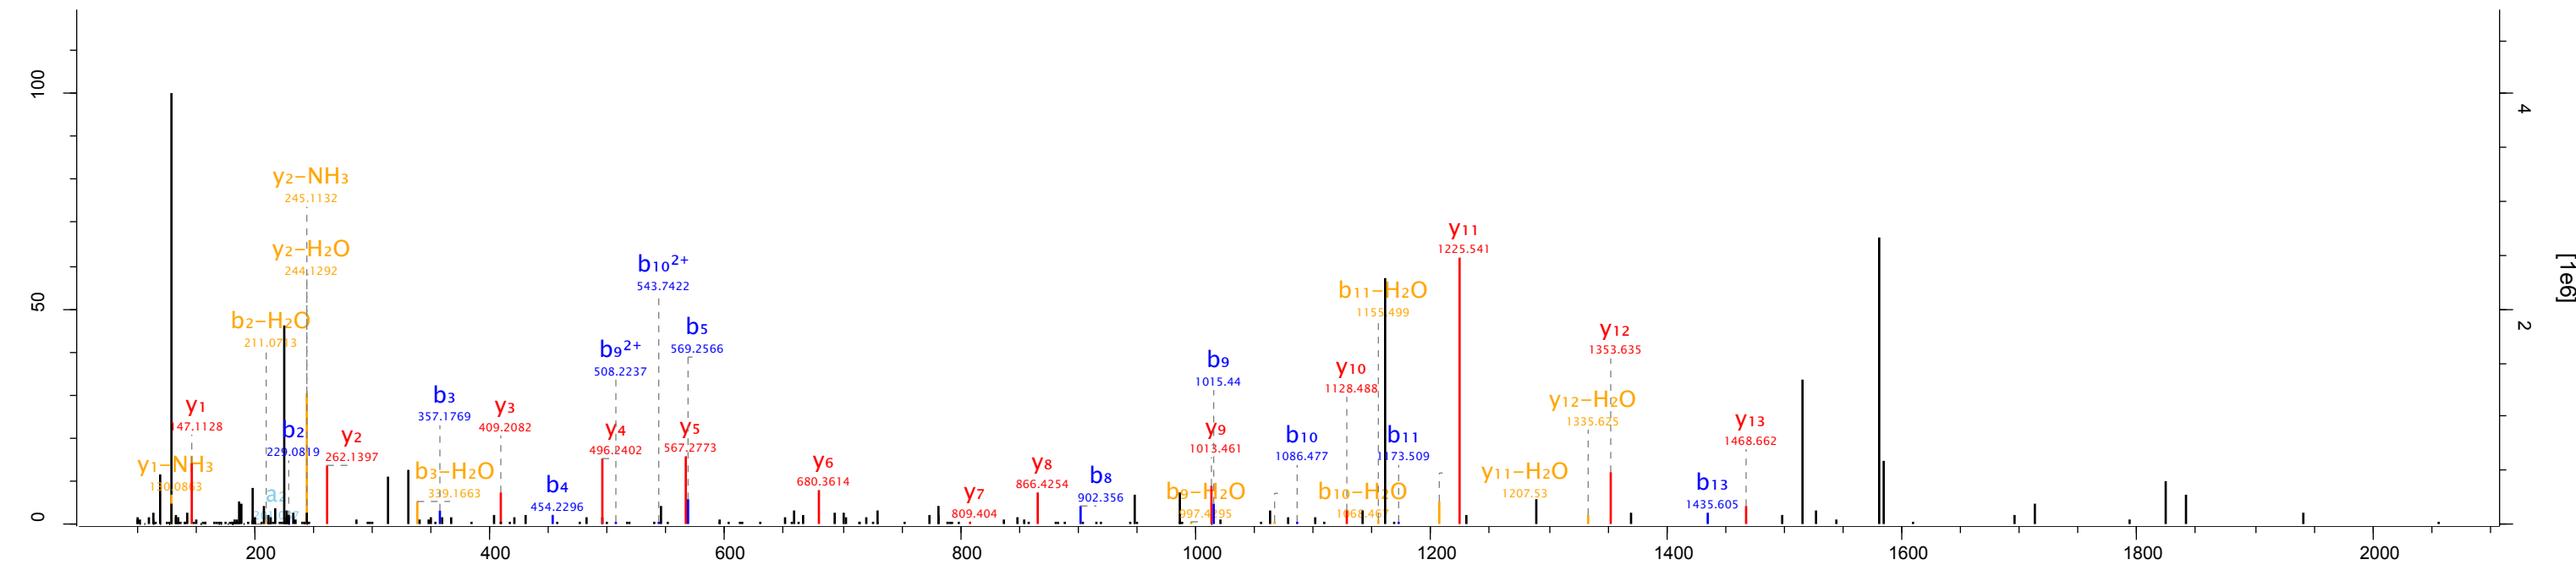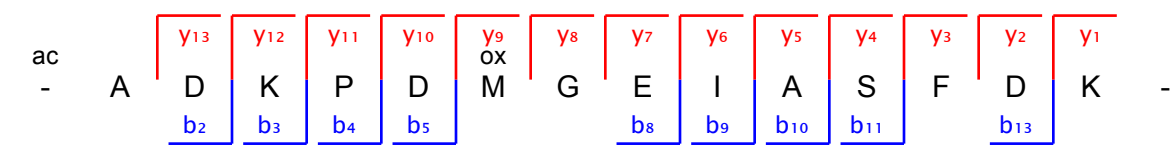

Raw file 20150812\_A375SR\_Phospho\_BR1\_04 Scan 13601 Method FTMS; HCD Score 213.48 m/z 999.42 Gene names ELMO1

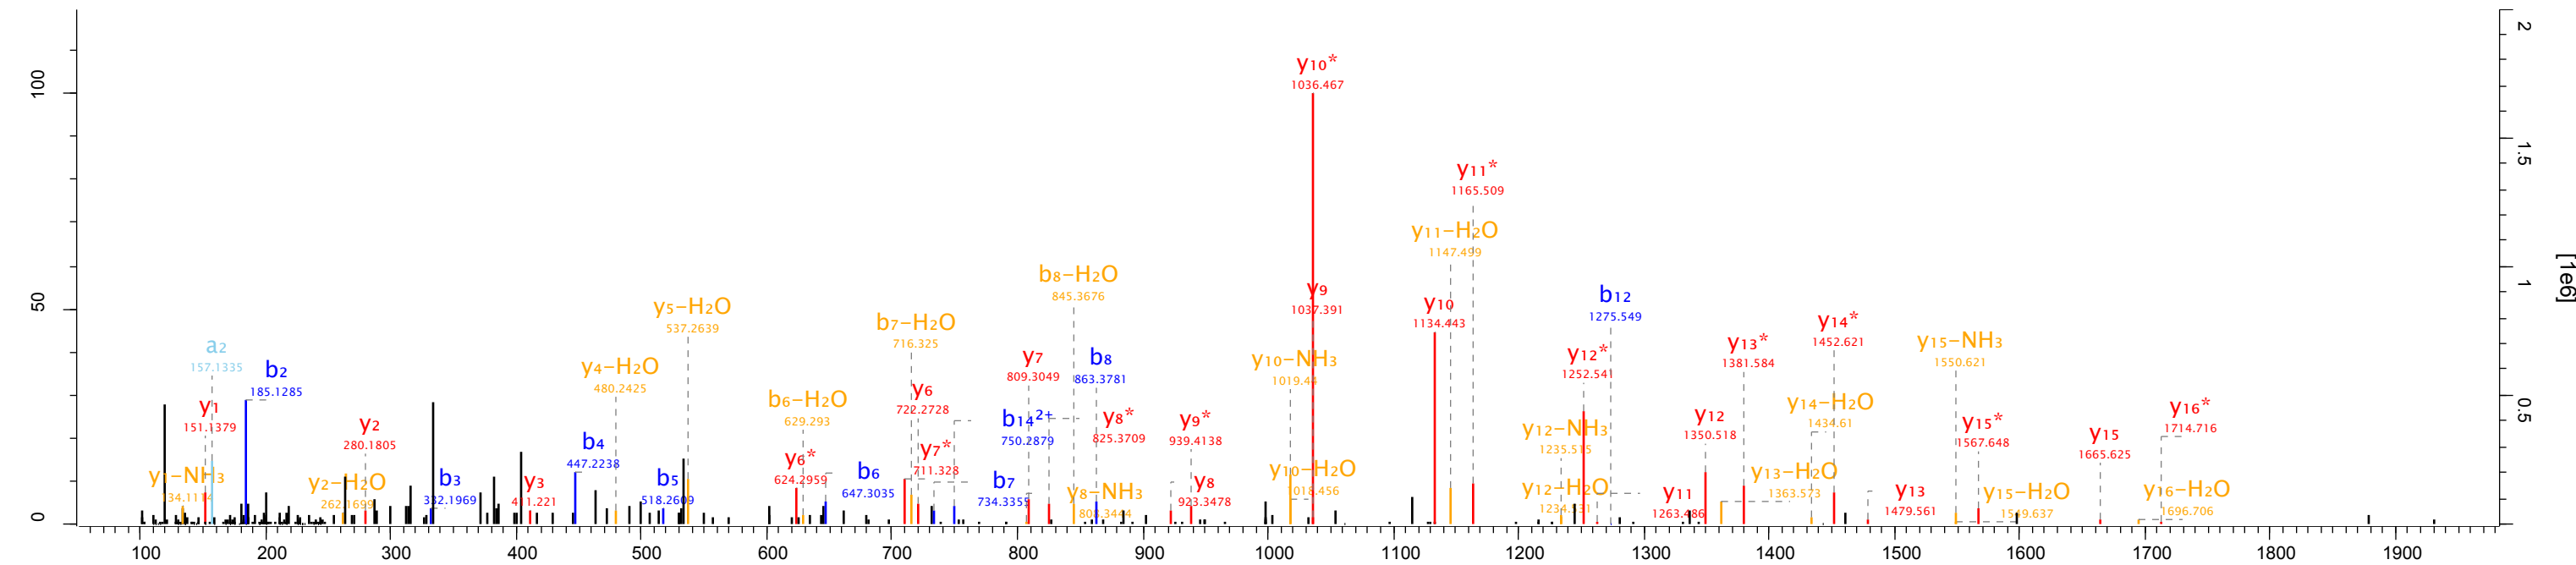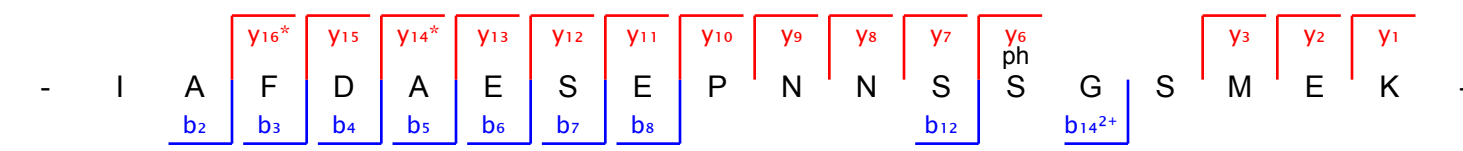

Raw file  
20150812\_A375SR\_Phospho\_BR1\_04

Scan 13711 Method FTMS; HCD Score 260.06 m/z 1309.01 Gene names YBX3

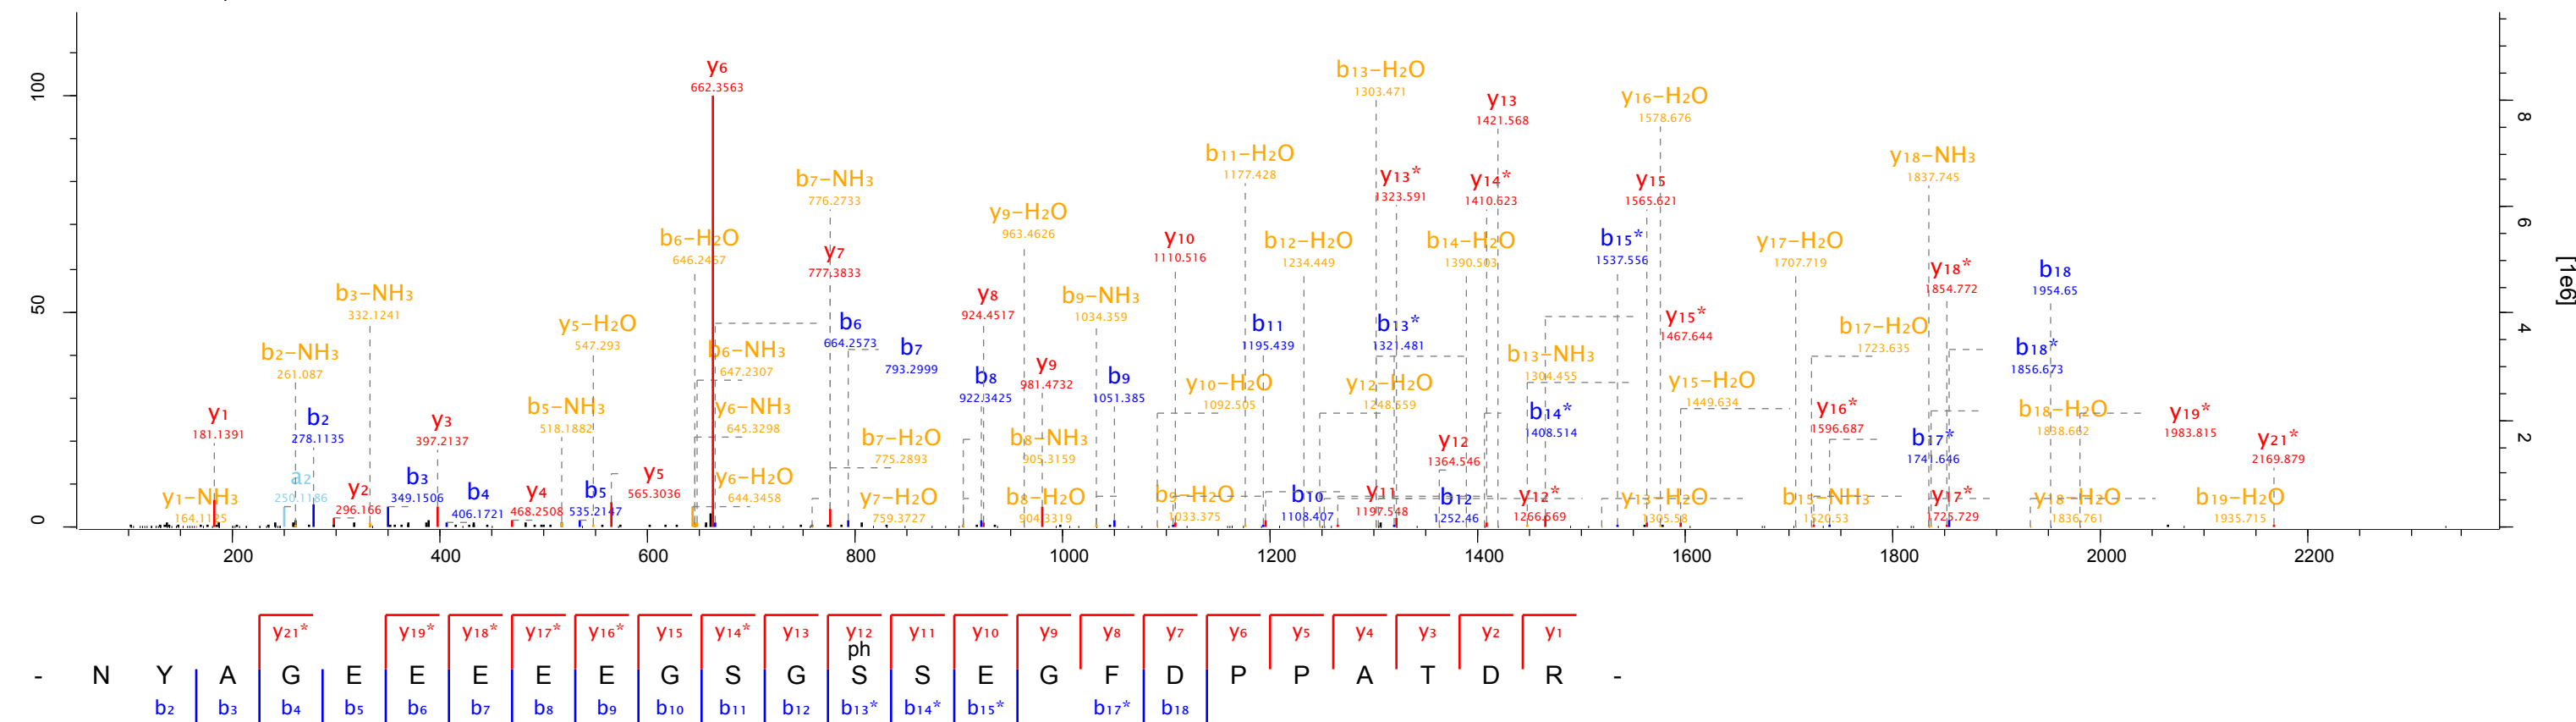

Raw file 20150812\_A375SR\_Phospho\_BR1\_04 Scan 14041 Method FTMS; HCD Score 185.3 m/z 782.84 Gene names PWWP2A

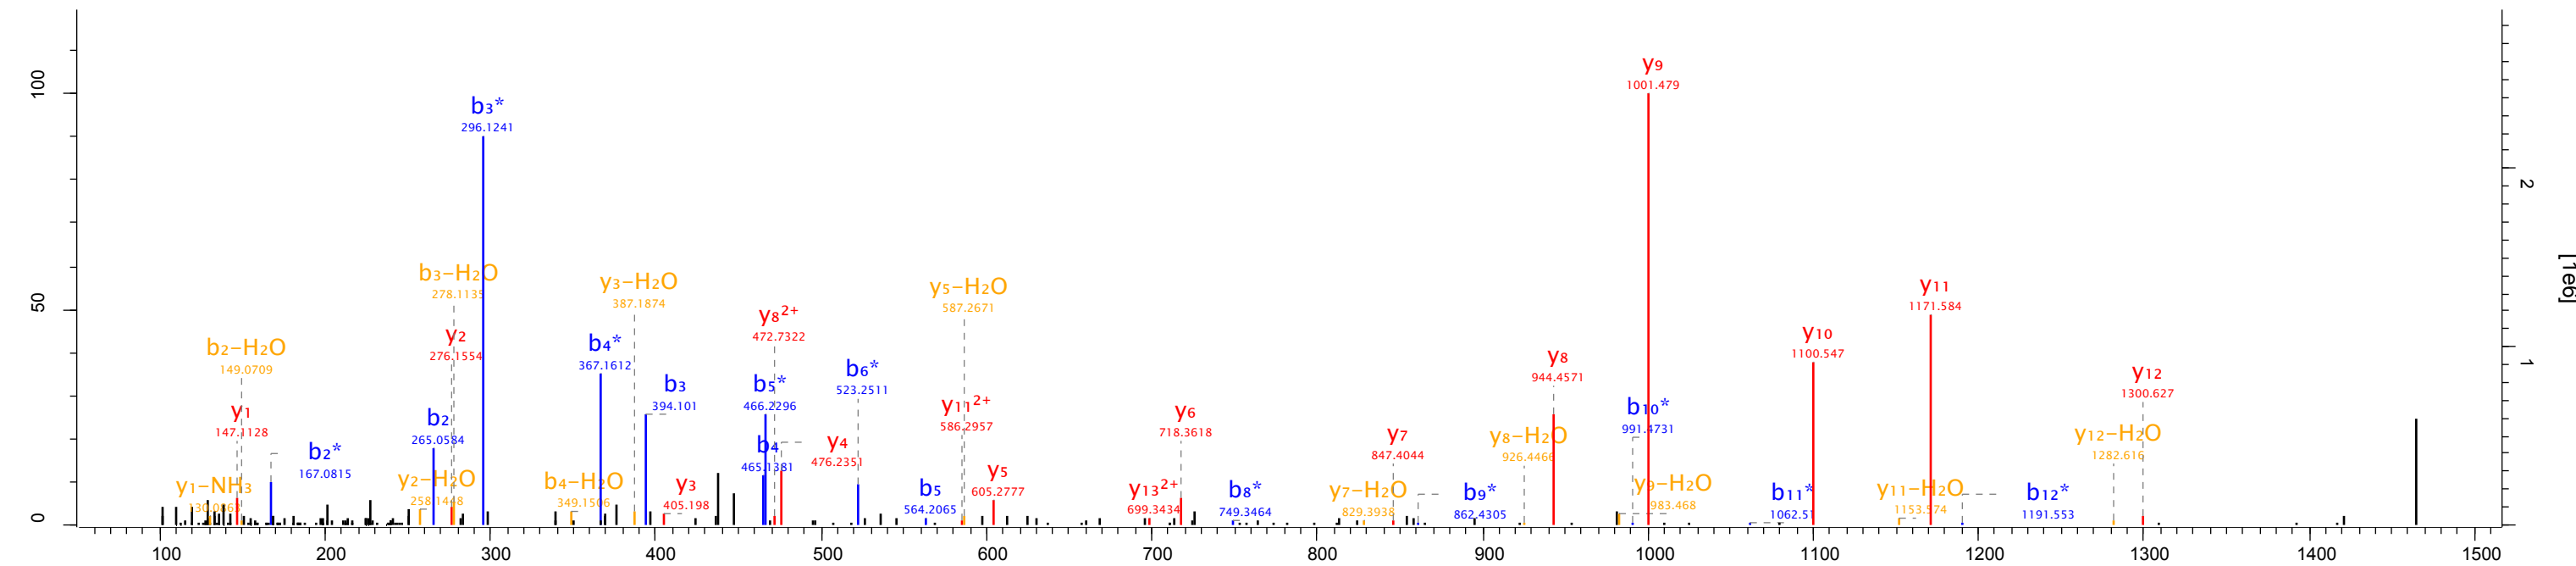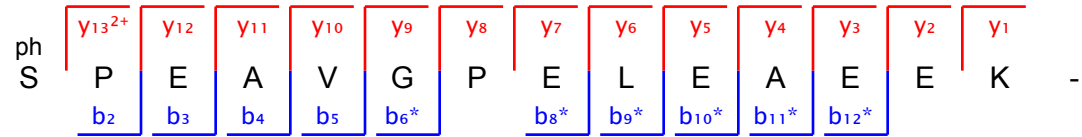

Raw file: 20150812\_A375SR\_Phospho\_BR1\_04  
 Scan: 14101 Method: FTMS; HCD Score: 148.64 m/z: 826.42 Gene names: RB1

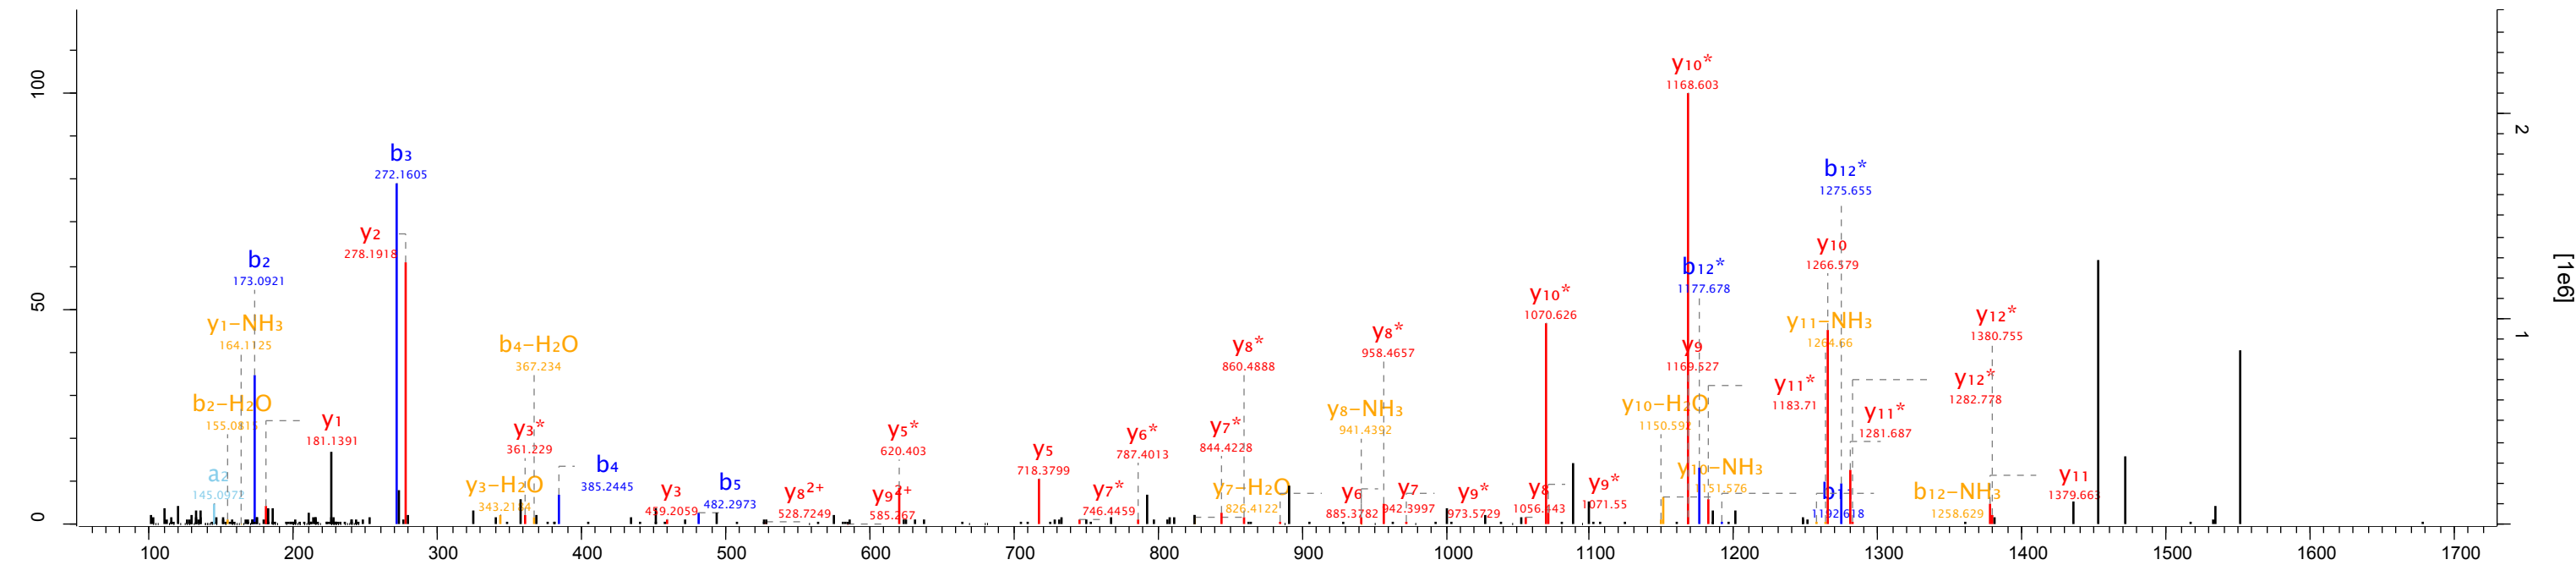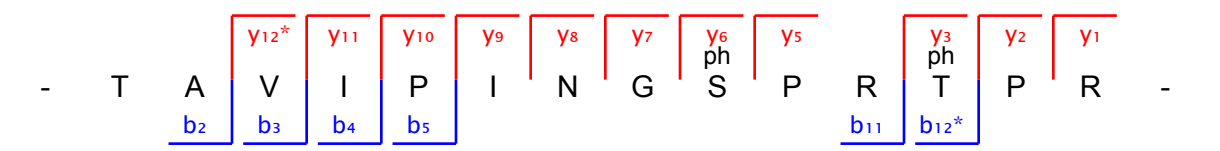

Raw file 20150812\_A375SR\_Phospho\_BR1\_04 Scan 15701 Method FTMS; HCD Score 127.53 m/z 779.37 Gene names SDE2

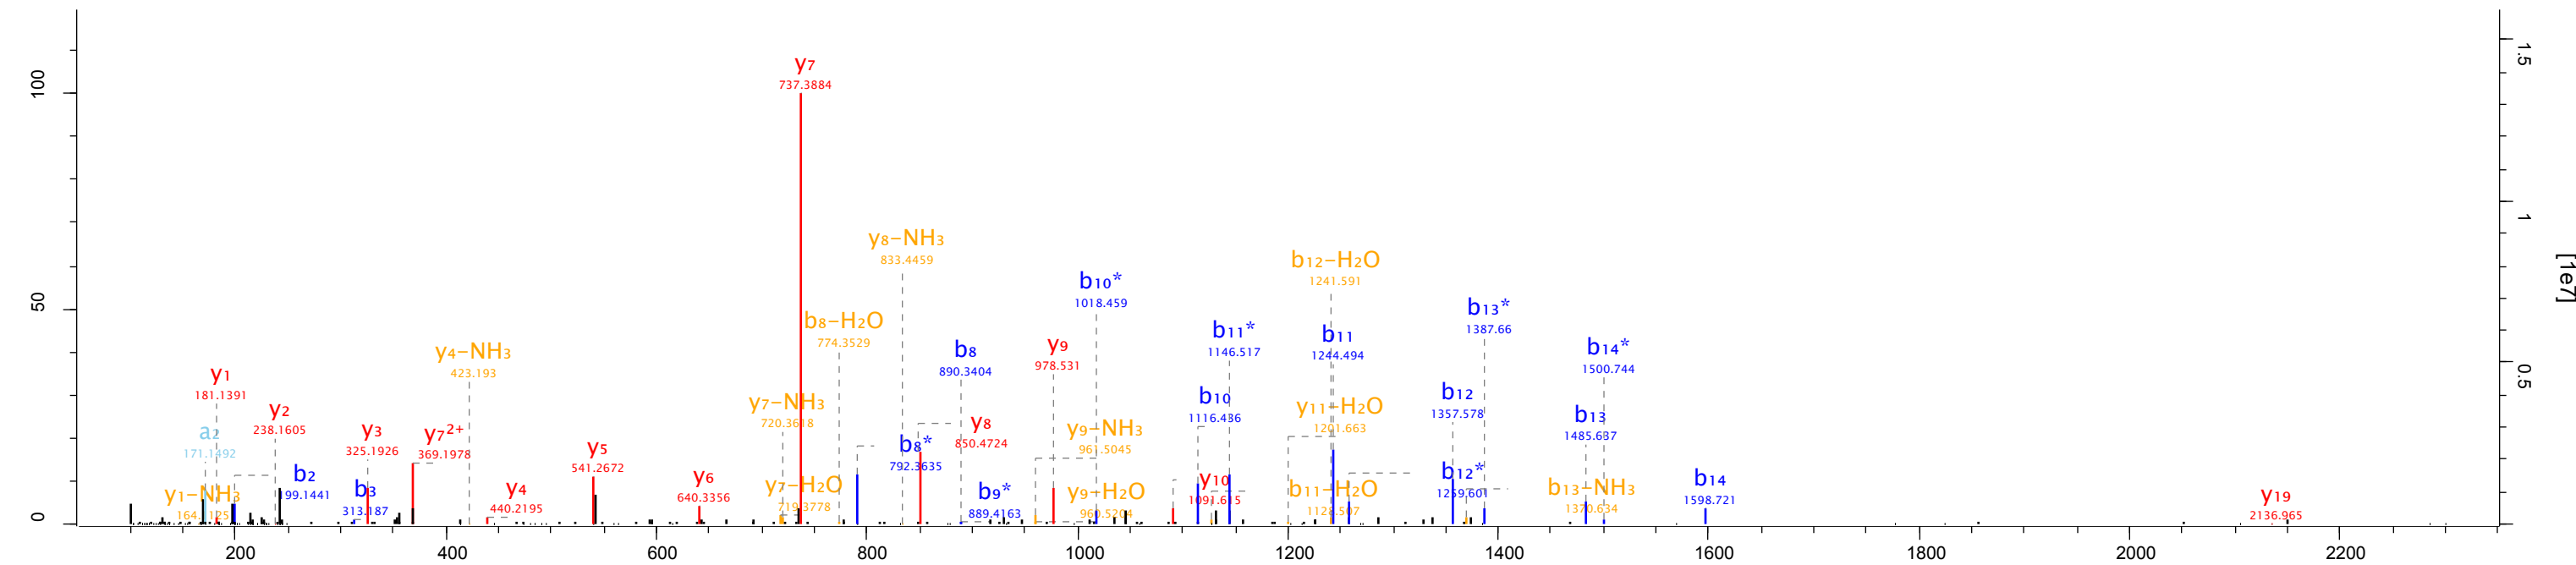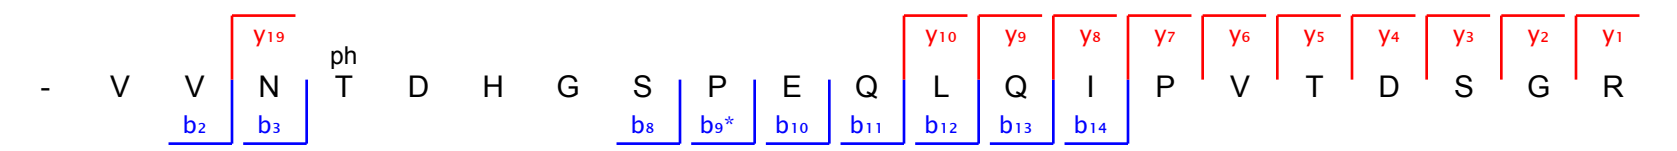



Raw file 20150812\_A375SR\_Phospho\_BR1\_04 Scan 16281 Method FTMS; HCD Score 51.47 m/z 1065.95 Gene names ARID4A

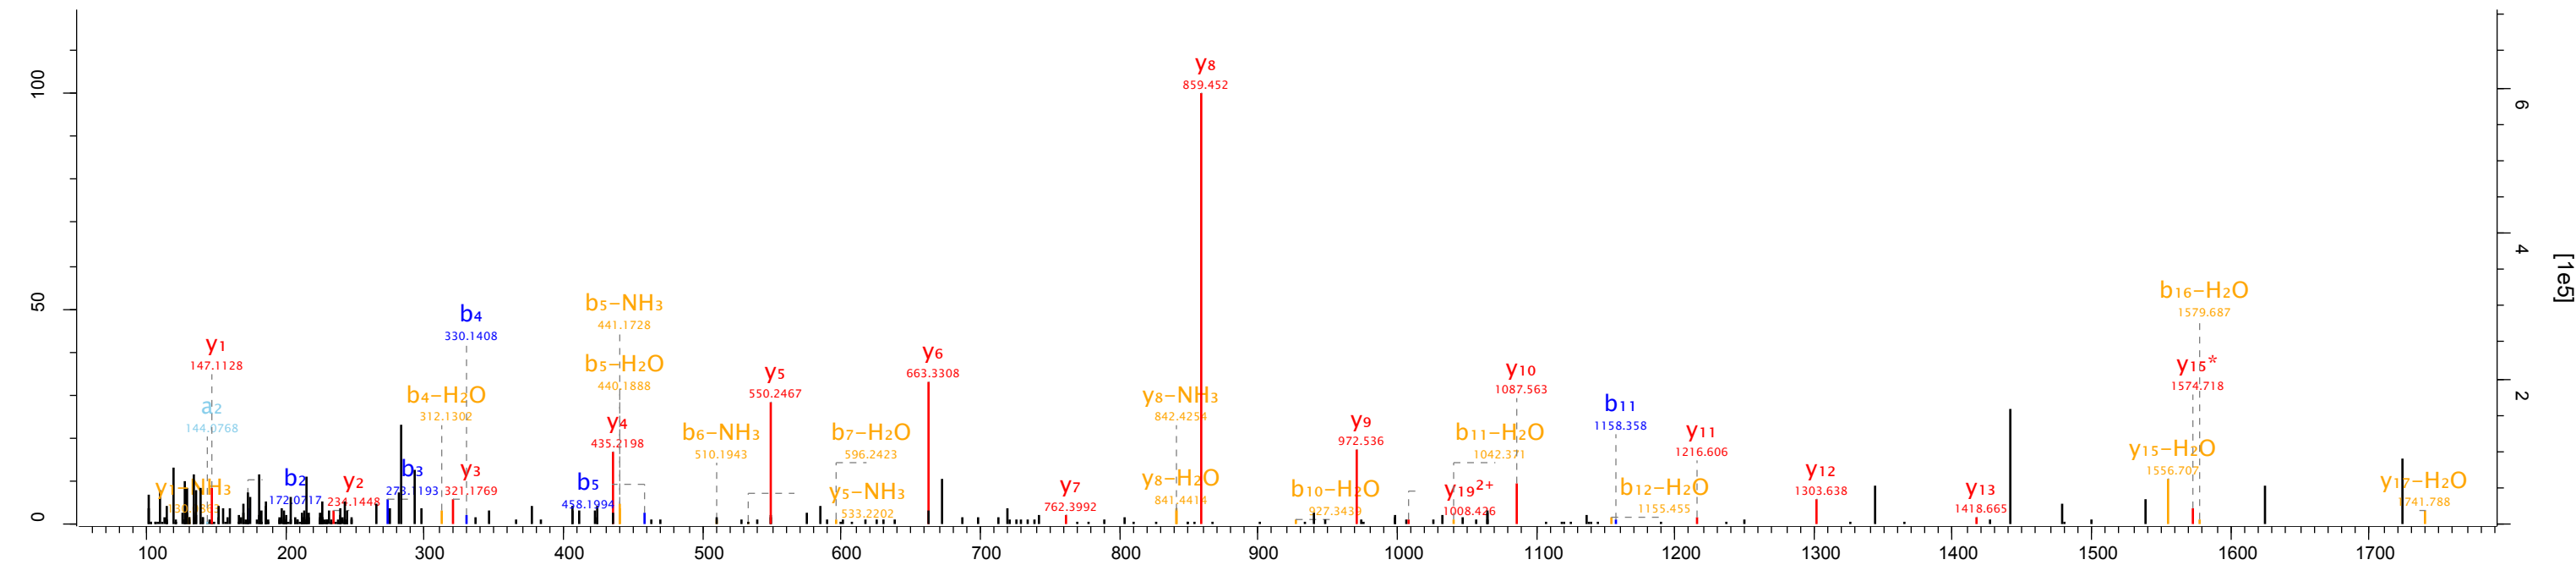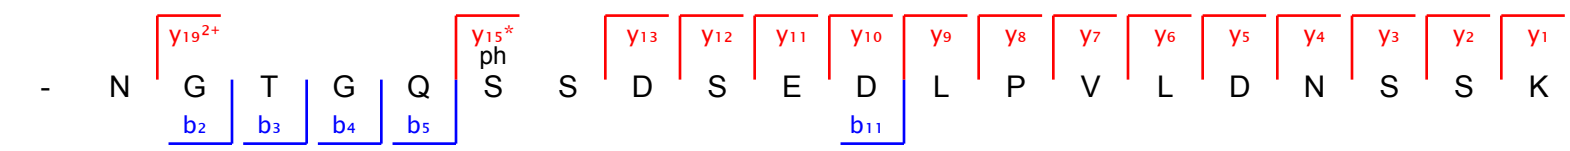

Raw file: 20150812\_A375SR\_Phospho\_BR1\_04  
 Scan: 16561  
 Method: FTMS; HCD  
 Score: 254.86  
 m/z: 1175.51  
 Gene names: OTUD5

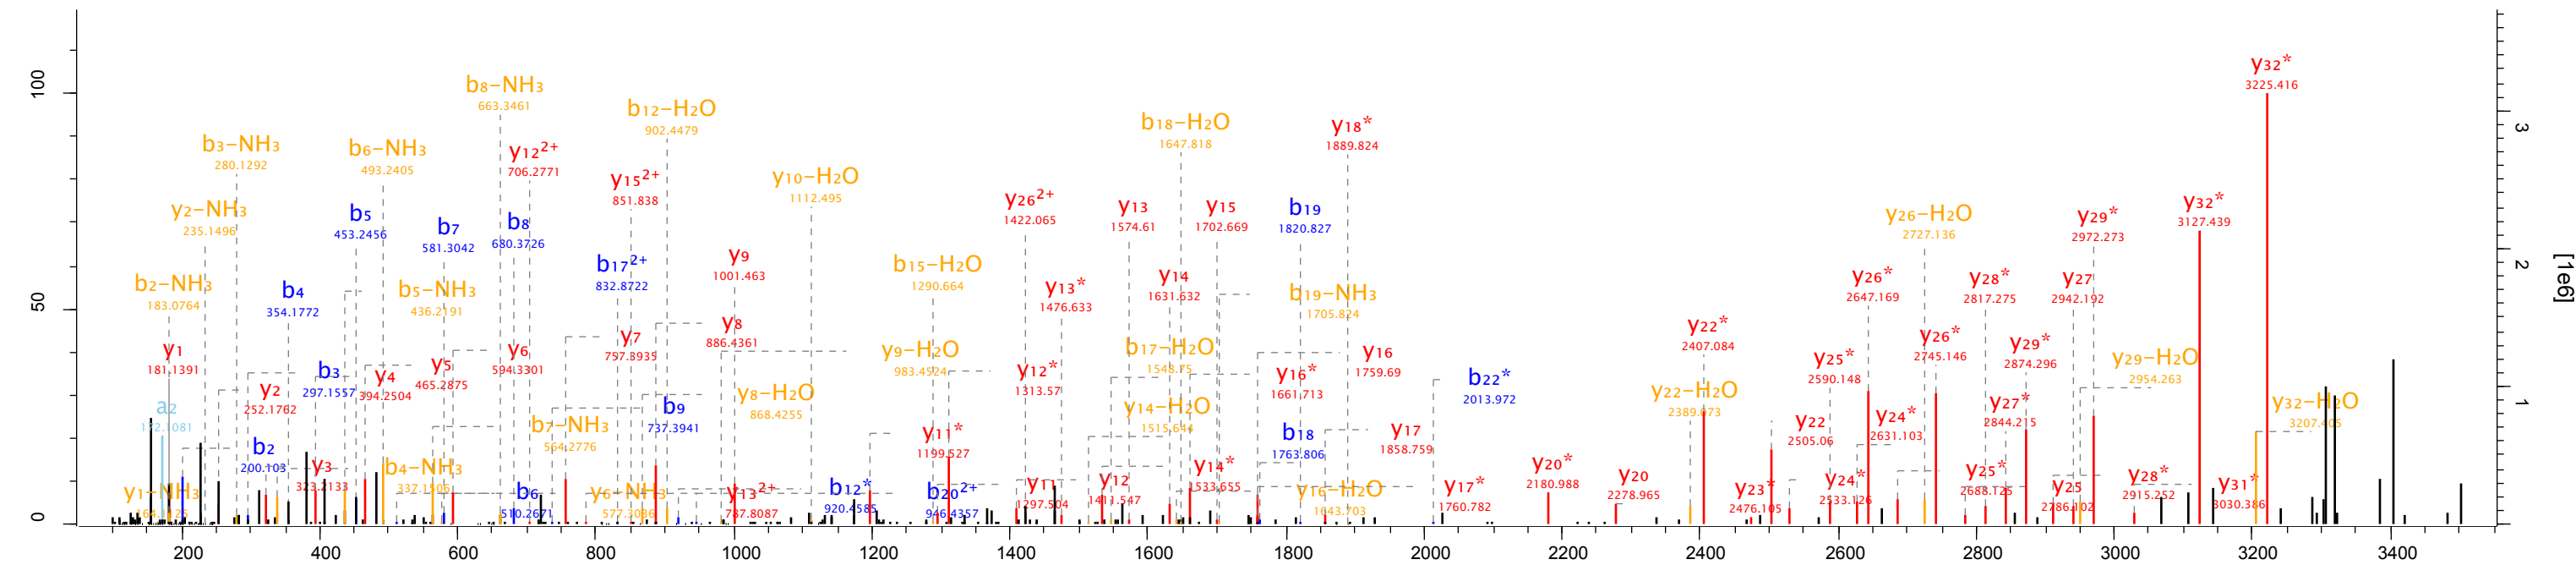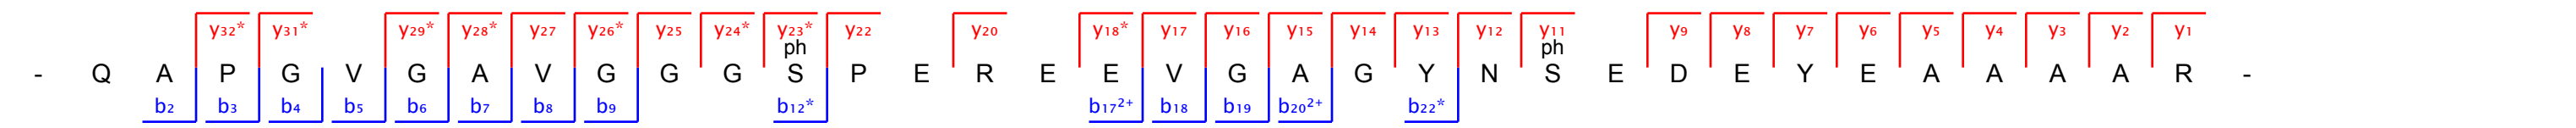

Raw file  
20150812\_A375SR\_Phospho\_BR1\_04

Scan 17231 Method FTMS; HCD Score 226.28 m/z 775.35 Gene names ZC3H11A

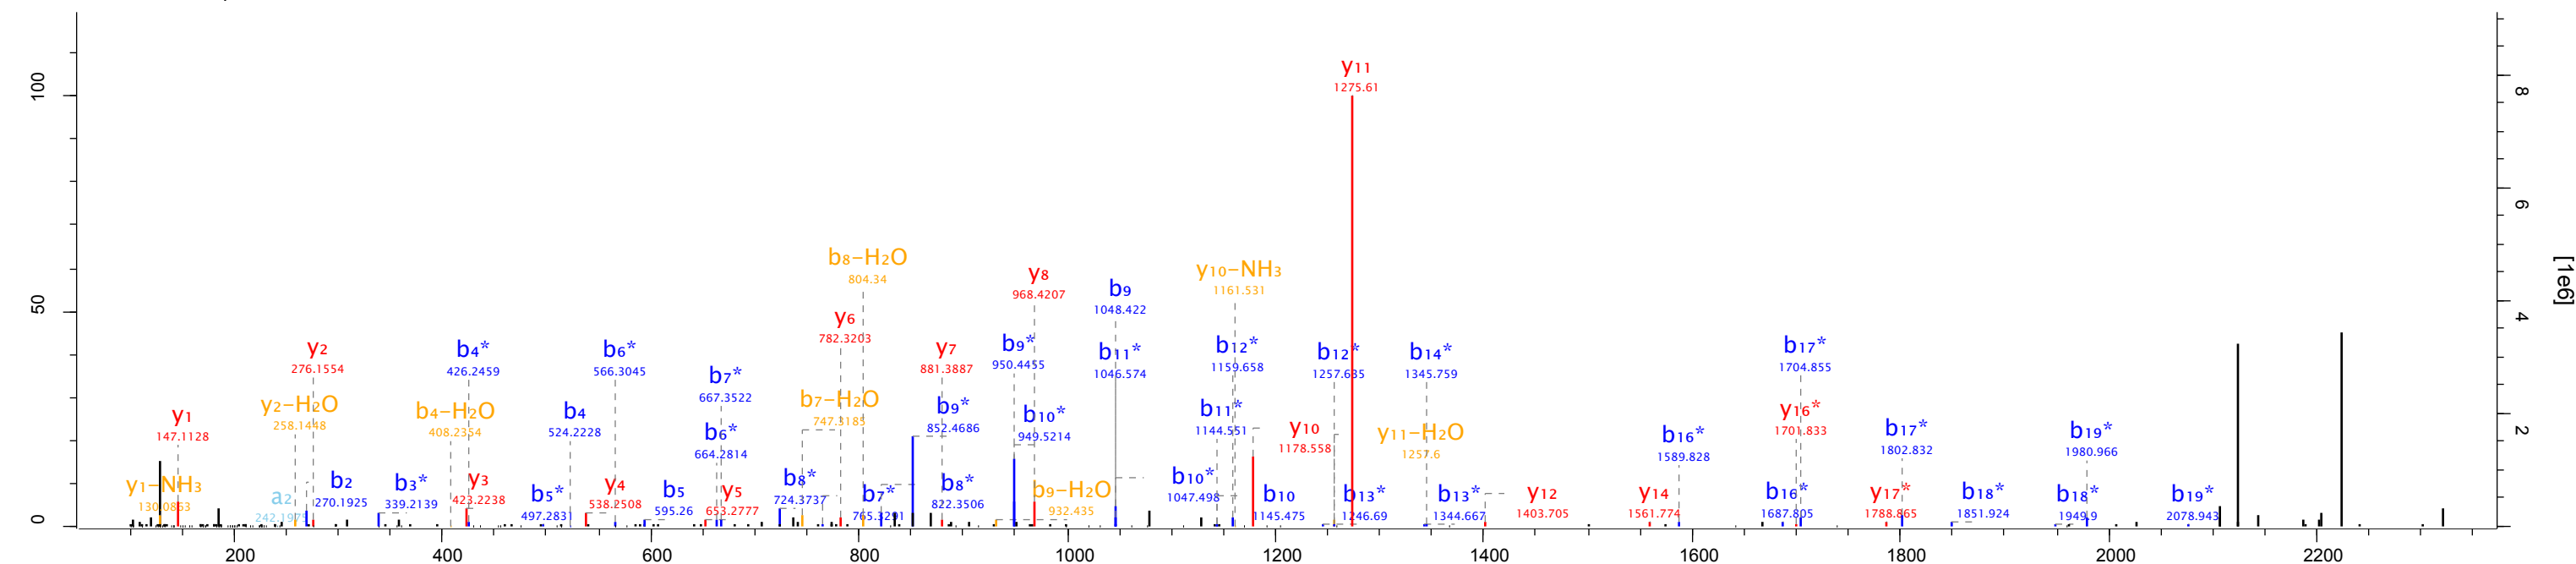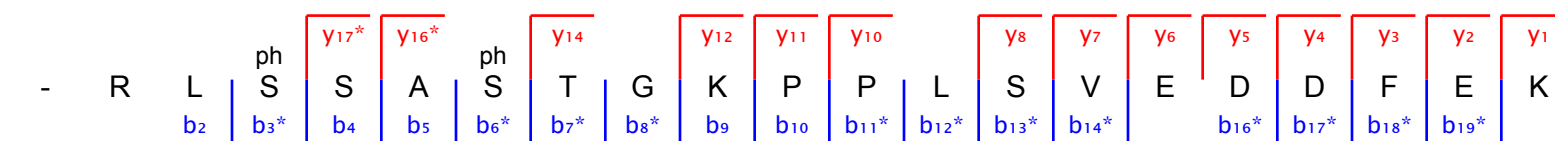

Raw file 20150812\_A375SR\_Phospho\_BR1\_04 Scan 17941 Method FTMS; HCD Score 206.73 m/z 1053.78 Gene names SFSWAP

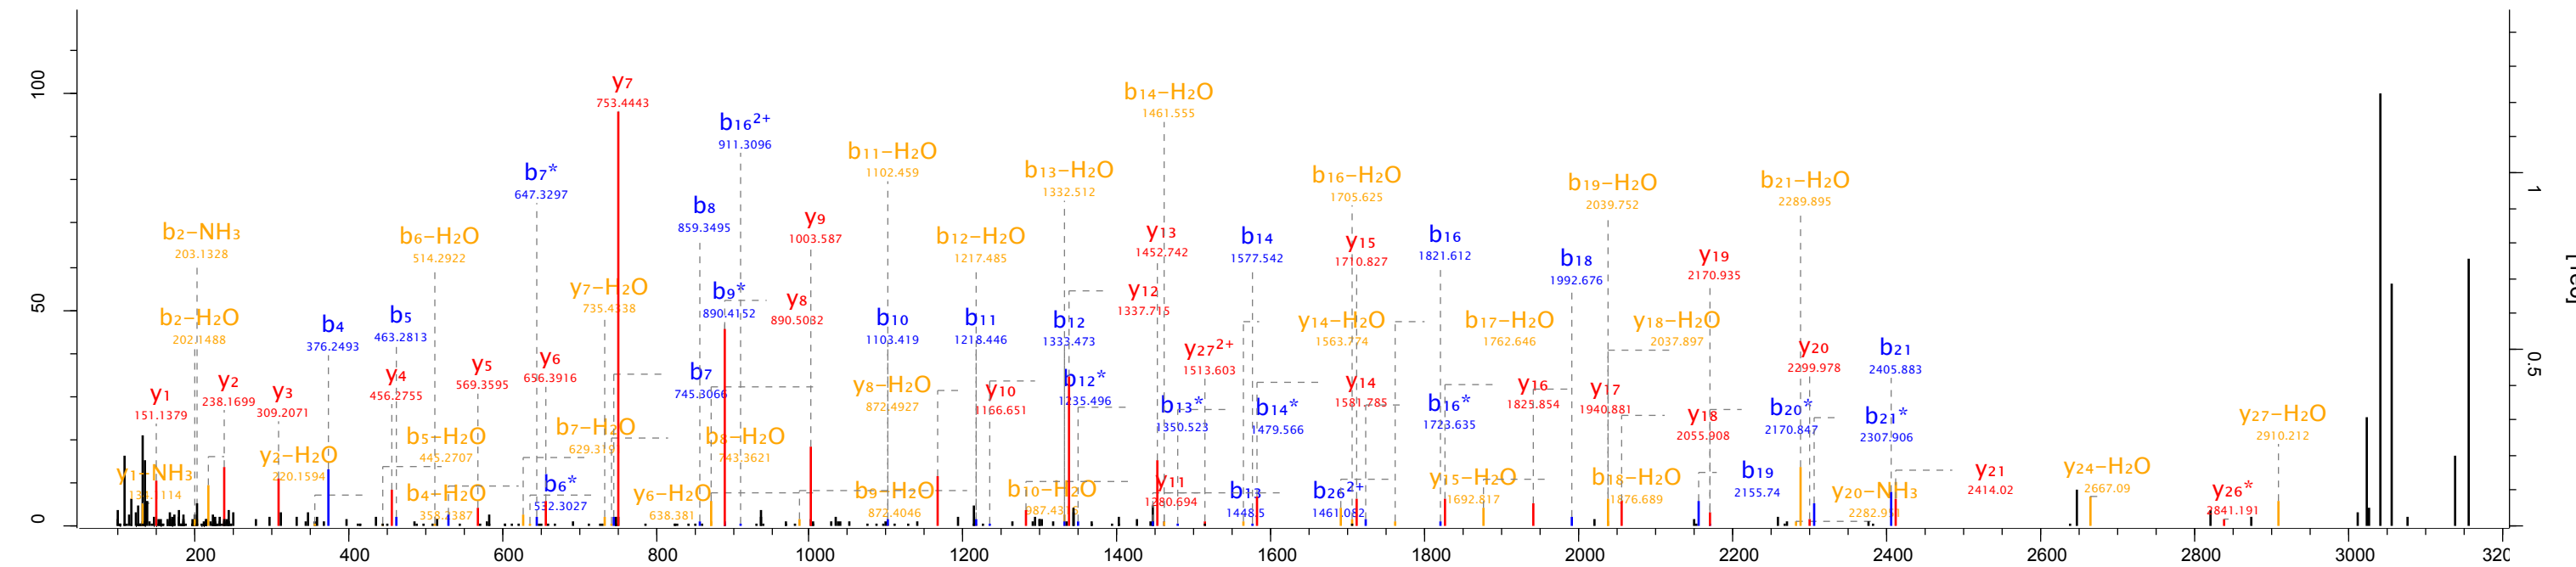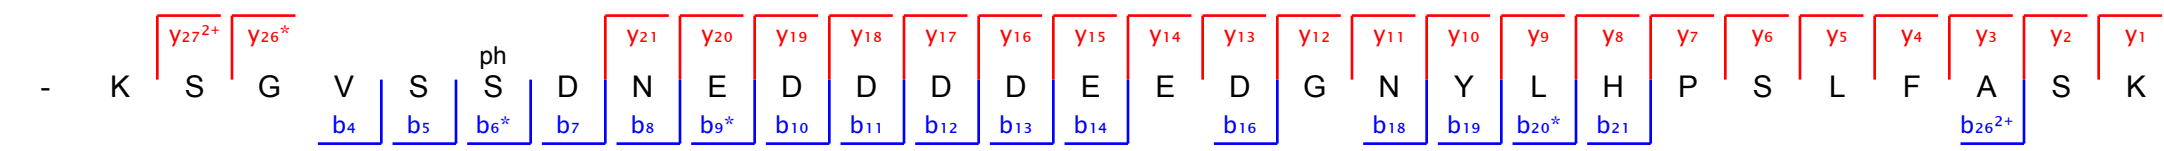

Raw file: 20150812\_A375SR\_Phospho\_BR1\_04  
 Scan: 1821 Method: FTMS; HCD Score: 119.68 m/z: 707.81 Gene names: TGFBRAP1

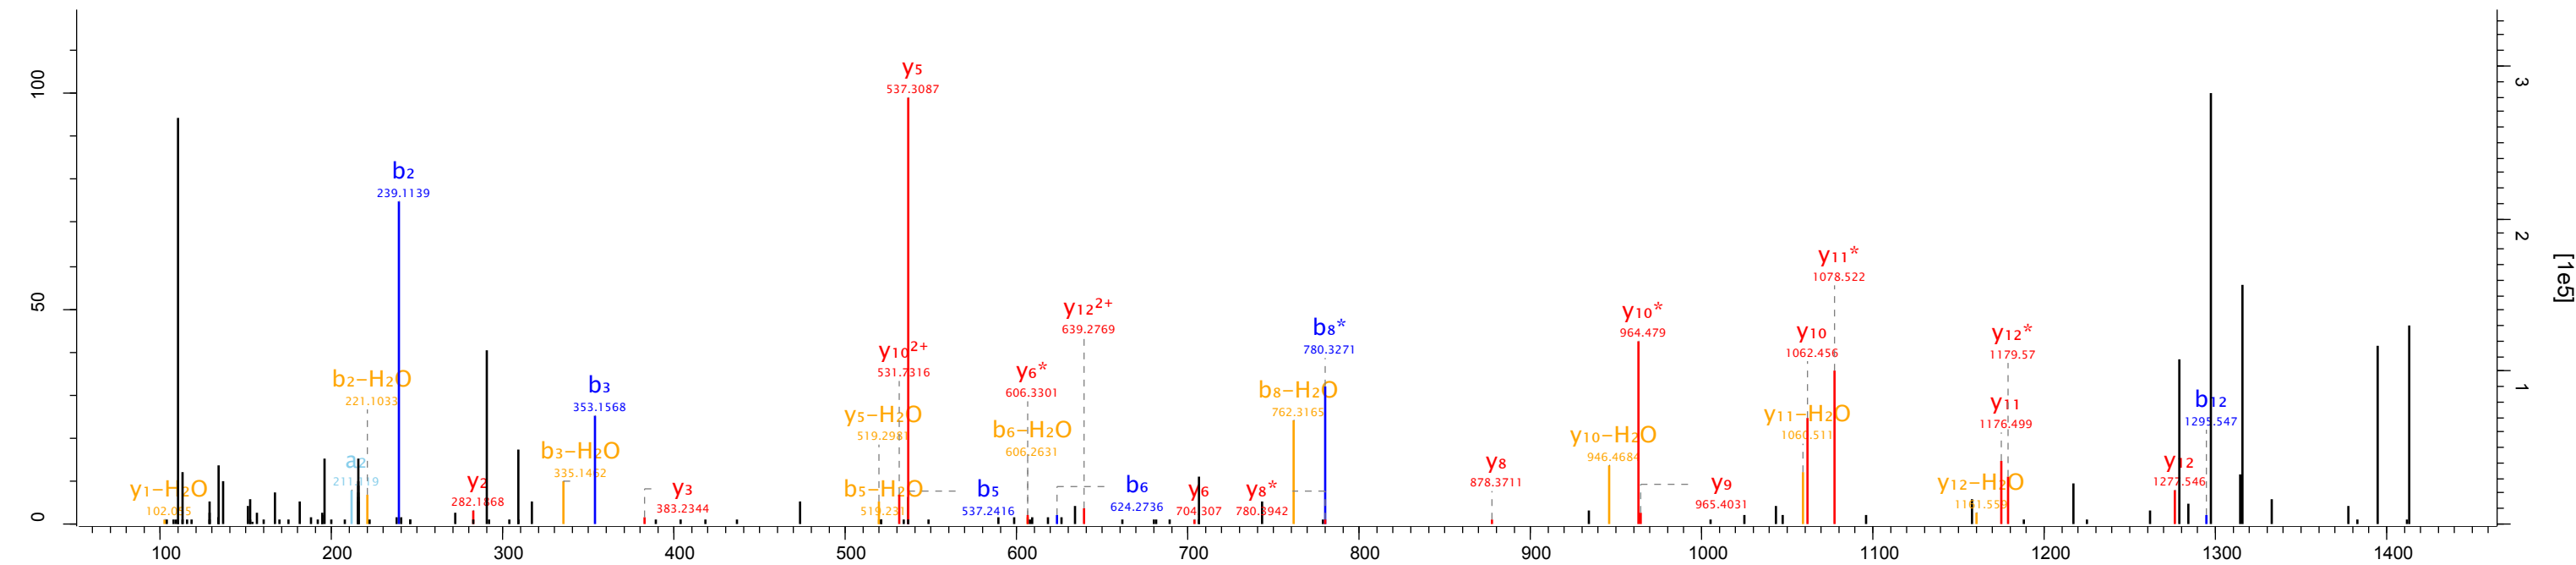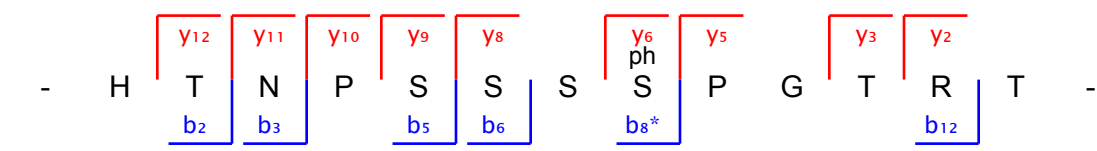

Raw file  
20150812\_A375SR\_Phospho\_BR1\_04

Scan 18331 Method FTMS; HCD Score 99.33 m/z 825.37

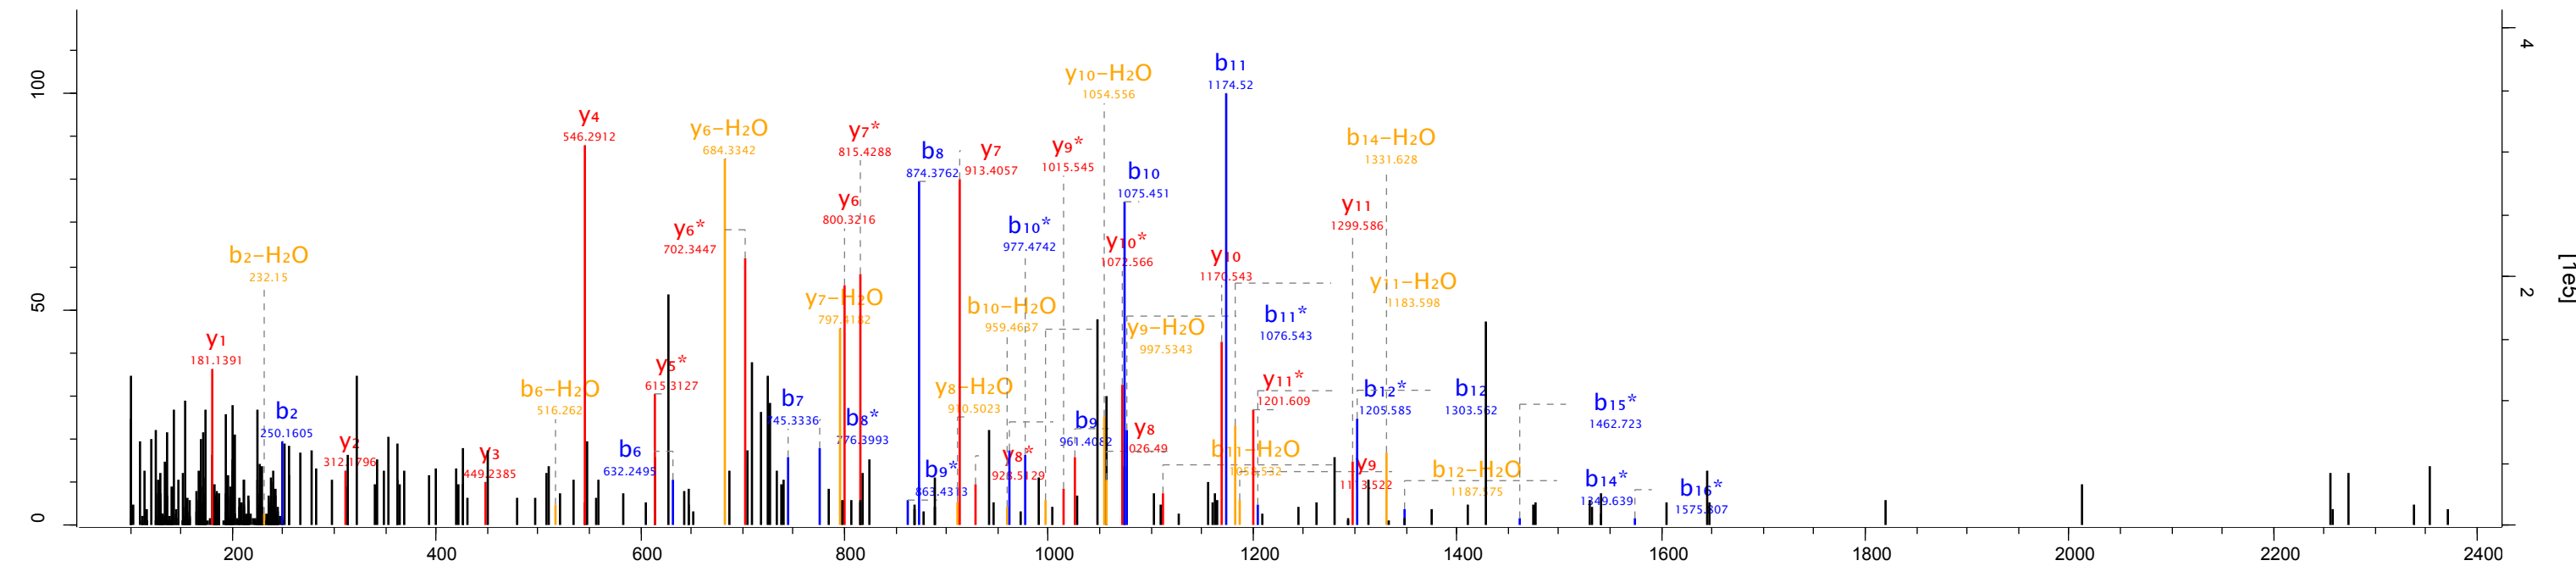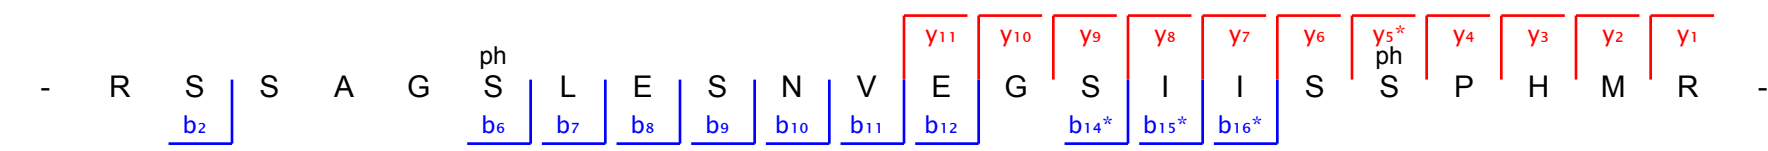

Raw file 20150812\_A375SR\_Phospho\_BR1\_04 Scan 18601 Method FTMS; HCD Score 41.25 m/z 1027.49 Gene names DDI2

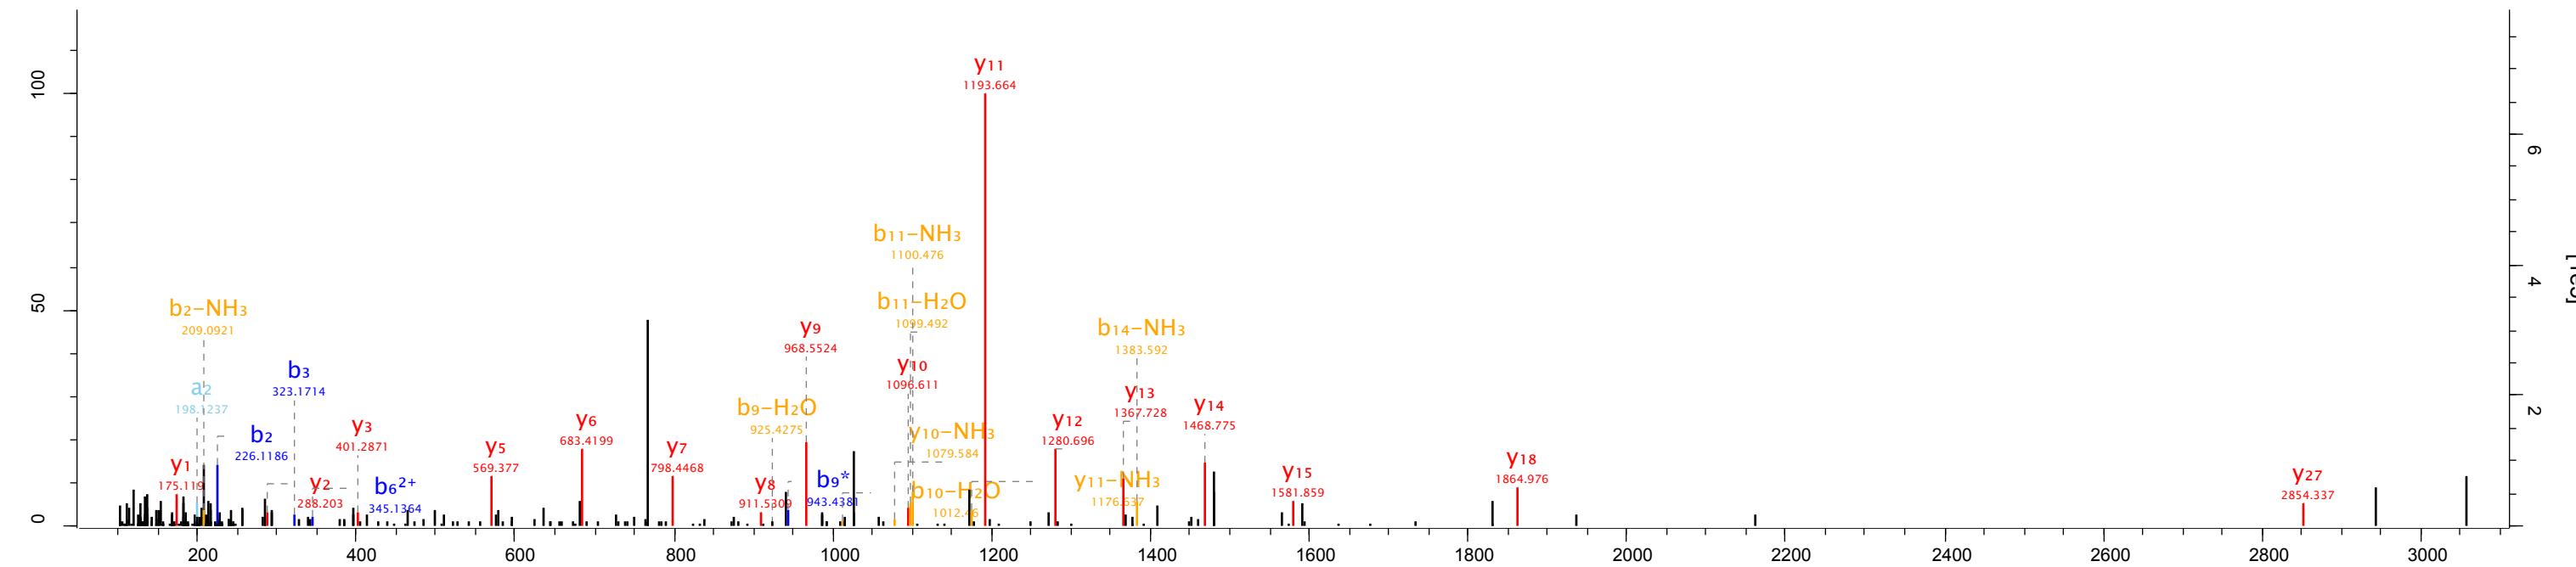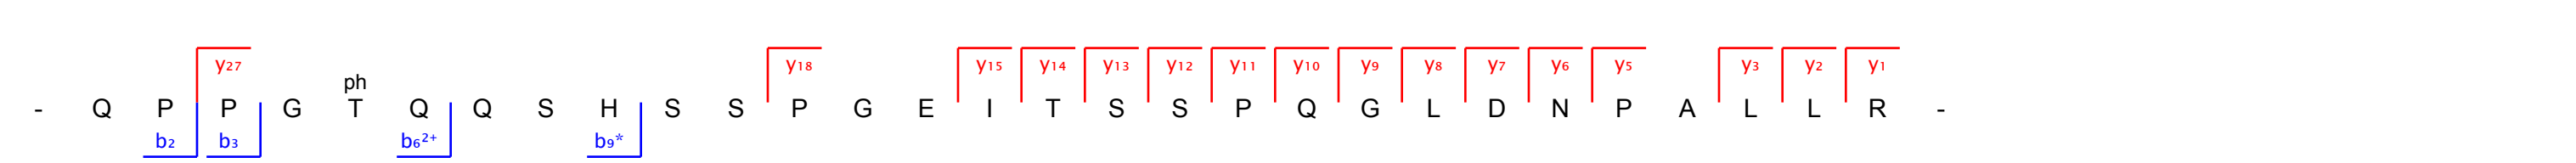

Raw file: 20150812\_A375SR\_Phospho\_BR1\_04  
 Scan: 2021 Method: FTMS; HCD Score: 216.53 m/z: 737.82 Gene names: MAP4

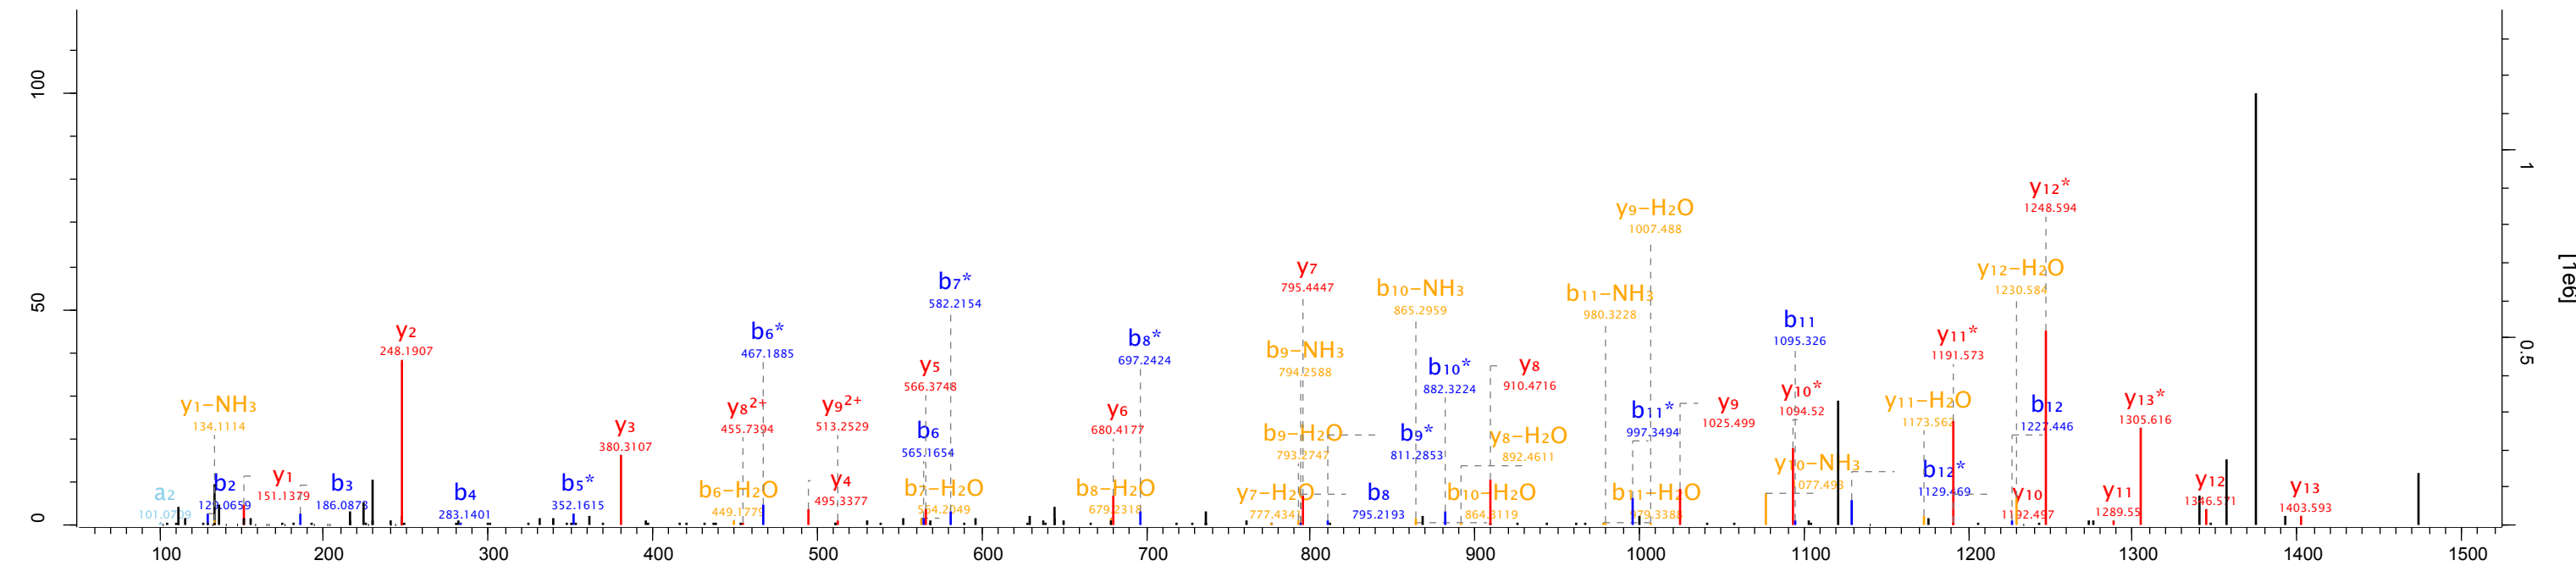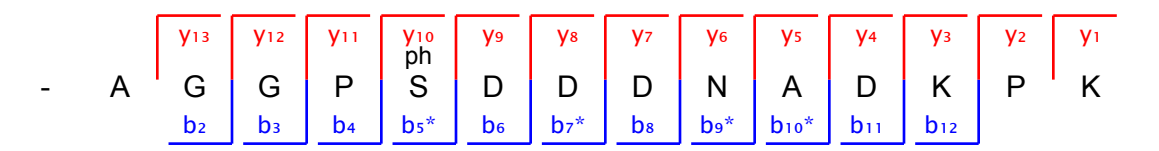



Raw file 20150812\_A375SR\_Phospho\_BR1\_04 Scan 20811 Method FTMS; HCD Score 43.04 m/z 1386.33 Gene names CNOT4

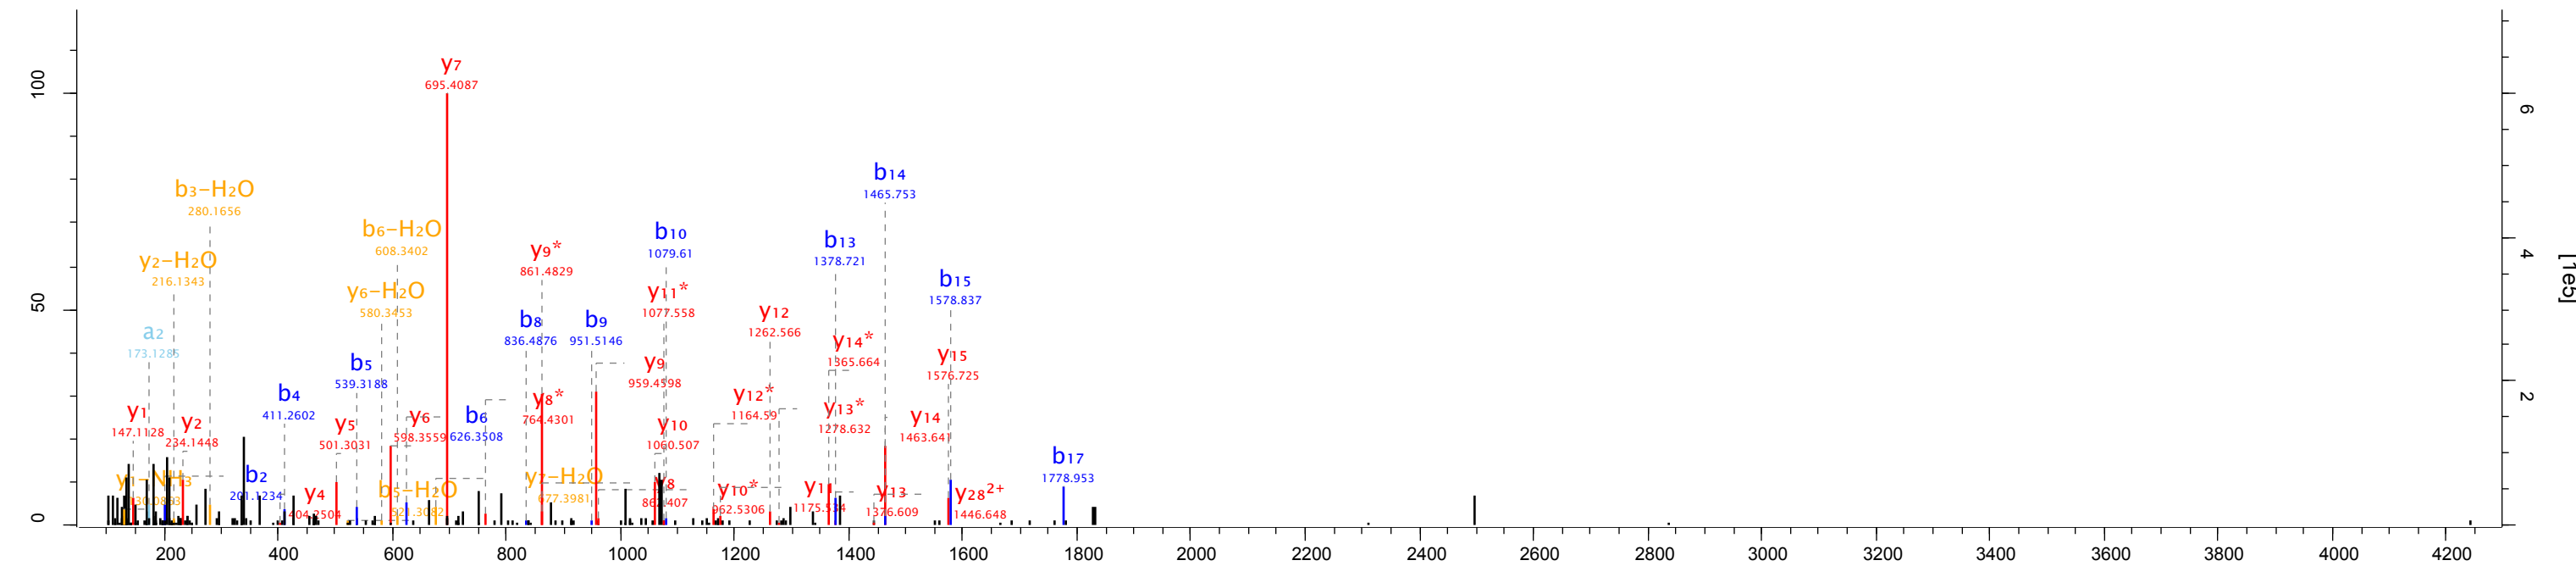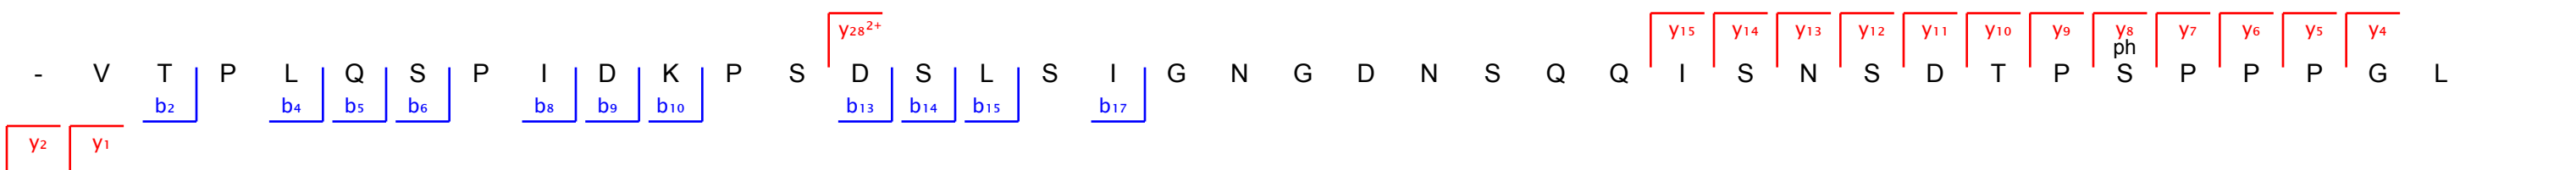

Raw file: 20150812\_A375SR\_Phospho\_BR1\_04  
 Scan: 22471 Method: FTMS; HCD Score: 152.31 m/z: 833.41 Gene names: PPP1R35

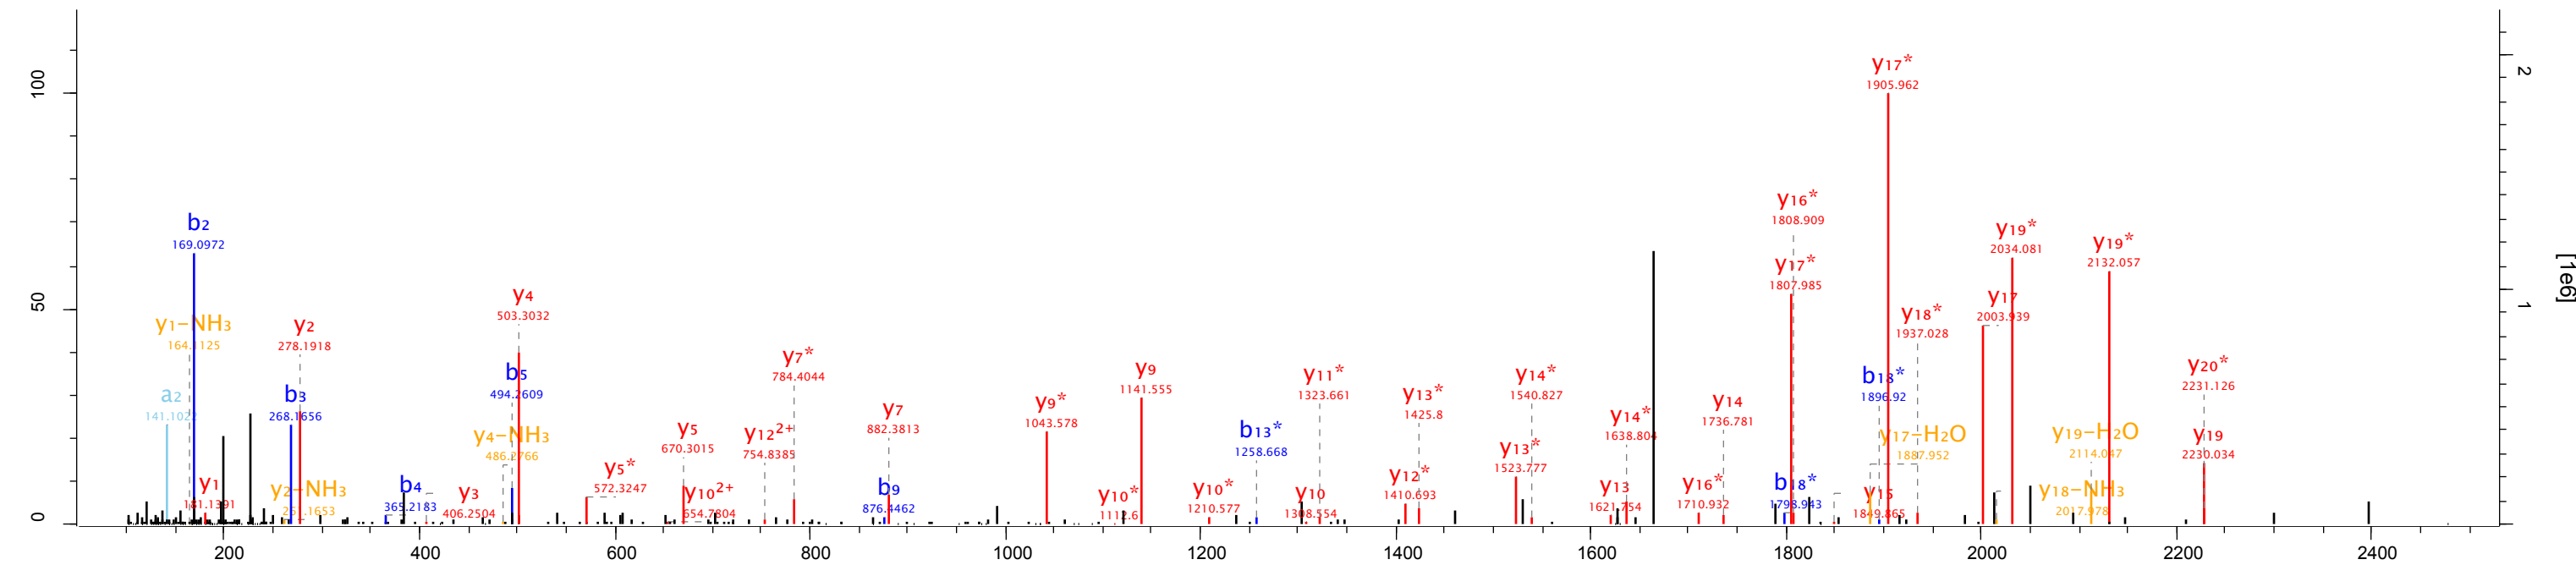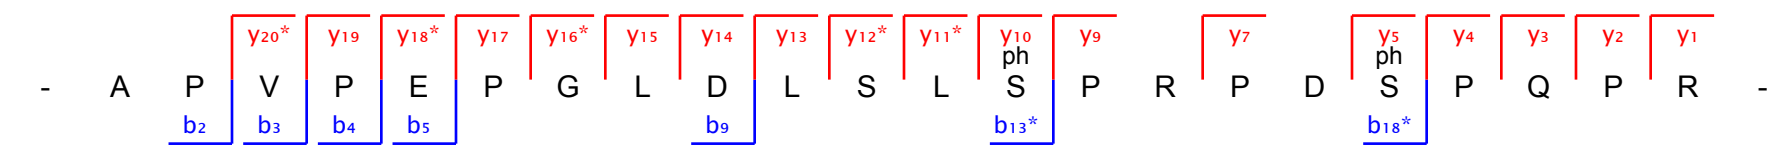

Raw file 20150812\_A375SR\_Phospho\_BR1\_04 Scan 24451 Method FTMS; HCD Score 49.74 m/z 1463.99 Gene names PABPN1

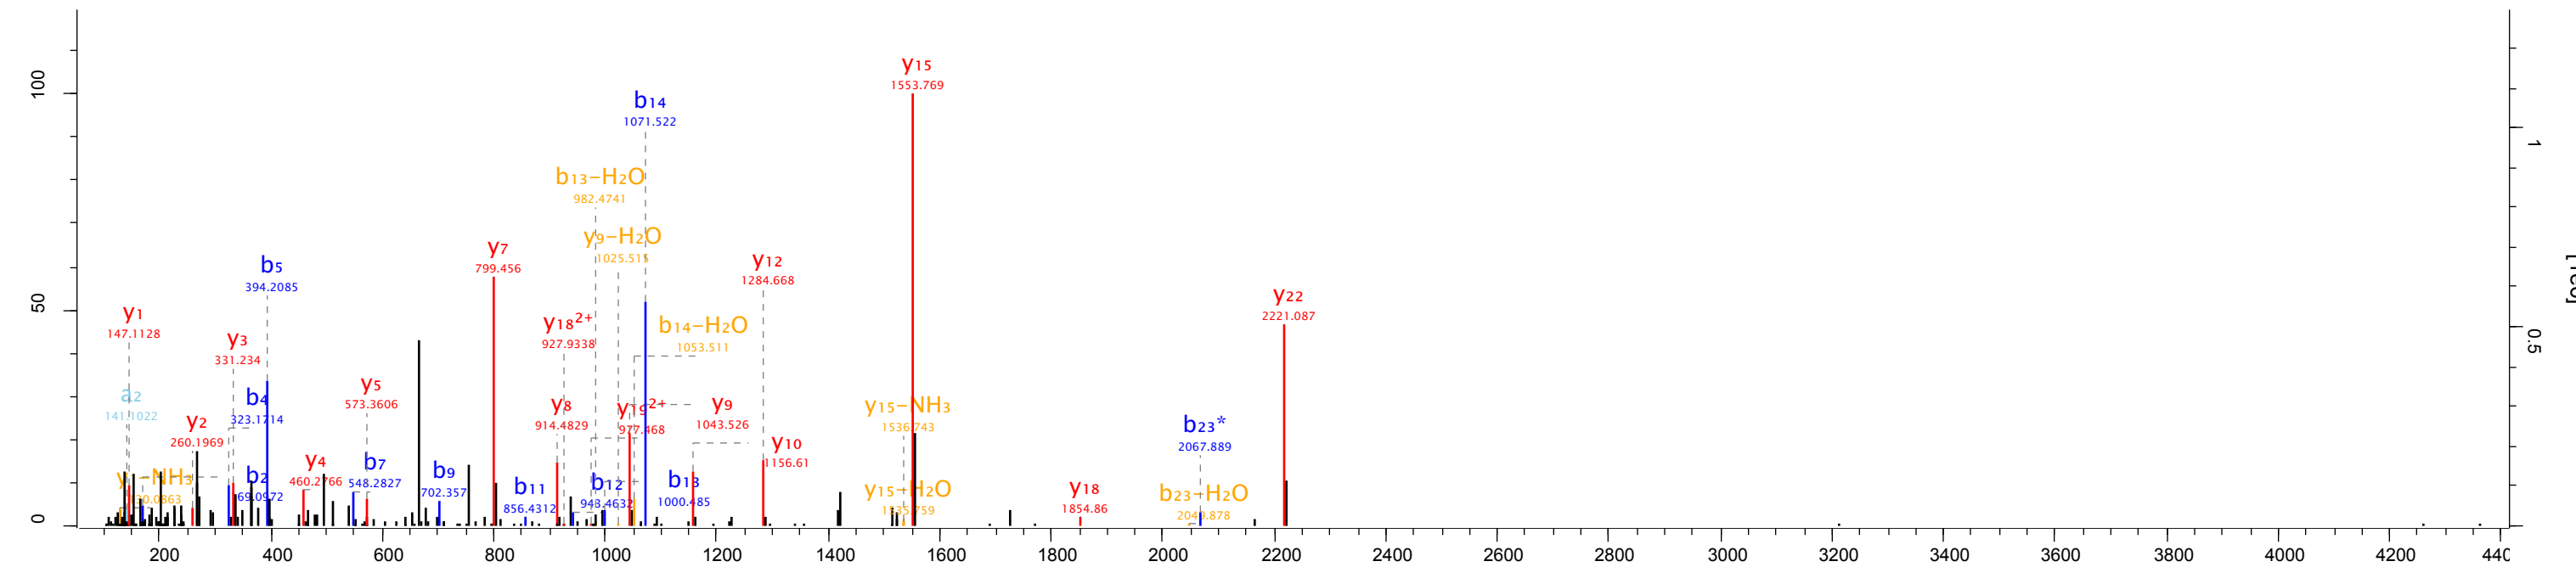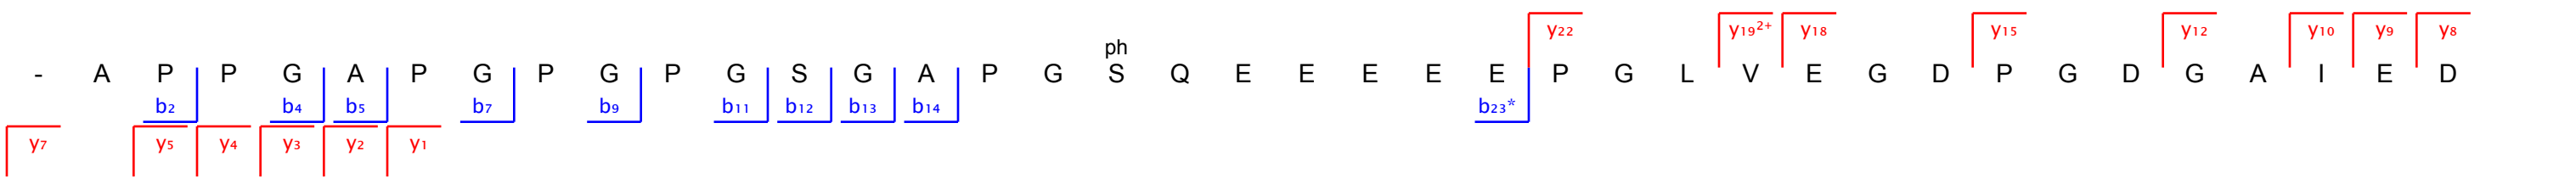

Raw file: 20150812\_A375SR\_Phospho\_BR1\_04  
 Scan: 25101 Method: FTMS; HCD Score: 235.78 m/z: 918.4 Gene names: IGF2R

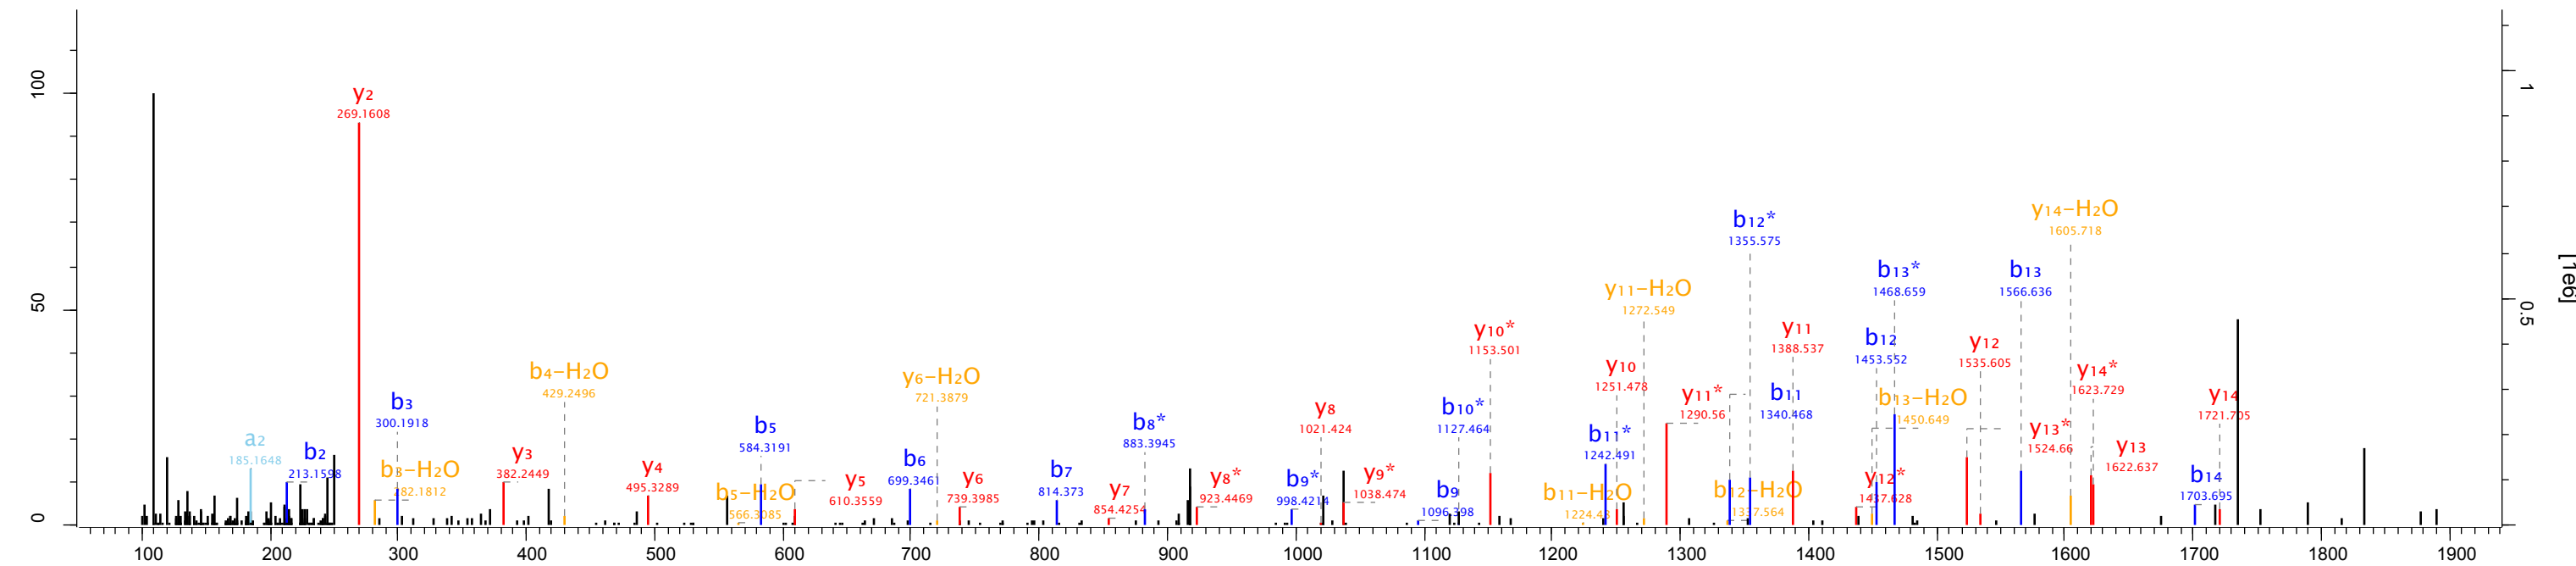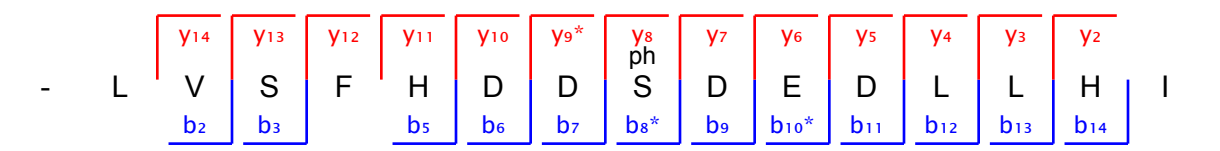

Raw file: 20150812\_A375SR\_Phospho\_BR1\_04  
 Scan: 26051 Method: FTMS; HCD Score: 100.64 m/z: 1068.13 Gene names: USP10

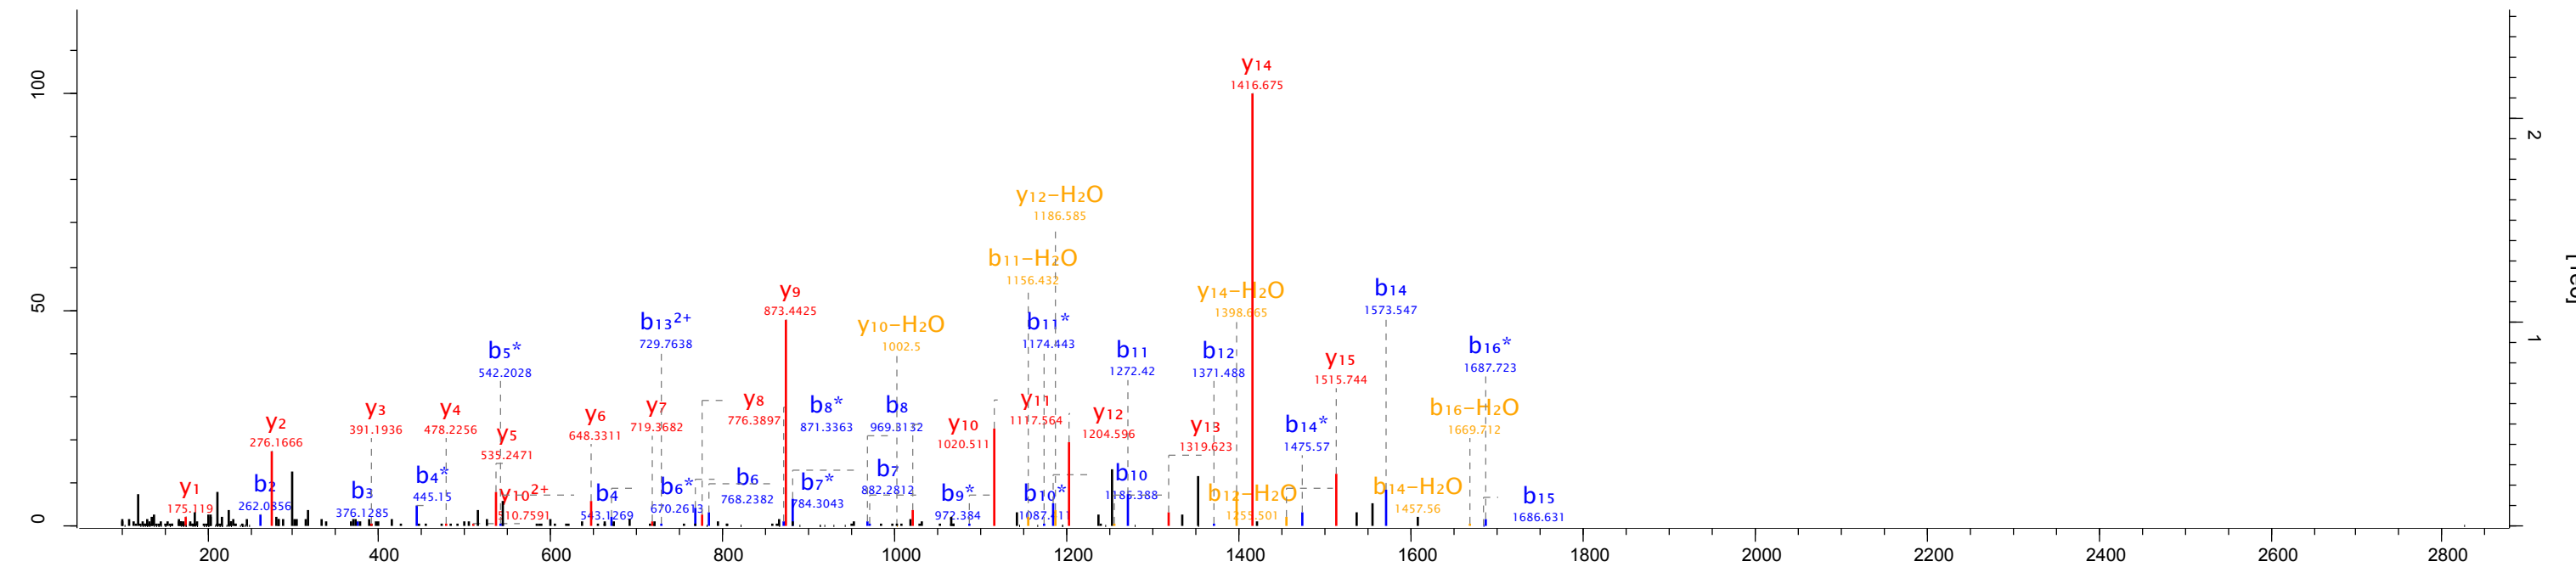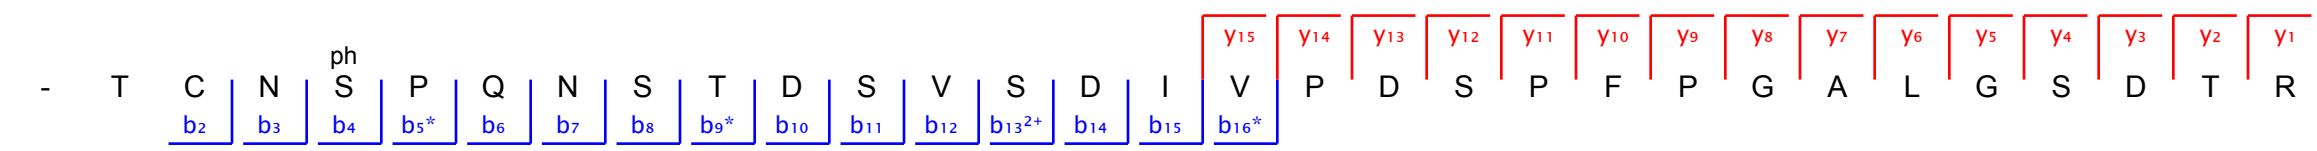

Raw file: 20150812\_A375SR\_Phospho\_BR1\_04  
 Scan: 26171 Method: FTMS; HCD Score: 195.18 m/z: 809.89 Gene names: GOLGA4

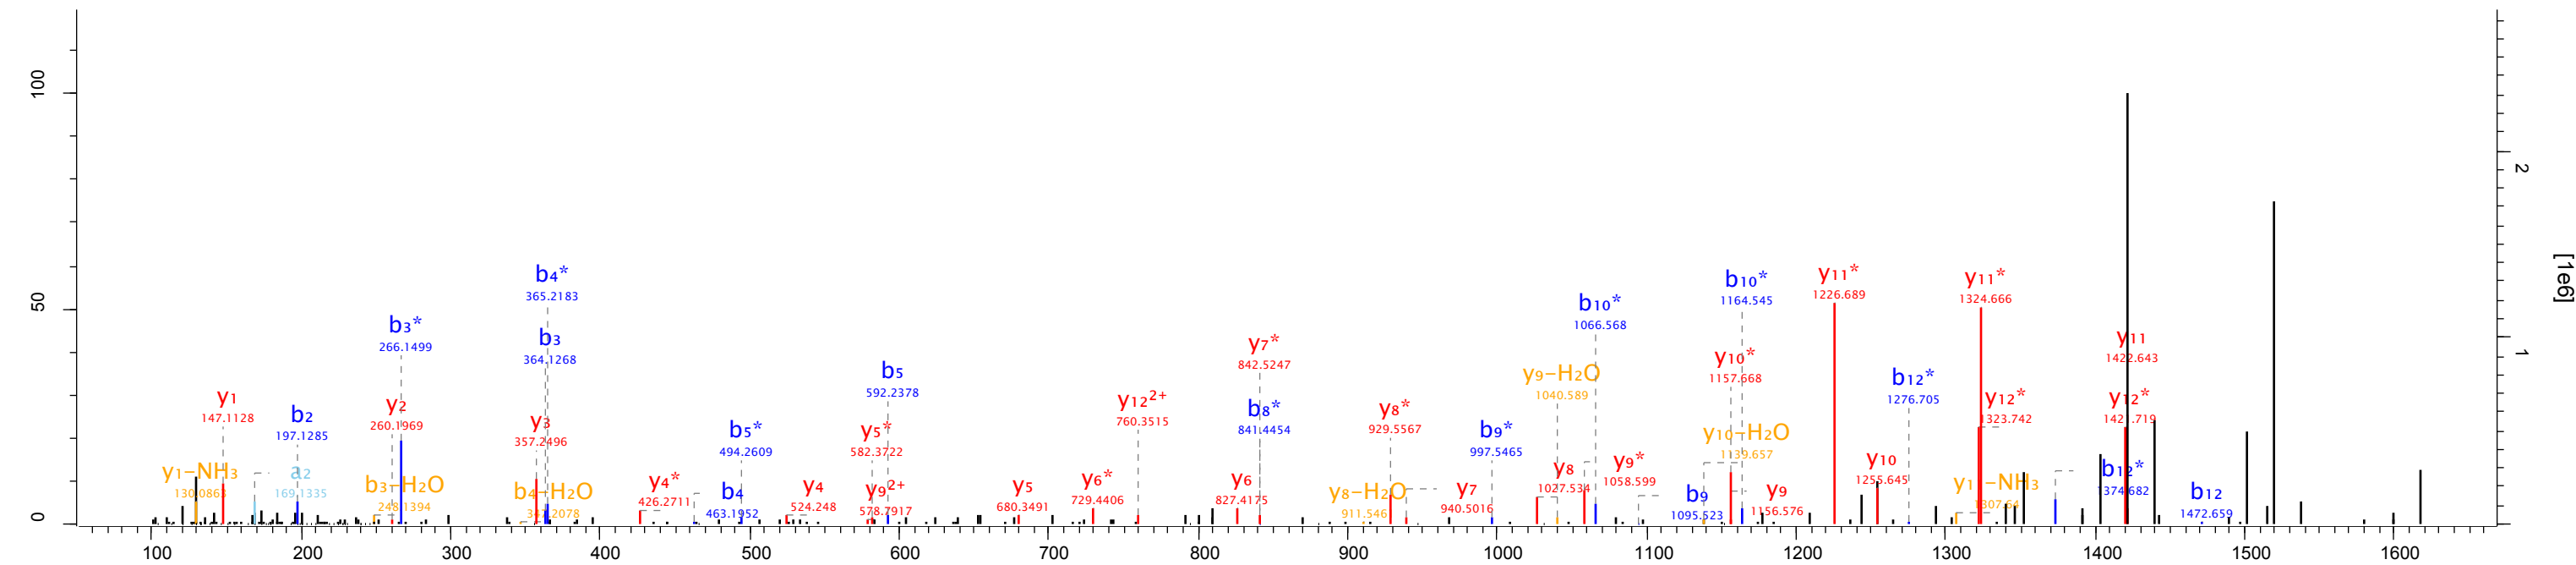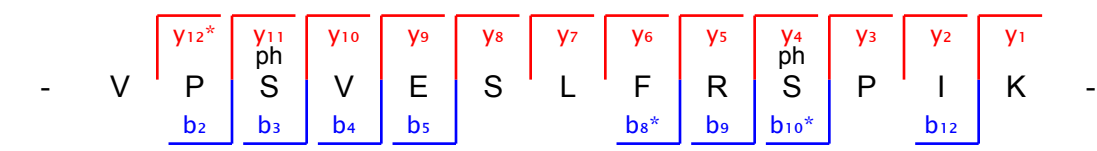

Raw file: 20150812\_A375SR\_Phospho\_BR1\_04  
 Scan: 2721 Method: FTMS; HCD Score: 55.71 m/z: 597.95 Gene names: IRS1

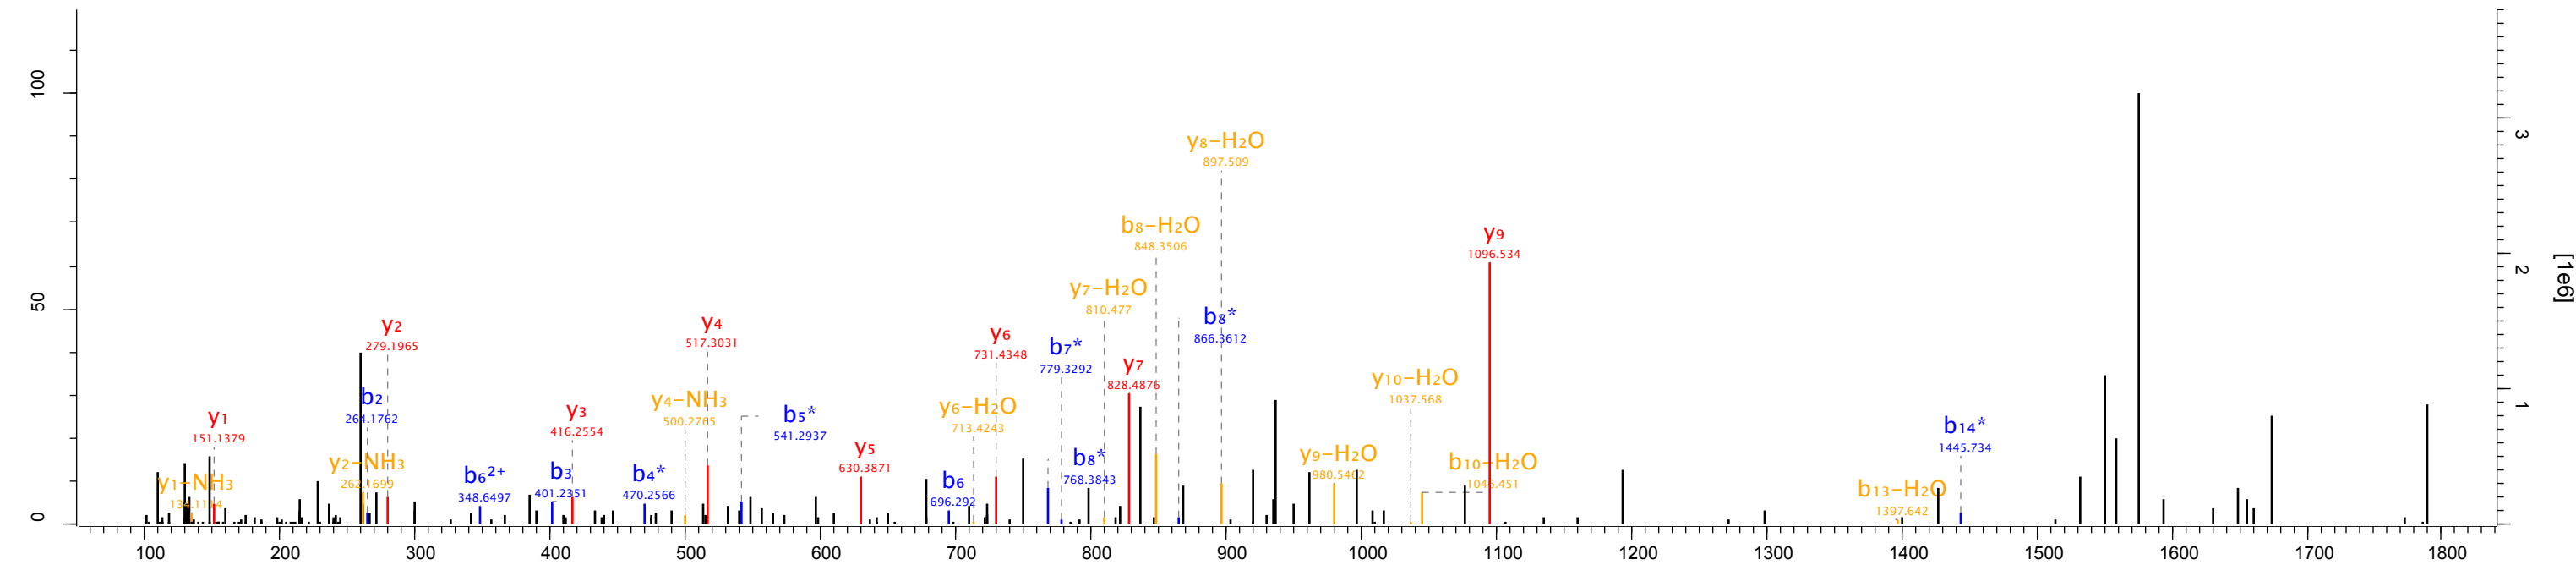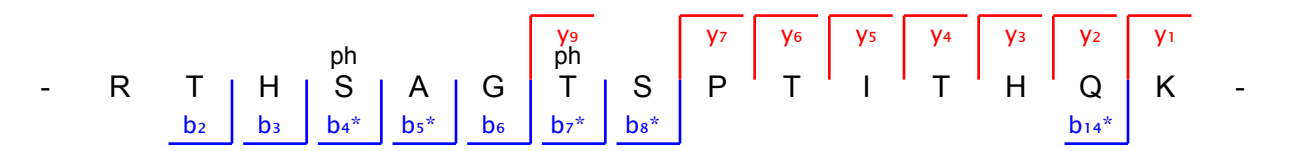

Raw file: 20150812\_A375SR\_Phospho\_BR1\_04  
 Scan: 28011 Method: FTMS; HCD Score: 191.65 m/z: 1511.22 Gene names: PXN

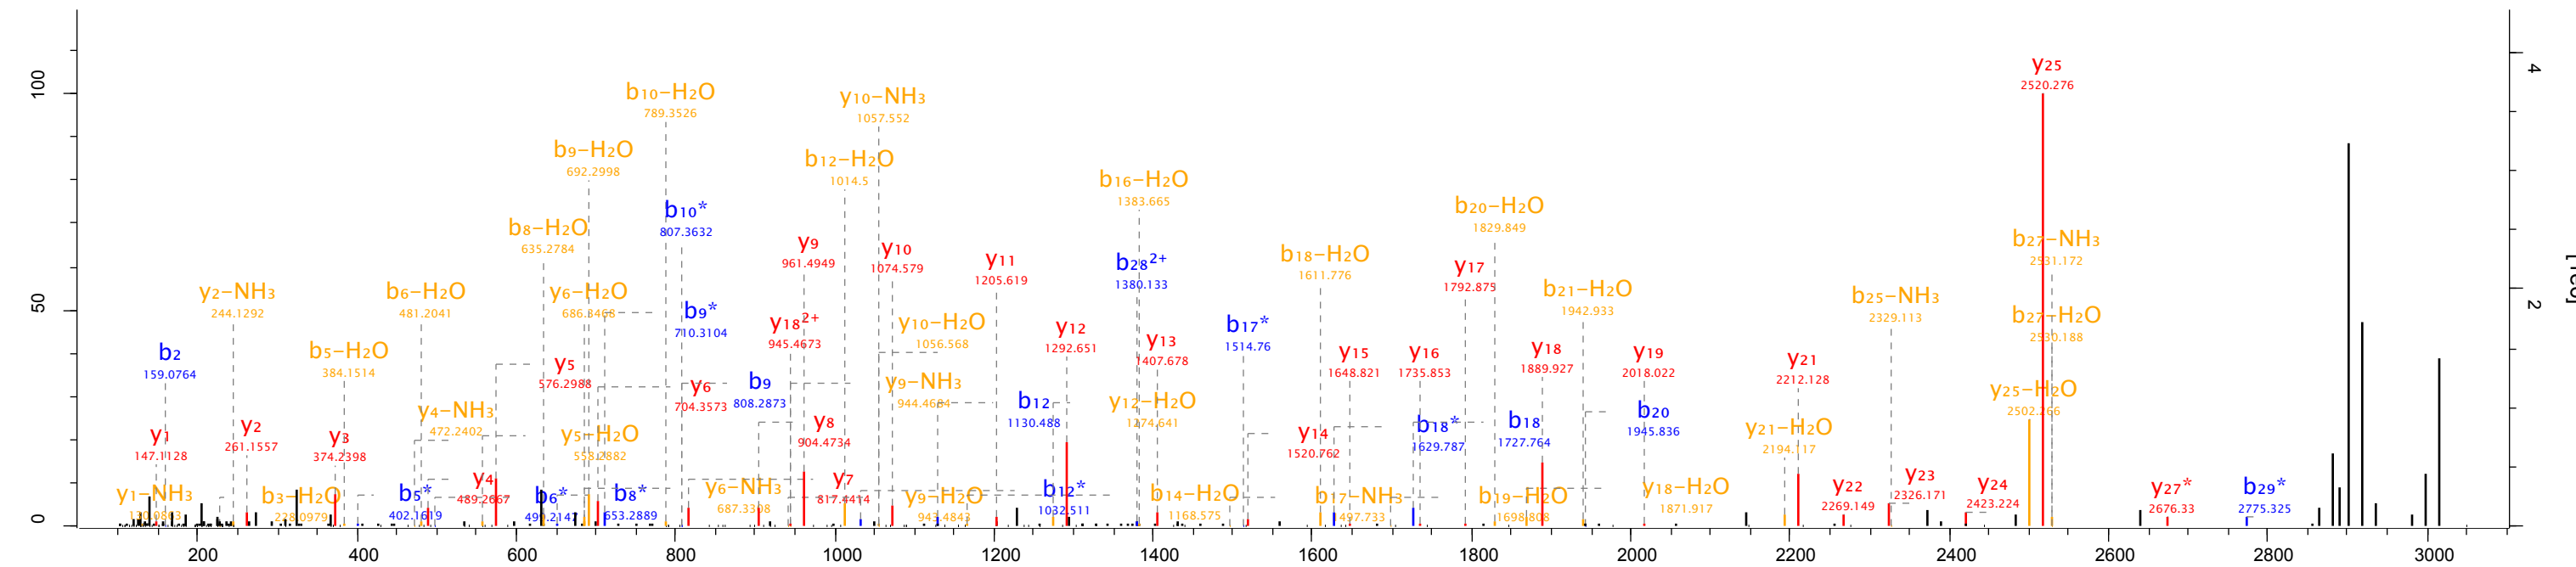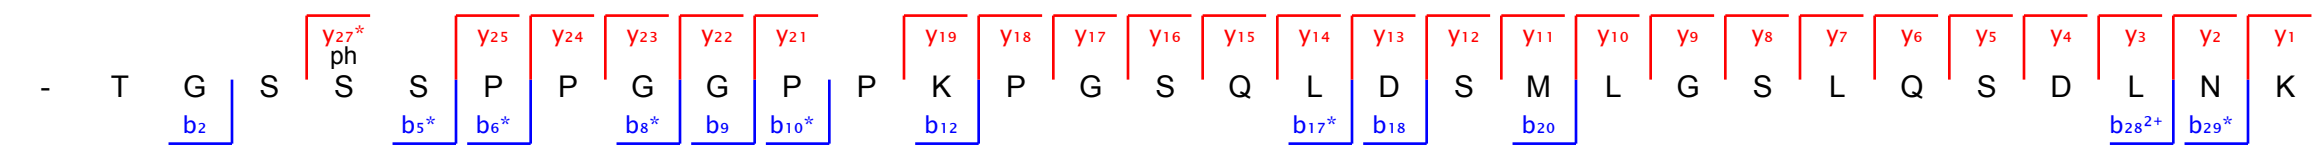



Raw file 20150812\_A375SR\_Phospho\_BR1\_04 Scan 2821 Method FTMS; HCD Score 54.94 m/z 555.25 Gene names PHACTR4

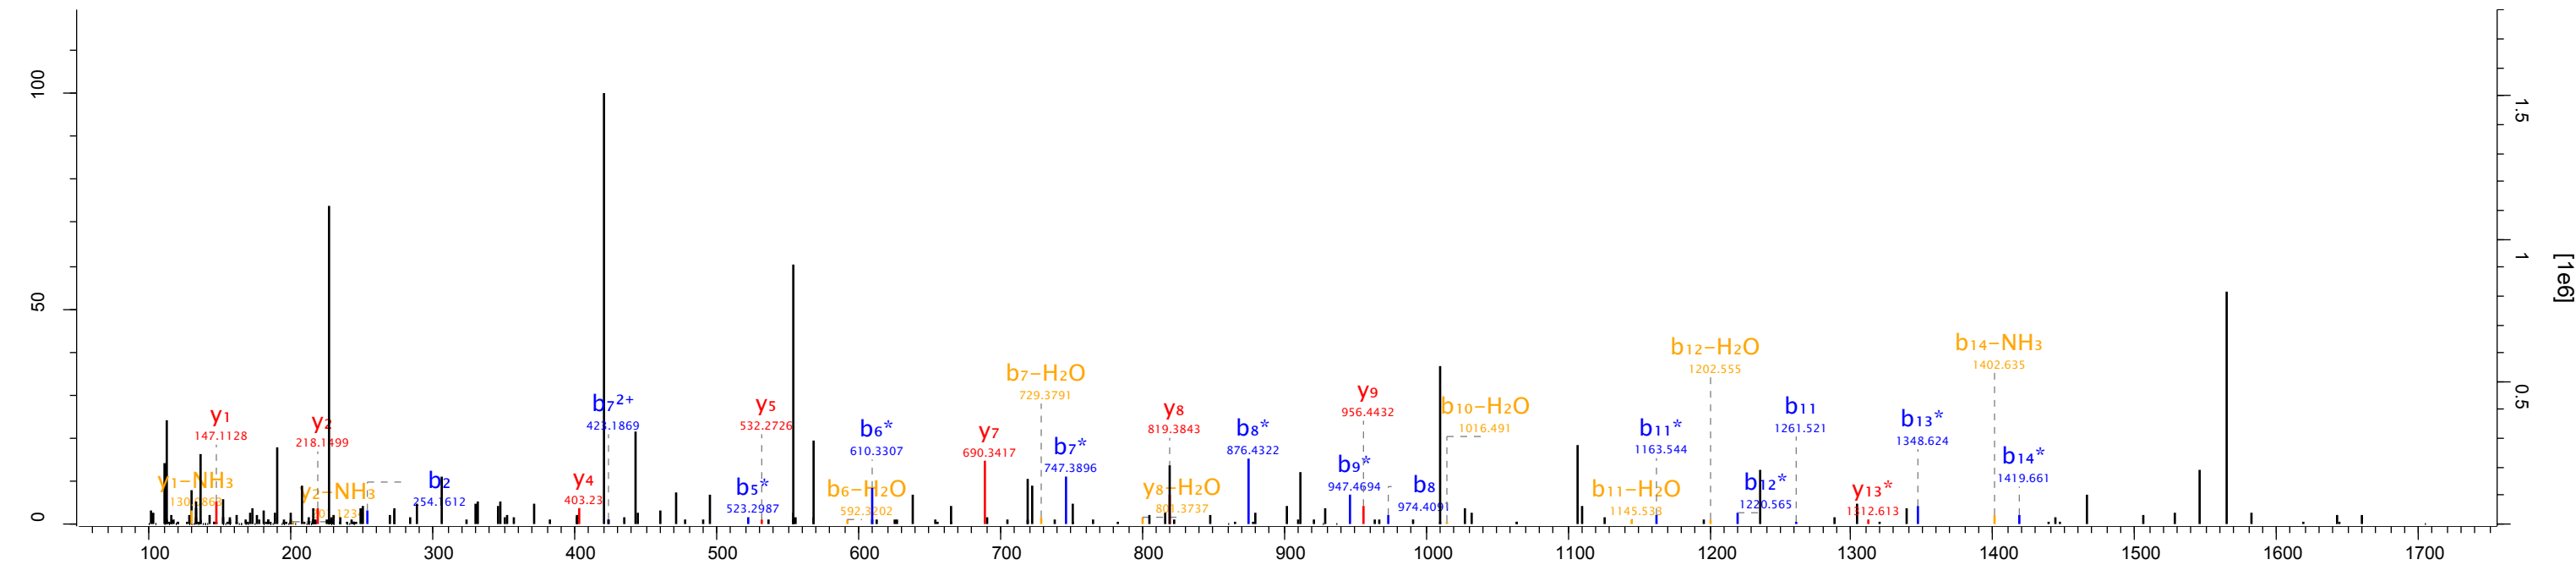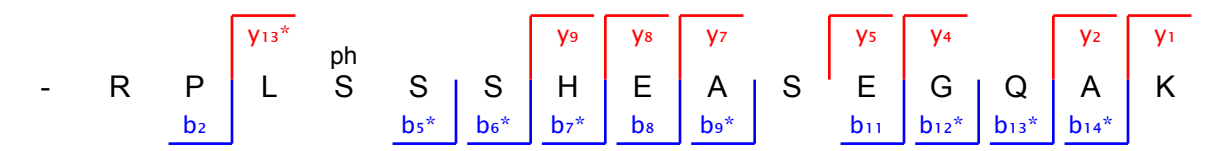

Raw file  
20150812\_A375SR\_Phospho\_BR1\_04

Scan 28591 Method FTMS; HCD Score 277.58 m/z 896.1 Gene names TTLL12

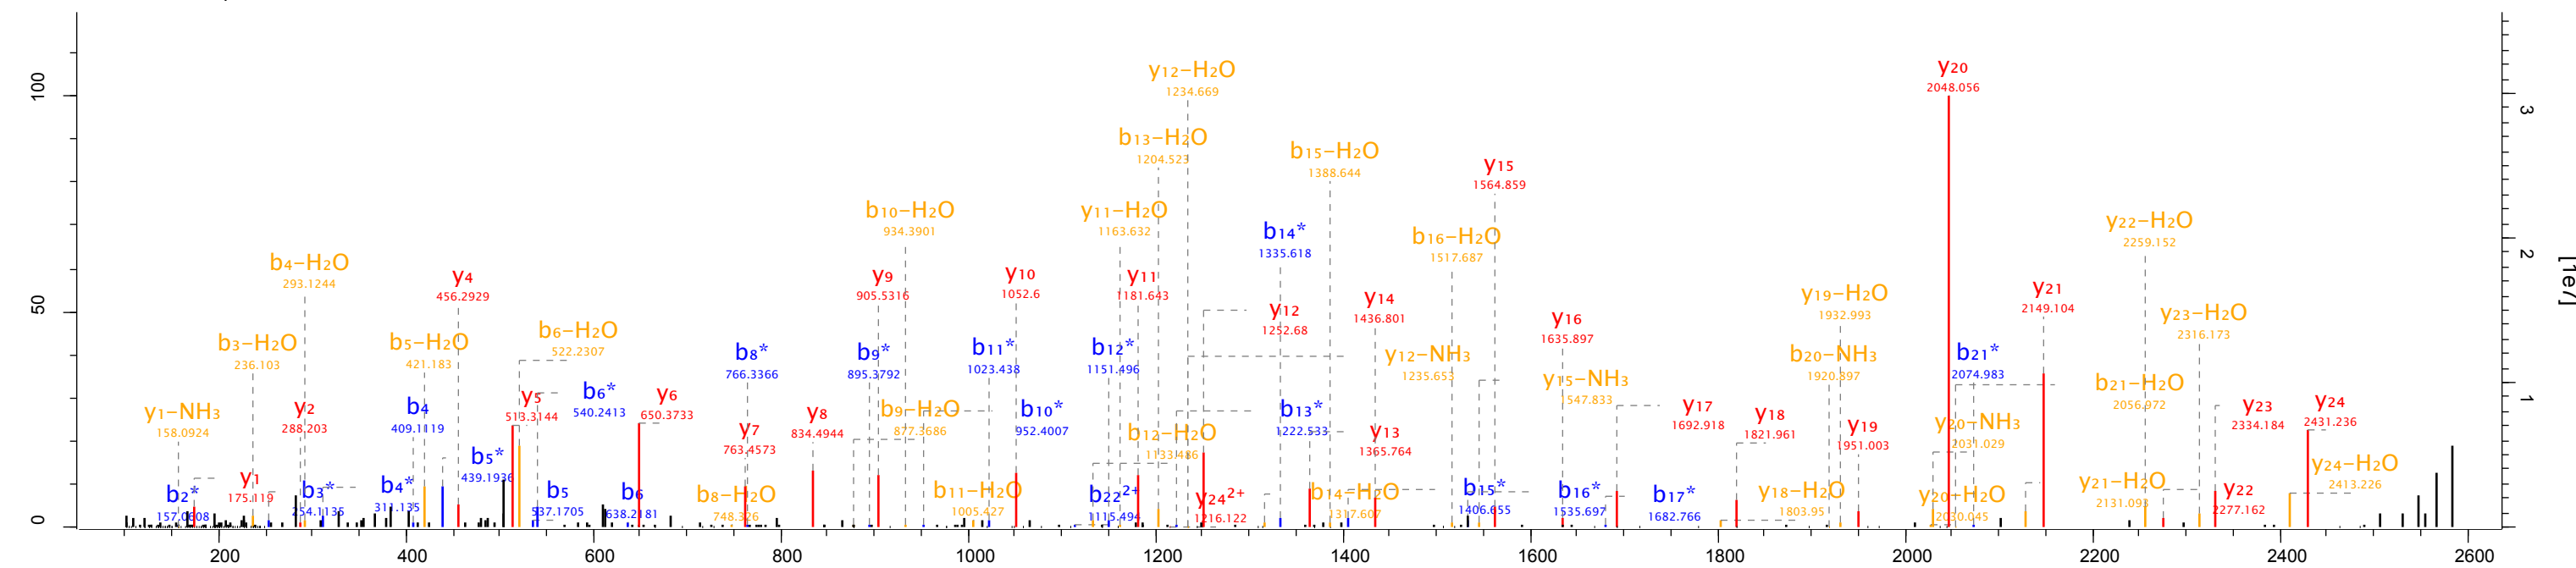

ph S  
 - S P G Q T P E E G A Q A L A E F A A L H G P A L R -  
 b<sub>2</sub><sup>\*</sup> b<sub>3</sub><sup>\*</sup> b<sub>4</sub> b<sub>5</sub> b<sub>6</sub> b<sub>8</sub><sup>\*</sup> b<sub>9</sub><sup>\*</sup> b<sub>10</sub><sup>\*</sup> b<sub>11</sub><sup>\*</sup> b<sub>12</sub><sup>\*</sup> b<sub>13</sub><sup>\*</sup> b<sub>14</sub><sup>\*</sup> b<sub>15</sub><sup>\*</sup> b<sub>16</sub><sup>\*</sup> b<sub>17</sub><sup>\*</sup> b<sub>21</sub><sup>\*</sup> b<sub>22</sub><sup>2+</sup>

Raw file  
20150812\_A375SR\_Phospho\_BR1\_04

Scan 28611 Method FTMS; HCD Score 359.05 m/z 819.15 Gene names KIAA1671

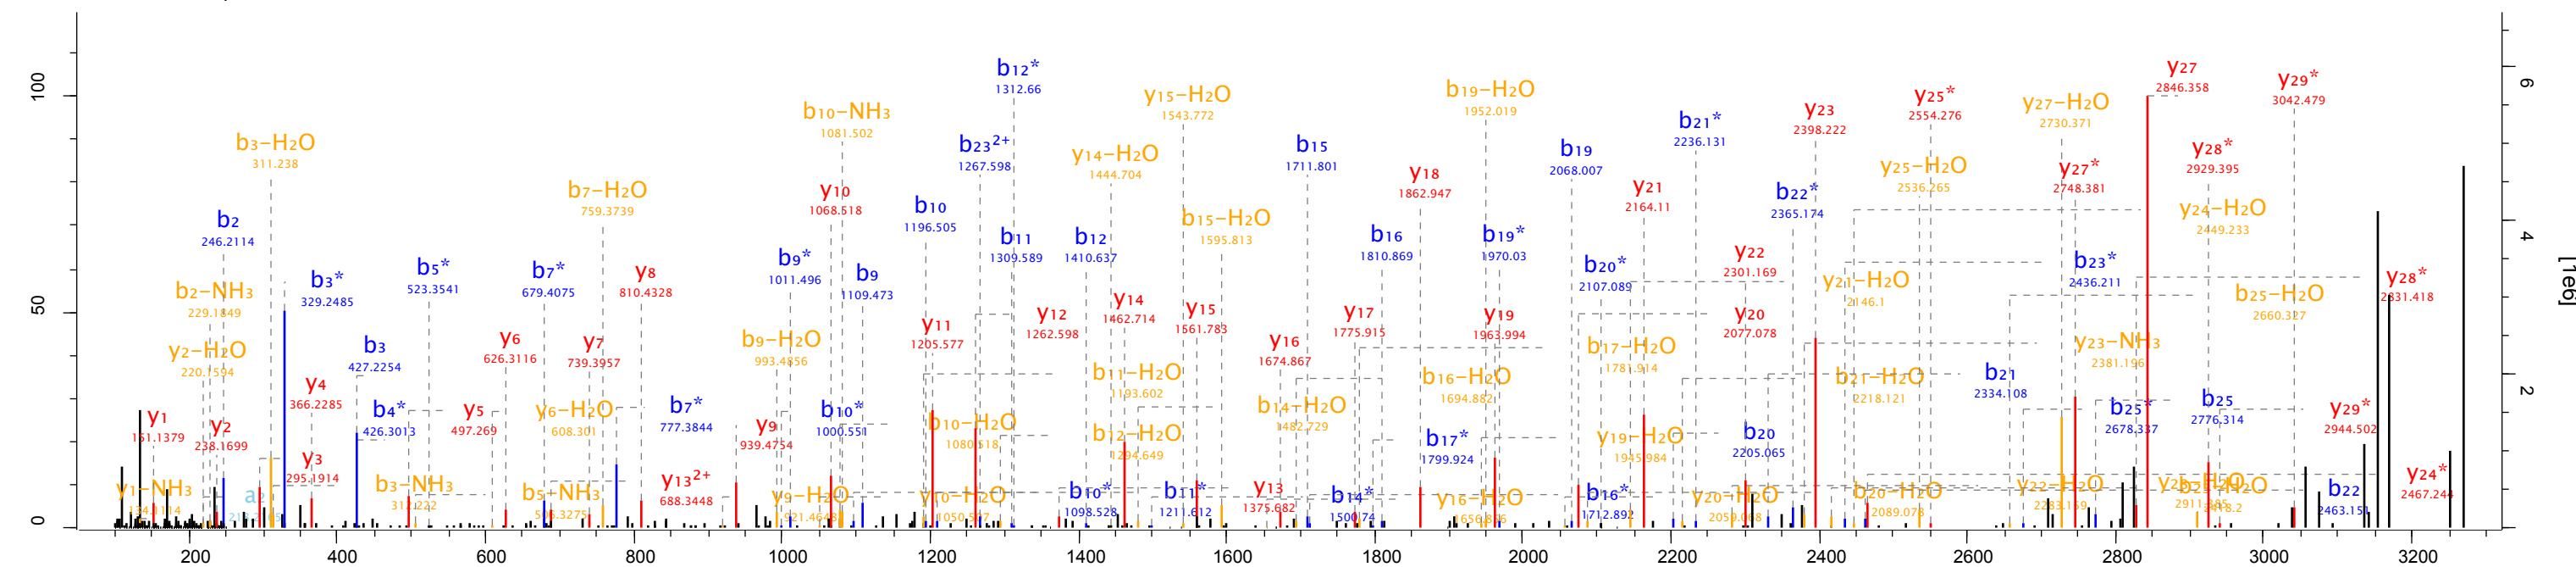

Raw file 20150812\_A375SR\_Phospho\_BR1\_04 Scan 3241 Method FTMS; HCD Score 78.23 m/z 719.84 Gene names GTSE1

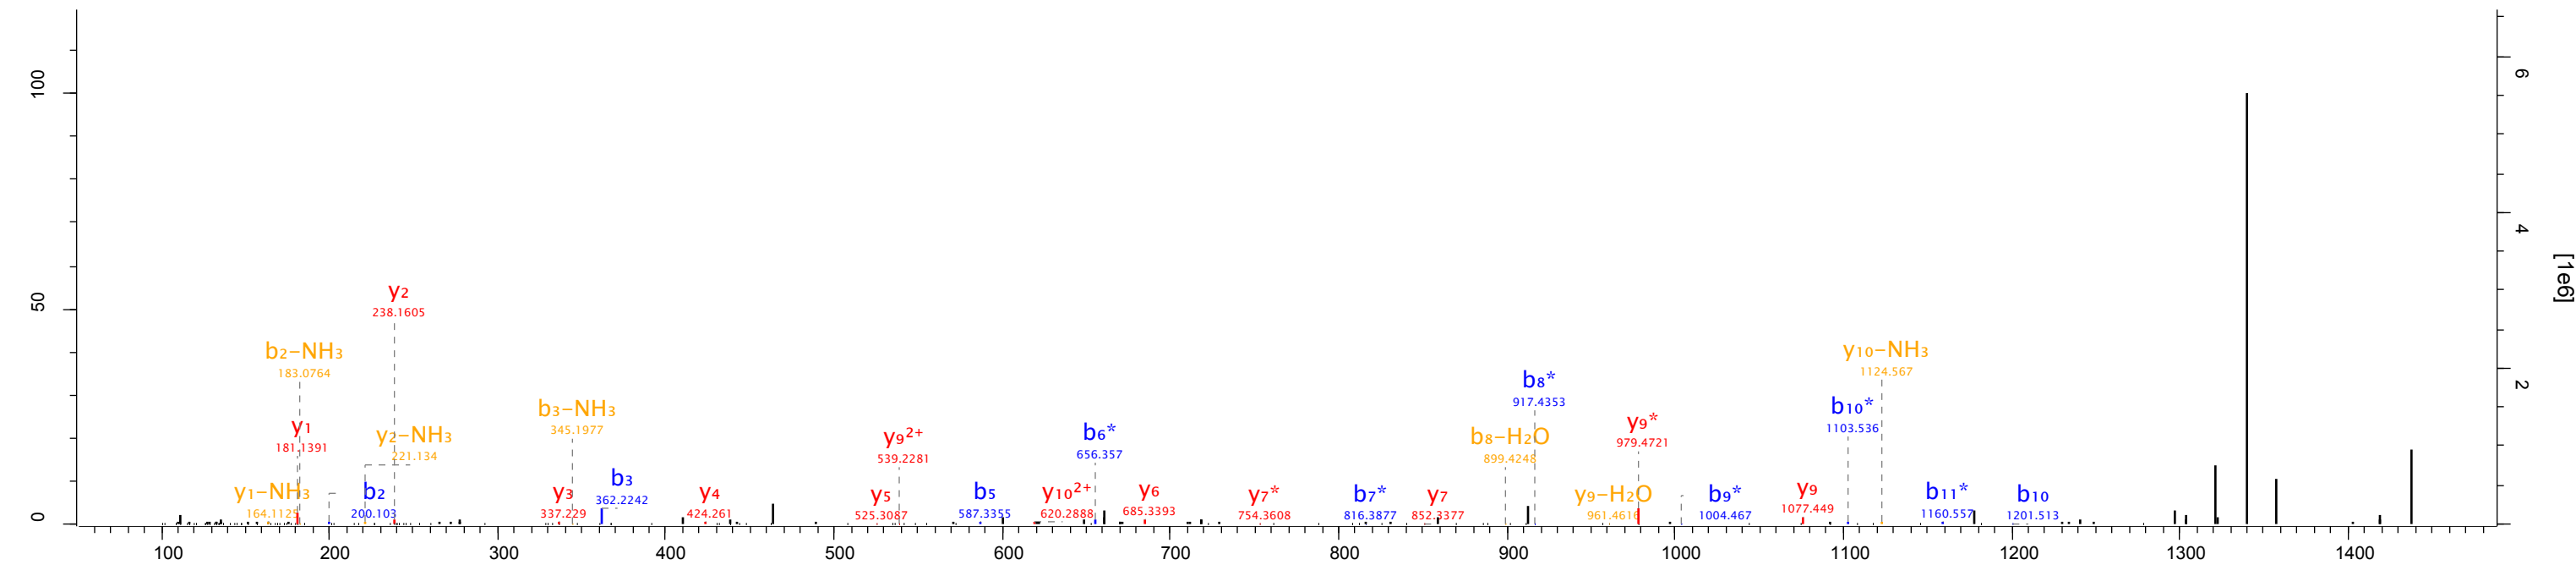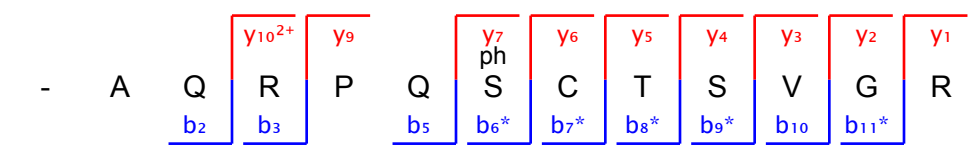

Raw file Scan Method Score m/z Gene names  
 20150812\_A375SR\_Phospho\_BR1\_04 3871 FTMS; HCD 280.32 1020.91 EPB41L2

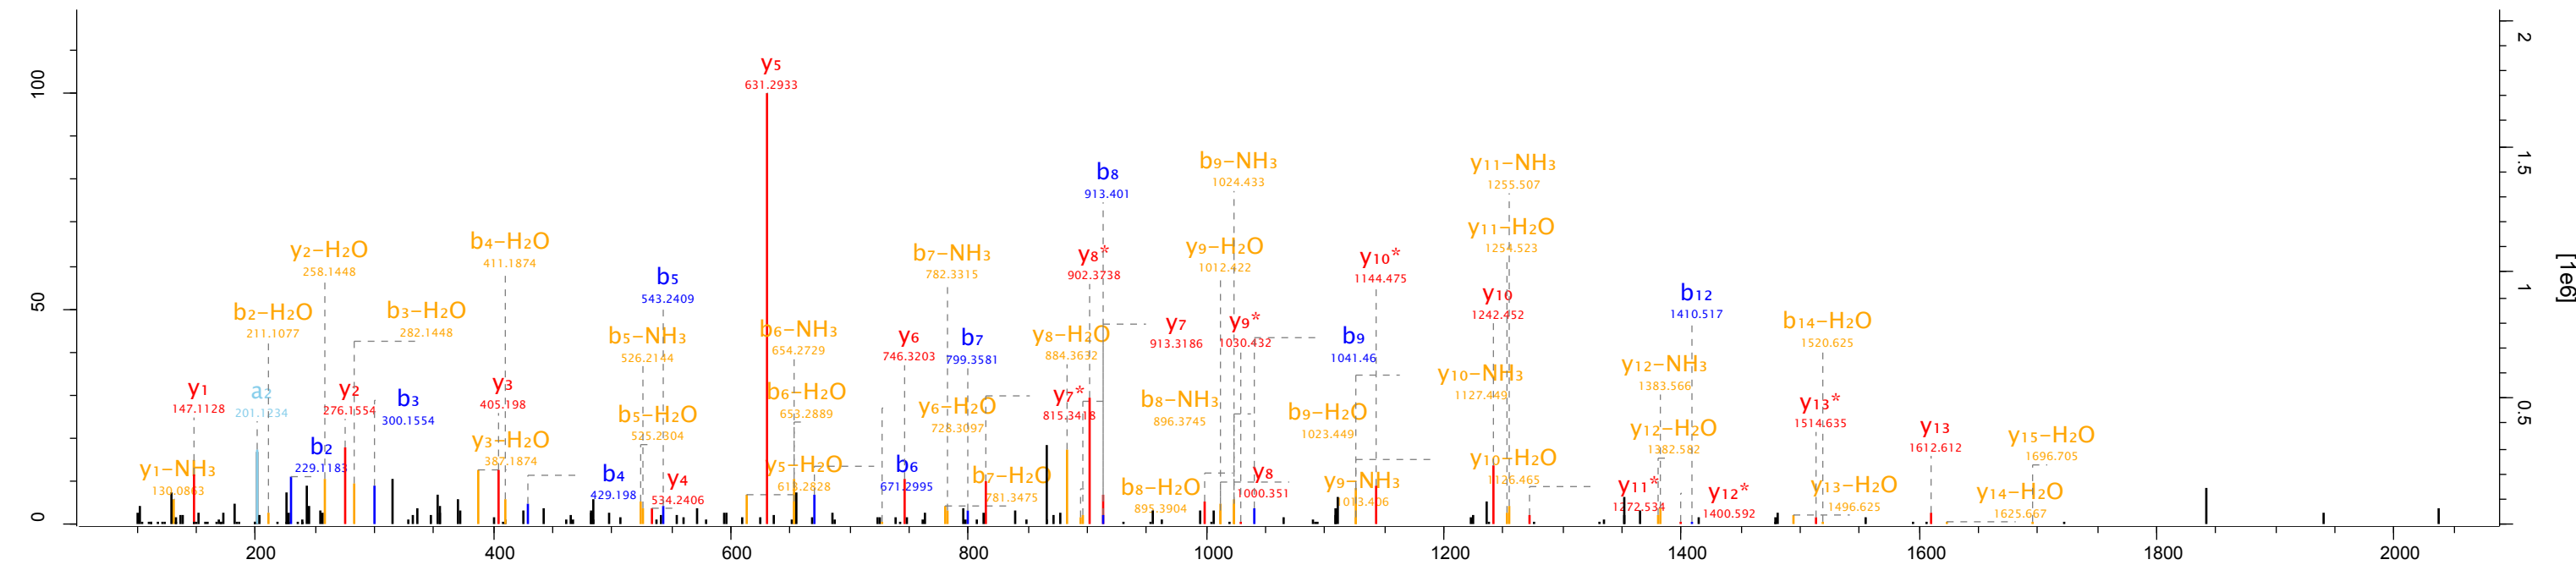

- E V A E N Q Q N Q S S D P E E E K -  
 b<sub>2</sub> b<sub>3</sub> b<sub>4</sub> b<sub>5</sub> b<sub>6</sub> b<sub>7</sub> b<sub>8</sub> b<sub>9</sub> b<sub>12</sub> y<sub>13</sub> y<sub>12</sub>\* y<sub>11</sub>\* y<sub>10</sub> y<sub>9</sub>\* y<sub>8</sub> y<sub>7</sub>ph y<sub>6</sub> y<sub>5</sub> y<sub>4</sub> y<sub>3</sub> y<sub>2</sub> y<sub>1</sub>

Raw file: 20150812\_A375SR\_Phospho\_BR1\_04  
 Scan: 4791 Method: FTMS; HCD Score: 59.71 m/z: 541.89 Gene names: BCKDK

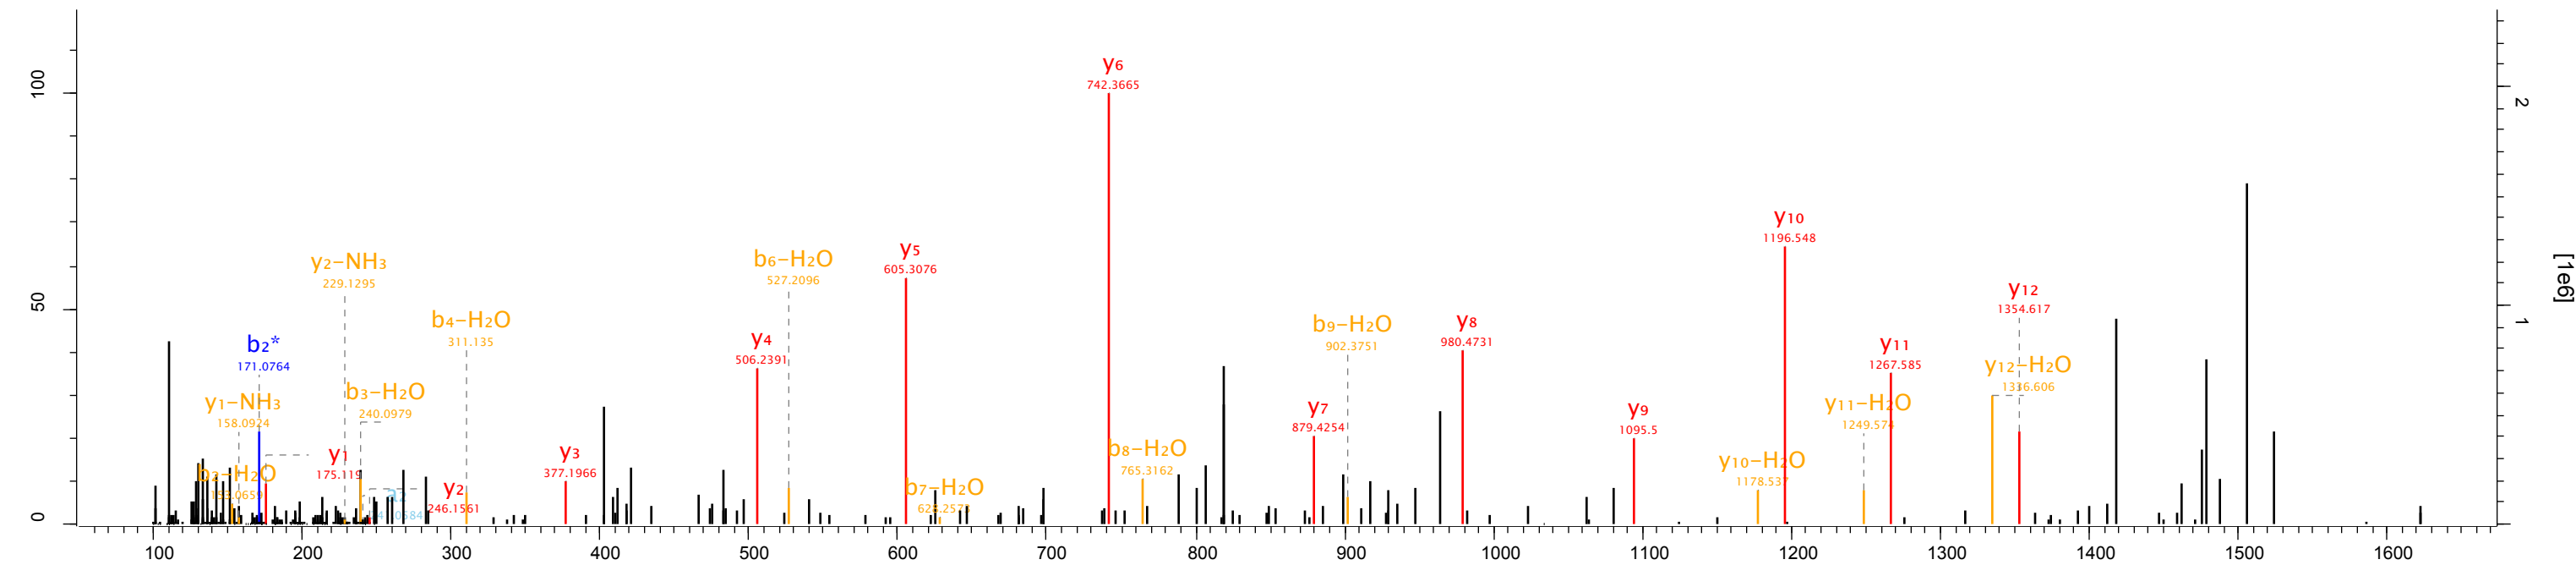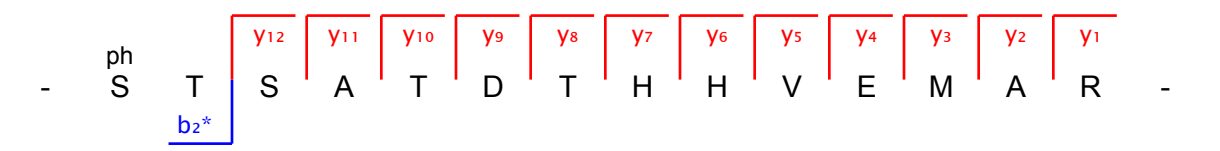

Raw file: 20150812\_A375SR\_Phospho\_BR1\_04  
 Scan: 4821 Method: FTMS; HCD Score: 62.44 m/z: 863.84 Gene names: NUFIP2

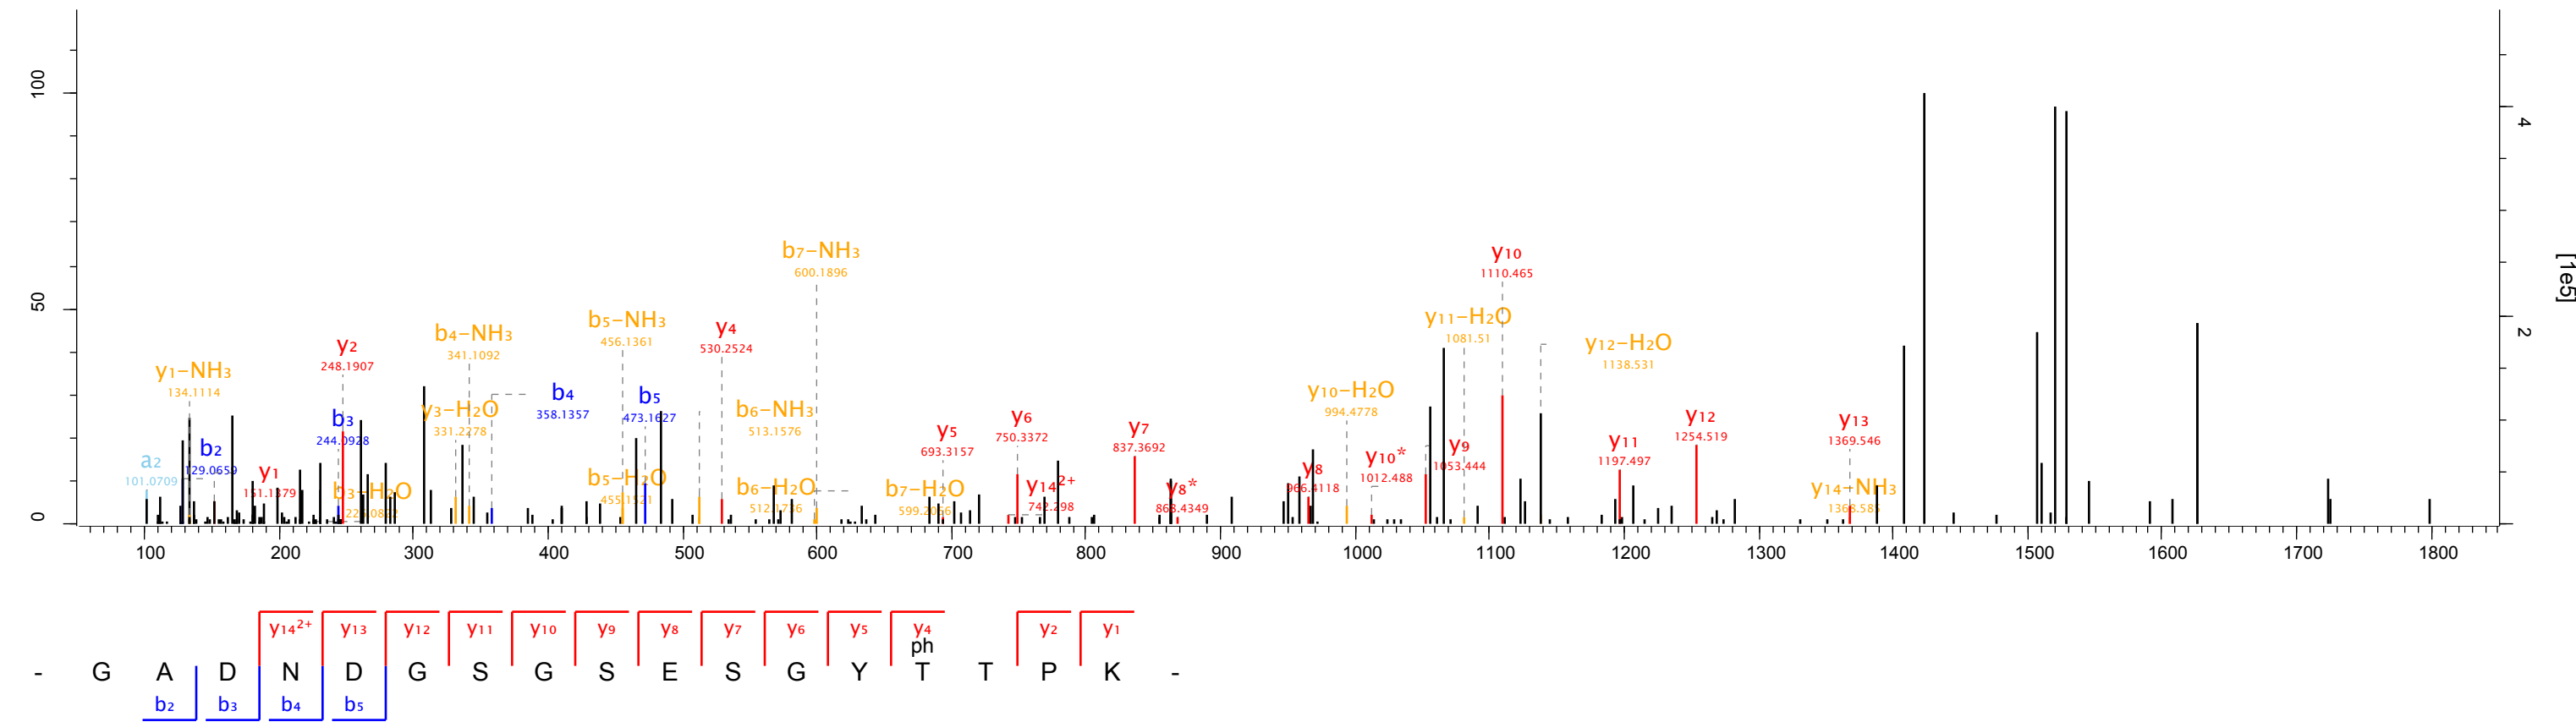

Raw file Scan Method Score m/z Gene names  
 20150812\_A375SR\_Phospho\_BR1\_04 4901 FTMS; HCD 108.39 765 MED1

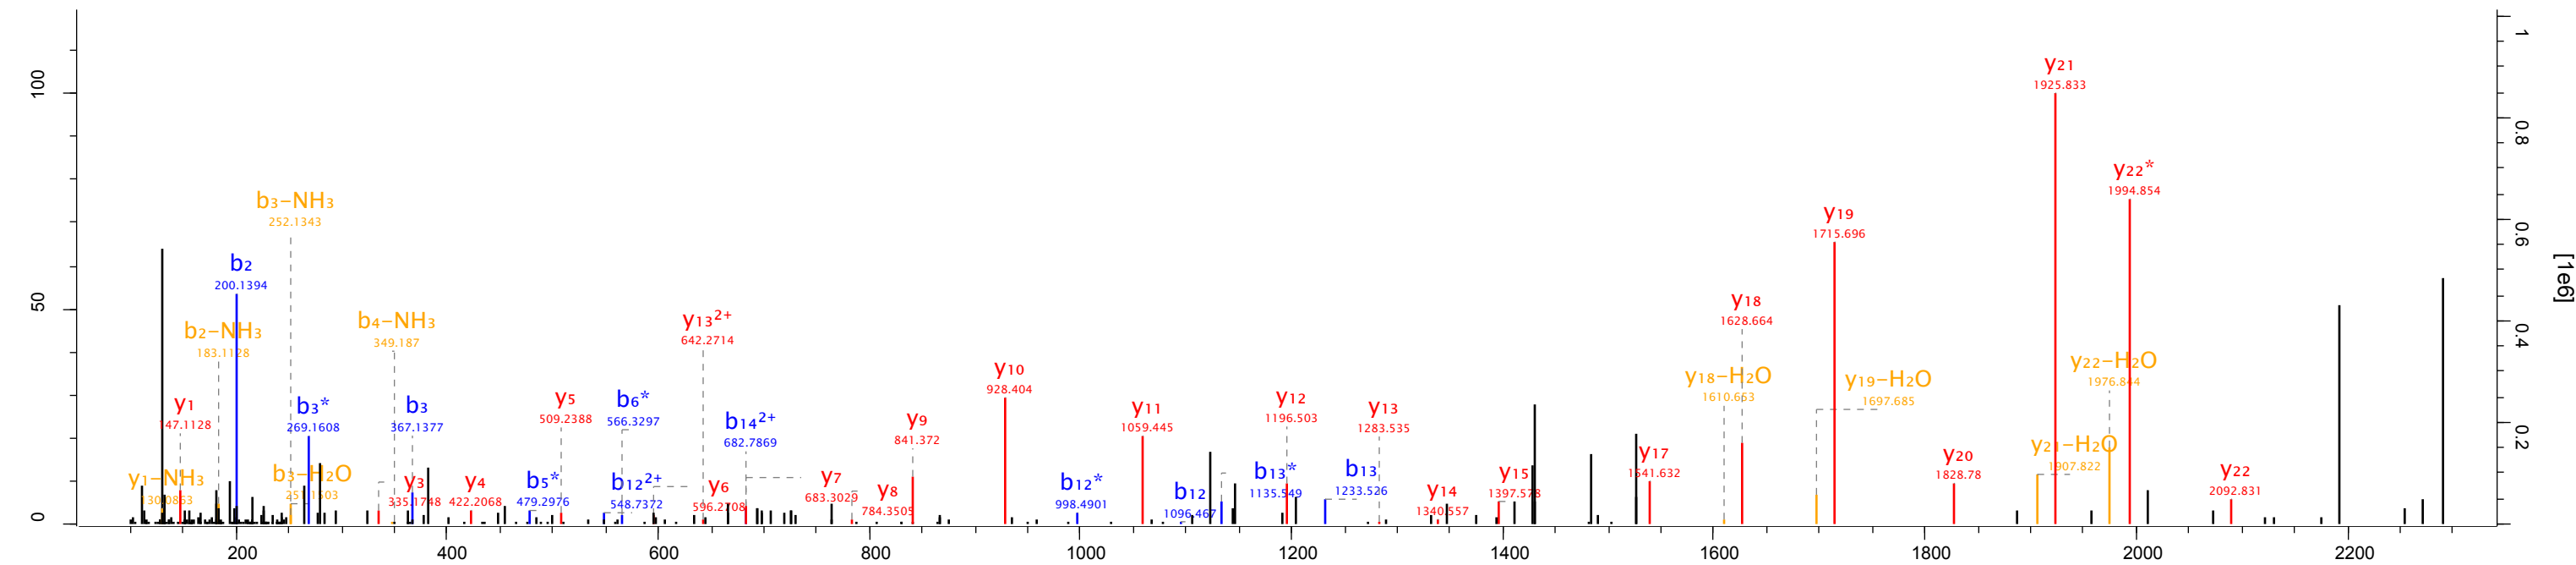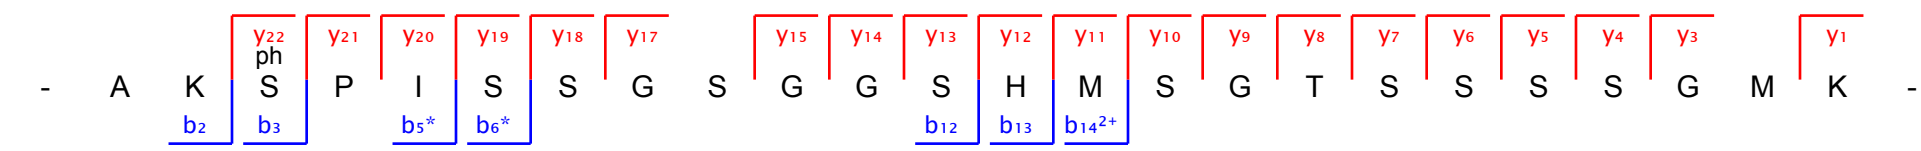



Raw file 20150812\_A375SR\_Phospho\_BR1\_04 Scan 5871 Method FTMS; HCD Score 140.19 m/z 762.04 Gene names INO80B;INO80B-WBP1

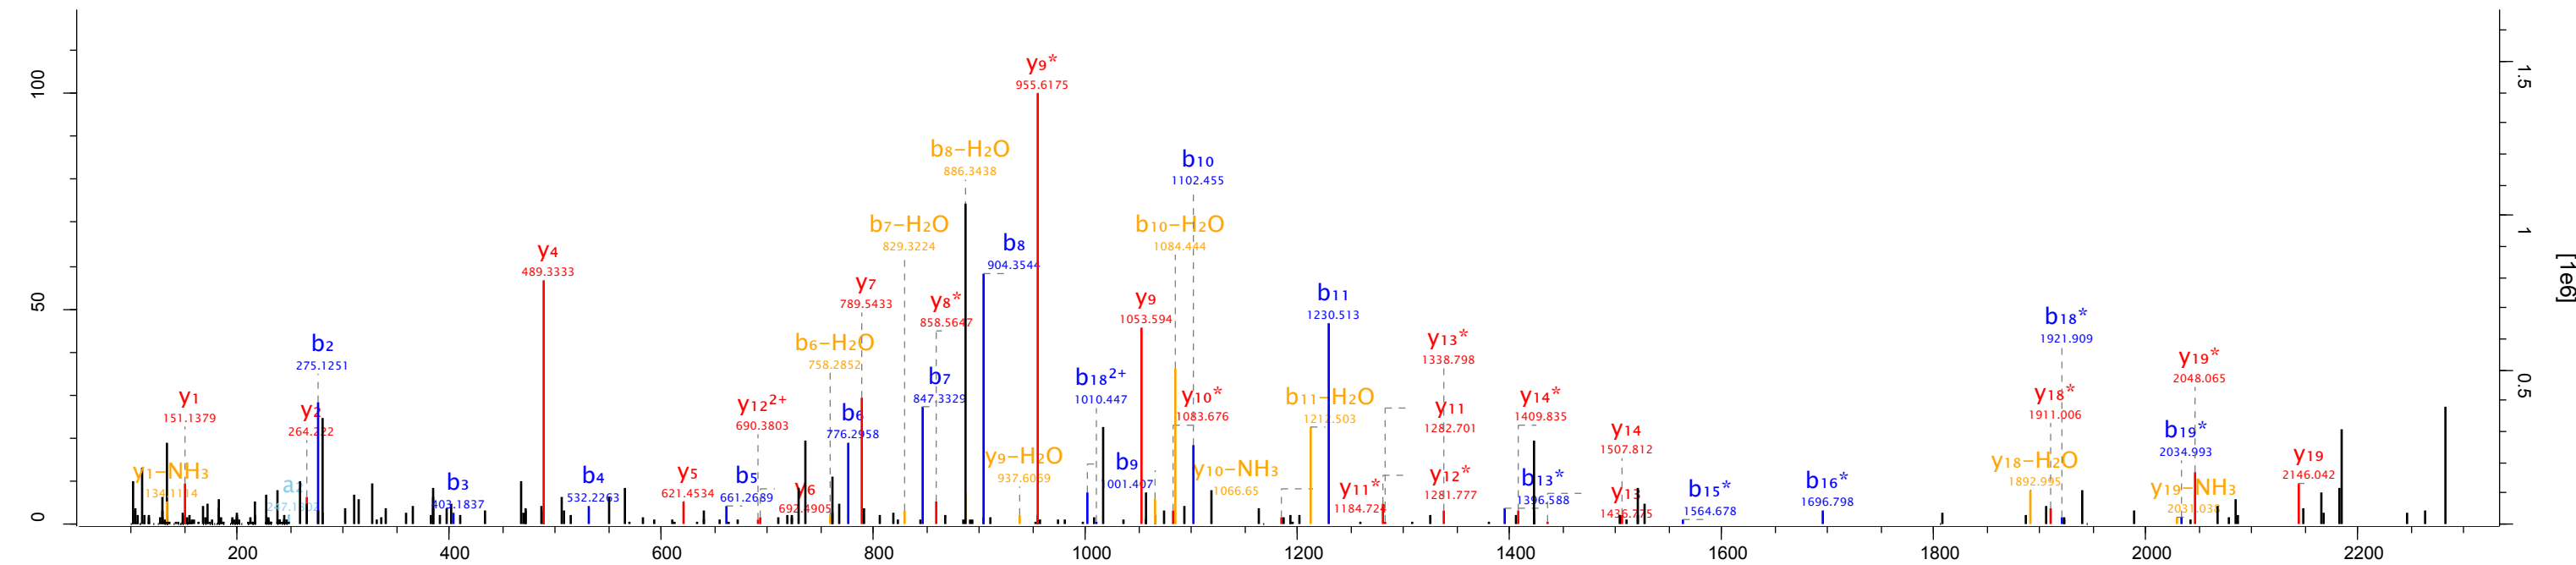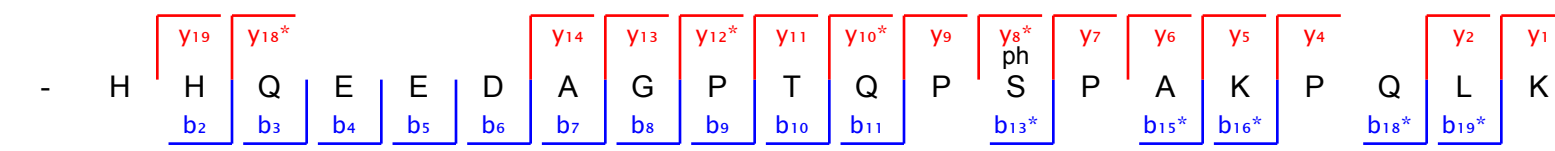

Raw file  
20150812\_A375SR\_Phospho\_BR1\_04

Scan 6431 Method FTMS; HCD Score 410.37 m/z 1132.48 Gene names MYH9

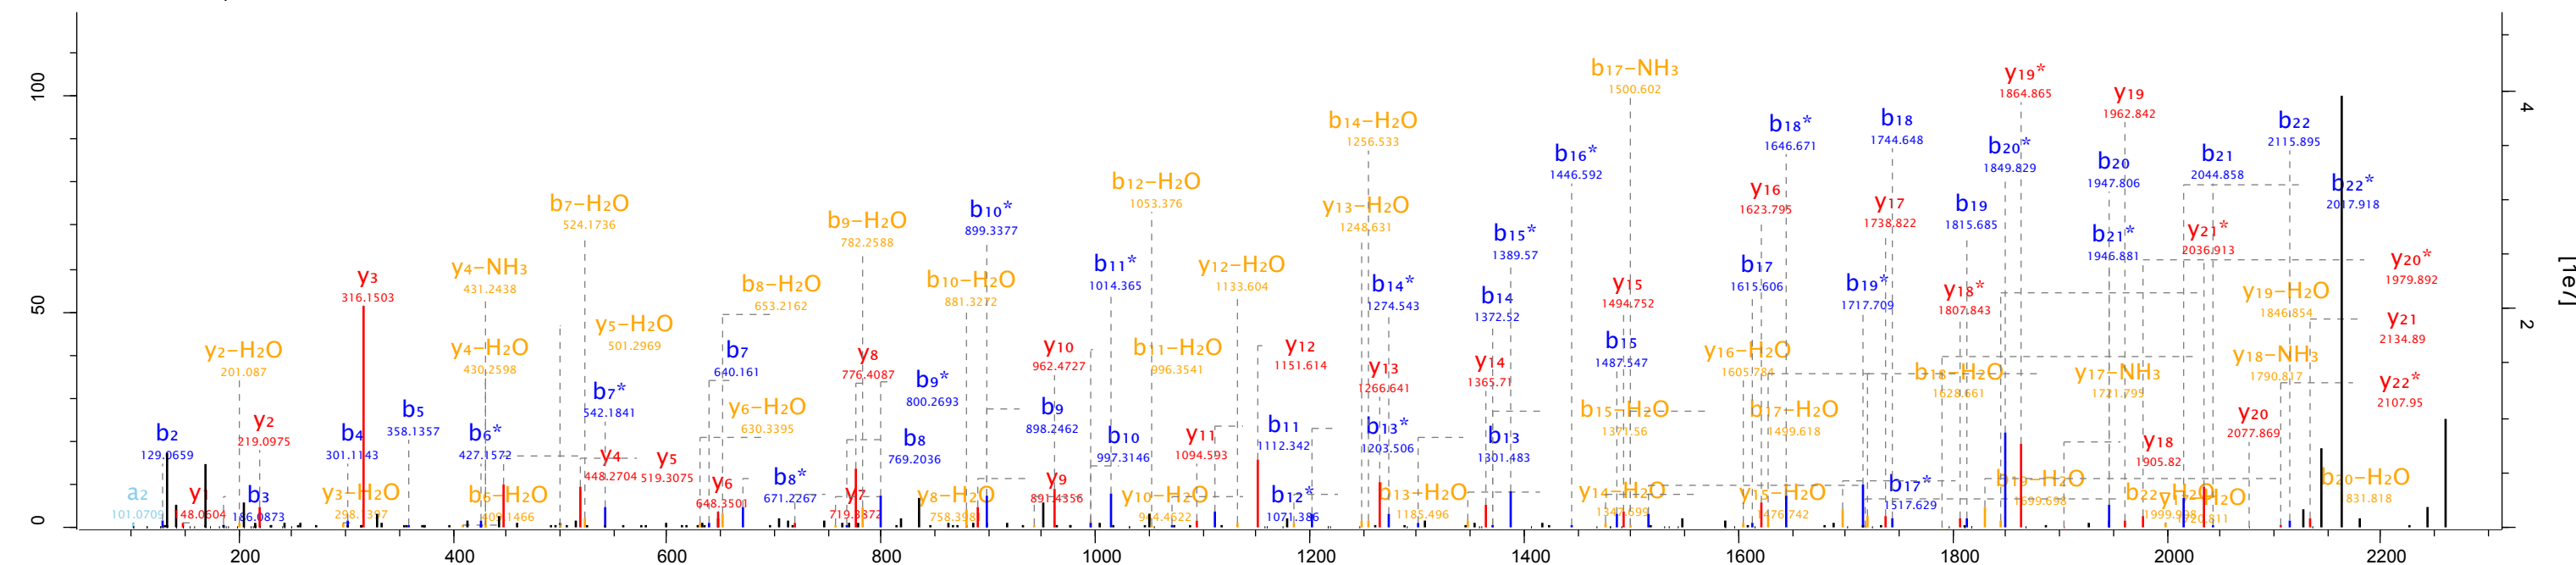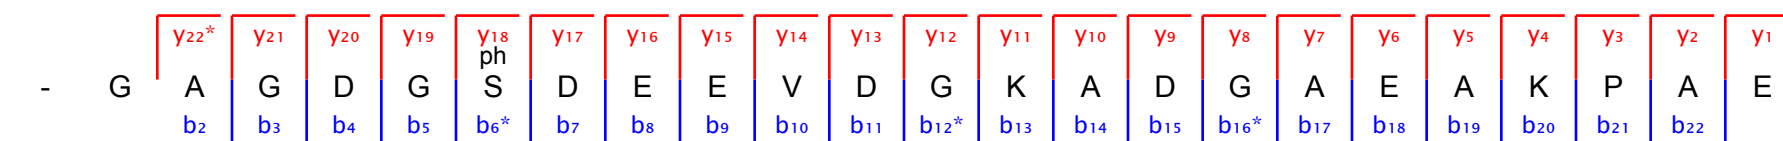

Raw file: 20150812\_A375SR\_Phospho\_BR1\_04  
 Scan: 6671 Method: FTMS; HCD Score: 101.72 m/z: 442.2 Gene names: CDK12

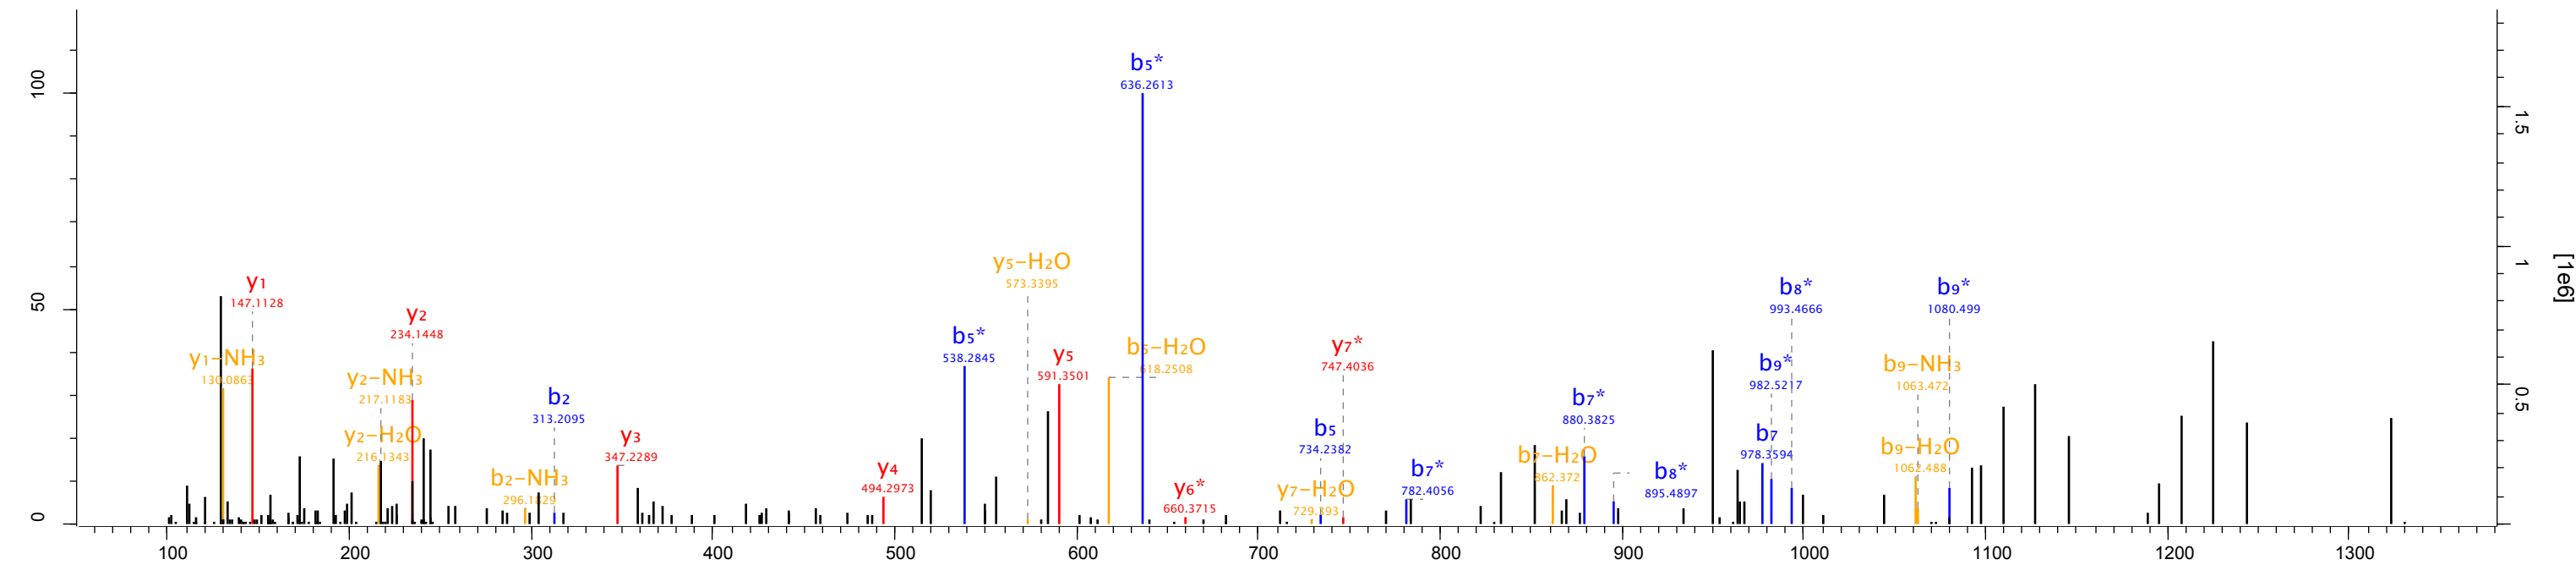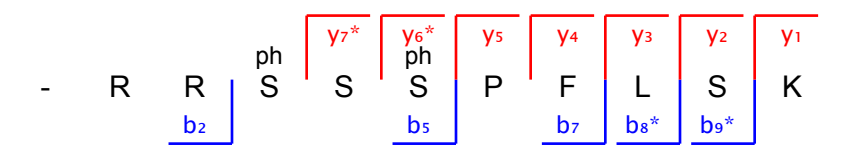

Raw file  
20150812\_A375SR\_Phospho\_BR1\_04

Scan 6751 Method FTMS; HCD Score 412.93 m/z 1088.94 Gene names NCAPG

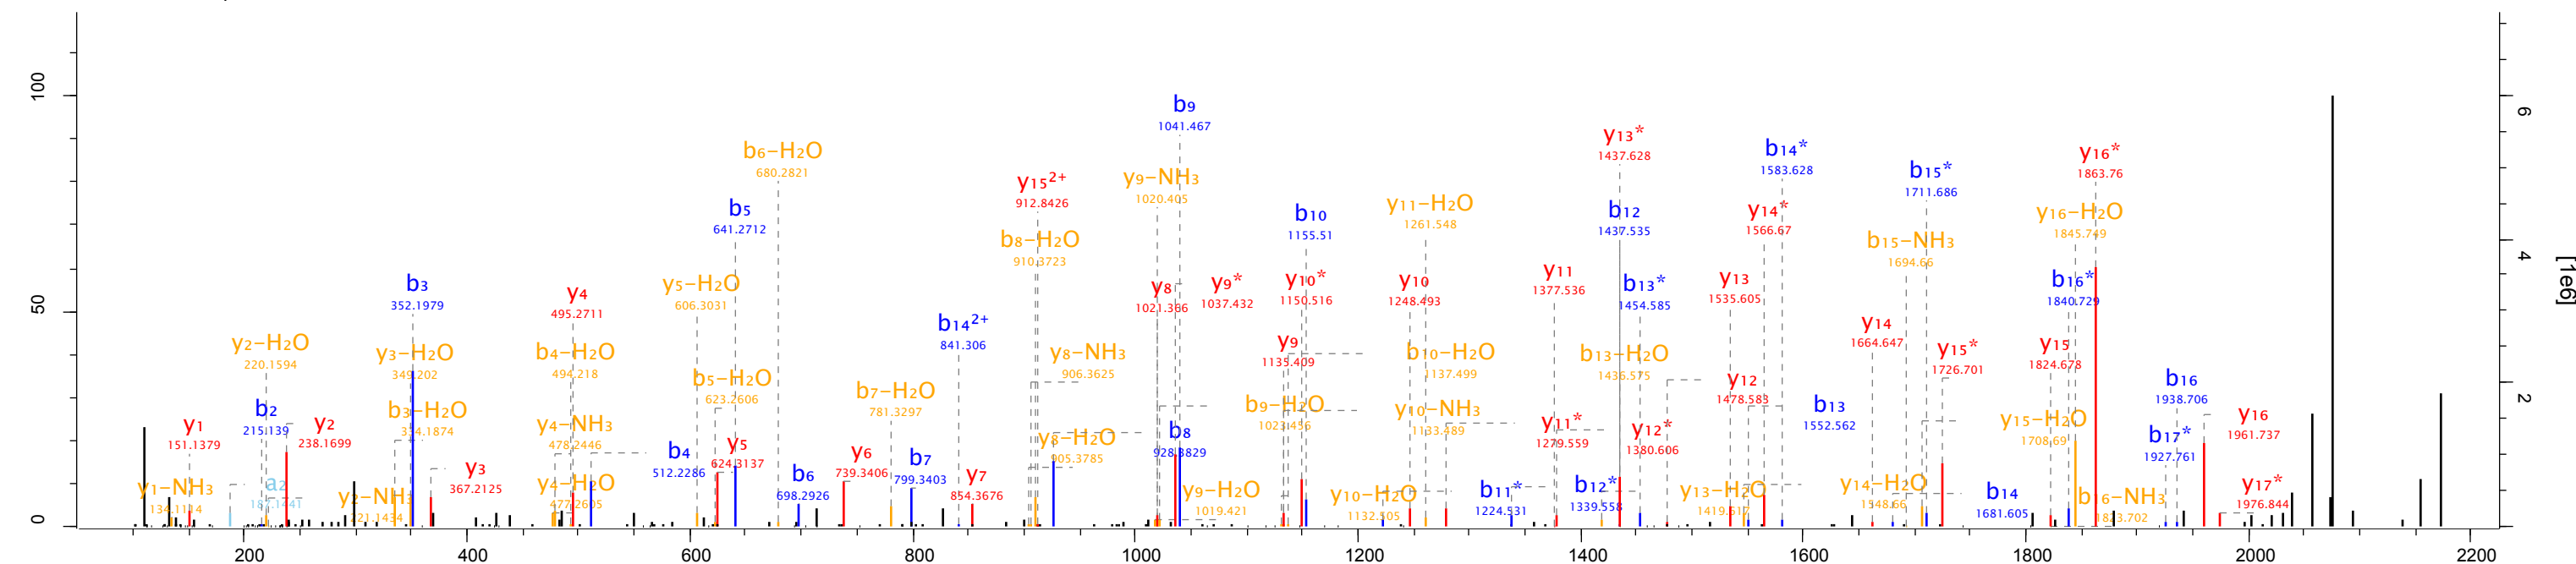

- T L H C E G T E I N S D D E Q E S K -

y17\*
y16
y15
y14
y13
y12
y11
y10
y9
y8
y7
y6
y5
y4
y3
y2
y1

b2
b3
b4
b5
b6
b7
b8
b9
b10
b11\*
b12
b13
b14
b15\*
b16
b17\*

Raw file Scan Method Score m/z Gene names

20150812\_A375SR\_Phospho\_BR1\_04 6831 FTMS; HCD 199.09 797.39 MGA

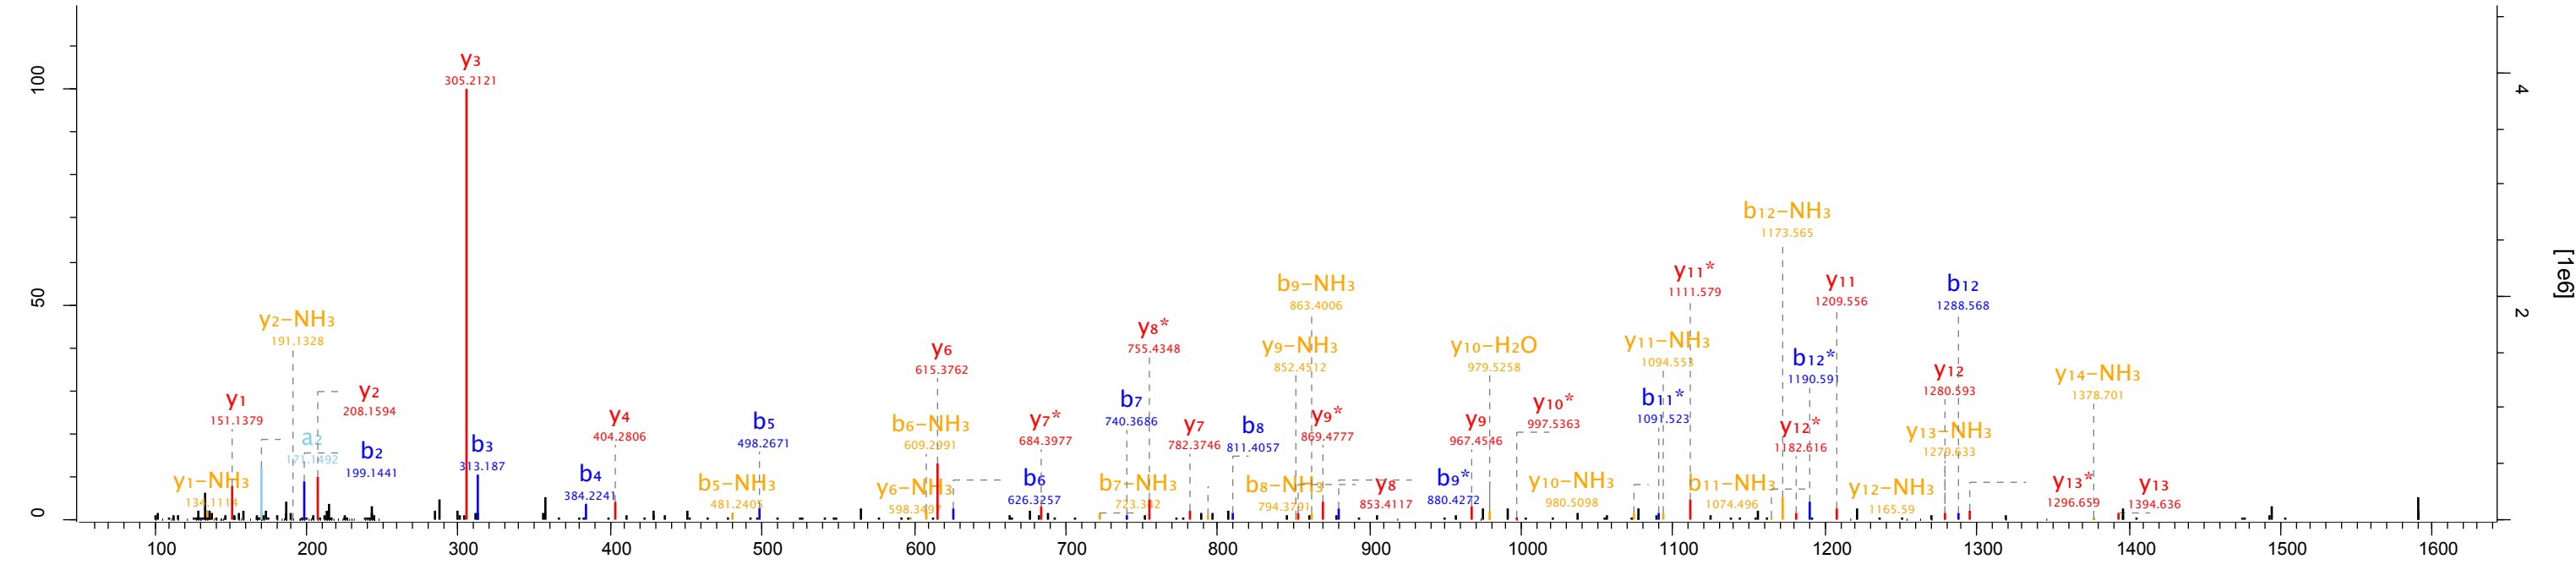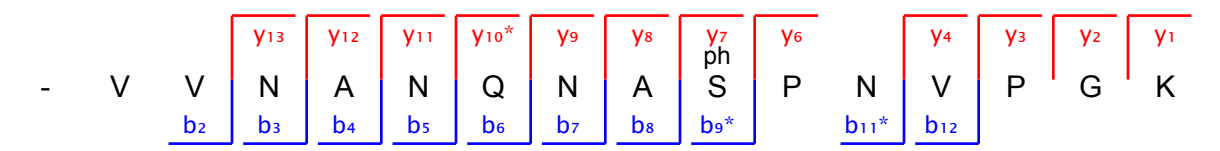

Raw file: 20150812\_A375SR\_Phospho\_BR1\_04  
 Scan: 7311 Method: FTMS; HCD Score: 139.19 m/z: 807.38 Gene names: BCLAF1

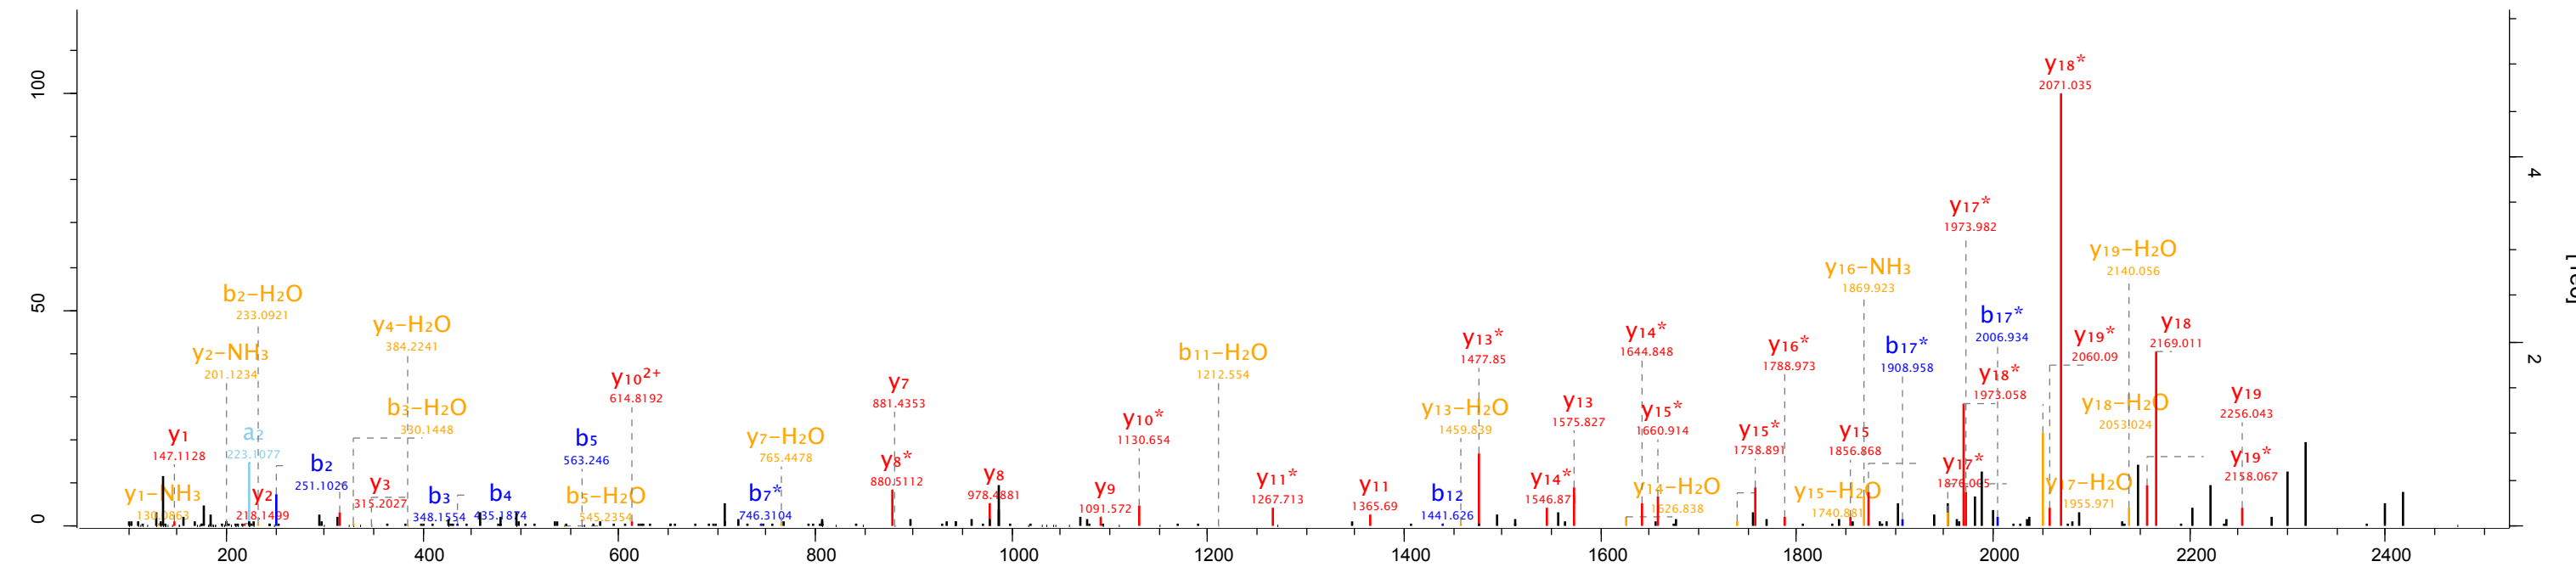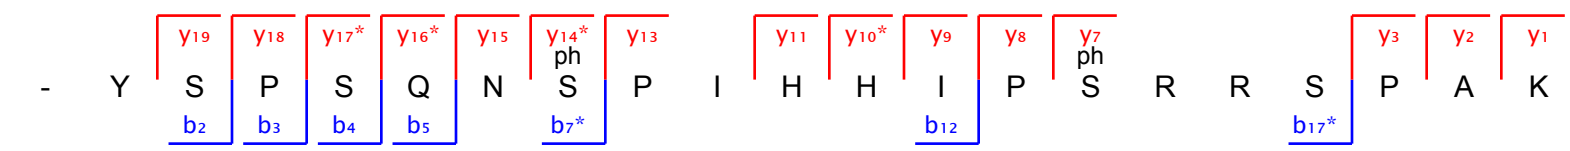

Raw file 20150812\_A375SR\_Phospho\_BR1\_04 Scan 7401 Method FTMS; HCD Score 150.72 m/z 1008.93 Gene names EPN2

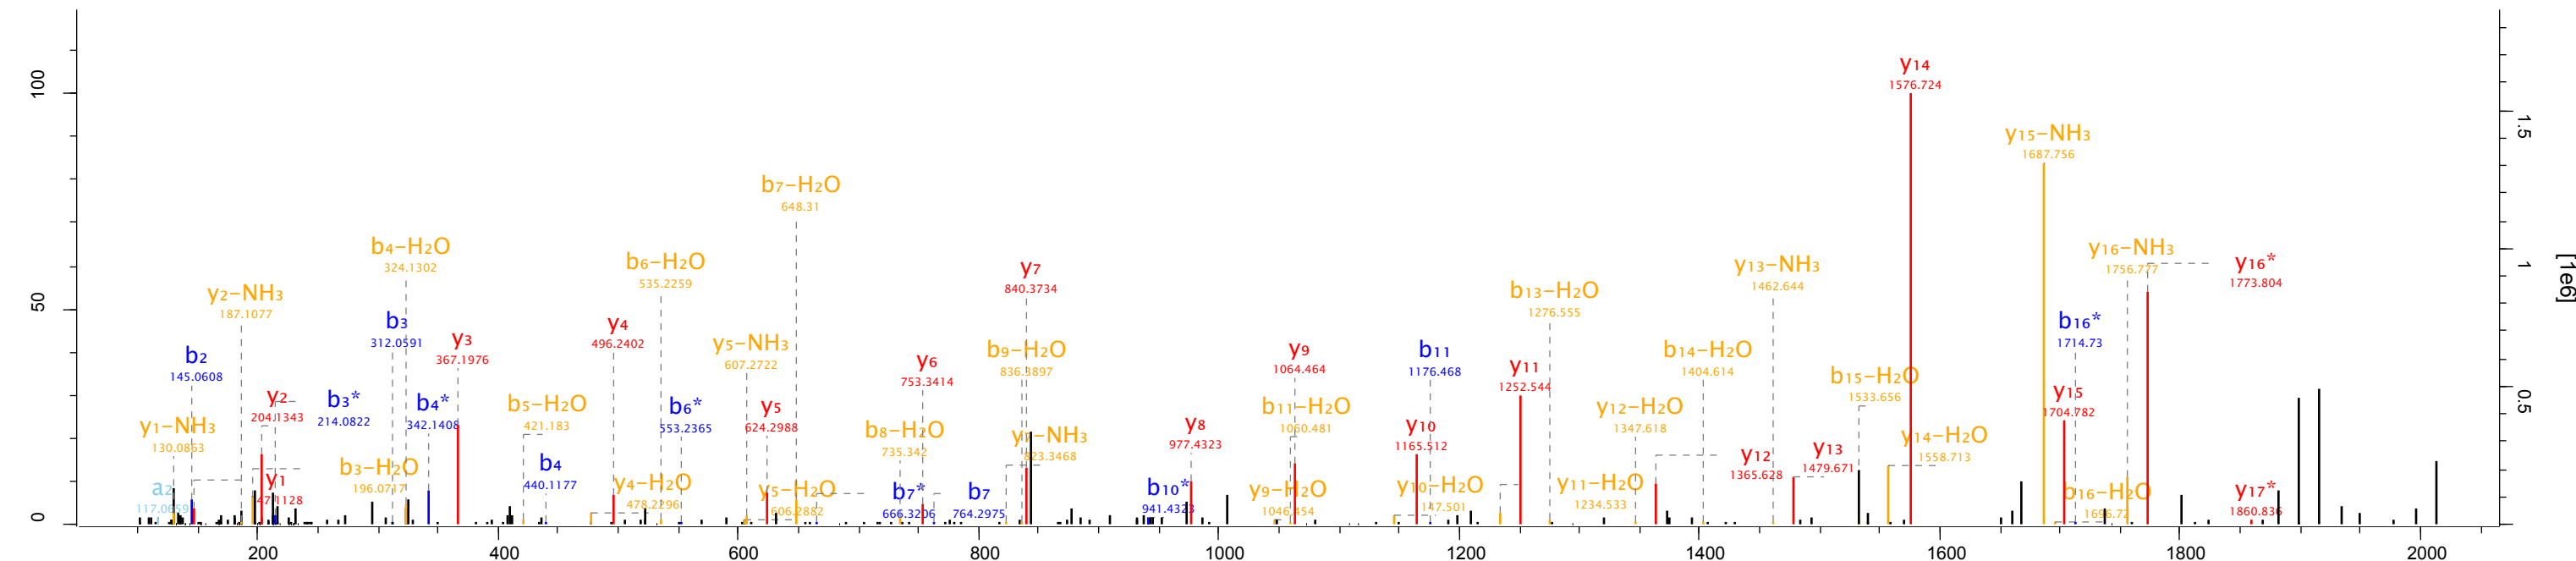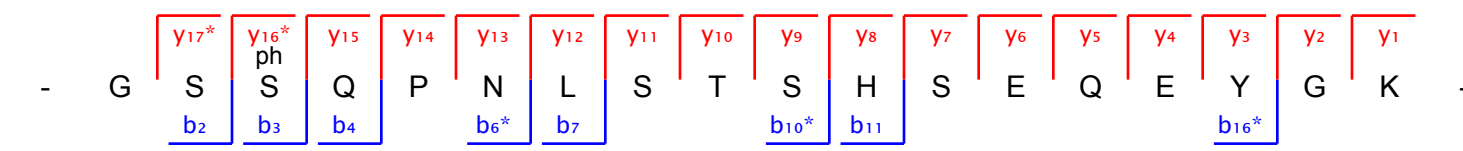

Raw file: 20150812\_A375SR\_Phospho\_BR1\_04  
 Scan: 8201 Method: FTMS; HCD Score: 101.89 m/z: 643.97 Gene names: ZFYVE19

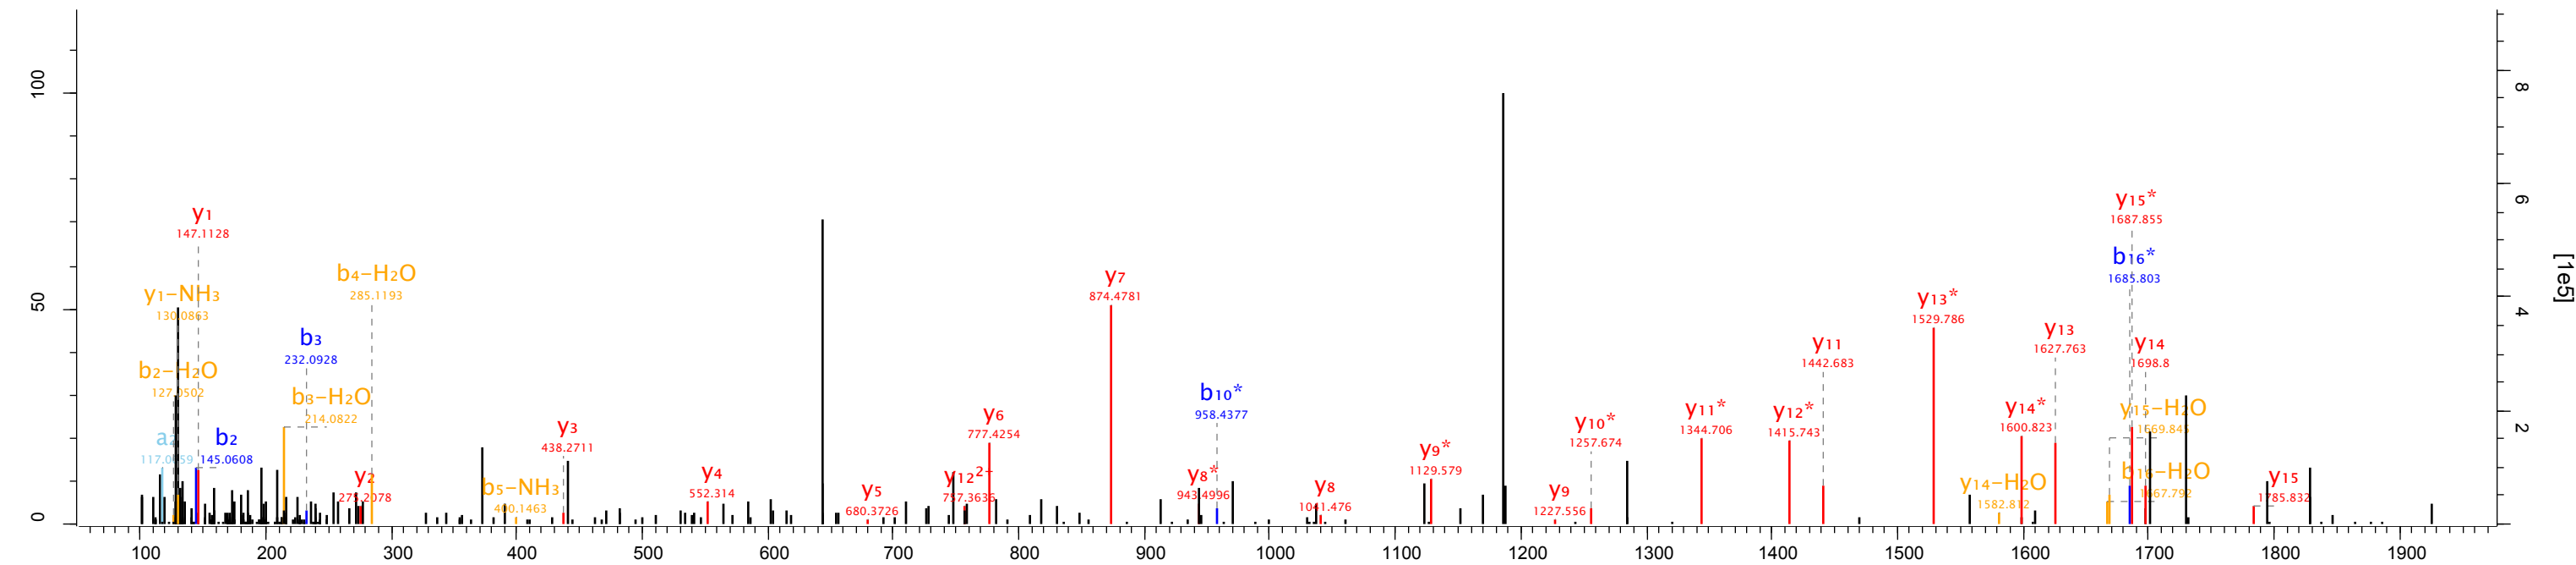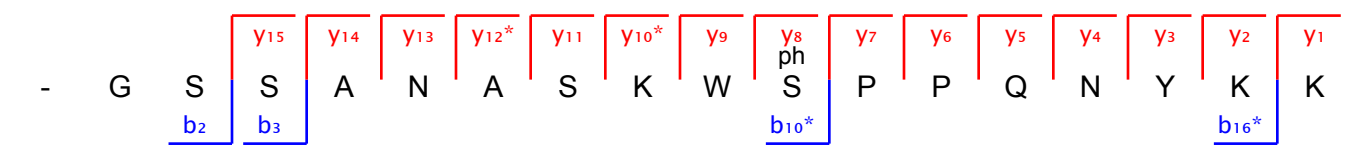



Raw file: 20150812\_A375SR\_Phospho\_BR1\_04  
 Scan: 8441 Method: FTMS; HCD Score: 105.01 m/z: 747.85 Gene names: DYNC1LI2

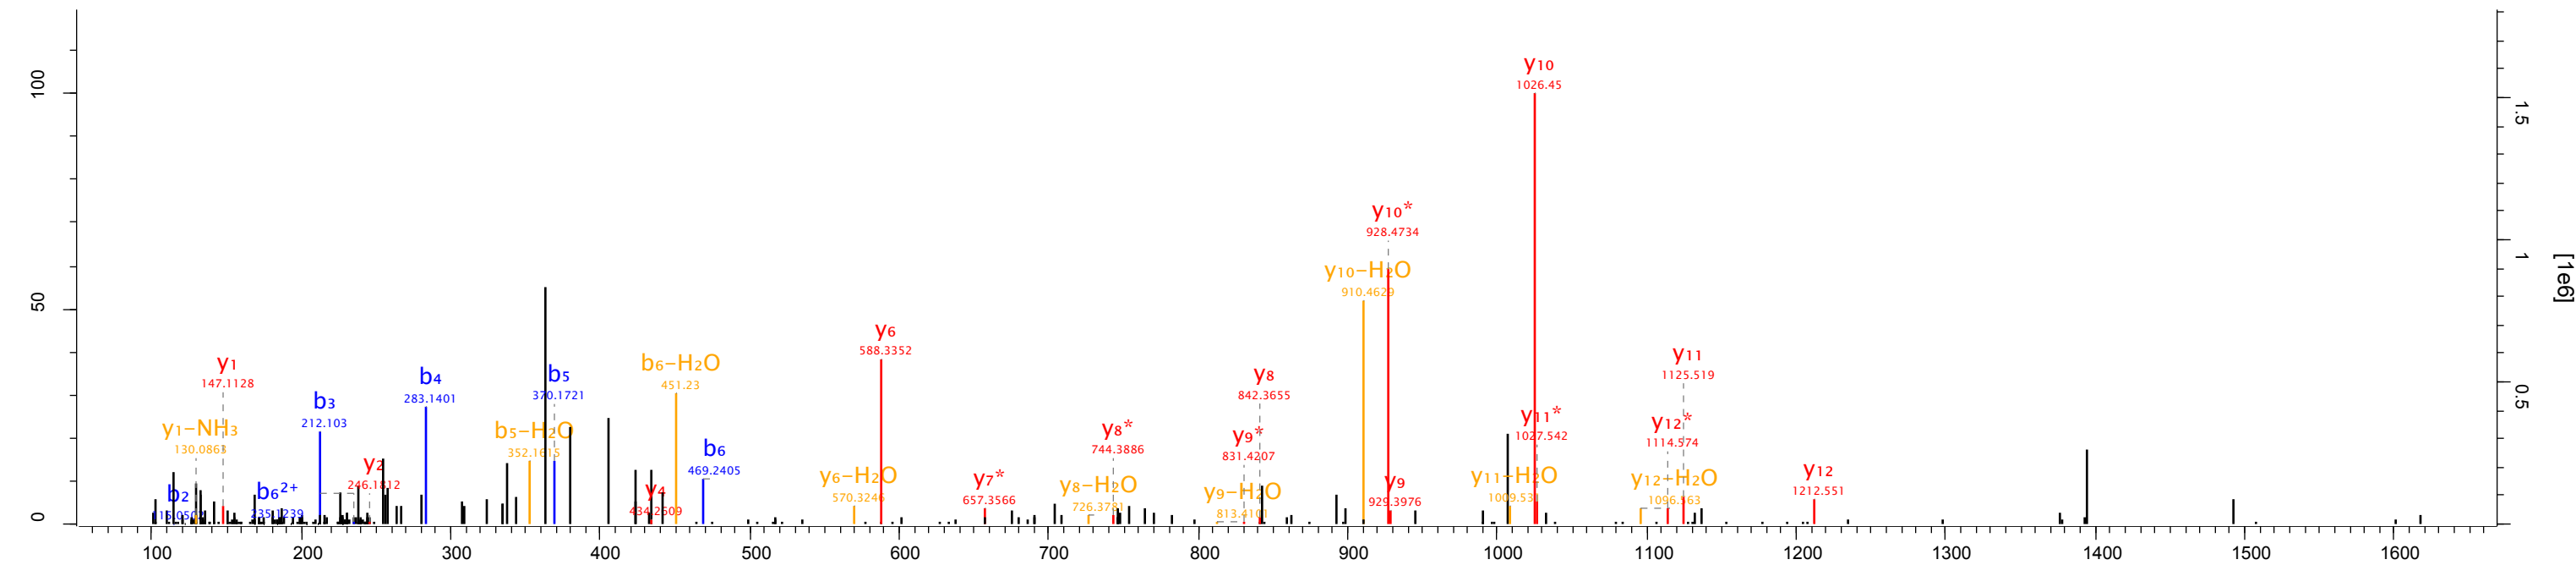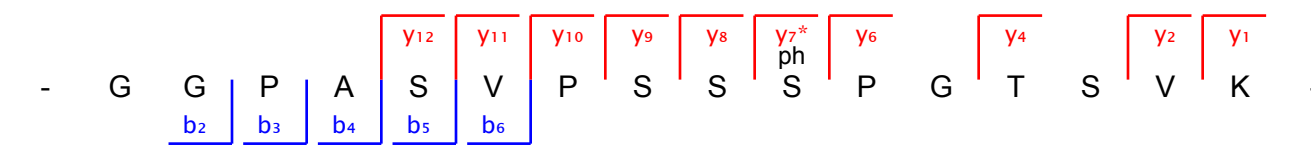

Raw file 20150812\_A375SR\_Phospho\_BR1\_04 Scan 9661 Method FTMS; HCD Score 101.06 m/z 803.42 Gene names FNBP1

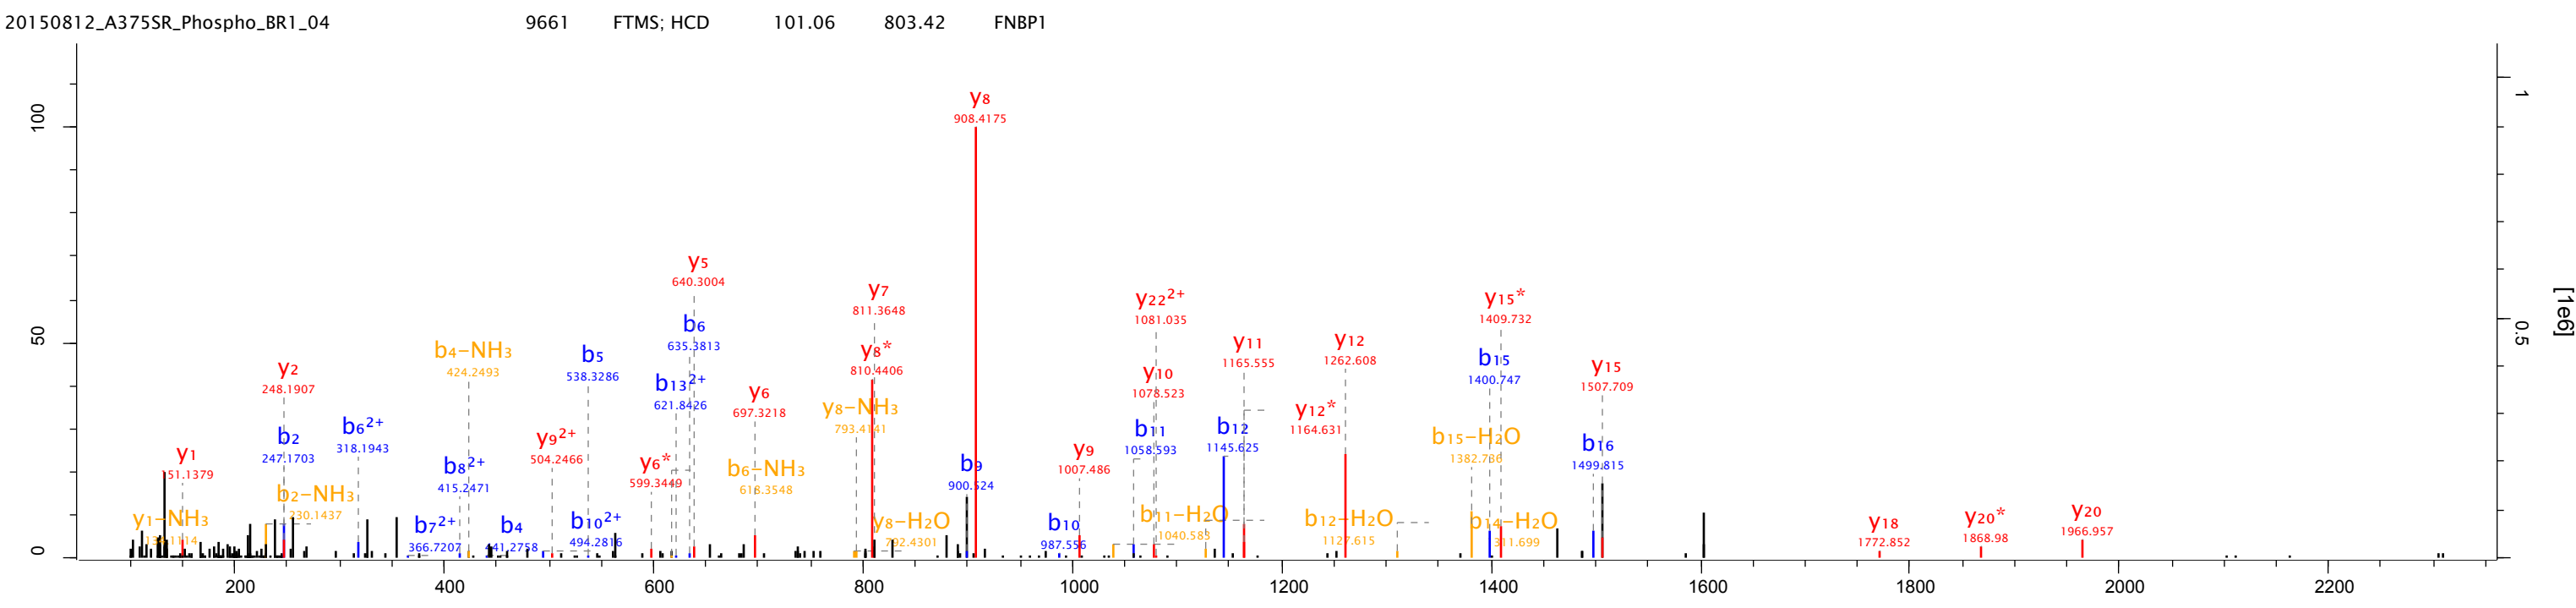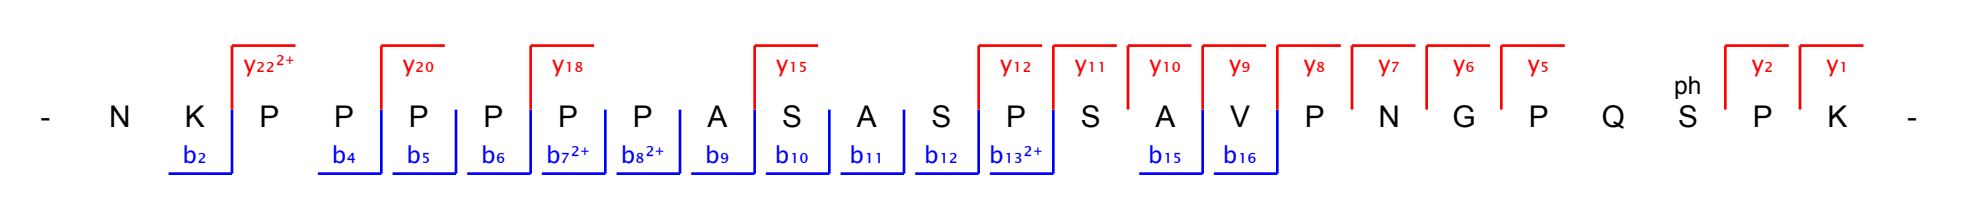

Raw file: 20150812\_A375SR\_Phospho\_BR1\_05  
 Scan: 10151 Method: FTMS; HCD Score: 62.57 m/z: 974.42 Gene names: UBR4

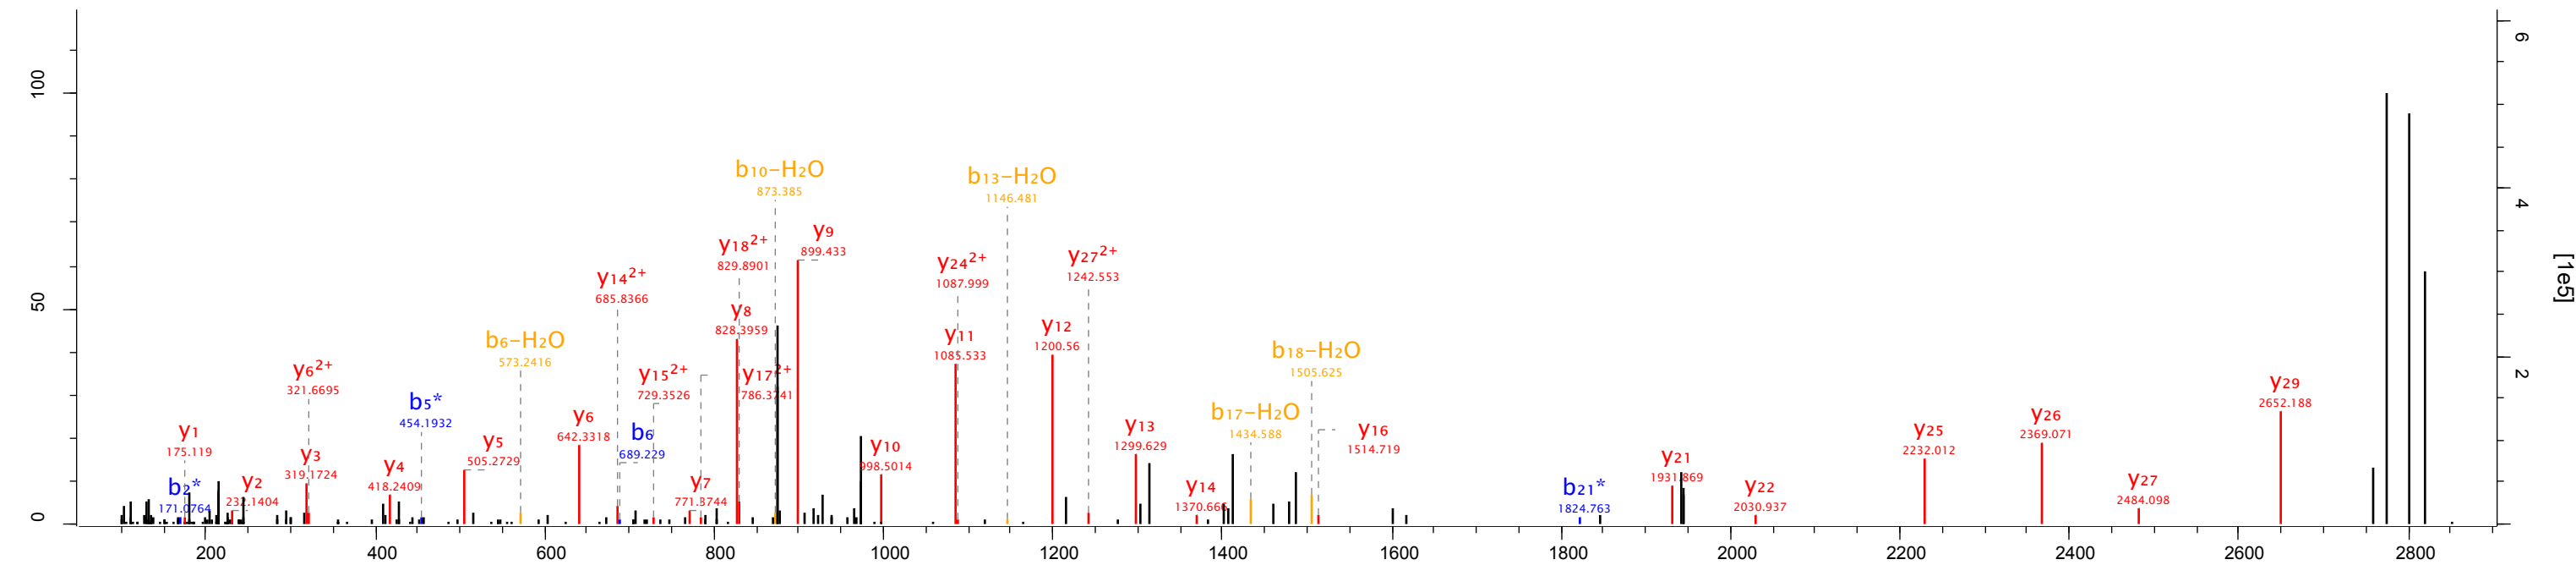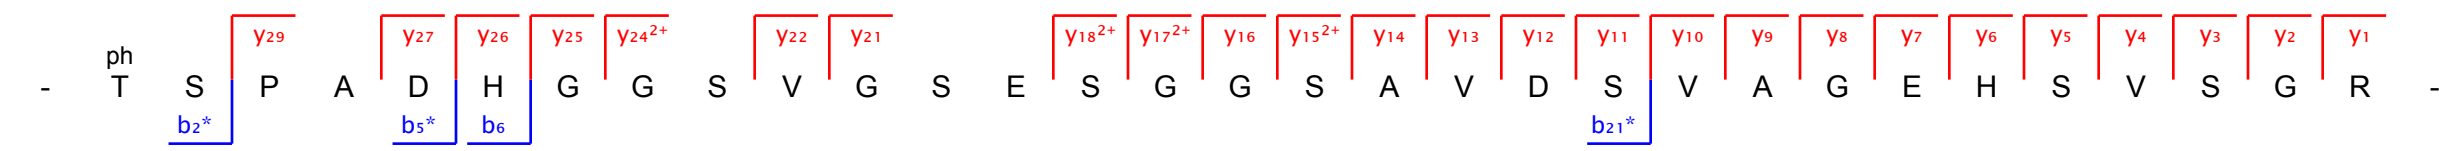

Raw file Scan Method Score m/z Gene names  
 20150812\_A375SR\_Phospho\_BR1\_05 11371 FTMS; HCD 95.79 494.73 SLBP

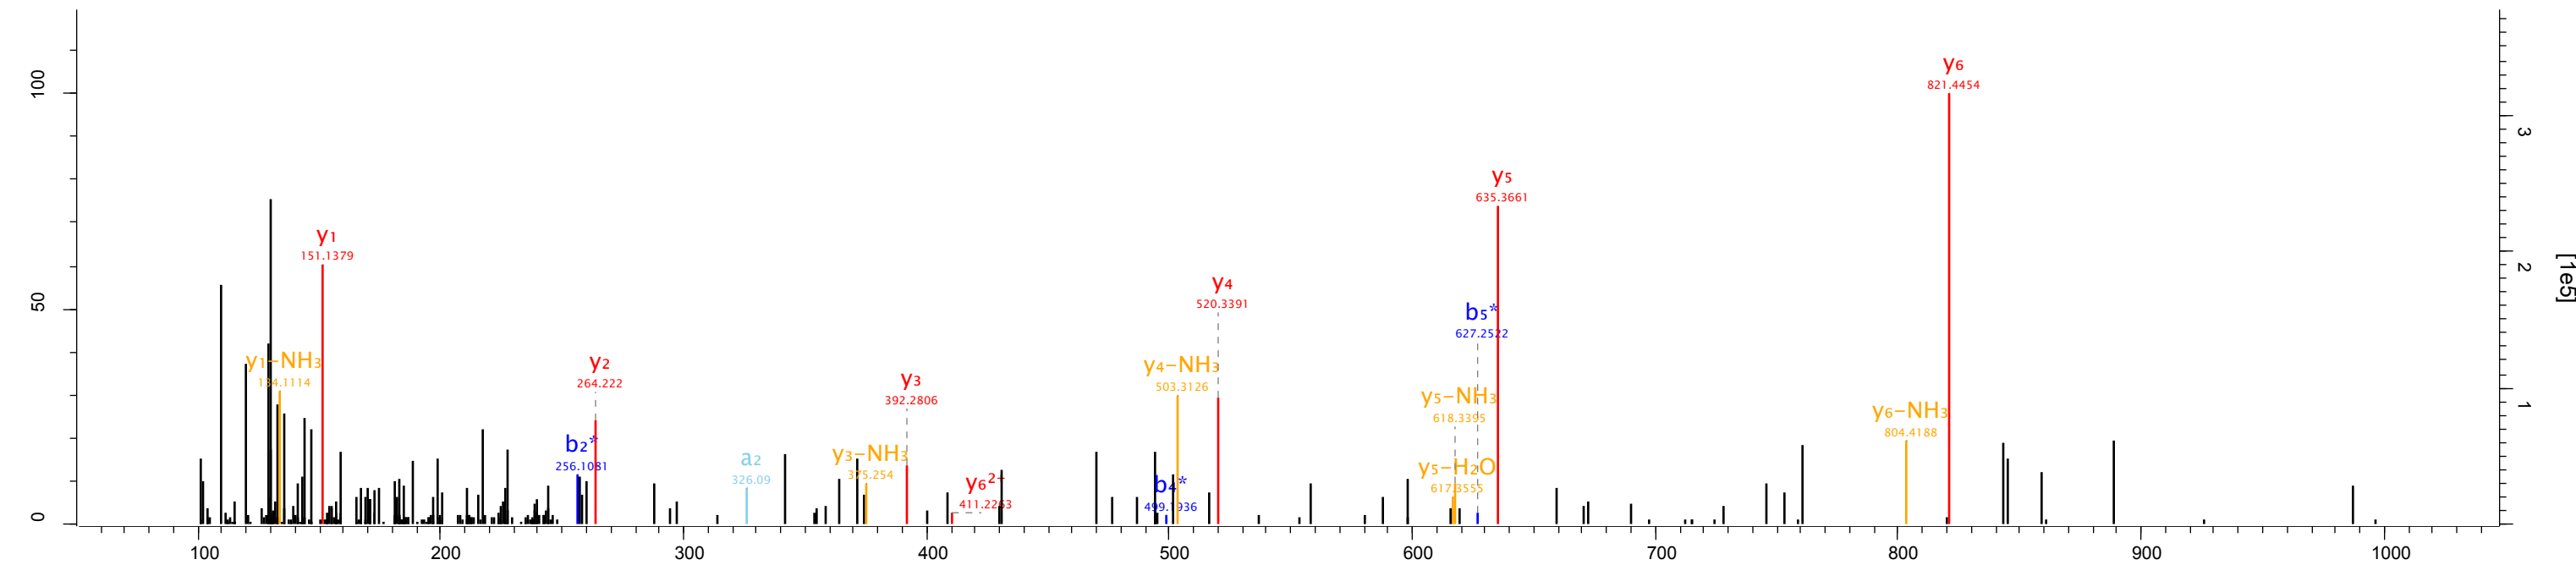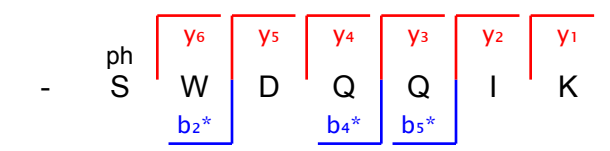

Raw file: 20150812\_A375SR\_Phospho\_BR1\_05  
 Scan: 12671  
 Method: FTMS; HCD  
 Score: 285.26  
 m/z: 965.8  
 Gene names: HELZ

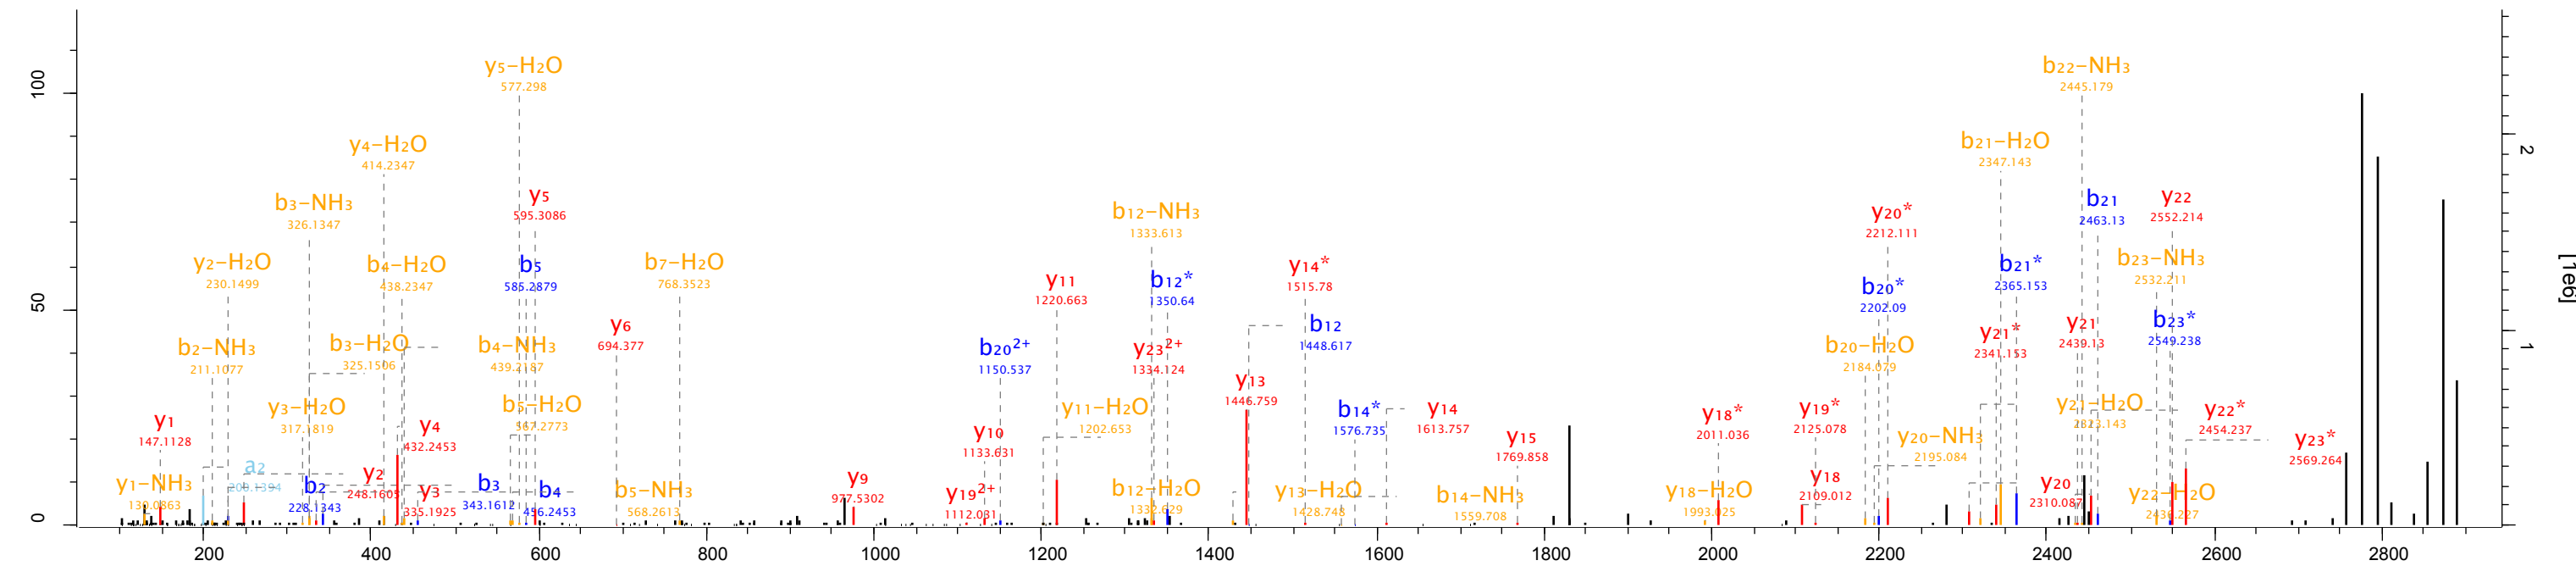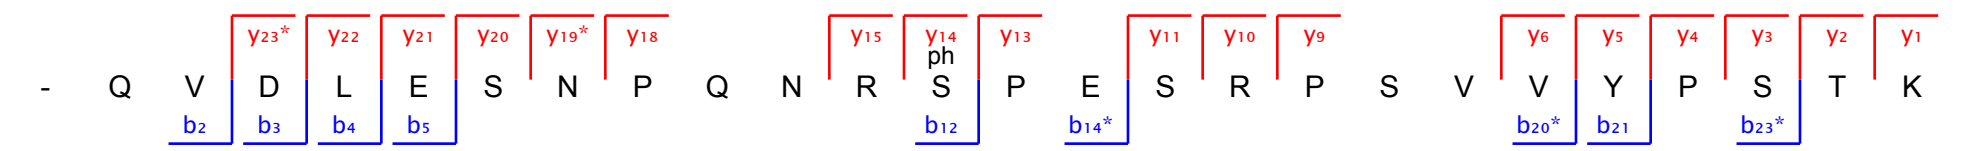

Raw file: 20150812\_A375SR\_Phospho\_BR1\_05  
 Scan: 12941 Method: FTMS; HCD Score: 108.13 m/z: 848.4 Gene names: SNX17

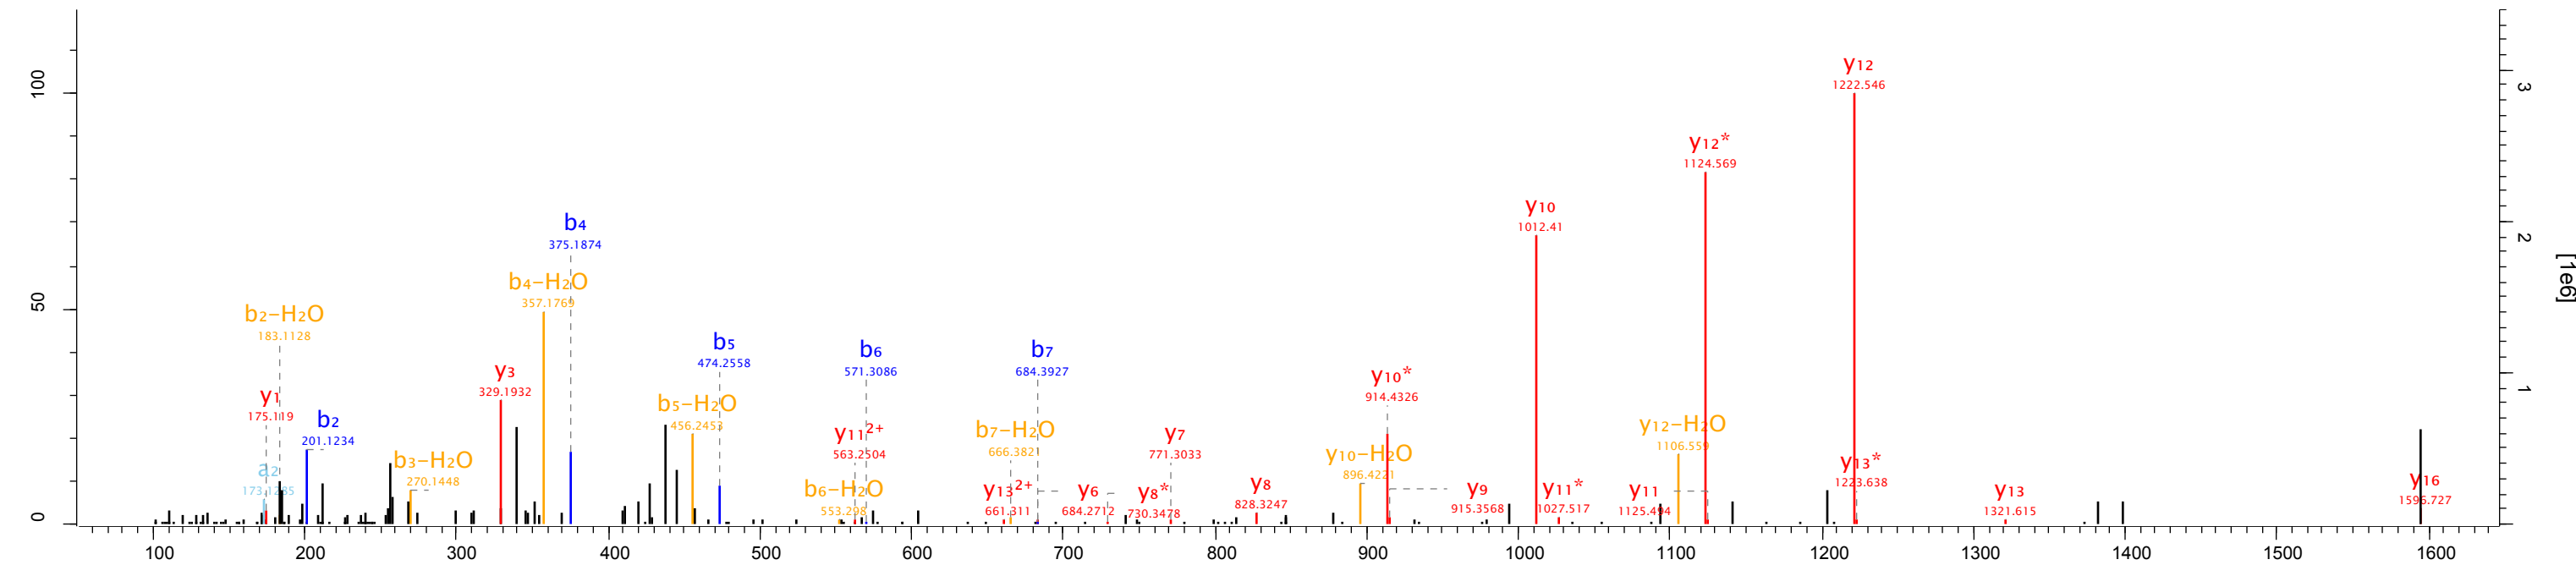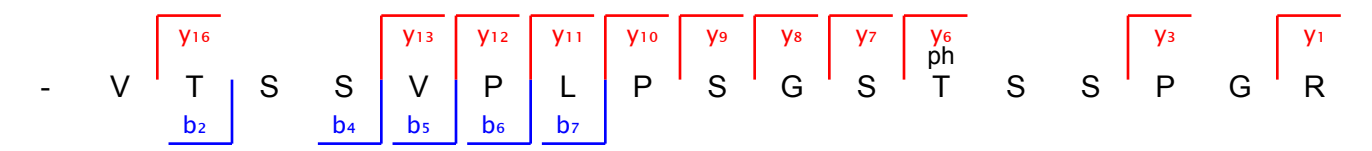

Raw file 20150812\_A375SR\_Phospho\_BR1\_05 Scan 14541 Method FTMS; HCD Score 142.39 m/z 757.85 Gene names VIM

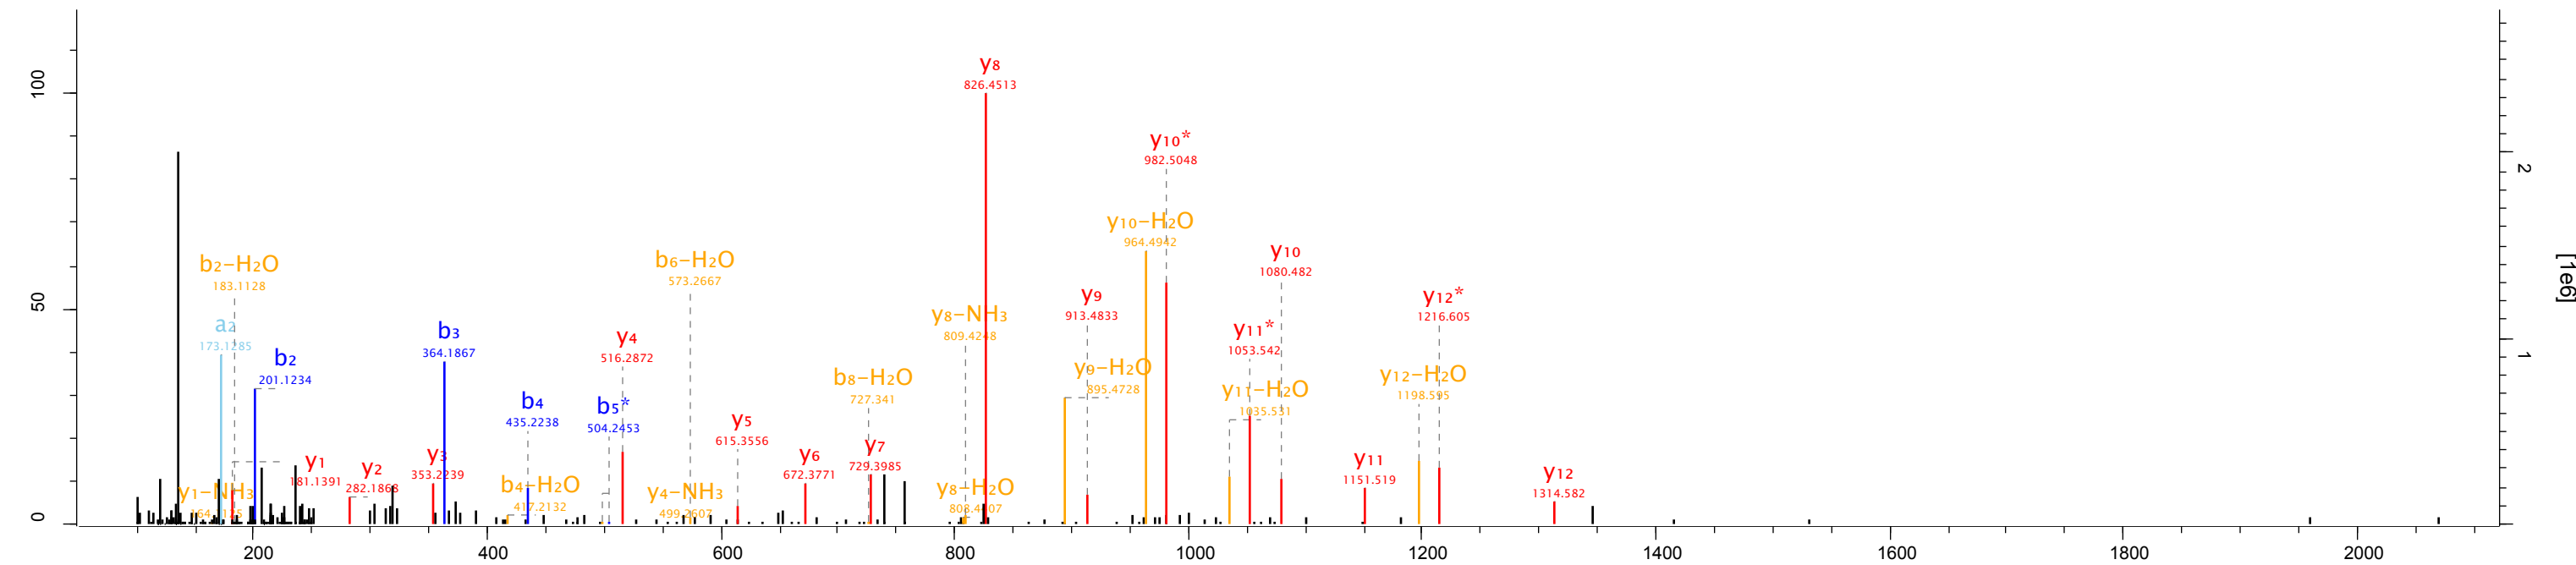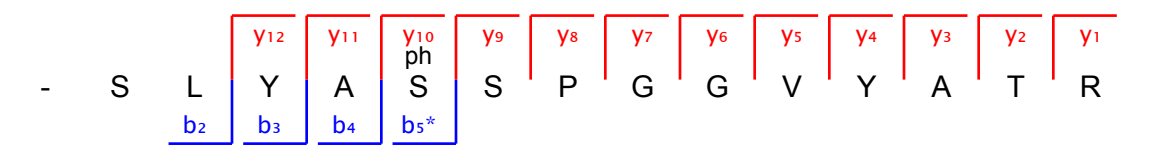

Raw file 20150812\_A375SR\_Phospho\_BR1\_05 Scan 14971 Method FTMS; HCD Score 133.16 m/z 581.28 Gene names RBM12

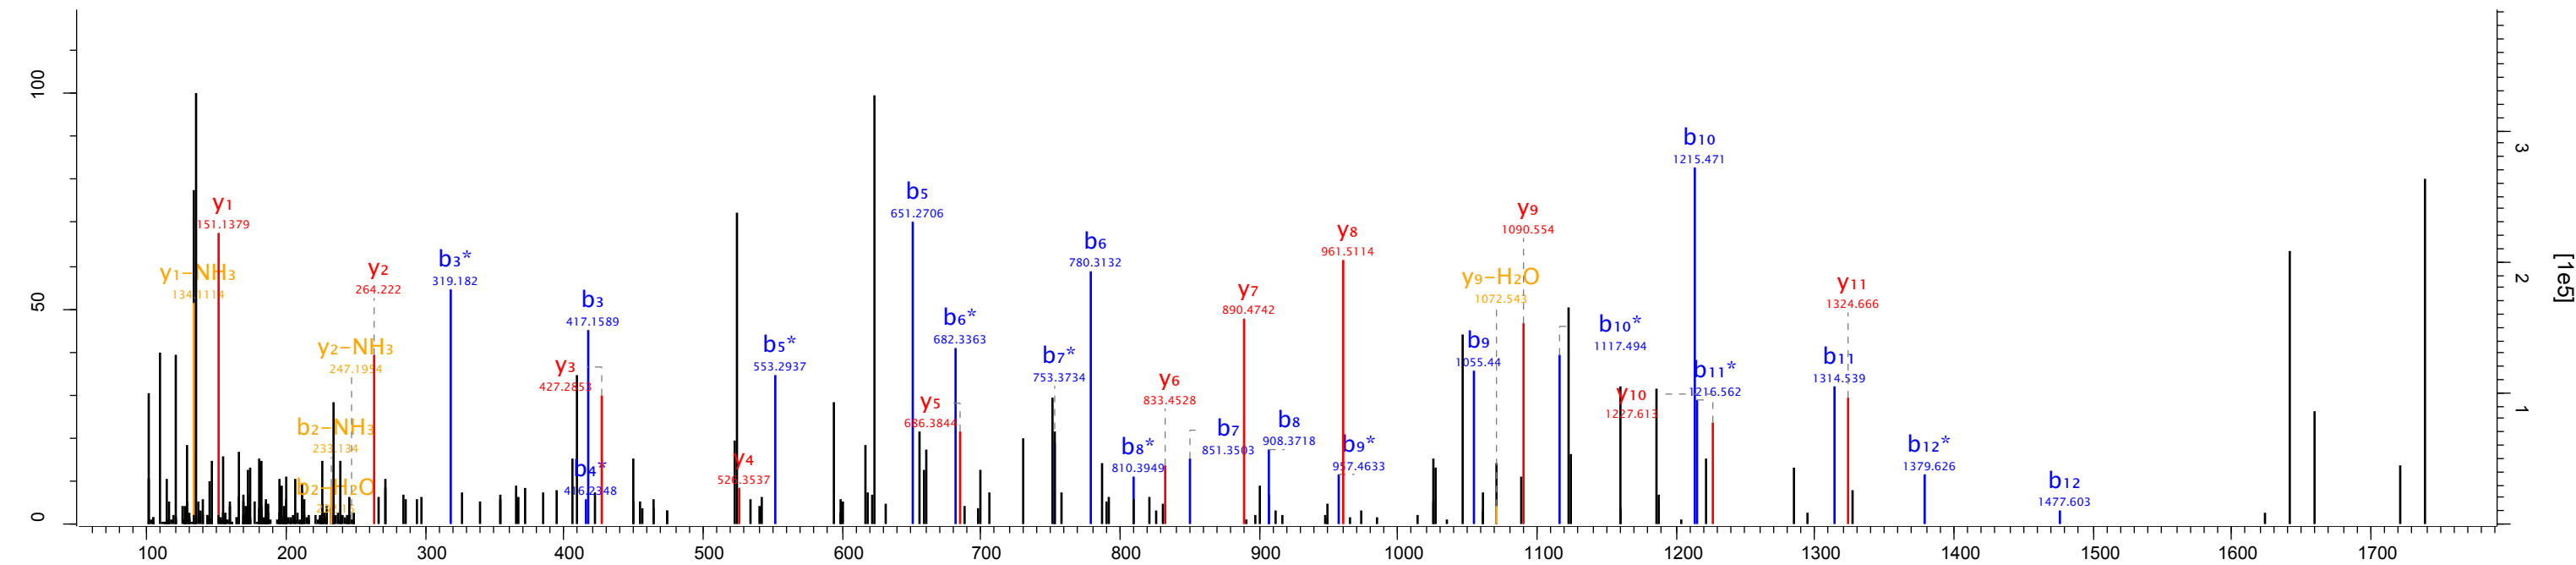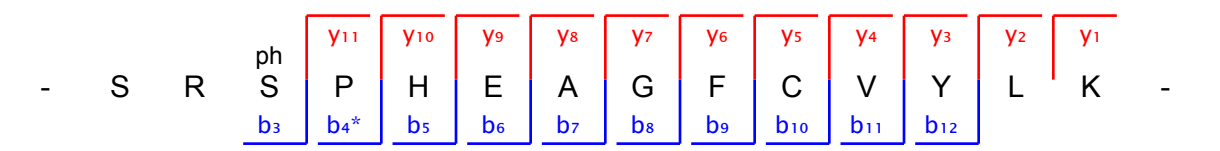



Raw file: 20150812\_A375SR\_Phospho\_BR1\_05  
 Scan: 1511 Method: FTMS; HCD Score: 80.87 m/z: 382.54 Gene names: PNN

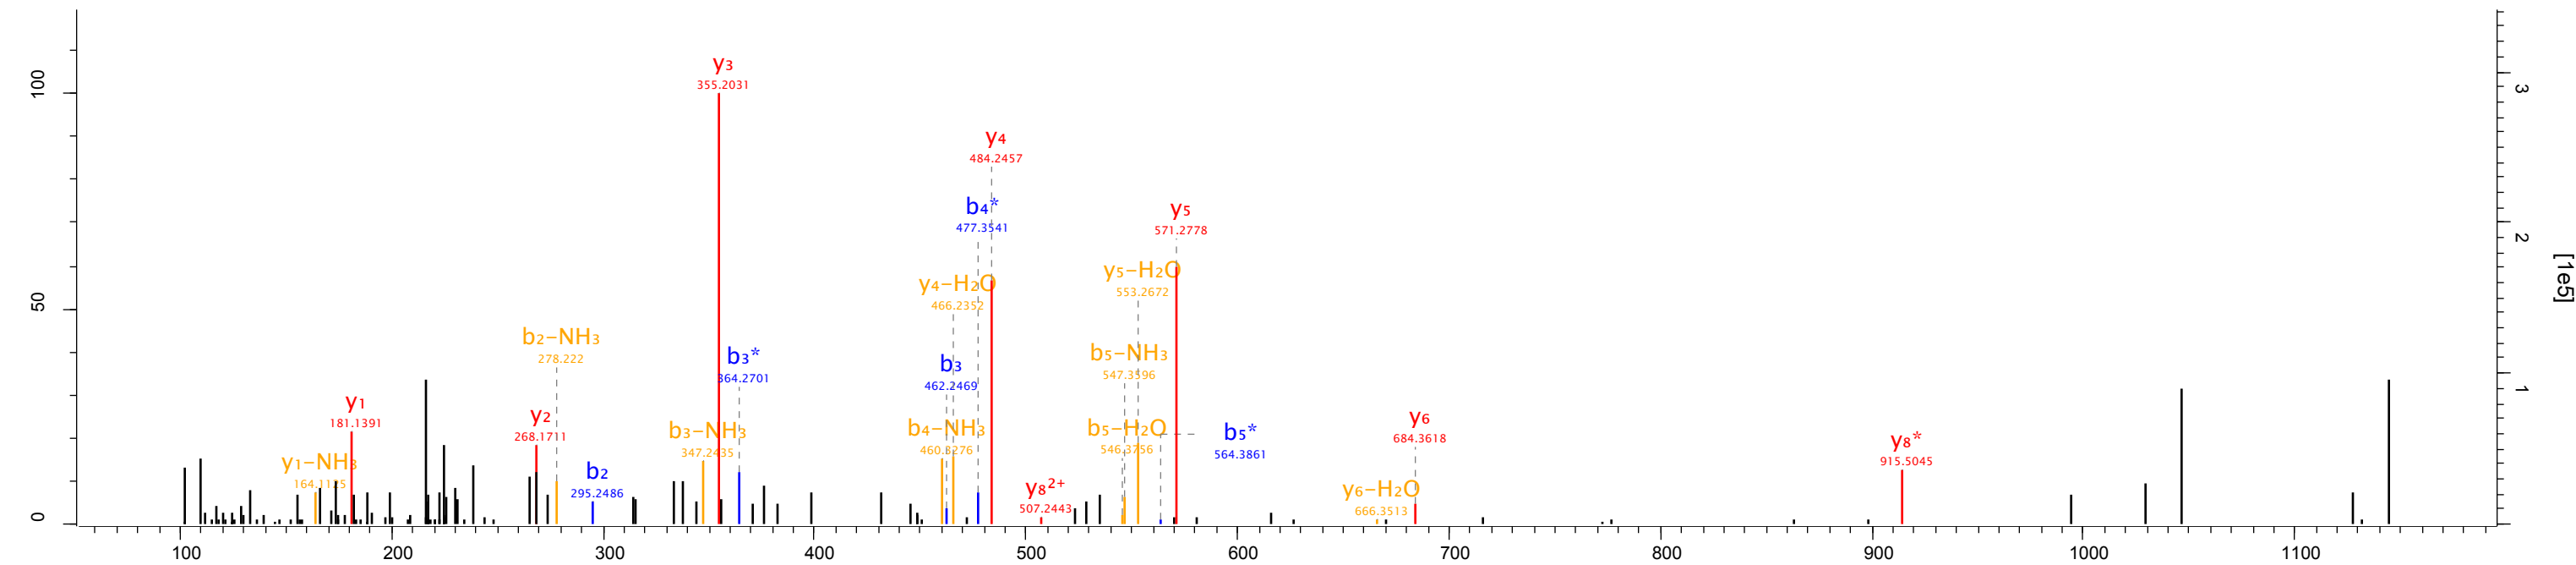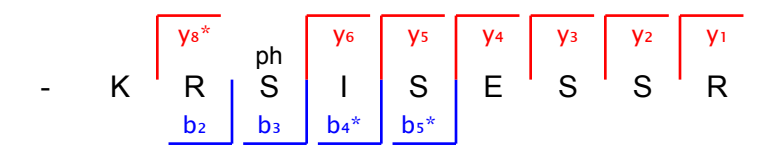

Raw file 20150812\_A375SR\_Phospho\_BR1\_05 Scan 15341 Method FTMS; HCD Score 184.56 m/z 981.93 Gene names RNF20

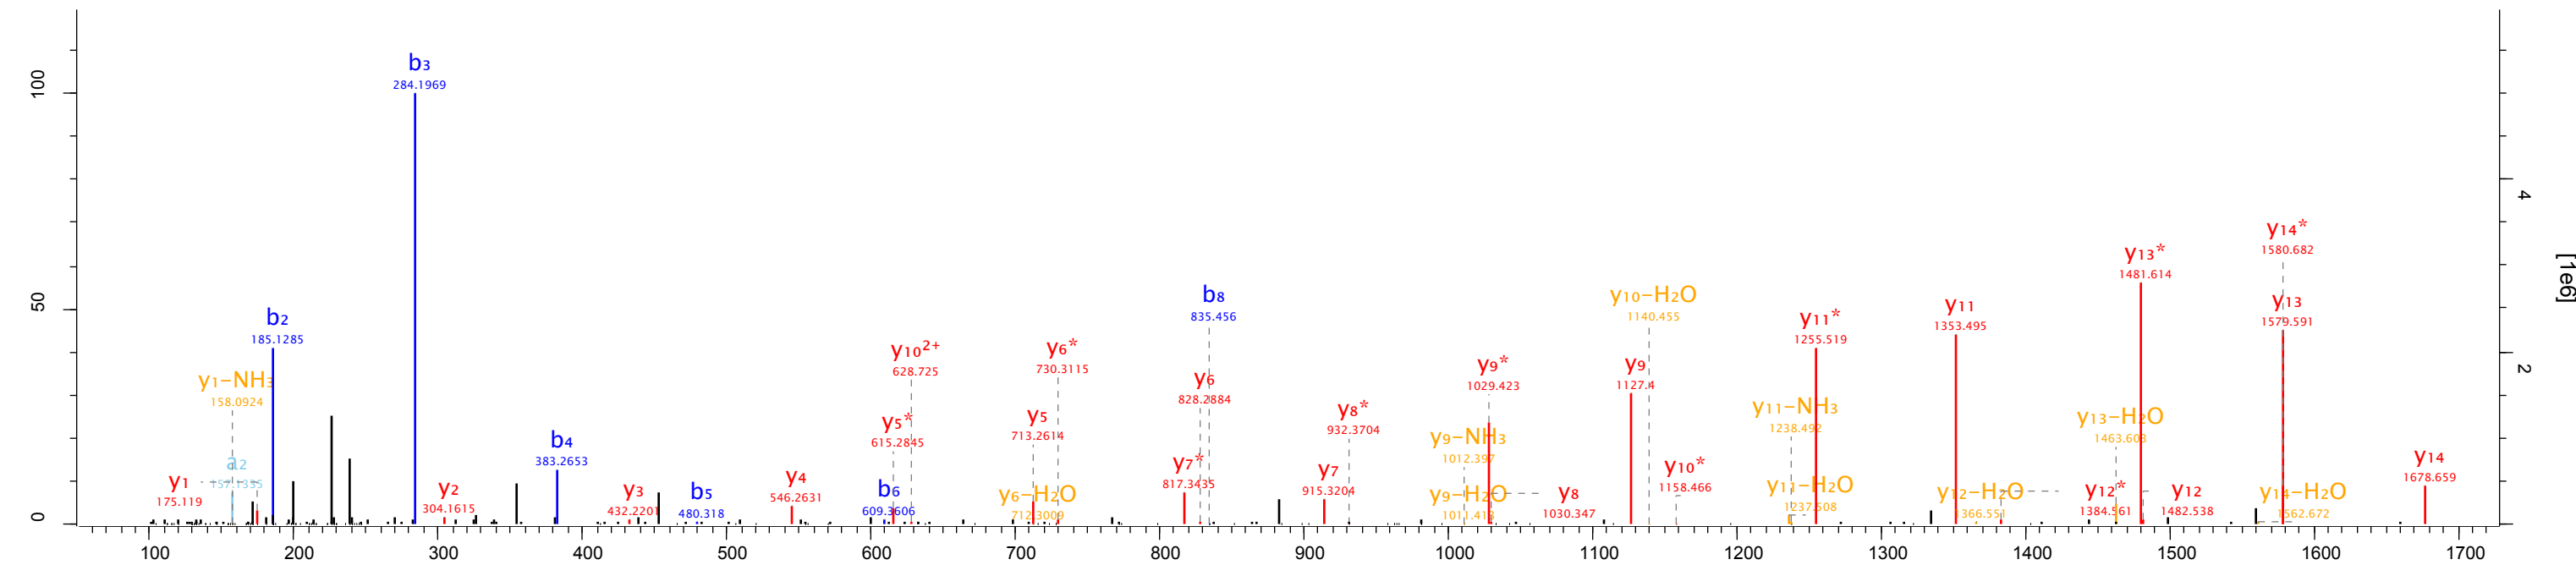

- A L V V P E P E P D S D S N Q E R -  
 b2 b3 b4 b5 b6 b8

Raw file 20150812\_A375SR\_Phospho\_BR1\_05 Scan 15771 Method FTMS; HCD Score 143.57 m/z 957.41 Gene names MTMR9

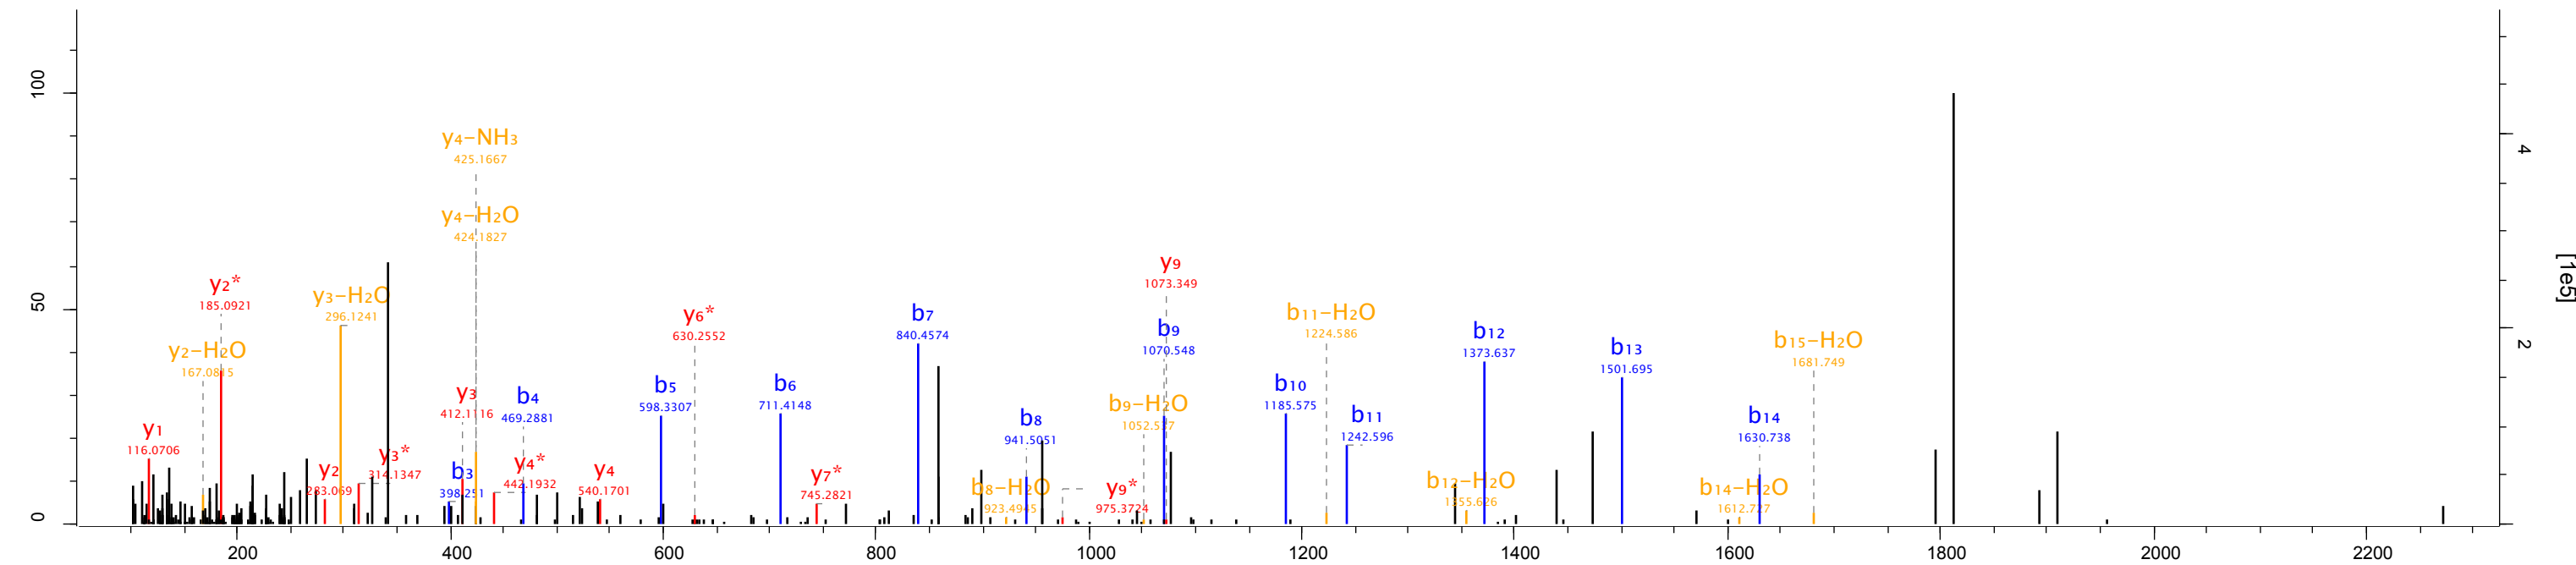

- R Q L A E L E T E D G M Q E S P -

b3 b4 b5 b6 b7 b8 b9 b10 b11 b12 b13 b14

y9 y7\* y6\* y4 y3 y2-ph y1

Raw file  
20150812\_A375SR\_Phospho\_BR1\_05

Scan 1631 Method FTMS; HCD Score 274.81 m/z 771.79 Gene names CSTF3

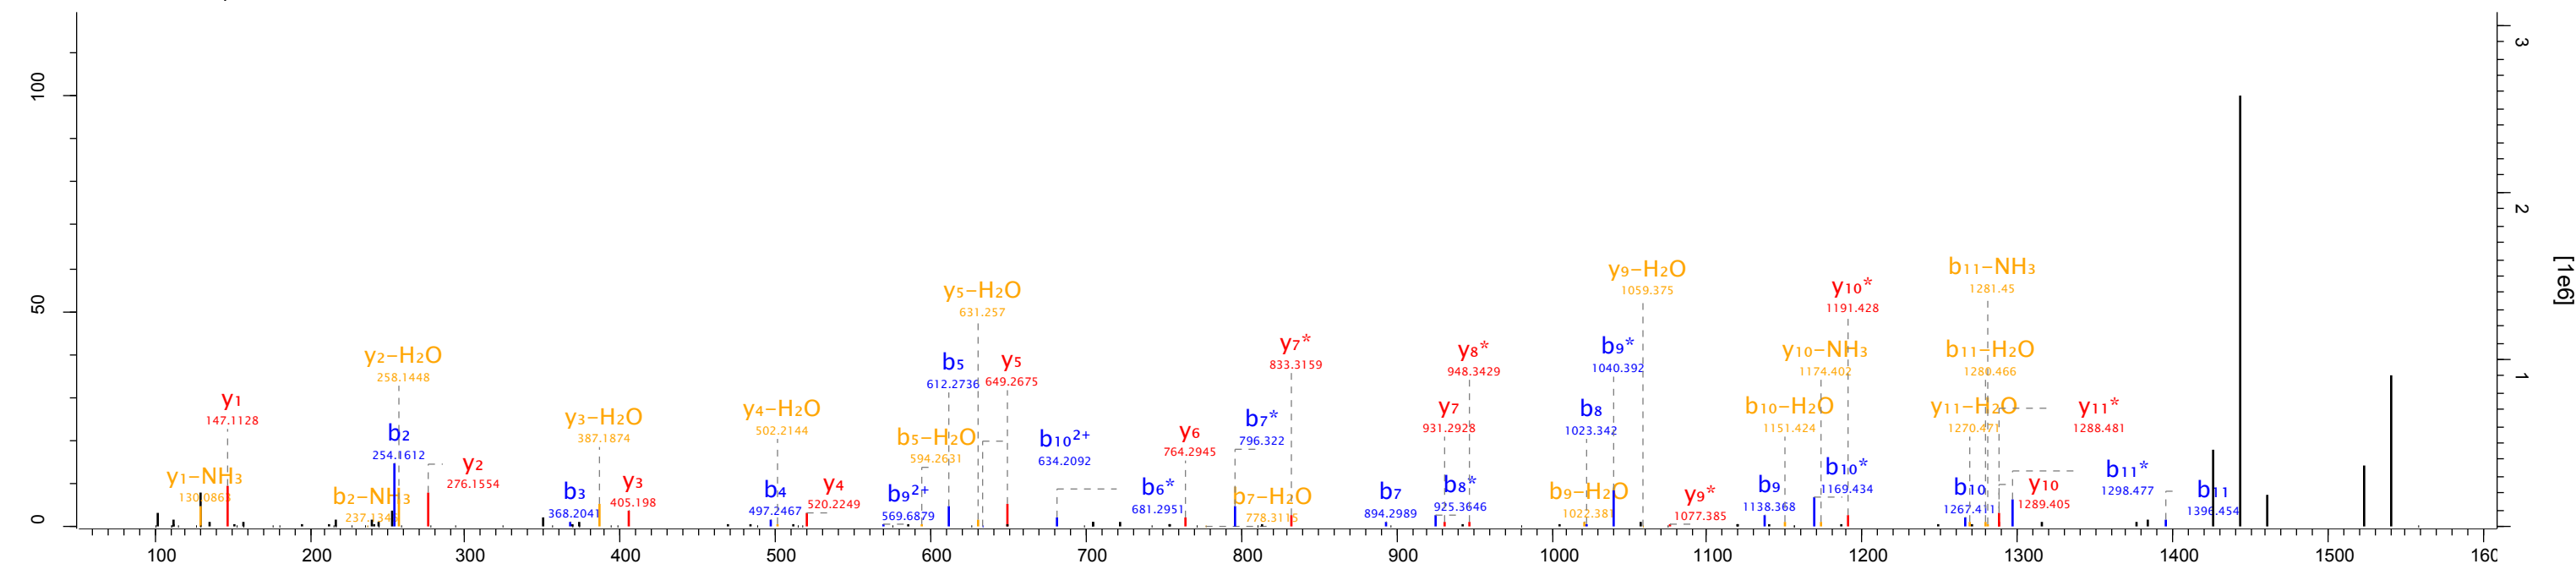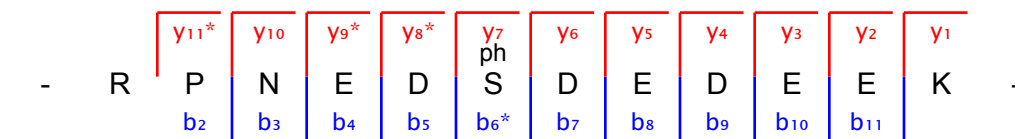

Raw file 20150812\_A375SR\_Phospho\_BR1\_05 Scan 17471 Method FTMS; HCD Score 129.29 m/z 690.83 Gene names BRD8

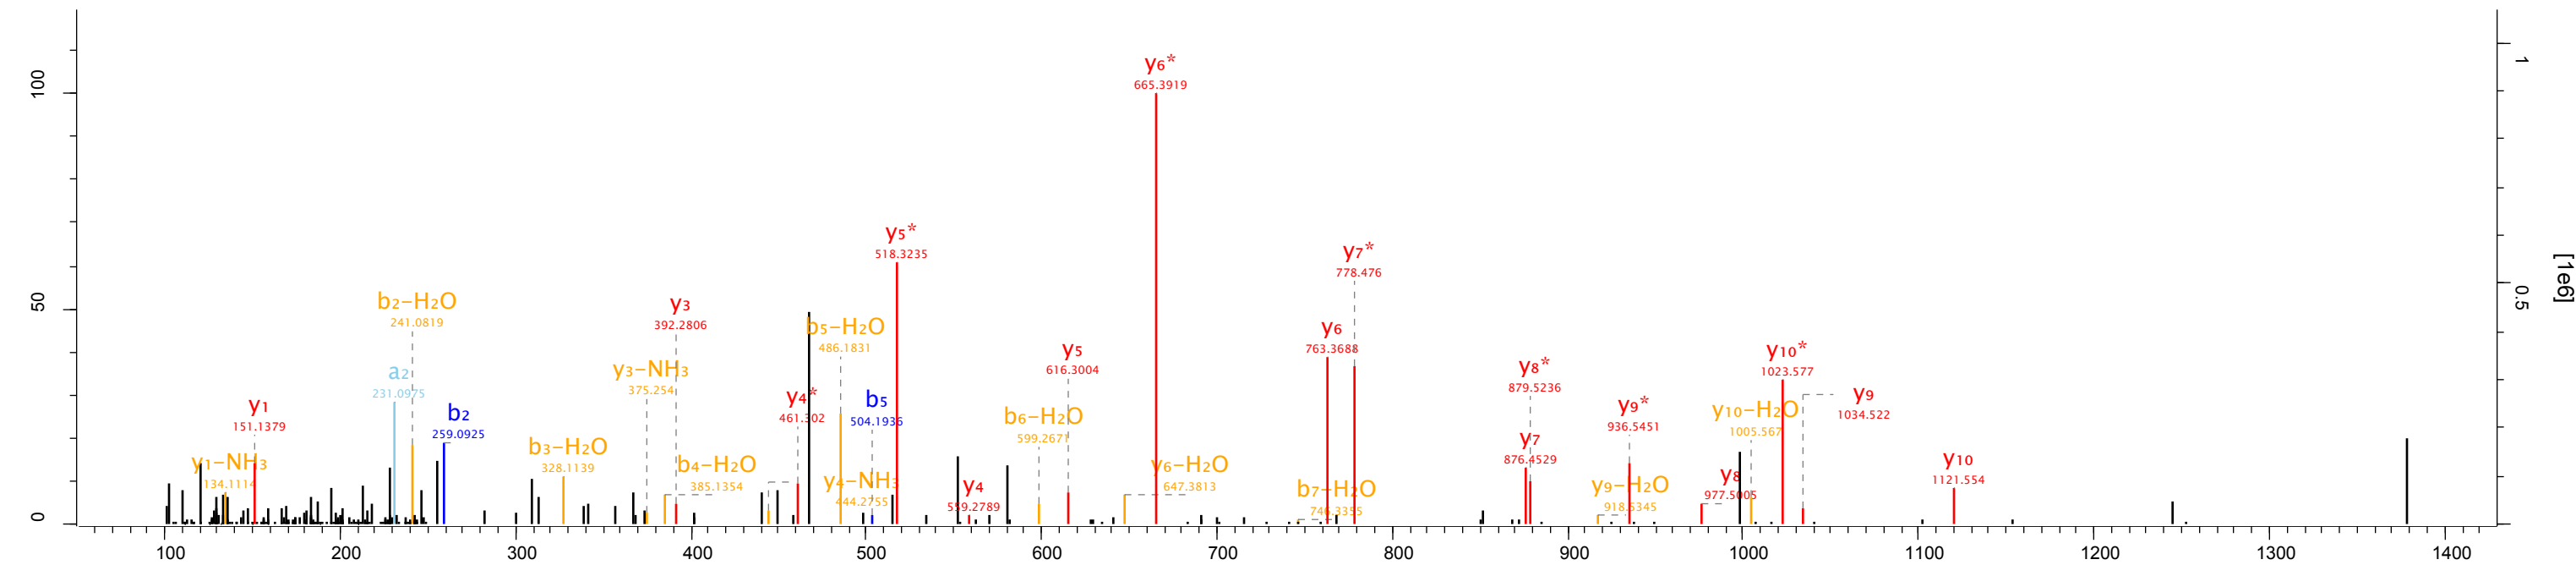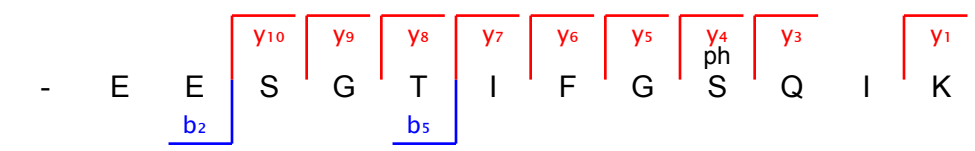

Raw file 20150812\_A375SR\_Phospho\_BR1\_05 Scan 17571 Method FTMS; HCD Score 74.79 m/z 583.97 Gene names PRKCD

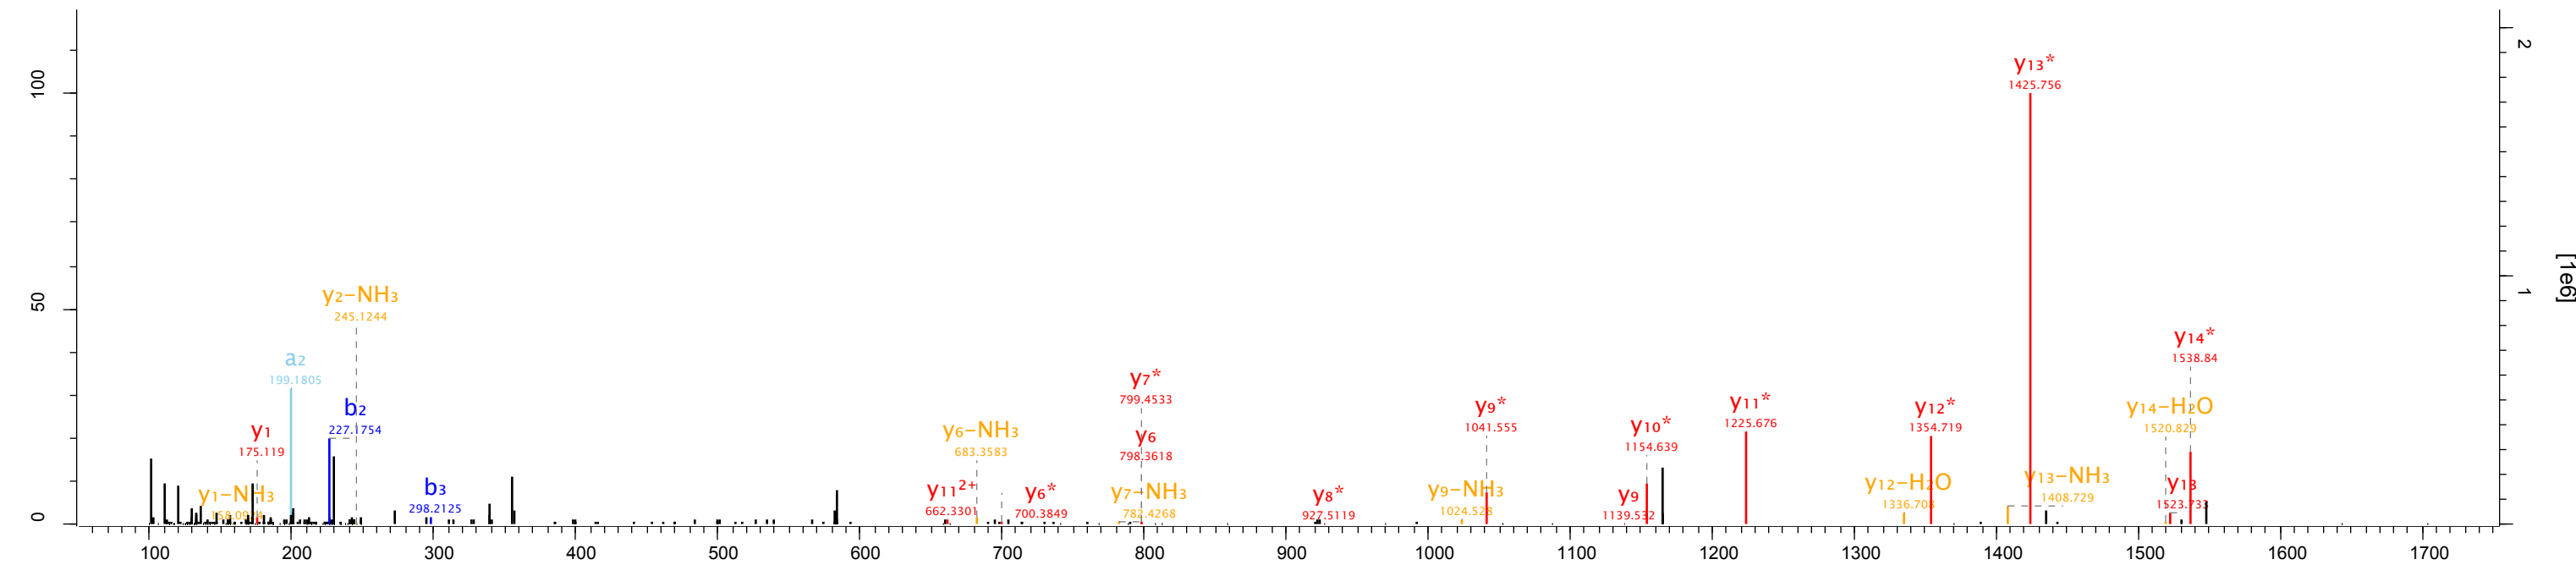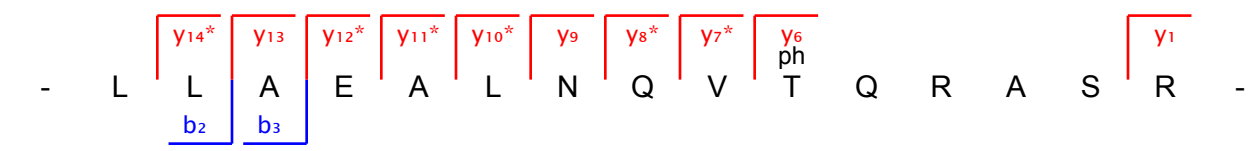

Raw file 20150812\_A375SR\_Phospho\_BR1\_05 Scan 1821 Method FTMS; HCD Score 82.42 m/z 533.74 Gene names CTNND1

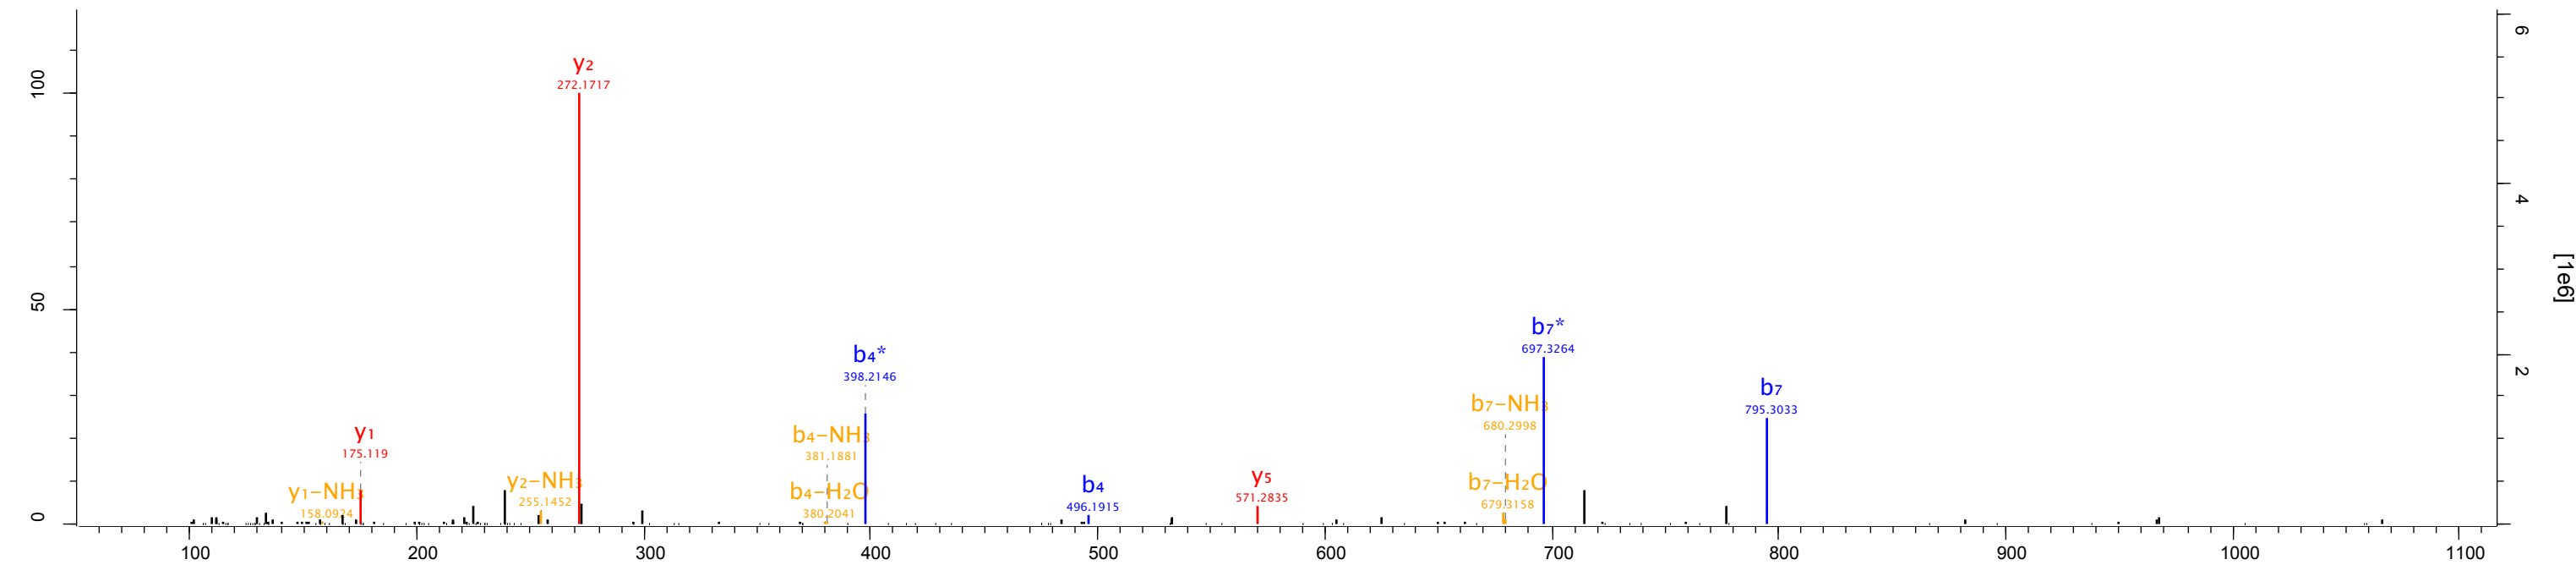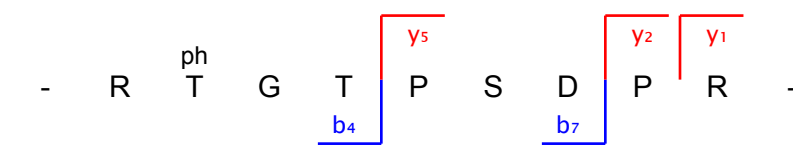

Raw file: 20150812\_A375SR\_Phospho\_BR1\_05  
 Scan: 18731 Method: FTMS; HCD Score: 198.03 m/z: 1064.57 Gene names: CDC40

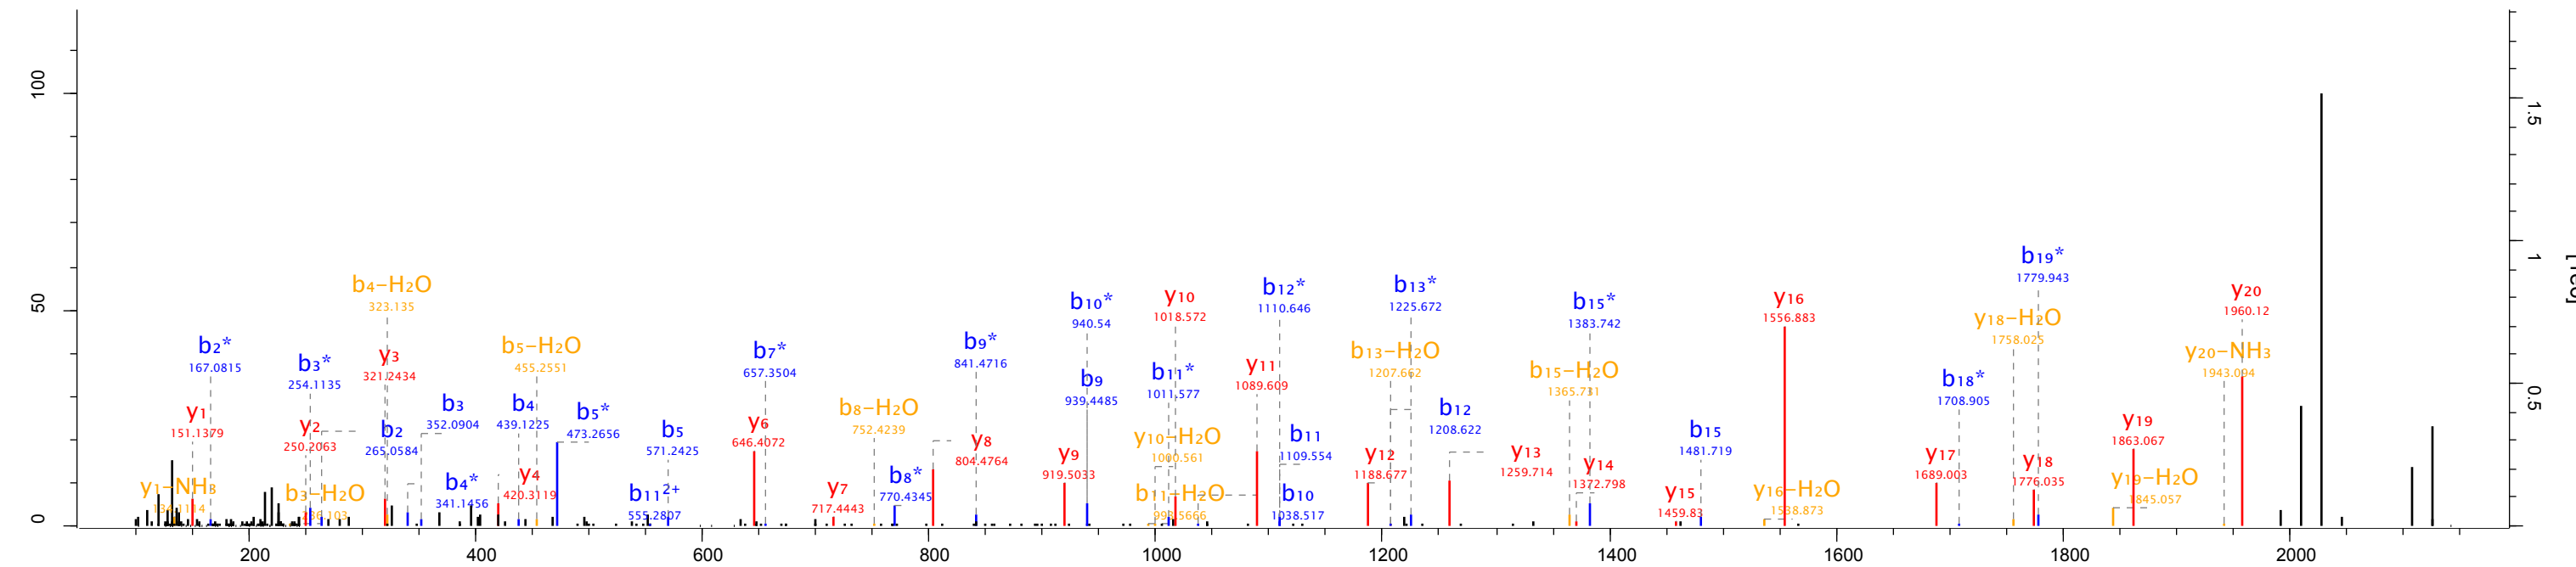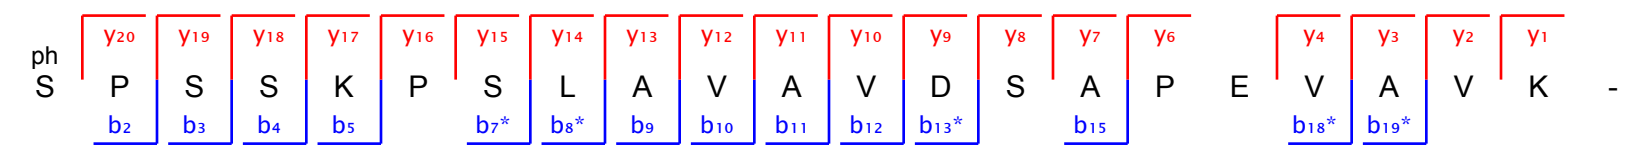



Raw file: 20150812\_A375SR\_Phospho\_BR1\_05  
 Scan: 19341 Method: FTMS; HCD Score: 139.46 m/z: 753.04 Gene names: RAB3IP

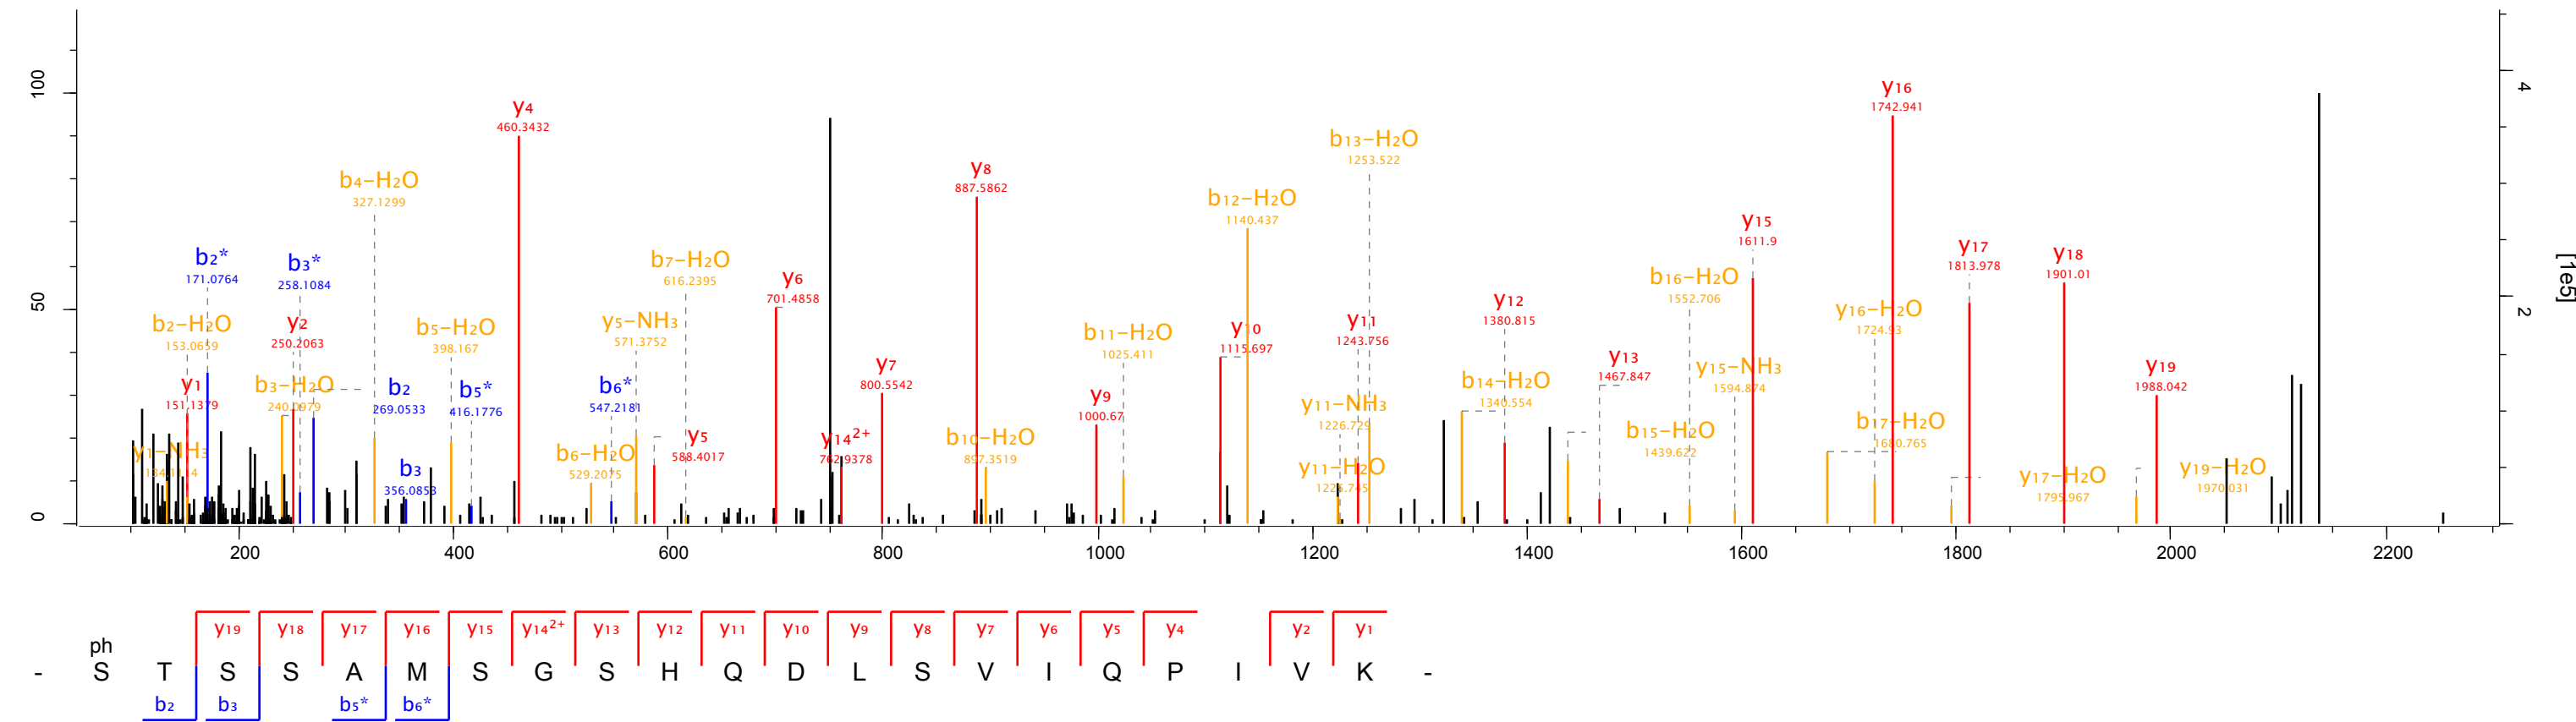

Raw file: 20150812\_A375SR\_Phospho\_BR1\_05  
 Scan: 19411 Method: FTMS; HCD Score: 130.27 m/z: 784.73 Gene names: ELL

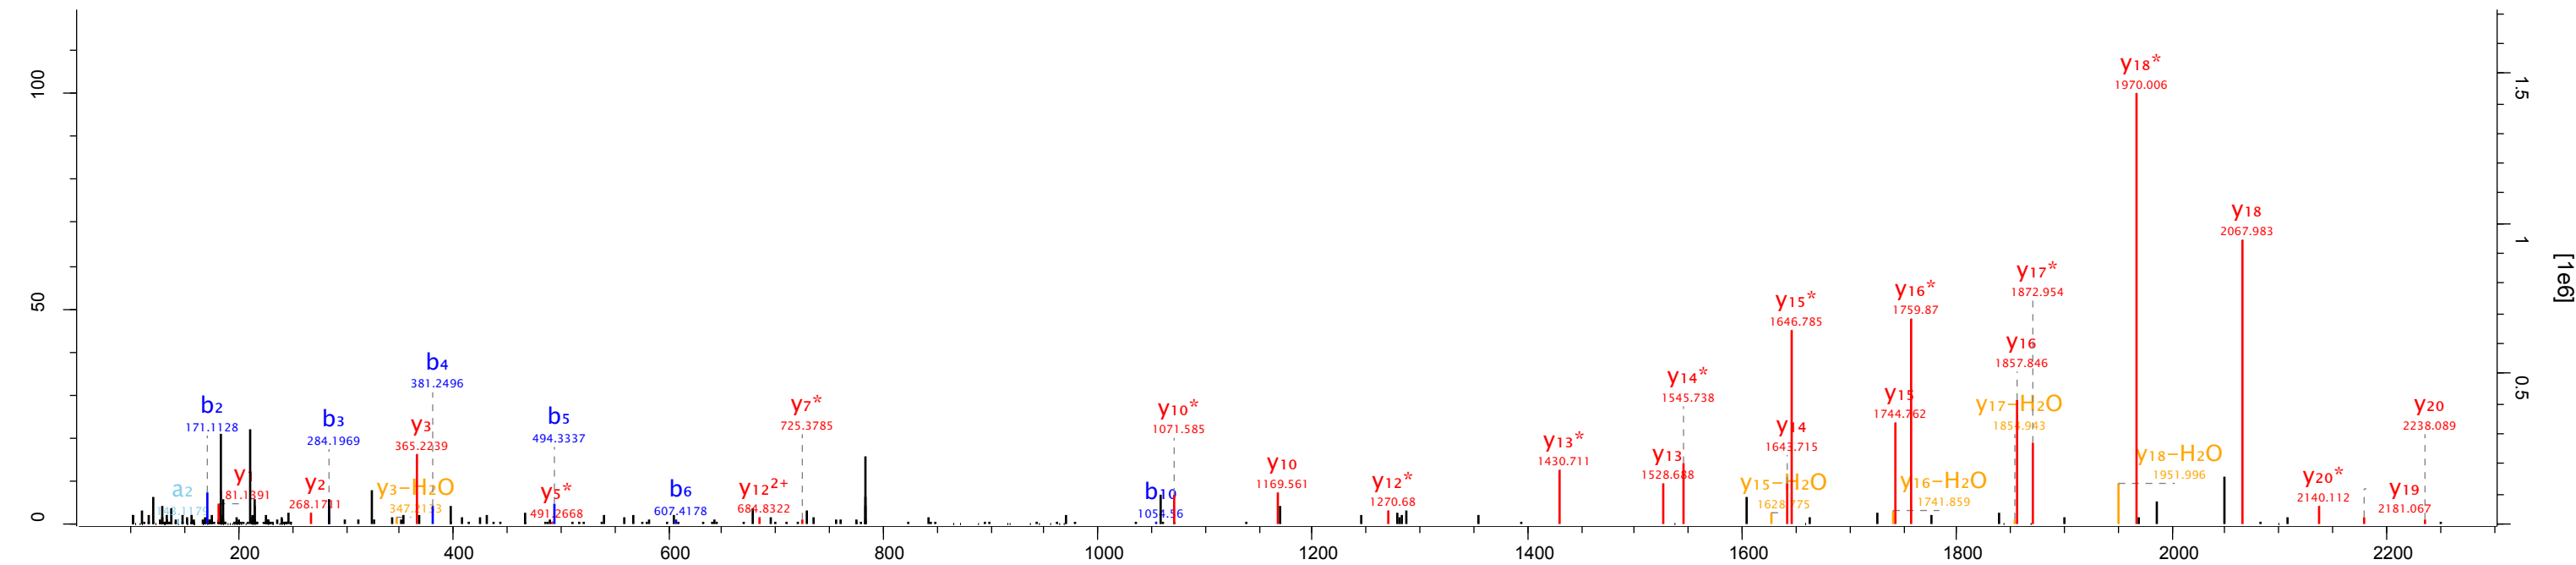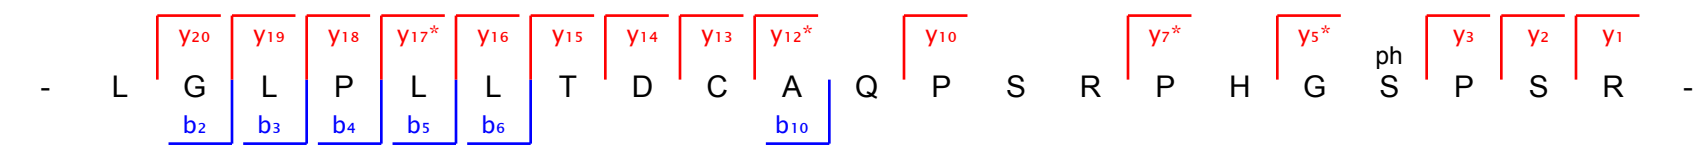

Raw file 20150812\_A375SR\_Phospho\_BR1\_05 Scan 20121 Method FTMS; HCD Score 185.28 m/z 981.33 Gene names PTGES3

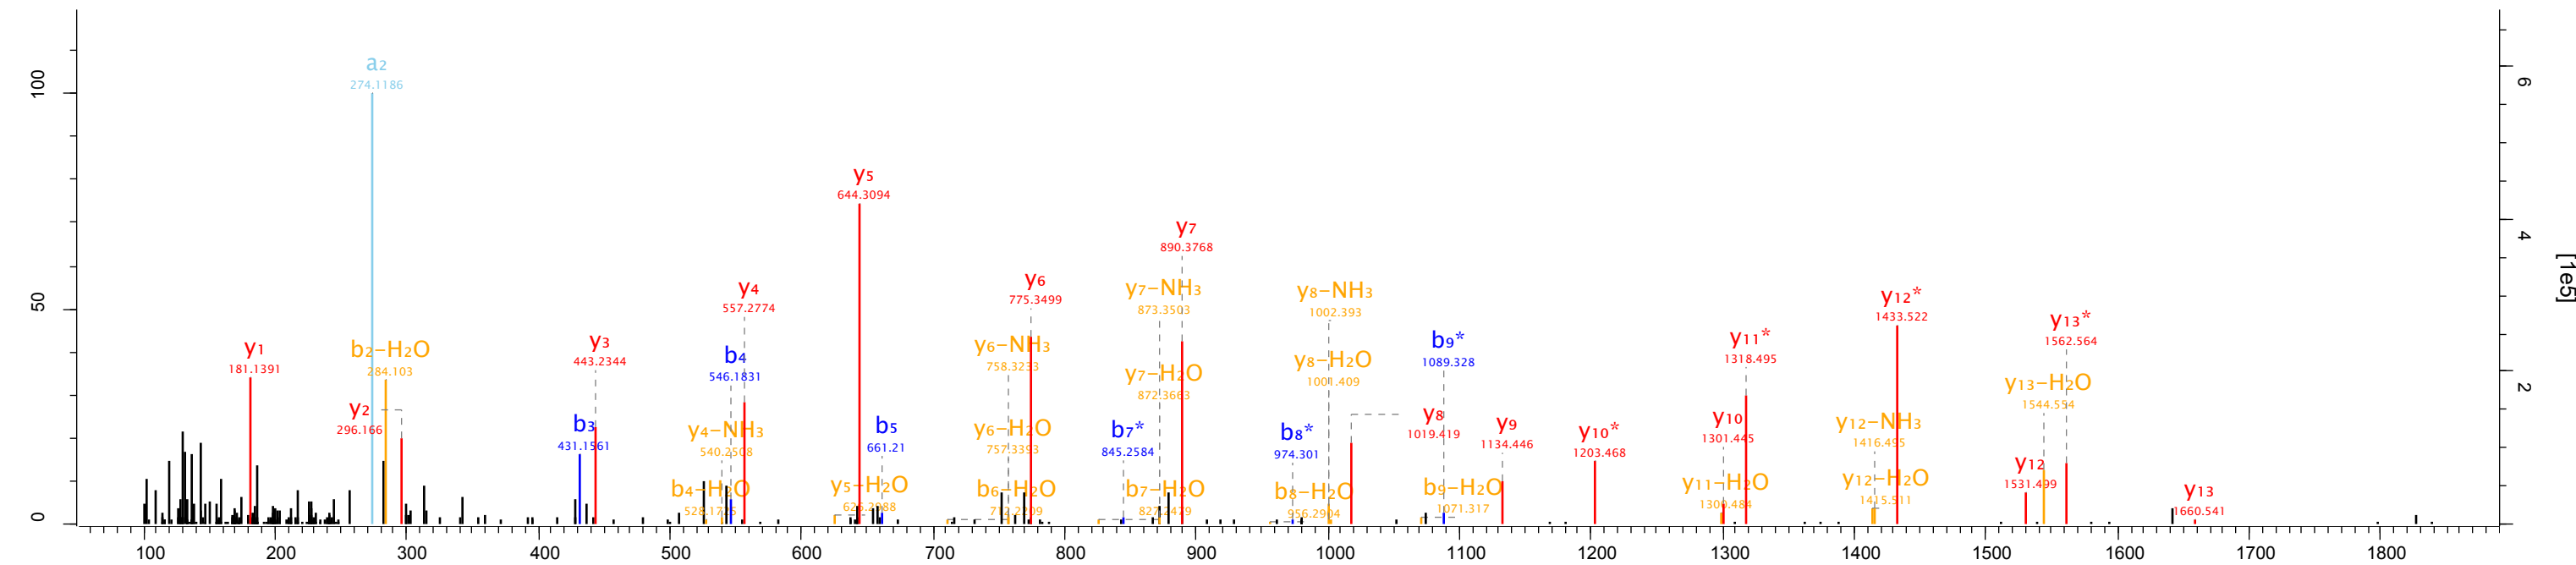

- D W E D D S D E D M S N F D R -

Fragmentation mapping (top to bottom):

- y13 (E)
- y12 (D)
- y11\* (D)
- y10 ph (S)
- y9 (D)
- y8 (E)
- y7 (D)
- y6 (M)
- y5 (S)
- y4 (N)
- y3 (F)
- y2 (D)
- y1 (R)

Fragmentation mapping (bottom to top):

- a2 (W)
- b3 (E)
- b4 (D)
- b5 (D)
- b7\* (D)
- b8\* (E)
- b9\* (D)

Raw file 20150812\_A375SR\_Phospho\_BR1\_05 Scan 2051 Method FTMS; HCD Score 102.47 m/z 586.6 Gene names TANC2

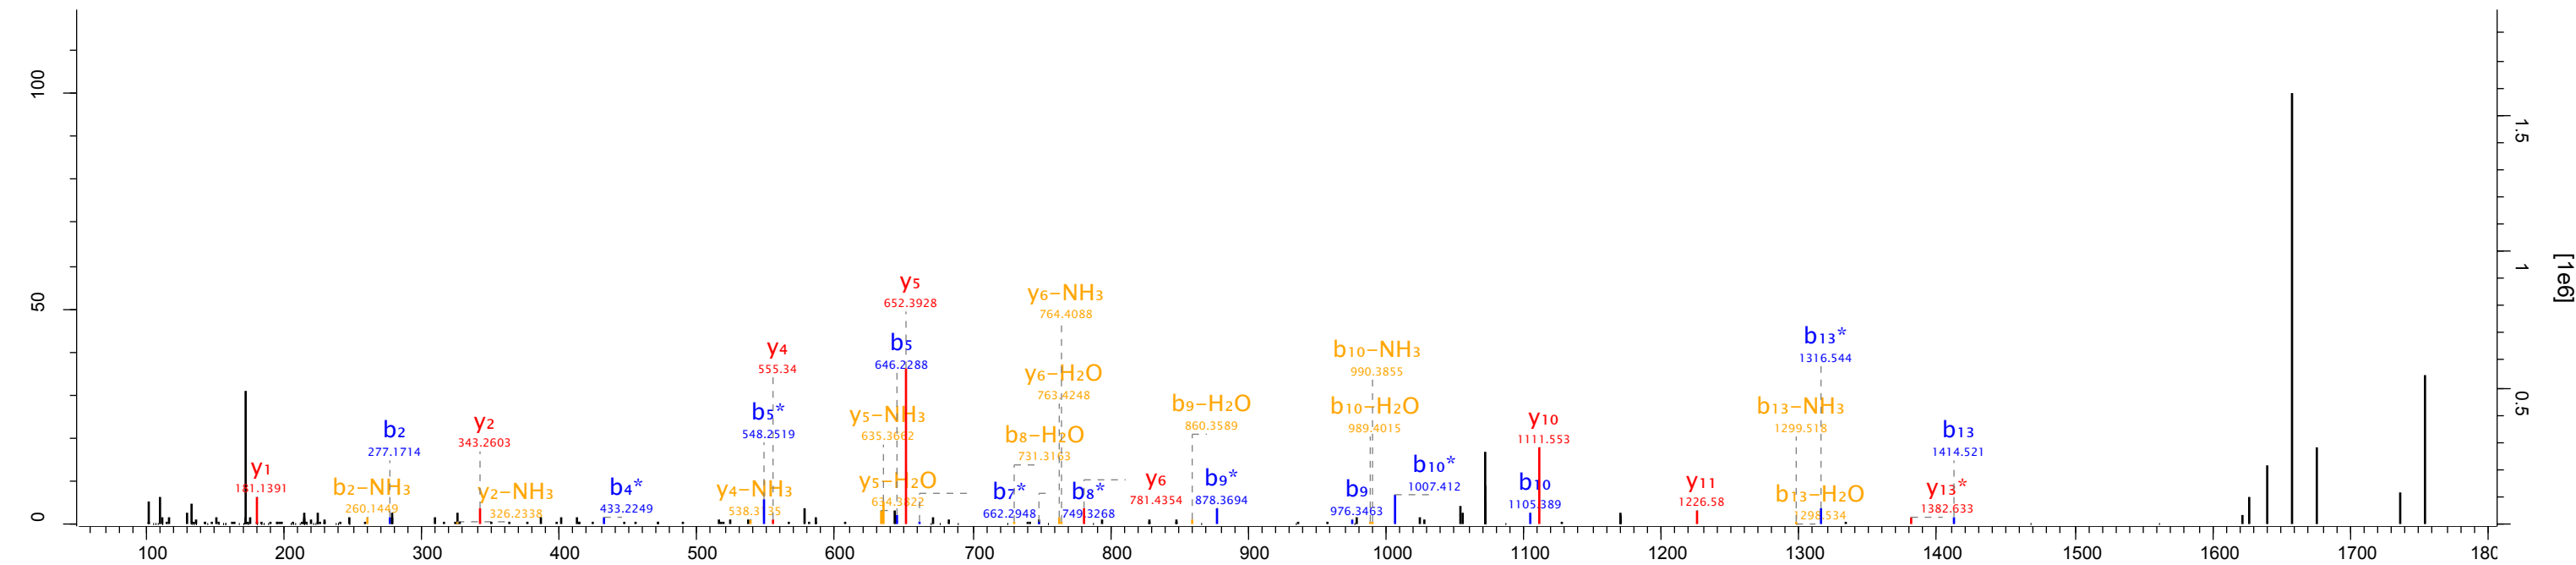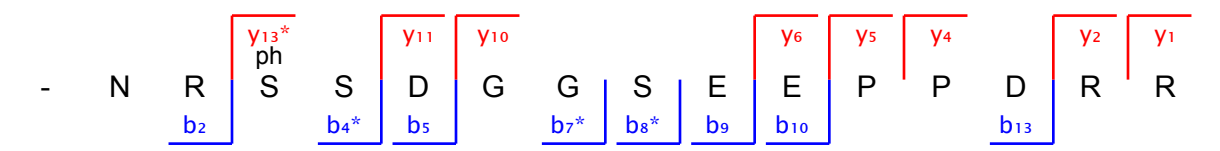

Raw file: 20150812\_A375SR\_Phospho\_BR1\_05  
 Scan: 22241 Method: FTMS; HCD Score: 149.71 m/z: 850.94 Gene names: AAK1

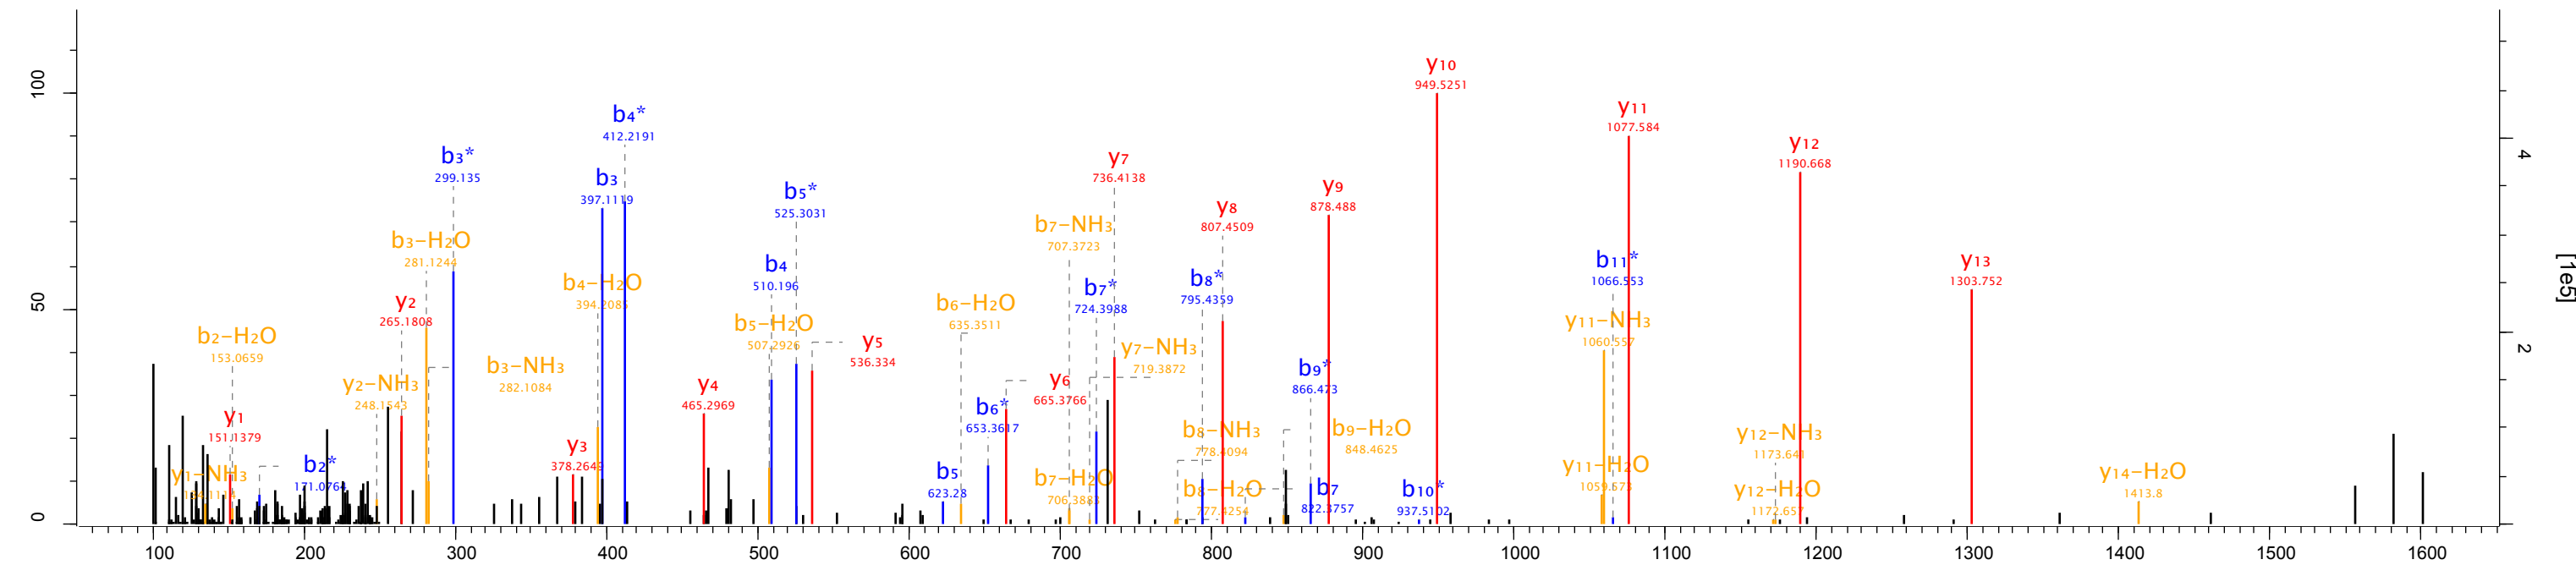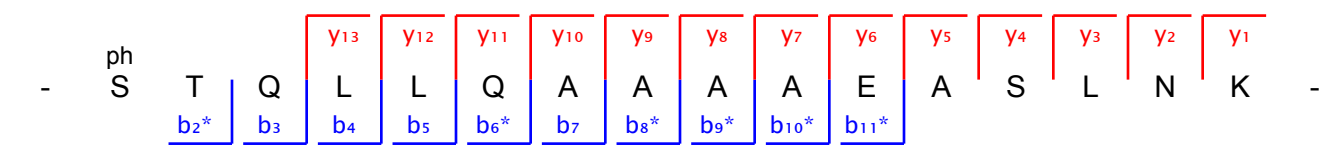

Raw file 20150812\_A375SR\_Phospho\_BR1\_05 Scan 22741 Method FTMS; HCD Score 103.46 m/z 926.21 Gene names YAP1

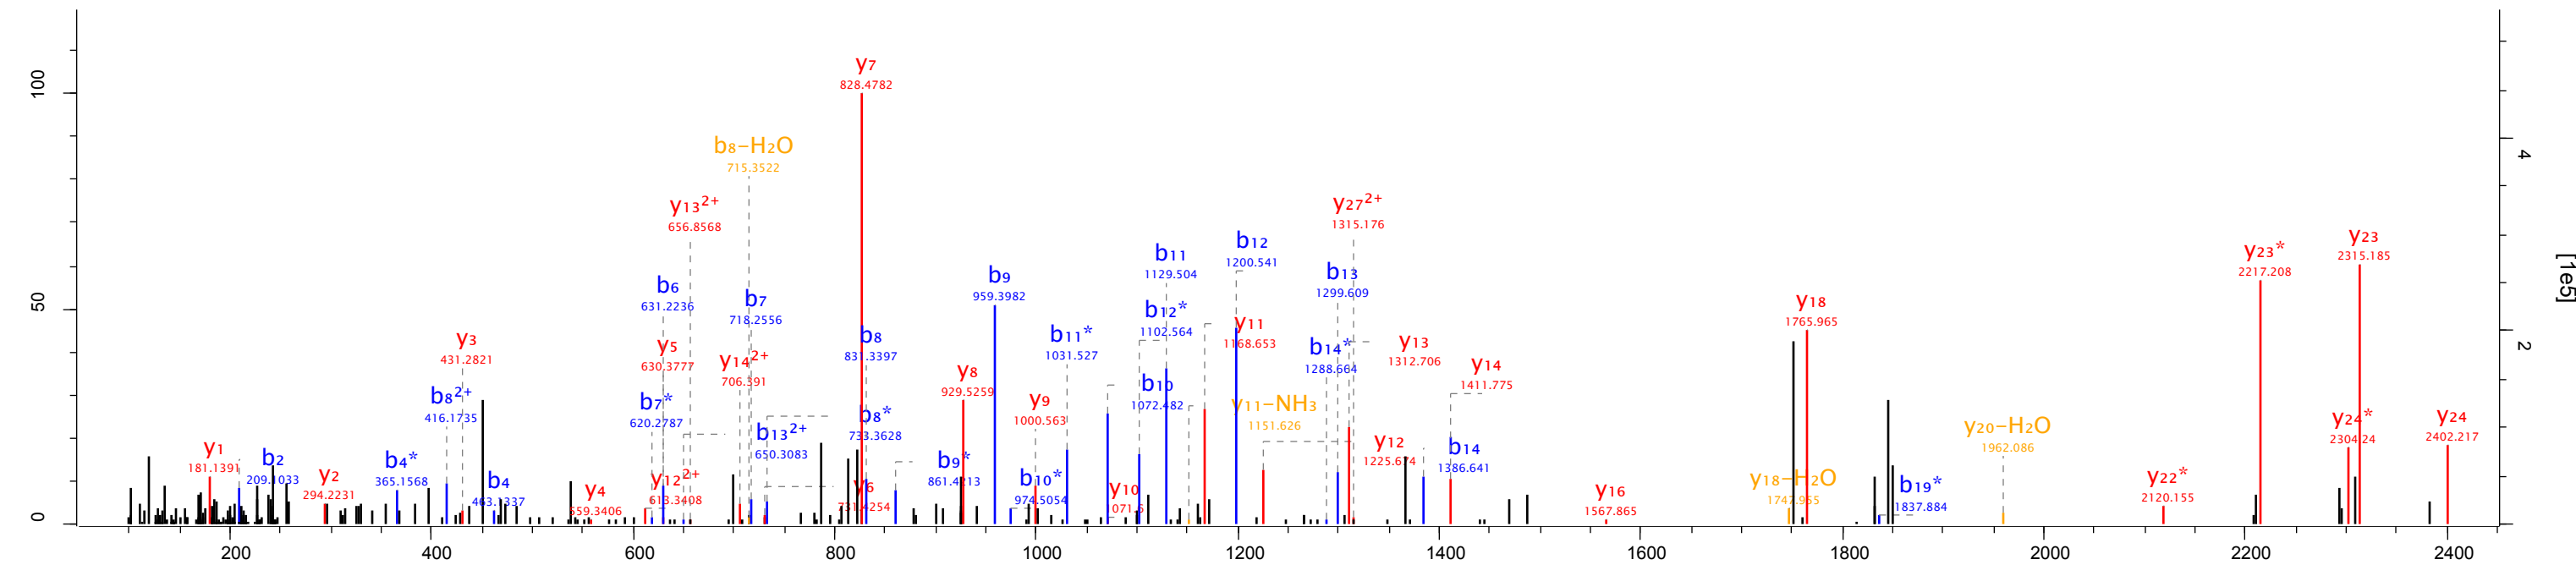

- A H S ph S P A S L Q L G A V S P G ph T L T P T G V V S G P A A T P T A Q H L R -

b<sub>2</sub> b<sub>4</sub> b<sub>6</sub> b<sub>7</sub> b<sub>8</sub> b<sub>9</sub> b<sub>10</sub> b<sub>11</sub> b<sub>12</sub> b<sub>13</sub> b<sub>14</sub> b<sub>19</sub>\*

y<sub>27</sub><sup>2+</sup> y<sub>24</sub> y<sub>23</sub> y<sub>22</sub>\* y<sub>18</sub> y<sub>16</sub> y<sub>14</sub> y<sub>13</sub> y<sub>12</sub> y<sub>11</sub> y<sub>10</sub> y<sub>9</sub> y<sub>8</sub> y<sub>7</sub> y<sub>6</sub> y<sub>5</sub> y<sub>4</sub> y<sub>3</sub> y<sub>2</sub> y<sub>1</sub>

Raw file 20150812\_A375SR\_Phospho\_BR1\_05 Scan 23691 Method FTMS; HCD Score 102.47 m/z 1333.65 Gene names EIF4EBP1

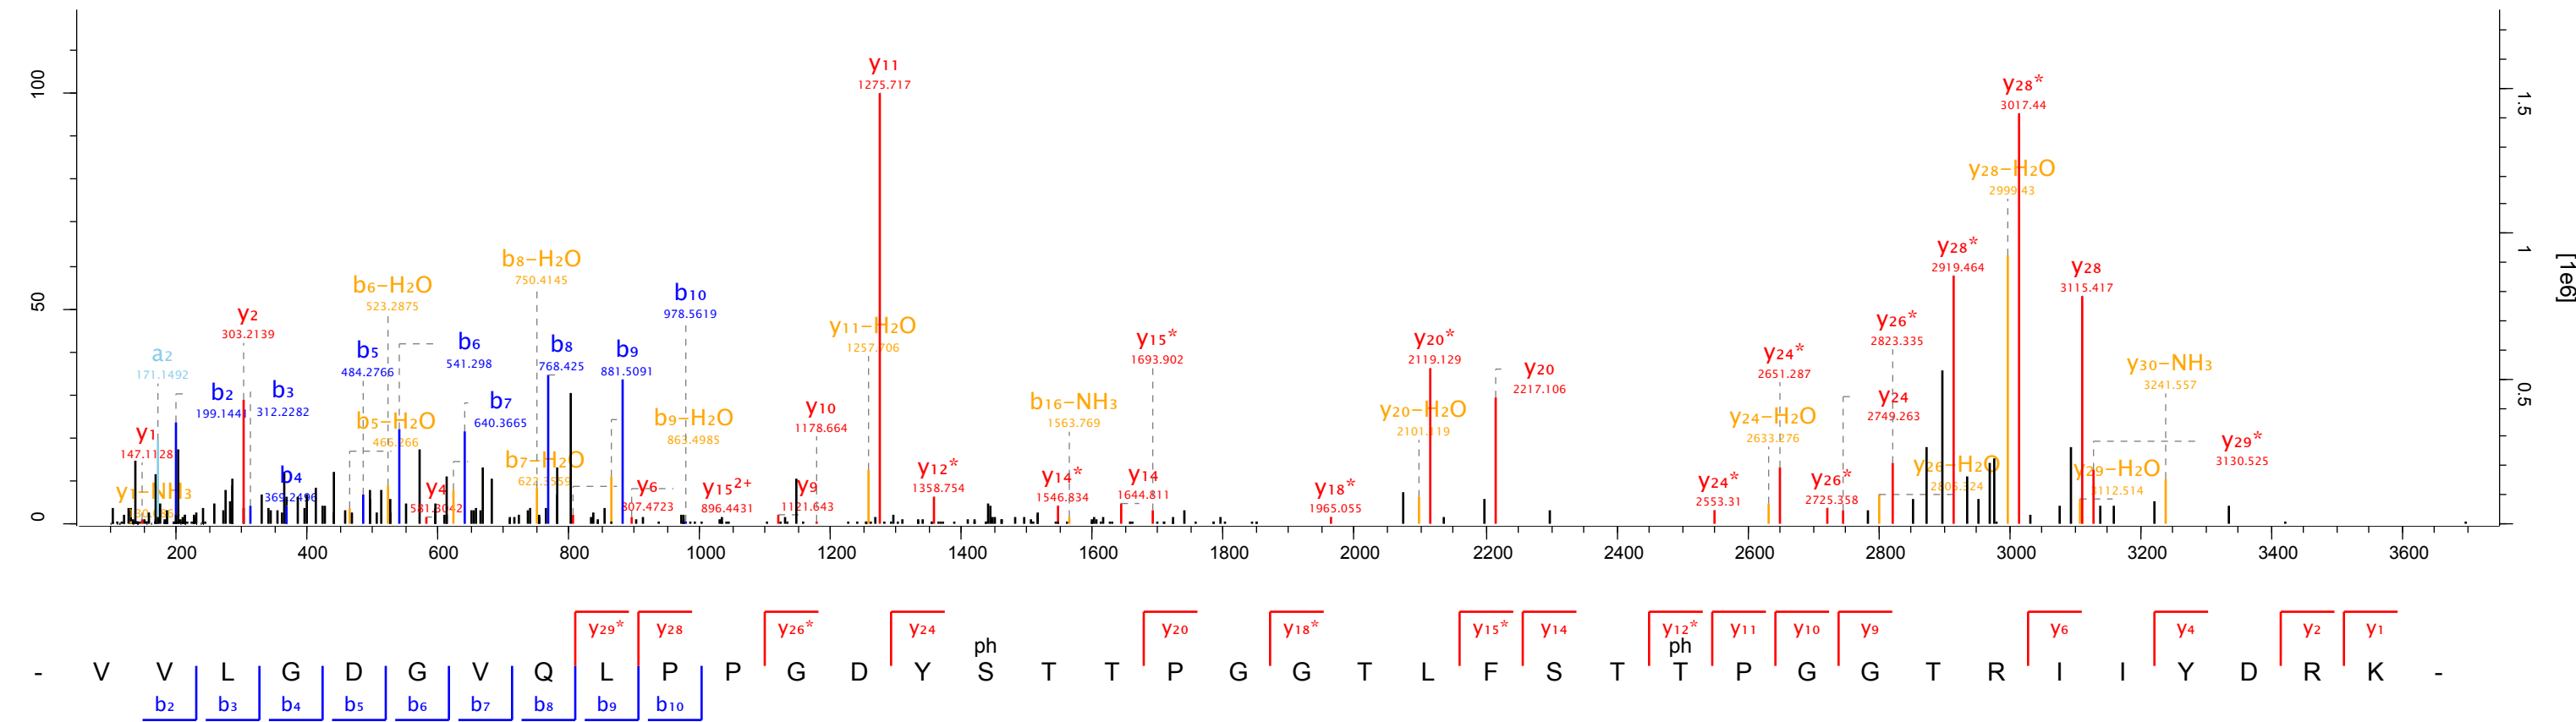

Raw file 20150812\_A375SR\_Phospho\_BR1\_05 Scan 24141 Method FTMS; HCD Score 269.83 m/z 1049.01 Gene names TRIOBP

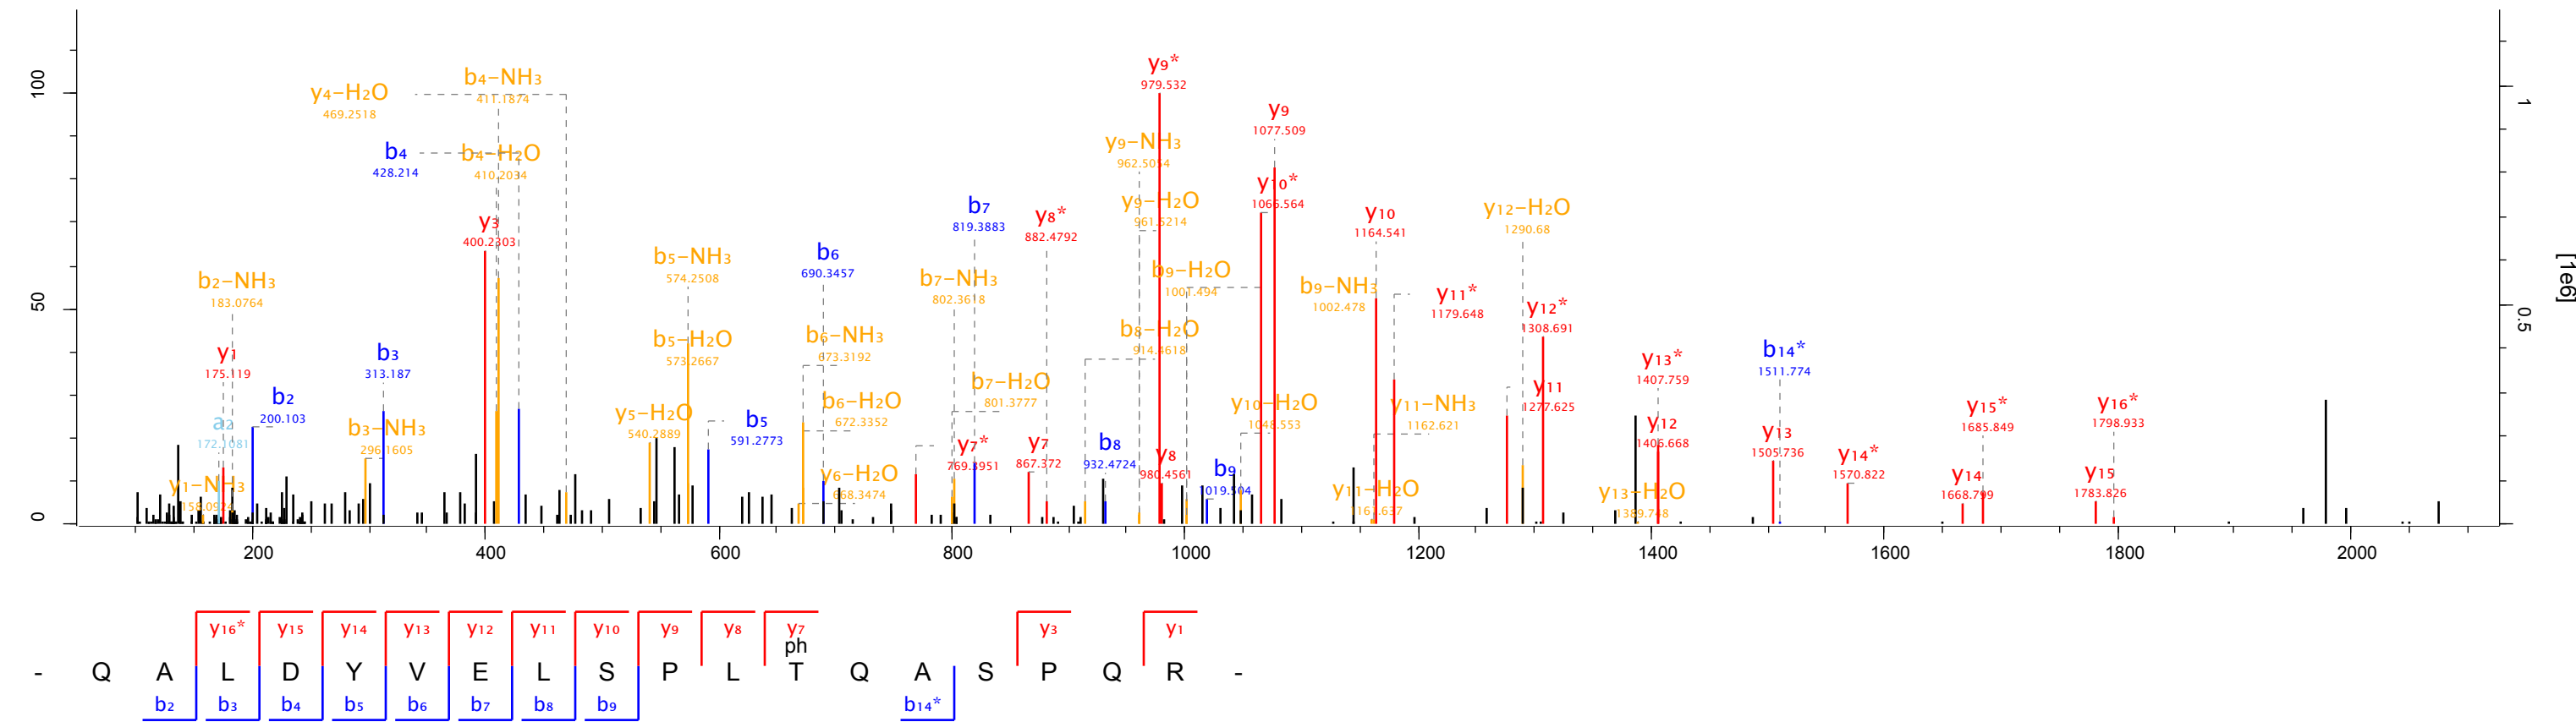



Raw file  
 20150812\_A375SR\_Phospho\_BR1\_05  
 Scan 24651 Method FTMS; HCD Score 99.71 m/z 1333.32 Gene names EIF4EBP1

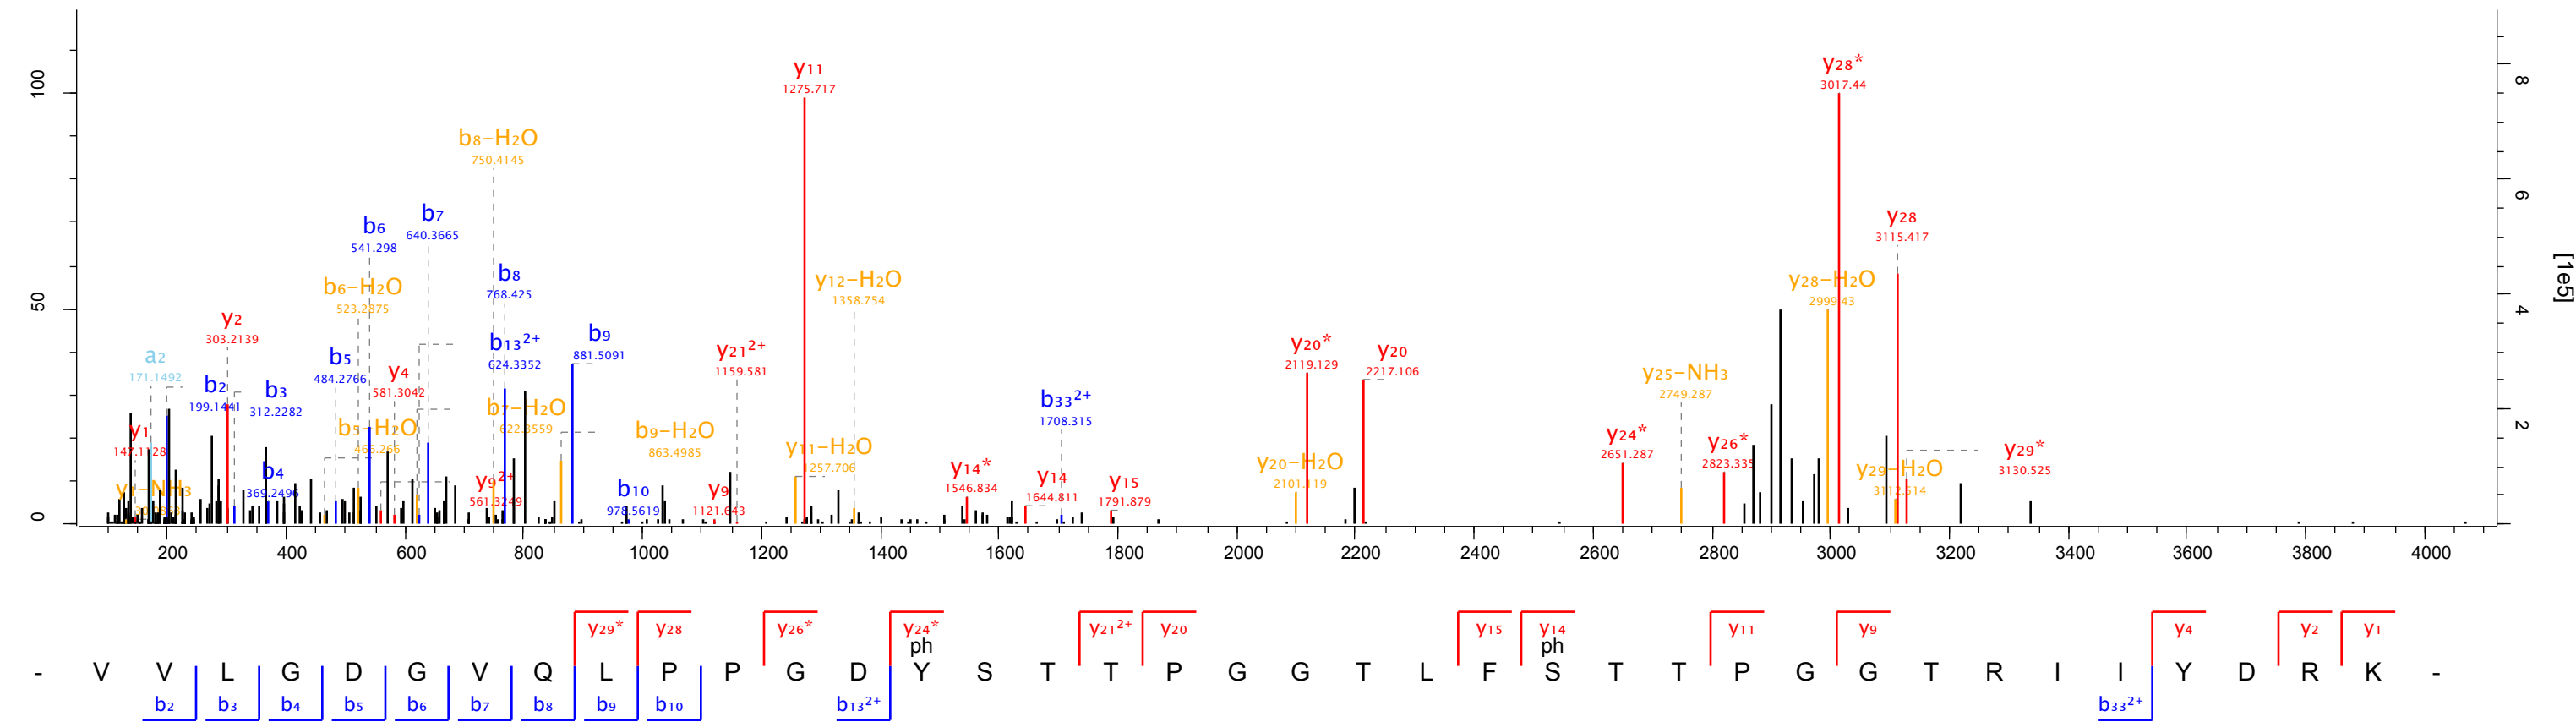

Raw file 20150812\_A375SR\_Phospho\_BR1\_05 Scan 26841 Method FTMS; HCD Score 78.1 m/z 769.36 Gene names KIF16B

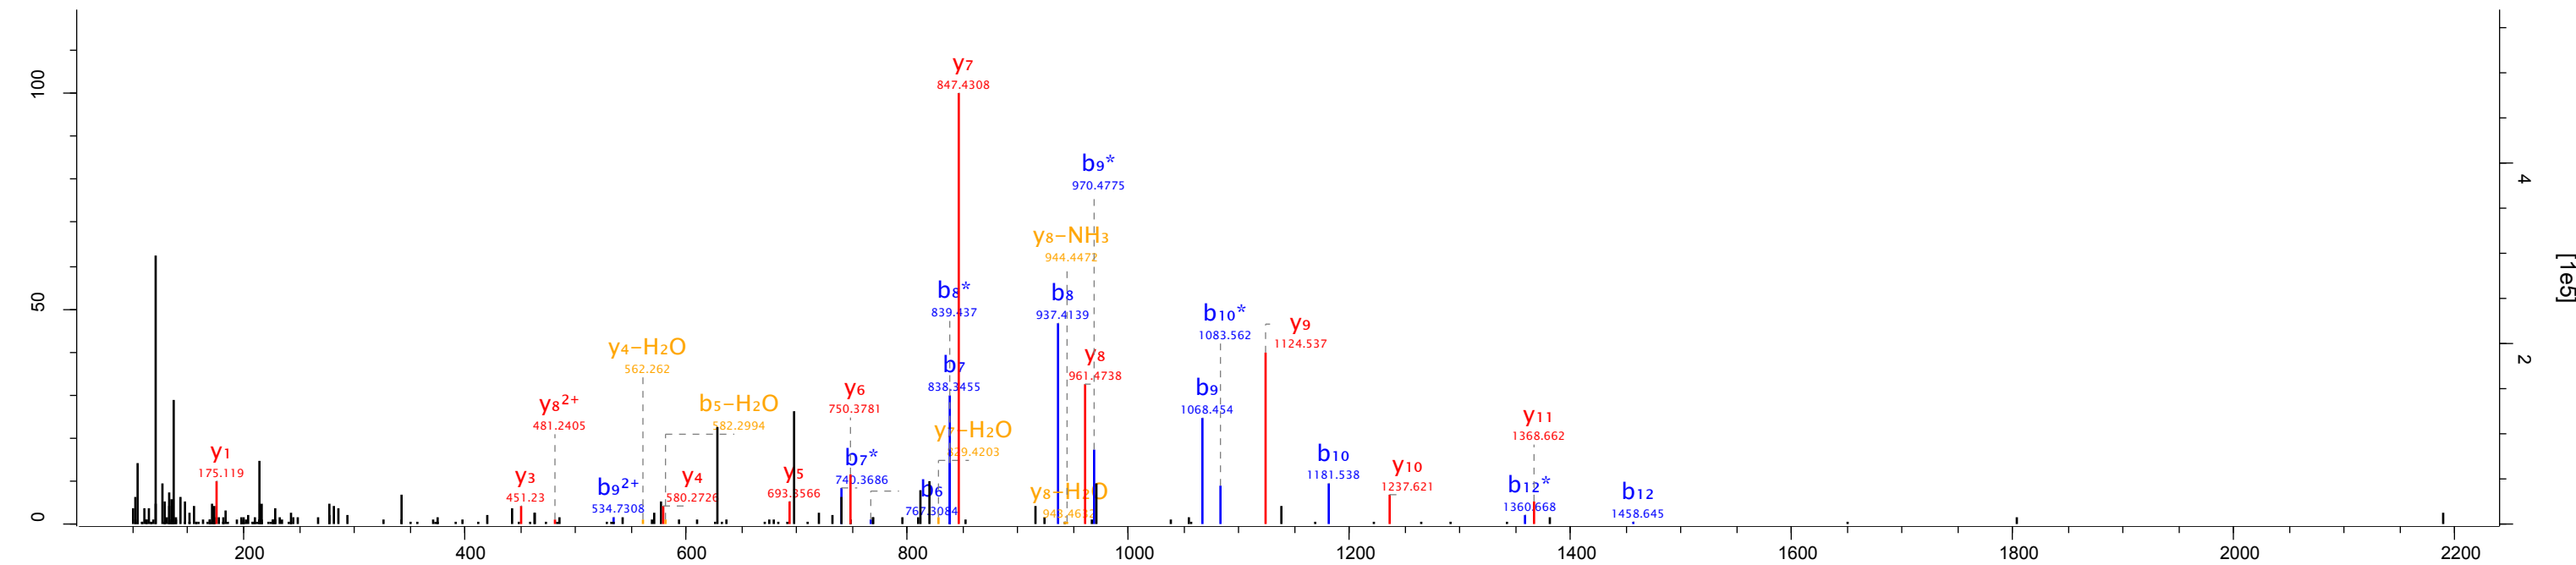

- S R E N L ph S A V M L Y N P G L E F E R -  
 b<sub>6</sub> b<sub>7</sub> b<sub>8</sub> b<sub>9</sub> b<sub>10</sub> b<sub>12</sub> y<sub>11</sub> y<sub>10</sub> y<sub>9</sub> y<sub>8</sub> y<sub>7</sub> y<sub>6</sub> y<sub>5</sub> y<sub>4</sub> y<sub>3</sub> y<sub>1</sub>

Raw file: 20150812\_A375SR\_Phospho\_BR1\_05  
 Scan: 28321 Method: FTMS; HCD Score: 160.12 m/z: 1065.53 Gene names: UTP14A

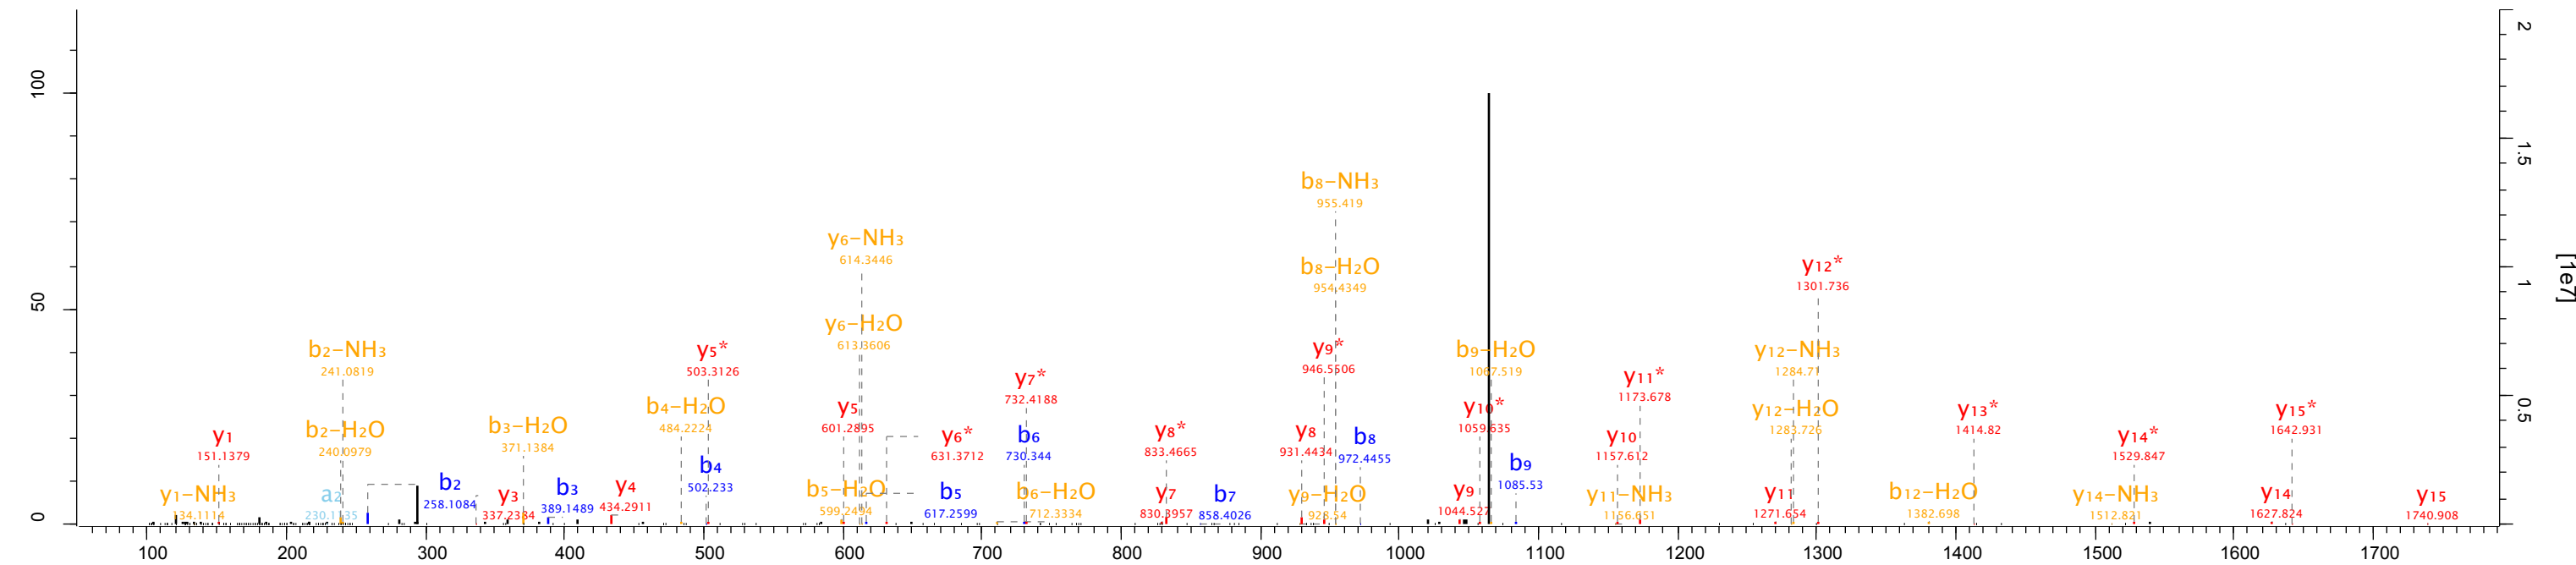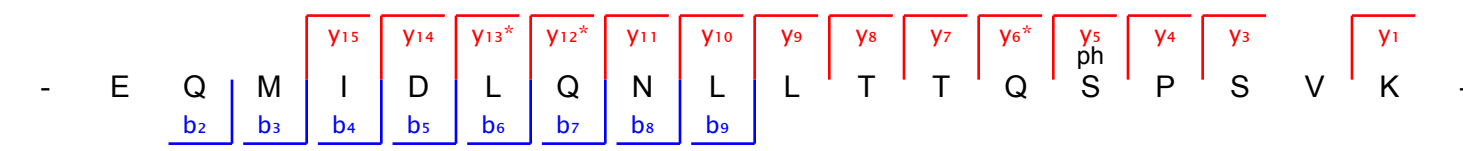

Raw file 20150812\_A375SR\_Phospho\_BR1\_05 Scan 3131 Method FTMS; HCD Score 106.11 m/z 590.31 Gene names DTL

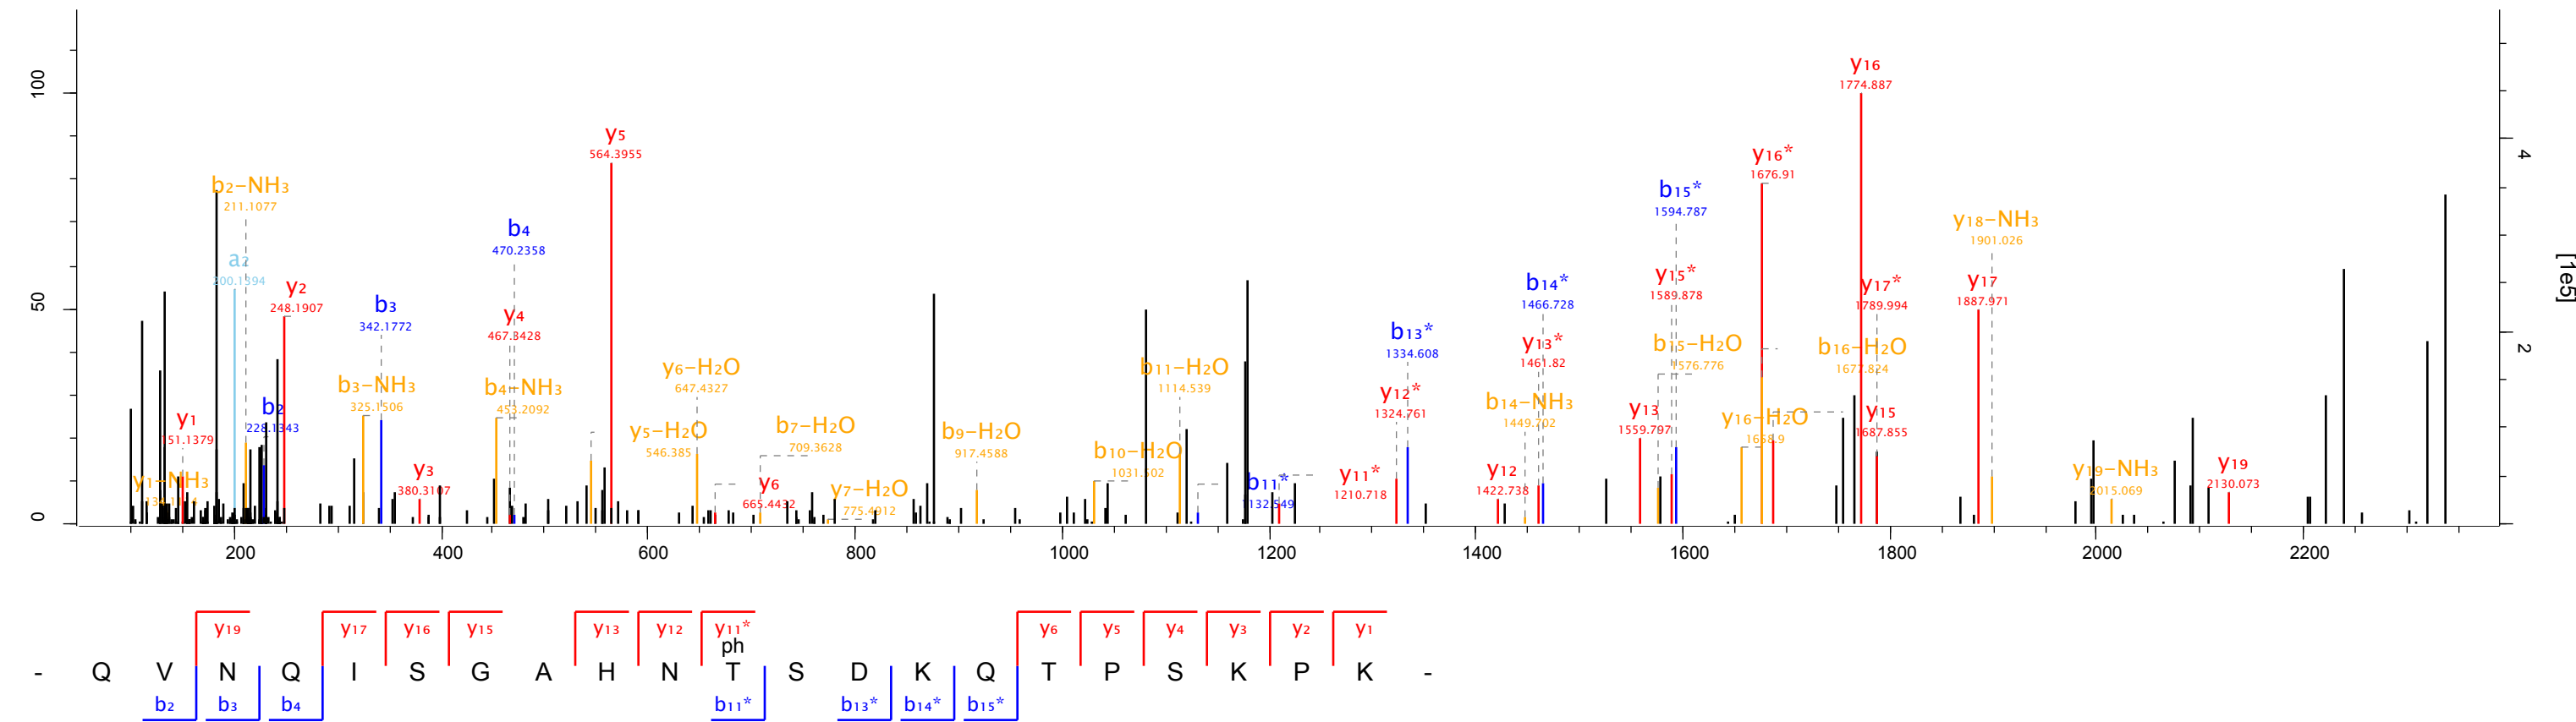

Raw file: 20150812\_A375SR\_Phospho\_BR1\_05  
 Scan: 3811 Method: FTMS; HCD Score: 109.95 m/z: 674.77 Gene names: MICAL3

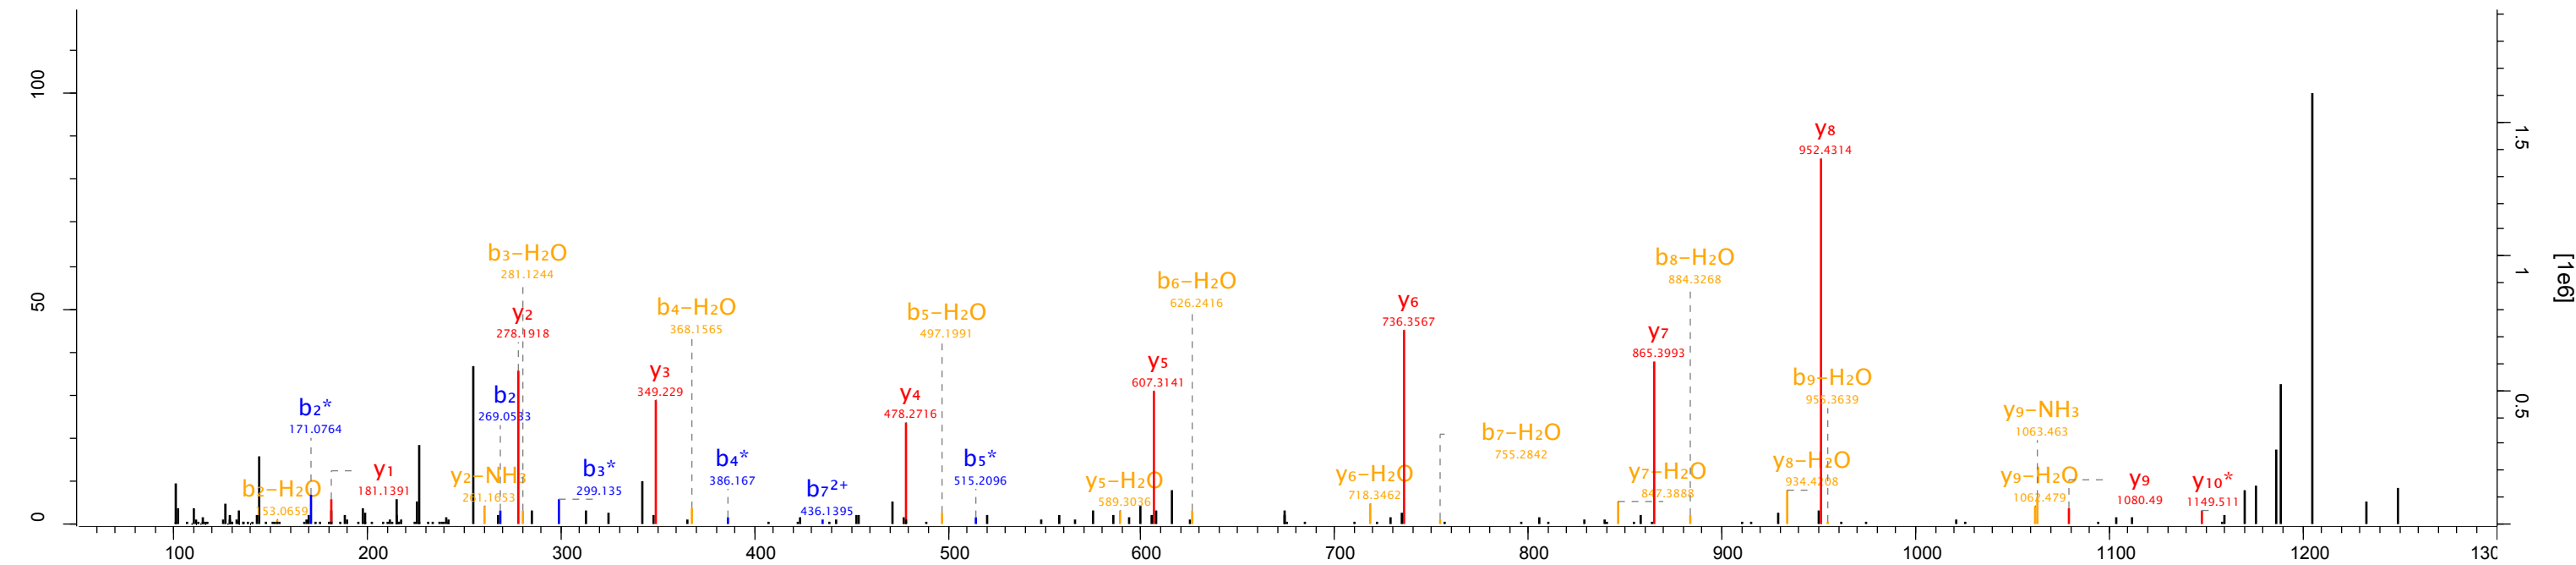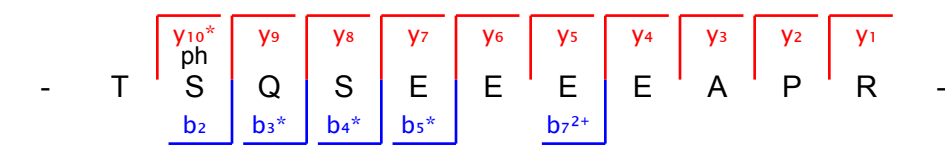

Raw file: 20150812\_A375SR\_Phospho\_BR1\_05  
 Scan: 4621 Method: FTMS; HCD Score: 129.36 m/z: 753.32 Gene names: ZNF592

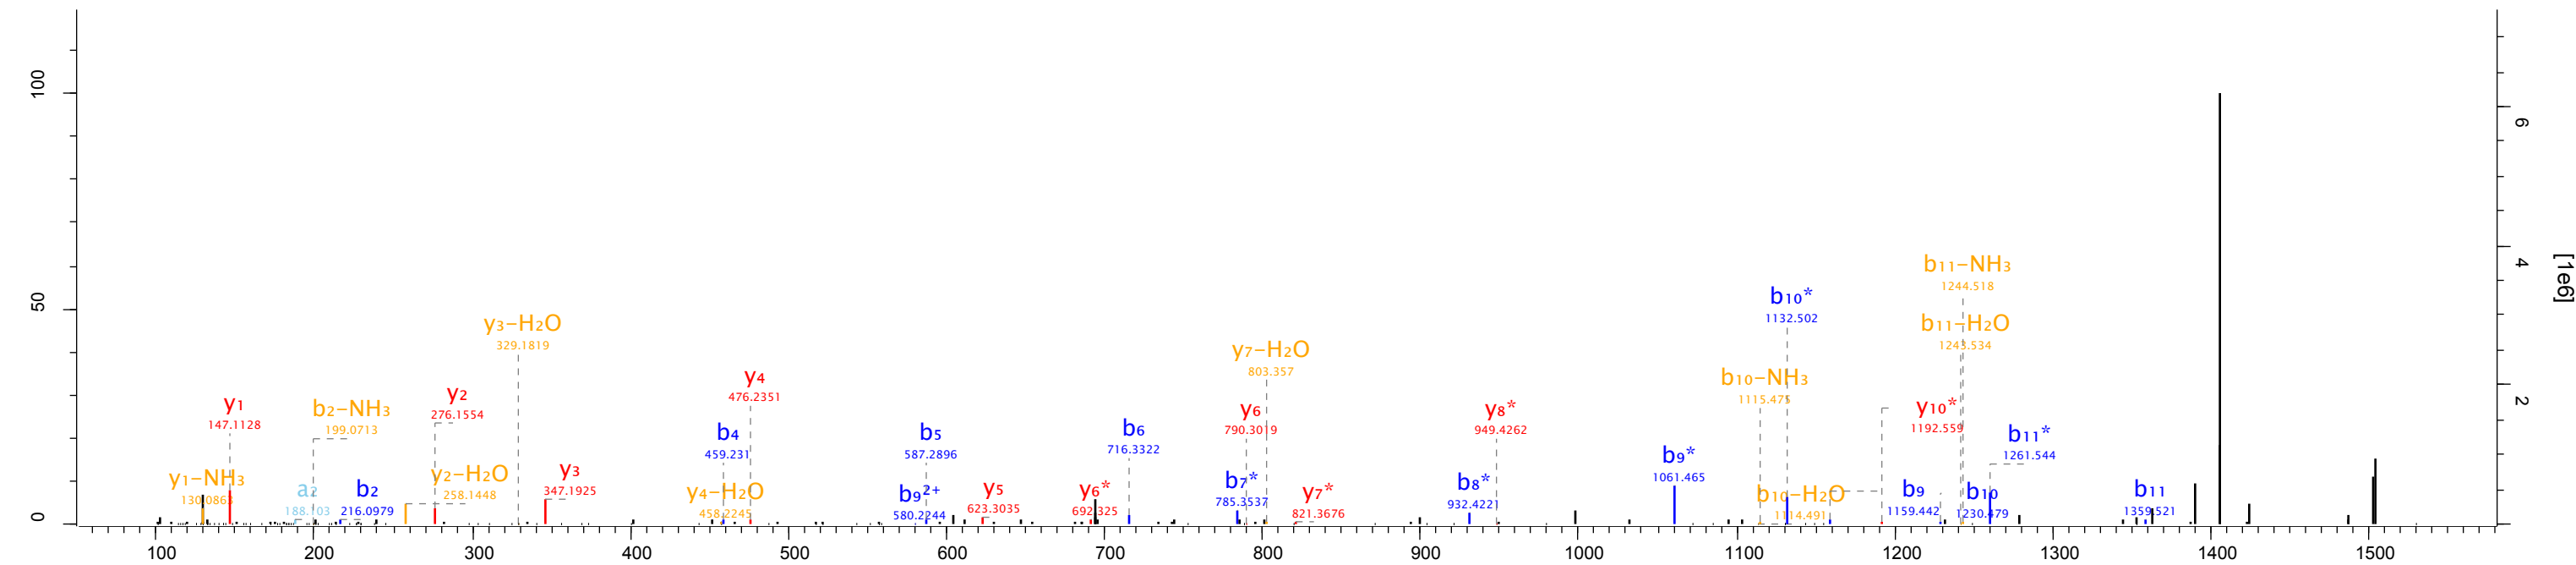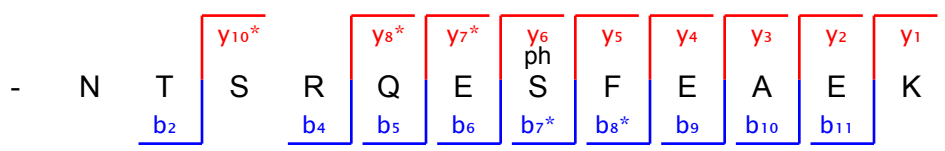

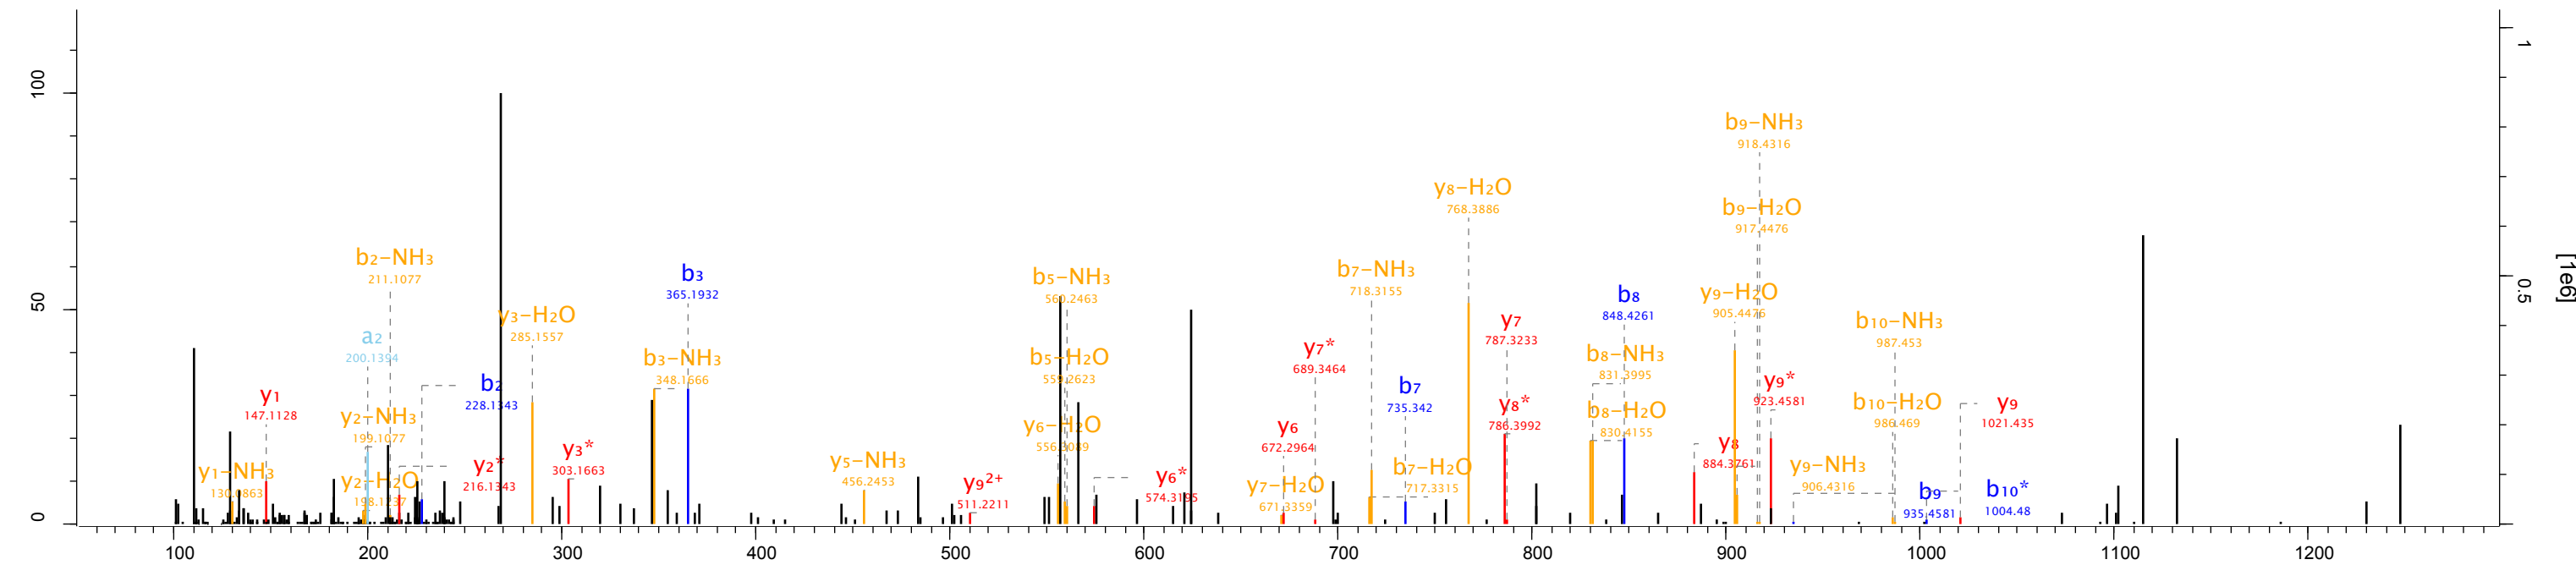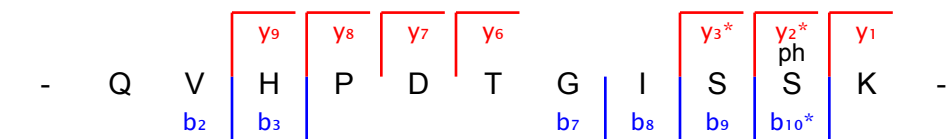

Raw file: 20150812\_A375SR\_Phospho\_BR1\_05  
 Scan: 5031 Method: FTMS; HCD Score: 112.7 m/z: 473.27 Gene names: KCTD3

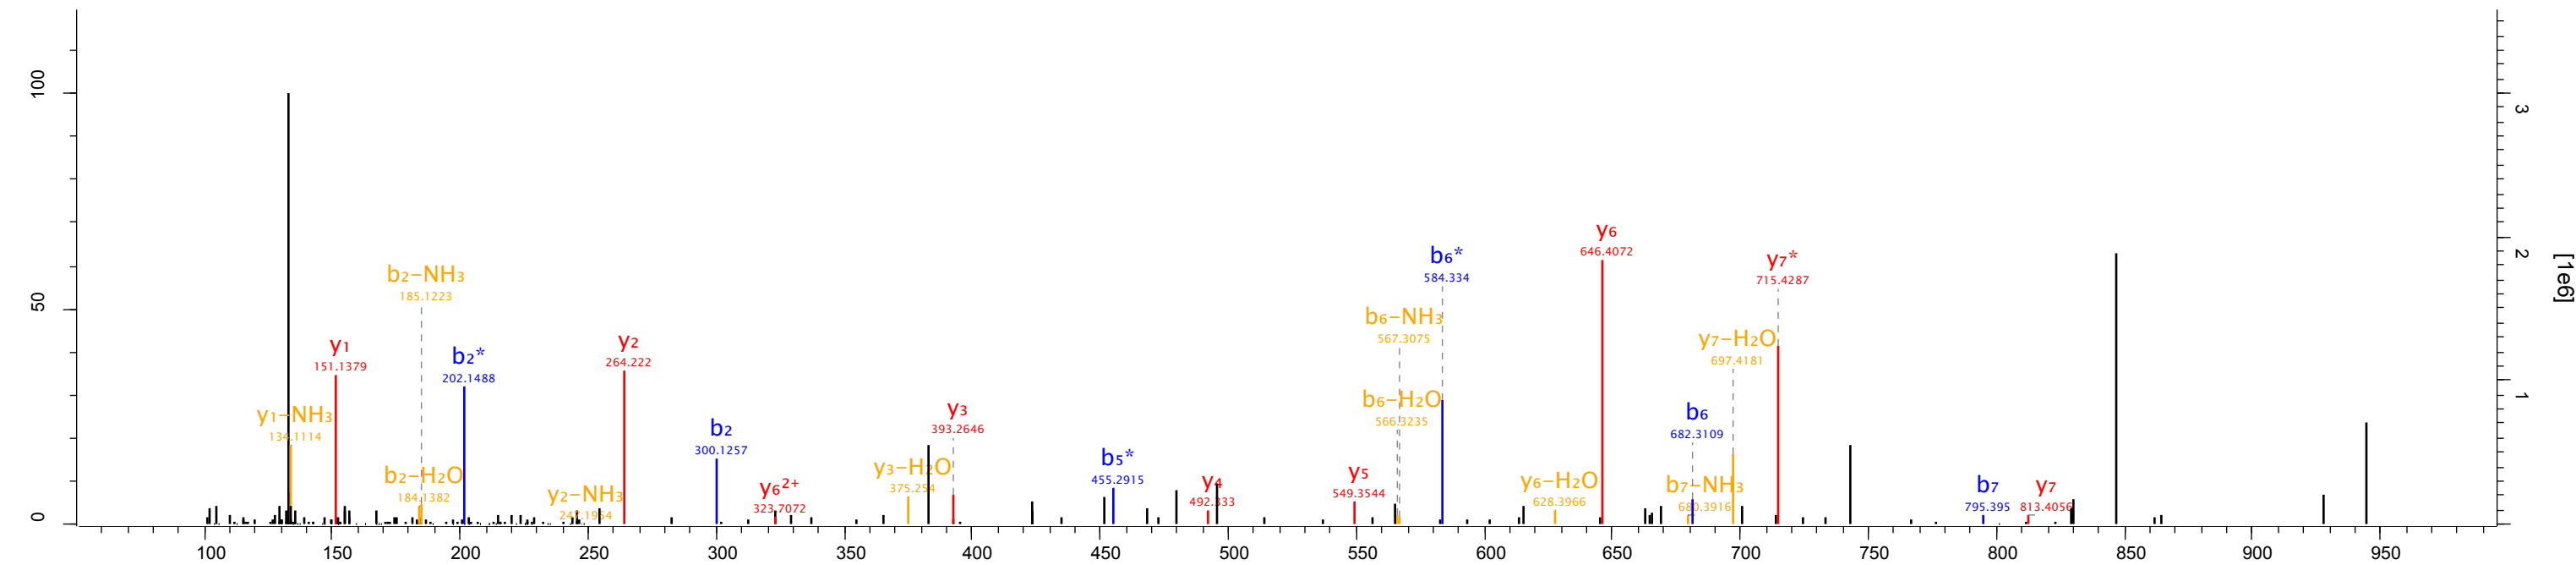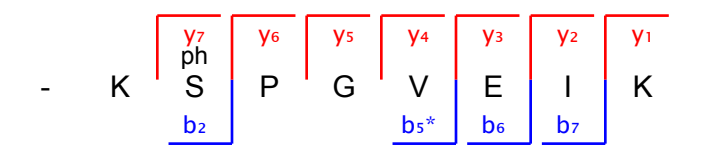



Raw file 20150812\_A375SR\_Phospho\_BR1\_05 Scan 5051 Method FTMS; HCD Score 100.07 m/z 482.77 Gene names NCL

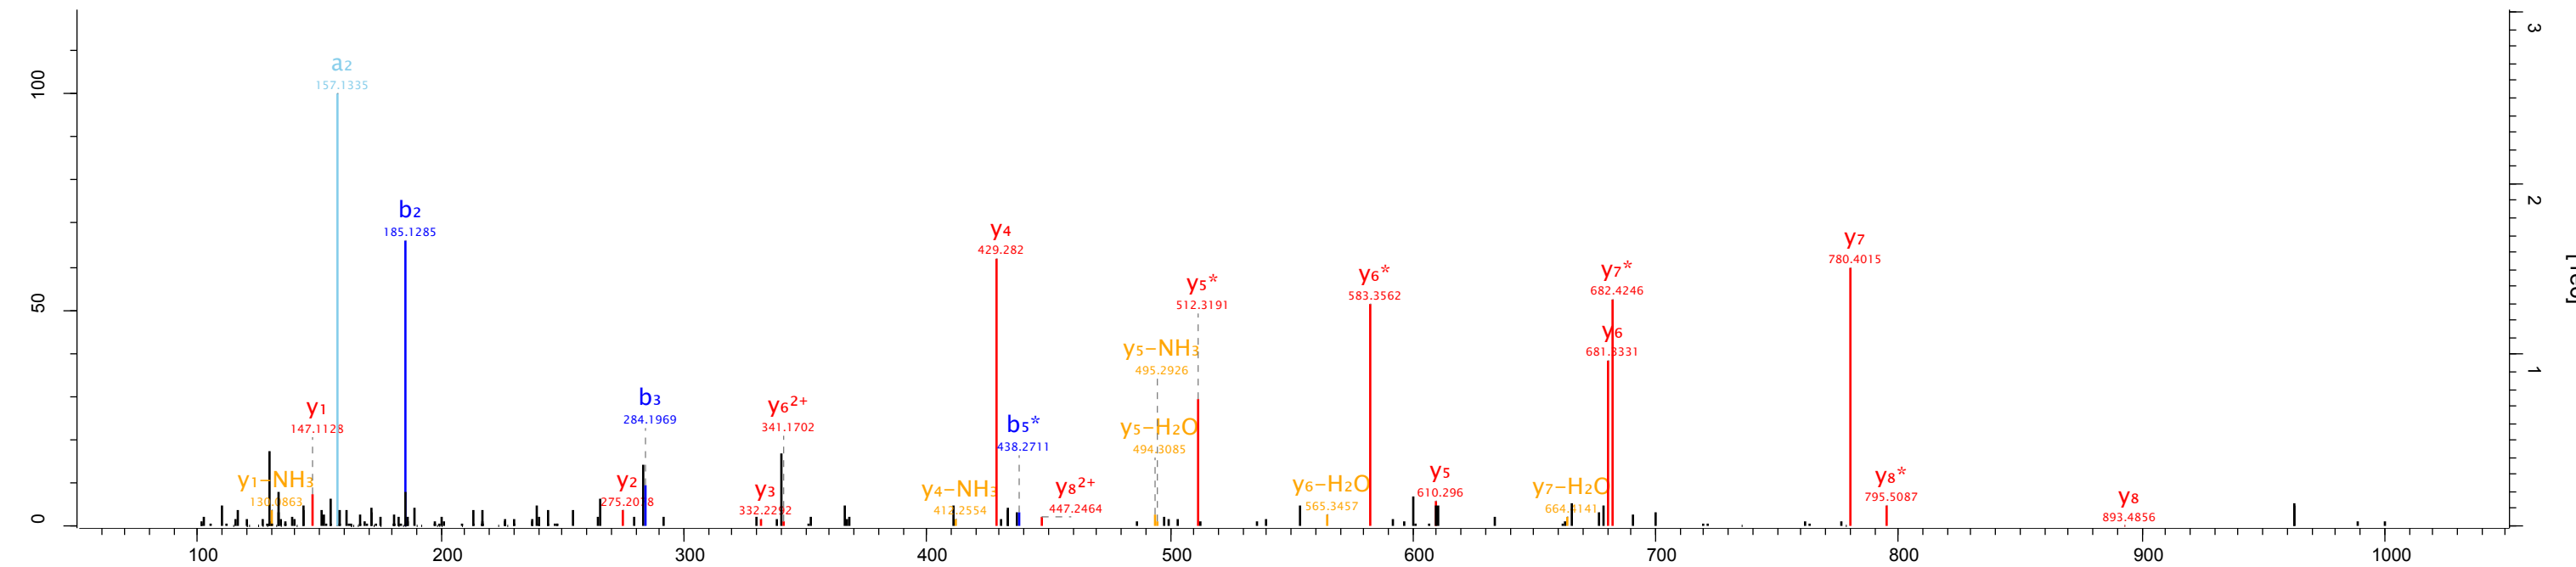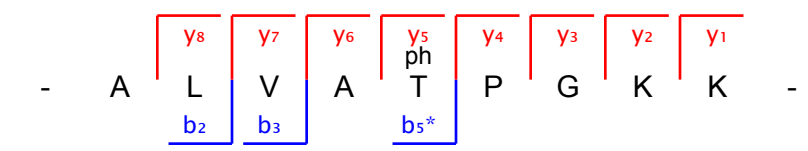

Raw file: 20150812\_A375SR\_Phospho\_BR1\_05  
 Scan: 5101 Method: FTMS; HCD Score: 273.32 m/z: 789.82 Gene names: AHNAK

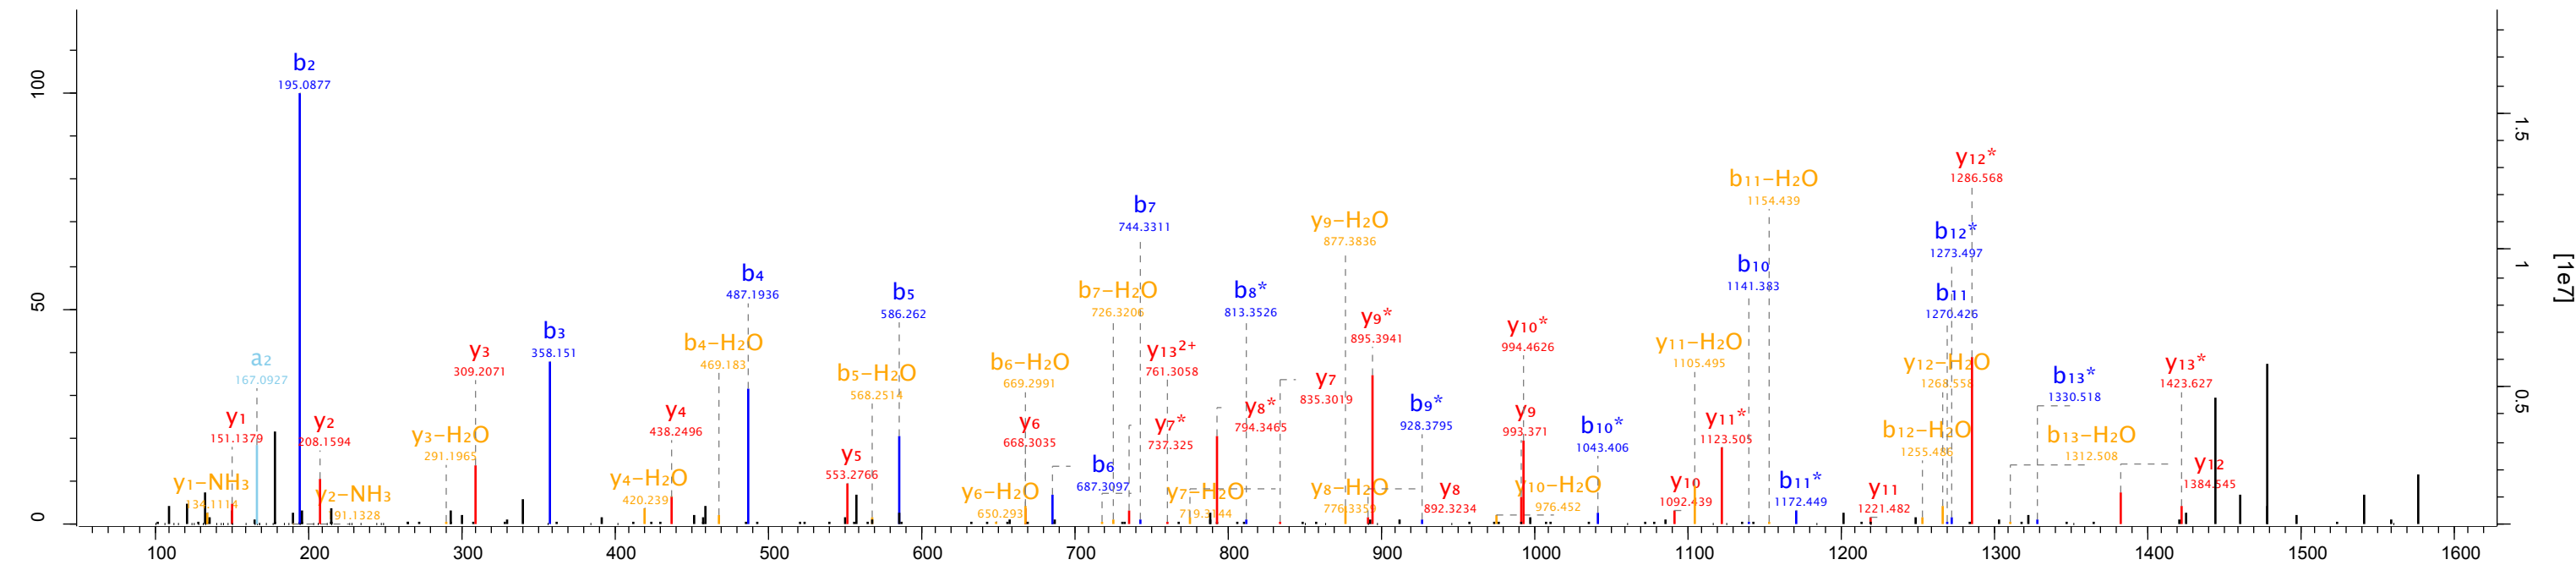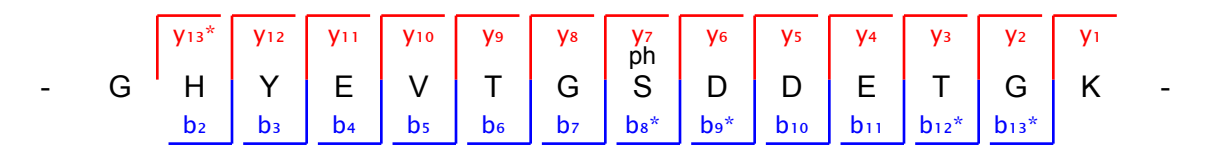

Raw file 20150812\_A375SR\_Phospho\_BR1\_05 Scan 5151 Method FTMS; HCD Score 64.22 m/z 530.24

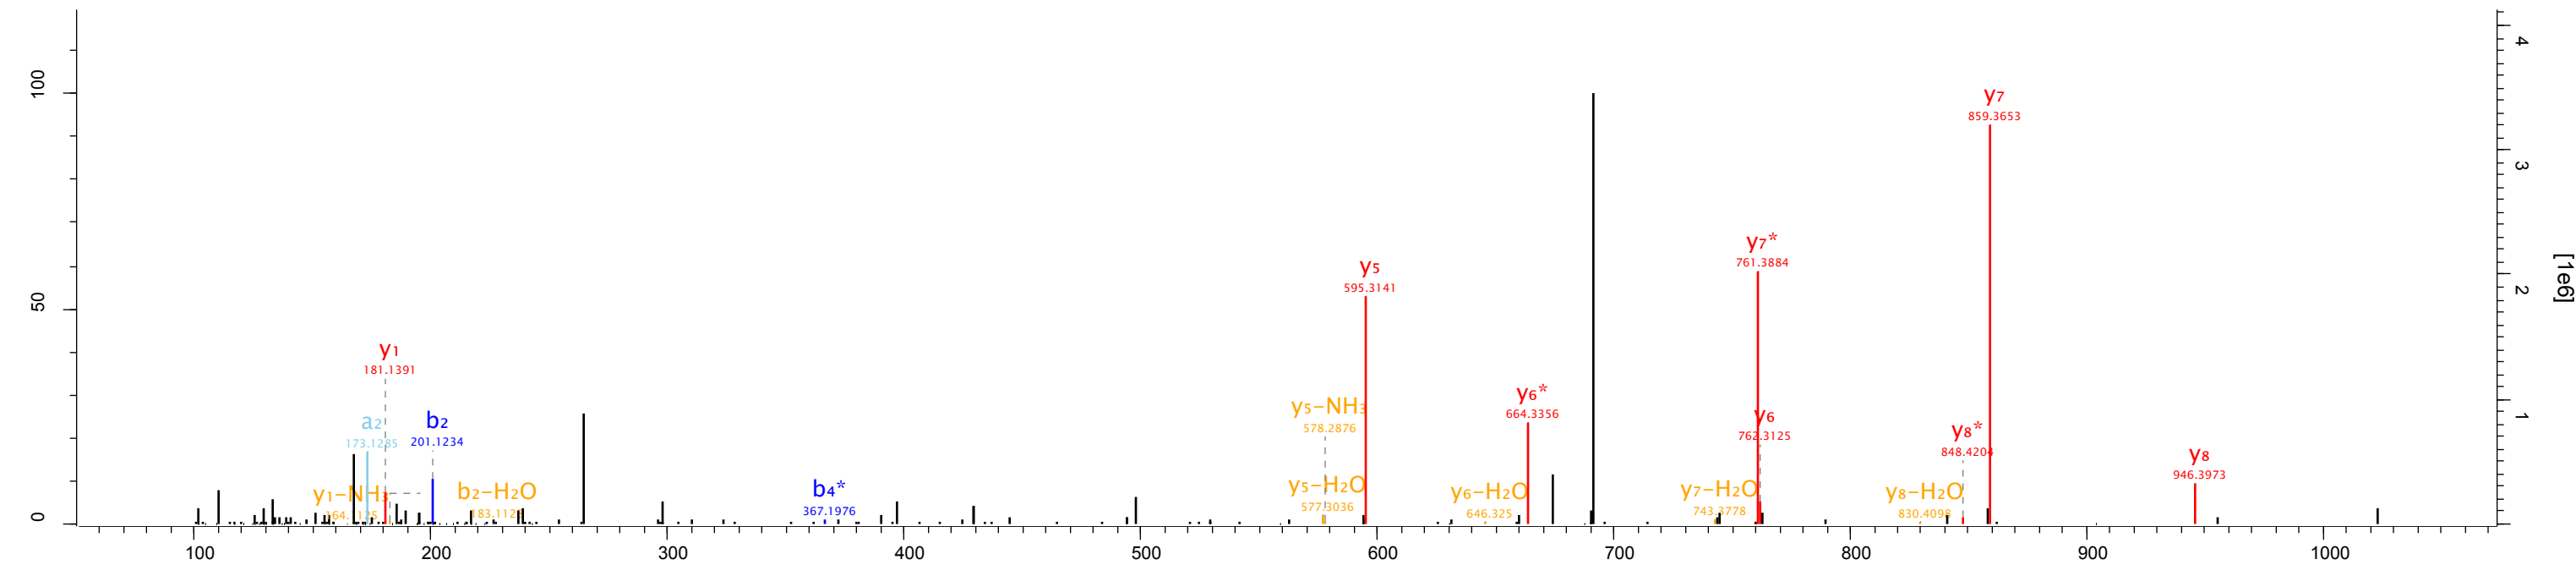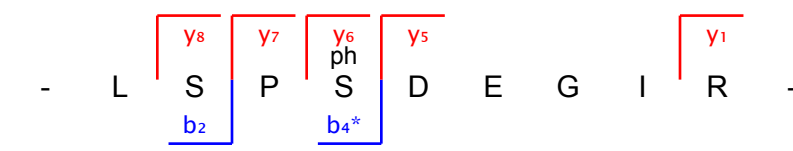

Raw file: 20150812\_A375SR\_Phospho\_BR1\_05  
 Scan: 5511 Method: FTMS; HCD Score: 121.77 m/z: 720.83 Gene names: NHSL1

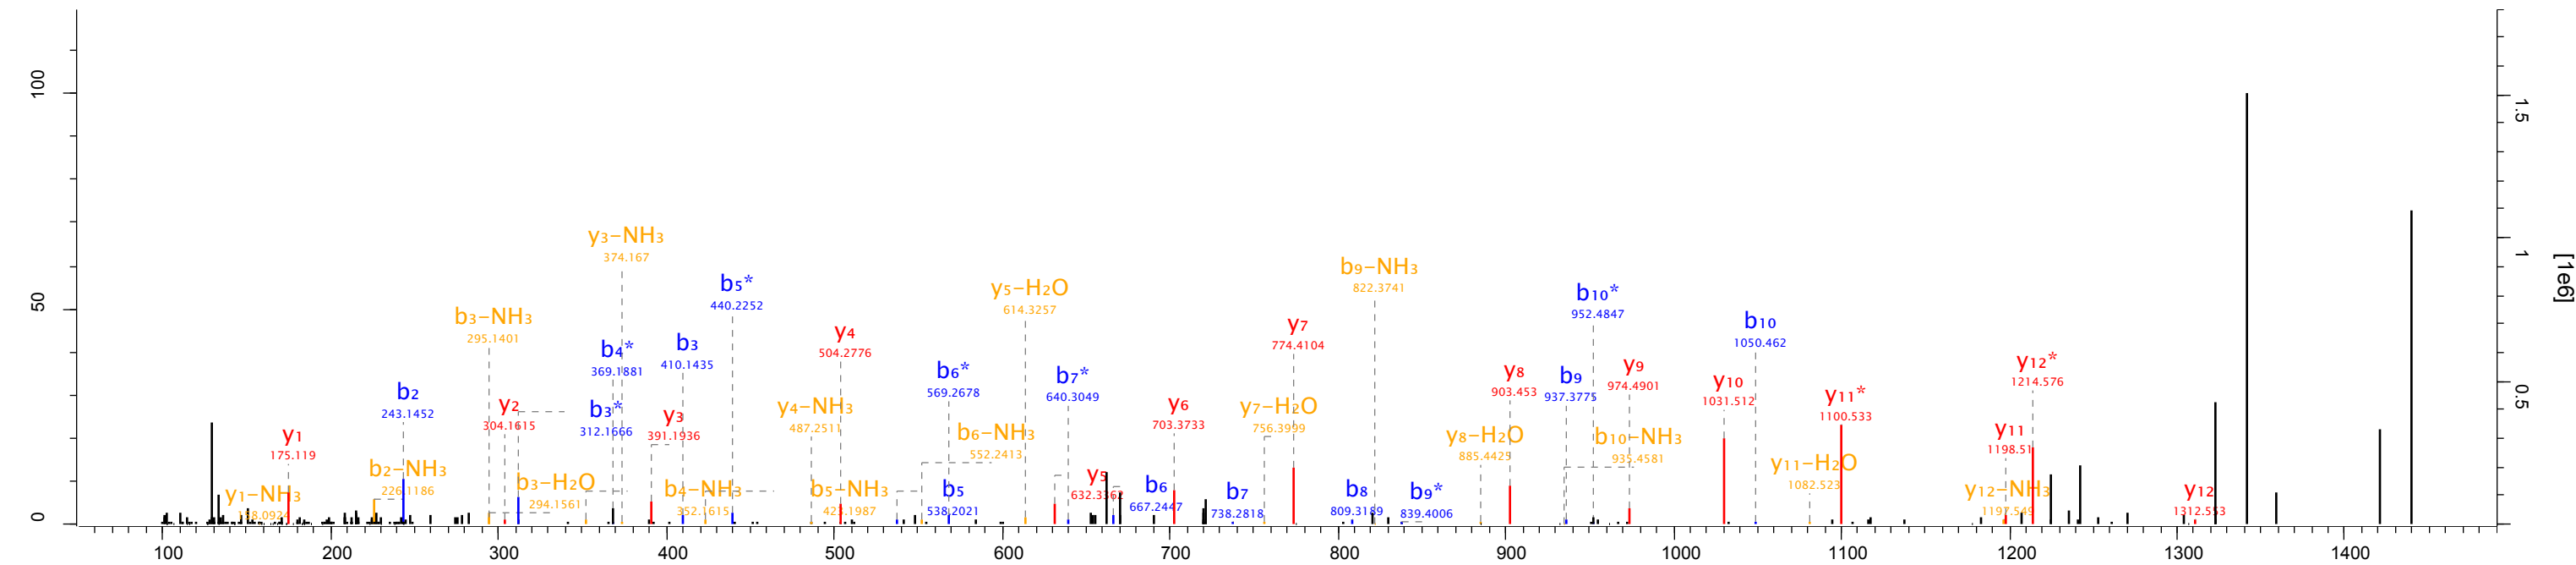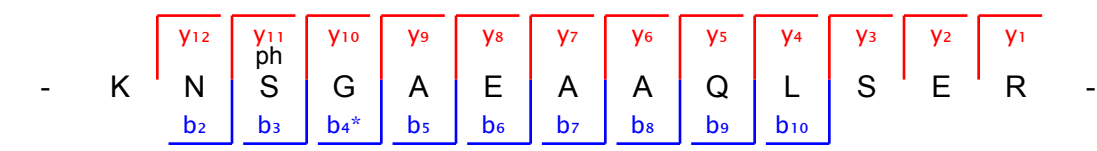

Raw file  
 20150812\_A375SR\_Phospho\_BR1\_05  
 Scan 6461 Method FTMS; HCD Score 172.9 m/z 731.81 Gene names RAB11FIP5

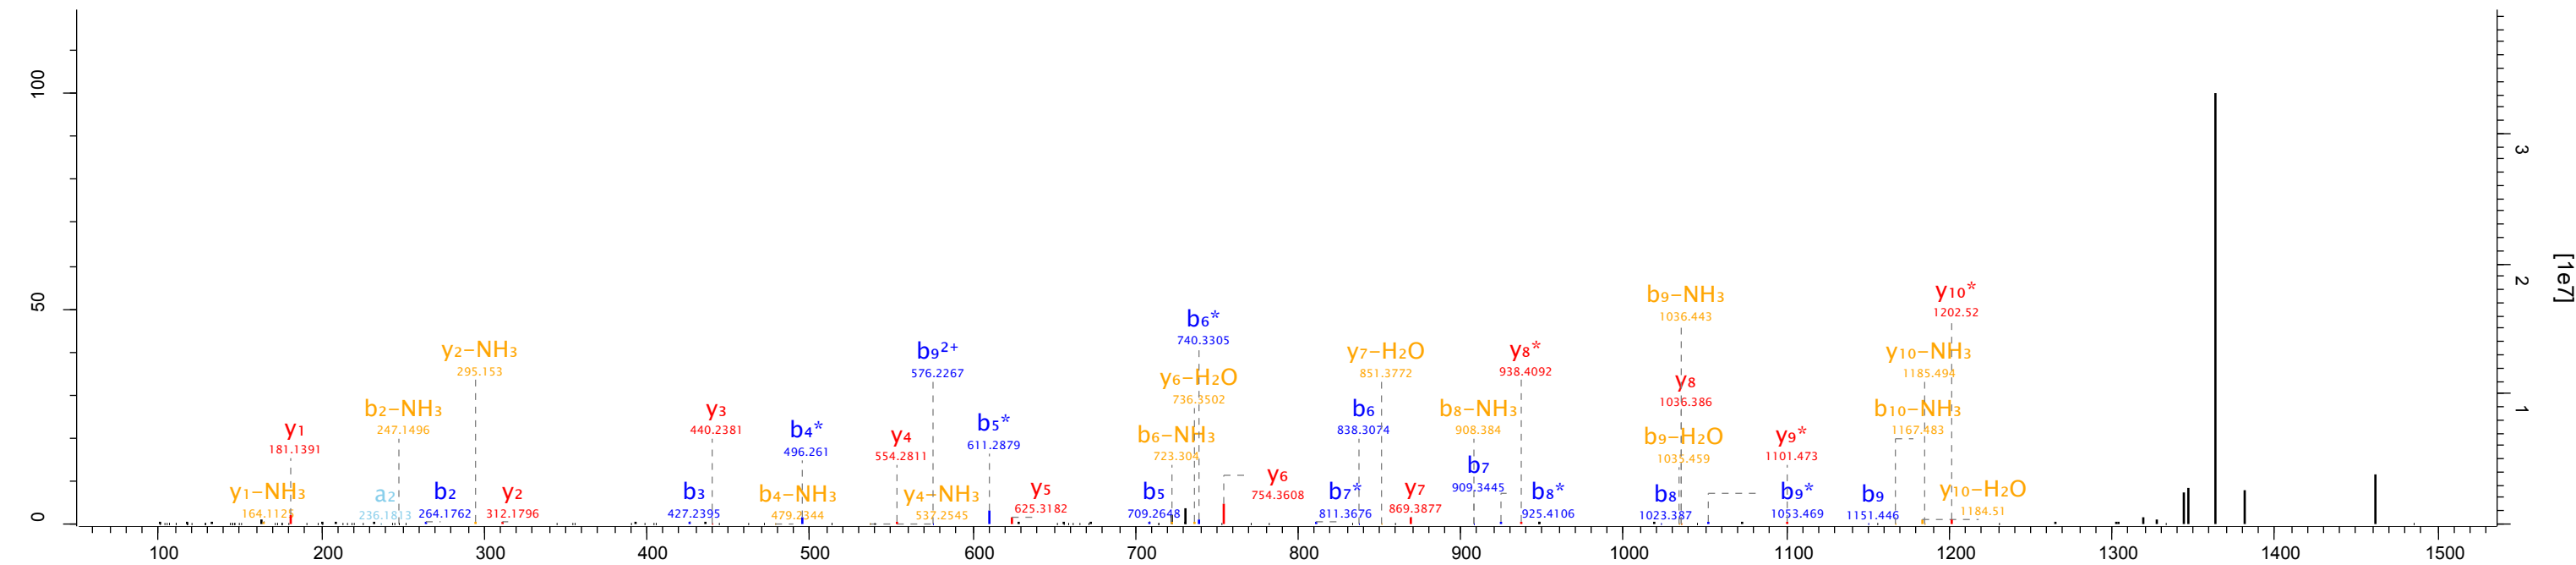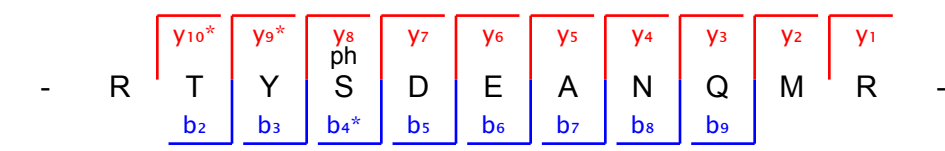

Raw file: 20150812\_A375SR\_Phospho\_BR1\_05  
 Scan: 6581 Method: FTMS; HCD Score: 57.57 m/z: 515.71 Gene names: ILF3

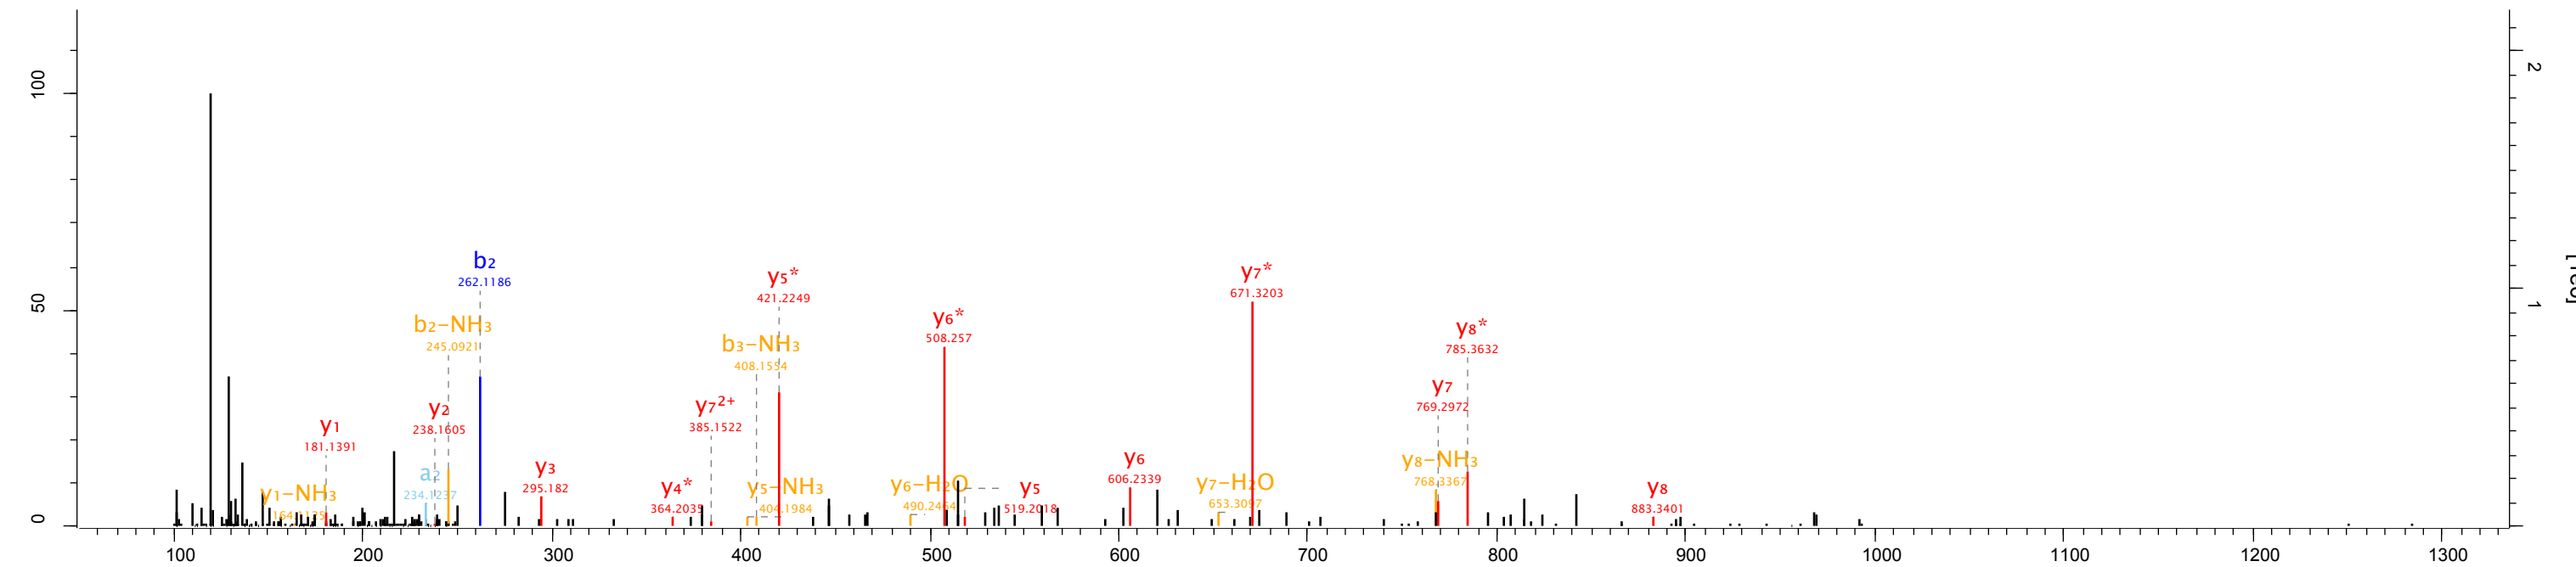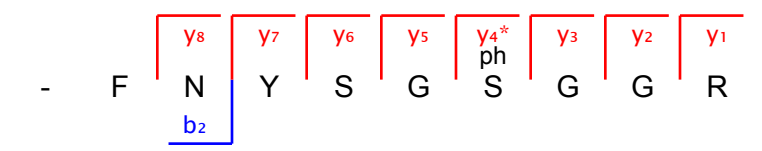

Raw file: 20150812\_A375SR\_Phospho\_BR1\_05  
 Scan: 6751 Method: FTMS; HCD Score: 86.88 m/z: 482.27 Gene names: CAMKK2;KIF1 8B;CAMKK1

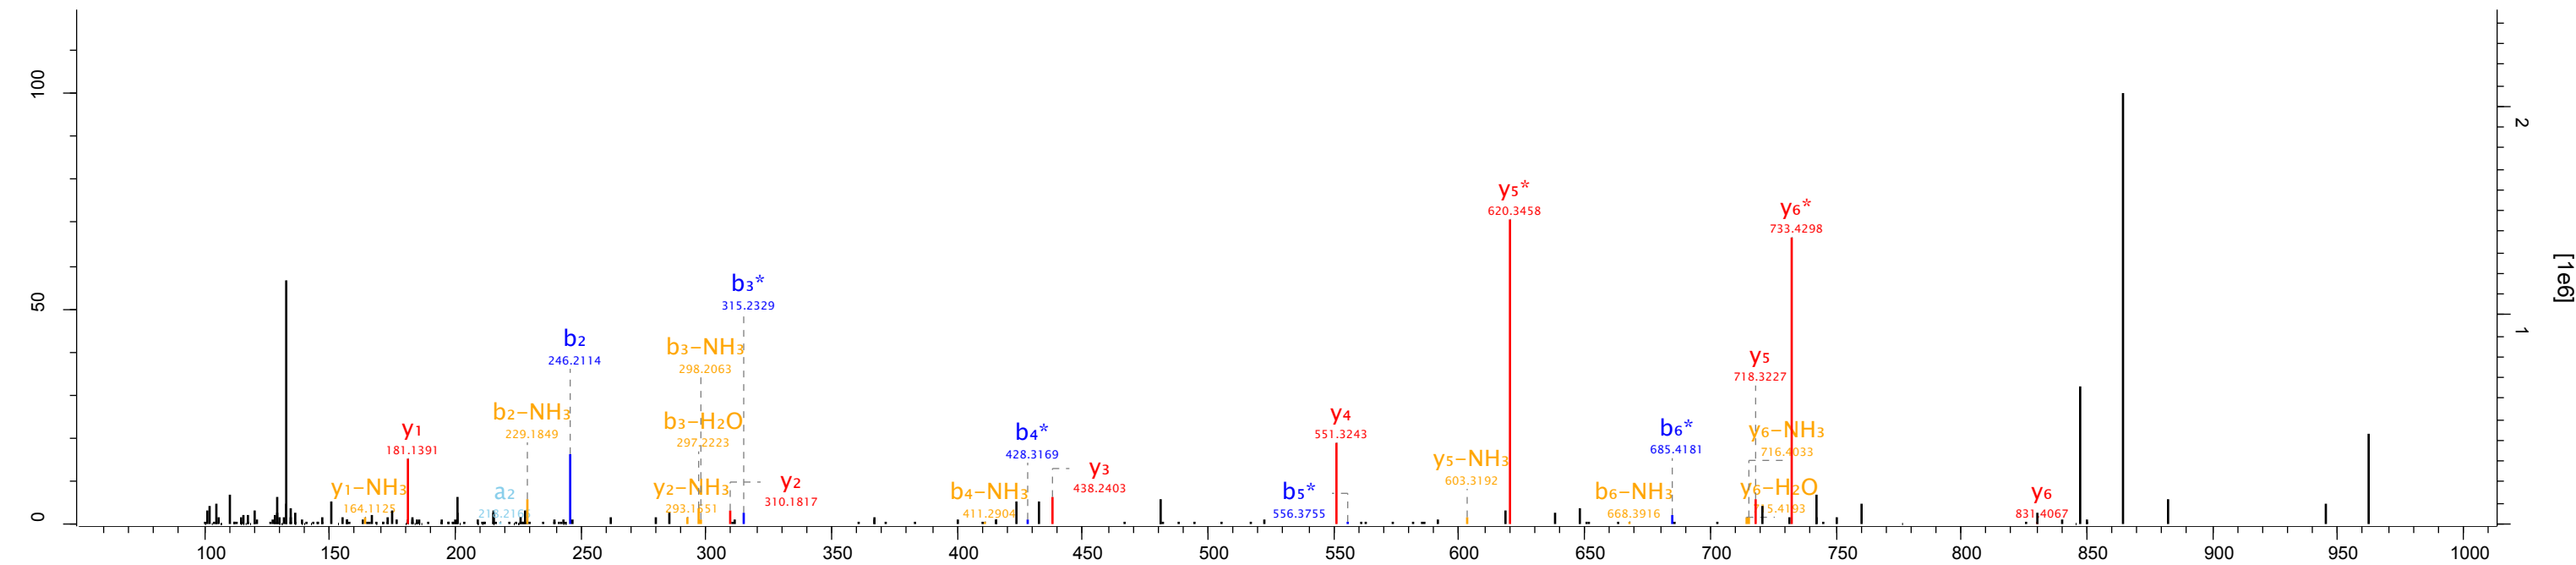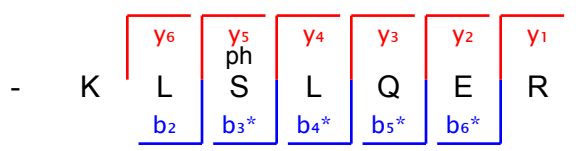





Raw file: 20150812\_A375SR\_Phospho\_BR1\_05  
 Scan: 6991 Method: FTMS; HCD Score: 100.07 m/z: 593.8 Gene names: YWHAB

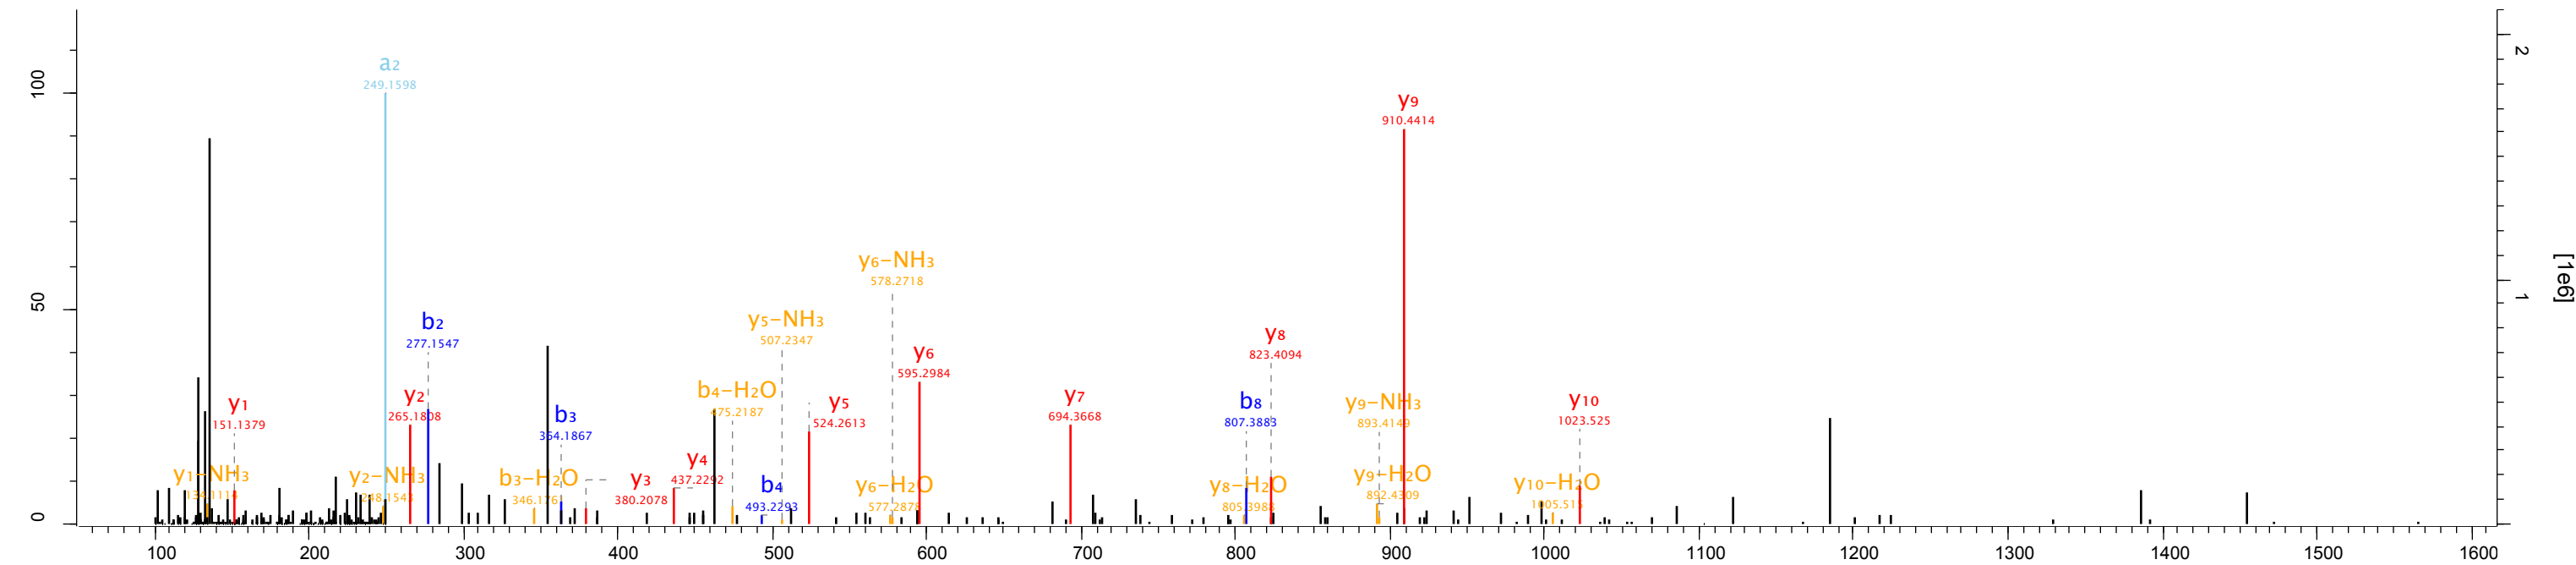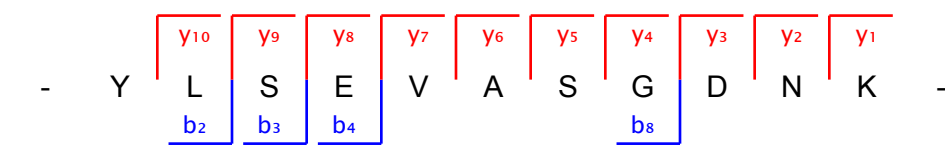

Raw file: 20150812\_A375SR\_Phospho\_BR1\_05  
 Scan: 7031 Method: FTMS; HCD Score: 125.36 m/z: 706.8 Gene names: ADNP

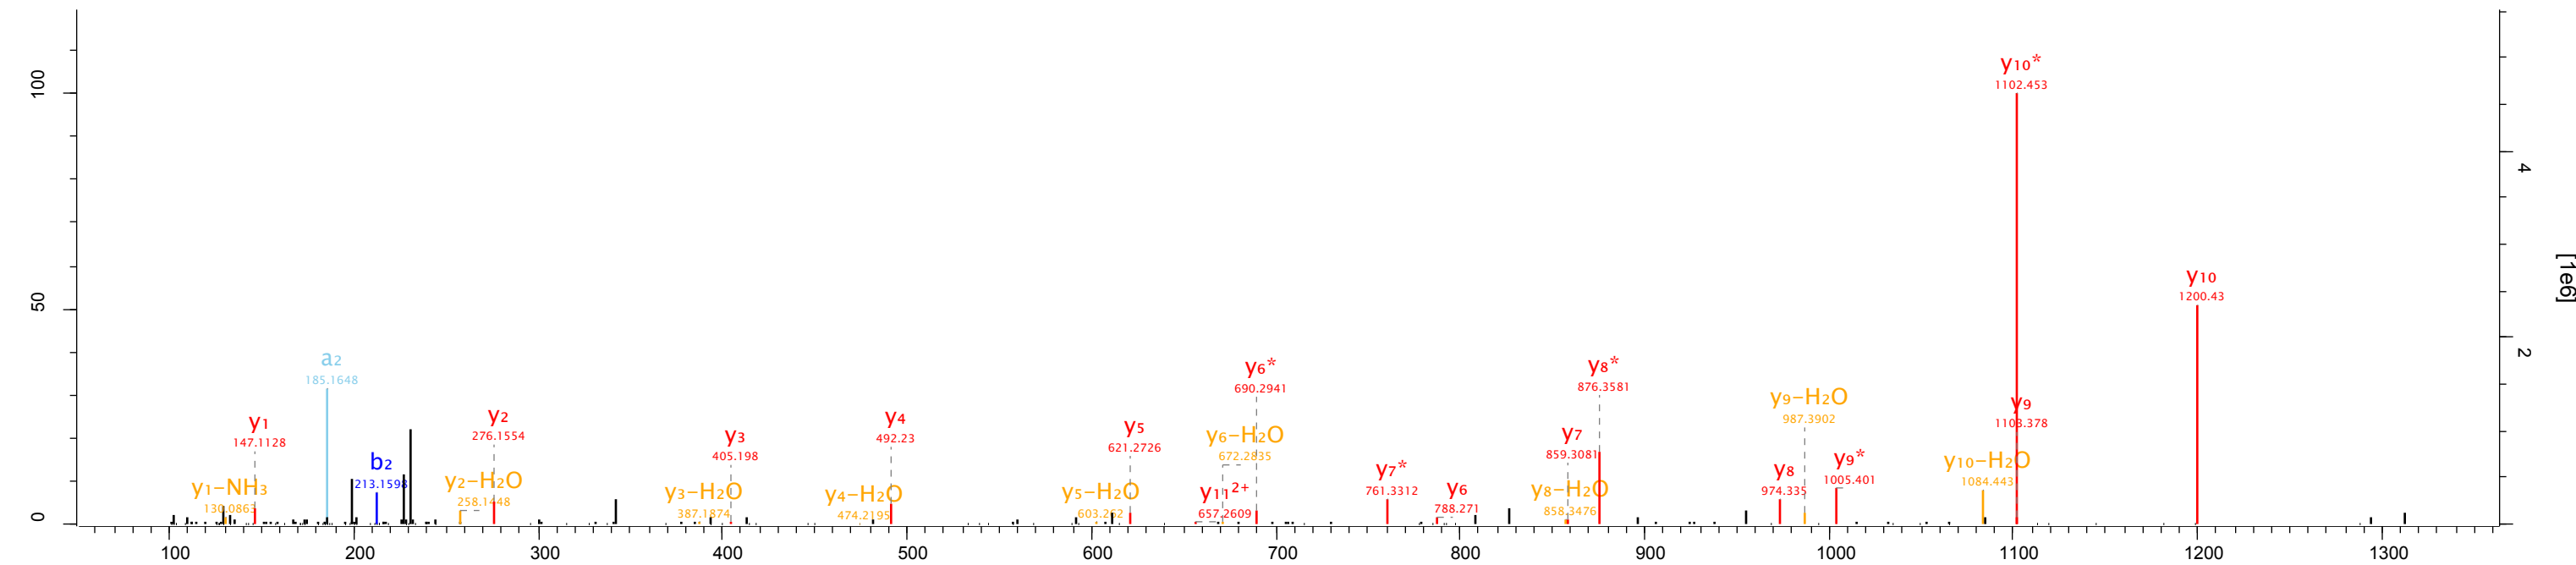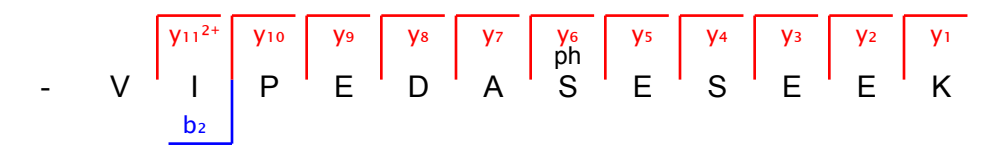

Raw file: 20150812\_A375SR\_Phospho\_BR1\_05  
 Scan: 7101 Method: FTMS; HCD Score: 112.43 m/z: 705.8 Gene names: ARHGEF40

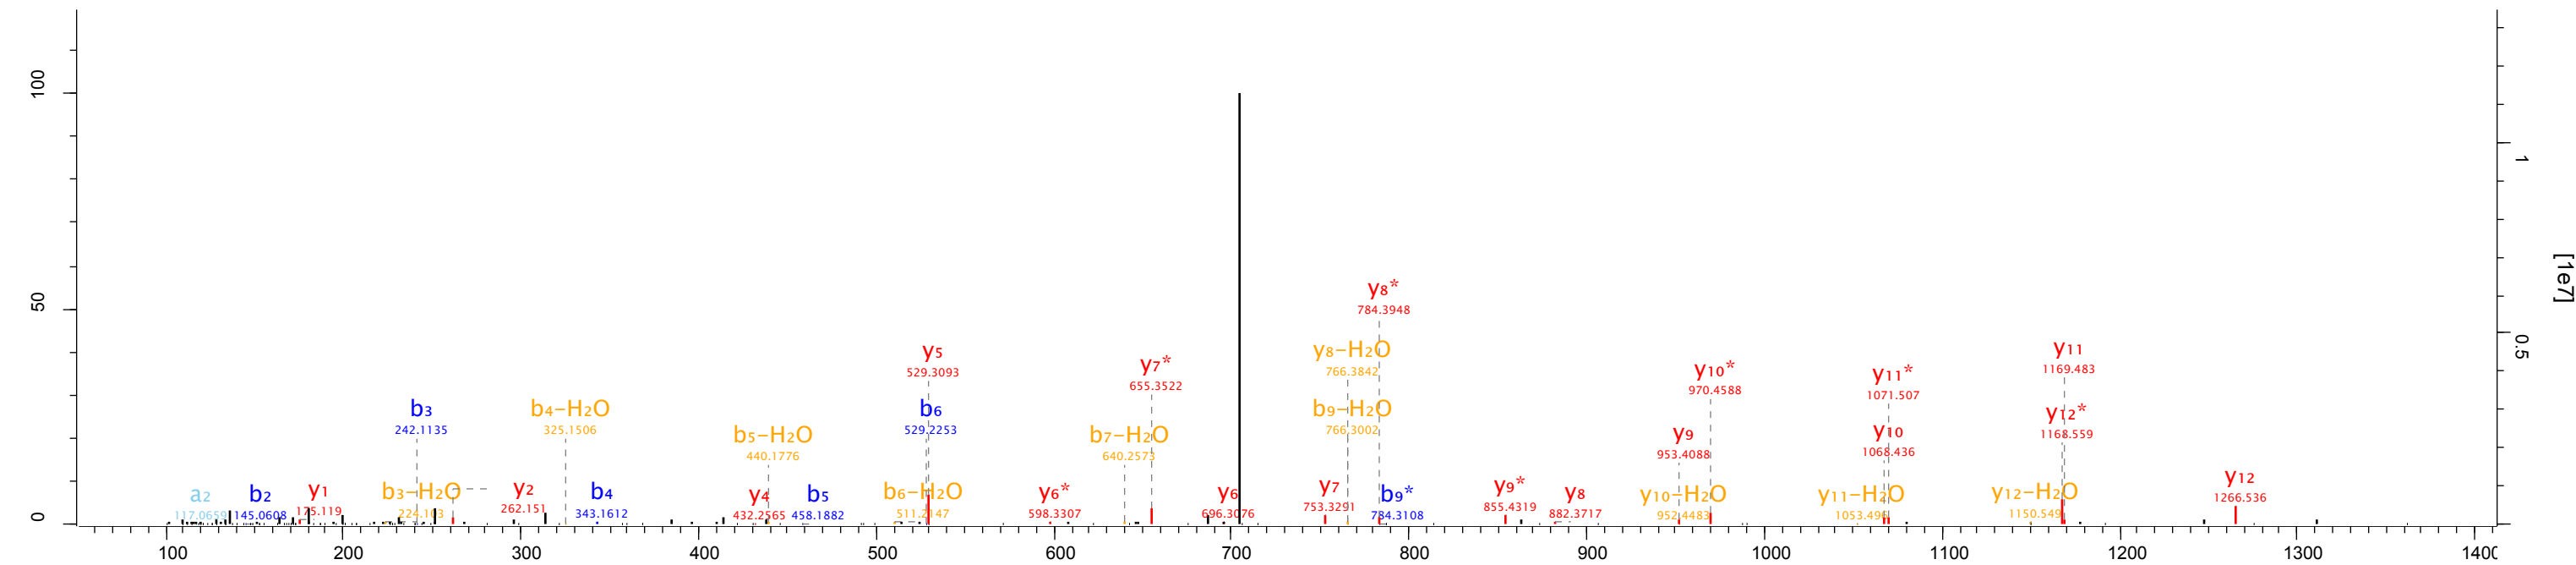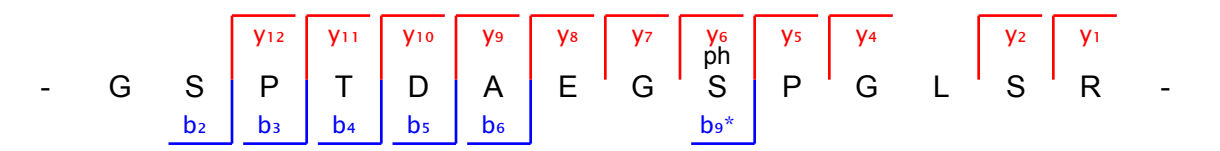

Raw file: 20150812\_A375SR\_Phospho\_BR1\_05  
 Scan: 7351 Method: FTMS; HCD Score: 114.89 m/z: 482.72 Gene names: GPBP1L1

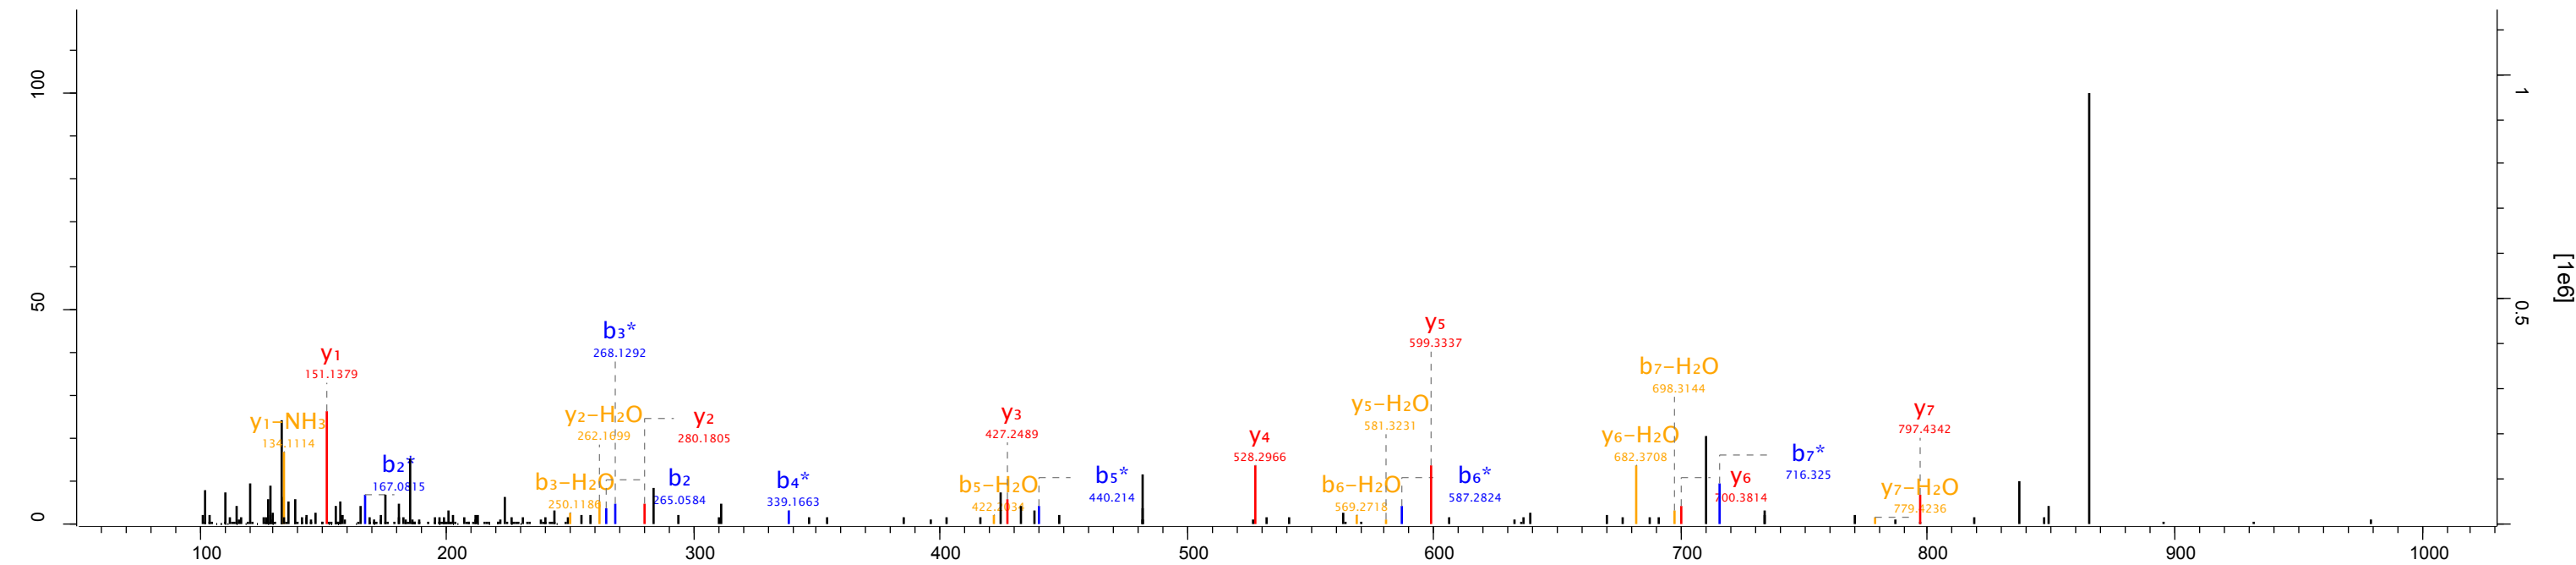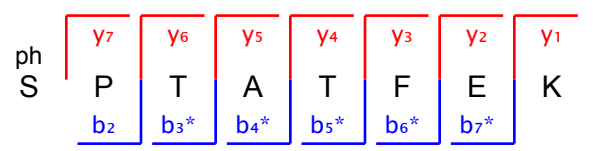

Raw file: 20150812\_A375SR\_Phospho\_BR1\_05  
 Scan: 7951 Method: FTMS; HCD Score: 115.12 m/z: 634.25 Gene names: CHAMP1

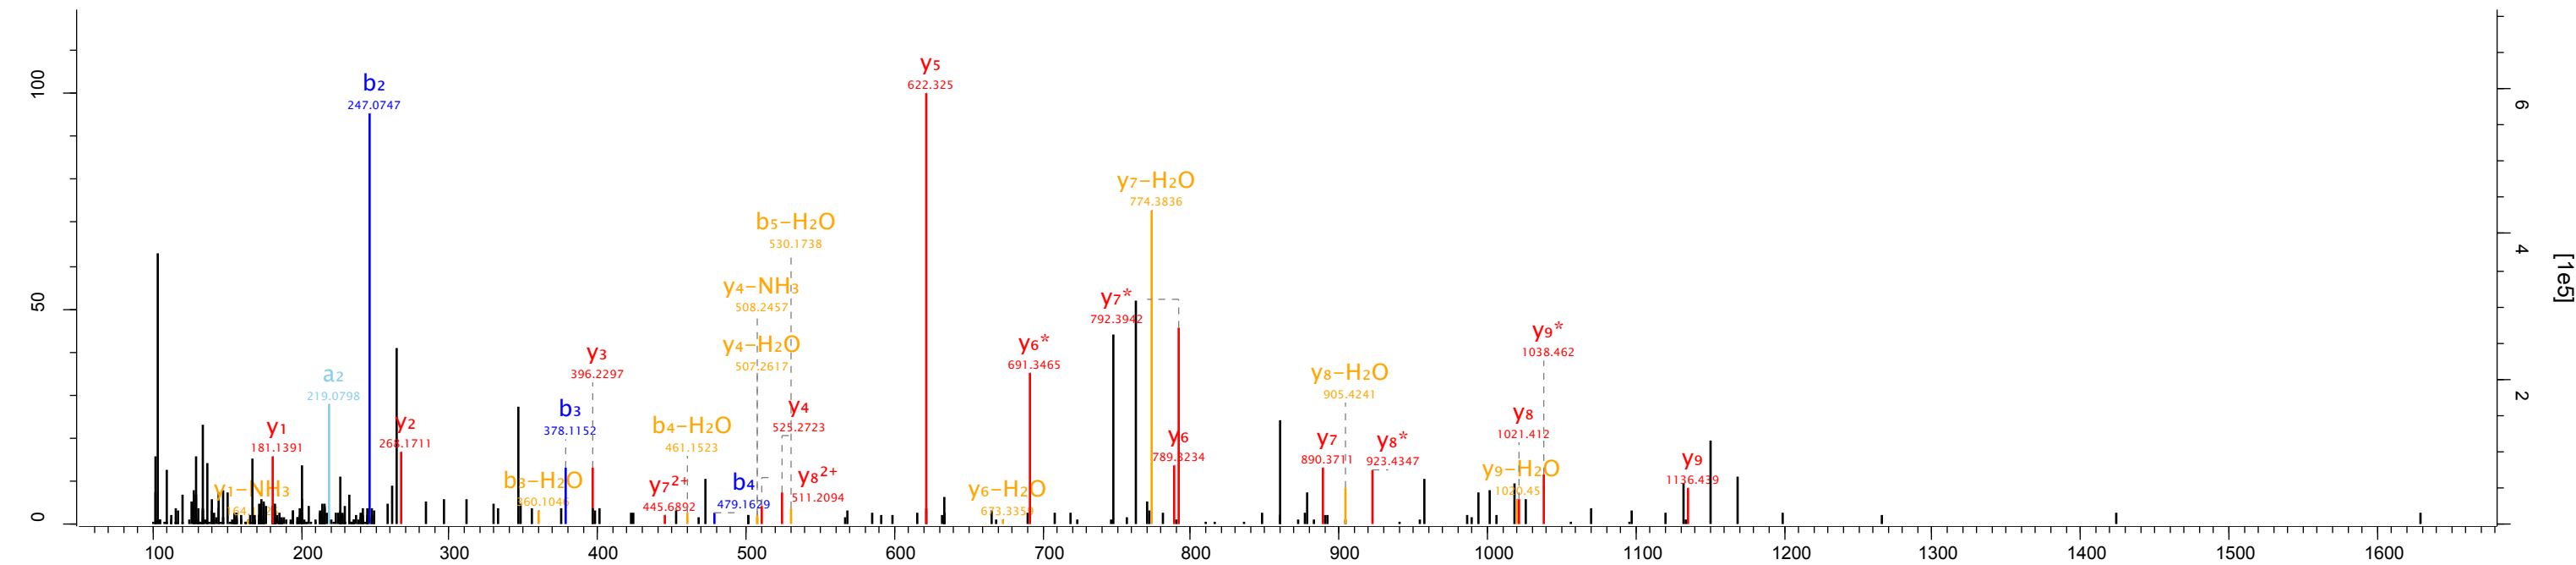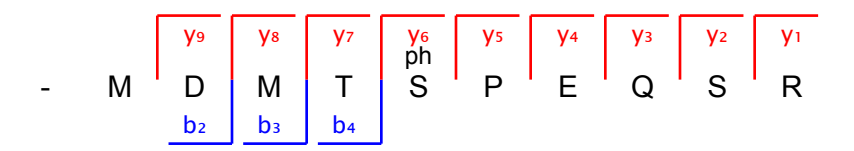

Raw file 20150812\_A375SR\_Phospho\_BR1\_05 Scan 8461 Method FTMS; HCD Score 76.24 m/z 553.24 Gene names C2CD5

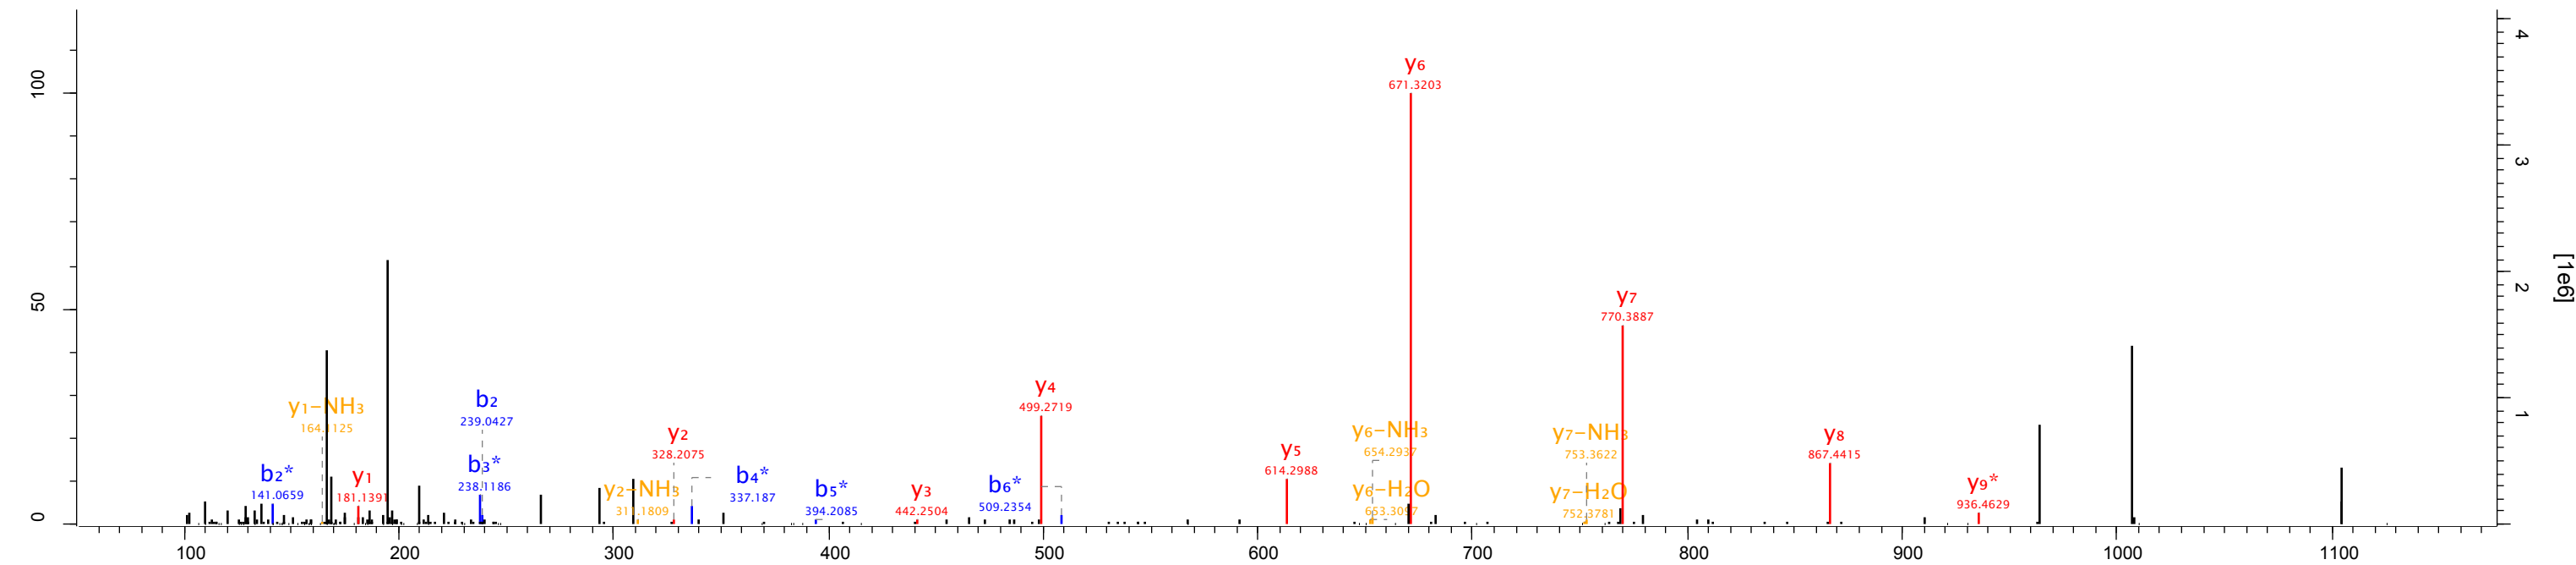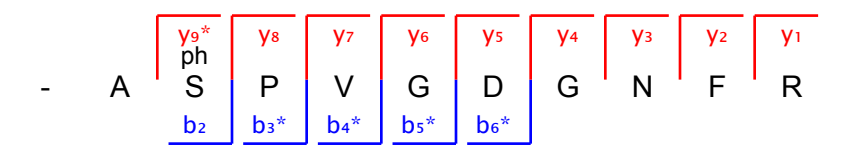

Raw file: 20150812\_A375SR\_Phospho\_BR1\_05  
 Scan: 8661 Method: FTMS; HCD Score: 318.69 m/z: 980.4 Gene names: SLC9A3R1

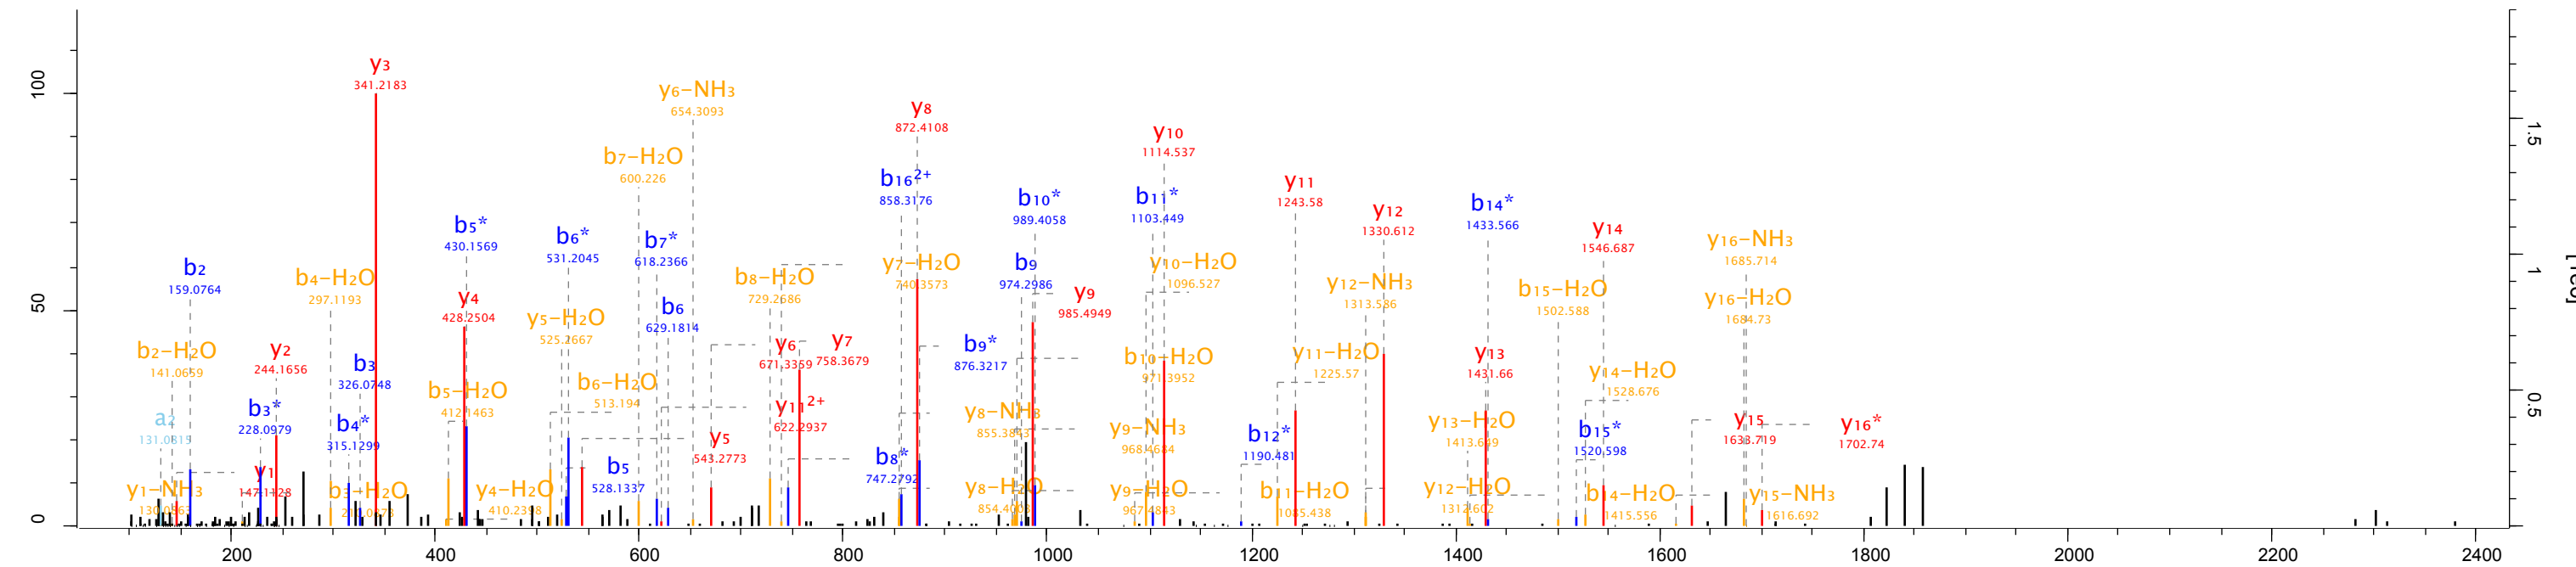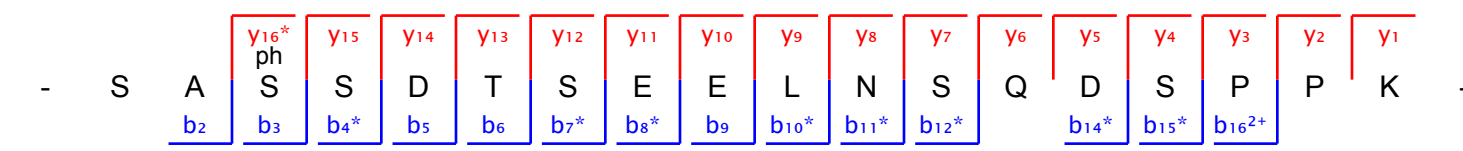

Raw file: 20150812\_A375SR\_Phospho\_BR1\_05  
 Scan: 8741 Method: FTMS; HCD Score: 157.35 m/z: 709.27 Gene names: SCAF1

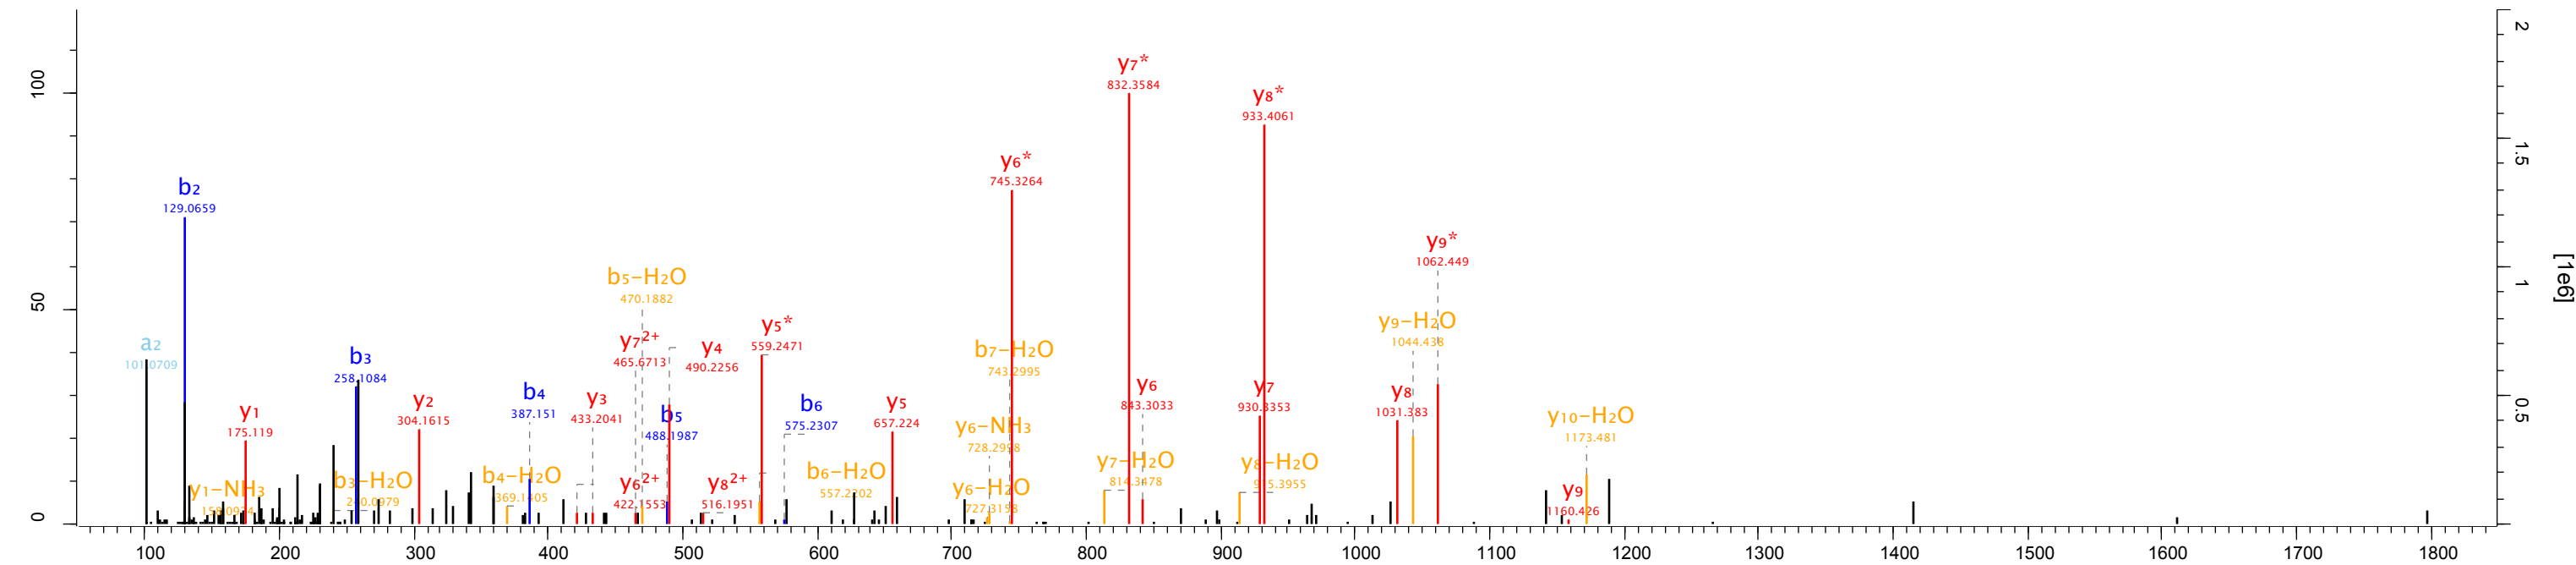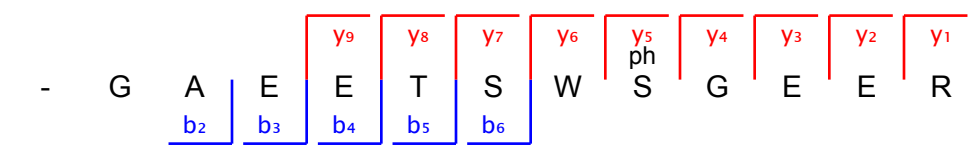



Raw file 20150812\_A375SR\_Phospho\_BR1\_06 Scan 10741 Method FTMS; HCD Score 112.57 m/z 959.87 Gene names PA2G4

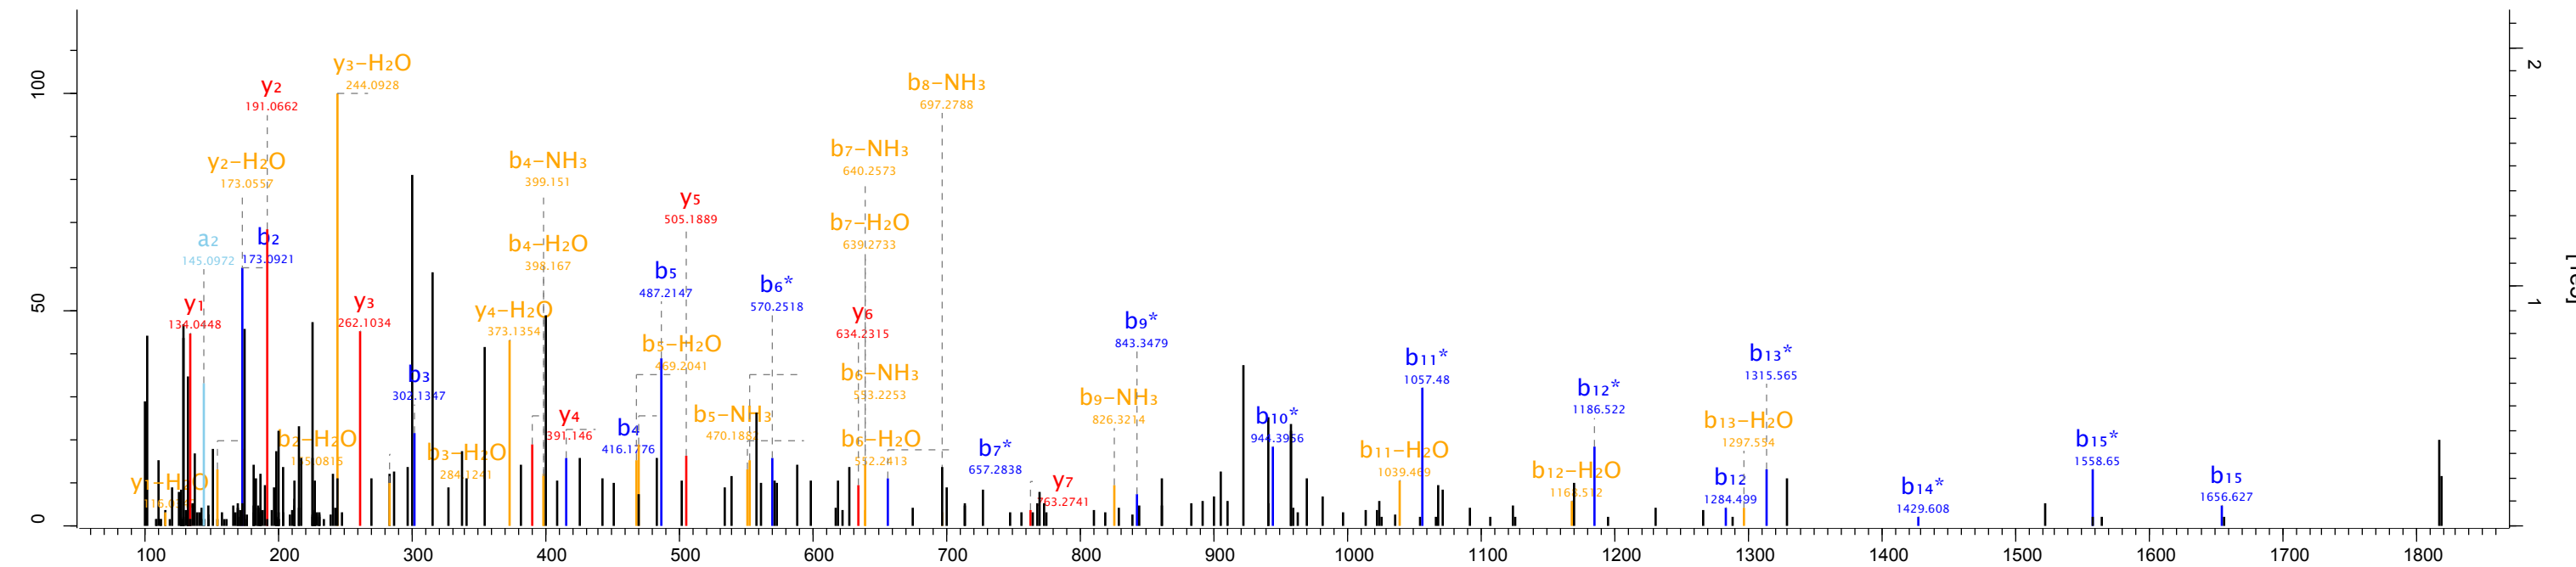

- T A E N A T S G E T L E E N E A G D -

ph

b<sub>2</sub> b<sub>3</sub> b<sub>4</sub> b<sub>5</sub> b<sub>6</sub>\* b<sub>7</sub>\* b<sub>9</sub>\* b<sub>10</sub>\* b<sub>11</sub>\* b<sub>12</sub> b<sub>13</sub>\* b<sub>14</sub>\* b<sub>15</sub> y<sub>7</sub> y<sub>6</sub> y<sub>5</sub> y<sub>4</sub> y<sub>3</sub> y<sub>2</sub> y<sub>1</sub>

Raw file 20150812\_A375SR\_Phospho\_BR1\_06 Scan 11111 Method FTMS; HCD Score 329.78 m/z 986.4 Gene names MSH6

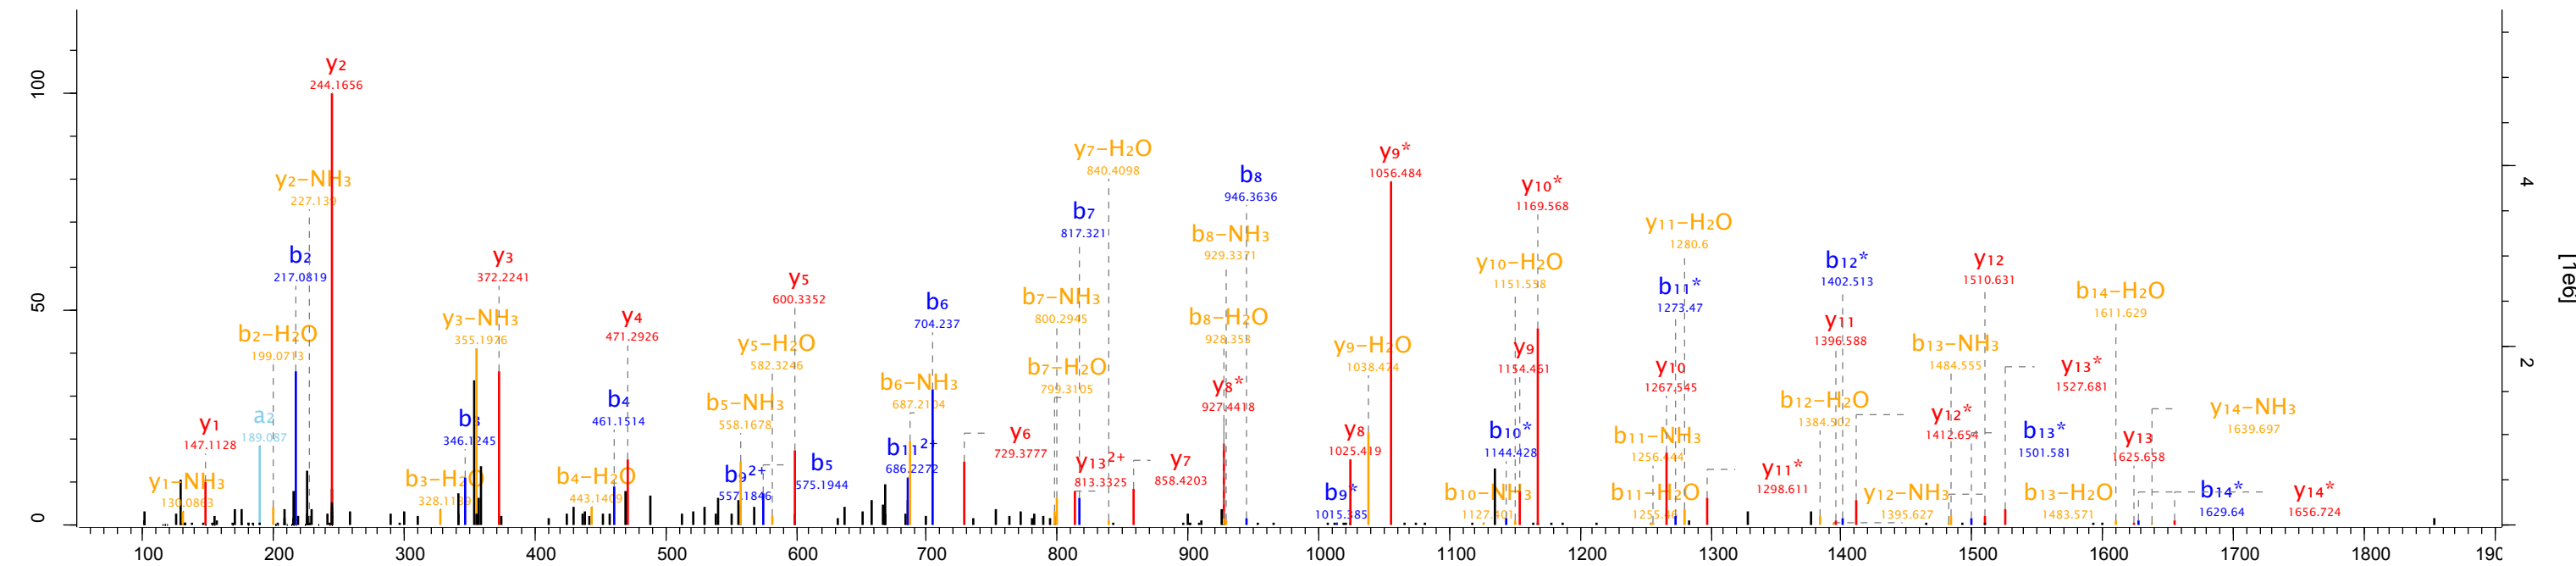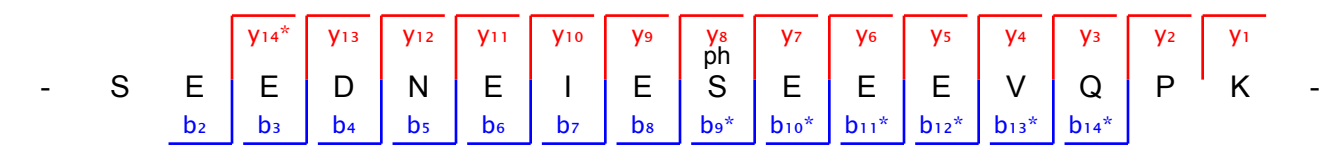

Raw file 20150812\_A375SR\_Phospho\_BR1\_06 Scan 11471 Method FTMS; HCD Score 183.41 m/z 679.34 Gene names LOH12CR1

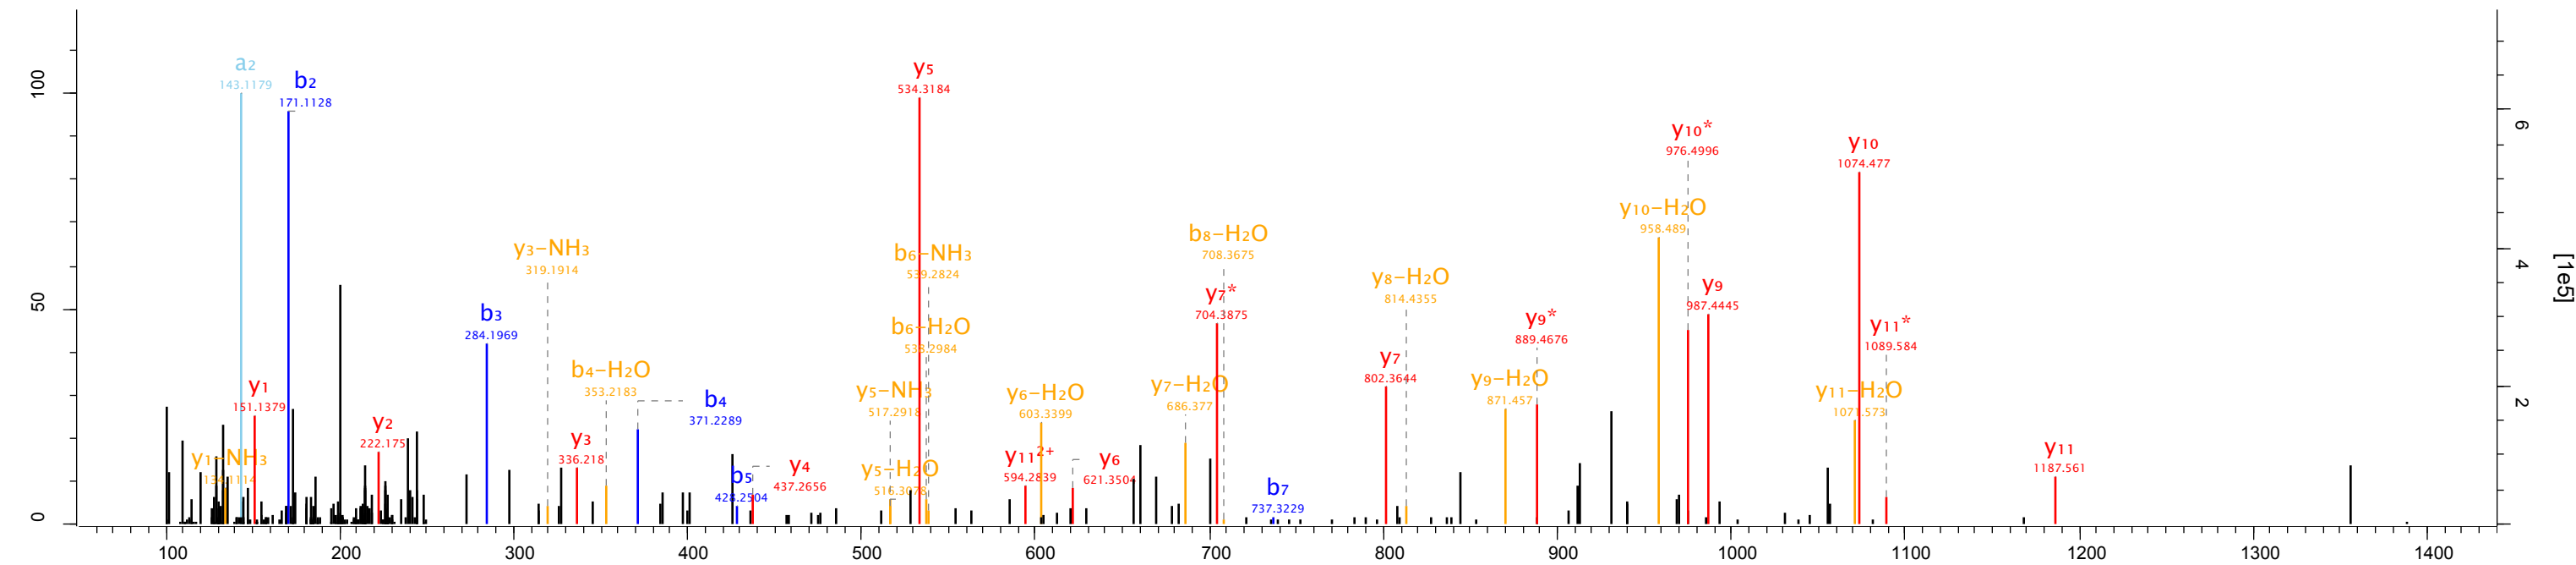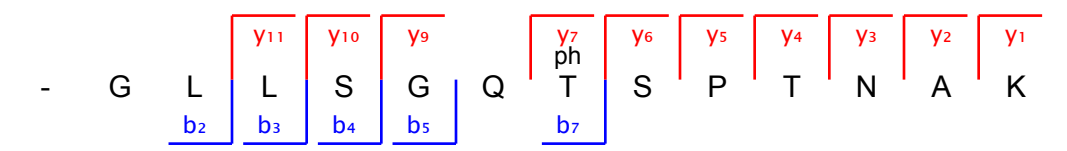

Raw file: 20150812\_A375SR\_Phospho\_BR1\_06  
 Scan: 12951 Method: FTMS; HCD Score: 178.32 m/z: 930.89 Gene names: NMD3

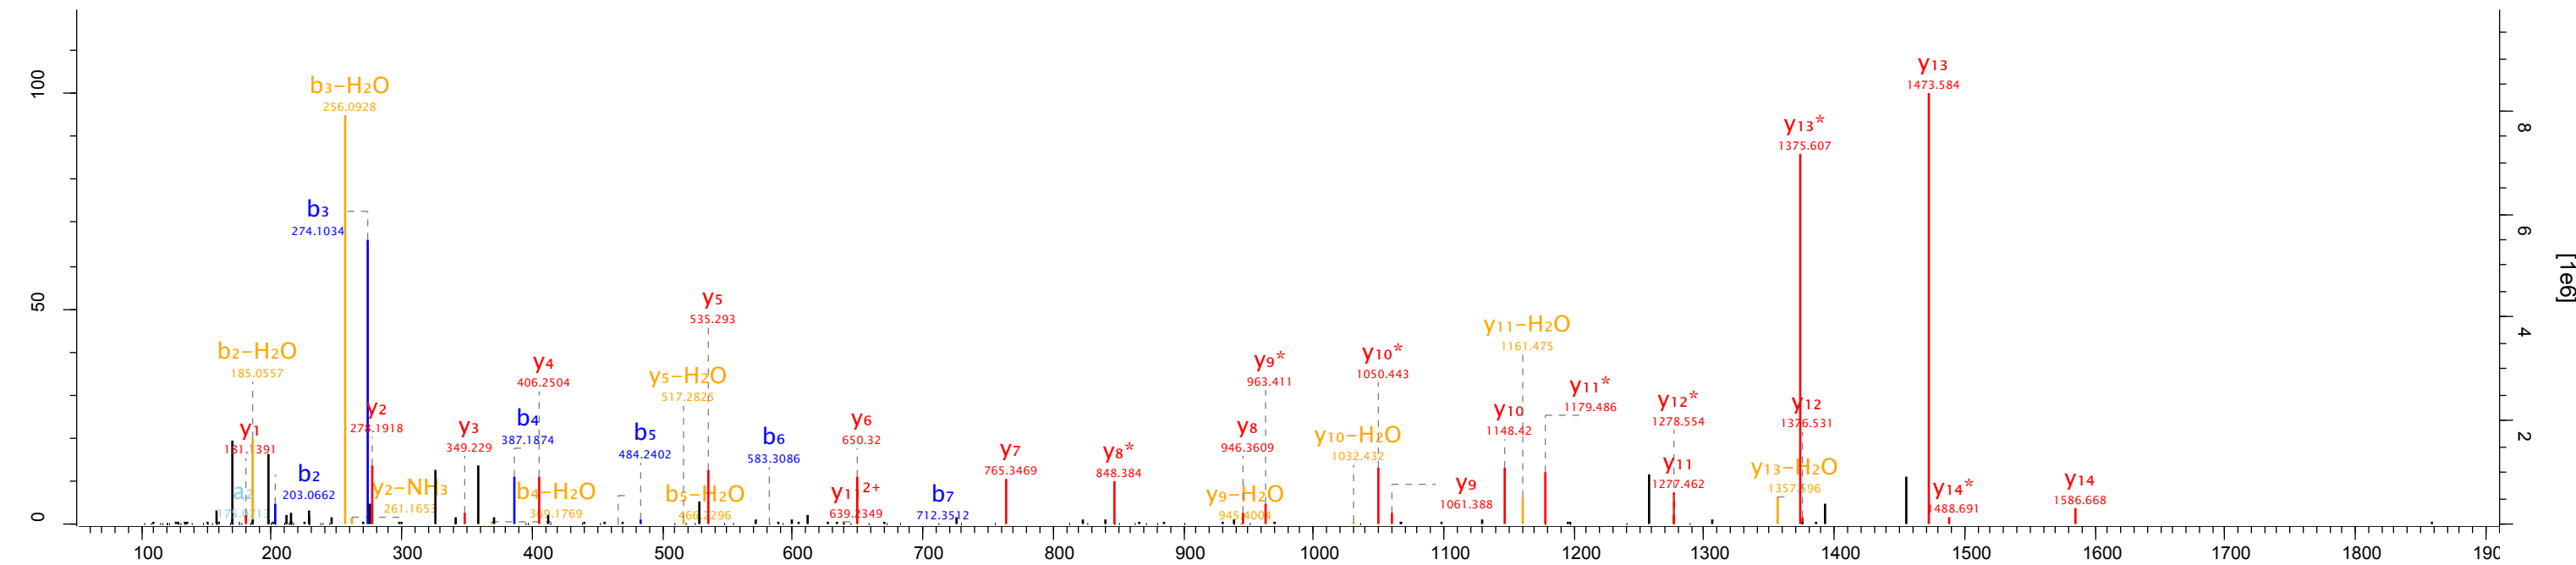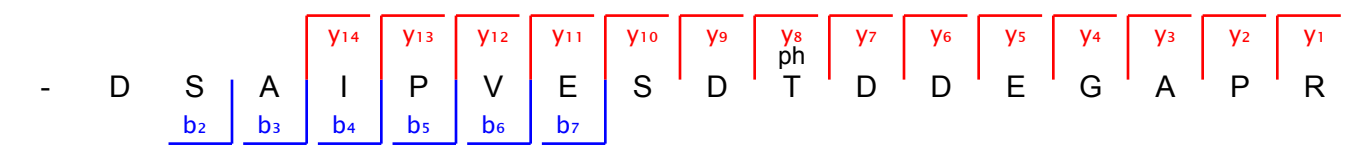

Raw file 20150812\_A375SR\_Phospho\_BR1\_06 Scan 13241 Method FTMS; HCD Score 89.62 m/z 436.56 Gene names CCDC88A

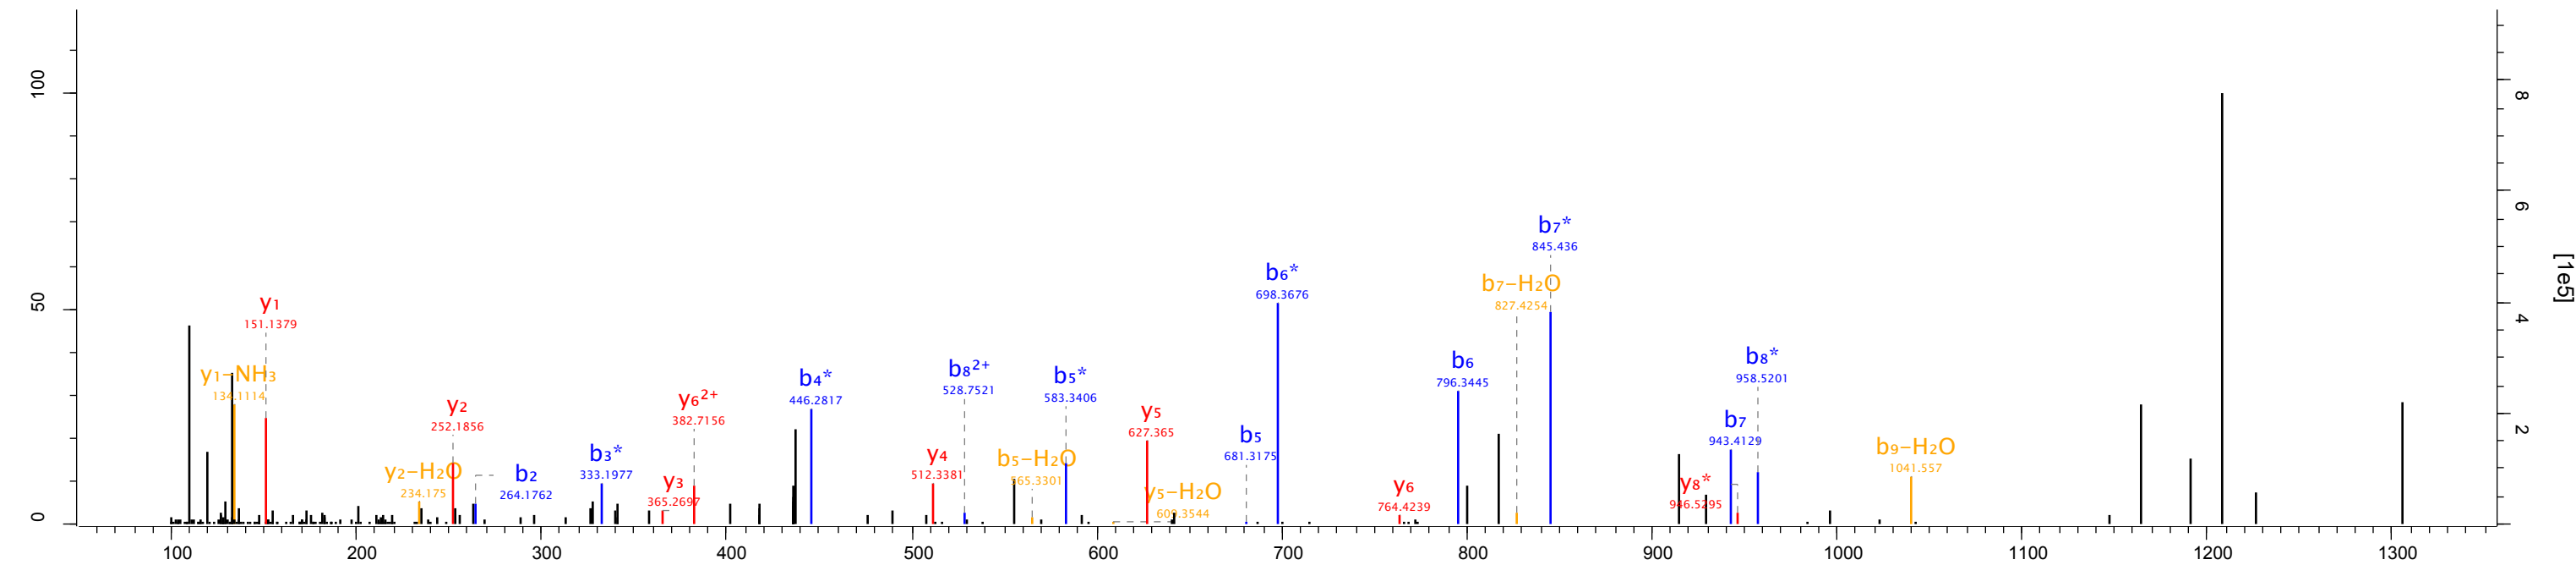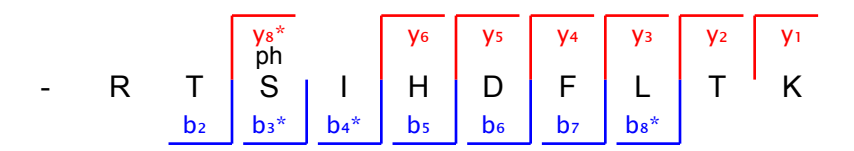

Raw file Scan Method Score m/z Gene names  
 20150812\_A375SR\_Phospho\_BR1\_06 13871 FTMS; HCD 92.2 469.24 CCNL1

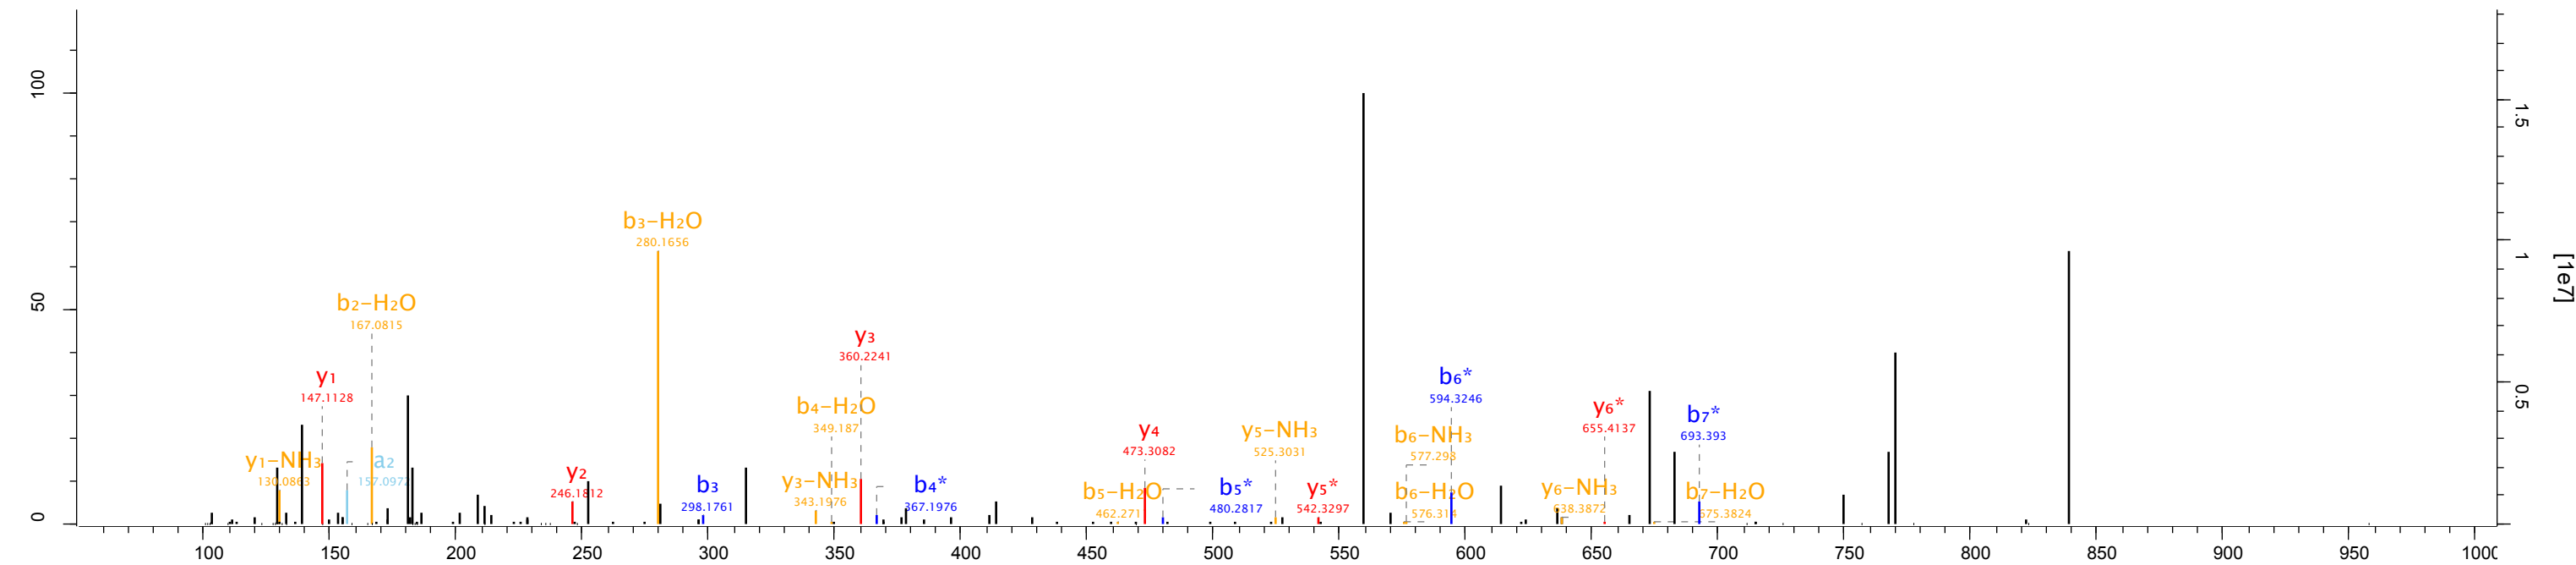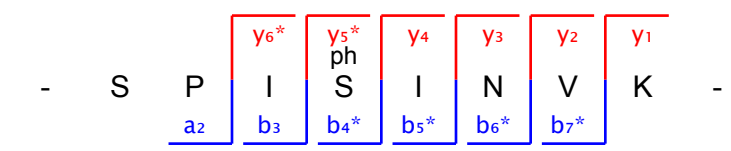

Raw file 20150812\_A375SR\_Phospho\_BR1\_06 Scan 14141 Method FTMS; HCD Score 81.59 m/z 726.36 Gene names OFD1

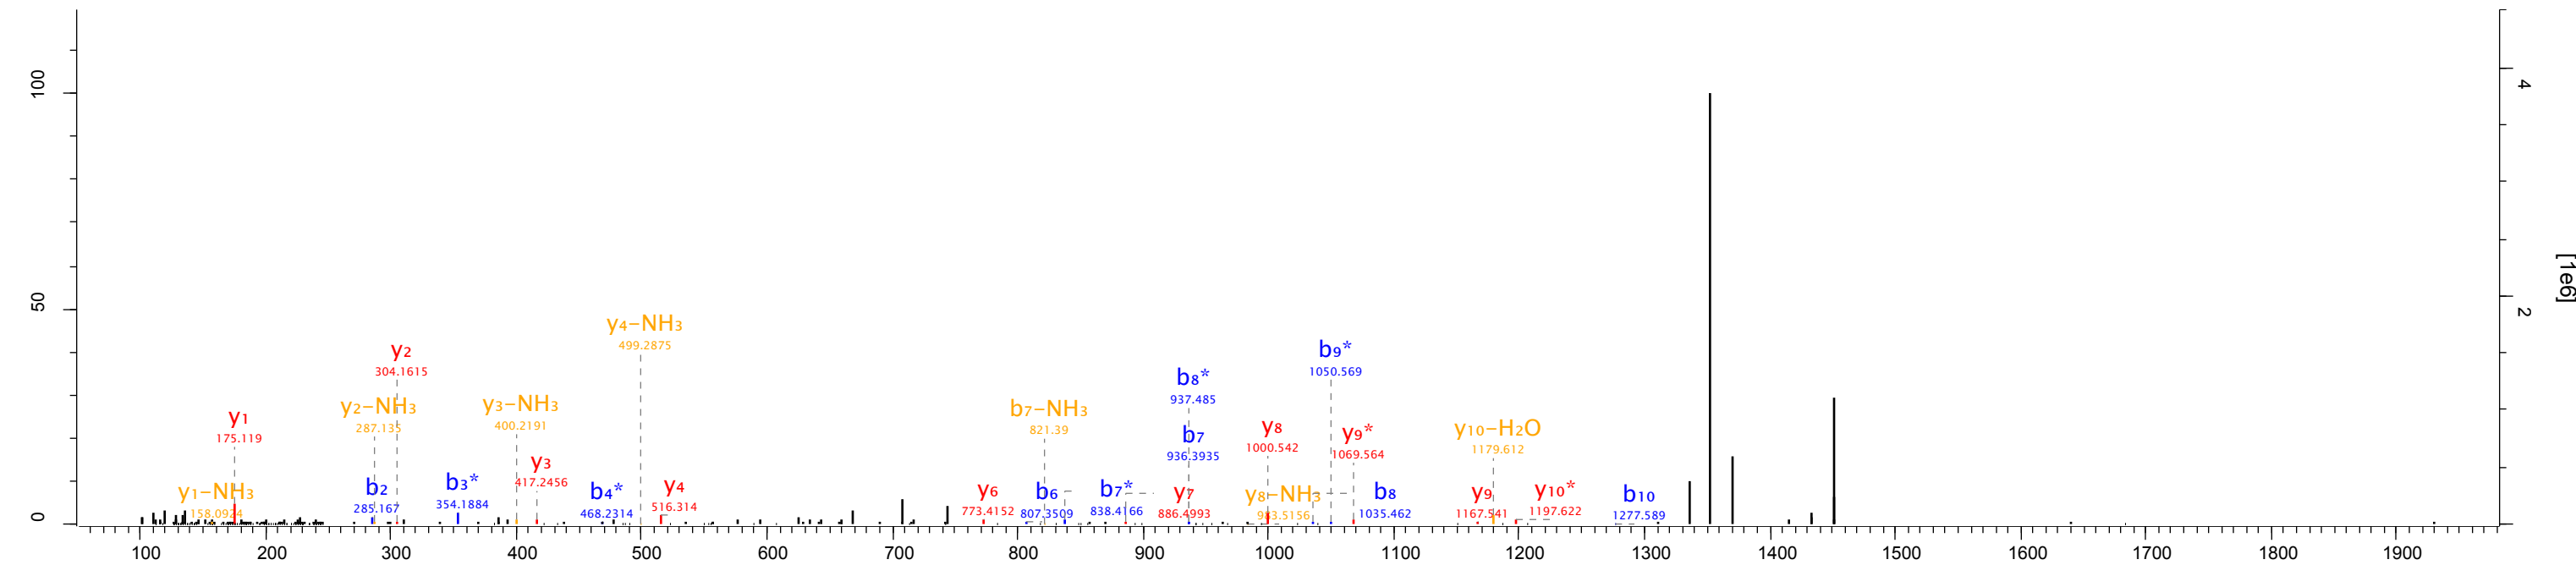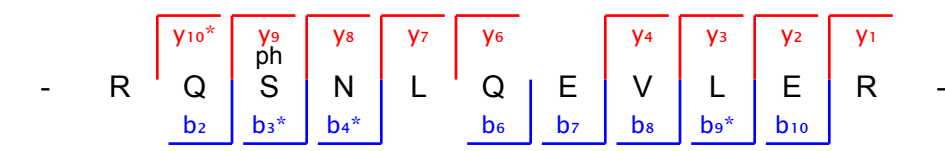

Raw file: 20150812\_A375SR\_Phospho\_BR1\_06  
 Scan: 15441  
 Method: FTMS; HCD  
 Score: 141.2  
 m/z: 1111.83  
 Gene names: SAMD4B

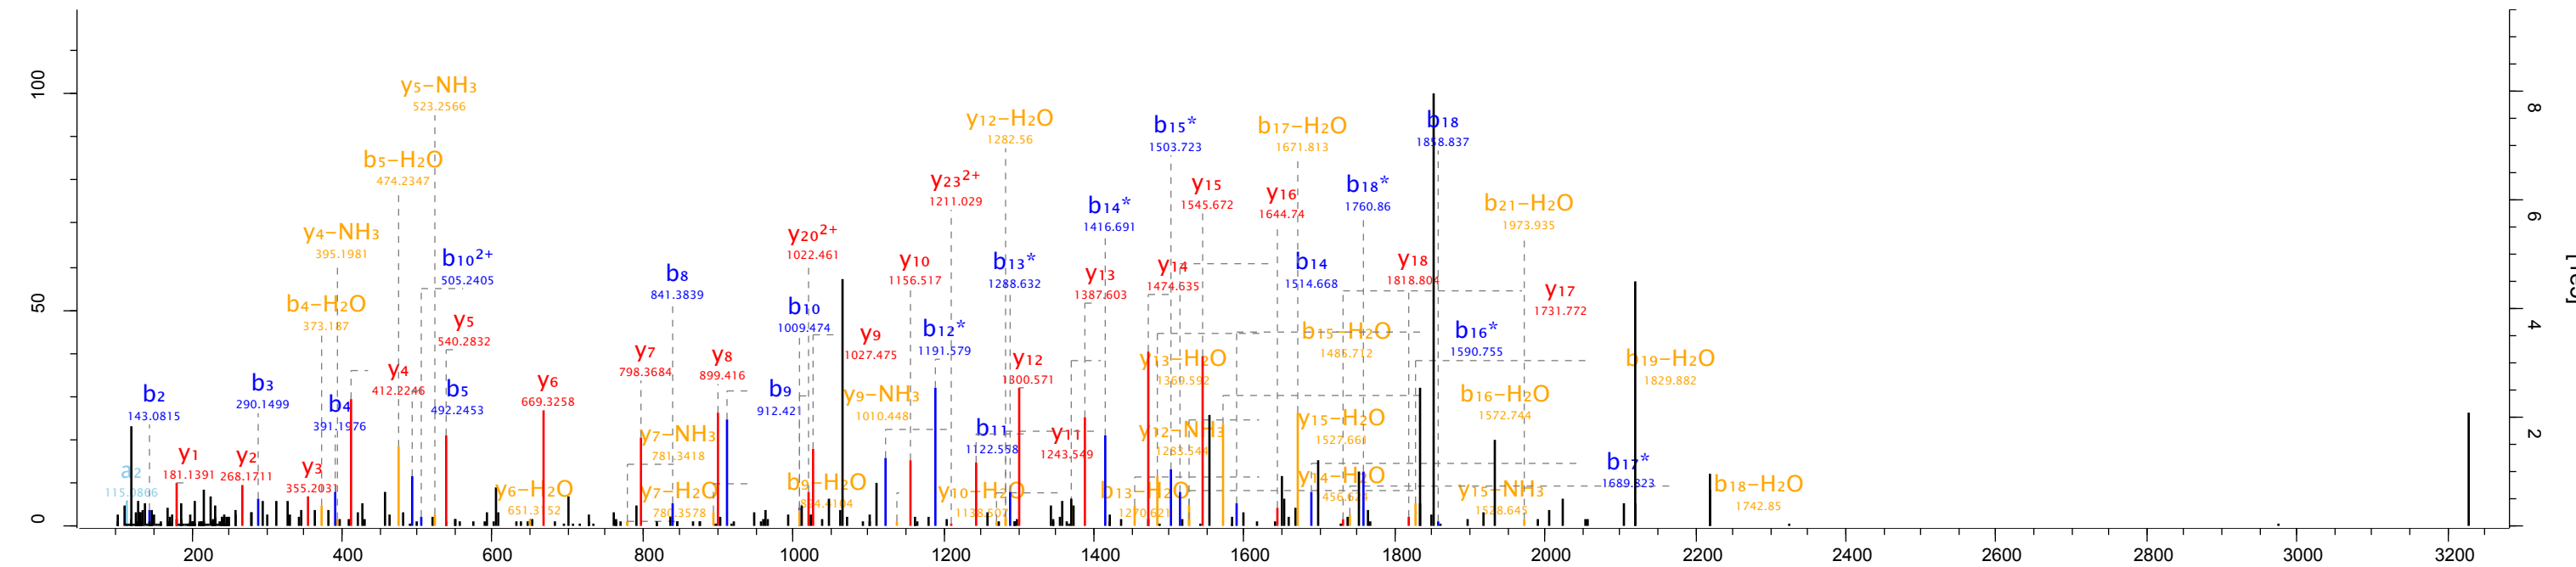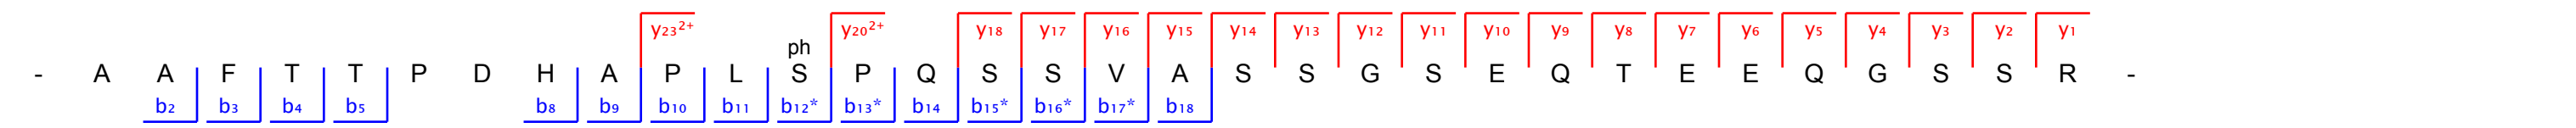



Raw file 20150812\_A375SR\_Phospho\_BR1\_06 Scan 15481 Method FTMS; HCD Score 73.69 m/z 808.38 Gene names TAF2

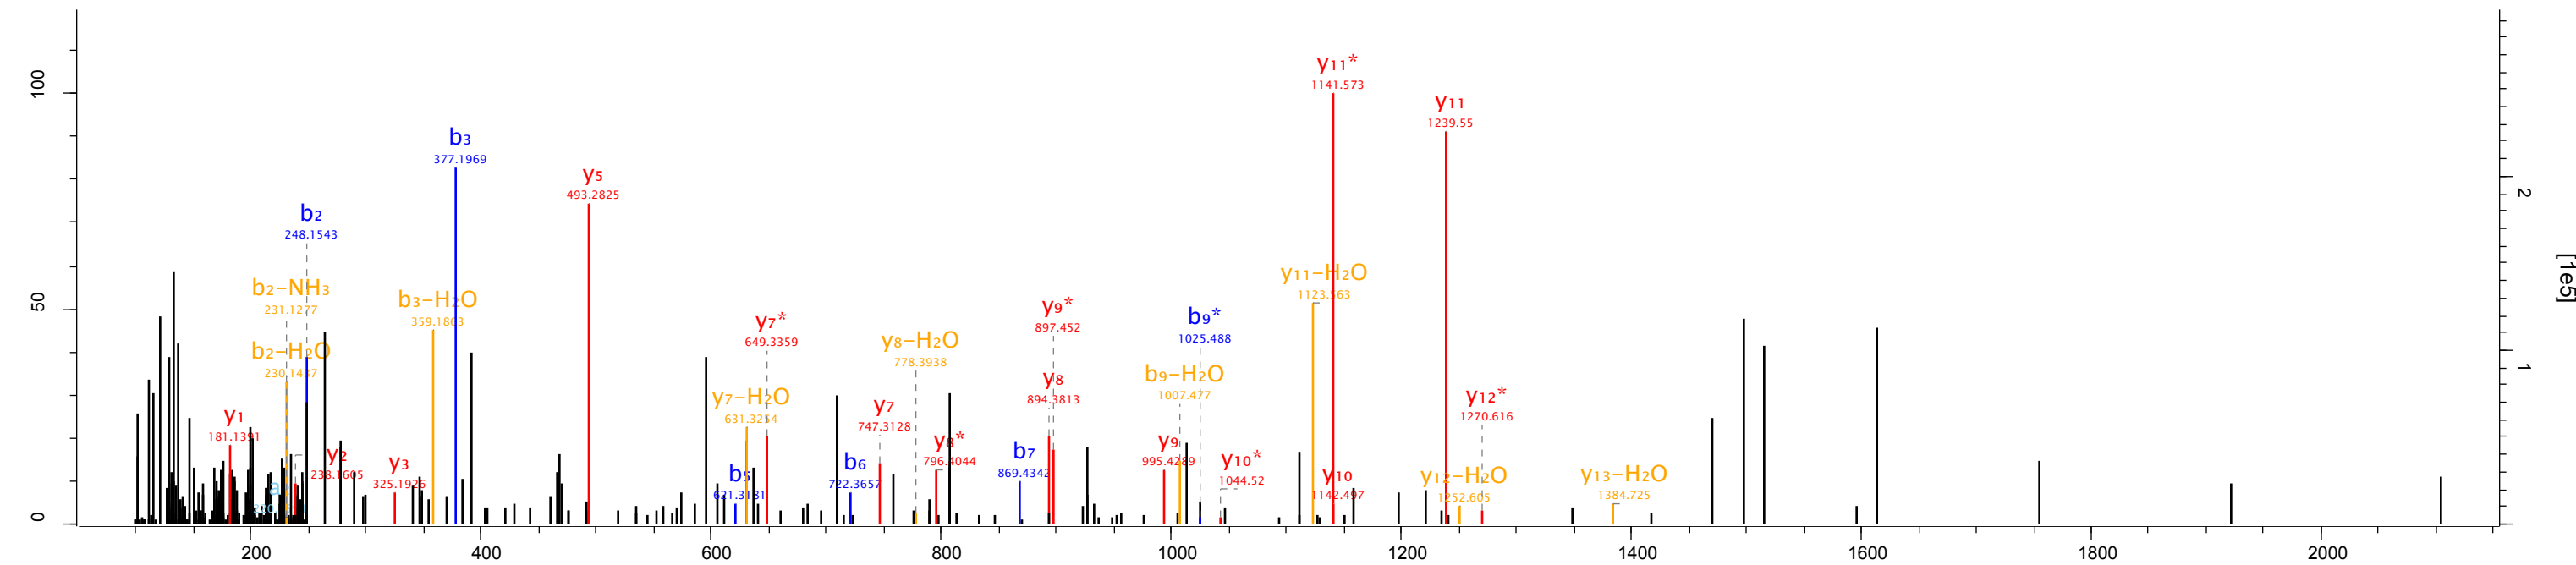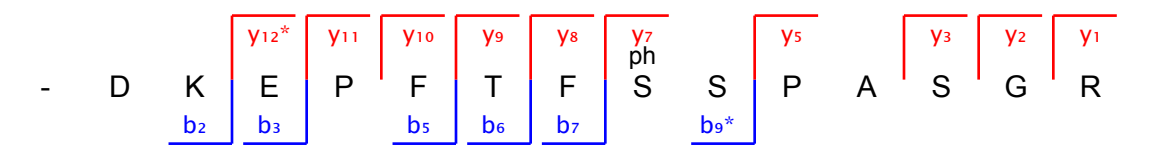

Raw file: 20150812\_A375SR\_Phospho\_BR1\_06  
 Scan: 15621 Method: FTMS; HCD Score: 321.54 m/z: 928.95 Gene names: PPP1R12A

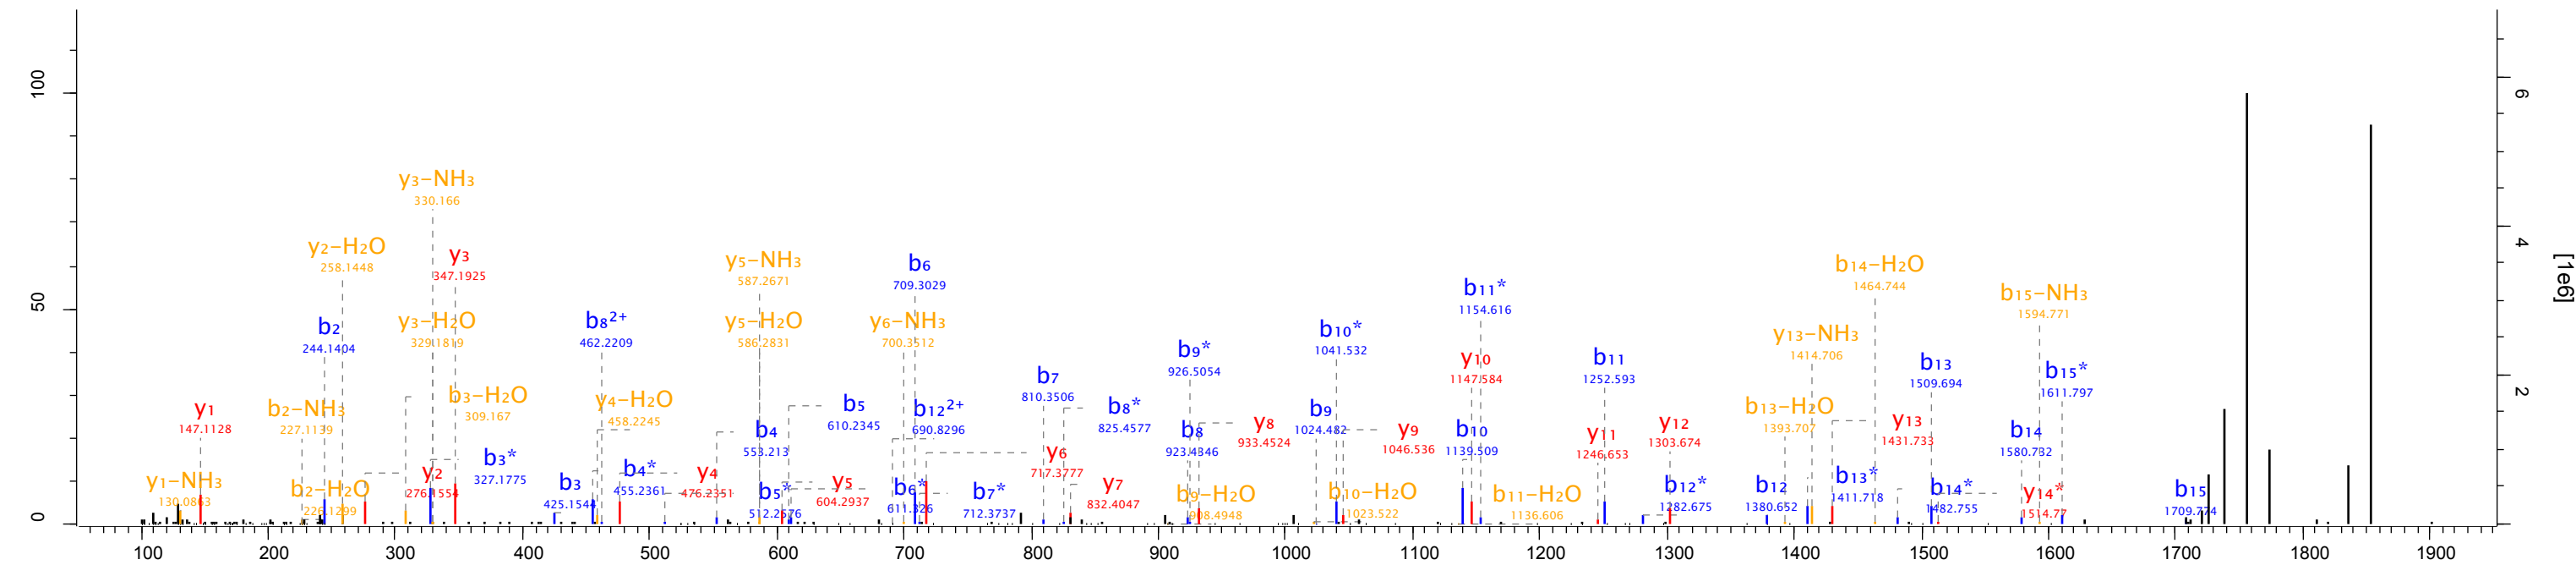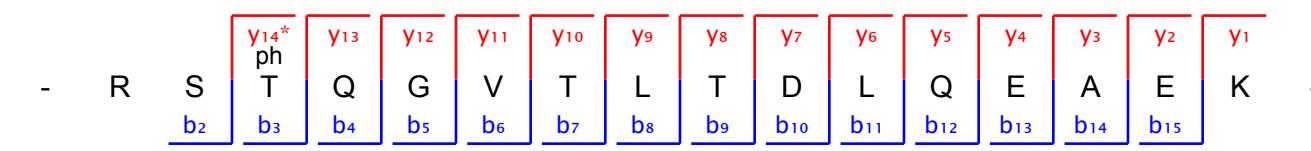

Raw file  
20150812\_A375SR\_Phospho\_BR1\_06

Scan 16401 Method FTMS; HCD Score 80.12 m/z 784.36 Gene names BCR

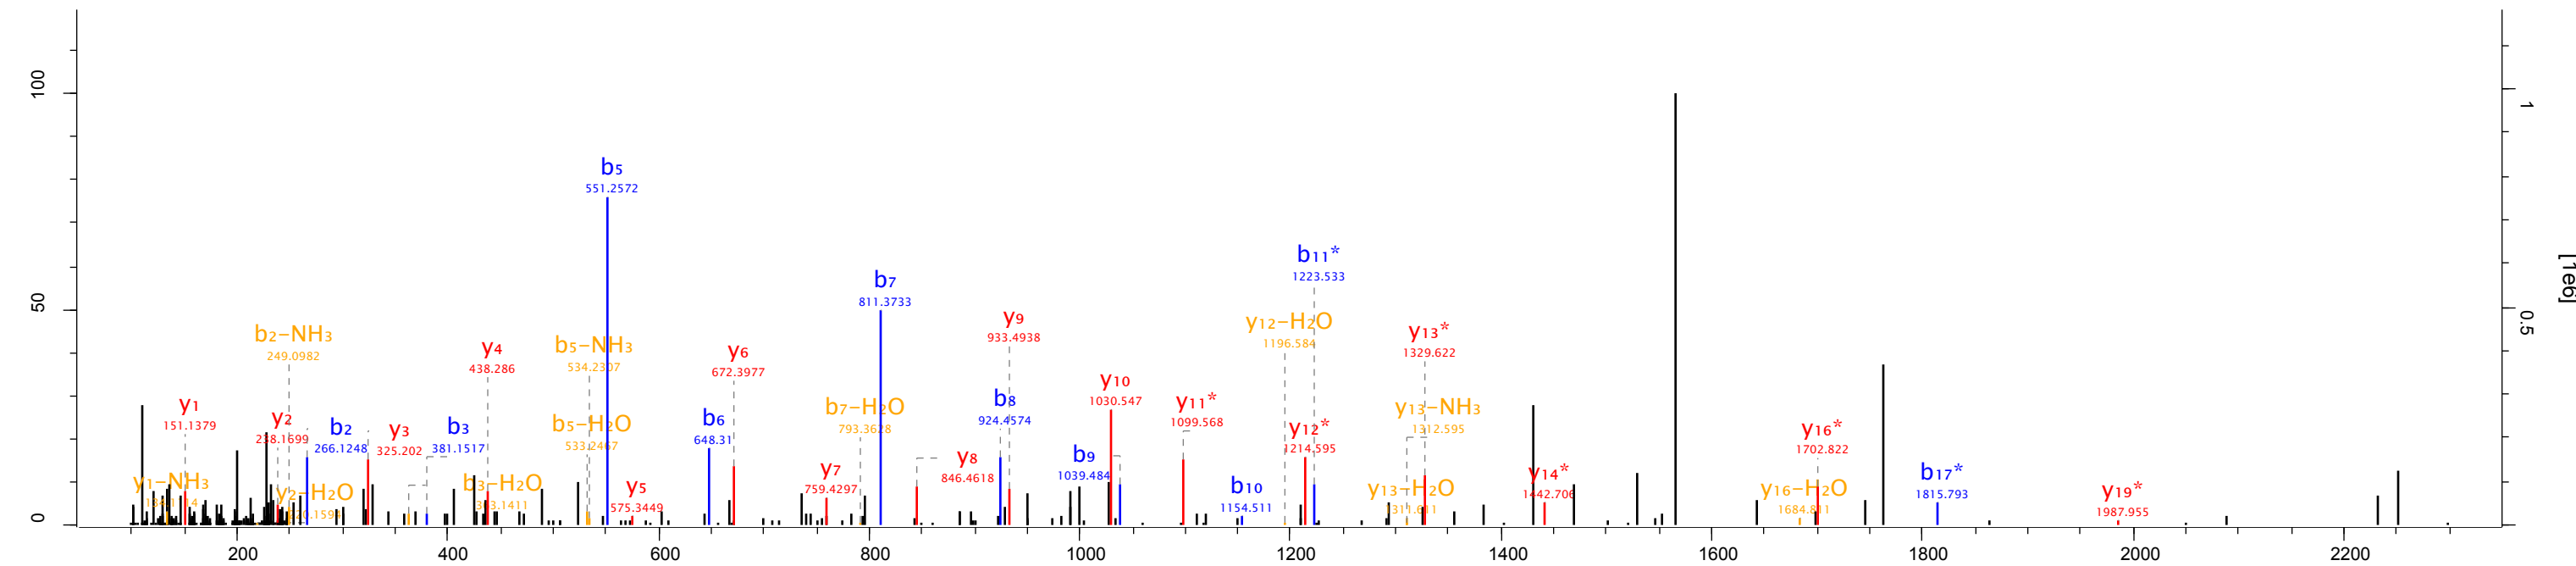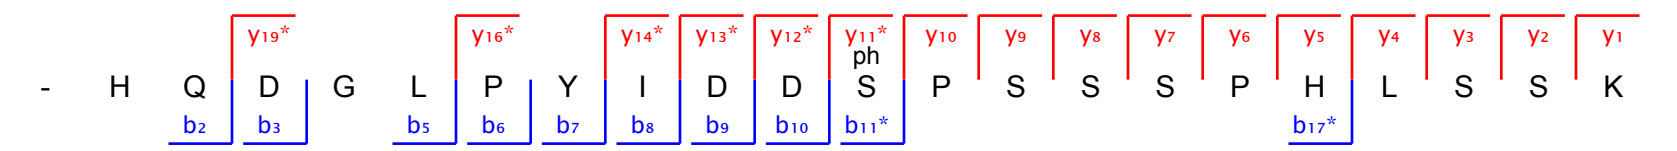

Raw file 20150812\_A375SR\_Phospho\_BR1\_06 Scan 16821 Method FTMS; HCD Score 291.06 m/z 1228.53 Gene names HDAC2

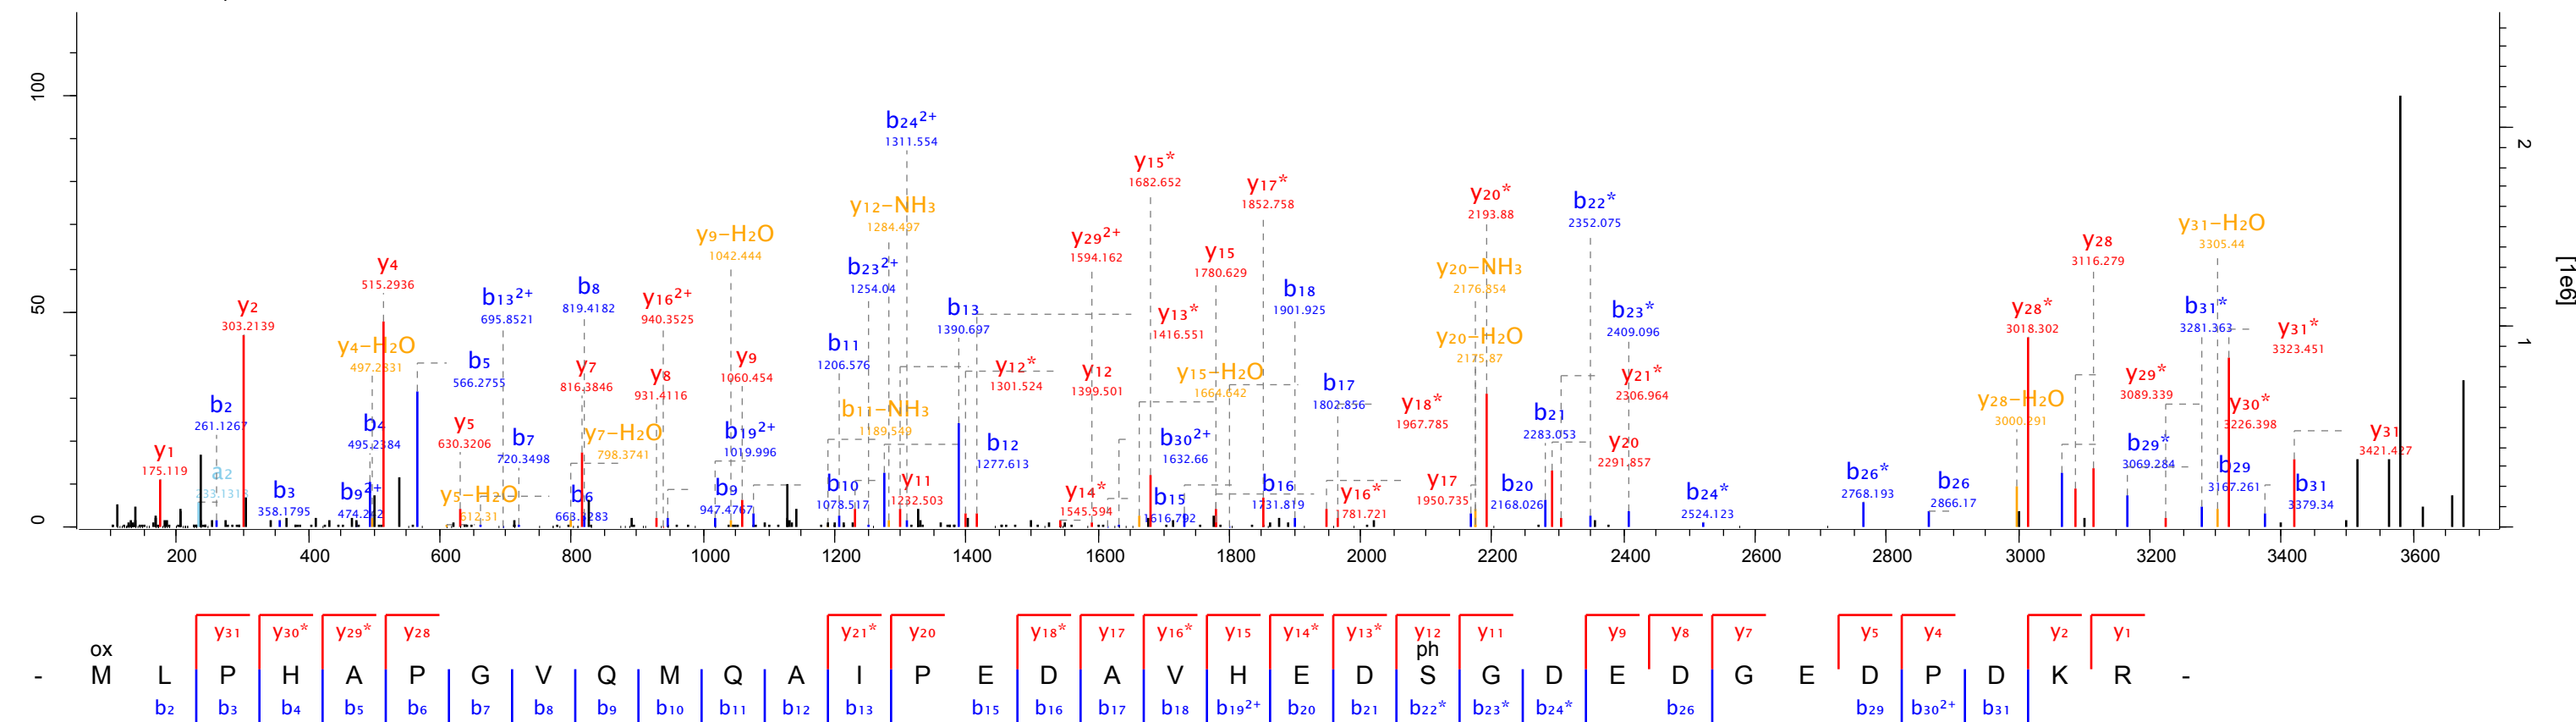

Raw file 20150812\_A375SR\_Phospho\_BR1\_06 Scan 16881 Method FTMS; HCD Score 41.78 m/z 931.43 Gene names DOCK7

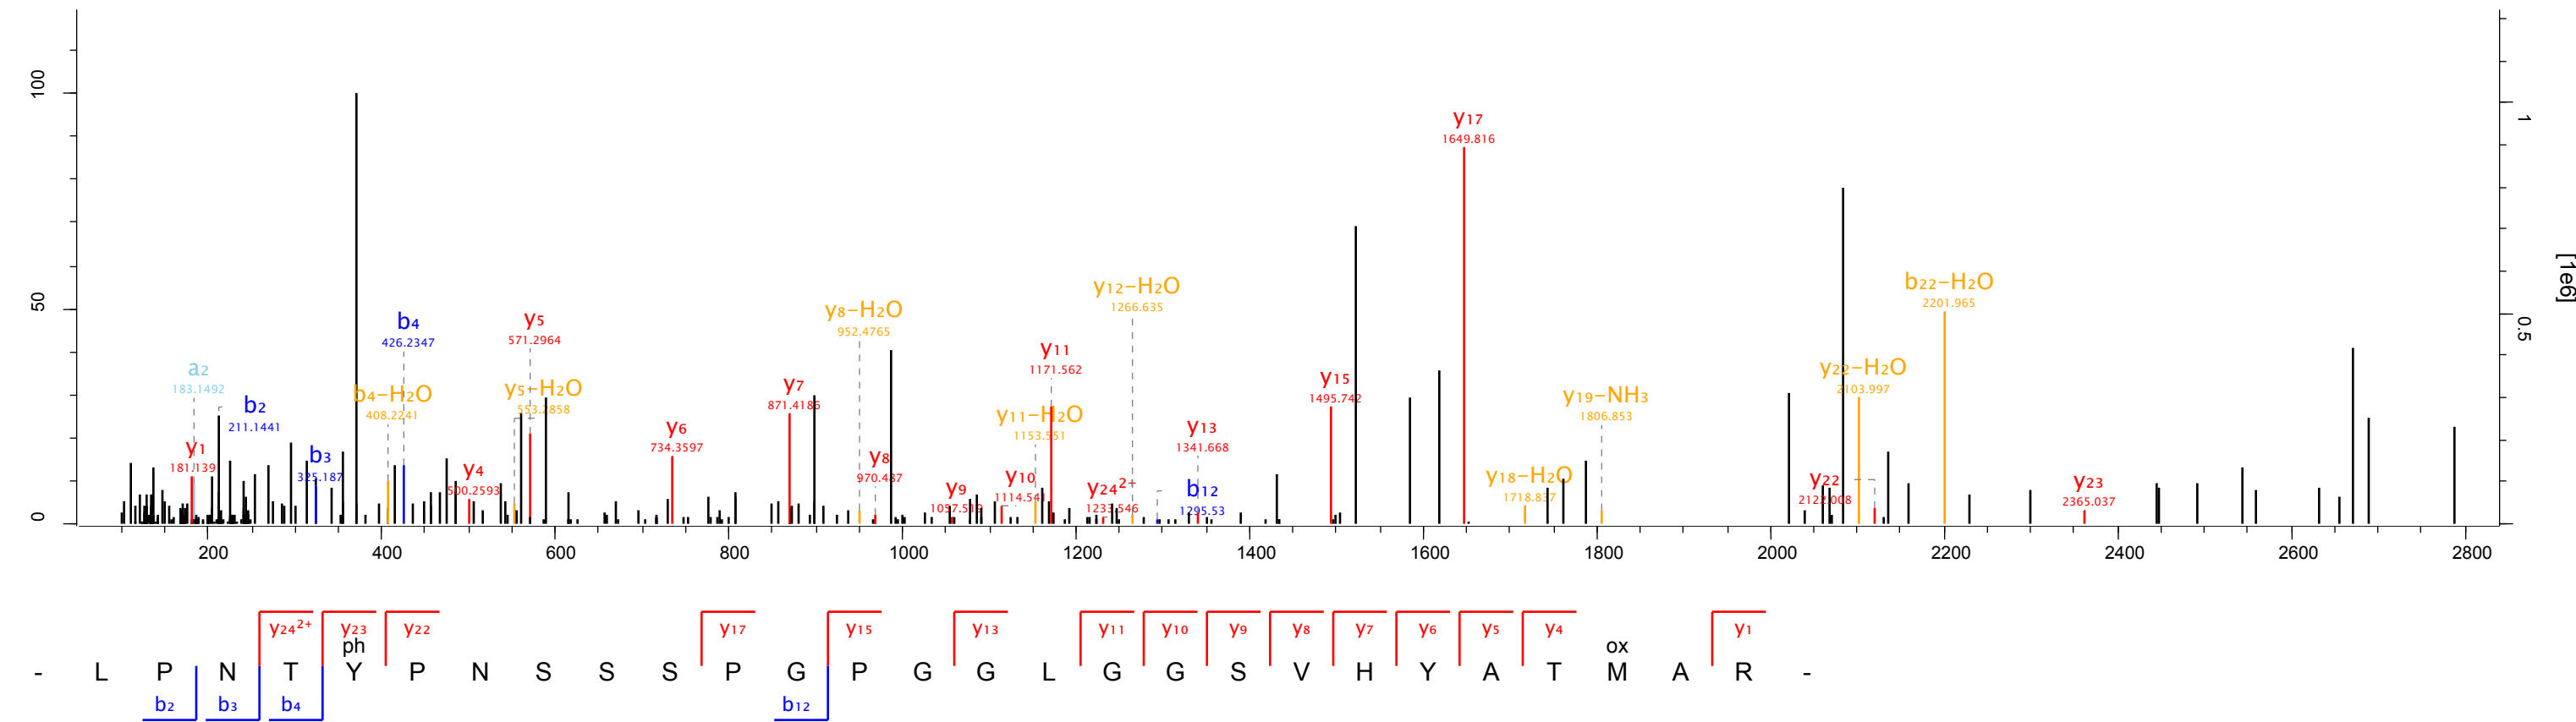

Raw file: 20150812\_A375SR\_Phospho\_BR1\_06  
 Scan: 17351 Method: FTMS; HCD Score: 315.43 m/z: 853.38 Gene names: HN1

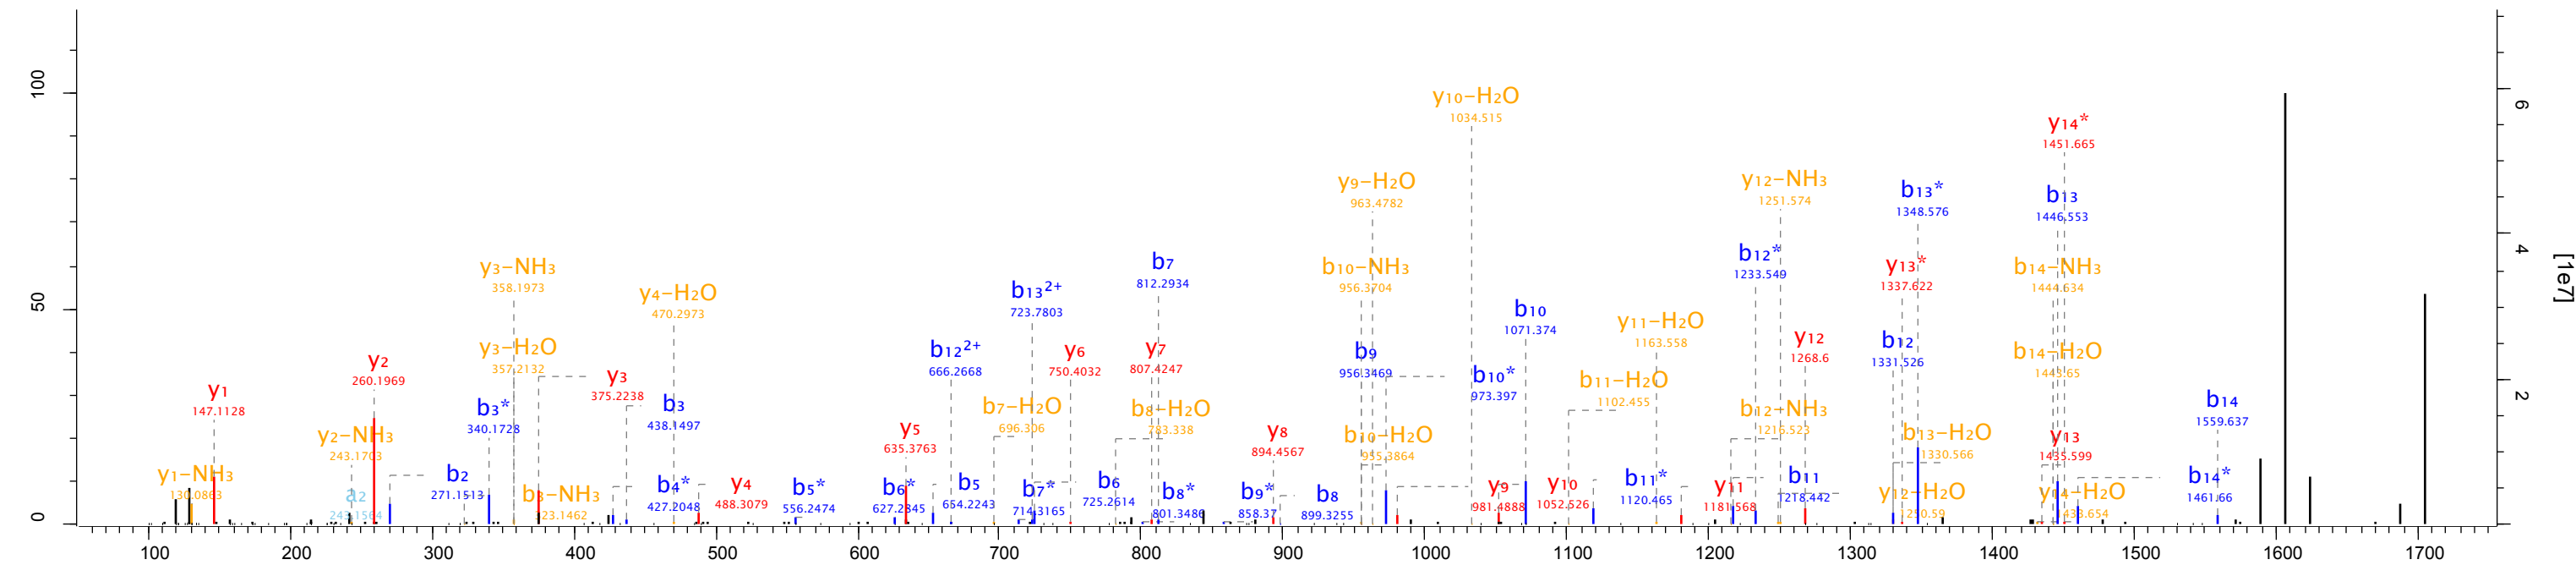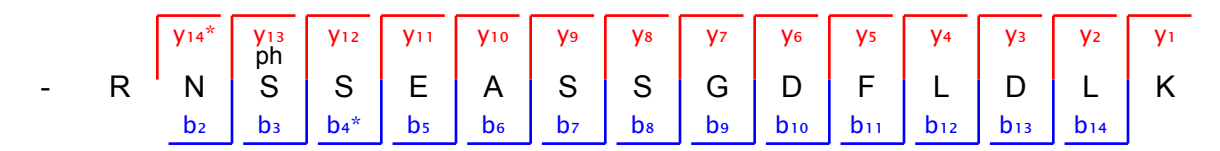

Raw file  
20150812\_A375SR\_Phospho\_BR1\_06

Scan 17621 Method FTMS; HCD Score 283.33 m/z 897.73 Gene names PCBP1

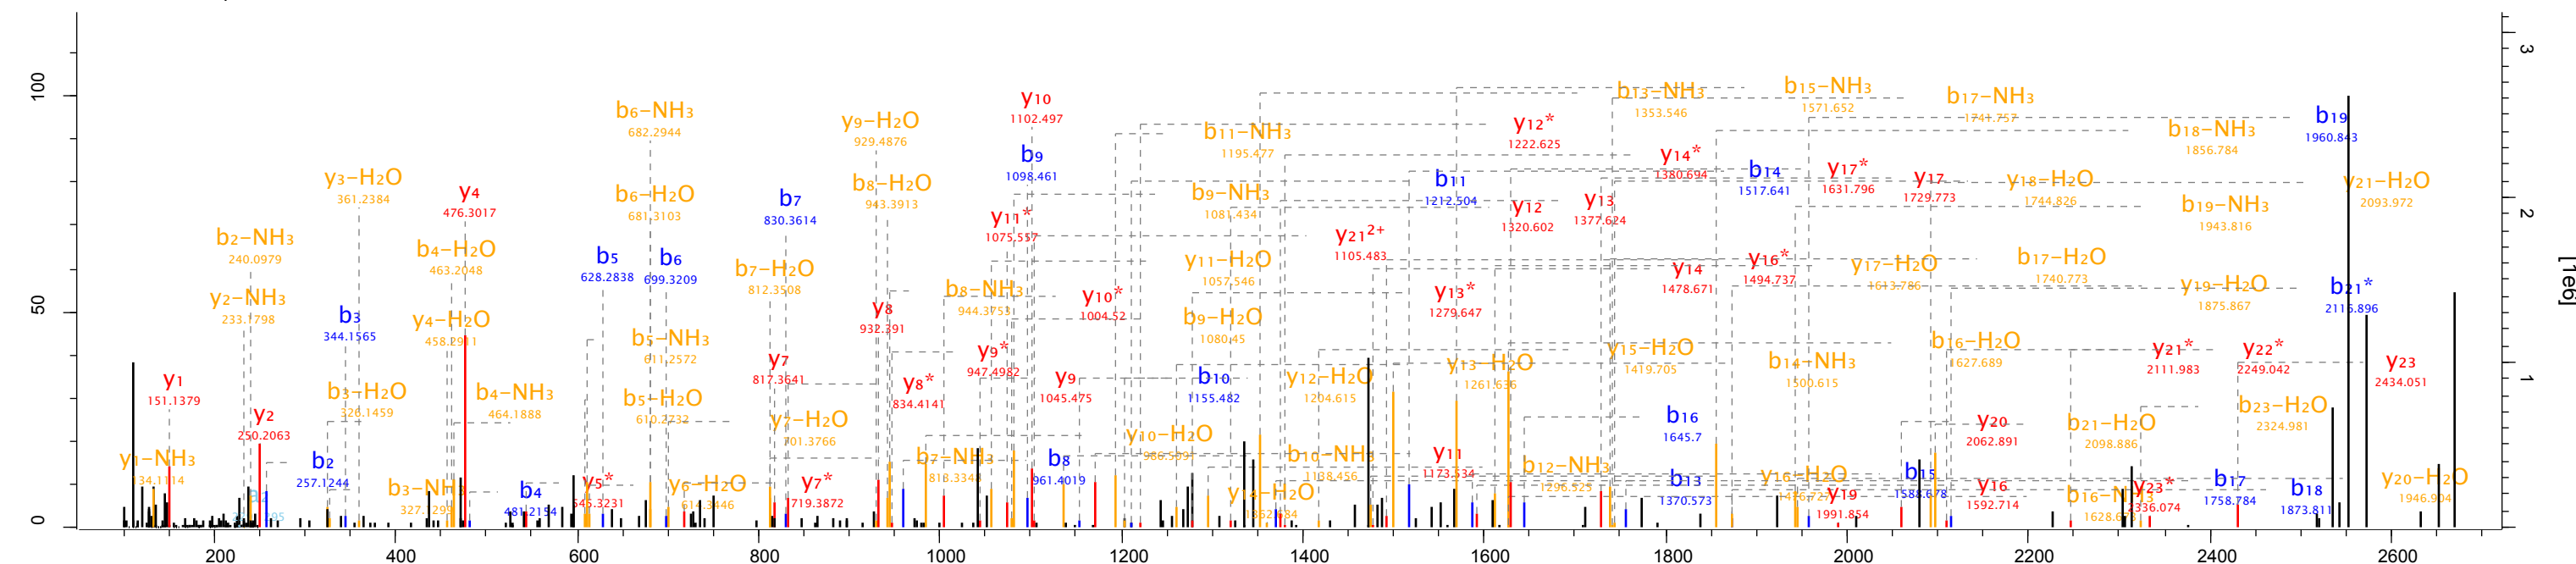

- Q Q S H F A M M H G G T G F A G I D S S y5\*  
ph  
S y4 P E V K -

b2
b3
b4
b5
b6
b7
b8
b9
b10
b11
b13
b14
b15
b16
b17
b18
b19
b21\*

Raw file: 20150812\_A375SR\_Phospho\_BR1\_06  
 Scan: 2001 Method: FTMS; HCD Score: 194.13 m/z: 576.27 Gene names: NUCKS1

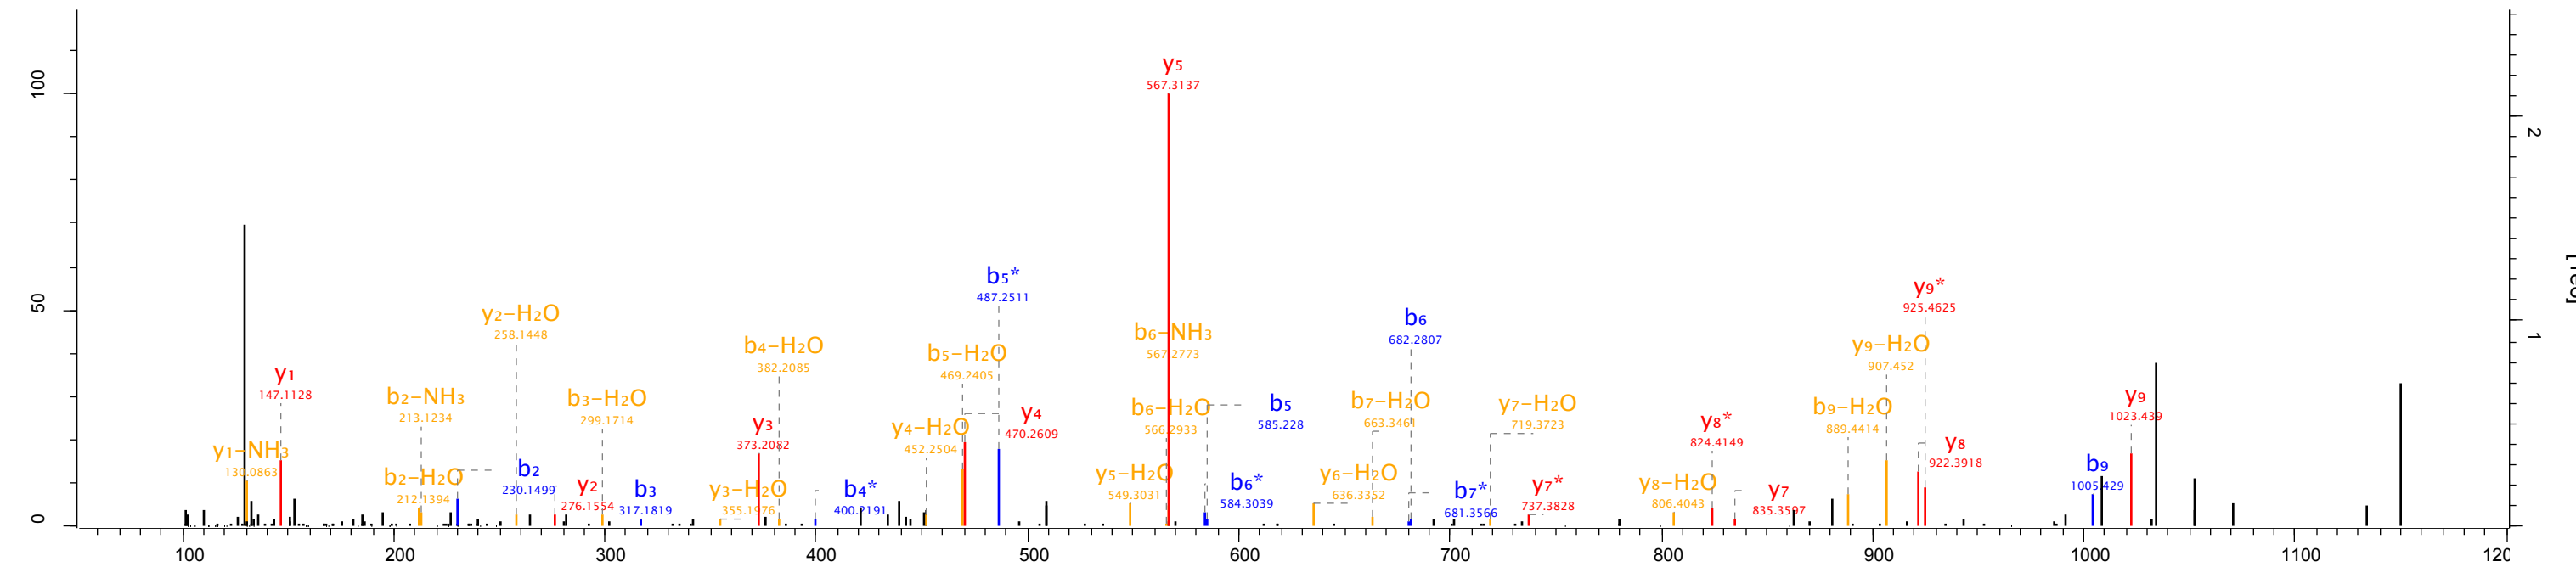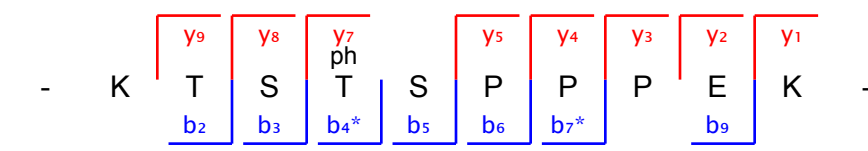



Raw file: 20150812\_A375SR\_Phospho\_BR1\_06  
 Scan: 2021 Method: FTMS; HCD Score: 109.79 m/z: 707.81 Gene names: TGFBRAP1

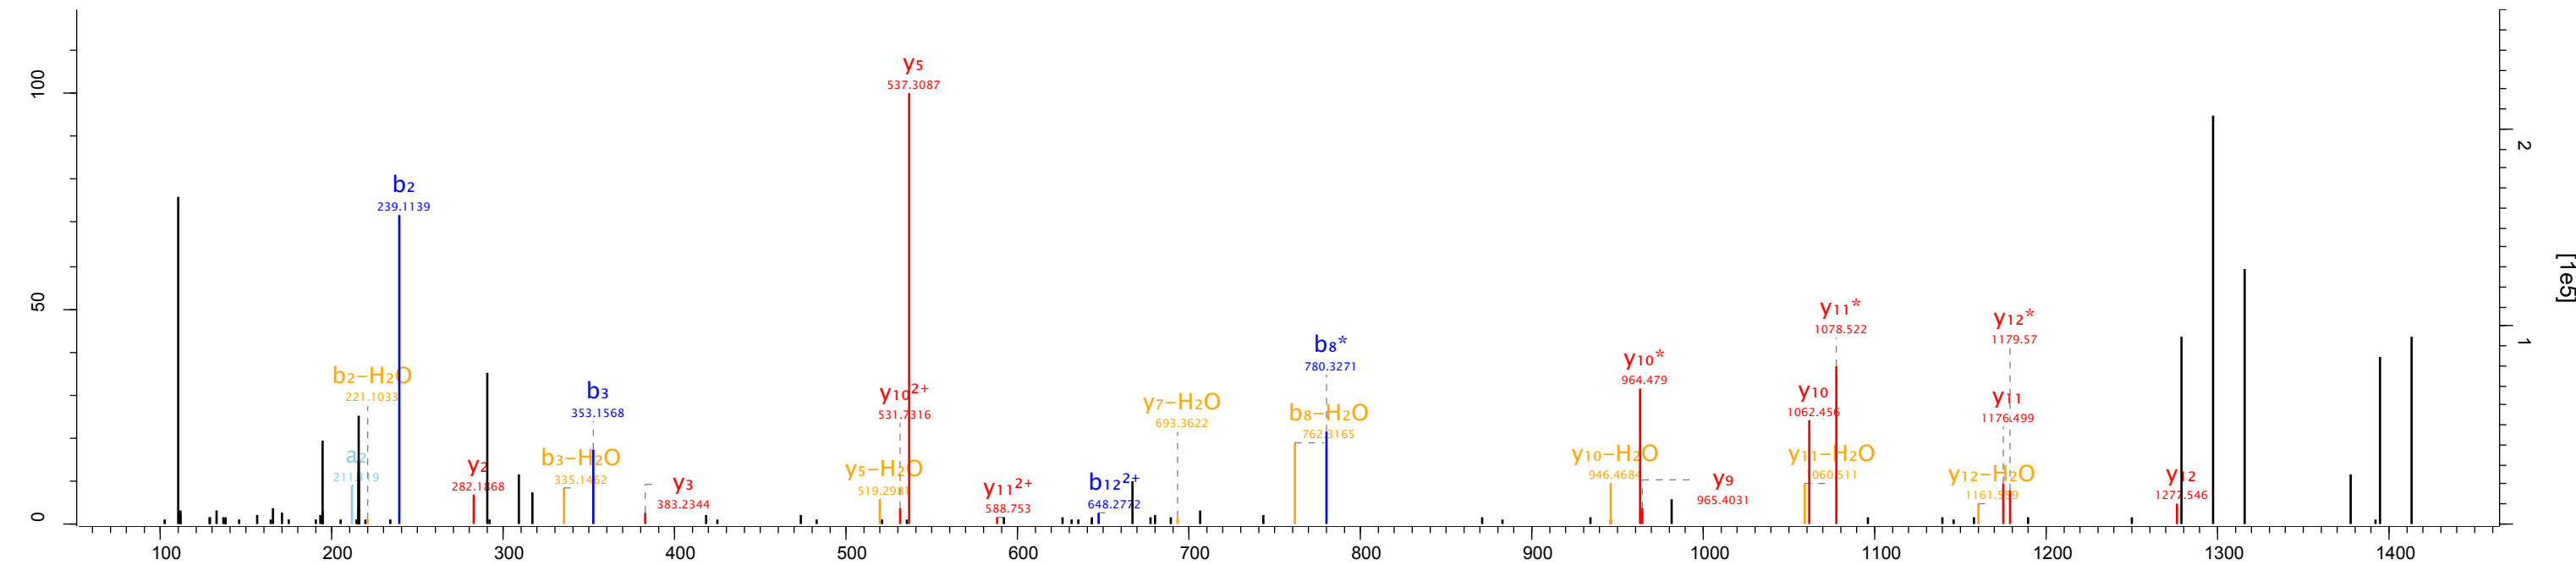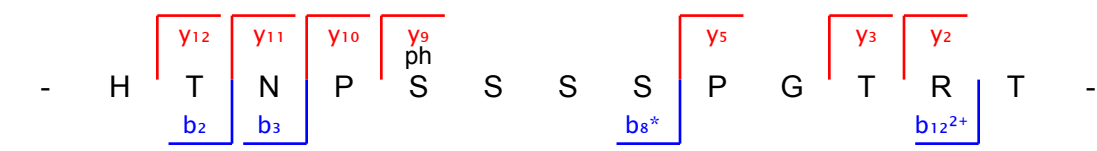

Raw file: 20150812\_A375SR\_Phospho\_BR1\_06  
 Scan: 20331 Method: FTMS; HCD Score: 160.8 m/z: 766.82 Gene names: CAPZA2

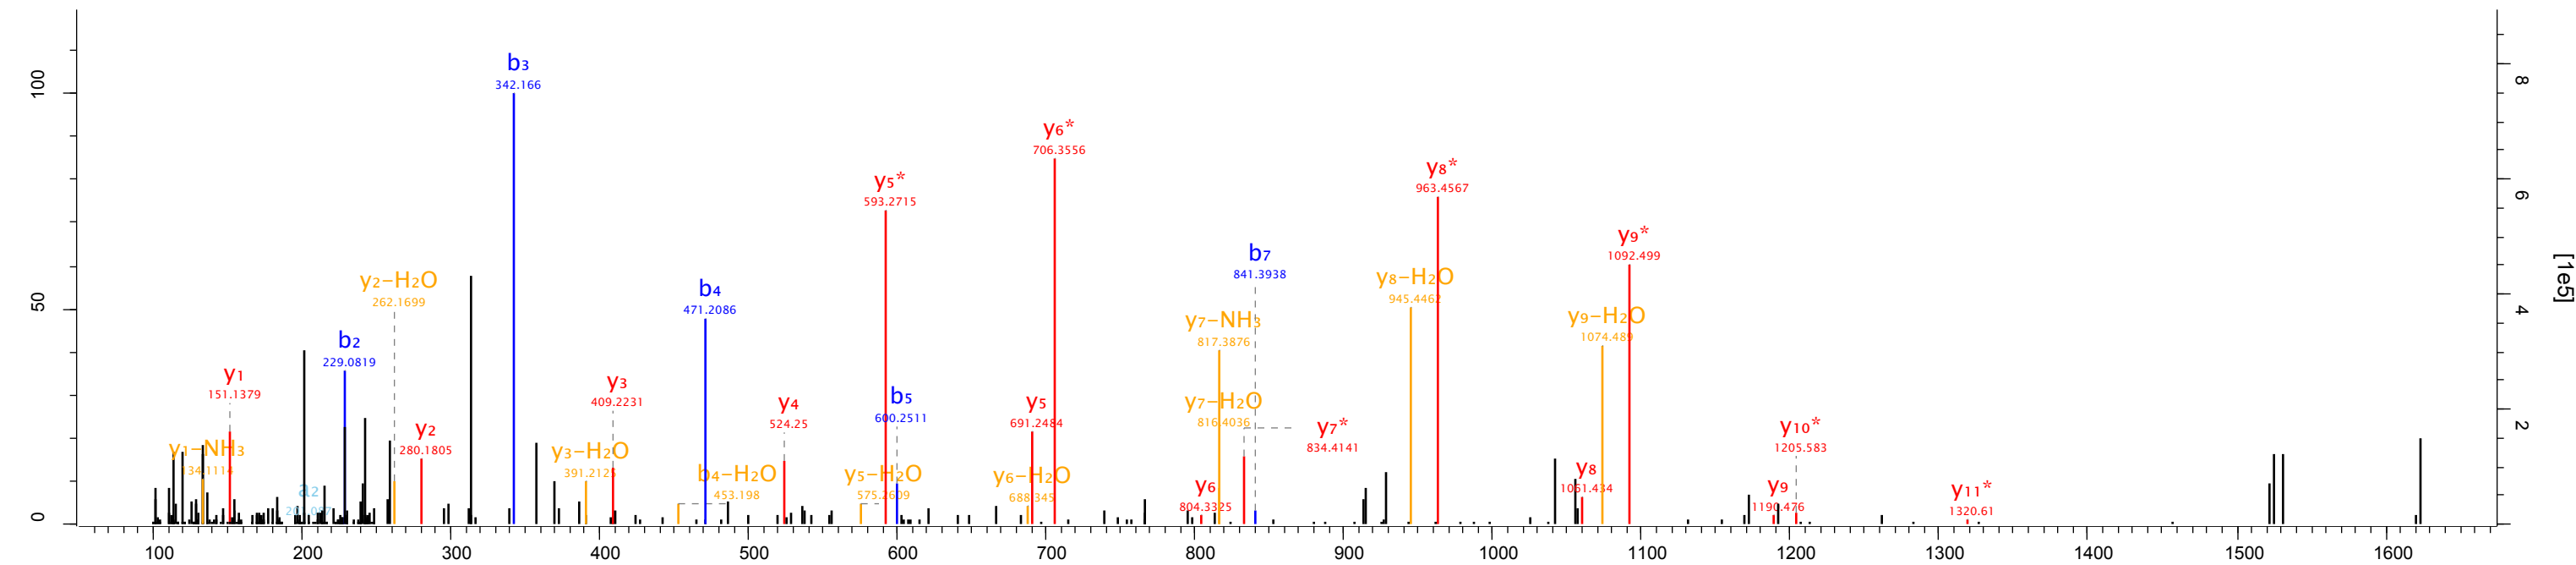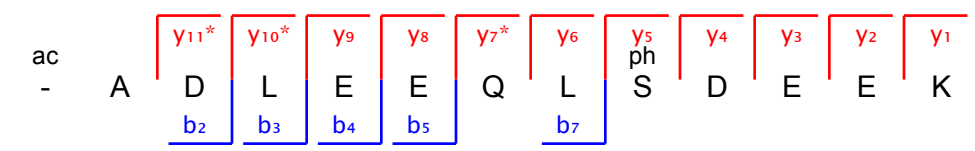

Raw file 20150812\_A375SR\_Phospho\_BR1\_06 Scan 20911 Method FTMS; HCD Score 117.8 m/z 831.05 Gene names POLR2M;GCOM1

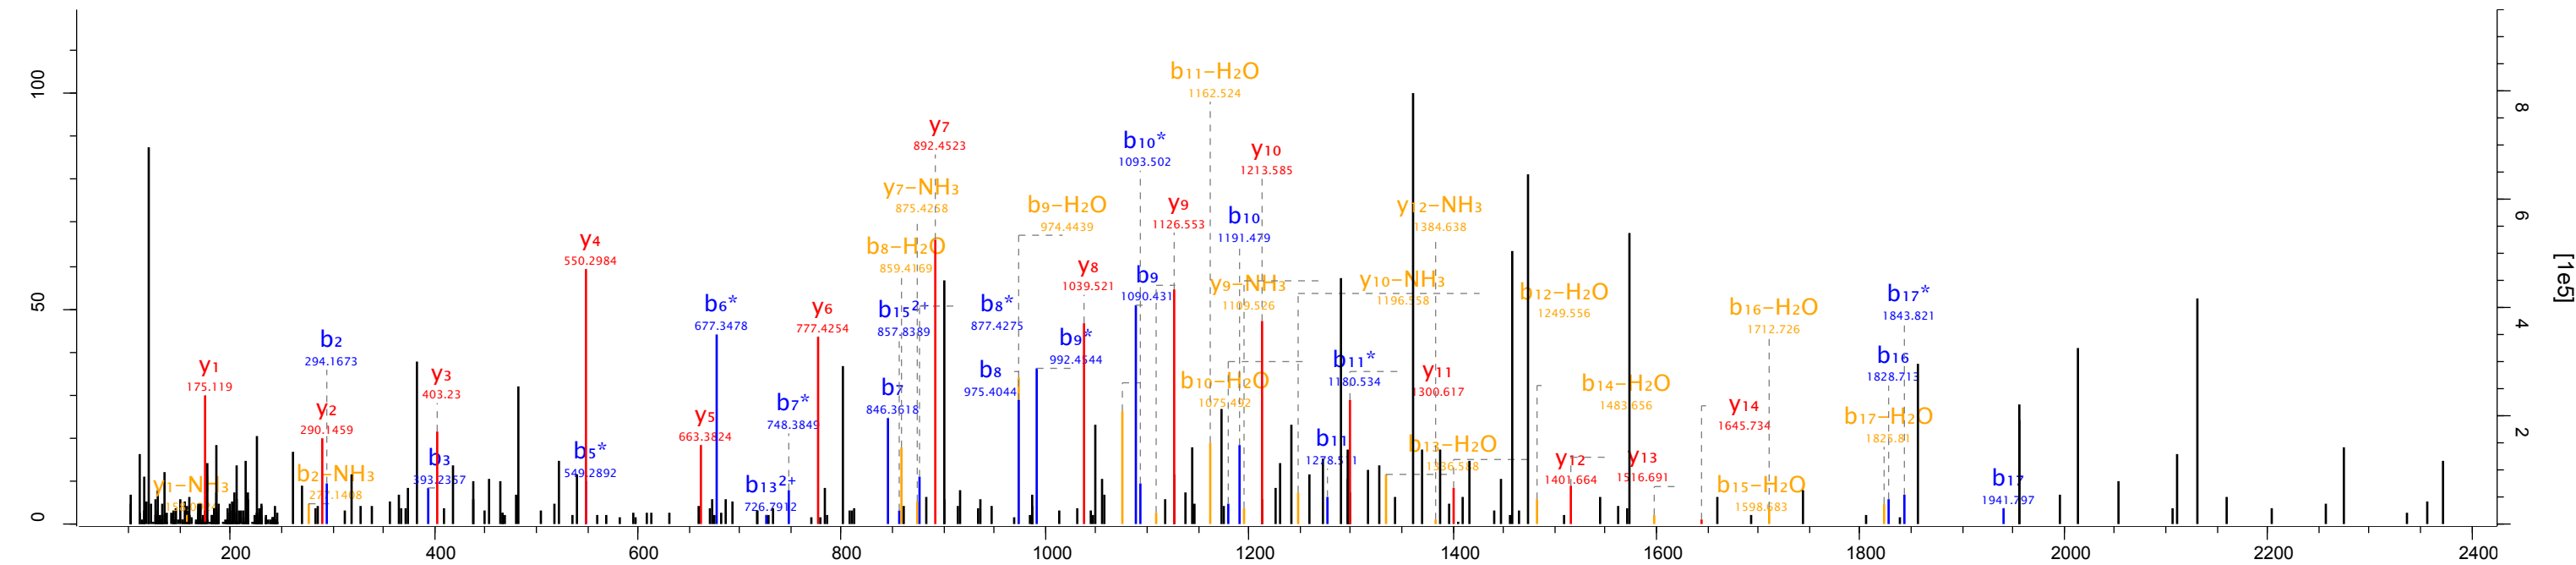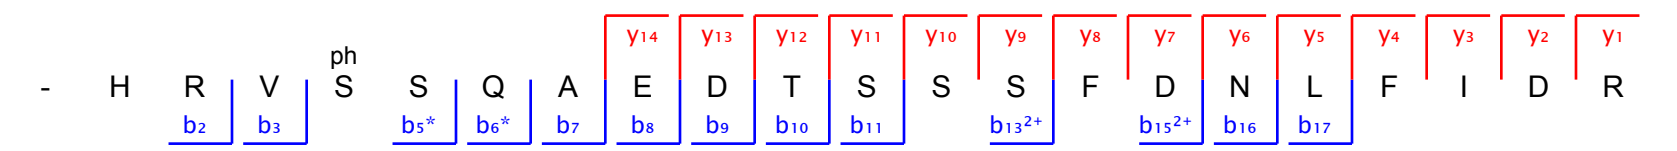

Raw file: 20150812\_A375SR\_Phospho\_BR1\_06  
 Scan: 2111 Method: FTMS; HCD Score: 208.47 m/z: 657.29 Gene names: ZC3H13

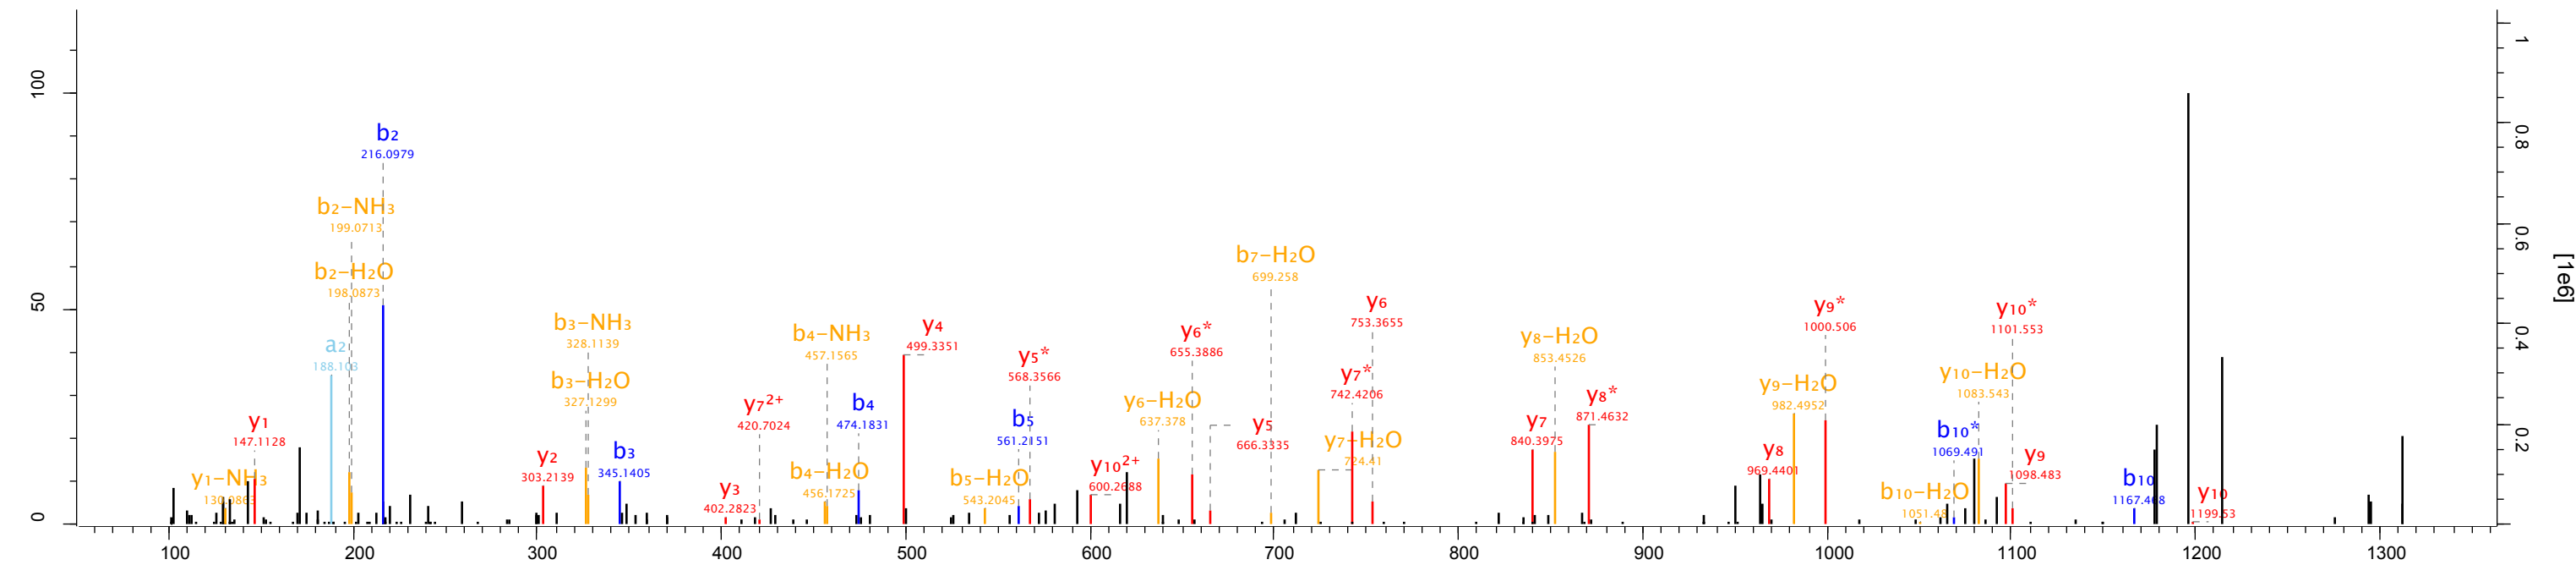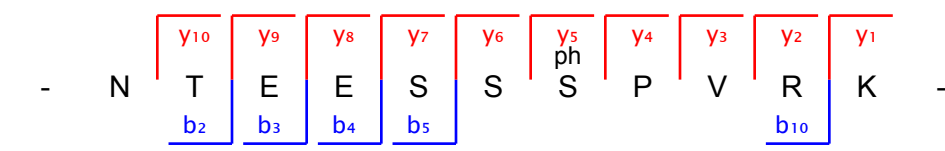

Raw file 20150812\_A375SR\_Phospho\_BR1\_06 Scan 23381 Method FTMS; HCD Score 69.07 m/z 928.76 Gene names ATF7IP

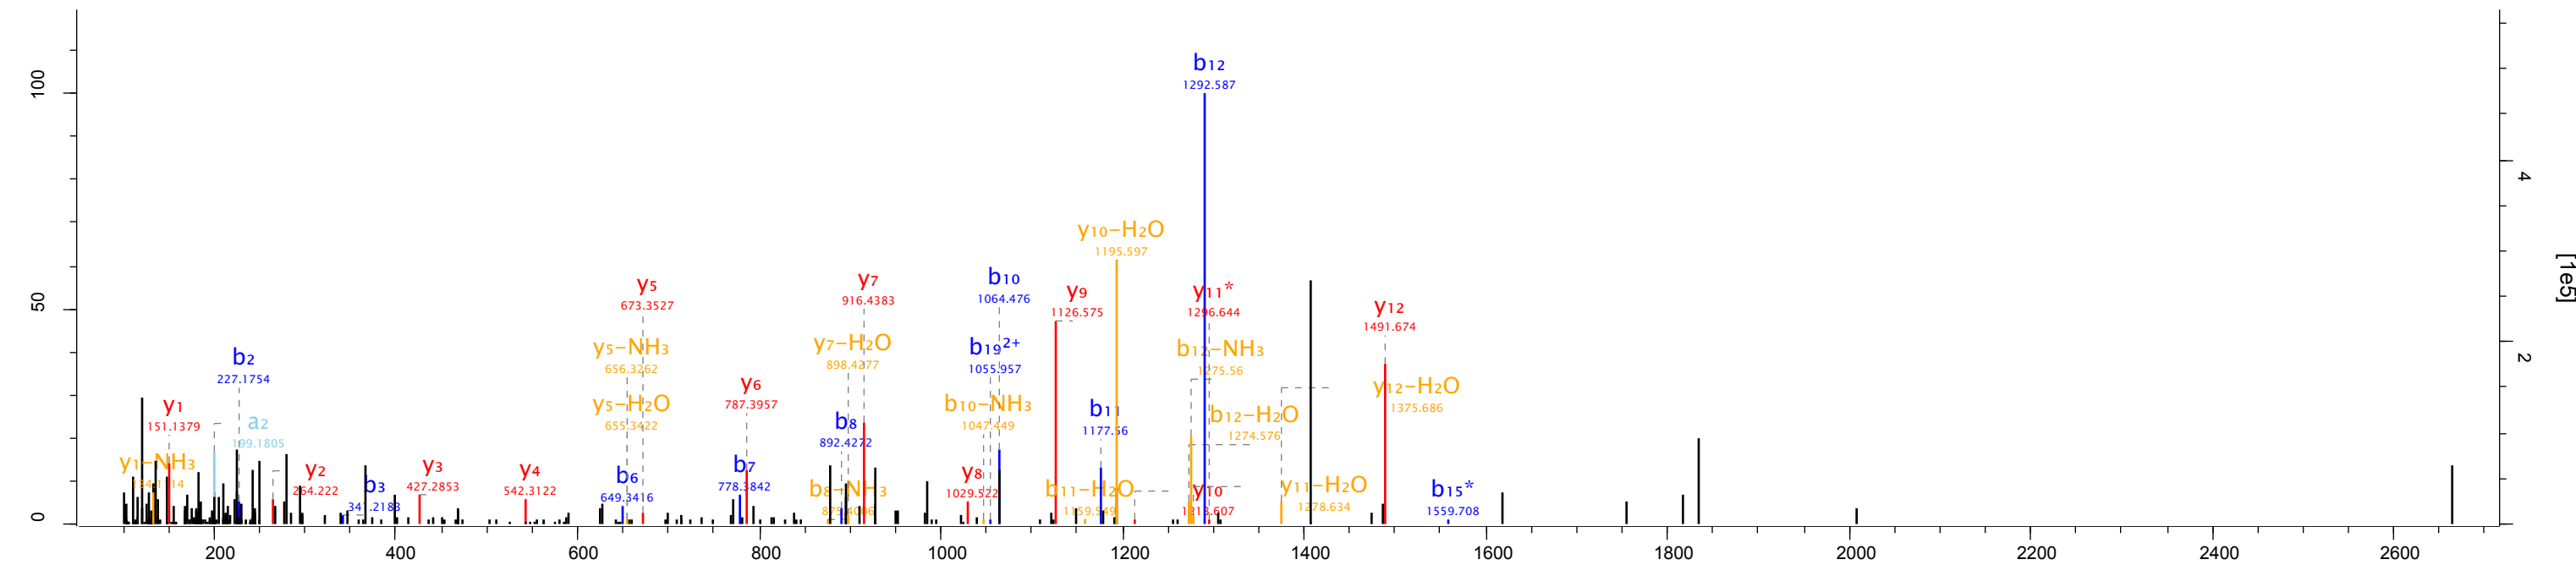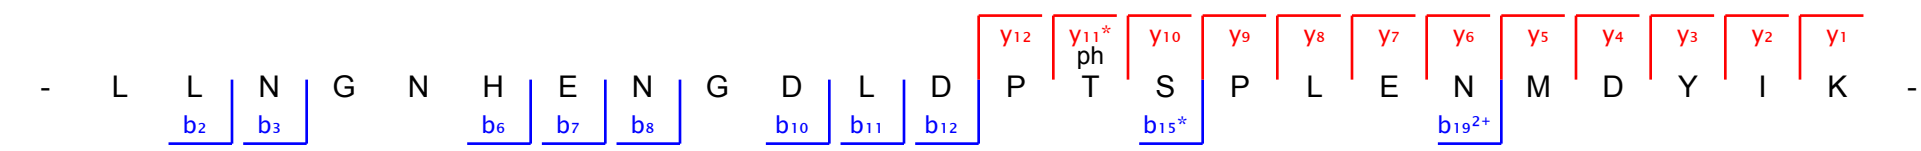

Raw file  
 20150812\_A375SR\_Phospho\_BR1\_06  
 Scan 2421 Method FTMS; HCD Score 102.66 m/z 657.64 Gene names TRIP12

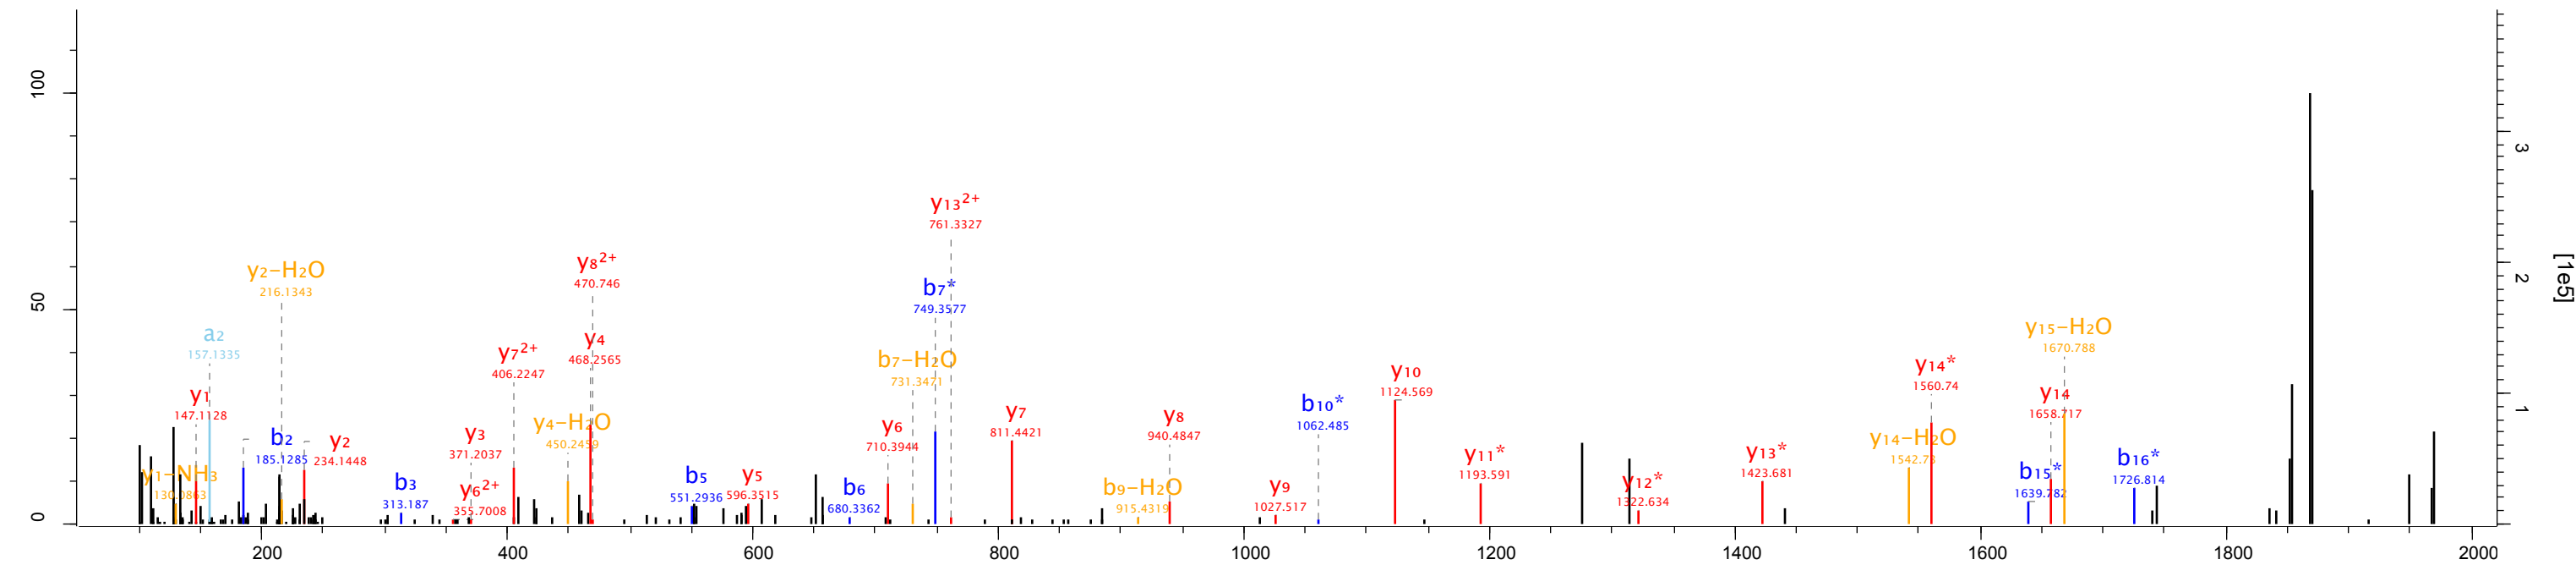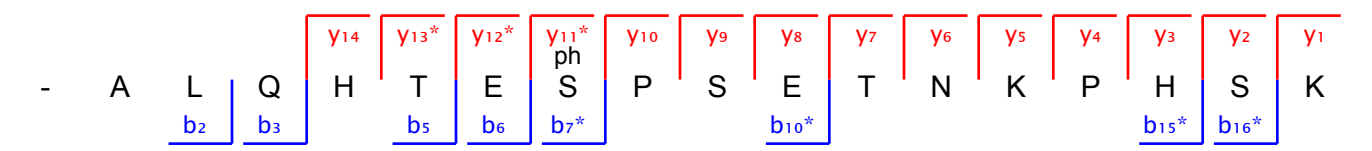

Raw file  
20150812\_A375SR\_Phospho\_BR1\_06

Scan 24421 Method FTMS; HCD Score 193.5 m/z 779.43 Gene names LIMCH1

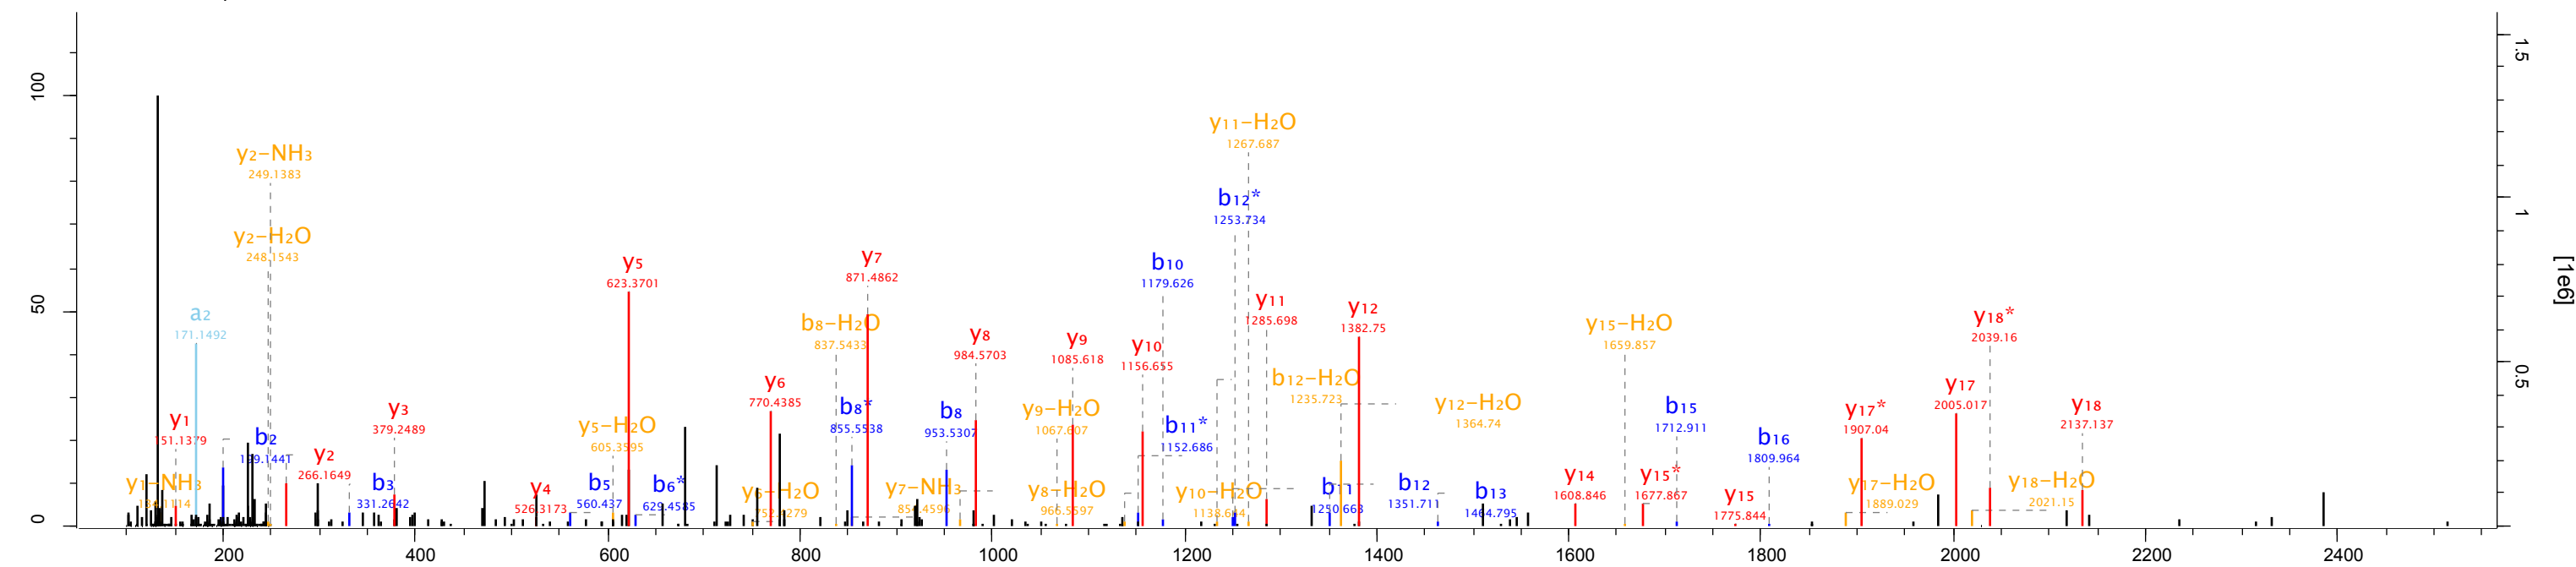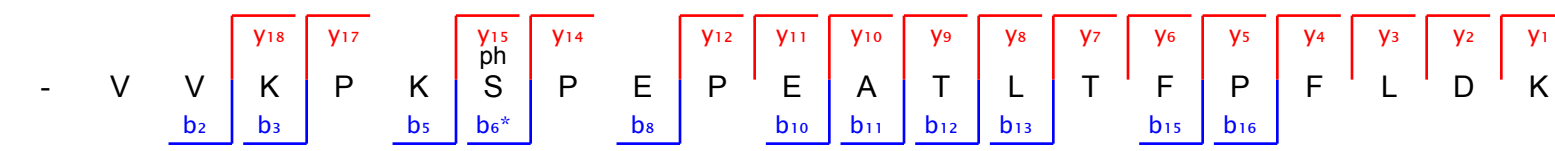

Raw file 20150812\_A375SR\_Phospho\_BR1\_06 Scan 2641 Method FTMS; HCD Score 129.53 m/z 694.82 Gene names SRRM2

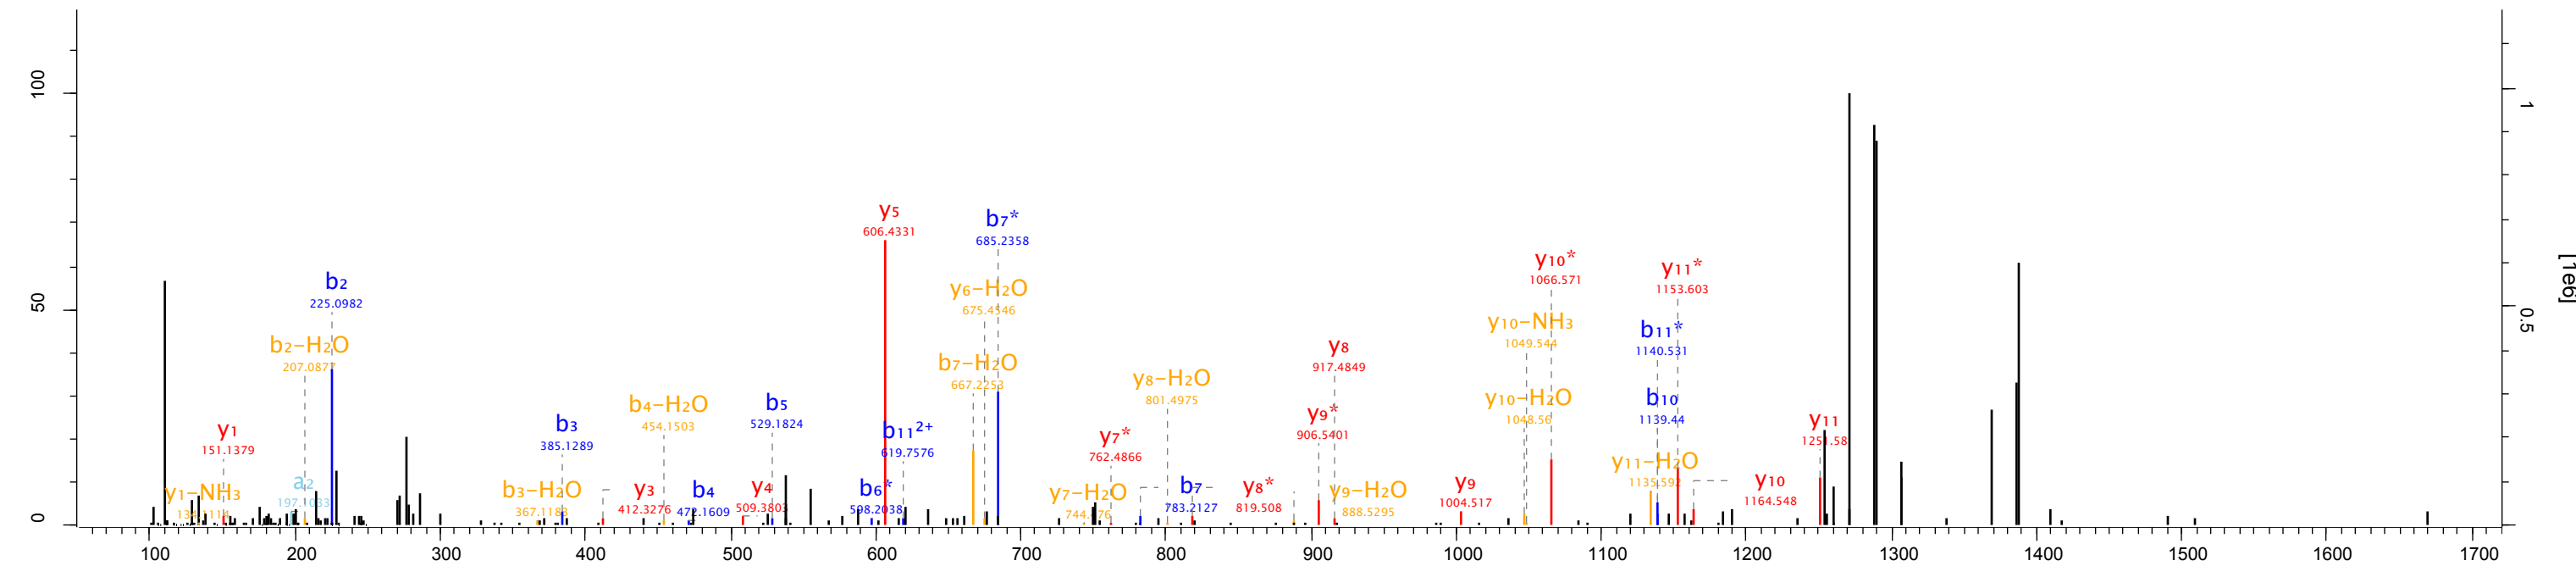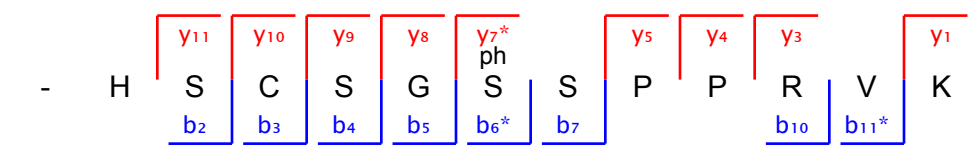



Raw file  
20150812\_A375SR\_Phospho\_BR1\_06

Scan 2841 Method FTMS; HCD Score 196.78 m/z 533.31 Gene names NCL

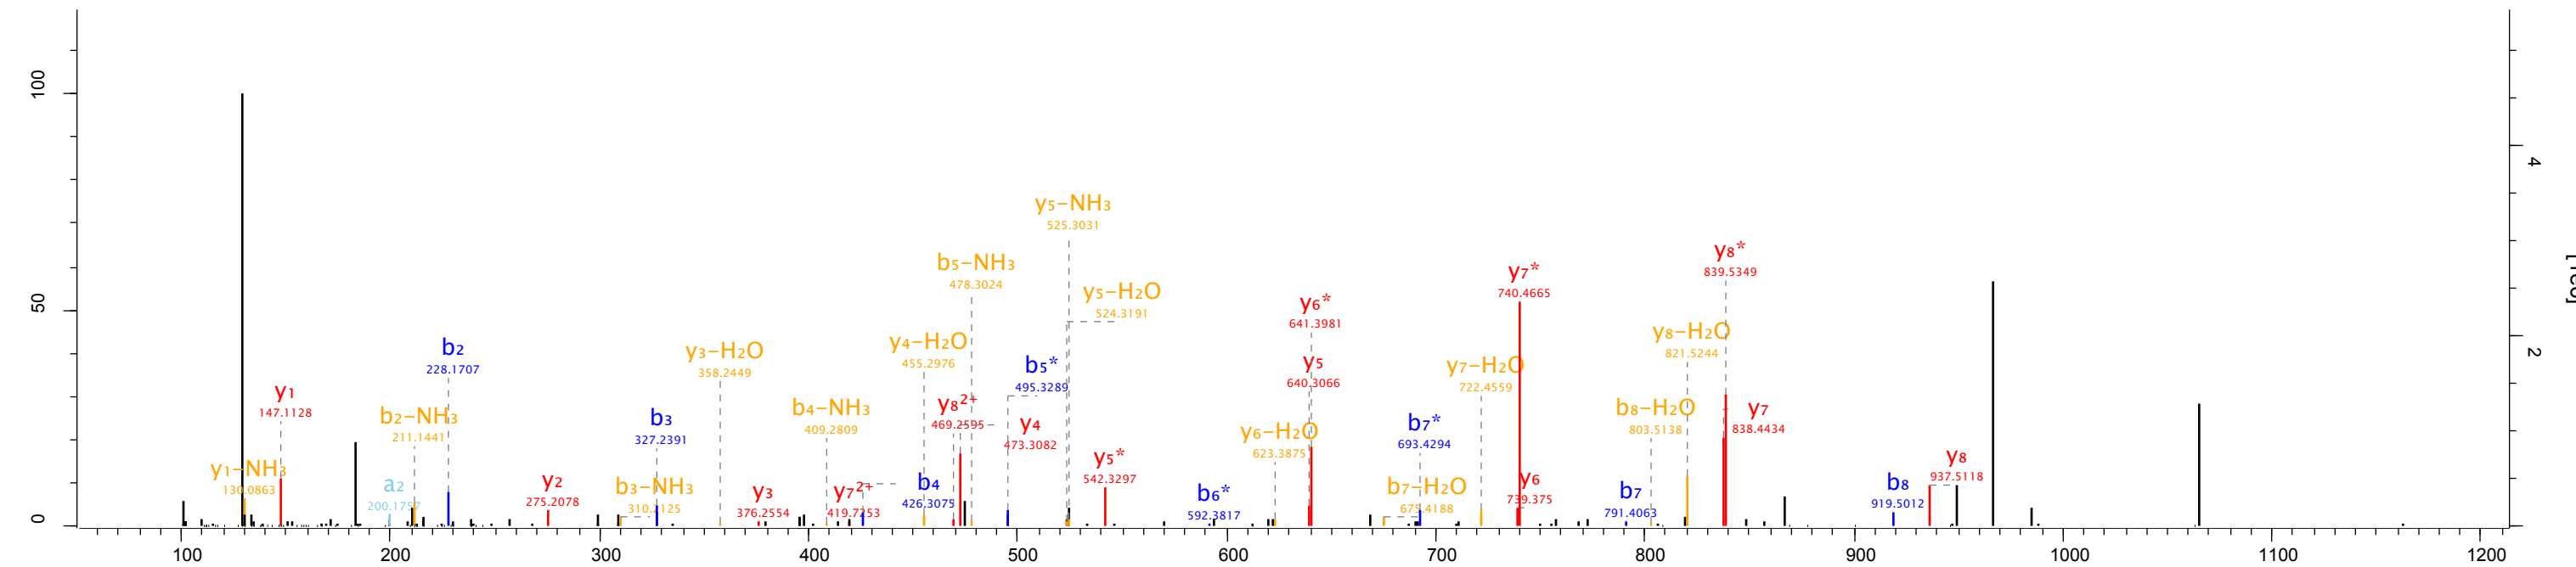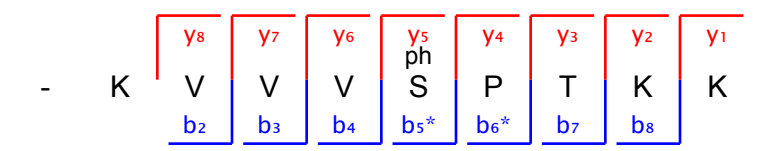

Raw file 20150812\_A375SR\_Phospho\_BR1\_06 Scan 3311 Method FTMS; HCD Score 137.4 m/z 482.77 Gene names NCL

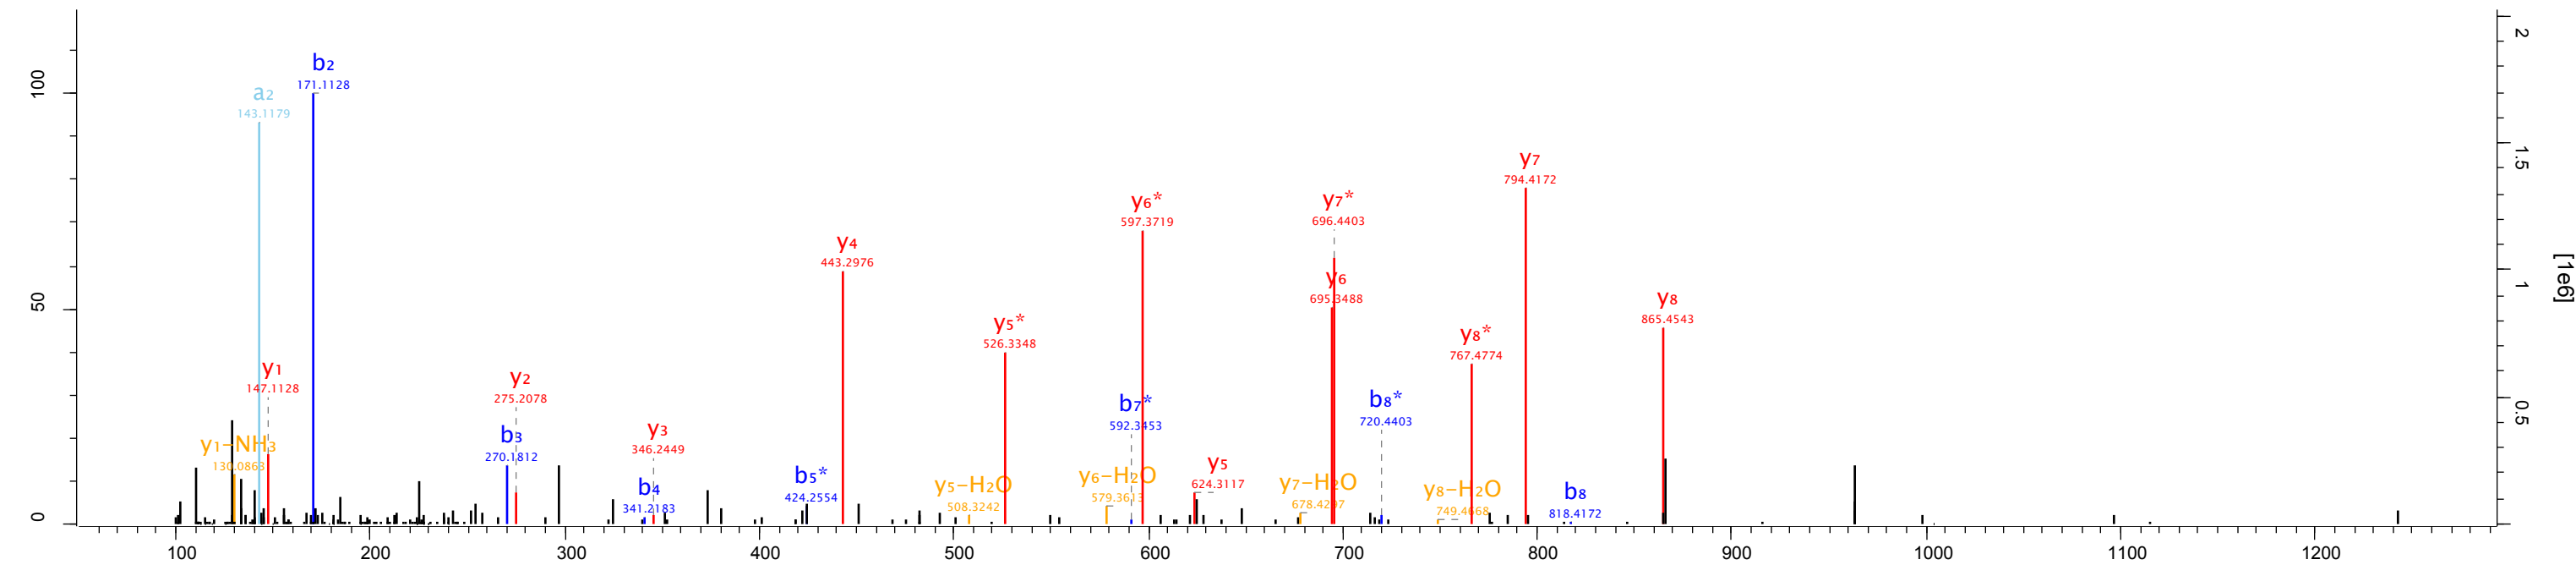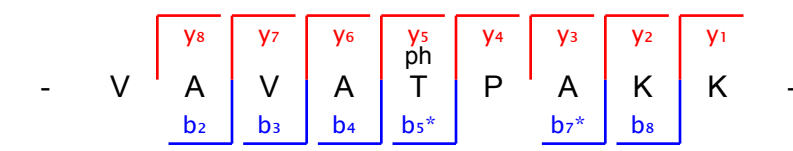

Raw file 20150812\_A375SR\_Phospho\_BR1\_06 Scan 3381 Method FTMS; HCD Score 247.66 m/z 844.86 Gene names CASC3

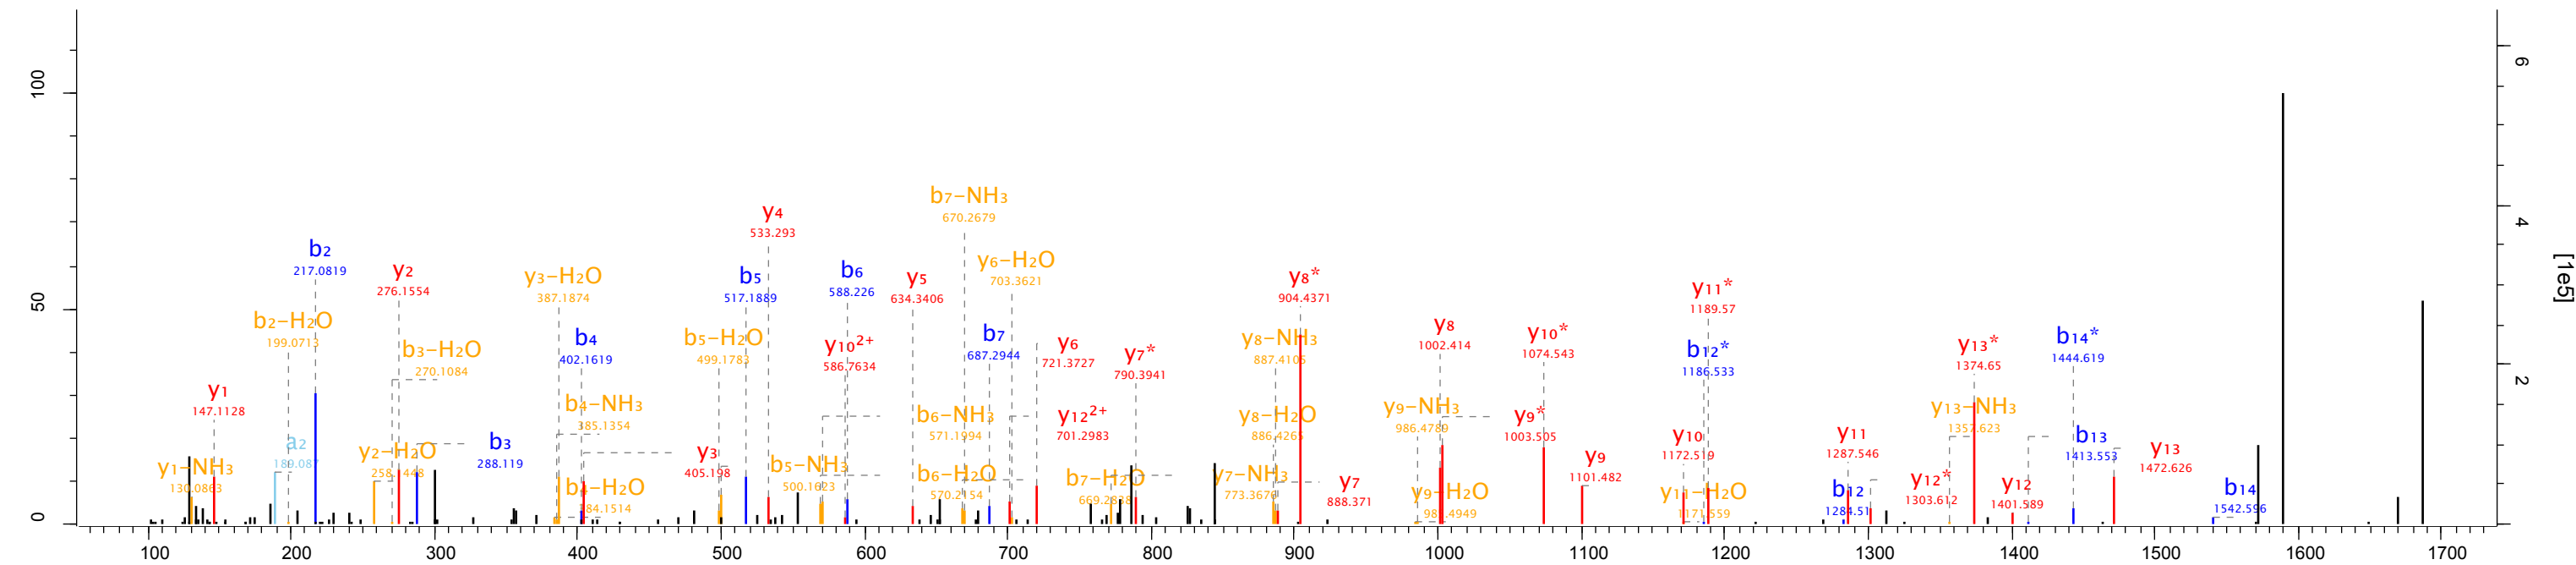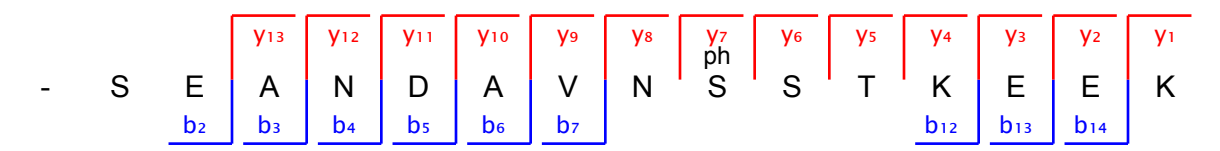

Raw file: 20150812\_A375SR\_Phospho\_BR1\_06  
 Scan: 4541 Method: FTMS; HCD Score: 154.51 m/z: 741.32 Gene names: RBMX2

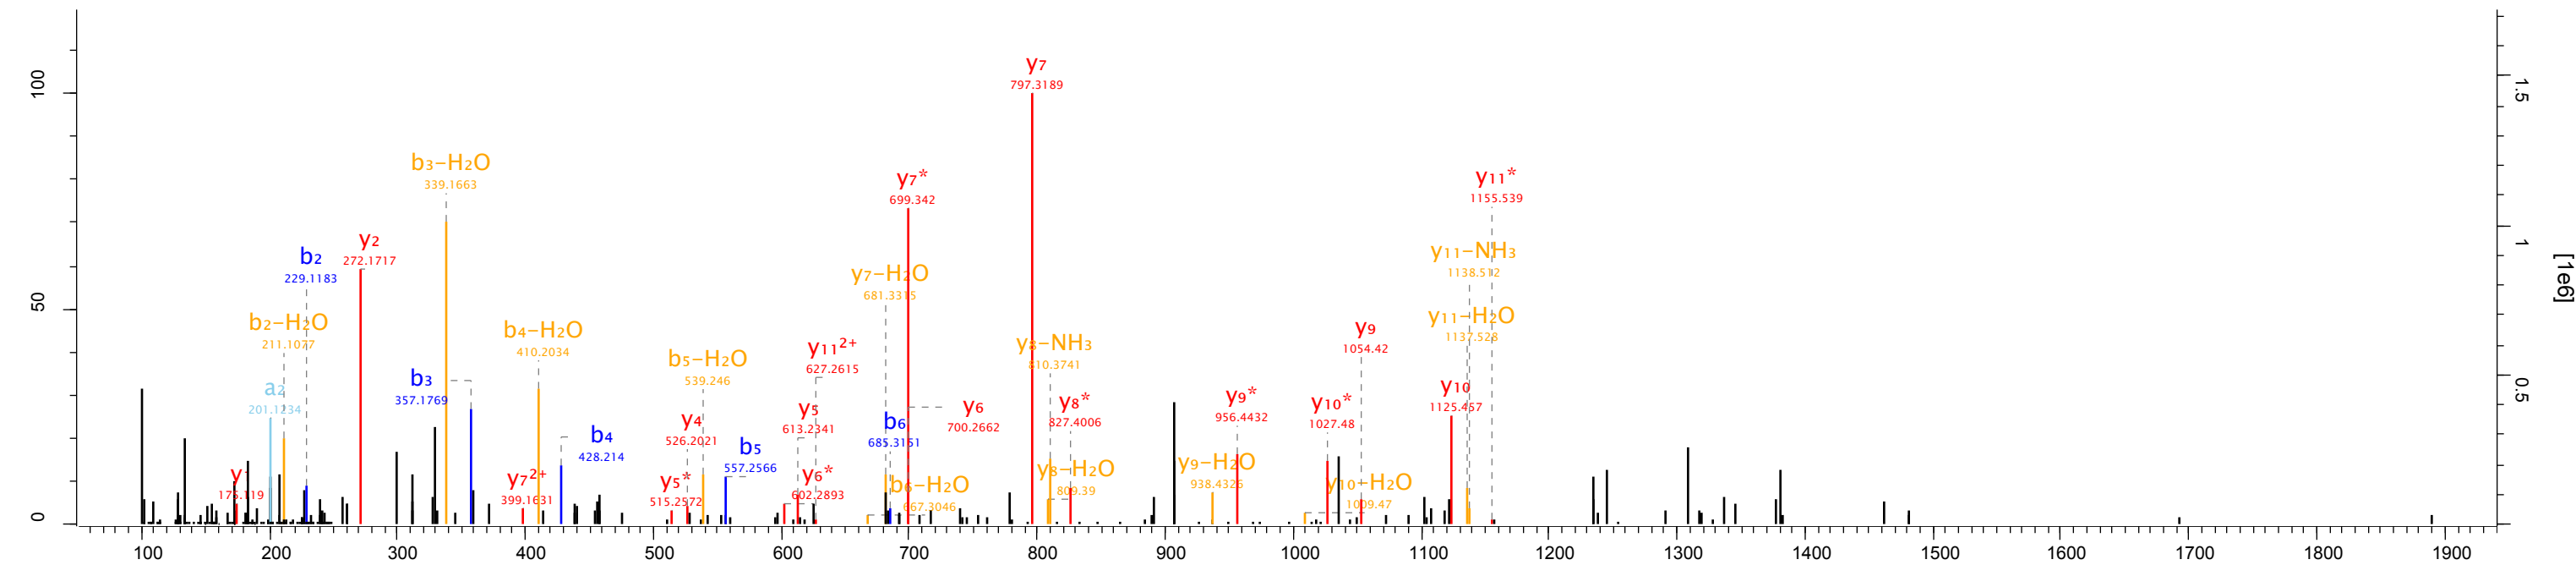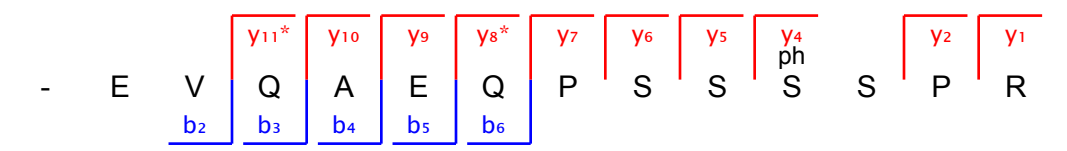

Raw file: 20150812\_A375SR\_Phospho\_BR1\_06  
 Scan: 4741 Method: FTMS; HCD Score: 108.71 m/z: 543.6 Gene names: ATF7IP

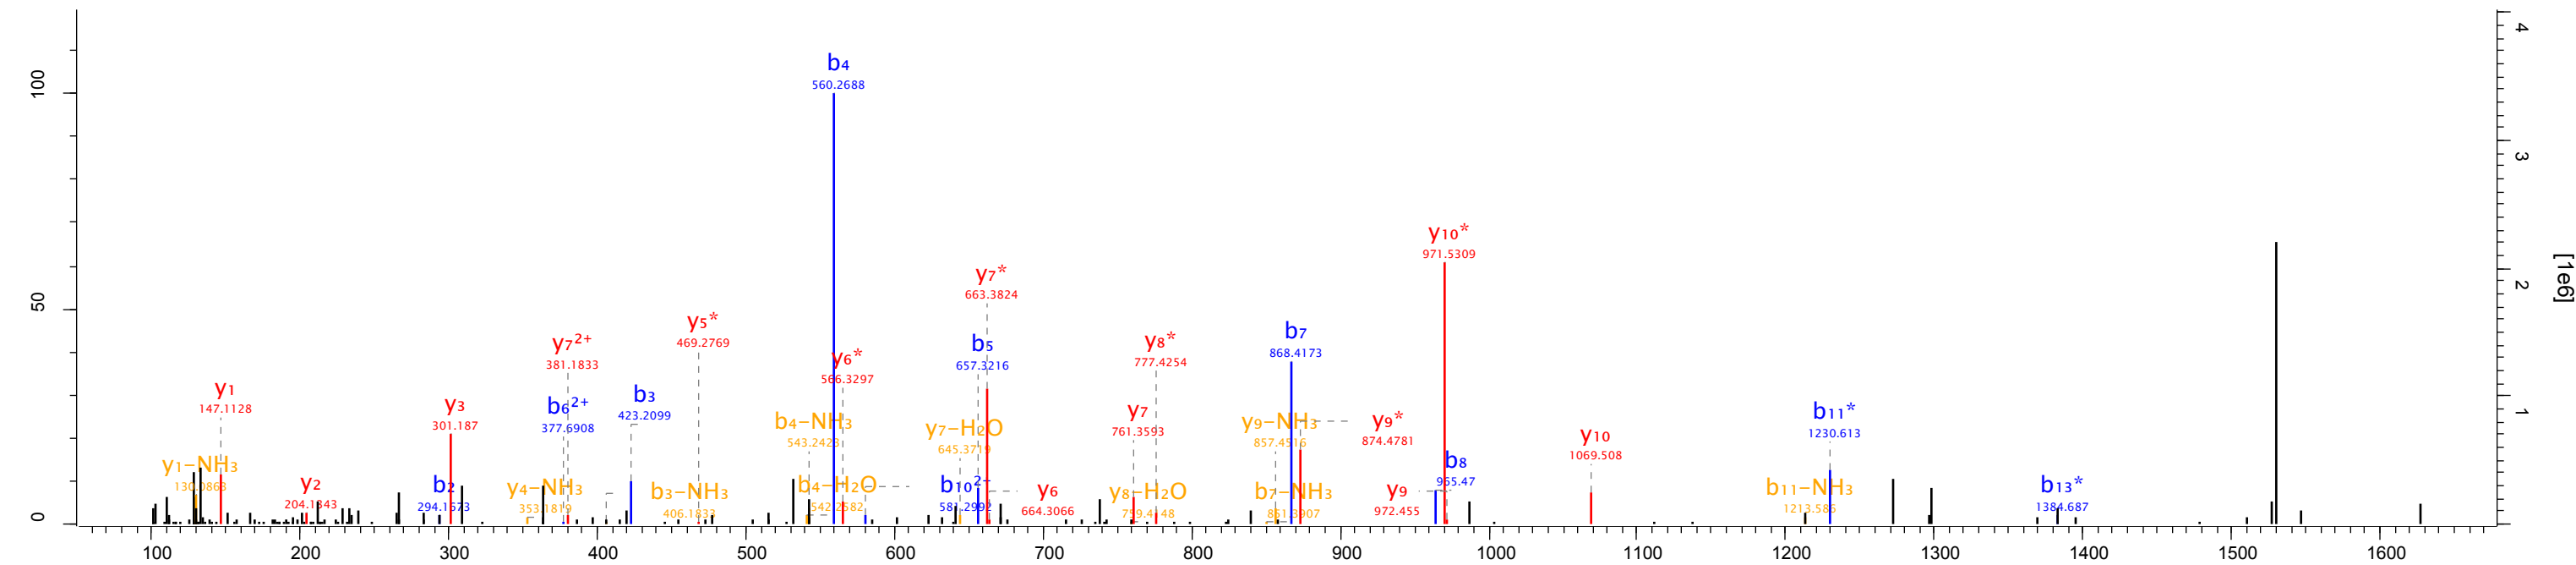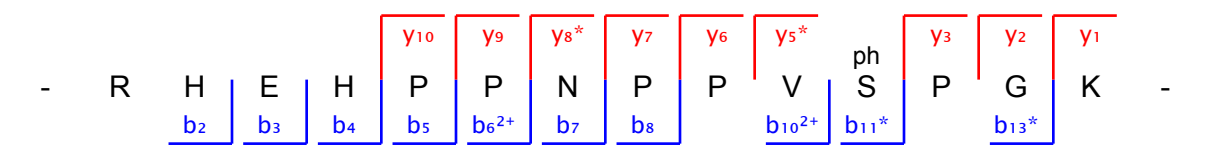

Raw file: 20150812\_A375SR\_Phospho\_BR1\_06  
 Scan: 5641 Method: FTMS; HCD Score: 227.09 m/z: 874.35 Gene names: TRA2B

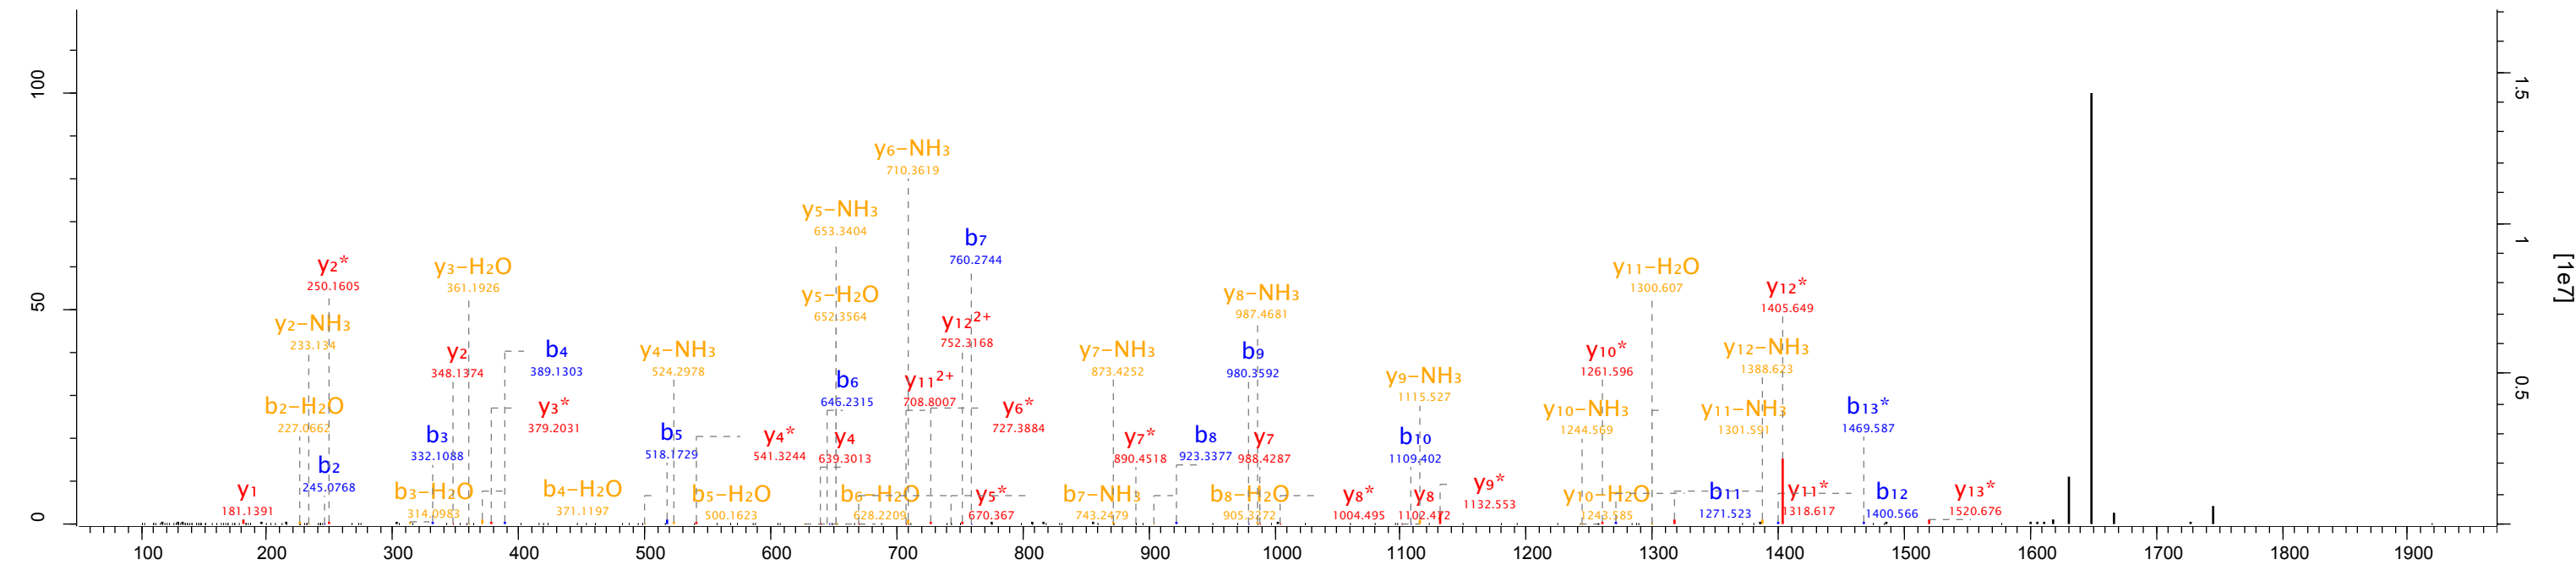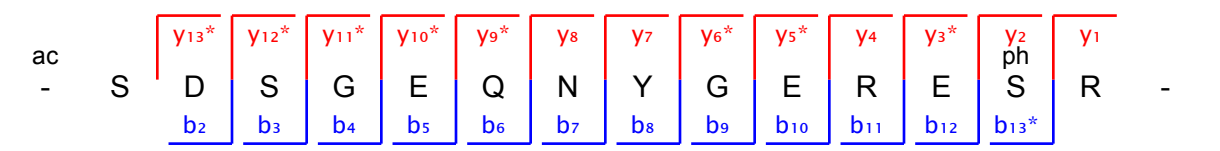

Raw file: 20150812\_A375SR\_Phospho\_BR1\_06  
 Scan: 6041 Method: FTMS; HCD Score: 108.09 m/z: 598.79 Gene names: BOD1L1

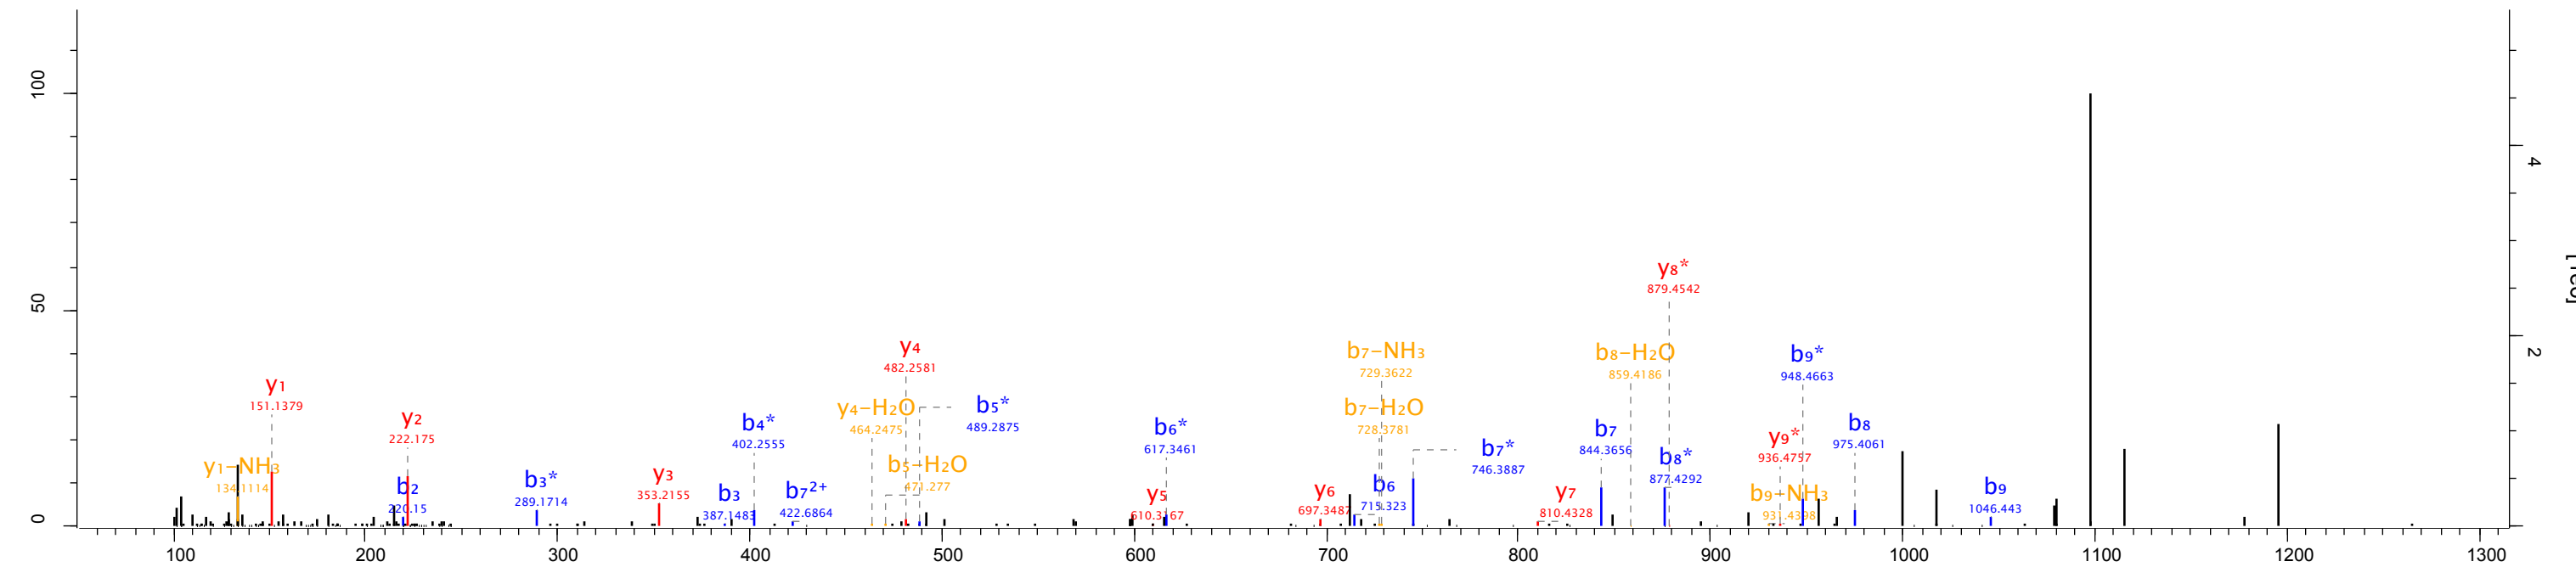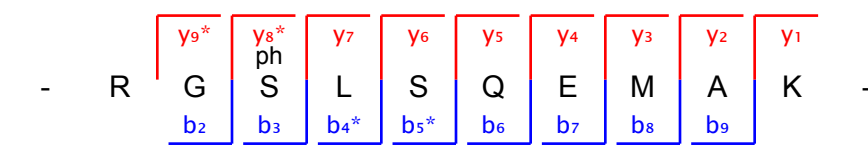

Raw file: 20150812\_A375SR\_Phospho\_BR1\_06  
 Scan: 6441 Method: FTMS; HCD Score: 117.25 m/z: 523.74 Gene names: BRAF

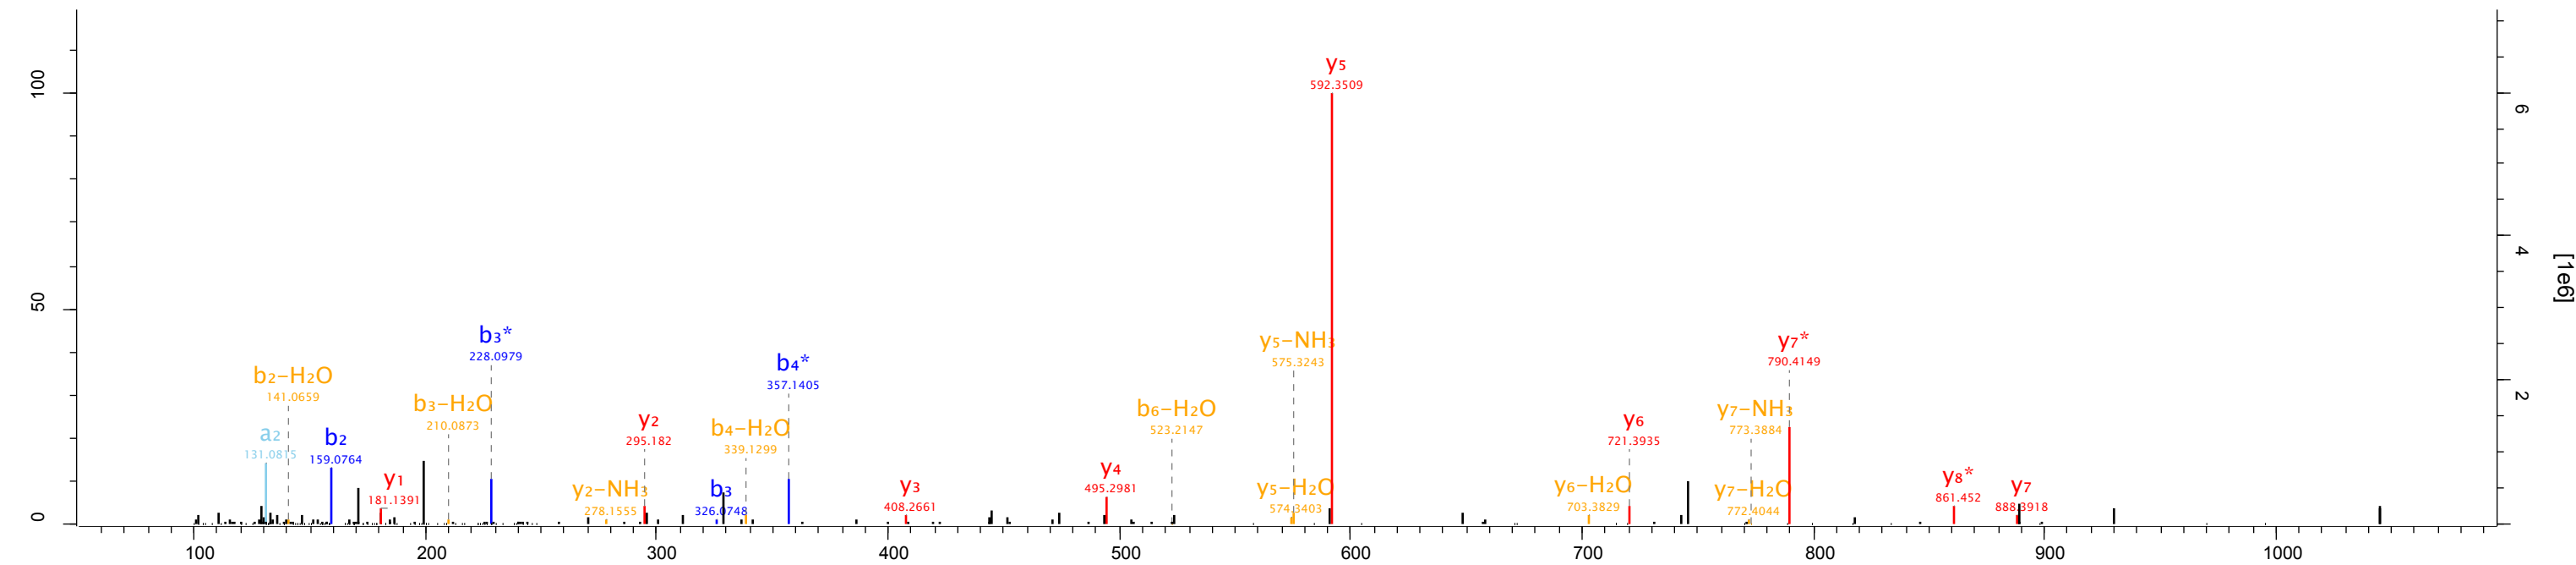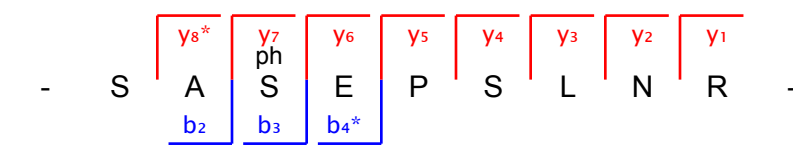



Raw file  
 20150812\_A375SR\_Phospho\_BR1\_06  
 Scan 7231 Method FTMS; HCD Score 158.27 m/z 538.25 Gene names TCF20

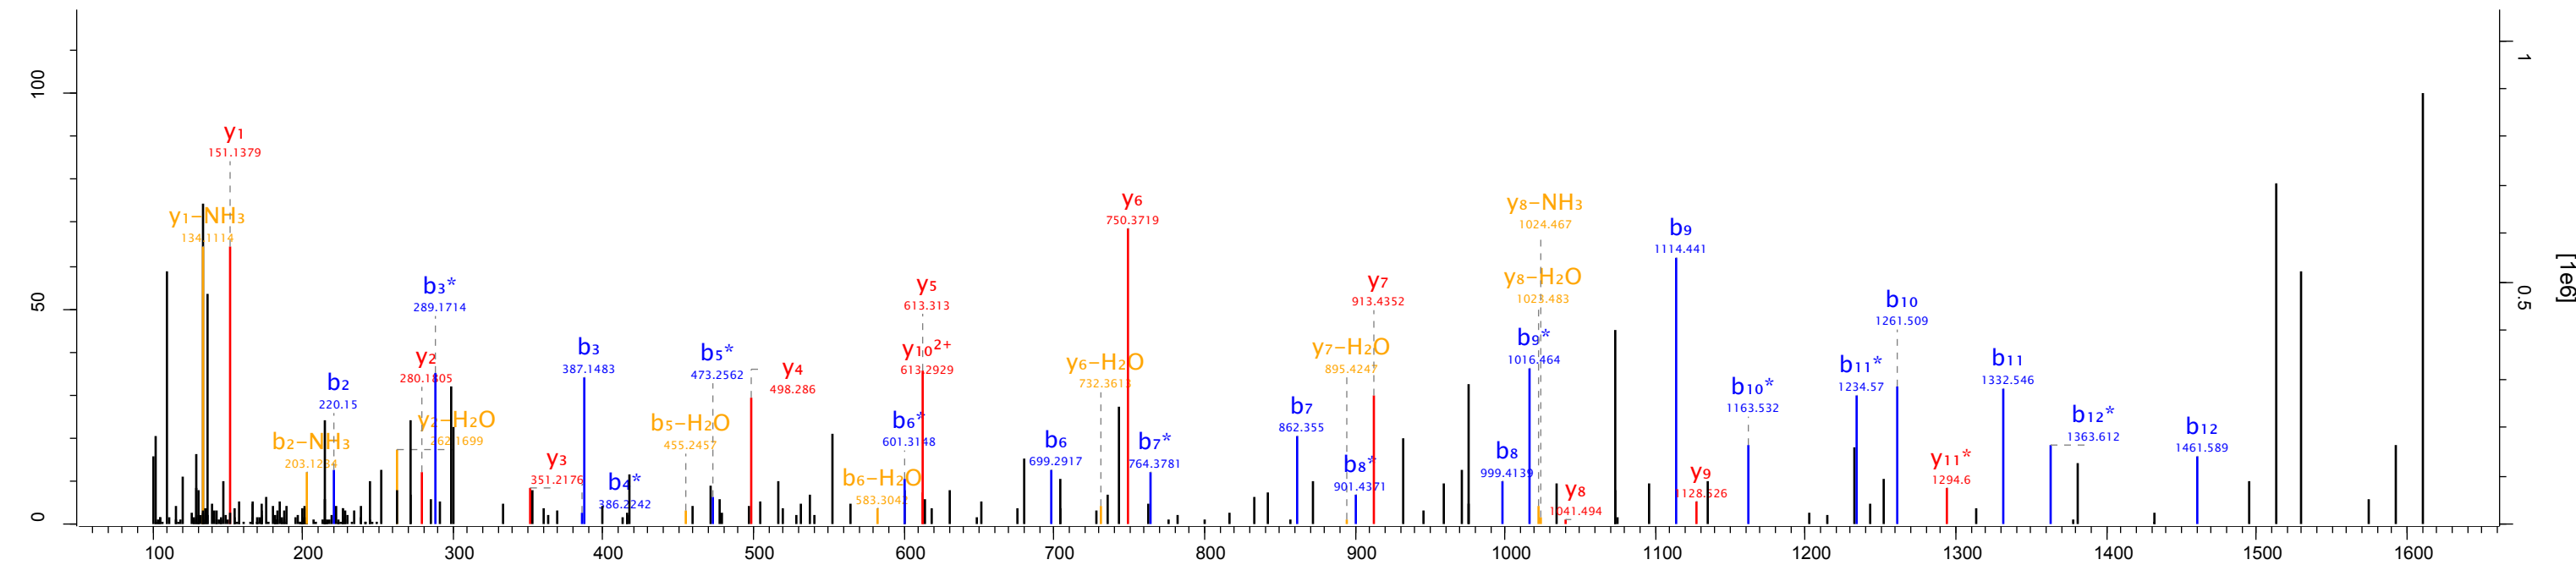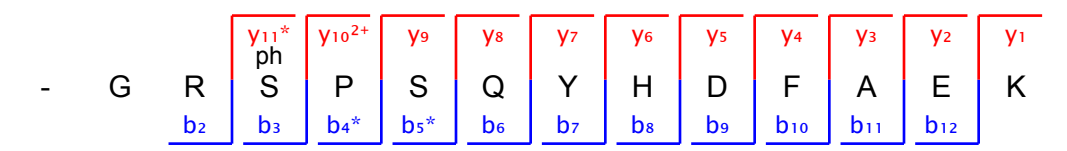

Raw file 20150812\_A375SR\_Phospho\_BR1\_06 Scan 8511 Method FTMS; HCD Score 245.11 m/z 1030.93 Gene names CDV3

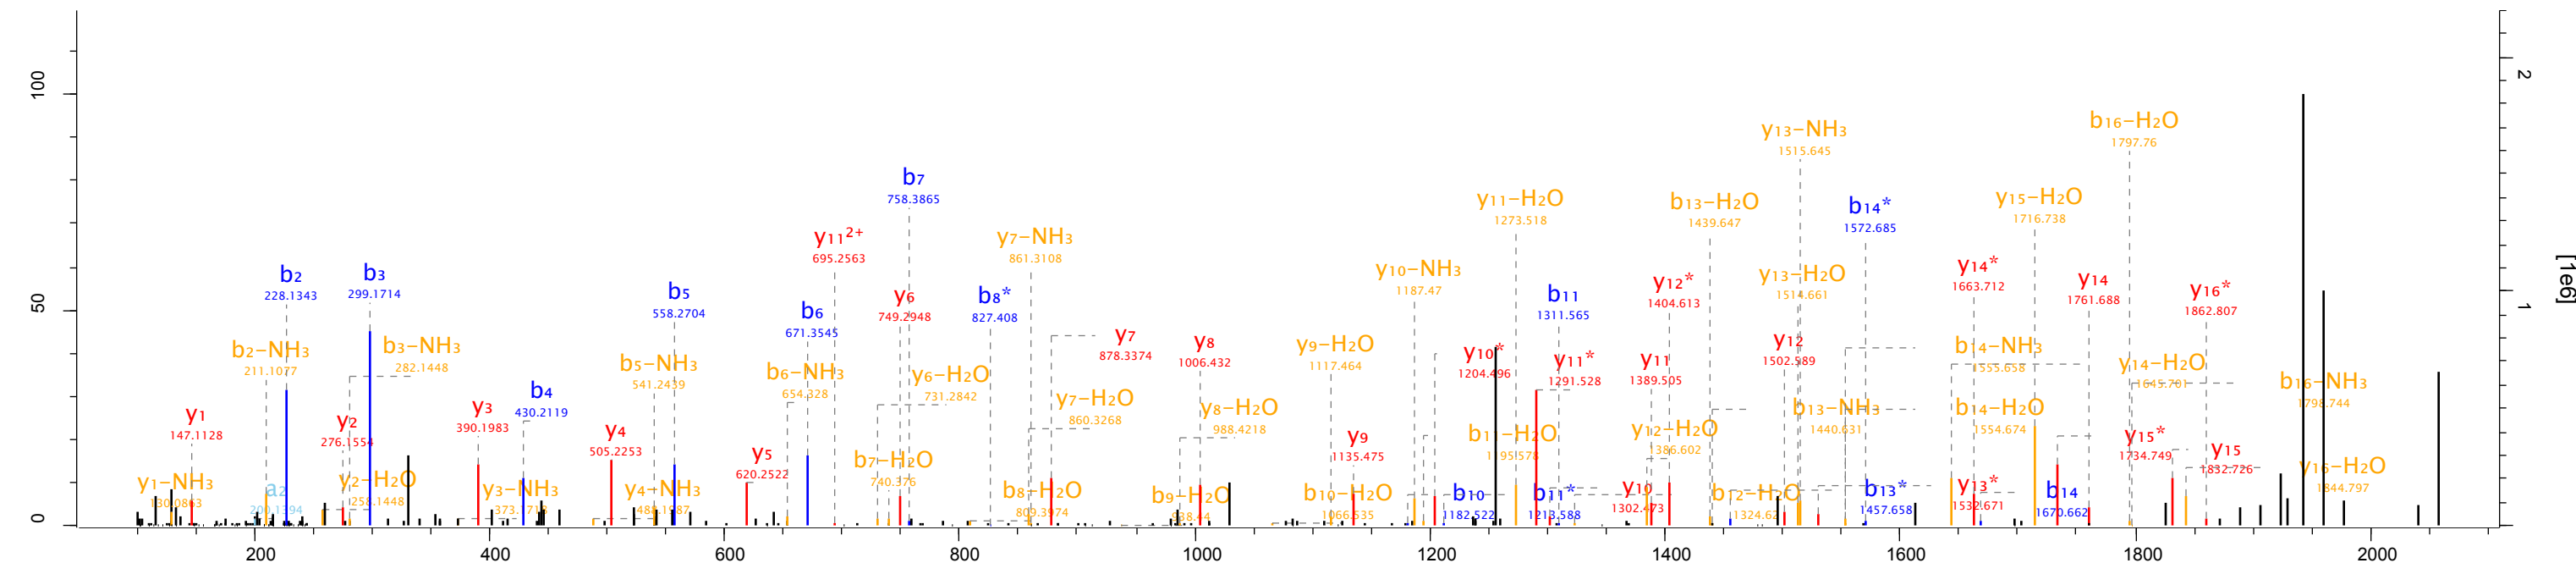

- V Q A M Q I S S E K E E D D N E K -

y16\*
y15
y14
y13\*
y12
y11
y10  
ph
y9
y8
y7
y6
y5
y4
y3
y2
y1

b2
b3
b4
b5
b6
b7
b8\*
b10
b11
b13\*
b14

Raw file: 20150812\_A375SR\_Phospho\_BR1\_06  
 Scan: 9831 Method: FTMS; HCD Score: 147.26 m/z: 551.49 Gene names: SERBP1

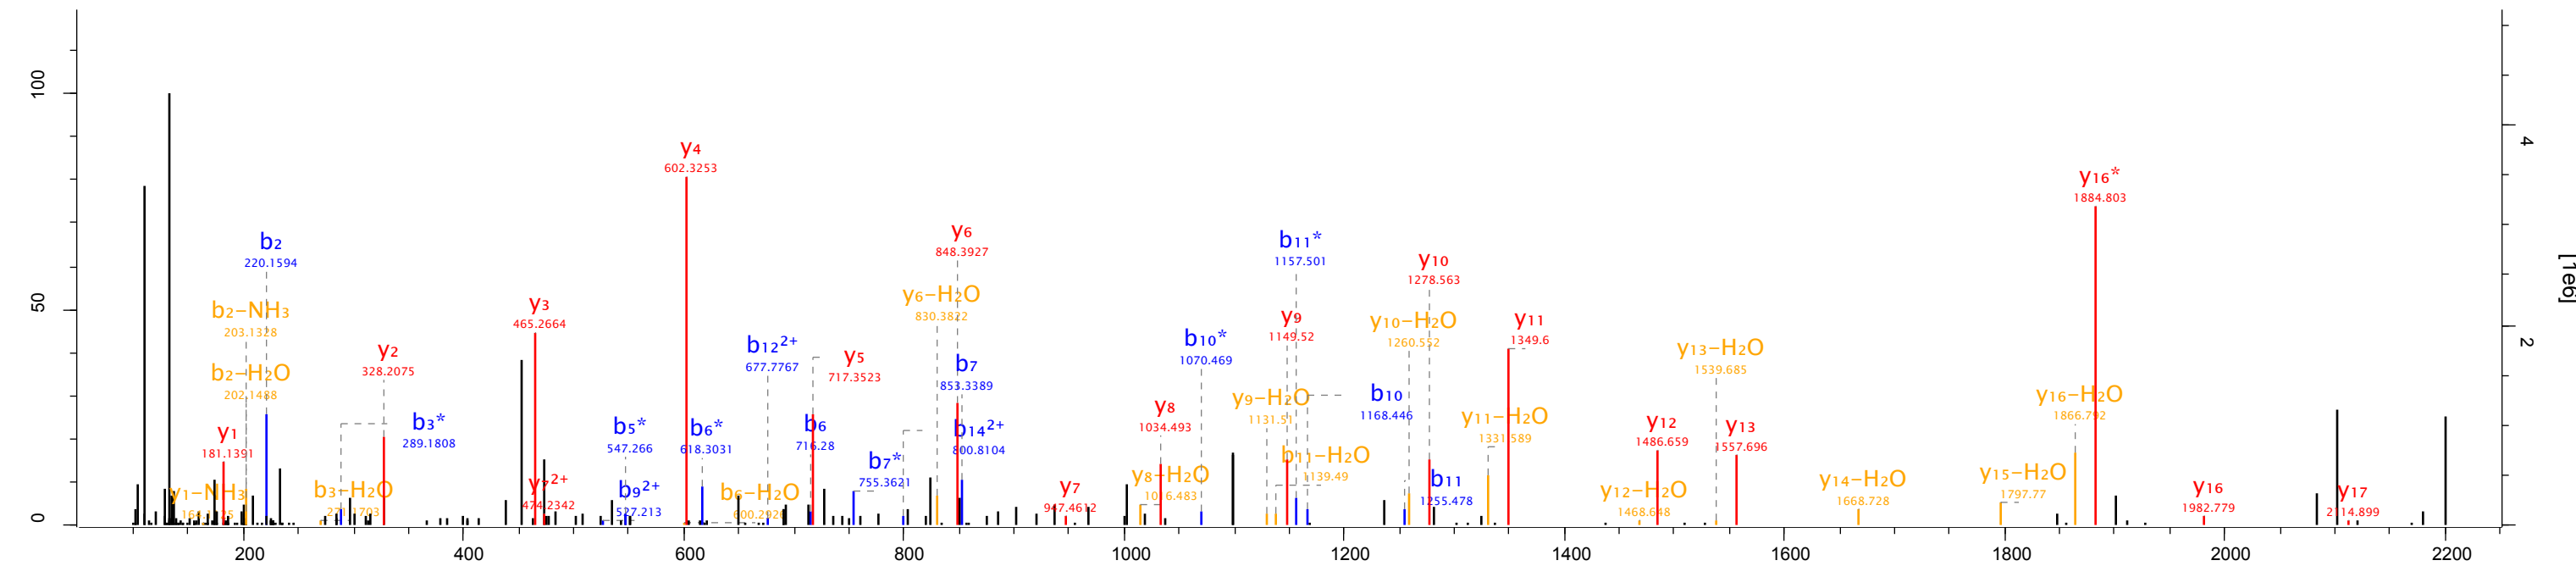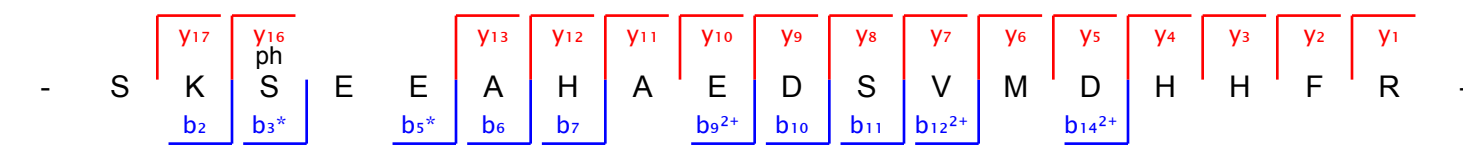

Raw file Scan Method Score m/z Gene names  
 20150812\_A375SR\_Phospho\_BR1\_07 10341 FTMS; HCD 458.49 1233.98 THRAP3

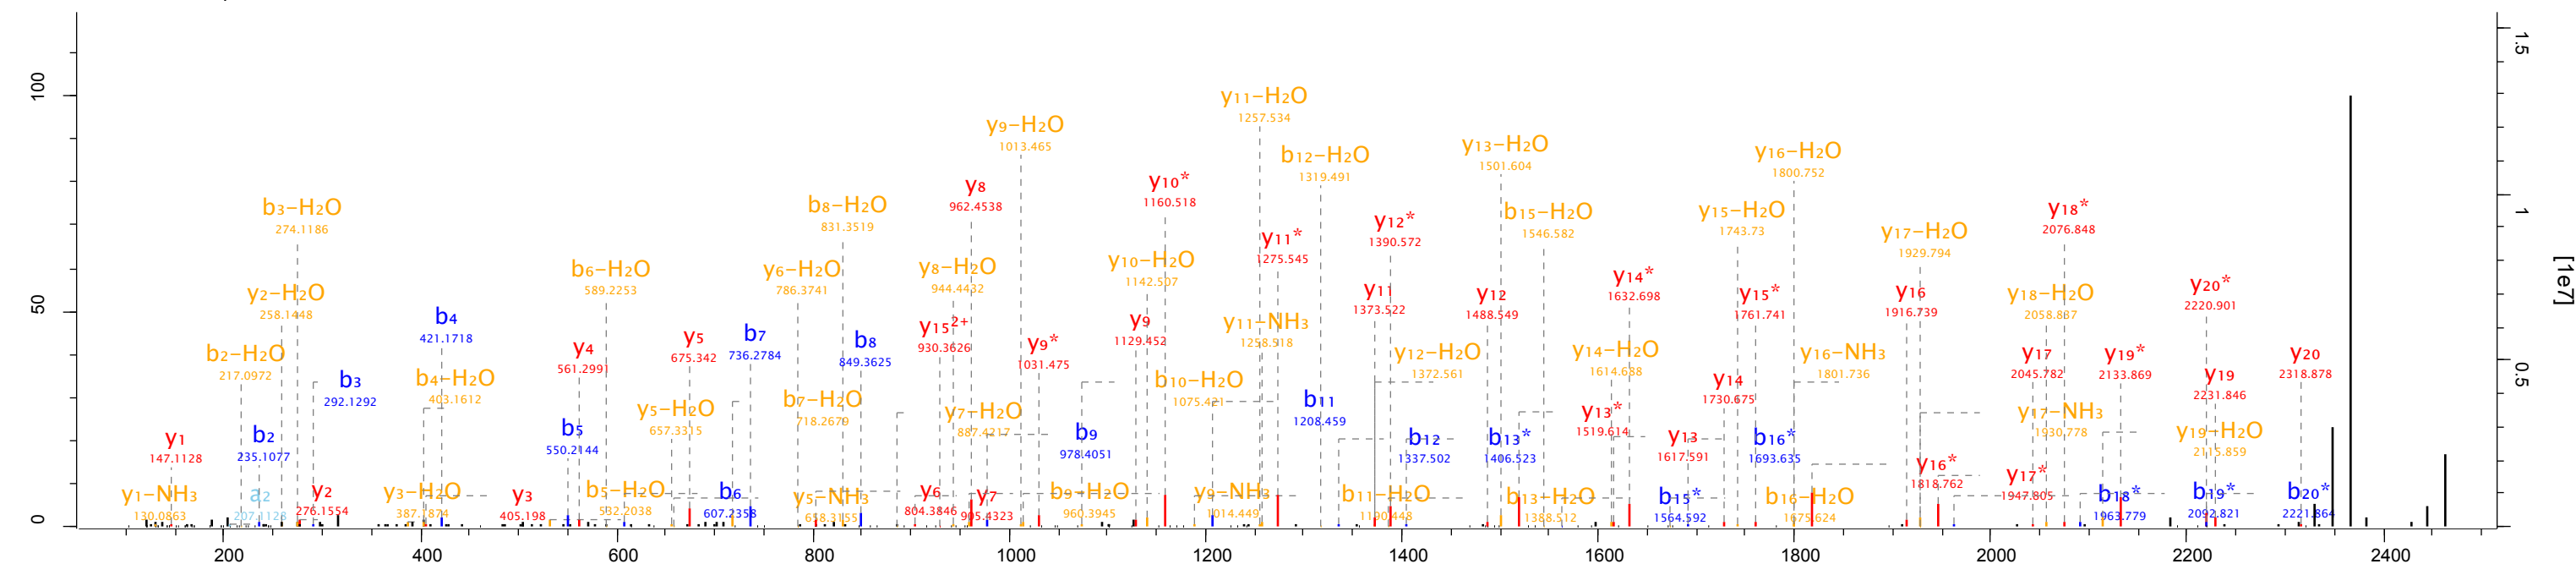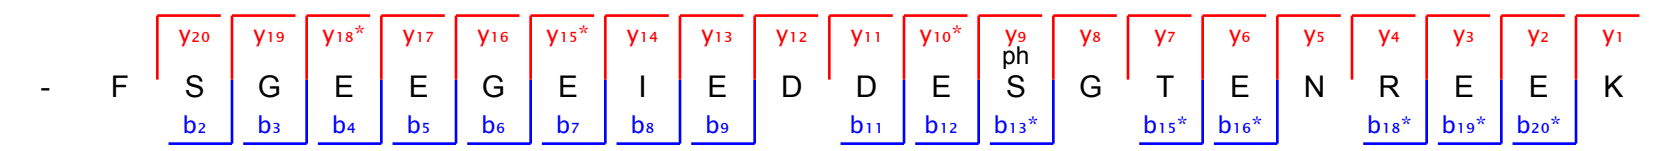

Raw file  
20150812\_A375SR\_Phospho\_BR1\_07

Scan 11181 Method FTMS; HCD Score 313.59 m/z 826.83 Gene names TCP1

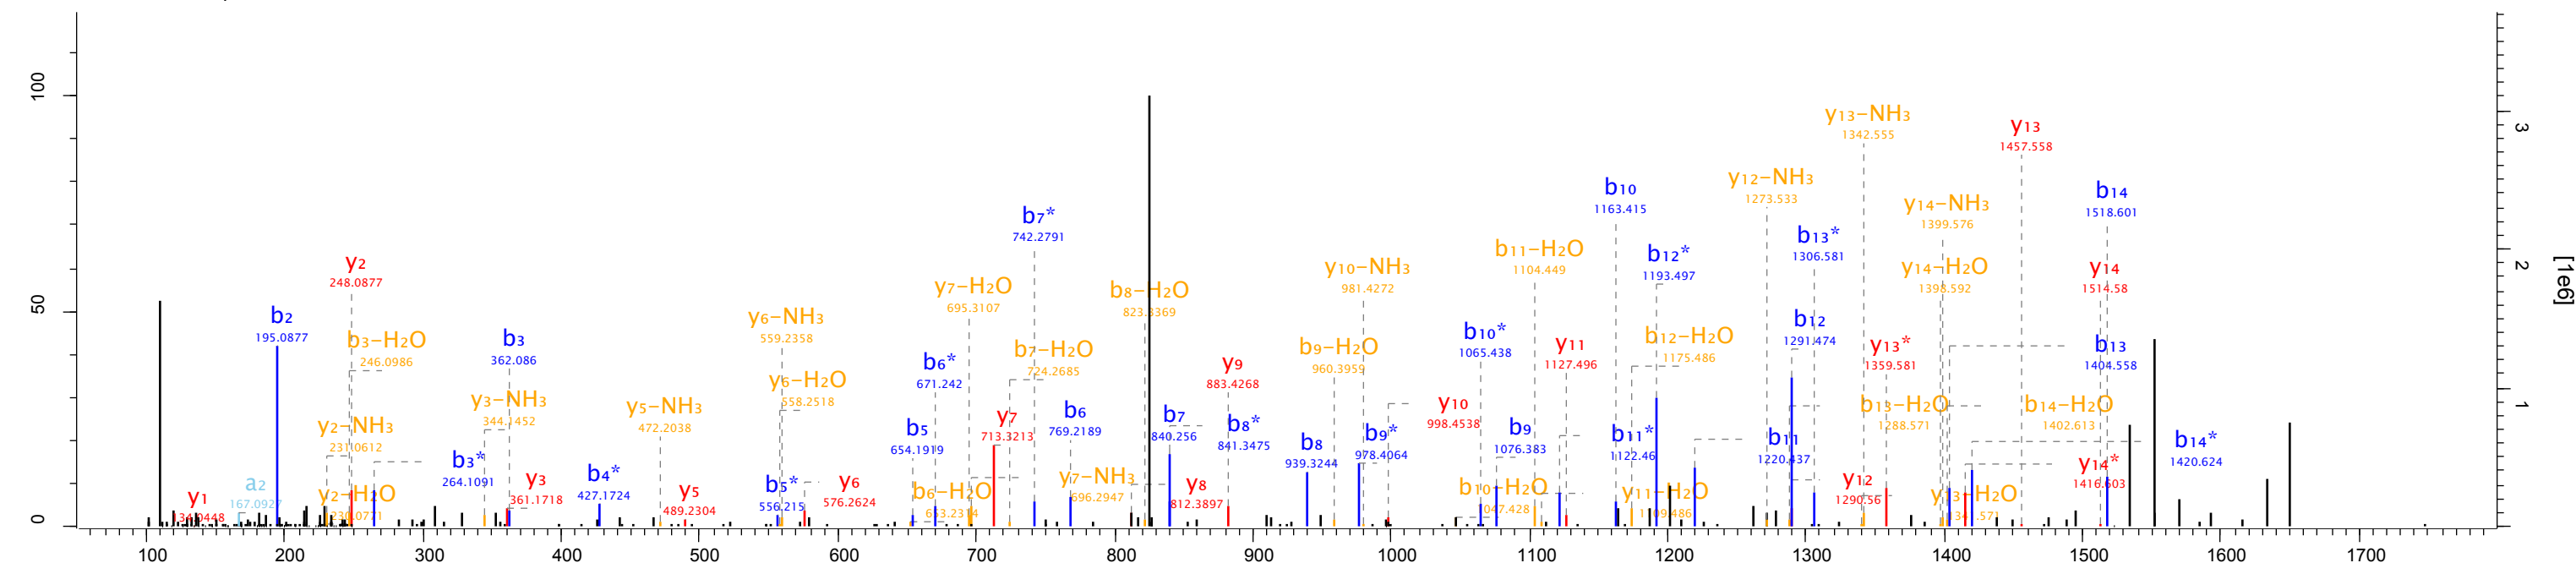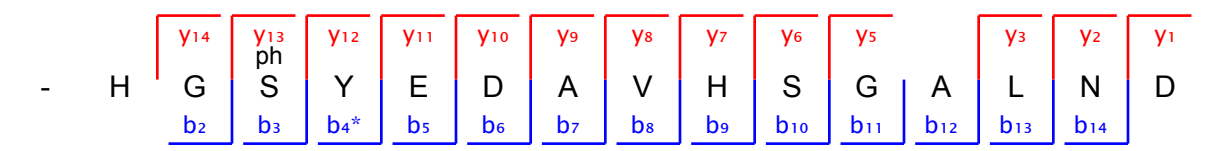

Raw file: 20150812\_A375SR\_Phospho\_BR1\_07  
 Scan: 12731 Method: FTMS; HCD Score: 287.57 m/z: 843.87 Gene names: FLNB

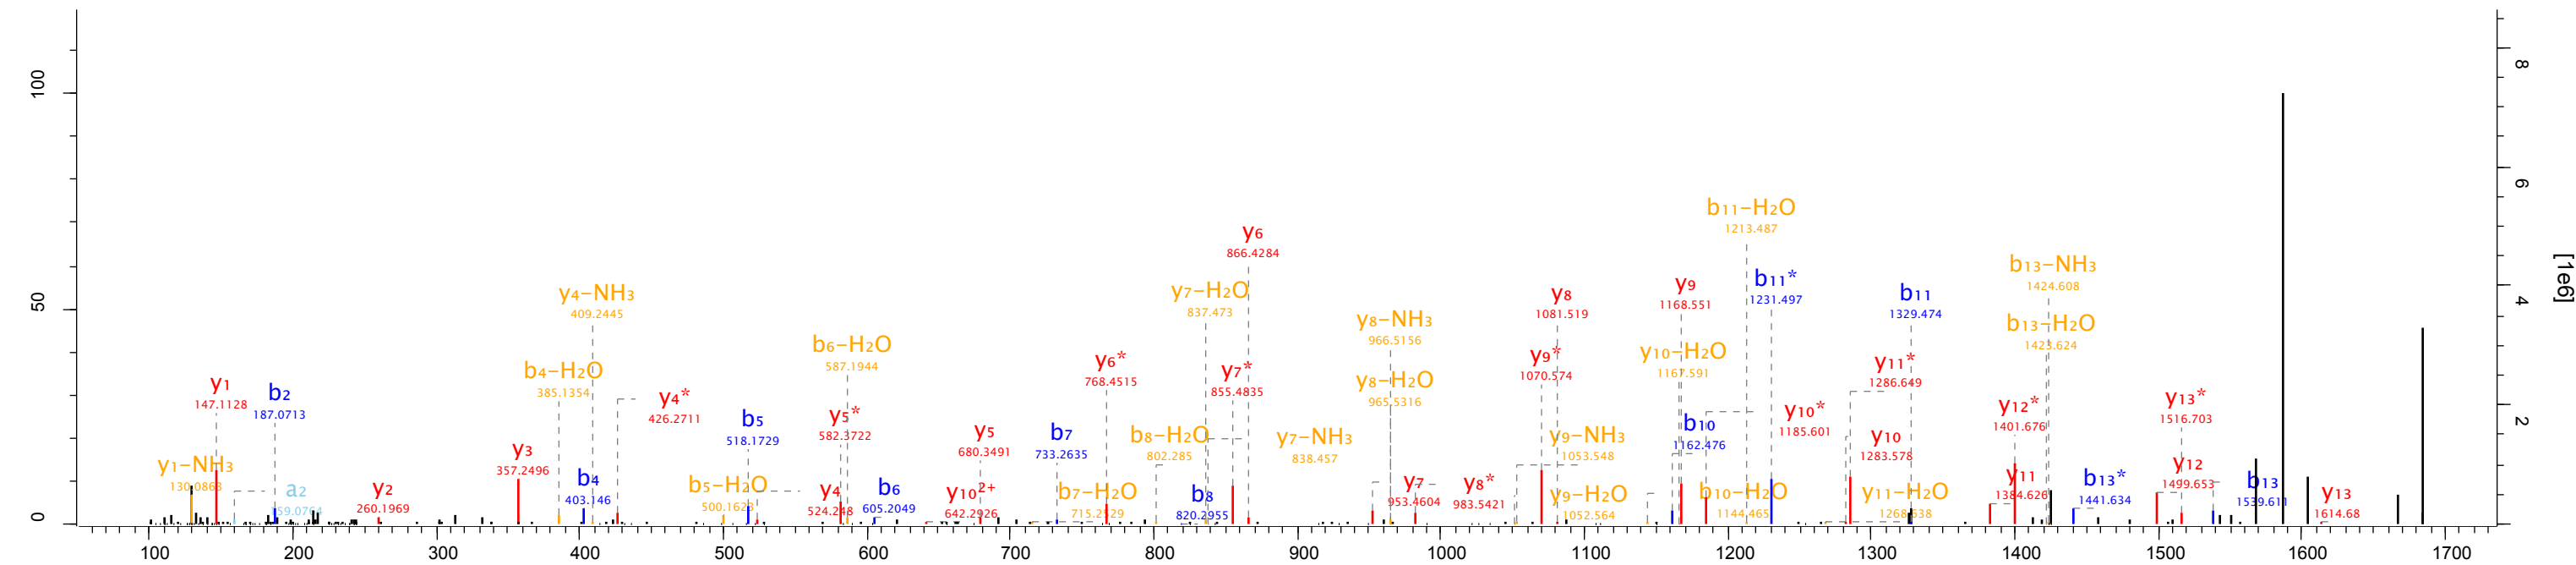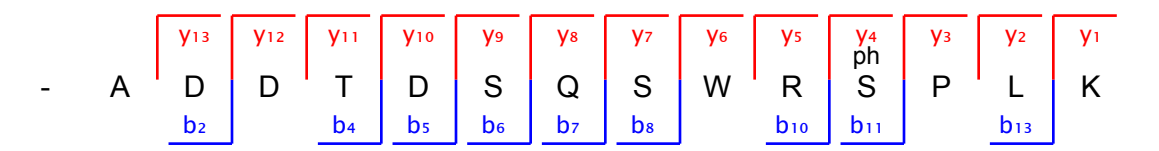

Raw file 20150812\_A375SR\_Phospho\_BR1\_07 Scan 16041 Method FTMS; HCD Score 199.15 m/z 665.61 Gene names BCLAF1

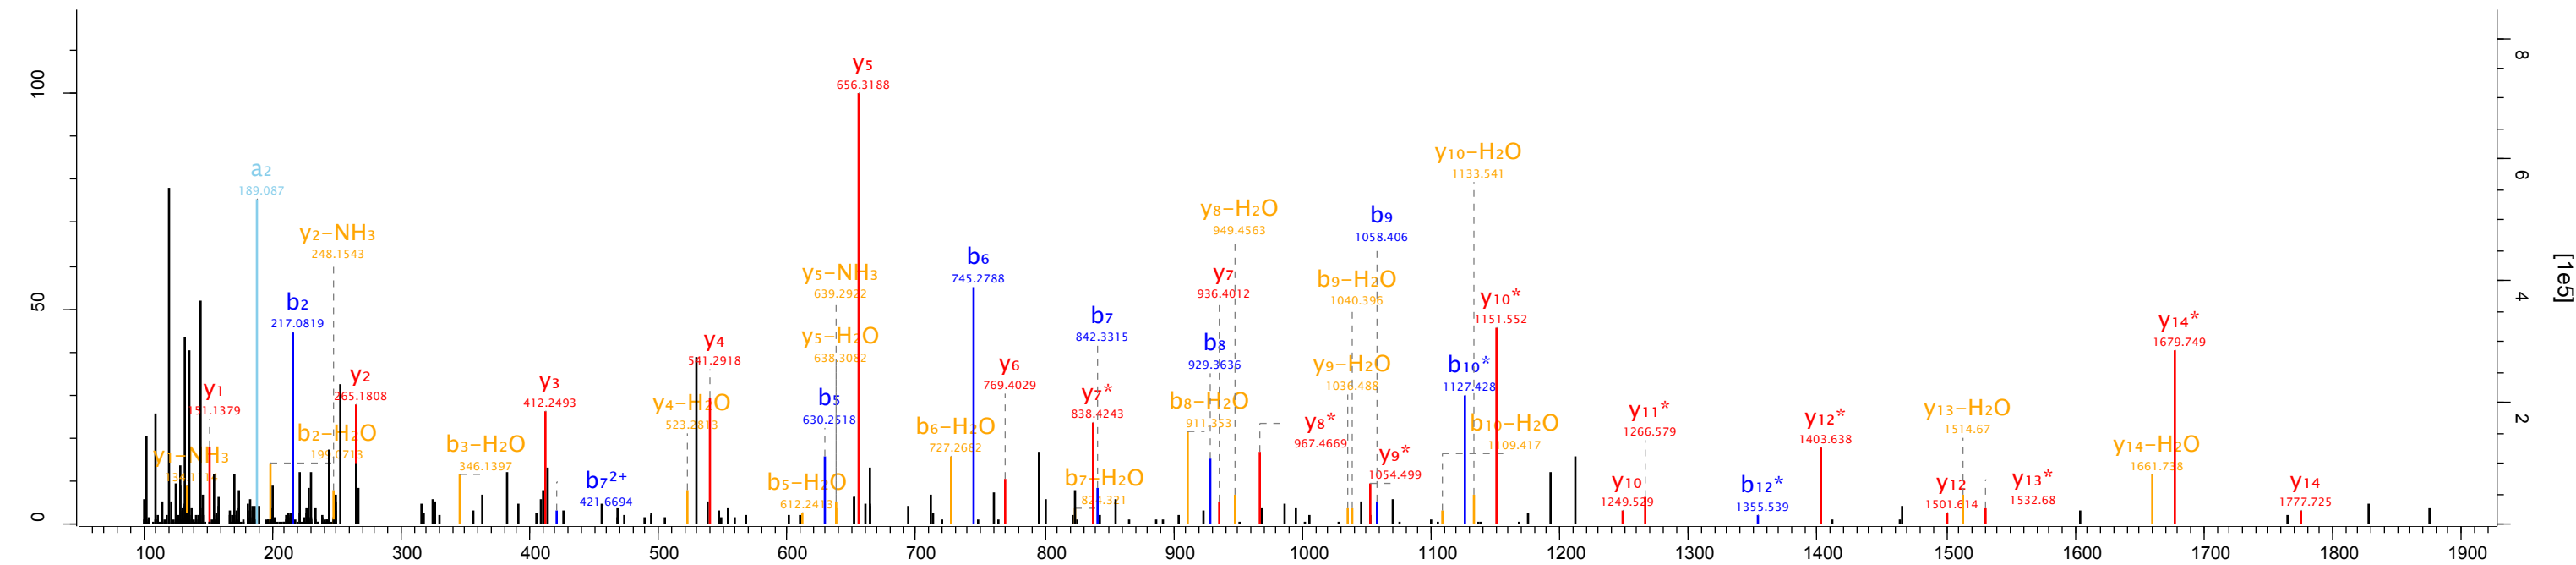

- D T F E H D P S E S I D E F N K -

b<sub>2</sub> b<sub>5</sub> b<sub>6</sub> b<sub>7</sub> b<sub>8</sub> b<sub>9</sub> b<sub>10</sub>\* b<sub>12</sub>\*

y<sub>14</sub> y<sub>13</sub>\* y<sub>12</sub> y<sub>11</sub>\* y<sub>10</sub> y<sub>9</sub>\* y<sub>8</sub>\* y<sub>7</sub> ph y<sub>6</sub> y<sub>5</sub> y<sub>4</sub> y<sub>3</sub> y<sub>2</sub> y<sub>1</sub>

Raw file Scan Method Score m/z Gene names  
 20150812\_A375SR\_Phospho\_BR1\_07 17161 FTMS; HCD 185.28 721.86 TRUB1

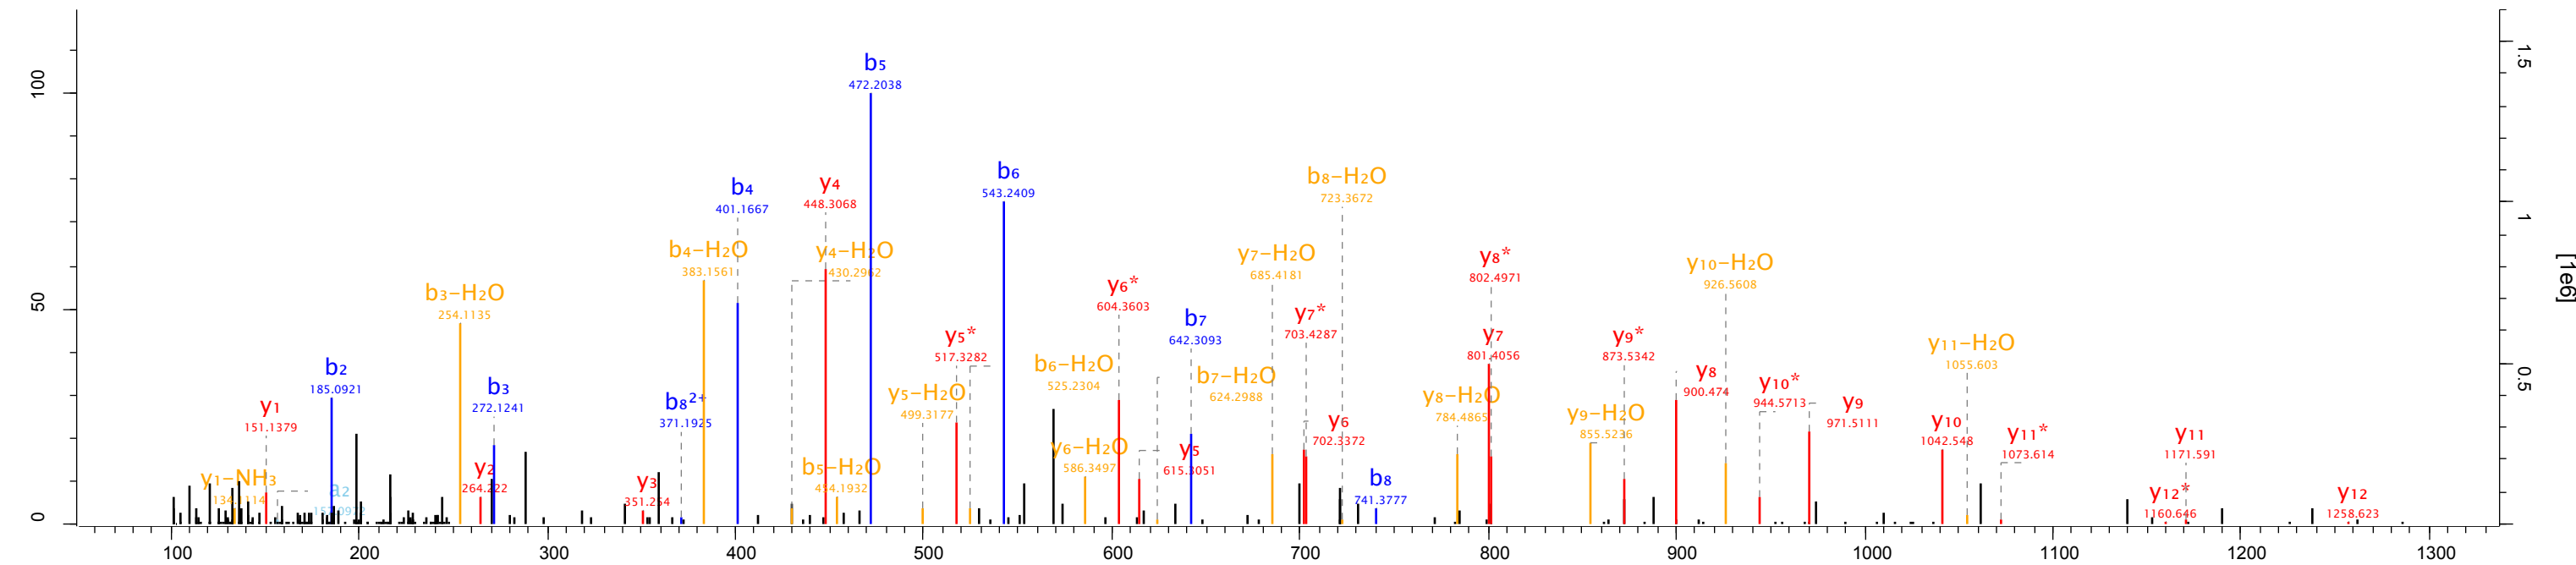

ac  
 - A A S E A A V V S S P S L K -  
 b<sub>2</sub> b<sub>3</sub> b<sub>4</sub> b<sub>5</sub> b<sub>6</sub> b<sub>7</sub> b<sub>8</sub> y<sub>12</sub> y<sub>11</sub> y<sub>10</sub> y<sub>9</sub> y<sub>8</sub> y<sub>7</sub> y<sub>6</sub> y<sub>5</sub> y<sub>4</sub> y<sub>3</sub> y<sub>2</sub> y<sub>1</sub>  
 ph



Raw file Scan Method Score m/z Gene names  
 20150812\_A375SR\_Phospho\_BR1\_07 18701 FTMS; HCD 153.87 714.03 SPTBN1

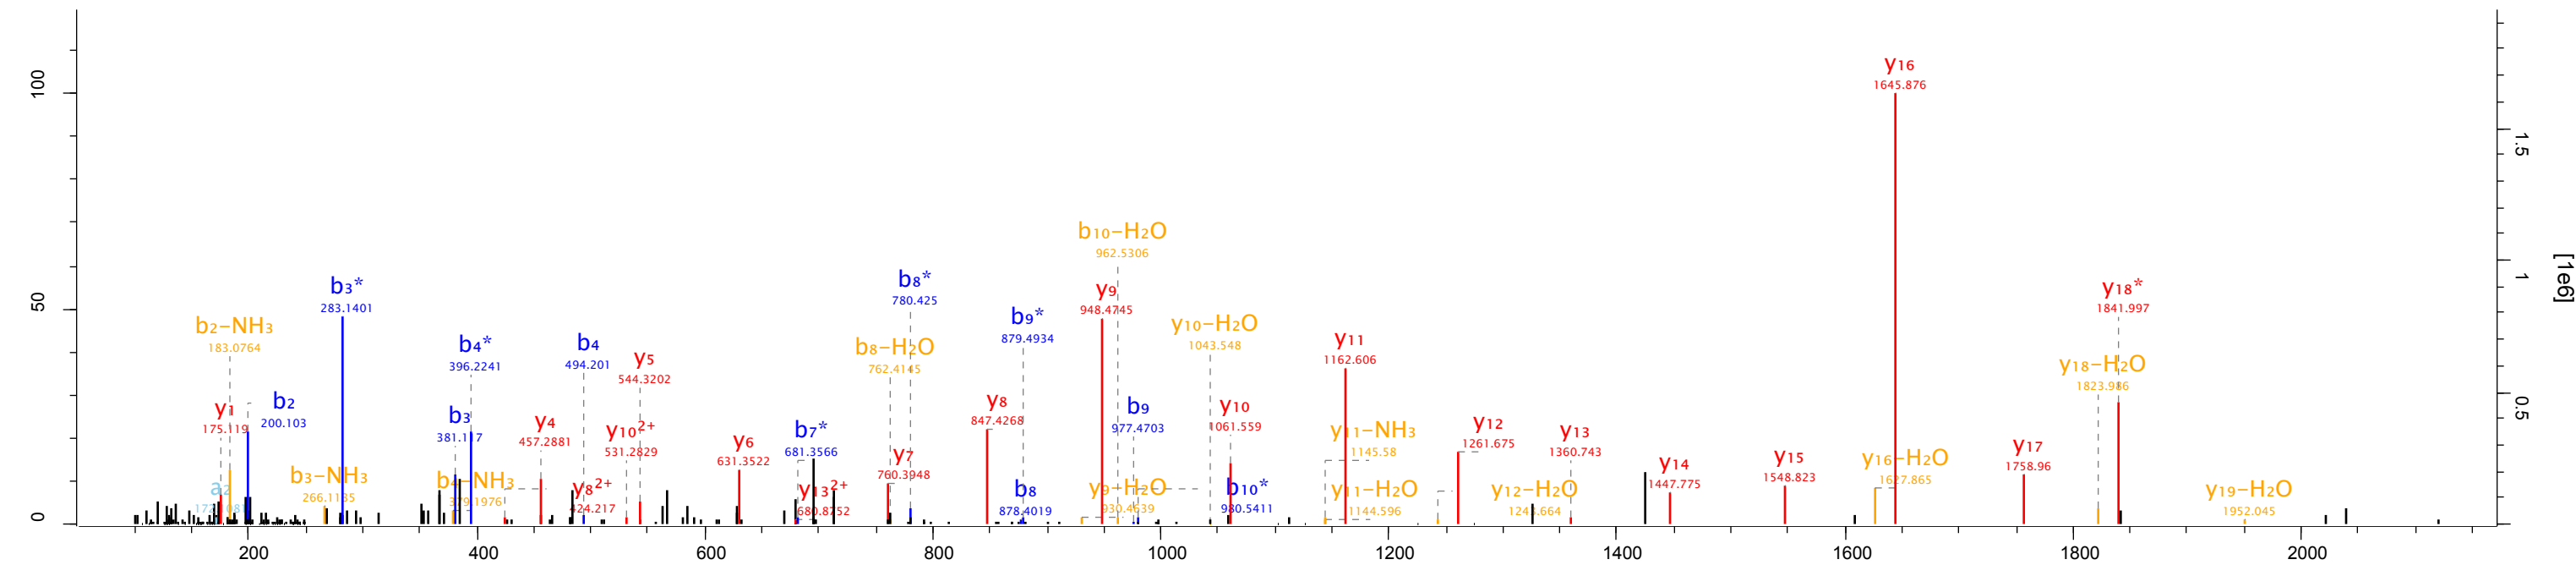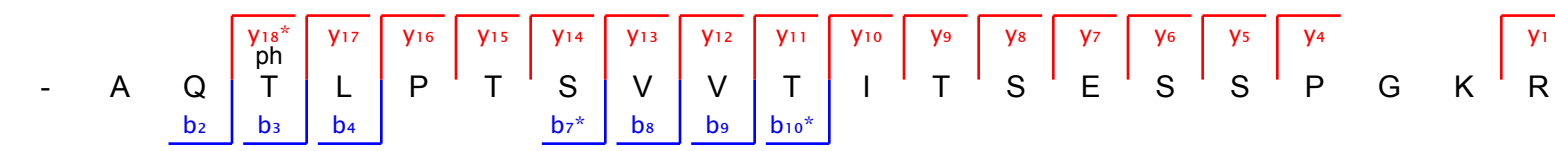

Raw file 20150812\_A375SR\_Phospho\_BR1\_07 Scan 18901 Method FTMS; HCD Score 94.02 m/z 850.71 Gene names RNF113A

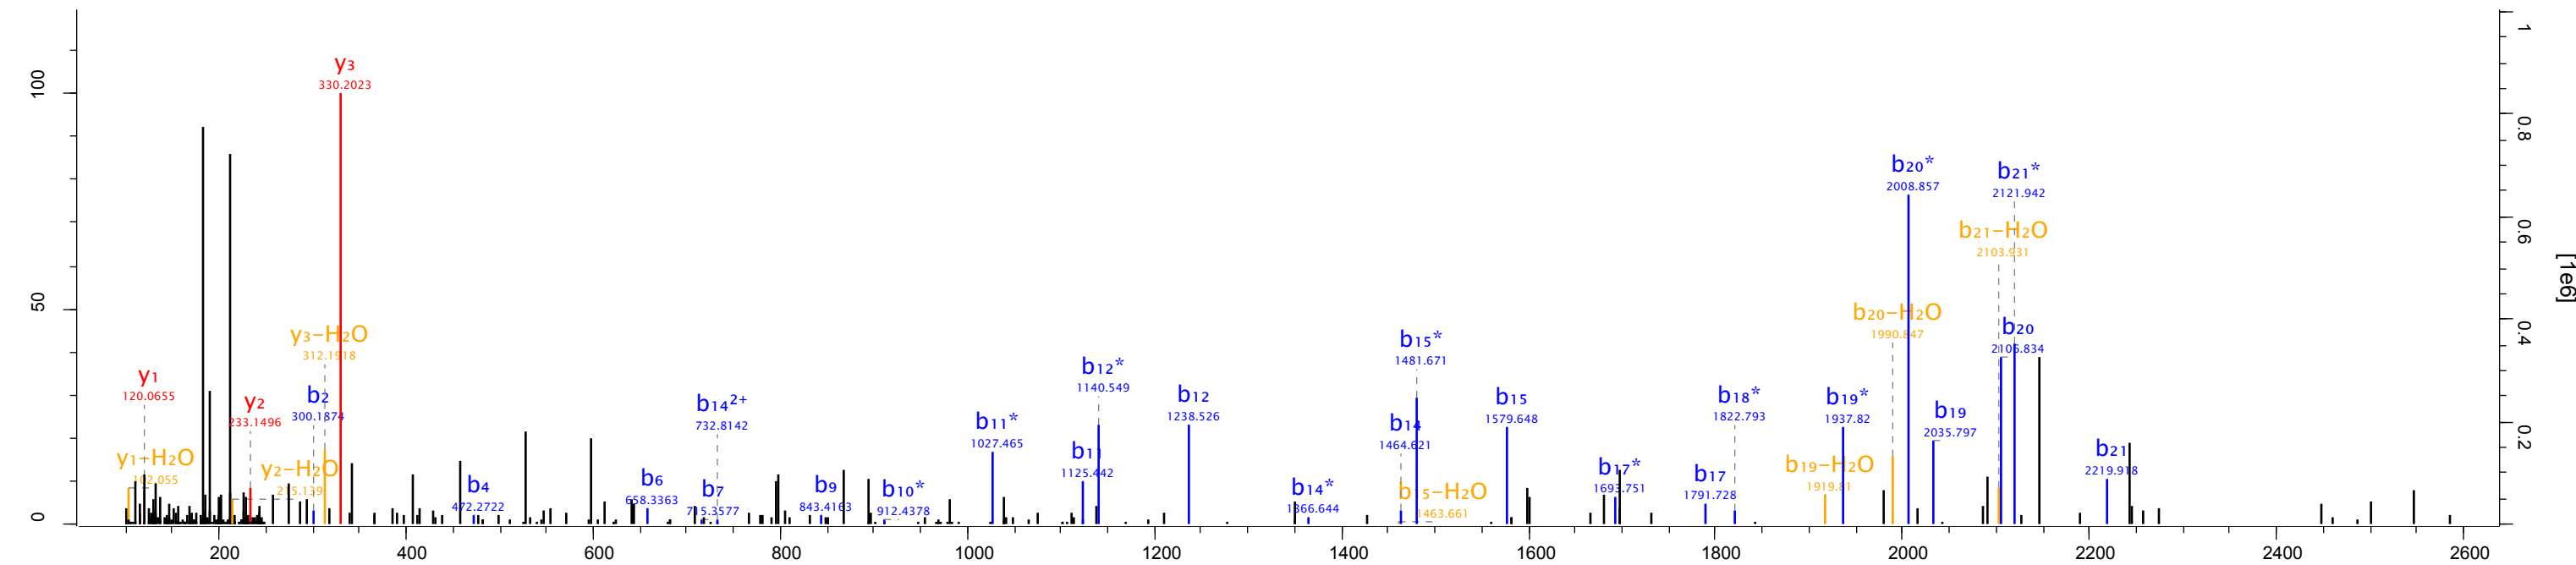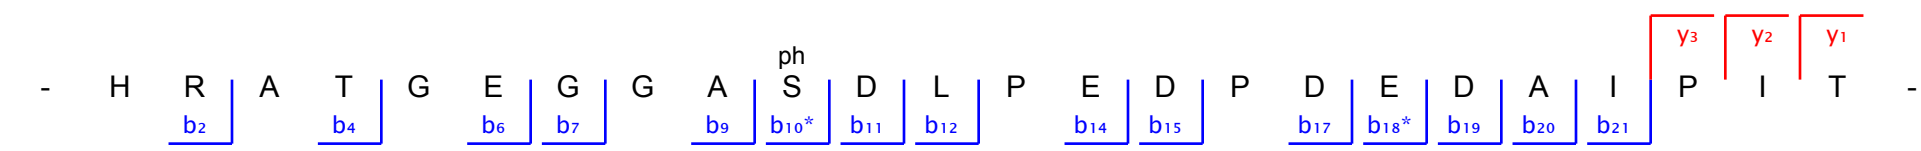

Raw file 20150812\_A375SR\_Phospho\_BR1\_07 Scan 23411 Method FTMS; HCD Score 80.73 m/z 764.06 Gene names PGM1

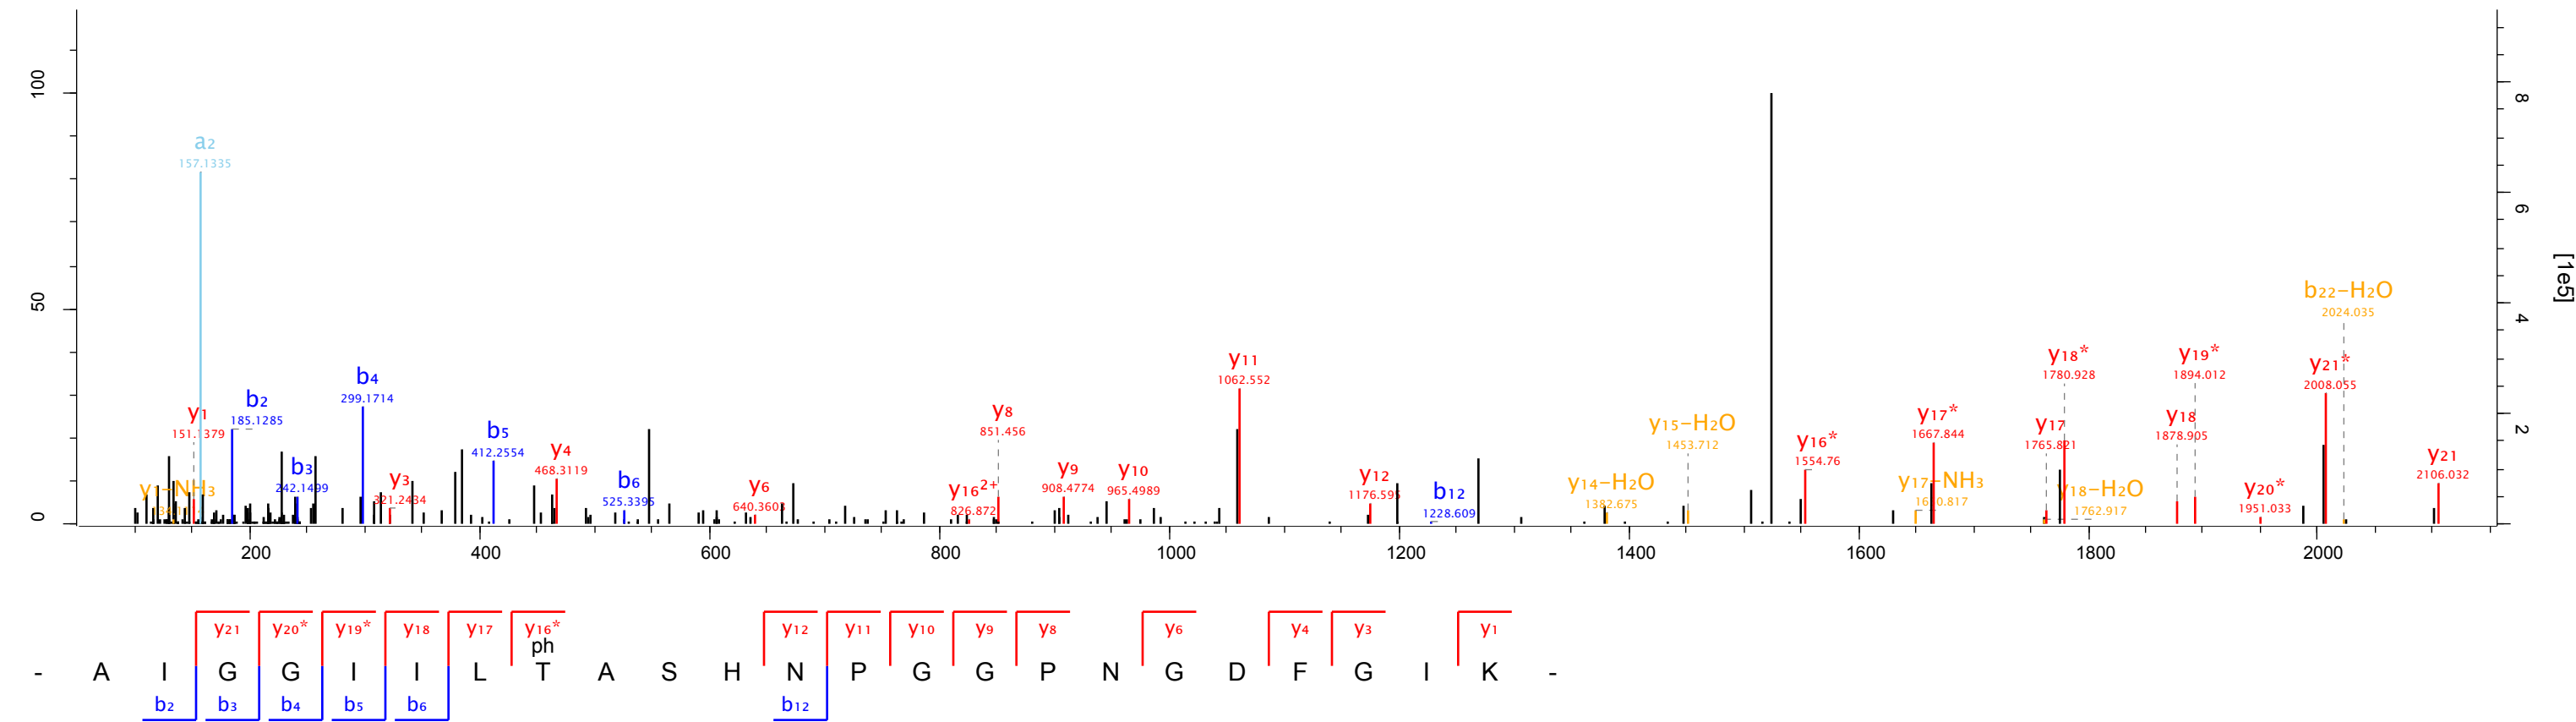

Raw file: 20150812\_A375SR\_Phospho\_BR1\_07  
 Scan: 2351 Method: FTMS; HCD Score: 62.47 m/z: 483.56 Gene names: AMOTL1

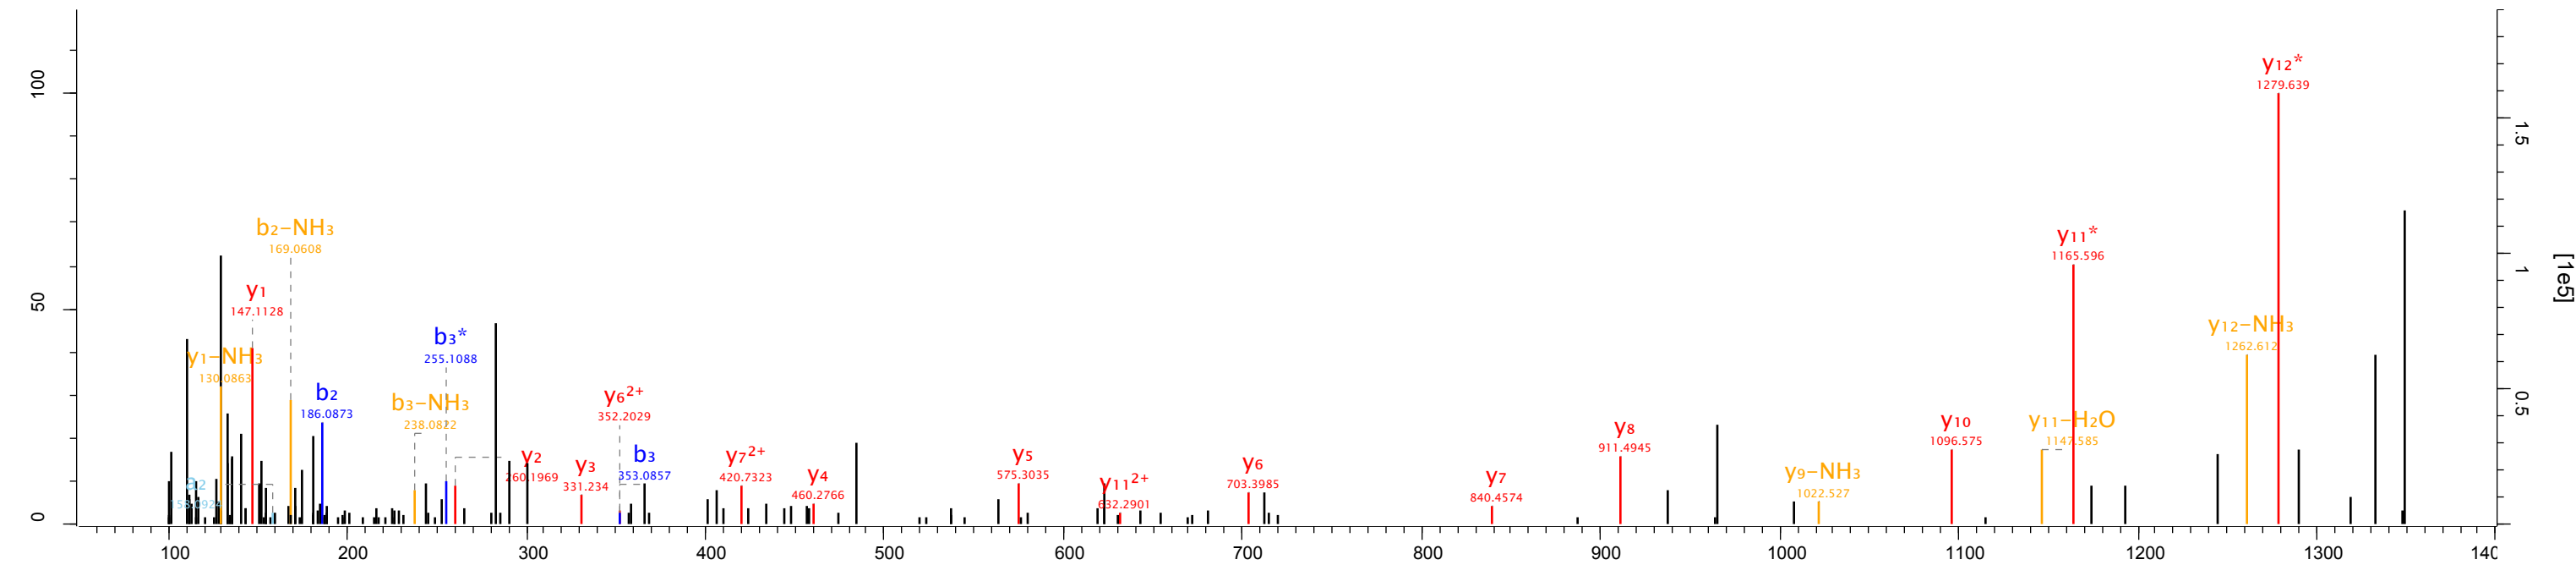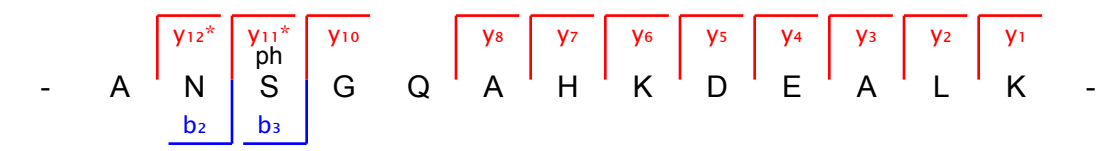

Raw file: 20150812\_A375SR\_Phospho\_BR1\_07  
 Scan: 26941 Method: FTMS; HCD Score: 100.19 m/z: 1132.32 Gene names: ILF3

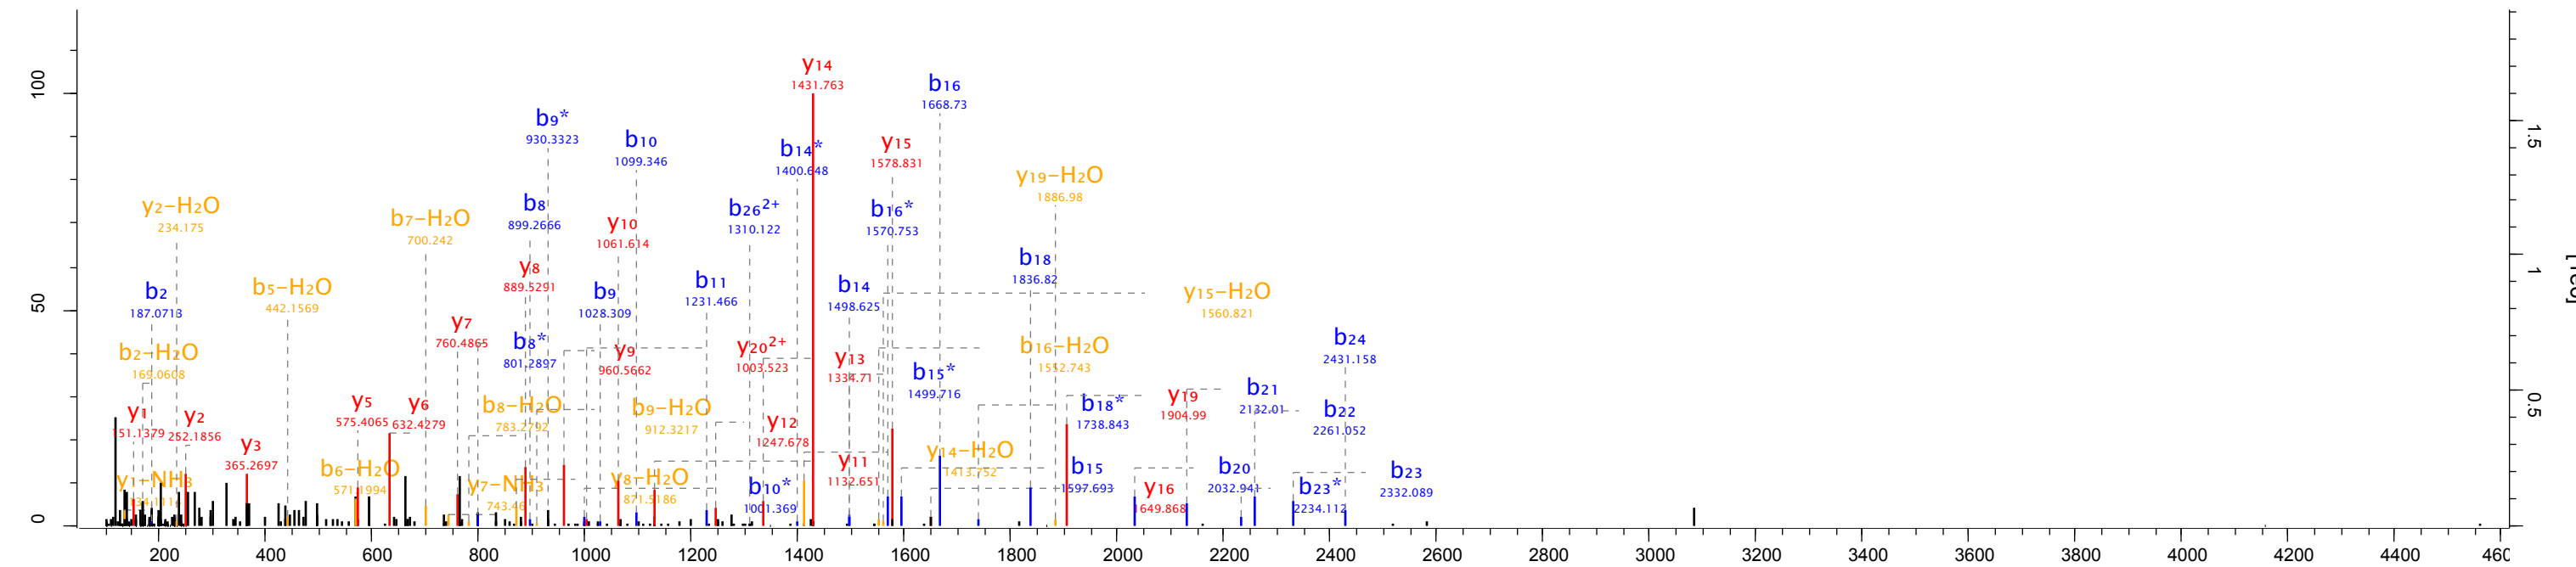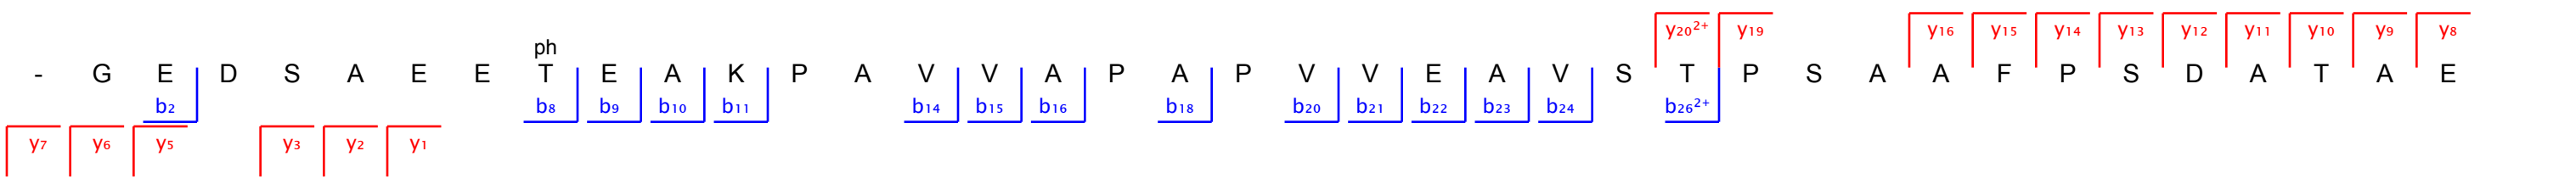

Raw file 20150812\_A375SR\_Phospho\_BR1\_07 Scan 2751 Method FTMS; HCD Score 96.03 m/z 456.23 Gene names NPM1

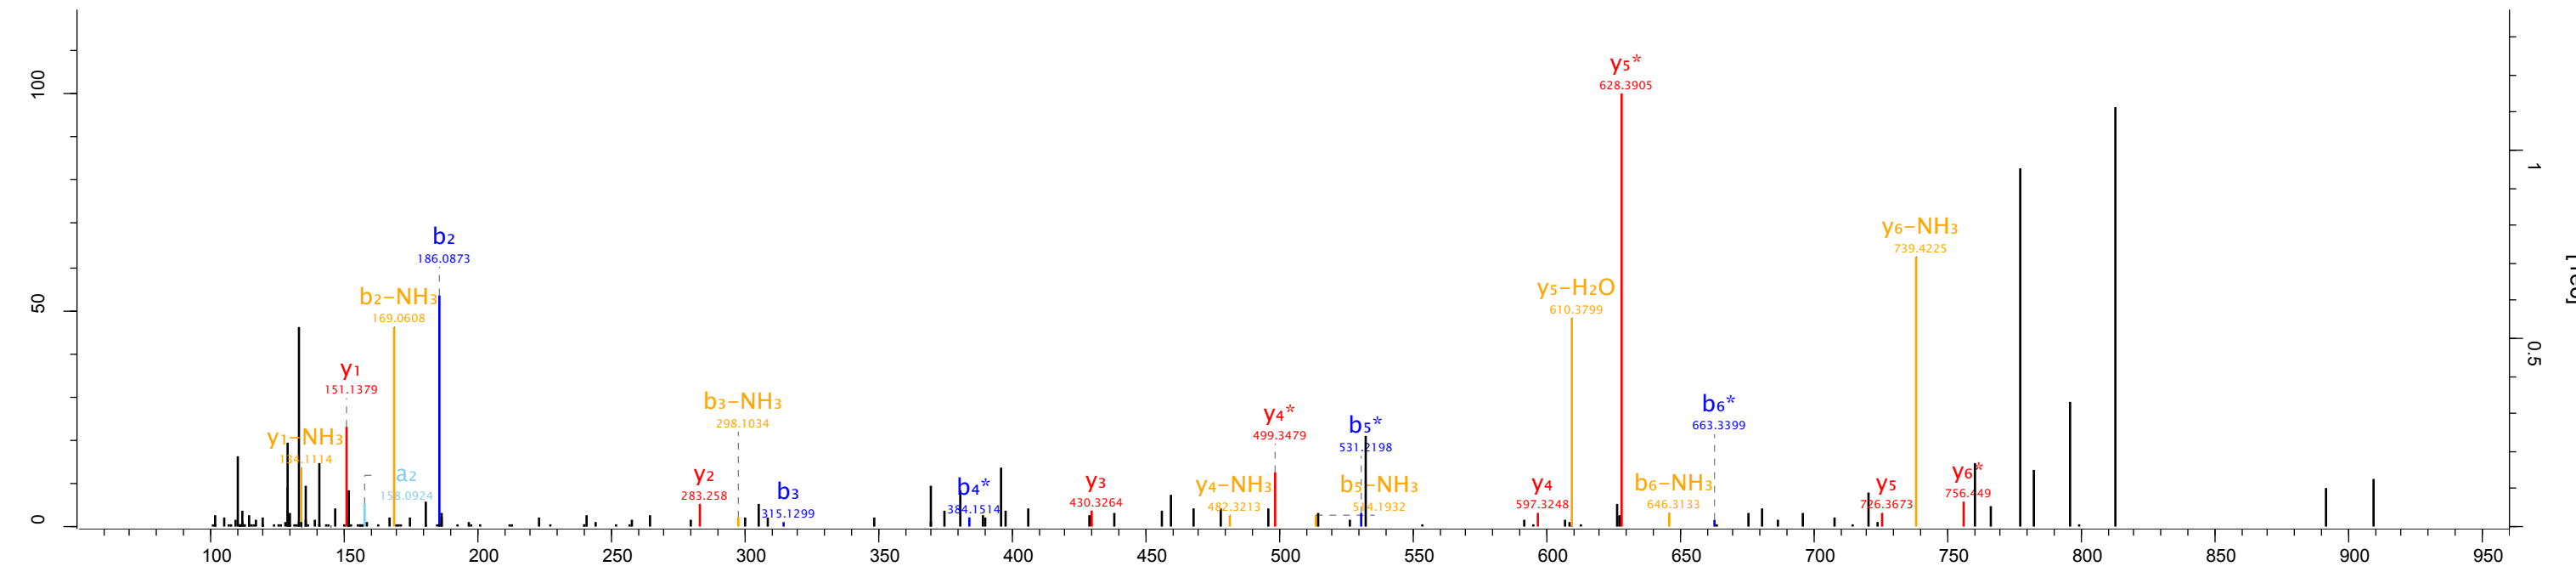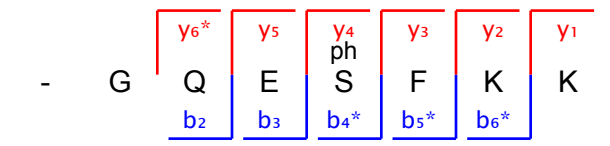

Raw file: 20150812\_A375SR\_Phospho\_BR1\_07  
 Scan: 7061 Method: FTMS; HCD Score: 107.39 m/z: 780.86 Gene names: EGLN1

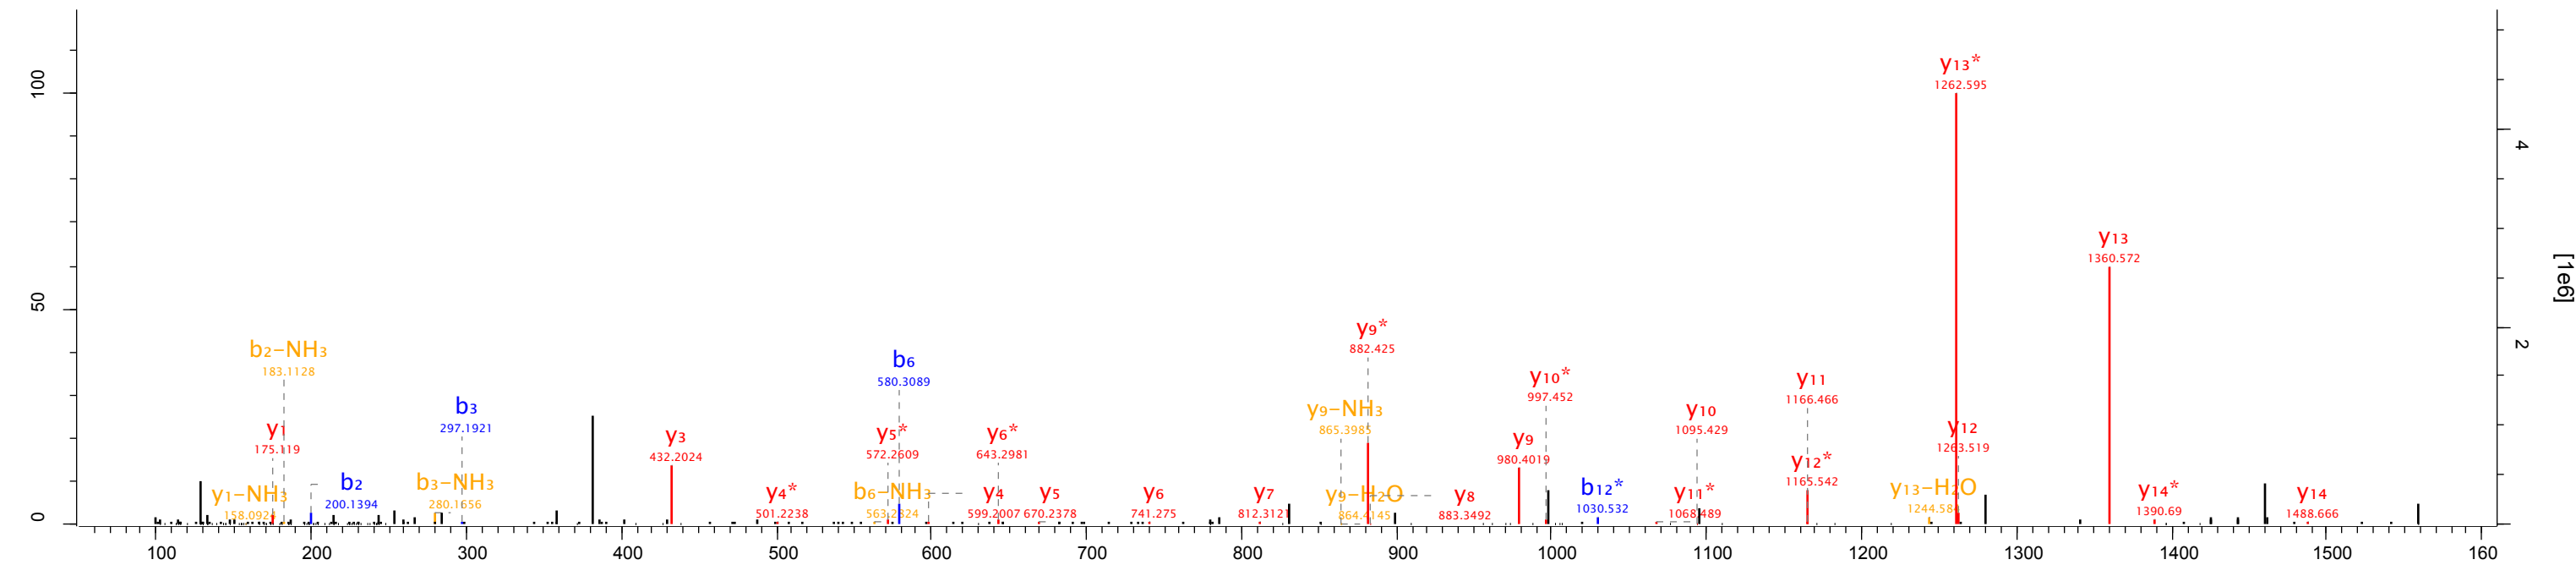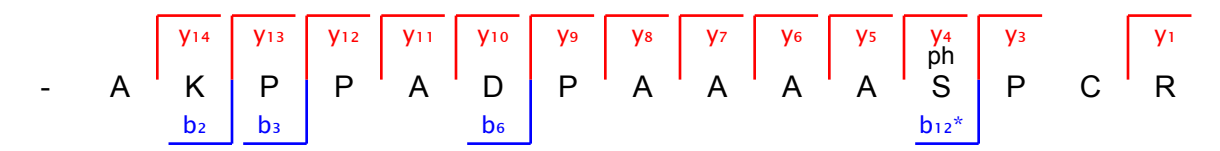

Raw file: 20150812\_A375SR\_Phospho\_BR1\_07  
 Scan: 8331 Method: FTMS; HCD Score: 100.22 m/z: 561.78 Gene names: MTA3

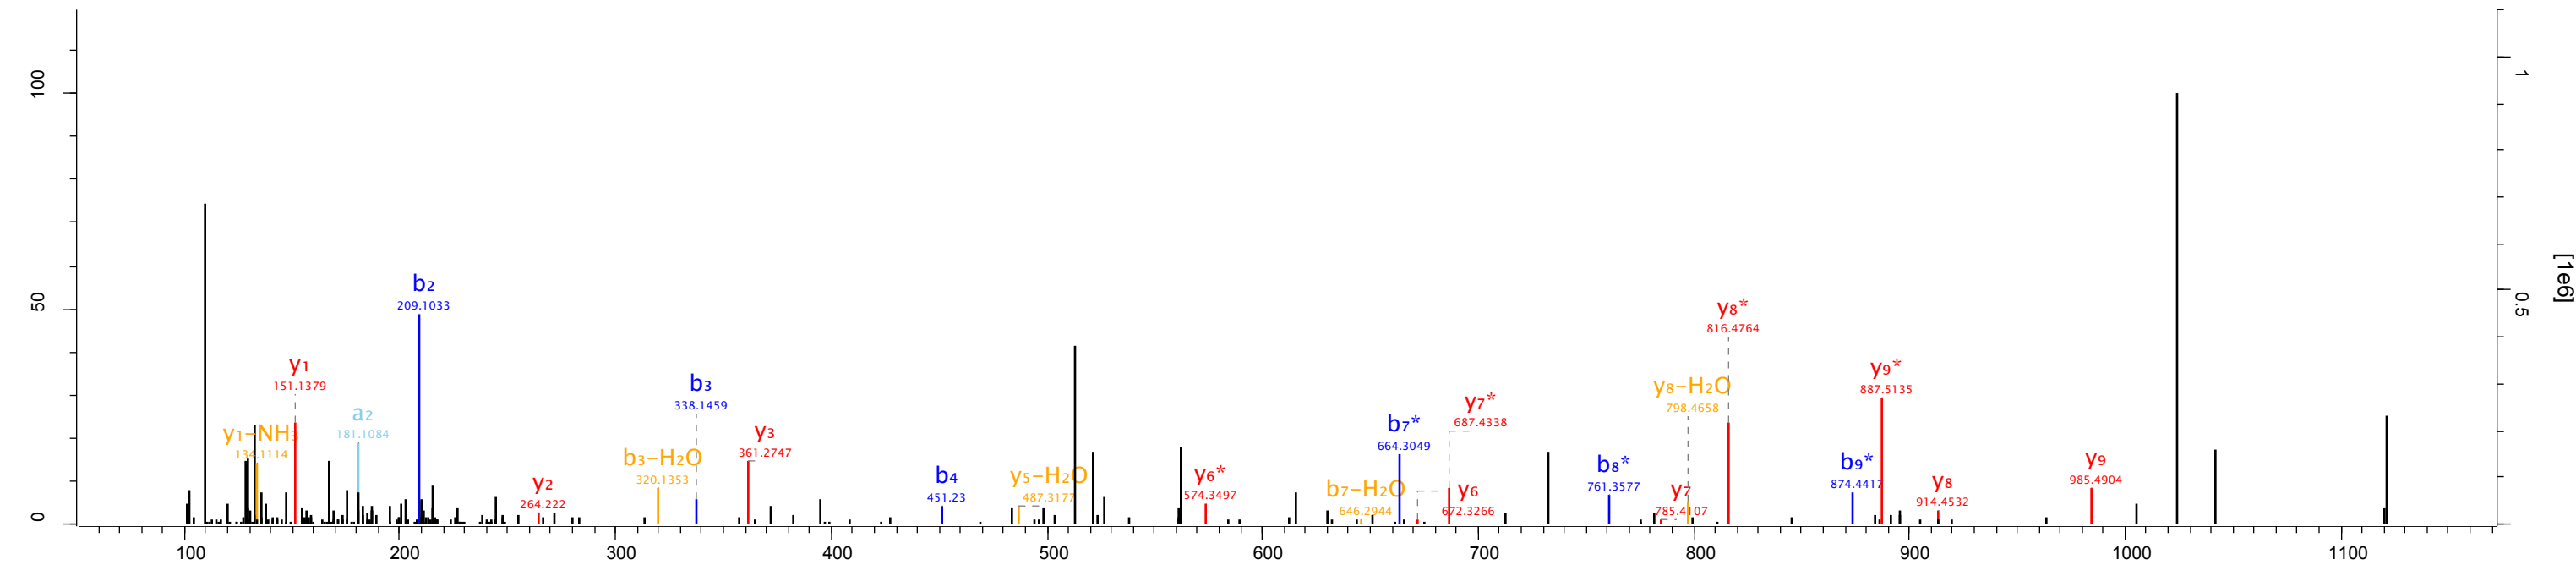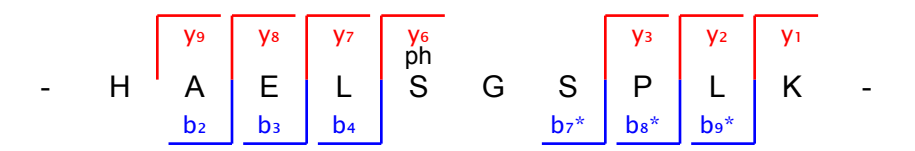



Raw file: 20150812\_A375SR\_Phospho\_BR1\_08  
 Scan: 10871 Method: FTMS; HCD Score: 174.78 m/z: 762.87 Gene names: NSUN5;NSUN5P2

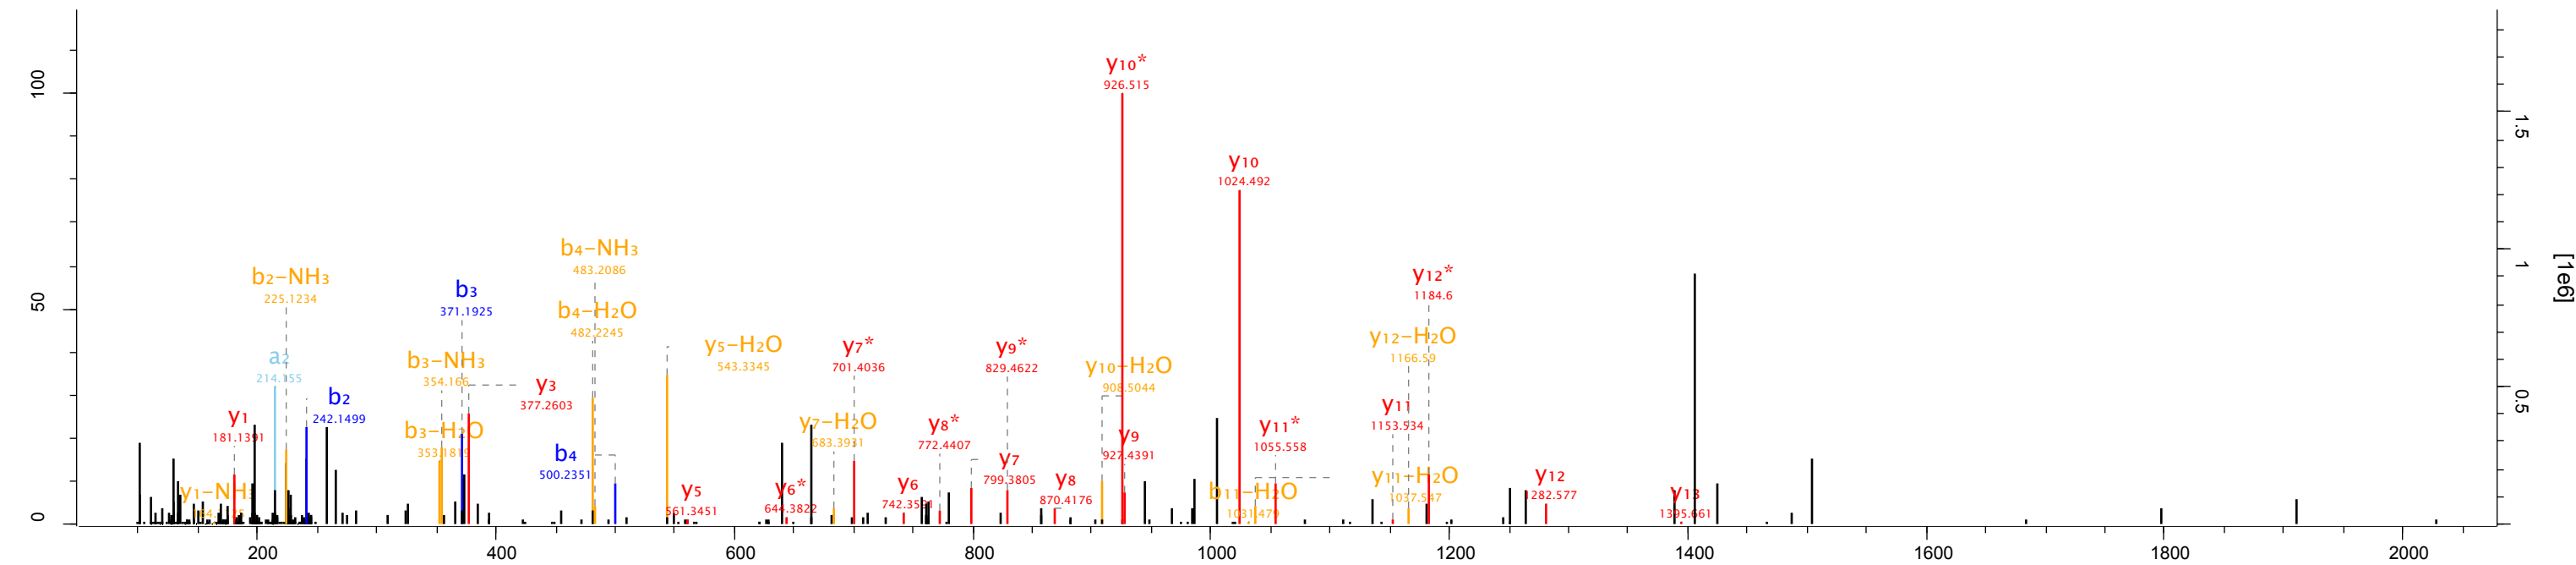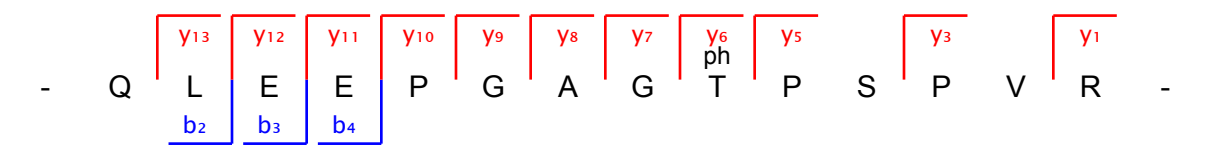

Raw file Scan Method Score m/z Gene names  
 20150812\_A375SR\_Phospho\_BR1\_08 11031 FTMS; HCD 133.27 583.04 TRA2B

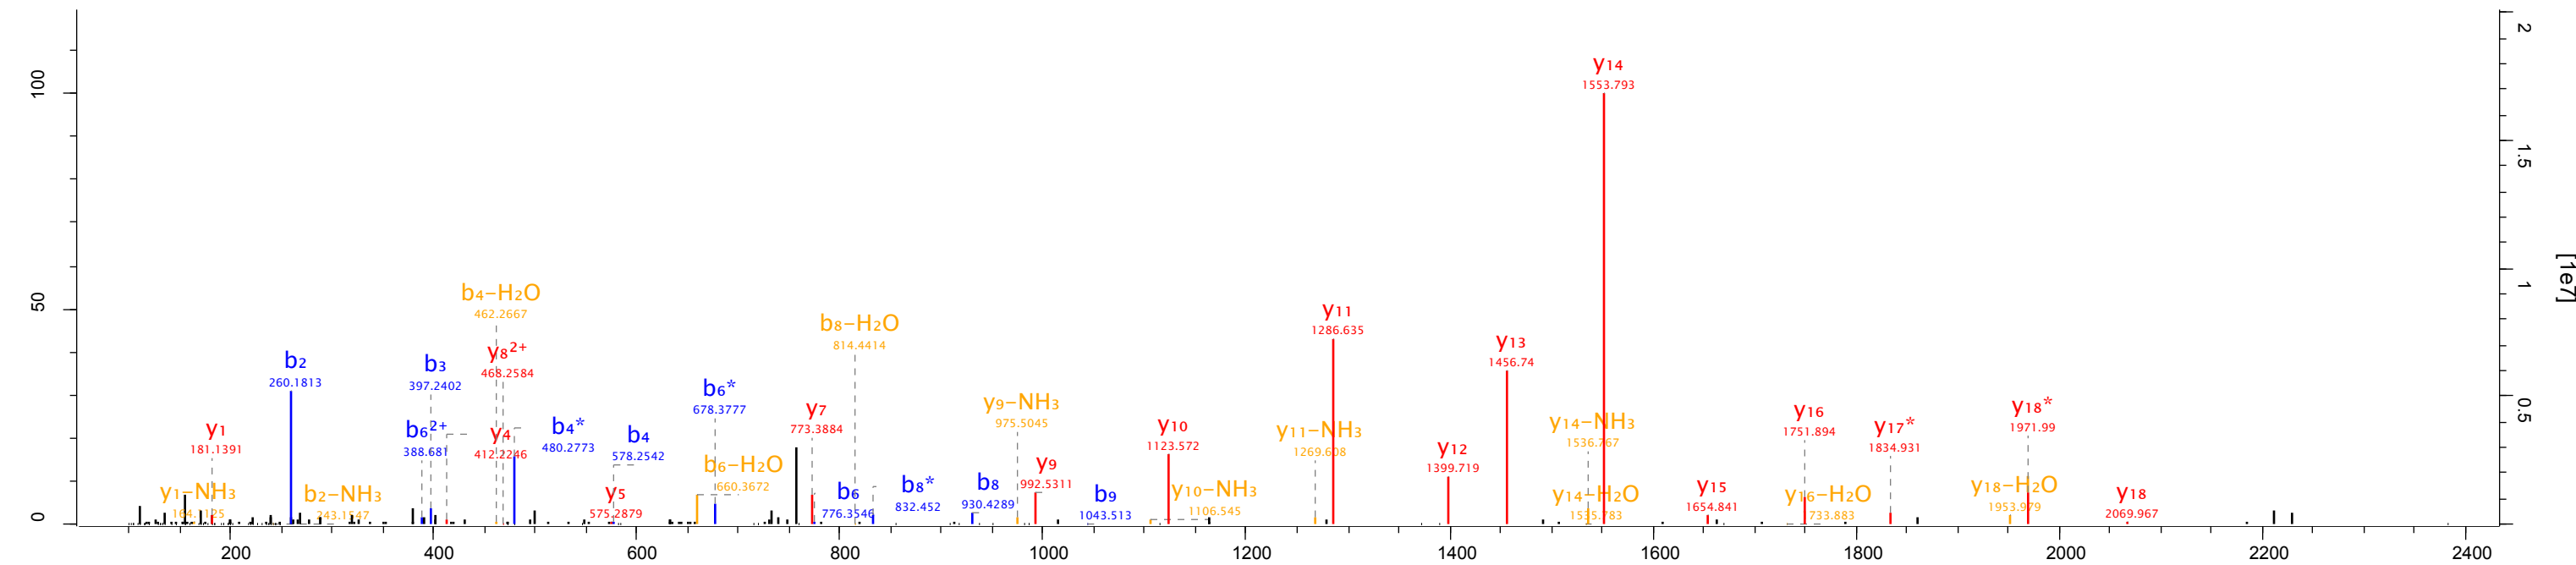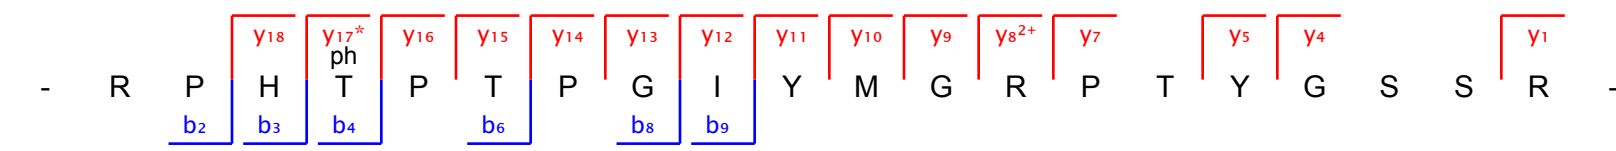

Raw file 20150812\_A375SR\_Phospho\_BR1\_08 Scan 11831 Method FTMS; HCD Score 154.92 m/z 1022.48 Gene names DPYSL3

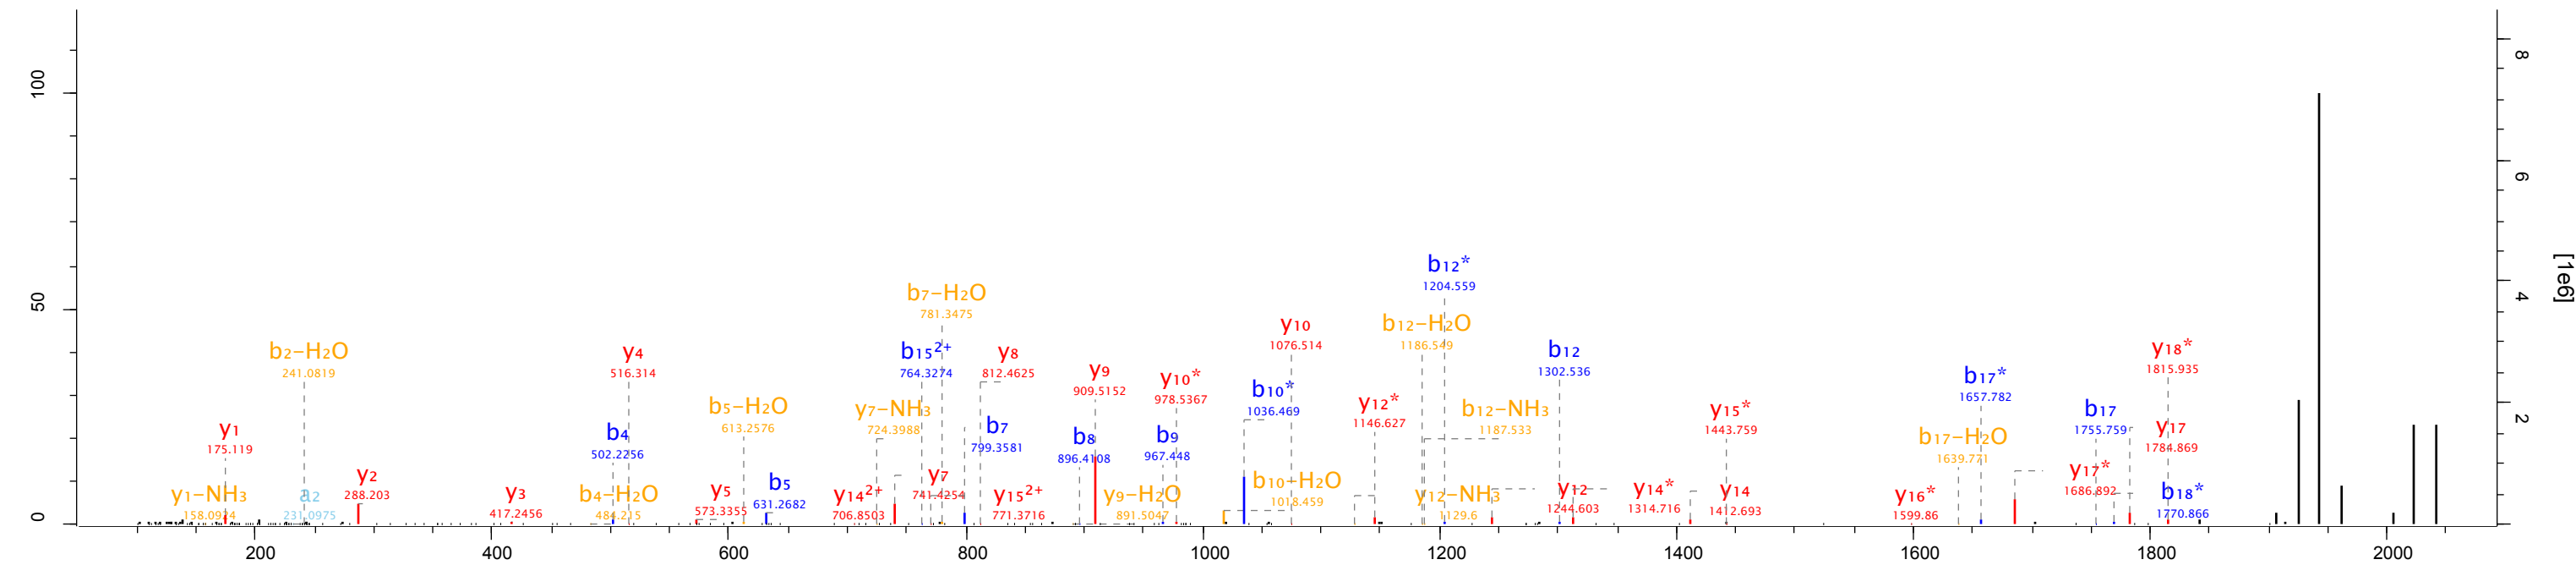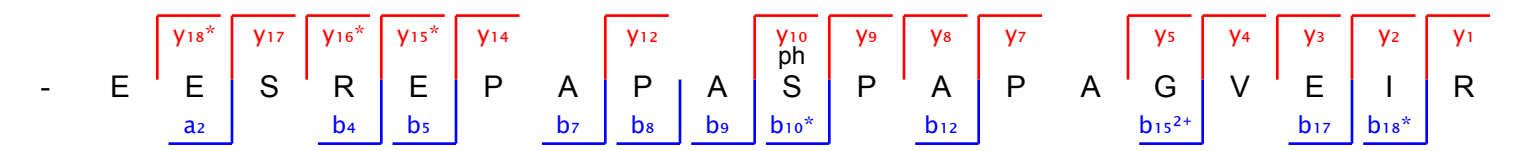

Raw file: 20150812\_A375SR\_Phospho\_BR1\_08  
 Scan: 12271  
 Method: FTMS; HCD  
 Score: 100.09  
 m/z: 550.77  
 Gene names: RPS6KB1

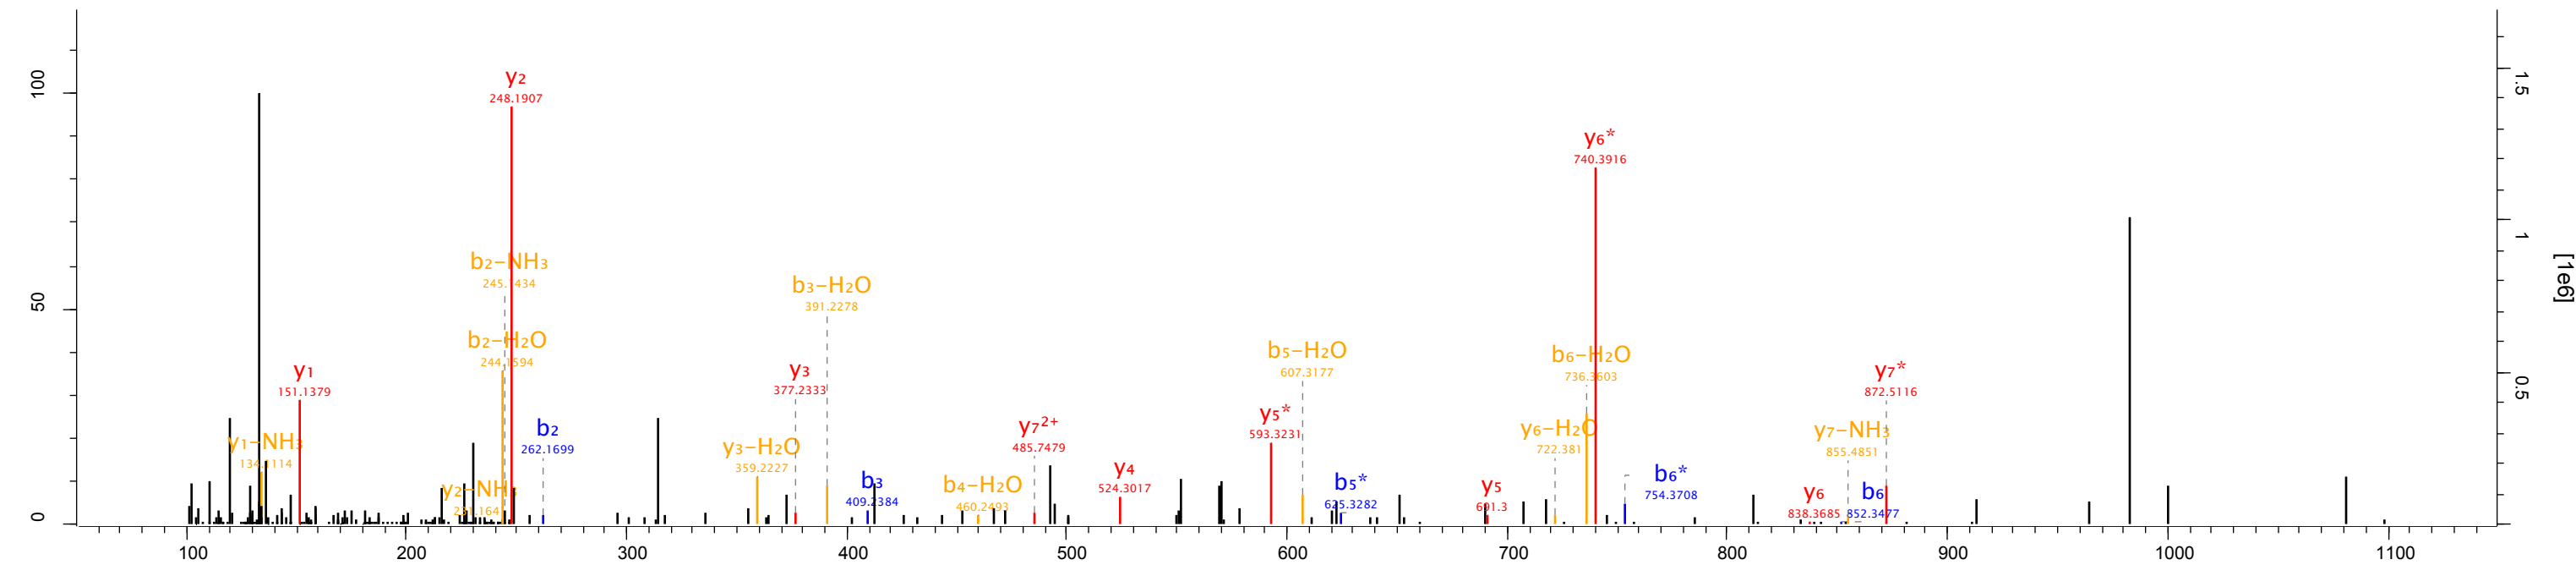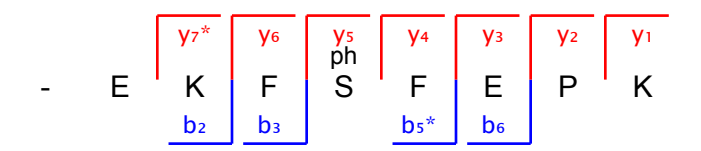

Raw file: 20150812\_A375SR\_Phospho\_BR1\_08  
 Scan: 12881 Method: FTMS; HCD Score: 145.6 m/z: 603.77 Gene names: RSF1

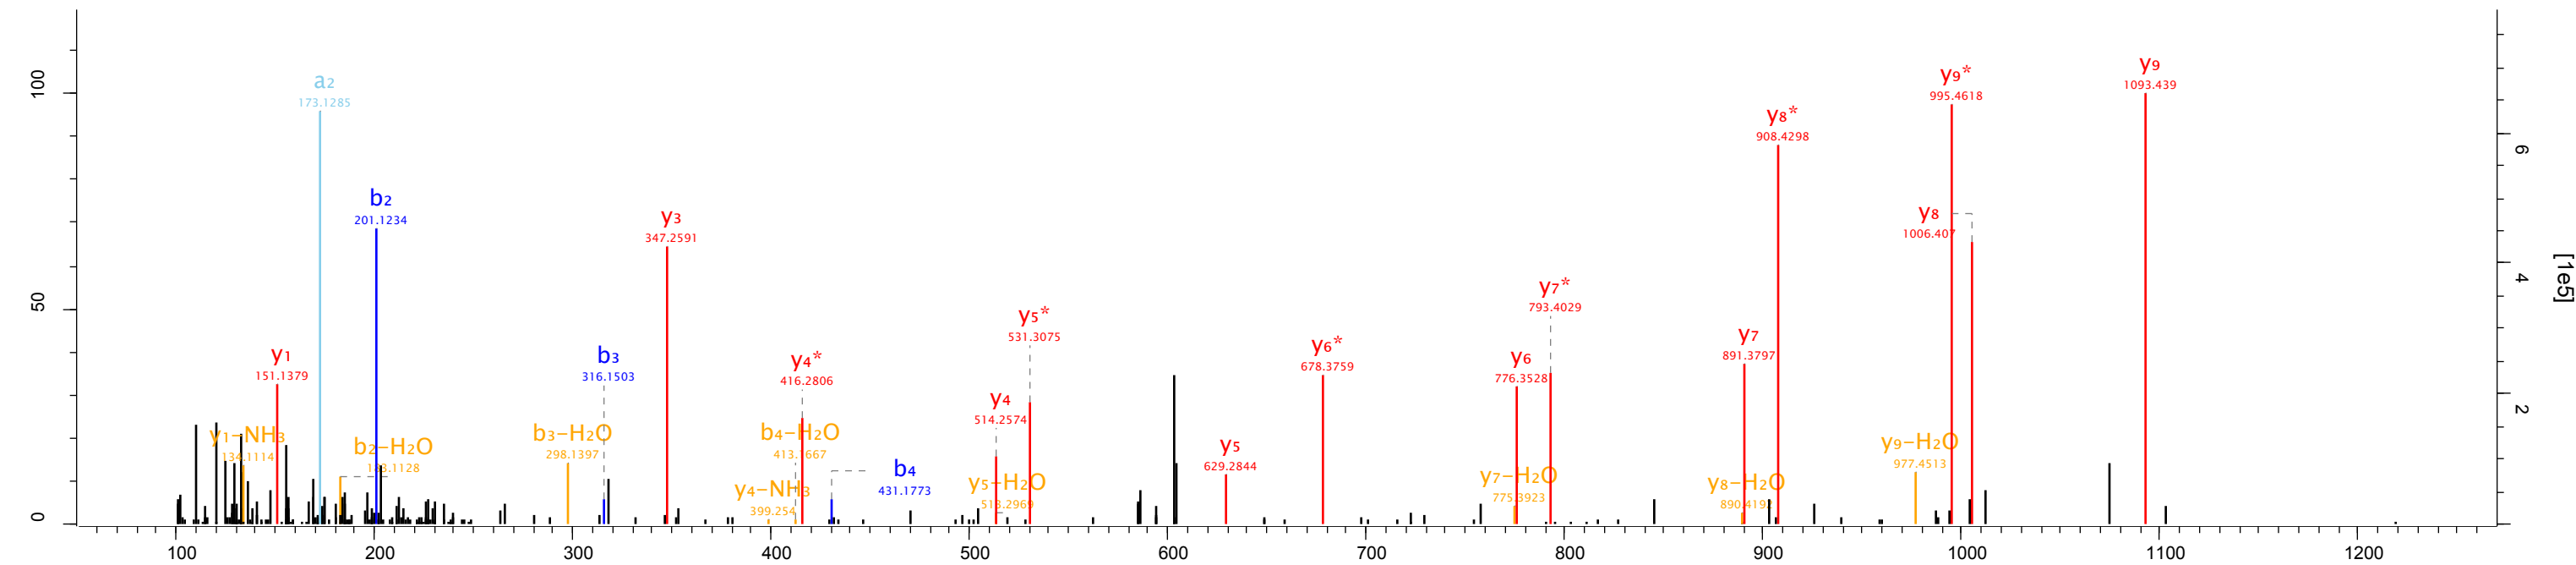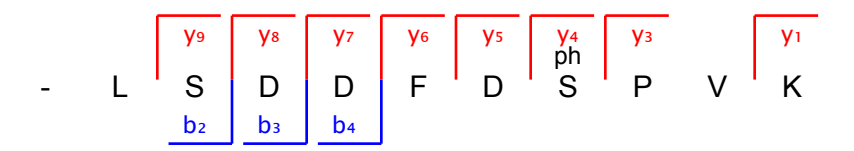

Raw file  
20150812\_A375SR\_Phospho\_BR1\_08

Scan 13171 Method FTMS; HCD Score 290.12 m/z 1060.83 Gene names KIAA1143

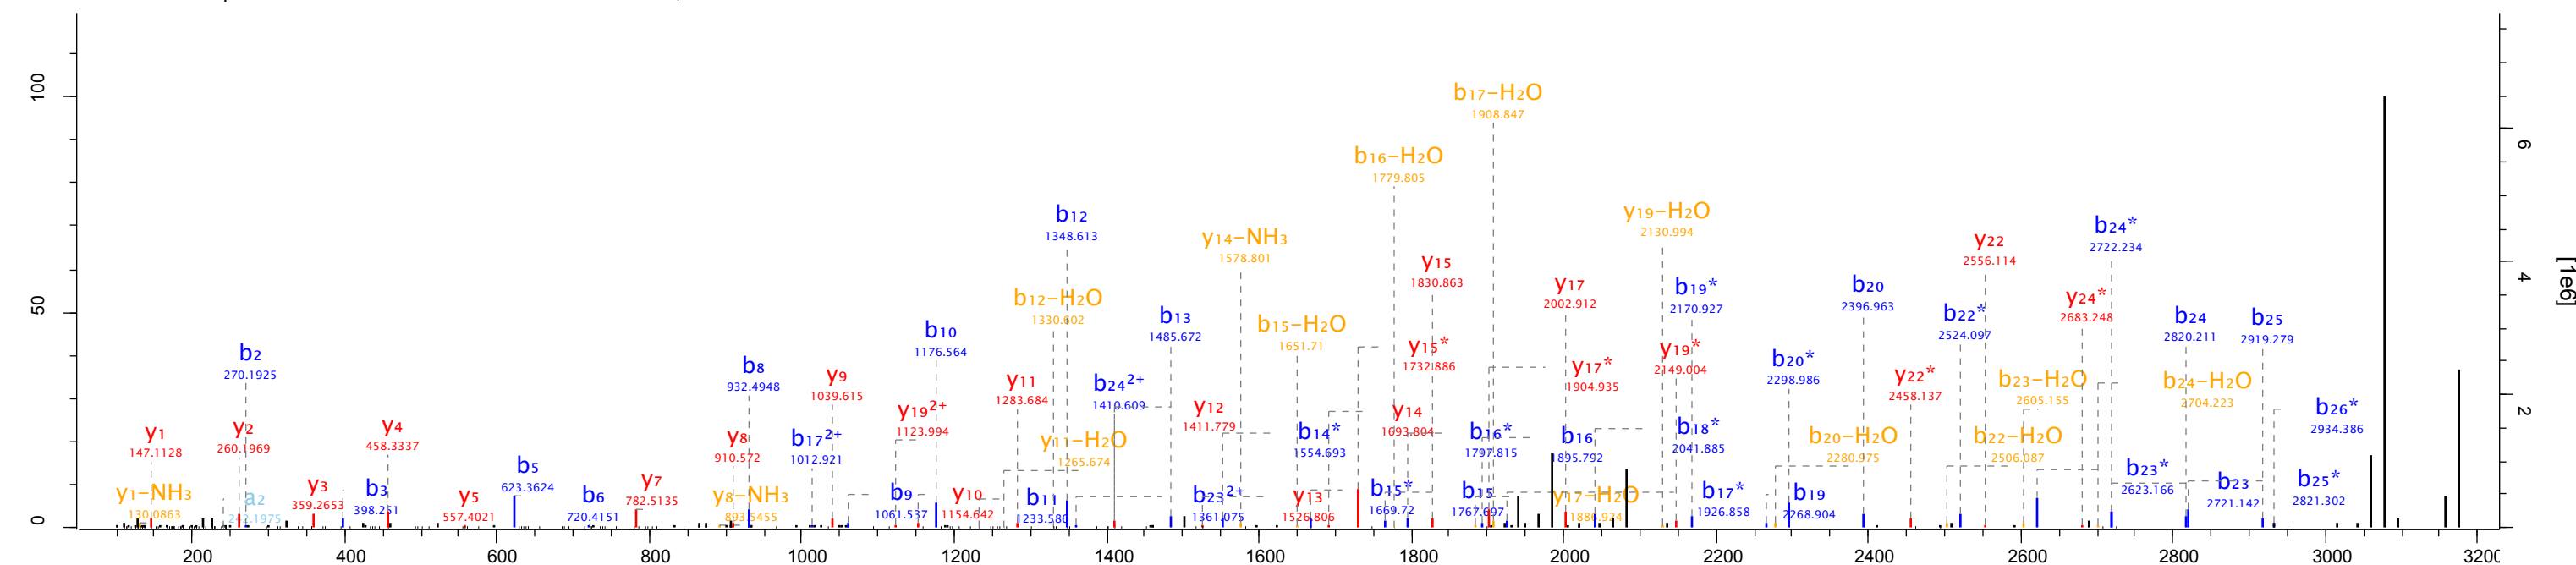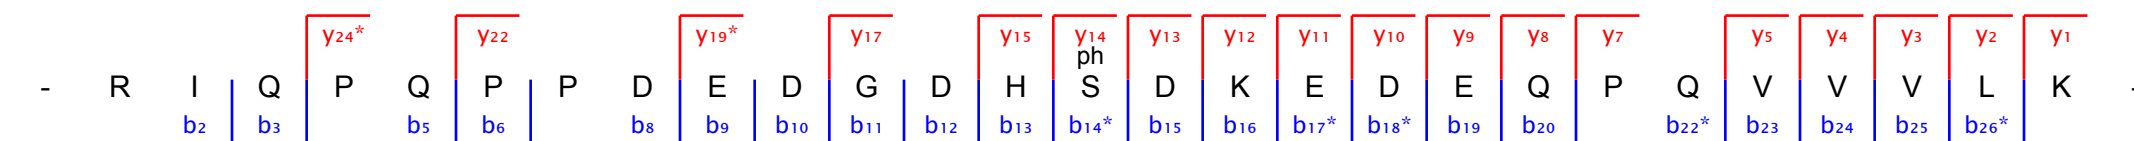

Raw file 20150812\_A375SR\_Phospho\_BR1\_08 Scan 13711 Method FTMS; HCD Score 183.81 m/z 988.49 Gene names NCOR2

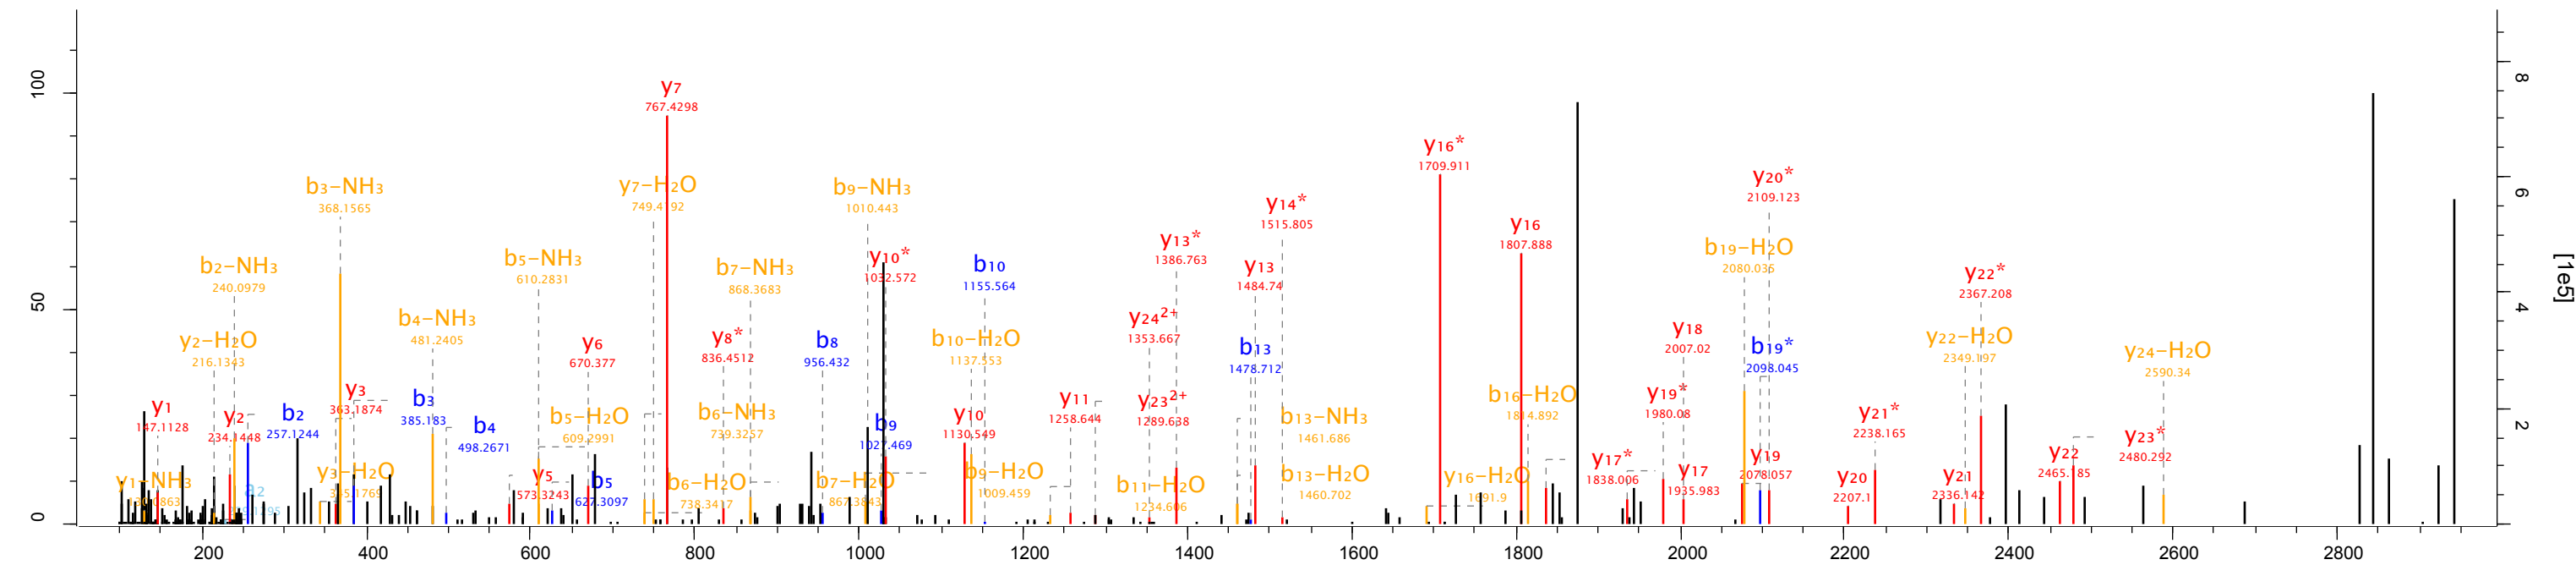

- Q Q Q L E E E A A K P P E P E K P V S P P P I E S K -

Fragmentation labels below the sequence:

- Red boxes: y<sub>24</sub><sup>2+</sup>, y<sub>23</sub><sup>\*</sup>, y<sub>22</sub>, y<sub>21</sub>, y<sub>20</sub>, y<sub>19</sub>, y<sub>18</sub>, y<sub>17</sub>, y<sub>16</sub>, y<sub>14</sub><sup>\*</sup>, y<sub>13</sub>, y<sub>11</sub>, y<sub>10</sub>, y<sub>8</sub><sup>\*</sup>, y<sub>7</sub>, y<sub>6</sub>, y<sub>5</sub>, y<sub>3</sub>, y<sub>2</sub>, y<sub>1</sub>
- Blue boxes: b<sub>2</sub>, b<sub>3</sub>, b<sub>4</sub>, b<sub>5</sub>, b<sub>8</sub>, b<sub>9</sub>, b<sub>10</sub>, b<sub>13</sub>, b<sub>19</sub><sup>\*</sup>

Raw file: 20150812\_A375SR\_Phospho\_BR1\_08  
 Scan: 13851 Method: FTMS; HCD Score: 91.4 m/z: 819.87 Gene names: HSPA4

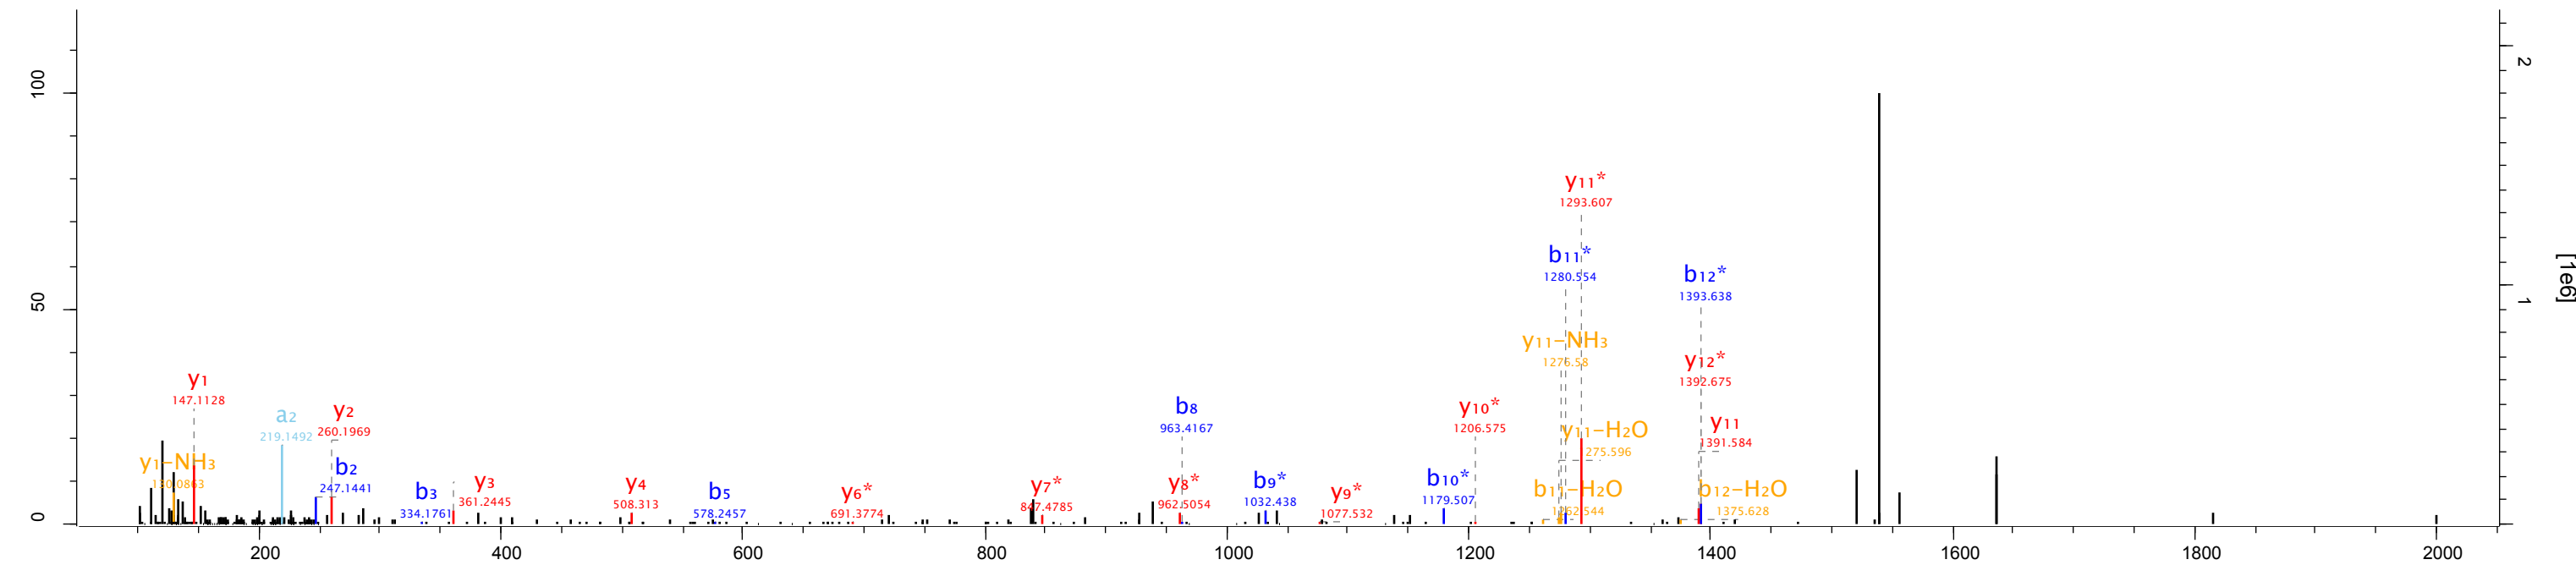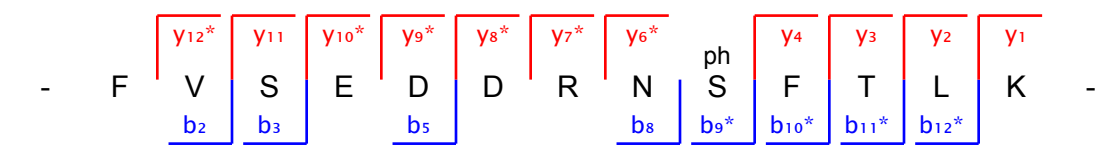



Raw file: 20150812\_A375SR\_Phospho\_BR1\_08  
 Scan: 15391 Method: FTMS; HCD Score: 111.66 m/z: 714.37 Gene names: ARHGDI1A

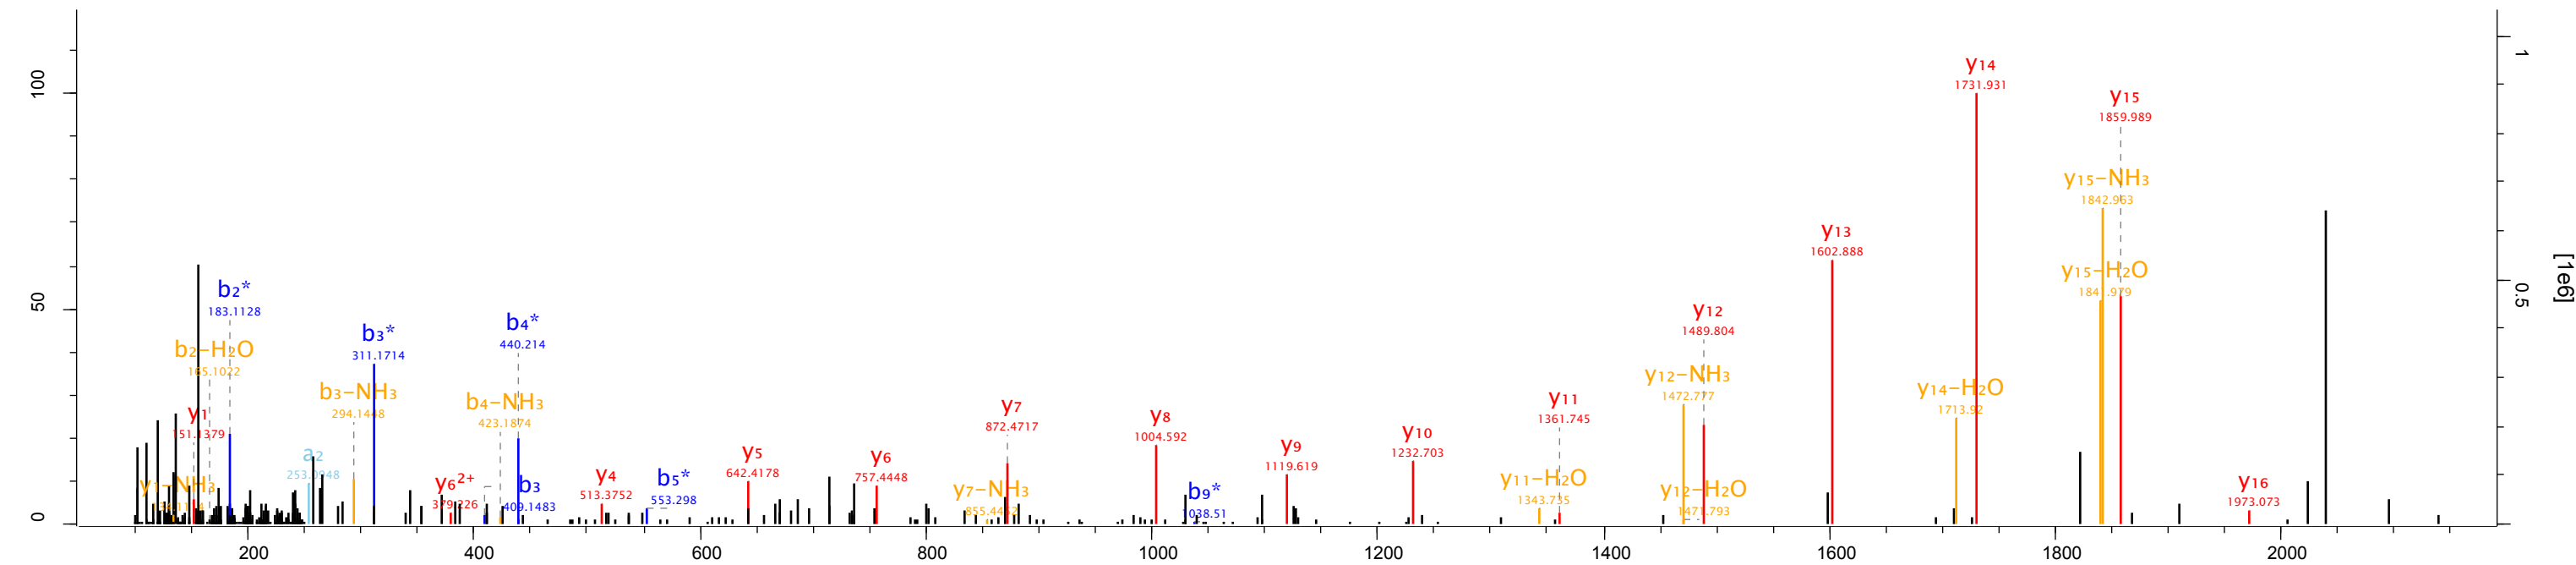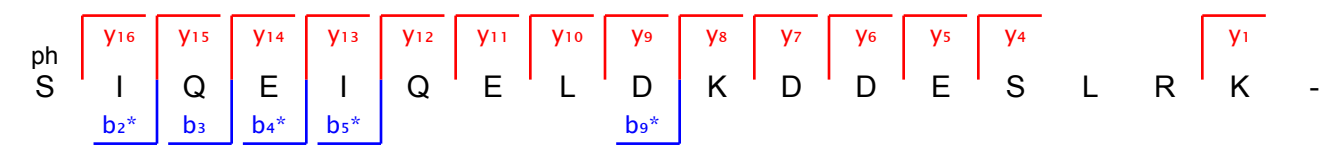

Raw file 20150812\_A375SR\_Phospho\_BR1\_08 Scan 15511 Method FTMS; HCD Score 129.68 m/z 1050.05 Gene names CEBPZ

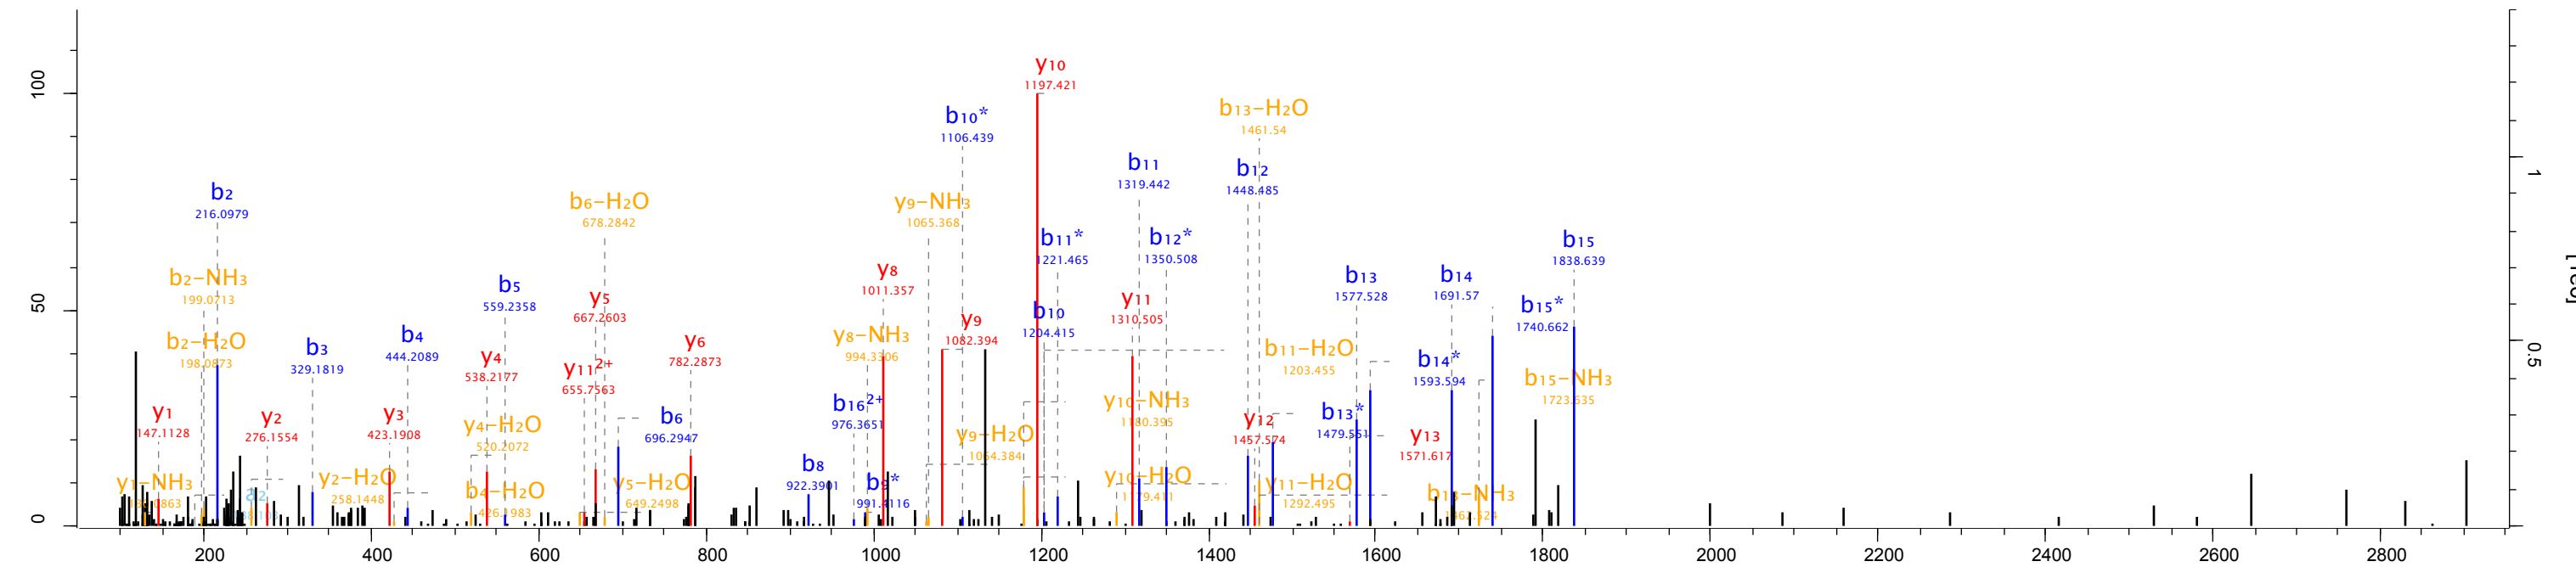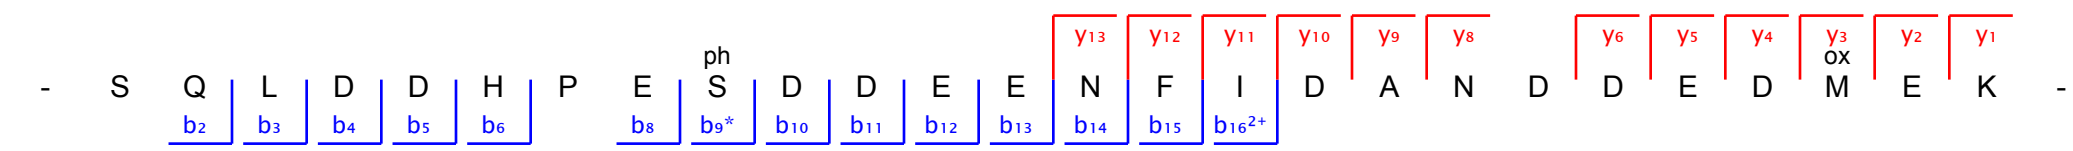

Raw file Scan Method Score m/z Gene names  
 20150812\_A375SR\_Phospho\_BR1\_08 15681 FTMS; HCD 137.85 737.39 MED1

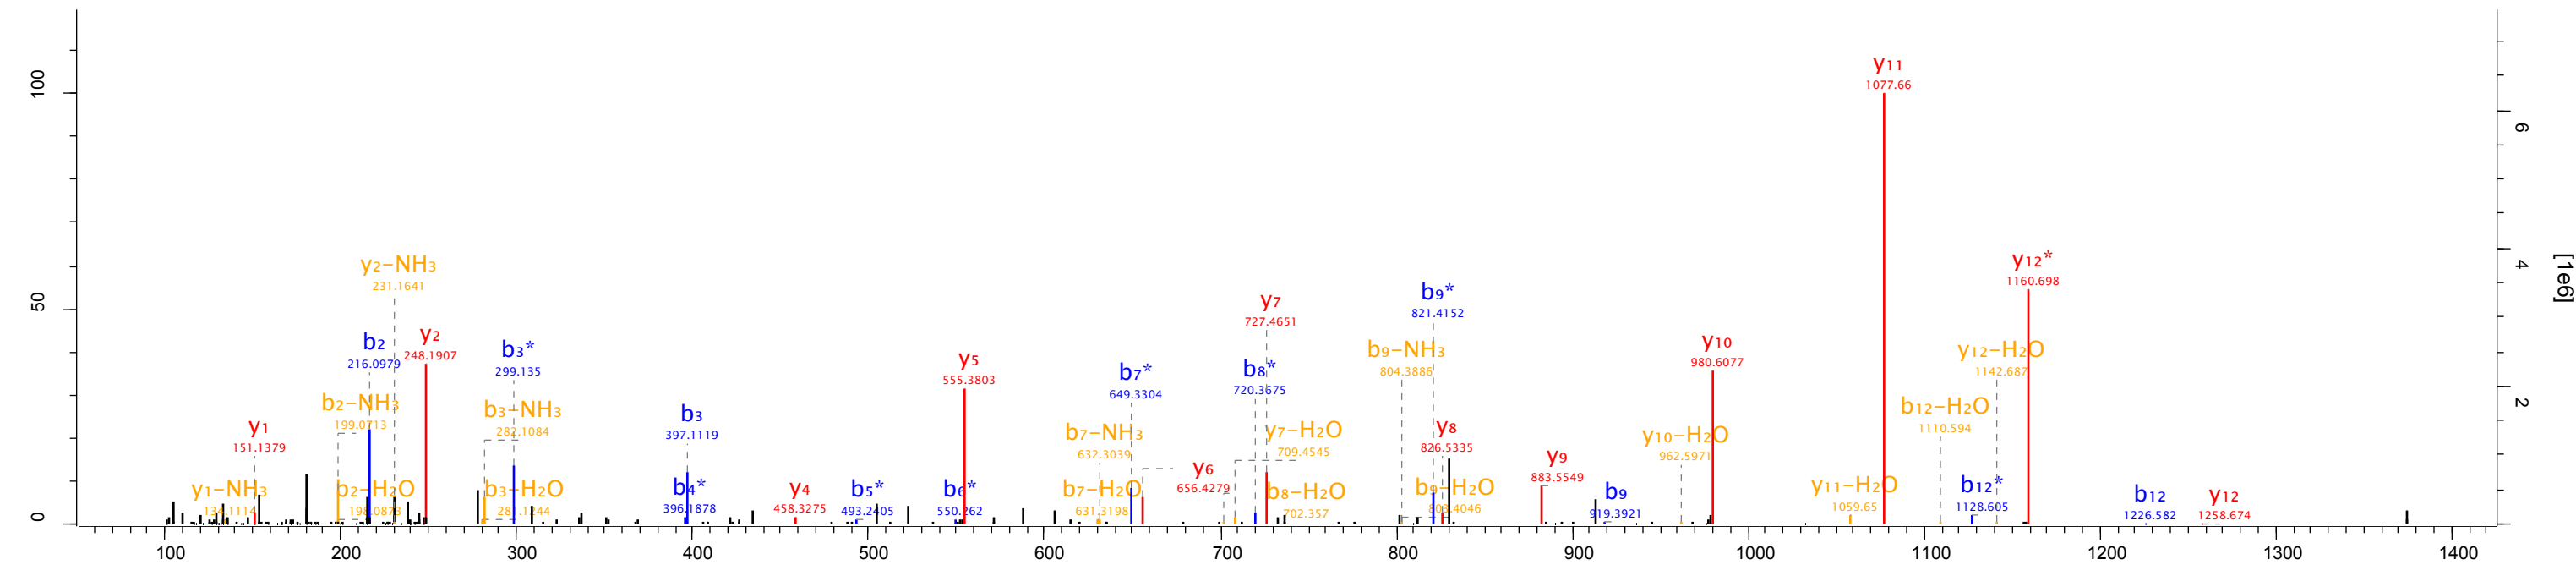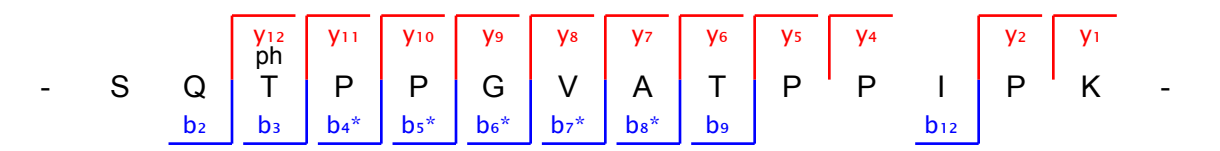

Raw file: 20150812\_A375SR\_Phospho\_BR1\_08  
 Scan: 16041 Method: FTMS; HCD Score: 342.03 m/z: 928.4 Gene names: PHF6

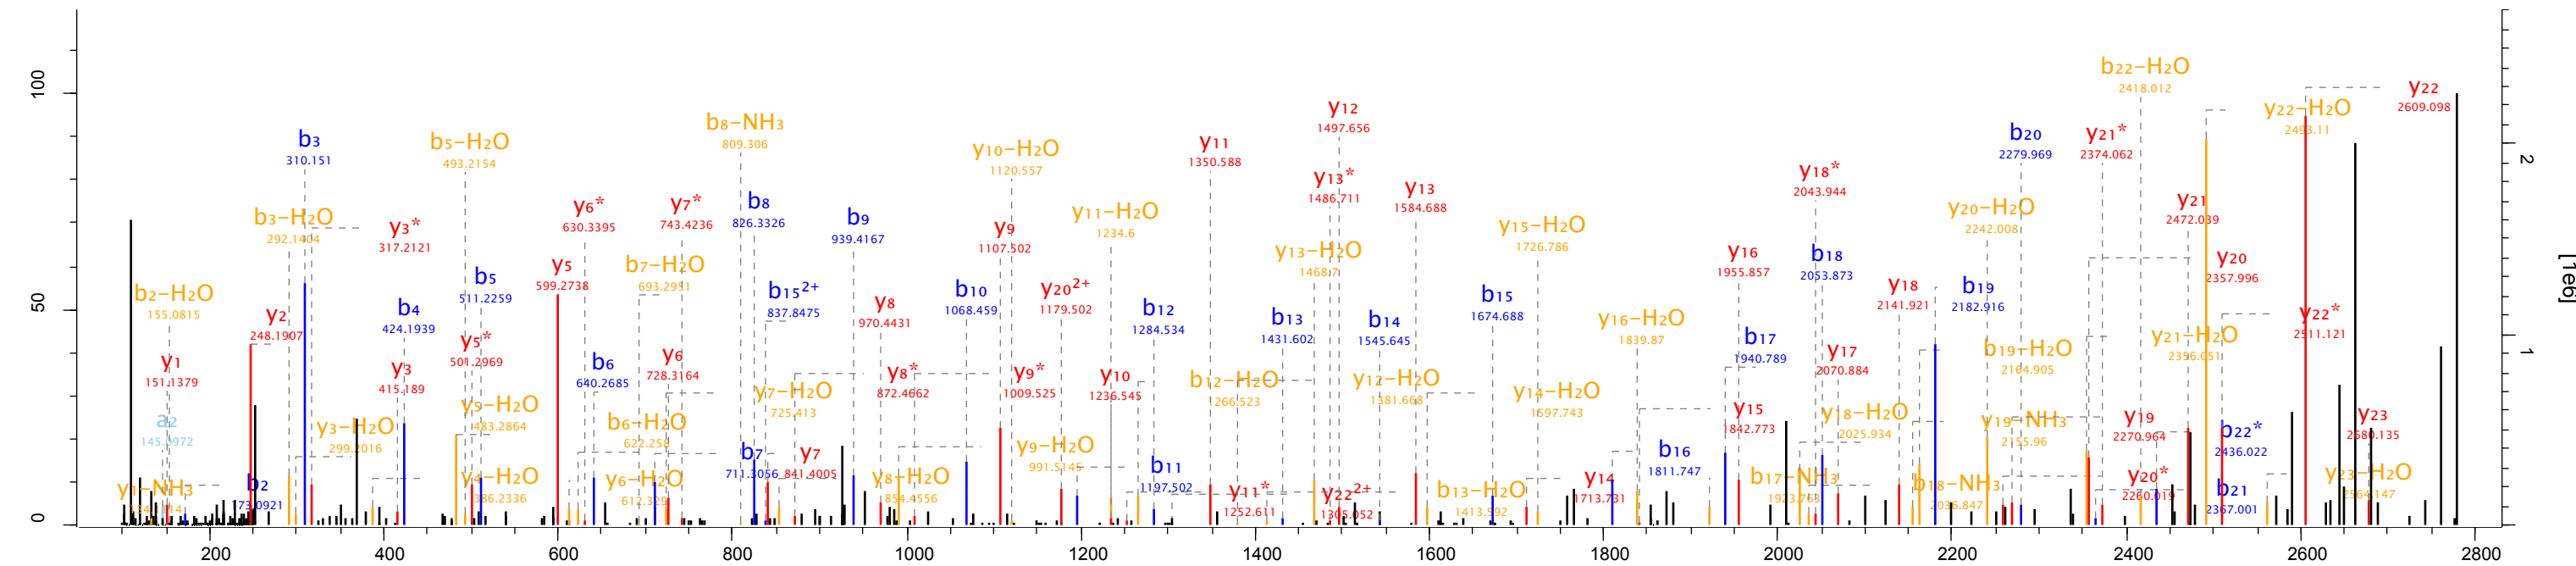

- T A H N S E A D L E E S F N E H E L E P S y<sub>3</sub>ph S y<sub>2</sub> y<sub>1</sub> -

y<sub>23</sub>
y<sub>22</sub>
y<sub>21</sub>
y<sub>20</sub>
y<sub>19</sub>
y<sub>18</sub>
y<sub>17</sub>
y<sub>16</sub>
y<sub>15</sub>
y<sub>14</sub>
y<sub>13</sub>
y<sub>12</sub>
y<sub>11</sub>
y<sub>10</sub>
y<sub>9</sub>
y<sub>8</sub>
y<sub>7</sub>
y<sub>6</sub>
y<sub>5</sub>
y<sub>3</sub>ph
S
y<sub>2</sub>
y<sub>1</sub>

b<sub>2</sub>
b<sub>3</sub>
b<sub>4</sub>
b<sub>5</sub>
b<sub>6</sub>
b<sub>7</sub>
b<sub>8</sub>
b<sub>9</sub>
b<sub>10</sub>
b<sub>11</sub>
b<sub>12</sub>
b<sub>13</sub>
b<sub>14</sub>
b<sub>15</sub>
b<sub>16</sub>
b<sub>17</sub>
b<sub>18</sub>
b<sub>19</sub>
b<sub>20</sub>
b<sub>21</sub>
b<sub>22</sub>\*

Raw file: 20150812\_A375SR\_Phospho\_BR1\_08  
 Scan: 1671 Method: FTMS; HCD Score: 63.18 m/z: 432.23 Gene names: YY2;YY1

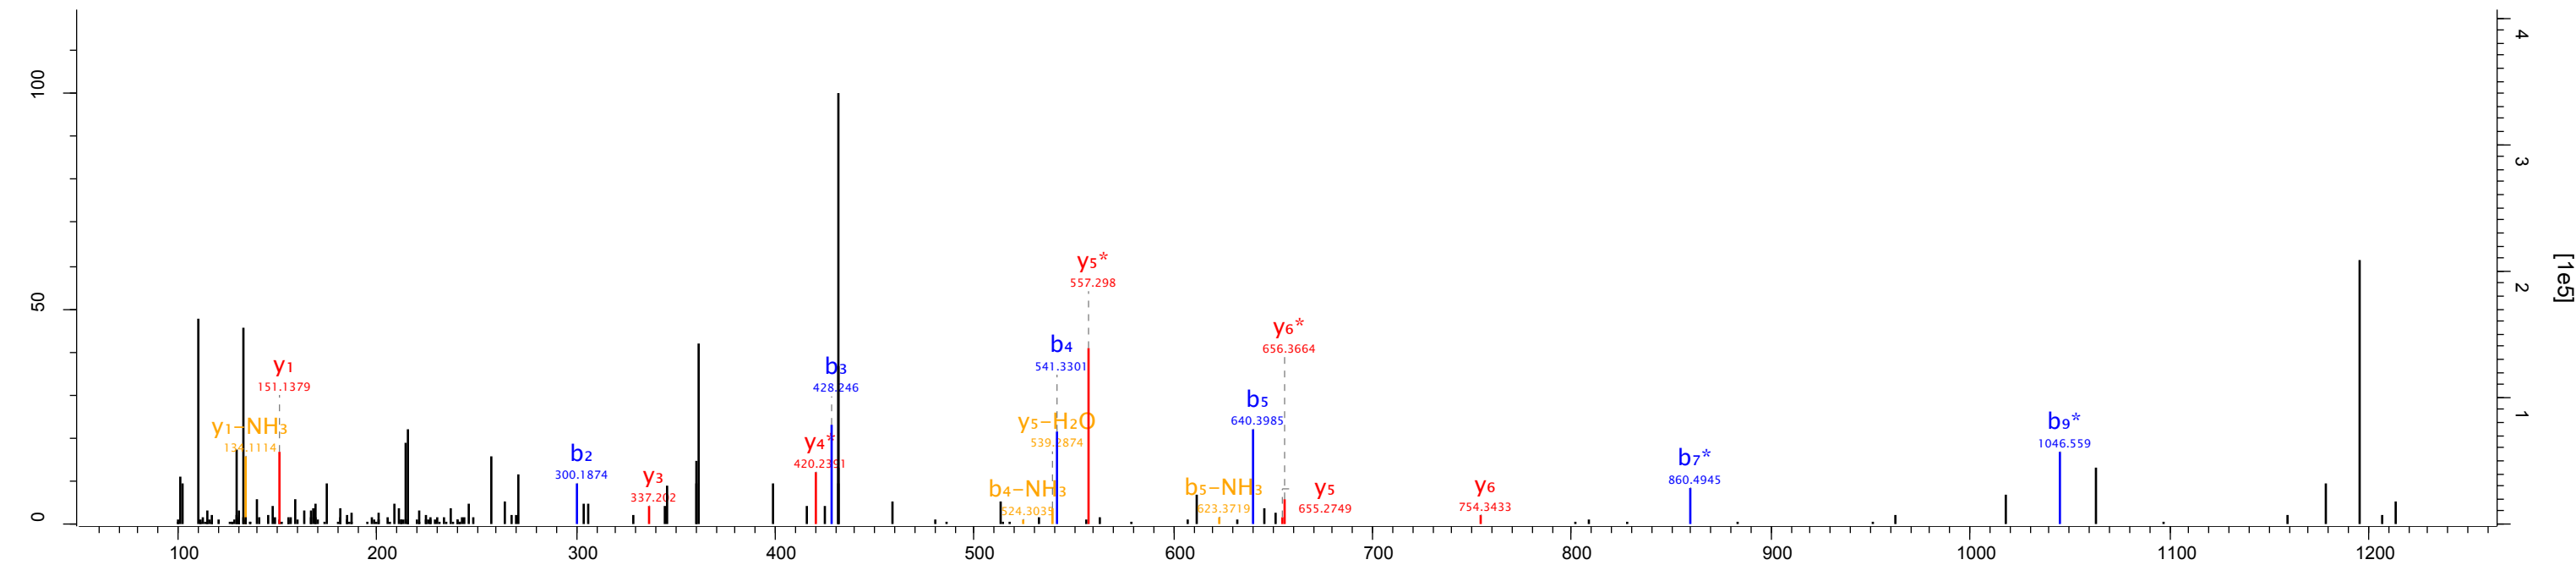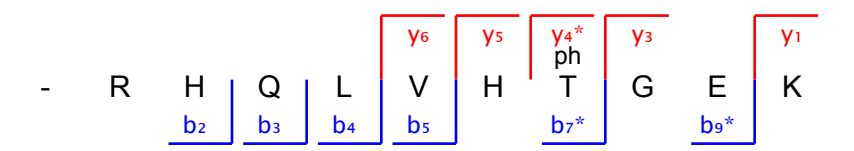

Raw file: 20150812\_A375SR\_Phospho\_BR1\_08  
 Scan: 18181 Method: FTMS; HCD Score: 126.42 m/z: 695.01 Gene names: NHS

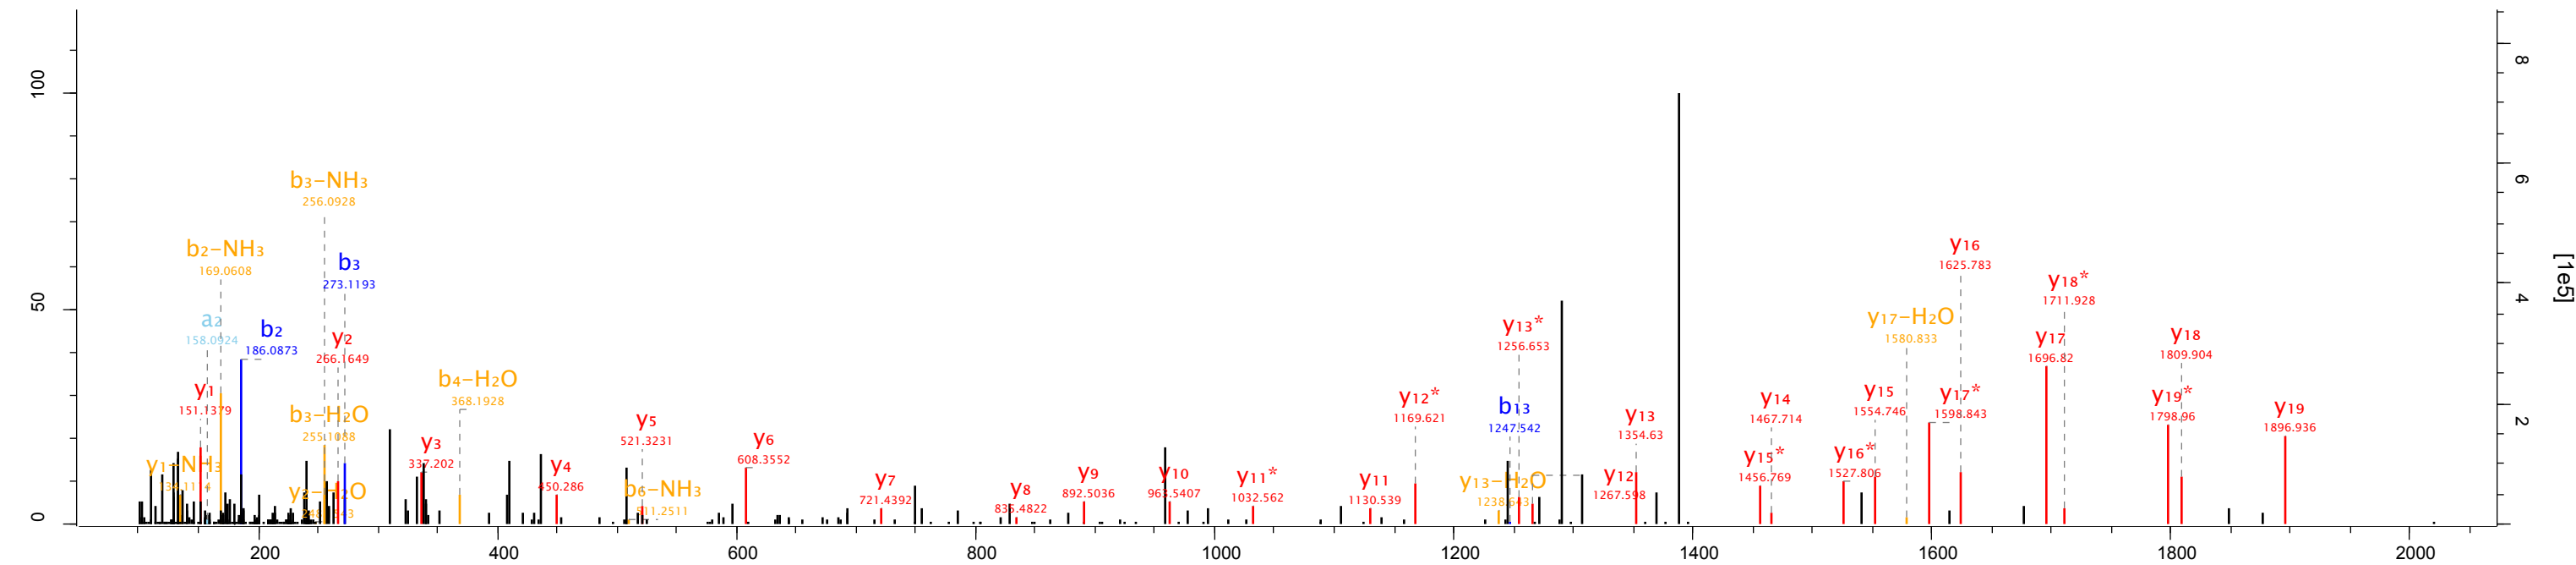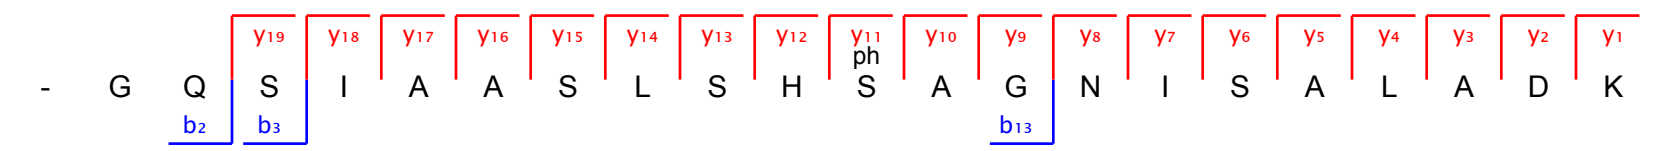

Raw file: 20150812\_A375SR\_Phospho\_BR1\_08  
 Scan: 18291  
 Method: FTMS; HCD  
 Score: 493.06  
 m/z: 1496.09  
 Gene names: EEF1D

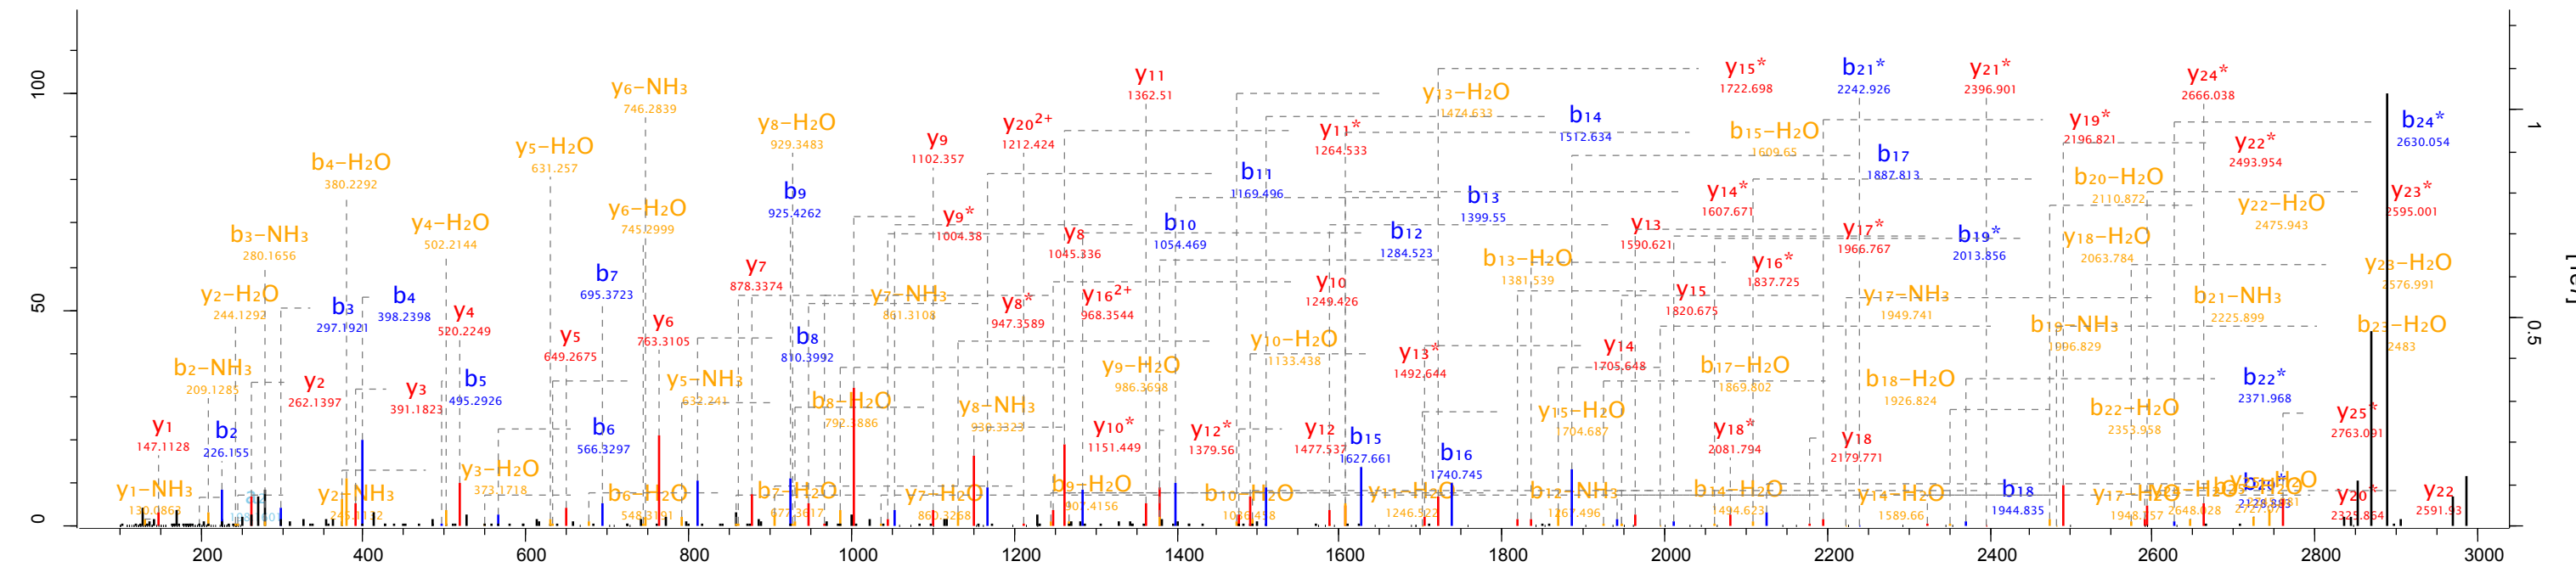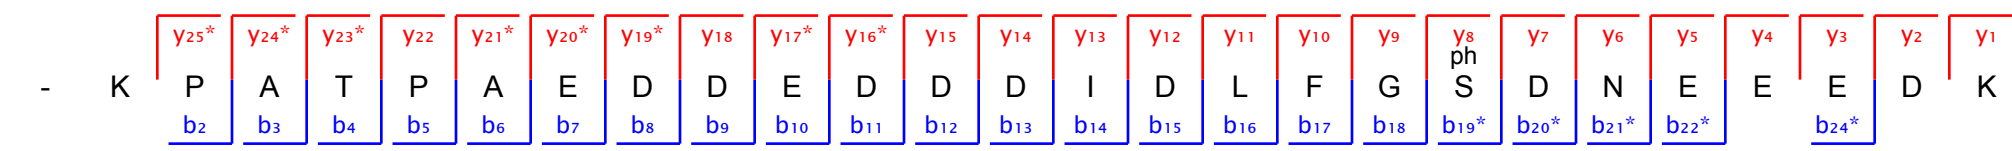

Raw file 20150812\_A375SR\_Phospho\_BR1\_08 Scan 19301 Method FTMS; HCD Score 165.41 m/z 888.93 Gene names PI4KB

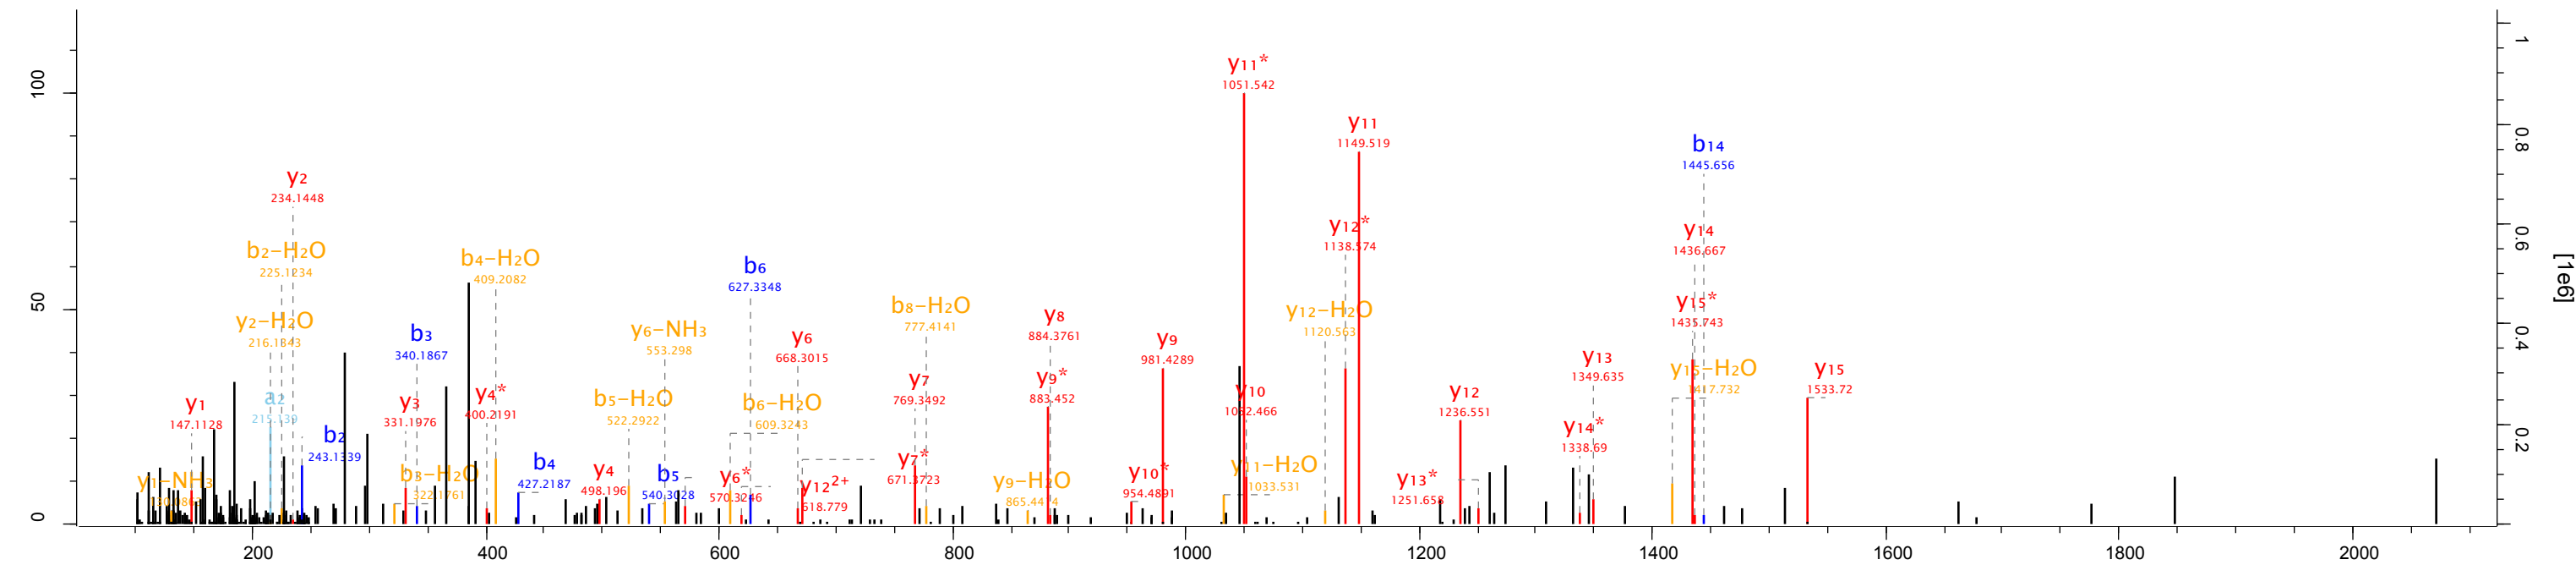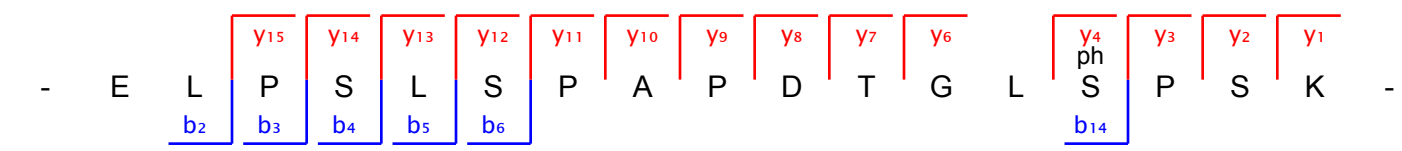



Raw file  
20150812\_A375SR\_Phospho\_BR1\_08

Scan 28261 Method FTMS; HCD Score 177.41 m/z 1109.2 Gene names SYNM

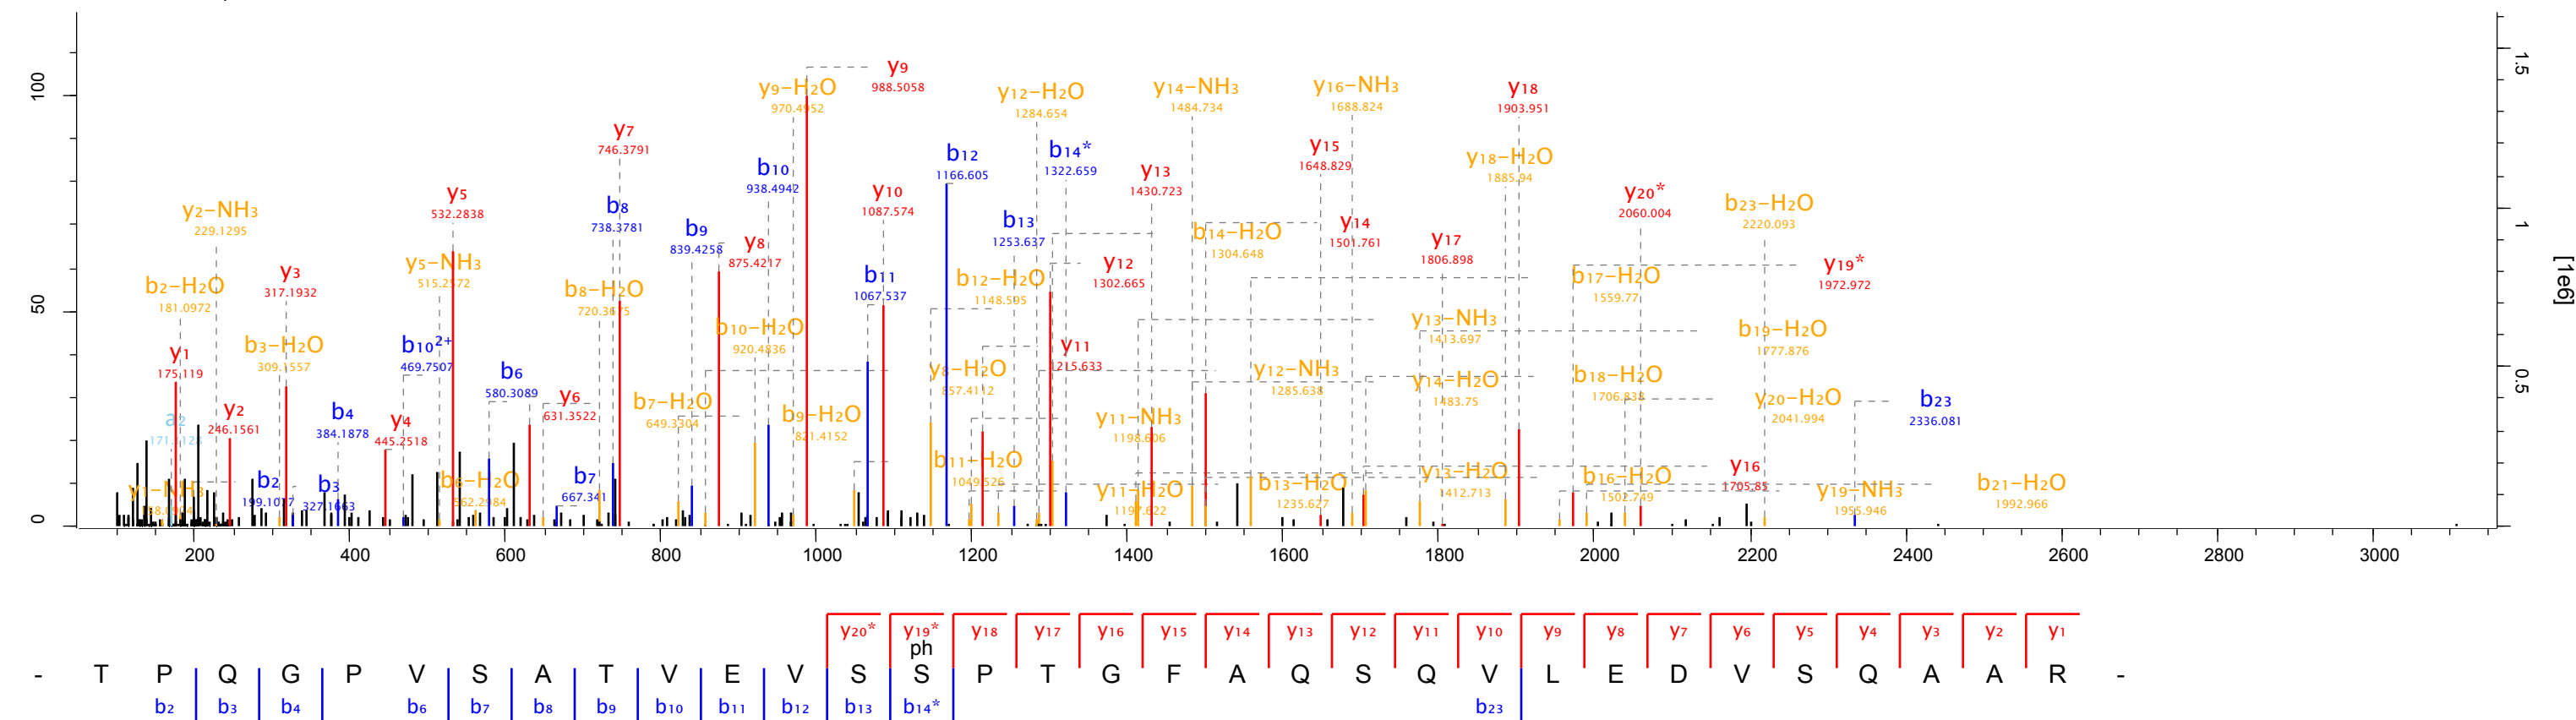

Raw file: 20150812\_A375SR\_Phospho\_BR1\_08  
 Scan: 4511 Method: FTMS; HCD Score: 150.03 m/z: 769.33 Gene names: SETD1A

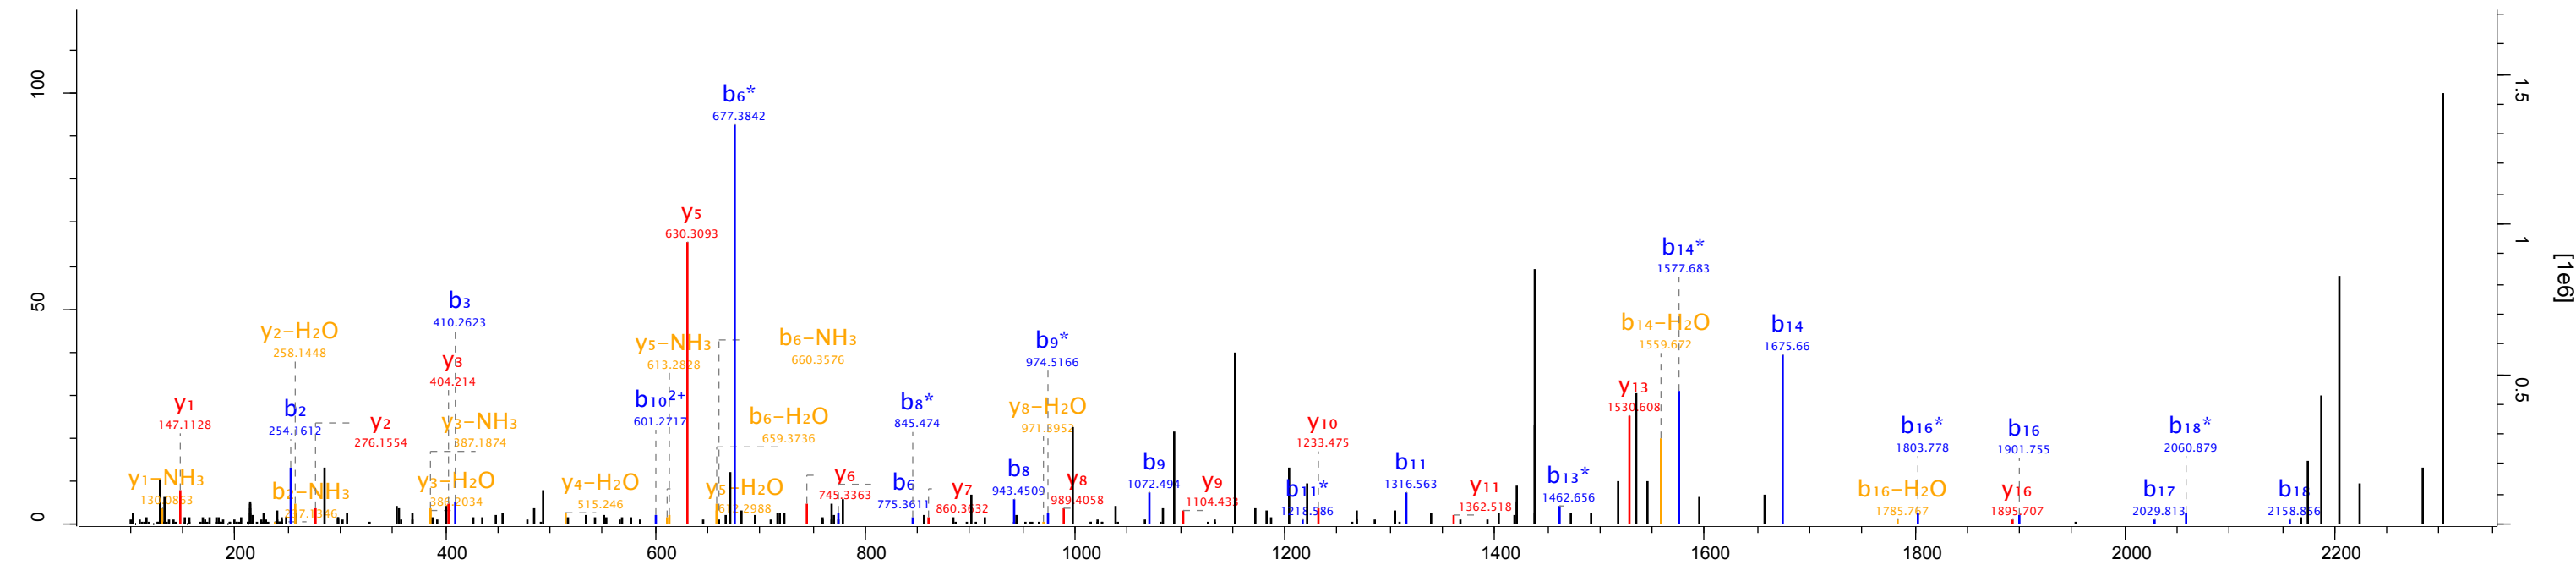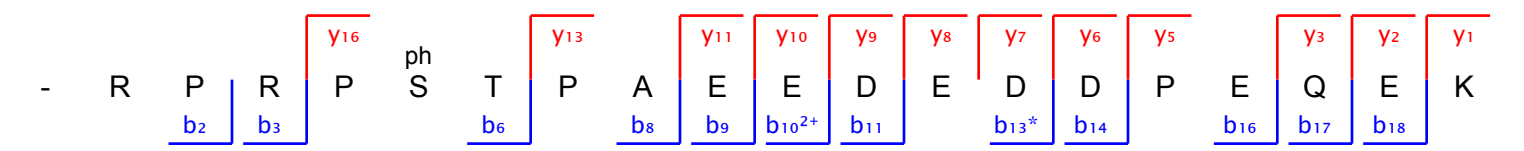

Raw file: 20150812\_A375SR\_Phospho\_BR1\_08  
 Scan: 6521 Method: FTMS; HCD Score: 123.61 m/z: 619.65 Gene names: BAP1

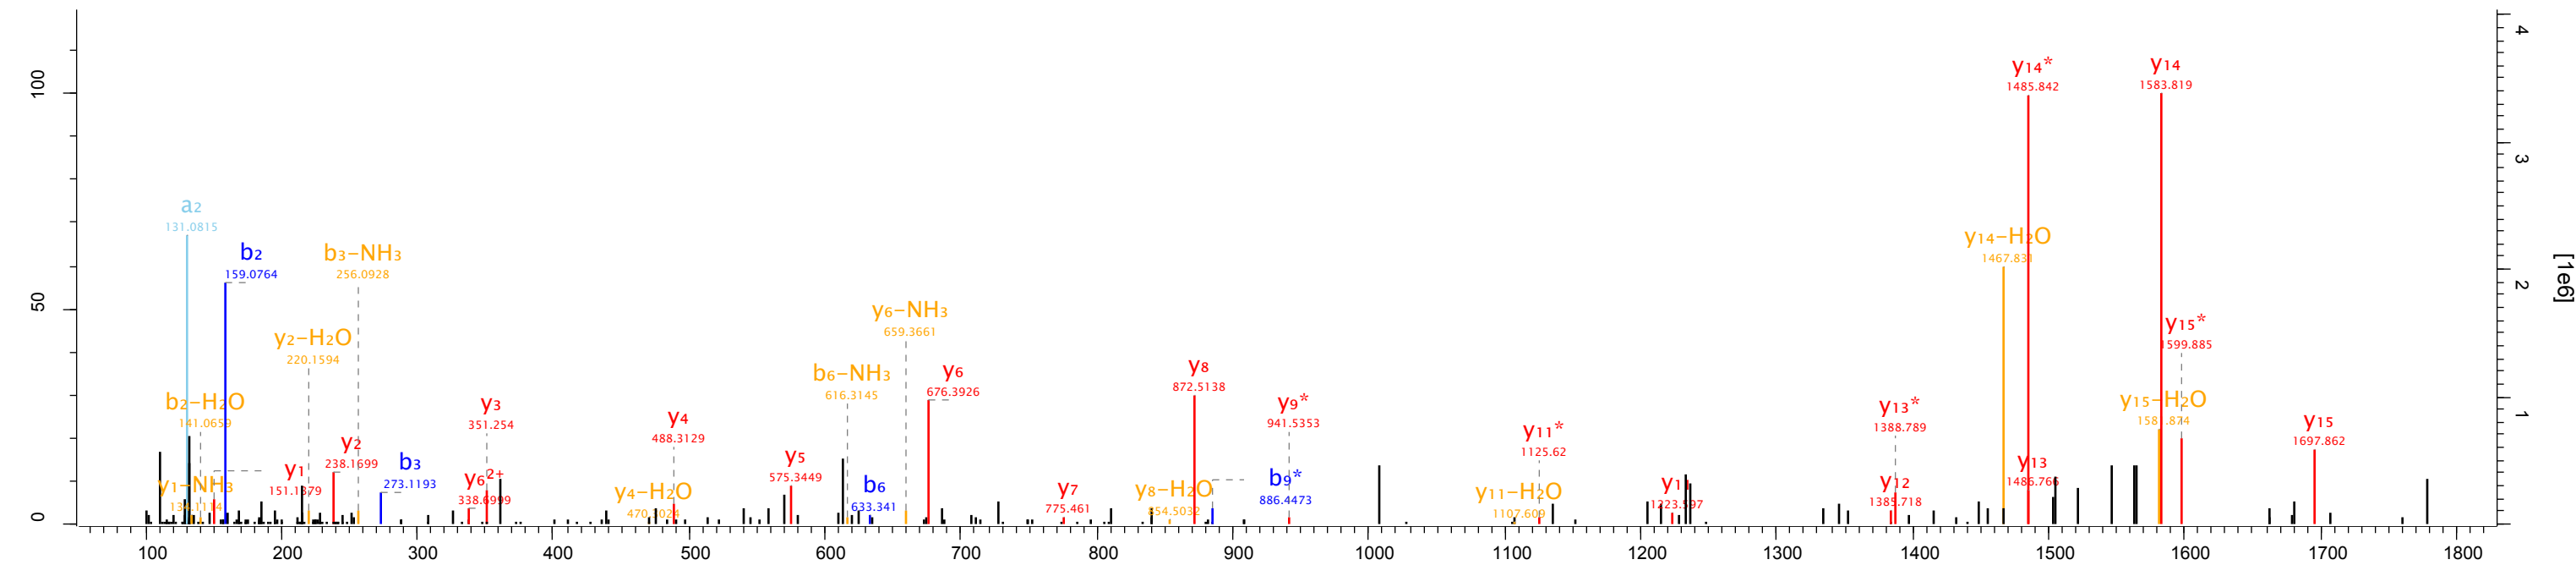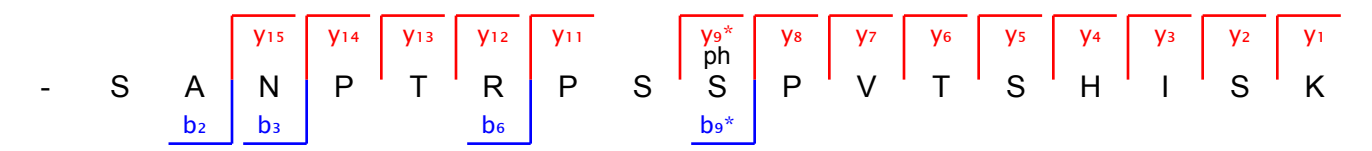

Raw file 20150812\_A375SR\_Phospho\_BR1\_08 Scan 7551 Method FTMS; HCD Score 54.67 m/z 567.27 Gene names FNBP1L

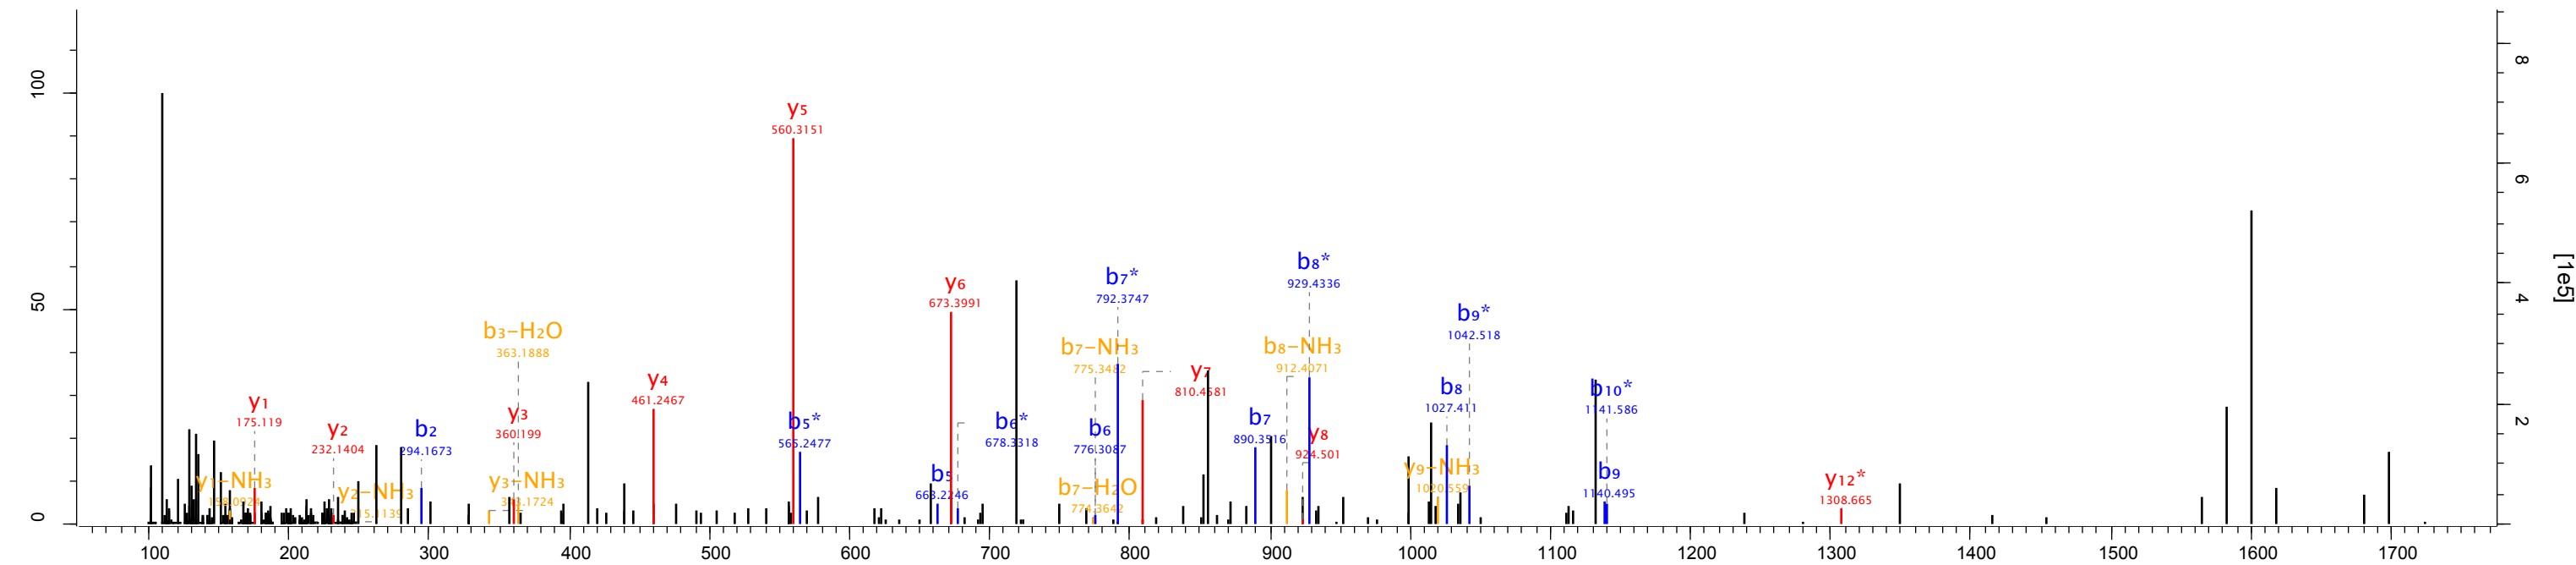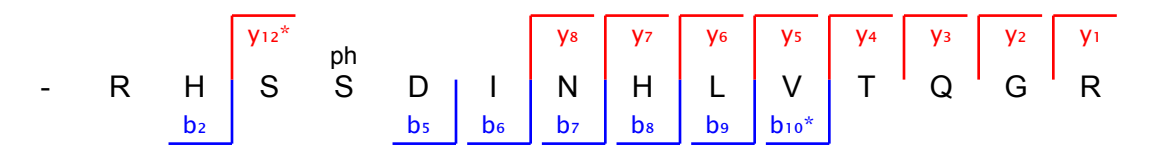

Raw file: 20150812\_A375SR\_Phospho\_BR1\_08  
 Scan: 7721 Method: FTMS; HCD Score: 58.82 m/z: 730.33 Gene names: CDON

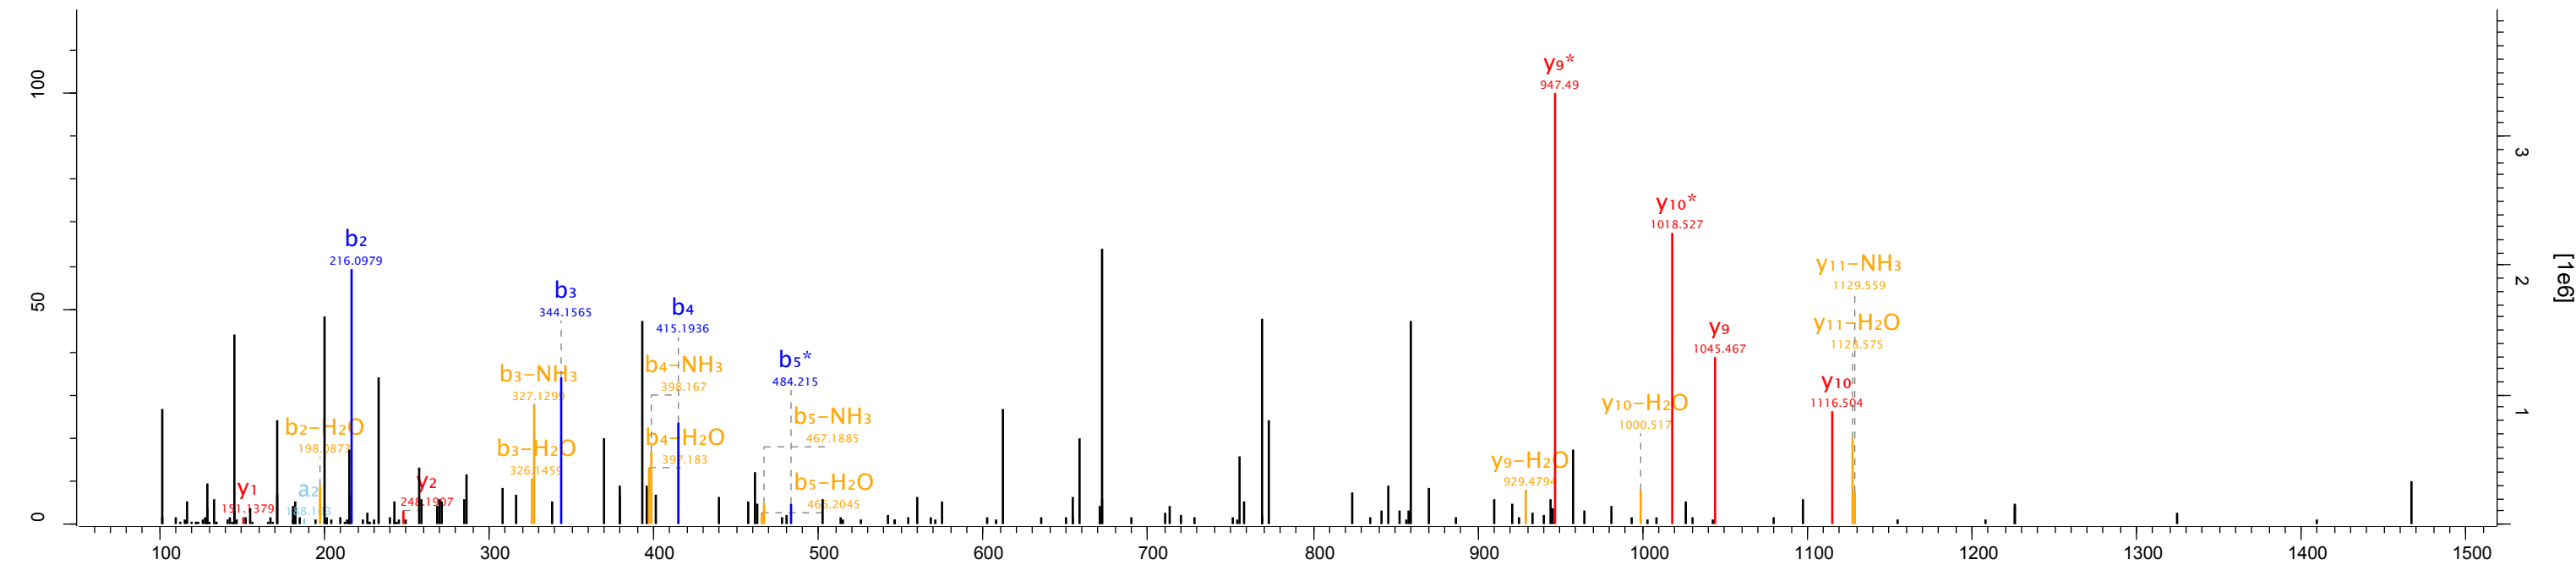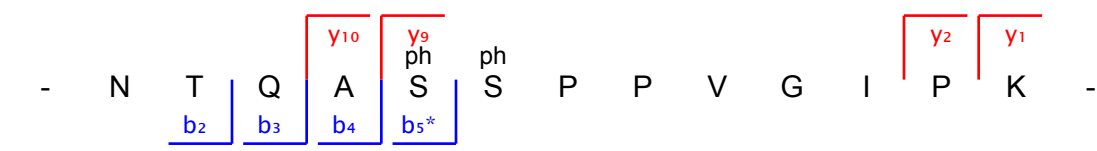

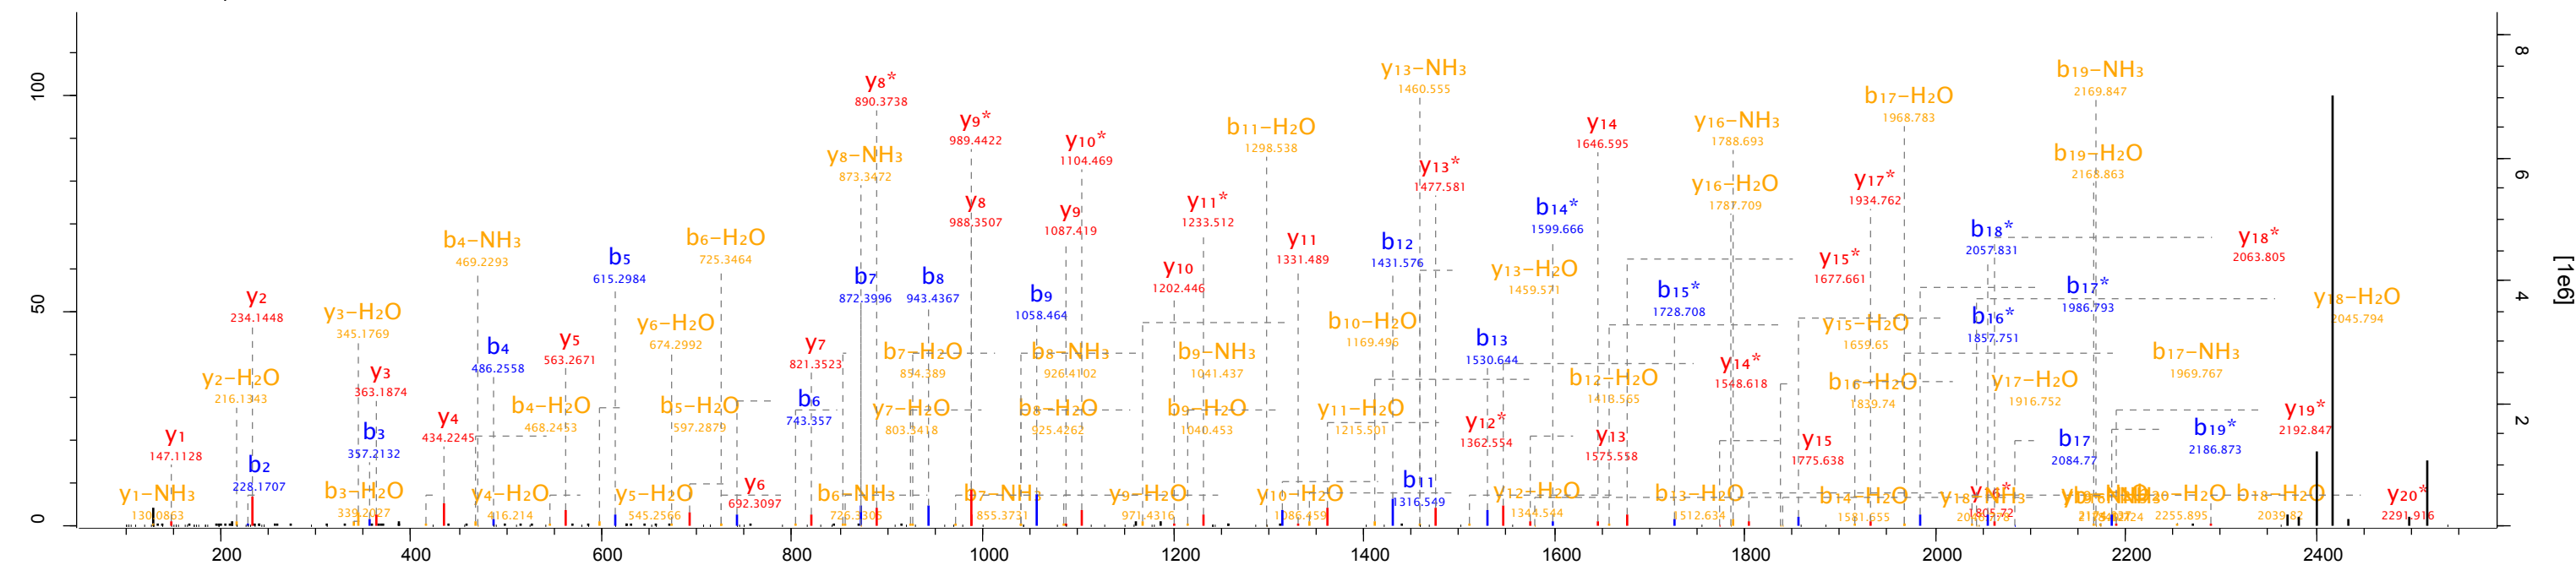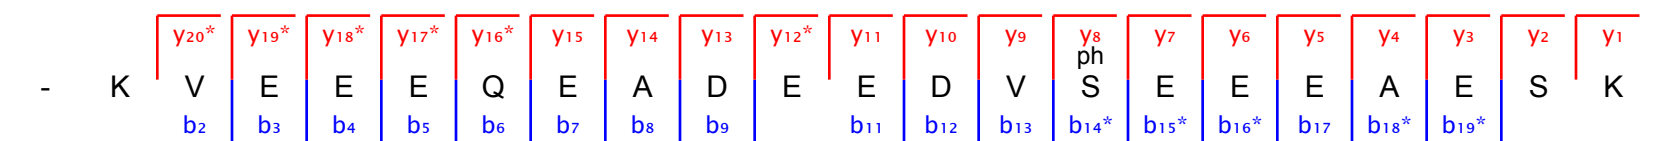

Raw file  
20150812\_A375SR\_Phospho\_BR1\_08

Scan 7961 Method FTMS; HCD Score 435.26 m/z 1326.11 Gene names RAD23B

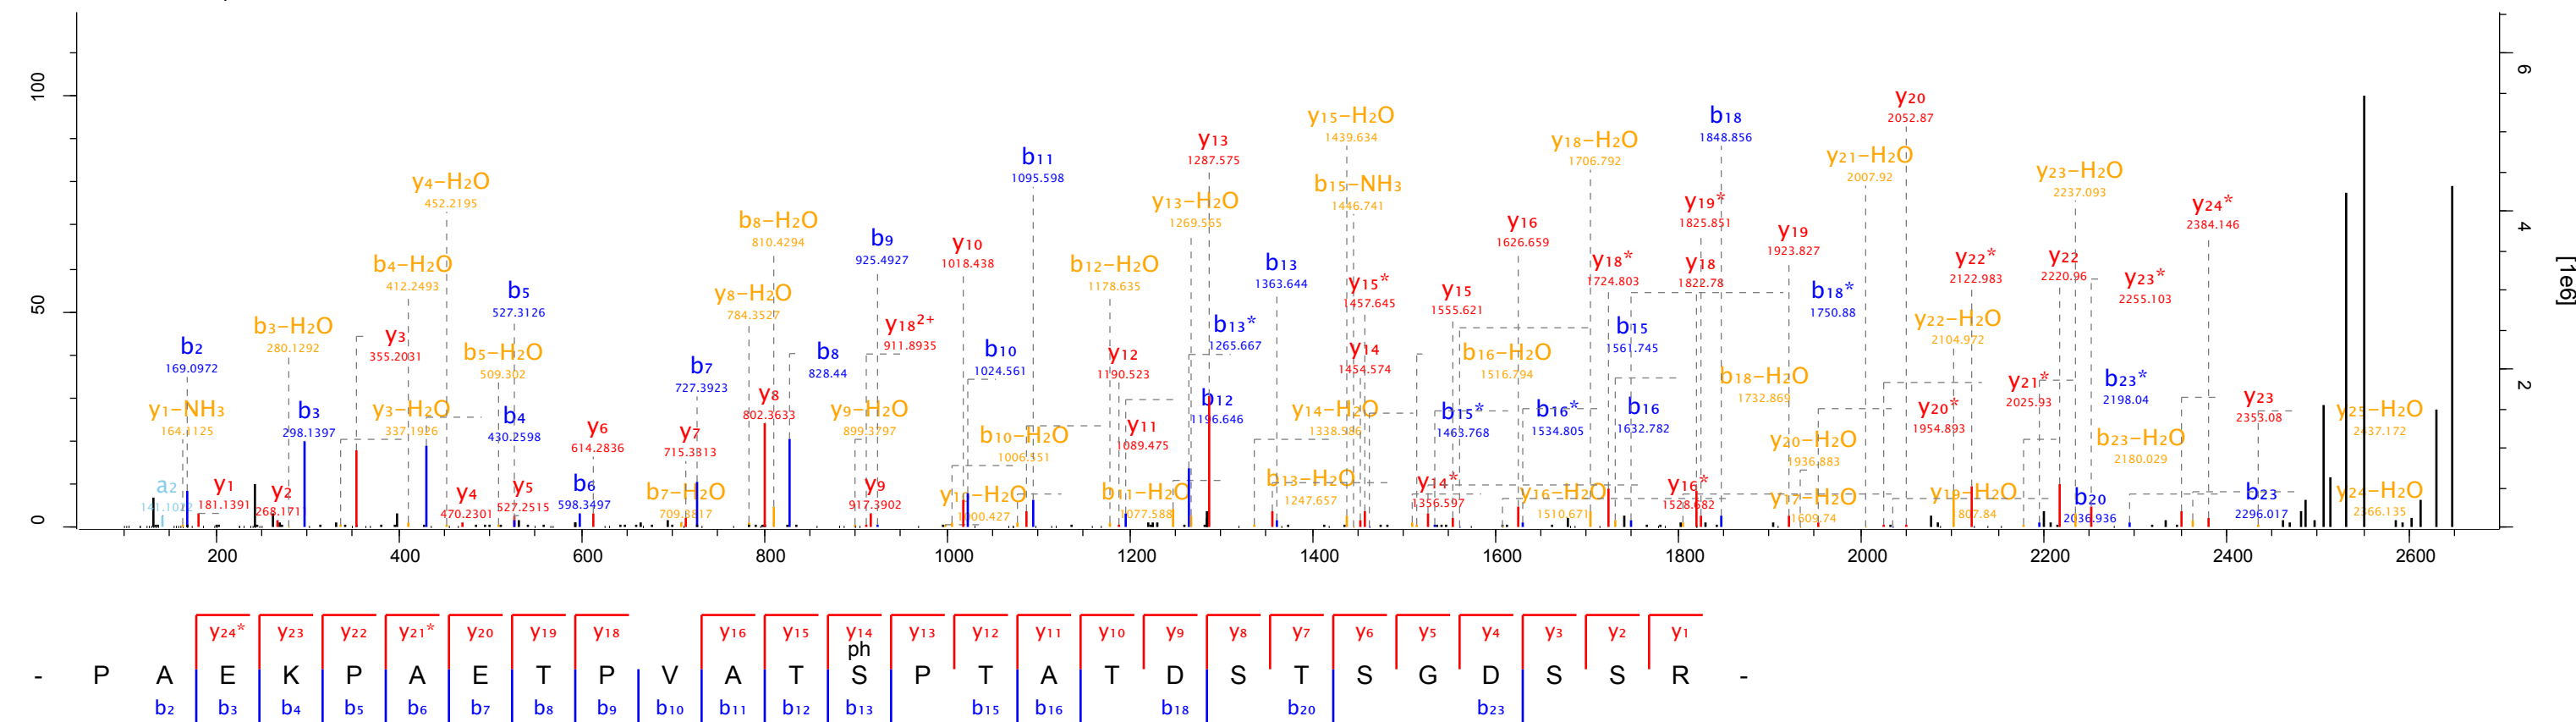

Raw file: 20150812\_A375SR\_Phospho\_BR1\_08  
 Scan: 8031 Method: FTMS; HCD Score: 88.57 m/z: 761.99 Gene names: RBPJ

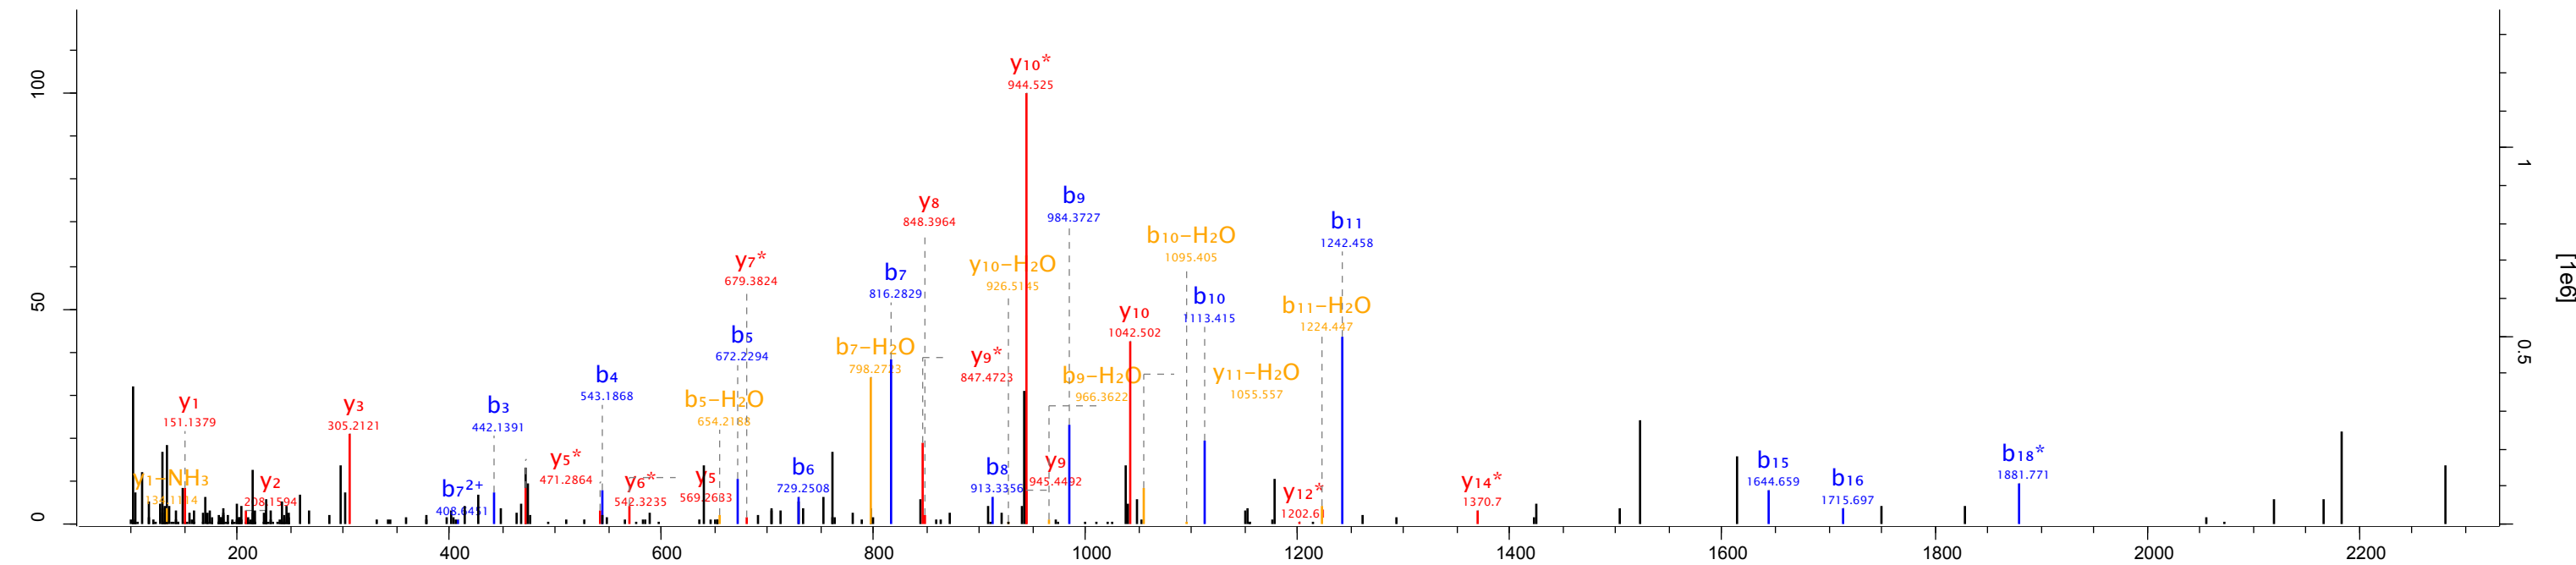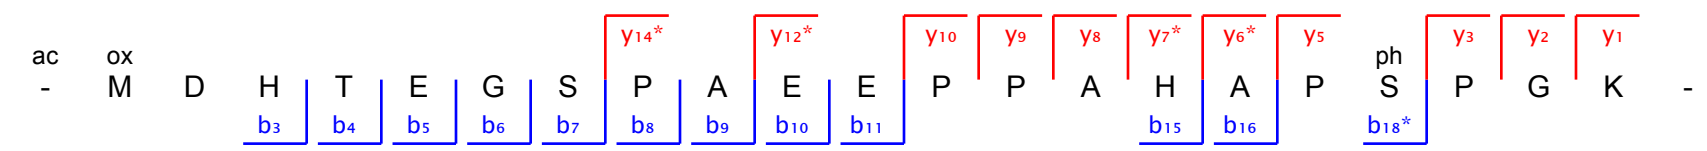



Raw file: 20150812\_A375SR\_Phospho\_BR1\_08  
 Scan: 8291 Method: FTMS; HCD Score: 299.57 m/z: 906.88 Gene names: HSP90AA1;HSP90AA2;HSP90AA5P

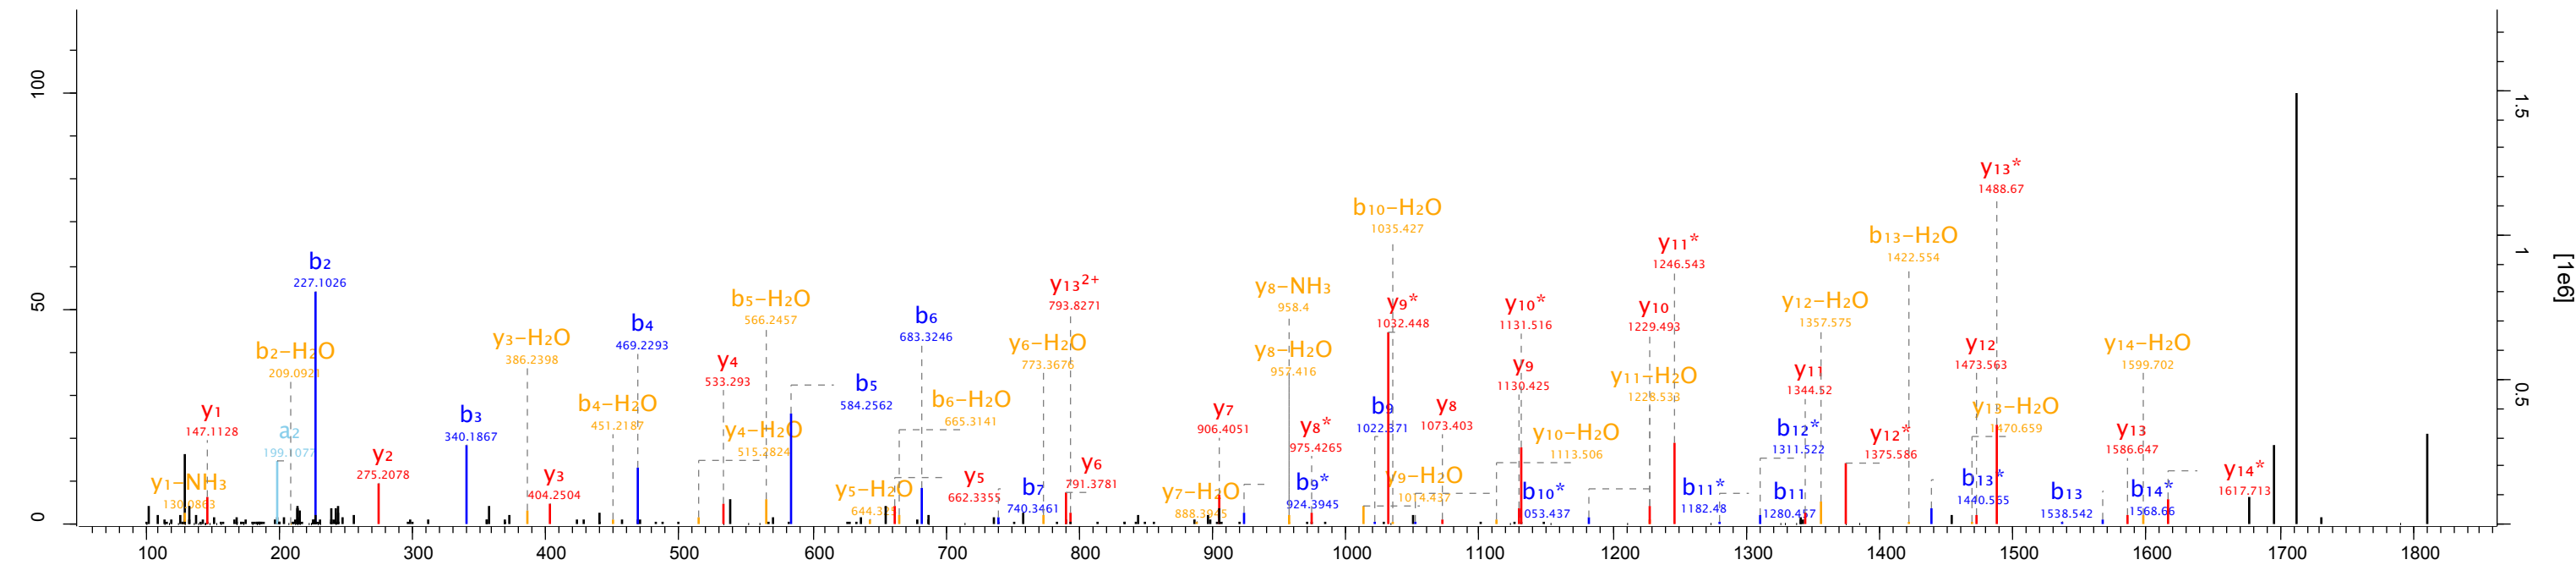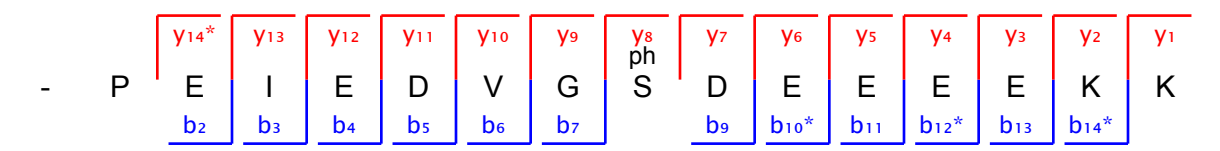

Raw file 20150812\_A375SR\_Phospho\_BR1\_08 Scan 8451 Method FTMS; HCD Score 109.44 m/z 564.23 Gene names EIF2B5

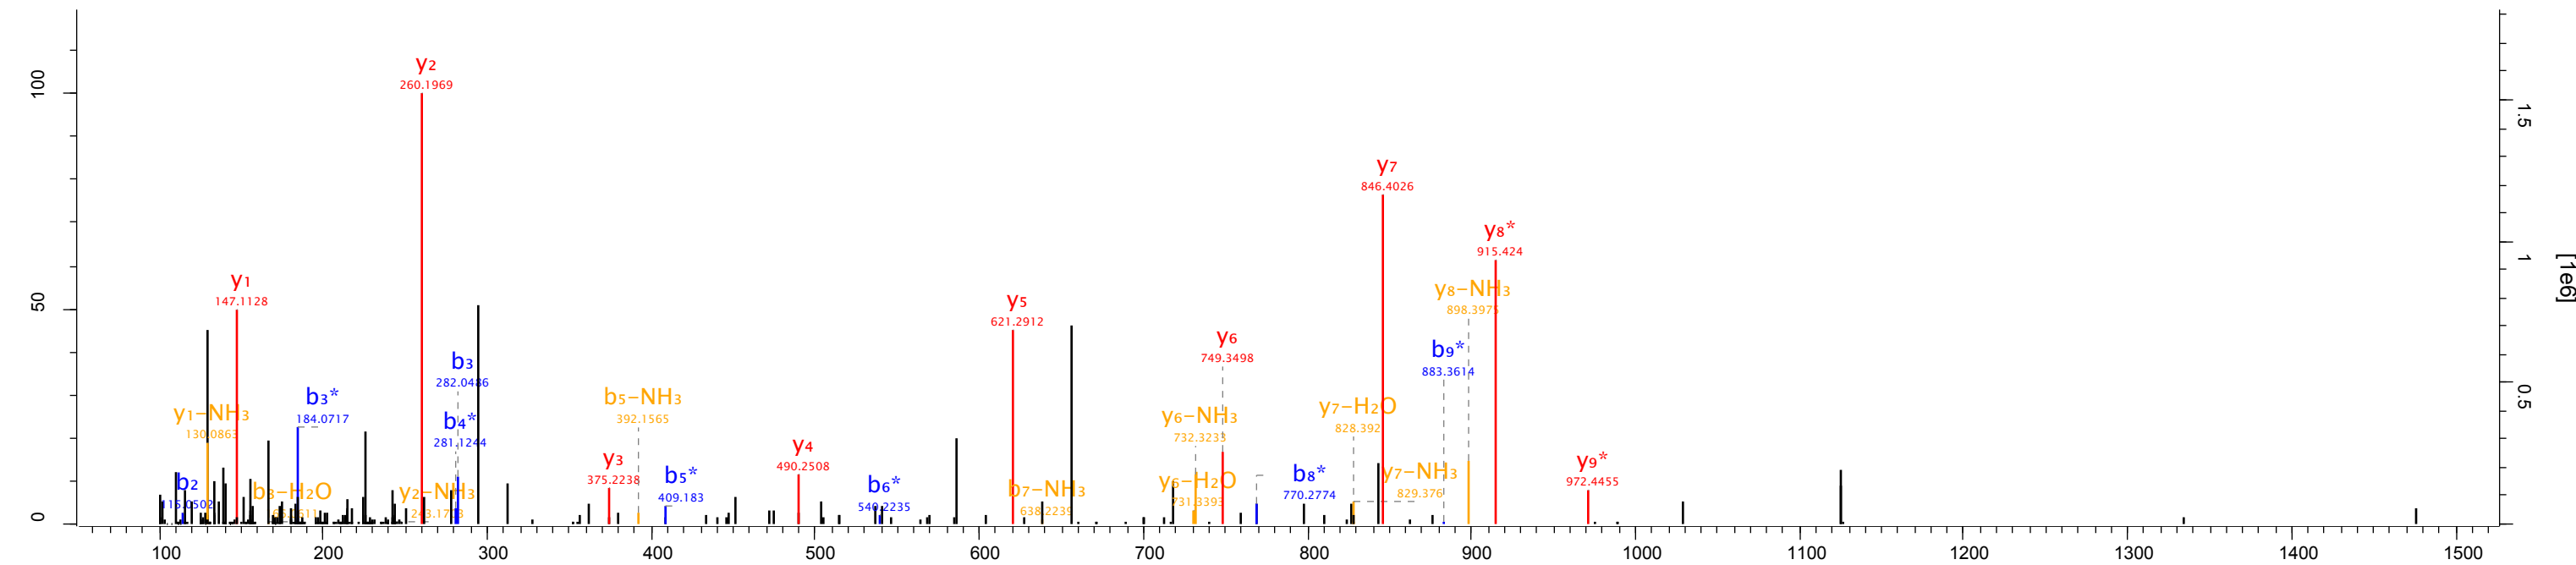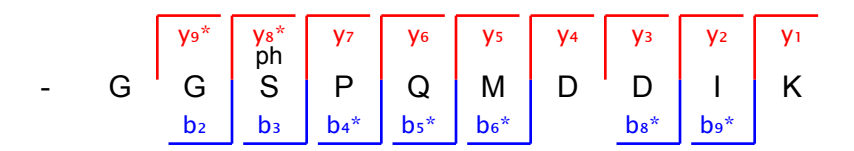

Raw file 20150812\_A375SR\_Phospho\_BR1\_09 Scan 13291 Method FTMS; HCD Score 151.52 m/z 590.28 Gene names LMNA

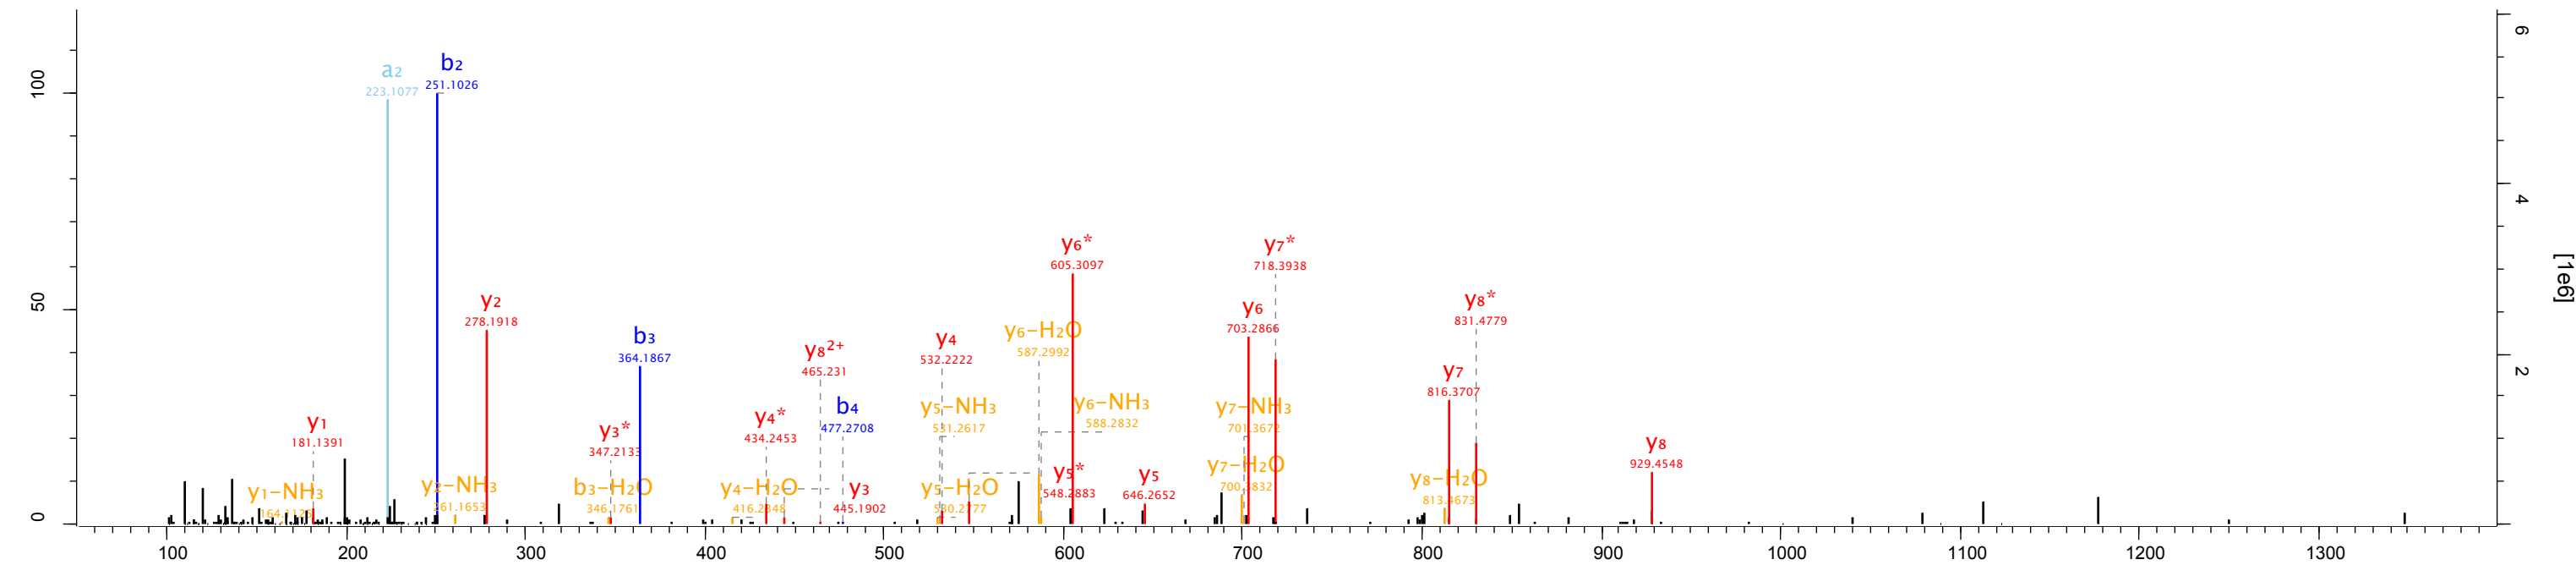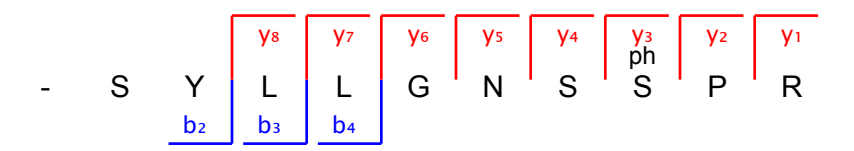

Raw file 20150812\_A375SR\_Phospho\_BR1\_09 Scan 14231 Method FTMS; HCD Score 309.43 m/z 1048.48 Gene names SYAP1

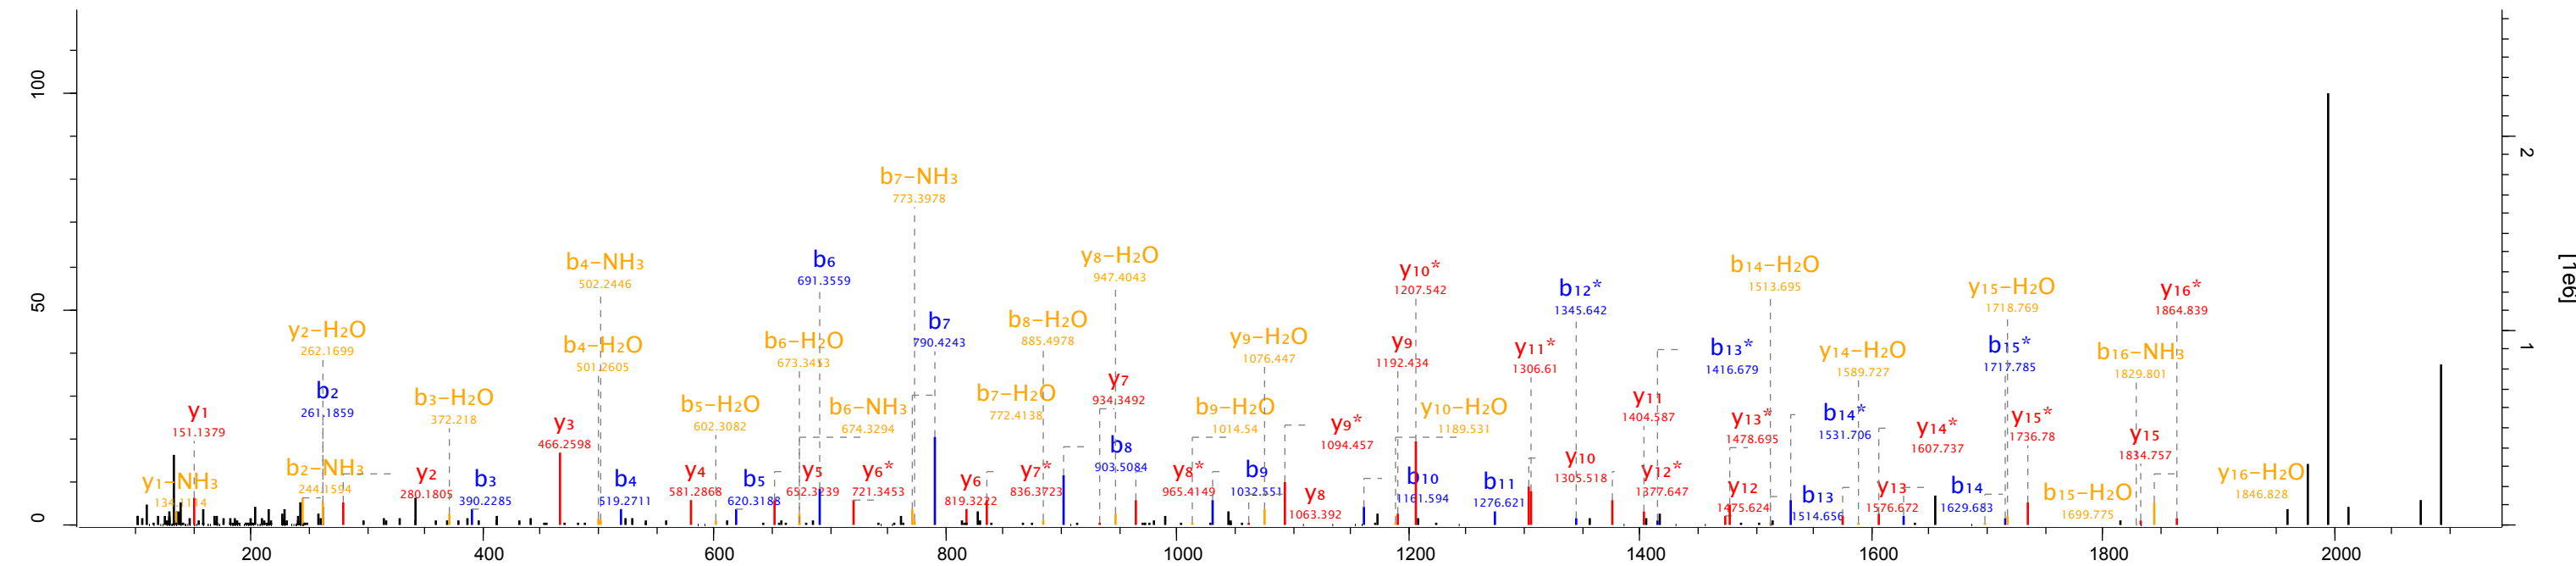

- K Q E E T A V L E E D S A D W E K -

y<sub>16</sub>\*
y<sub>15</sub>
y<sub>14</sub>\*
y<sub>13</sub>
y<sub>12</sub>
y<sub>11</sub>
y<sub>10</sub>
y<sub>9</sub>
y<sub>8</sub>
y<sub>7</sub>
y<sub>6</sub>
y<sub>5</sub>
y<sub>4</sub>
y<sub>3</sub>
y<sub>2</sub>
y<sub>1</sub>

b<sub>2</sub>
b<sub>3</sub>
b<sub>4</sub>
b<sub>5</sub>
b<sub>6</sub>
b<sub>7</sub>
b<sub>8</sub>
b<sub>9</sub>
b<sub>10</sub>
b<sub>11</sub>
b<sub>12</sub>\*
b<sub>13</sub>
b<sub>14</sub>
b<sub>15</sub>\*

Raw file: 20150812\_A375SR\_Phospho\_BR1\_09  
 Scan: 1591 Method: FTMS; HCD Score: 121.01 m/z: 588.29 Gene names: CBX4

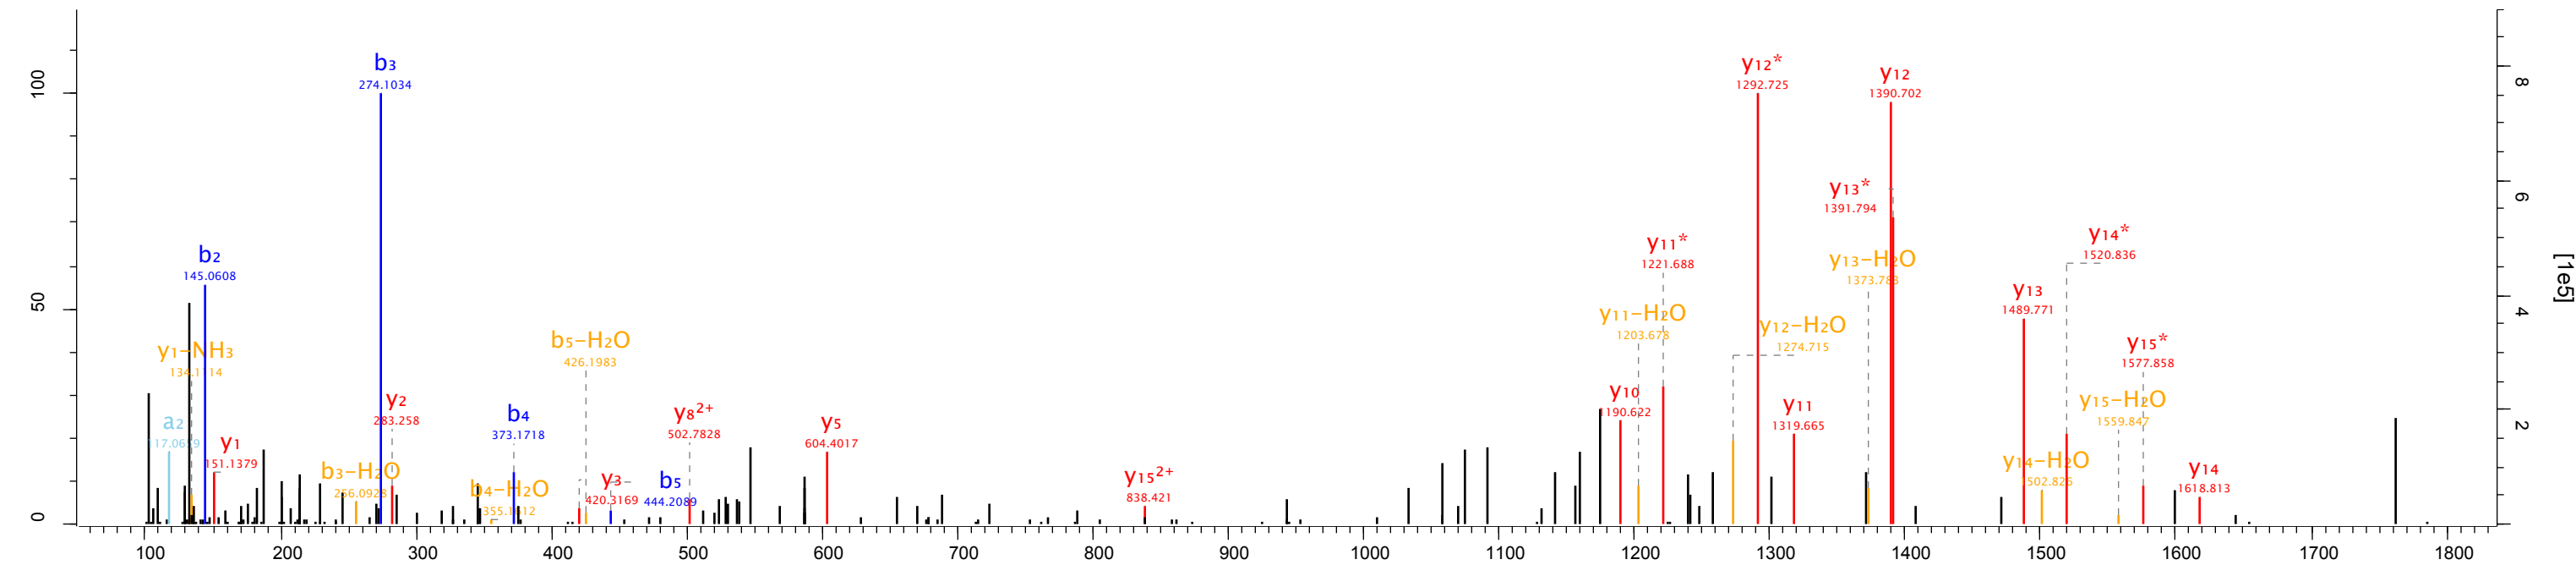

- S G E V A E G E A R S P S H K K -

Fragmentation sites are indicated by boxes below the sequence:

- Red boxes: y<sub>15</sub><sup>\*</sup>, y<sub>14</sub>, y<sub>13</sub>, y<sub>12</sub>, y<sub>11</sub>, y<sub>10</sub>, y<sub>8</sub><sup>2+</sup>, y<sub>5</sub>, y<sub>3</sub>, y<sub>2</sub>, y<sub>1</sub>
- Blue boxes: b<sub>2</sub>, b<sub>3</sub>, b<sub>4</sub>, b<sub>5</sub>

Raw file 20150812\_A375SR\_Phospho\_BR1\_09 Scan 16771 Method FTMS; HCD Score 48.29 m/z 669.97 Gene names CTNND1

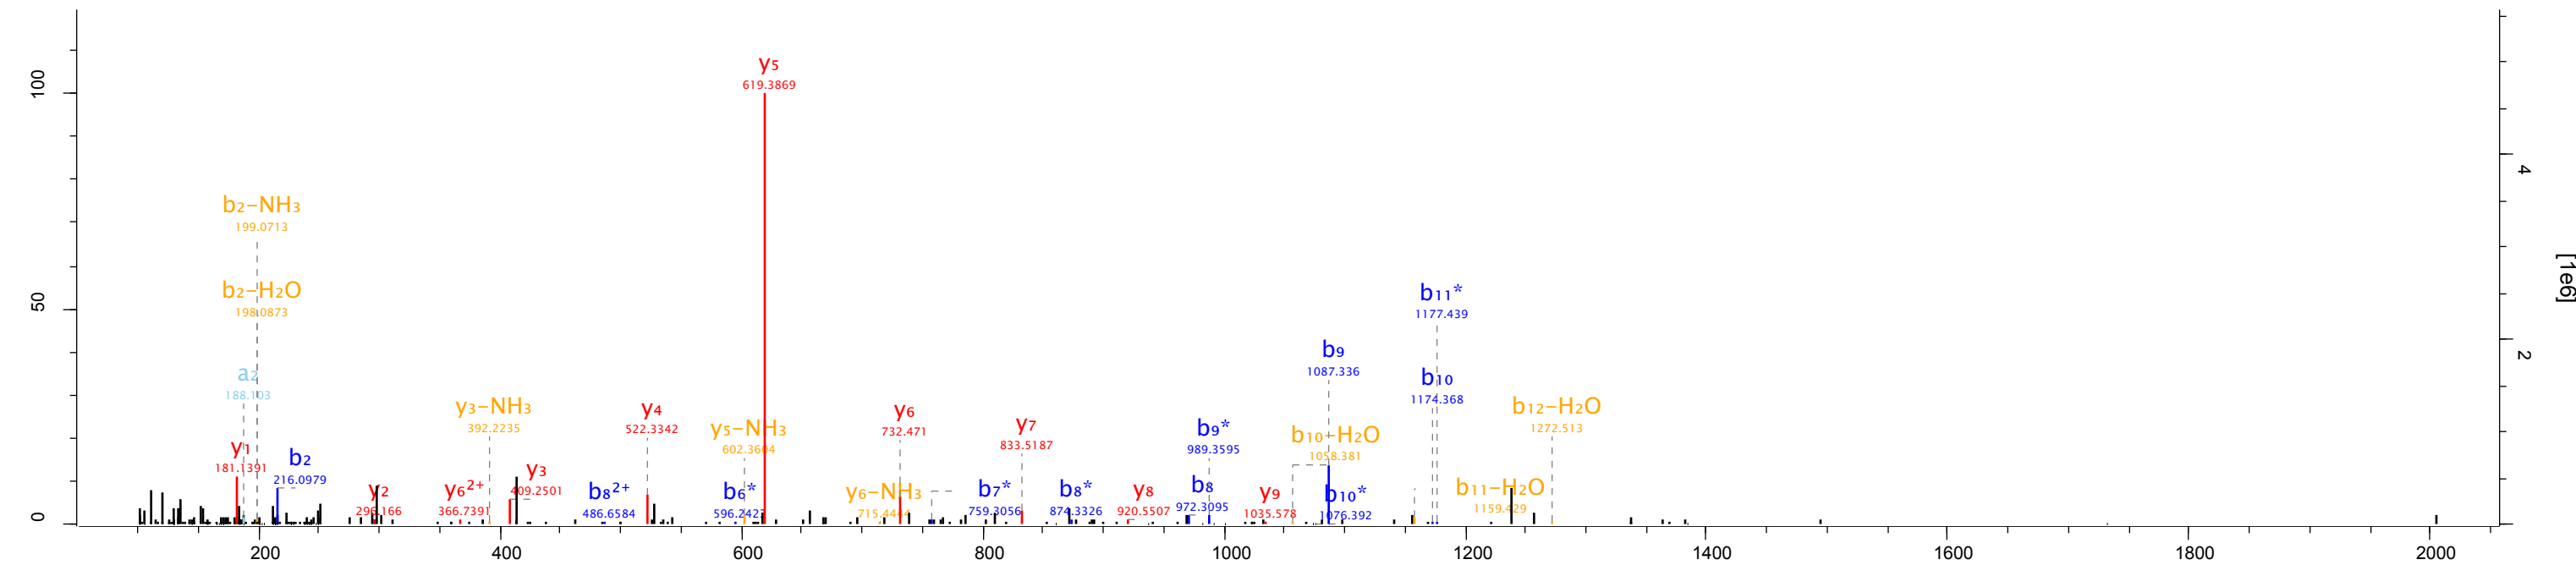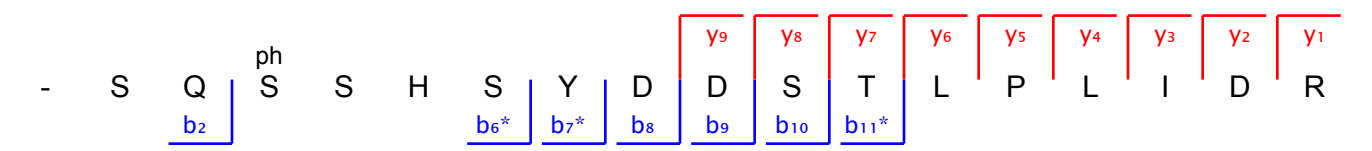

Raw file 20150812\_A375SR\_Phospho\_BR1\_09 Scan 21641 Method FTMS; HCD Score 65.33 m/z 911.5 Gene names STK10

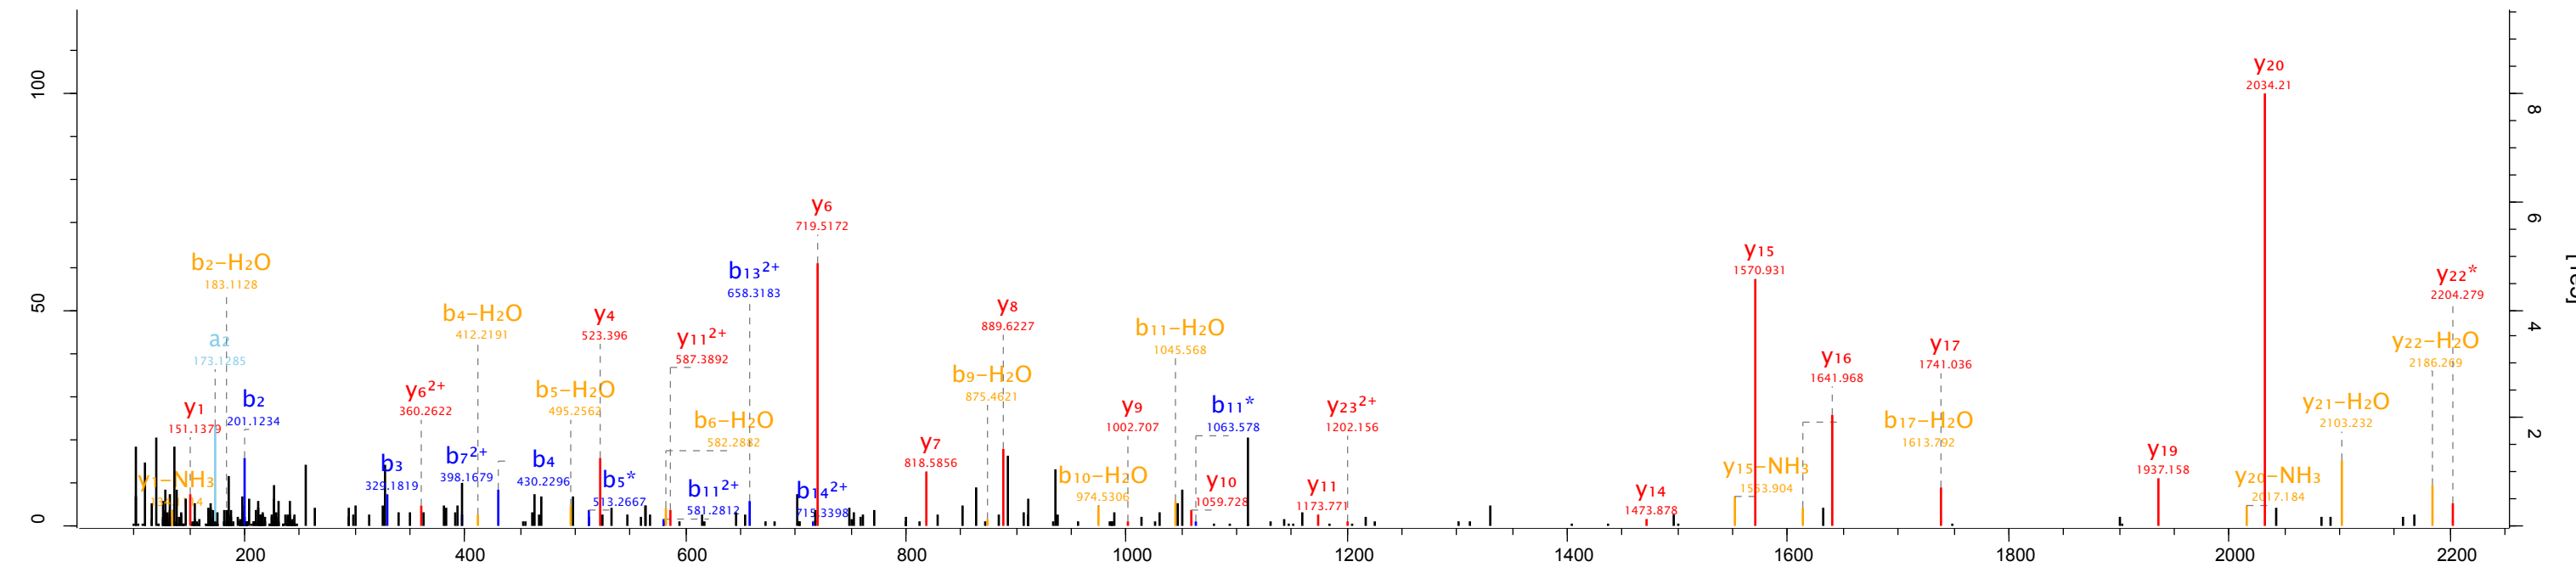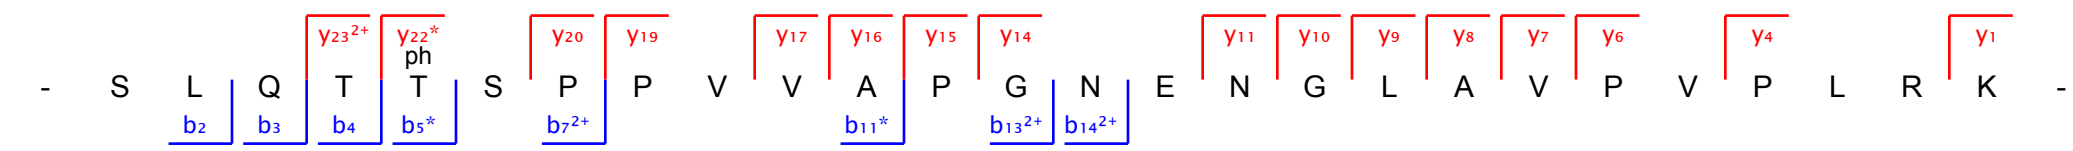

Raw file 20150812\_A375SR\_Phospho\_BR1\_09 Scan 2191 Method FTMS; HCD Score 66.27 m/z 531.78 Gene names PRPF38A

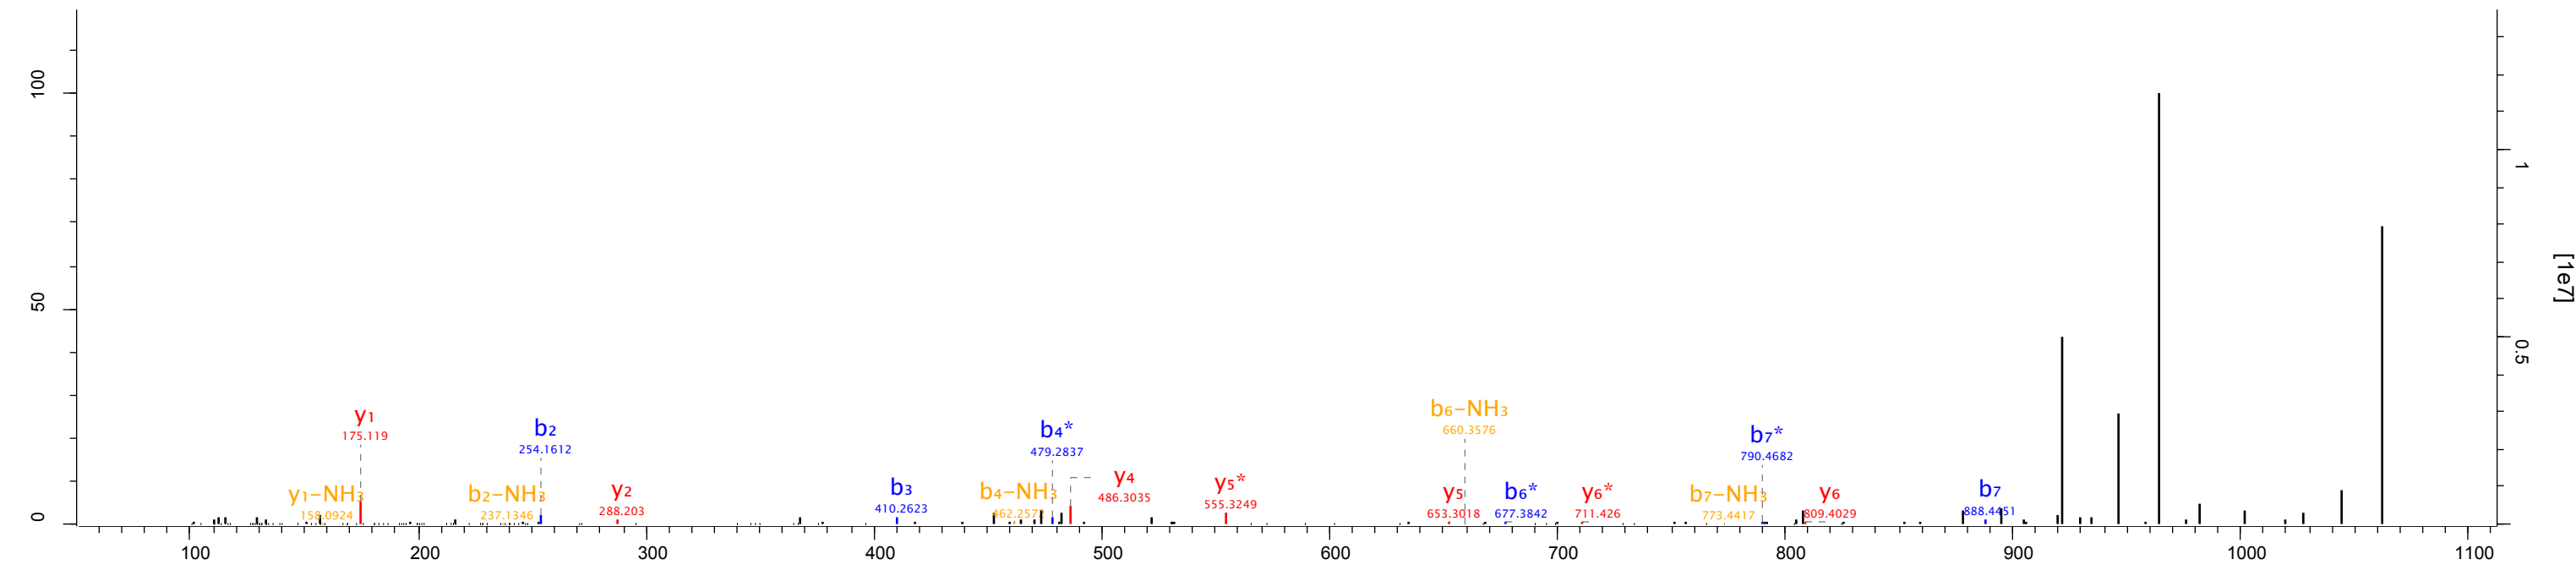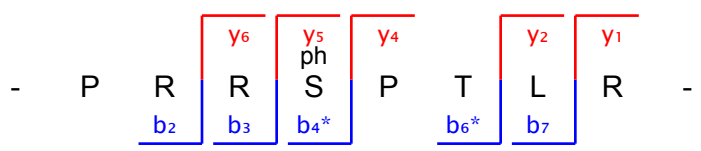





Raw file 20150812\_A375SR\_Phospho\_BR1\_09 Scan 23741 Method FTMS; HCD Score 289.43 m/z 890.97 Gene names LMNA

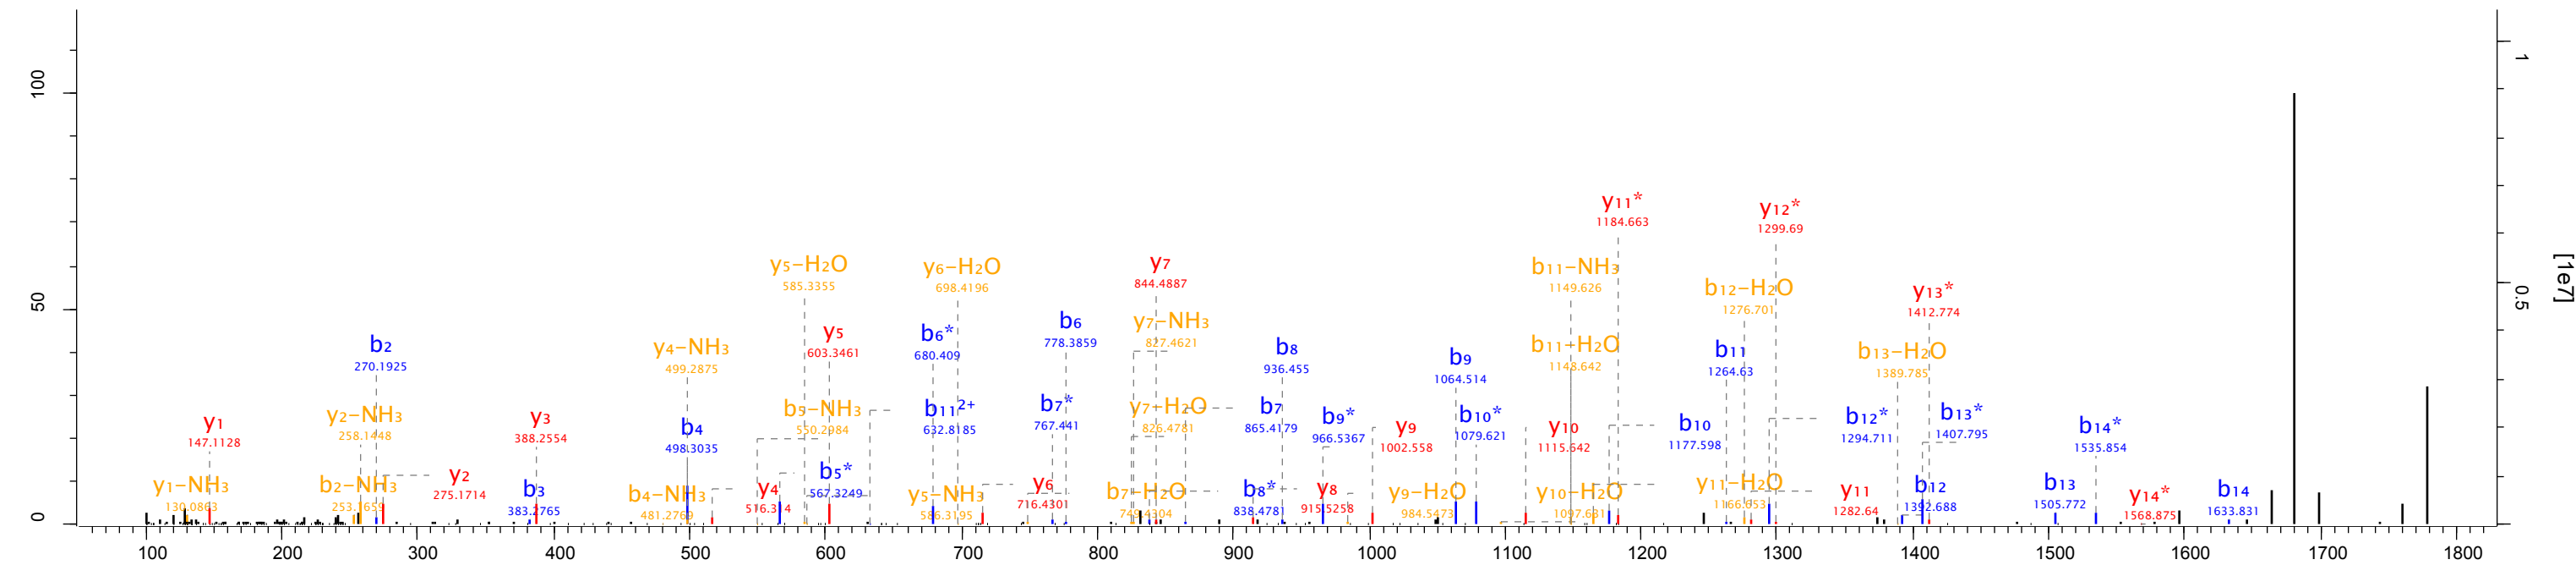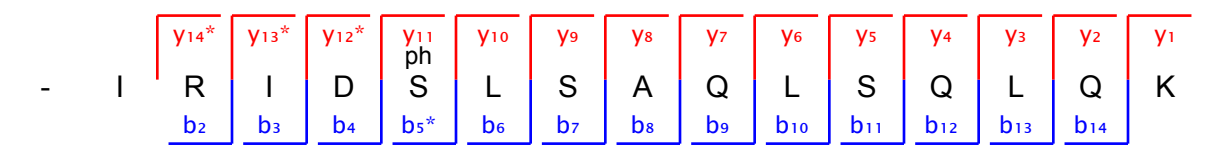

Raw file 20150812\_A375SR\_Phospho\_BR1\_09 Scan 23831 Method FTMS; HCD Score 41.51 m/z 1097.54 Gene names SPIN4

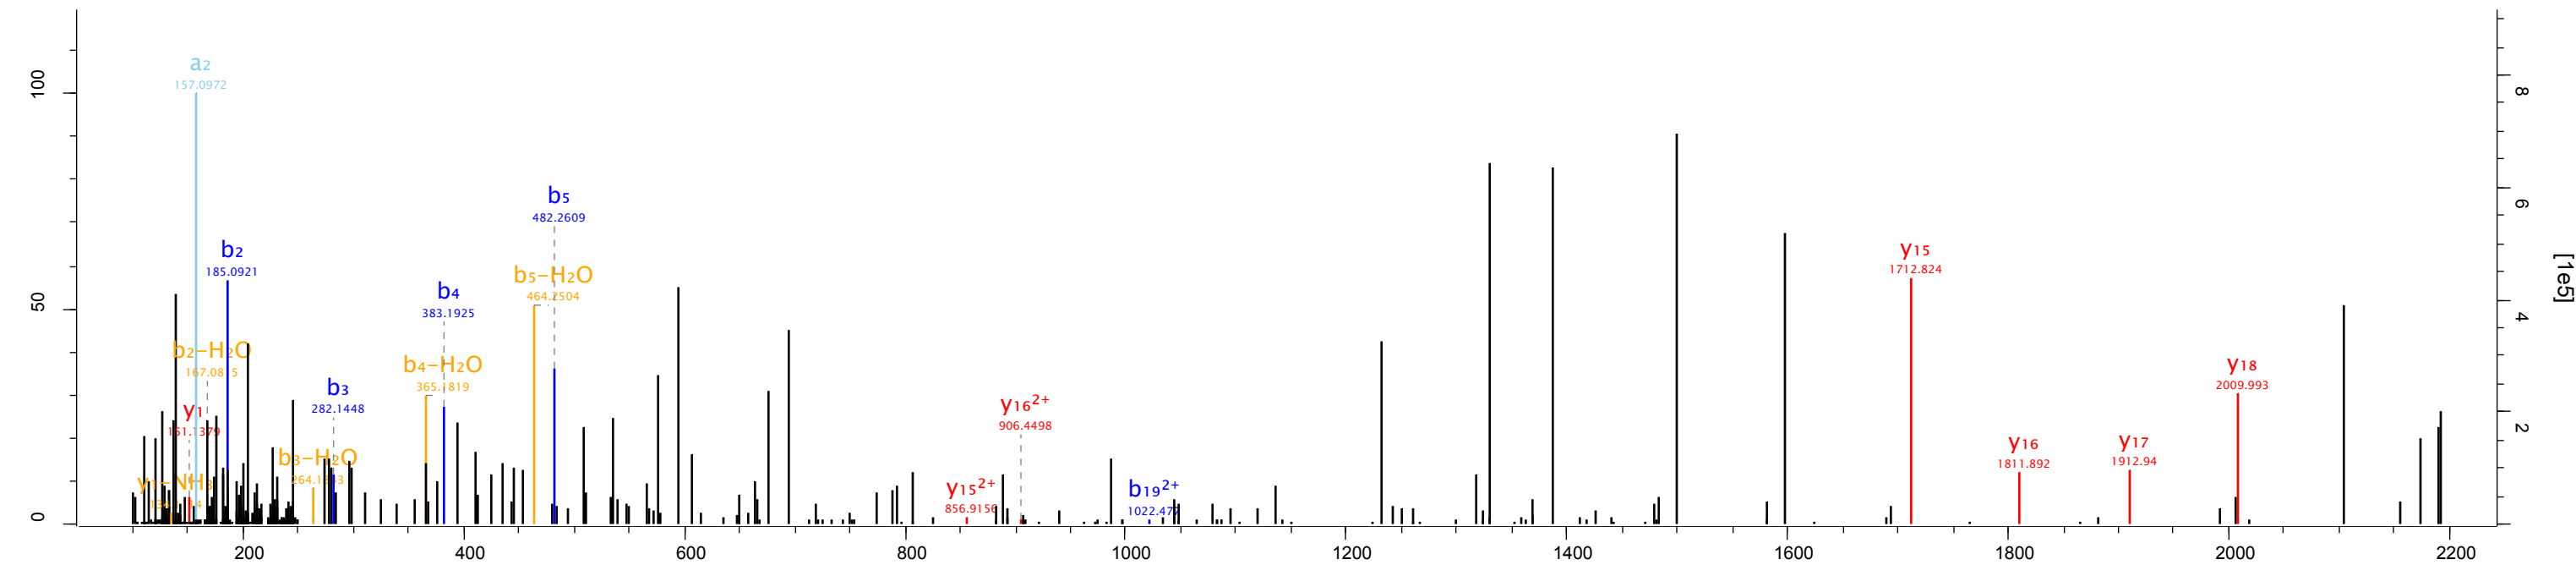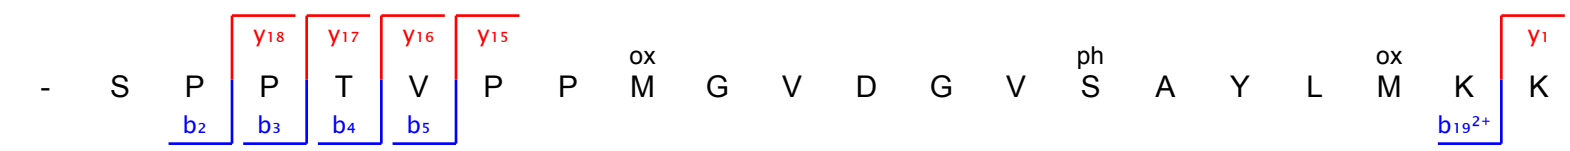

Raw file 20150812\_A375SR\_Phospho\_BR1\_09 Scan 24511 Method FTMS; HCD Score 127.94 m/z 936.44 Gene names LRRFIP1

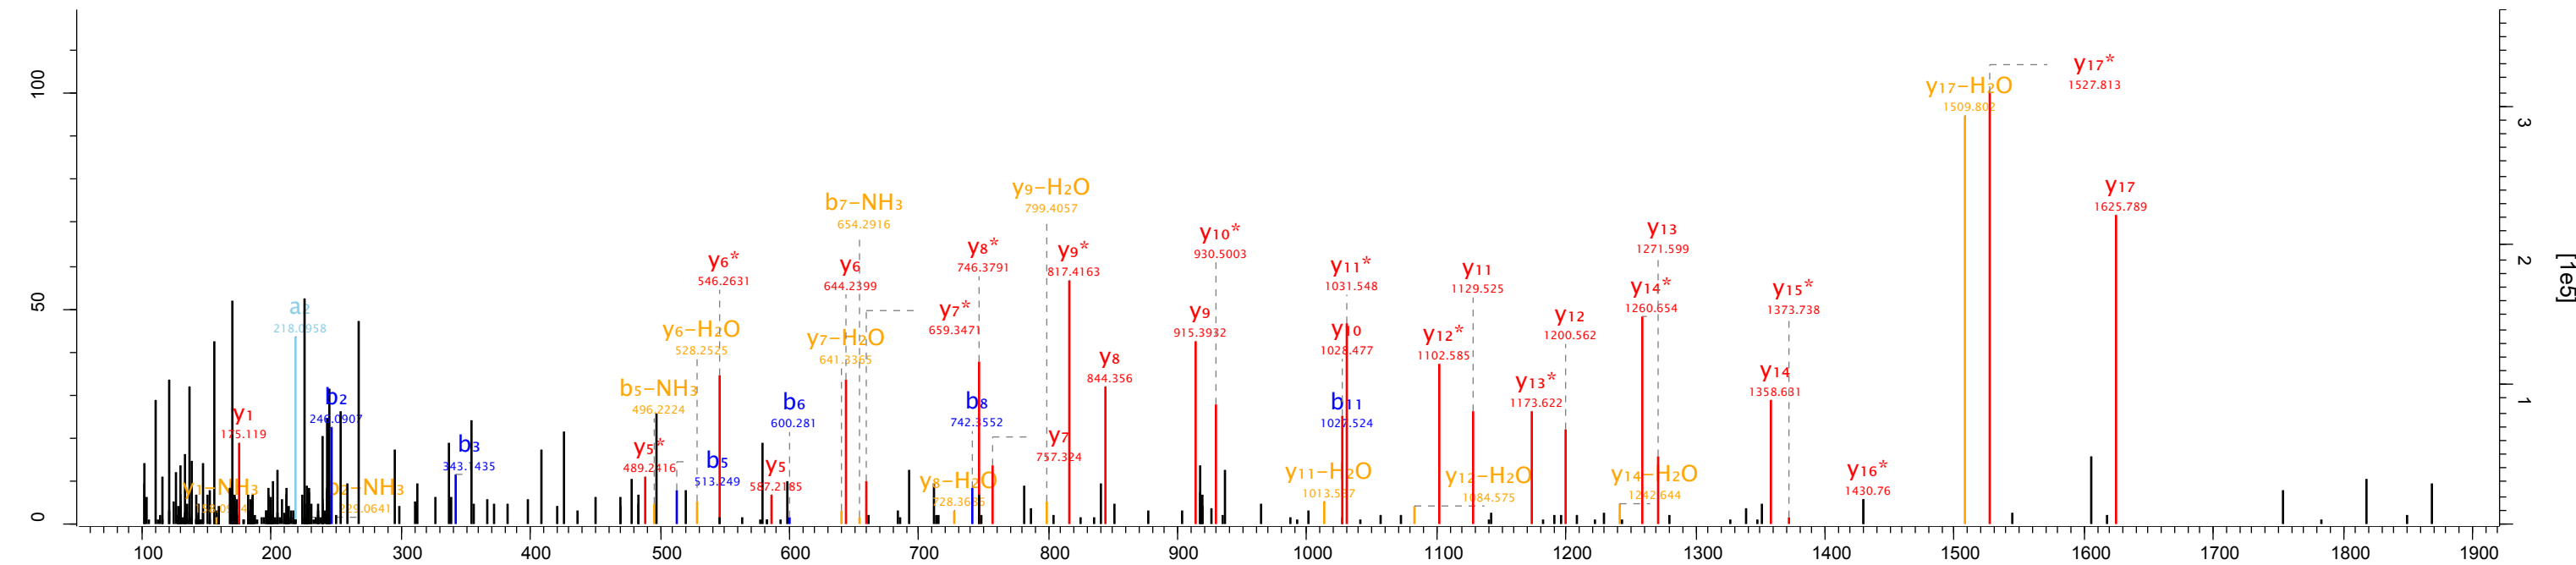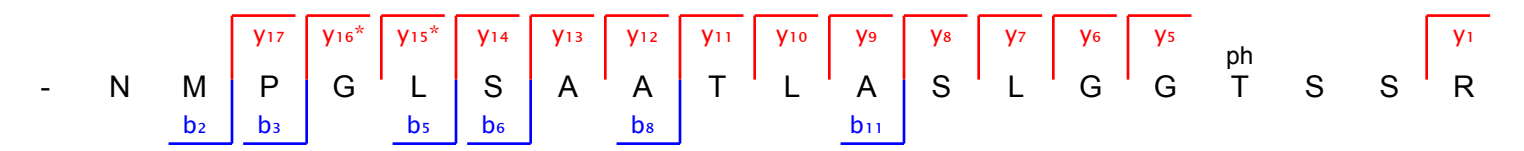

Raw file 20150812\_A375SR\_Phospho\_BR1\_09 Scan 28311 Method FTMS; HCD Score 199.78 m/z 1318.25 Gene names SYAP1

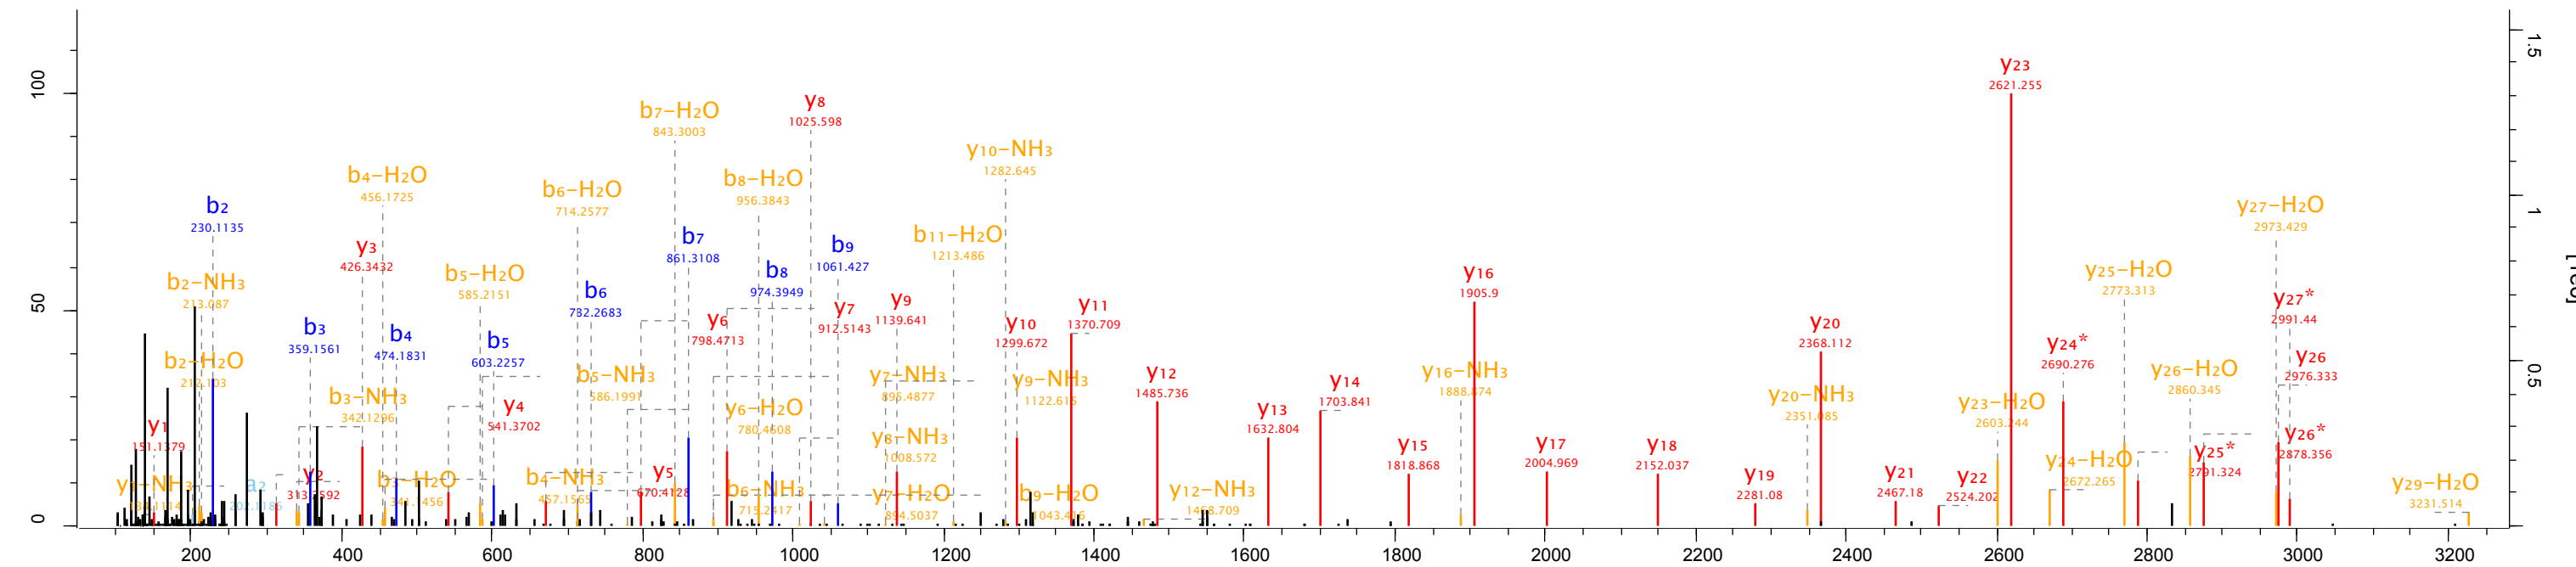

- T Q E D E E E I S T S P G V S E F V S D A F D A C N L N Q E D L R K -

Fragmentation mapping: b2 (Q), b3 (E), b4 (D), b5 (E), b6 (E), b7 (E), b8 (I), b9 (S), y27\* (T), y26 (S), y25\* (P), y24\* (G), y23 (V), y22 (S), y21 (E), y20 (F), y19 (V), y18 (S), y17 (D), y16 (A), y15 (F), y14 (D), y13 (A), y12 (C), y11 (N), y10 (L), y9 (N), y8 (Q), y7 (E), y6 (D), y5 (L), y4 (R), y3 (K).

Raw file 20150812\_A375SR\_Phospho\_BR1\_09 Scan 7281 Method FTMS; HCD Score 132.64 m/z 534.25 Gene names SNRNP70

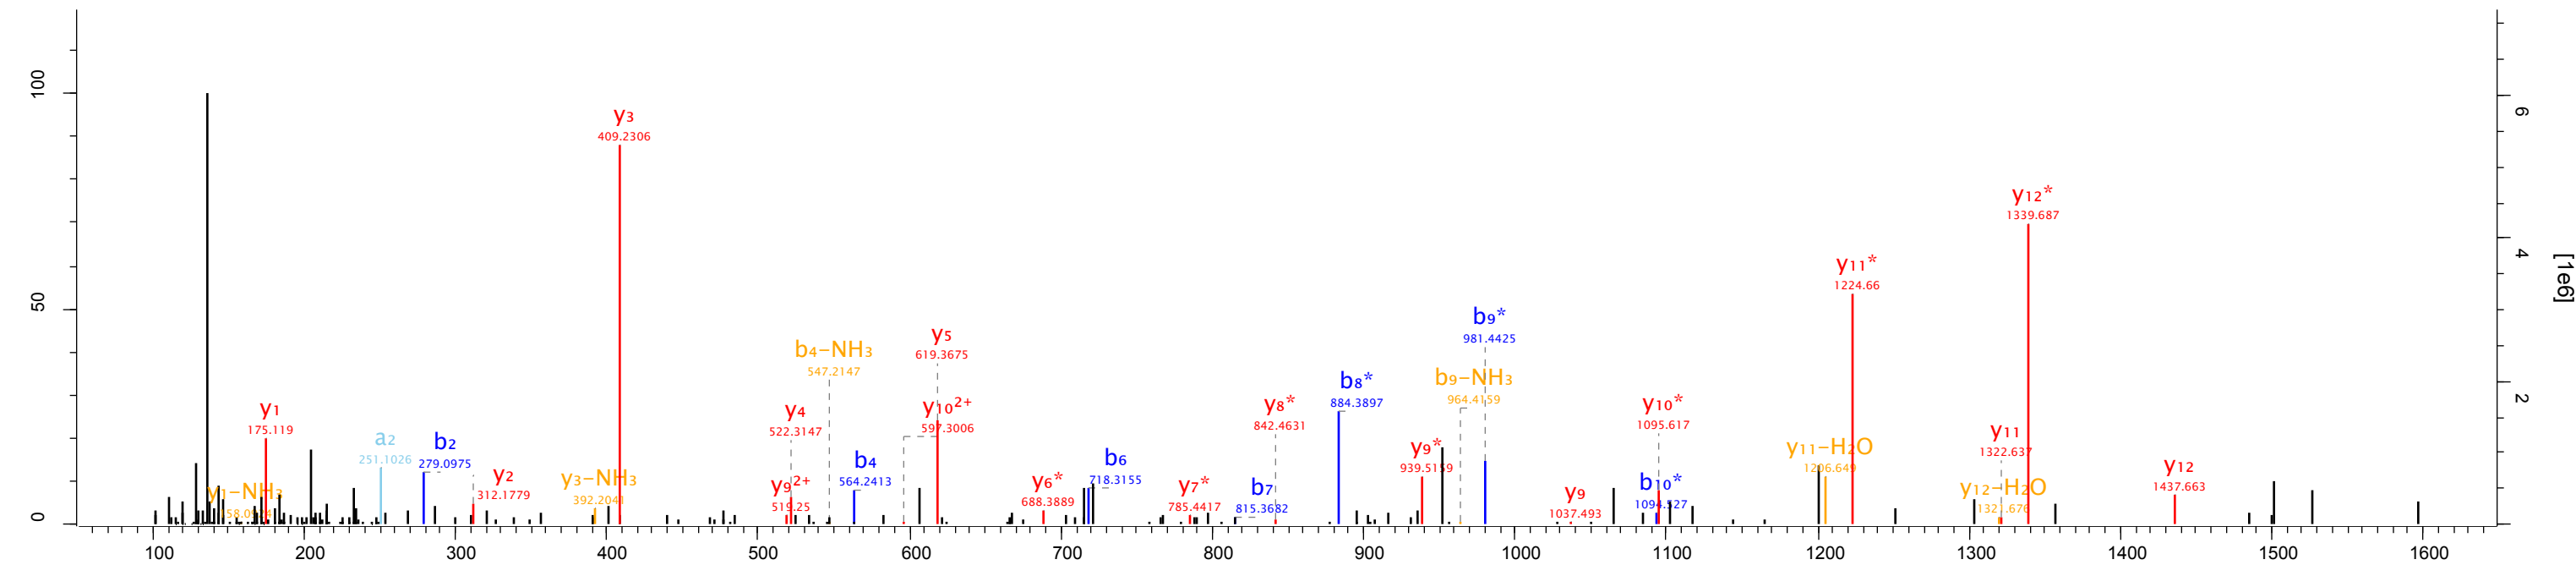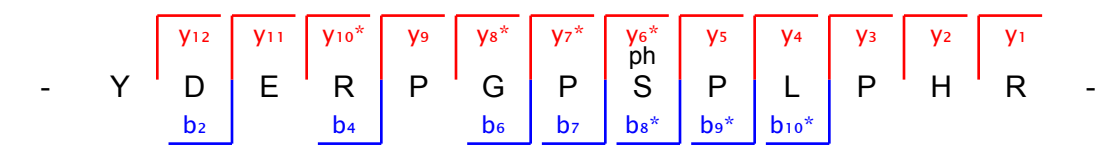

Raw file 20150812\_A375SR\_Phospho\_BR1\_09 Scan 9041 Method FTMS; HCD Score 141.13 m/z 575.26 Gene names PSMA5

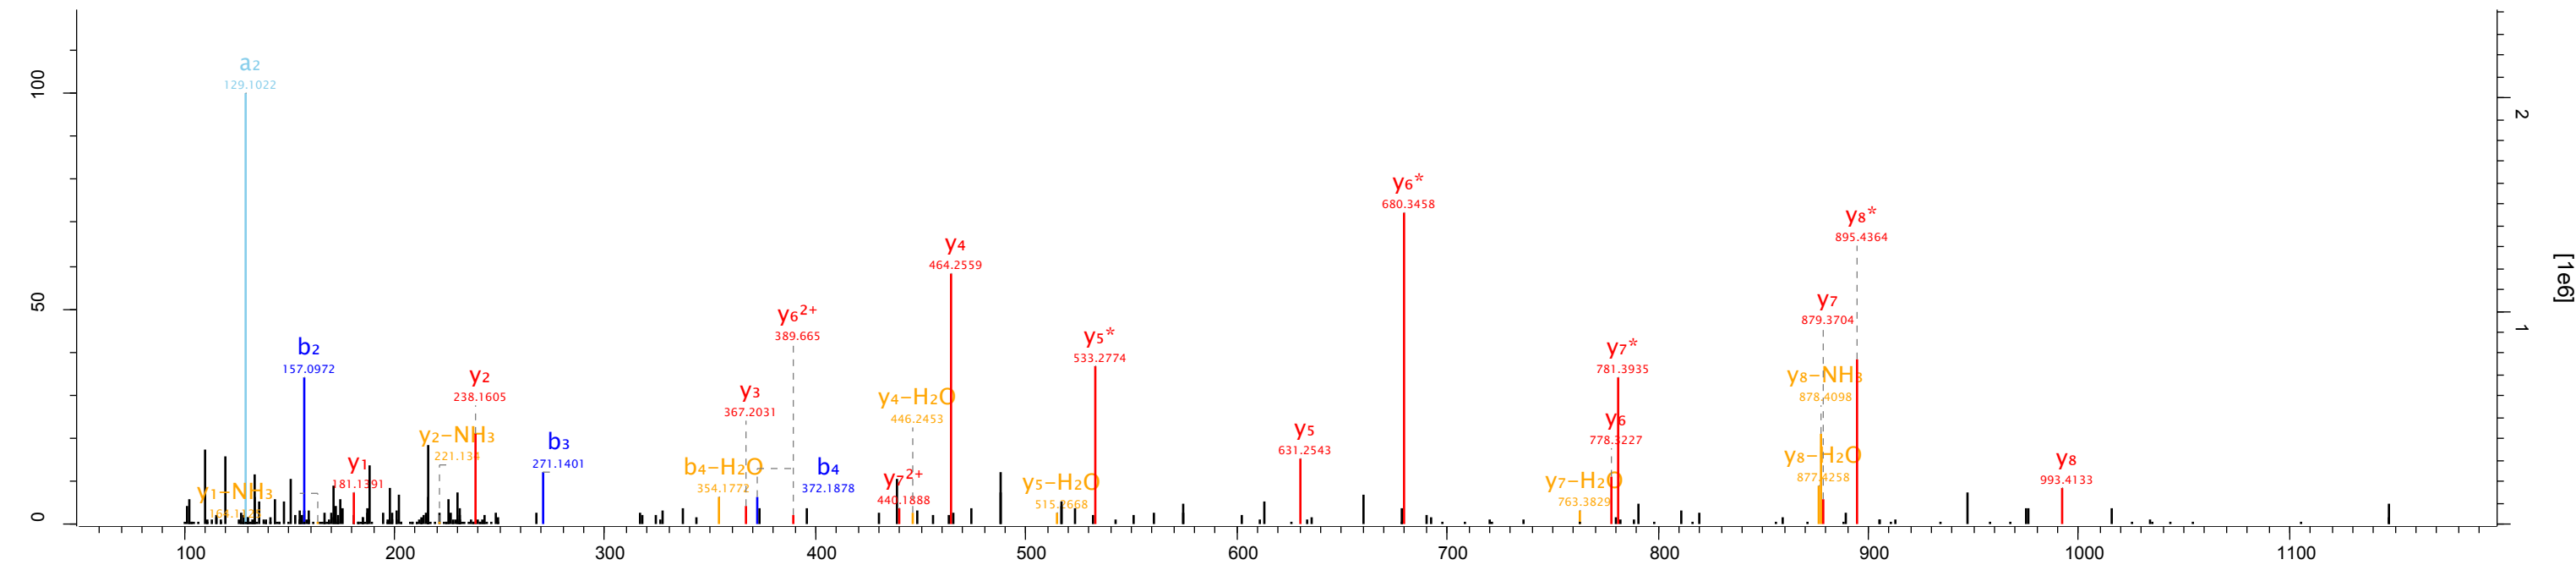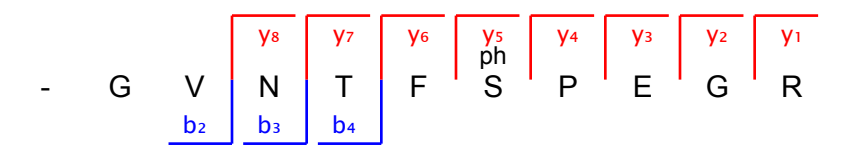

Raw file: 20150812\_A375SR\_Phospho\_BR1\_10  
 Scan: 10841 Method: FTMS; HCD Score: 196.06 m/z: 764.7 Gene names: SETD2

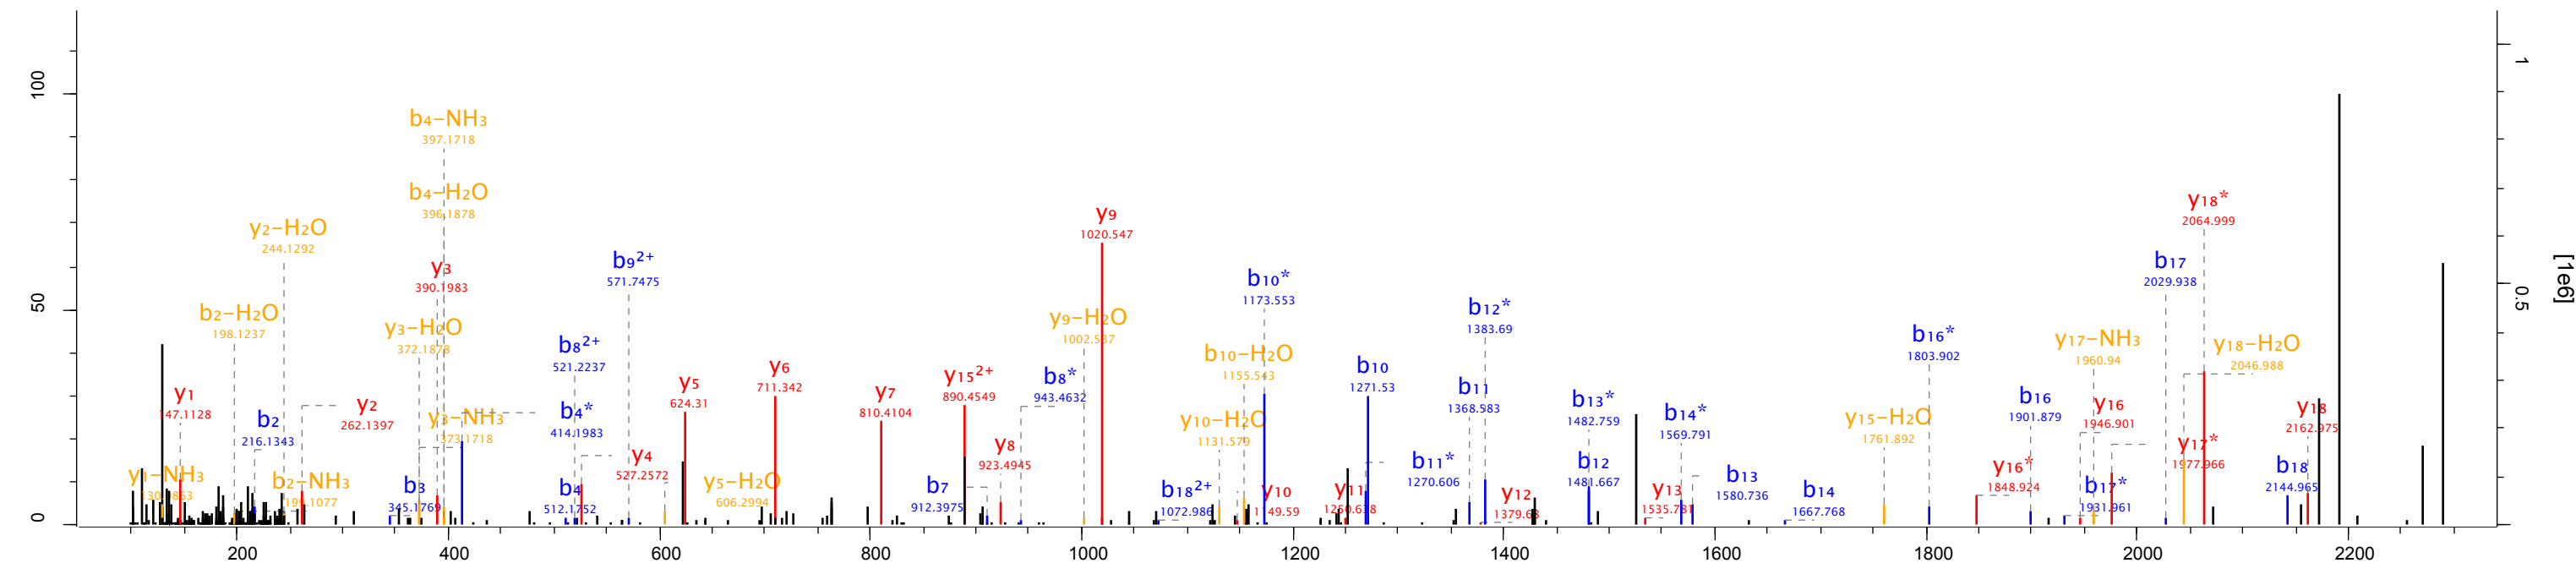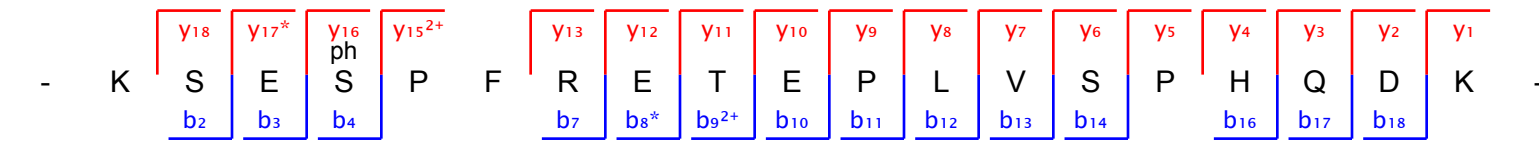



Raw file: 20150812\_A375SR\_Phospho\_BR1\_10  
 Scan: 1221 Method: FTMS; HCD Score: 46.38 m/z: 357.53 Gene names: CRKL

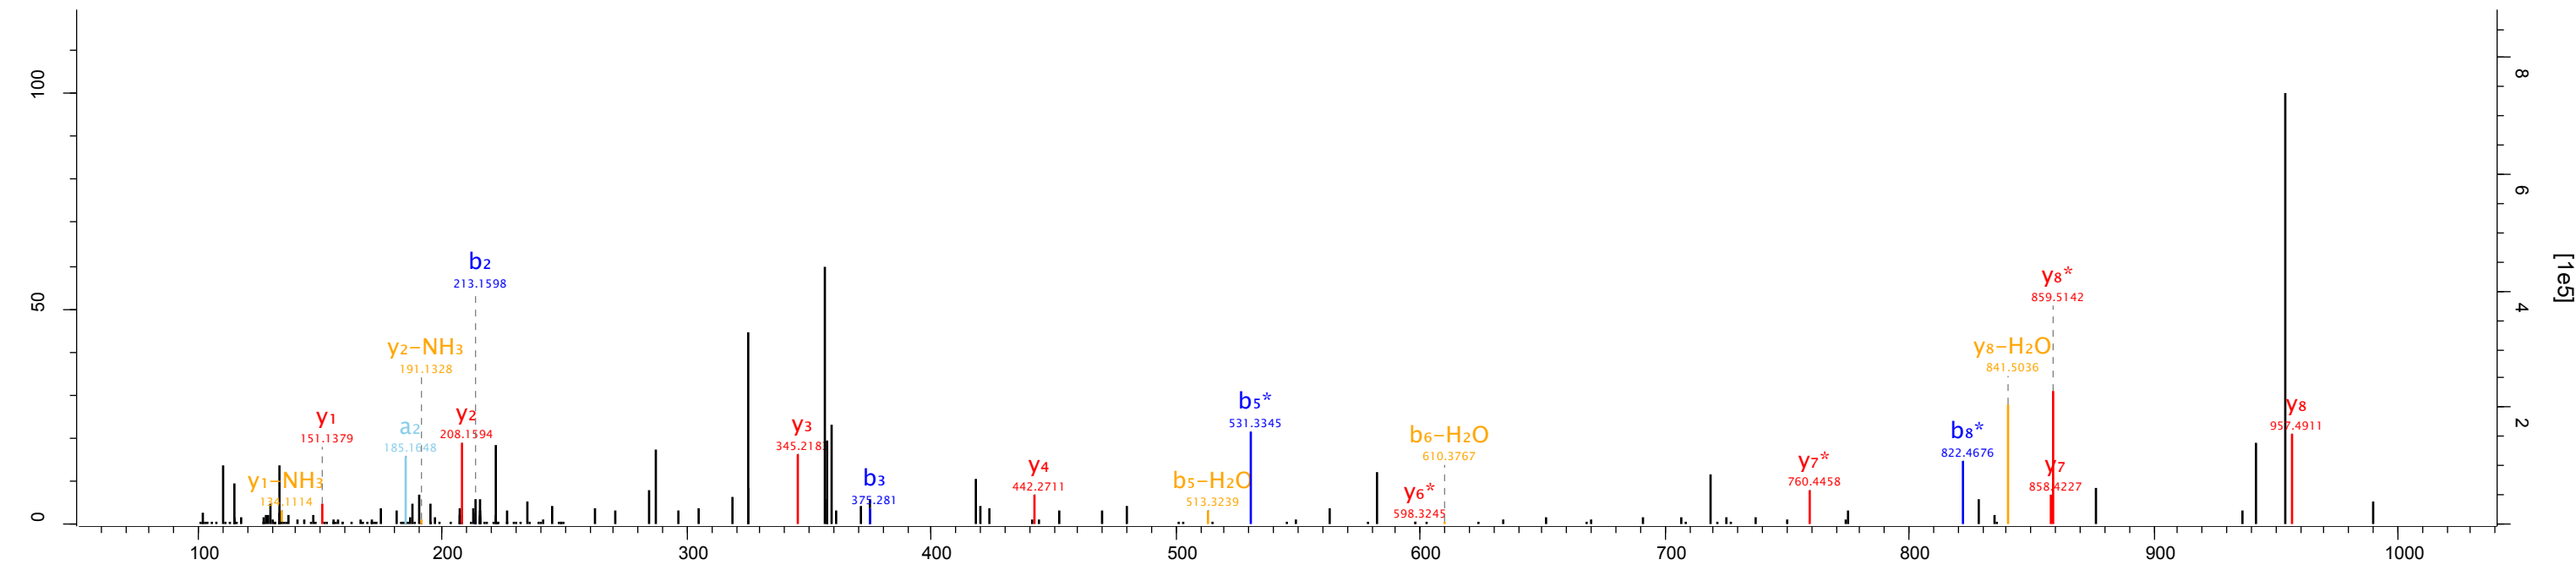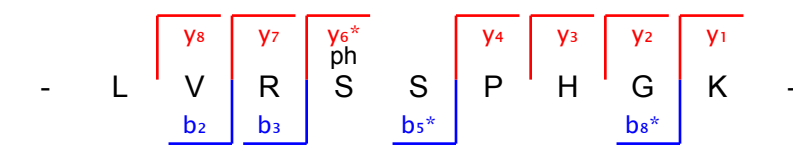

Raw file 20150812\_A375SR\_Phospho\_BR1\_10 Scan 15421 Method FTMS; HCD Score 160.91 m/z 764.74 Gene names MAP4

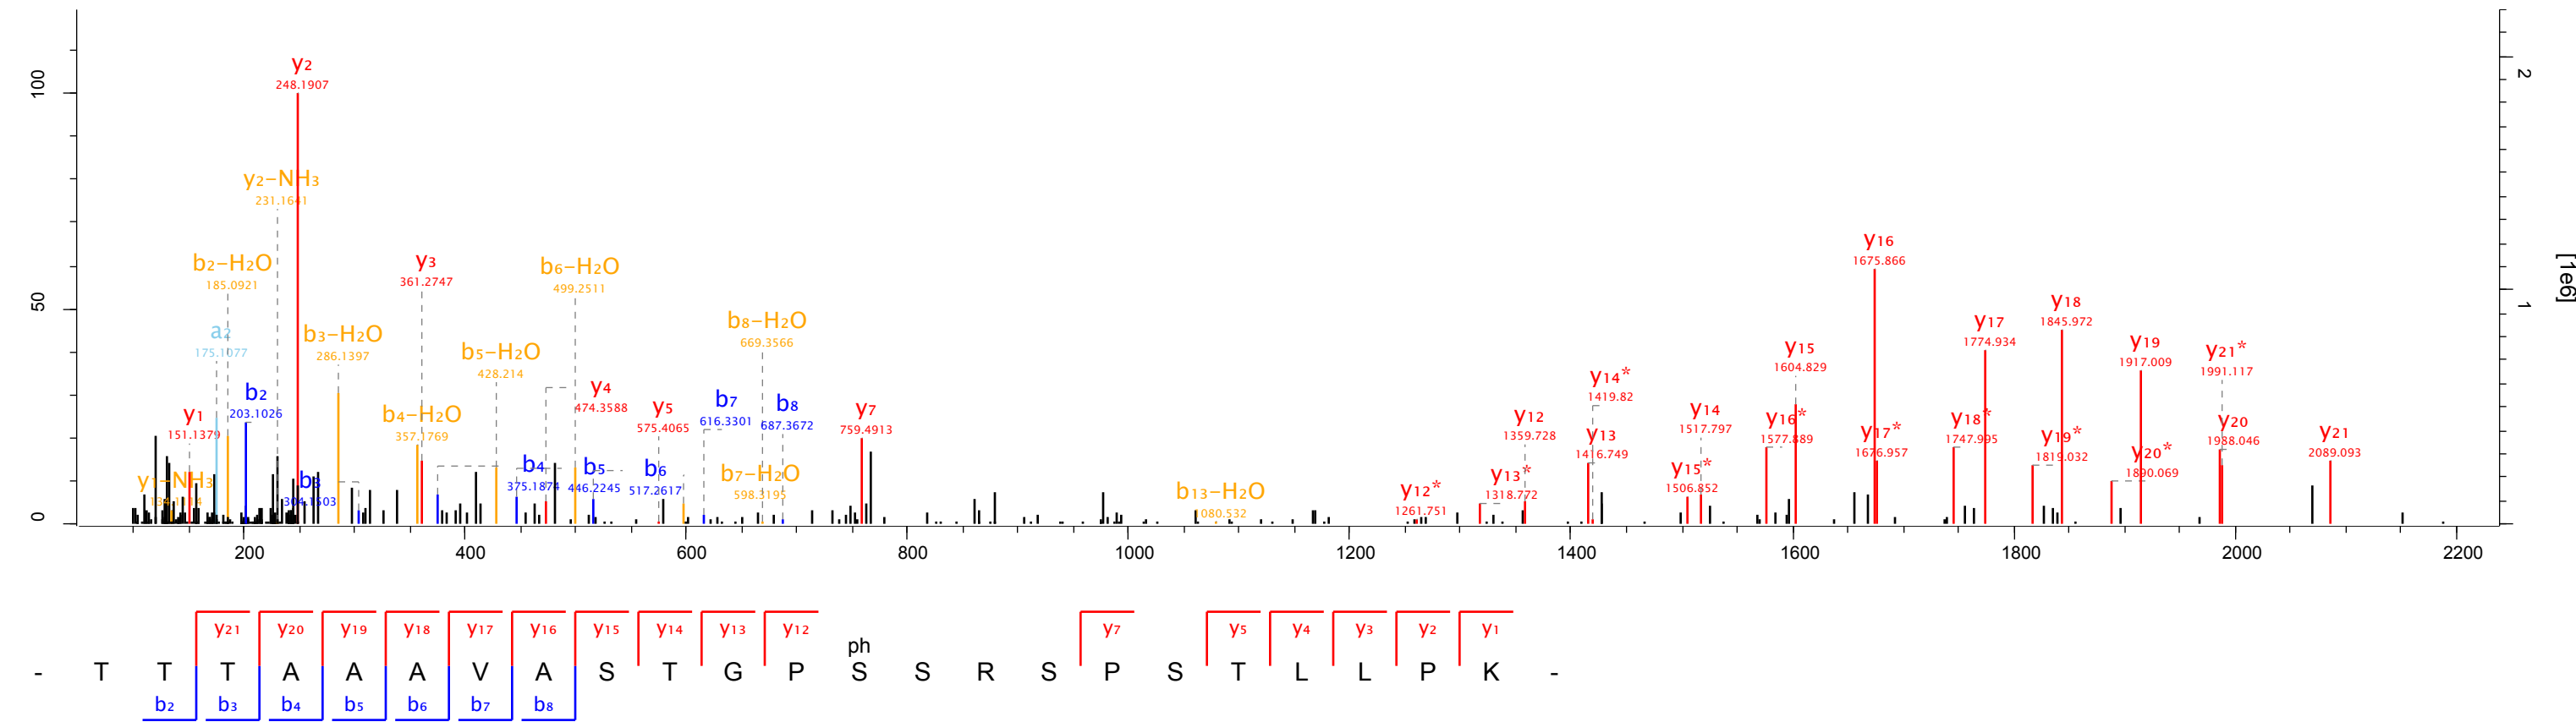

Raw file 20150812\_A375SR\_Phospho\_BR1\_10 Scan 18261 Method FTMS; HCD Score 175.46 m/z 1051.04 Gene names PRCC

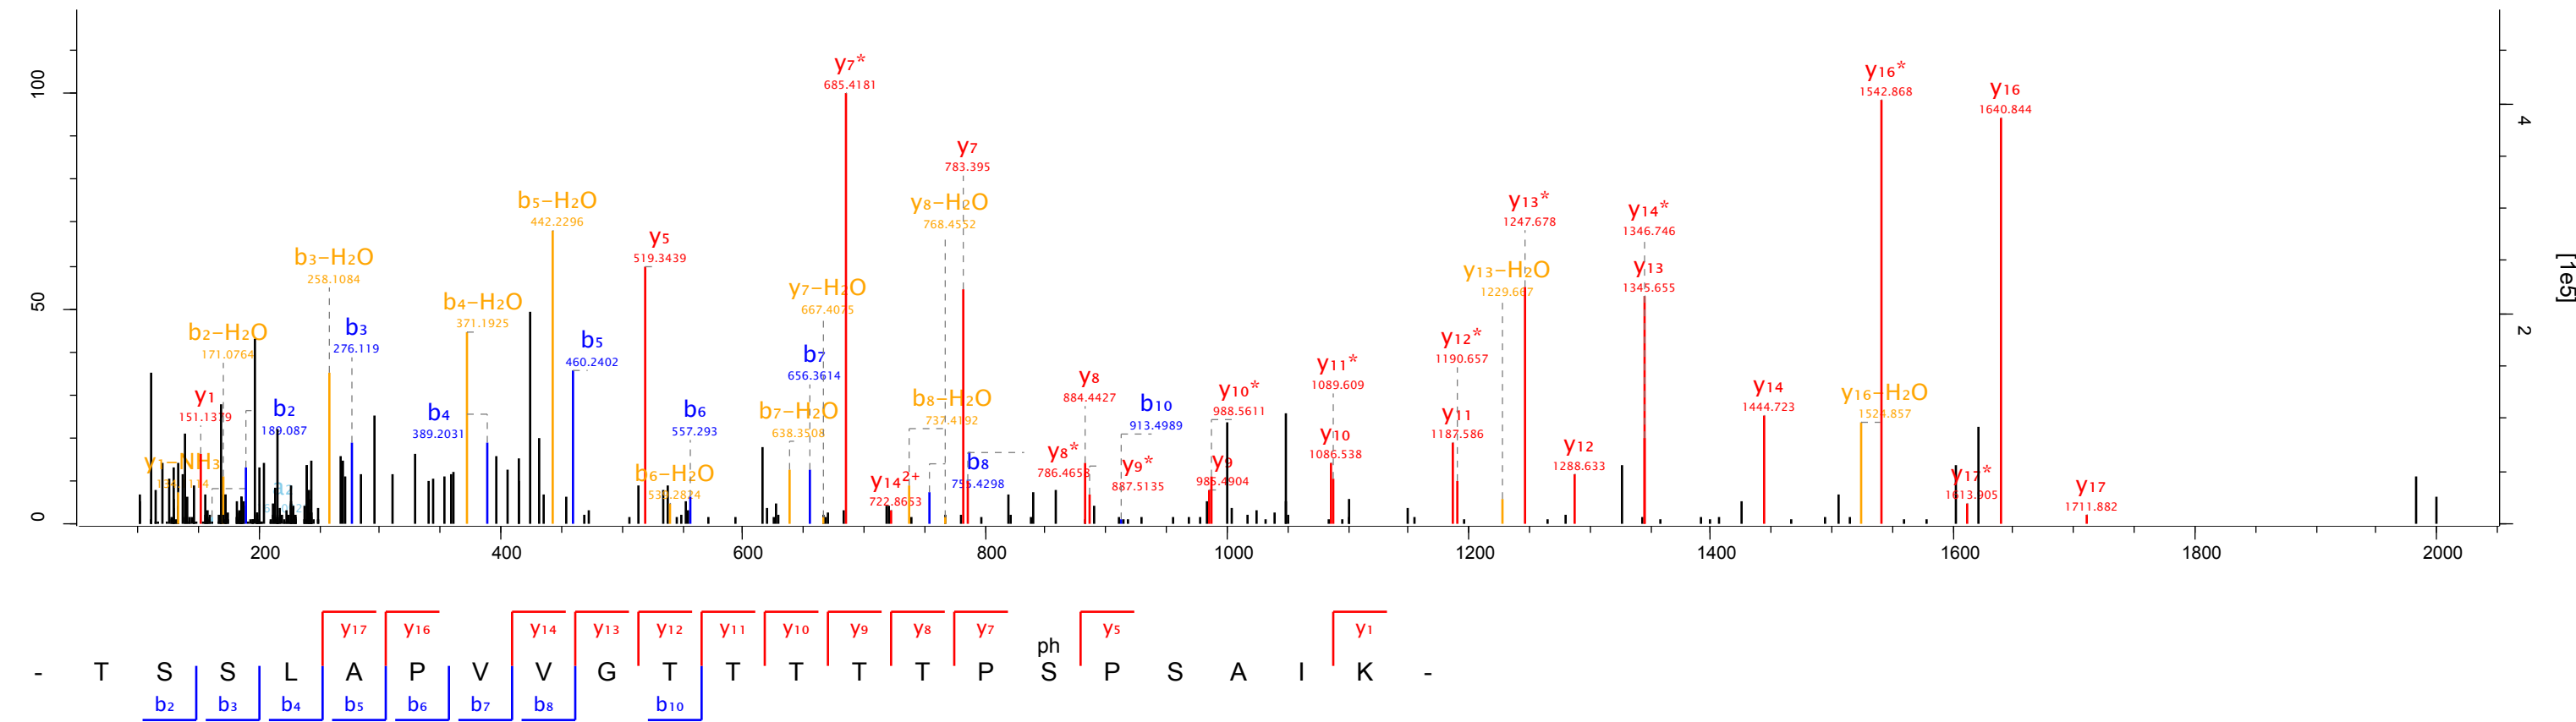

Raw file 20150812\_A375SR\_Phospho\_BR1\_10 Scan 1991 Method FTMS; HCD Score 153.51 m/z 619.3 Gene names TRIP12

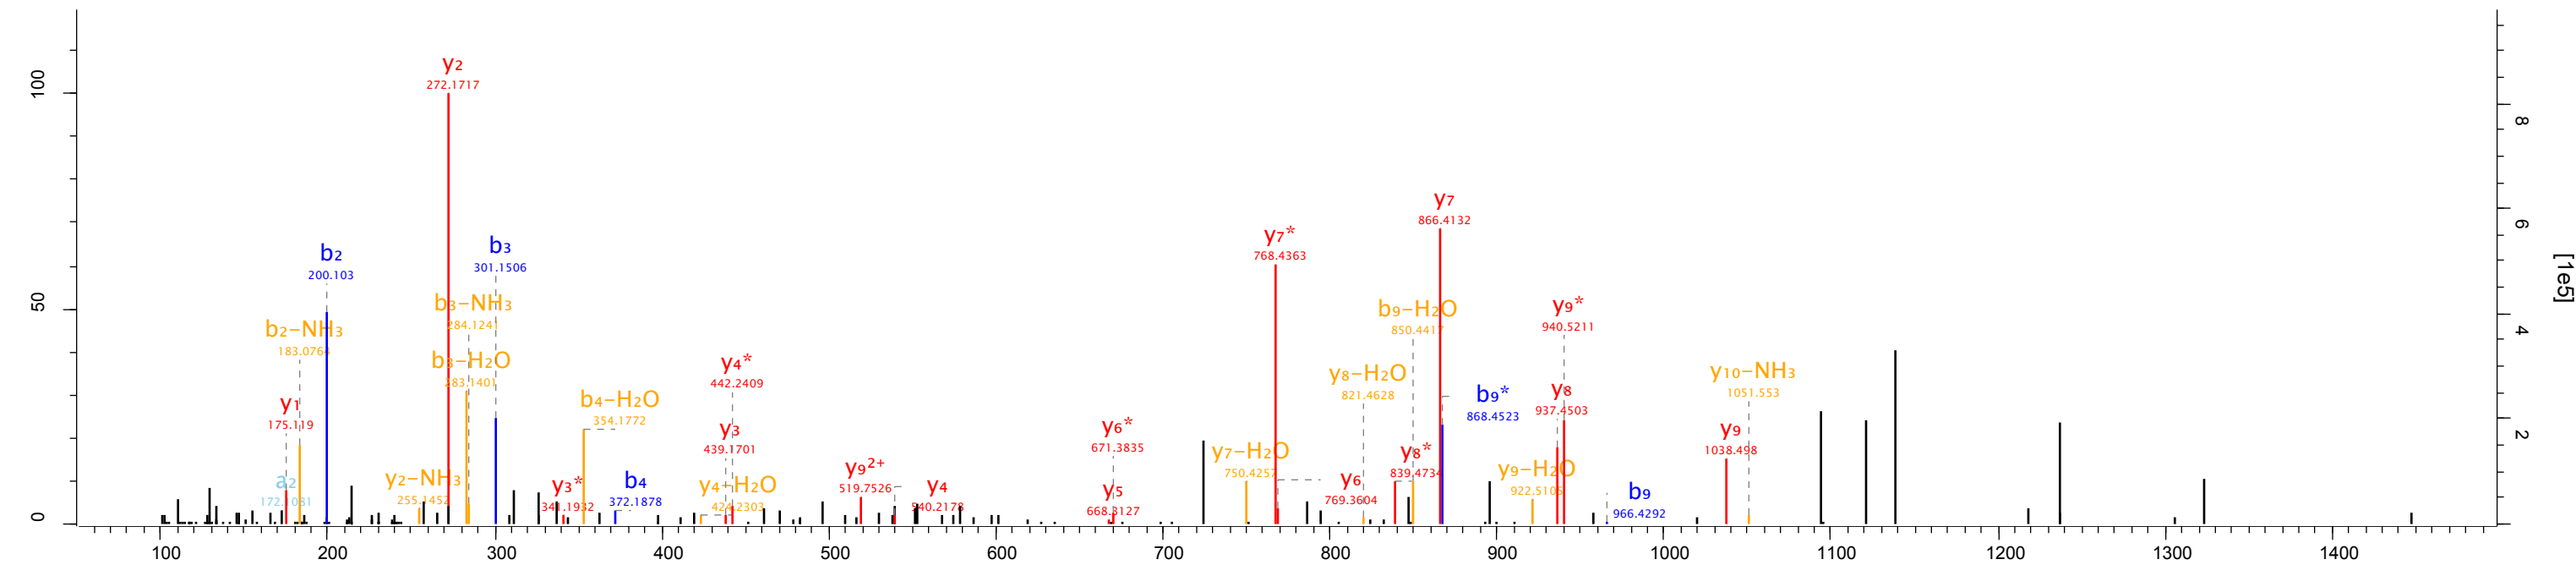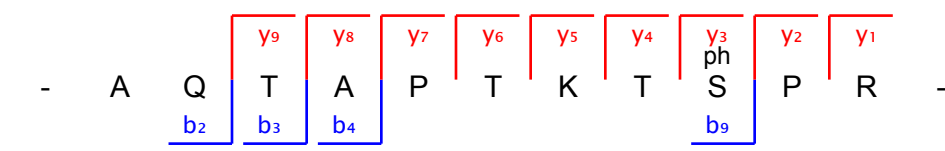

Raw file: 20150812\_A375SR\_Phospho\_BR1\_10  
 Scan: 21821 Method: FTMS; HCD Score: 80.79 m/z: 805.08 Gene names: PPIP5K2

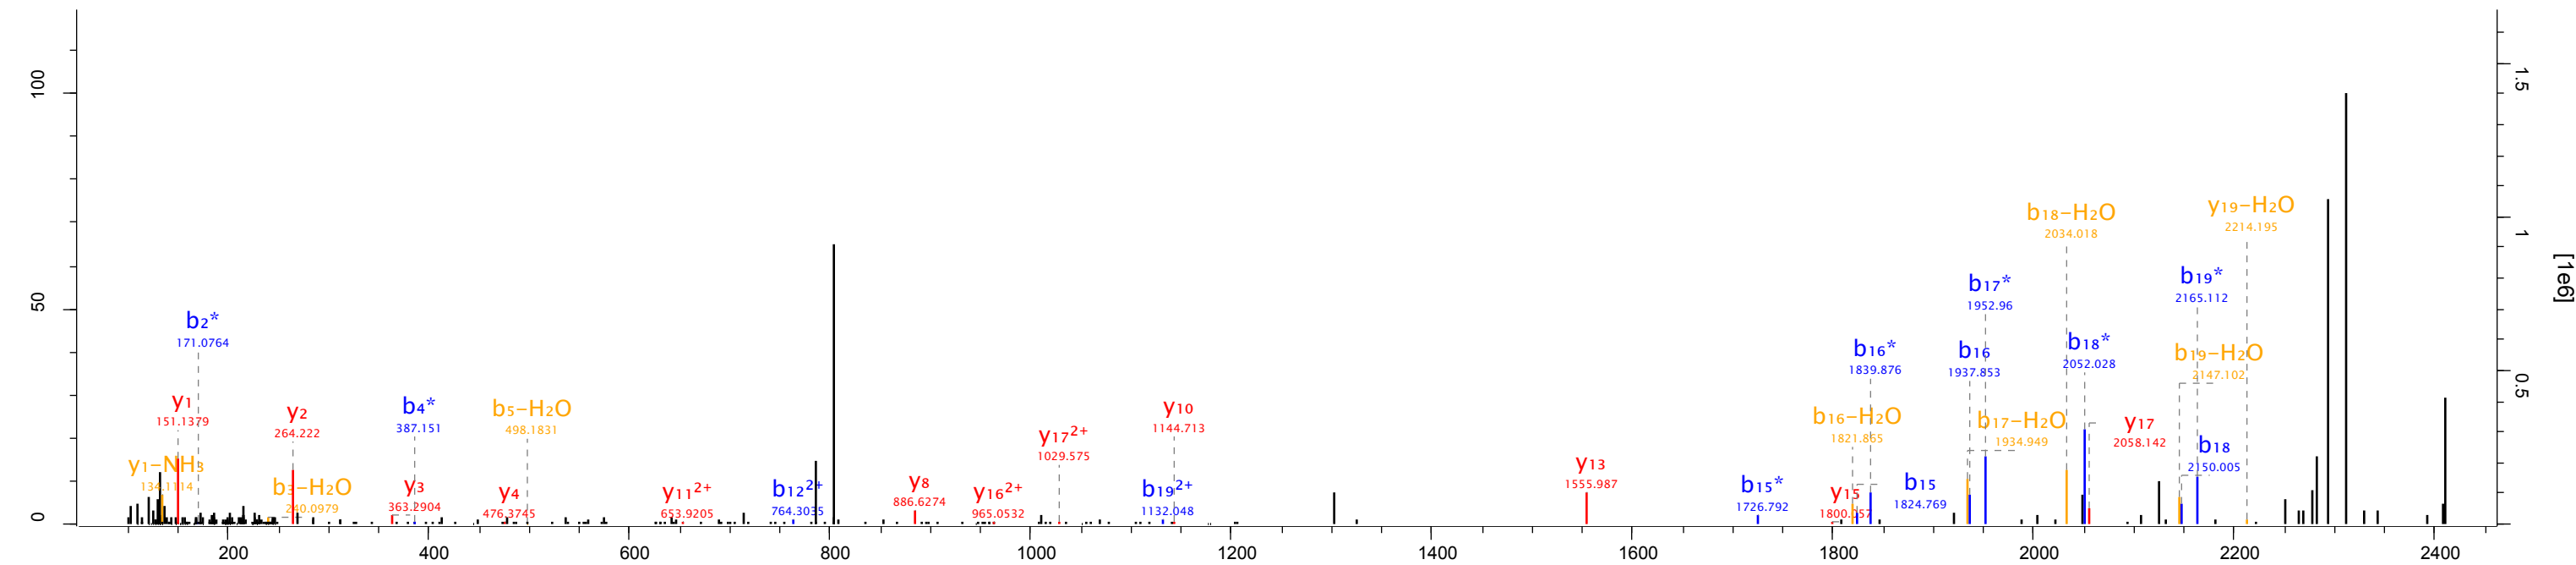

Sequence: - pH T S S E E E D S R R E E P S L L L V L K -

Fragmentation mapping (red boxes): y17, y16<sup>2+</sup>, y15, y13, y11<sup>2+</sup>, y10, y8, y4, y3, y2, y1

Fragmentation mapping (blue boxes): b2\*, b4\*, b12<sup>2+</sup>, b15, b16, b17\*, b18, b19\*

Raw file 20150812\_A375SR\_Phospho\_BR1\_10 Scan 2541 Method FTMS; HCD Score 73.83 m/z 772.85 Gene names RBM15

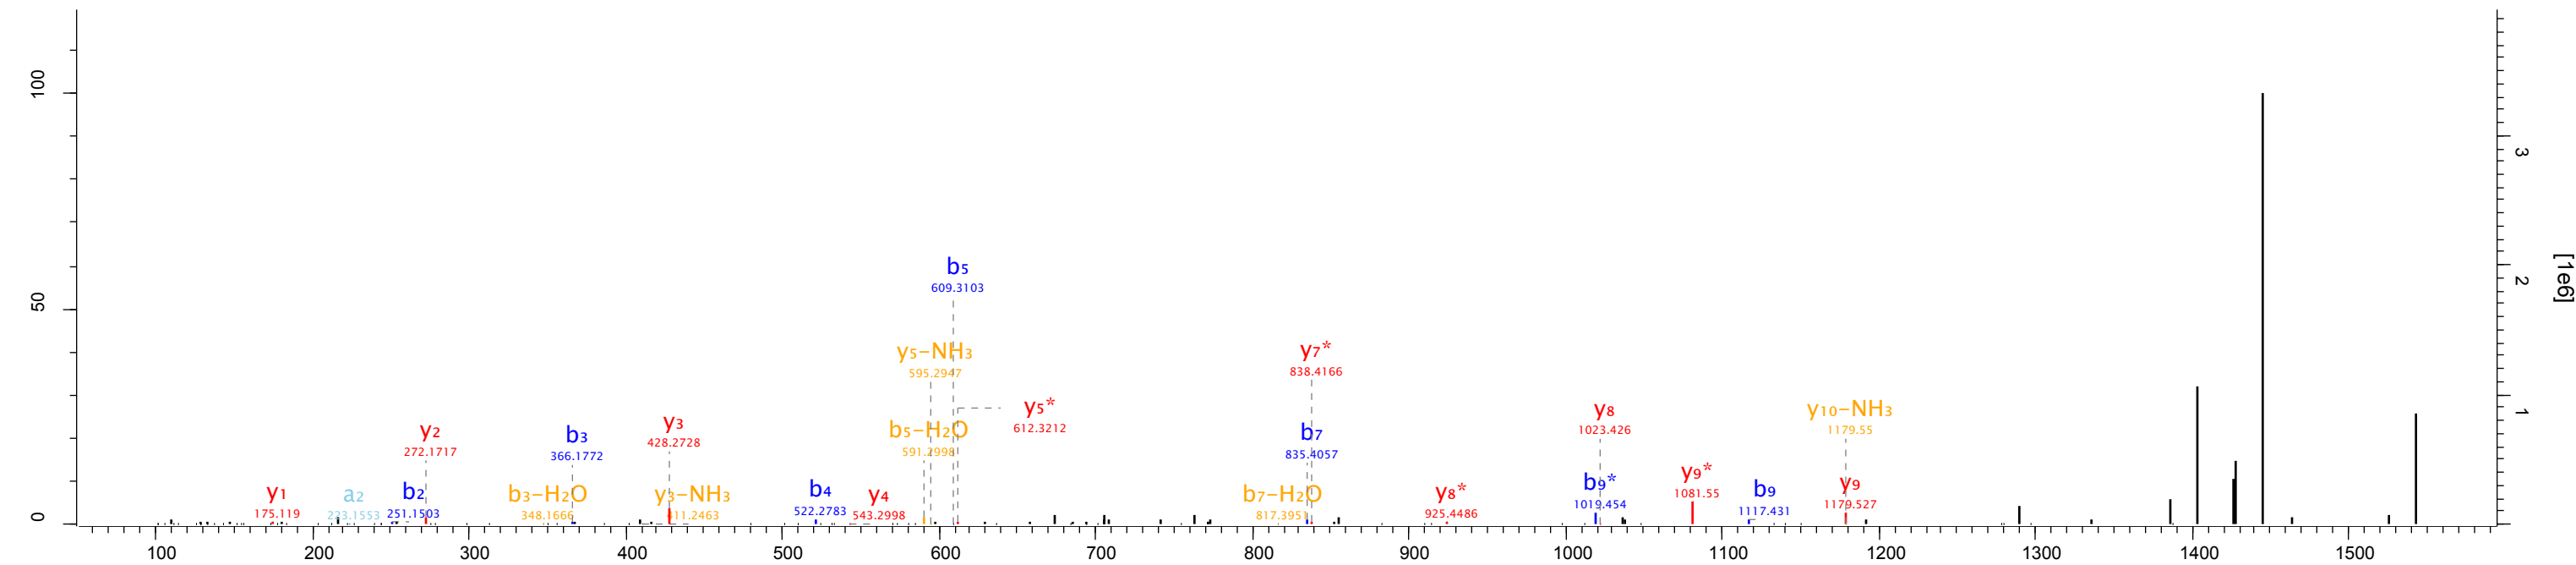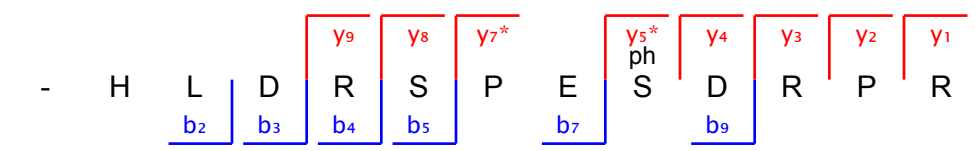

Raw file 20150812\_A375SR\_Phospho\_BR1\_10 Scan 28051 Method FTMS; HCD Score 48.63 m/z 836.08 Gene names NR2C2

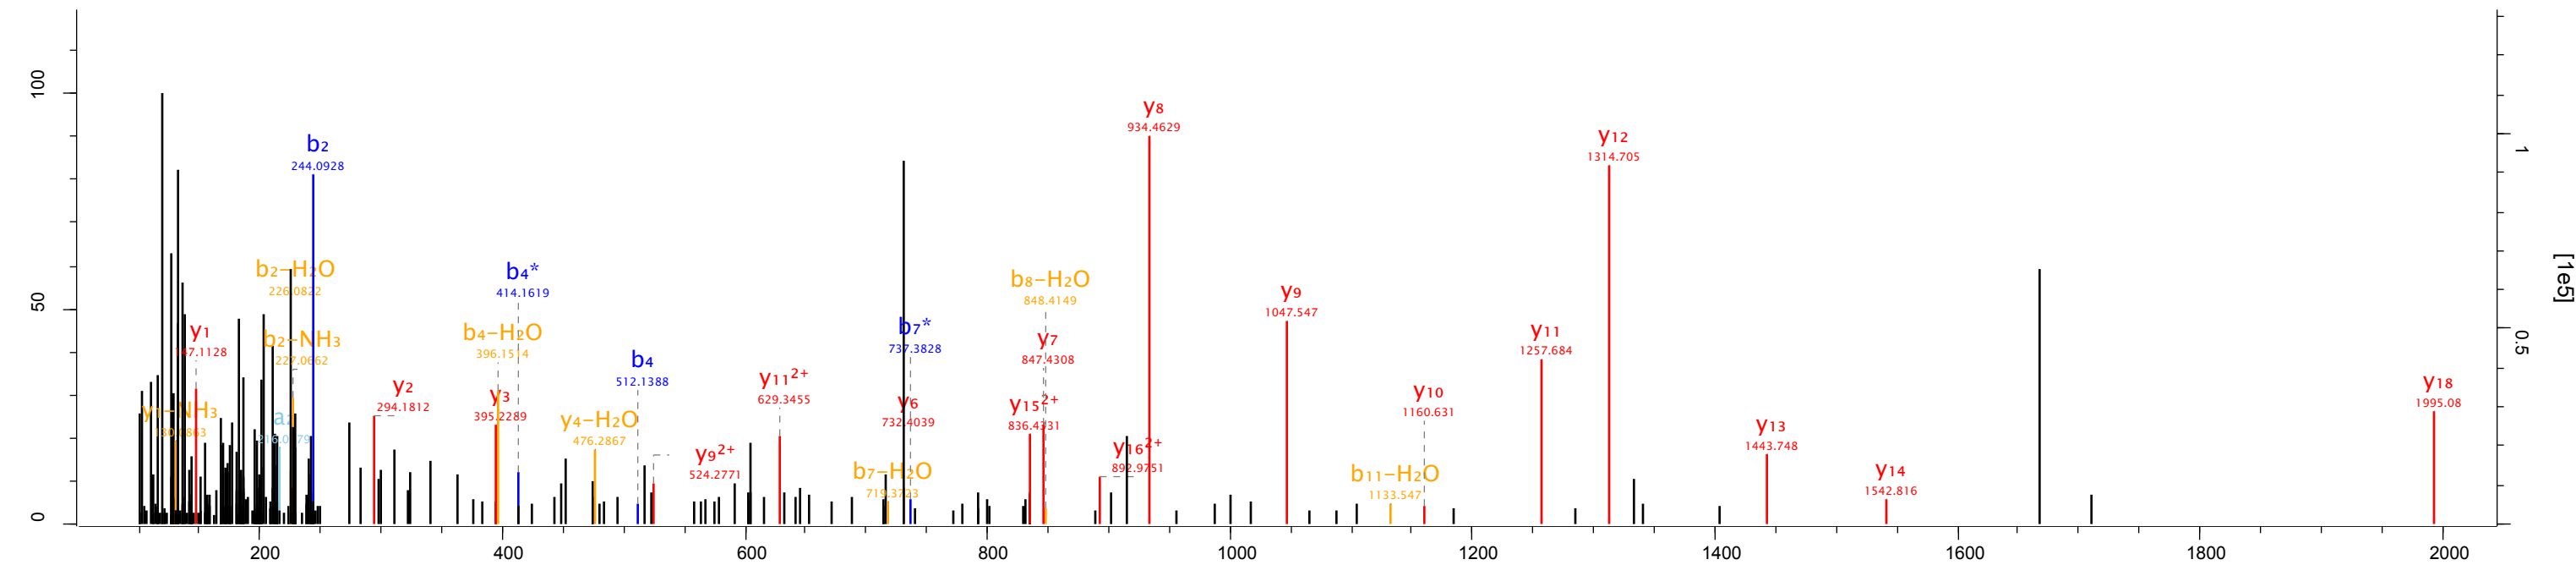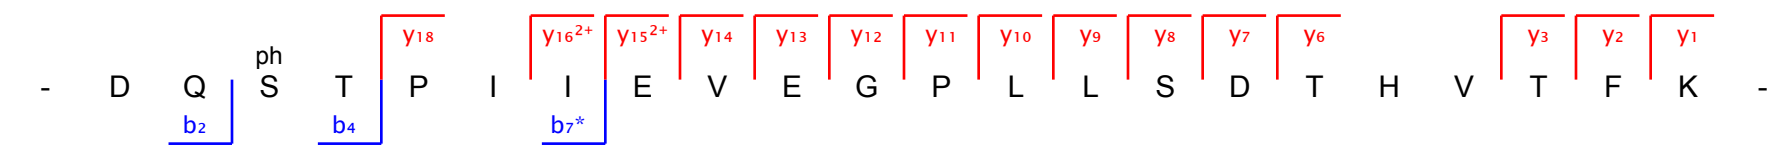

Raw file Scan Method Score m/z Gene names  
 20150812\_A375SR\_Phospho\_BR1\_10 2941 FTMS; HCD 152.34 440.23 TCOF1

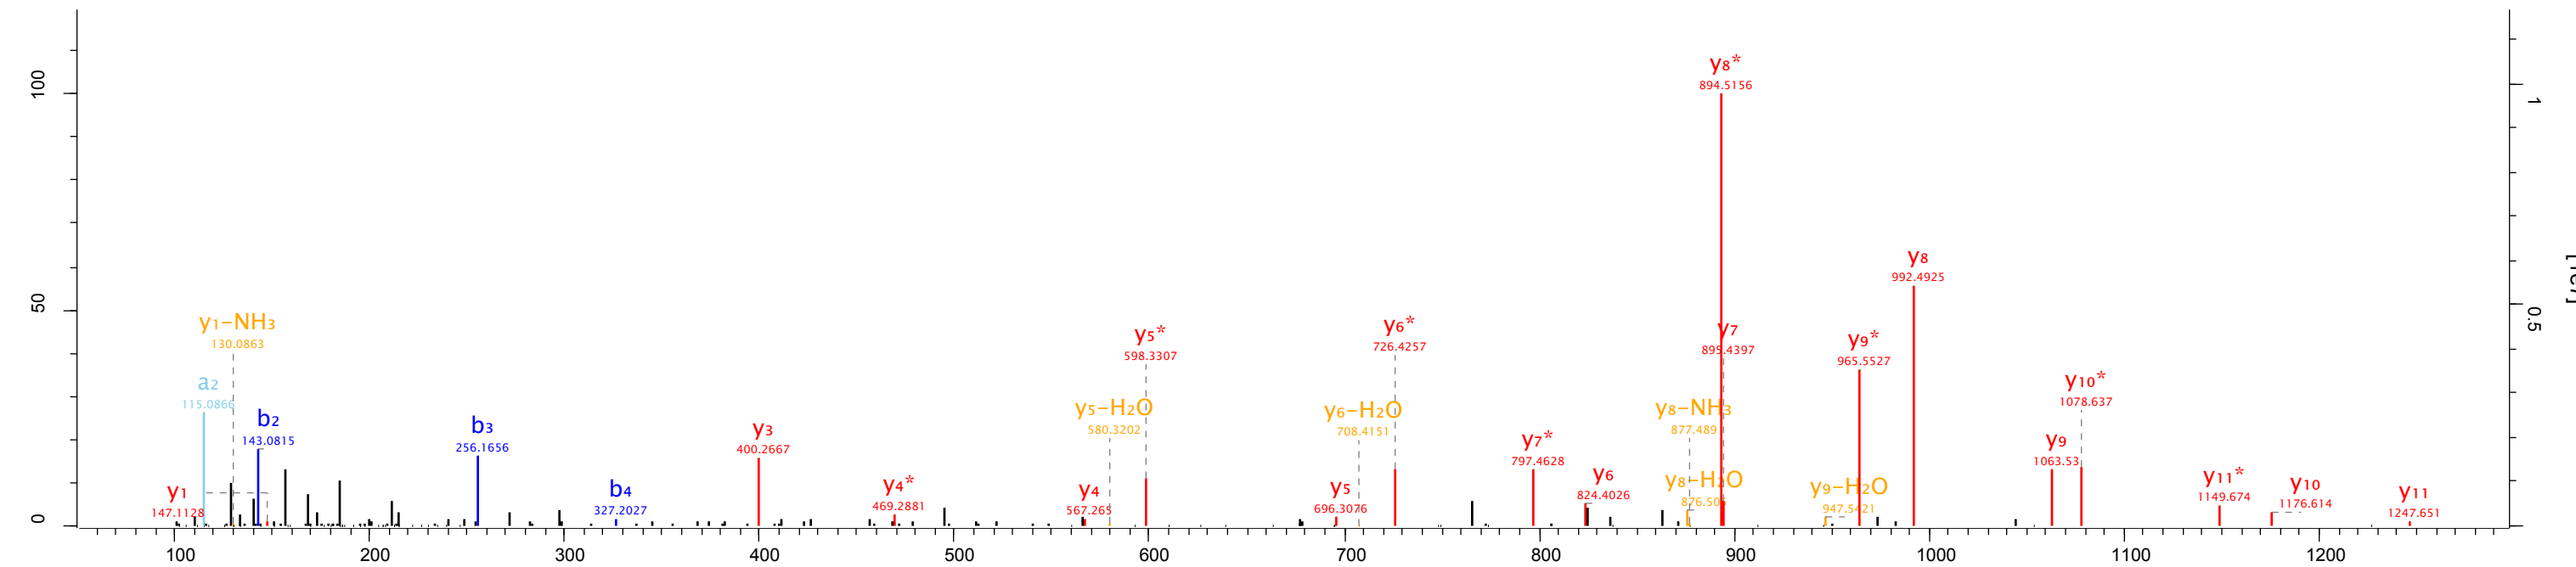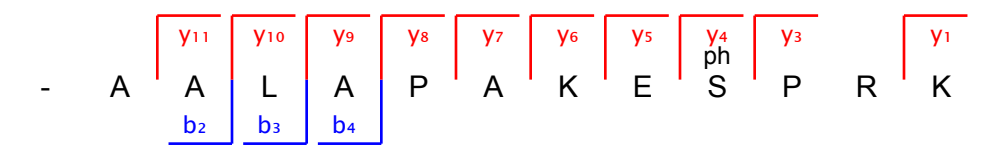



Raw file: 20150812\_A375SR\_Phospho\_BR1\_10  
 Scan: 4351 Method: FTMS; HCD Score: 65.84 m/z: 581.78 Gene names: SRRM2

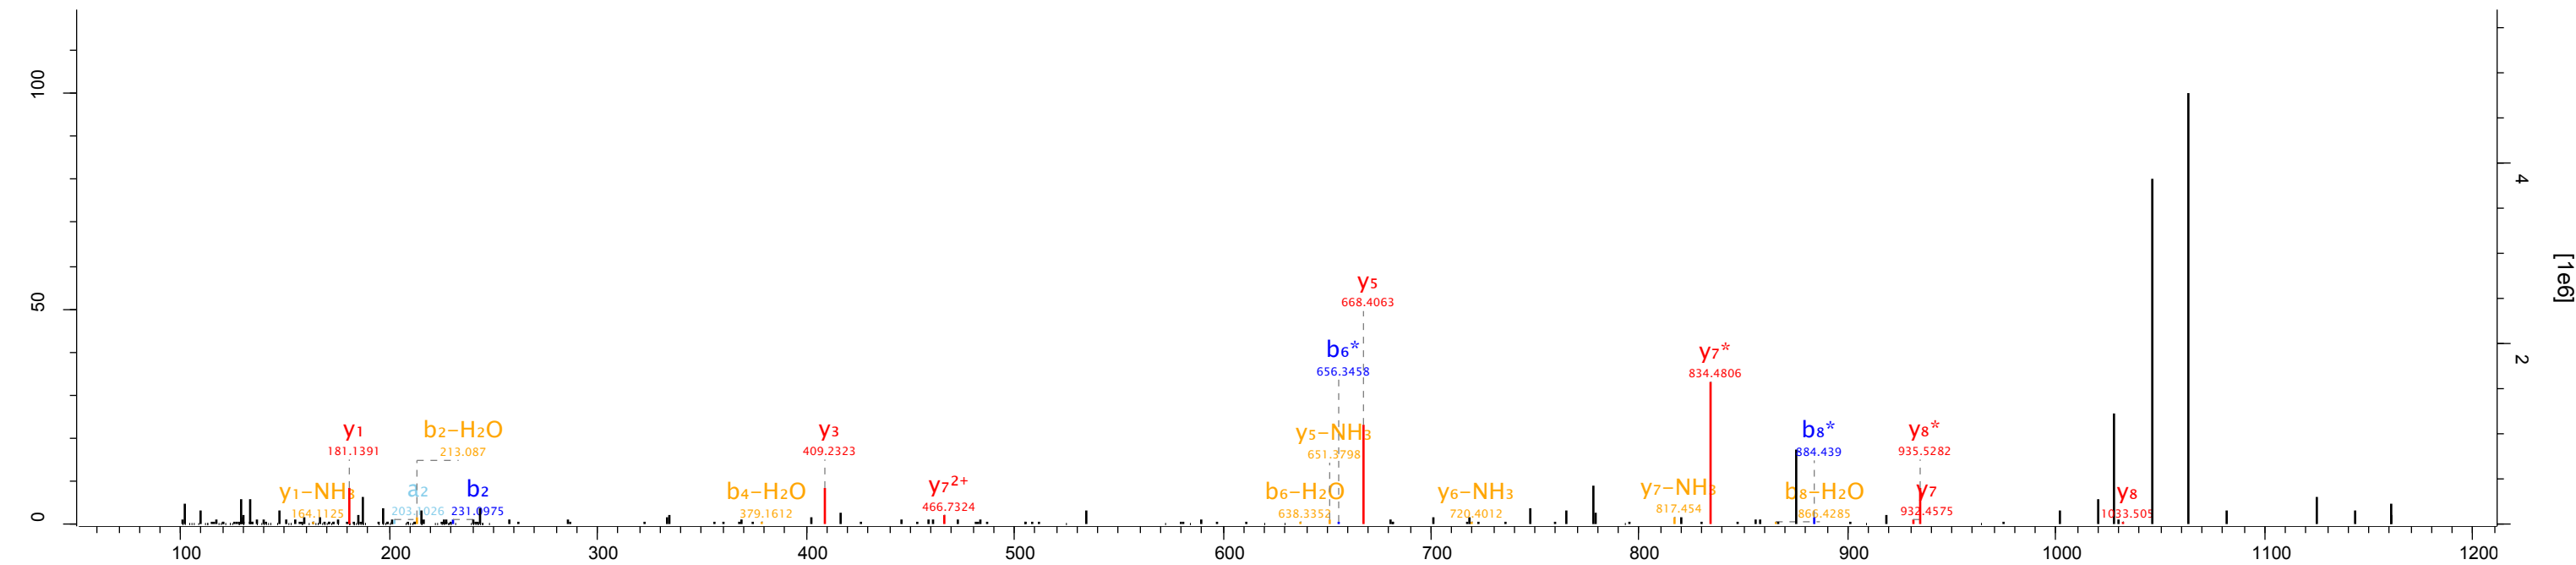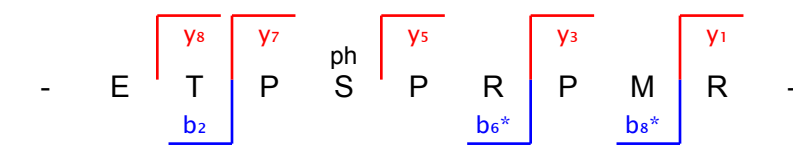

Raw file: 20150812\_A375SR\_Phospho\_BR1\_10  
 Scan: 5901 Method: FTMS; HCD Score: 138.17 m/z: 475.59 Gene names: LARP1

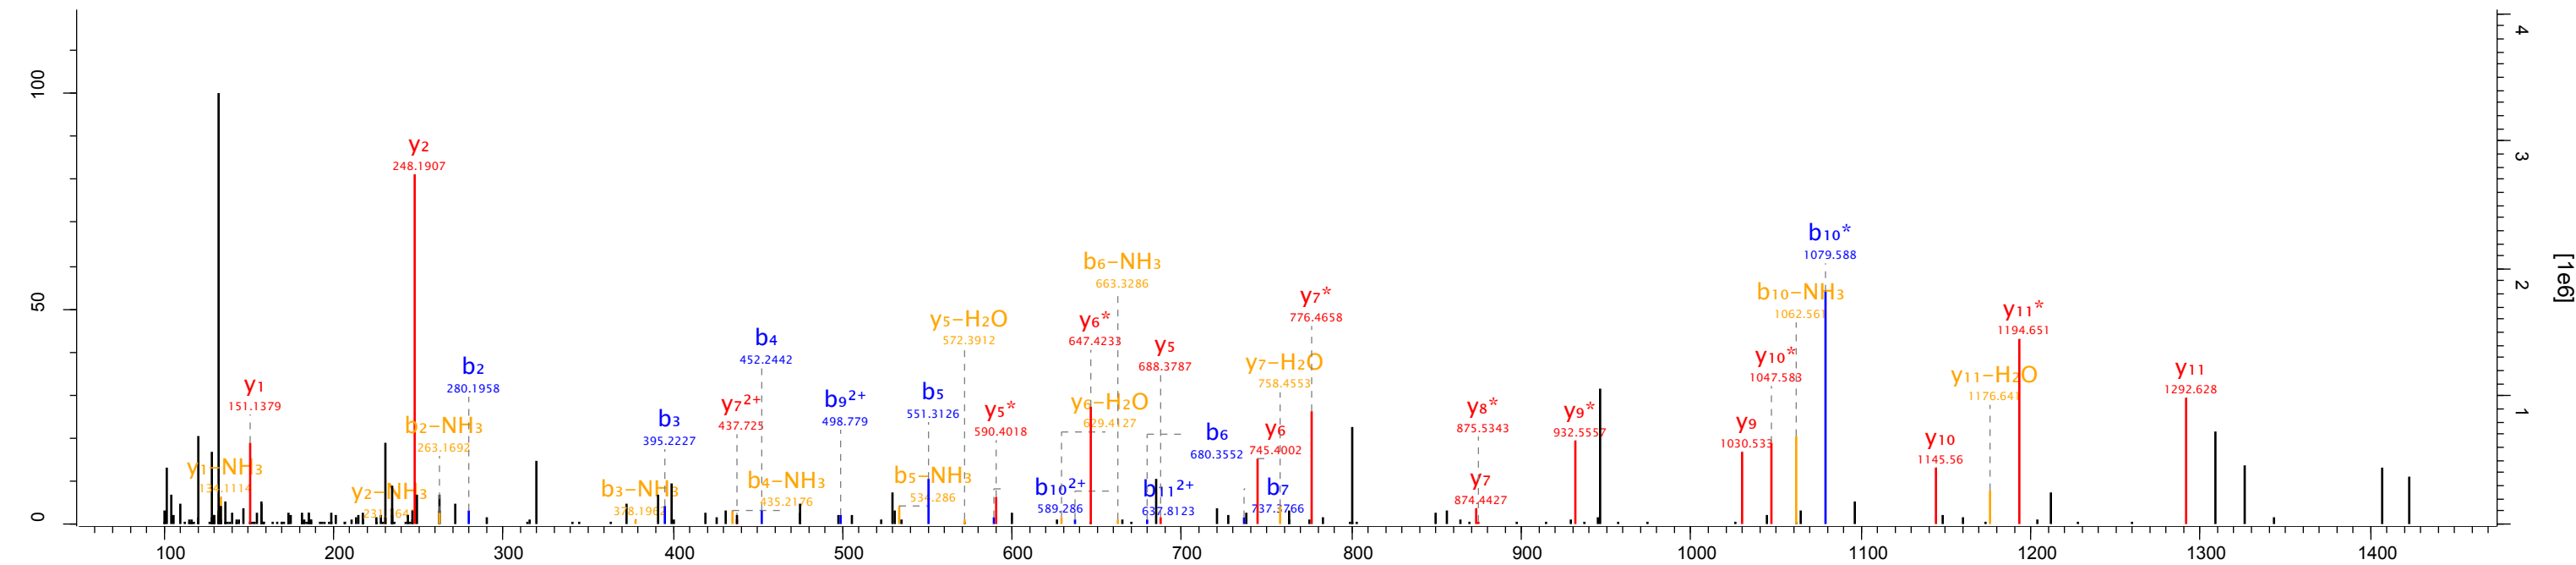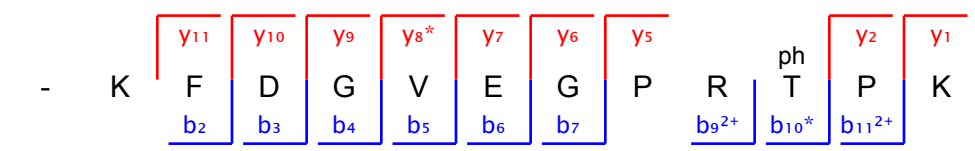

Raw file: 20150812\_A375SR\_Phospho\_BR1\_10  
 Scan: 7031 Method: FTMS; HCD Score: 287.48 m/z: 865.88 Gene names: ZRANB2

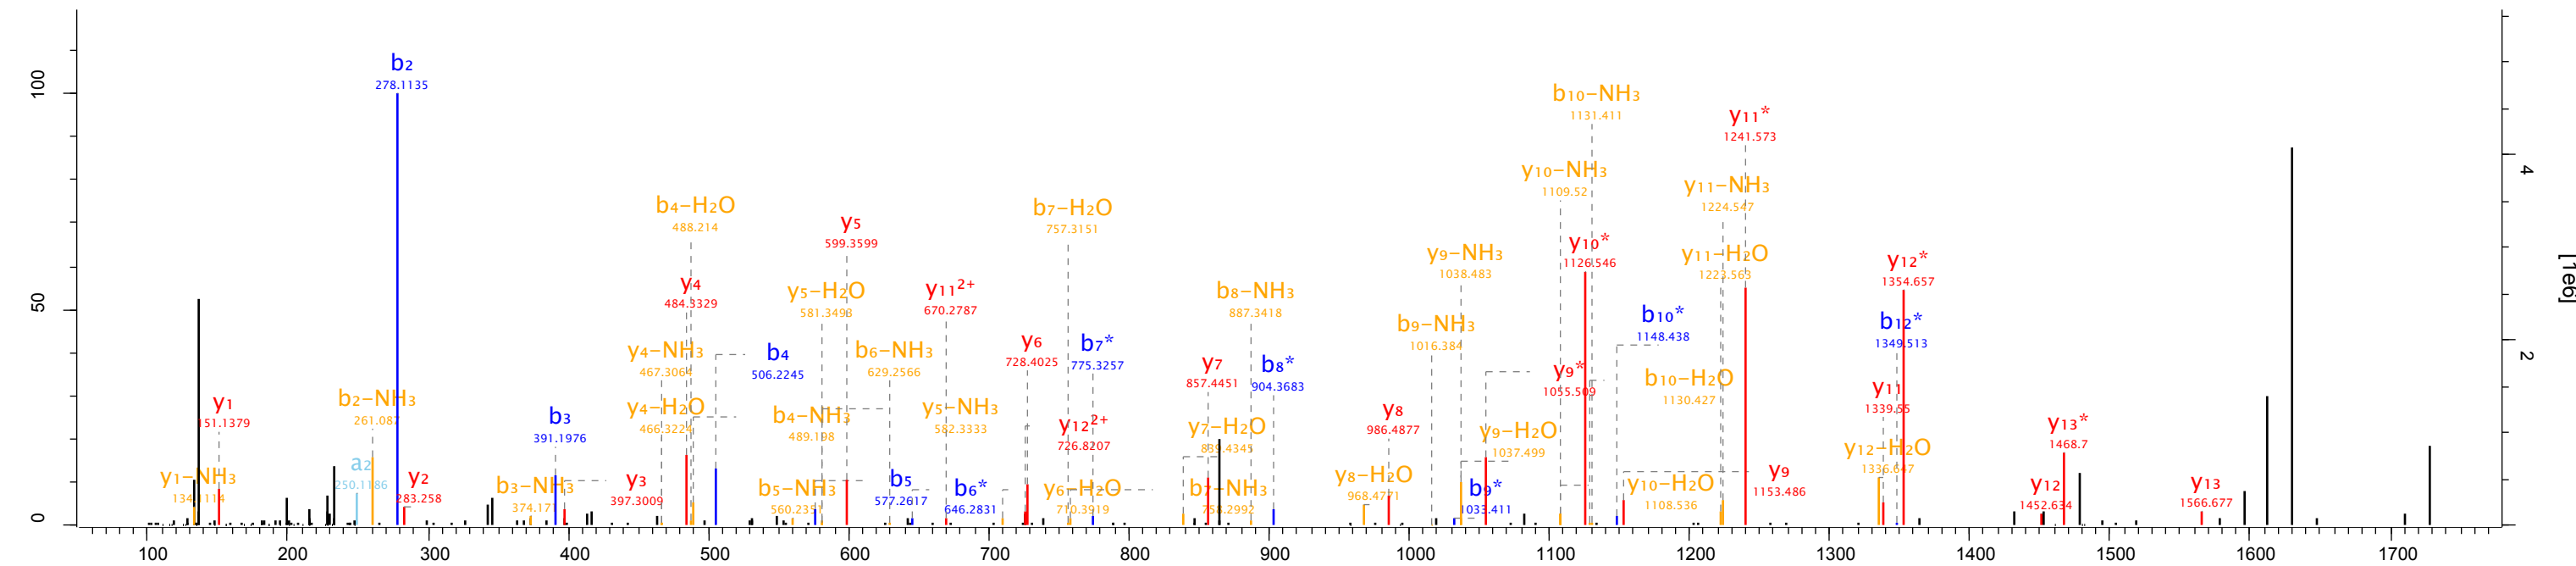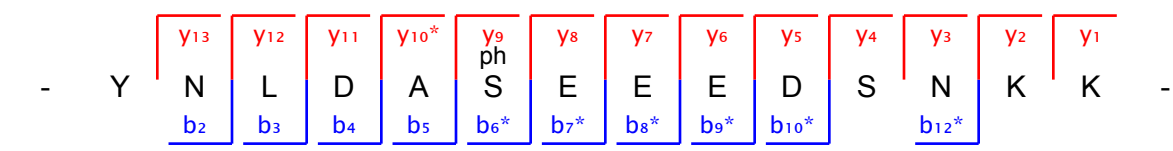



Raw file  
20150812\_A375SR\_Phospho\_BR1\_01

Scan: 10752  
Method: FTMS; HCD  
Score: 40.85  
m/z: 1205.42  
Gene names: PPP1R2;PPP1R2P3

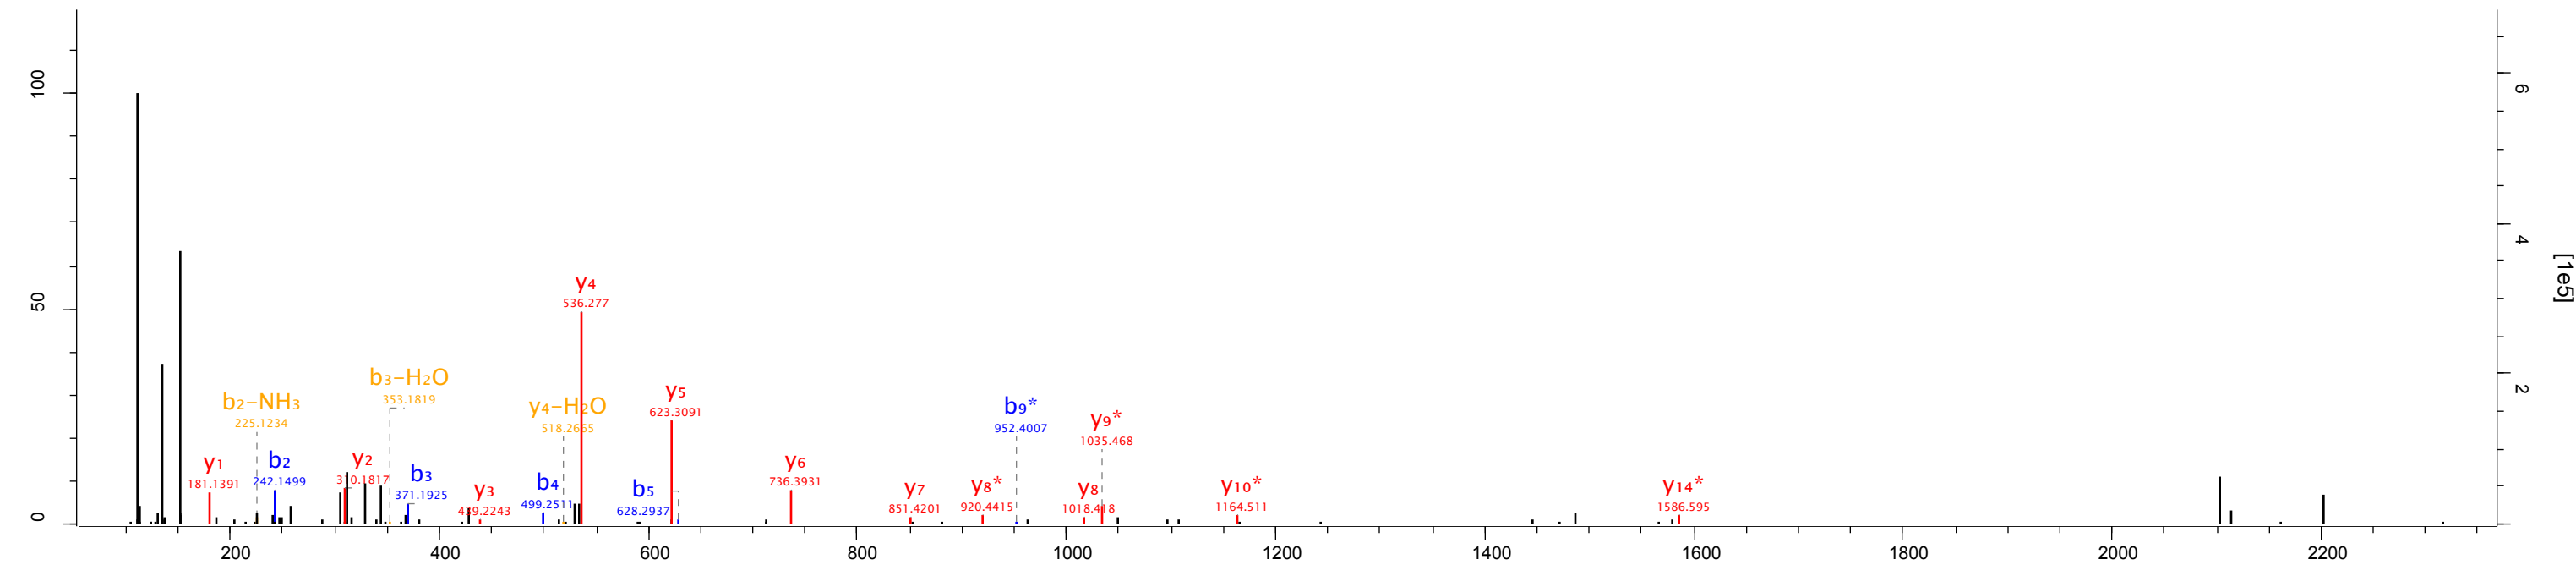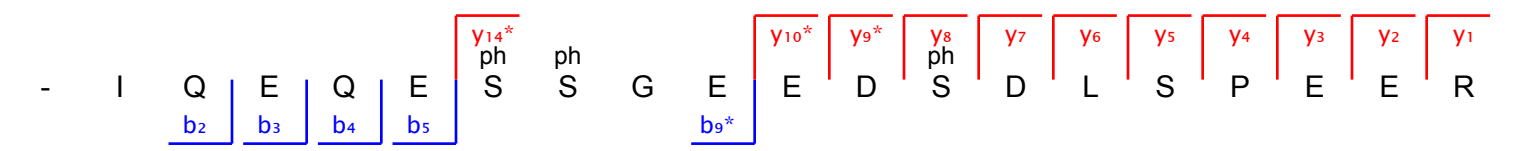

Raw file 20150812\_A375SR\_Phospho\_BR1\_01 Scan 11832 Method FTMS; HCD Score 78.55 m/z 853.26 Gene names HIRIP3

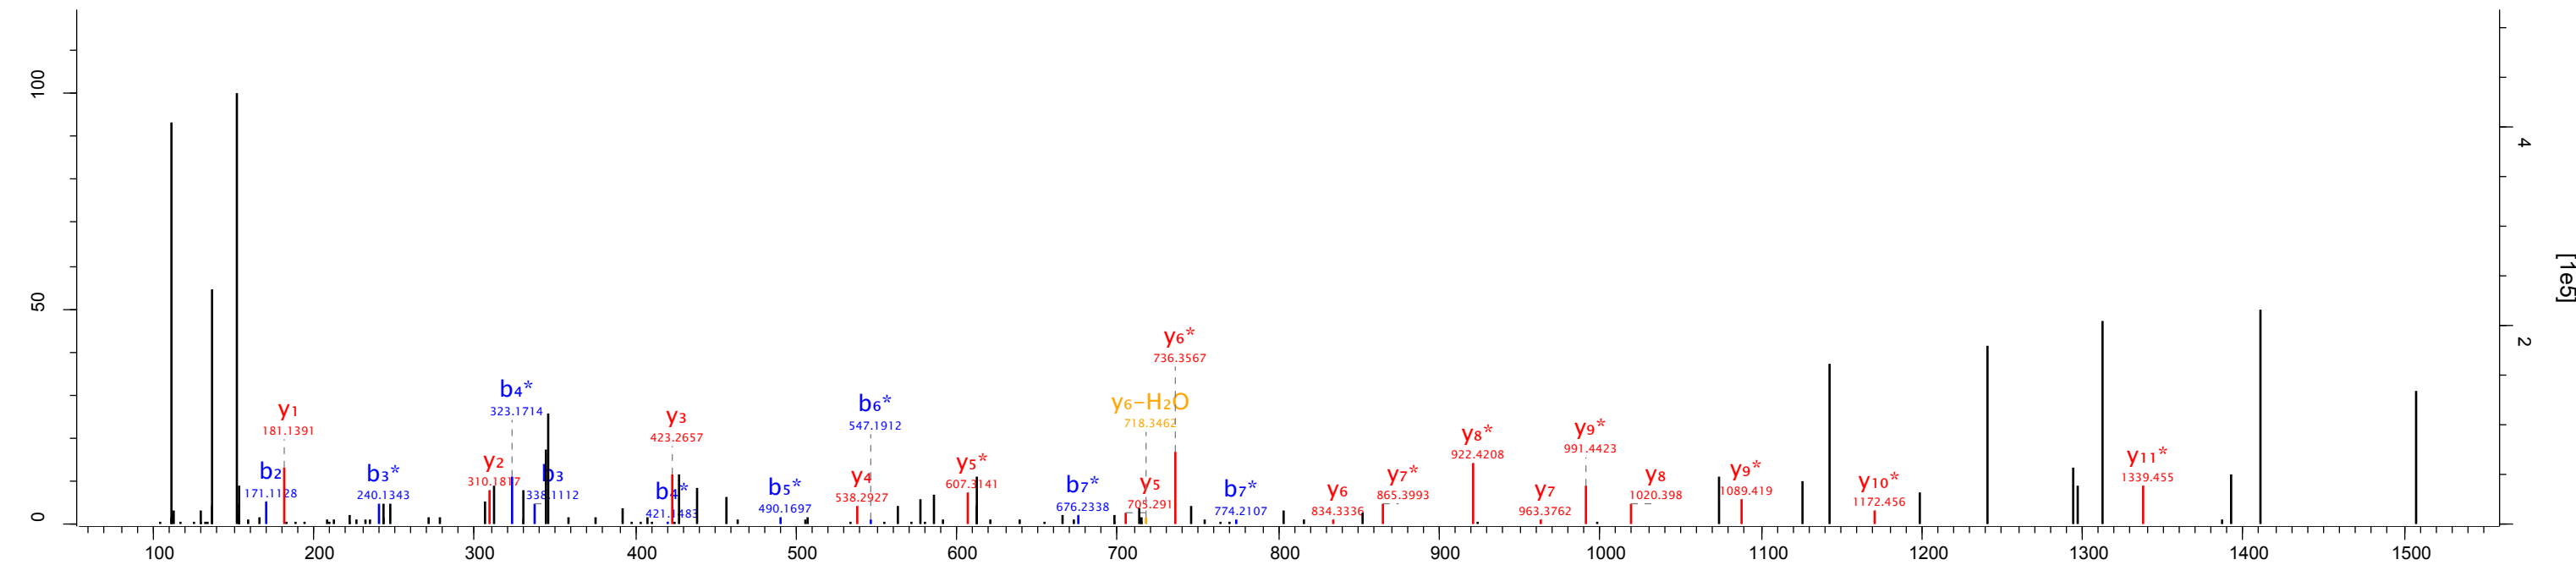

- L G S ph T S G E E S D L E R -

b<sub>2</sub>
b<sub>3</sub>
b<sub>4</sub>\*
b<sub>5</sub>\*
b<sub>6</sub>\*
b<sub>7</sub>\*
y<sub>11</sub>\*
y<sub>10</sub>\*
y<sub>9</sub>\*
y<sub>8</sub>
y<sub>7</sub>
y<sub>6</sub>
y<sub>5</sub> ph
y<sub>4</sub>
y<sub>3</sub>
y<sub>2</sub>
y<sub>1</sub>

Raw file: 20150812\_A375SR\_Phospho\_BR1\_01  
 Scan: 3082  
 Method: FTMS; HCD  
 Score: 141.07  
 m/z: 914.86  
 Gene names: CLASP1

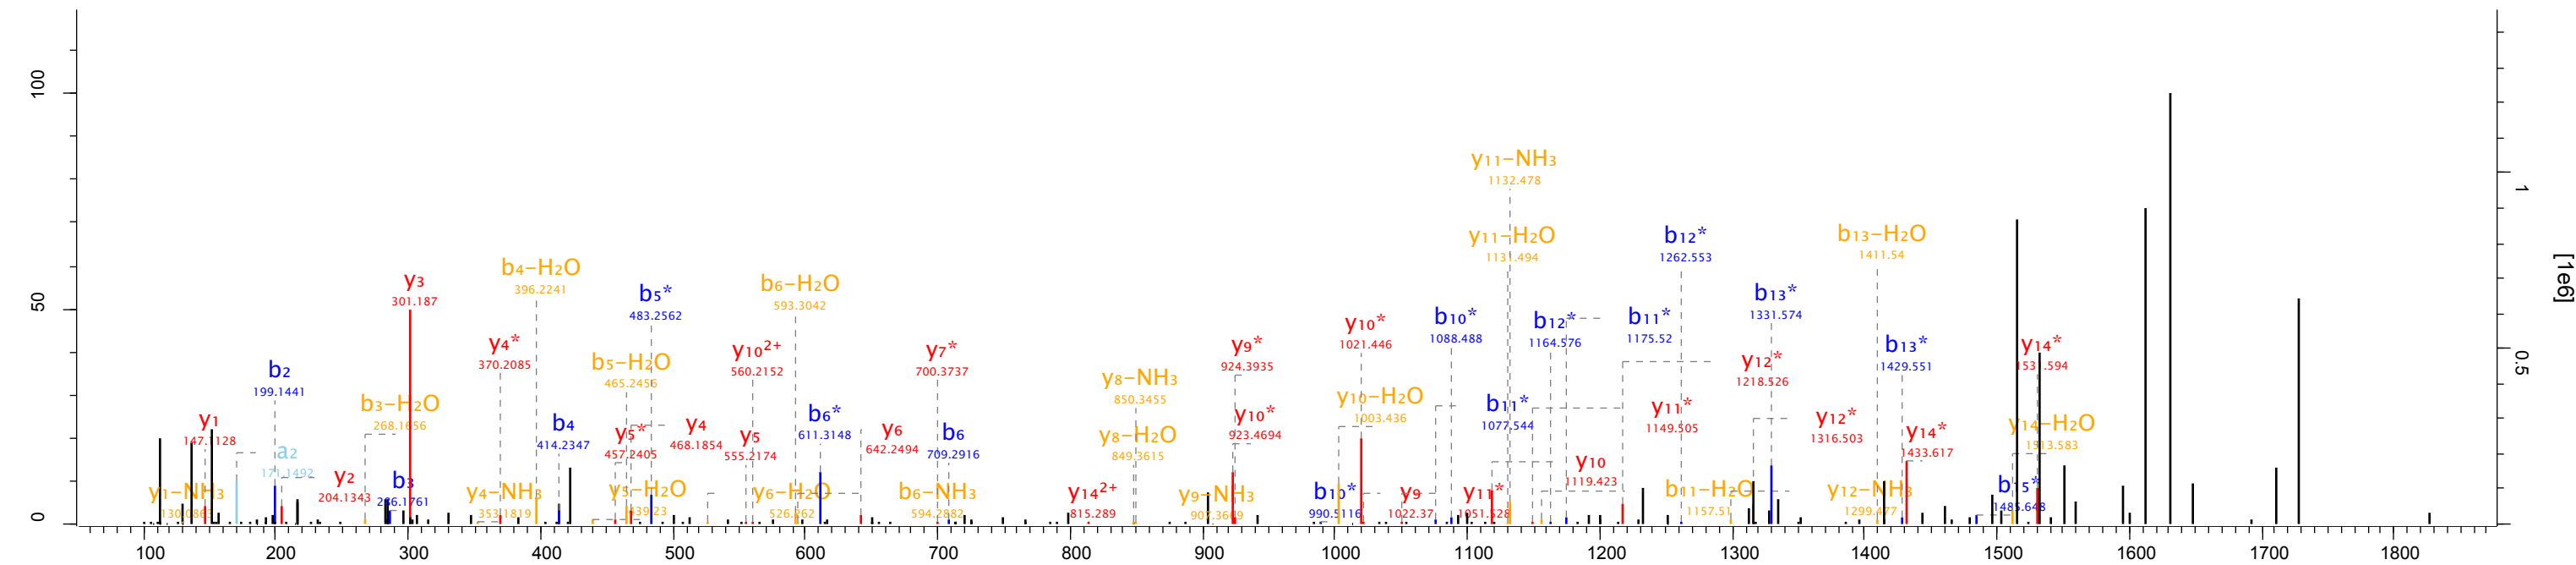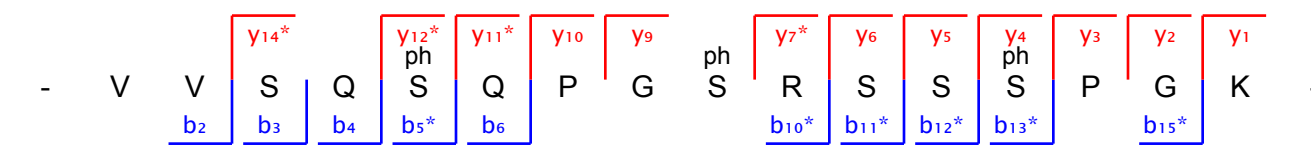

Raw file: 20150812\_A375SR\_Phospho\_BR1\_01  
 Scan: 5752 Method: FTMS; HCD Score: 46.27 m/z: 907.32 Gene names: FBRSL1

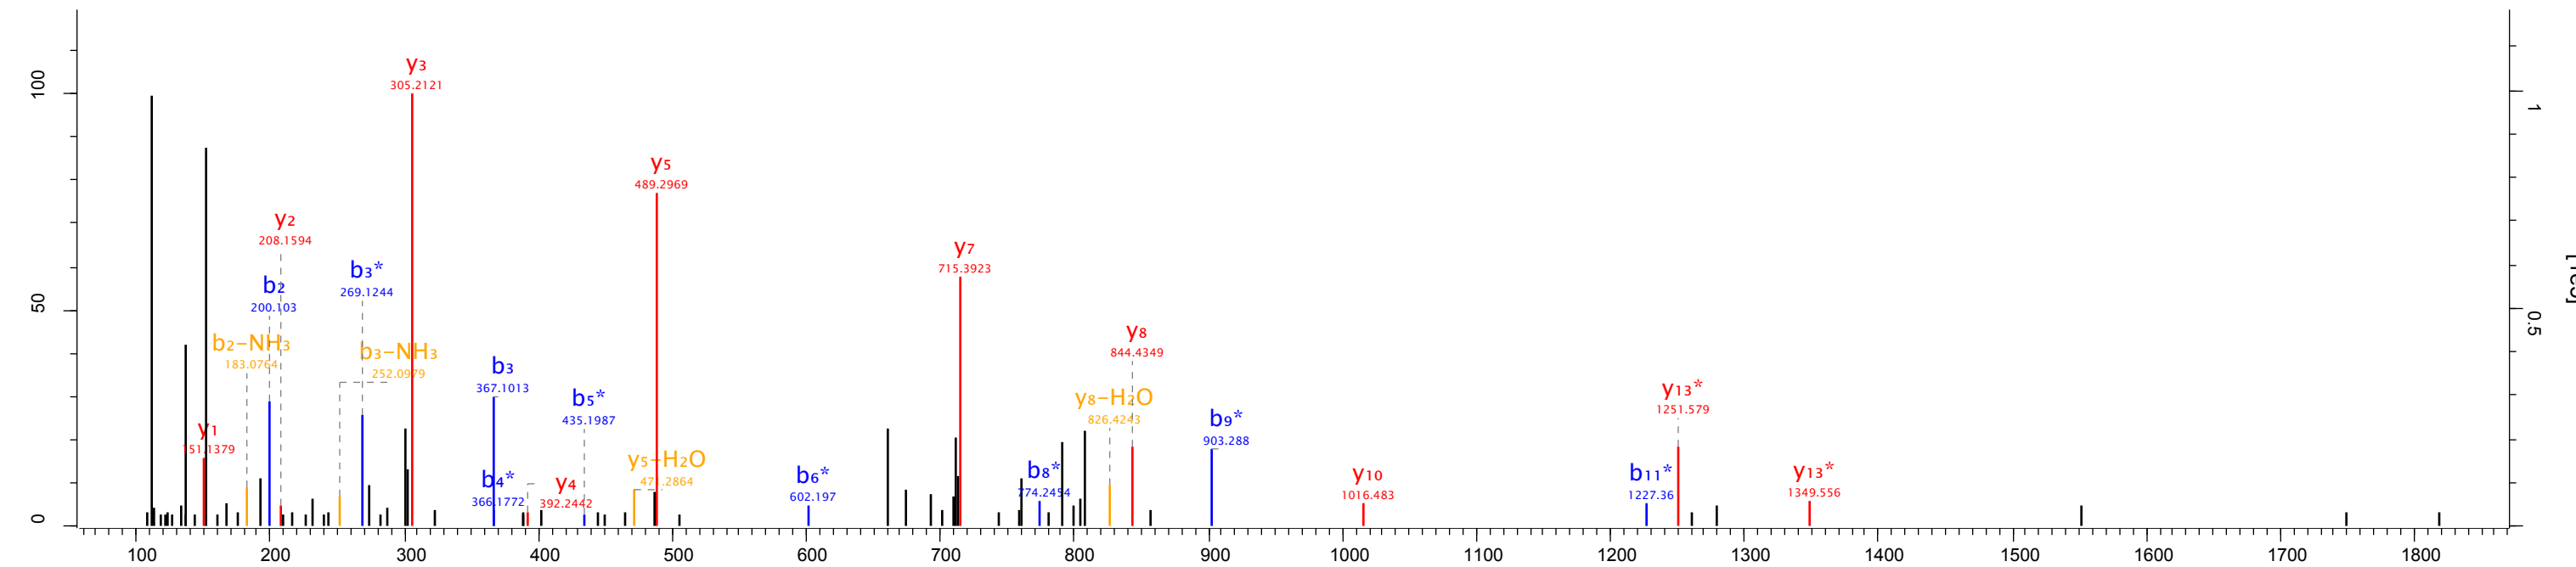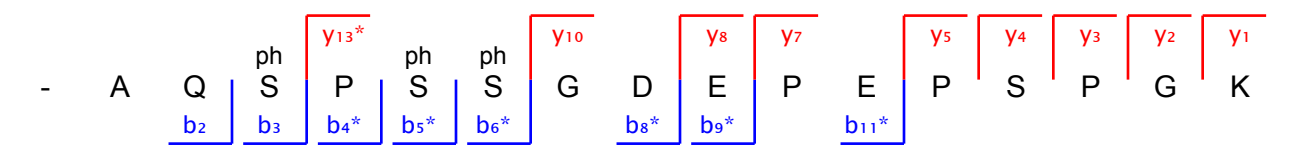



Raw file: 20150812\_A375SR\_Phospho\_BR1\_01  
 Scan: 6002 Method: FTMS; HCD Score: 47.29 m/z: 1097.82 Gene names: PDS5B

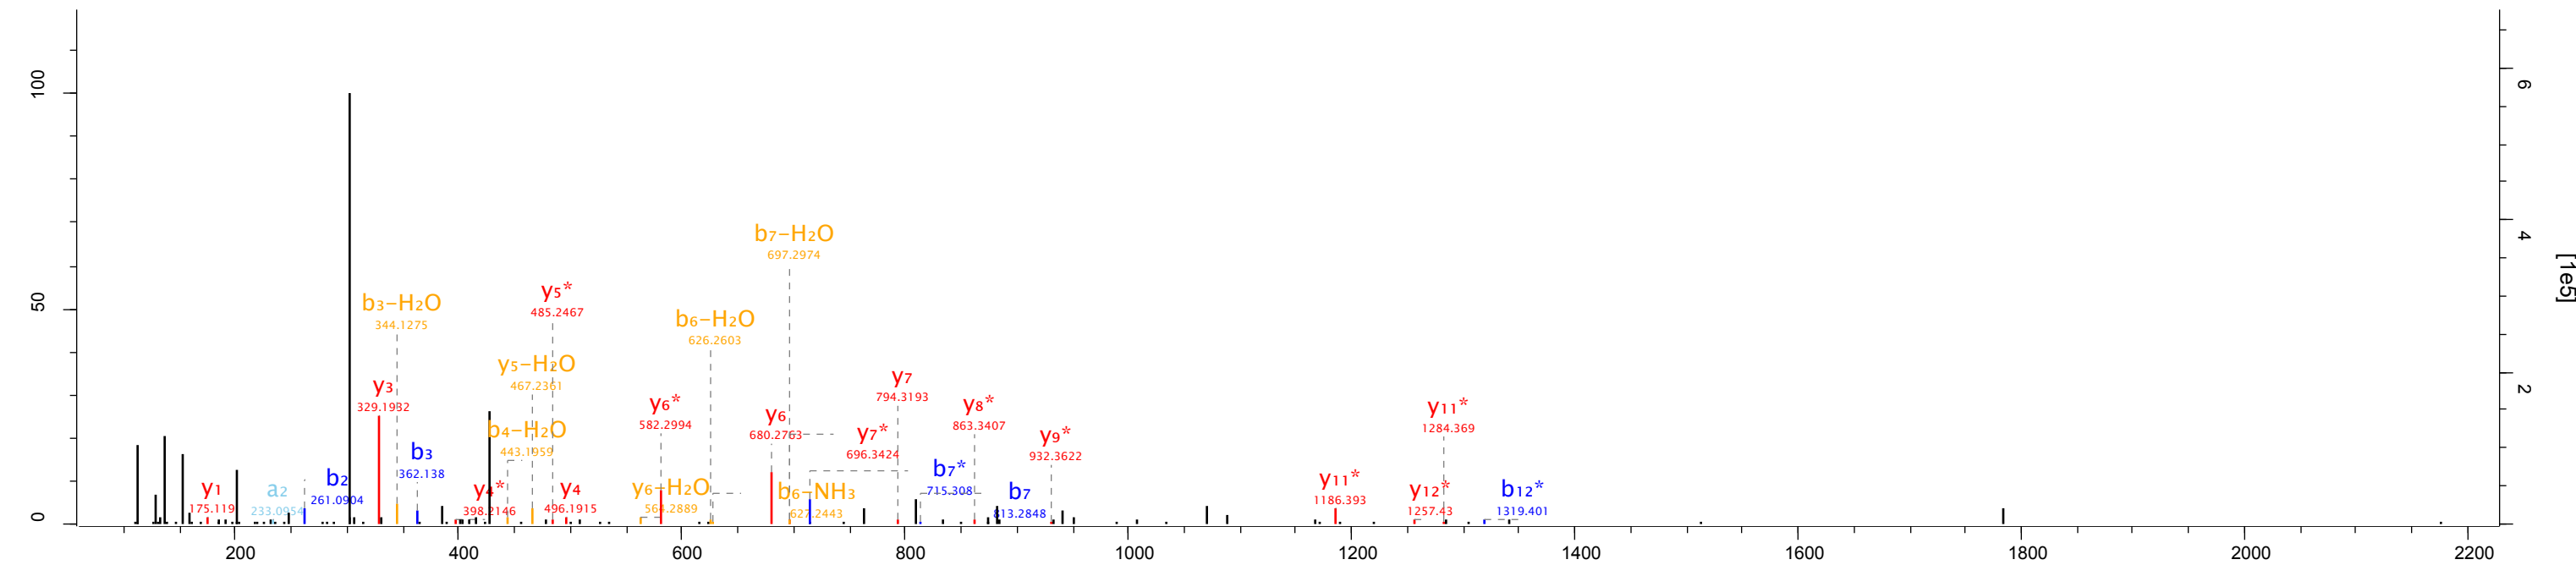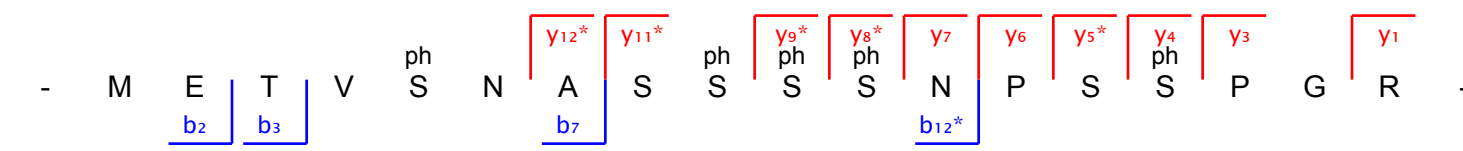

Raw file: 20150812\_A375SR\_Phospho\_BR1\_01  
 Scan: 9622 Method: FTMS; HCD Score: 180.79 m/z: 1178.87 Gene names: TSR3

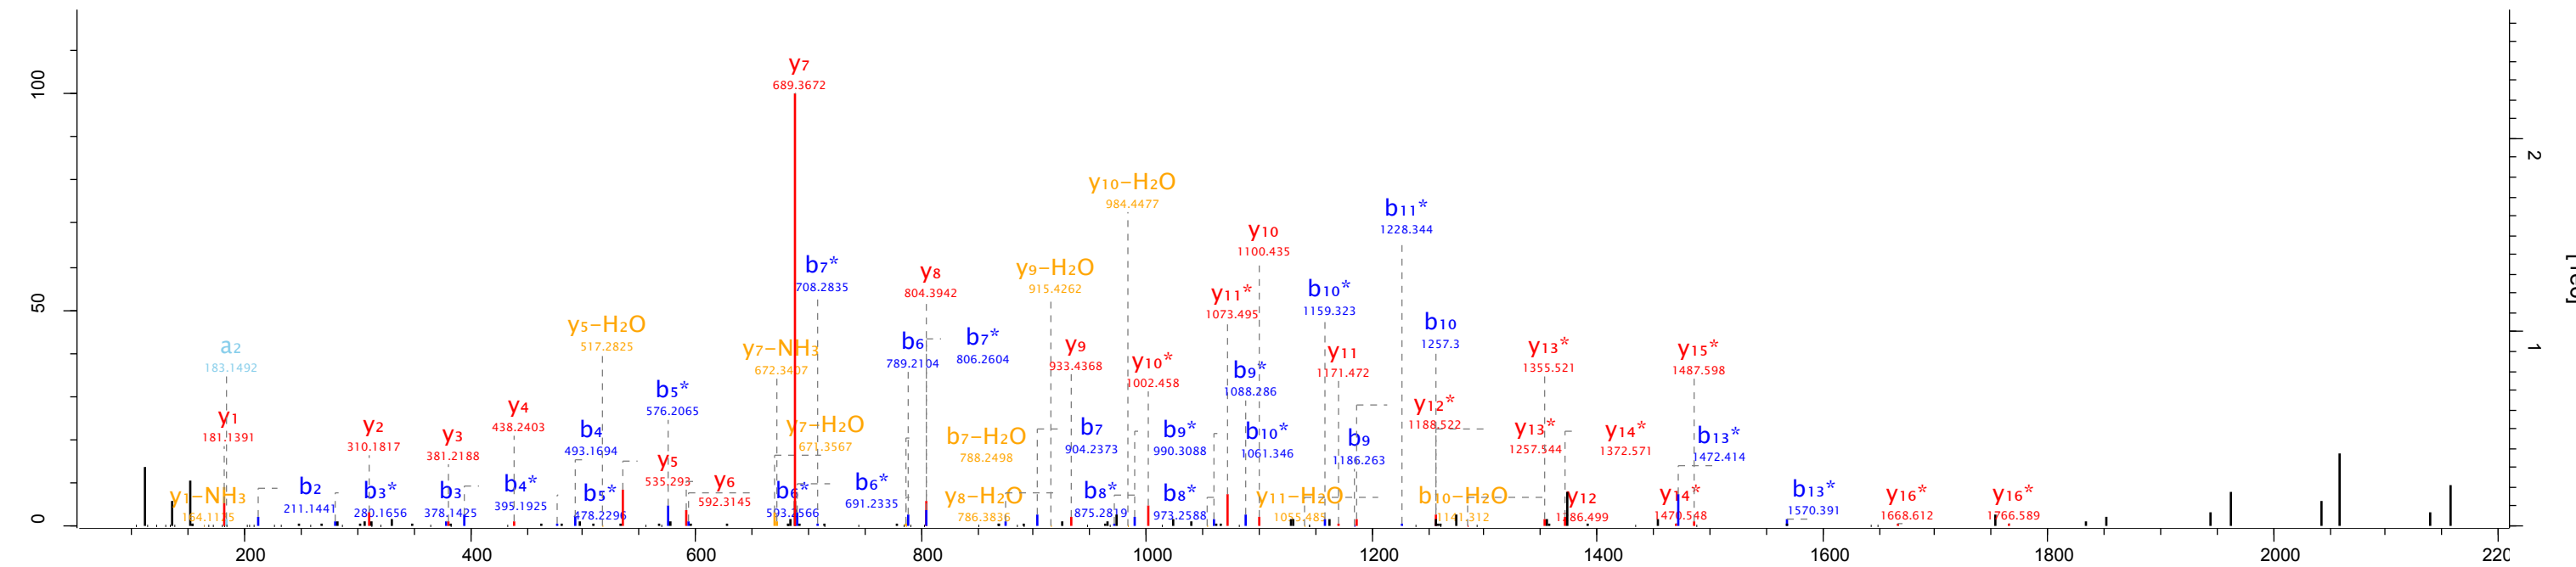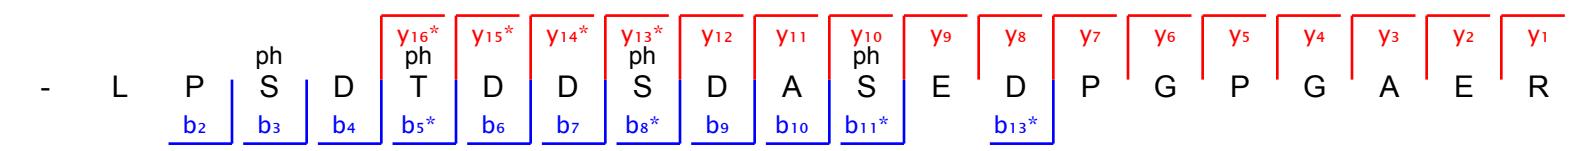

Raw file 20150812\_A375SR\_Phospho\_BR1\_02 Scan 10182 Method FTMS; HCD Score 129.2 m/z 1160.86 Gene names CHD1

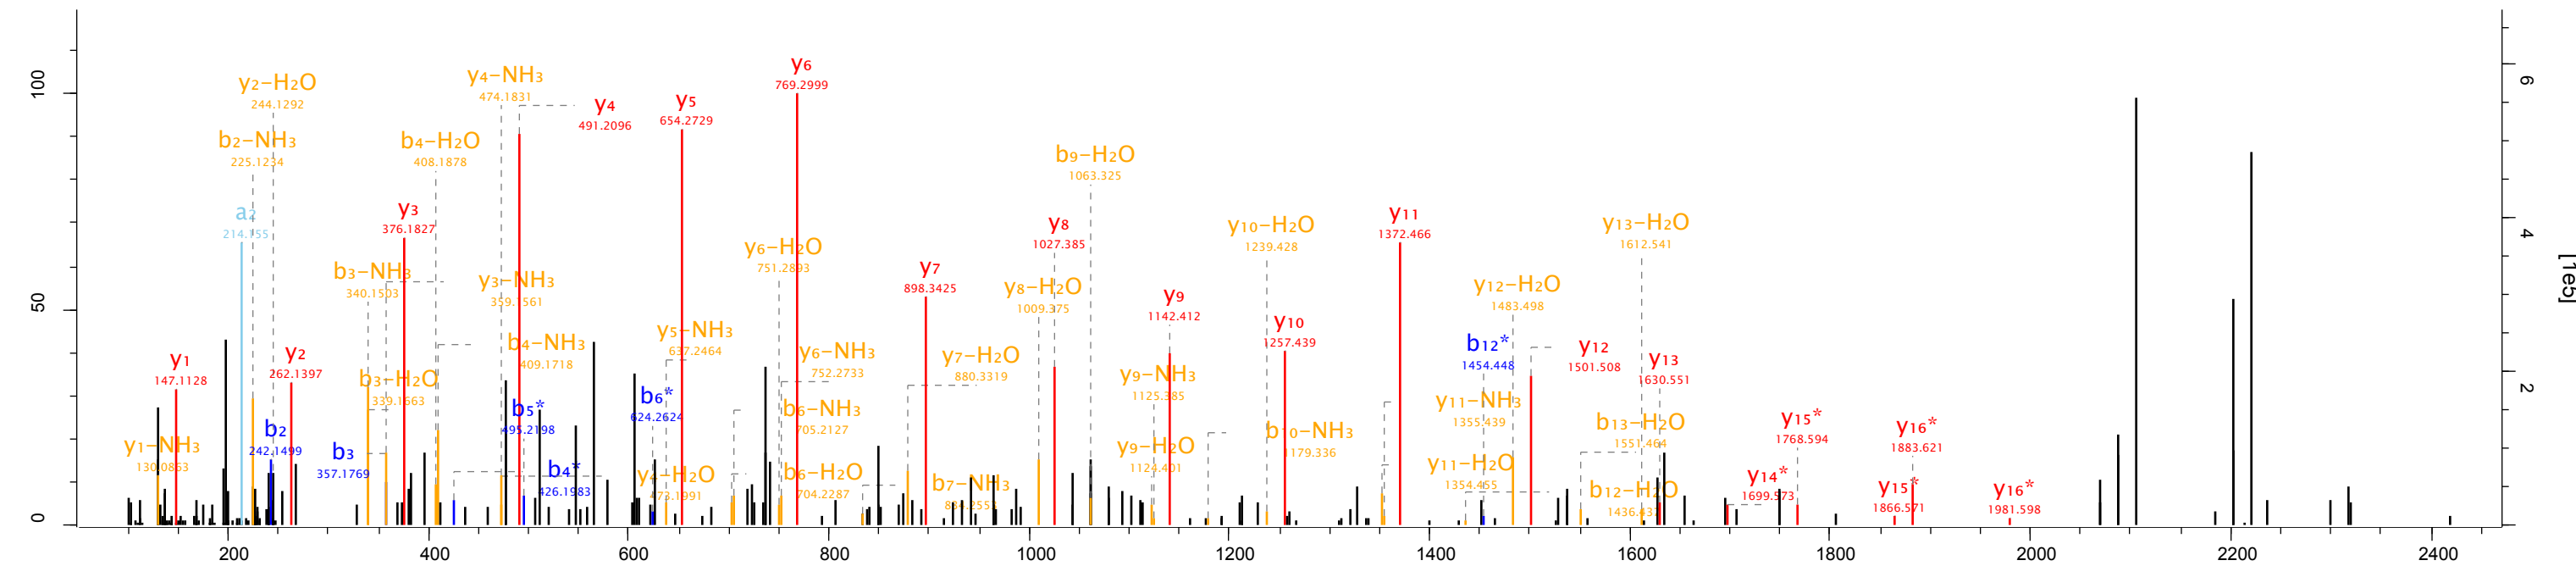

- Q I D S S E E D D D E E D Y D N D K -

Fragmentation mapping (b and y ions) is shown below the sequence:

- b<sub>2</sub> (under I)
- b<sub>3</sub> (under D)
- b<sub>4</sub><sup>\*</sup> (under S)
- b<sub>5</sub><sup>\*</sup> (under S)
- b<sub>6</sub><sup>\*</sup> (under E)
- b<sub>12</sub><sup>\*</sup> (under E)
- y<sub>16</sub><sup>\*</sup> (over D)
- y<sub>15</sub><sup>\*</sup> (over S)
- y<sub>14</sub><sup>\*</sup> (over S)
- y<sub>13</sub> (over E)
- y<sub>12</sub> (over E)
- y<sub>11</sub> (over D)
- y<sub>10</sub> (over D)
- y<sub>9</sub> (over D)
- y<sub>8</sub> (over E)
- y<sub>7</sub> (over E)
- y<sub>6</sub> (over D)
- y<sub>5</sub> (over Y)
- y<sub>4</sub> (over D)
- y<sub>3</sub> (over N)
- y<sub>2</sub> (over D)
- y<sub>1</sub> (over K)

Raw file: 20150812\_A375SR\_Phospho\_BR1\_02  
 Scan: 10592 Method: FTMS; HCD Score: 100.9 m/z: 691.79 Gene names: SRRM2

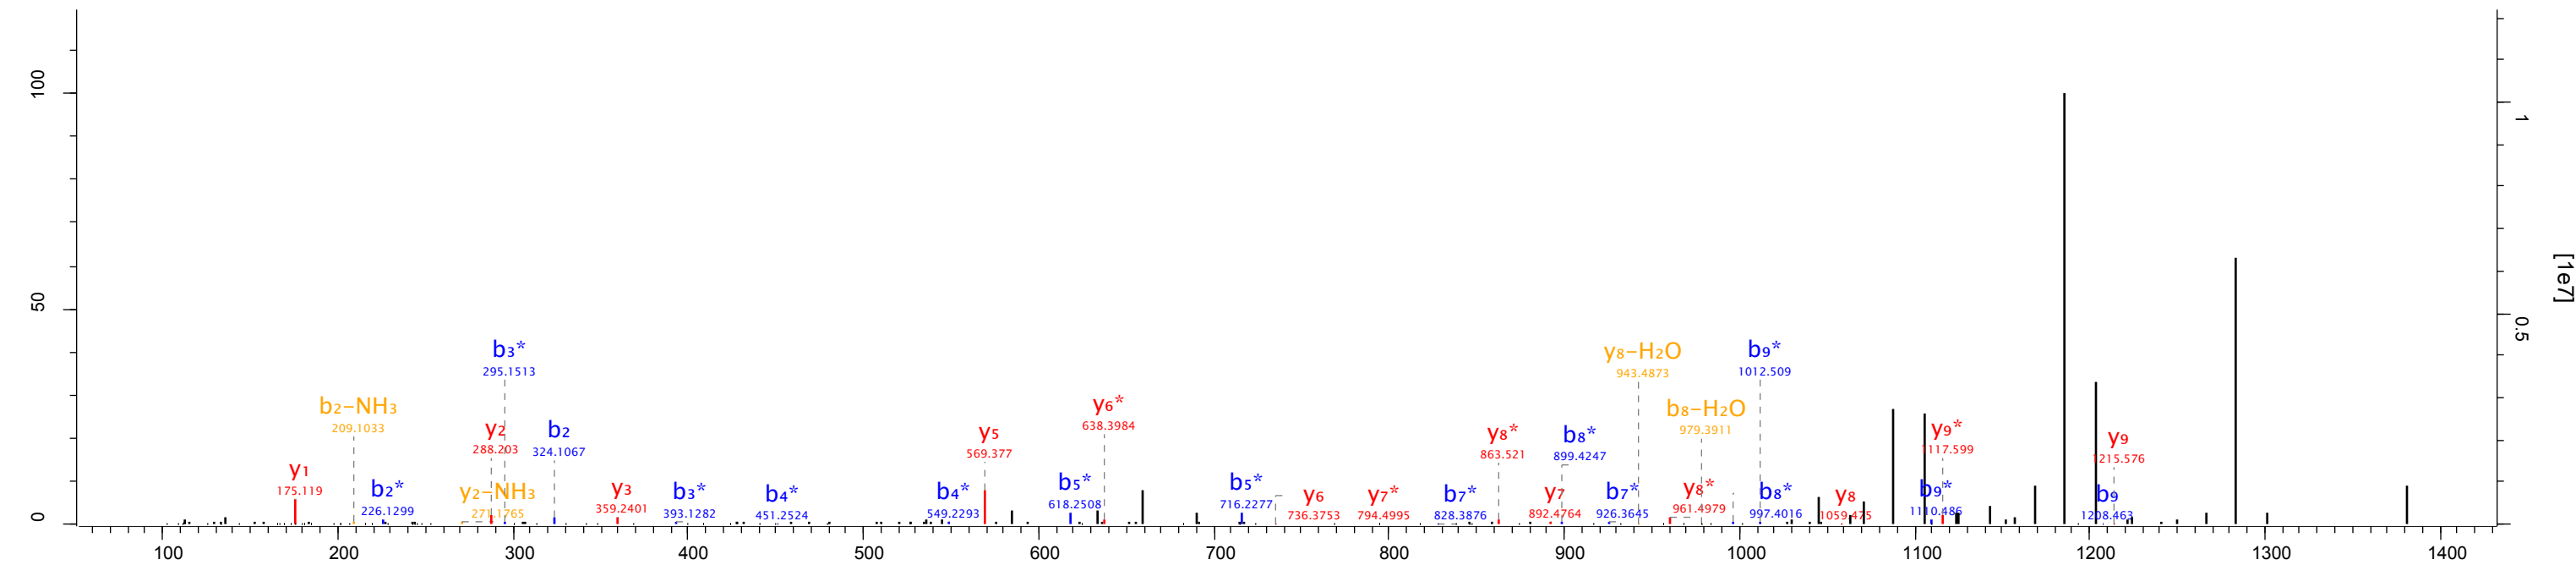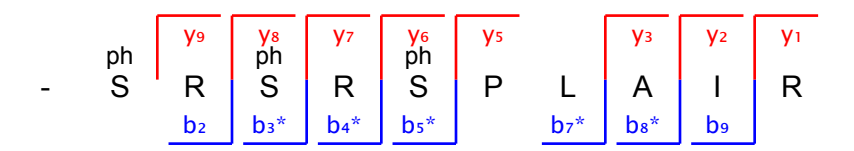

Raw file: 20150812\_A375SR\_Phospho\_BR1\_02  
 Scan: 10782 Method: FTMS; HCD Score: 93.92 m/z: 730.32 Gene names: SORBS2

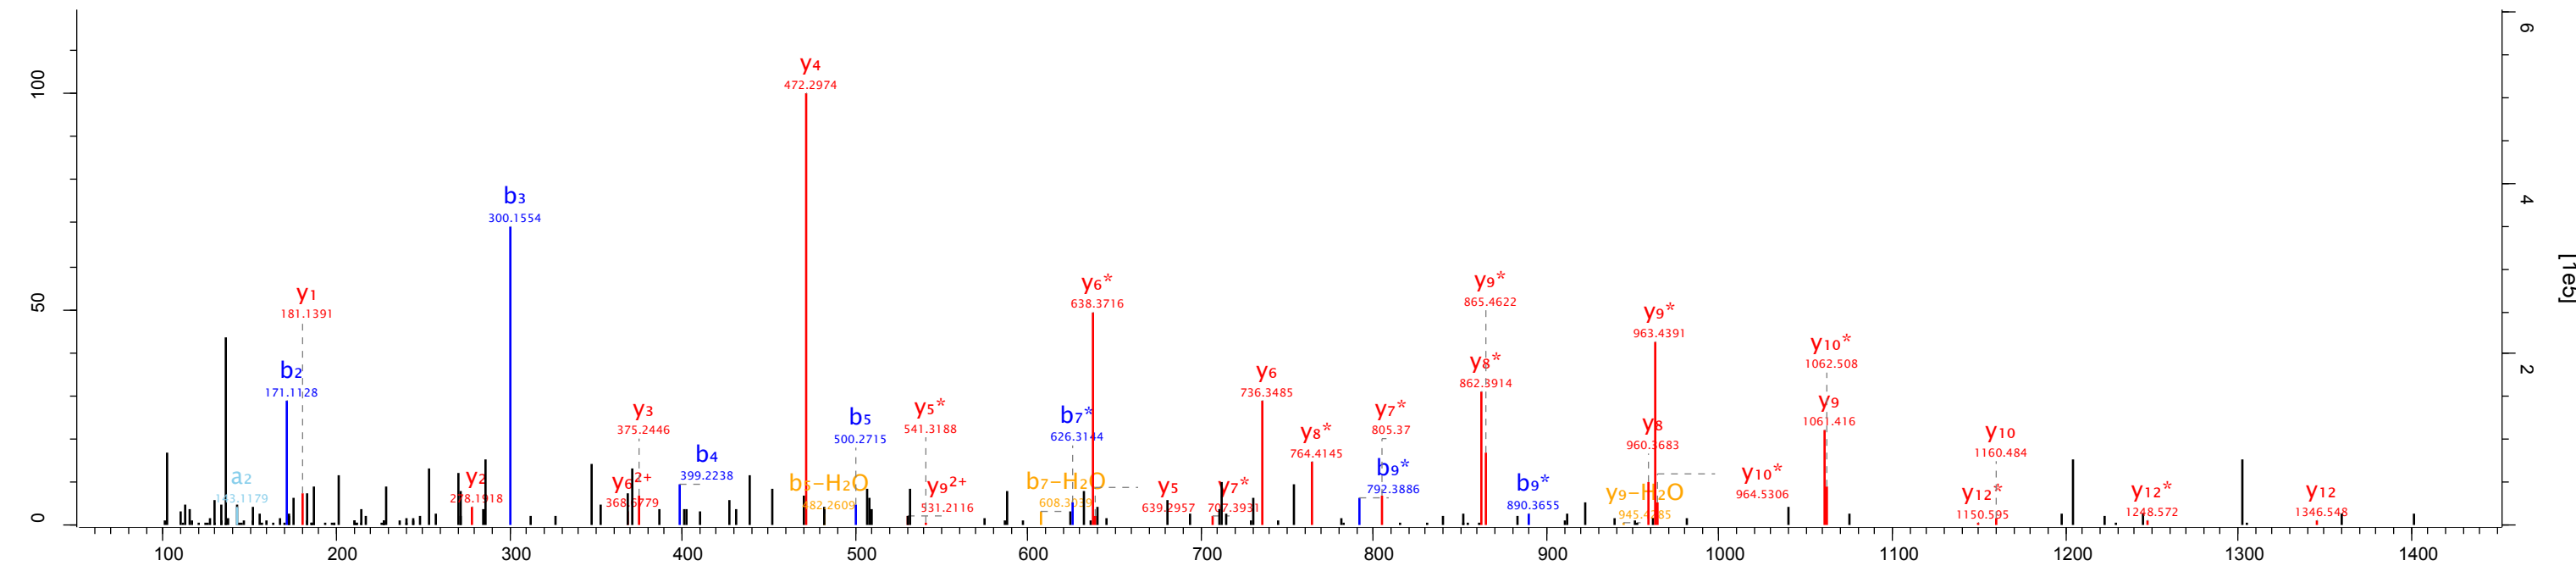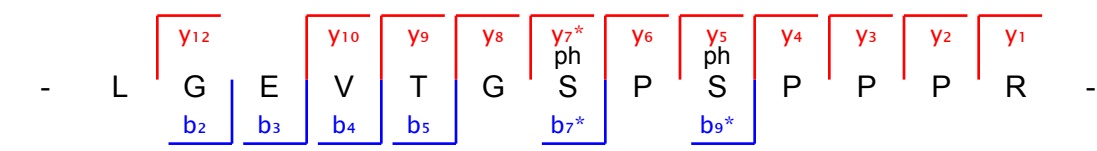

Raw file 20150812\_A375SR\_Phospho\_BR1\_02 Scan 10832 Method FTMS; HCD Score 181.88 m/z 575.74 Gene names RAI14

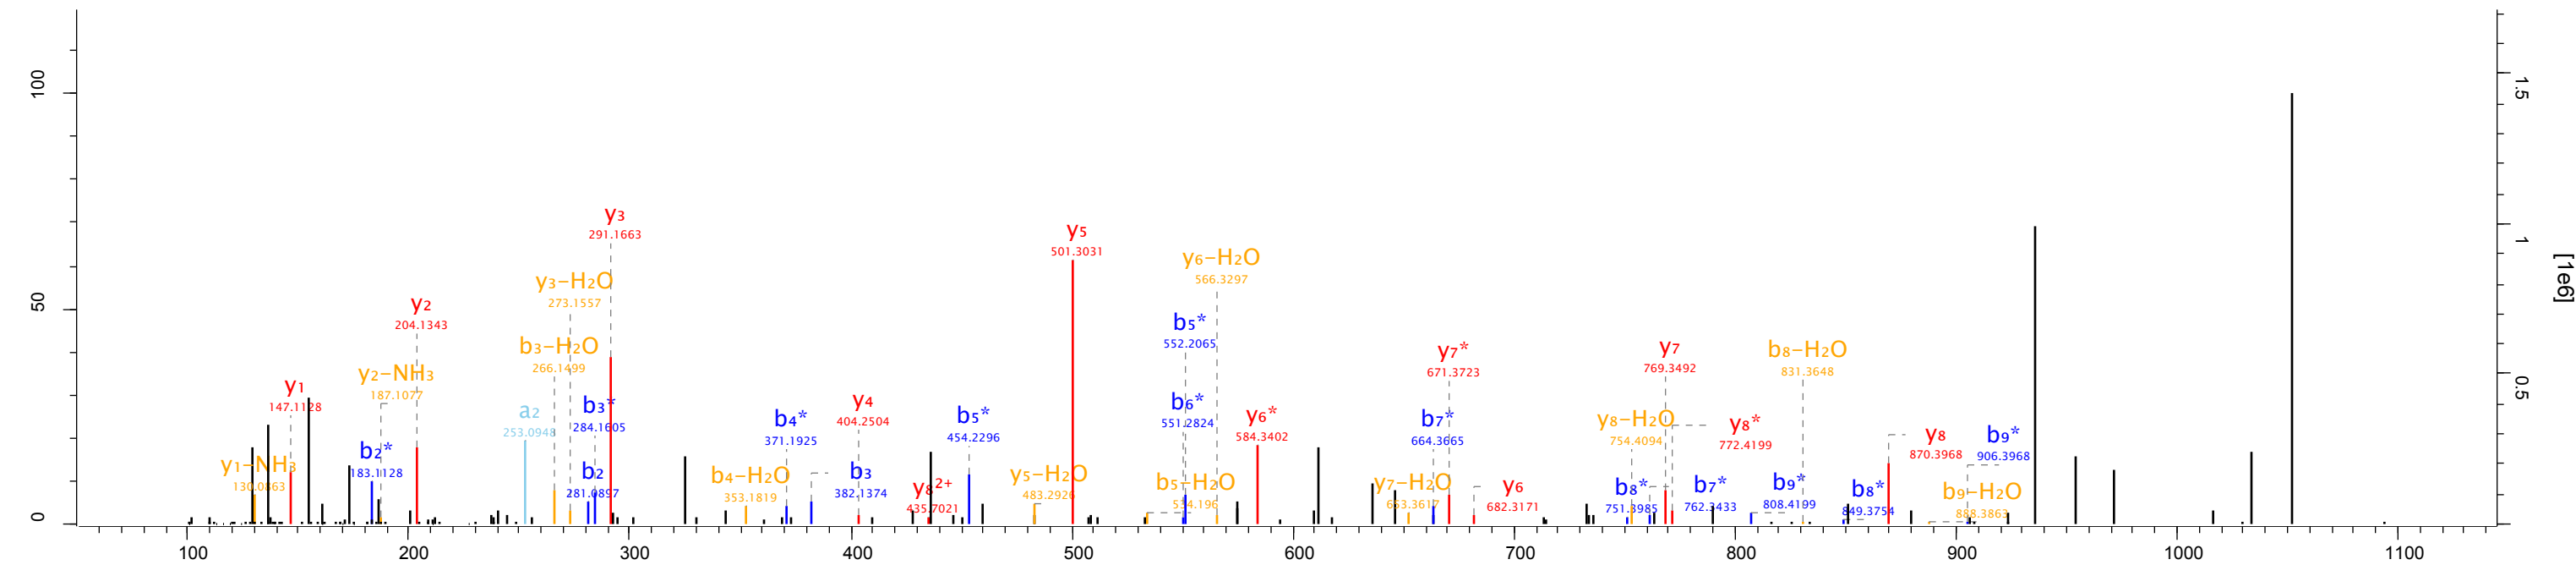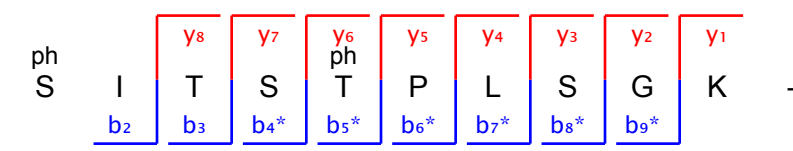

Raw file: 20150812\_A375SR\_Phospho\_BR1\_02  
 Scan: 10862 Method: FTMS; HCD Score: 94.02 m/z: 756.31 Gene names: ERRFI1

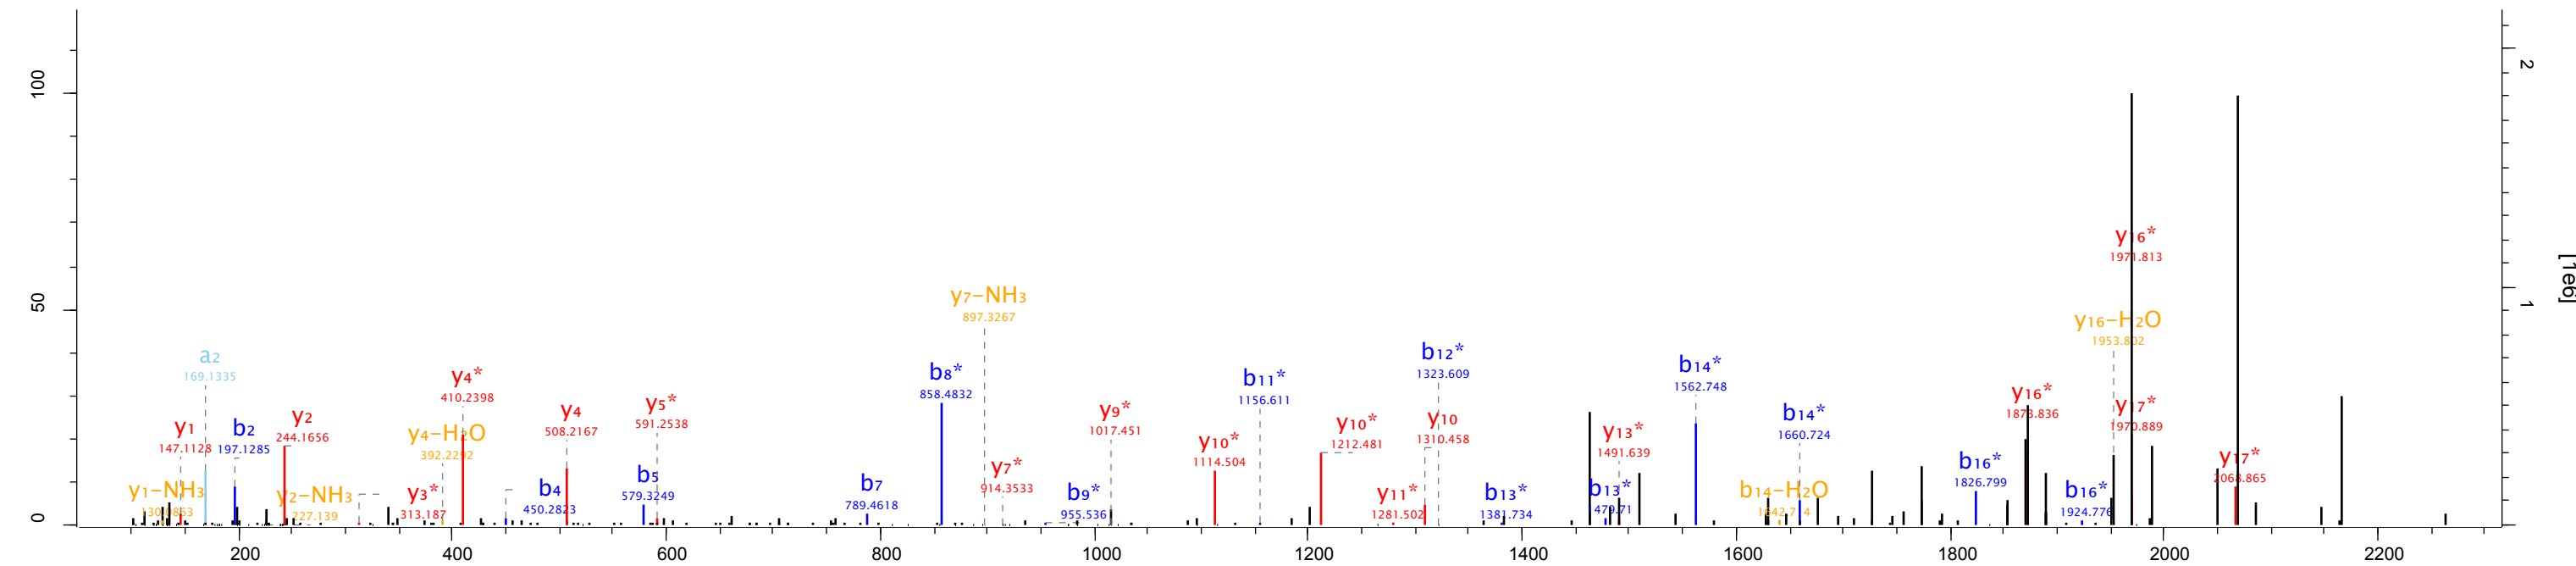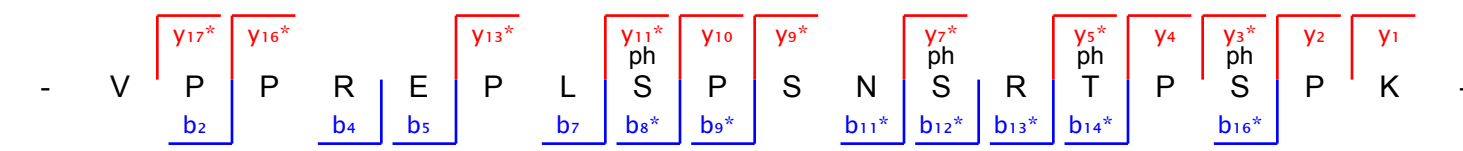

Raw file 20150812\_A375SR\_Phospho\_BR1\_02 Scan 10952 Method FTMS; HCD Score 177.56 m/z 789.87 Gene names PTPN14

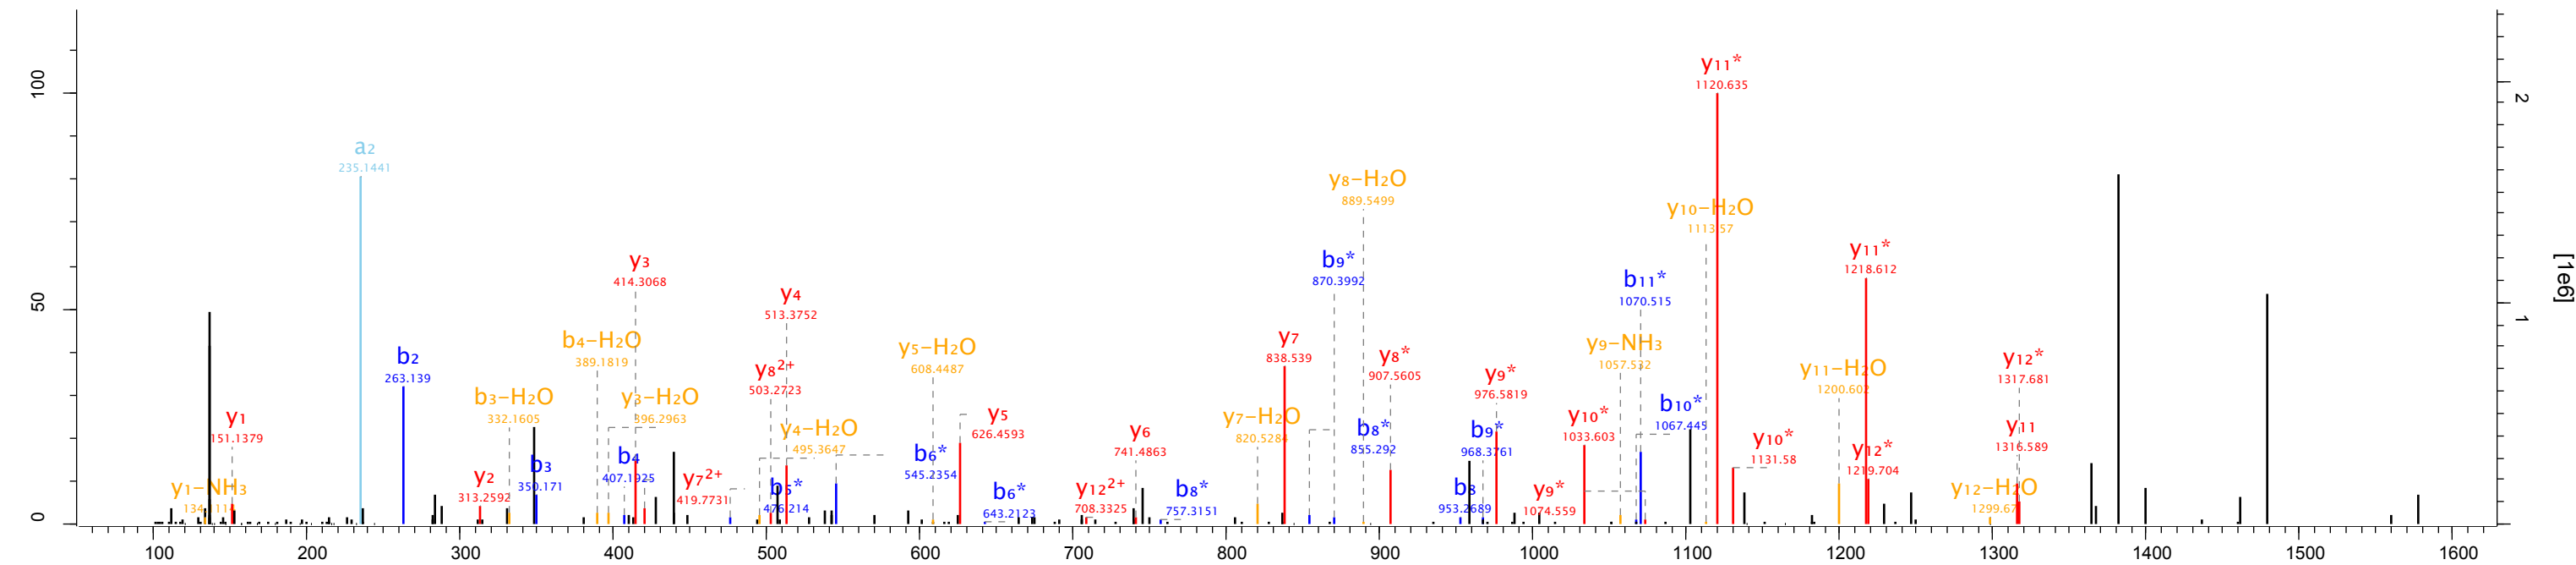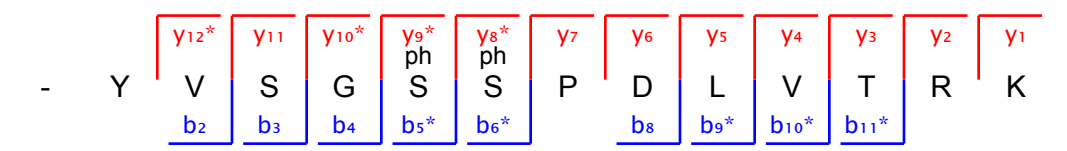



Raw file: 20150812\_A375SR\_Phospho\_BR1\_02  
 Scan: 11102 Method: FTMS; HCD Score: 247.73 m/z: 800.3 Gene names: NSD1

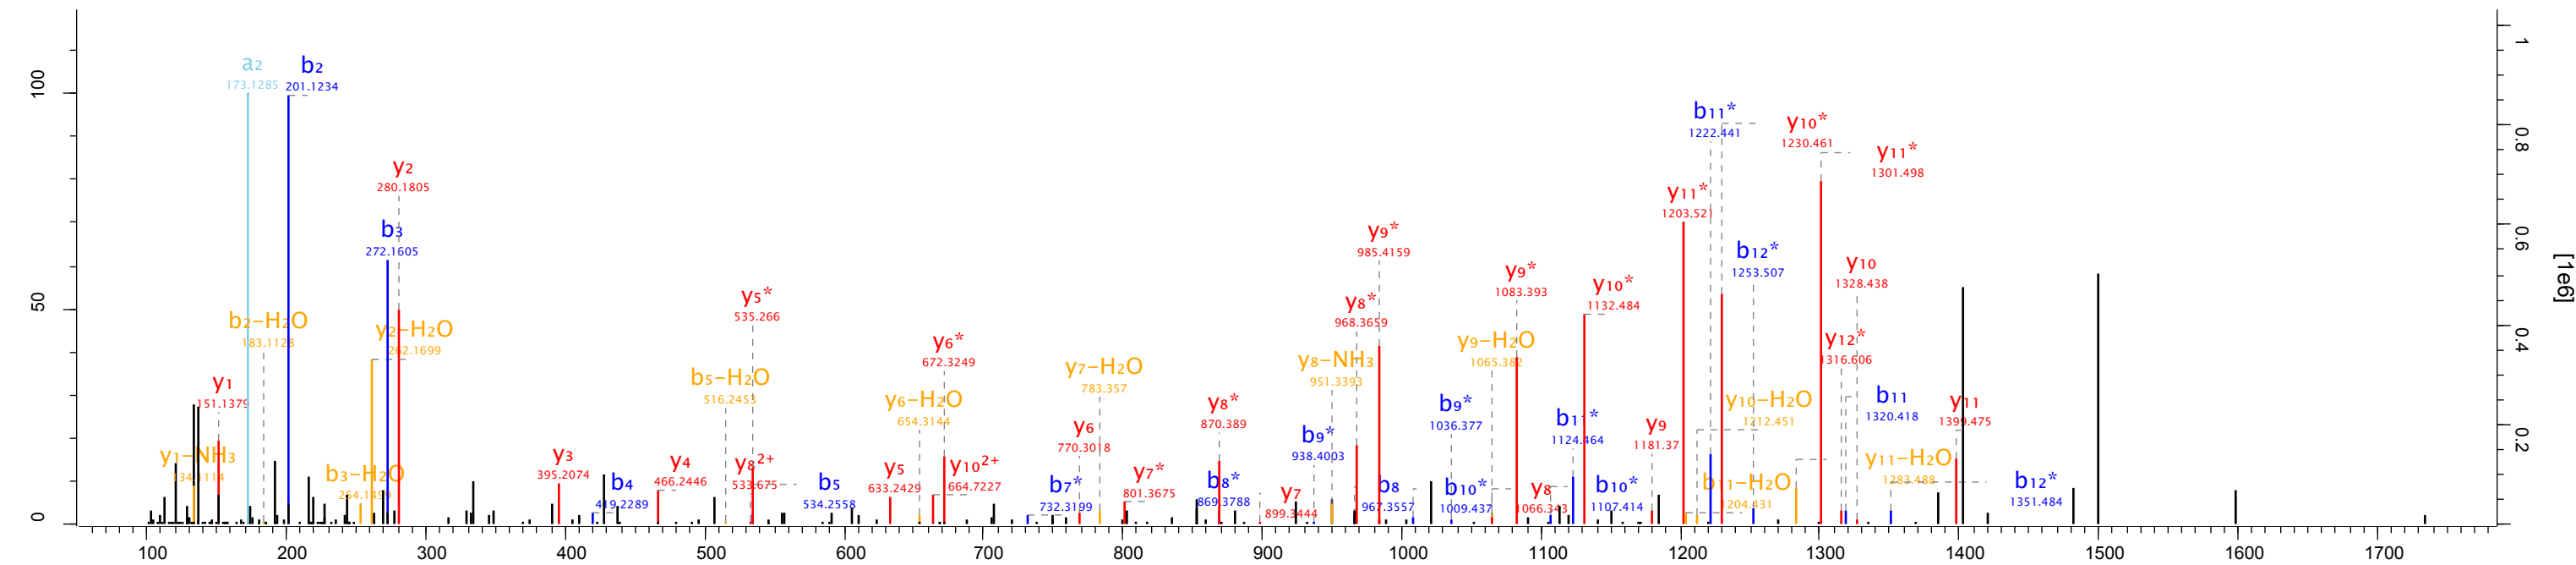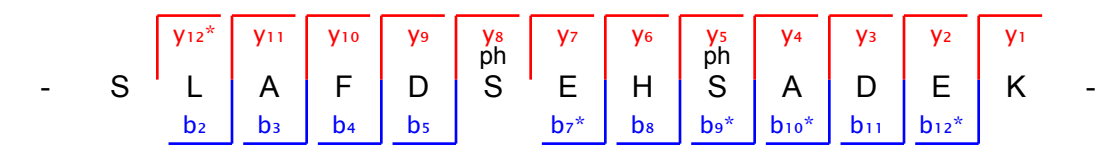

Raw file 20150812\_A375SR\_Phospho\_BR1\_02 Scan 11172 Method FTMS; HCD Score 171.36 m/z 890.68 Gene names OGFR

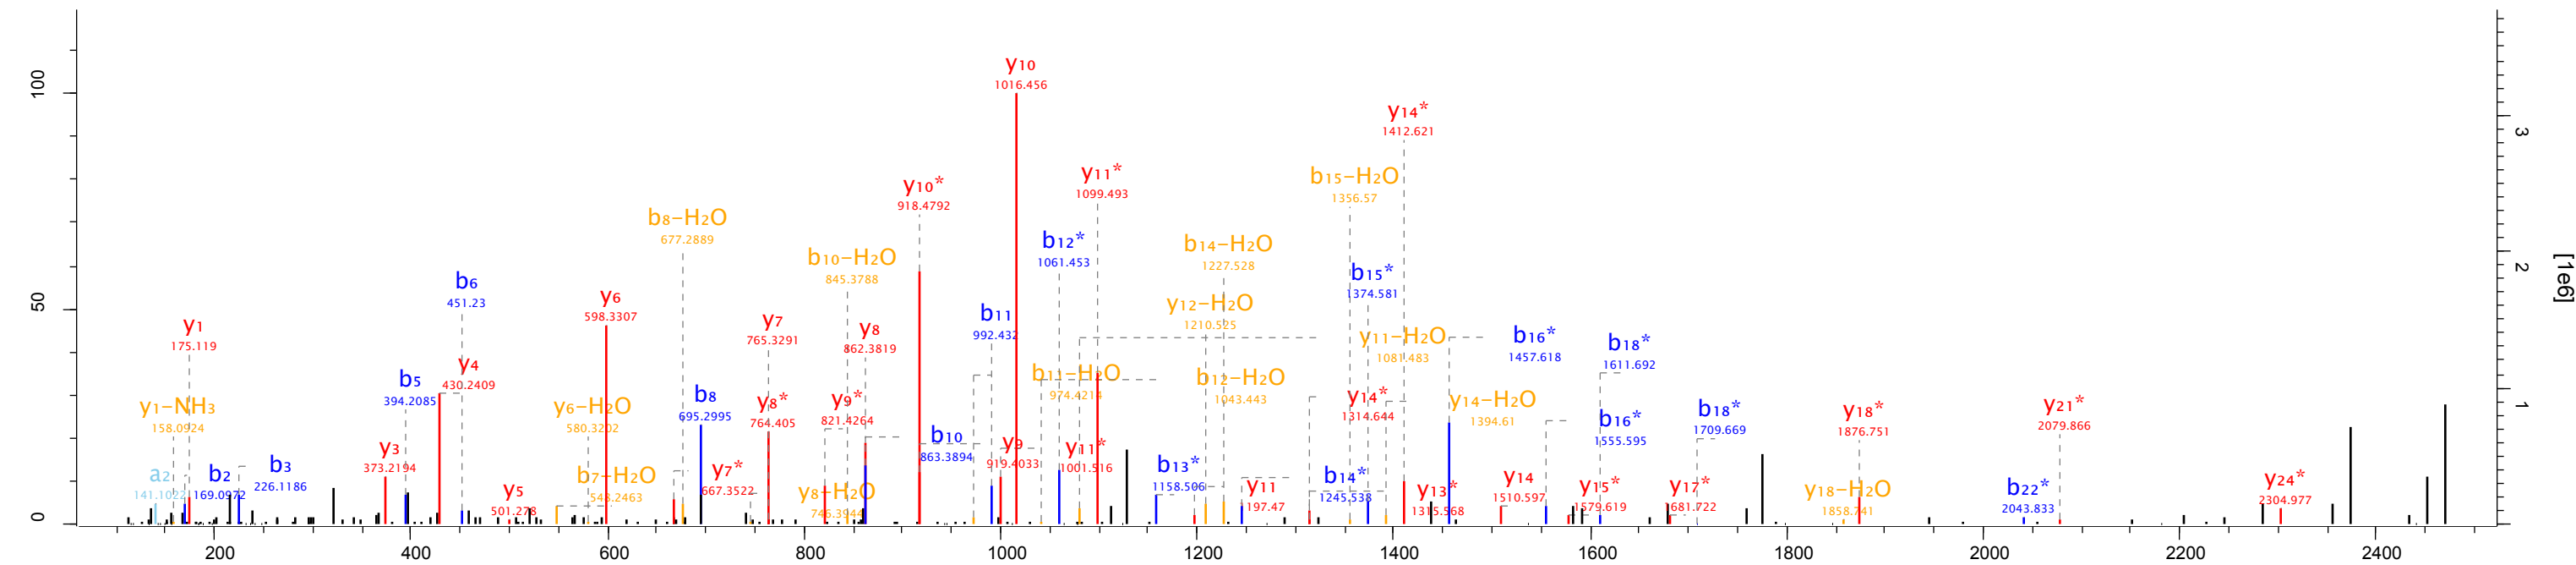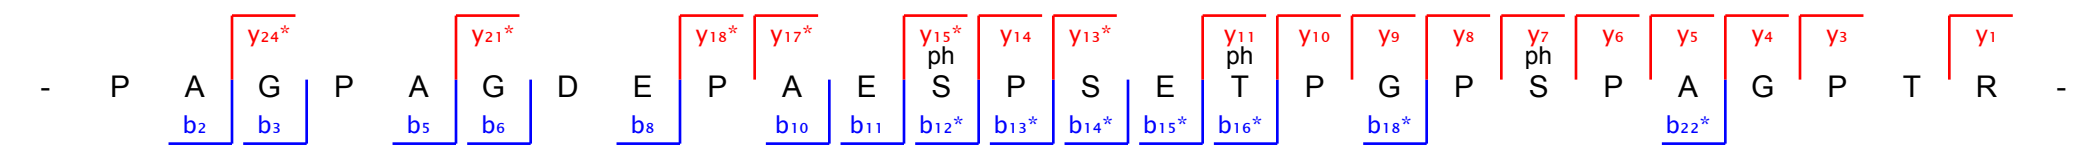

Raw file 20150812\_A375SR\_Phospho\_BR1\_02 Scan 11352 Method FTMS; HCD Score 63.73 m/z 609.67 Gene names HIRIP3

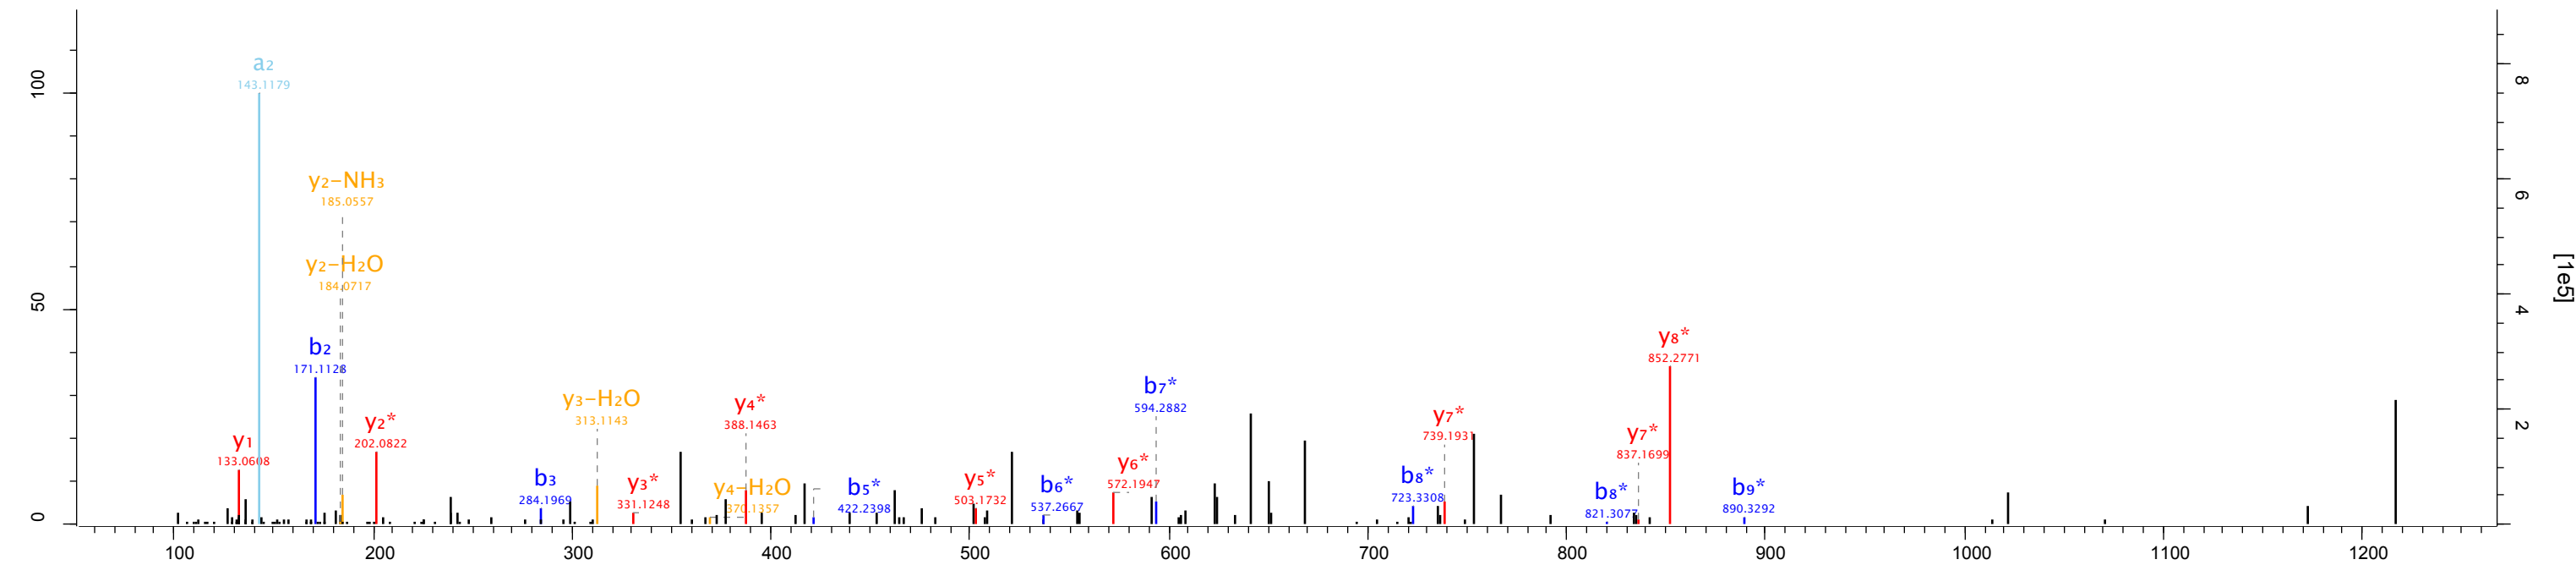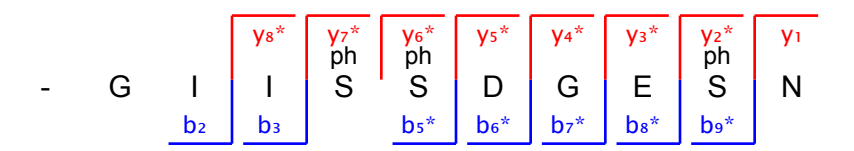

Raw file 20150812\_A375SR\_Phospho\_BR1\_02 Scan 11432 Method FTMS; HCD Score 216.62 m/z 794.34 Gene names SYNM

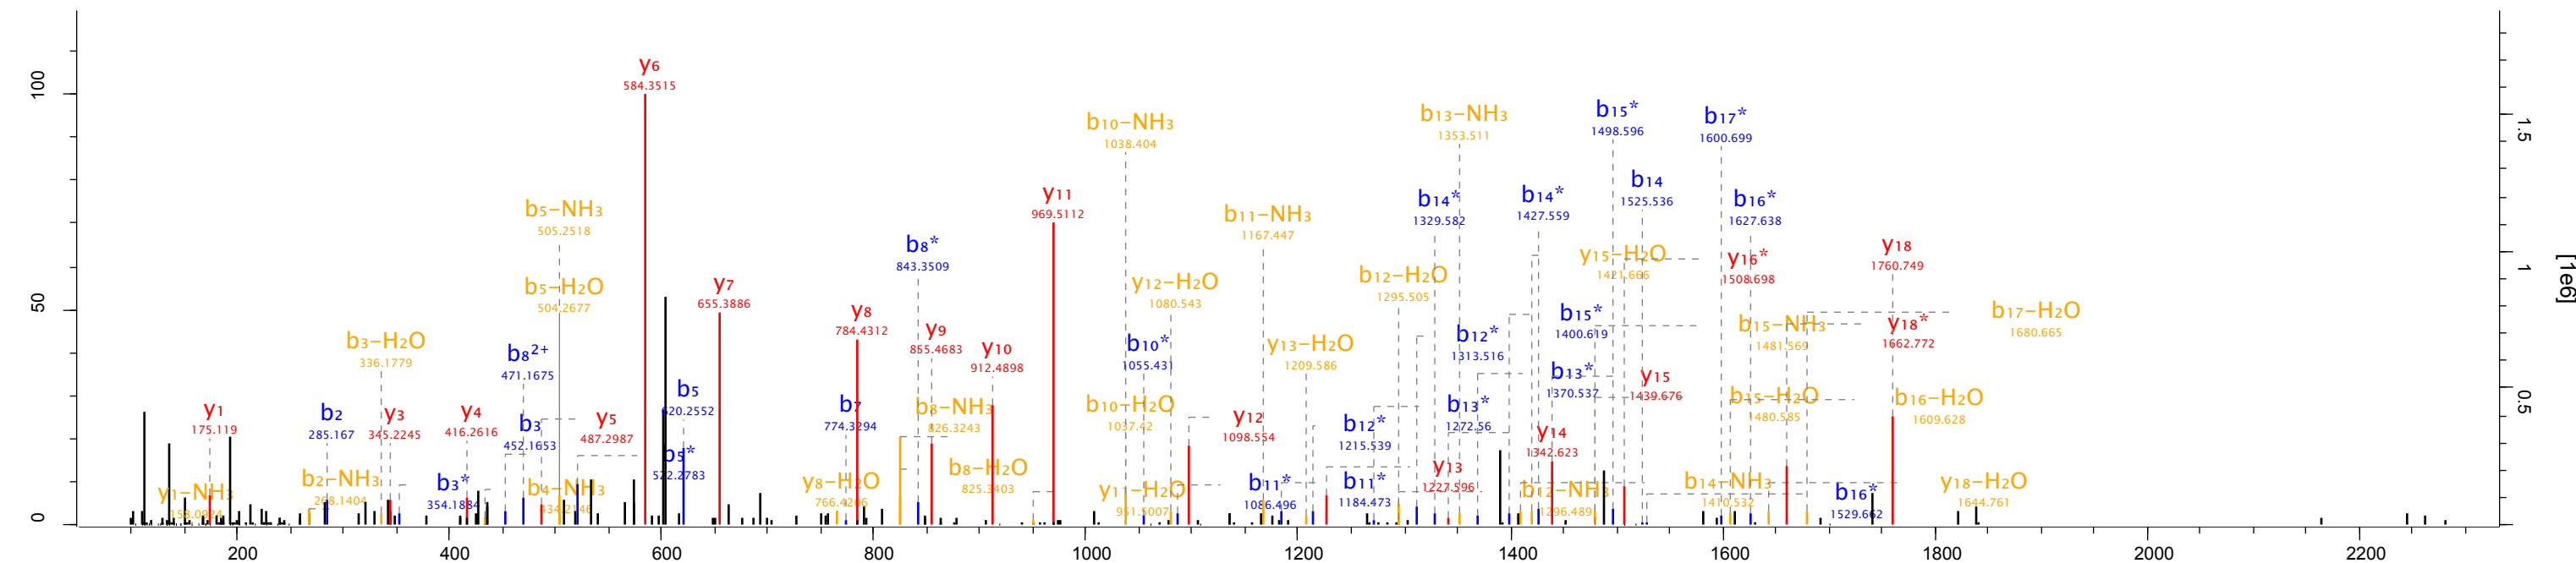

- Q R S ph P A P G S P D E E G G A E A P A A G I R -

Fragmentation mapping (b-ions in blue, y-ions in red):

- b<sub>2</sub> (R), b<sub>3</sub> (S), b<sub>5</sub> (A), b<sub>7</sub> (G), b<sub>8</sub><sup>\*</sup> (S), b<sub>10</sub><sup>\*</sup> (D), b<sub>11</sub><sup>\*</sup> (E), b<sub>12</sub><sup>\*</sup> (E), b<sub>13</sub><sup>\*</sup> (G), b<sub>14</sub> (G), b<sub>15</sub><sup>\*</sup> (A), b<sub>16</sub><sup>\*</sup> (E), b<sub>17</sub><sup>\*</sup> (A)
- y<sub>1</sub> (R), y<sub>3</sub> (G), y<sub>4</sub> (A), y<sub>5</sub> (P), y<sub>6</sub> (D), y<sub>7</sub> (E), y<sub>8</sub> (E), y<sub>9</sub> (G), y<sub>10</sub> (G), y<sub>11</sub> (A), y<sub>12</sub> (E), y<sub>13</sub> (E), y<sub>14</sub> (G), y<sub>15</sub> (G), y<sub>16</sub><sup>\*</sup> (A), y<sub>18</sub> (I)

Raw file 20150812\_A375SR\_Phospho\_BR1\_02 Scan 11462 Method FTMS; HCD Score 108.13 m/z 857.8 Gene names ABCC1

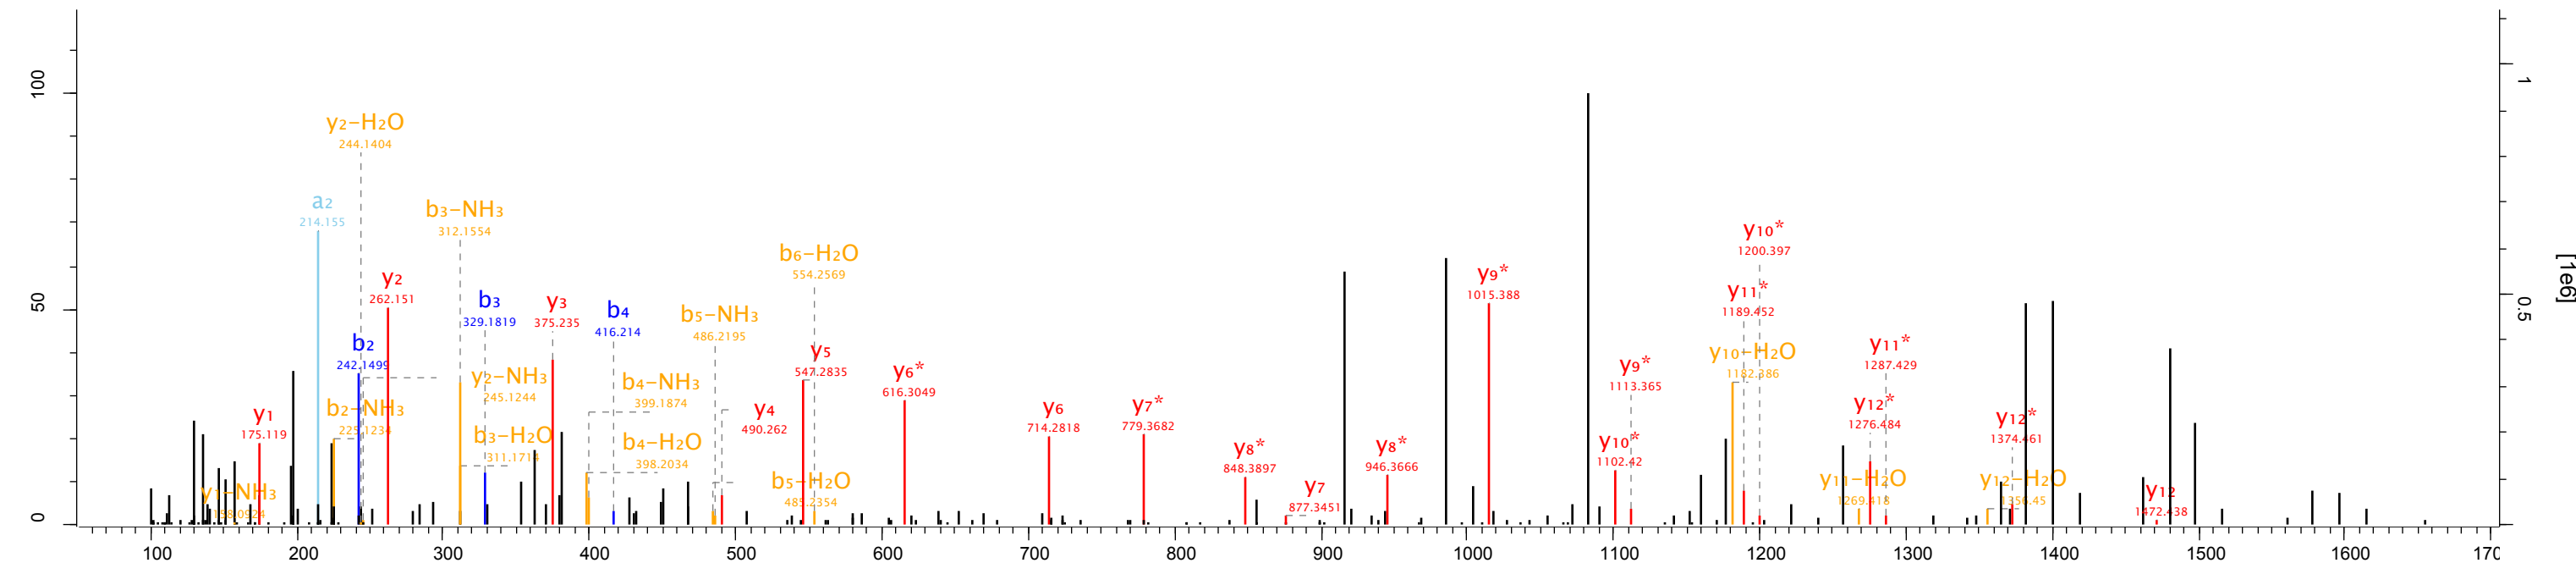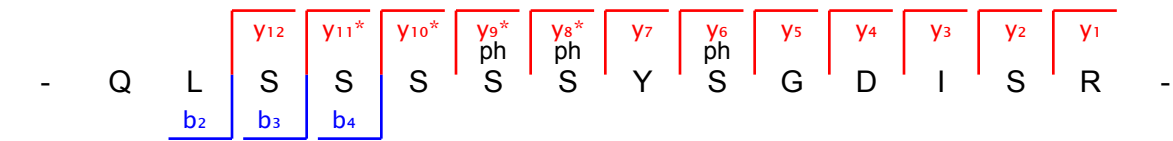

Raw file Scan Method Score m/z Gene names  
 20150812\_A375SR\_Phospho\_BR1\_02 11832 FTMS; HCD 113.07 1208.93 DIDO1

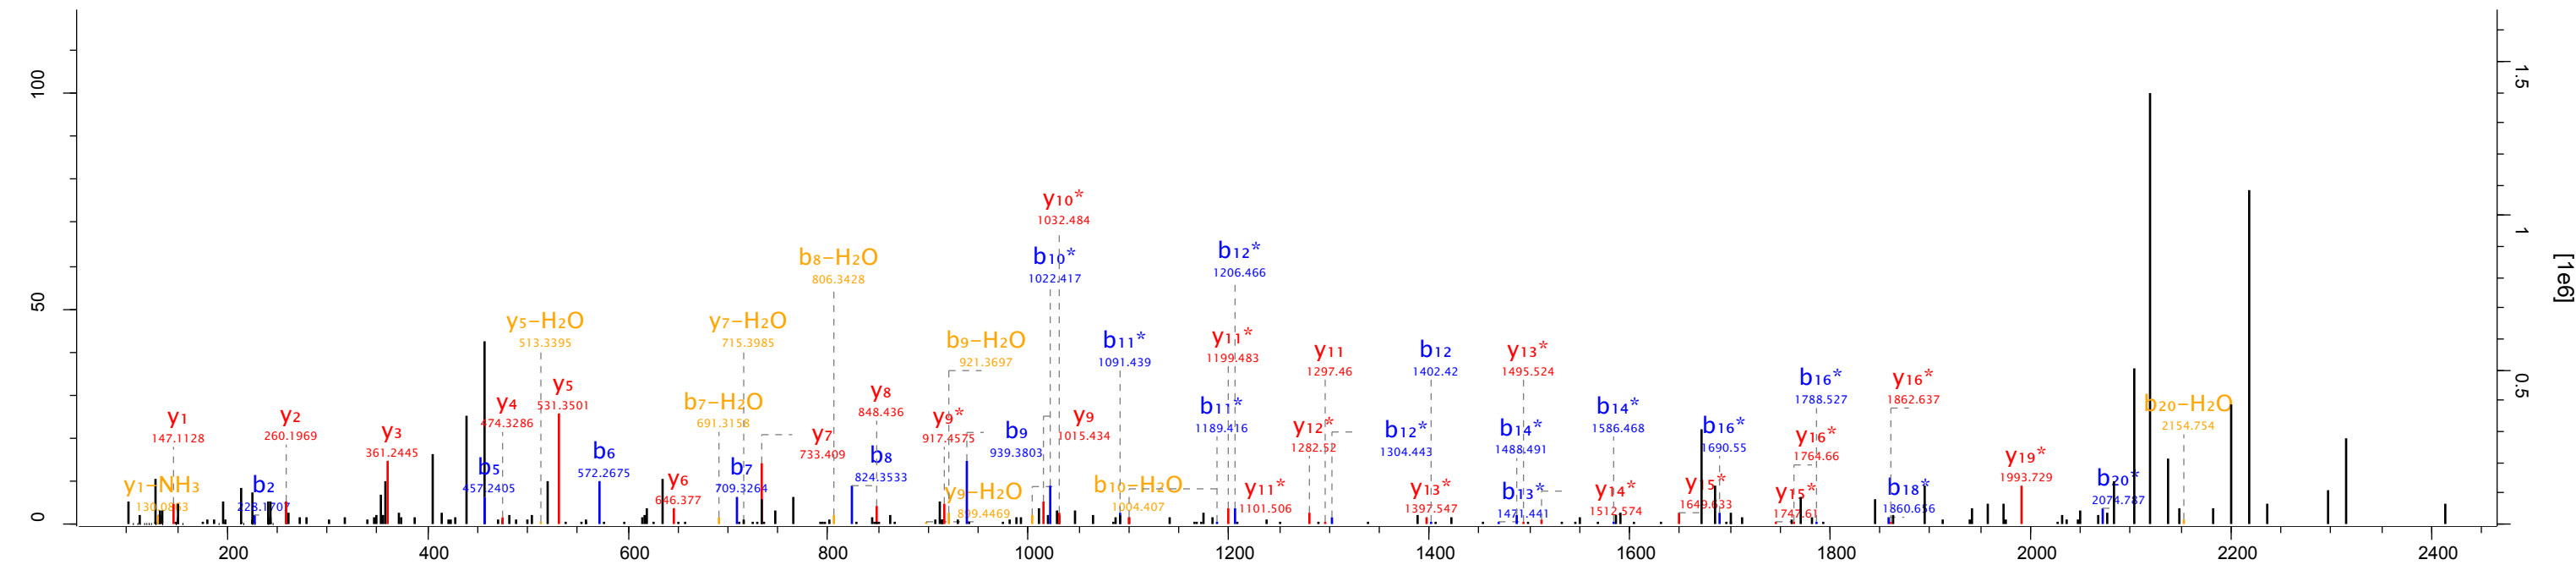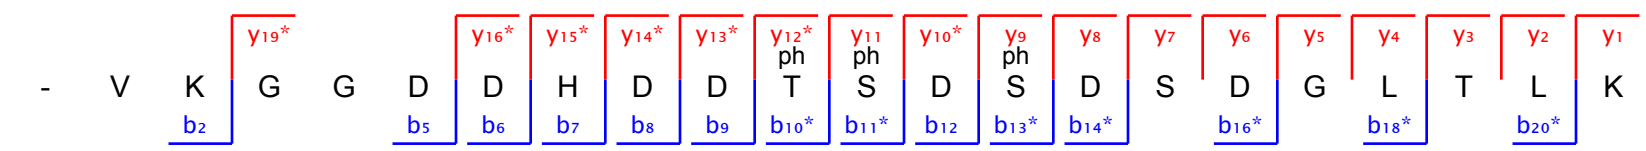

Raw file: 20150812\_A375SR\_Phospho\_BR1\_02  
 Scan: 11952 Method: FTMS; HCD Score: 90.42 m/z: 744.77 Gene names: HIRA

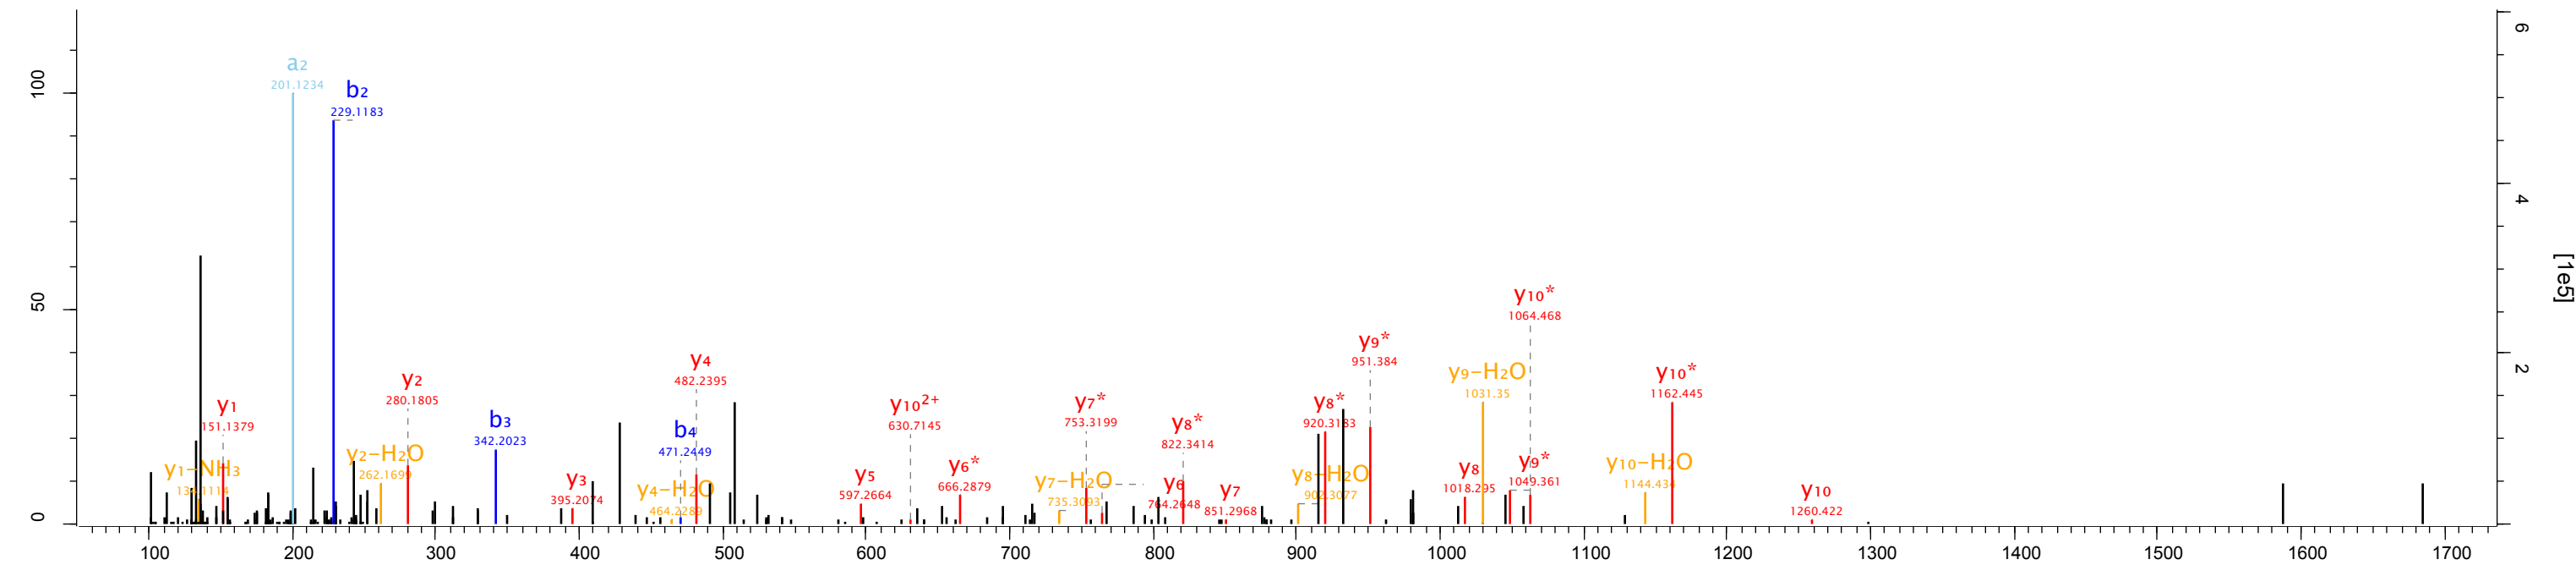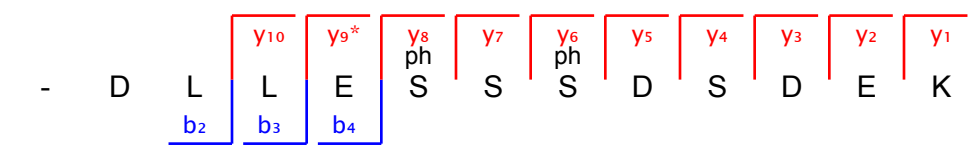

Raw file 20150812\_A375SR\_Phospho\_BR1\_02 Scan 12062 Method FTMS; HCD Score 185.51 m/z 968.81 Gene names SRRM2

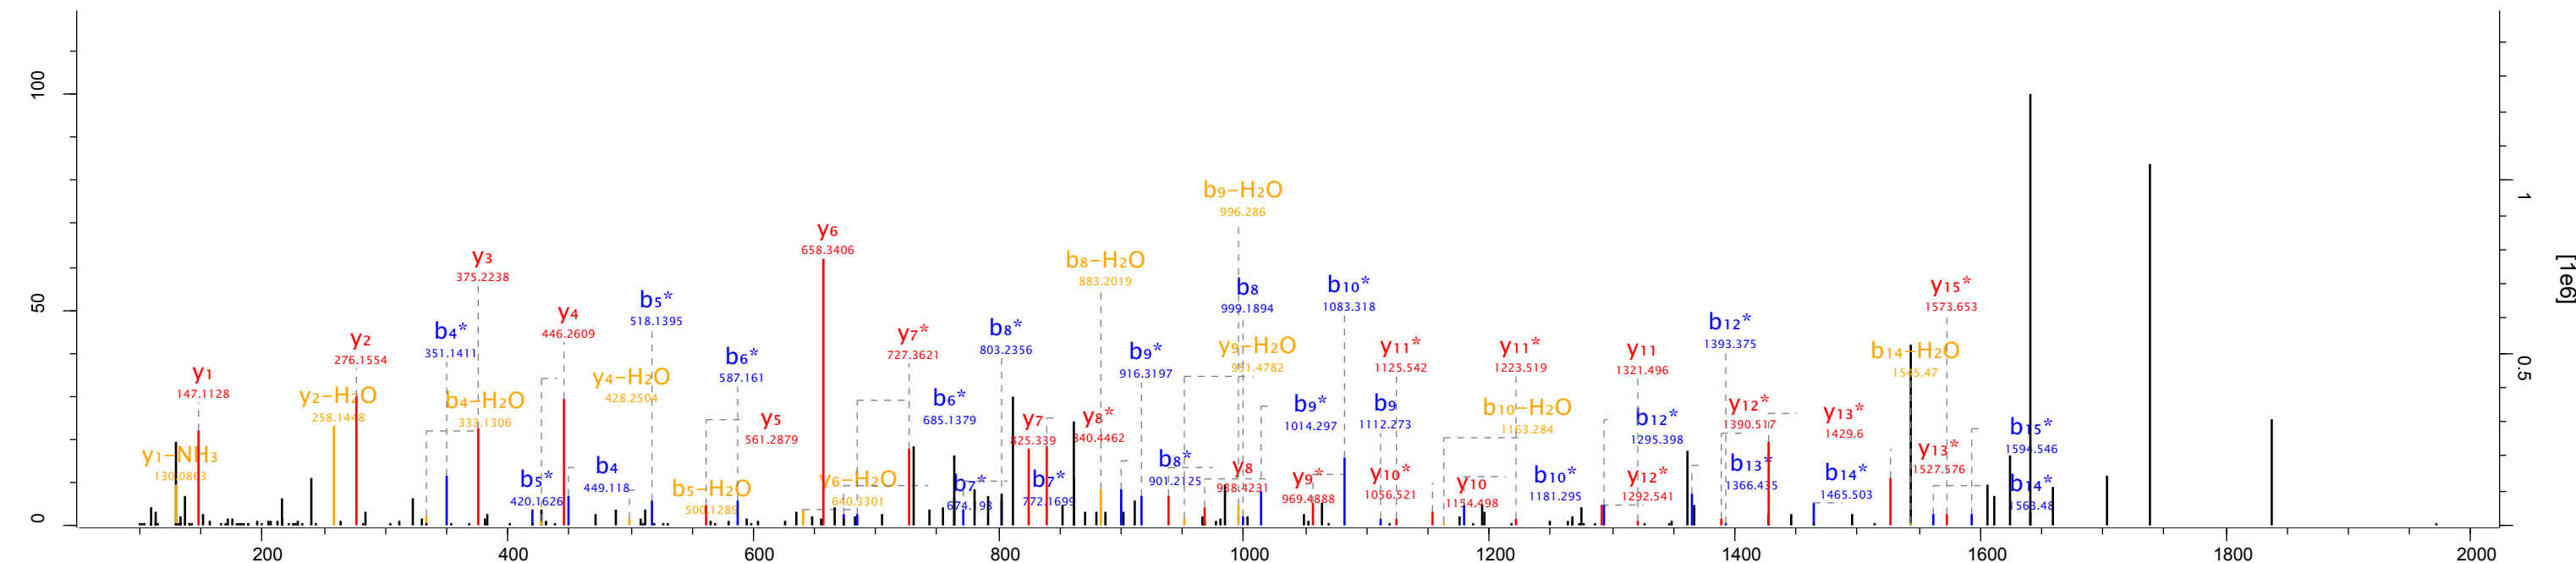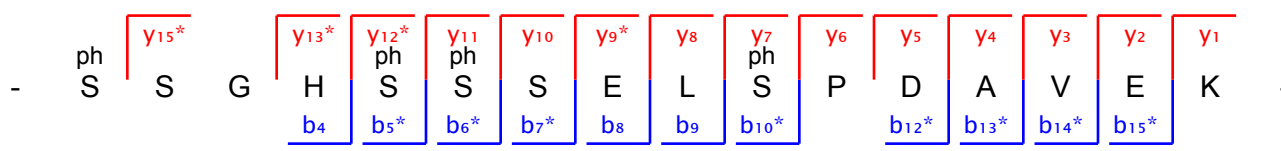



Raw file 20150812\_A375SR\_Phospho\_BR1\_02 Scan 12342 Method FTMS; HCD Score 40.52 m/z 1029.04 Gene names RBM10

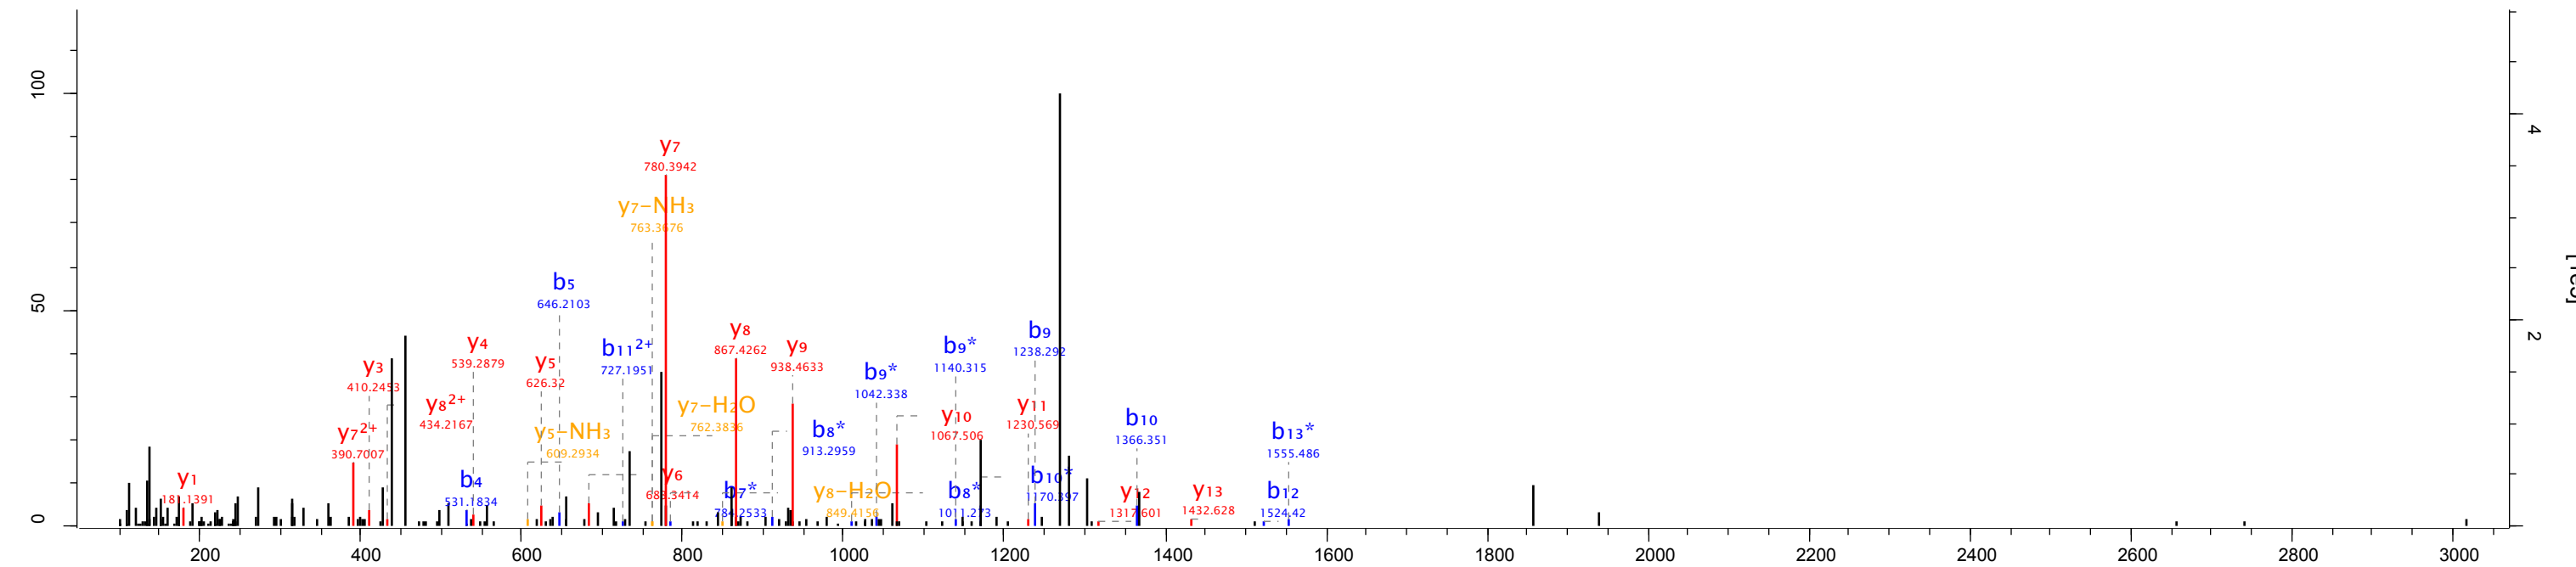

- H D Y D D S S E E Q S A E D S Y E A S P G S E T Q R -

ph ph

b<sub>4</sub> b<sub>5</sub> b<sub>7</sub>\* b<sub>8</sub>\* b<sub>9</sub> b<sub>10</sub> b<sub>11</sub><sup>2+</sup> b<sub>12</sub> b<sub>13</sub>\* y<sub>13</sub> y<sub>12</sub> y<sub>11</sub> y<sub>10</sub> y<sub>9</sub> y<sub>8</sub> y<sub>7</sub> y<sub>6</sub> y<sub>5</sub> y<sub>4</sub> y<sub>3</sub> y<sub>1</sub>

Raw file 20150812\_A375SR\_Phospho\_BR1\_02 Scan 12472 Method FTMS; HCD Score 57.79 m/z 702.31 Gene names CEP170B

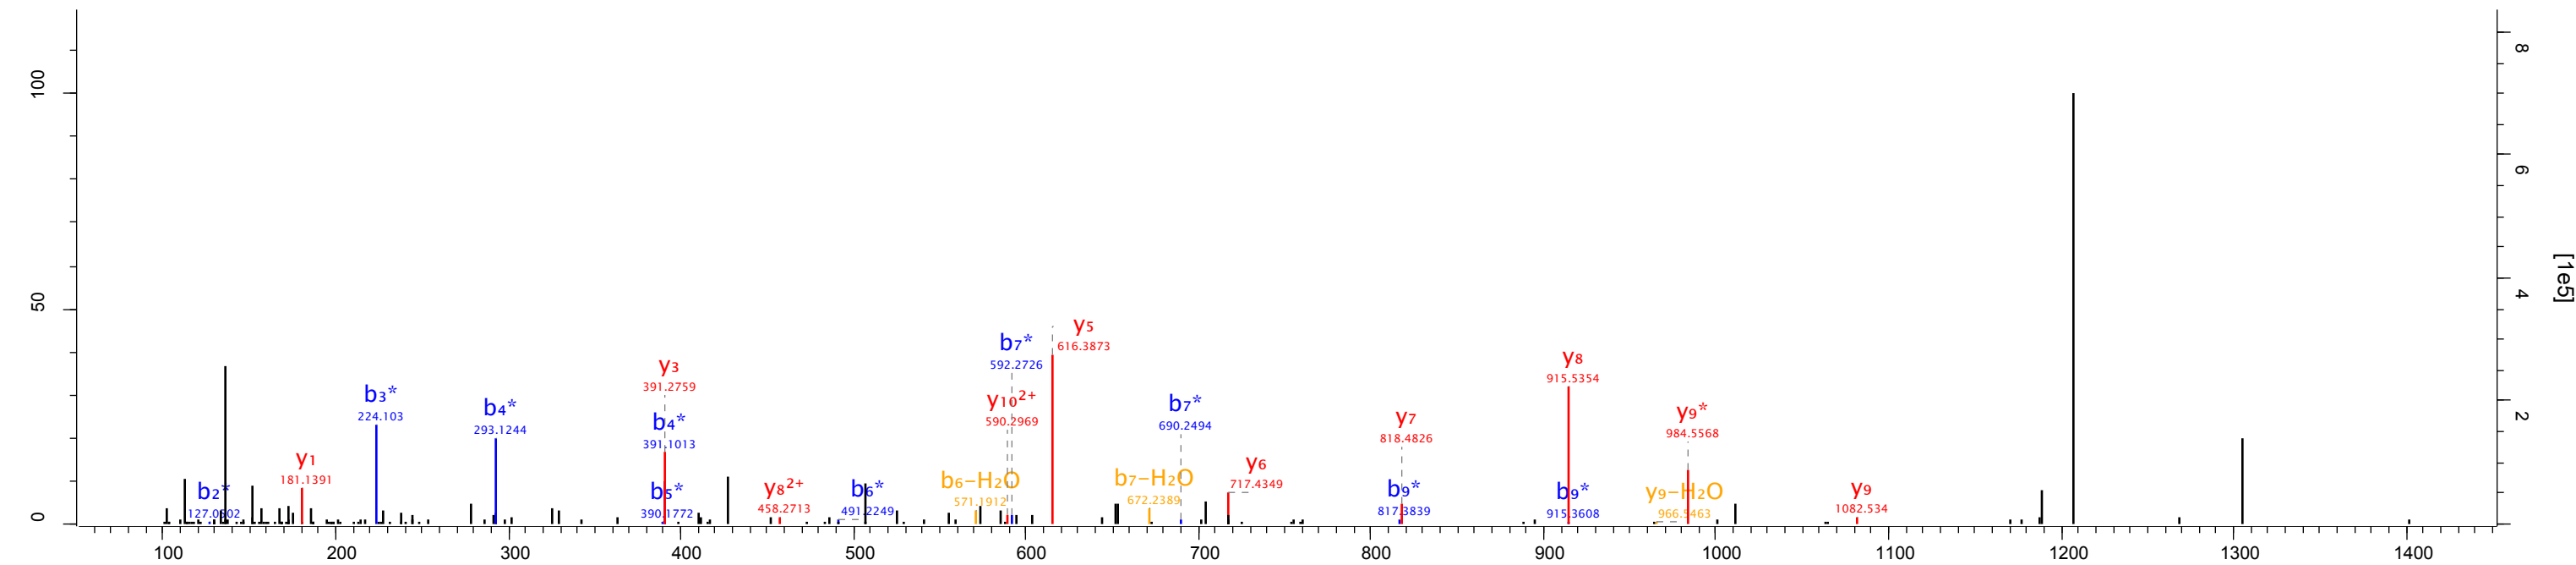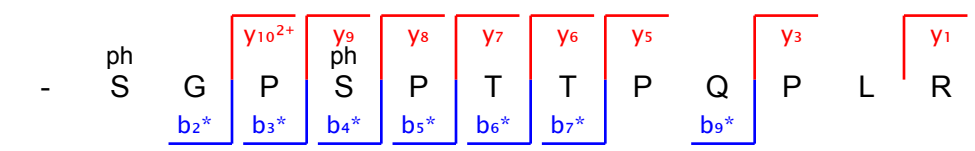

Raw file: 20150812\_A375SR\_Phospho\_BR1\_02  
 Scan: 12612  
 Method: FTMS; HCD  
 Score: 166.08  
 m/z: 1186.93  
 Gene names: CTPS2

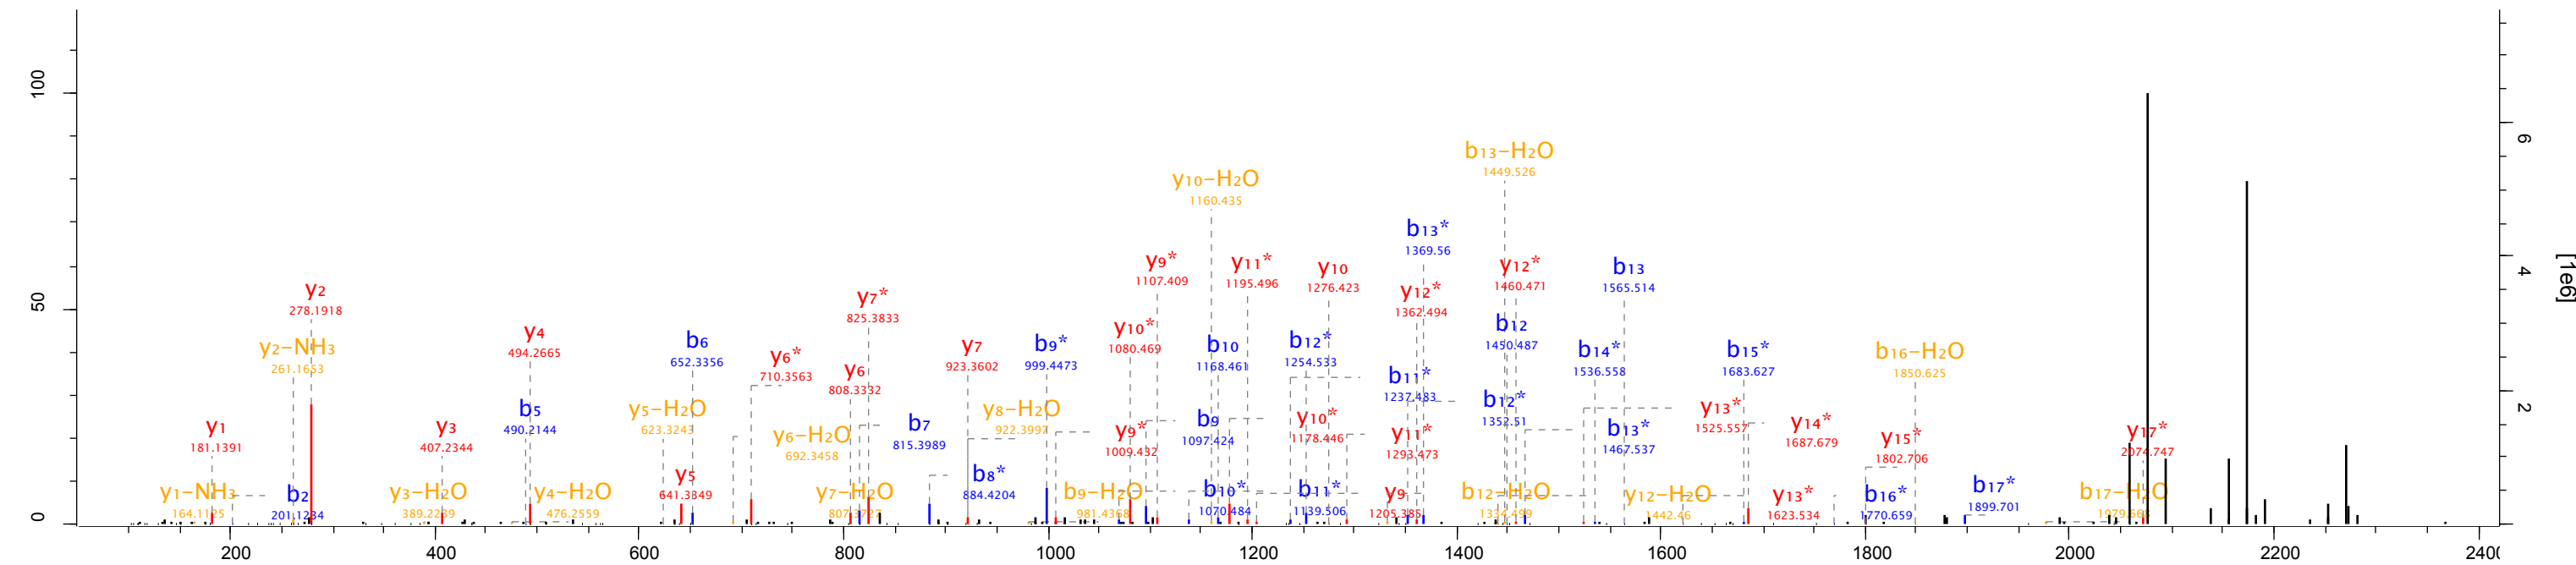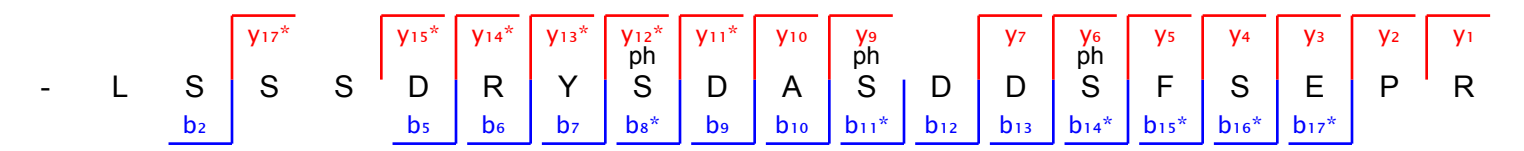

Raw file: 20150812\_A375SR\_Phospho\_BR1\_02  
 Scan: 12712 Method: FTMS; HCD Score: 190.54 m/z: 1092.91 Gene names: SF3B2

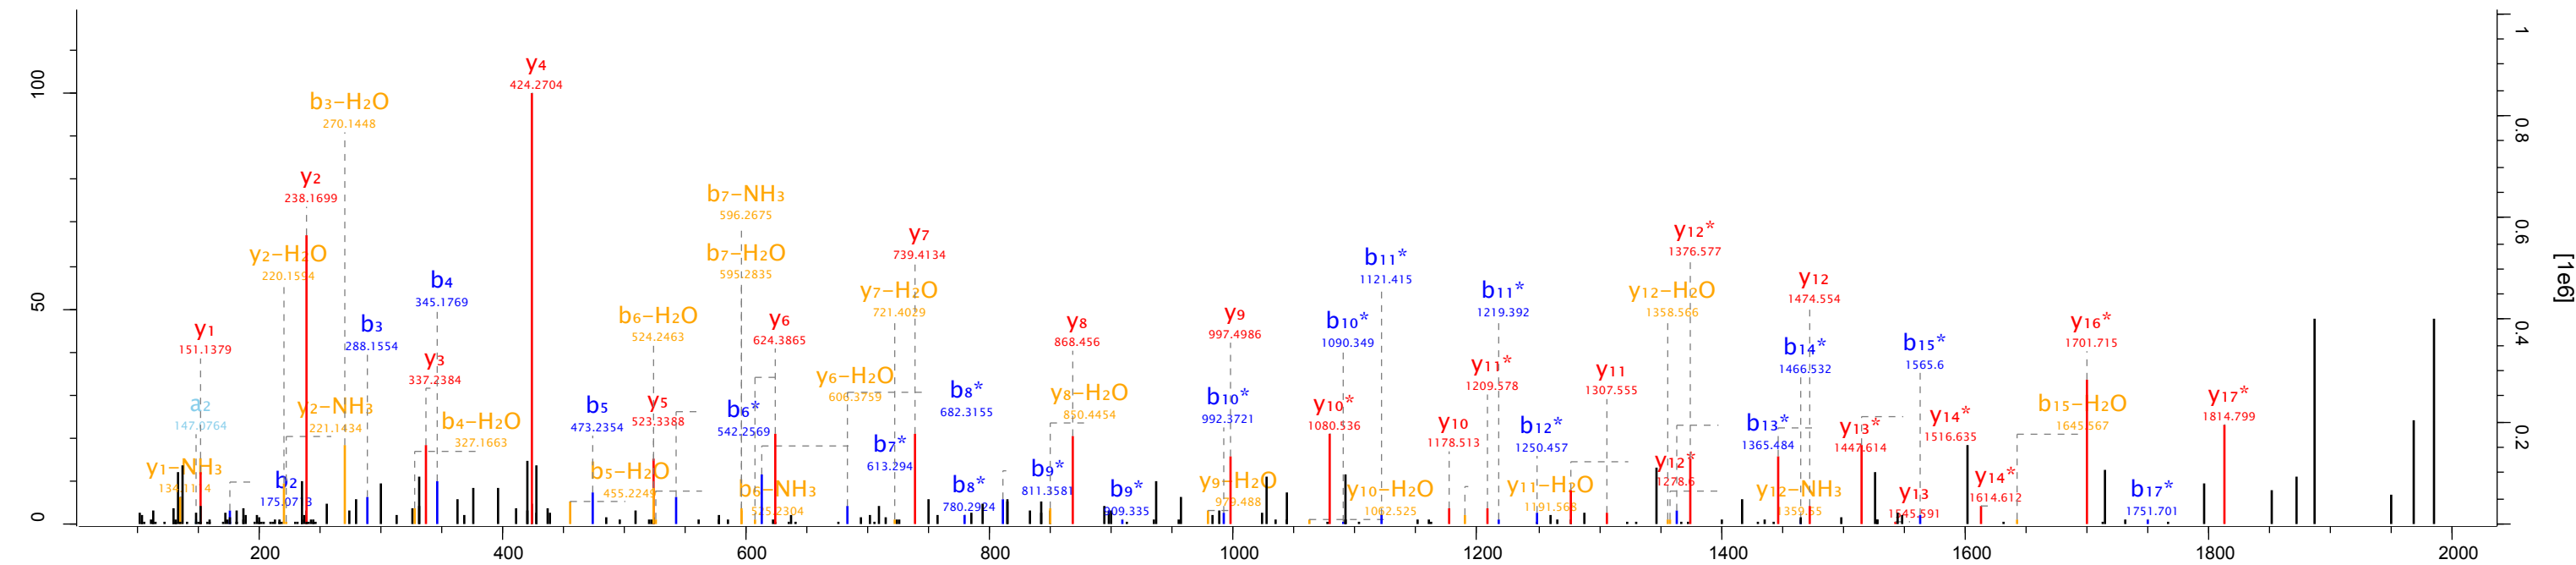

- S S L G Q S A S E T E E D T V S V S K -

b<sub>2</sub>
b<sub>3</sub>
b<sub>4</sub>
b<sub>5</sub>
b<sub>6</sub>\*
b<sub>7</sub>\*
b<sub>8</sub>\*
b<sub>9</sub>\*
b<sub>10</sub>\*
b<sub>11</sub>\*
b<sub>12</sub>\*
b<sub>13</sub>\*
b<sub>14</sub>\*
b<sub>15</sub>\*
b<sub>17</sub>\*

y<sub>17</sub>\*
y<sub>16</sub>\*
y<sub>14</sub>\*
y<sub>13</sub>
y<sub>12</sub>
y<sub>11</sub>
y<sub>10</sub>
y<sub>9</sub>
y<sub>8</sub>
y<sub>7</sub>
y<sub>6</sub>
y<sub>5</sub>
y<sub>4</sub>
y<sub>3</sub>
y<sub>2</sub>
y<sub>1</sub>

Raw file: 20150812\_A375SR\_Phospho\_BR1\_02  
 Scan: 12862 Method: FTMS; HCD Score: 237.5 m/z: 1023.89 Gene names: CENPU;MLF1IP

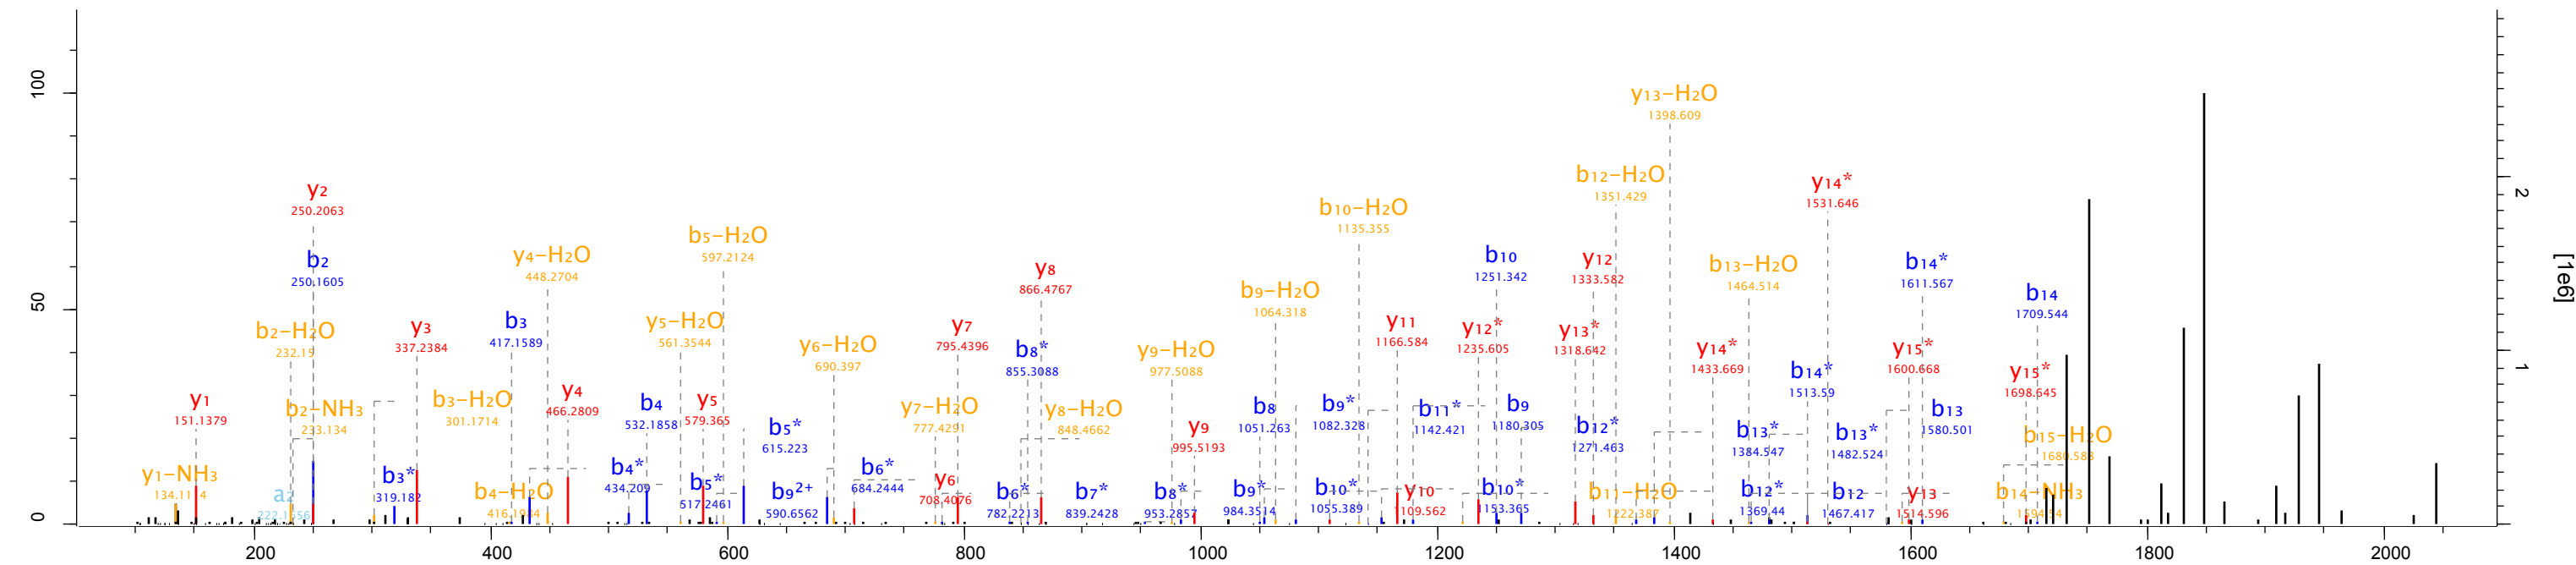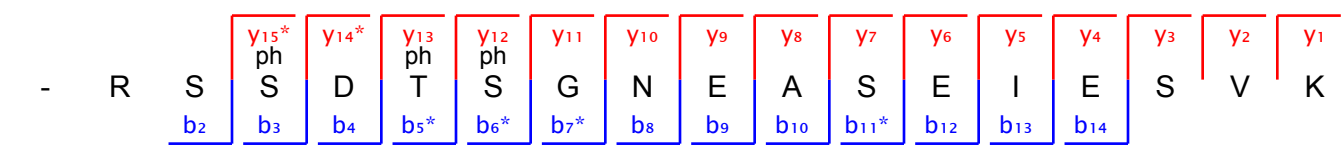

Raw file: 20150812\_A375SR\_Phospho\_BR1\_02  
 Scan: 13132 Method: FTMS; HCD Score: 111.03 m/z: 731.83 Gene names: SON

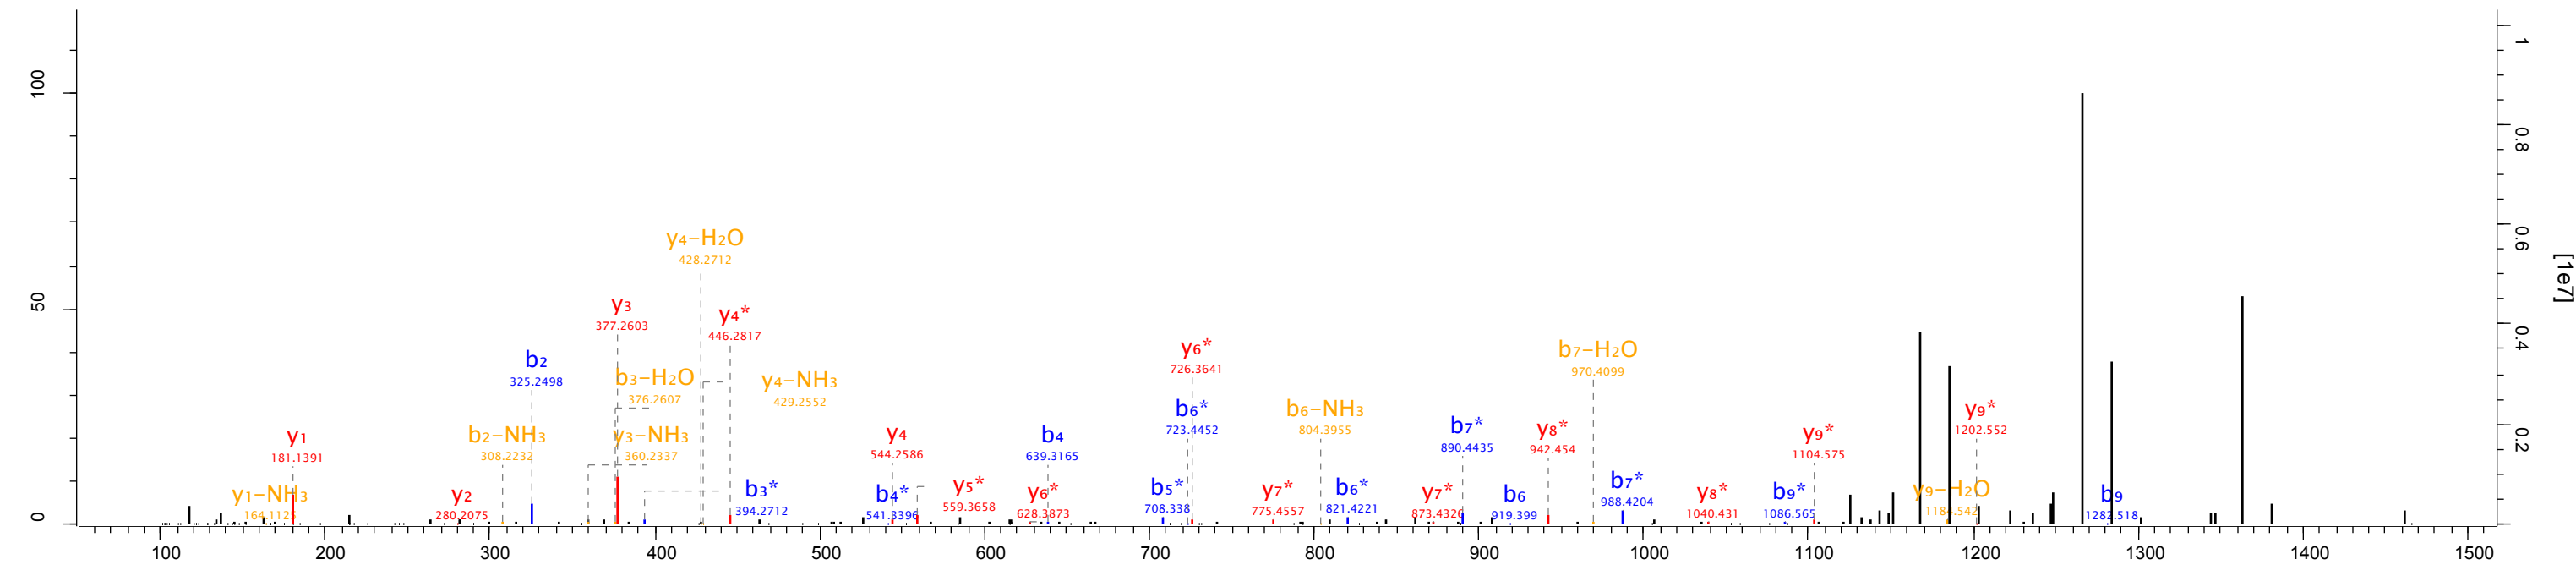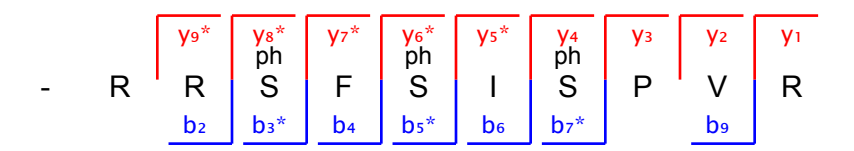

Raw file: 20150812\_A375SR\_Phospho\_BR1\_02  
 Scan: 13352 Method: FTMS; HCD Score: 47.98 m/z: 1040.95 Gene names: FOXO3

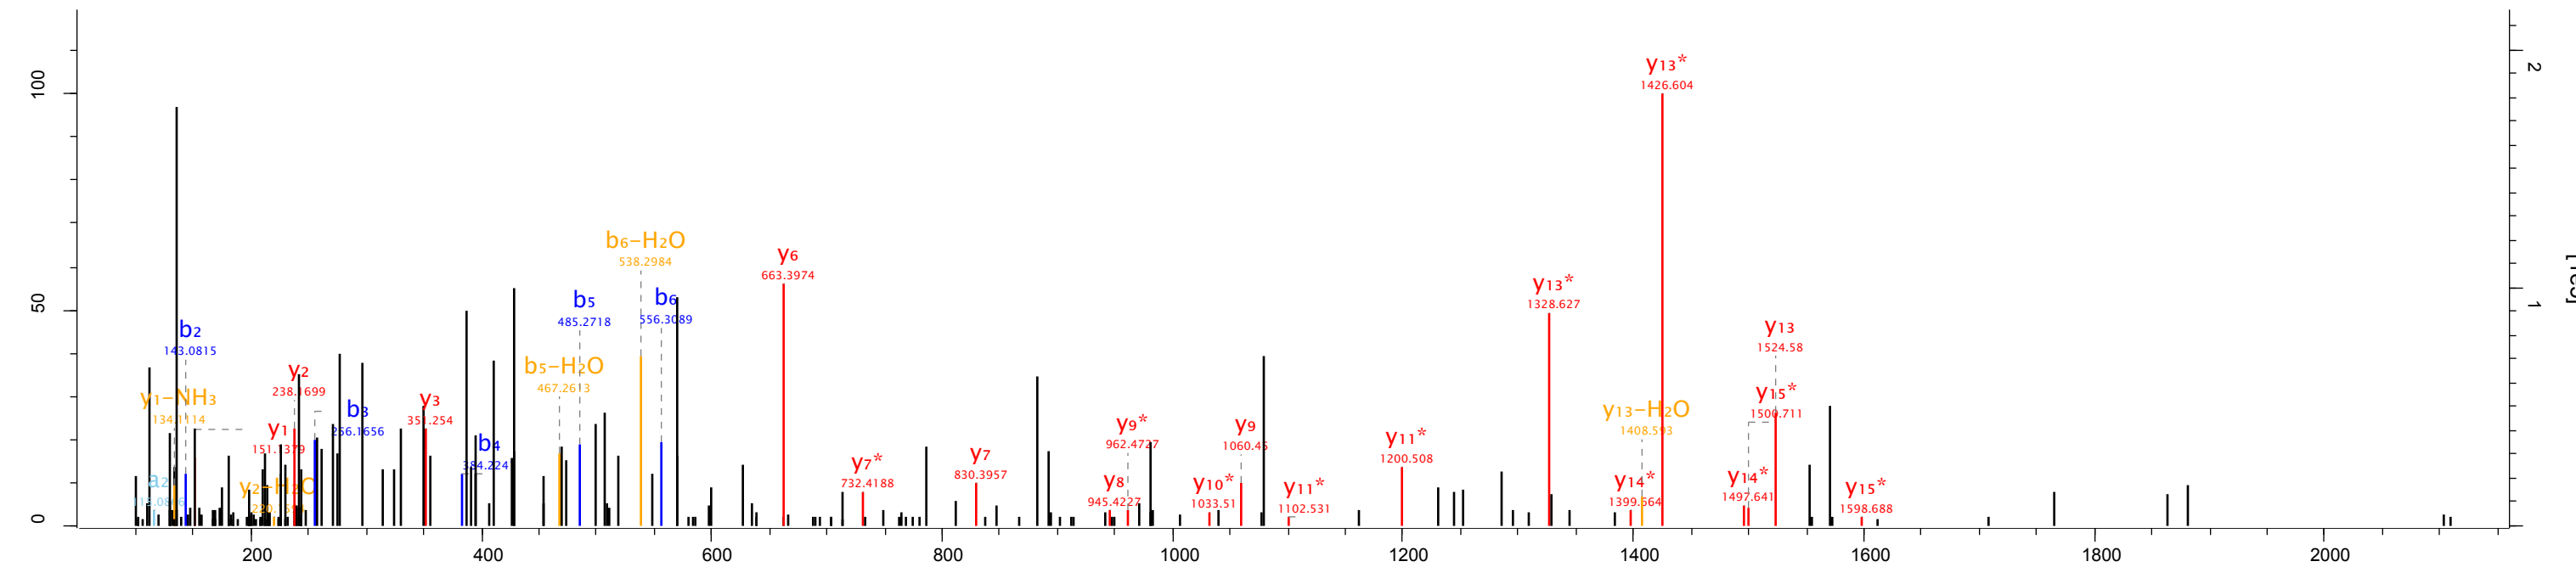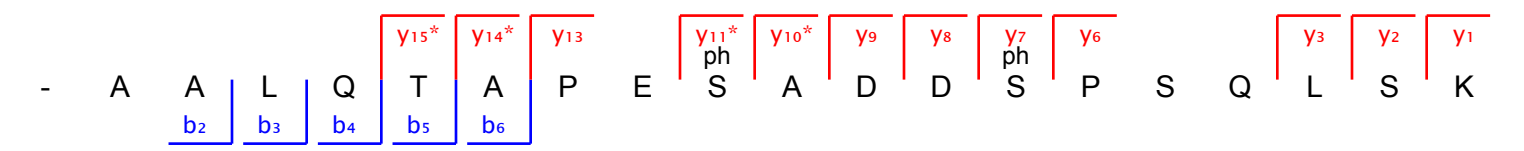

Raw file 20150812\_A375SR\_Phospho\_BR1\_02 Scan 13622 Method FTMS; HCD Score 144.23 m/z 745.67 Gene names CTNNA1;CTNNA2

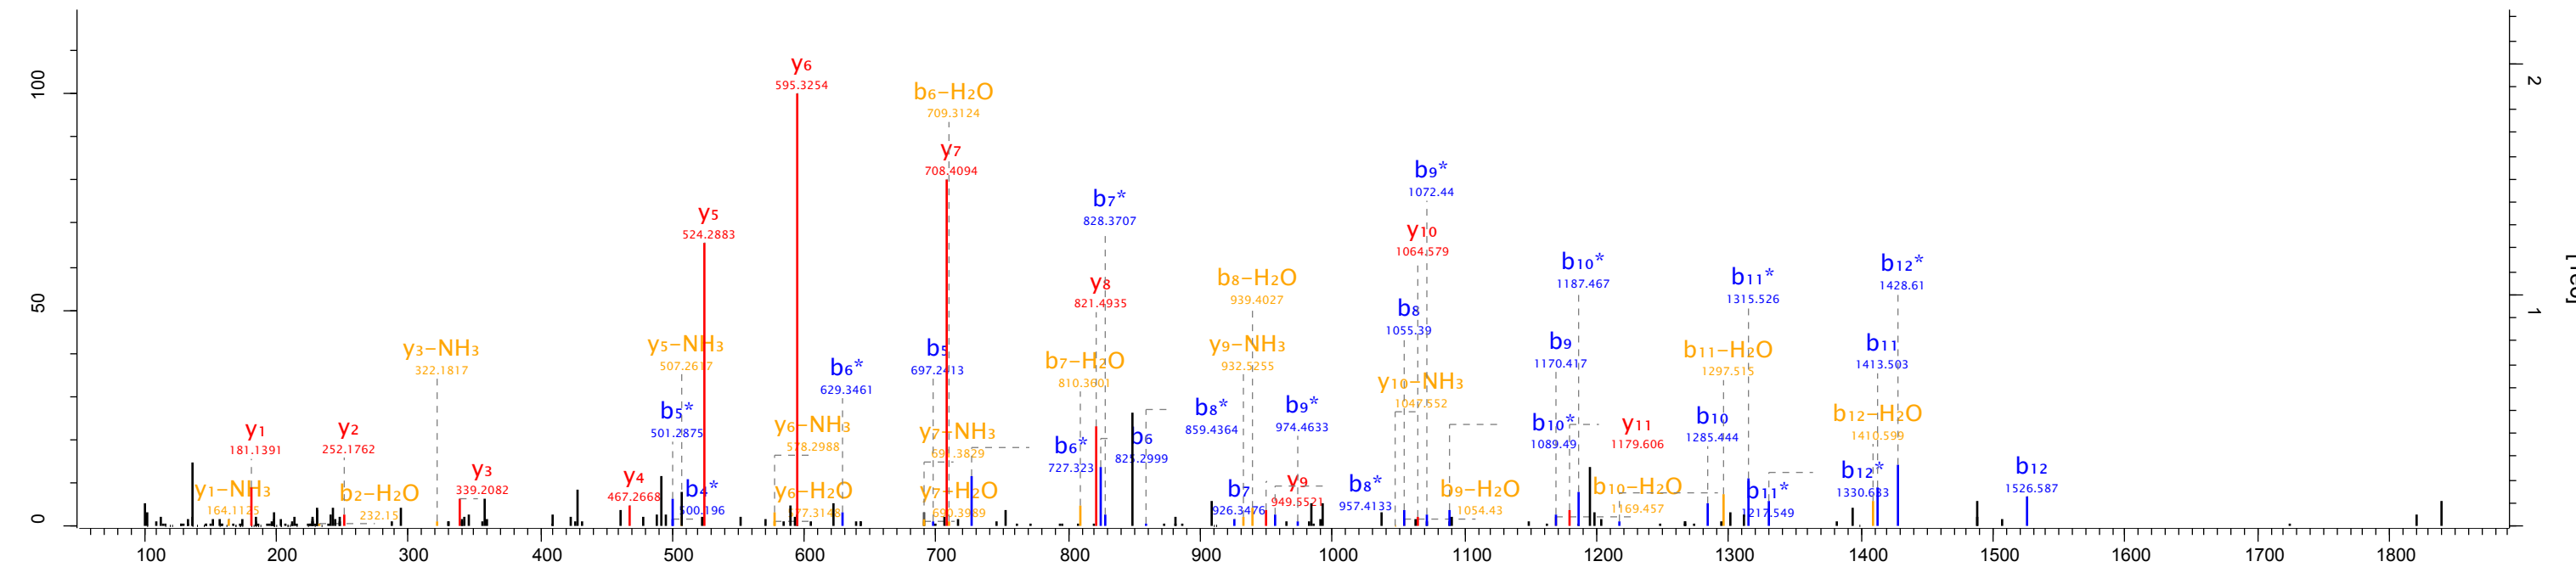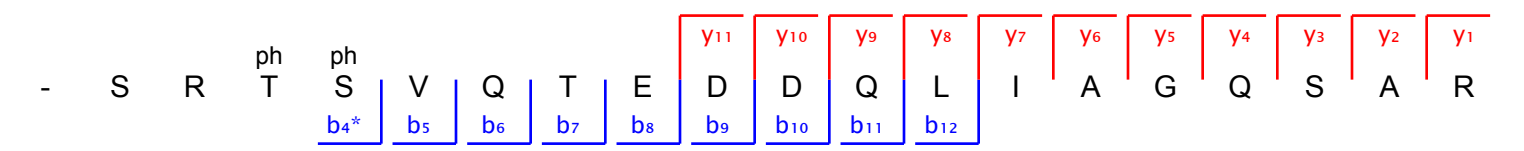



Raw file 20150812\_A375SR\_Phospho\_BR1\_02 Scan 13792 Method FTMS; HCD Score 45.61 m/z 668.68 Gene names BHLHE22

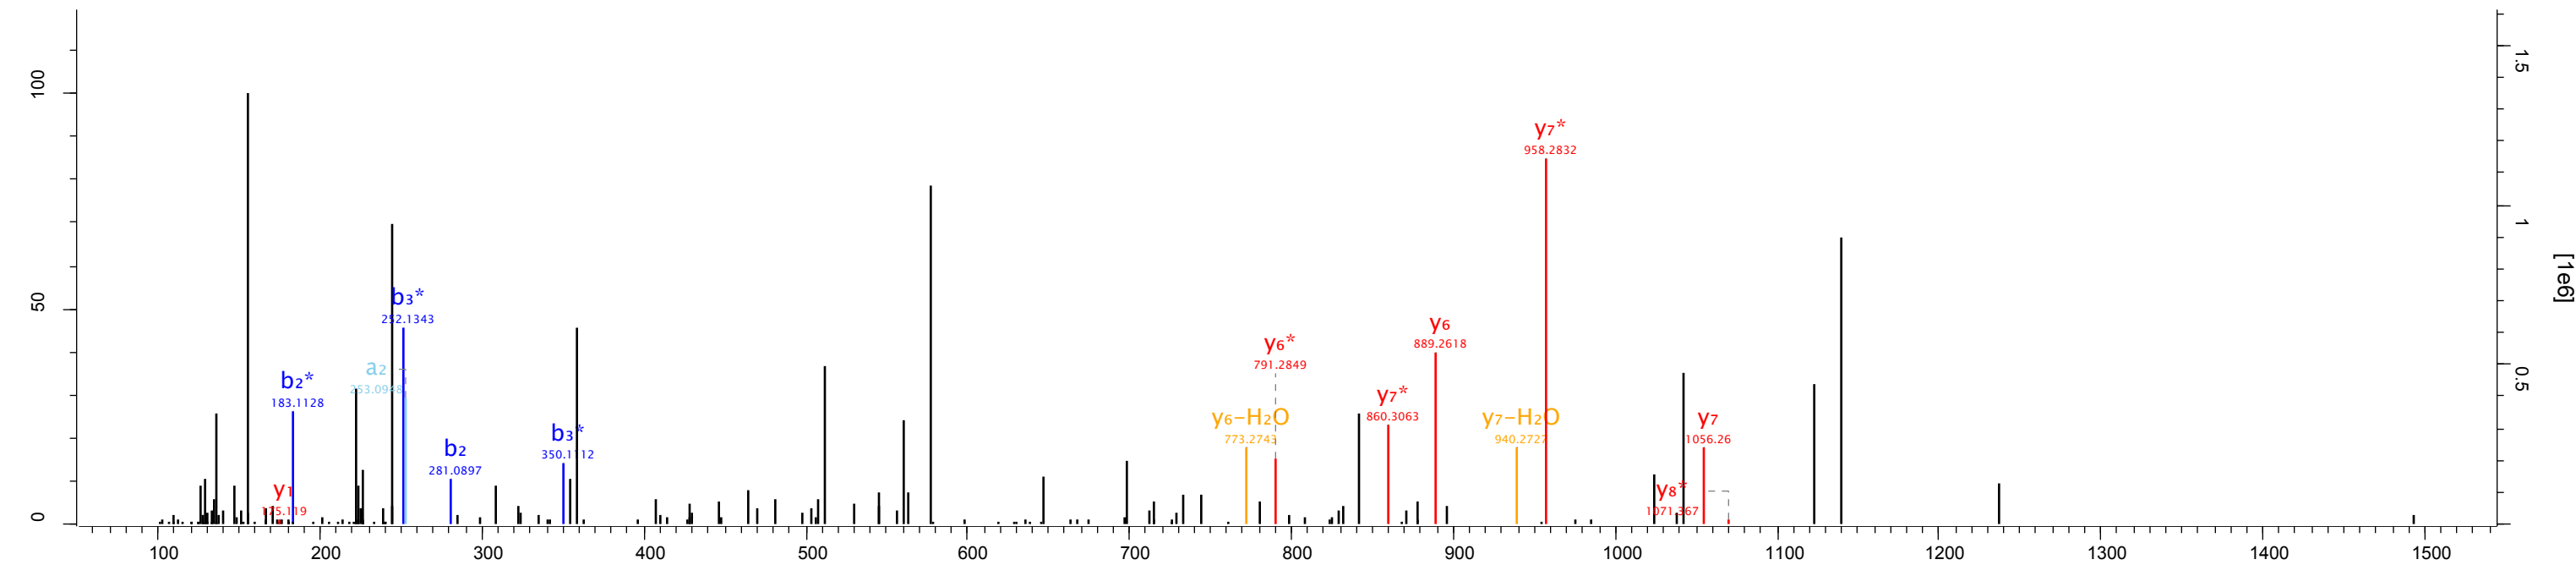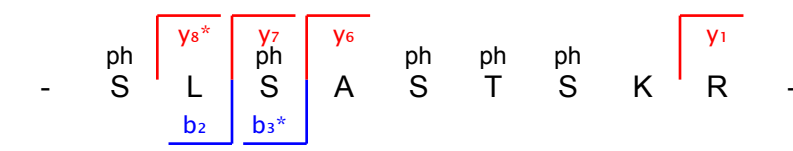

Raw file: 20150812\_A375SR\_Phospho\_BR1\_02  
 Scan: 13822 Method: FTMS; HCD Score: 99.57 m/z: 656.92 Gene names: SRSF10

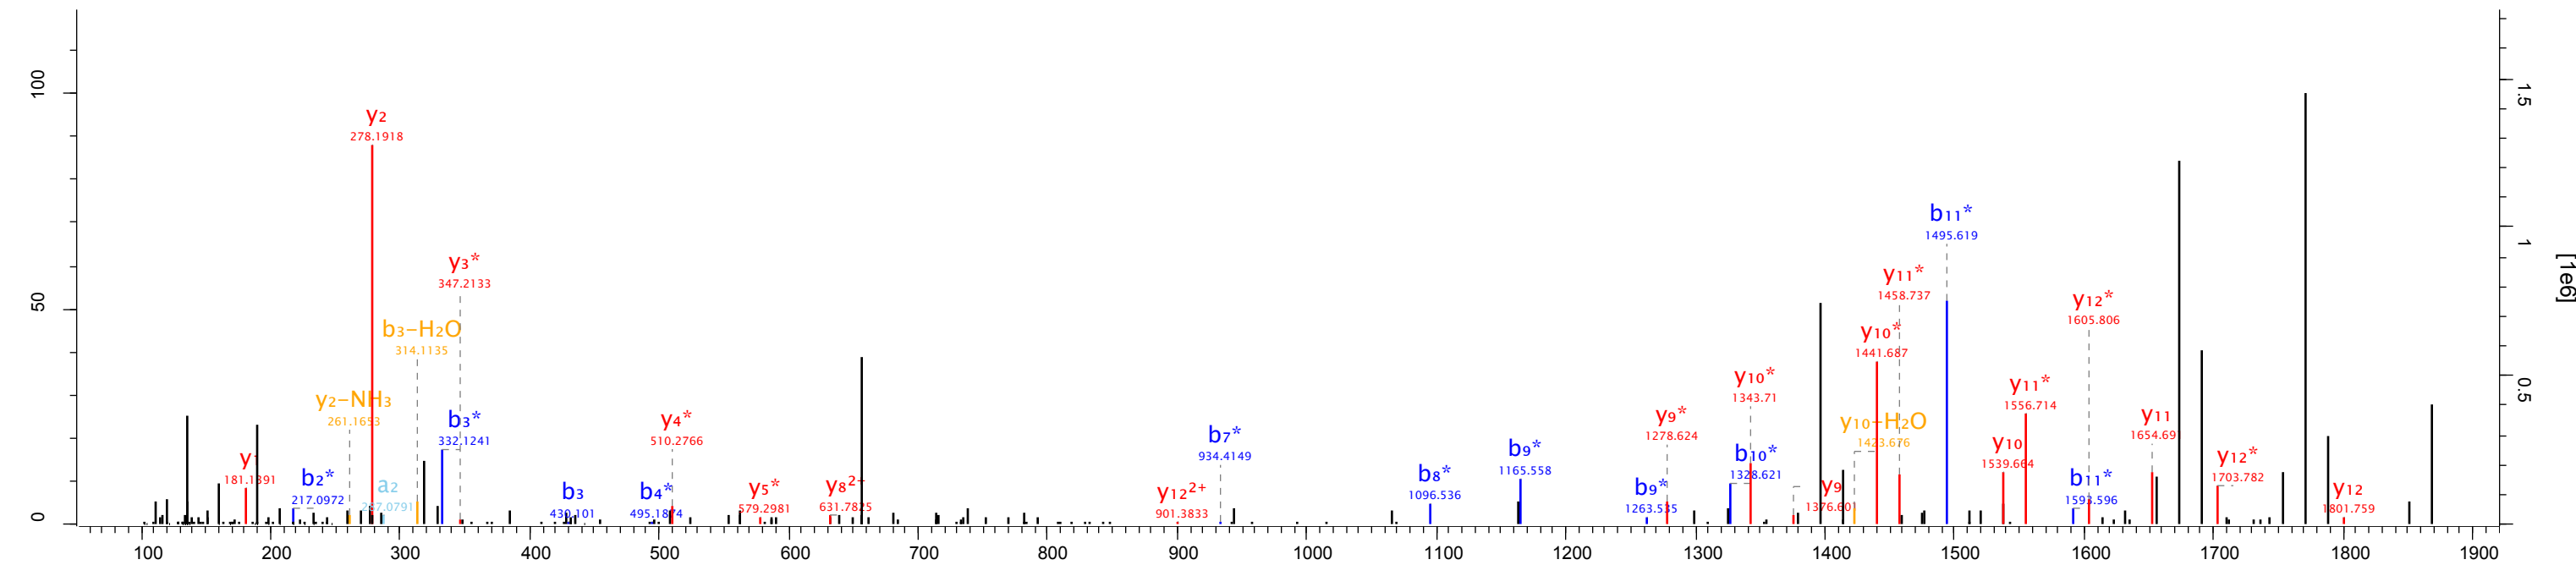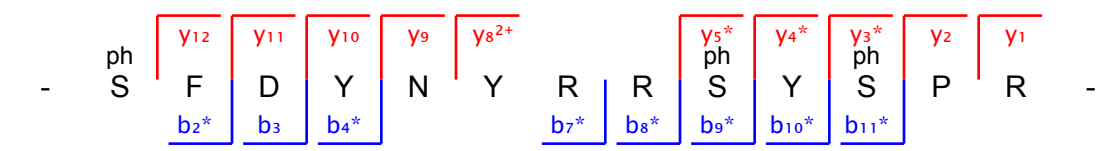

Raw file  
 20150812\_A375SR\_Phospho\_BR1\_02  
 Scan 13902 Method FTMS; HCD Score 87.21 m/z 983.42 Gene names TMF1

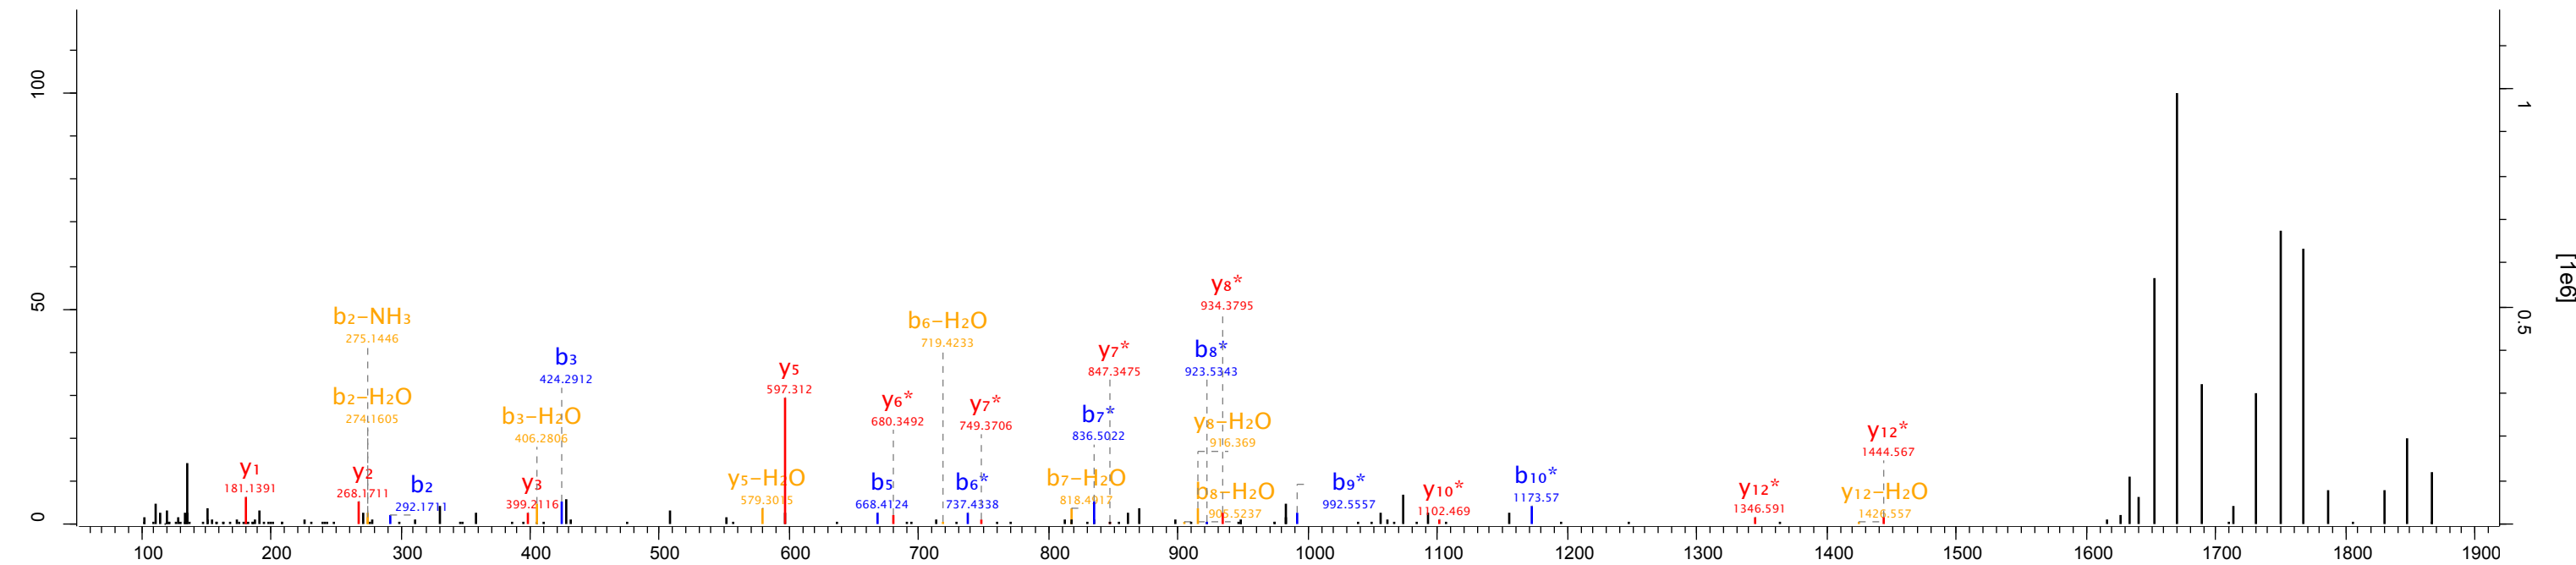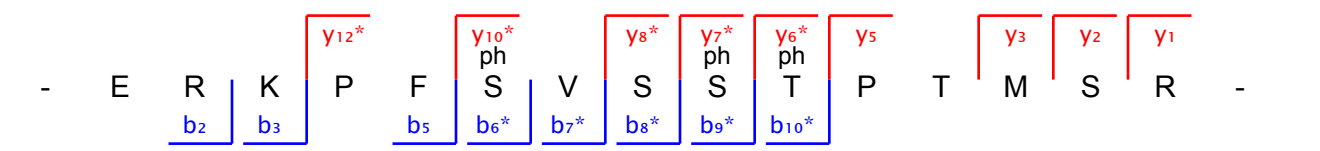

Raw file Scan Method Score m/z Gene names  
 20150812\_A375SR\_Phospho\_BR1\_02 13982 FTMS; HCD 141.41 857.89 NUP188

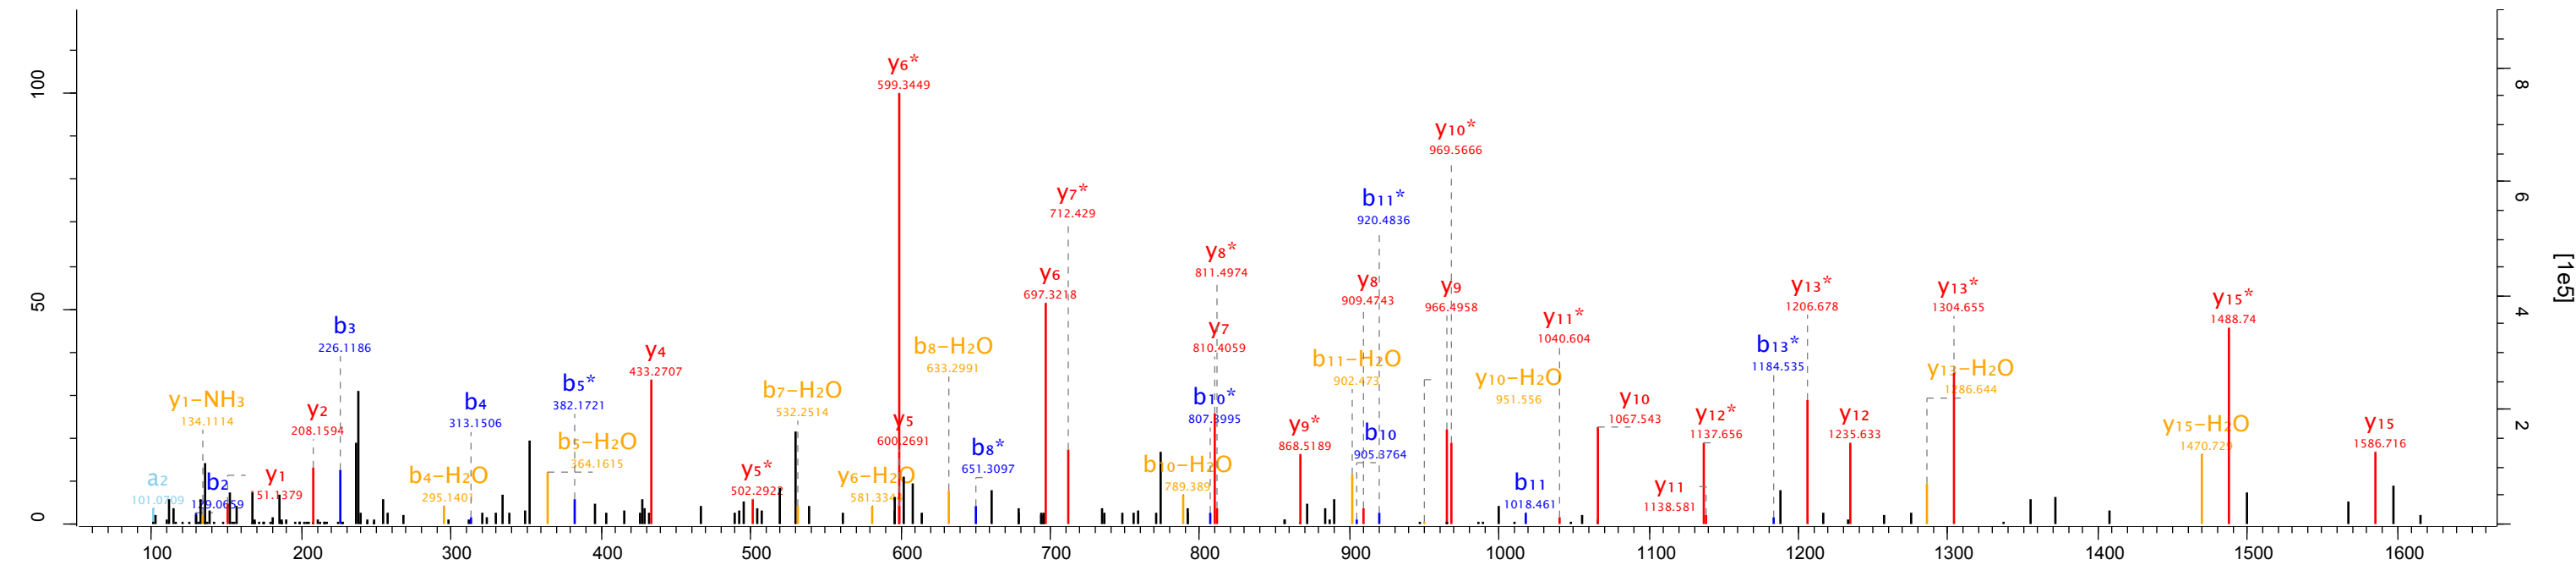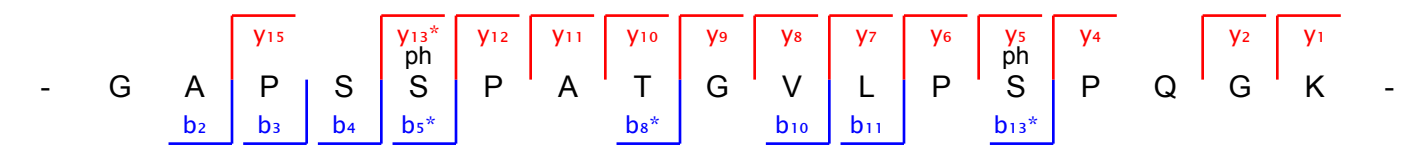

Raw file 20150812\_A375SR\_Phospho\_BR1\_02 Scan 14242 Method FTMS; HCD Score 250.1 m/z 1151.96 Gene names CTNNA1;CTNNA2

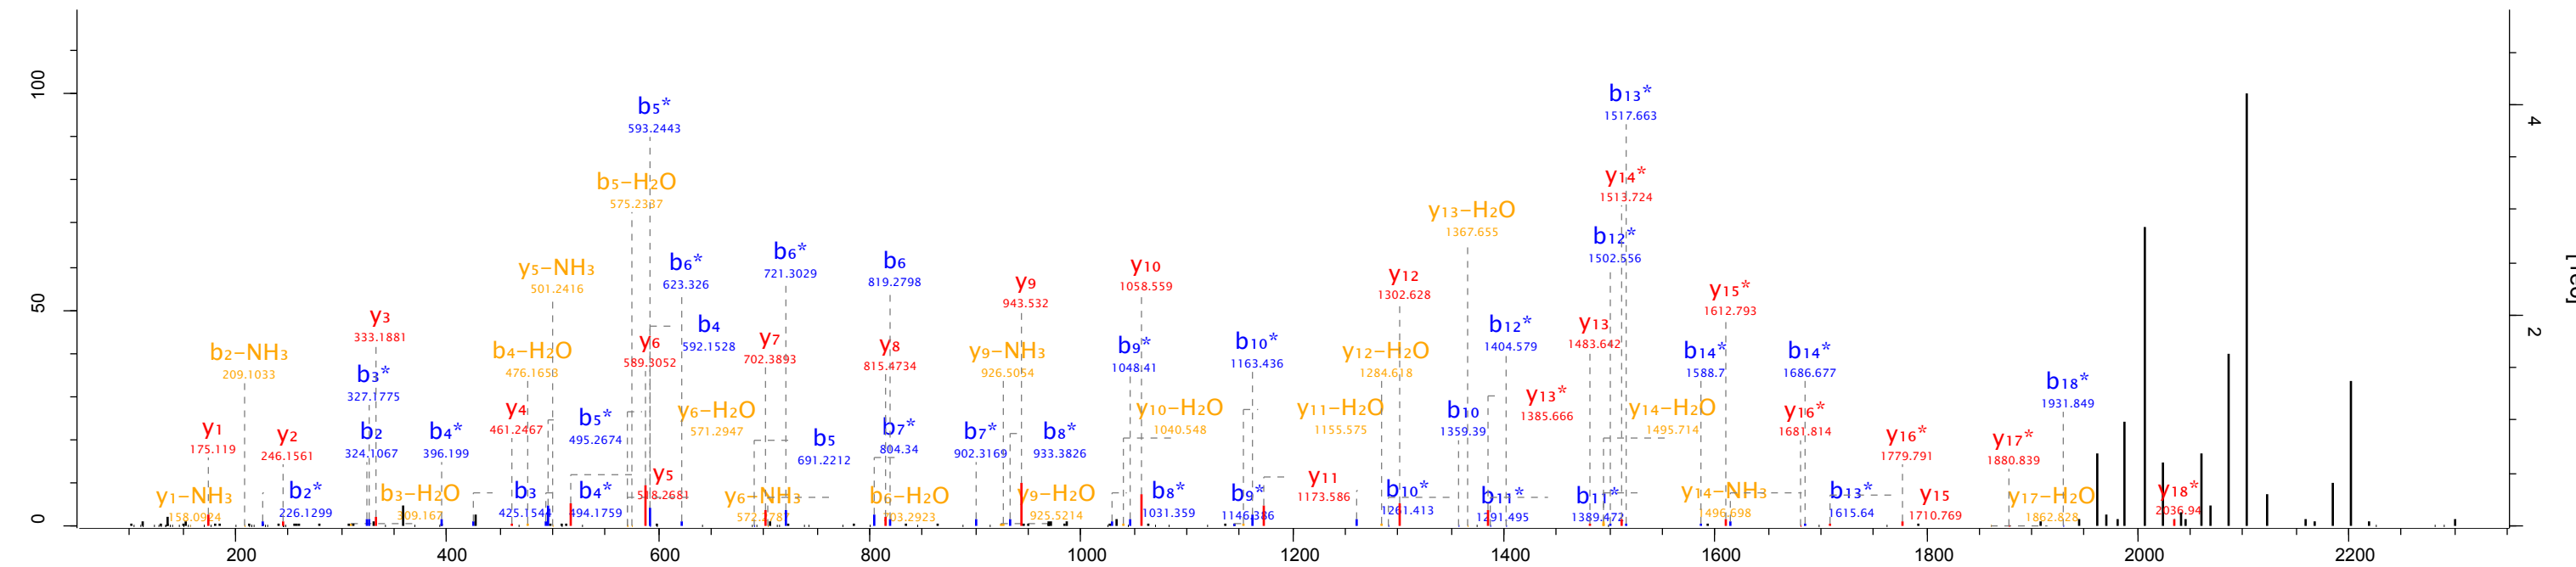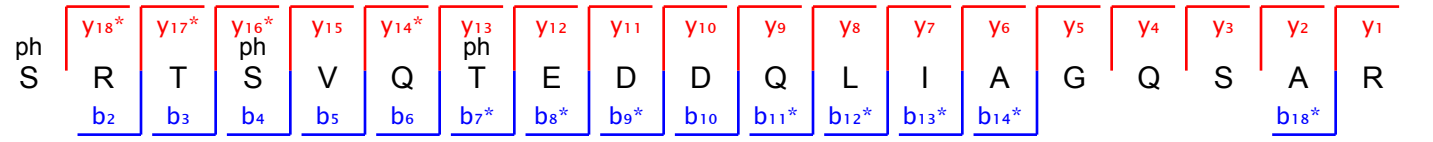

Raw file 20150812\_A375SR\_Phospho\_BR1\_02 Scan 14292 Method FTMS; HCD Score 82.07 m/z 581.72 Gene names ANK2

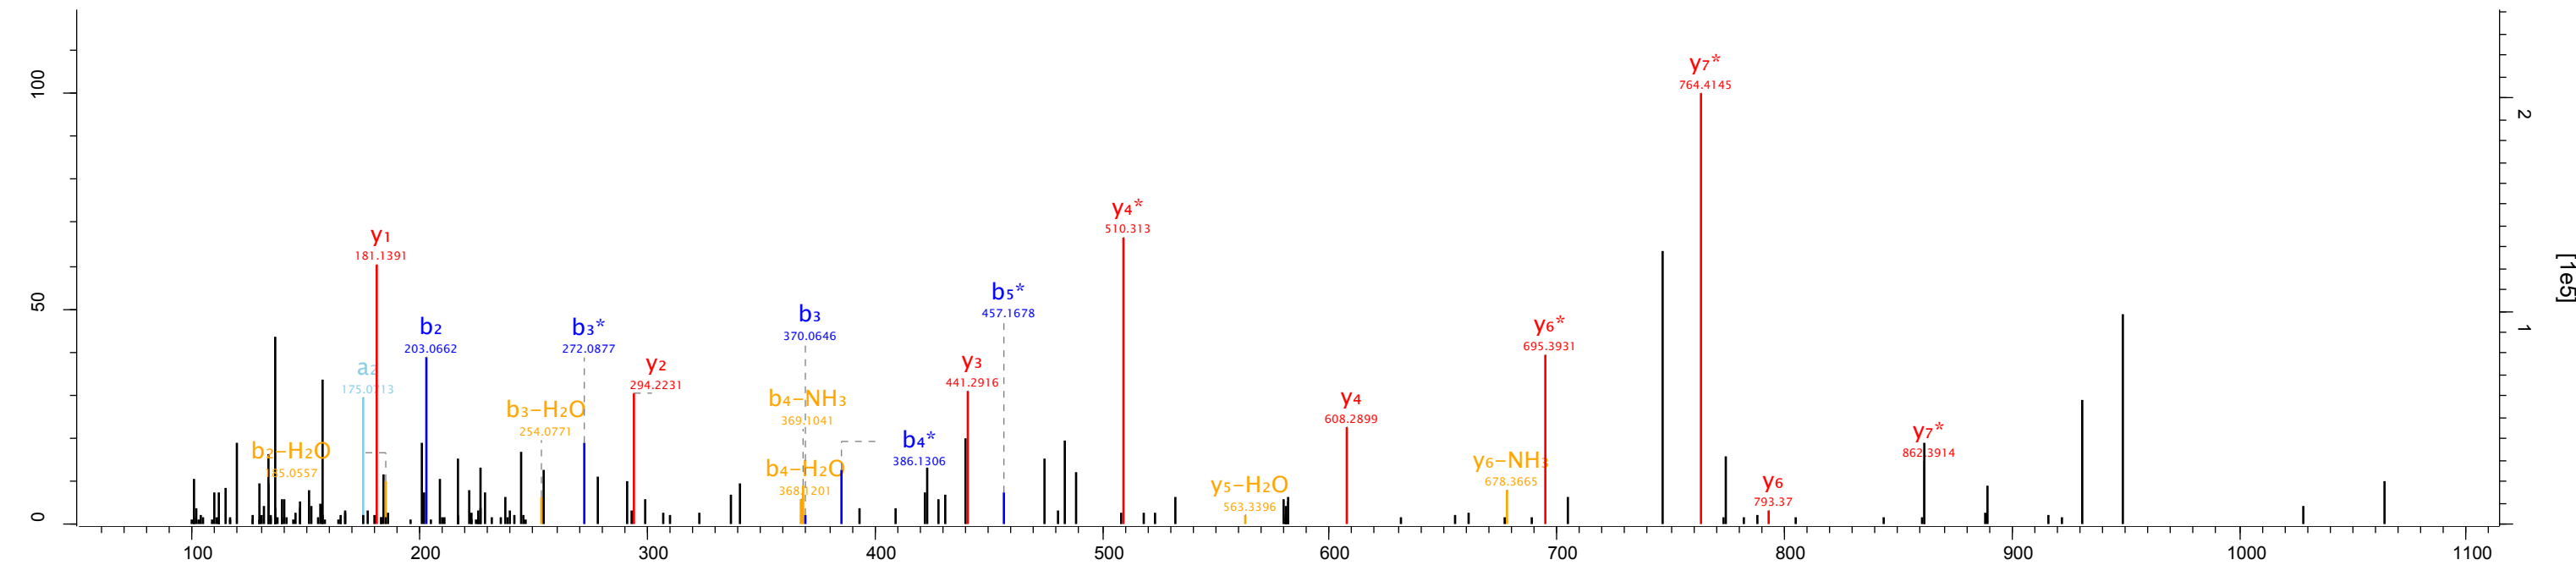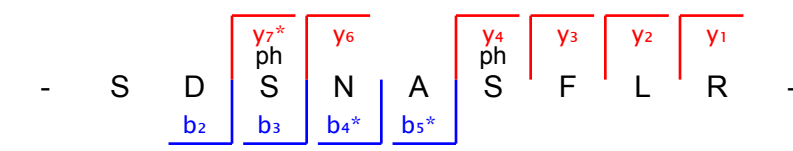

Raw file 20150812\_A375SR\_Phospho\_BR1\_02 Scan 14512 Method FTMS; HCD Score 64.83 m/z 732.74 Gene names SGMS2

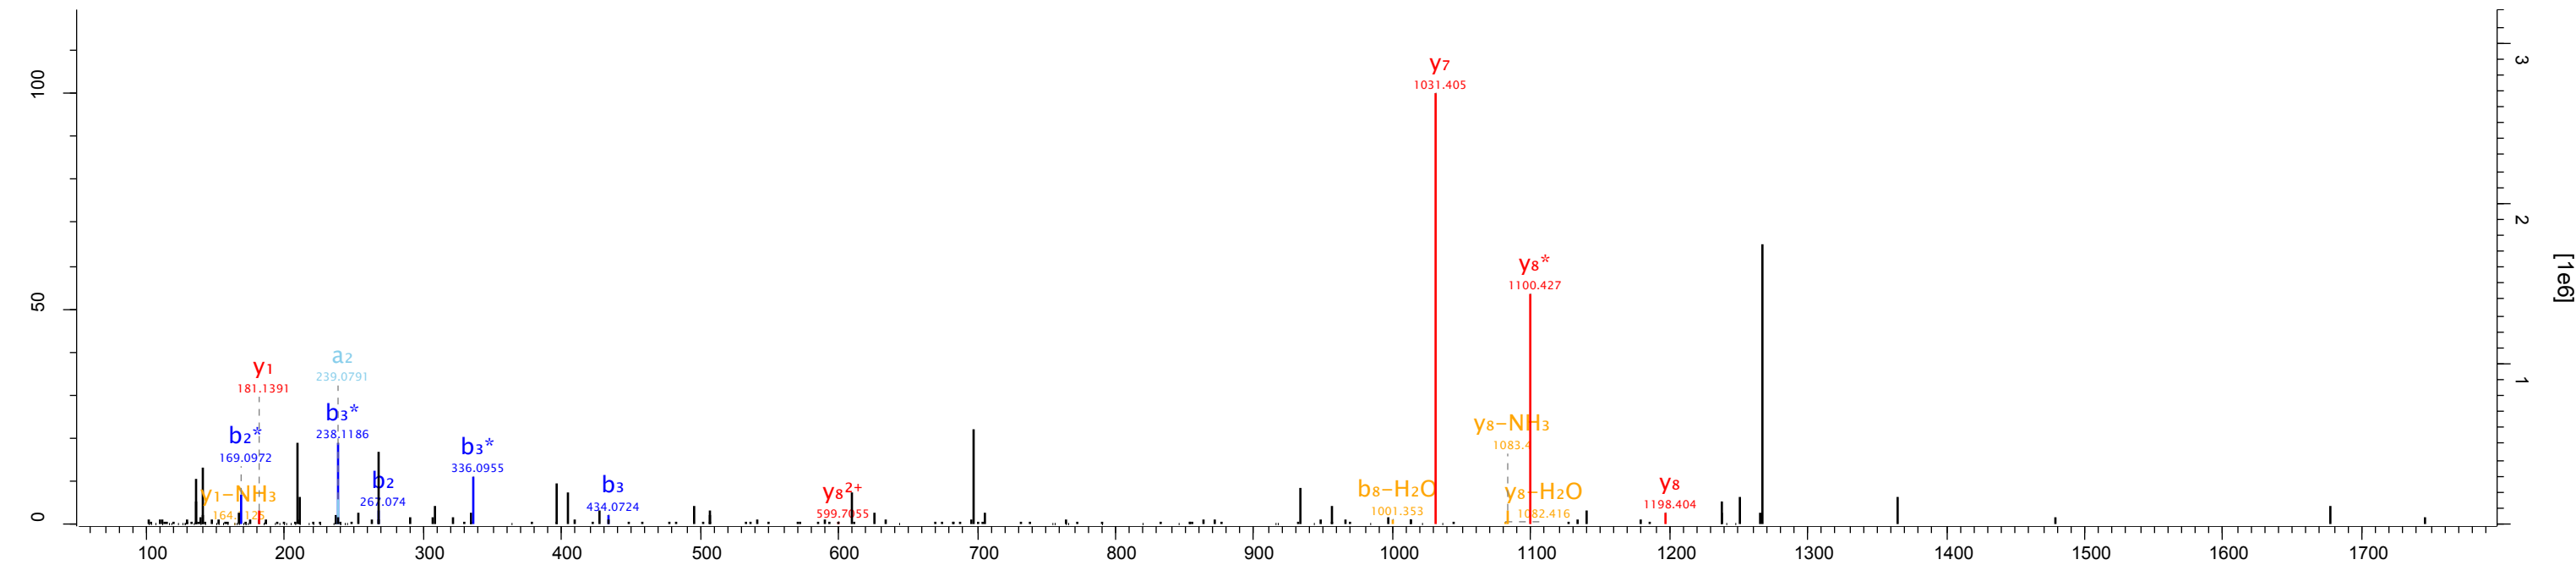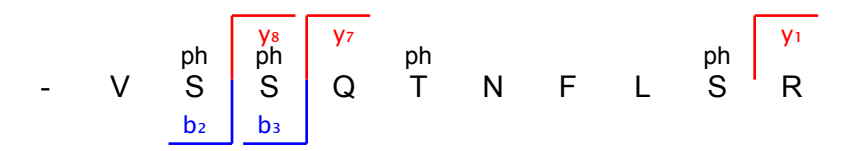

Raw file 20150812\_A375SR\_Phospho\_BR1\_02 Scan 14602 Method FTMS; HCD Score 250.09 m/z 897.35 Gene names ZNF609

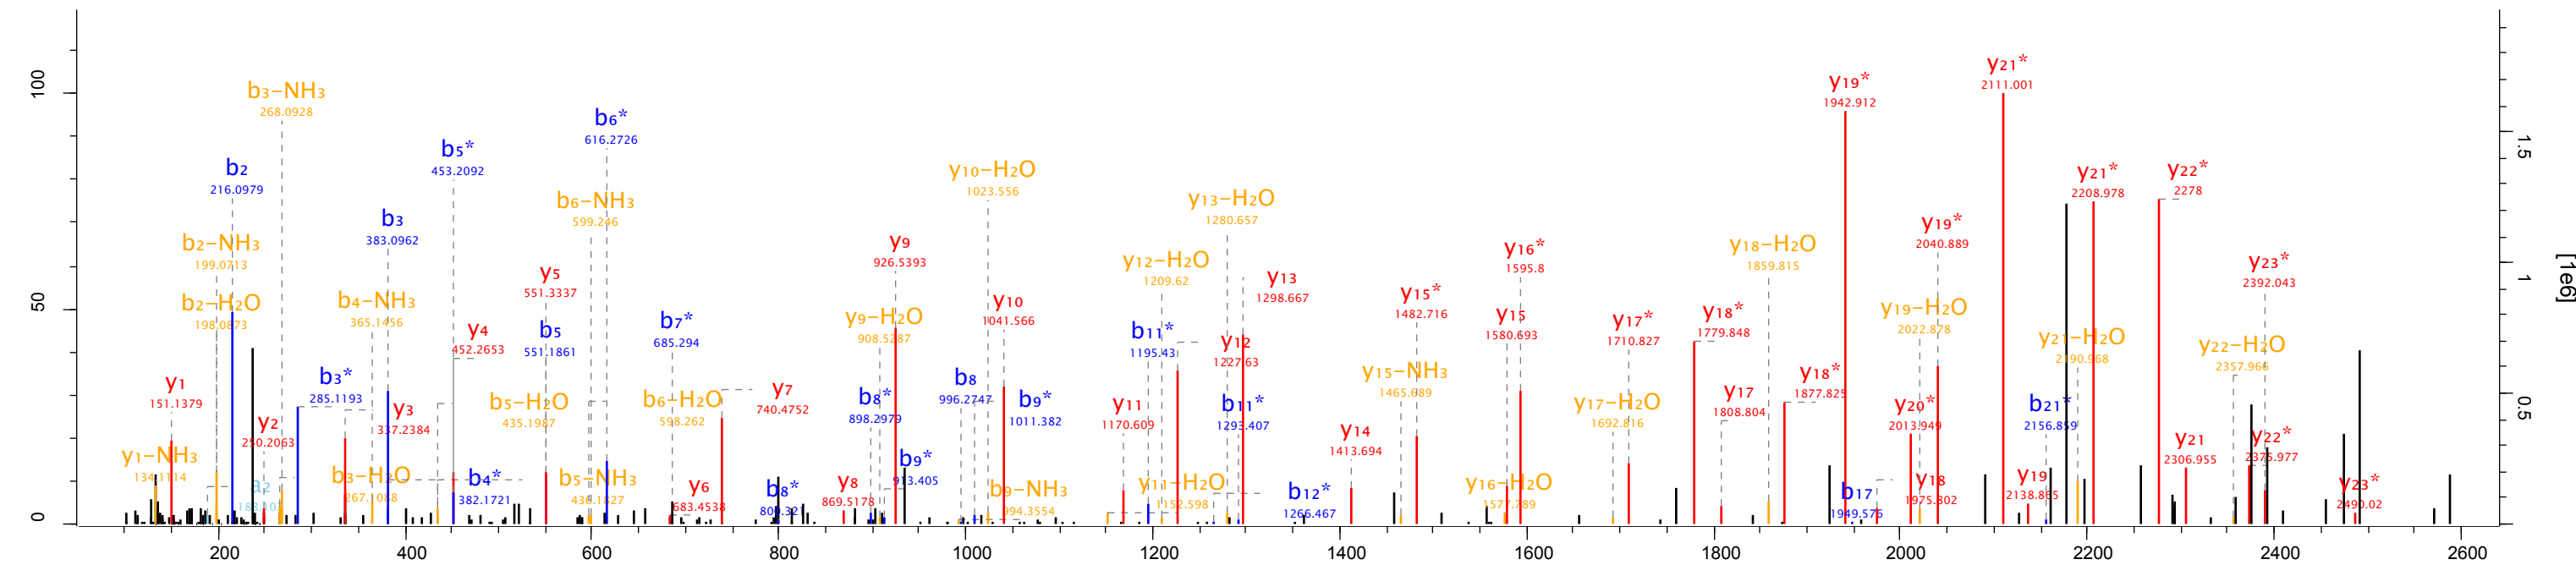

- T N S P A Y S D I S D A G E D G E G K V D S V K -

Fragmentation mapping (b and y ions) is shown below the protein sequence:

- b2: N
- b3: S
- b4\*: P
- b5: A
- b6\*: Y
- b7\*: S
- b8: D
- b9\*: I
- b11\*: S
- b12\*: D
- b17: E
- b21\*: D

Fragmentation mapping (b and y ions) is shown below the protein sequence:

- y1: K
- y2: V
- y3: S
- y4: D
- y5: V
- y6: K
- y7: G
- y8: E
- y9: G
- y10: D
- y11: E
- y12: G
- y13: A
- y14: D
- y15: S
- y16\*: I
- y17: D
- y18: S
- y19: Y
- y18 ph: S
- y16\*: I
- y15 ph: S
- y14: D
- y13: A
- y12: G
- y11: E
- y10: D
- y9: G
- y8: E
- y7: G
- y6: K
- y5: V
- y4: D
- y3: S
- y2: V
- y1: K
- y23\*: K
- y22\*: V
- y21: S
- y20\*: S
- y19: Y
- y18: S
- y17: D
- y16\*: I
- y15 ph: S
- y14: D
- y13: A
- y12: G
- y11: E
- y10: D
- y9: G
- y8: E
- y7: G
- y6: K
- y5: V
- y4: D
- y3: S
- y2: V
- y1: K
- y23\*: K
- y22\*: V
- y21: S
- y20\*: S
- y19: Y
- y18: S
- y17: D
- y16\*: I
- y15 ph: S
- y14: D
- y13: A
- y12: G
- y11: E
- y10: D
- y9: G
- y8: E
- y7: G
- y6: K
- y5: V
- y4: D
- y3: S
- y2: V
- y1: K
- y23\*: K
- y22\*: V
- y21: S
- y20\*: S
- y19: Y
- y18: S
- y17: D
- y16\*: I
- y15 ph: S
- y14: D
- y13: A
- y12: G
- y11: E
- y10: D
- y9: G
- y8: E
- y7: G
- y6: K
- y5: V
- y4: D
- y3: S
- y2: V
- y1: K



Raw file 20150812\_A375SR\_Phospho\_BR1\_02 Scan 14622 Method FTMS; HCD Score 79.34 m/z 790.01 Gene names KANSL3

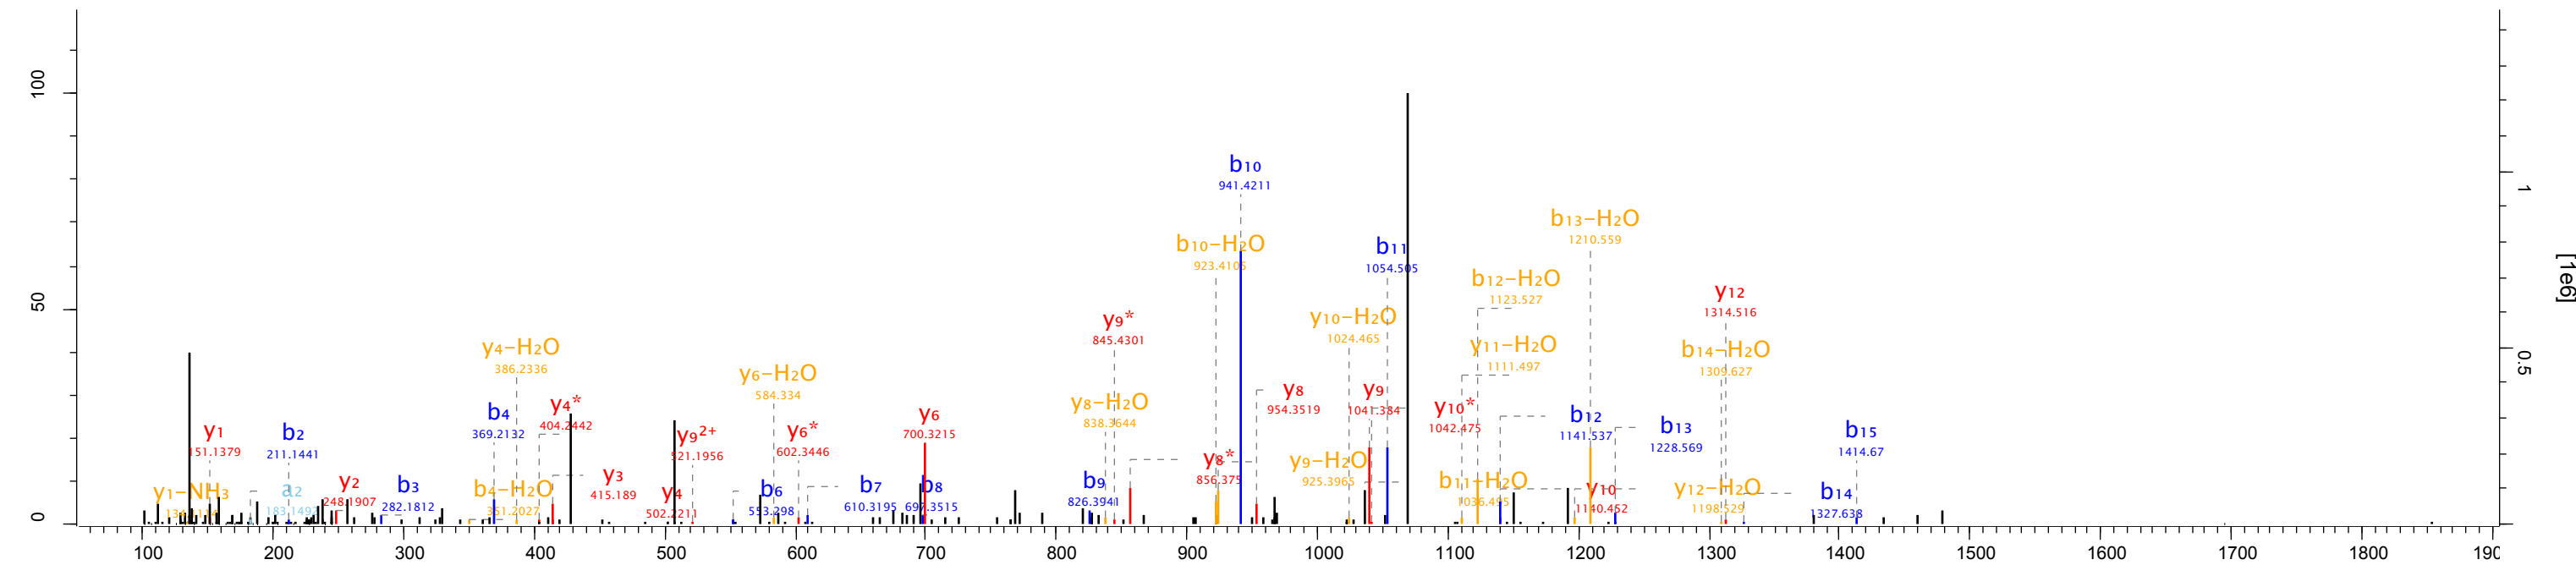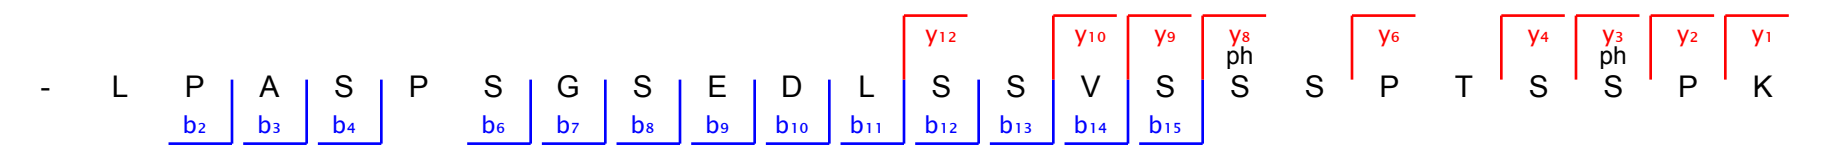

Raw file 20150812\_A375SR\_Phospho\_BR1\_02 Scan 15342 Method FTMS; HCD Score 190.8 m/z 1080.97 Gene names MAP1B

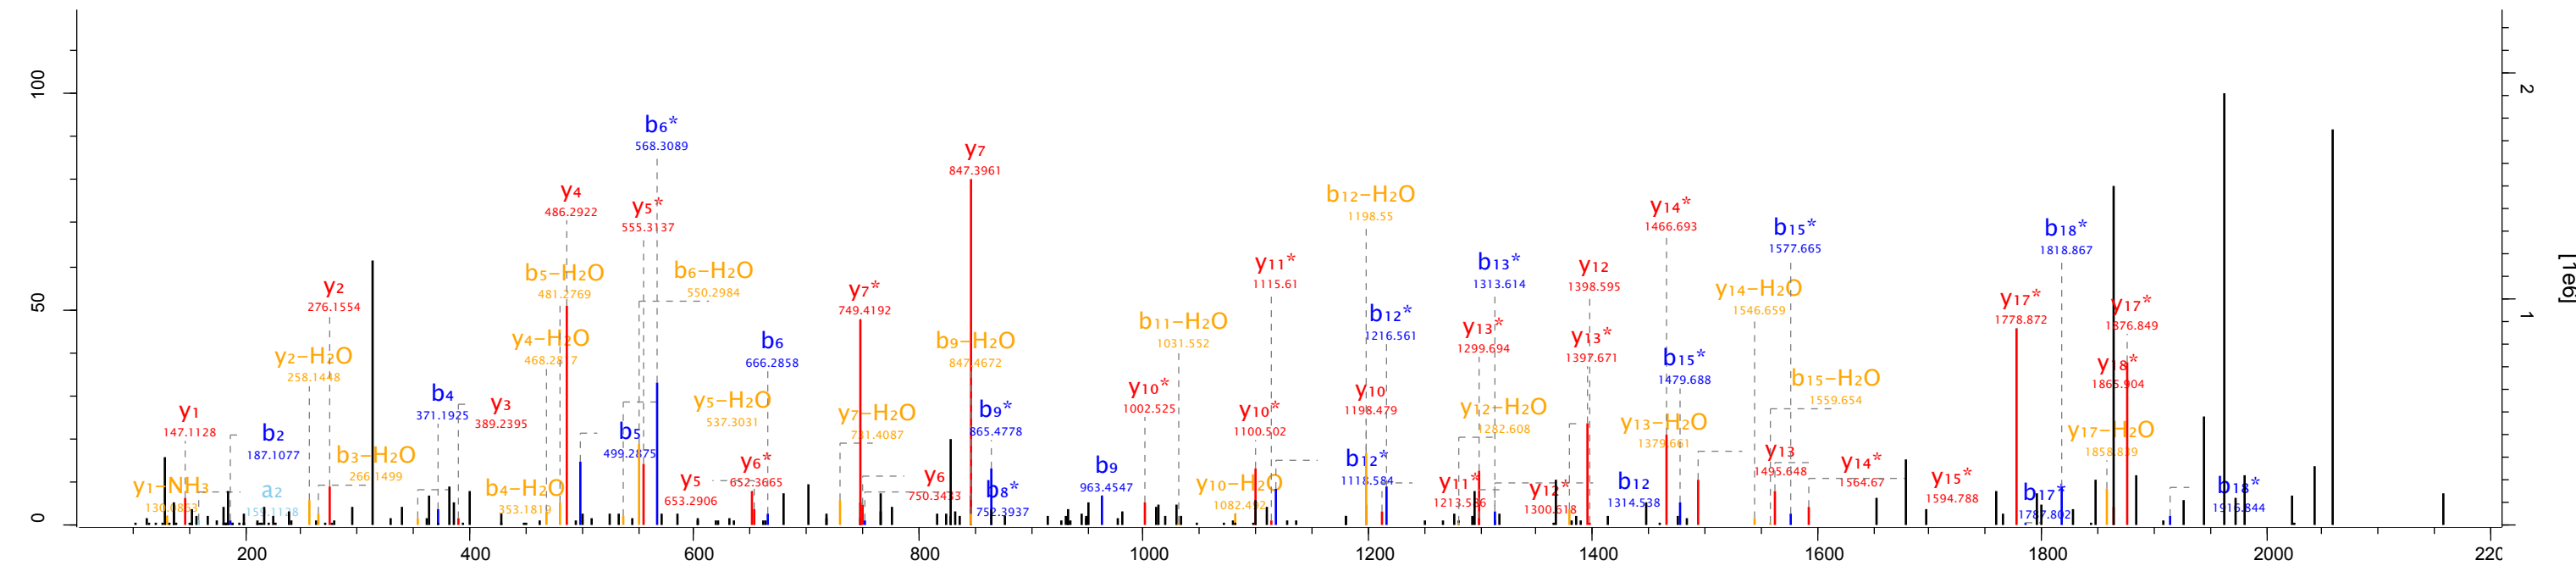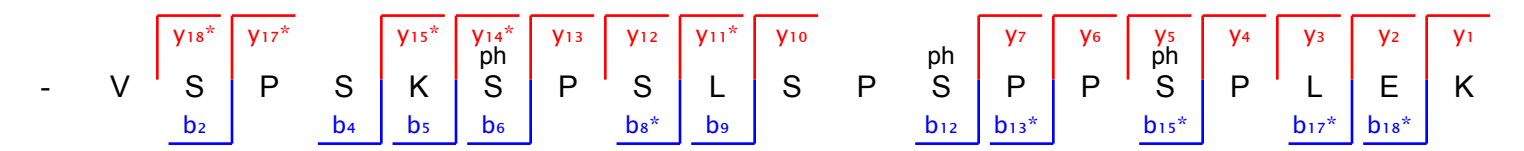

Raw file Scan Method Score m/z Gene names  
 20150812\_A375SR\_Phospho\_BR1\_02 15832 FTMS; HCD 219.16 1106.37 PRRC2B

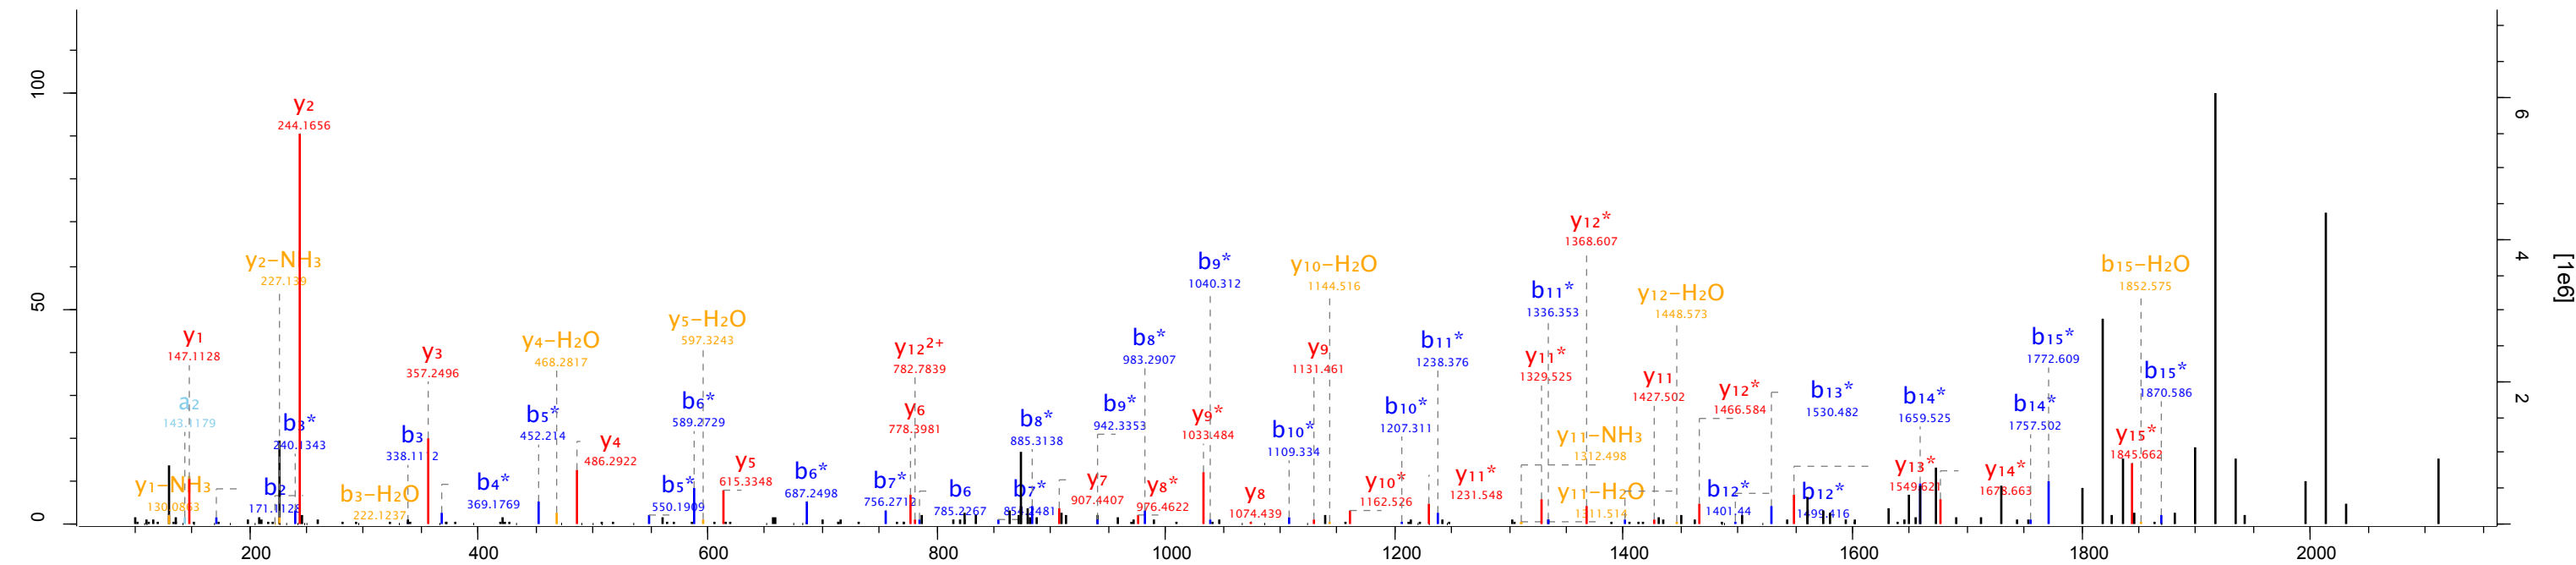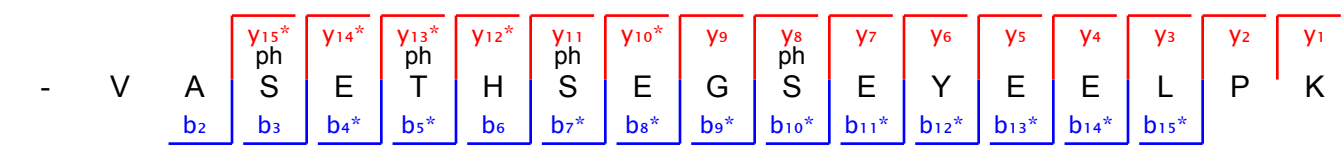

Raw file: 20150812\_A375SR\_Phospho\_BR1\_02  
 Scan: 16072 Method: FTMS; HCD Score: 111.24 m/z: 1014.89 Gene names: SPATS2L

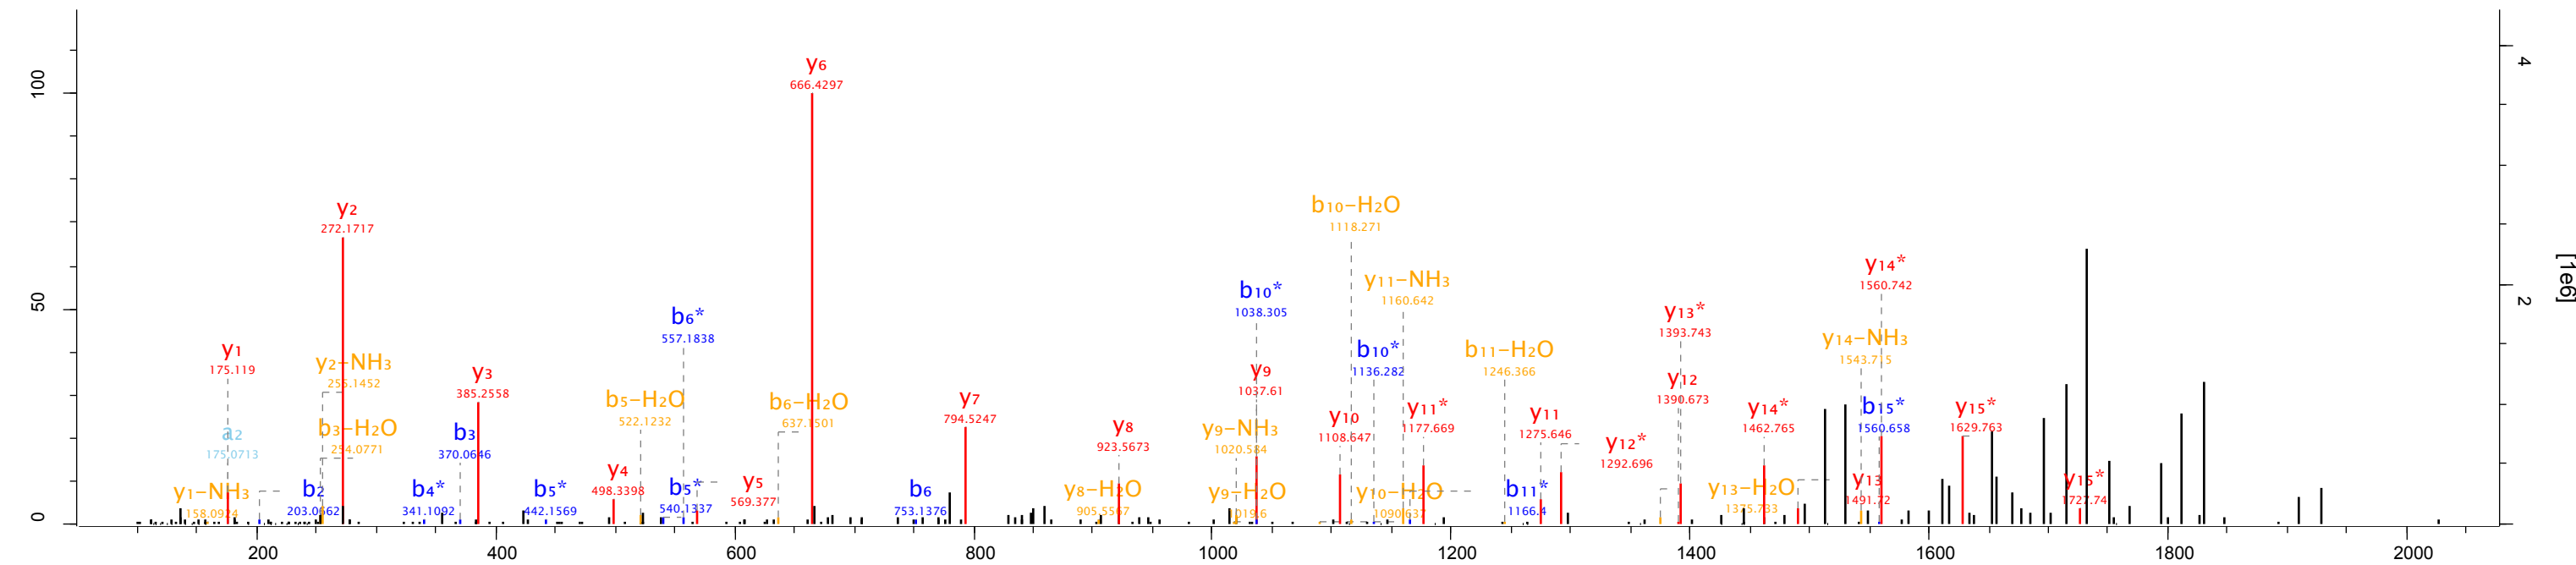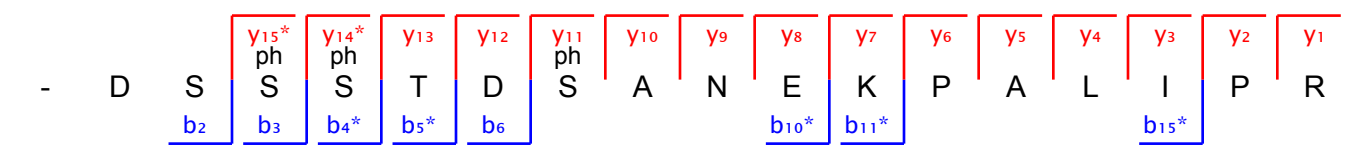

Raw file 20150812\_A375SR\_Phospho\_BR1\_02 Scan 16132 Method FTMS; HCD Score 225.44 m/z 1189.99 Gene names OSBP

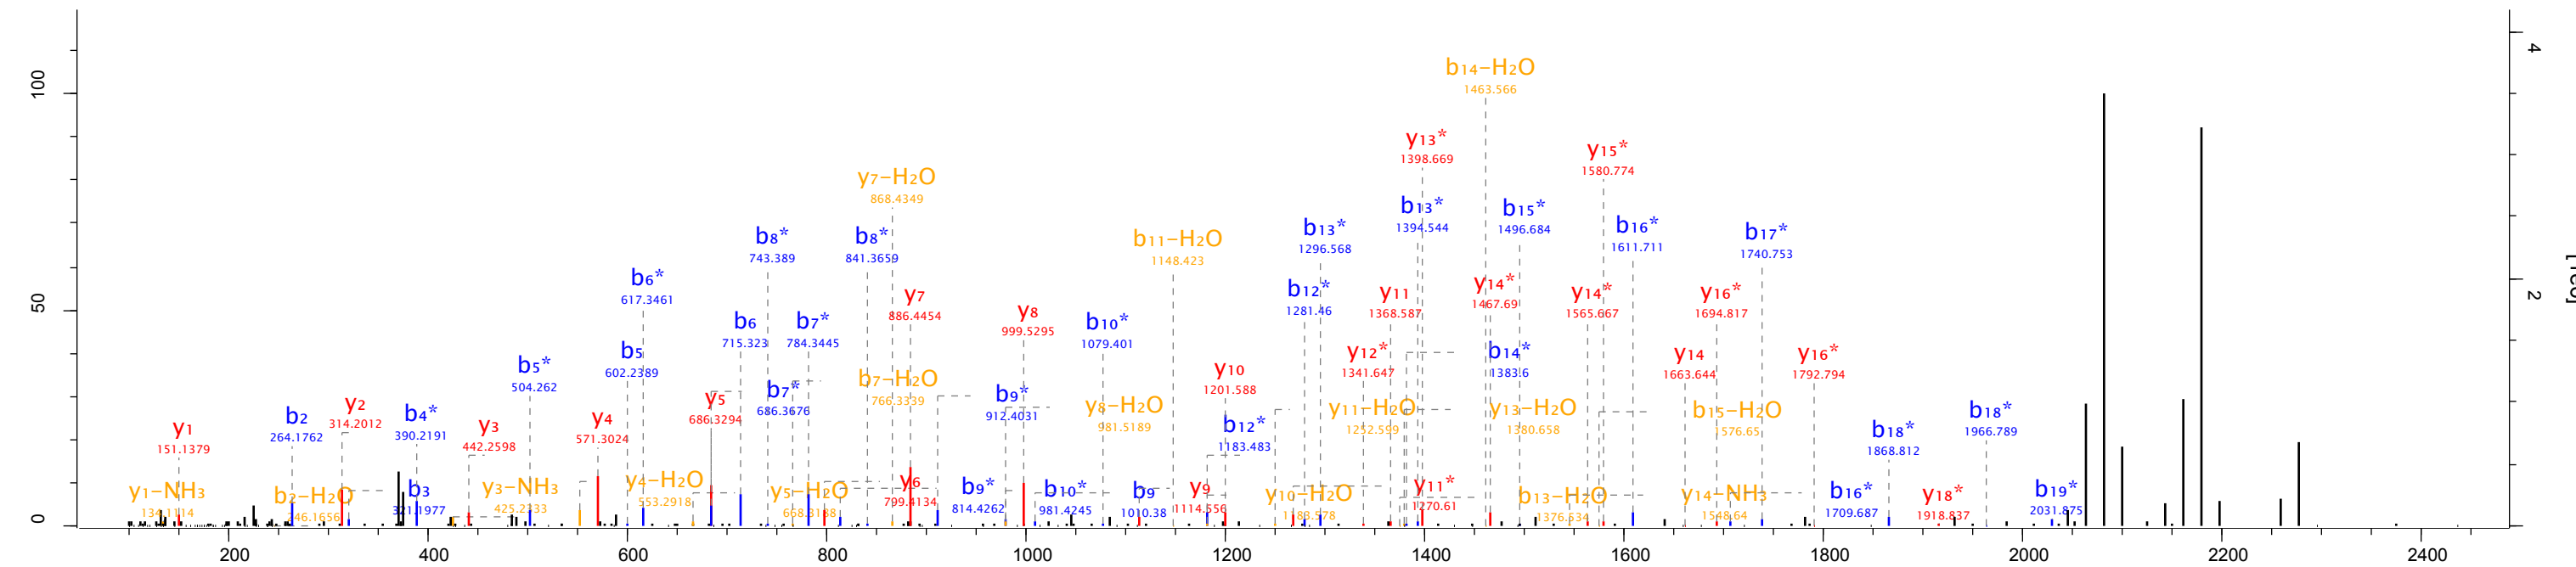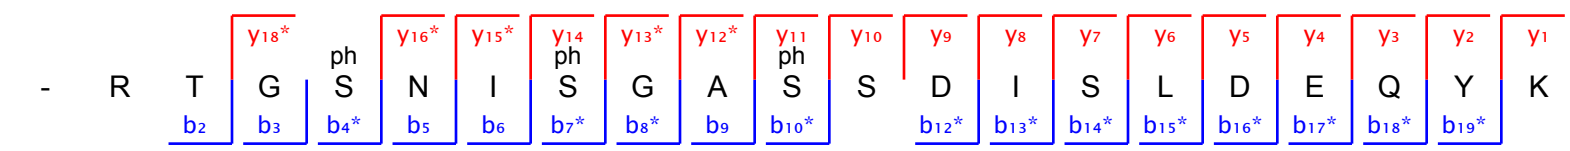

Raw file 20150812\_A375SR\_Phospho\_BR1\_02 Scan 16182 Method FTMS; HCD Score 123.86 m/z 967.06 Gene names CHERP

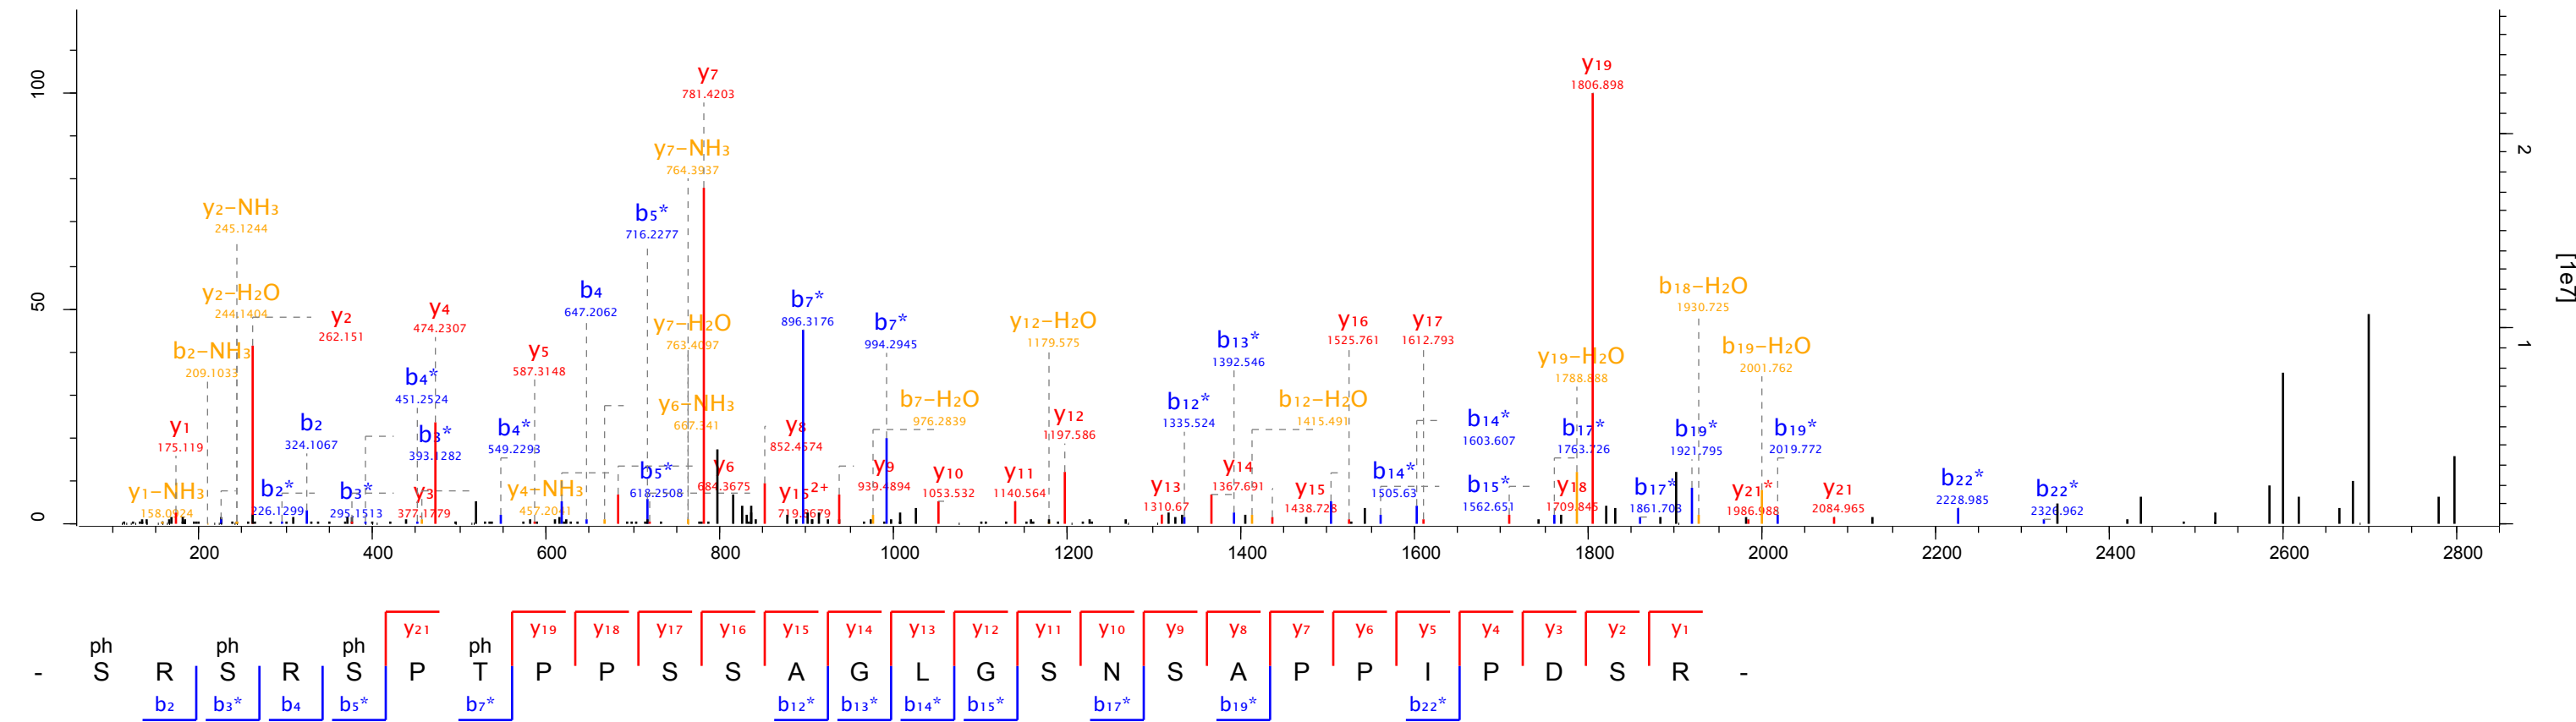

Raw file: 20150812\_A375SR\_Phospho\_BR1\_02  
 Scan: 16272 Method: FTMS; HCD Score: 145.19 m/z: 910.35 Gene names: NCOA7

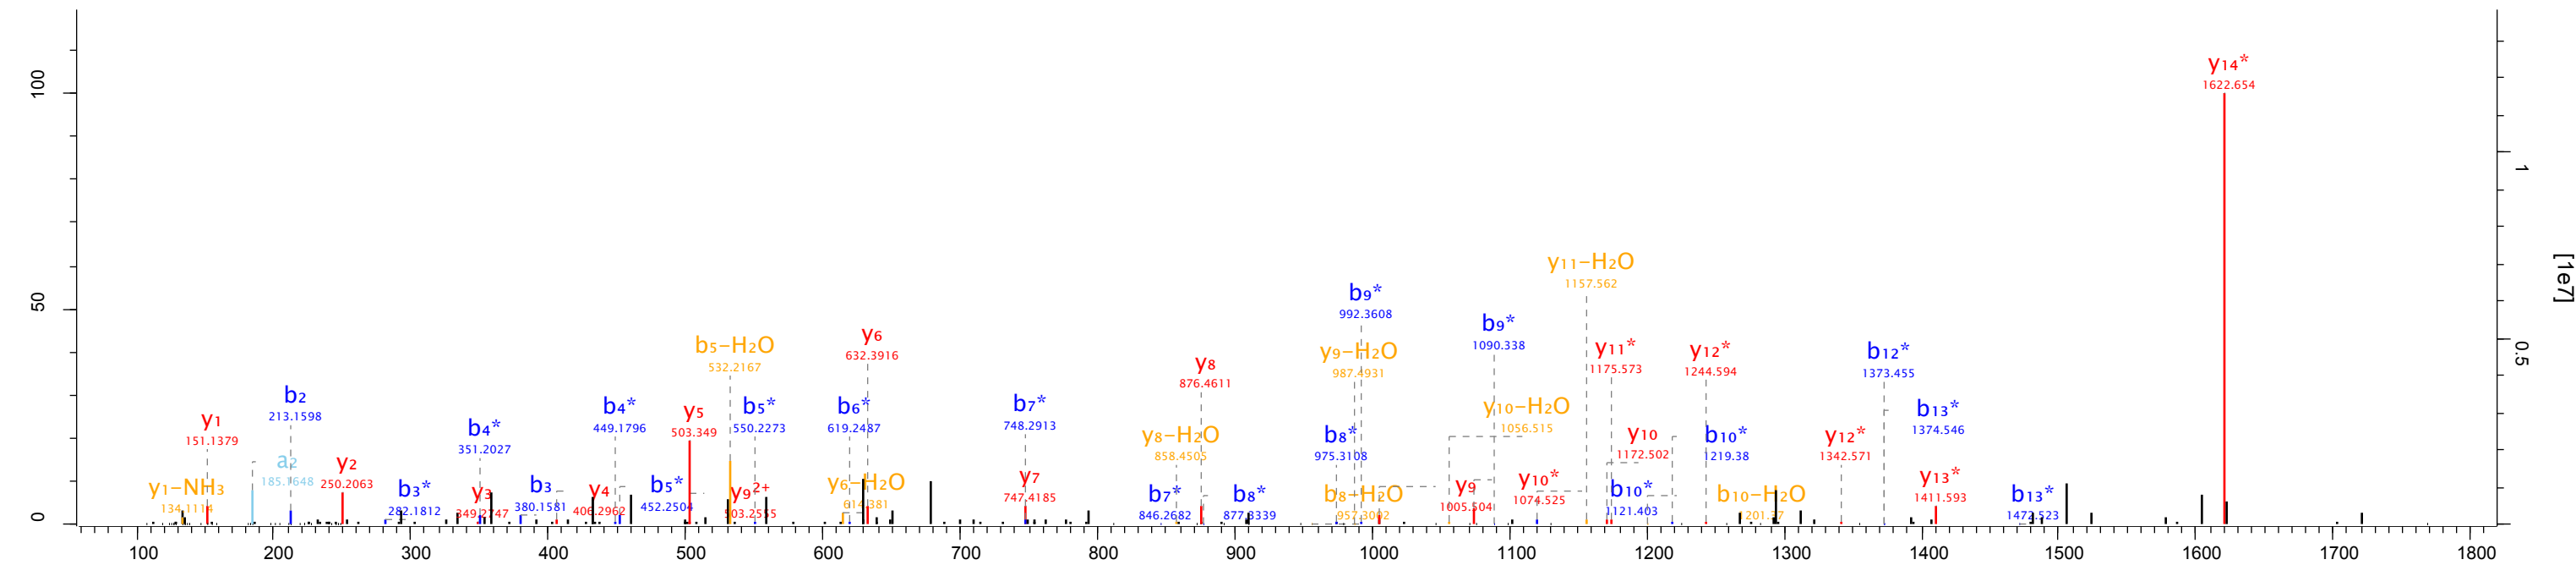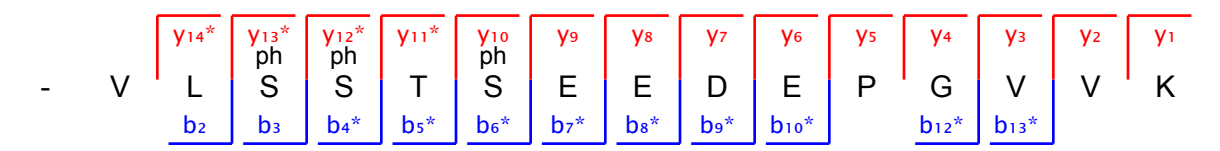

Raw file Scan Method Score m/z Gene names  
 20150812\_A375SR\_Phospho\_BR1\_02 16482 FTMS; HCD 49.73 1017.7 THOC5

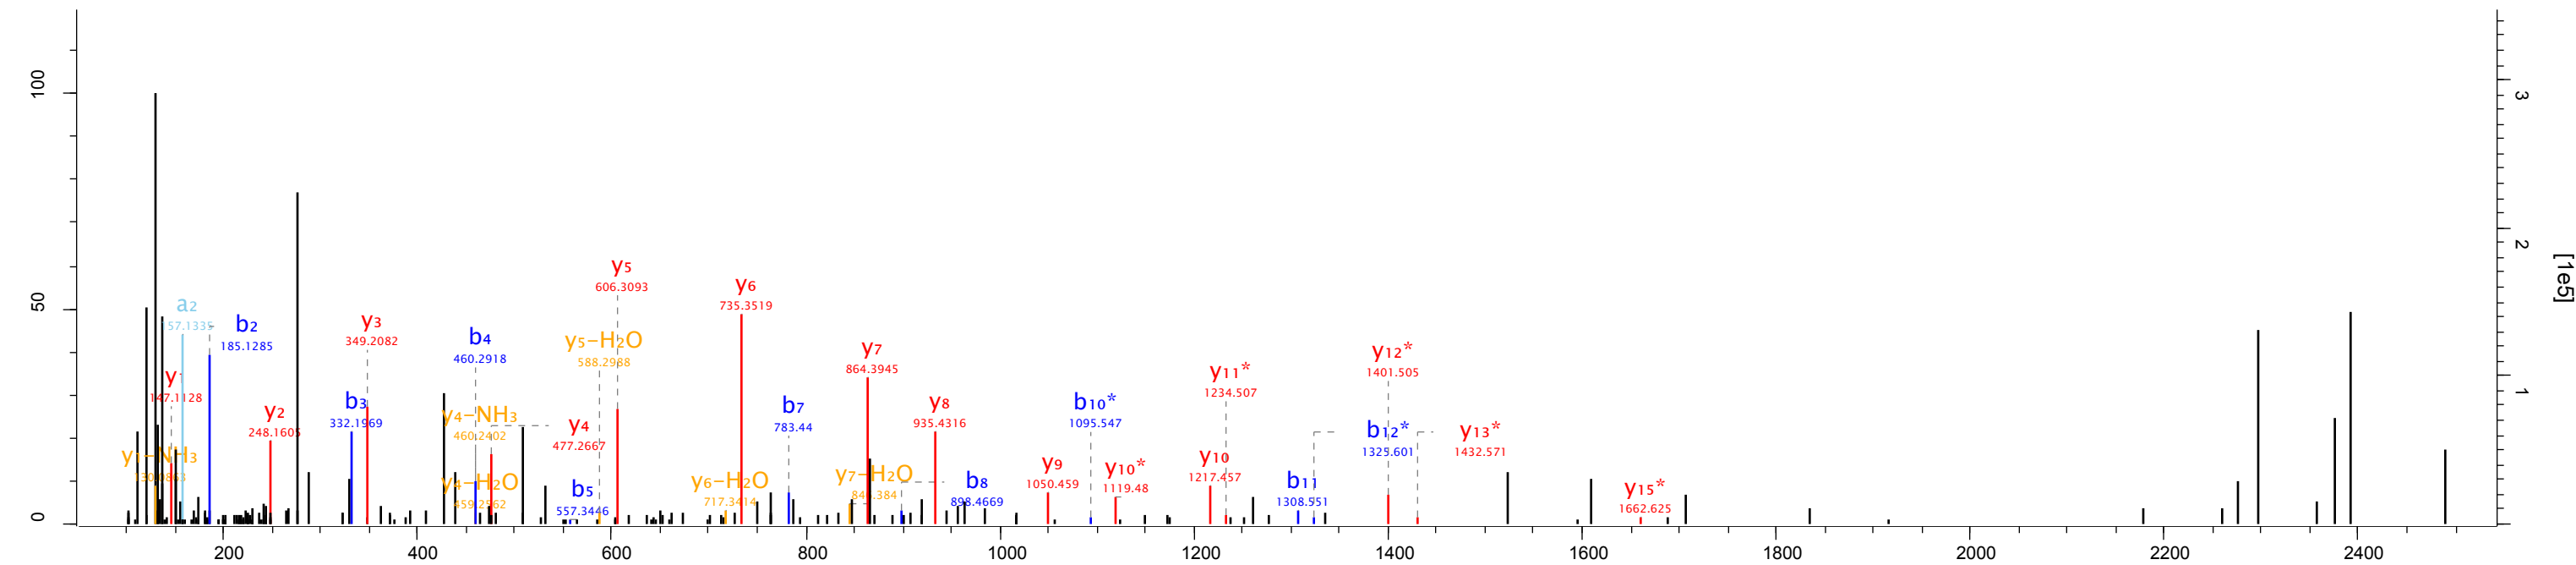

- A L F K P P E D S Q D D E S D S D A E E E Q T T K -

b<sub>2</sub>
b<sub>3</sub>
b<sub>4</sub>
b<sub>5</sub>
b<sub>7</sub>
b<sub>8</sub>
b<sub>10</sub>\*
b<sub>11</sub>
b<sub>12</sub>\*
y<sub>15</sub>\*
y<sub>13</sub>\*
y<sub>12</sub>\*
y<sub>11</sub>\*
y<sub>10</sub>
y<sub>9</sub>
y<sub>8</sub>
y<sub>7</sub>
y<sub>6</sub>
y<sub>5</sub>
y<sub>4</sub>
y<sub>3</sub>
y<sub>2</sub>
y<sub>1</sub>



Raw file 20150812\_A375SR\_Phospho\_BR1\_02 Scan 16612 Method FTMS; HCD Score 83.96 m/z 766.8 Gene names GPR56

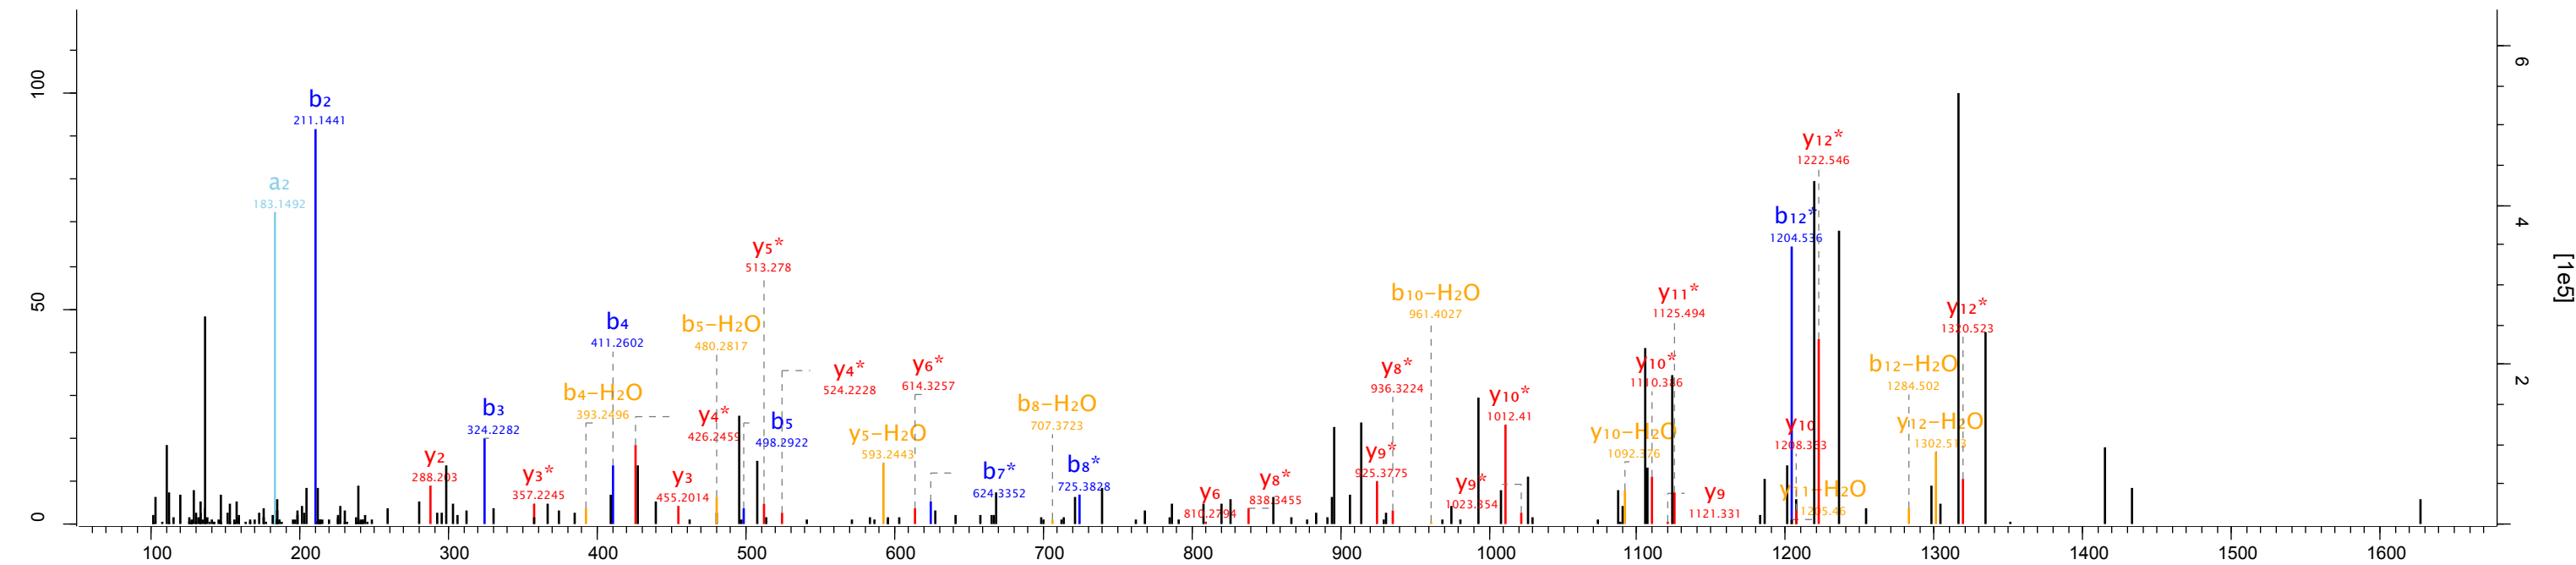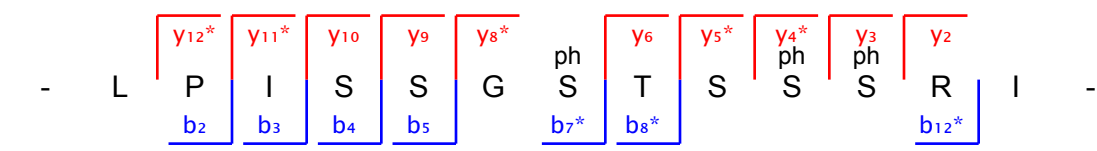

Raw file 20150812\_A375SR\_Phospho\_BR1\_02 Scan 16772 Method FTMS; HCD Score 62.25 m/z 1147.5 Gene names RAI1

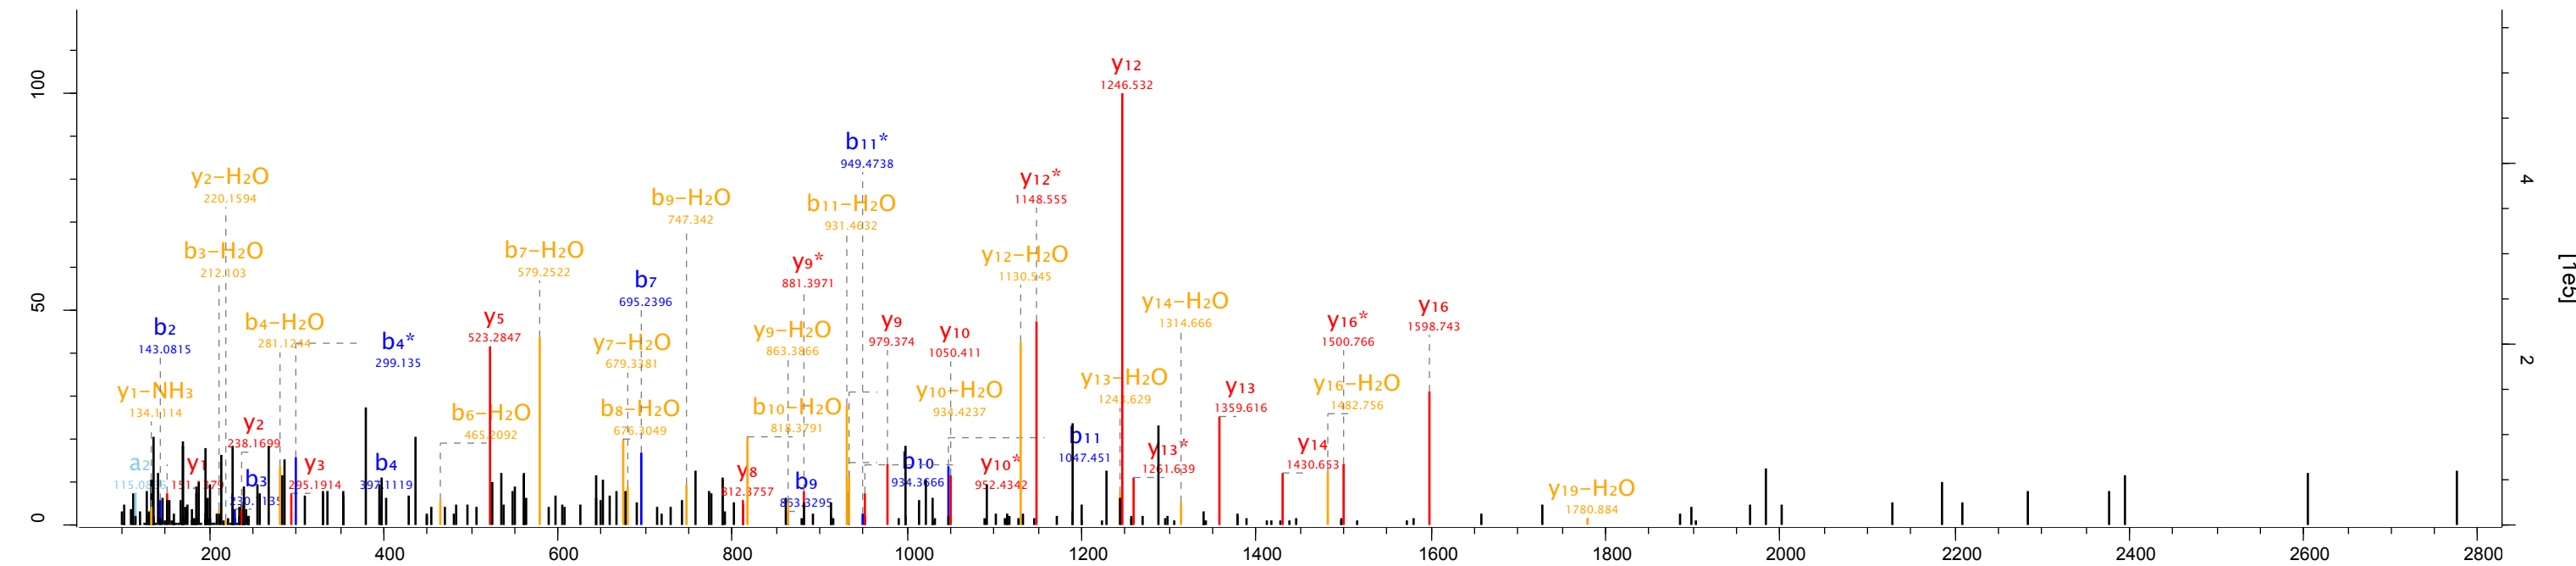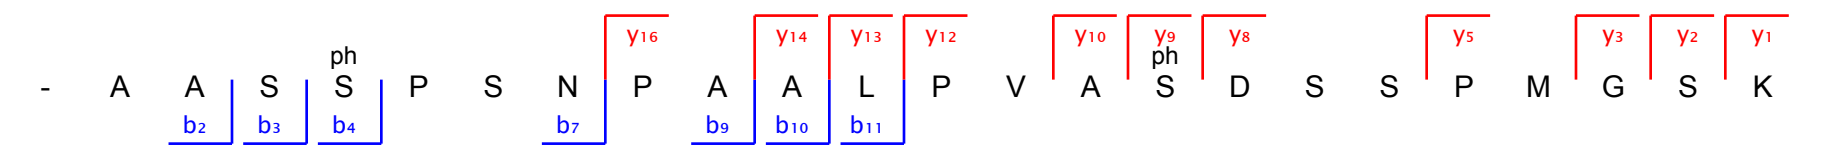

Raw file: 20150812\_A375SR\_Phospho\_BR1\_02  
 Scan: 17622 Method: FTMS; HCD Score: 208.63 m/z: 677.27 Gene names: SRRM2

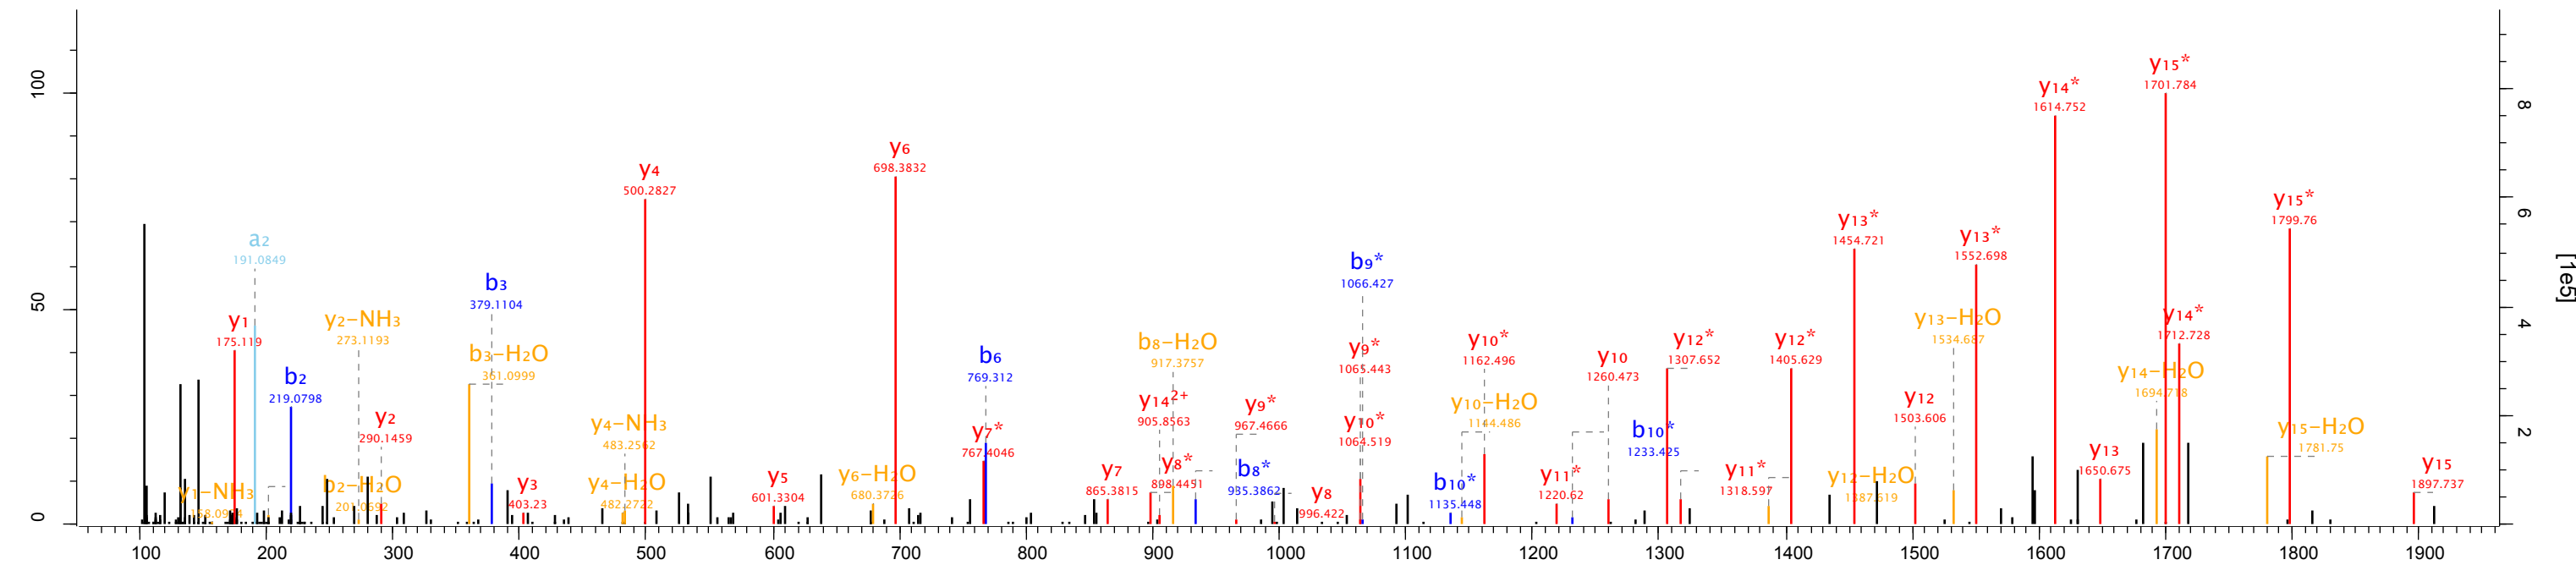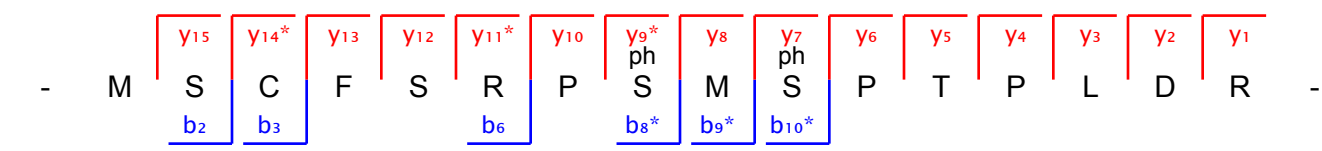

Raw file: 20150812\_A375SR\_Phospho\_BR1\_02  
 Scan: 18042 Method: FTMS; HCD Score: 297.63 m/z: 1086.49 Gene names: MAP1B

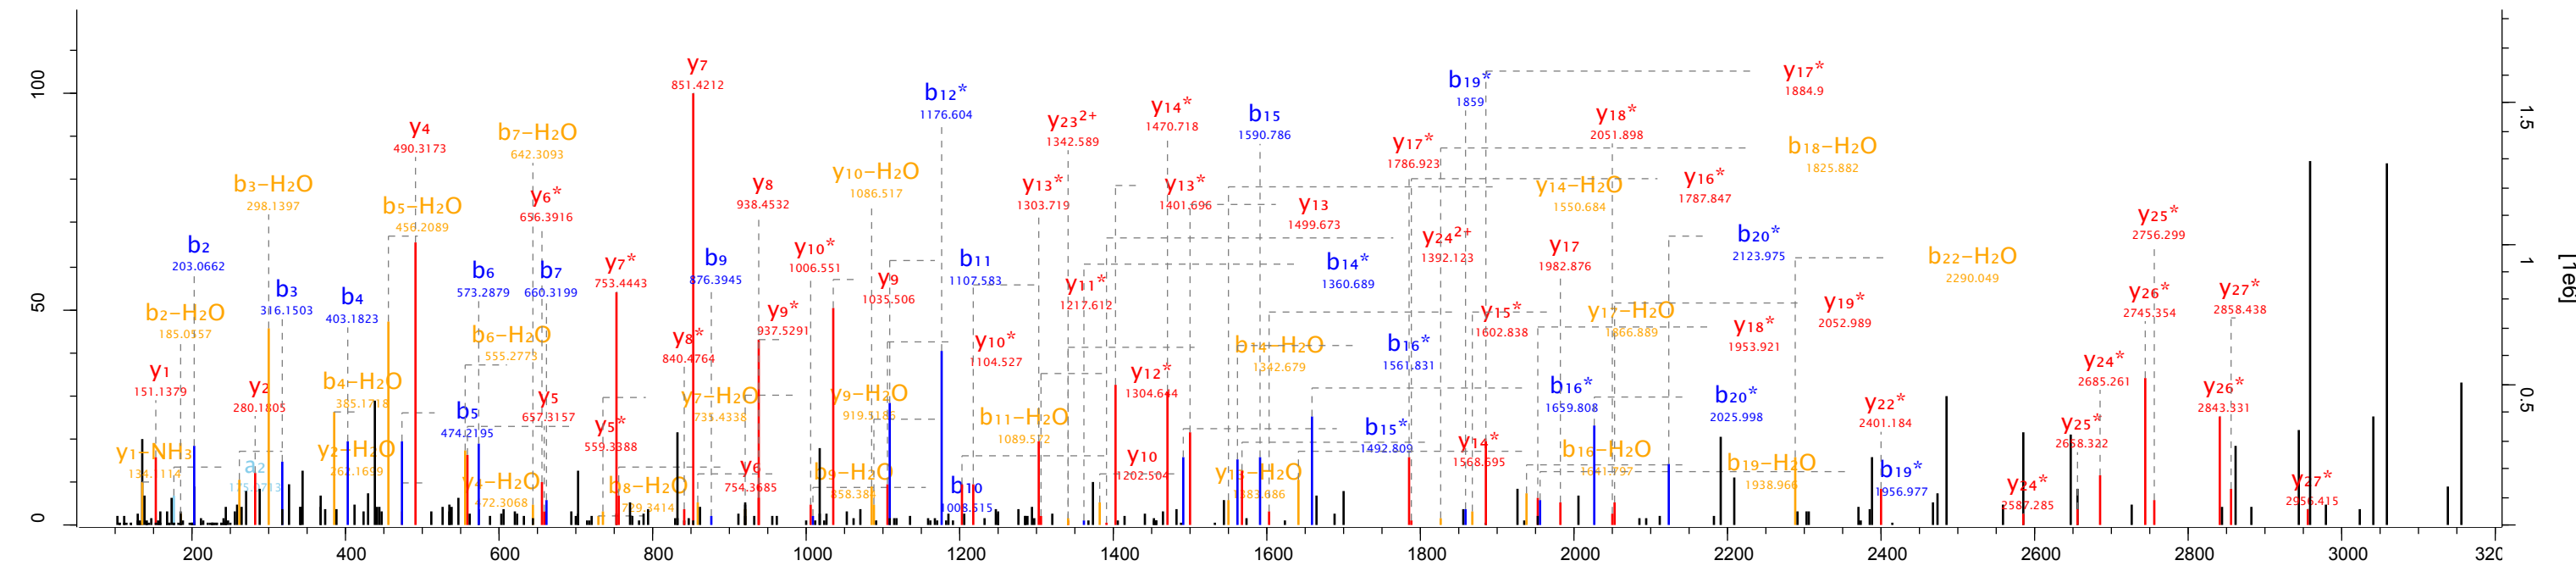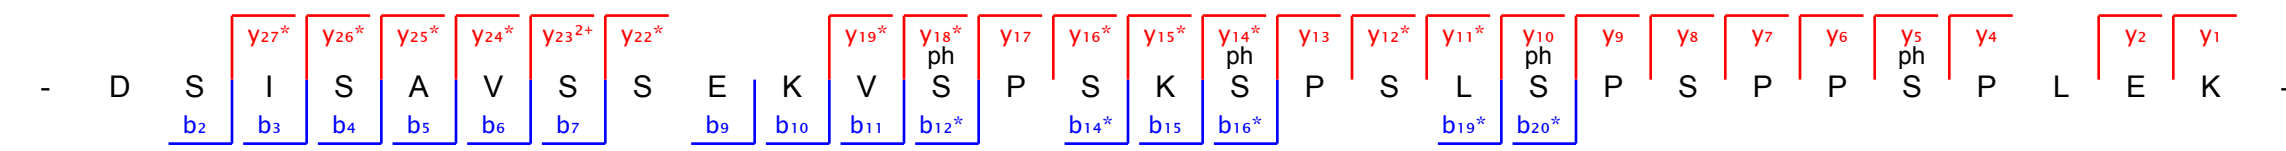

Raw file Scan Method Score m/z Gene names  
 20150812\_A375SR\_Phospho\_BR1\_02 18882 FTMS; HCD 91.62 1055.43 NKTR

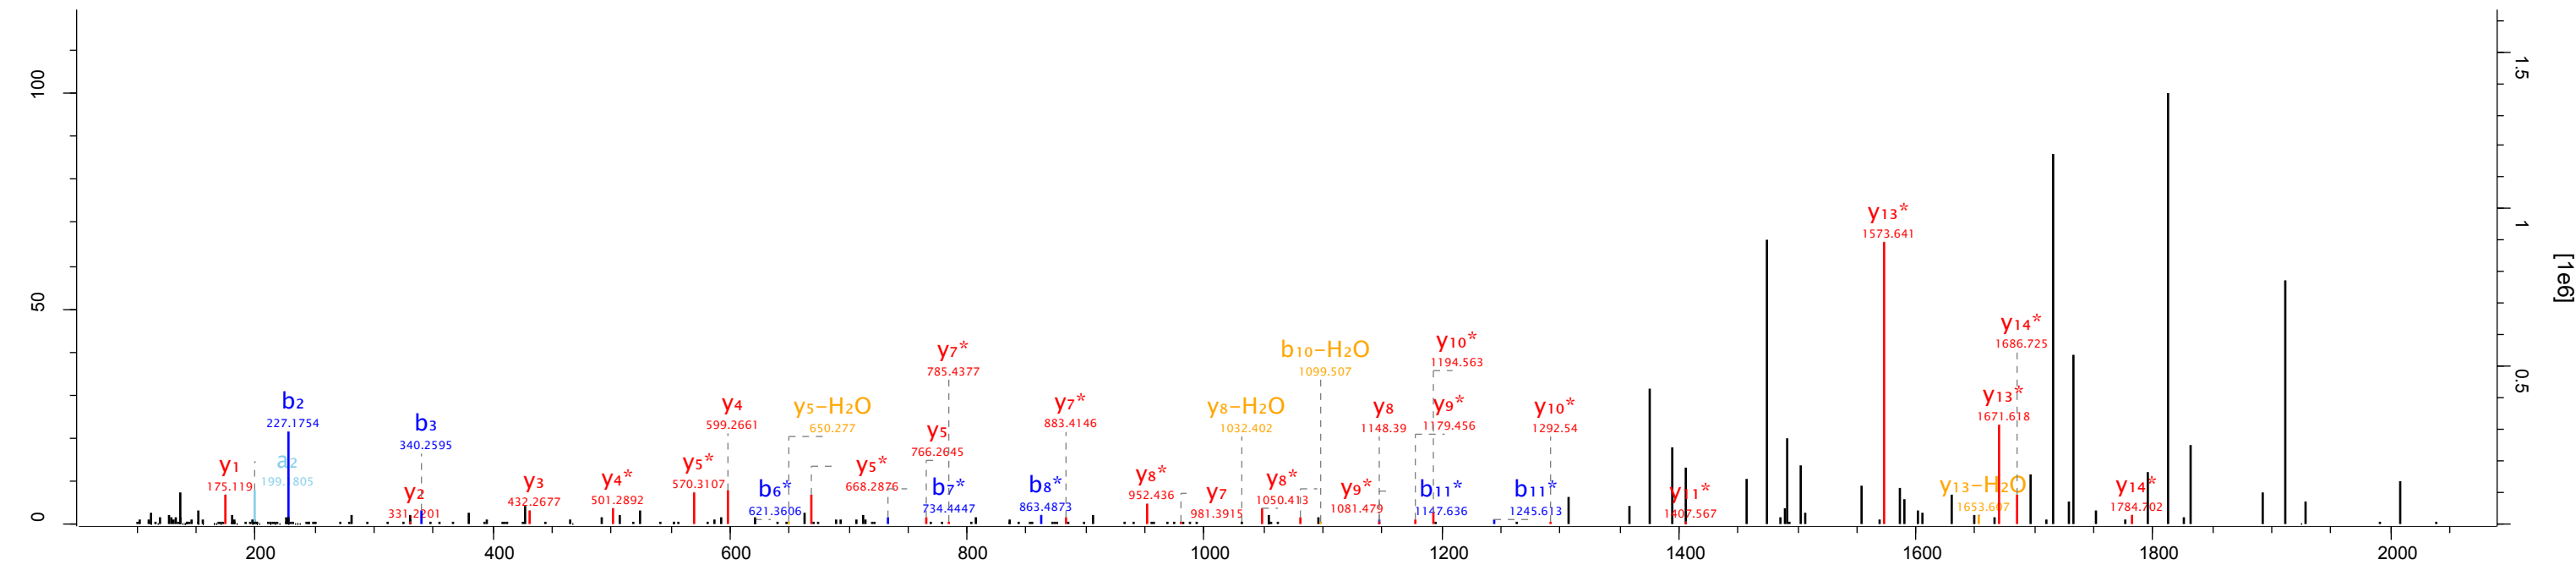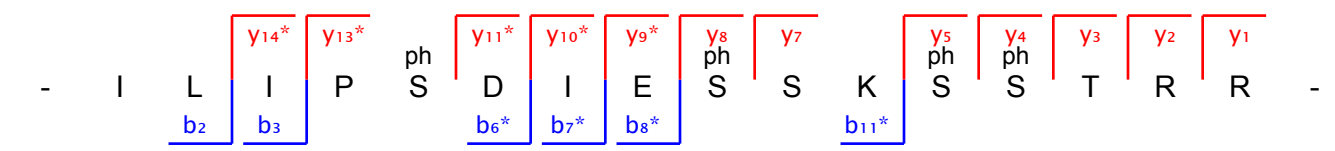

Raw file  
20150812\_A375SR\_Phospho\_BR1\_02

Scan 19362 Method FTMS; HCD Score 94.8 m/z 1311.47 Gene names GTPBP4

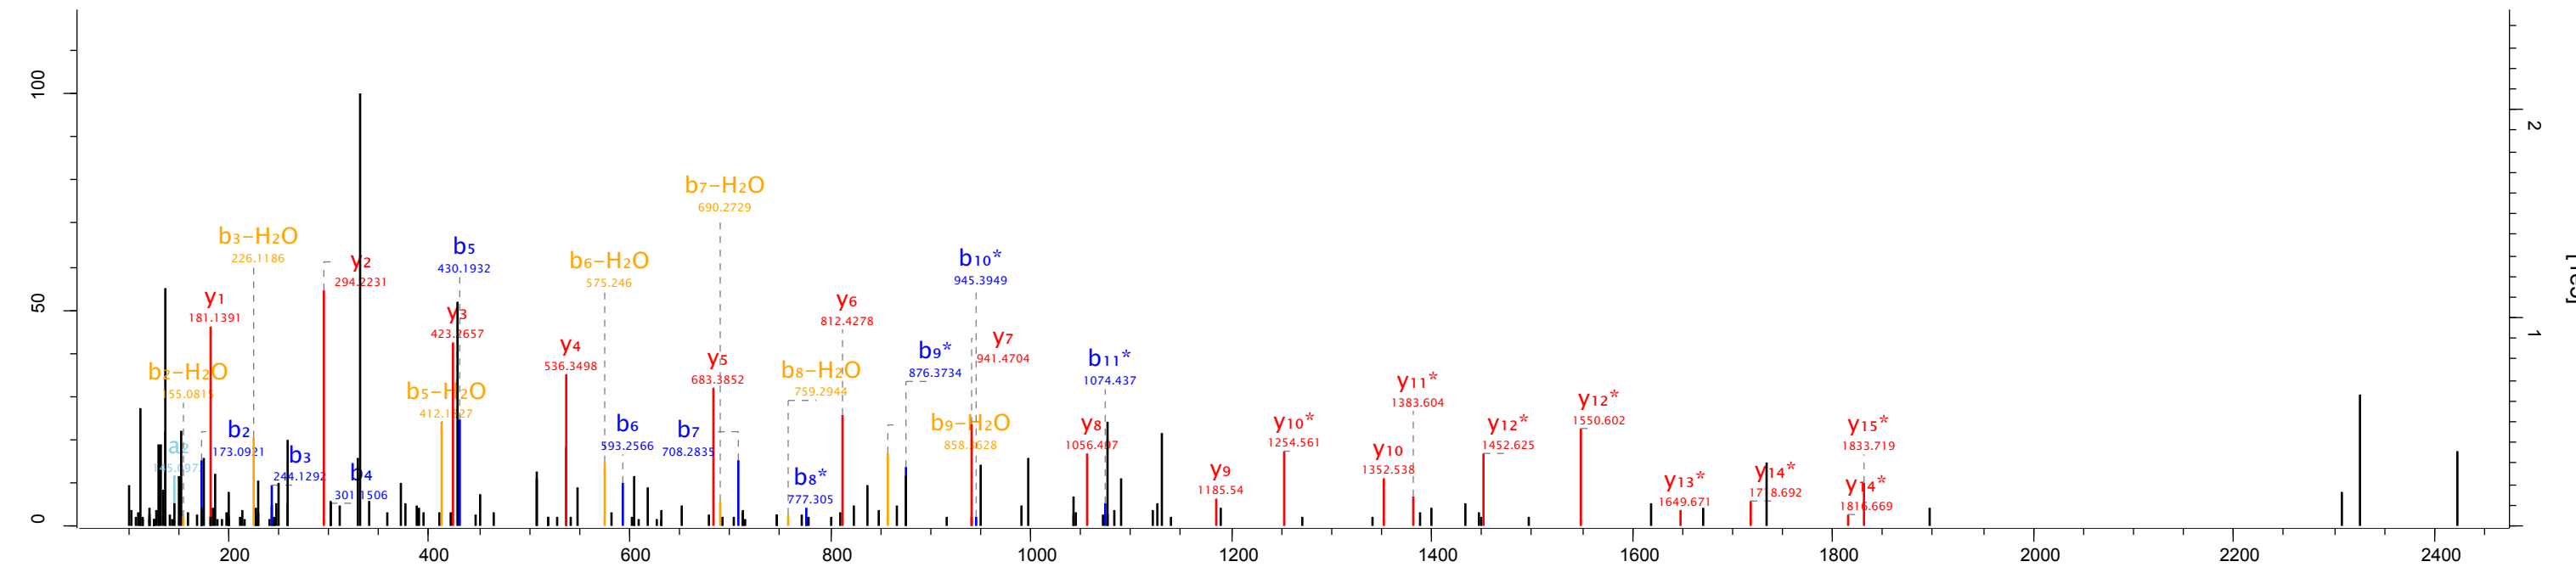

- T A A G E Y D S V S E S E D E E M L E I R -

b<sub>2</sub>
b<sub>3</sub>
b<sub>4</sub>
b<sub>5</sub>
b<sub>6</sub>
b<sub>7</sub>
b<sub>8</sub>\*
b<sub>9</sub>\*
b<sub>10</sub>\*
b<sub>11</sub>\*
y<sub>15</sub>\*
y<sub>14</sub>\*  
ph
y<sub>13</sub>\*
y<sub>12</sub>\*  
ph
y<sub>11</sub>\*
y<sub>10</sub>  
ph
y<sub>9</sub>
y<sub>8</sub>
y<sub>7</sub>
y<sub>6</sub>
y<sub>5</sub>  
ox
y<sub>4</sub>
y<sub>3</sub>
y<sub>2</sub>
y<sub>1</sub>

Raw file 20150812\_A375SR\_Phospho\_BR1\_02 Scan 19532 Method FTMS; HCD Score 152.15 m/z 1124.44 Gene names PDXDC1

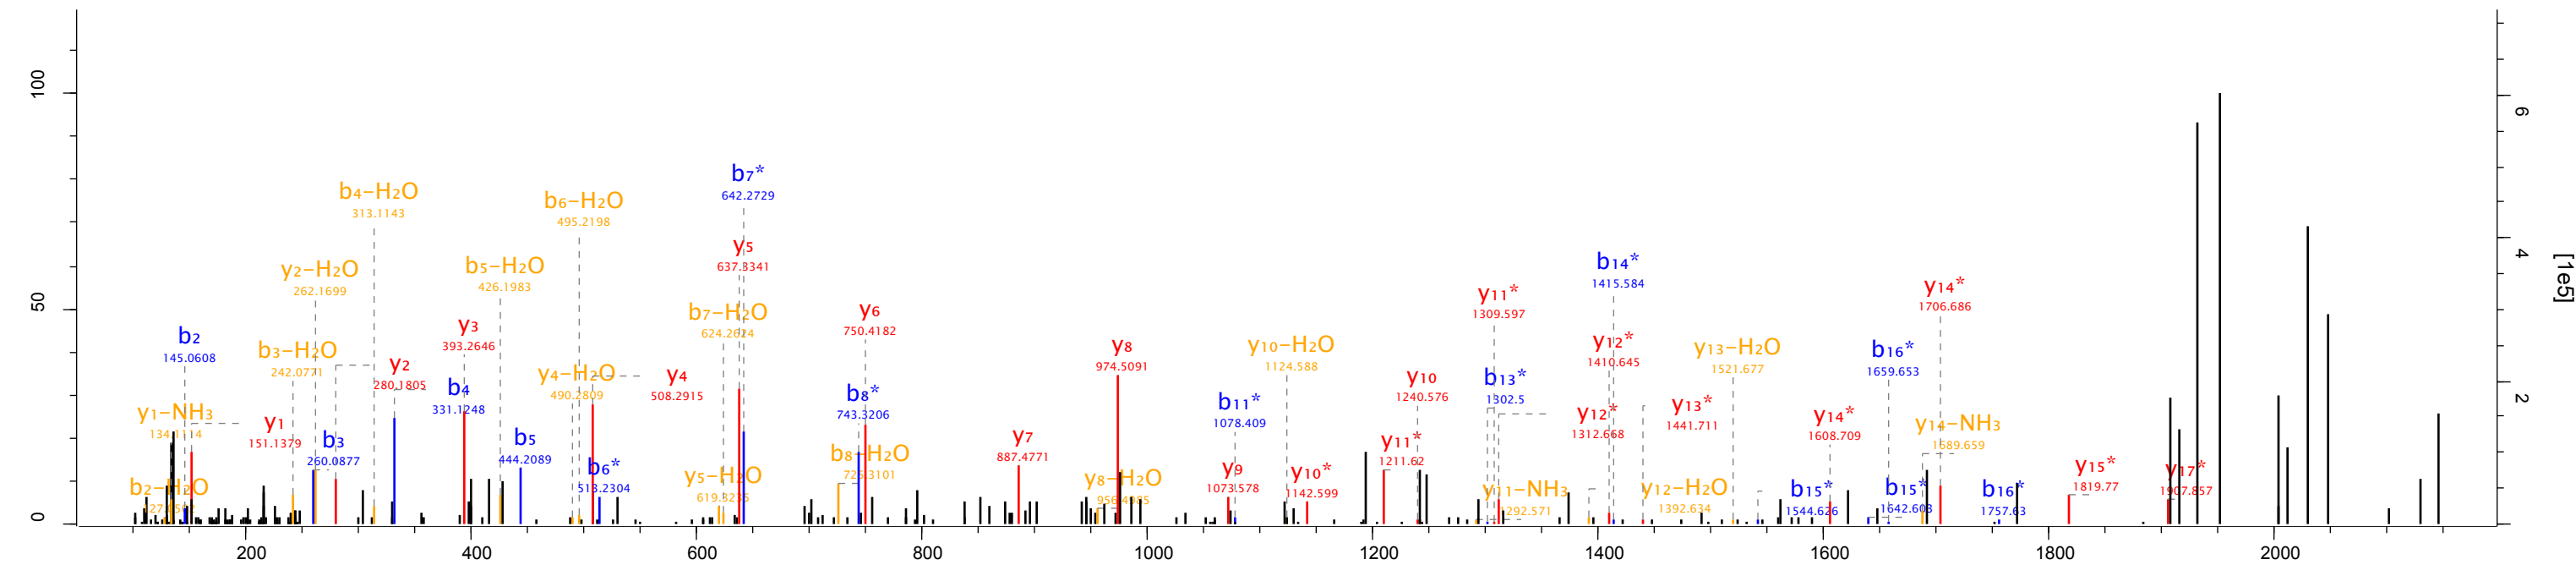

- G S D A L S E T S S V S H I E D L E K -

Fragmentation mapping (b and y ions) is shown below the sequence:

- b2: S
- b3: D
- b4: A
- b5: L
- b6\*: S
- b7\*: E
- b8\*: T
- b11\*: V
- b13\*: H
- b14\*: I
- b15\*: E
- b16\*: D

Fragmentation mapping (y ions) is shown below the sequence:

- y1: K
- y2: E
- y3: L
- y4: D
- y5: E
- y6: I
- y7: H
- y8: S
- y9: V
- y10: S
- y11\*: S
- y12\*: T
- y13\*: E
- y14\*: S
- y15\*: L
- y17\*: G

Raw file: 20150812\_A375SR\_Phospho\_BR1\_02  
 Scan: 19542 Method: FTMS; HCD Score: 134.3 m/z: 1156.39 Gene names: TAF1A

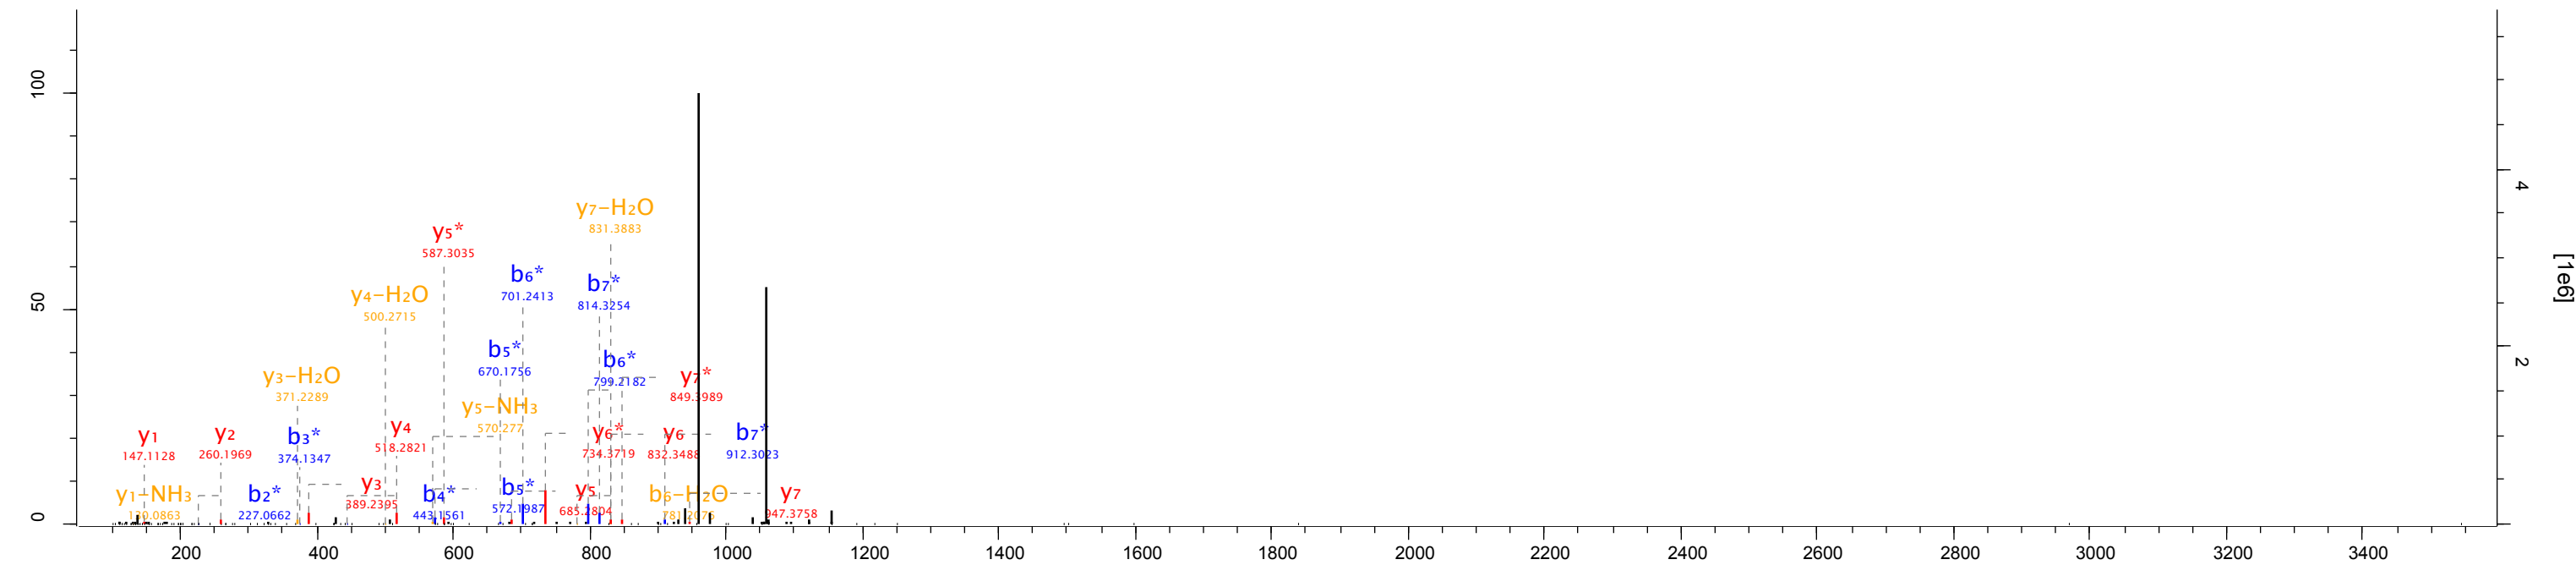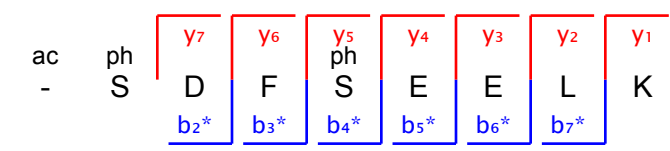



Raw file: 20150812\_A375SR\_Phospho\_BR1\_02  
 Scan: 20112  
 Method: FTMS; HCD  
 Score: 64.73  
 m/z: 1163.99  
 Gene names: POLA2

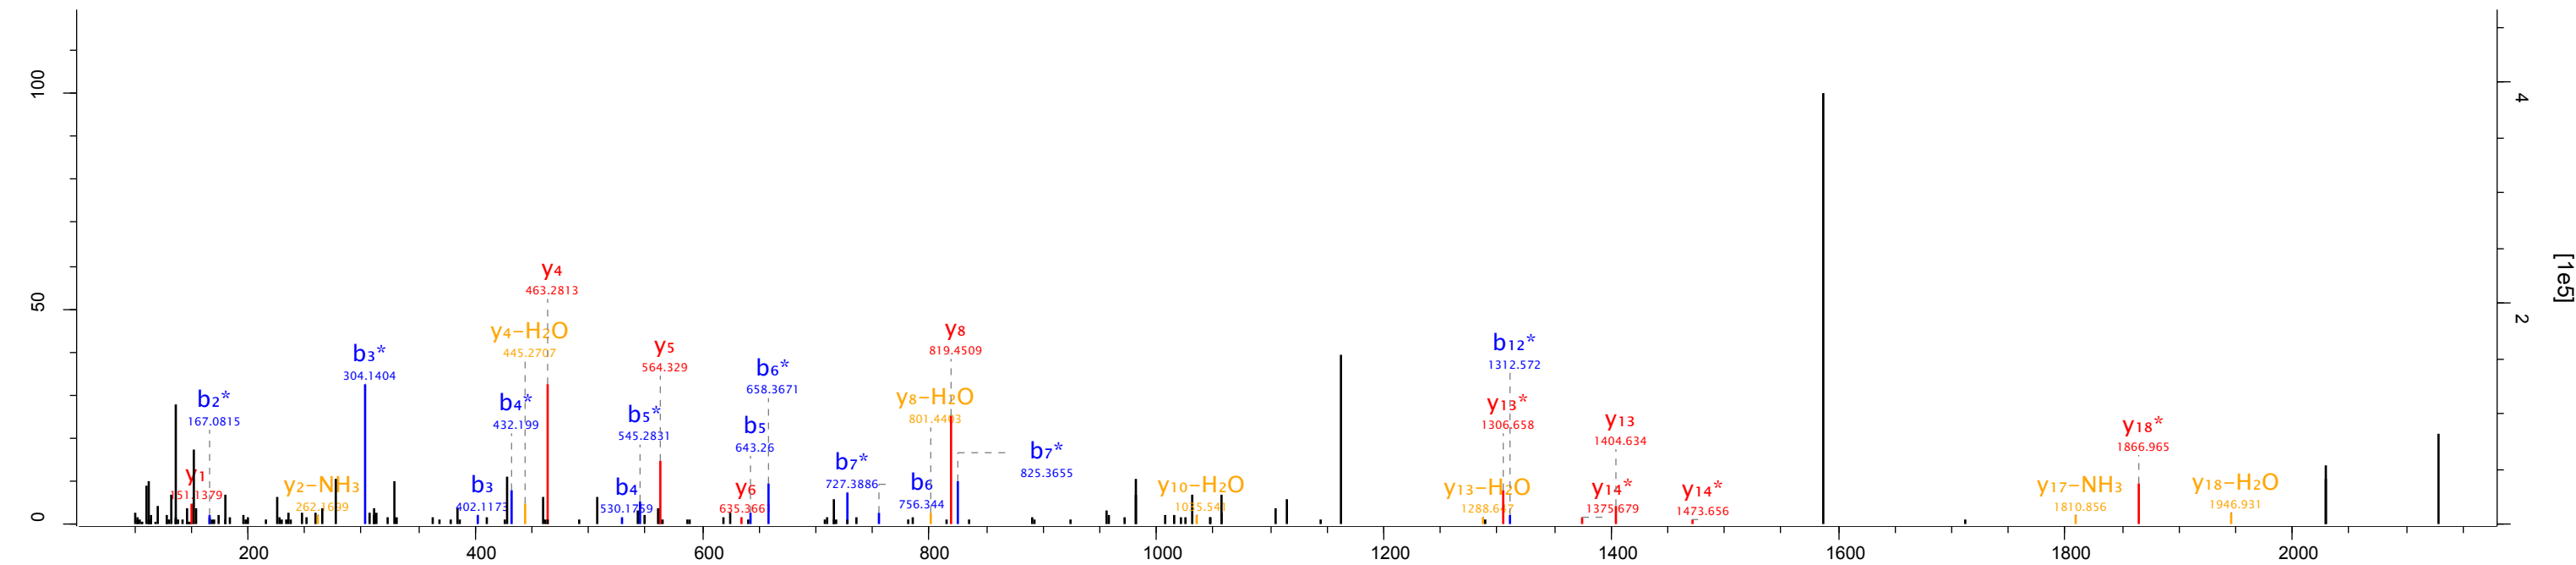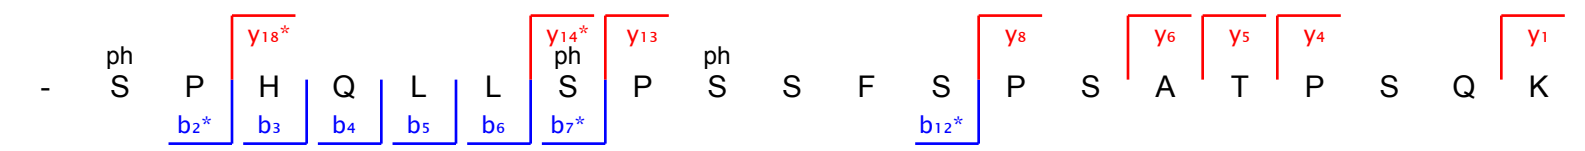

Raw file: 20150812\_A375SR\_Phospho\_BR1\_02  
 Scan: 20352 Method: FTMS; HCD Score: 101.66 m/z: 1223.99 Gene names: MAP1B

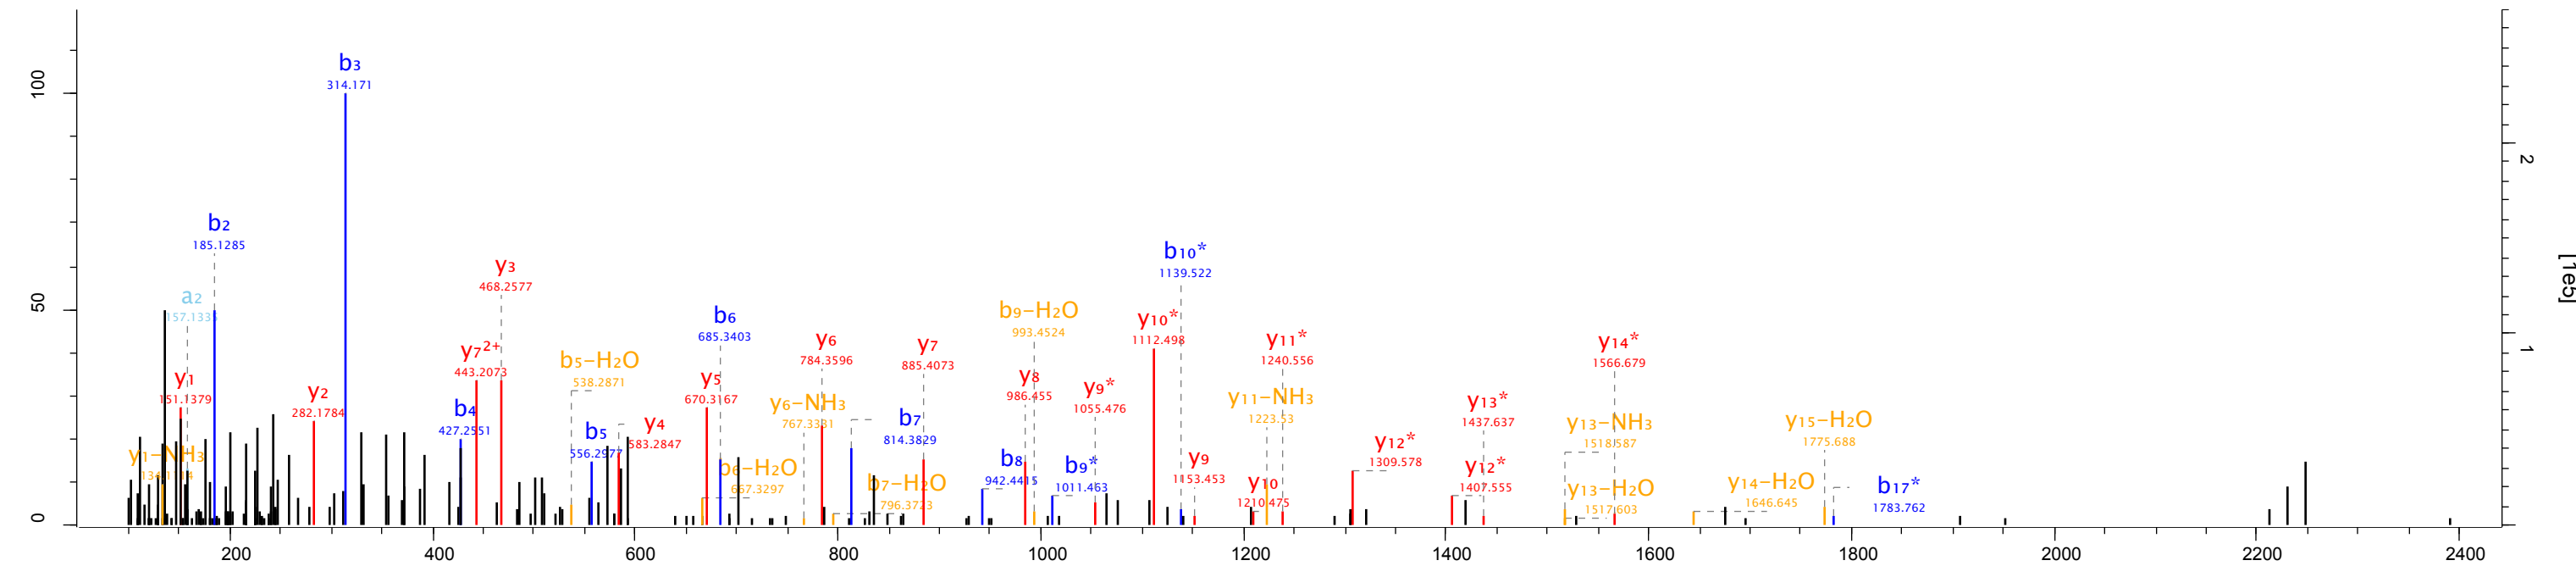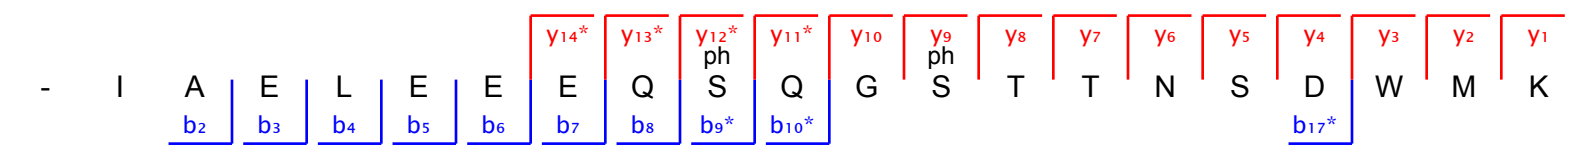

Raw file 20150812\_A375SR\_Phospho\_BR1\_02 Scan 20612 Method FTMS; HCD Score 169.84 m/z 1187.46 Gene names CHAMP1

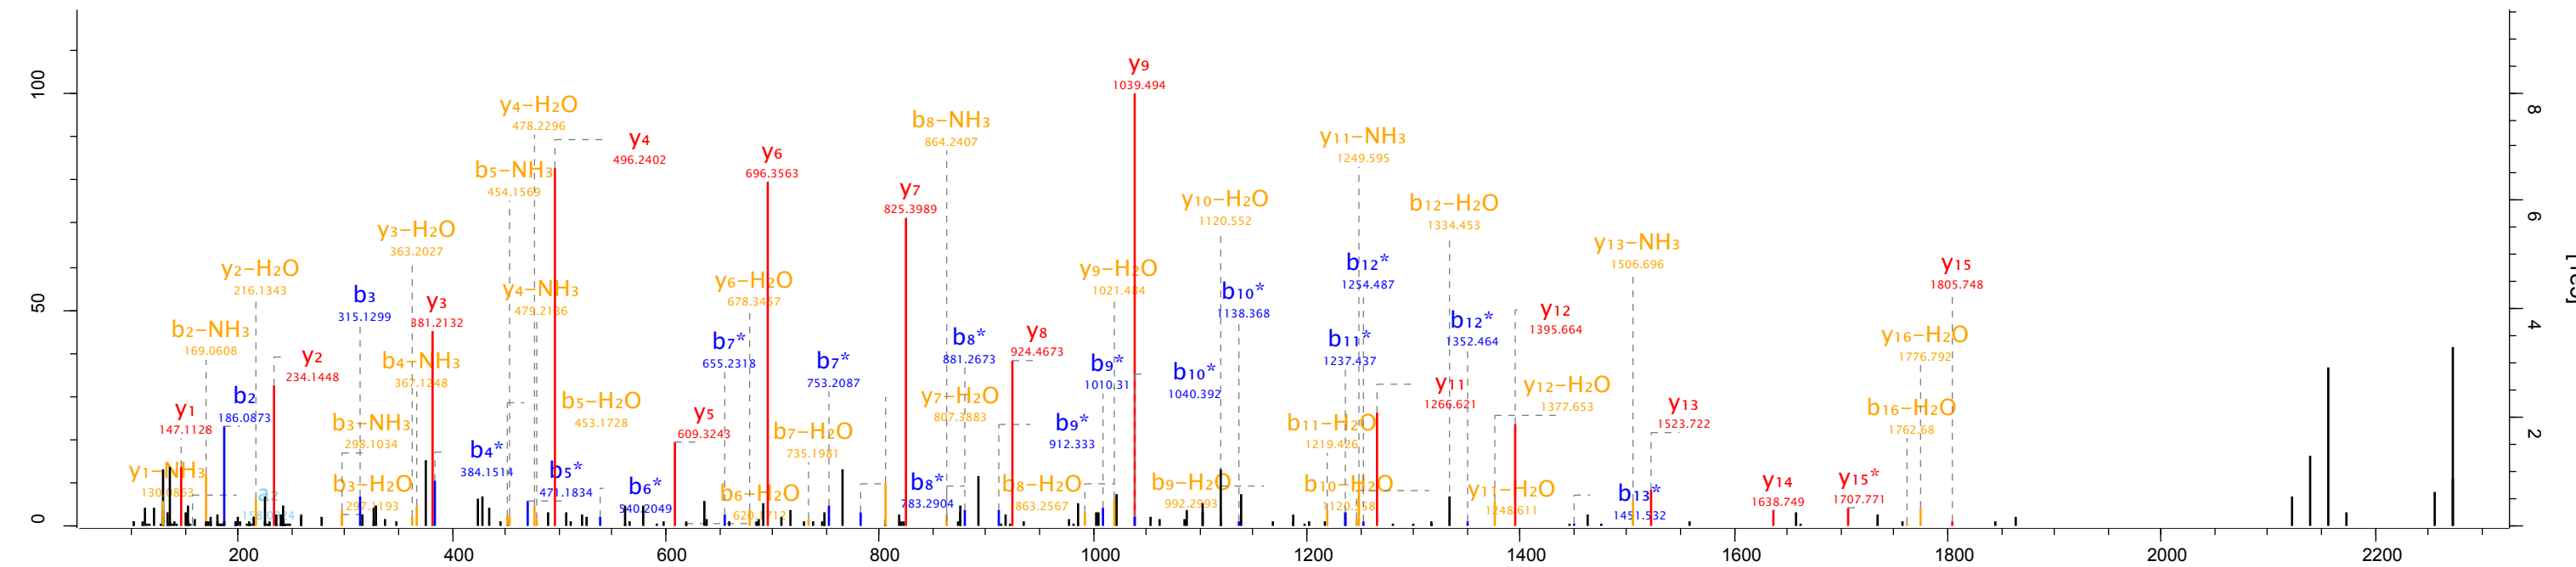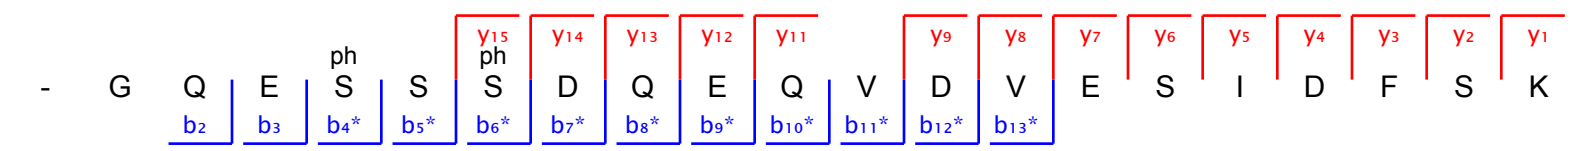

Raw file 20150812\_A375SR\_Phospho\_BR1\_02 Scan 21472 Method FTMS; HCD Score 231.89 m/z 1176.92 Gene names EEF1B2

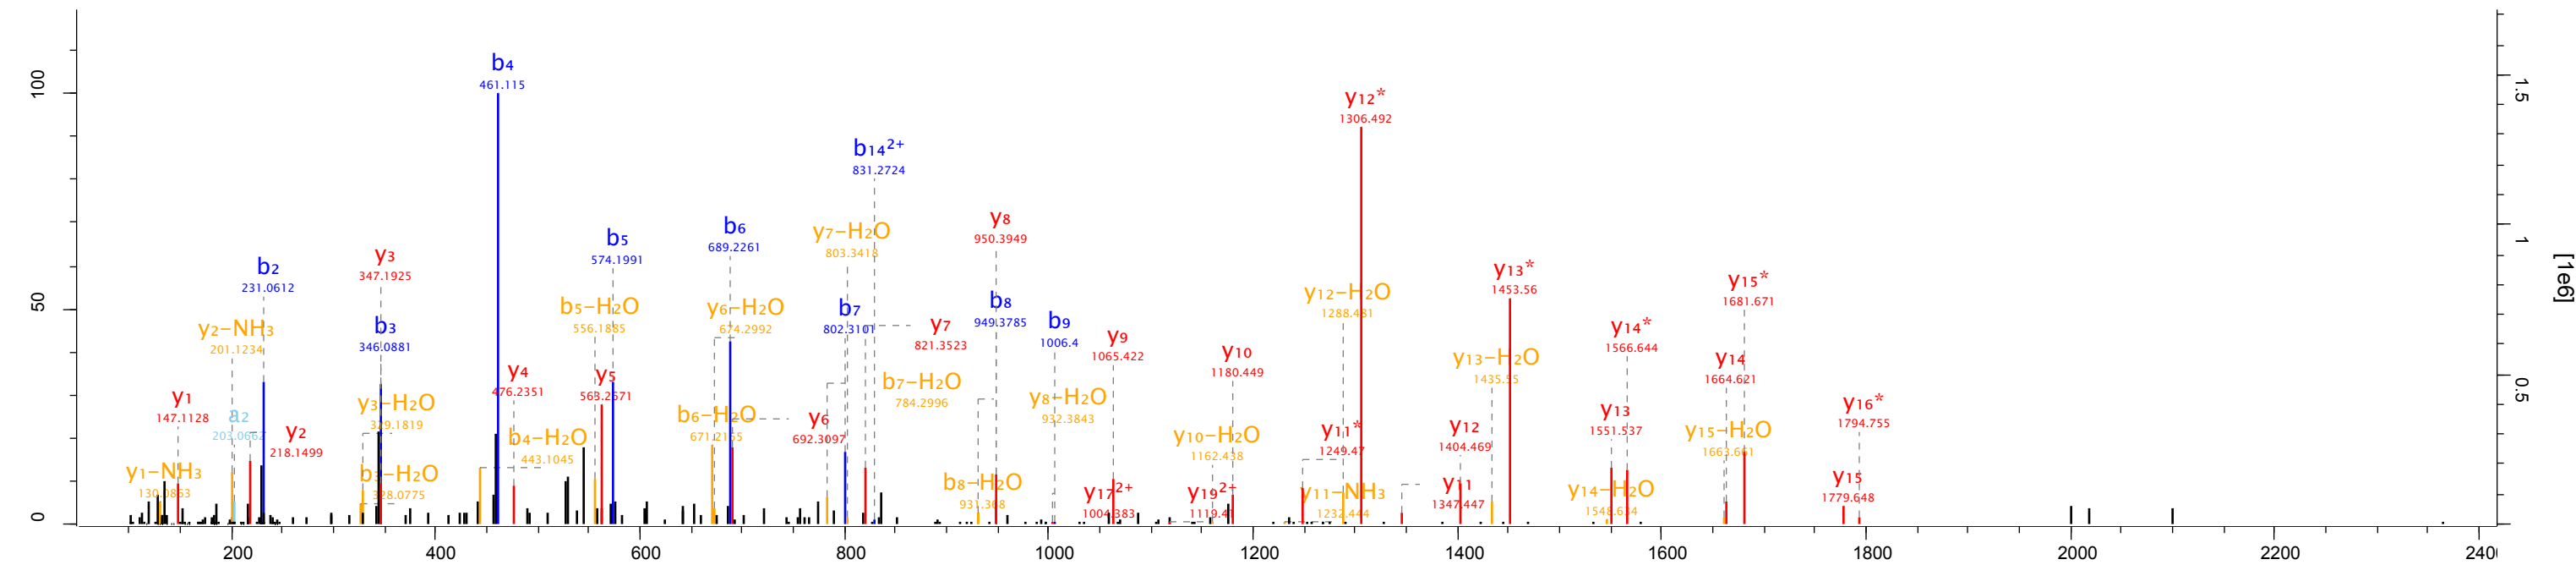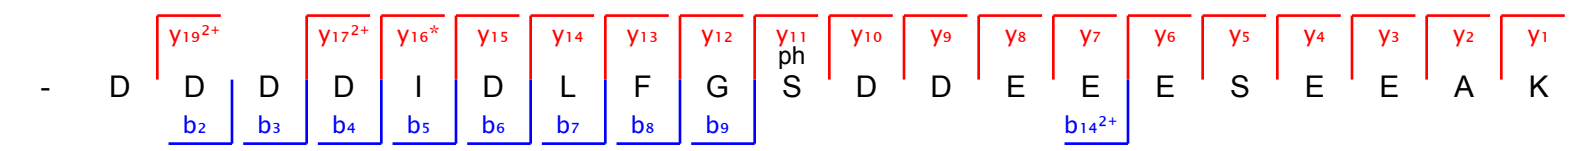

Raw file: 20150812\_A375SR\_Phospho\_BR1\_02  
 Scan: 21572 Method: FTMS; HCD Score: 119.27 m/z: 995.87 Gene names: RBM39

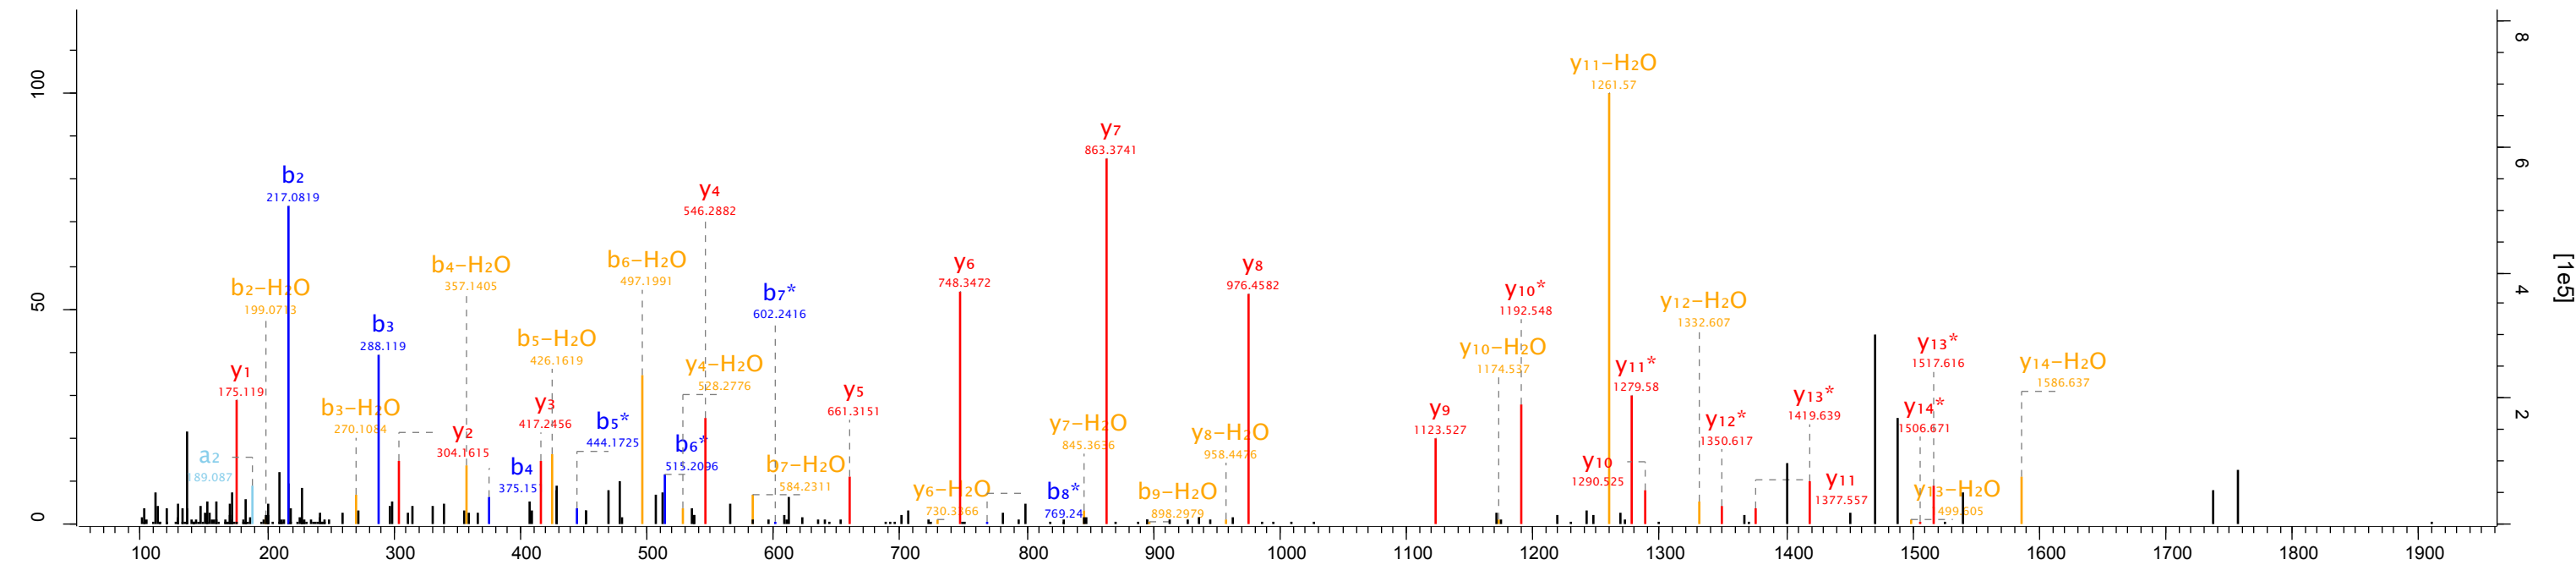

- T D A S ph S A S ph S F L D S D E L E R -

Fragmentation sites are indicated by boxes below the sequence:

- Blue boxes: b<sub>2</sub> (D), b<sub>3</sub> (A), b<sub>4</sub> (S), b<sub>5</sub>\* (S), b<sub>6</sub>\* (A), b<sub>7</sub>\* (S), b<sub>8</sub>\* (S)
- Red boxes: y<sub>14</sub>\* (S), y<sub>13</sub>\* (ph S), y<sub>12</sub>\* (A), y<sub>11</sub> (S), y<sub>10</sub> (ph S), y<sub>9</sub> (F), y<sub>8</sub> (L), y<sub>7</sub> (D), y<sub>6</sub> (S), y<sub>5</sub> (D), y<sub>4</sub> (E), y<sub>3</sub> (L), y<sub>2</sub> (E), y<sub>1</sub> (R)

Raw file: 20150812\_A375SR\_Phospho\_BR1\_02  
 Scan: 21742 Method: FTMS; HCD Score: 105.06 m/z: 946.38 Gene names: ANKS3

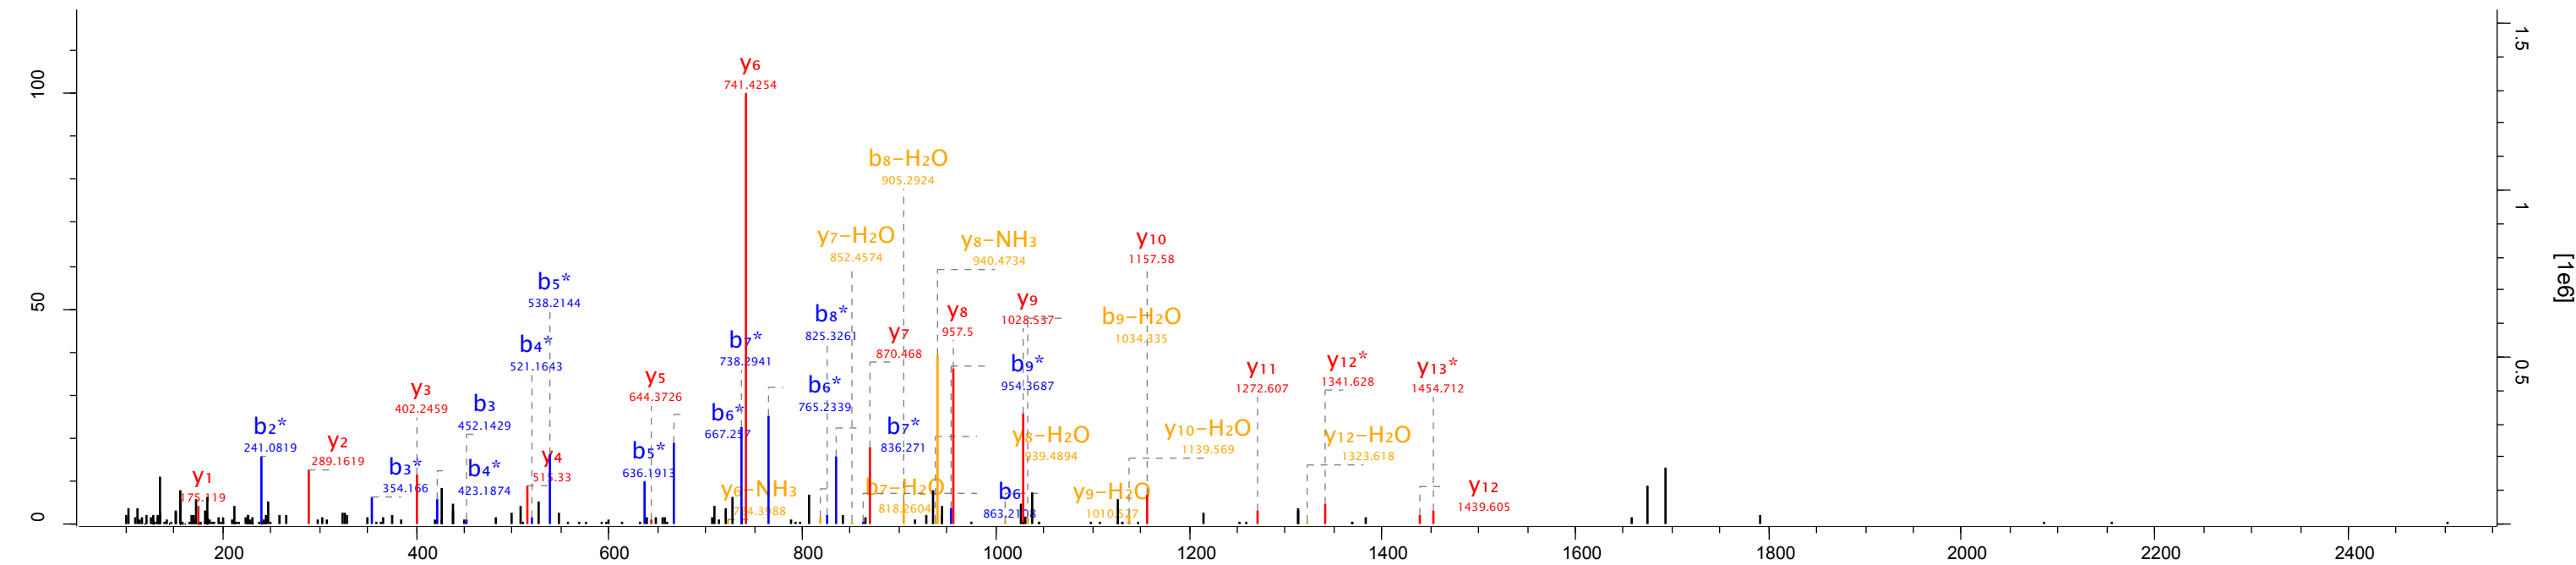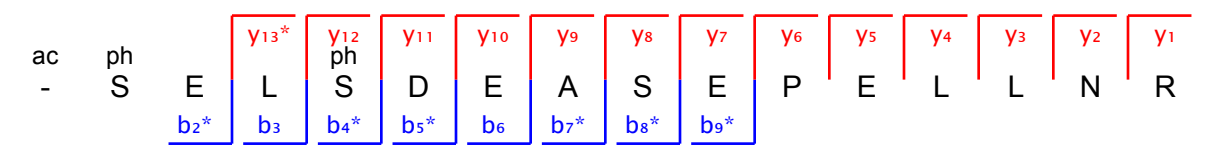

Raw file: 20150812\_A375SR\_Phospho\_BR1\_02  
 Scan: 21872 Method: FTMS; HCD Score: 92.01 m/z: 988.87 Gene names: ANKS3

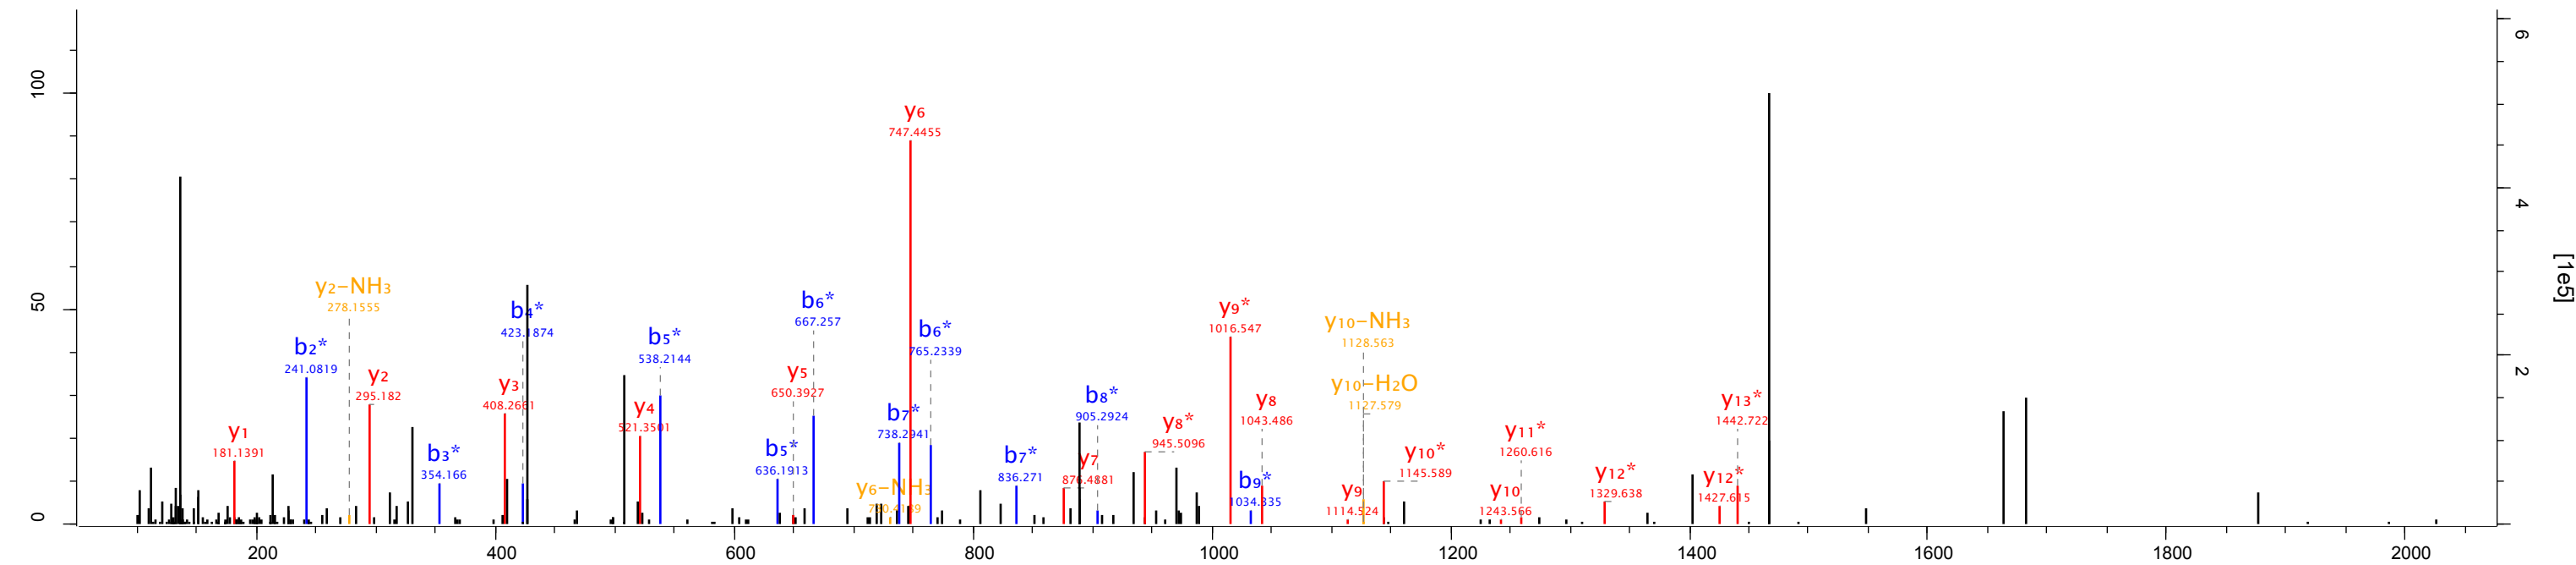

ac - S E L S D E A S E P E L L N R -

b2\*
y13\*
y12\*
y11\*
y10
y9
y8
y7
y6
y5
y4
y3
y2
y1

b3\*
b4\*
b5\*
b6\*
b7\*
b8\*
b9\*

Raw file: 20150812\_A375SR\_Phospho\_BR1\_02  
 Scan: 23602 Method: FTMS; HCD Score: 250.72 m/z: 956.4 Gene names: PRPF4B

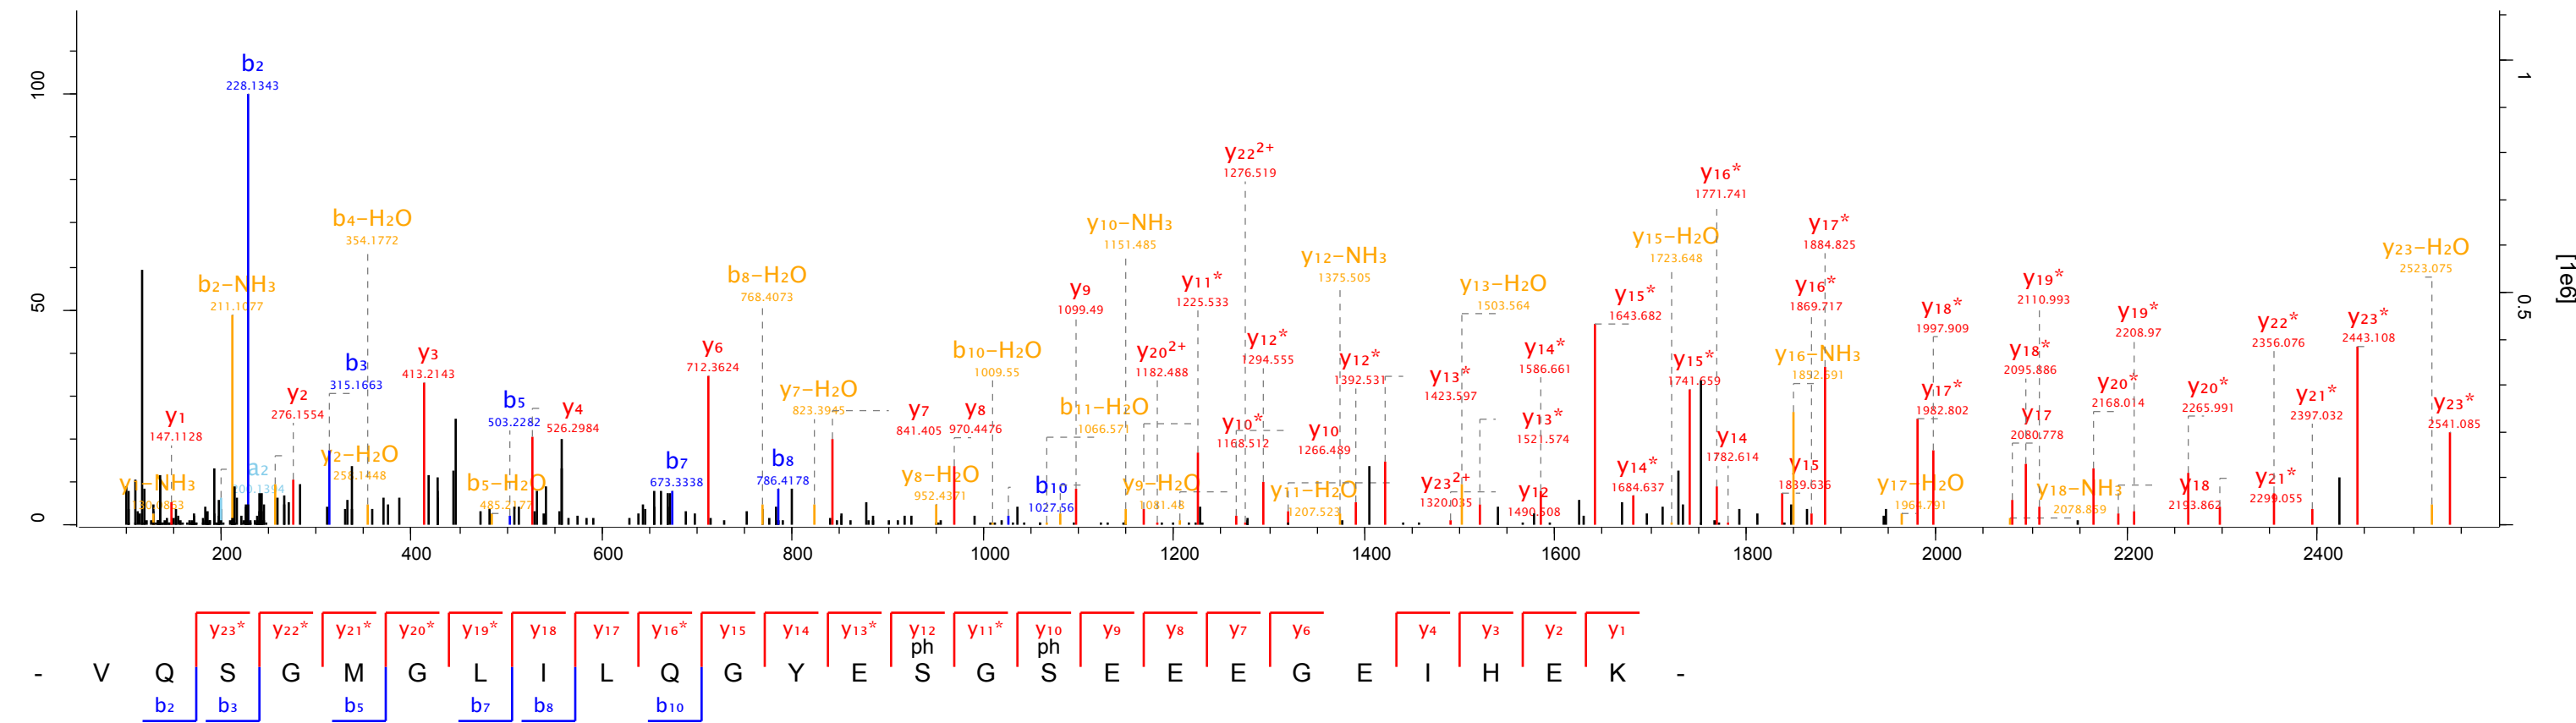



Raw file  
20150812\_A375SR\_Phospho\_BR1\_02

Scan 24862 Method FTMS; HCD Score 41.55 m/z 940.7 Gene names SNX29

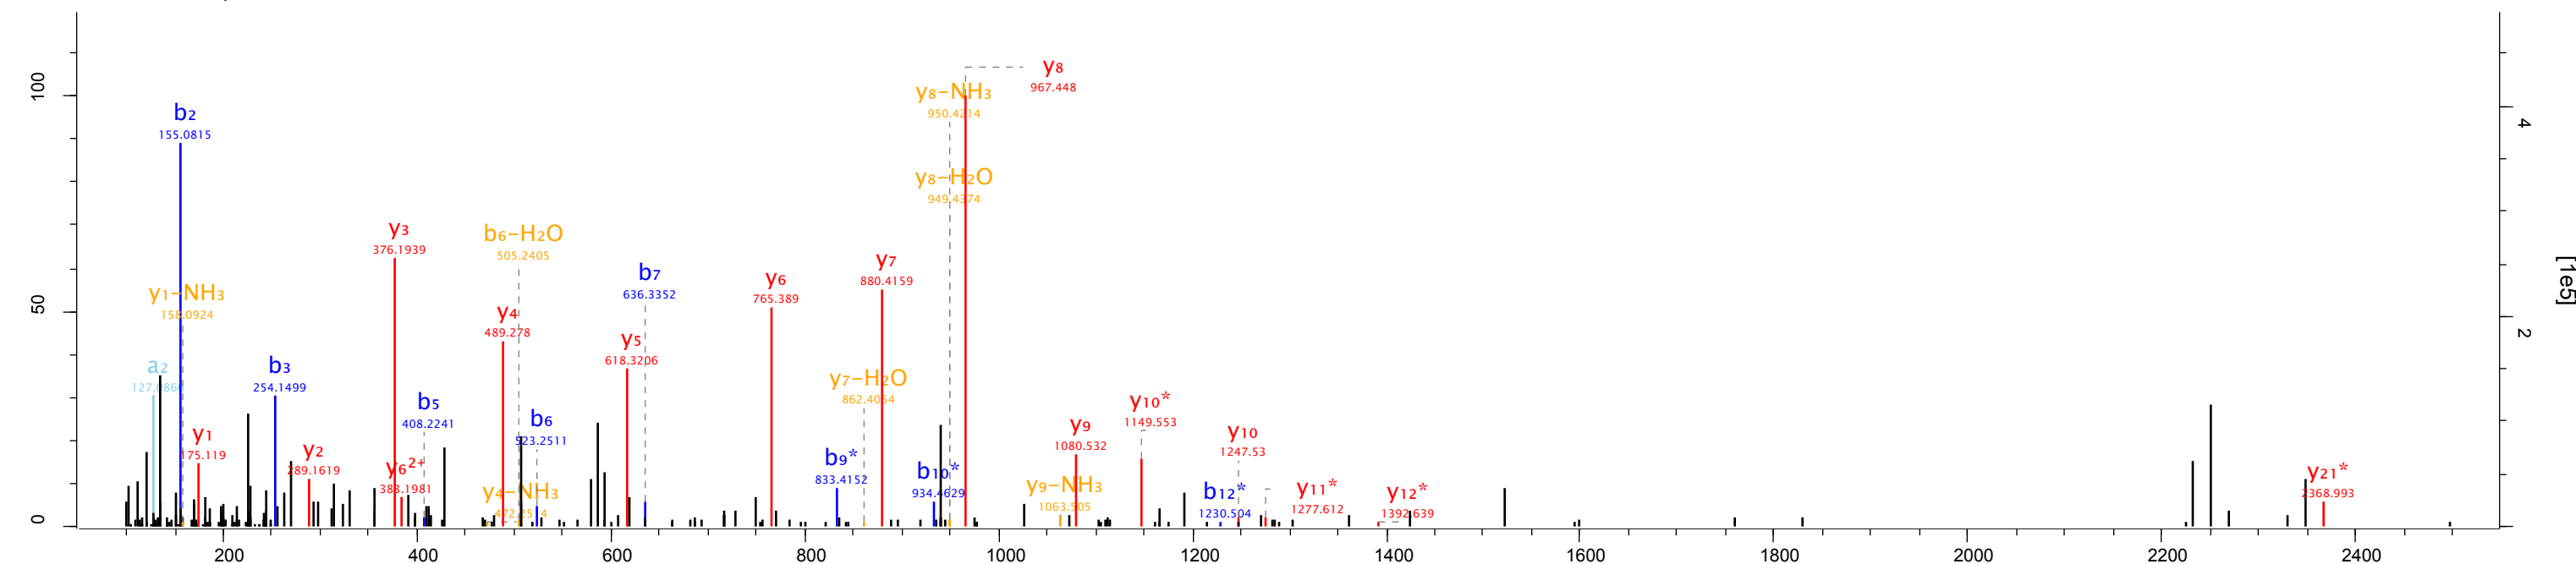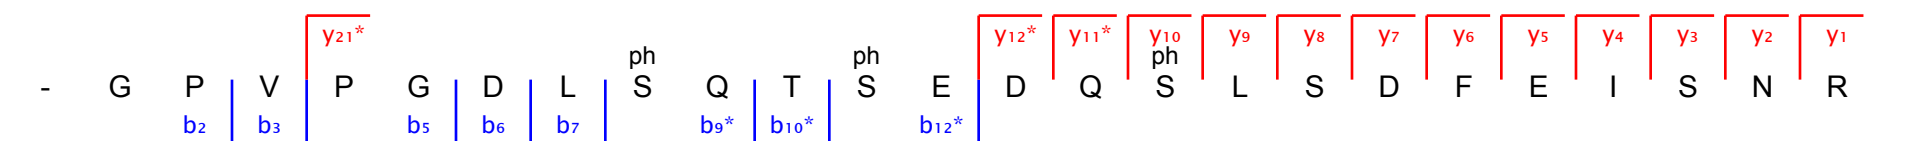

Raw file: 20150812\_A375SR\_Phospho\_BR1\_02  
 Scan: 24942 Method: FTMS; HCD Score: 115.54 m/z: 1227.52 Gene names: EGFR

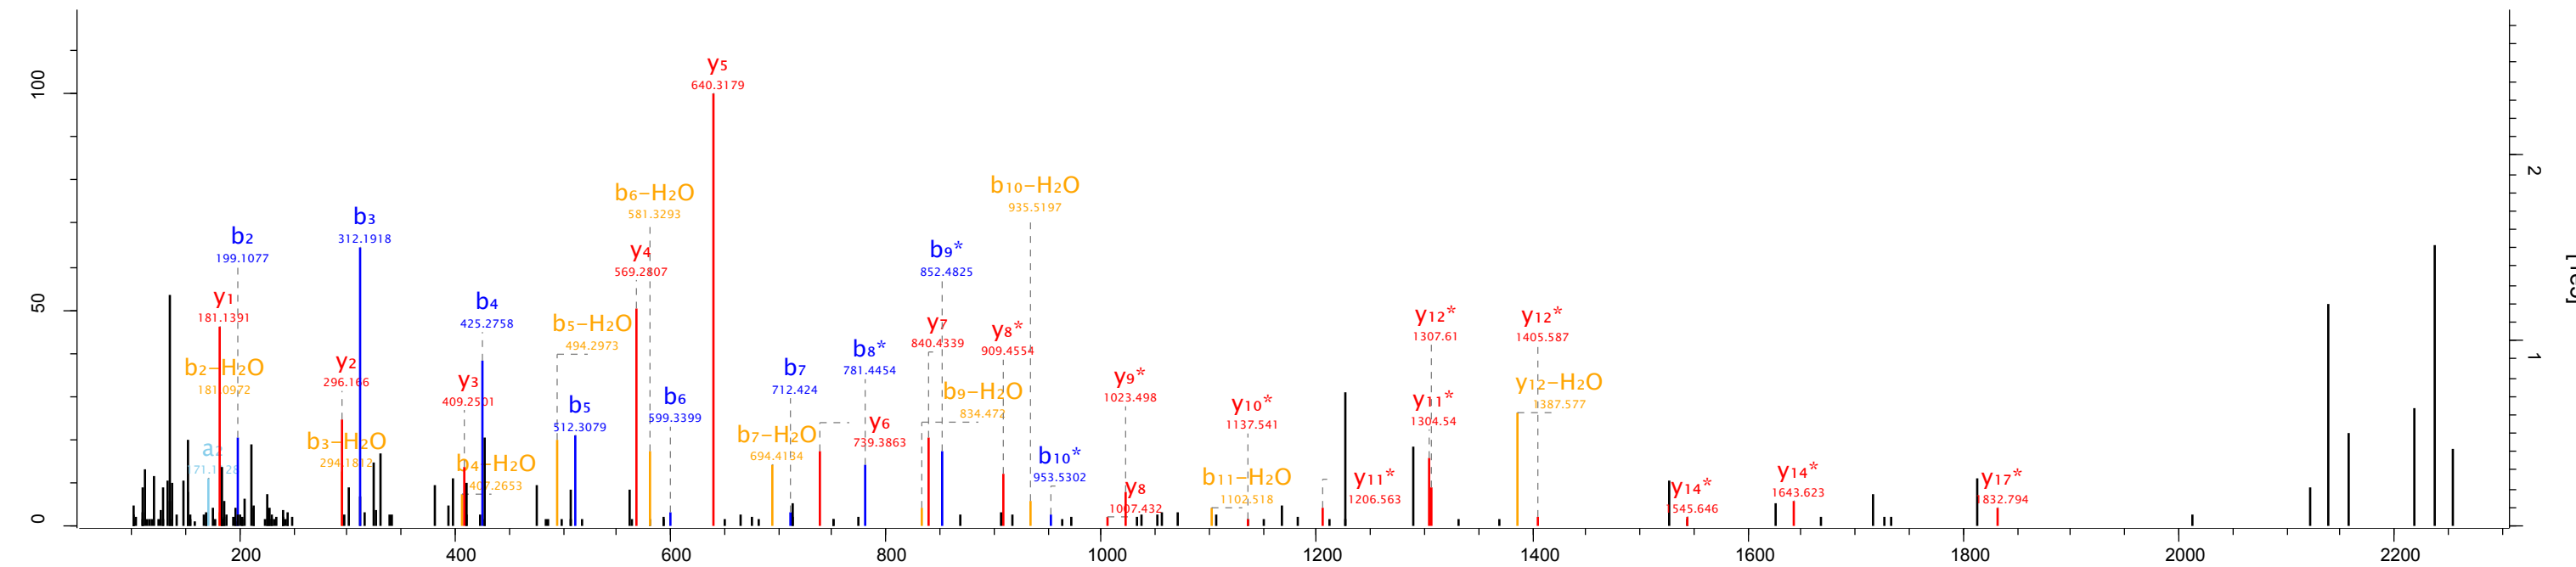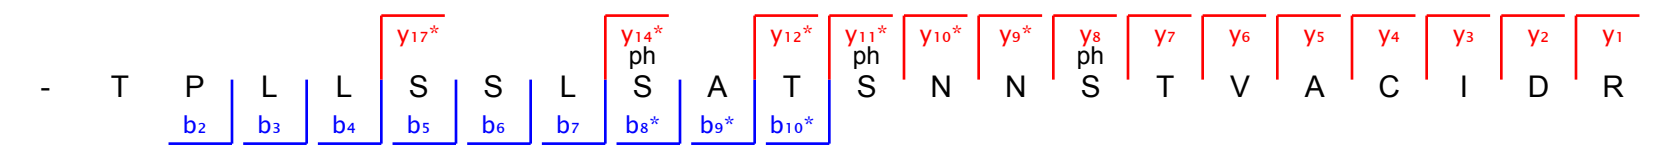

Raw file: 20150812\_A375SR\_Phospho\_BR1\_02  
 Scan: 27462 Method: FTMS; HCD Score: 149.53 m/z: 830.29 Gene names: EIF2S2

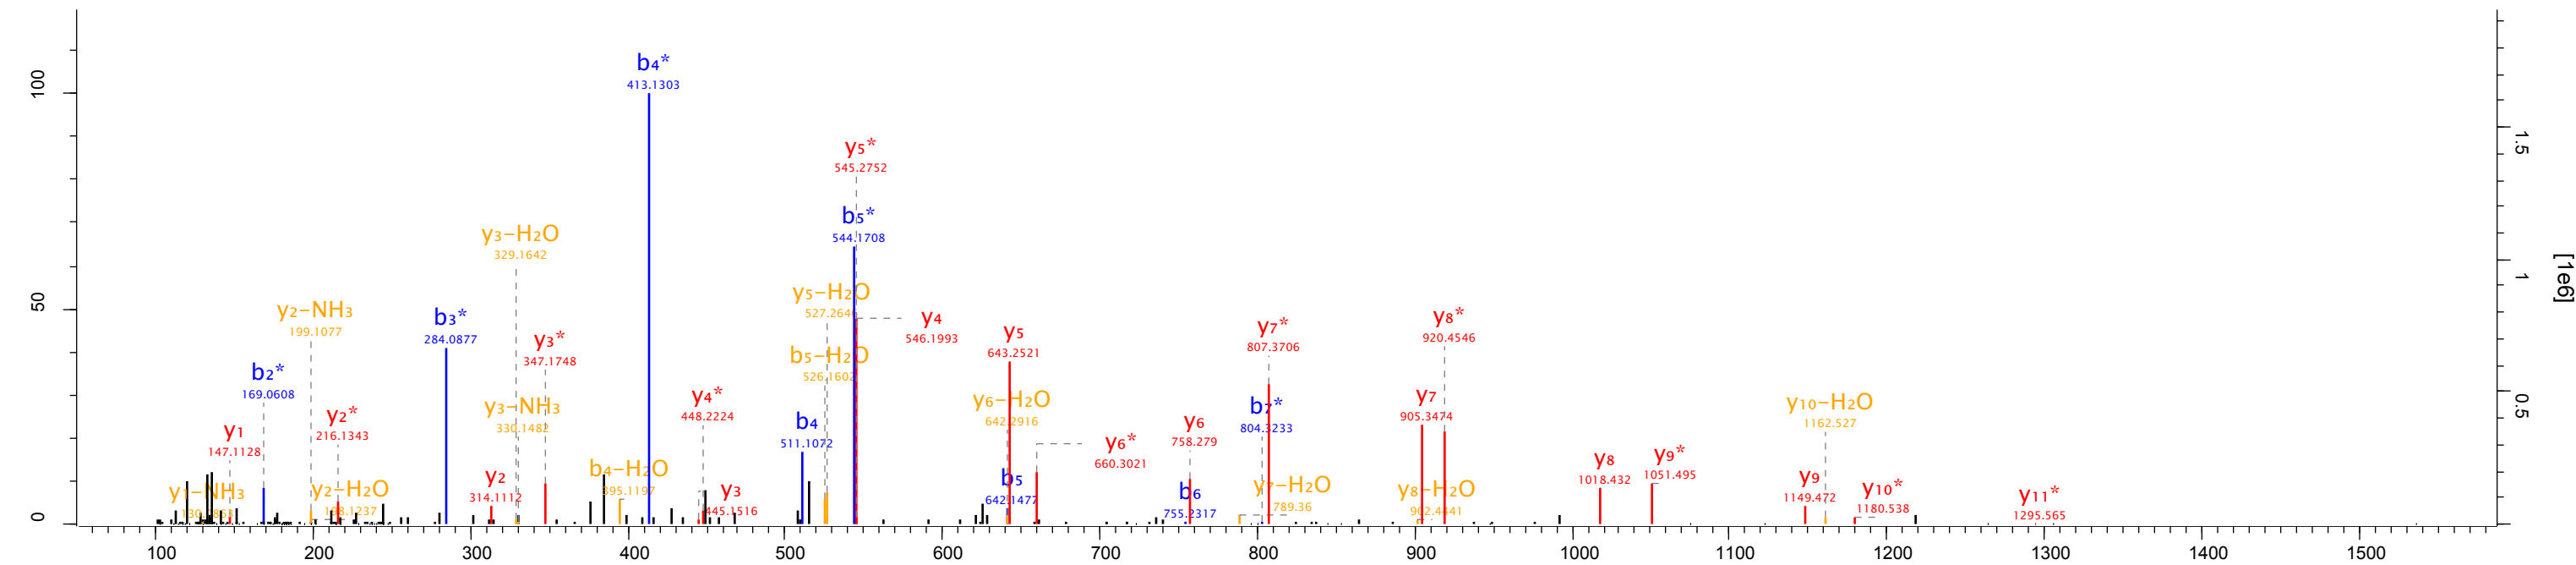

ac - ph S G D E M I F D P T M S K -

b2\*
y11\*
y10\*
y9
y8
y7
y6
y5
y4
y3
y2
y1

b3\*
b4
b5
b6
b7\*
ph
S

Raw file: 20150812\_A375SR\_Phospho\_BR1\_02  
 Scan: 2772 Method: FTMS; HCD Score: 72.32 m/z: 695.79 Gene names: SRRM2

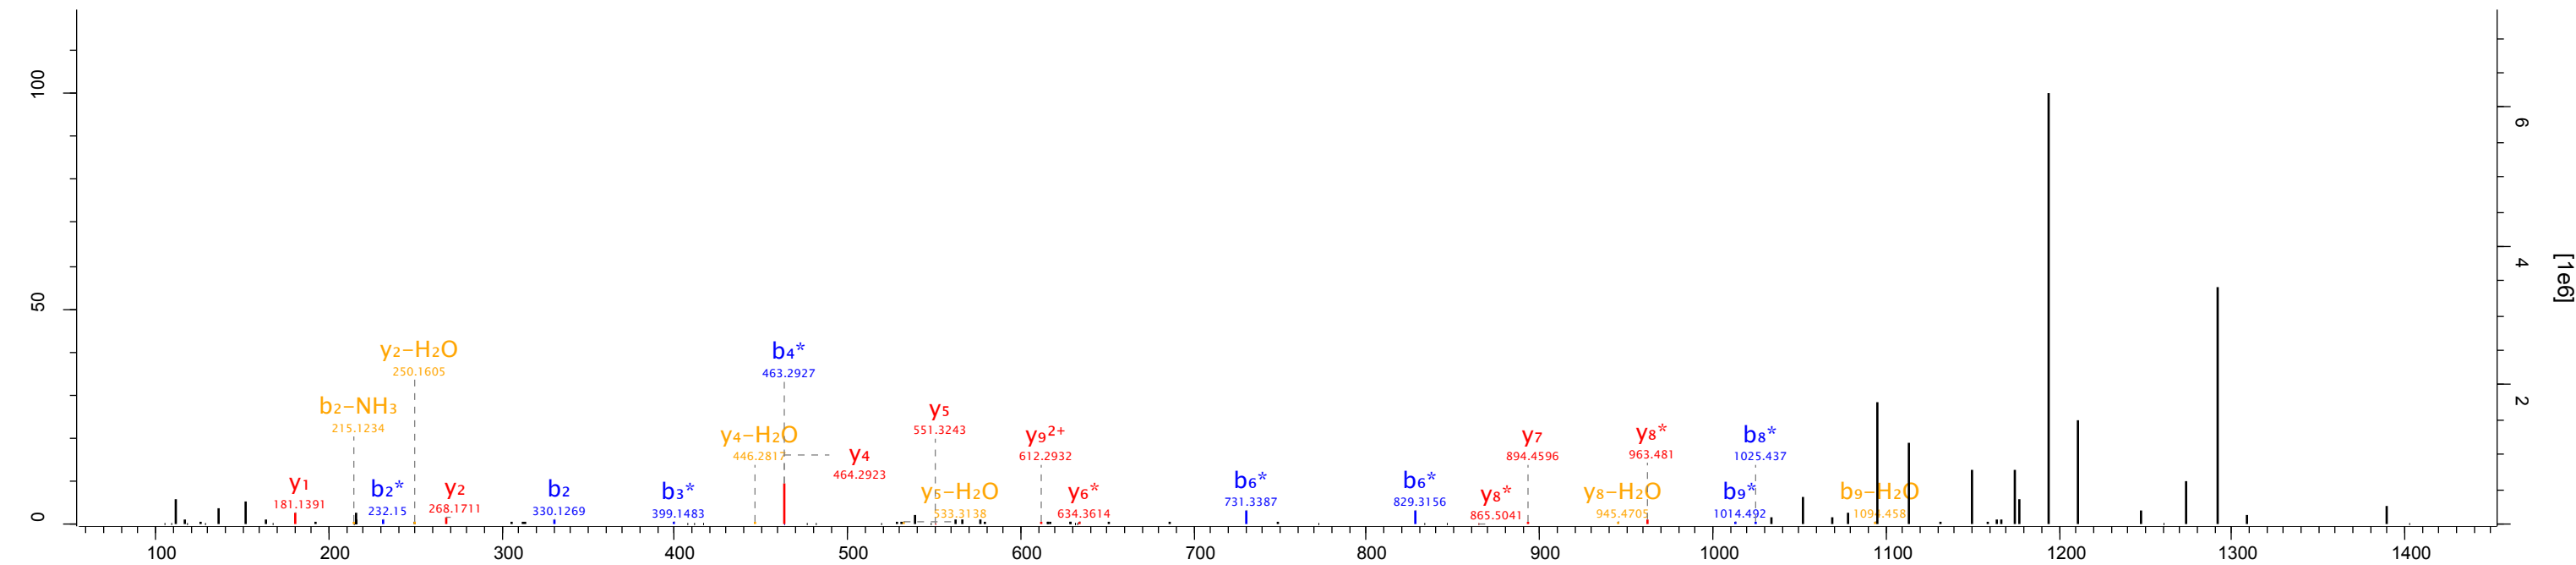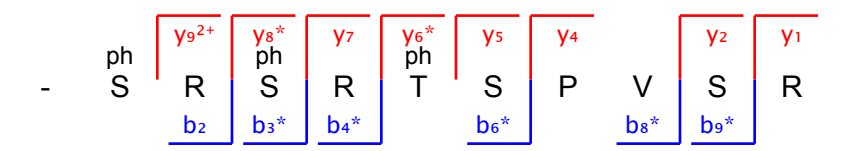

Raw file 20150812\_A375SR\_Phospho\_BR1\_02 Scan 27842 Method FTMS; HCD Score 45.88 m/z 1126.51 Gene names XPO6

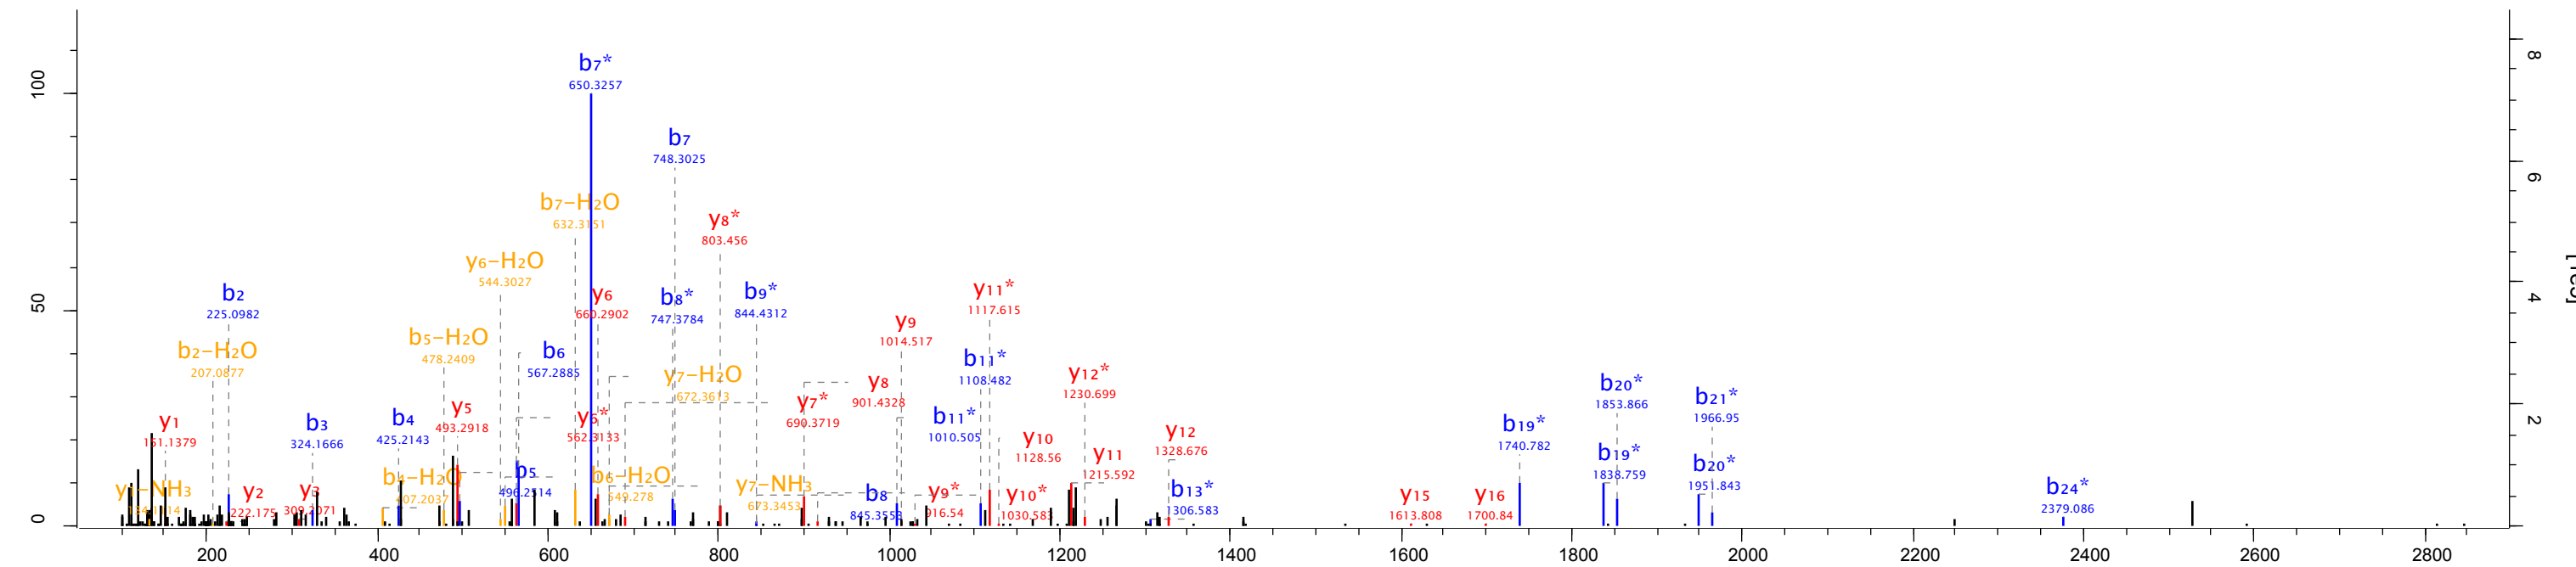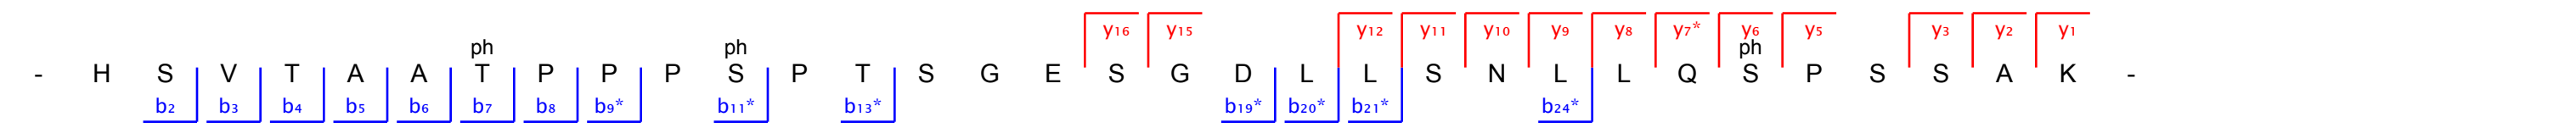

Raw file 20150812\_A375SR\_Phospho\_BR1\_02 Scan 3182 Method FTMS; HCD Score 72.57 m/z 687.26 Gene names SRRM2

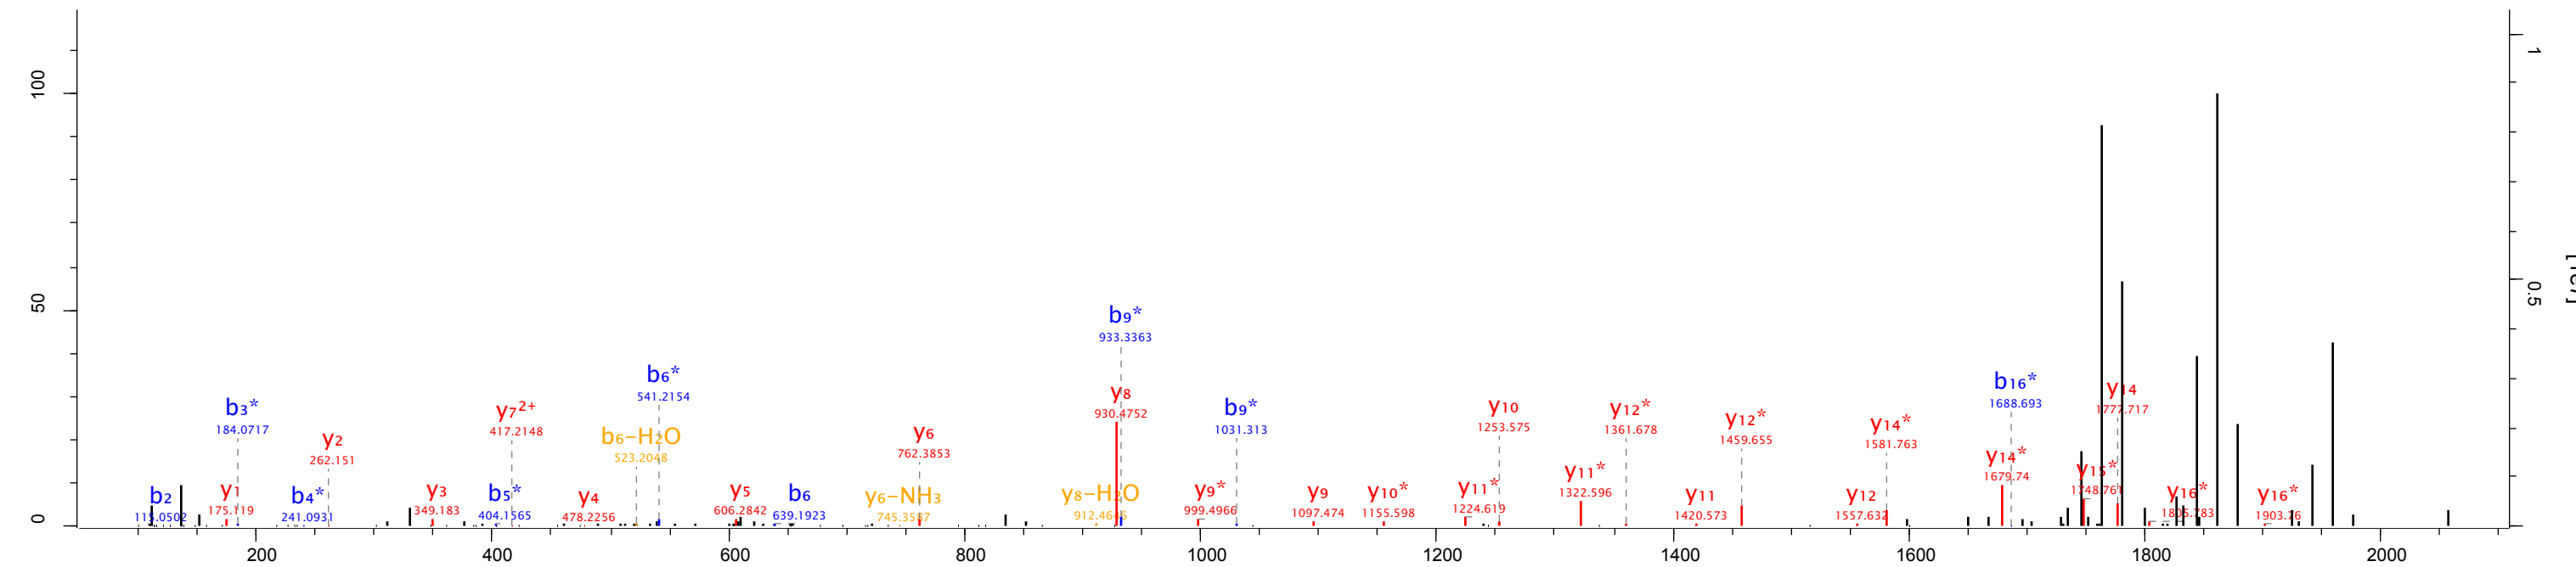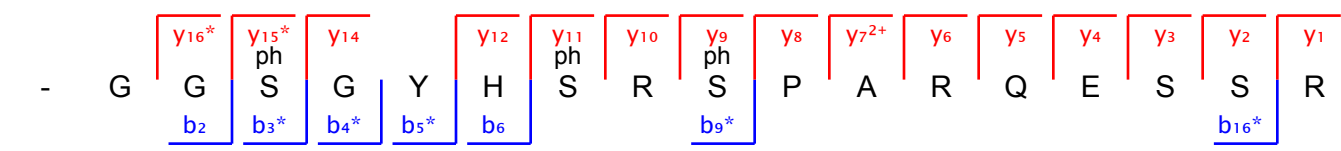

Raw file: 20150812\_A375SR\_Phospho\_BR1\_02  
 Scan: 4452 Method: FTMS; HCD Score: 134.22 m/z: 1011.38 Gene names: SRRM1

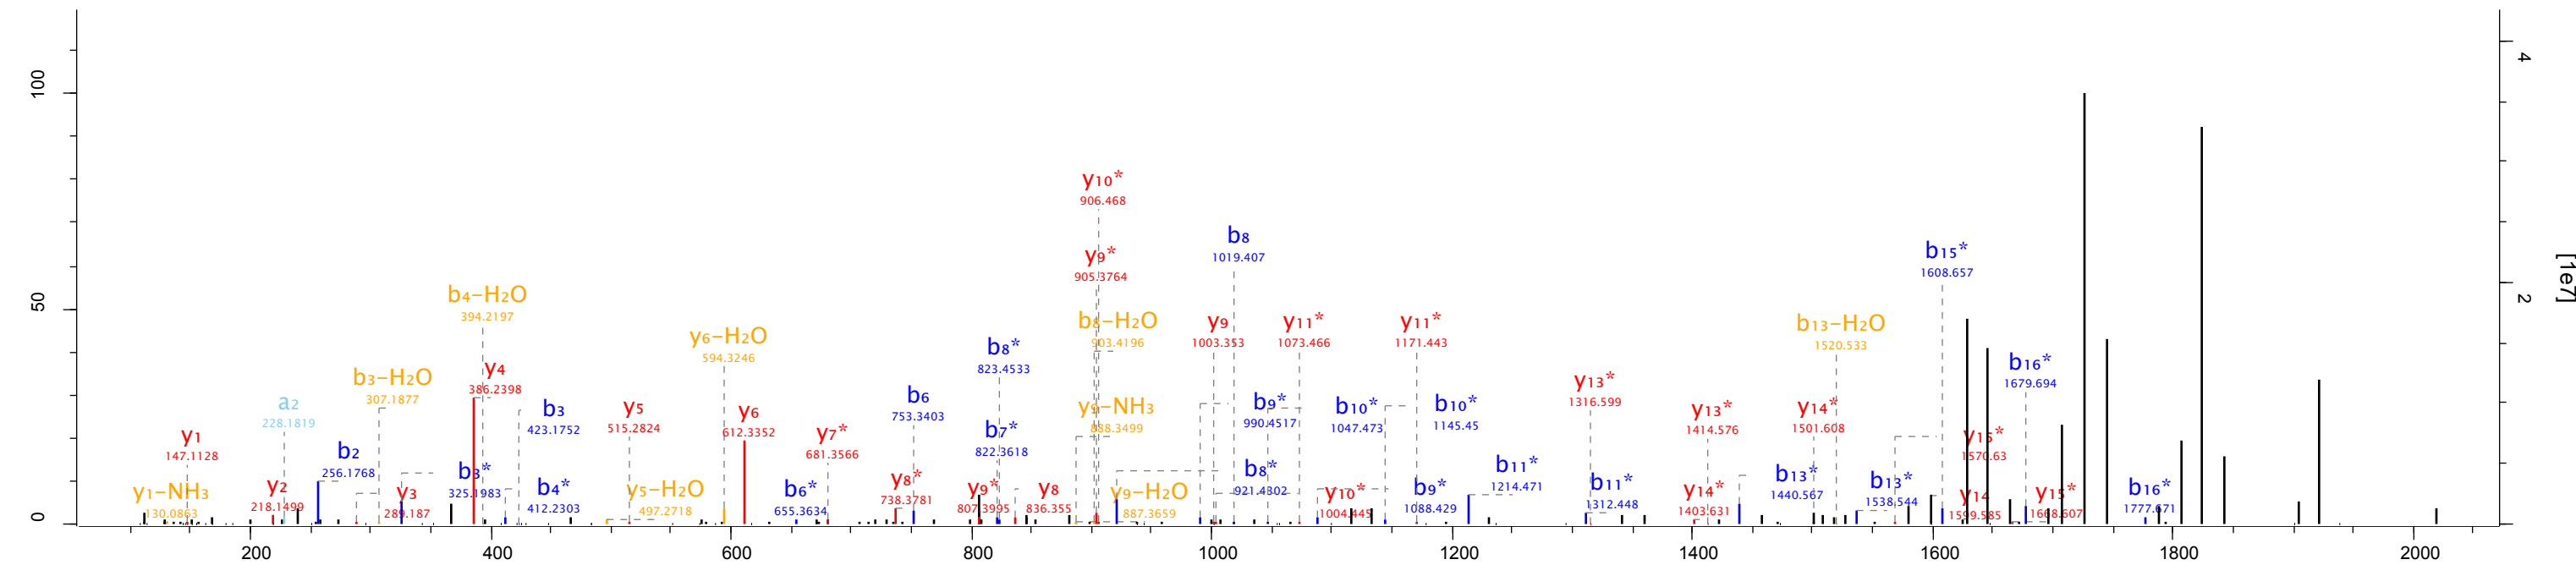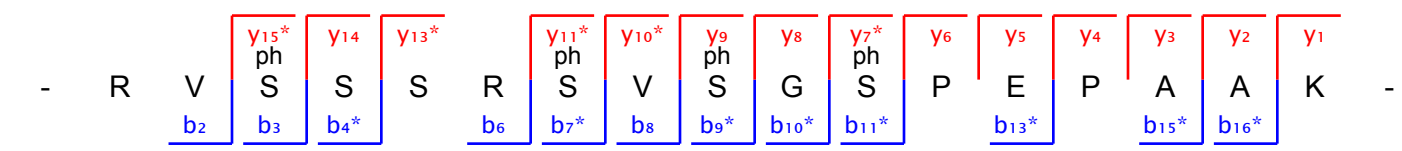

Raw file: 20150812\_A375SR\_Phospho\_BR1\_02  
 Scan: 4572 Method: FTMS; HCD Score: 85.71 m/z: 653.29 Gene names: SRRM1

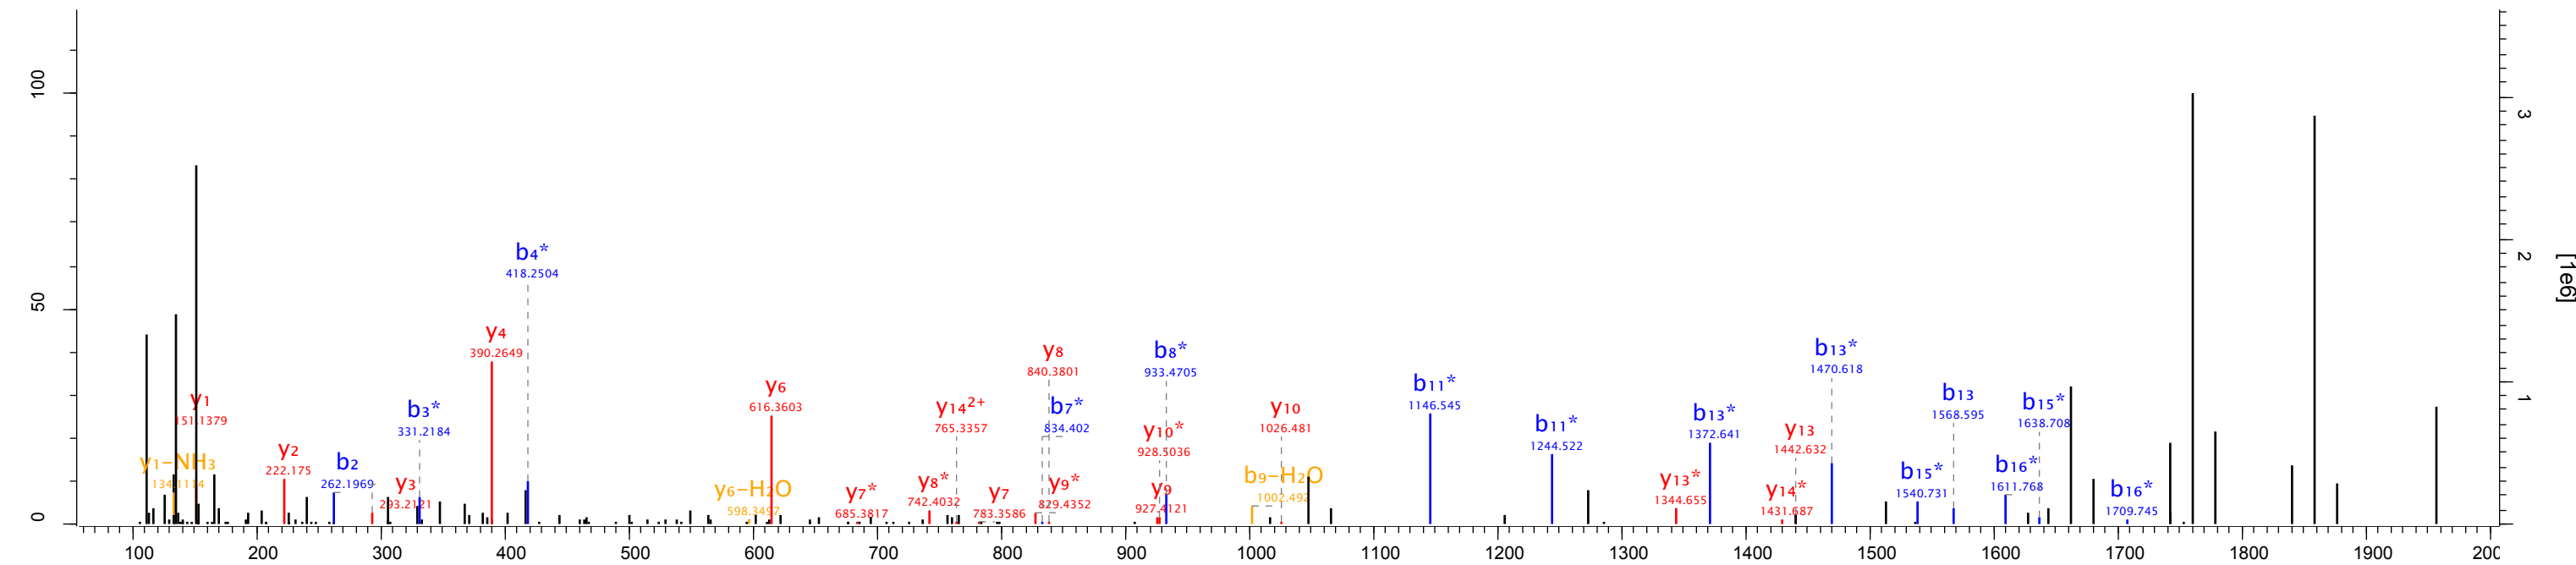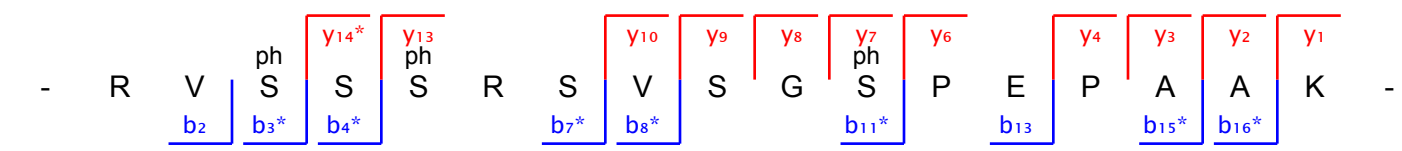



Raw file: 20150812\_A375SR\_Phospho\_BR1\_02  
 Scan: 4992 Method: FTMS; HCD Score: 43.95 m/z: 727.79 Gene names: PRPF4B

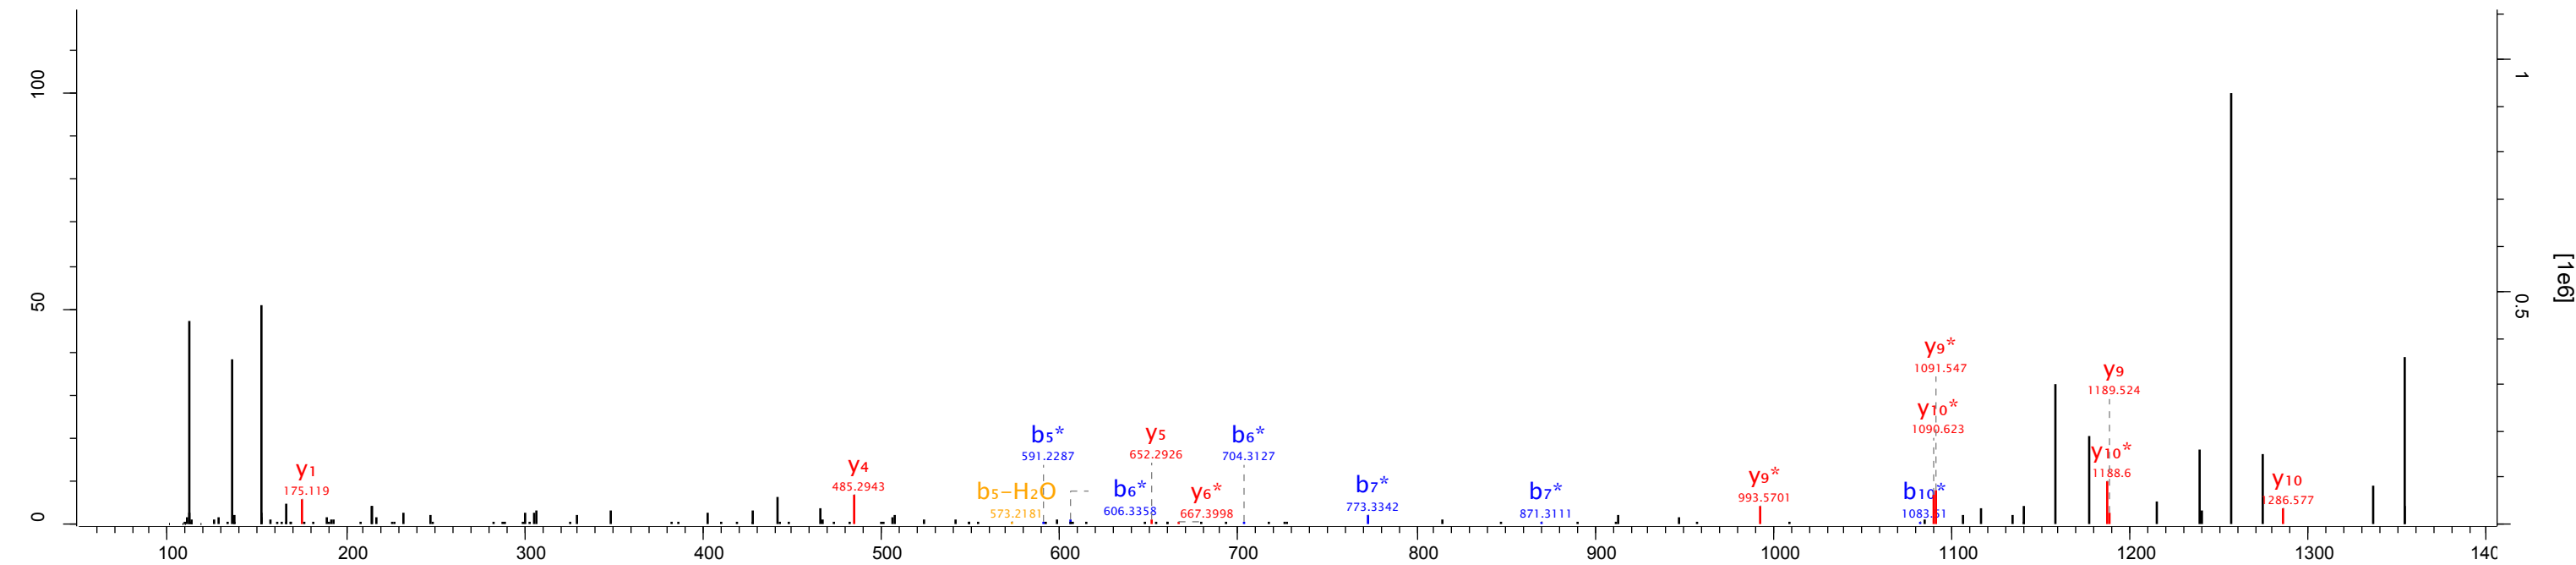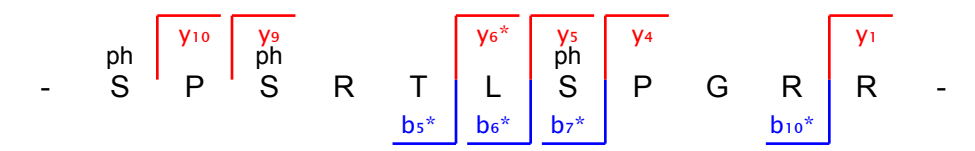

Raw file: 20150812\_A375SR\_Phospho\_BR1\_02  
 Scan: 5232 Method: FTMS; HCD Score: 179.17 m/z: 693.95 Gene names: SGTA

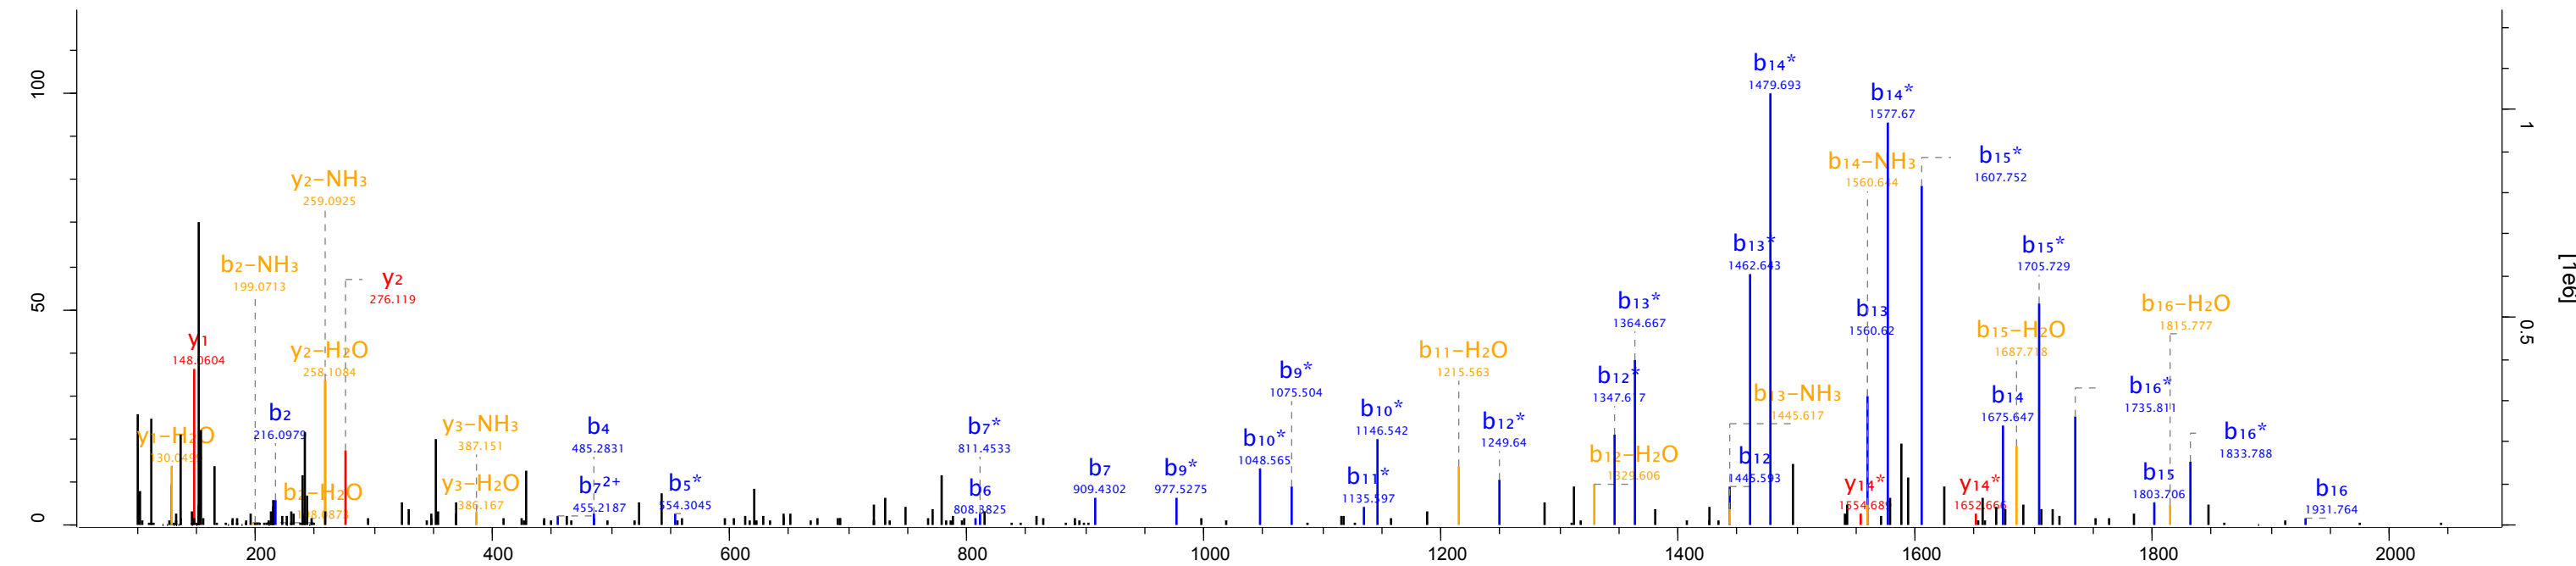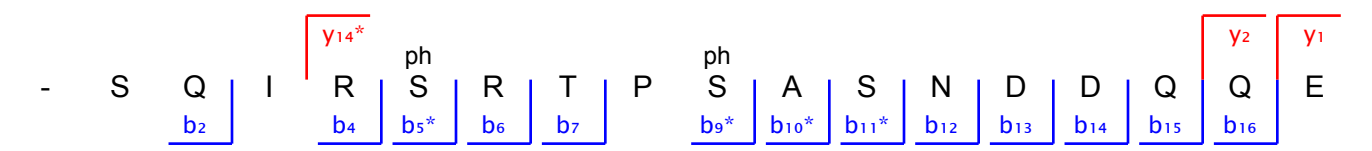

Raw file: 20150812\_A375SR\_Phospho\_BR1\_02  
 Scan: 5272 Method: FTMS; HCD Score: 42.95 m/z: 714.77 Gene names: FSD1

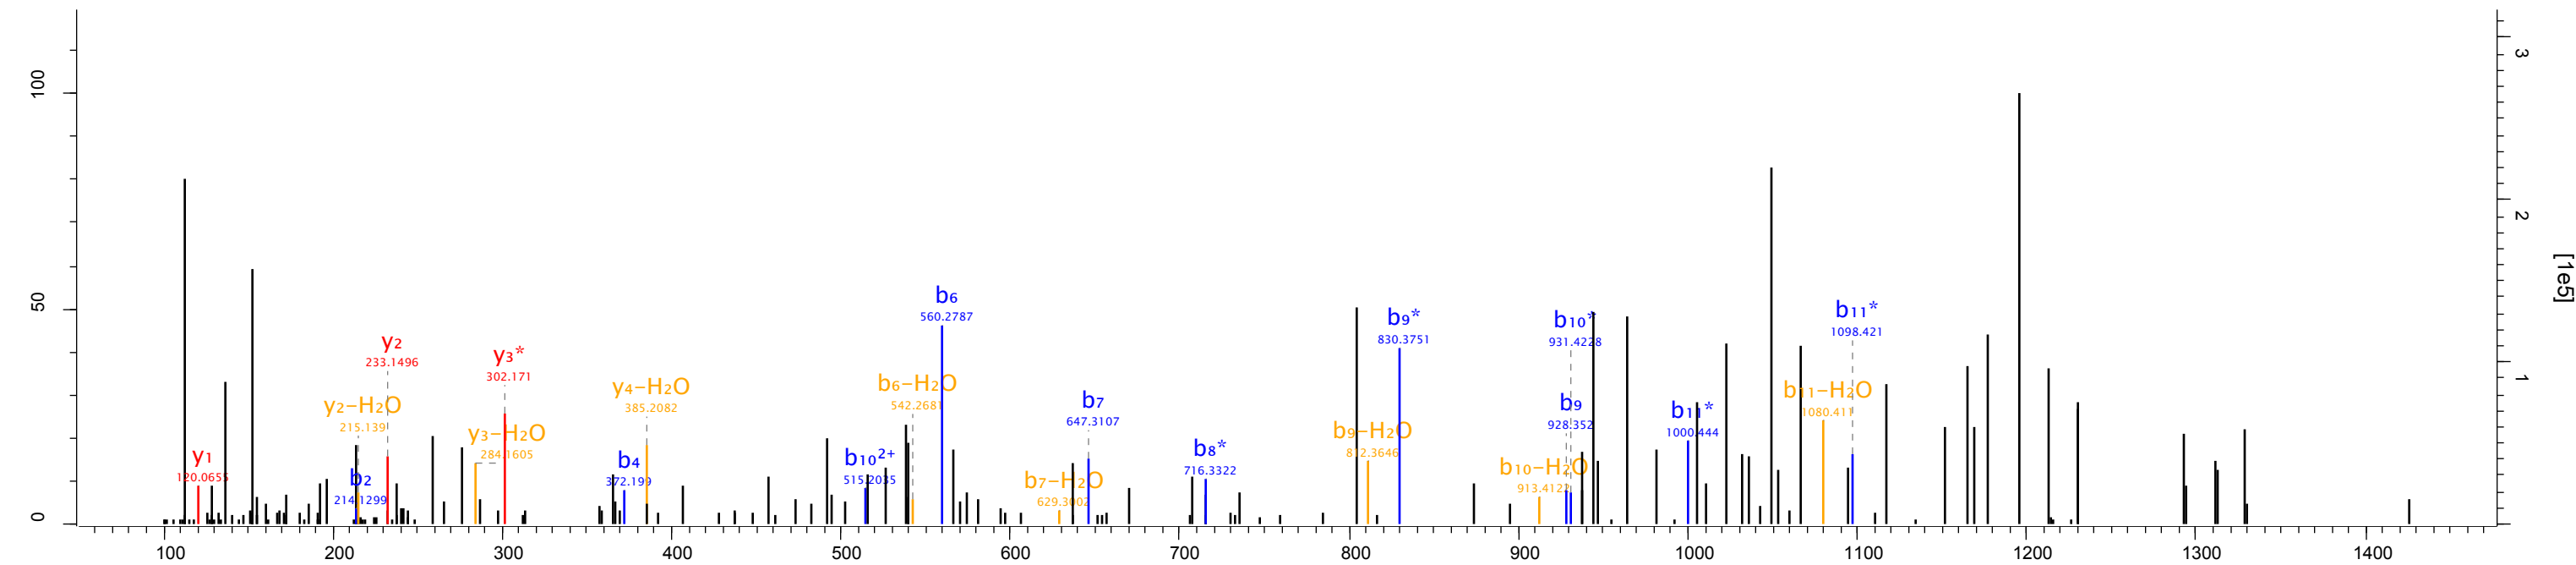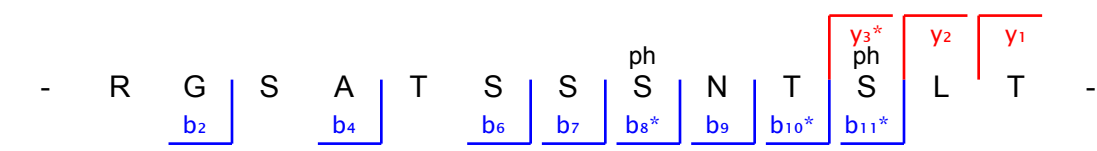

Raw file: 20150812\_A375SR\_Phospho\_BR1\_02  
 Scan: 6492 Method: FTMS; HCD Score: 89.3 m/z: 990.87 Gene names: TCEAL3;TCEAL5;TCEAL6

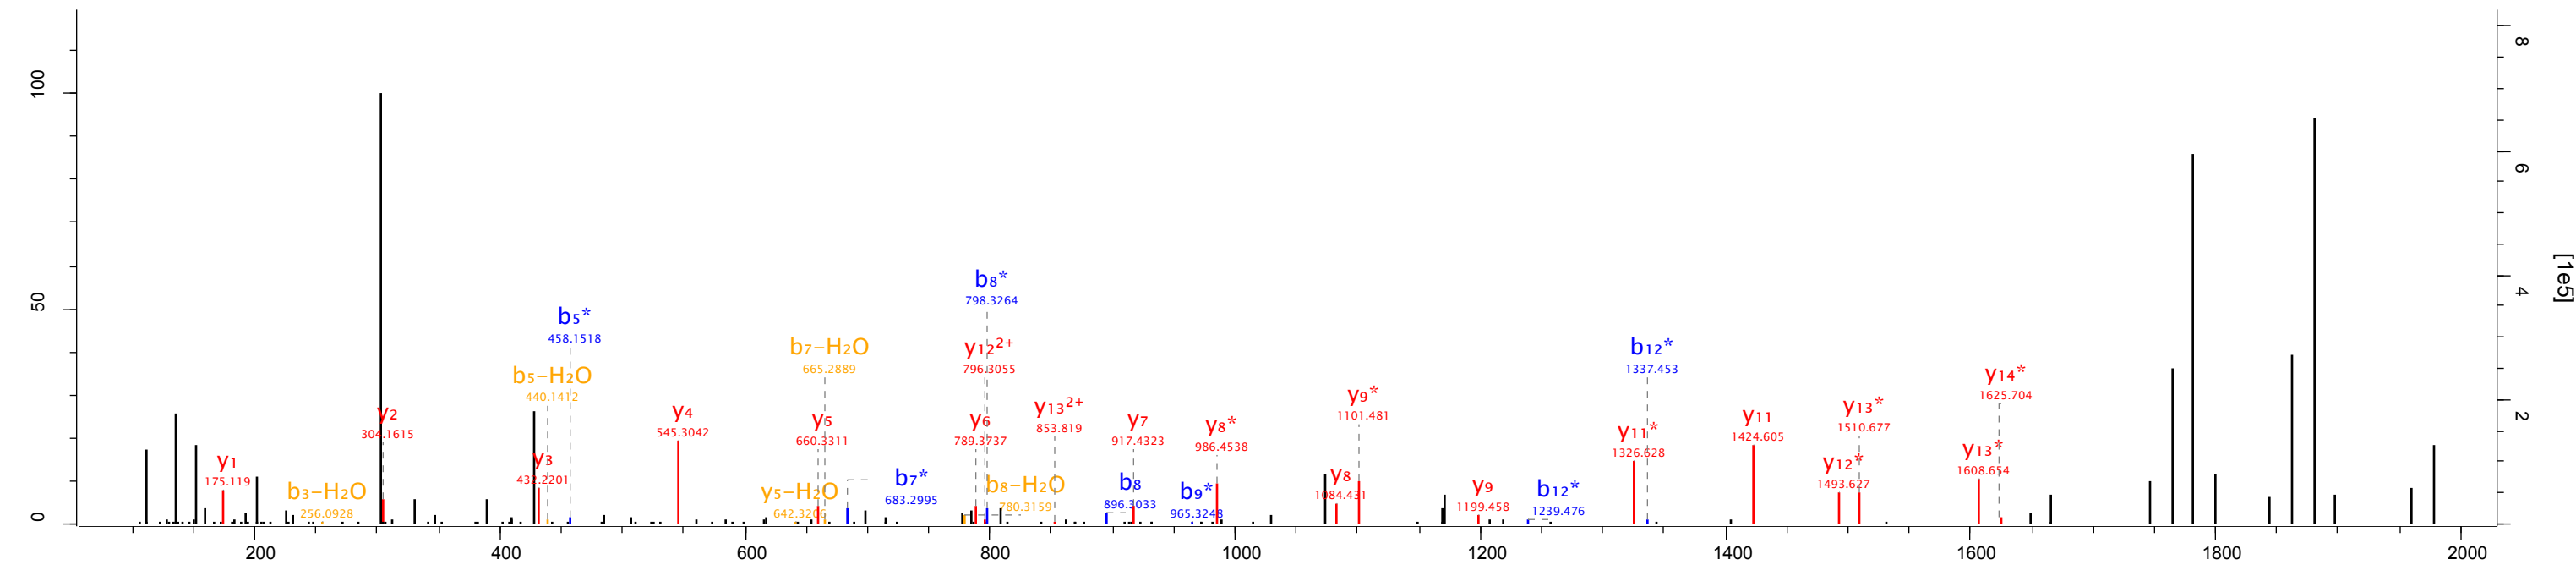

- G T D D S P K D S Q E D L Q E R -

y14\*
y13\*
y12\*  
ph
y11  
b5\*
b7\*
b8
b9\*
b12\*

Raw file 20150812\_A375SR\_Phospho\_BR1\_02 Scan 6542 Method FTMS; HCD Score 312.6 m/z 946.89 Gene names HOXC10

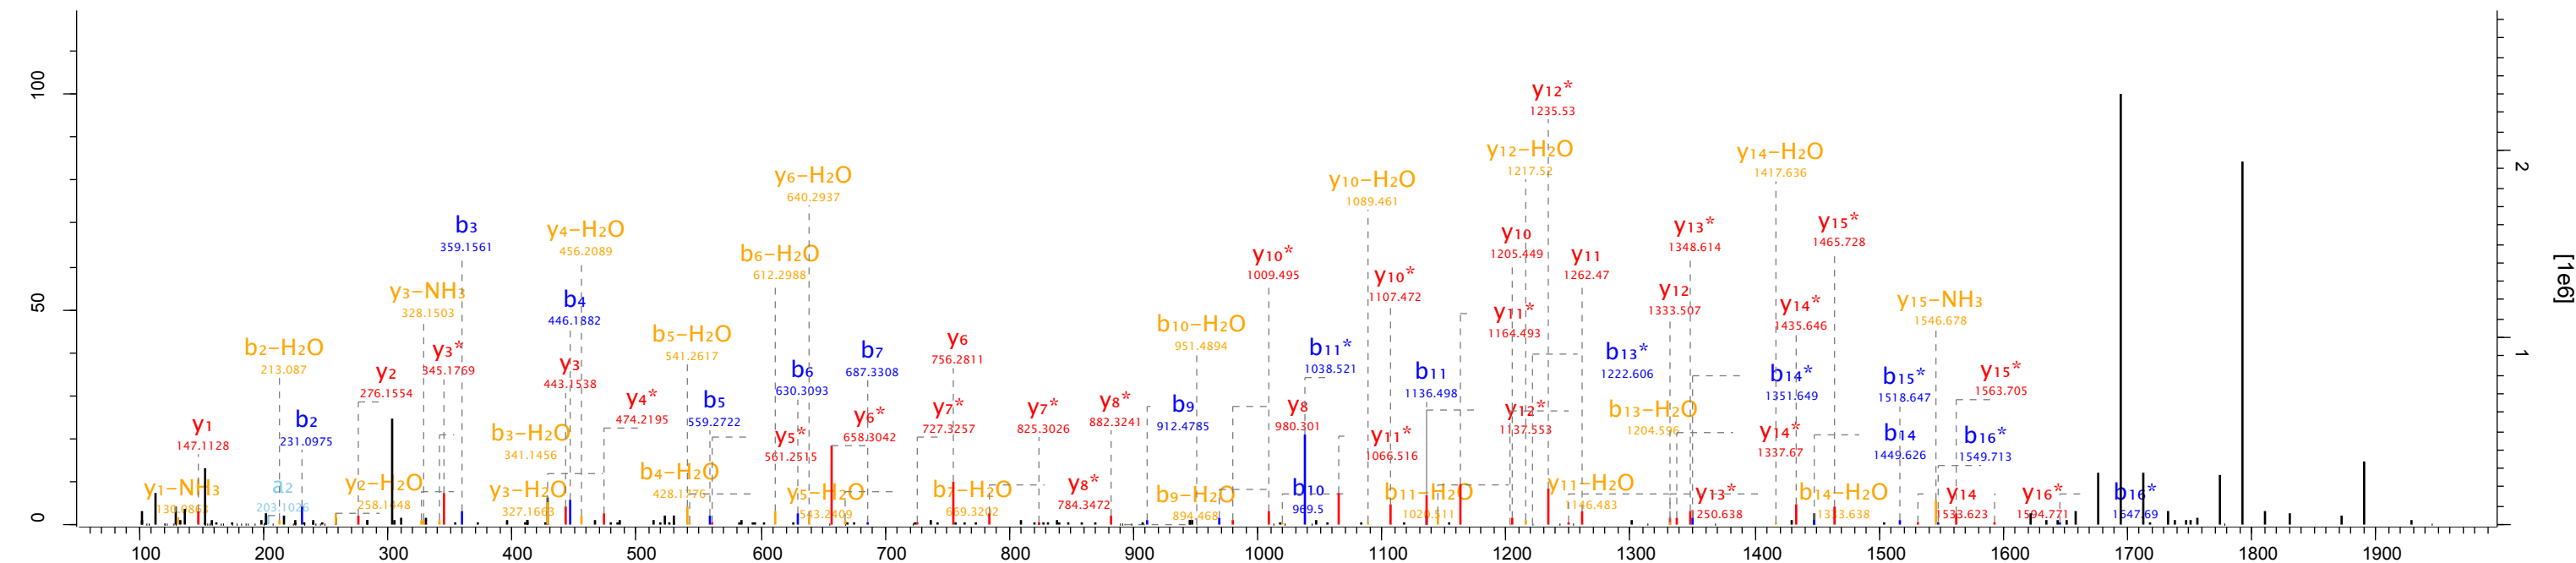

- T E Q S L A G P K G S P S E S E K -

y16\*
y15\*
y14
y13\*
y12
y11
y10
b2
b3
b4
b5
b6
b7
b9
b10
b11
b13\*
b14
b15\*
b16\*

Raw file 20150812\_A375SR\_Phospho\_BR1\_02 Scan 6572 Method FTMS; HCD Score 81.55 m/z 670.91 Gene names LIMCH1

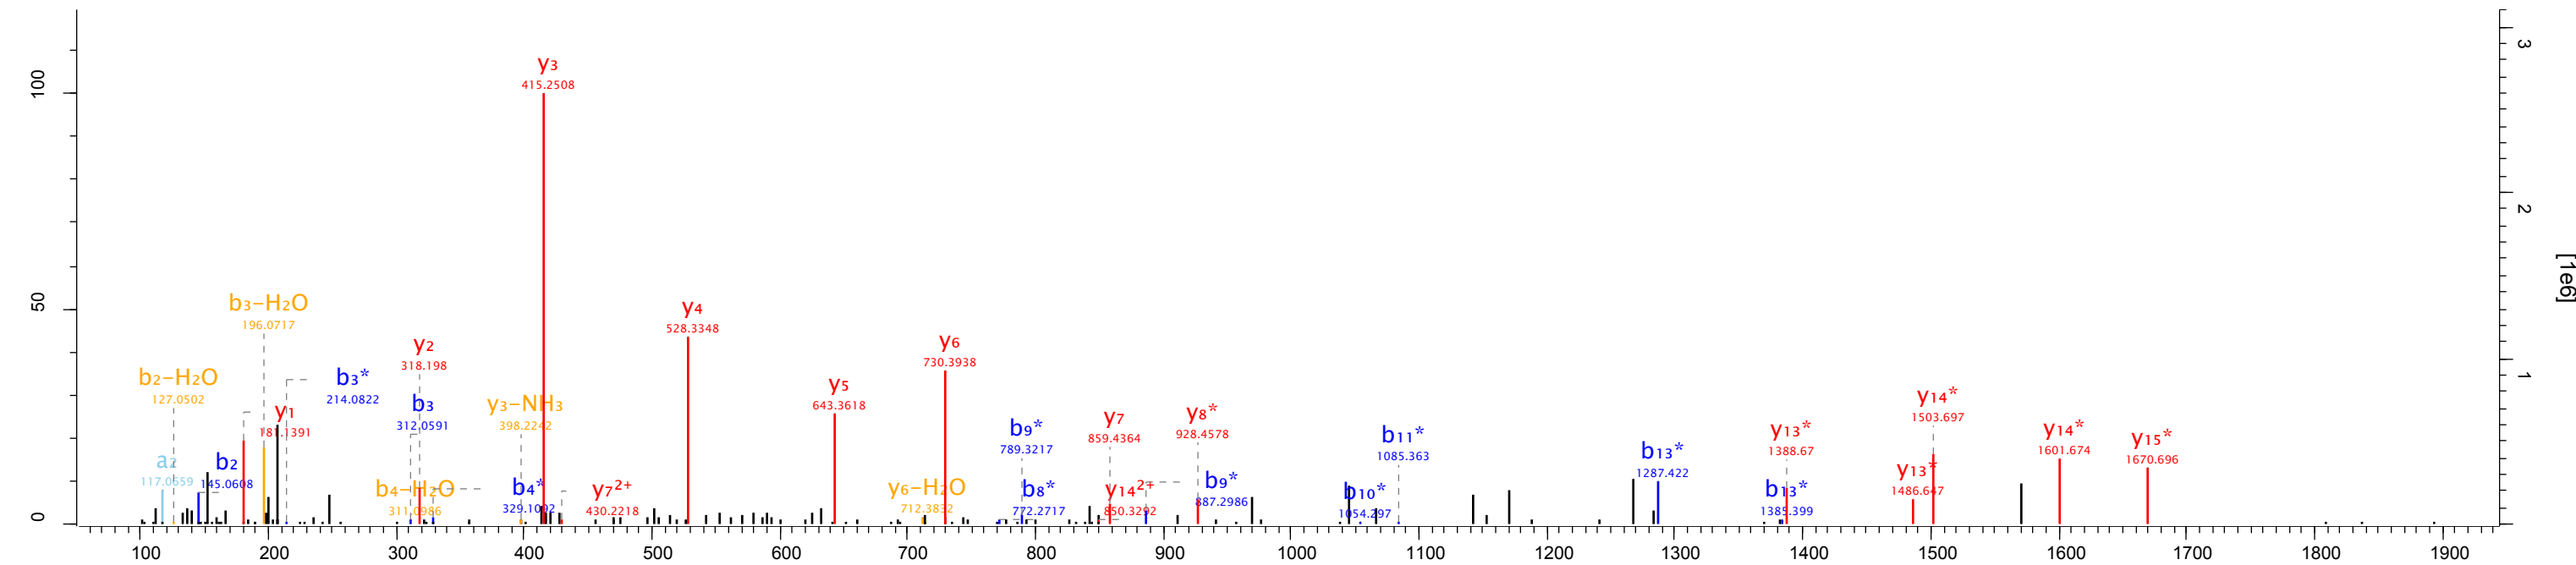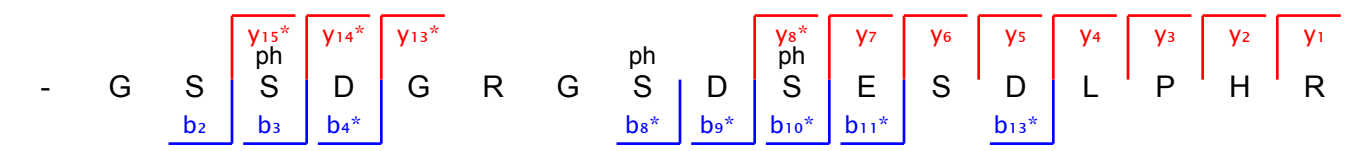

Raw file: 20150812\_A375SR\_Phospho\_BR1\_02  
 Scan: 7232 Method: FTMS; HCD Score: 120.29 m/z: 497.9 Gene names: SRRM2

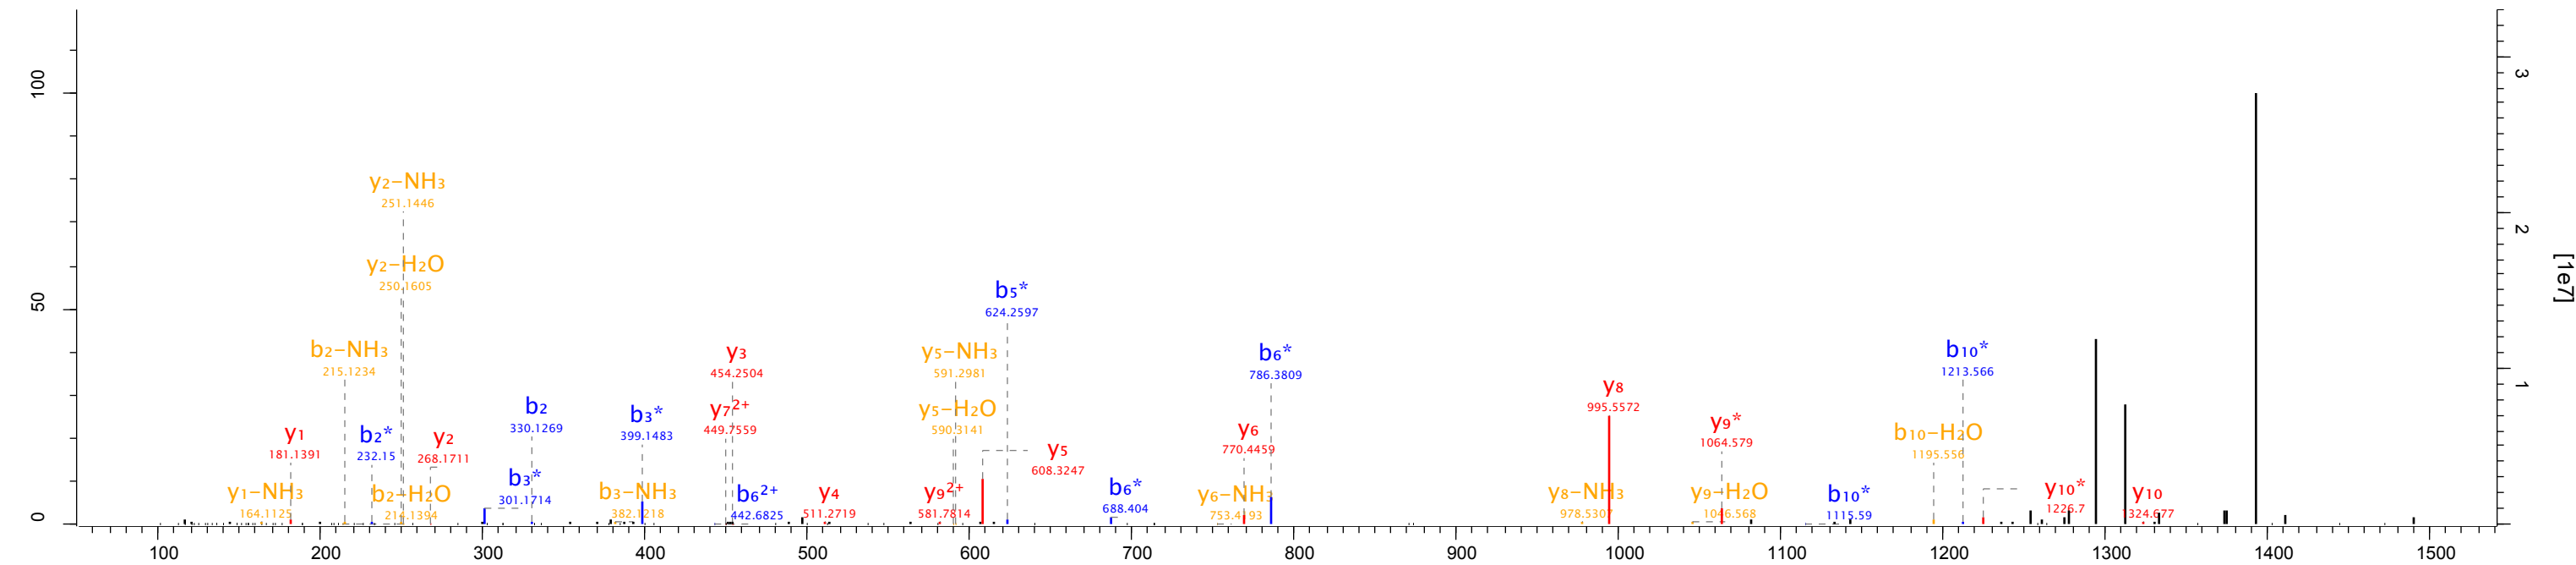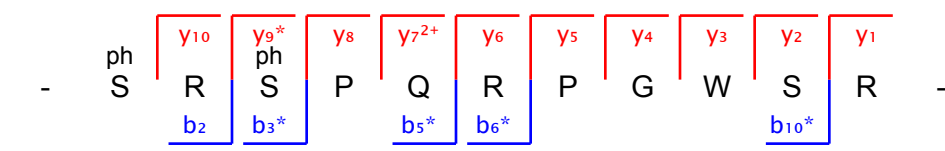

Raw file: 20150812\_A375SR\_Phospho\_BR1\_02  
 Scan: 7392 Method: FTMS; HCD Score: 120.15 m/z: 771.29 Gene names: EPS8

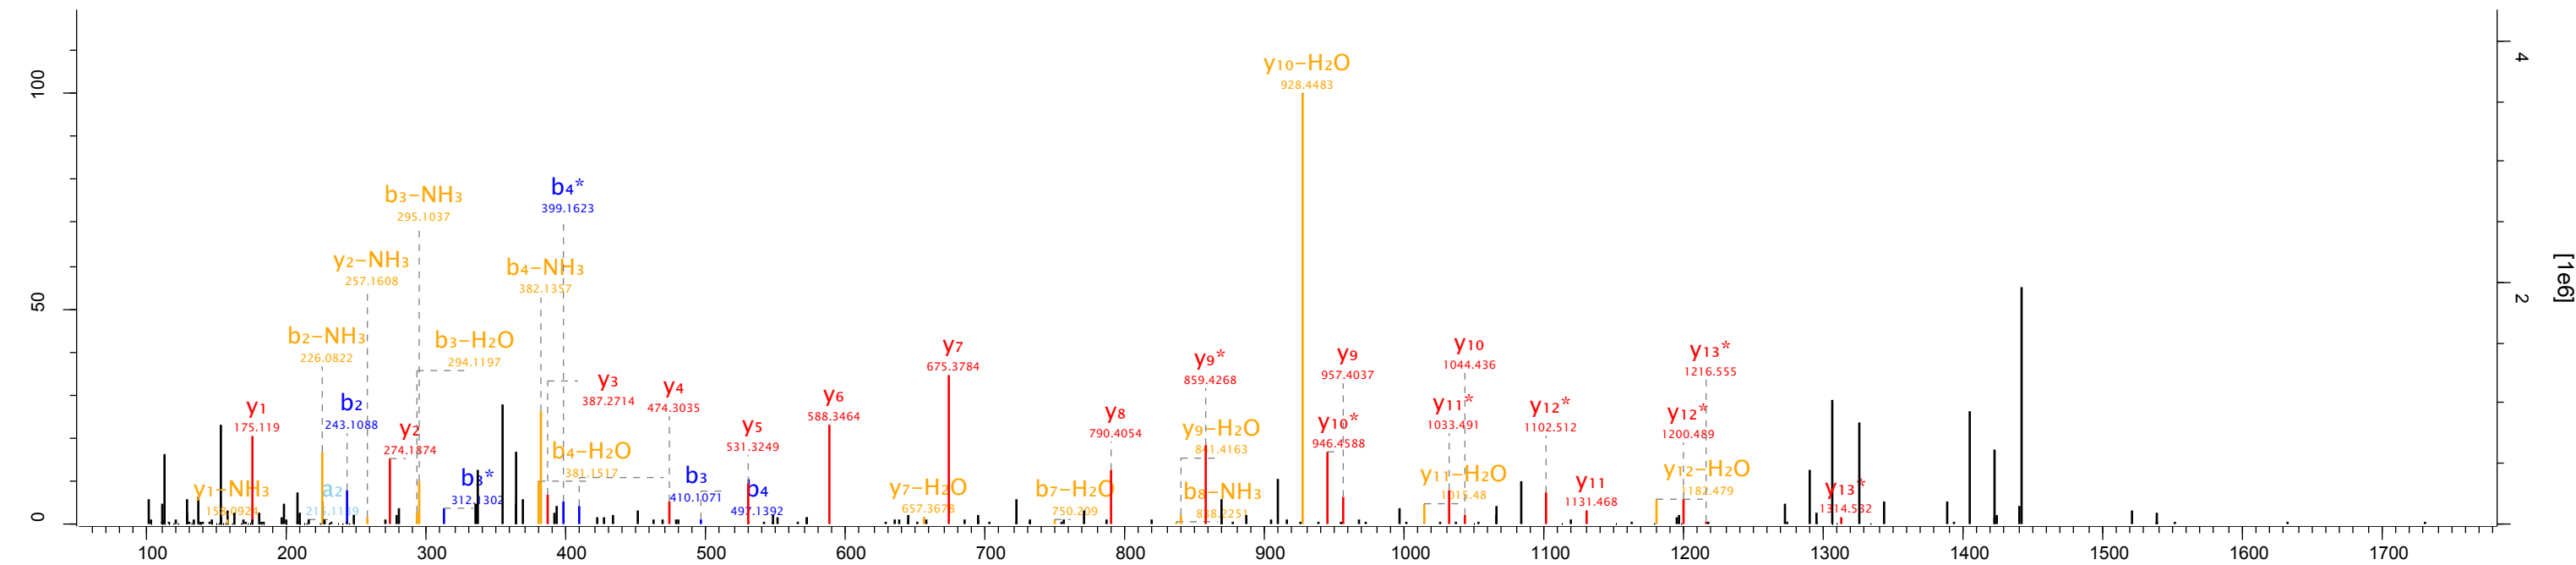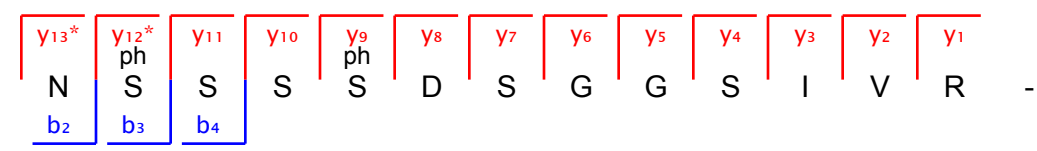



Raw file: 20150812\_A375SR\_Phospho\_BR1\_02  
 Scan: 8182 Method: FTMS; HCD Score: 92.1 m/z: 638.24 Gene names: LRRFIP1

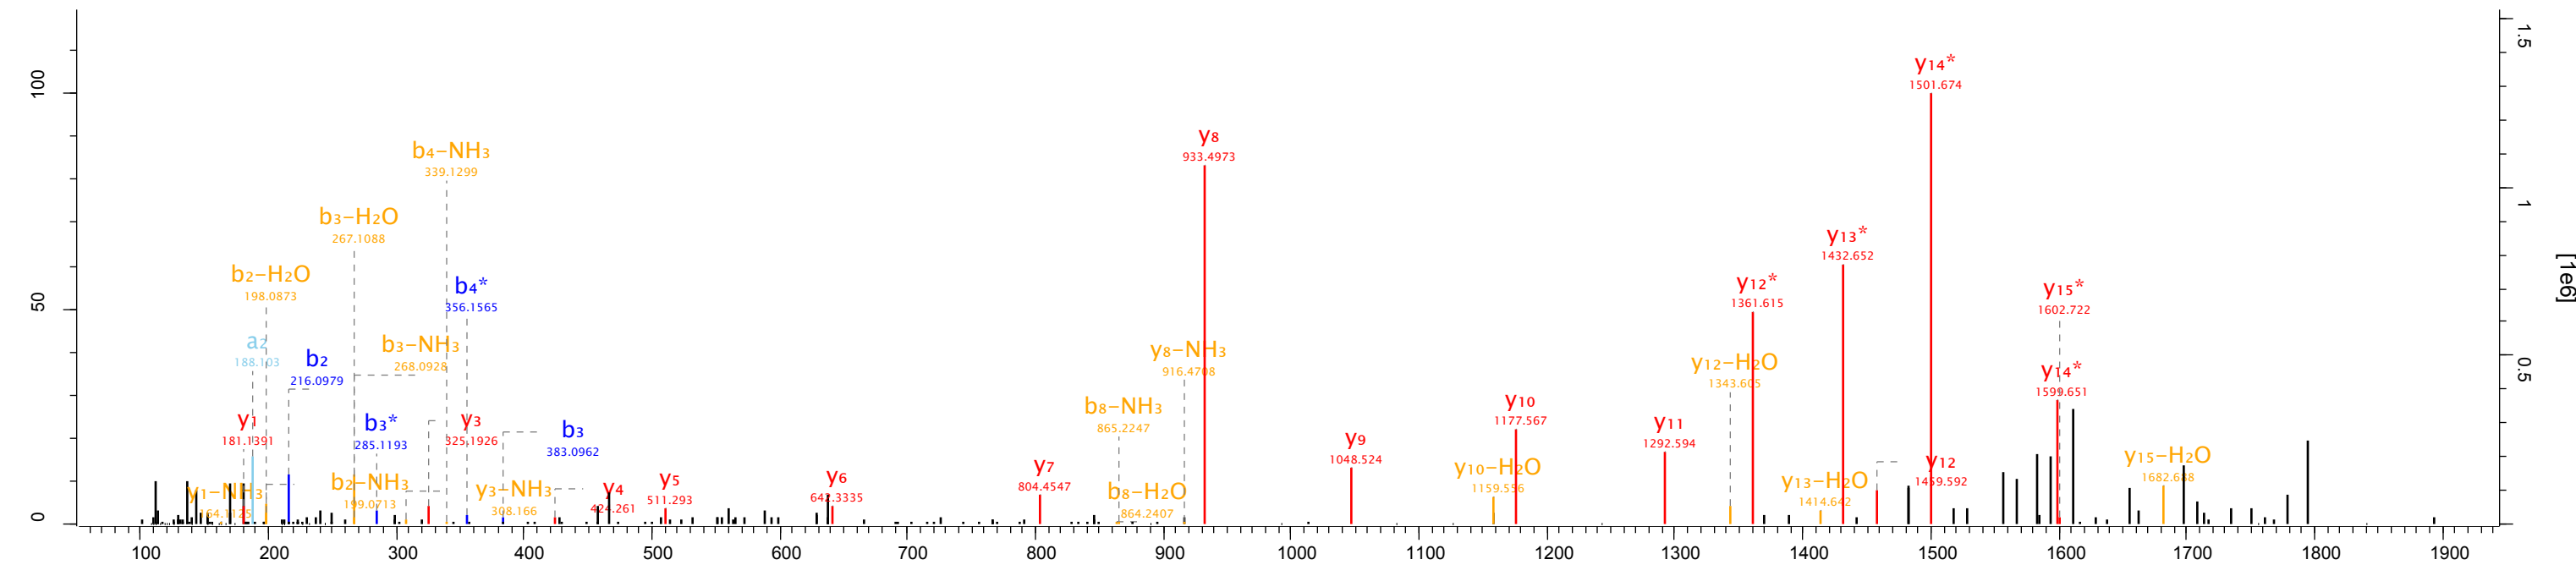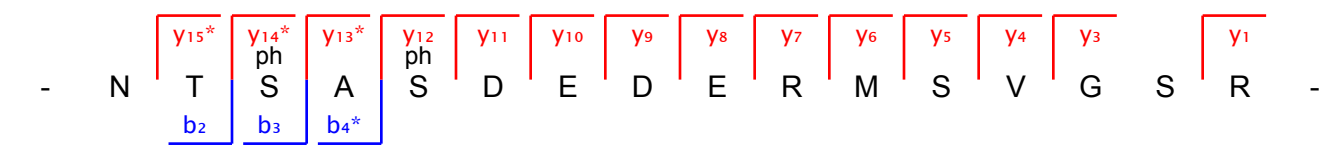

Raw file: 20150812\_A375SR\_Phospho\_BR1\_02  
 Scan: 8252 Method: FTMS; HCD Score: 164.48 m/z: 934.88 Gene names: SLC4A7

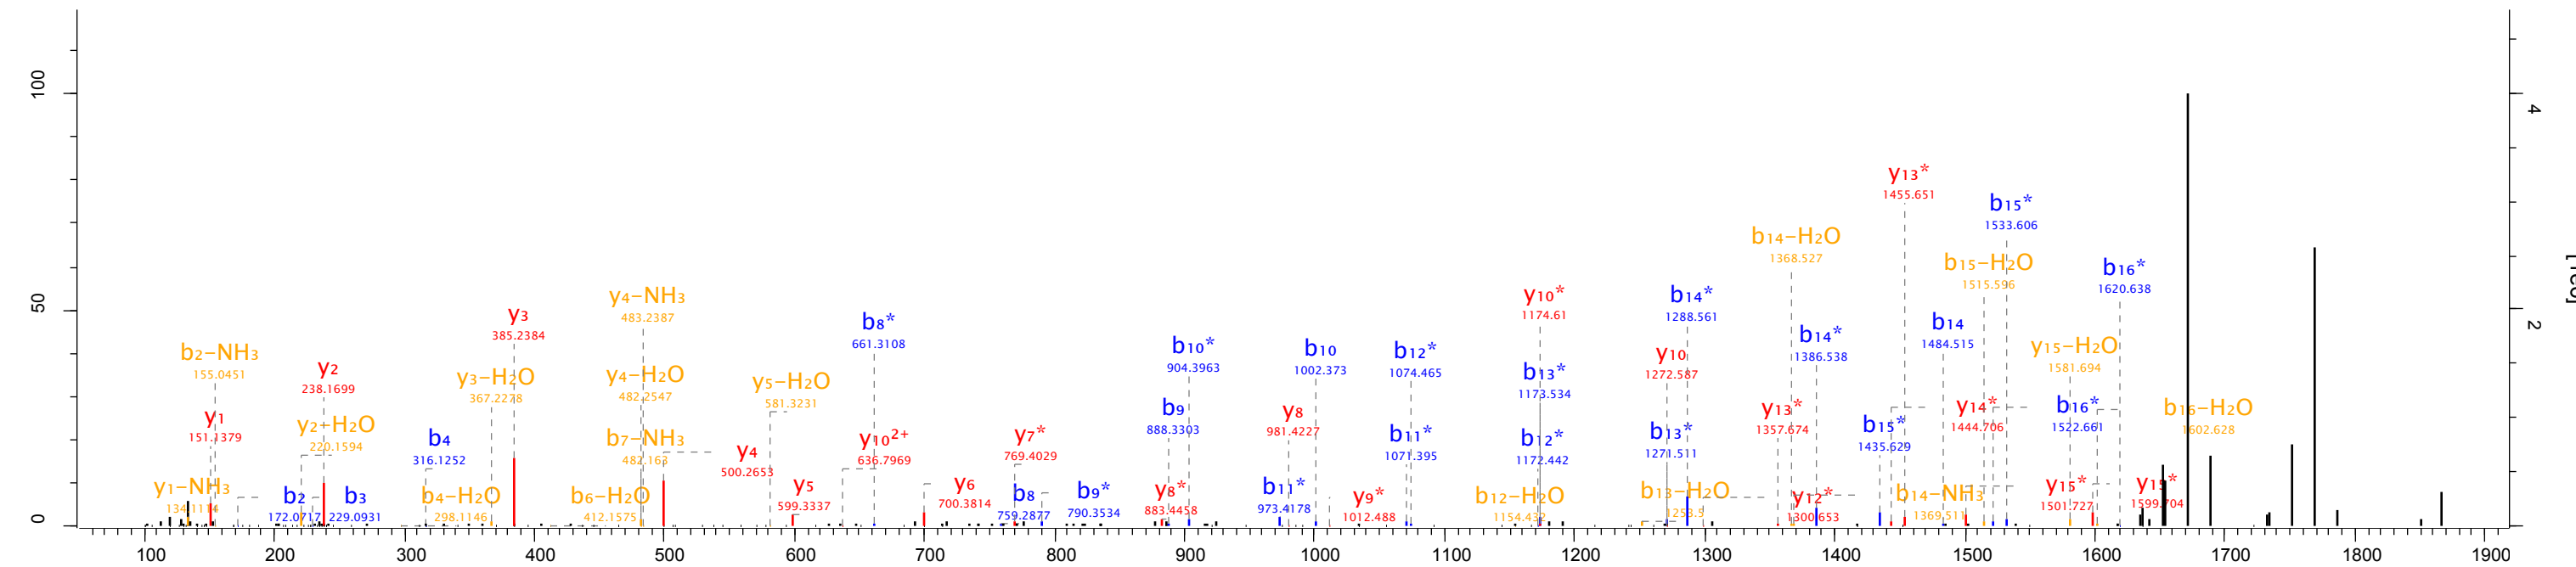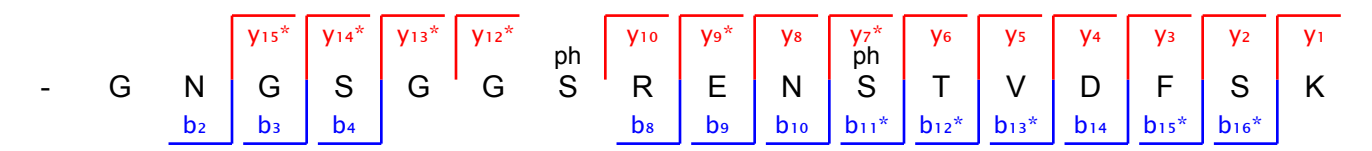

Raw file: 20150812\_A375SR\_Phospho\_BR1\_02  
 Scan: 8372 Method: FTMS; HCD Score: 133.41 m/z: 1112.88 Gene names: NDRG1

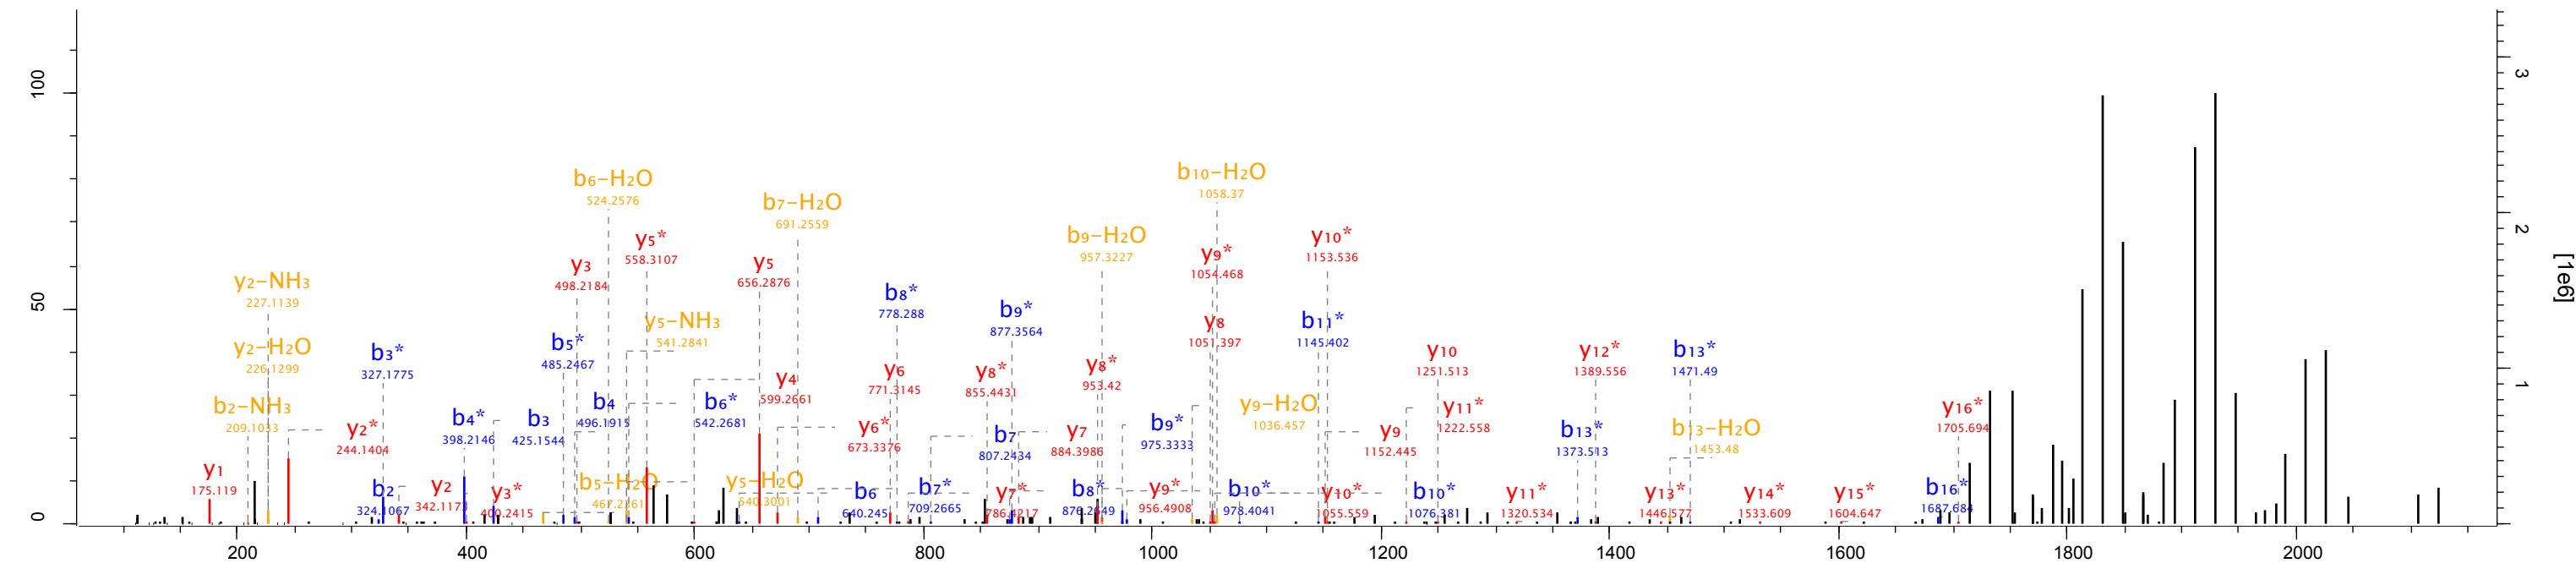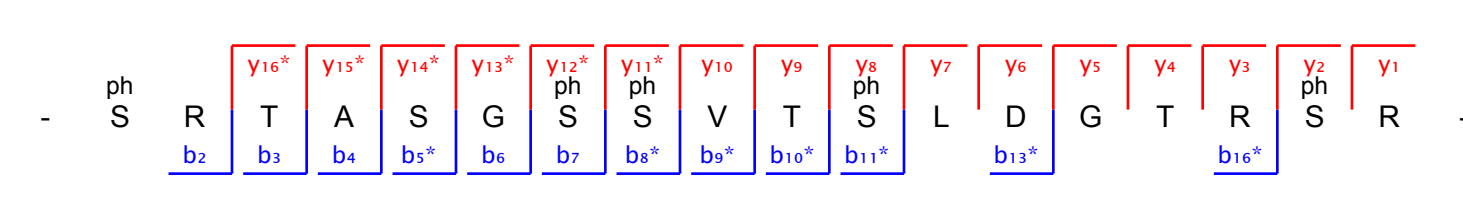

Raw file: 20150812\_A375SR\_Phospho\_BR1\_02  
 Scan: 8412 Method: FTMS; HCD Score: 124.3 m/z: 750.75 Gene names: TJP2

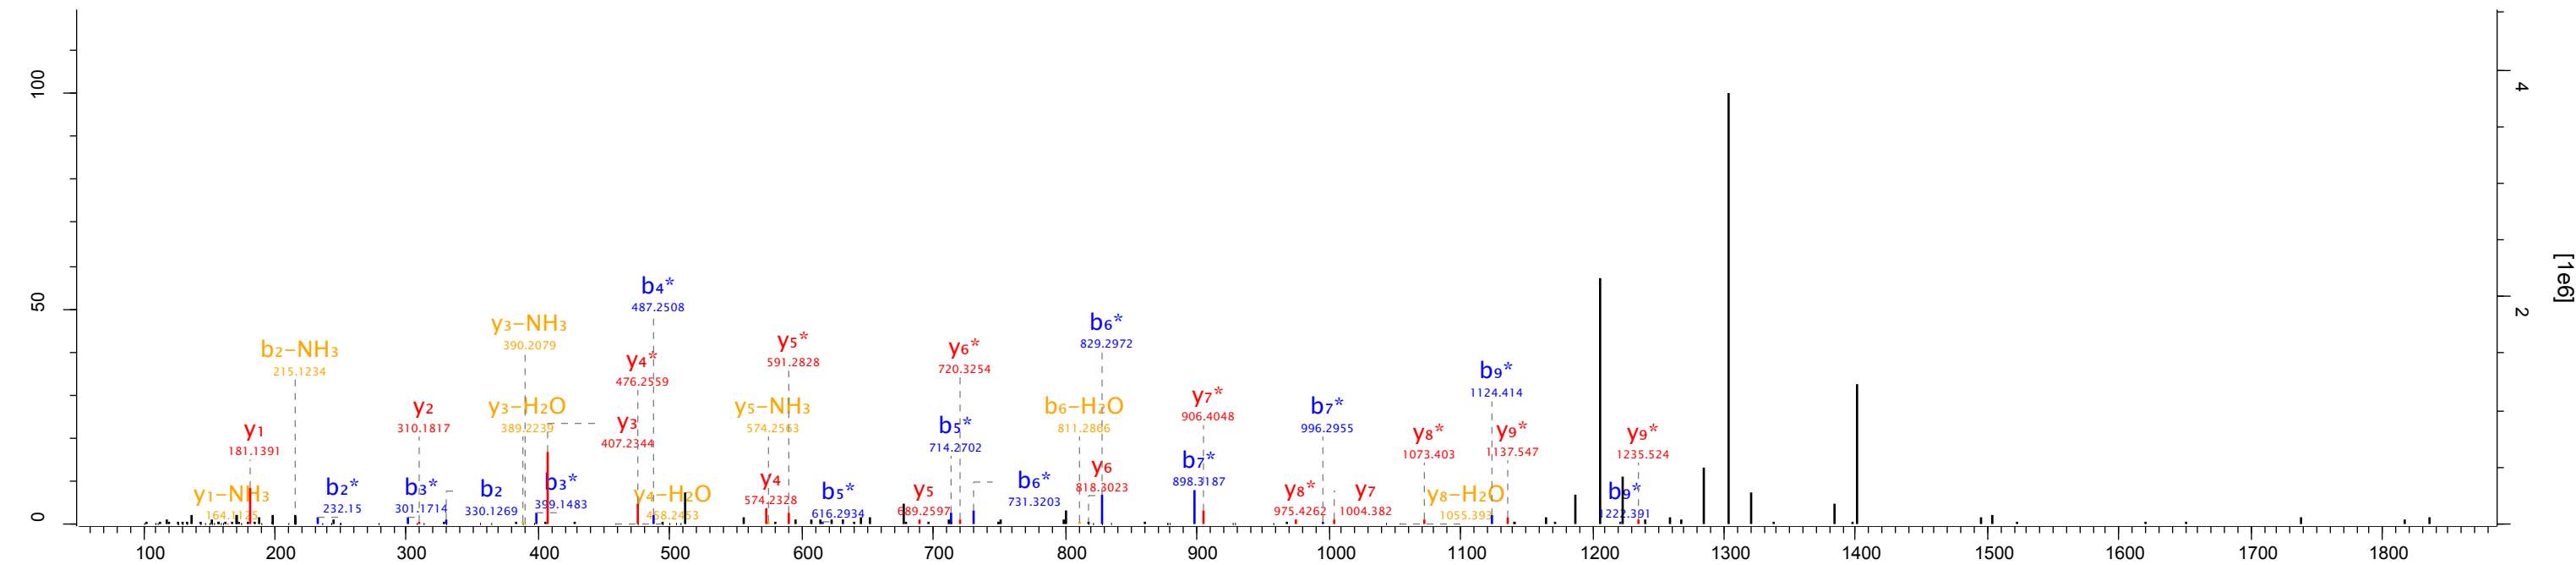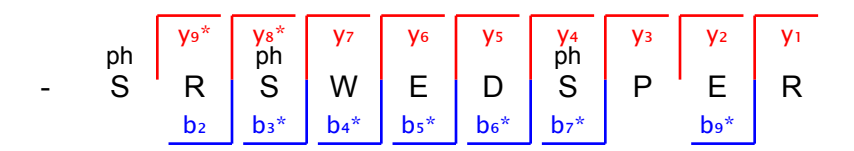

Raw file: 20150812\_A375SR\_Phospho\_BR1\_02  
 Scan: 8492 Method: FTMS; HCD Score: 106.74 m/z: 693.94 Gene names: TCF12

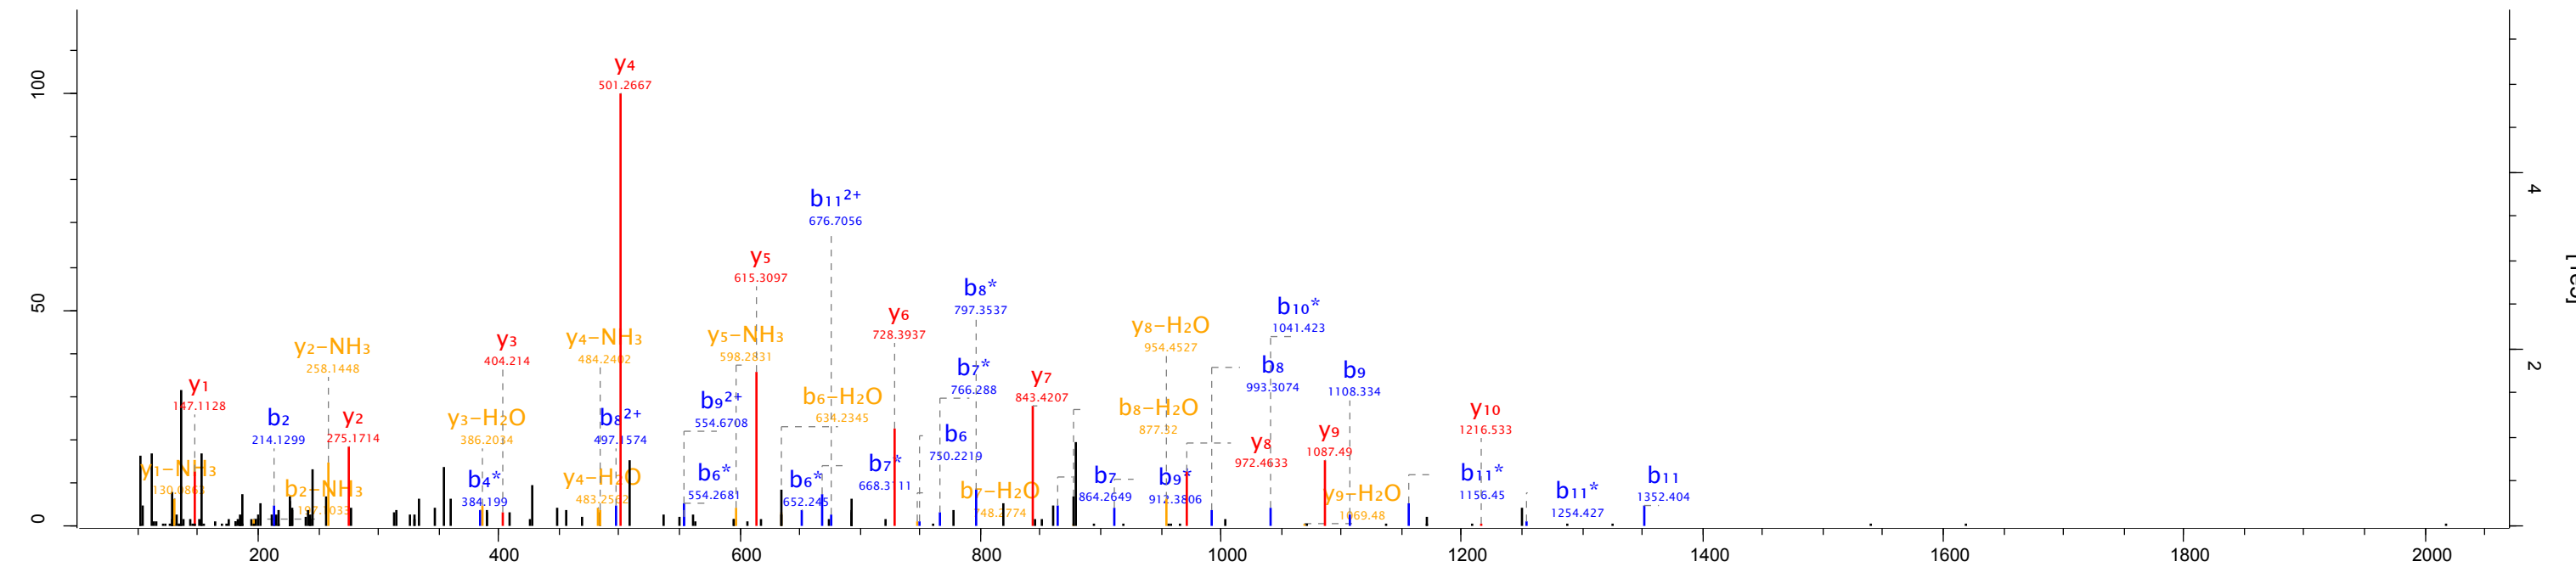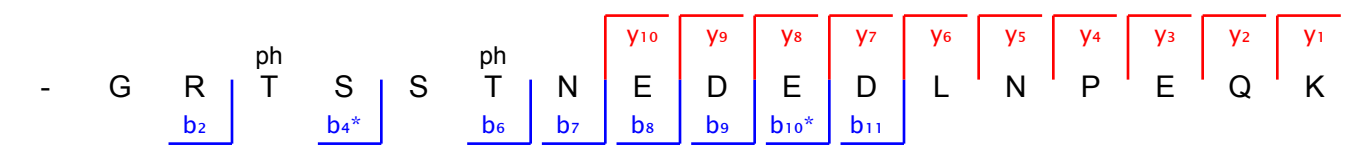

Raw file: 20150812\_A375SR\_Phospho\_BR1\_02  
 Scan: 8502 Method: FTMS; HCD Score: 81.53 m/z: 610.72 Gene names: ATF7IP

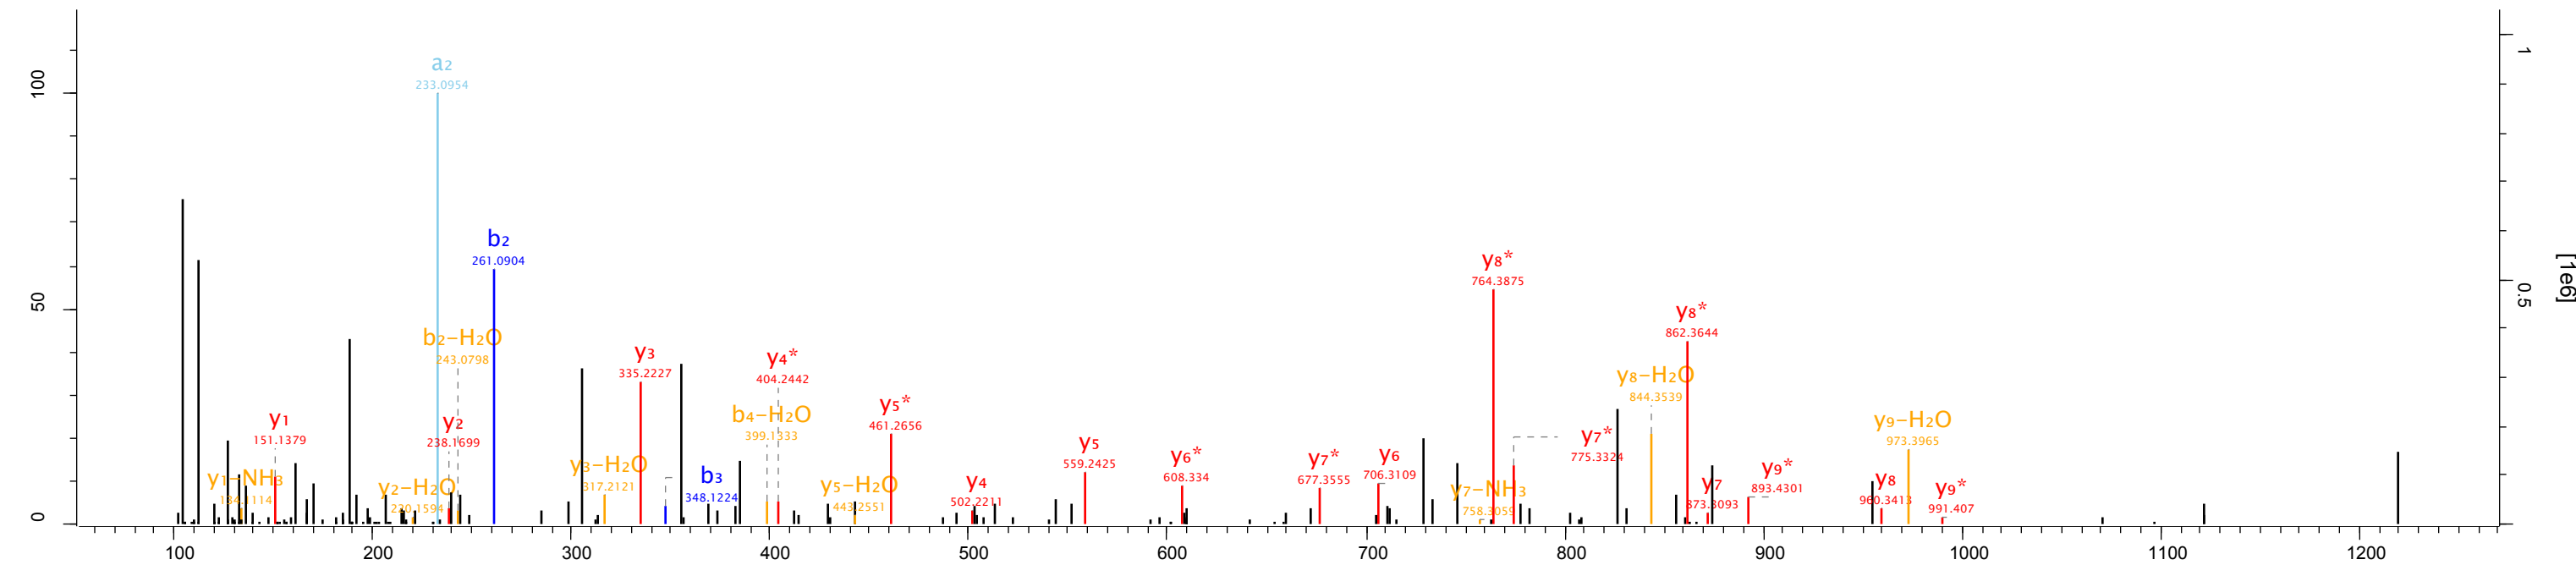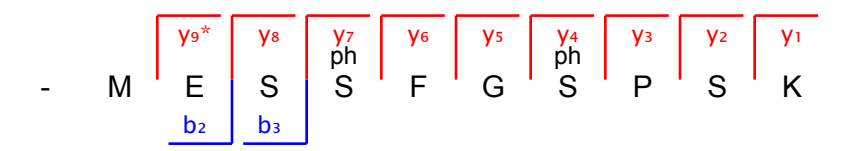

Raw file: 20150812\_A375SR\_Phospho\_BR1\_02  
 Scan: 8782 Method: FTMS; HCD Score: 85.05 m/z: 711.79 Gene names: ANAPC1

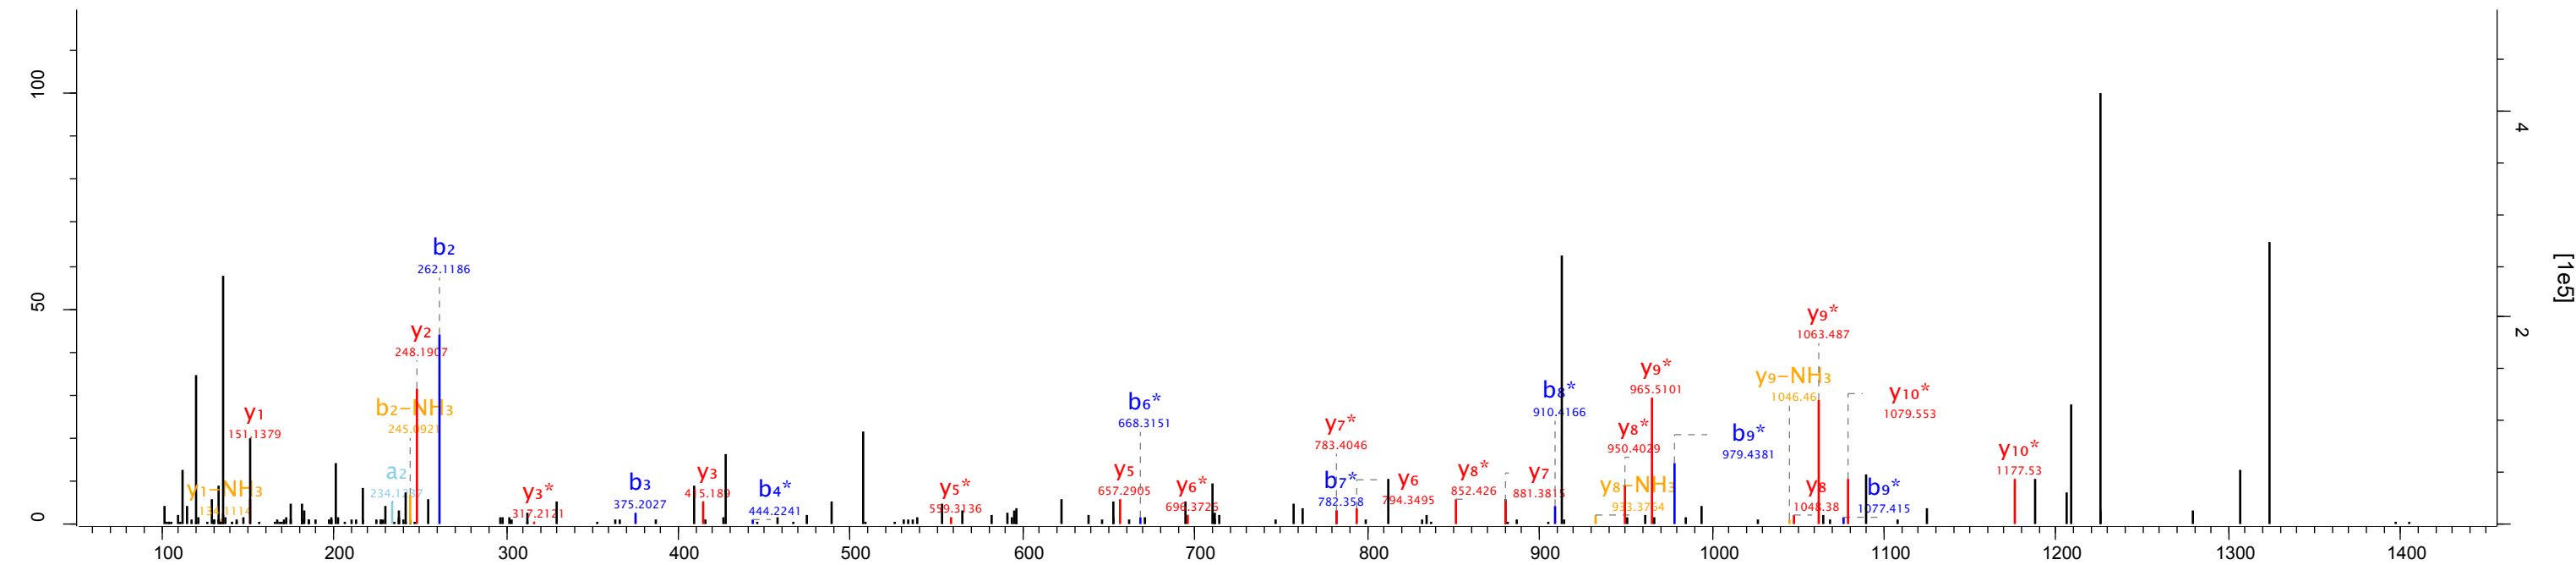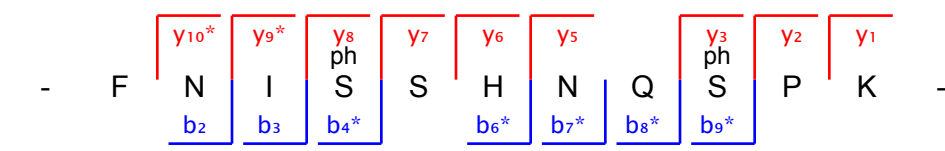

Raw file: 20150812\_A375SR\_Phospho\_BR1\_02  
 Scan: 8932 Method: FTMS; HCD Score: 142.32 m/z: 704.26 Gene names: PPRC1

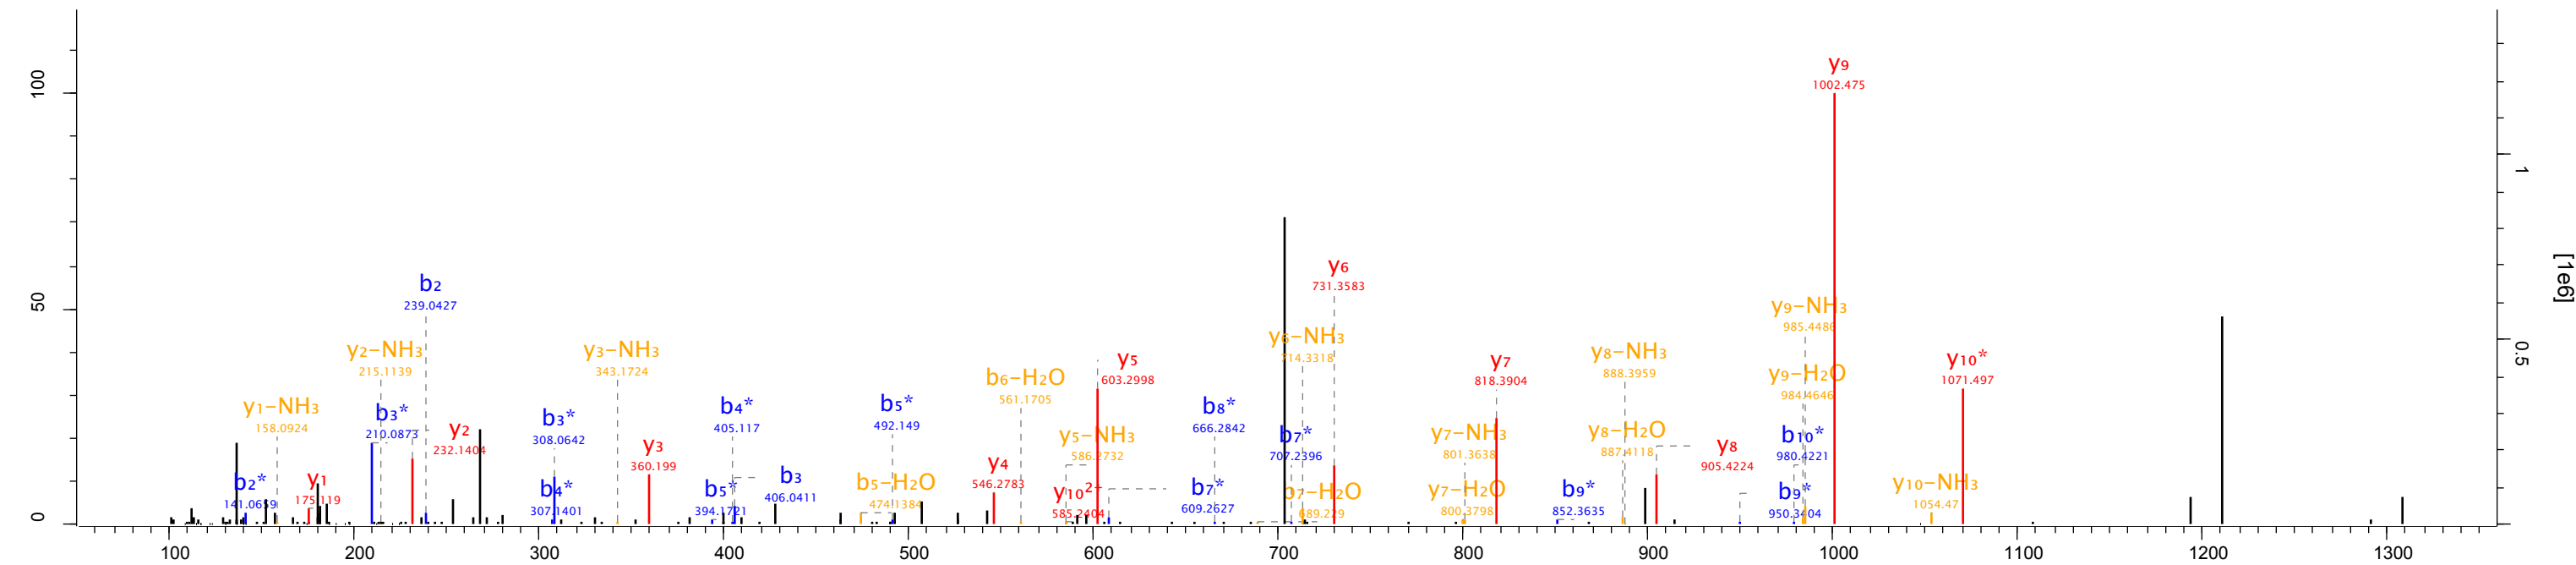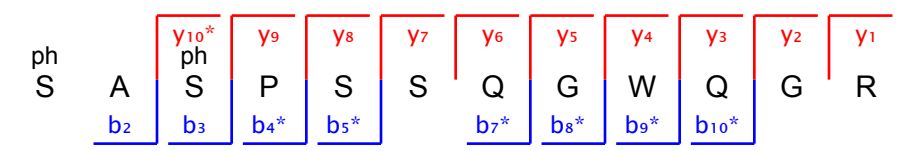



Raw file 20150812\_A375SR\_Phospho\_BR1\_02 Scan 9062 Method FTMS; HCD Score 87.35 m/z 579.58 Gene names CCDC132

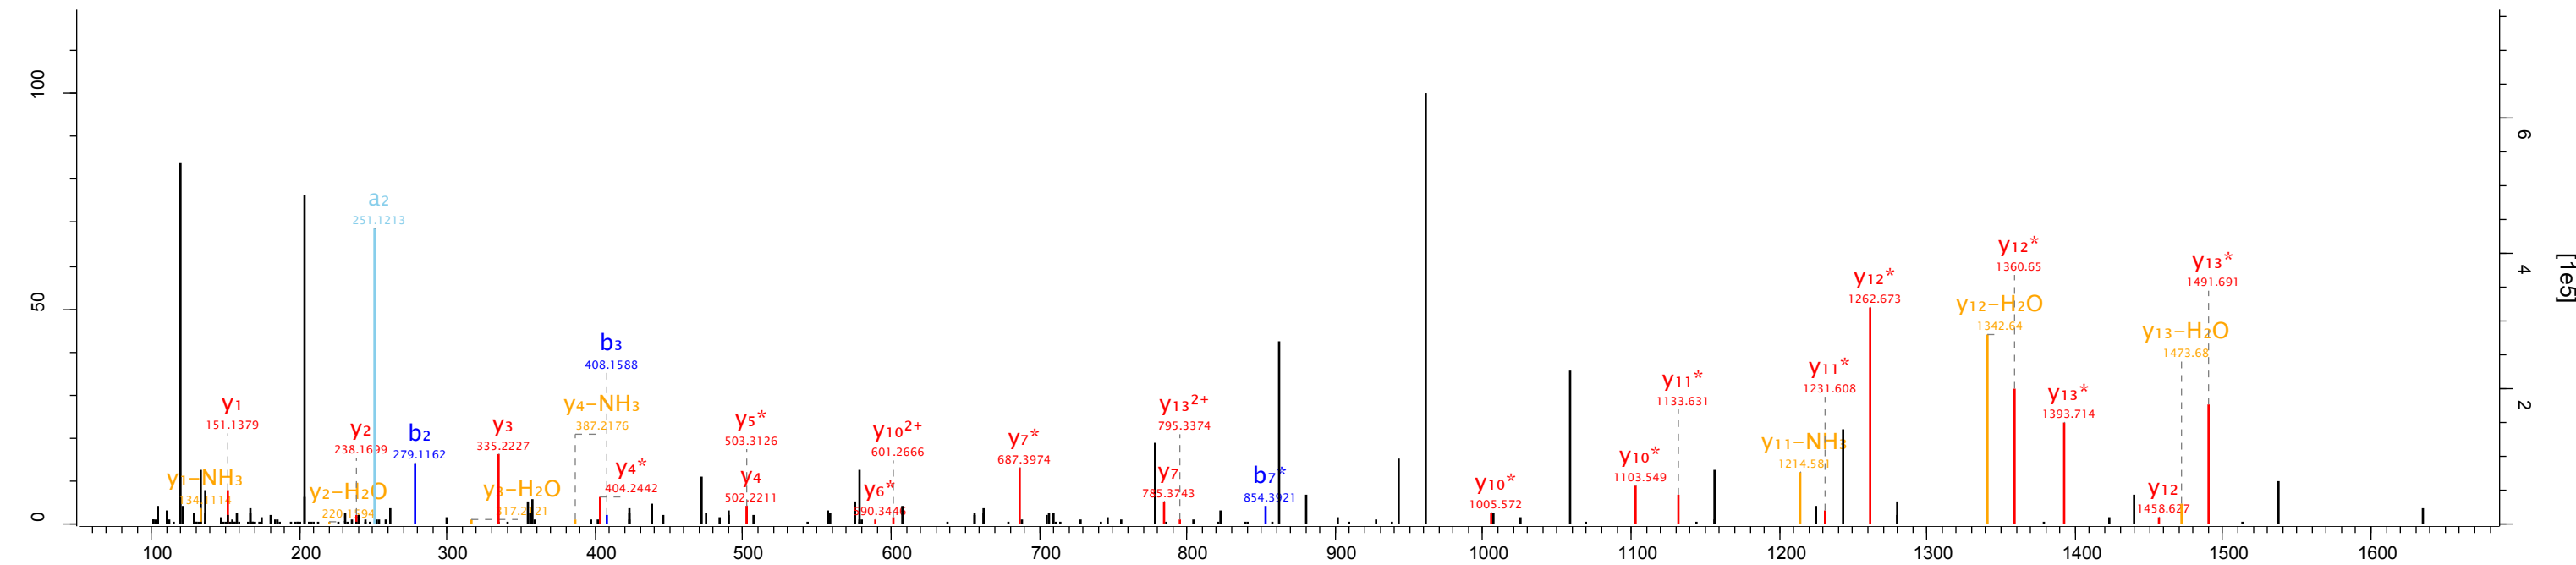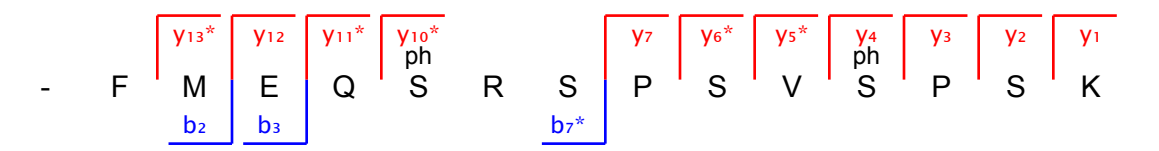

Raw file: 20150812\_A375SR\_Phospho\_BR1\_02  
 Scan: 9232 Method: FTMS; HCD Score: 187.76 m/z: 1217.49 Gene names: PHRF1

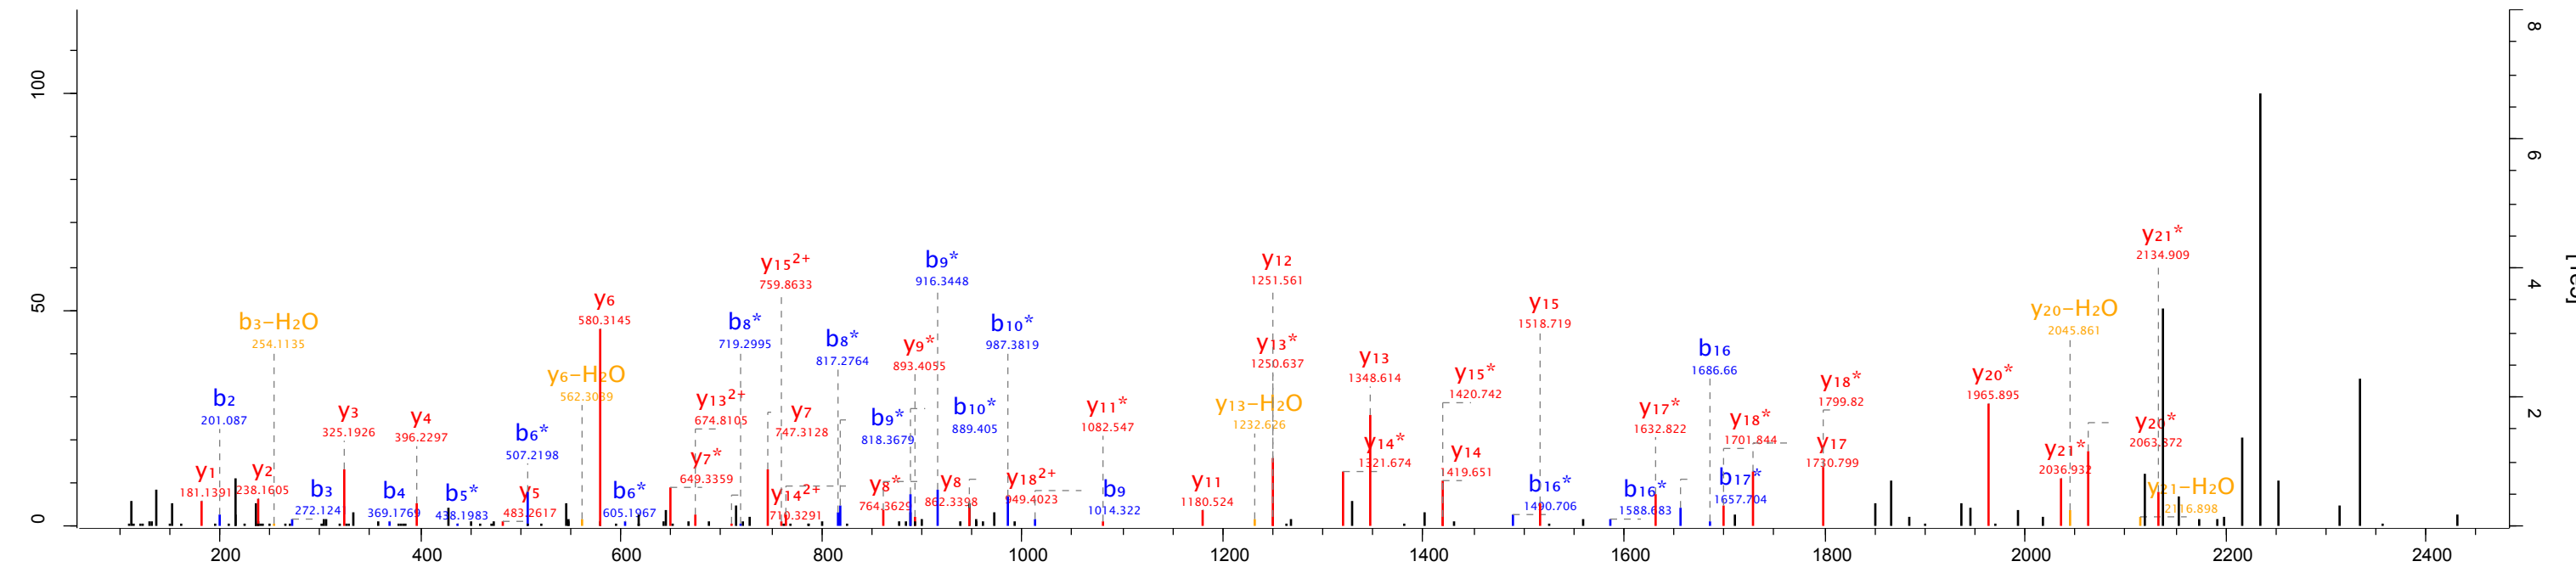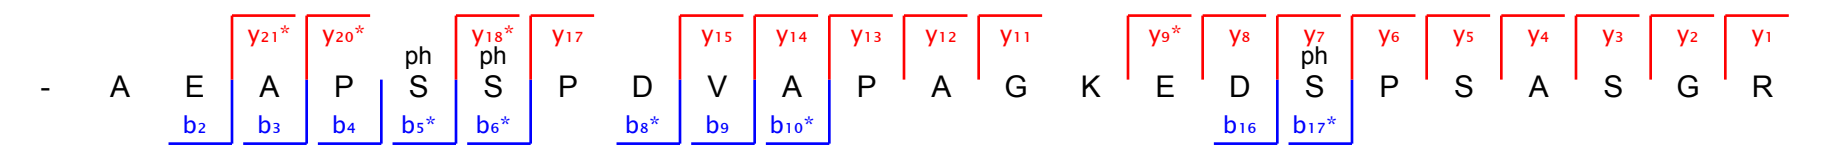

Raw file: 20150812\_A375SR\_Phospho\_BR1\_02  
 Scan: 9262 Method: FTMS; HCD Score: 85.78 m/z: 673.96 Gene names: PARVA

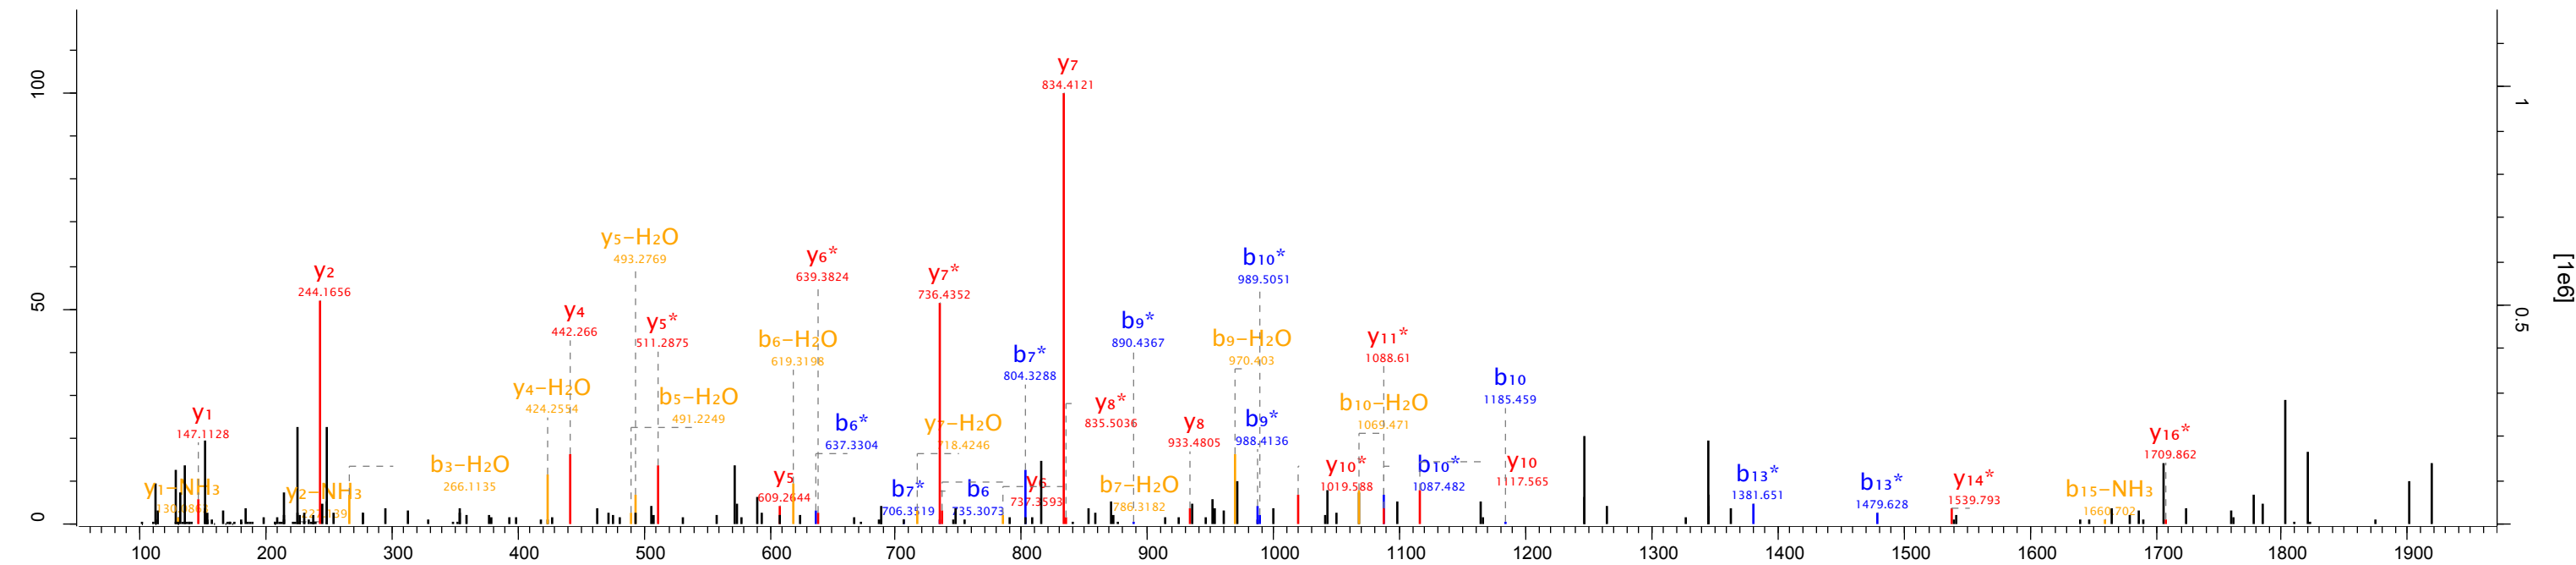

ac - A T S P Q K S V P K S P T P K -

Fragmentation mapping (red boxes): y16\* (ph) on T, y14\* on P, y11\* (ph) on S, y10 on P, y8 on V, y7 on P, y6 on K, y5 (ph) on S, y4 on P, y2 on P, y1 on K.

Fragmentation mapping (blue boxes): b6 on K, b7\* on S, b9\* on S, b10 on V, b13\* on S.

Raw file: 20150812\_A375SR\_Phospho\_BR1\_02  
 Scan: 9592 Method: FTMS; HCD Score: 166.7 m/z: 819.77 Gene names: FAM175A

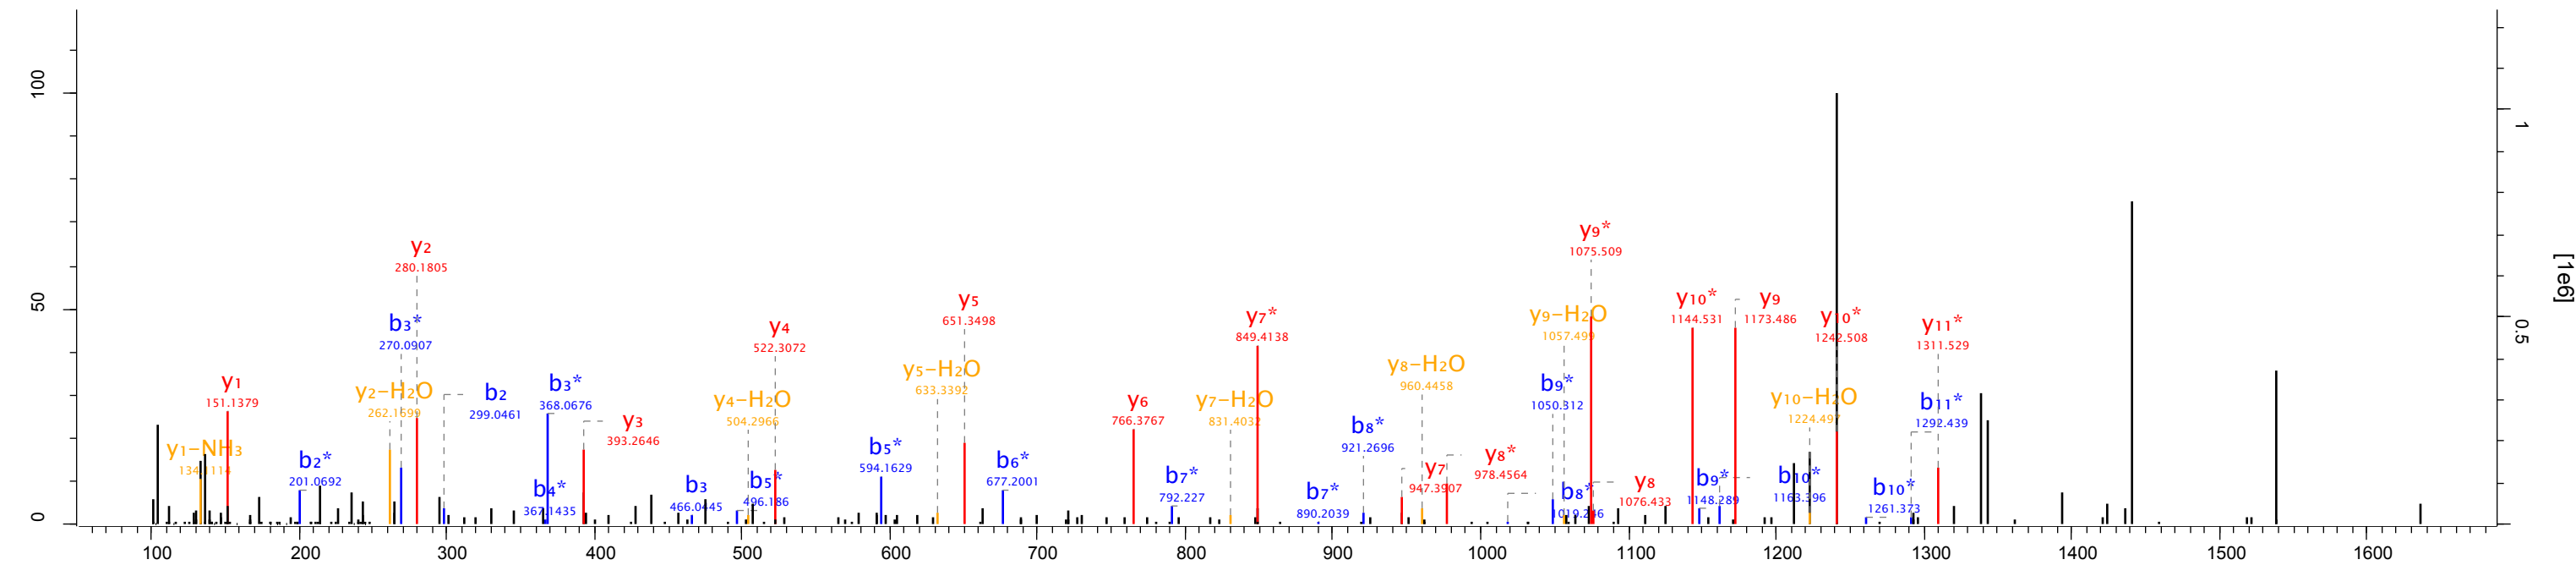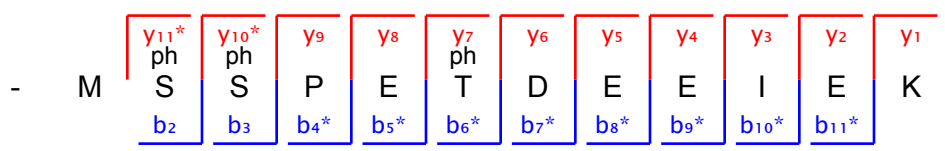

Raw file: 20150812\_A375SR\_Phospho\_BR1\_02  
 Scan: 9792 Method: FTMS; HCD Score: 106.76 m/z: 855.84 Gene names: ACIN1

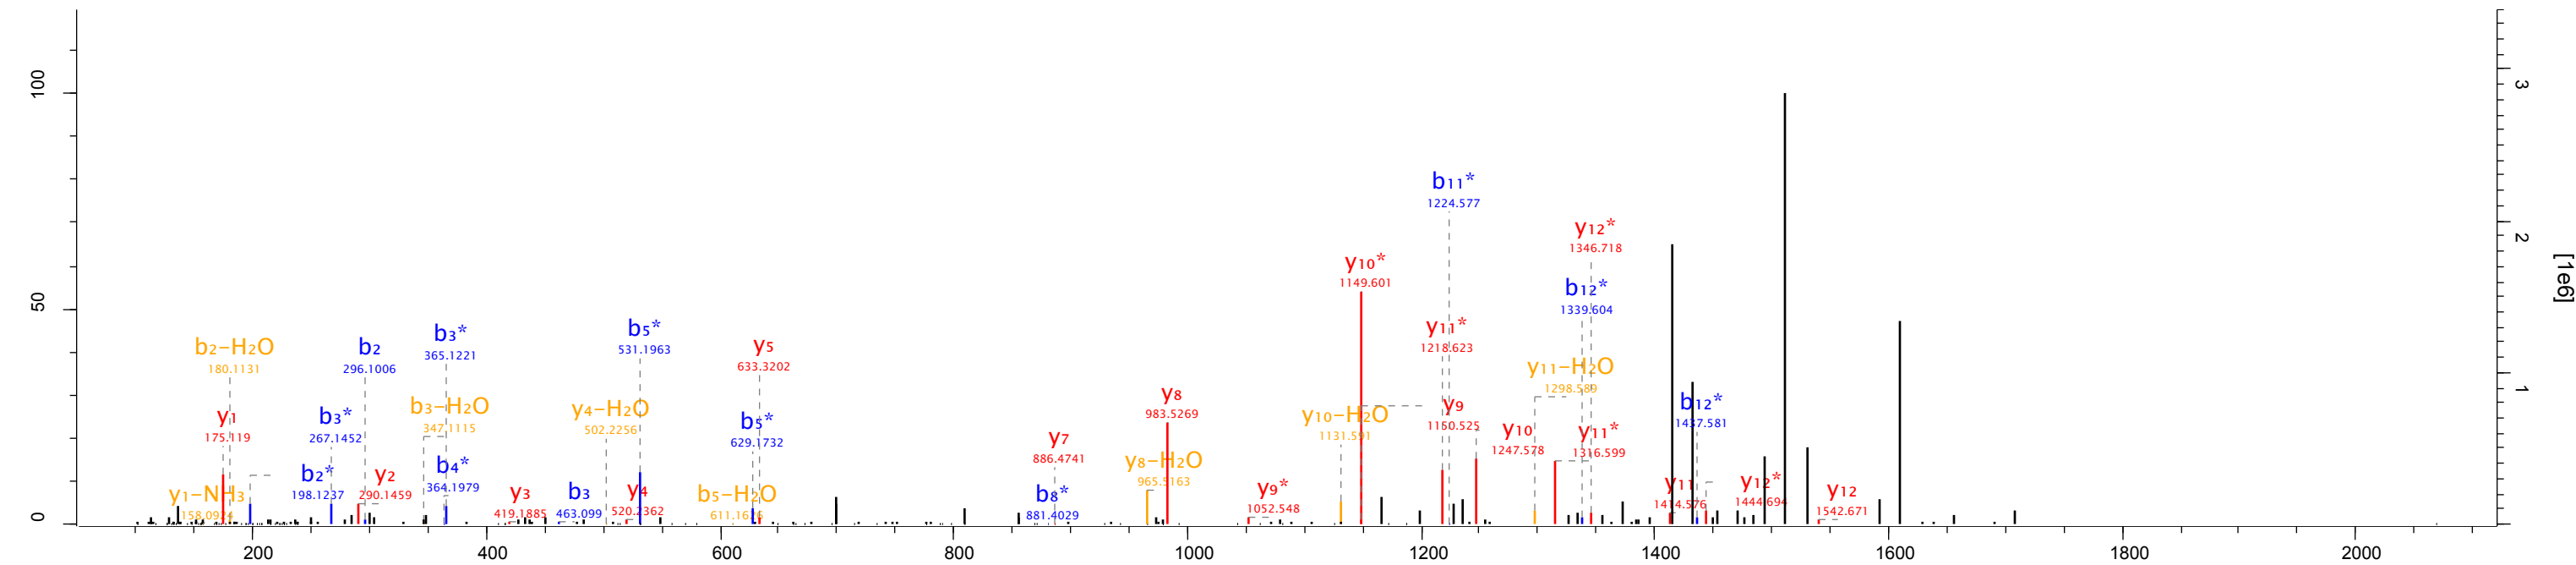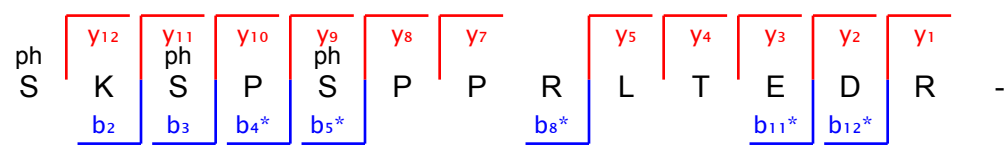

Raw file 20150812\_A375SR\_Phospho\_BR1\_03 Scan 10122 Method FTMS; HCD Score 86.62 m/z 663.98 Gene names PKP4

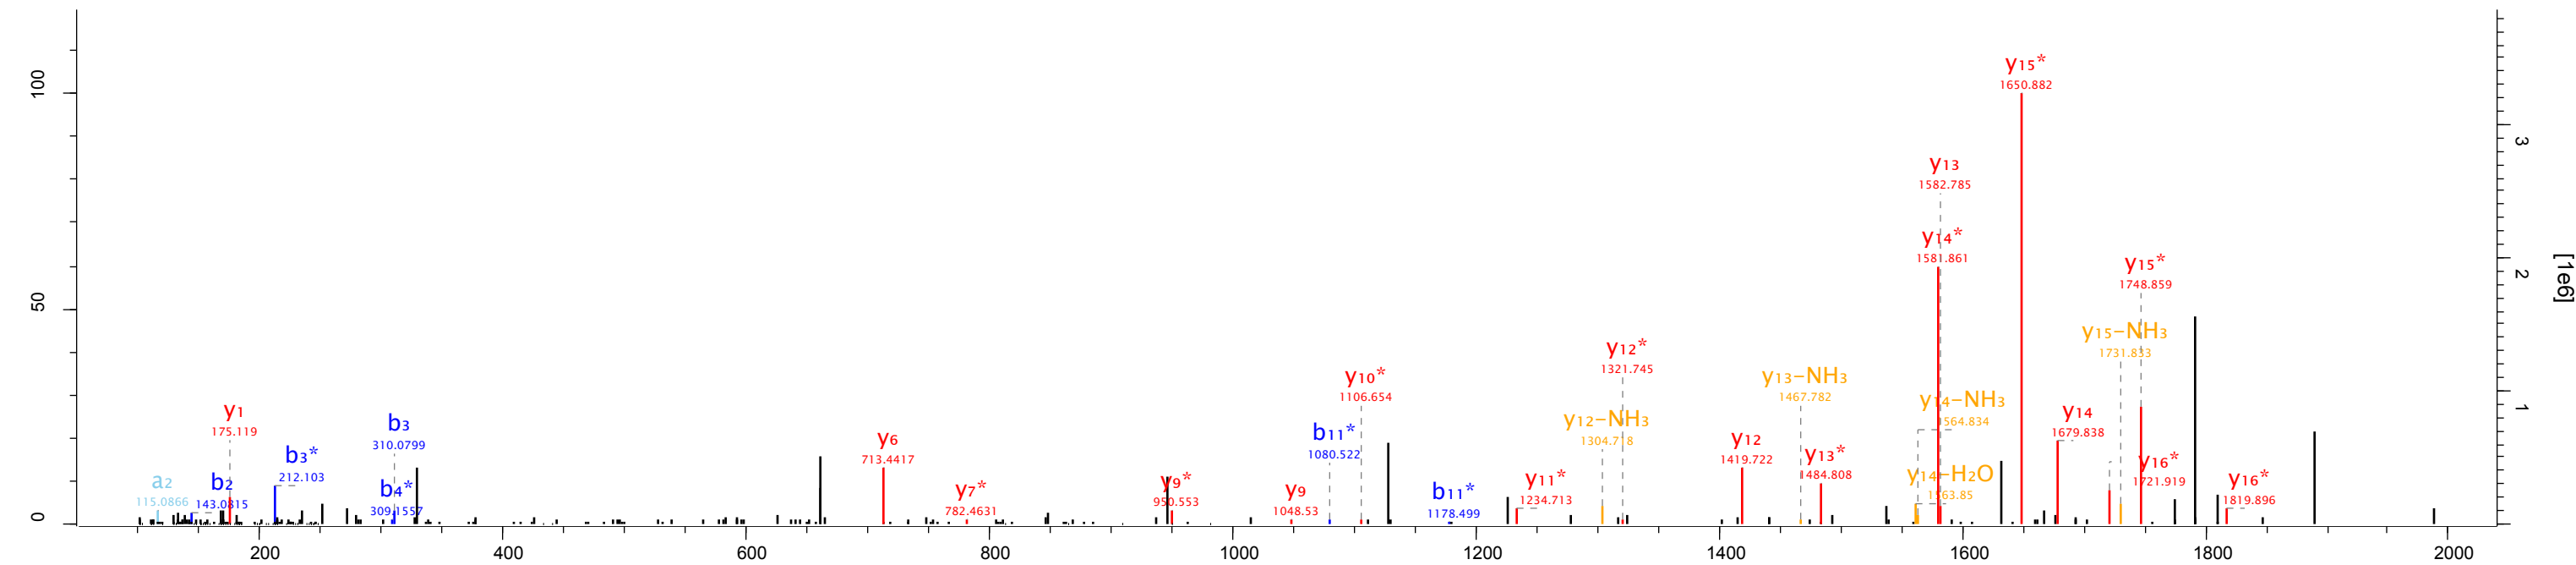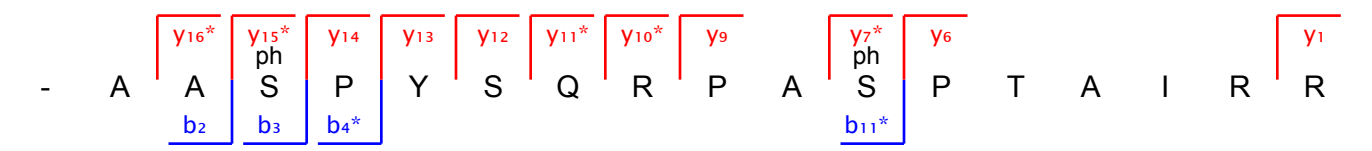

Raw file Scan Method Score m/z Gene names  
 20150812\_A375SR\_Phospho\_BR1\_03 10242 FTMS; HCD 235.73 1125.93 LEO1

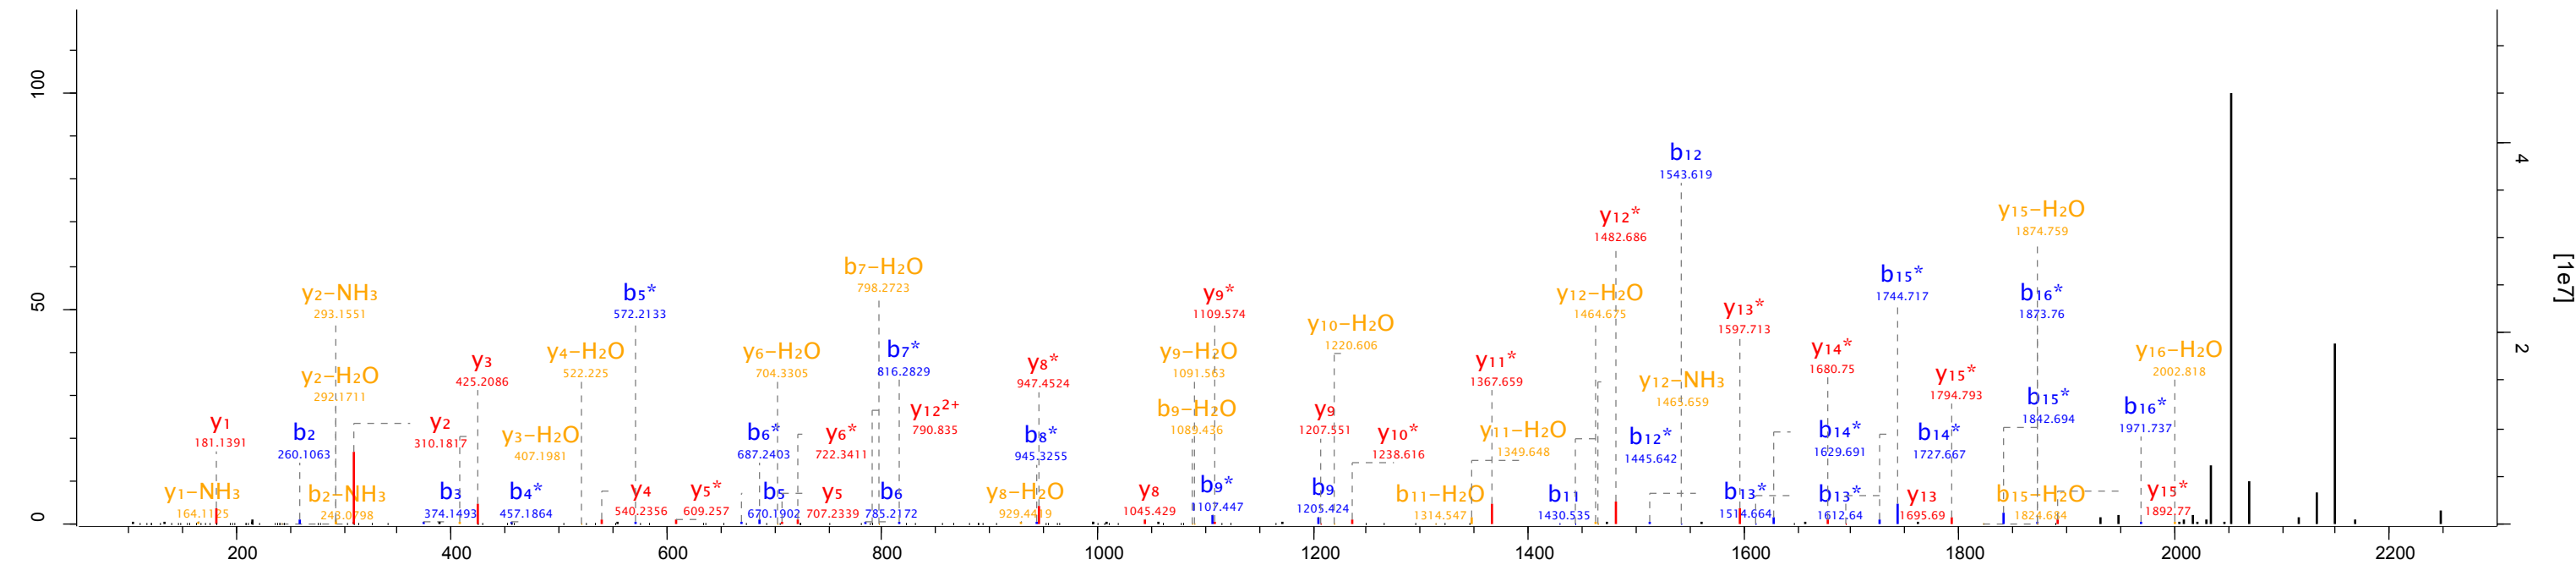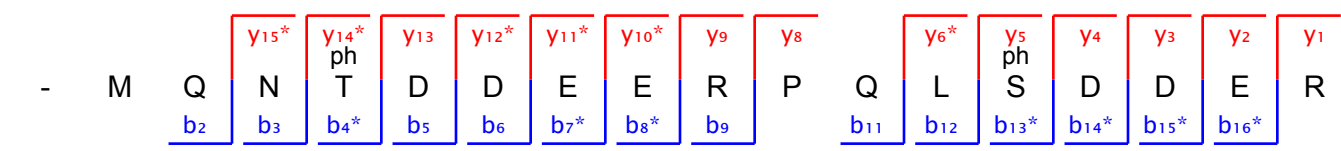

Raw file: 20150812\_A375SR\_Phospho\_BR1\_03  
 Scan: 10312 Method: FTMS; HCD Score: 192.24 m/z: 966.45 Gene names: CBF8

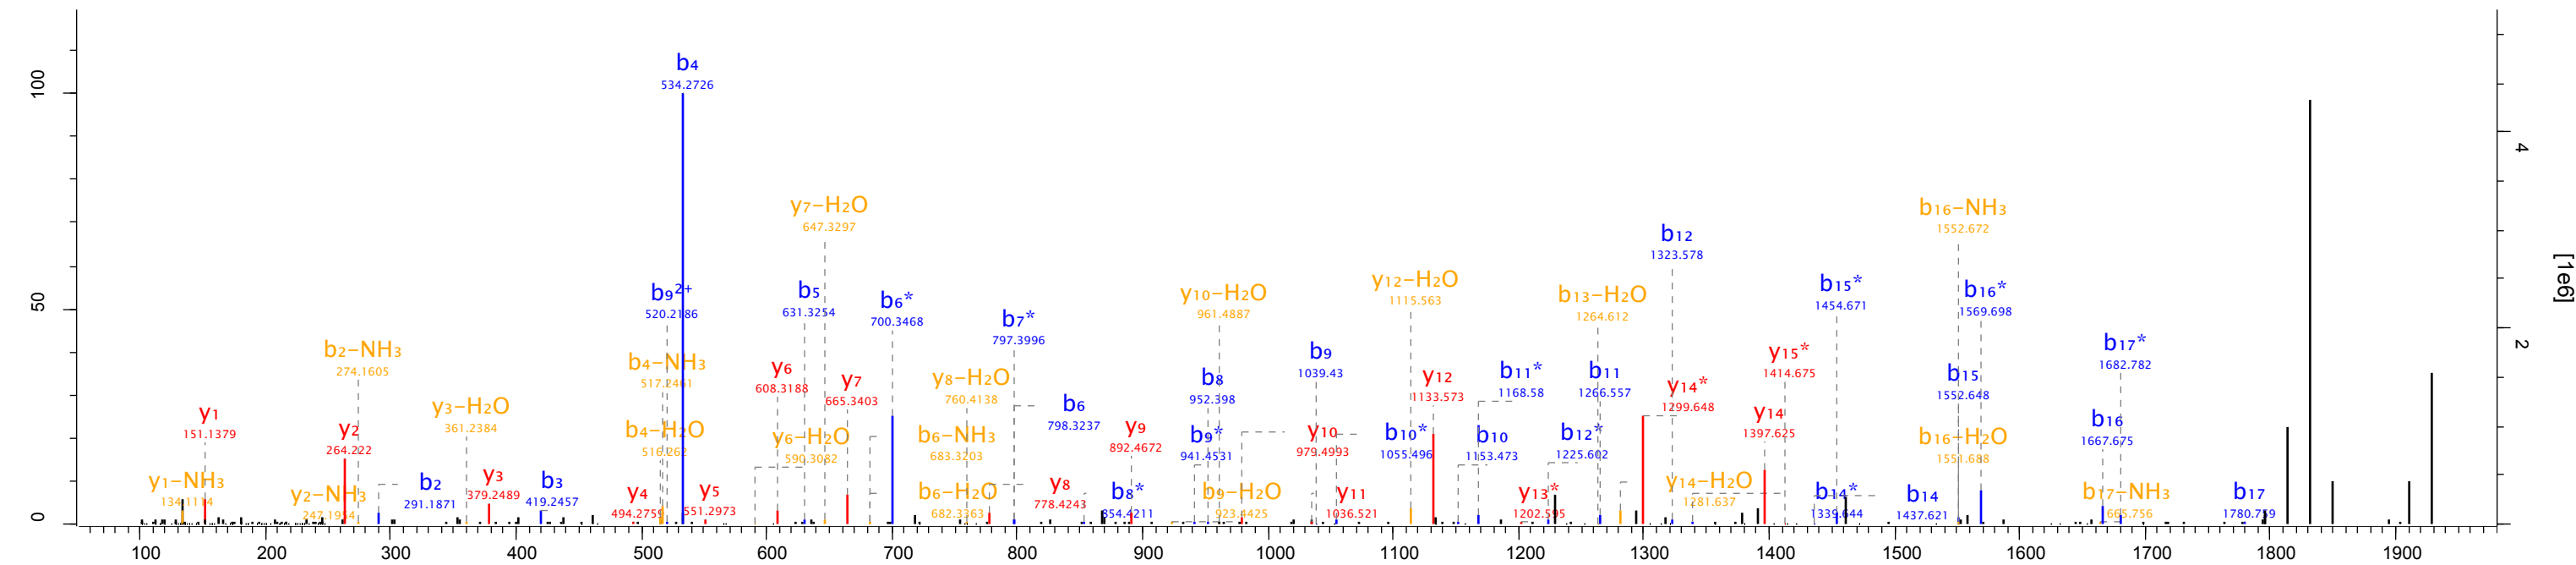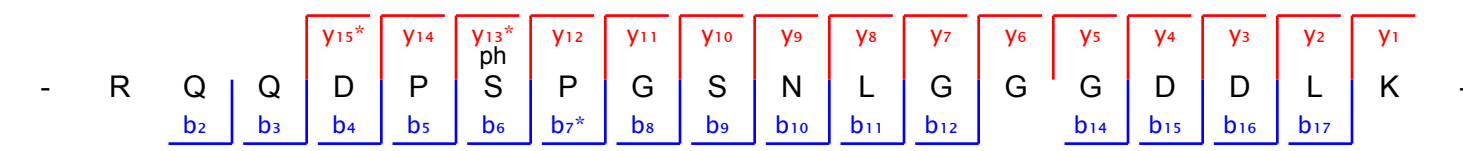



Raw file 20150812\_A375SR\_Phospho\_BR1\_03 Scan 10992 Method FTMS; HCD Score 116.63 m/z 774.3 Gene names UBAP2L

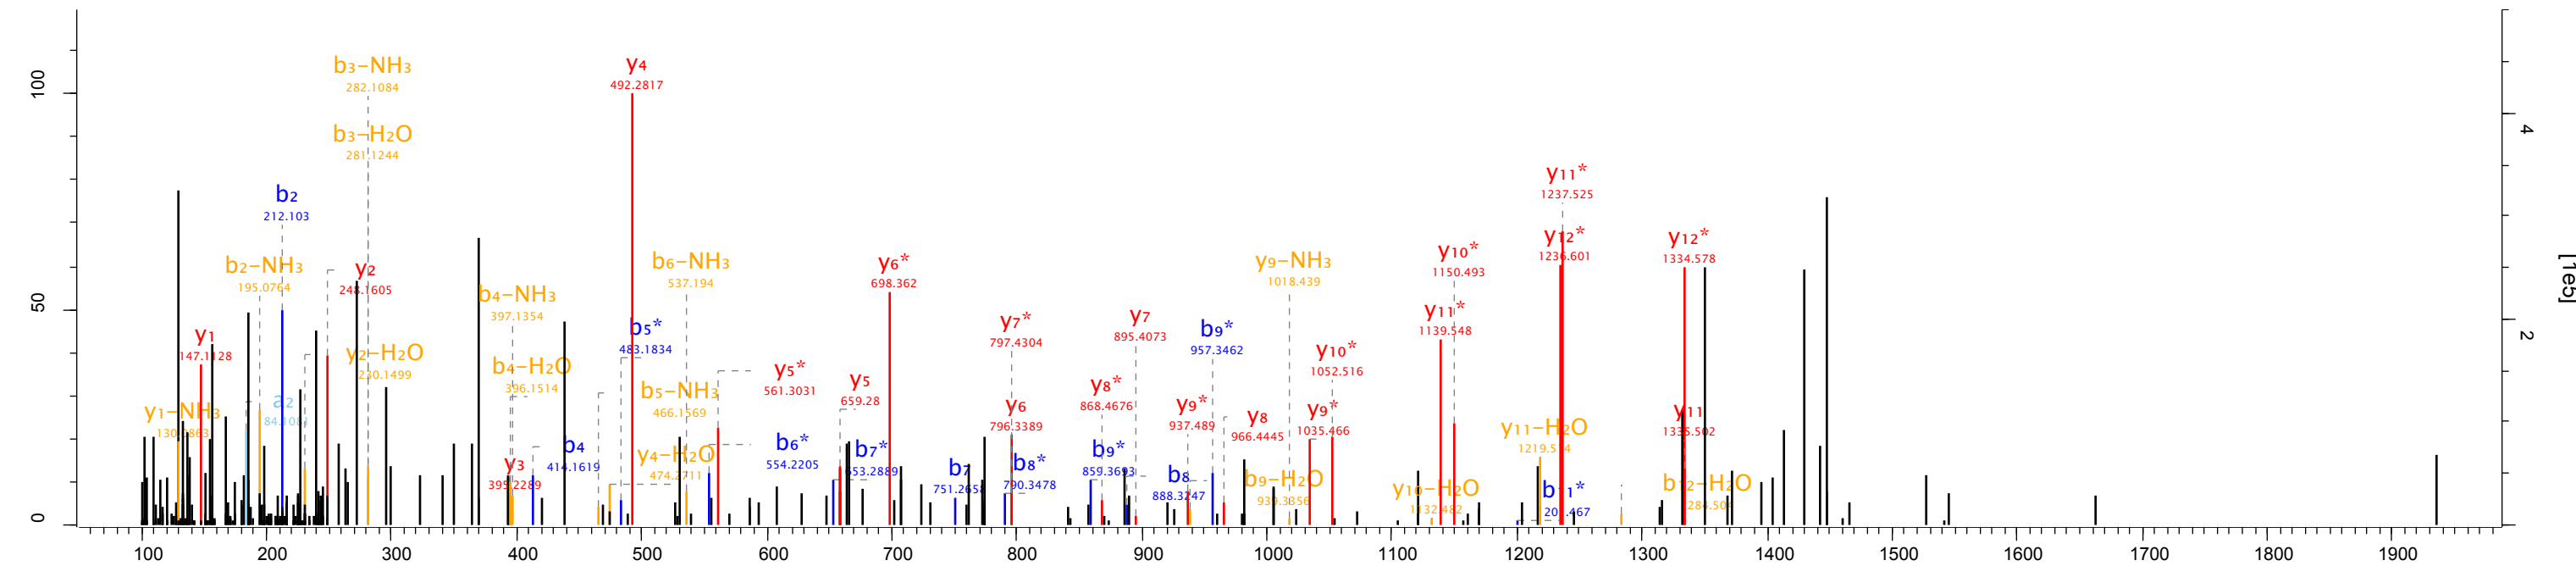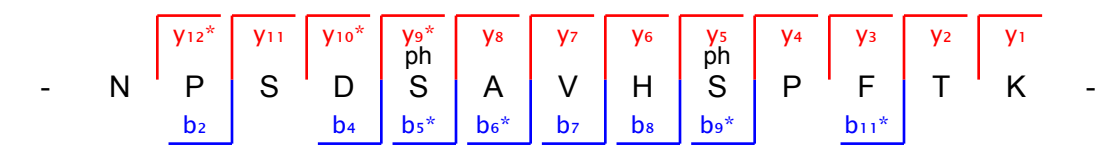

Raw file: 20150812\_A375SR\_Phospho\_BR1\_03  
 Scan: 11482 Method: FTMS; HCD Score: 134.49 m/z: 976.73 Gene names: ARHGEF2

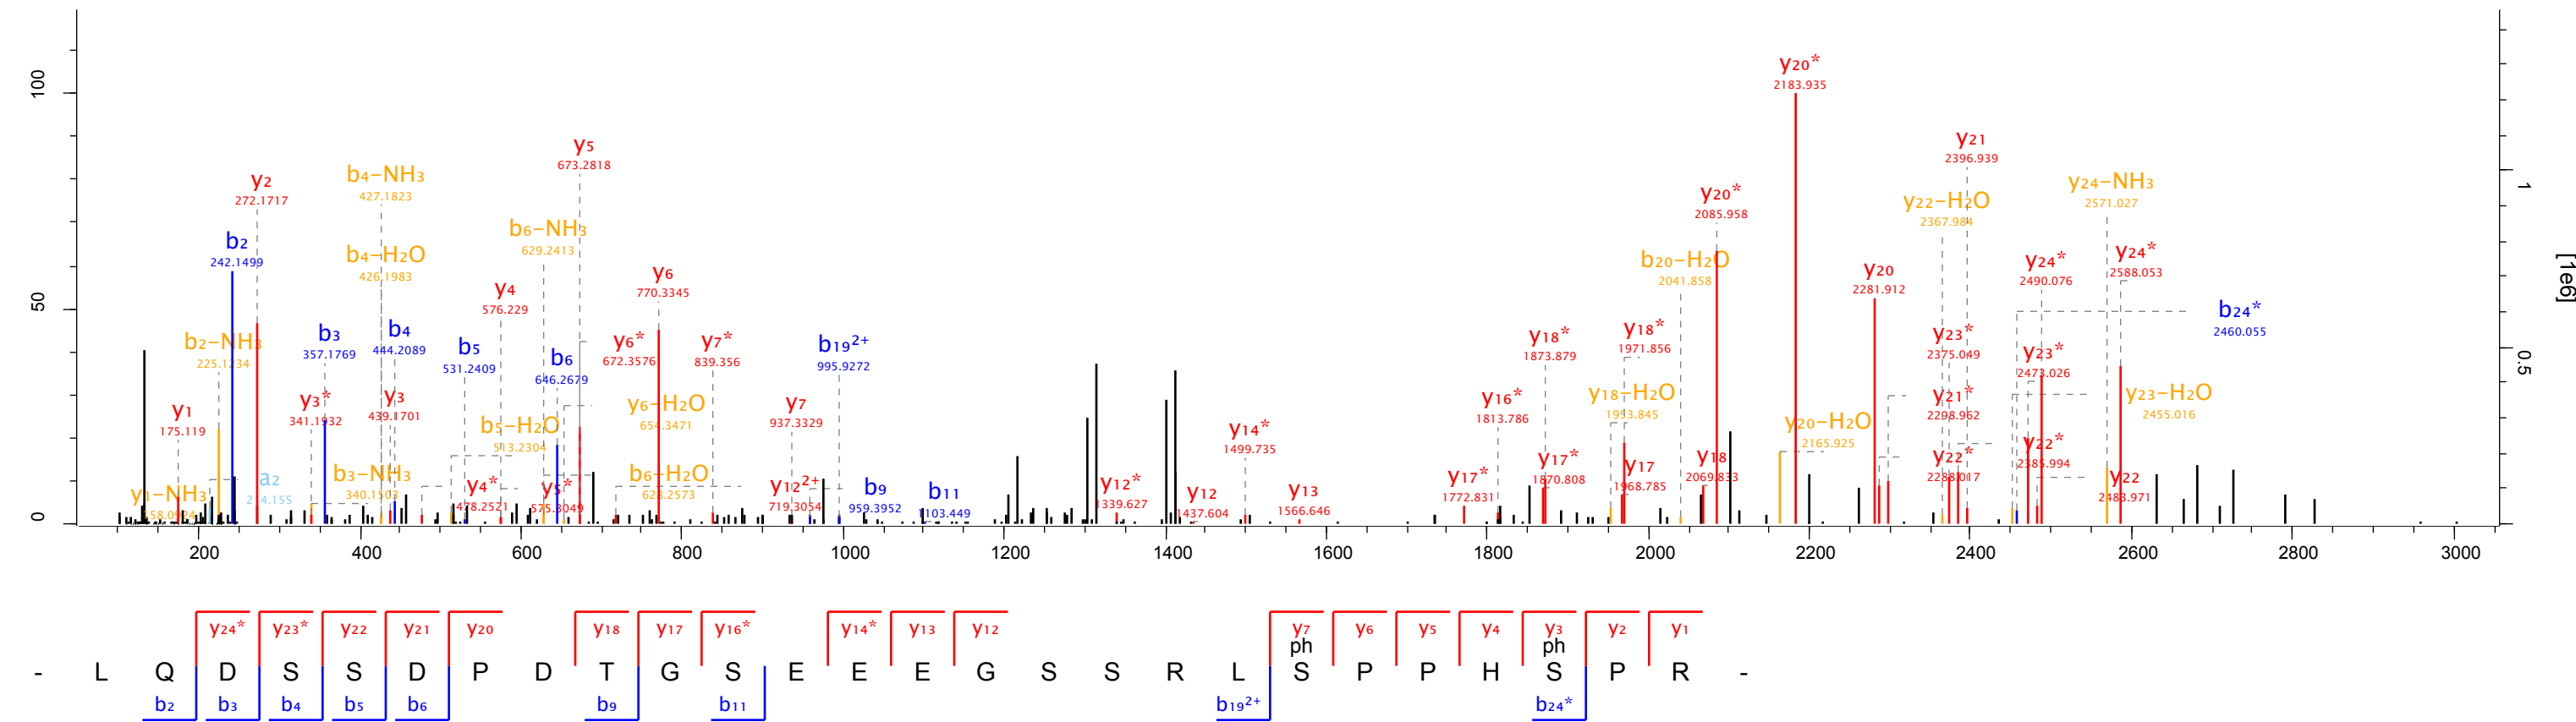

Raw file 20150812\_A375SR\_Phospho\_BR1\_03 Scan 11812 Method FTMS; HCD Score 233.44 m/z 750.33 Gene names WAPAL

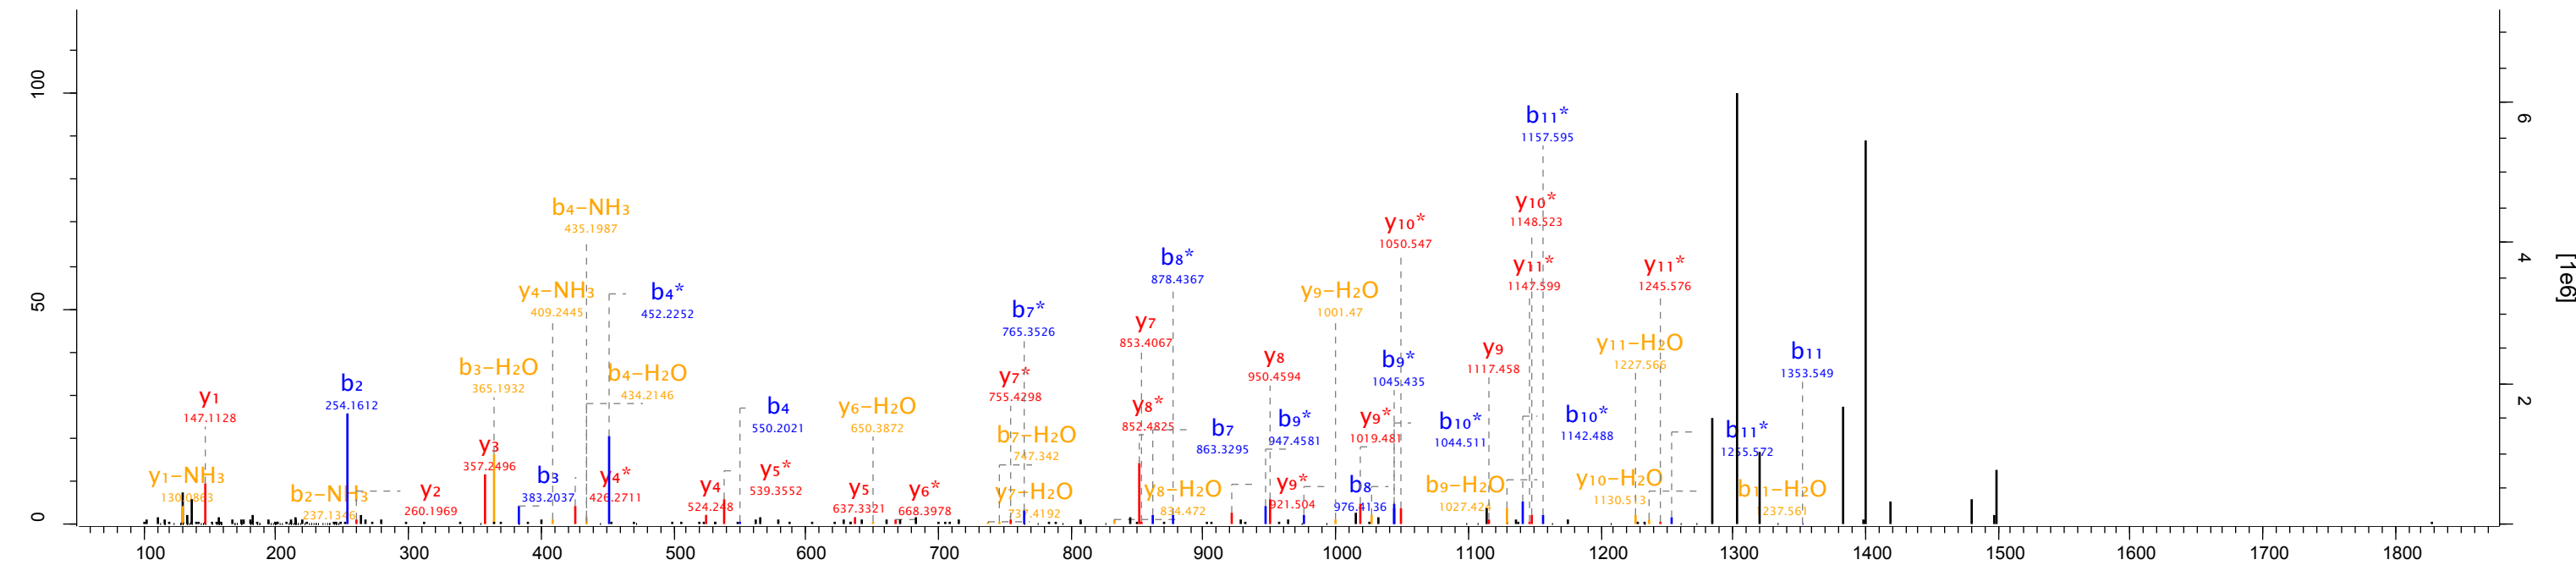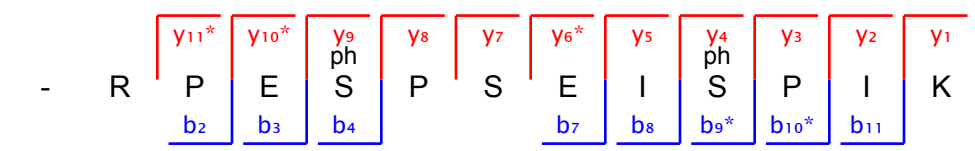

Raw file 20150812\_A375SR\_Phospho\_BR1\_03 Scan 12242 Method FTMS; HCD Score 135.29 m/z 773.32 Gene names PKP2

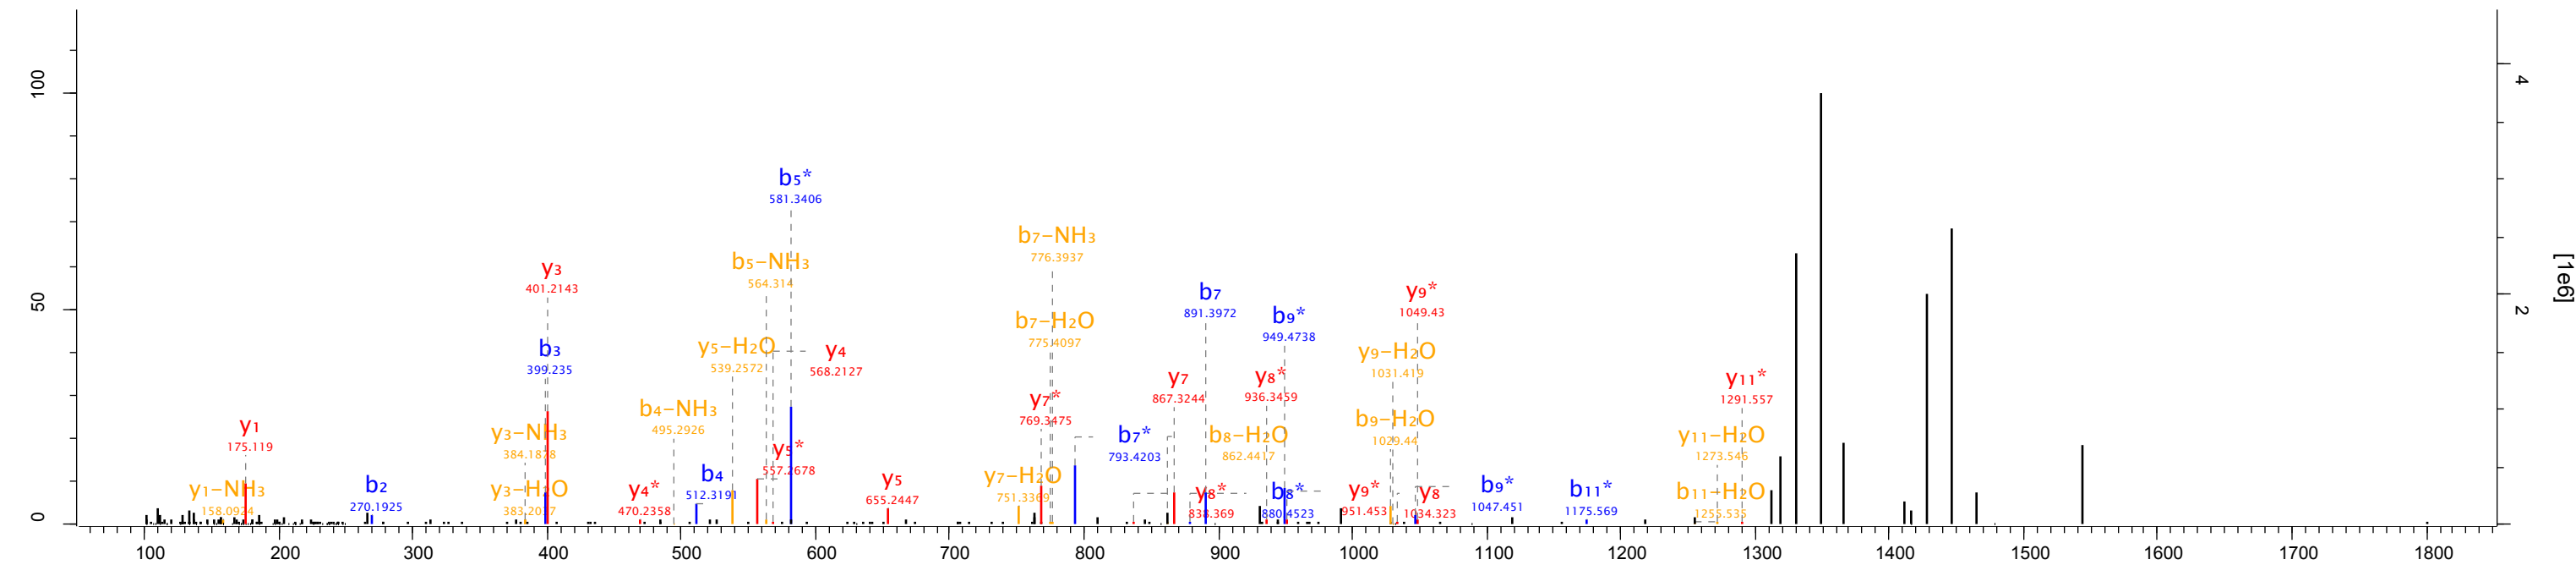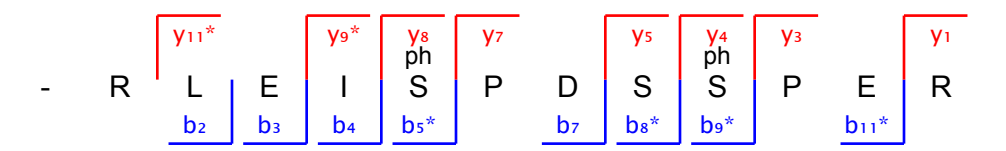

Raw file: 20150812\_A375SR\_Phospho\_BR1\_03  
 Scan: 12602 Method: FTMS; HCD Score: 80.35 m/z: 834.35 Gene names: MDC1

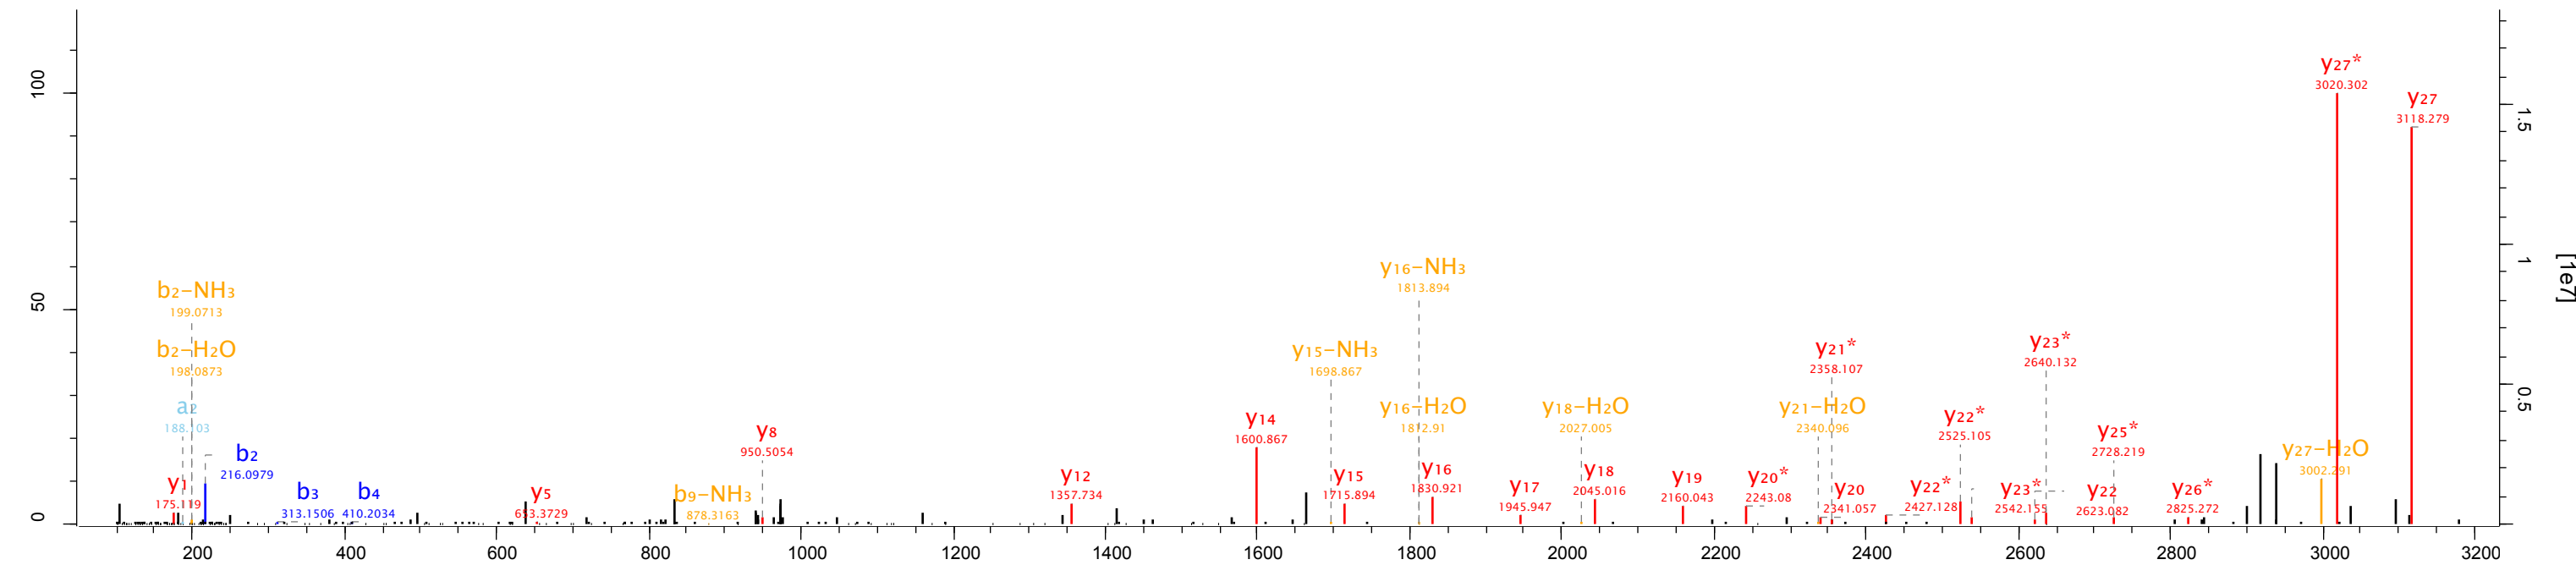

- S Q P P G E D S D T D V D D D S R P P G R P A E V H L E R -  
 (b2, b3, b4 are grouped under Q, P, P)  
 (y27, y26\*, y25\*, y23\*, y22 ph, y21\*, y20 ph, y19, y18, y17, y16, y15, y14, y12, y8, y5, y1 are grouped under P, P, G, D, S, D, T, D, V, D, D, D, S, R, P, A, E, V, H, L, E, R)

Raw file: 20150812\_A375SR\_Phospho\_BR1\_03  
 Scan: 12762 Method: FTMS; HCD Score: 46.54 m/z: 950.66 Gene names: SF3B1

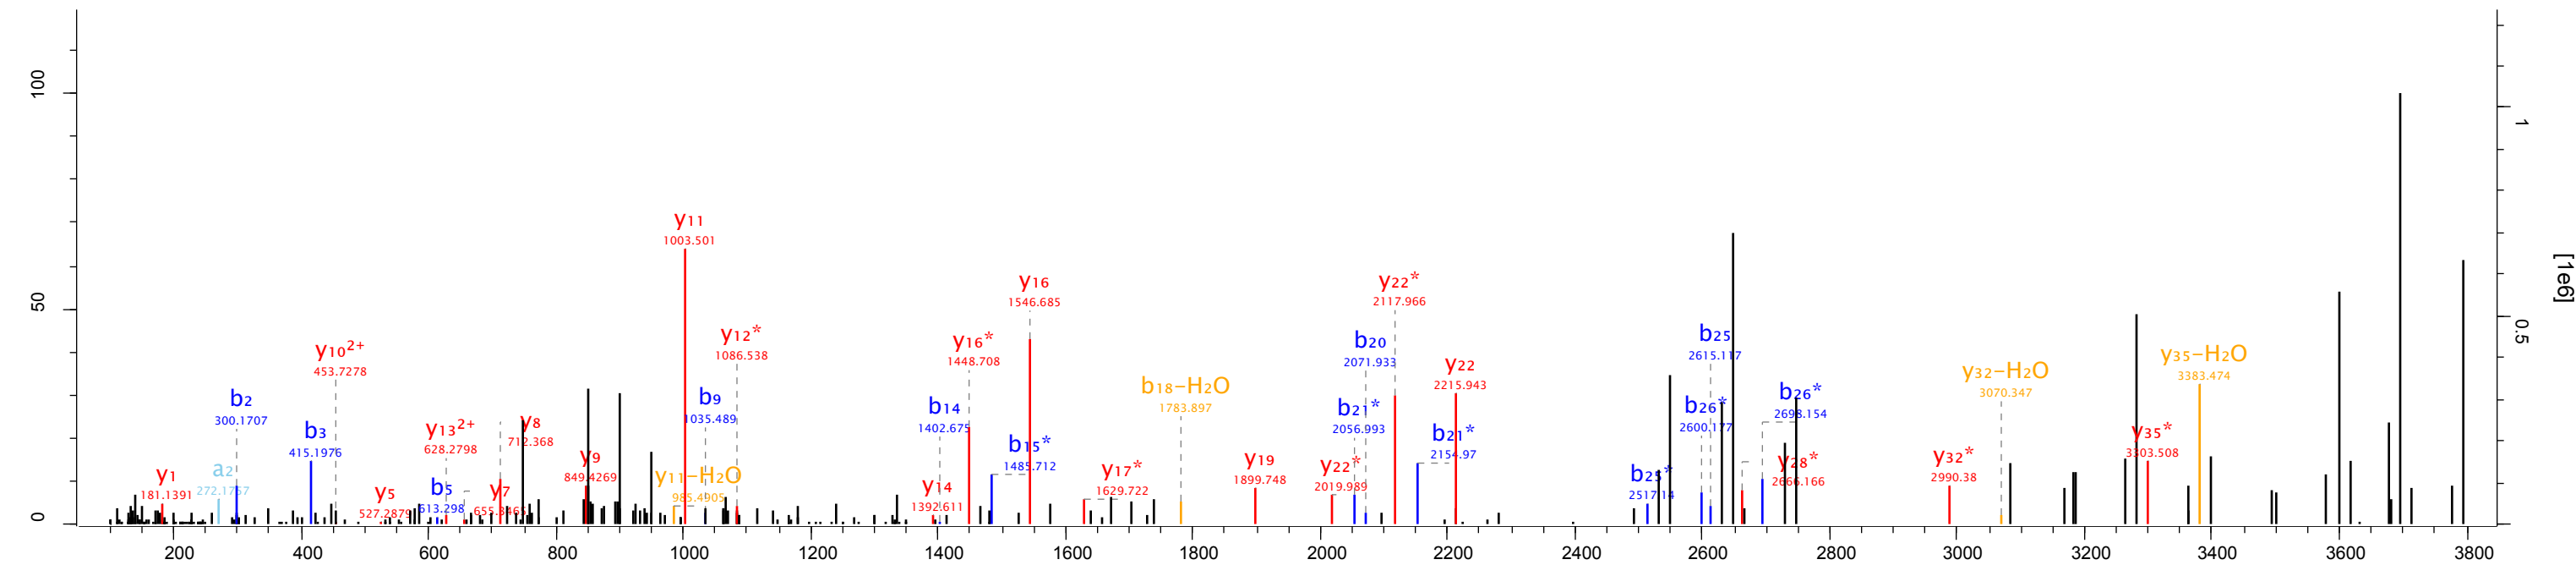

Protein sequence: - I W D P T P S H T P A G A A T P G R G D T P G H A P G H G G A T S S A R -

Fragmentation mapping (b and y ions):

- b<sub>2</sub>**: W
- b<sub>3</sub>**: D
- b<sub>5</sub>**: T
- b<sub>9</sub>**: T
- b<sub>14</sub>**: A
- b<sub>15</sub><sup>\*</sup>**: T
- b<sub>20</sub>**: D
- b<sub>21</sub><sup>\*</sup>**: T
- b<sub>25</sub>**: A
- b<sub>26</sub><sup>\*</sup>**: P
- y<sub>1</sub>**: R
- y<sub>5</sub>**: T
- y<sub>7</sub>**: G
- y<sub>8</sub>**: G
- y<sub>9</sub>**: H
- y<sub>10</sub><sup>2+</sup>**: P
- y<sub>11</sub>**: G
- y<sub>12</sub><sup>\*</sup>**: P
- y<sub>13</sub><sup>2+</sup>**: A
- y<sub>14</sub>**: H
- y<sub>16</sub>**: P
- y<sub>17</sub><sup>\*</sup>**: T
- y<sub>19</sub>**: G
- y<sub>22</sub>**: P
- y<sub>28</sub><sup>\*</sup>**: P
- y<sub>32</sub><sup>\*</sup>**: T
- y<sub>35</sub><sup>\*</sup>**: S

Raw file 20150812\_A375SR\_Phospho\_BR1\_03 Scan 13322 Method FTMS; HCD Score 227.43 m/z 966.43 Gene names ADD3

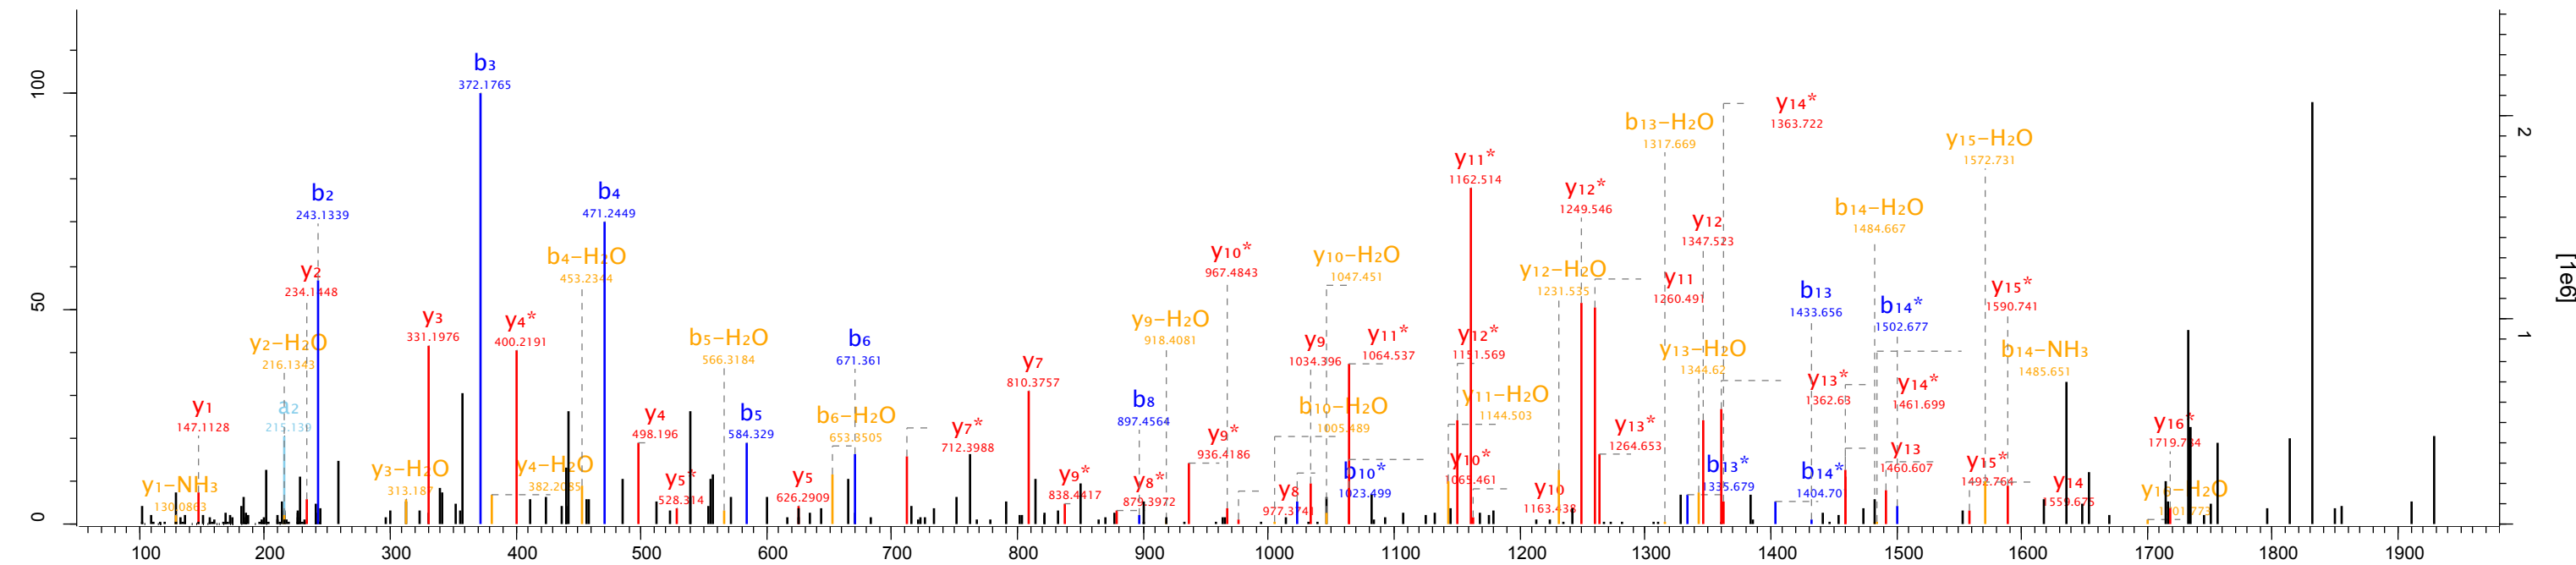

- I E E V L S P E G S P S K S P S K -

y16\*
y15\*
y14
y13
y12
y11
y10
y9
y8  
ph
y7
b2
b3
b4
b5
b6
b8
b10\*
b13
b14\*

Raw file 20150812\_A375SR\_Phospho\_BR1\_03 Scan 13512 Method FTMS; HCD Score 213.37 m/z 828.99 Gene names MAP1A

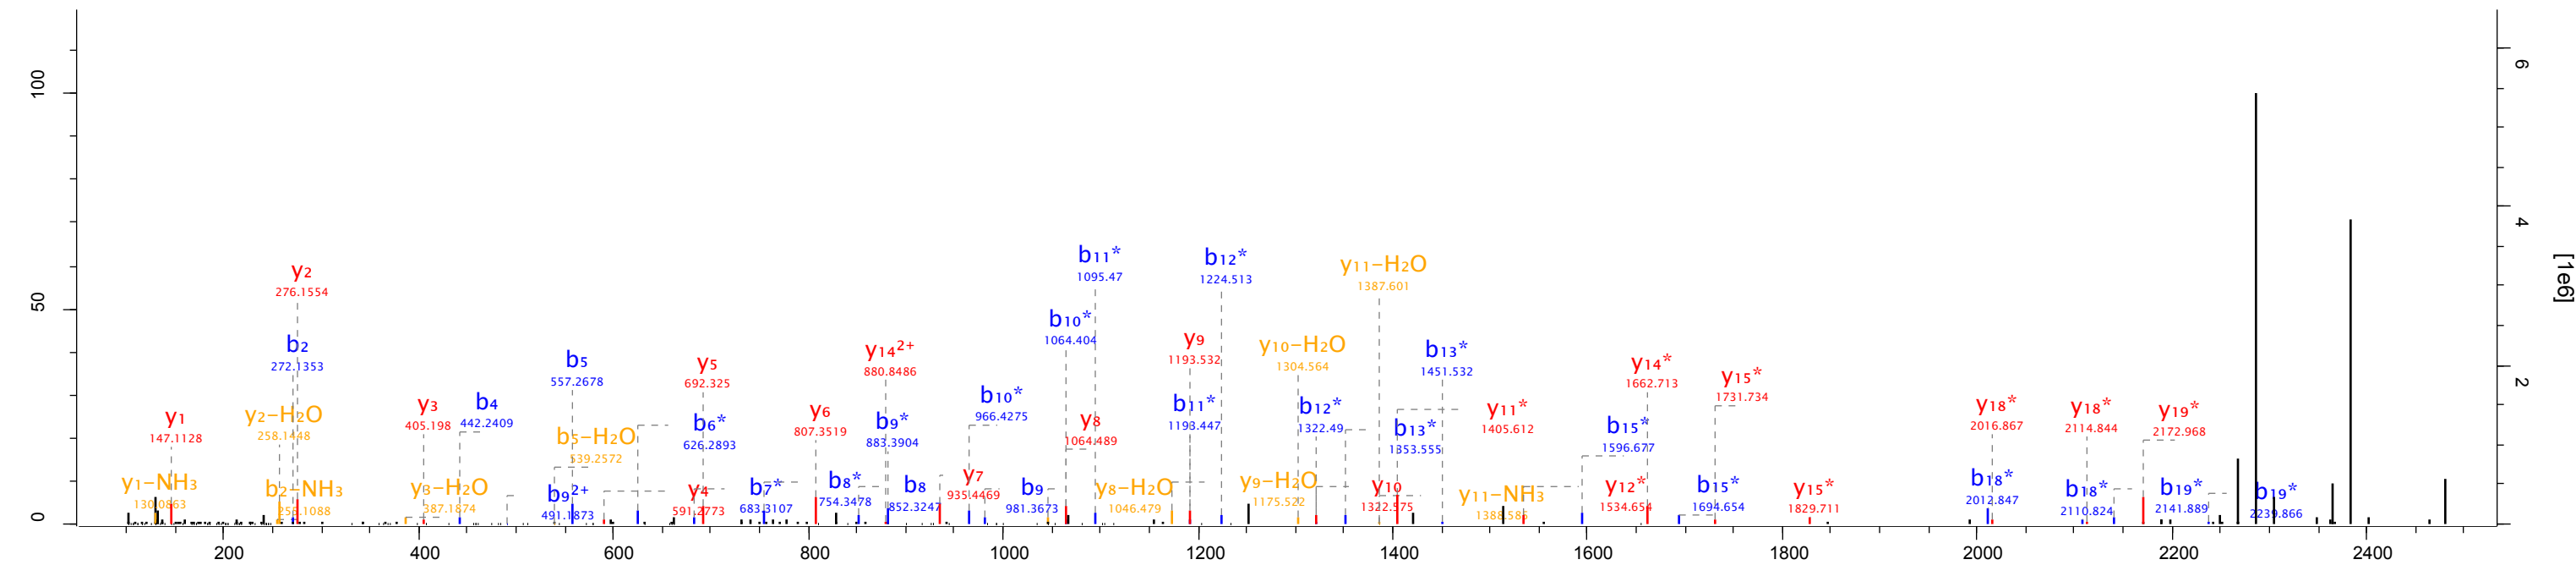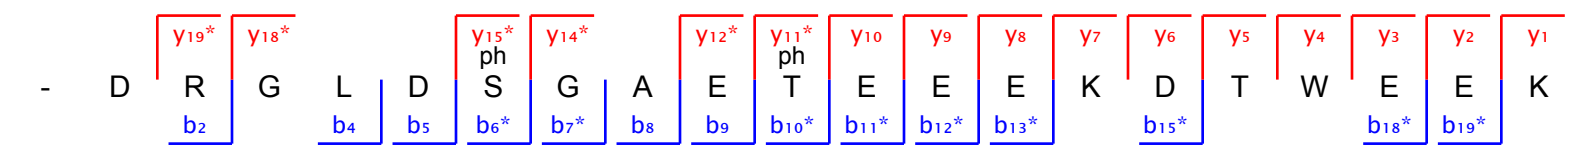



Raw file 20150812\_A375SR\_Phospho\_BR1\_03 Scan 13632 Method FTMS; HCD Score 148.31 m/z 896.77 Gene names INCENP

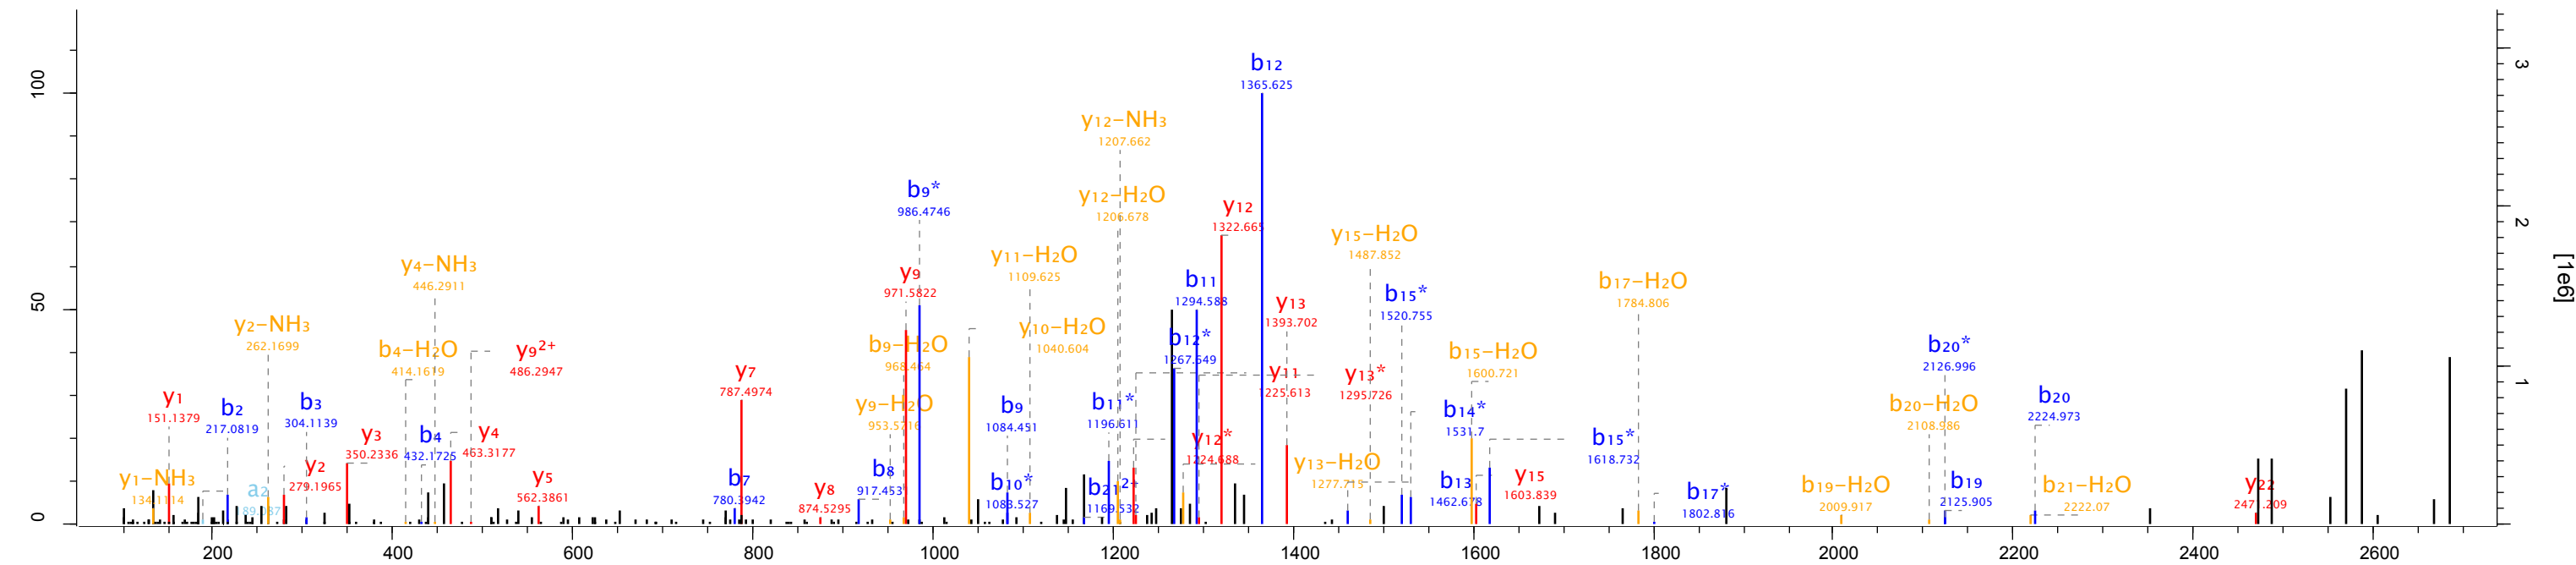

- T D S Q S V R H S P I A P S S P S P Q V L A Q K -

y22 y15 y13 y12 y11 y9 y8 y7 y5 y4 y3 y2 y1  
b2 b3 b4 b7 b8 b9 b10\* b11 b12 b13 b14\* b15\* b17\* b19 b20 b21<sup>2+</sup>

Raw file 20150812\_A375SR\_Phospho\_BR1\_03 Scan 13712 Method FTMS; HCD Score 129.57 m/z 929.85 Gene names COMMD3-BMI1;BMI1

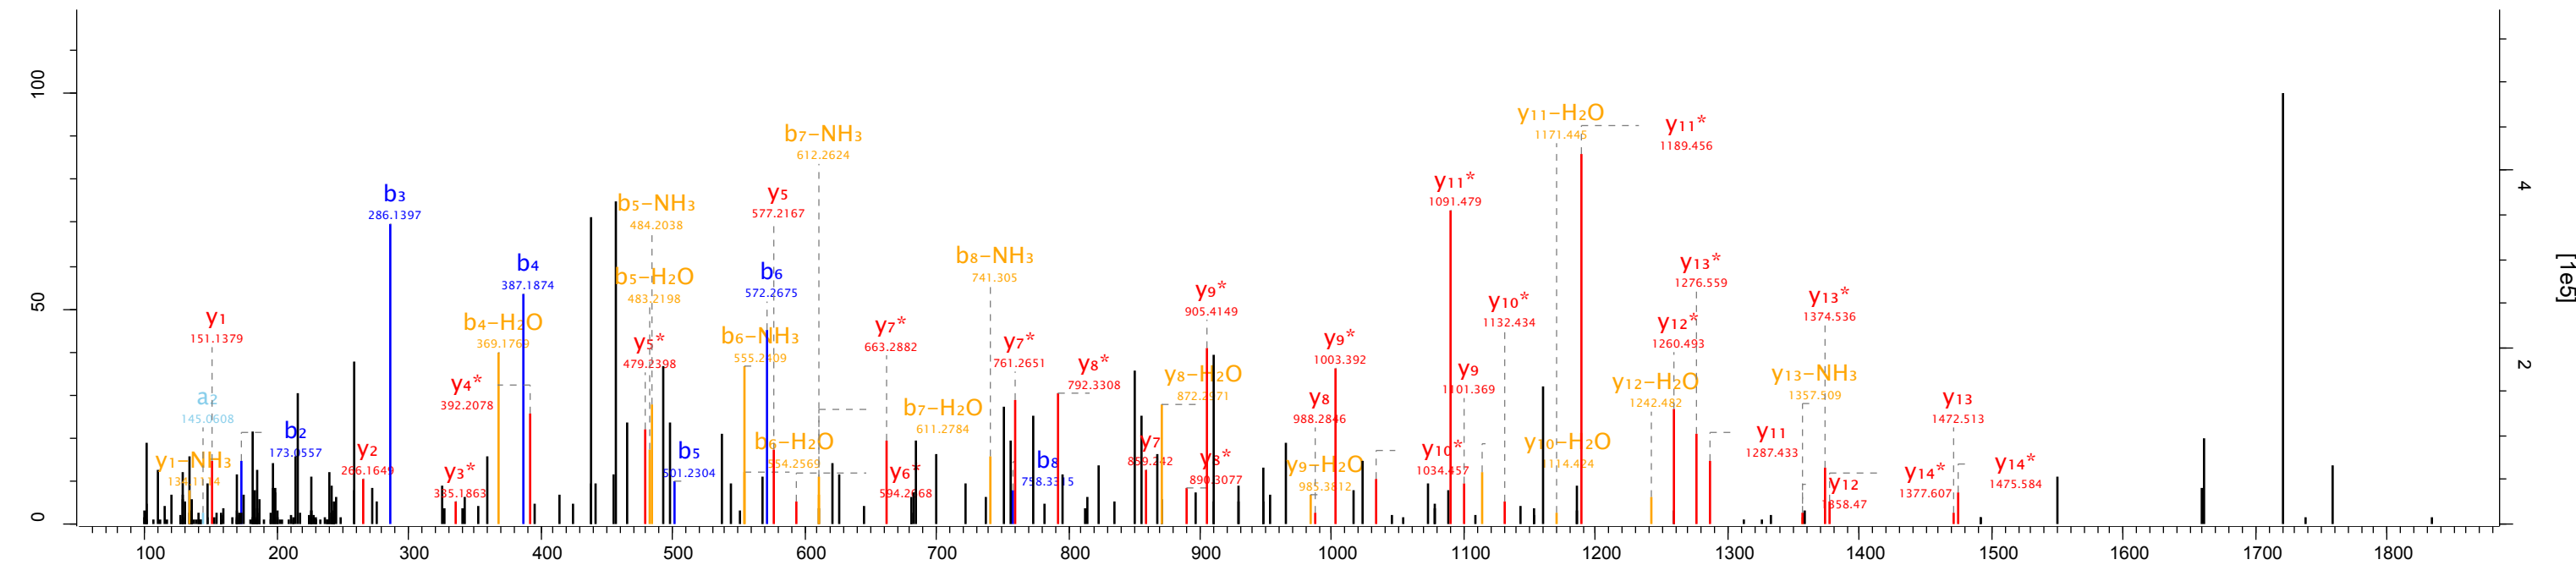

- D G L T N A G E L E S D S G S D K -

b<sub>2</sub> b<sub>3</sub> b<sub>4</sub> b<sub>5</sub> b<sub>6</sub> b<sub>8</sub> y<sub>14</sub>\* y<sub>13</sub> y<sub>12</sub> y<sub>11</sub> y<sub>10</sub>\* y<sub>9</sub> y<sub>8</sub> y<sub>7</sub> y<sub>6</sub>\* y<sub>5</sub> y<sub>4</sub>\* y<sub>3</sub>\* y<sub>2</sub> y<sub>1</sub>

ph ph

Raw file 20150812\_A375SR\_Phospho\_BR1\_03 Scan 14082 Method FTMS; HCD Score 87.57 m/z 972.07 Gene names BCL7B

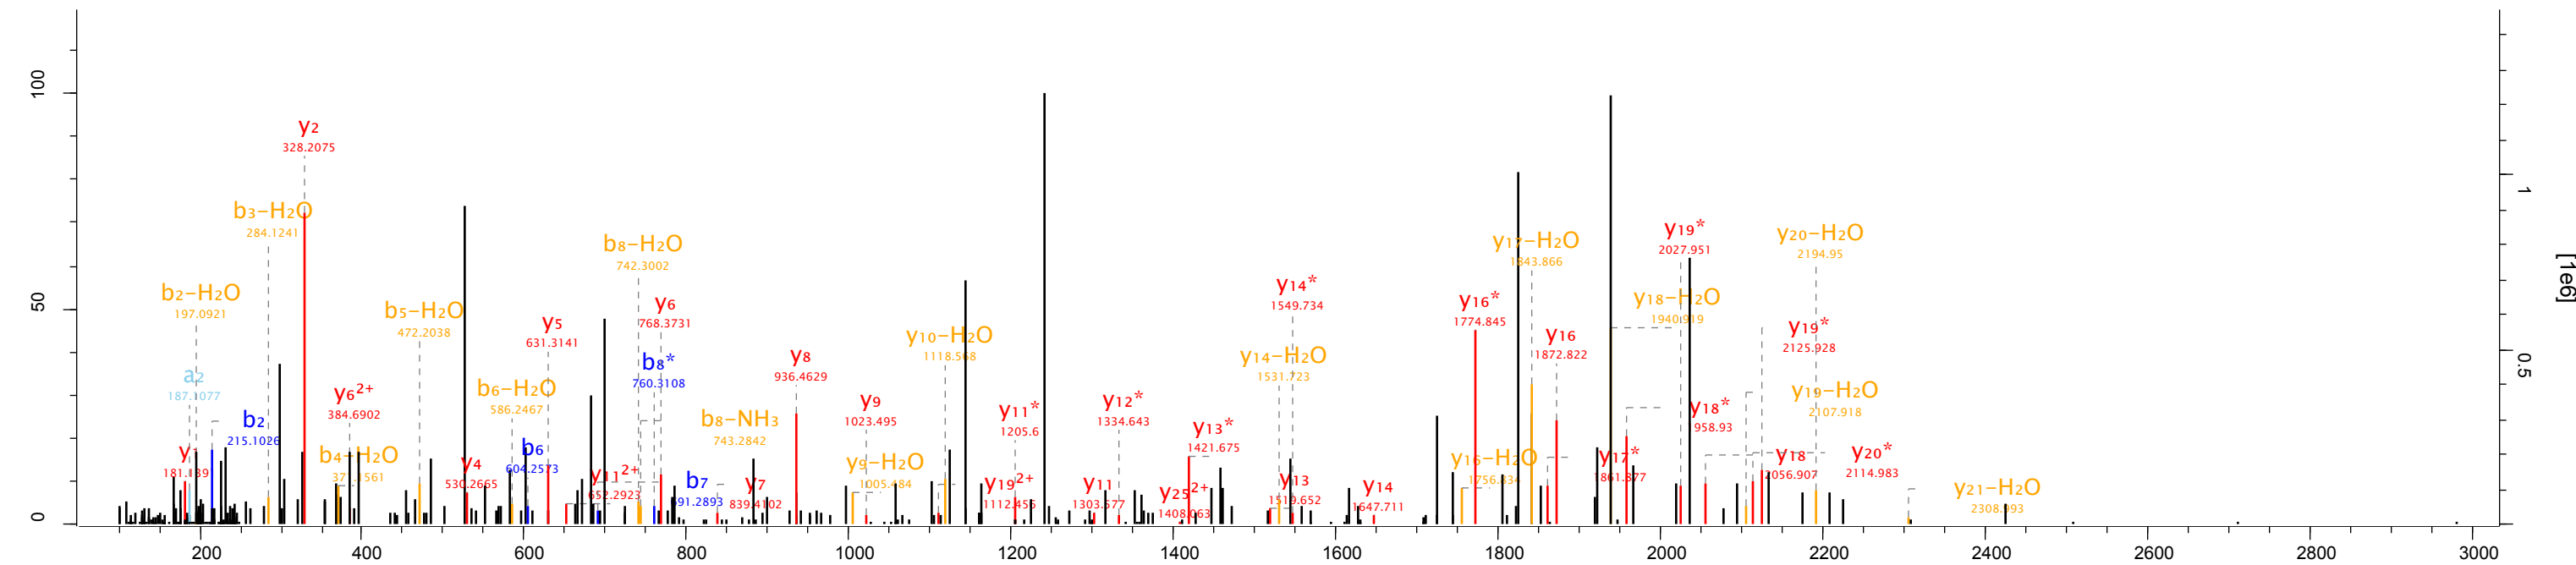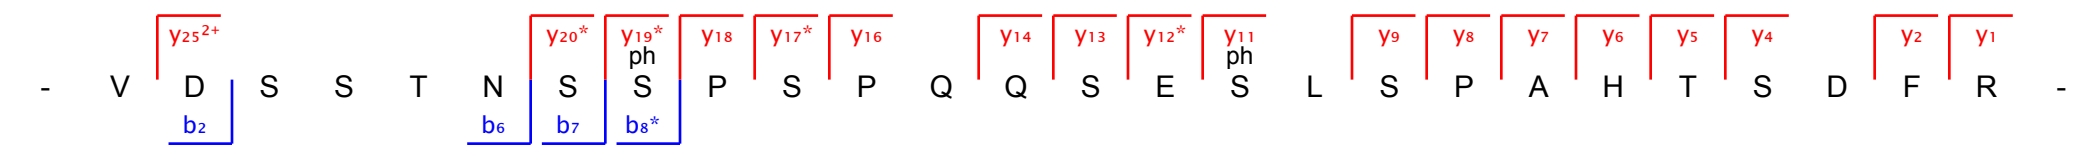

Raw file Scan Method Score m/z Gene names  
 20150812\_A375SR\_Phospho\_BR1\_03 14162 FTMS; HCD 214.79 958.43 DCP1A

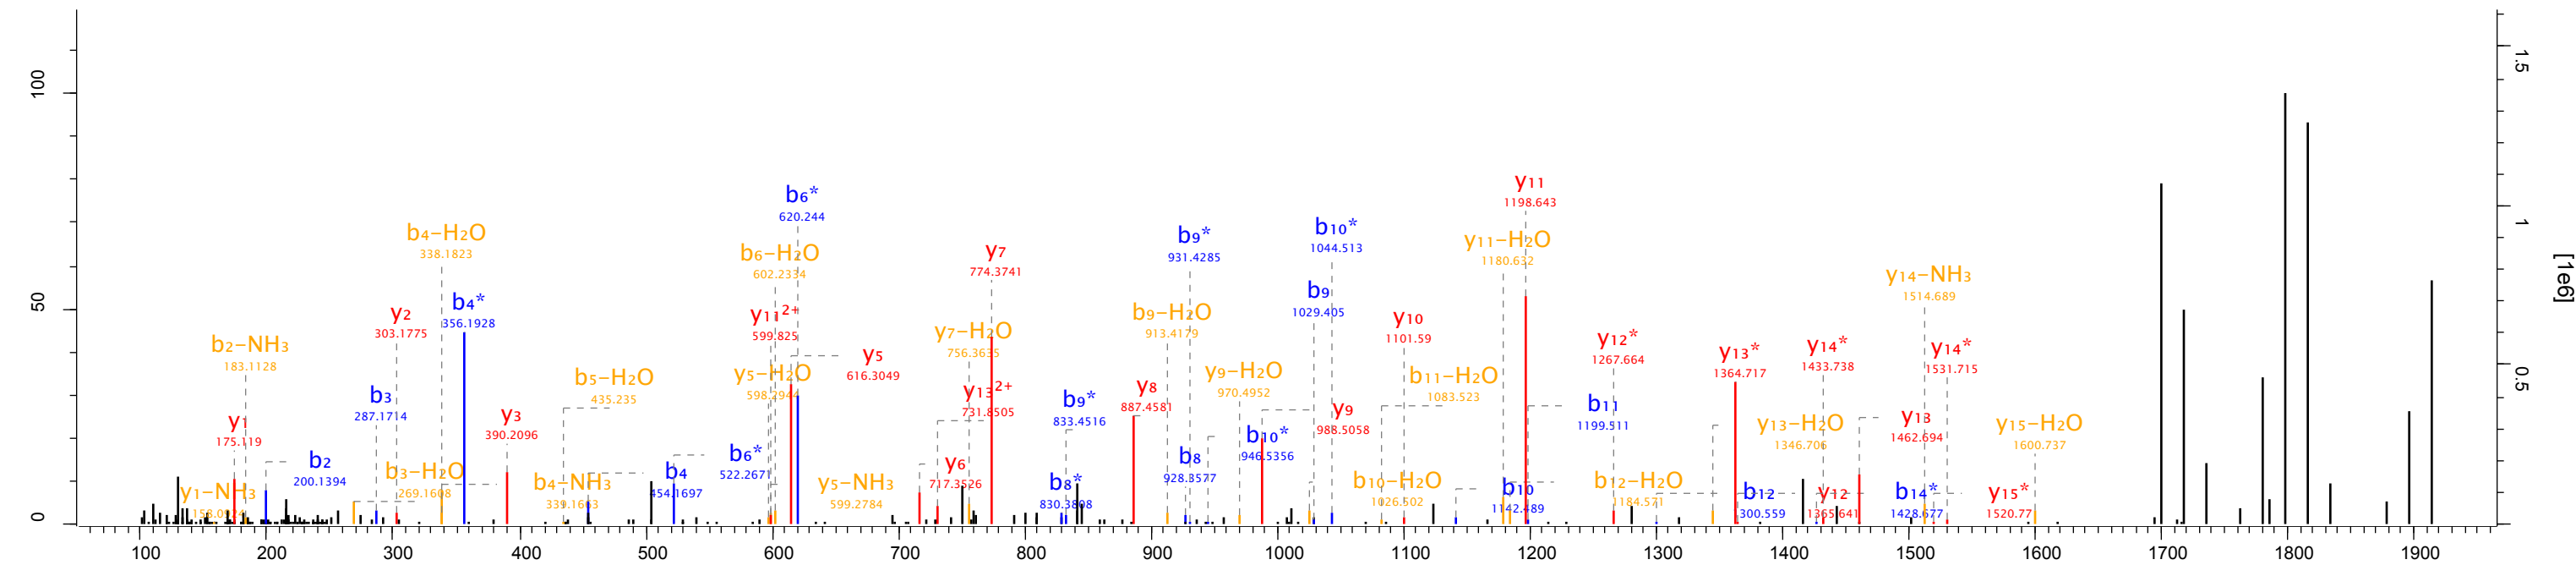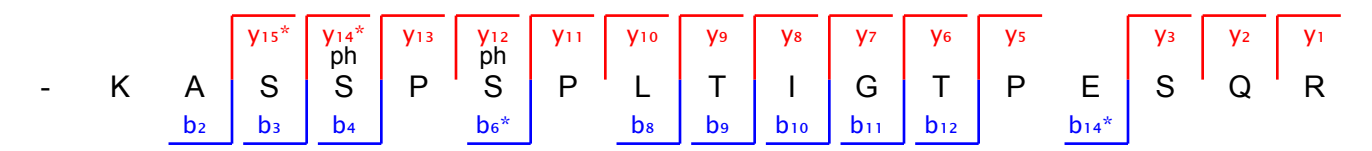

Raw file: 20150812\_A375SR\_Phospho\_BR1\_03  
 Scan: 14452 Method: FTMS; HCD Score: 159.77 m/z: 888.85 Gene names: RBMX;RBMXL1

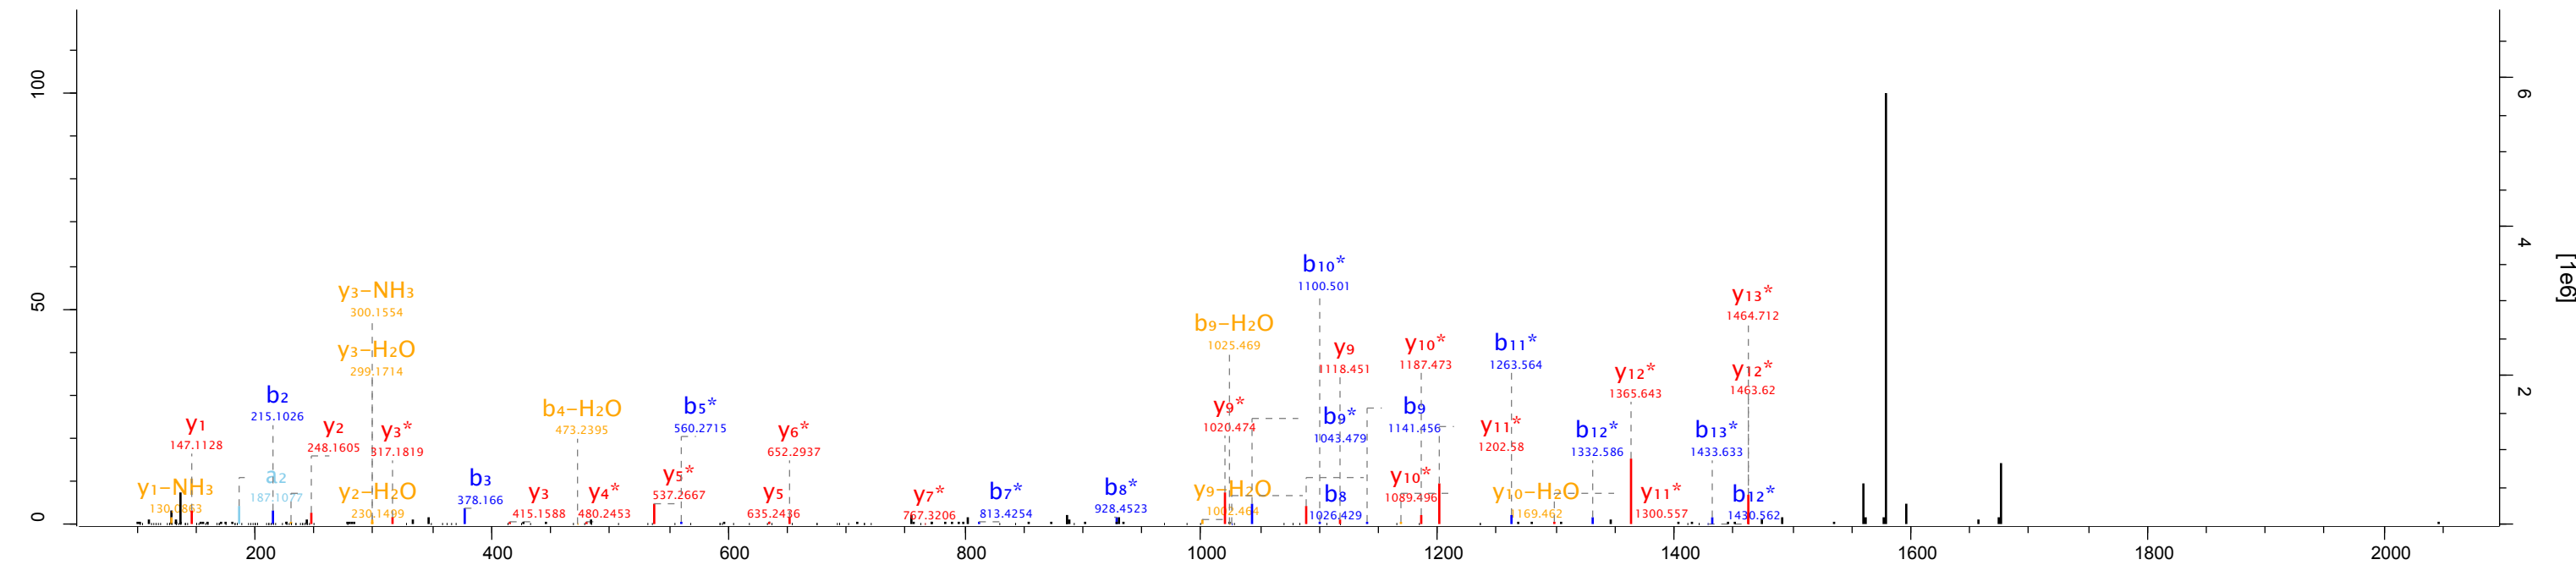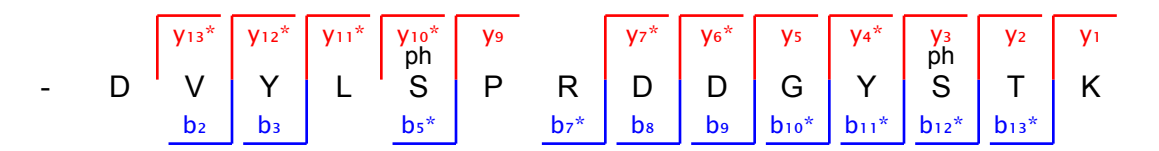

Raw file: 20150812\_A375SR\_Phospho\_BR1\_03  
 Scan: 14462 Method: FTMS; HCD Score: 209.31 m/z: 1077.96 Gene names: EPHA2

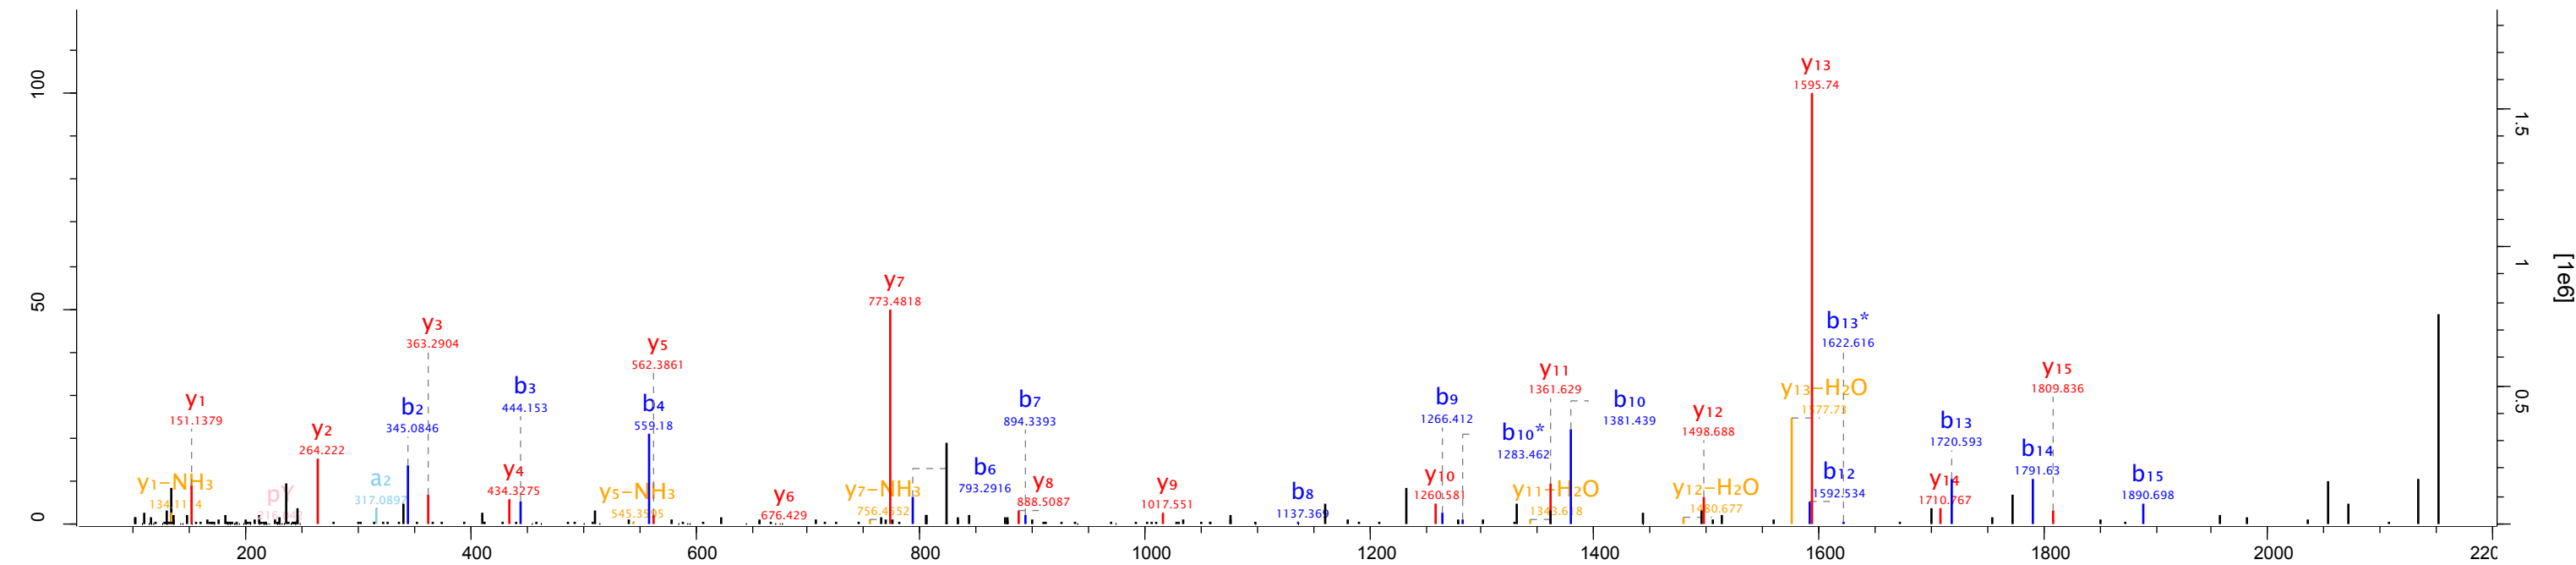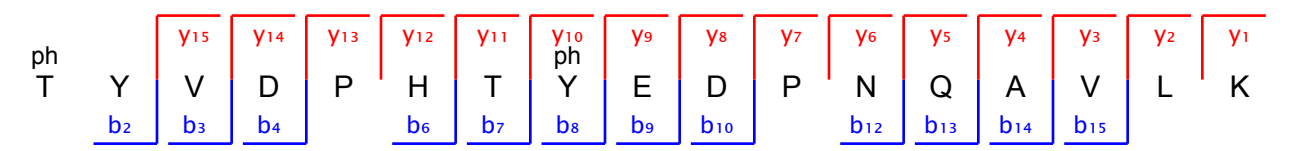



Raw file: 20150812\_A375SR\_Phospho\_BR1\_03  
 Scan: 15172 Method: FTMS; HCD Score: 143.91 m/z: 823.85 Gene names: TBC1D5

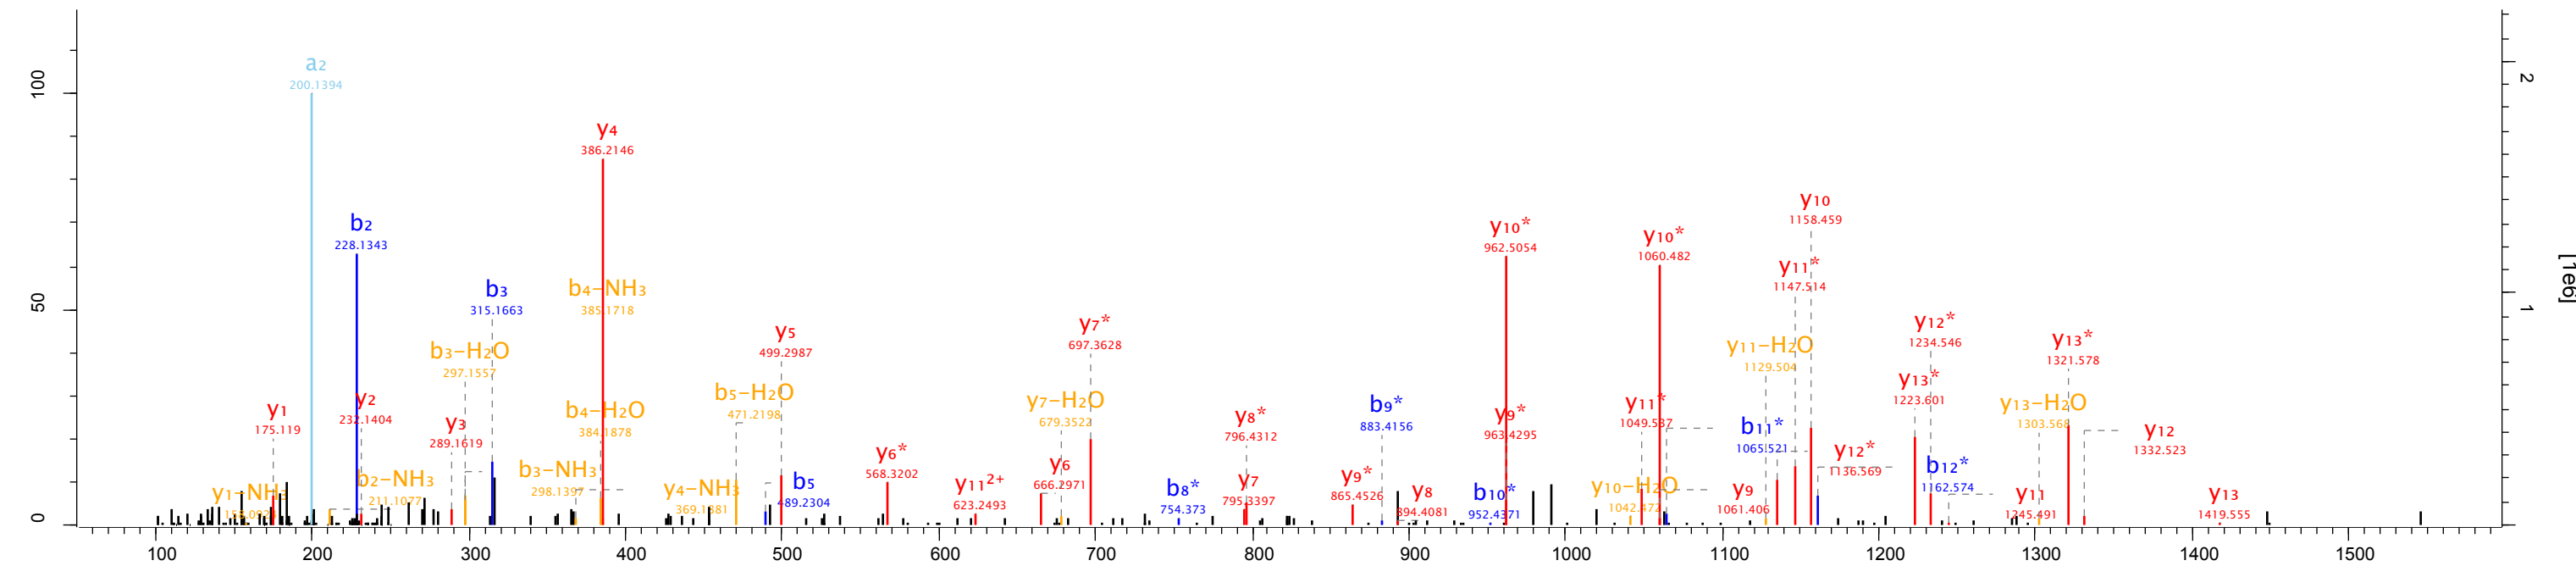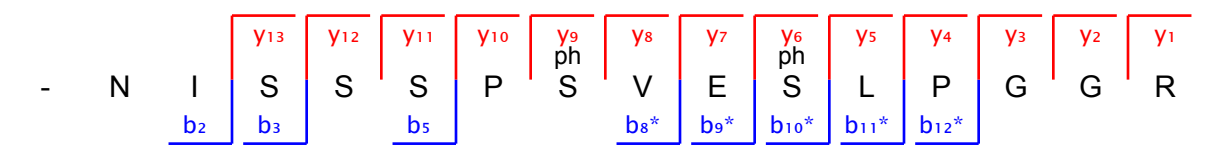



Raw file Scan Method Score m/z Gene names  
 20150812\_A375SR\_Phospho\_BR1\_03 15402 FTMS; HCD 134.03 742.98 PHLDB2

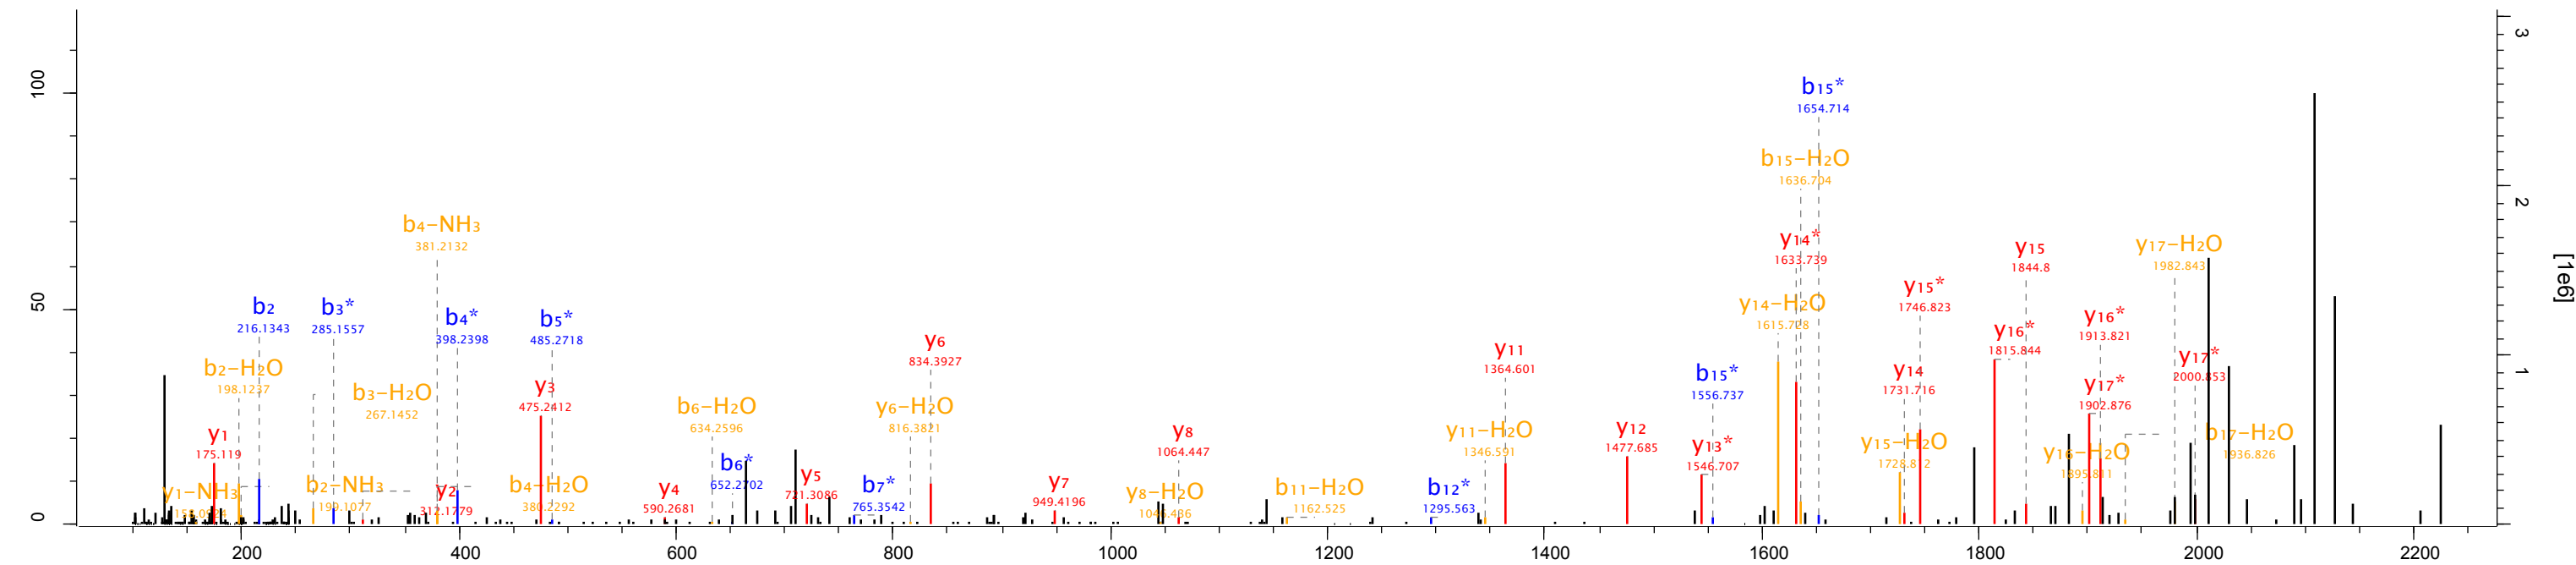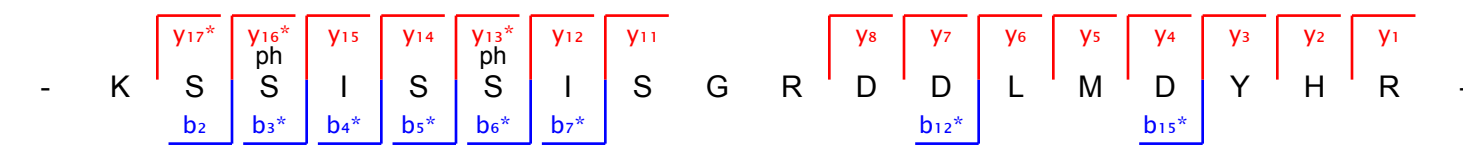

Raw file 20150812\_A375SR\_Phospho\_BR1\_03 Scan 15602 Method FTMS; HCD Score 131.13 m/z 773.32 Gene names PRPF4B

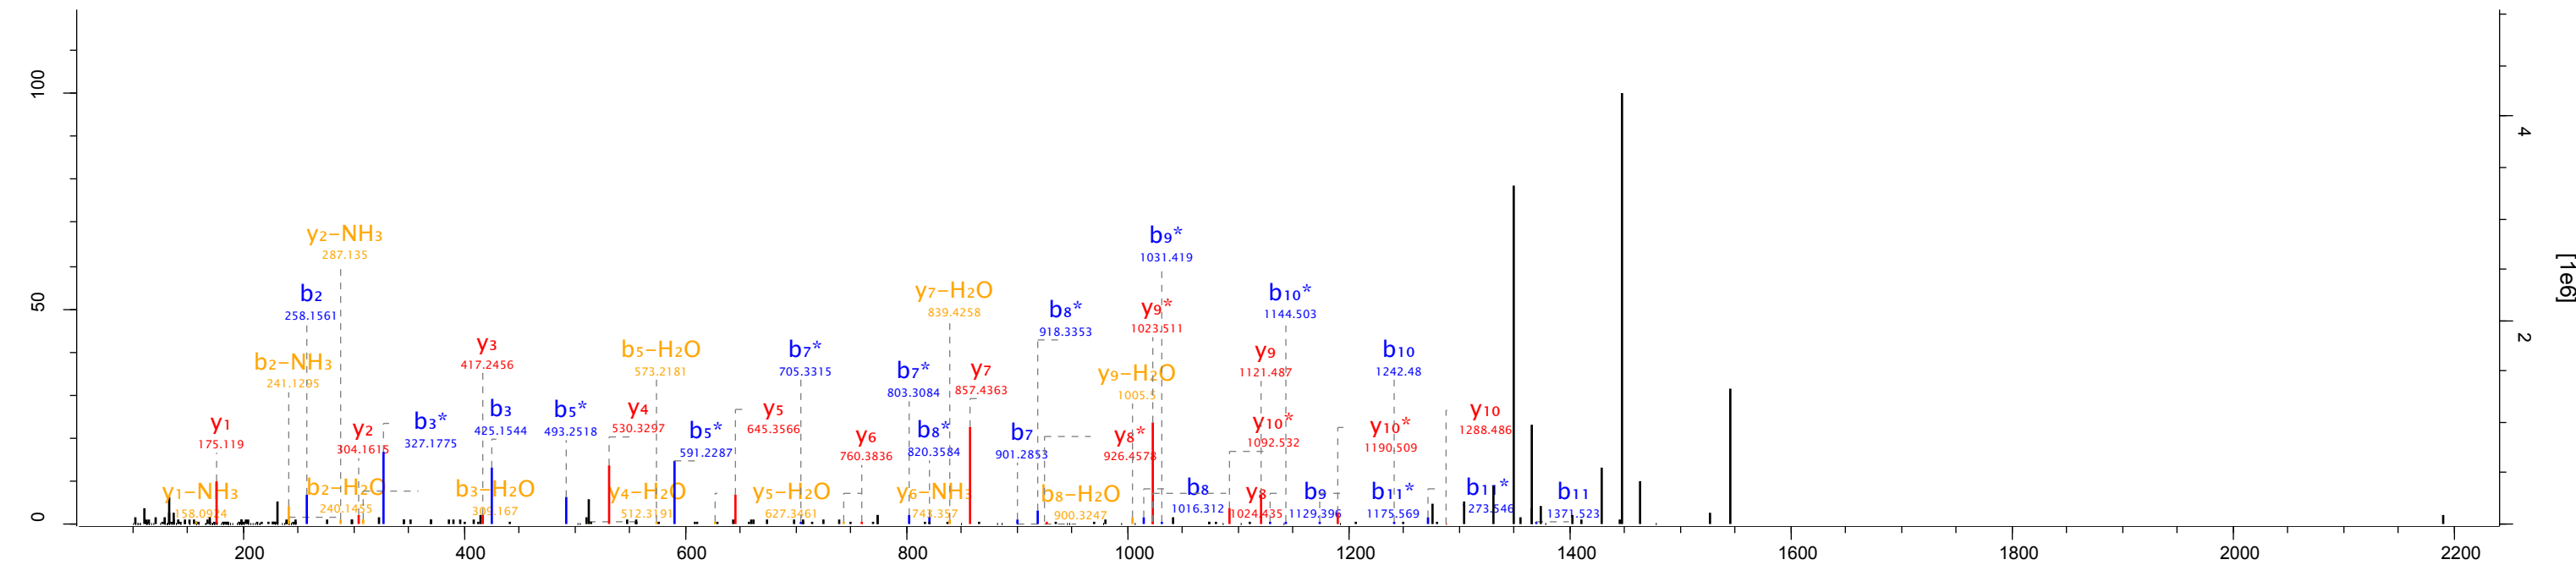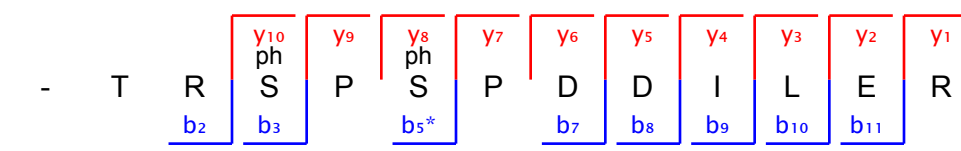

Raw file: 20150812\_A375SR\_Phospho\_BR1\_03  
 Scan: 1582 Method: FTMS; HCD Score: 48.29 m/z: 489.19 Gene names: SRRM2

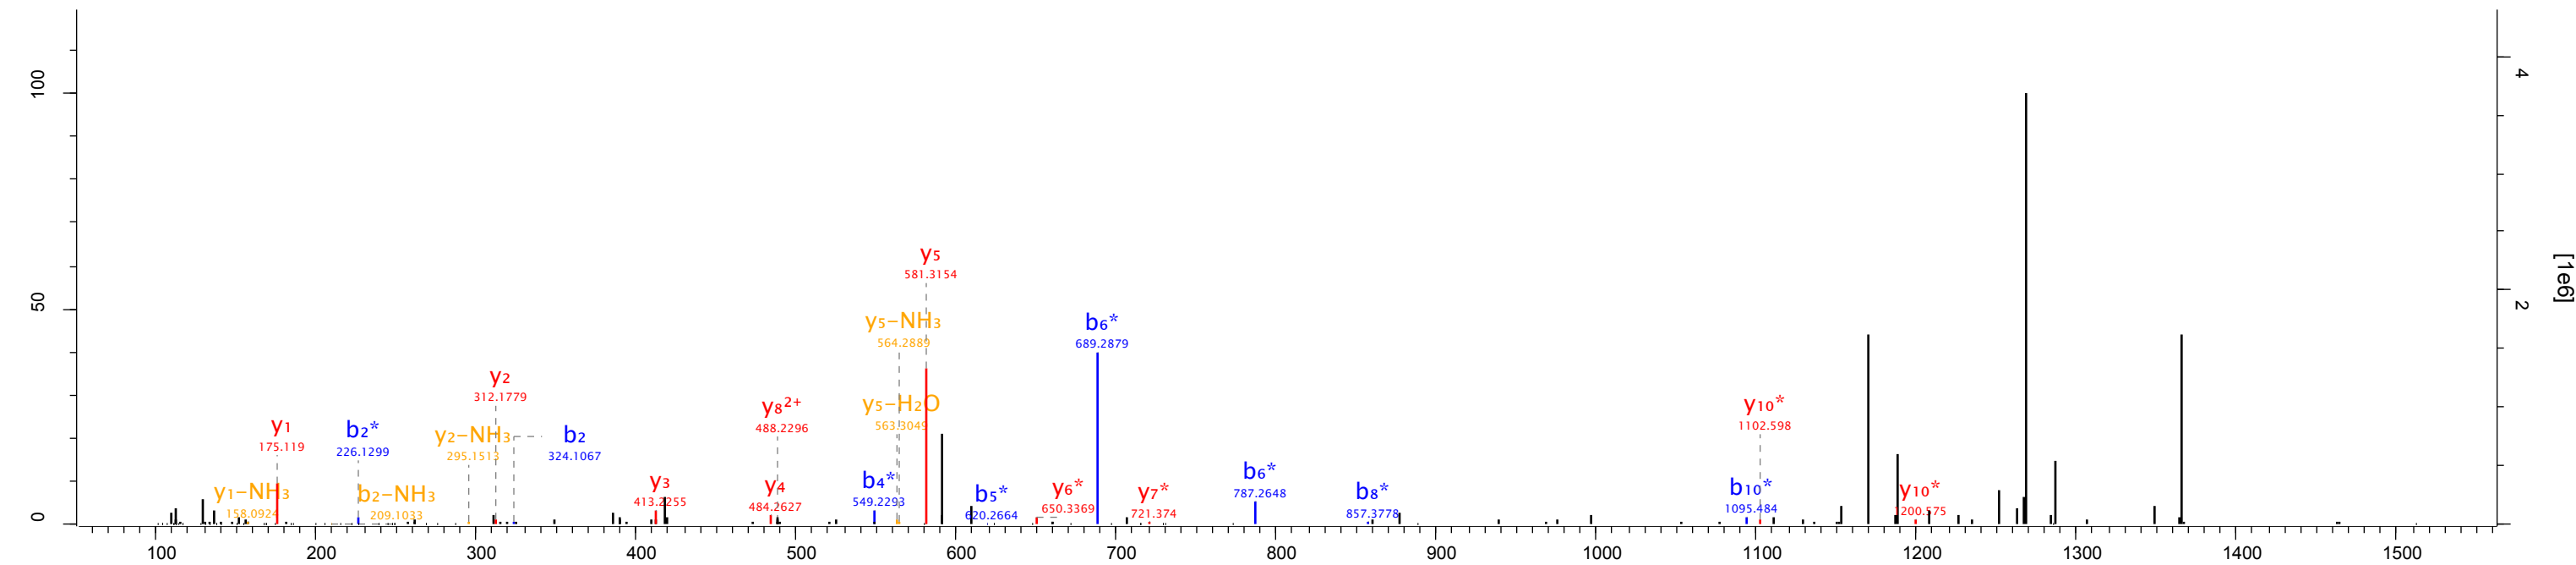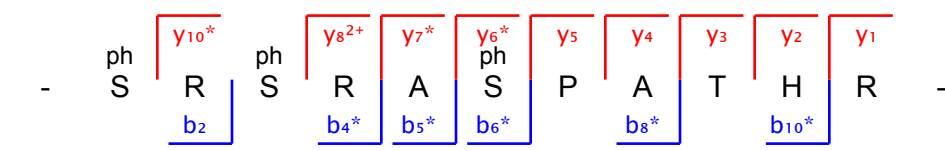

Raw file 20150812\_A375SR\_Phospho\_BR1\_03 Scan 15862 Method FTMS; HCD Score 85.94 m/z 1011.03 Gene names SSRP1

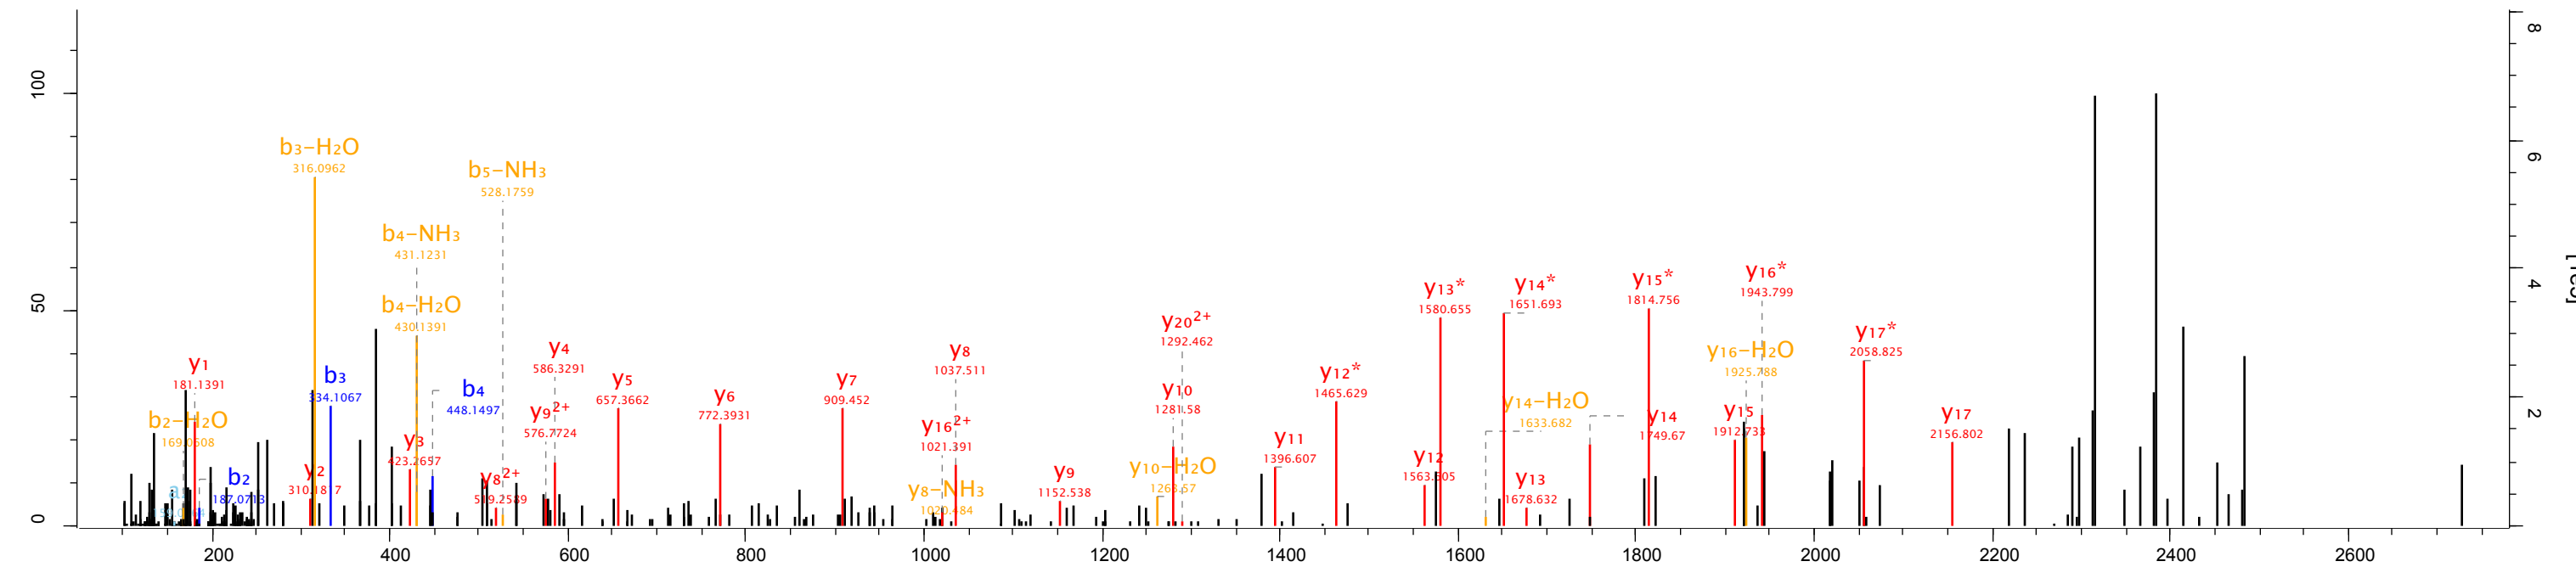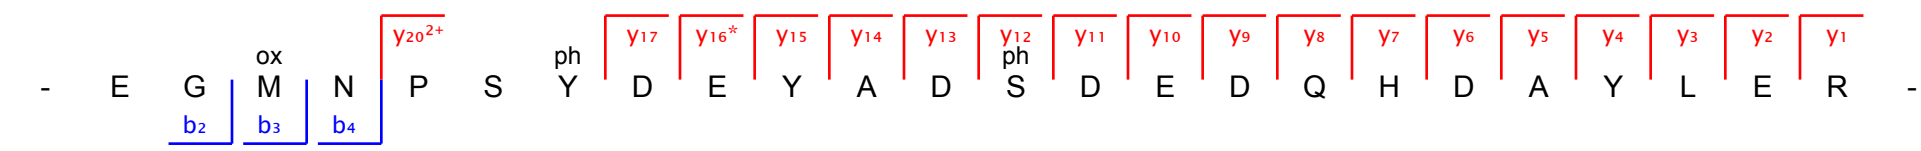

Raw file 20150812\_A375SR\_Phospho\_BR1\_03 Scan 15942 Method FTMS; HCD Score 63.37 m/z 813.68 Gene names POLR2A

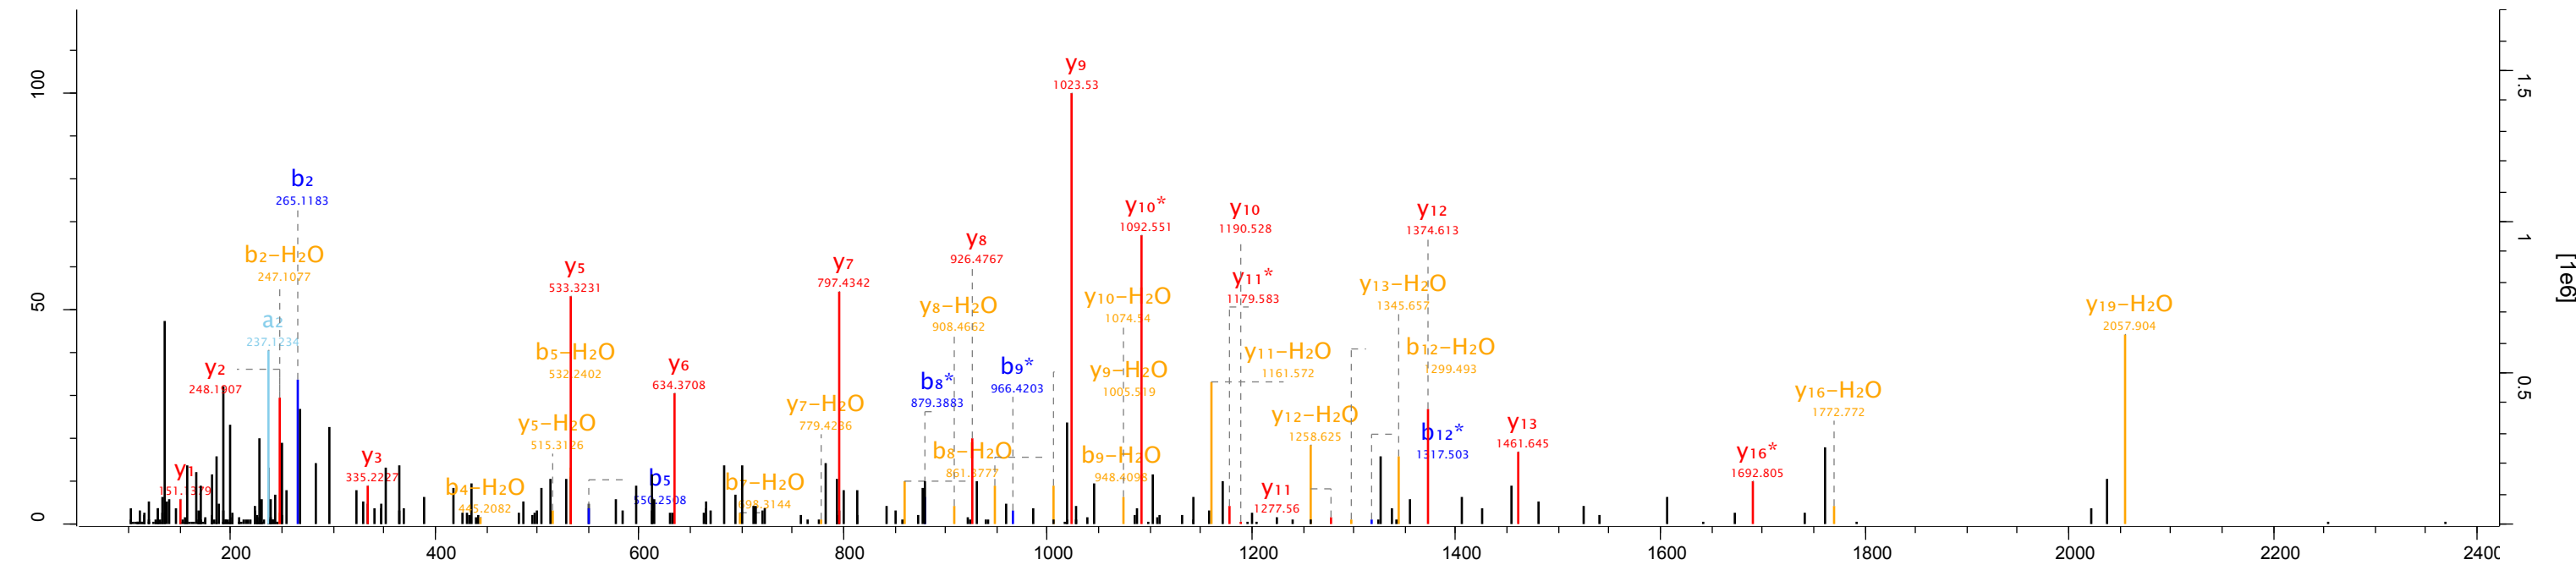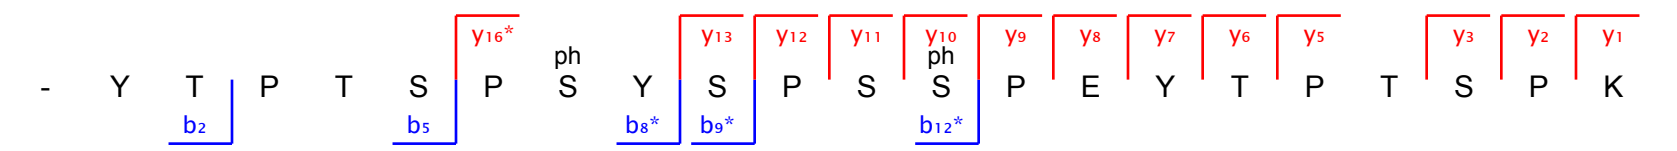

Raw file: 20150812\_A375SR\_Phospho\_BR1\_03  
 Scan: 16522 Method: FTMS; HCD Score: 114.13 m/z: 730.29 Gene names: PPP6R1

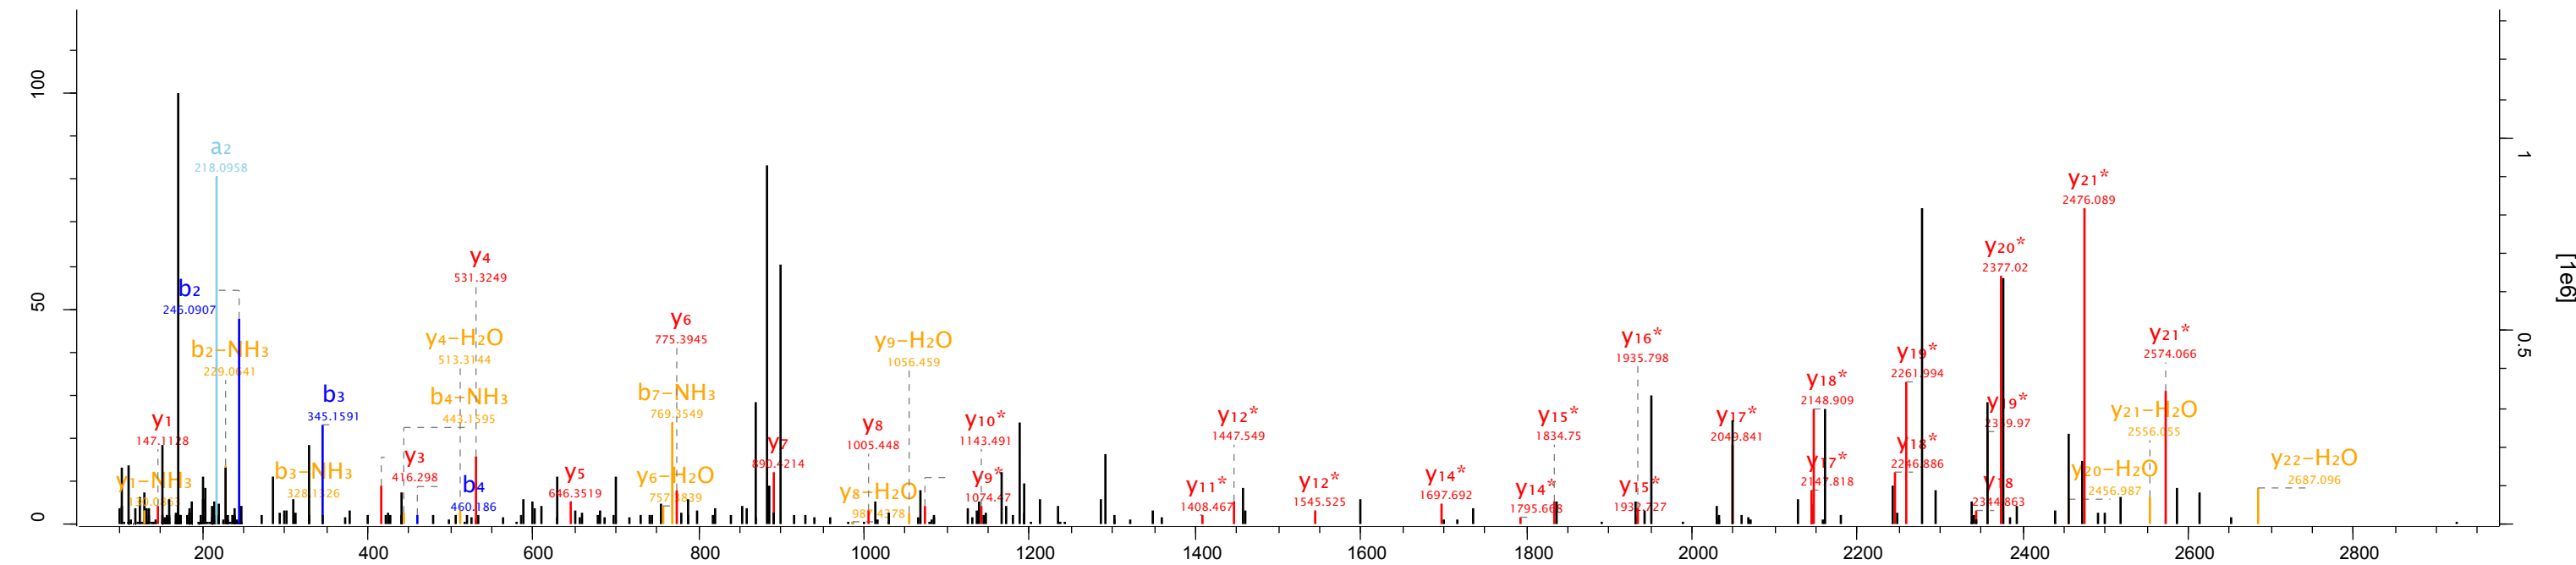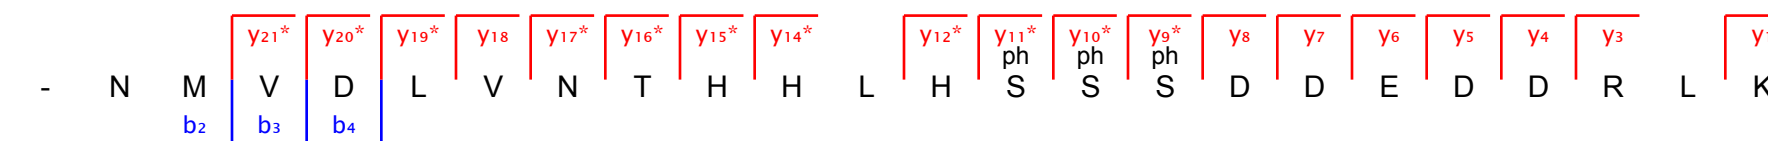

Raw file 20150812\_A375SR\_Phospho\_BR1\_03 Scan 1672 Method FTMS; HCD Score 93.34 m/z 730.8 Gene names YTHDC1

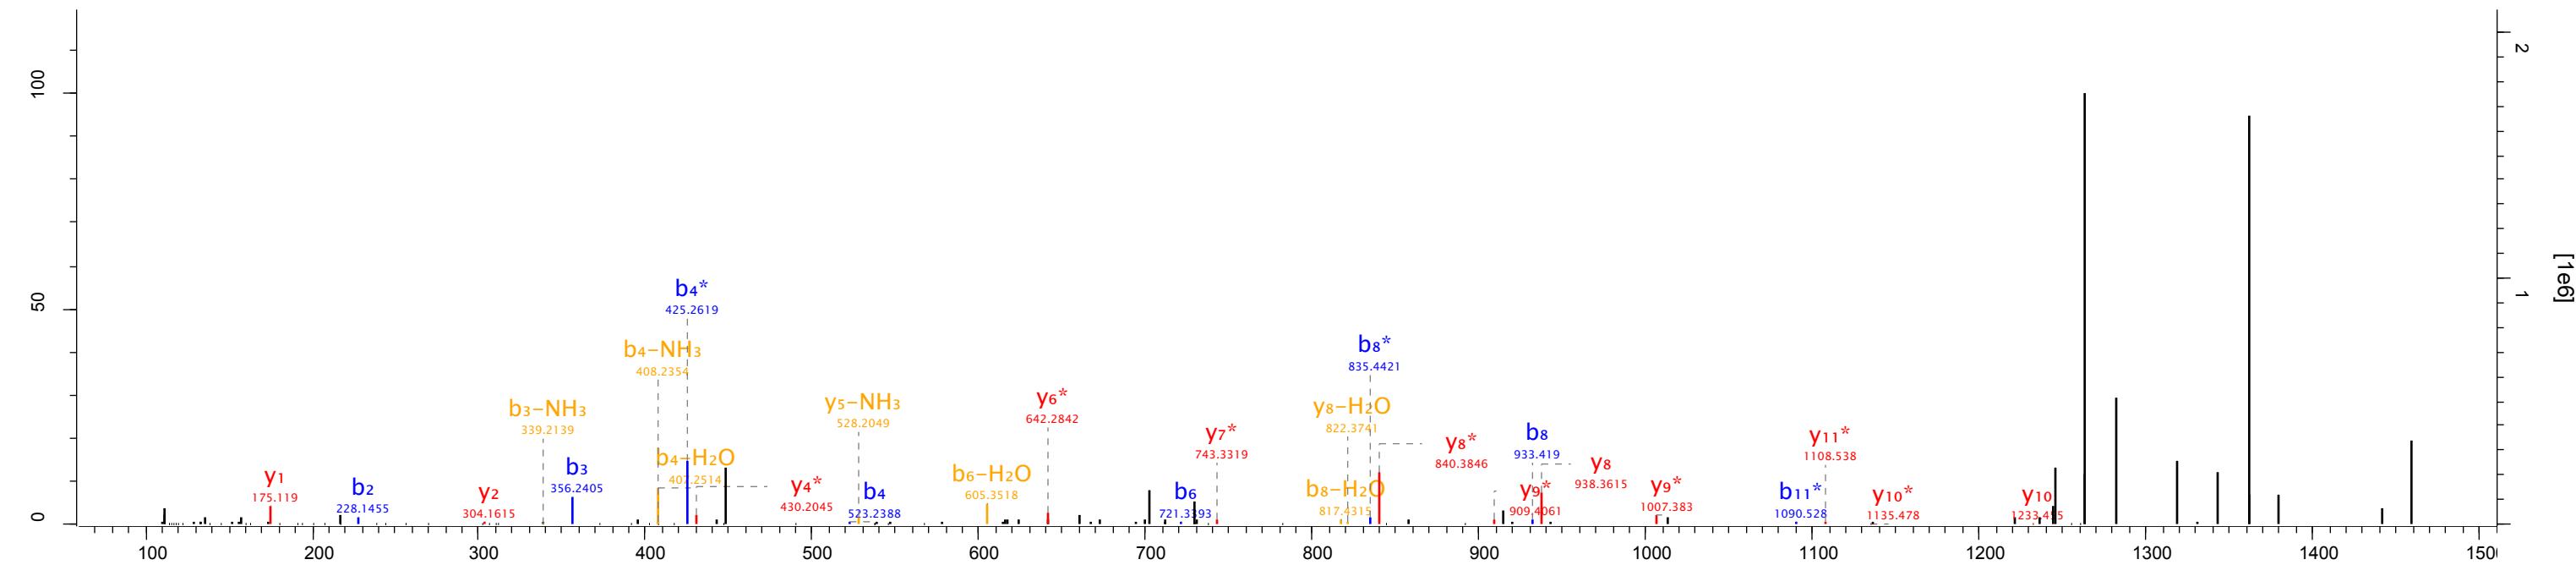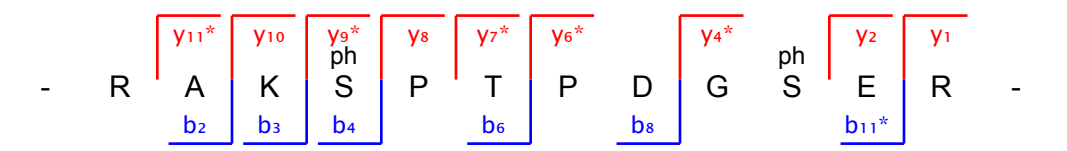

Raw file 20150812\_A375SR\_Phospho\_BR1\_03 Scan 16892 Method FTMS; HCD Score 106.37 m/z 904.4 Gene names IRS2

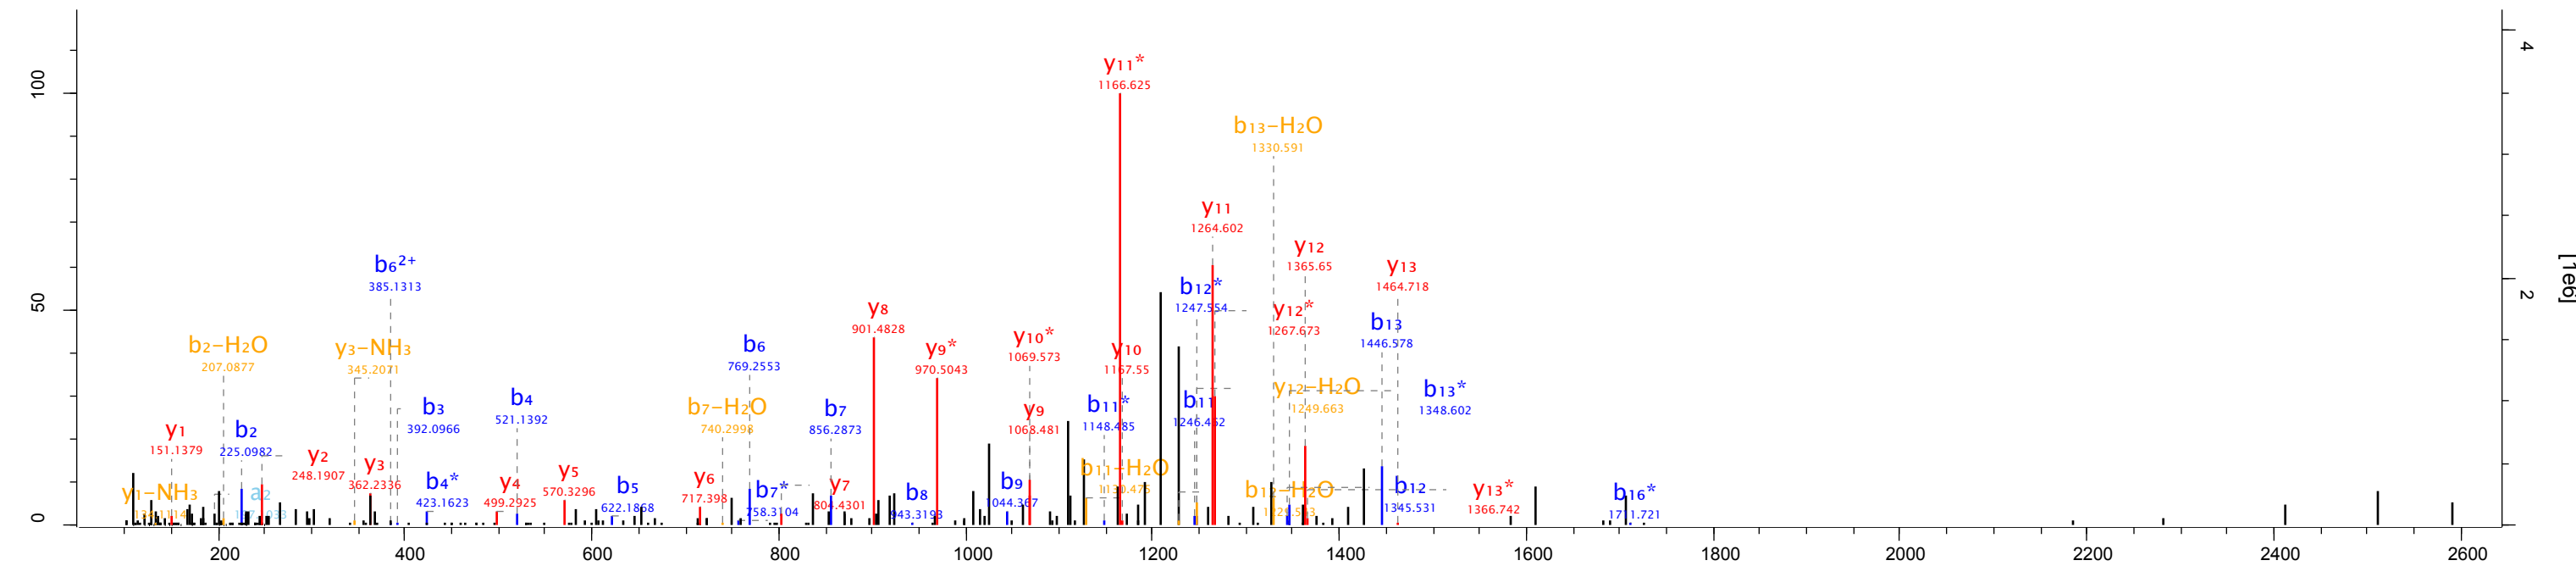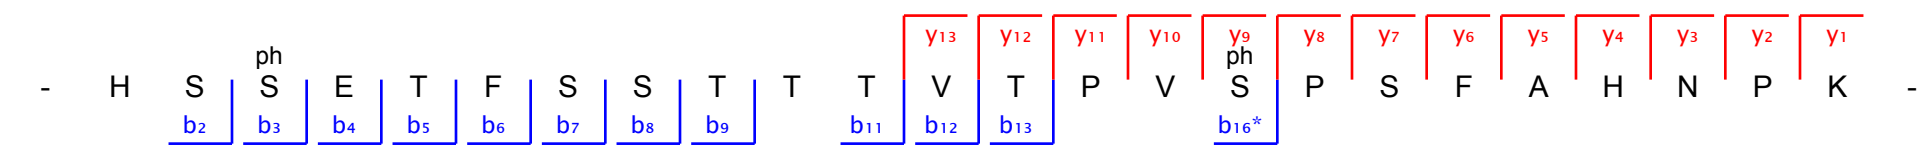



Raw file 20150812\_A375SR\_Phospho\_BR1\_03 Scan 17202 Method FTMS; HCD Score 329.03 m/z 1283.52 Gene names EPB41L1

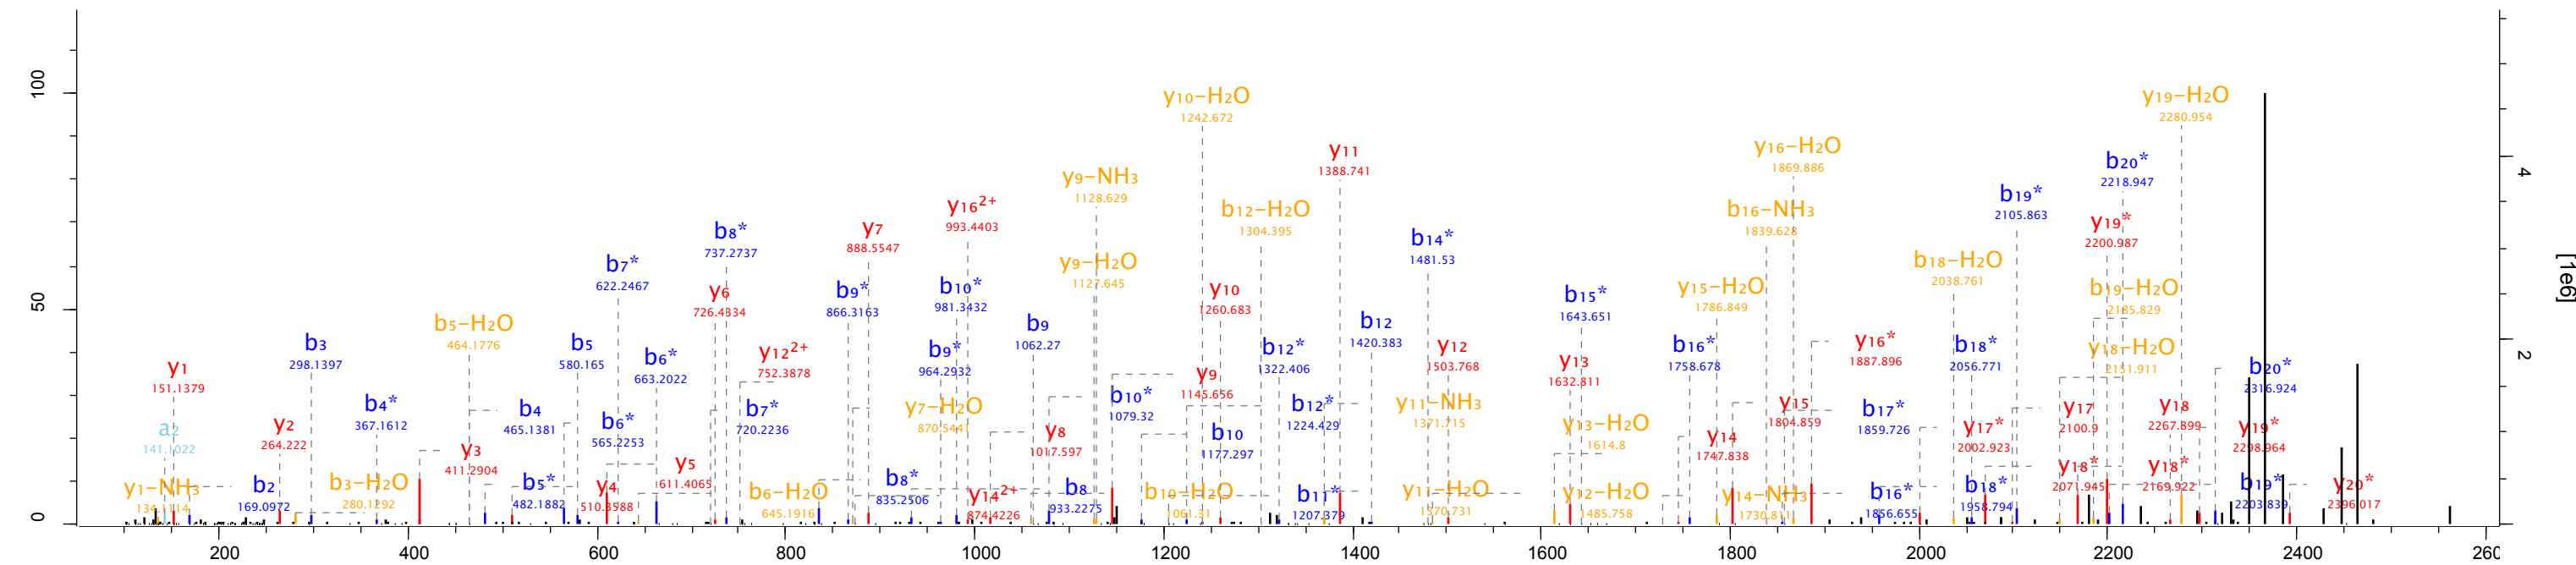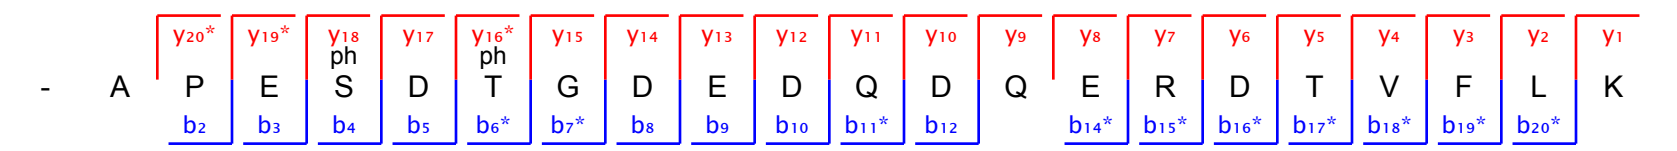

Raw file 20150812\_A375SR\_Phospho\_BR1\_03 Scan 17222 Method FTMS; HCD Score 251.37 m/z 1029.42 Gene names UPF1

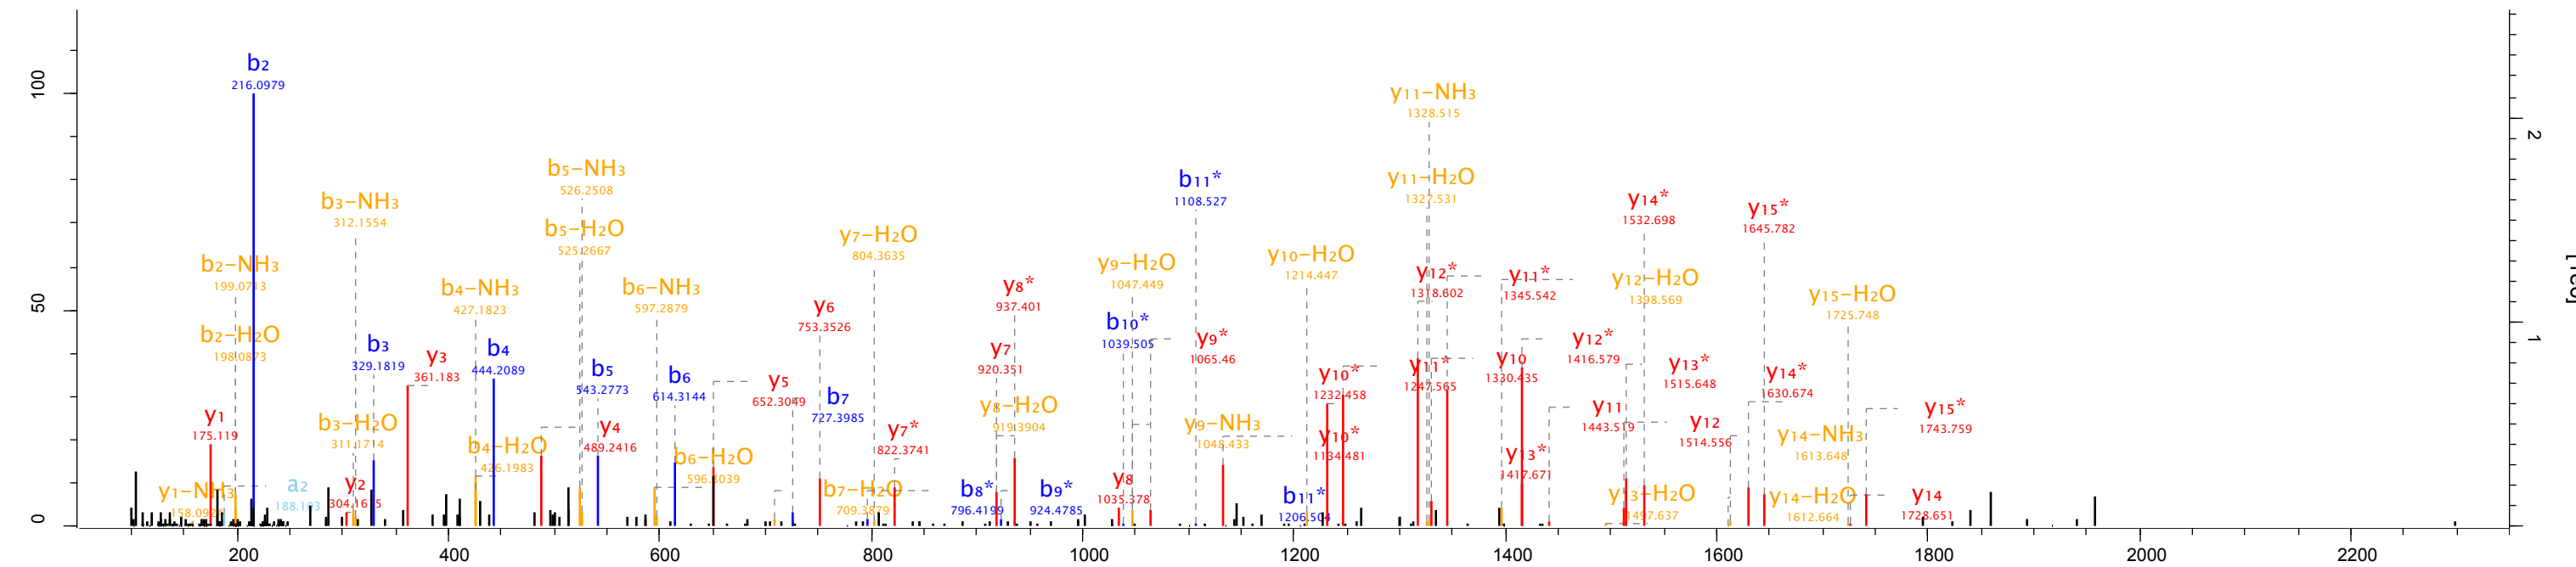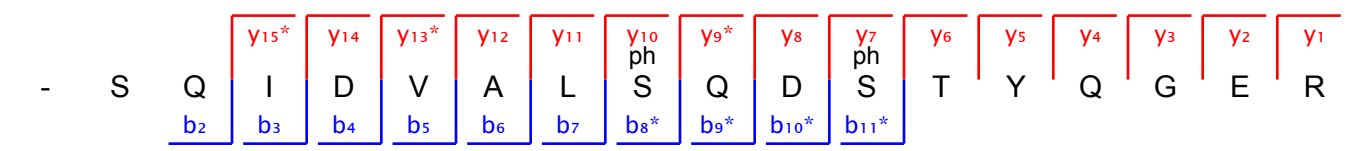

Raw file: 20150812\_A375SR\_Phospho\_BR1\_03  
 Scan: 17302 Method: FTMS; HCD Score: 254.39 m/z: 1066.46 Gene names: SLC26A2

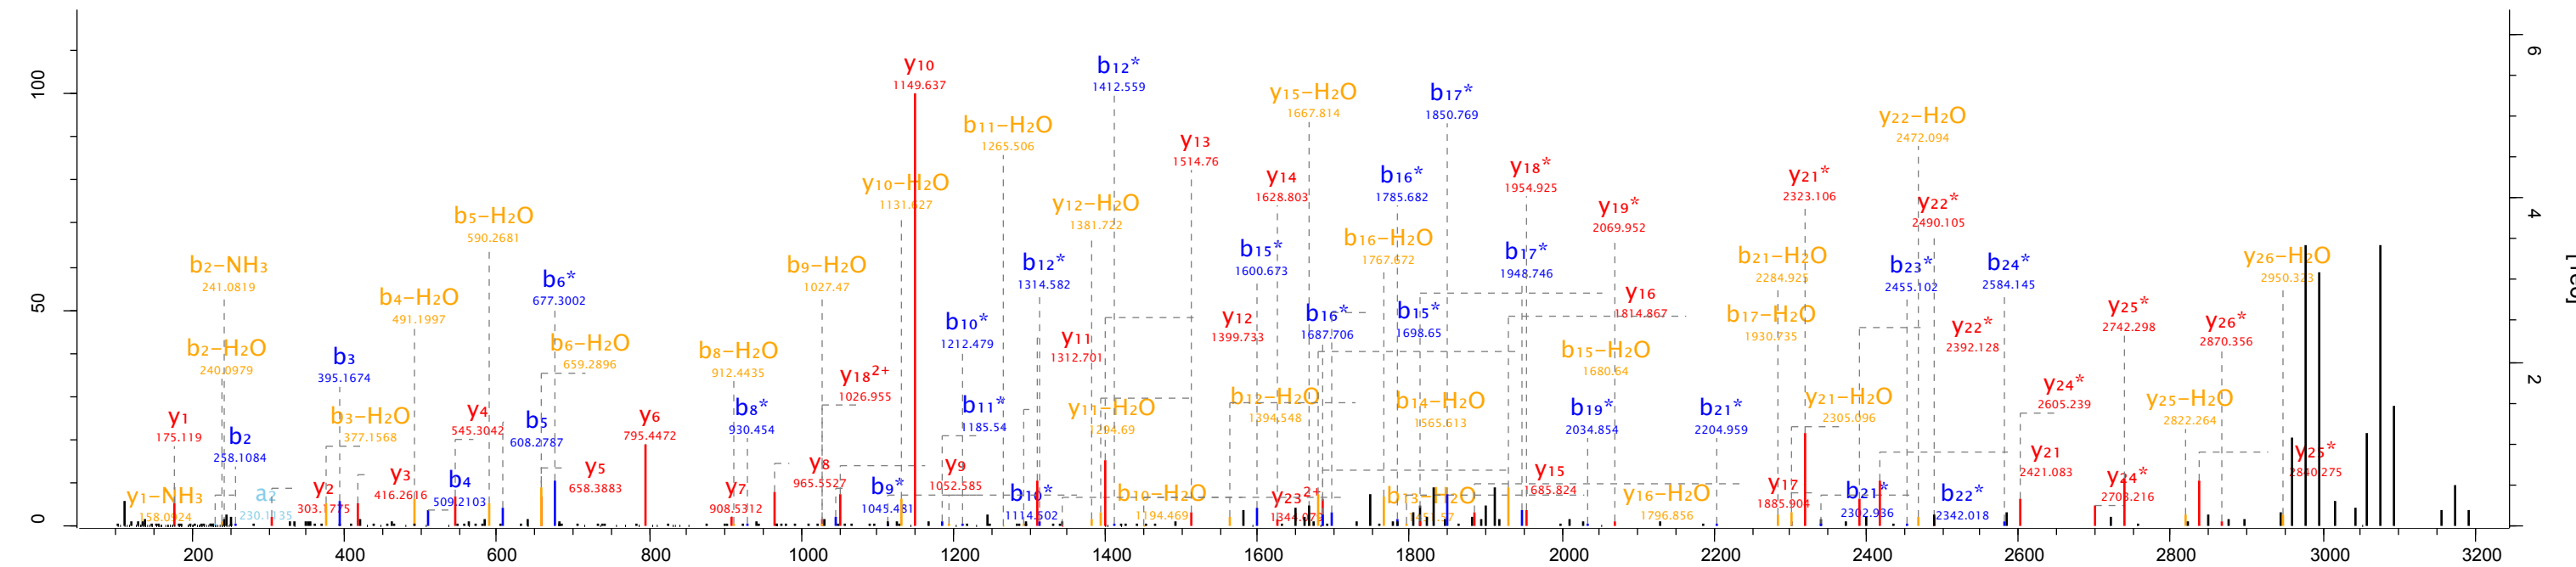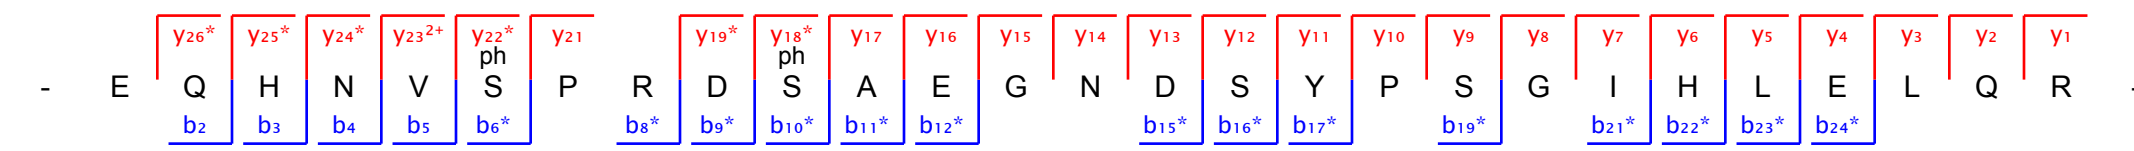

Raw file 20150812\_A375SR\_Phospho\_BR1\_03 Scan 17732 Method FTMS; HCD Score 163.41 m/z 1037.06 Gene names SLU7

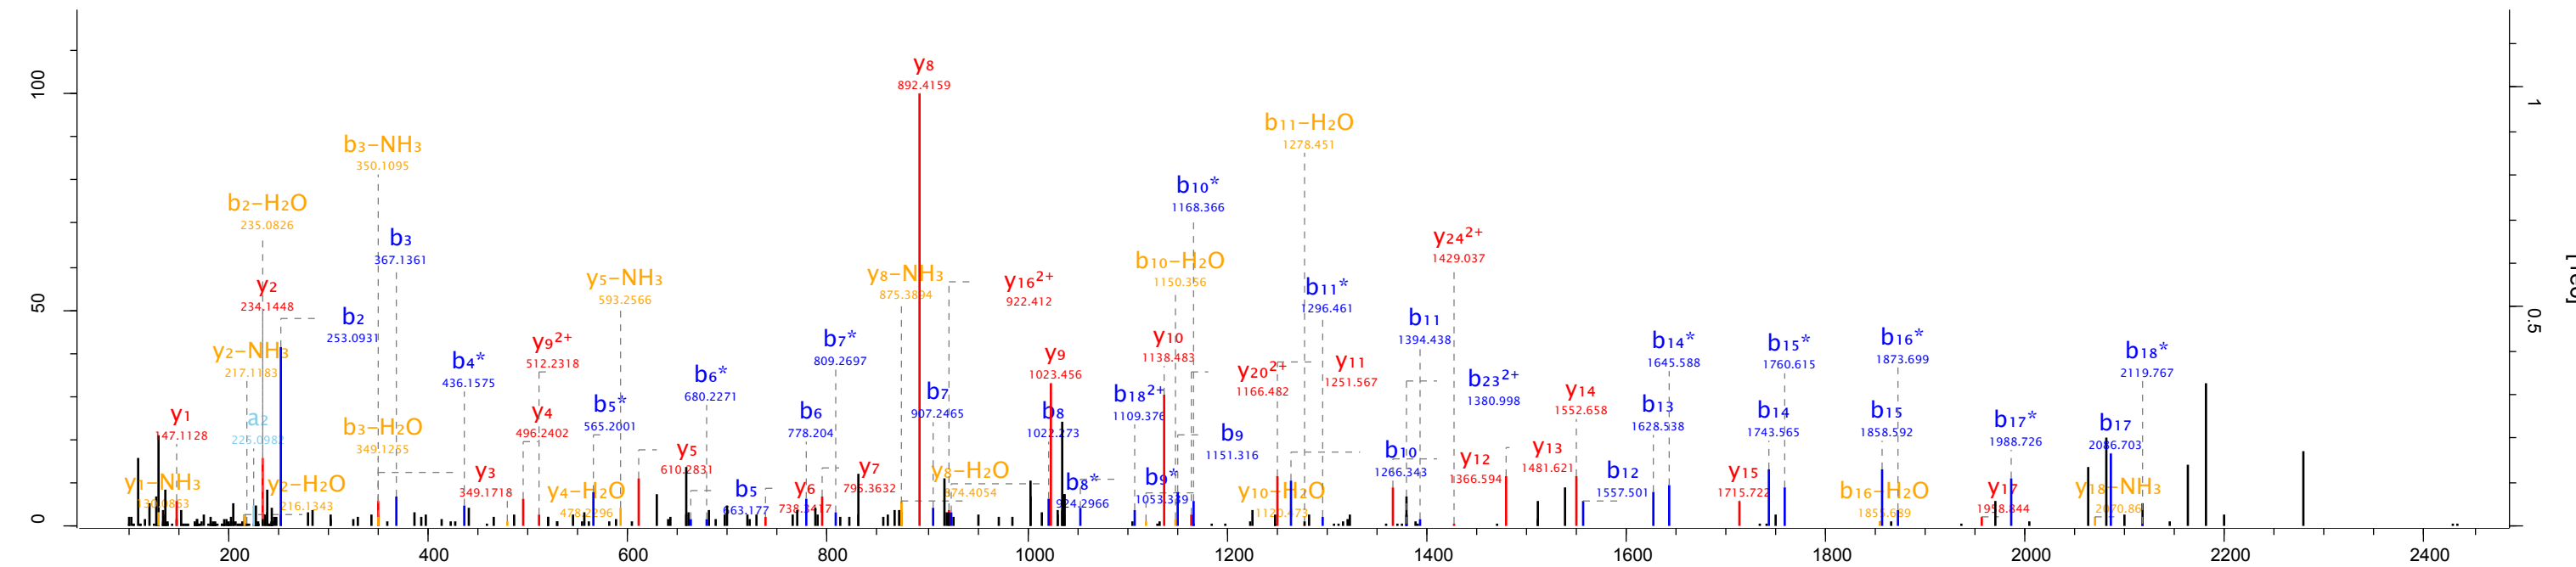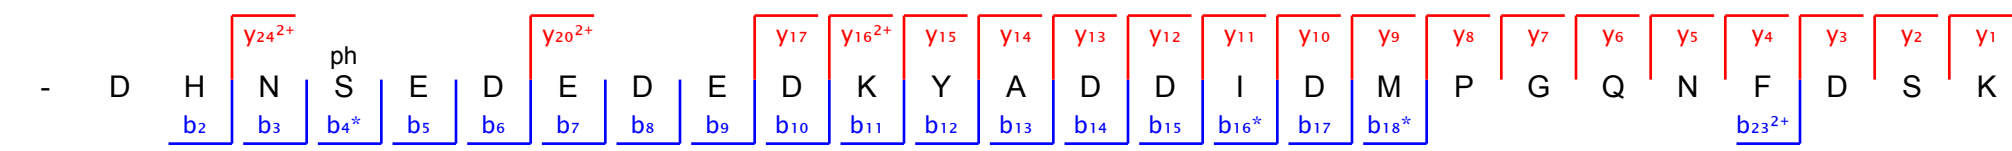

Raw file 20150812\_A375SR\_Phospho\_BR1\_03 Scan 17742 Method FTMS; HCD Score 60.17 m/z 883.42 Gene names CCDC86

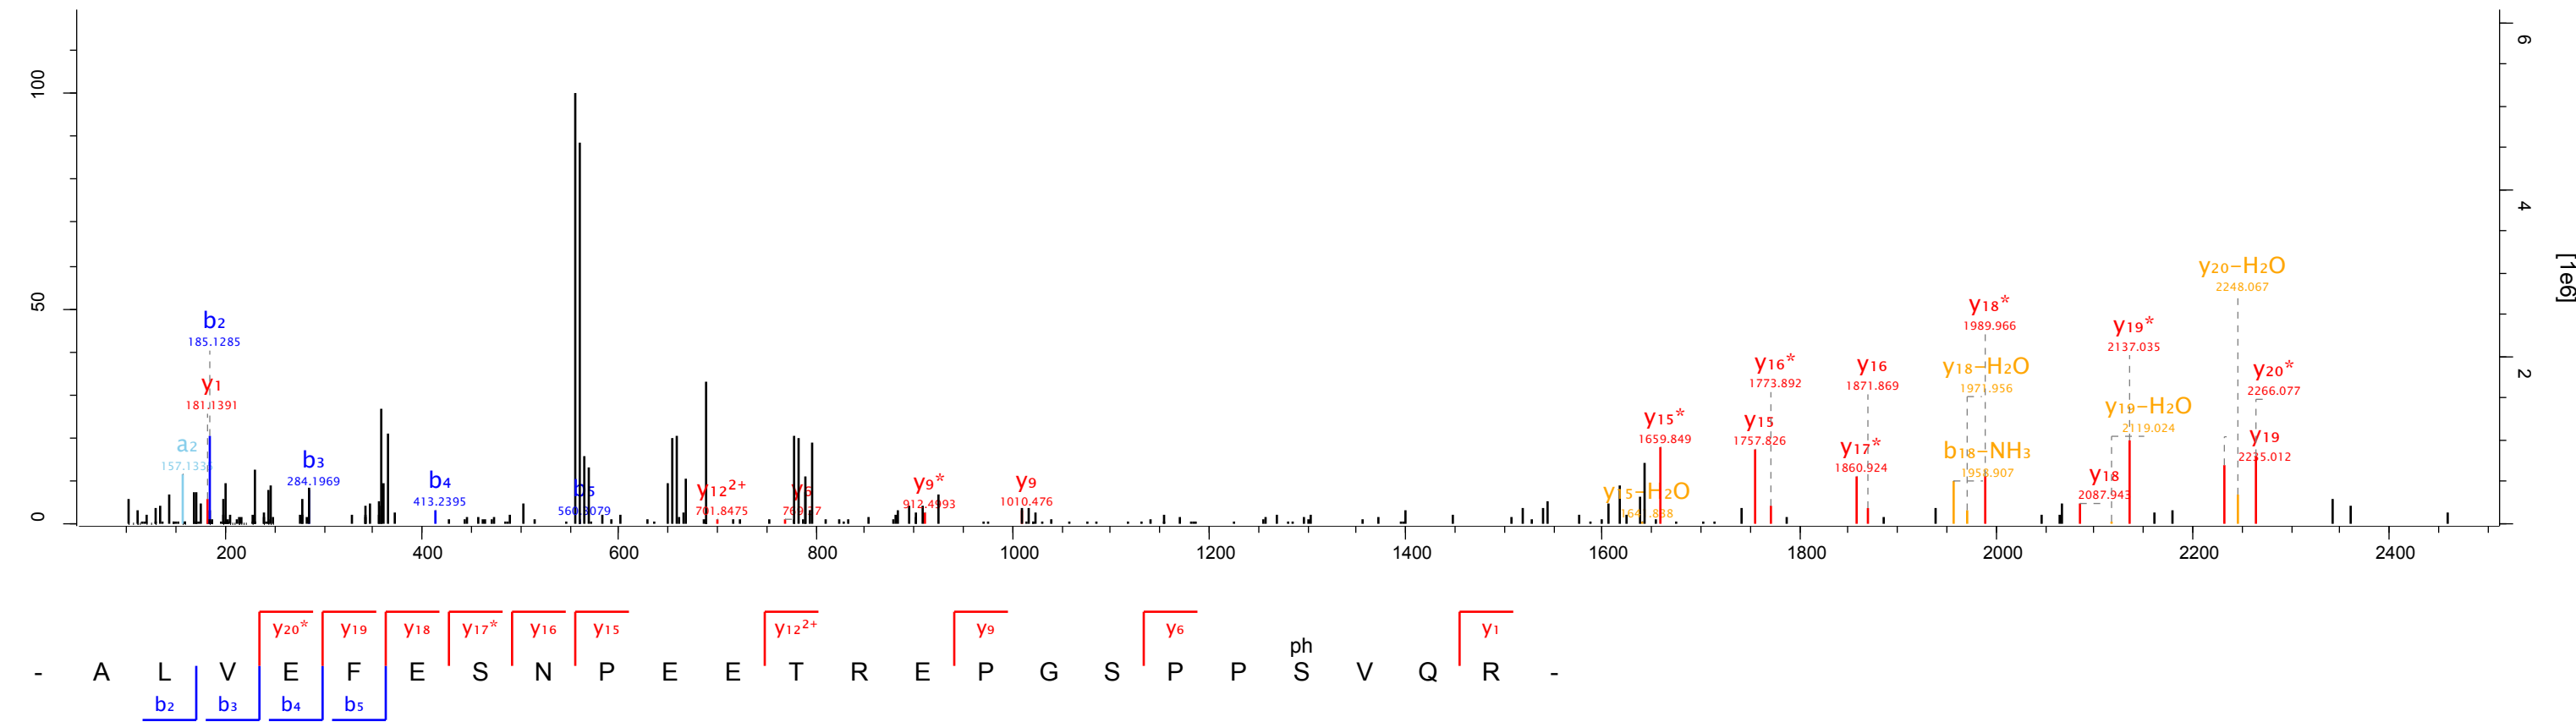

Raw file: 20150812\_A375SR\_Phospho\_BR1\_03  
 Scan: 17922 Method: FTMS; HCD Score: 106.28 m/z: 1093.97 Gene names: FAM214B

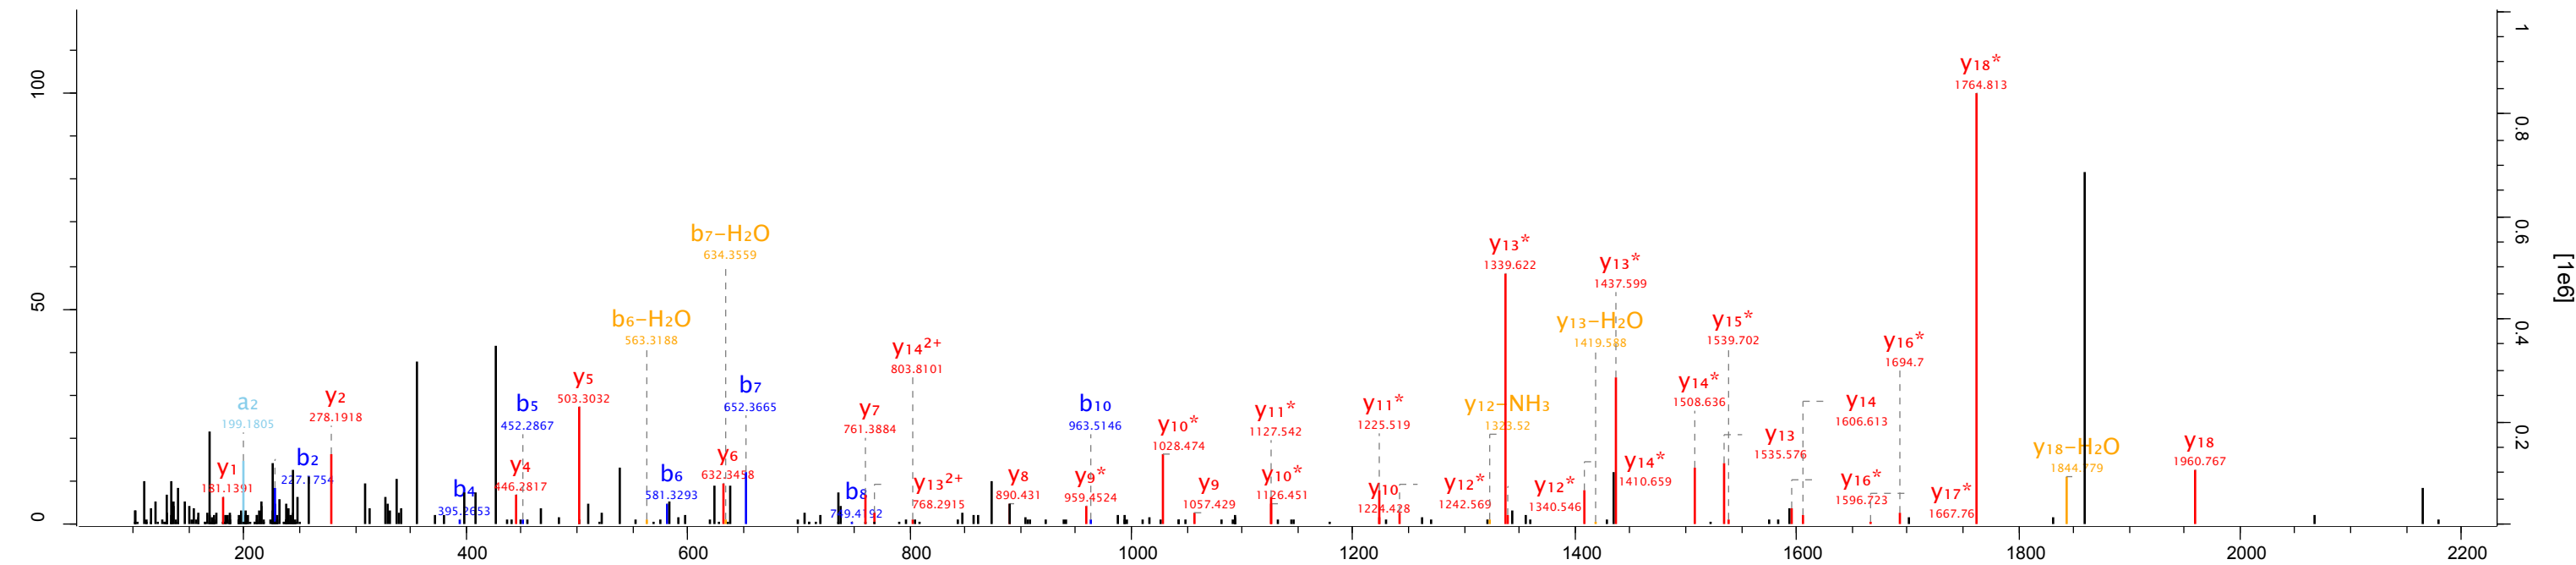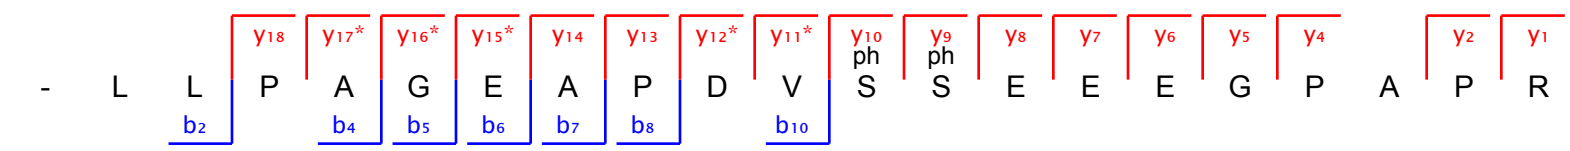

Raw file: 20150812\_A375SR\_Phospho\_BR1\_03  
 Scan: 1812 Method: FTMS; HCD Score: 114.1 m/z: 523.9 Gene names: CDC20

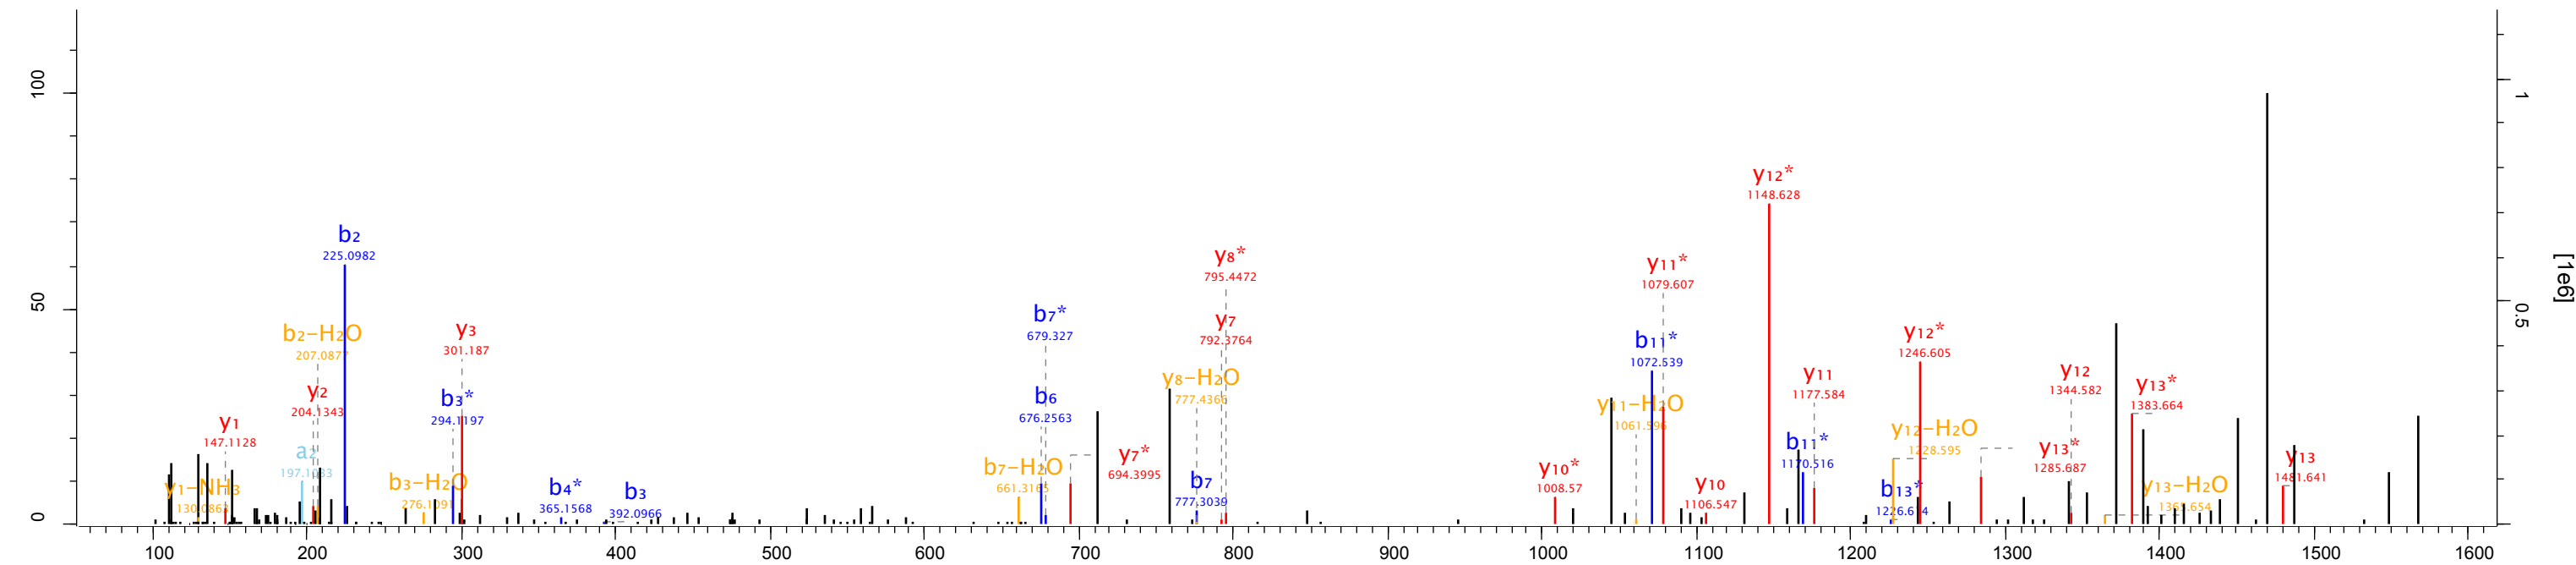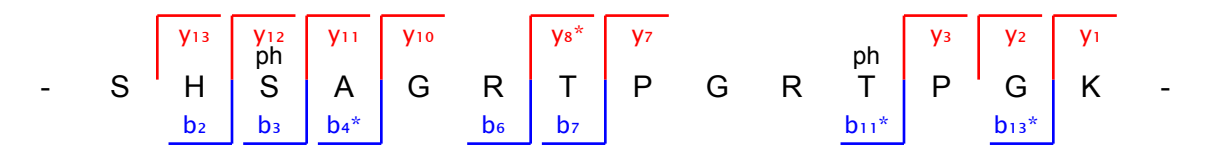

Raw file: 20150812\_A375SR\_Phospho\_BR1\_03  
 Scan: 18292 Method: FTMS; HCD Score: 76.24 m/z: 656.96 Gene names: ATXN2

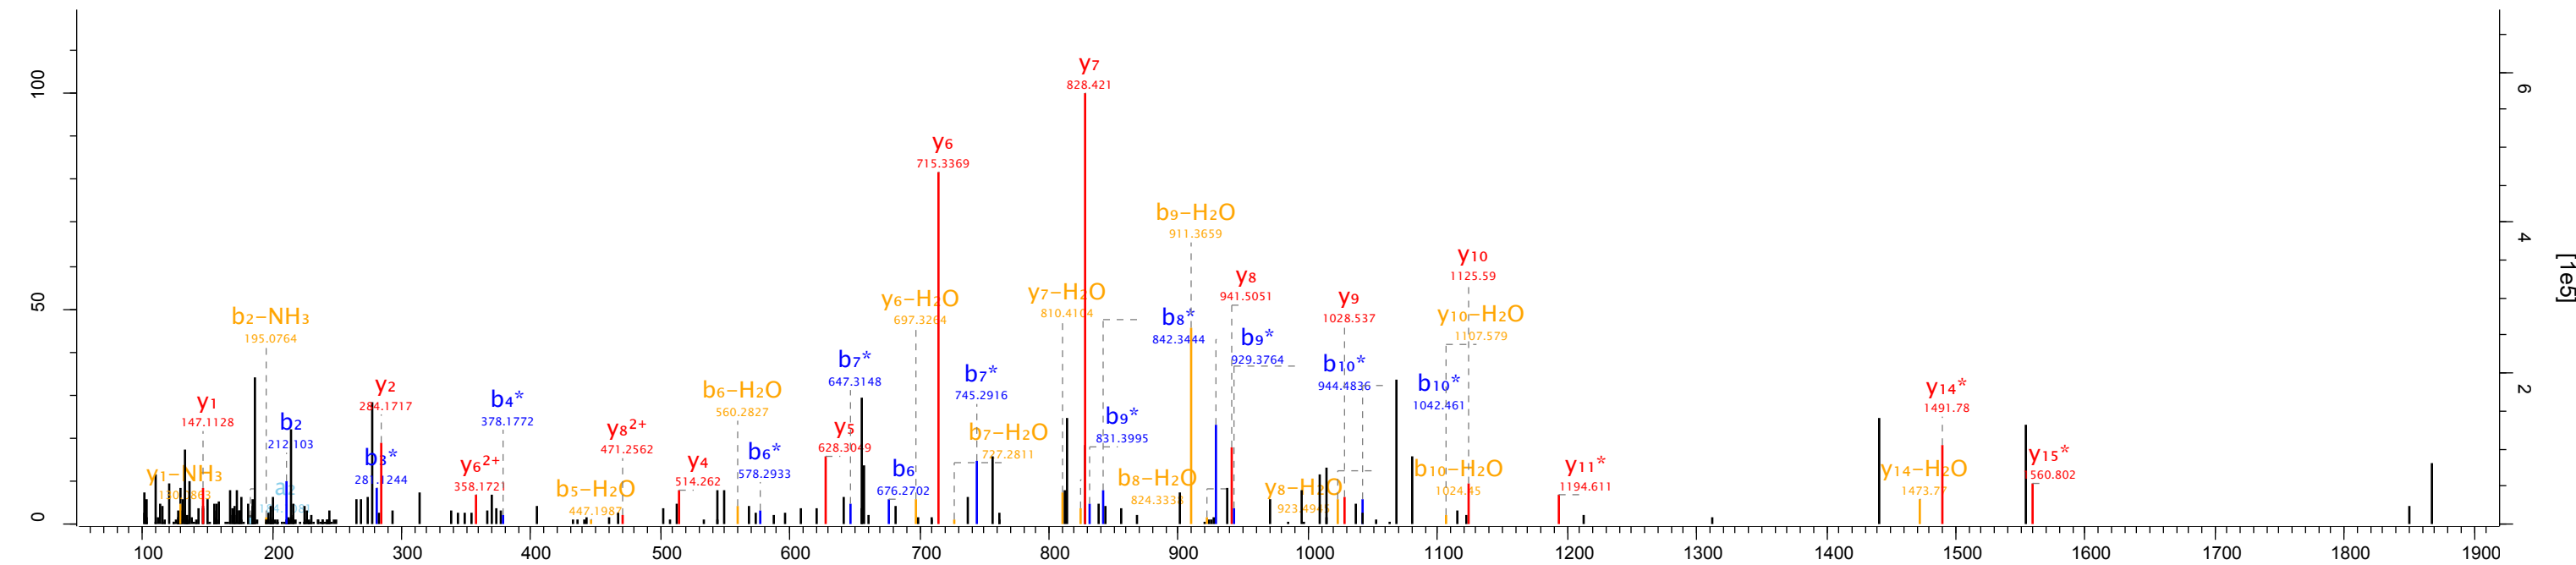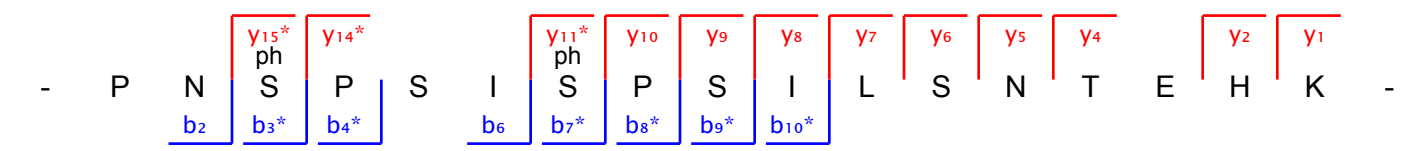



Raw file 20150812\_A375SR\_Phospho\_BR1\_03 Scan 18582 Method FTMS; HCD Score 139.69 m/z 930.39 Gene names SLAIN2

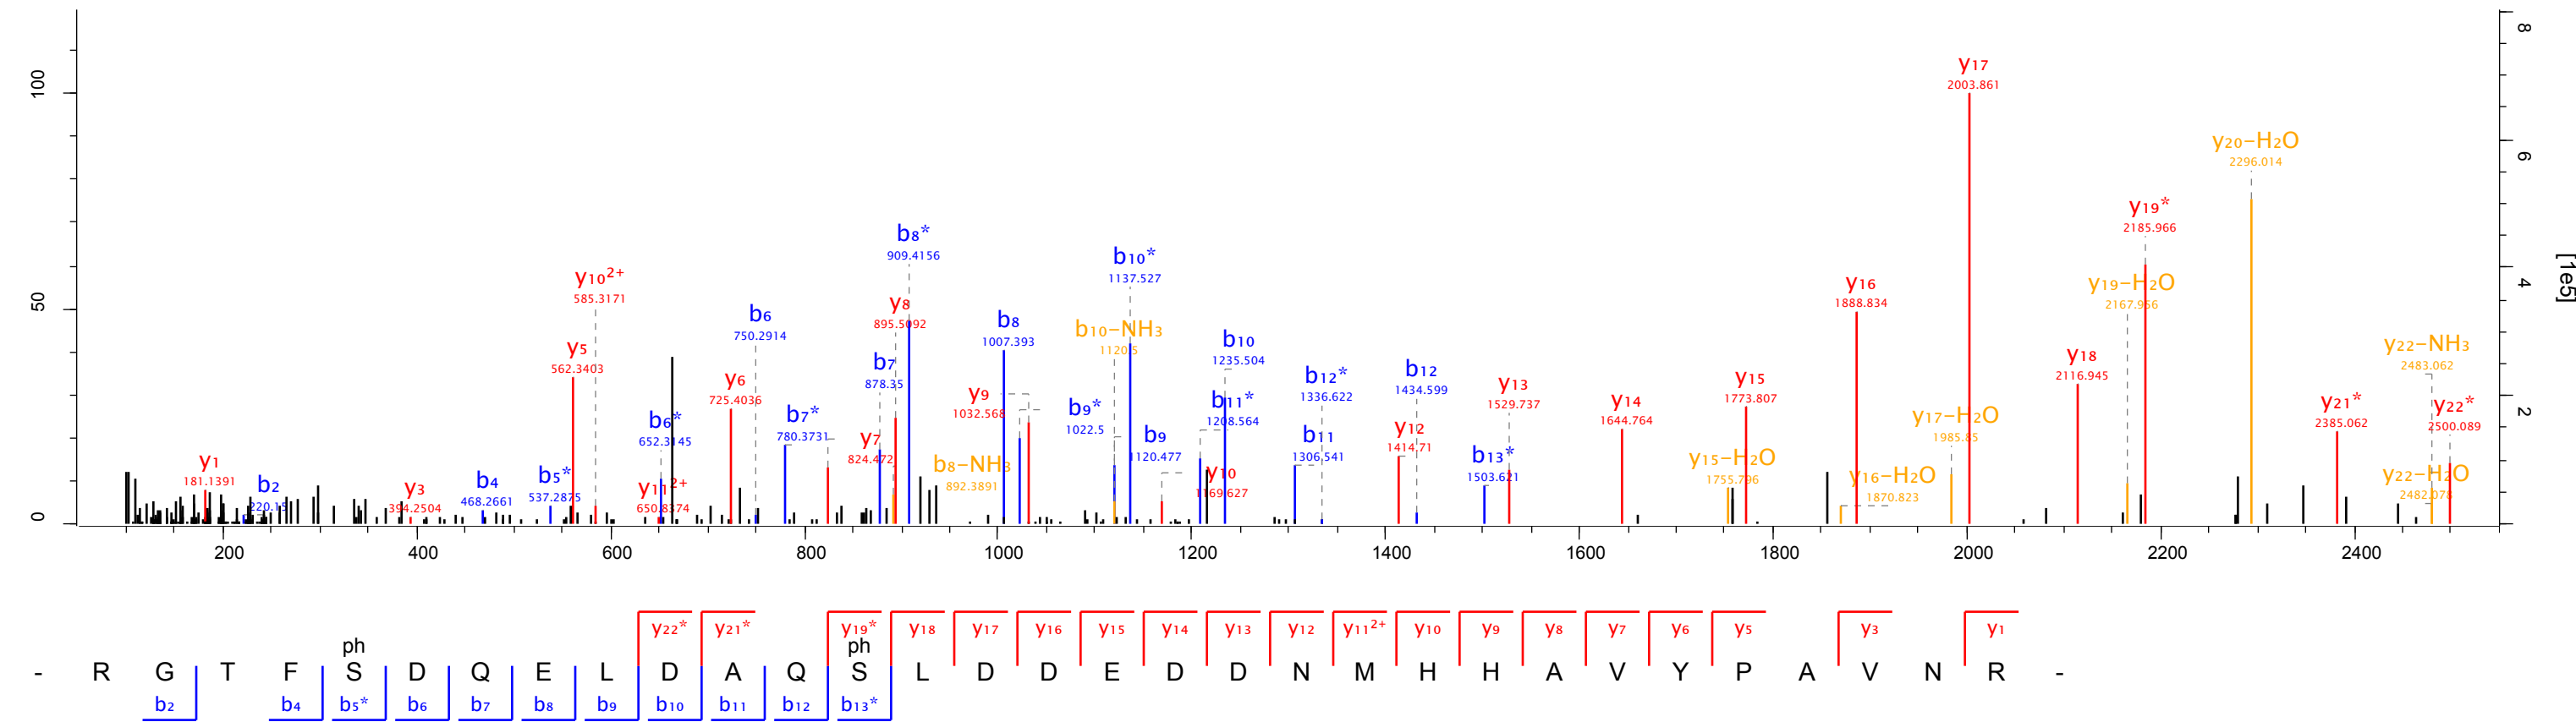

Raw file: 20150812\_A375SR\_Phospho\_BR1\_03  
 Scan: 18722 Method: FTMS; HCD Score: 137.46 m/z: 912.36 Gene names: FAM134C

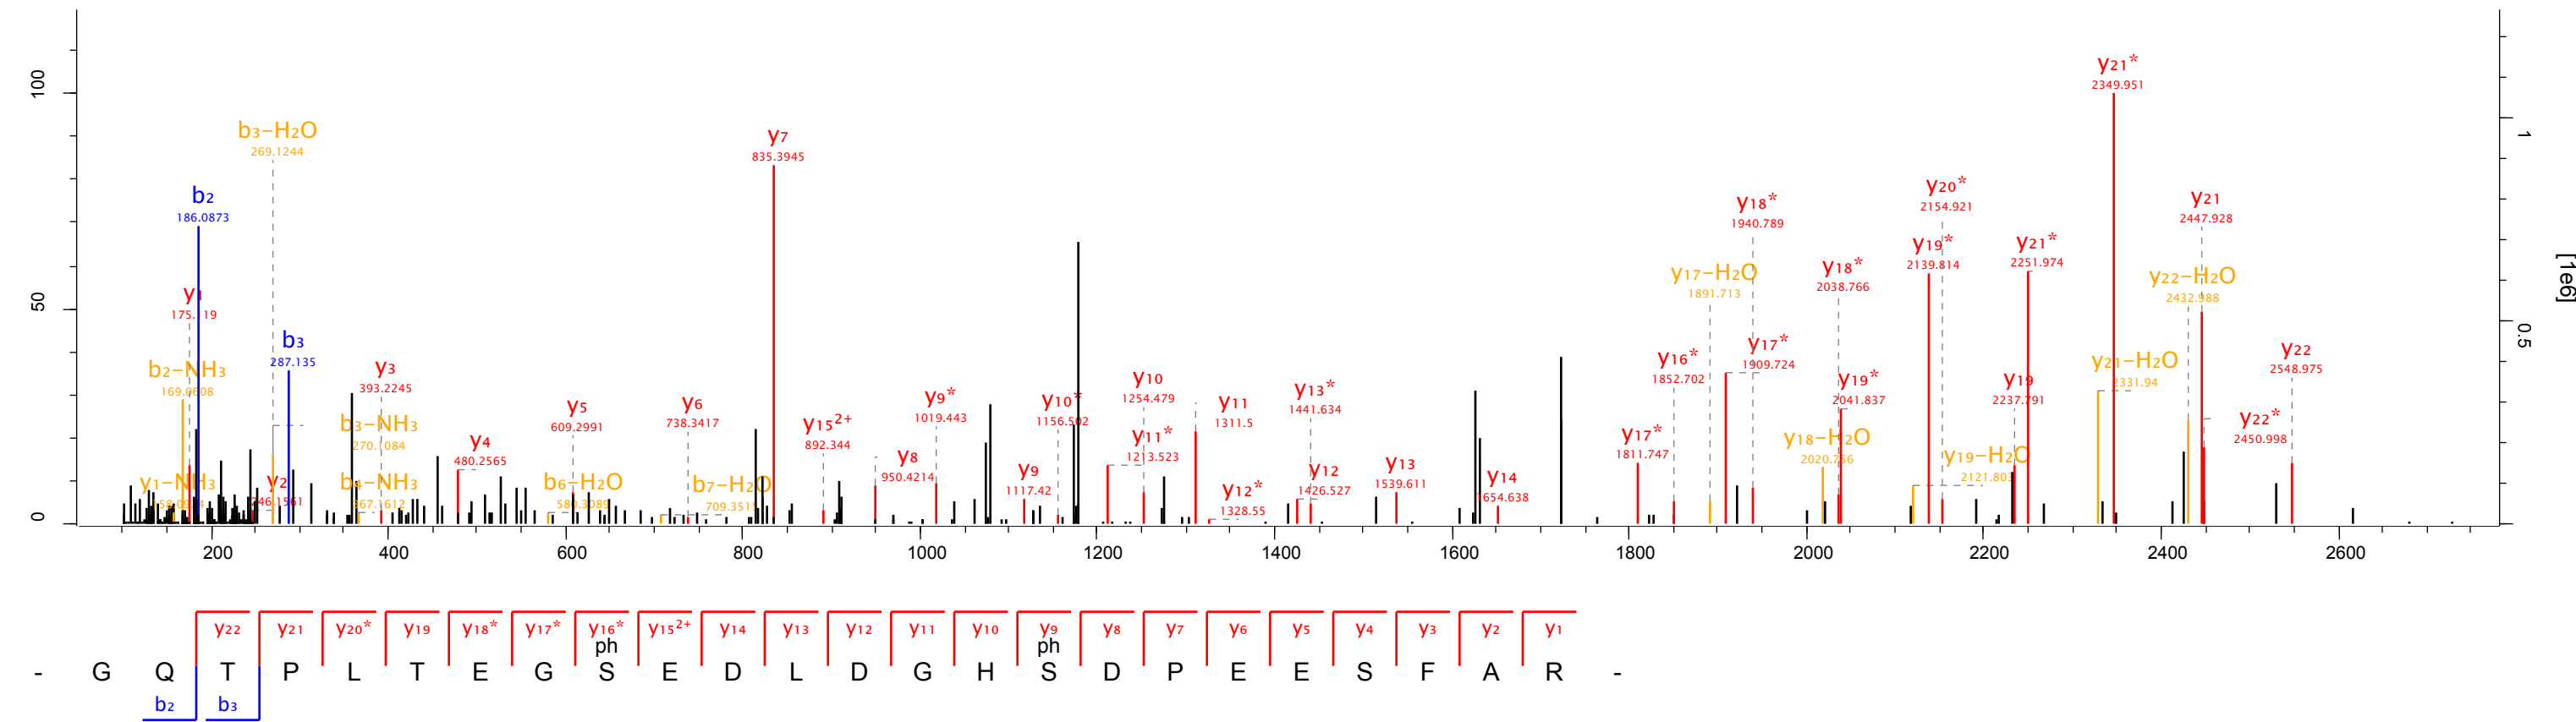

Raw file  
 20150812\_A375SR\_Phospho\_BR1\_03  
 Scan 19252 Method FTMS; HCD Score 245.1 m/z 1226.06 Gene names LARP4

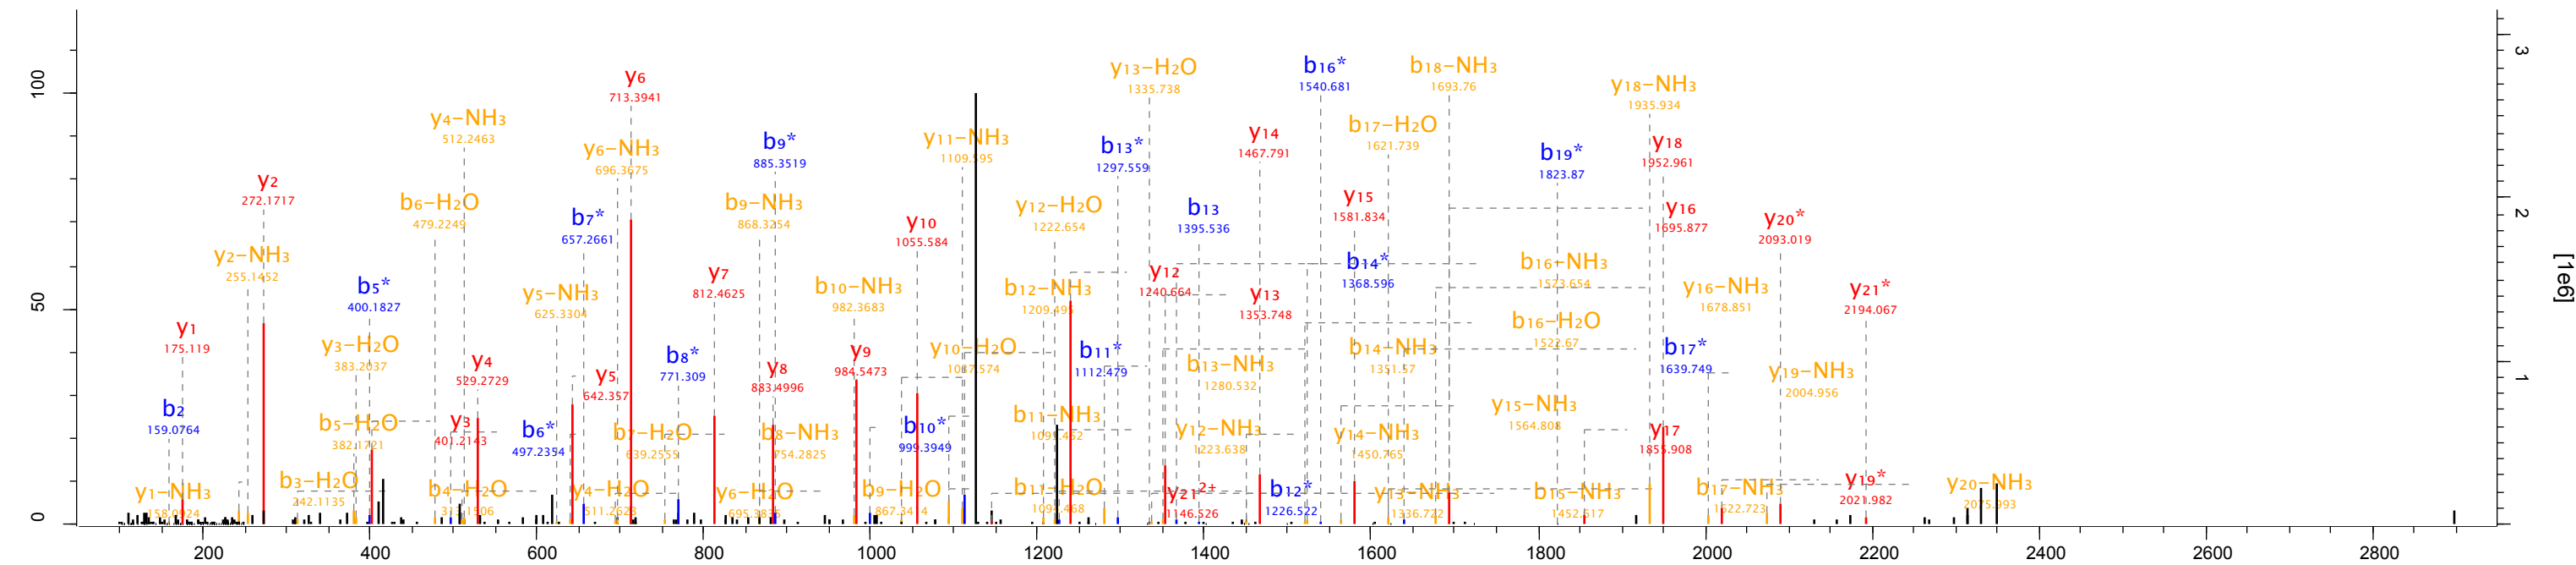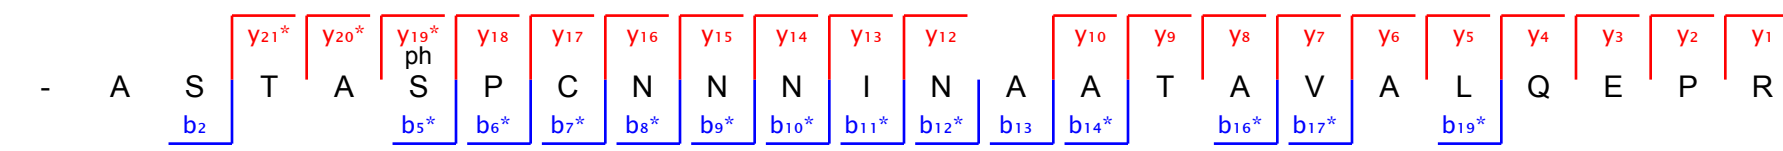

Raw file  
20150812\_A375SR\_Phospho\_BR1\_03

Scan 19342 Method FTMS; HCD Score 232.24 m/z 1043.13 Gene names SRRM2

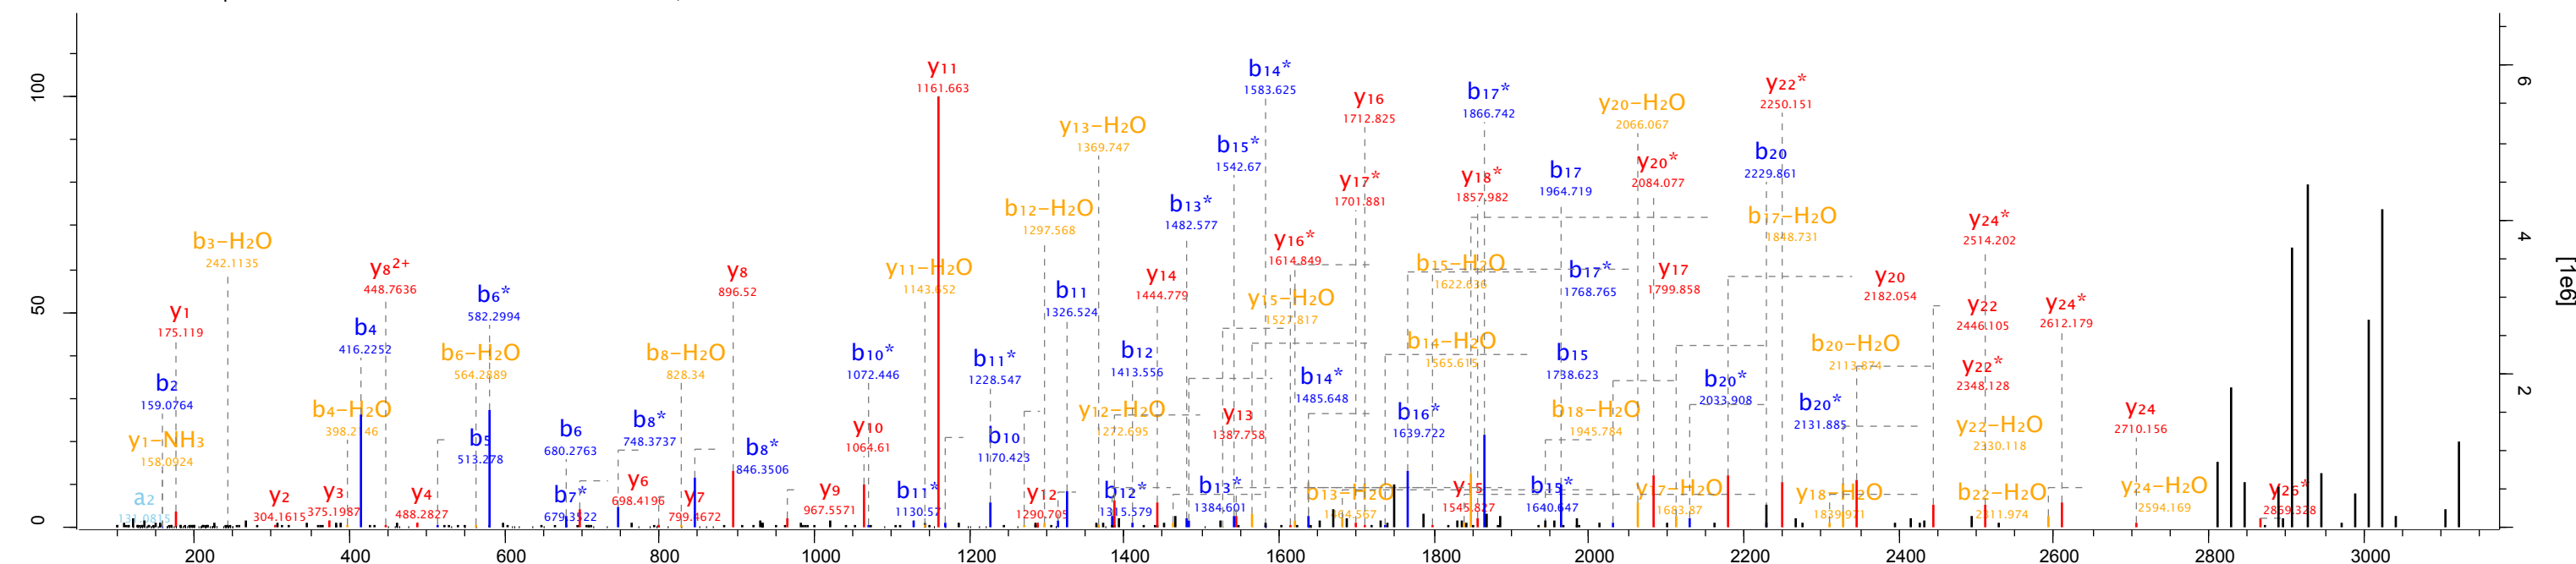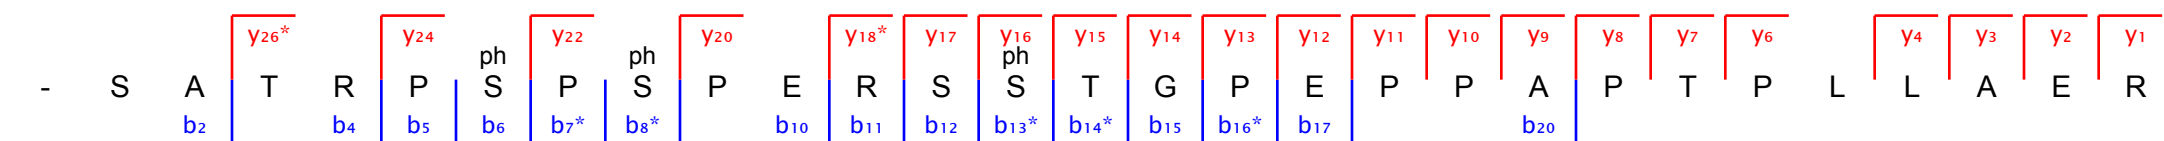

Raw file: 20150812\_A375SR\_Phospho\_BR1\_03  
 Scan: 19522 Method: FTMS; HCD Score: 292.69 m/z: 1024.09 Gene names: NEMF

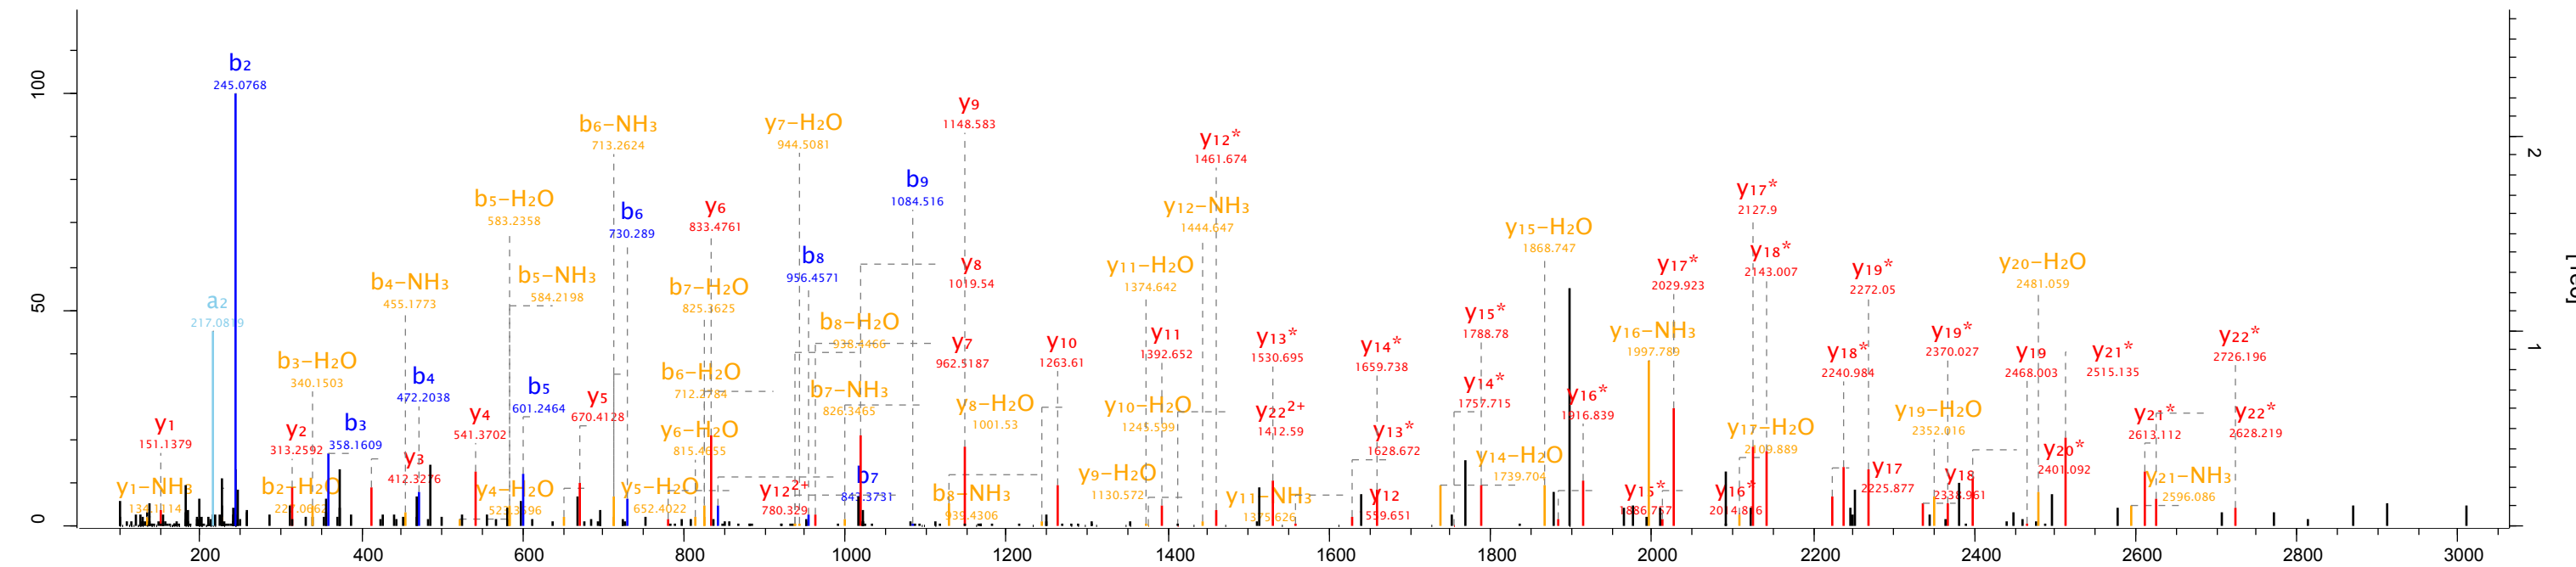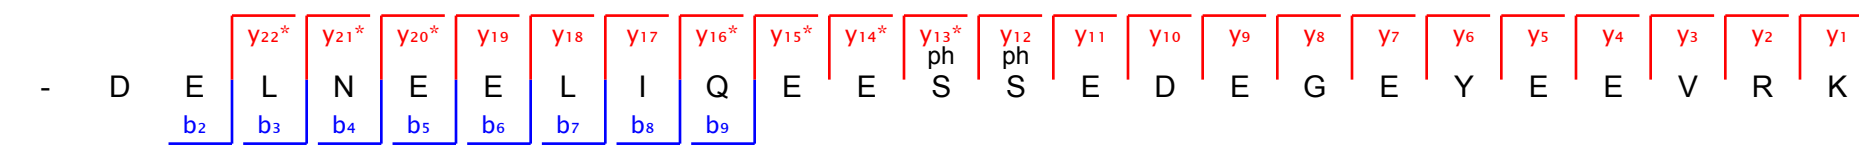

Raw file  
 20150812\_A375SR\_Phospho\_BR1\_03  
 Scan 19662 Method FTMS; HCD Score 64.5 m/z 923.69 Gene names QSER1

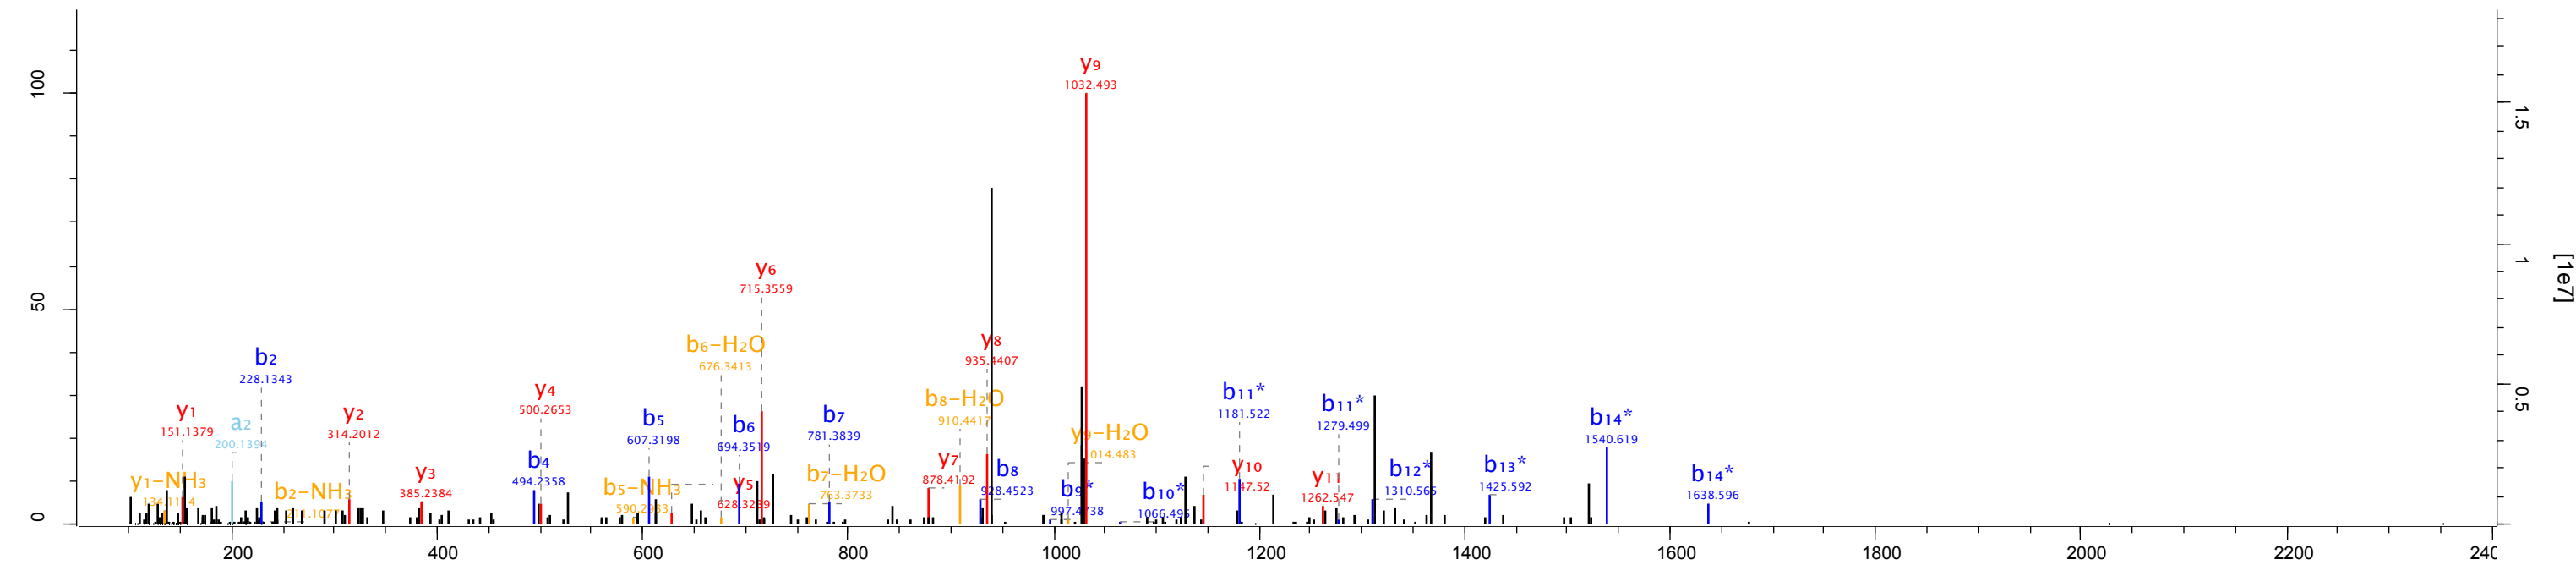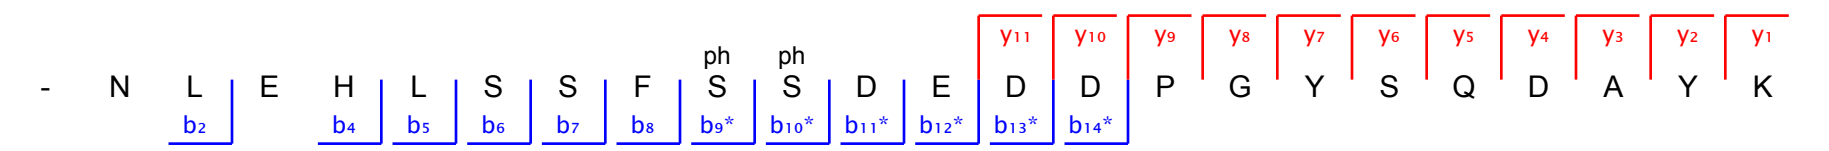

Raw file 20150812\_A375SR\_Phospho\_BR1\_03 Scan 20422 Method FTMS; HCD Score 85.8 m/z 696.62 Gene names CTNND1

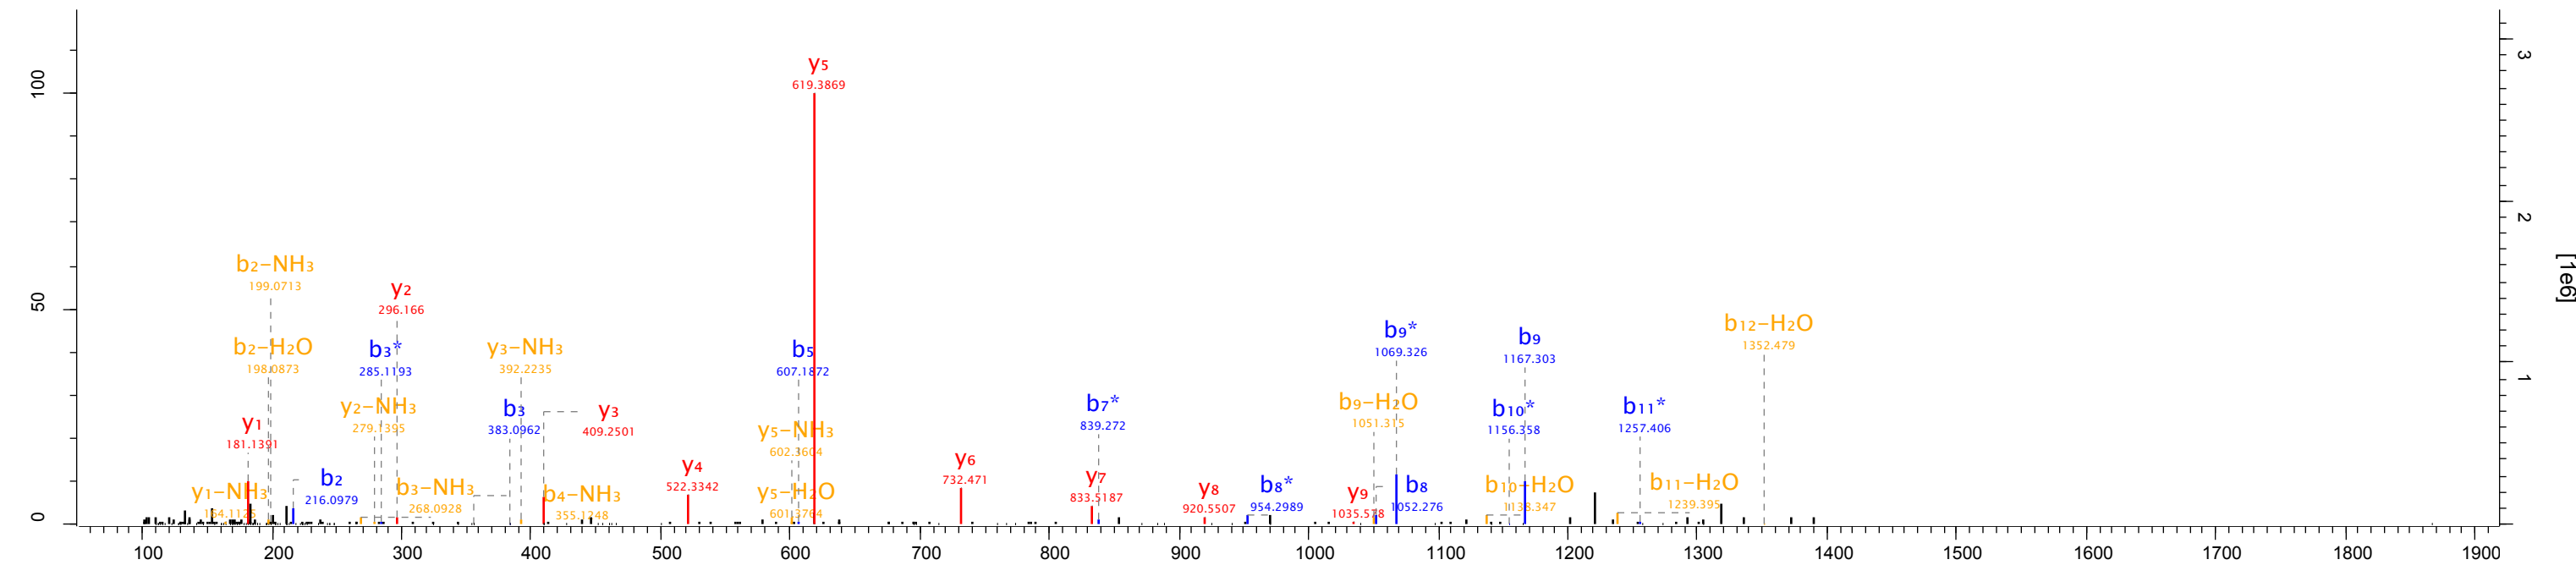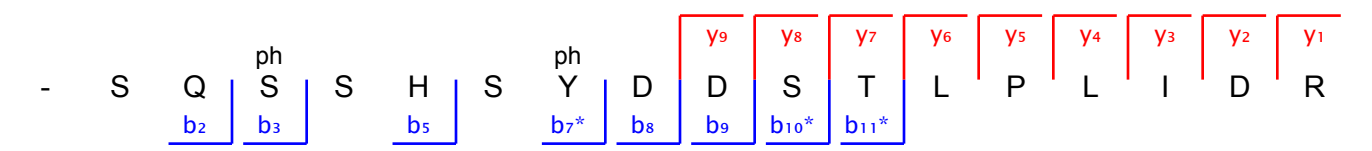

Raw file 20150812\_A375SR\_Phospho\_BR1\_03 Scan 20762 Method FTMS; HCD Score 138.9 m/z 885.71 Gene names MAP1S

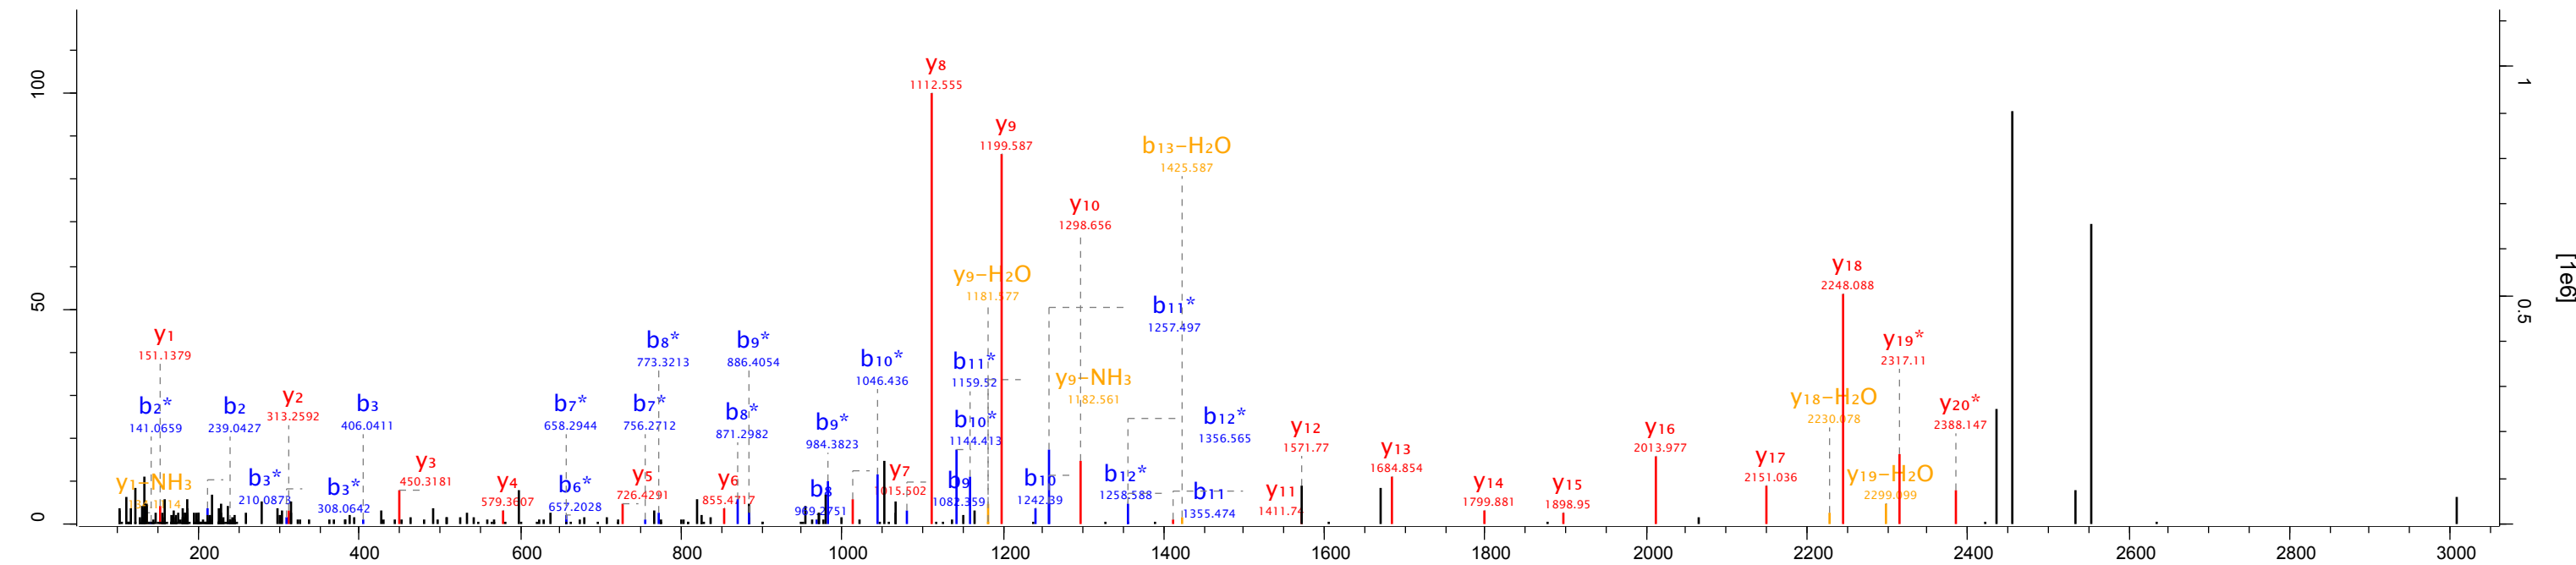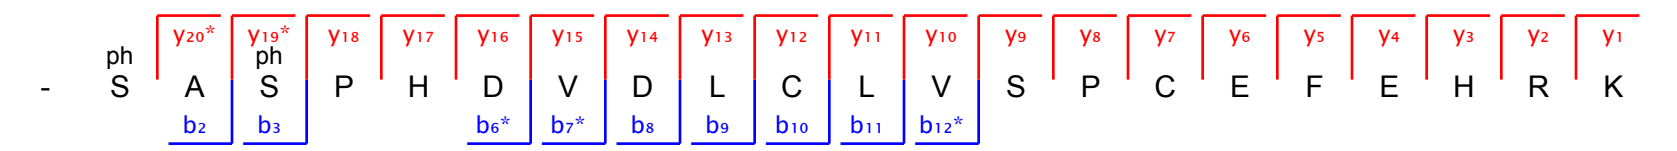



Raw file  
20150812\_A375SR\_Phospho\_BR1\_03

Scan 21002 Method FTMS; HCD Score 133.99 m/z 1008.71 Gene names EIF4EBP1

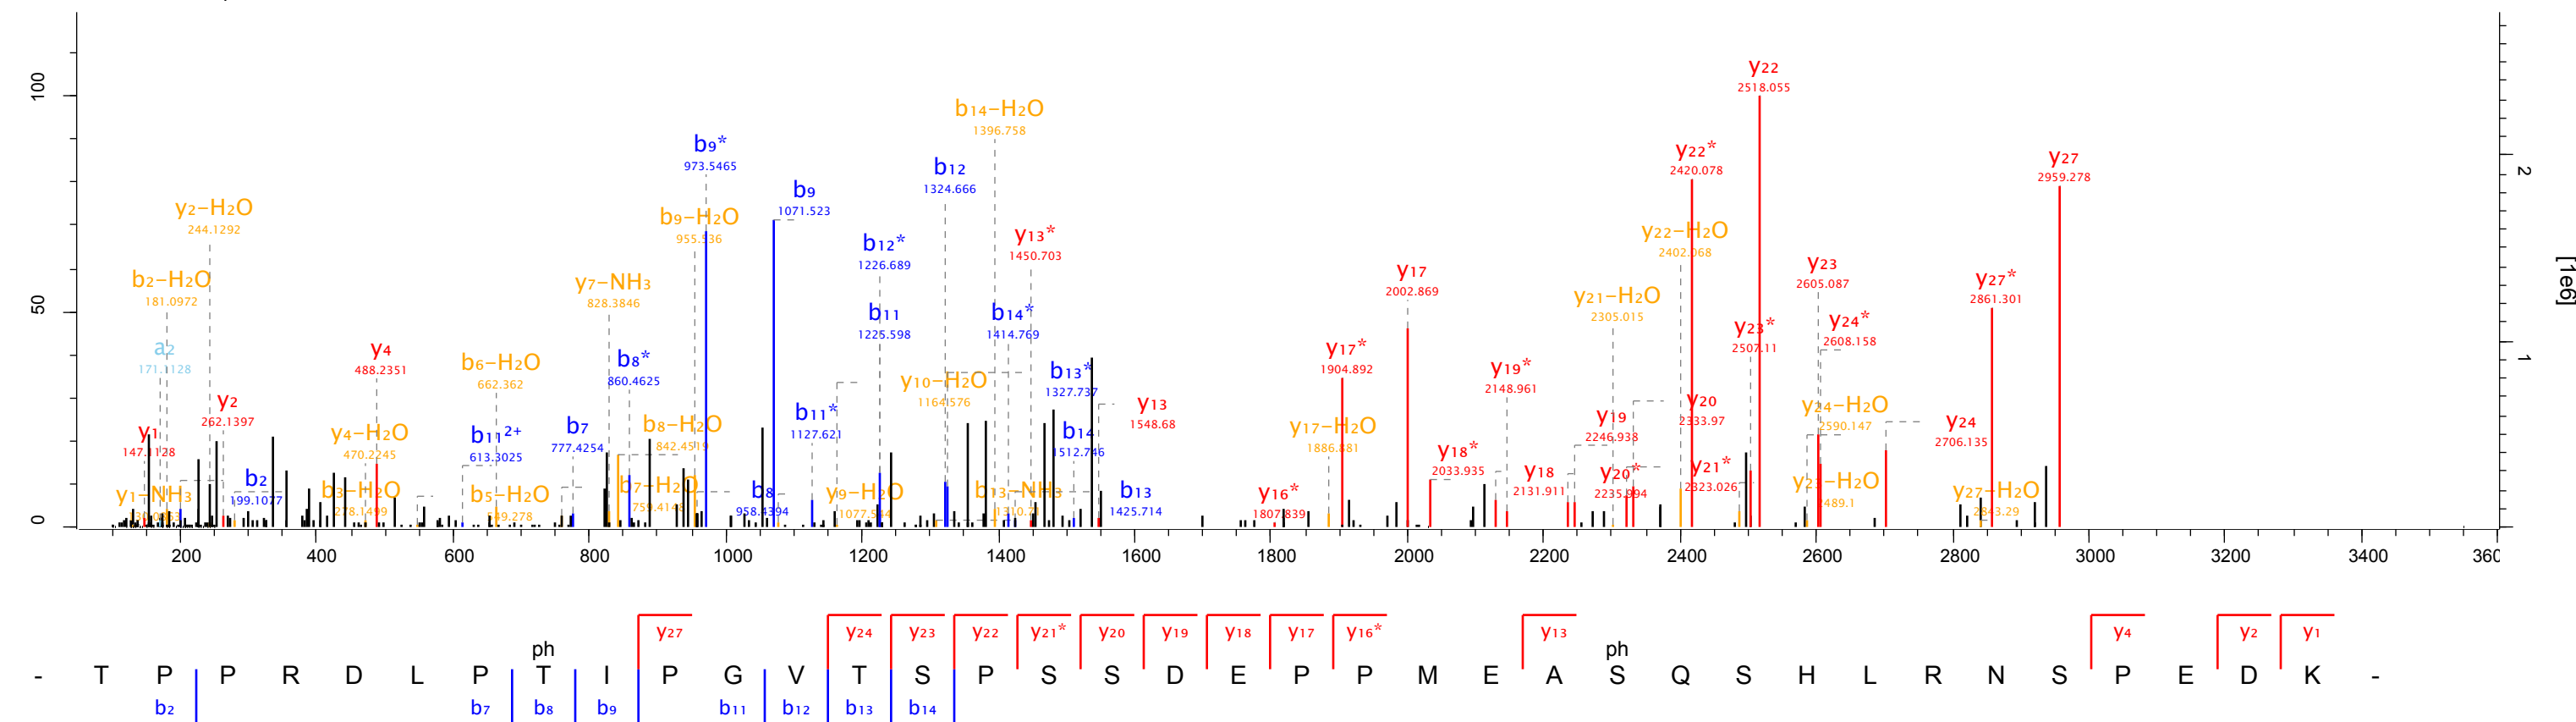

Raw file  
20150812\_A375SR\_Phospho\_BR1\_03

Scan Method Score m/z Gene names  
21202 FTMS; HCD 239.41 975.07 FRA10AC1

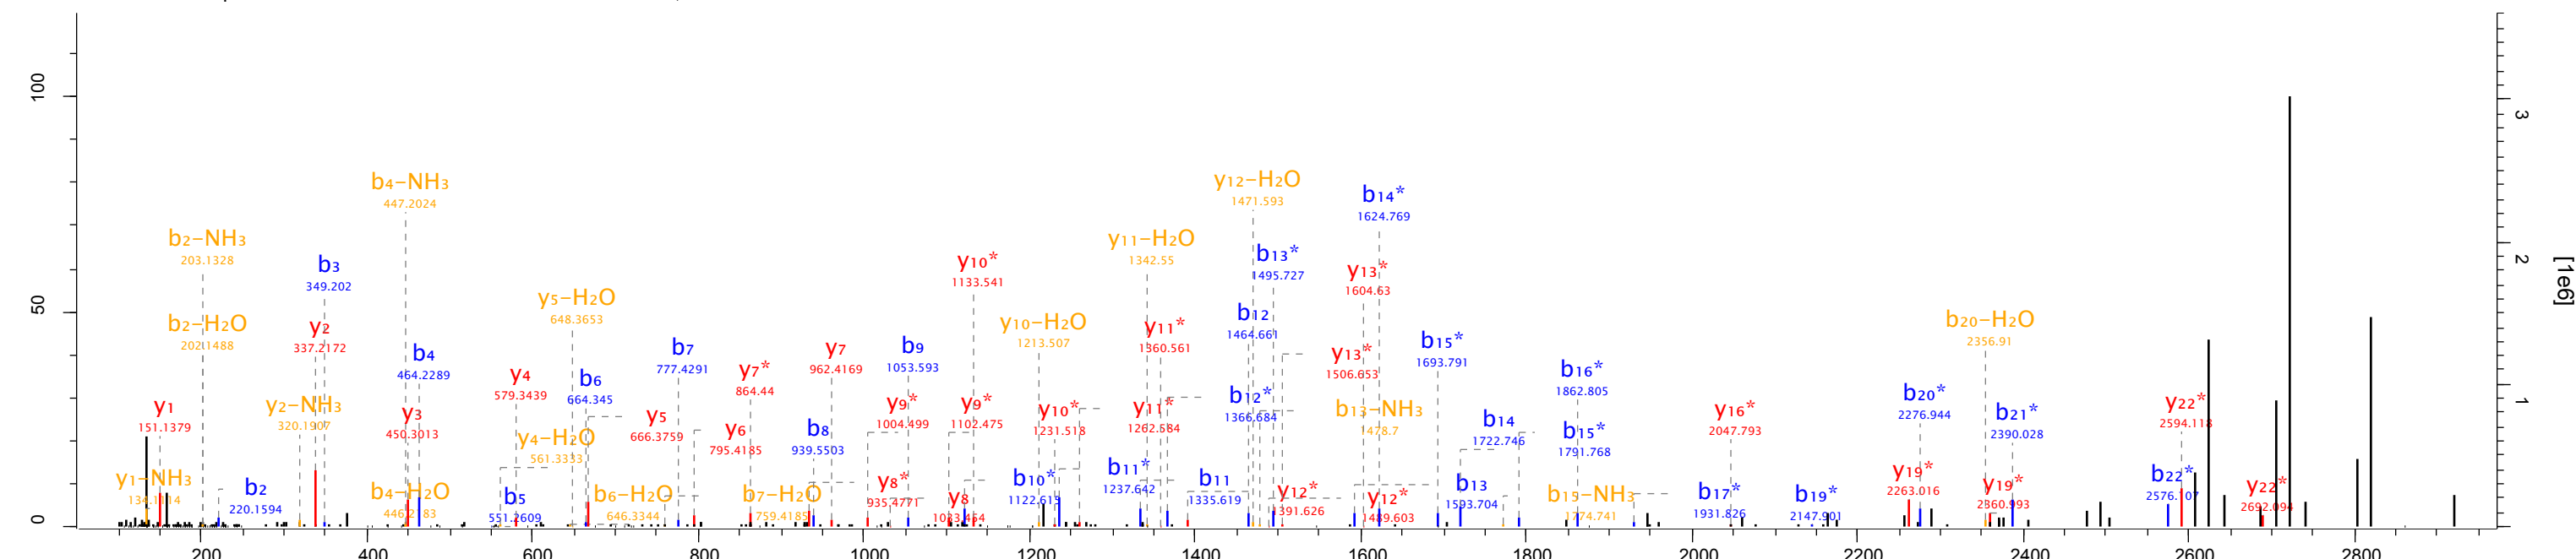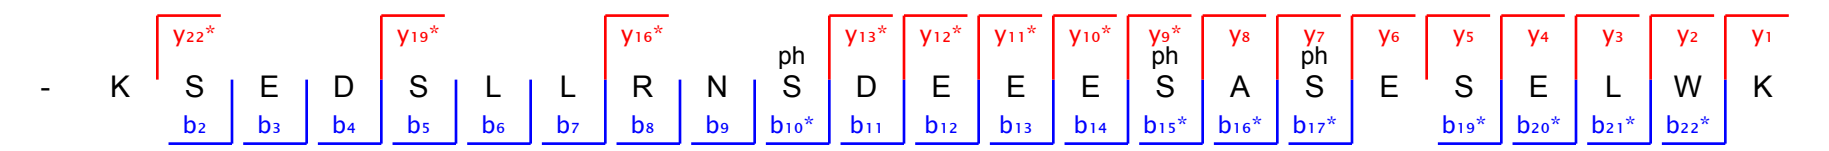

Raw file: 20150812\_A375SR\_Phospho\_BR1\_03  
 Scan: 21252 Method: FTMS; HCD Score: 159.91 m/z: 976.1 Gene names: TP53BP1

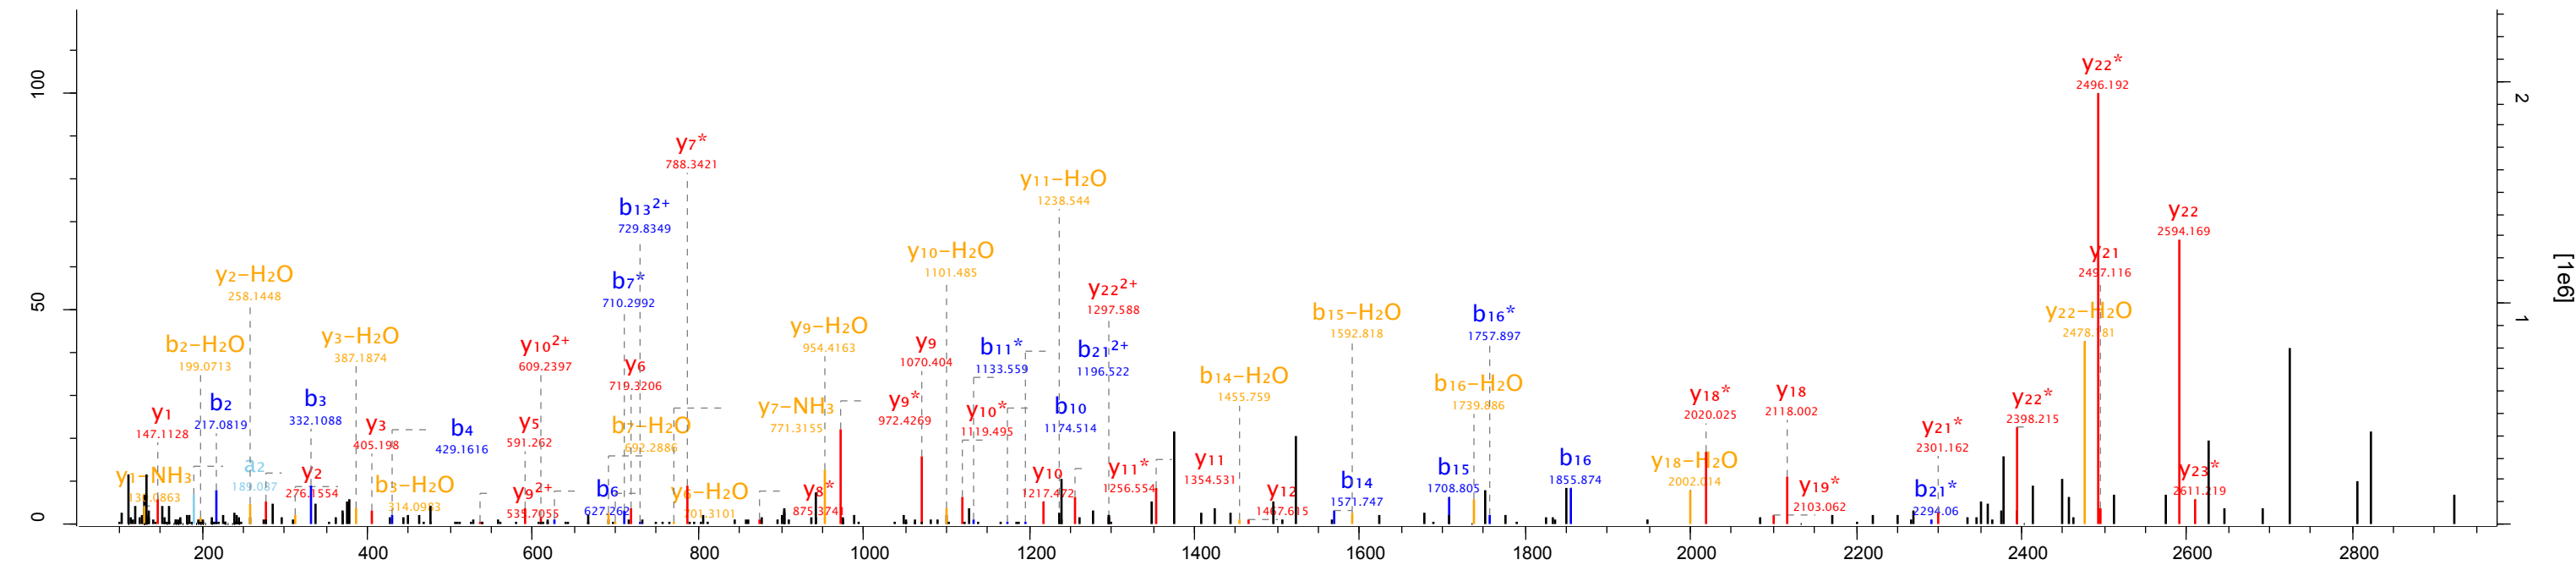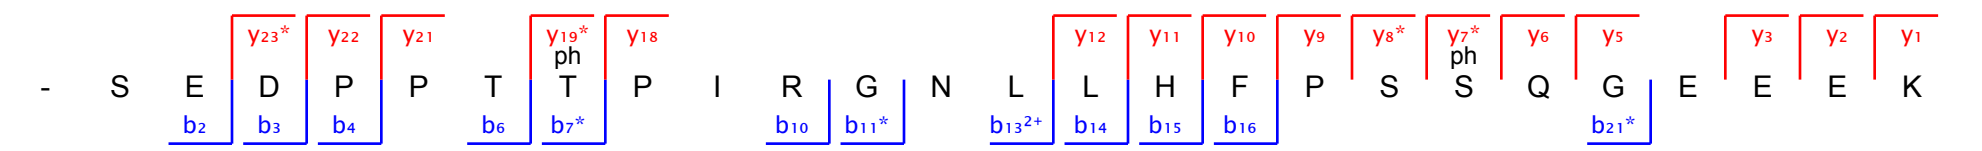

Raw file 20150812\_A375SR\_Phospho\_BR1\_03 Scan 21442 Method FTMS; HCD Score 44.86 m/z 1109.5 Gene names DTL

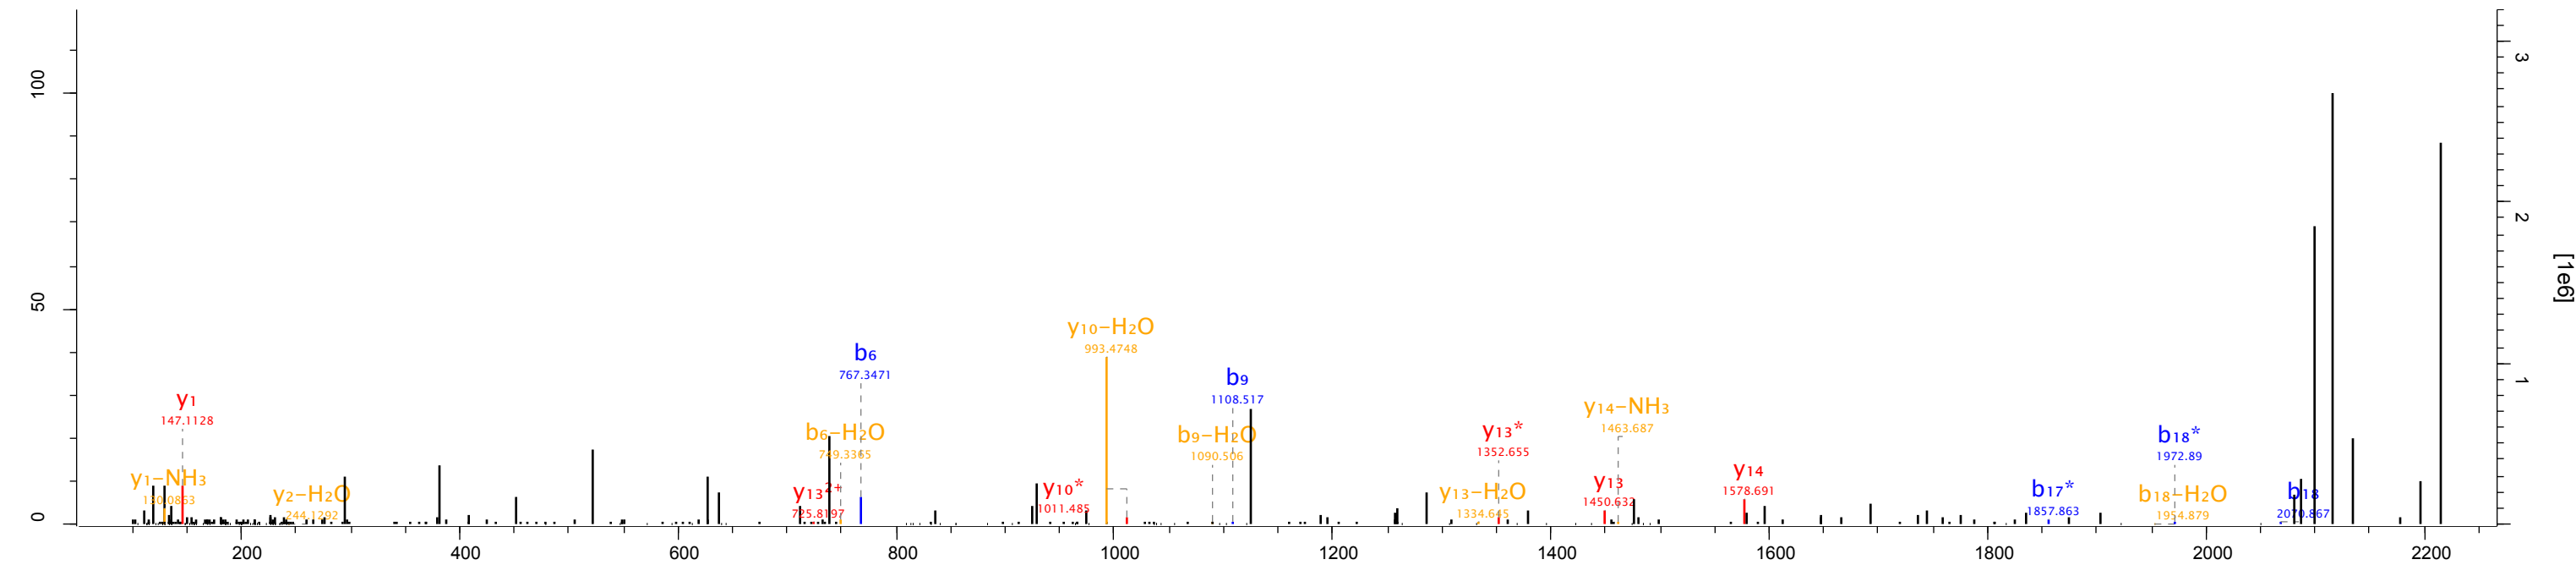

- D G F Y R Q V N Q I S G A H N T S D K -

Fragmentation mapping:  
 - Red boxes above: y14 (Q), y13 (V), y10\* (I)  
 - Blue boxes below: b6 (Q), b9 (Q), b17\* (S), b18 (D), y1 (K)

Raw file 20150812\_A375SR\_Phospho\_BR1\_03 Scan 21452 Method FTMS; HCD Score 105.75 m/z 1028.98 Gene names NUMB

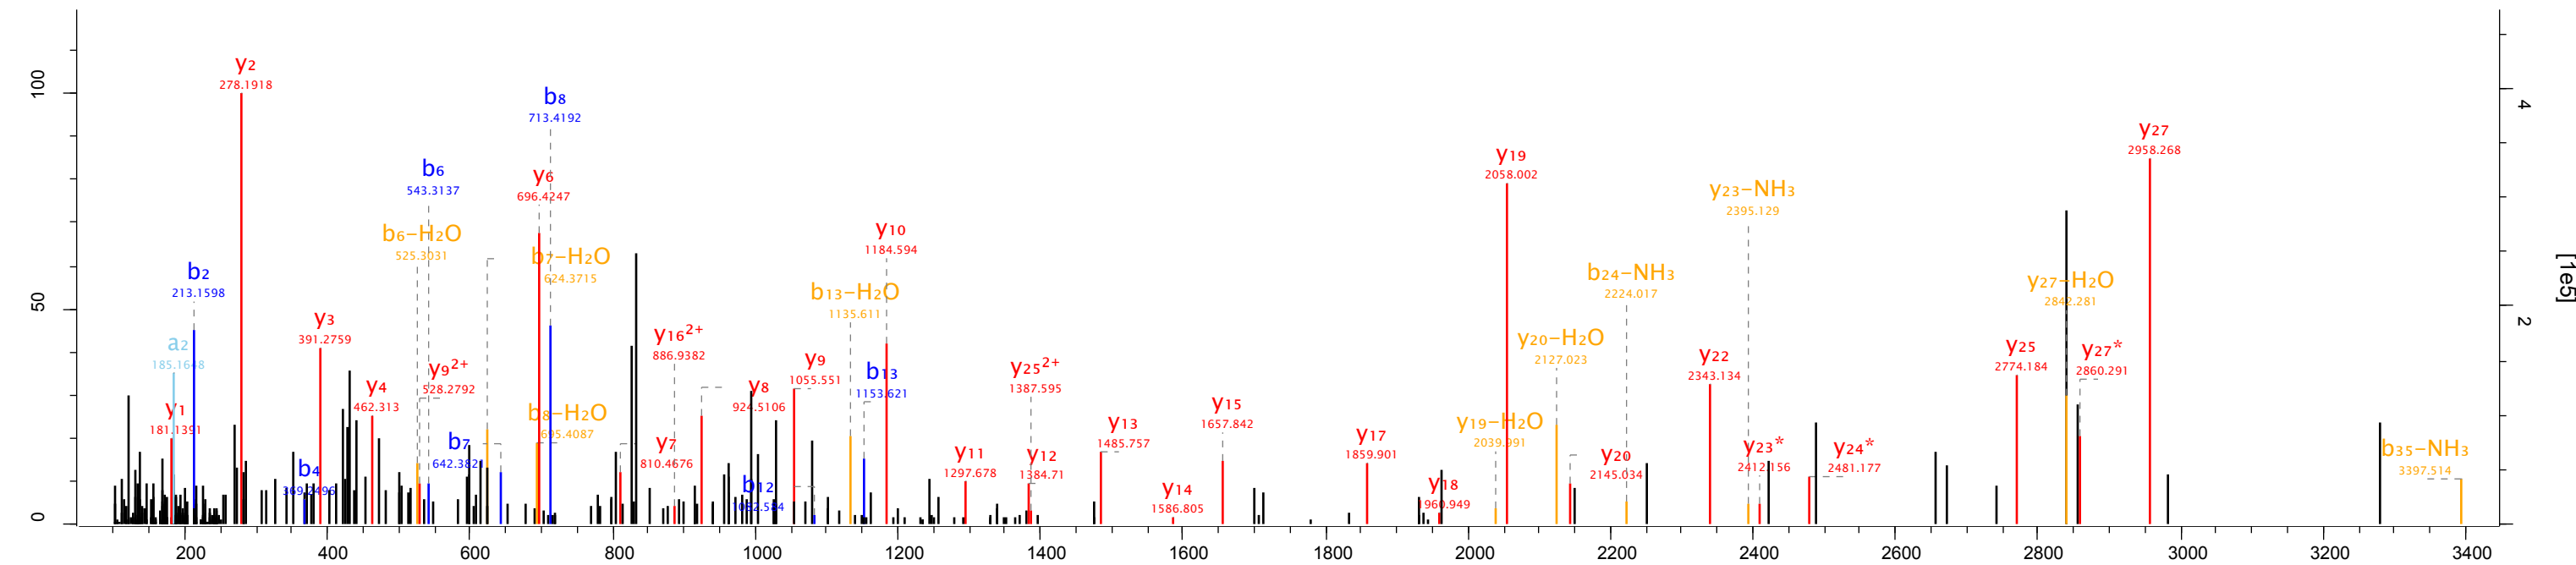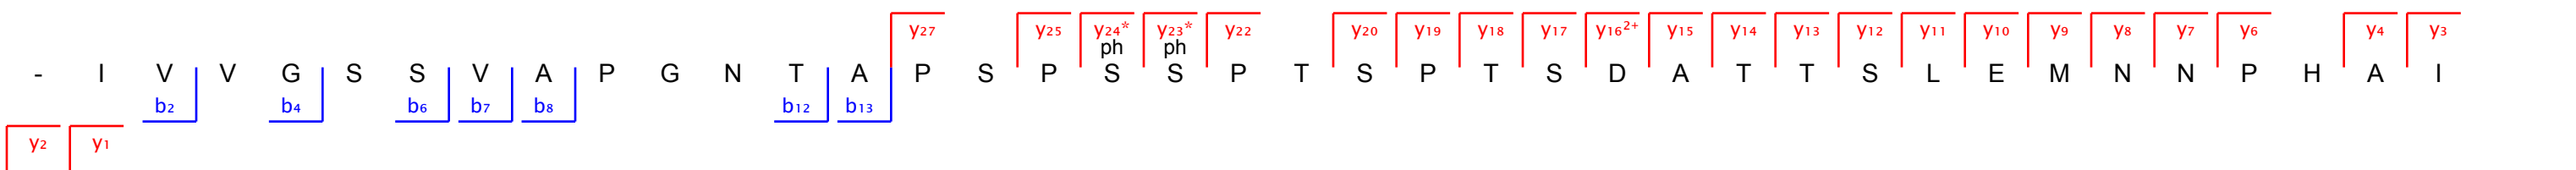

Raw file 20150812\_A375SR\_Phospho\_BR1\_03 Scan 2182 Method FTMS; HCD Score 70.78 m/z 487.86 Gene names CLASRP

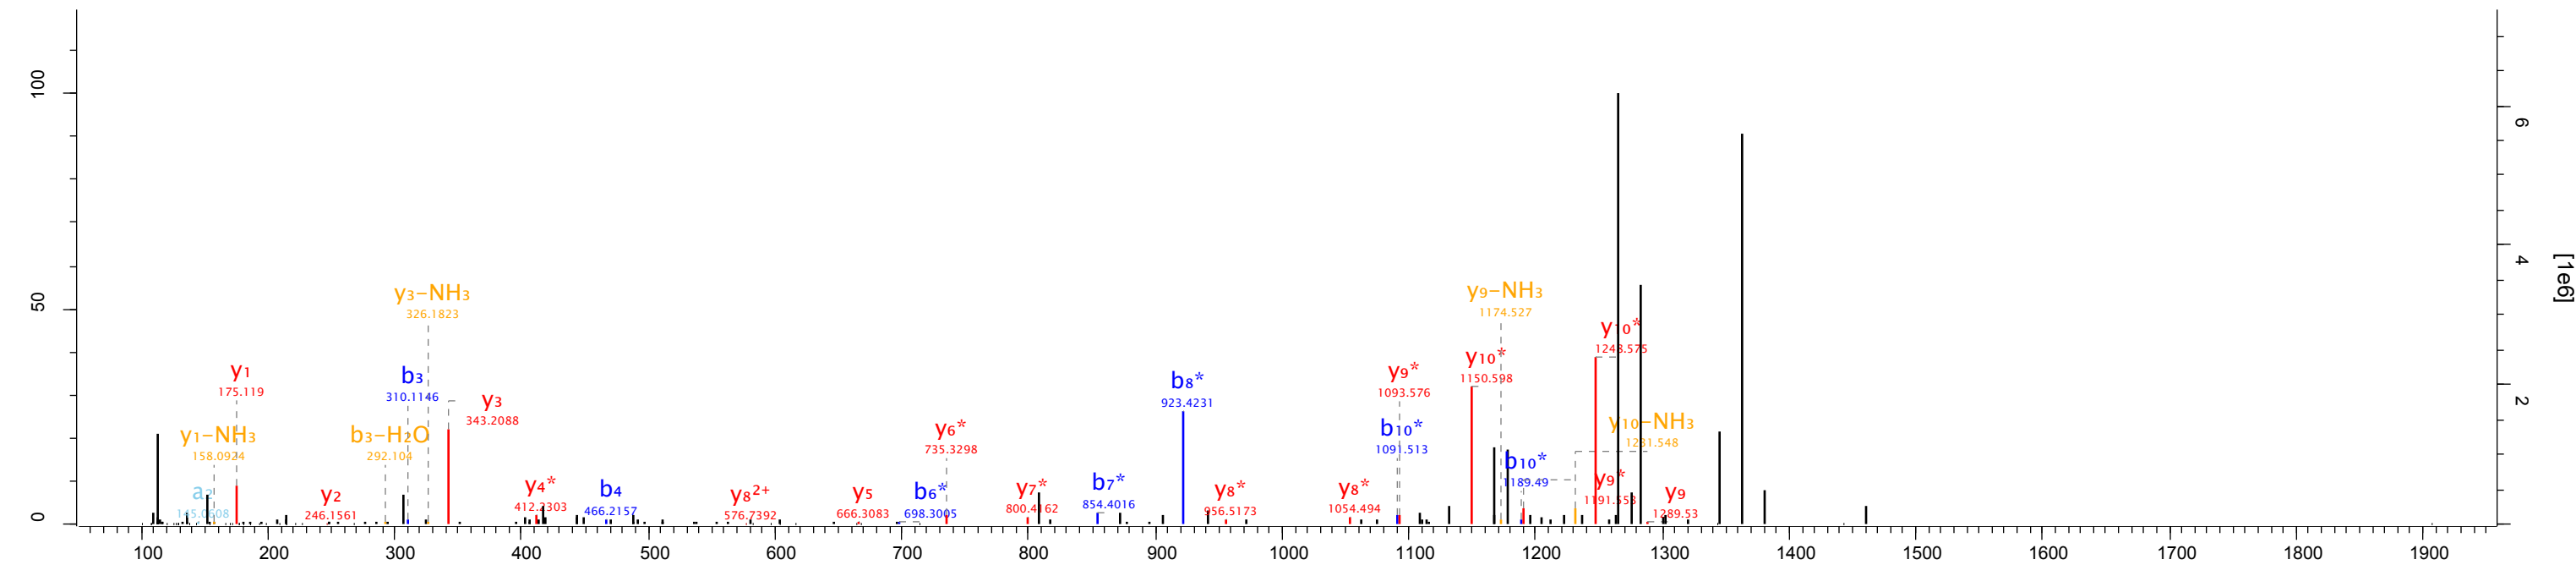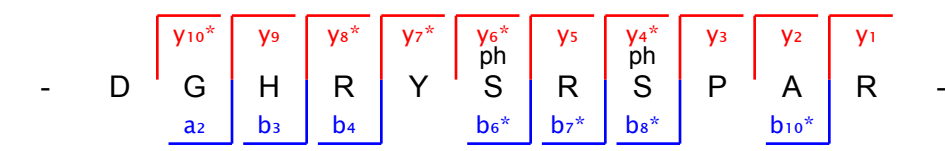

Raw file 20150812\_A375SR\_Phospho\_BR1\_03 Scan 21942 Method FTMS; HCD Score 146.63 m/z 1101.1 Gene names LIMA1;TRMT1

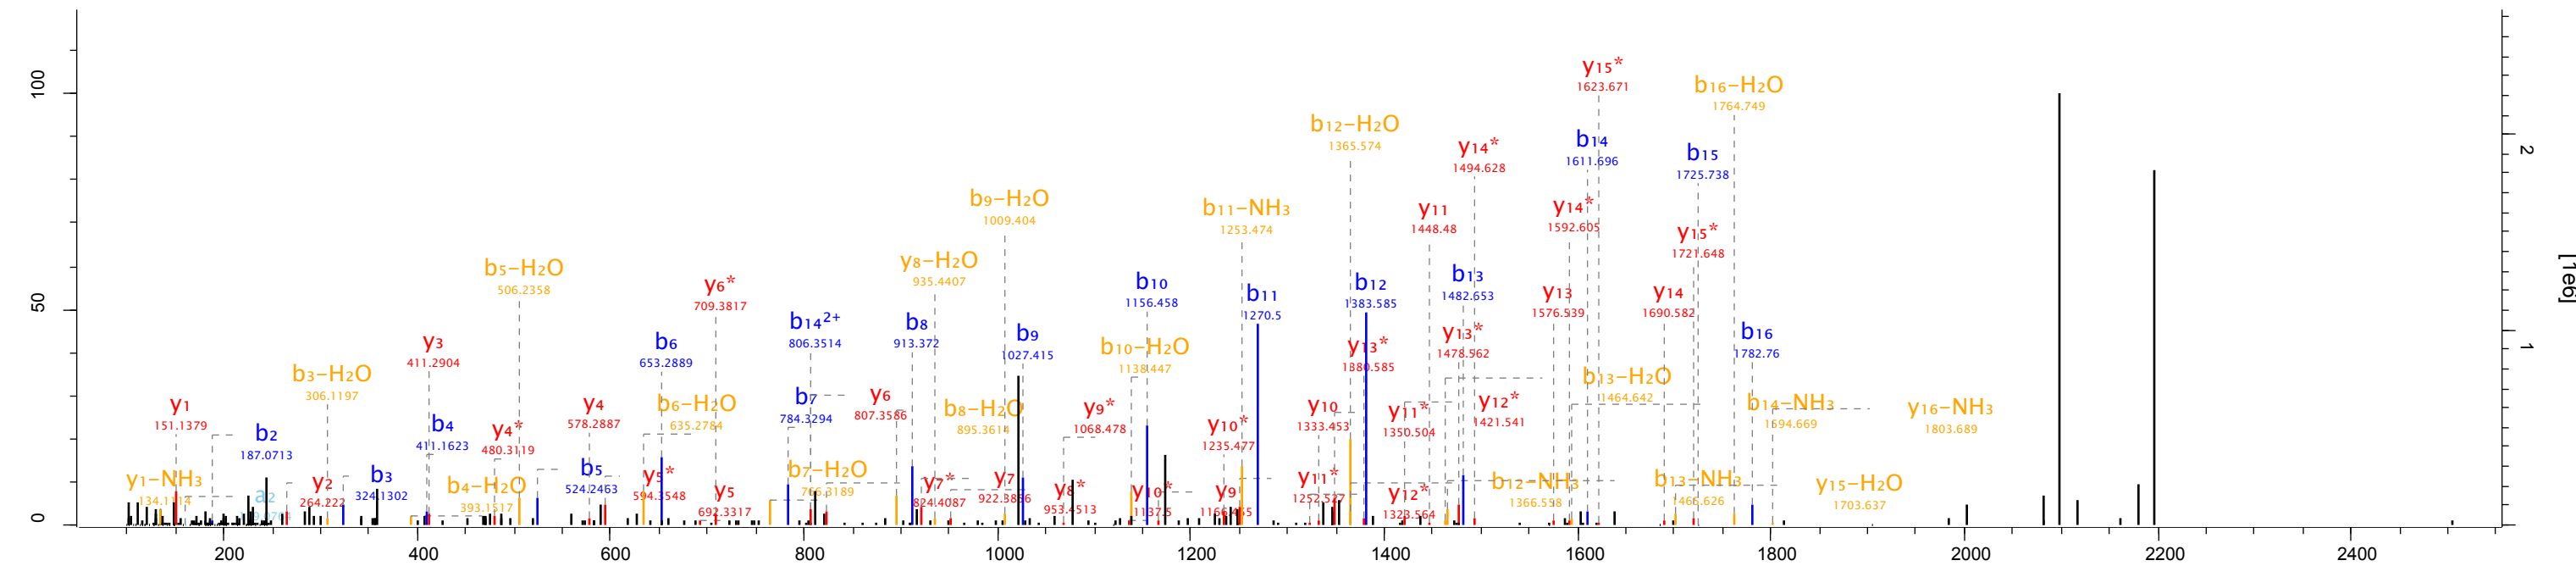

- E G H S L E M E N E N L V E N G A D S D E D D N S F L K -

Fragmentation mapping (b and y ions) is shown below the sequence:

- b<sub>2</sub> (under G)
- b<sub>3</sub> (under H)
- b<sub>4</sub> (under S)
- b<sub>5</sub> (under L)
- b<sub>6</sub> (under E)
- b<sub>7</sub> (under M)
- b<sub>8</sub> (under E)
- b<sub>9</sub> (under N)
- b<sub>10</sub> (under E)
- b<sub>11</sub> (under N)
- b<sub>12</sub> (under L)
- b<sub>13</sub> (under V)
- b<sub>14</sub> (under E)
- b<sub>15</sub> (under N)
- b<sub>16</sub> (under G)

Fragmentation mapping (y ions) is shown below the sequence:

- y<sub>1</sub> (under K)
- y<sub>2</sub> (under L)
- y<sub>3</sub> (under F)
- y<sub>4</sub> (under S)
- y<sub>5</sub> (under N)
- y<sub>6</sub> (under D)
- y<sub>7</sub> (under D)
- y<sub>8</sub> (under E)
- y<sub>9</sub> (under D)
- y<sub>10</sub> (under S)
- y<sub>11</sub> (under D)
- y<sub>12</sub> (under A)
- y<sub>13</sub> (under G)
- y<sub>14</sub> (under N)
- y<sub>15</sub> (under E)

Raw file: 20150812\_A375SR\_Phospho\_BR1\_03  
 Scan: 21992 Method: FTMS; HCD Score: 93.87 m/z: 805.86 Gene names: ZNF768

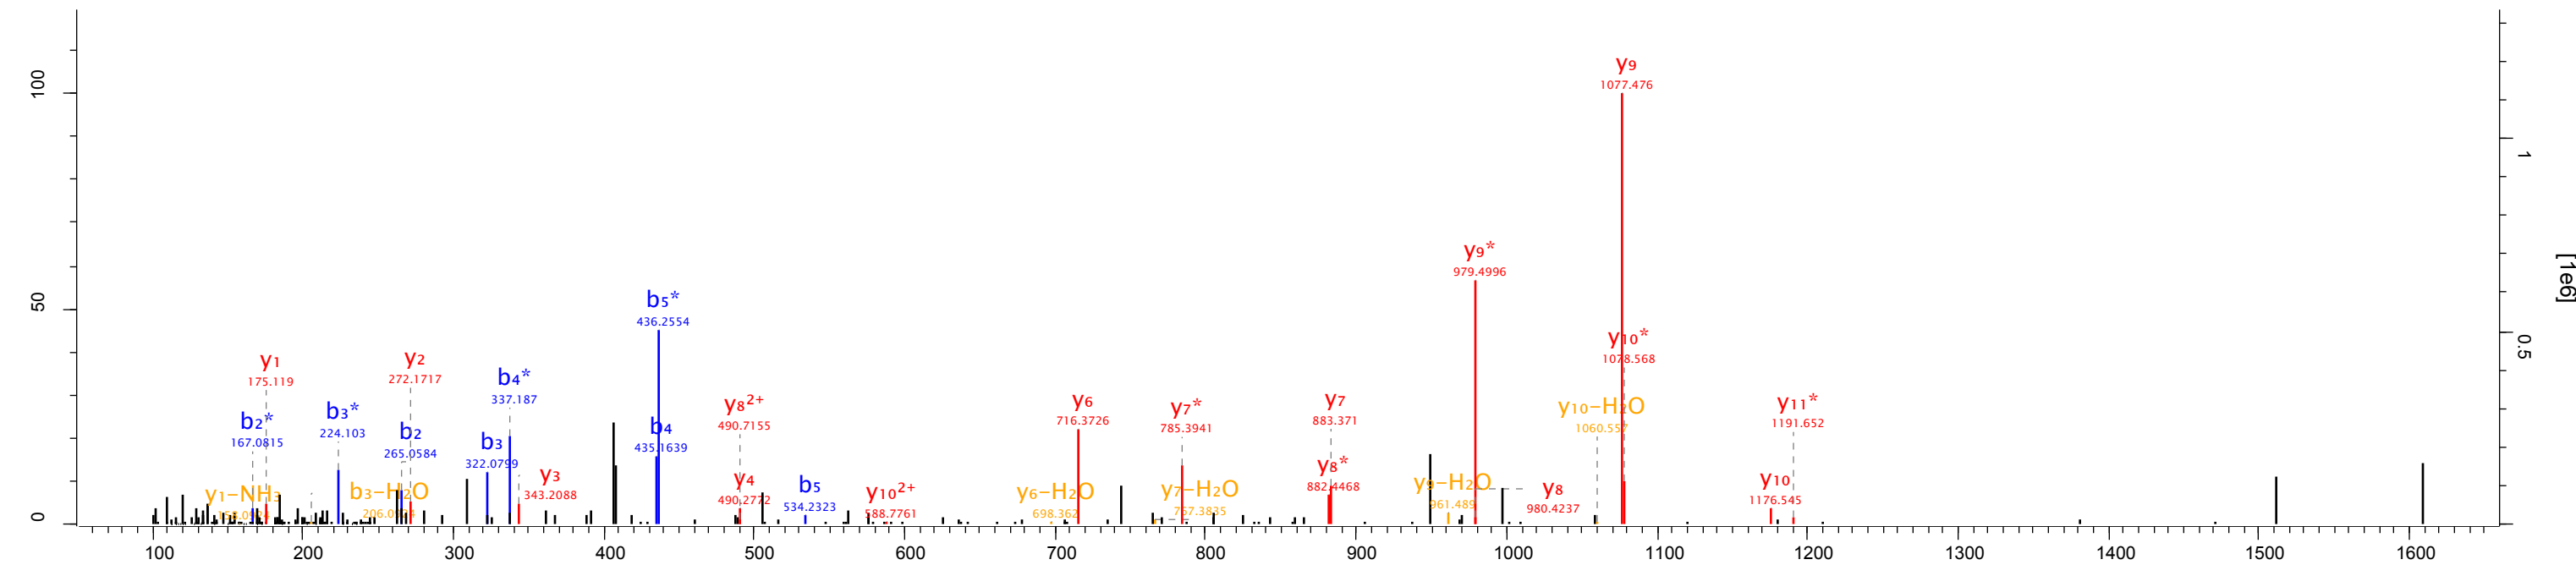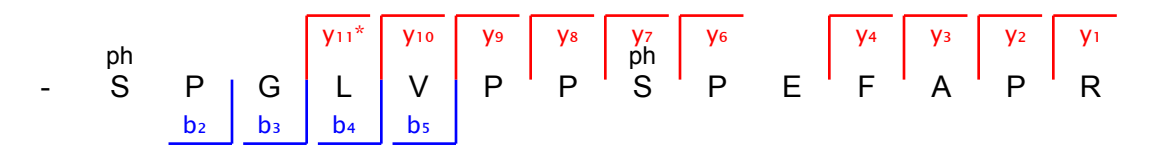



Raw file 20150812\_A375SR\_Phospho\_BR1\_03 Scan 22082 Method FTMS; HCD Score 98.15 m/z 947.12 Gene names KIF14

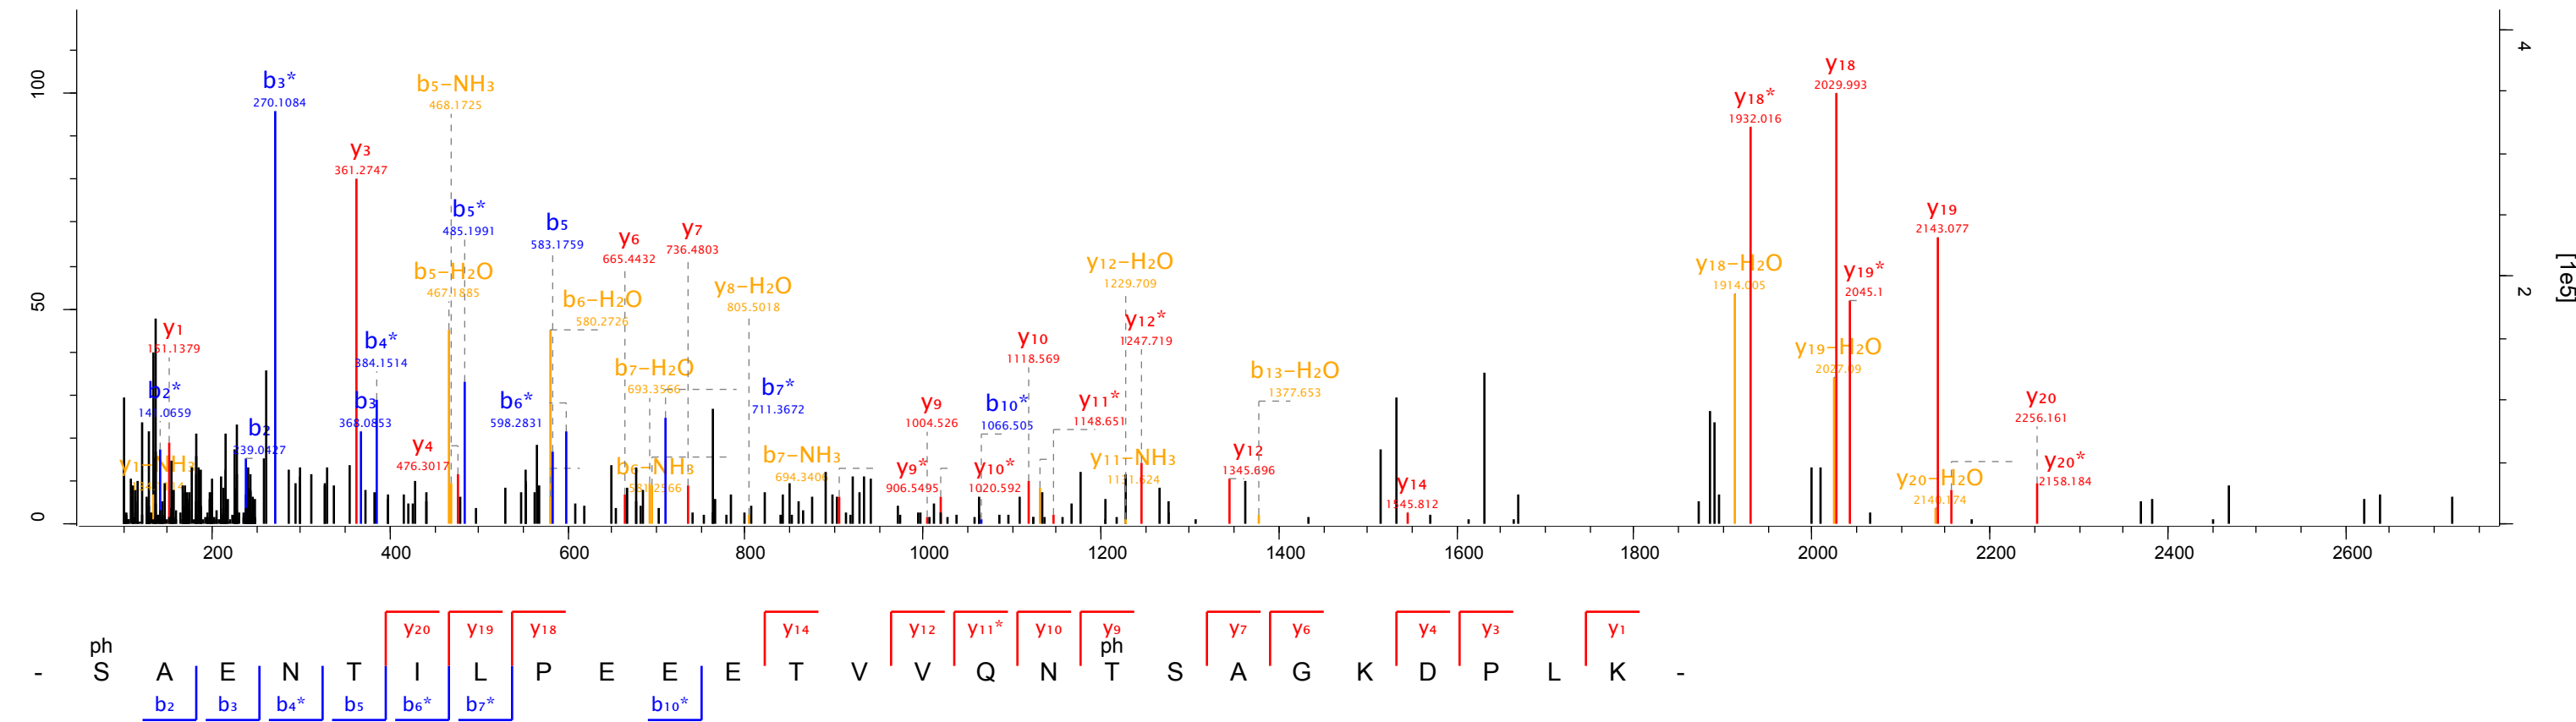

Raw file: 20150812\_A375SR\_Phospho\_BR1\_03  
 Scan: 22482 Method: FTMS; HCD Score: 210.31 m/z: 1148.45 Gene names: CCAR2

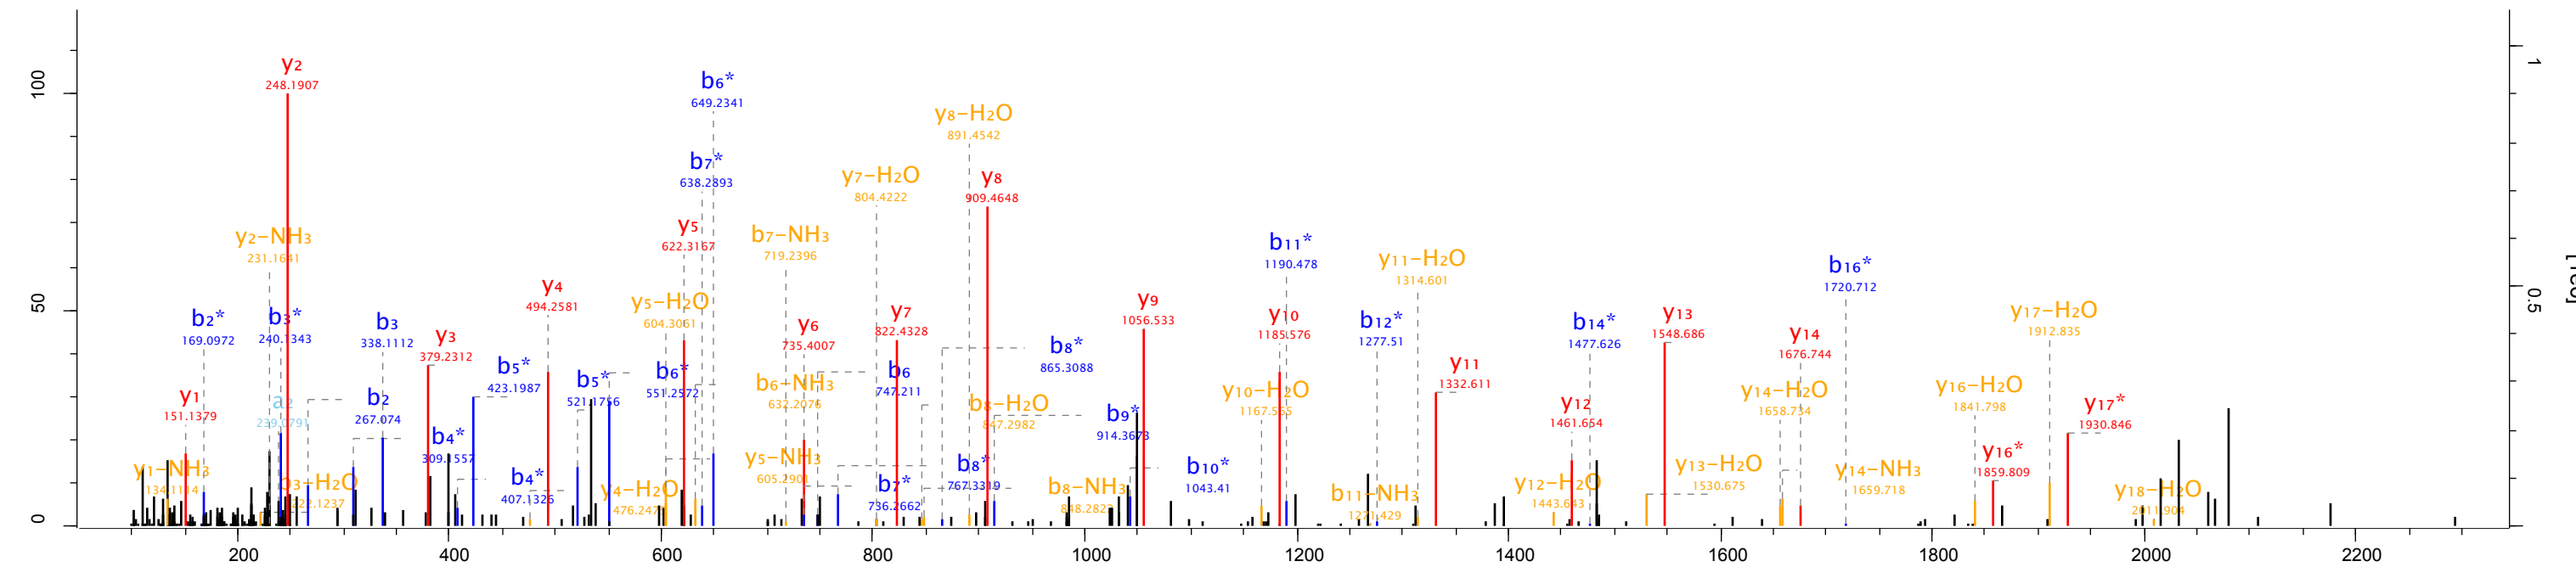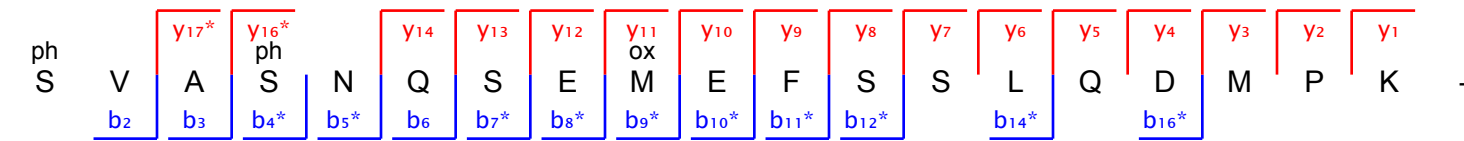

Raw file  
 20150812\_A375SR\_Phospho\_BR1\_03  
 Scan 22532 Method FTMS; HCD Score 42.46 m/z 944.68 Gene names BRD4

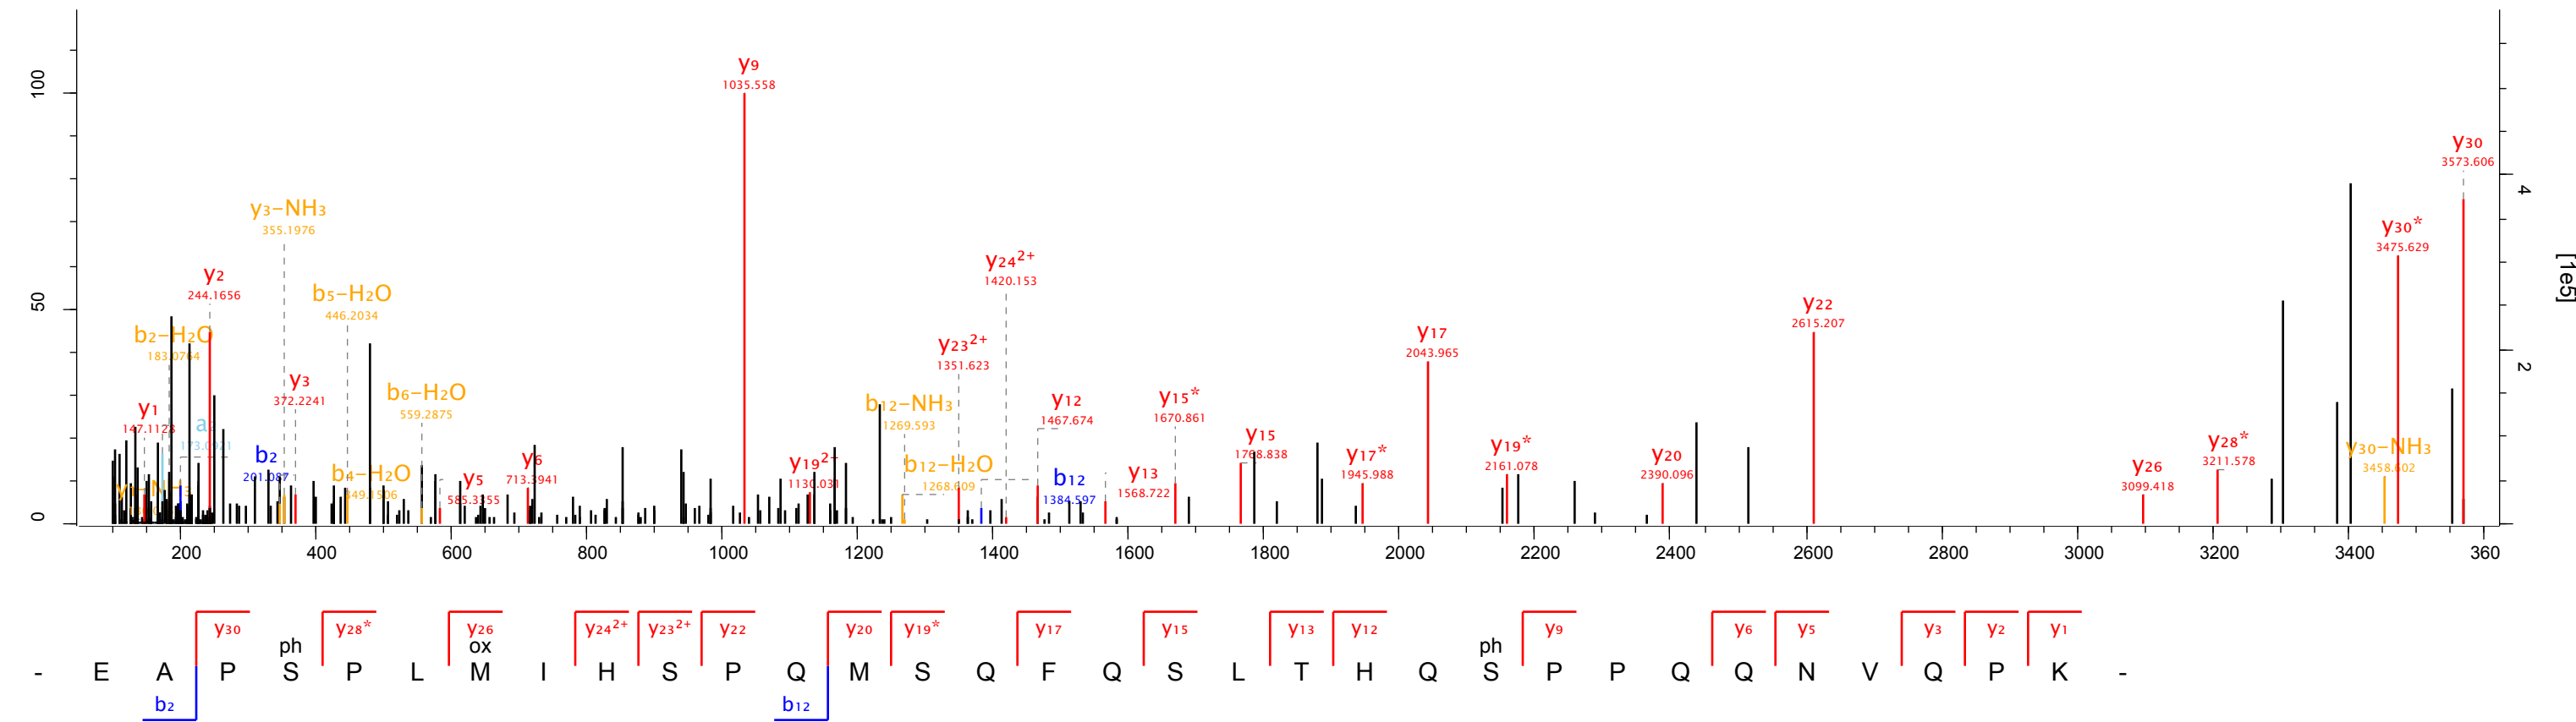

Raw file: 20150812\_A375SR\_Phospho\_BR1\_03  
 Scan: 22962 Method: FTMS; HCD Score: 125.97 m/z: 1458.13 Gene names: TCOF1

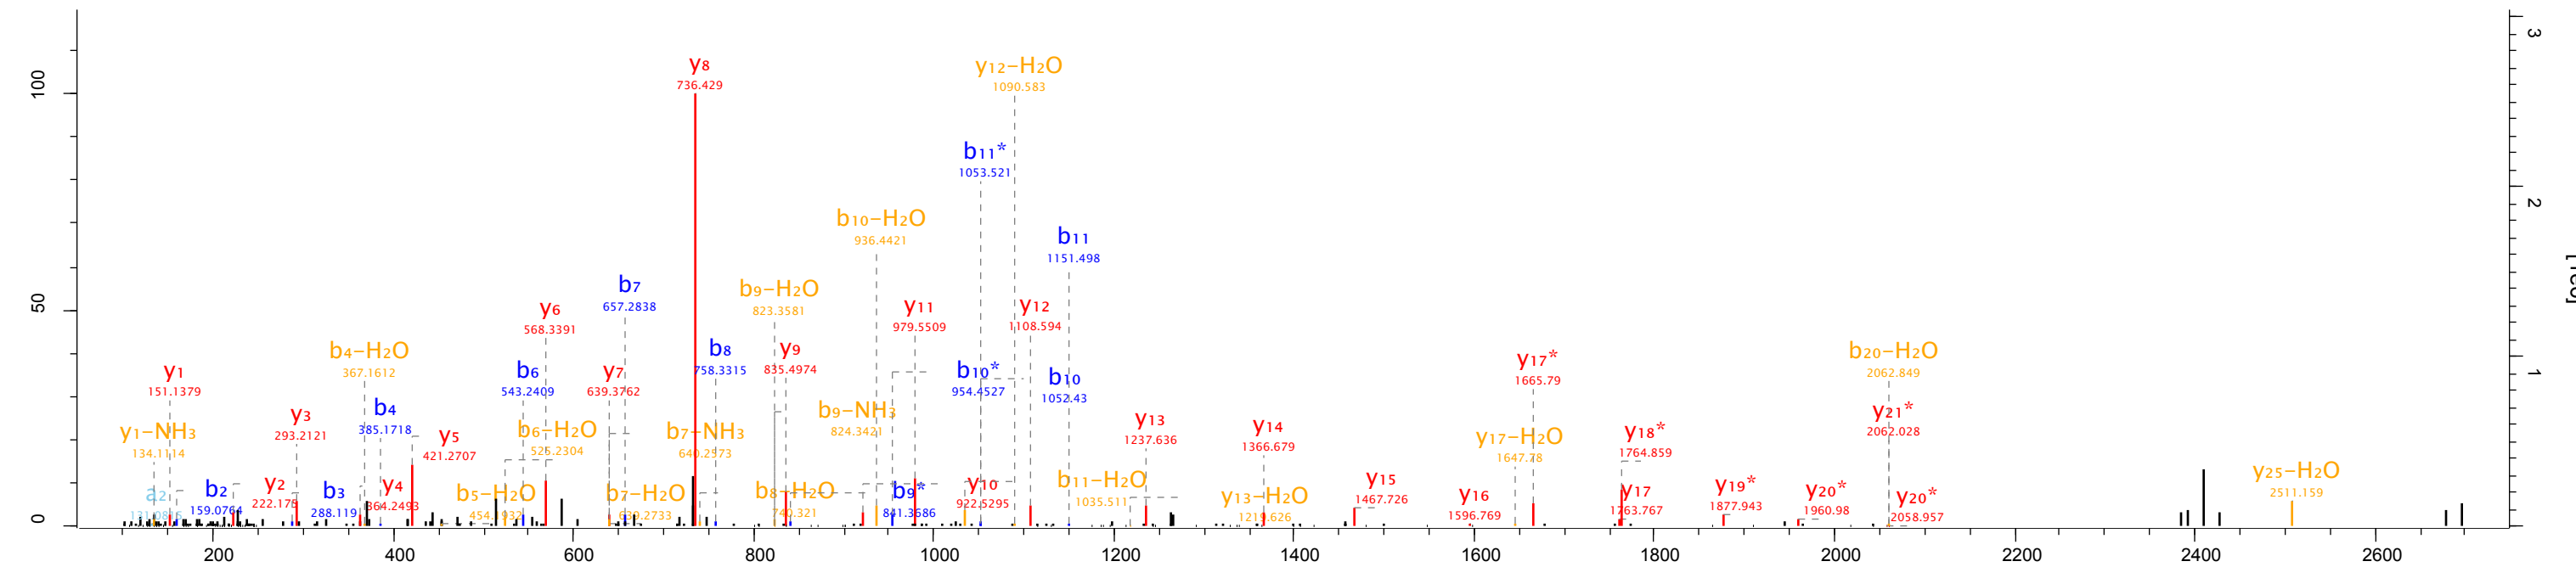

Peptide sequence: - S A E P S A N T T L V S E T E E E G S V P A F G A A A K -

Fragmentation sites (b and y ions):

- b2 (under A), b3 (under E), b4 (under P)
- b6 (under A), b7 (under N), b8 (under T), b9\* (under T), b10 (under L), b11 (under V)
- y1 (under K), y2 (under A), y3 (under A), y4 (under G), y5 (under F), y6 (under A), y7 (under P), y8 (under V), y9 (under S), y10 (under G), y11 (under E), y12 (under E), y13 (under E), y14 (under T), y15 (under E), y16 (under S), y17 (under V), y18\* (under P), y19\* (under A), y20\* (under F), y21\* (under G), y21\* (under A)

Raw file 20150812\_A375SR\_Phospho\_BR1\_03 Scan 23132 Method FTMS; HCD Score 149 m/z 911.08 Gene names TRAPPC10

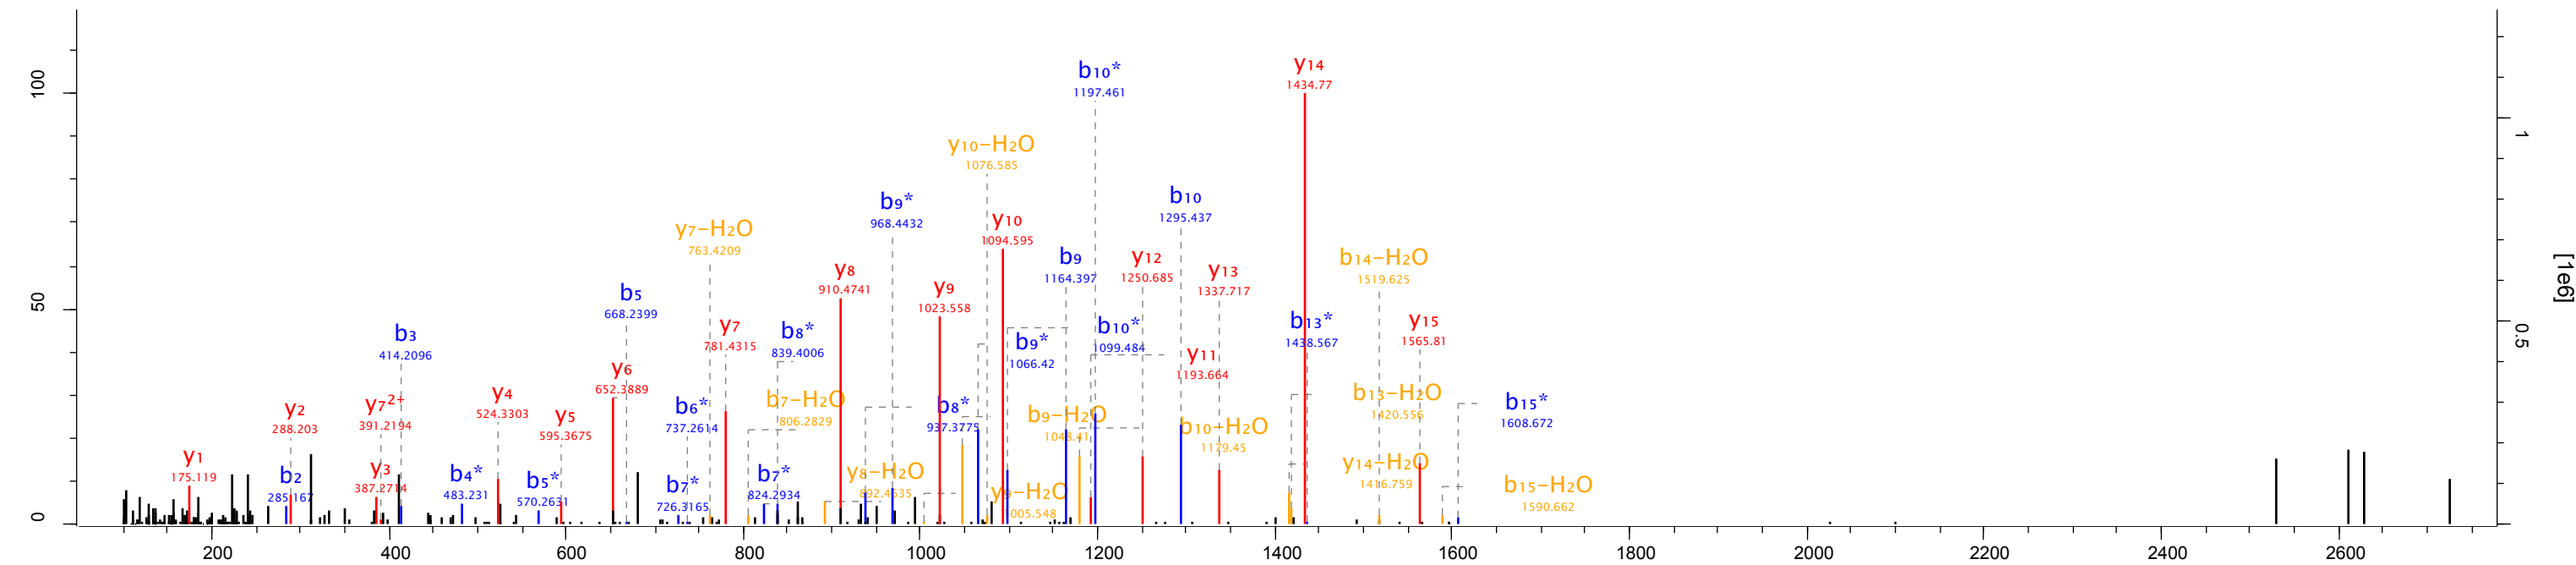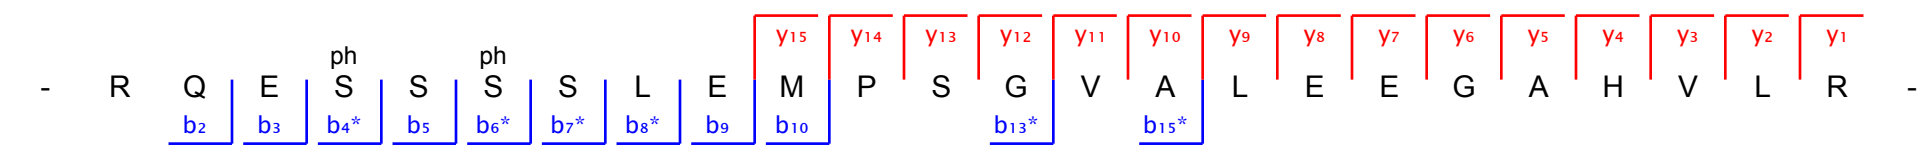

Raw file 20150812\_A375SR\_Phospho\_BR1\_03 Scan 23282 Method FTMS; HCD Score 164.3 m/z 891.14 Gene names SYDE1

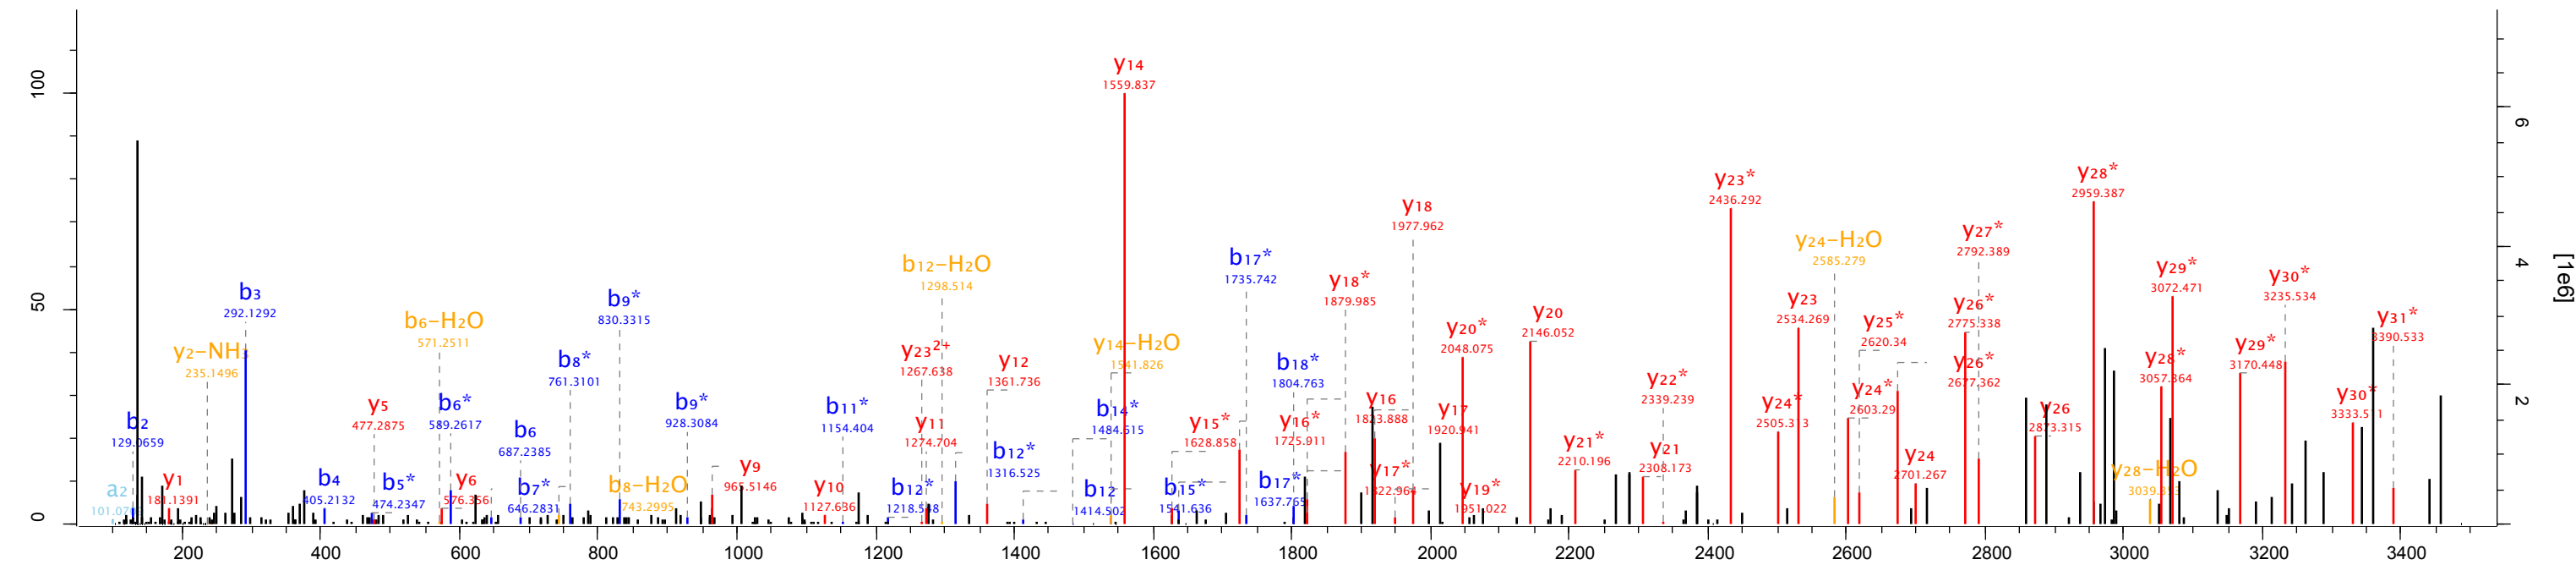

- A G Y L S D G D S P E R P A G P P S P T S F R P Y E V G P A A R -

b<sub>2</sub>
b<sub>3</sub>
b<sub>4</sub>
b<sub>5</sub>\*
b<sub>6</sub>
b<sub>7</sub>\*
b<sub>8</sub>\*
b<sub>9</sub>\*
b<sub>11</sub>\*
b<sub>12</sub>
b<sub>14</sub>\*
b<sub>15</sub>\*
b<sub>17</sub>\*
b<sub>18</sub>\*
y<sub>1</sub>
y<sub>5</sub>
y<sub>6</sub>
y<sub>9</sub>
y<sub>10</sub>
y<sub>11</sub>
y<sub>12</sub>
y<sub>14</sub>
y<sub>15</sub> ph
y<sub>16</sub>
y<sub>17</sub>
y<sub>18</sub>
y<sub>19</sub>\*
y<sub>20</sub>
y<sub>21</sub>
y<sub>22</sub>\*
y<sub>23</sub>
y<sub>24</sub> ph
y<sub>25</sub>\*
y<sub>26</sub>\*
y<sub>27</sub>\*
y<sub>28</sub>\*
y<sub>29</sub>\*
y<sub>30</sub>\*
y<sub>31</sub>\*

Raw file Scan Method Score m/z Gene names  
 20150812\_A375SR\_Phospho\_BR1\_03 23322 FTMS; HCD 145.2 1109.46 CLNS1A

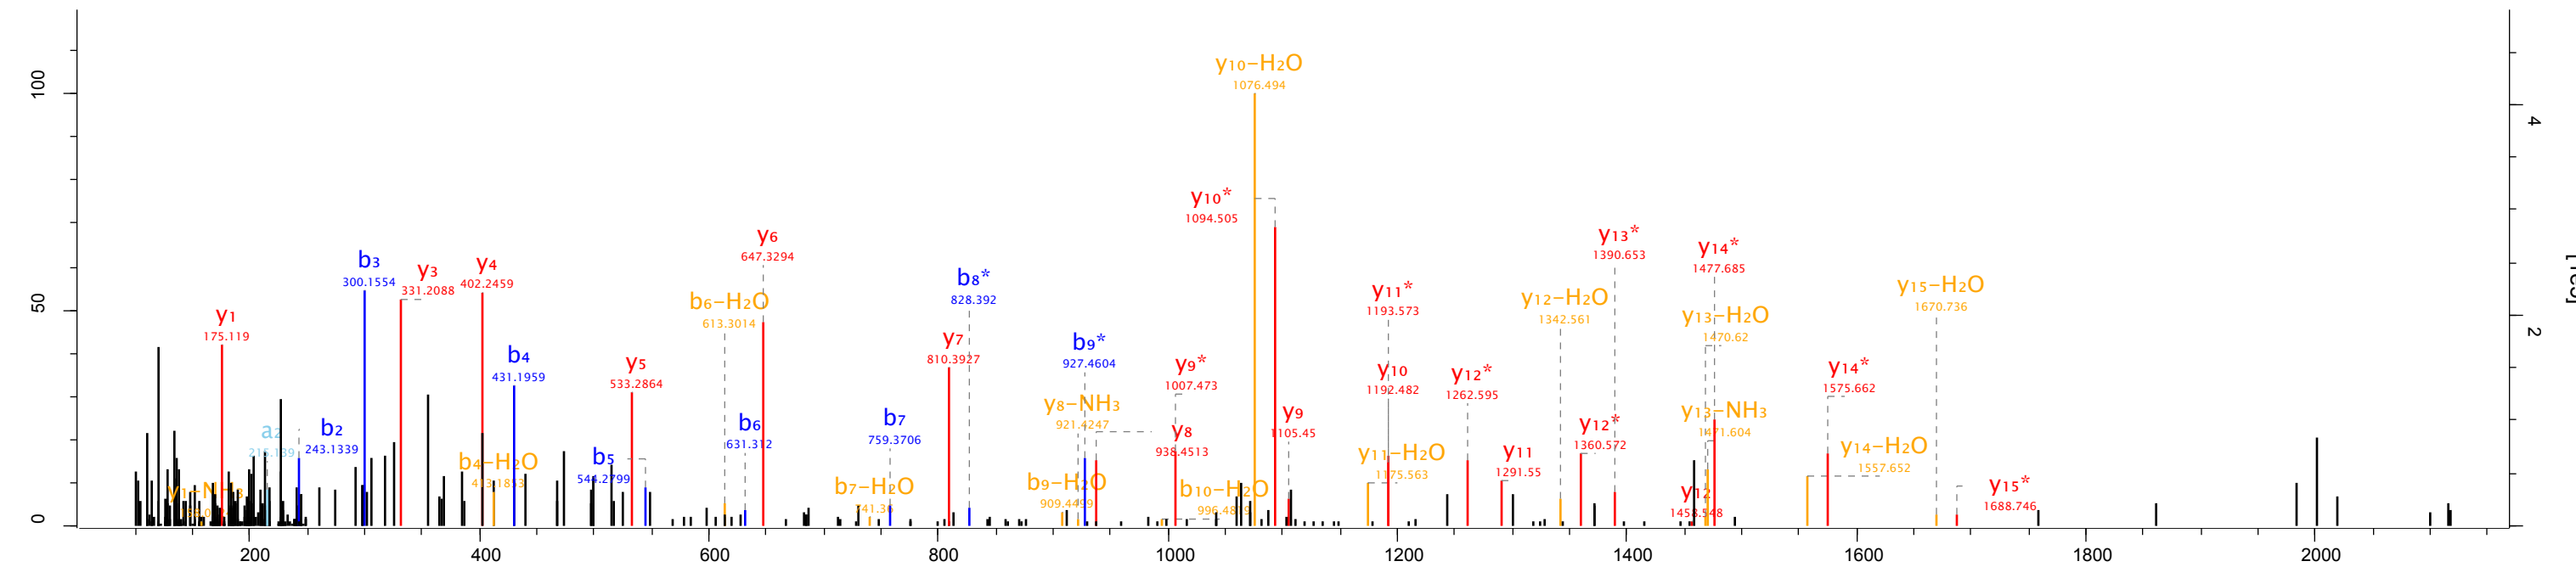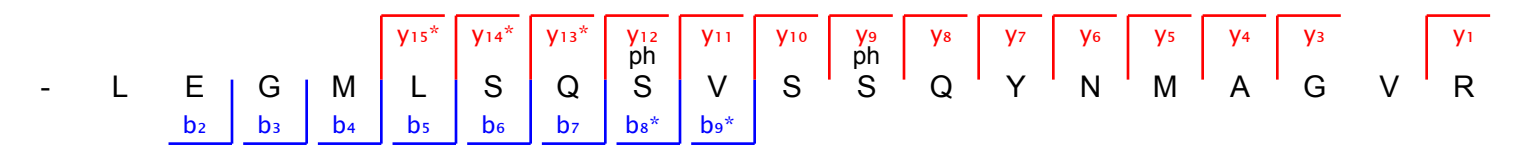

Raw file 20150812\_A375SR\_Phospho\_BR1\_03 Scan 2352 Method FTMS; HCD Score 249.33 m/z 807.31 Gene names CBX3

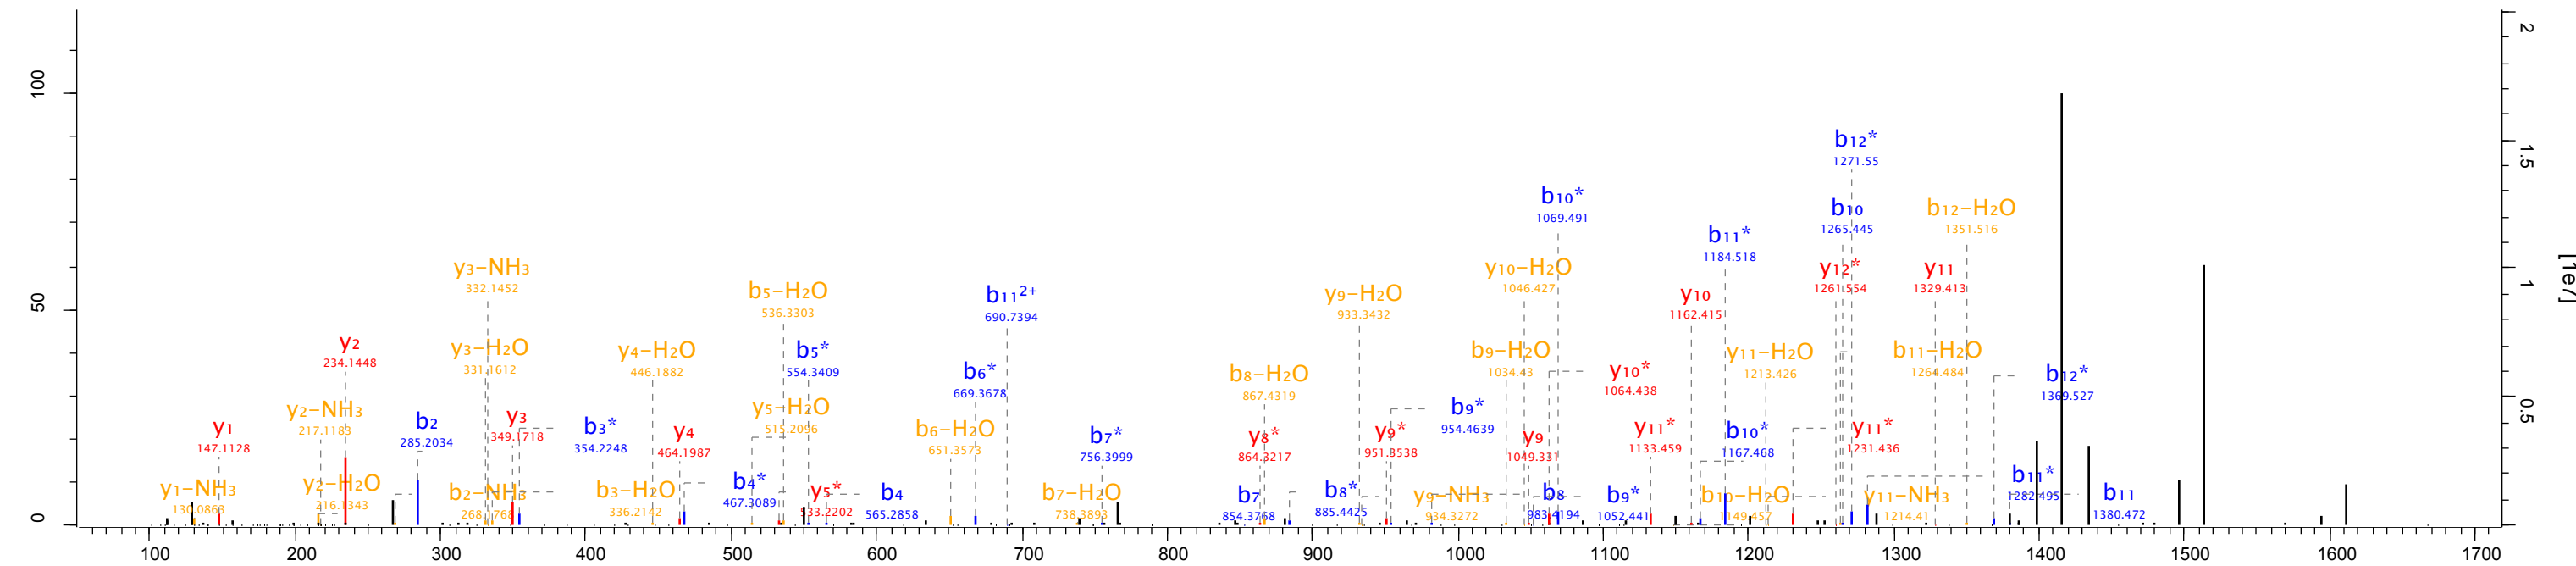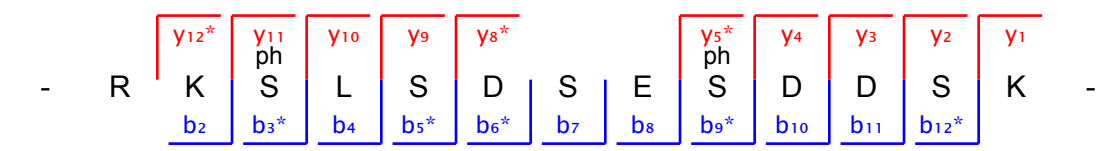



Raw file: 20150812\_A375SR\_Phospho\_BR1\_03  
 Scan: 23992 Method: FTMS; HCD Score: 165.21 m/z: 856.72 Gene names: DPYSL3

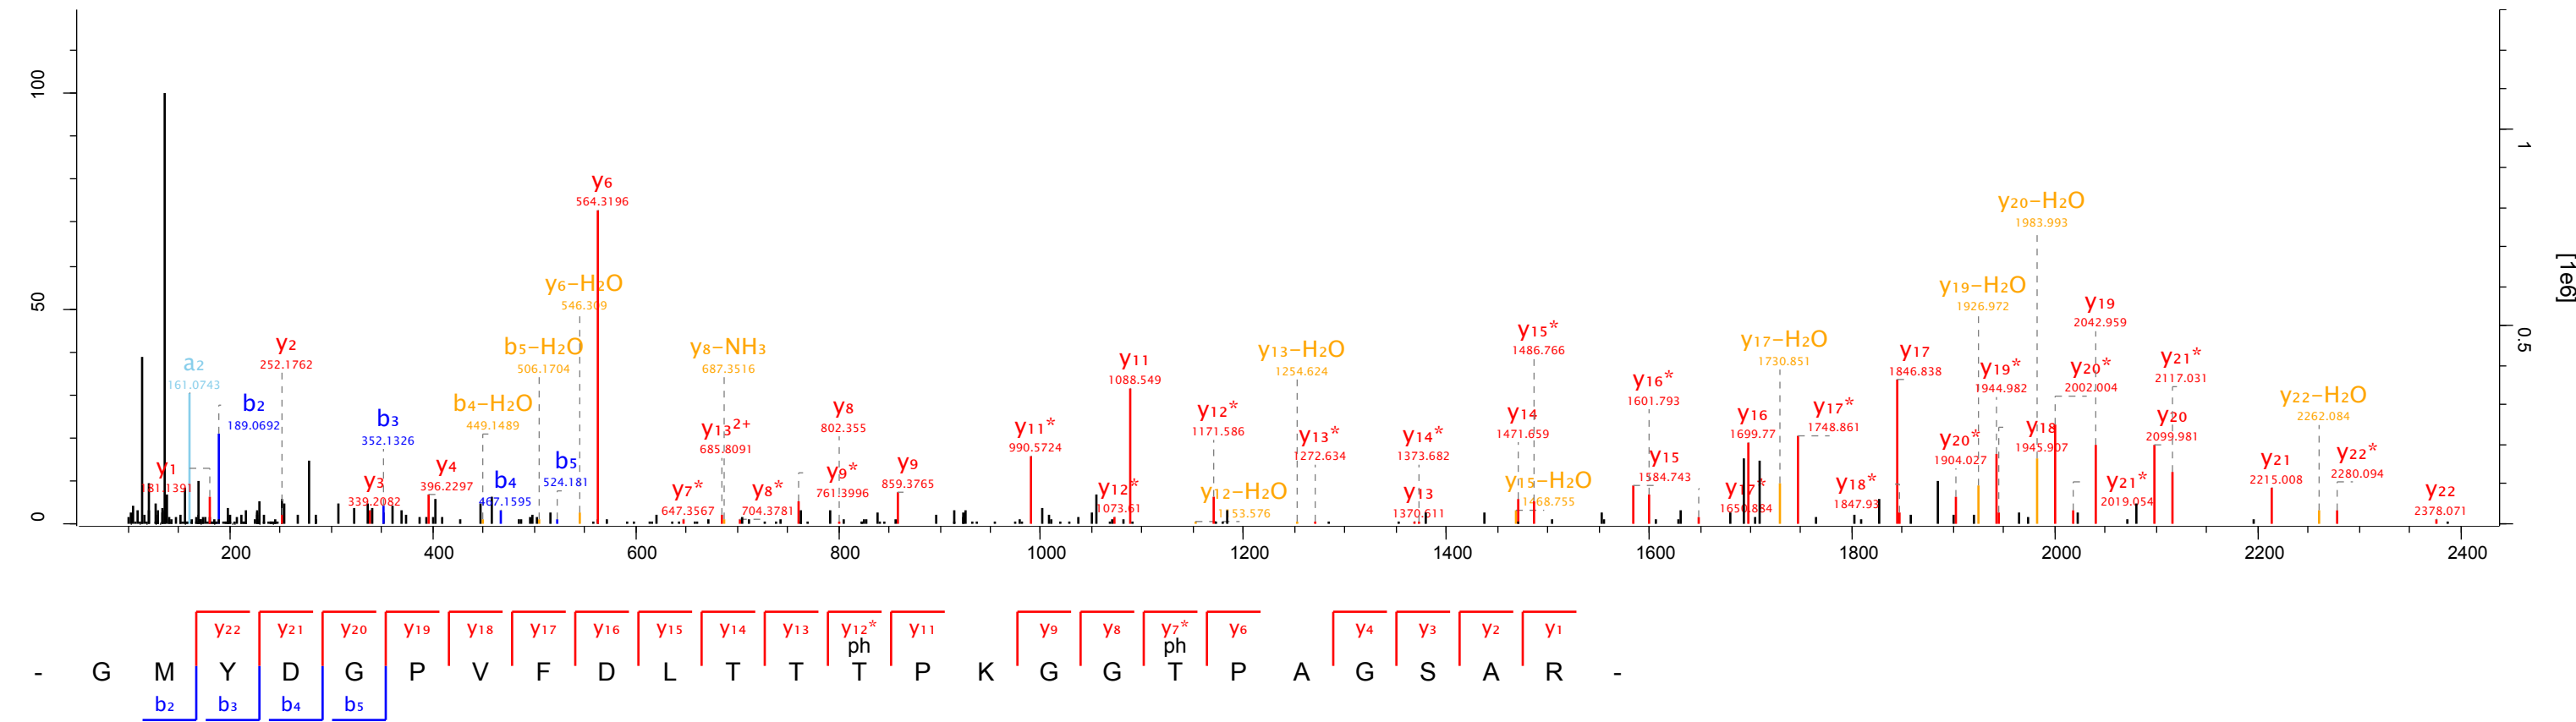

Raw file: 20150812\_A375SR\_Phospho\_BR1\_03  
 Scan: 24132 Method: FTMS; HCD Score: 160.33 m/z: 994.98 Gene names: TRIO

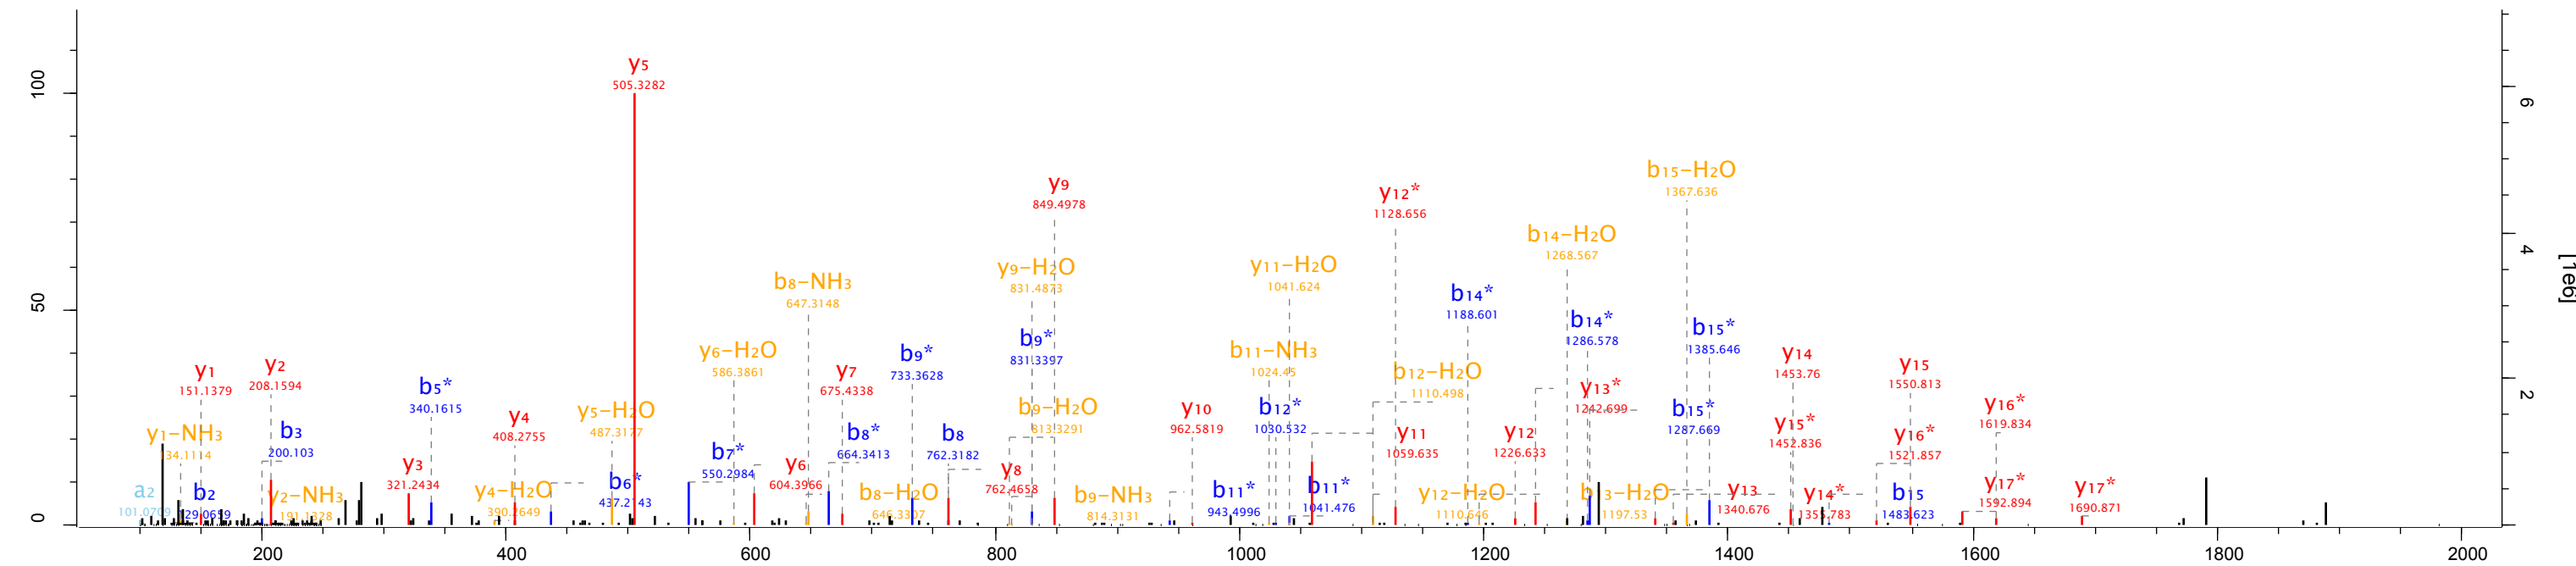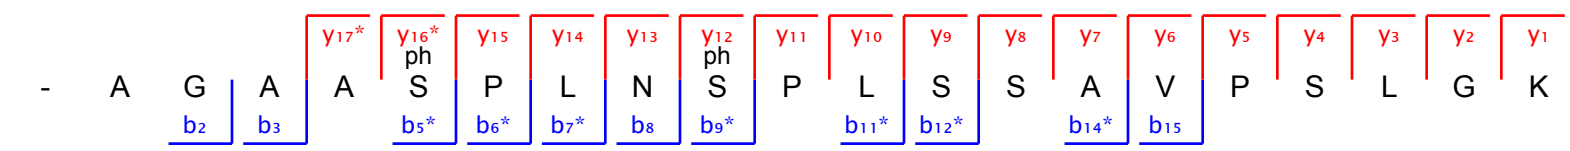

Raw file: 20150812\_A375SR\_Phospho\_BR1\_03  
 Scan: 24412 Method: FTMS; HCD Score: 42.22 m/z: 1065.43 Gene names: CCAR2

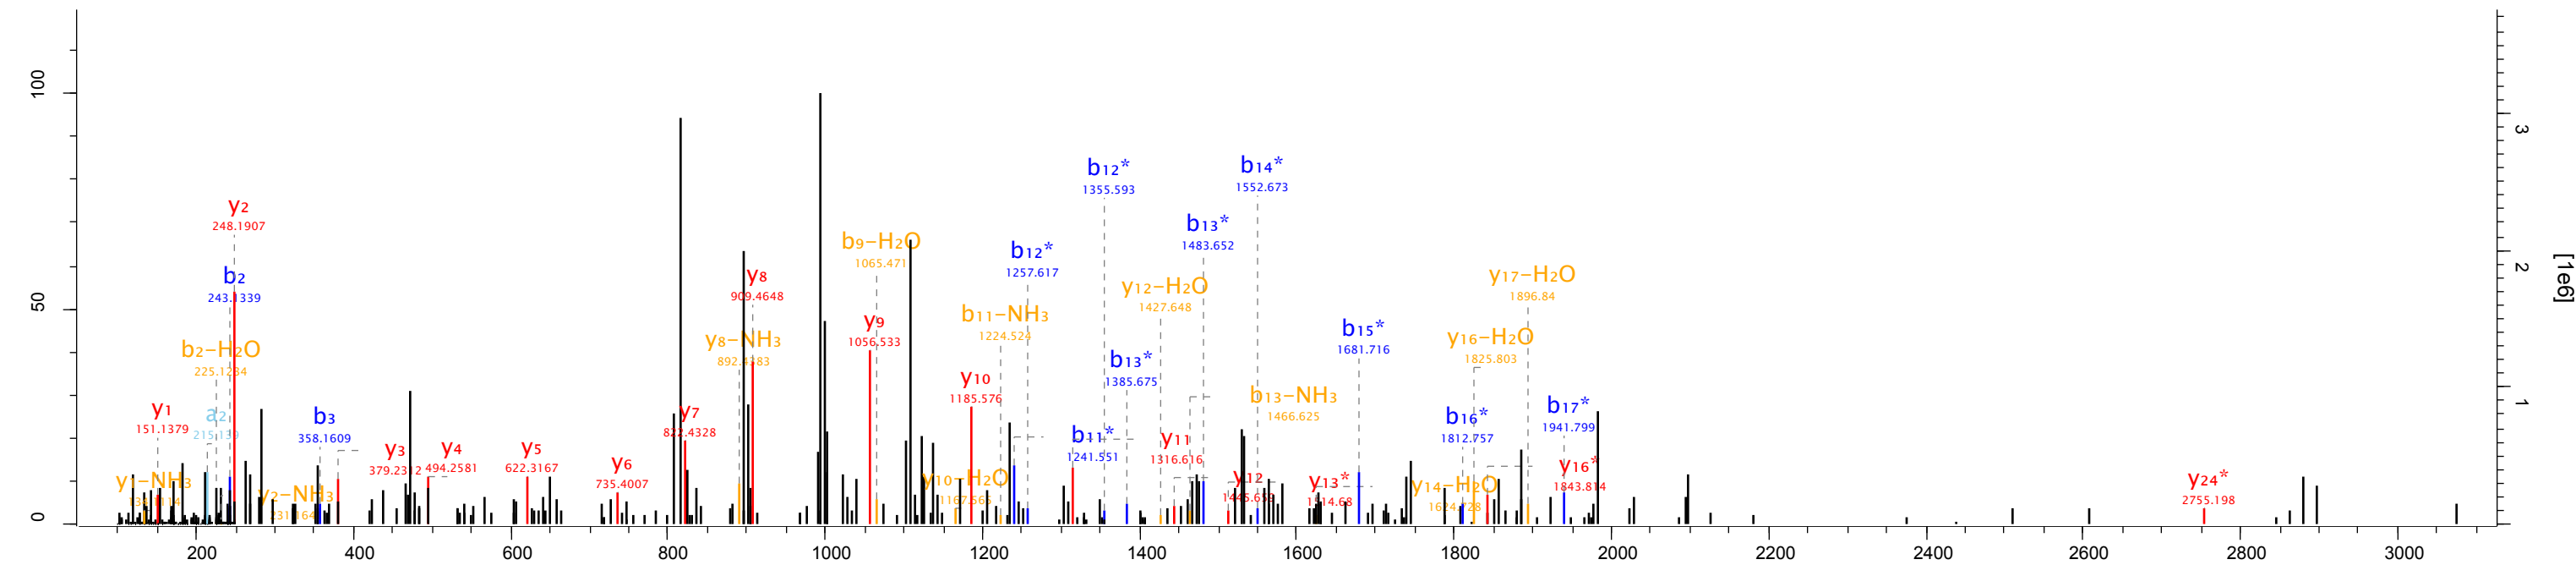

- L E D S E V R S V A S N Q S E M E F S S L Q D M P K -

b<sub>2</sub>
b<sub>3</sub>
b<sub>11</sub>\*
b<sub>12</sub>\*
b<sub>13</sub>\*
b<sub>14</sub>\*
b<sub>15</sub>\*
b<sub>16</sub>\*
b<sub>17</sub>\*
y<sub>13</sub>\*
y<sub>12</sub>
y<sub>11</sub>
y<sub>10</sub>
y<sub>9</sub>
y<sub>8</sub>
y<sub>7</sub>
y<sub>6</sub>
y<sub>5</sub>
y<sub>4</sub>
y<sub>3</sub>
y<sub>2</sub>
y<sub>1</sub>
y<sub>24</sub>\*
y<sub>16</sub>\*

Raw file  
 20150812\_A375SR\_Phospho\_BR1\_03  
 Scan 24912 Method FTMS; HCD Score 320.42 m/z 1132.48 Gene names SMN1

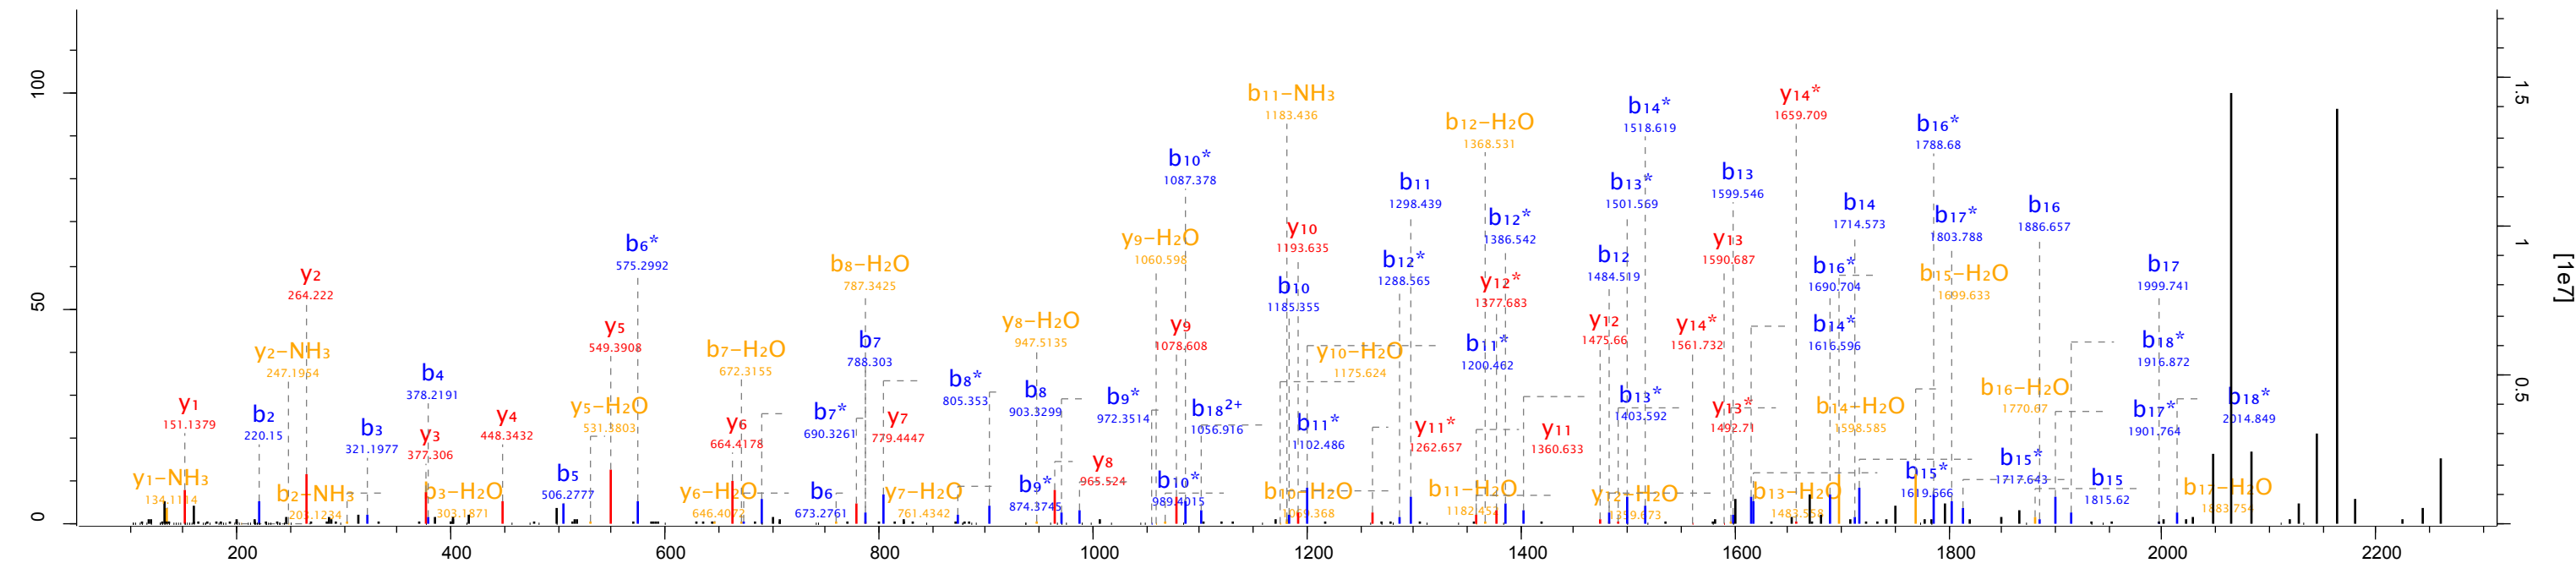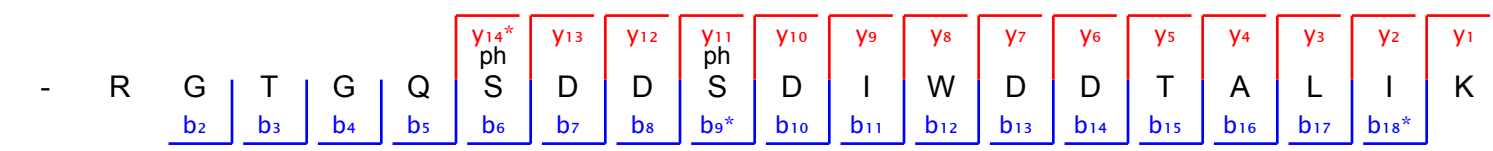

Raw file 20150812\_A375SR\_Phospho\_BR1\_03 Scan 25062 Method FTMS; HCD Score 198.85 m/z 957.13 Gene names SMARCA1

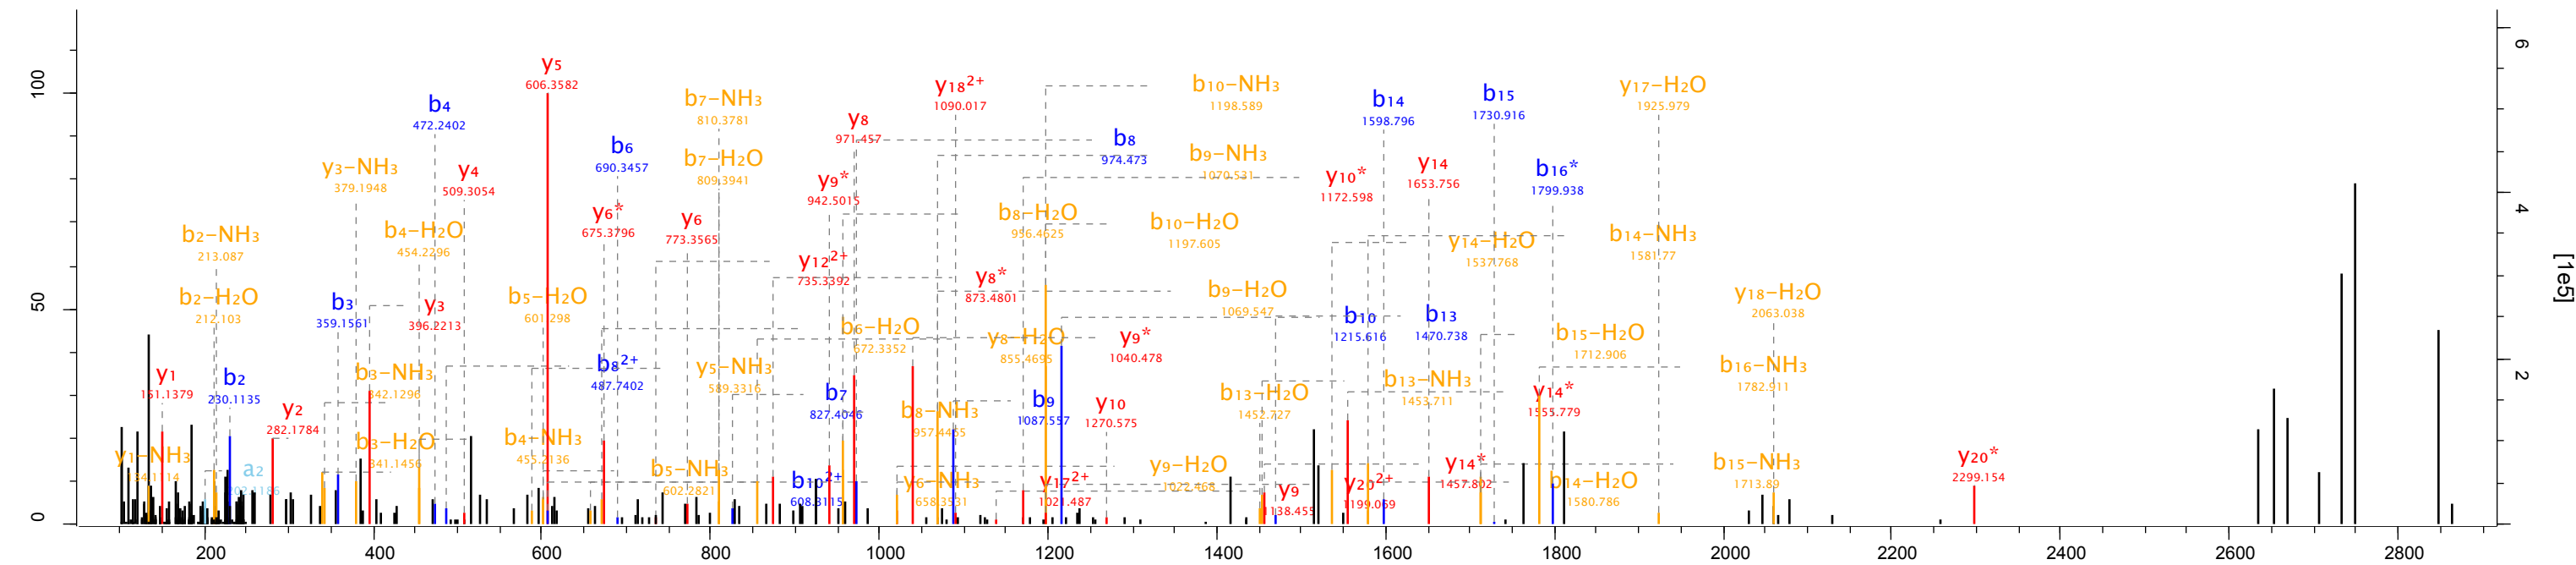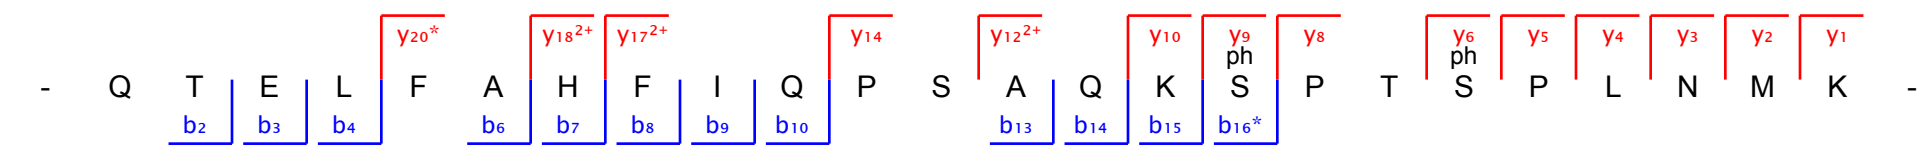

Raw file Scan Method Score m/z Gene names  
 20150812\_A375SR\_Phospho\_BR1\_03 25352 FTMS; HCD 112.05 1057.95 PHAX

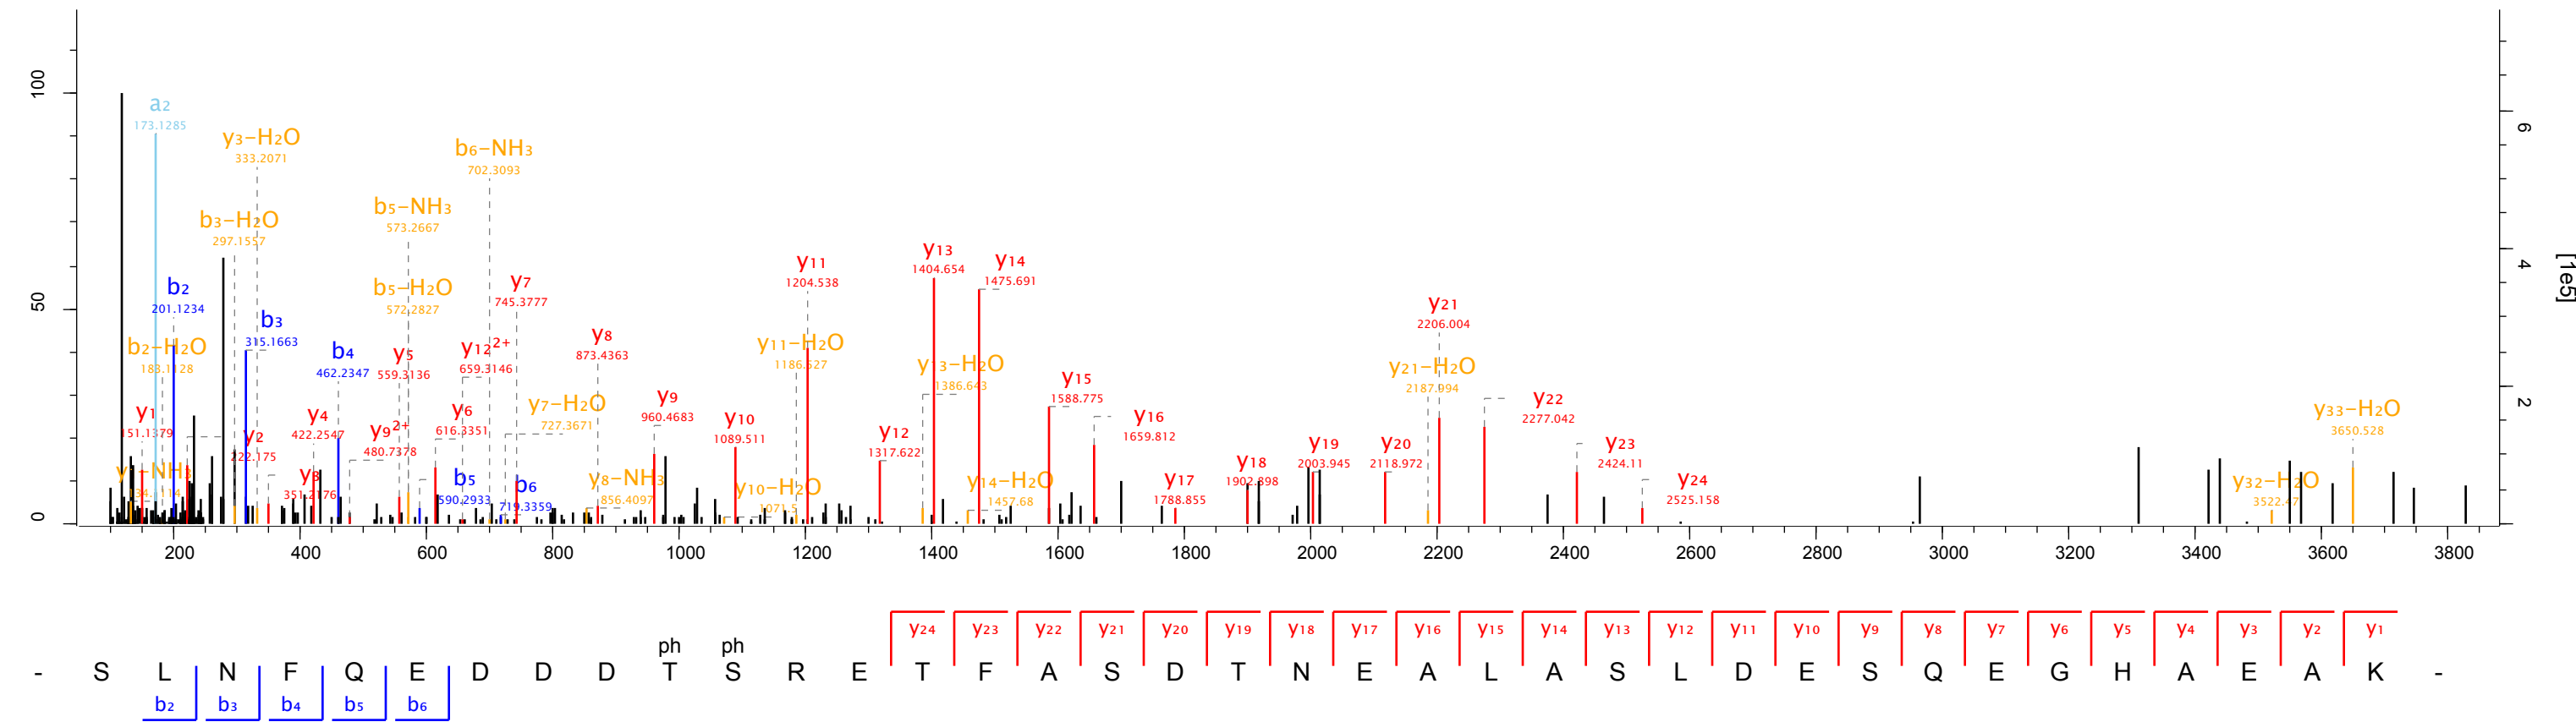

Raw file: 20150812\_A375SR\_Phospho\_BR1\_03  
 Scan: 25492 Method: FTMS; HCD Score: 188.31 m/z: 1072.12 Gene names: RBM5

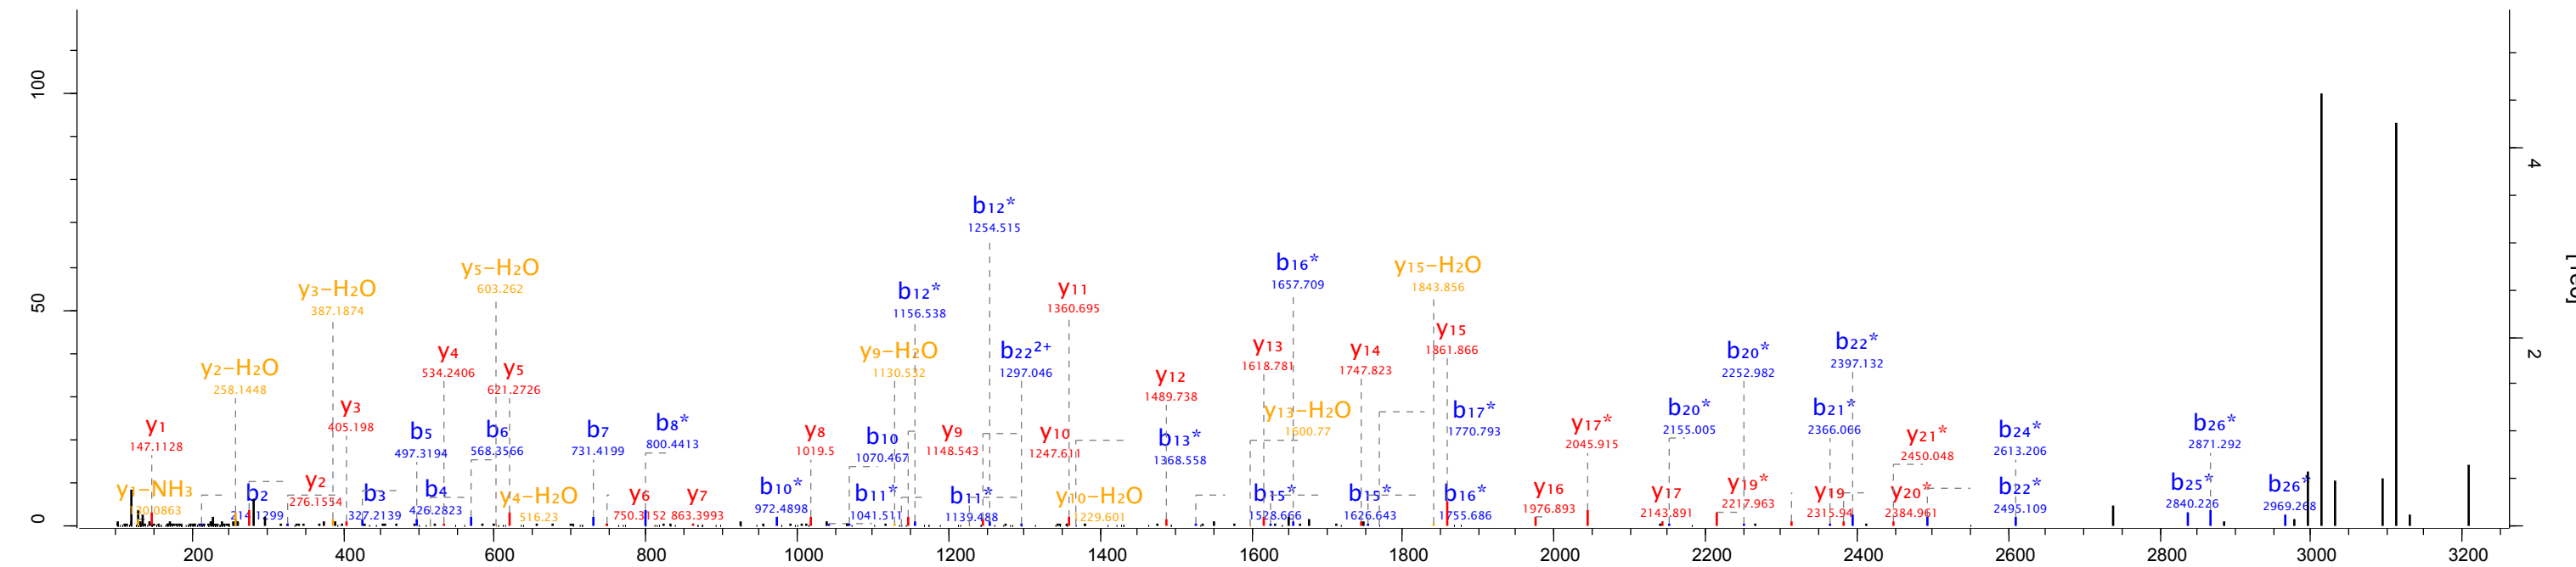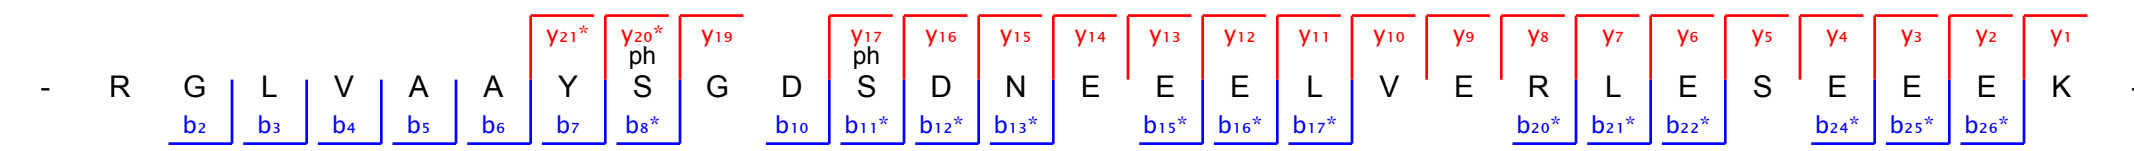

Raw file  
20150812\_A375SR\_Phospho\_BR1\_03

Scan 25562 Method FTMS; HCD Score 281.66 m/z 1139.08 Gene names FOXK1

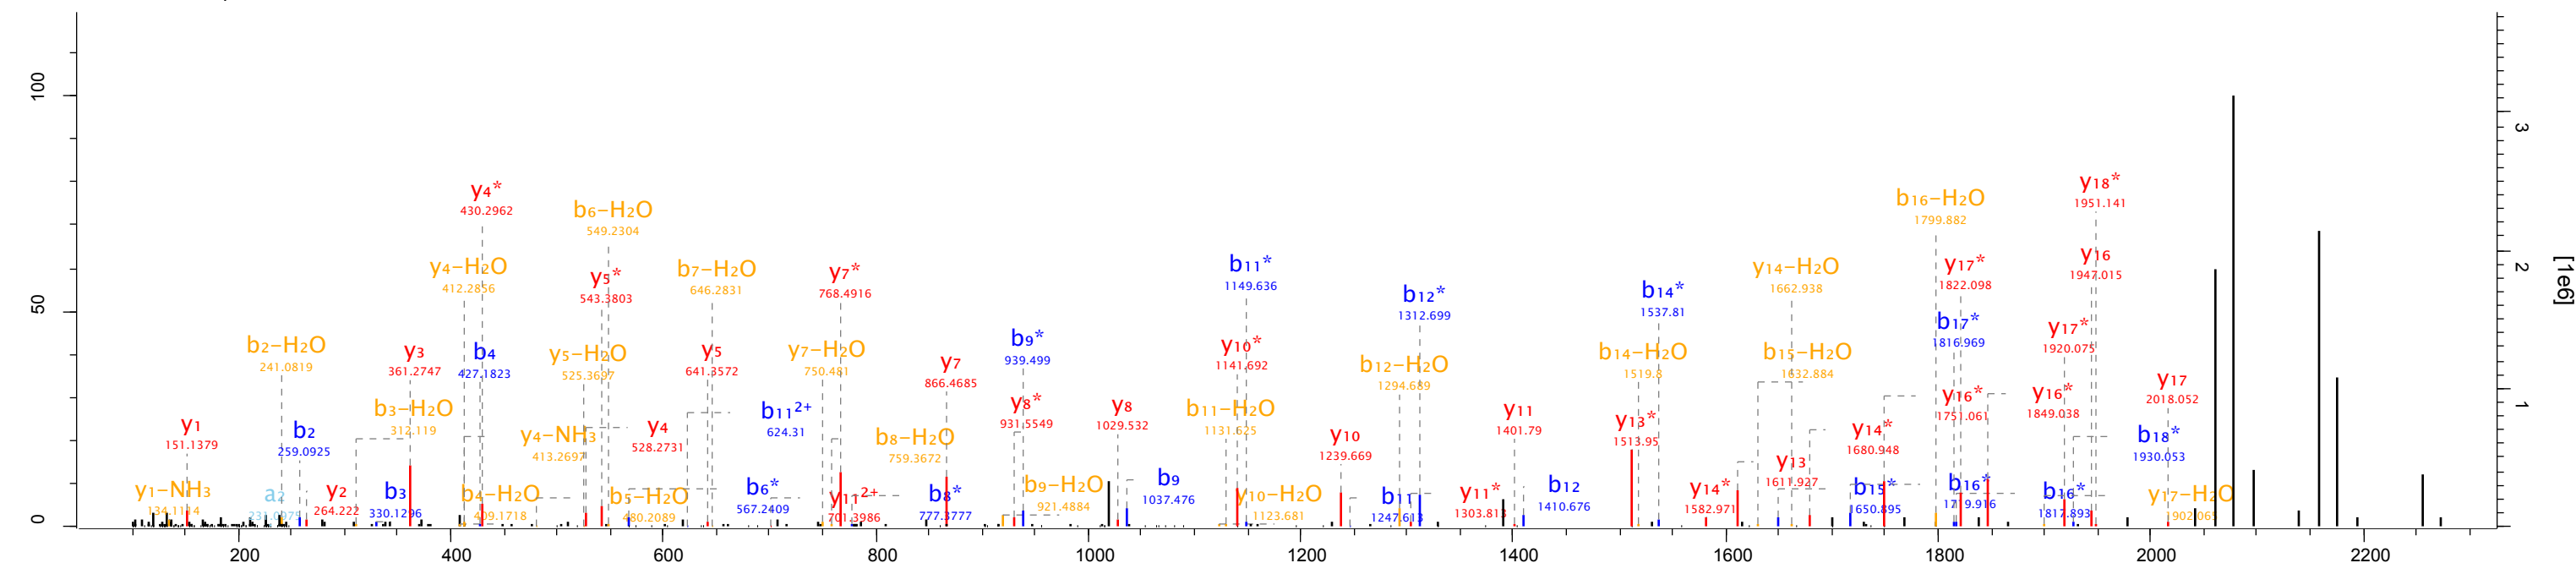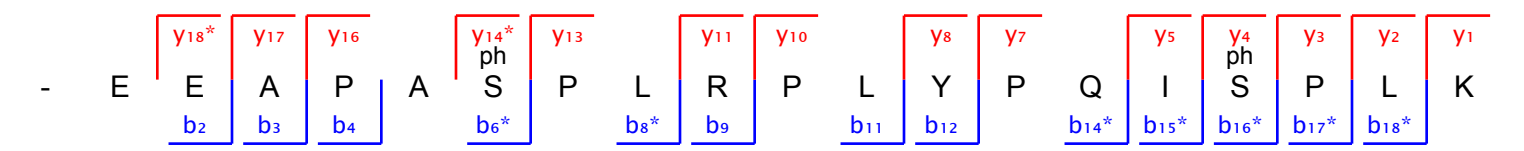



Raw file: 20150812\_A375SR\_Phospho\_BR1\_03  
 Scan: 25762 Method: FTMS; HCD Score: 177.87 m/z: 933.4 Gene names: INO80B;INO80B-WBP1

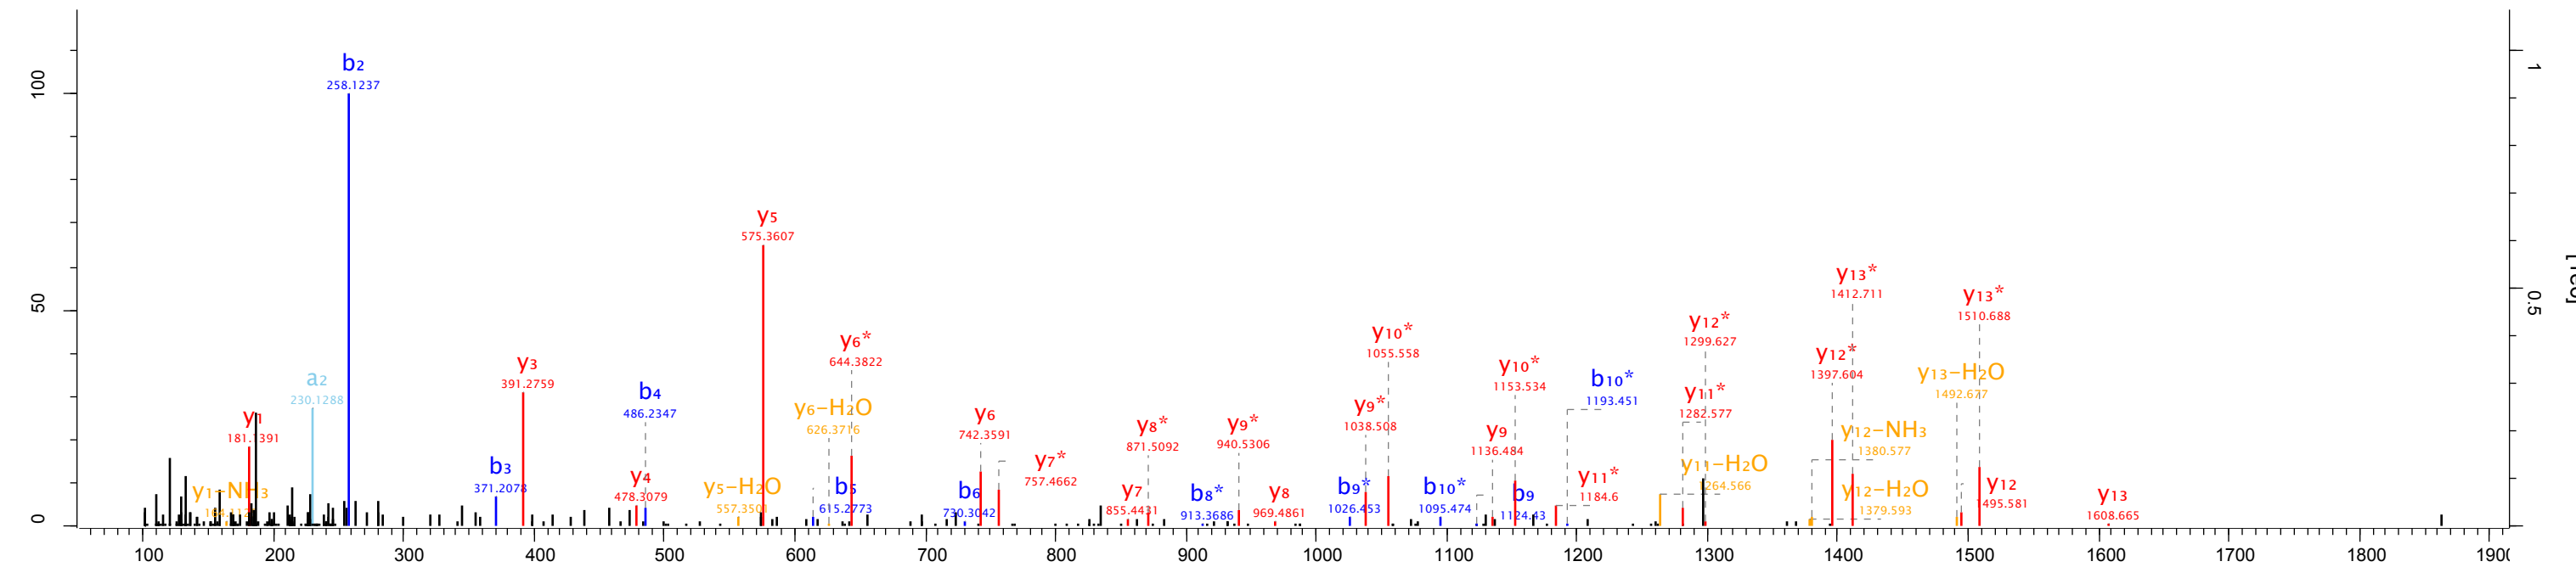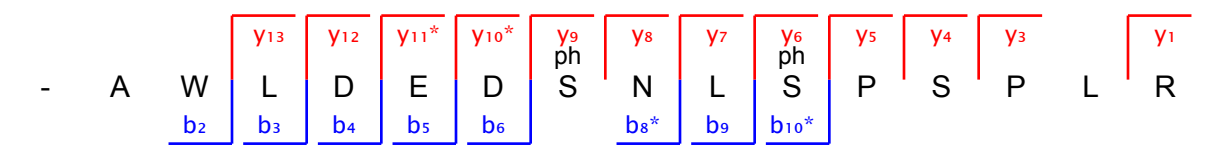

Raw file: 20150812\_A375SR\_Phospho\_BR1\_03  
 Scan: 25912 Method: FTMS; HCD Score: 98.64 m/z: 1332.66 Gene names: PCIF1

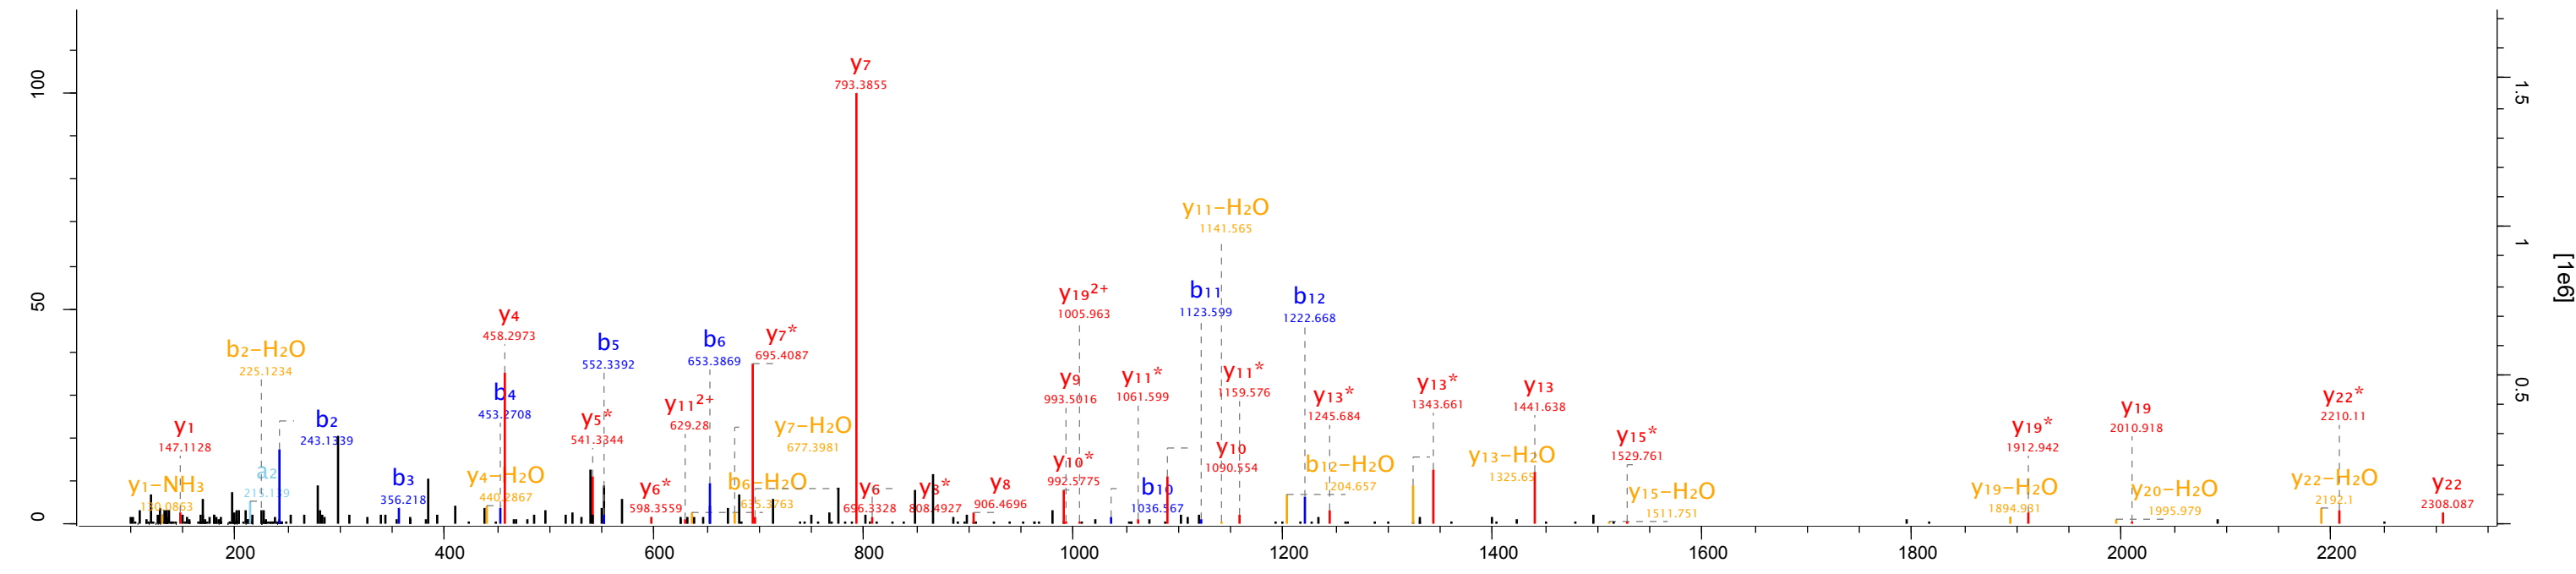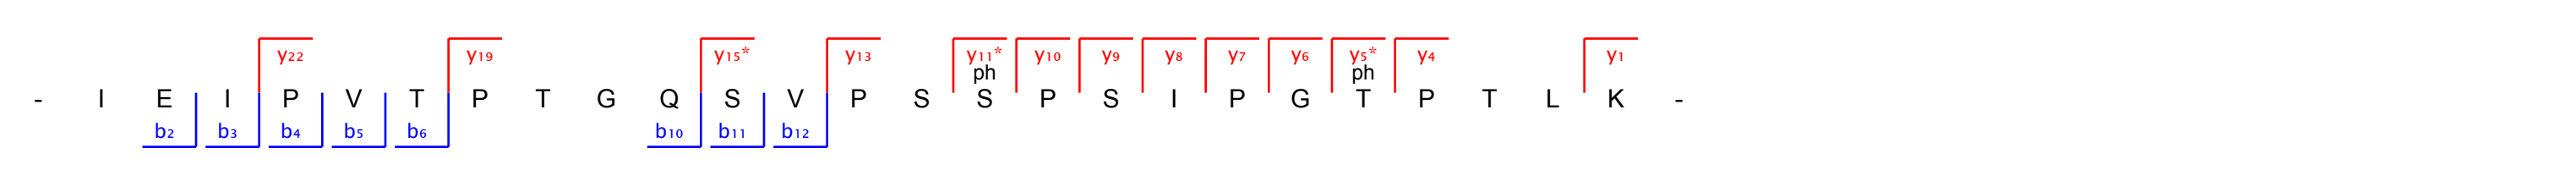

Raw file: 20150812\_A375SR\_Phospho\_BR1\_03  
 Scan: 26042 Method: FTMS; HCD Score: 197.56 m/z: 872.37 Gene names: FAM21C;FAM21D;FAM21A

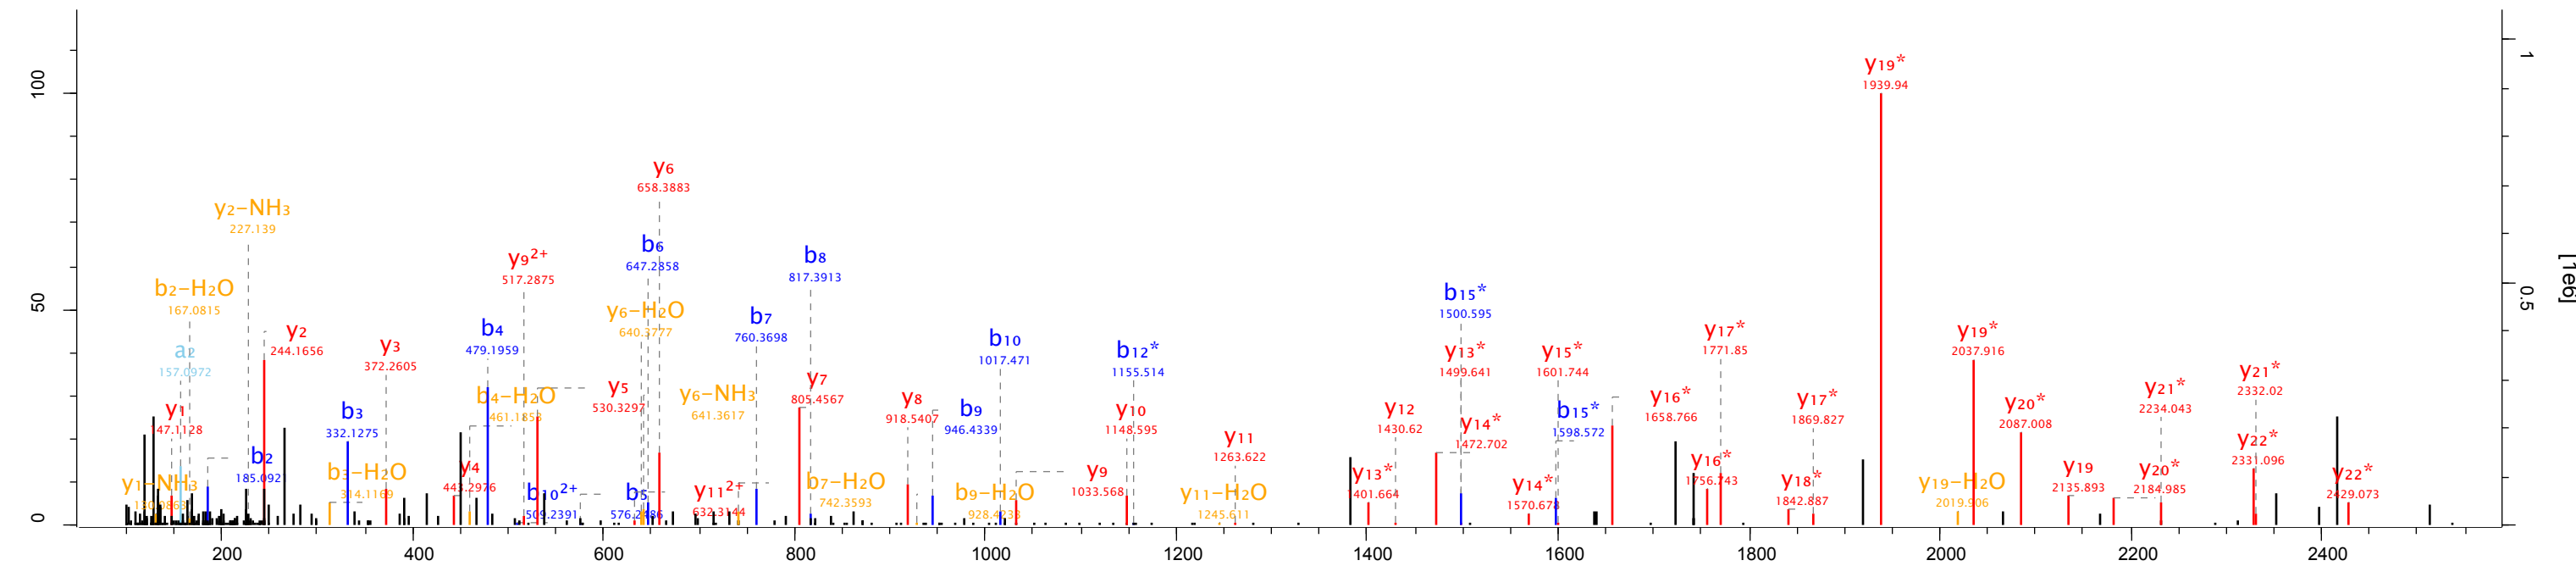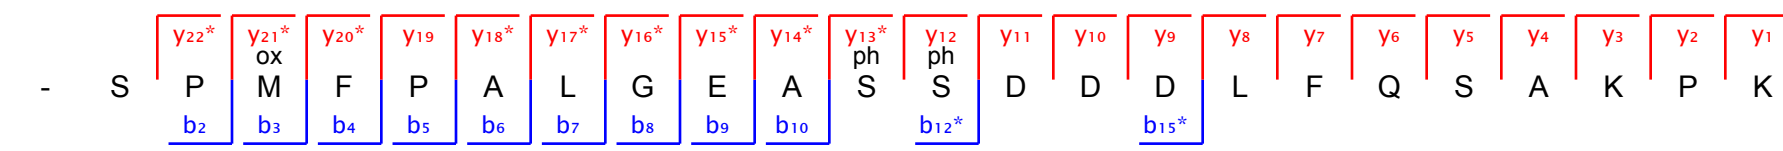

Raw file 20150812\_A375SR\_Phospho\_BR1\_03 Scan 26412 Method FTMS; HCD Score 118.9 m/z 783.38 Gene names TECPR2

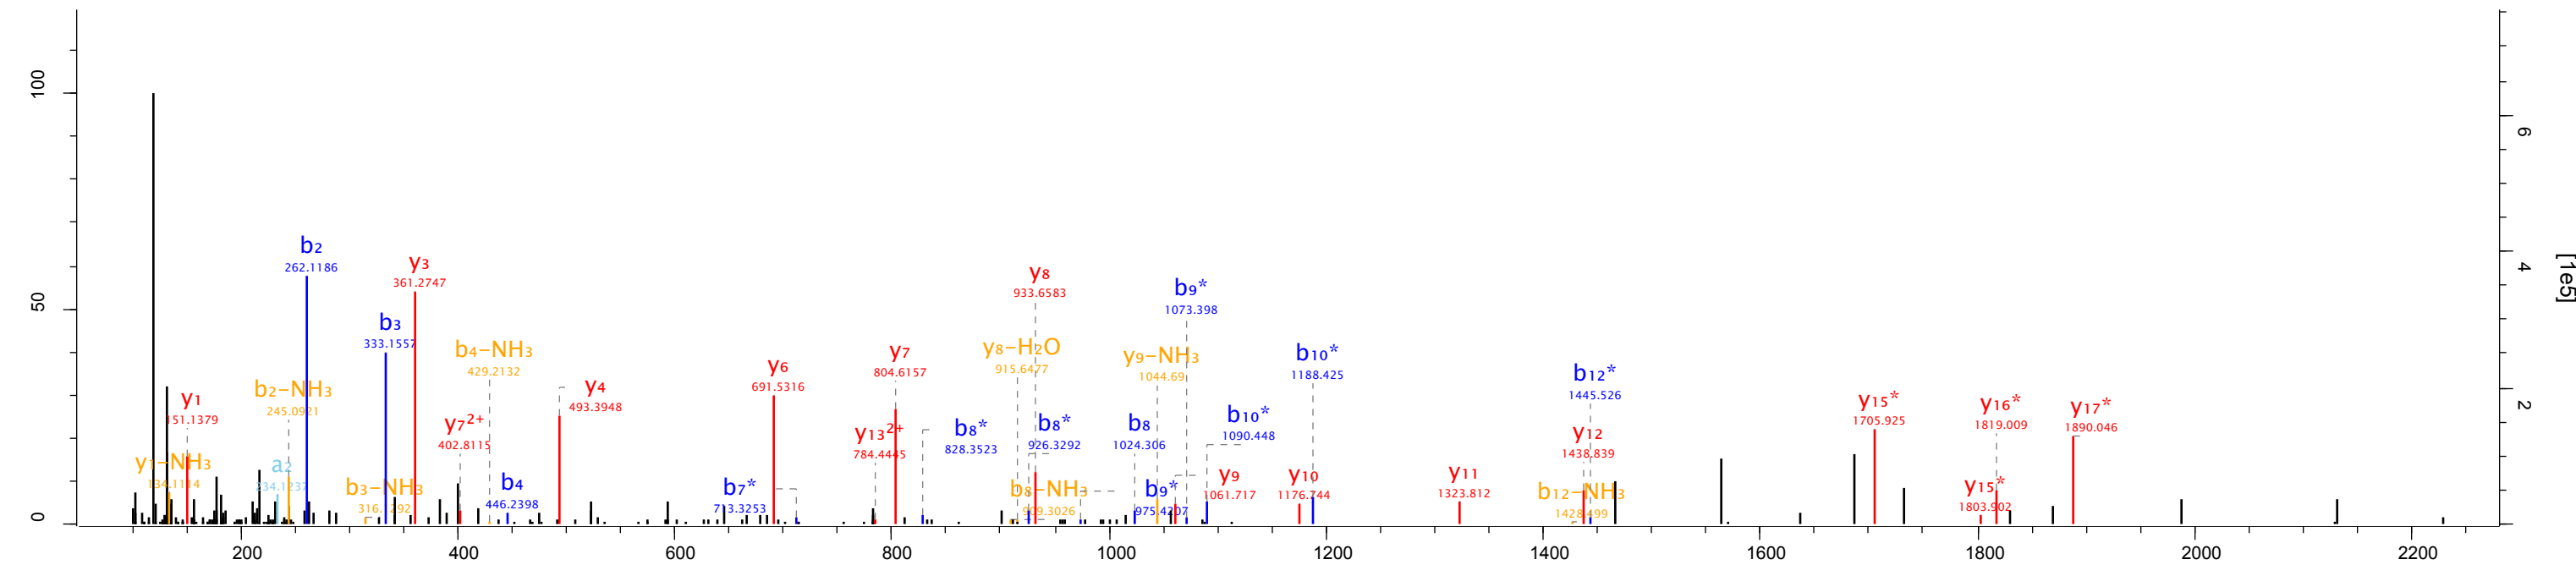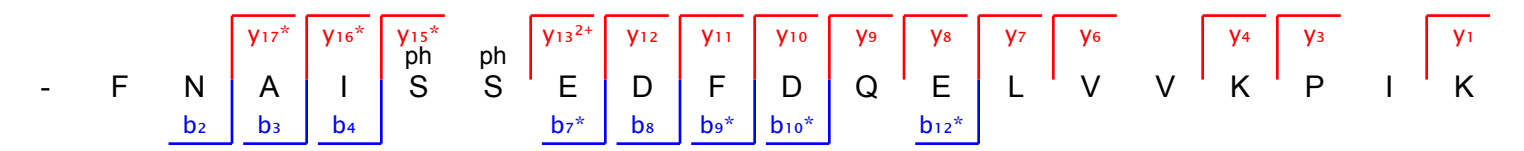

Raw file  
20150812\_A375SR\_Phospho\_BR1\_03

Scan 27072 Method FTMS; HCD Score 95.46 m/z 1186.51 Gene names KMT2B

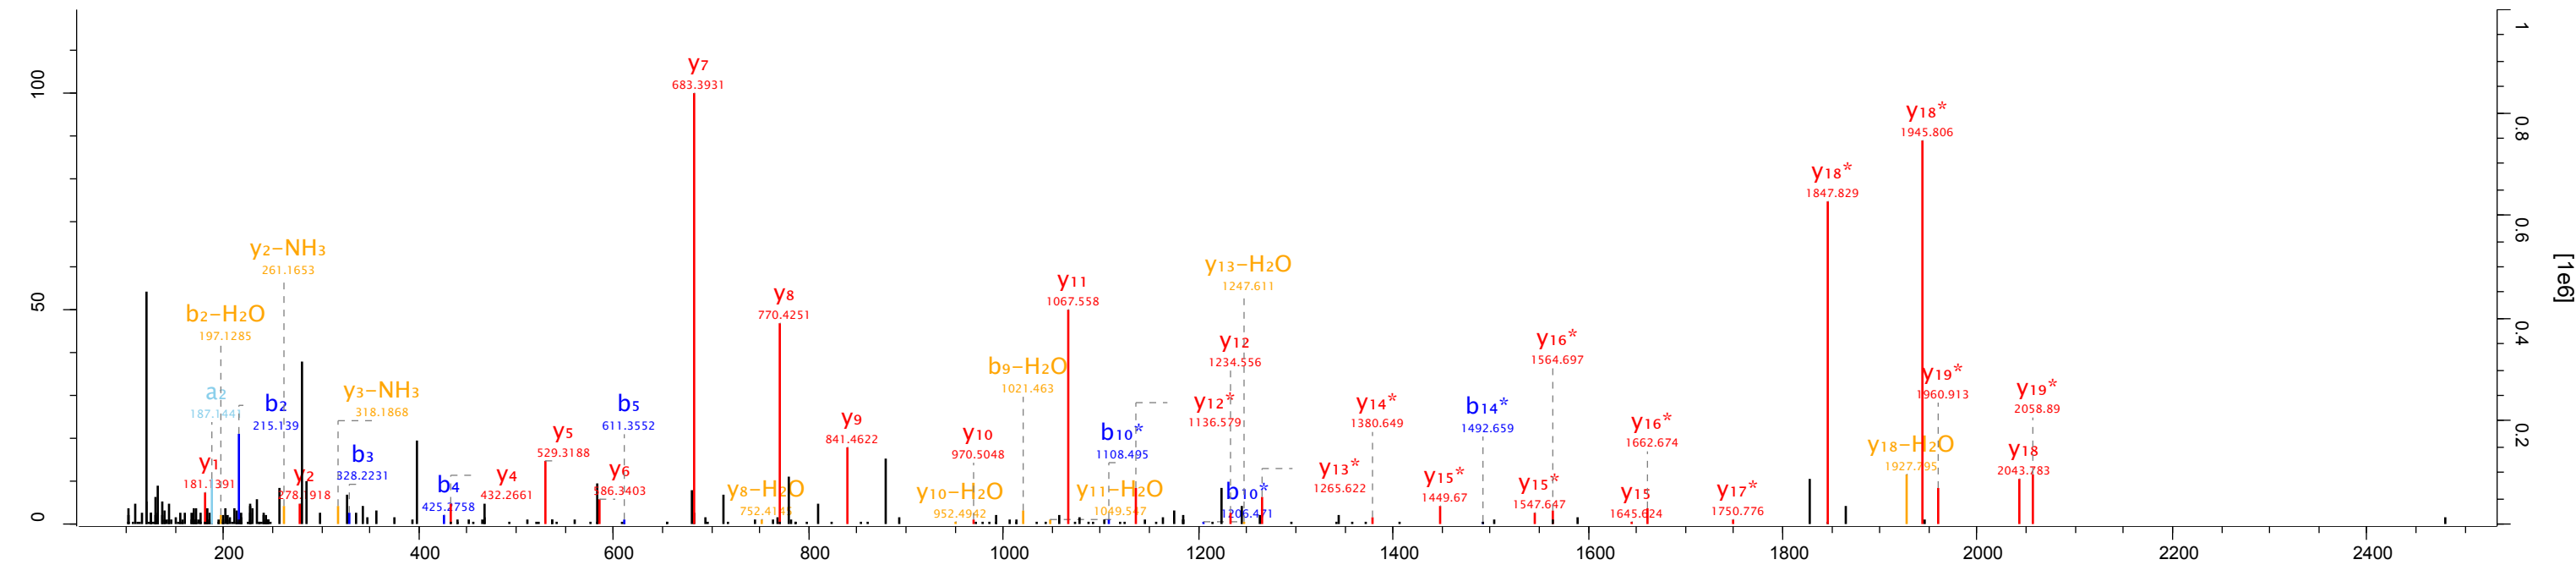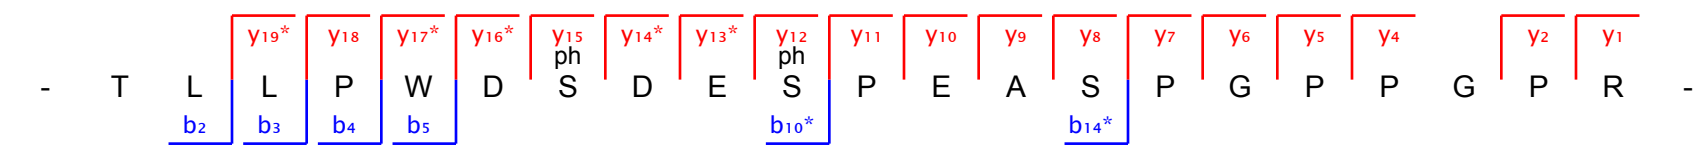

Raw file: 20150812\_A375SR\_Phospho\_BR1\_03  
 Scan: 27932 Method: FTMS; HCD Score: 215.15 m/z: 1281.53 Gene names: RRAGC

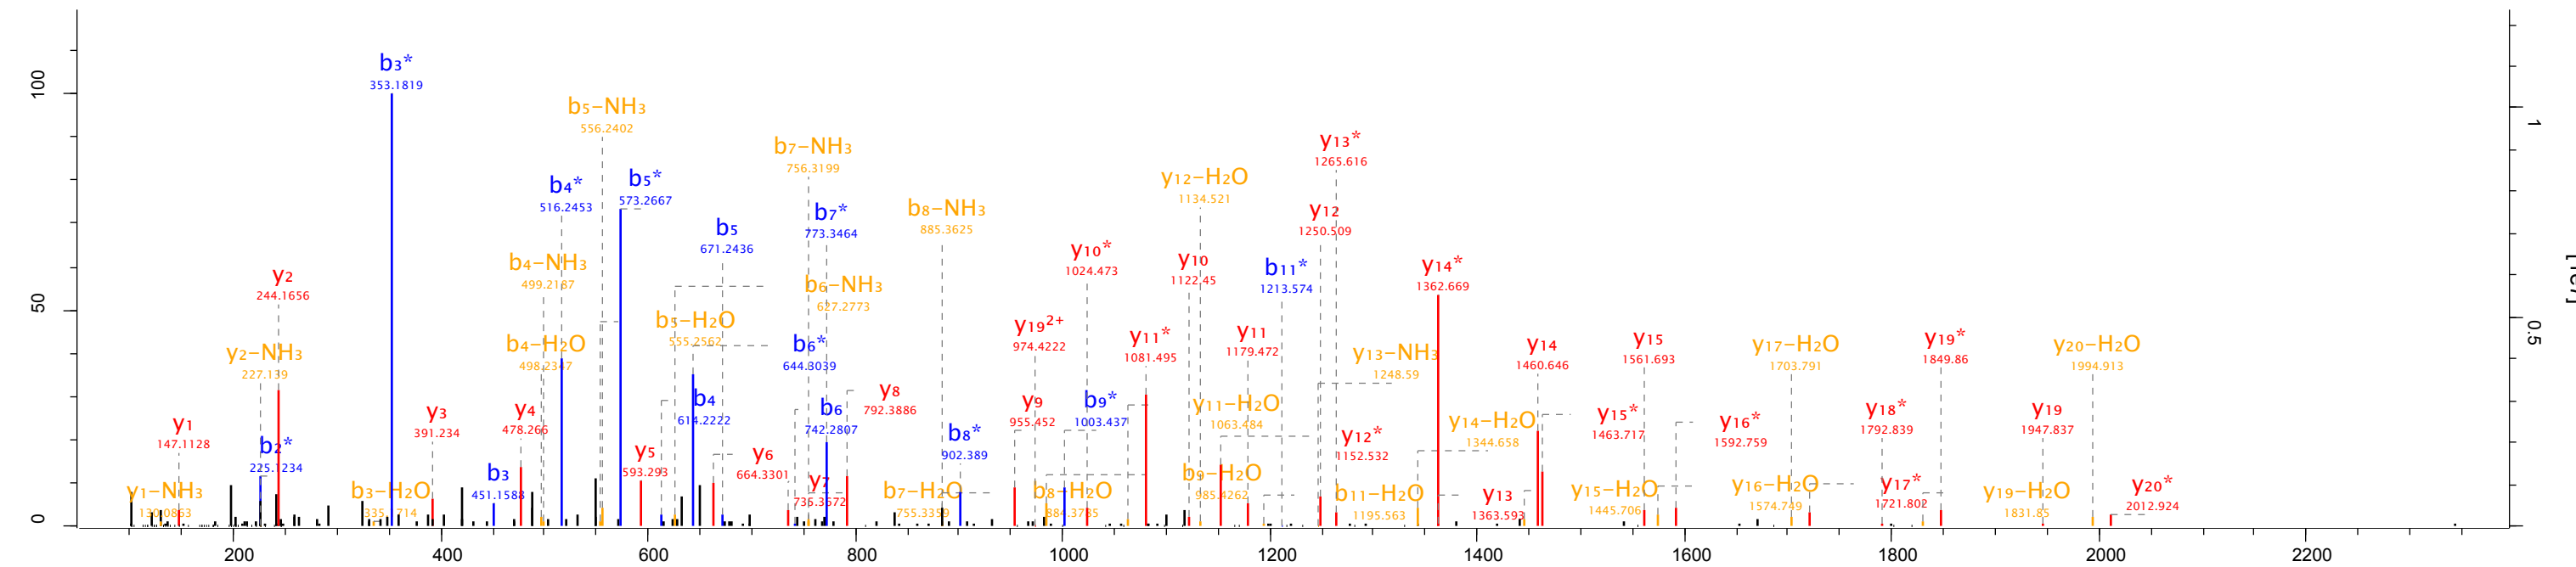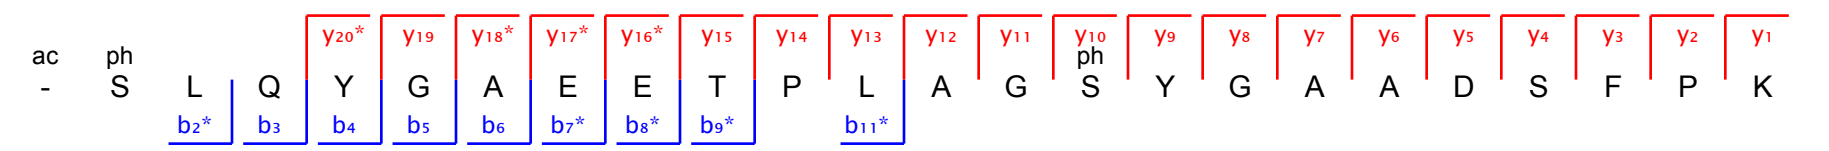

Raw file Scan Method Score m/z Gene names  
 20150812\_A375SR\_Phospho\_BR1\_03 28482 FTMS; HCD 75.9 1010.81 LRRFIP2

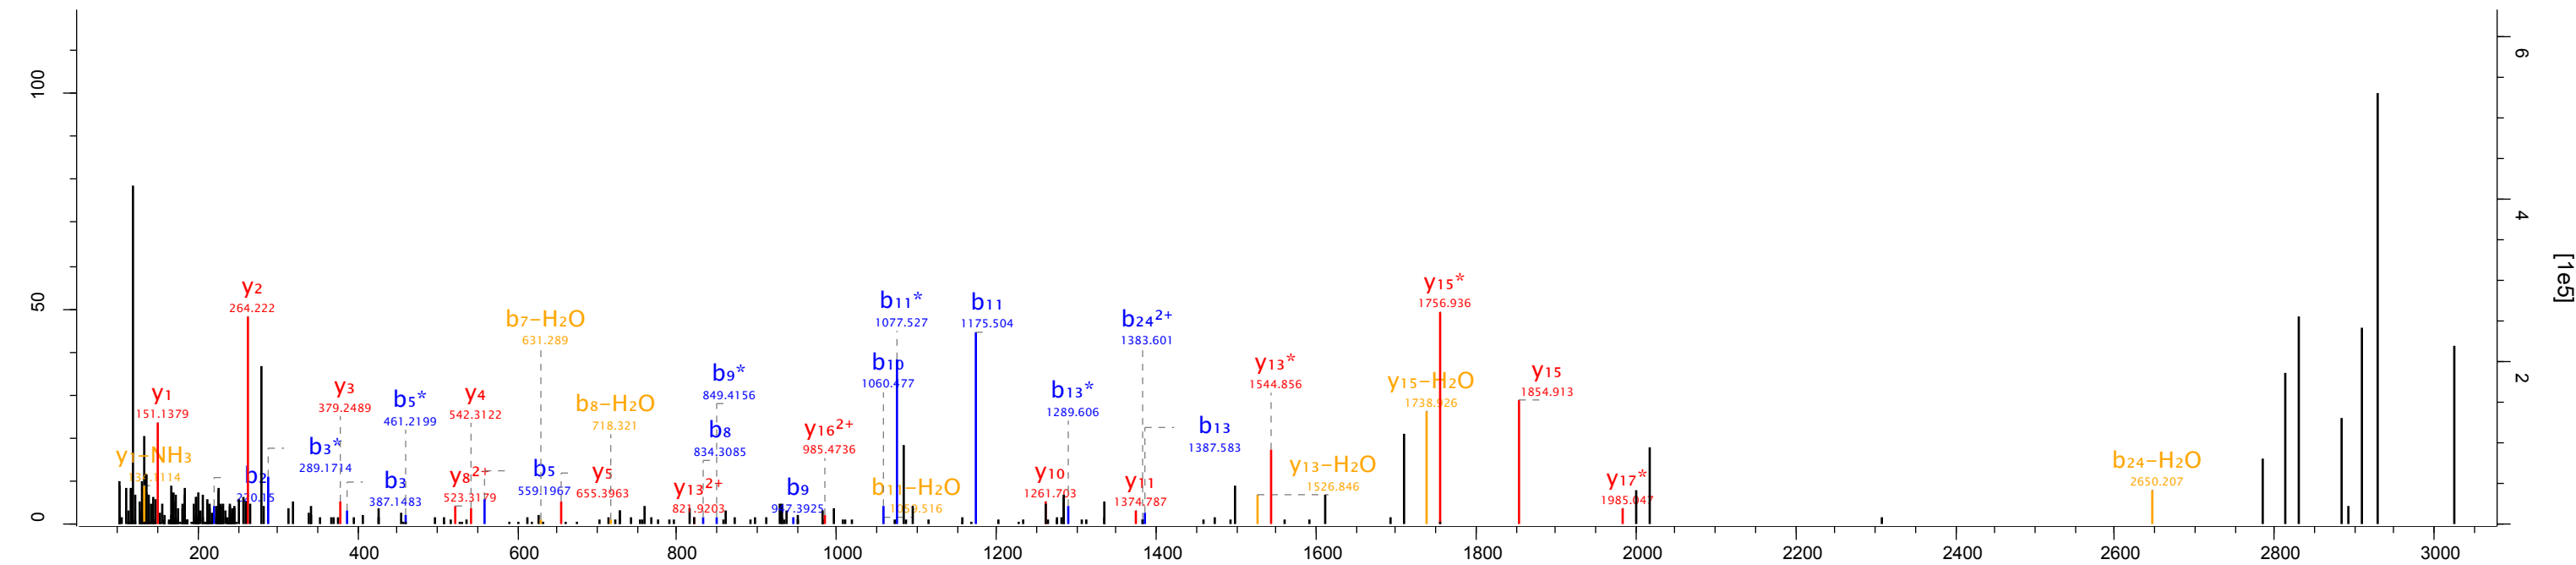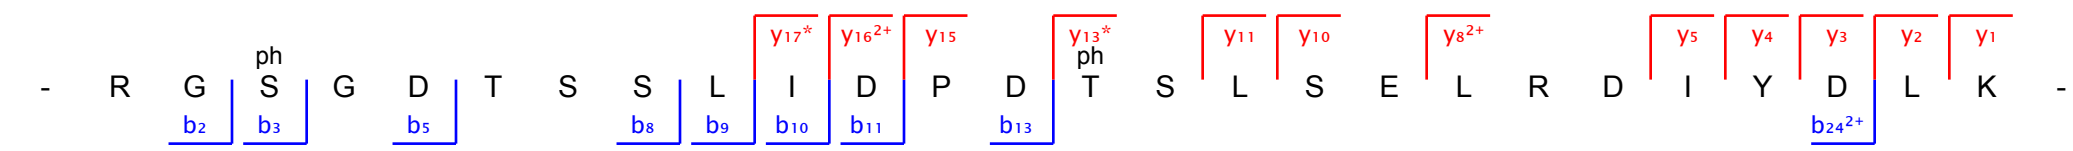

Raw file: 20150812\_A375SR\_Phospho\_BR1\_03  
 Scan: 2872 Method: FTMS; HCD Score: 42.24 m/z: 728.77 Gene names: SRSF3

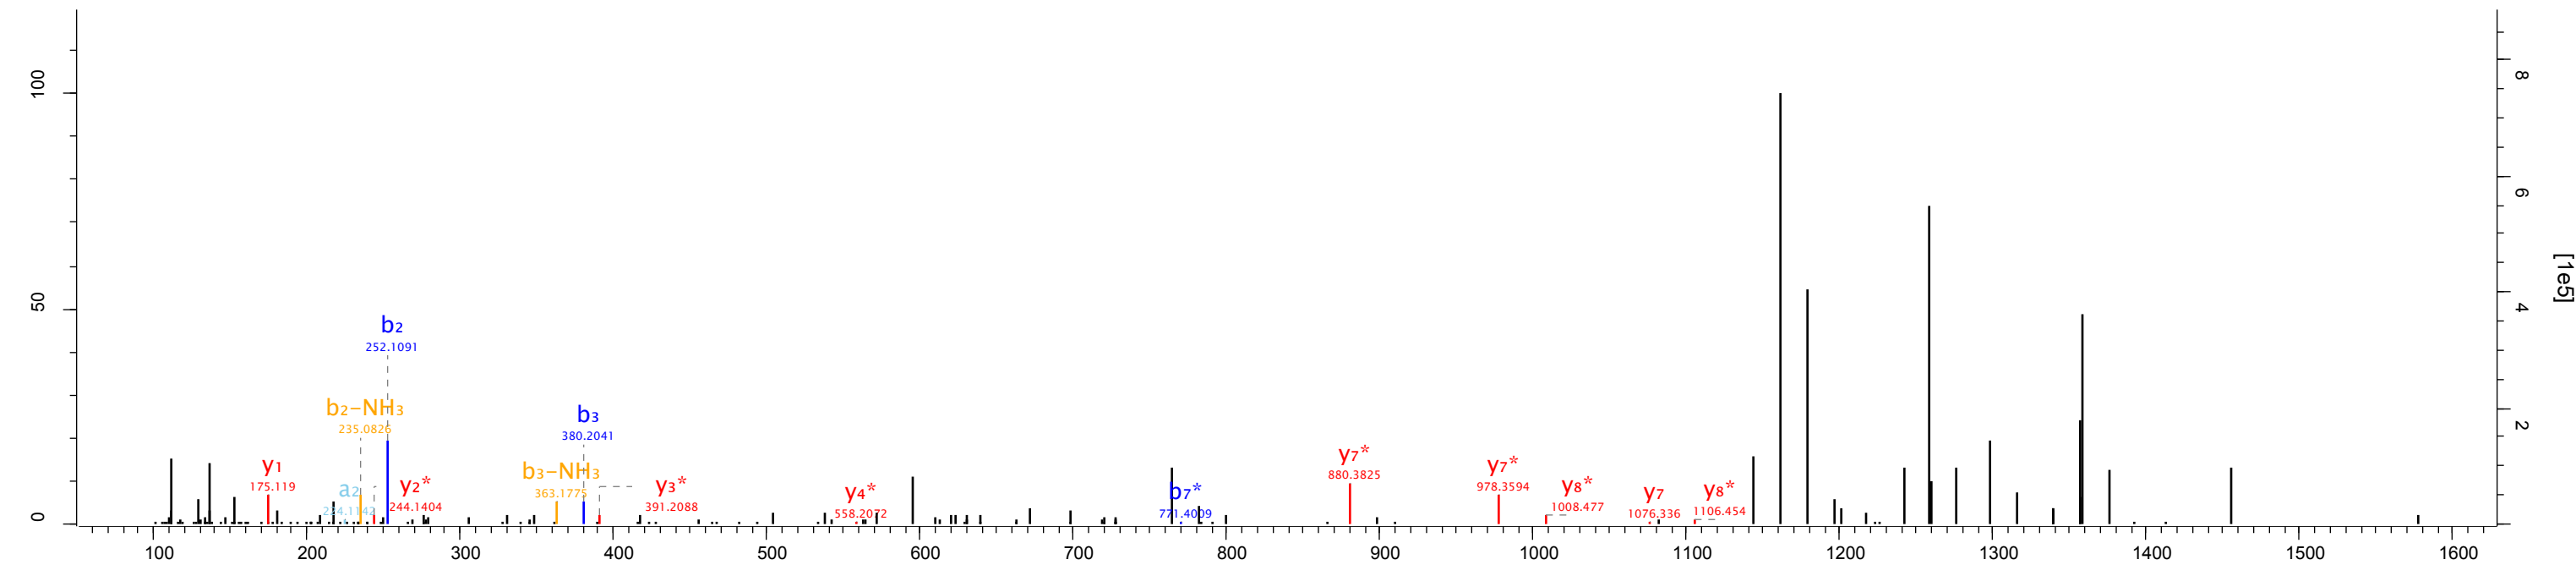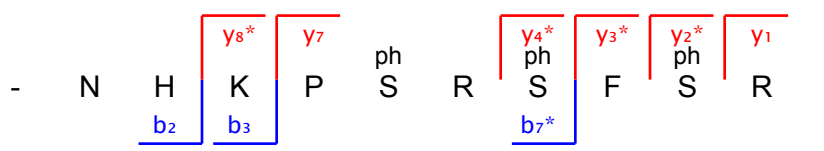



Raw file 20150812\_A375SR\_Phospho\_BR1\_03 Scan 3072 Method FTMS; HCD Score 123.76 m/z 688.8 Gene names SPAG9

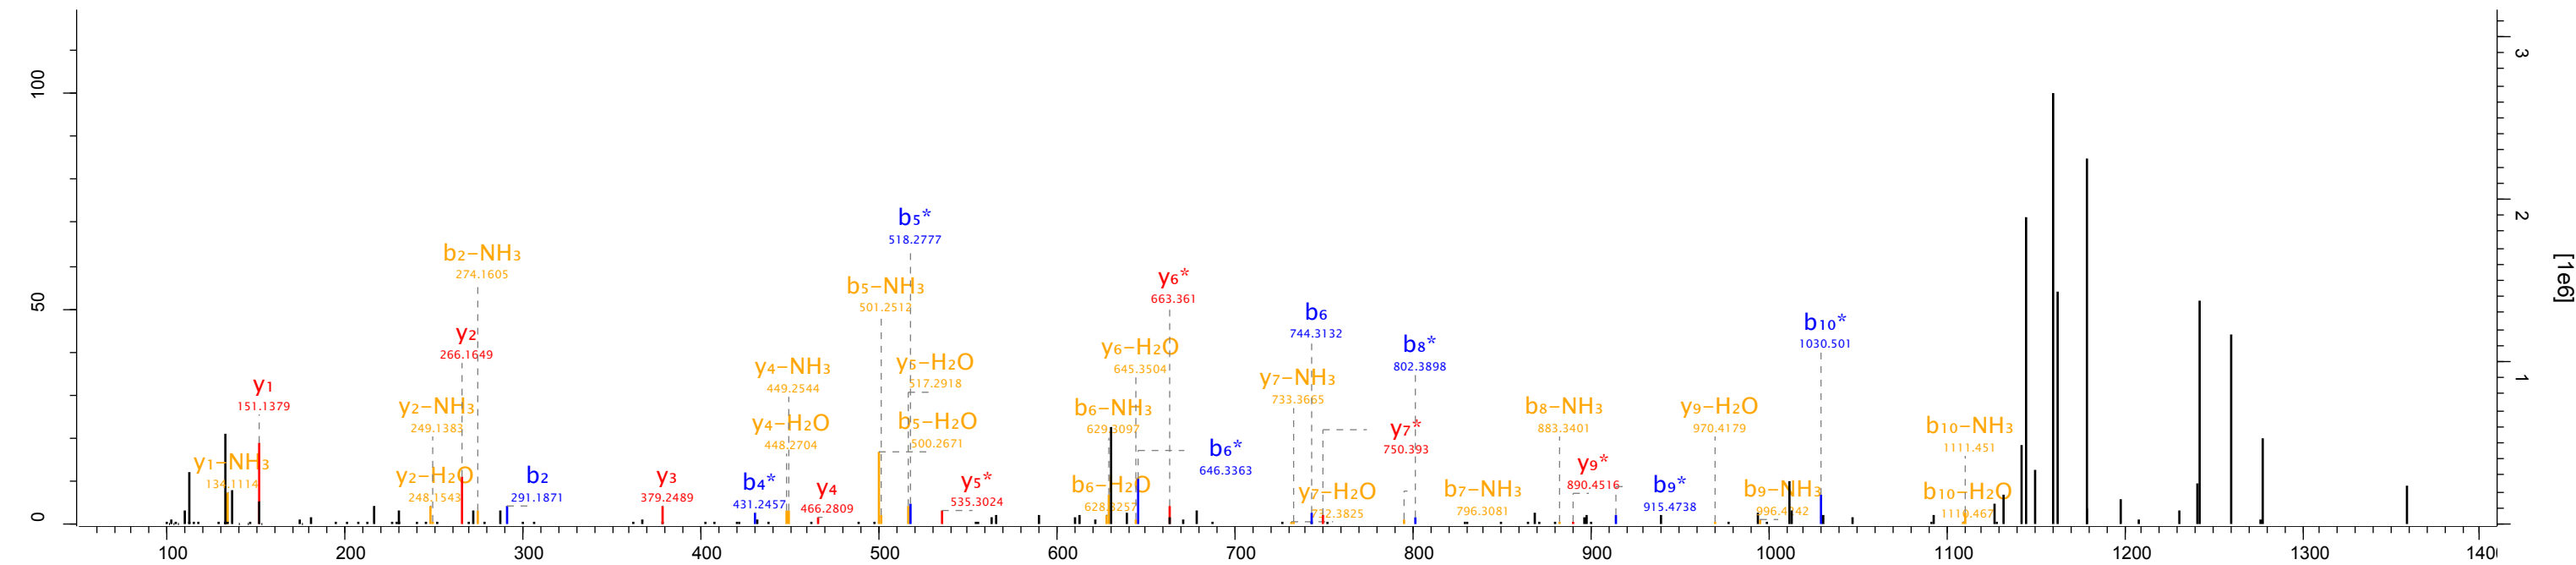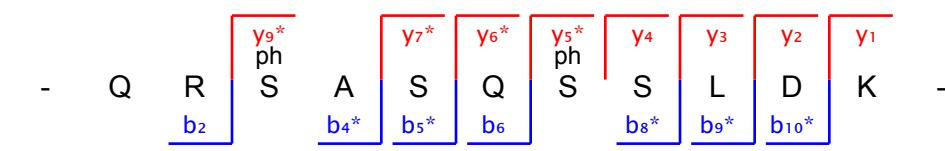

Raw file 20150812\_A375SR\_Phospho\_BR1\_03 Scan 3092 Method FTMS; HCD Score 151.16 m/z 533.31 Gene names NCL

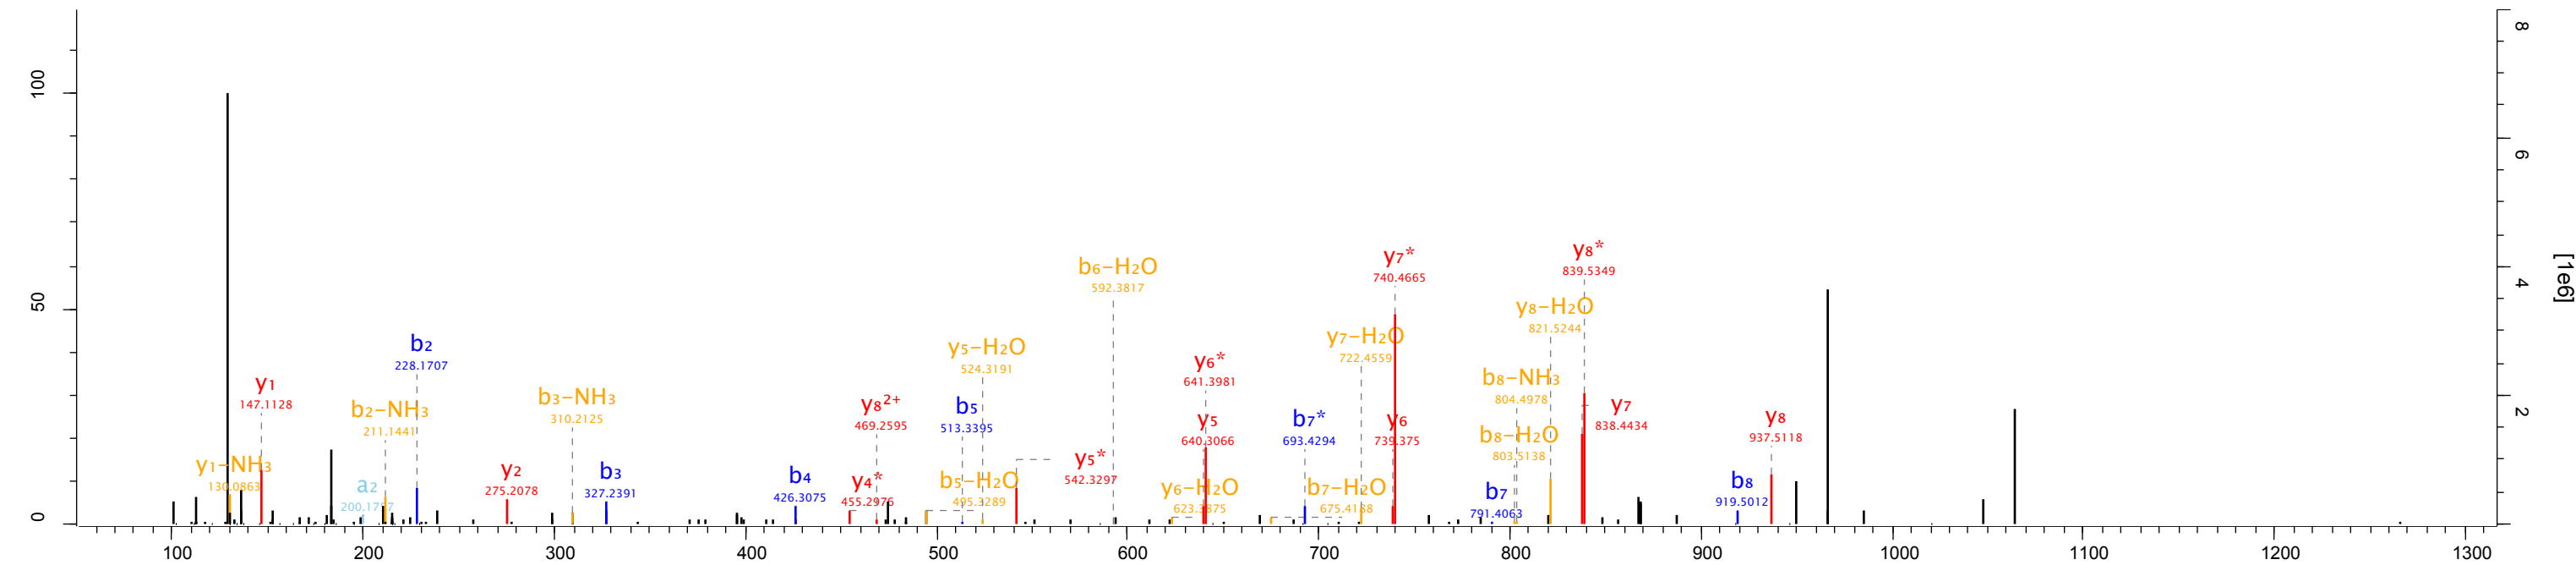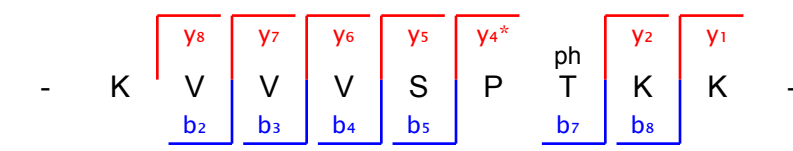

Raw file 20150812\_A375SR\_Phospho\_BR1\_03 Scan 3392 Method FTMS; HCD Score 83.61 m/z 528.56 Gene names WEE1

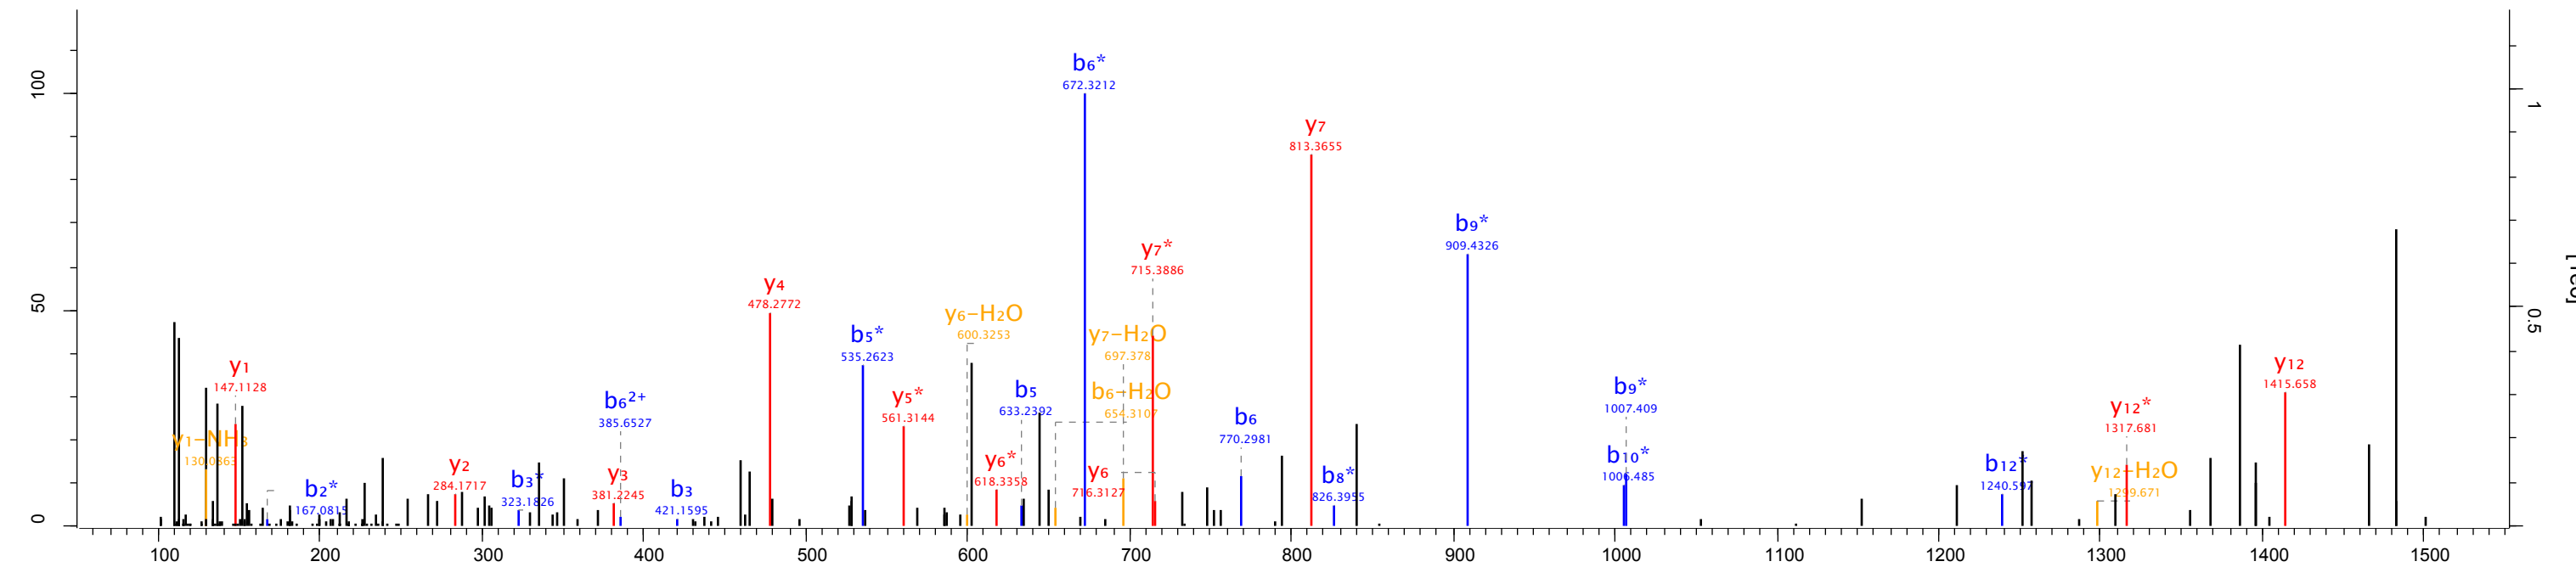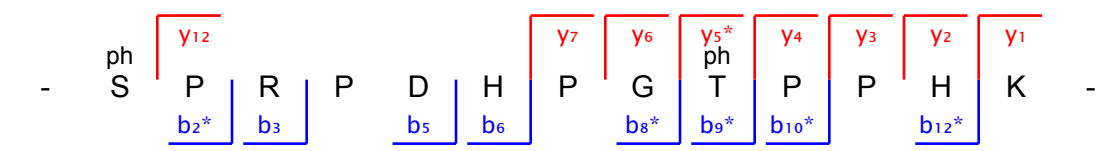

Raw file: 20150812\_A375SR\_Phospho\_BR1\_03  
 Scan: 3632 Method: FTMS; HCD Score: 99.8 m/z: 441.52 Gene names: SRSF1

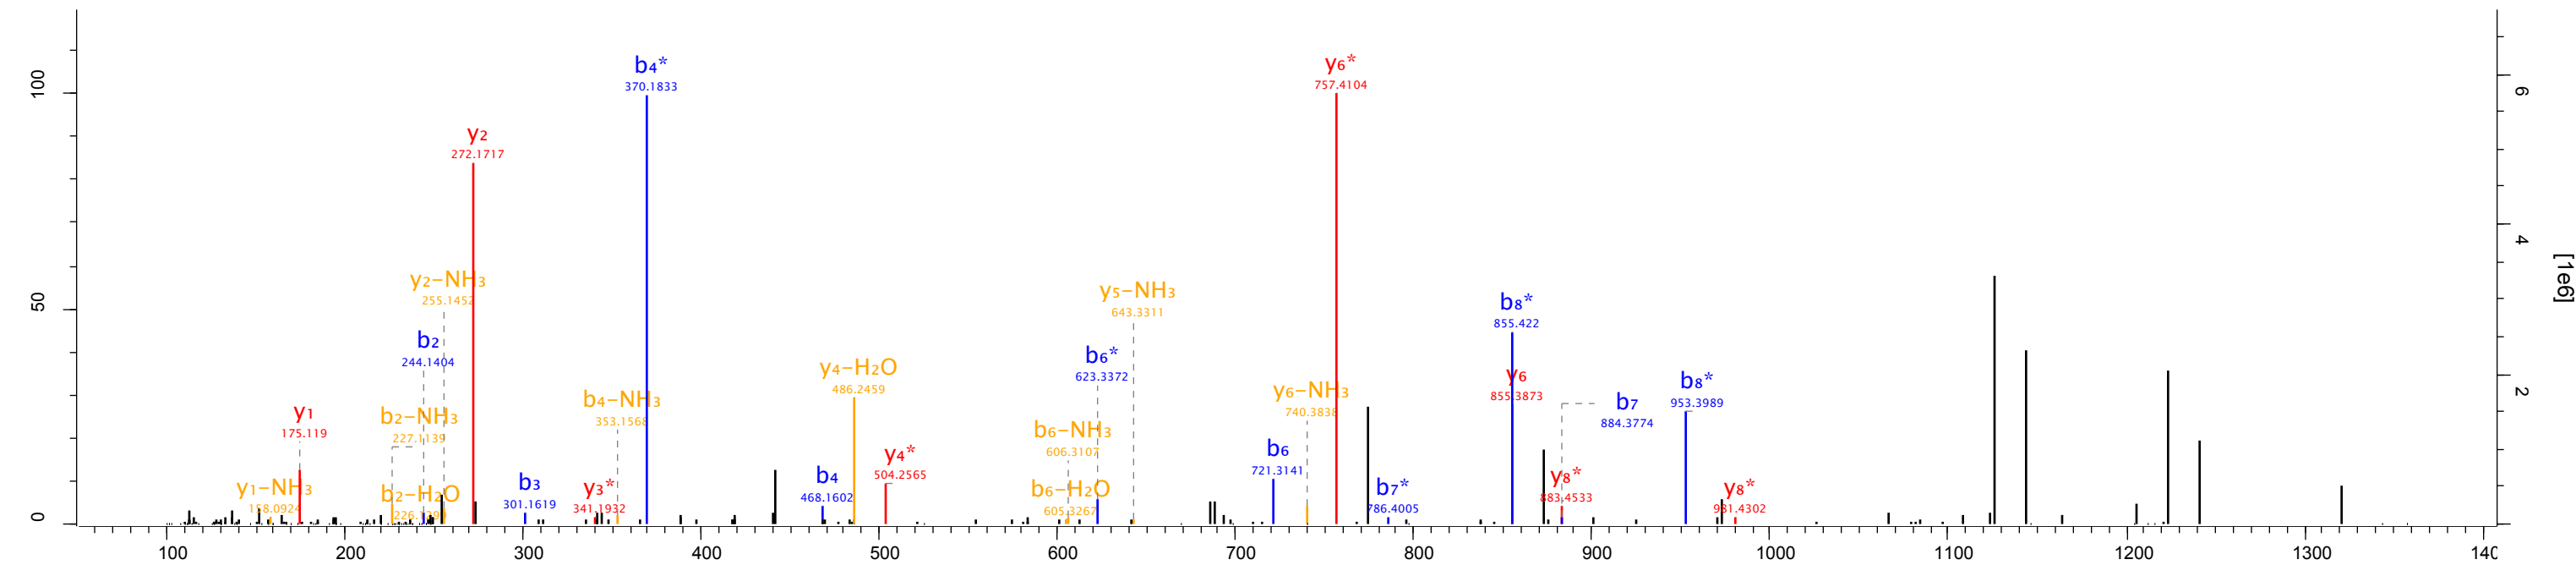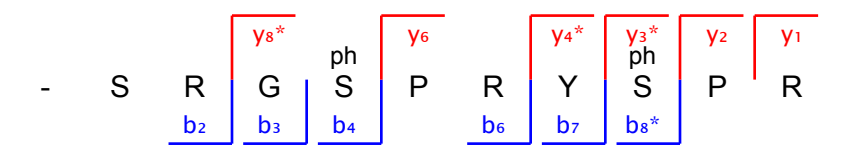

Raw file: 20150812\_A375SR\_Phospho\_BR1\_03  
 Scan: 3732 Method: FTMS; HCD Score: 42.78 m/z: 430.51 Gene names: SRRM2

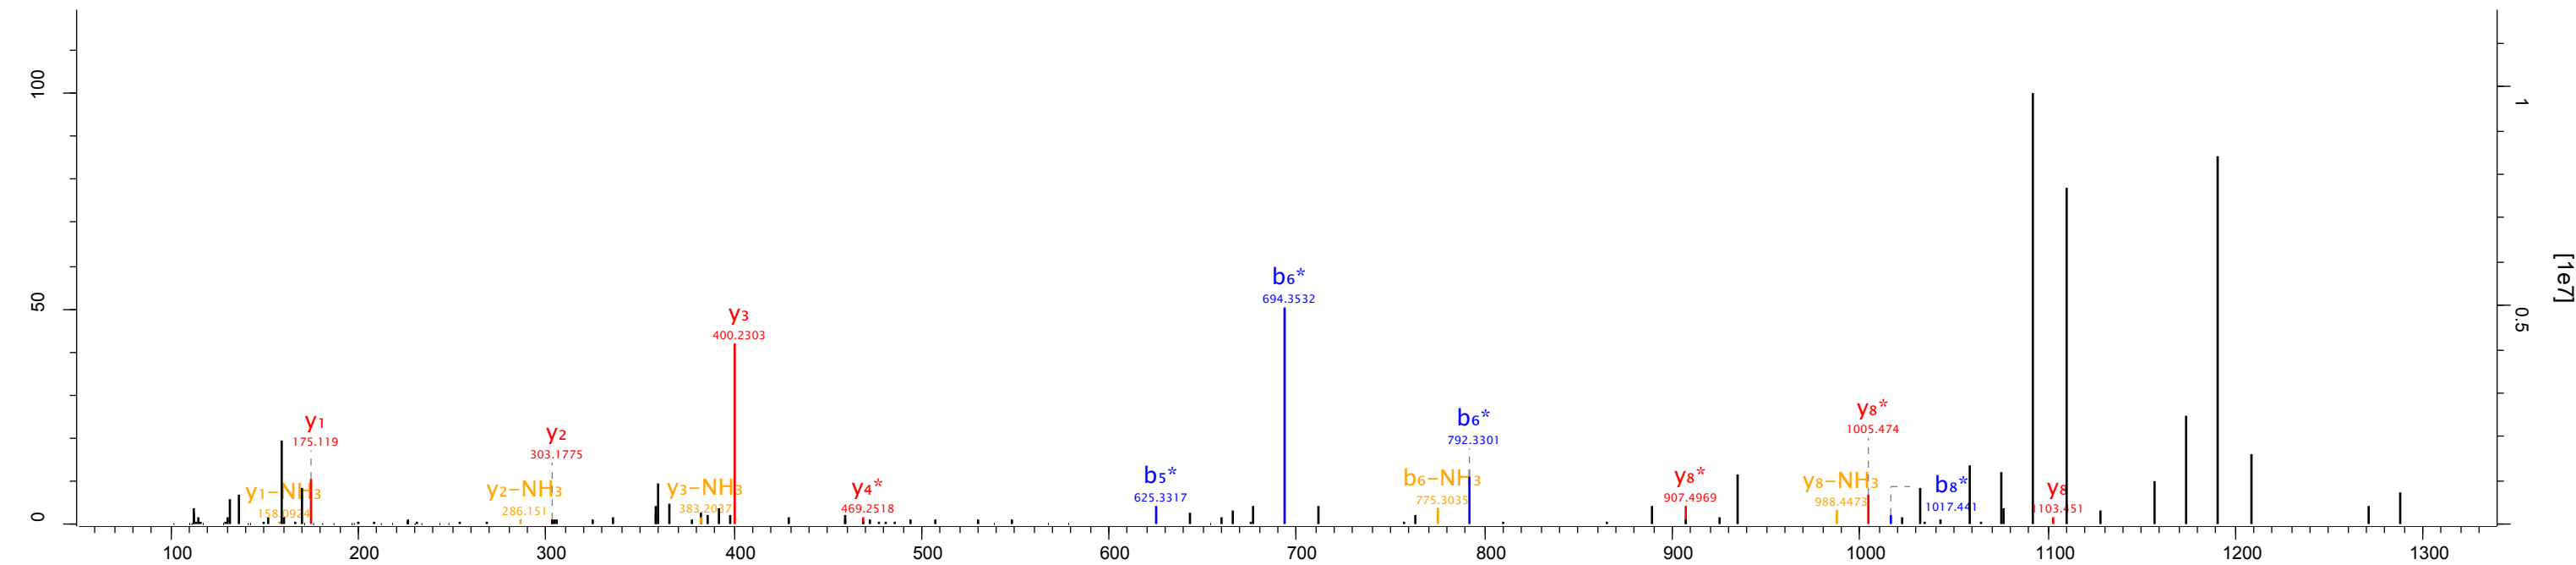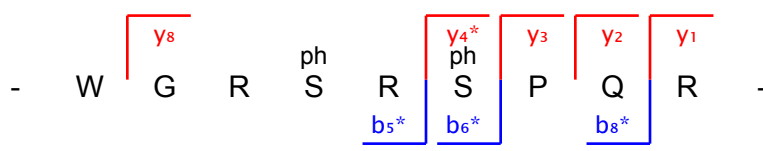

Raw file: 20150812\_A375SR\_Phospho\_BR1\_03  
 Scan: 3842 Method: FTMS; HCD Score: 40.62 m/z: 435.57 Gene names: LRP1

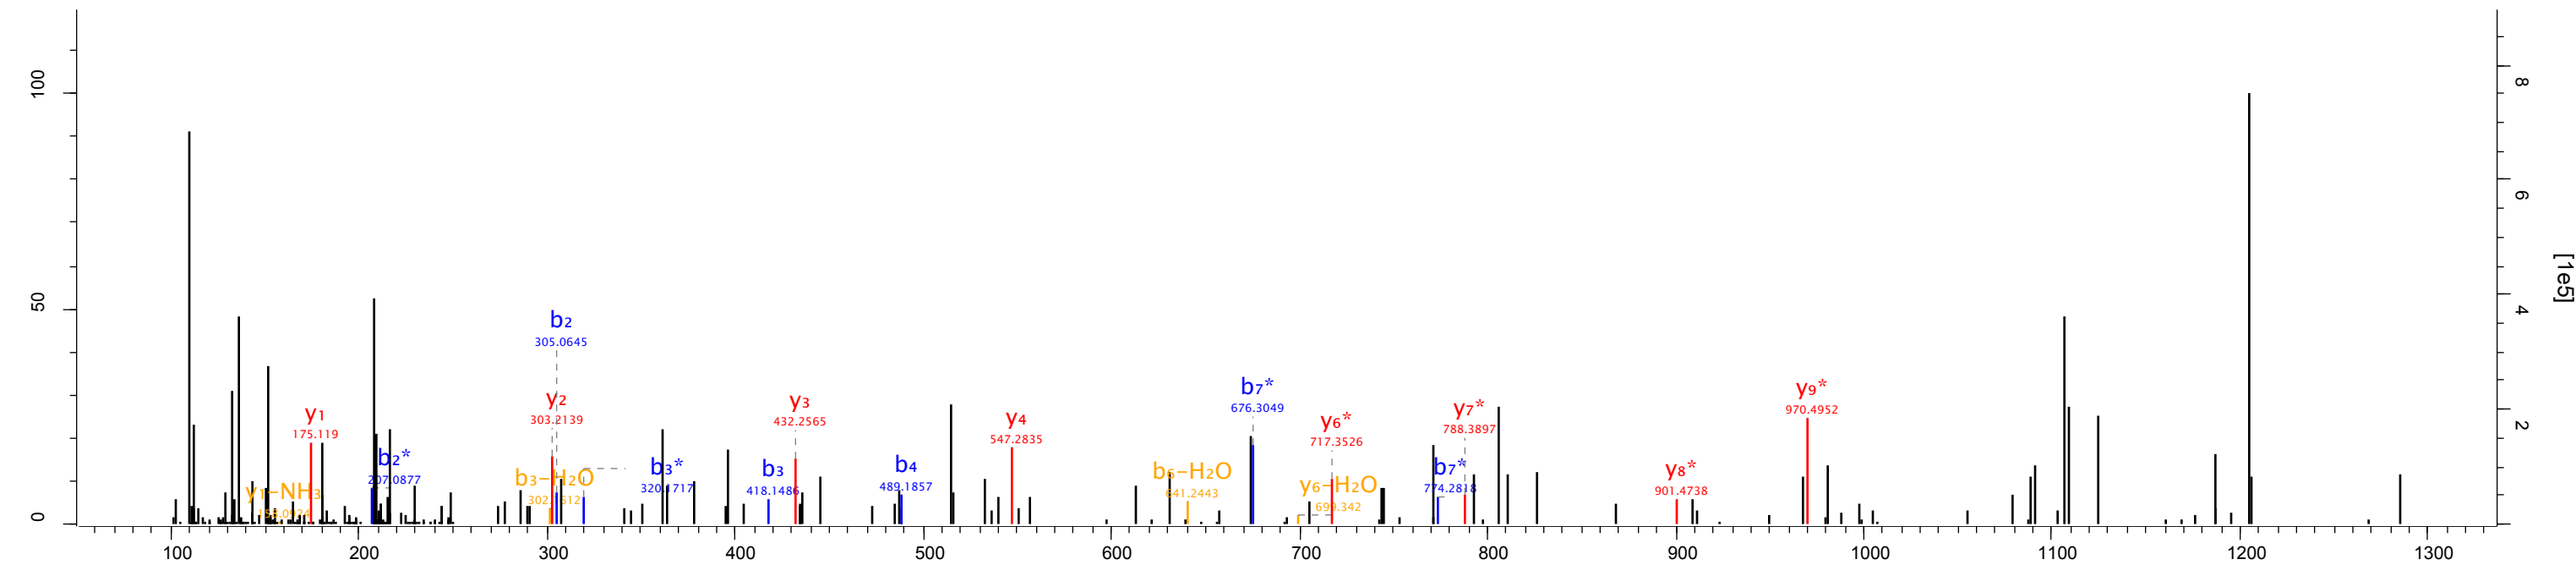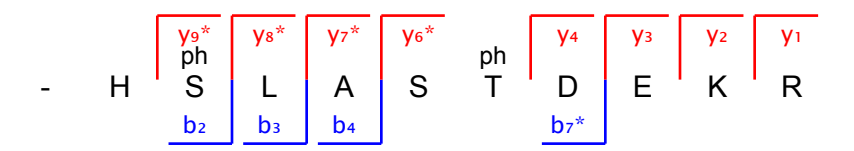

Raw file: 20150812\_A375SR\_Phospho\_BR1\_03  
 Scan: 4032 Method: FTMS; HCD Score: 98.49 m/z: 666.94 Gene names: TRIP12

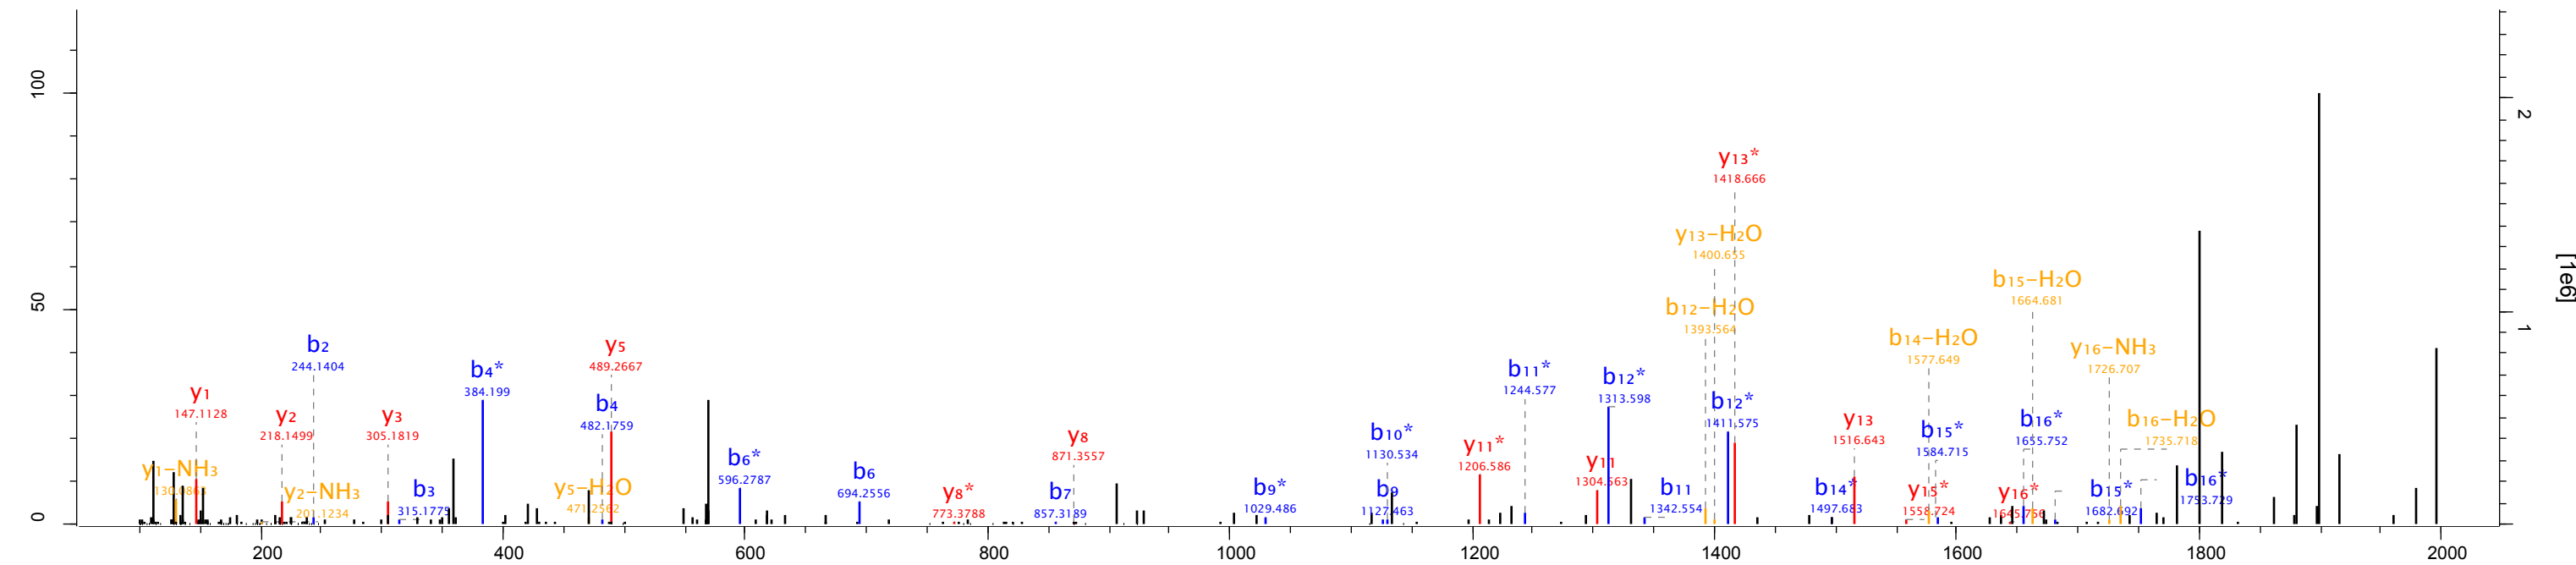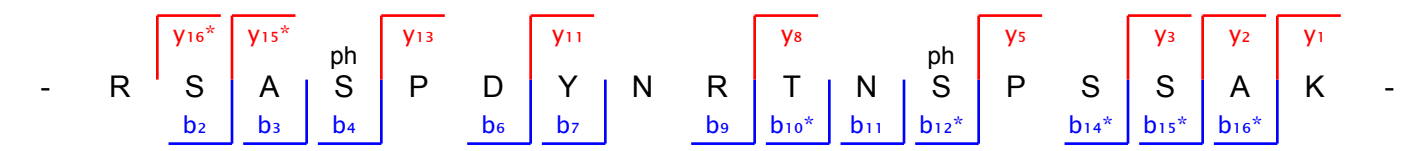

Raw file: 20150812\_A375SR\_Phospho\_BR1\_03  
 Scan: 4402 Method: FTMS; HCD Score: 96.26 m/z: 682.32 Gene names: SRRM1

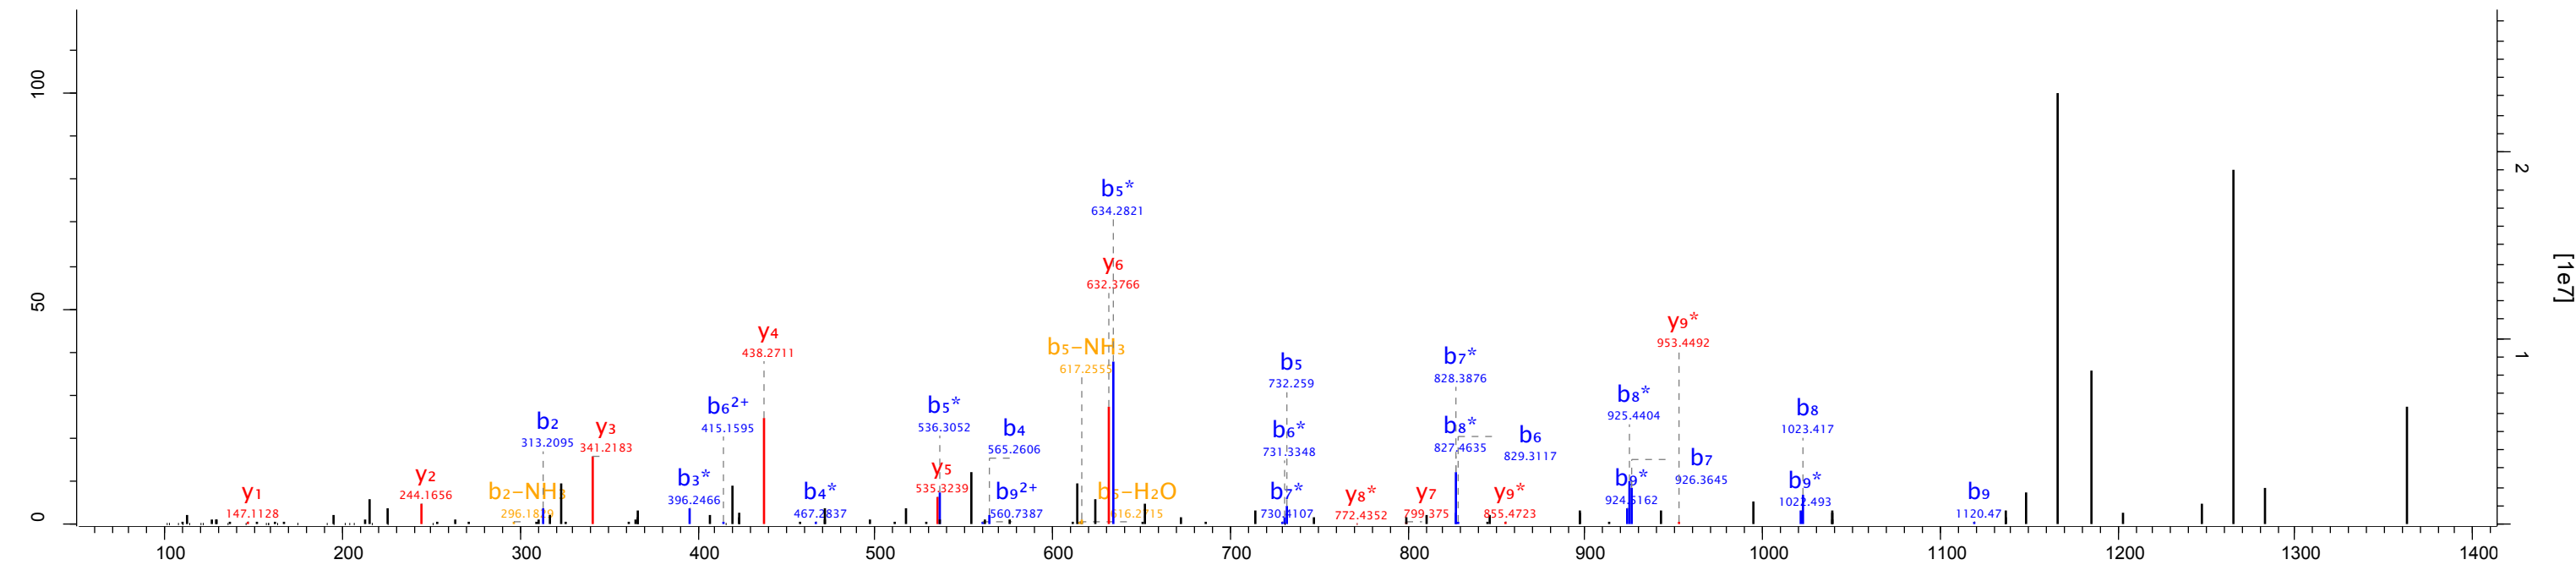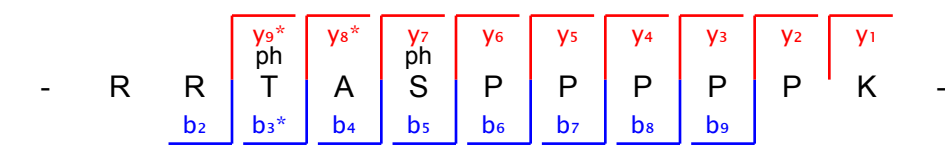



Raw file: 20150812\_A375SR\_Phospho\_BR1\_03  
 Scan: 4792 Method: FTMS; HCD Score: 122.68 m/z: 782.35 Gene names: ZC3H11A

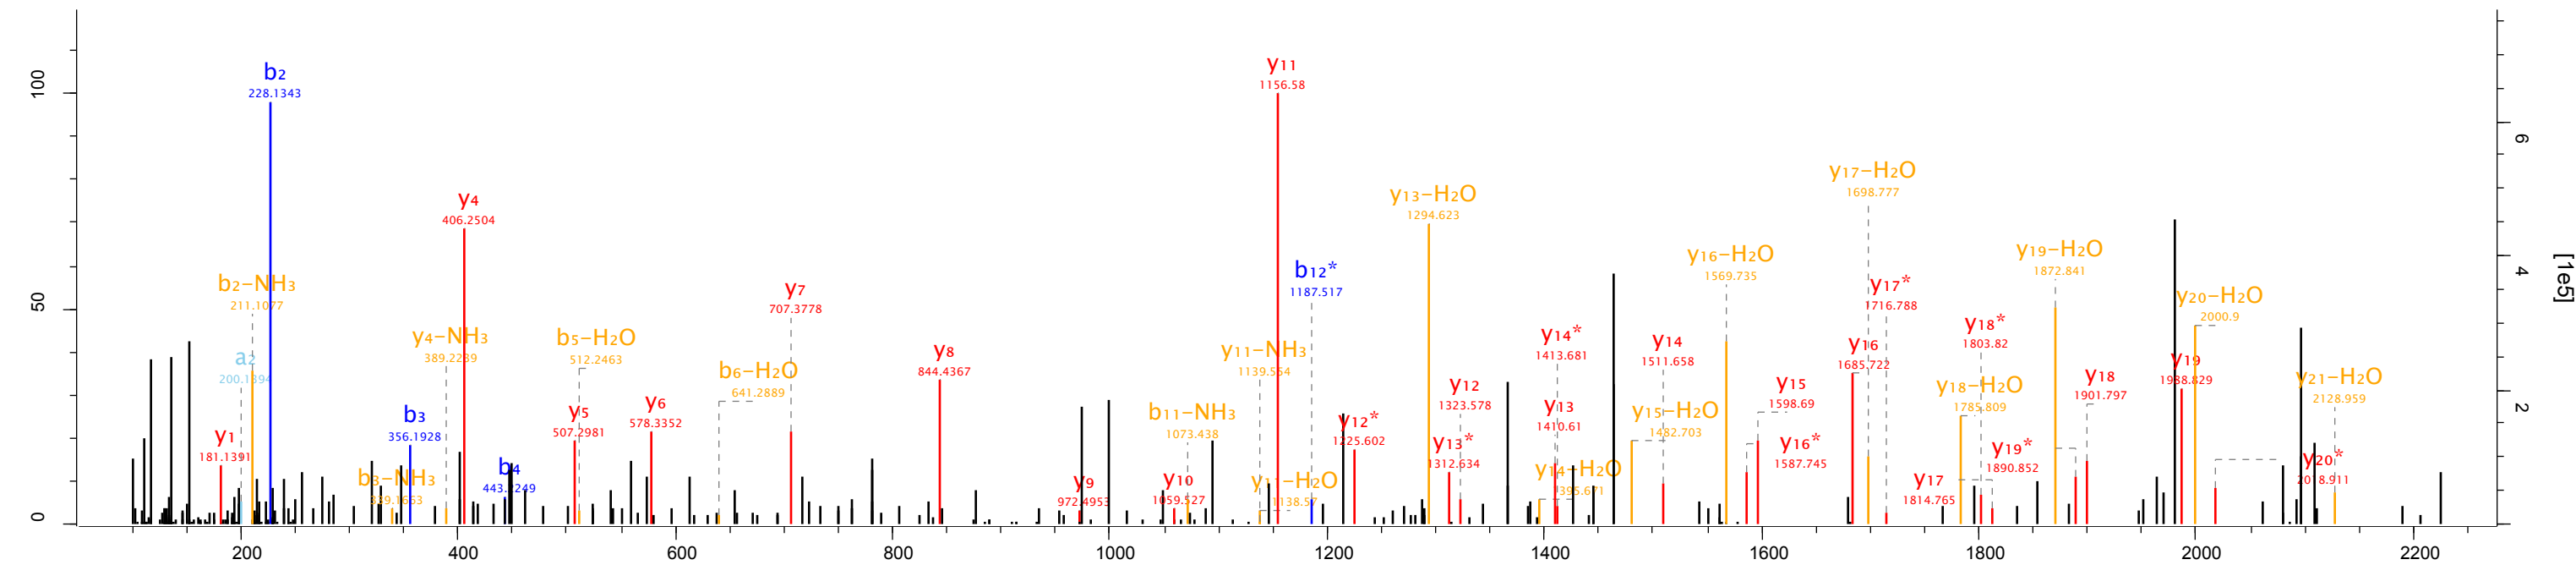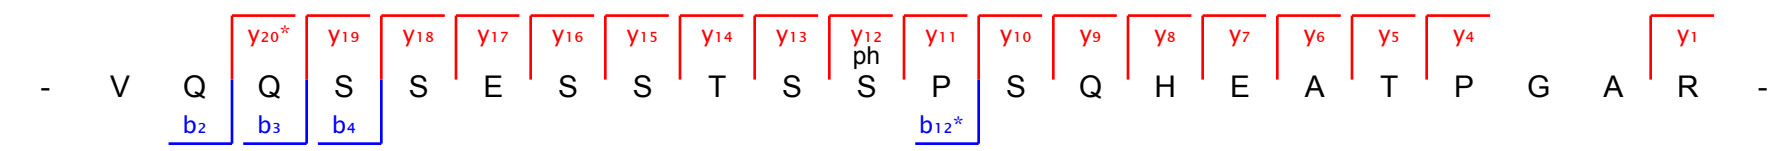

Raw file Scan Method Score m/z Gene names  
 20150812\_A375SR\_Phospho\_BR1\_03 5082 FTMS; HCD 93.06 752.37 ATXN1L

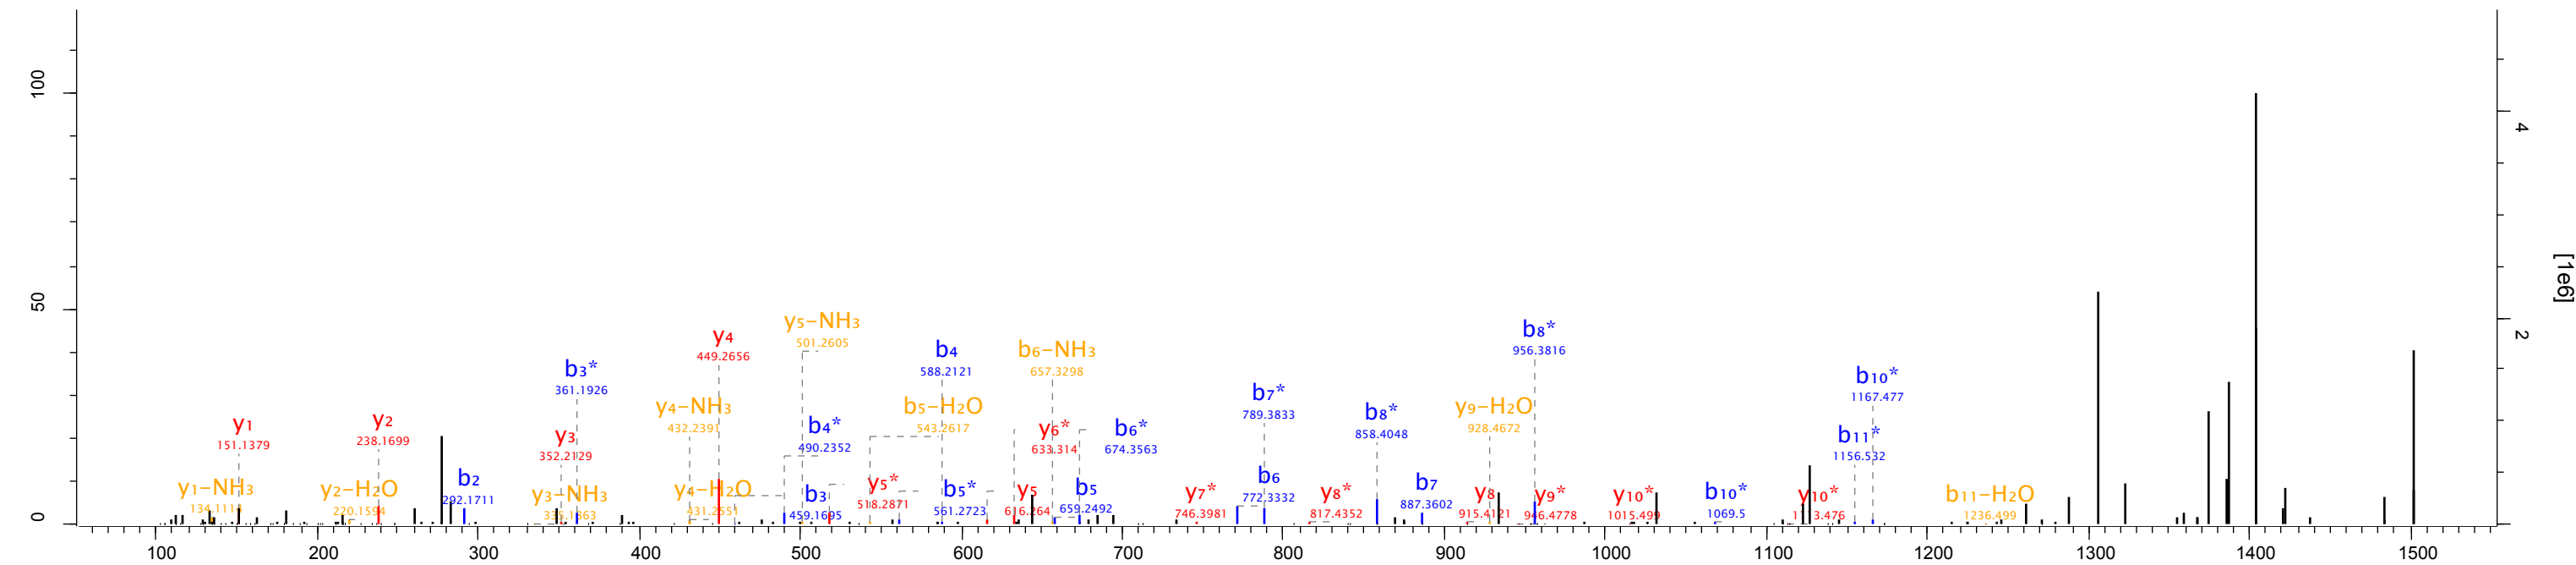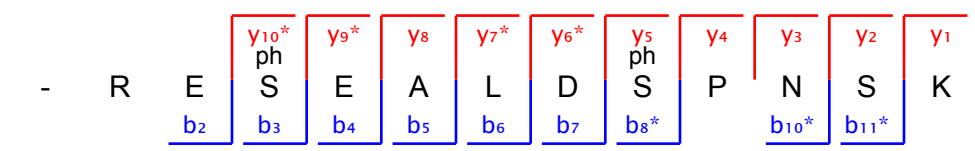

Raw file 20150812\_A375SR\_Phospho\_BR1\_03 Scan 5092 Method FTMS; HCD Score 109.48 m/z 695.3 Gene names PCF11

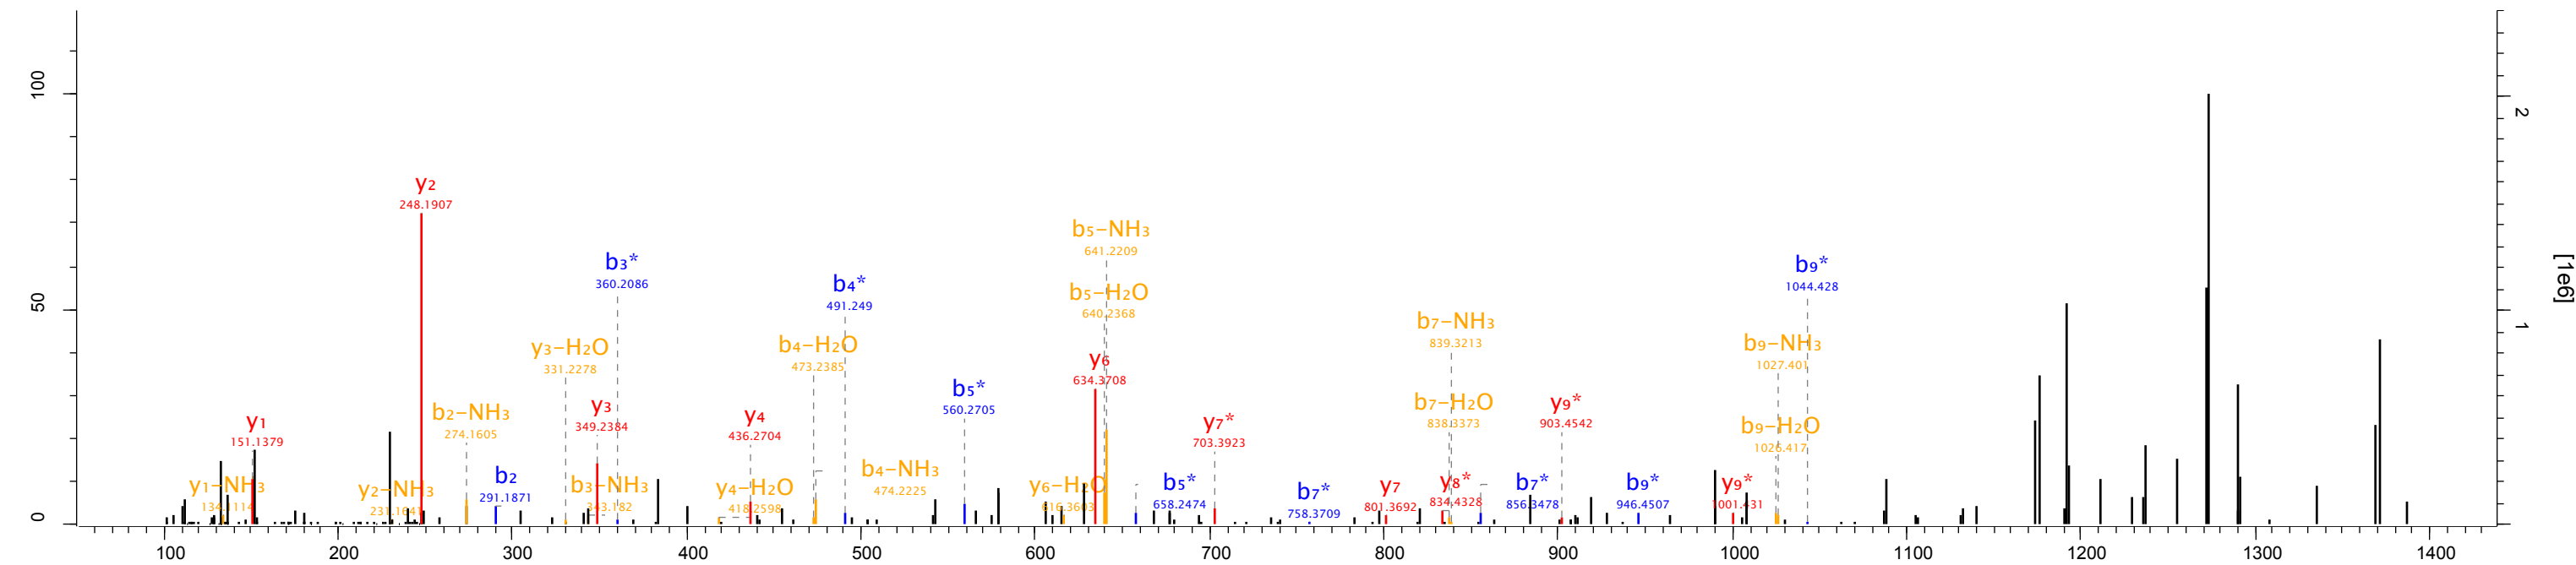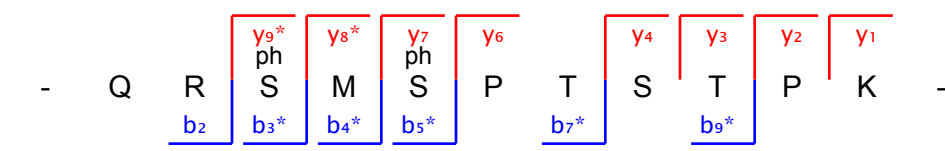



Raw file: 20150812\_A375SR\_Phospho\_BR1\_03  
 Scan: 5872 Method: FTMS; HCD Score: 56.08 m/z: 549.23 Gene names: PPP1R18

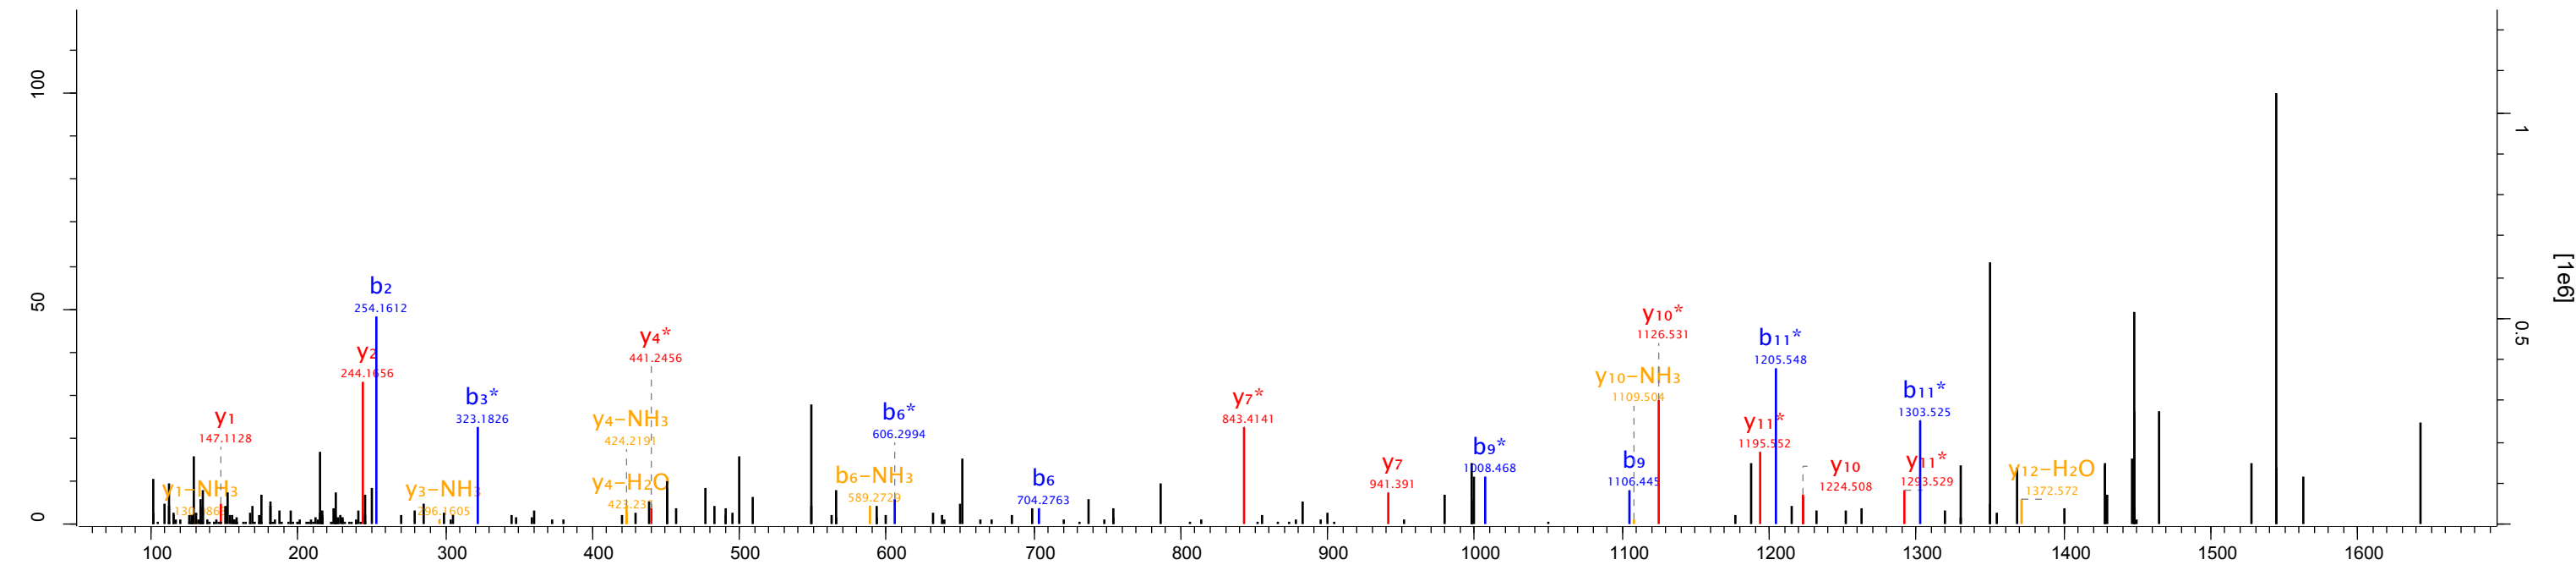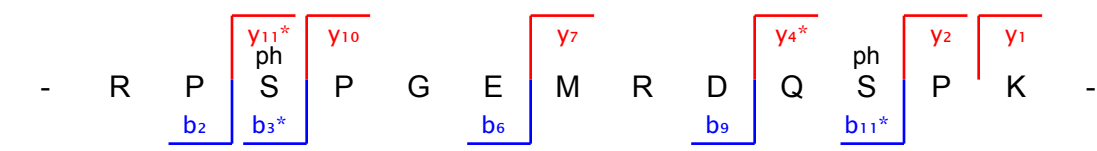

Raw file: 20150812\_A375SR\_Phospho\_BR1\_03  
 Scan: 5962 Method: FTMS; HCD Score: 144.4 m/z: 578.92 Gene names: SLX4

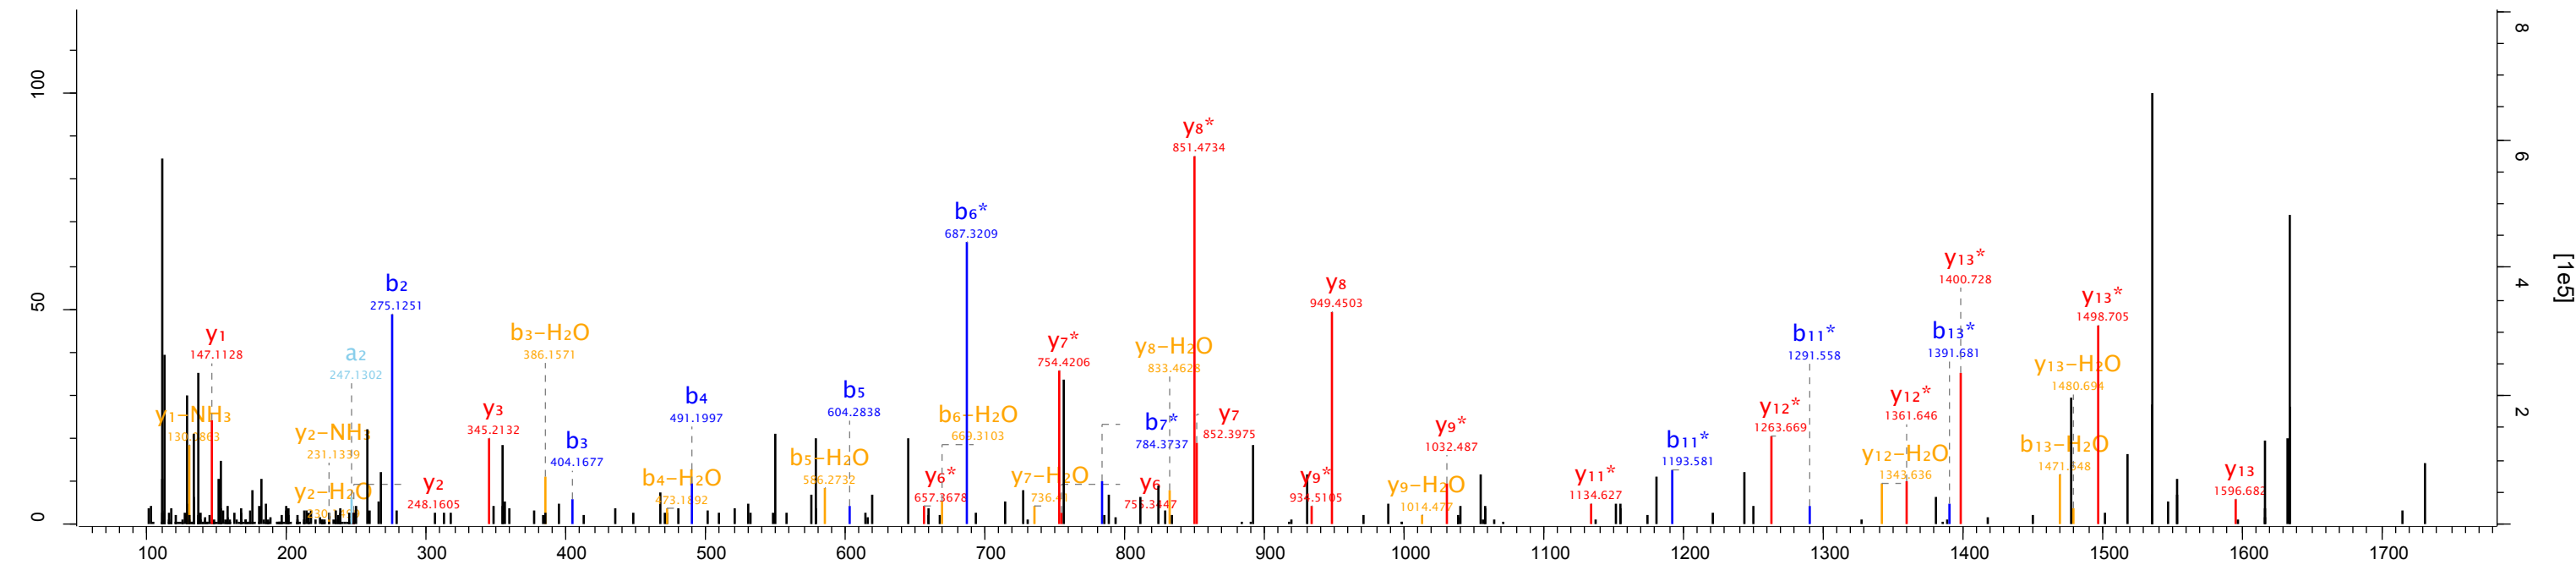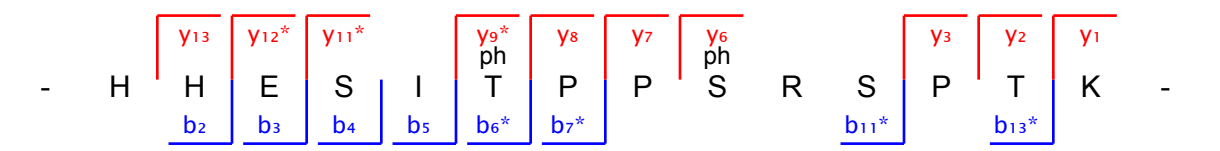

Raw file 20150812\_A375SR\_Phospho\_BR1\_03 Scan 6002 Method FTMS; HCD Score 127.91 m/z 594.75 Gene names SRRM1

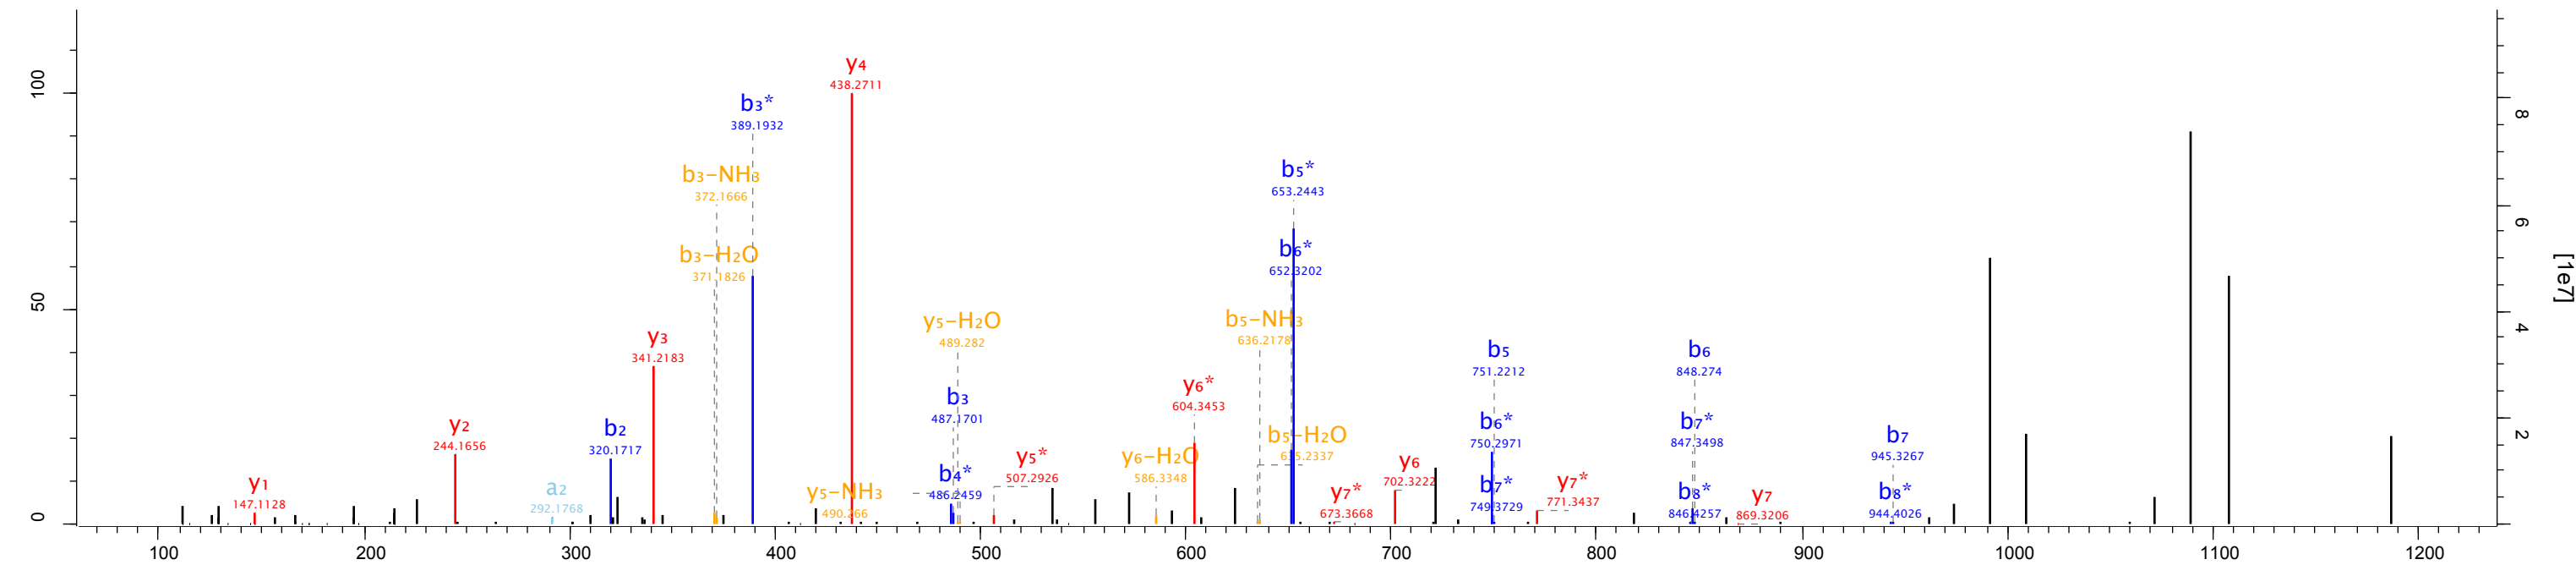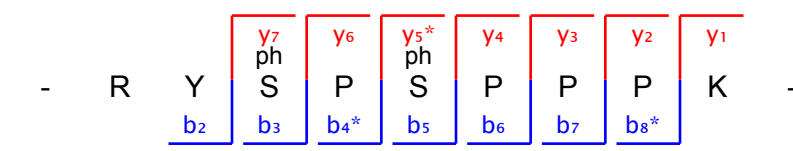

Raw file: 20150812\_A375SR\_Phospho\_BR1\_03  
 Scan: 6292 Method: FTMS; HCD Score: 135.91 m/z: 590.21 Gene names: SRRM2

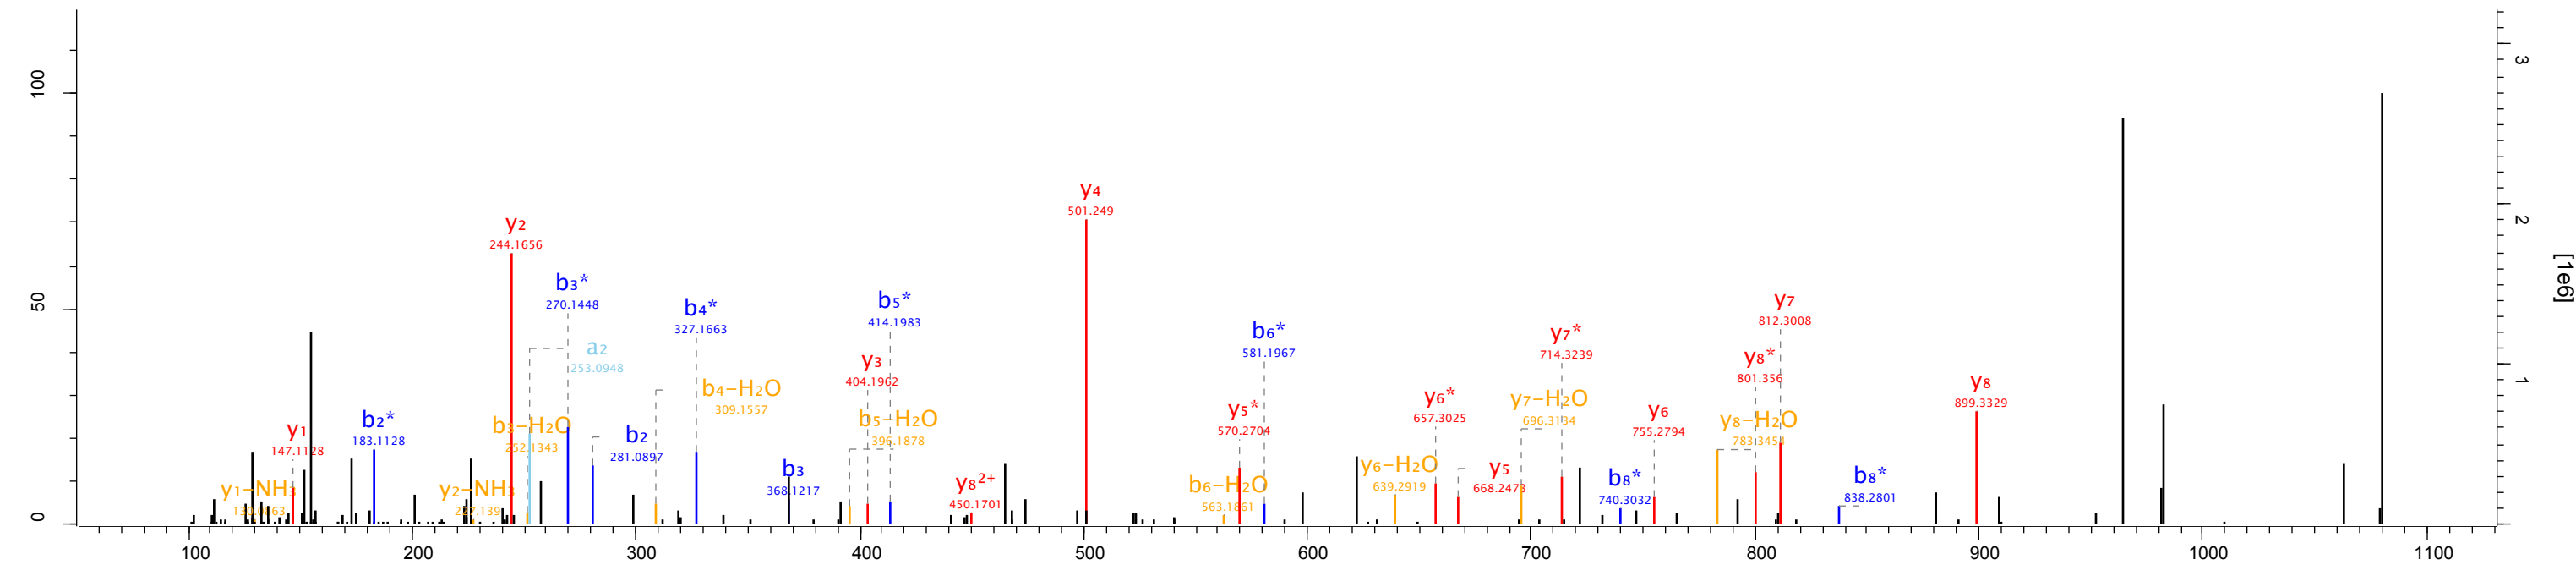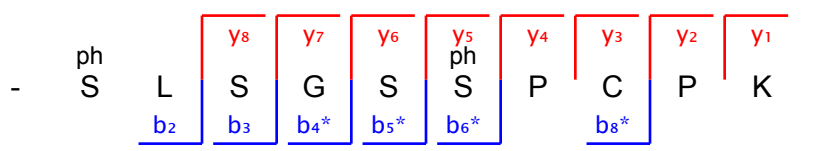



Raw file: 20150812\_A375SR\_Phospho\_BR1\_03  
 Scan: 6332 Method: FTMS; HCD Score: 179.01 m/z: 721.33 Gene names: EPB41

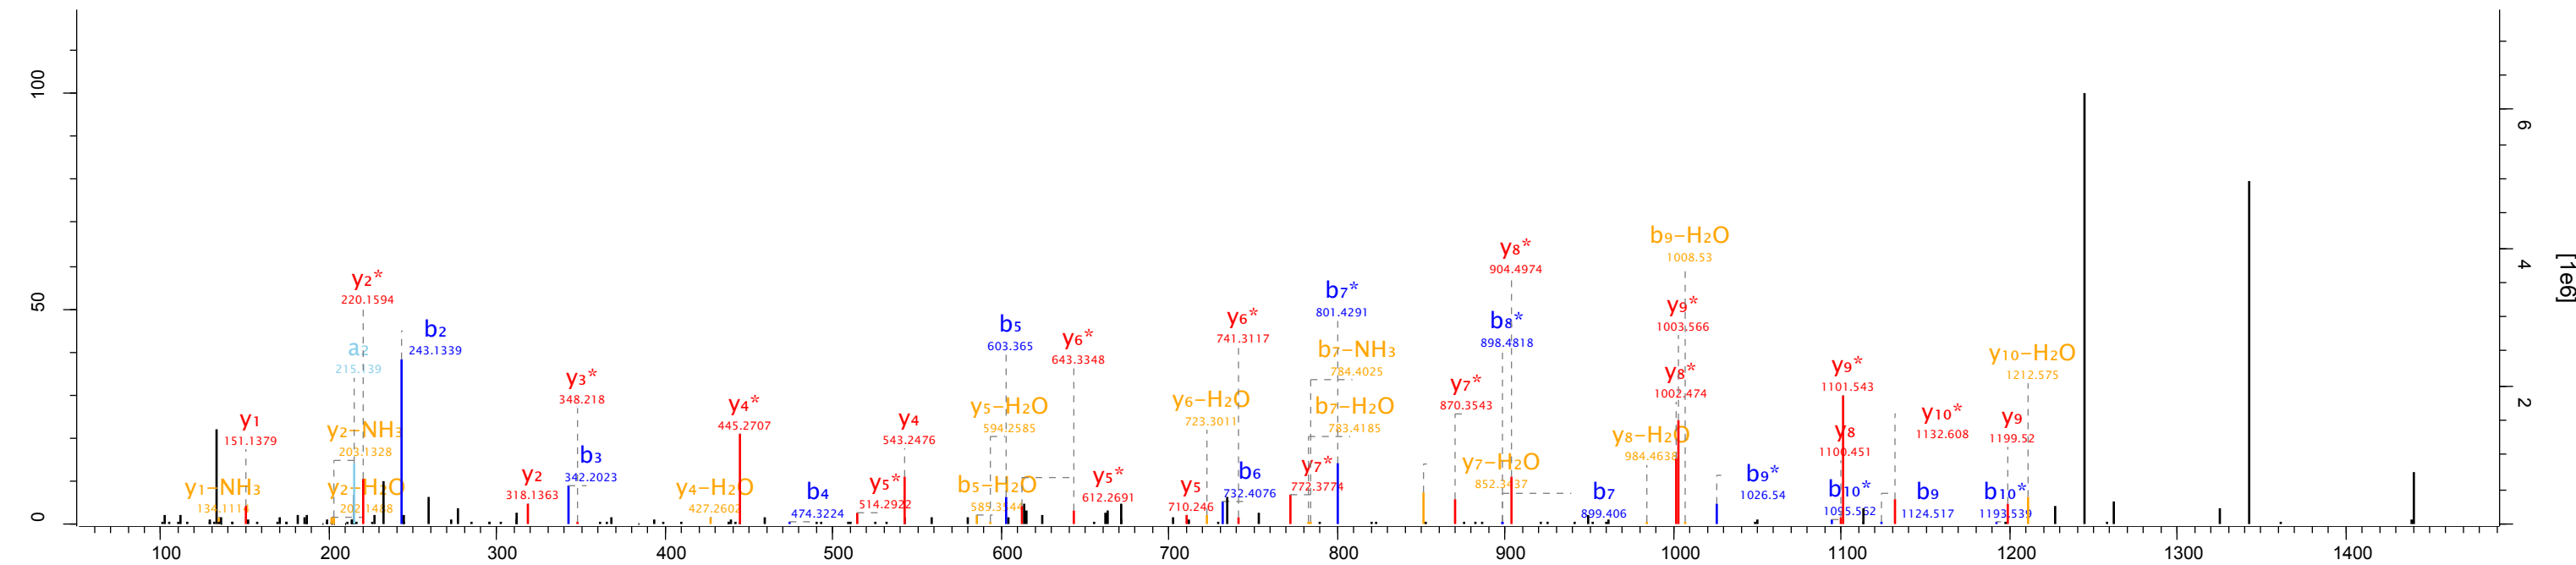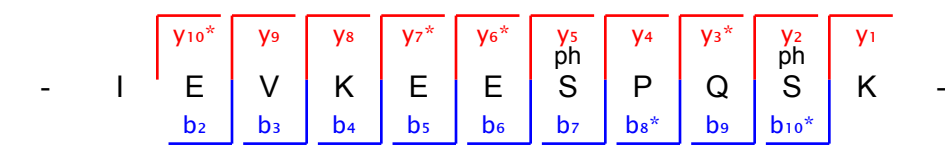

Raw file: 20150812\_A375SR\_Phospho\_BR1\_03  
 Scan: 6492 Method: FTMS; HCD Score: 139.94 m/z: 666.77 Gene names: ADNP

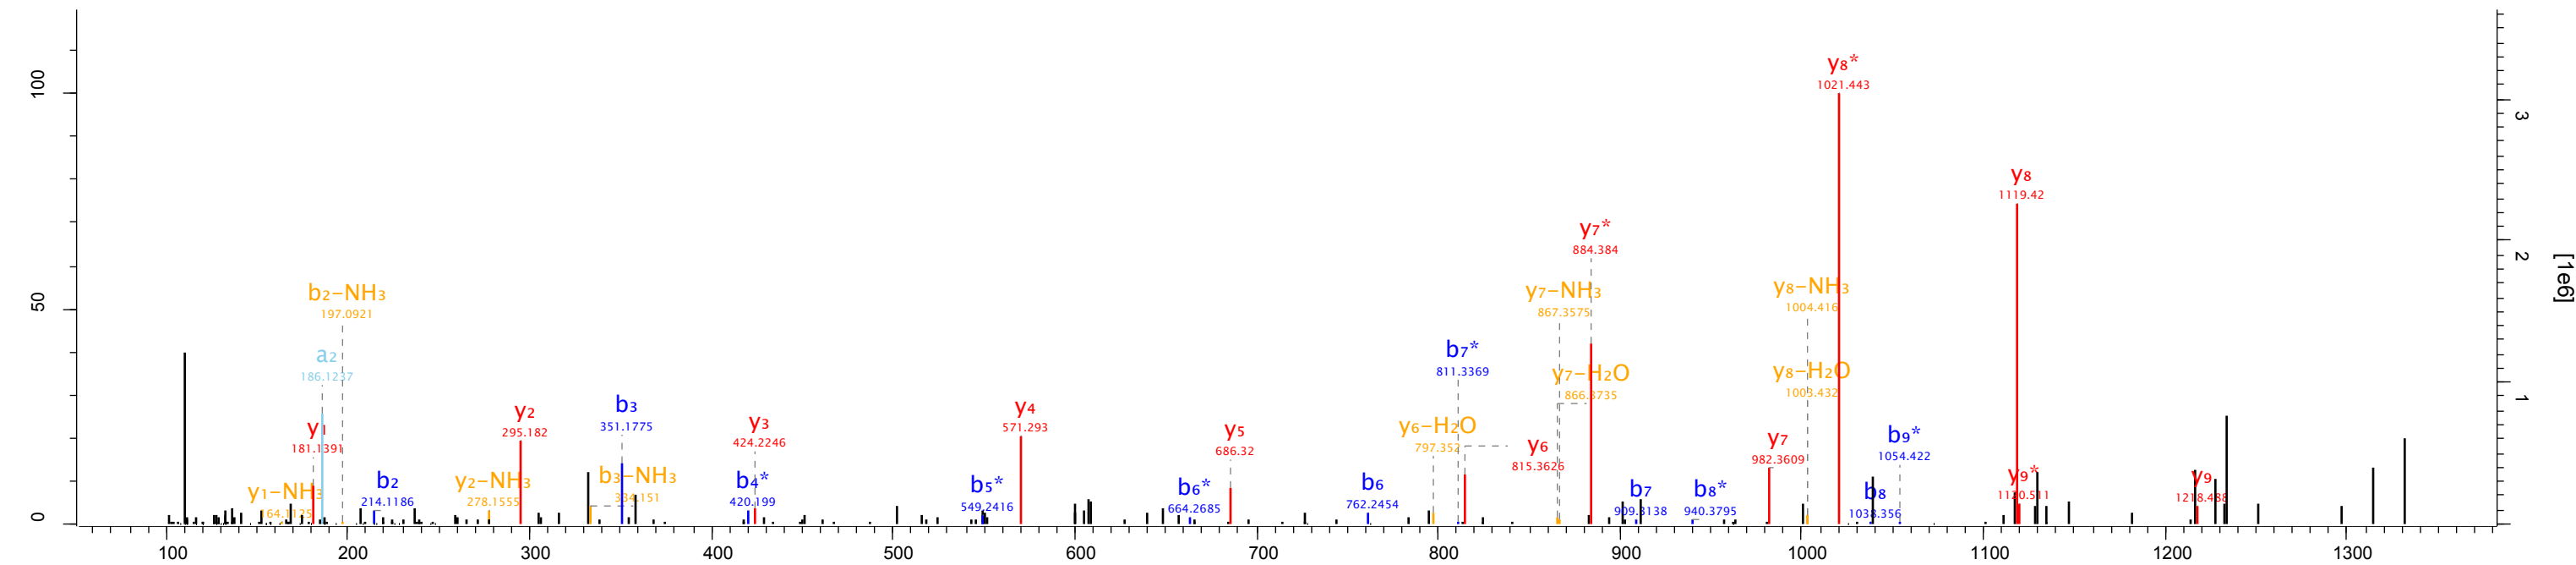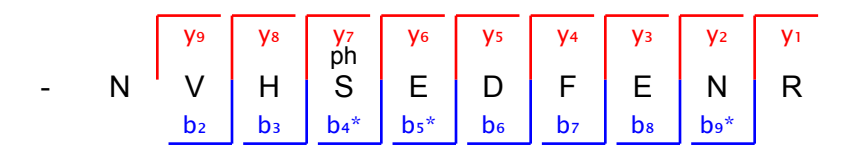

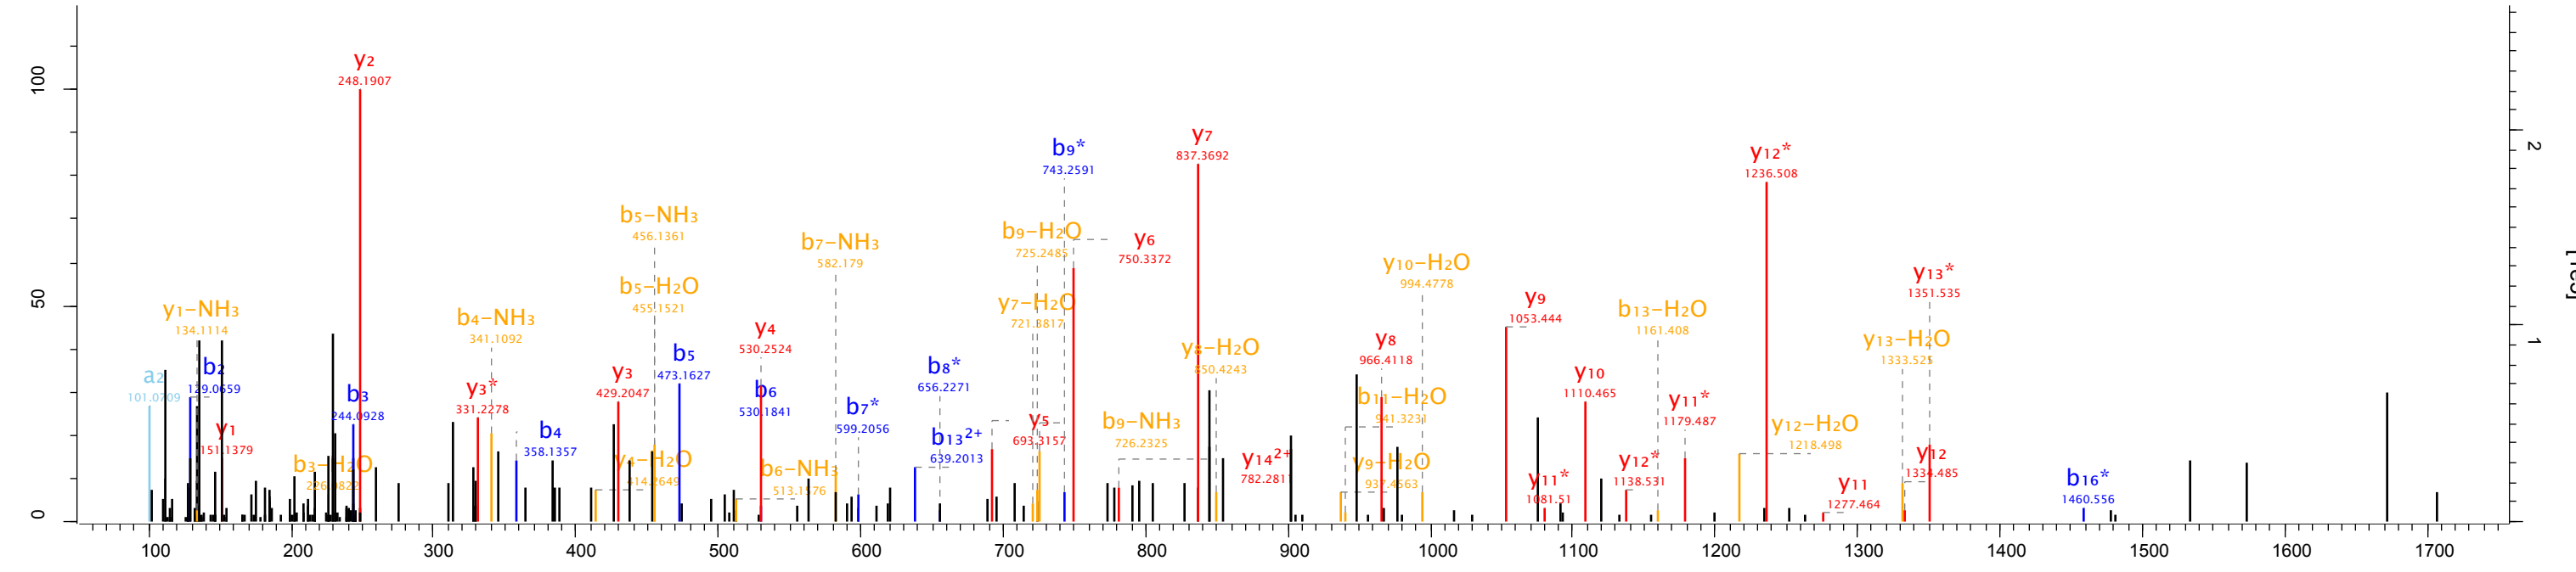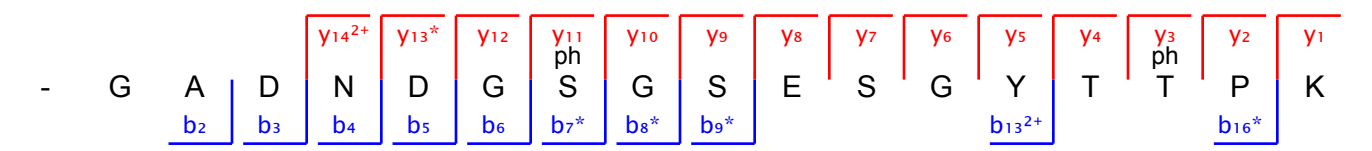

Raw file: 20150812\_A375SR\_Phospho\_BR1\_03  
 Scan: 6572 Method: FTMS; HCD Score: 150.91 m/z: 719.77 Gene names: PHIP

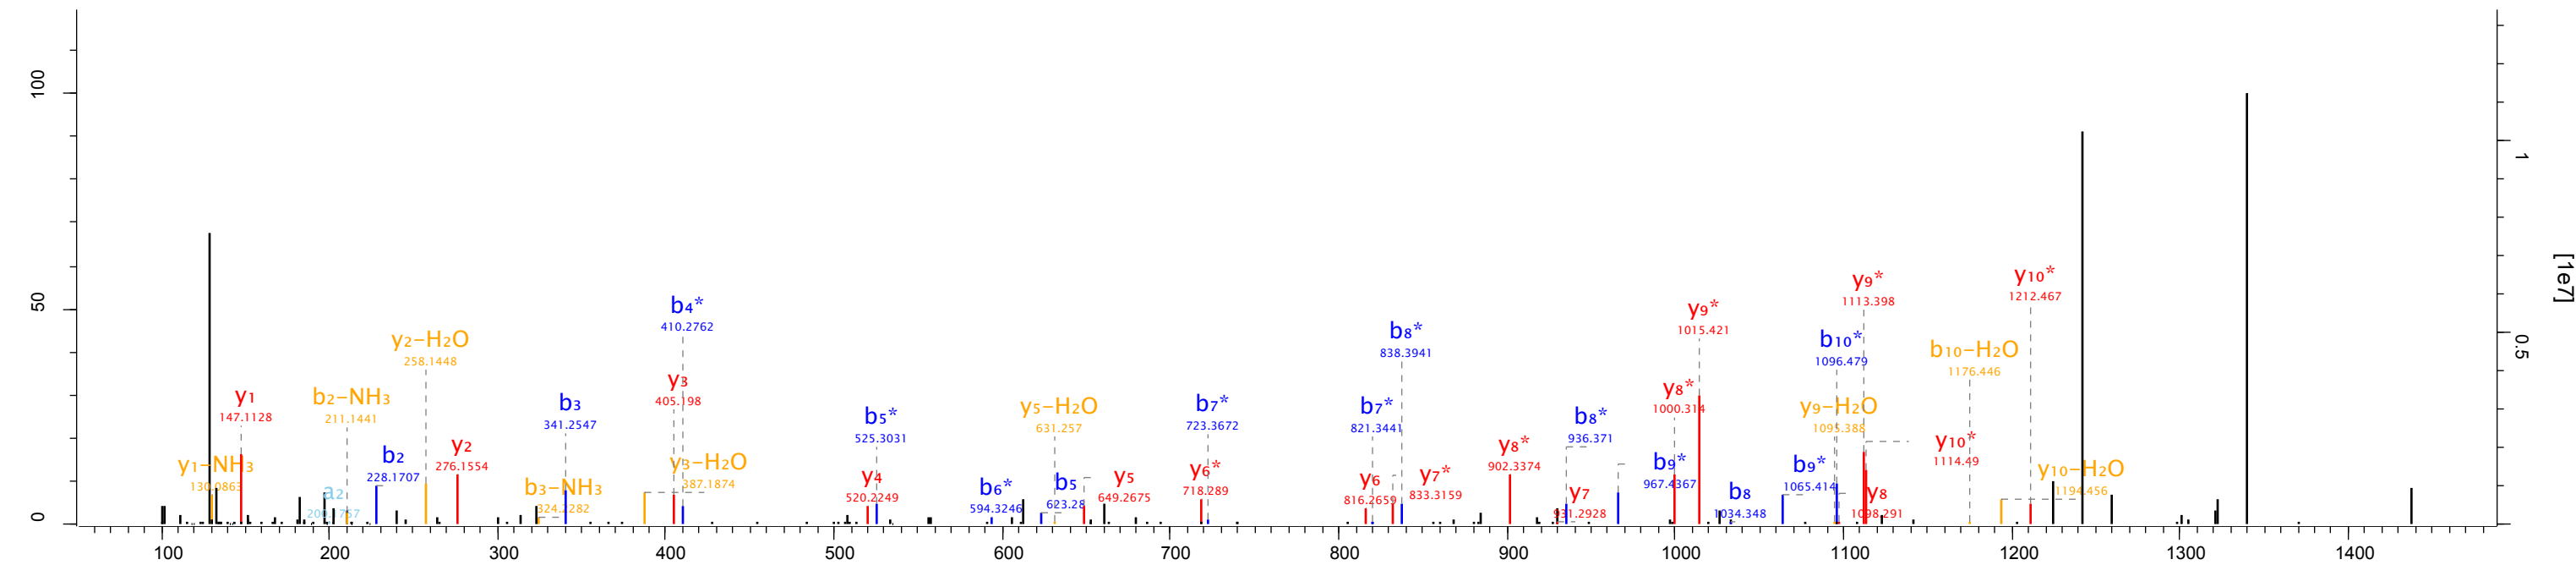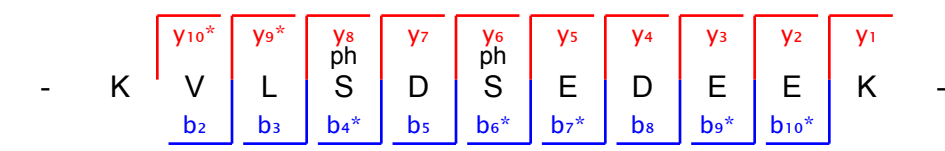

Raw file: 20150812\_A375SR\_Phospho\_BR1\_03  
 Scan: 6812 Method: FTMS; HCD Score: 85.52 m/z: 554.72 Gene names: RBBP6

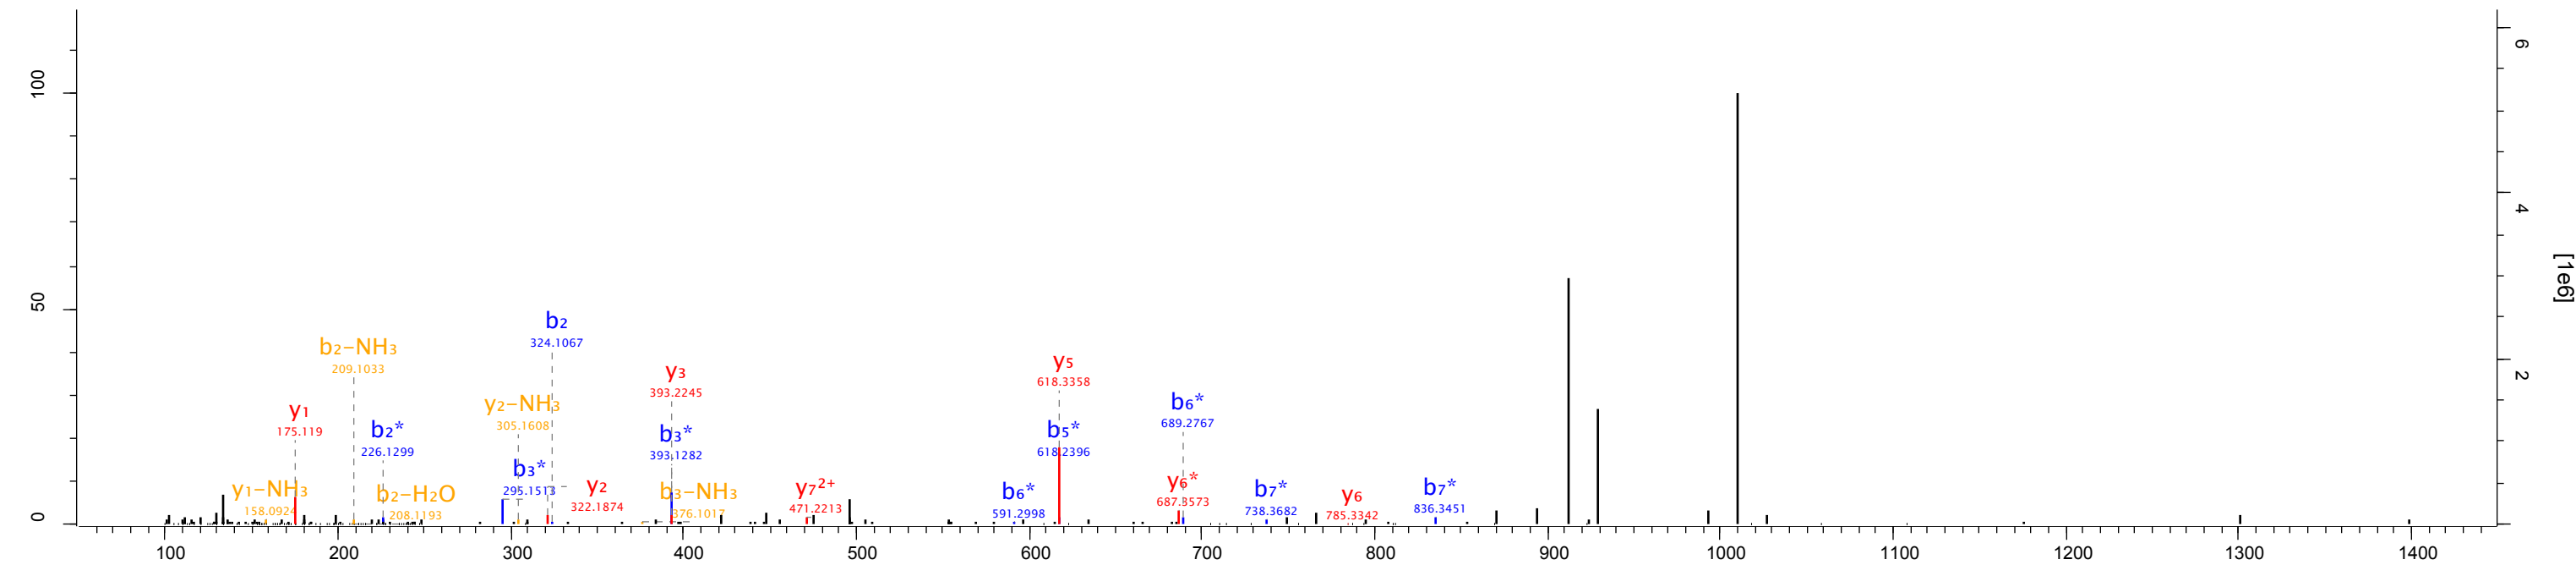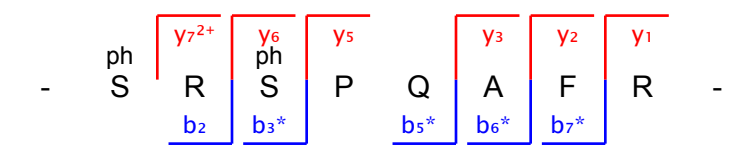

Raw file 20150812\_A375SR\_Phospho\_BR1\_03 Scan 7052 Method FTMS; HCD Score 85.54 m/z 604.77 Gene names CXorf23

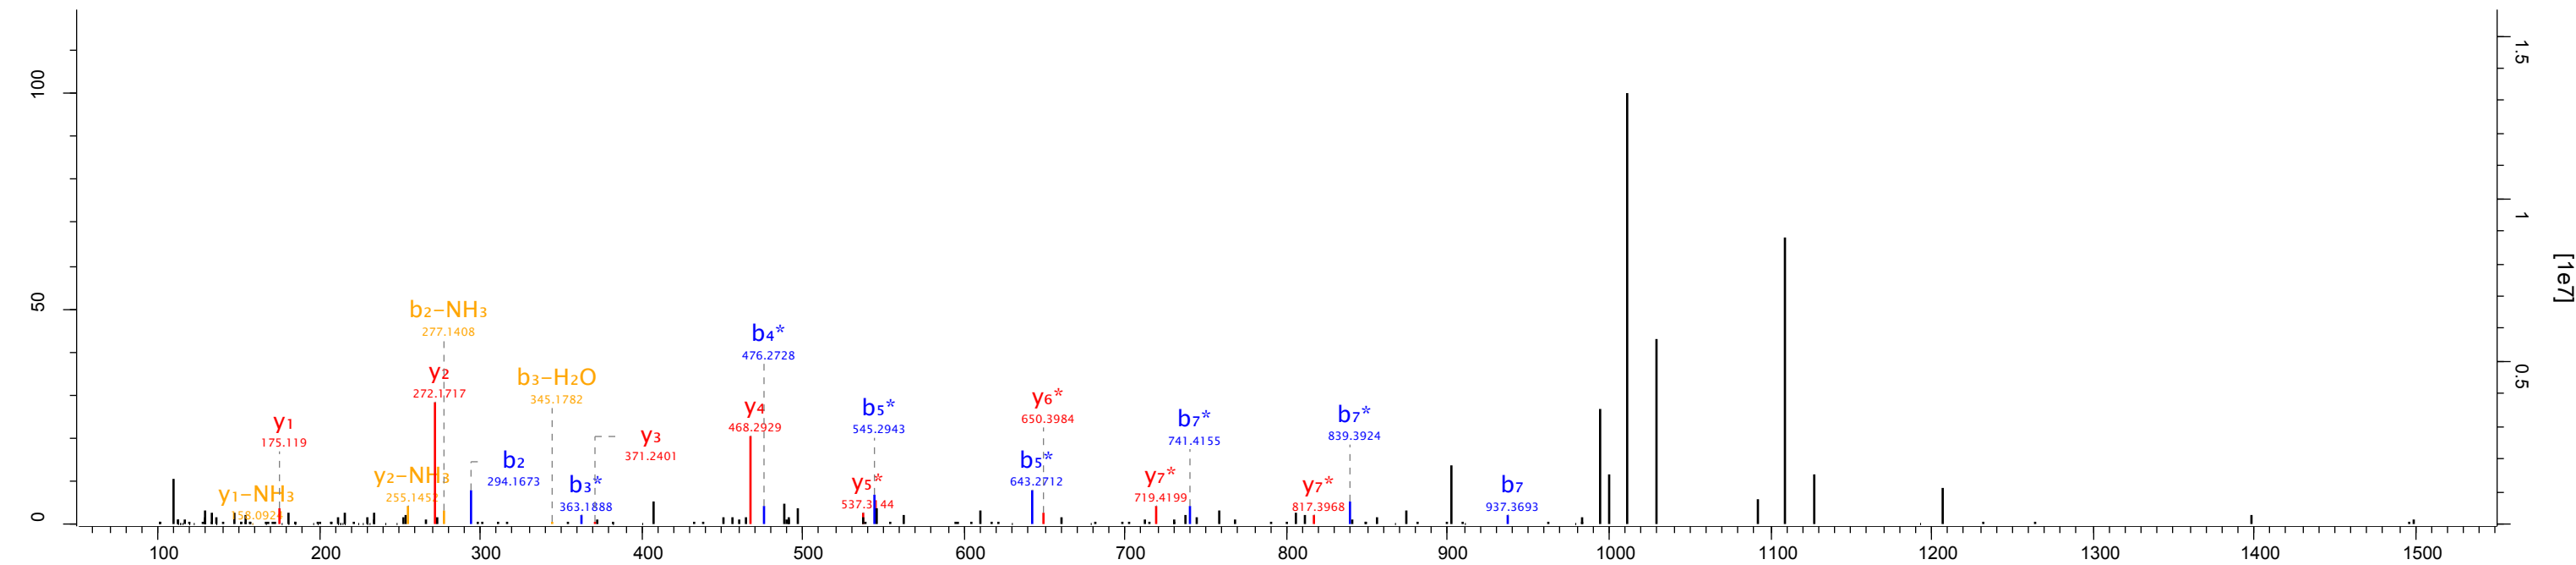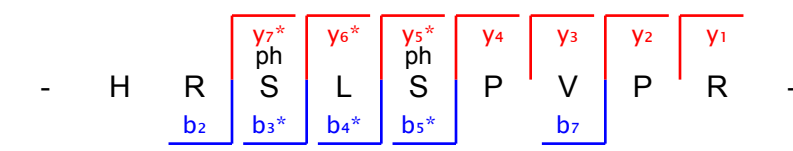

Raw file Scan Method Score m/z Gene names  
 20150812\_A375SR\_Phospho\_BR1\_03 7192 FTMS; HCD 68.68 378.84 SRSF7

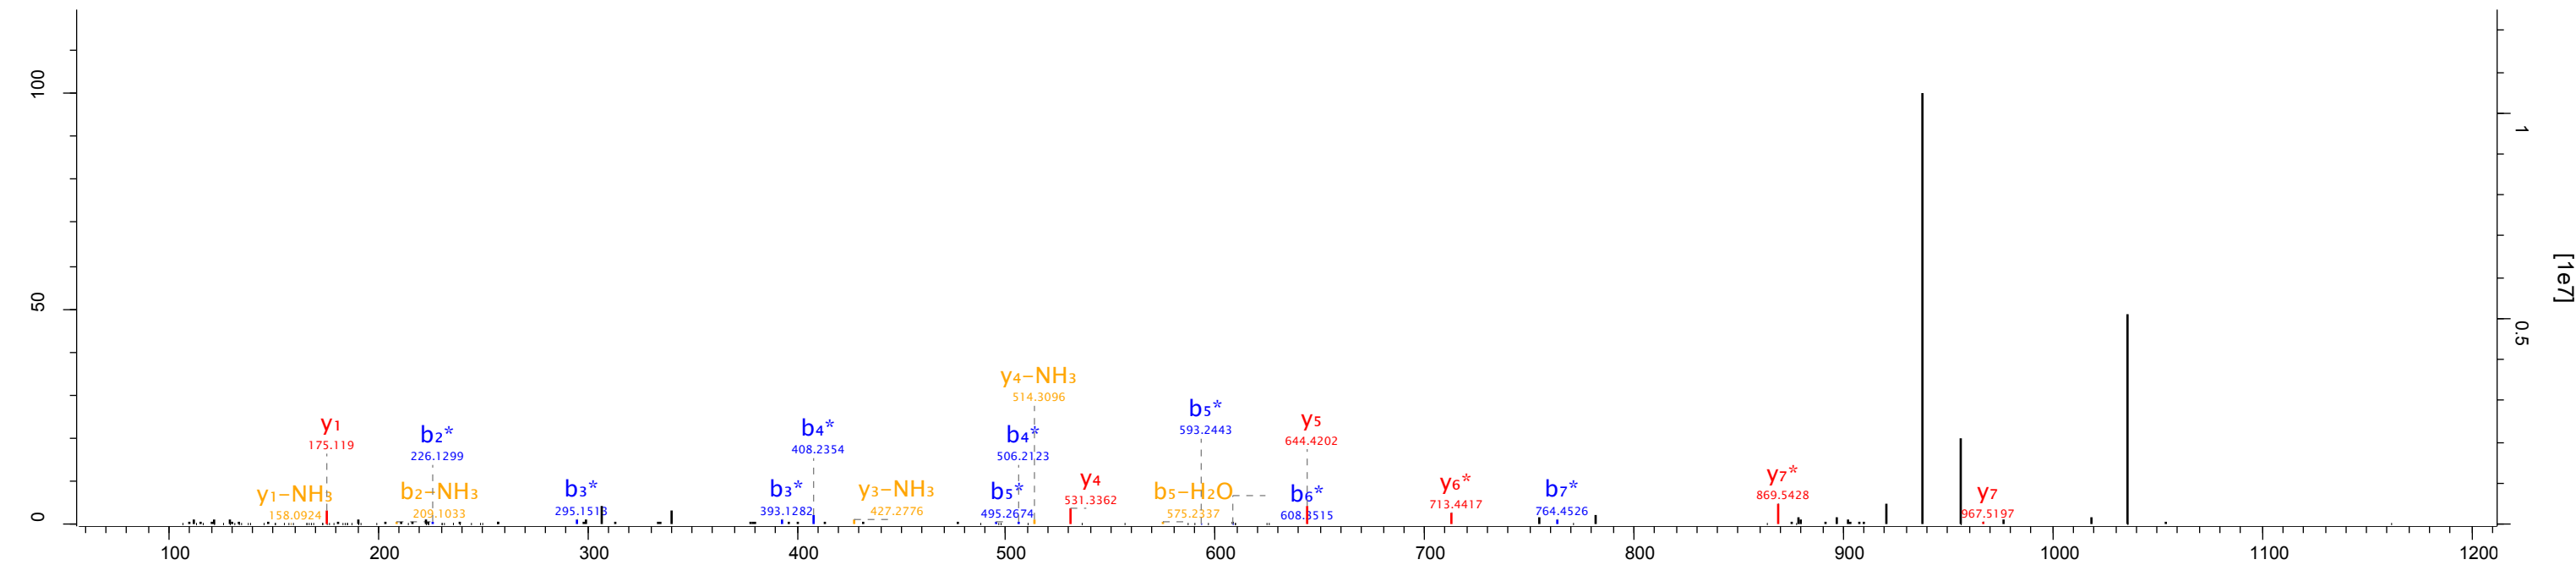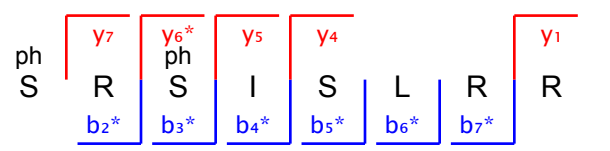

Raw file: 20150812\_A375SR\_Phospho\_BR1\_03  
 Scan: 7492 Method: FTMS; HCD Score: 221.86 m/z: 825.83 Gene names: DTD1

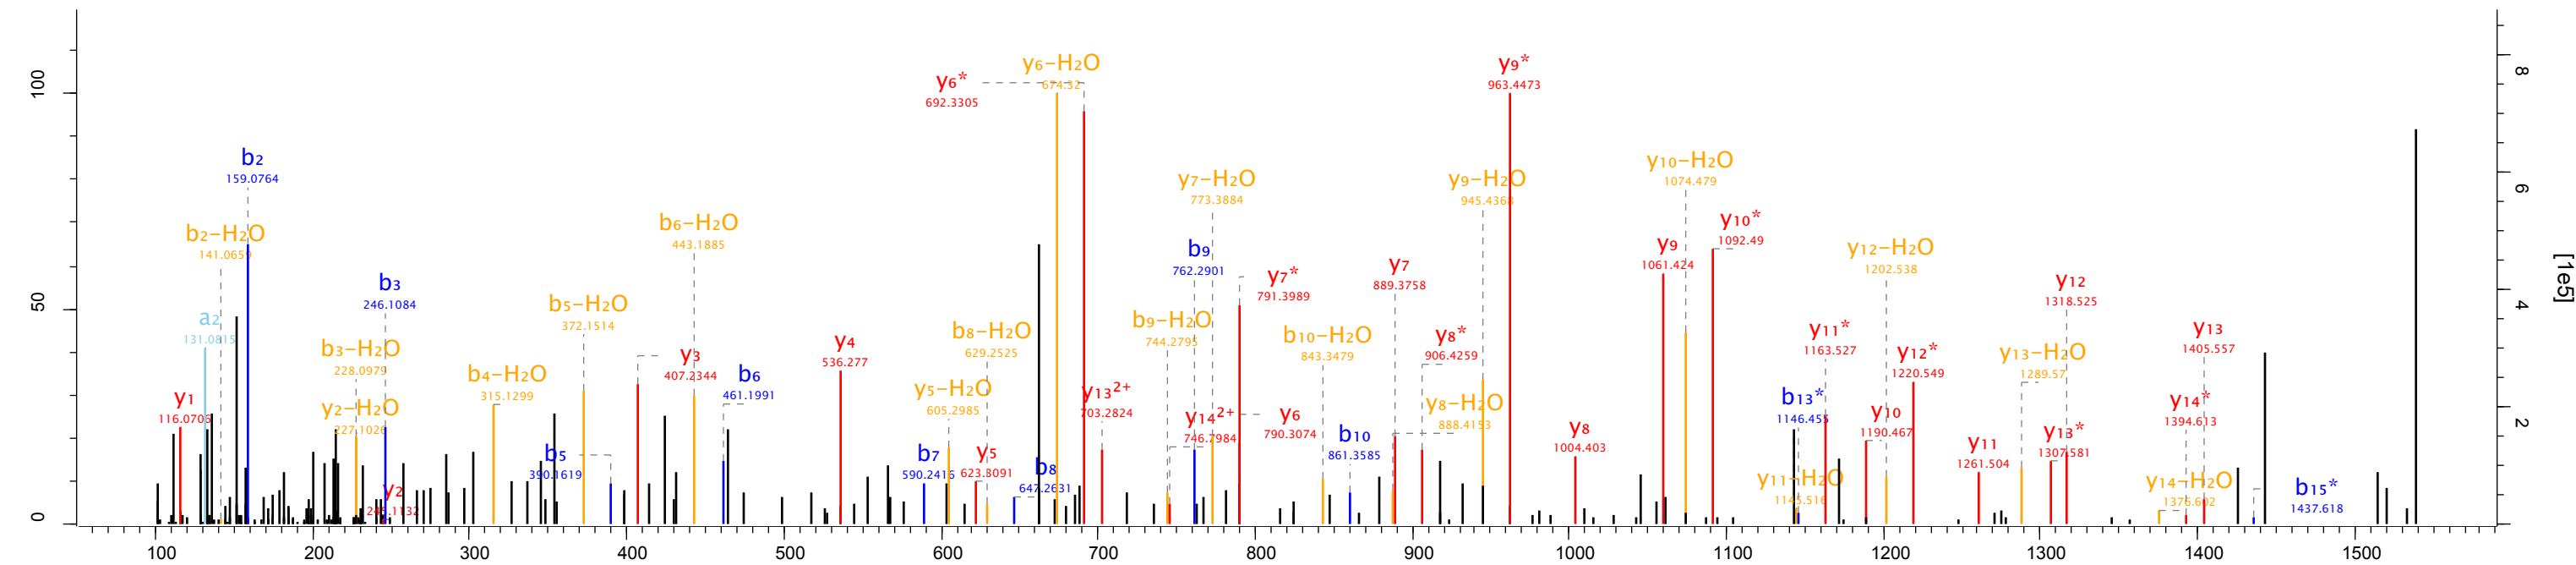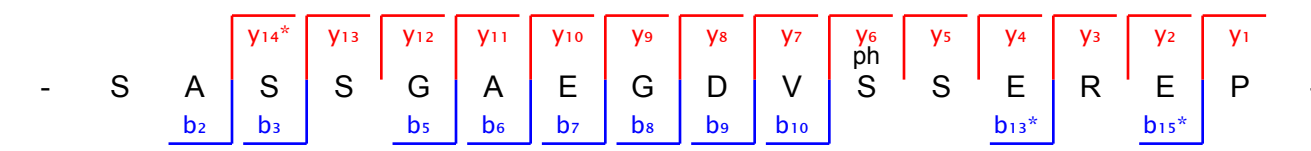



Raw file 20150812\_A375SR\_Phospho\_BR1\_03 Scan 7502 Method FTMS; HCD Score 204.81 m/z 1225.6 Gene names FOXH1;XRCC1

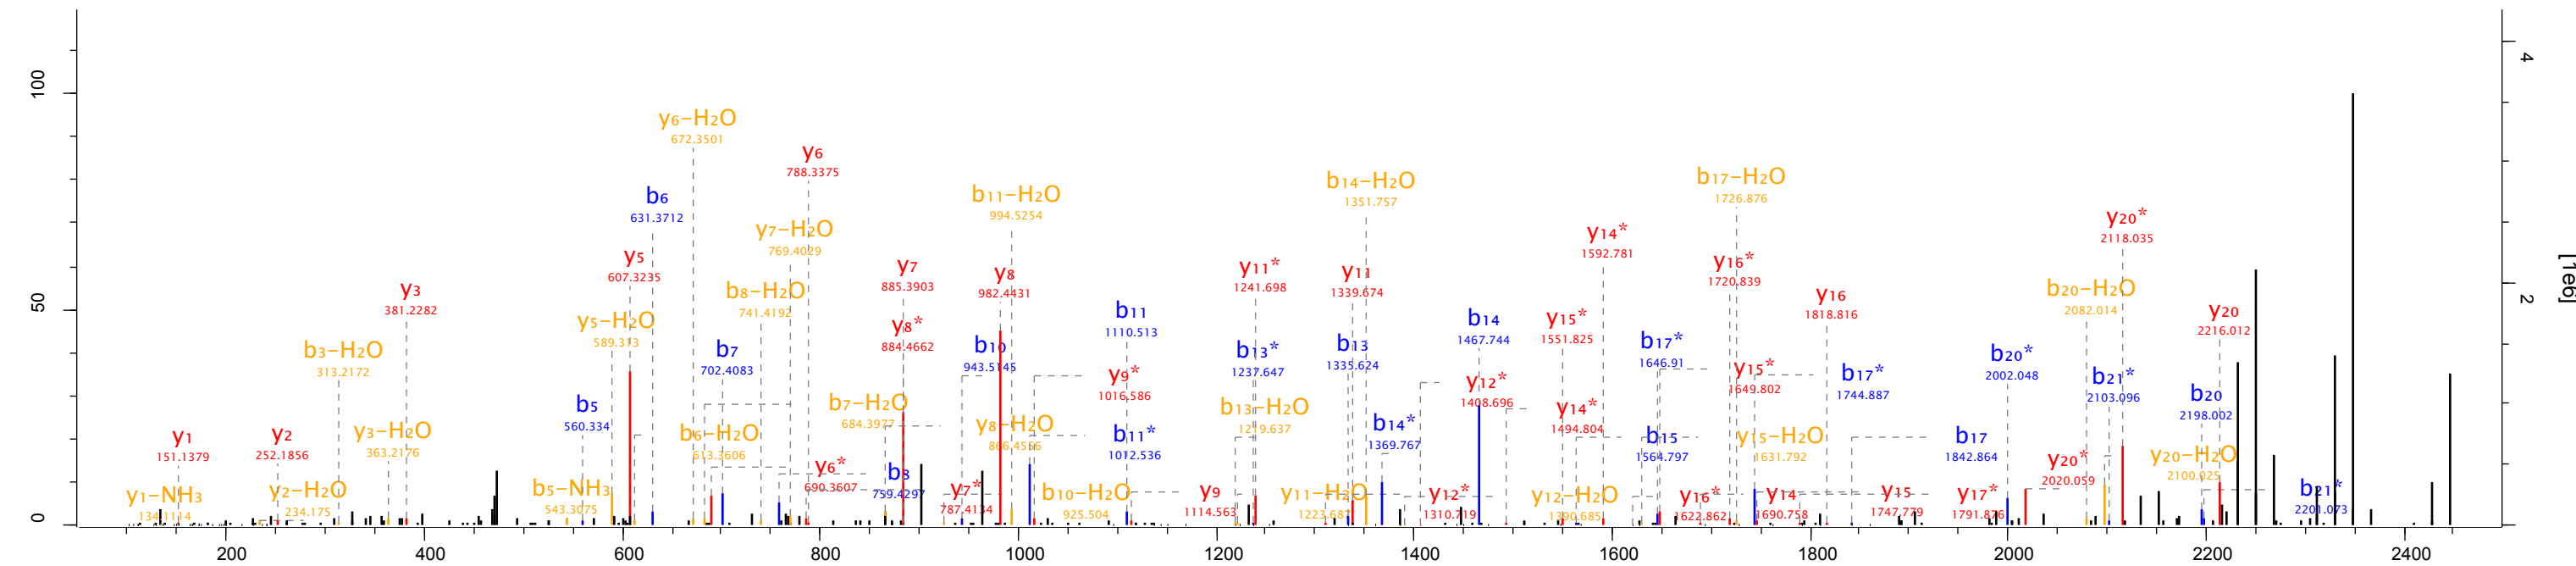

- T K P T Q A A G P S S P Q K P P T P E E T K -

Fragmentation mapping (b-ions in blue, y-ions in red):

- Peptide: T K P T Q A A G P S S P Q K P P T P E E T K
- Fragmentation sites: b<sub>5</sub>, b<sub>6</sub>, b<sub>7</sub>, b<sub>8</sub>, b<sub>10</sub>, b<sub>11</sub>, b<sub>13</sub>, b<sub>14</sub>, b<sub>15</sub>, b<sub>17</sub>, b<sub>20</sub>, b<sub>21</sub>\*
- Fragmentation sites: y<sub>20</sub>, y<sub>17</sub>\*, y<sub>16</sub>, y<sub>15</sub>, y<sub>14</sub>, y<sub>12</sub>\*, y<sub>11</sub>, y<sub>9</sub>, y<sub>8</sub>, y<sub>7</sub>, y<sub>6</sub> ph, y<sub>5</sub>, y<sub>3</sub>, y<sub>2</sub>, y<sub>1</sub>

Raw file: 20150812\_A375SR\_Phospho\_BR1\_03  
 Scan: 7582 Method: FTMS; HCD Score: 172.32 m/z: 710.77 Gene names: TJP2

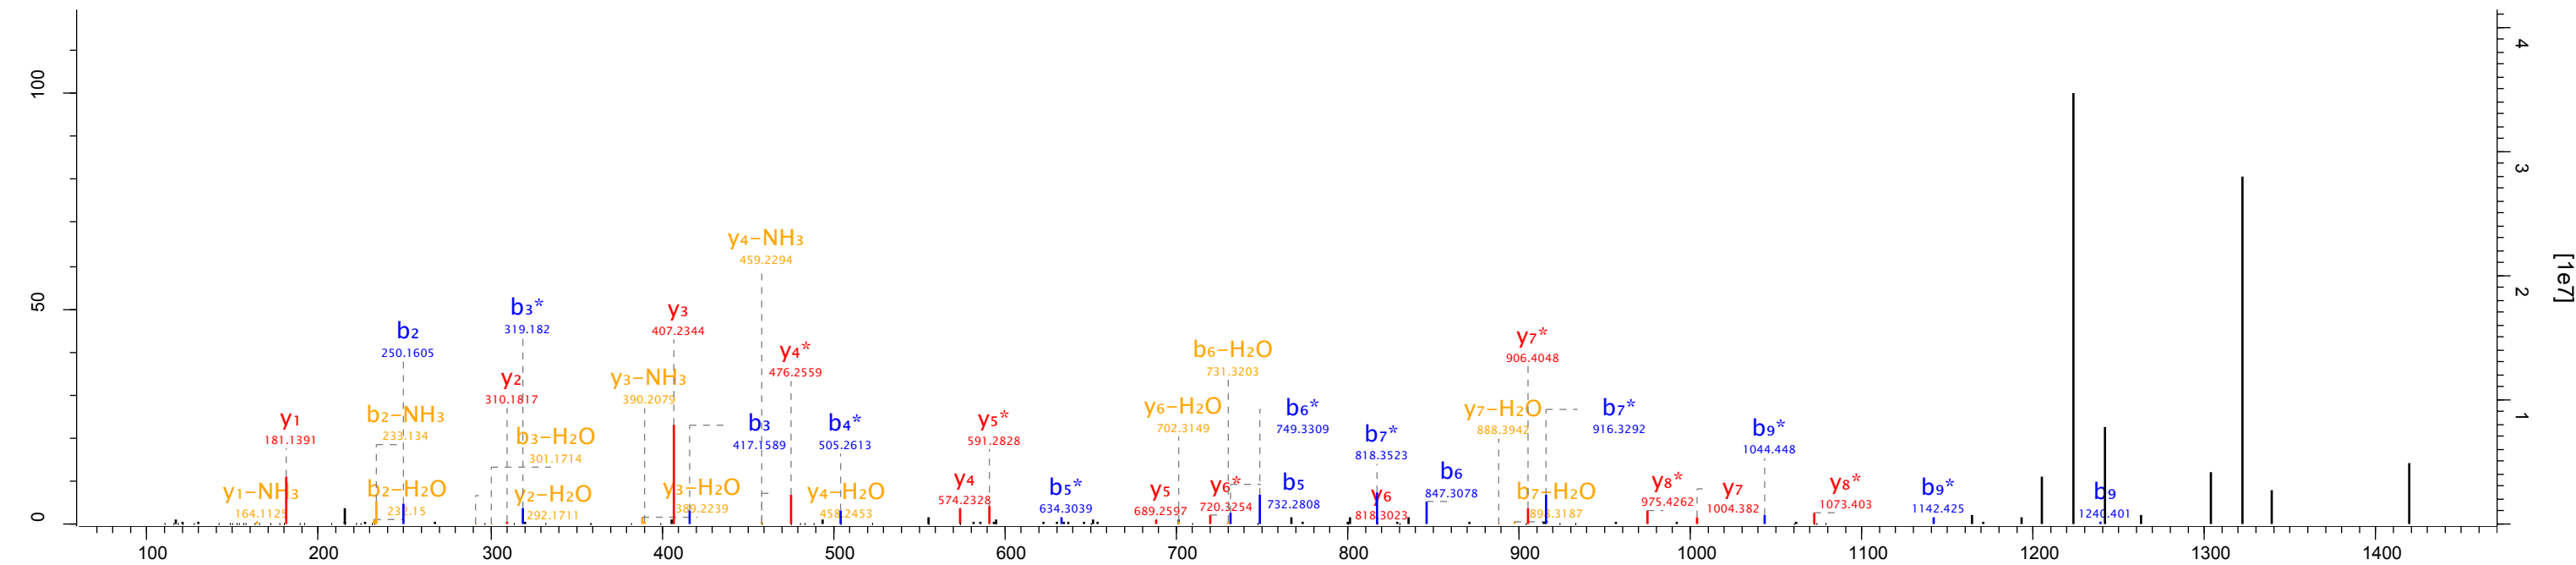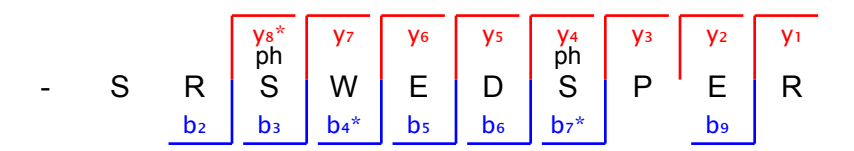

Raw file  
20150812\_A375SR\_Phospho\_BR1\_03

Scan 7752 Method FTMS; HCD Score 108.47 m/z 523.28 Gene names JMJ1C

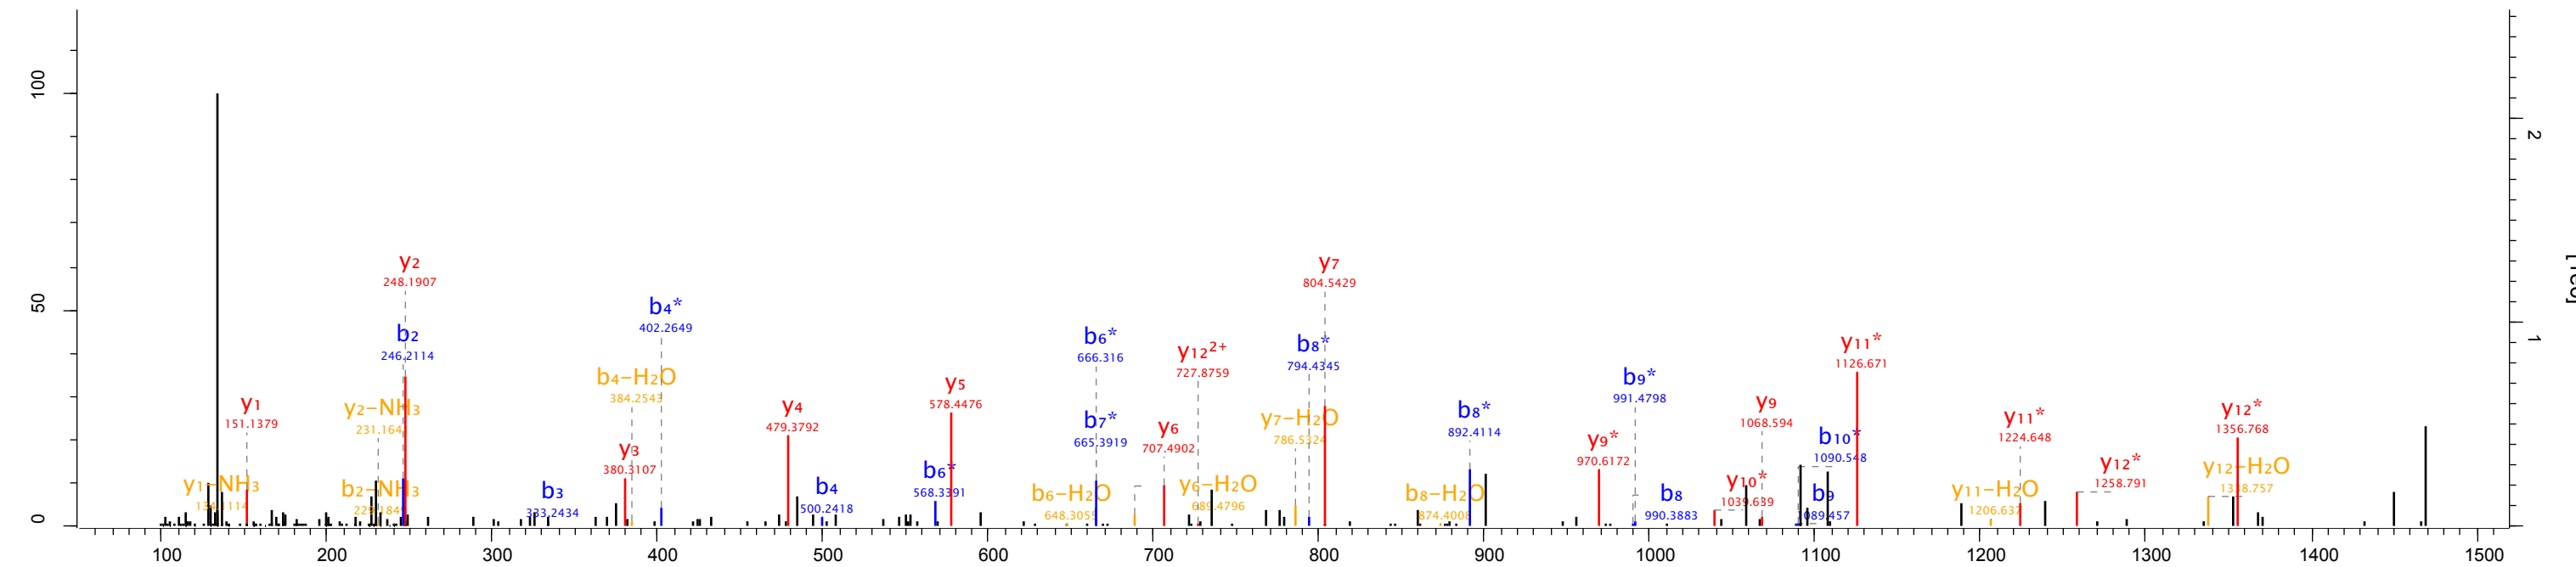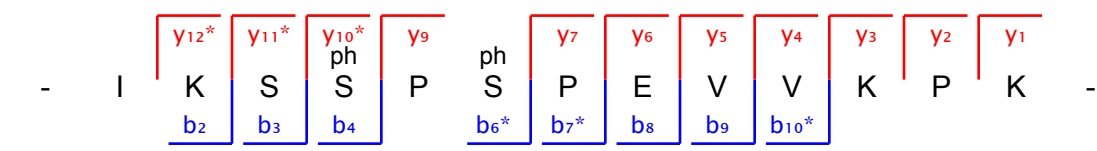

Raw file: 20150812\_A375SR\_Phospho\_BR1\_03  
 Scan: 7842 Method: FTMS; HCD Score: 147.78 m/z: 739.65 Gene names: CDK12

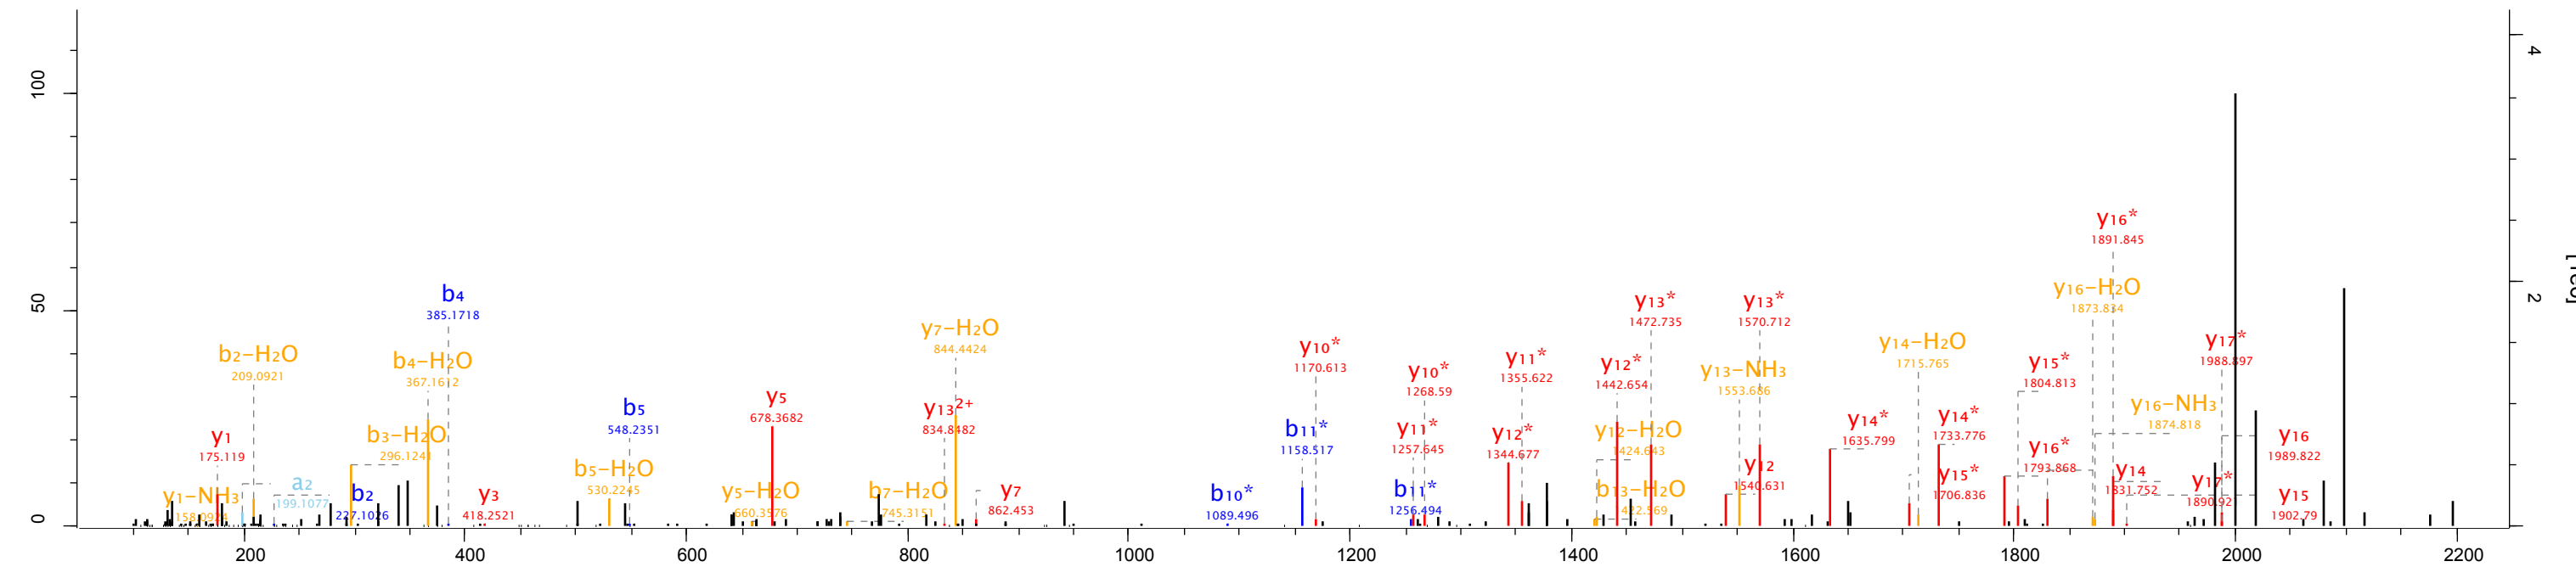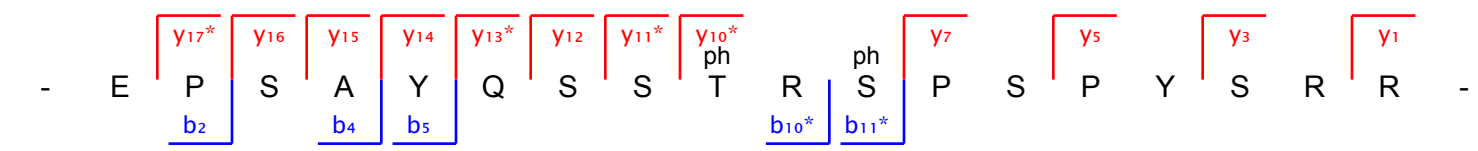

Raw file: 20150812\_A375SR\_Phospho\_BR1\_03  
 Scan: 8482 Method: FTMS; HCD Score: 152.06 m/z: 910.88 Gene names: ATG2B

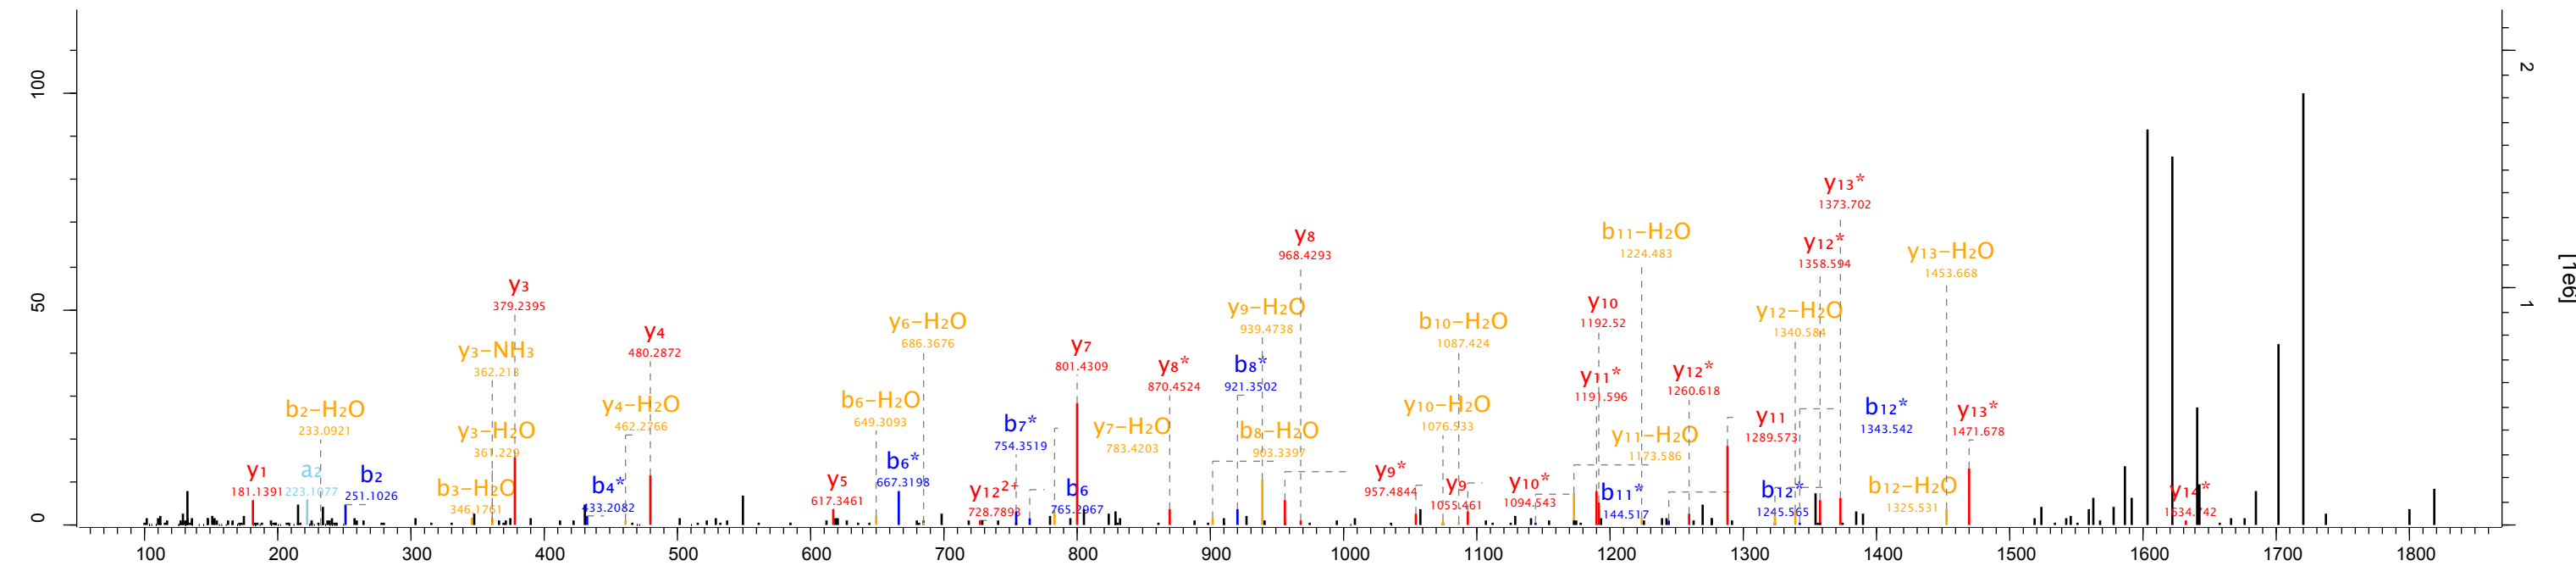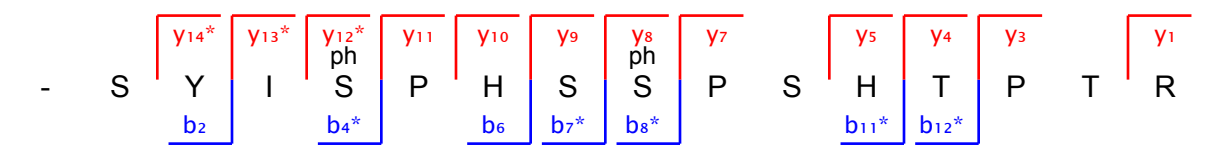

Raw file: 20150812\_A375SR\_Phospho\_BR1\_03  
 Scan: 8632 Method: FTMS; HCD Score: 130.89 m/z: 809.37 Gene names: HSF1

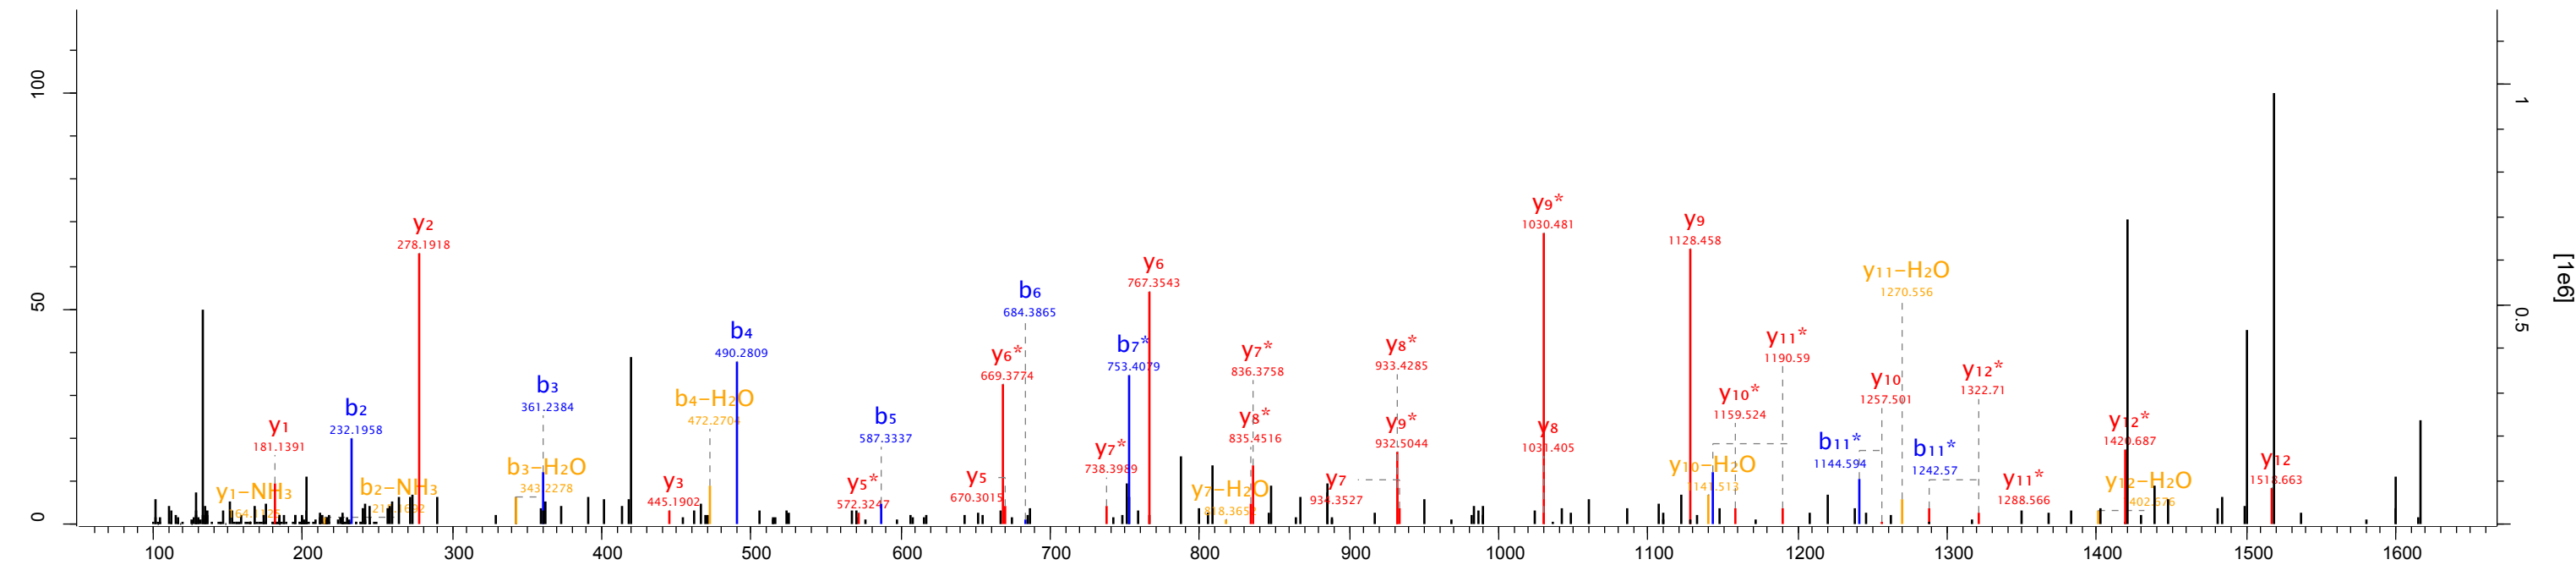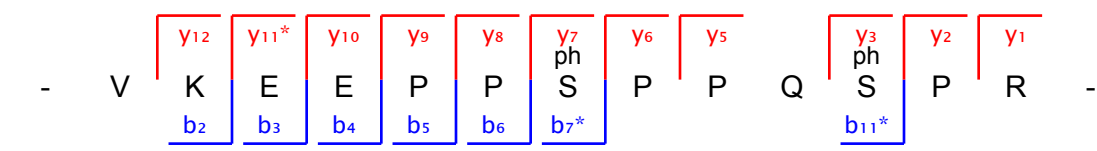

Raw file: 20150812\_A375SR\_Phospho\_BR1\_03  
 Scan: 9092 Method: FTMS; HCD Score: 101.05 m/z: 572.29 Gene names: CIC

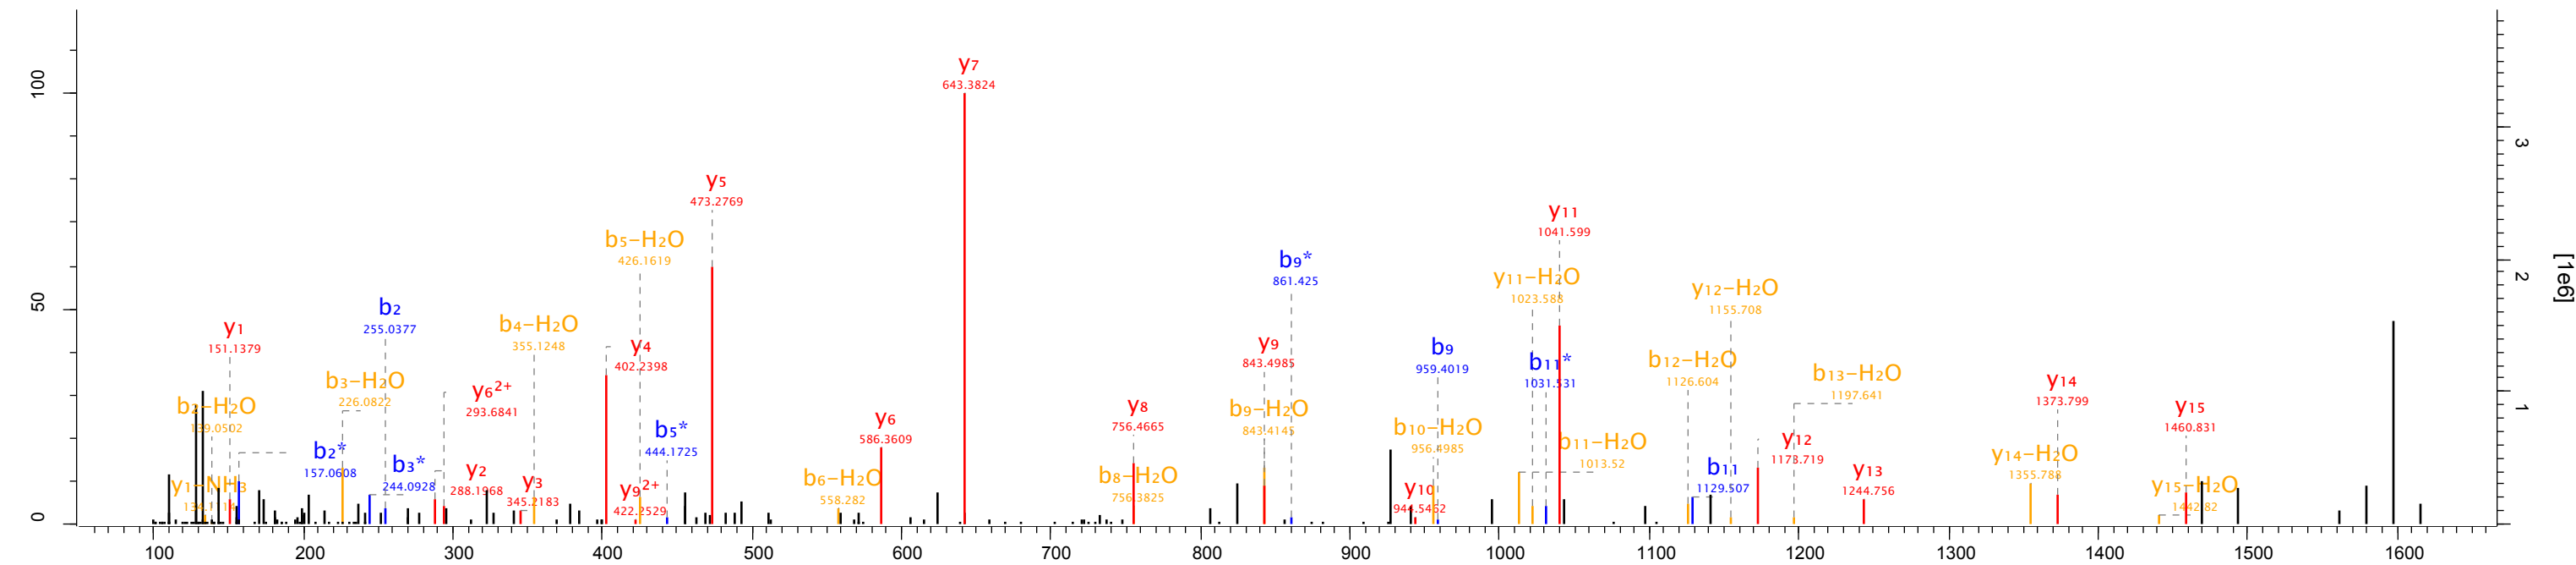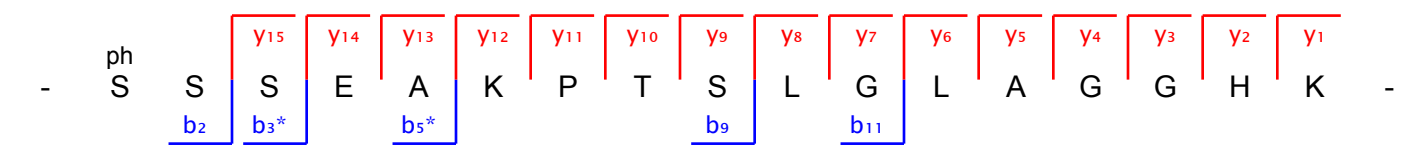

Raw file: 20150812\_A375SR\_Phospho\_BR1\_03  
 Scan: 9192 Method: FTMS; HCD Score: 103.99 m/z: 823.39 Gene names: ACIN1

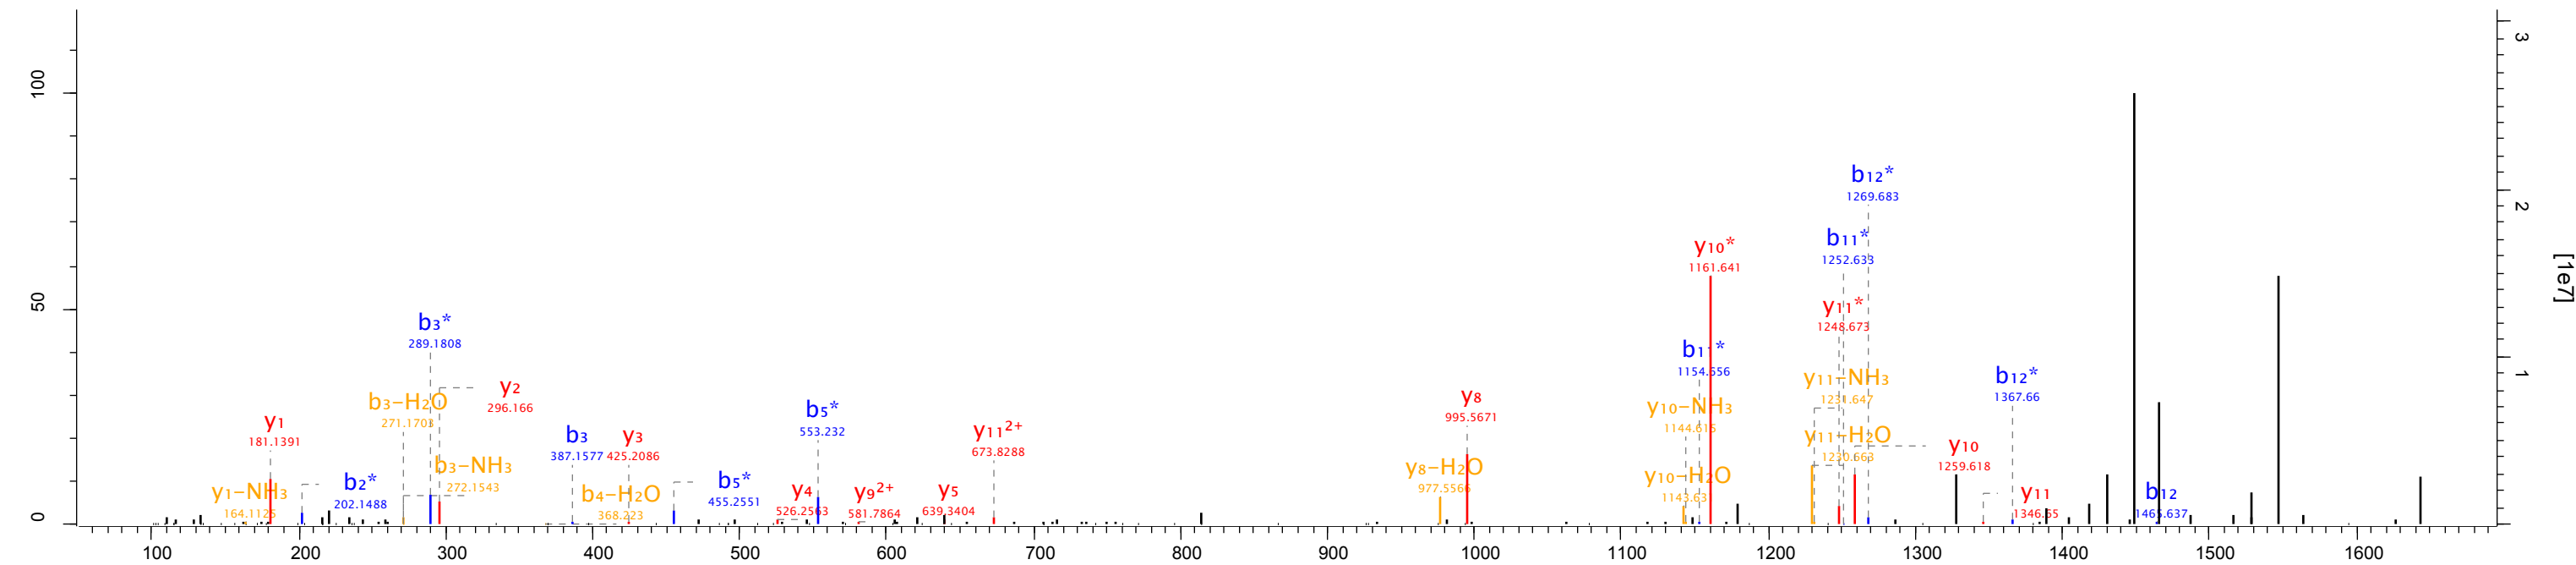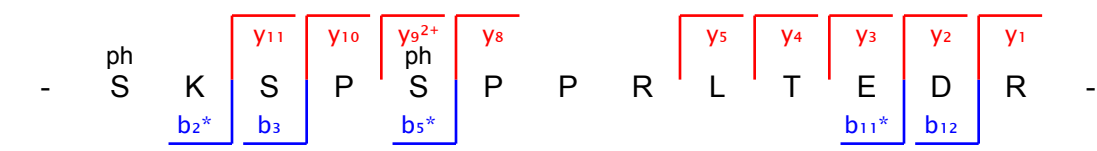



Raw file: 20150812\_A375SR\_Phospho\_BR1\_03  
 Scan: 9492 Method: FTMS; HCD Score: 334.51 m/z: 741.81 Gene names: DUT

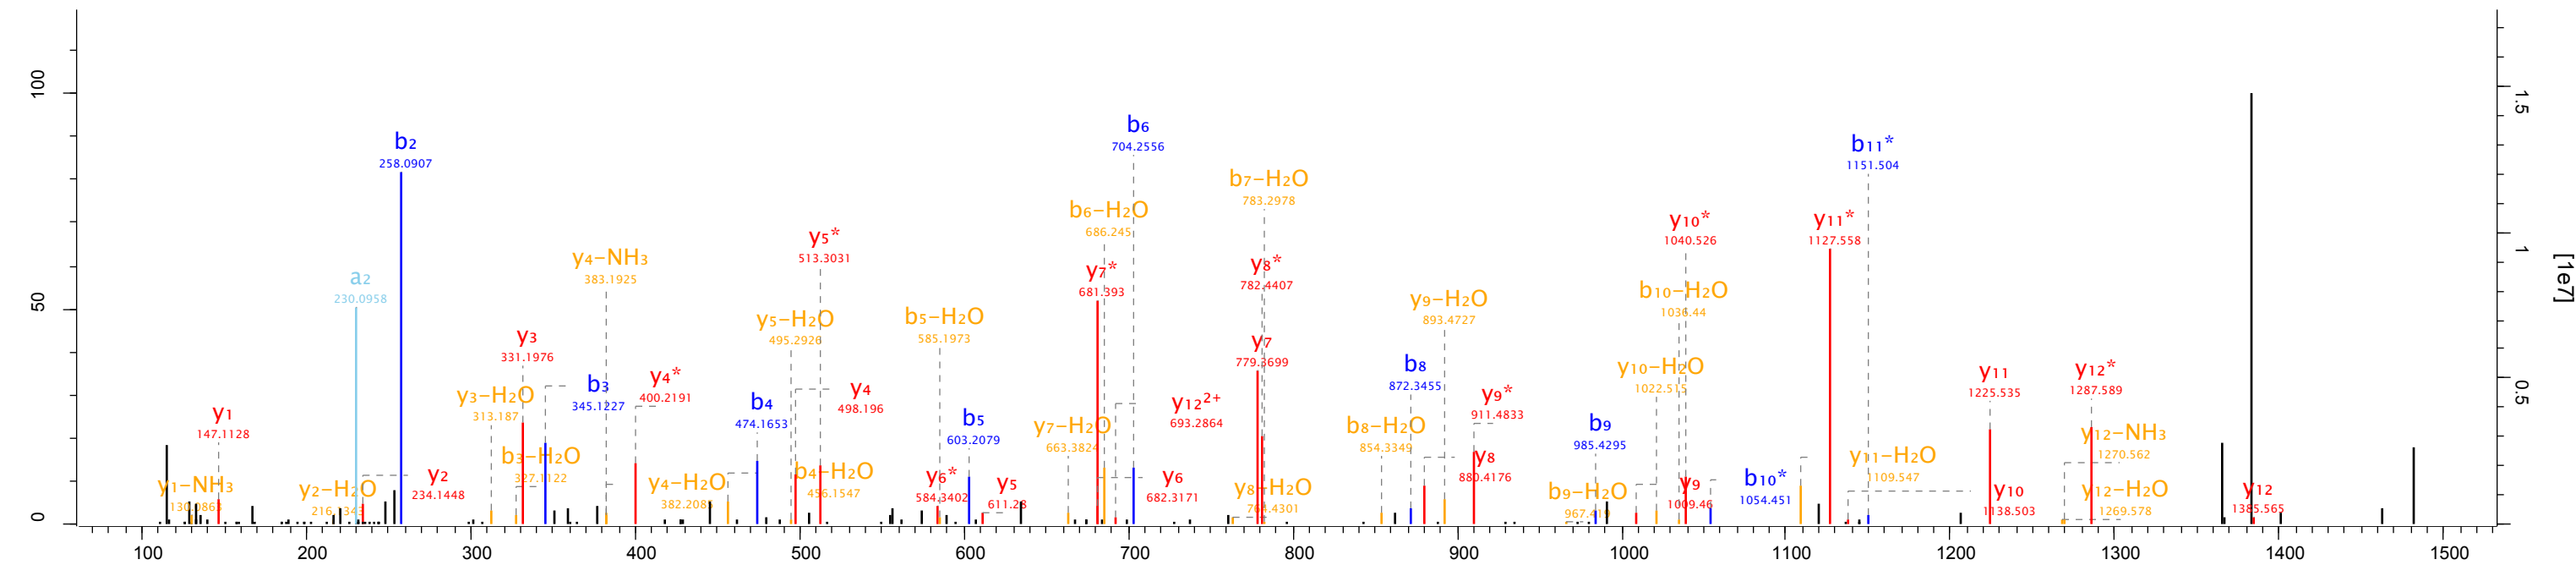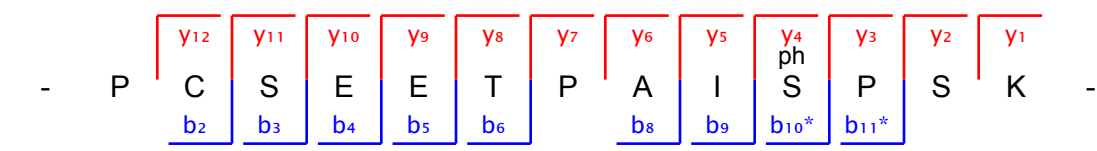

Raw file 20150812\_A375SR\_Phospho\_BR1\_03 Scan 9542 Method FTMS; HCD Score 87.23 m/z 545.88 Gene names SRSF11

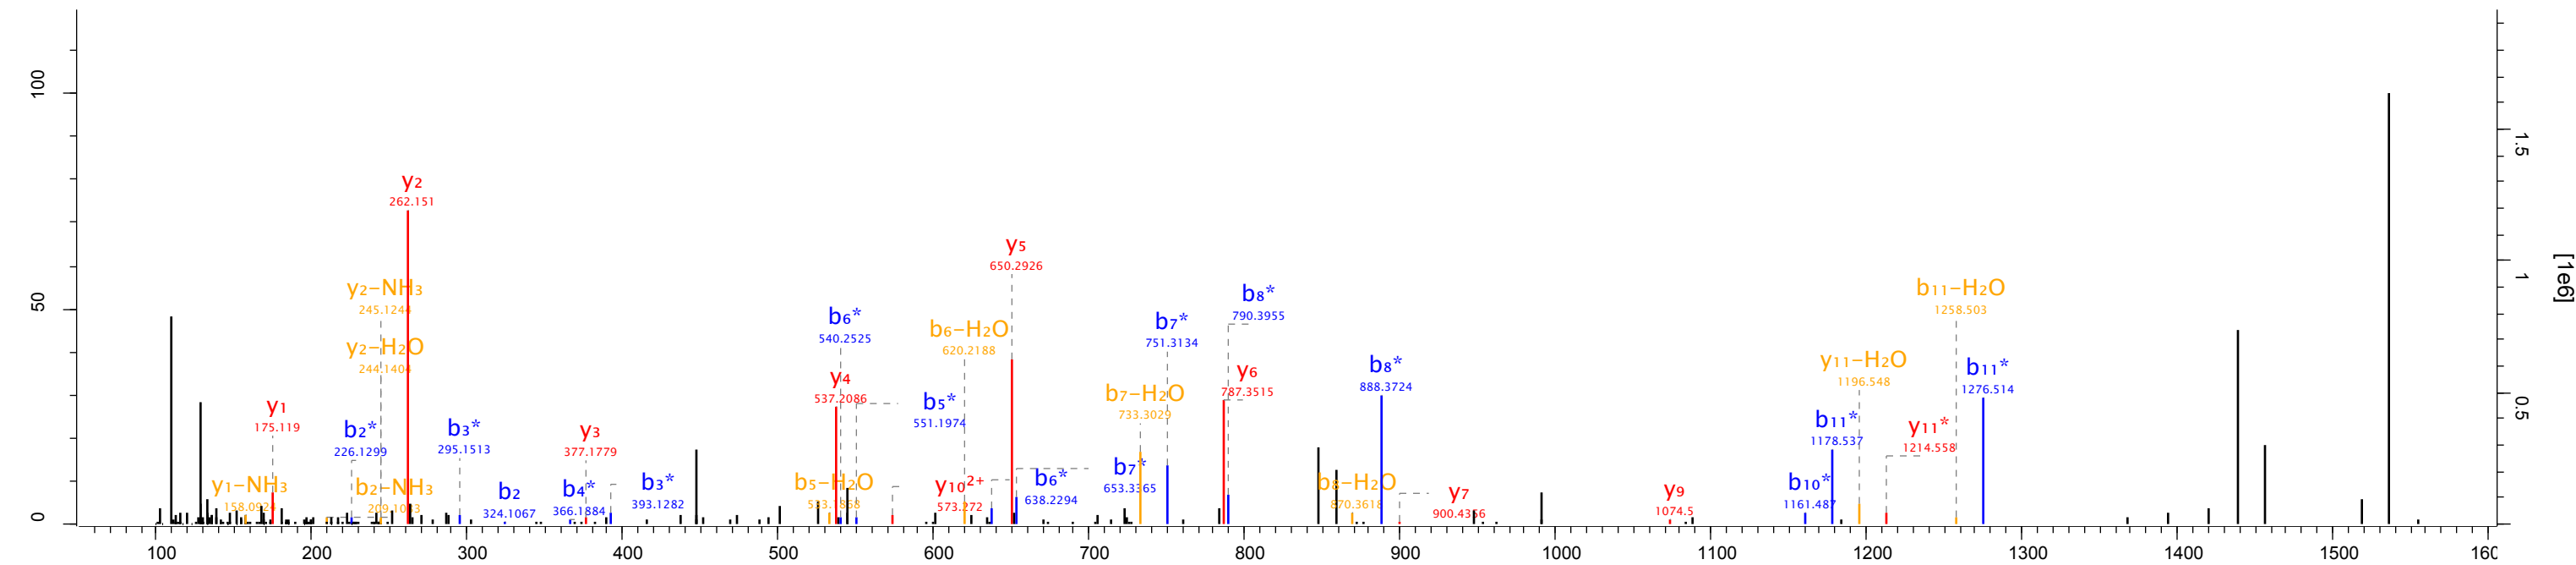

Sequence: R S R S A S S L H I C D S R

Fragmentation mapping (b and y ions):

- b<sub>2</sub> (R)
- b<sub>3</sub>\* (R S)
- b<sub>4</sub>\* (R S A)
- b<sub>5</sub>\* (R S A S)
- b<sub>6</sub>\* (R S A S S)
- b<sub>7</sub>\* (R S A S S L)
- b<sub>8</sub>\* (R S A S S L H)
- b<sub>10</sub>\* (R S A S S L H I C)
- b<sub>11</sub>\* (R S A S S L H I C D)

Fragmentation mapping (y ions):

- y<sub>1</sub> (R S)
- y<sub>2</sub> (R S A S)
- y<sub>3</sub> (R S A S S)
- y<sub>4</sub> (R S A S S L)
- y<sub>5</sub> (R S A S S L H)
- y<sub>6</sub> (R S A S S L H I)
- y<sub>7</sub> (R S A S S L H I C)
- y<sub>9</sub> (R S A S S L H I C D S)
- y<sub>10<sup>2+</sup> (R S A S S L H I C D)</sub>
- y<sub>11</sub>\* (R S A S S L H I C D S R)

Raw file: 20150812\_A375SR\_Phospho\_BR1\_03  
 Scan: 9982 Method: FTMS; HCD Score: 239.26 m/z: 855.01 Gene names: SMARCAD1

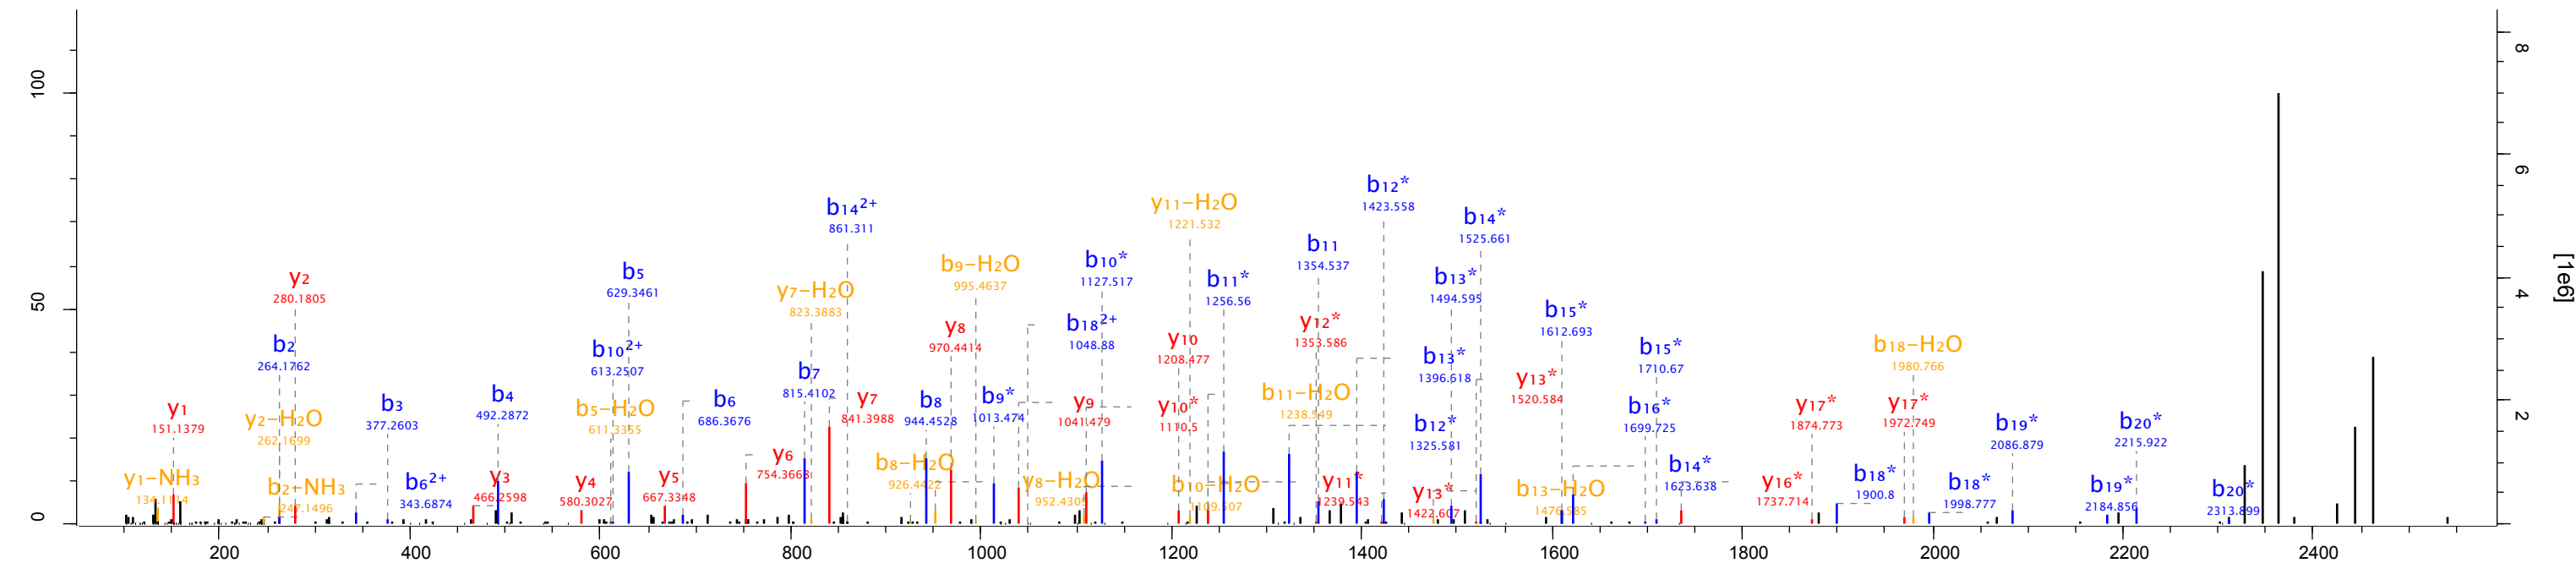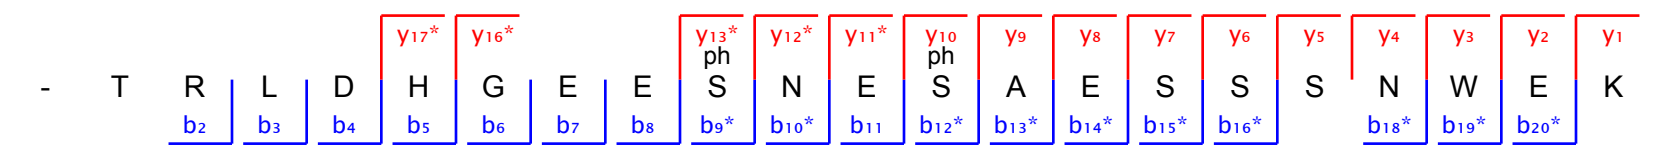

Raw file 20150812\_A375SR\_Phospho\_BR1\_04 Scan 10012 Method FTMS; HCD Score 293.12 m/z 1039.9 Gene names MON1A

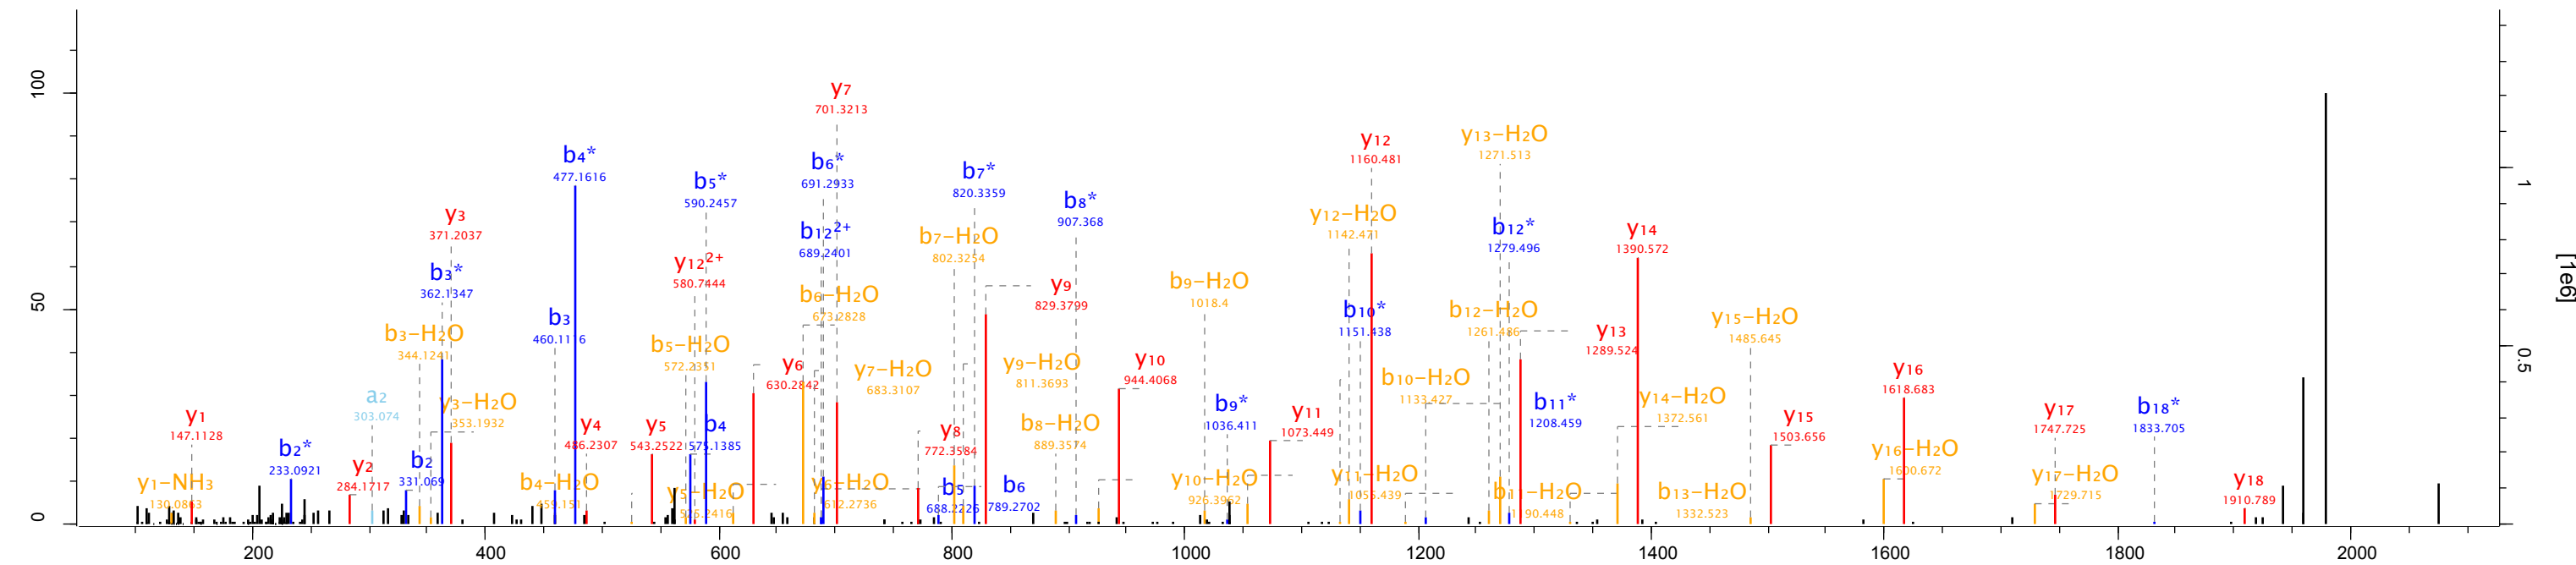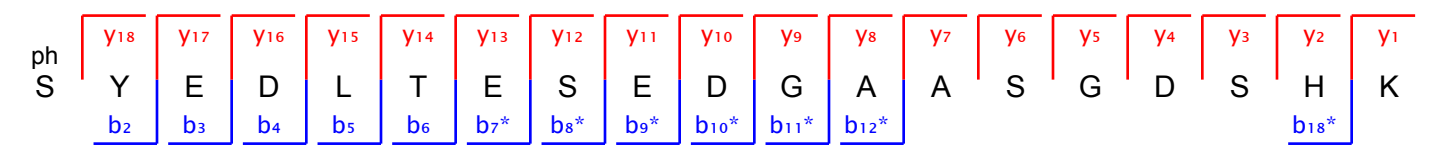

Raw file Scan Method Score m/z Gene names  
 20150812\_A375SR\_Phospho\_BR1\_04 10272 FTMS; HCD 139.38 475.73 MTRF1L

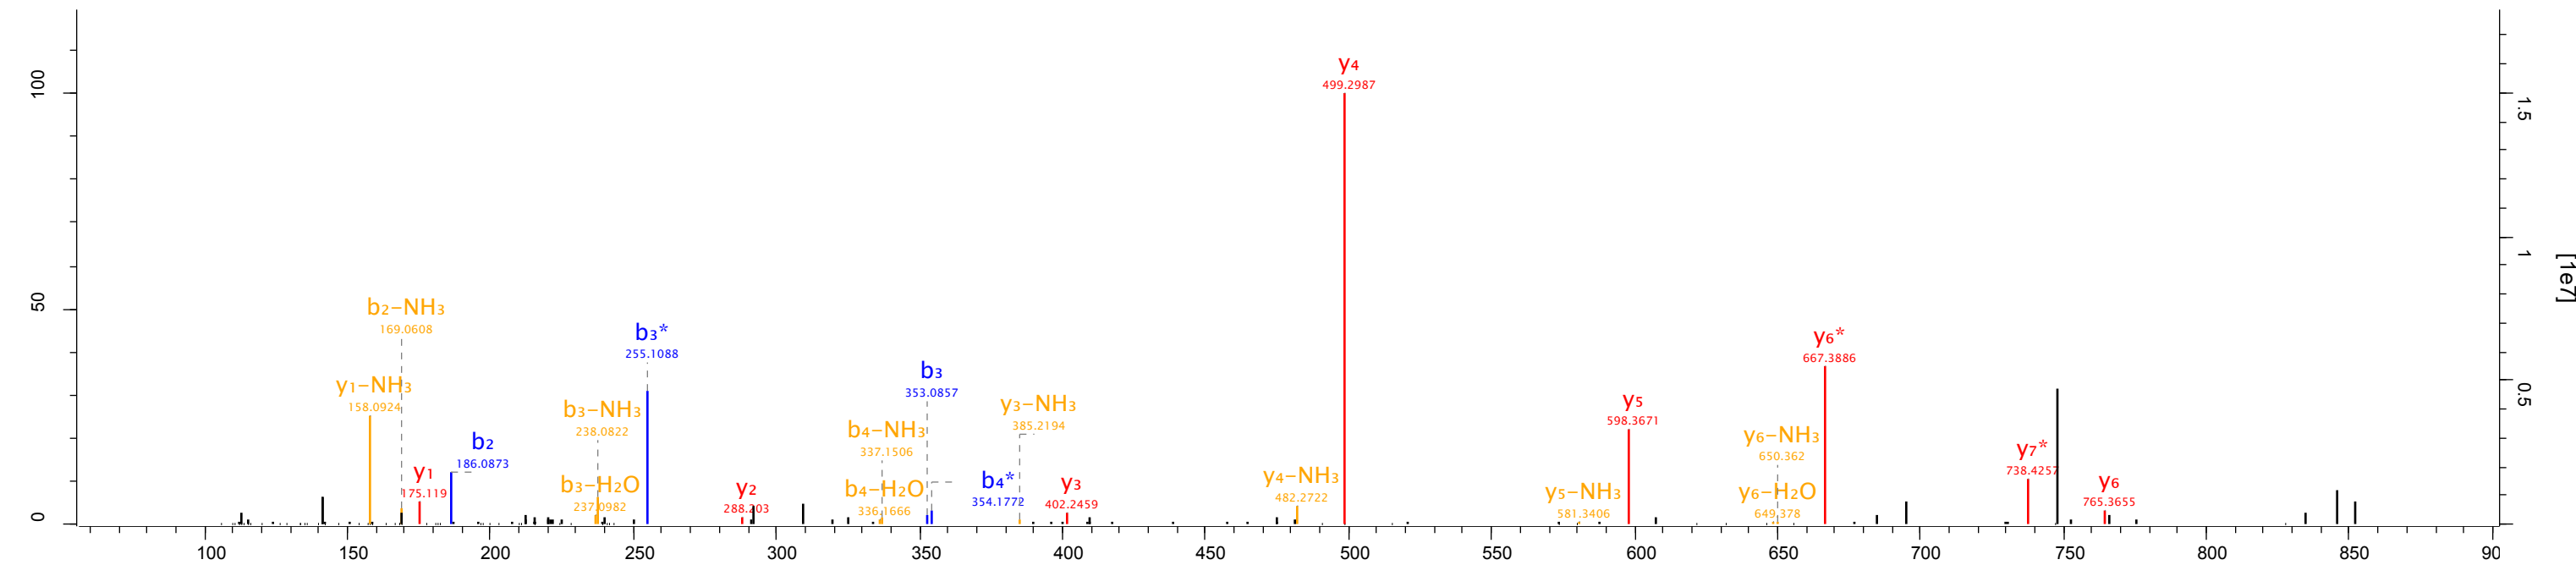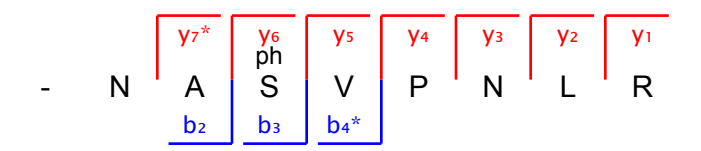

Raw file: 20150812\_A375SR\_Phospho\_BR1\_04  
 Scan: 10382 Method: FTMS; HCD Score: 65.88 m/z: 479.25 Gene names: RNF214

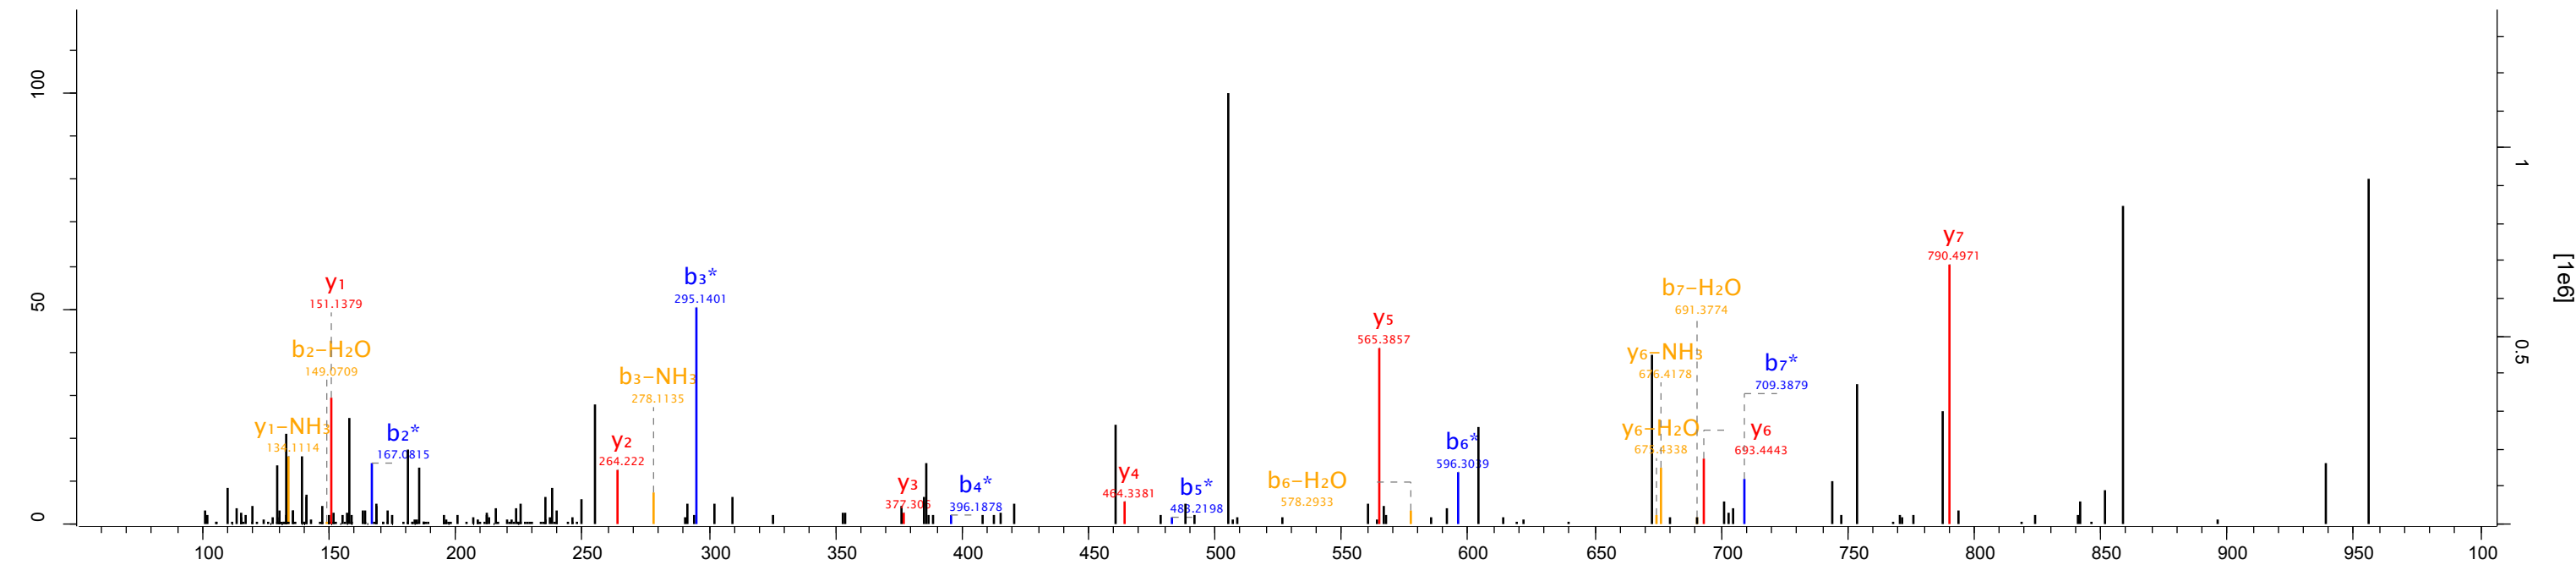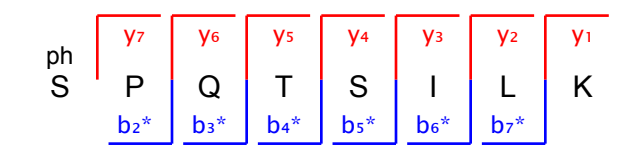

Raw file 20150812\_A375SR\_Phospho\_BR1\_04 Scan 10652 Method FTMS; HCD Score 60.76 m/z 897.89 Gene names SSBP2

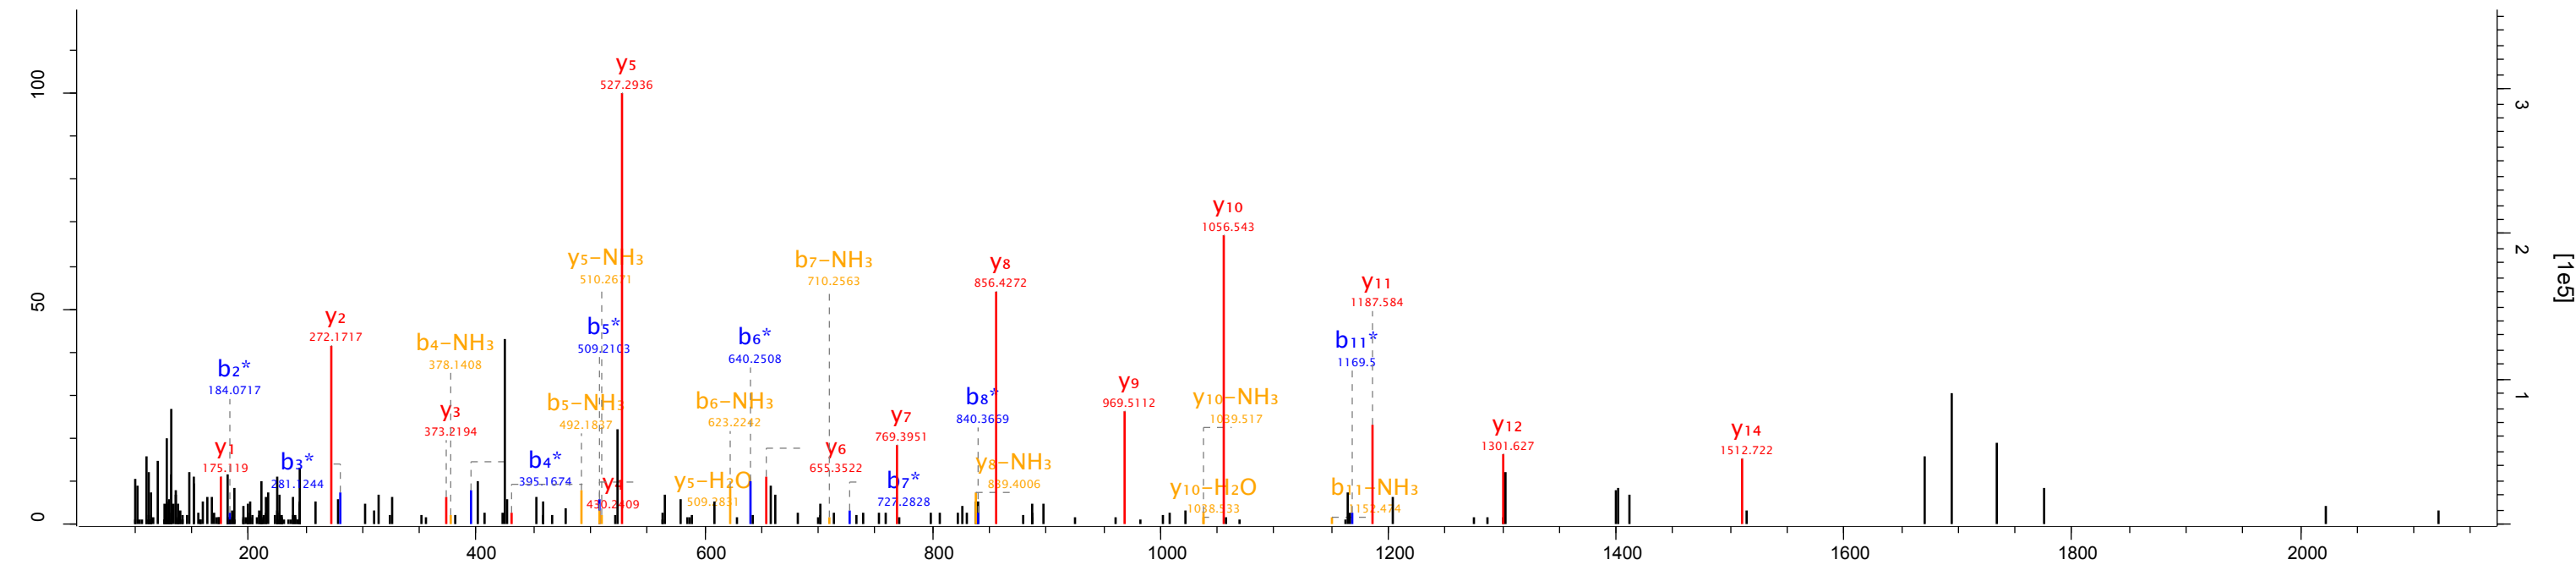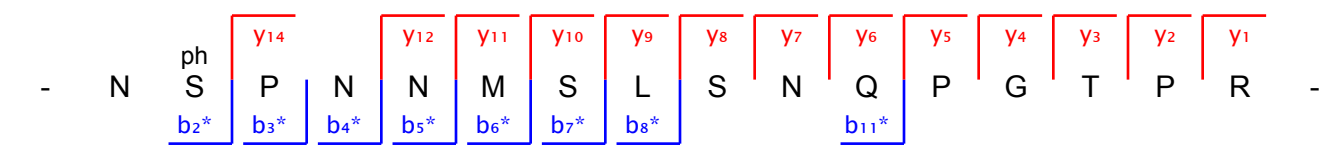

Raw file 20150812\_A375SR\_Phospho\_BR1\_04 Scan 10752 Method FTMS; HCD Score 144.24 m/z 893.09 Gene names RPTOR

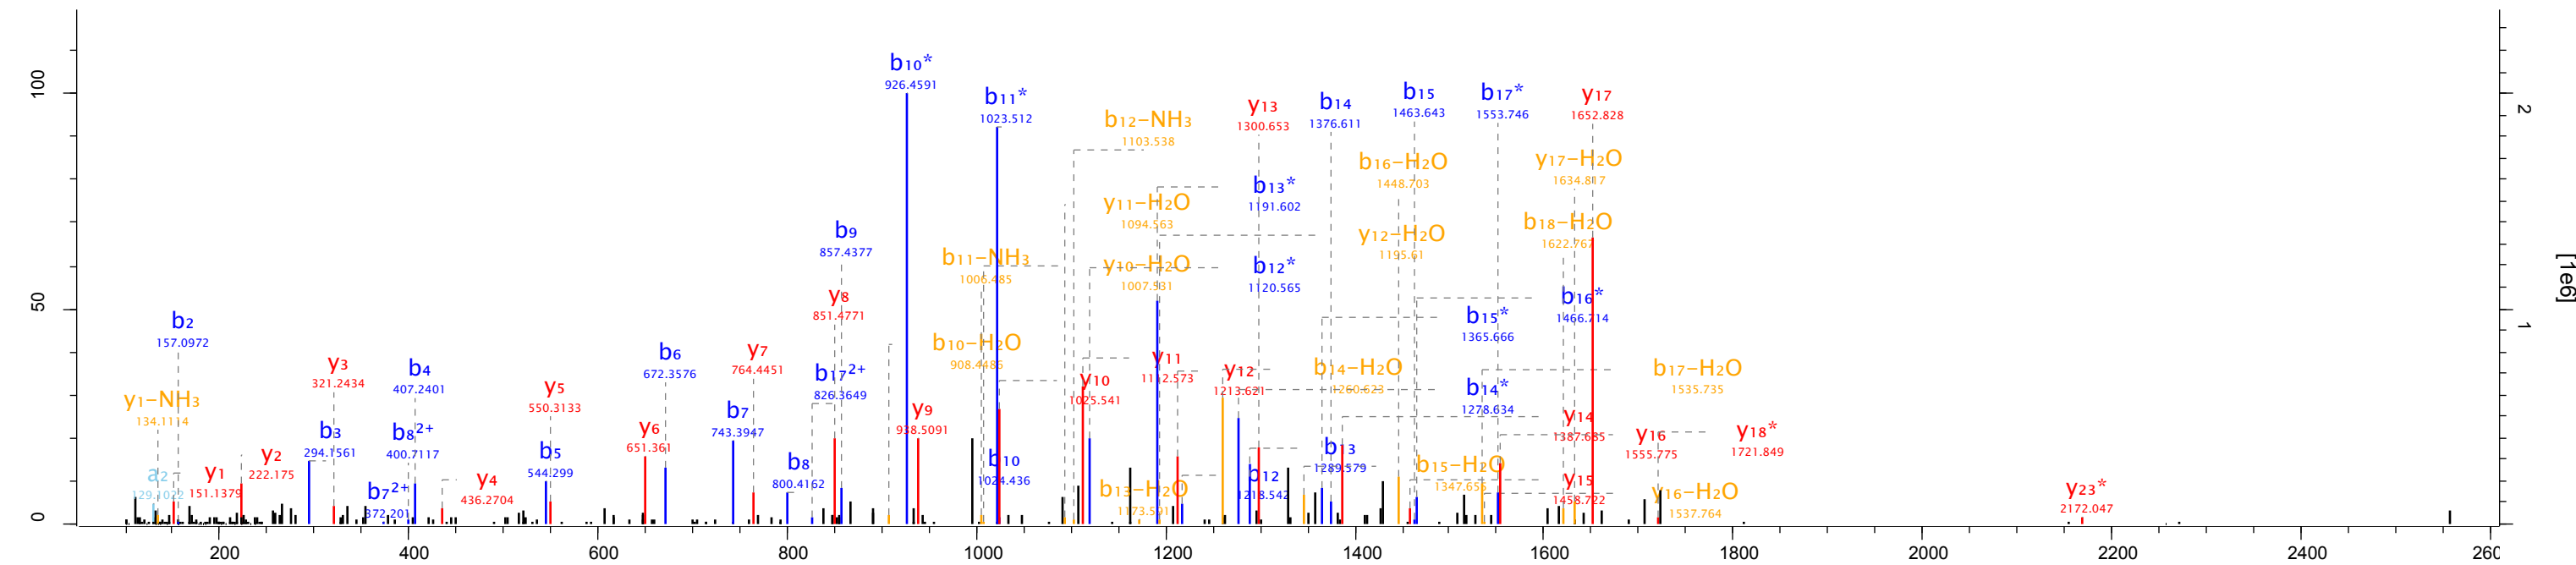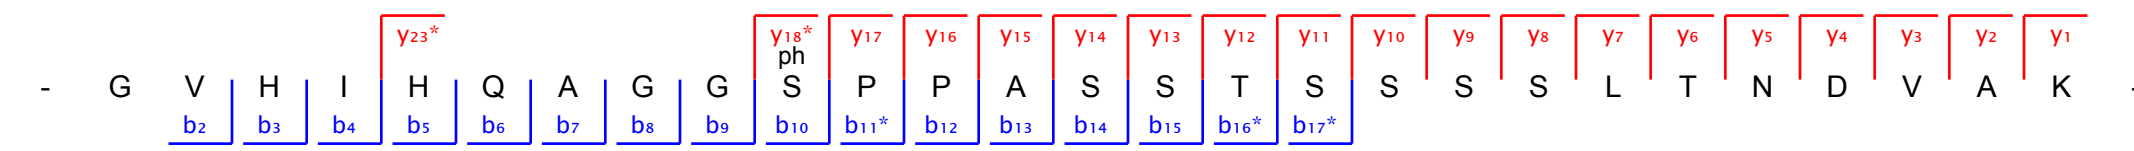



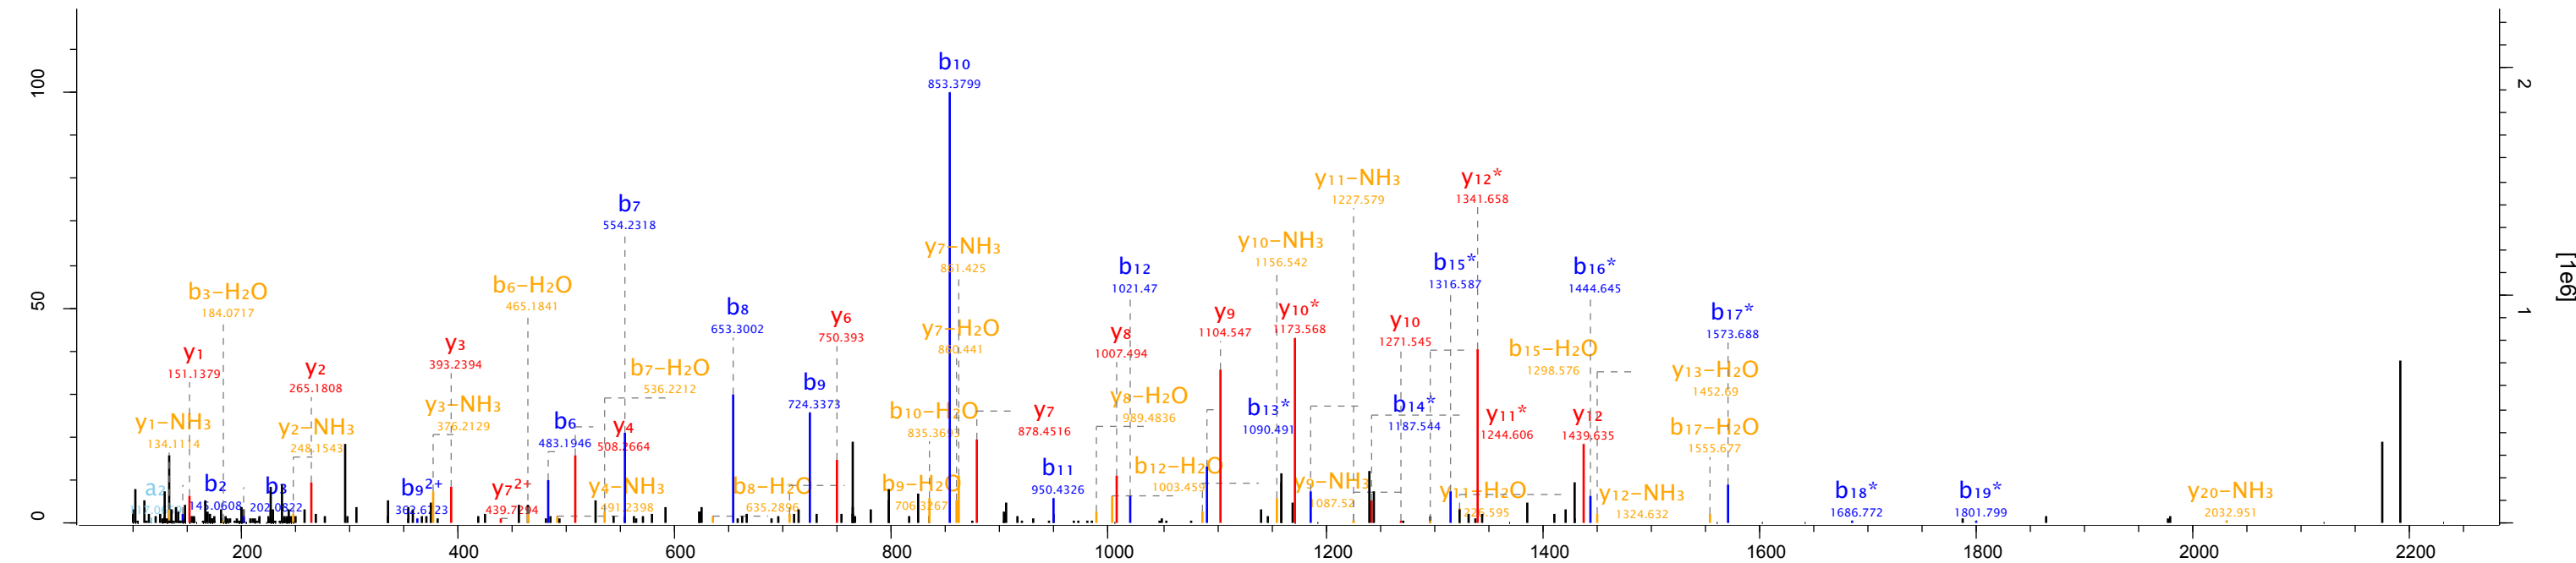

- S G G S G H A V A E P A S P E Q E L D Q N K -

b2 b3 b6 b7 b8 b9 b10 b11 b12 b13\* b14\* b15\* b16\* b17\* b18\* b19\*

y12 y11\* y10 ph y9 y8 y7 y6 y4 y3 y2 y1

Raw file: 20150812\_A375SR\_Phospho\_BR1\_04  
 Scan: 11232 Method: FTMS; HCD Score: 237.4 m/z: 782.34 Gene names: TMF1

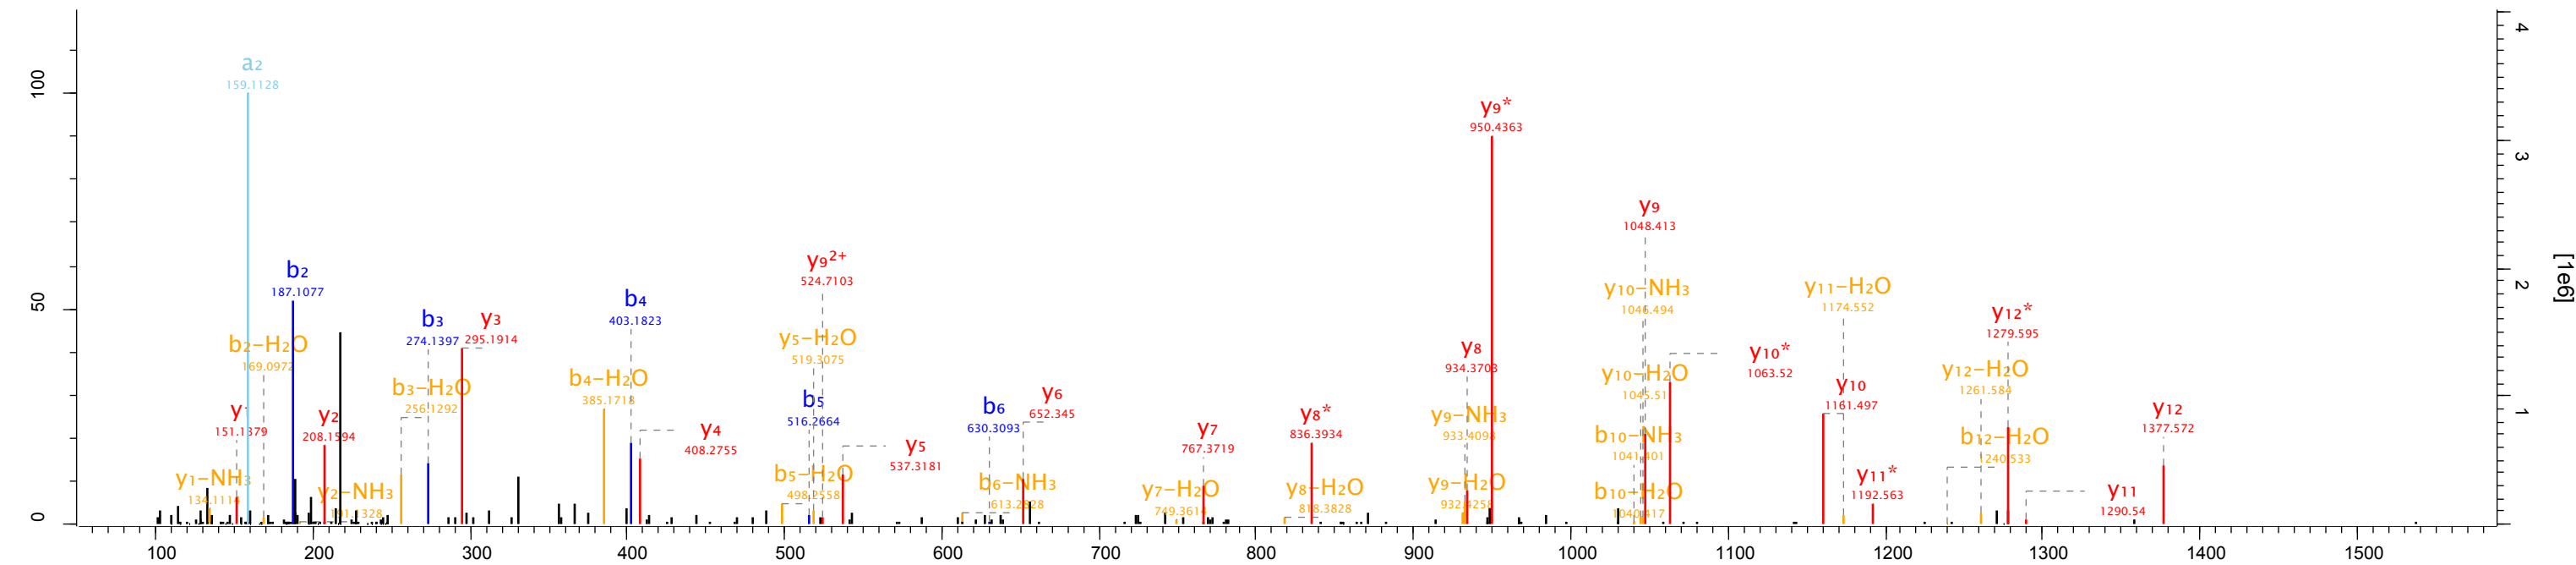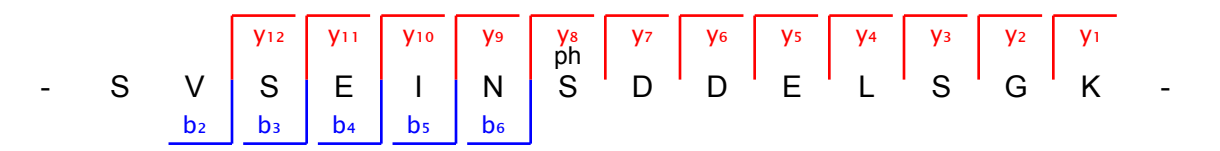

Raw file: 20150812\_A375SR\_Phospho\_BR1\_04  
 Scan: 11472 Method: FTMS; HCD Score: 121.56 m/z: 535.76 Gene names: RAI14

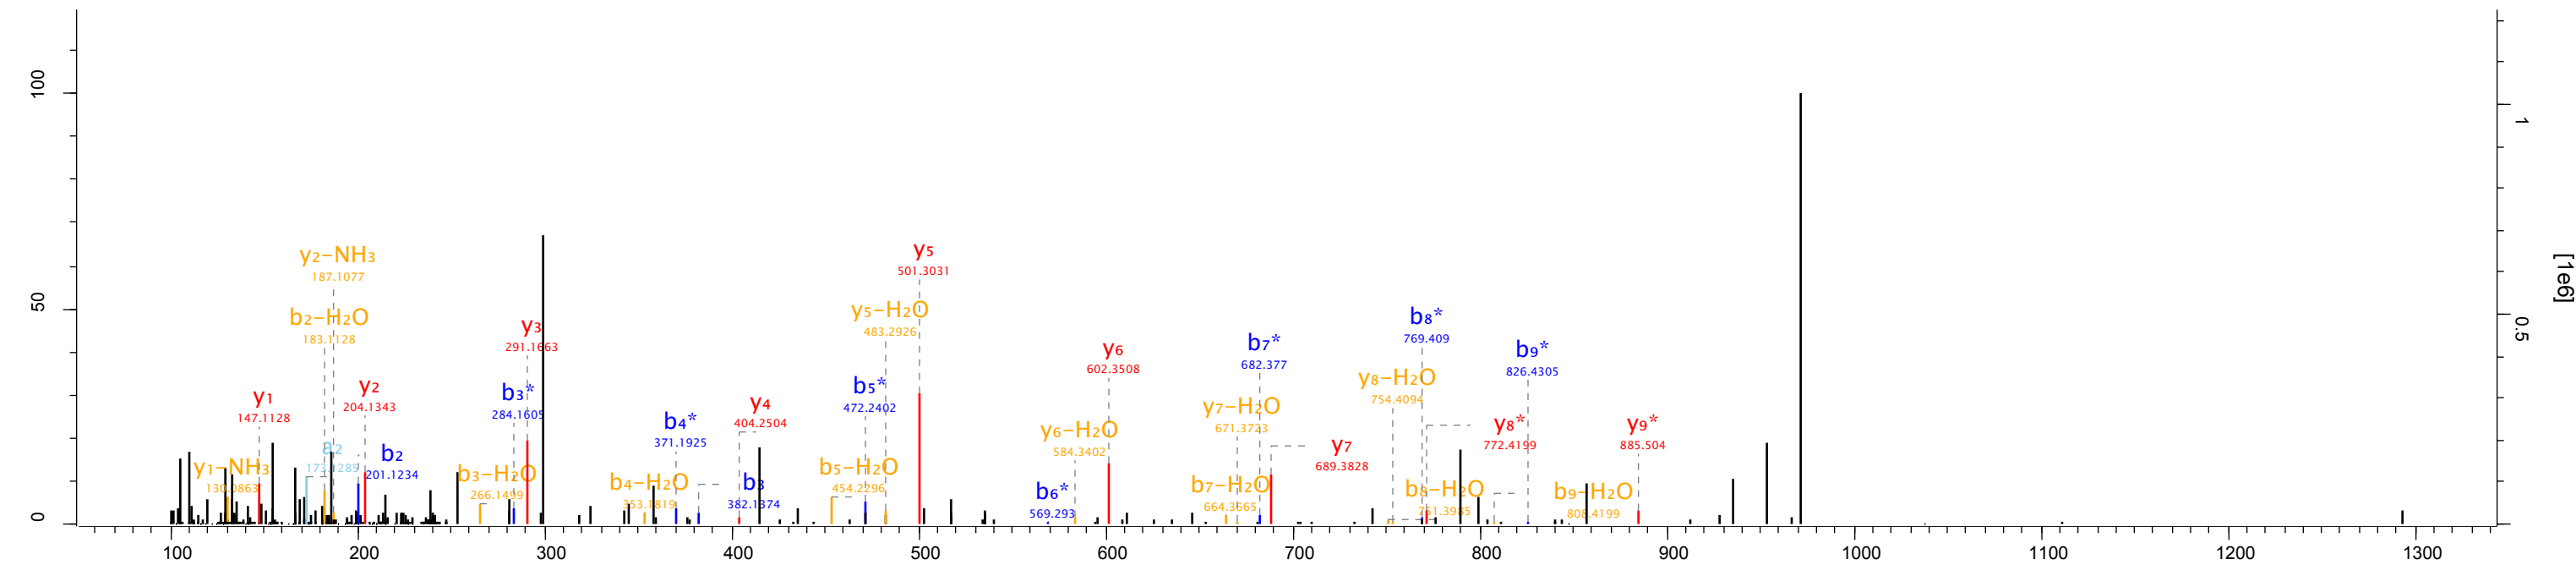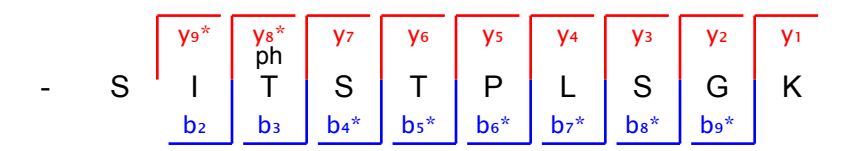

Raw file Scan Method Score m/z Gene names

20150812\_A375SR\_Phospho\_BR1\_04 1202 FTMS; HCD 133.42 553.75 SRRM1

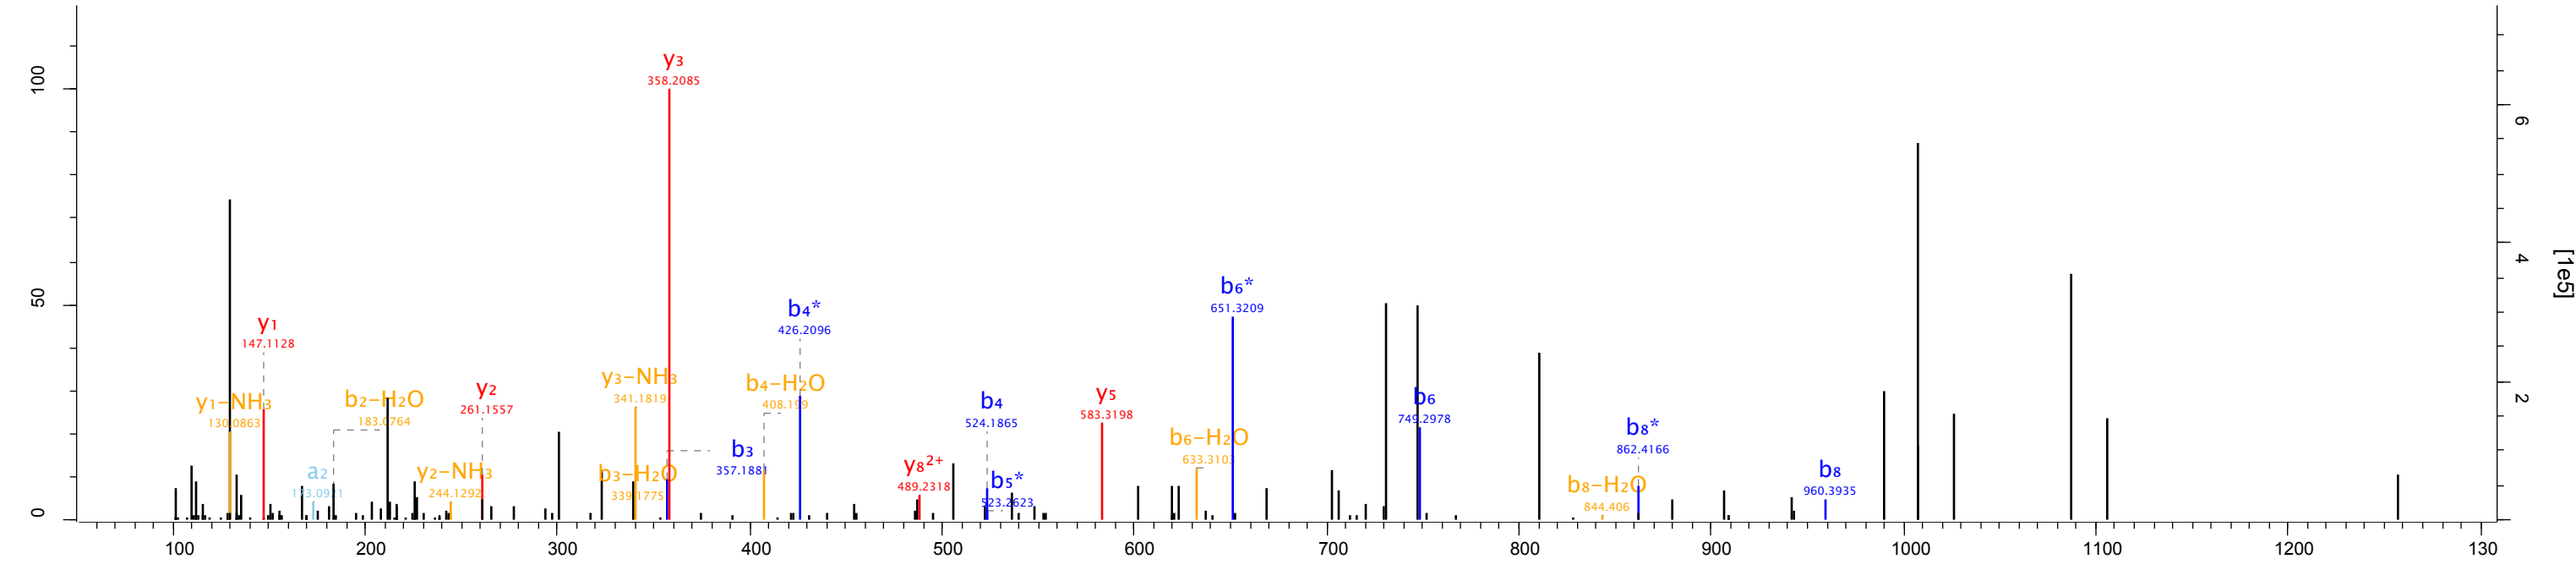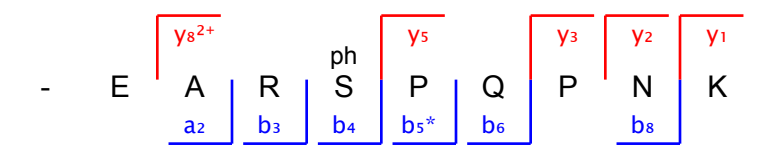

Raw file 20150812\_A375SR\_Phospho\_BR1\_04 Scan 12532 Method FTMS; HCD Score 87.06 m/z 694.31 Gene names NASP

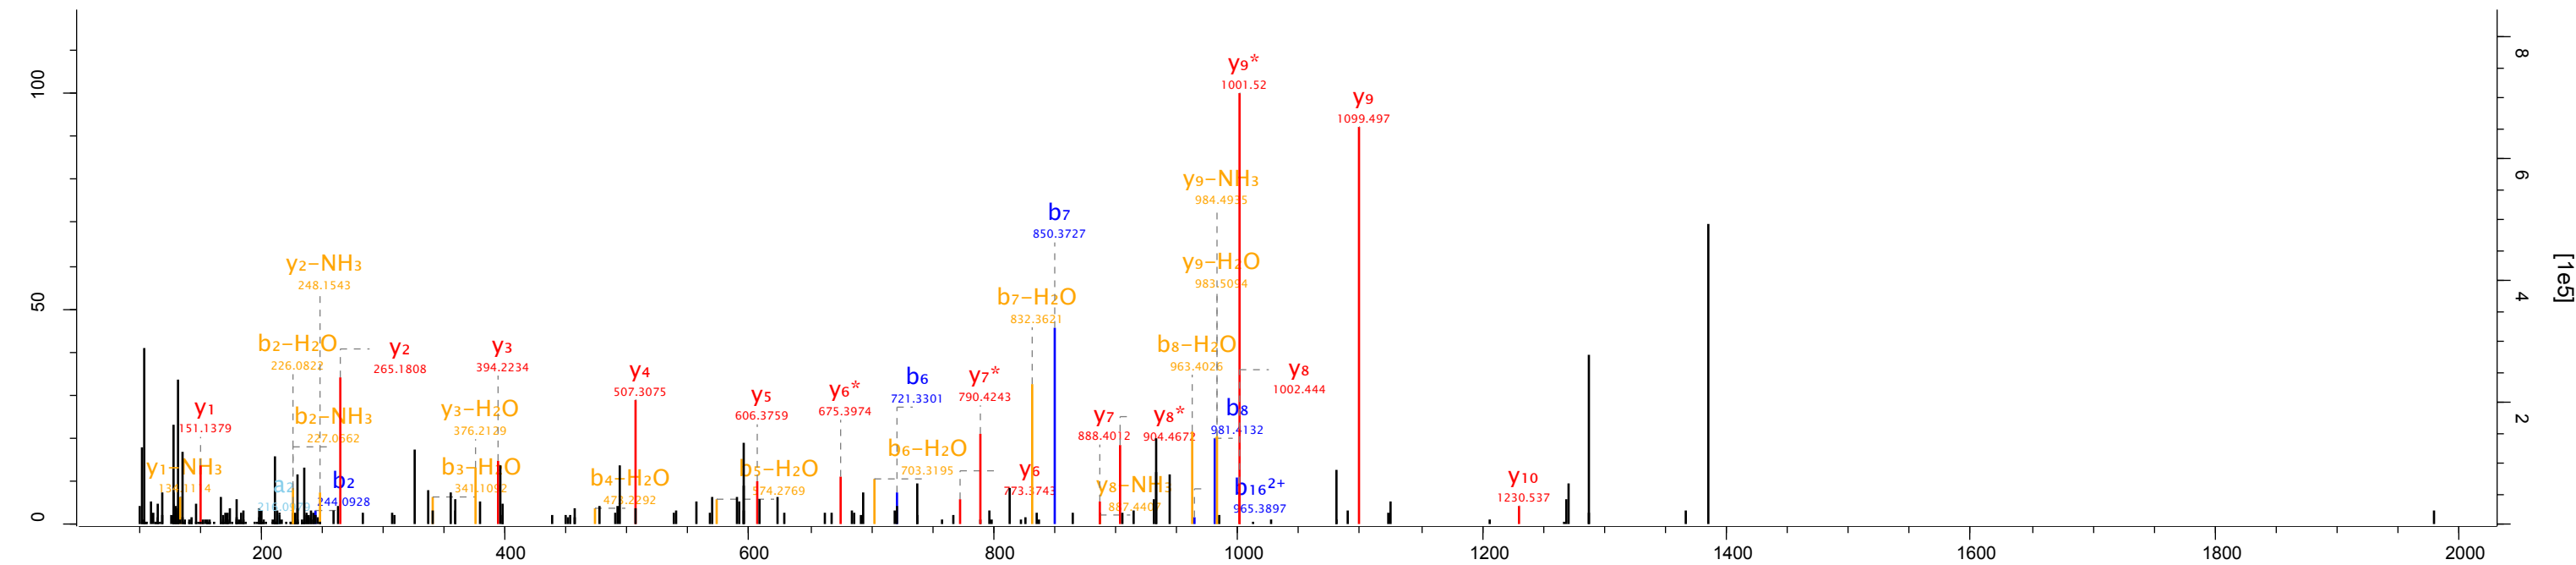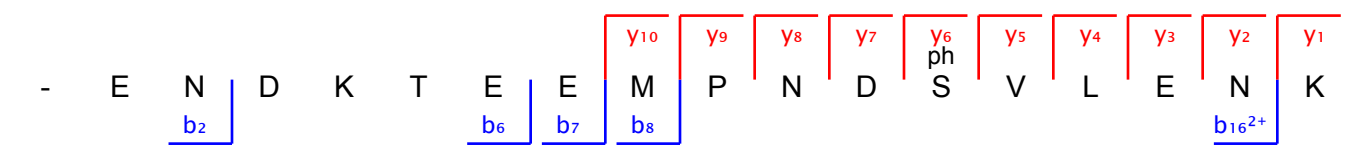

Raw file 20150812\_A375SR\_Phospho\_BR1\_04 Scan 12602 Method FTMS; HCD Score 172.91 m/z 1072.95 Gene names MAGI3

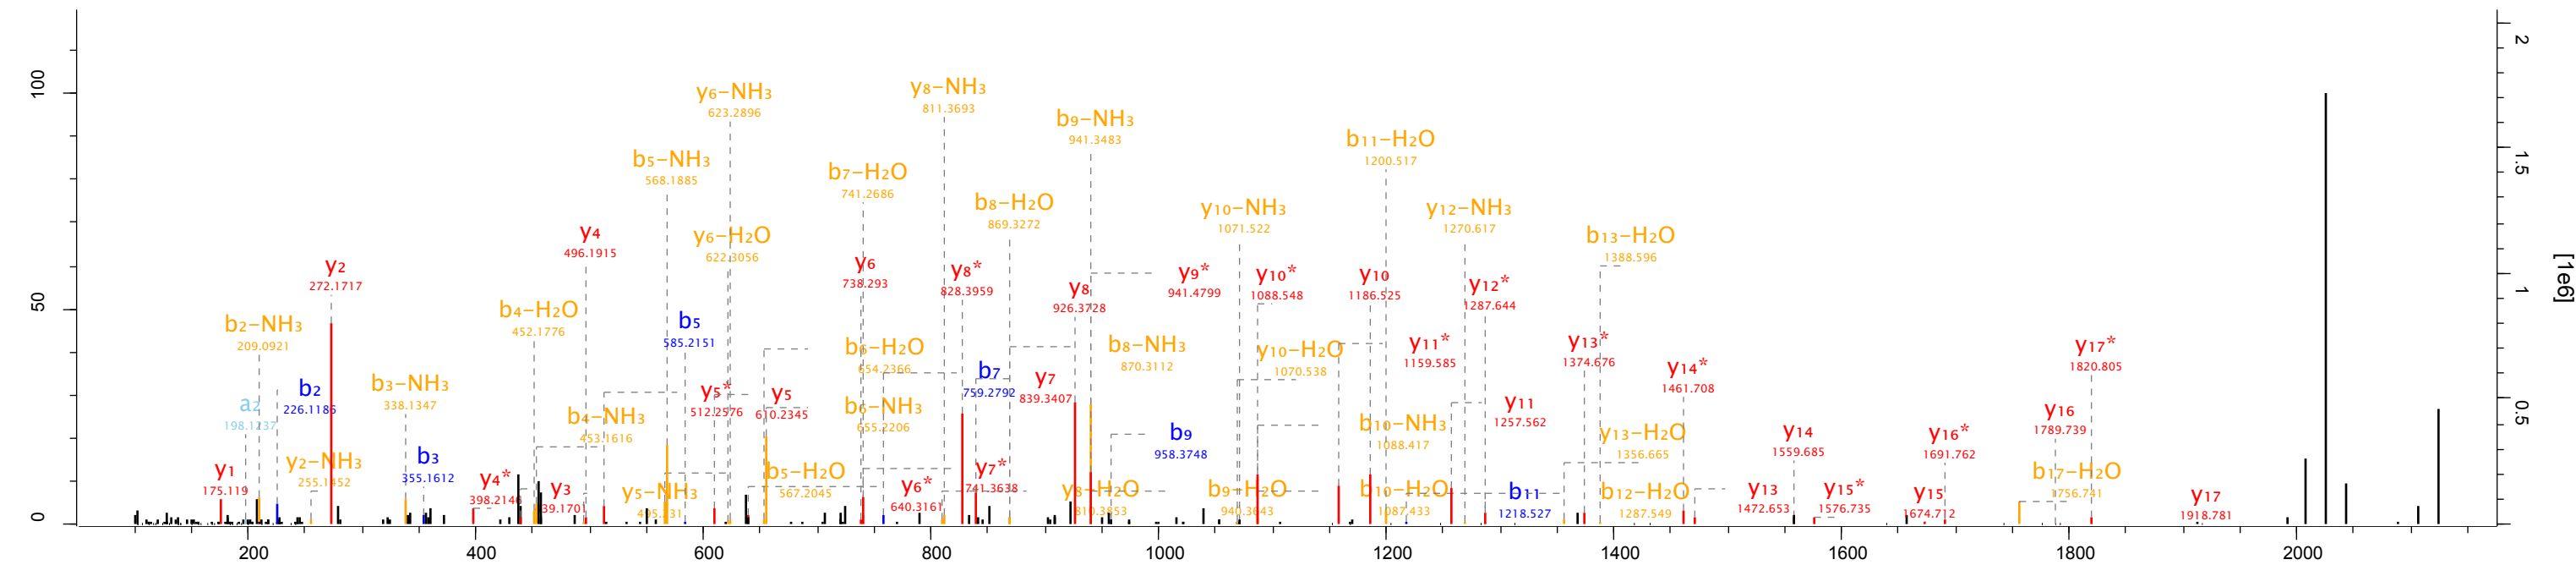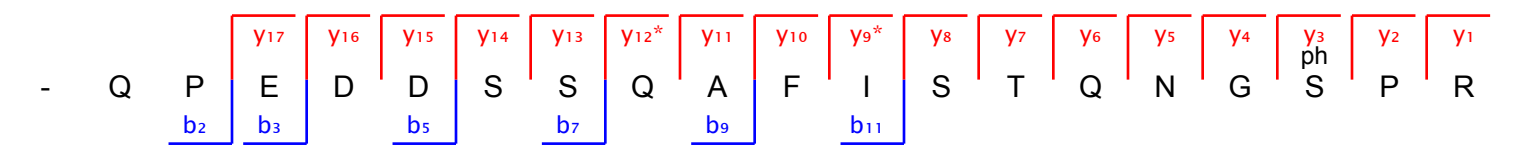

Raw file 20150812\_A375SR\_Phospho\_BR1\_04 Scan 12612 Method FTMS; HCD Score 92.11 m/z 541.74 Gene names ANK2

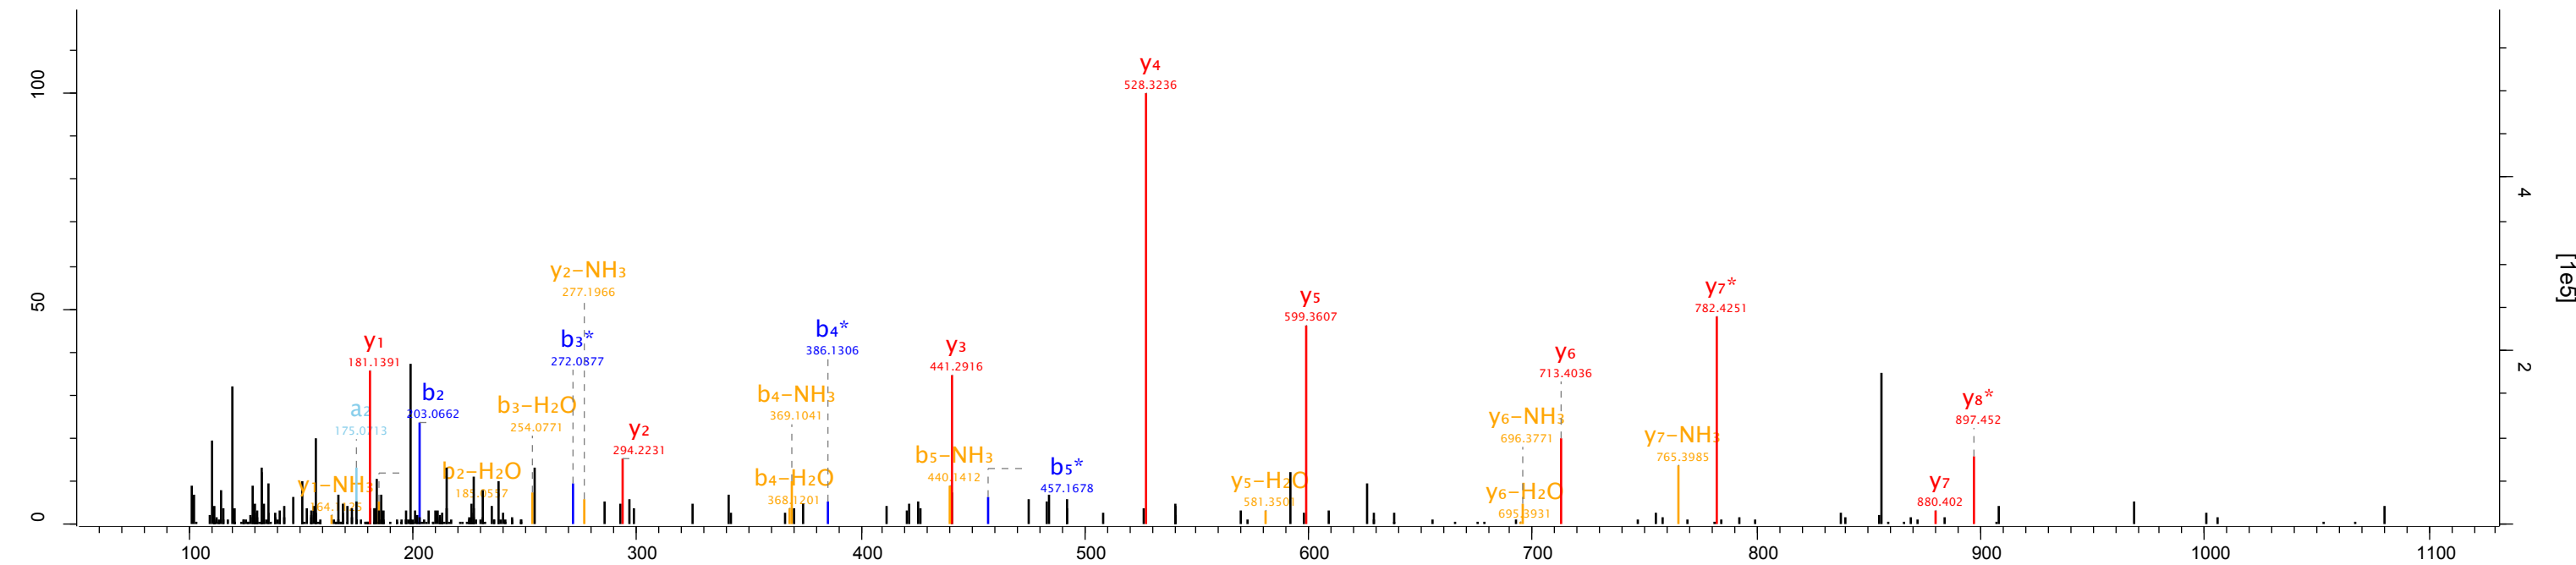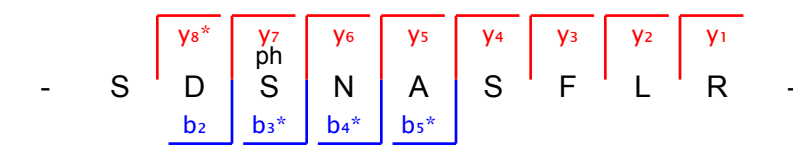

Raw file 20150812\_A375SR\_Phospho\_BR1\_04 Scan 12902 Method FTMS; HCD Score 163.99 m/z 738.29 Gene names SRRM2

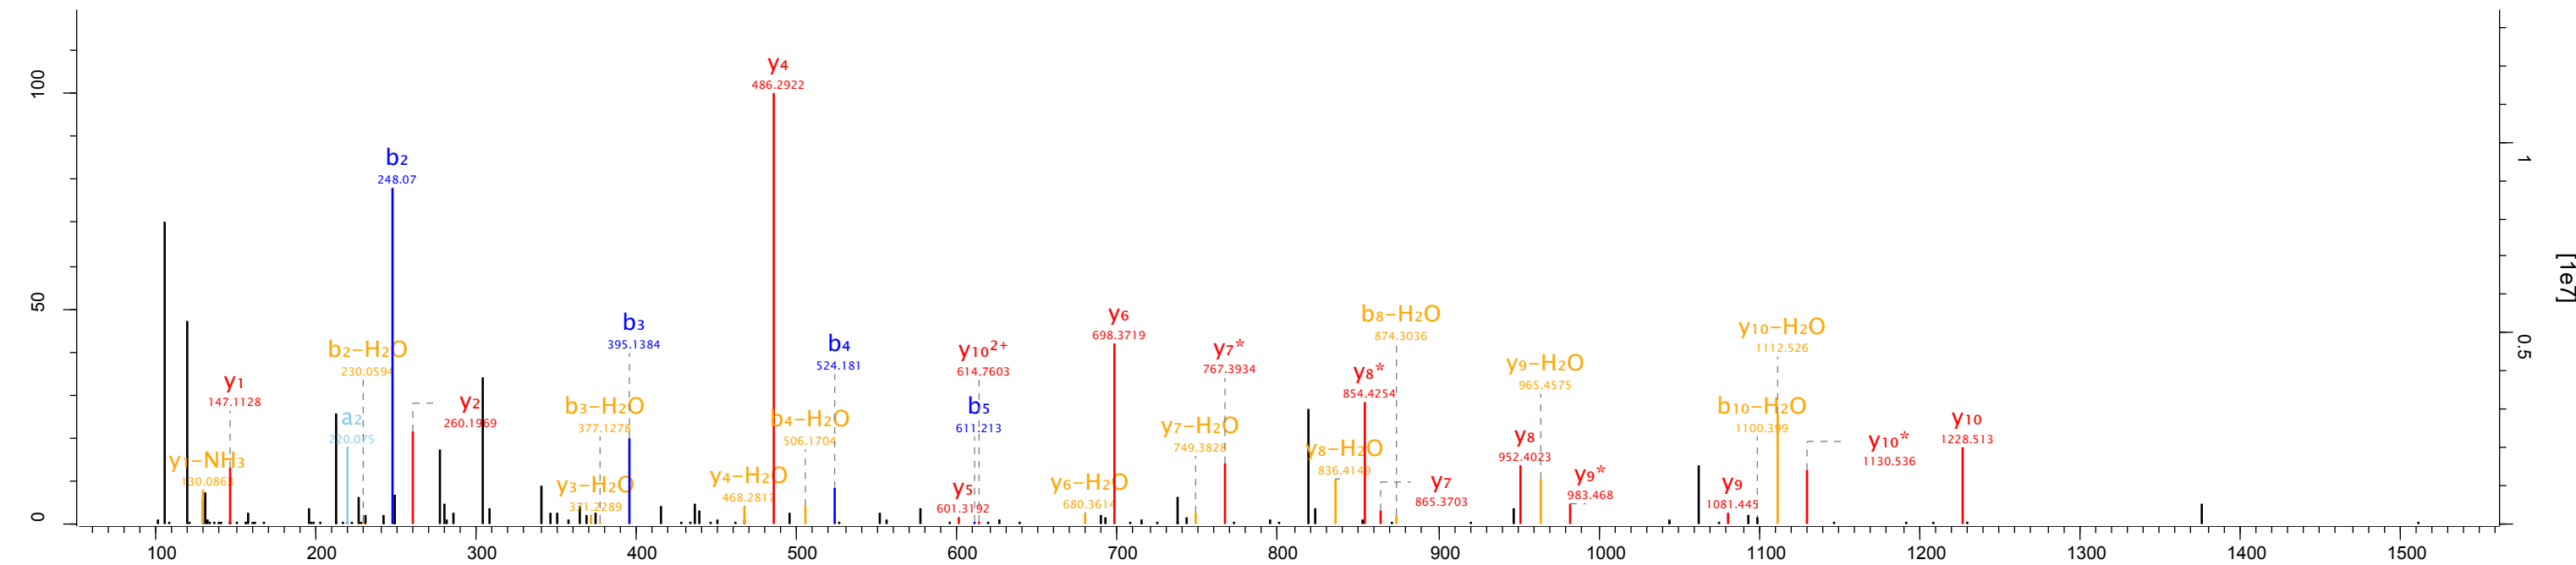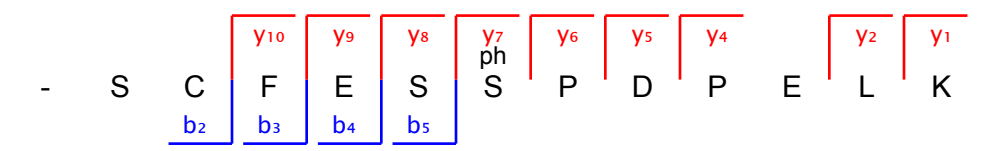



Raw file: 20150812\_A375SR\_Phospho\_BR1\_04  
 Scan: 12932 Method: FTMS; HCD Score: 66.57 m/z: 1047.12 Gene names: RILPL1

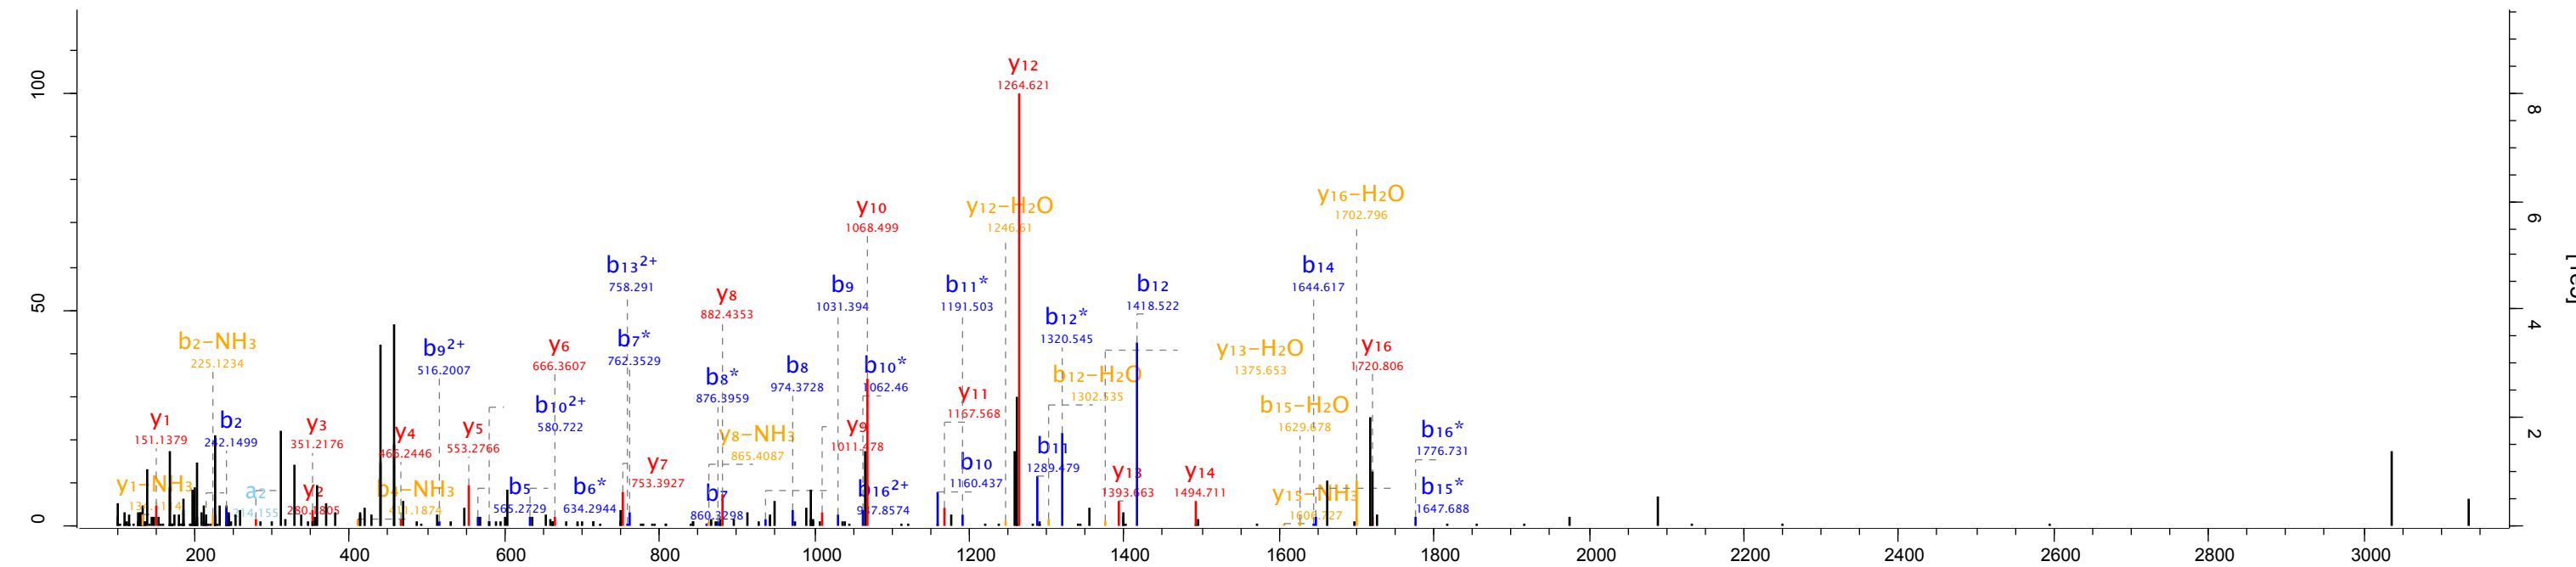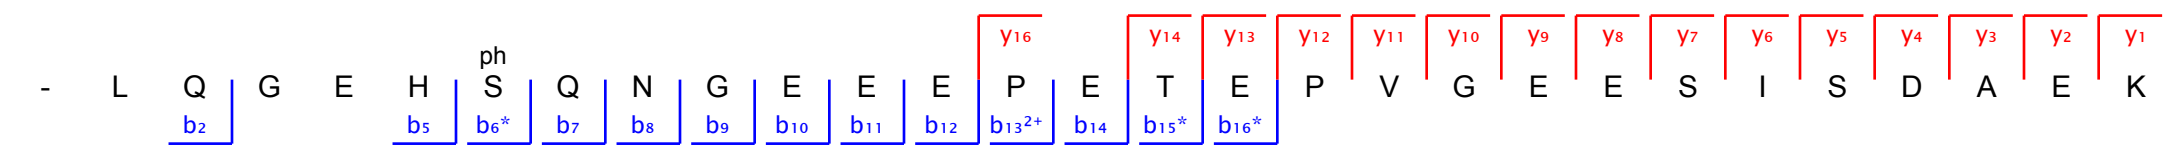

Raw file 20150812\_A375SR\_Phospho\_BR1\_04 Scan 13222 Method FTMS; HCD Score 315.24 m/z 1226.58 Gene names LMNA

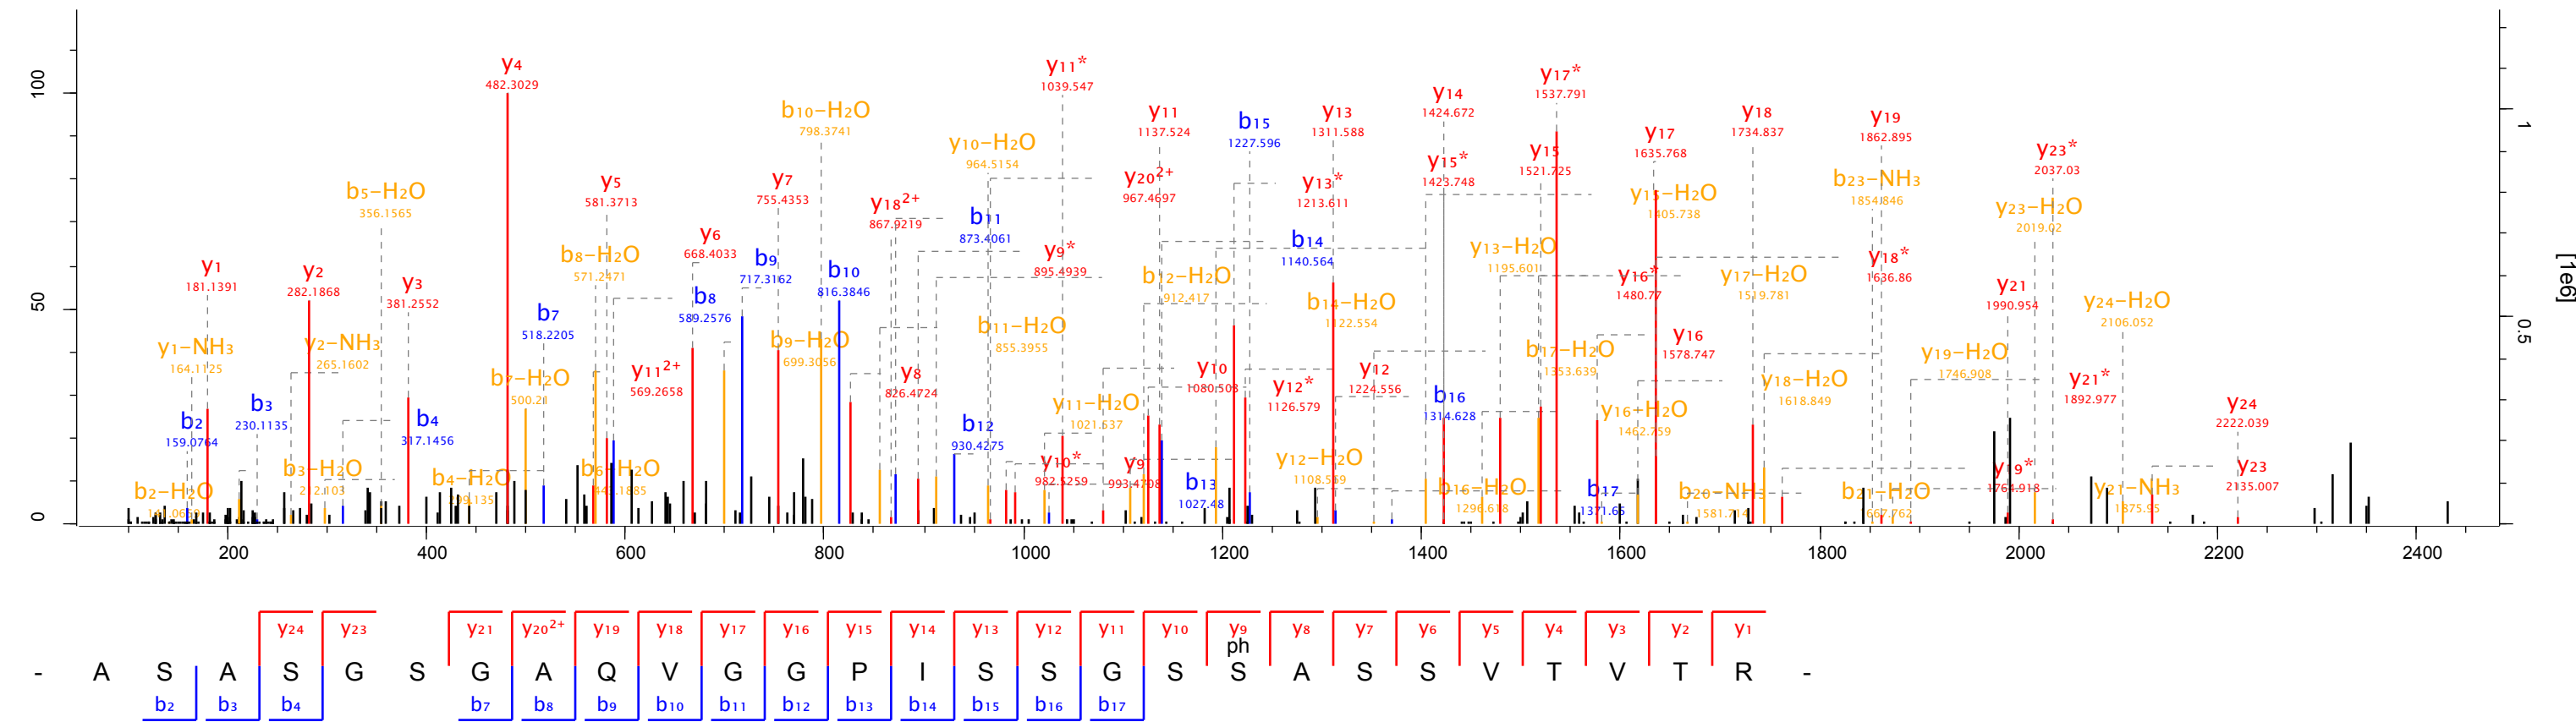

Raw file: 20150812\_A375SR\_Phospho\_BR1\_04  
 Scan: 13362 Method: FTMS; HCD Score: 135.23 m/z: 940.92 Gene names: RIOK2

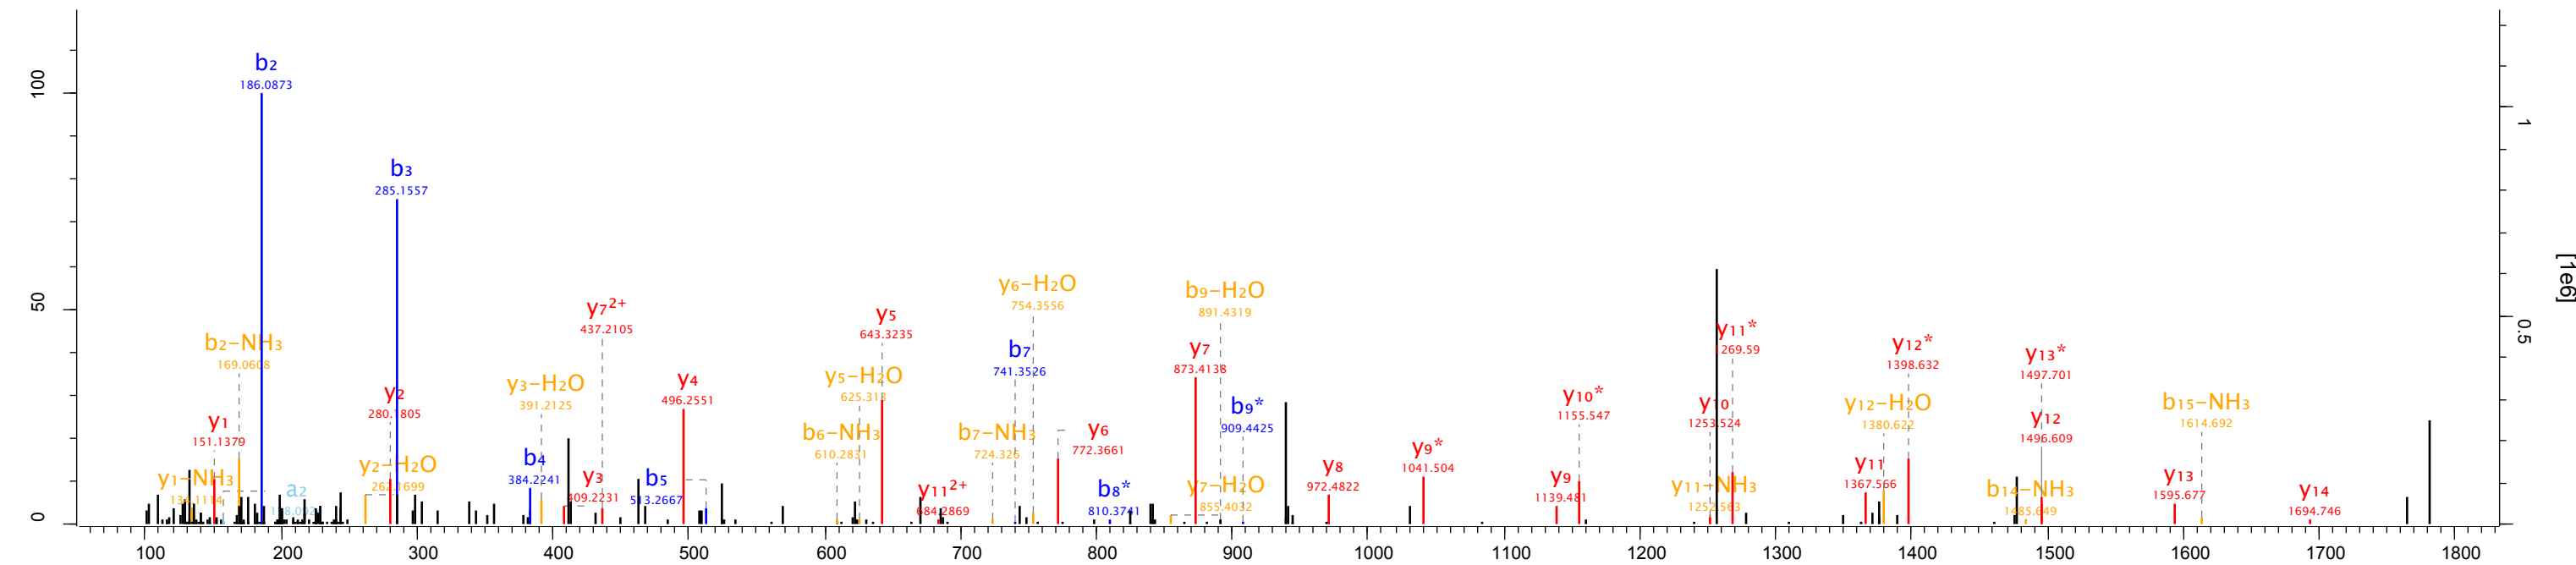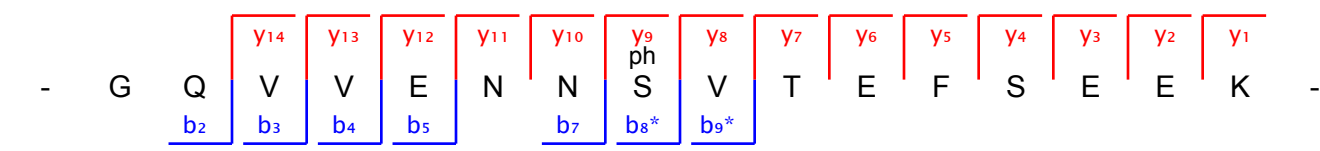

Raw file  
20150812\_A375SR\_Phospho\_BR1\_04

Scan 13612 Method FTMS; HCD Score 270.3 m/z 1561.21 Gene names PAGE5

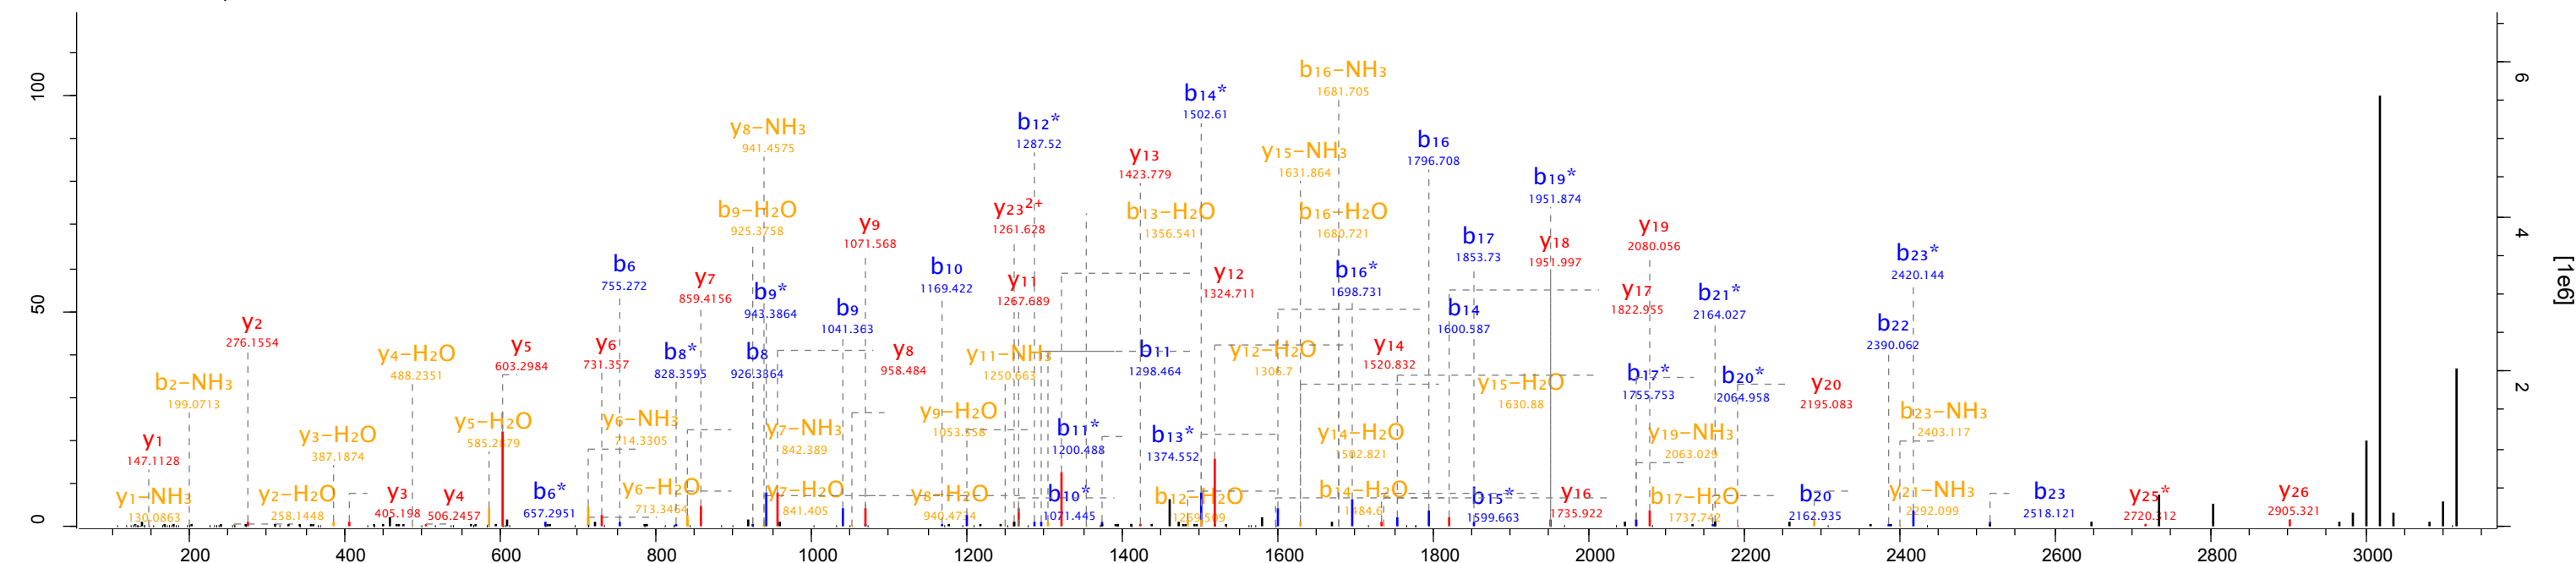

- S Q S S E R G N D Q E S S Q P V I V Q Q P T E E K -

y<sub>26</sub>
y<sub>25</sub><sup>ph</sup>
y<sub>23</sub><sup>2+</sup>
y<sub>20</sub>
y<sub>19</sub>
y<sub>18</sub>
y<sub>17</sub>
y<sub>16</sub>
y<sub>14</sub>
y<sub>13</sub>
y<sub>12</sub>
y<sub>11</sub>
y<sub>9</sub>
y<sub>8</sub>
y<sub>7</sub>
y<sub>6</sub>
y<sub>5</sub>
y<sub>4</sub>
y<sub>3</sub>
y<sub>2</sub>
y<sub>1</sub>

b<sub>6</sub>
b<sub>8</sub>
b<sub>9</sub>
b<sub>10</sub>
b<sub>11</sub>
b<sub>12</sub><sup>\*</sup>
b<sub>13</sub><sup>\*</sup>
b<sub>14</sub>
b<sub>15</sub><sup>\*</sup>
b<sub>16</sub>
b<sub>17</sub>
b<sub>19</sub><sup>\*</sup>
b<sub>20</sub>
b<sub>21</sub><sup>\*</sup>
b<sub>22</sub>
b<sub>23</sub>

Raw file 20150812\_A375SR\_Phospho\_BR1\_04 Scan 13912 Method FTMS; HCD Score 166.06 m/z 1015.83 Gene names CDK13

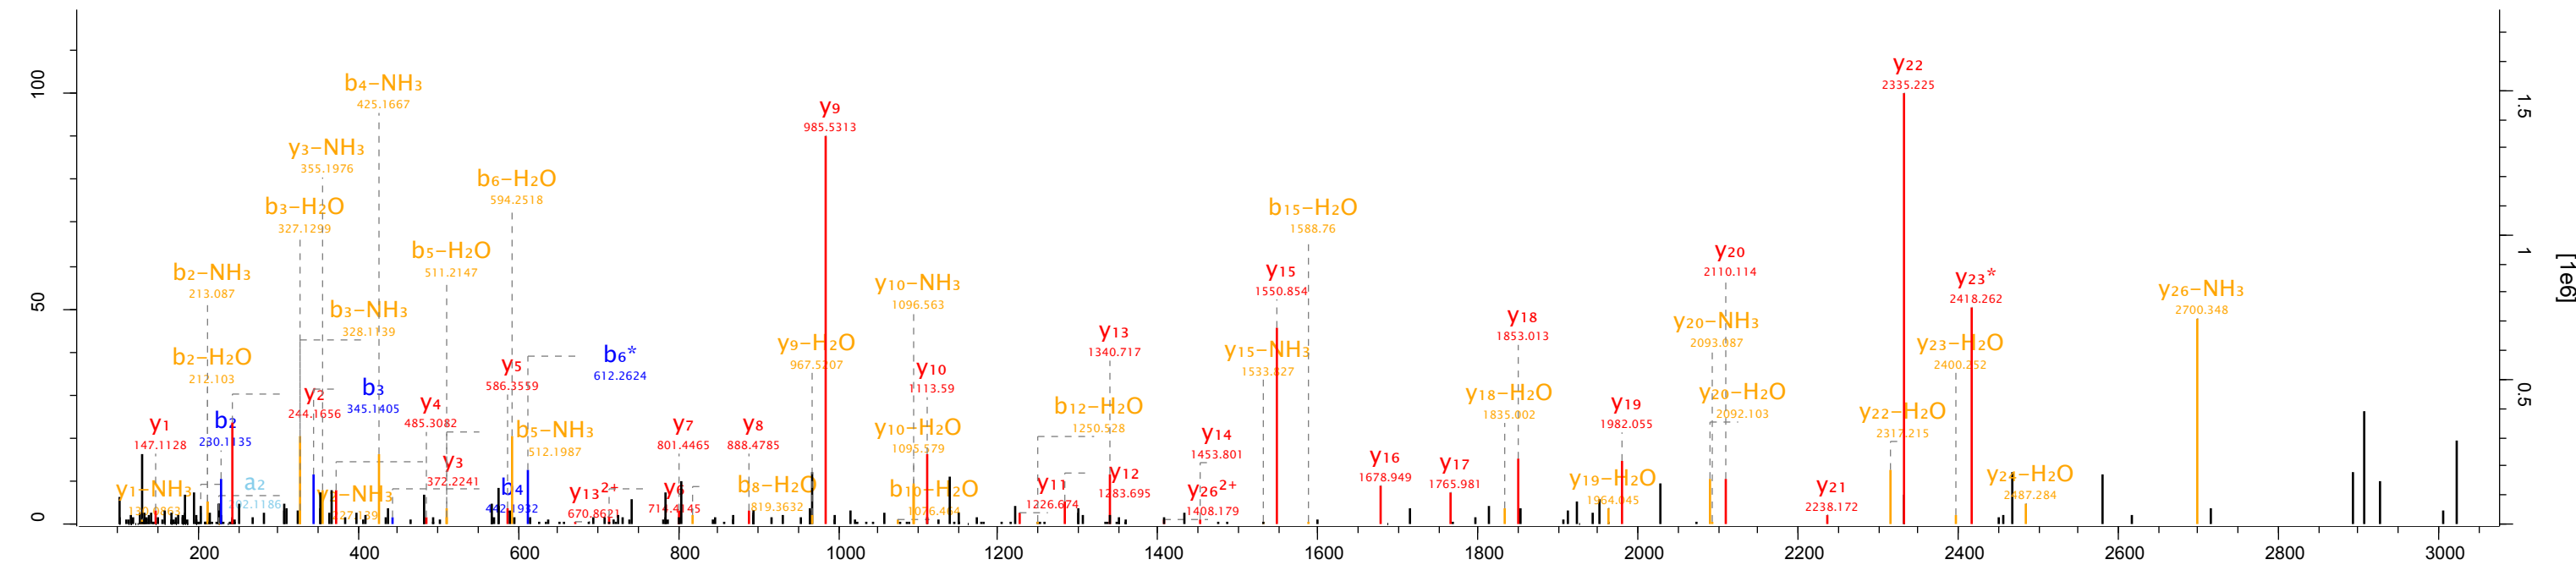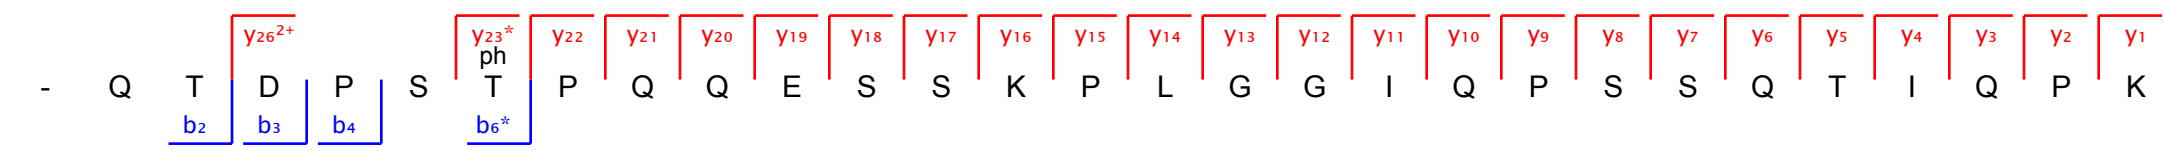

Raw file: 20150812\_A375SR\_Phospho\_BR1\_04  
 Scan: 14232 Method: FTMS; HCD Score: 122.3 m/z: 919.11 Gene names: CASC3

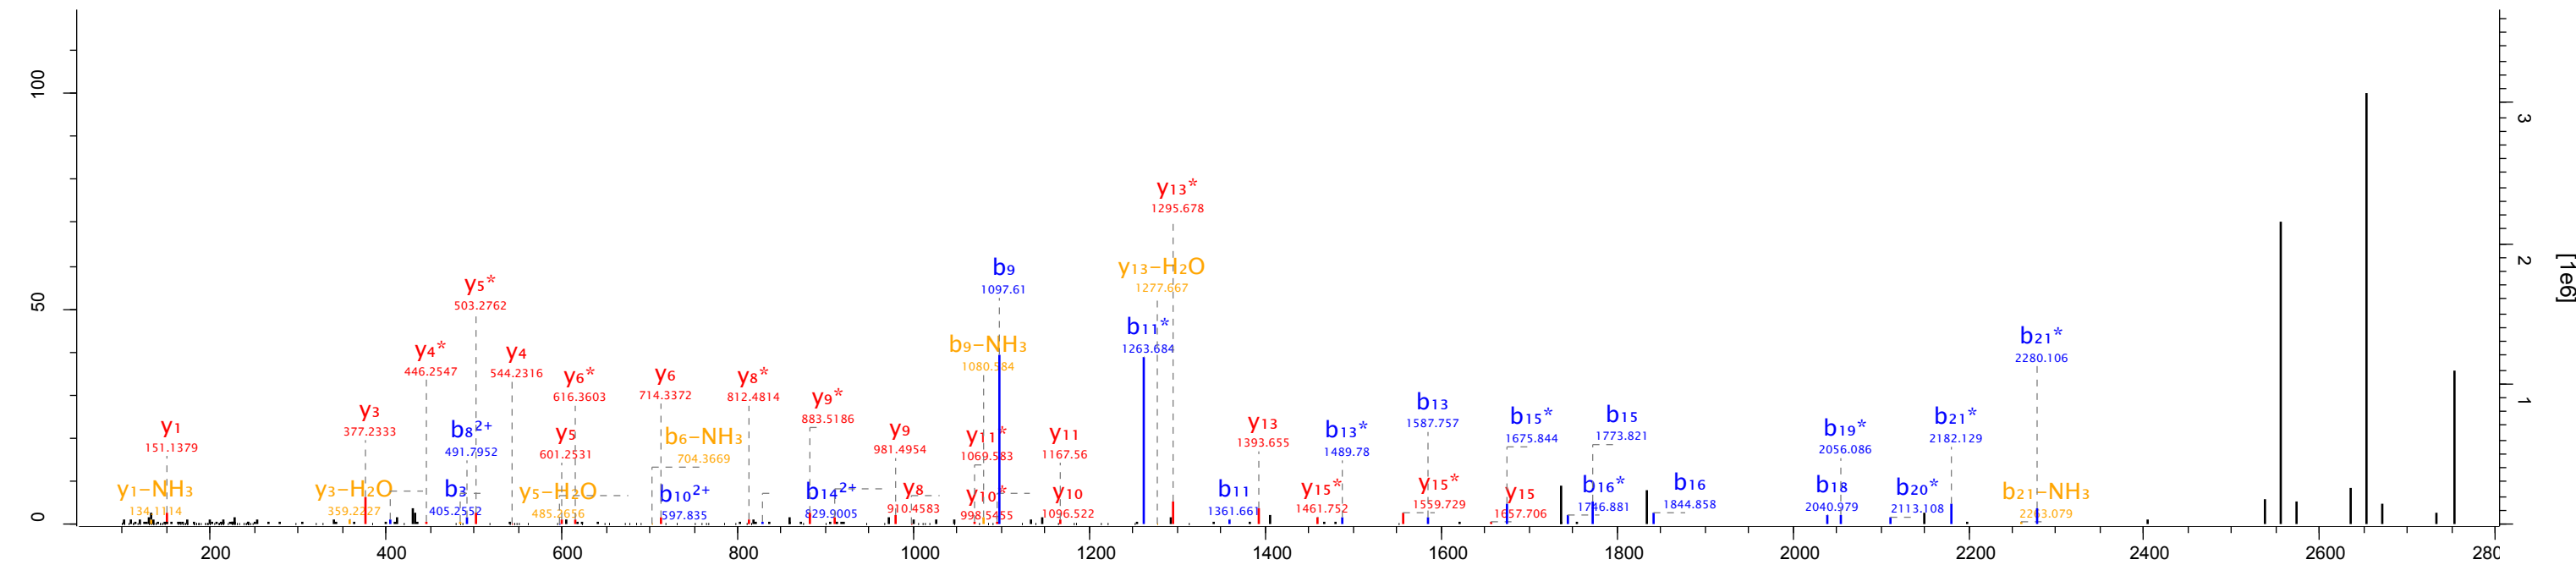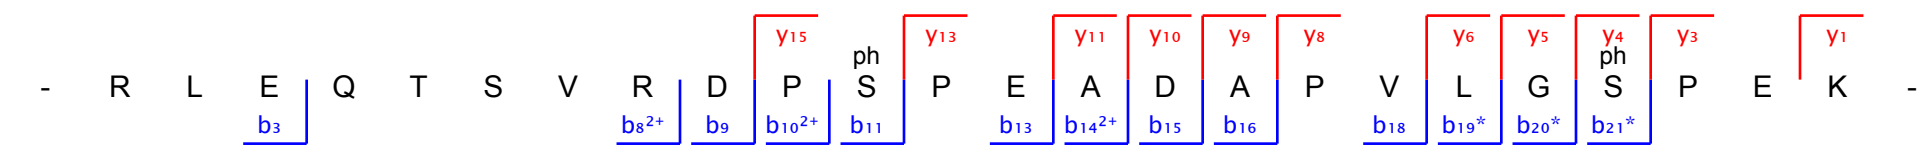

Raw file 20150812\_A375SR\_Phospho\_BR1\_04 Scan 15152 Method FTMS; HCD Score 196.38 m/z 950.45 Gene names ZMYND8

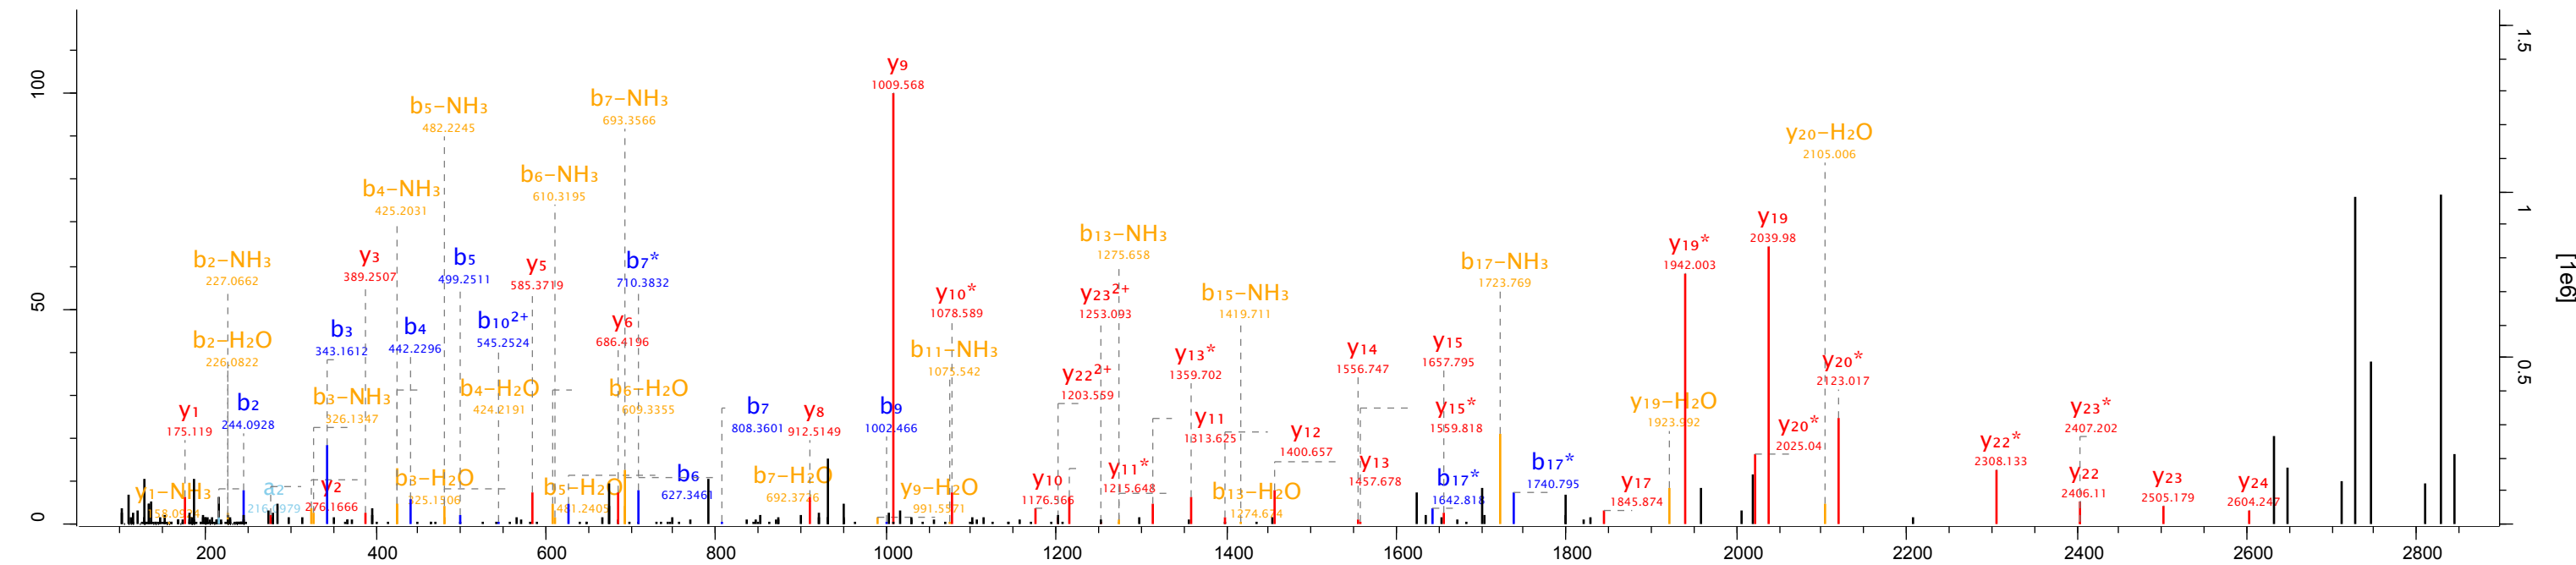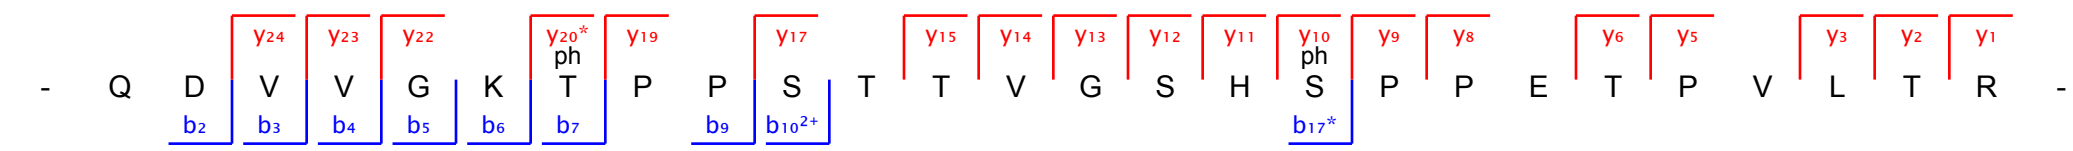

Raw file 20150812\_A375SR\_Phospho\_BR1\_04 Scan 16012 Method FTMS; HCD Score 77.04 m/z 744.83 Gene names KRT13

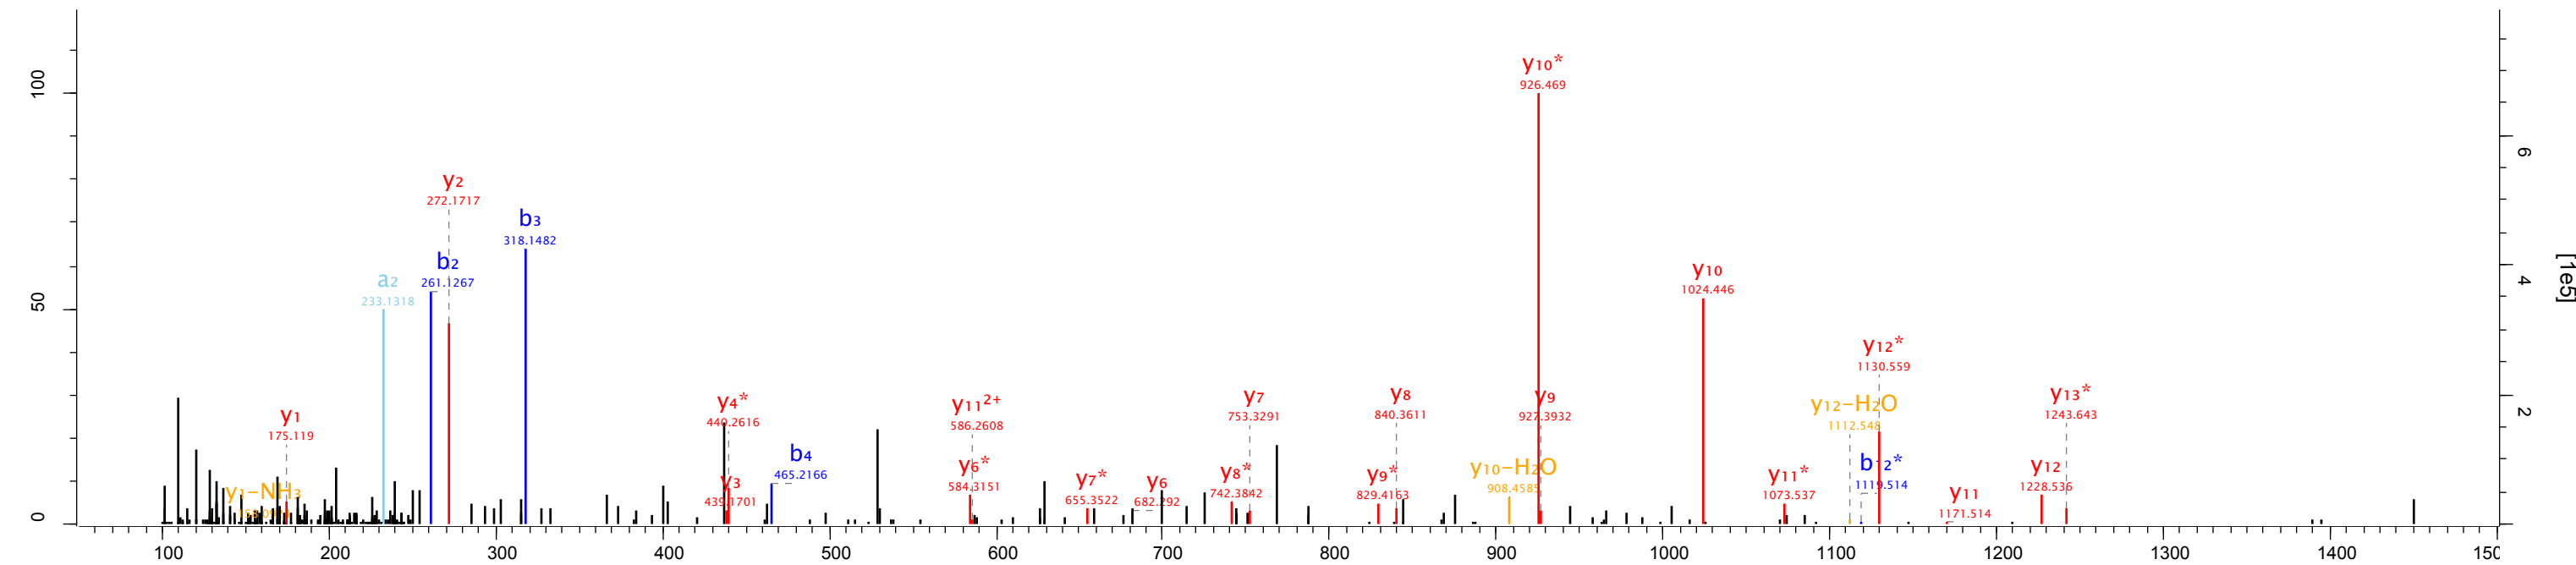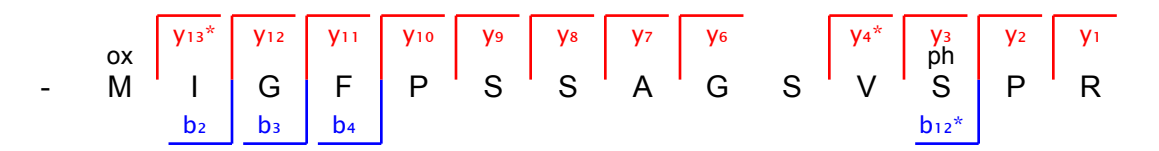



Raw file 20150812\_A375SR\_Phospho\_BR1\_04 Scan 16052 Method FTMS; HCD Score 108.28 m/z 1049.79 Gene names NES

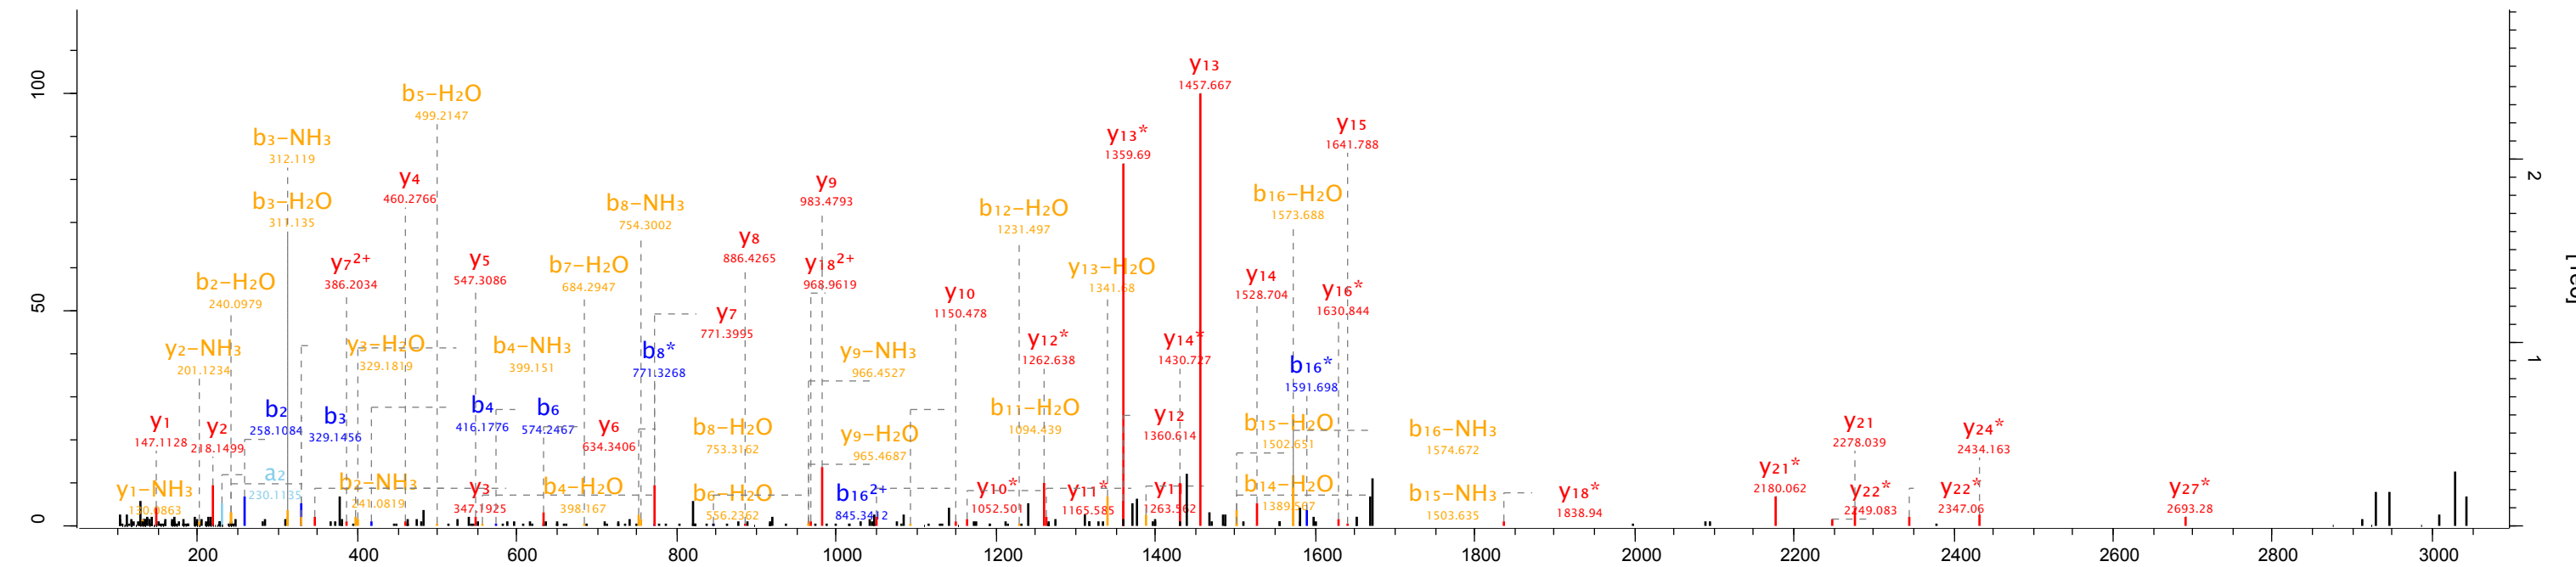

- Q E A S T G Q S P E D H A S L A P P L S P D H S S L E A K -

Fragmentation sites are indicated by brackets below the sequence:

- Red brackets: y27\* (A-S), y24\* (G-Q), y22\* (S-P), y21 (P-E), y18\* (H-A), y16\* (S-L), y15 (L-A), y14 (A-P), y13 (P-P), y12 (P-L), y11 (L-S), y10 (S-P), y9 (P-D), y8 (D-H), y7 (H-S), y6 (S-S), y5 (S-L), y4 (L-E), y3 (E-A), y2 (E-A), y1 (A-K)
- Blue brackets: b2 (E-A), b3 (A-S), b4 (S-T), b6 (G-Q), b8\* (S-P), b16\* (L-A)

Raw file 20150812\_A375SR\_Phospho\_BR1\_04 Scan 1672 Method FTMS; HCD Score 72.53 m/z 613.81 Gene names CPSF7

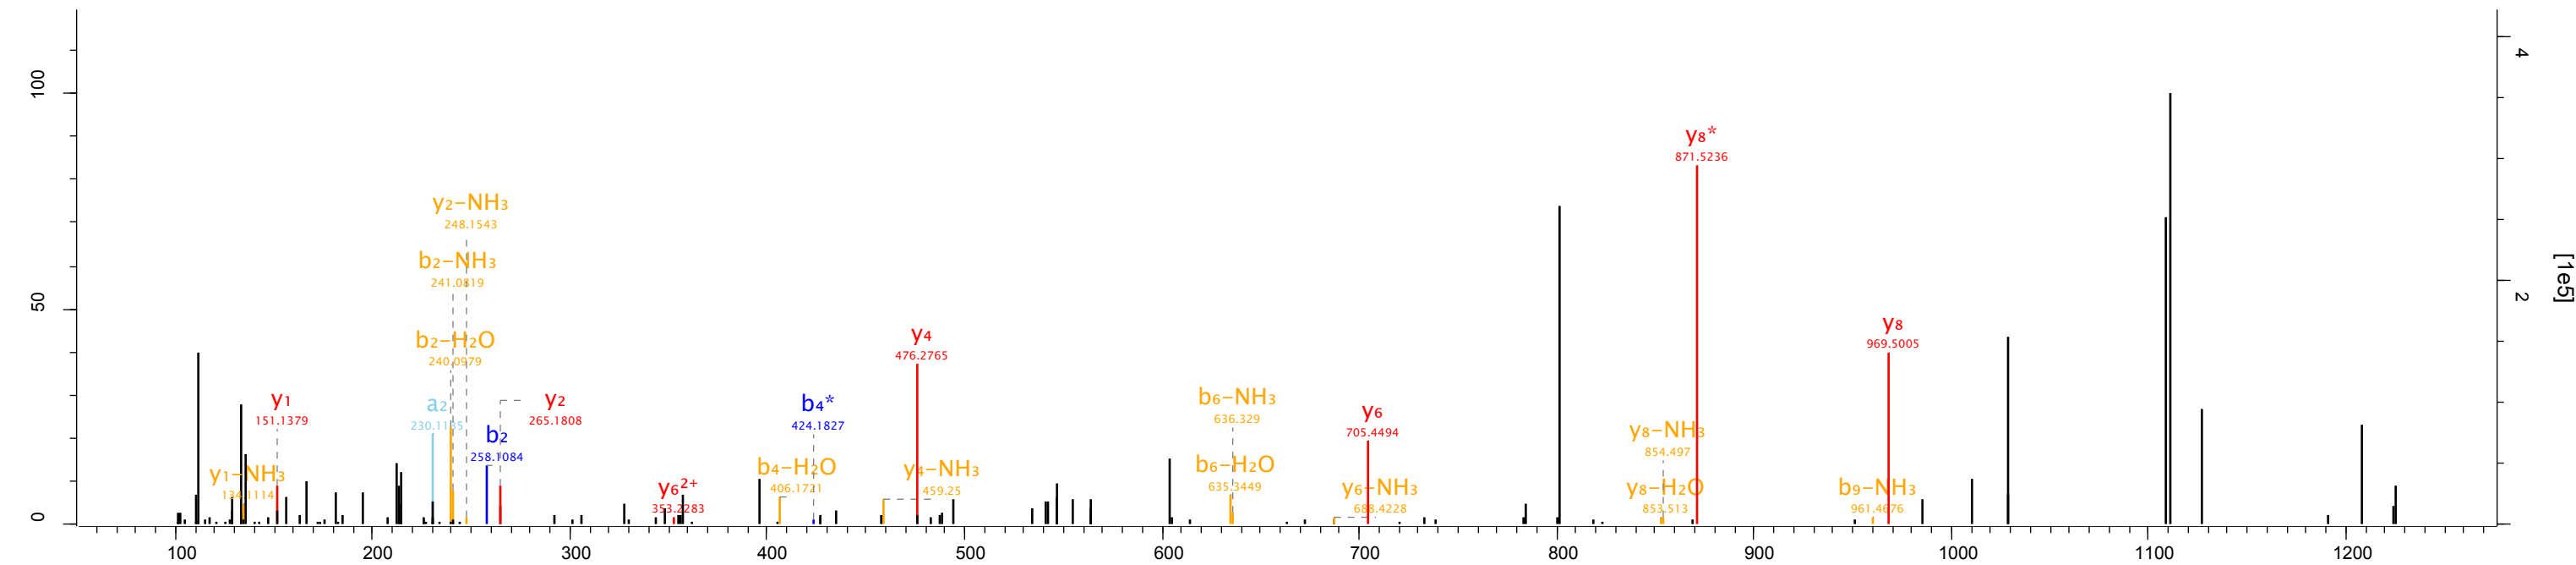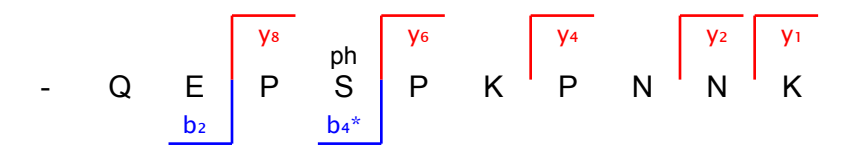

Raw file: 20150812\_A375SR\_Phospho\_BR1\_04  
 Scan: 17232 Method: FTMS; HCD Score: 116.79 m/z: 652.84 Gene names: RAI14

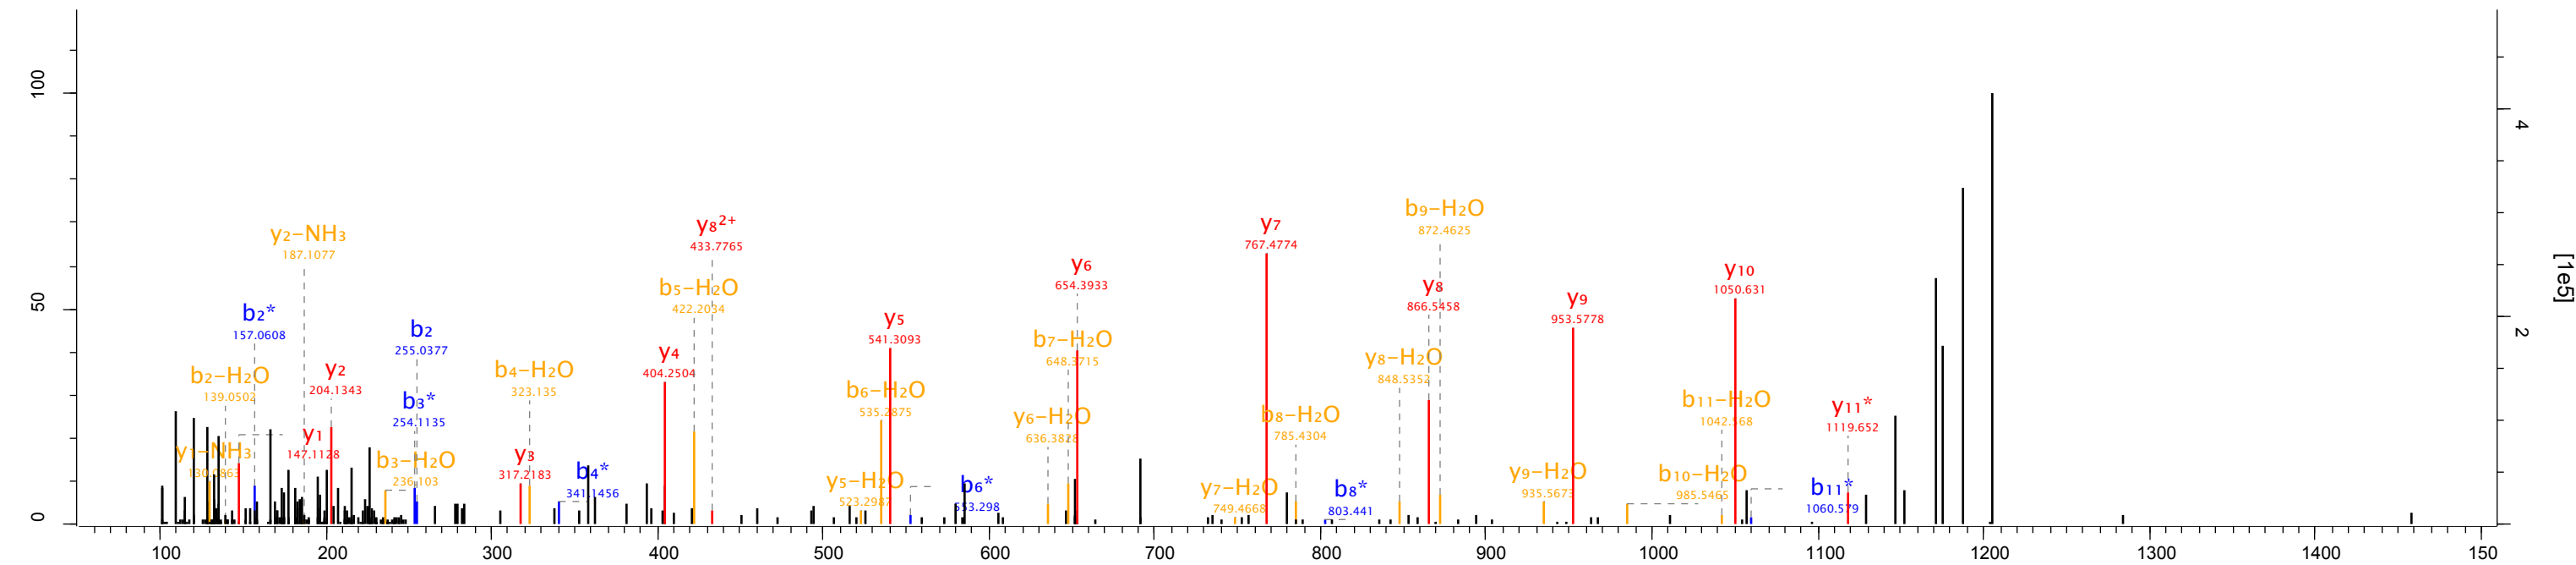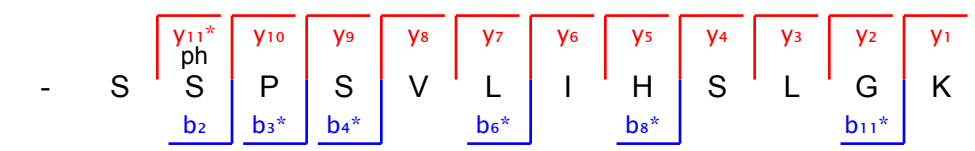

Raw file Scan Method Score m/z Gene names  
 20150812\_A375SR\_Phospho\_BR1\_04 17342 FTMS; HCD 211.04 877.77 C6orf106

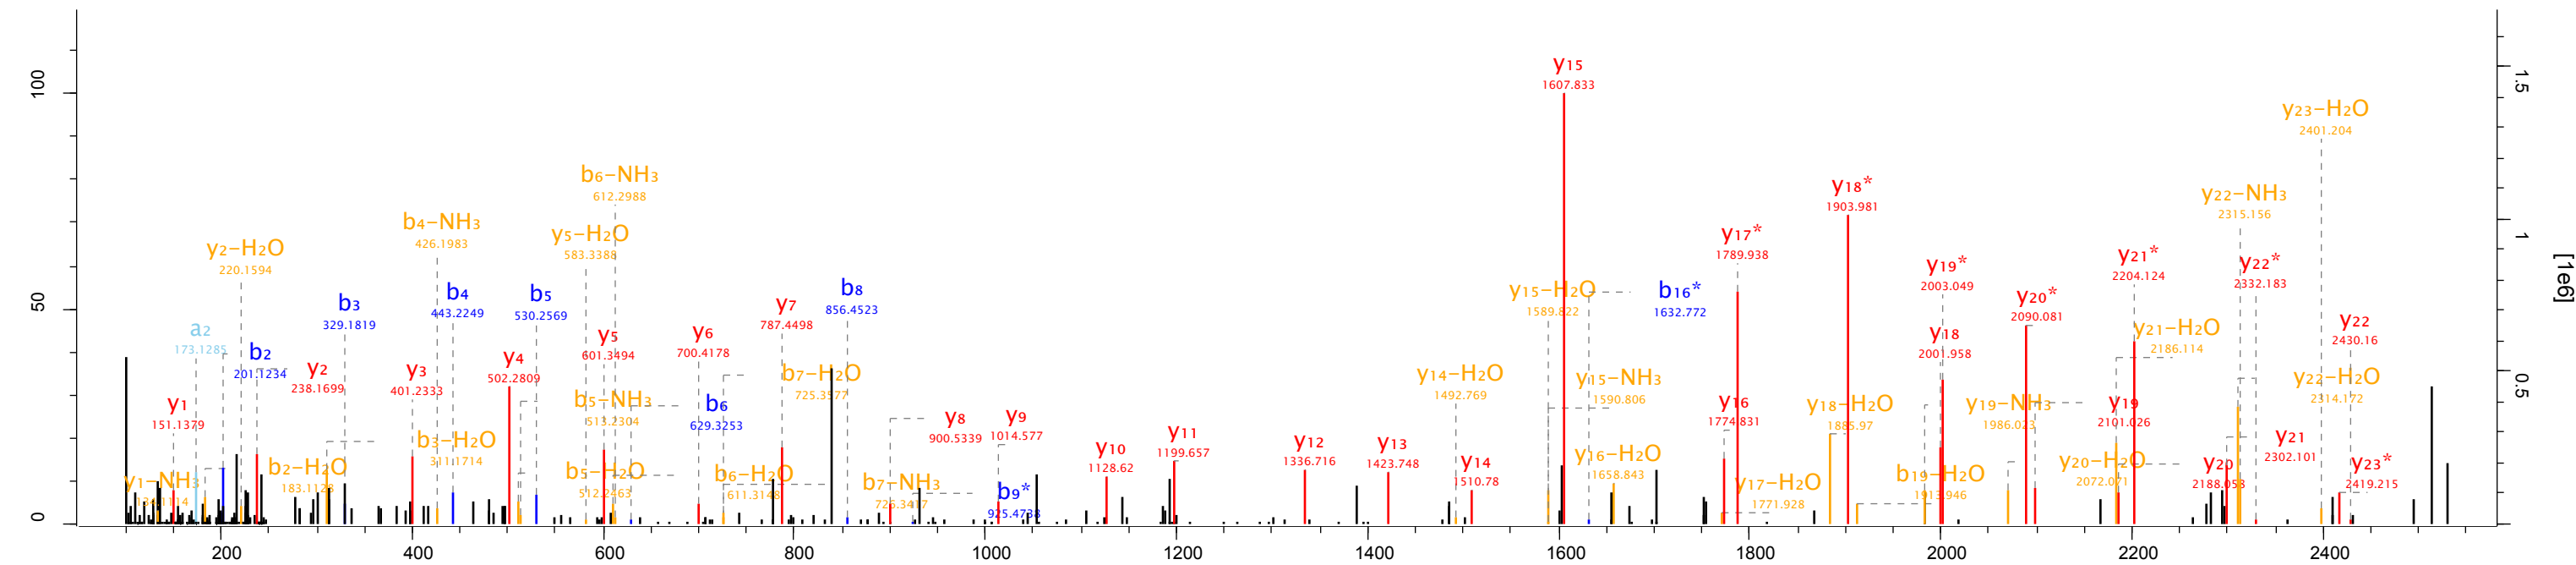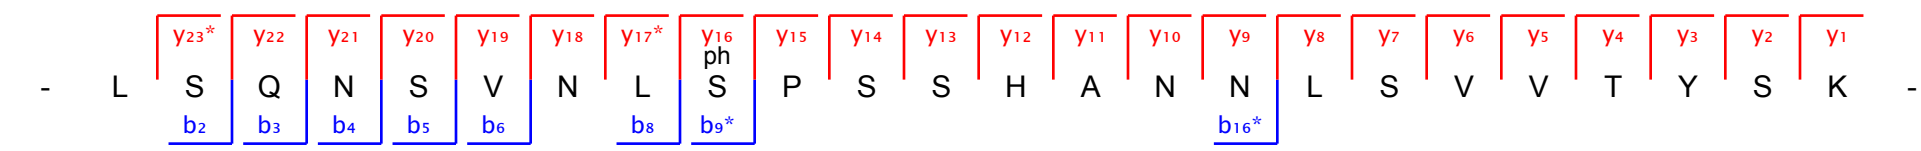

Raw file 20150812\_A375SR\_Phospho\_BR1\_04 Scan 17642 Method FTMS; HCD Score 51.99 m/z 933.43 Gene names LRRC47

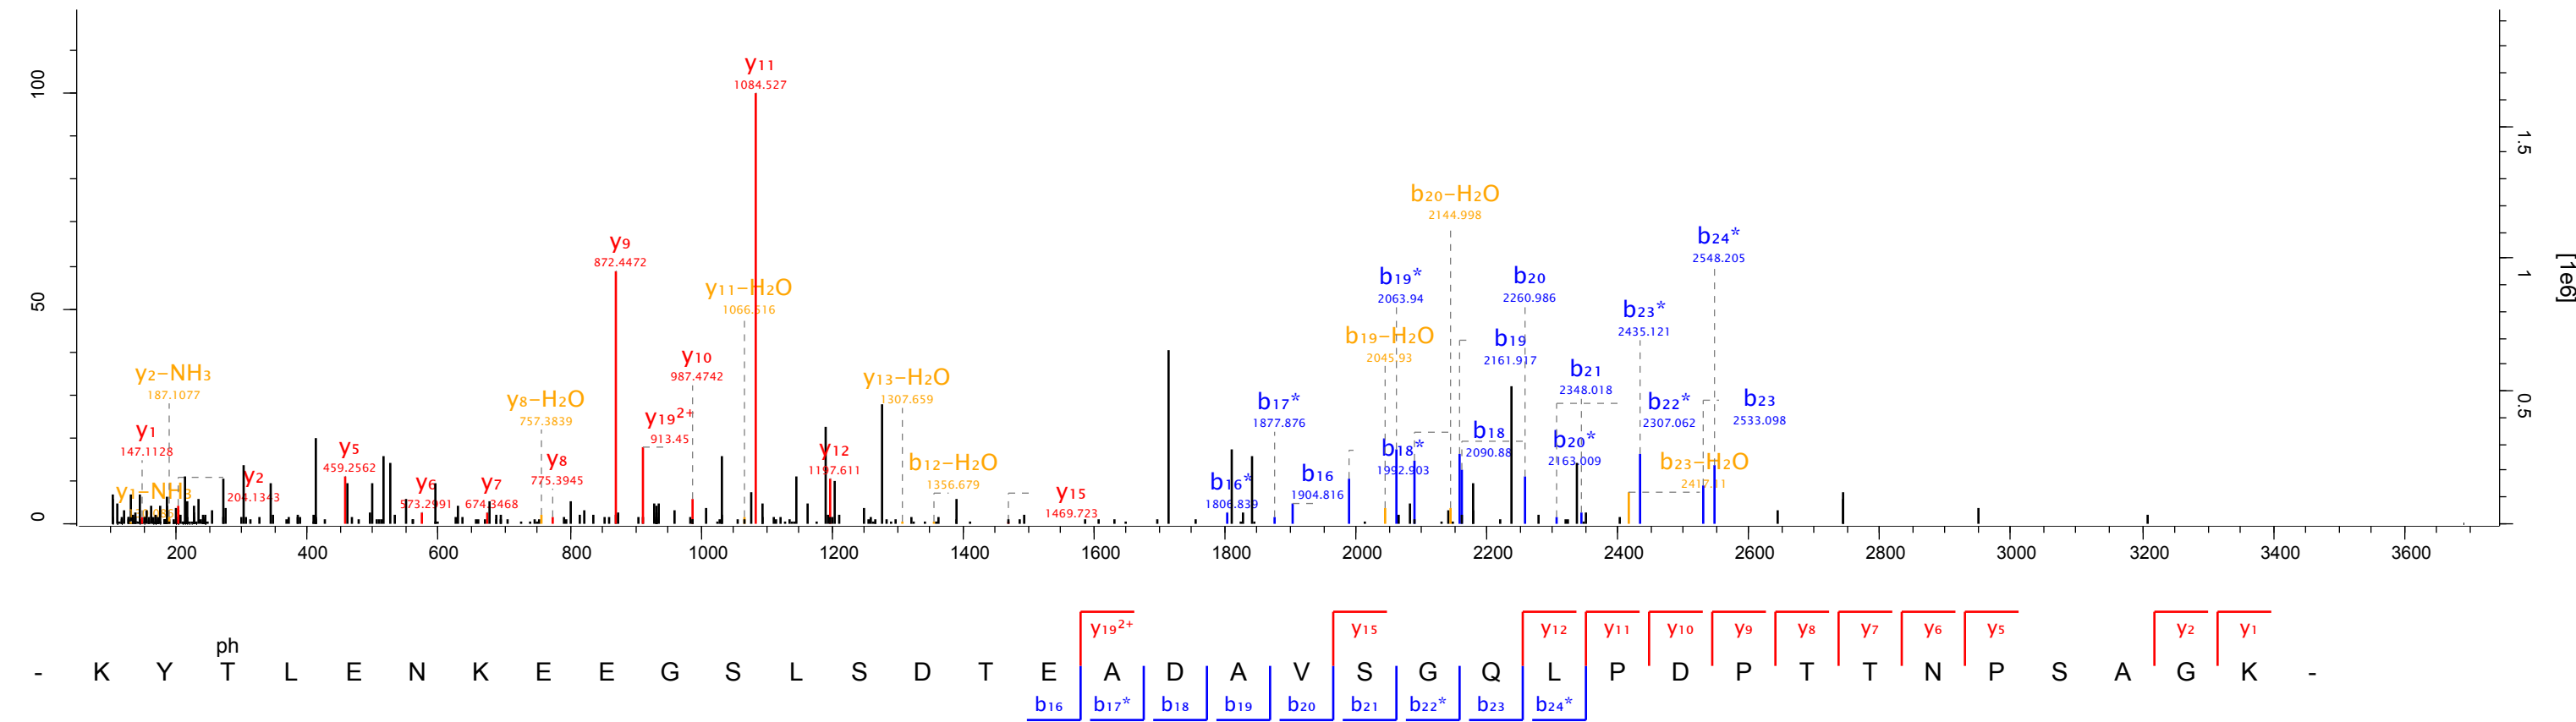

Raw file: 20150812\_A375SR\_Phospho\_BR1\_04  
 Scan: 1932 Method: FTMS; HCD Score: 96.55 m/z: 562.92 Gene names: PALLD

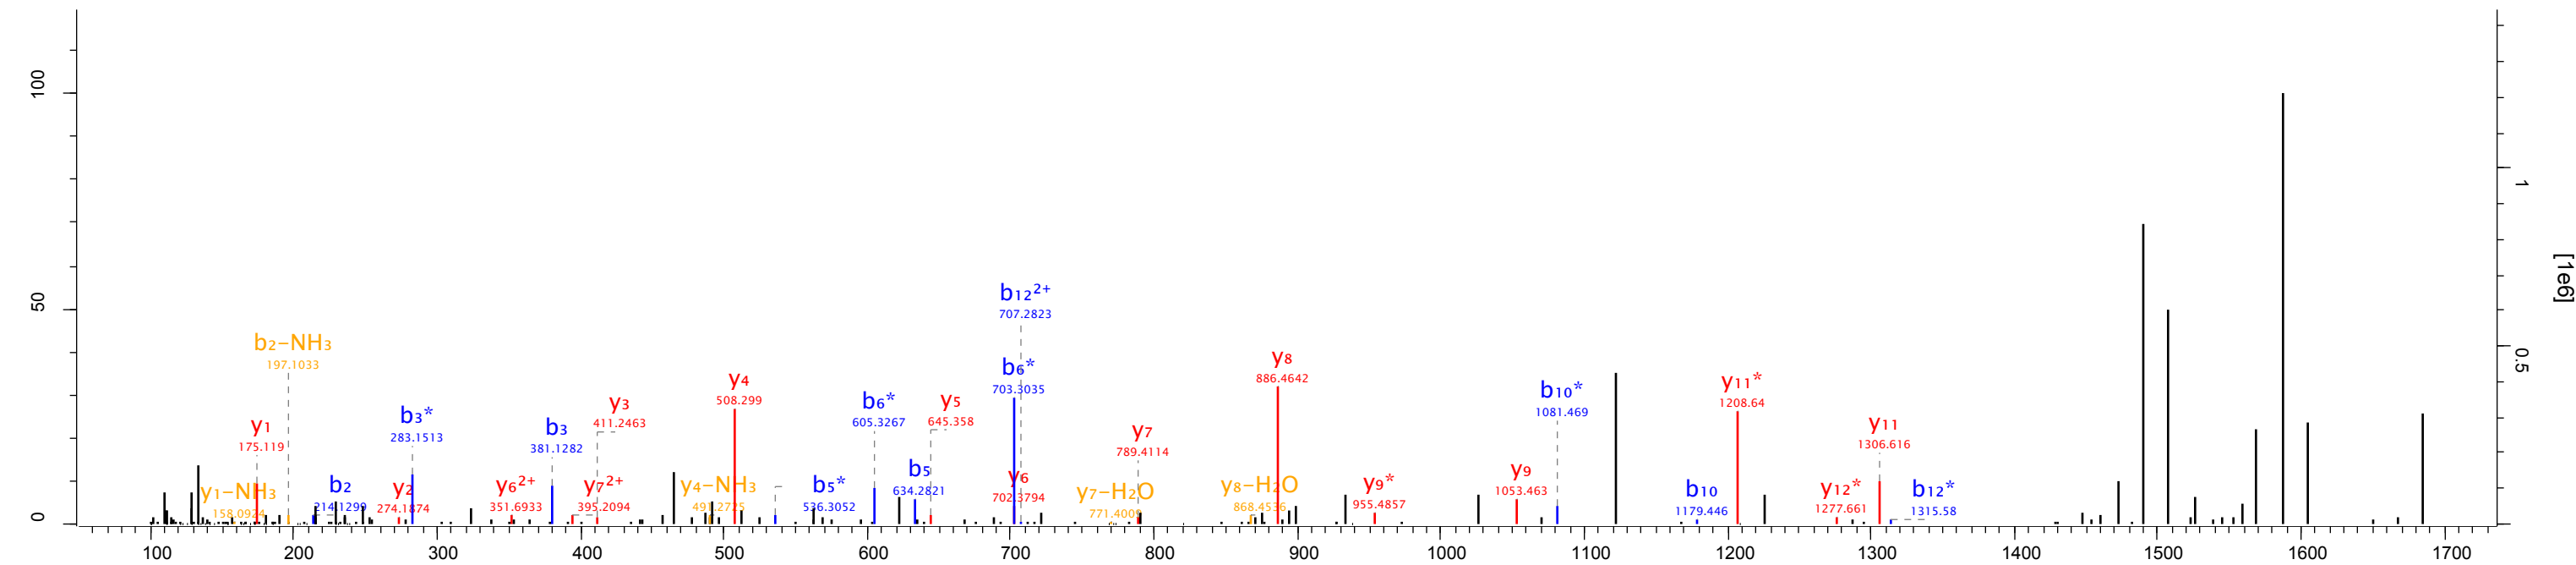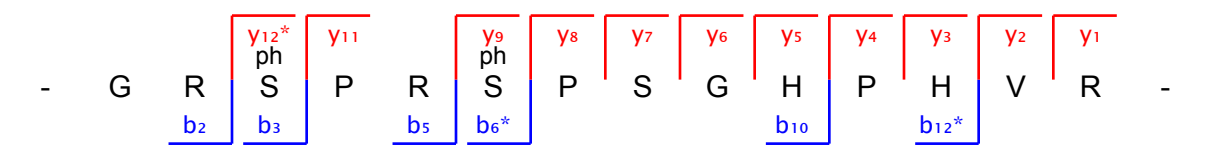

Raw file Scan Method Score m/z Gene names  
 20150812\_A375SR\_Phospho\_BR1\_04 19472 FTMS; HCD 190.37 823.43 AHNAK

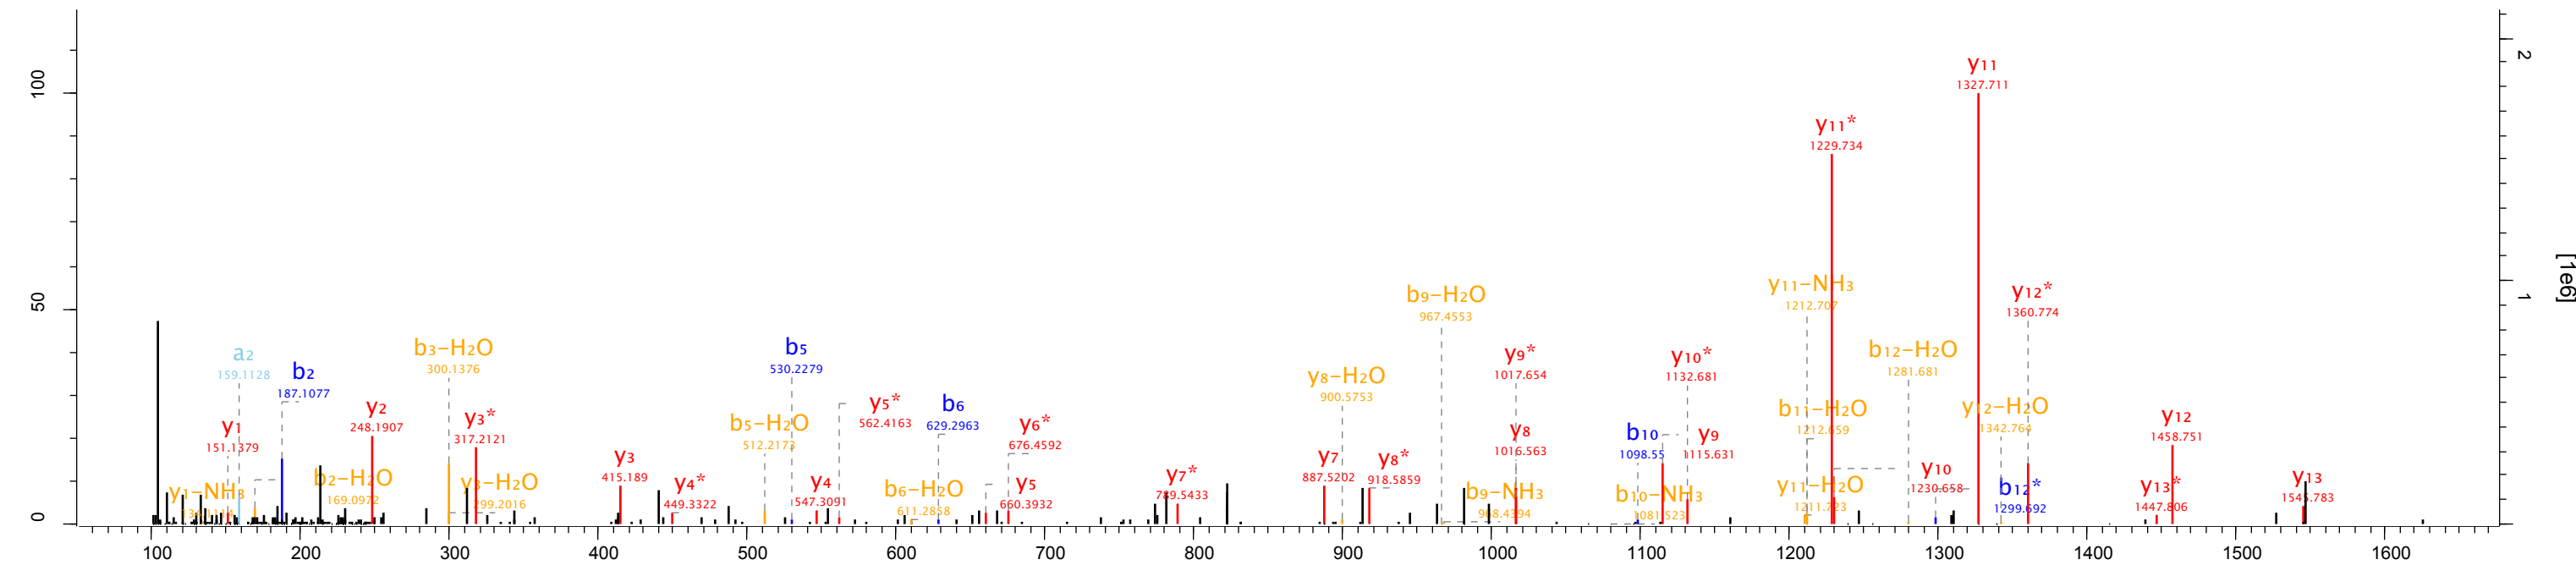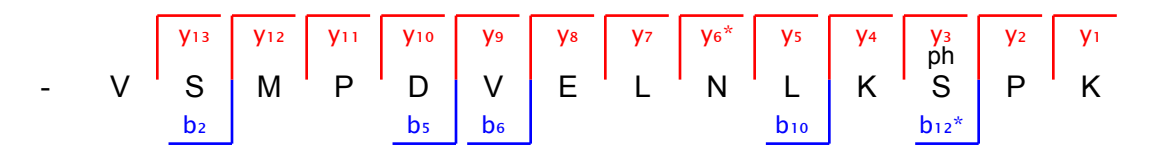

Raw file: 20150812\_A375SR\_Phospho\_BR1\_04  
 Scan: 1982 Method: FTMS; HCD Score: 268.91 m/z: 894.39 Gene names: BCLAF1

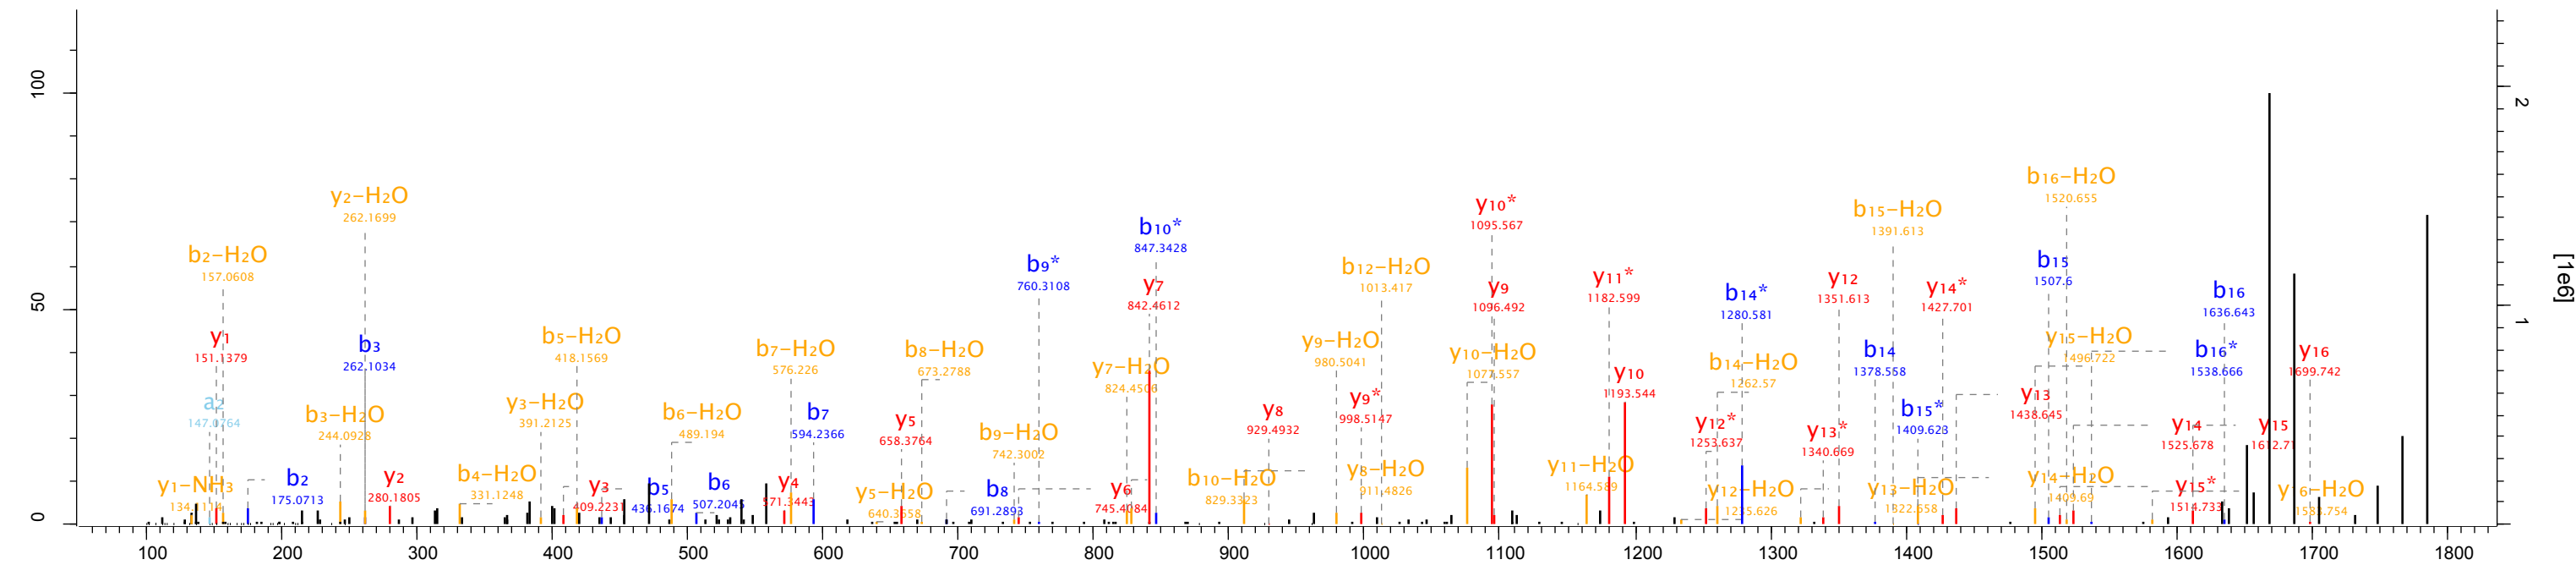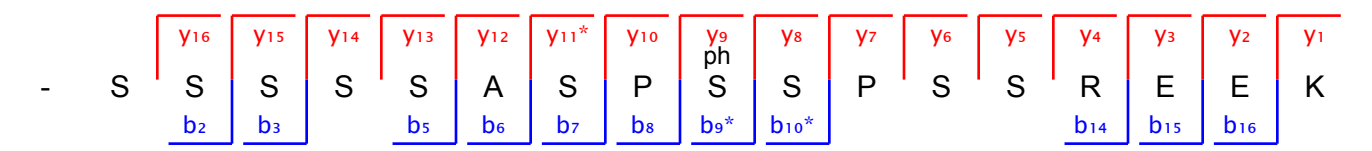



Raw file 20150812\_A375SR\_Phospho\_BR1\_04 Scan 2082 Method FTMS; HCD Score 78.71 m/z 580.24 Gene names TANC2

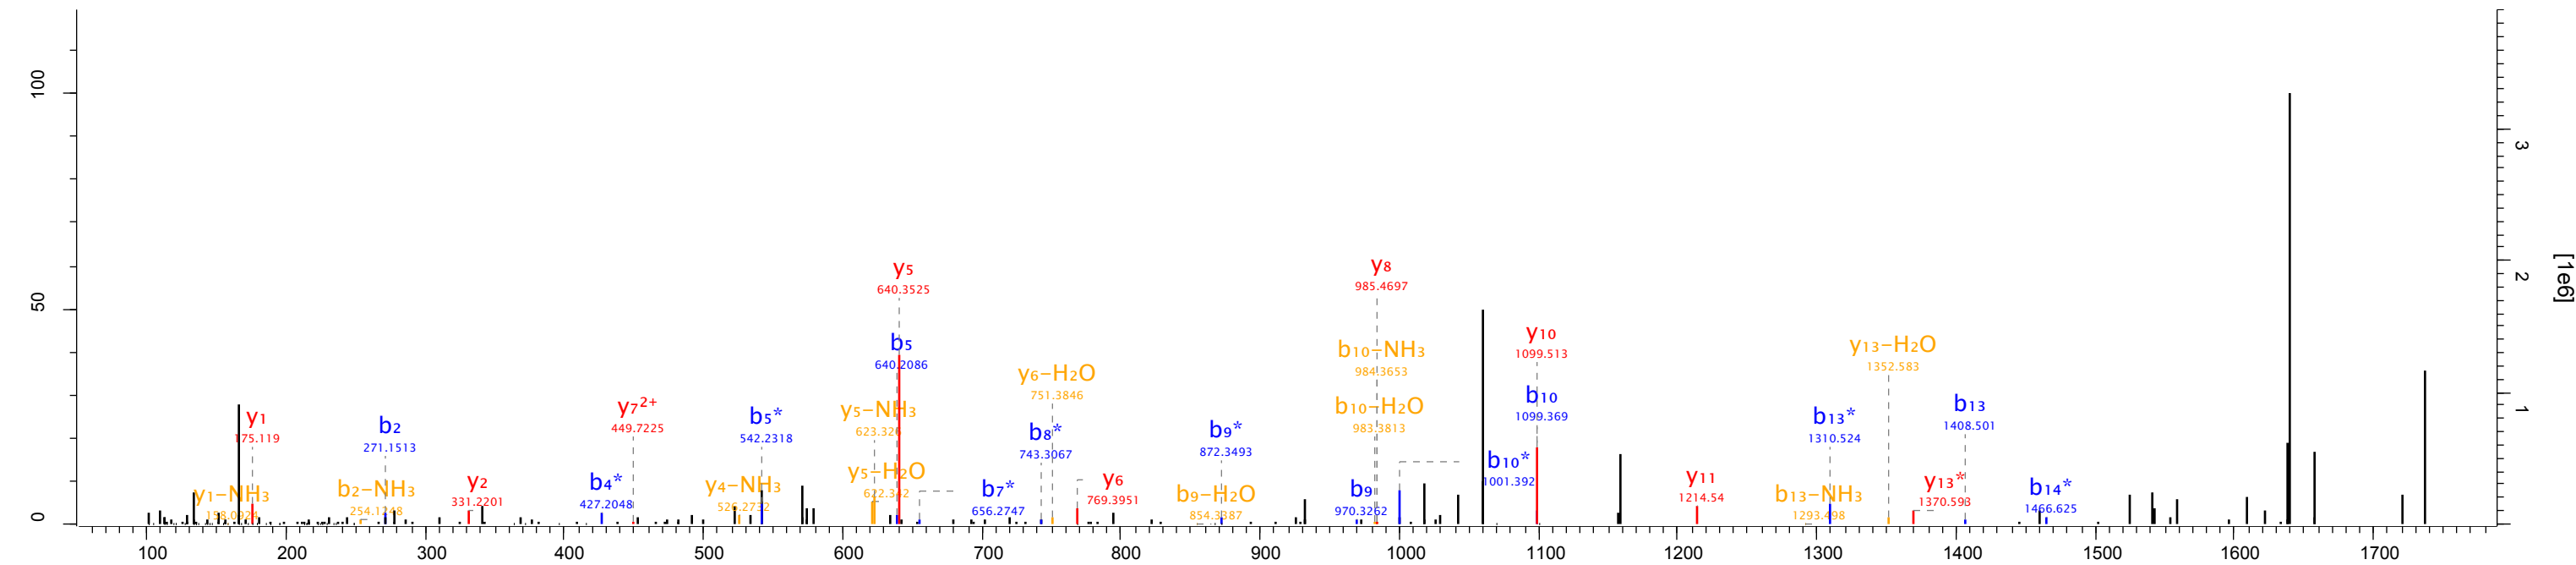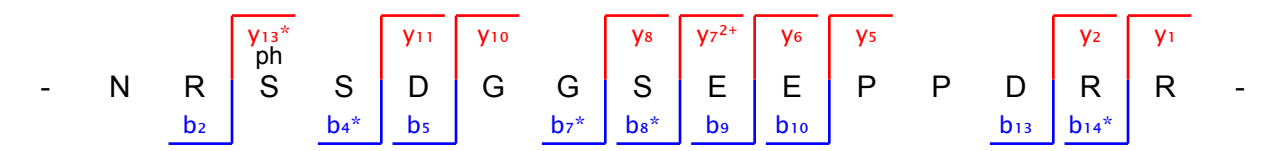

Raw file 20150812\_A375SR\_Phospho\_BR1\_04 Scan 2162 Method FTMS; HCD Score 183.06 m/z 783.35 Gene names WNK1

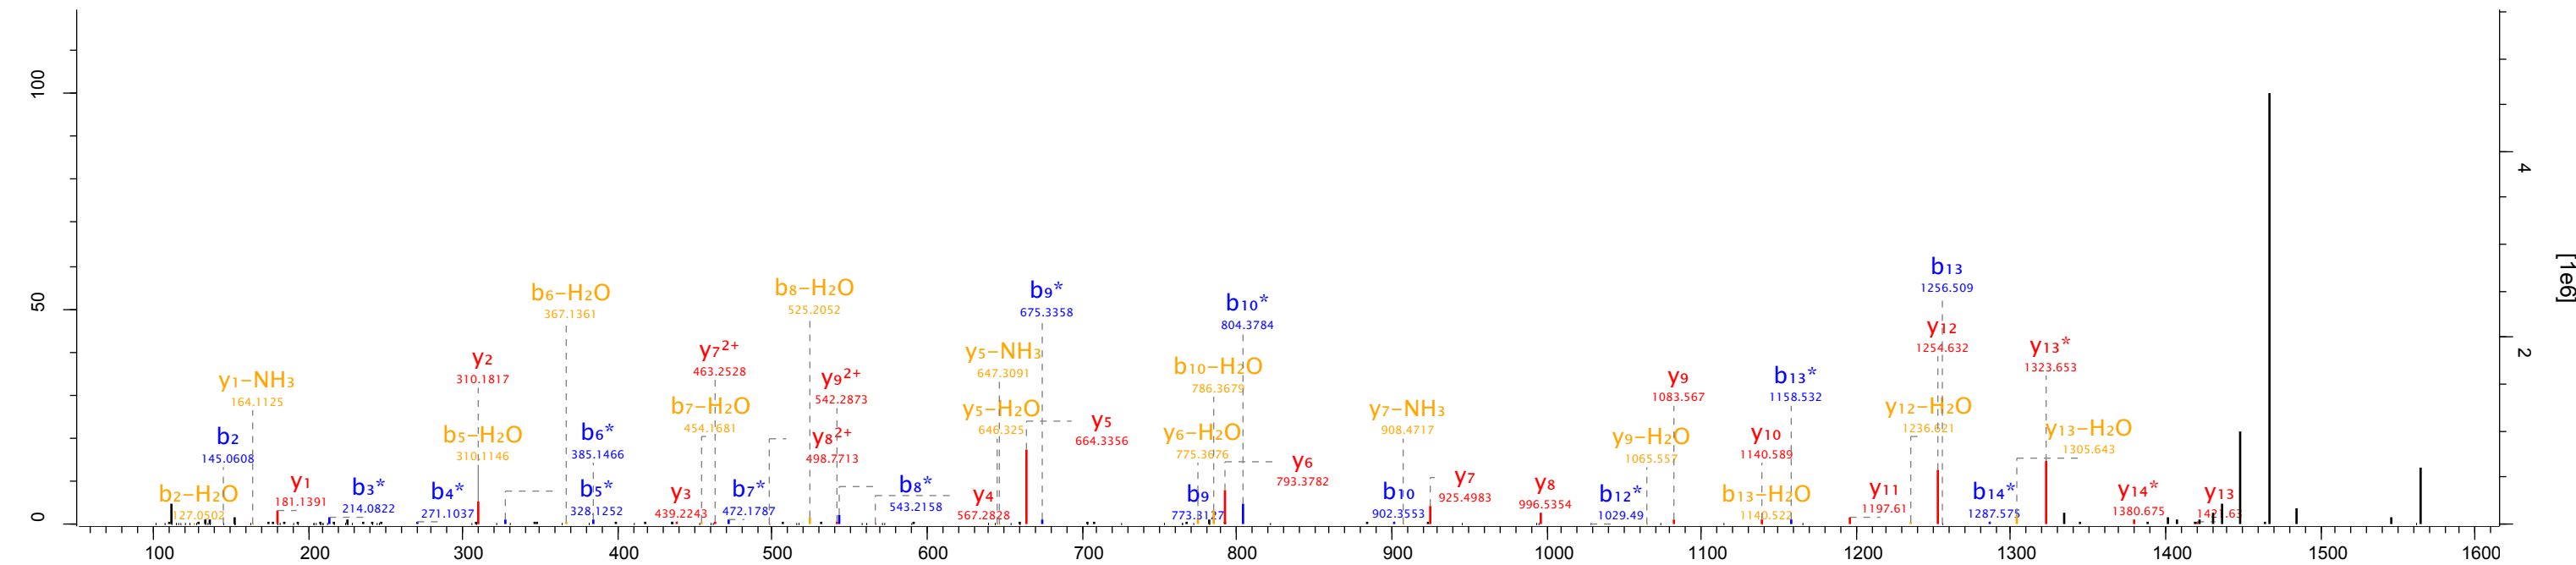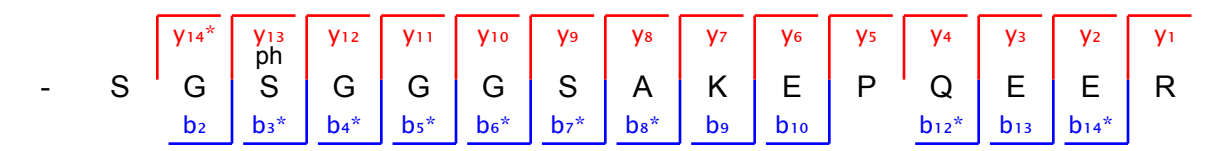

Raw file Scan Method Score m/z Gene names  
 20150812\_A375SR\_Phospho\_BR1\_04 21912 FTMS; HCD 147.73 1052.1 DBN1

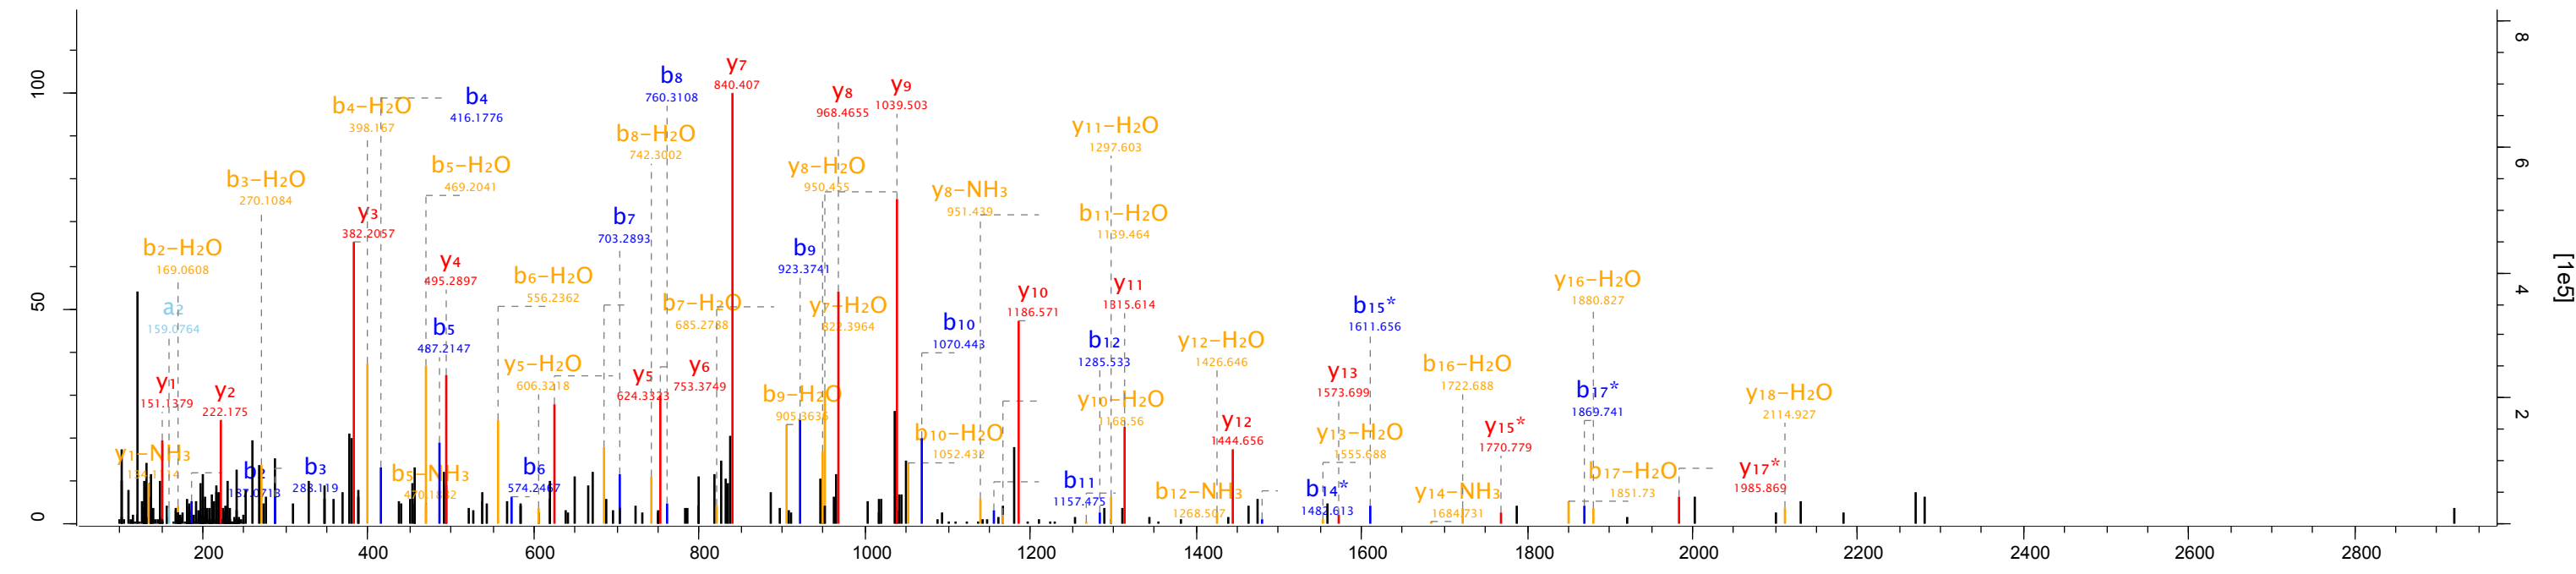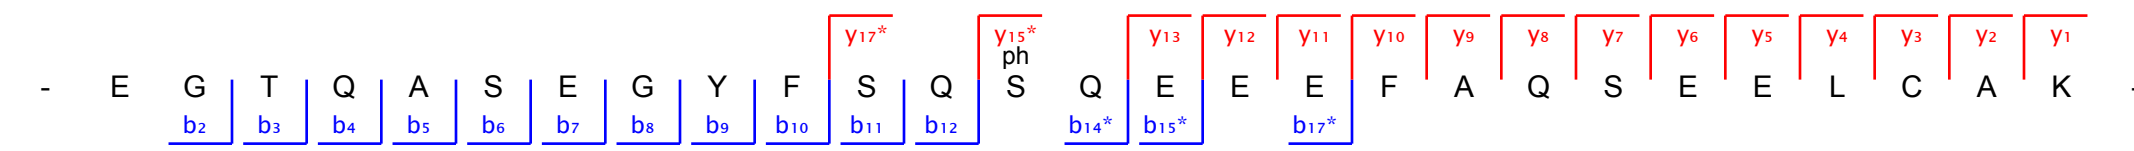

Raw file 20150812\_A375SR\_Phospho\_BR1\_04 Scan 22552 Method FTMS; HCD Score 64.4 m/z 988.03 Gene names MCM3

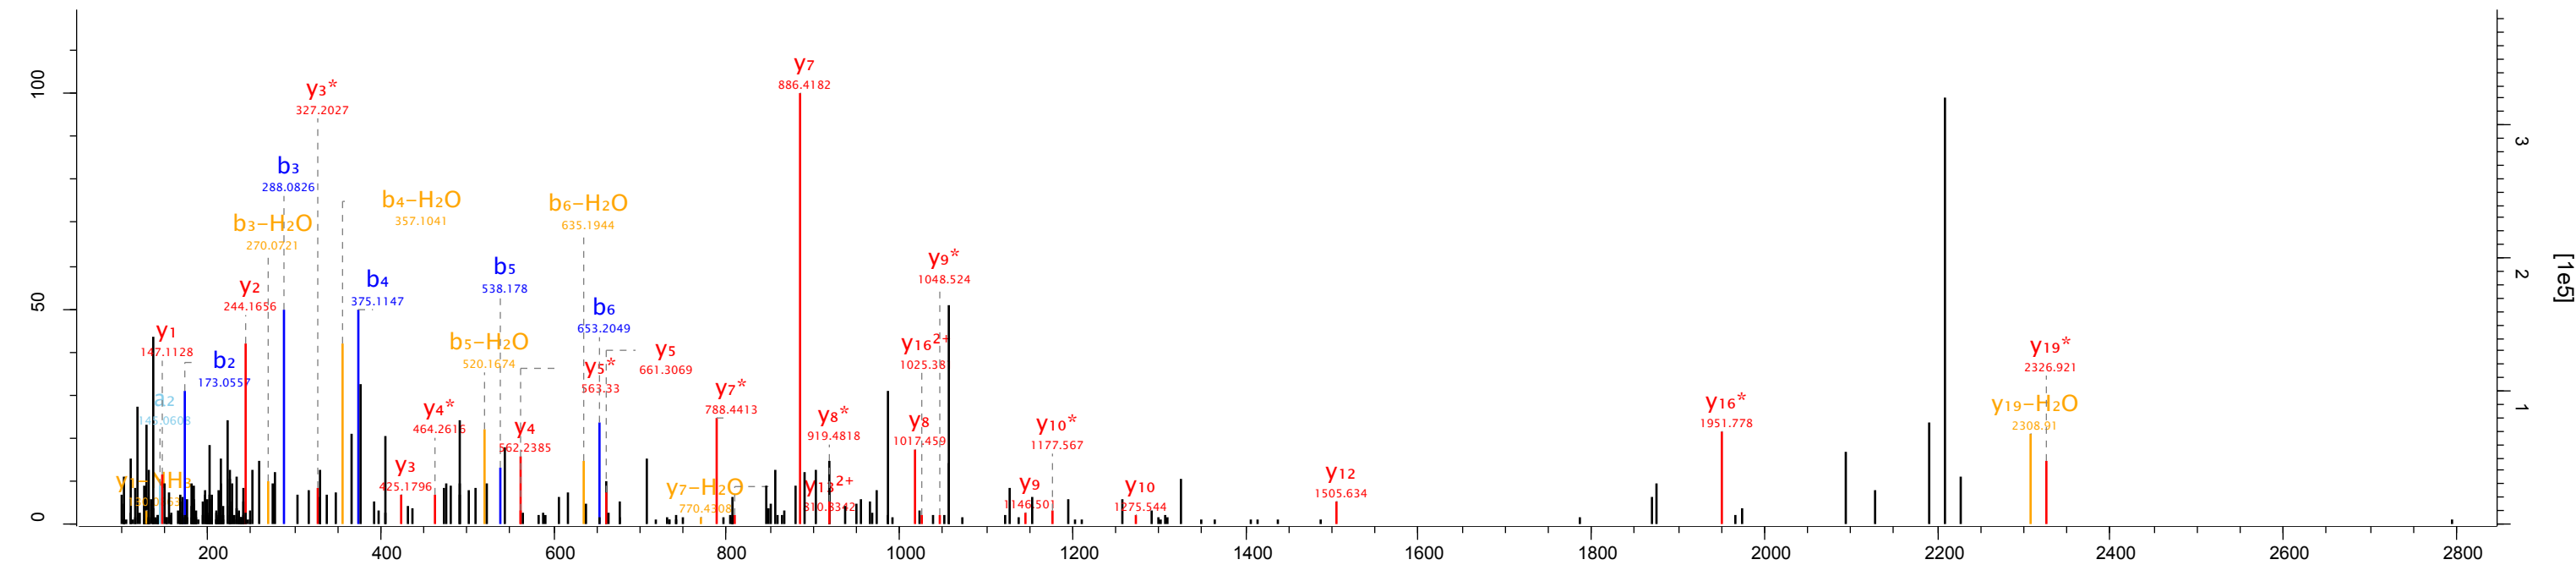

- D G D S Y D P Y D F S D T E E E M P Q V H T P K -

b<sub>2</sub>
b<sub>3</sub>
b<sub>4</sub>
b<sub>5</sub>
b<sub>6</sub>
y<sub>19</sub><sup>\*</sup>
y<sub>16</sub><sup>\*</sup>
y<sub>13</sub><sup>2+</sup>
y<sub>12</sub>
y<sub>10</sub>
y<sub>9</sub>
y<sub>8</sub>
y<sub>7</sub>
y<sub>5</sub>
y<sub>4</sub>
y<sub>3</sub>  
ph
y<sub>2</sub>
y<sub>1</sub>

Raw file: 20150812\_A375SR\_Phospho\_BR1\_04  
 Scan: 22692 Method: FTMS; HCD Score: 45.78 m/z: 1079.27 Gene names: UIMC1

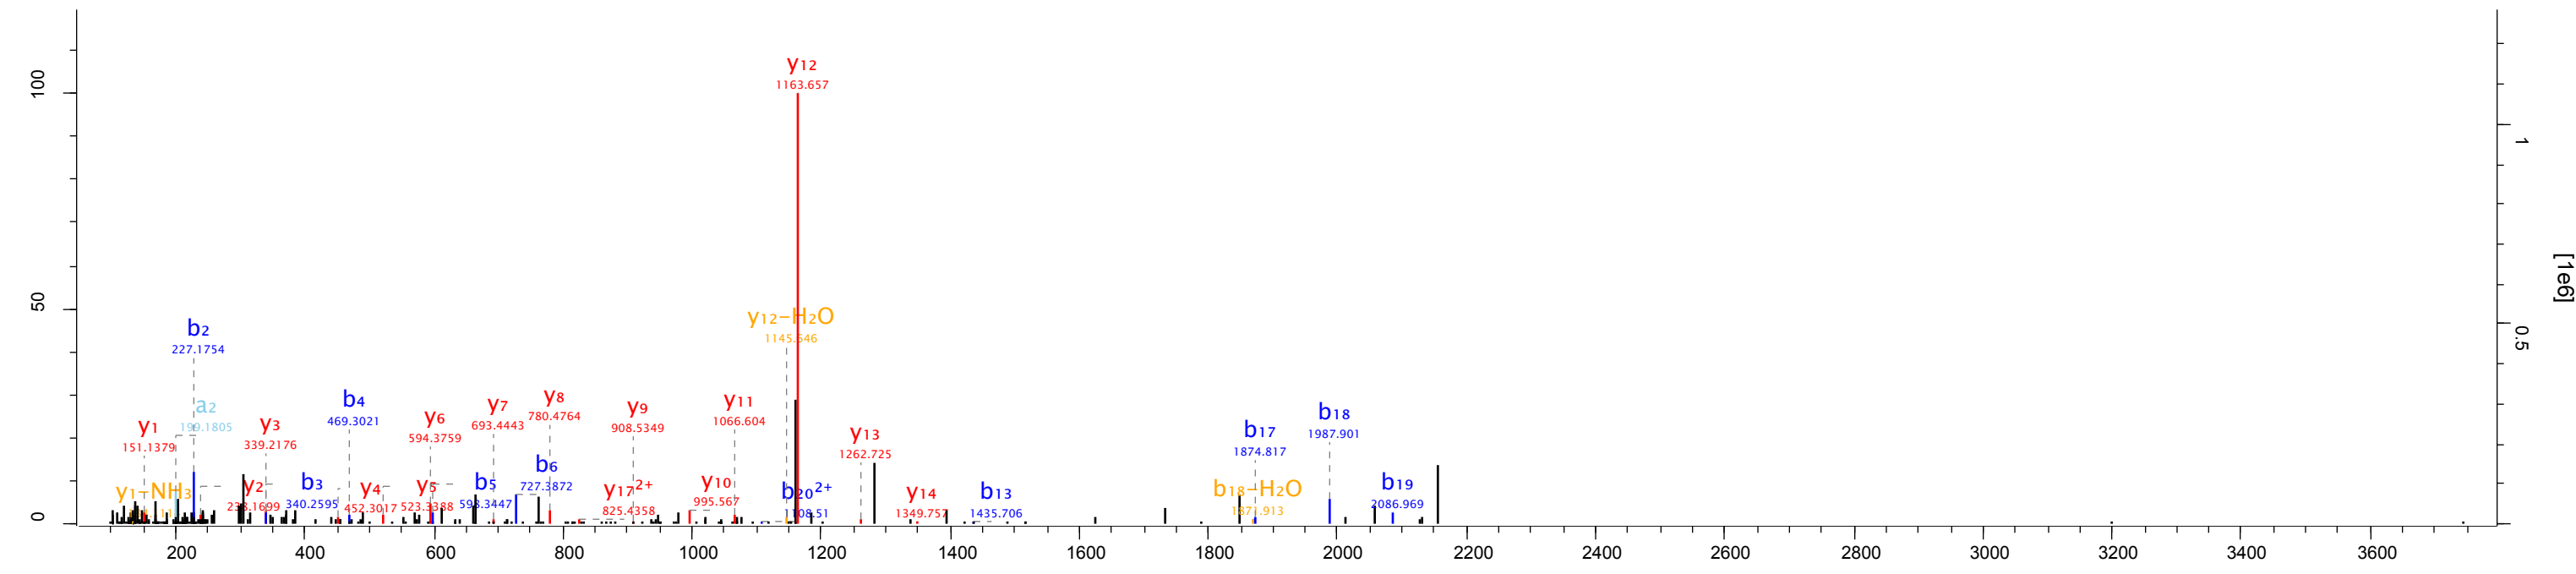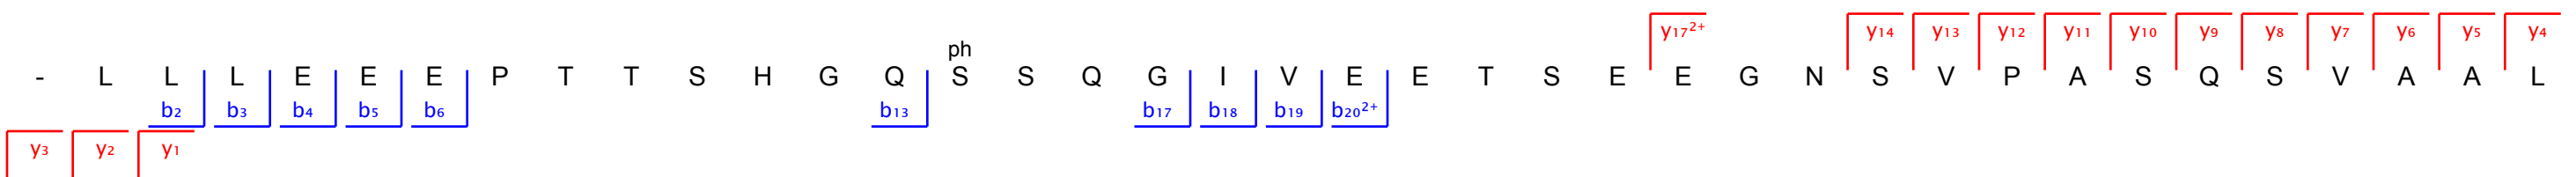

Raw file 20150812\_A375SR\_Phospho\_BR1\_04 Scan 23272 Method FTMS; HCD Score 94.77 m/z 802.7 Gene names PLEKHA5

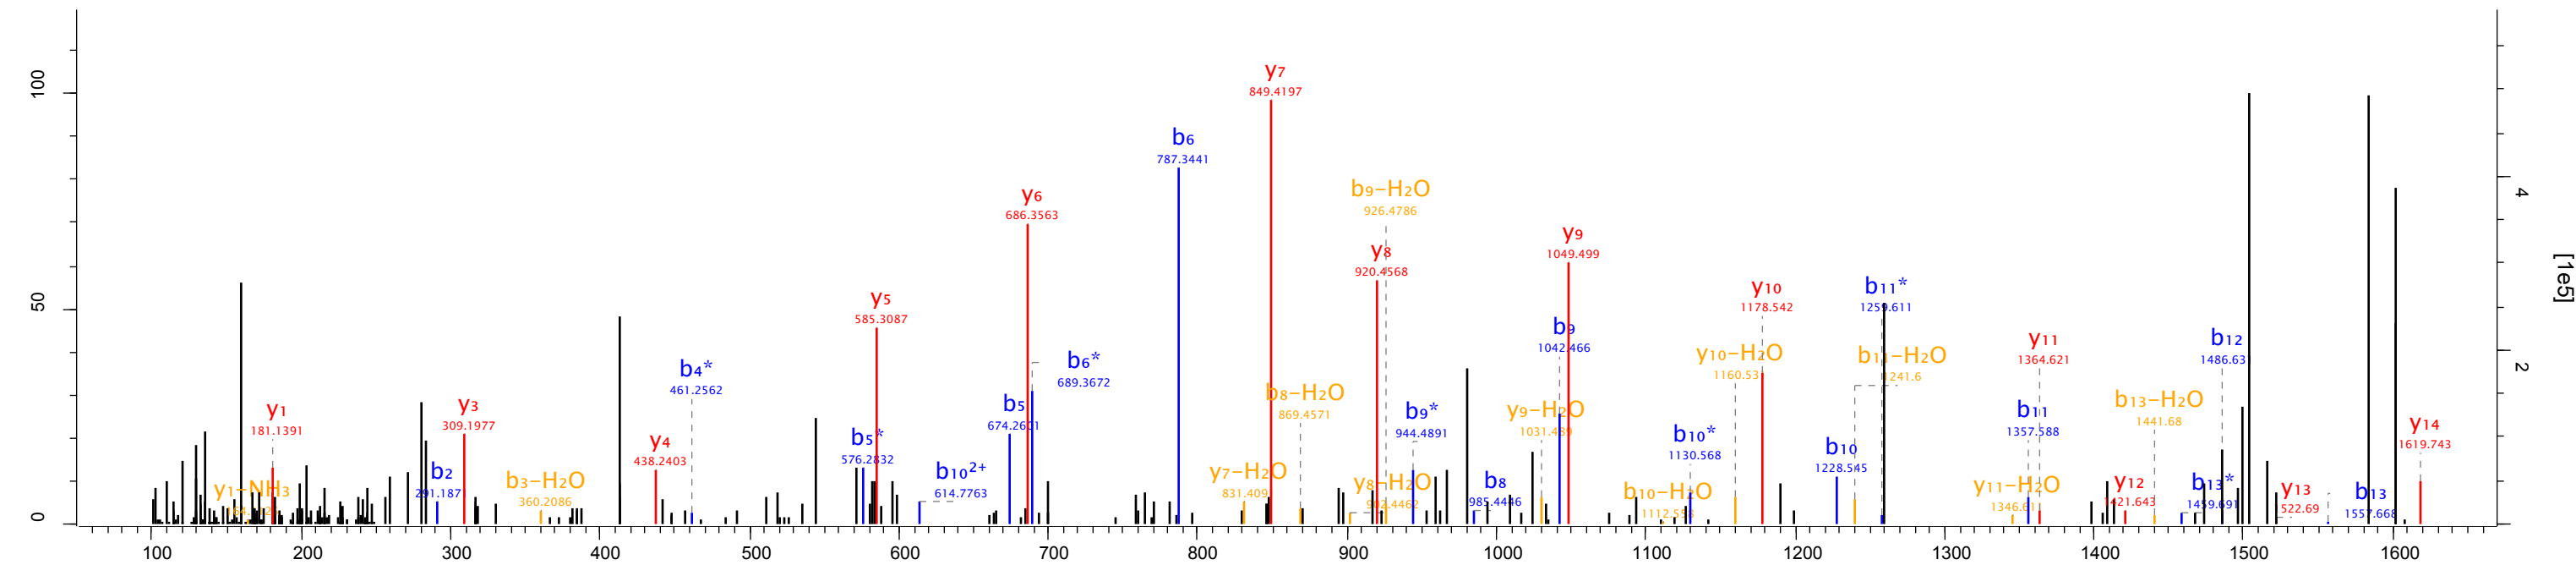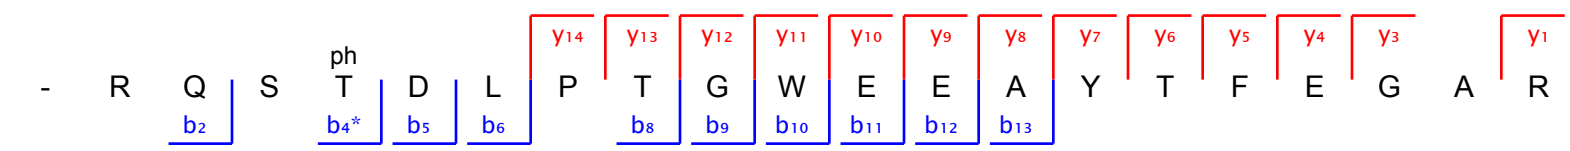

Raw file: 20150812\_A375SR\_Phospho\_BR1\_04  
 Scan: 23702 Method: FTMS; HCD Score: 70.11 m/z: 1140.86 Gene names: LMO7

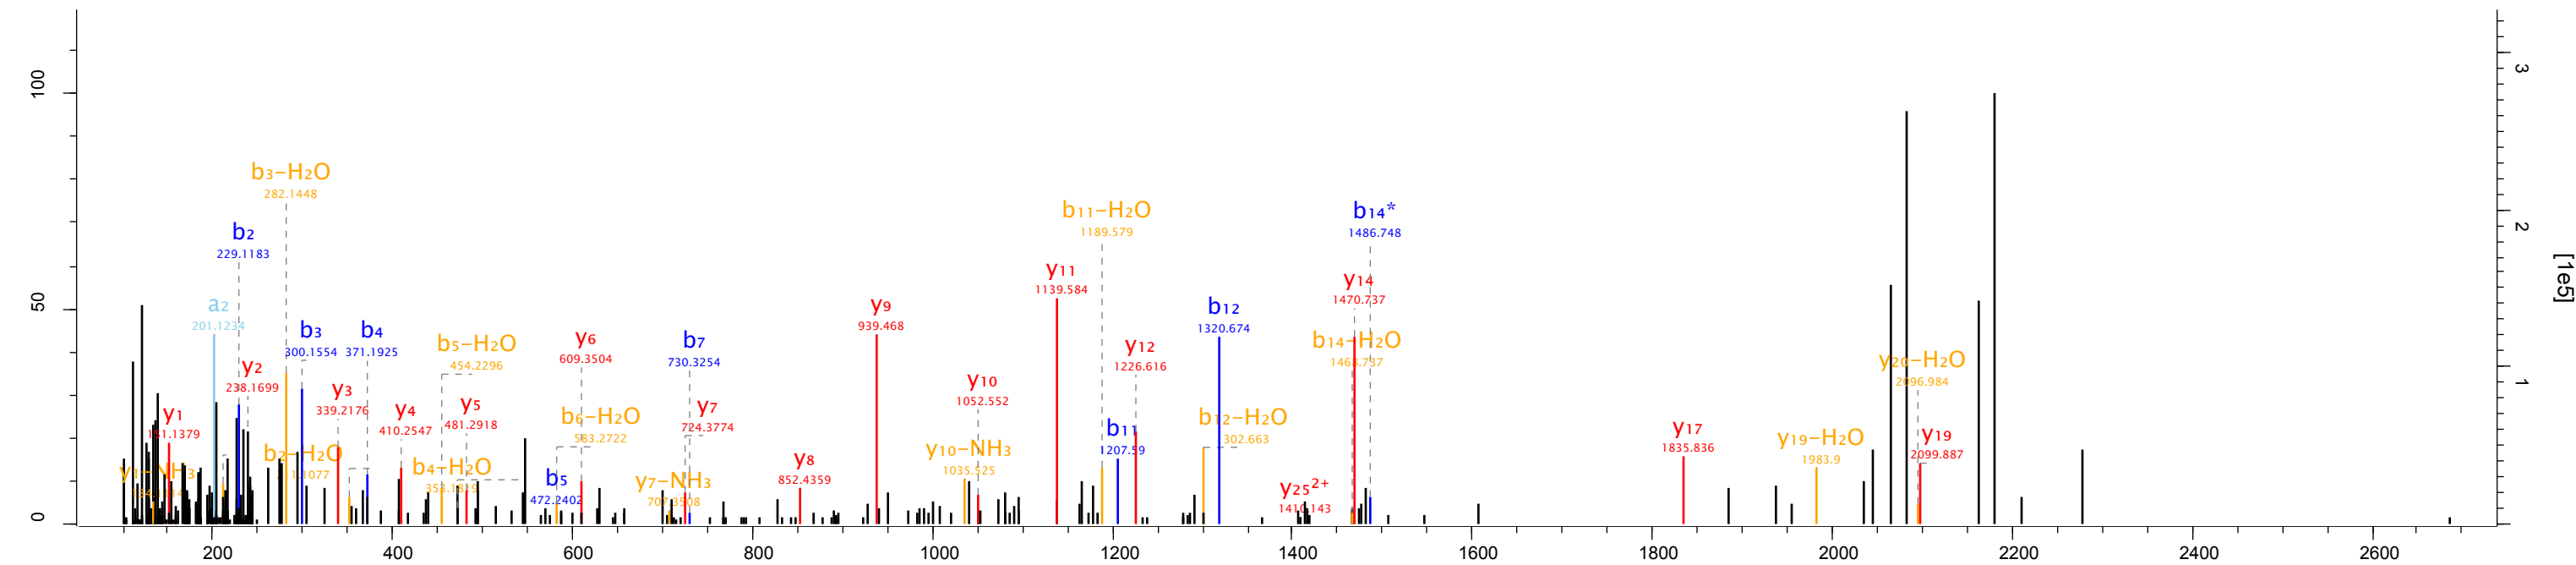

Sequence: E V A A T E E D V T R L P S P T S P F S S L S Q D Q A A T S K

Fragmentation sites (b ions): b<sub>2</sub>, b<sub>3</sub>, b<sub>4</sub>, b<sub>5</sub>, b<sub>7</sub>, b<sub>11</sub>, b<sub>12</sub>, b<sub>14</sub>\*

Fragmentation sites (y ions): y<sub>1</sub>, y<sub>2</sub>, y<sub>3</sub>, y<sub>4</sub>, y<sub>5</sub>, y<sub>6</sub>, y<sub>7</sub>, y<sub>8</sub>, y<sub>9</sub>, y<sub>10</sub>, y<sub>11</sub>, y<sub>12</sub>, y<sub>14</sub>, y<sub>17</sub>, y<sub>19</sub>, y<sub>25</sub><sup>2+</sup>

Raw file 20150812\_A375SR\_Phospho\_BR1\_04 Scan 24032 Method FTMS; HCD Score 97.3 m/z 829.08 Gene names CRTC2

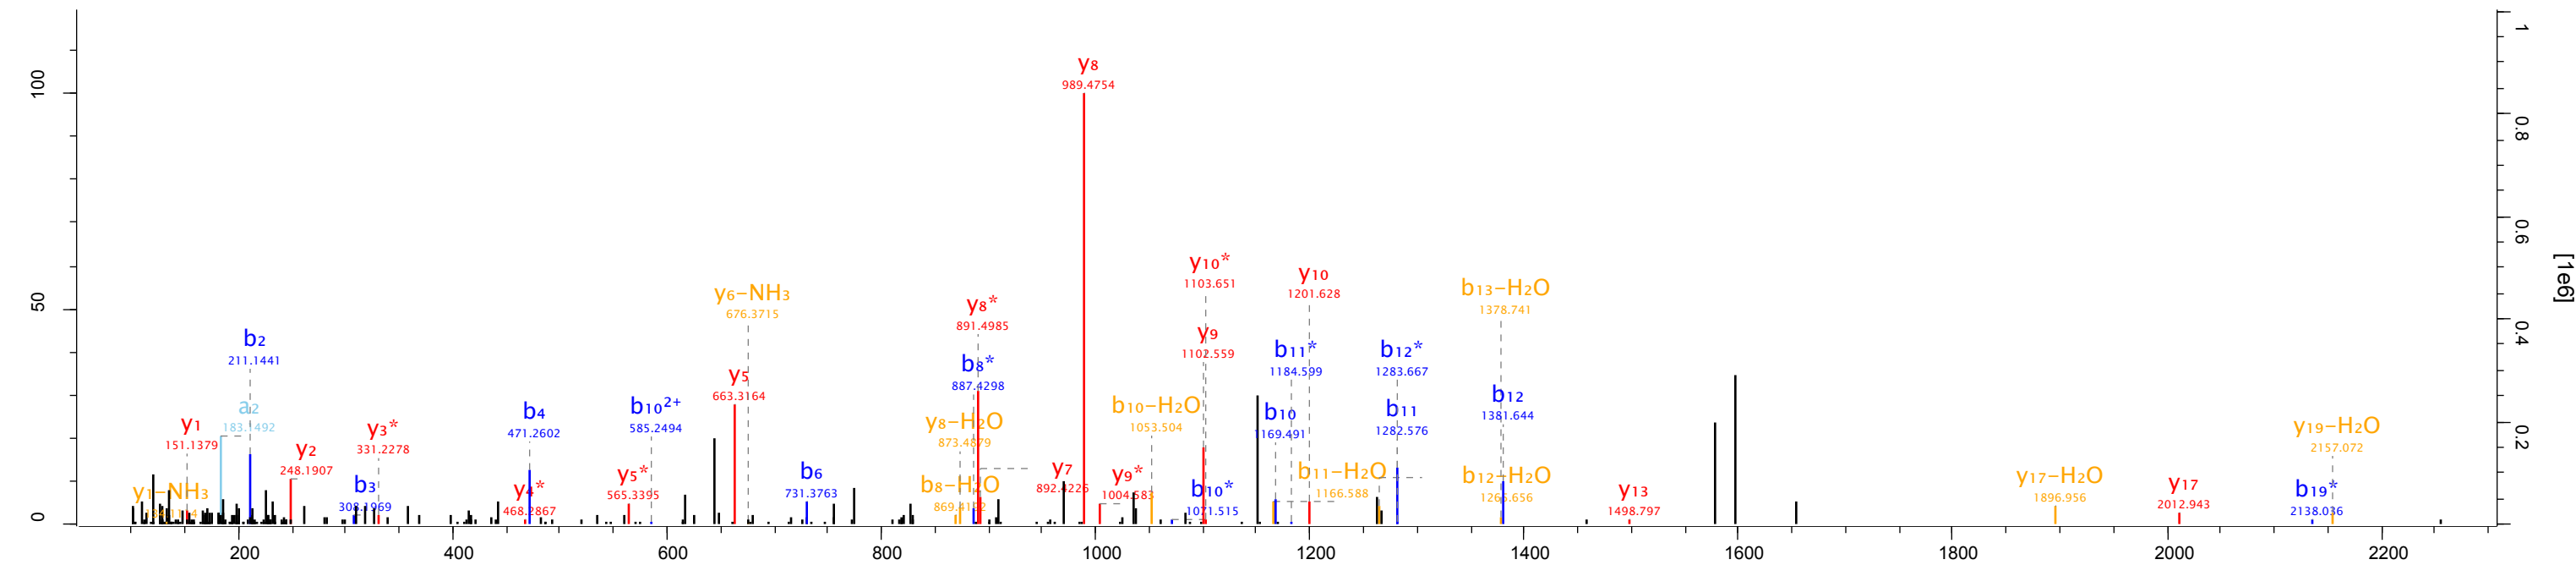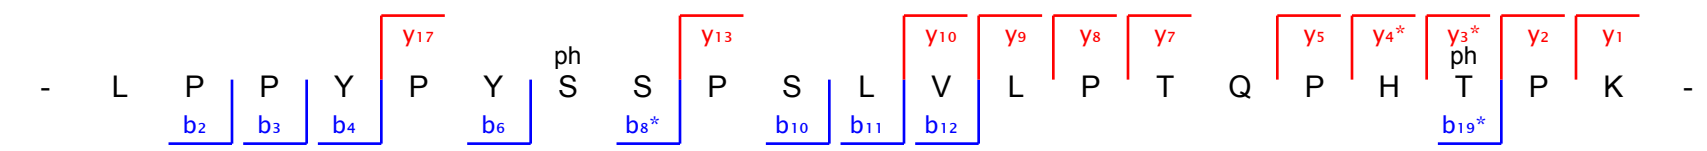



Raw file  
20150812\_A375SR\_Phospho\_BR1\_04

Scan 24712 Method FTMS; HCD Score 257.65 m/z 939.46 Gene names LRRFIP1

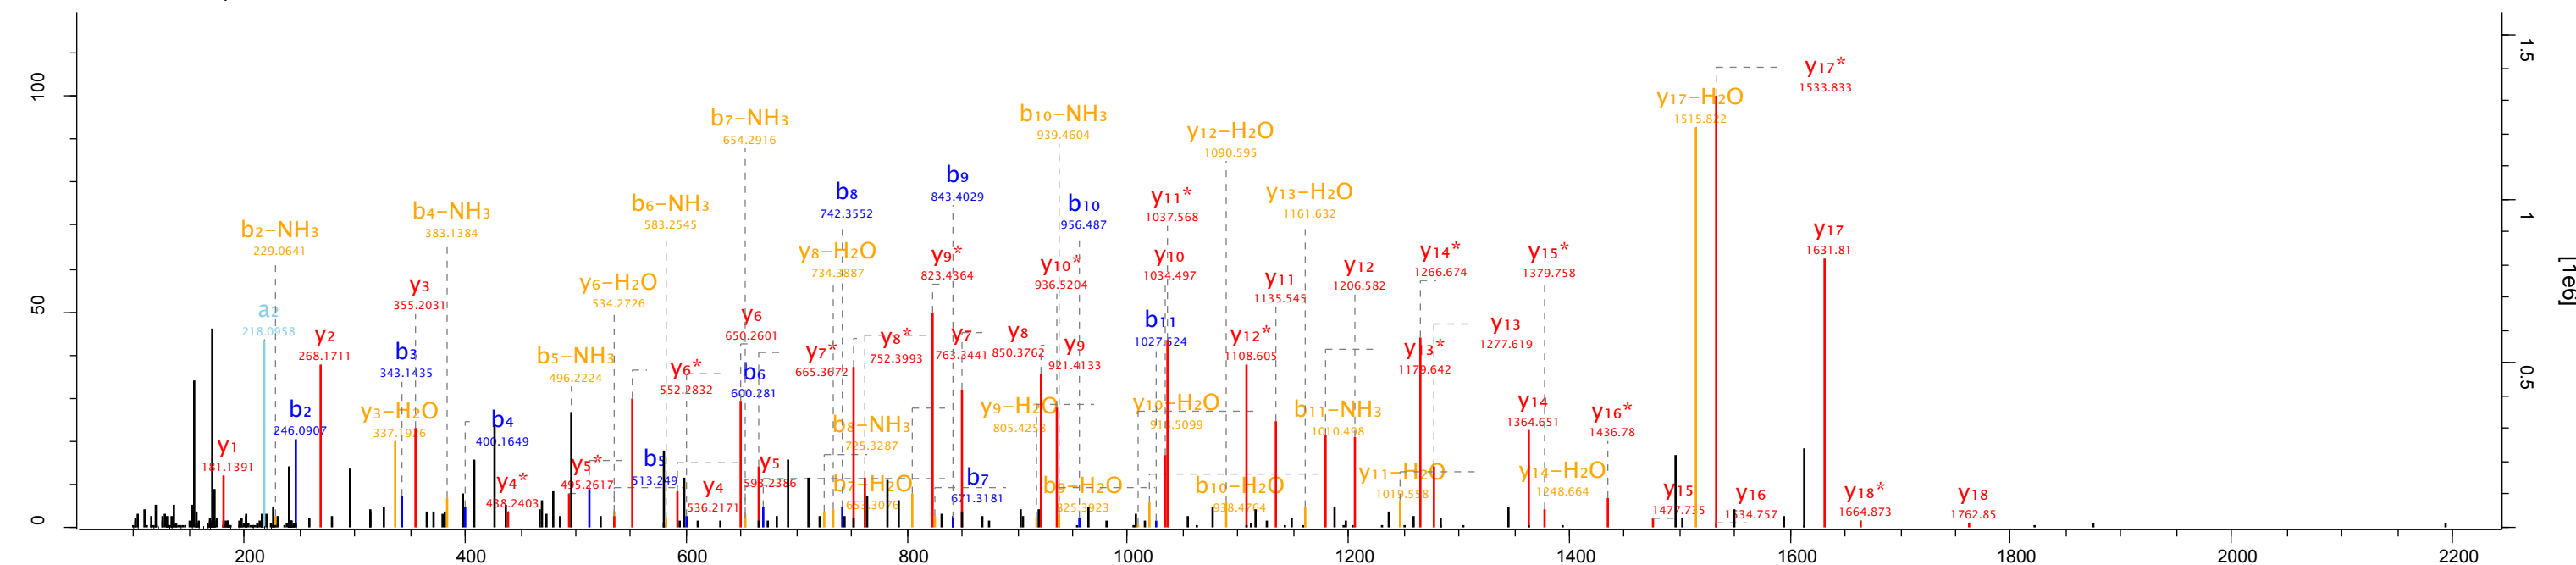

- N M P G L S A A T L A S L G G T S S R -

Fragmentation scheme showing b and y ions for the peptide sequence M P G L S A A T L A S L G G T S S R. The b ions (b2 to b11) are shown in blue boxes, and the y ions (y1 to y18) are shown in red boxes. The y18 ion is shown in a red box but is not present in the spectrum.

Raw file: 20150812\_A375SR\_Phospho\_BR1\_04  
 Scan: 2482 Method: FTMS; HCD Score: 96.01 m/z: 349.16 Gene names: SON

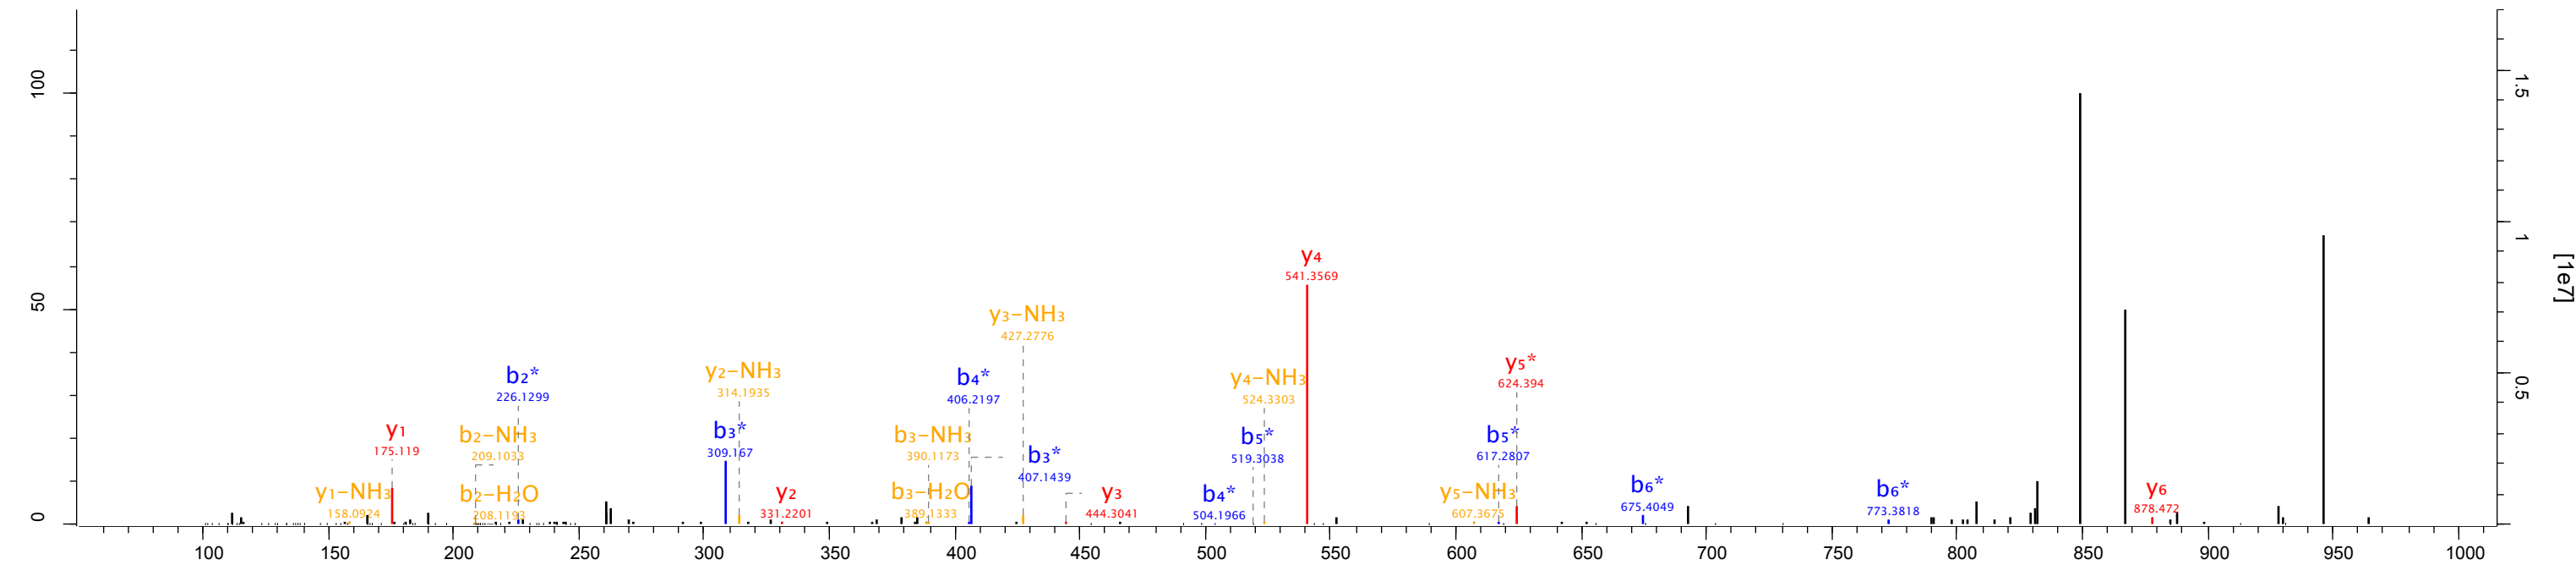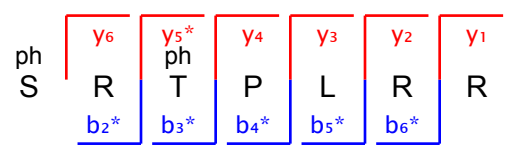

Raw file: 20150812\_A375SR\_Phospho\_BR1\_04  
 Scan: 2572 Method: FTMS; HCD Score: 131.79 m/z: 525.77 Gene names: ZNF609

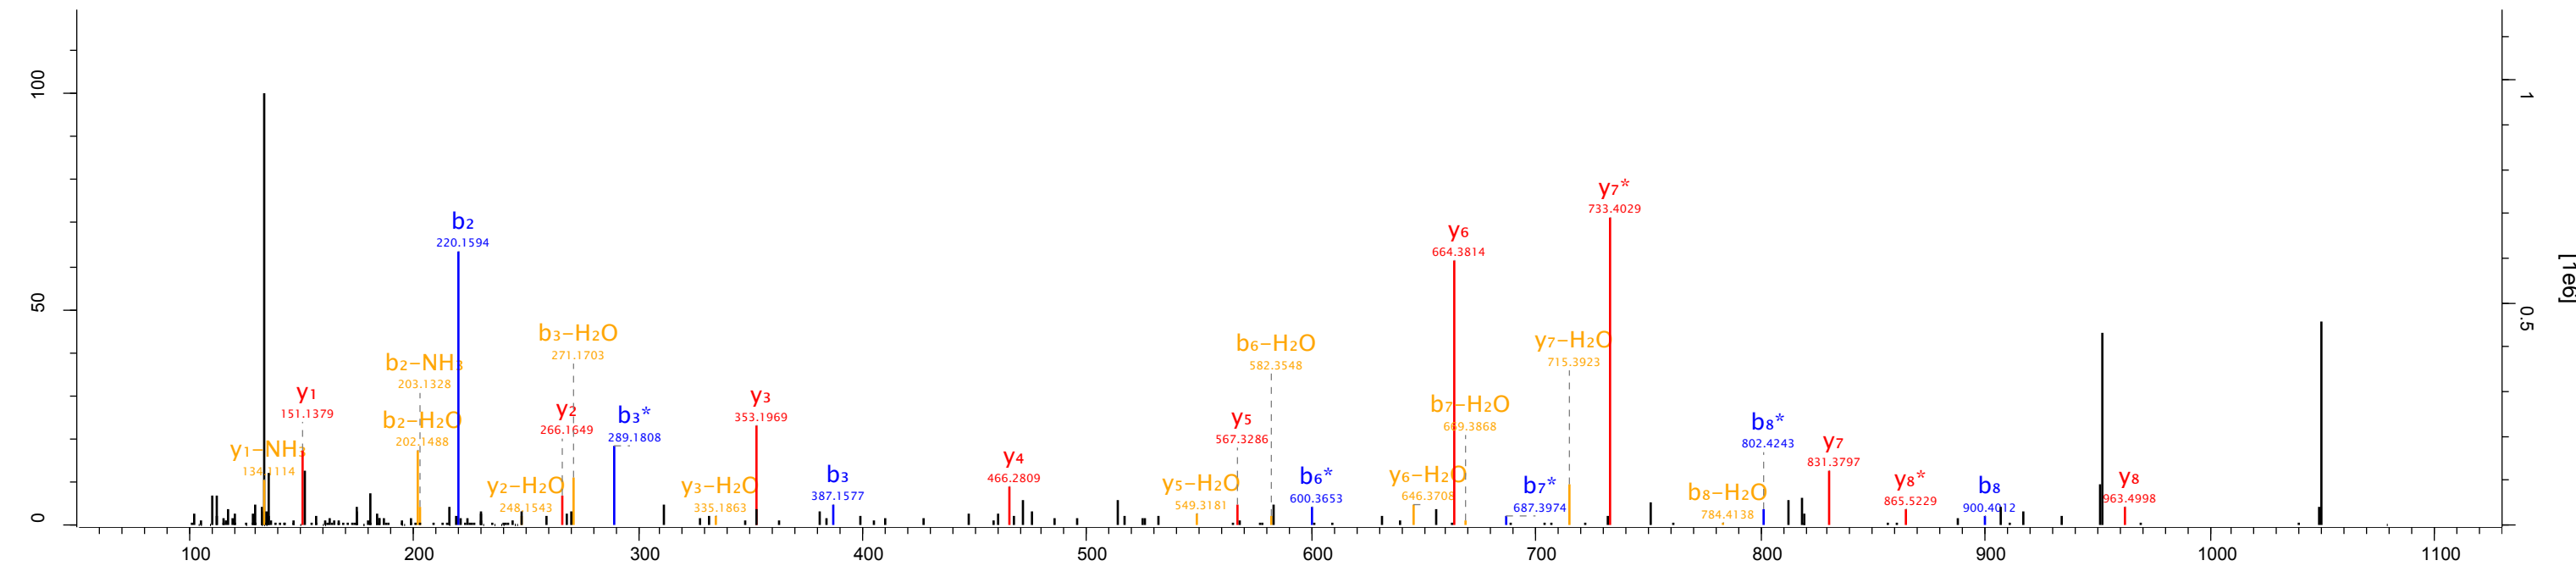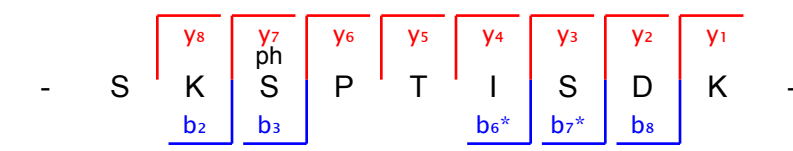

Raw file

Scan Method Score m/z Gene names

20150812\_A375SR\_Phospho\_BR1\_04

2622 FTMS; HCD 257.2 701.33 SLTM

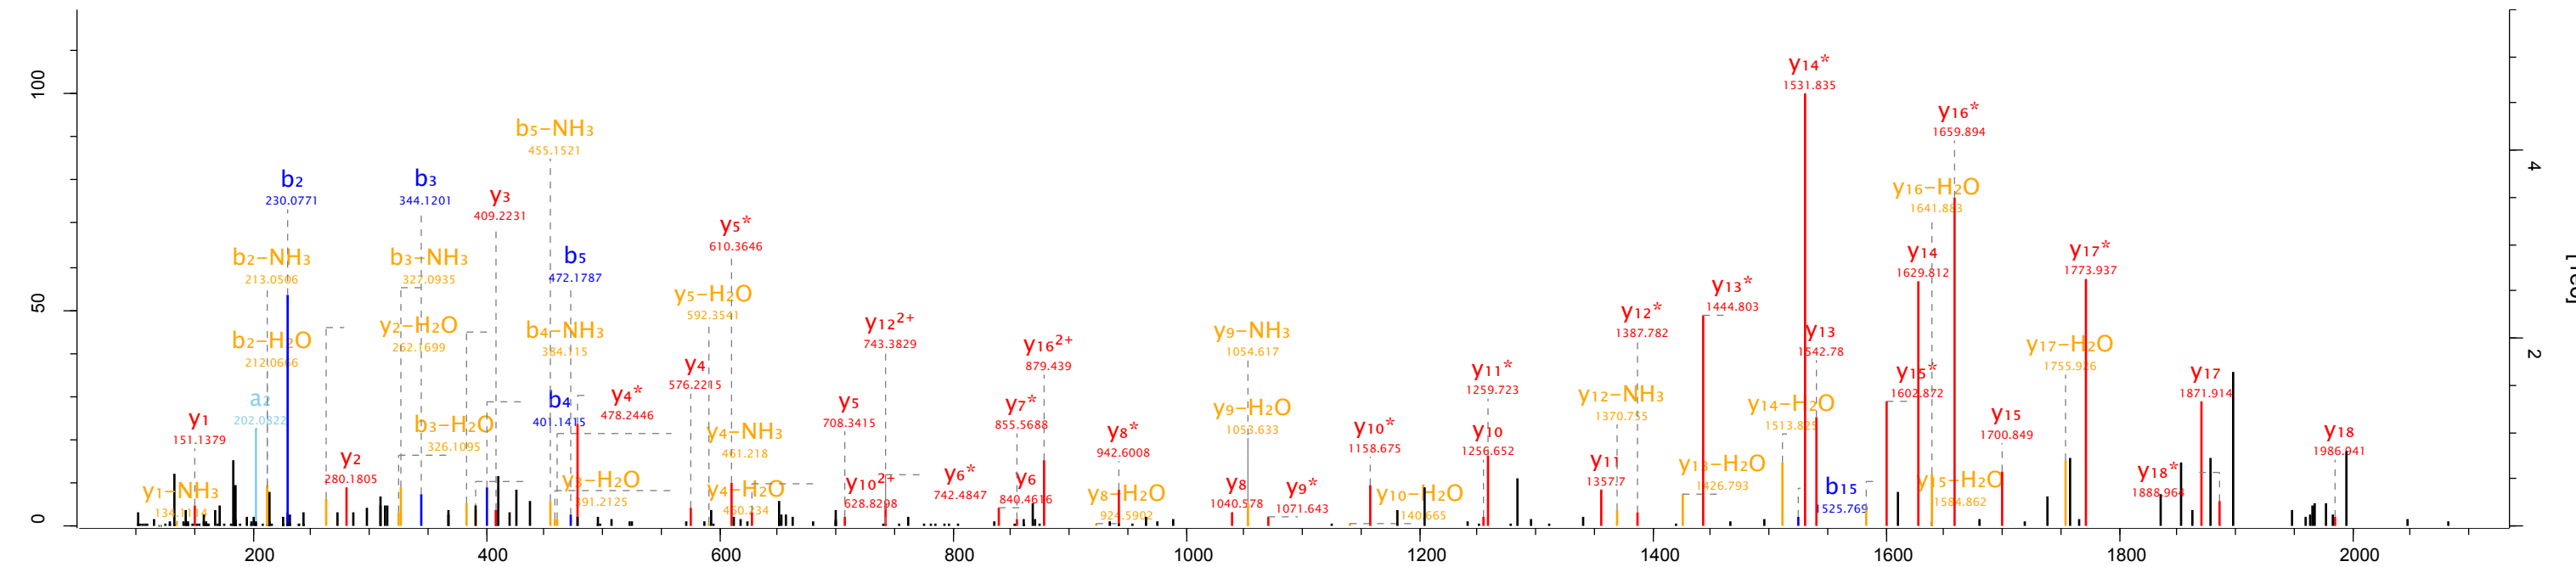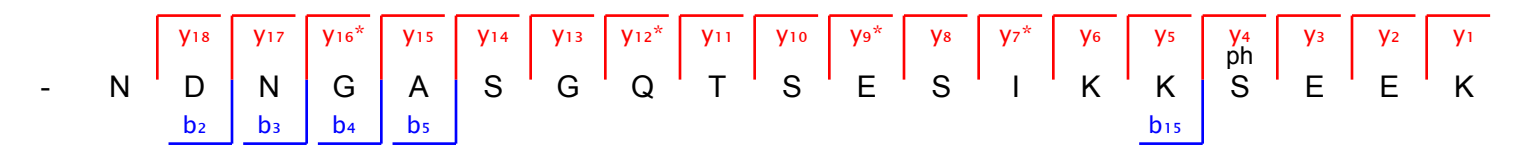

Raw file 20150812\_A375SR\_Phospho\_BR1\_04 Scan 26572 Method FTMS; HCD Score 40.85 m/z 900.43 Gene names CNTROB

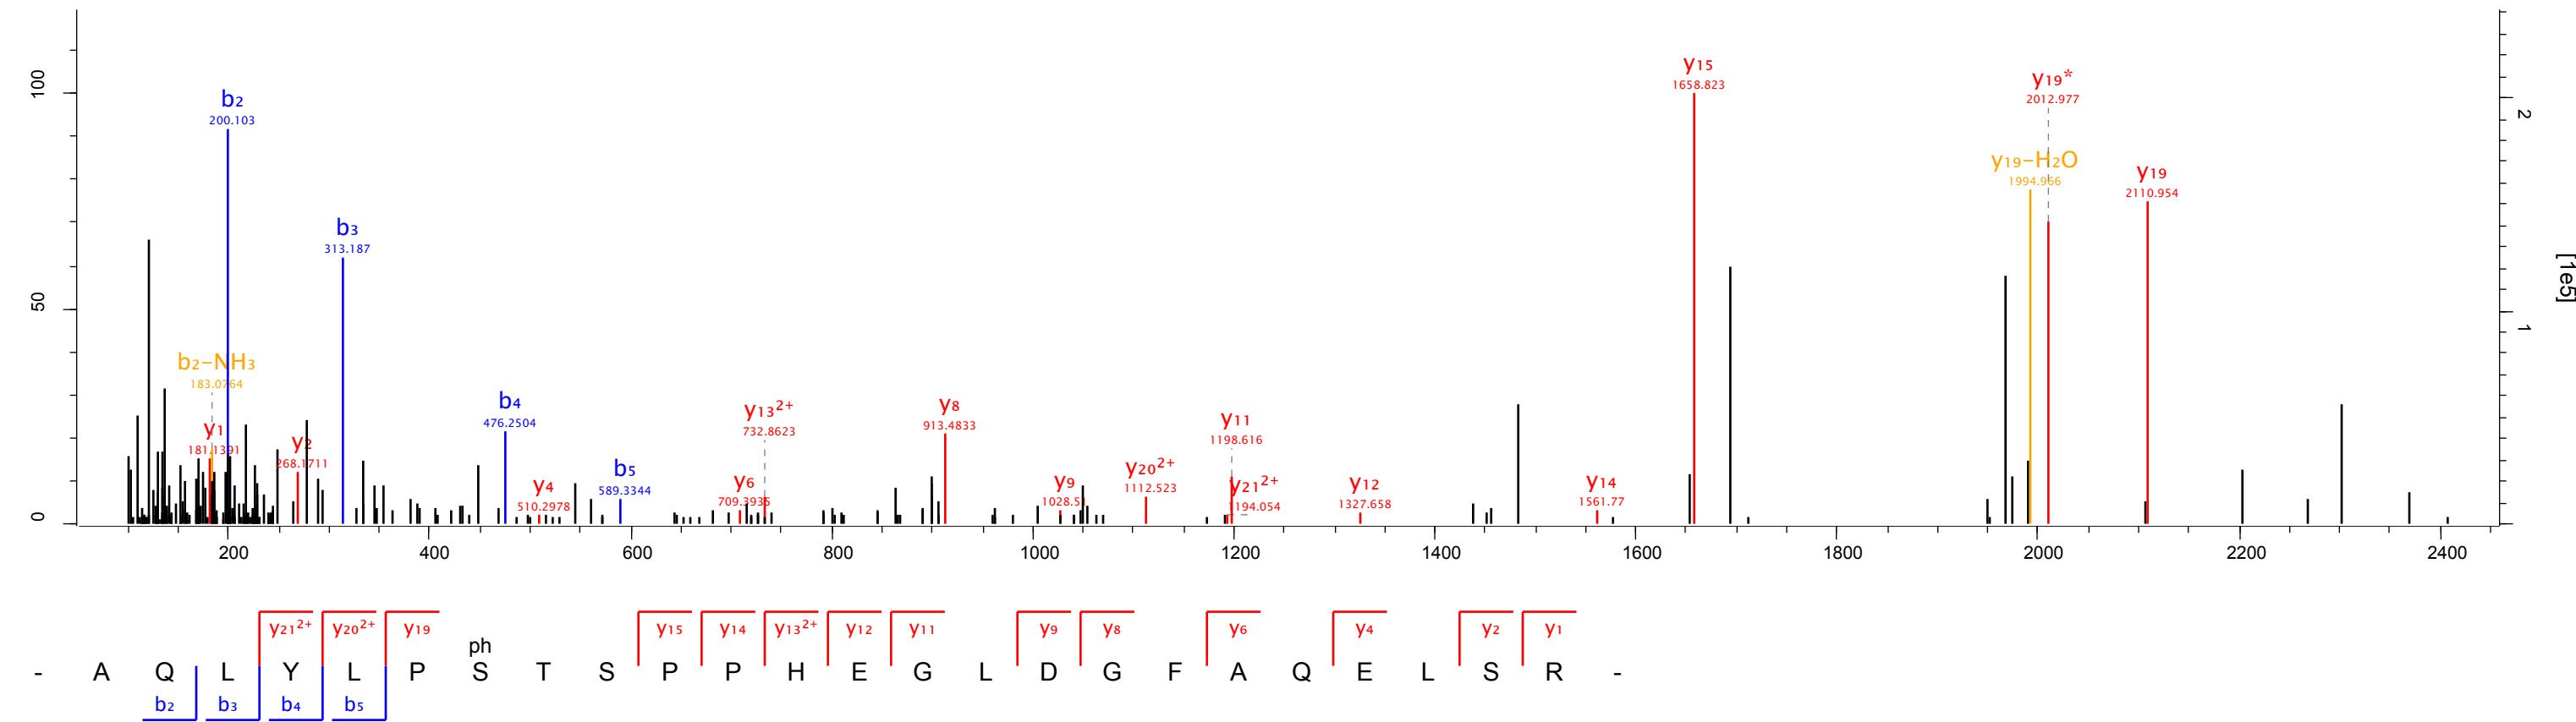

Raw file 20150812\_A375SR\_Phospho\_BR1\_04 Scan 26652 Method FTMS; HCD Score 116.59 m/z 1033.85 Gene names KPNA4

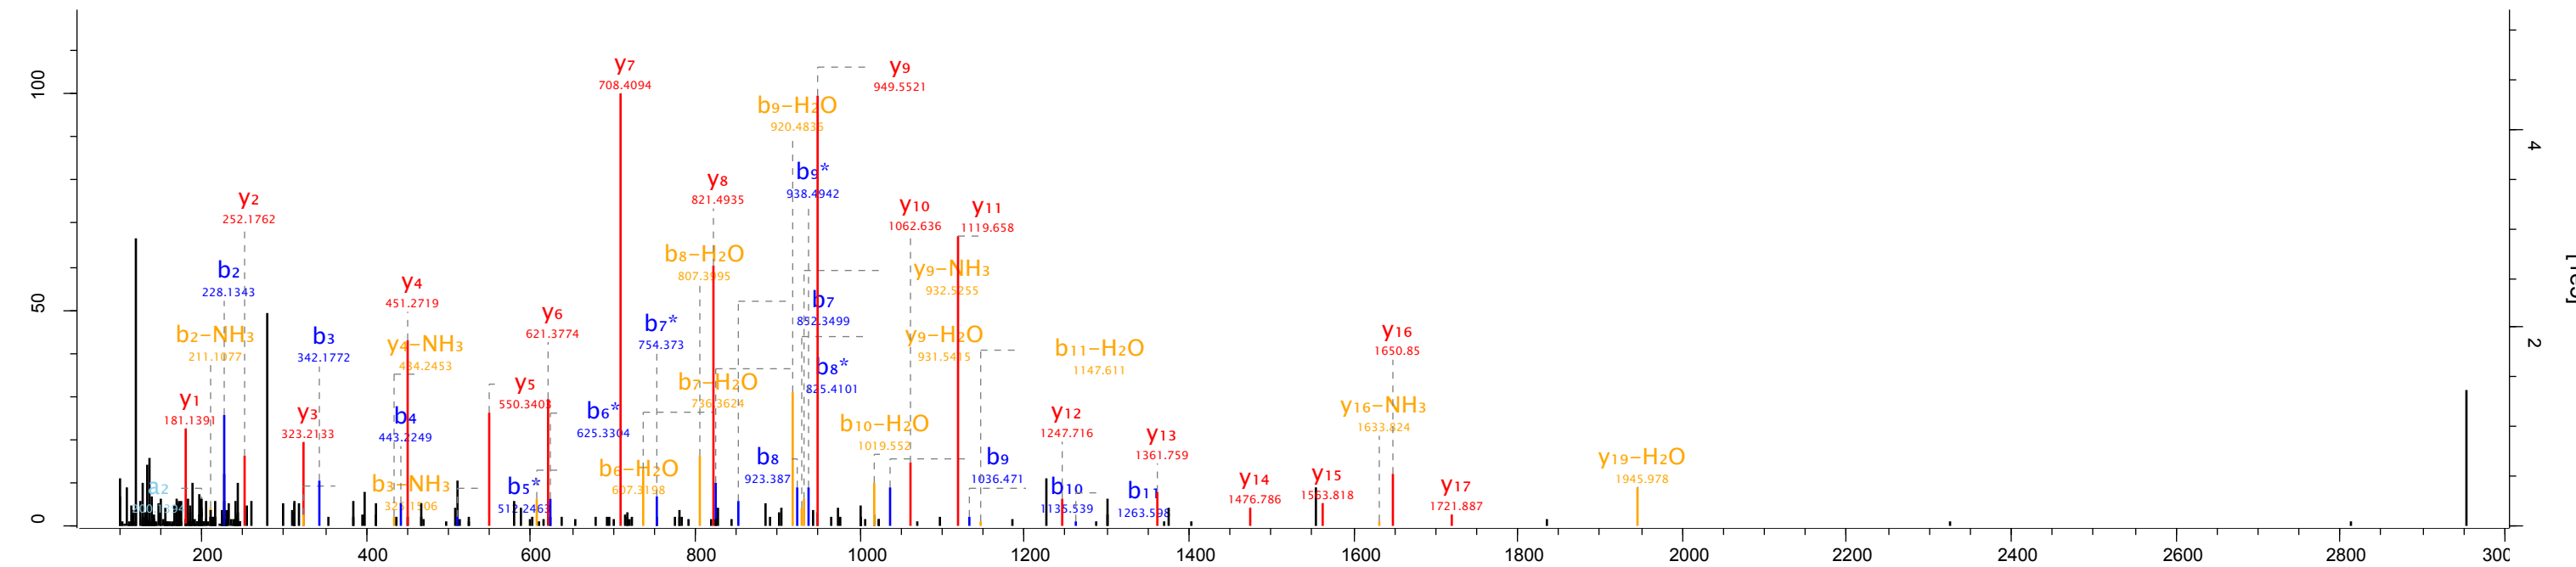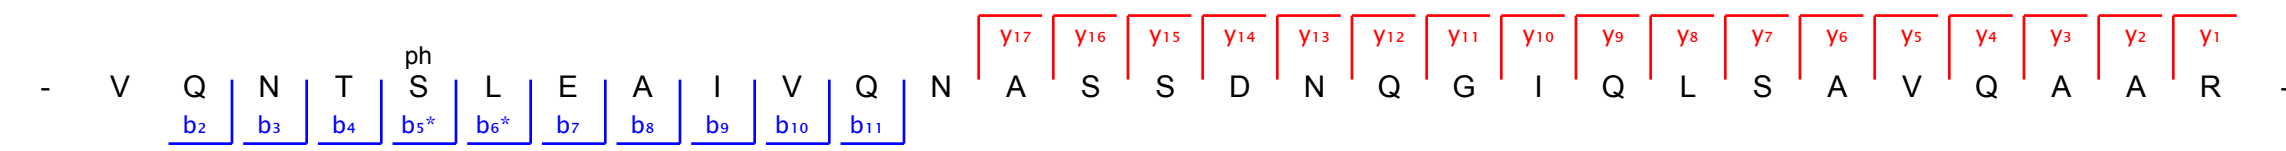

Raw file 20150812\_A375SR\_Phospho\_BR1\_04 Scan 2682 Method FTMS; HCD Score 50.87 m/z 496.59 Gene names TLK2

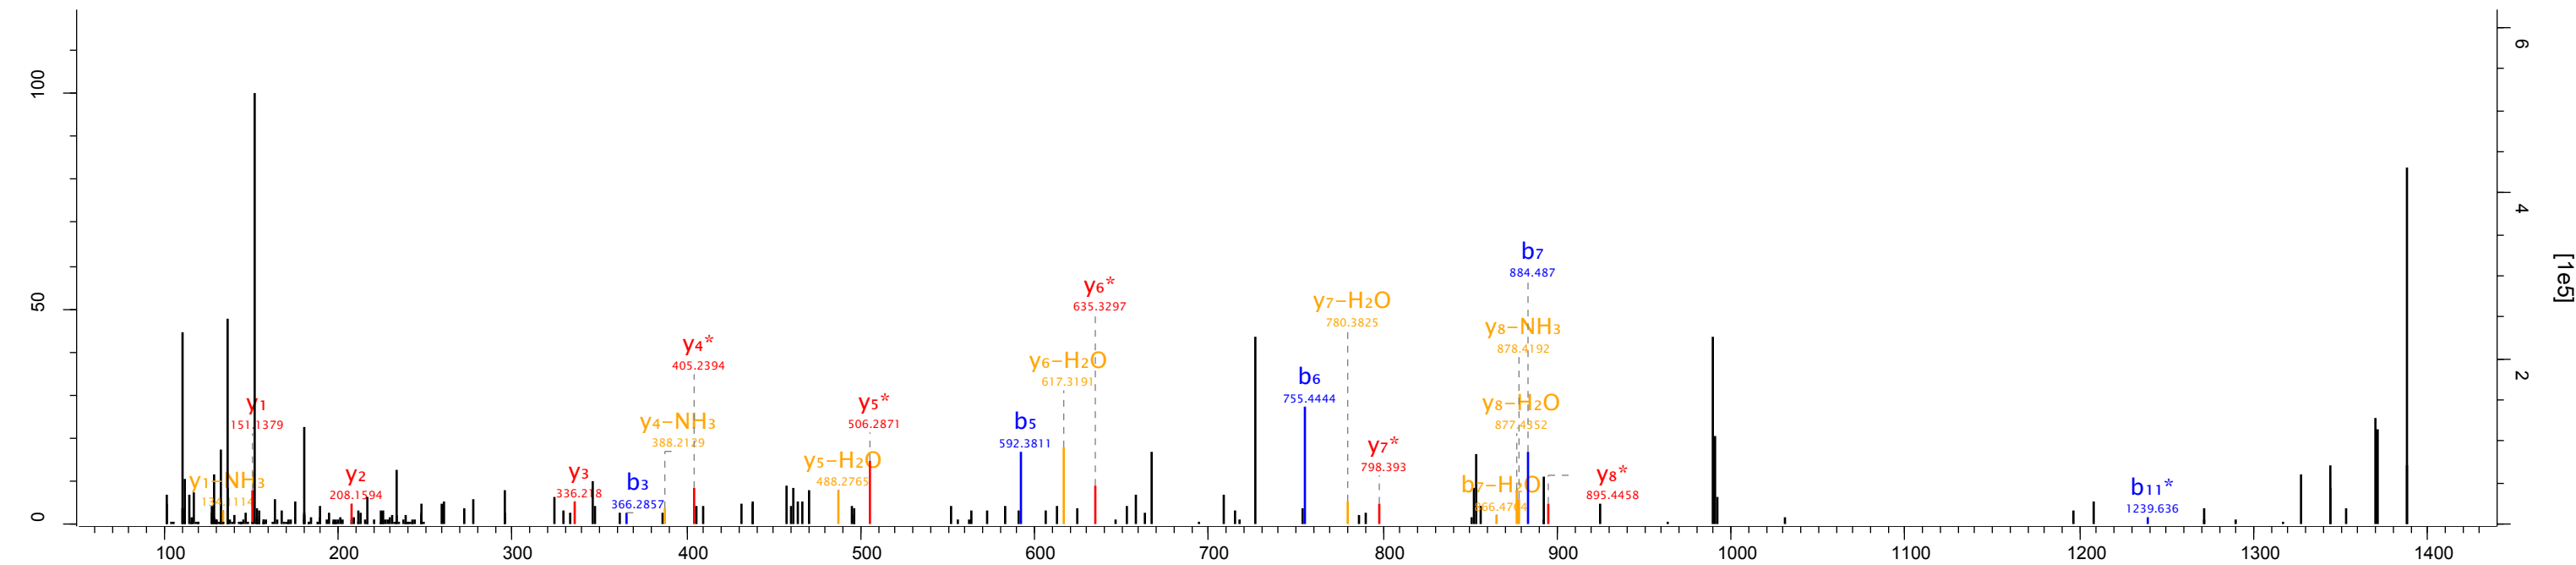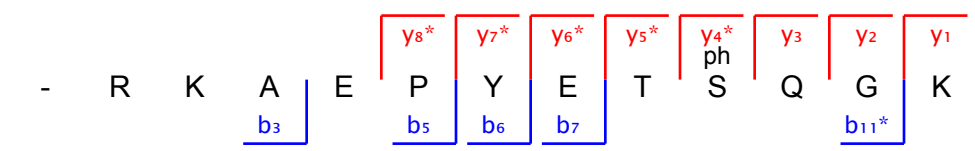

Raw file: 20150812\_A375SR\_Phospho\_BR1\_04  
 Scan: 26872 Method: FTMS; HCD Score: 160.42 m/z: 1359.95 Gene names: RPRD1B

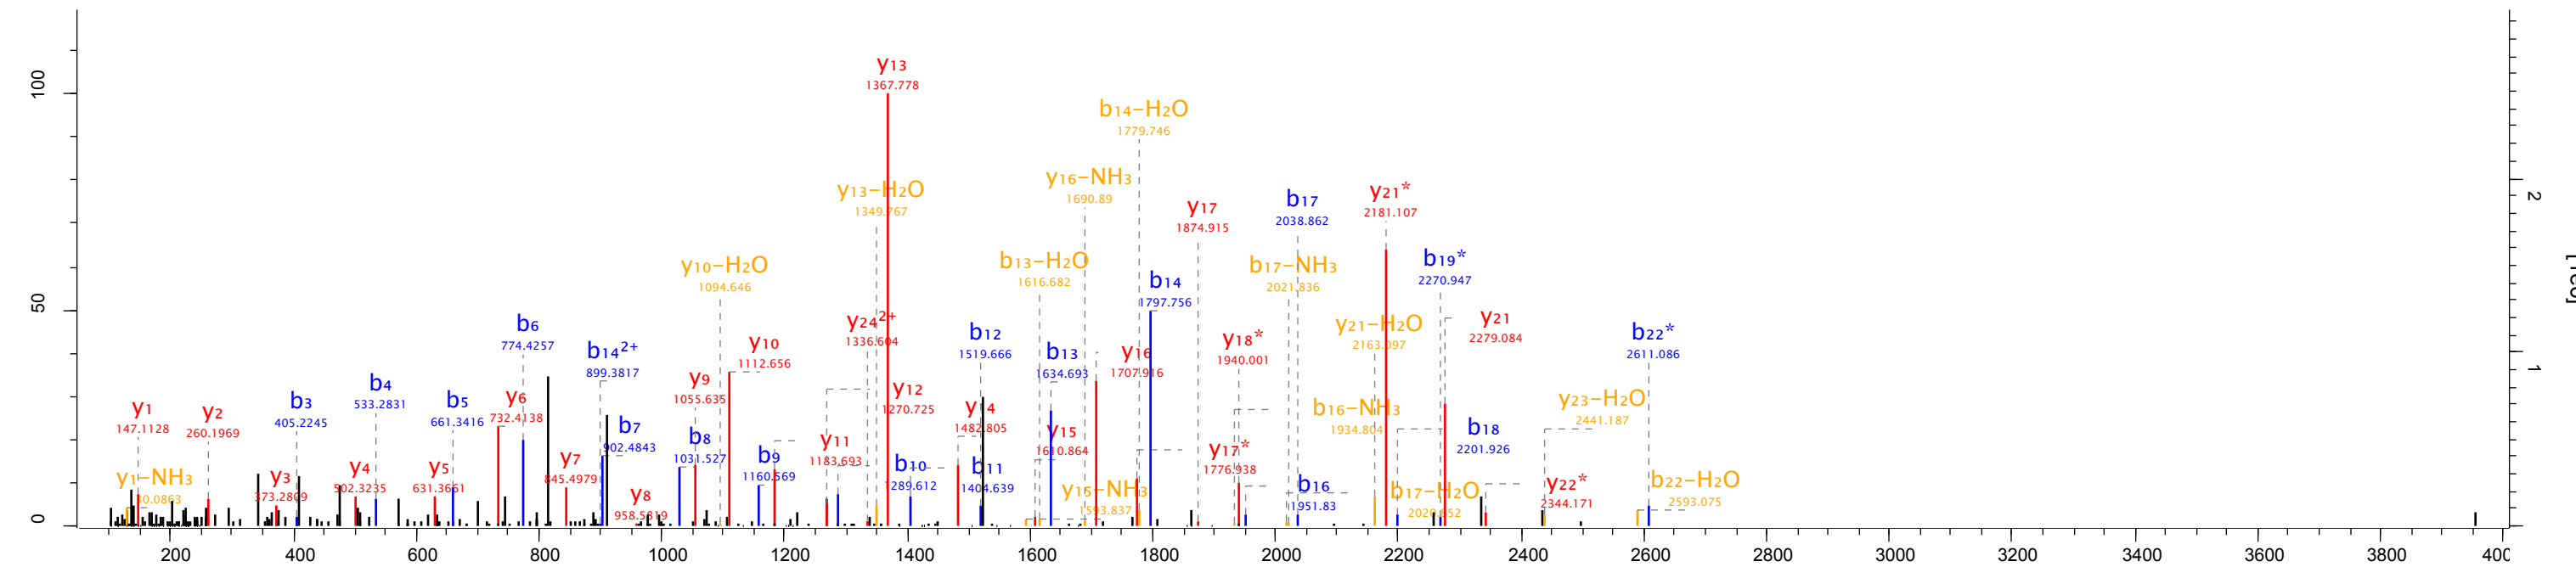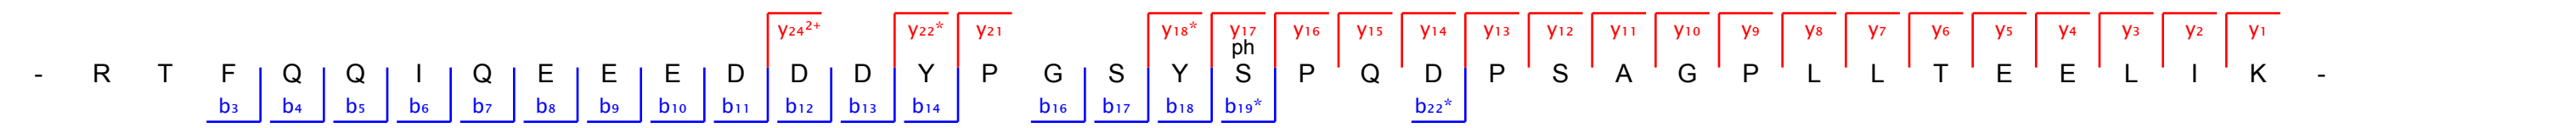



Raw file 20150812\_A375SR\_Phospho\_BR1\_04 Scan 2872 Method FTMS; HCD Score 71.89 m/z 712.33 Gene names ASXL2

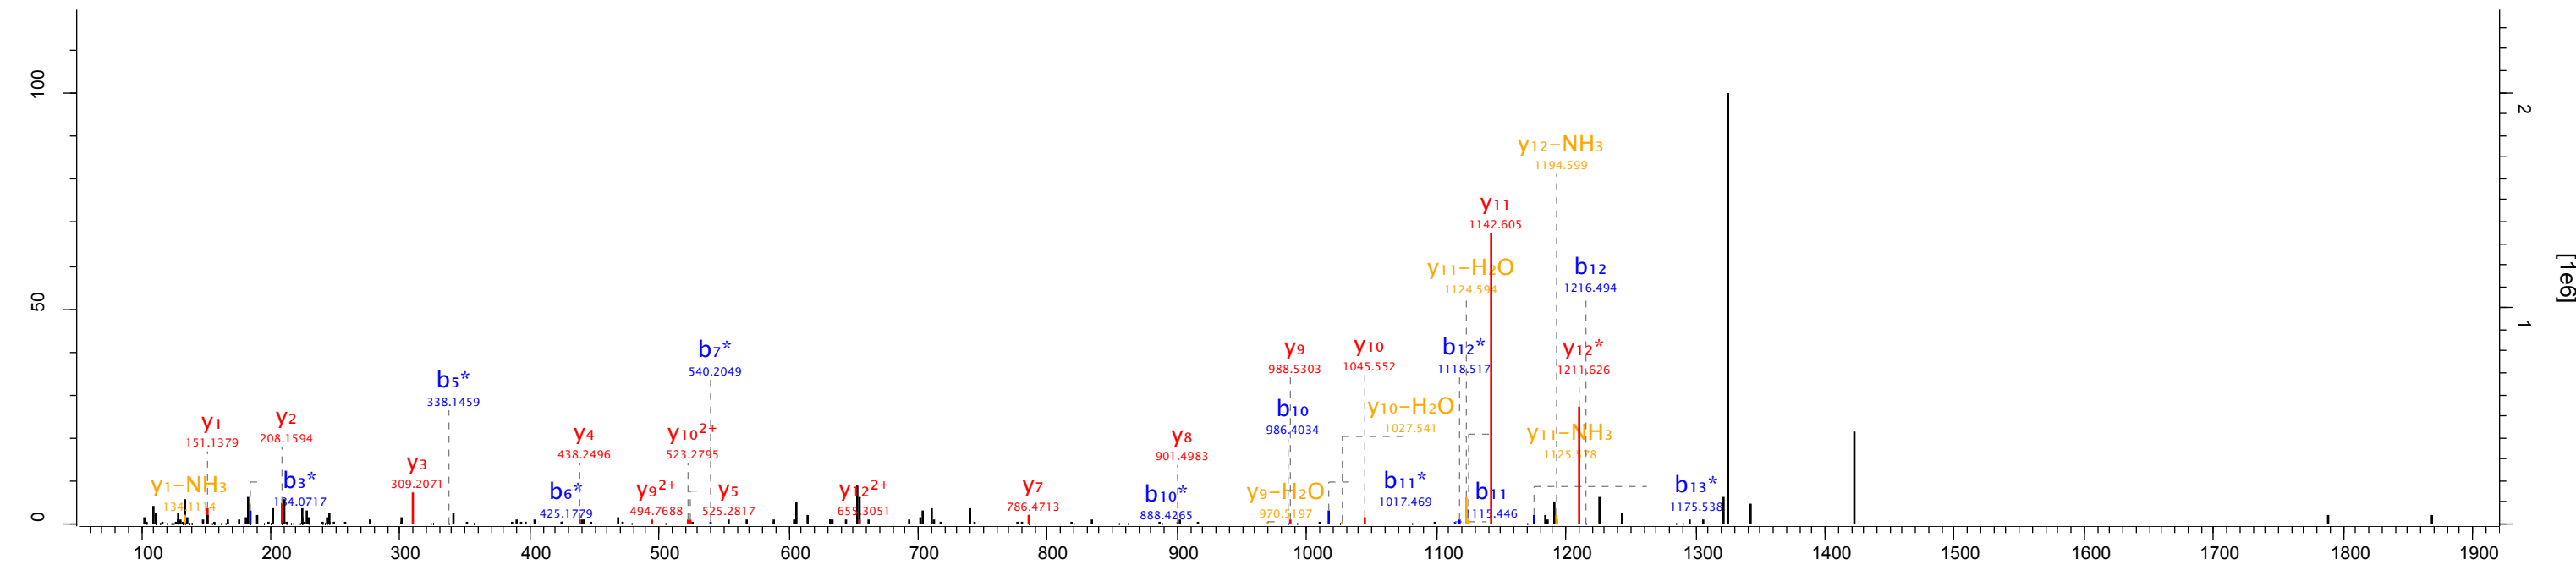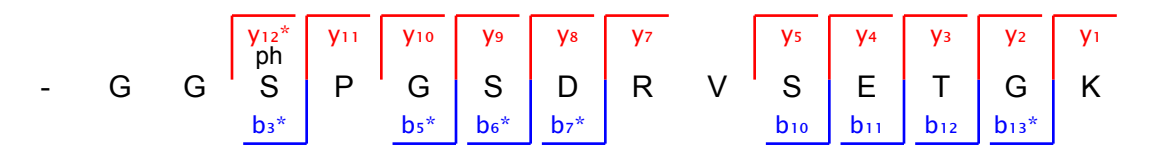

Raw file: 20150812\_A375SR\_Phospho\_BR1\_04  
 Scan: 3042 Method: FTMS; HCD Score: 81.53 m/z: 681.31 Gene names: MARK3

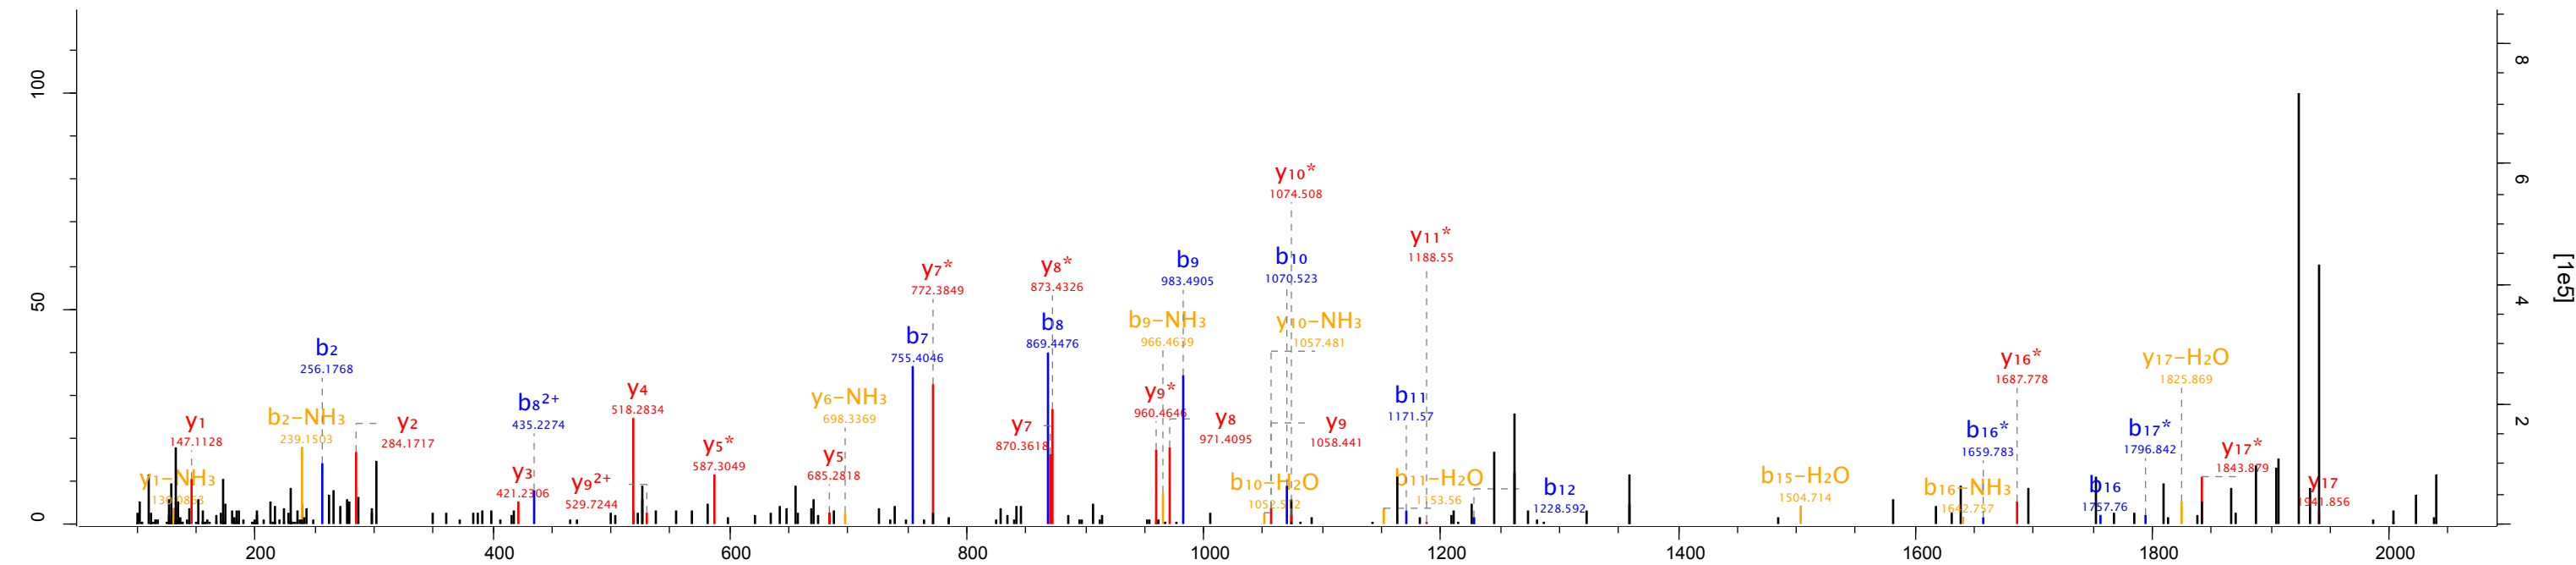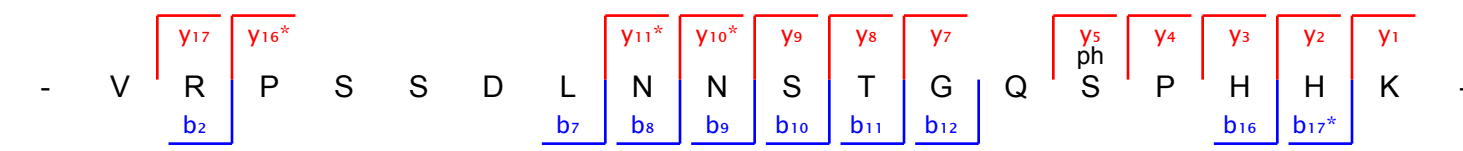

Raw file: 20150812\_A375SR\_Phospho\_BR1\_04  
 Scan: 3052 Method: FTMS; HCD Score: 111.65 m/z: 567.23 Gene names: POGZ

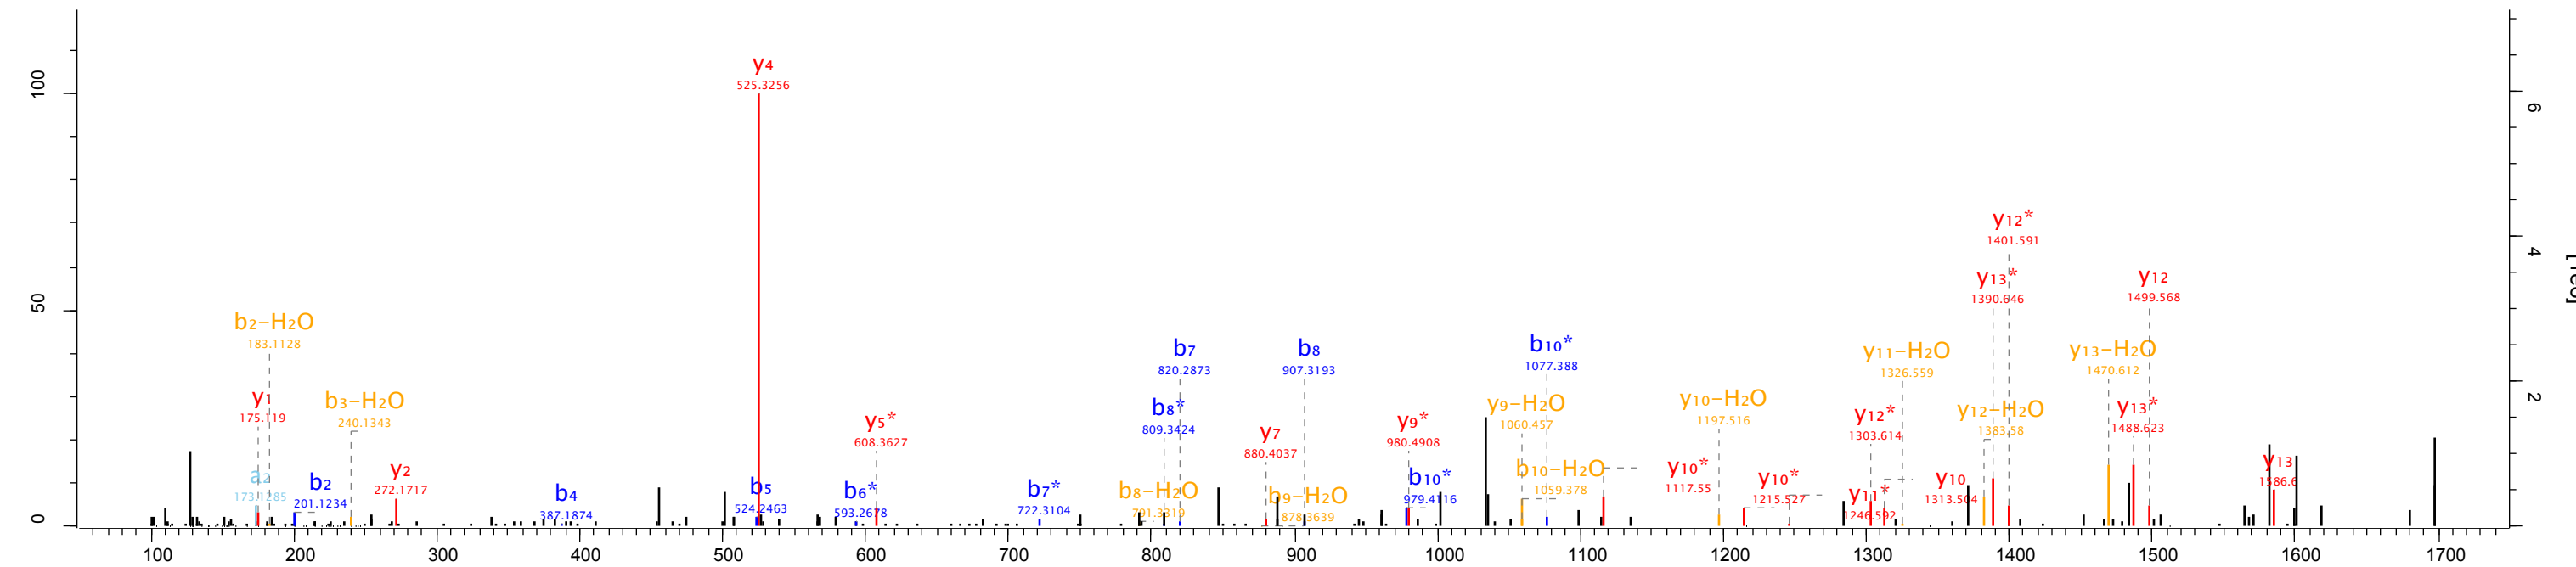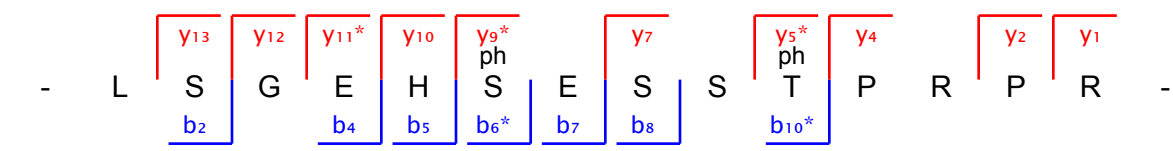

Raw file: 20150812\_A375SR\_Phospho\_BR1\_04  
 Scan: 3192 Method: FTMS; HCD Score: 109.77 m/z: 667.32 Gene names: WRNIP1

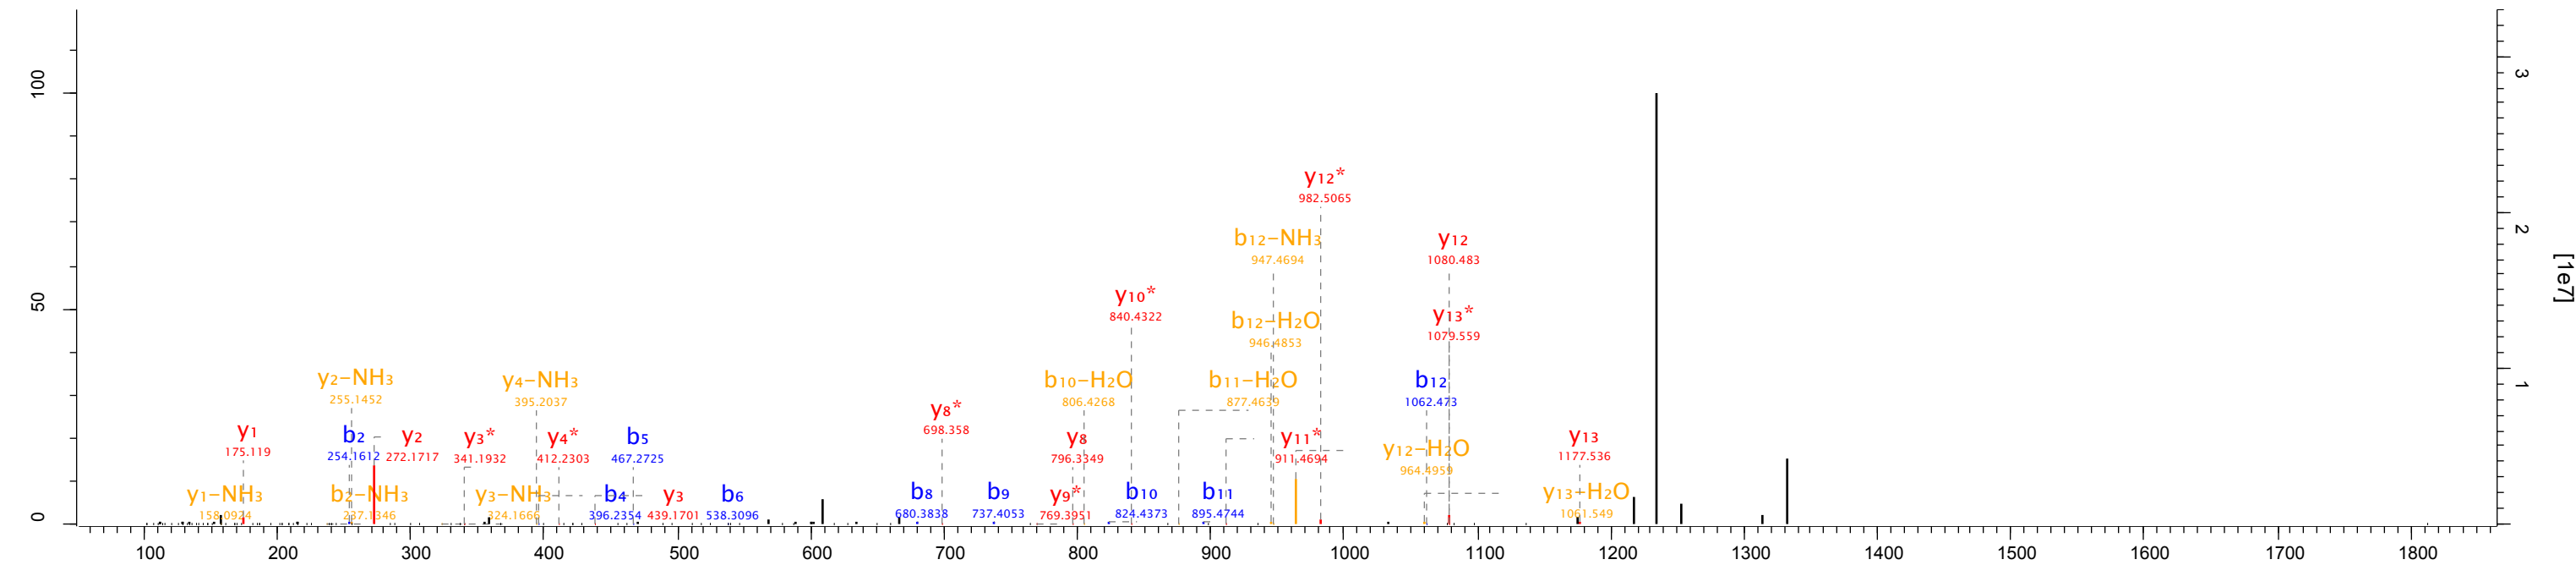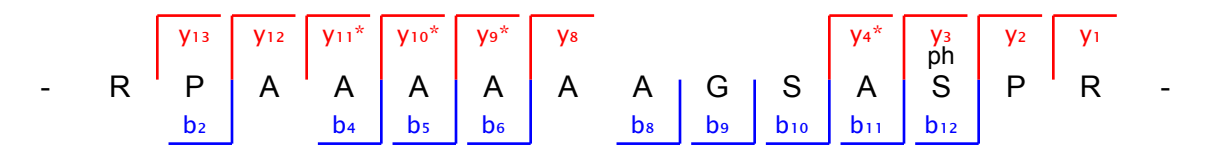

Raw file: 20150812\_A375SR\_Phospho\_BR1\_04  
 Scan: 3362 Method: FTMS; HCD Score: 117.42 m/z: 599.23 Gene names: CT45A3;CT45A1;CT45A2

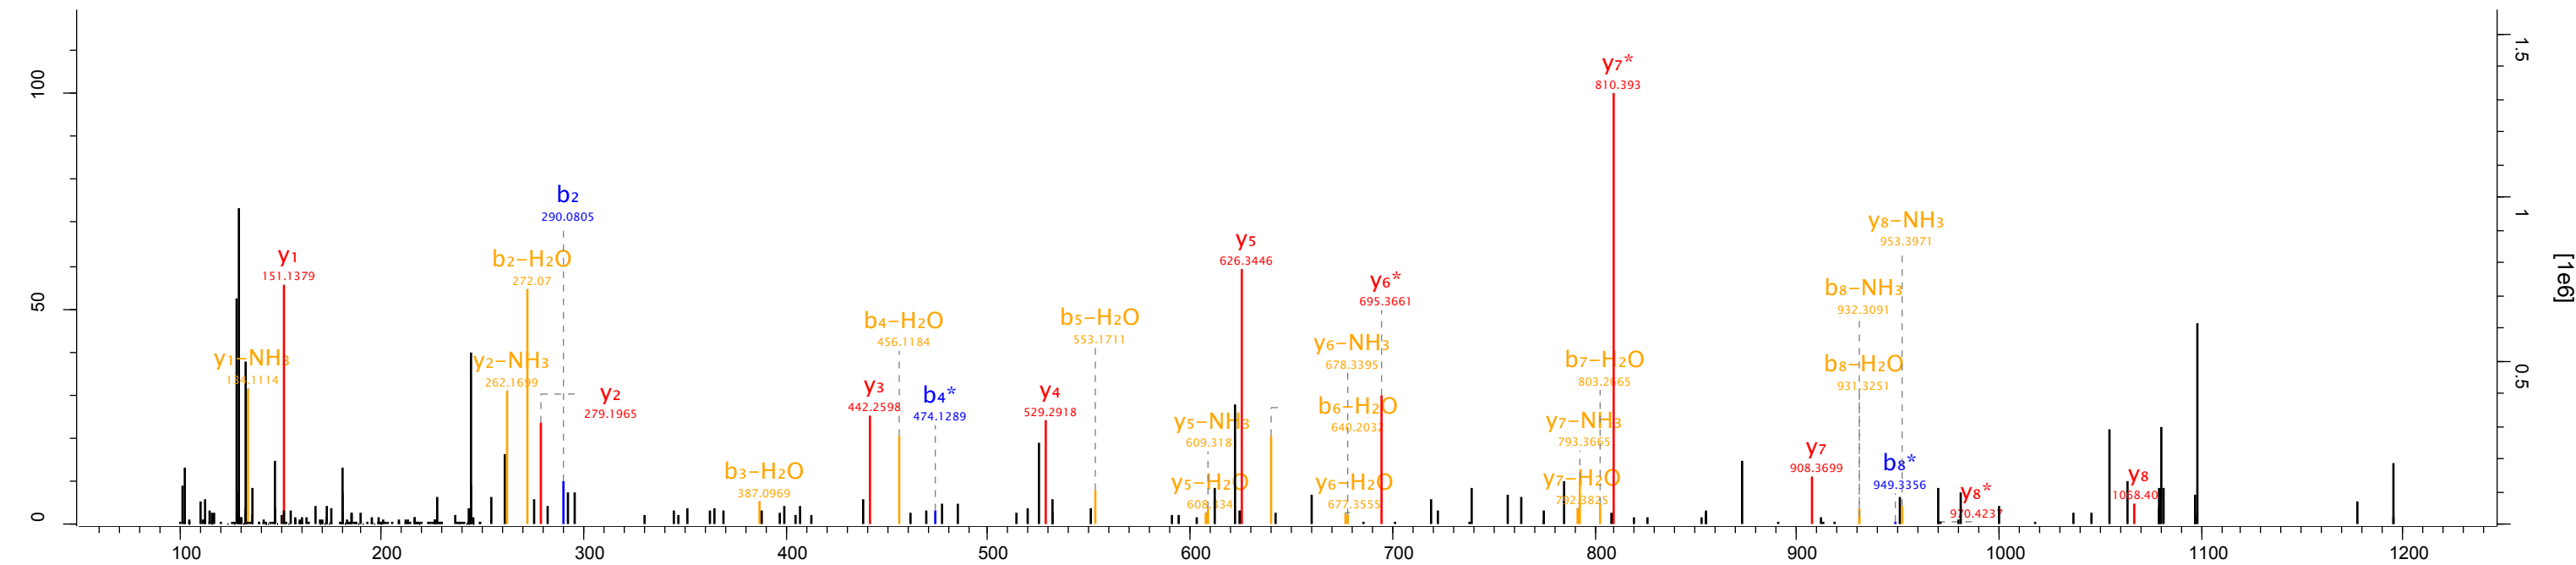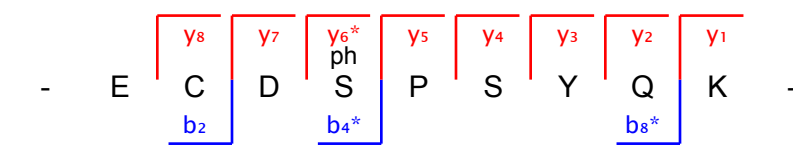

Raw file 20150812\_A375SR\_Phospho\_BR1\_04 Scan 3432 Method FTMS; HCD Score 259.22 m/z 728.32 Gene names ATF7IP

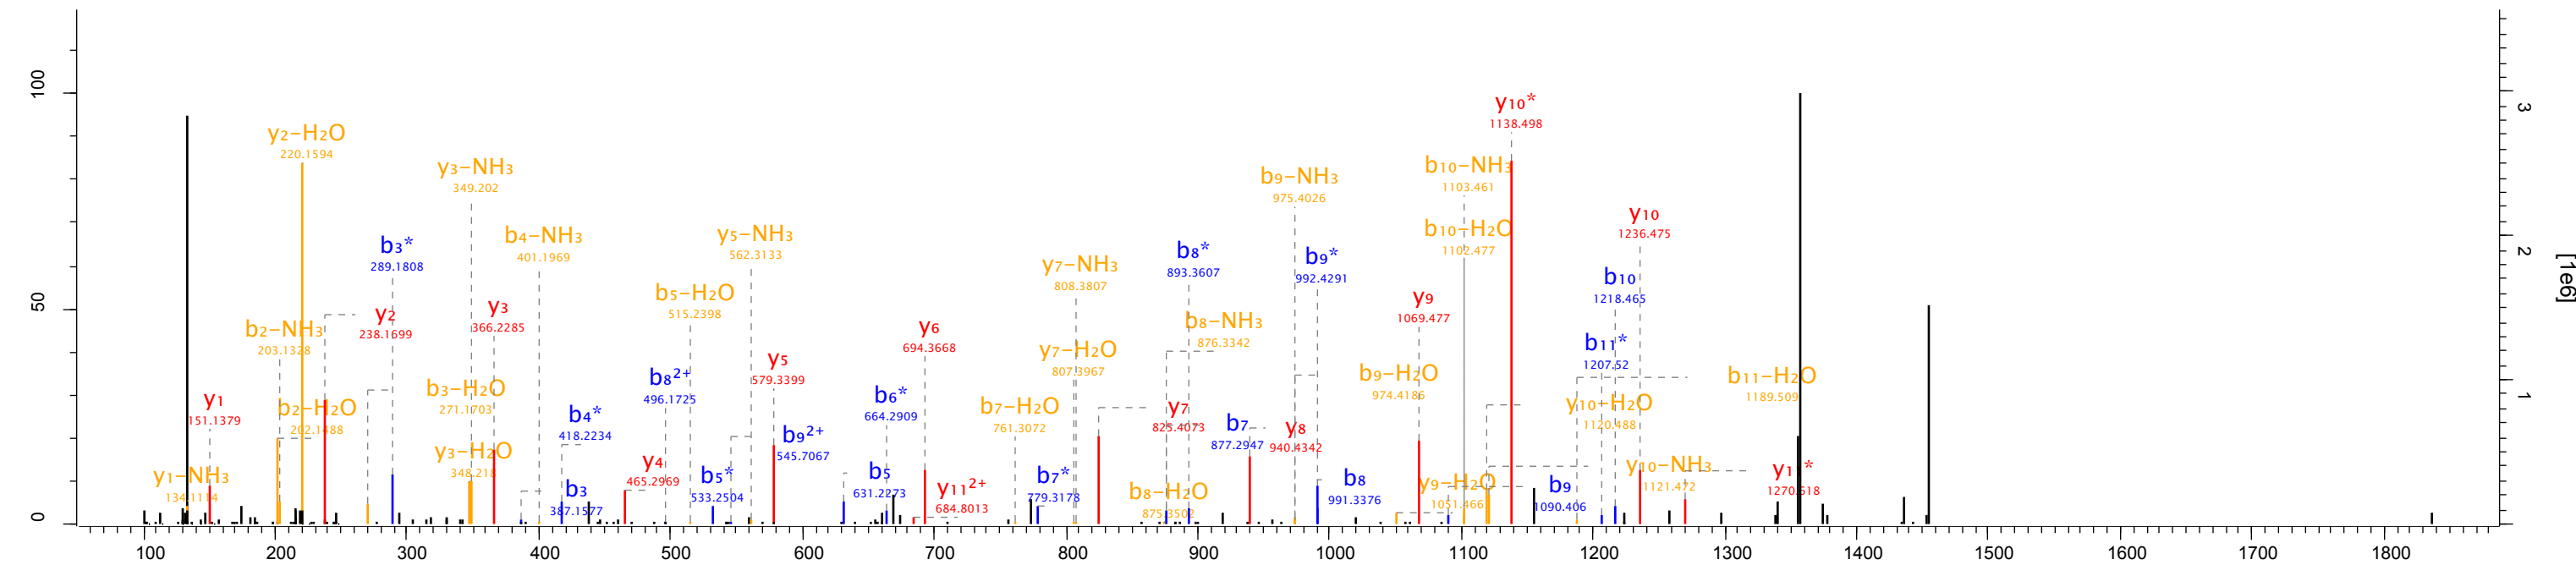

- S K y11\* y10  
ph y9 y8 y7 y6 y5 y4 y3 y2 y1 -  
b3 b4\* b5 b6\* b7 b8 b9 b10 b11\*

Raw file: 20150812\_A375SR\_Phospho\_BR1\_04  
 Scan: 3692 Method: FTMS; HCD Score: 141.79 m/z: 854.38 Gene names: ACIN1

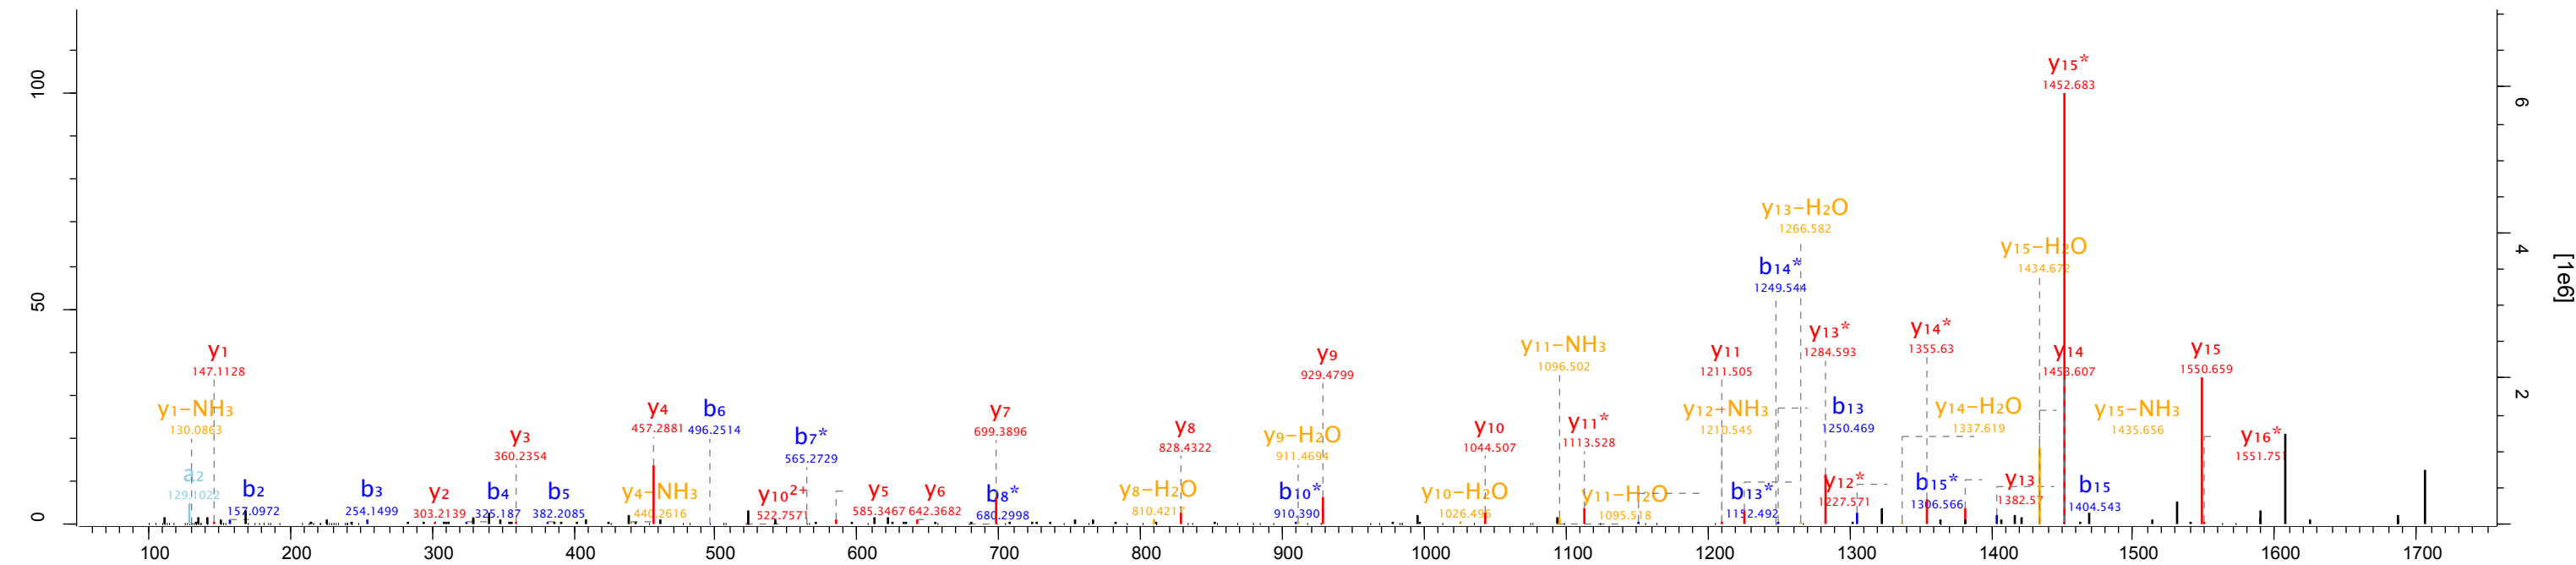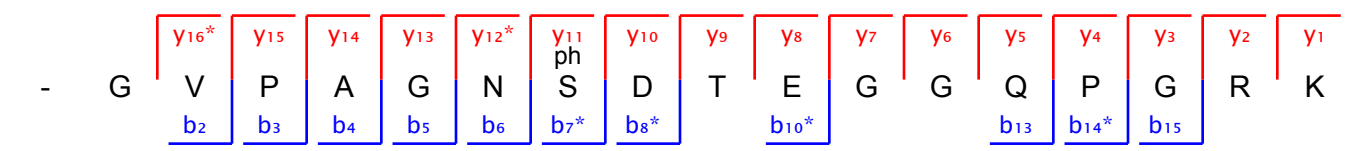

Raw file: 20150812\_A375SR\_Phospho\_BR1\_04  
 Scan: 3742 Method: FTMS; HCD Score: 173.45 m/z: 753.34 Gene names: DPYSL2

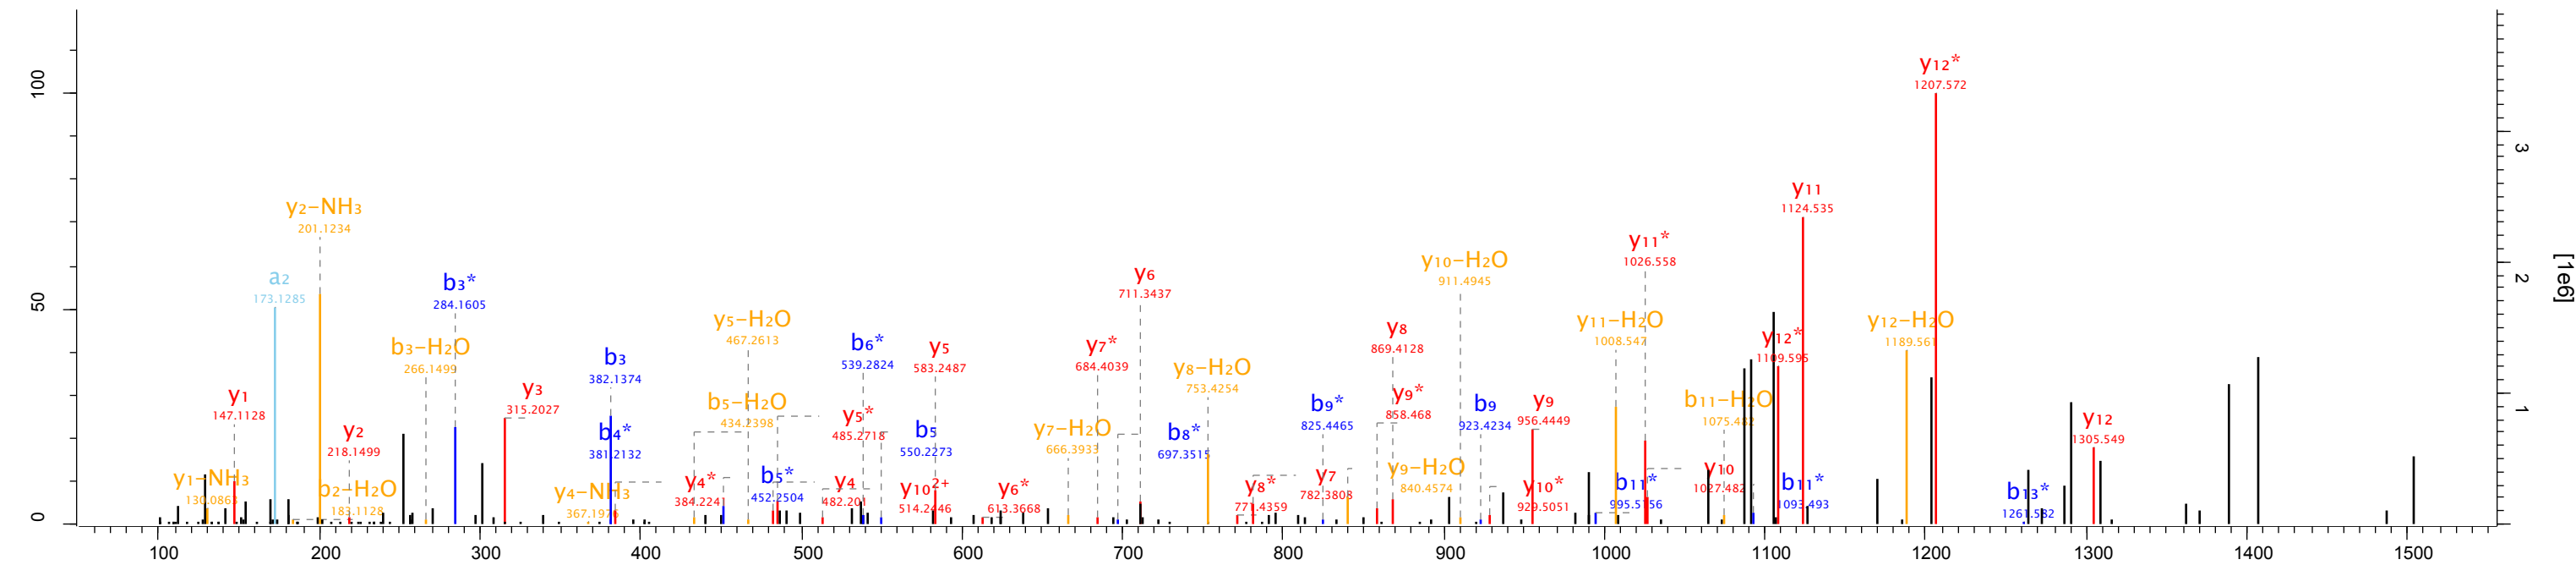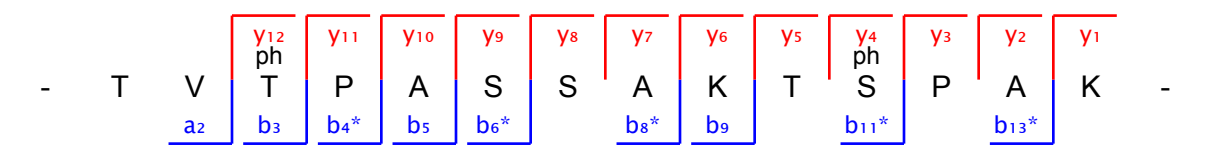



Raw file: 20150812\_A375SR\_Phospho\_BR1\_04  
 Scan: 4002 Method: FTMS; HCD Score: 61.96 m/z: 731.58 Gene names: ZNF609

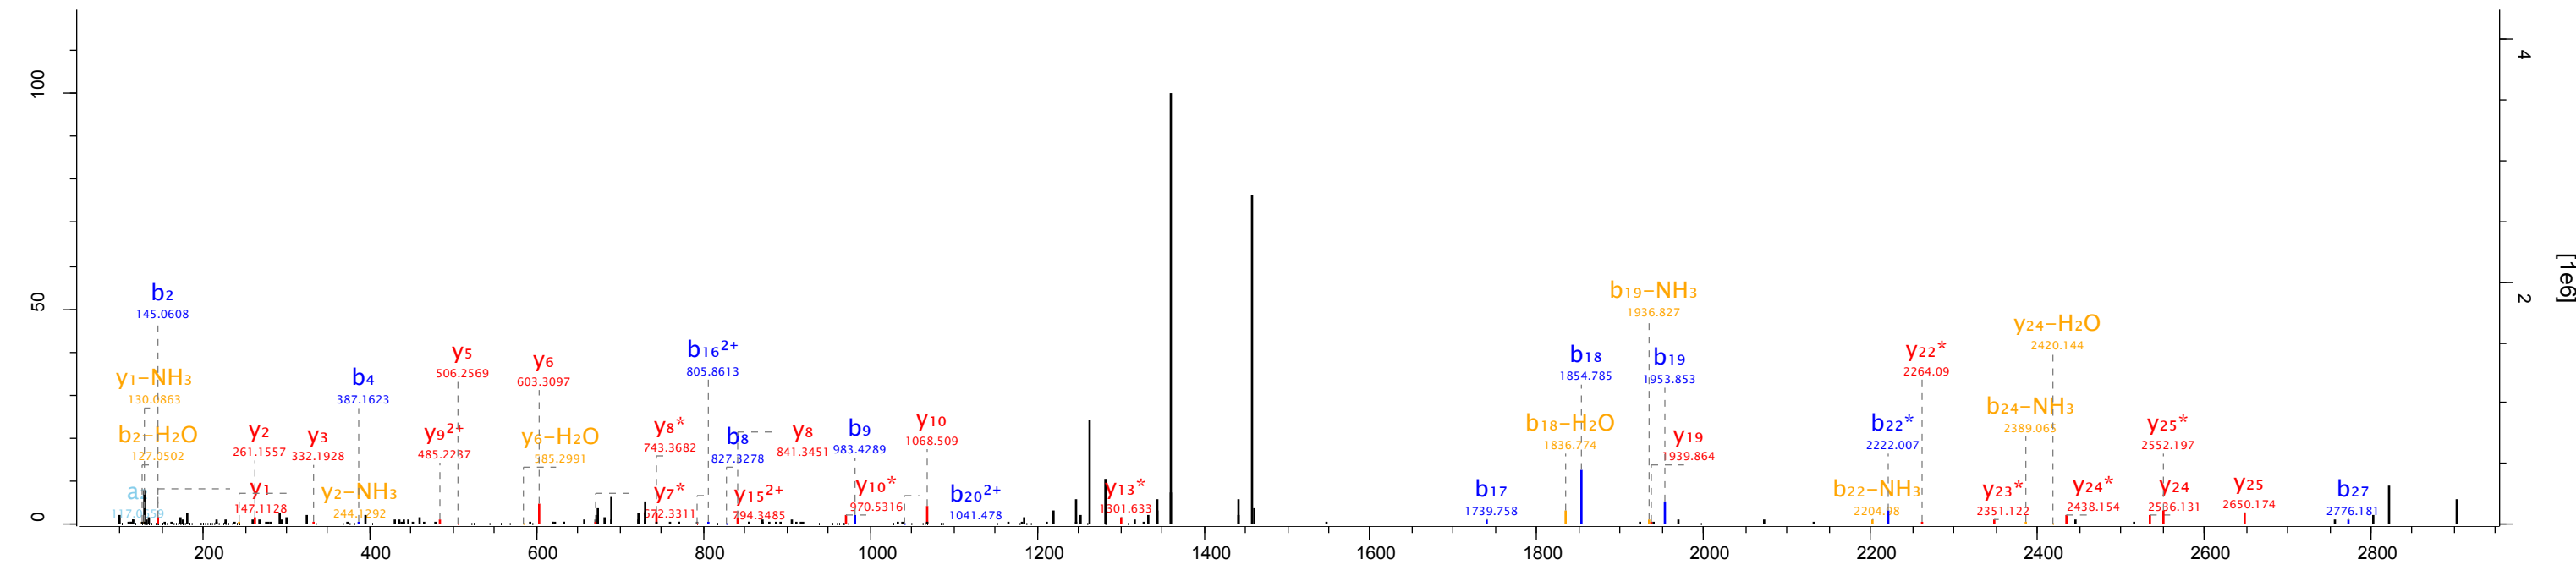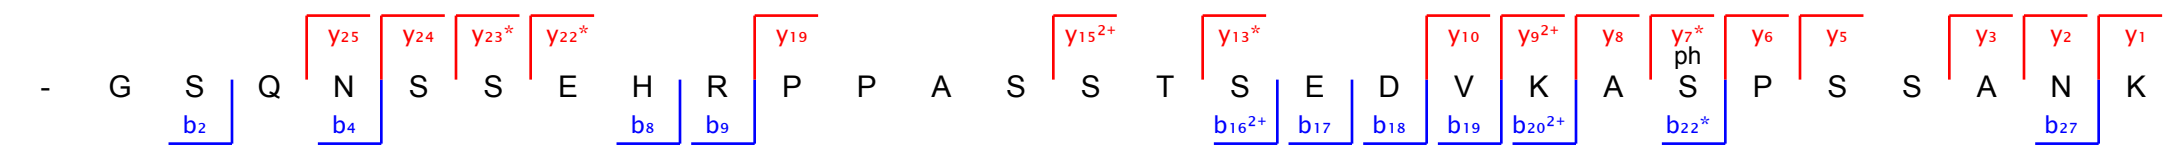

Raw file 20150812\_A375SR\_Phospho\_BR1\_04 Scan 4082 Method FTMS; HCD Score 50.18 m/z 587.63 Gene names PRRC2B

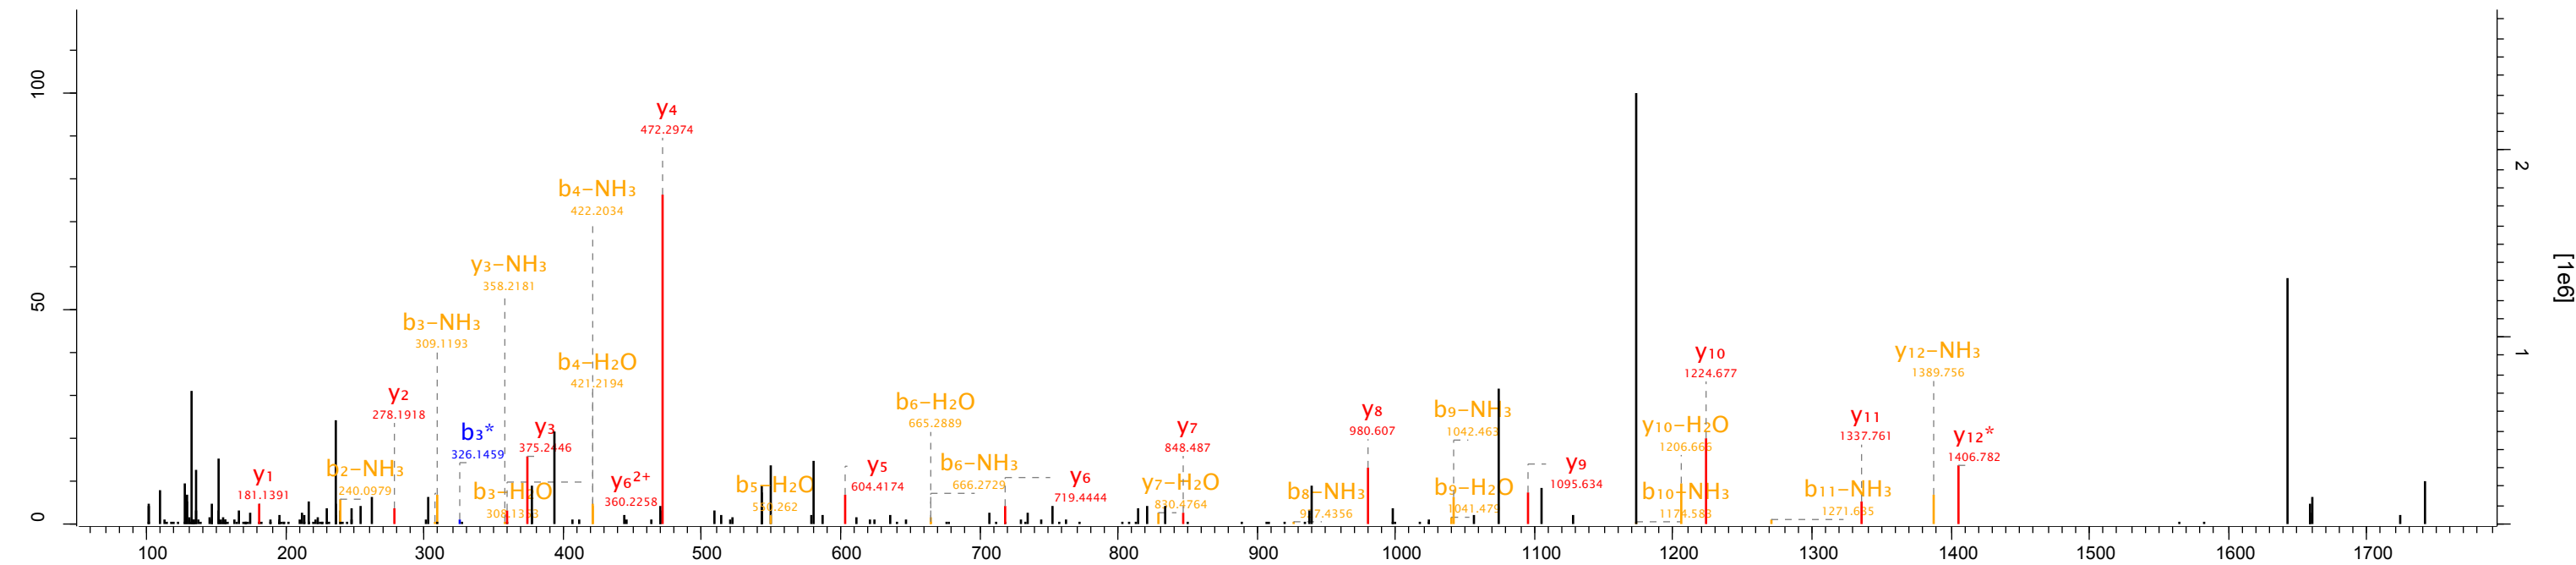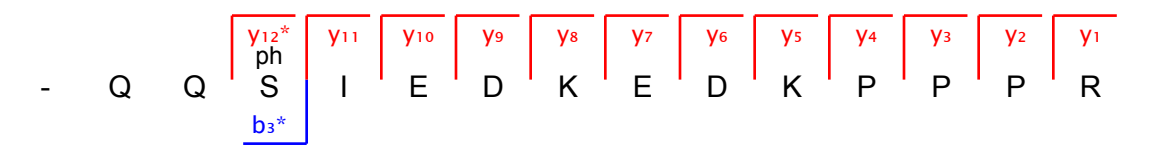

Raw file: 20150812\_A375SR\_Phospho\_BR1\_04  
 Scan: 4162 Method: FTMS; HCD Score: 243.17 m/z: 580.6 Gene names: TCEAL1

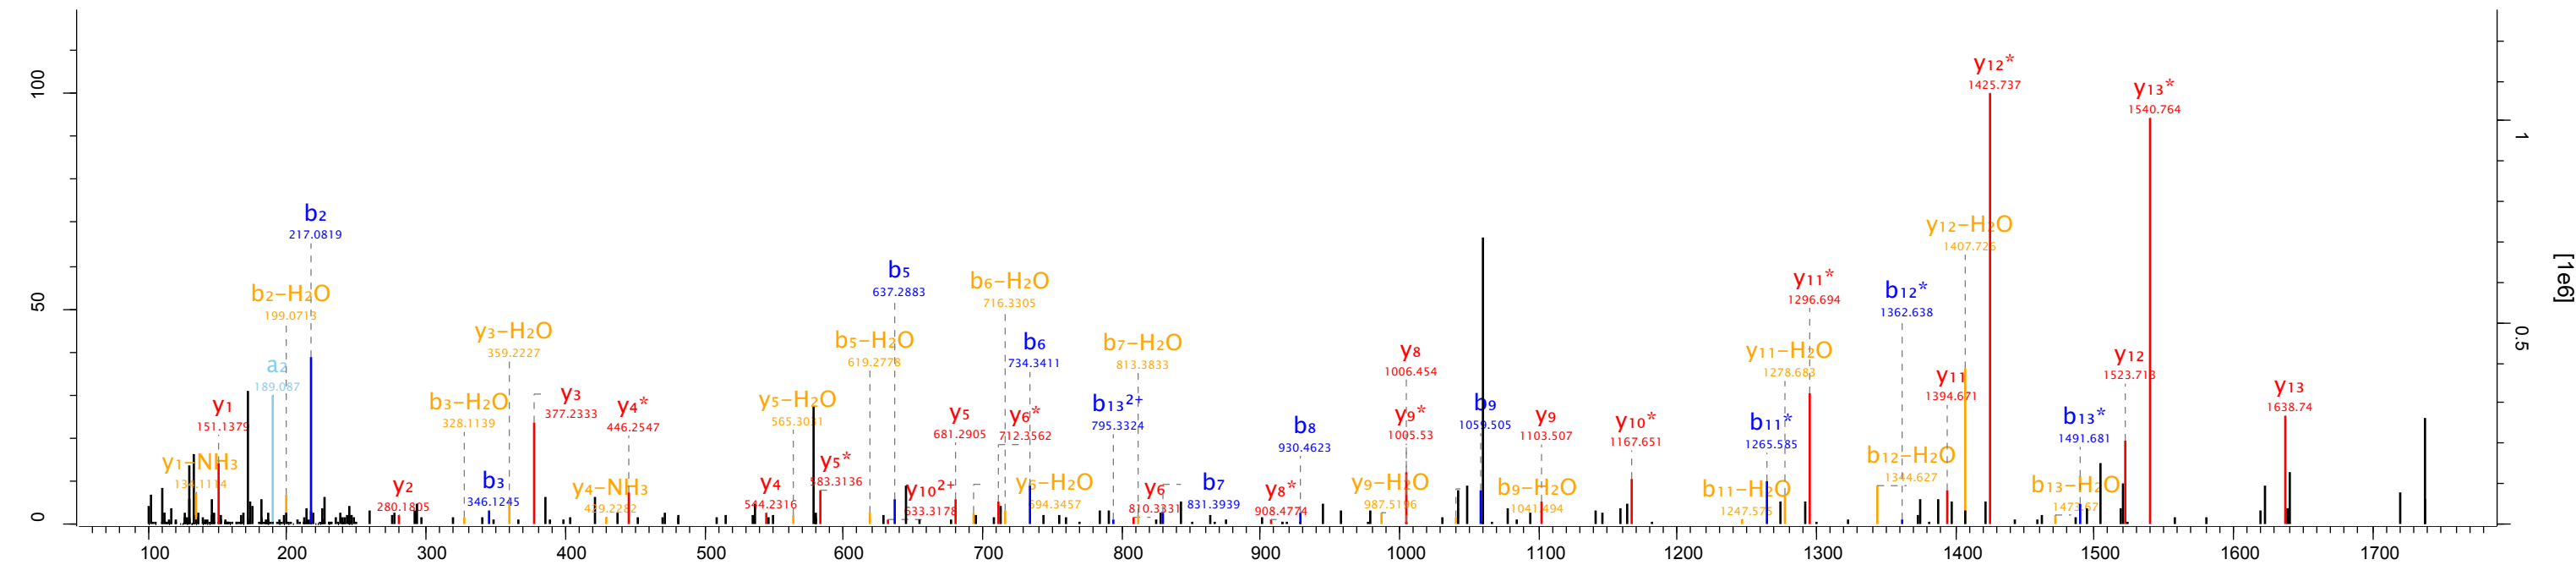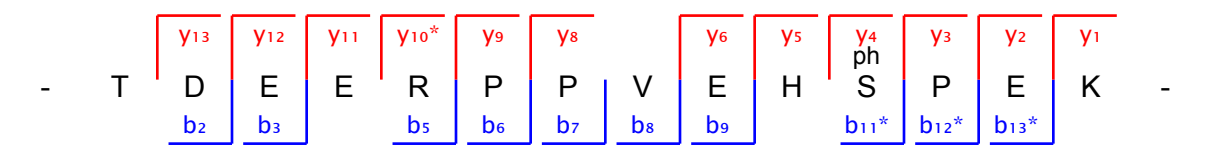

Raw file: 20150812\_A375SR\_Phospho\_BR1\_04  
 Scan: 4302 Method: FTMS; HCD Score: 189.47 m/z: 770.8 Gene names: EIF3C;EIF3CL

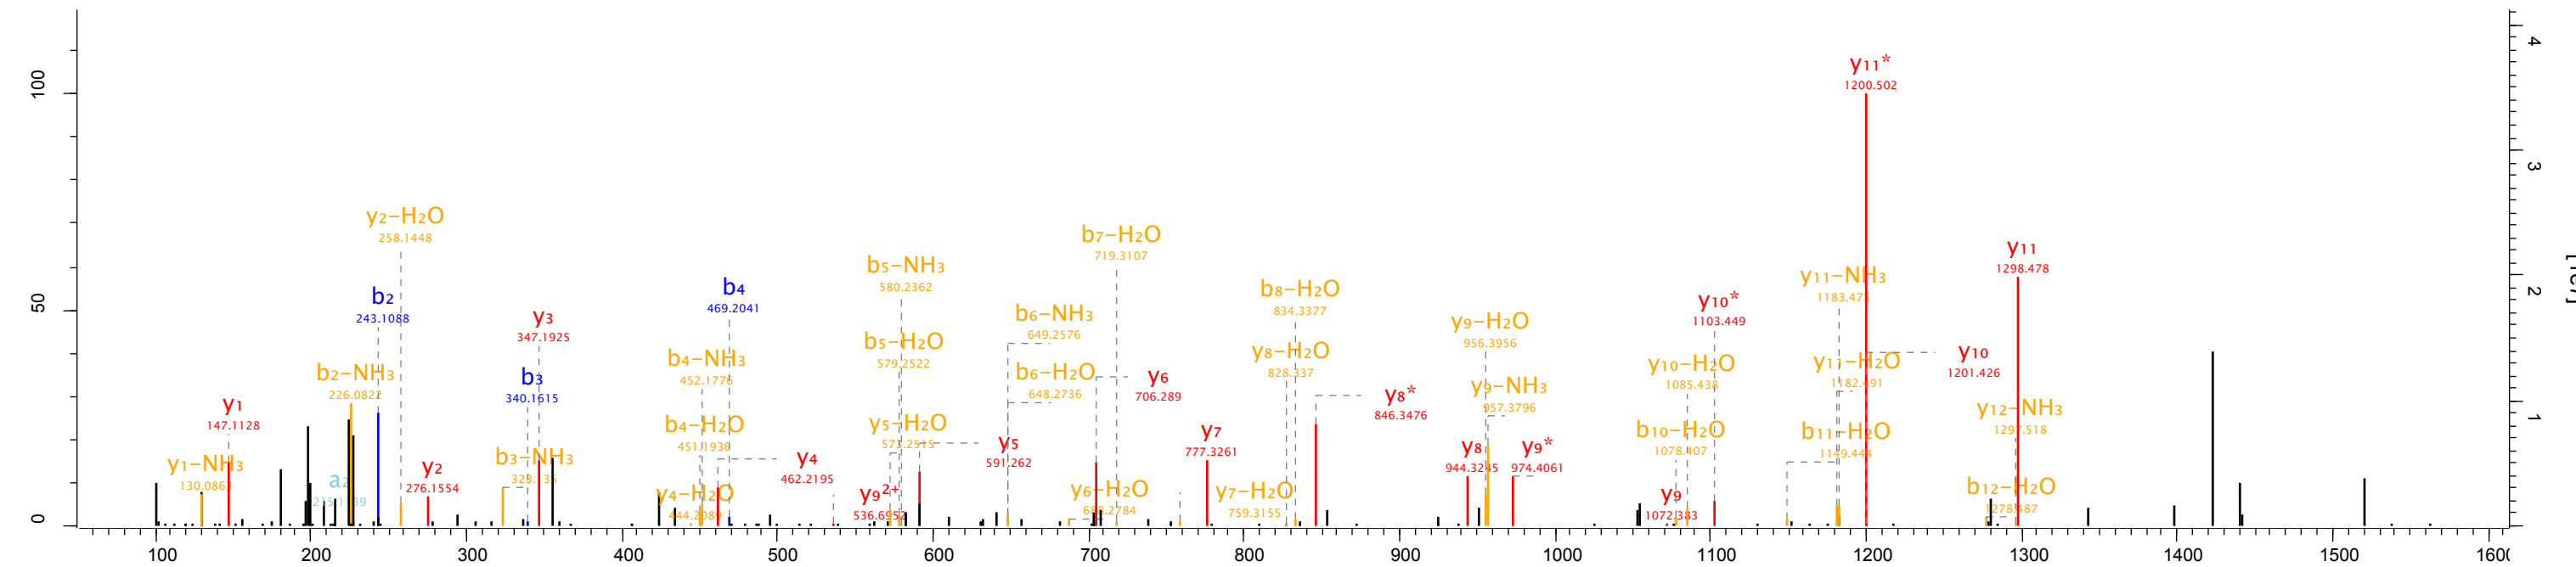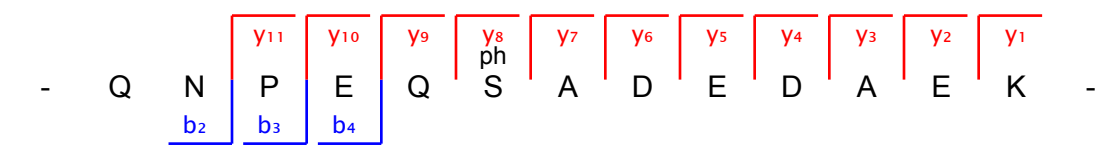

Raw file: 20150812\_A375SR\_Phospho\_BR1\_04  
 Scan: 4652 Method: FTMS; HCD Score: 140.83 m/z: 701.85 Gene names: RAB13

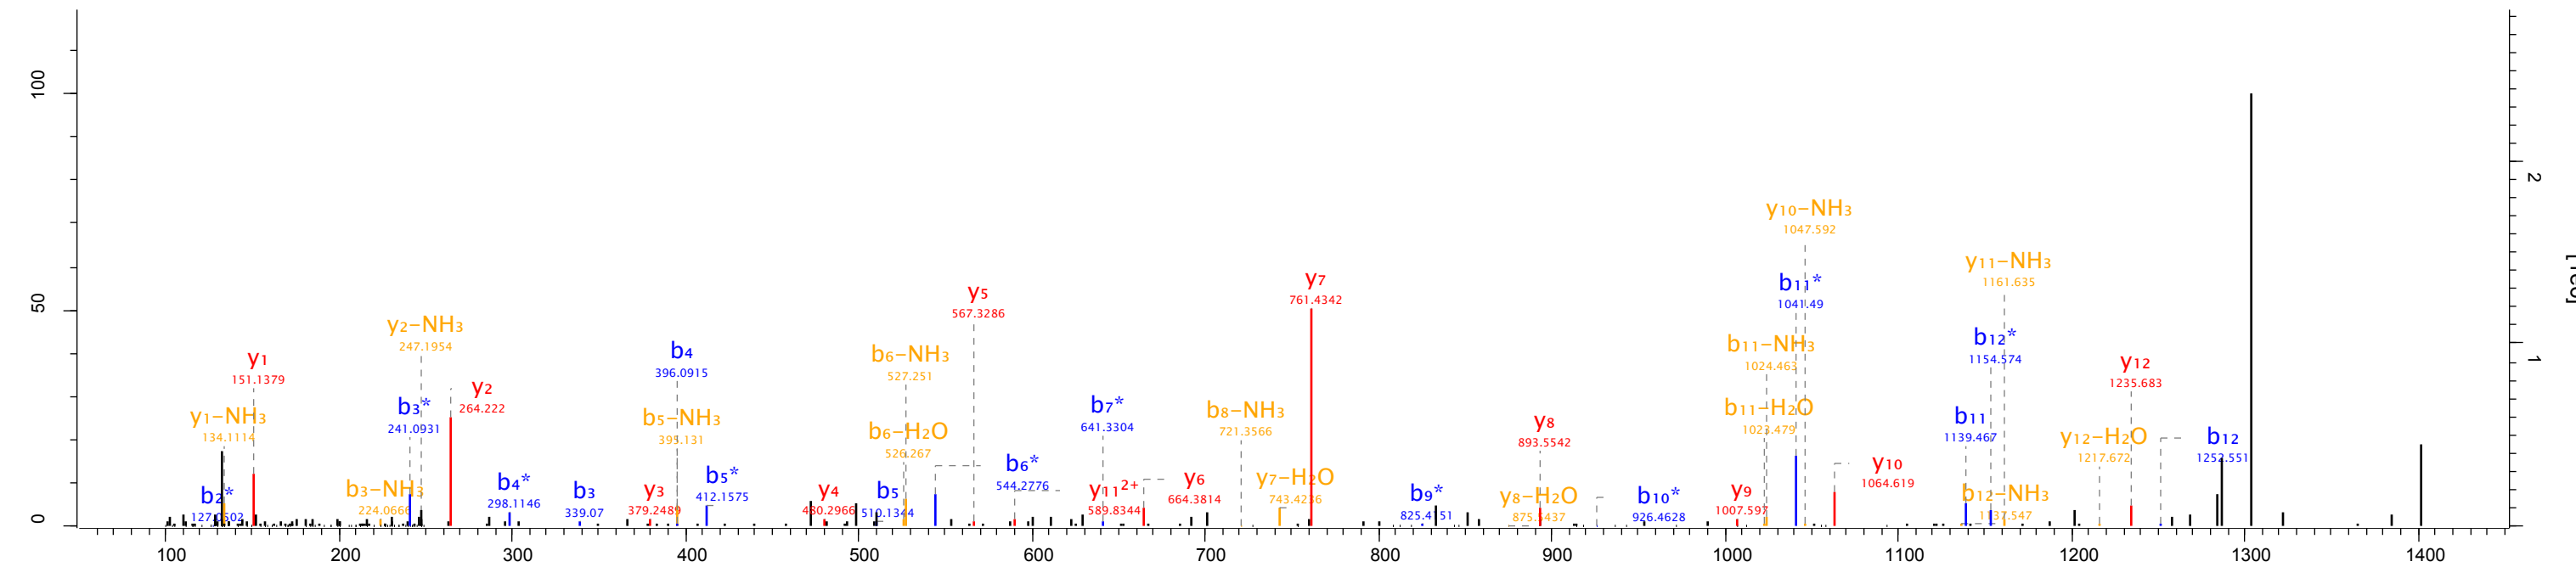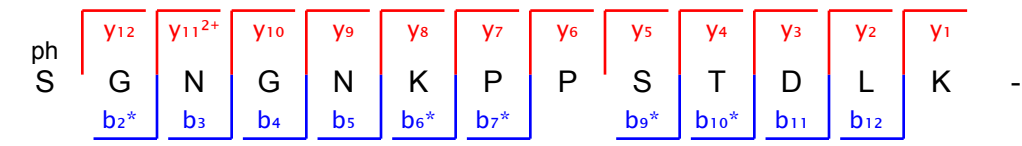

Raw file: 20150812\_A375SR\_Phospho\_BR1\_04  
 Scan: 5042 Method: FTMS; HCD Score: 334.44 m/z: 750.33 Gene names: TNKS1BP1

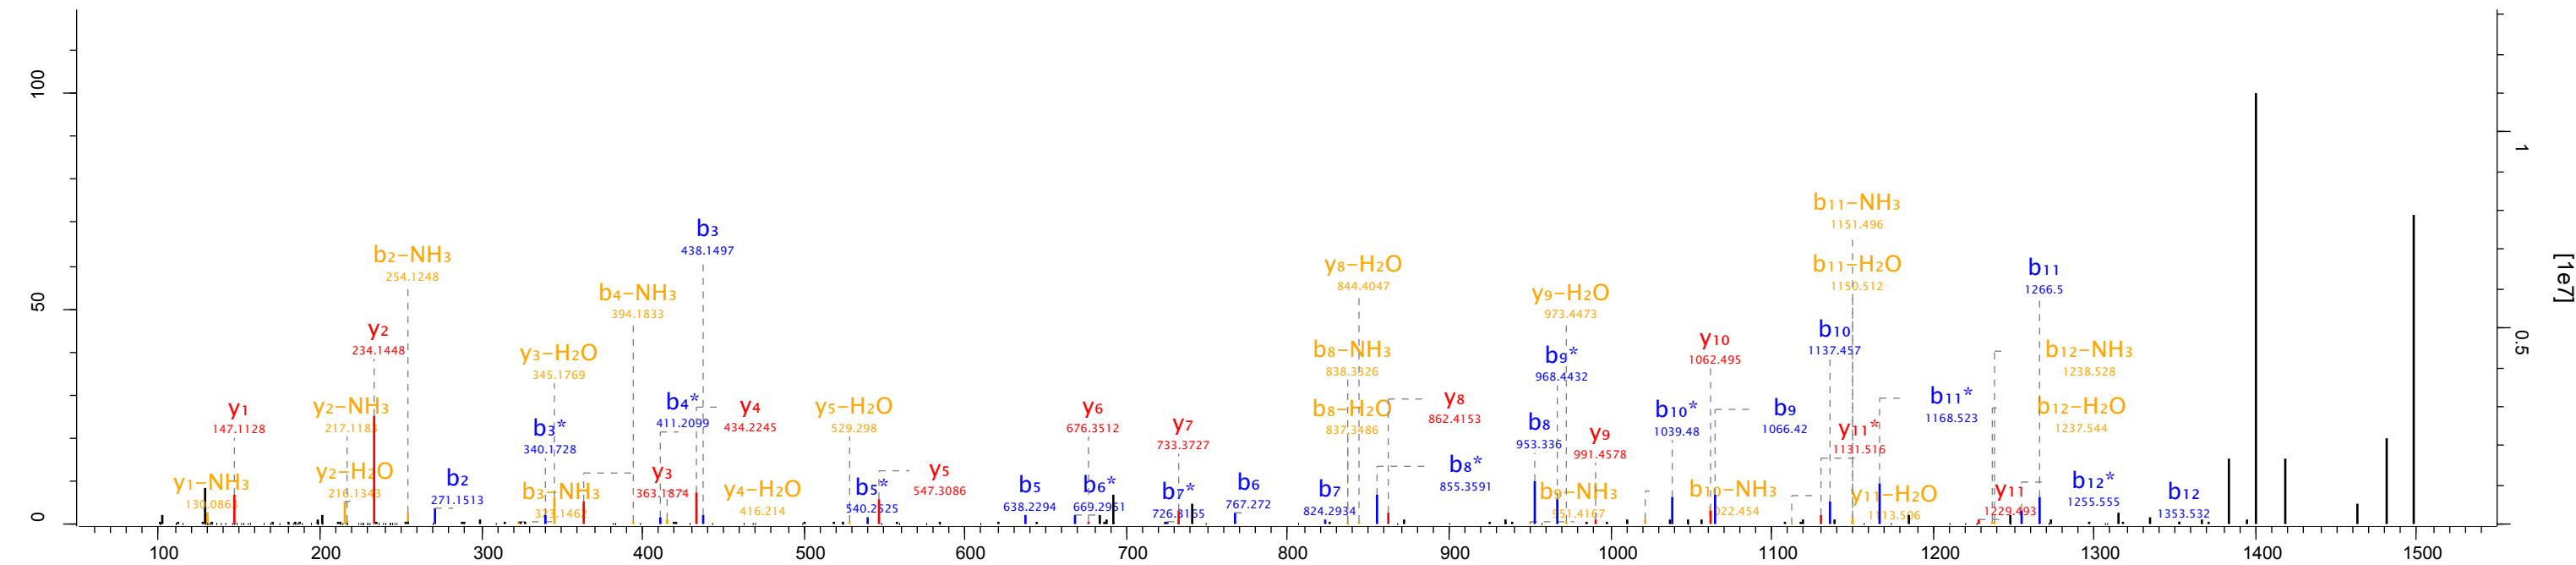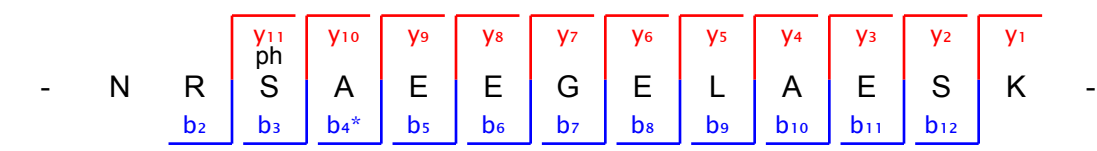

Raw file: 20150812\_A375SR\_Phospho\_BR1\_04  
 Scan: 5362 Method: FTMS; HCD Score: 192.11 m/z: 890.85 Gene names: HNRNPA1

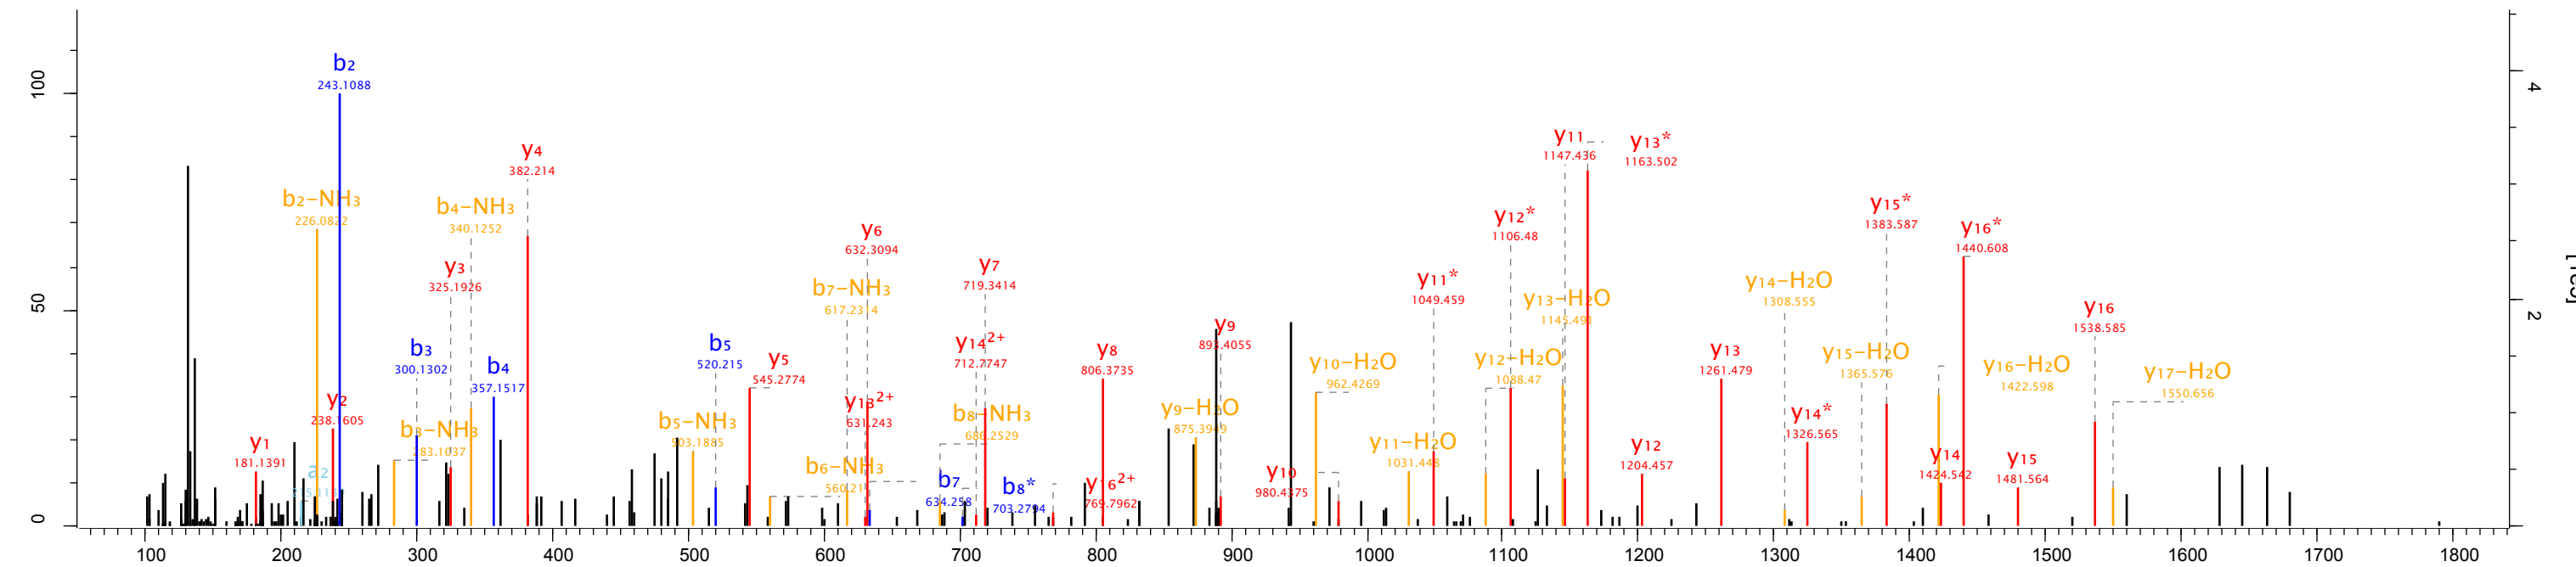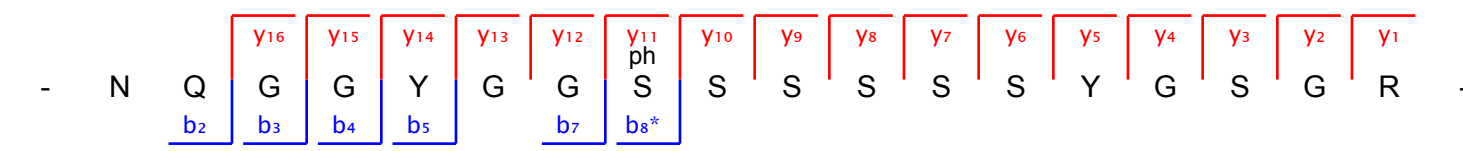

Raw file: 20150812\_A375SR\_Phospho\_BR1\_04  
 Scan: 5372 Method: FTMS; HCD Score: 240.77 m/z: 930.85 Gene names: COPS3

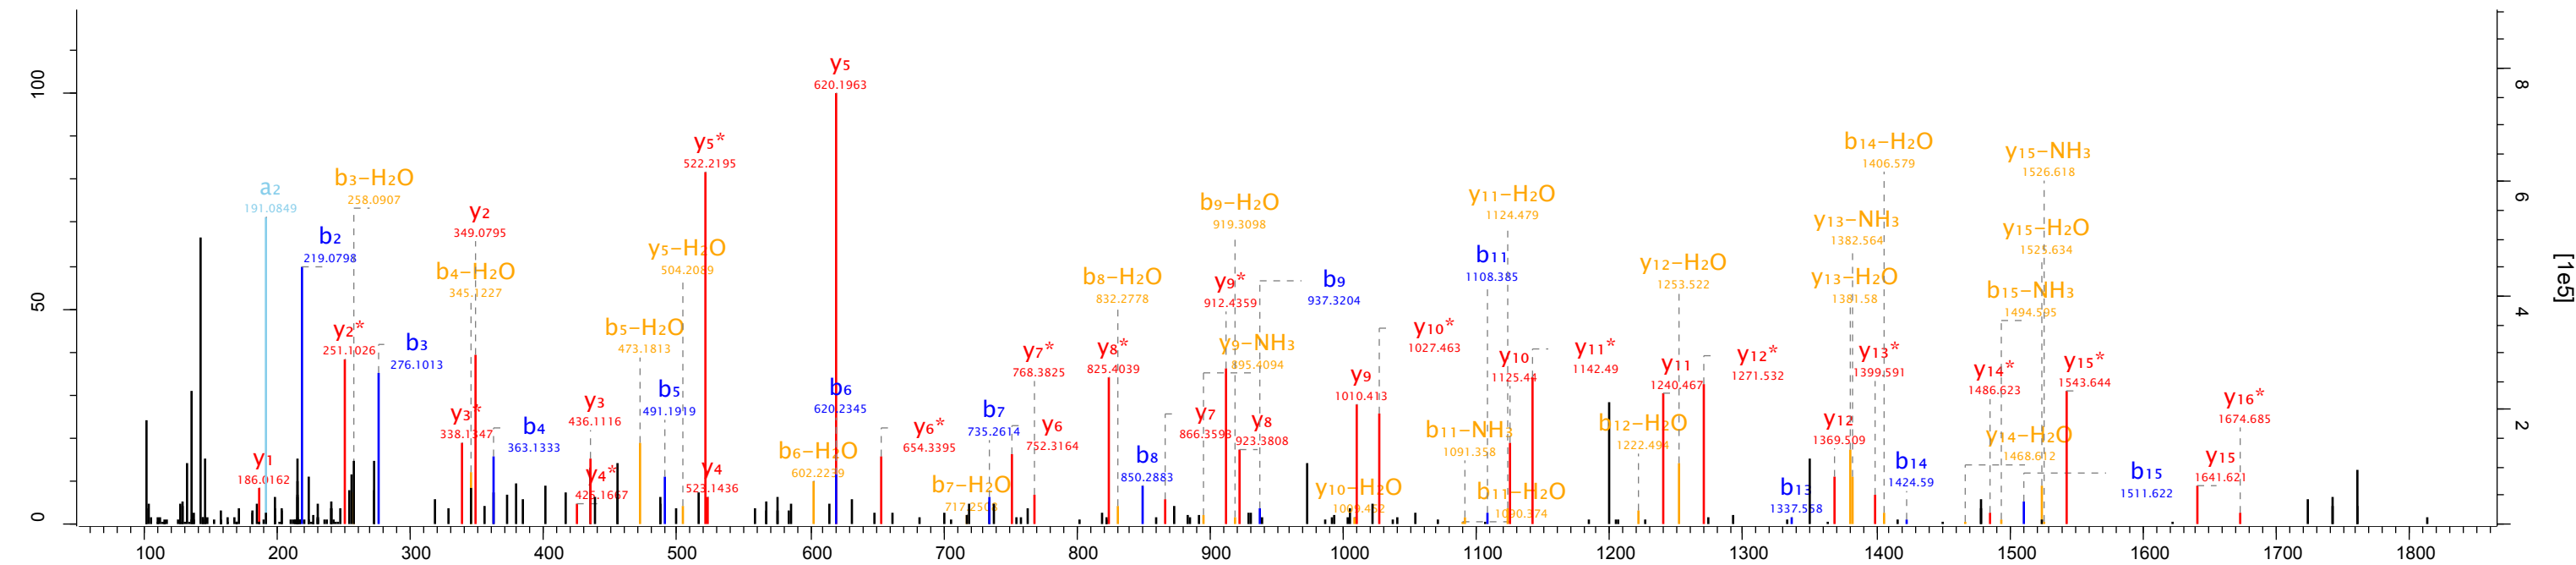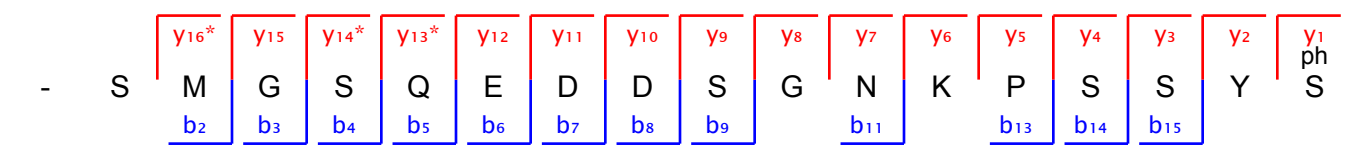



Raw file  
20150812\_A375SR\_Phospho\_BR1\_04

Scan 5692 Method FTMS; HCD Score 125.61 m/z 829.34 Gene names TRIM16

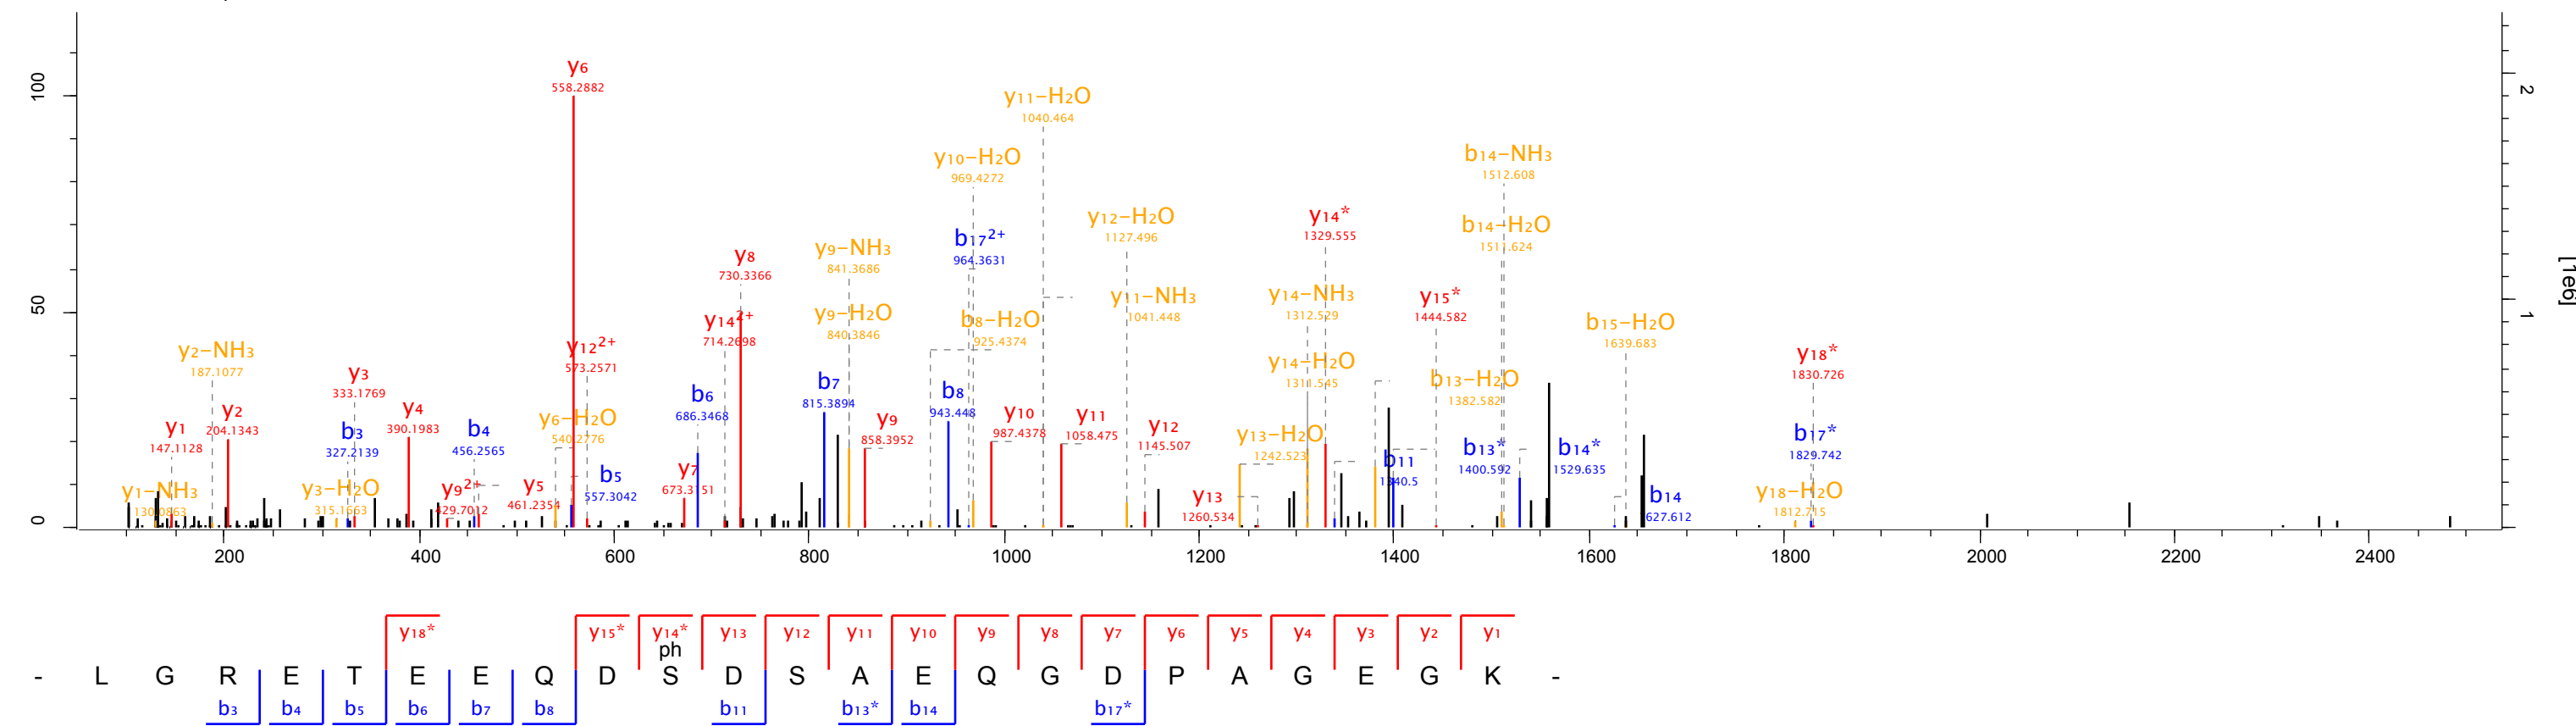

Raw file: 20150812\_A375SR\_Phospho\_BR1\_04  
 Scan: 5842 Method: FTMS; HCD Score: 129.43 m/z: 769.34 Gene names: SHROOM1

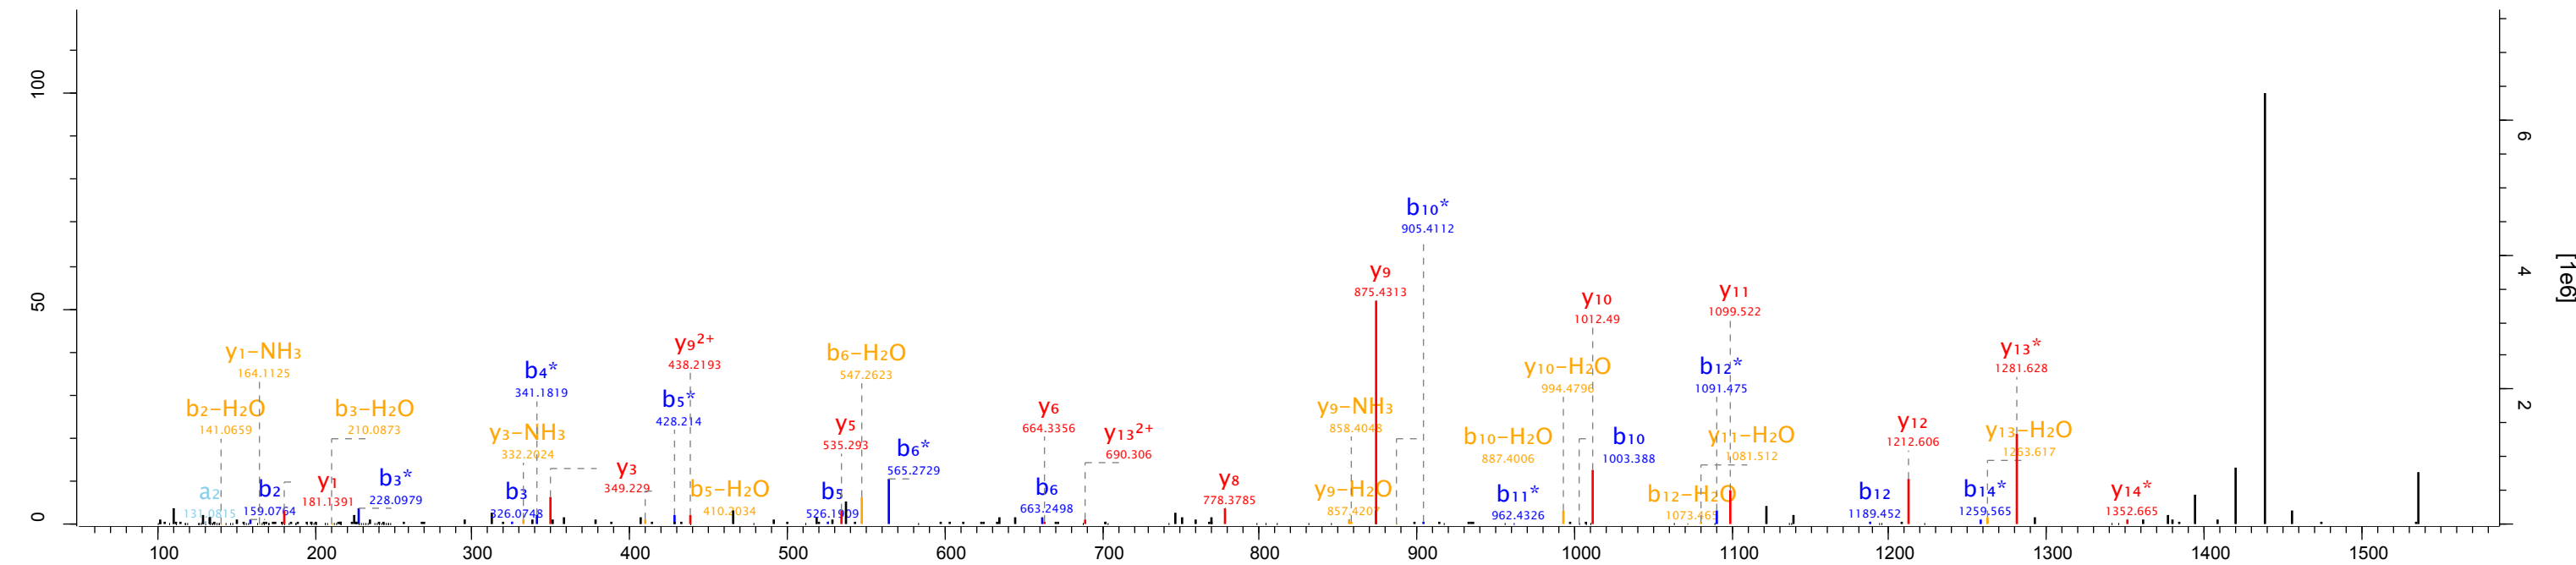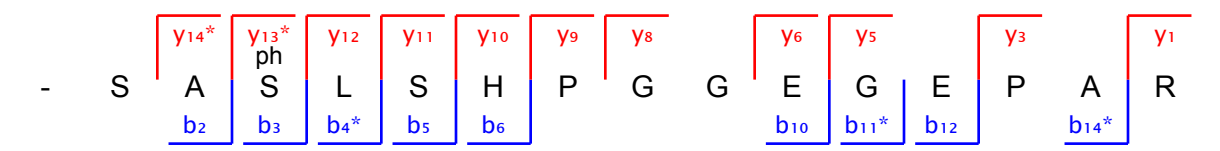

Raw file 20150812\_A375SR\_Phospho\_BR1\_04 Scan 5912 Method FTMS; HCD Score 442.89 m/z 859.4 Gene names MKI67

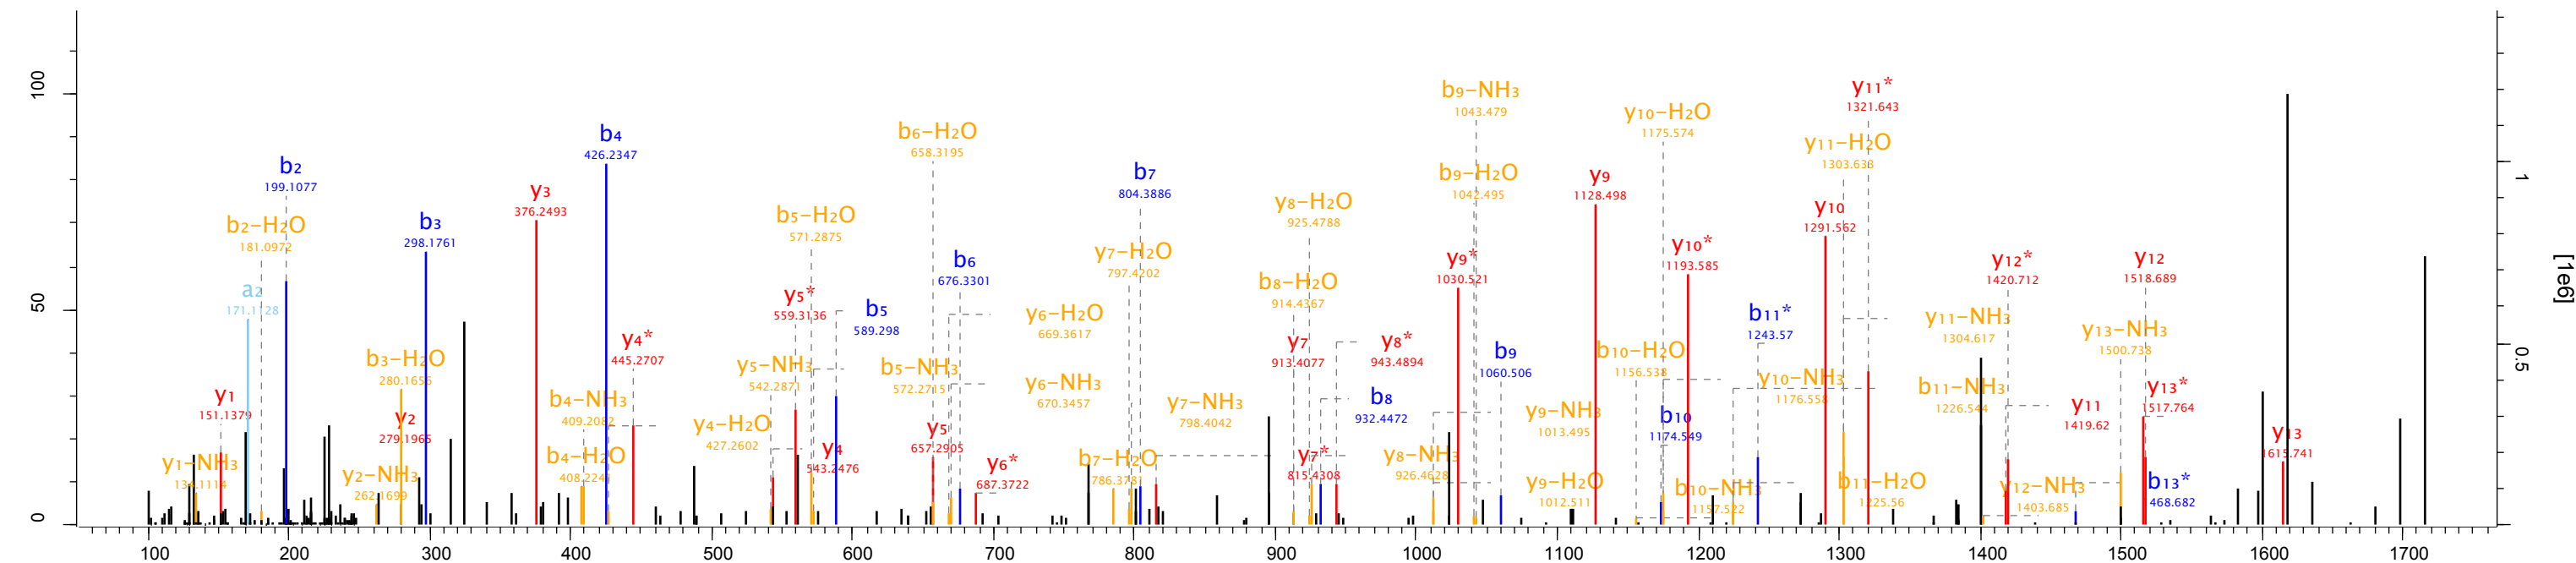

- T y13 y12 y11 y10 y9 y8\* y7 y6\* y5 y4 y3 y2 y1 -

P V Q Y S Q Q Q N S P Q K

b2 b3 b4 b5 b6 b7 b8 b9 b10 b11\* b13\*

Raw file: 20150812\_A375SR\_Phospho\_BR1\_04  
 Scan: 6292 Method: FTMS; HCD Score: 245.75 m/z: 800.85 Gene names: MECOM

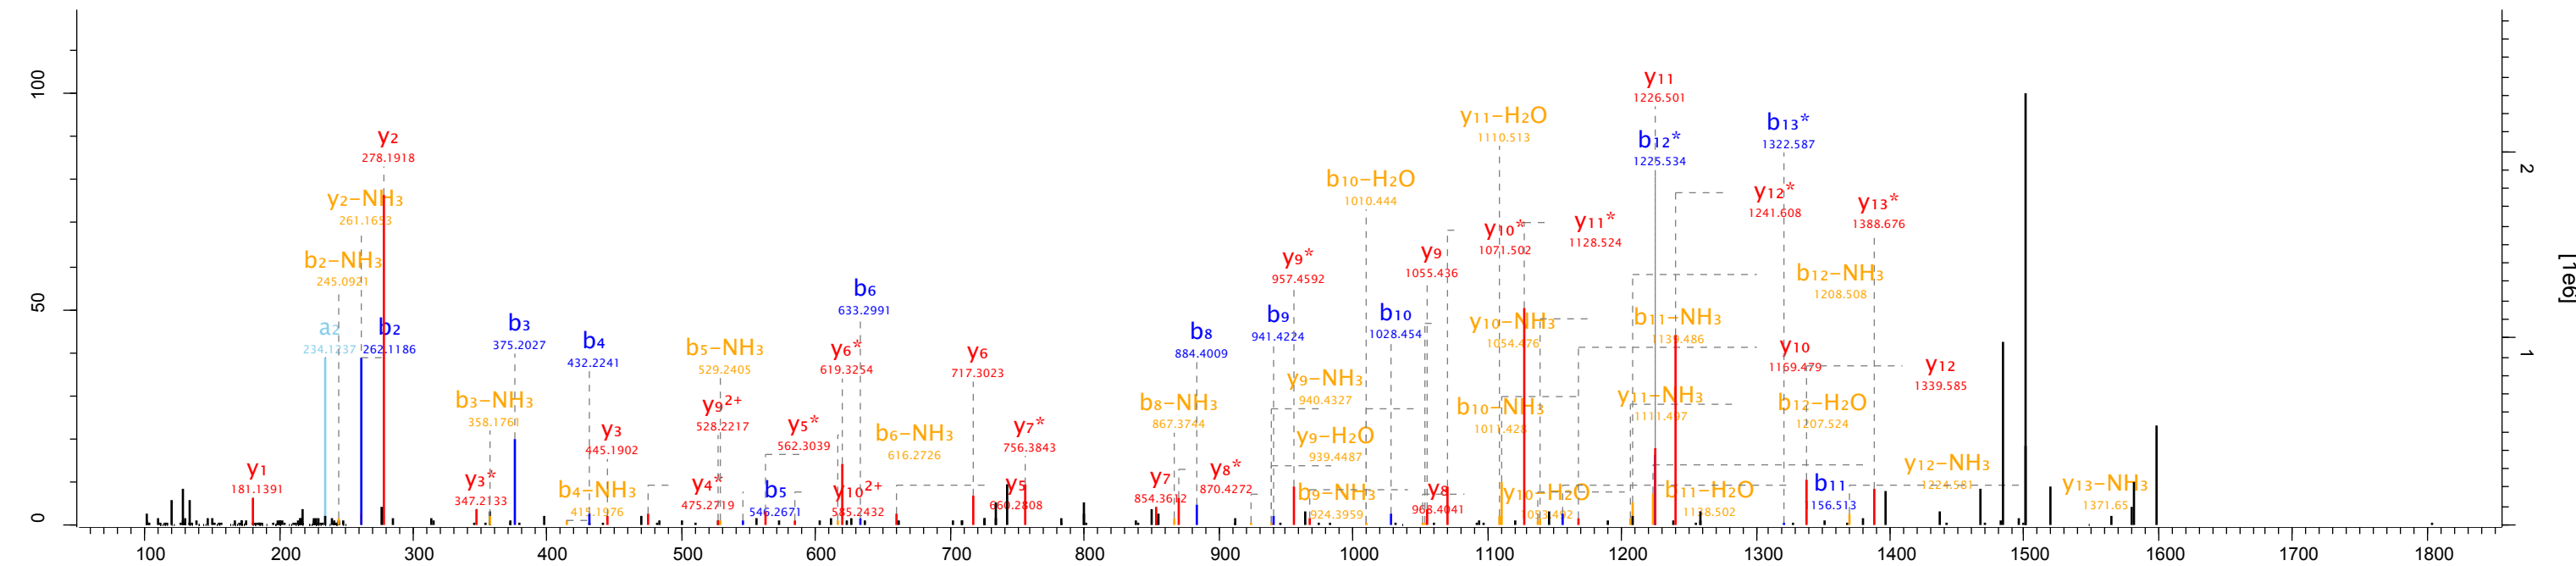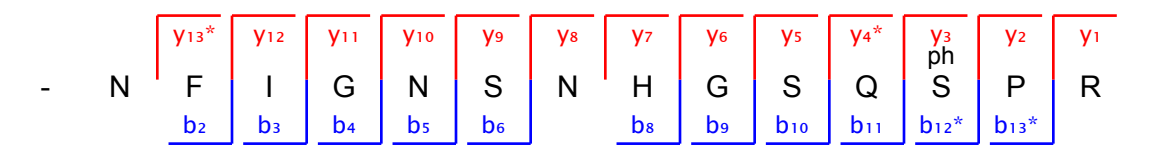

Raw file: 20150812\_A375SR\_Phospho\_BR1\_04  
 Scan: 6602 Method: FTMS; HCD Score: 155.88 m/z: 793.34 Gene names: HNRNPAB

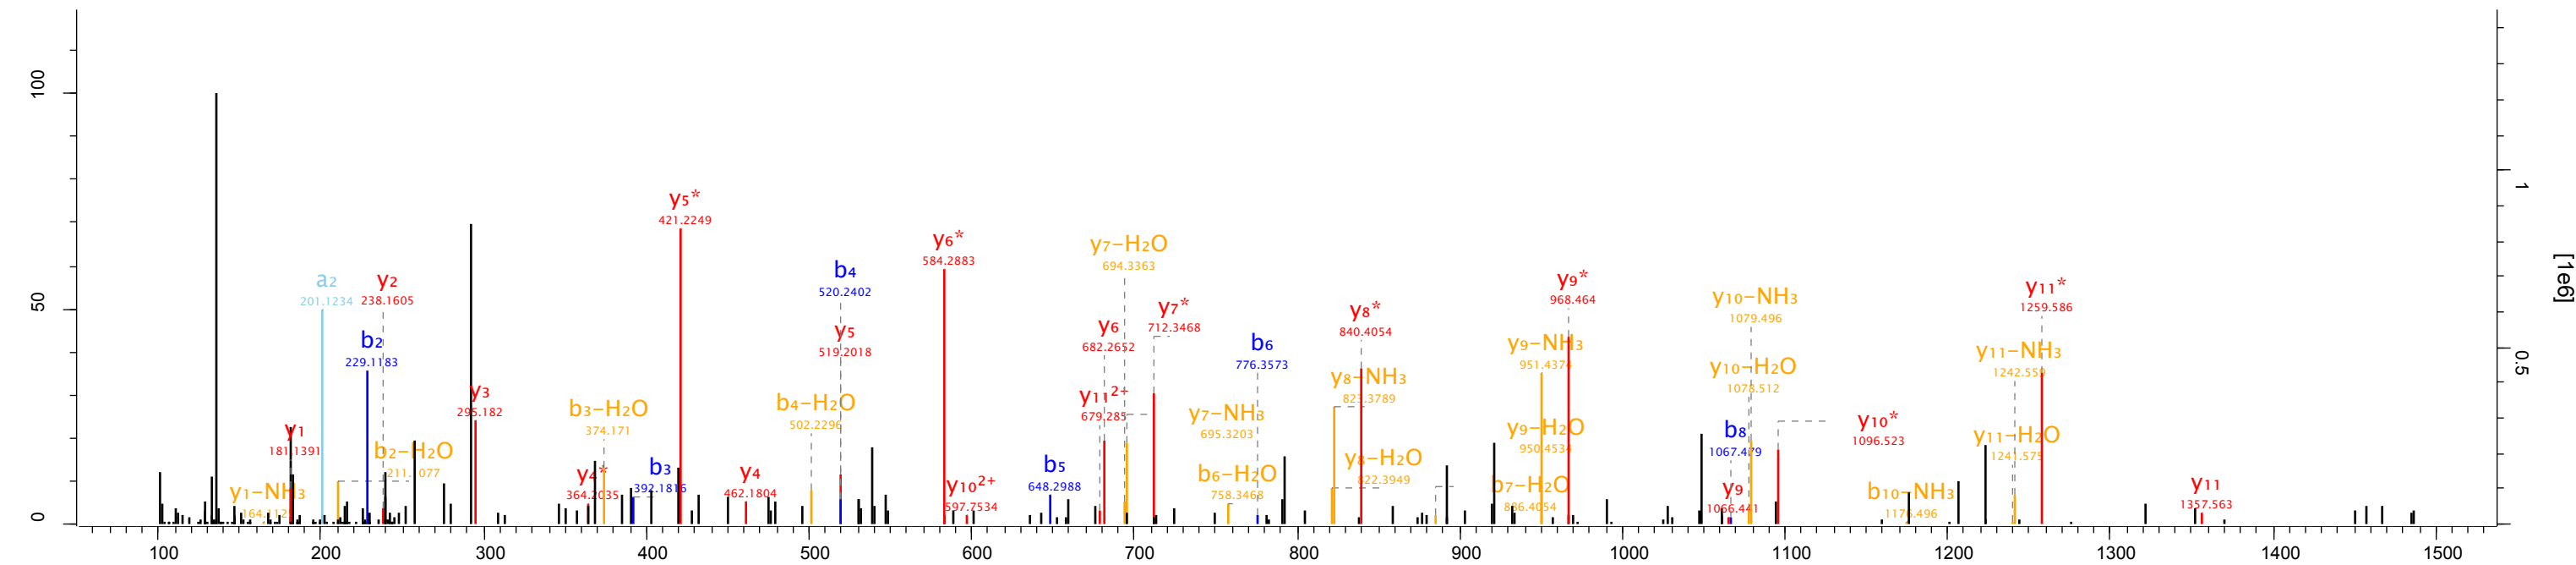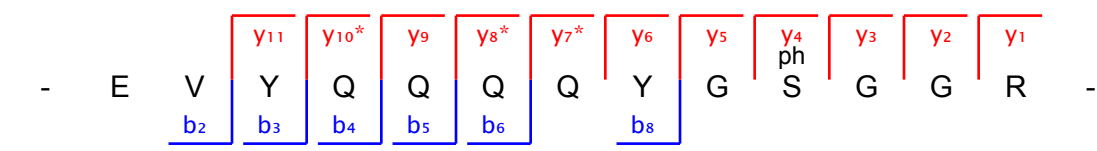

Raw file: 20150812\_A375SR\_Phospho\_BR1\_04  
 Scan: 6732 Method: FTMS; HCD Score: 106.72 m/z: 957.42 Gene names: UTP14A

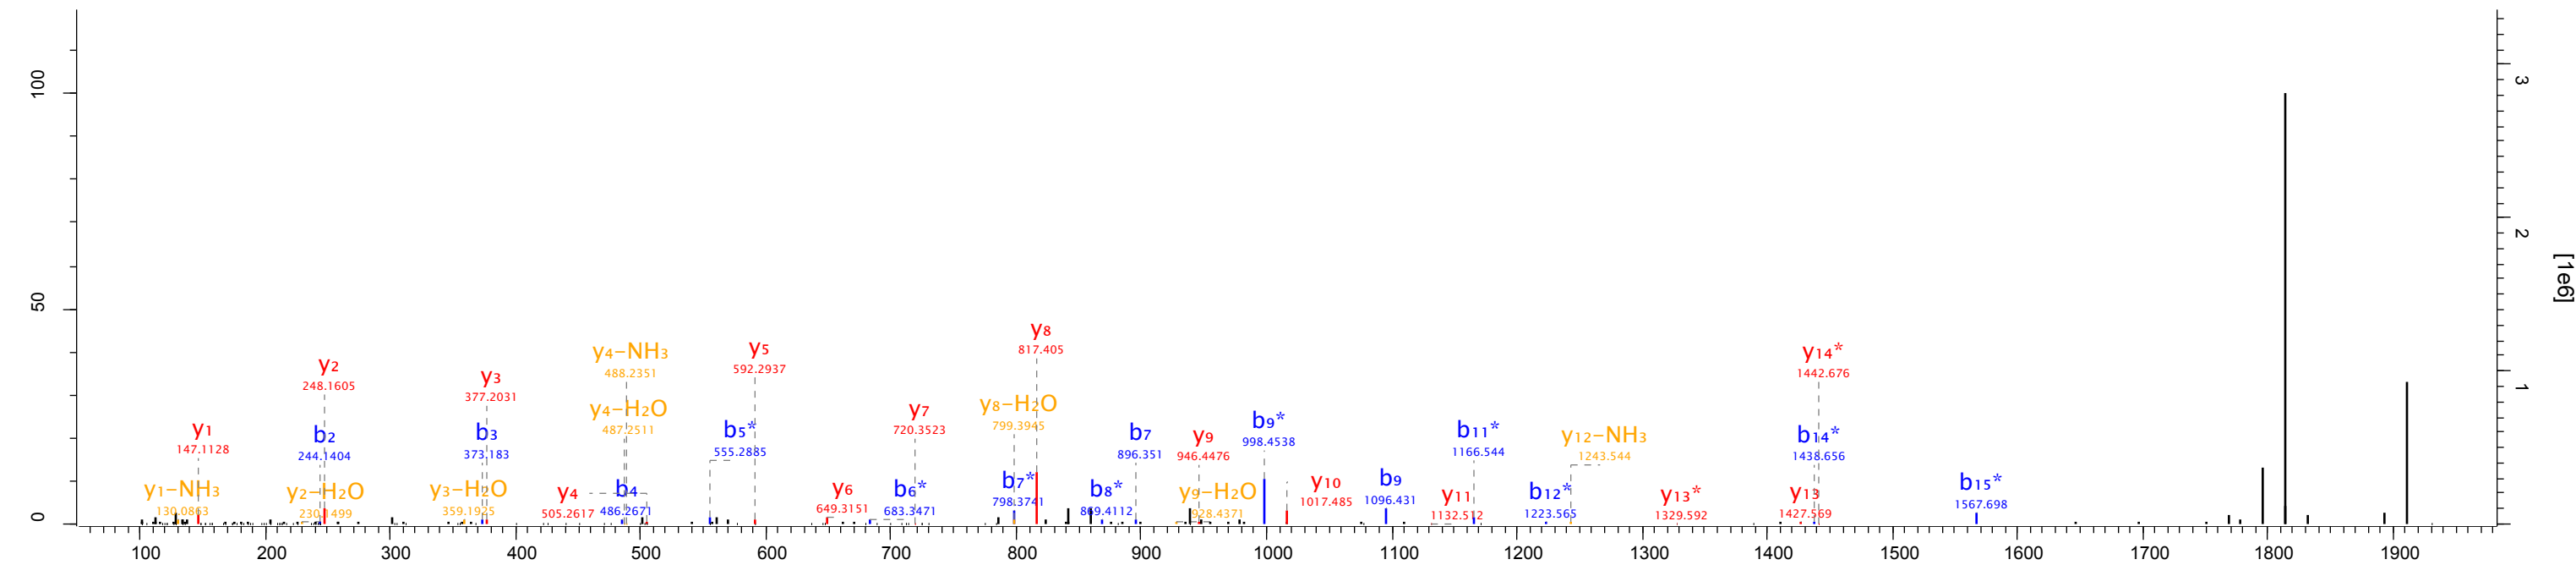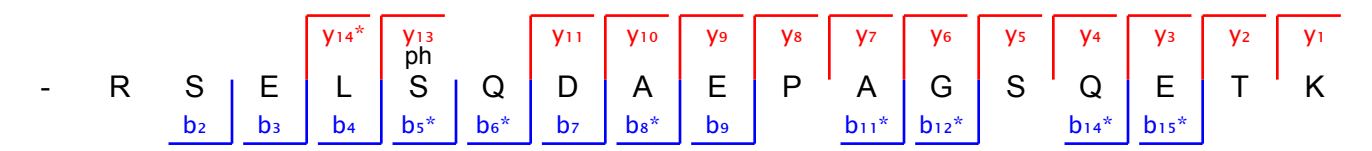

Raw file: 20150812\_A375SR\_Phospho\_BR1\_04  
 Scan: 7192 Method: FTMS; HCD Score: 136.26 m/z: 508.24 Gene names: RBM10

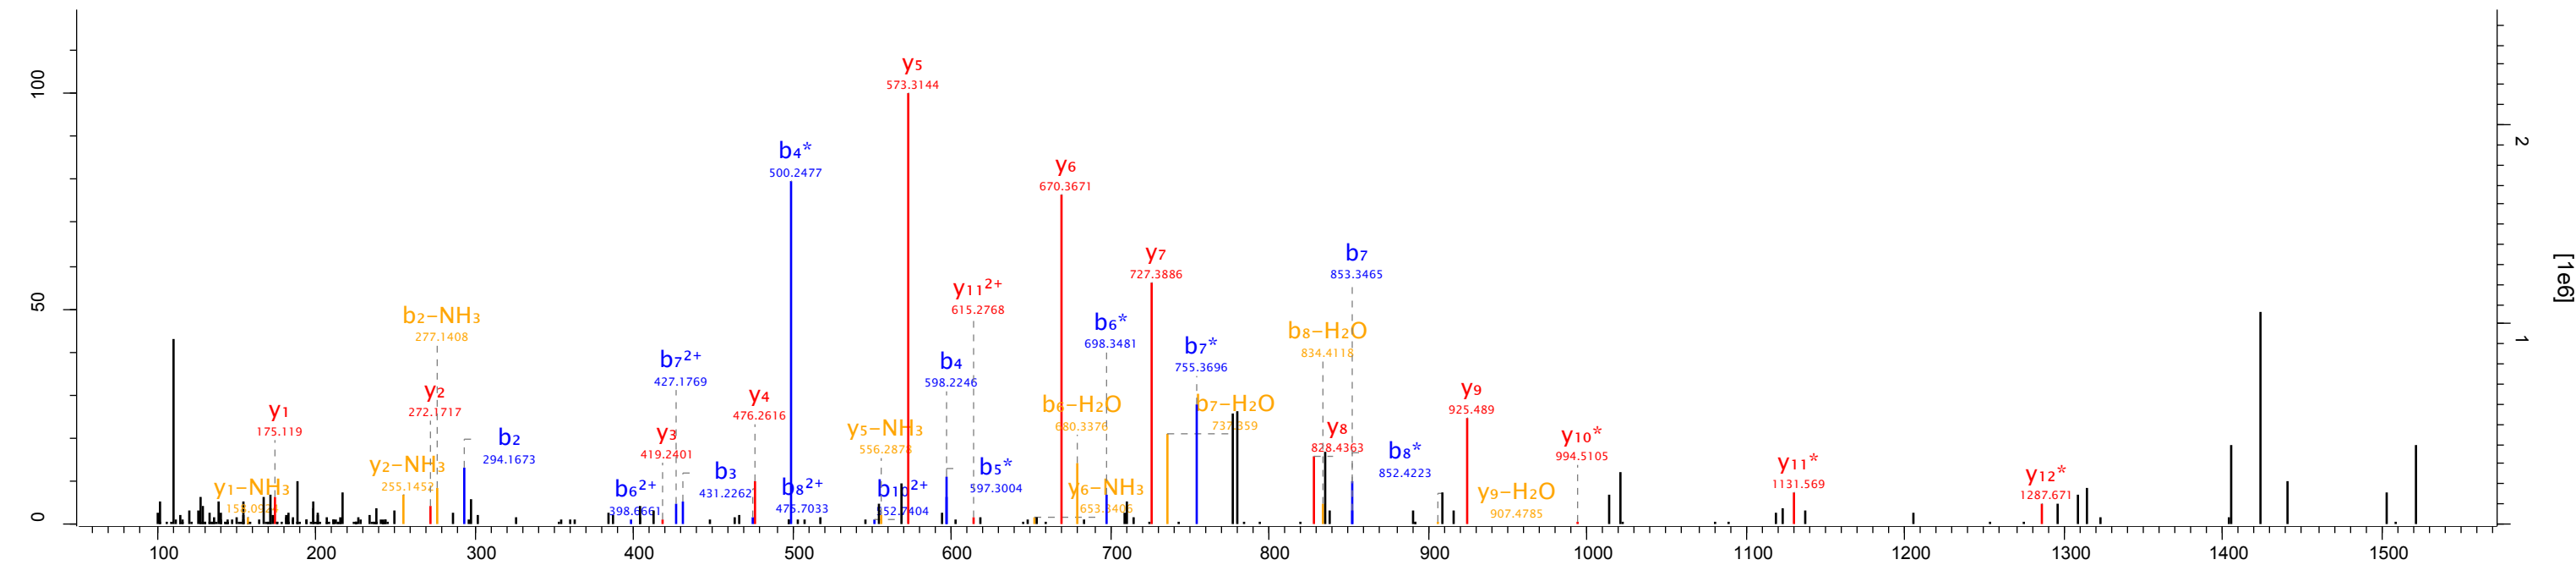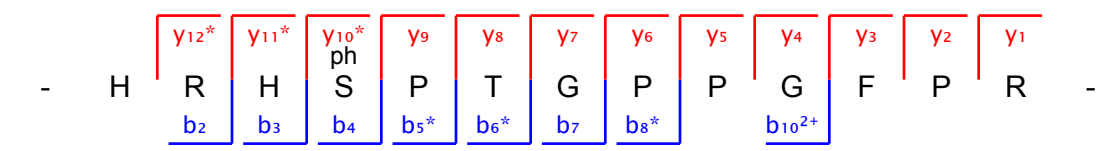

Raw file: 20150812\_A375SR\_Phospho\_BR1\_04  
 Scan: 7302 Method: FTMS; HCD Score: 105.79 m/z: 605.78 Gene names: BCLAF1

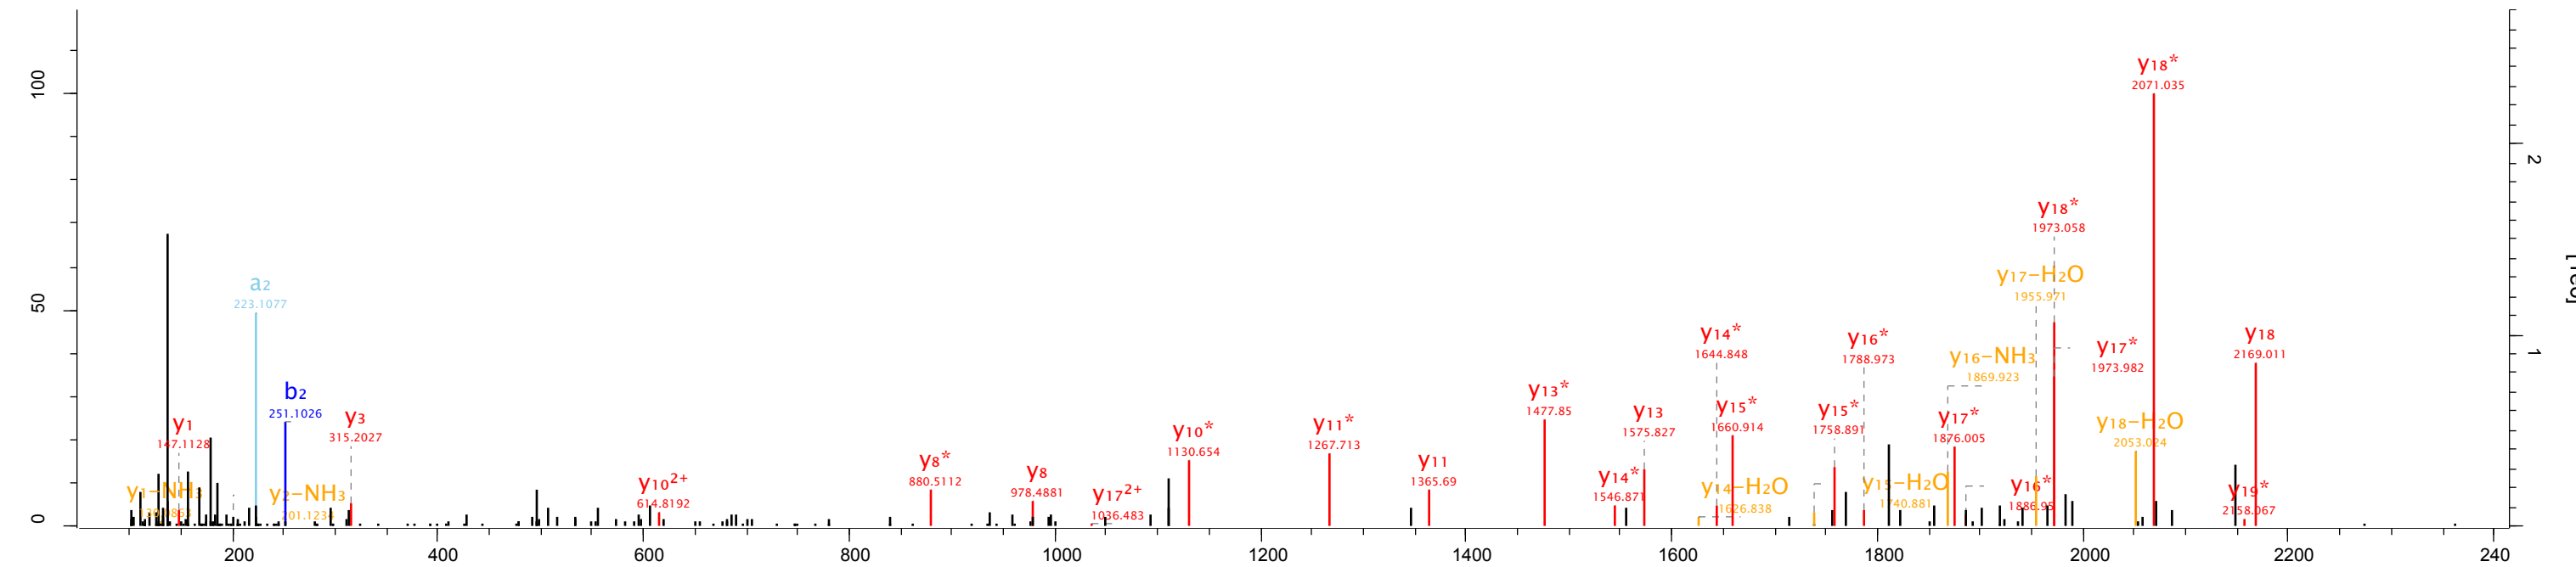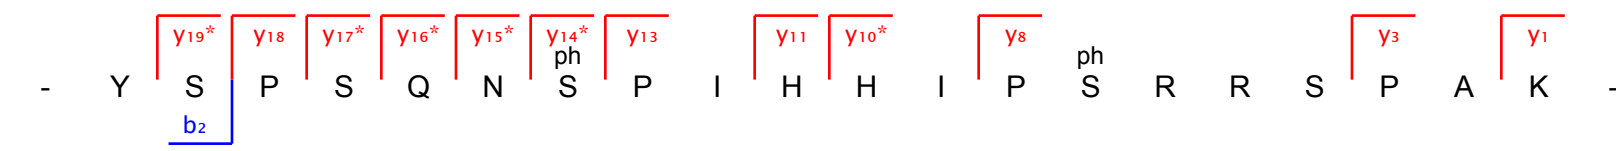



Raw file: 20150812\_A375SR\_Phospho\_BR1\_04  
 Scan: 7332 Method: FTMS; HCD Score: 196.98 m/z: 857.35 Gene names: CEP170B

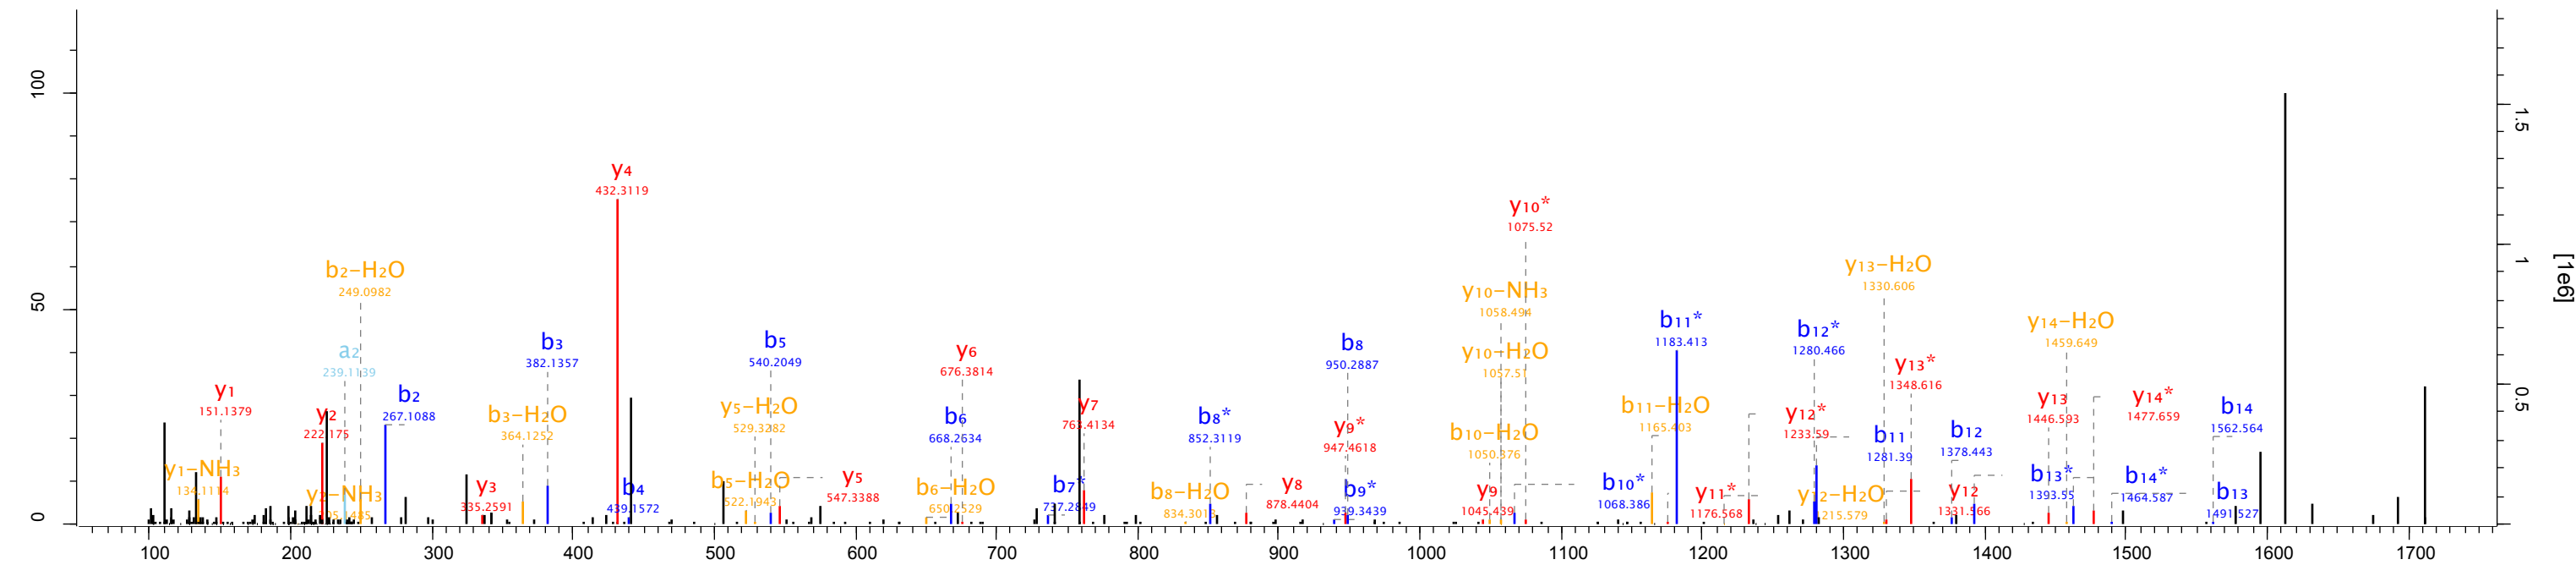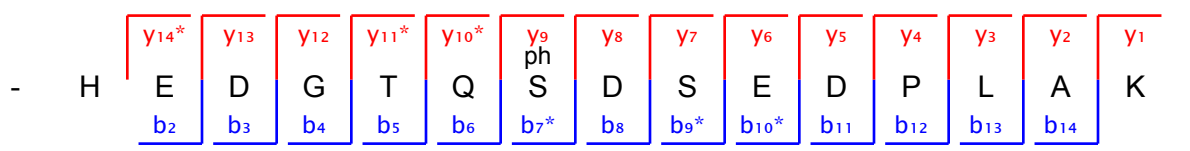

Raw file 20150812\_A375SR\_Phospho\_BR1\_04 Scan 7392 Method FTMS; HCD Score 104.18 m/z 607.26 Gene names ATG2B

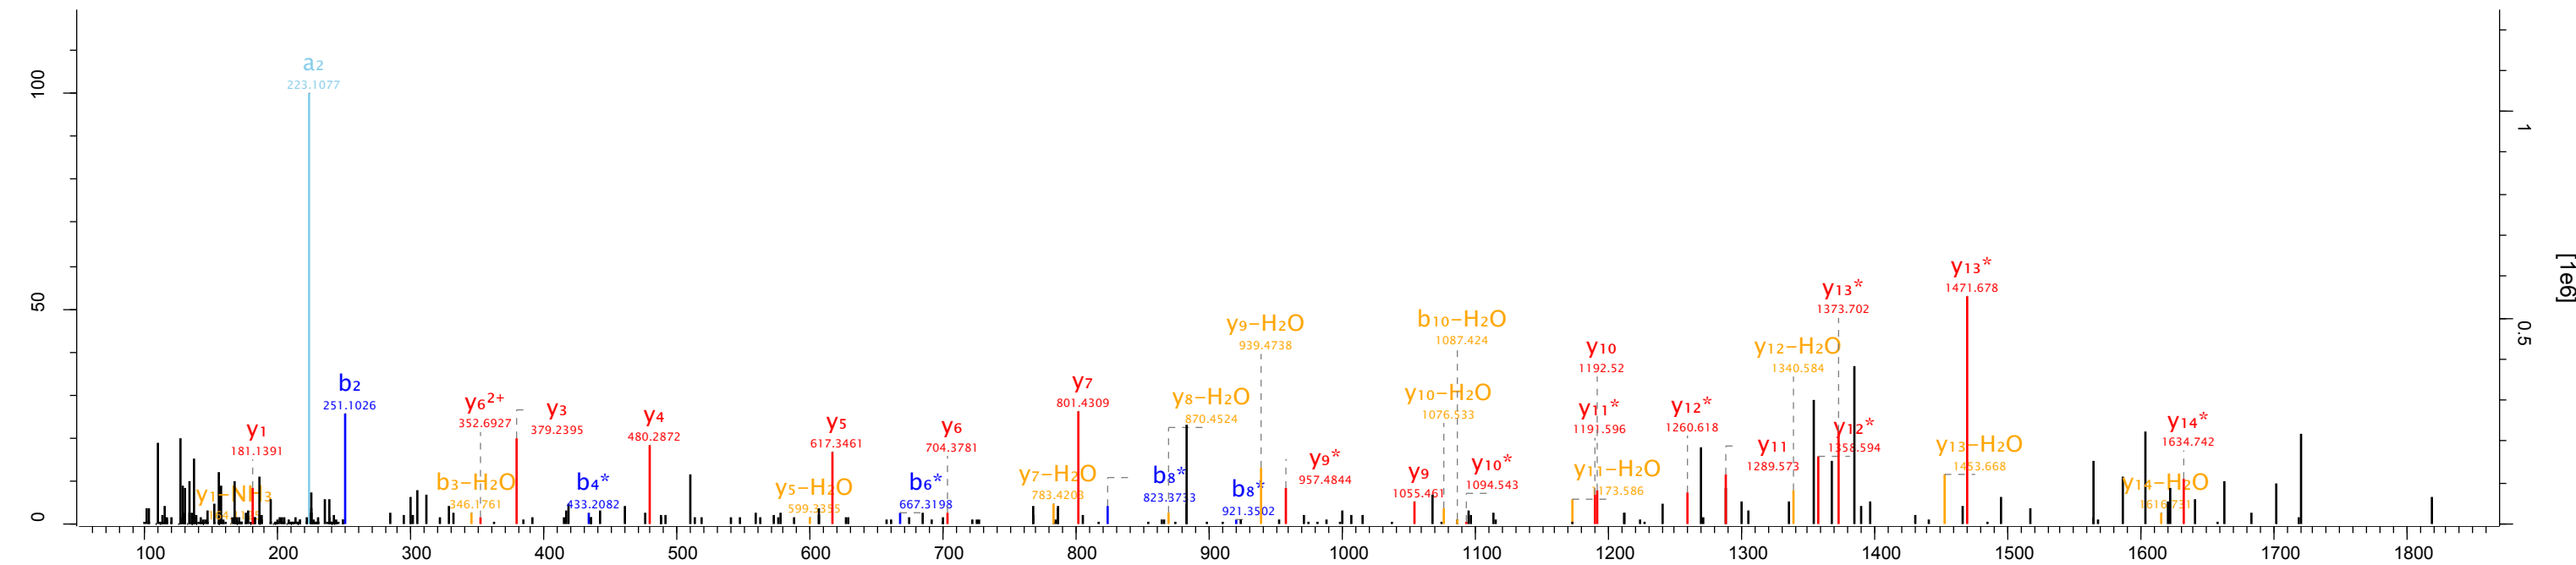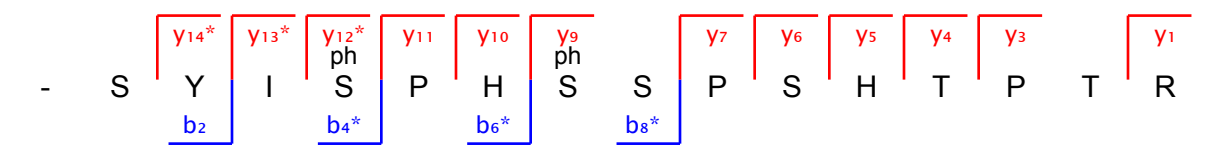

Raw file: 20150812\_A375SR\_Phospho\_BR1\_04  
 Scan: 7532 Method: FTMS; HCD Score: 163.38 m/z: 757.67 Gene names: ARHGAP21

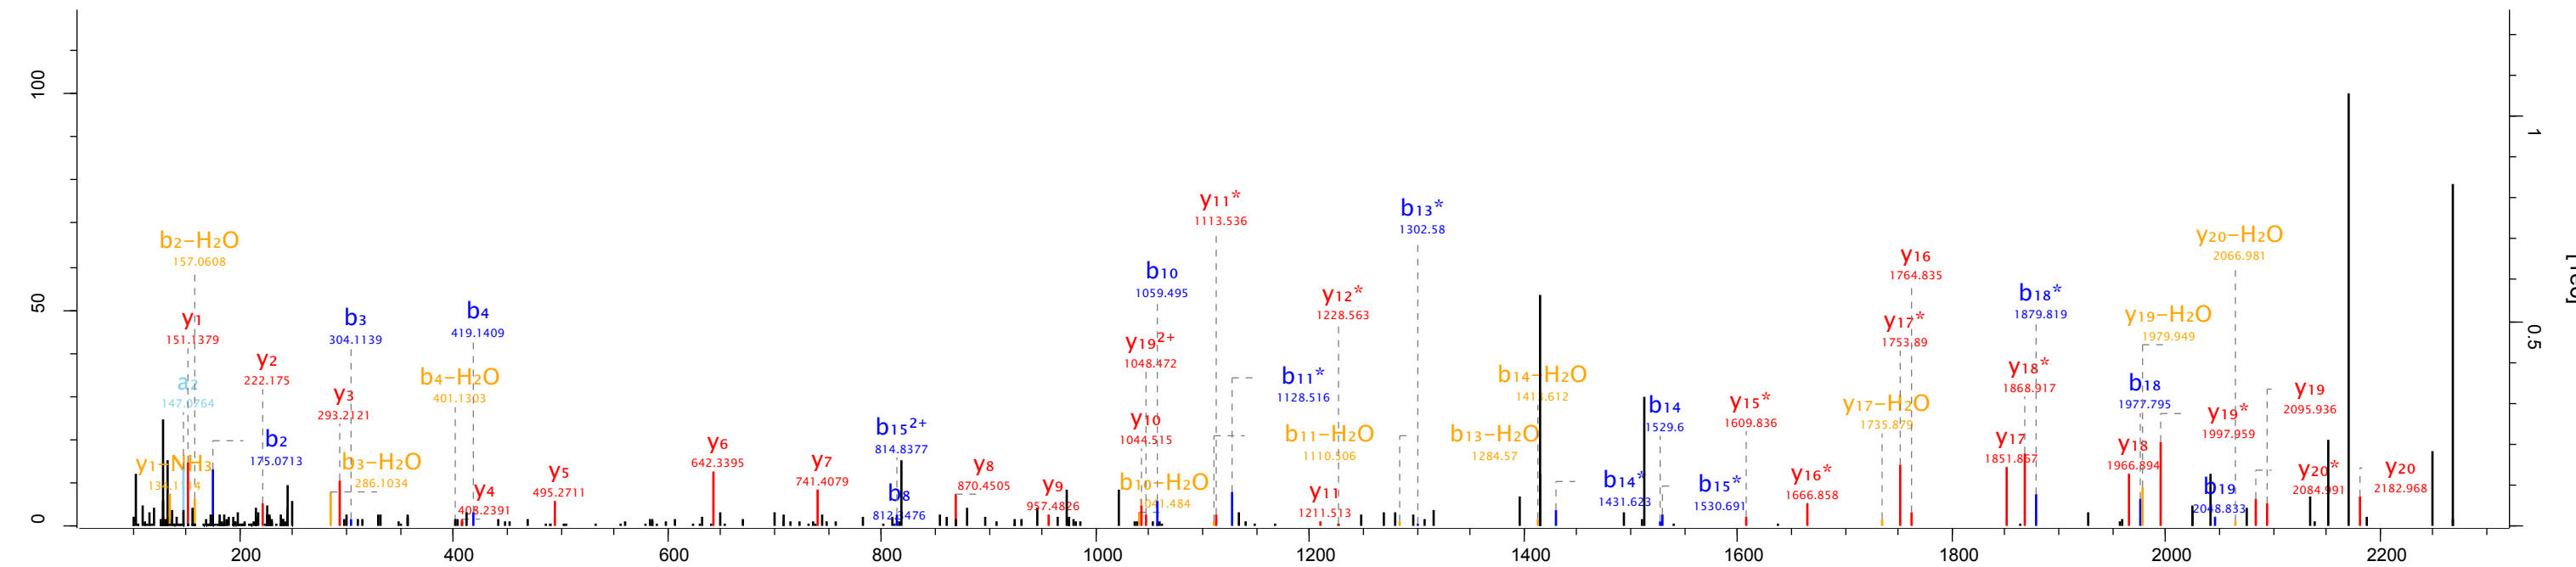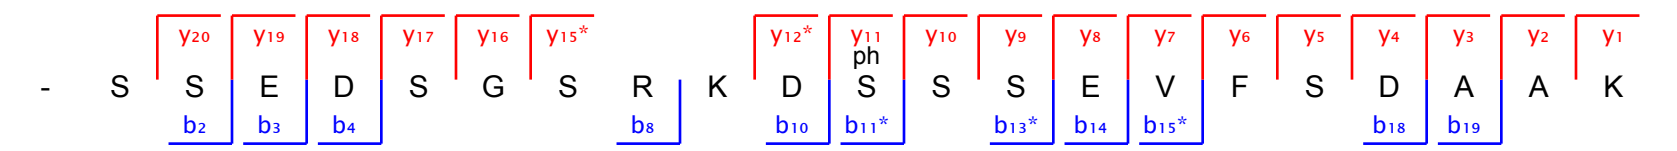

Raw file: 20150812\_A375SR\_Phospho\_BR1\_04  
 Scan: 7772 Method: FTMS; HCD Score: 134.66 m/z: 614.27 Gene names: SRRM2

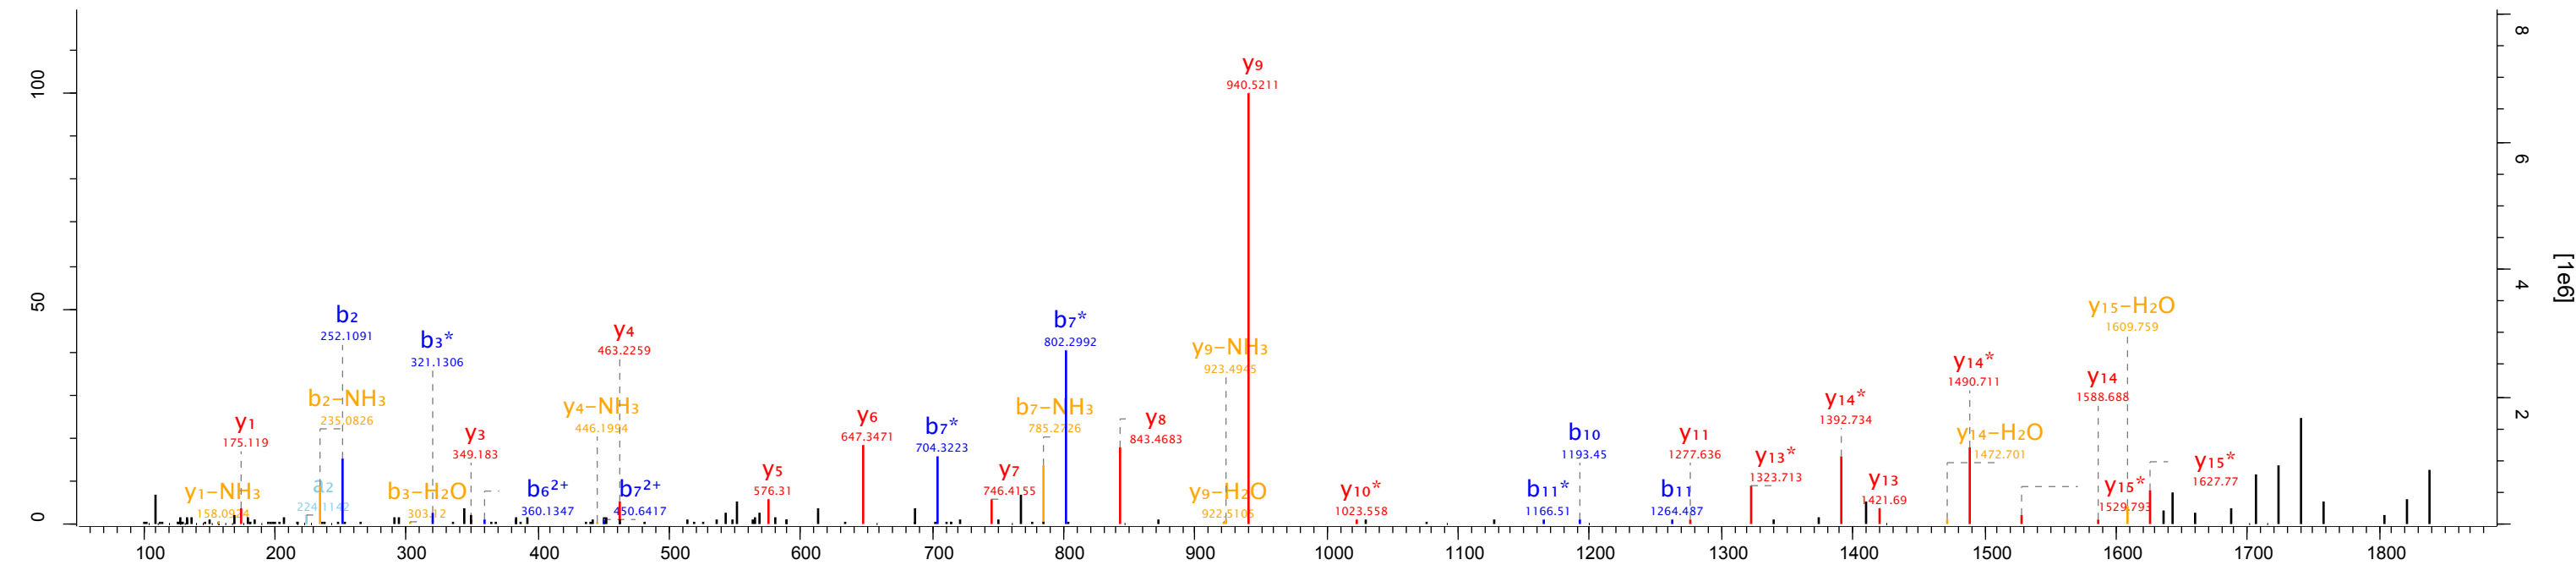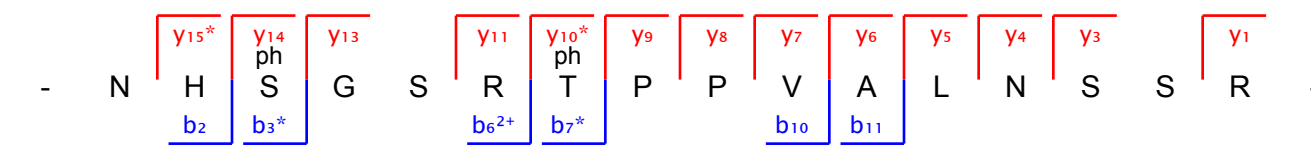

Raw file: 20150812\_A375SR\_Phospho\_BR1\_04  
 Scan: 8042 Method: FTMS; HCD Score: 150.17 m/z: 830.02 Gene names: ATRX

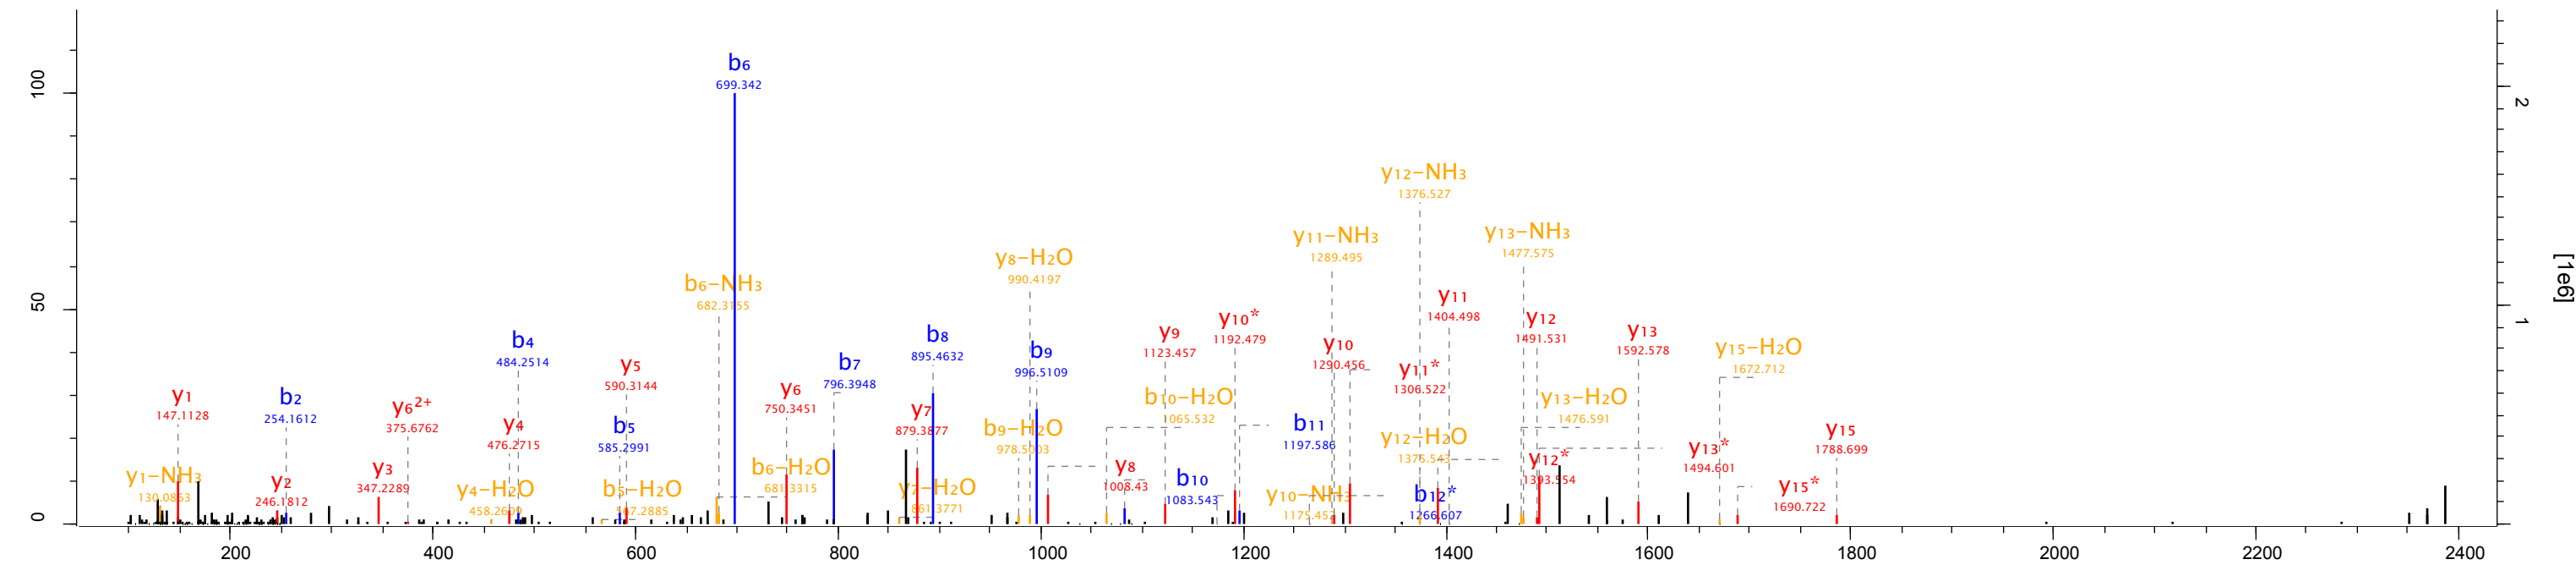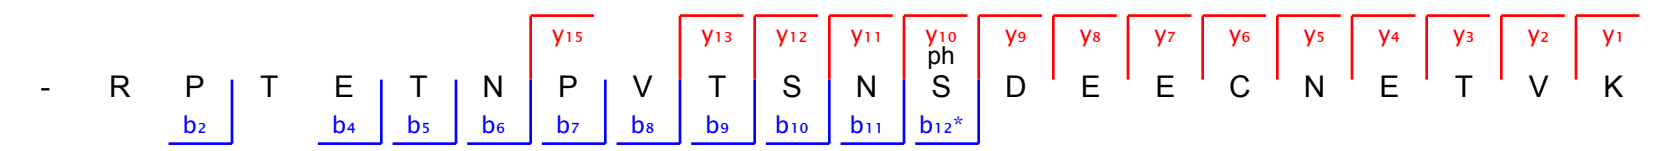

Raw file: 20150812\_A375SR\_Phospho\_BR1\_04  
 Scan: 8082 Method: FTMS; HCD Score: 151.1 m/z: 1184.08 Gene names: SRRM2

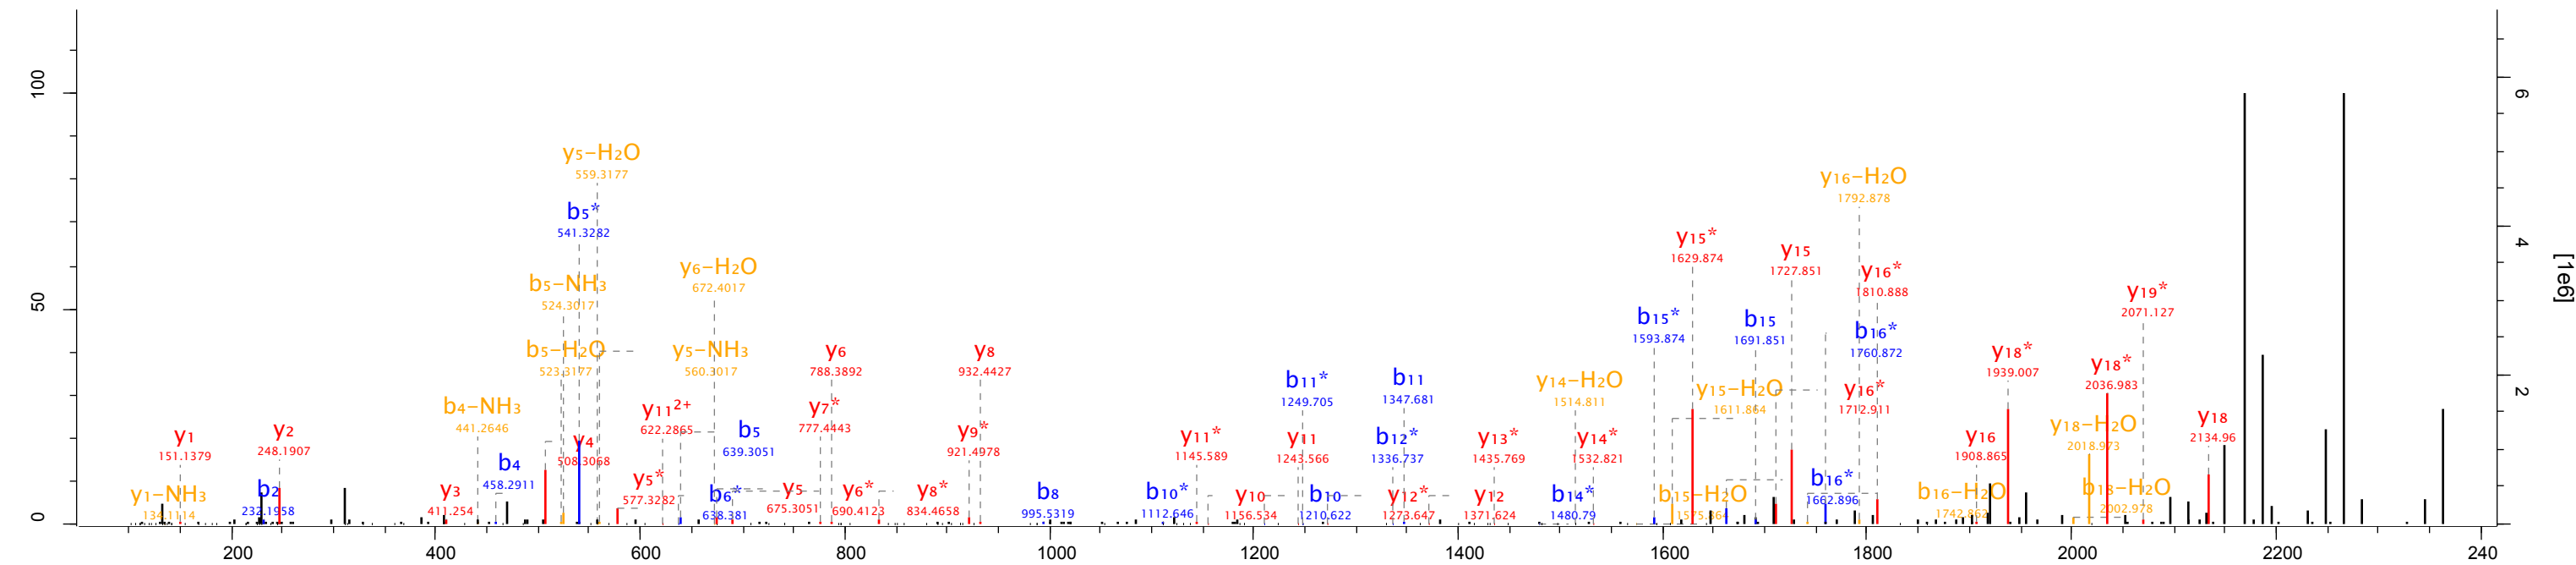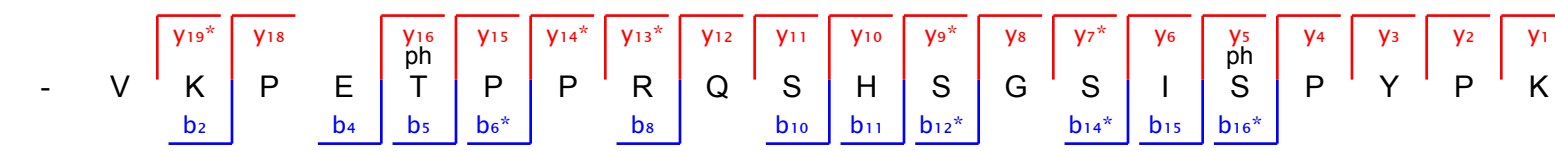

Raw file: 20150812\_A375SR\_Phospho\_BR1\_04  
 Scan: 8302 Method: FTMS; HCD Score: 161.25 m/z: 670.74 Gene names: AP3B1

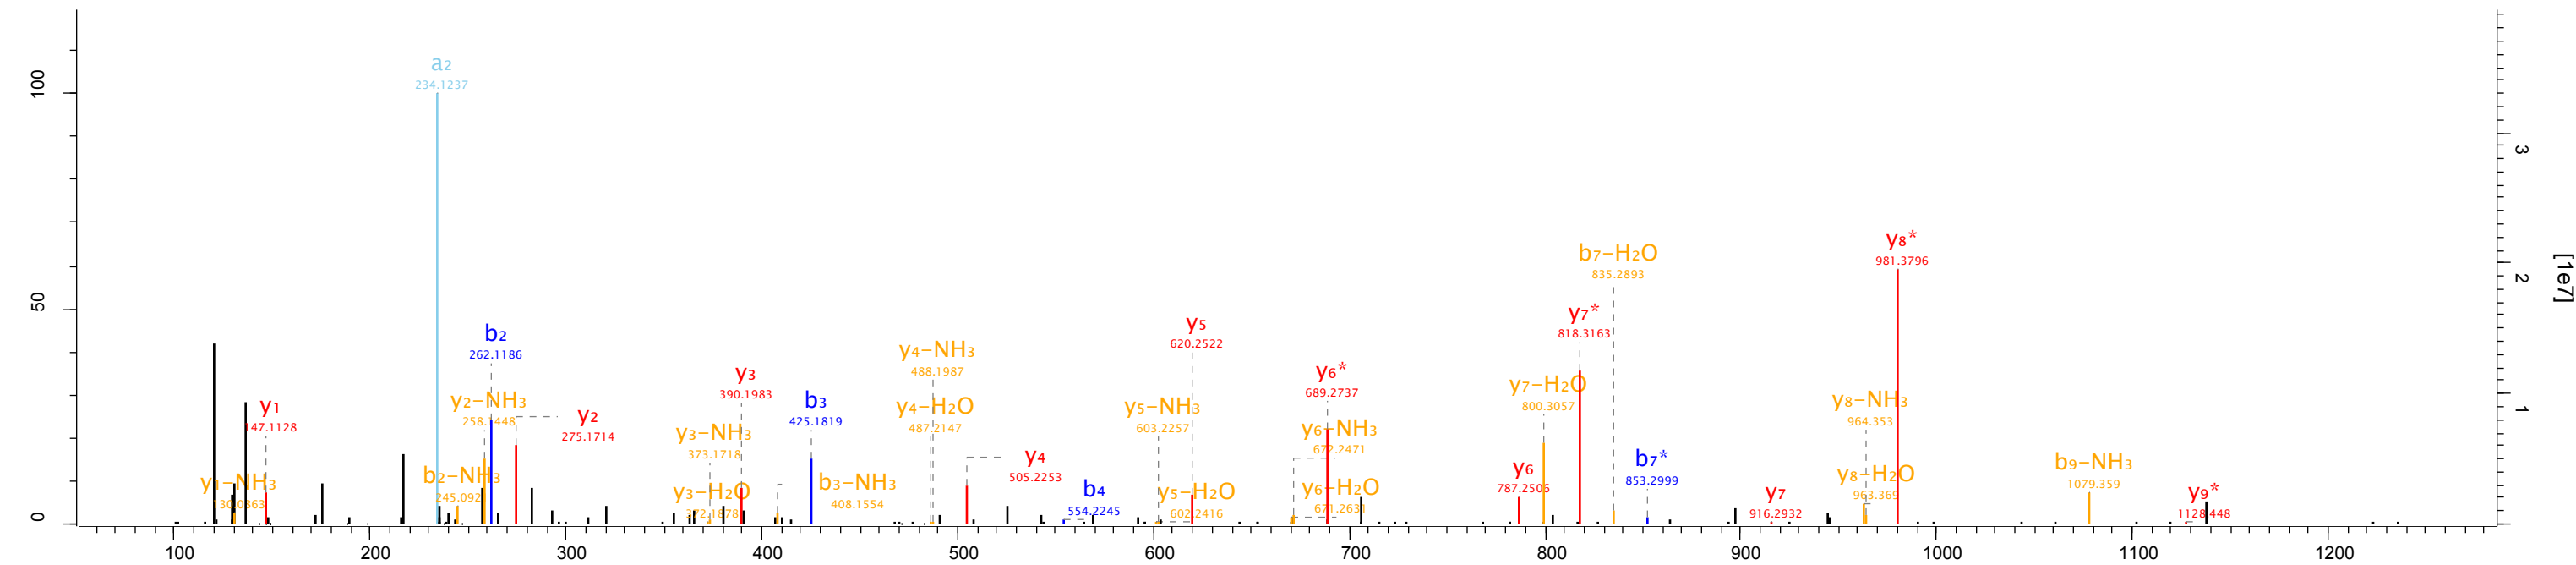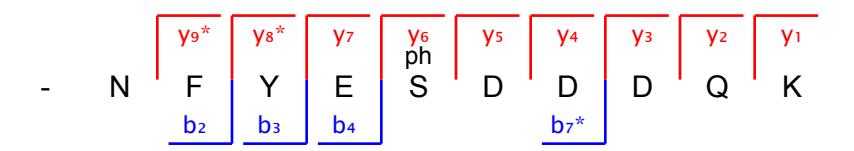

Raw file 20150812\_A375SR\_Phospho\_BR1\_04 Scan 8412 Method FTMS; HCD Score 205 m/z 783.35 Gene names NME1

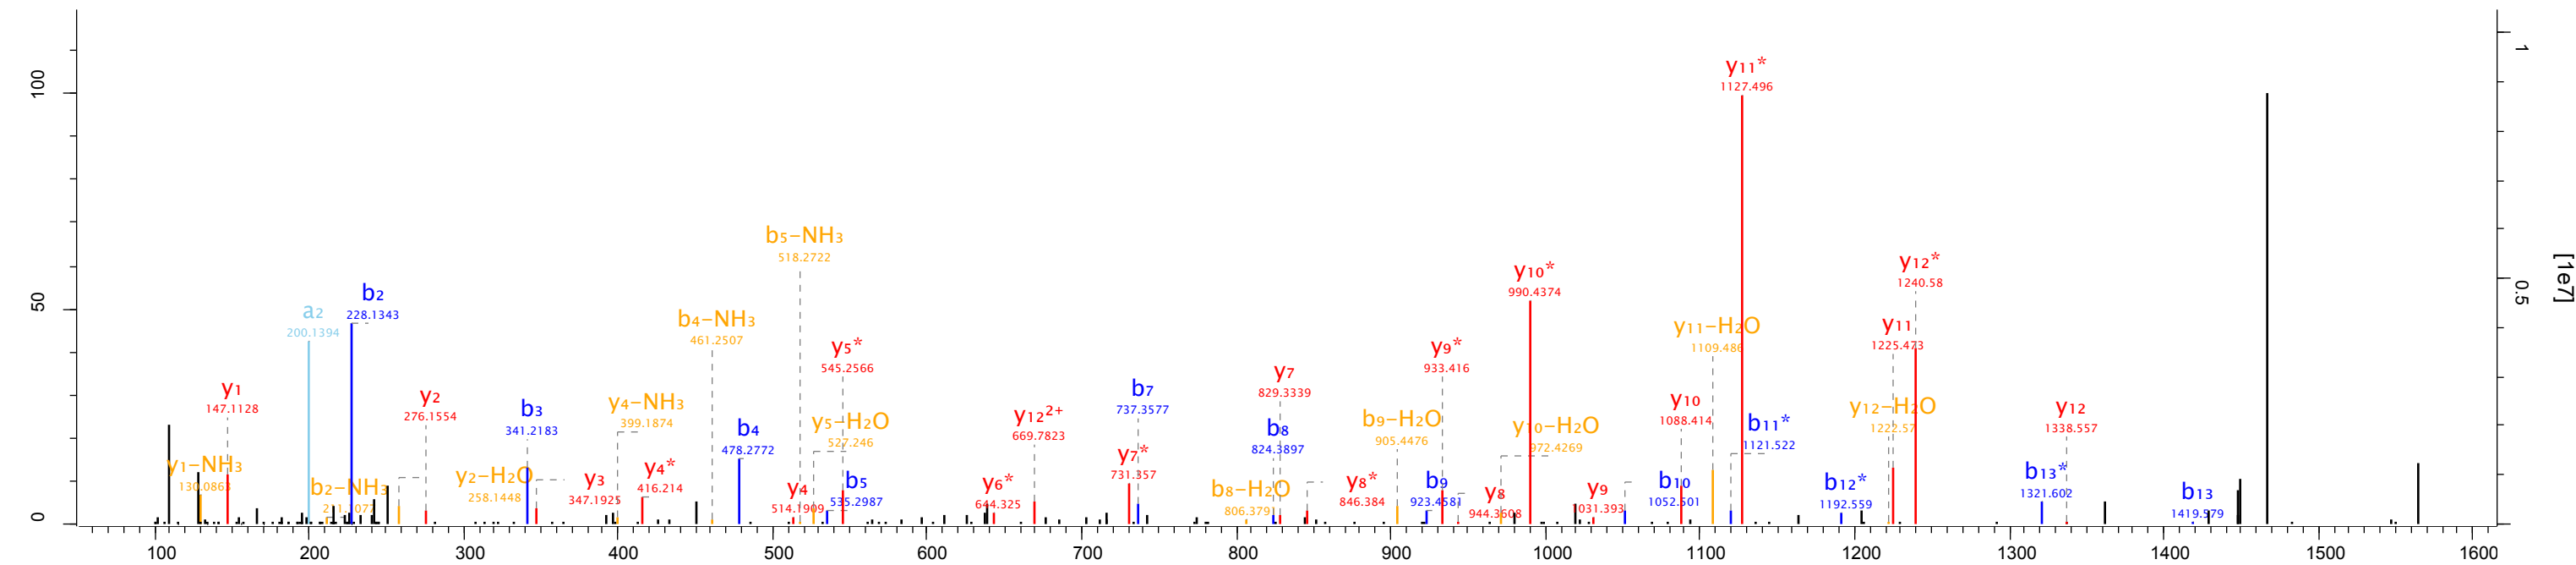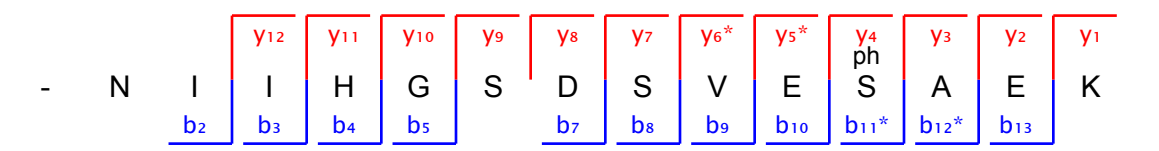



Raw file: 20150812\_A375SR\_Phospho\_BR1\_04  
 Scan: 8842 Method: FTMS; HCD Score: 121.53 m/z: 449.21 Gene names: PIK3C2A

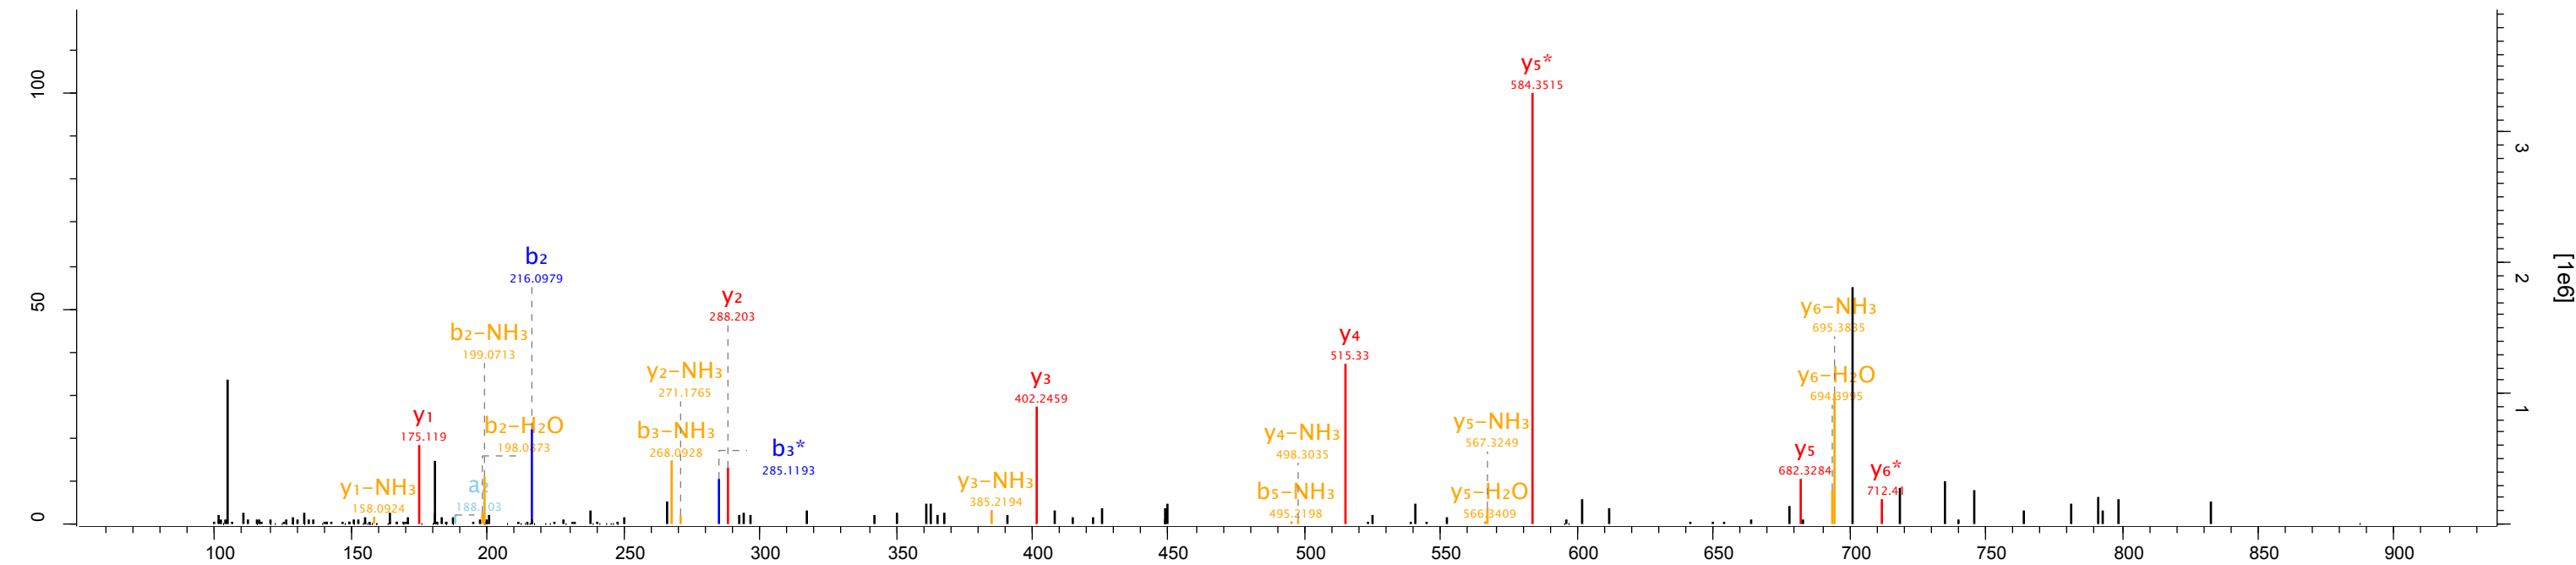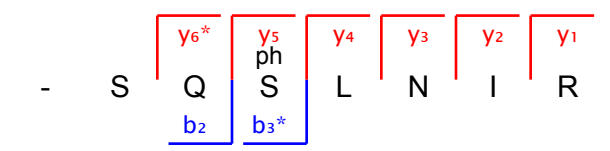

Raw file: 20150812\_A375SR\_Phospho\_BR1\_04  
 Scan: 9072 Method: FTMS; HCD Score: 232.37 m/z: 894.86 Gene names: AKT1S1

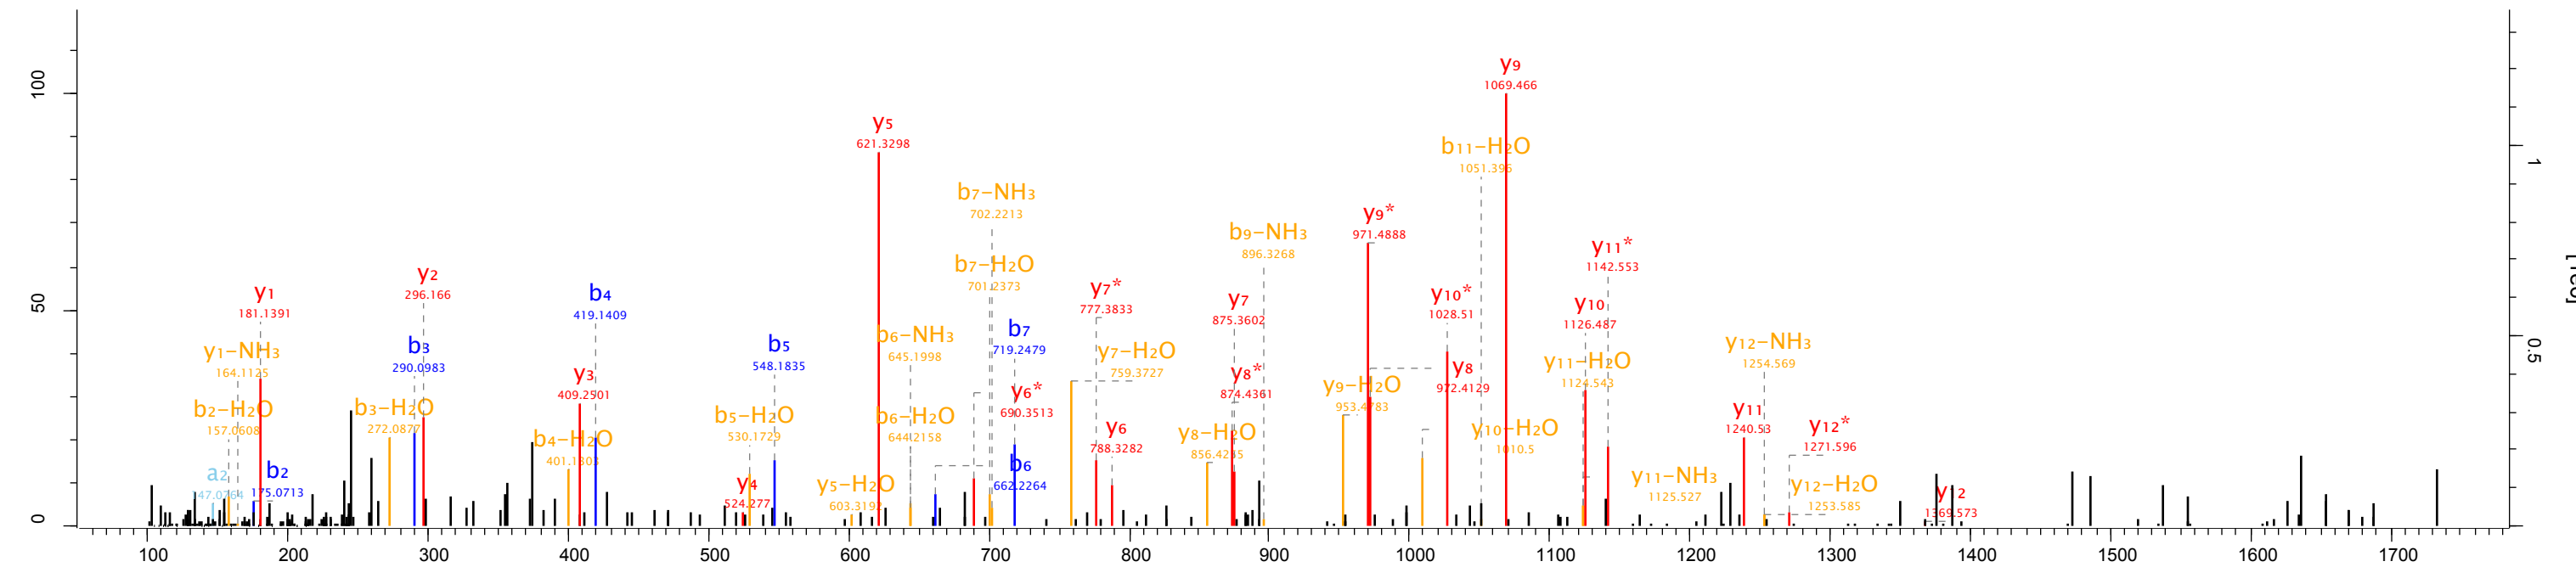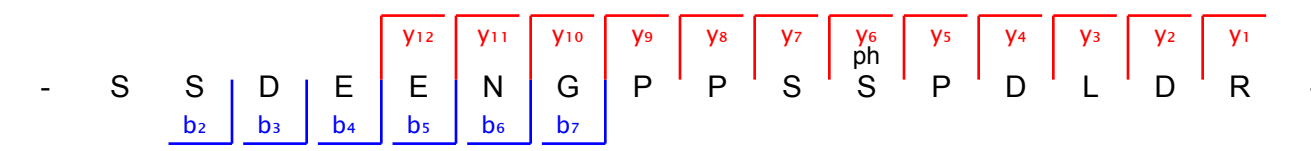

Raw file 20150812\_A375SR\_Phospho\_BR1\_04 Scan 9232 Method FTMS; HCD Score 293.47 m/z 981.77 Gene names PRRC2C

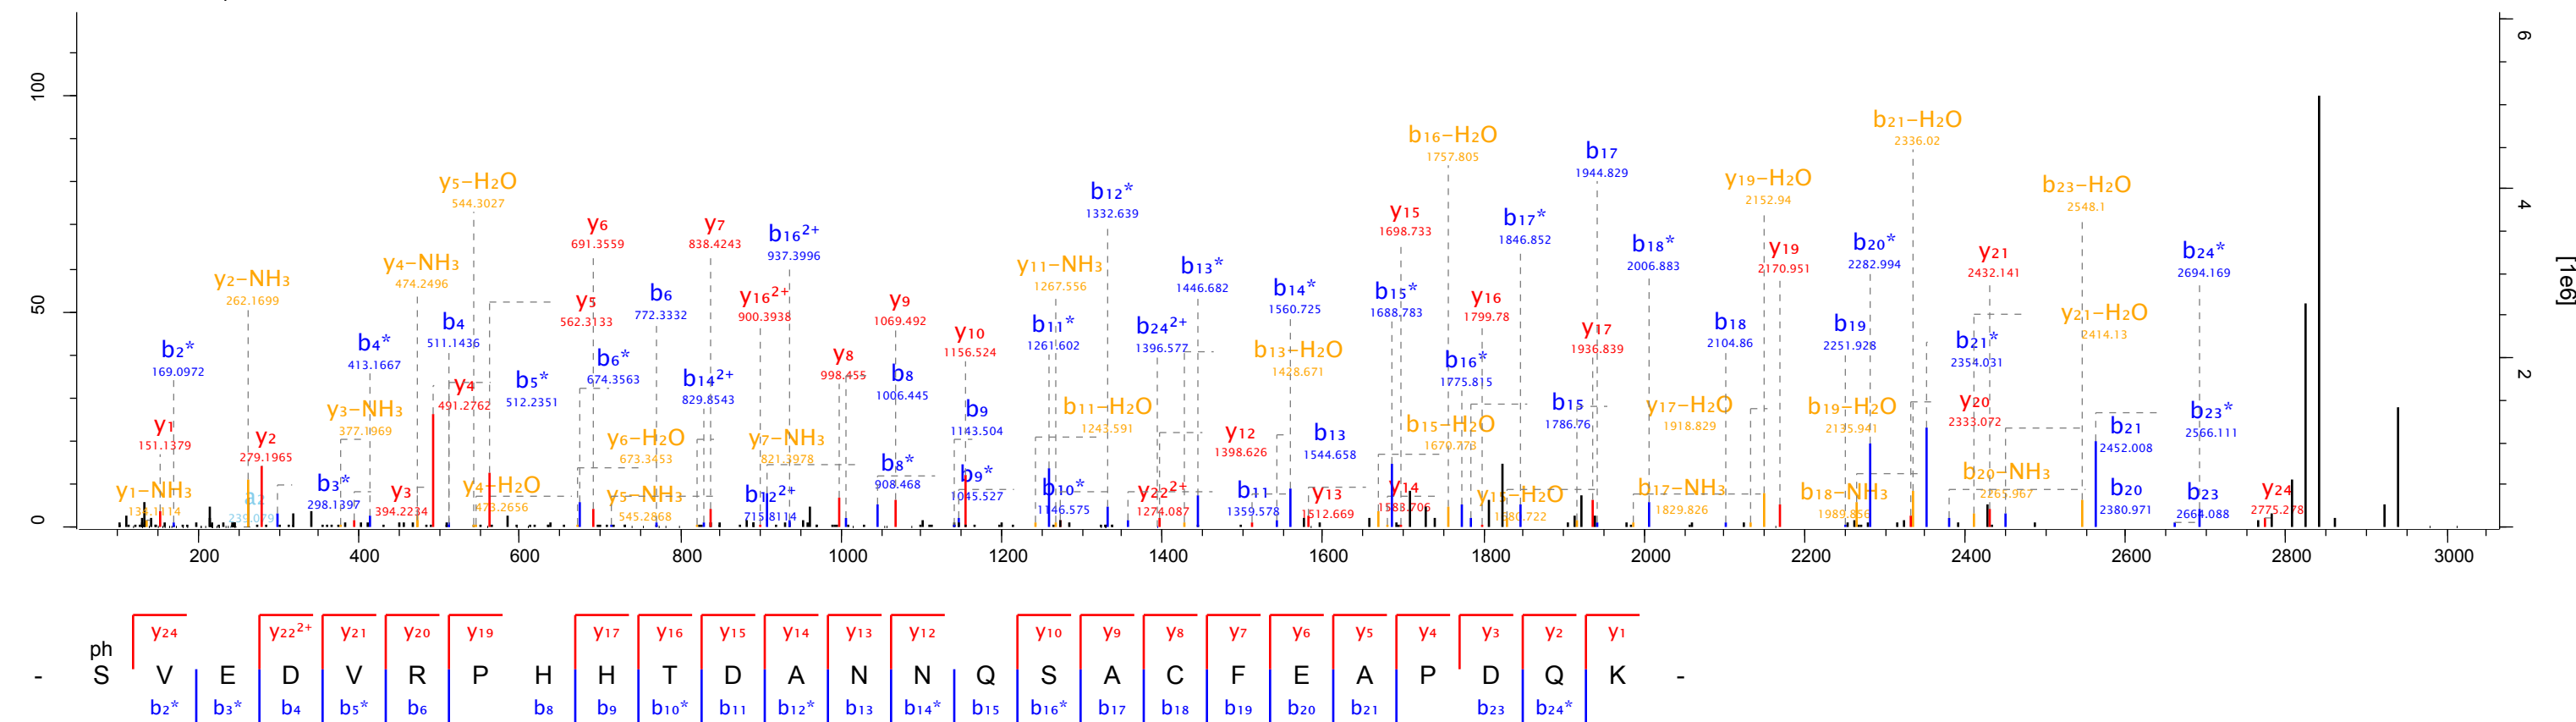

Raw file: 20150812\_A375SR\_Phospho\_BR1\_04  
 Scan: 9382 Method: FTMS; HCD Score: 162.14 m/z: 782.84 Gene names: SYTL2

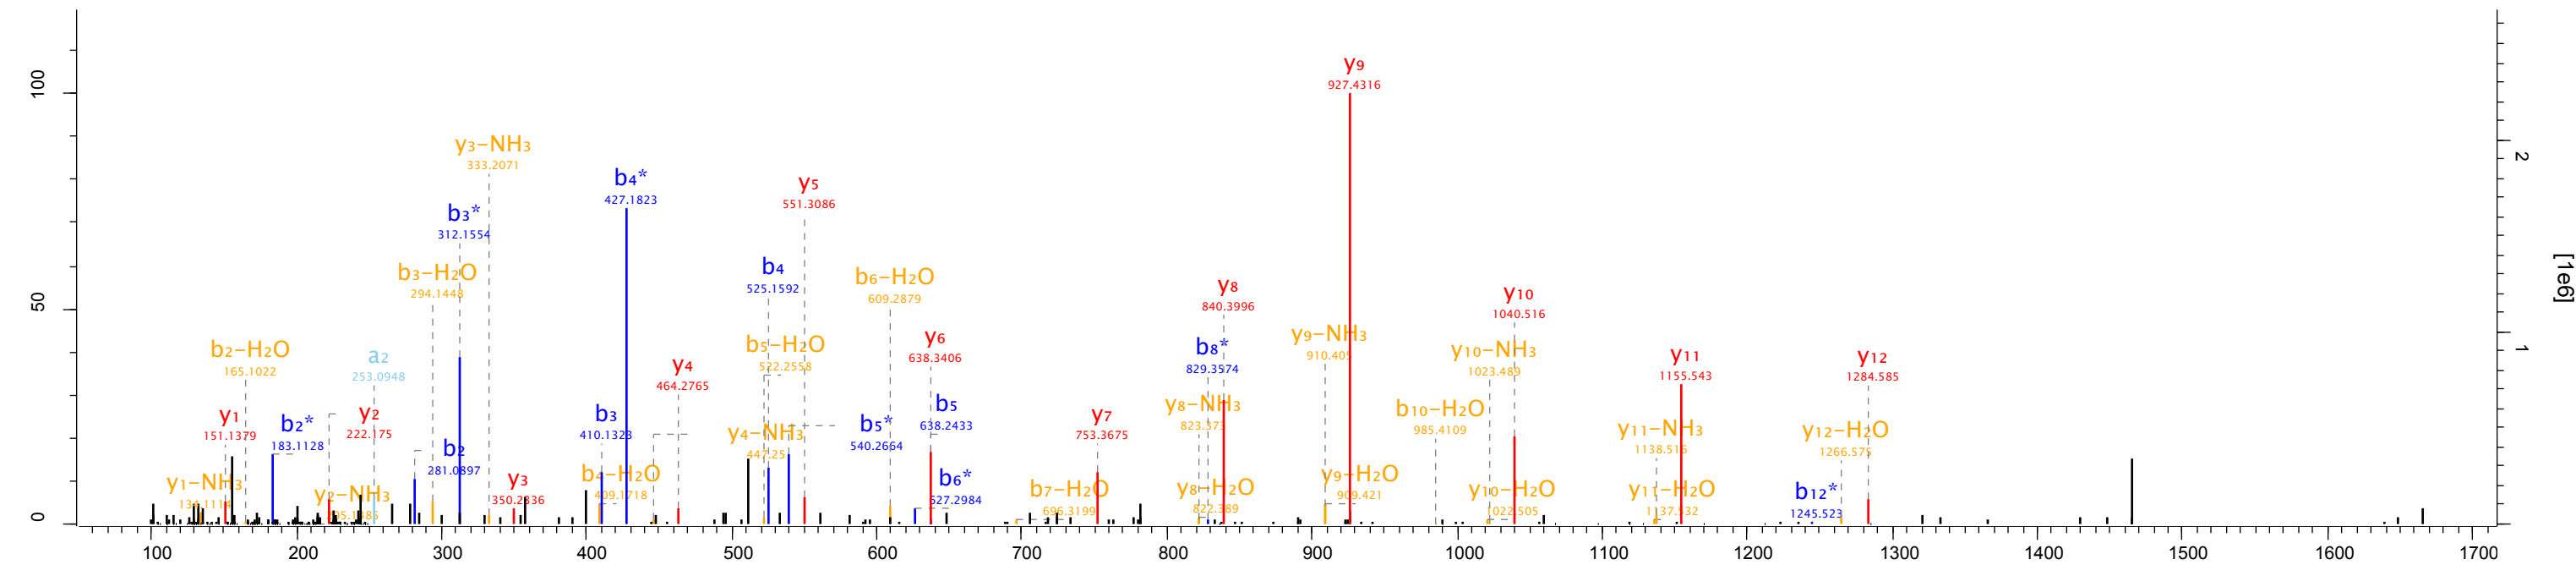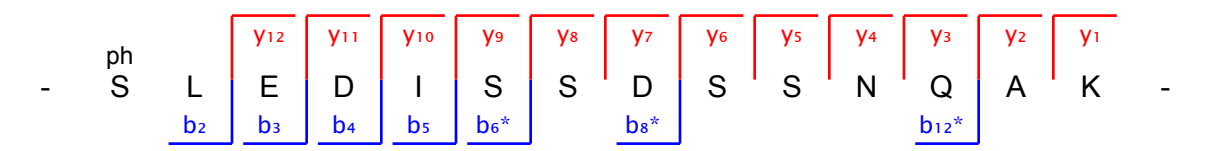

Raw file: 20150812\_A375SR\_Phospho\_BR1\_04  
 Scan: 9562 Method: FTMS; HCD Score: 284.51 m/z: 915.38 Gene names: ATRX

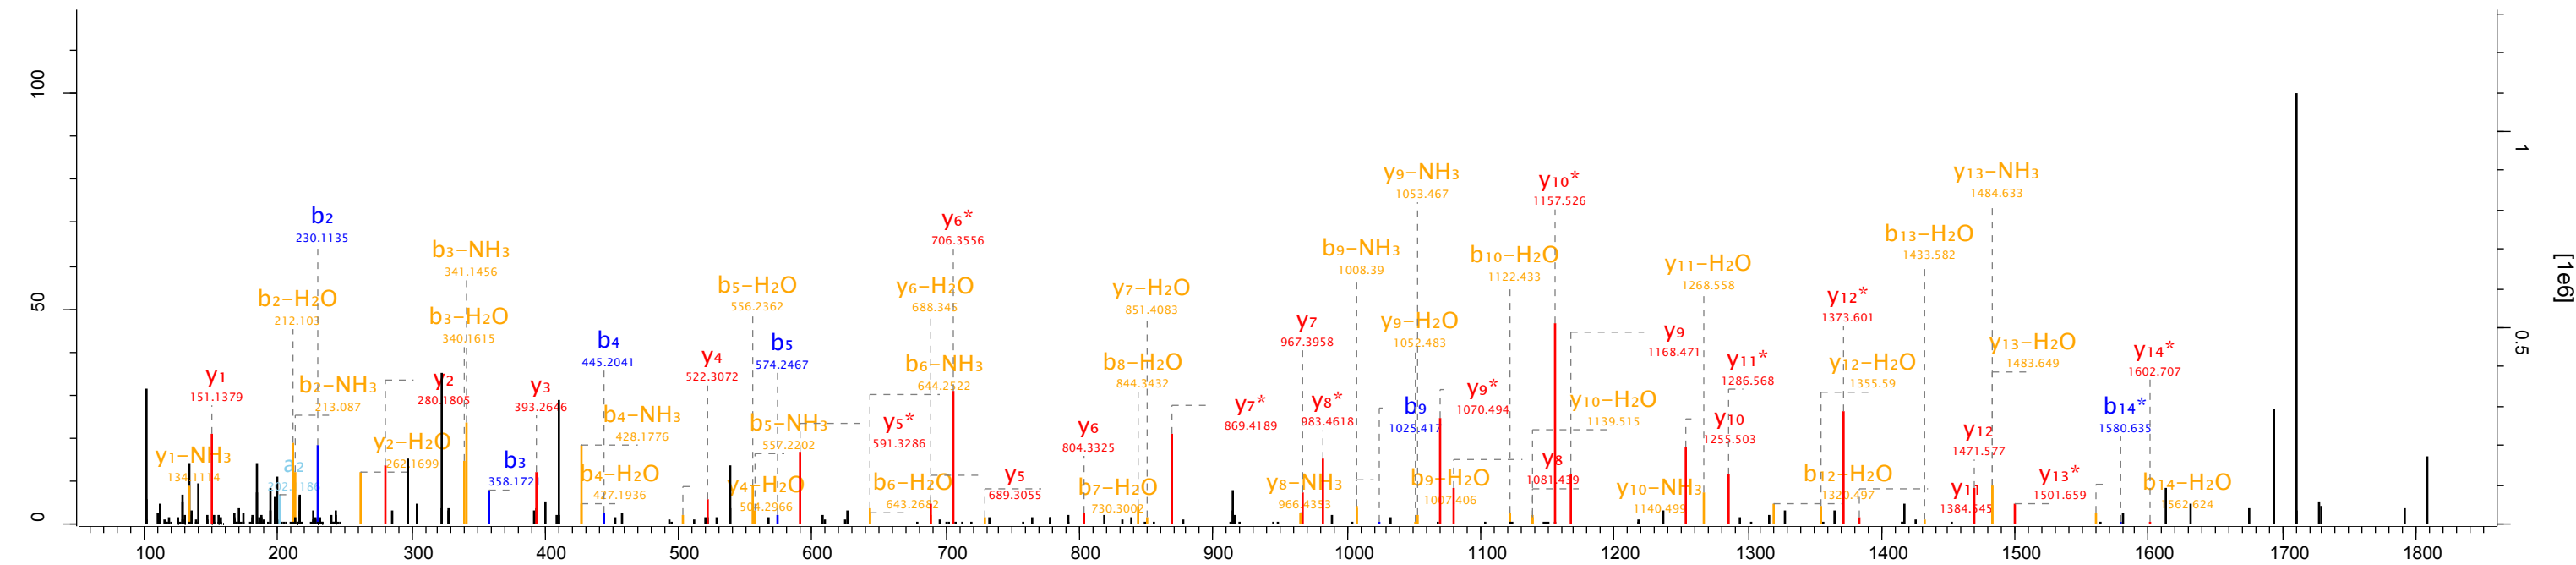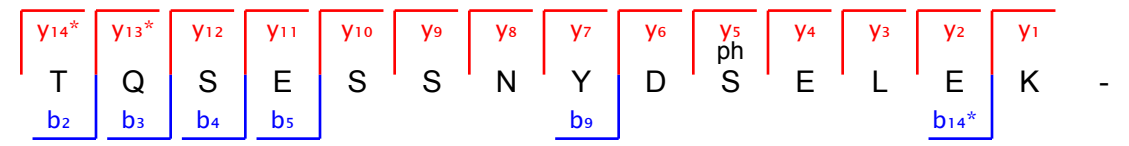

Raw file 20150812\_A375SR\_Phospho\_BR1\_05 Scan 10802 Method FTMS; HCD Score 145.81 m/z 570.78 Gene names KIF1B

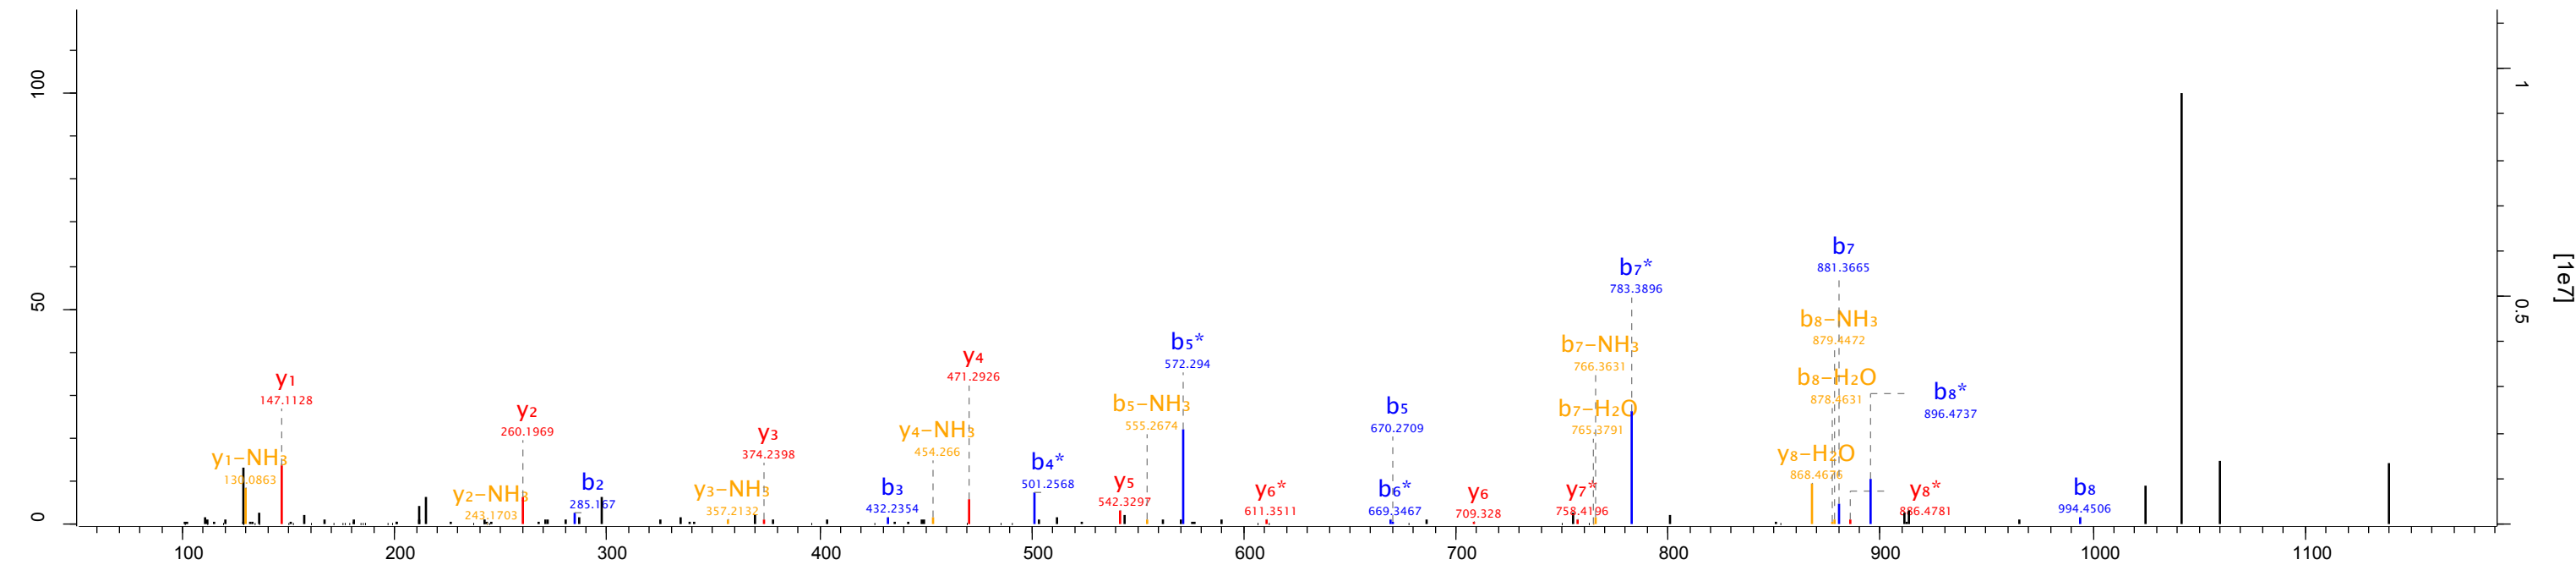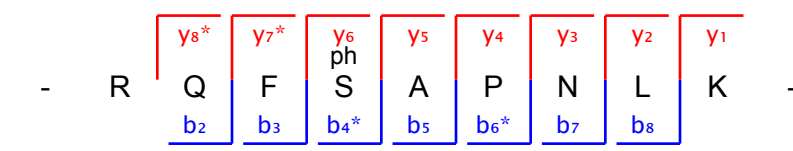

Raw file 20150812\_A375SR\_Phospho\_BR1\_05 Scan 11202 Method FTMS; HCD Score 111.22 m/z 821.8 Gene names LICAM

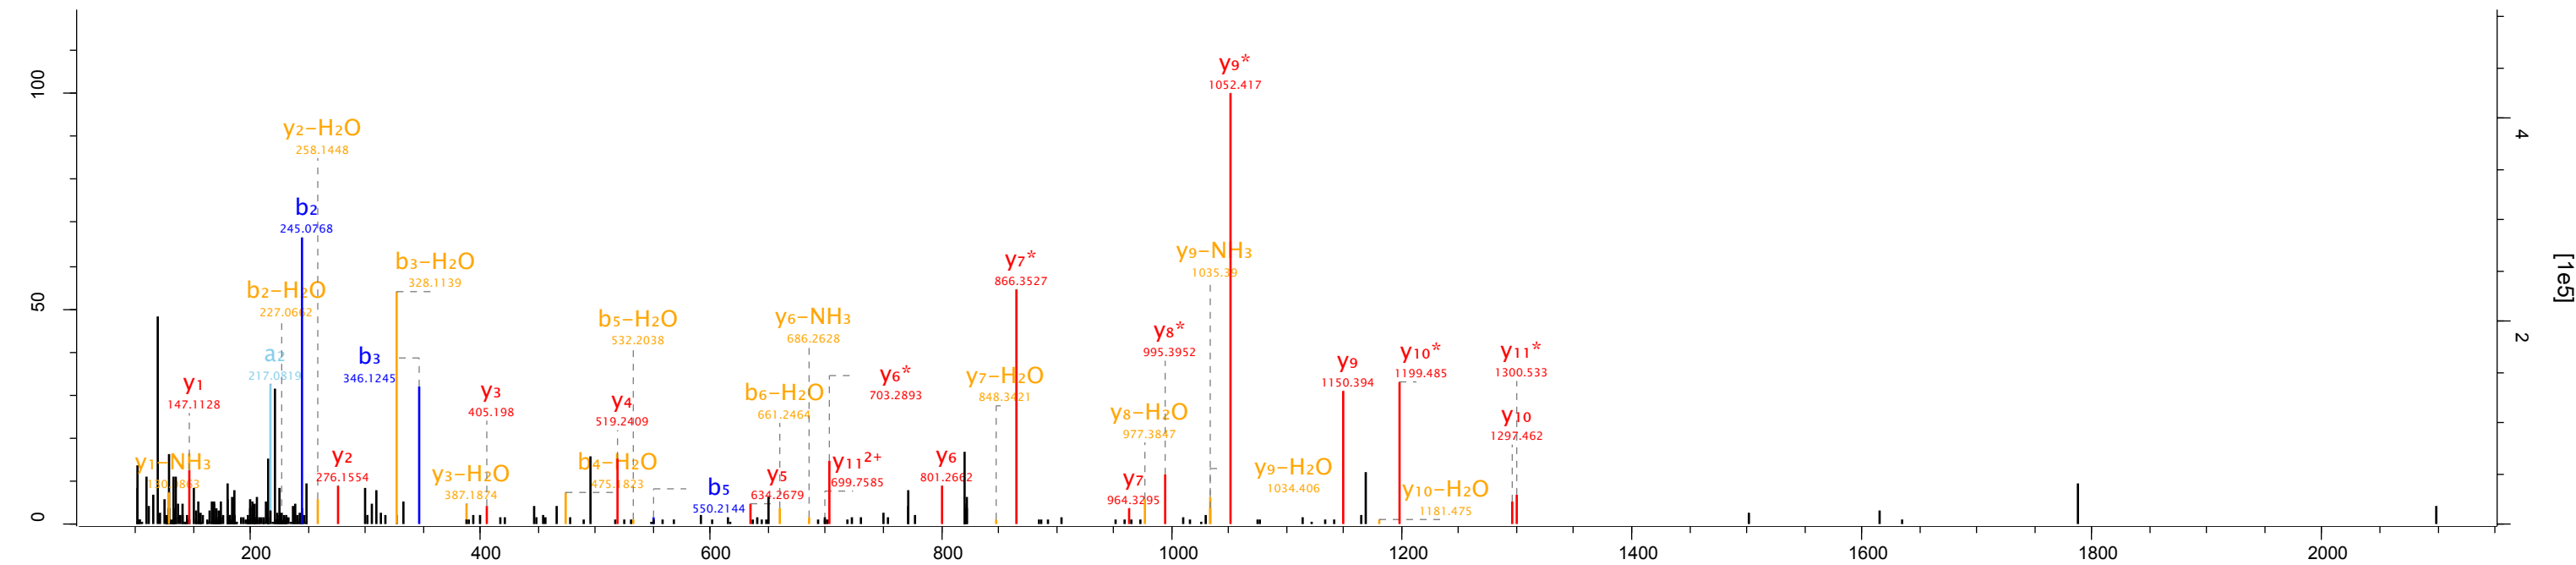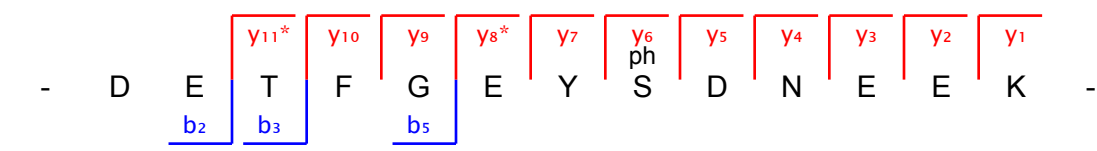

Raw file: 20150812\_A375SR\_Phospho\_BR1\_05  
 Scan: 11682 Method: FTMS; HCD Score: 158.61 m/z: 798.72 Gene names: ZEB1

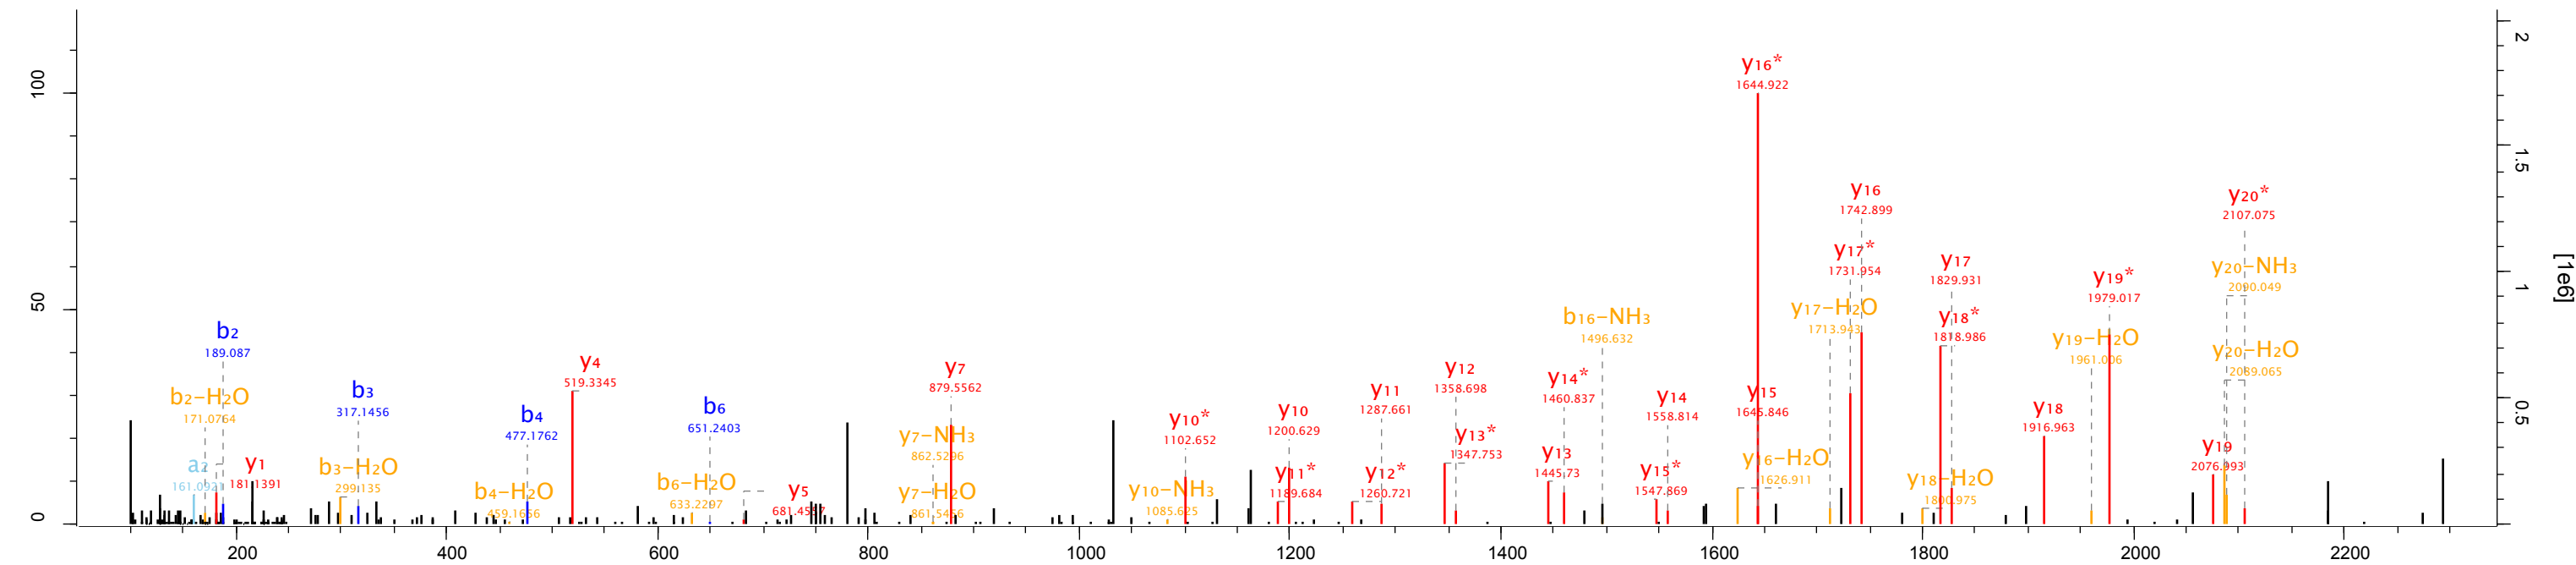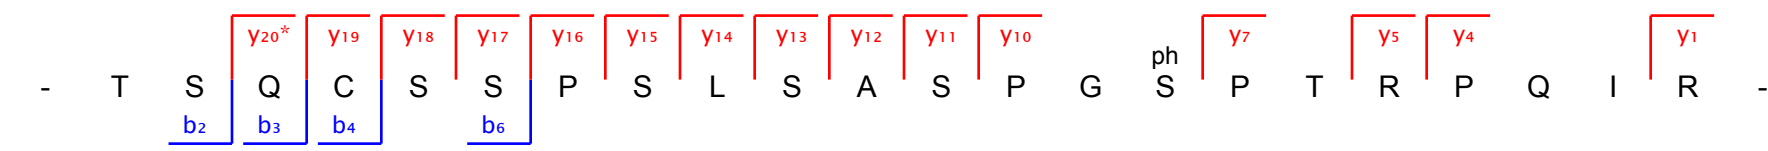



Raw file 20150812\_A375SR\_Phospho\_BR1\_05 Scan 12202 Method FTMS; HCD Score 80.24 m/z 607.31 Gene names MYCBP2

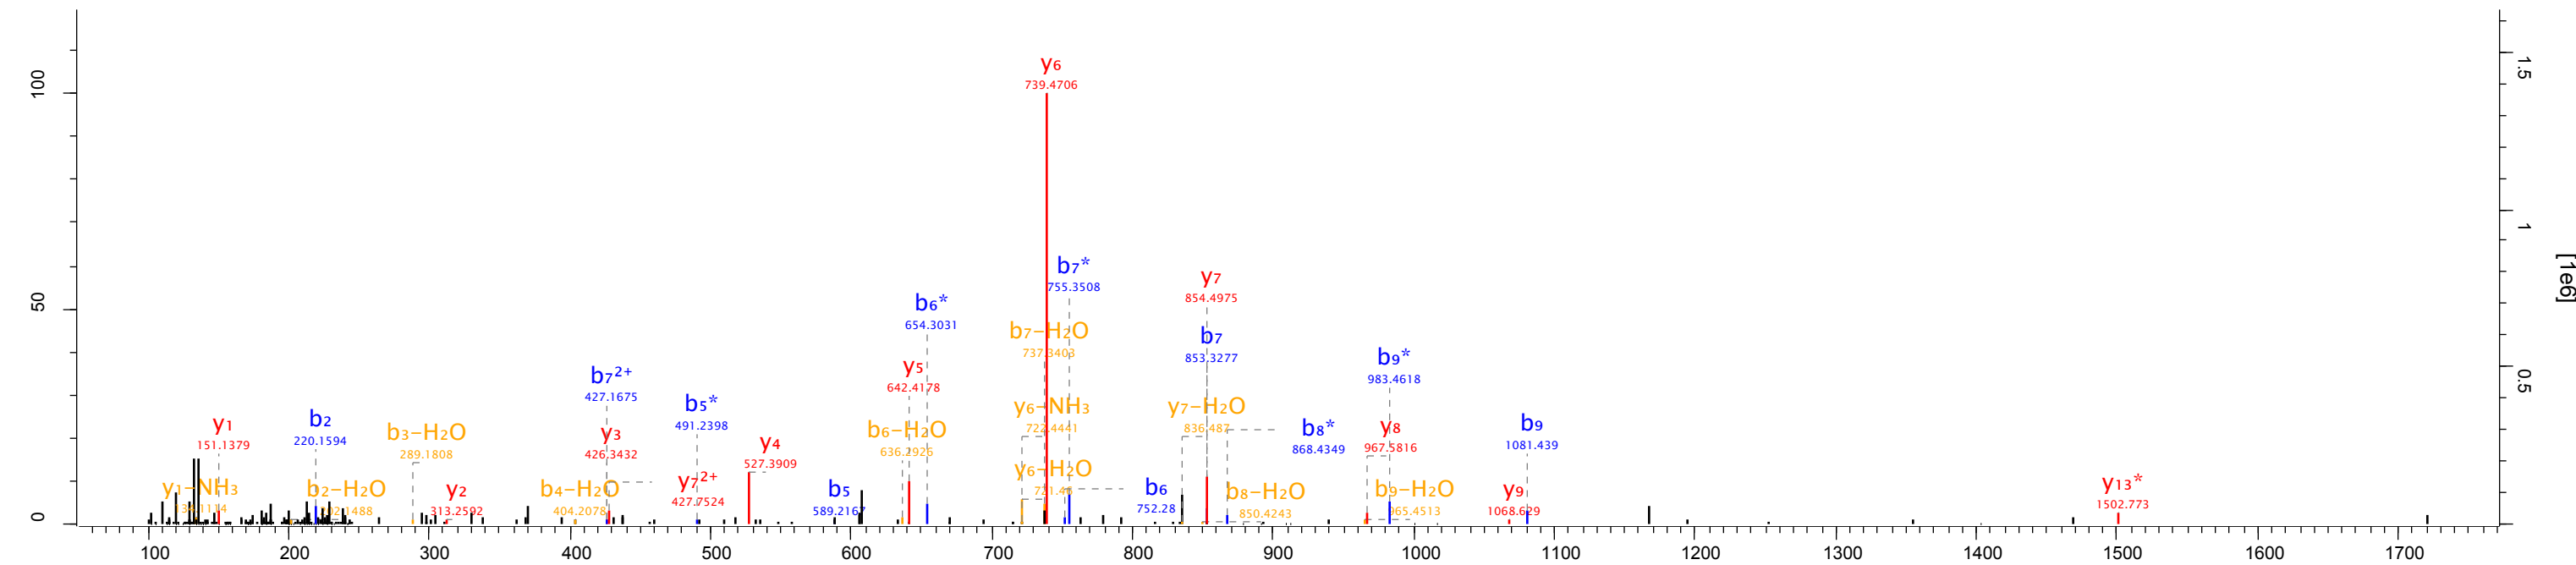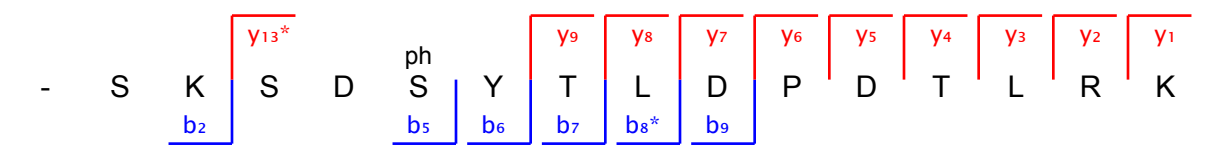

Raw file 20150812\_A375SR\_Phospho\_BR1\_05 Scan 14202 Method FTMS; HCD Score 130.1 m/z 615.8 Gene names CCNY

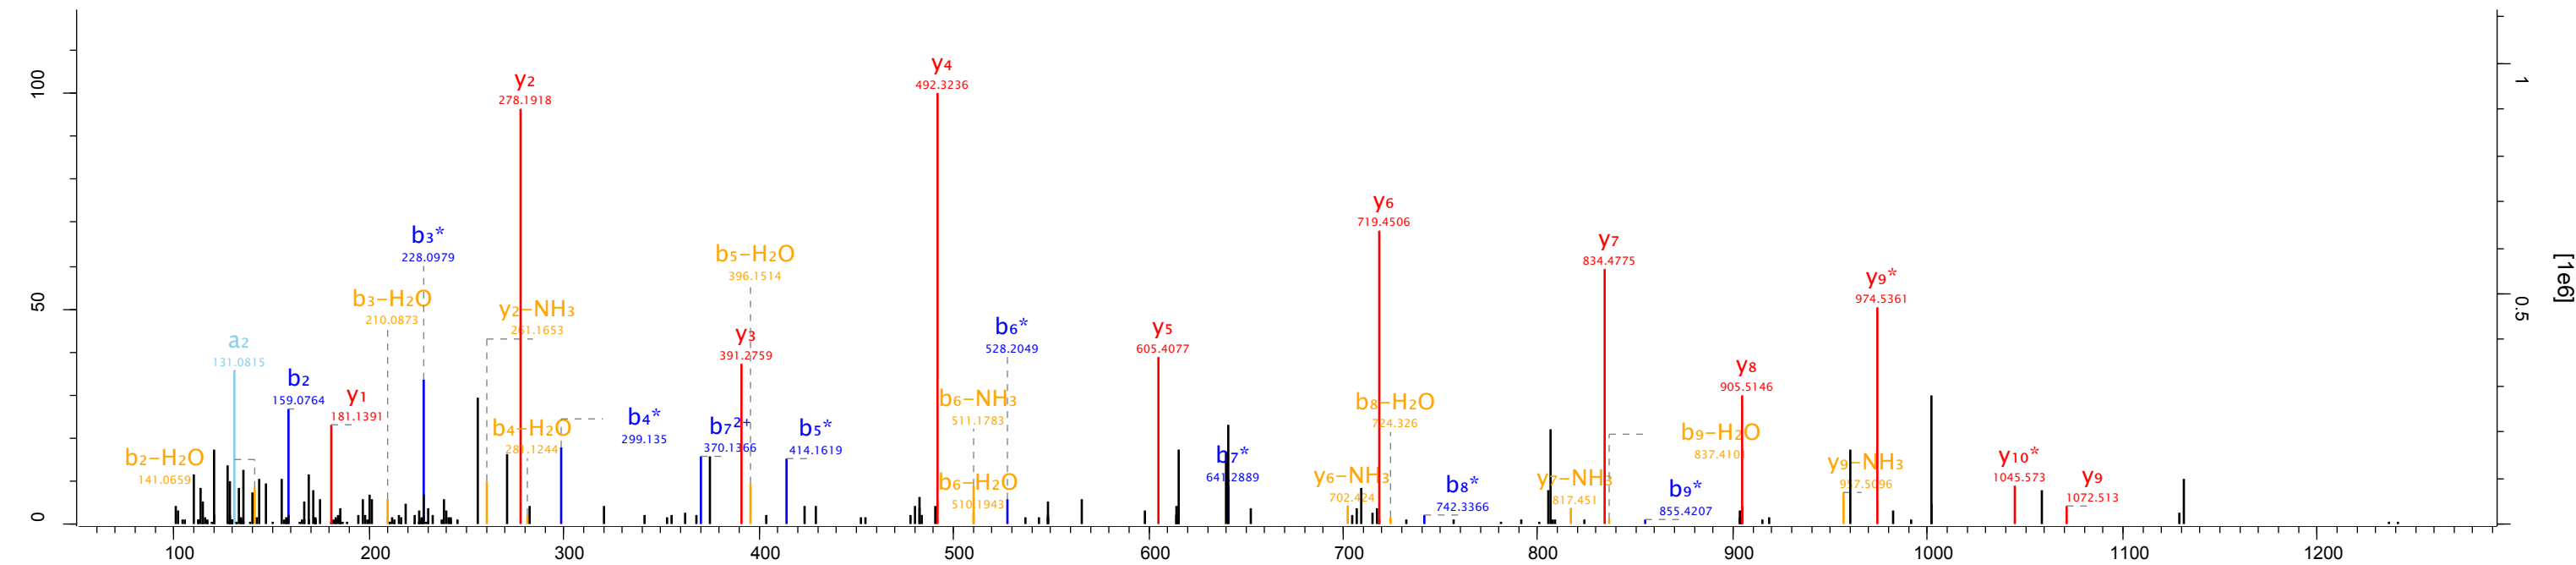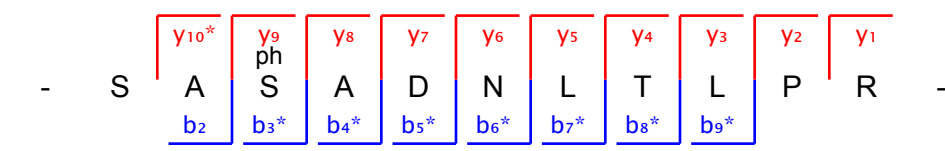

Raw file 20150812\_A375SR\_Phospho\_BR1\_05 Scan 14352 Method FTMS; HCD Score 126.19 m/z 669.79 Gene names STRIP2

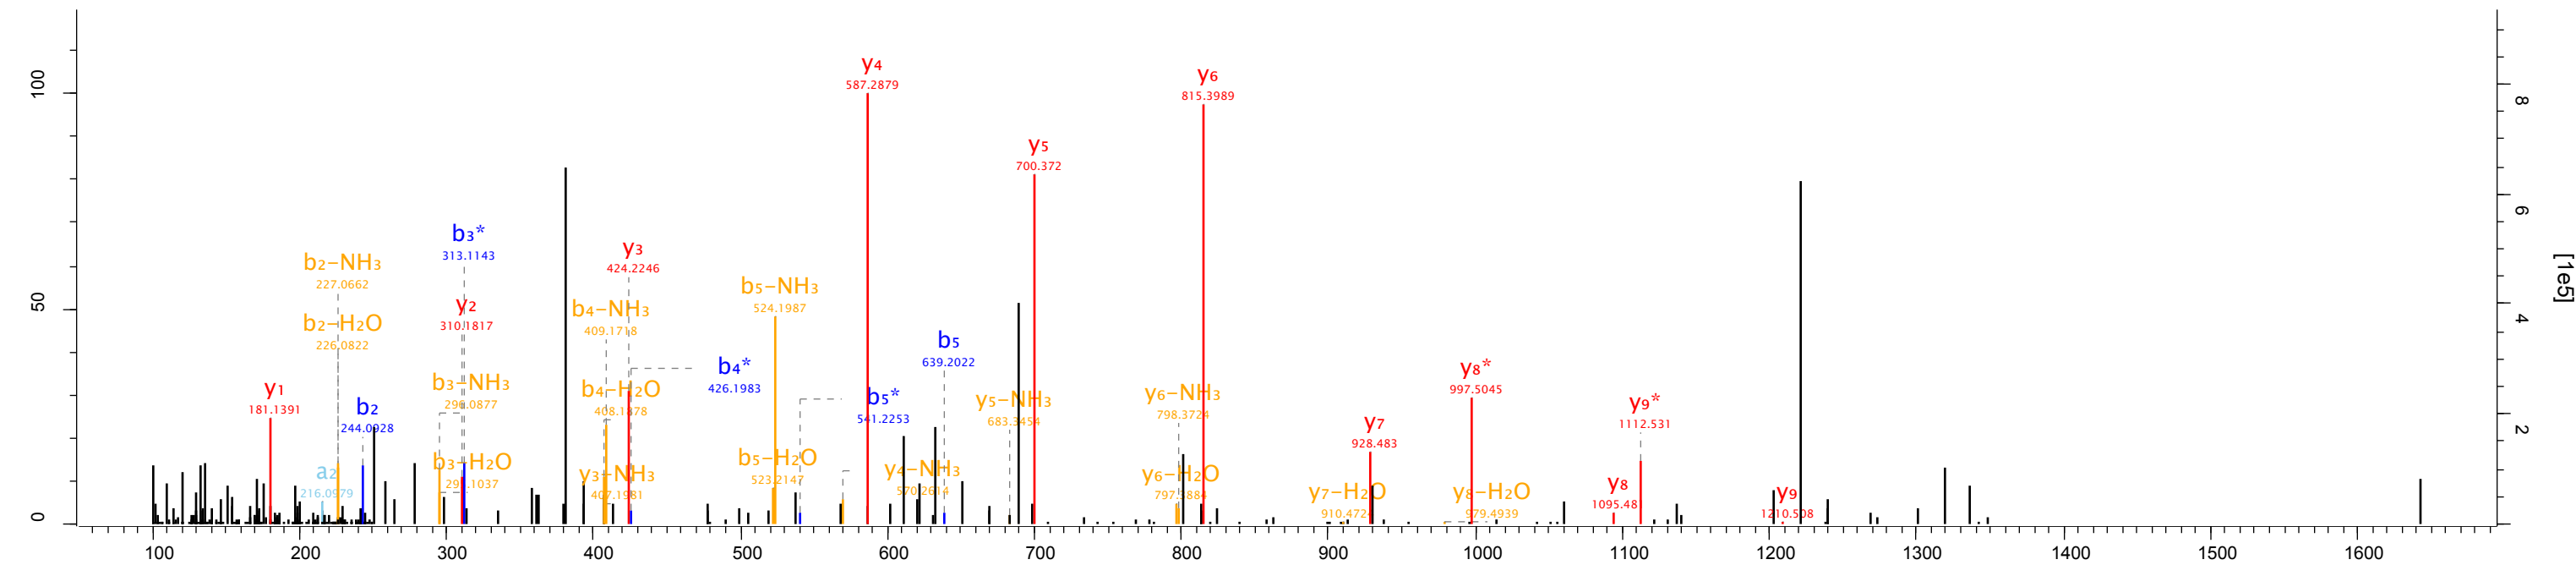

- Q D S L D I Y N E R -  
 b2 b3\* b4\* b5

Raw file 20150812\_A375SR\_Phospho\_BR1\_05 Scan 14792 Method FTMS; HCD Score 87.41 m/z 849.39 Gene names FARP2

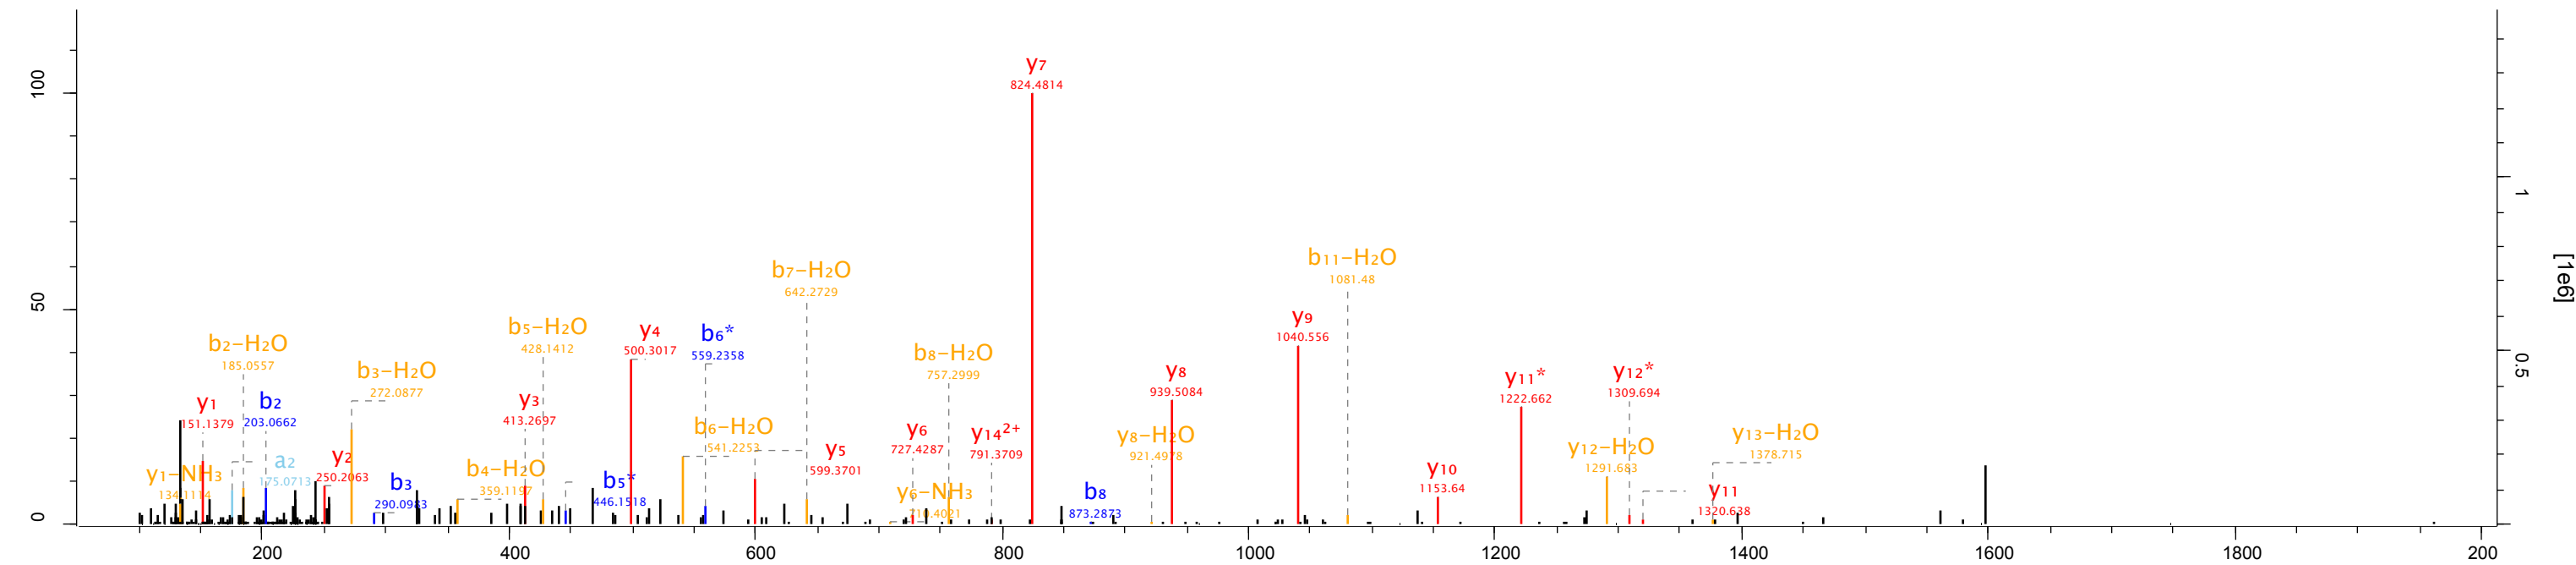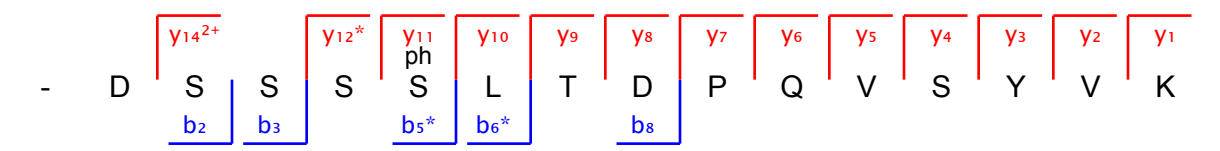

Raw file: 20150812\_A375SR\_Phospho\_BR1\_05  
 Scan: 1522 Method: FTMS; HCD Score: 129.15 m/z: 561.75 Gene names: TNIP1

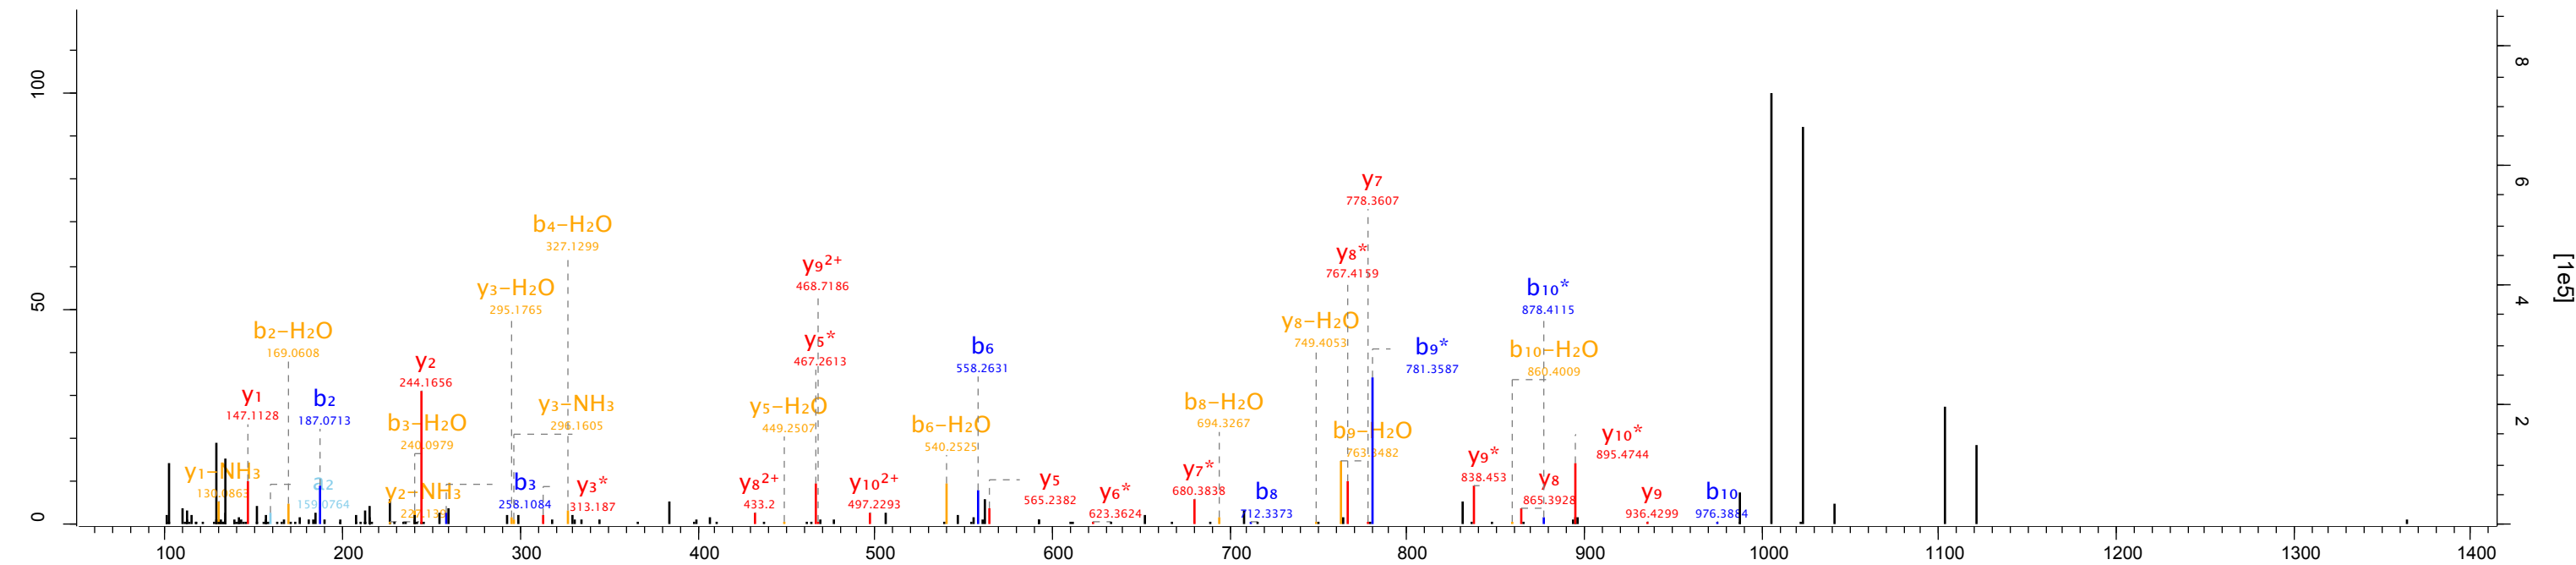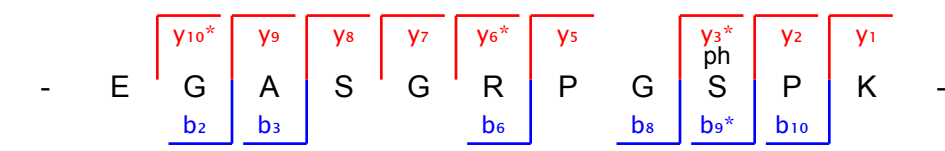

Raw file: 20150812\_A375SR\_Phospho\_BR1\_05  
 Scan: 15862 Method: FTMS; HCD Score: 55.75 m/z: 711.64 Gene names: LINC00614

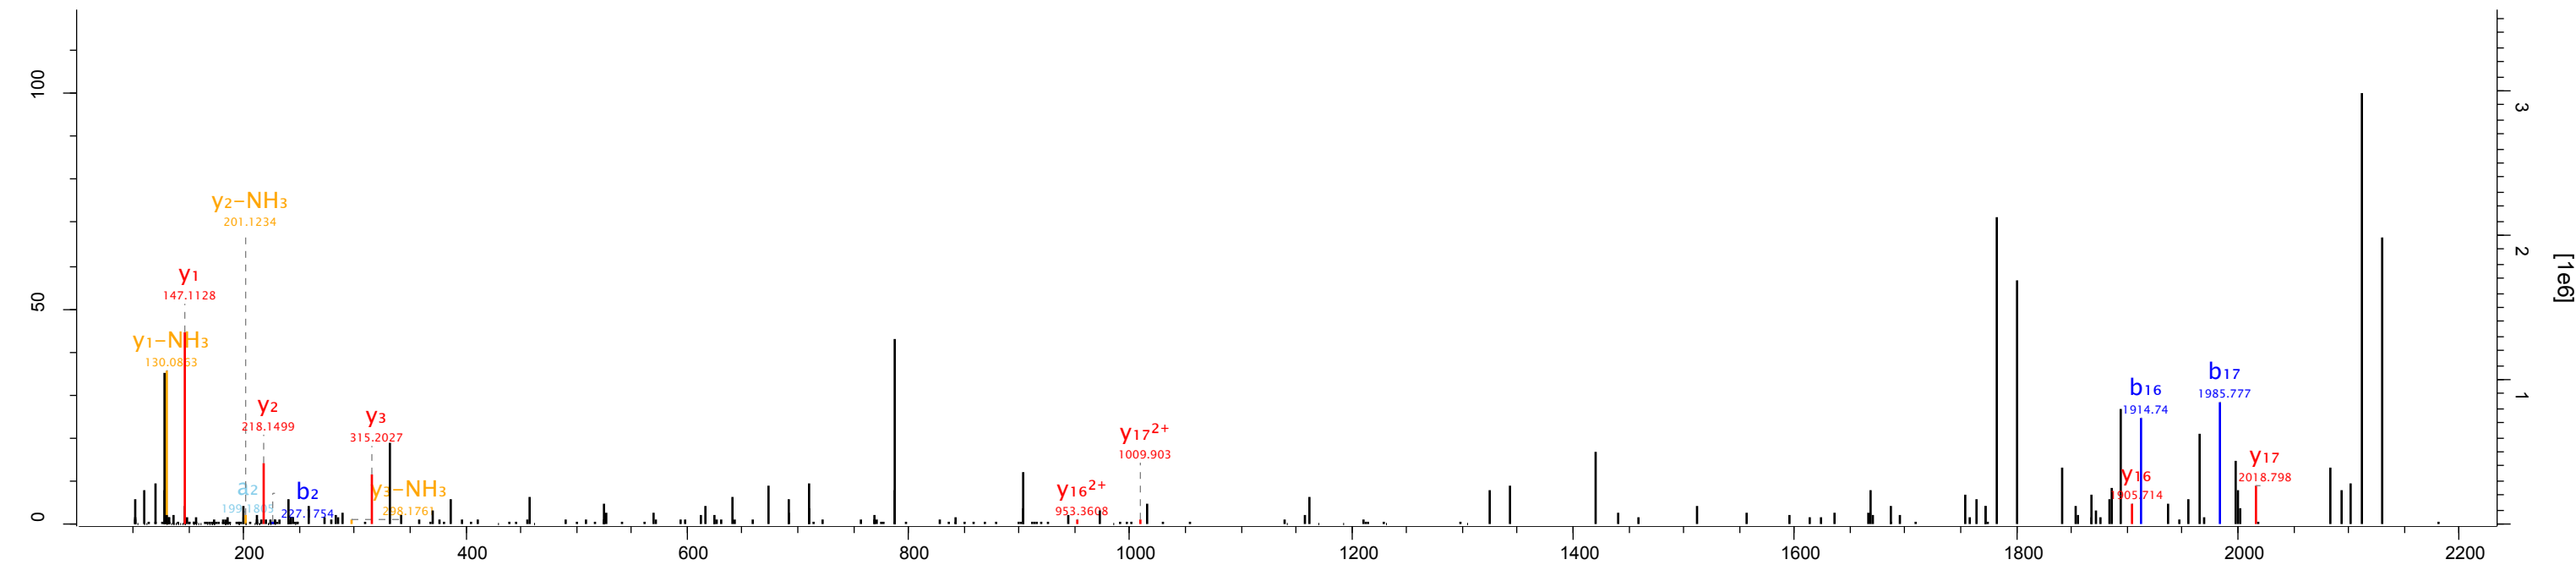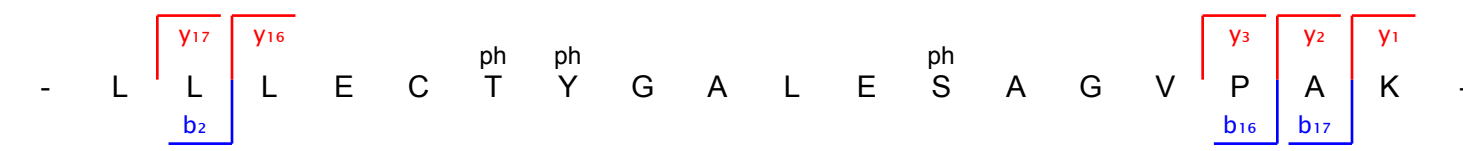

Raw file 20150812\_A375SR\_Phospho\_BR1\_05 Scan 15882 Method FTMS; HCD Score 143.88 m/z 786.85 Gene names PKN2

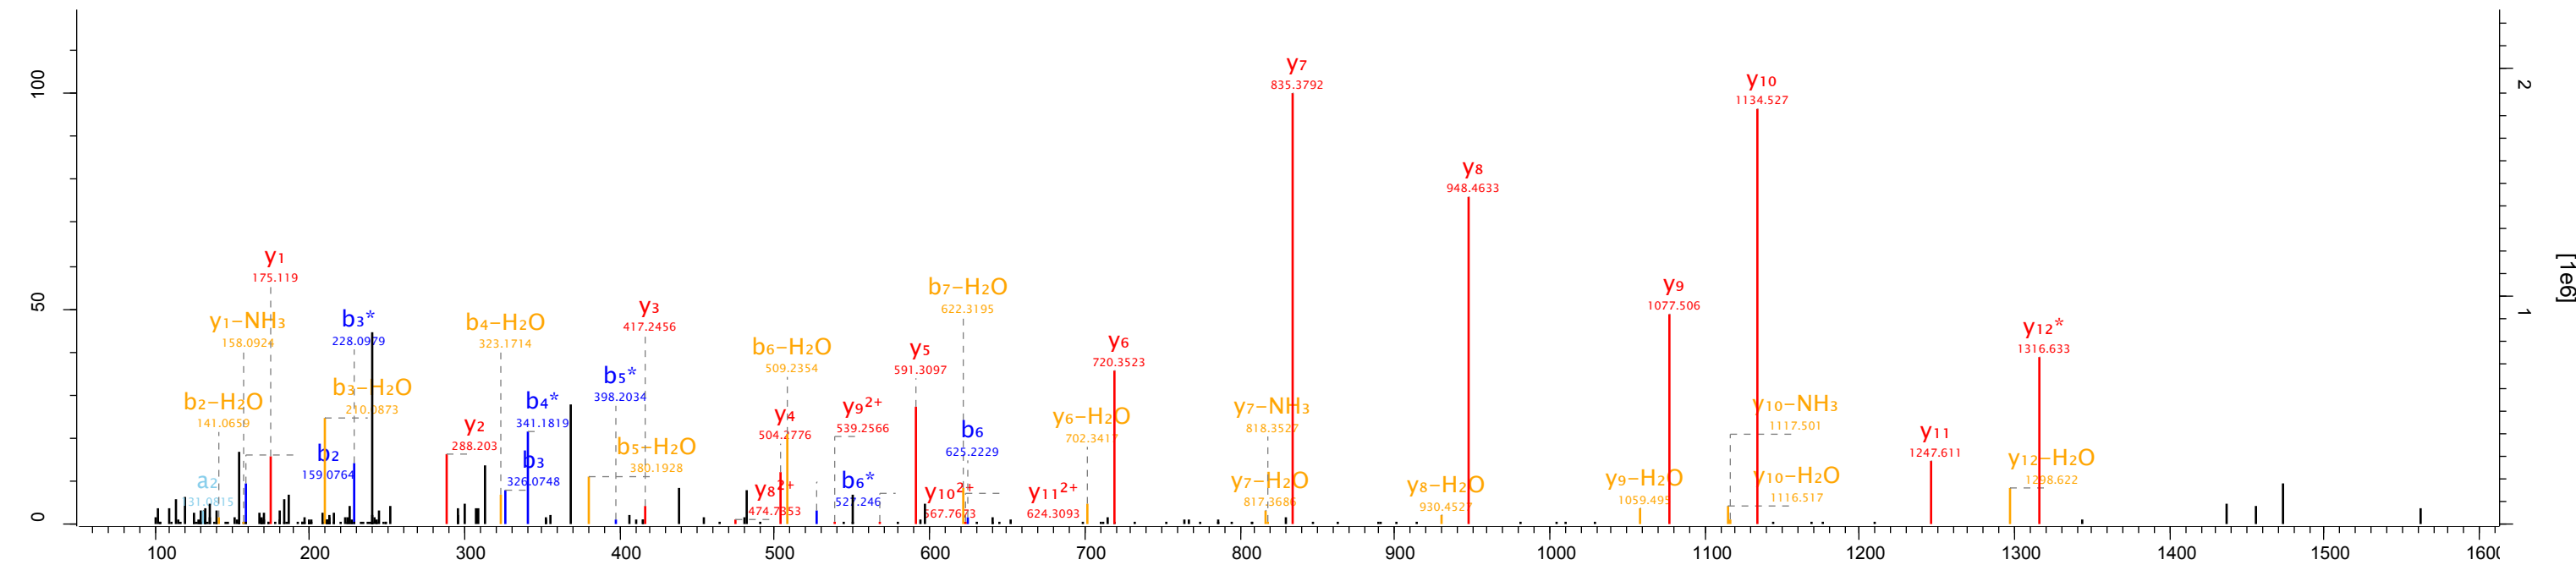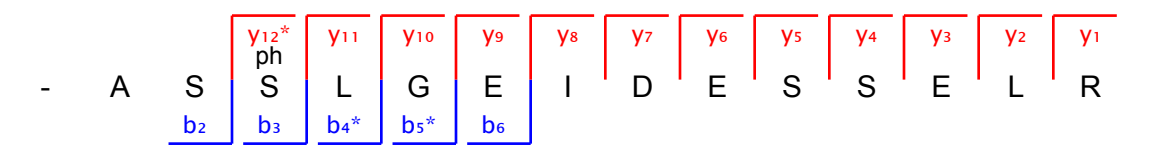

Raw file 20150812\_A375SR\_Phospho\_BR1\_05 Scan 16402 Method FTMS; HCD Score 77.18 m/z 731.34 Gene names NEDD4L;ZNF227

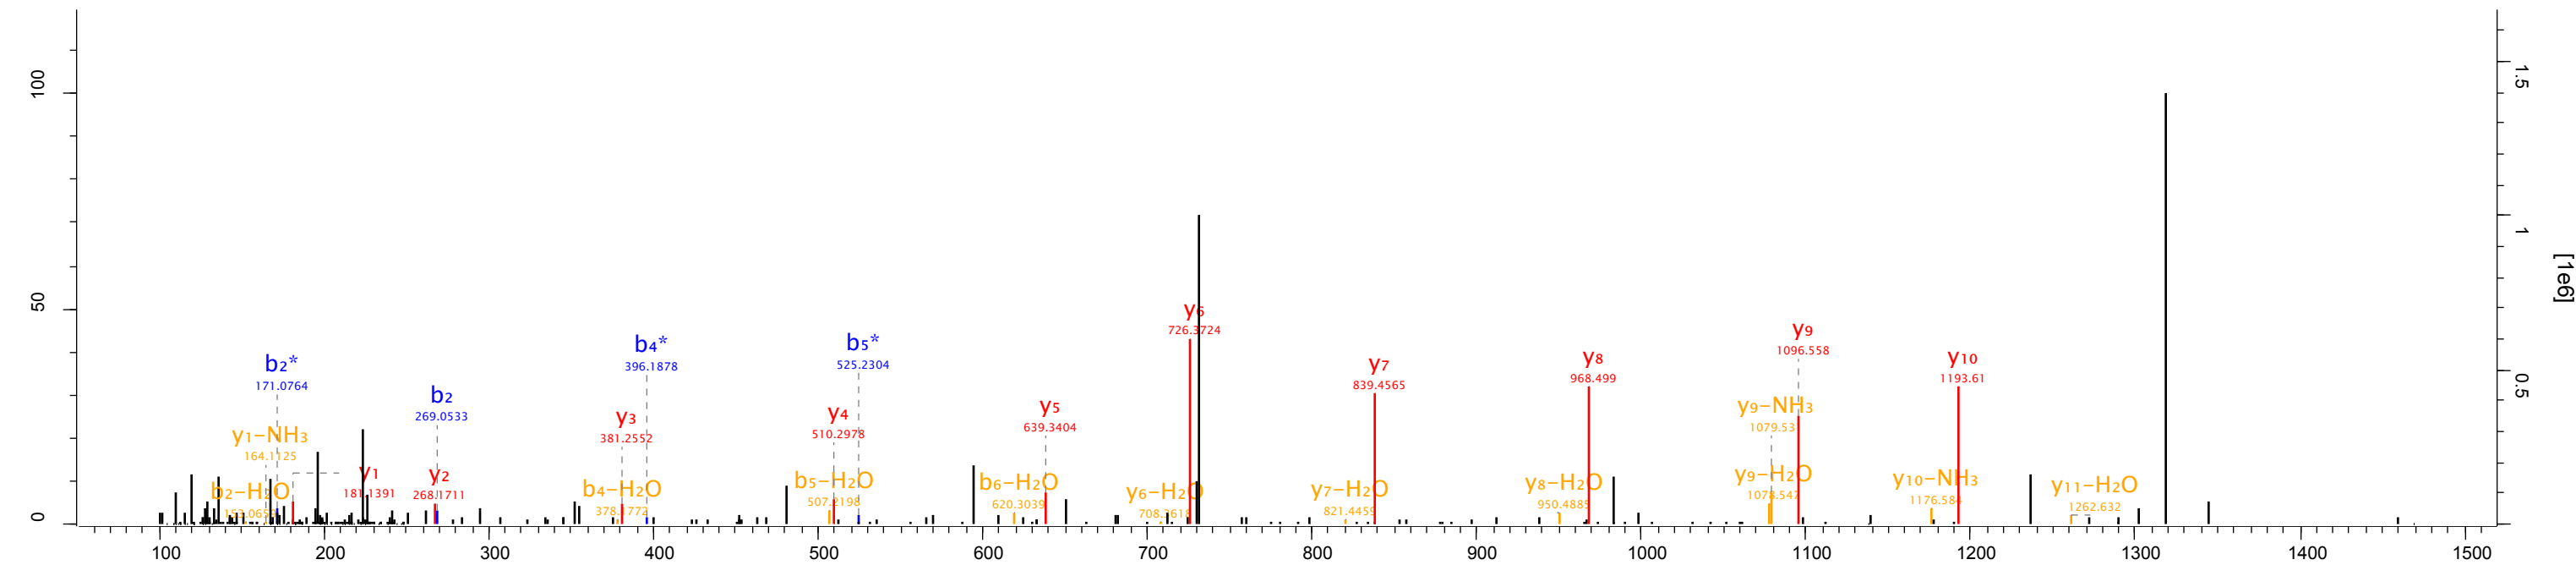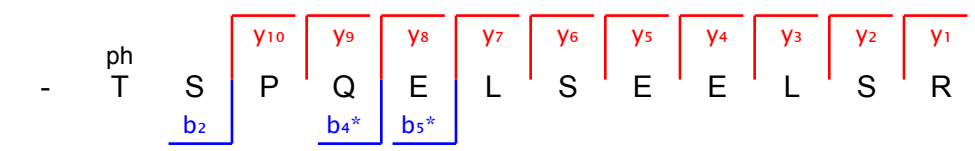



Raw file: 20150812\_A375SR\_Phospho\_BR1\_05  
 Scan: 1682 Method: FTMS; HCD Score: 150.9 m/z: 622.77 Gene names: TBC1D13

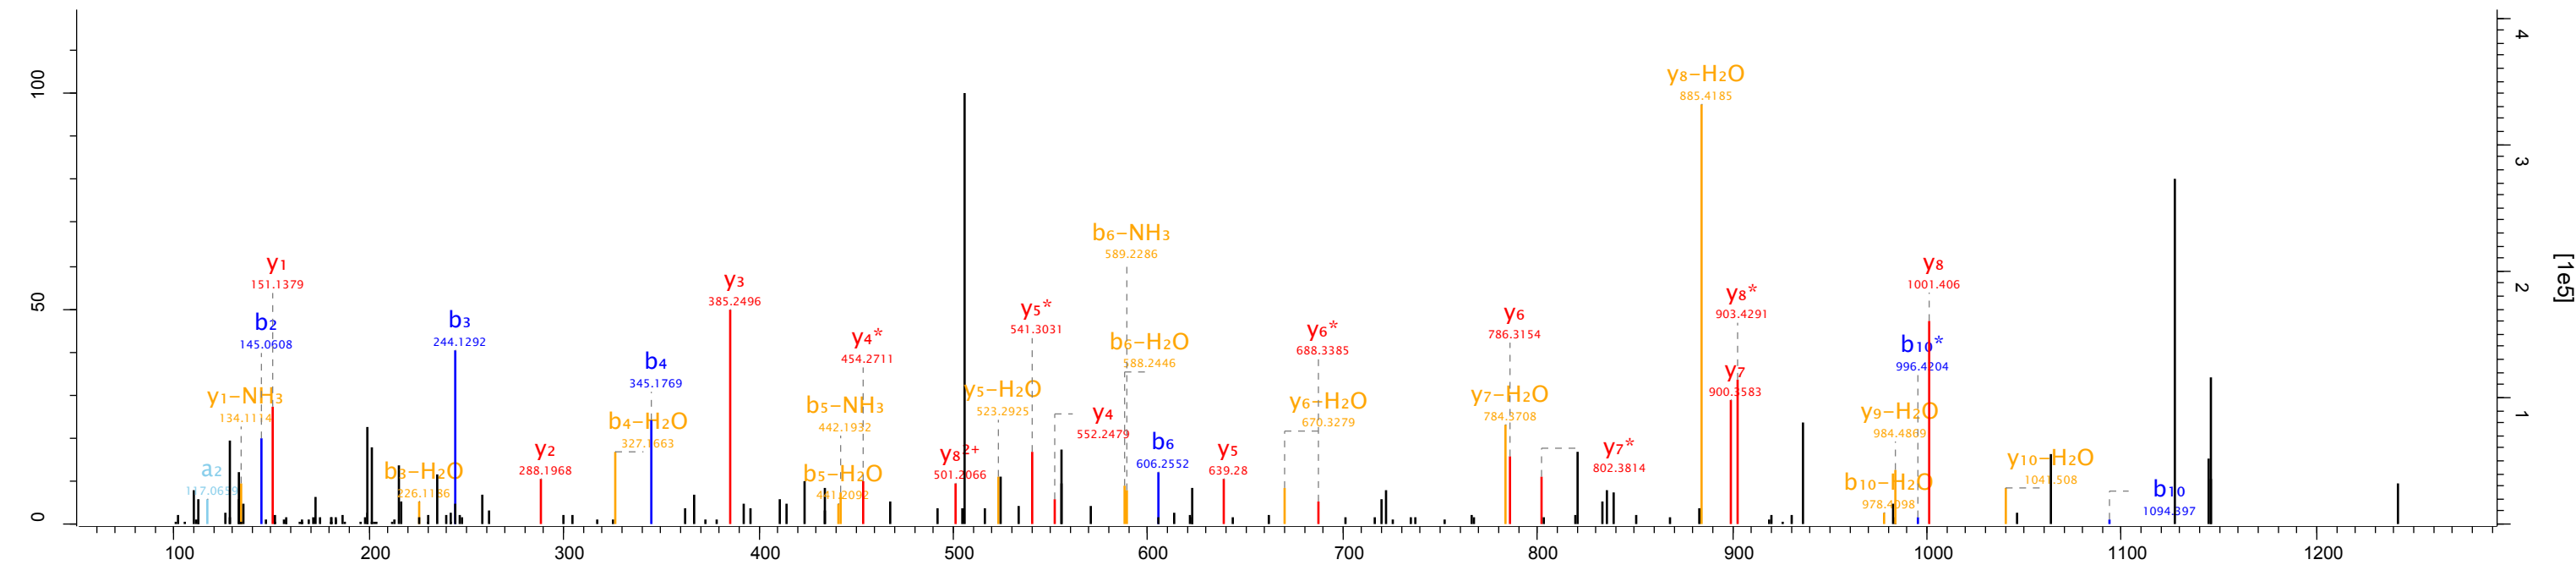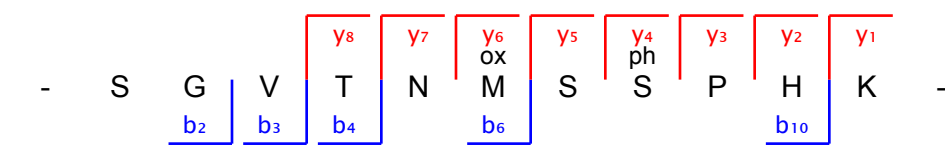

Raw file 20150812\_A375SR\_Phospho\_BR1\_05 Scan 16932 Method FTMS; HCD Score 225.29 m/z 687.98 Gene names USP8

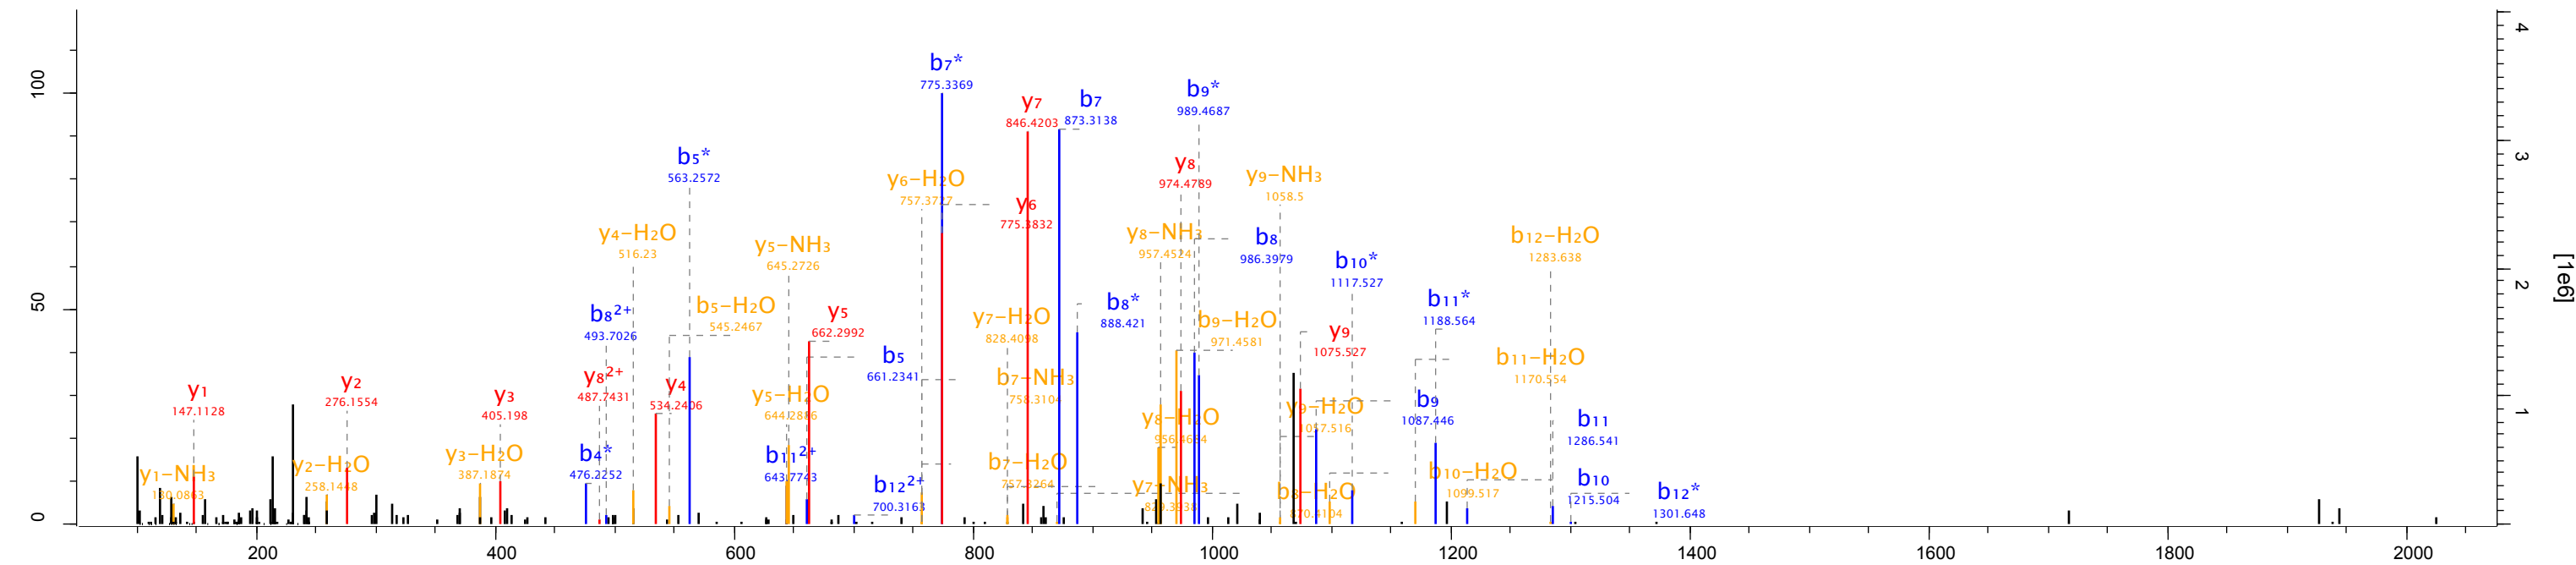

- R S Y S S P D I T Q A I Q E E E K -

ph

b4\* b5 b7 b8 b9 b10 b11 b12\*

y9 y8 y7 y6 y5 y4 y3 y2 y1

Raw file: 20150812\_A375SR\_Phospho\_BR1\_05  
 Scan: 17252 Method: FTMS; HCD Score: 212 m/z: 1047.51 Gene names: CPEB4

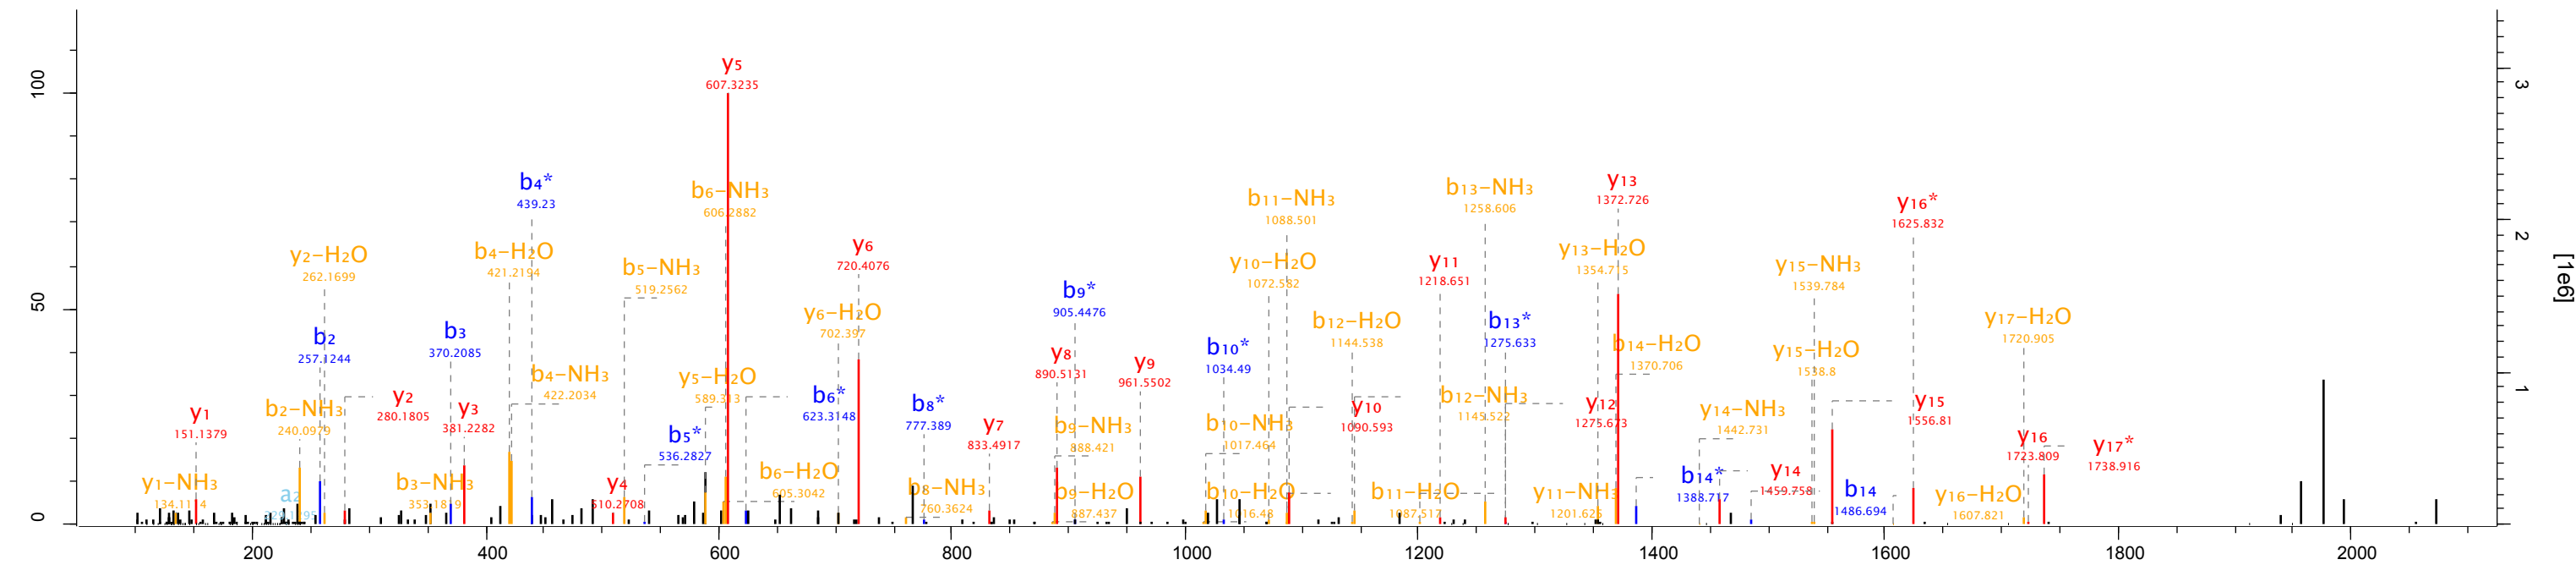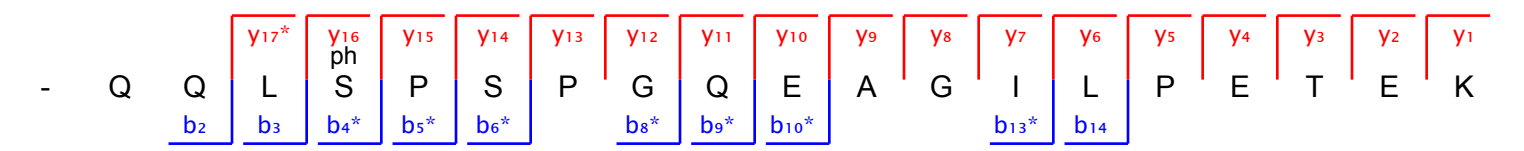

Raw file 20150812\_A375SR\_Phospho\_BR1\_05 Scan 17492 Method FTMS; HCD Score 227.59 m/z 815.69 Gene names PHLDB2

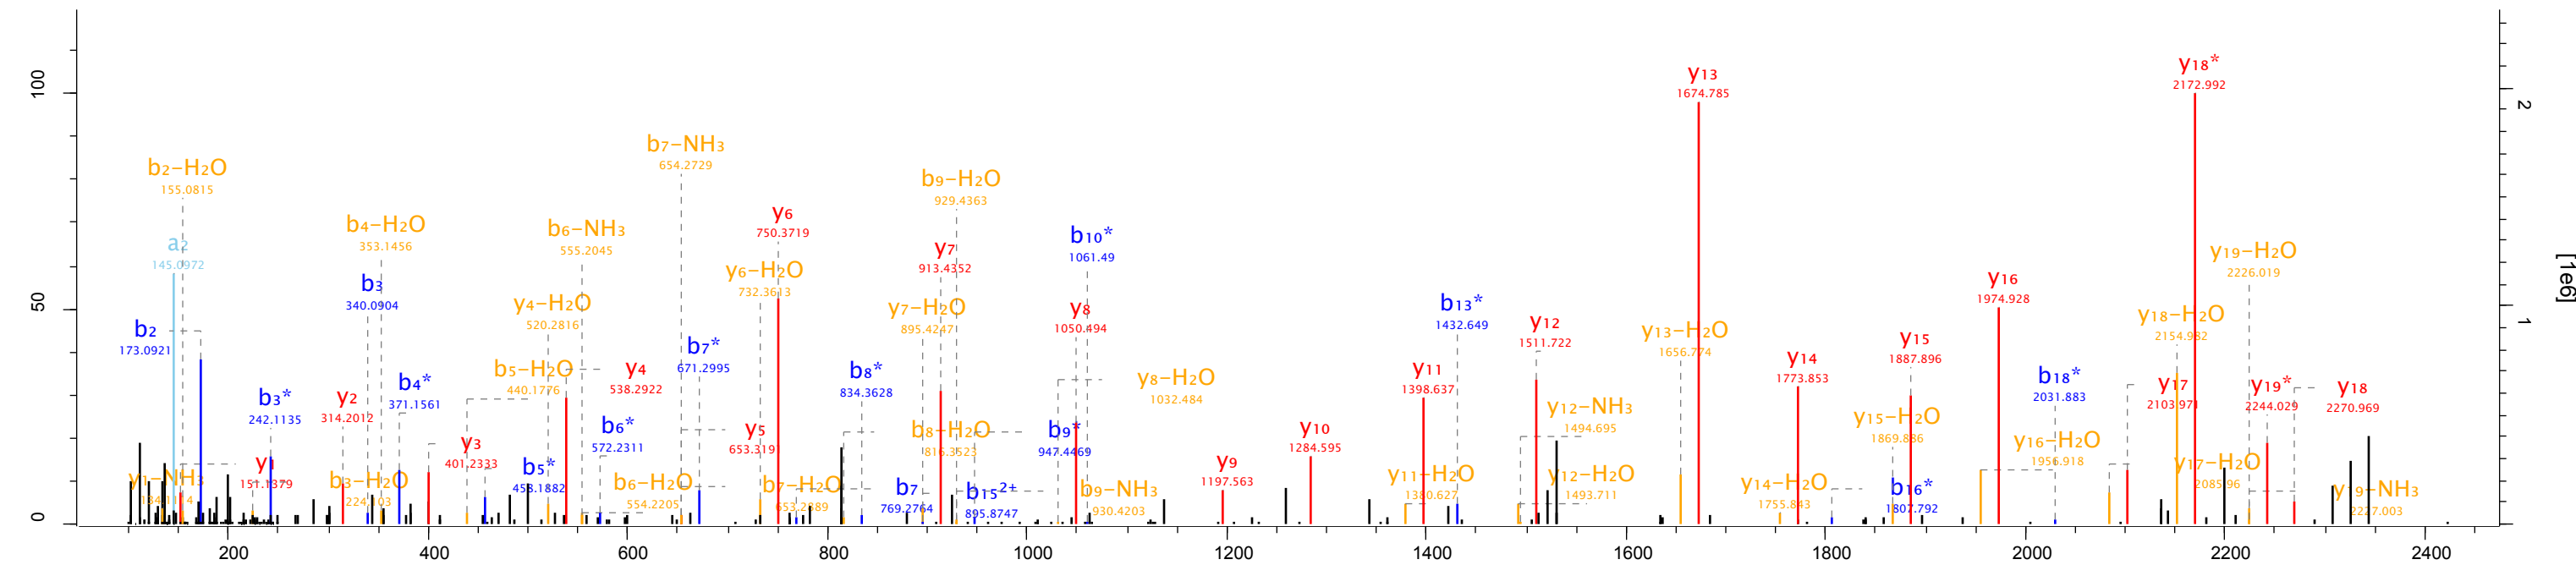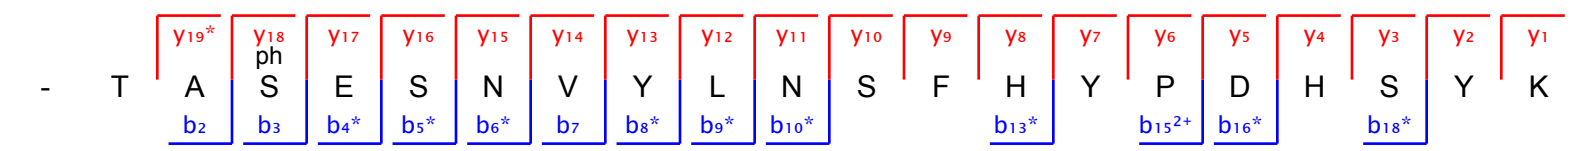

Raw file 20150812\_A375SR\_Phospho\_BR1\_05 Scan 18572 Method FTMS; HCD Score 48.98 m/z 644.33 Gene names PRIM1

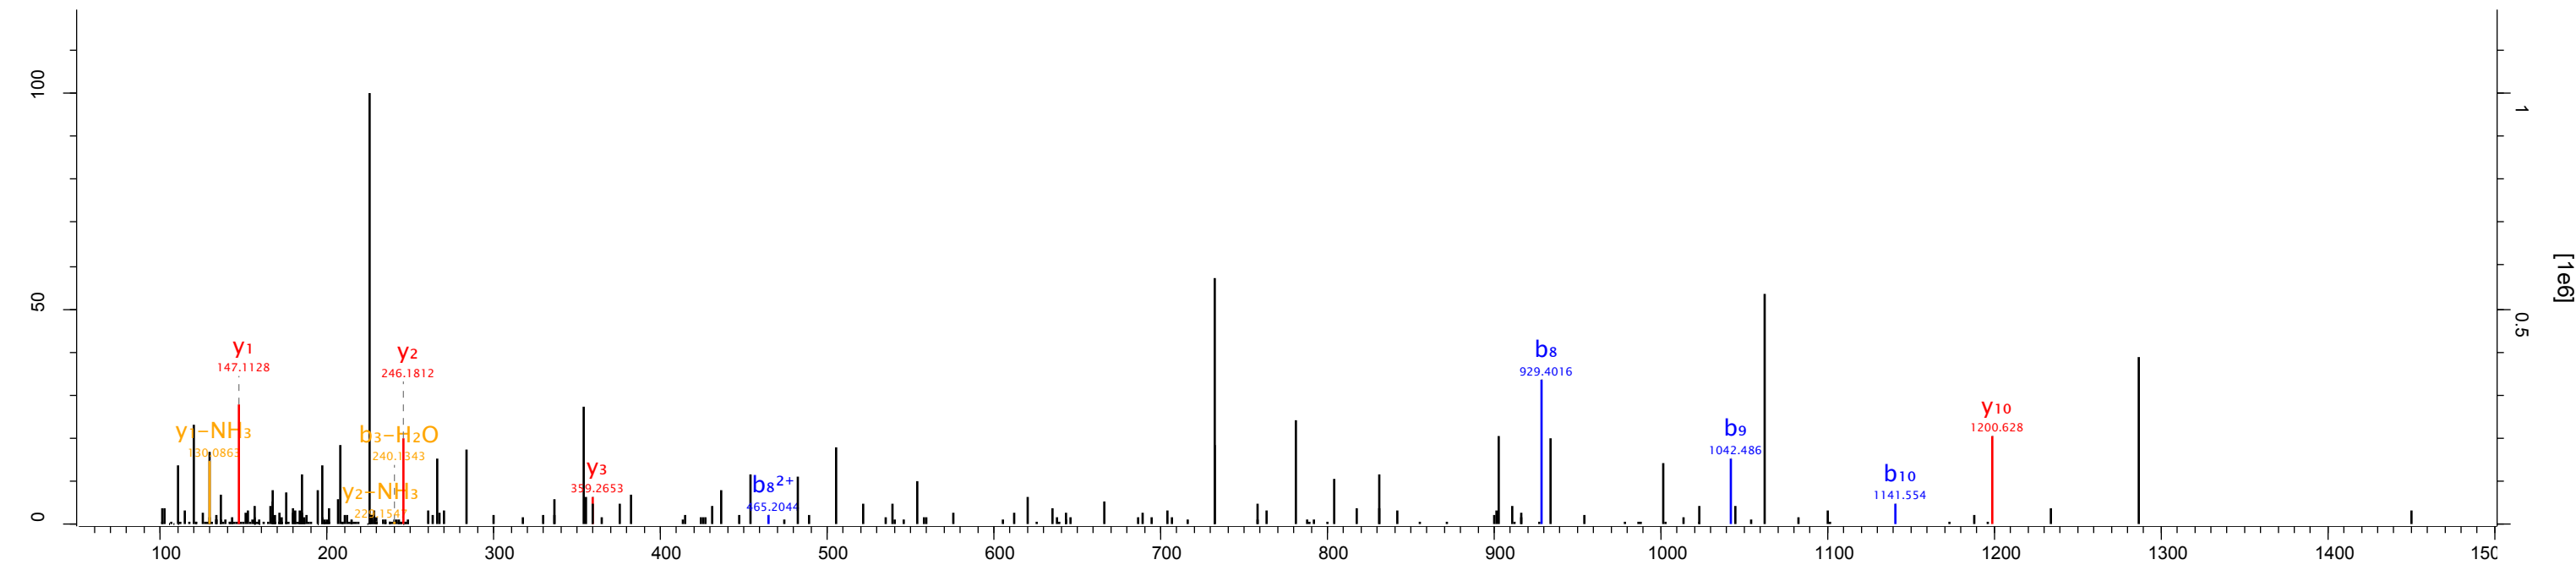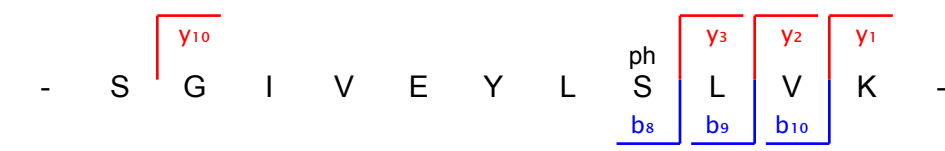

Raw file: 20150812\_A375SR\_Phospho\_BR1\_05  
 Scan: 18772 Method: FTMS; HCD Score: 168.91 m/z: 742.83 Gene names: MTCL1

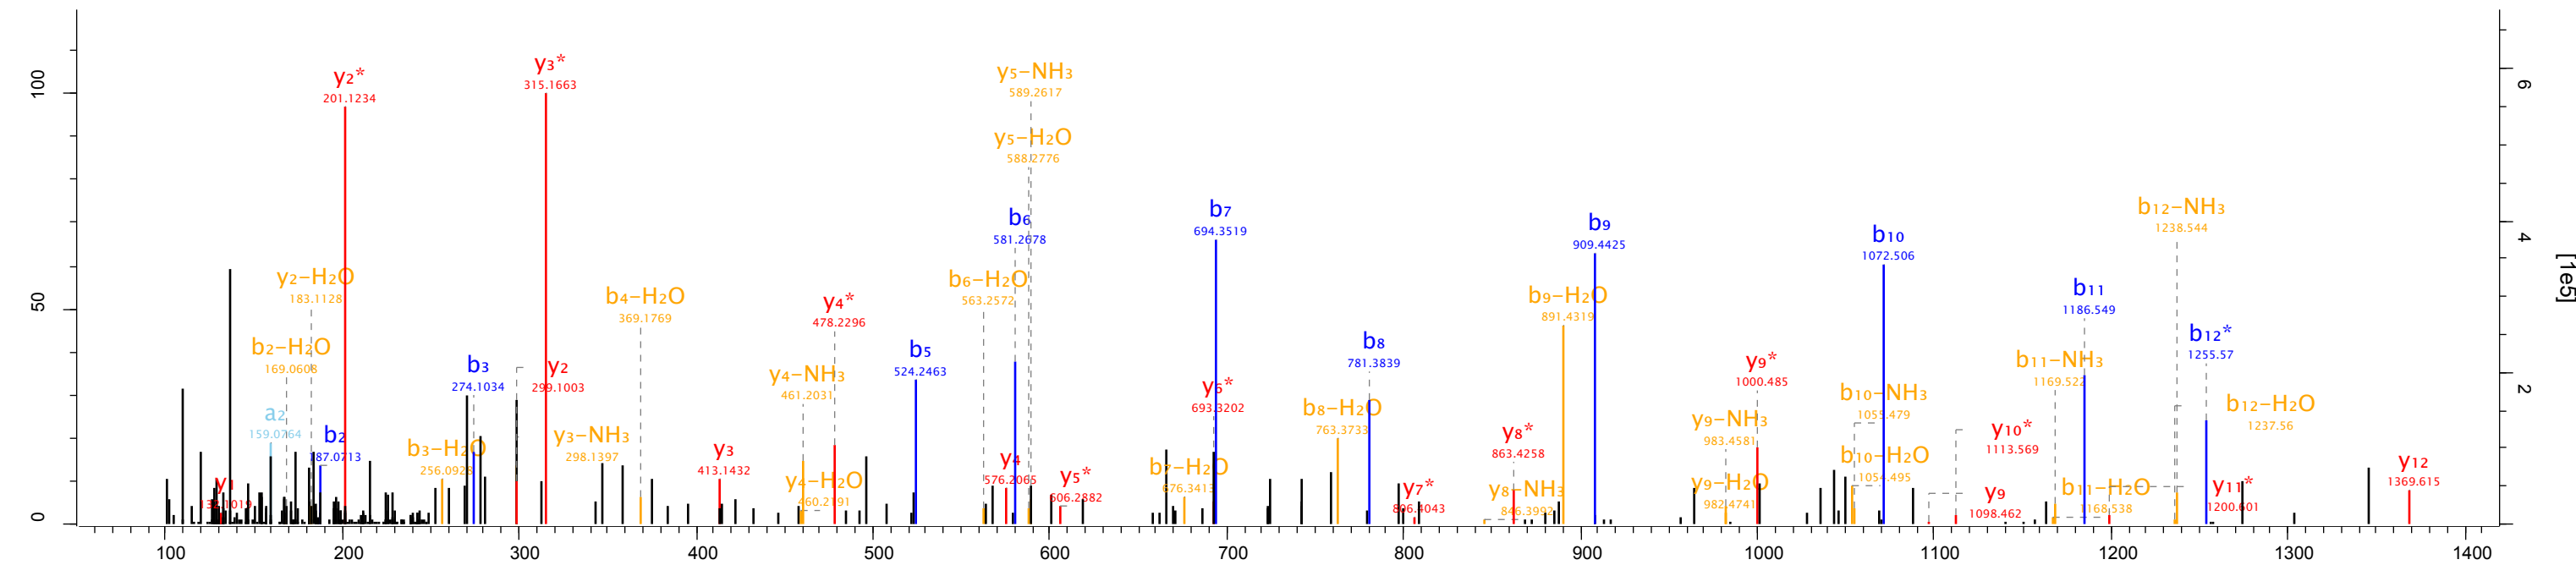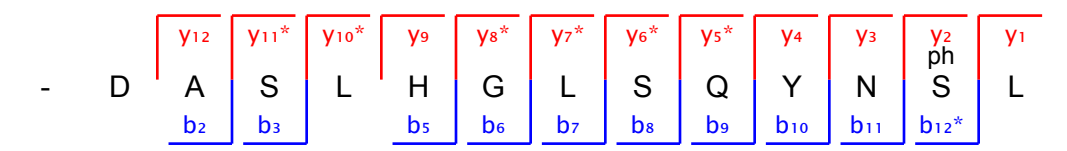

Raw file: 20150812\_A375SR\_Phospho\_BR1\_05  
 Scan: 19482 Method: FTMS; HCD Score: 216.6 m/z: 790.38 Gene names: INPP5F

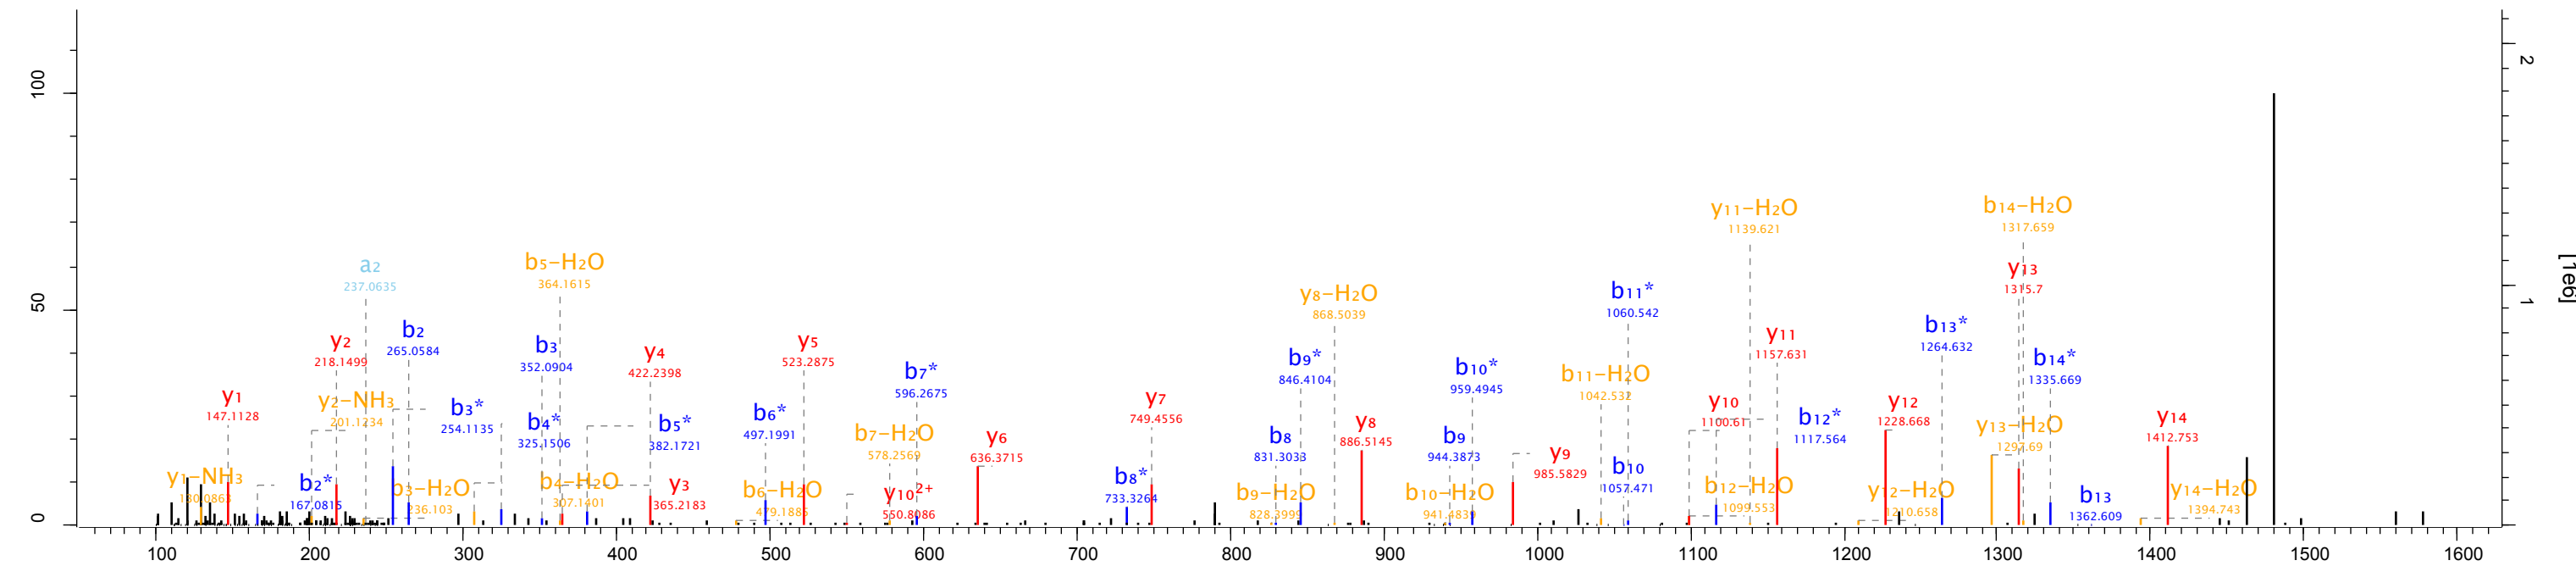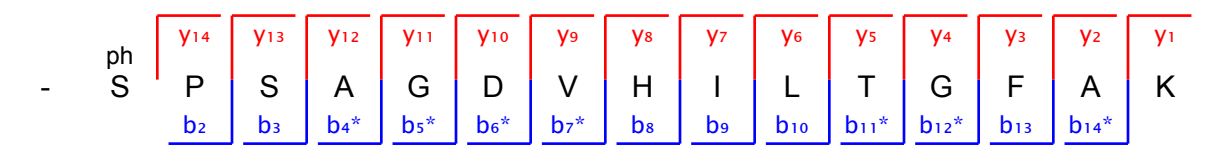

Raw file: 20150812\_A375SR\_Phospho\_BR1\_05  
 Scan: 1962 Method: FTMS; HCD Score: 207.54 m/z: 893.89 Gene names: BCLAF1

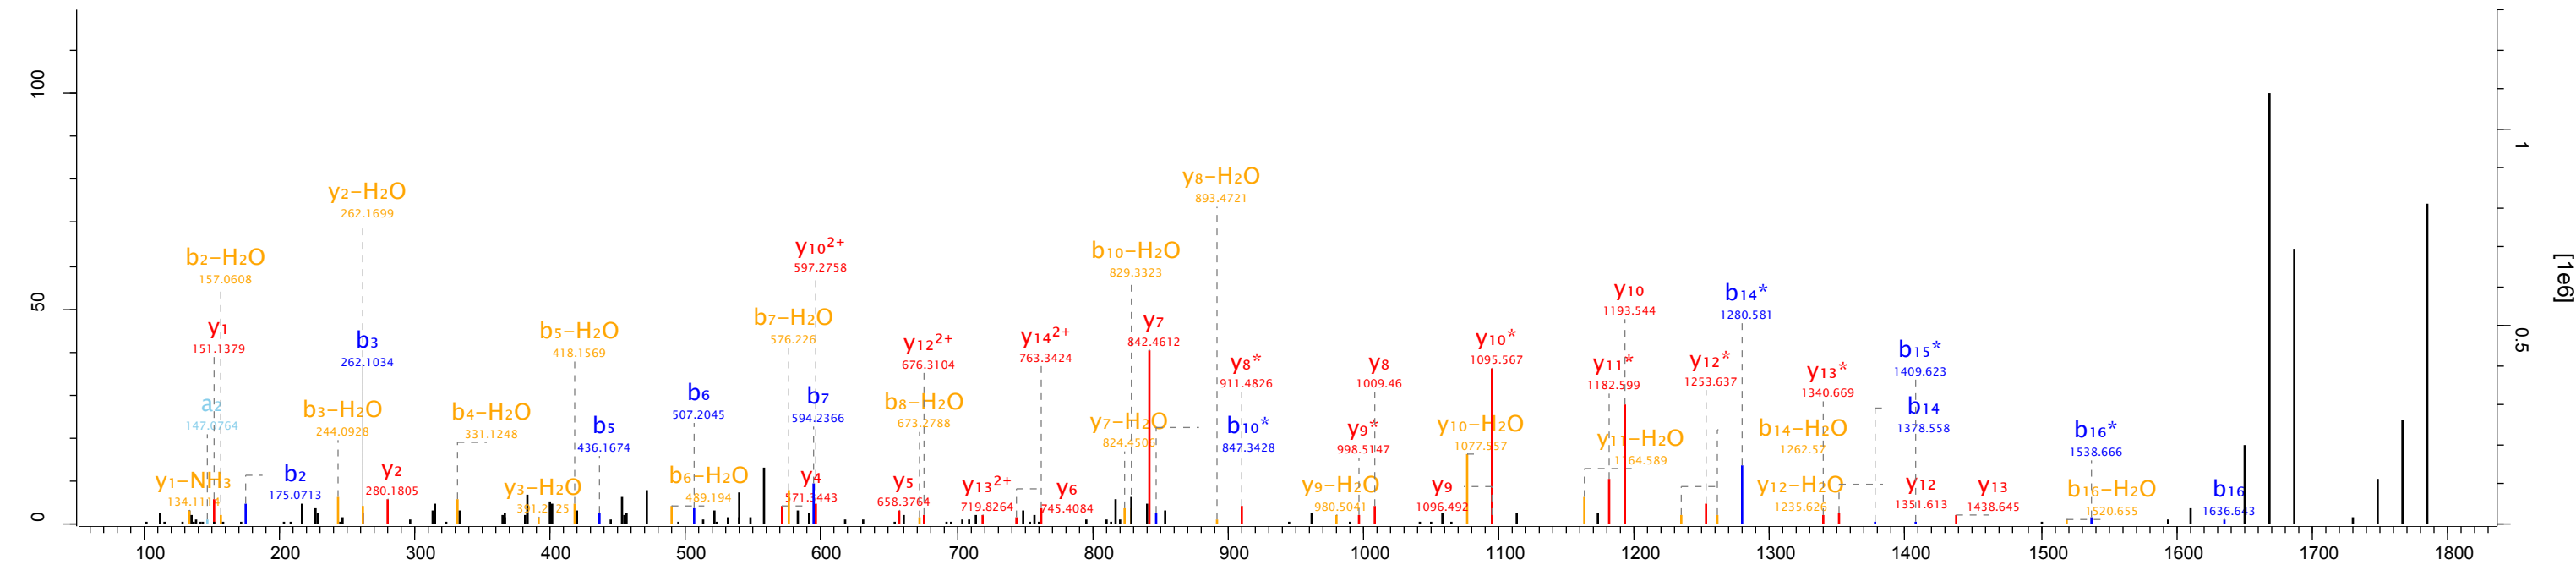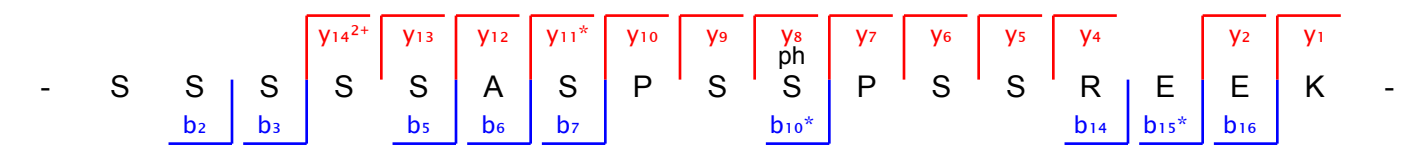



Raw file: 20150812\_A375SR\_Phospho\_BR1\_05  
 Scan: 19762 Method: FTMS; HCD Score: 238.87 m/z: 957.44 Gene names: ATXN2L

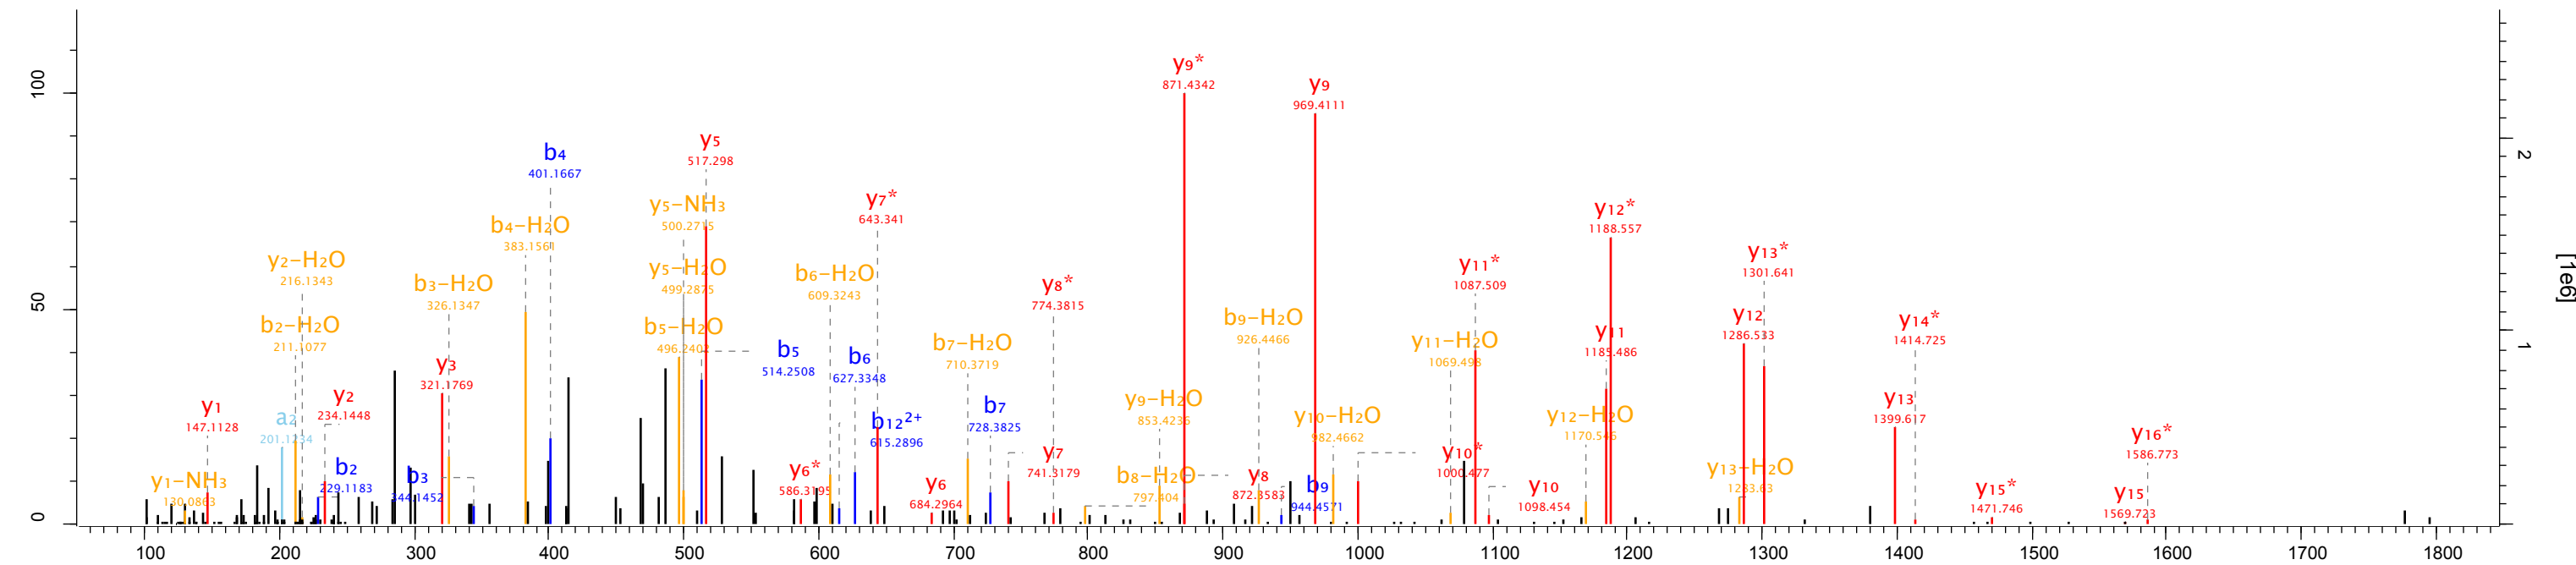

Peptide sequence: - E V D G L L T S E P M G S P V S S K -

Fragmentation sites (b and y ions) are indicated by boxes below the sequence:

- Blue boxes (b ions): b<sub>2</sub> (V-D), b<sub>3</sub> (D-G), b<sub>4</sub> (G-L), b<sub>5</sub> (L-L), b<sub>6</sub> (L-T), b<sub>7</sub> (T-S), b<sub>9</sub> (E-P), b<sub>12</sub><sup>2+</sup> (G-S)
- Red boxes (y ions): y<sub>1</sub> (S-P), y<sub>2</sub> (P-M), y<sub>3</sub> (M-G), y<sub>5</sub> (S-P), y<sub>6</sub> (P-V), y<sub>7</sub> (V-S), y<sub>8</sub> (S-S), y<sub>9</sub> (S-K), y<sub>10</sub> (K-), y<sub>11</sub> (-), y<sub>12</sub> (E), y<sub>13</sub> (V), y<sub>14</sub> (S), y<sub>15</sub> (S), y<sub>16</sub> (K)

Raw file Scan Method Score m/z Gene names

20150812\_A375SR\_Phospho\_BR1\_05 2142 FTMS; HCD 109.07 553.26 NCOR2

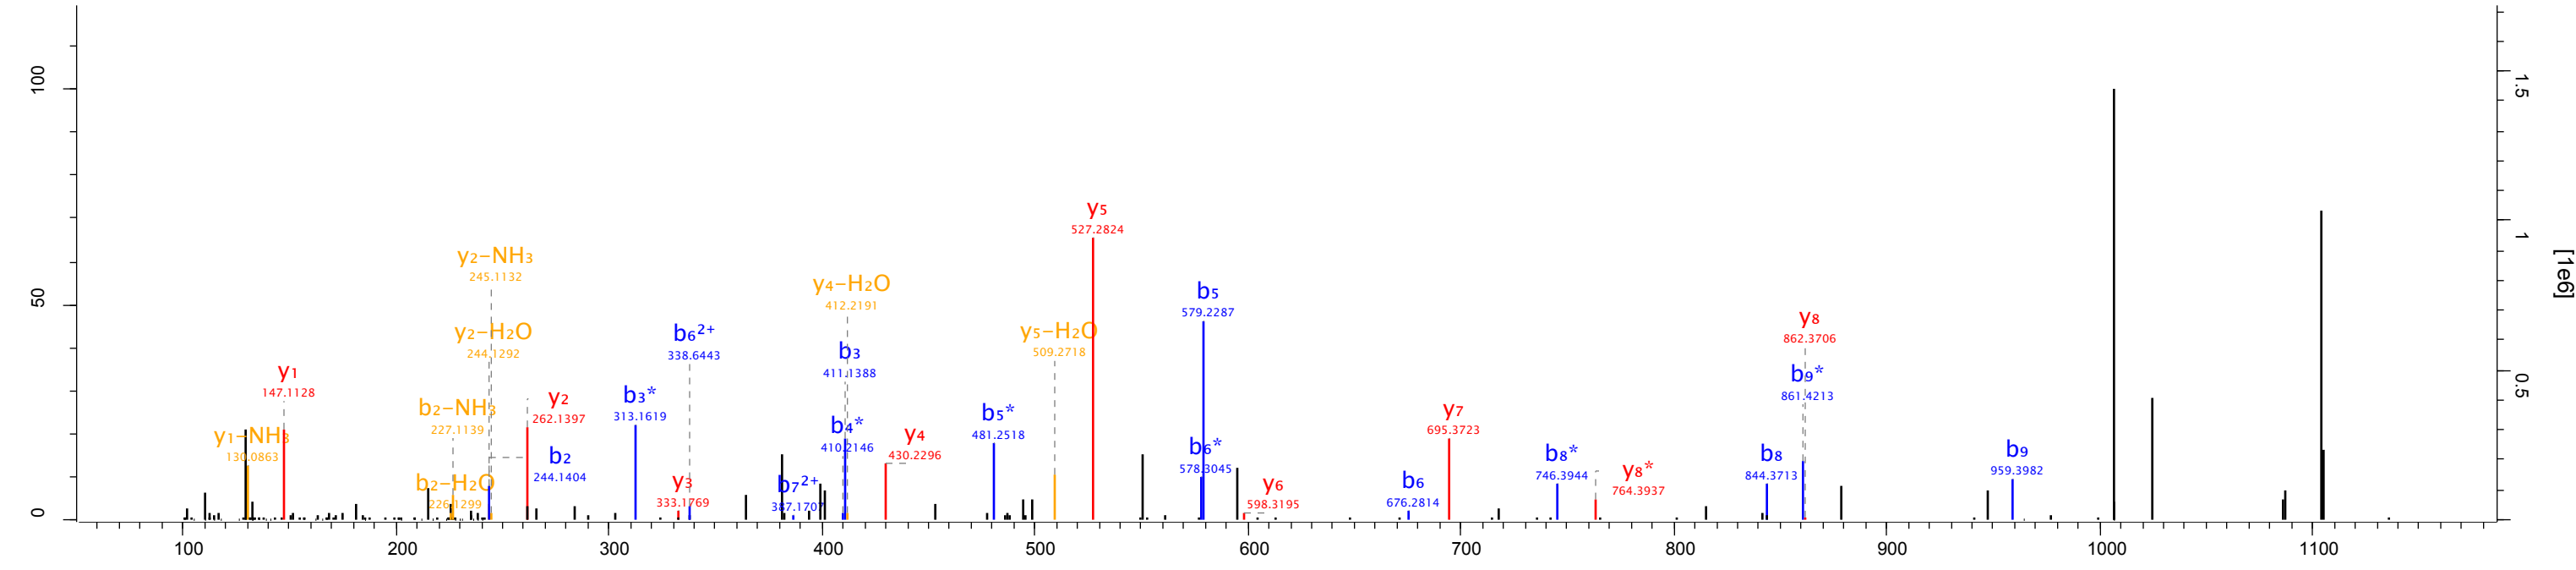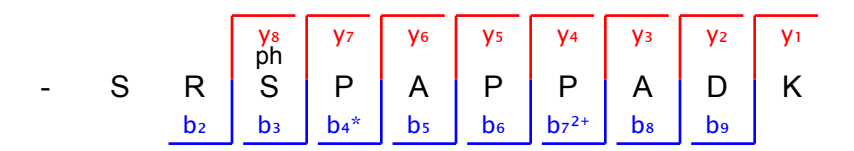

Raw file Scan Method Score m/z Gene names  
 20150812\_A375SR\_Phospho\_BR1\_05 22052 FTMS; HCD 199.85 922.92 ARHGDI4

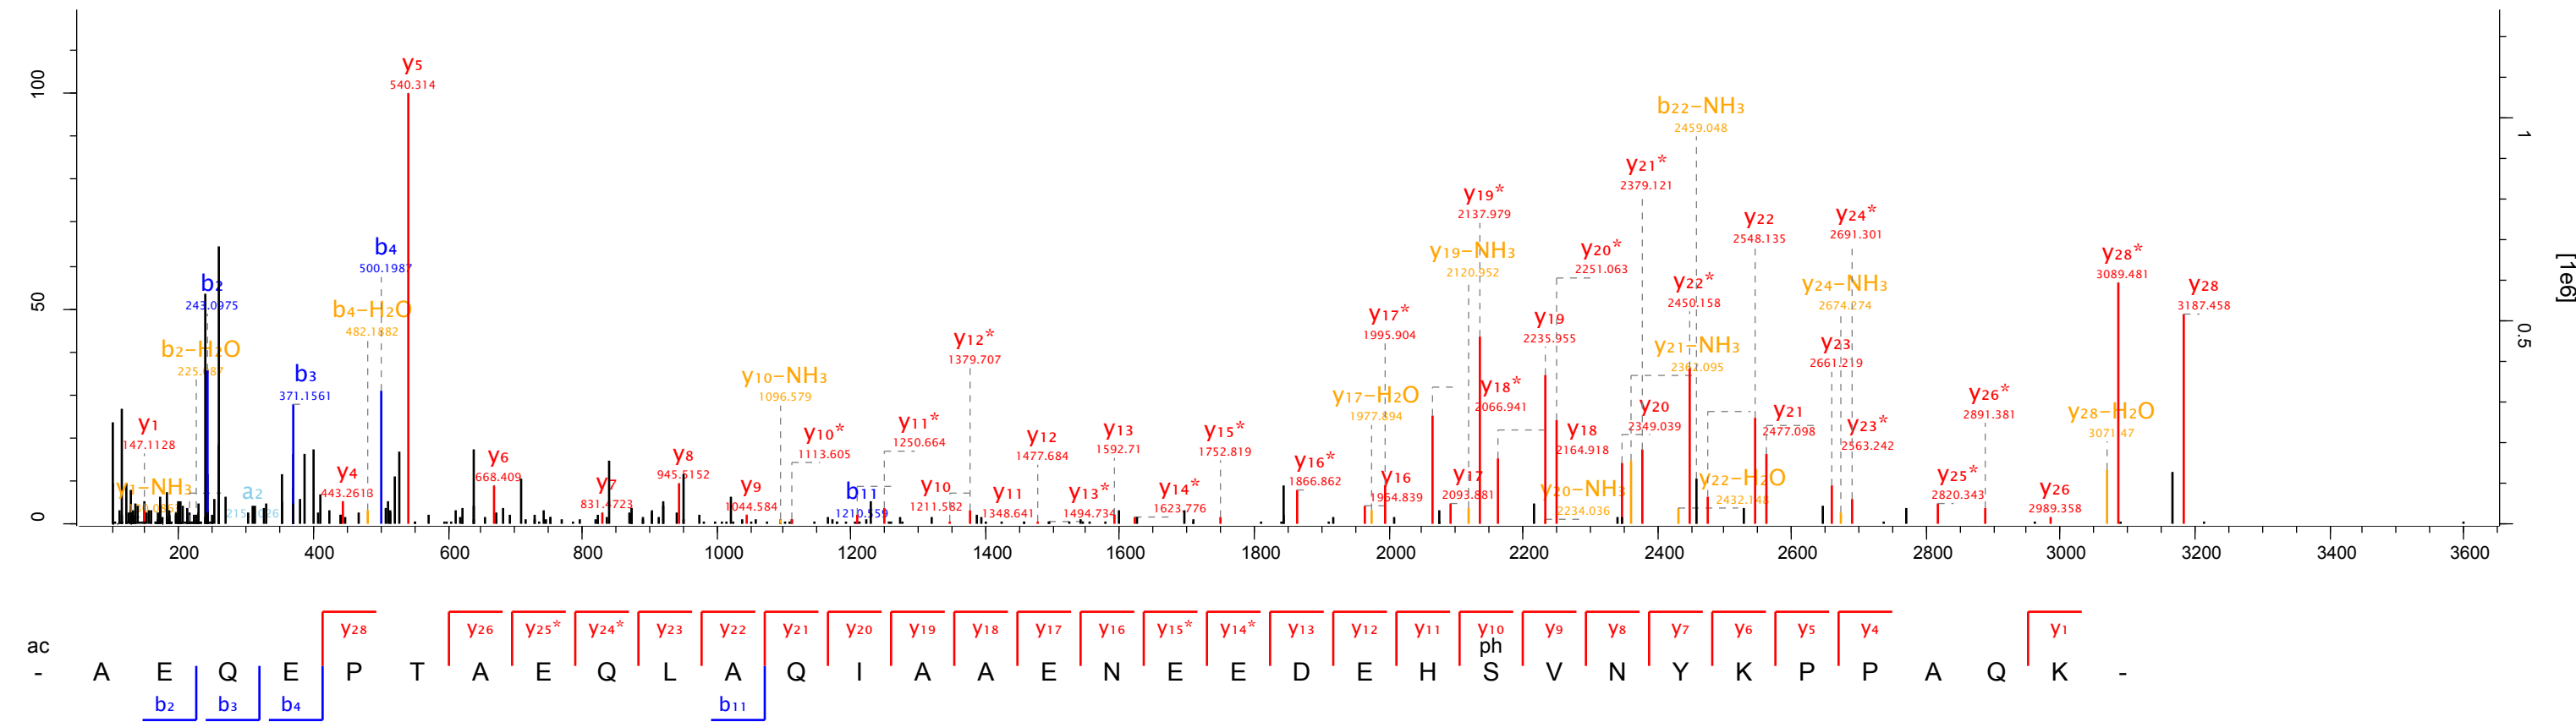

Raw file: 20150812\_A375SR\_Phospho\_BR1\_05  
 Scan: 22192 Method: FTMS; HCD Score: 171.99 m/z: 638.75 Gene names: NUFIP2

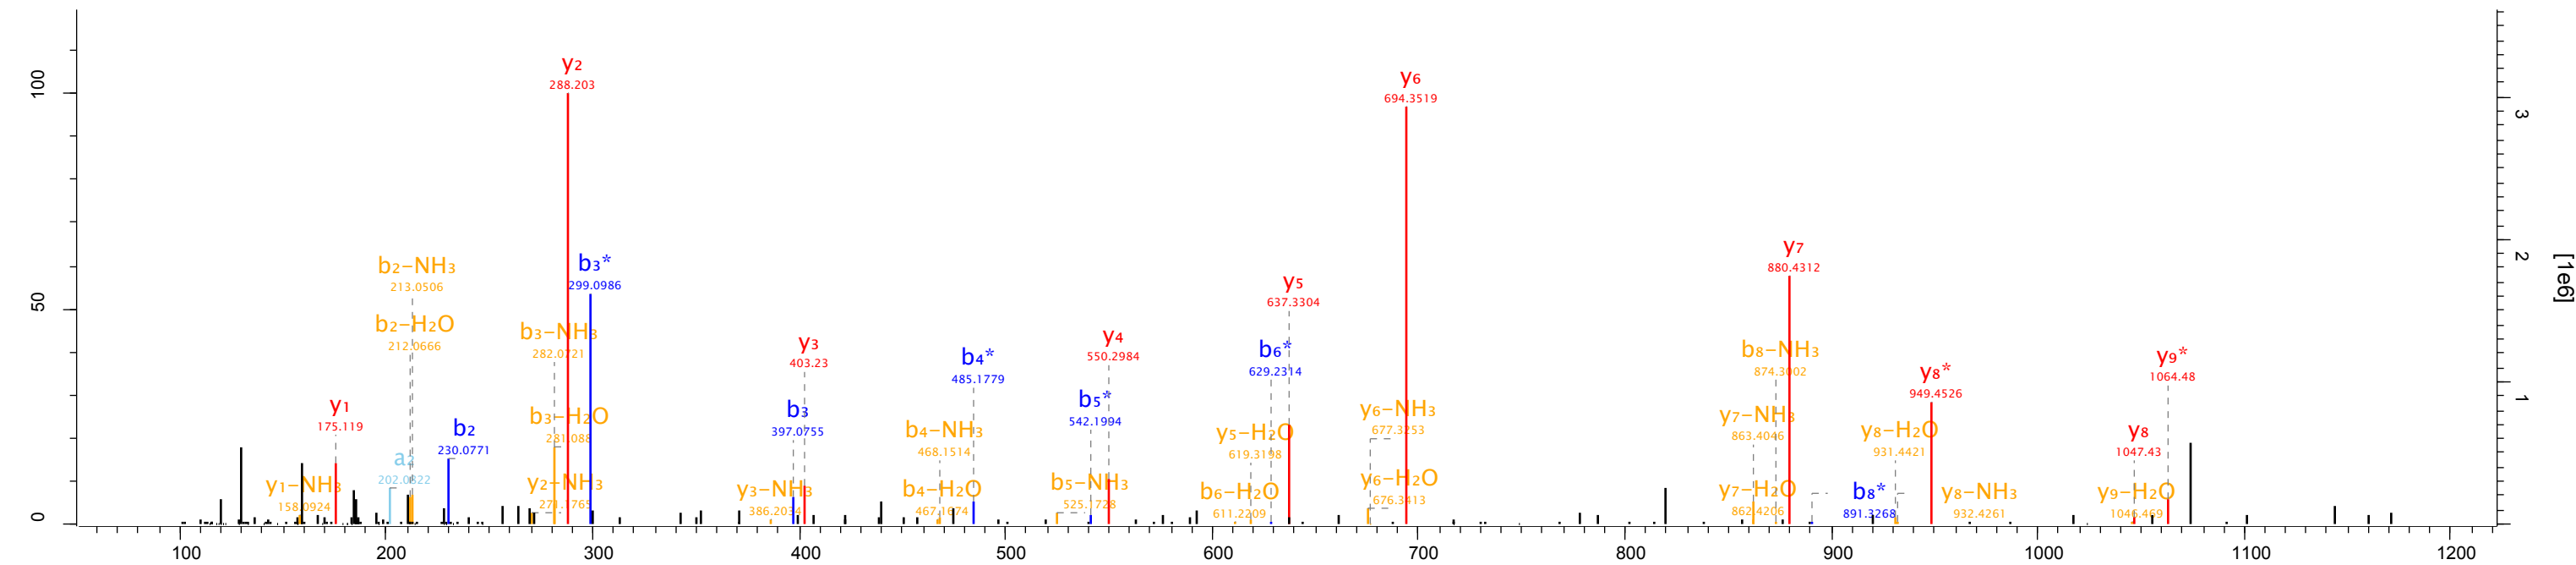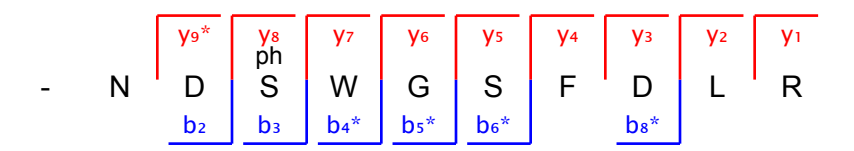

Raw file: 20150812\_A375SR\_Phospho\_BR1\_05  
 Scan: 2222 Method: FTMS; HCD Score: 61.76 m/z: 555.94 Gene names: SIN3B

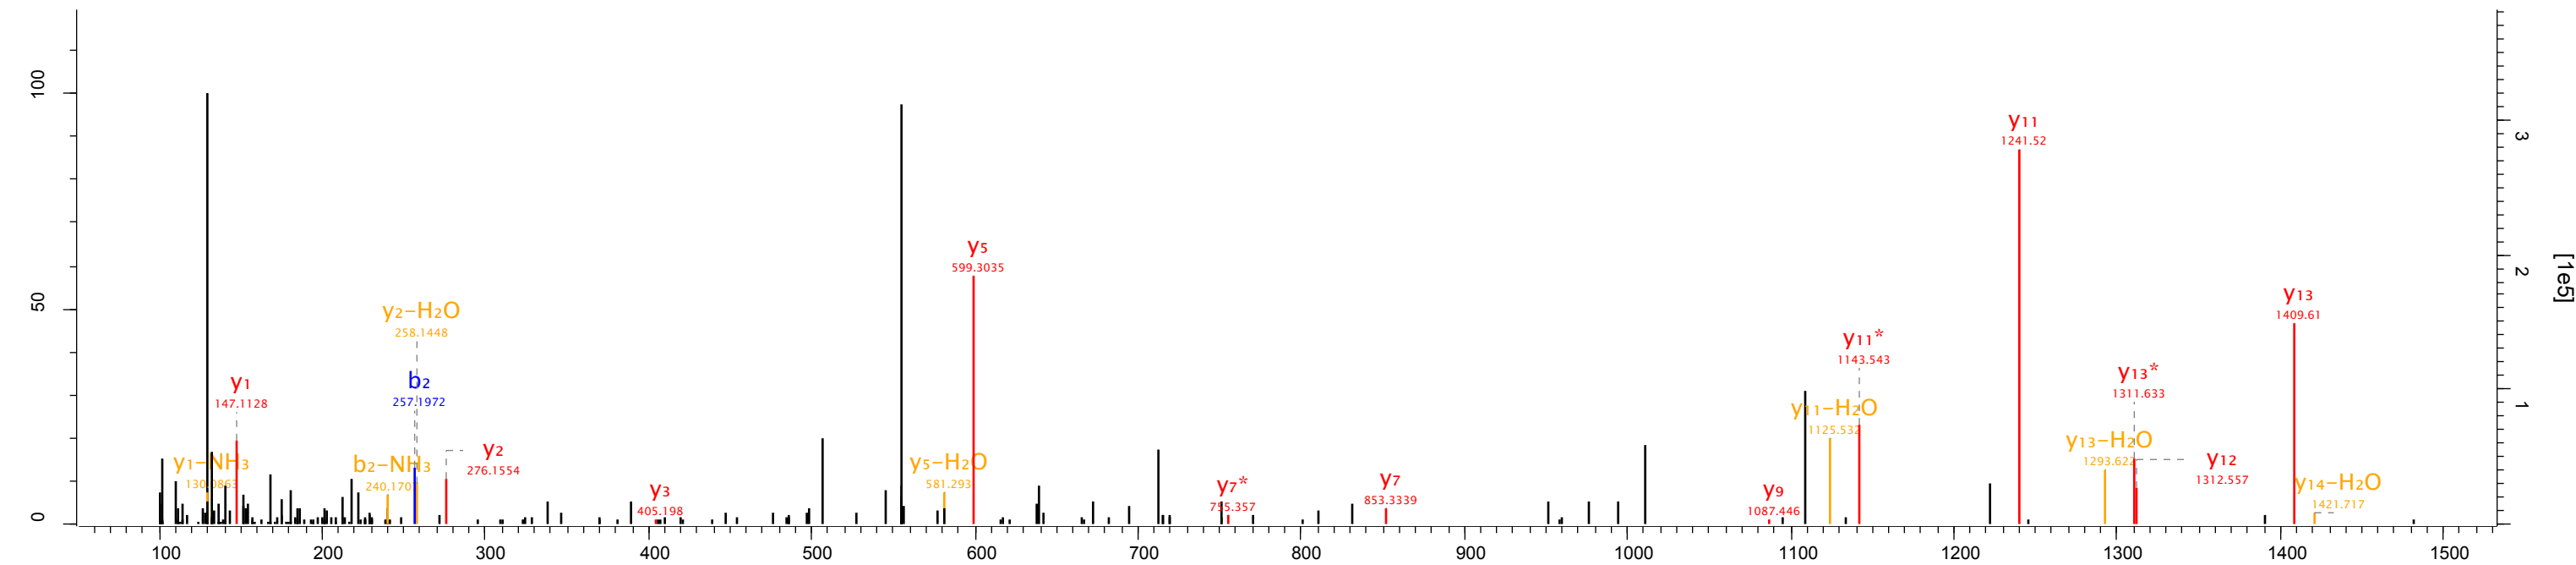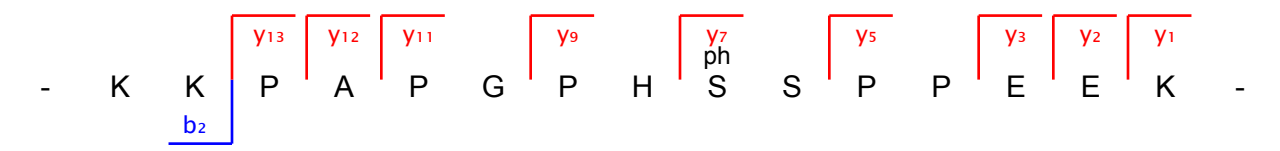

Raw file: 20150812\_A375SR\_Phospho\_BR1\_05  
 Scan: 23862 Method: FTMS; HCD Score: 221.51 m/z: 901.9 Gene names: IRS2

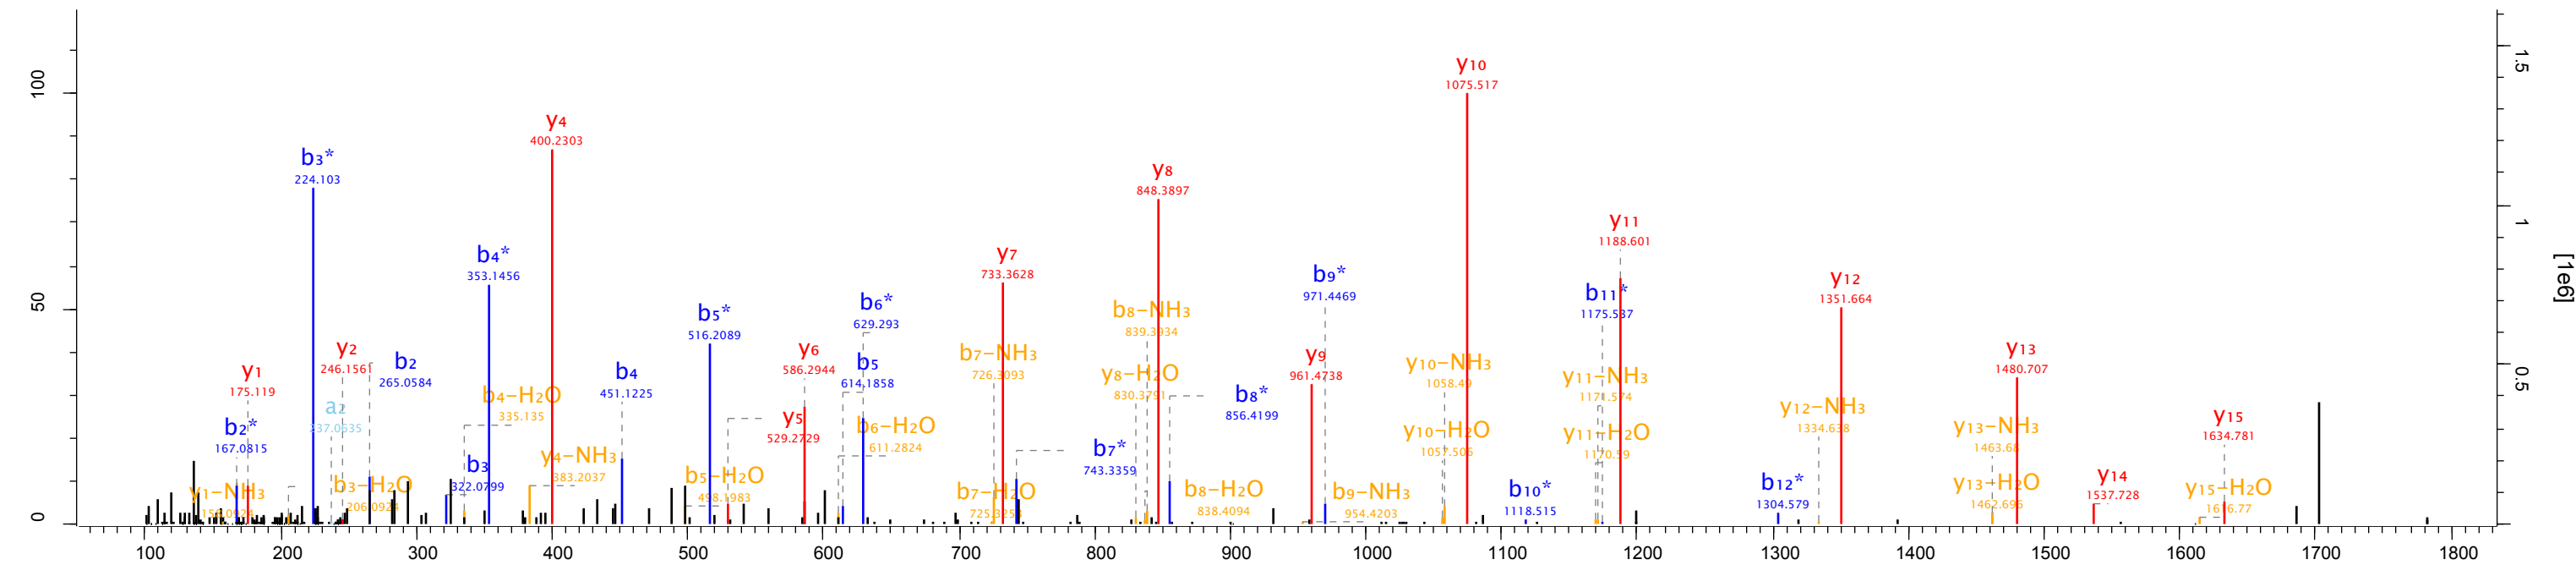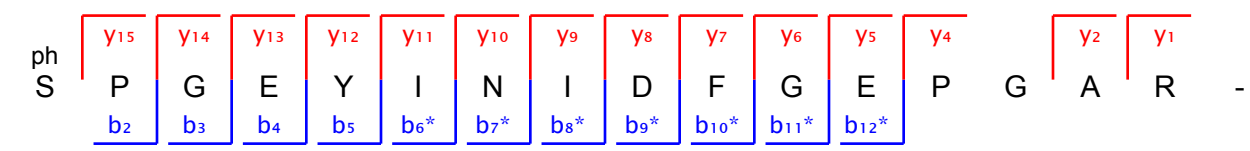

Raw file: 20150812\_A375SR\_Phospho\_BR1\_05  
 Scan: 24062 Method: FTMS; HCD Score: 56.34 m/z: 1296.29 Gene names: SASH1

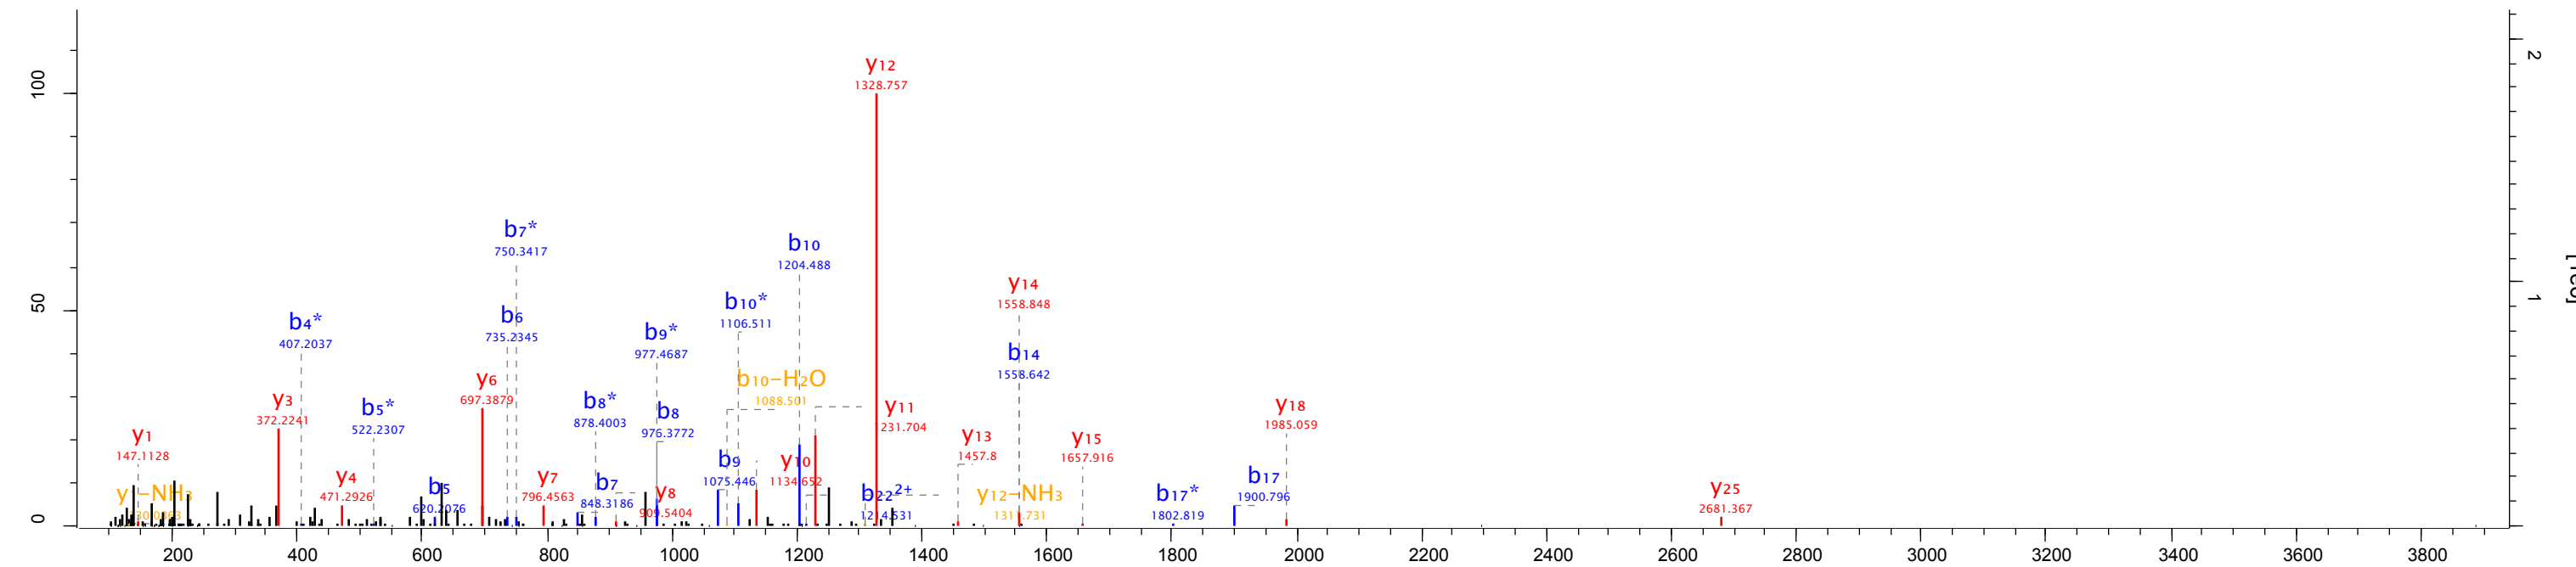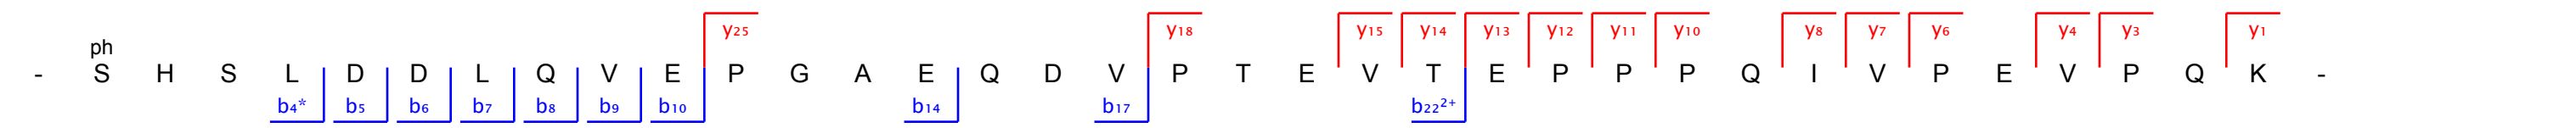

Raw file: 20150812\_A375SR\_Phospho\_BR1\_05  
 Scan: 24222 Method: FTMS; HCD Score: 257.29 m/z: 924.49 Gene names: AMPD2

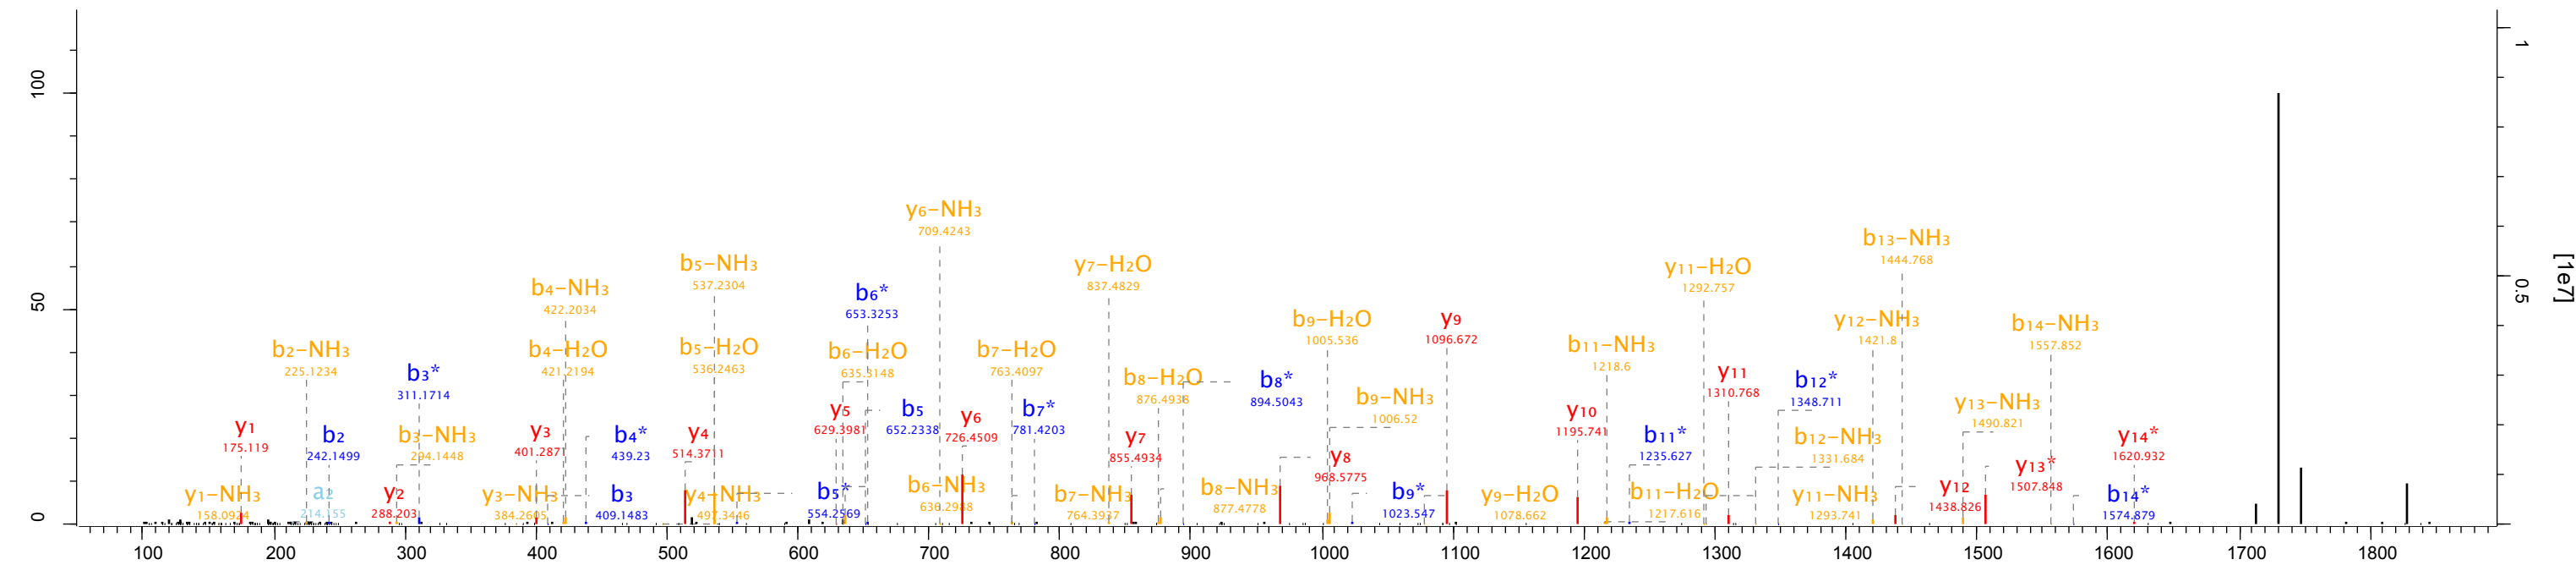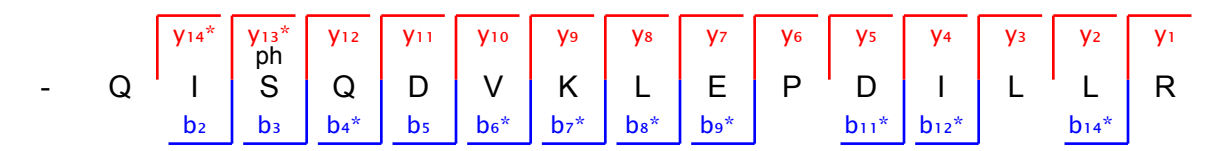



Raw file Scan Method Score m/z Gene names  
 20150812\_A375SR\_Phospho\_BR1\_05 25912 FTMS; HCD 116.24 1186.08 PITPNC1

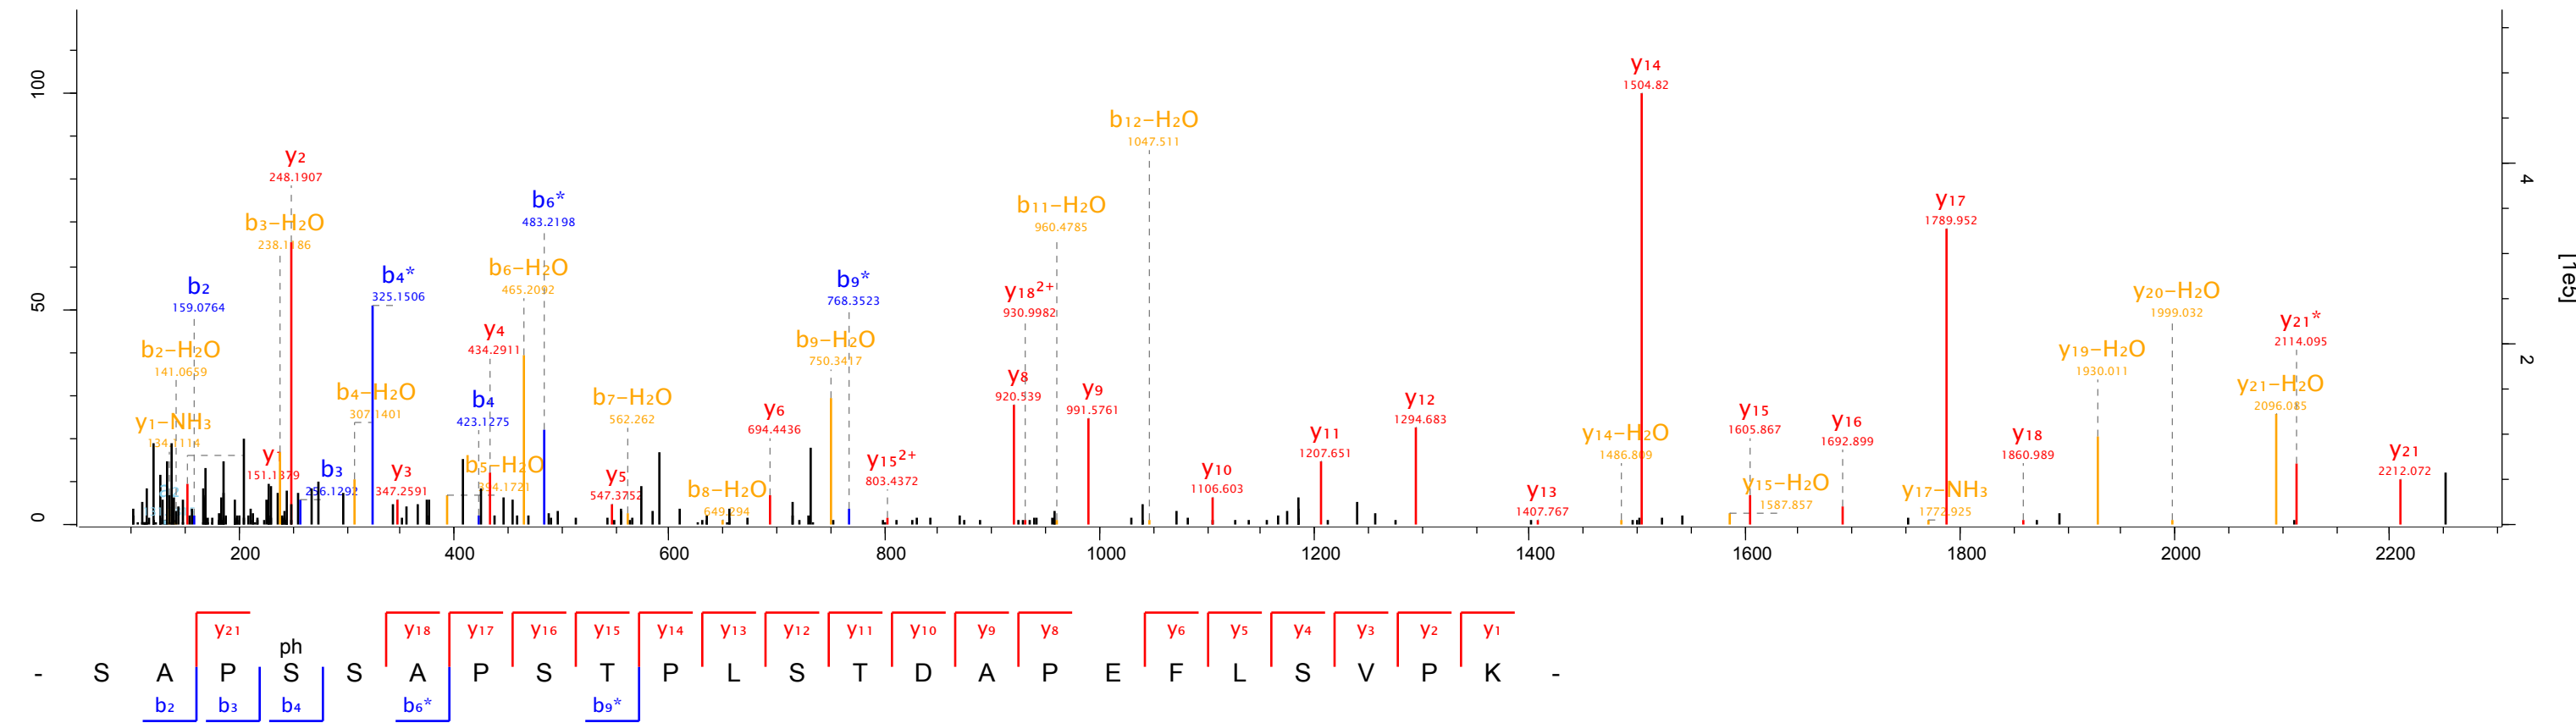

Raw file: 20150812\_A375SR\_Phospho\_BR1\_05  
 Scan: 2602 Method: FTMS; HCD Score: 57.79 m/z: 465.24 Gene names: ENSA

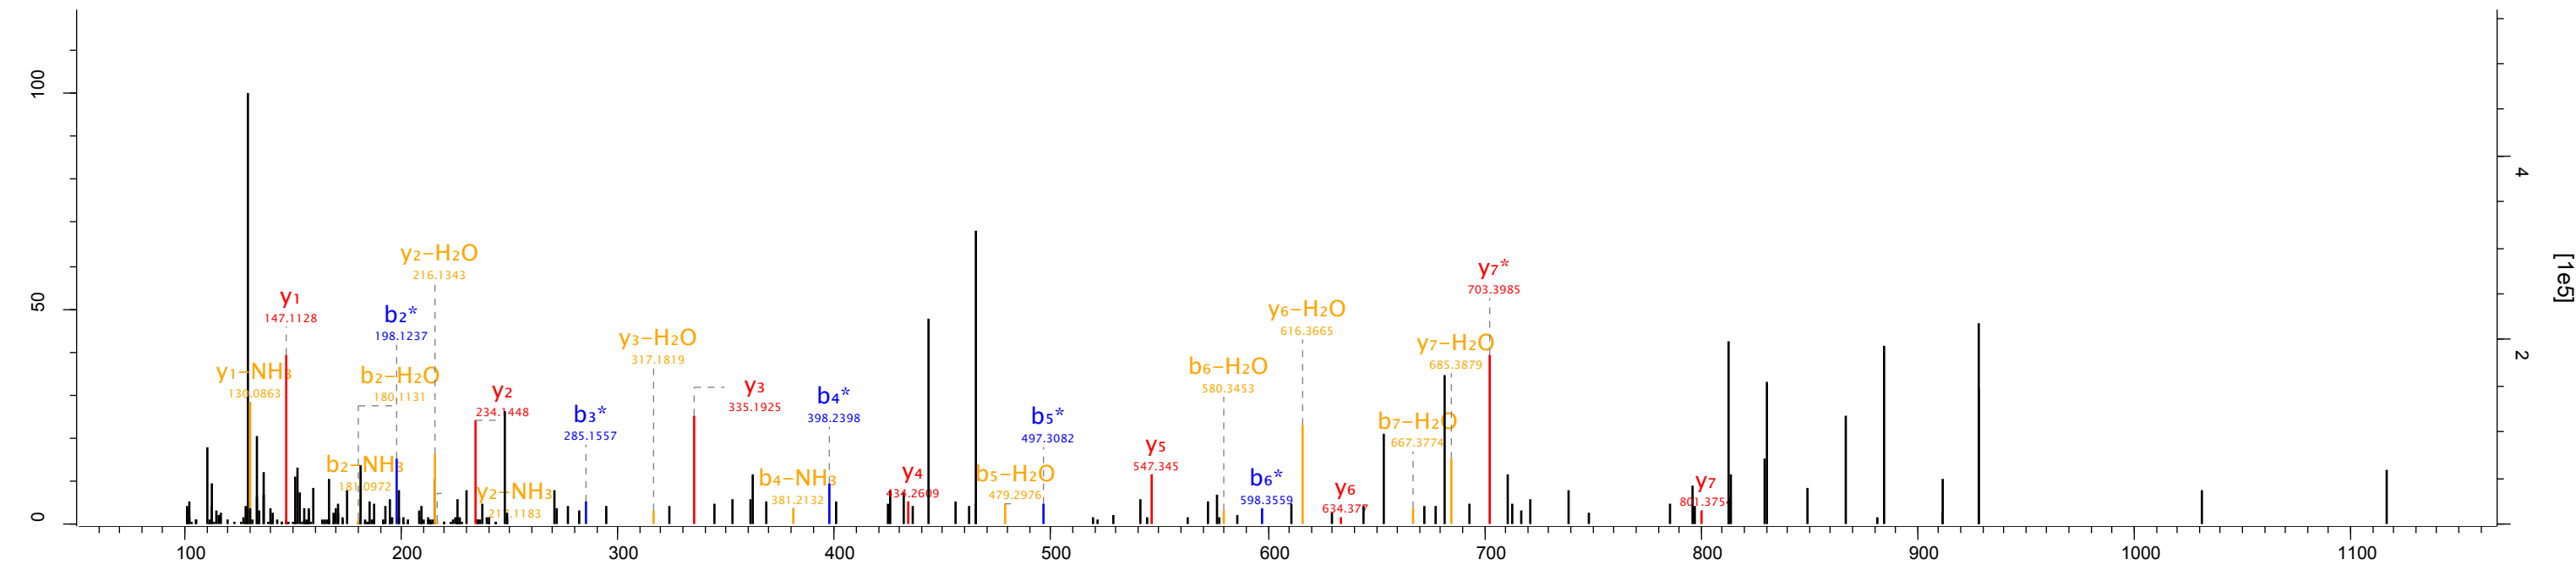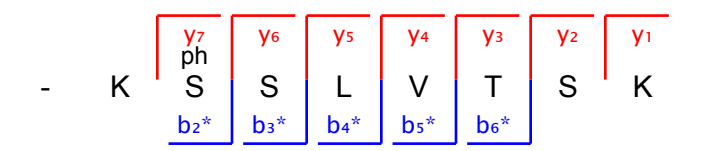

Raw file 20150812\_A375SR\_Phospho\_BR1\_05 Scan 26272 Method FTMS; HCD Score 156.41 m/z 1138.5 Gene names SLITRK6

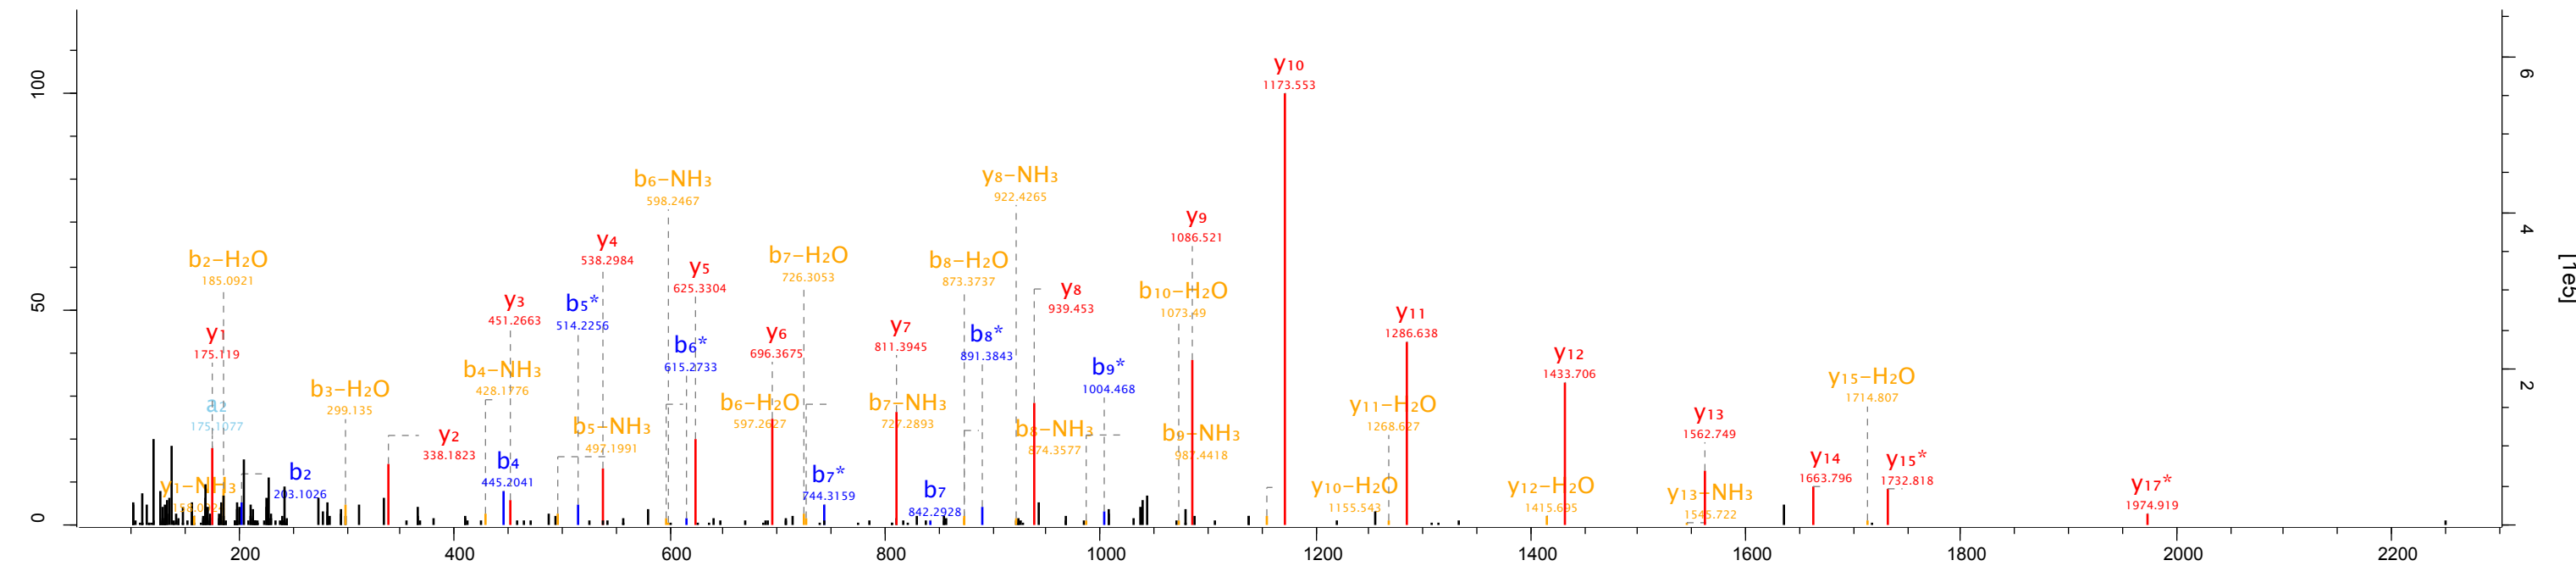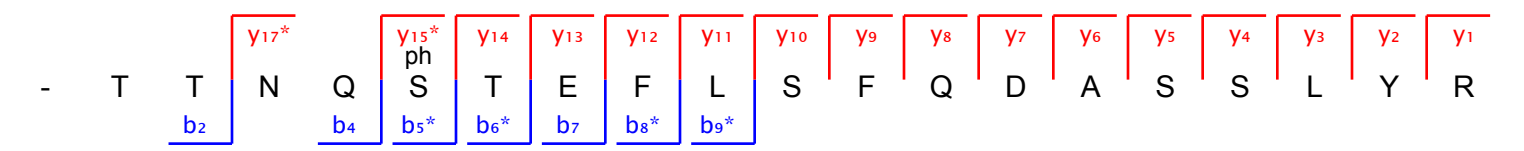

Raw file: 20150812\_A375SR\_Phospho\_BR1\_05  
 Scan: 26652 Method: FTMS; HCD Score: 72.36 m/z: 737.69 Gene names: CNKSR2

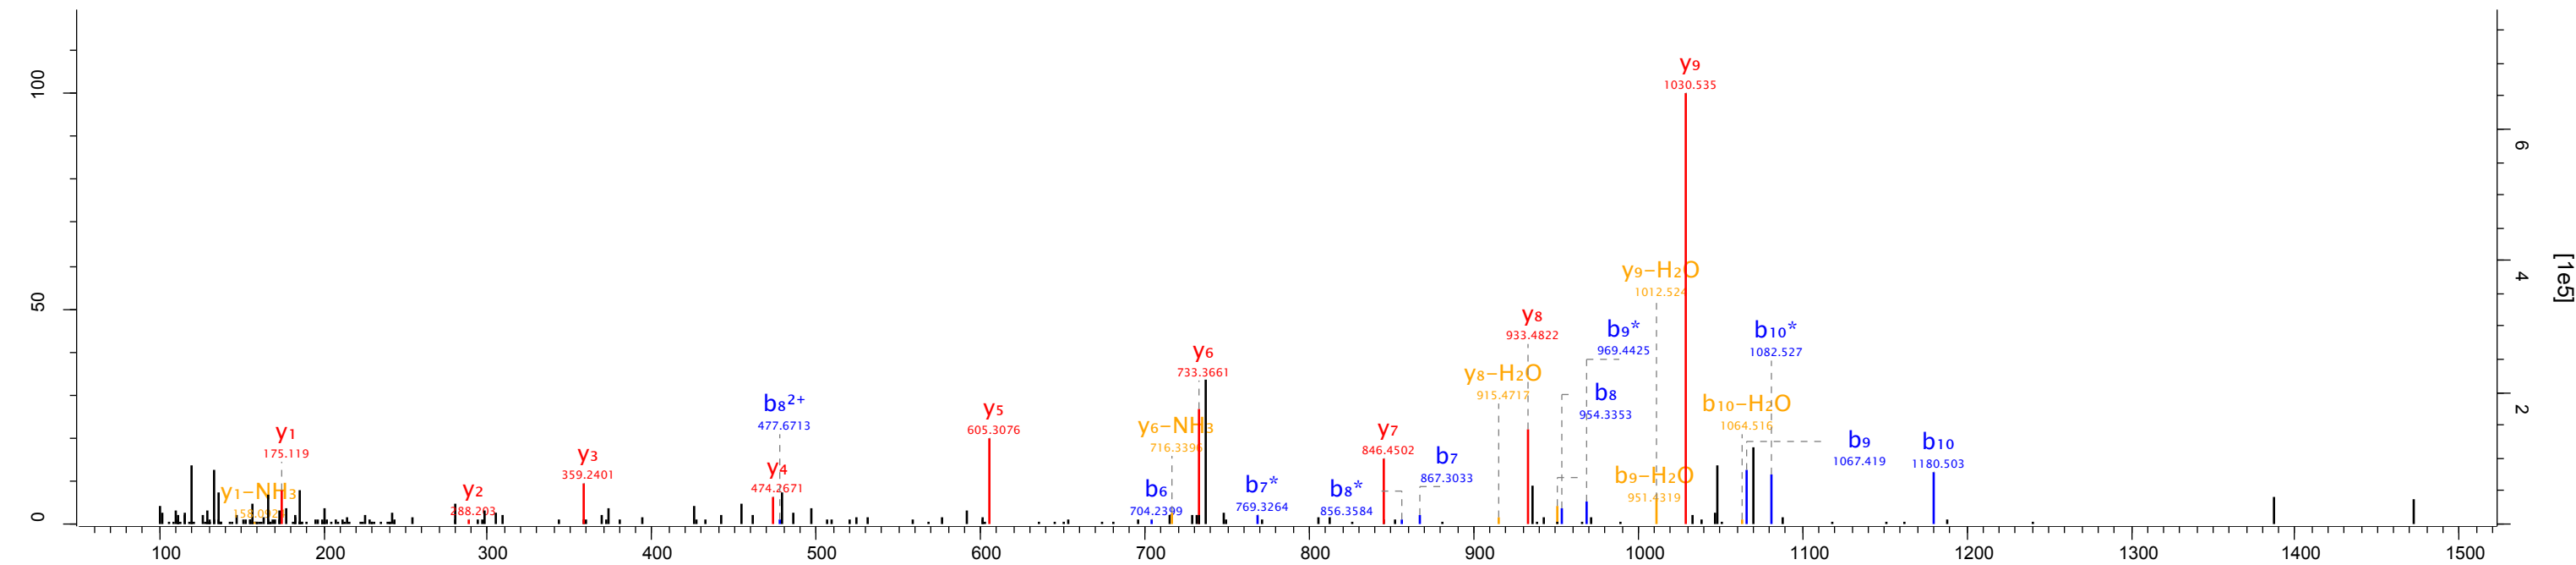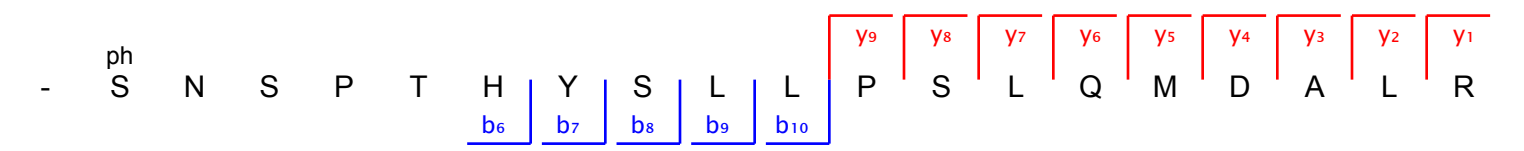

Raw file 20150812\_A375SR\_Phospho\_BR1\_05 Scan 28642 Method FTMS; HCD Score 232.09 m/z 1258.6 Gene names TNS3

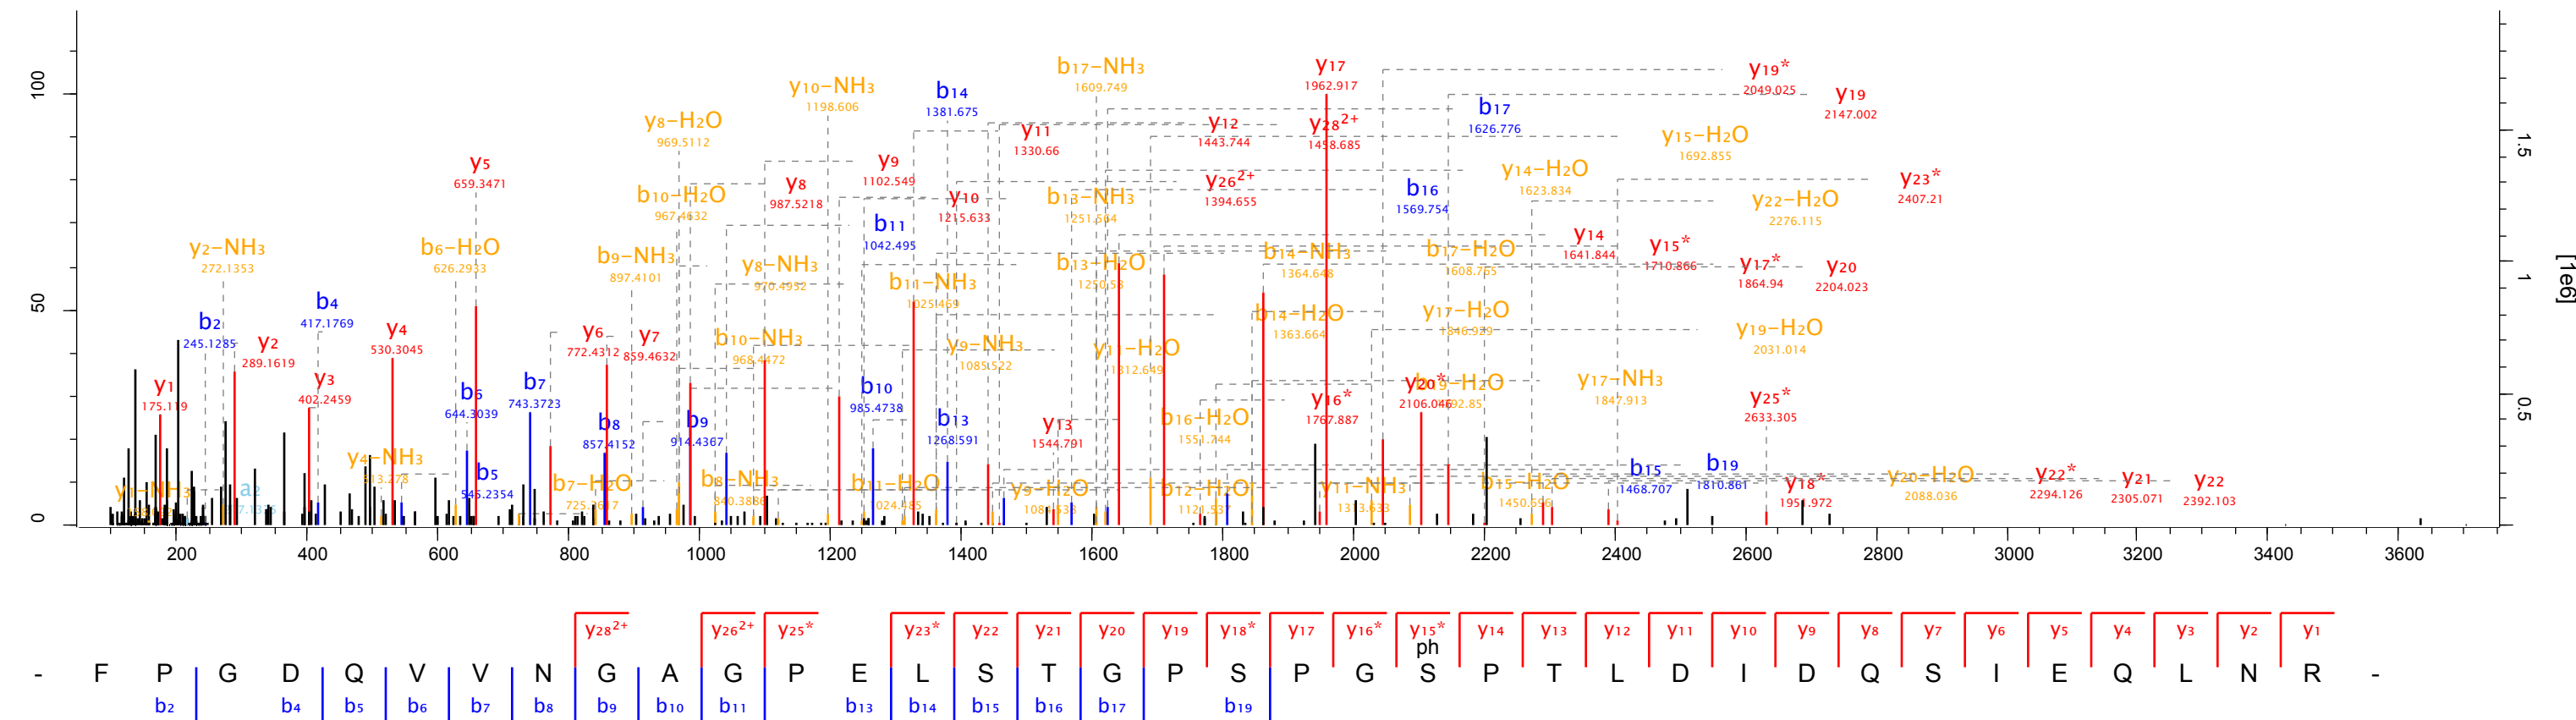

Raw file Scan Method Score m/z Gene names  
 20150812\_A375SR\_Phospho\_BR1\_05 3082 FTMS; HCD 181.87 713.32 PTBP1

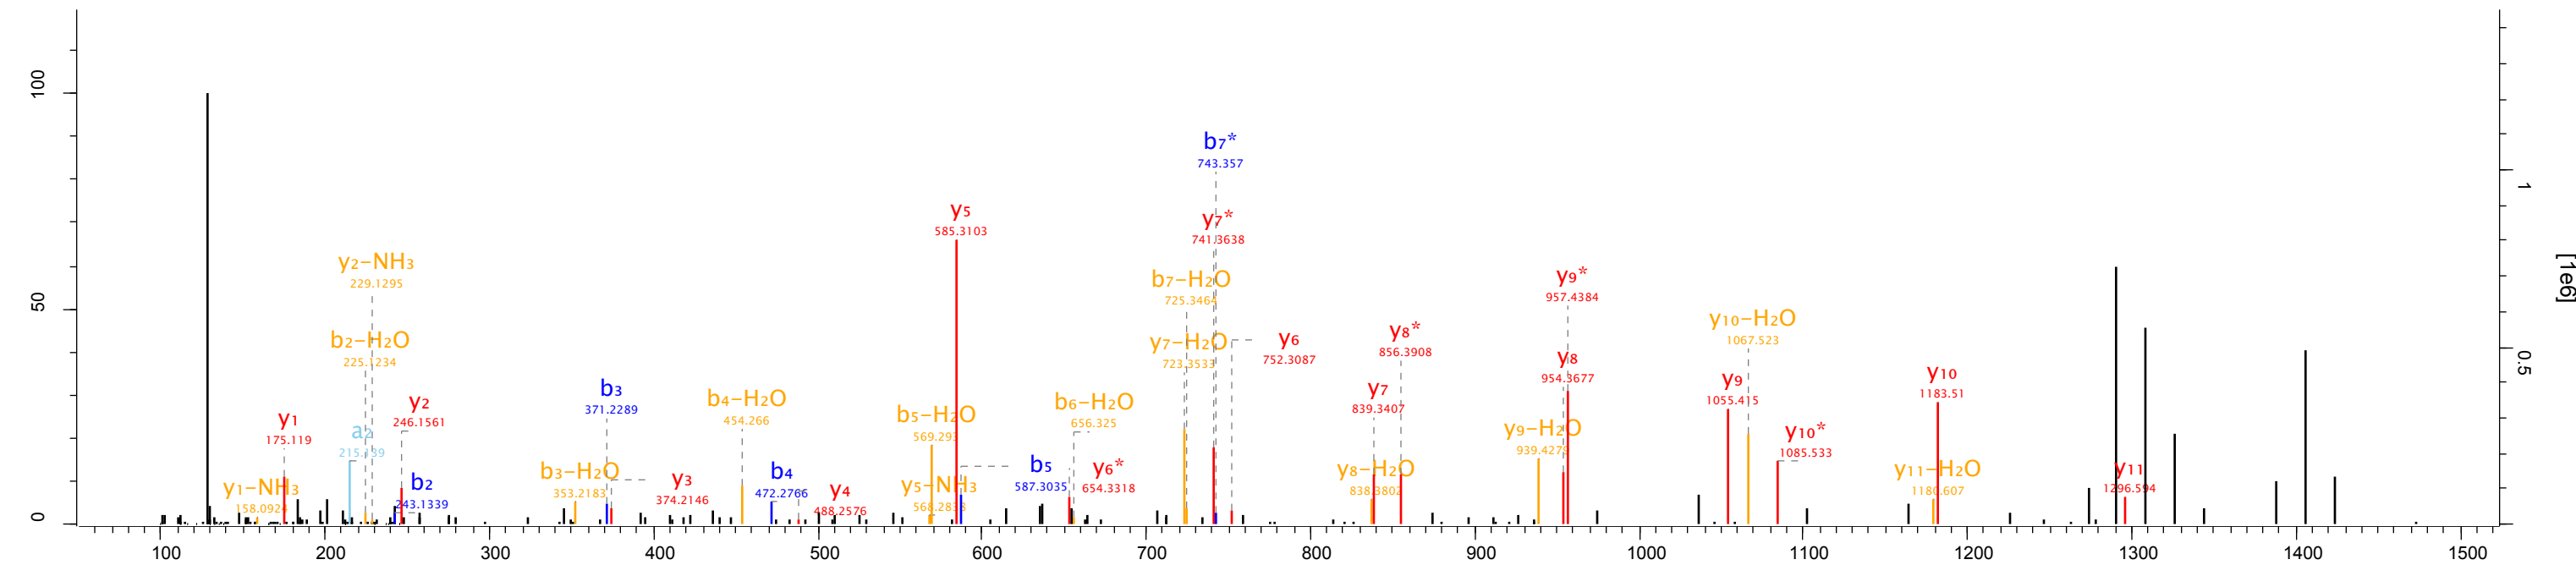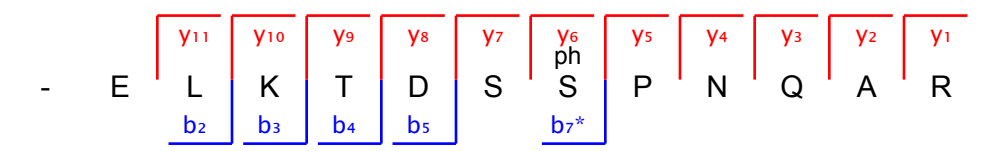

Raw file: 20150812\_A375SR\_Phospho\_BR1\_05  
 Scan: 3182 Method: FTMS; HCD Score: 176.97 m/z: 564.22 Gene names: EDC3

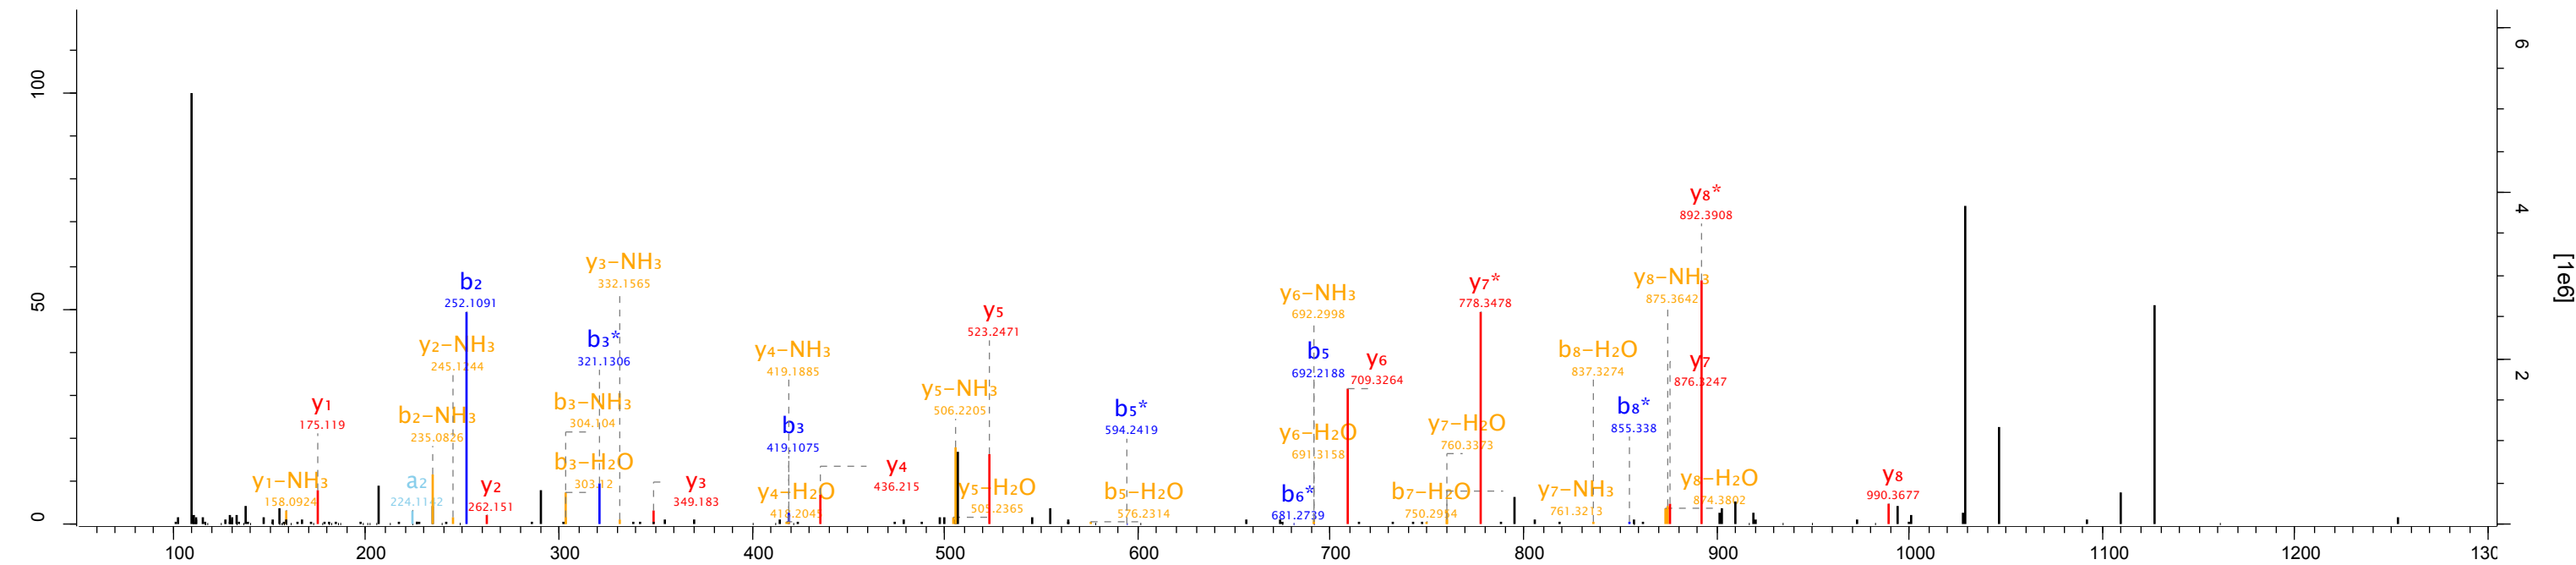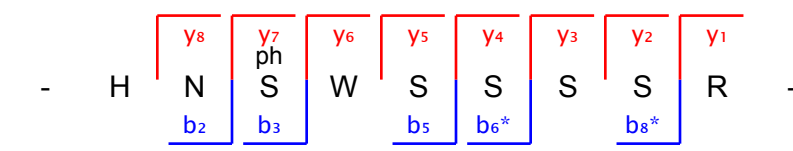

Raw file: 20150812\_A375SR\_Phospho\_BR1\_05  
 Scan: 3192 Method: FTMS; HCD Score: 321.05 m/z: 699.81 Gene names: SRRM2

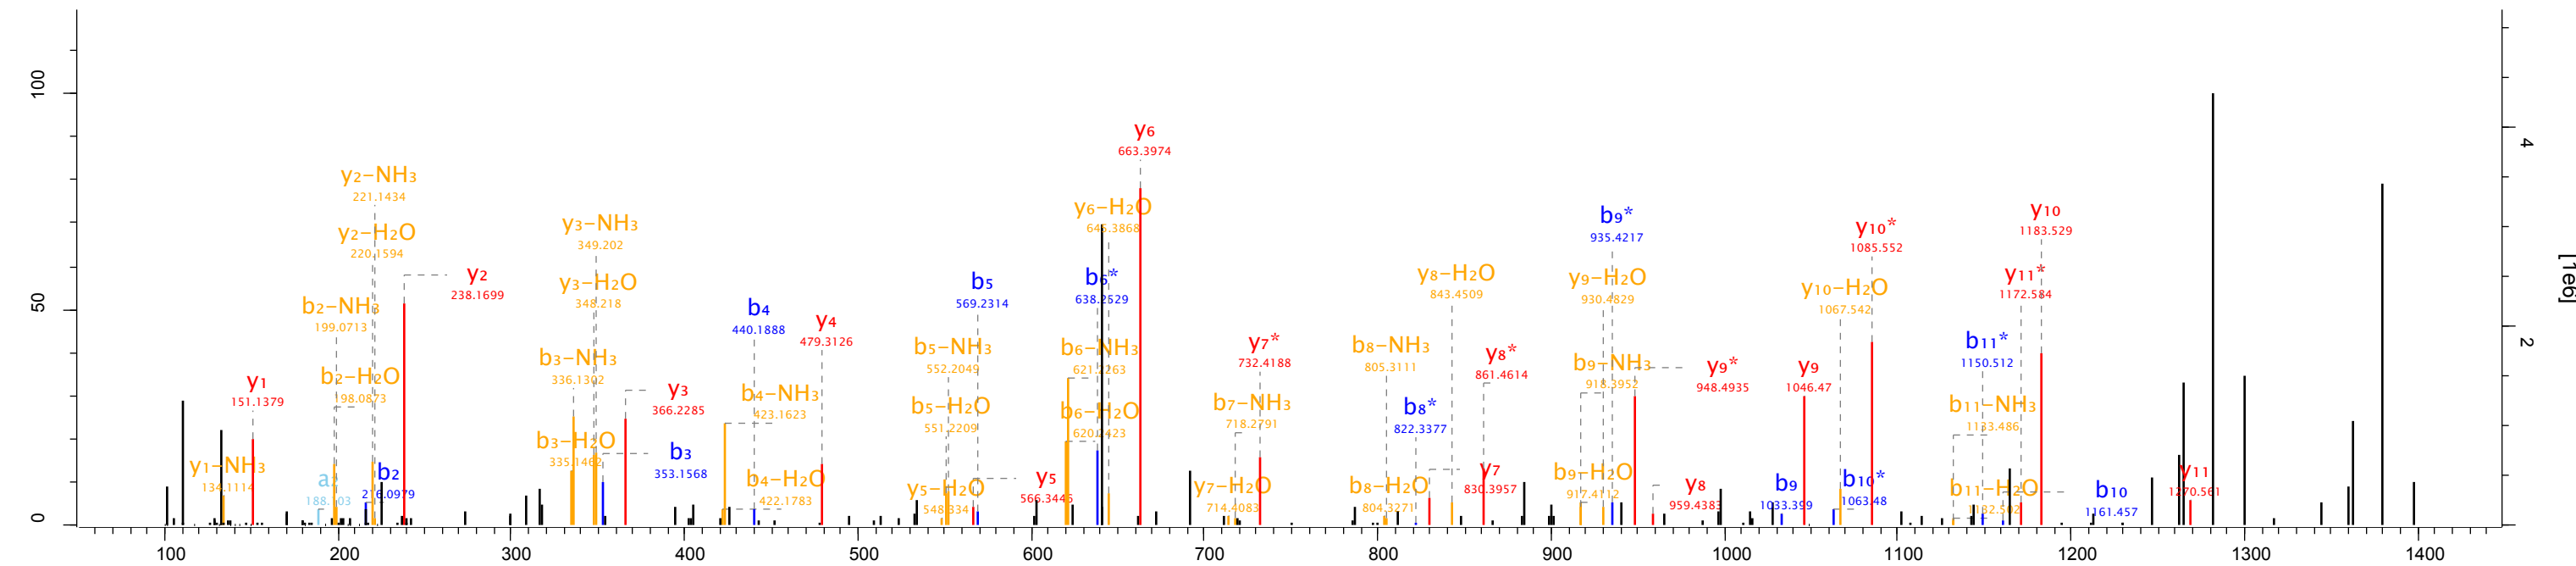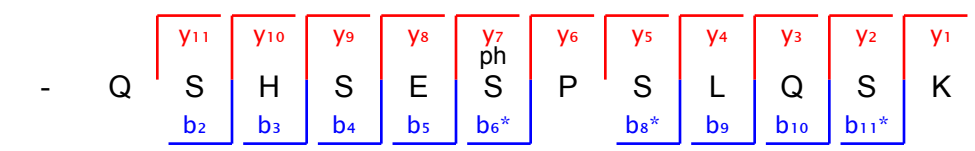



Raw file: 20150812\_A375SR\_Phospho\_BR1\_05  
 Scan: 3242 Method: FTMS; HCD Score: 47.81 m/z: 574.77 Gene names: TJP1

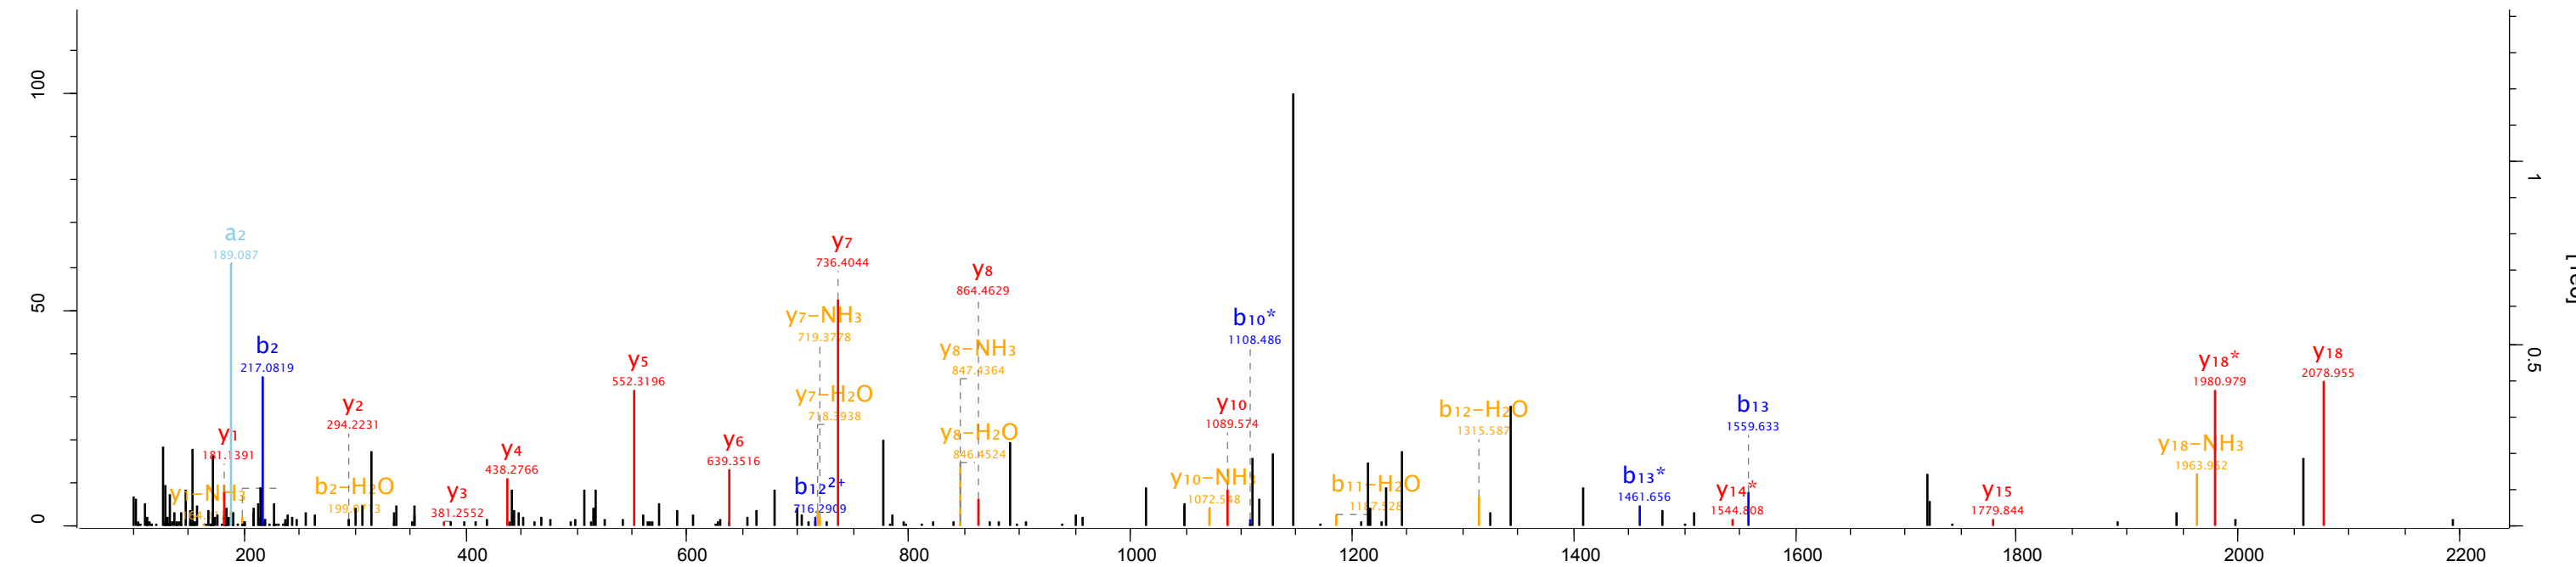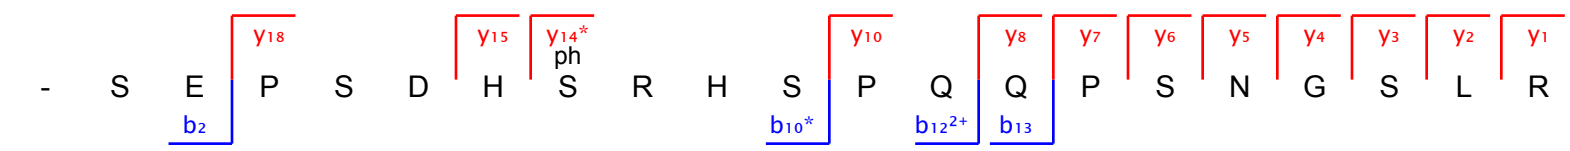

Raw file: 20150812\_A375SR\_Phospho\_BR1\_05  
 Scan: 3702 Method: FTMS; HCD Score: 182.23 m/z: 535.27 Gene names: SLU7

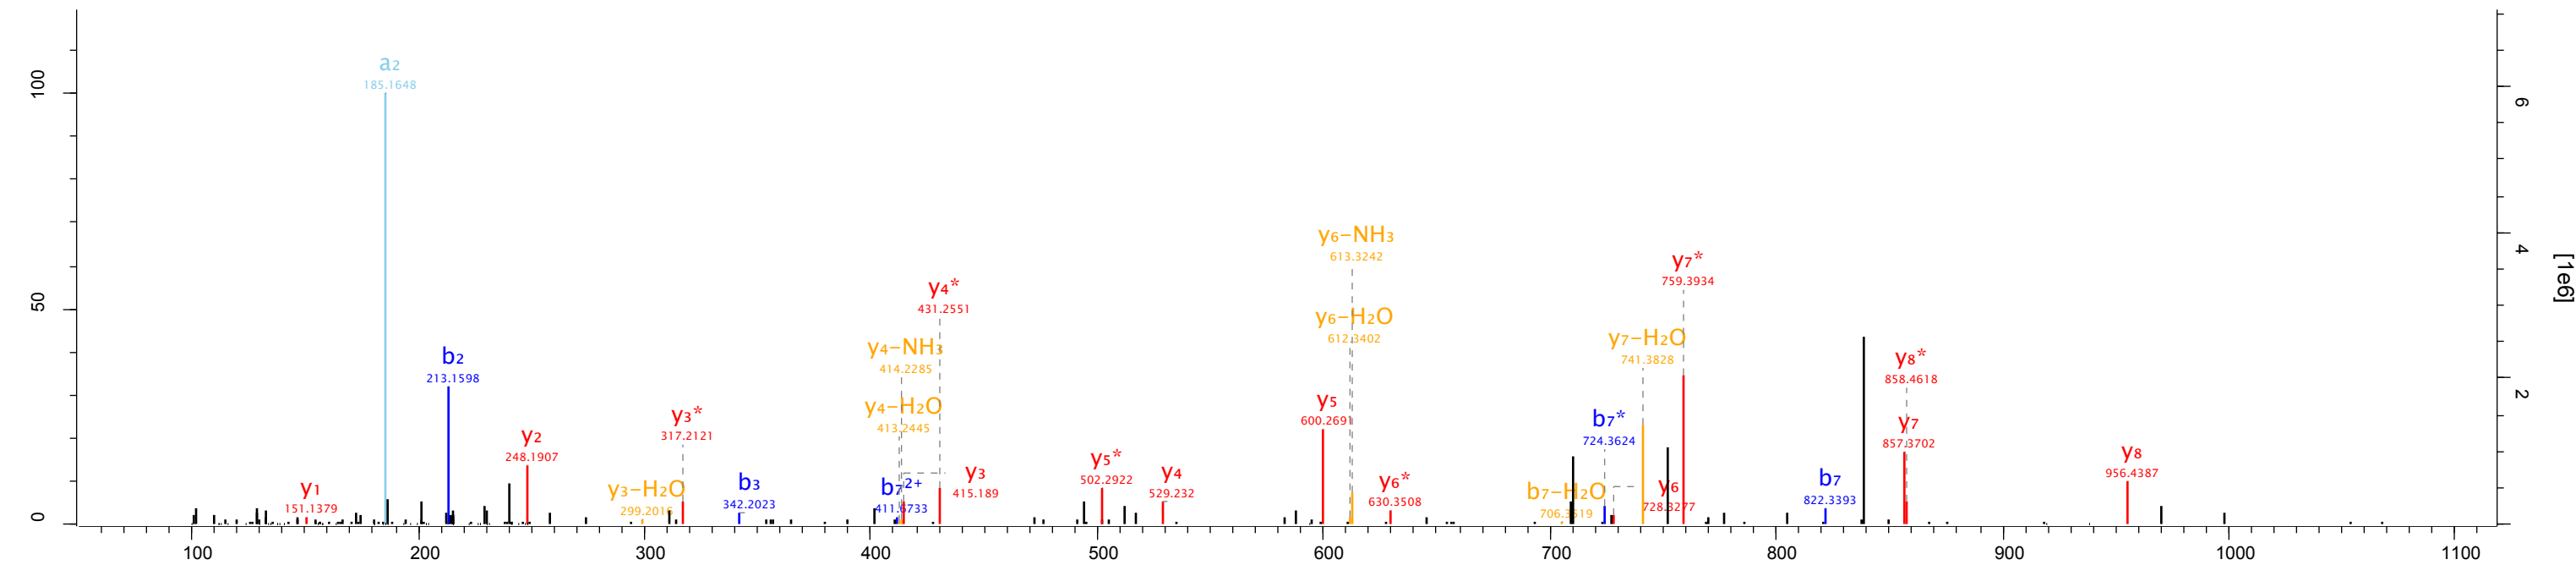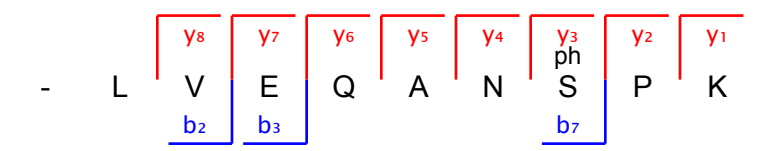

Raw file  
20150812\_A375SR\_Phospho\_BR1\_05

Scan 3712 Method FTMS; HCD Score 239.38 m/z 731.83 Gene names KLC2

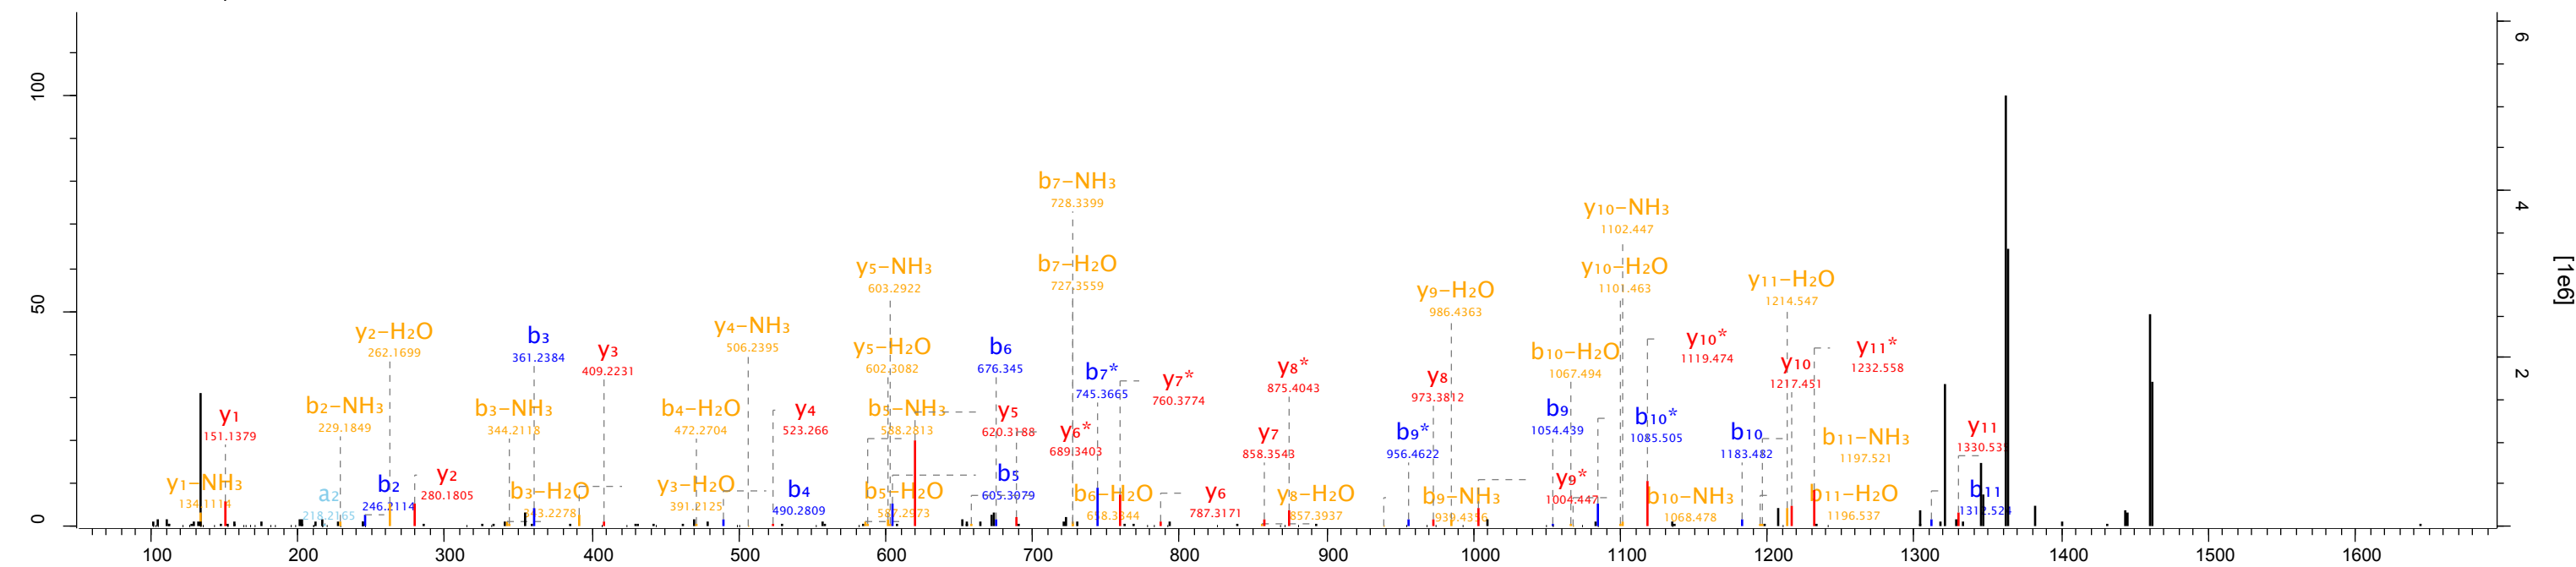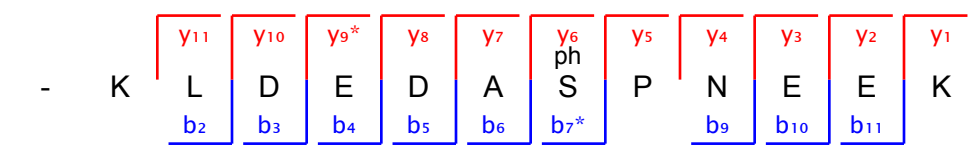

Raw file 20150812\_A375SR\_Phospho\_BR1\_05 Scan 3742 Method FTMS; HCD Score 139.38 m/z 799.9 Gene names CAST

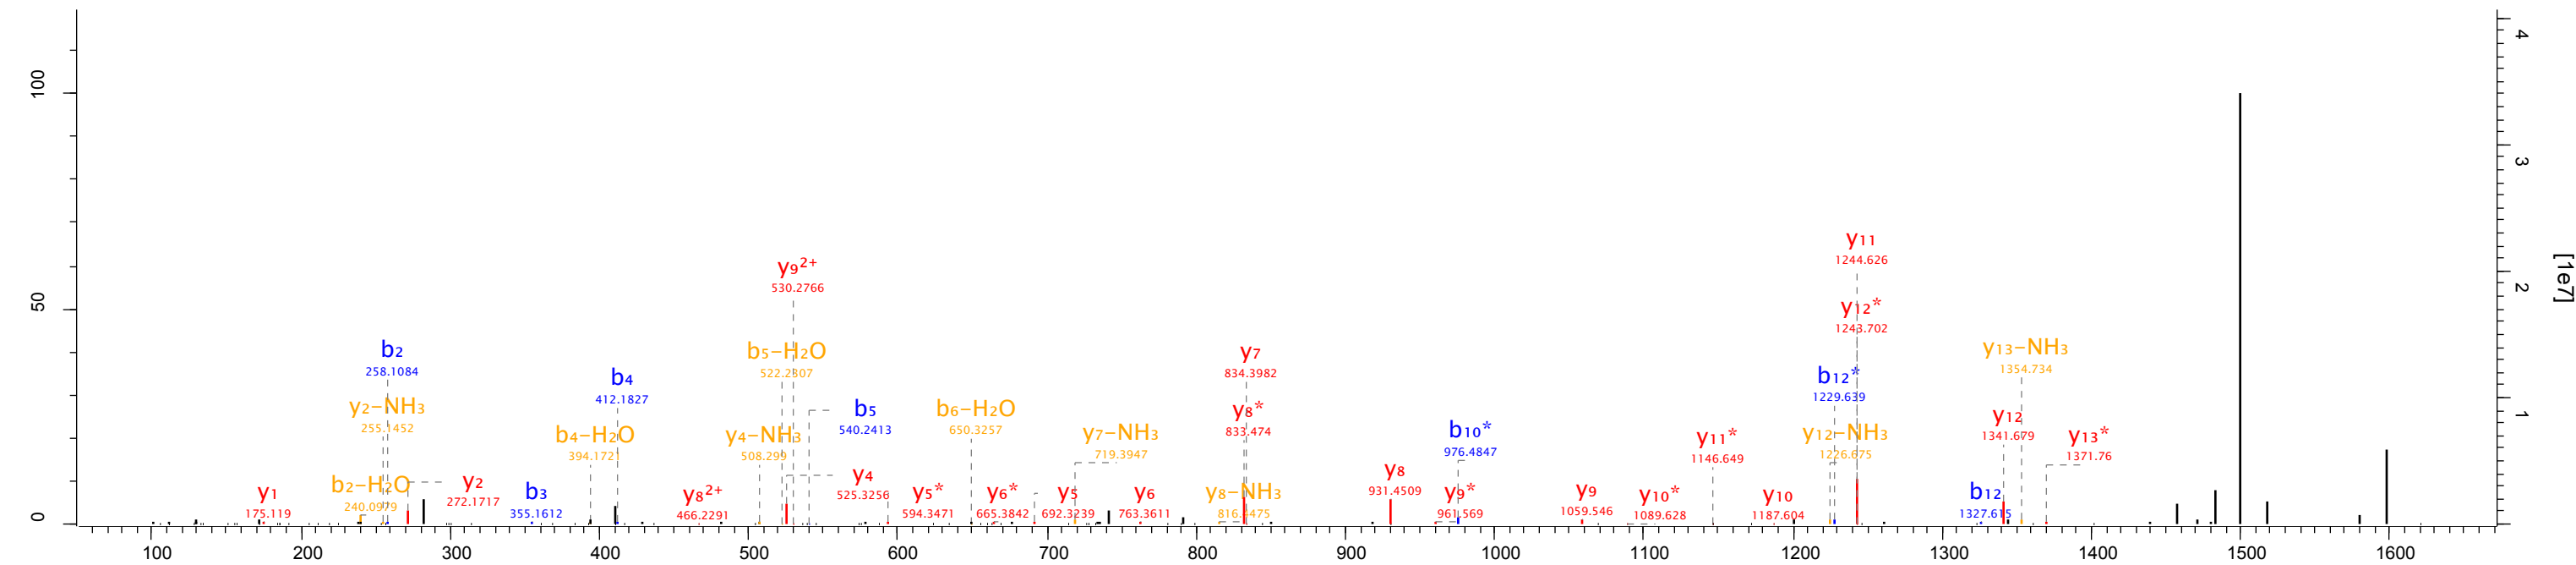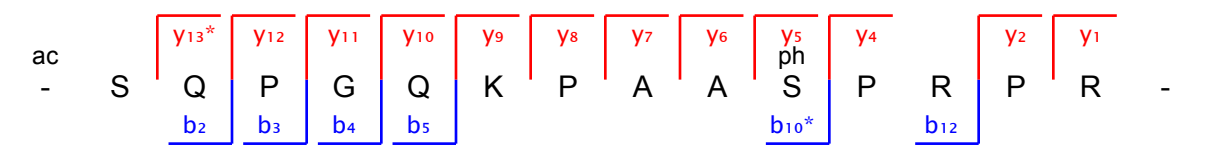

Raw file 20150812\_A375SR\_Phospho\_BR1\_05 Scan 3842 Method FTMS; HCD Score 83.75 m/z 721.3 Gene names NMT1

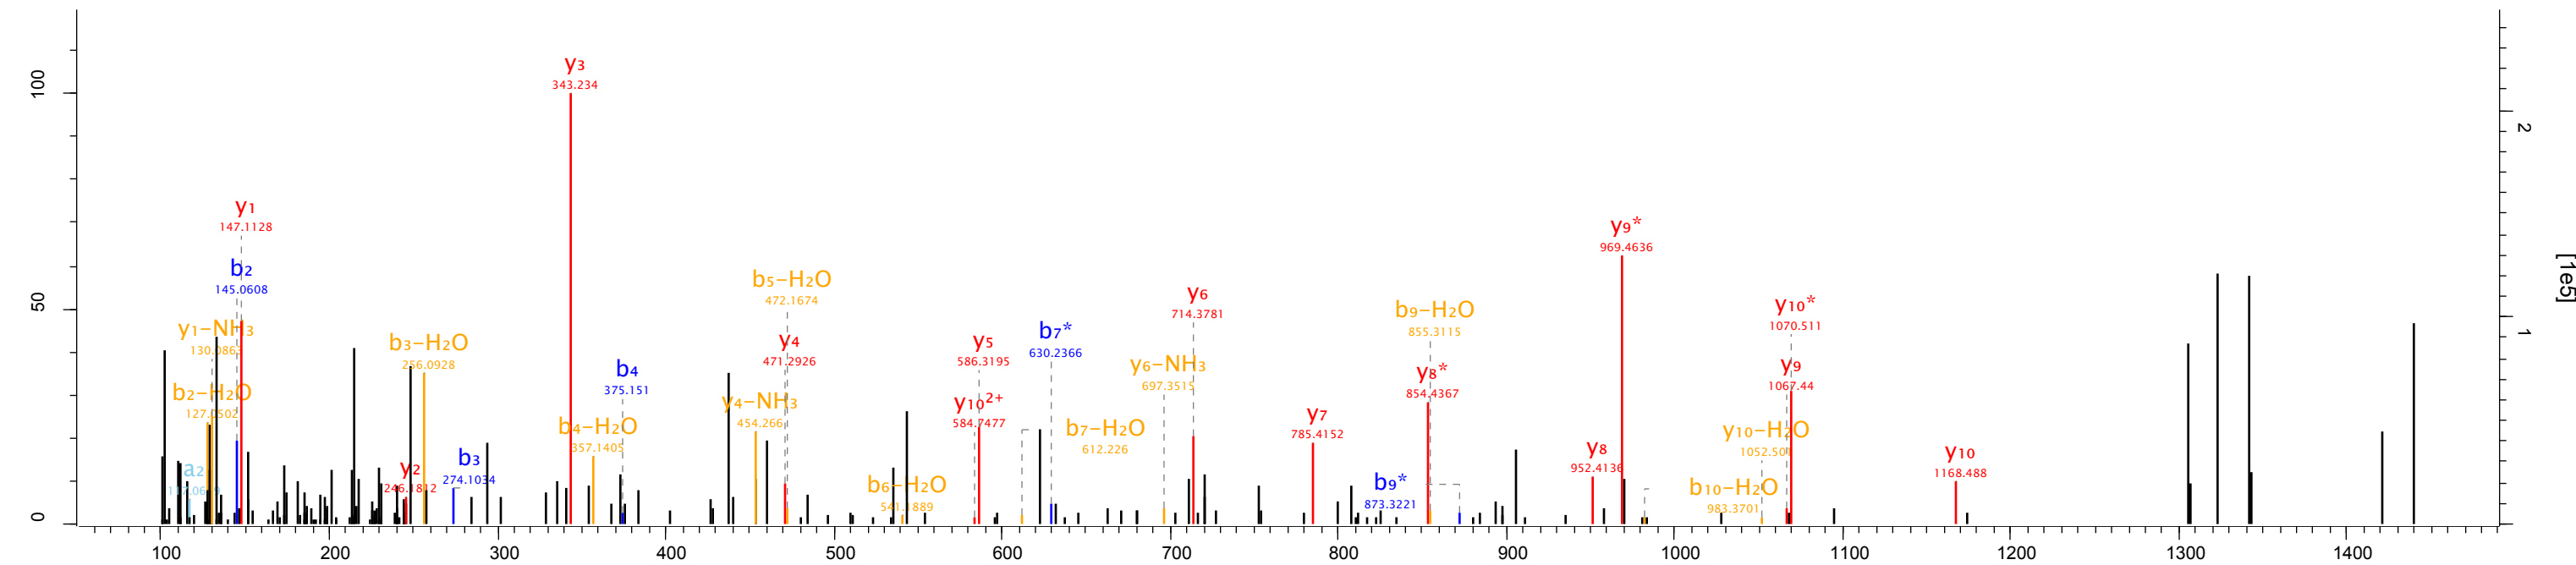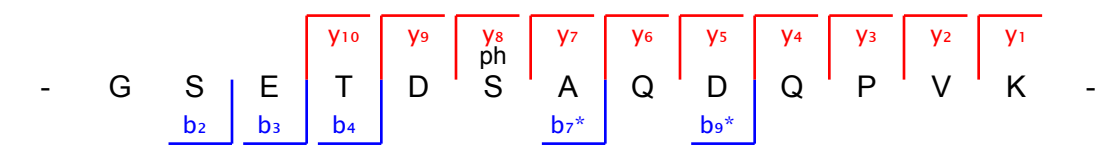

Raw file: 20150812\_A375SR\_Phospho\_BR1\_05  
 Scan: 4232 Method: FTMS; HCD Score: 72.52 m/z: 460.91 Gene names: PPHLN1

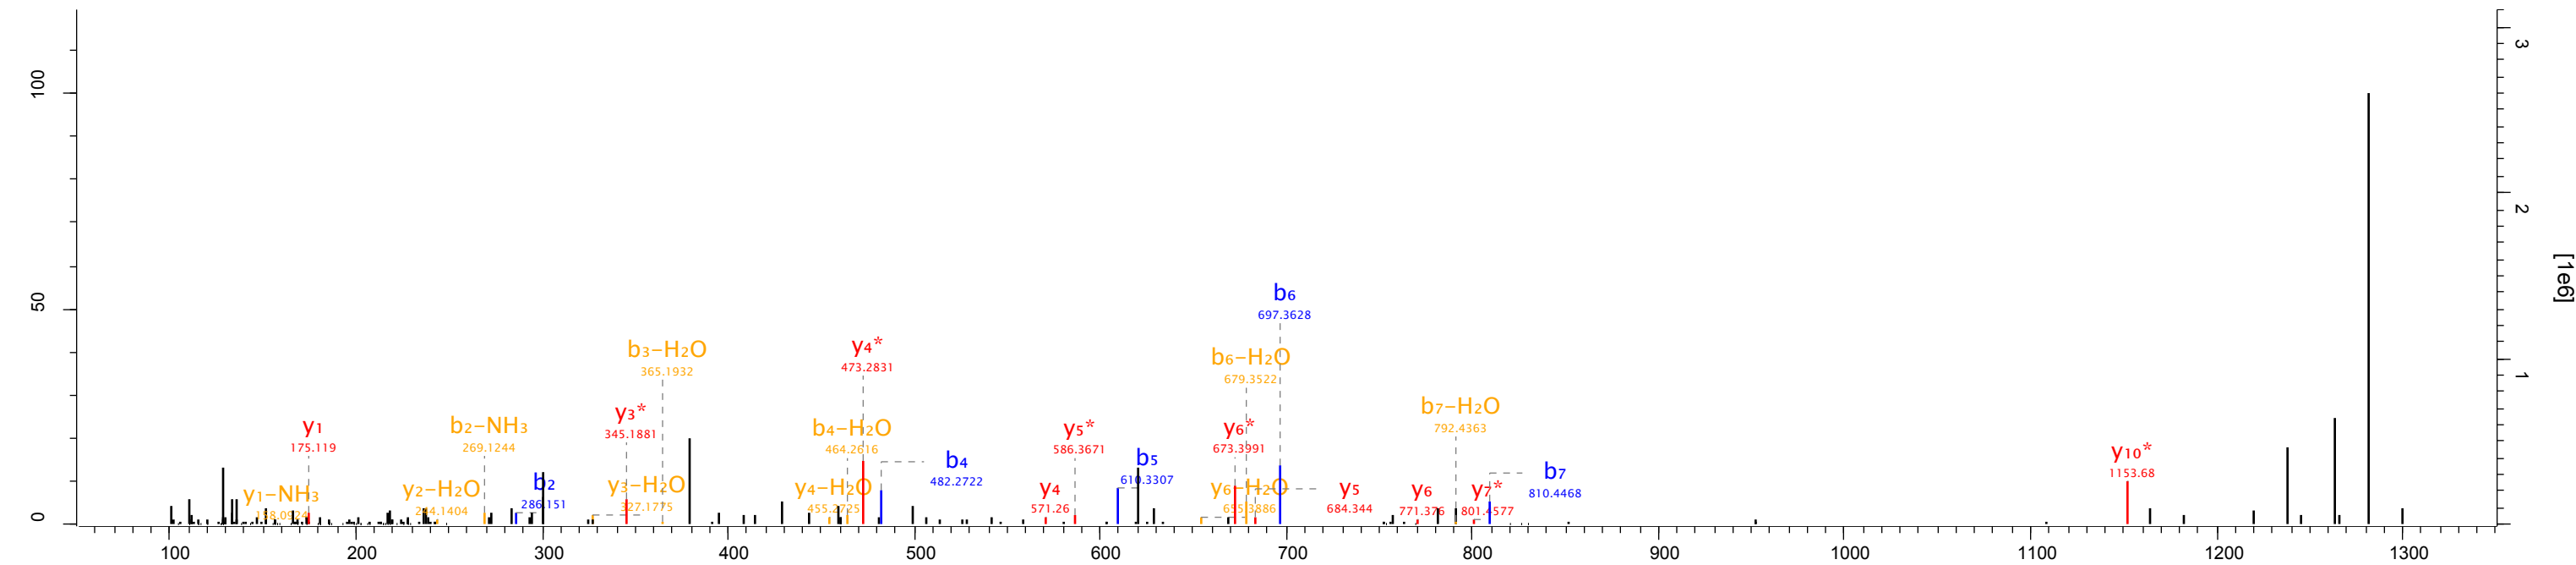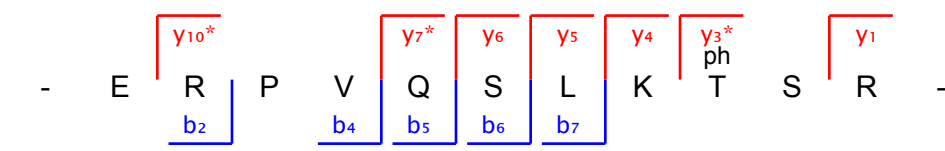

Raw file: 20150812\_A375SR\_Phospho\_BR1\_05  
 Scan: 4292 Method: FTMS; HCD Score: 178.52 m/z: 653.31 Gene names: SF3B1

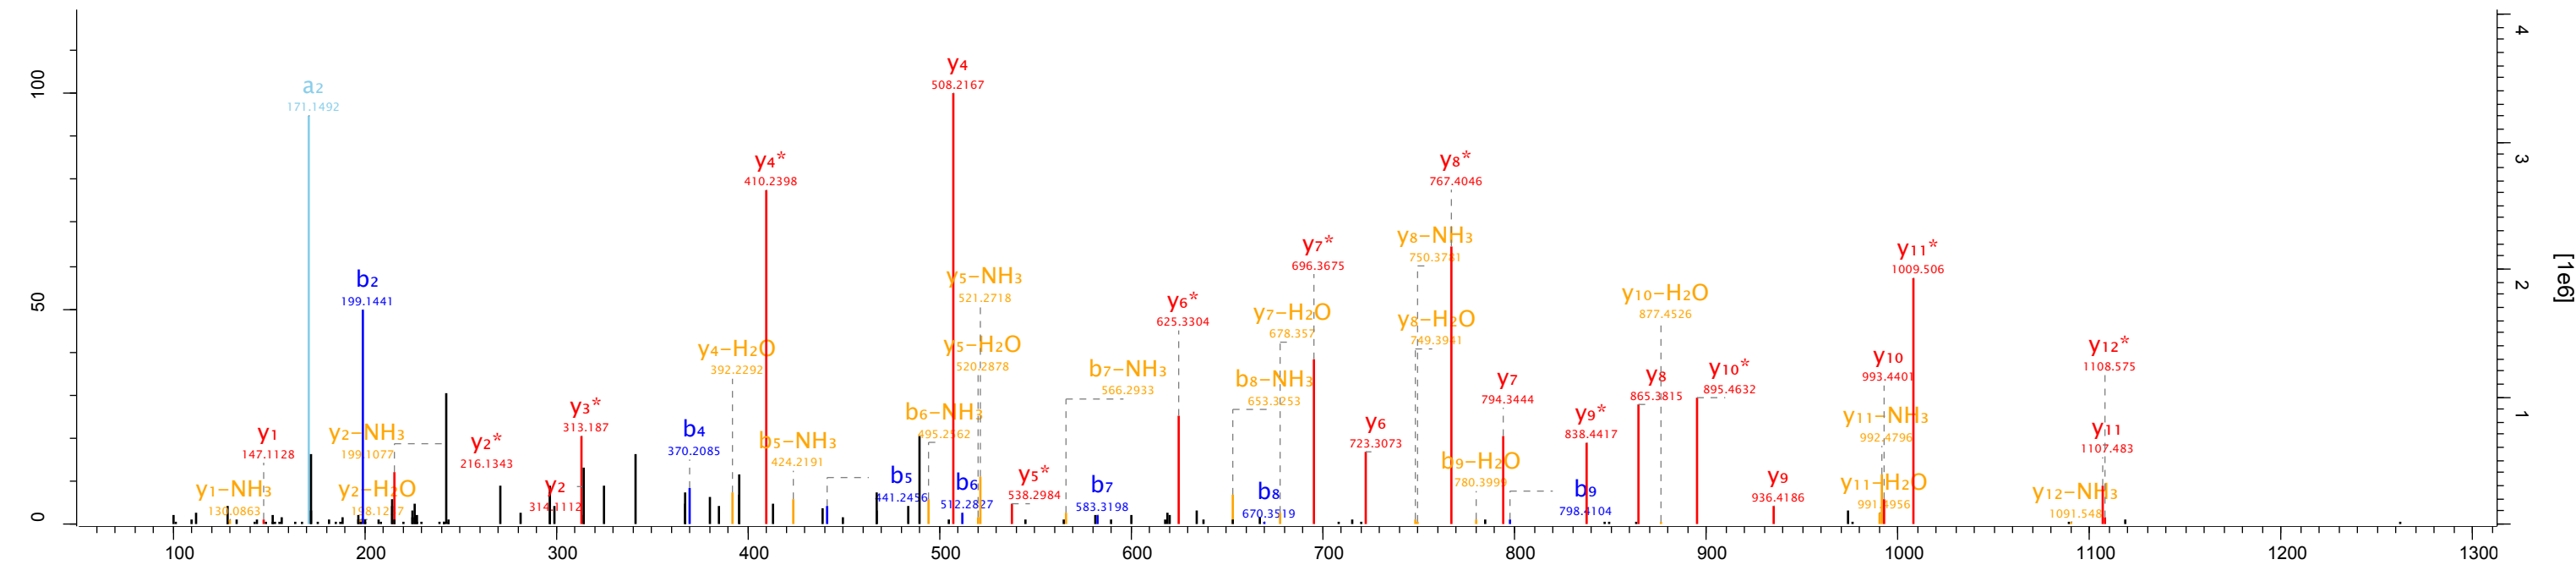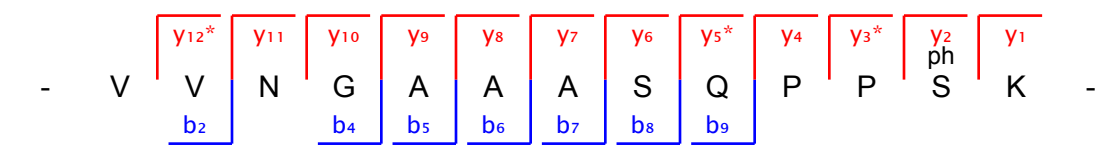

Raw file: 20150812\_A375SR\_Phospho\_BR1\_05  
 Scan: 4452 Method: FTMS; HCD Score: 117.09 m/z: 535.24 Gene names: ARAF;RAF1

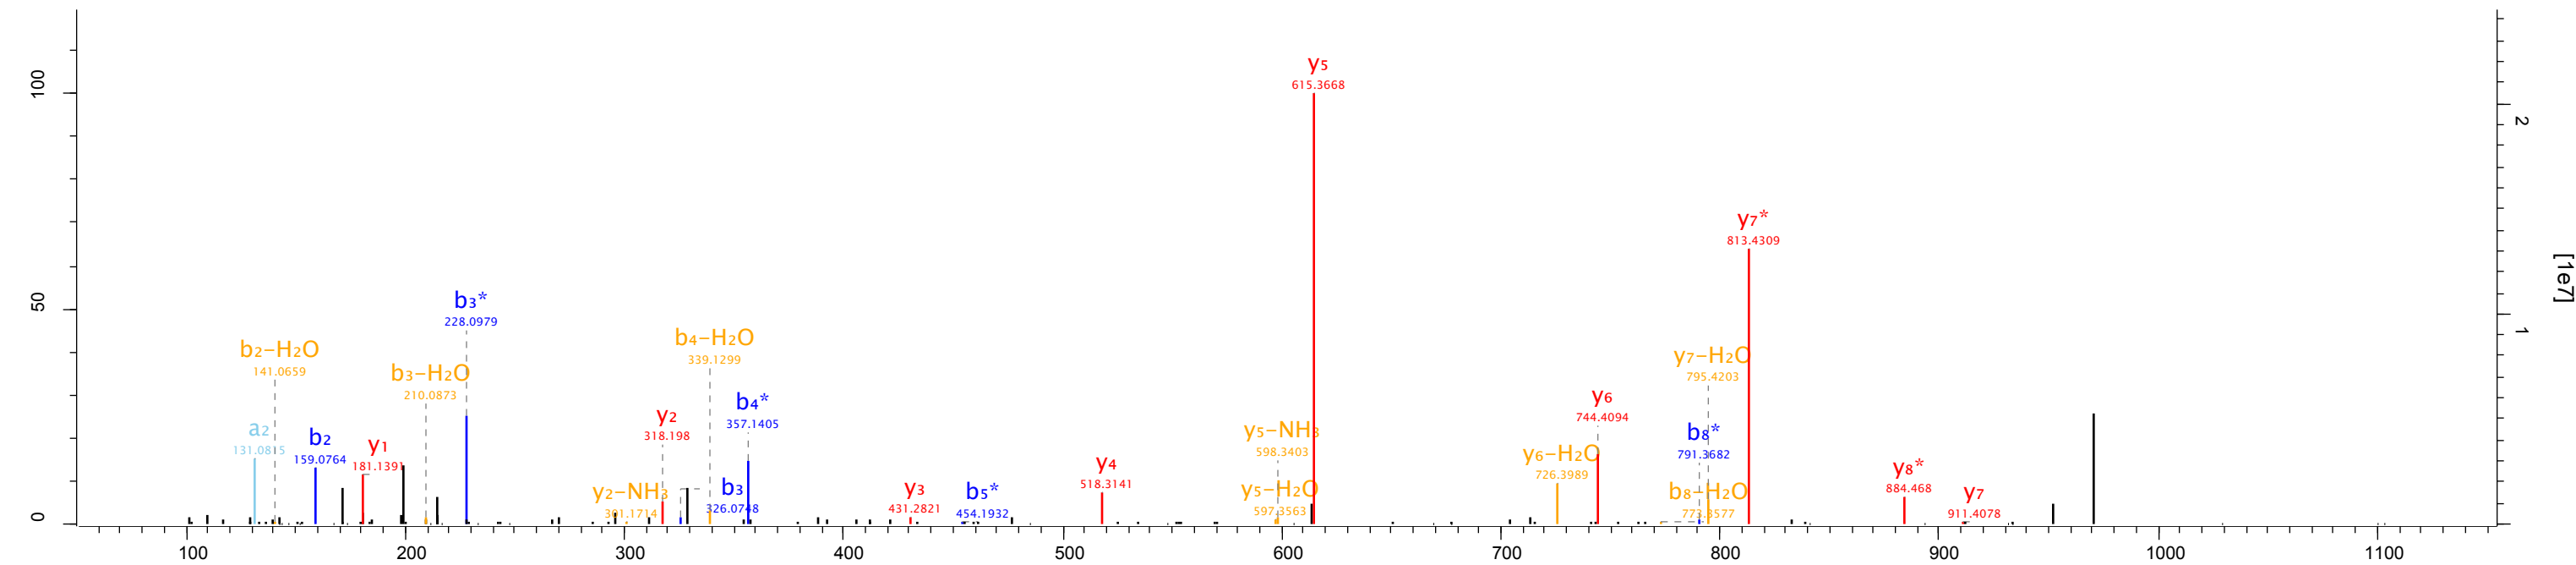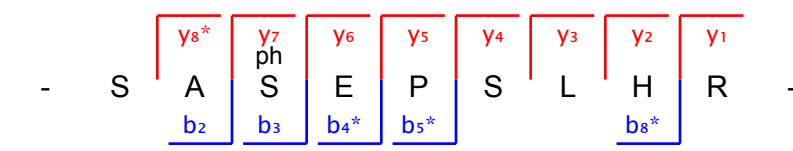



Raw file: 20150812\_A375SR\_Phospho\_BR1\_05  
 Scan: 4562 Method: FTMS; HCD Score: 251.44 m/z: 755.31 Gene names: SLC4A7

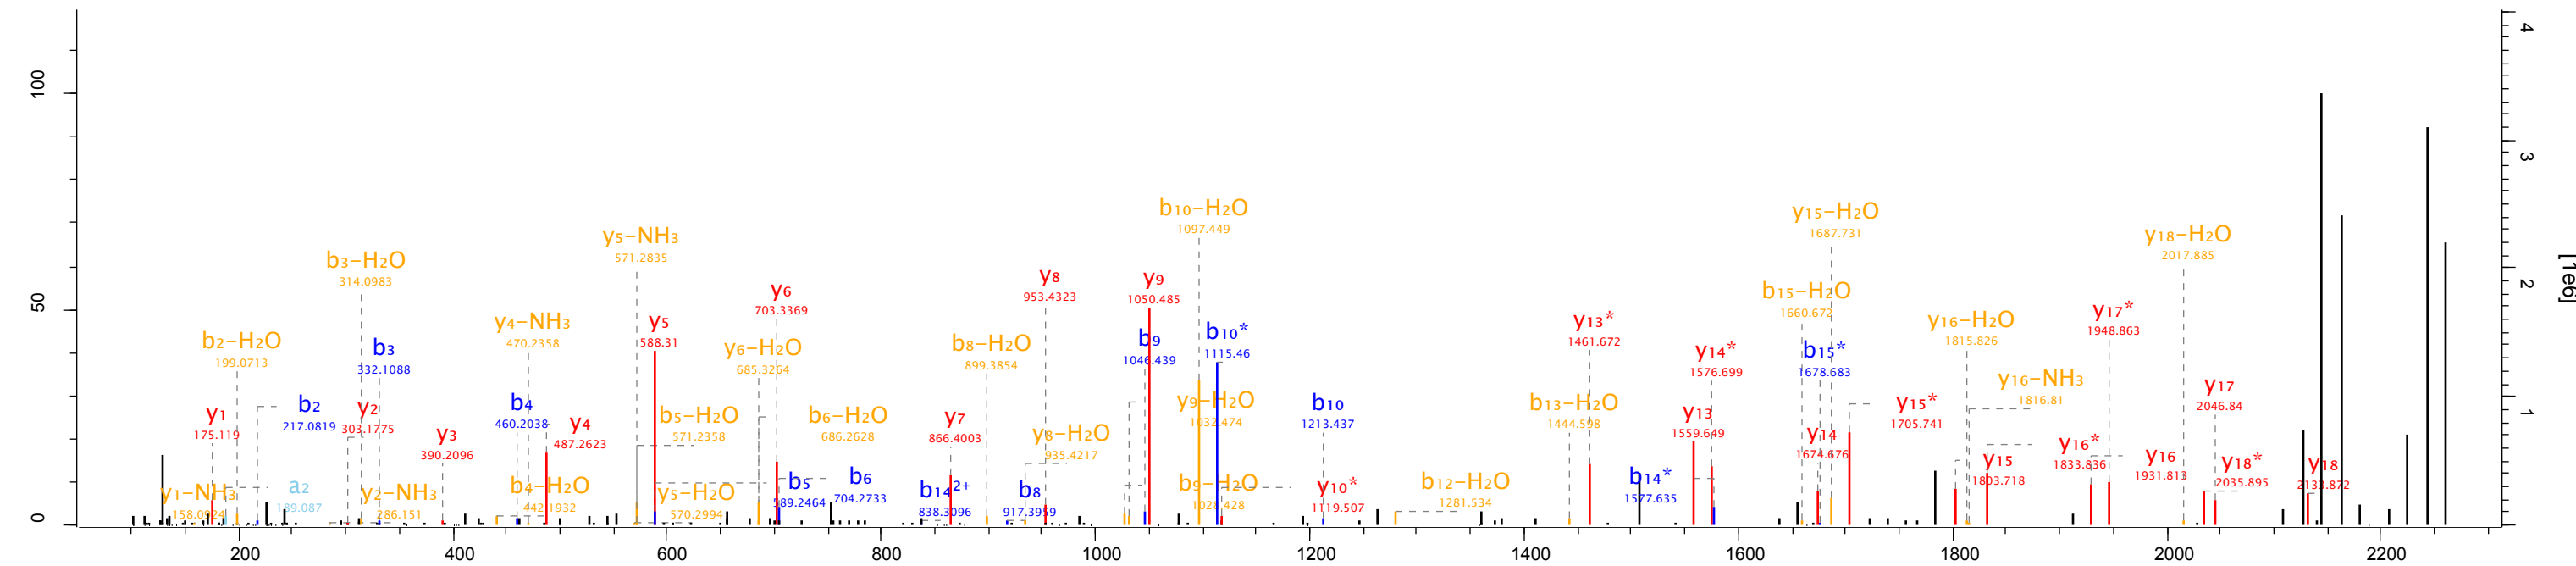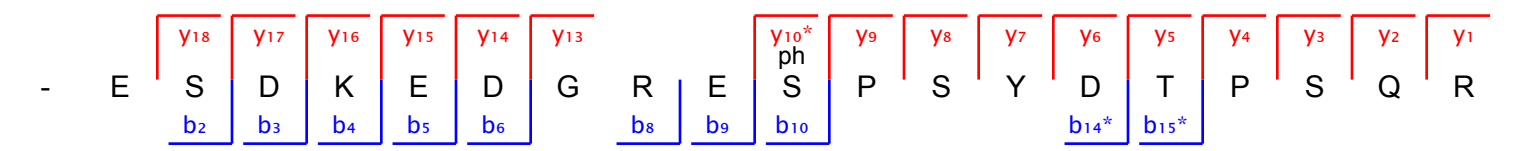

Raw file: 20150812\_A375SR\_Phospho\_BR1\_05  
 Scan: 4982 Method: FTMS; HCD Score: 138.98 m/z: 536.59 Gene names: WDR11

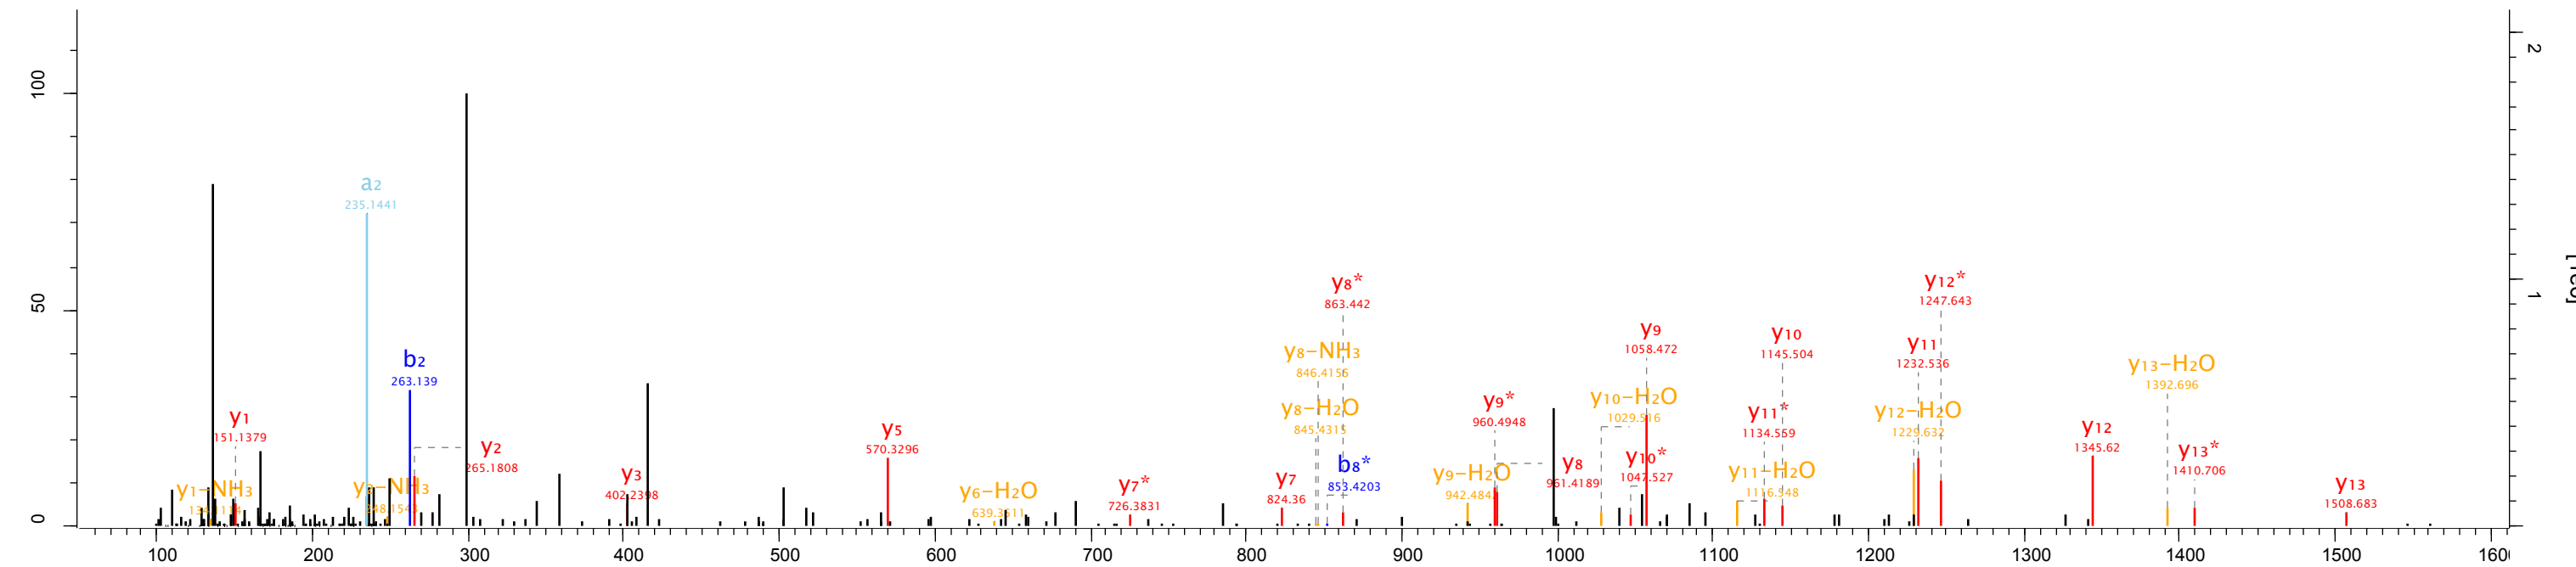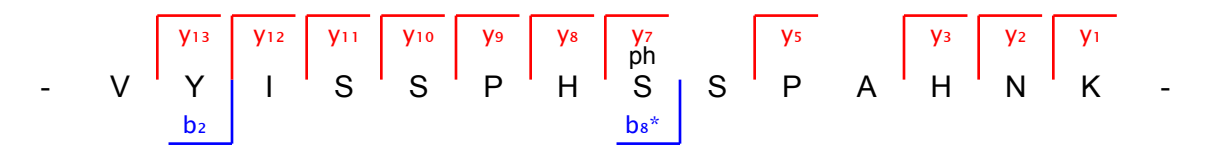

Raw file: 20150812\_A375SR\_Phospho\_BR1\_05  
 Scan: 5112 Method: FTMS; HCD Score: 162.93 m/z: 681.26 Gene names: SRRT

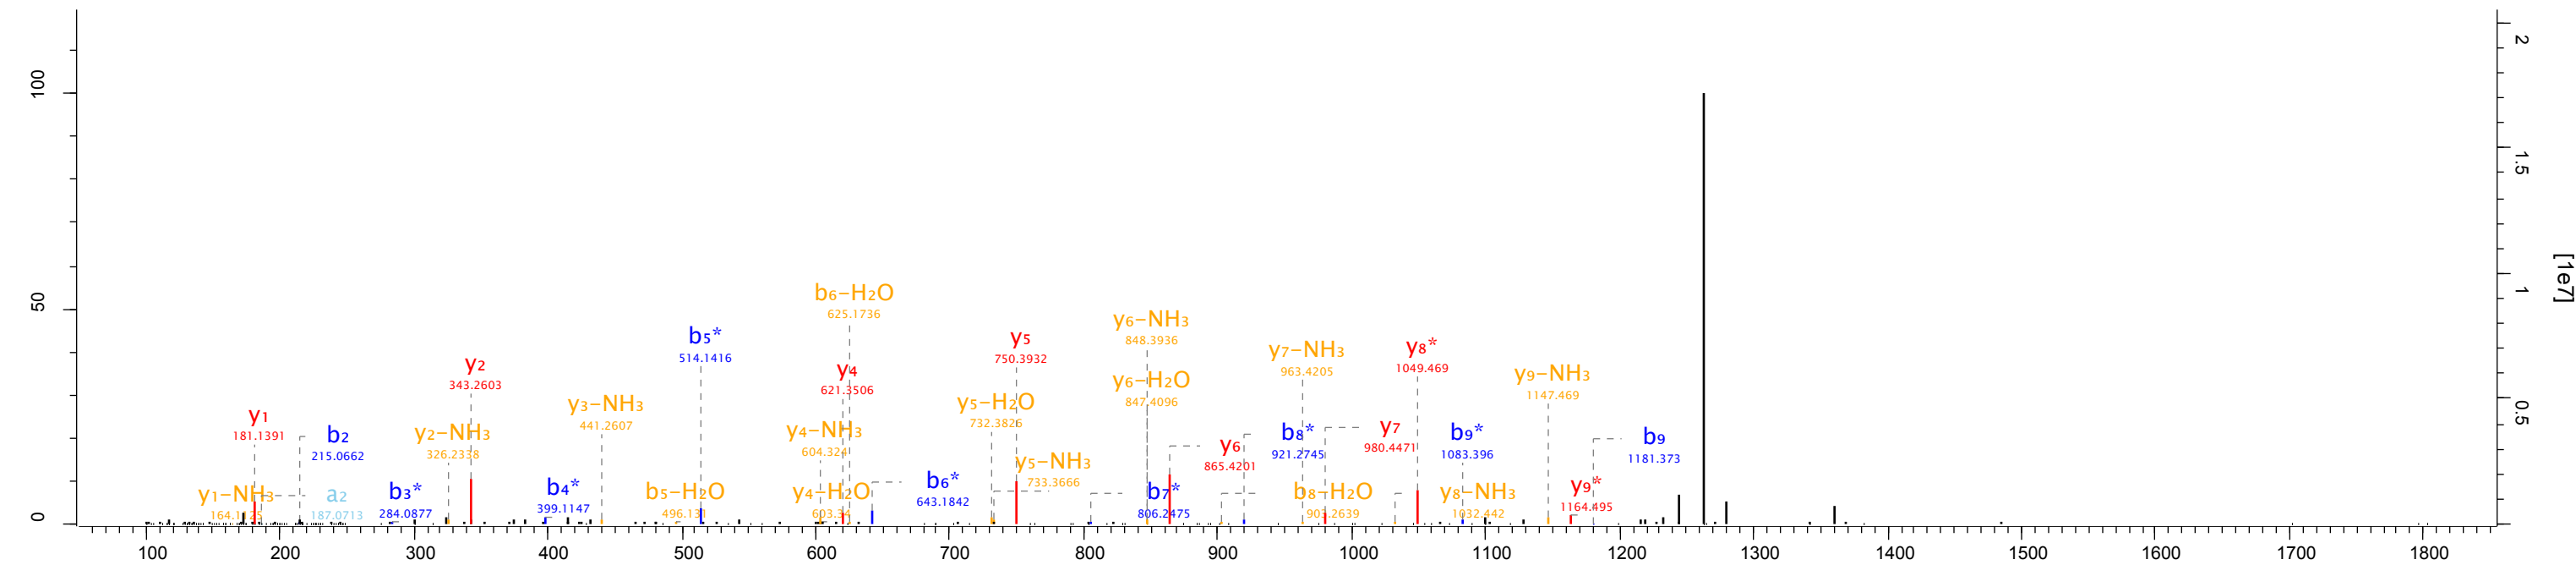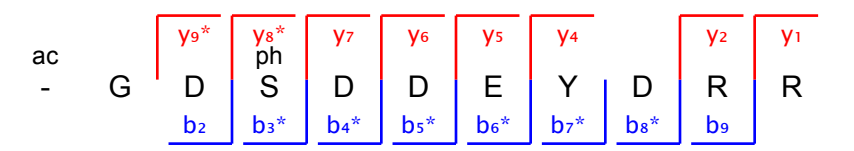

Raw file: 20150812\_A375SR\_Phospho\_BR1\_05  
 Scan: 5622 Method: FTMS; HCD Score: 218 m/z: 665.8 Gene names: TJP2

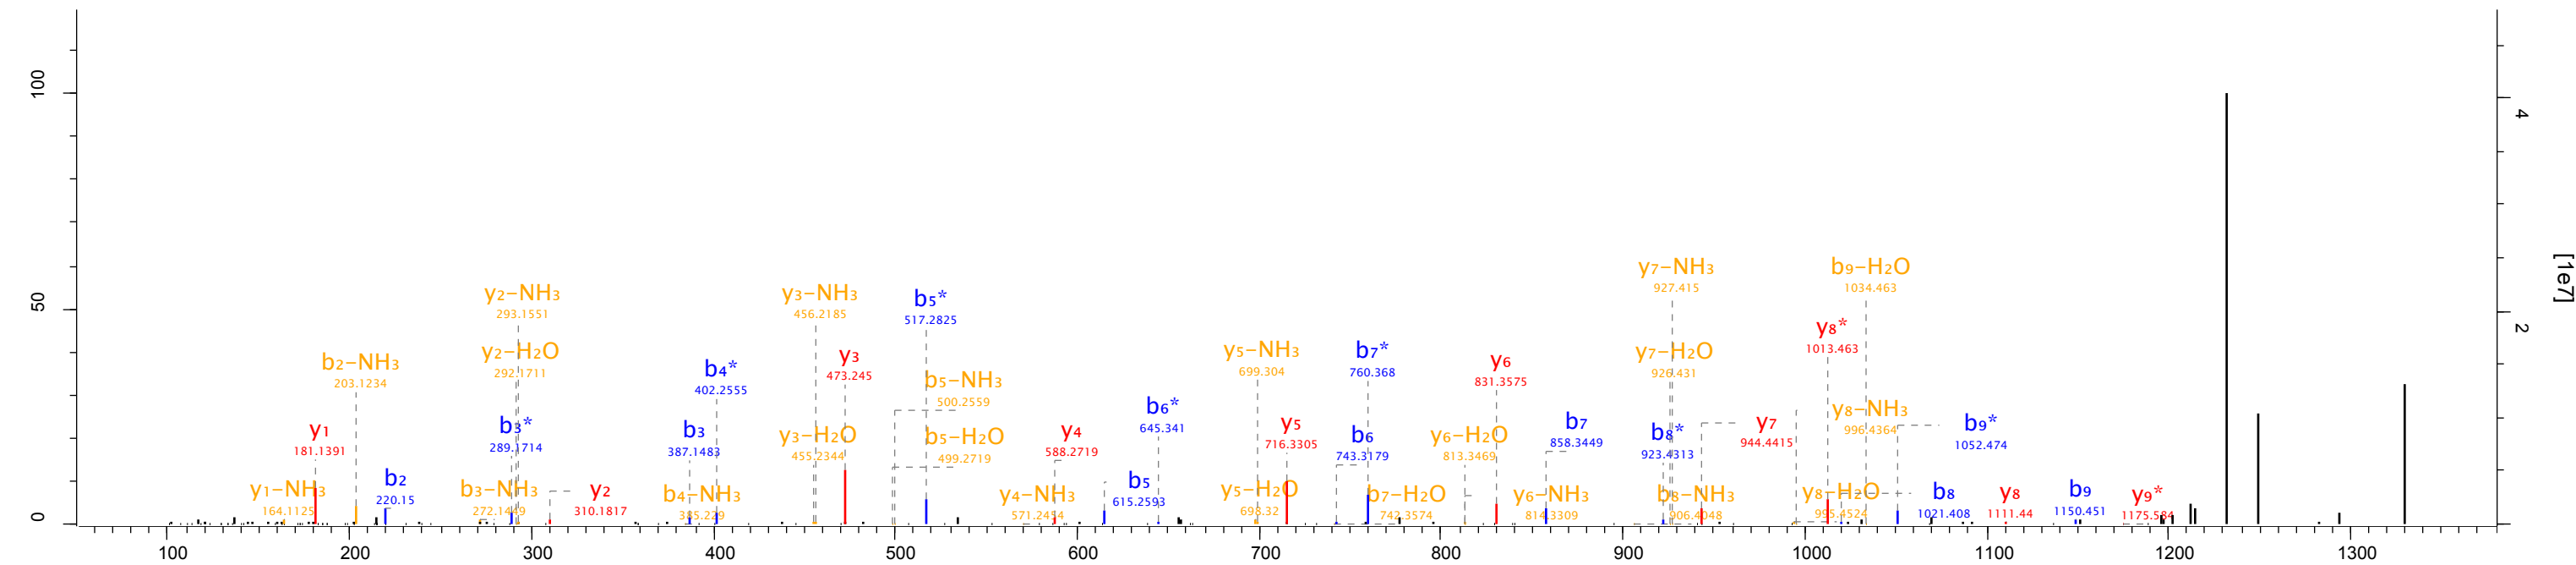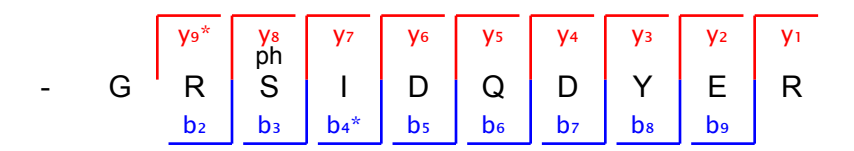

Raw file: 20150812\_A375SR\_Phospho\_BR1\_05  
 Scan: 6772 Method: FTMS; HCD Score: 132.62 m/z: 526.26 Gene names: HSPH1

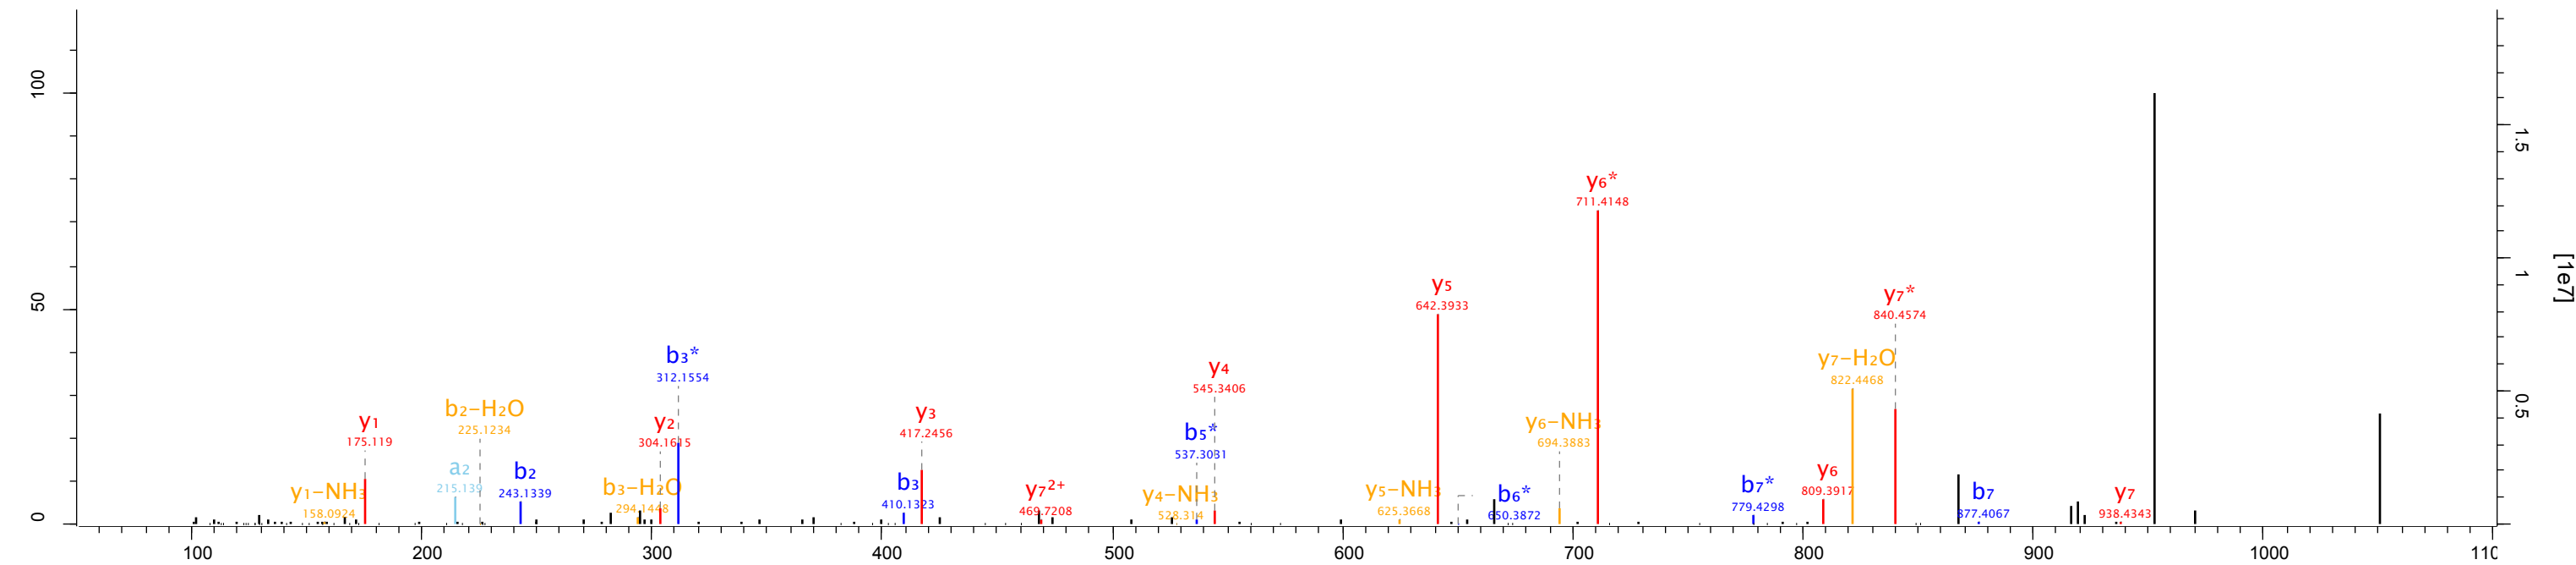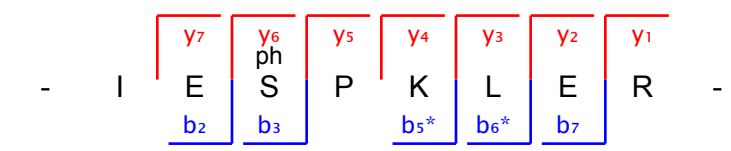

Raw file: 20150812\_A375SR\_Phospho\_BR1\_05  
 Scan: 6782 Method: FTMS; HCD Score: 156.6 m/z: 622.81 Gene names: NOVA1

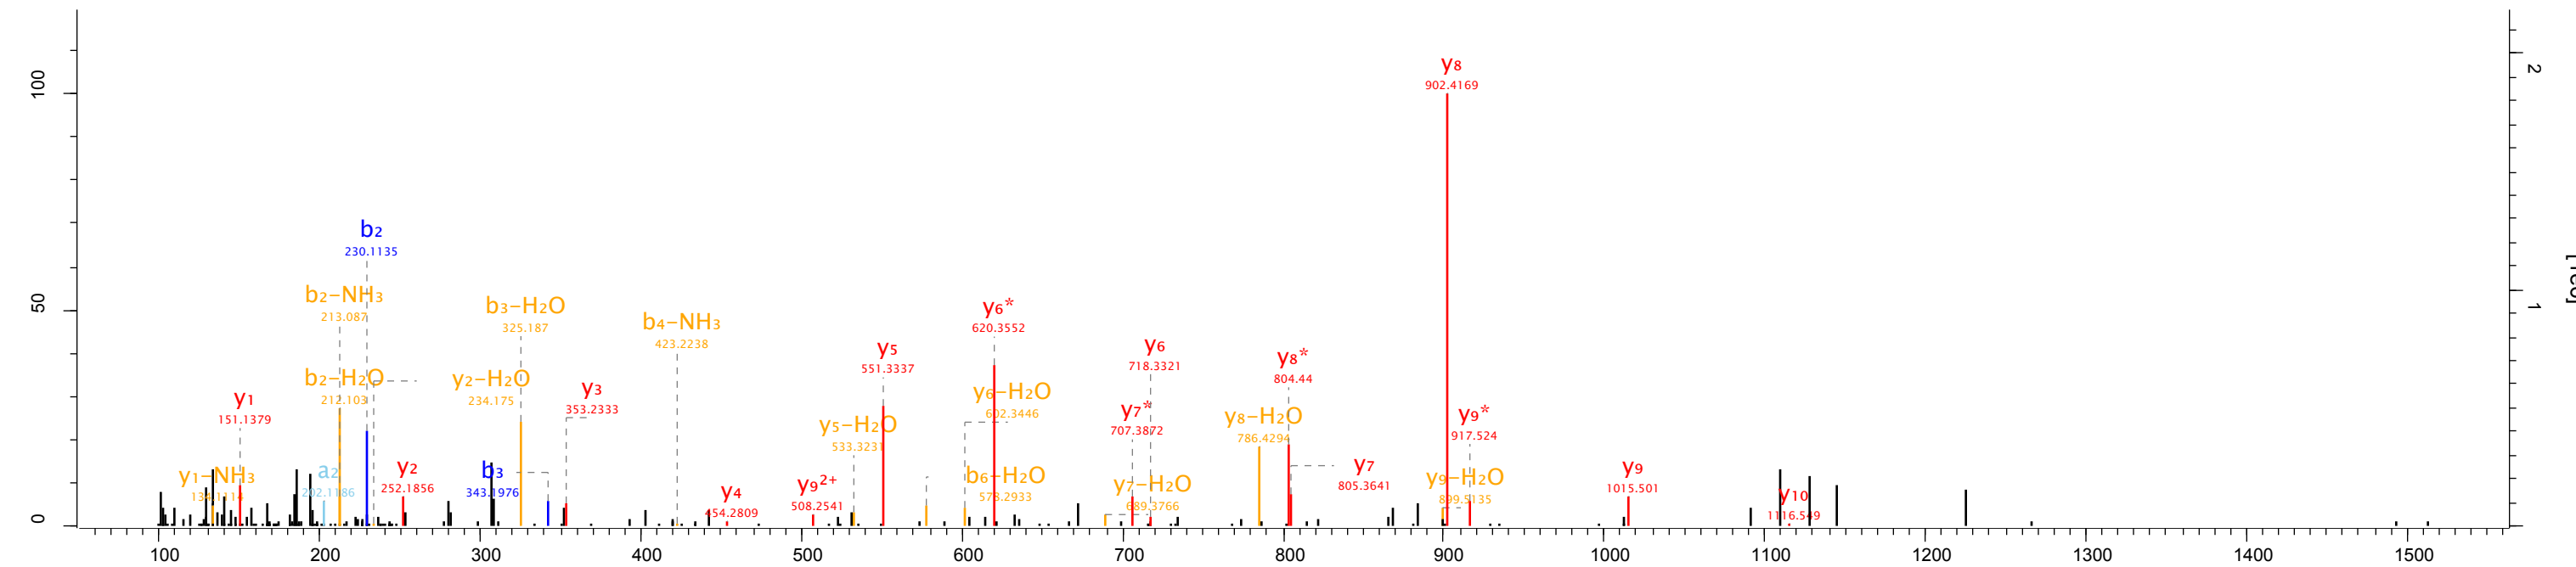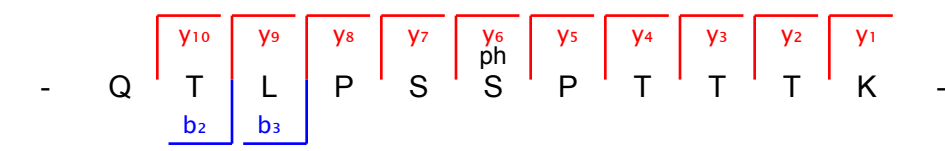



Raw file: 20150812\_A375SR\_Phospho\_BR1\_05  
 Scan: 8092 Method: FTMS; HCD Score: 82.11 m/z: 653.33 Gene names: MLPH

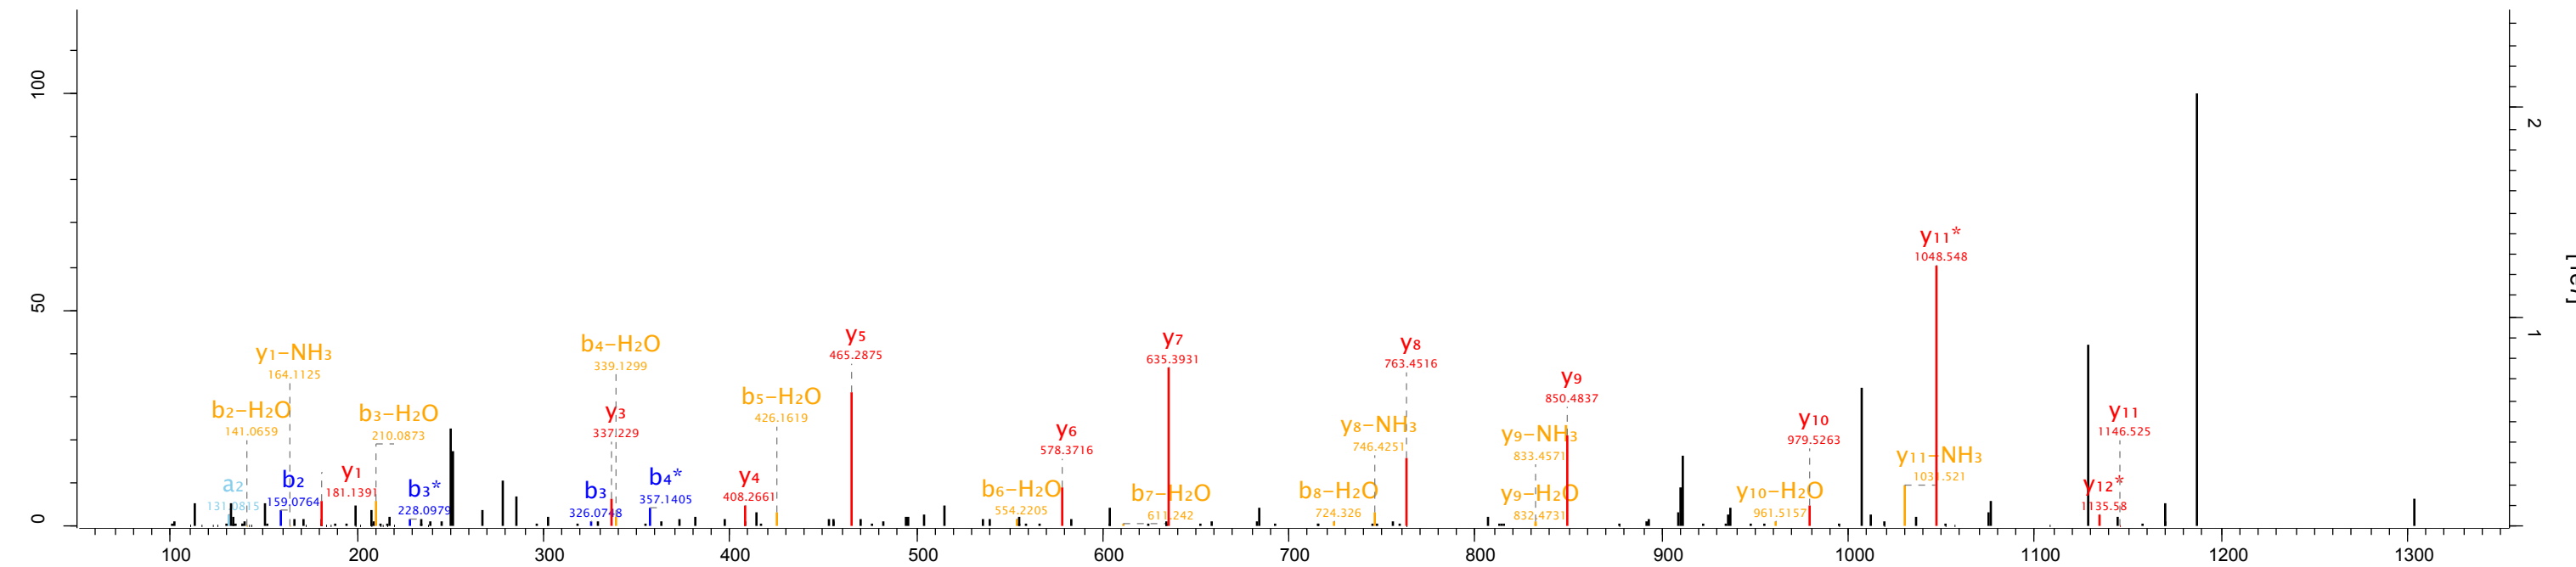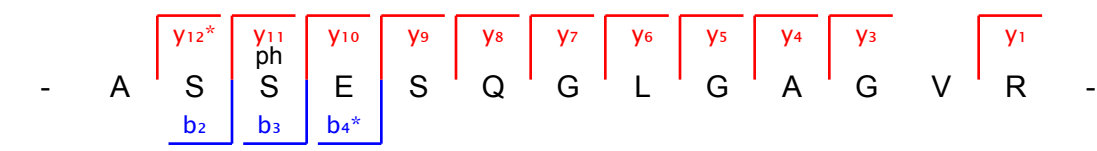



Raw file: 20150812\_A375SR\_Phospho\_BR1\_05  
 Scan: 8282 Method: FTMS; HCD Score: 101.23 m/z: 750.36 Gene names: DYNC1LI2

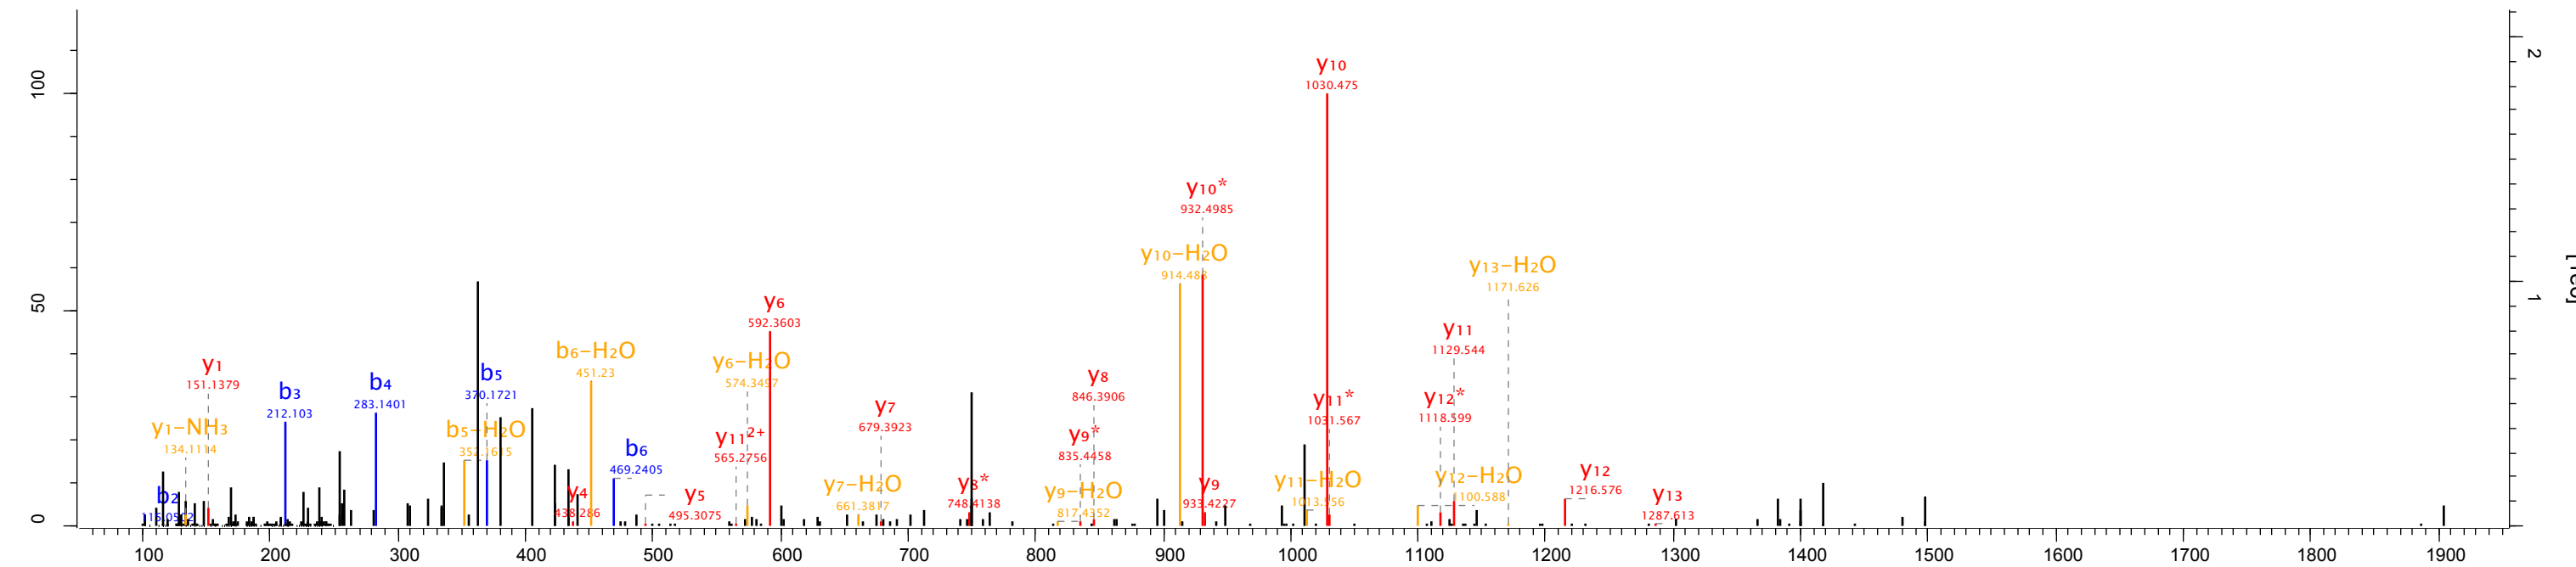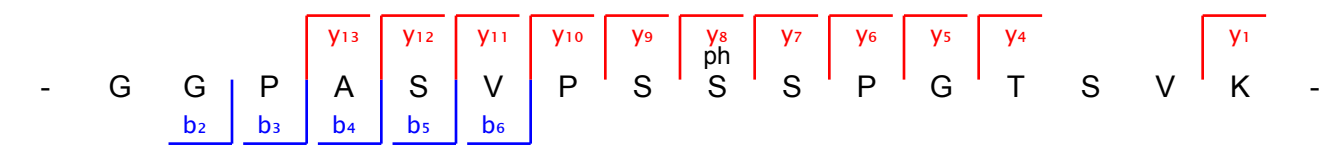

Raw file: 20150812\_A375SR\_Phospho\_BR1\_05  
 Scan: 8602 Method: FTMS; HCD Score: 104.97 m/z: 550.28 Gene names: MARK2

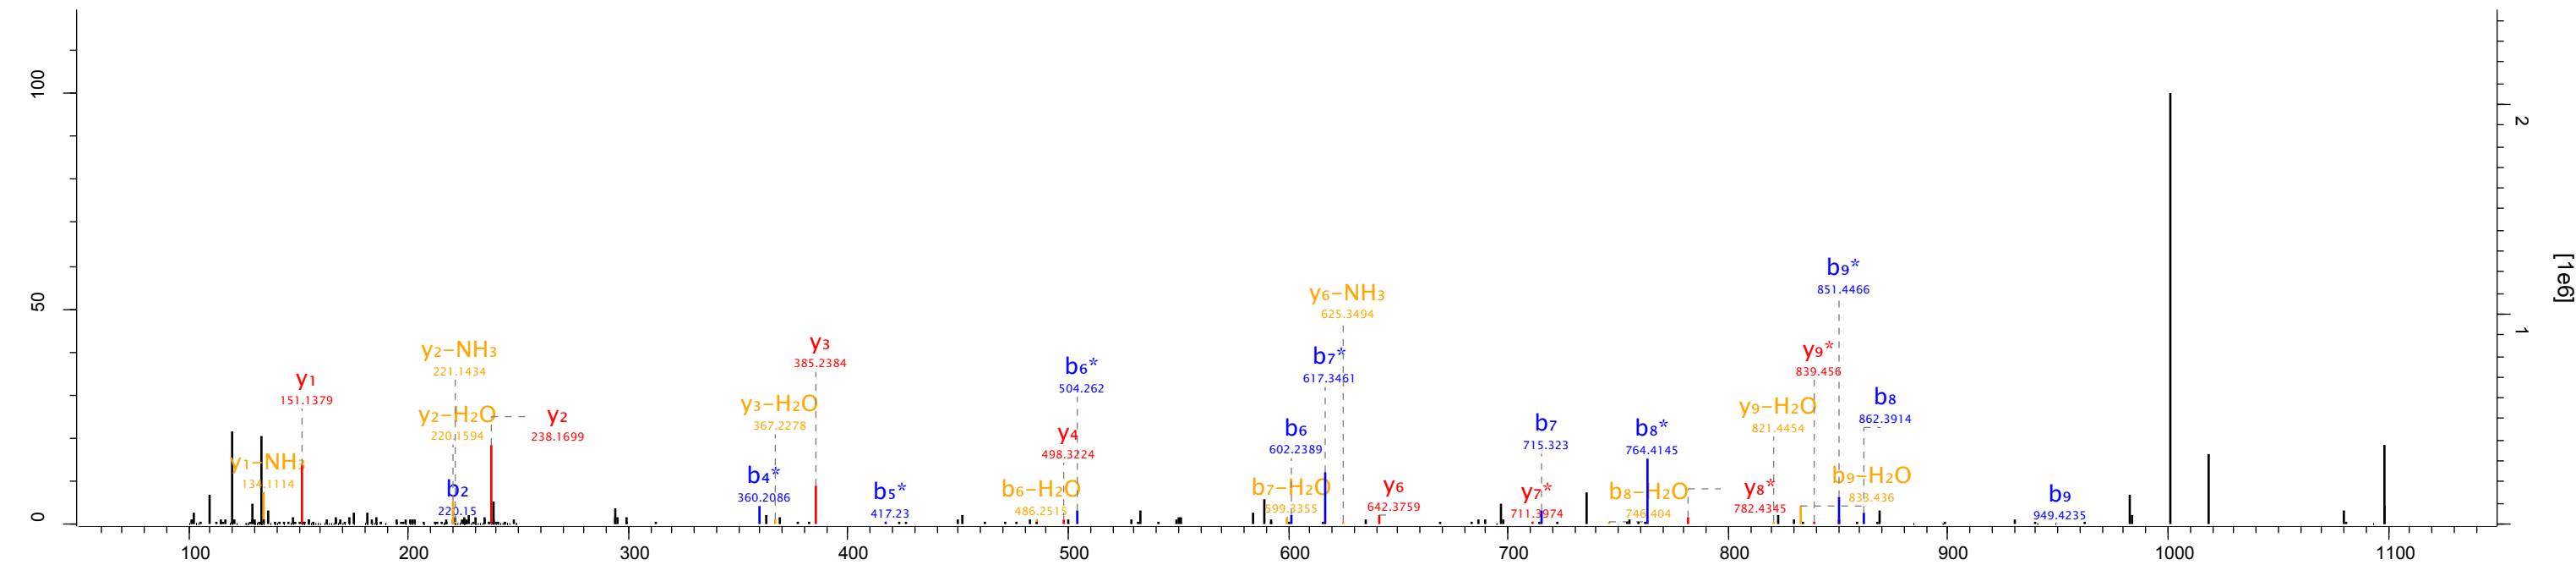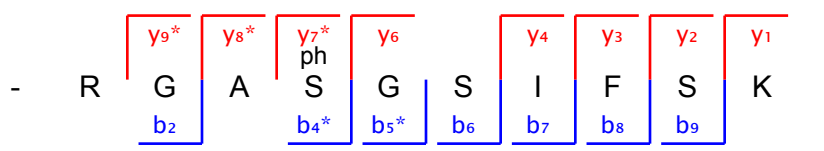

Raw file: 20150812\_A375SR\_Phospho\_BR1\_05  
 Scan: 9412 Method: FTMS; HCD Score: 81.92 m/z: 502.23 Gene names: GIGYF1

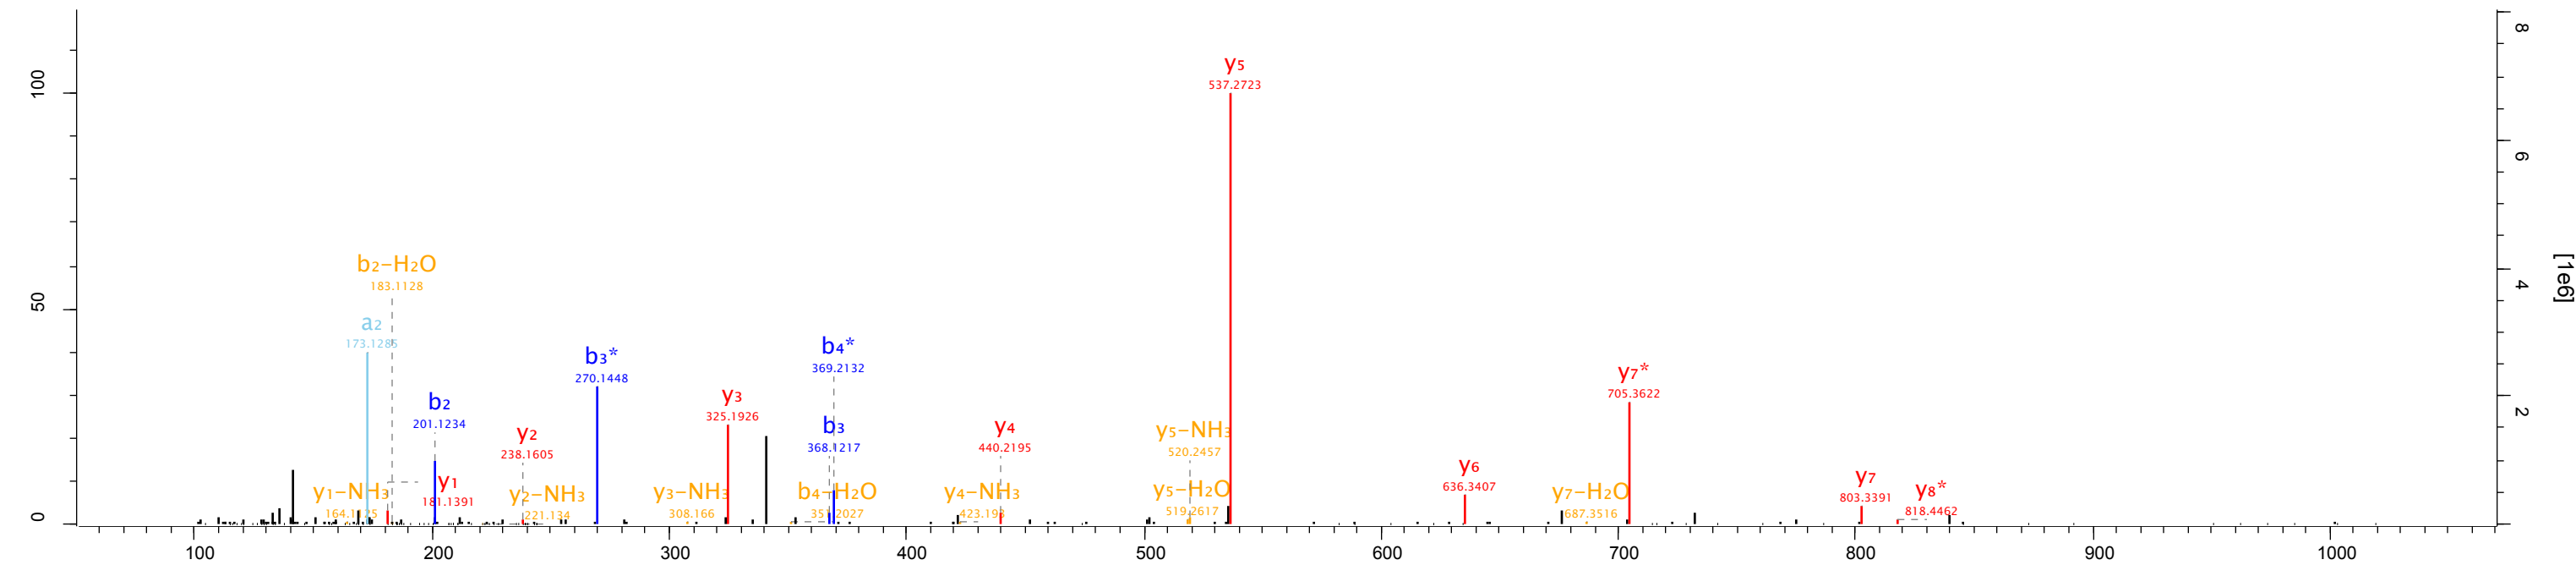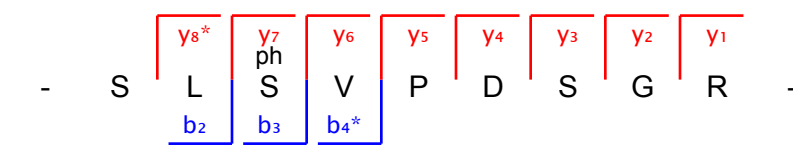

Raw file 20150812\_A375SR\_Phospho\_BR1\_05 Scan 9662 Method FTMS; HCD Score 231.06 m/z 860.84 Gene names MAP1A

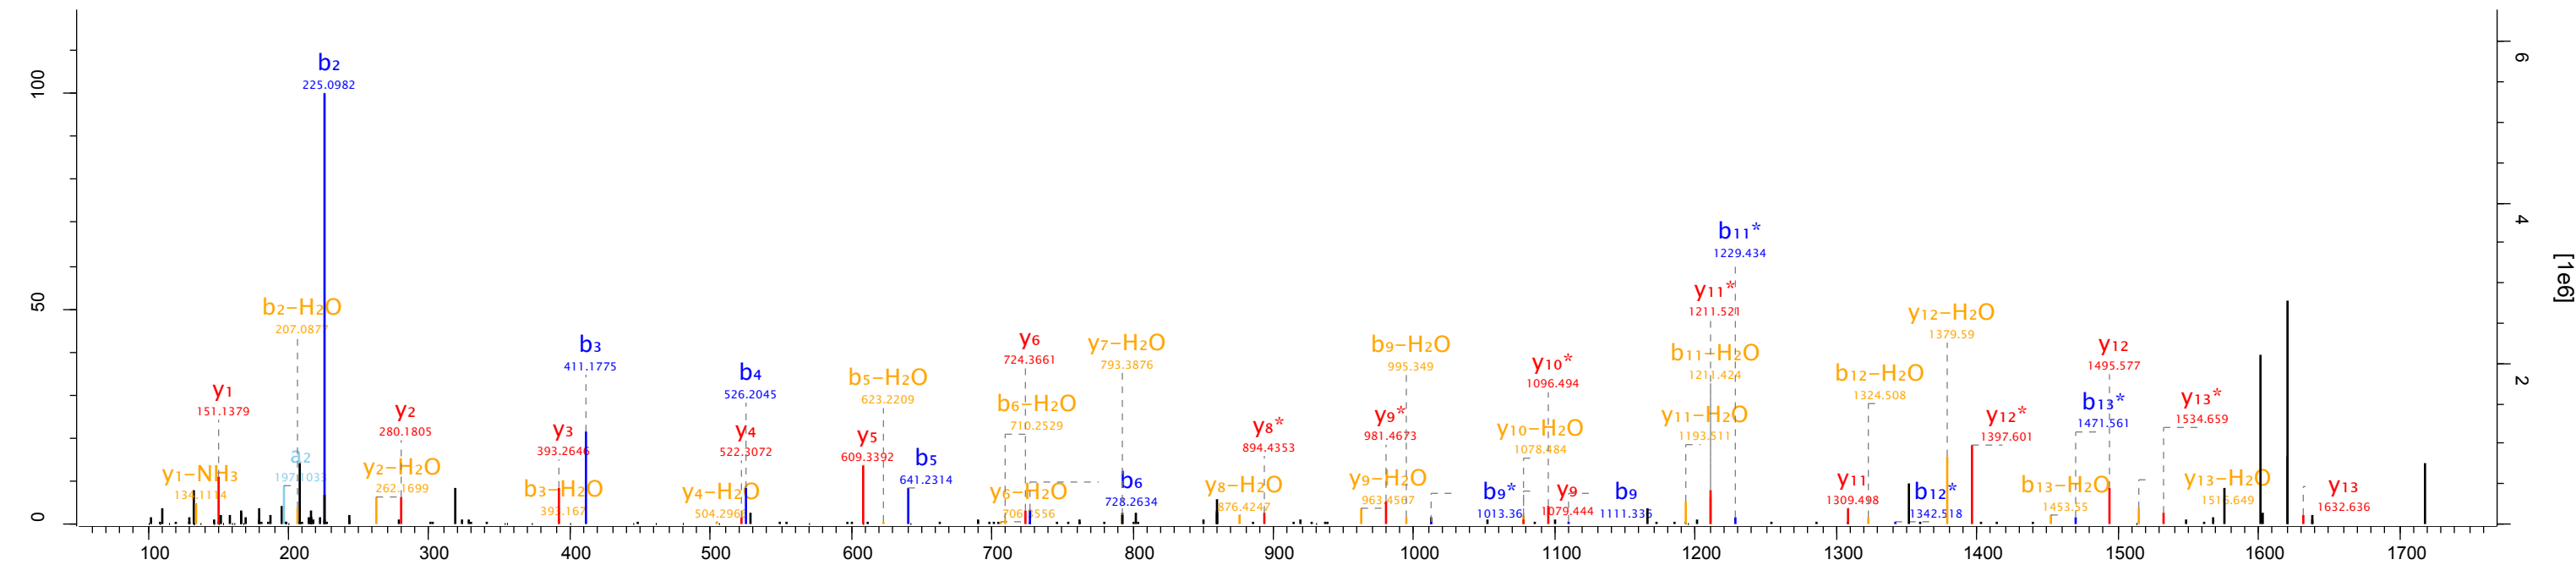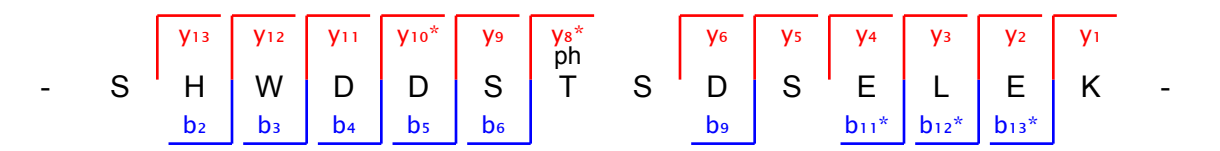

Raw file: 20150812\_A375SR\_Phospho\_BR1\_05  
 Scan: 9712 Method: FTMS; HCD Score: 59.34 m/z: 767.37 Gene names: MED26

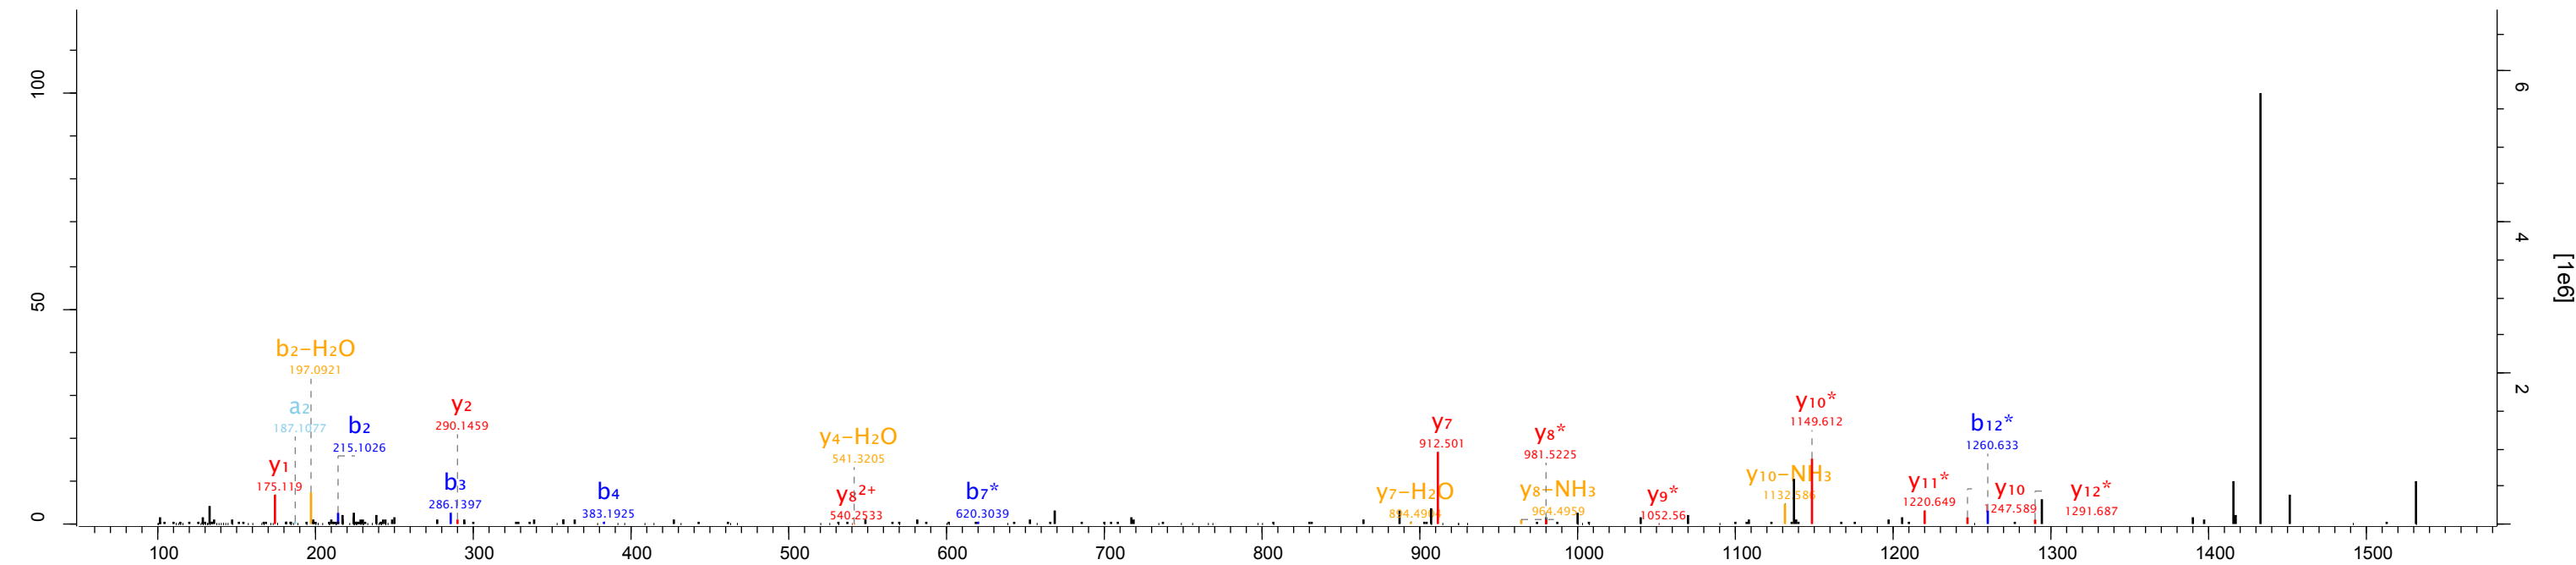

ac  
 - T A A P A S P Q Q I R D R -  
 b2 b3 b4 b7\* b12\*

Raw file: 20150812\_A375SR\_Phospho\_BR1\_05  
 Scan: 9812 Method: FTMS; HCD Score: 292.35 m/z: 826.32 Gene names: TCP1

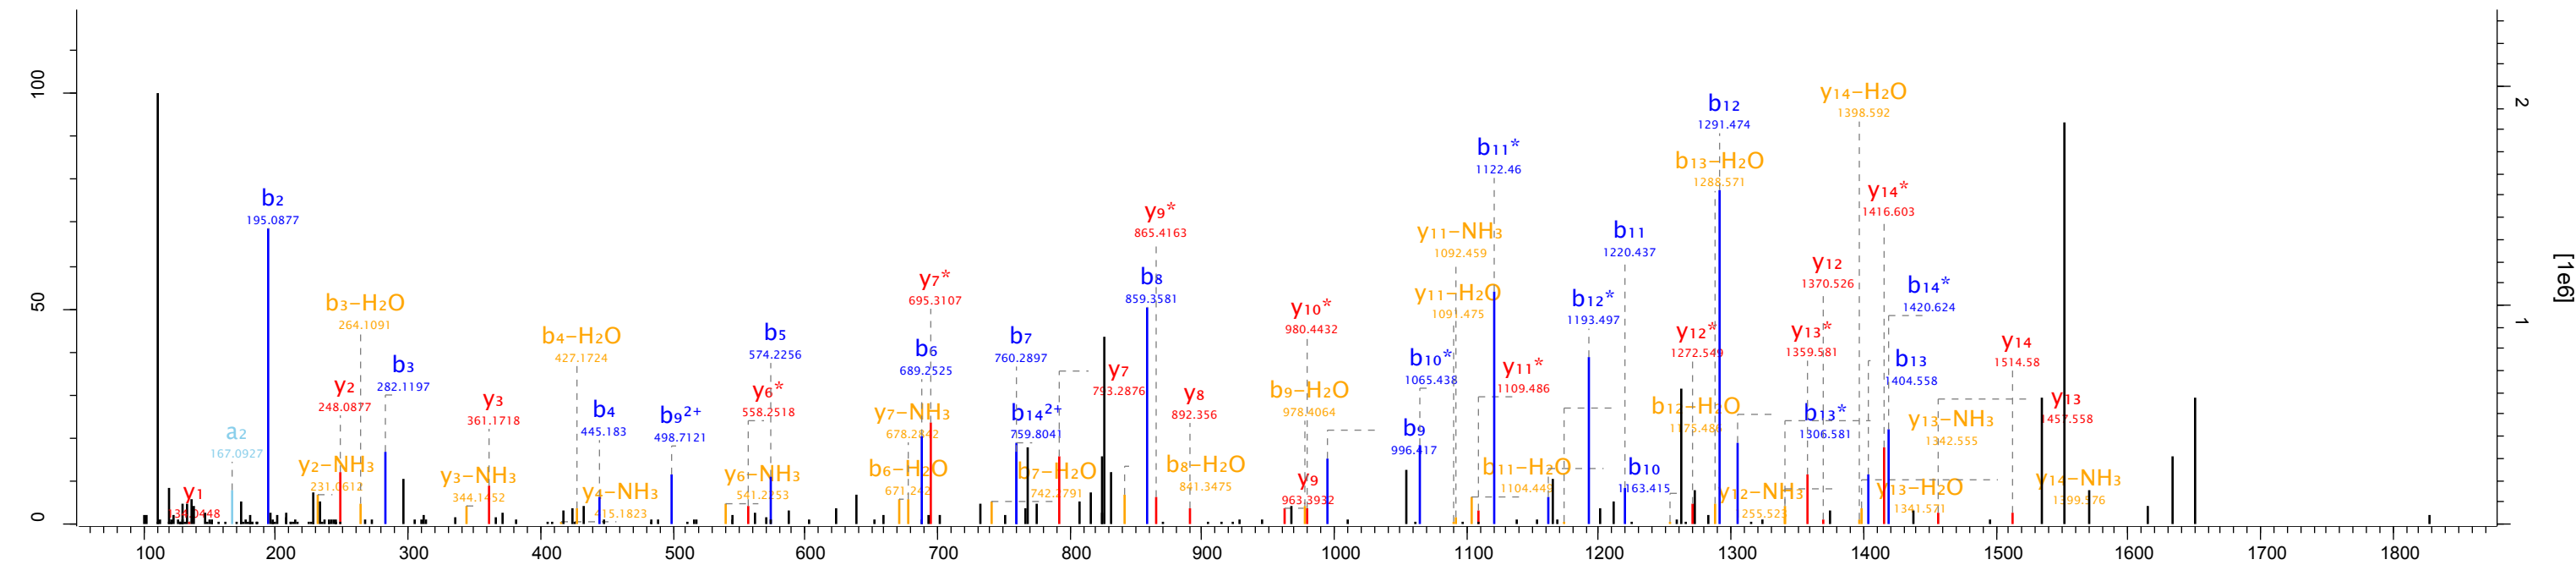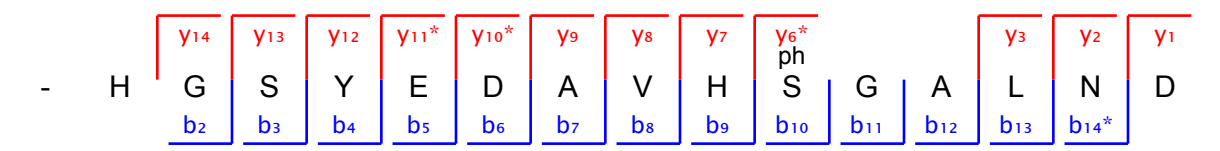

Raw file 20150812\_A375SR\_Phospho\_BR1\_05 Scan 9992 Method FTMS; HCD Score 50.13 m/z 542.27 Gene names SEPT10

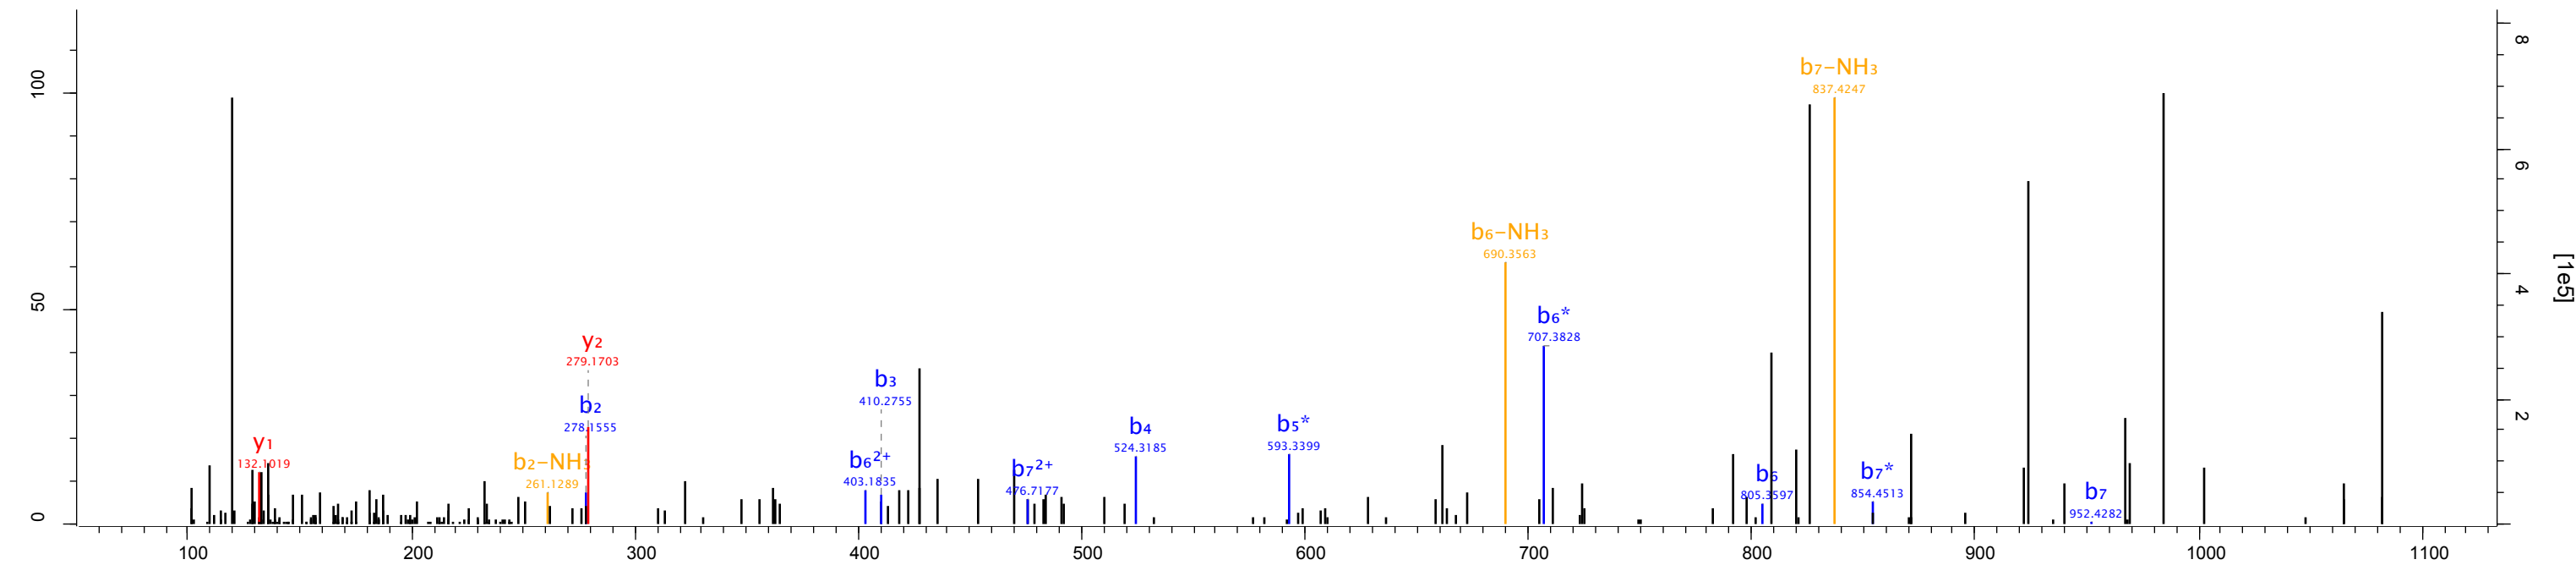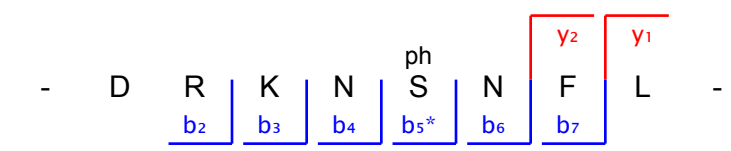

Raw file: 20150812\_A375SR\_Phospho\_BR1\_06  
 Scan: 10272 Method: FTMS; HCD Score: 208.4 m/z: 732.93 Gene names: TCOF1

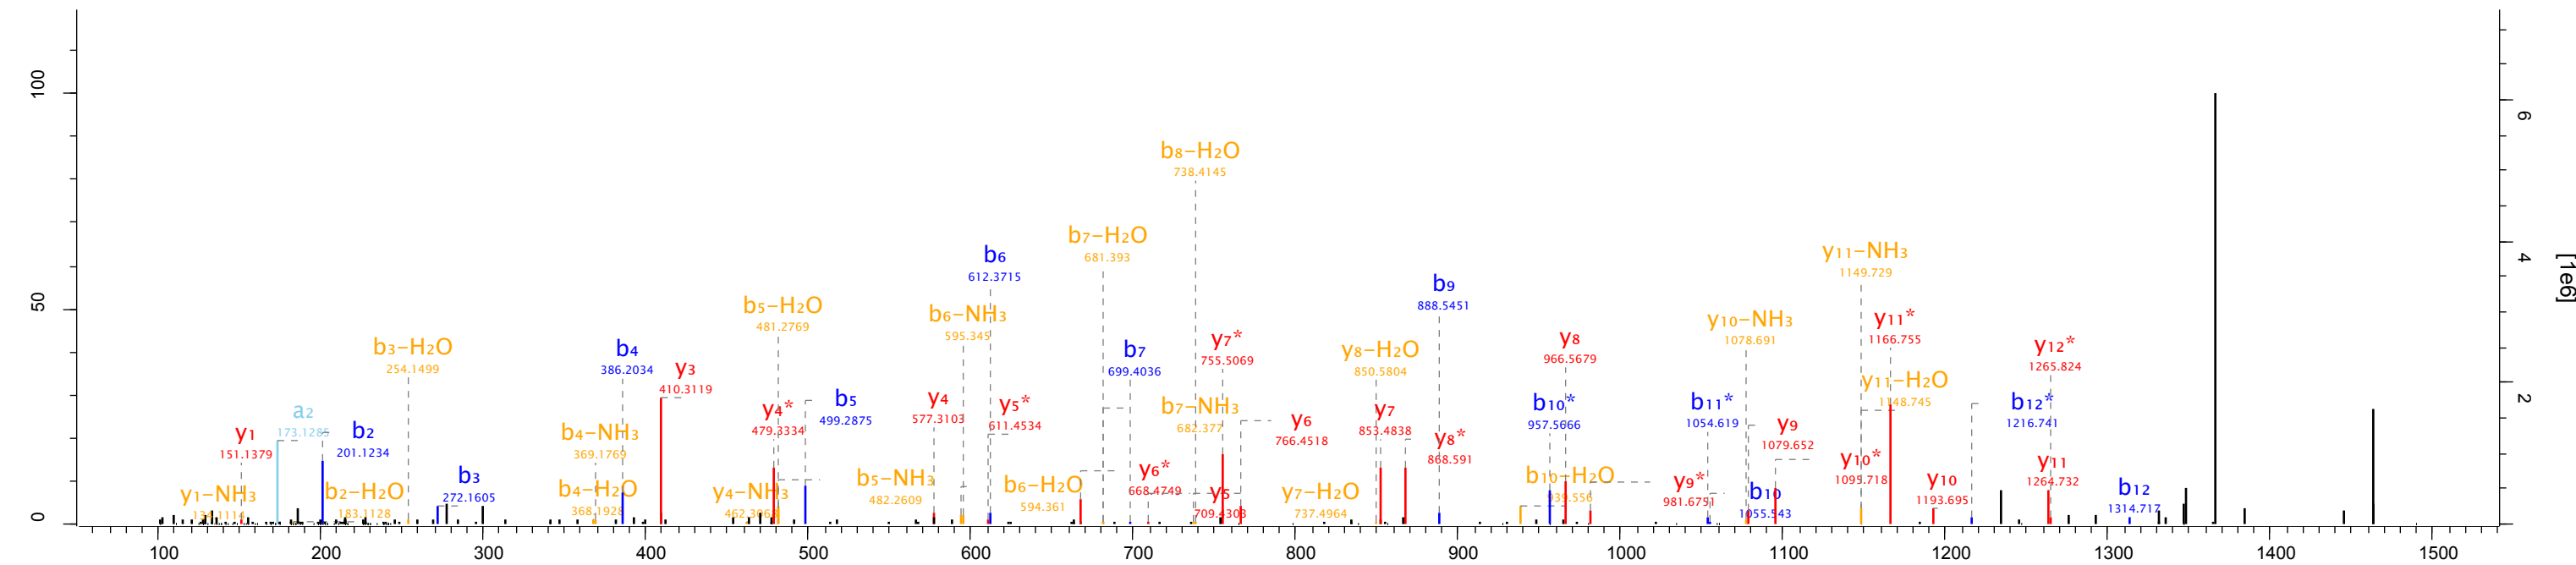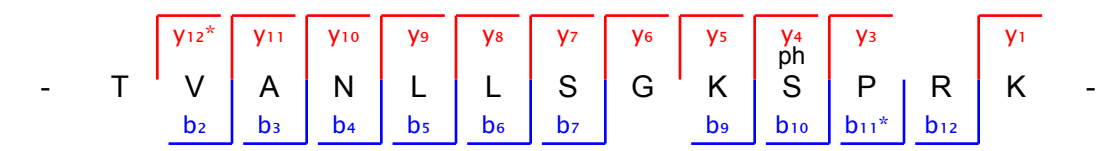



Raw file 20150812\_A375SR\_Phospho\_BR1\_06 Scan 10382 Method FTMS; HCD Score 132.67 m/z 622.97 Gene names YAP1

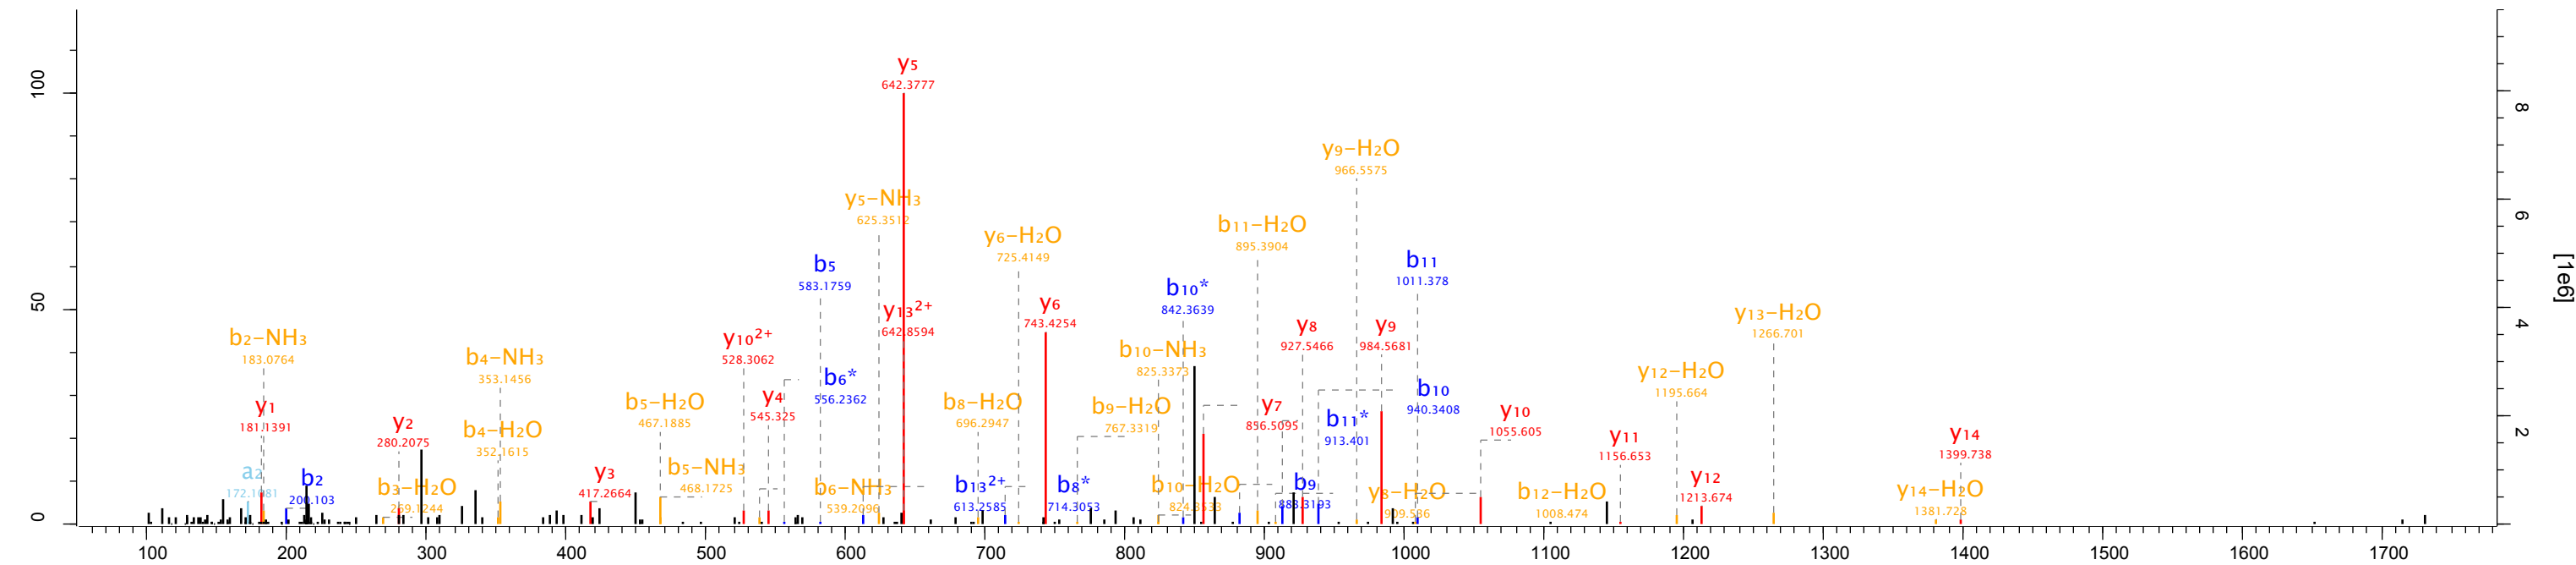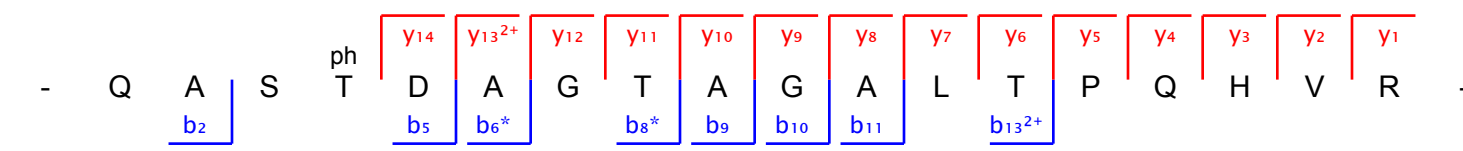

Raw file Scan Method Score m/z Gene names  
 20150812\_A375SR\_Phospho\_BR1\_06 10962 FTMS; HCD 149.3 837.37 VIM

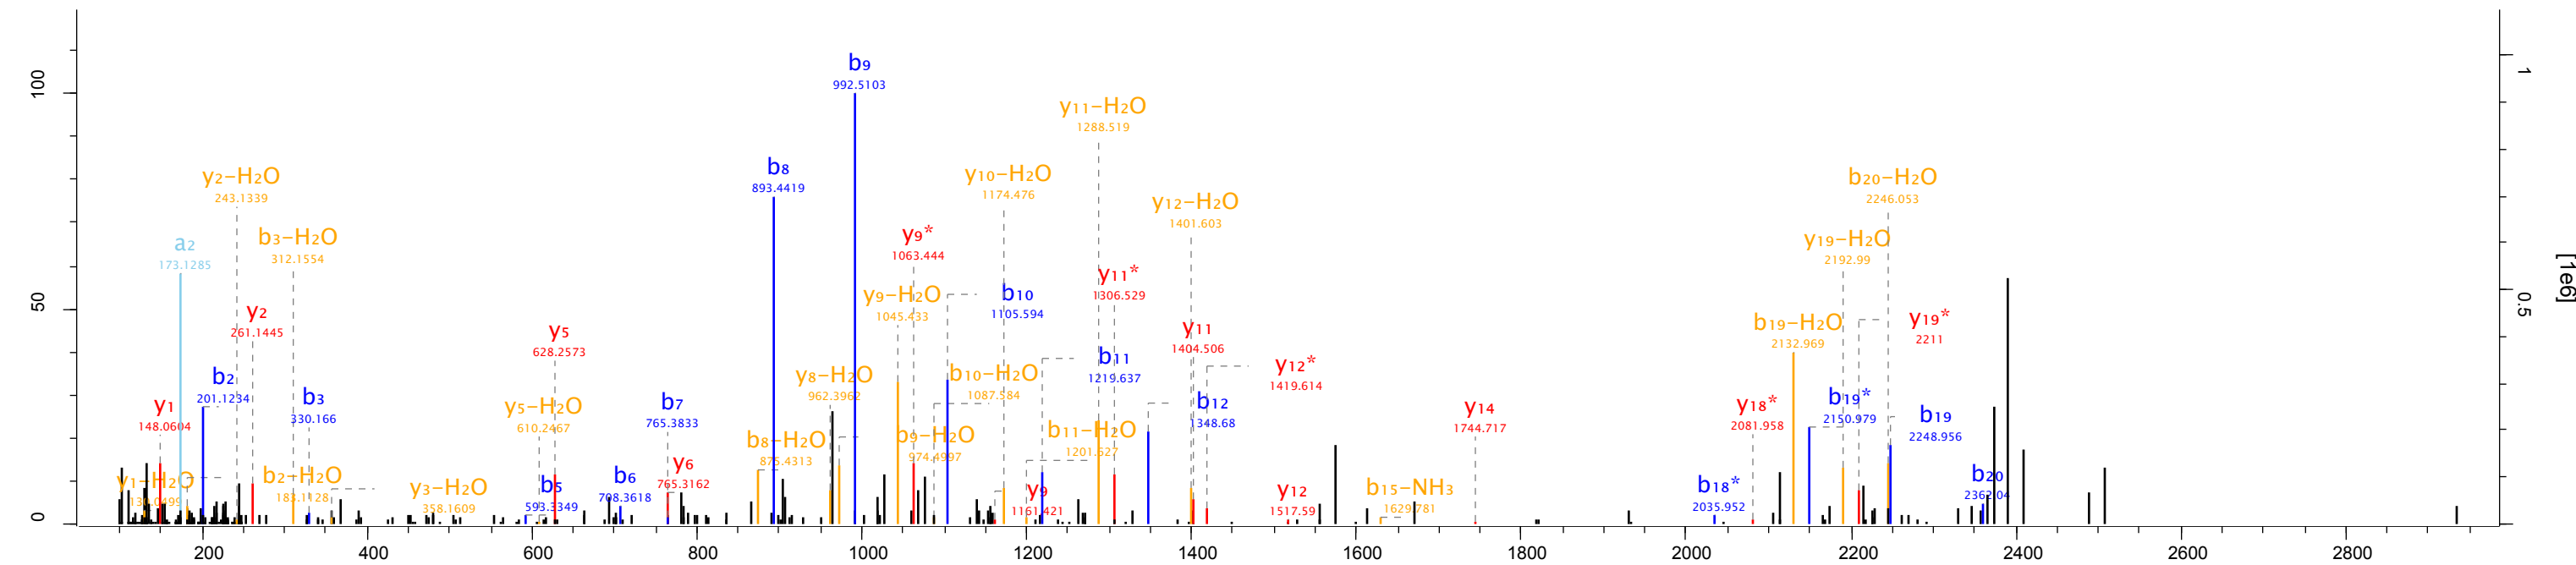

- T V E T R D G Q V I N E T S Q H H D D L E -

b<sub>2</sub>
b<sub>3</sub>
b<sub>5</sub>
b<sub>6</sub>
b<sub>7</sub>
b<sub>8</sub>
b<sub>9</sub>
b<sub>10</sub>
b<sub>11</sub>
b<sub>12</sub>
b<sub>18</sub>\*
b<sub>19</sub>
b<sub>20</sub>
y<sub>19</sub>\*
y<sub>18</sub>\*
y<sub>14</sub>
y<sub>12</sub>
y<sub>11</sub>
y<sub>9</sub><sup>ph</sup>
y<sub>6</sub>
y<sub>5</sub>
y<sub>2</sub>
y<sub>1</sub>

Raw file 20150812\_A375SR\_Phospho\_BR1\_06 Scan 11272 Method FTMS; HCD Score 102.62 m/z 448.21 Gene names C1orf226

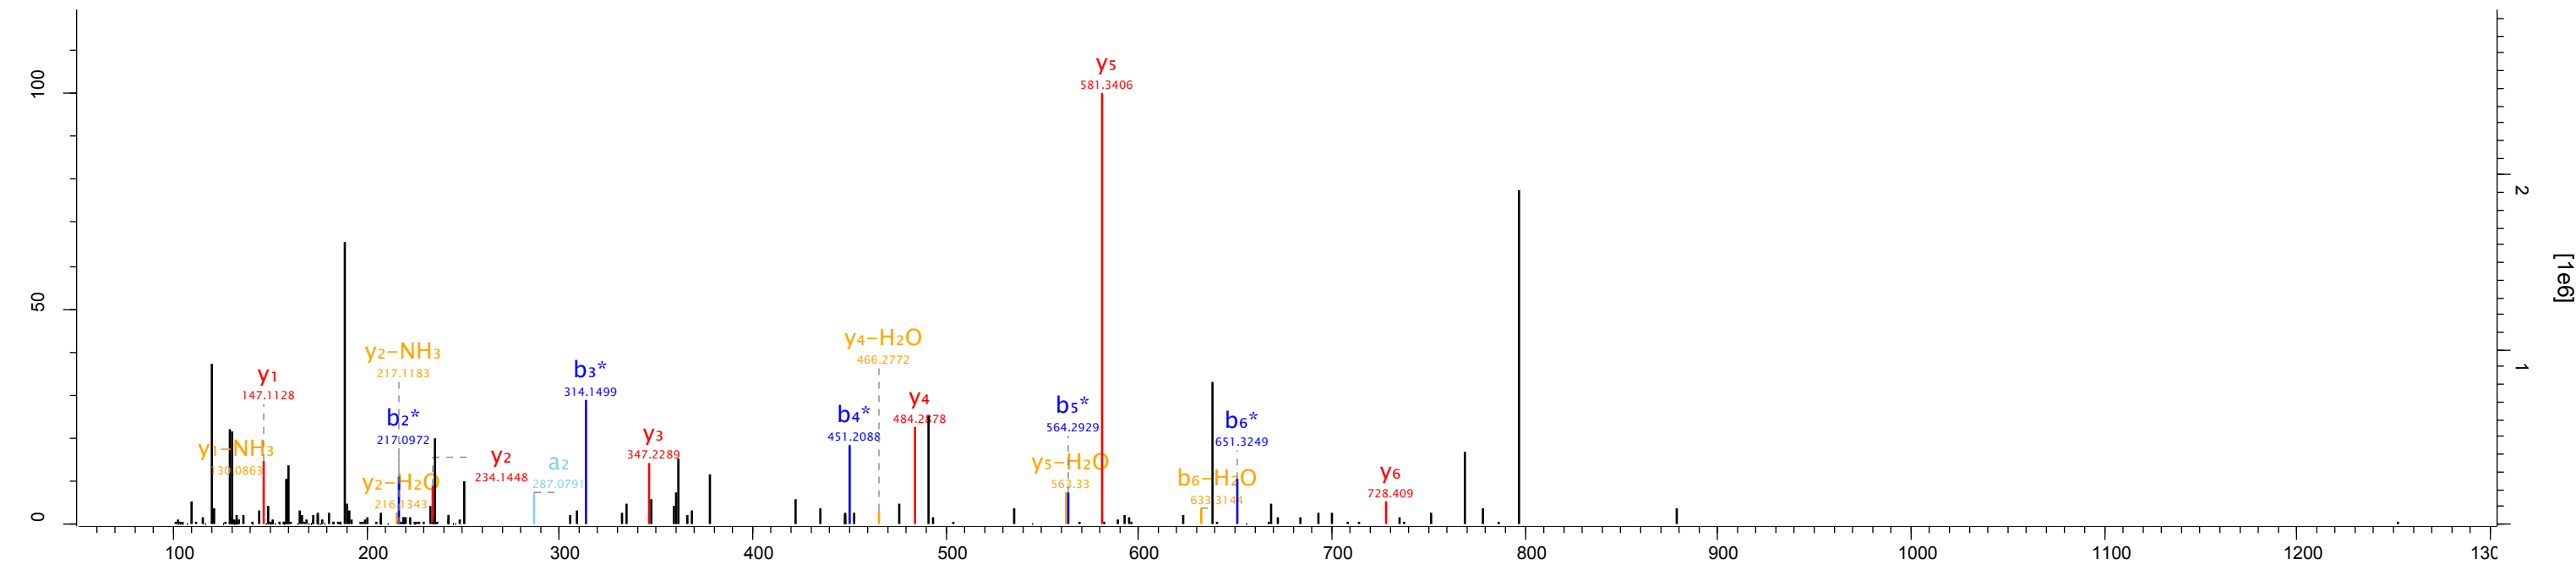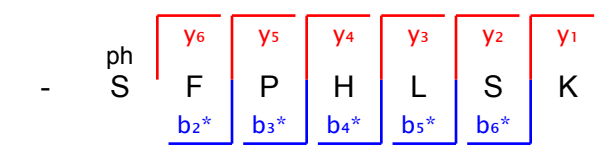

Raw file 20150812\_A375SR\_Phospho\_BR1\_06 Scan 11542 Method FTMS; HCD Score 113.05 m/z 556.98 Gene names TPX2

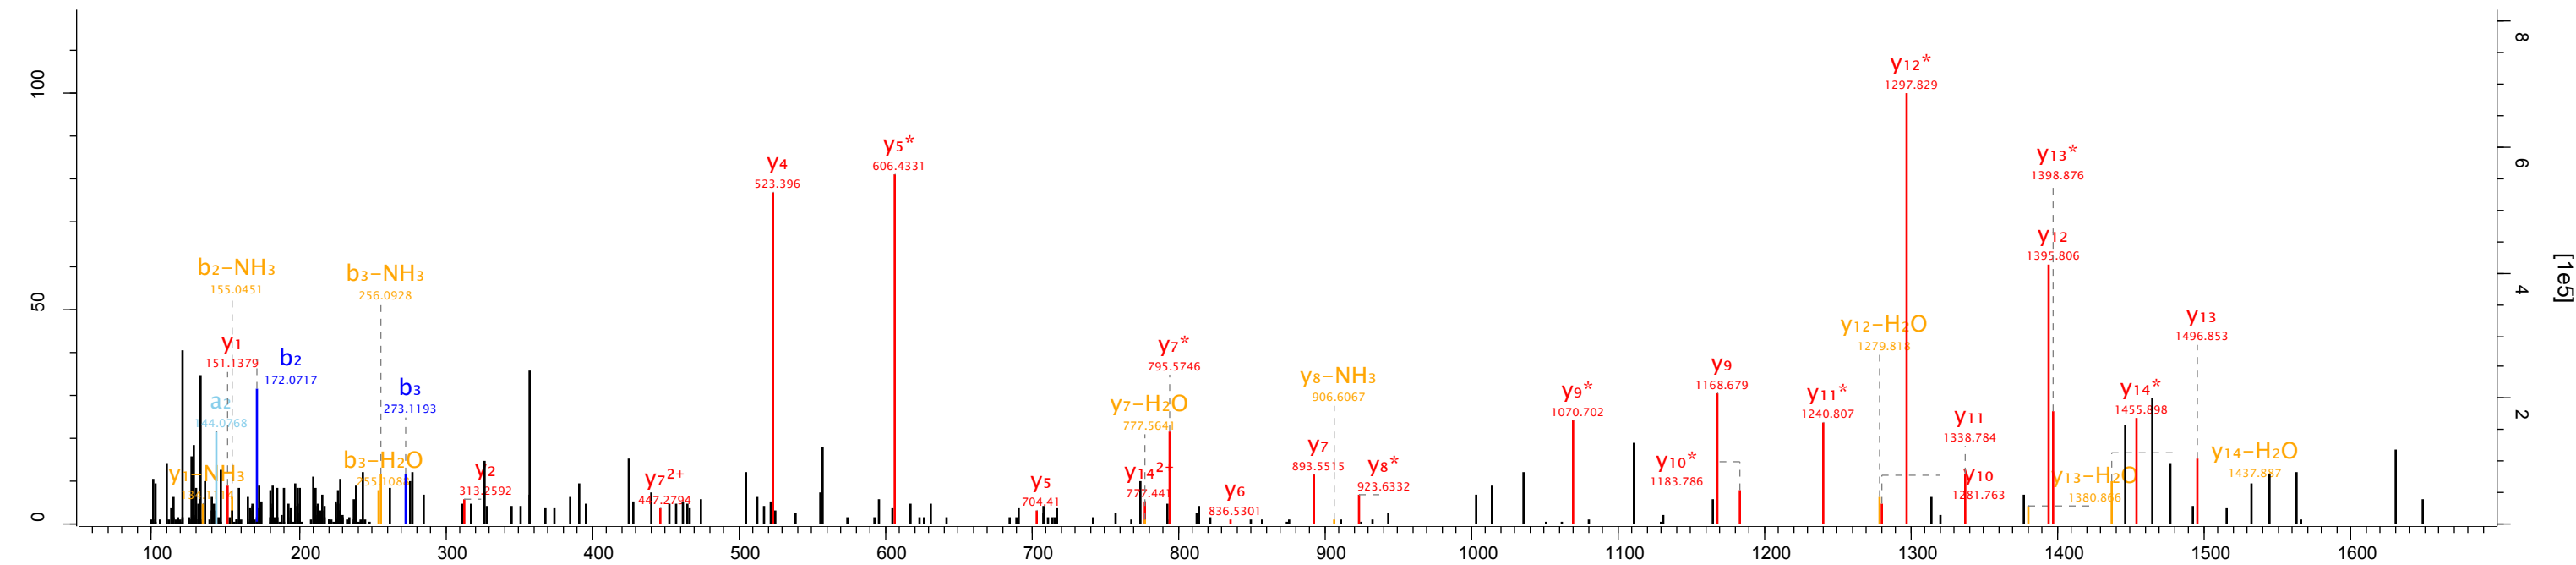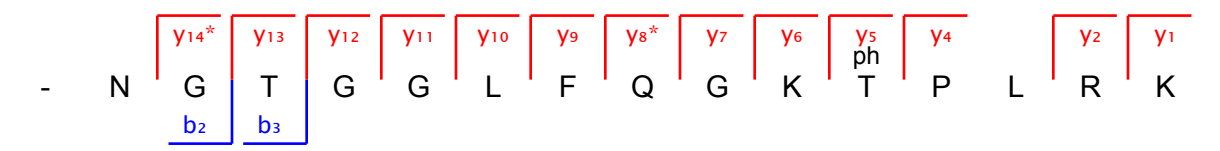

Raw file 20150812\_A375SR\_Phospho\_BR1\_06 Scan 11792 Method FTMS; HCD Score 183.75 m/z 985.97 Gene names DYNC1LI1

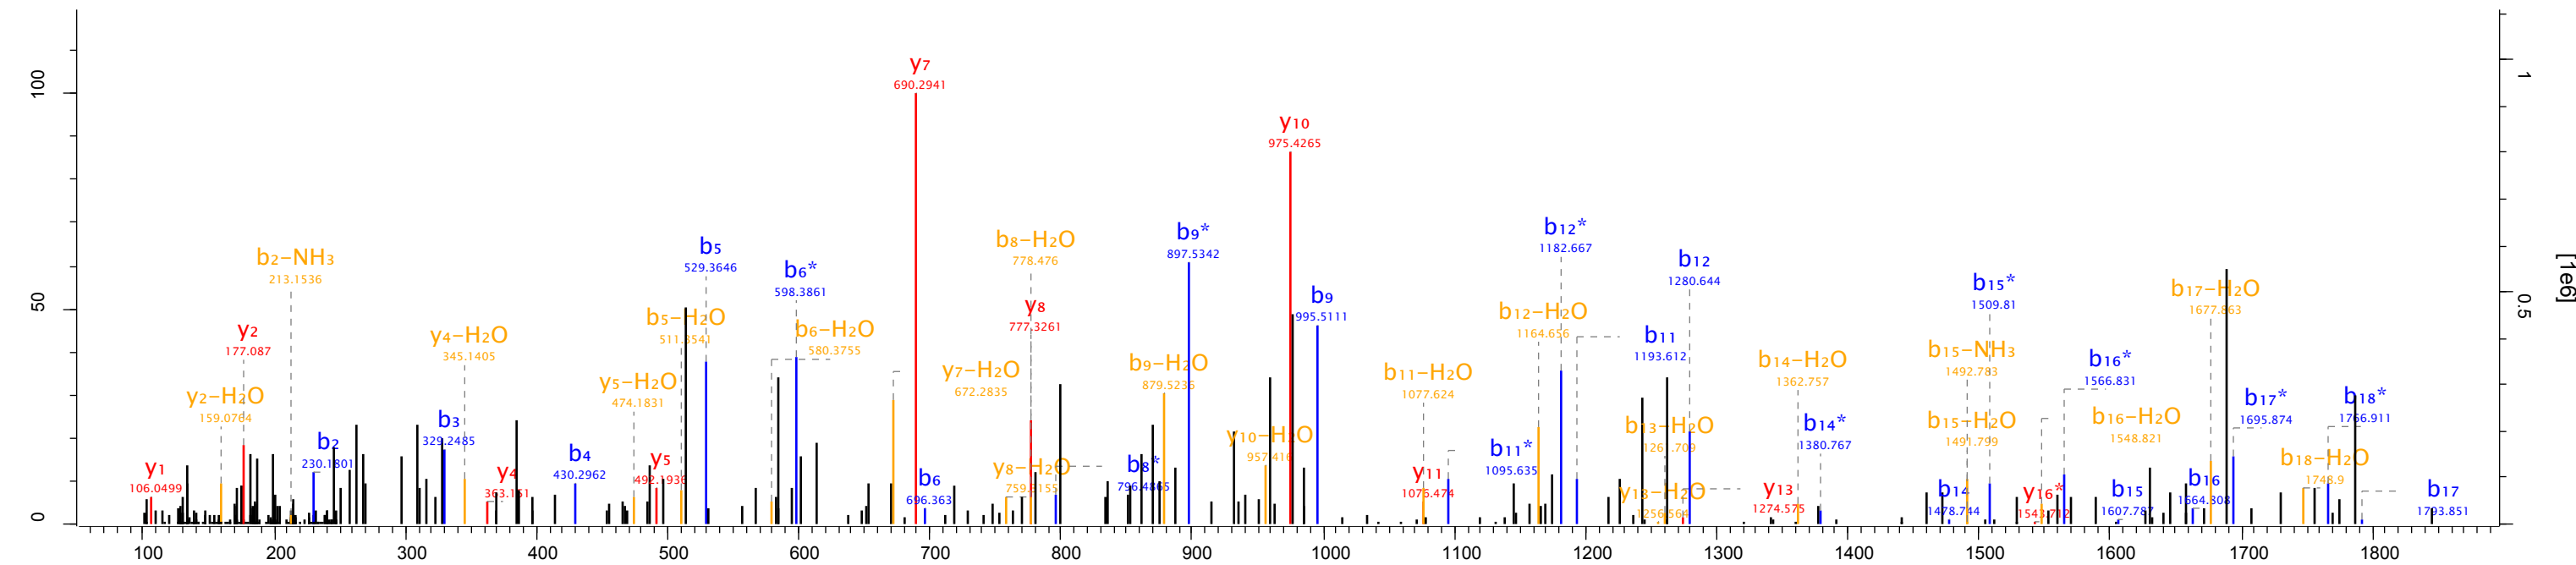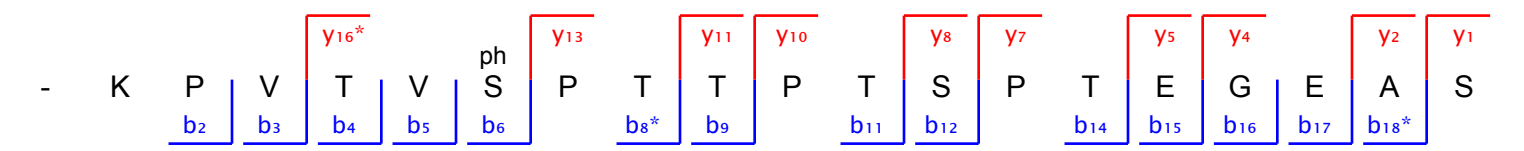

Raw file 20150812\_A375SR\_Phospho\_BR1\_06 Scan 12262 Method FTMS; HCD Score 257.01 m/z 767.34 Gene names CPSF7

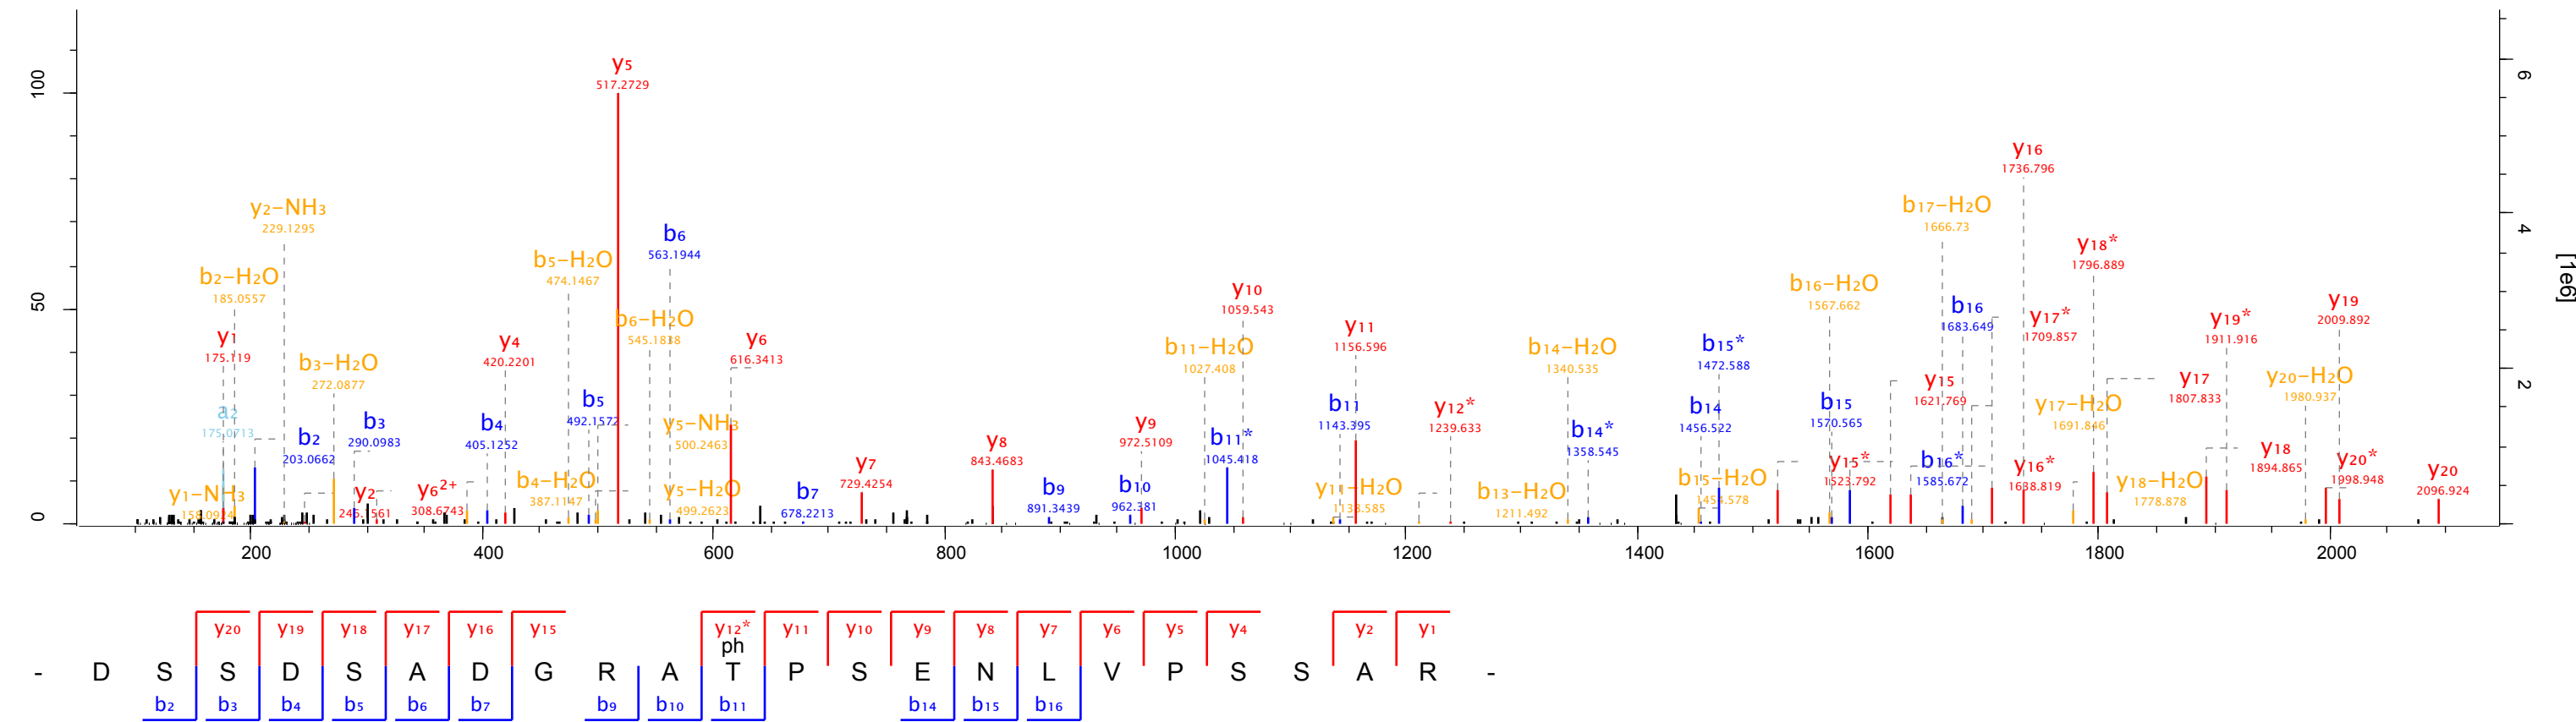

Raw file 20150812\_A375SR\_Phospho\_BR1\_06 Scan 12272 Method FTMS; HCD Score 92.78 m/z 551.79 Gene names TNIK

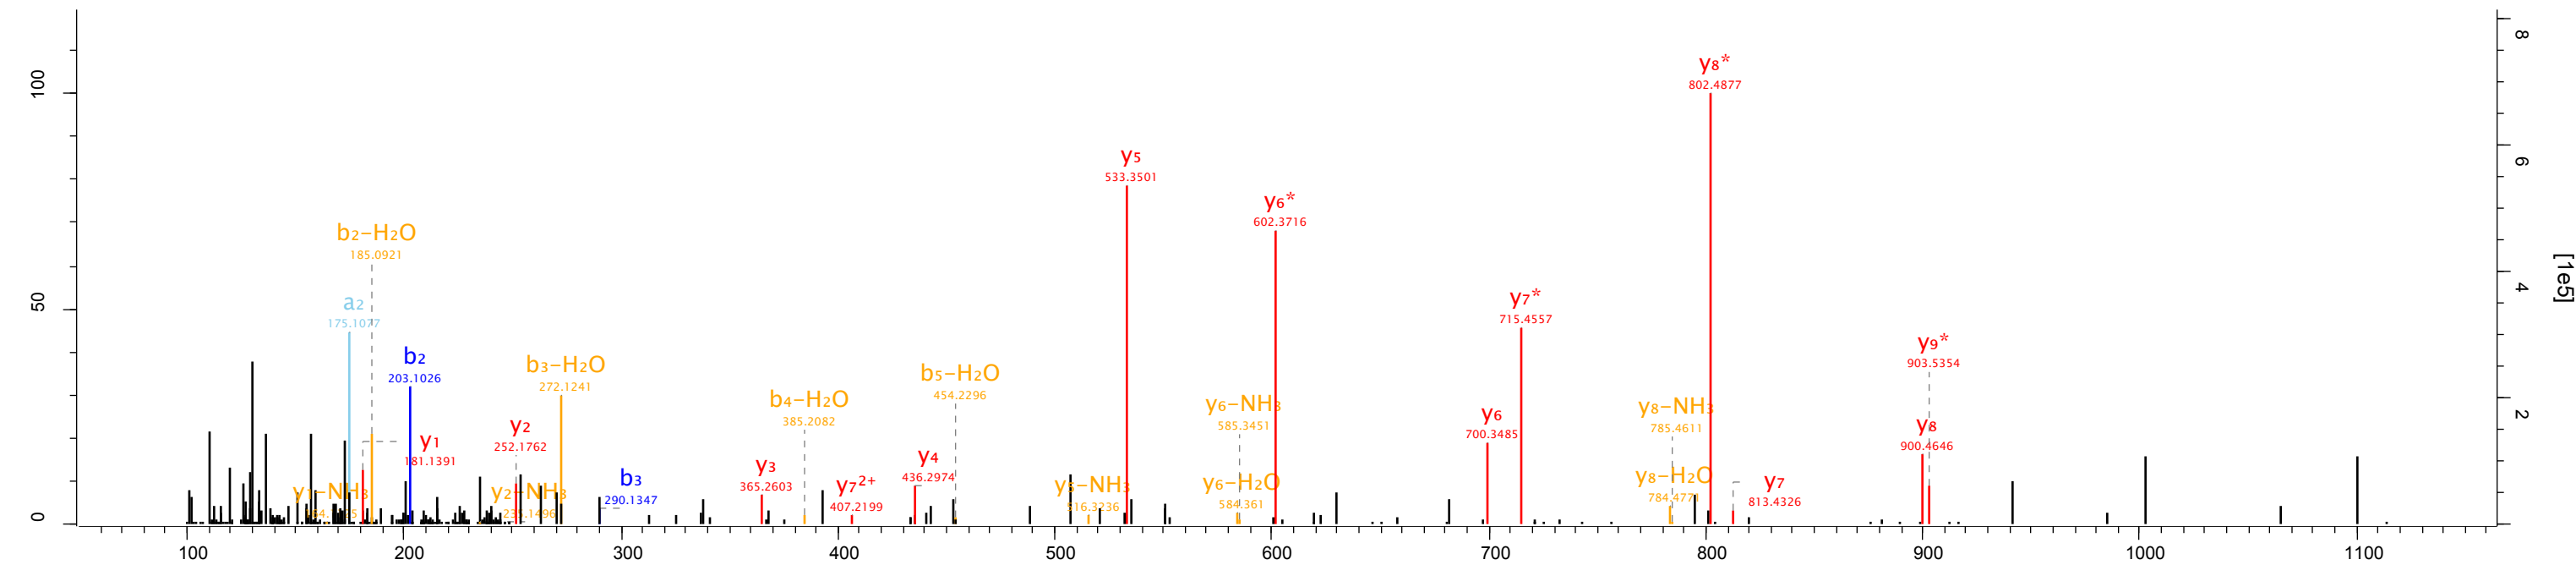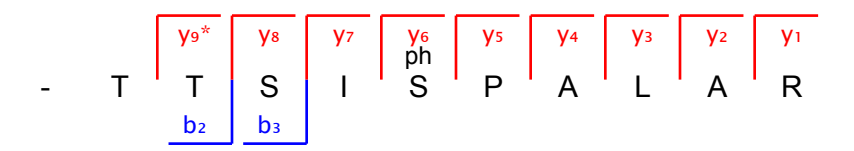

Raw file: 20150812\_A375SR\_Phospho\_BR1\_06  
 Scan: 1262 Method: FTMS; HCD Score: 149.22 m/z: 491.58 Gene names: PDCD11

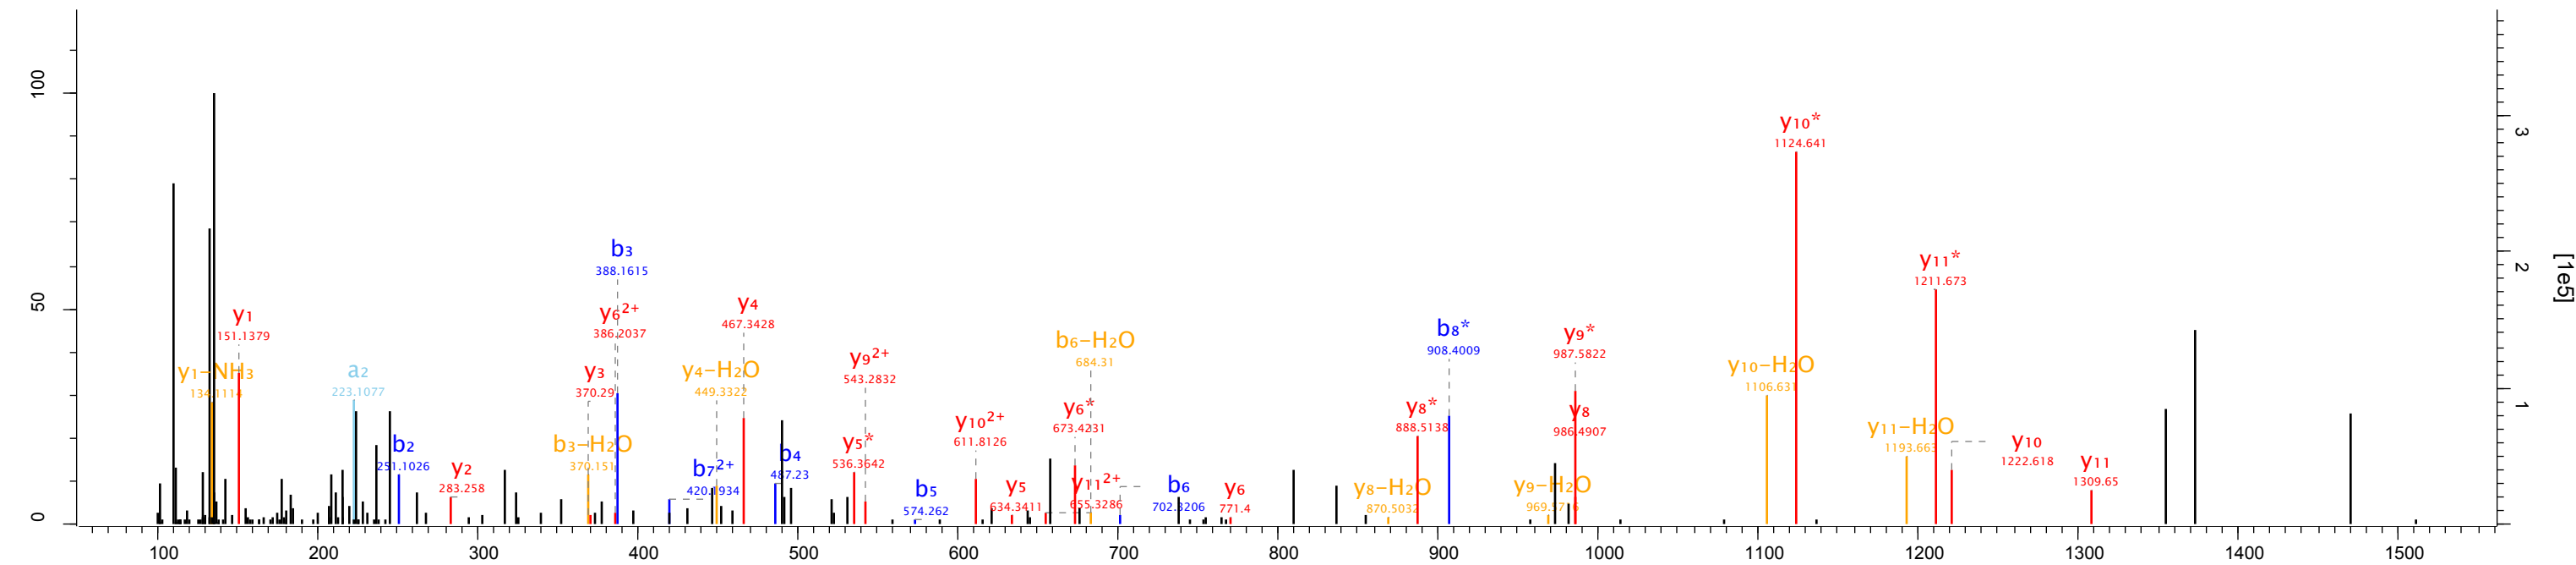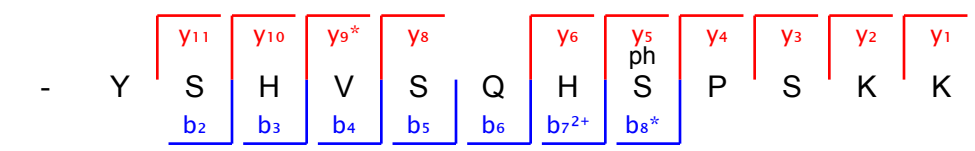



Raw file: 20150812\_A375SR\_Phospho\_BR1\_06  
 Scan: 13852 Method: FTMS; HCD Score: 46.88 m/z: 723.36 Gene names: ZNF592

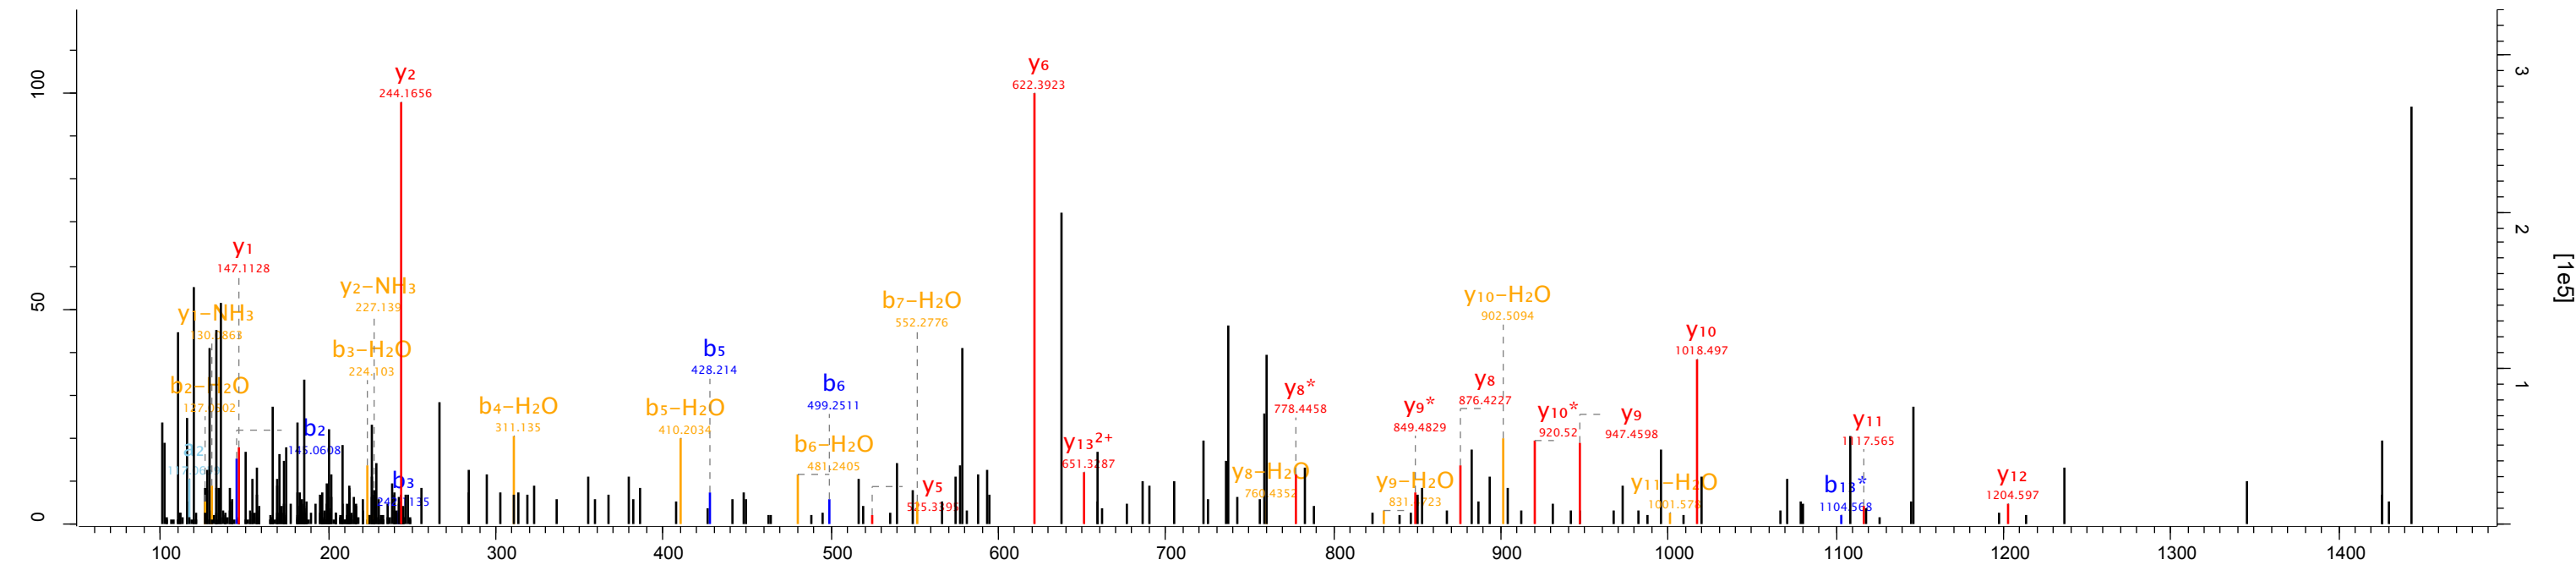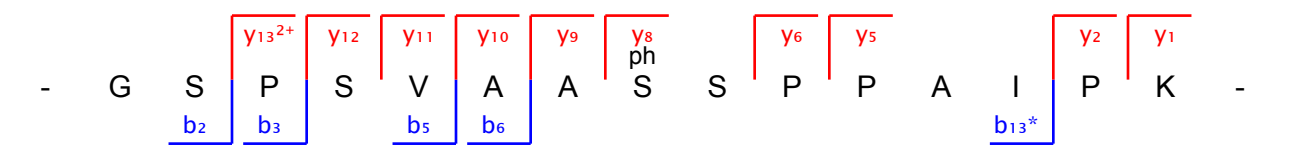

Raw file: 20150812\_A375SR\_Phospho\_BR1\_06  
 Scan: 13872 Method: FTMS; HCD Score: 184.59 m/z: 686.83 Gene names: TRAFD1

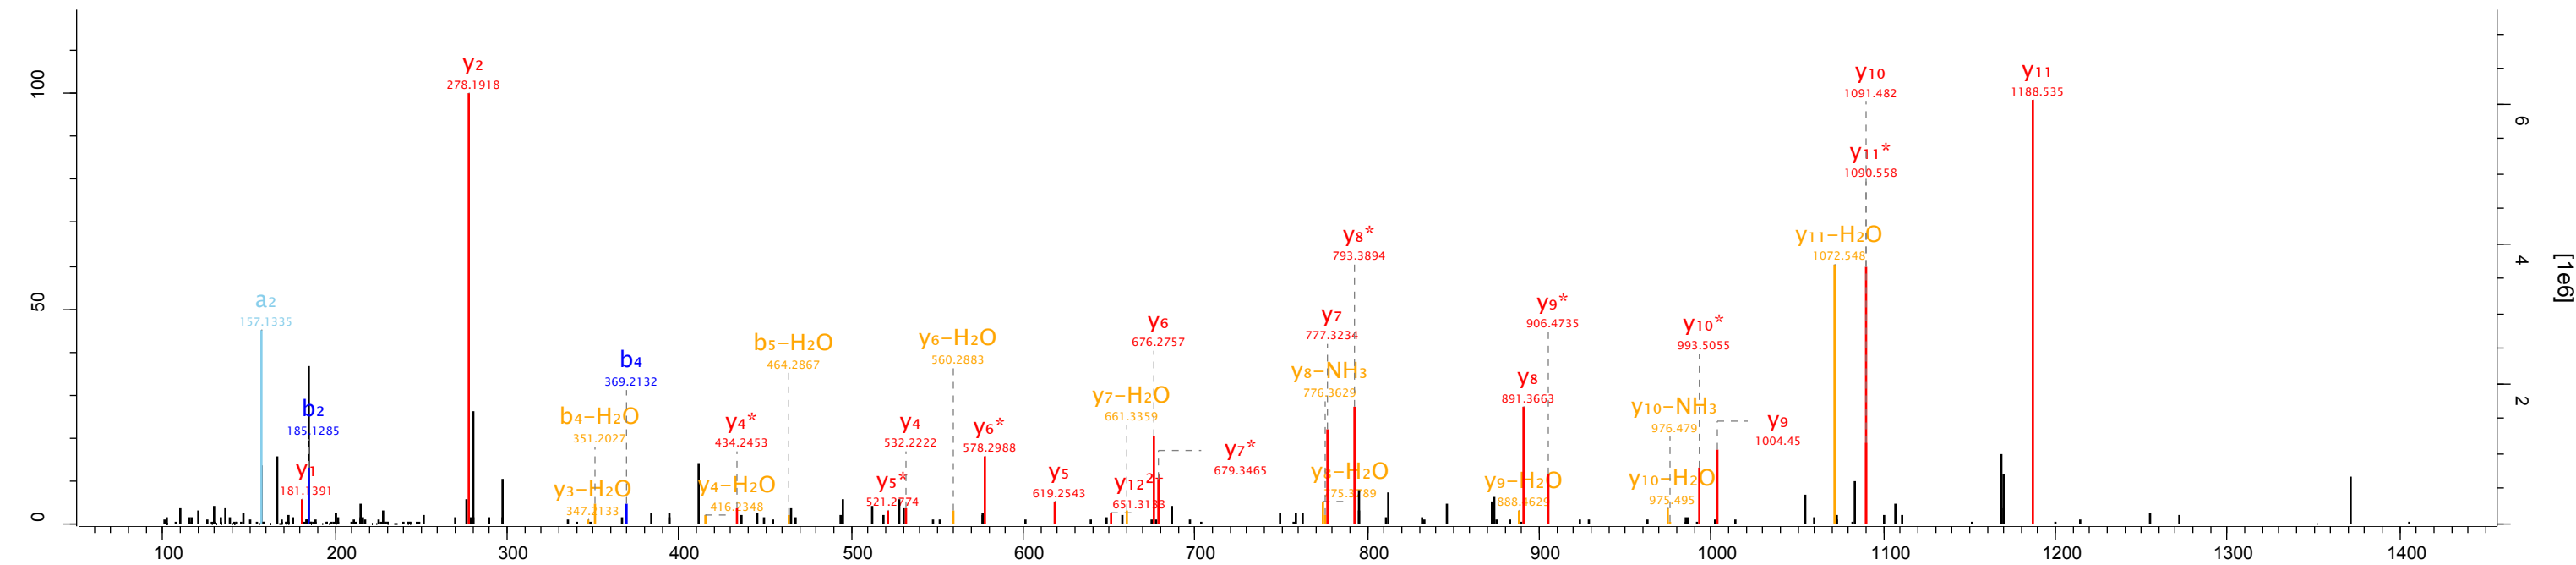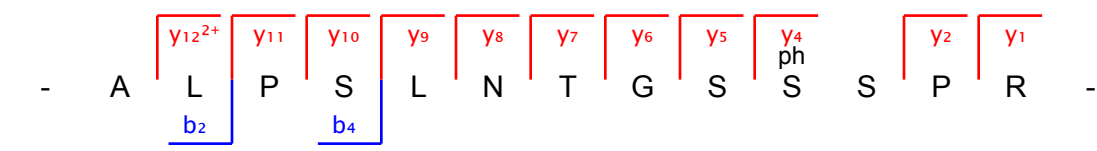

Raw file Scan Method Score m/z Gene names  
 20150812\_A375SR\_Phospho\_BR1\_06 14292 FTMS; HCD 213.99 748.83 ADAM17

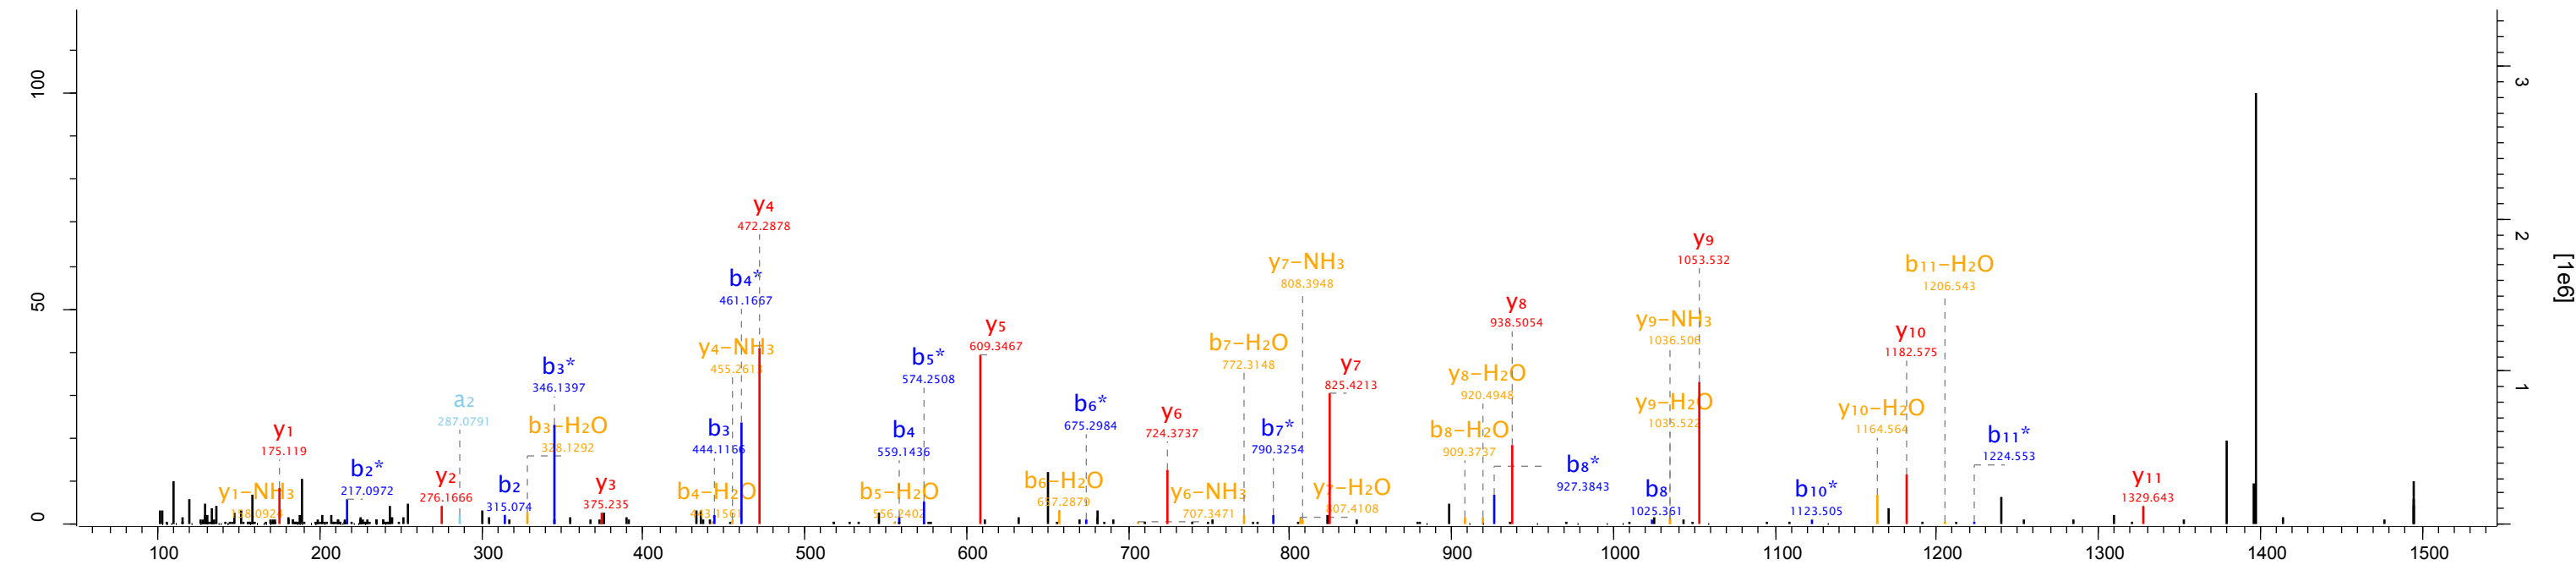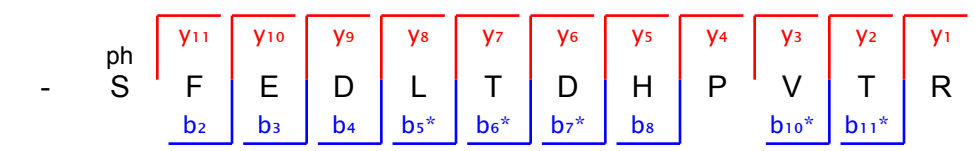

Raw file: 20150812\_A375SR\_Phospho\_BR1\_06  
 Scan: 15022 Method: FTMS; HCD Score: 214.69 m/z: 630.29 Gene names: TIAM1

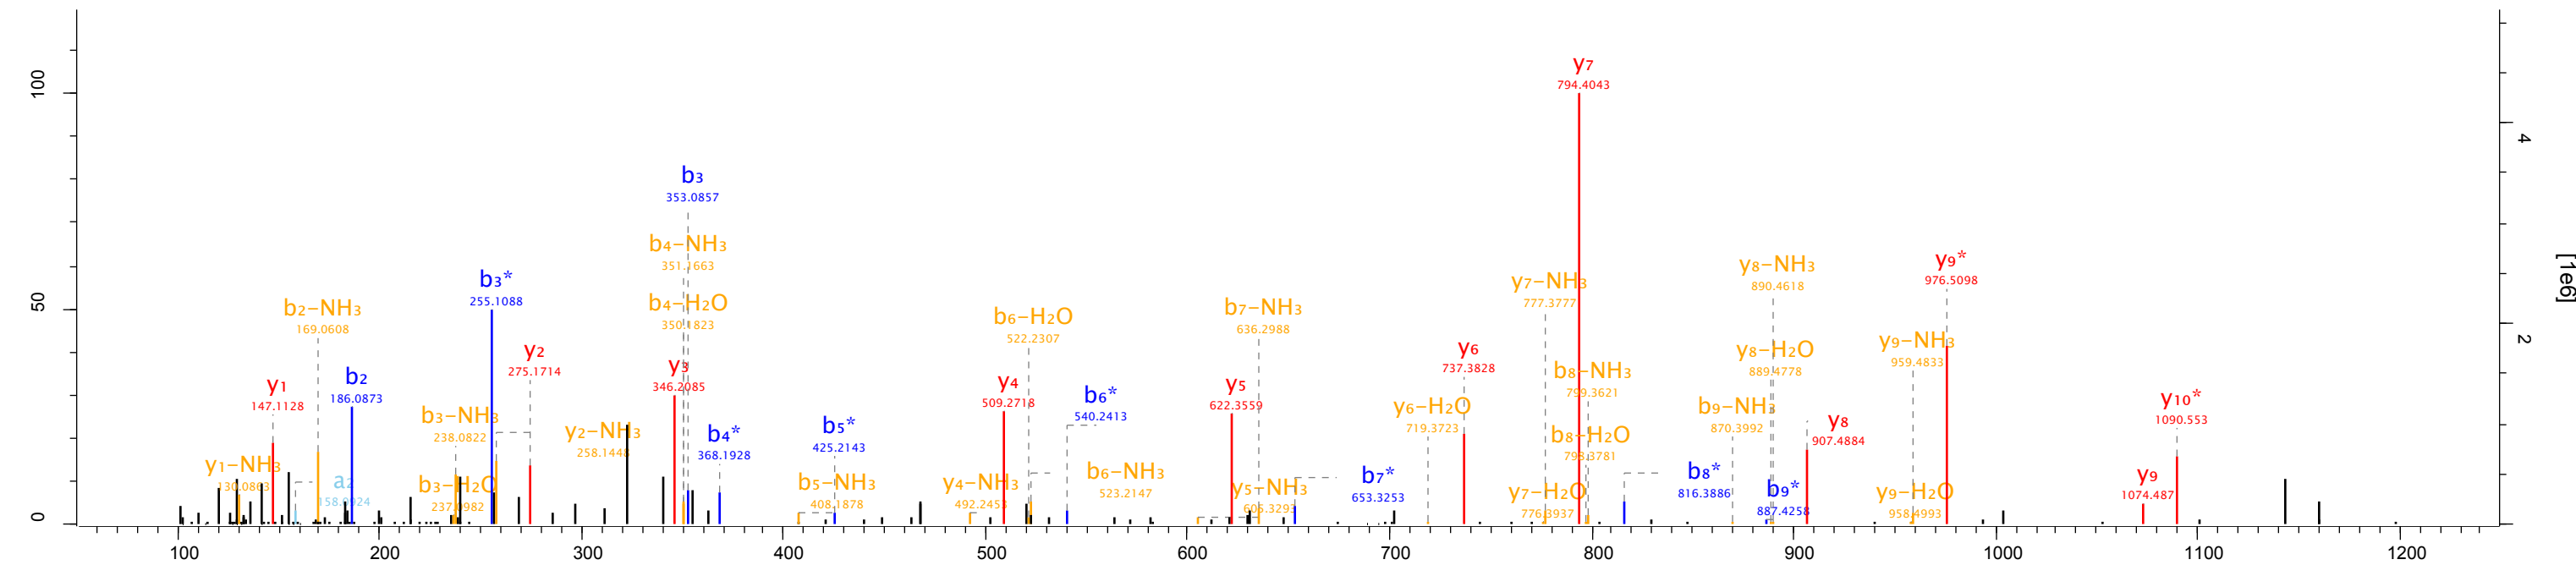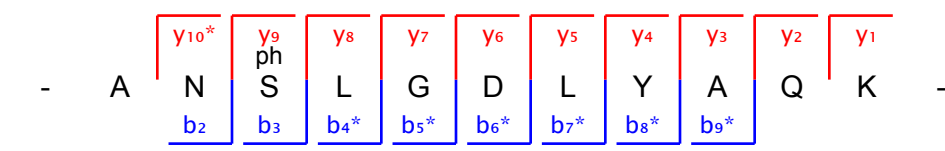

Raw file 20150812\_A375SR\_Phospho\_BR1\_06 Scan 1522 Method FTMS; HCD Score 61.87 m/z 405.94 Gene names ZC3H13

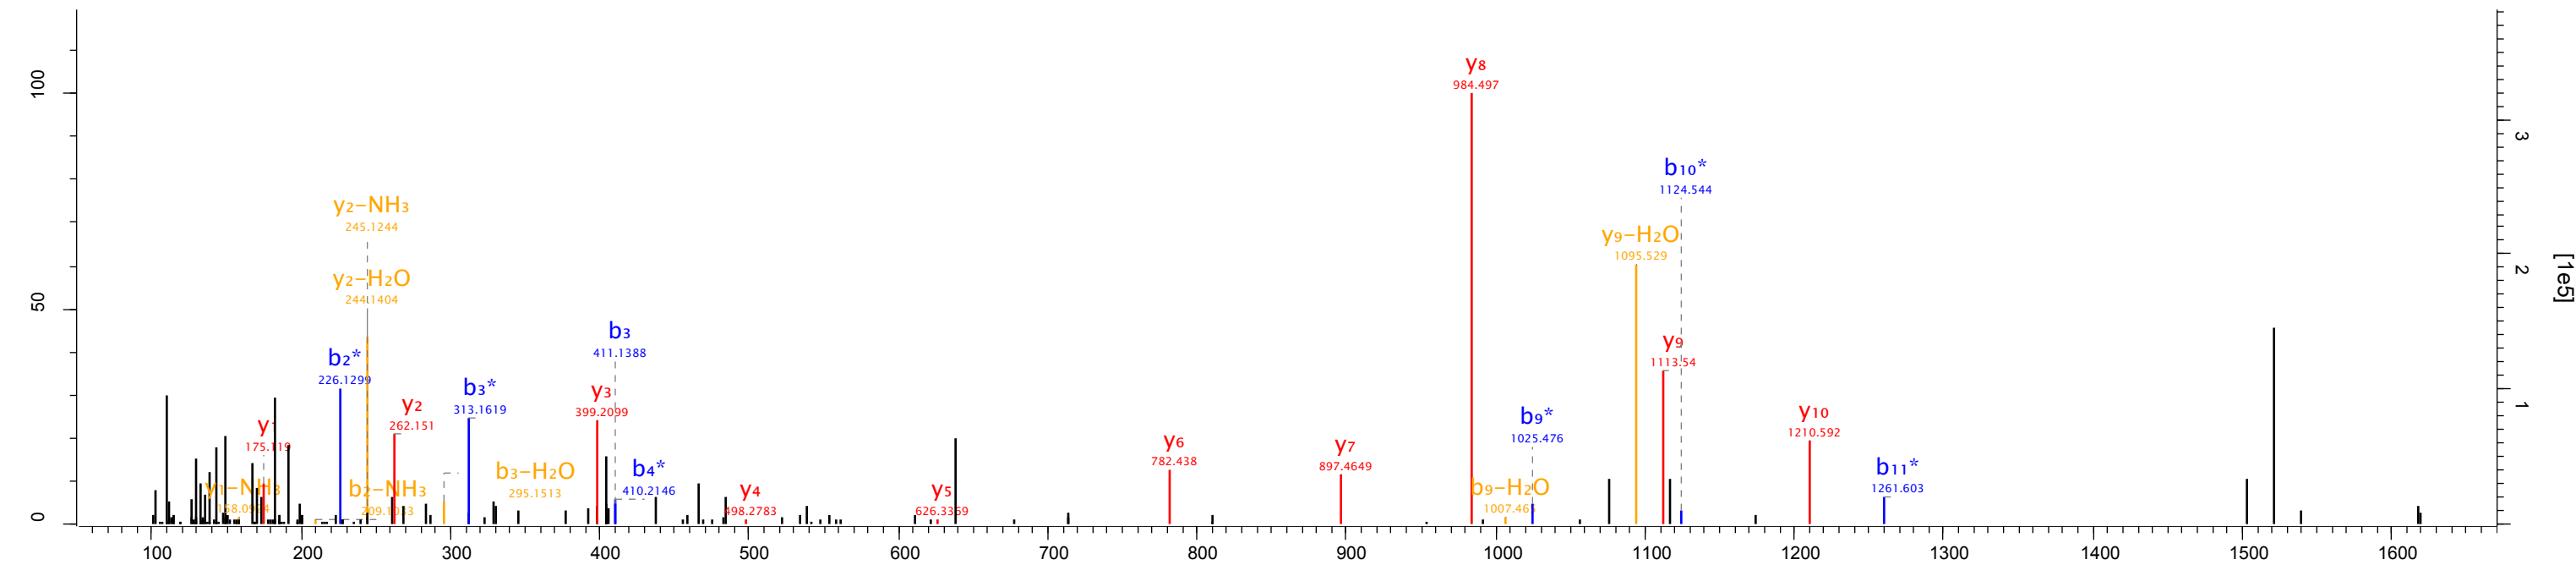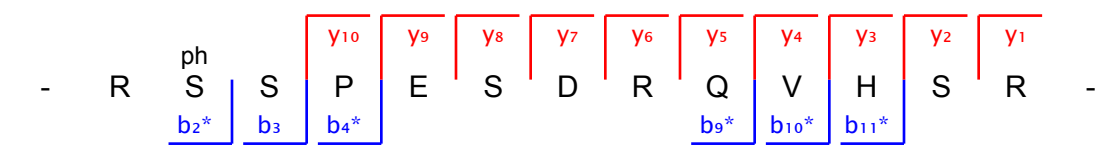

Raw file 20150812\_A375SR\_Phospho\_BR1\_06 Scan 15262 Method FTMS; HCD Score 214.63 m/z 847.36 Gene names ARHGAP39

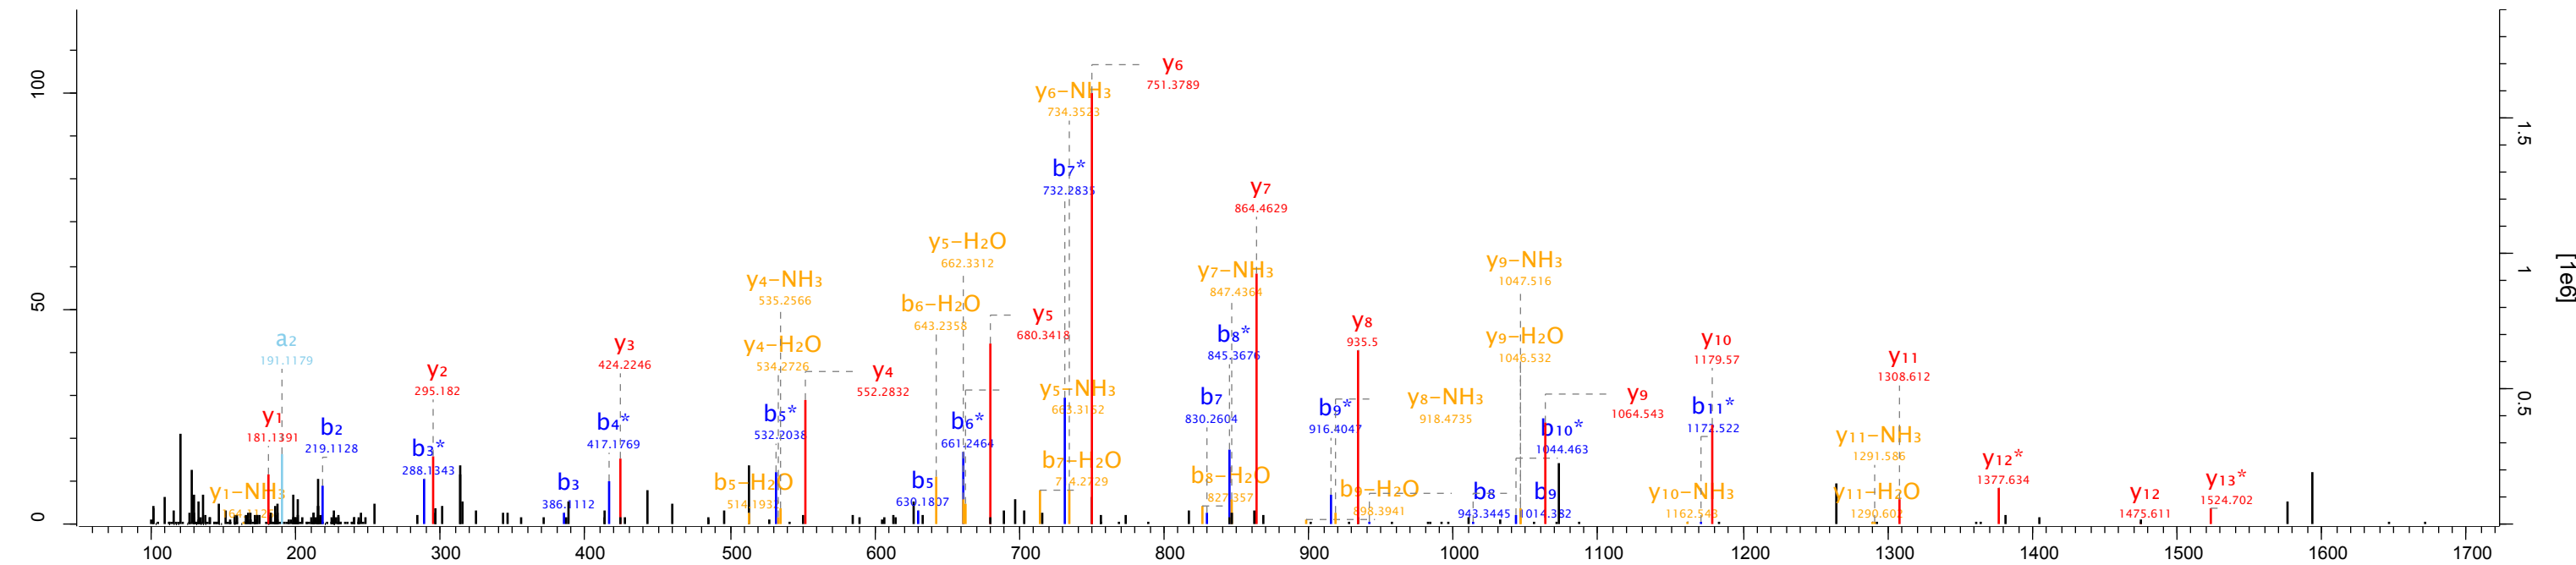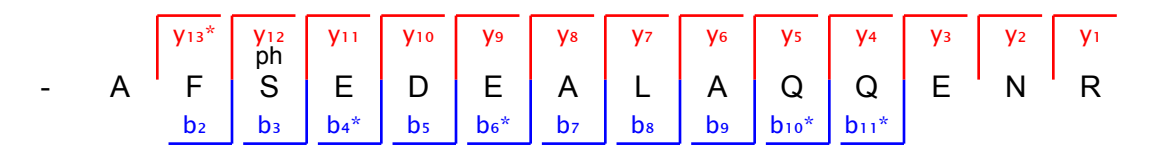

Raw file: 20150812\_A375SR\_Phospho\_BR1\_06  
 Scan: 15282 Method: FTMS; HCD Score: 95.44 m/z: 951.48 Gene names: NOL12

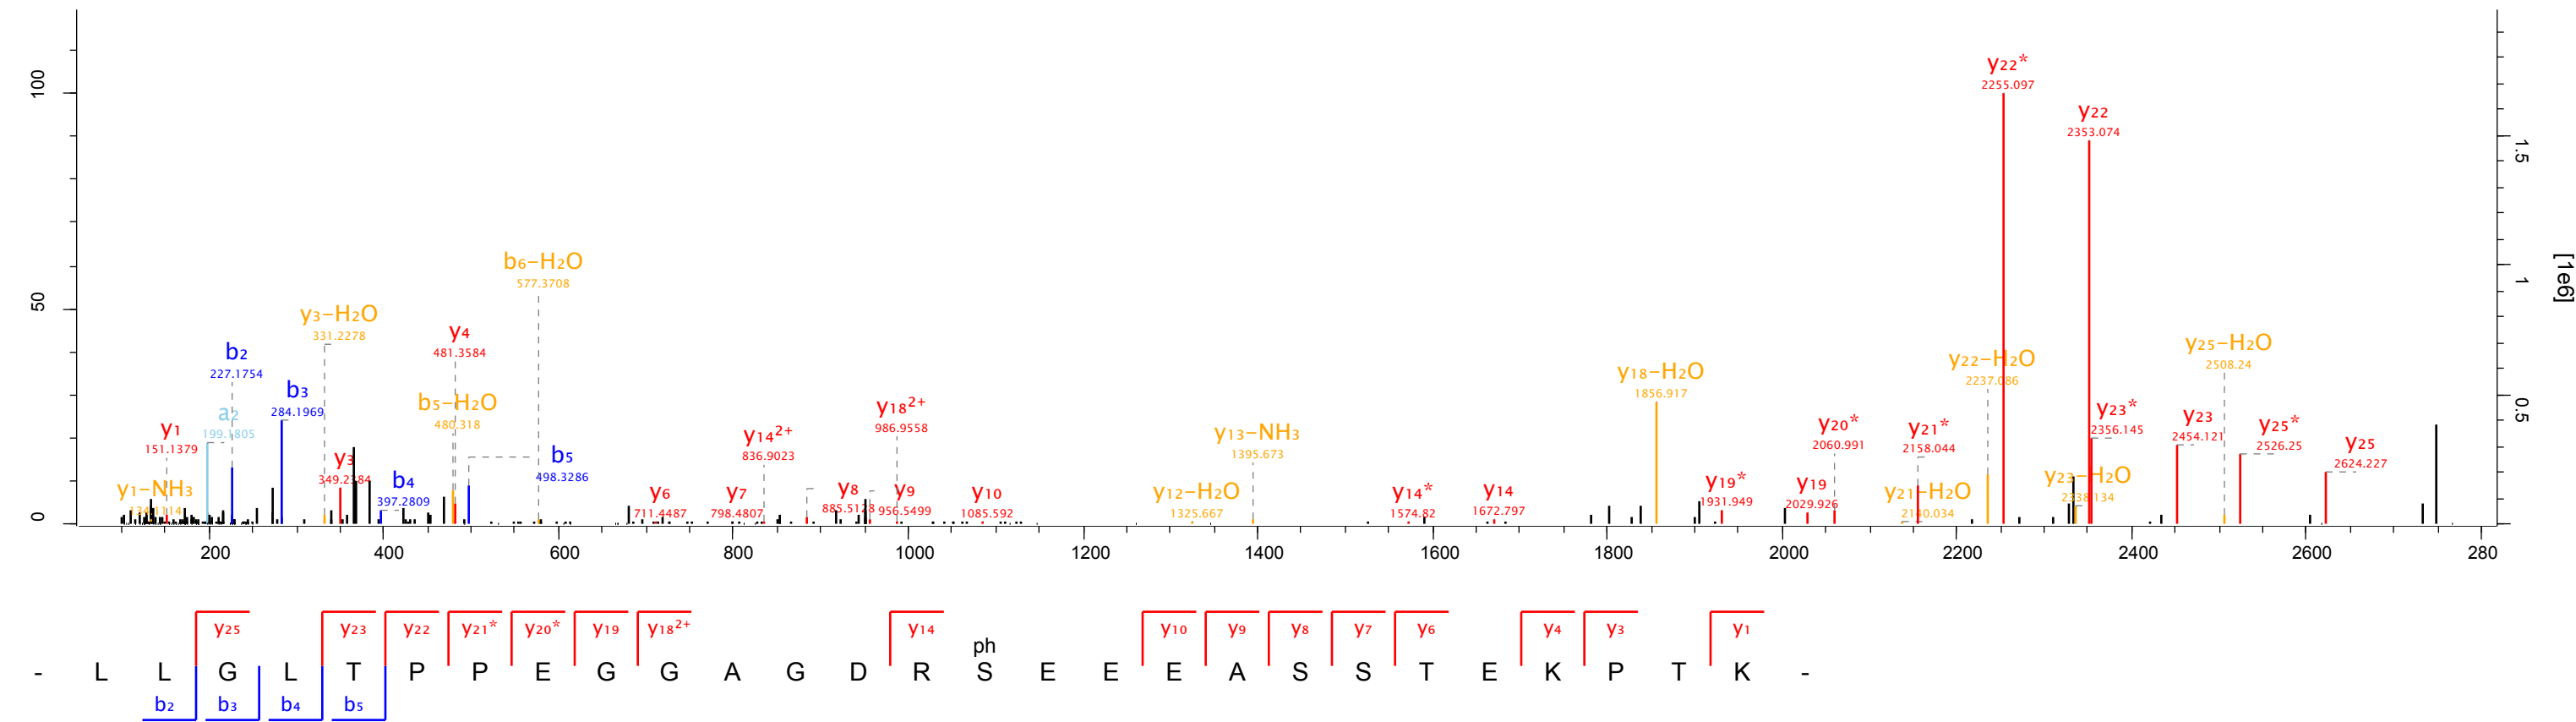

Raw file  
 20150812\_A375SR\_Phospho\_BR1\_06  
 Scan 15542 Method FTMS; HCD Score 179.8 m/z 864.43 Gene names RPRD2

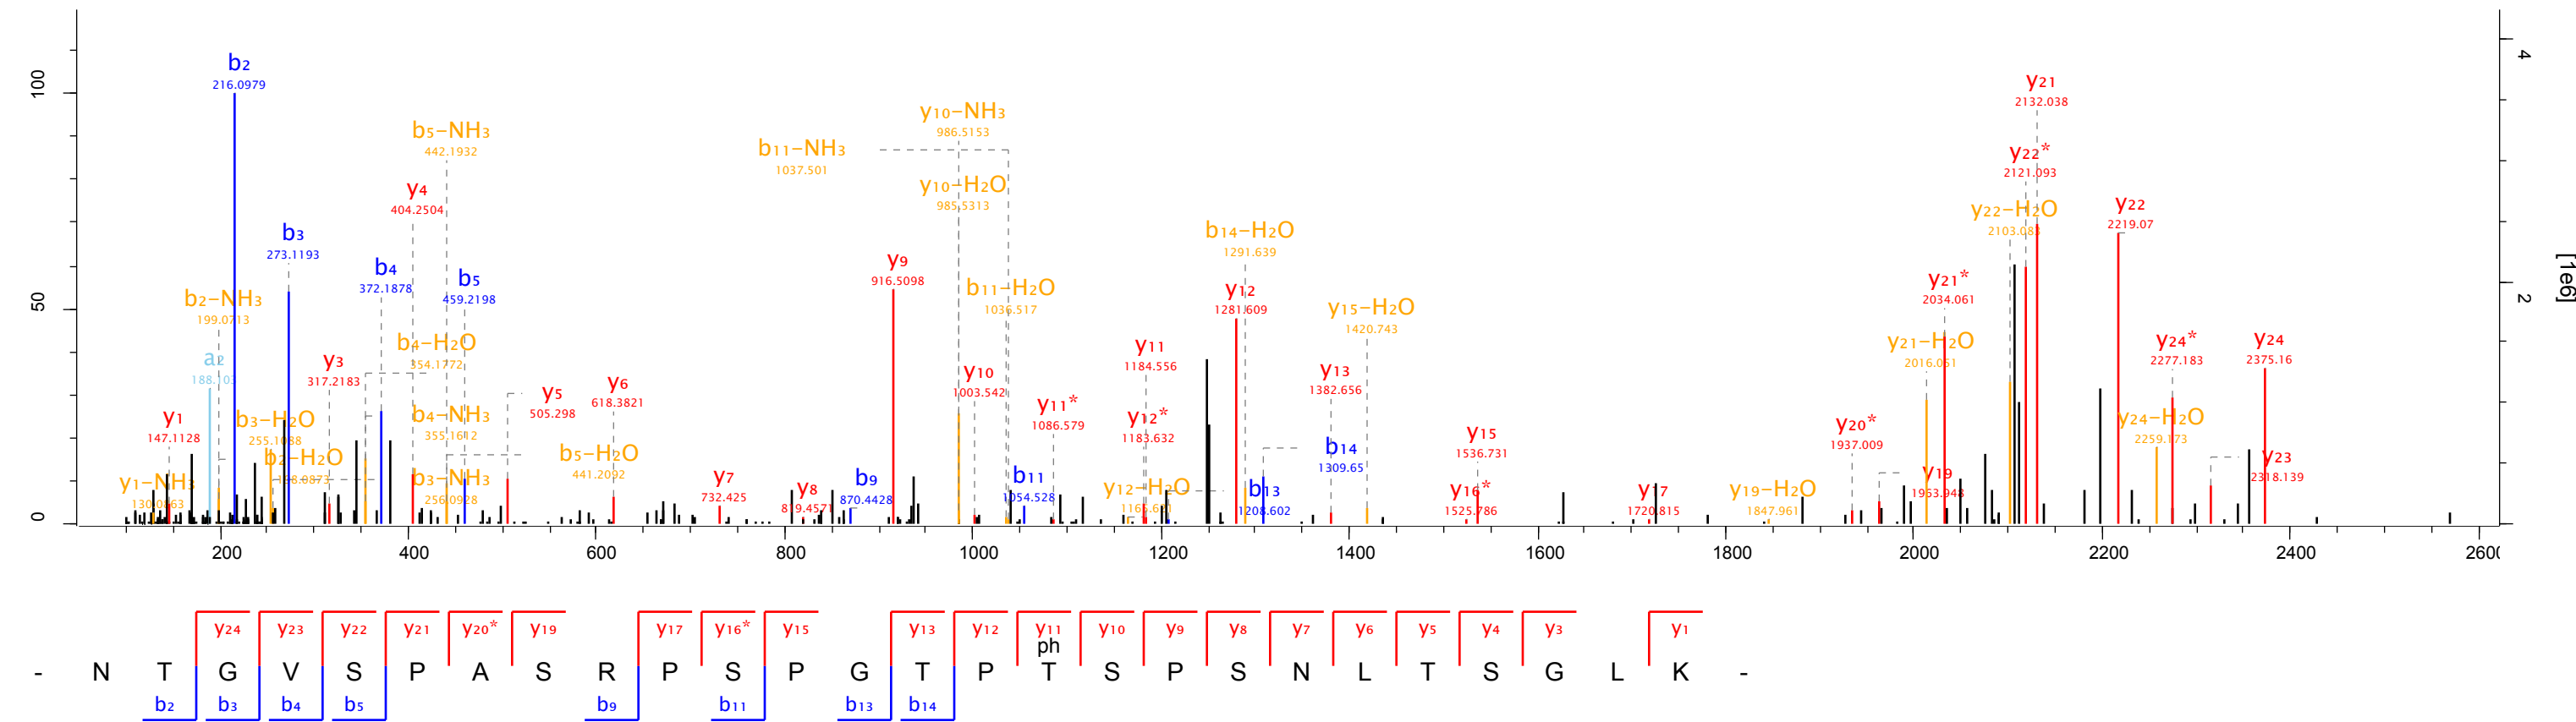



Raw file: 20150812\_A375SR\_Phospho\_BR1\_06  
 Scan: 15572 Method: FTMS; HCD Score: 339.99 m/z: 973.42 Gene names: NAP1L4

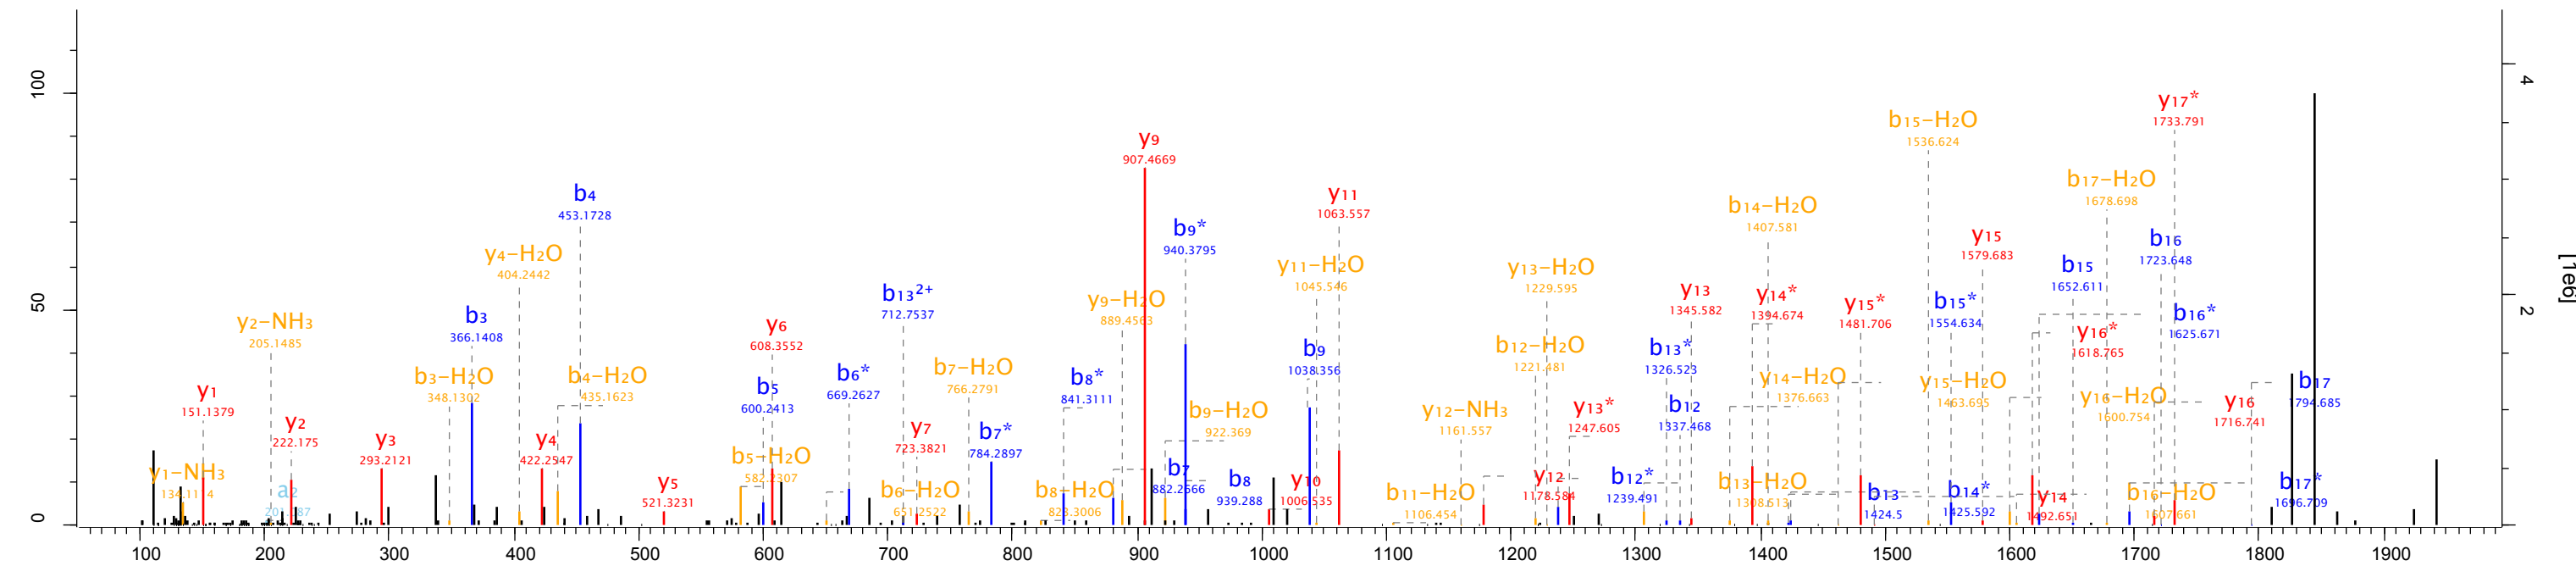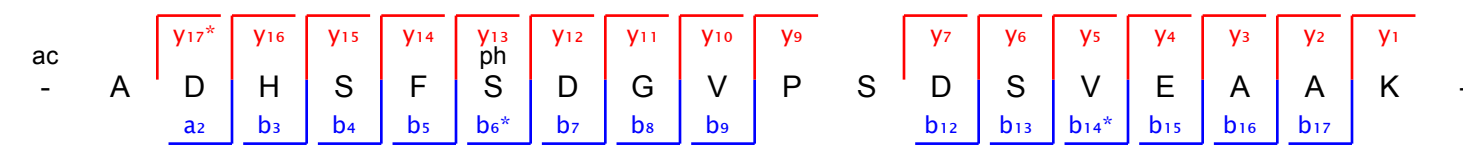

Raw file Scan Method Score m/z  
 20150812\_A375SR\_Phospho\_BR1\_06 16582 FTMS; HCD 419.73 1100.99

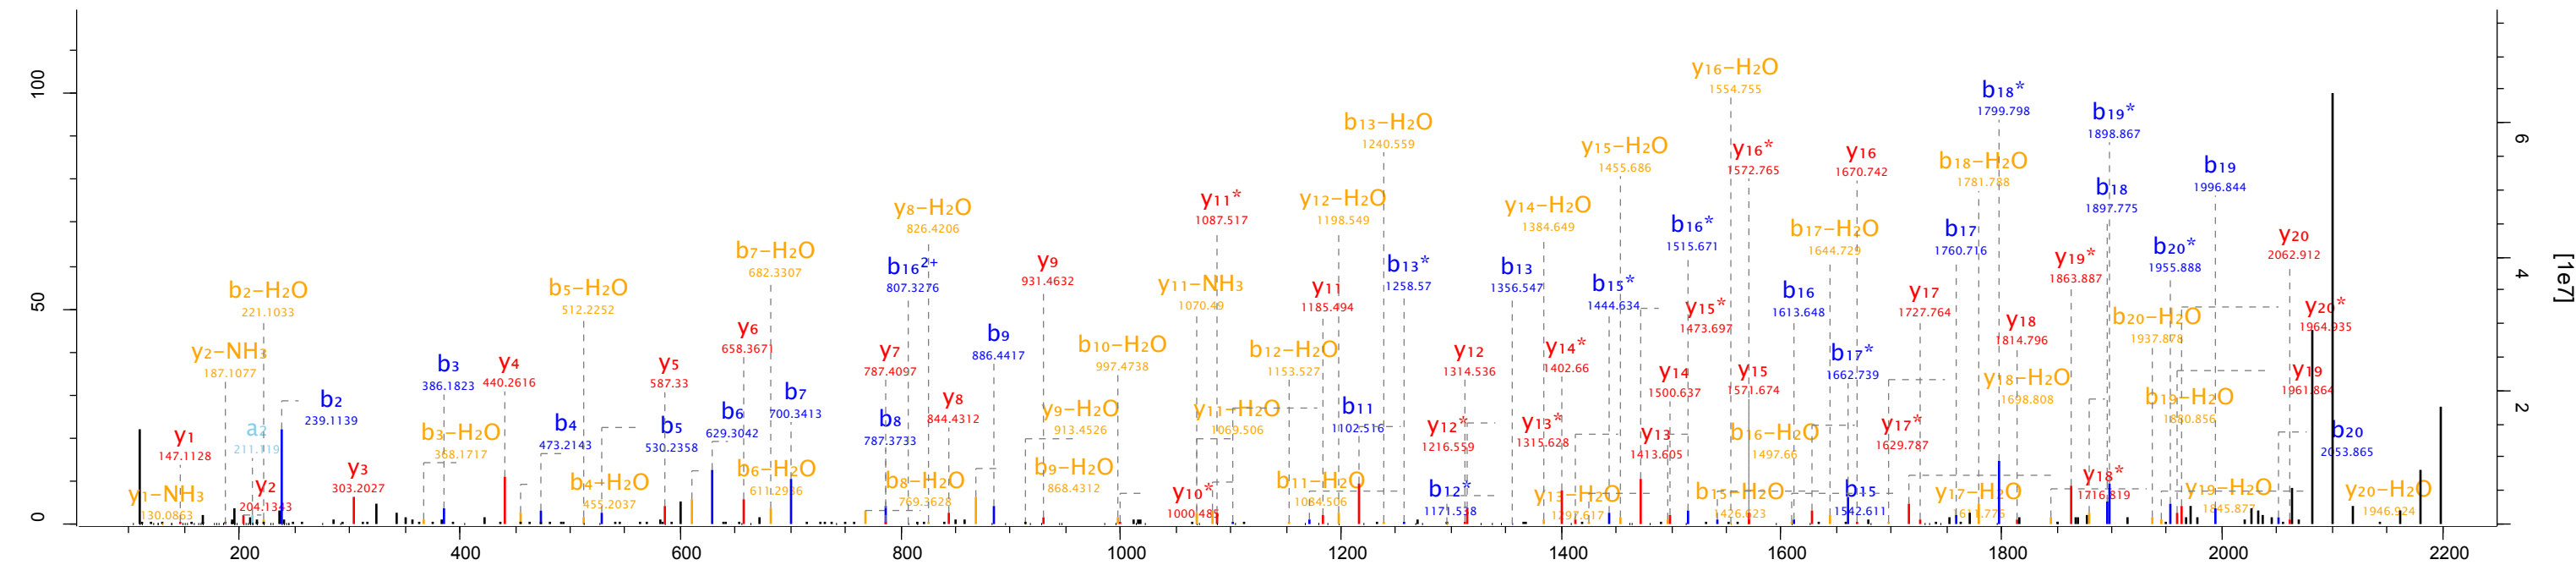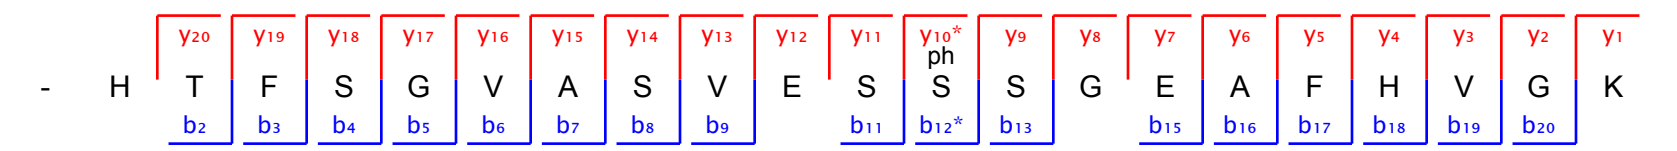

Raw file: 20150812\_A375SR\_Phospho\_BR1\_06  
 Scan: 1672 Method: FTMS; HCD Score: 81.61 m/z: 544.59 Gene names: EML3

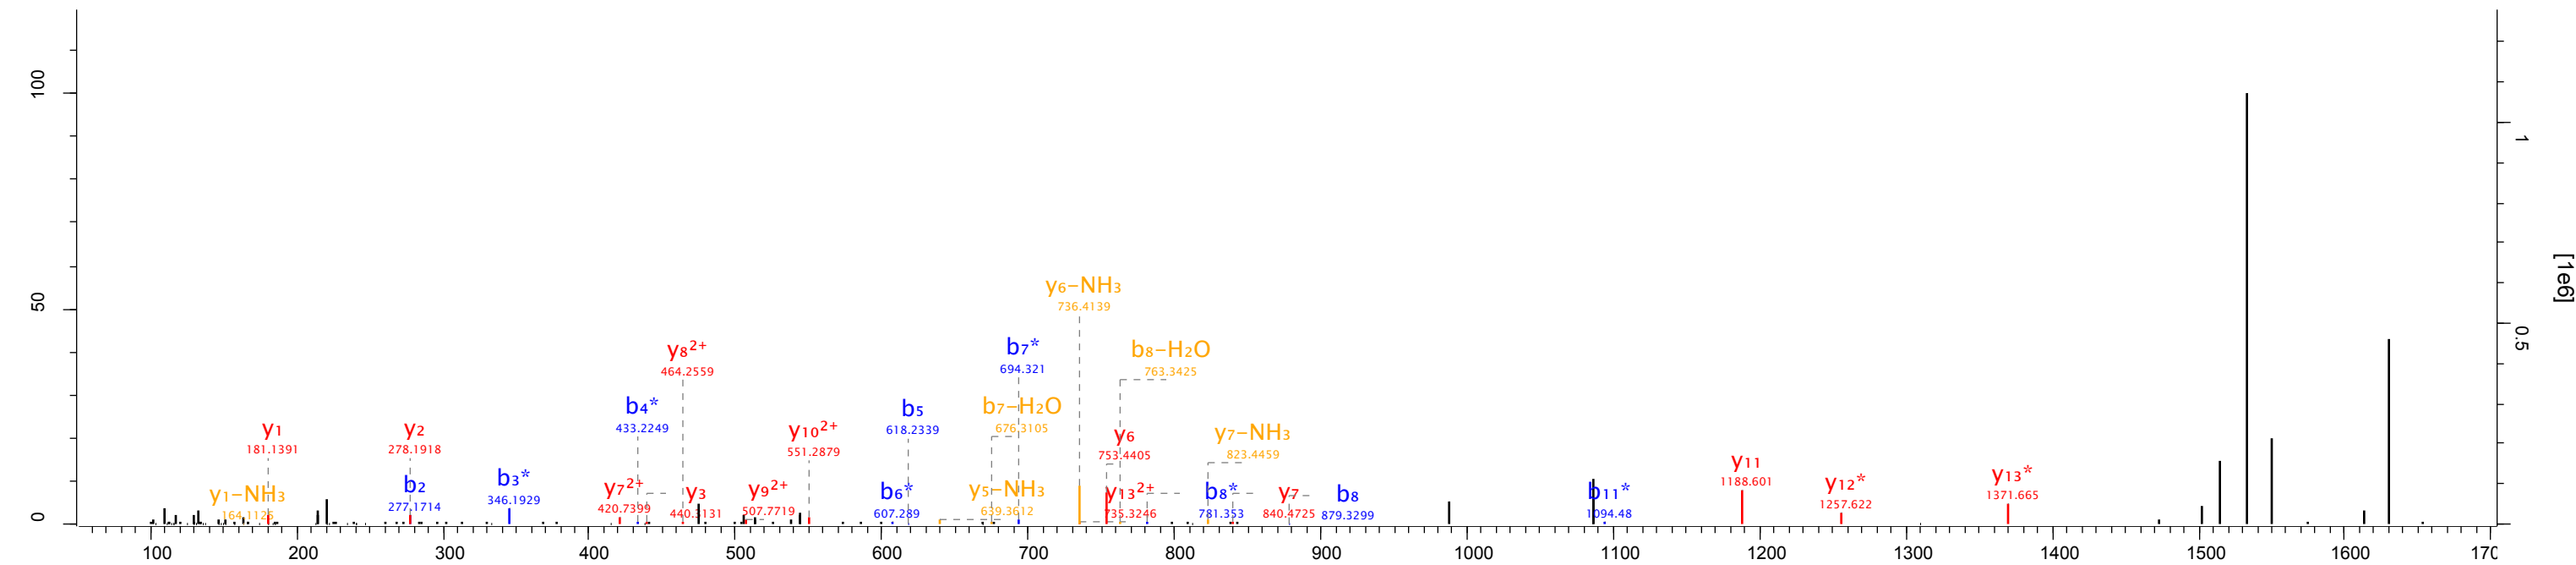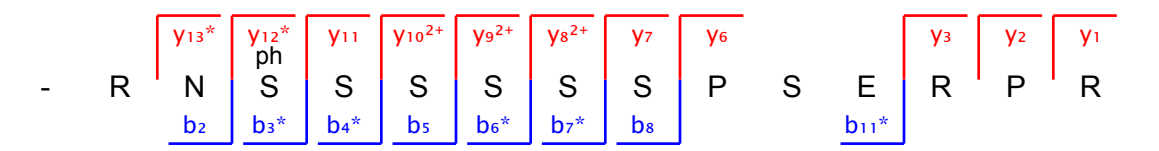

Raw file: 20150812\_A375SR\_Phospho\_BR1\_06  
 Scan: 17402  
 Method: FTMS; HCD  
 Score: 291.03  
 m/z: 1279.55  
 Gene names: MAP1B

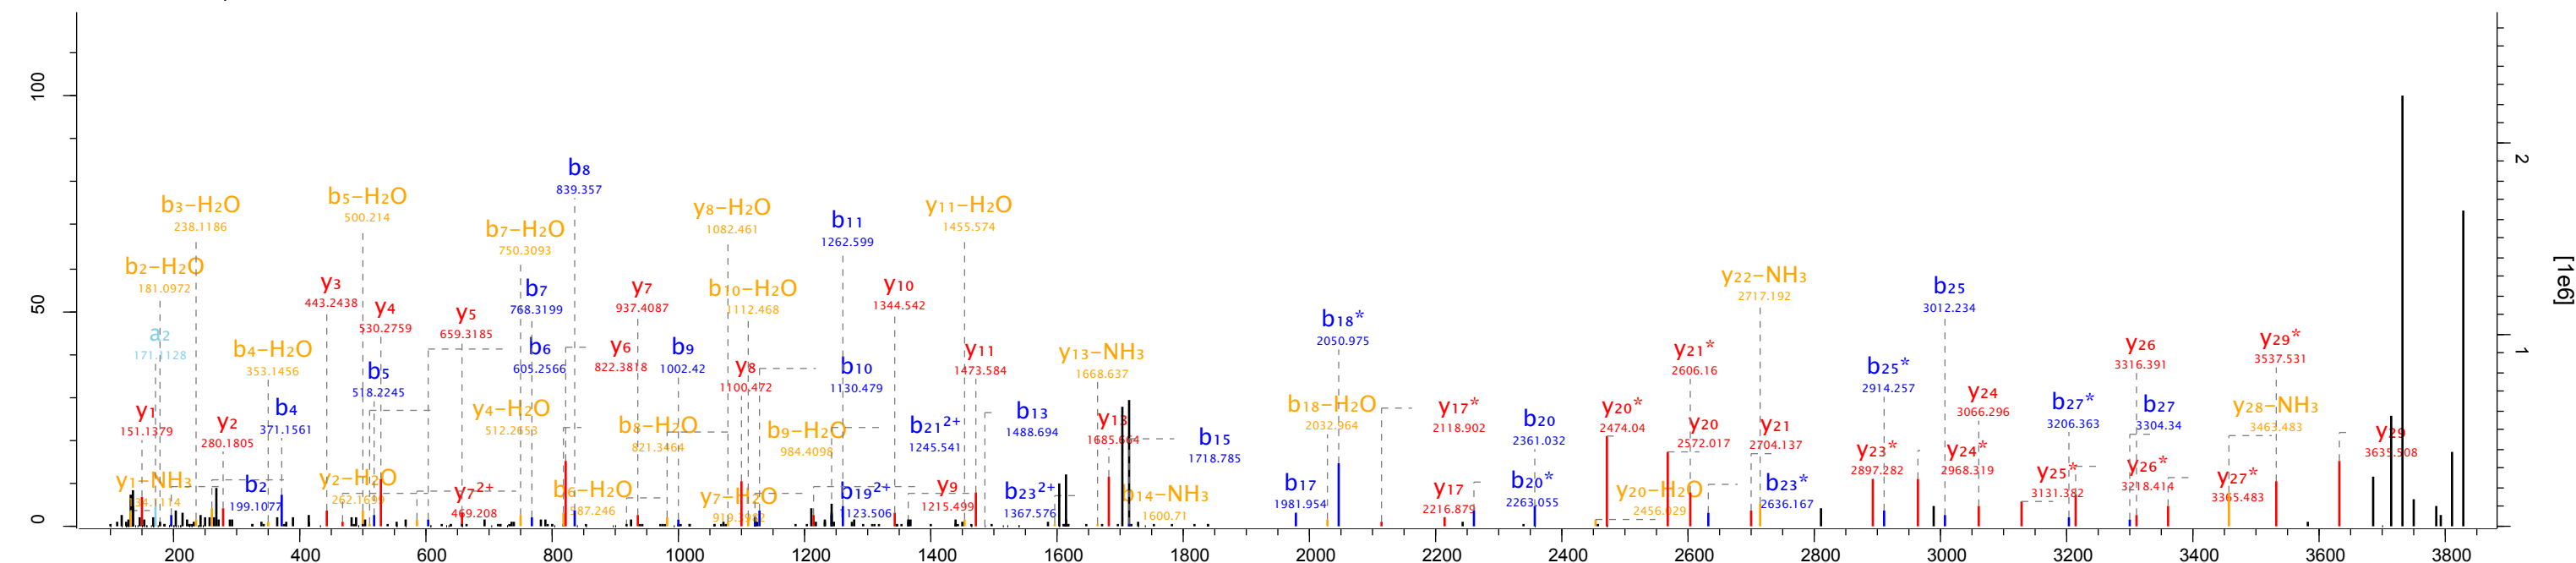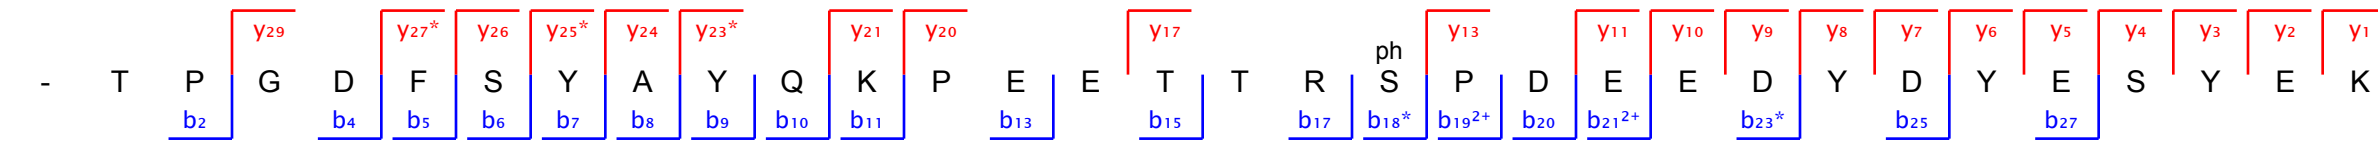

Raw file: 20150812\_A375SR\_Phospho\_BR1\_06  
 Scan: 17482 Method: FTMS; HCD Score: 234.74 m/z: 1514.35 Gene names: EIF3B

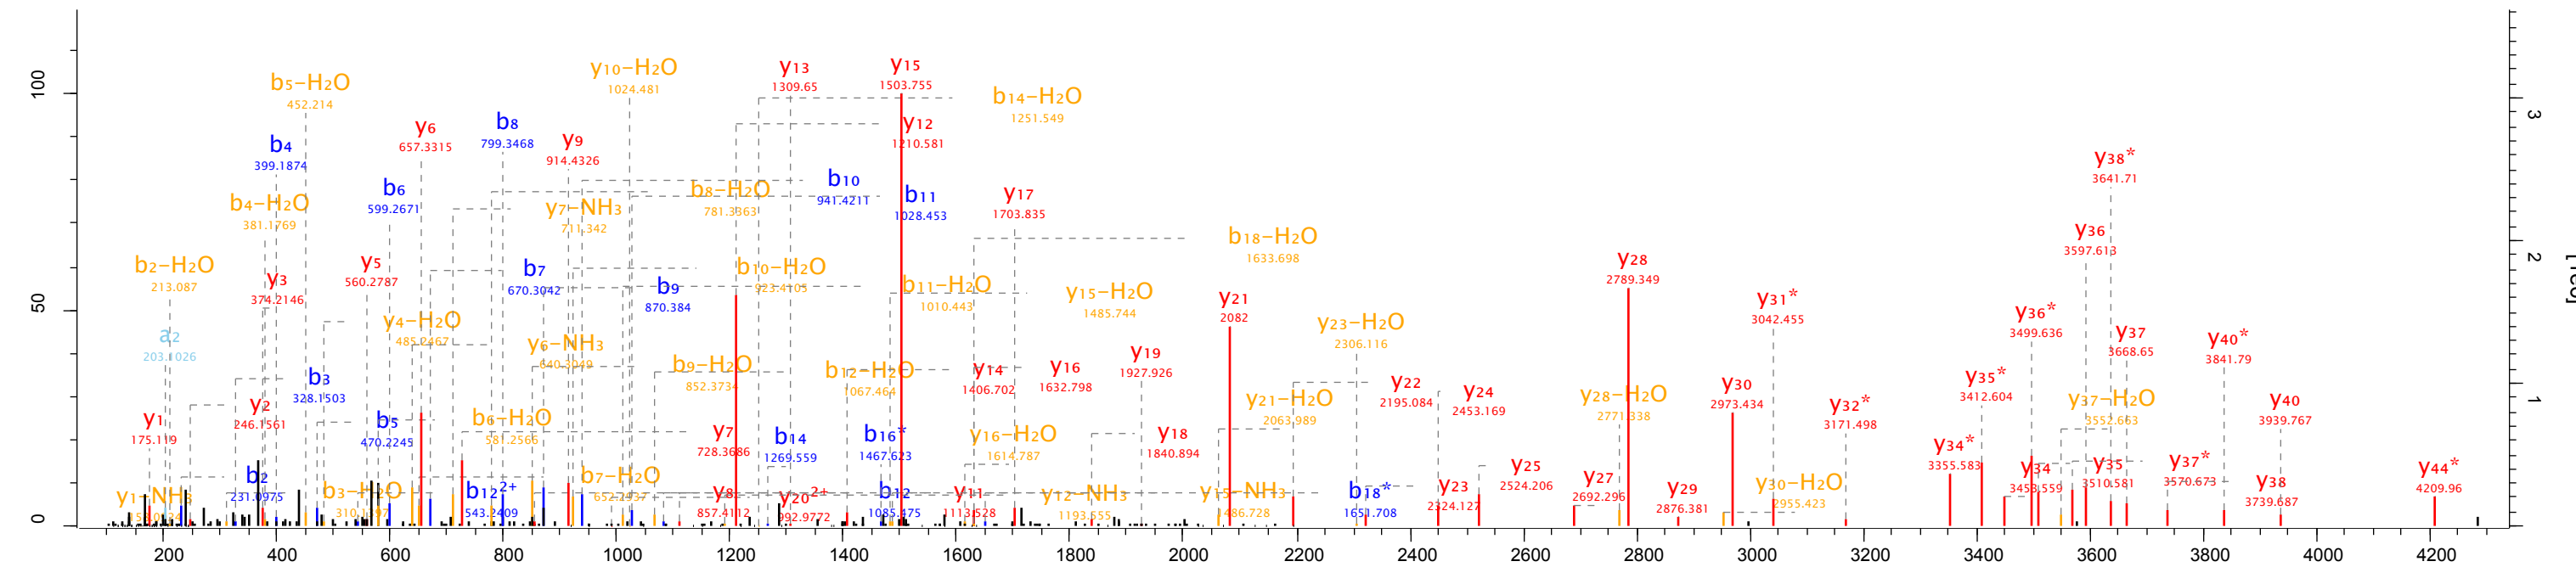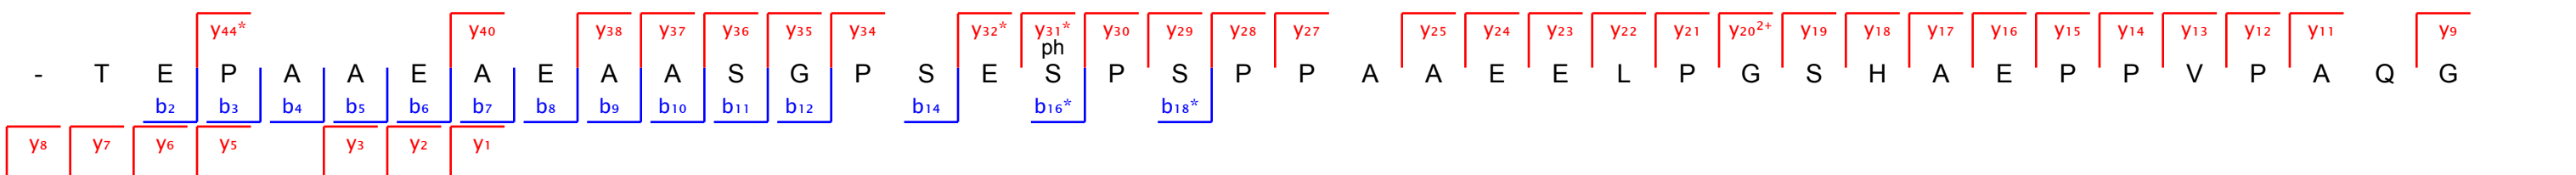

Raw file 20150812\_A375SR\_Phospho\_BR1\_06 Scan 17522 Method FTMS; HCD Score 125.26 m/z 1017.48 Gene names MAP1B

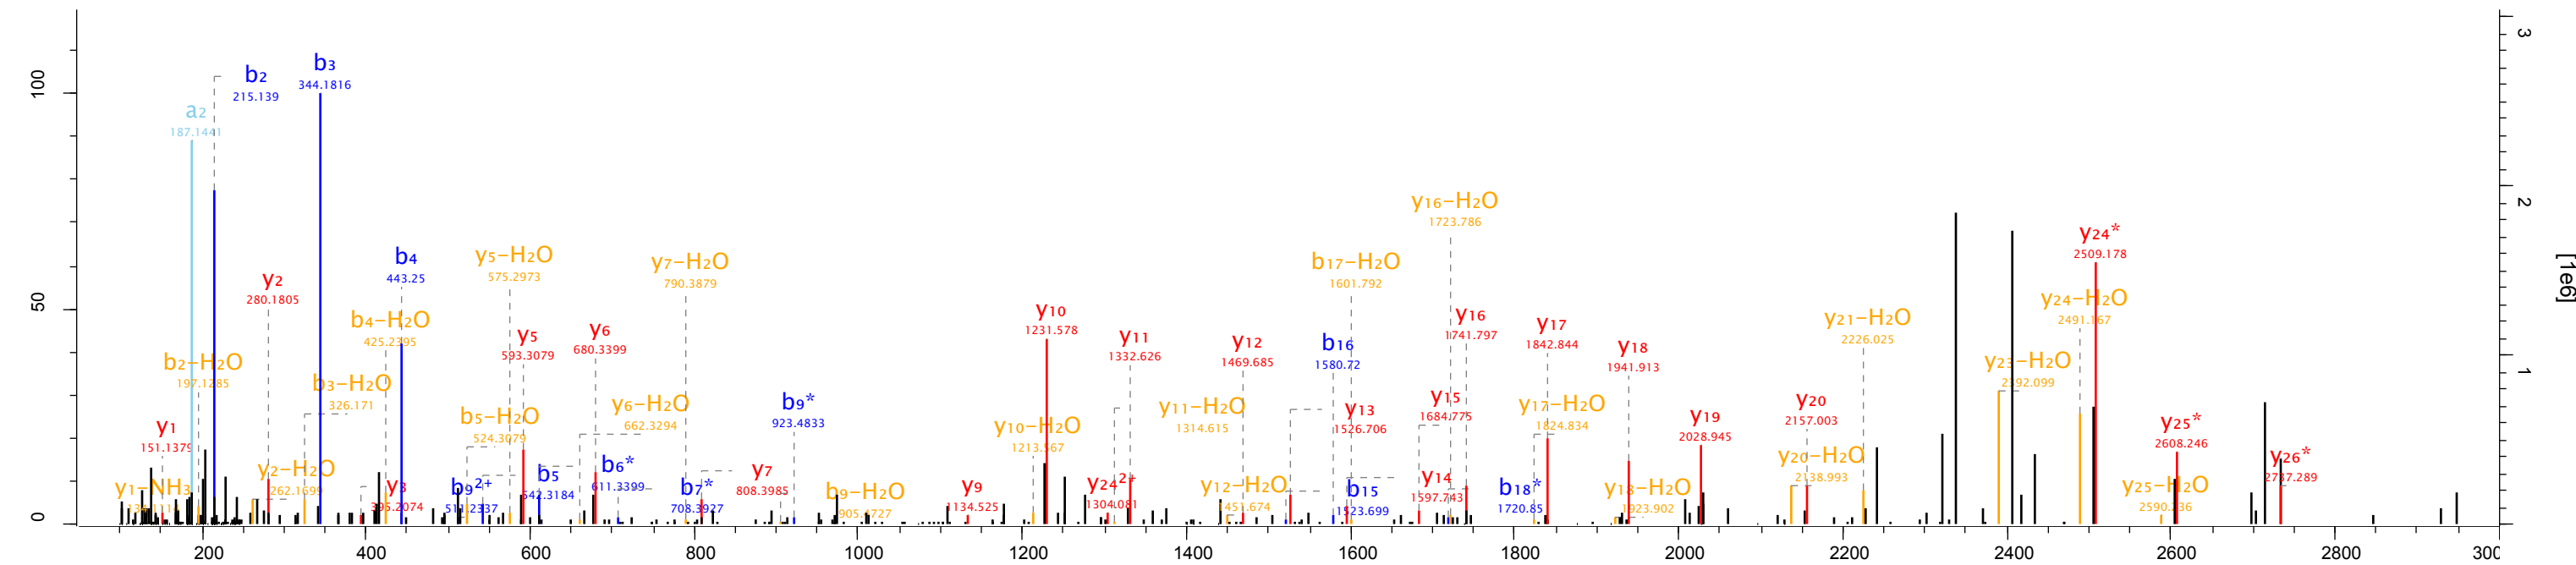

- T L E V V S P S Q S V T G S A G H T P Y Y Q S P T D E K -

Fragmentation mapping (b-ions in blue, y-ions in red):

- b<sub>2</sub> (L), b<sub>3</sub> (E), b<sub>4</sub> (V), b<sub>5</sub> (V), b<sub>6</sub><sup>\*</sup> (S), b<sub>7</sub><sup>\*</sup> (P)
- b<sub>9</sub><sup>\*</sup> (Q), b<sub>15</sub> (A), b<sub>16</sub> (G), b<sub>18</sub><sup>\*</sup> (T)
- y<sub>1</sub> (K), y<sub>2</sub> (E), y<sub>3</sub> (D), y<sub>5</sub> (P), y<sub>6</sub> (S), y<sub>7</sub> (Q), y<sub>9</sub> (Y), y<sub>10</sub> (P), y<sub>11</sub> (H), y<sub>12</sub> (T), y<sub>13</sub> (G), y<sub>14</sub> (A), y<sub>15</sub> (S), y<sub>16</sub> (G), y<sub>17</sub> (T), y<sub>18</sub> (V), y<sub>19</sub> (S), y<sub>20</sub> (Q), y<sub>24</sub><sup>\*</sup> (V), y<sub>25</sub><sup>\*</sup> (E), y<sub>26</sub><sup>\*</sup> (K)

Raw file Scan Method Score m/z Gene names  
 20150812\_A375SR\_Phospho\_BR1\_06 17622 FTMS; HCD 152.16 669.32 SAFB2

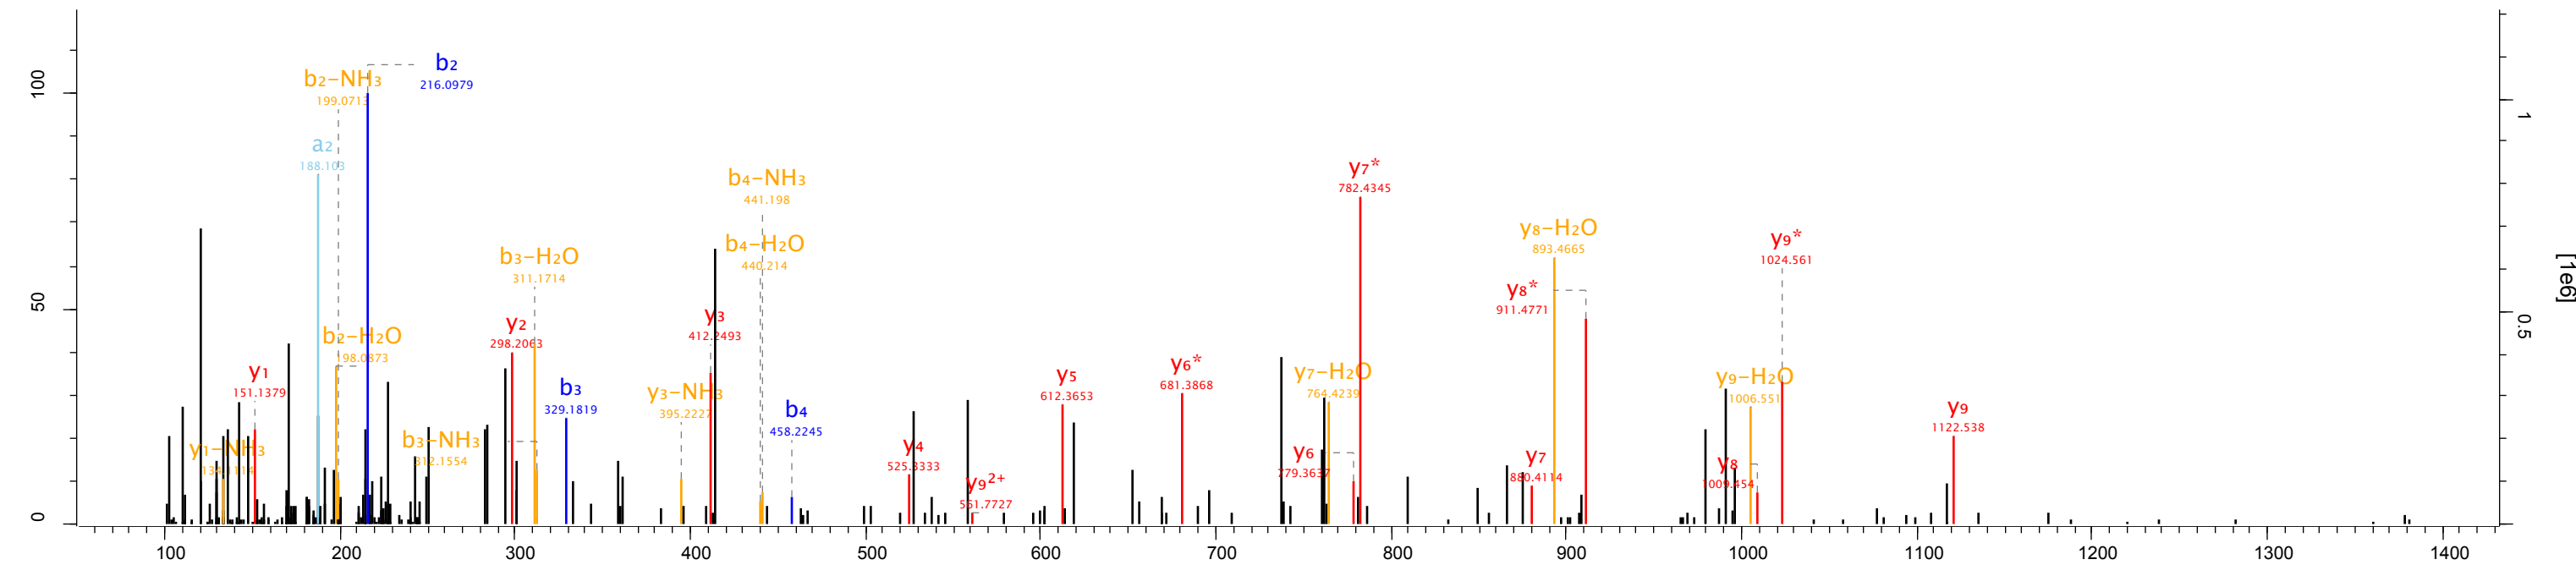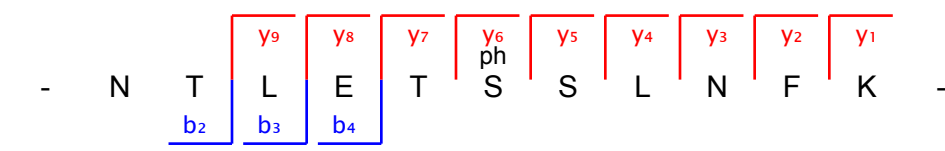

Raw file: 20150812\_A375SR\_Phospho\_BR1\_06  
 Scan: 1782 Method: FTMS; HCD Score: 128.52 m/z: 542.78 Gene names: LUZP1

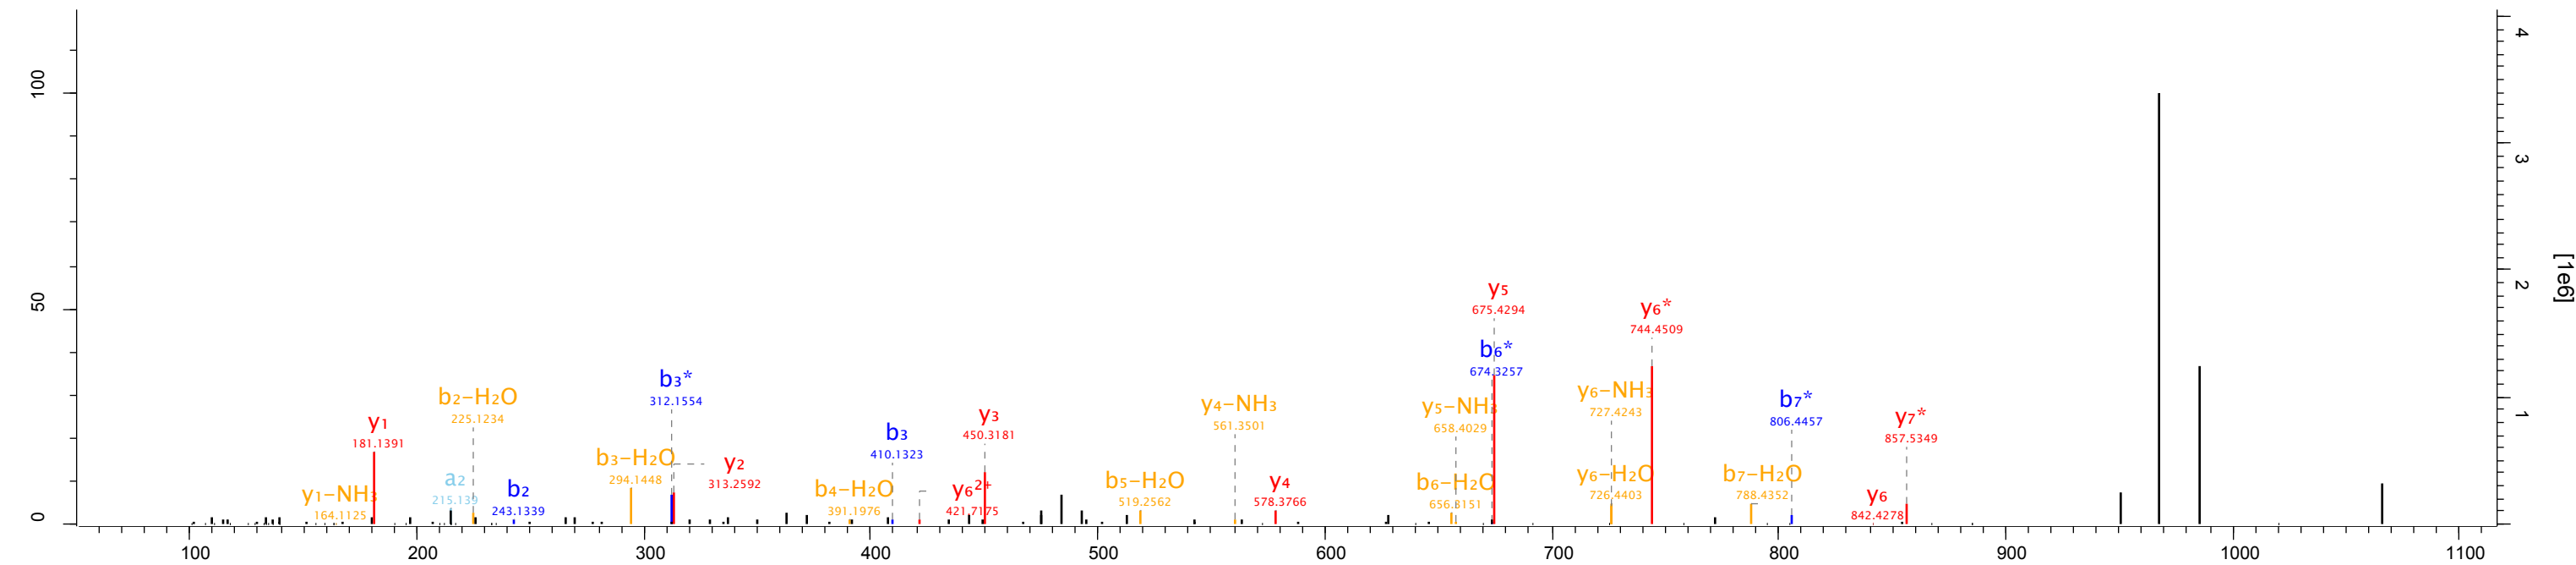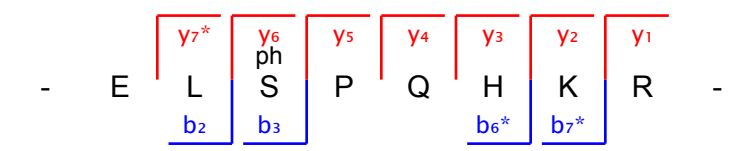



Raw file 20150812\_A375SR\_Phospho\_BR1\_06 Scan 18142 Method FTMS; HCD Score 61.44 m/z 861.37

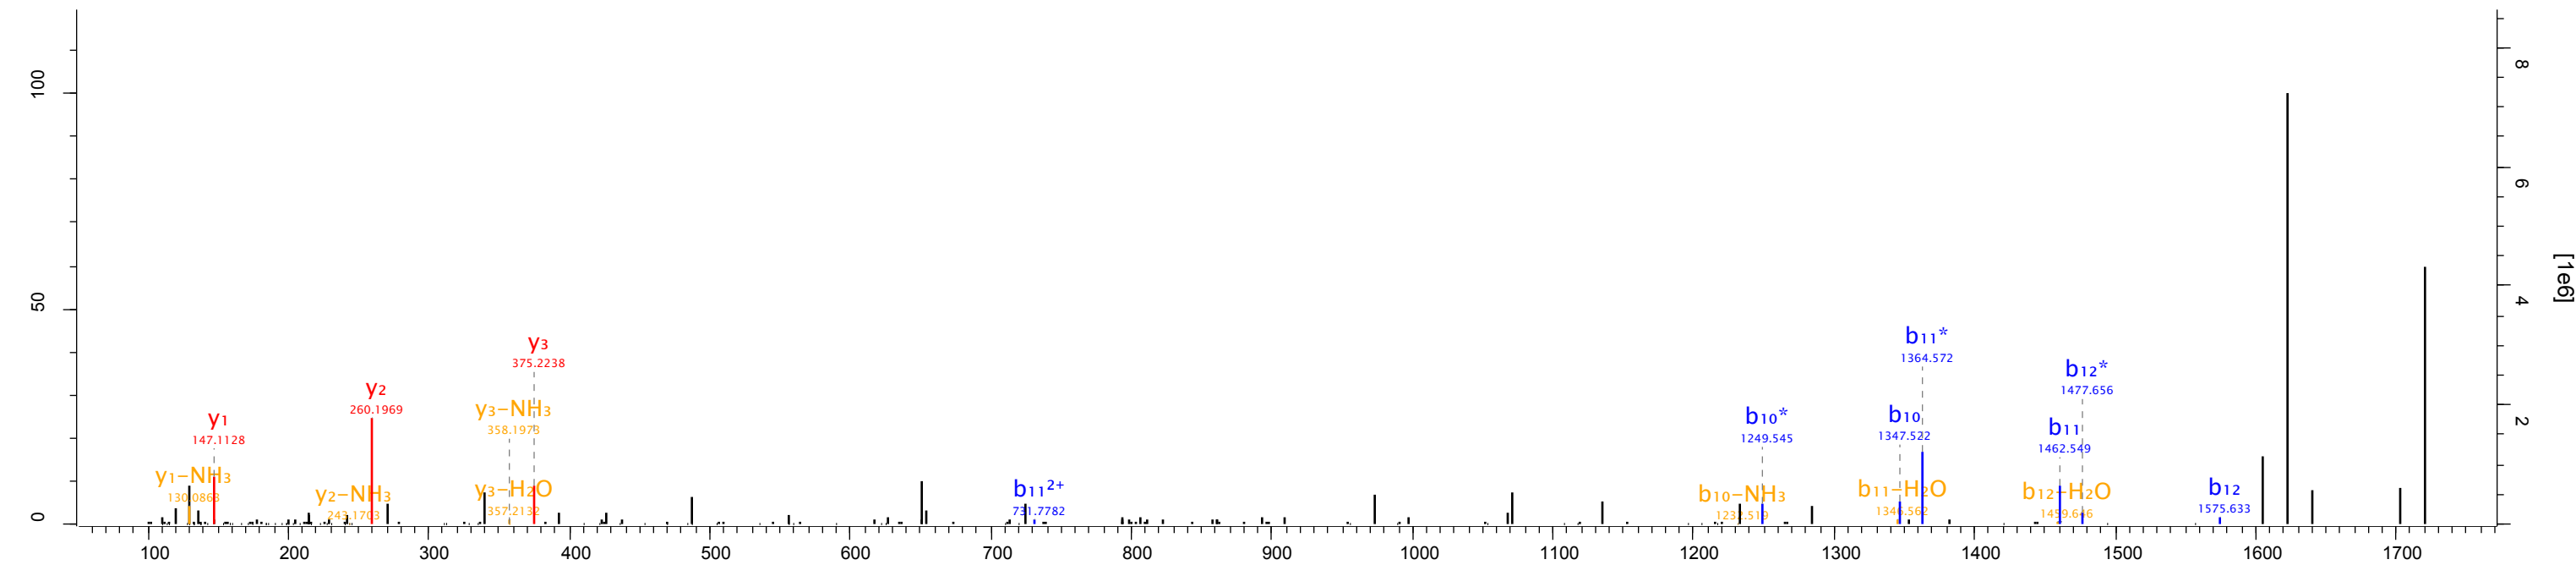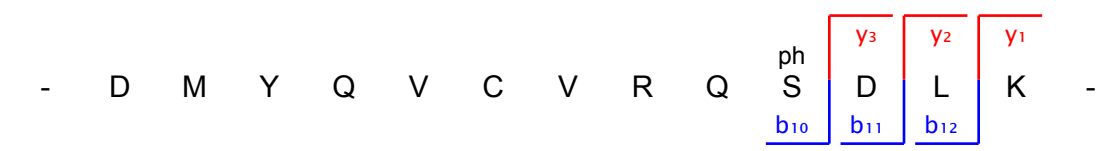

Raw file: 20150812\_A375SR\_Phospho\_BR1\_06  
 Scan: 18652 Method: FTMS; HCD Score: 73.92 m/z: 1095.51 Gene names: CEBPB

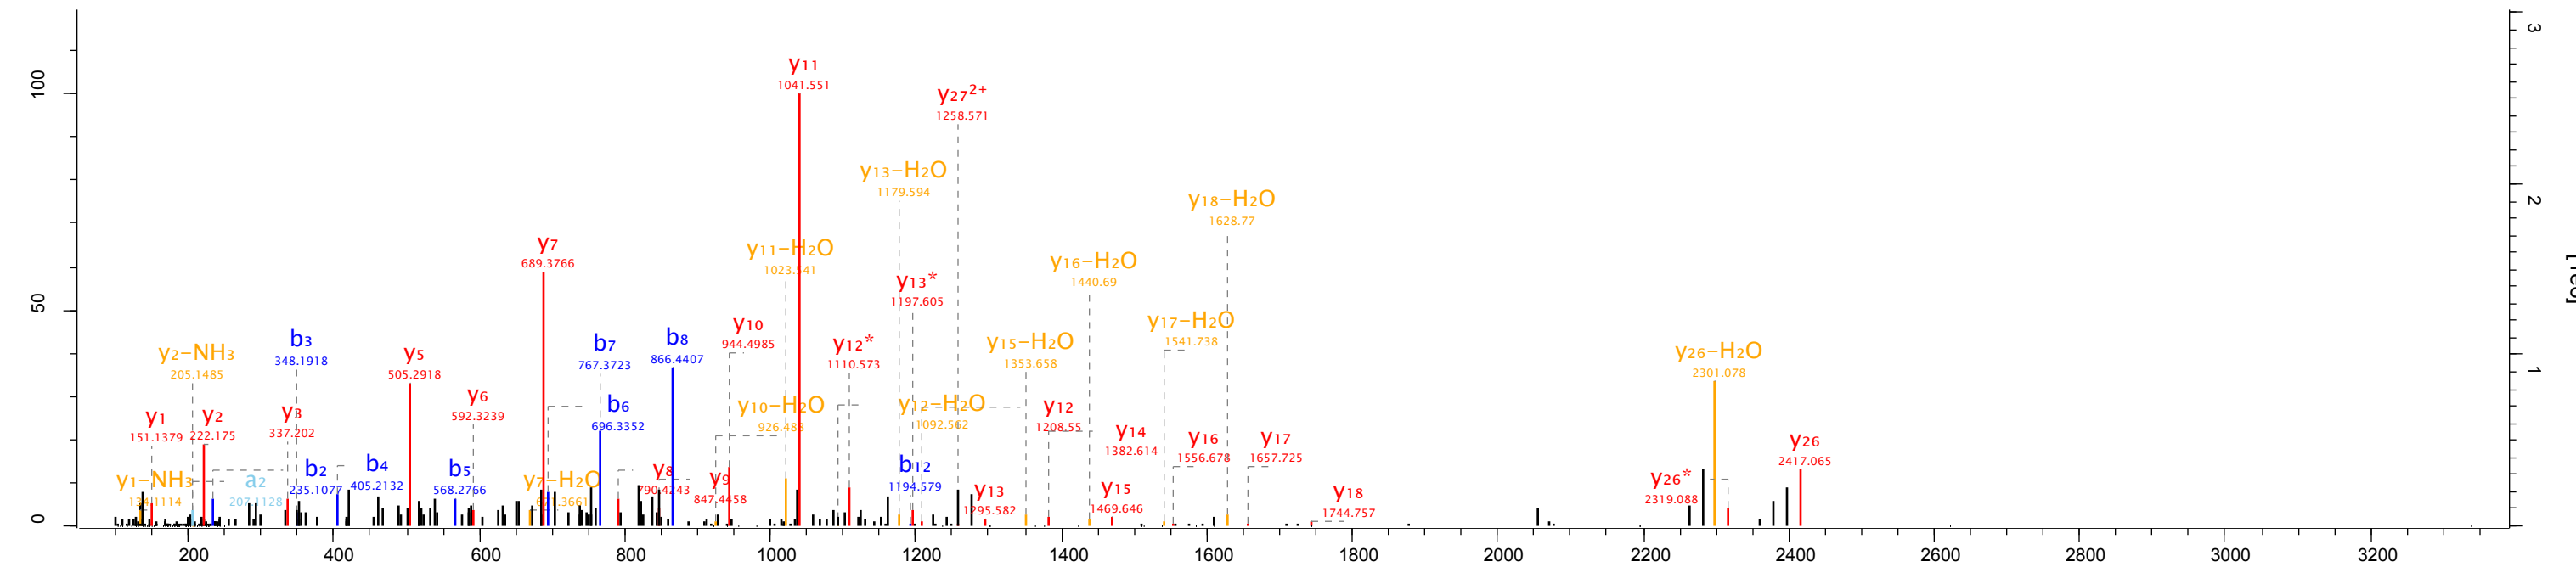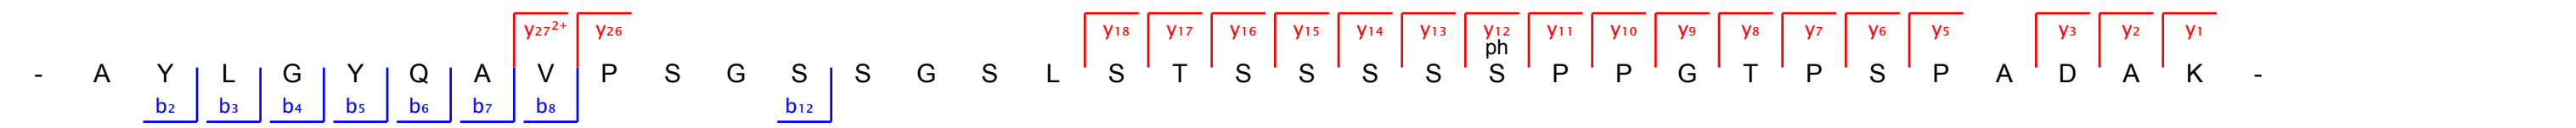

Raw file: 20150812\_A375SR\_Phospho\_BR1\_06  
 Scan: 18972 Method: FTMS; HCD Score: 216.21 m/z: 948.46 Gene names: PTPN14

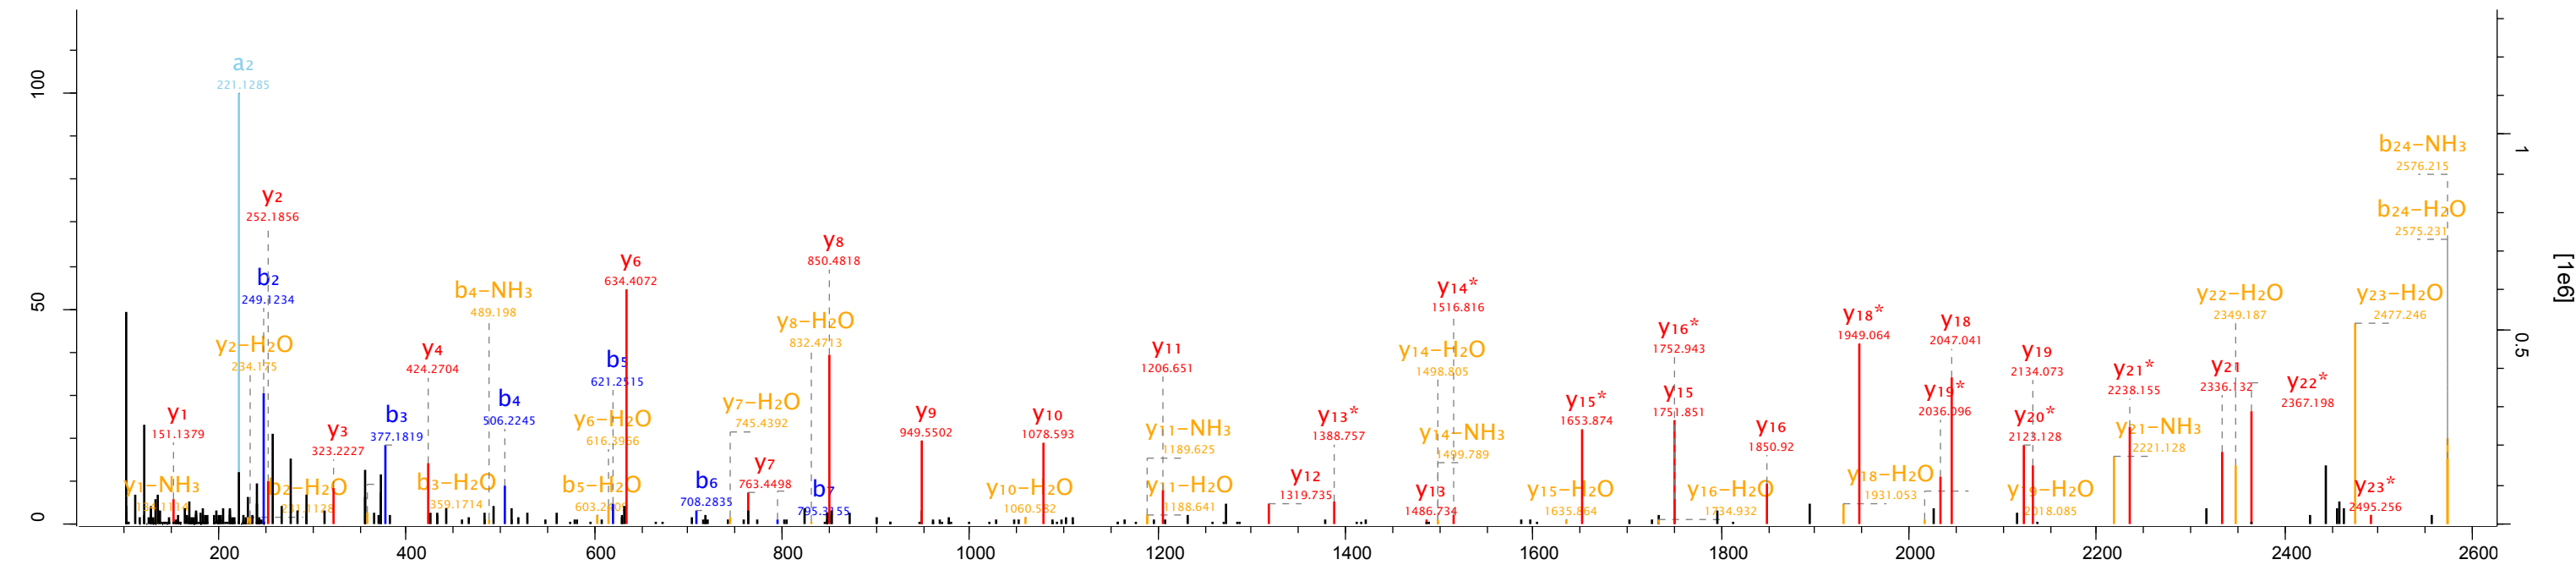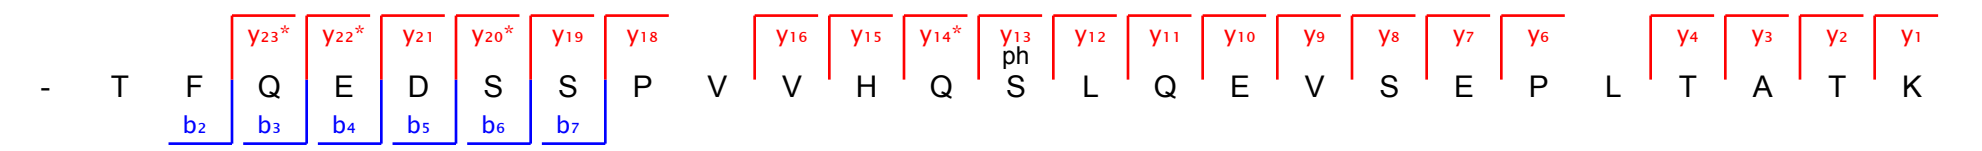

Raw file: 20150812\_A375SR\_Phospho\_BR1\_06  
 Scan: 1922 Method: FTMS; HCD Score: 98.35 m/z: 610.31 Gene names: ACIN1

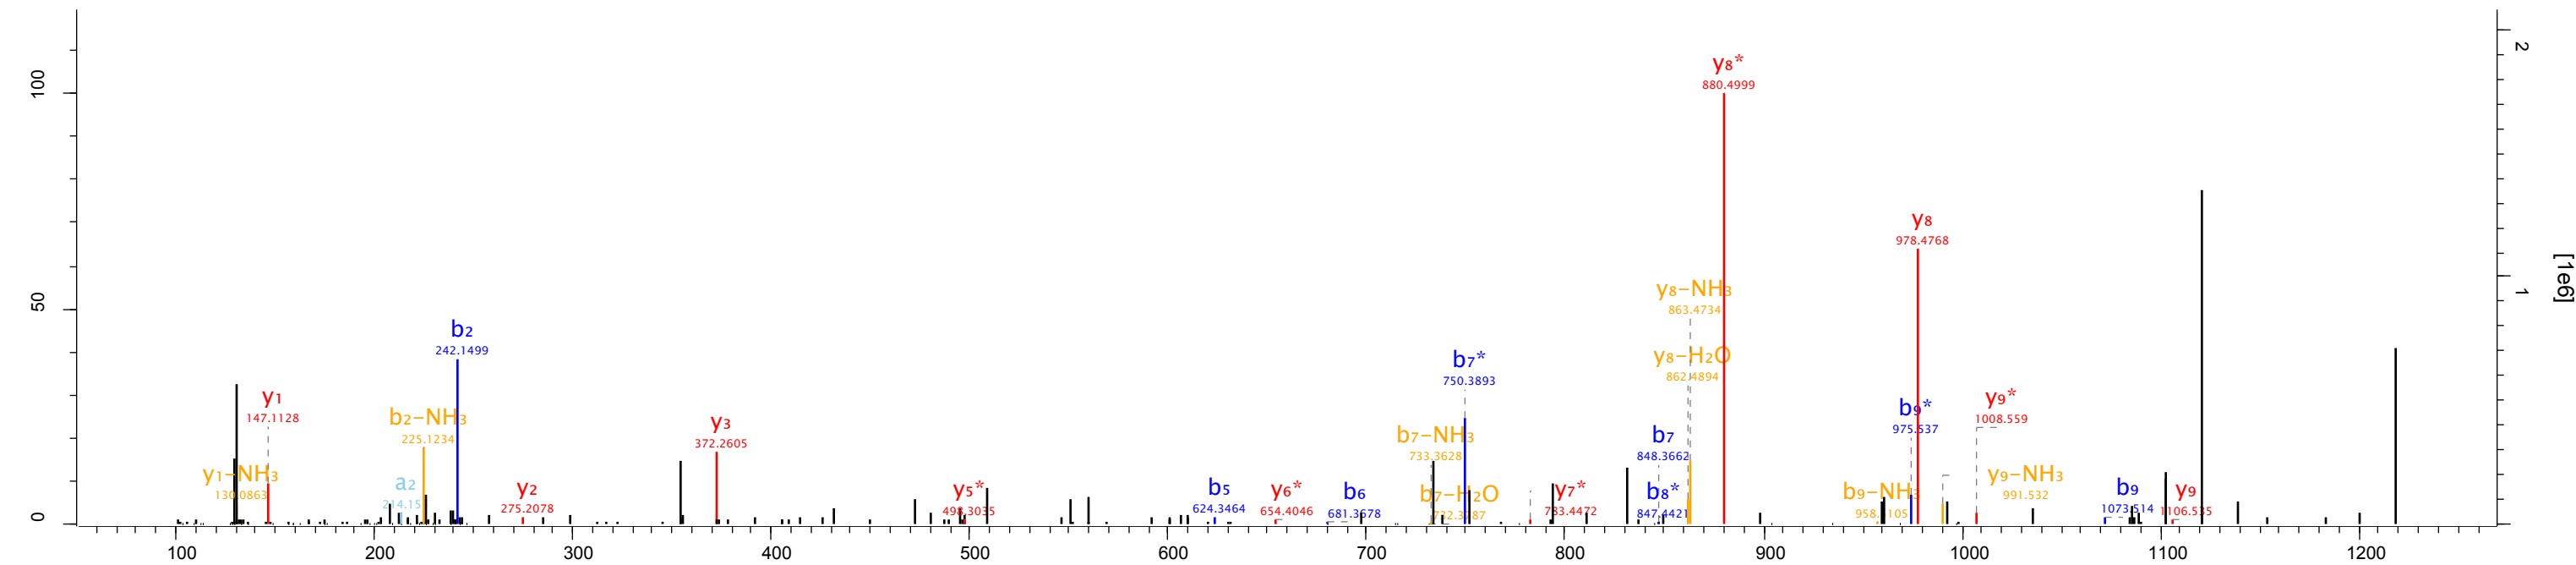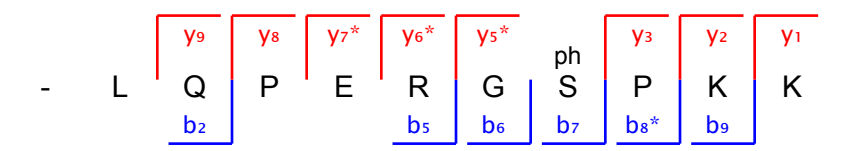

Raw file 20150812\_A375SR\_Phospho\_BR1\_06 Scan 20452 Method FTMS; HCD Score 207.31 m/z 706.81 Gene names EPB41L1

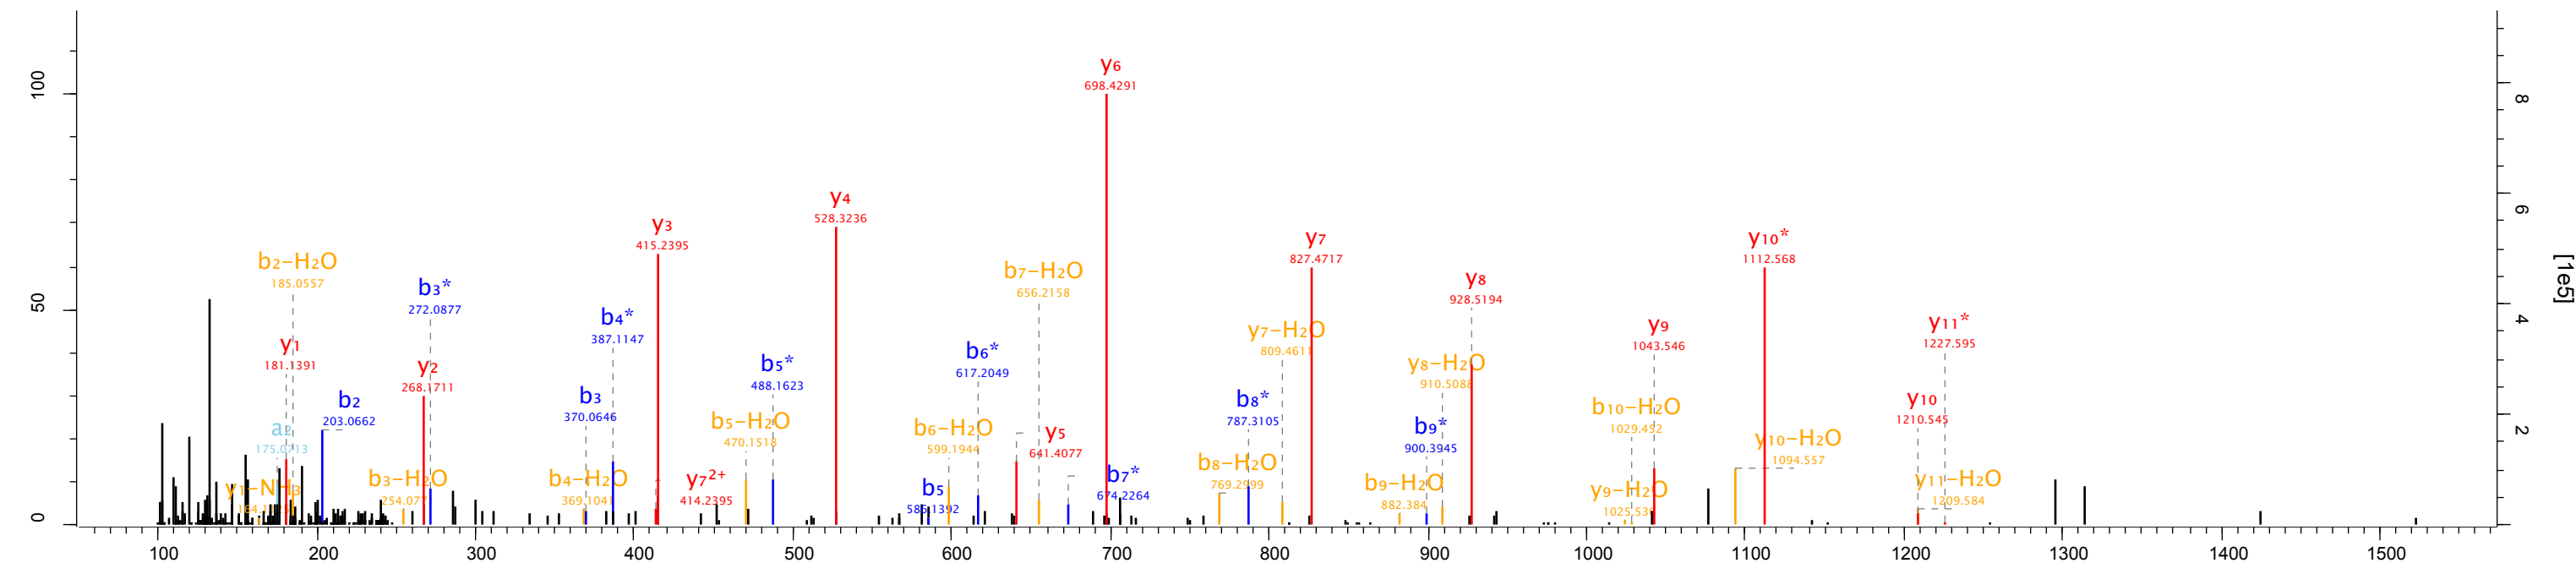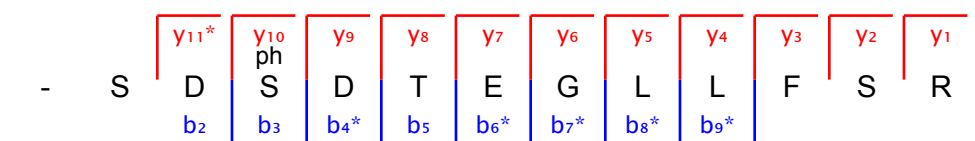

Raw file  
 20150812\_A375SR\_Phospho\_BR1\_06  
 Scan 21602 Method FTMS; HCD Score 106.54 m/z 1004.85 Gene names HCFC1

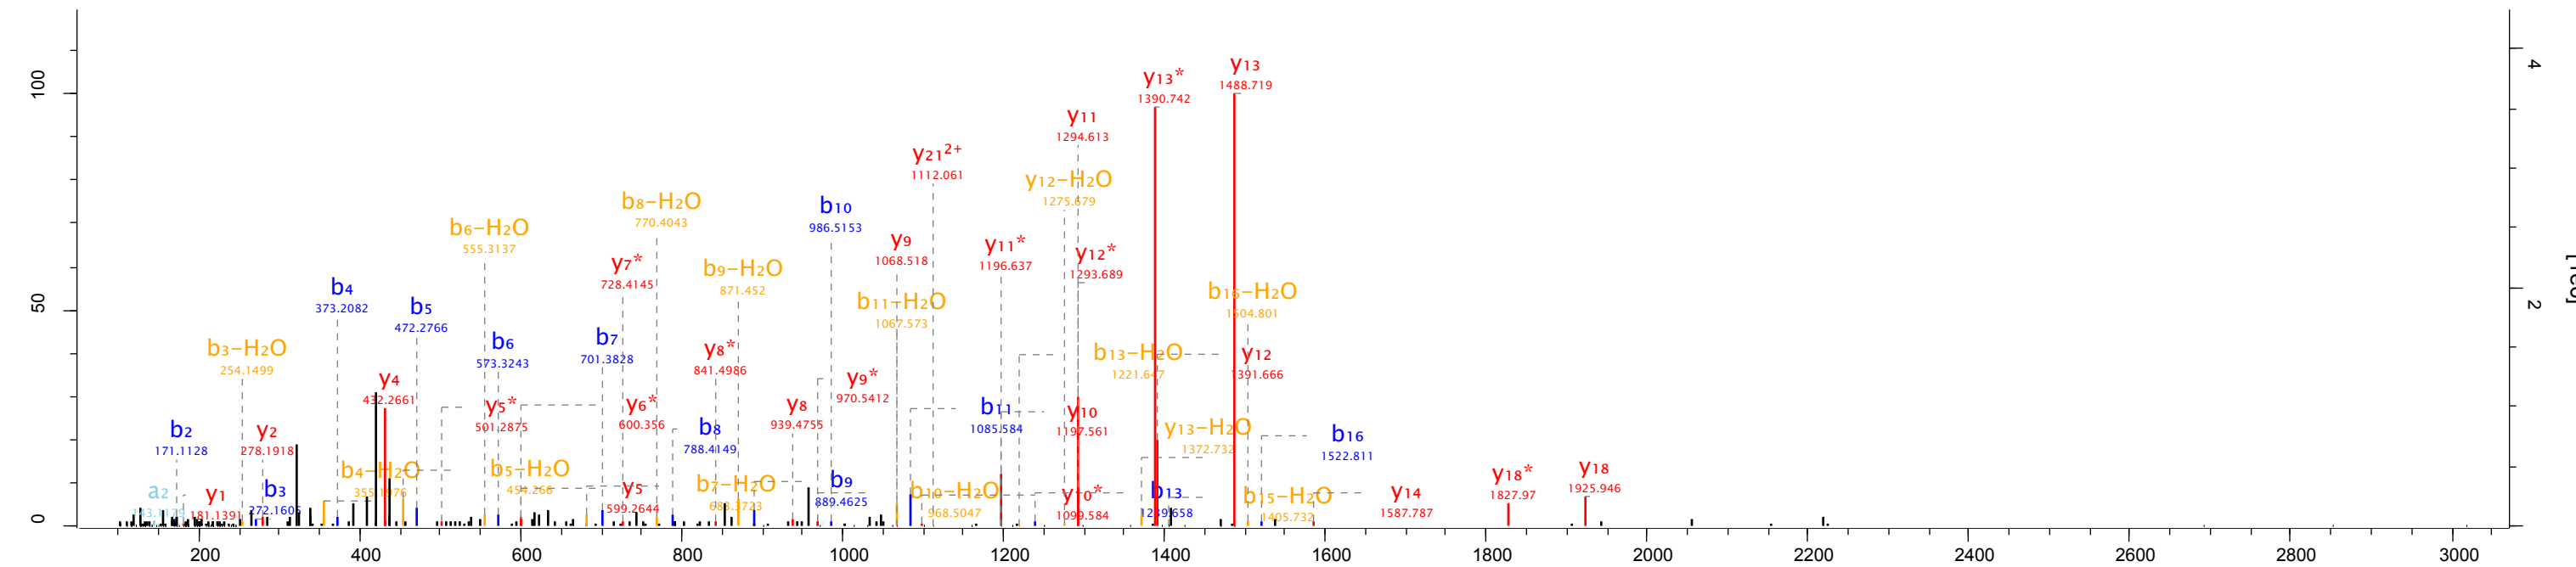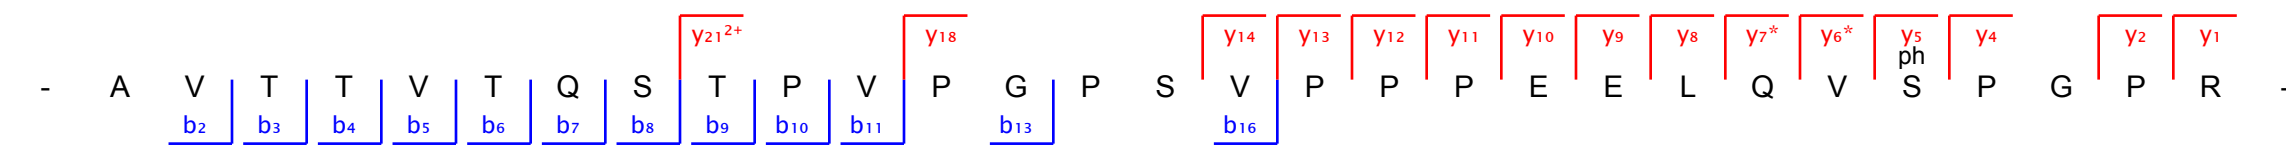

Raw file: 20150812\_A375SR\_Phospho\_BR1\_06  
 Scan: 2342 Method: FTMS; HCD Score: 105.03 m/z: 574.59 Gene names: PSIP1

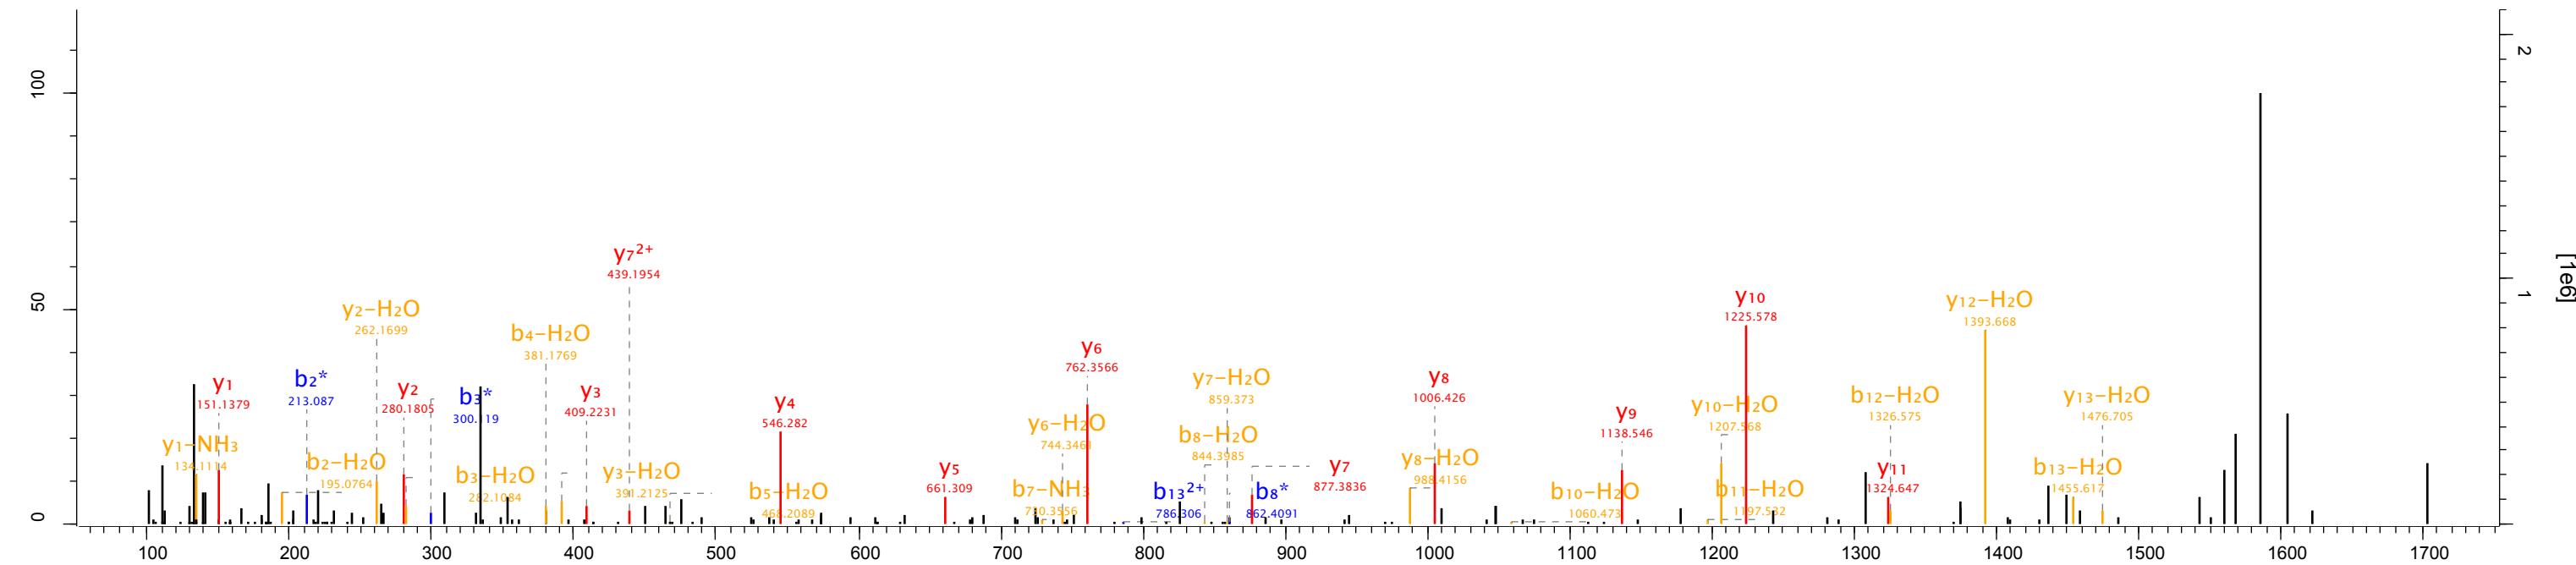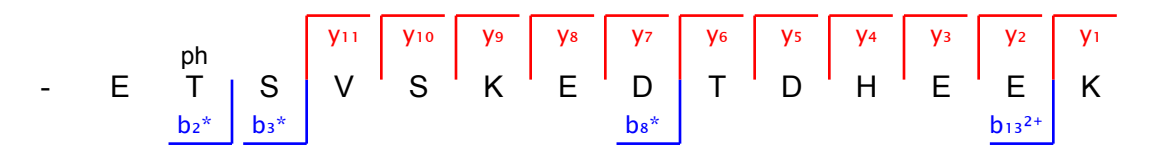

Raw file: 20150812\_A375SR\_Phospho\_BR1\_06  
 Scan: 2782 Method: FTMS; HCD Score: 63.3 m/z: 643.28 Gene names: RICTOR

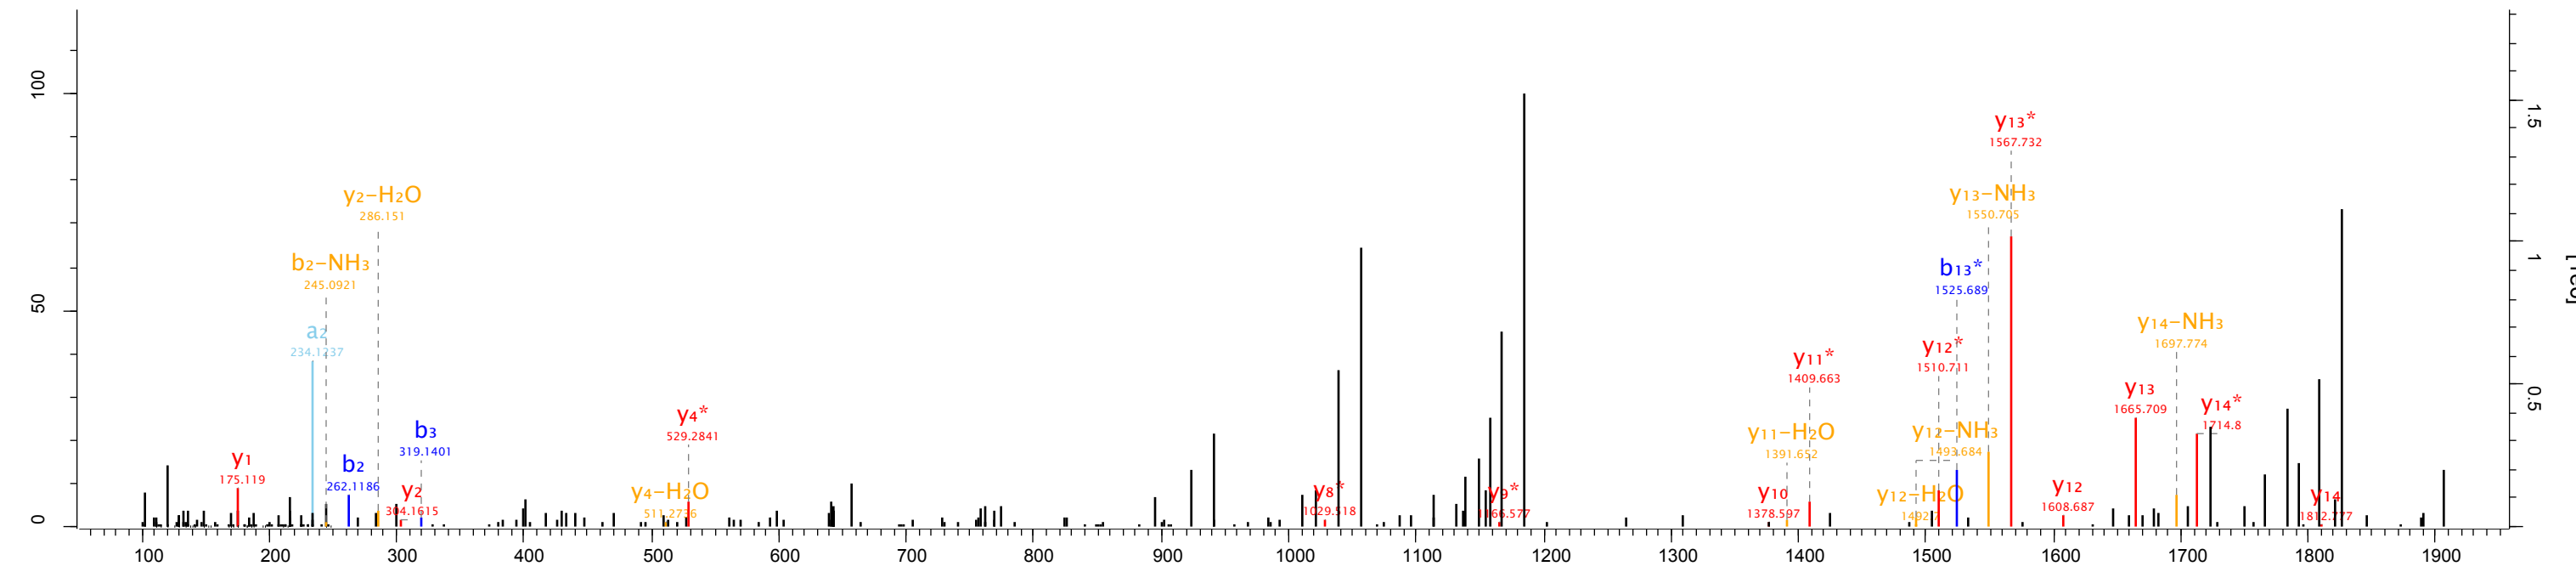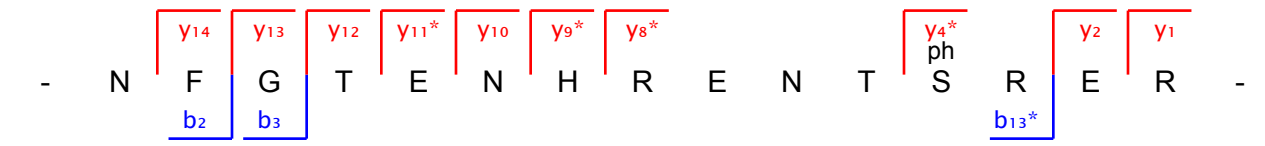





Raw file: 20150812\_A375SR\_Phospho\_BR1\_06  
 Scan: 3622 Method: FTMS; HCD Score: 221.9 m/z: 732.81 Gene names: C18orf25;ARKL1

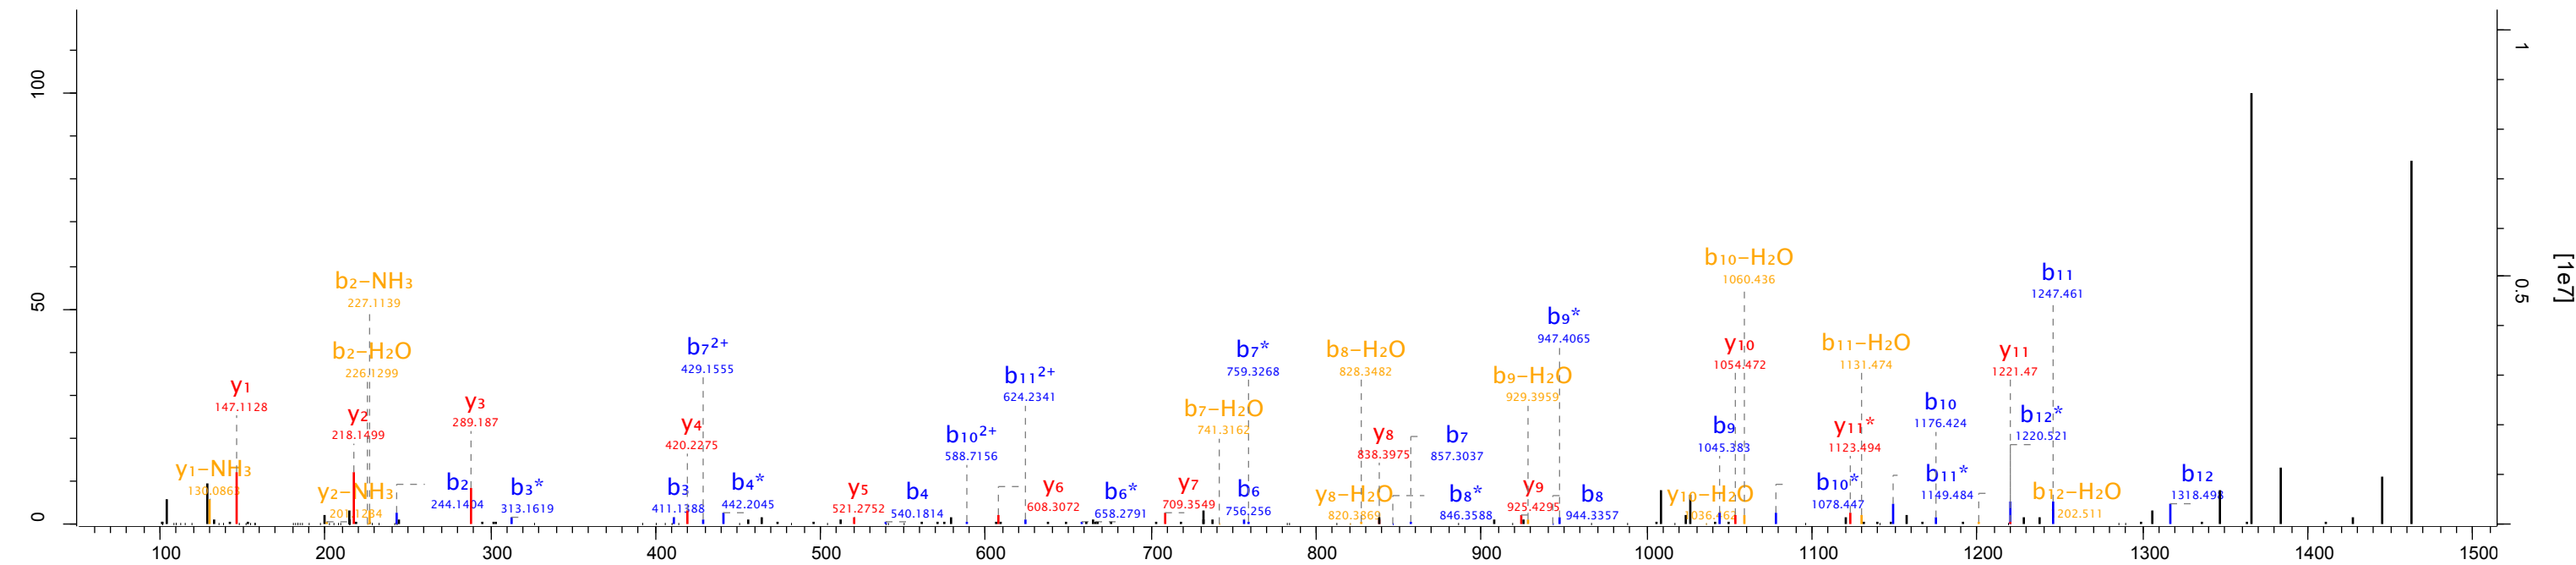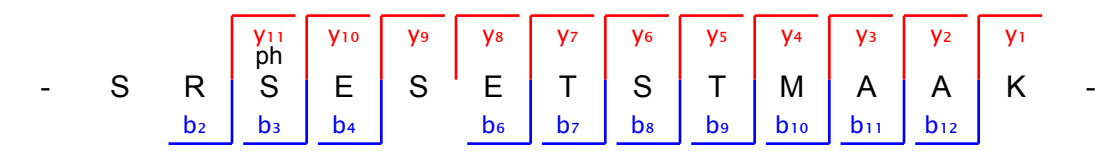

Raw file Scan Method Score m/z Gene names  
 20150812\_A375SR\_Phospho\_BR1\_06 3982 FTMS; HCD 73.06 540.26 MEPCE

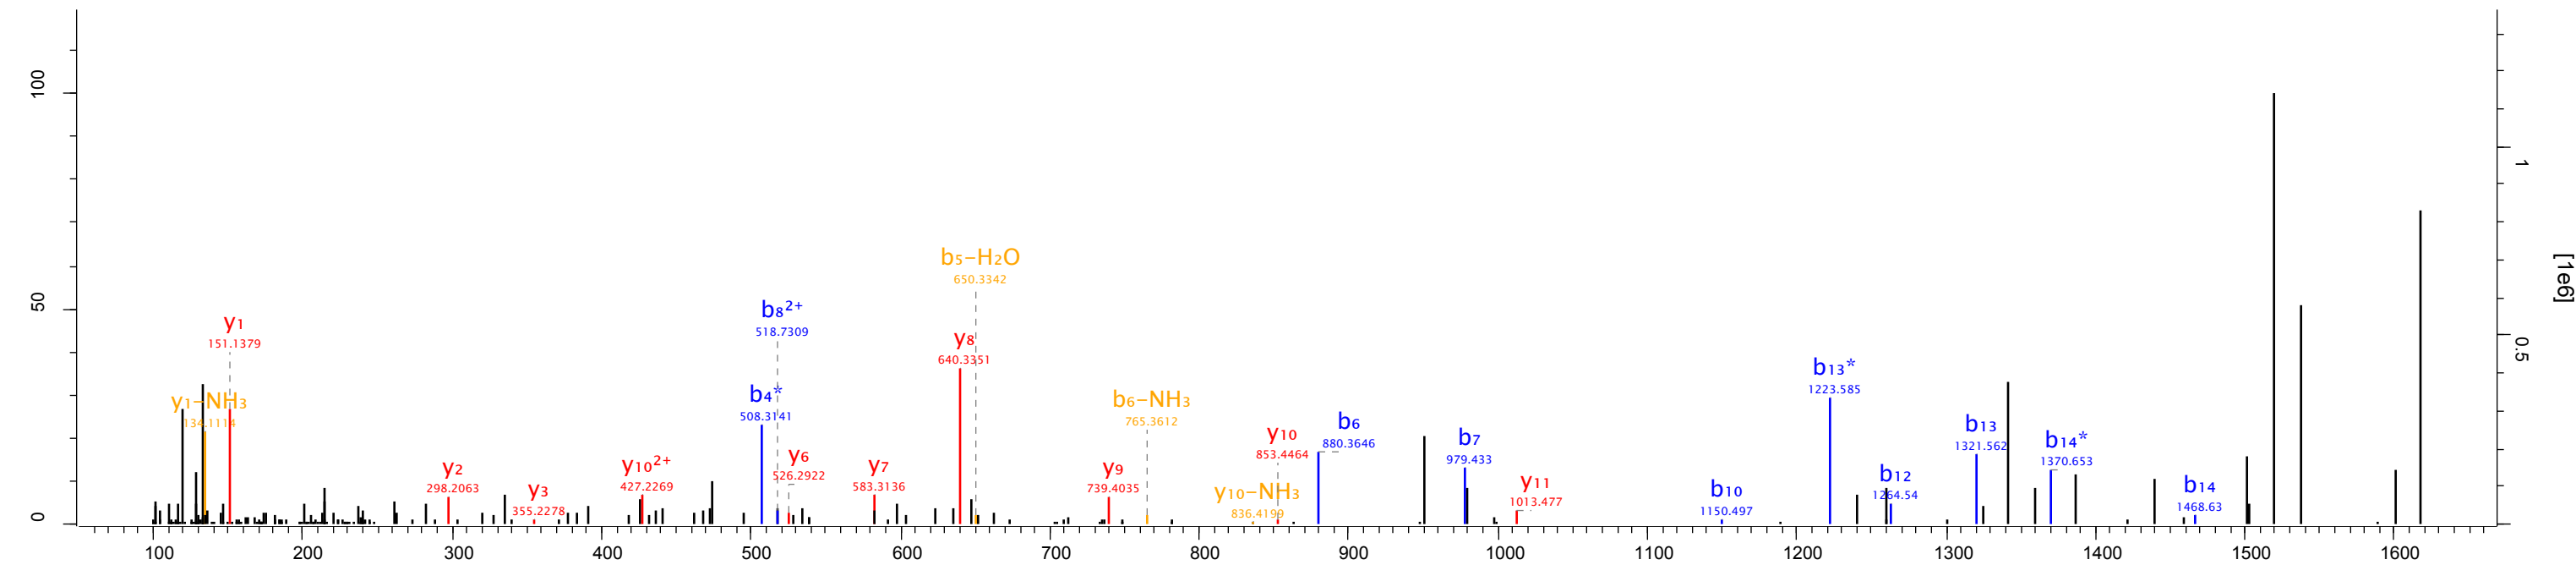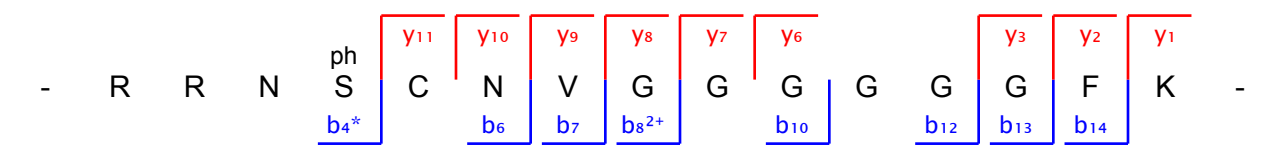

Raw file: 20150812\_A375SR\_Phospho\_BR1\_06  
 Scan: 4152 Method: FTMS; HCD Score: 147.72 m/z: 553.22 Gene names: HTATSF1

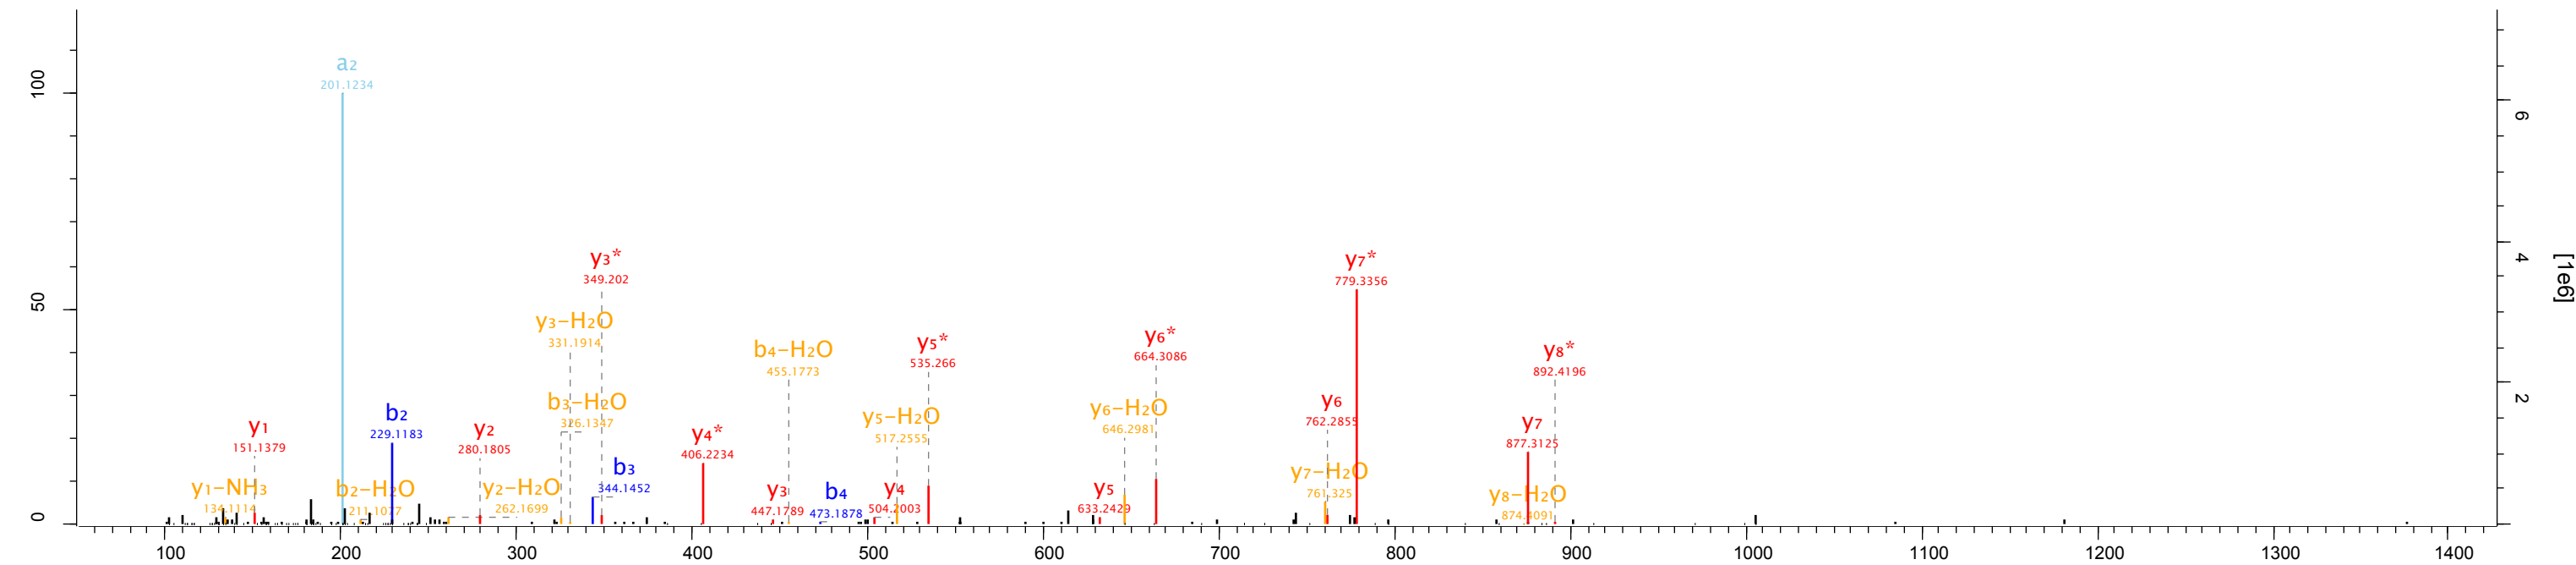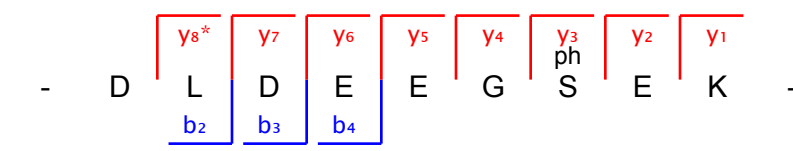

Raw file: 20150812\_A375SR\_Phospho\_BR1\_06  
 Scan: 4572 Method: FTMS; HCD Score: 172.55 m/z: 859.4 Gene names: MARCKS

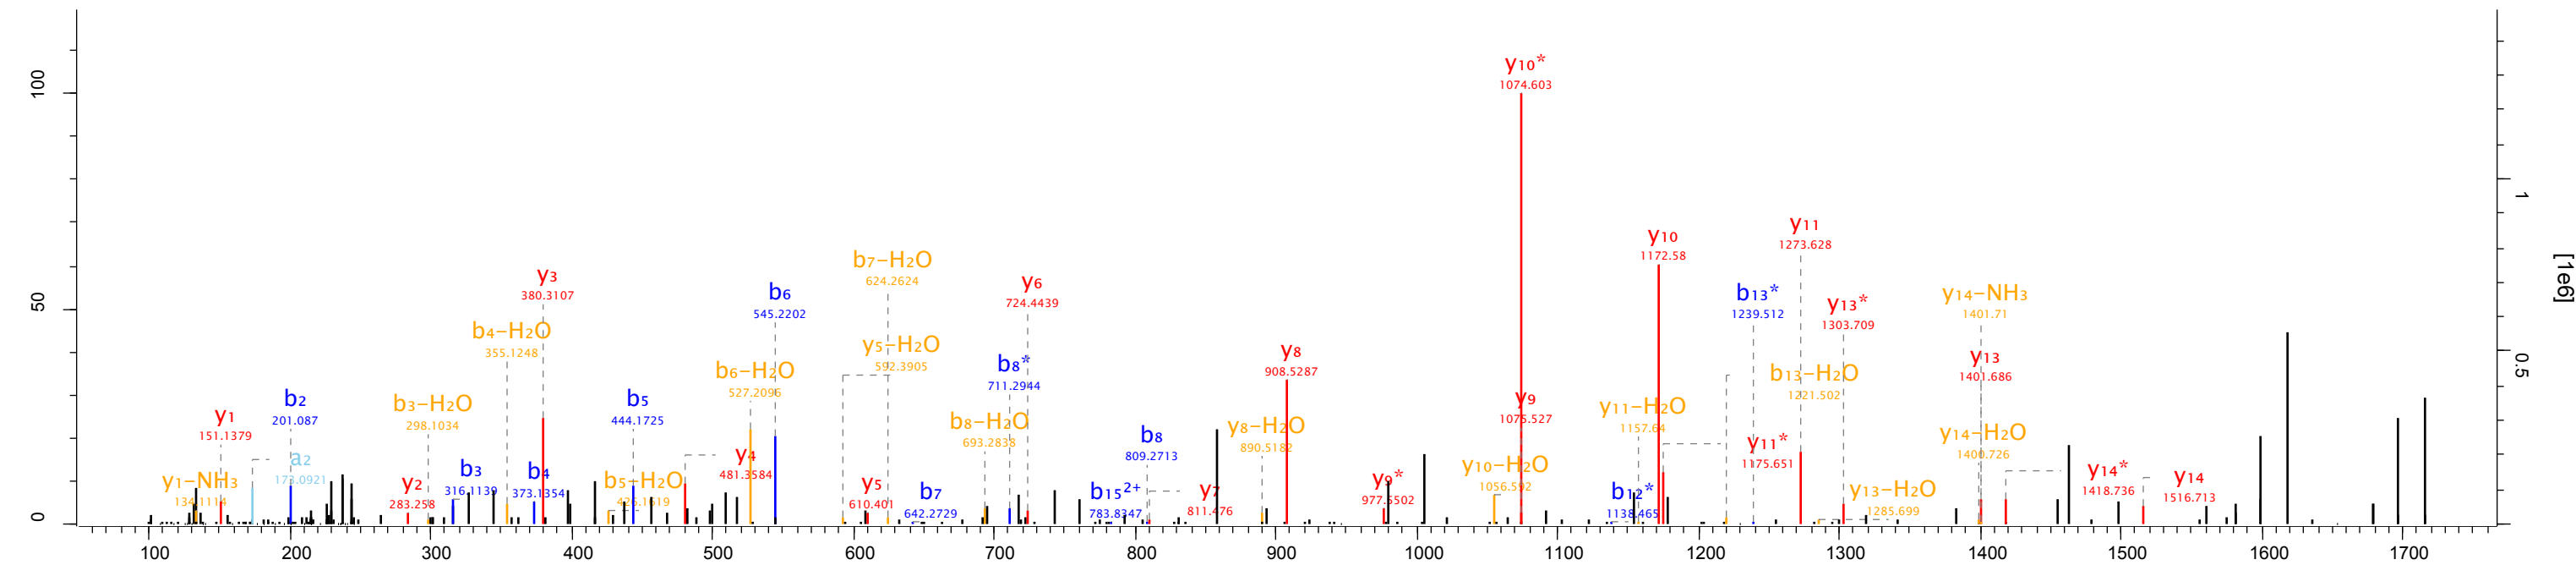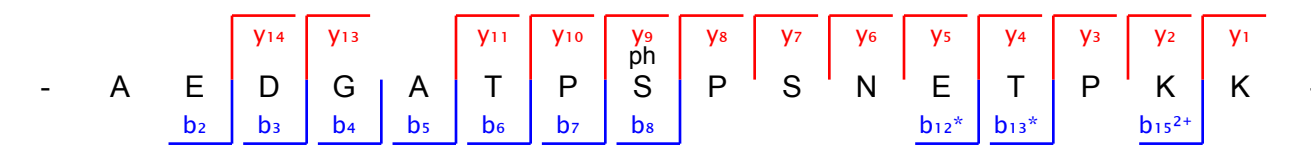

Raw file: 20150812\_A375SR\_Phospho\_BR1\_06  
 Scan: 4932 Method: FTMS; HCD Score: 94.8 m/z: 481.72

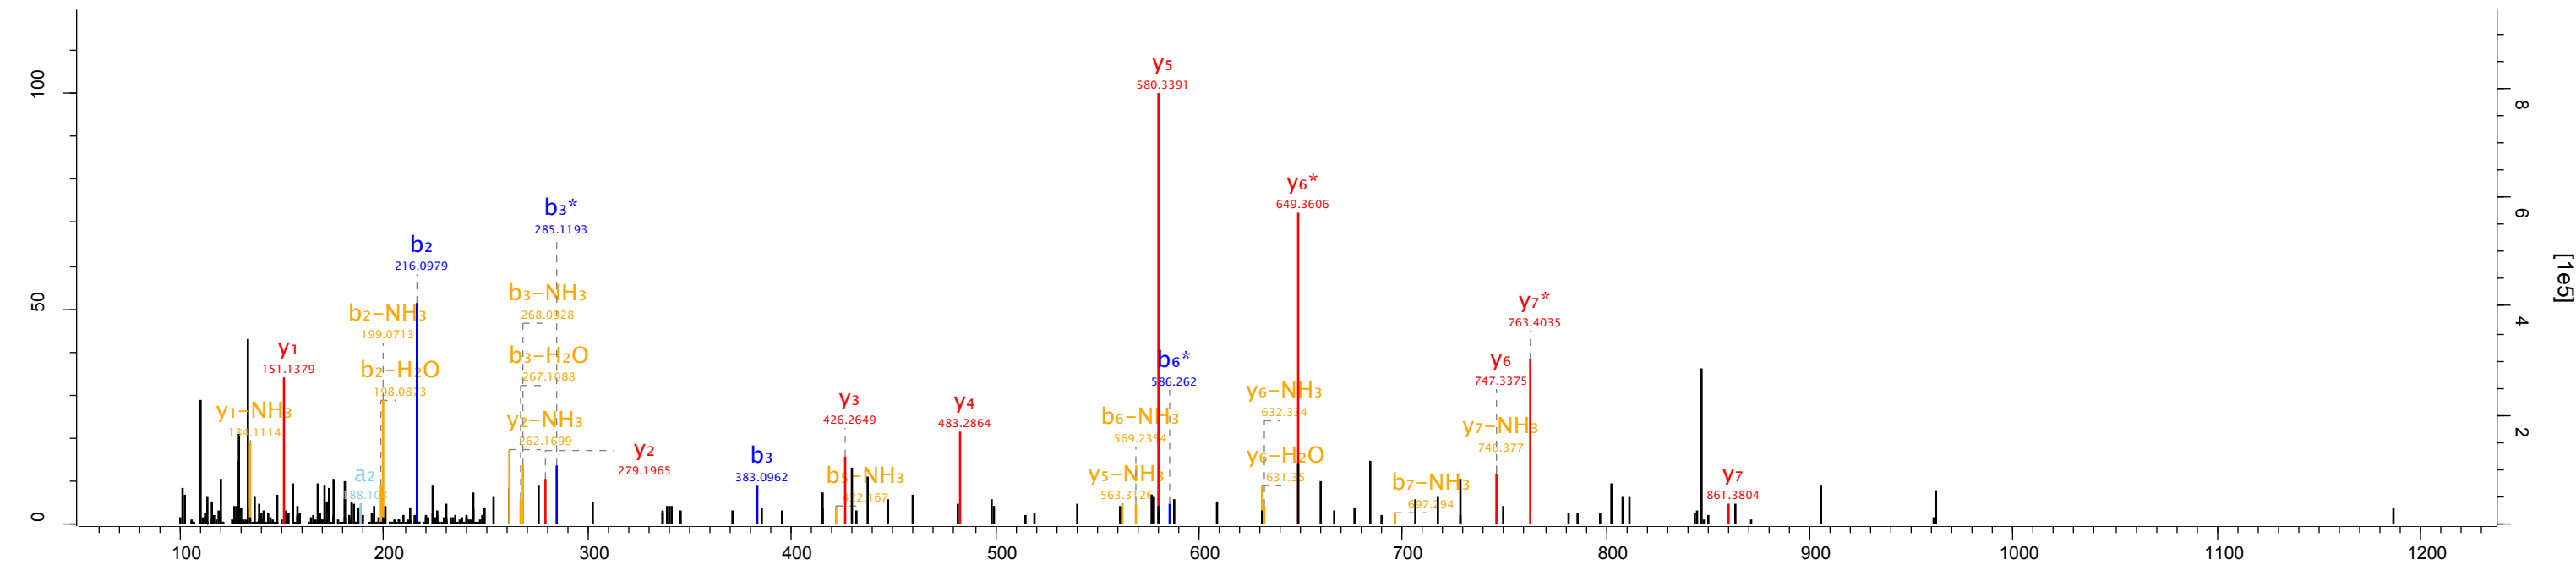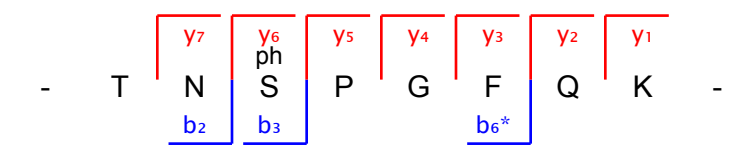

Raw file 20150812\_A375SR\_Phospho\_BR1\_06 Scan 4982 Method FTMS; HCD Score 200.14 m/z 613.92 Gene names LIMCH1

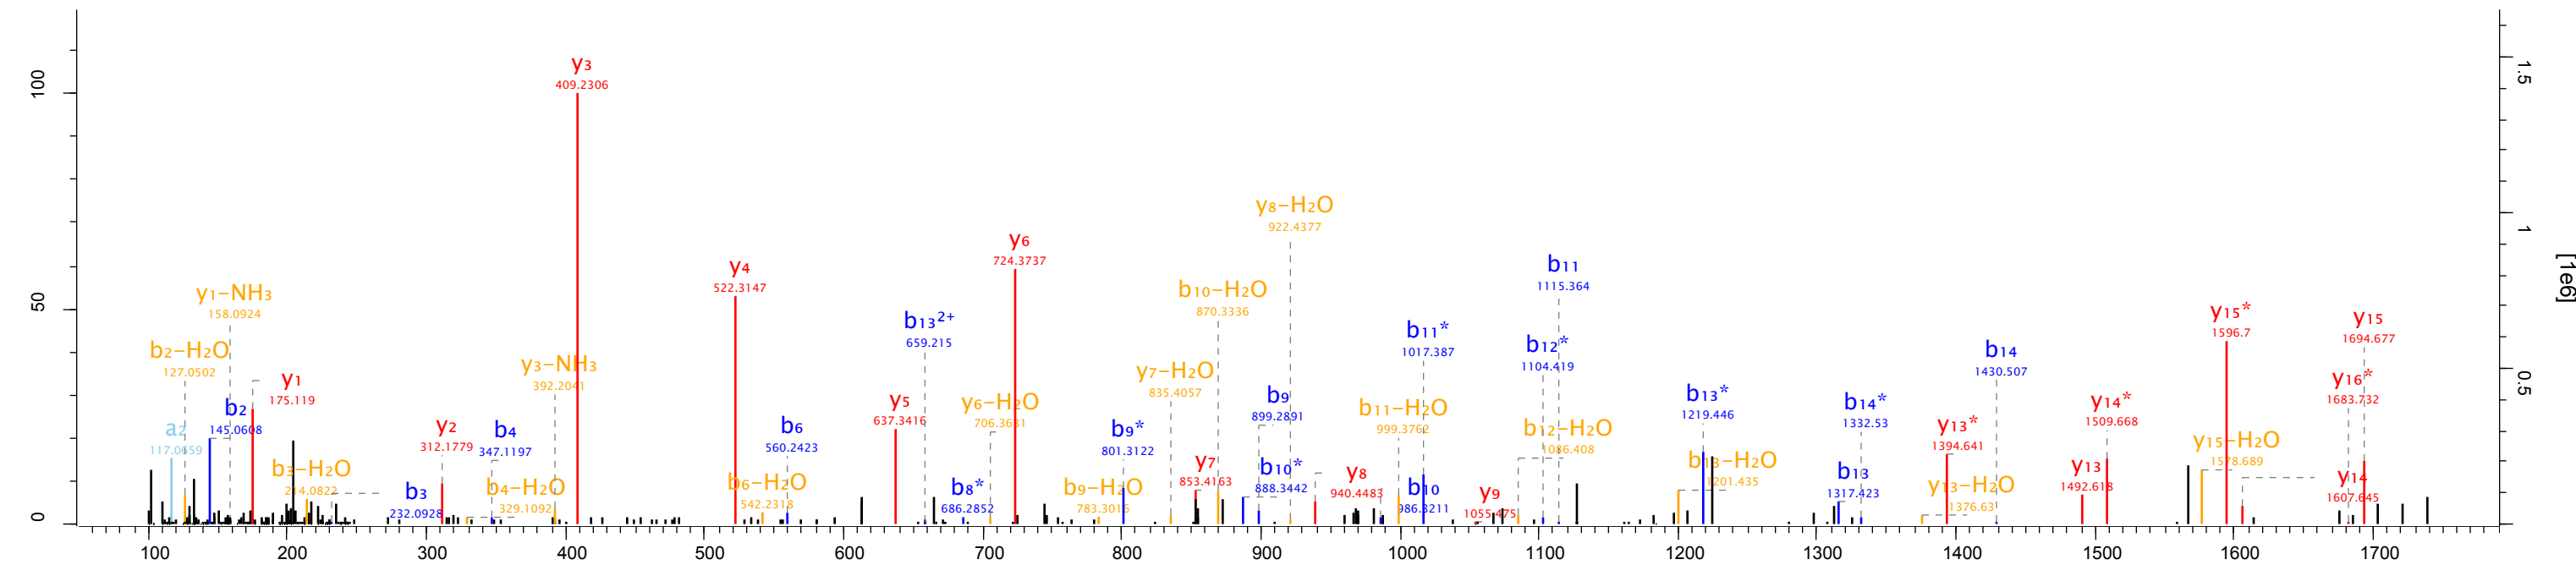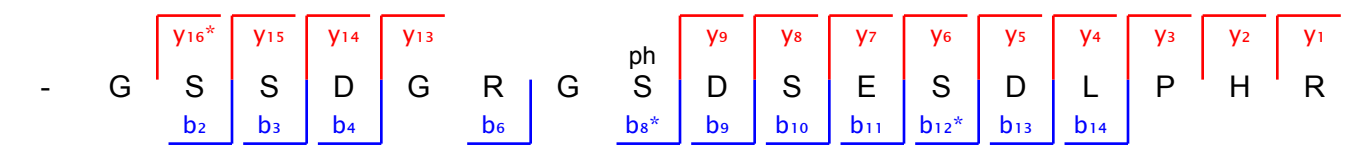

Raw file: 20150812\_A375SR\_Phospho\_BR1\_06  
 Scan: 6752 Method: FTMS; HCD Score: 155.58 m/z: 443.22 Gene names: IRS1

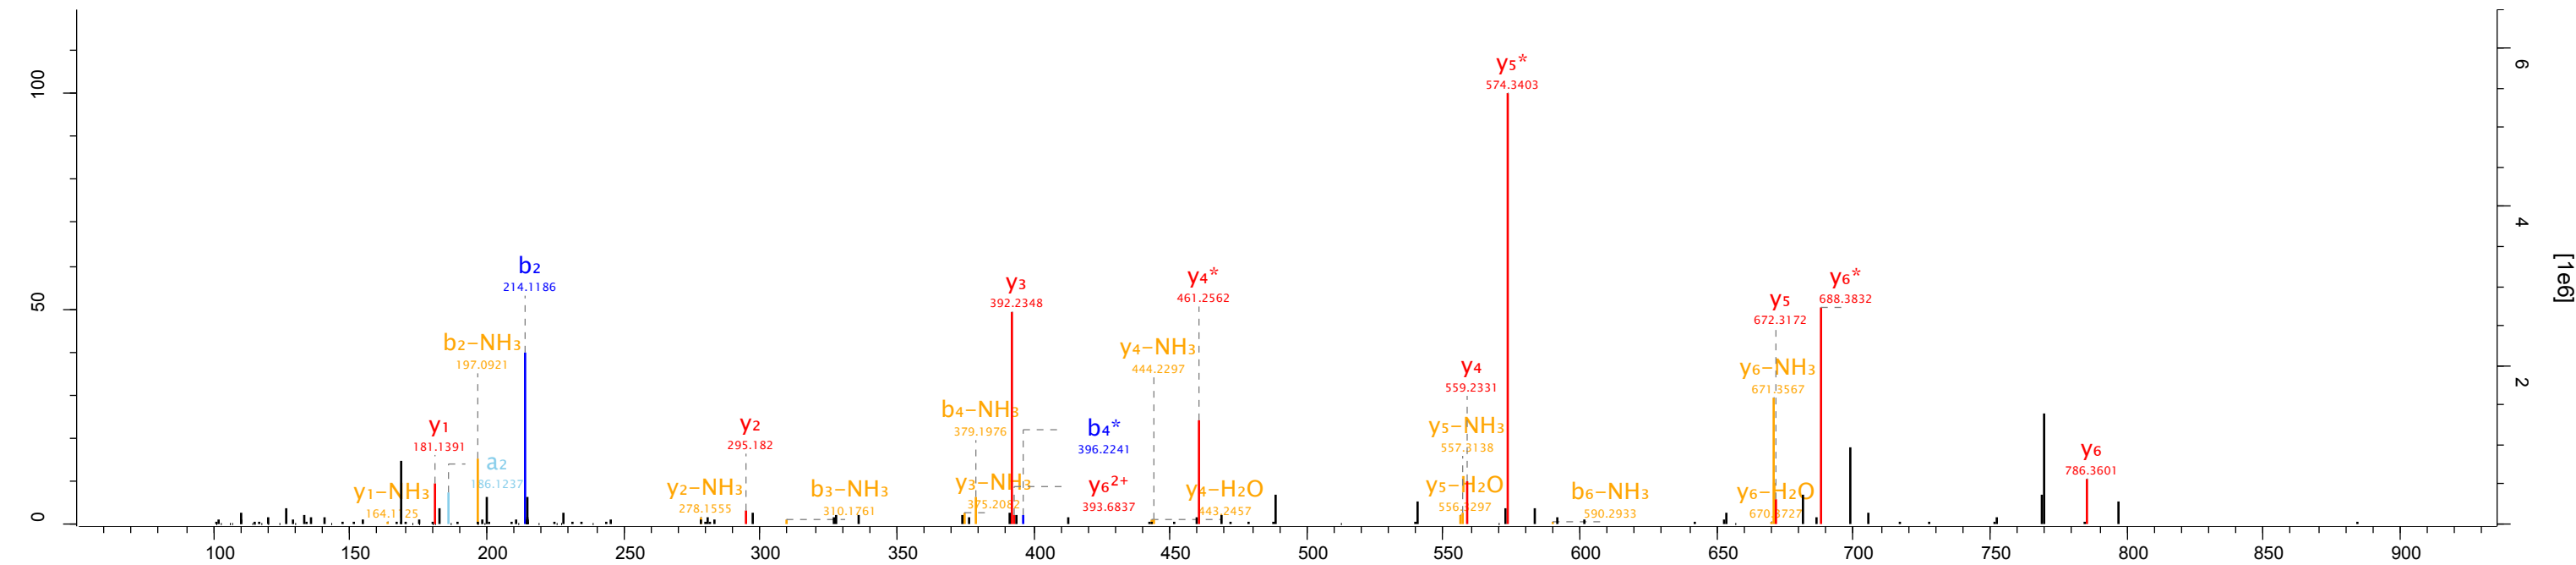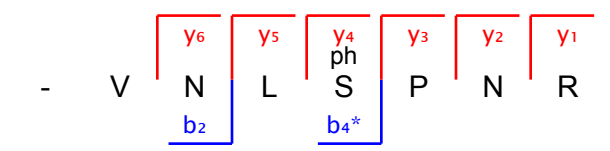



Raw file 20150812\_A375SR\_Phospho\_BR1\_06 Scan 8122 Method FTMS; HCD Score 275.65 m/z 863.87 Gene names SPECC1L;SPECC1L-ADORA2A

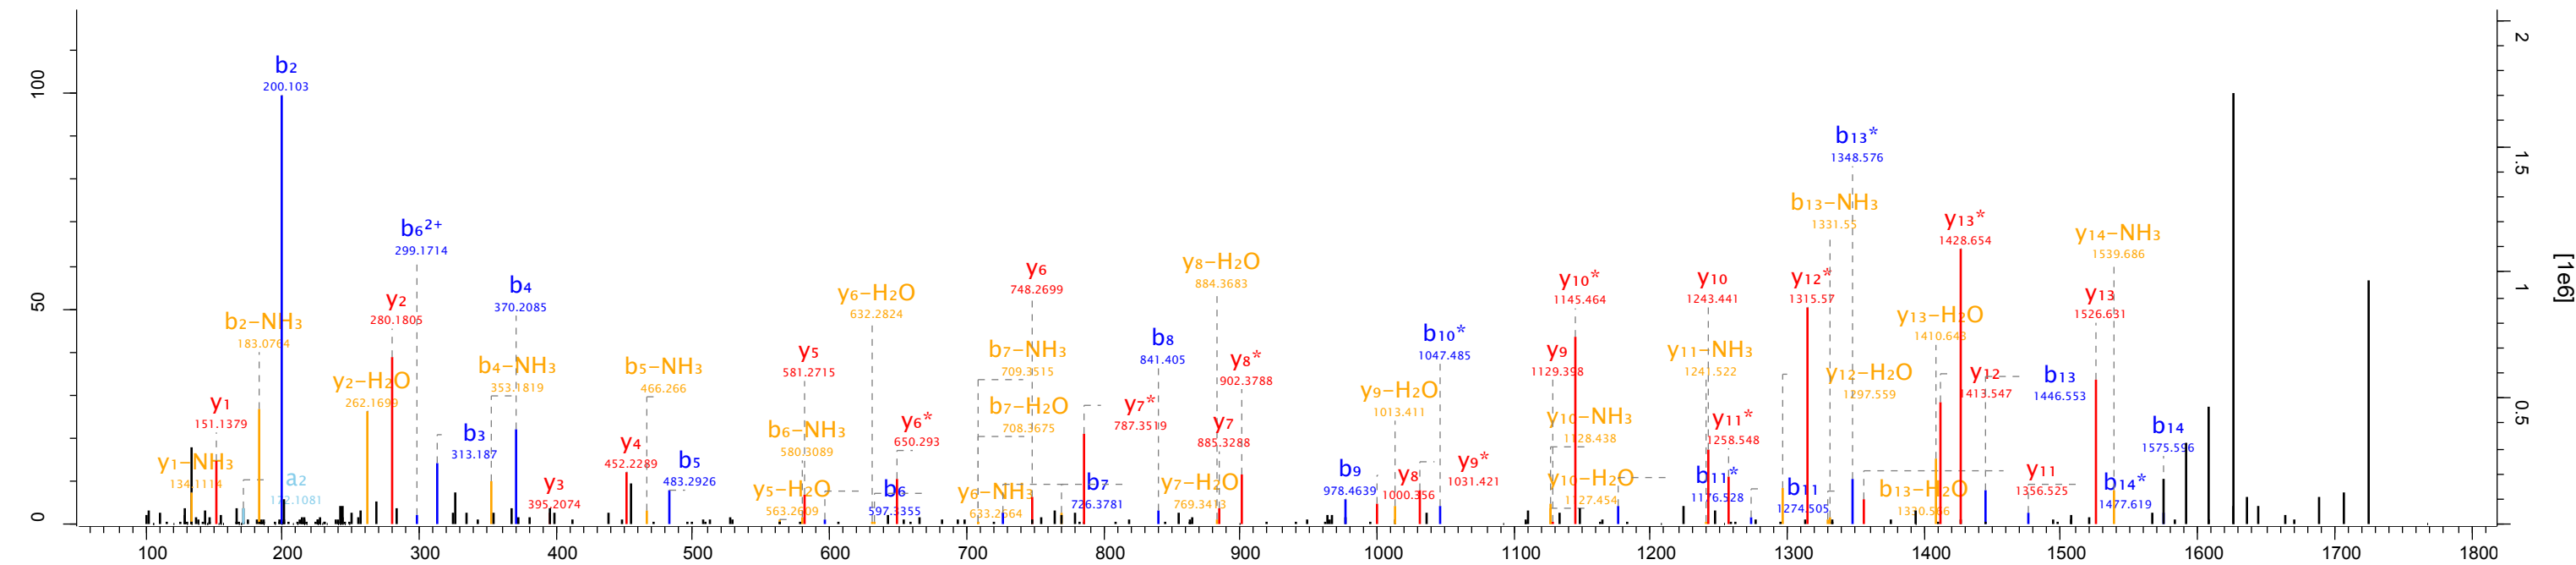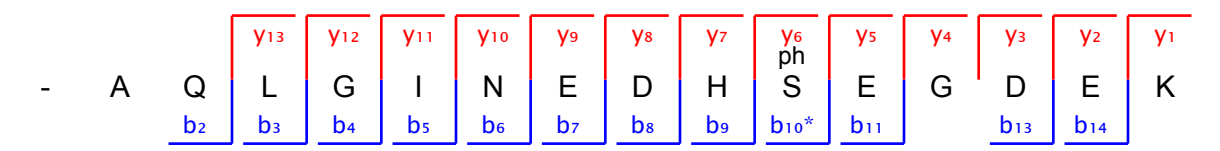

Raw file: 20150812\_A375SR\_Phospho\_BR1\_06  
 Scan: 8612 Method: FTMS; HCD Score: 66.5 m/z: 688.98 Gene names: MARK2

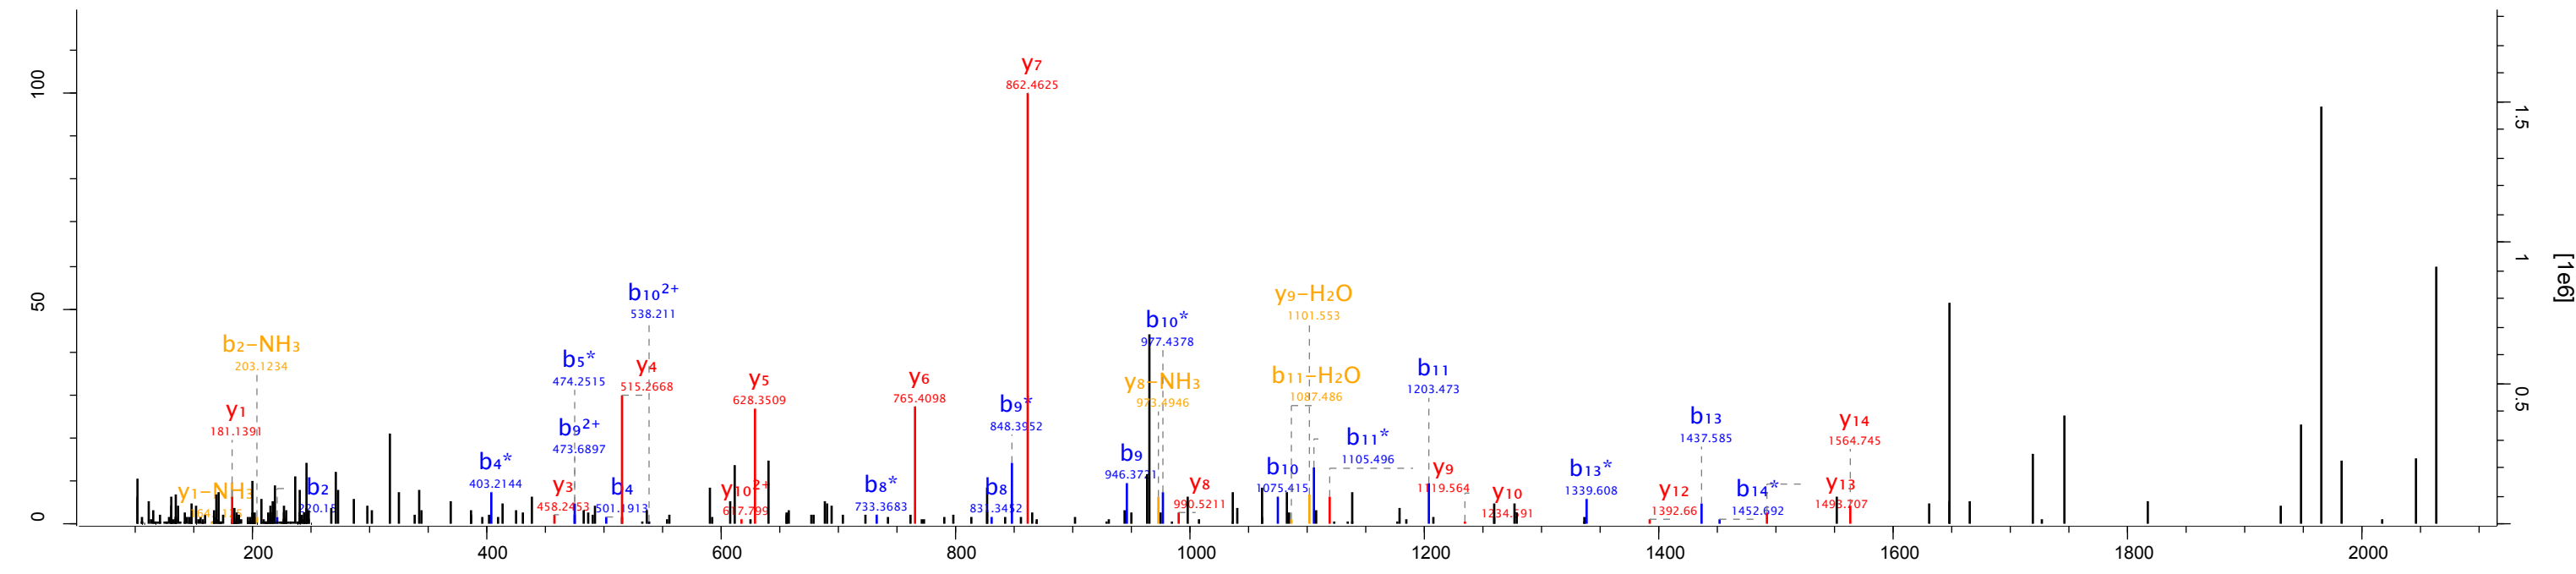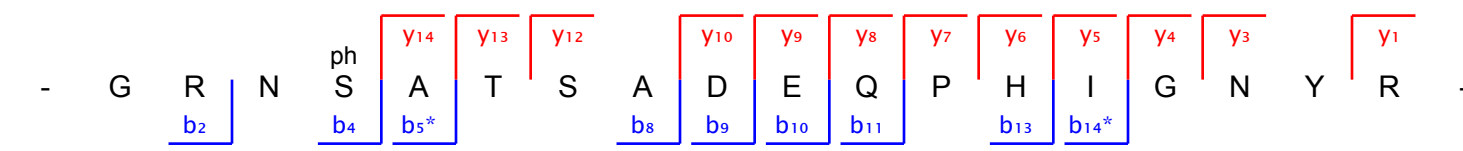

Raw file: 20150812\_A375SR\_Phospho\_BR1\_06  
 Scan: 9432 Method: FTMS; HCD Score: 211.11 m/z: 783.85 Gene names: NME1

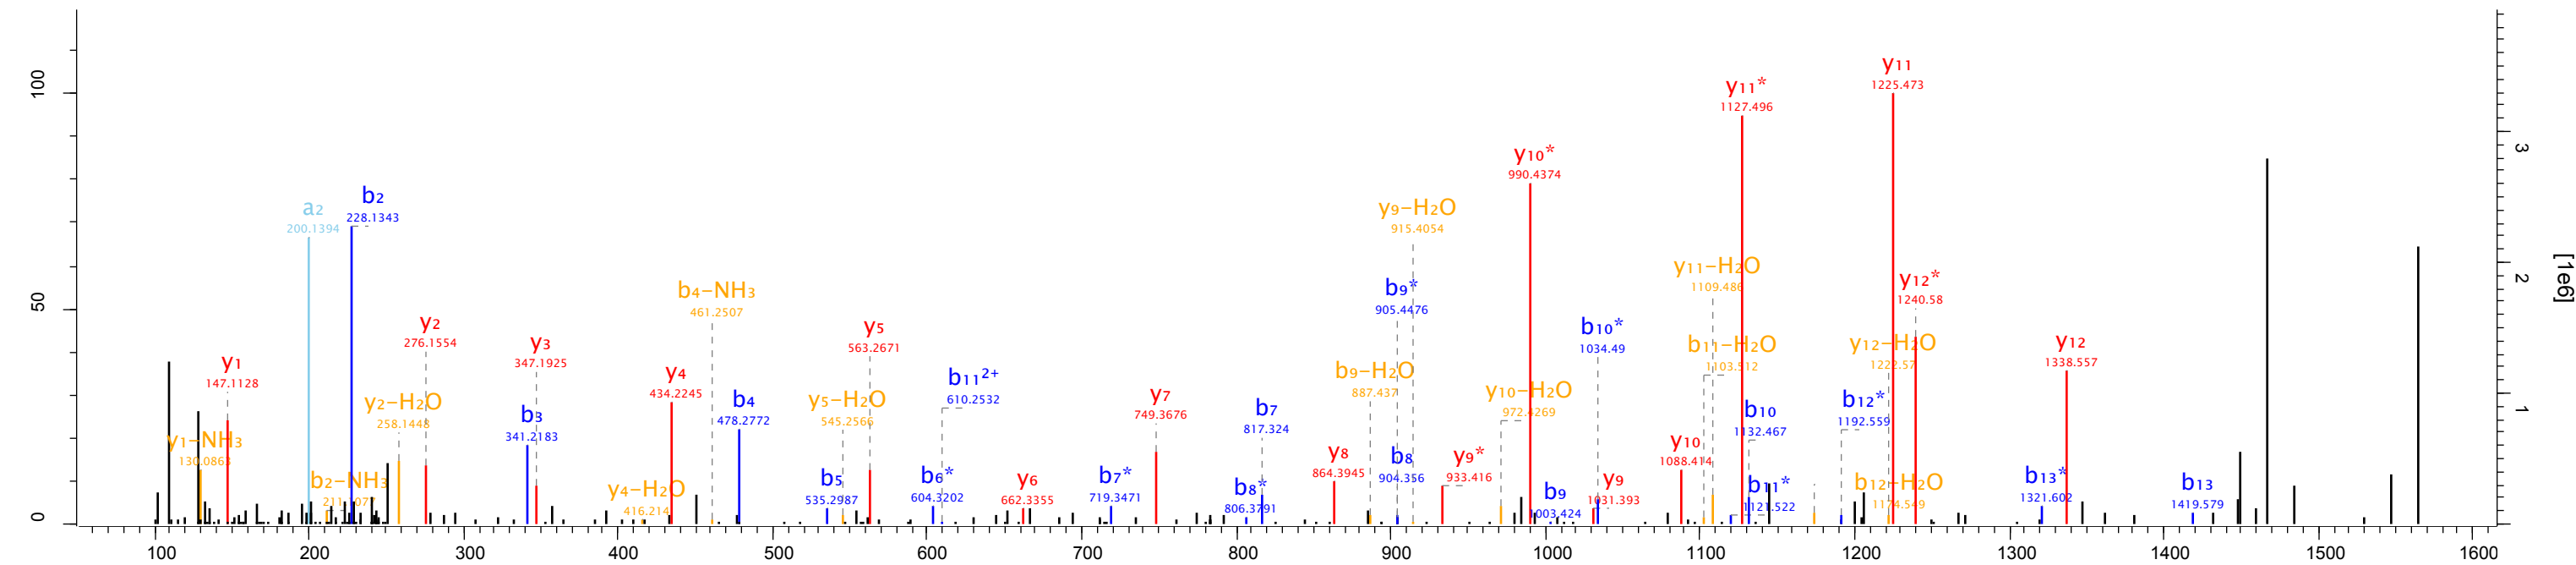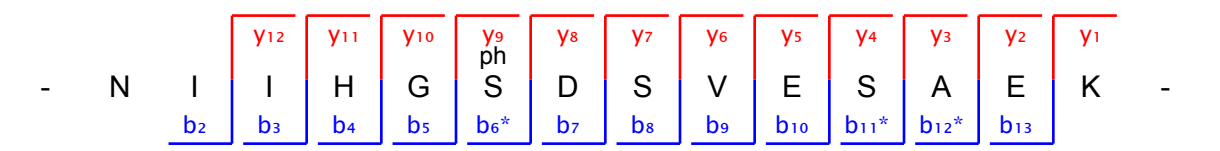

Raw file: 20150812\_A375SR\_Phospho\_BR1\_06  
 Scan: 9482 Method: FTMS; HCD Score: 235.76 m/z: 1004.94 Gene names: DEK

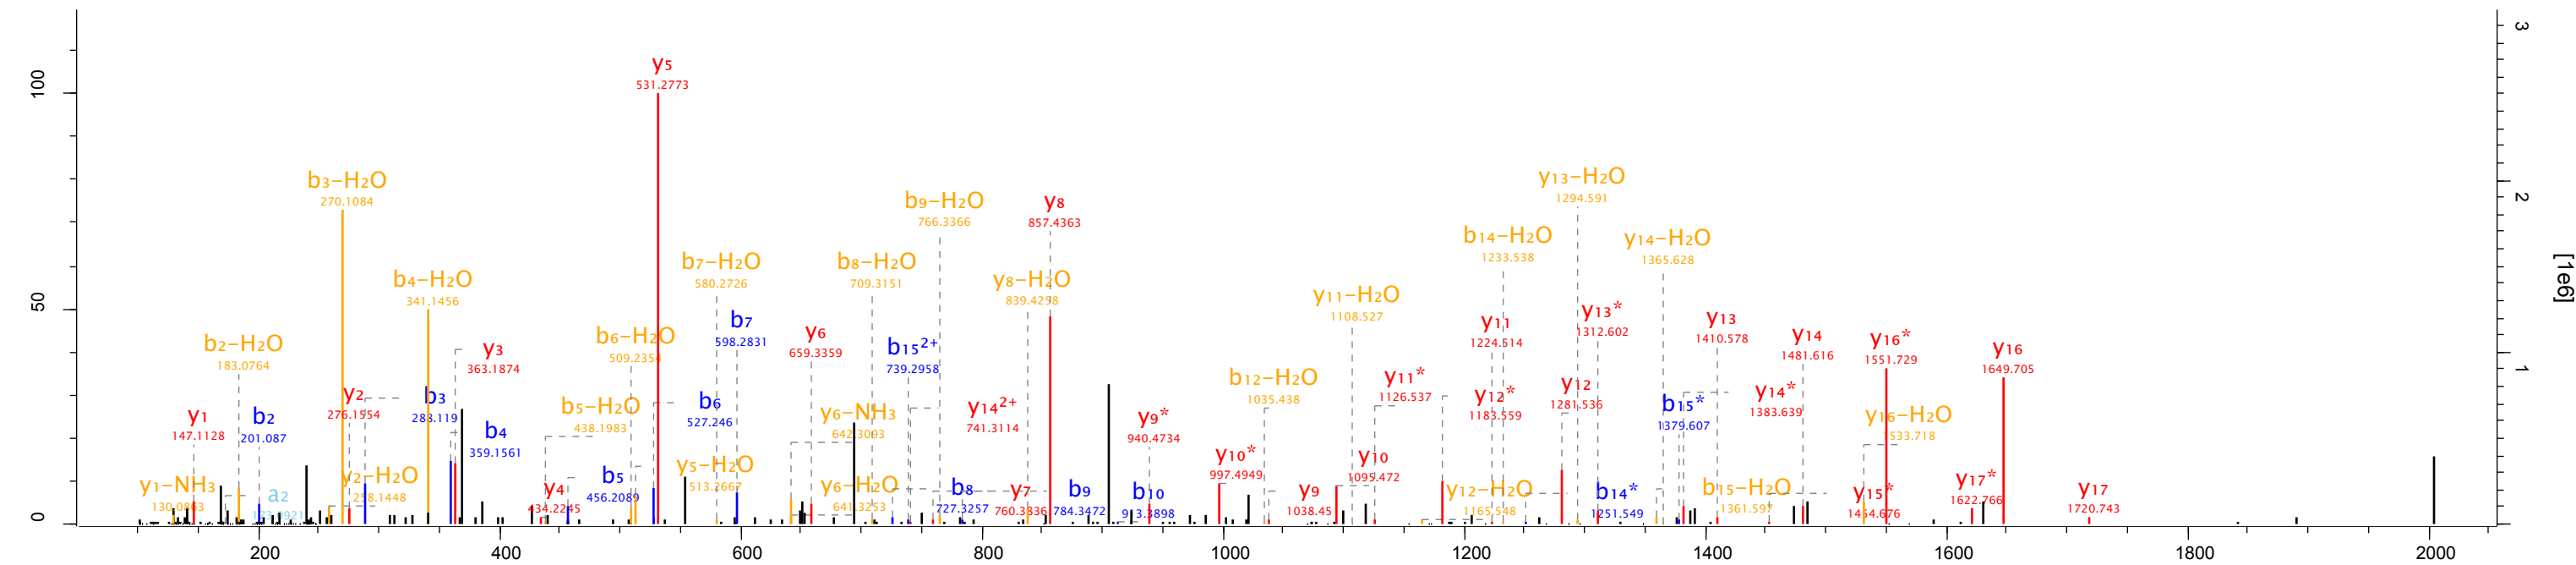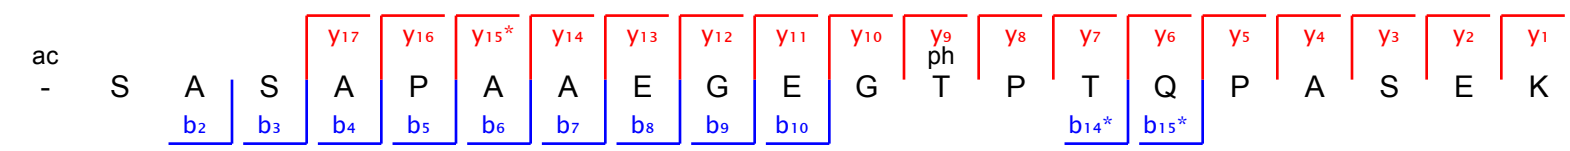

Raw file 20150812\_A375SR\_Phospho\_BR1\_07 Scan 13612 Method FTMS; HCD Score 162.61 m/z 920.94 Gene names SNAPIN

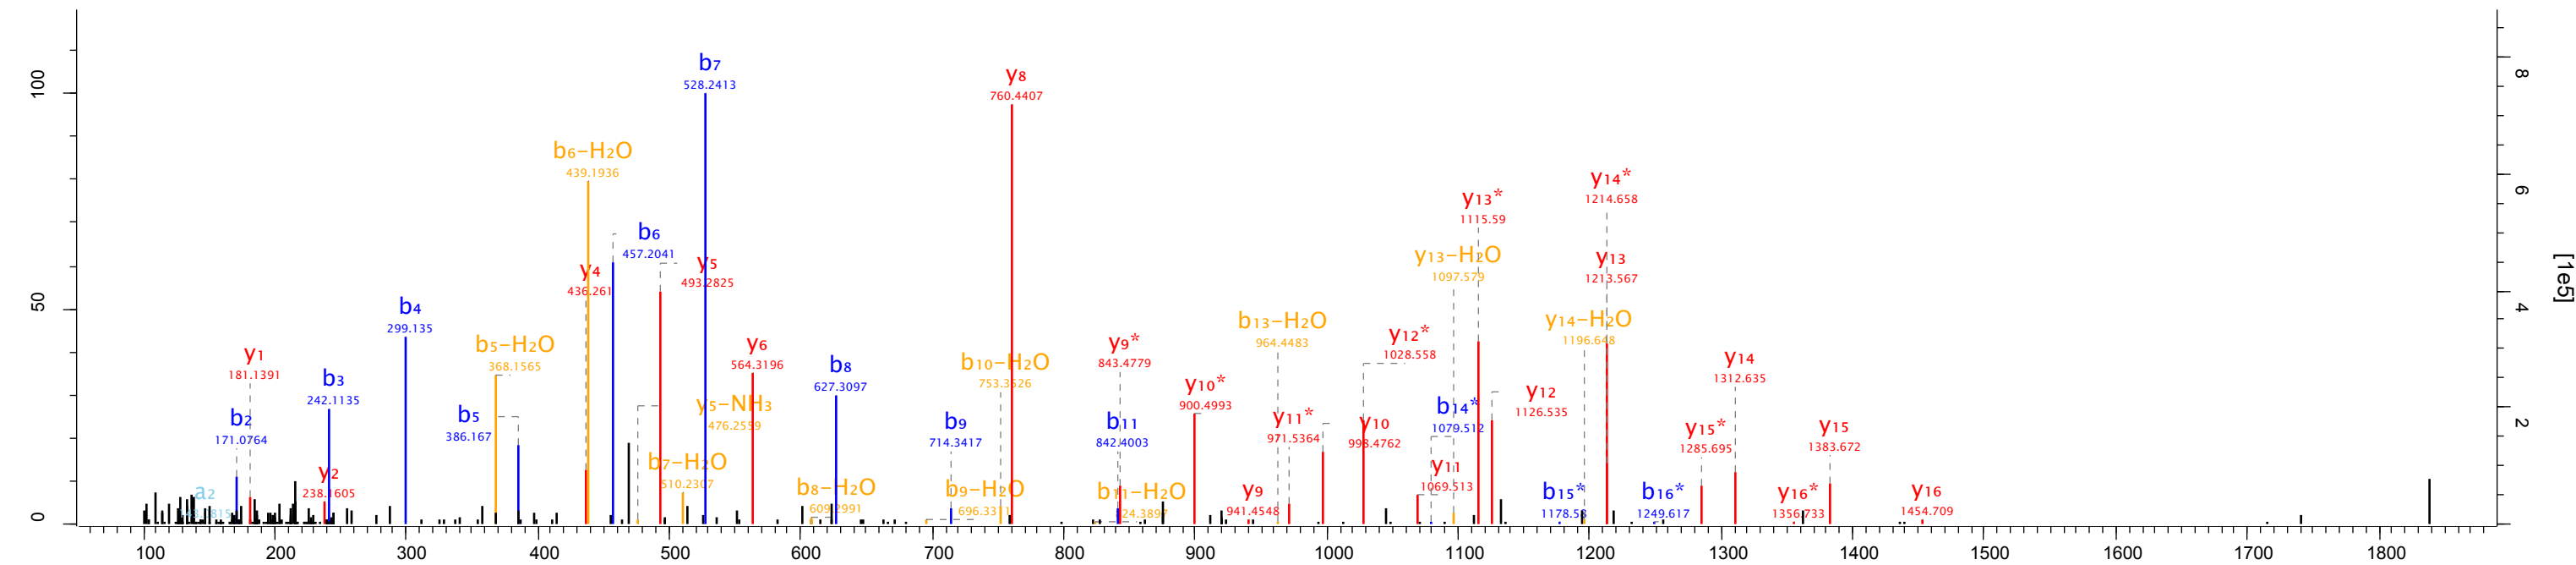

ac - A G A G S A A V S G A G T P V A G P T G R -

b<sub>2</sub>
b<sub>3</sub>
b<sub>4</sub>
b<sub>5</sub>
y<sub>16</sub>
y<sub>15</sub>
y<sub>14</sub>
y<sub>13</sub>
y<sub>12</sub>
y<sub>11</sub>
y<sub>10</sub>
y<sub>9</sub>  
ph
y<sub>8</sub>
y<sub>6</sub>
y<sub>5</sub>
y<sub>4</sub>
y<sub>2</sub>
y<sub>1</sub>

b<sub>14</sub>\*
b<sub>15</sub>\*
b<sub>16</sub>\*

Raw file 20150812\_A375SR\_Phospho\_BR1\_07 Scan 18912 Method FTMS; HCD Score 122.29 m/z 748.4 Gene names GAPDH

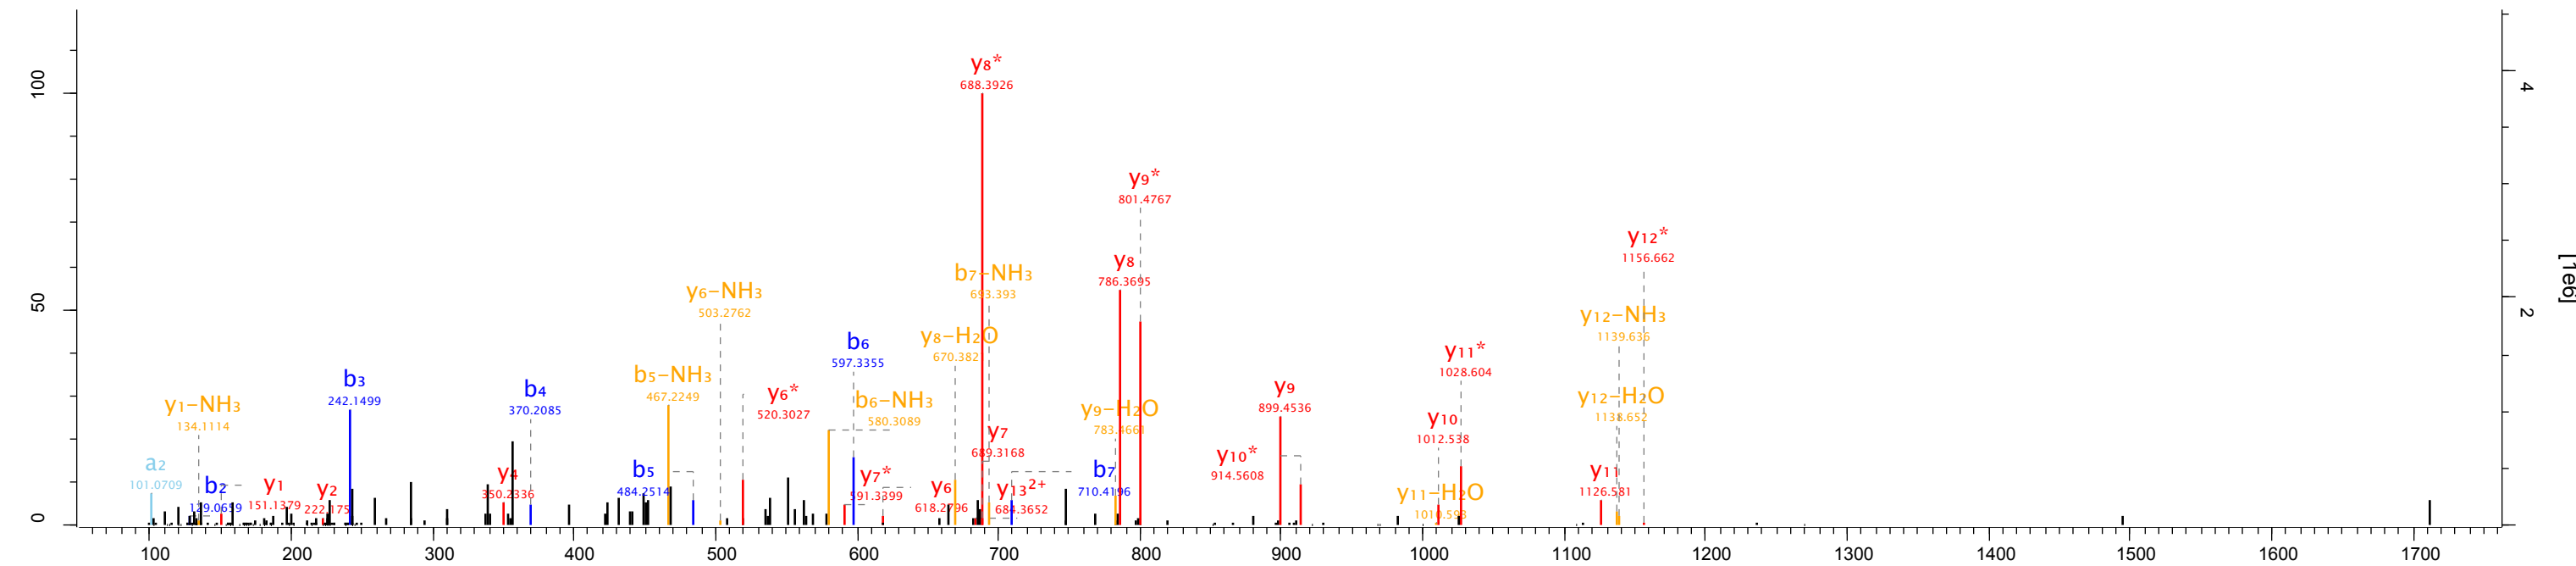

- G A A L Q N I I P A S T G A A K -

Fragmentation mapping: b2 (A), b3 (L), b4 (Q), b5 (N), b6 (I), b7 (I), y1 (K), y2 (A), y3 (A), y4 (G), y5 (S), y6 (A), y7 (P), y8 (I), y9 (I), y10 (N), y11 (Q), y12 (L), y13 (A), y13<sup>2+</sup> (A).

Raw file 20150812\_A375SR\_Phospho\_BR1\_07 Scan 19562 Method FTMS; HCD Score 189.84 m/z 1045.99 Gene names AKAP2

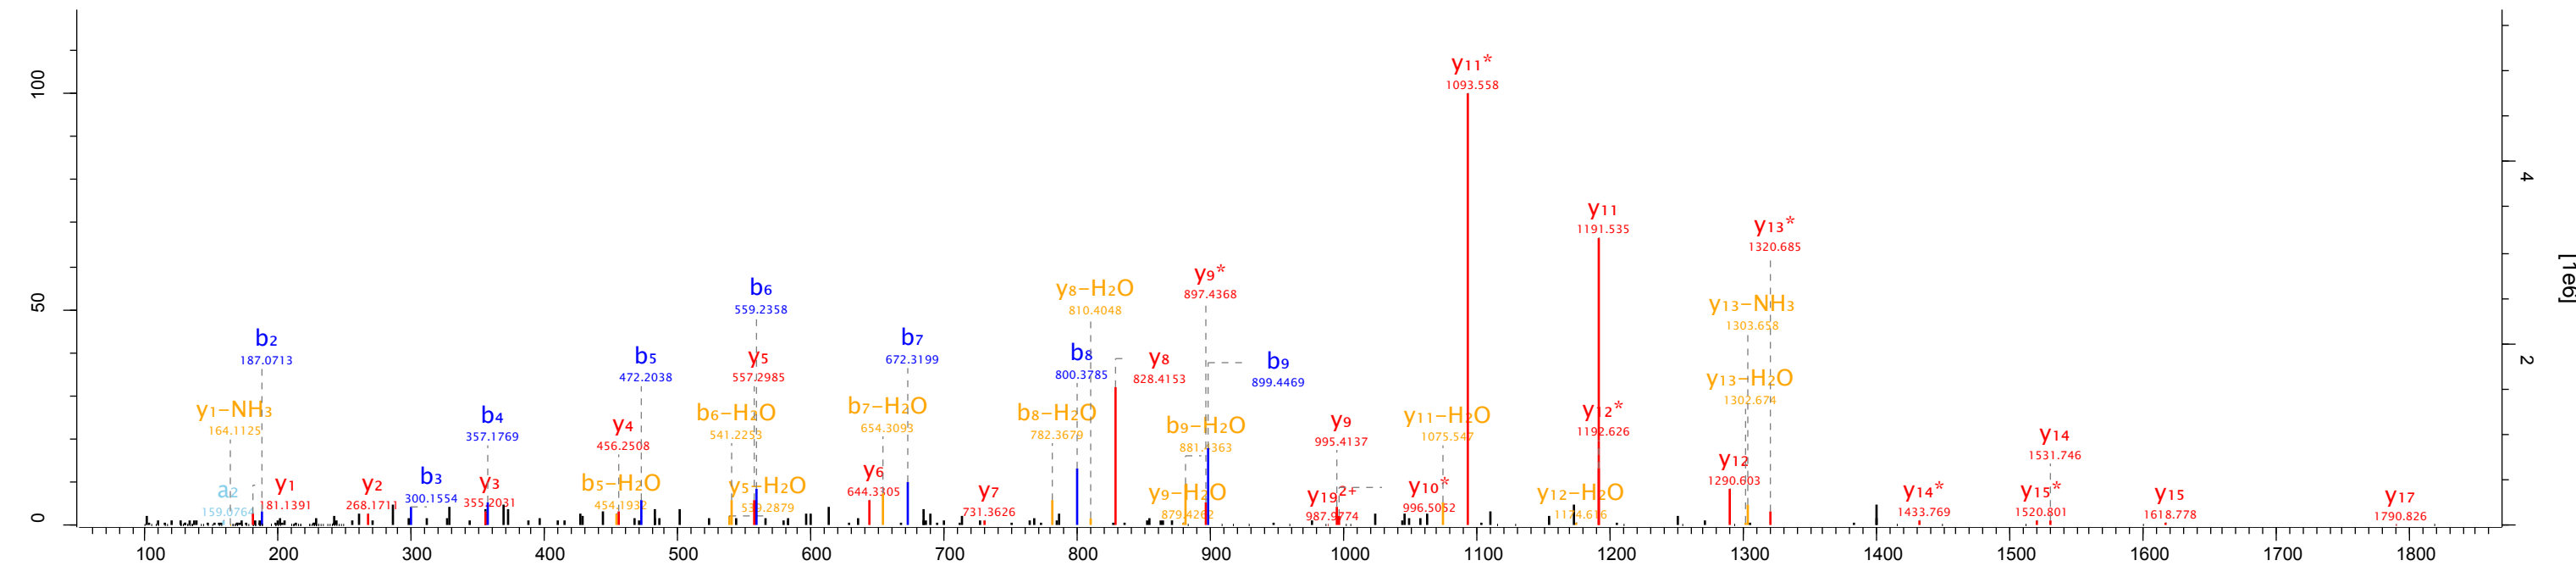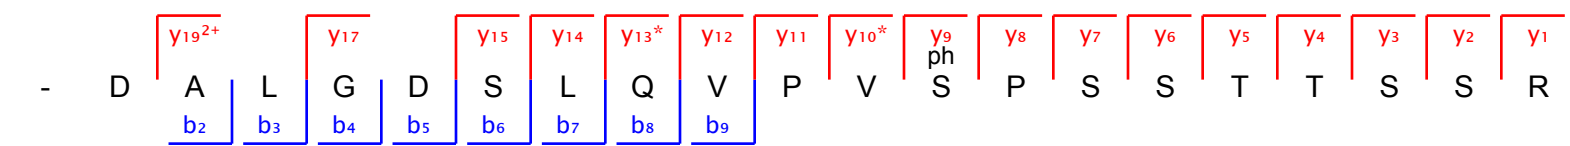

Raw file 20150812\_A375SR\_Phospho\_BR1\_07 Scan 21232 Method FTMS; HCD Score 158.98 m/z 838.75 Gene names GAPVD1

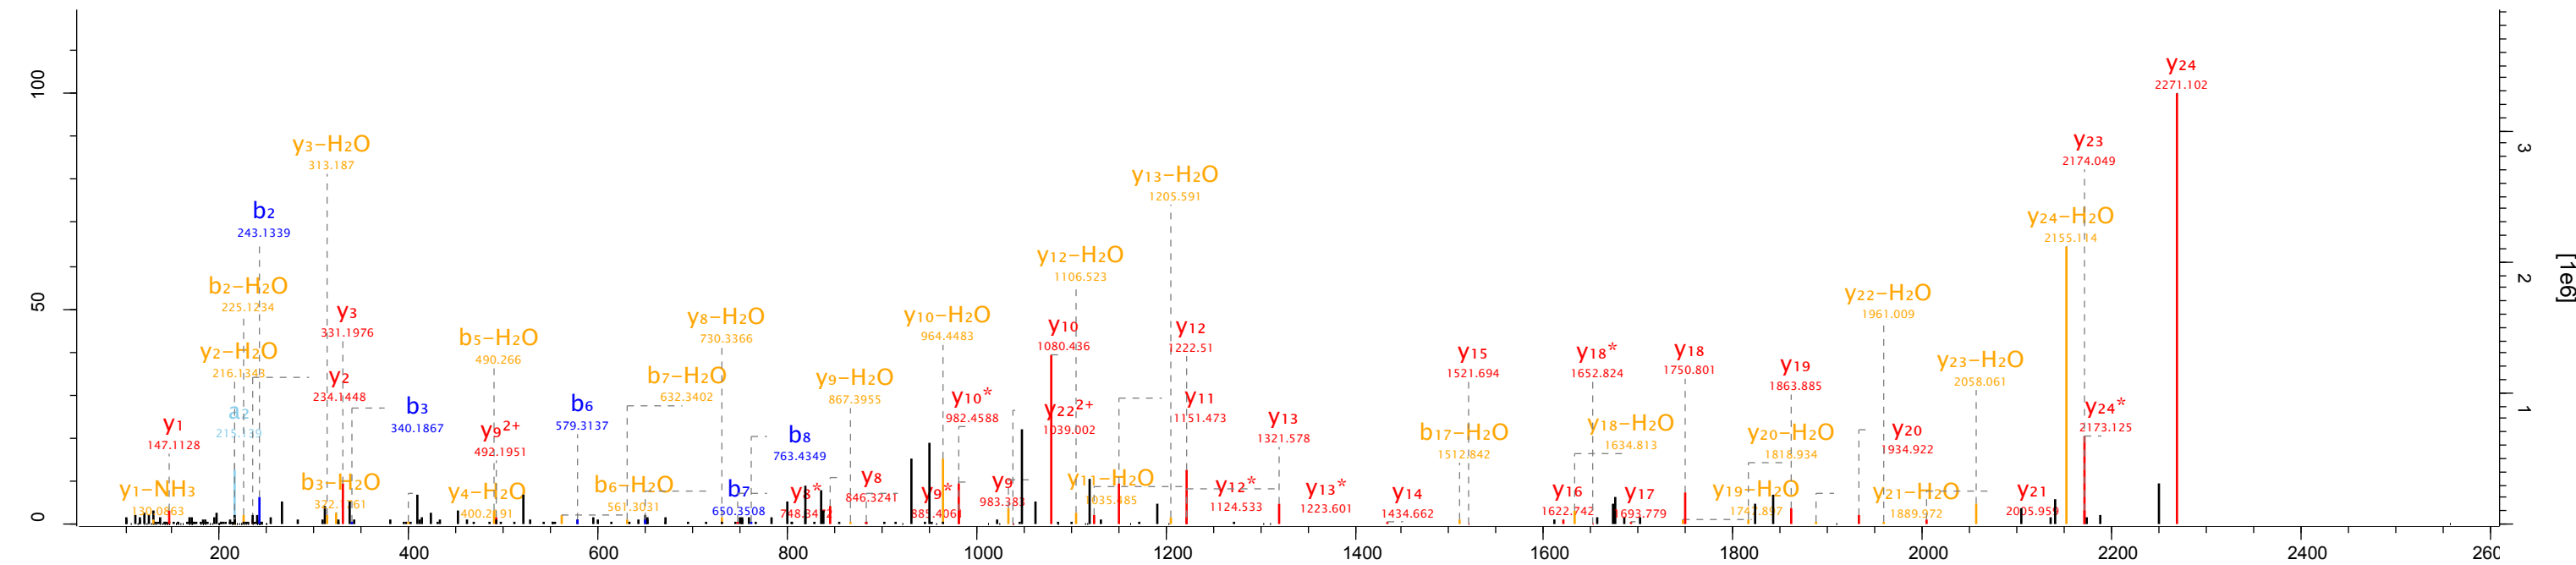

- E L P P A A A I G A T S L V A A P H S S S S P S K -

Fragmentation mapping: b2 (L), b3 (P), b6 (A), b7 (A), b8 (A) are highlighted in blue. y1 (K), y2 (S), y3 (P), y8 (S), y9 (H), y10 (P), y11 (A), y12 (A), y13 (V), y14 (L), y15 (S), y16 (T), y17 (A), y18 (G), y19 (I), y20 (A), y21 (A), y22<sup>2+</sup> (P), y23 (P), y24 (L) are highlighted in red.



Raw file  
 20150812\_A375SR\_Phospho\_BR1\_07  
 Scan 22792 Method FTMS; HCD Score 134.76 m/z 811.43 Gene names MAP4

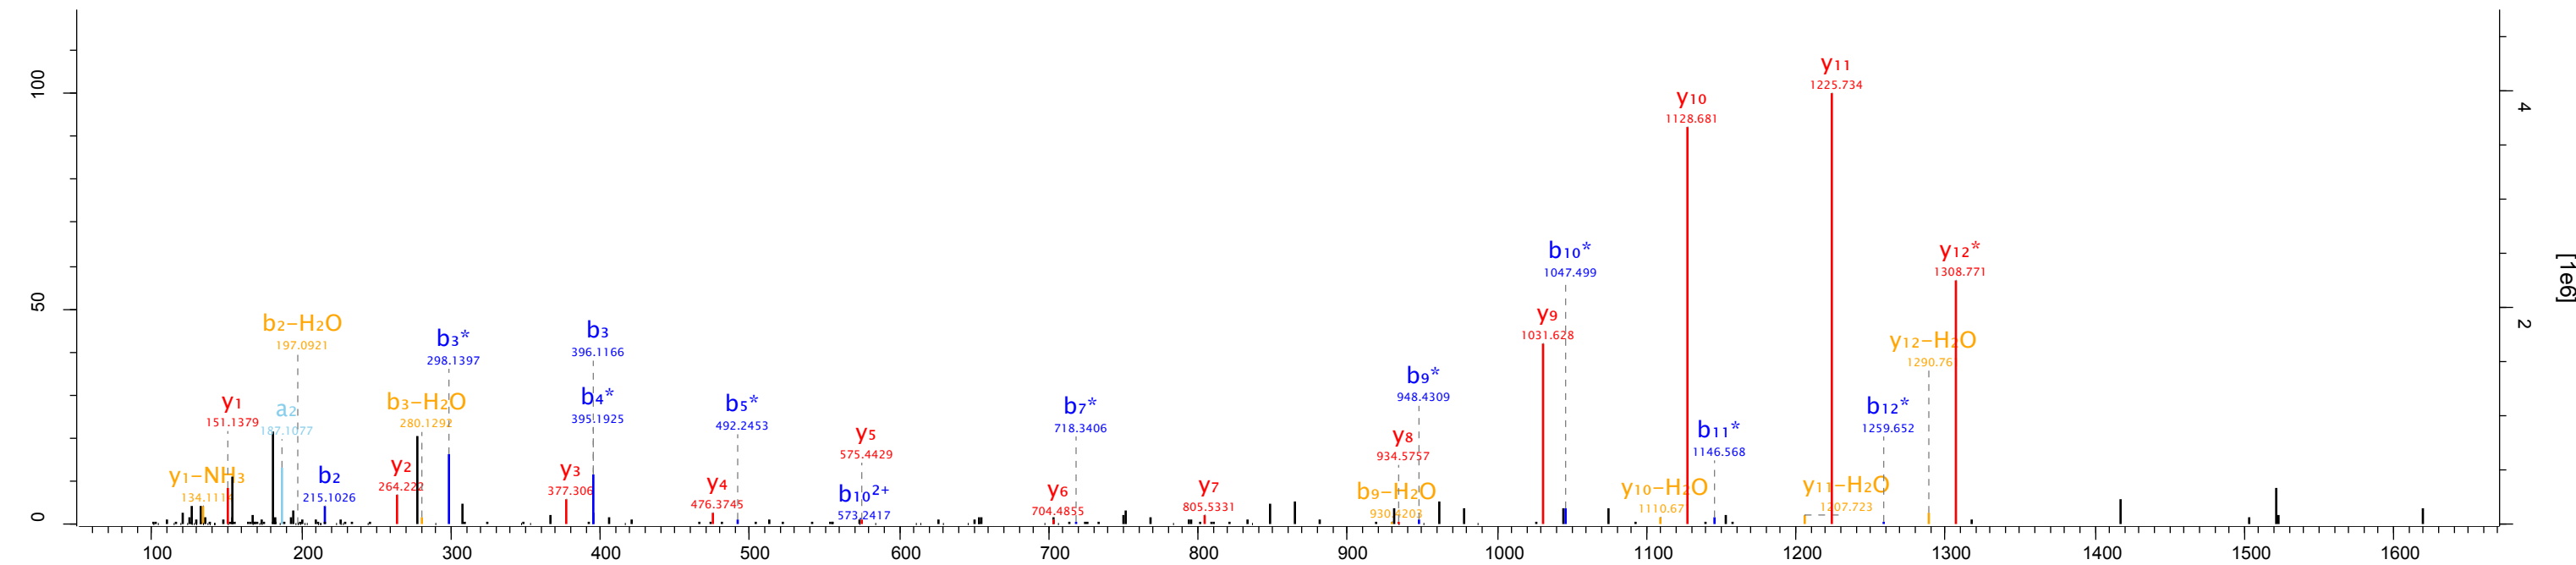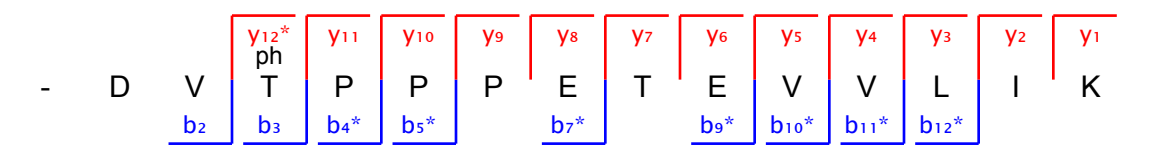

Raw file Scan Method Score m/z Gene names  
 20150812\_A375SR\_Phospho\_BR1\_07 23212 FTMS; HCD 343.87 1144.07 PGM1

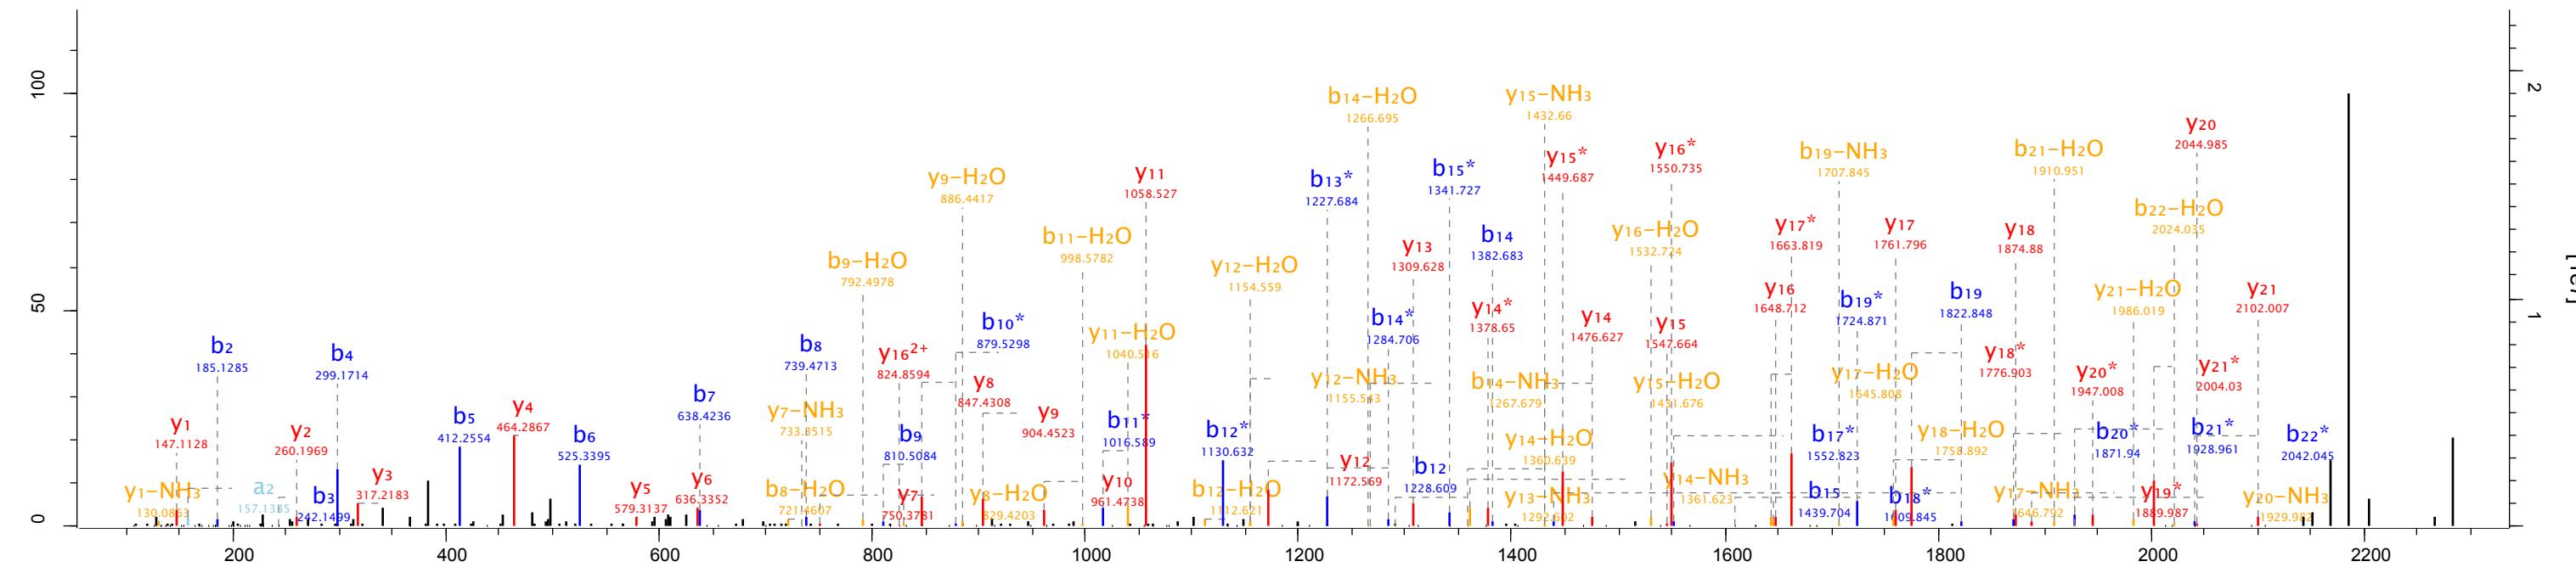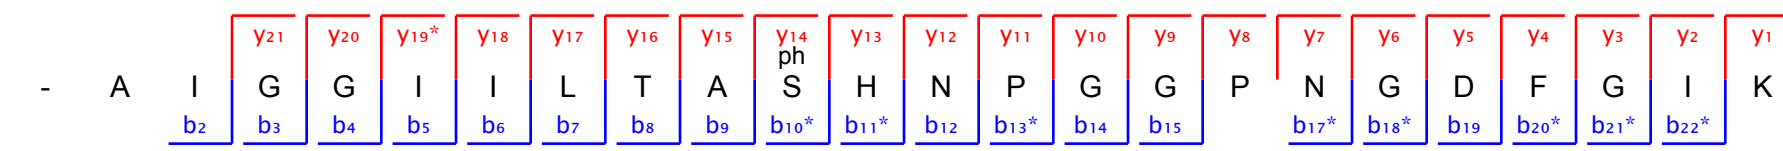

Raw file: 20150812\_A375SR\_Phospho\_BR1\_07  
 Scan: 4542 Method: FTMS; HCD Score: 173.57 m/z: 512.24 Gene names: ANKRD54

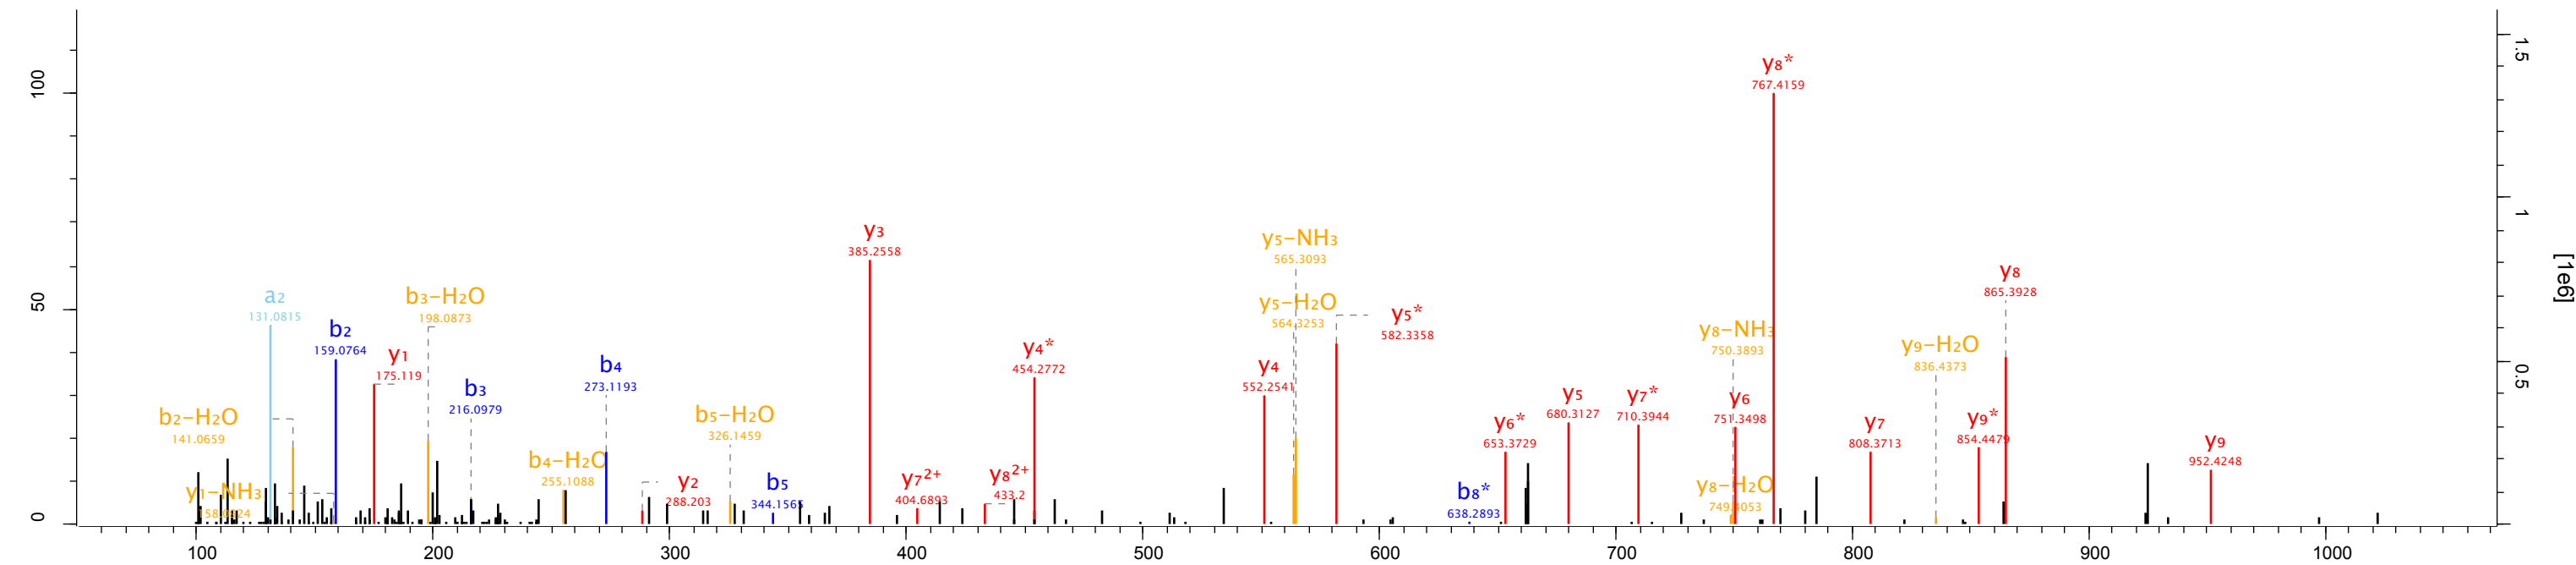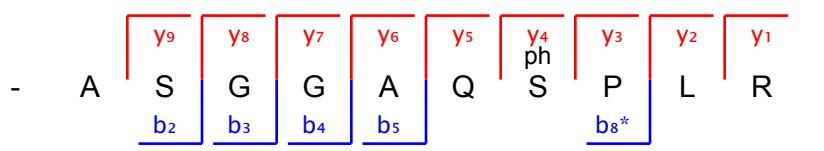

Raw file: 20150812\_A375SR\_Phospho\_BR1\_07  
 Scan: 5992 Method: FTMS; HCD Score: 210.43 m/z: 551.24 Gene names: BRD7

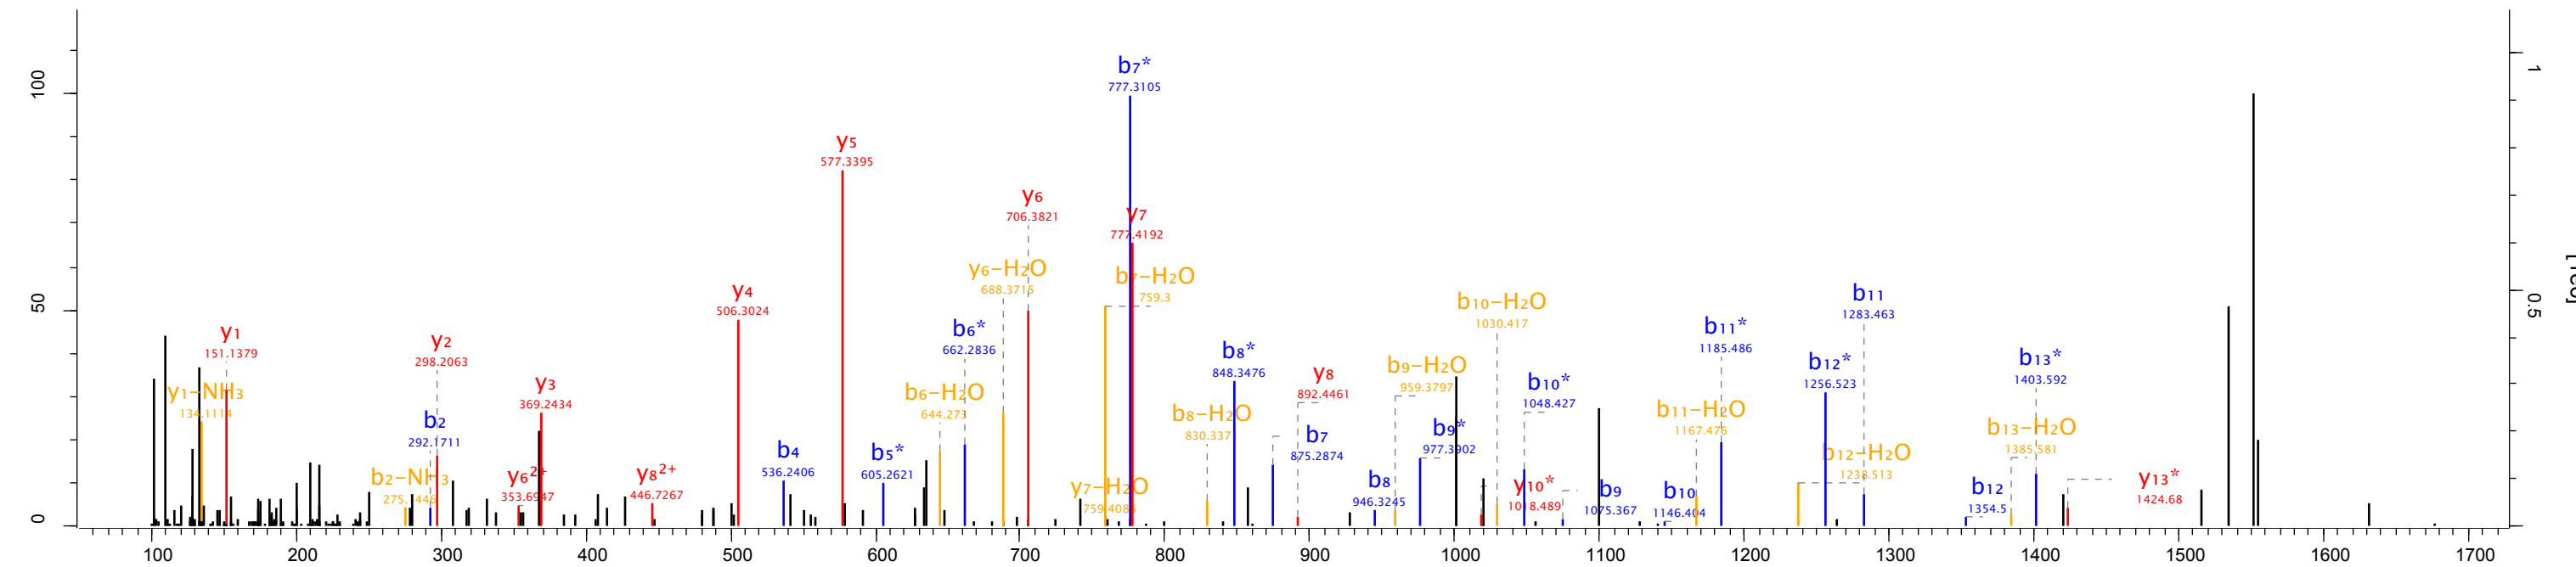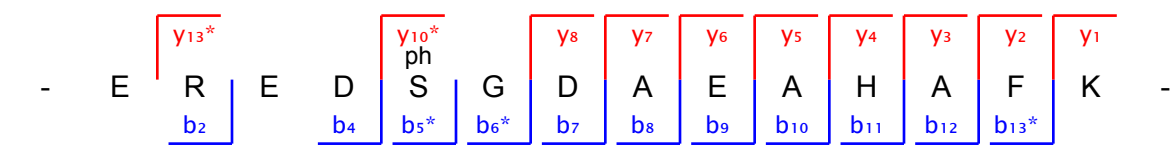



Raw file: 20150812\_A375SR\_Phospho\_BR1\_07  
 Scan: 9712 Method: FTMS; HCD Score: 174.48 m/z: 619.31 Gene names: BUB1

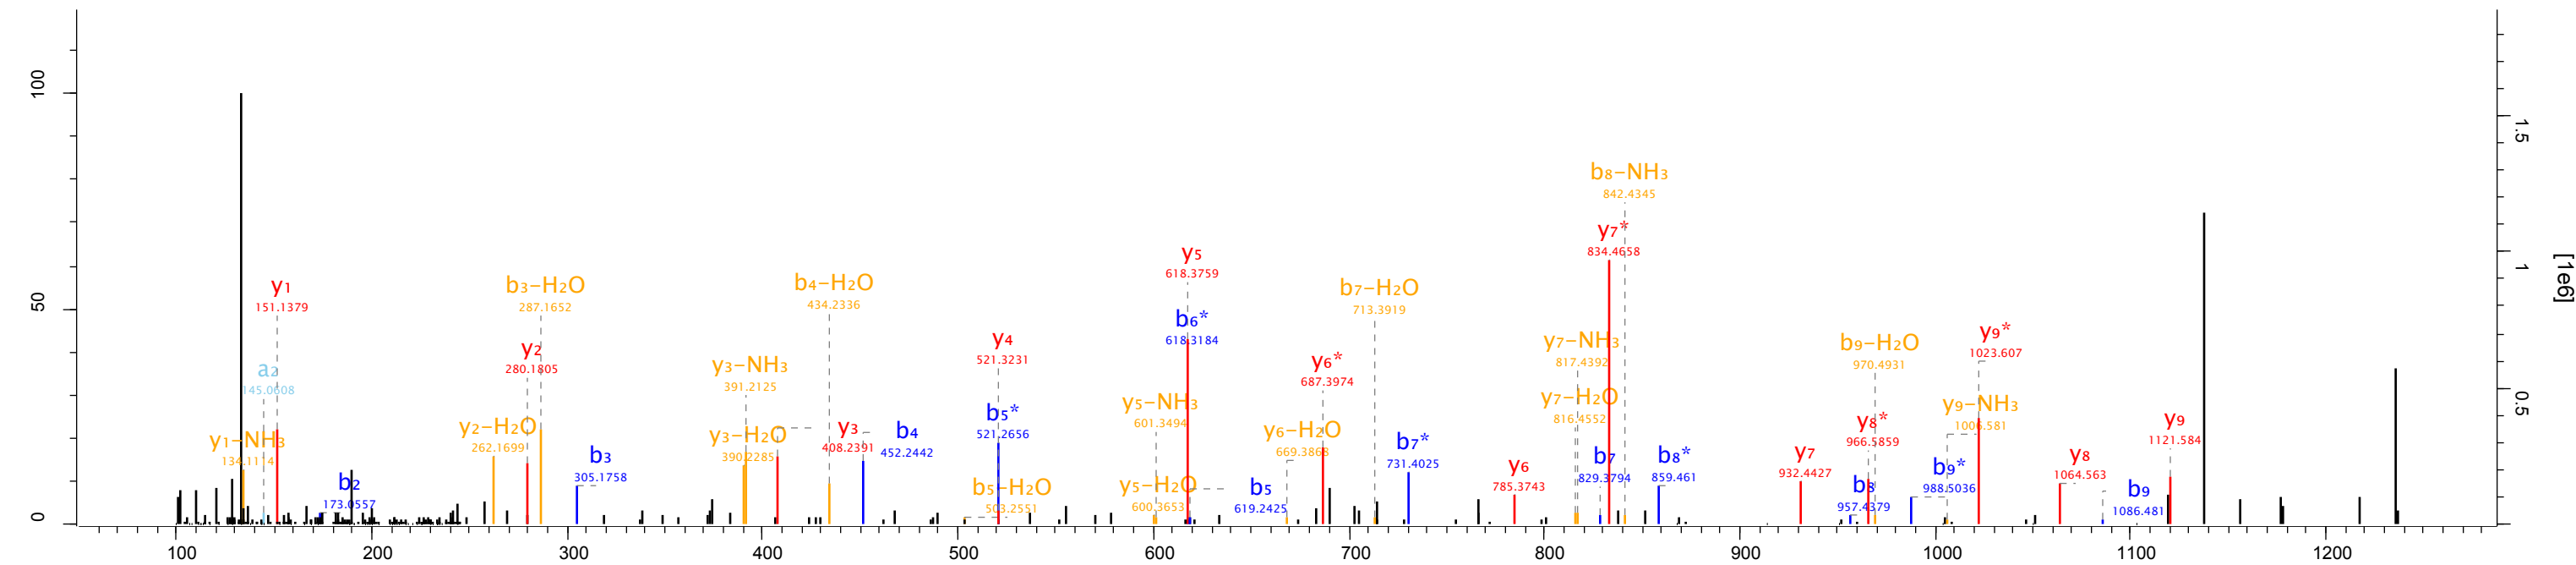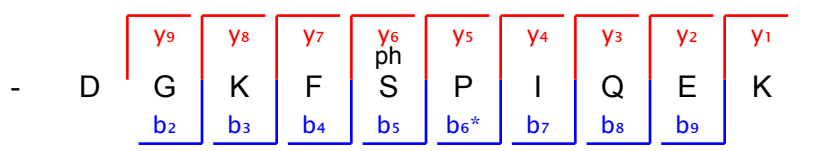

Raw file: 20150812\_A375SR\_Phospho\_BR1\_08  
 Scan: 10552 Method: FTMS; HCD Score: 233.02 m/z: 687.31 Gene names: RAD18

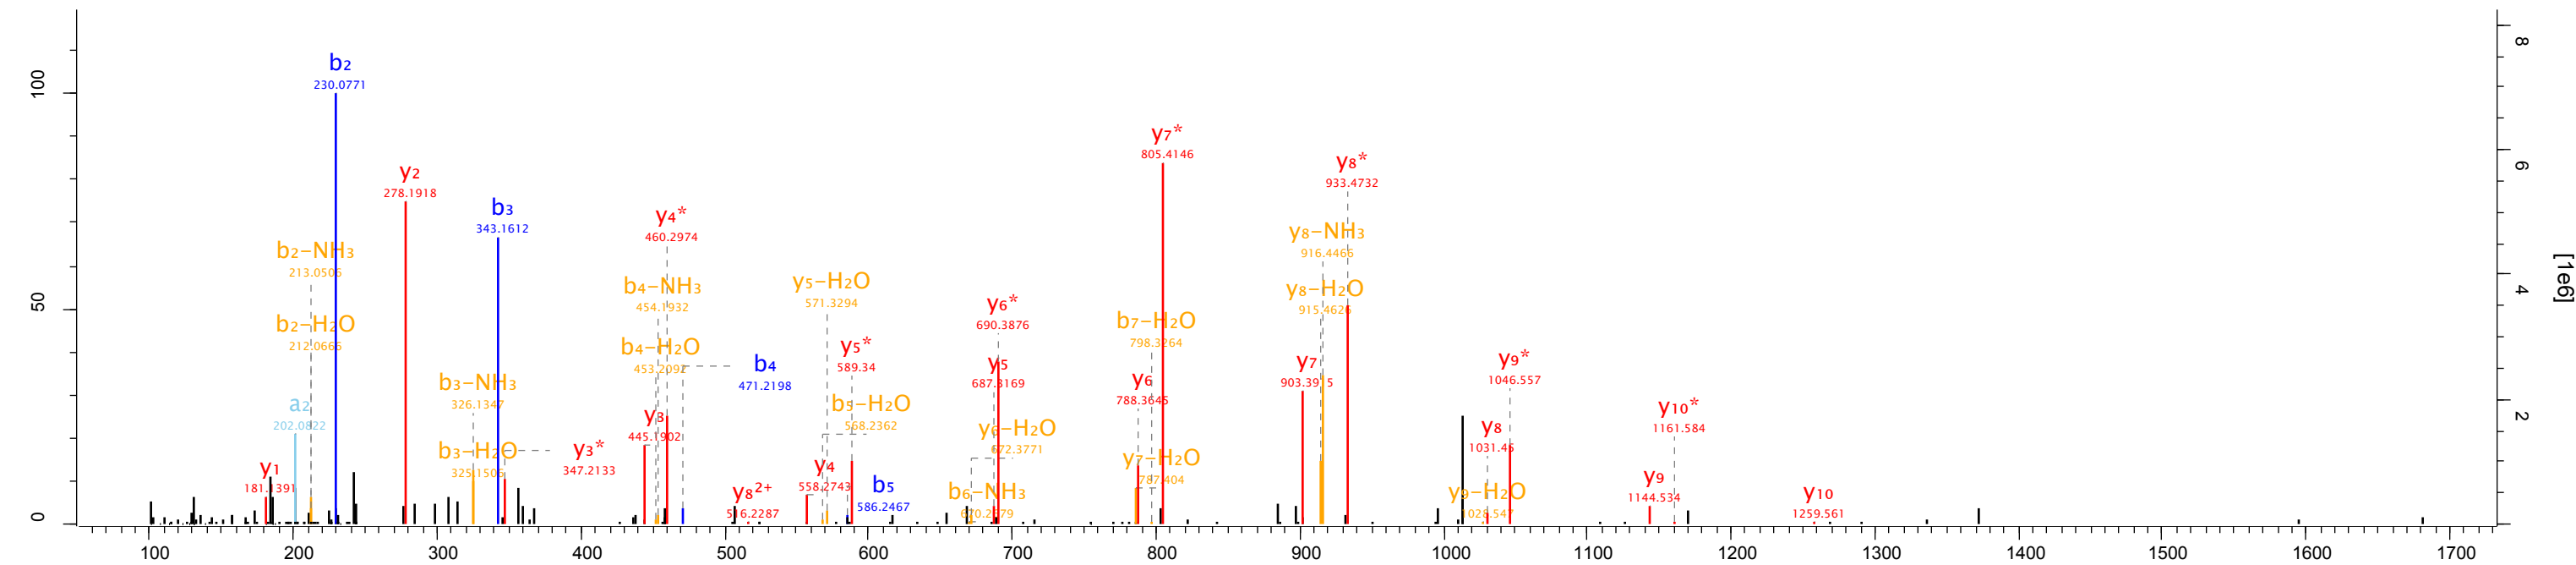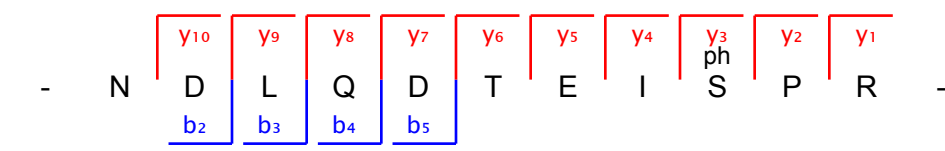

Raw file: 20150812\_A375SR\_Phospho\_BR1\_08  
 Scan: 11532 Method: FTMS; HCD Score: 149.74 m/z: 719.32 Gene names: NCKAP5L

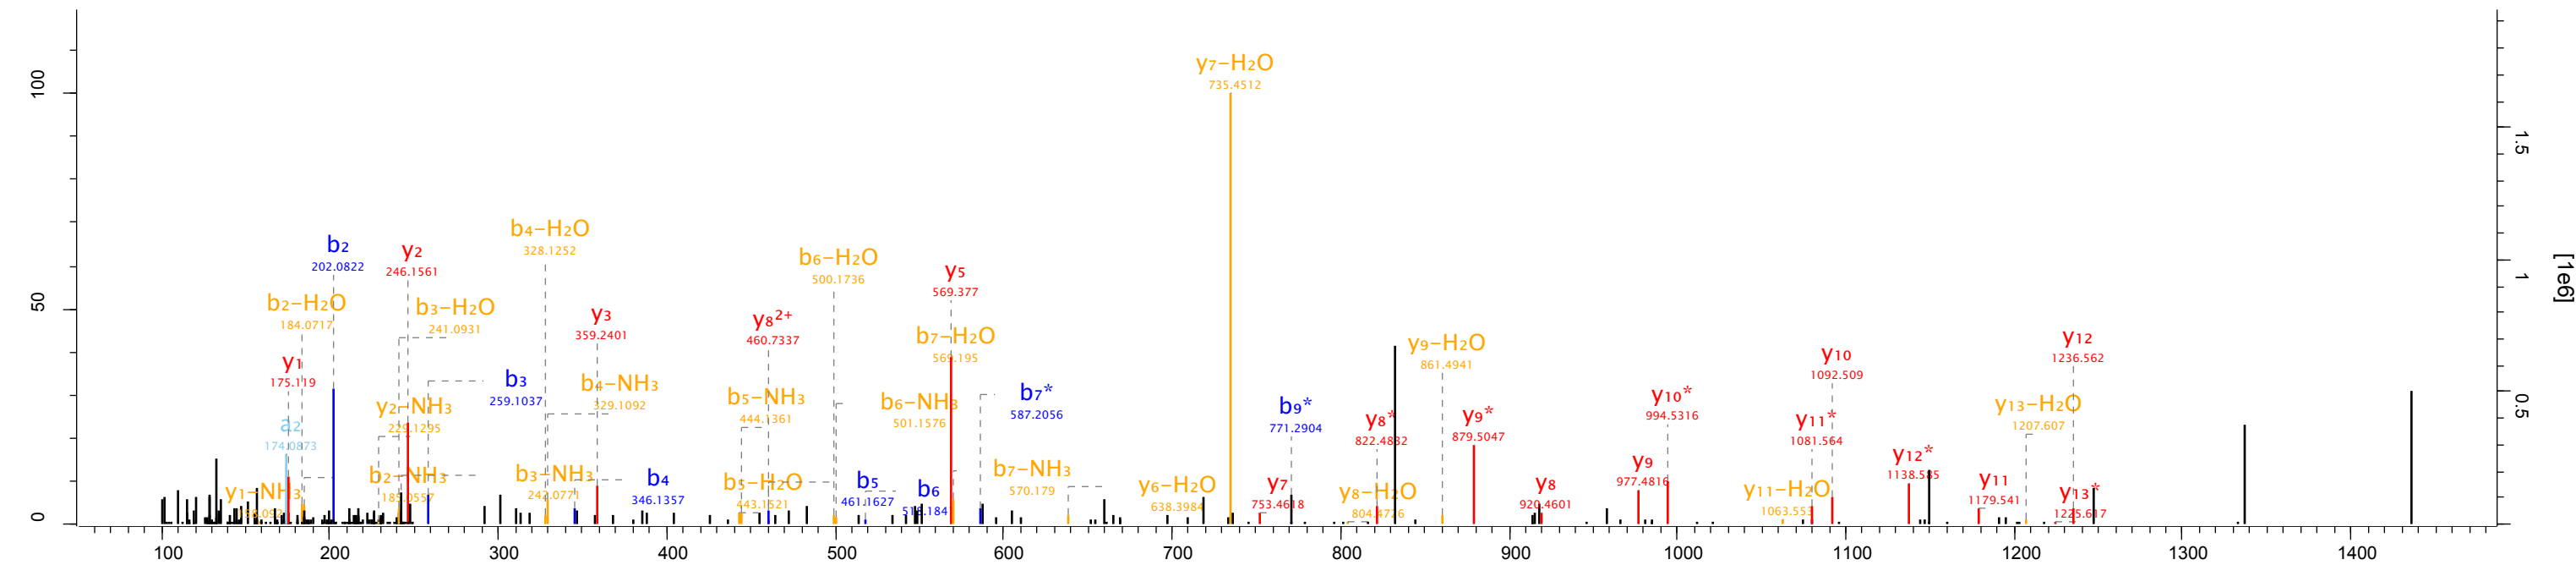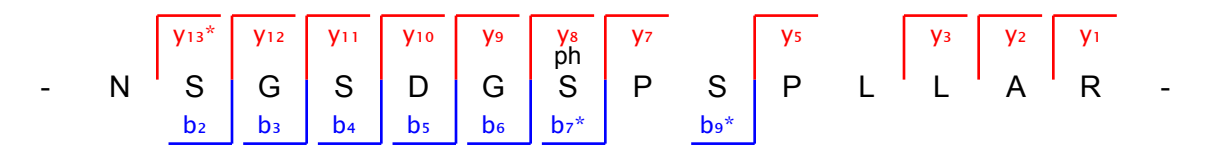



Raw file 20150812\_A375SR\_Phospho\_BR1\_08 Scan 11972 Method FTMS; HCD Score 86.37 m/z 663.33 Gene names KLC1

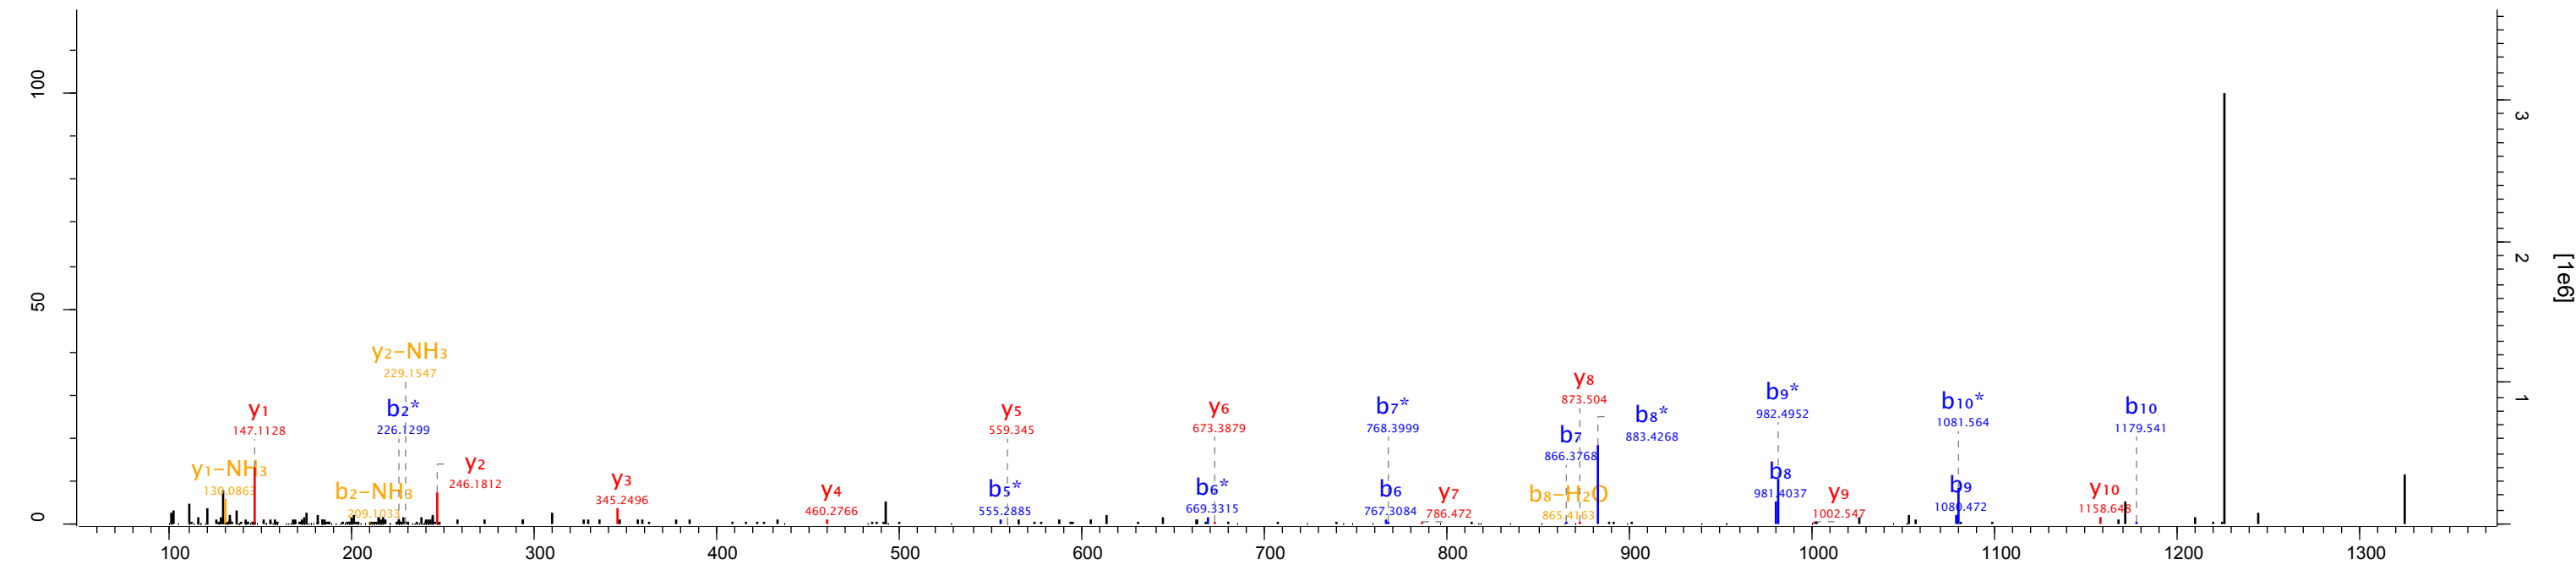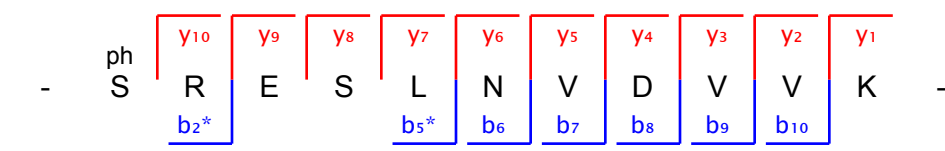

Raw file: 20150812\_A375SR\_Phospho\_BR1\_08  
 Scan: 11982 Method: FTMS; HCD Score: 121.58 m/z: 684.29 Gene names: GSK3A;GSK3B

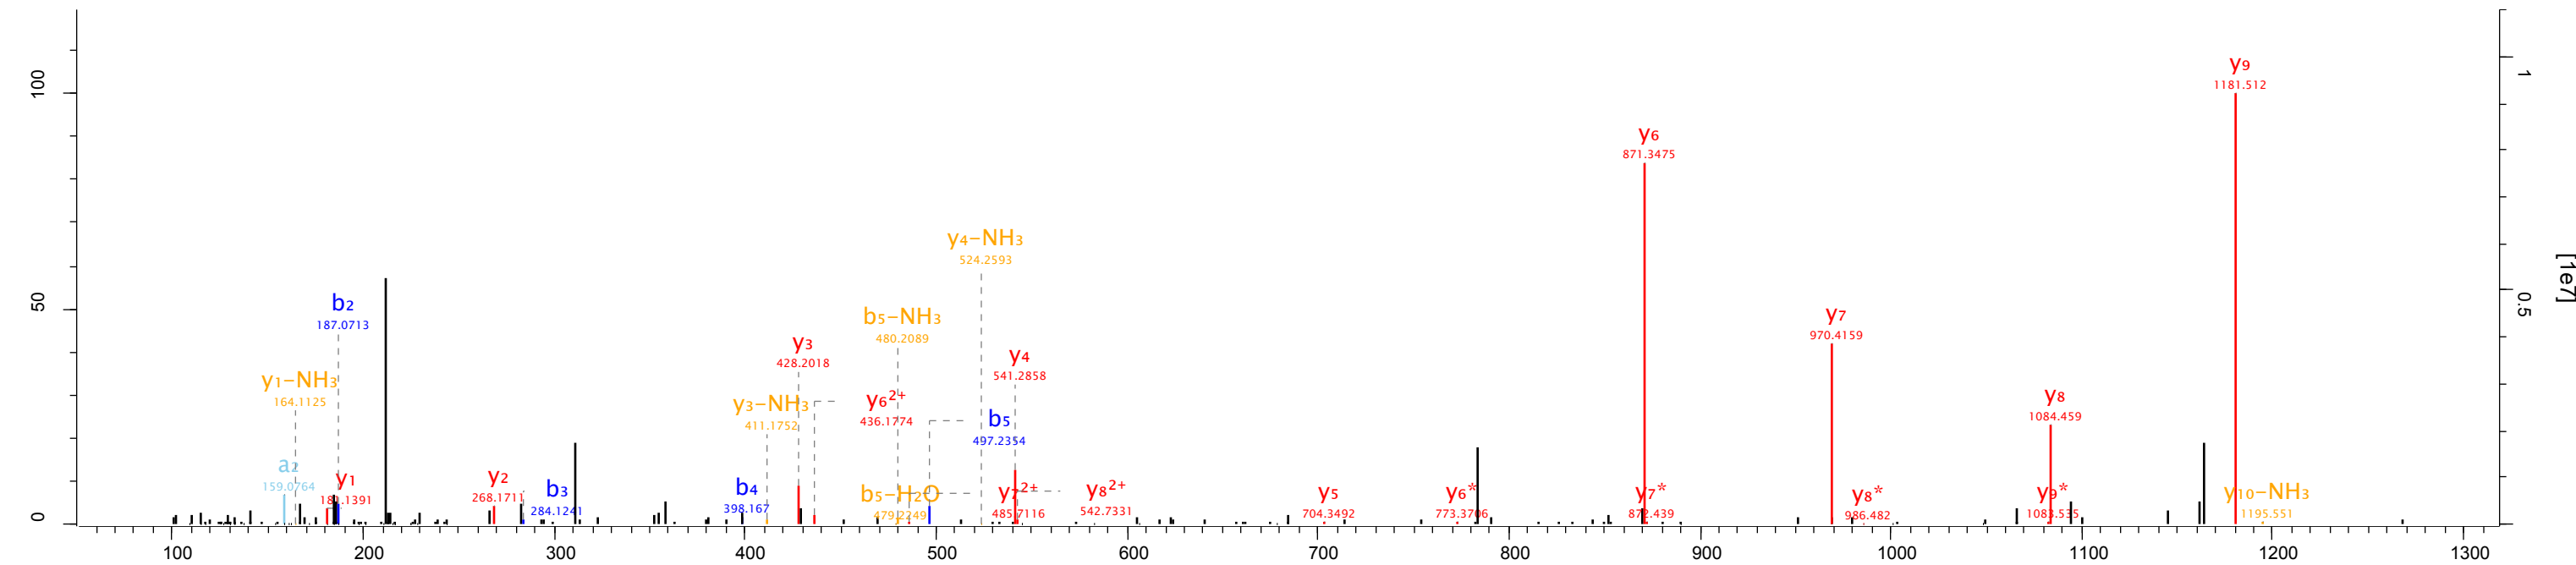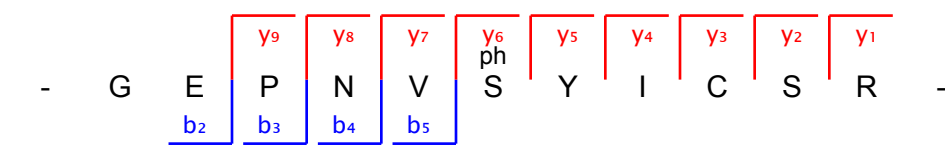

Raw file 20150812\_A375SR\_Phospho\_BR1\_08 Scan 1262 Method FTMS; HCD Score 57.17 m/z 578.62 Gene names ARHGAP21

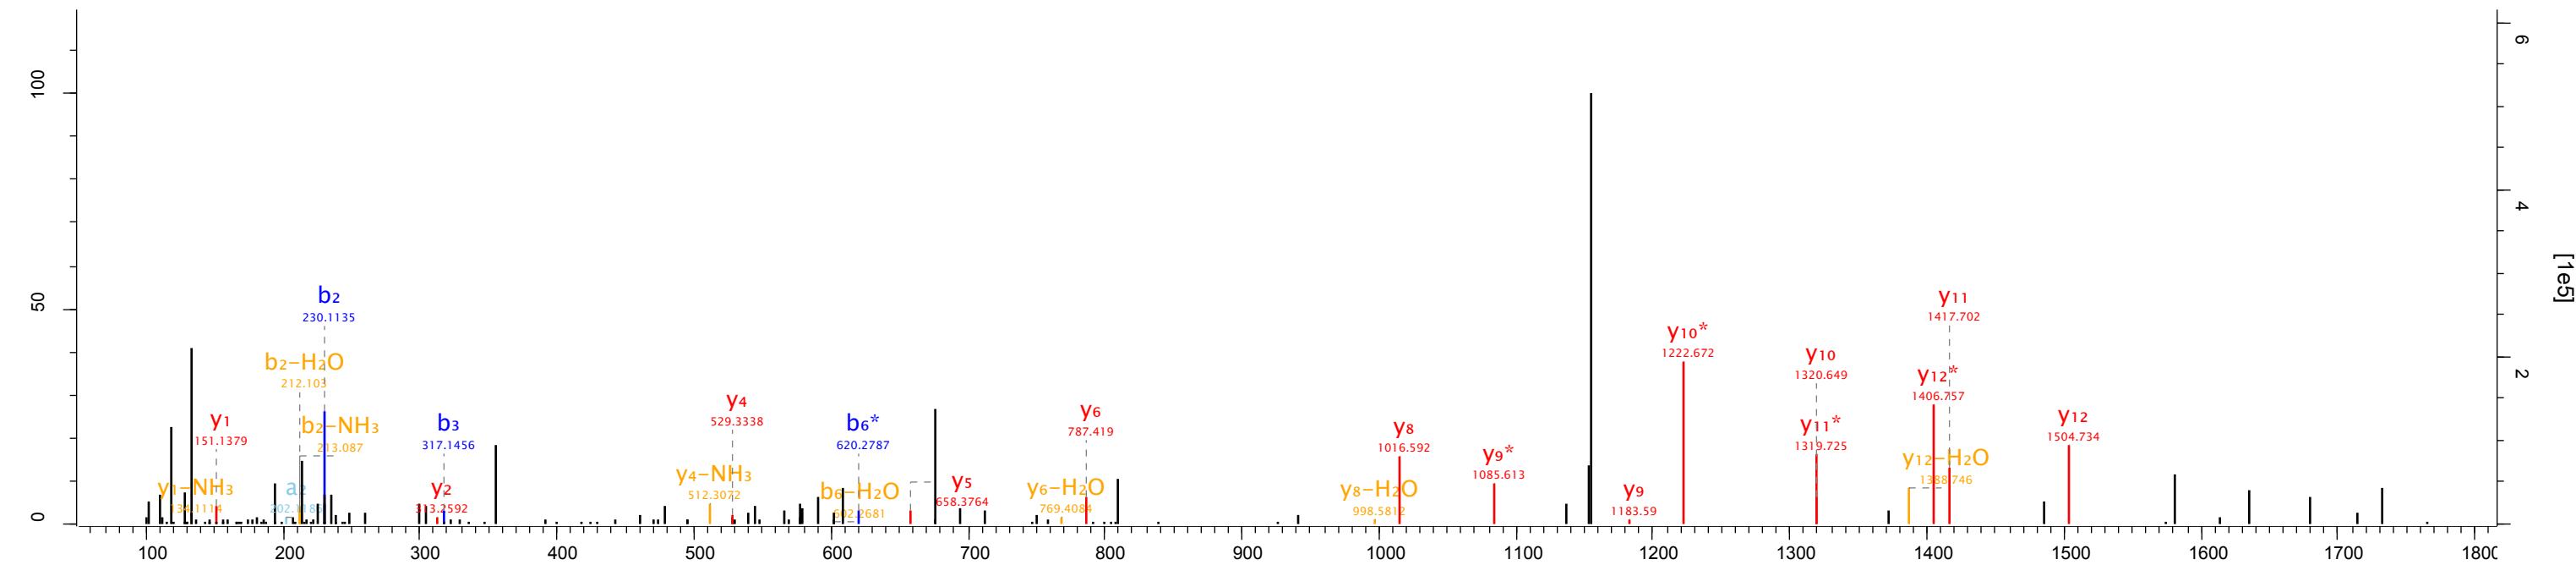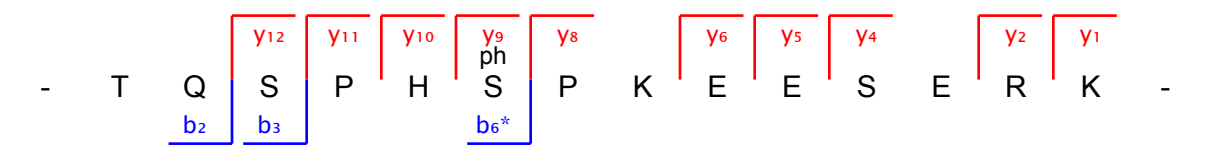

Raw file: 20150812\_A375SR\_Phospho\_BR1\_08  
 Scan: 12812 Method: FTMS; HCD Score: 199.15 m/z: 867.38 Gene names: NRBP1

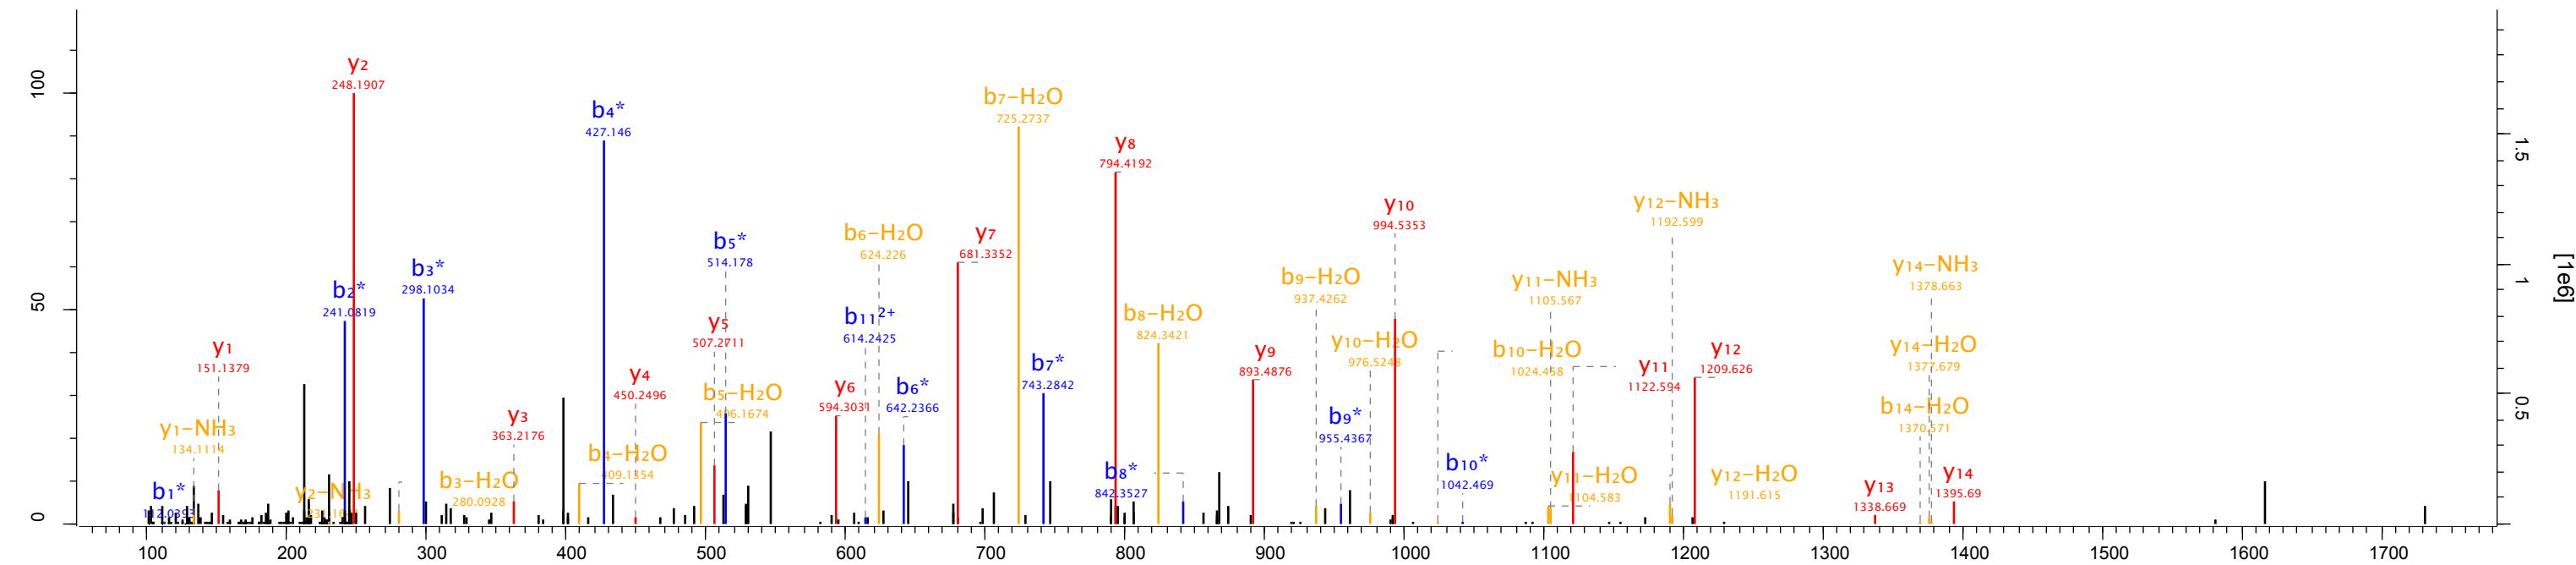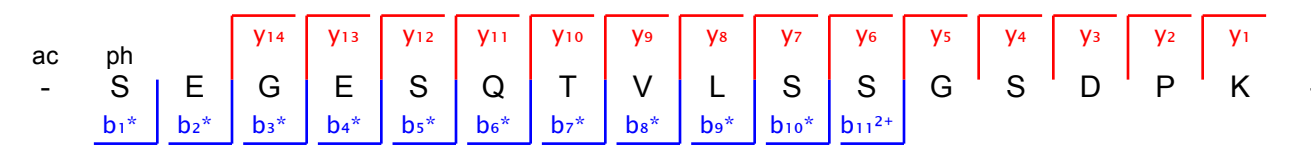

Raw file 20150812\_A375SR\_Phospho\_BR1\_08 Scan 13492 Method FTMS; HCD Score 104.97 m/z 958.77 Gene names FAM195A

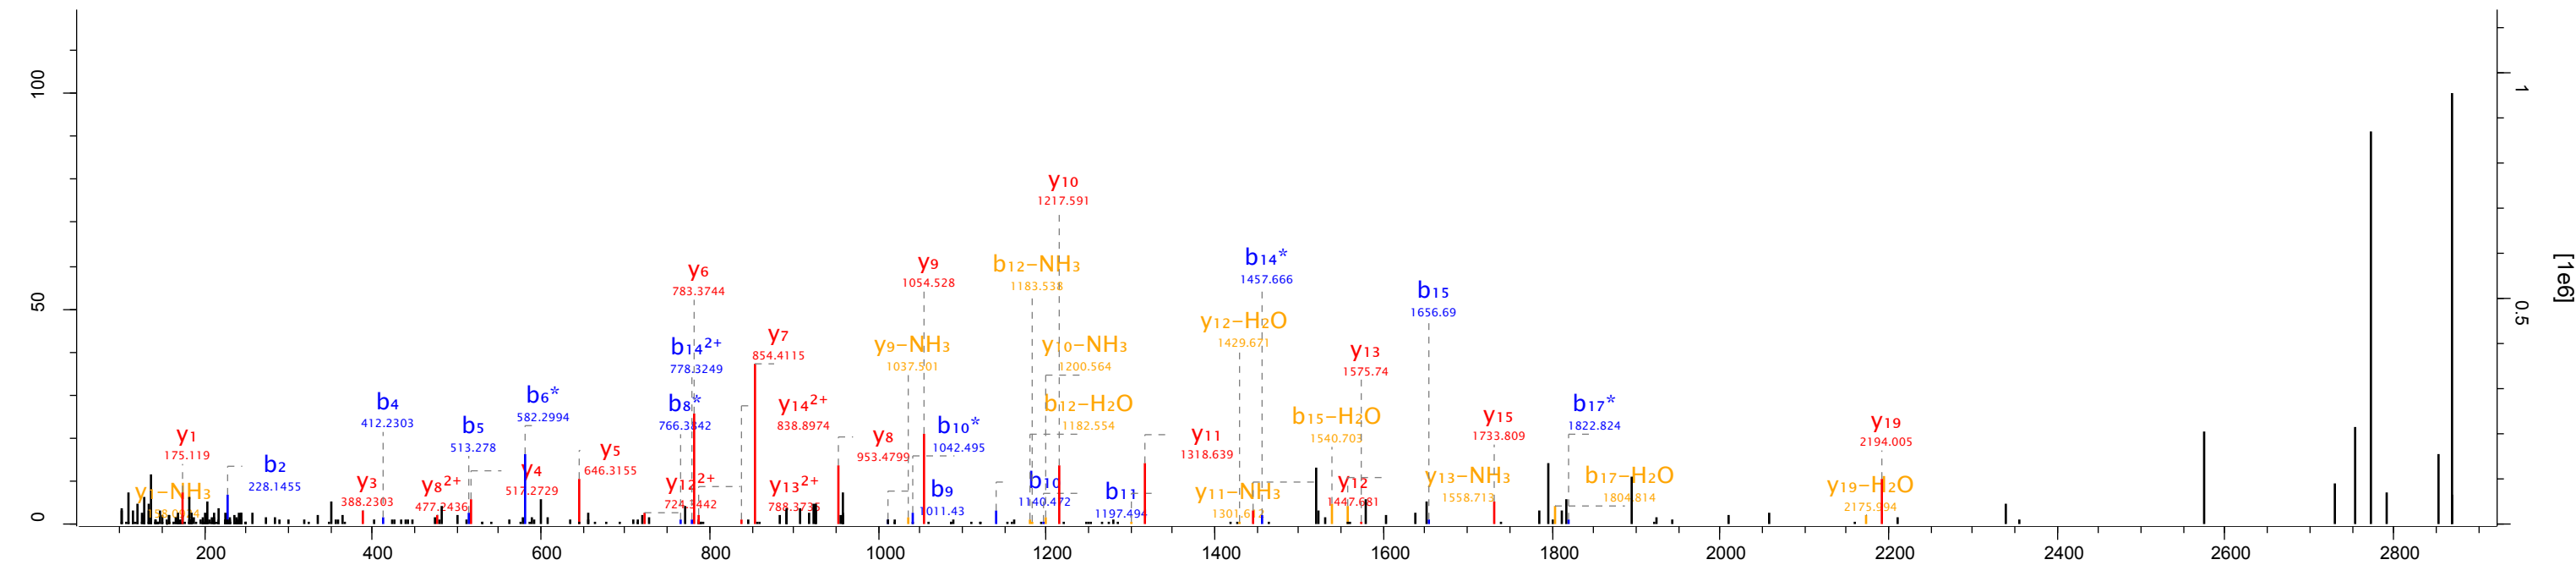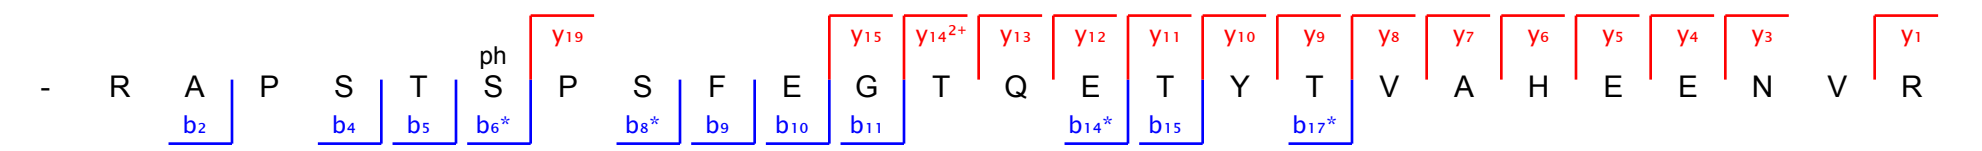

Raw file  
 20150812\_A375SR\_Phospho\_BR1\_08  
 Scan 14722 Method FTMS; HCD Score 212.79 m/z 655 Gene names CLASP1

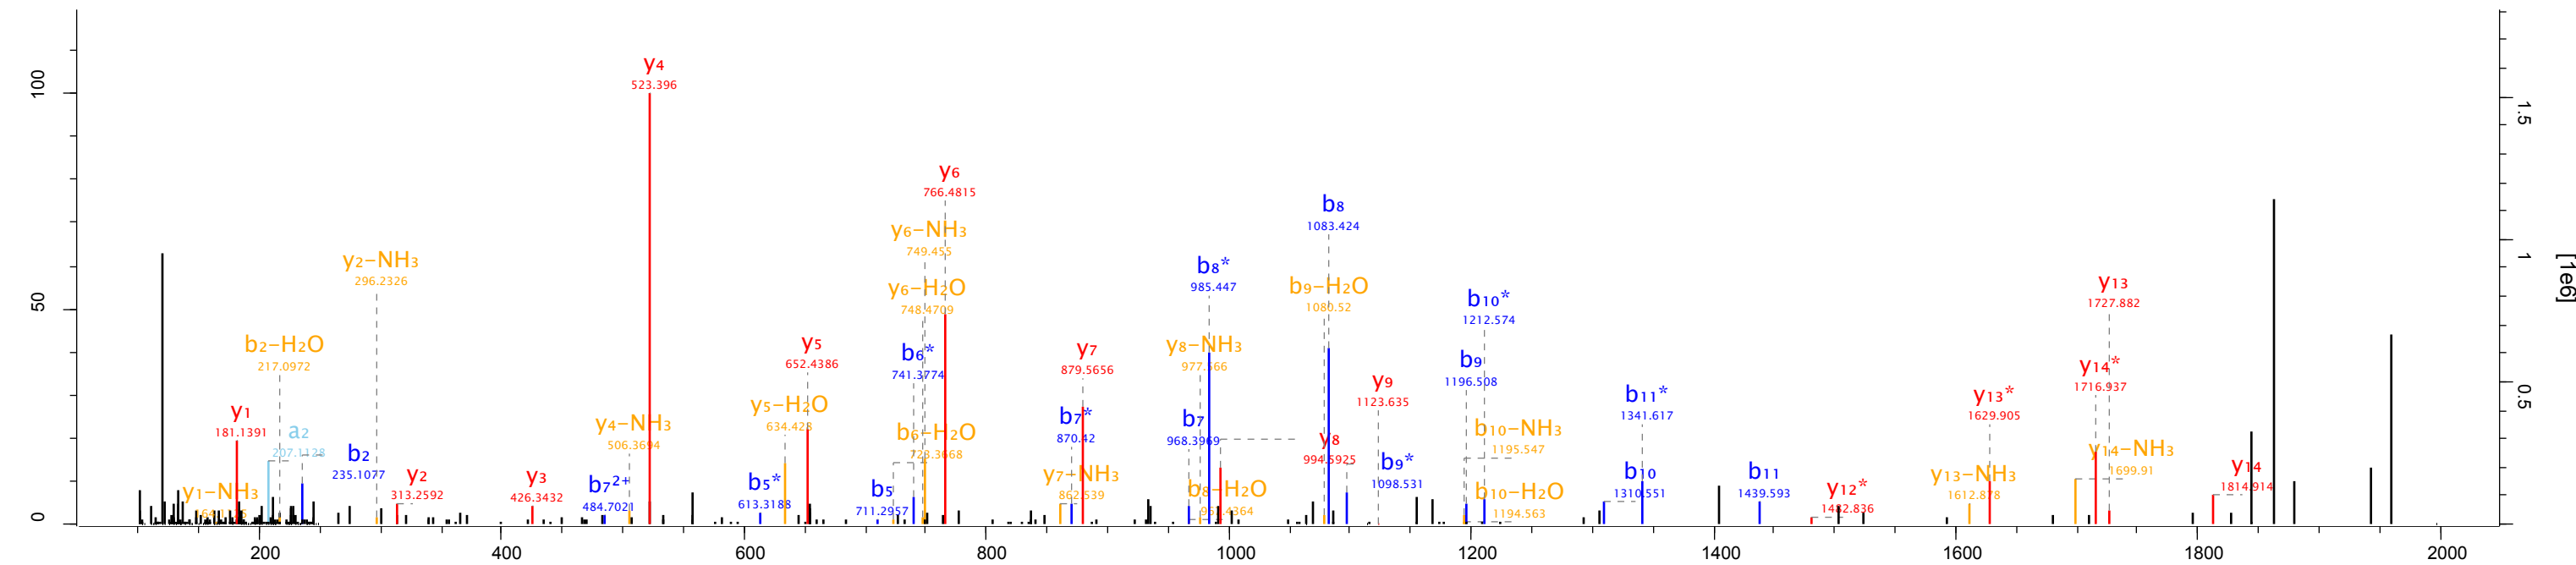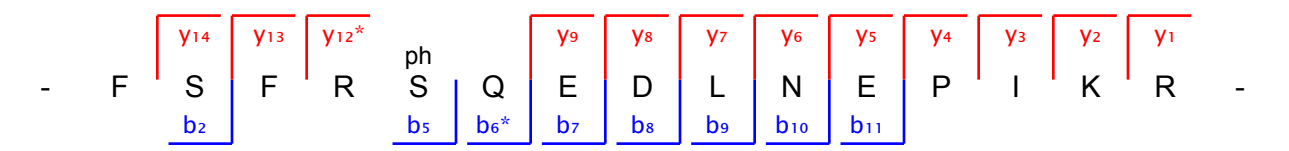

Raw file: 20150812\_A375SR\_Phospho\_BR1\_08  
 Scan: 16222 Method: FTMS; HCD Score: 244.19 m/z: 1086.01 Gene names: ITSN1

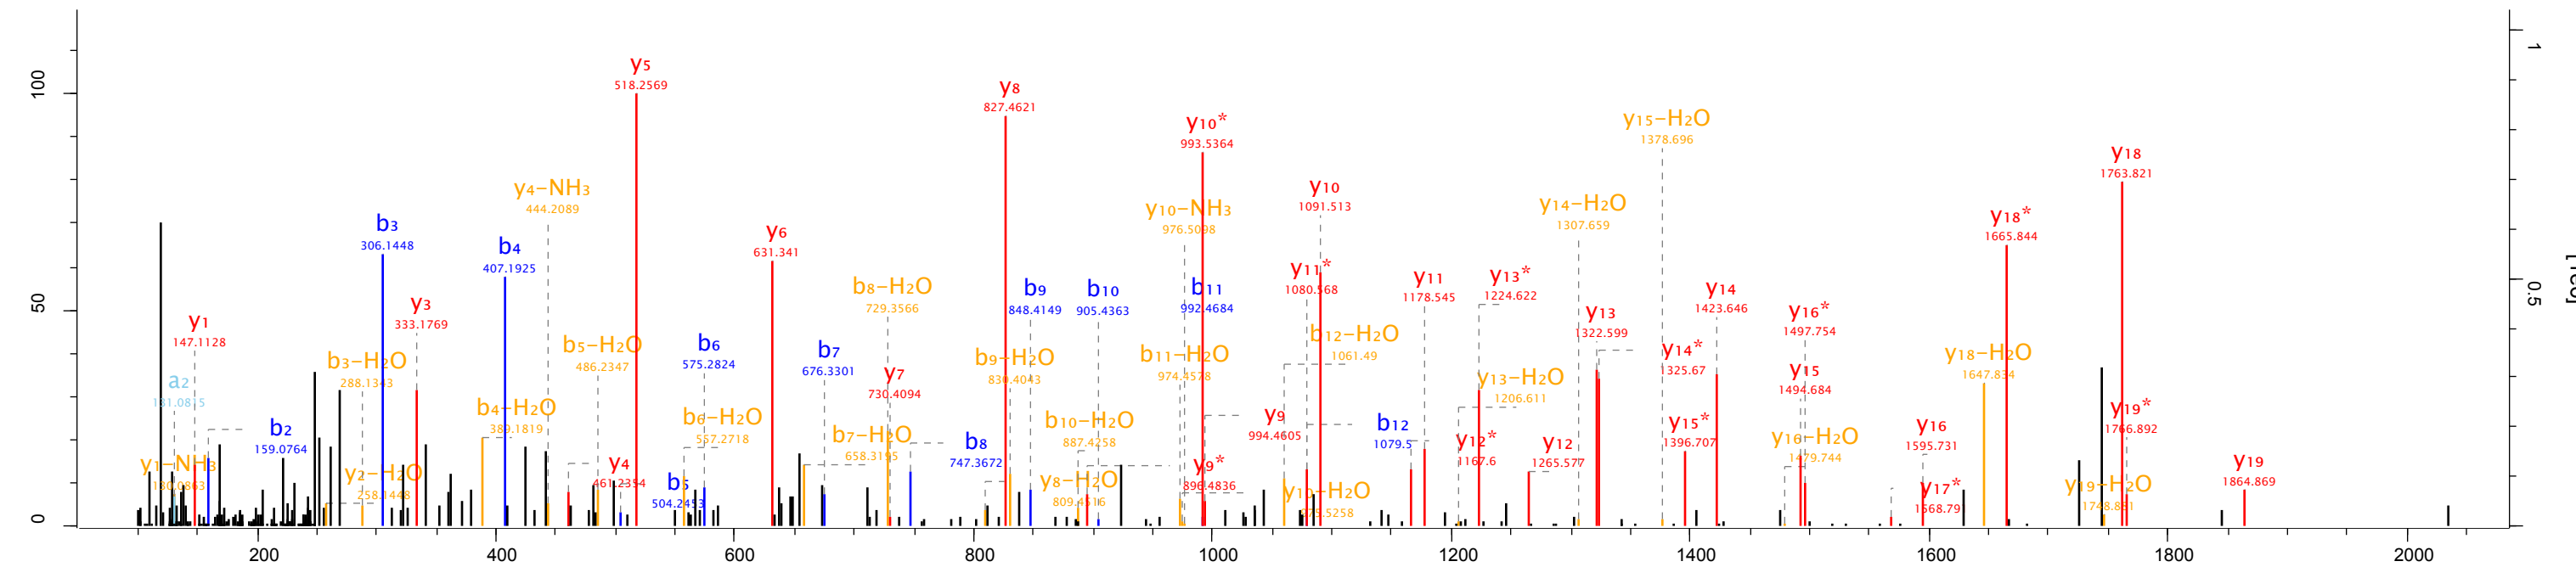

- S A F T P A T A T G S S P S P V L G Q G E K -

b<sub>2</sub>
b<sub>3</sub>
b<sub>4</sub>
b<sub>5</sub>
b<sub>6</sub>
b<sub>7</sub>
b<sub>8</sub>
b<sub>9</sub>
b<sub>10</sub>
b<sub>11</sub>
b<sub>12</sub>
y<sub>19</sub>
y<sub>18</sub>
y<sub>17</sub>\*
y<sub>16</sub>
y<sub>15</sub>
y<sub>14</sub>
y<sub>13</sub>
y<sub>12</sub>
y<sub>11</sub>
y<sub>10</sub>
y<sub>9</sub>ph
y<sub>8</sub>
y<sub>7</sub>
y<sub>6</sub>
y<sub>5</sub>
y<sub>4</sub>
y<sub>3</sub>
y<sub>1</sub>

Raw file Scan Method Score m/z Gene names  
 20150812\_A375SR\_Phospho\_BR1\_08 16972 FTMS; HCD 424.54 1255.55 TRIM28

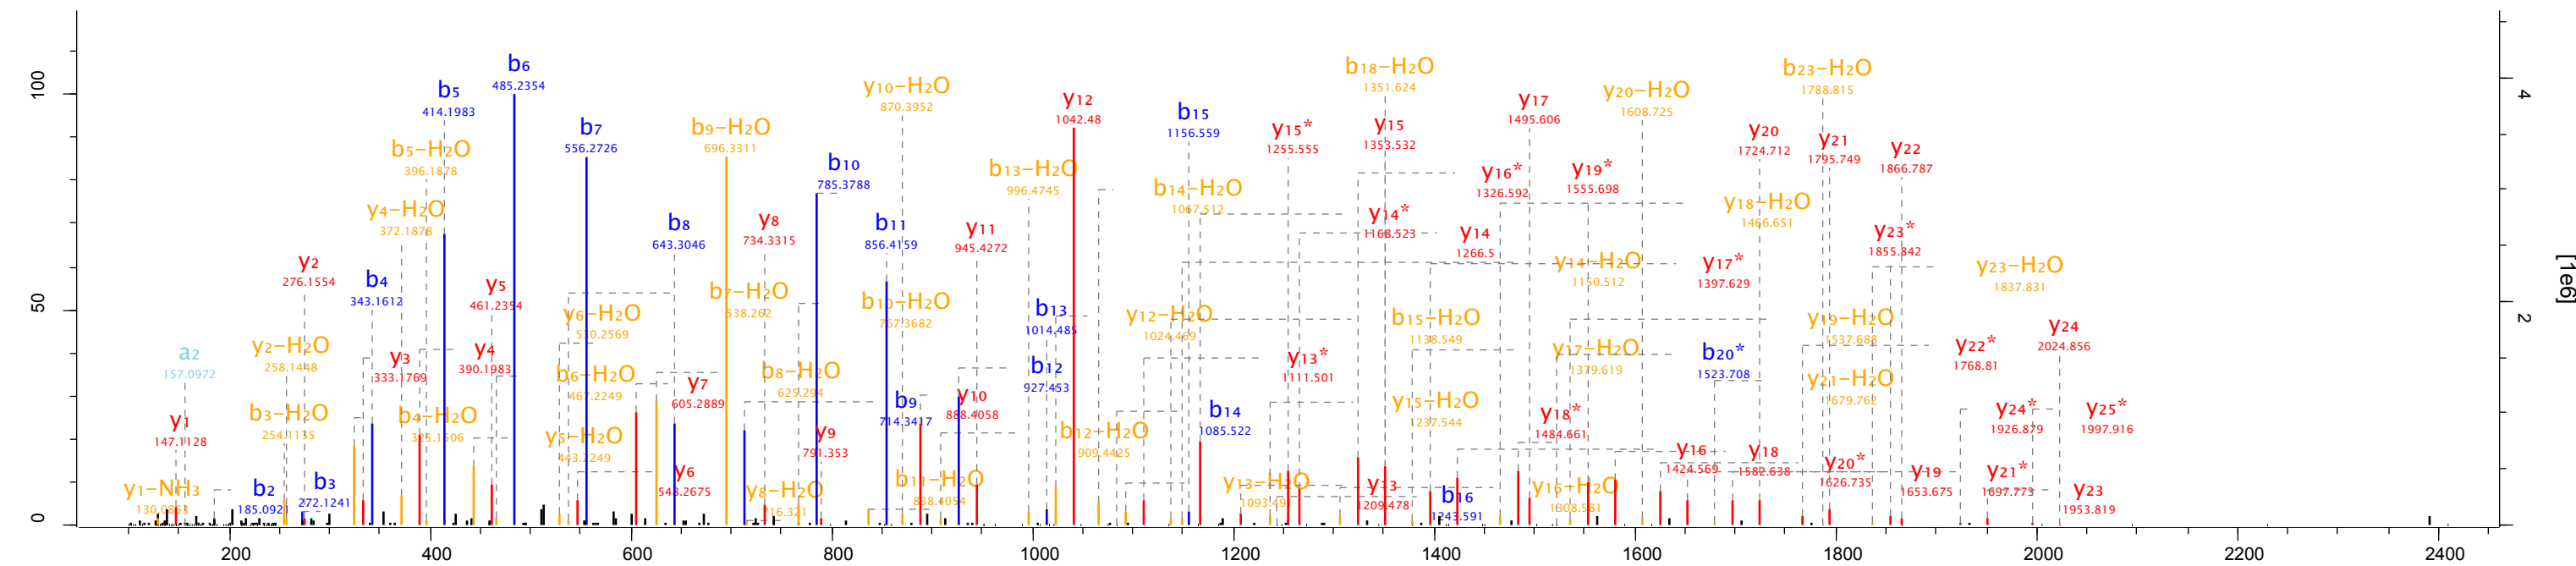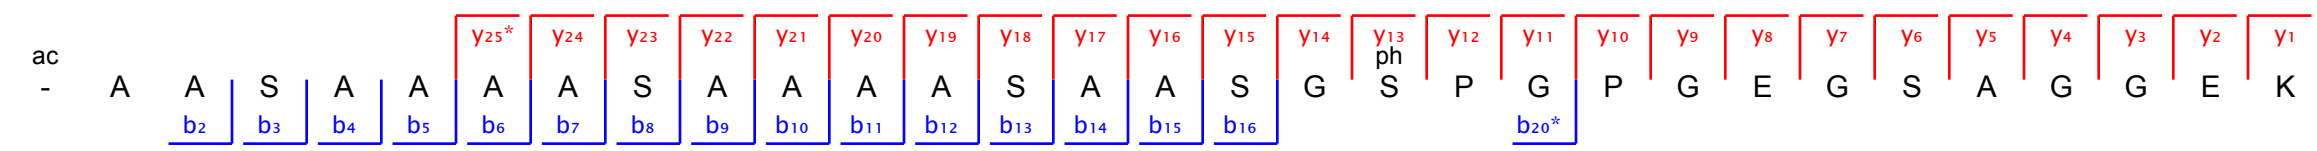



Raw file 20150812\_A375SR\_Phospho\_BR1\_08 Scan 17632 Method FTMS; HCD Score 237.19 m/z 1013.47 Gene names MAP1B

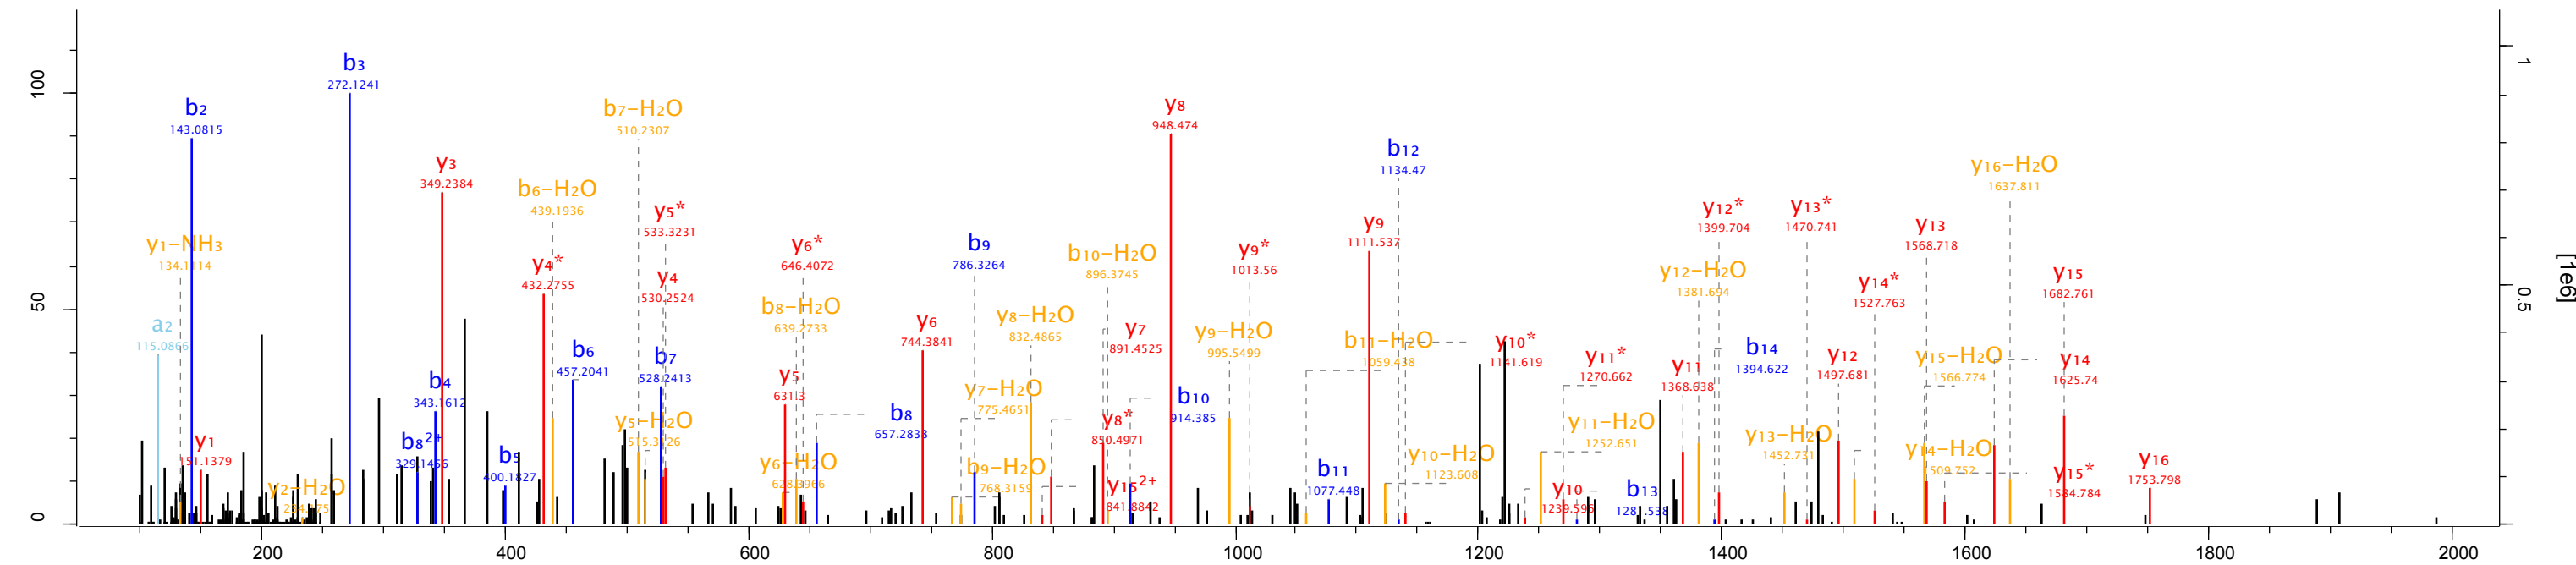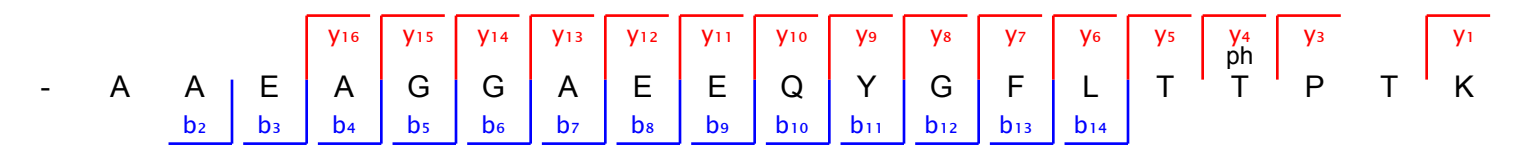

Raw file: 20150812\_A375SR\_Phospho\_BR1\_08  
 Scan: 19362 Method: FTMS; HCD Score: 65.04 m/z: 885.18 Gene names: EIF4G1

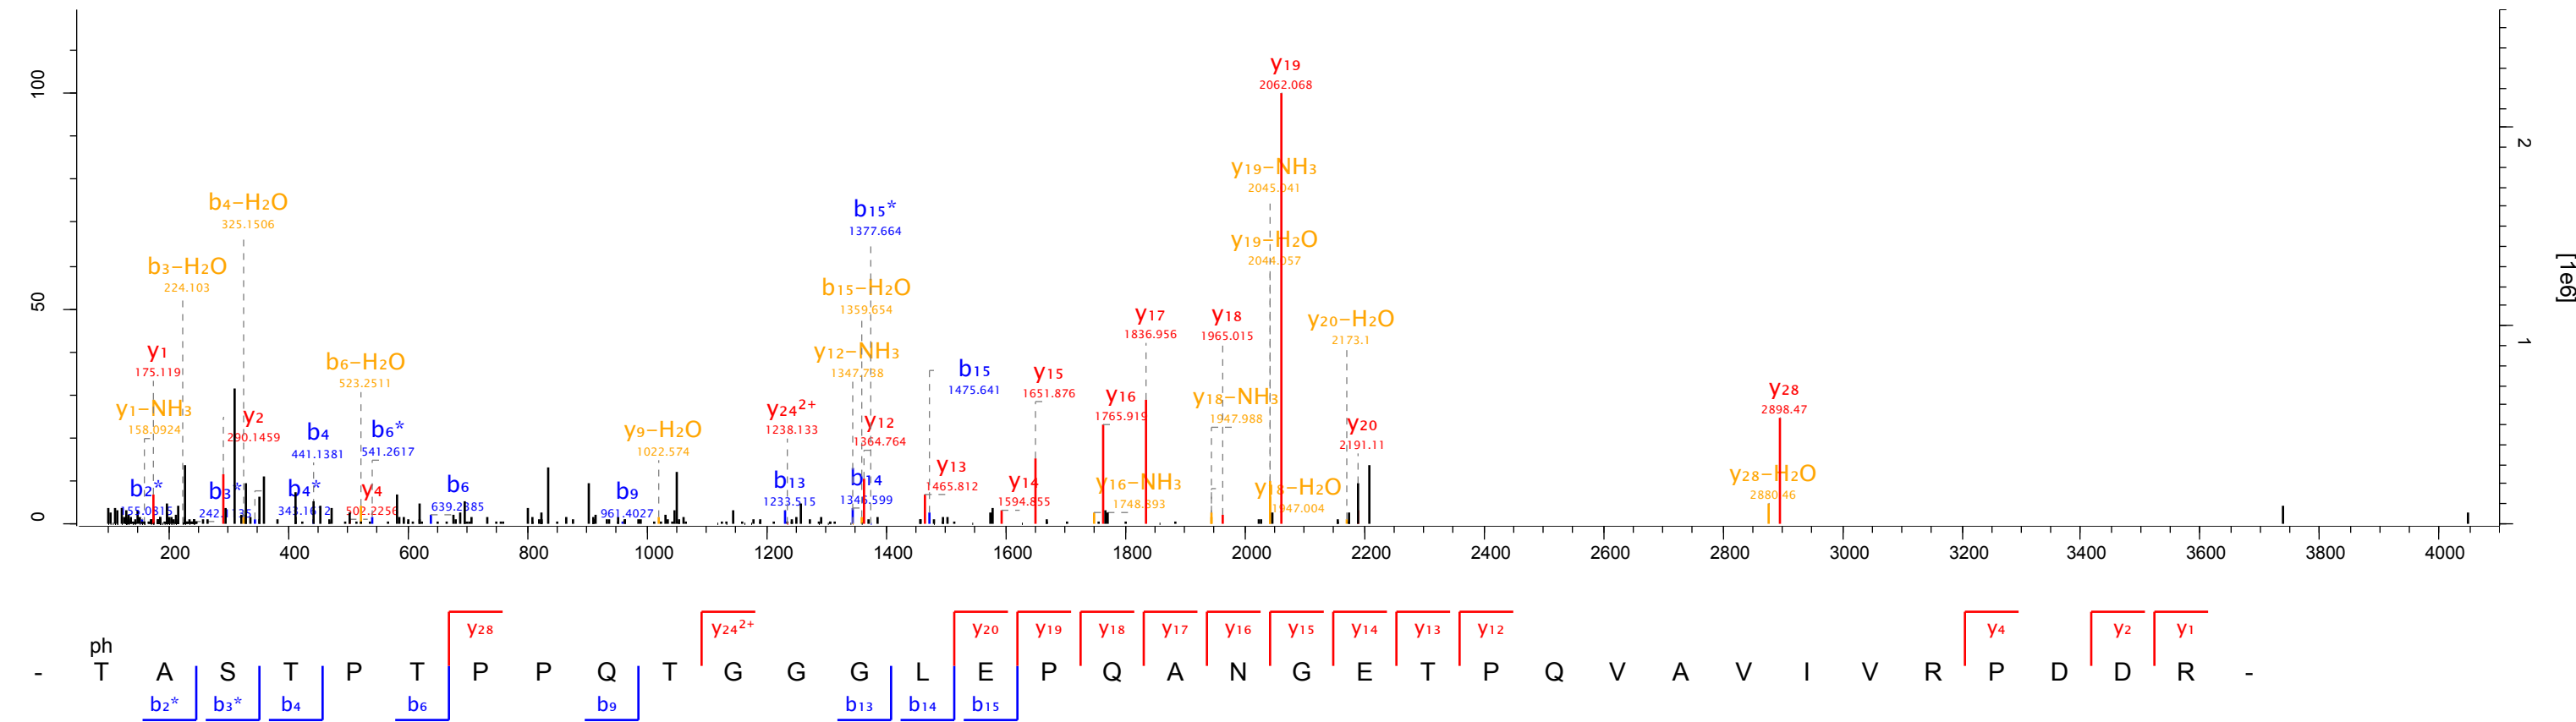

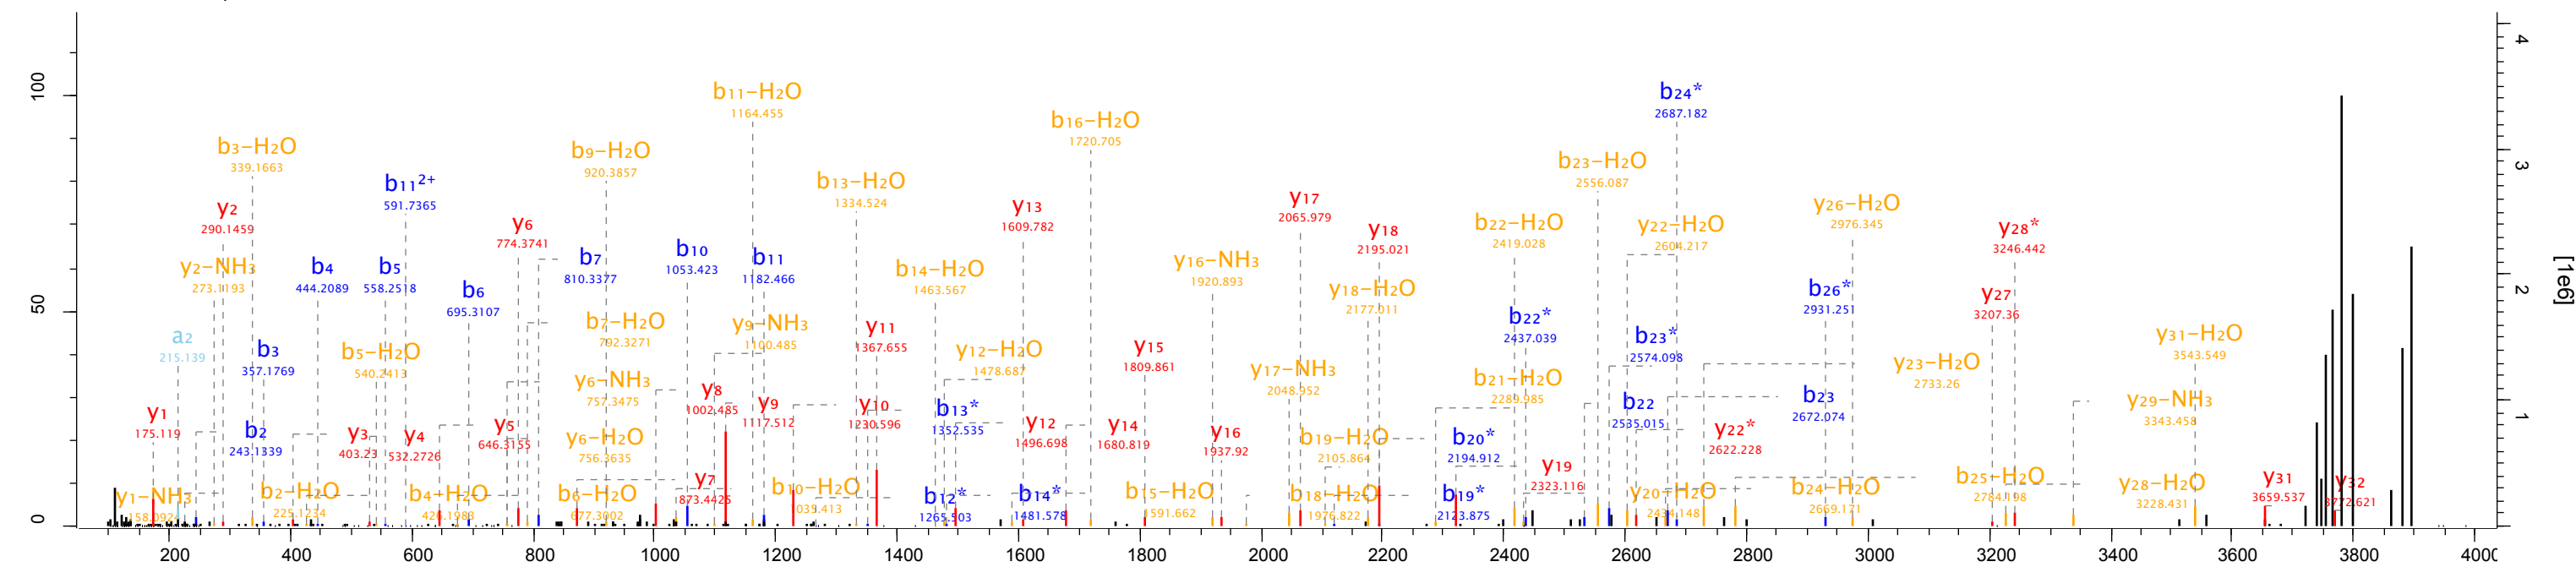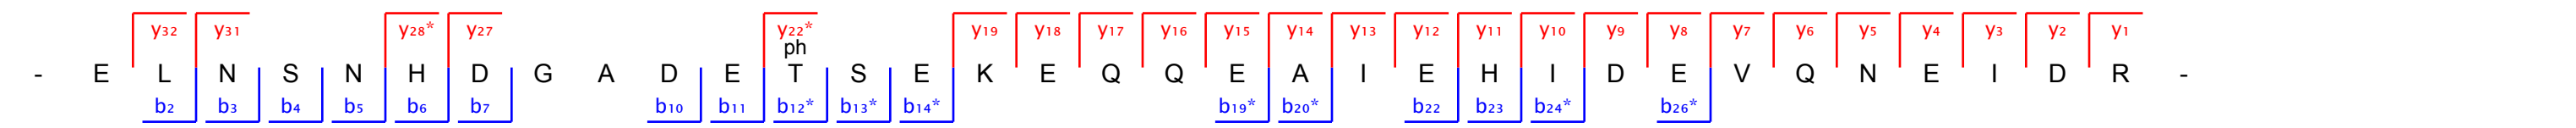

Raw file: 20150812\_A375SR\_Phospho\_BR1\_08  
 Scan: 1962 Method: FTMS; HCD Score: 115.63 m/z: 570.25 Gene names: NELFE

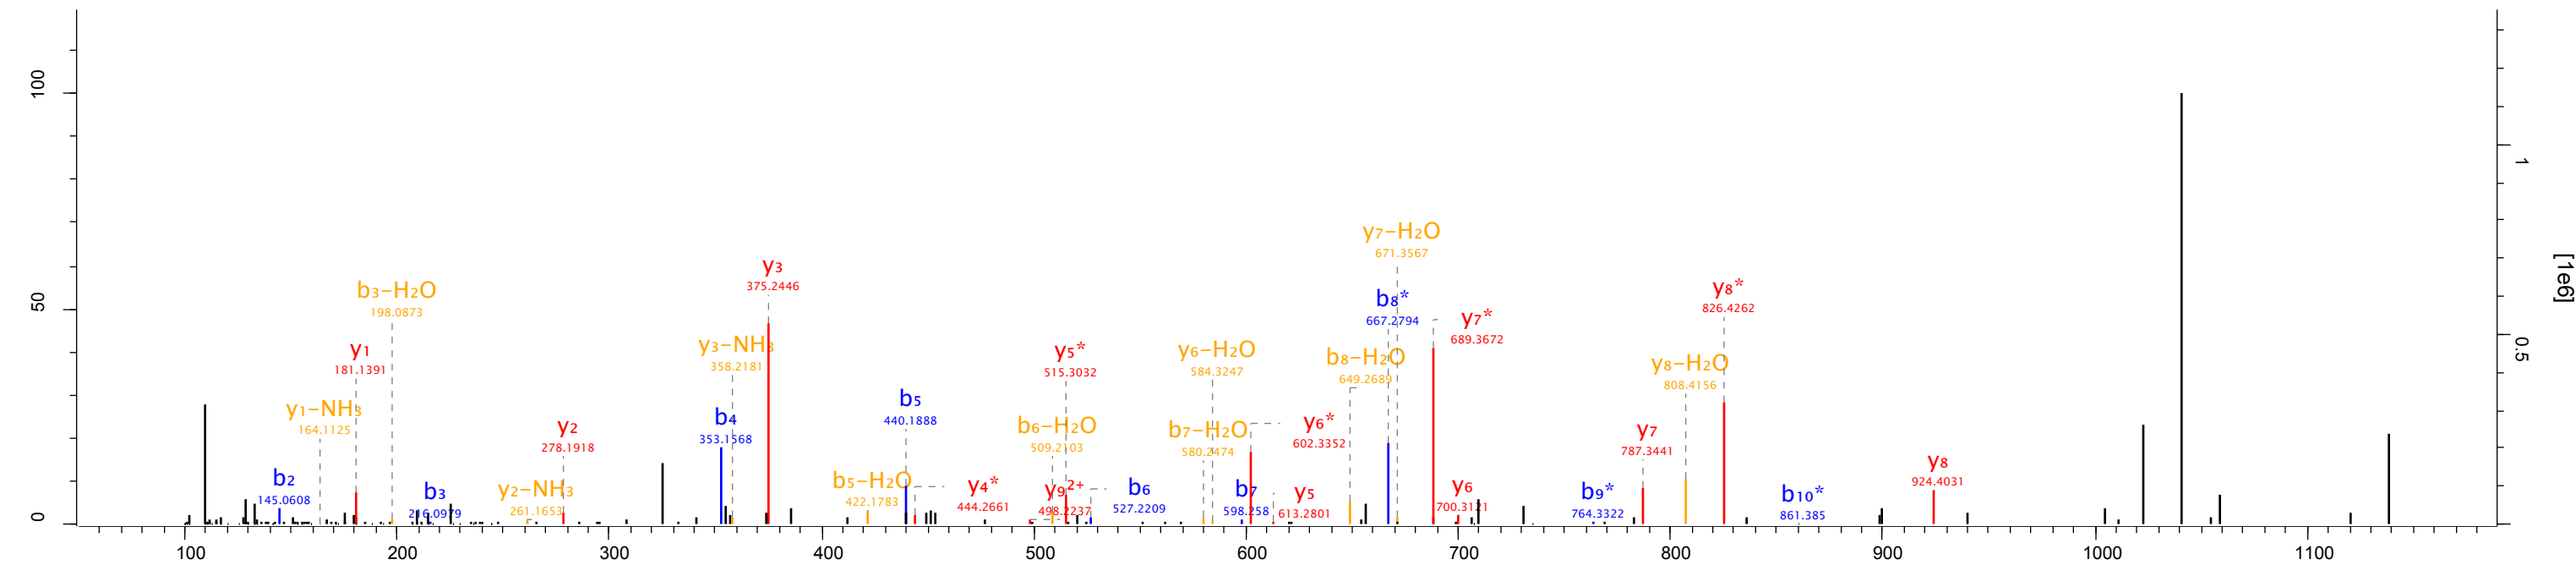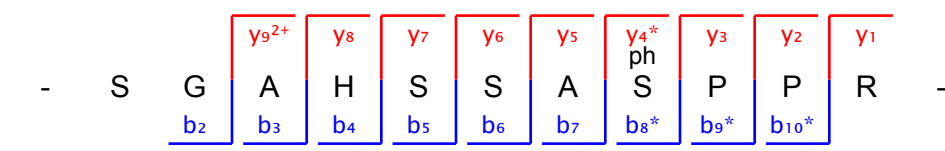

Raw file: 20150812\_A375SR\_Phospho\_BR1\_08  
 Scan: 20432 Method: FTMS; HCD Score: 75.14 m/z: 528.63 Gene names: CCAR2

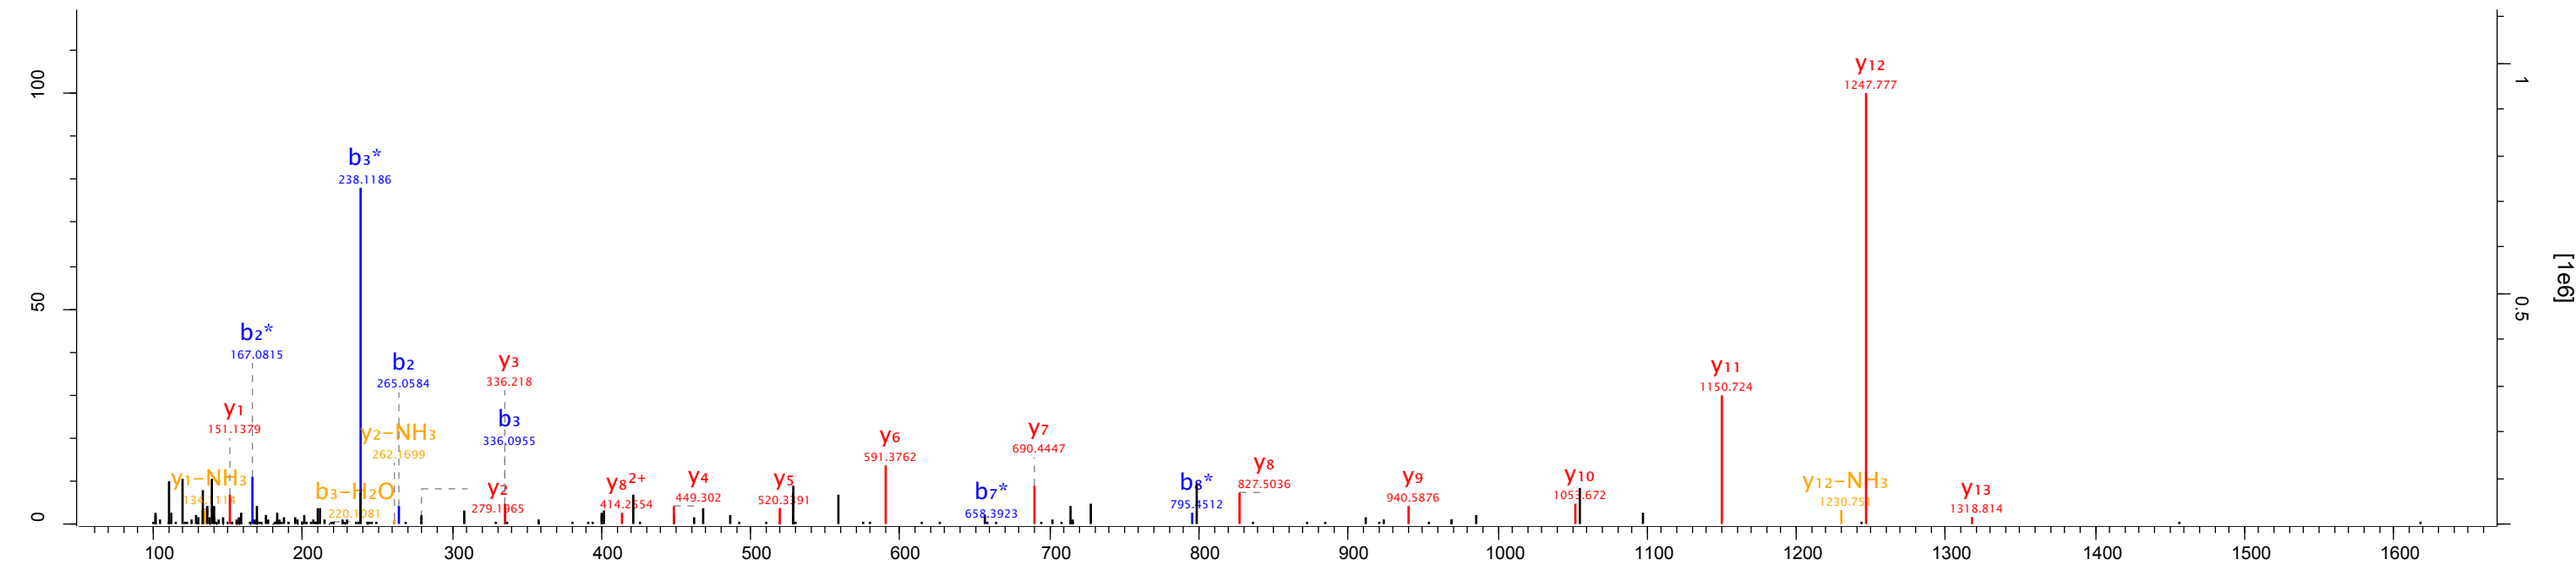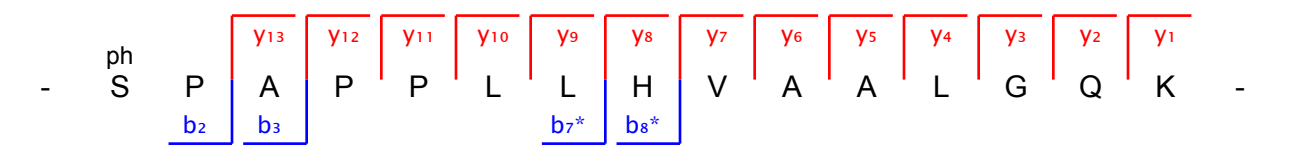

Raw file Scan Method Score m/z Gene names  
 20150812\_A375SR\_Phospho\_BR1\_08 22812 FTMS; HCD 164.79 1092.98 SERBP1

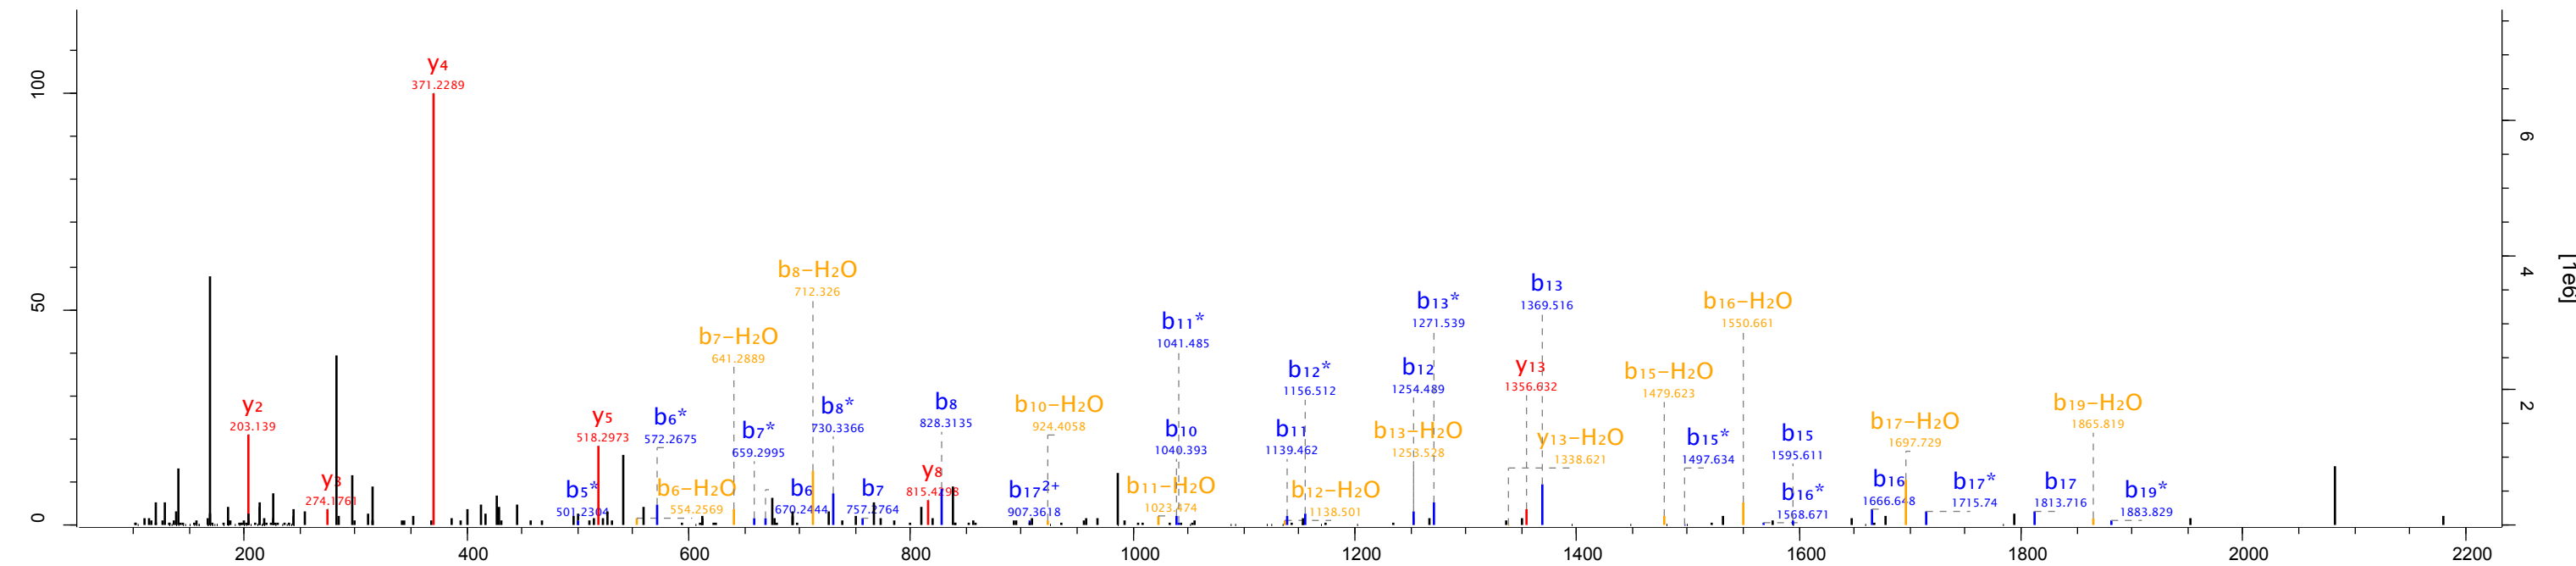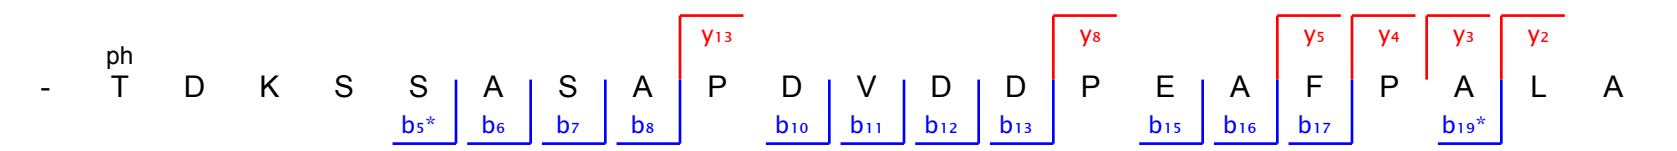

Raw file 20150812\_A375SR\_Phospho\_BR1\_08 Scan 25872 Method FTMS; HCD Score 173.86 m/z 853.42 Gene names WDR44

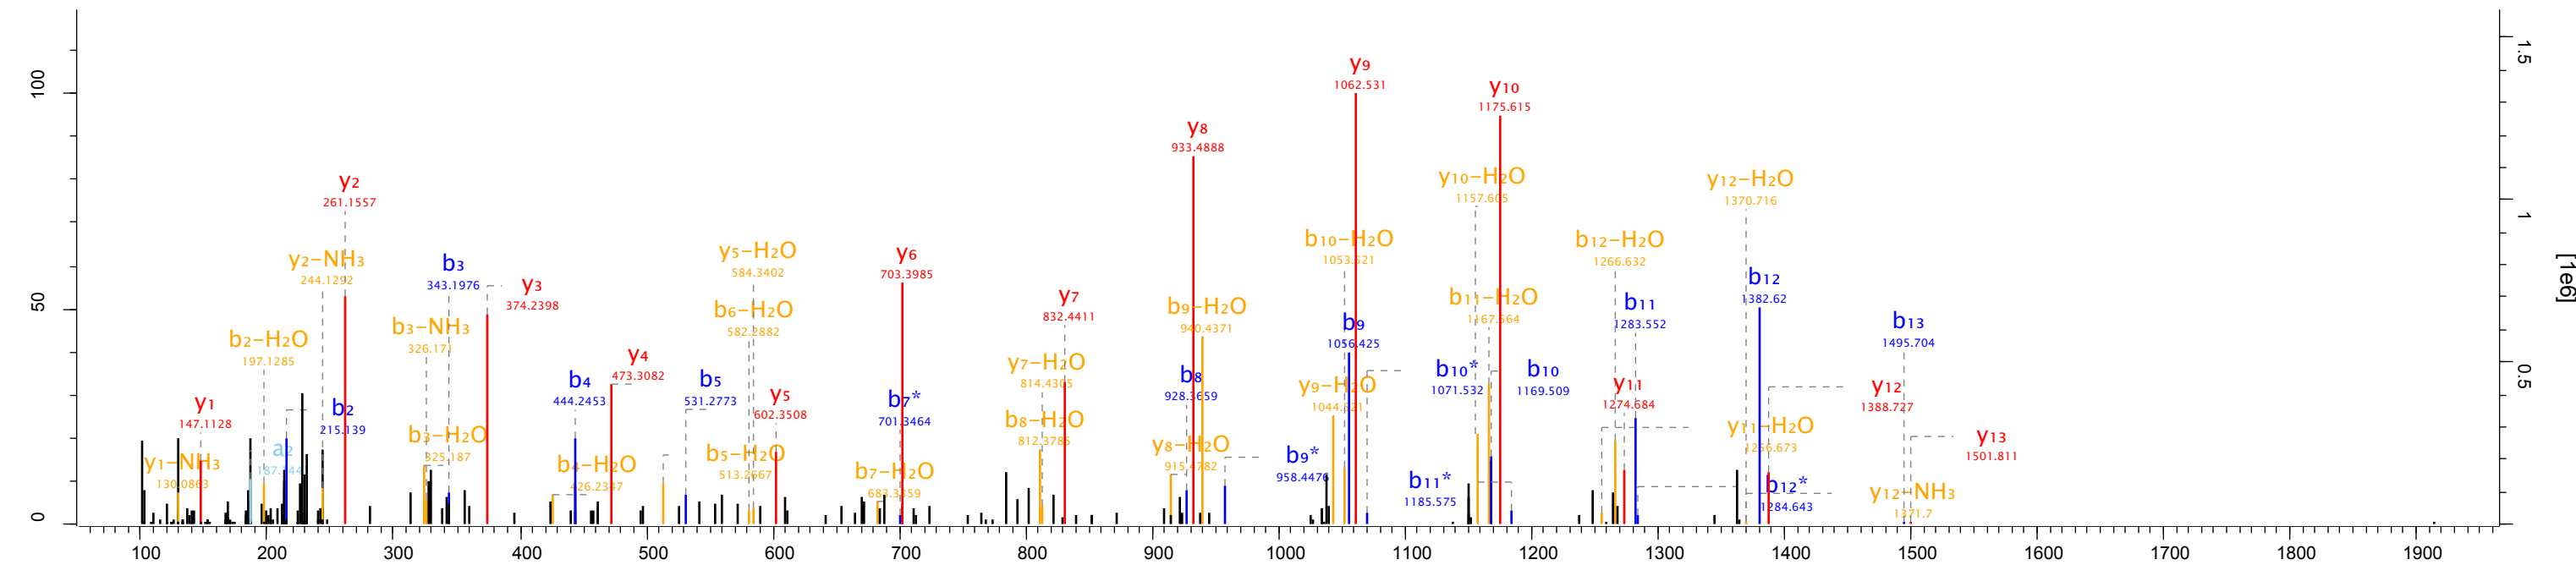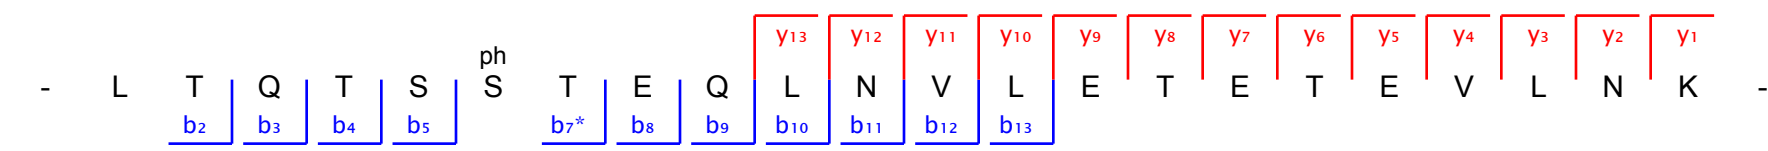

Raw file 20150812\_A375SR\_Phospho\_BR1\_08 Scan 26872 Method FTMS; HCD Score 64.88 m/z 951.81 Gene names RNF214

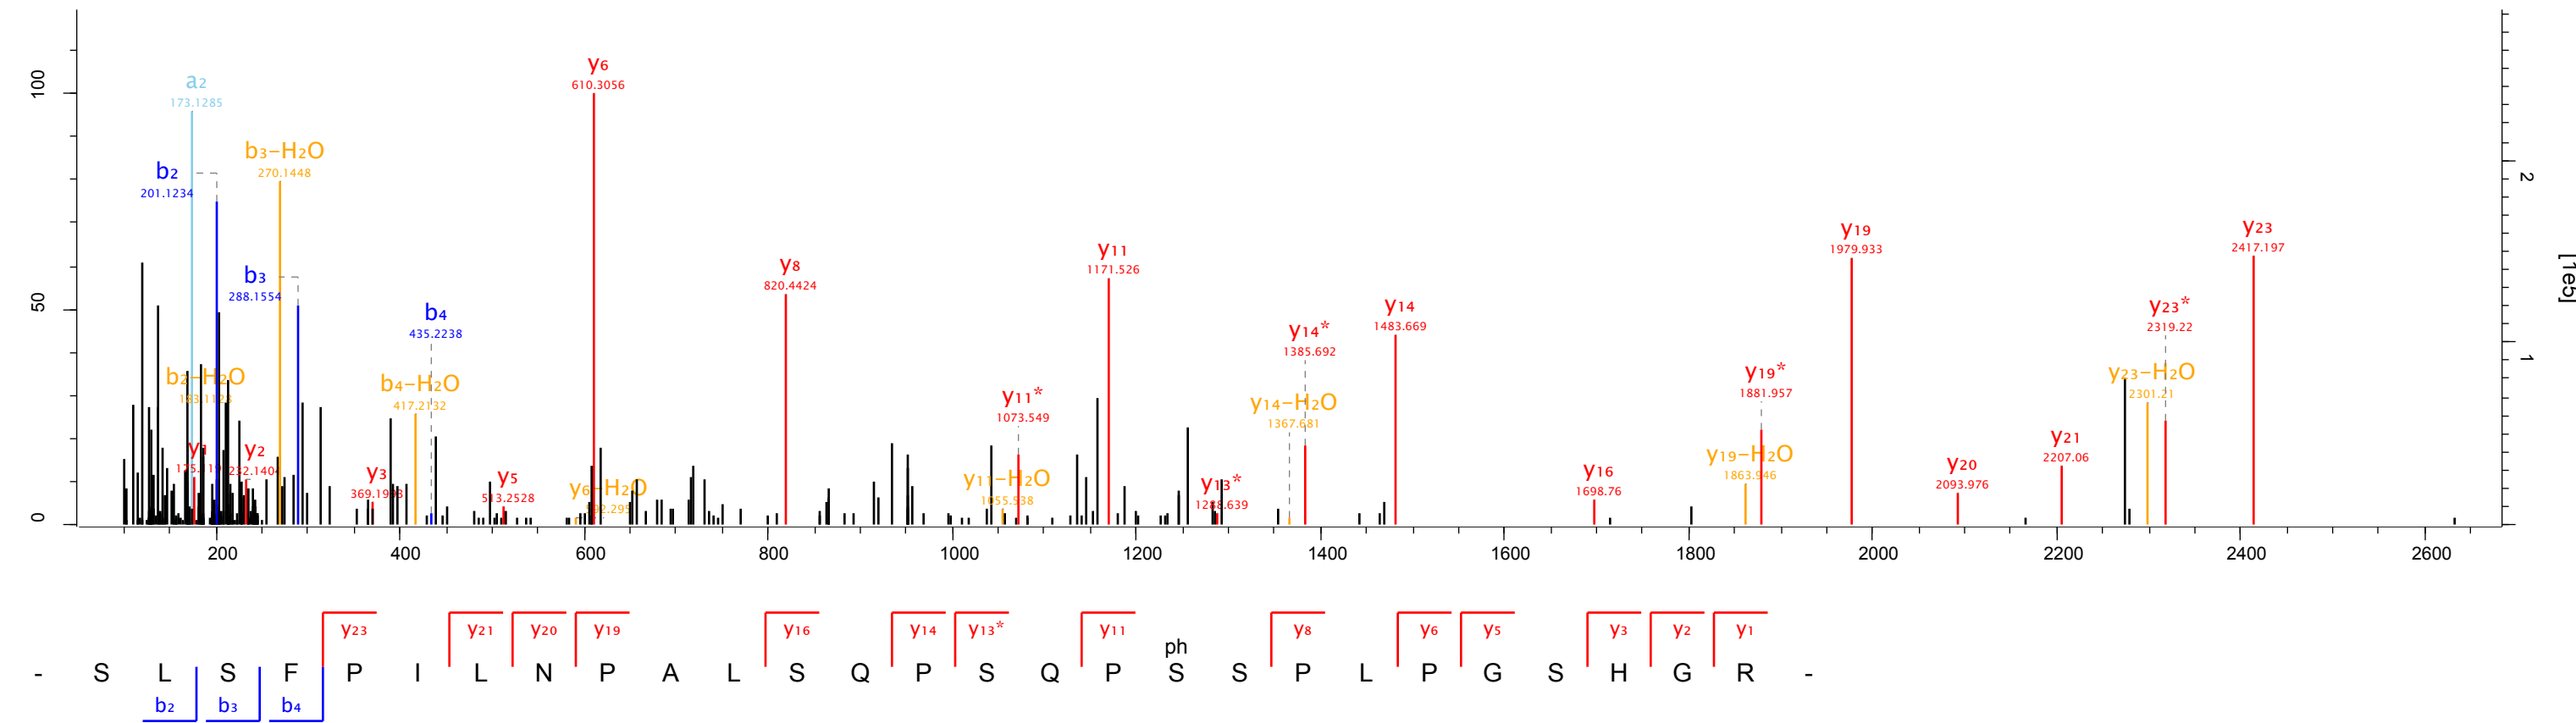



Raw file: 20150812\_A375SR\_Phospho\_BR1\_08  
 Scan: 3172 Method: FTMS; HCD Score: 280.89 m/z: 883.44 Gene names: TCOF1

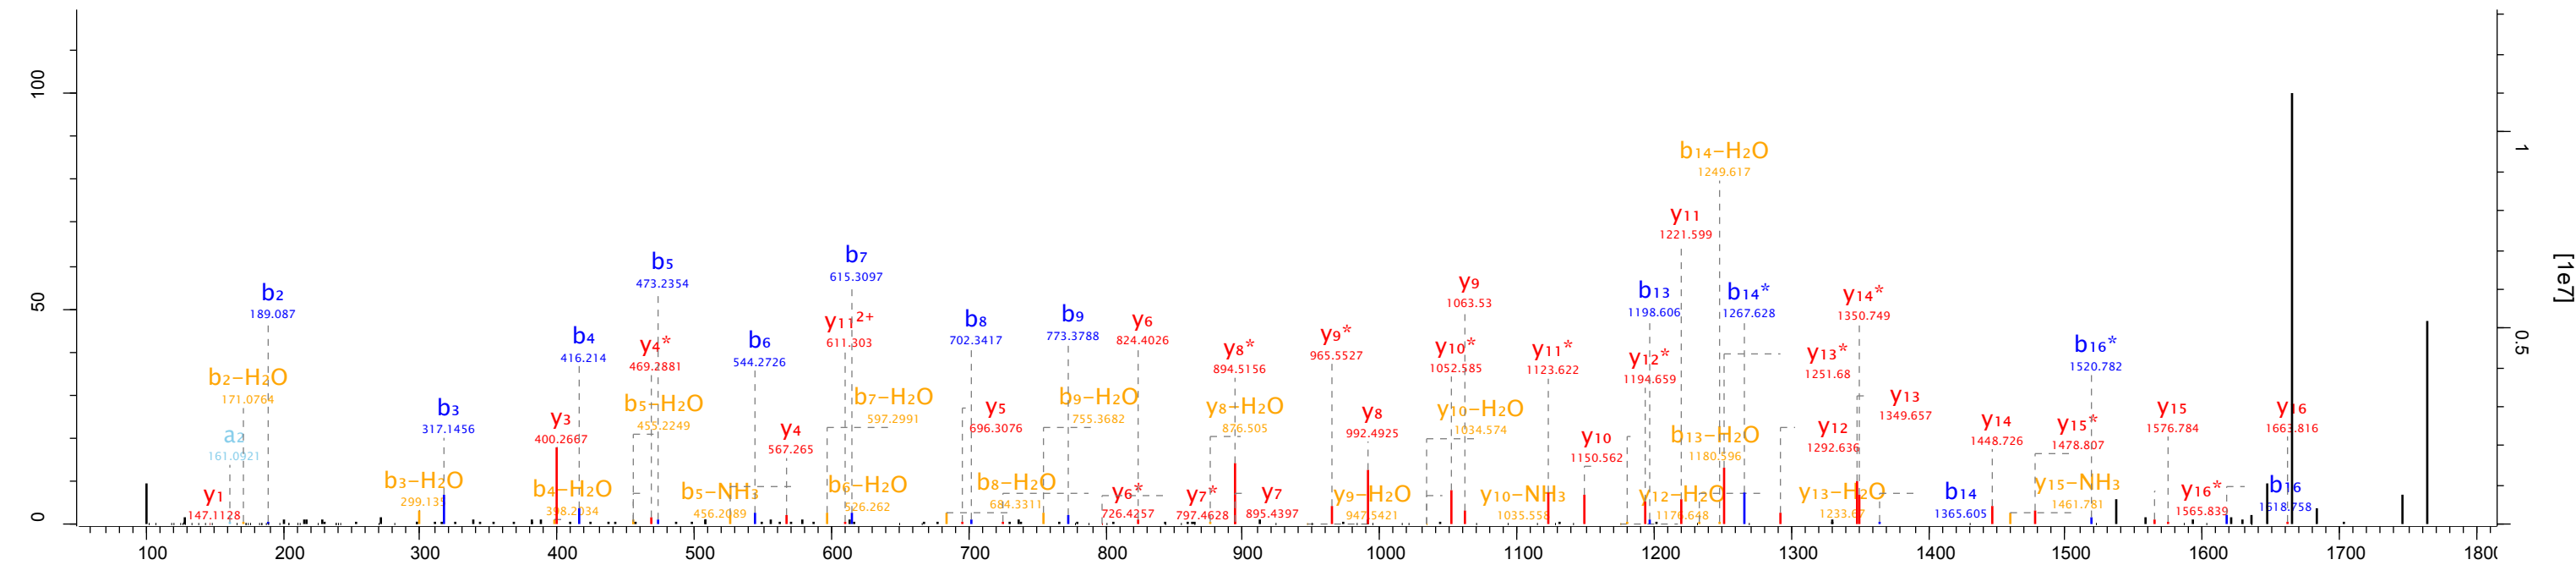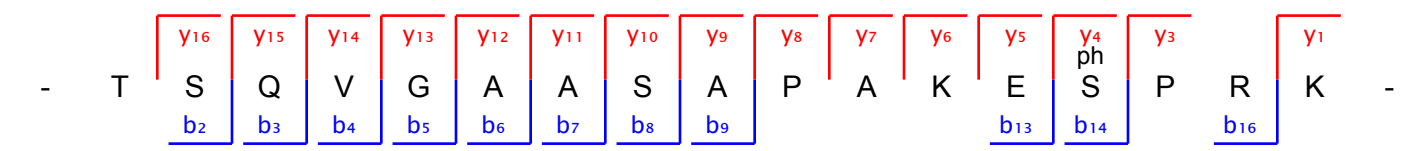

Raw file: 20150812\_A375SR\_Phospho\_BR1\_08  
 Scan: 3572 Method: FTMS; HCD Score: 182 m/z: 866.91 Gene names: SMTN

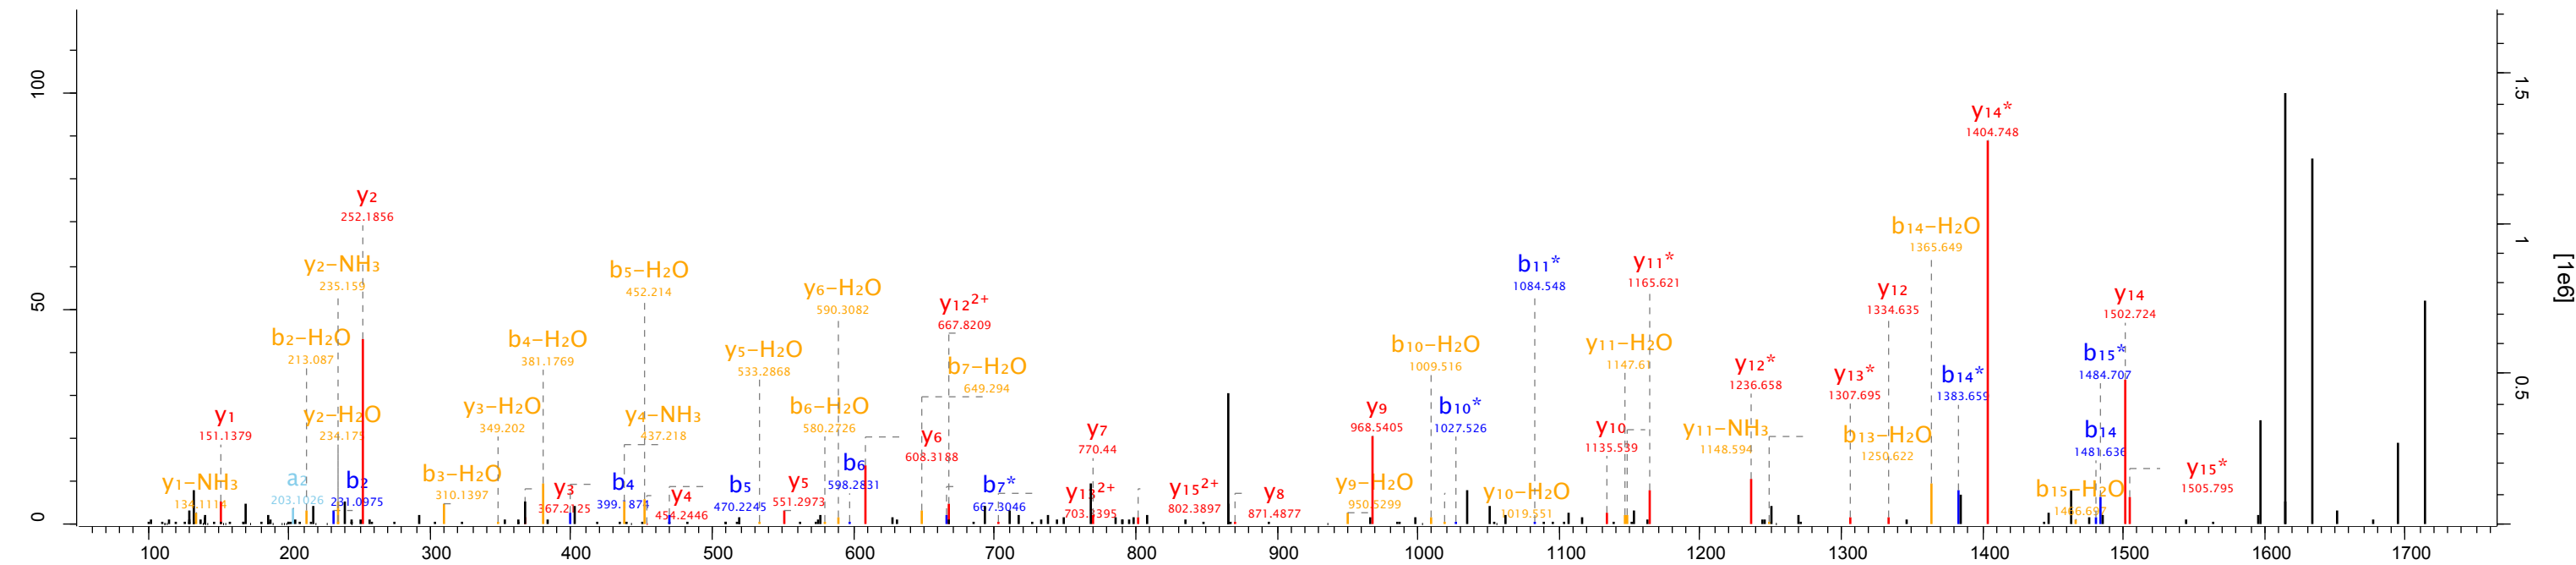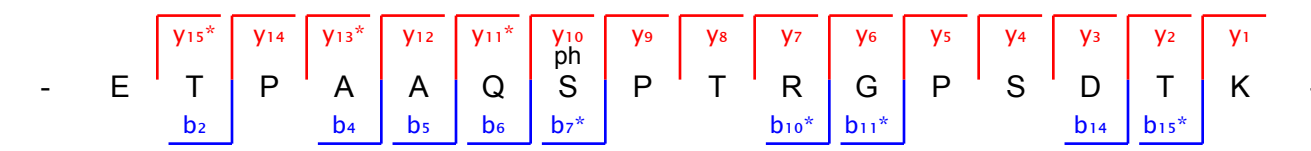

Raw file: 20150812\_A375SR\_Phospho\_BR1\_08  
 Scan: 4652 Method: FTMS; HCD Score: 125.92 m/z: 590.61 Gene names: BPTF

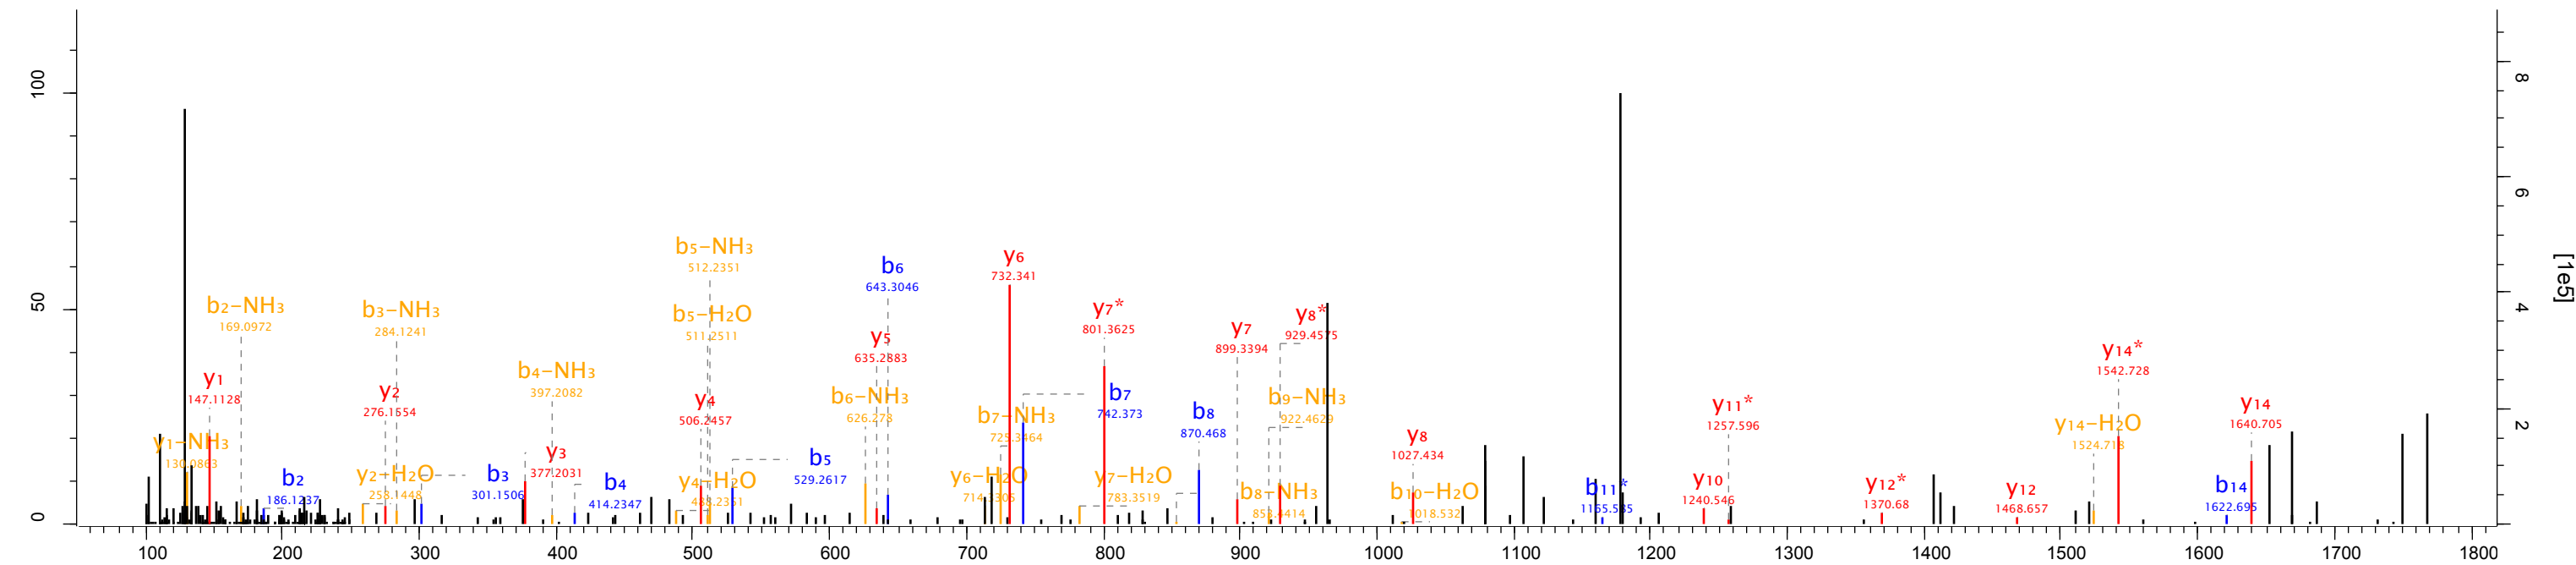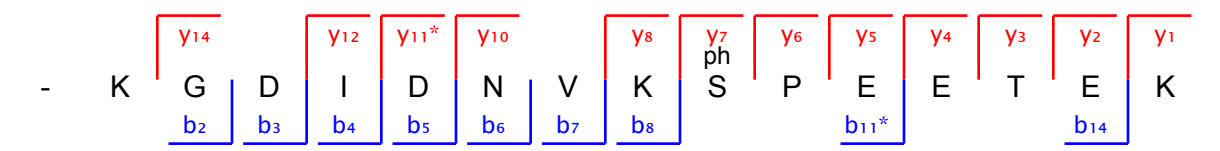

Raw file: 20150812\_A375SR\_Phospho\_BR1\_08  
 Scan: 4912 Method: FTMS; HCD Score: 199.01 m/z: 523.27 Gene names: CALD1

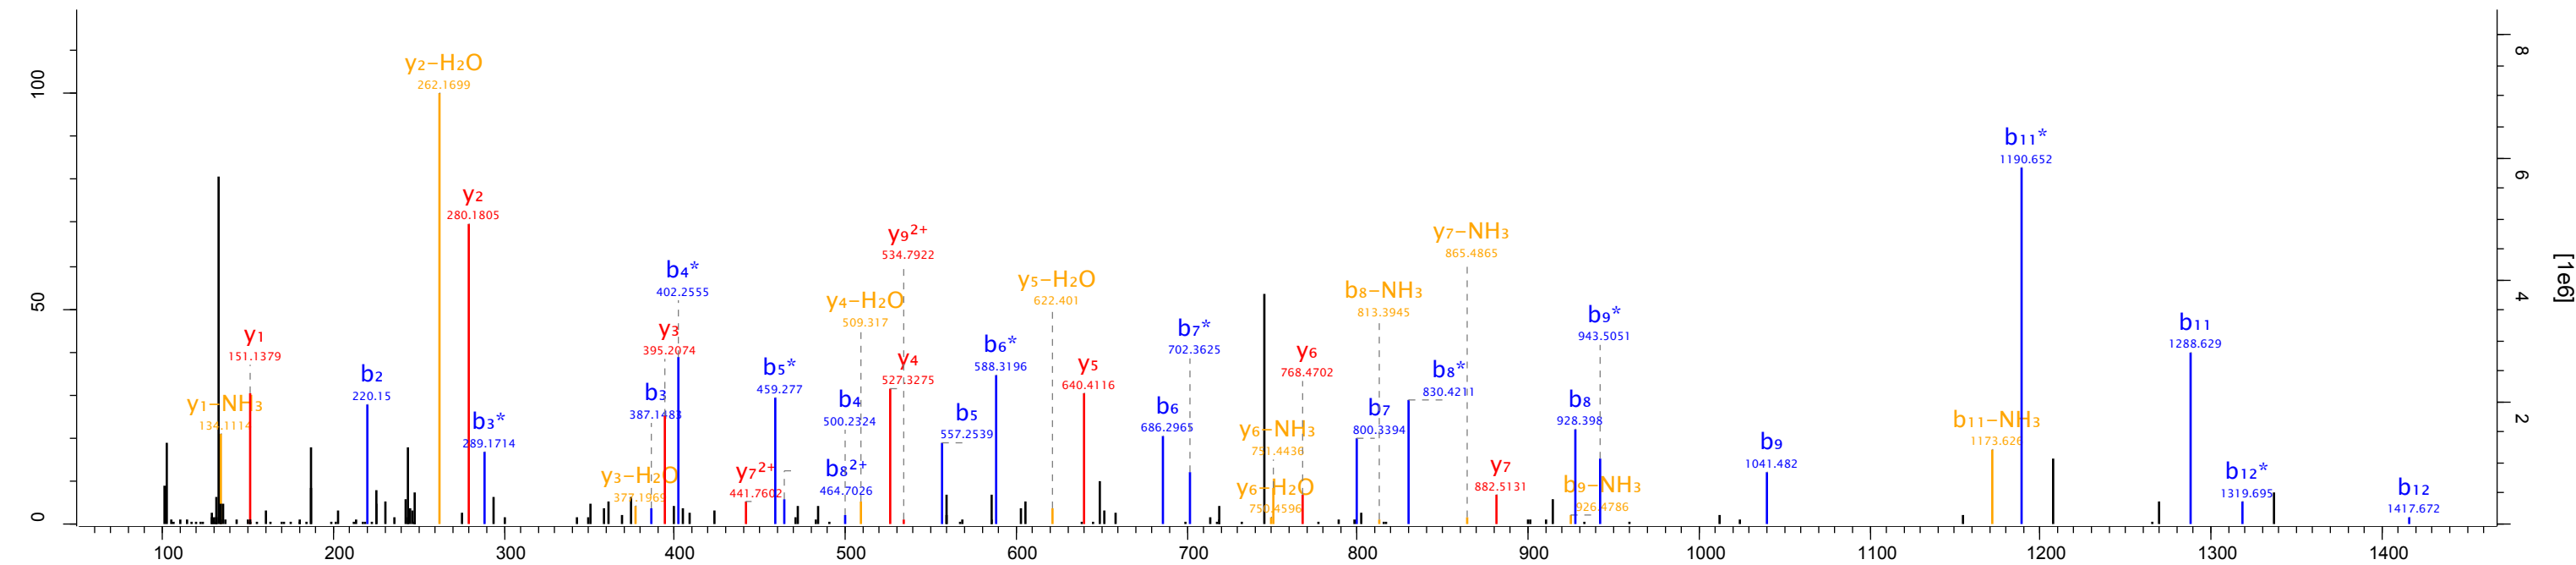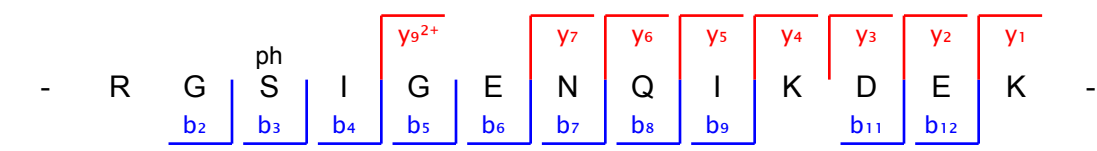

Raw file: 20150812\_A375SR\_Phospho\_BR1\_08  
 Scan: 5392 Method: FTMS; HCD Score: 251.56 m/z: 761.35 Gene names: BCLAF1

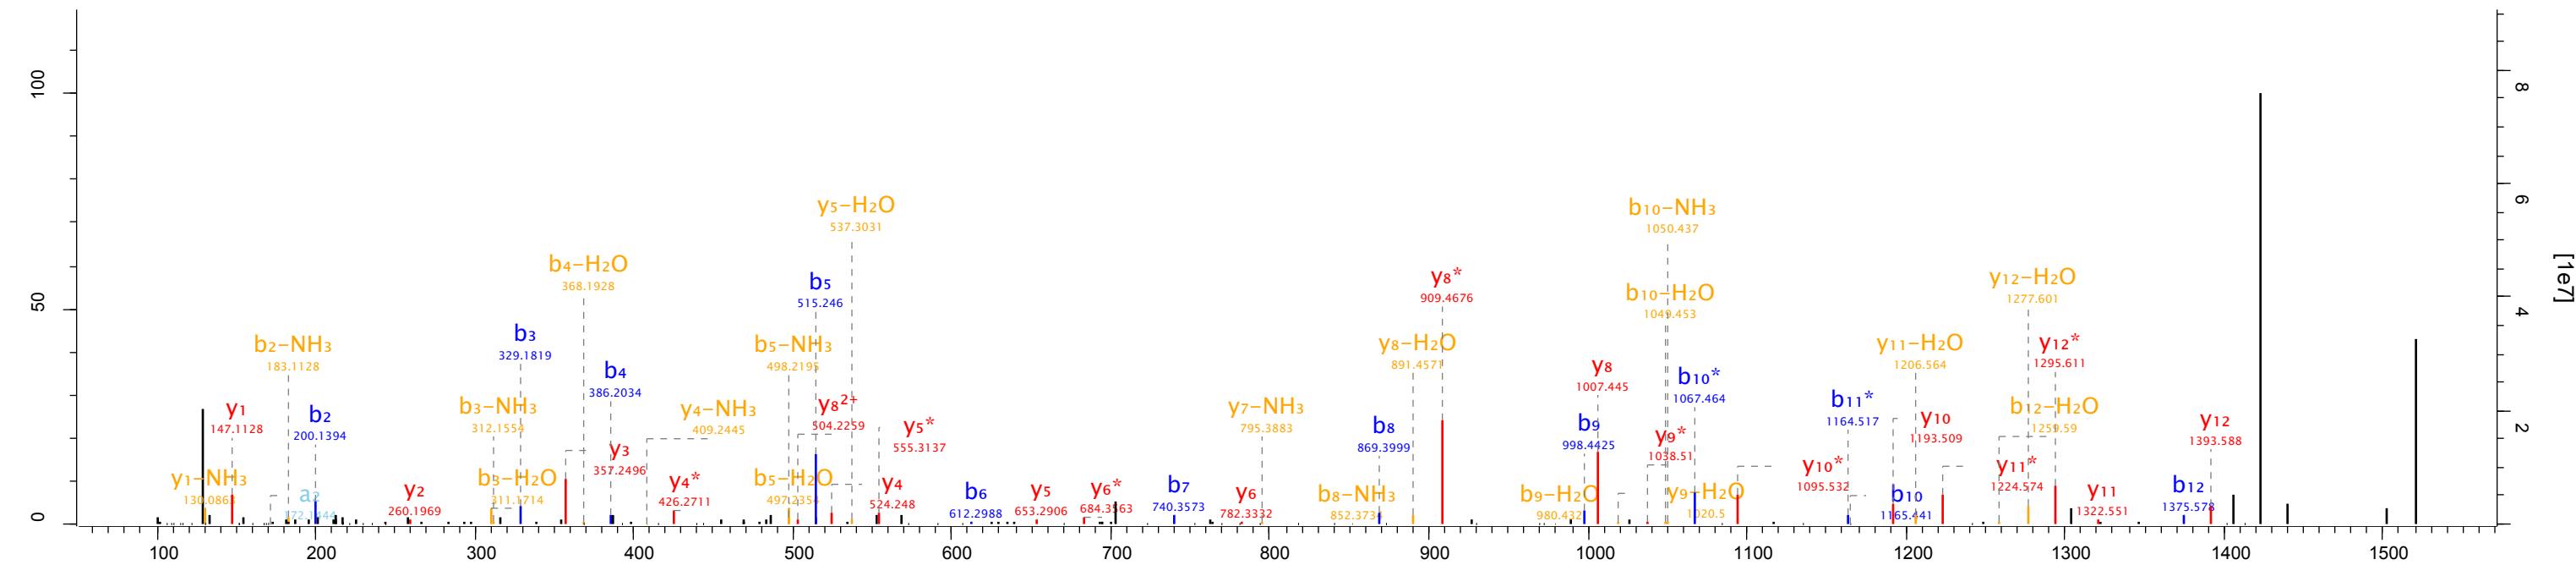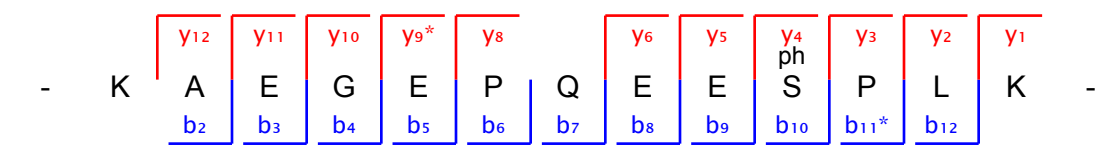

Raw file: 20150812\_A375SR\_Phospho\_BR1\_08  
 Scan: 5402 Method: FTMS; HCD Score: 143.23 m/z: 532.47 Gene names: DNAJB6

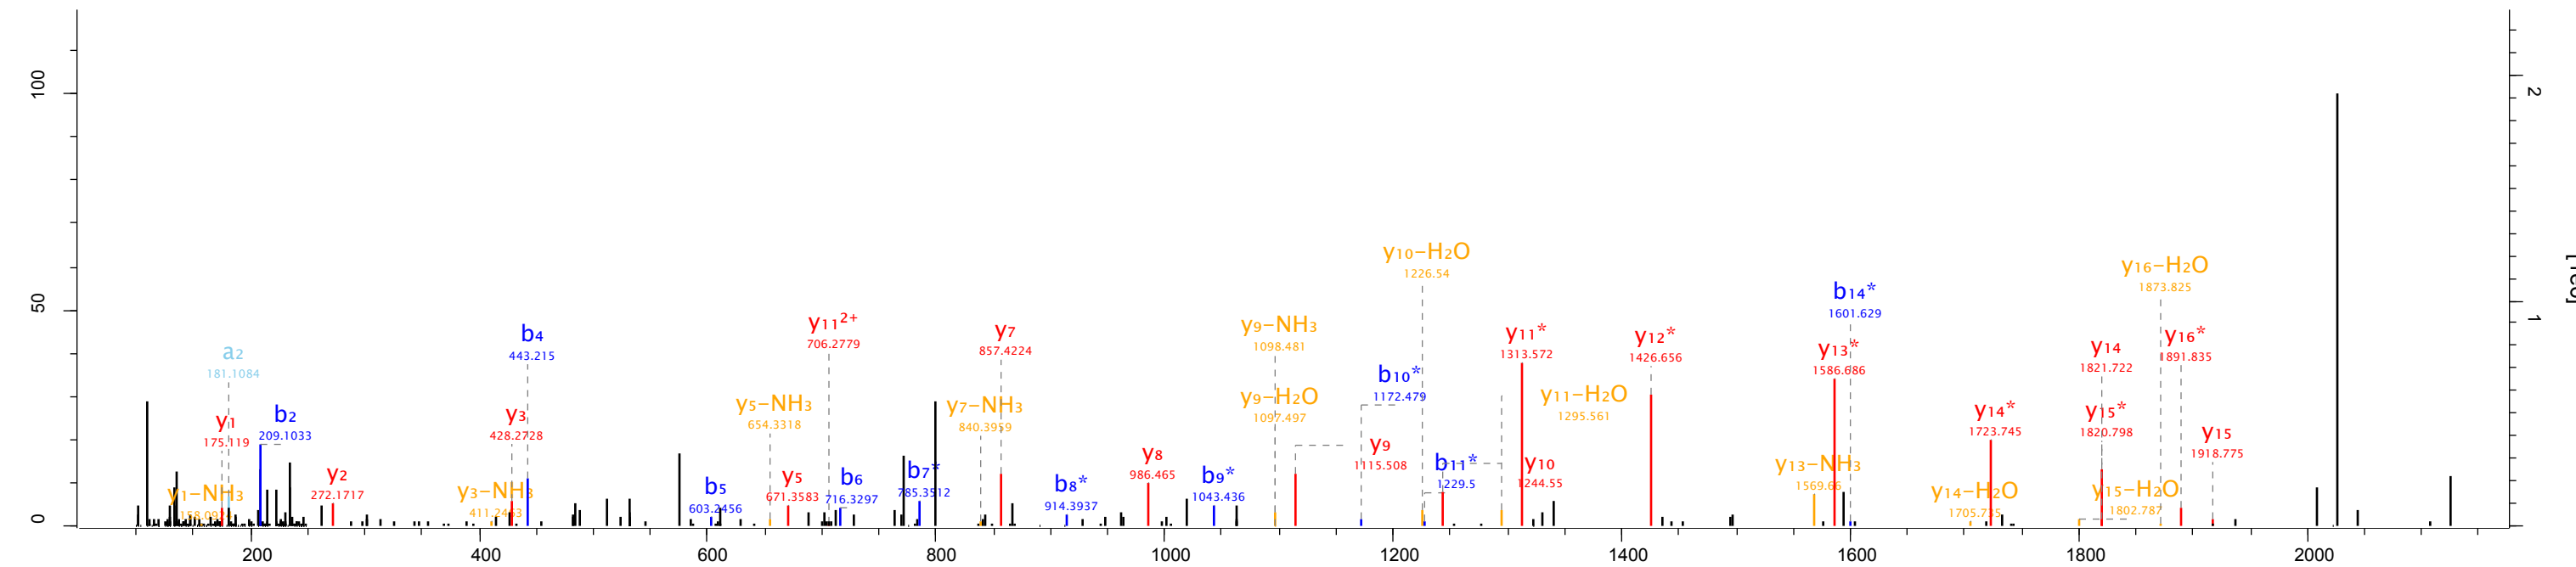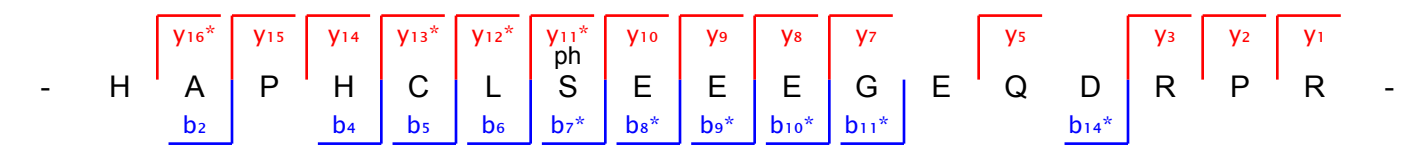

Raw file Scan Method Score m/z Gene names  
 20150812\_A375SR\_Phospho\_BR1\_08 5462 FTMS; HCD 58.82 671.79 LUC7L2;C7orf55

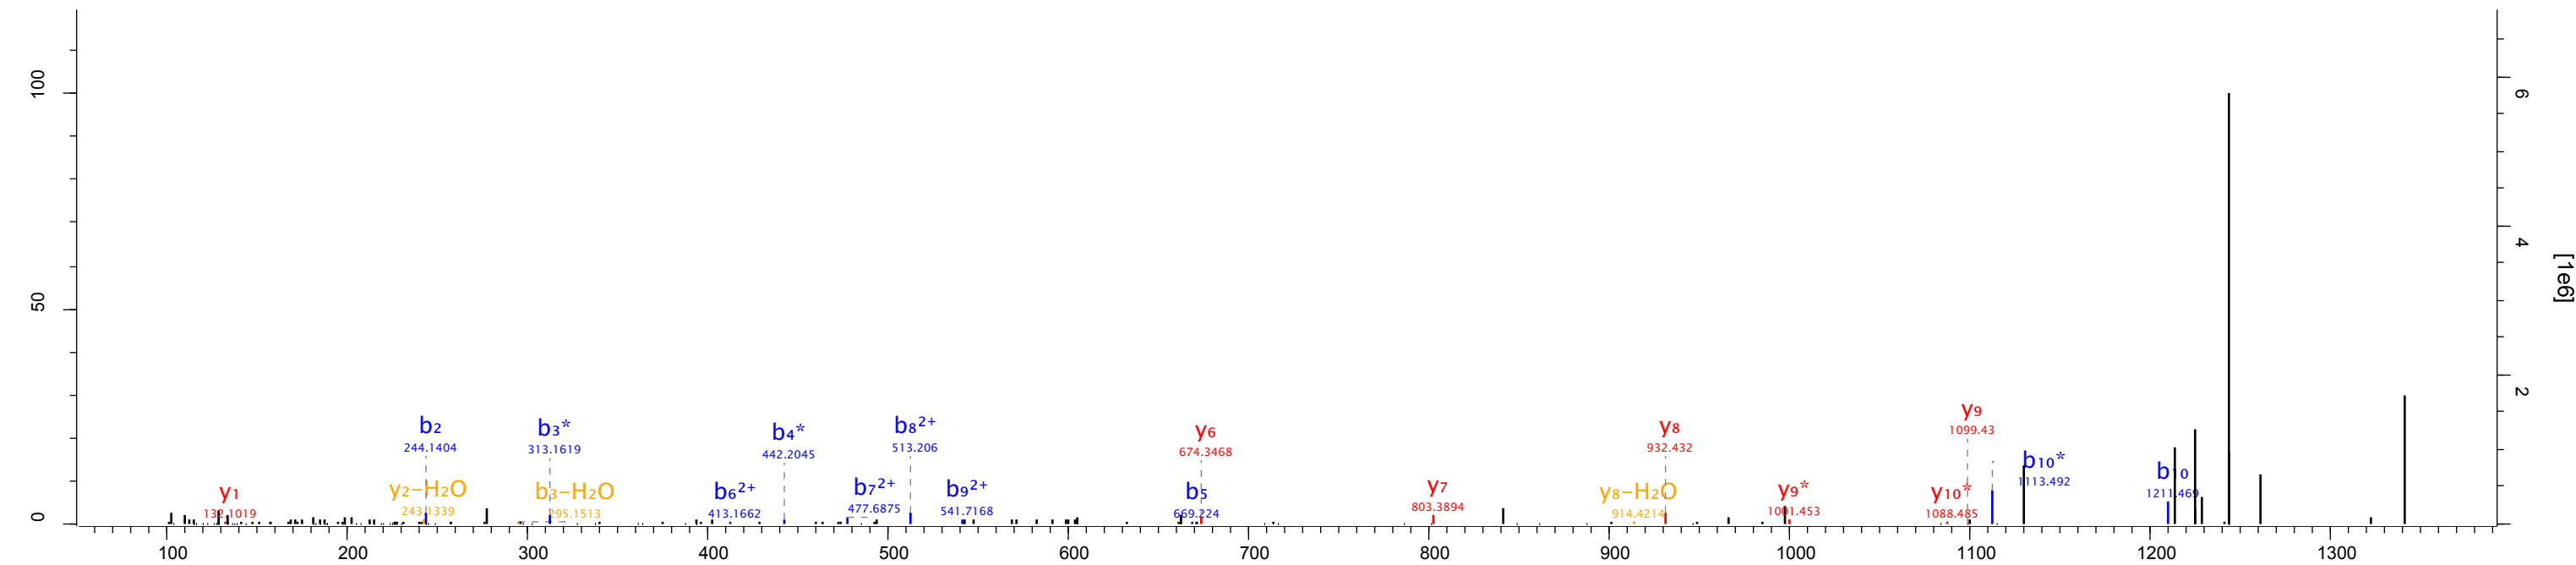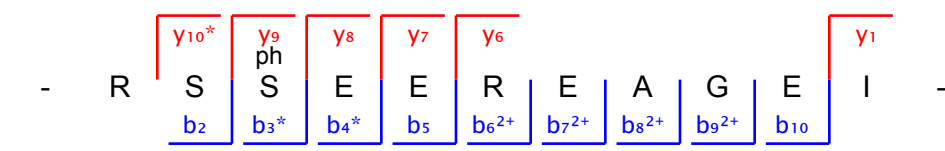

Raw file 20150812\_A375SR\_Phospho\_BR1\_08 Scan 5592 Method FTMS; HCD Score 276.38 m/z 718.33 Gene names RBM25

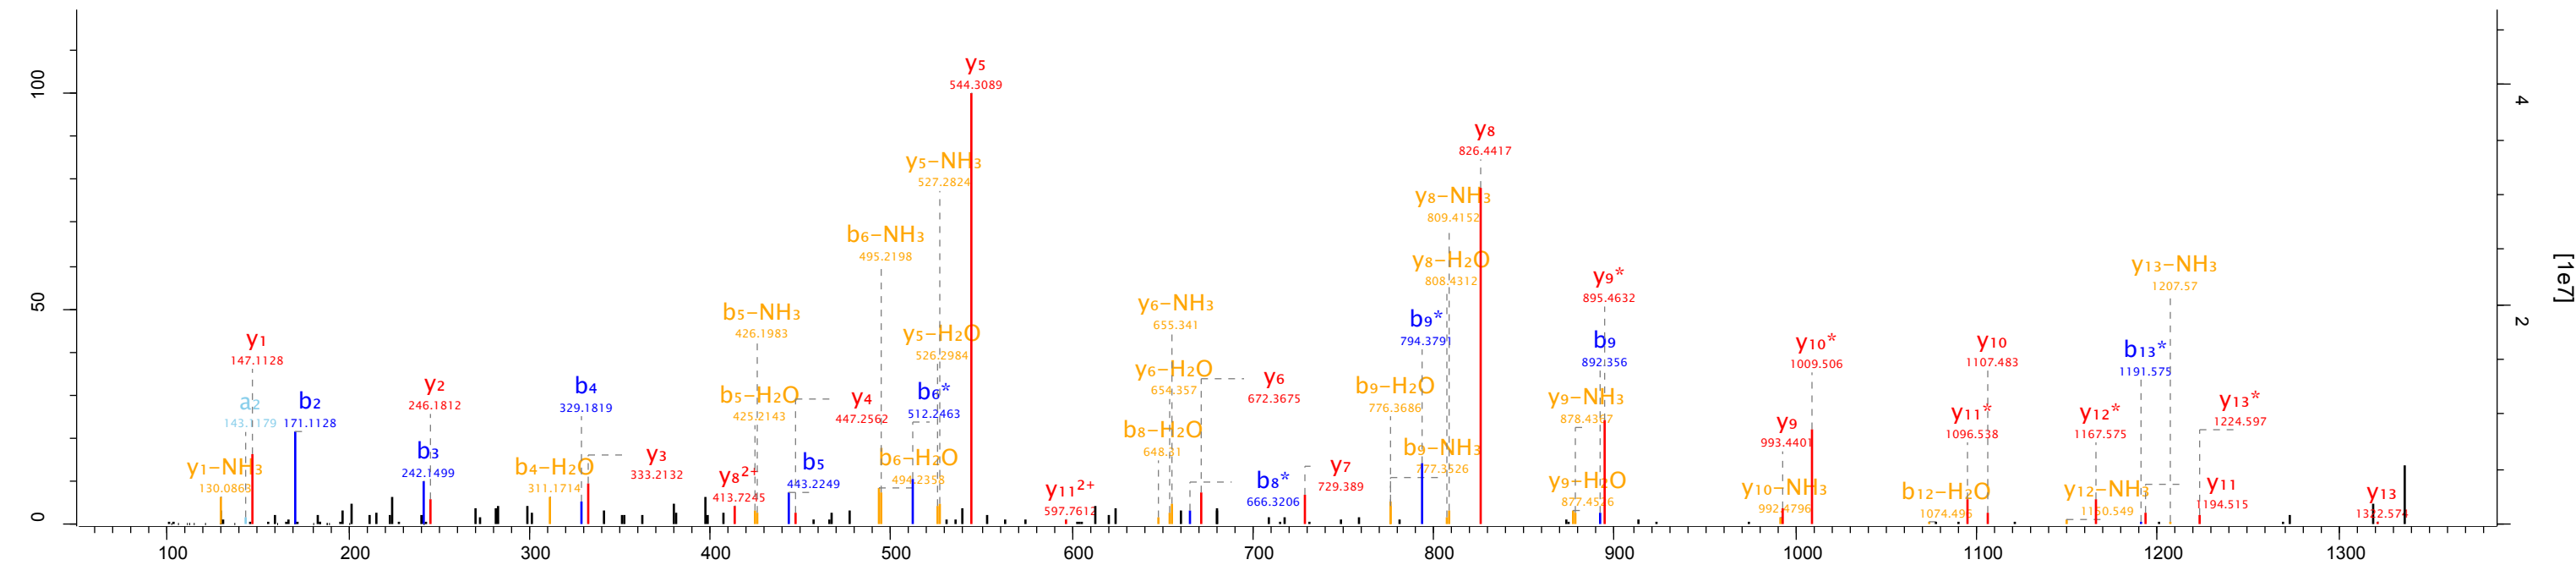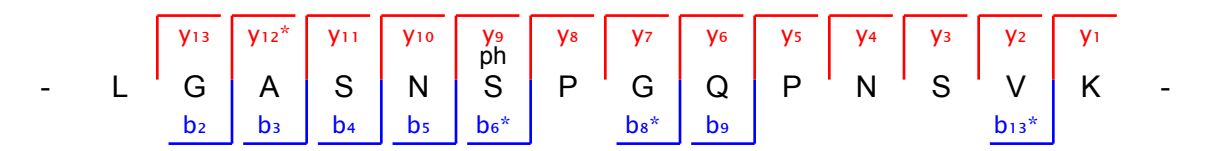



Raw file 20150812\_A375SR\_Phospho\_BR1\_08 Scan 5652 Method FTMS; HCD Score 246.67 m/z 1052.4 Gene names RBM17

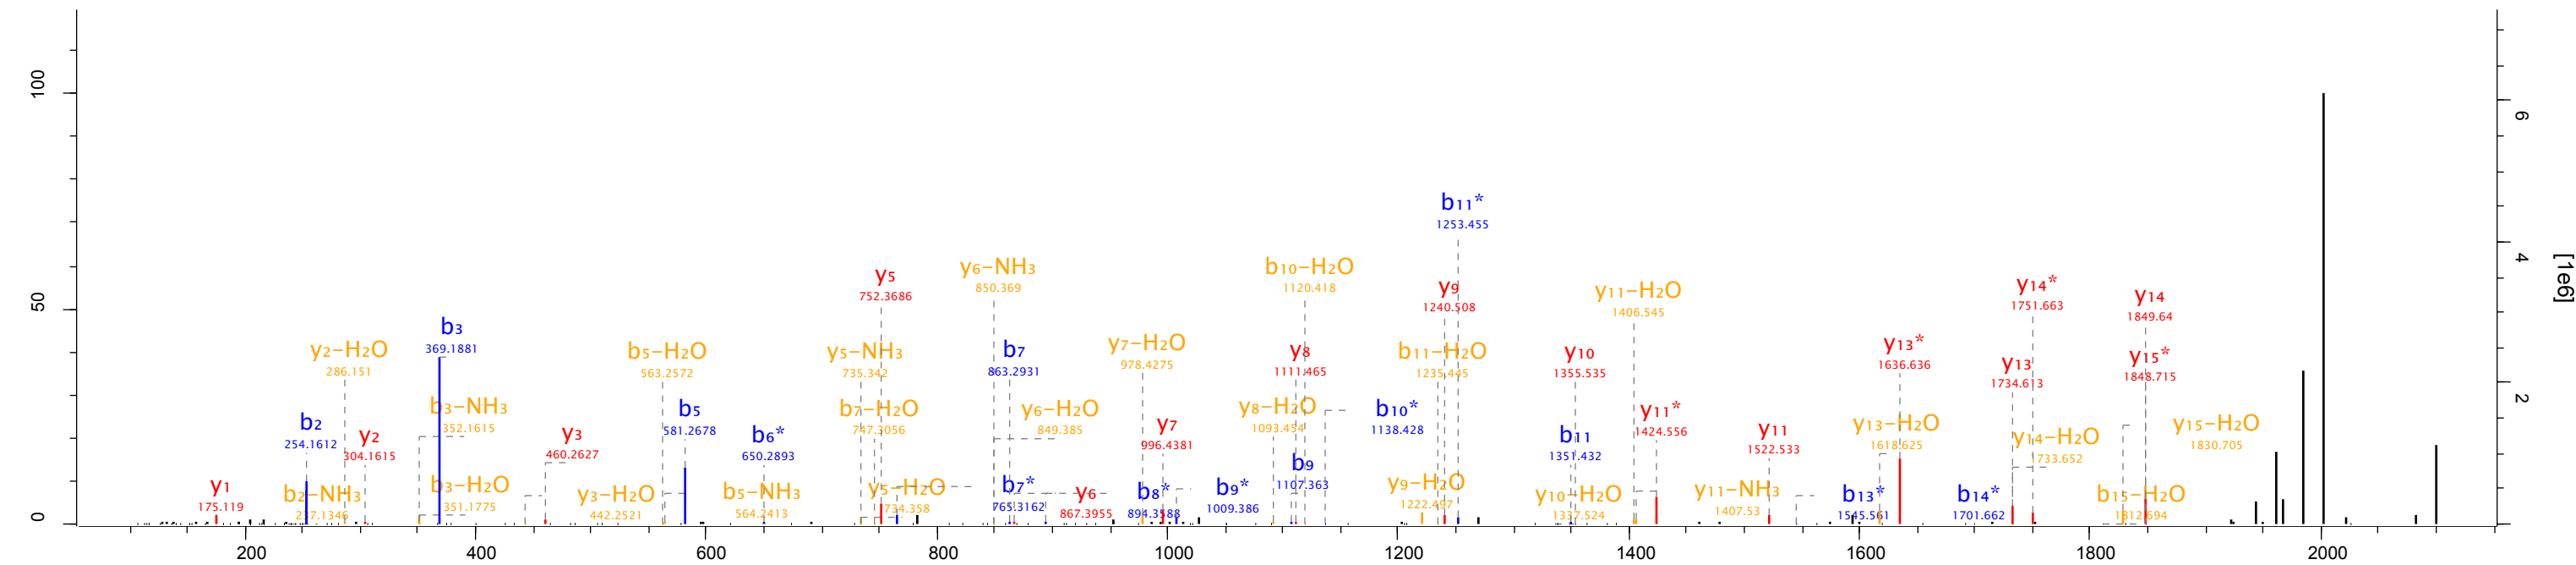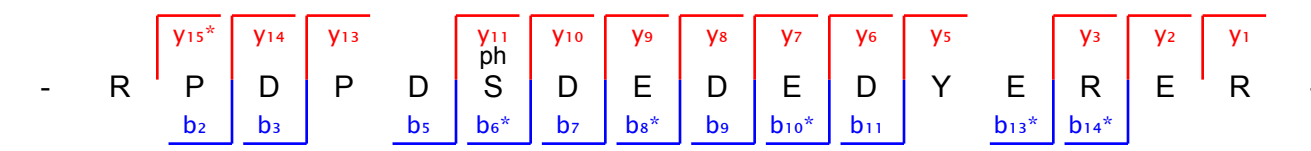

Raw file: 20150812\_A375SR\_Phospho\_BR1\_08  
 Scan: 6652 Method: FTMS; HCD Score: 154.84 m/z: 908.9 Gene names: PARD3

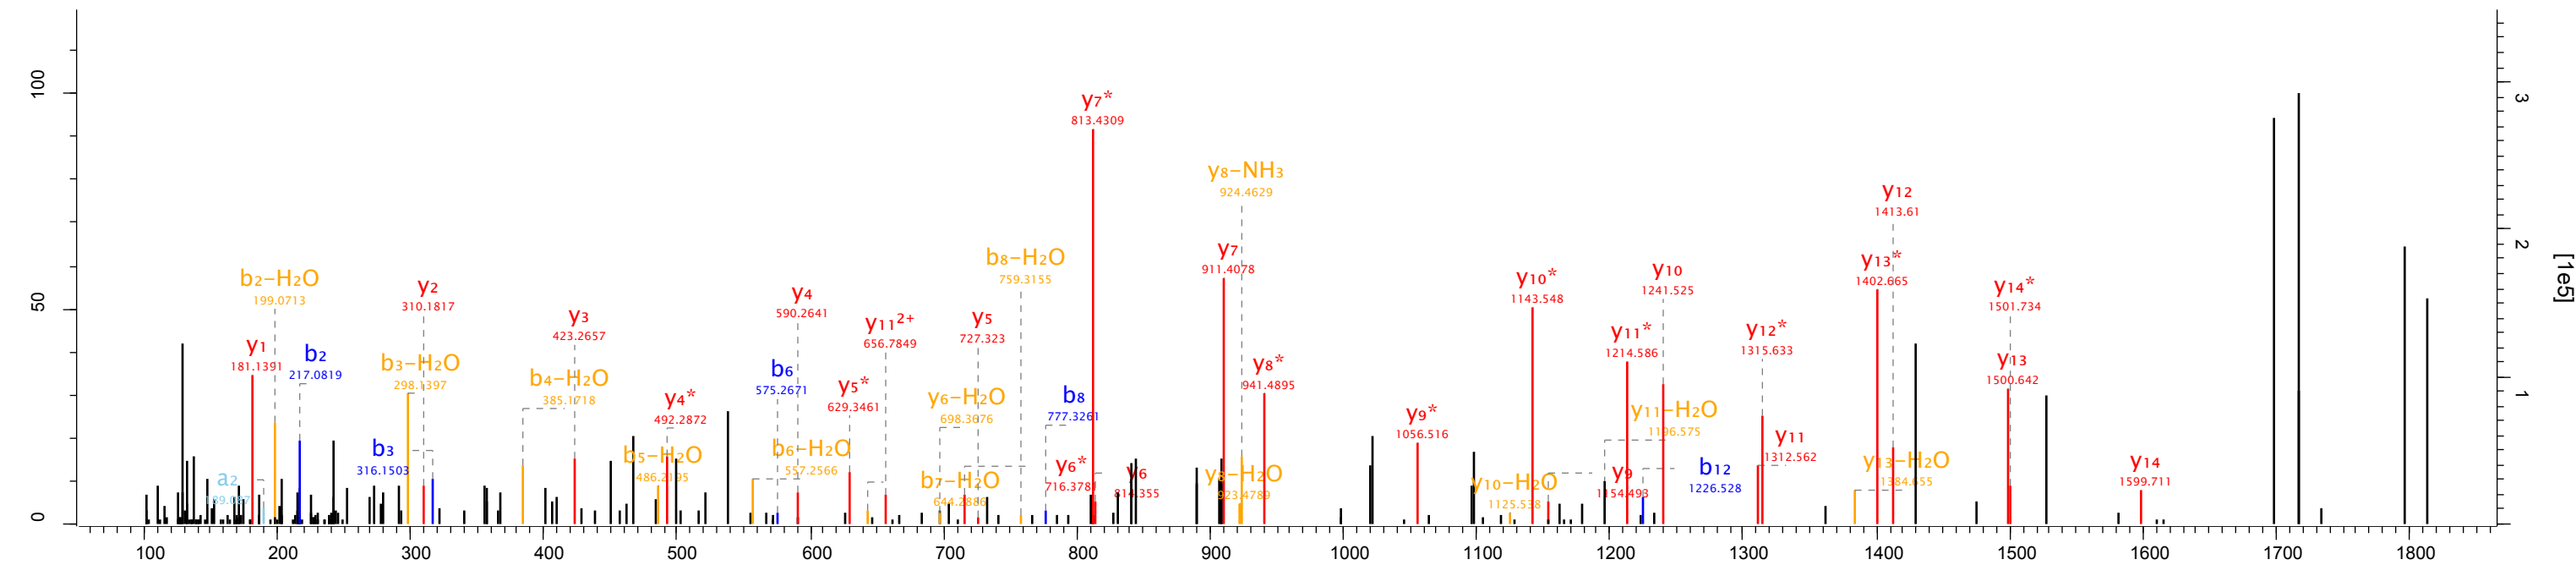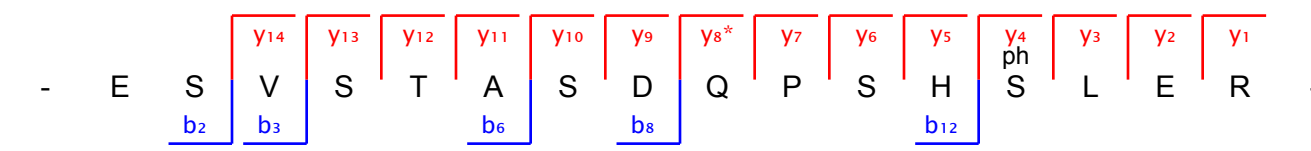

Raw file: 20150812\_A375SR\_Phospho\_BR1\_08  
 Scan: 6972 Method: FTMS; HCD Score: 131.56 m/z: 674.7 Gene names: MAPRE1

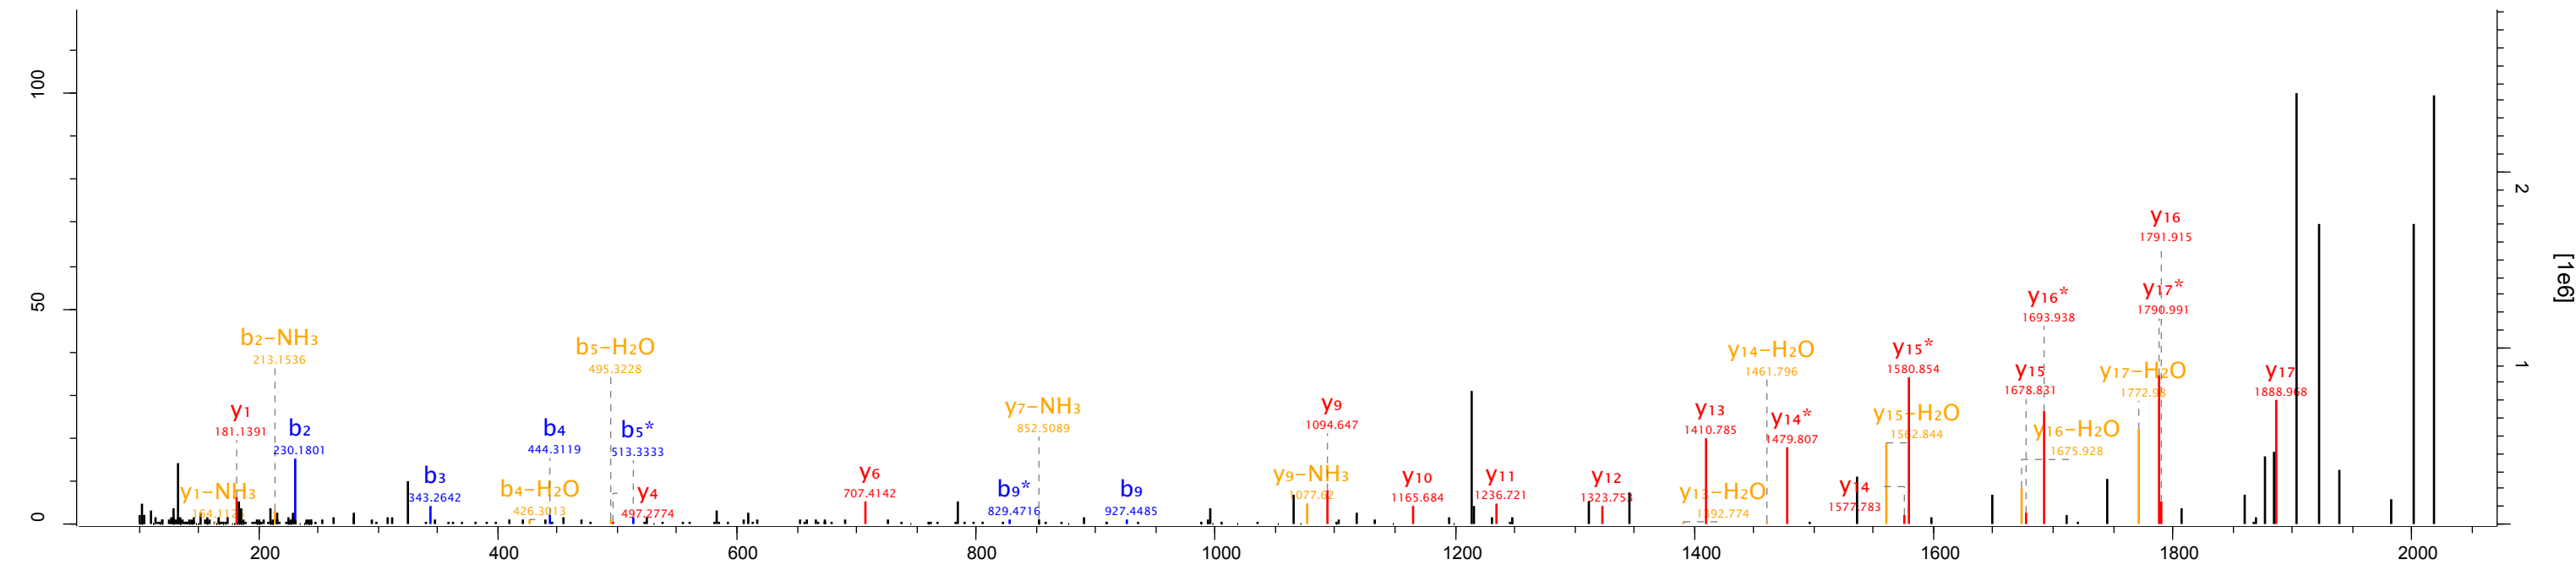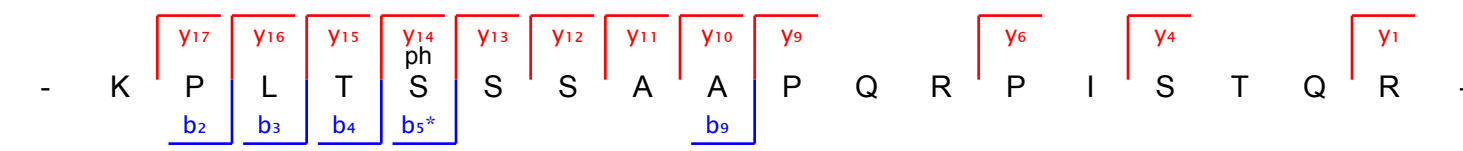

Raw file: 20150812\_A375SR\_Phospho\_BR1\_08  
 Scan: 7412 Method: FTMS; HCD Score: 187.56 m/z: 837.34 Gene names: PDHA1;PDHA2

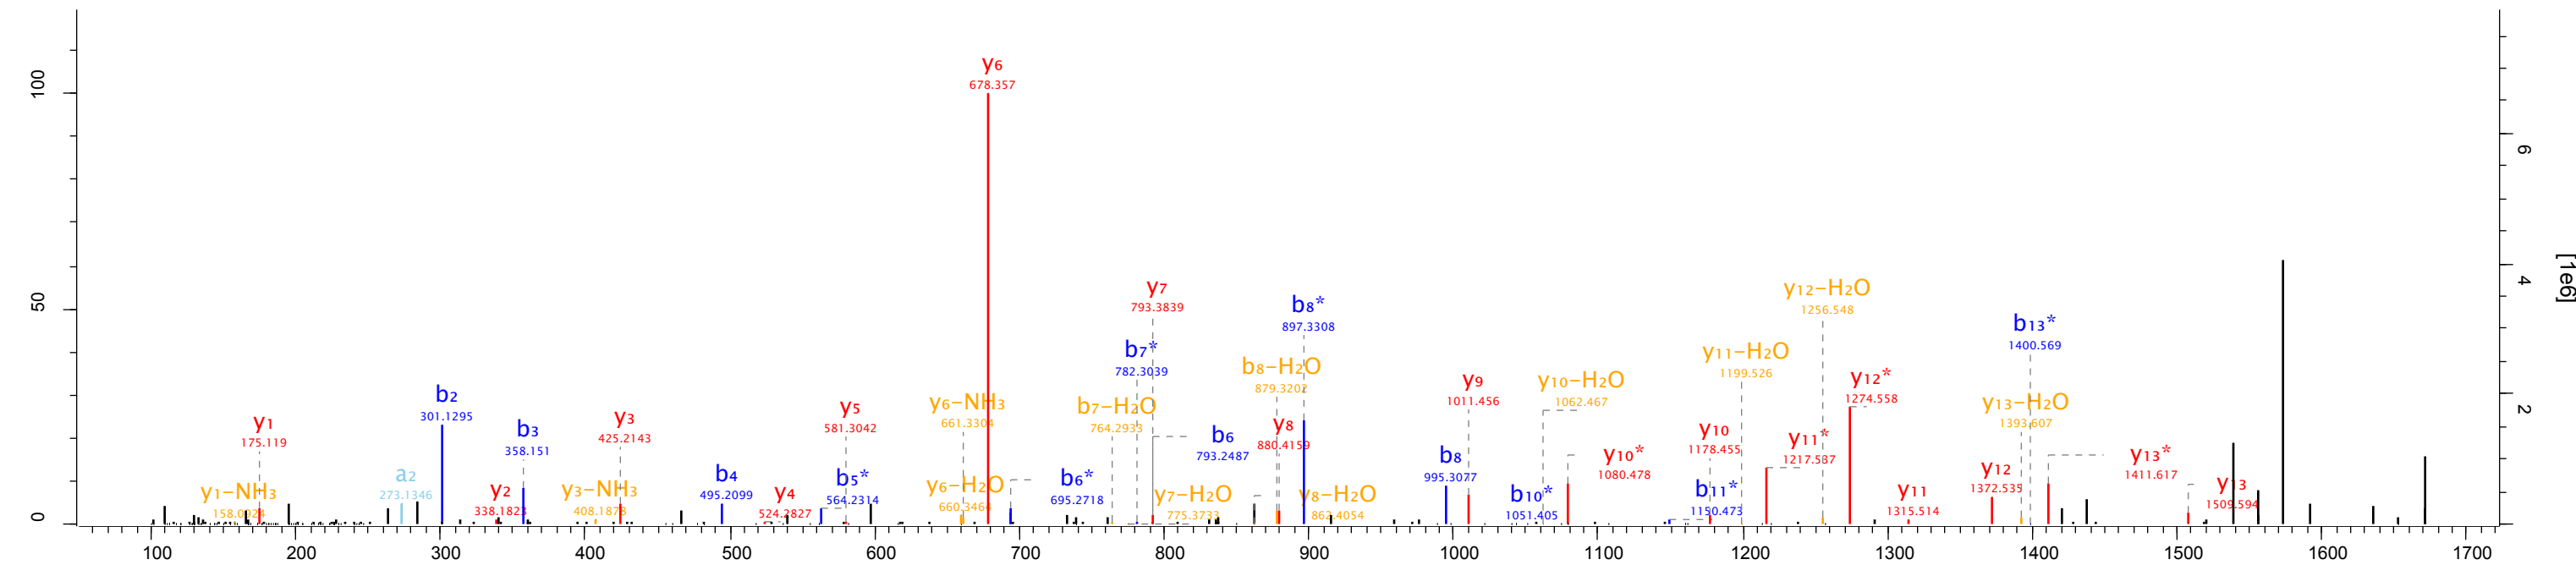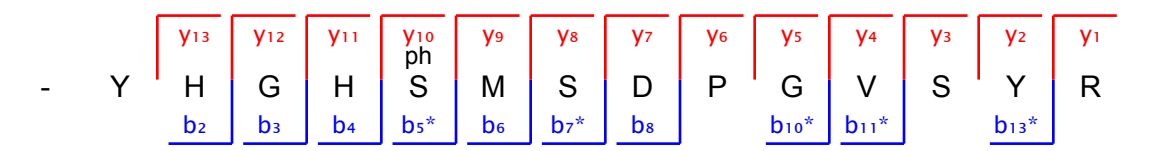

Raw file: 20150812\_A375SR\_Phospho\_BR1\_08  
 Scan: 7472 Method: FTMS; HCD Score: 162.81 m/z: 687.84 Gene names: ZC3H14

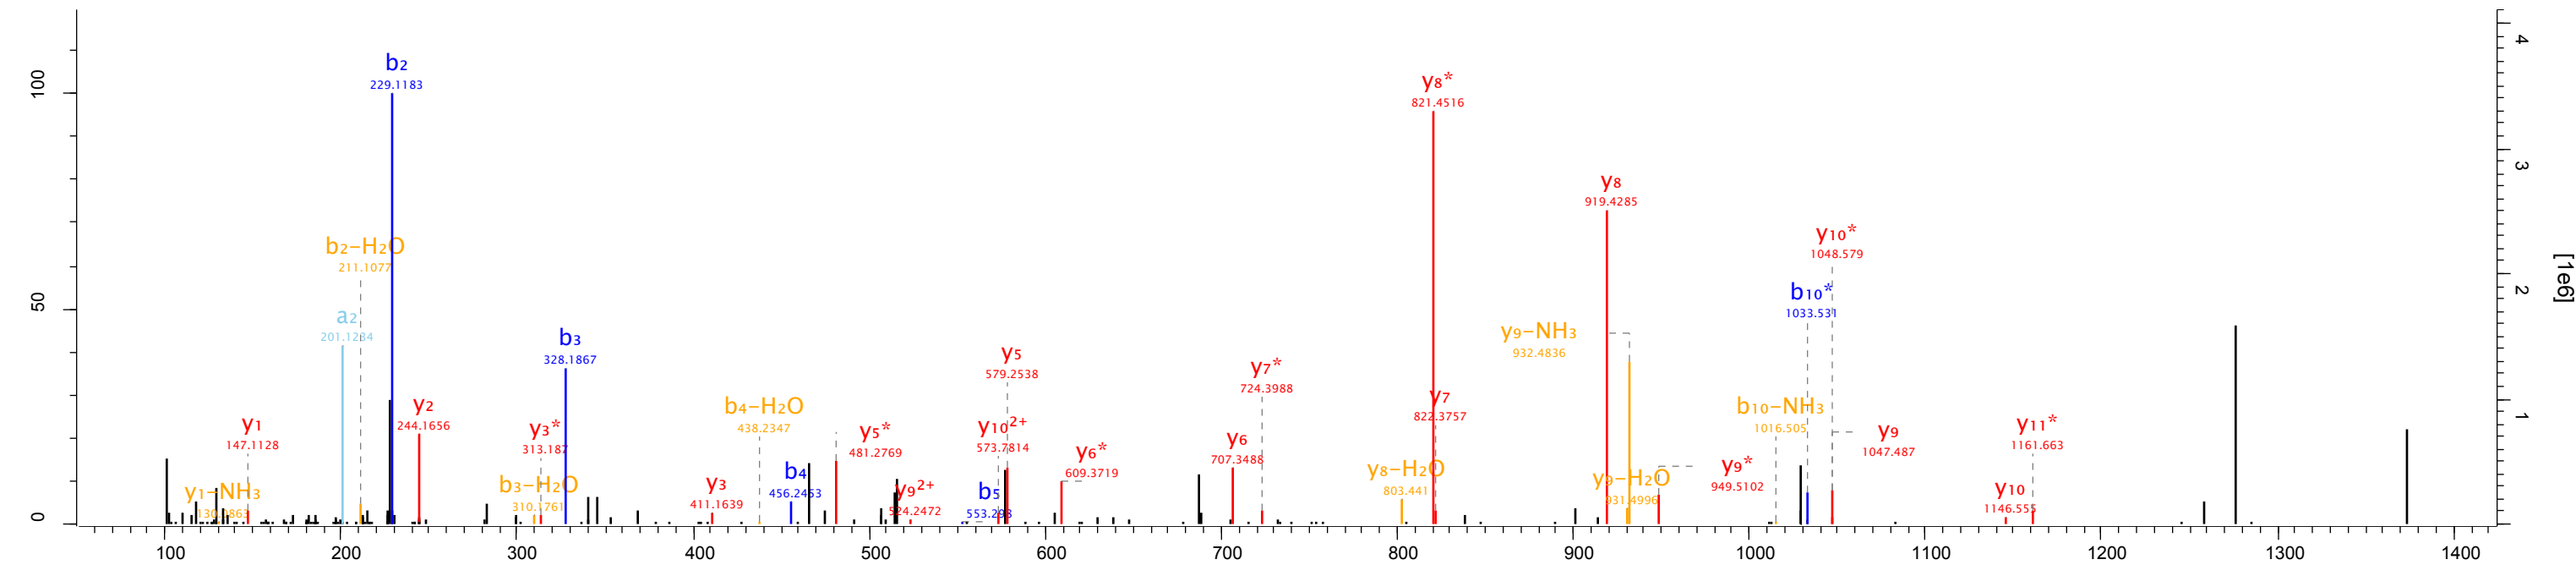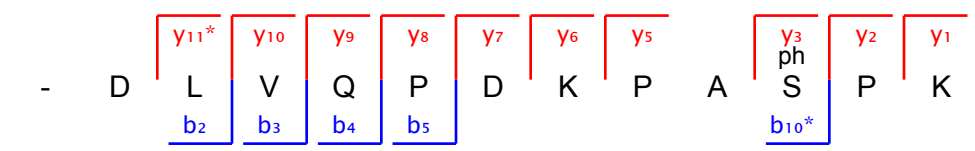

Raw file: 20150812\_A375SR\_Phospho\_BR1\_08  
 Scan: 7582 Method: FTMS; HCD Score: 73.77 m/z: 617.07 Gene names: SFPQ

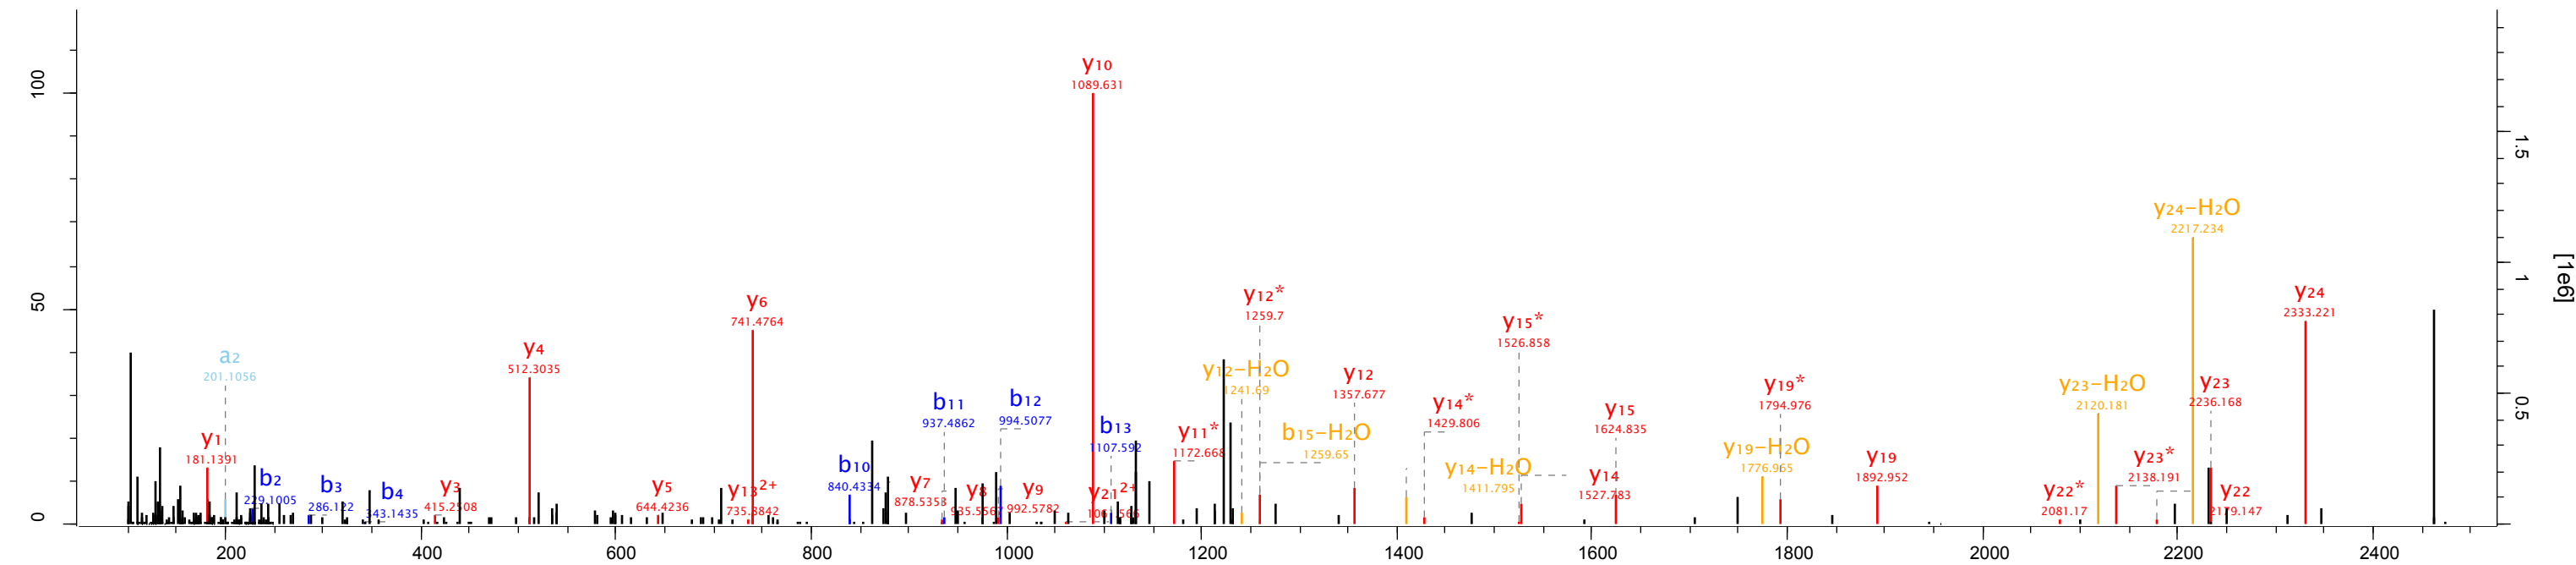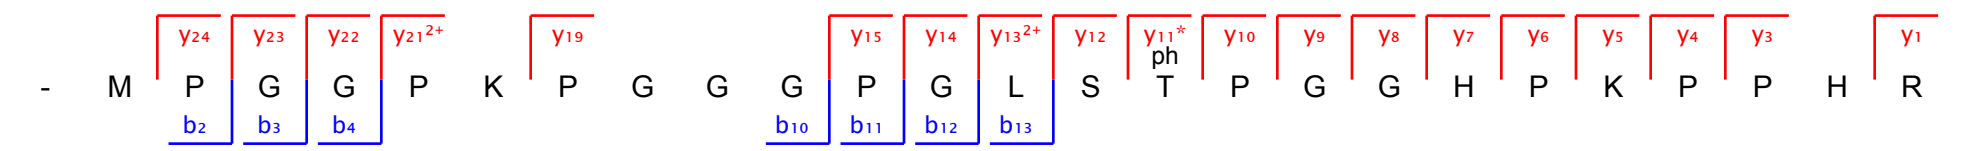

Raw file: 20150812\_A375SR\_Phospho\_BR1\_08  
 Scan: 8222 Method: FTMS; HCD Score: 78.55 m/z: 749.86 Gene names: DYNC1LI2

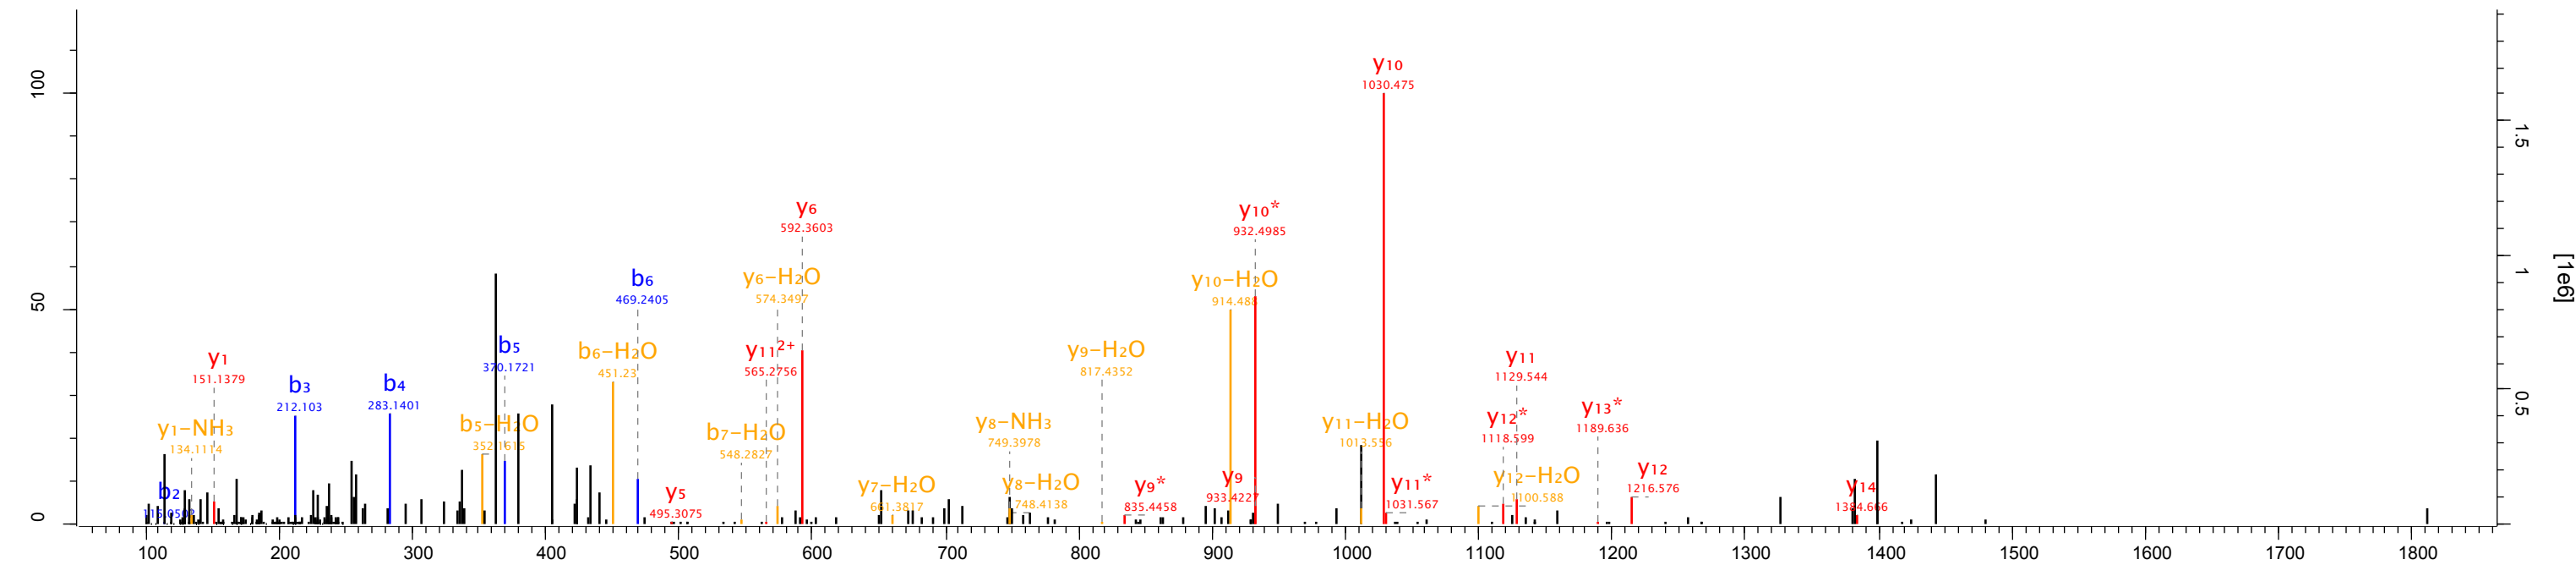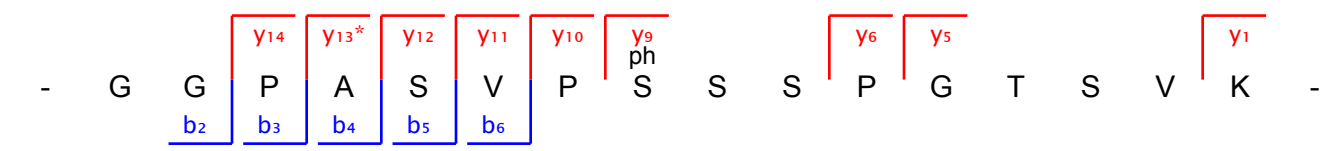

Raw file  
20150812\_A375SR\_Phospho\_BR1\_08

Scan Method Score m/z Gene names  
8862 FTMS; HCD 258.27 1136.03 SLC16A1

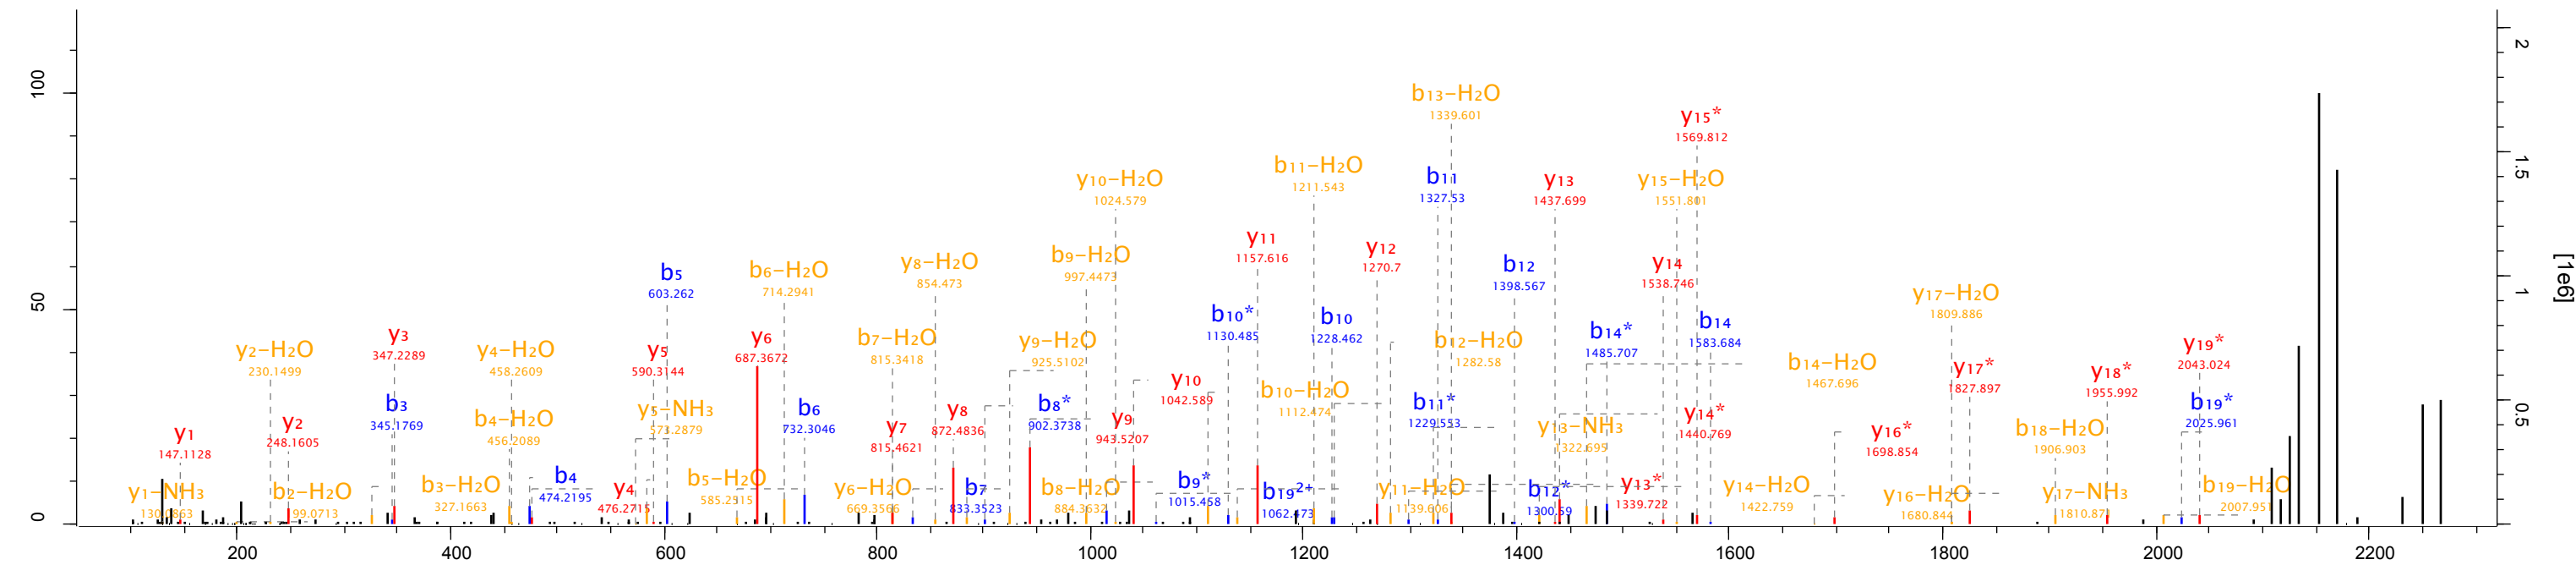

- E S K E E E T S I D V A G K P N E V T K -

b3 b4 b5 b6 b7 b8\* b9\* b10 b11 b12 b14 b19\*



Raw file 20150812\_A375SR\_Phospho\_BR1\_08 Scan 9082 Method FTMS; HCD Score 224.57 m/z 866.4 Gene names FAM21C;FAM21A

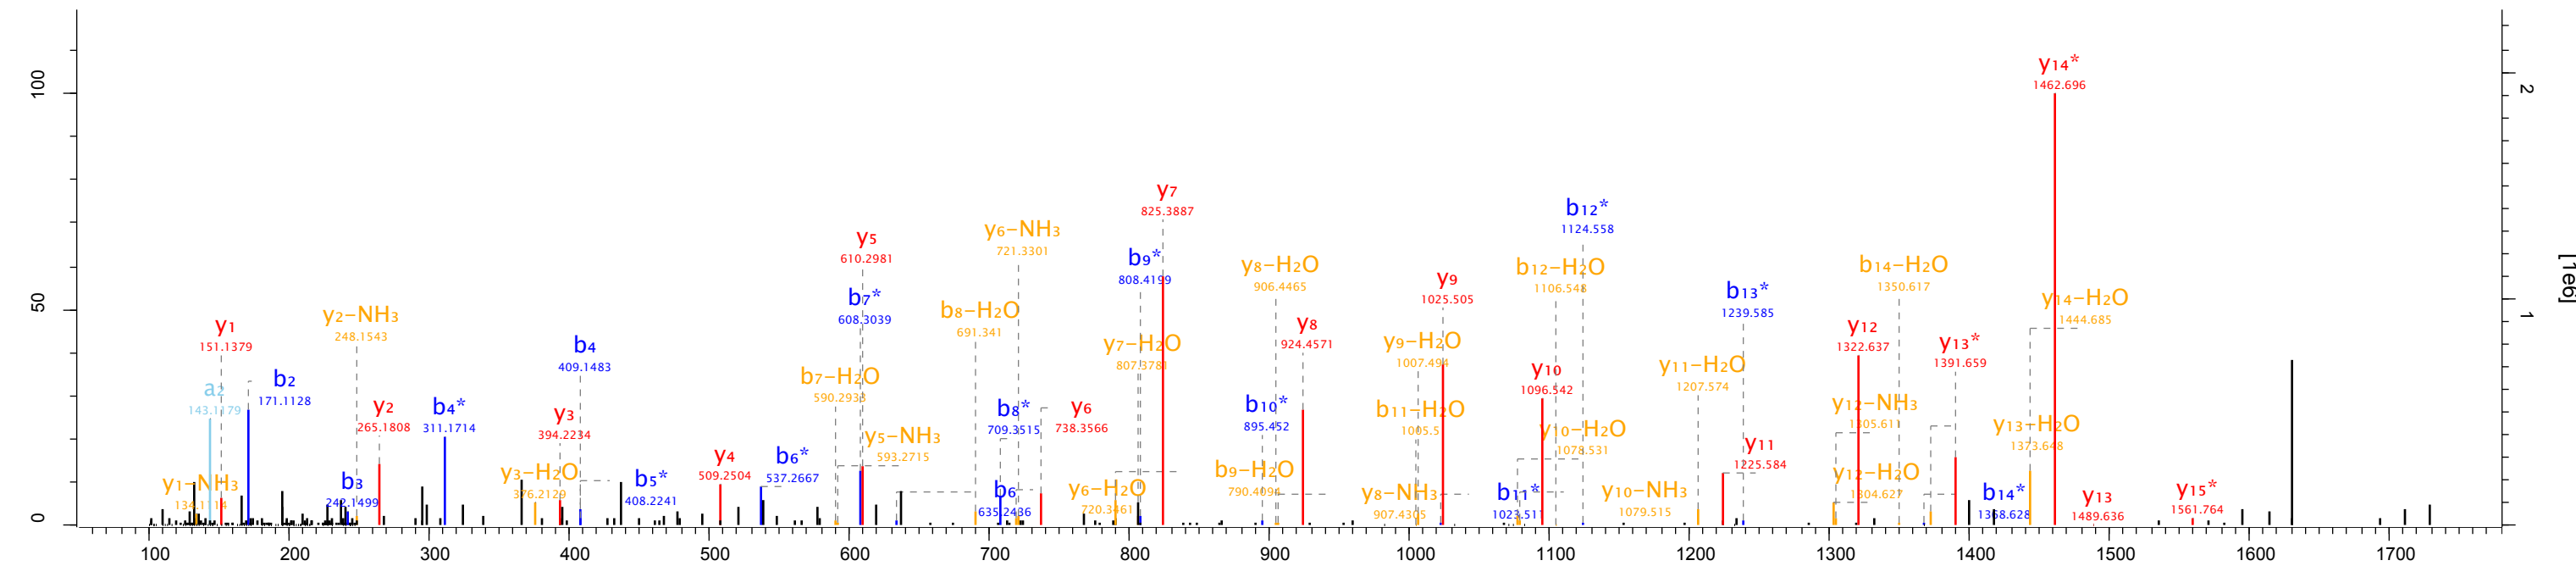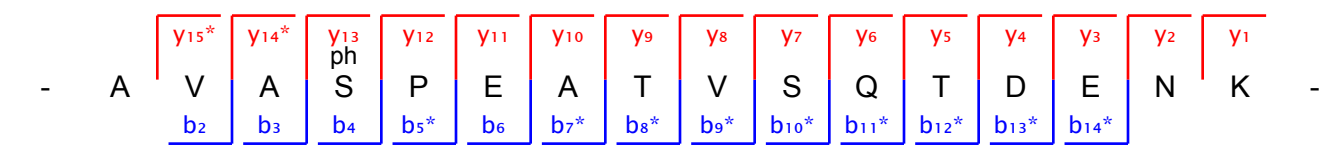

Raw file: 20150812\_A375SR\_Phospho\_BR1\_09  
 Scan: 10772 Method: FTMS; HCD Score: 268.31 m/z: 1012.45 Gene names: MAP1B

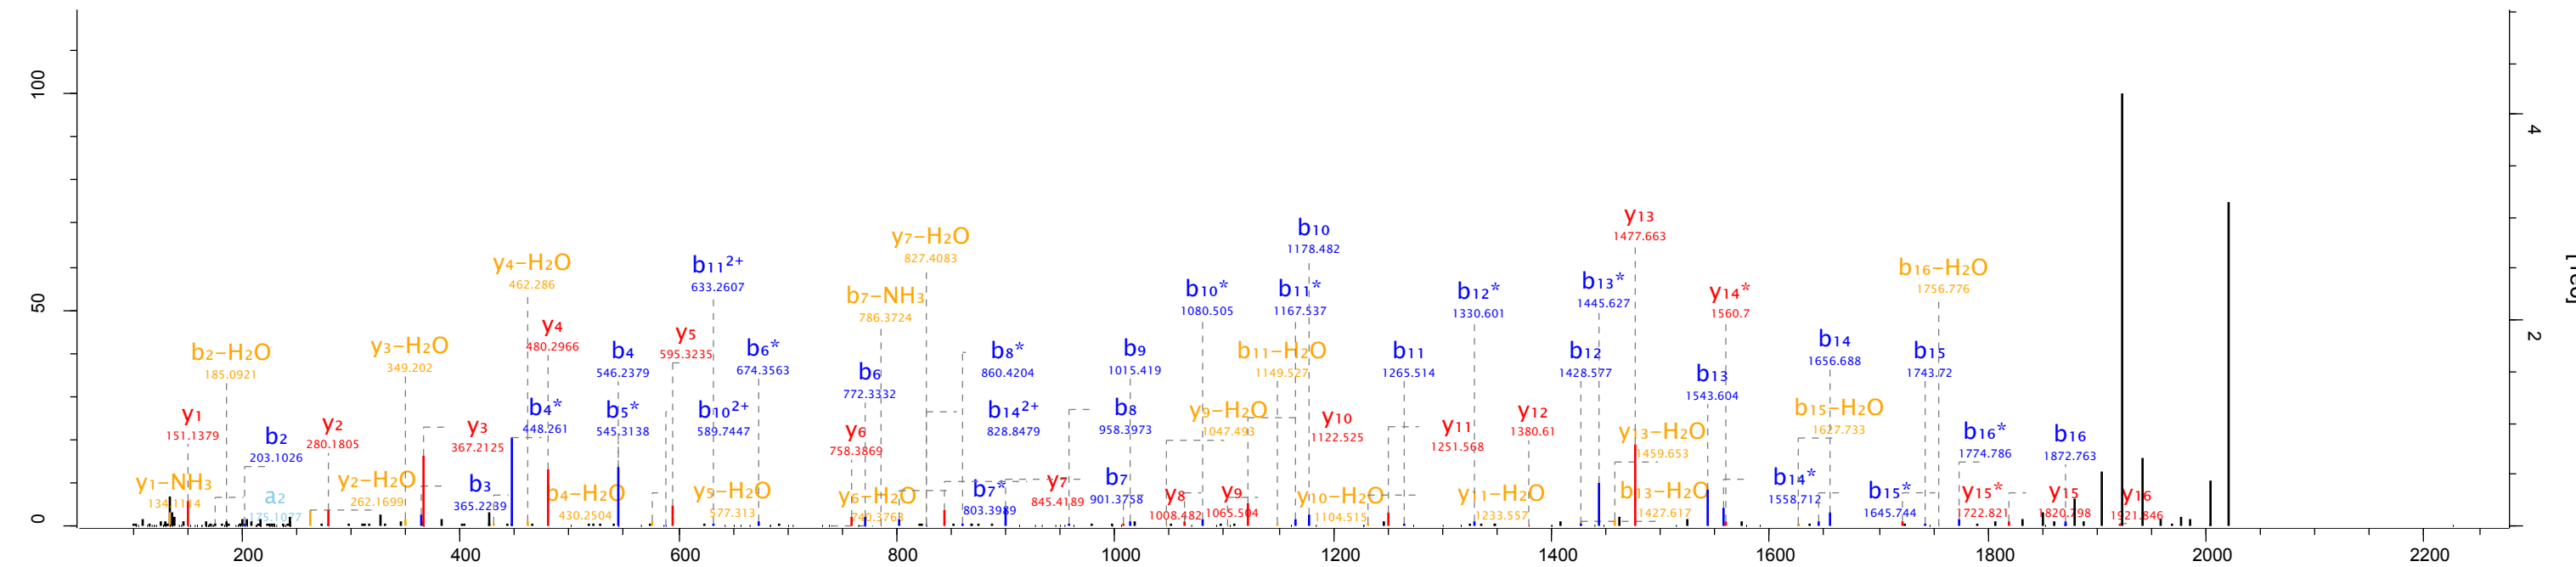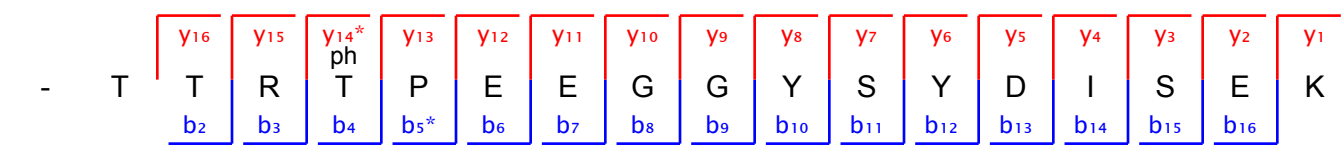

Raw file Scan Method Score m/z Gene names  
 20150812\_A375SR\_Phospho\_BR1\_09 10932 FTMS; HCD 109.1 681.33 C11orf84

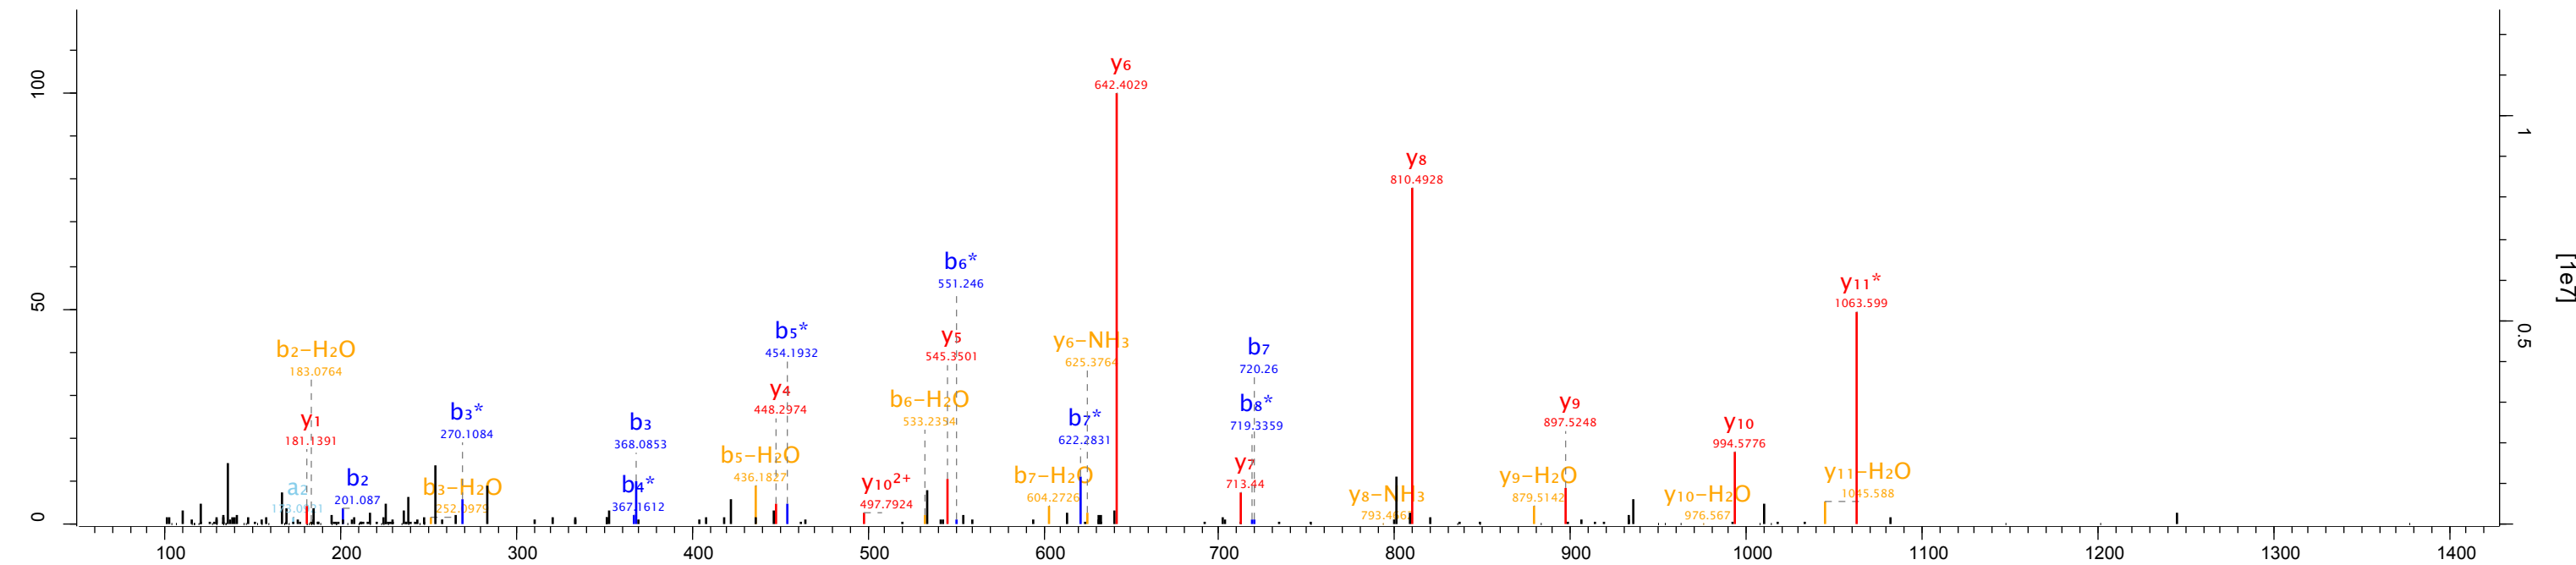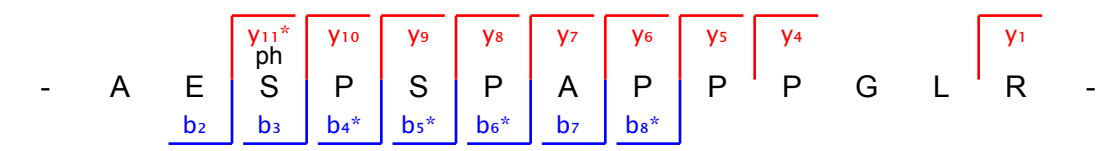

Raw file  
 20150812\_A375SR\_Phospho\_BR1\_09  
 Scan 11772 Method FTMS; HCD Score 88.77 m/z 491.94 Gene names WDR44

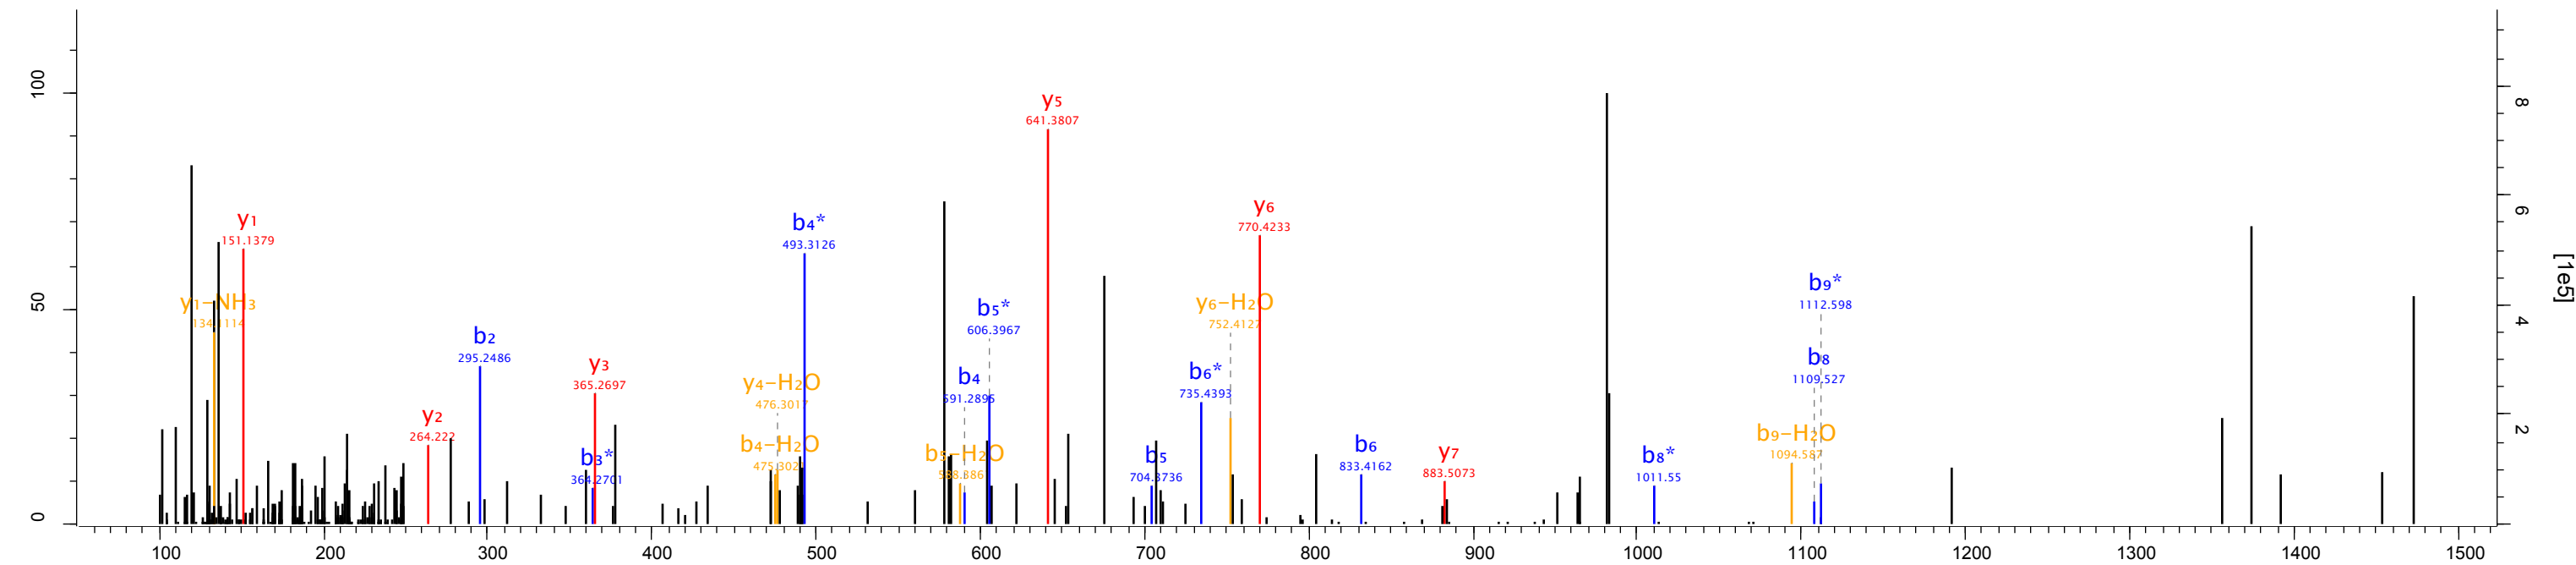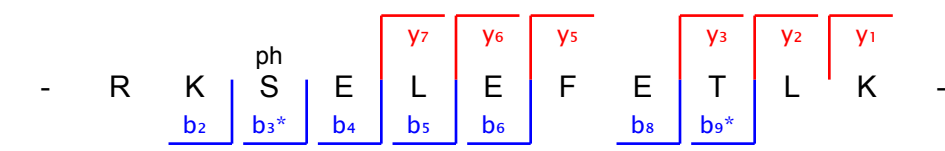

Raw file 20150812\_A375SR\_Phospho\_BR1\_09 Scan 12172 Method FTMS; HCD Score 331.46 m/z 920.4 Gene names LIG1

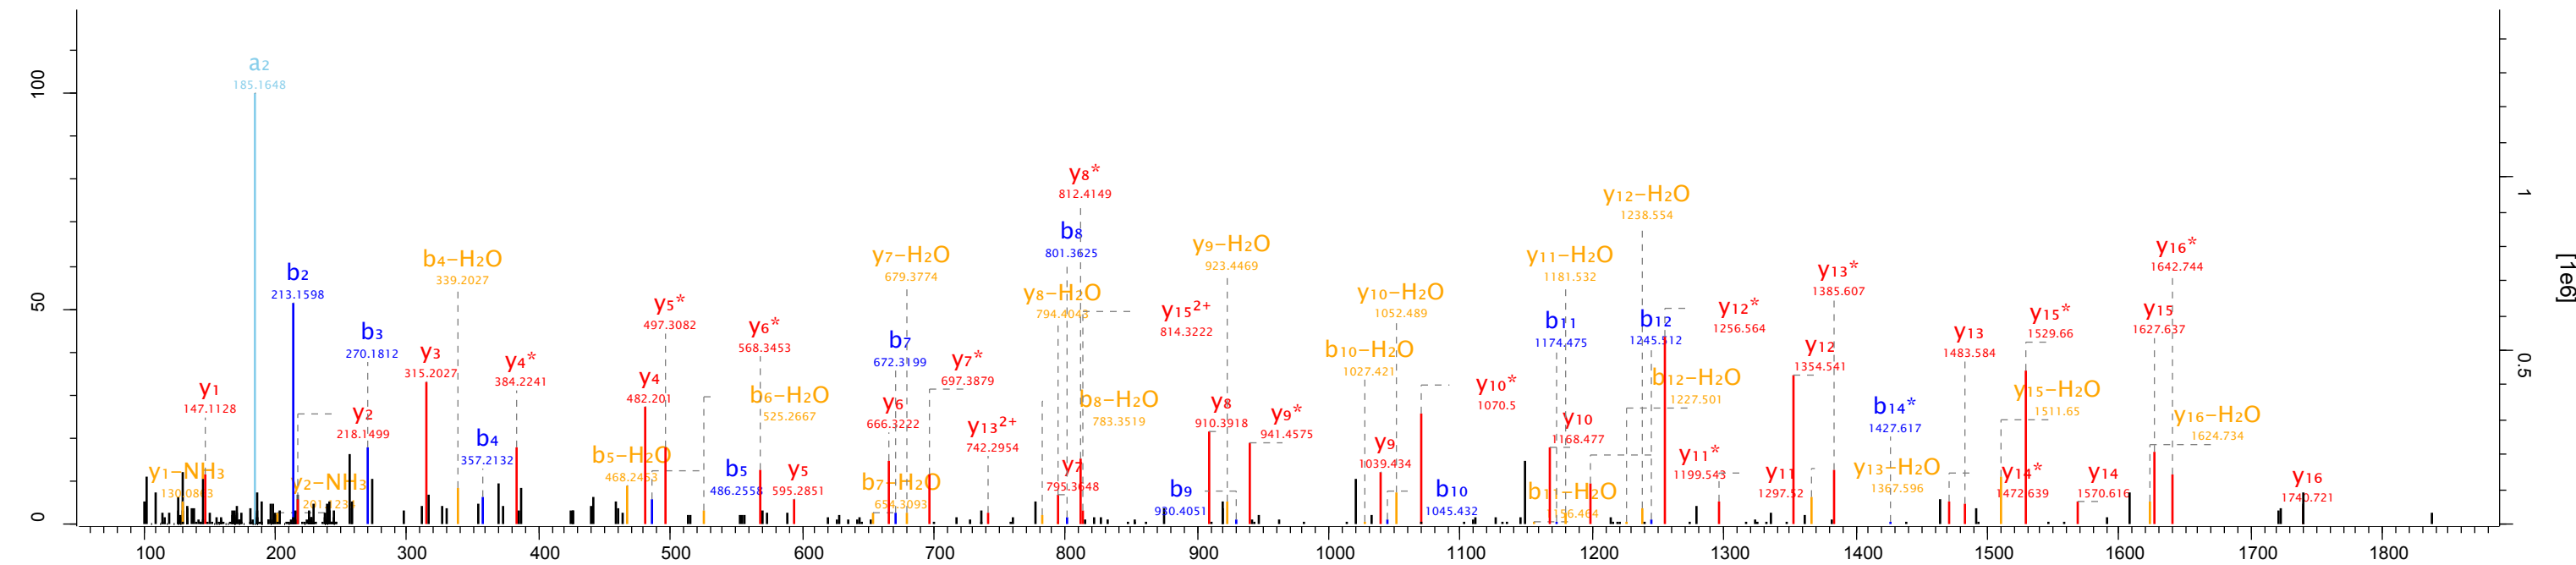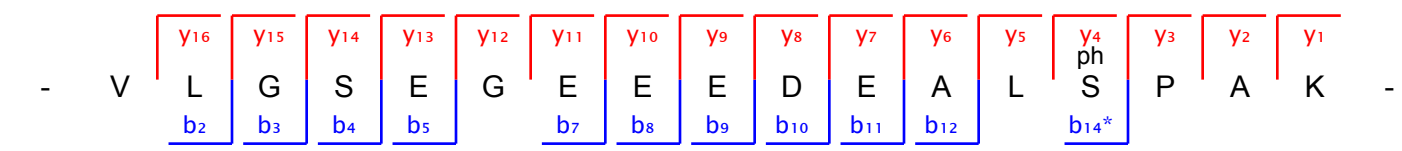

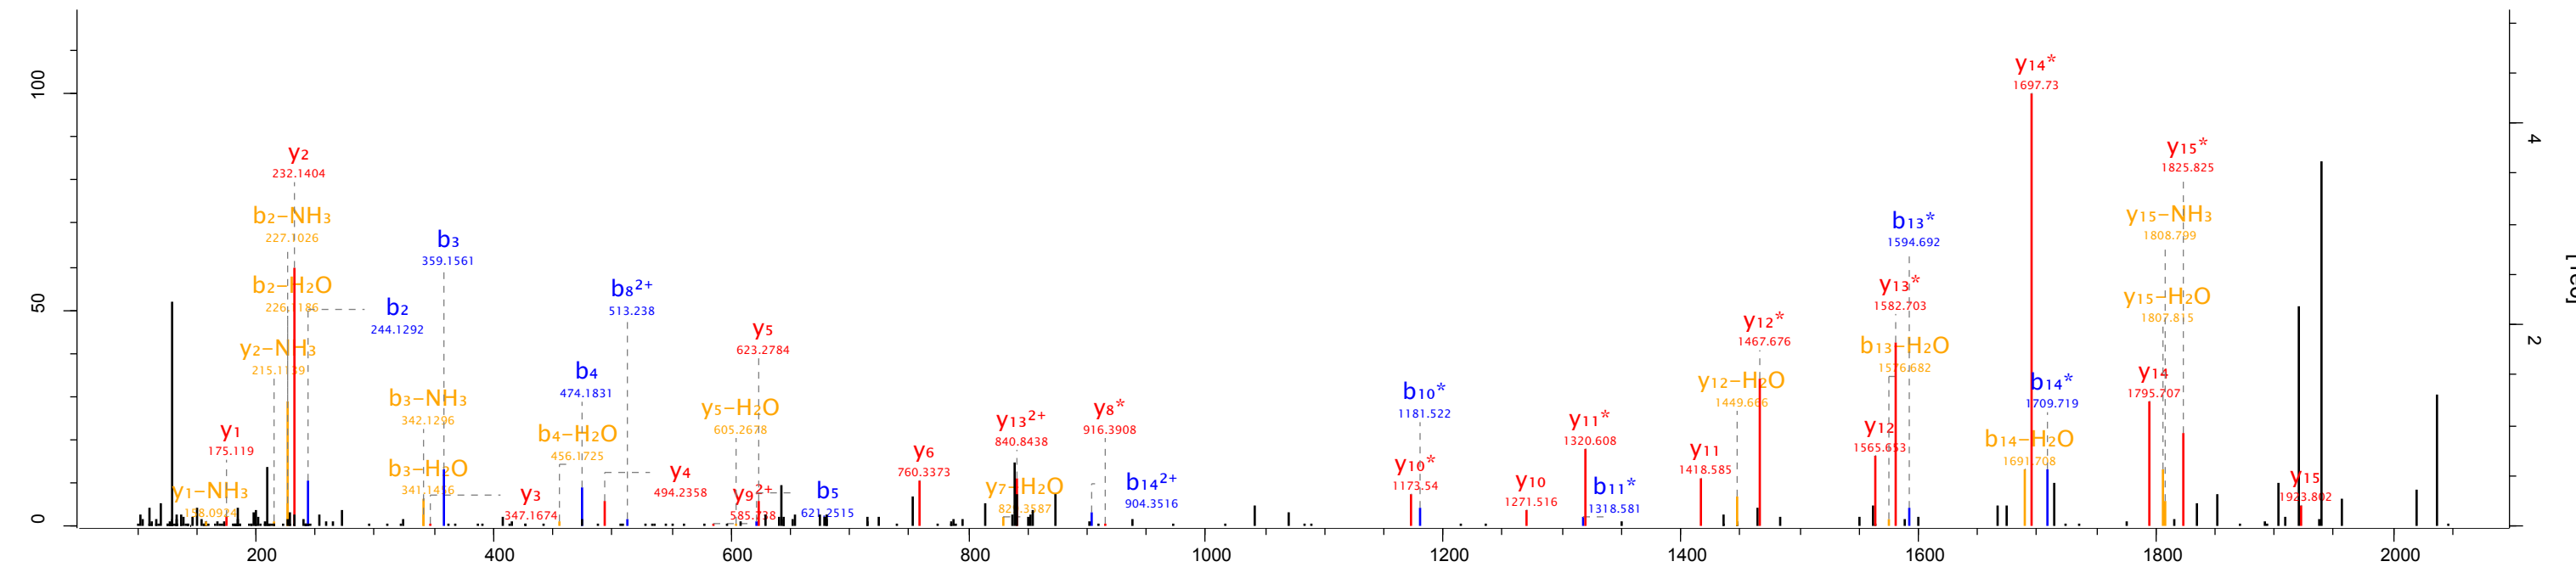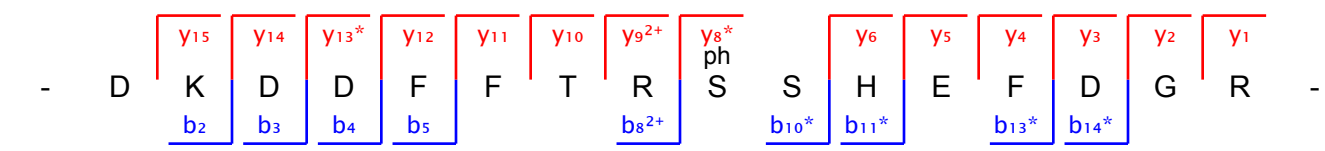

Raw file  
20150812\_A375SR\_Phospho\_BR1\_09

Scan 18112 Method FTMS; HCD Score 328.37 m/z 847.05 Gene names TLN1

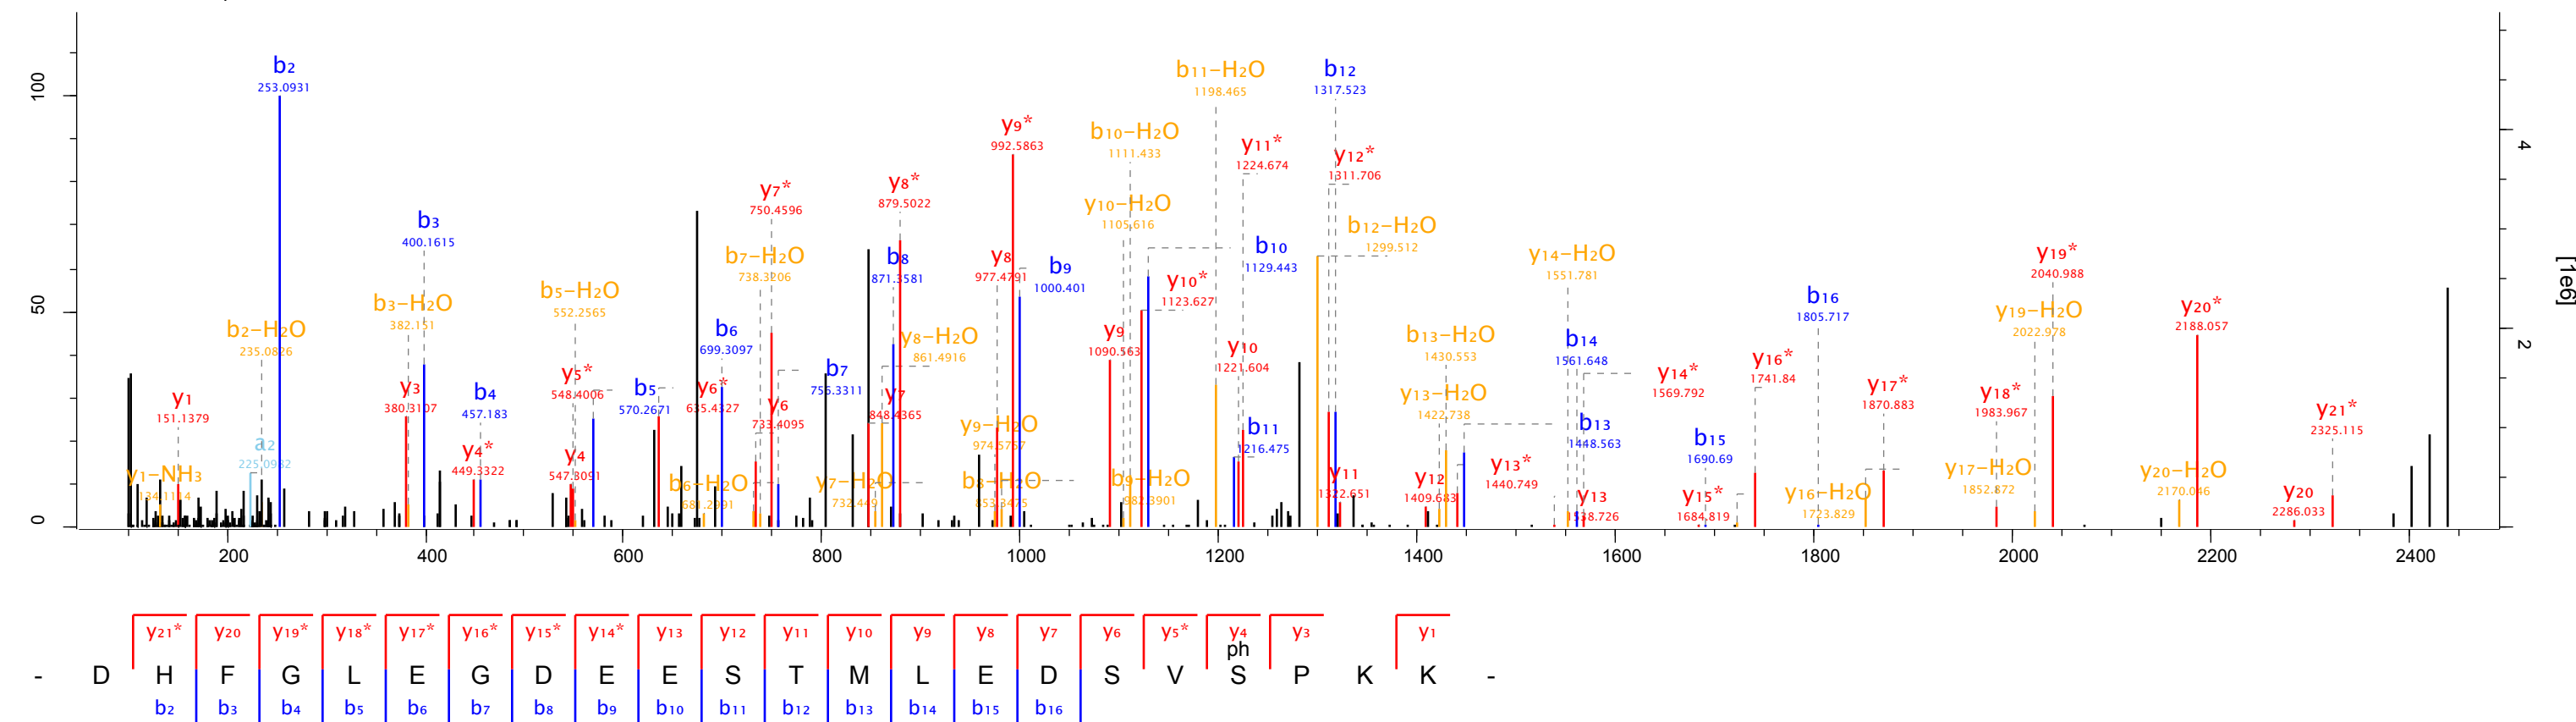





Raw file 20150812\_A375SR\_Phospho\_BR1\_09 Scan 19802 Method FTMS; HCD Score 257.5 m/z 1103.53 Gene names CTTN

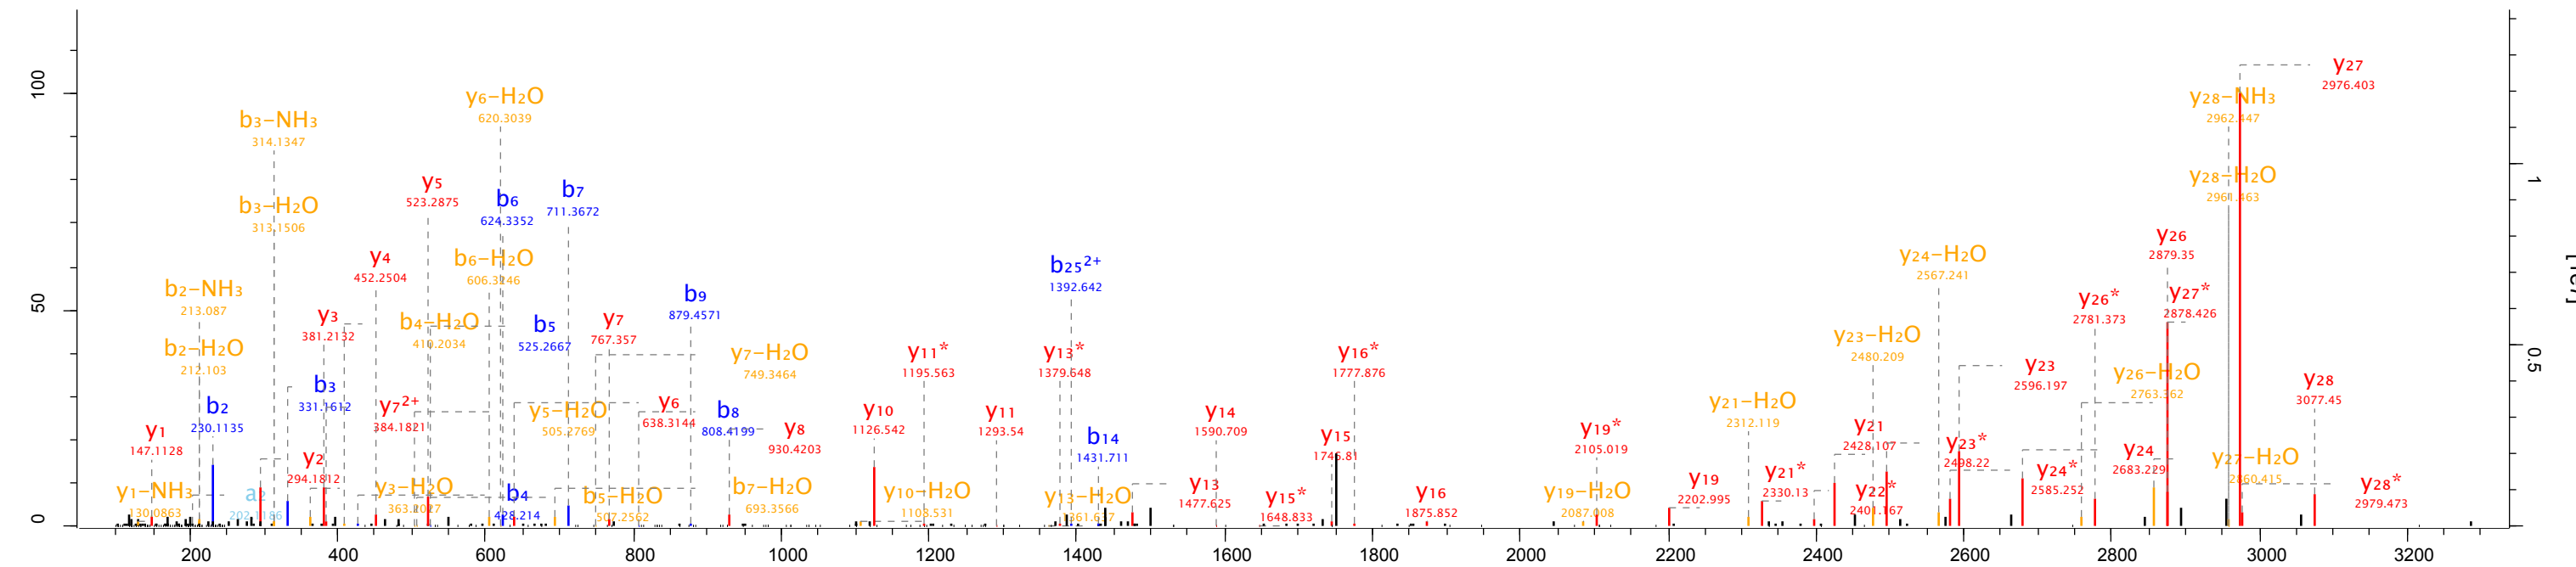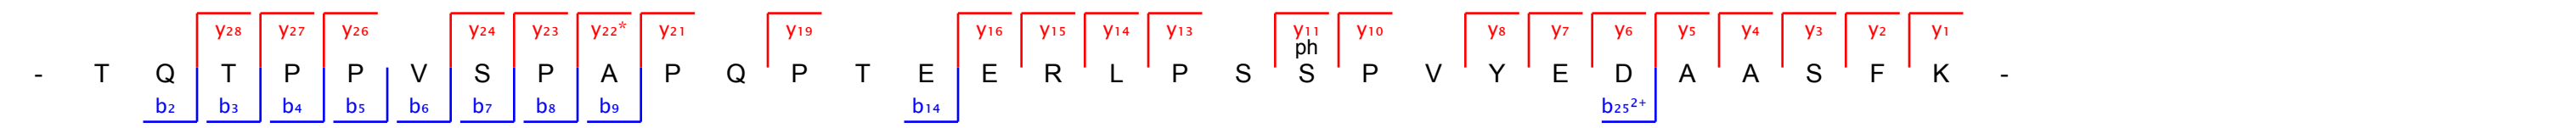

Raw file: 20150812\_A375SR\_Phospho\_BR1\_09  
 Scan: 2332 Method: FTMS; HCD Score: 137.58 m/z: 388.53 Gene names: RPS2

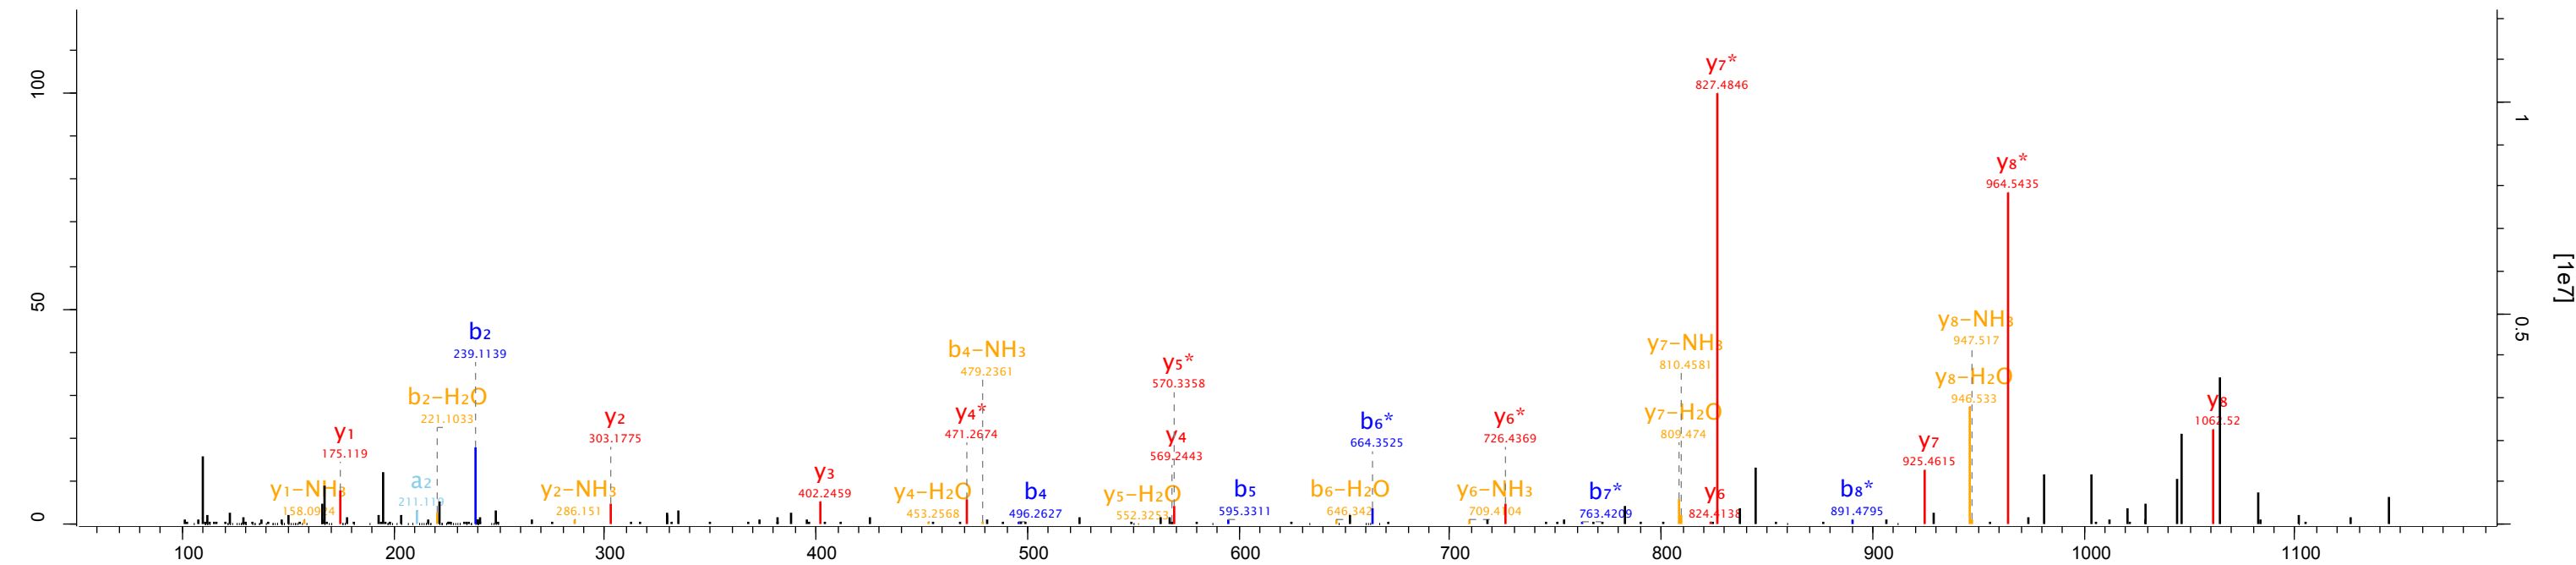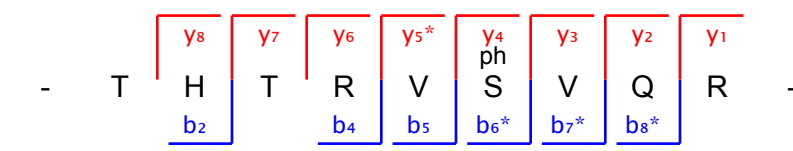

Raw file: 20150812\_A375SR\_Phospho\_BR1\_09  
 Scan: 24672 Method: FTMS; HCD Score: 192.85 m/z: 981.51 Gene names: SH3KBP1

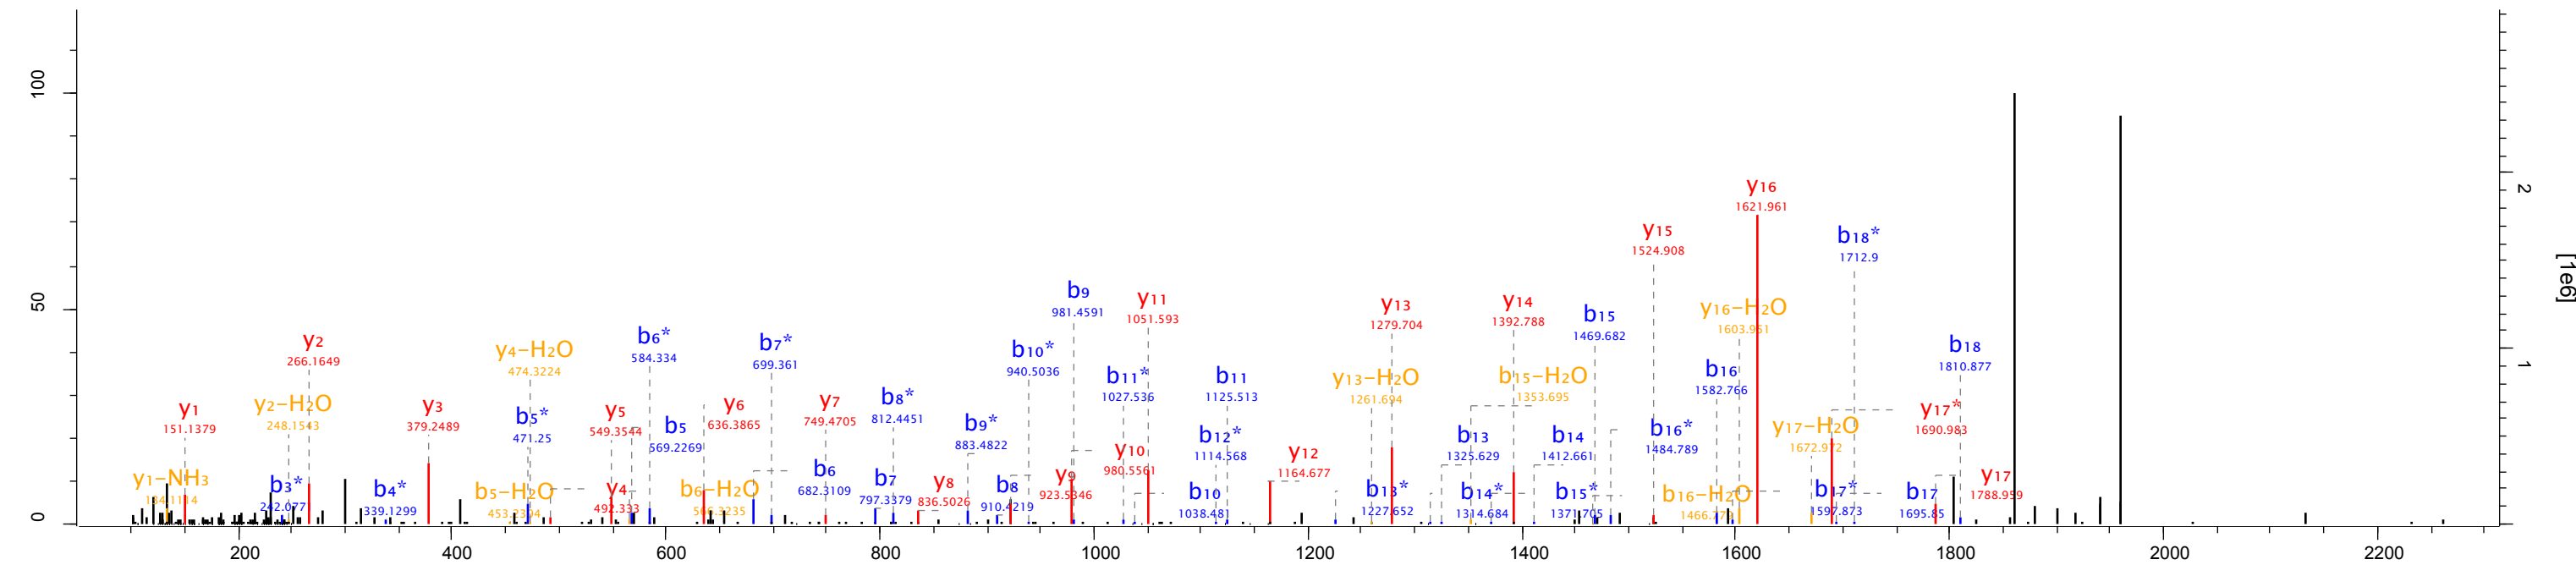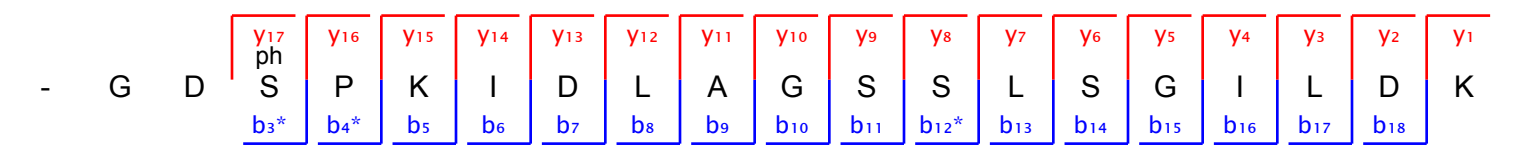

Raw file 20150812\_A375SR\_Phospho\_BR1\_09 Scan 26052 Method FTMS; HCD Score 94.49 m/z 724.86 Gene names ZFP36L2;ZFP36L1

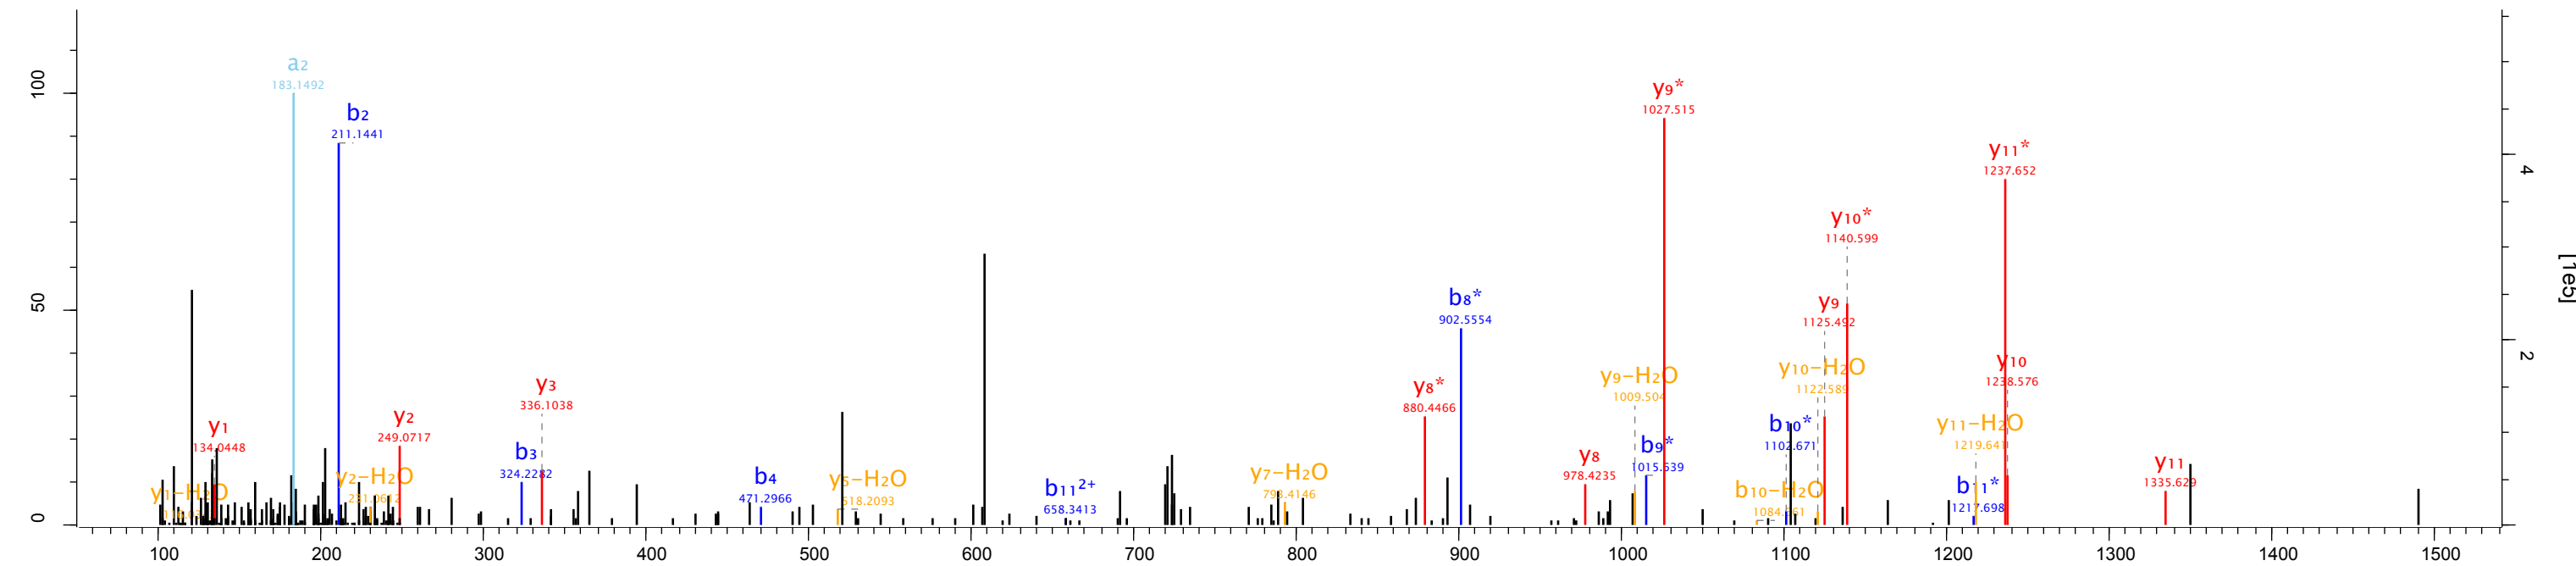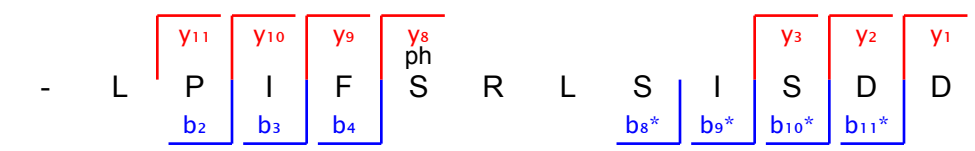

Raw file: 20150812\_A375SR\_Phospho\_BR1\_09  
 Scan: 4022 Method: FTMS; HCD Score: 150.68 m/z: 728.84 Gene names: SPECC1L;SPECC1L-ADORA2A

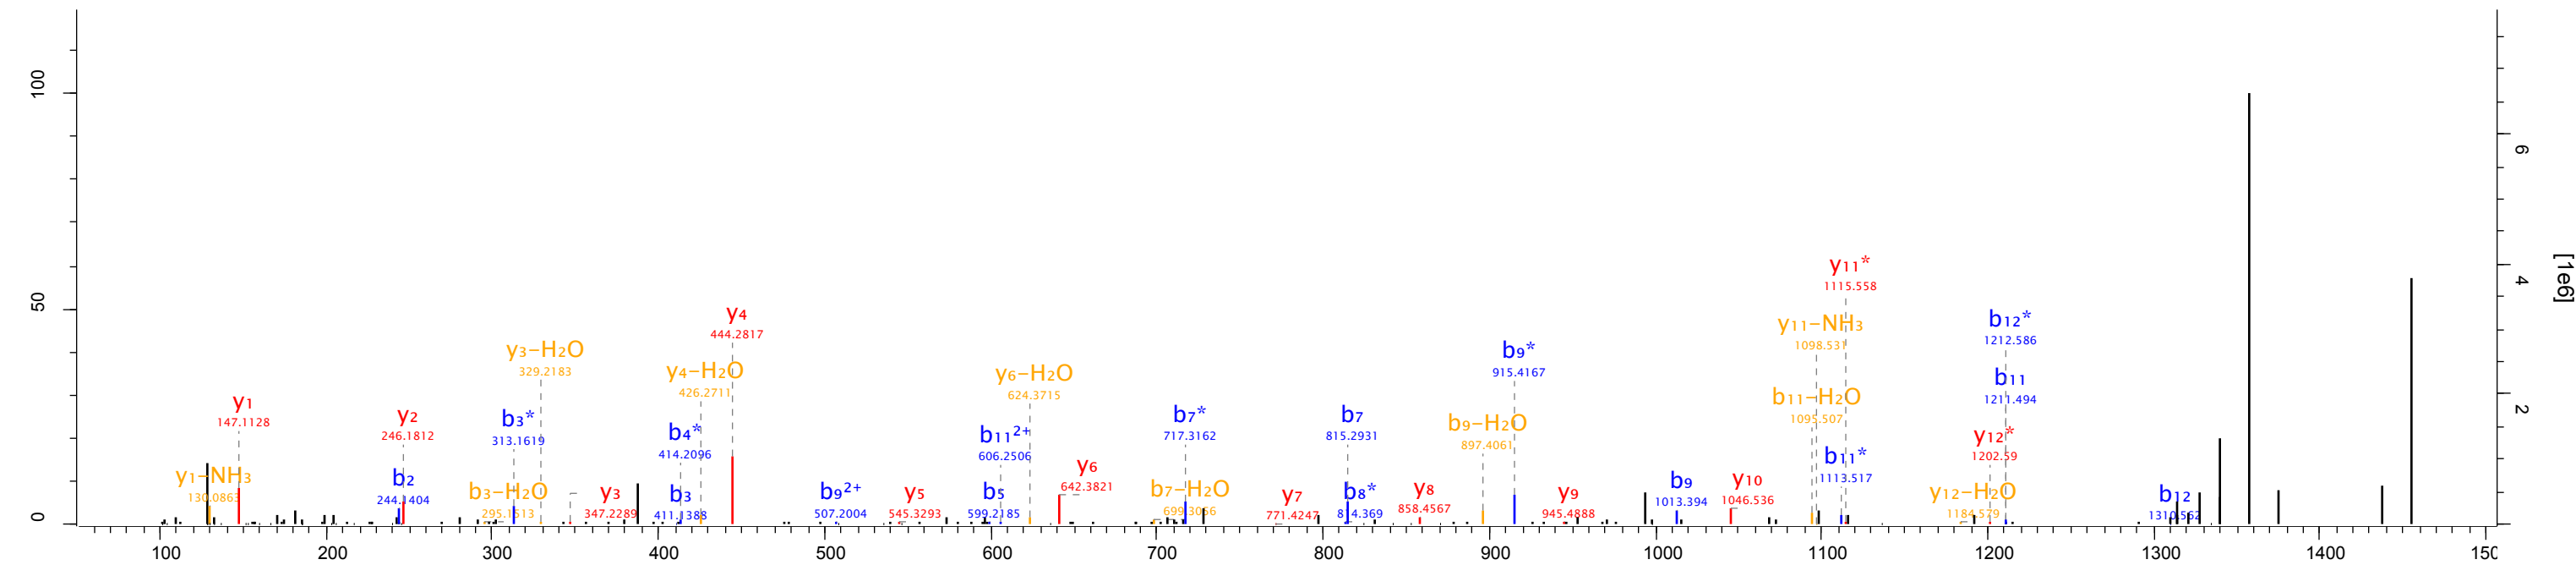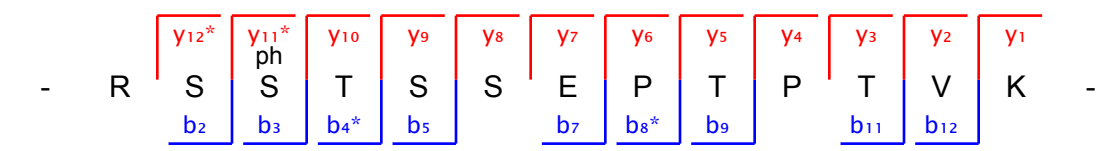

Raw file: 20150812\_A375SR\_Phospho\_BR1\_09  
 Scan: 4272 Method: FTMS; HCD Score: 107.65 m/z: 565.29 Gene names: SRRM2

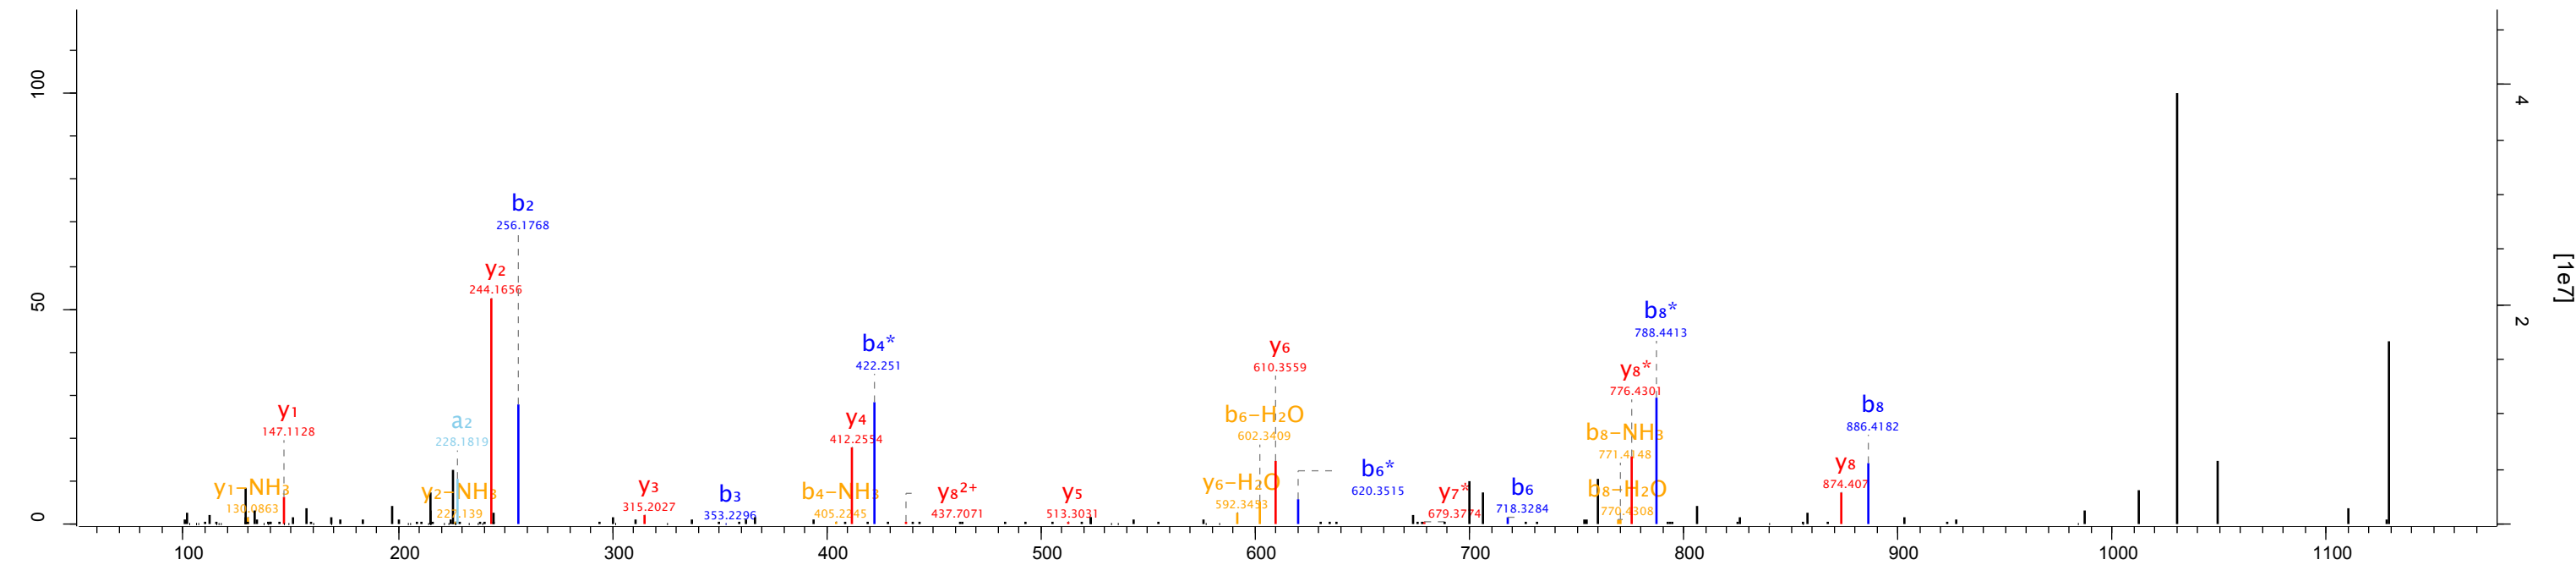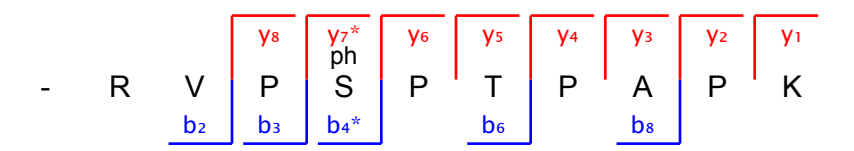

Raw file 20150812\_A375SR\_Phospho\_BR1\_09 Scan 5172 Method FTMS; HCD Score 373.11 m/z 923.92 Gene names AJUBA

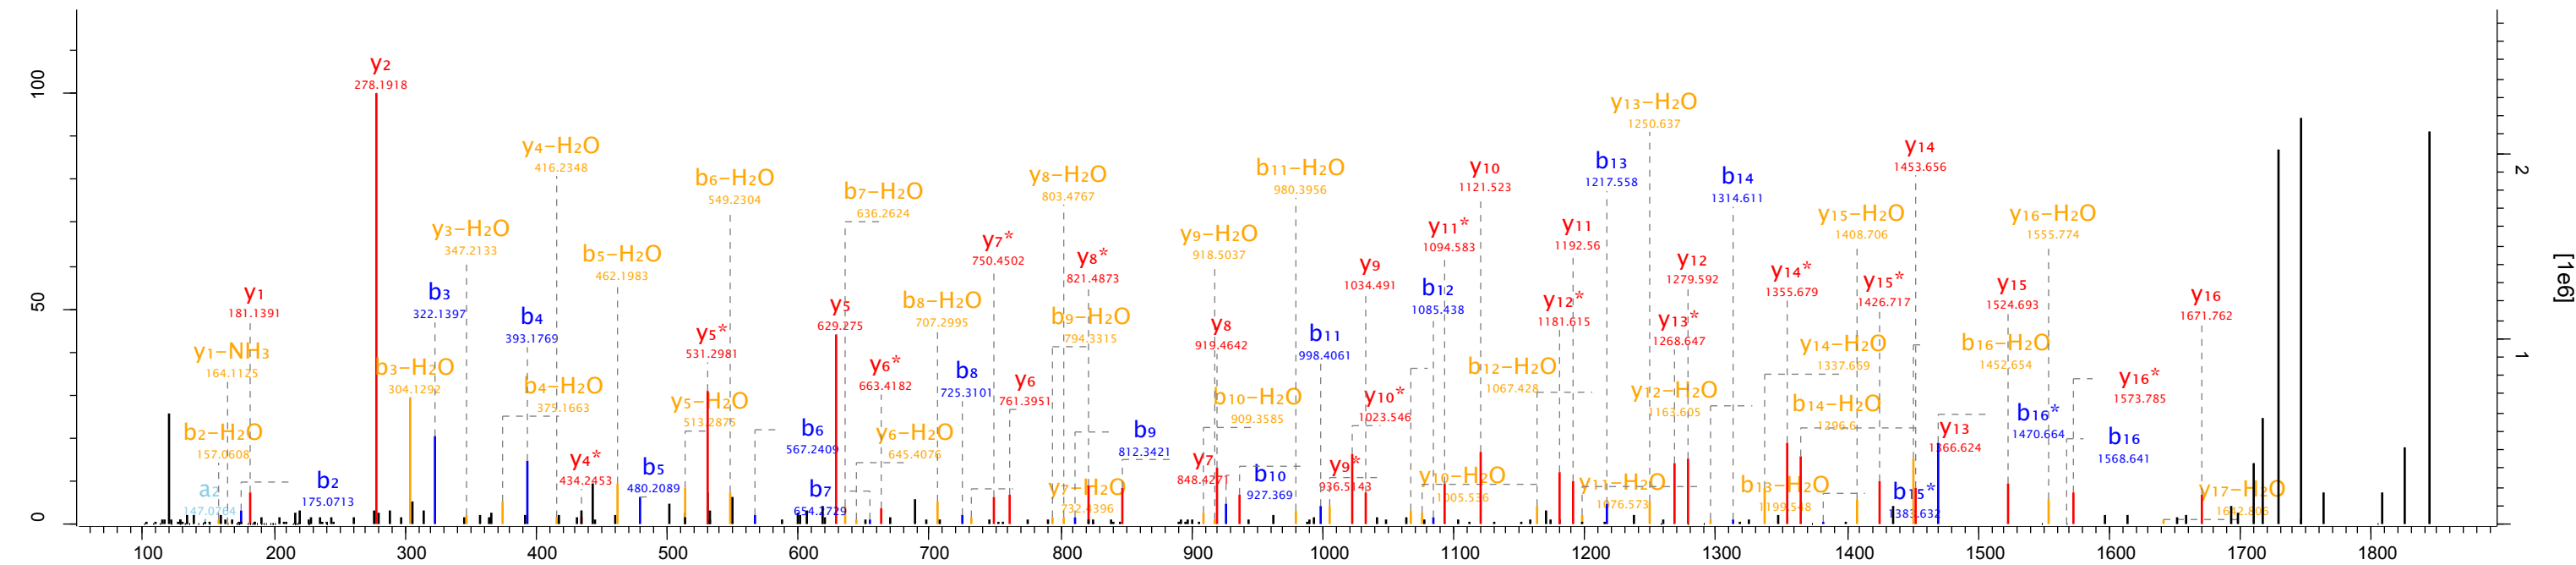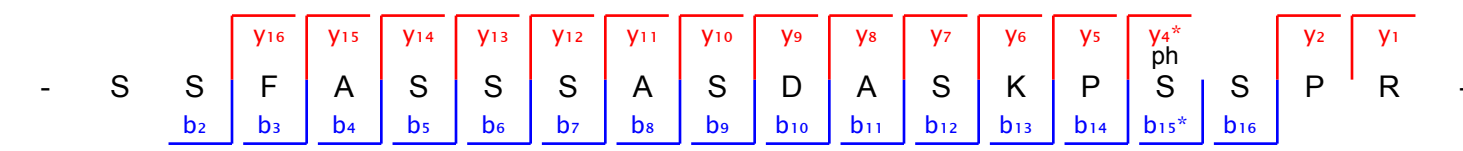

Raw file: 20150812\_A375SR\_Phospho\_BR1\_09  
 Scan: 8482 Method: FTMS; HCD Score: 98.25 m/z: 629.32 Gene names: IRS2

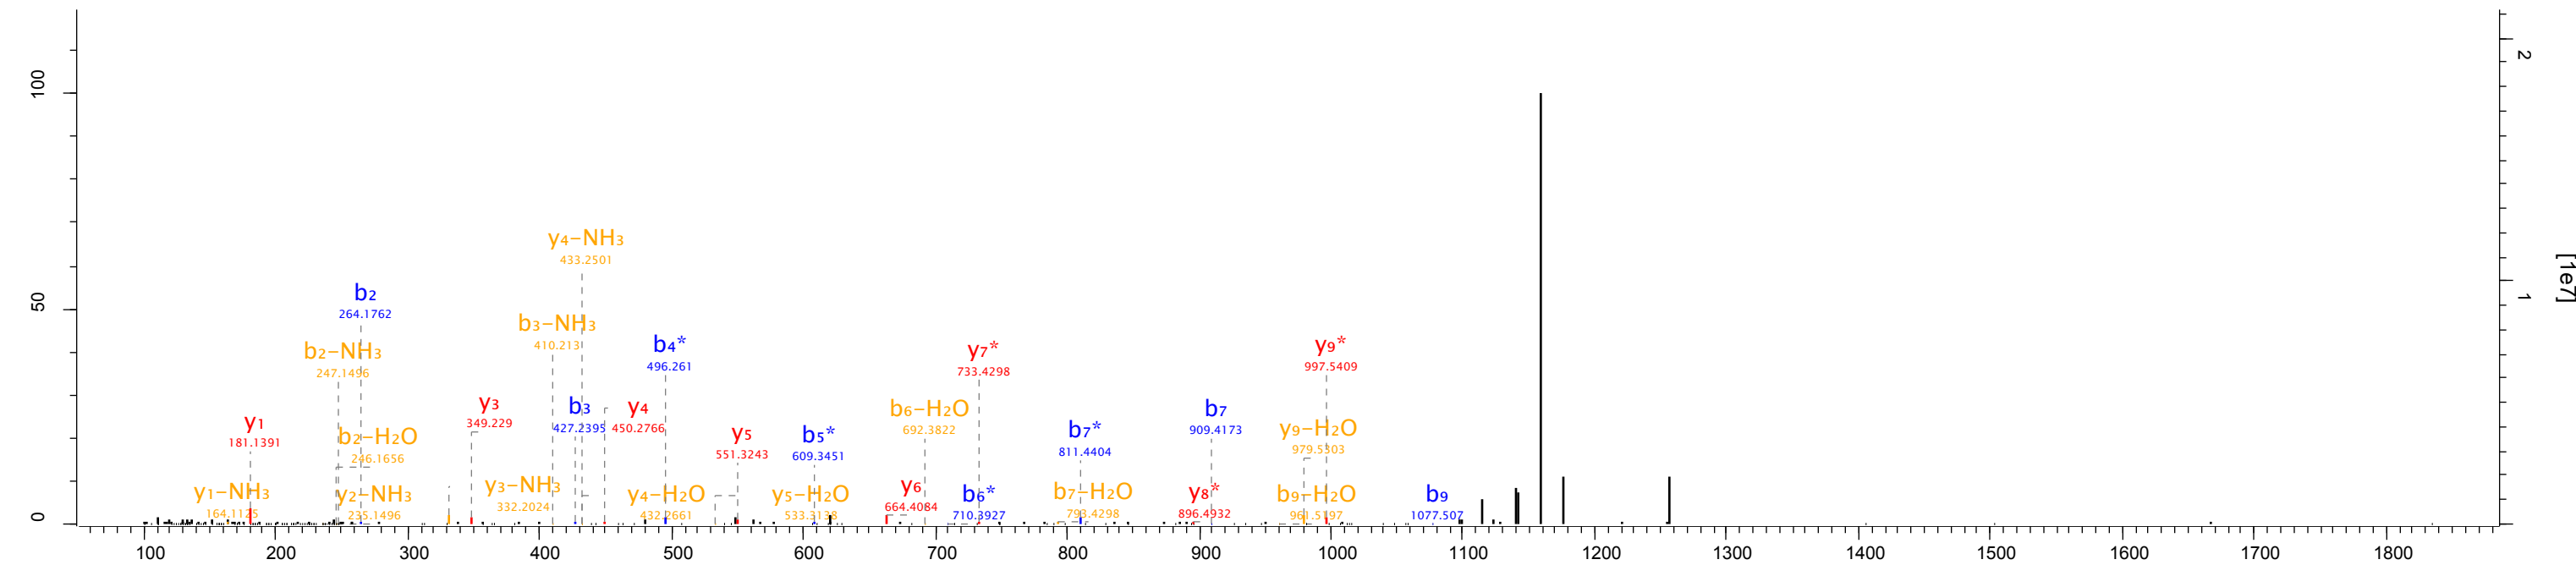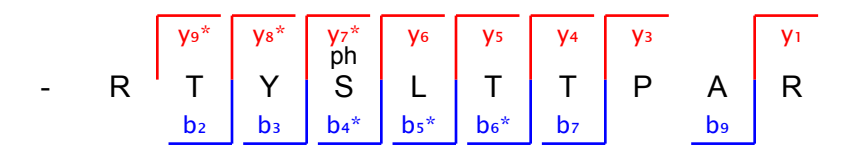



Raw file 20150812\_A375SR\_Phospho\_BR1\_09 Scan 8932 Method FTMS; HCD Score 463.52 m/z 1165.54 Gene names PNN

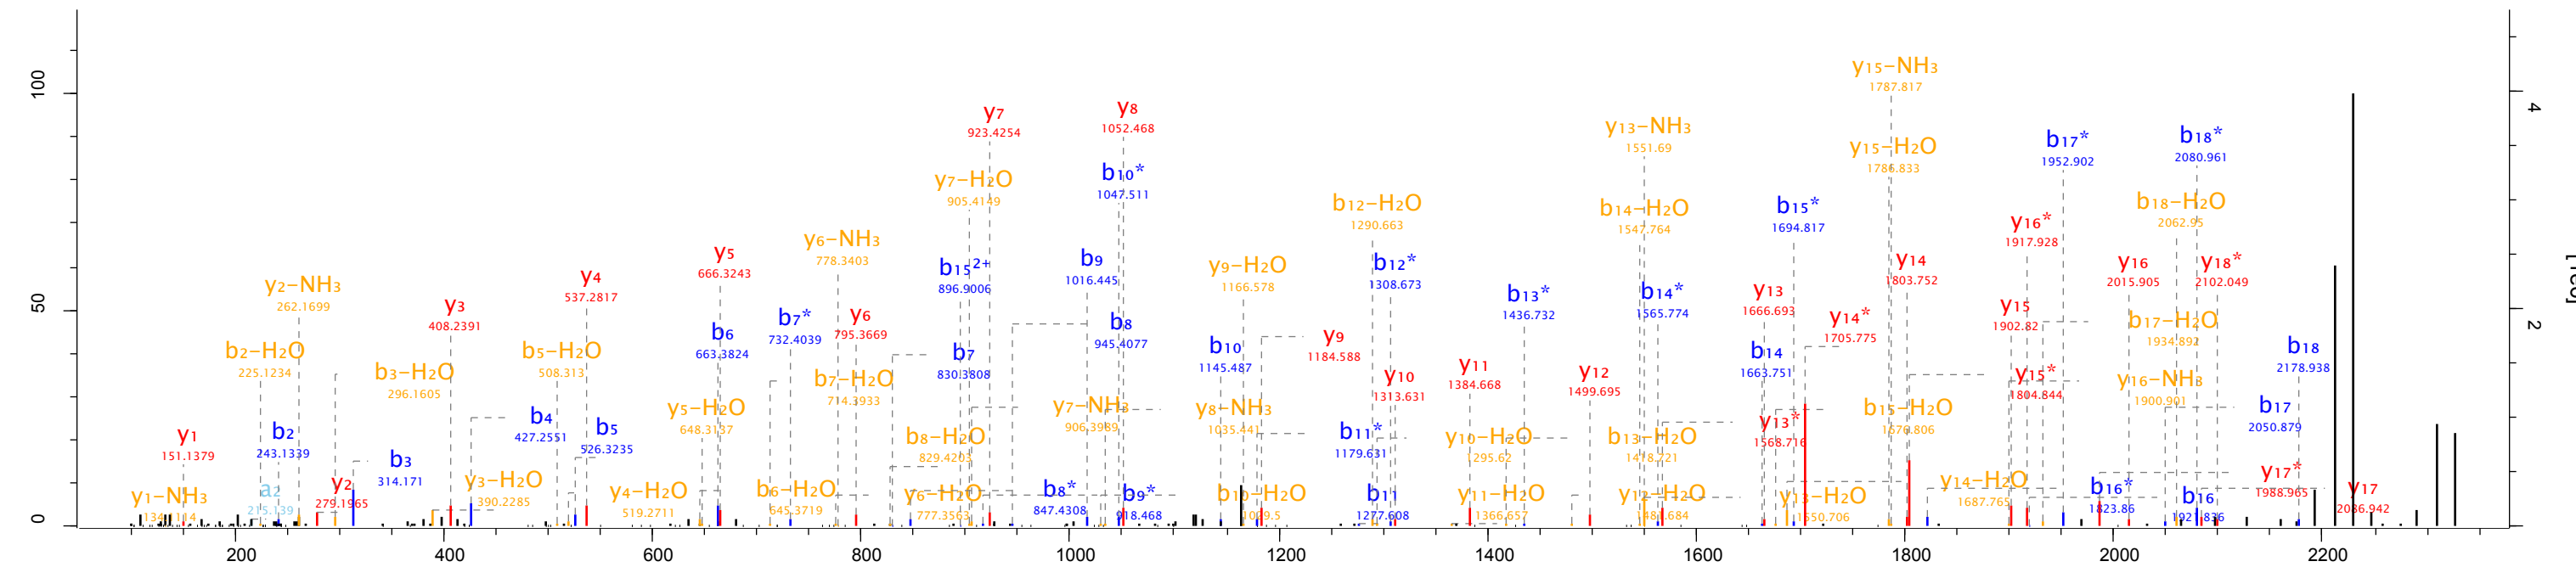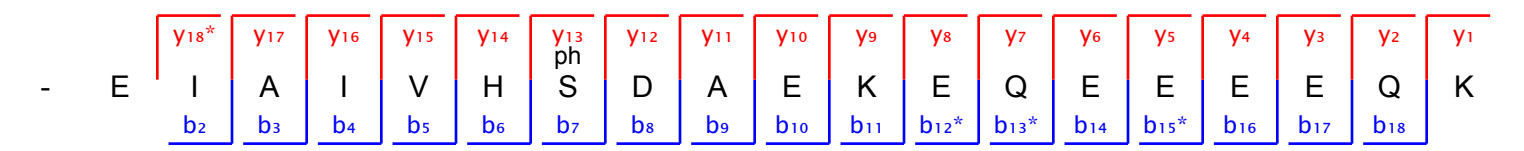

Raw file: 20150812\_A375SR\_Phospho\_BR1\_09  
 Scan: 8992 Method: FTMS; HCD Score: 233.46 m/z: 959.39 Gene names: VIM

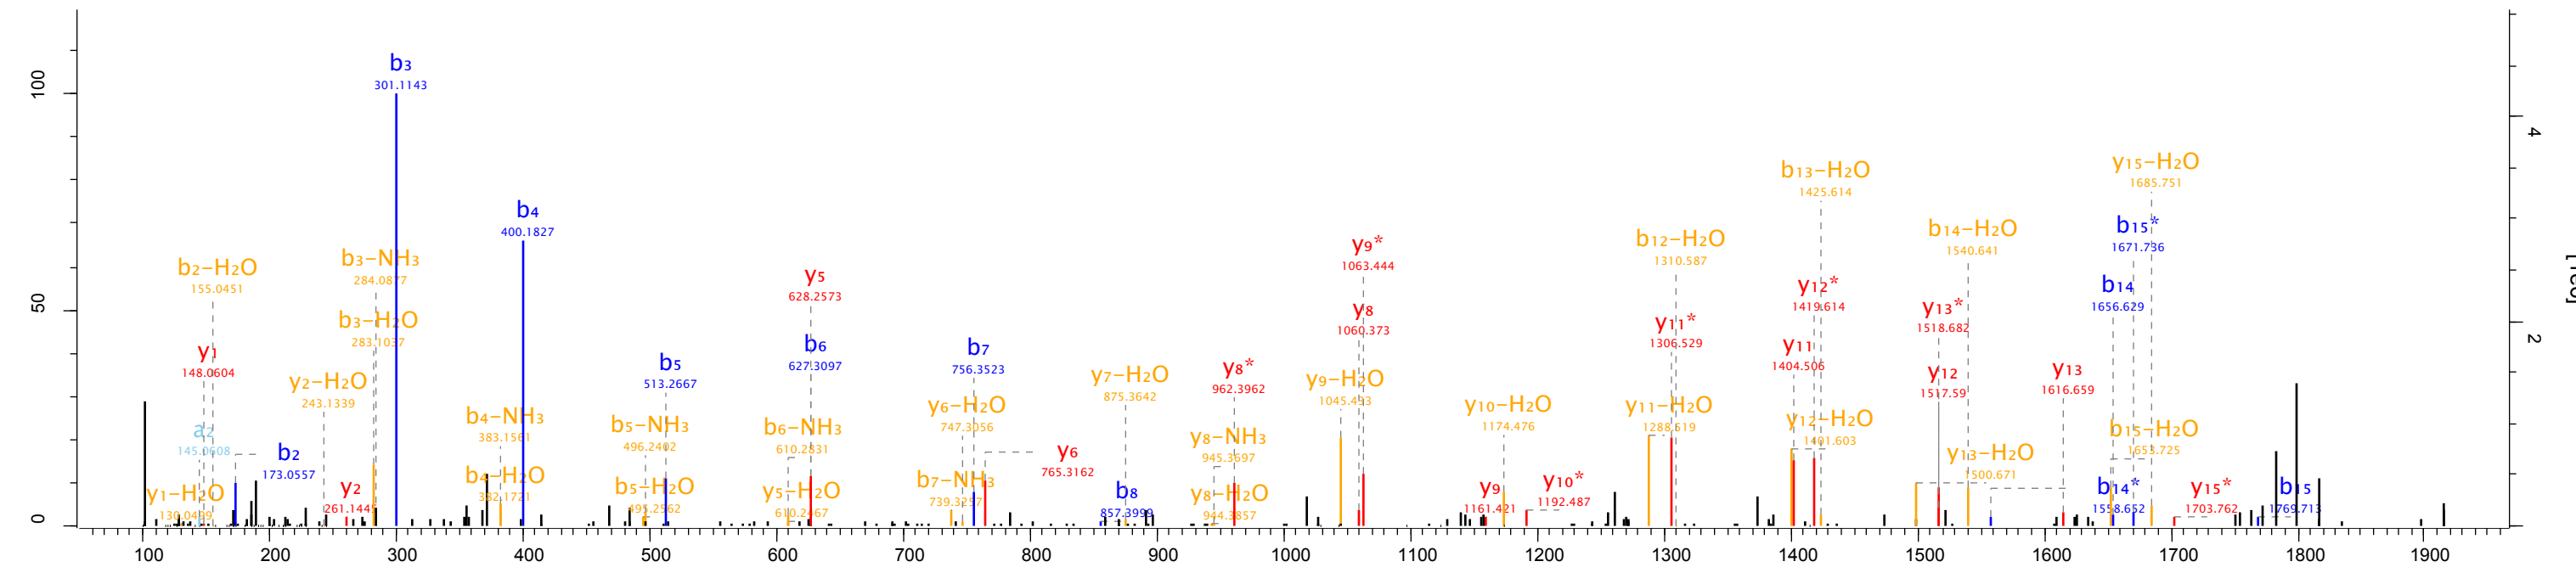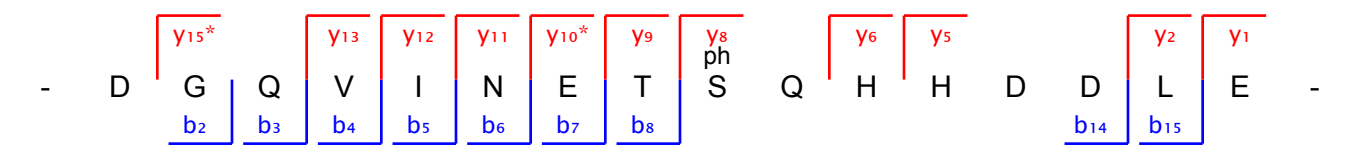

Raw file: 20150812\_A375SR\_Phospho\_BR1\_09  
 Scan: 9312 Method: FTMS; HCD Score: 246.59 m/z: 977.98 Gene names: EIF2A

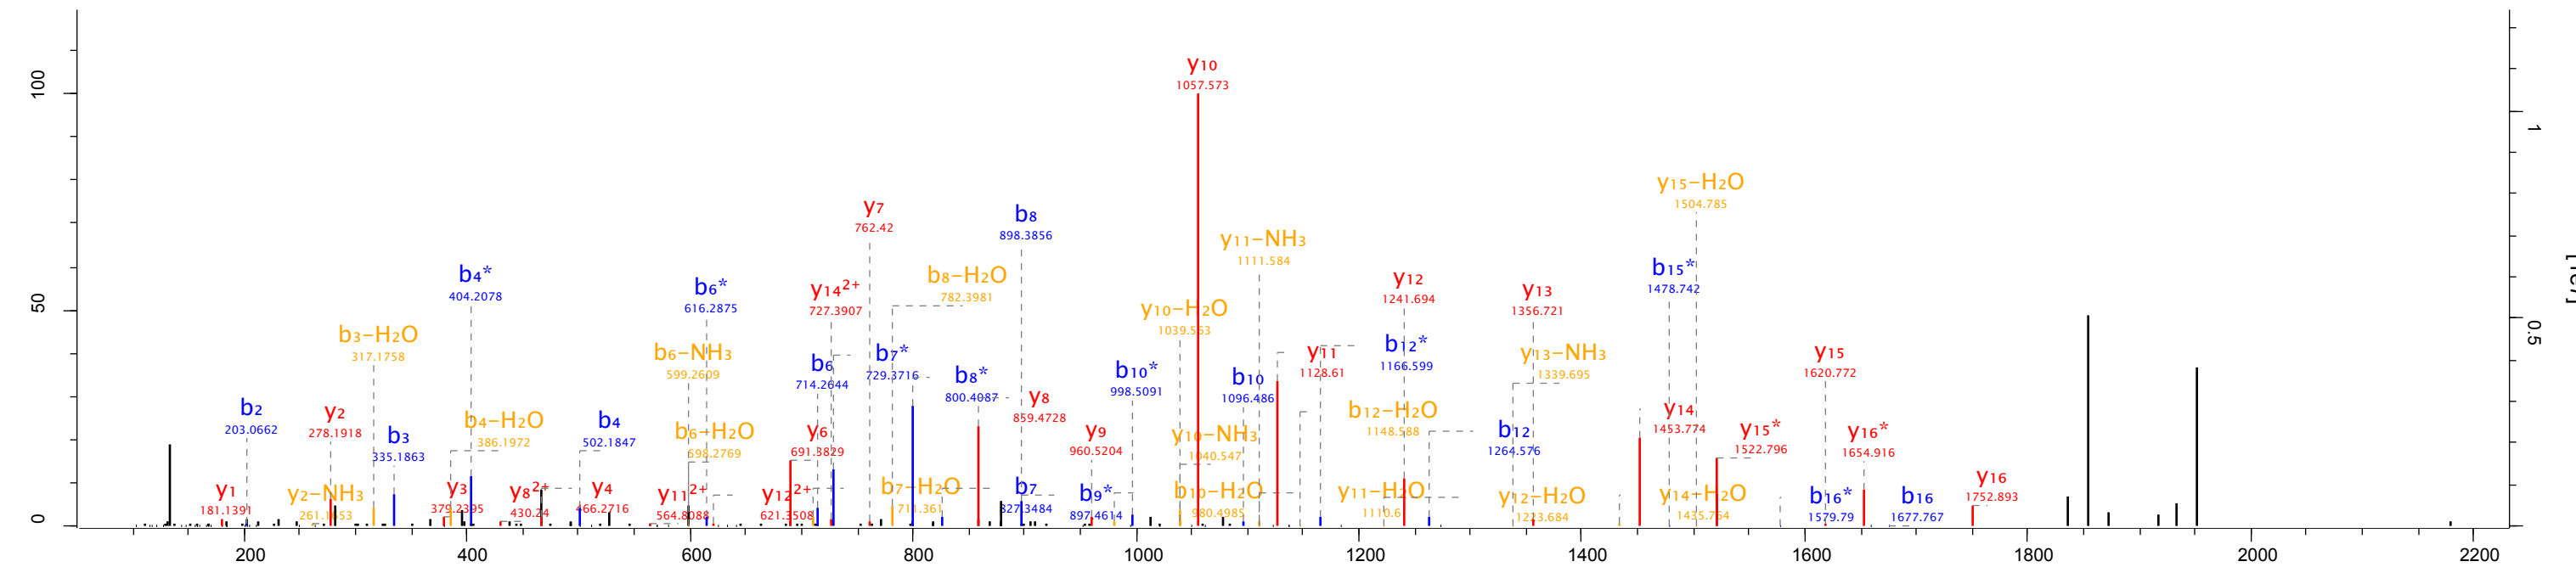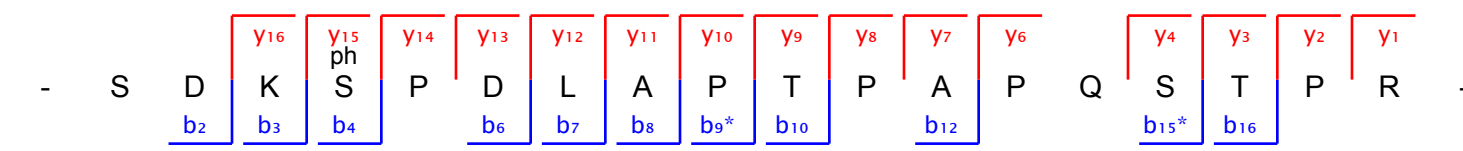

Raw file: 20150812\_A375SR\_Phospho\_BR1\_10  
 Scan: 12412 Method: FTMS; HCD Score: 148.19 m/z: 849.89 Gene names: PPP1R18

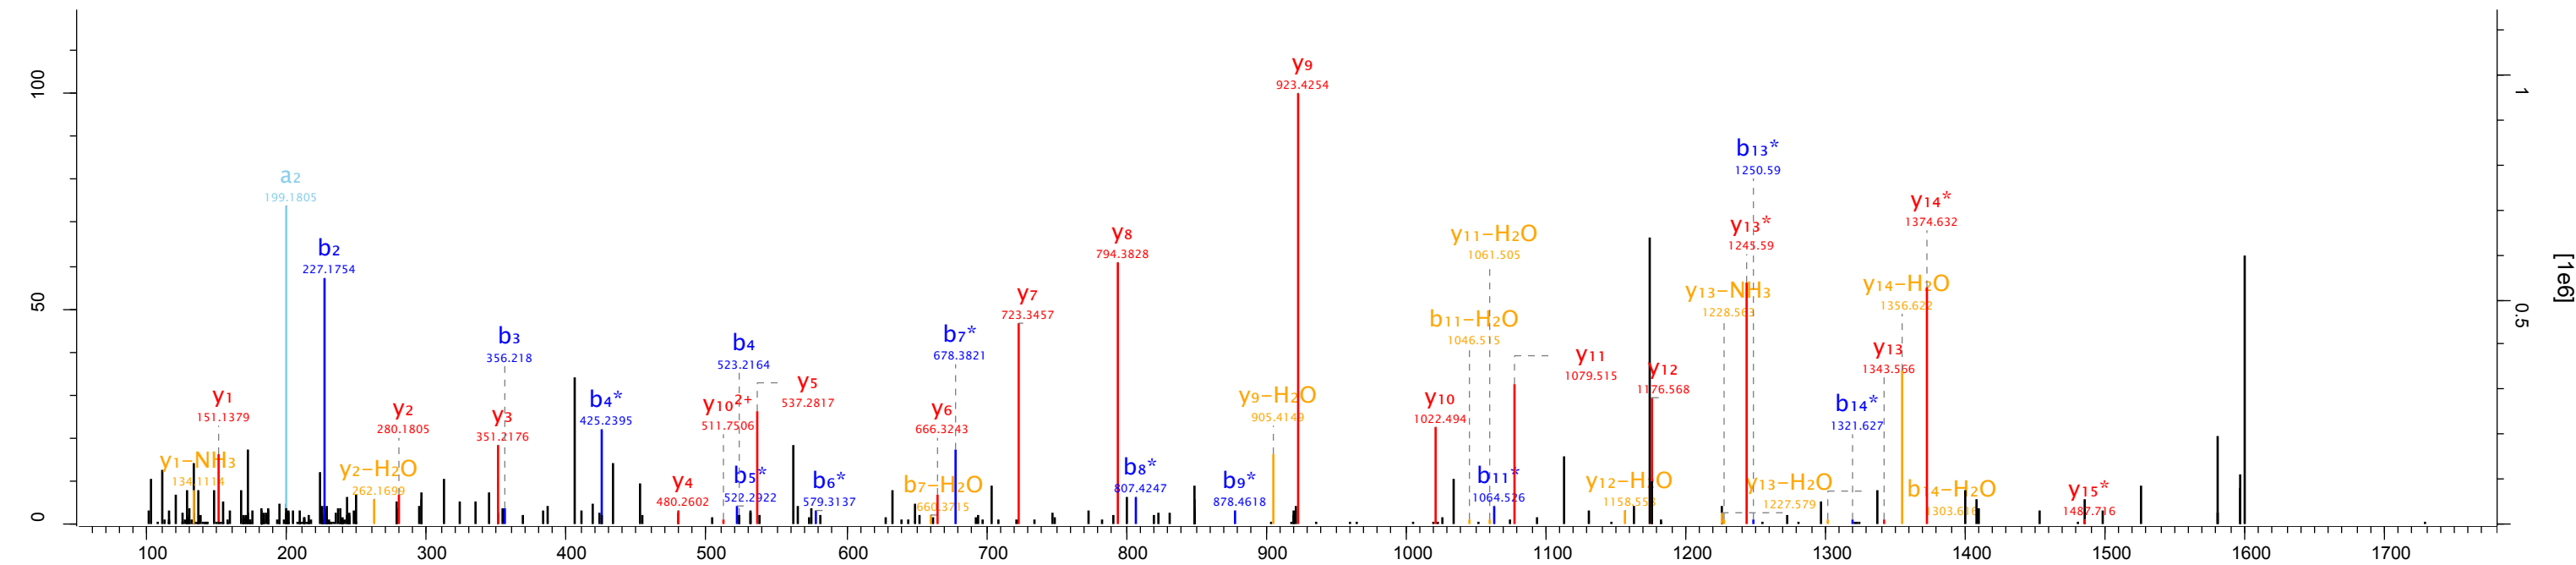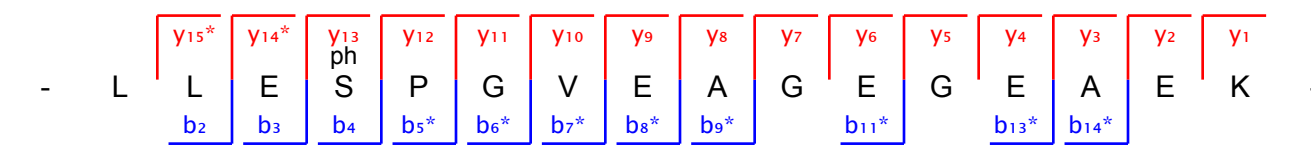

Raw file  
20150812\_A375SR\_Phospho\_BR1\_10

Scan 12512 Method FTMS; HCD Score 201.48 m/z 805.43 Gene names UFD1L

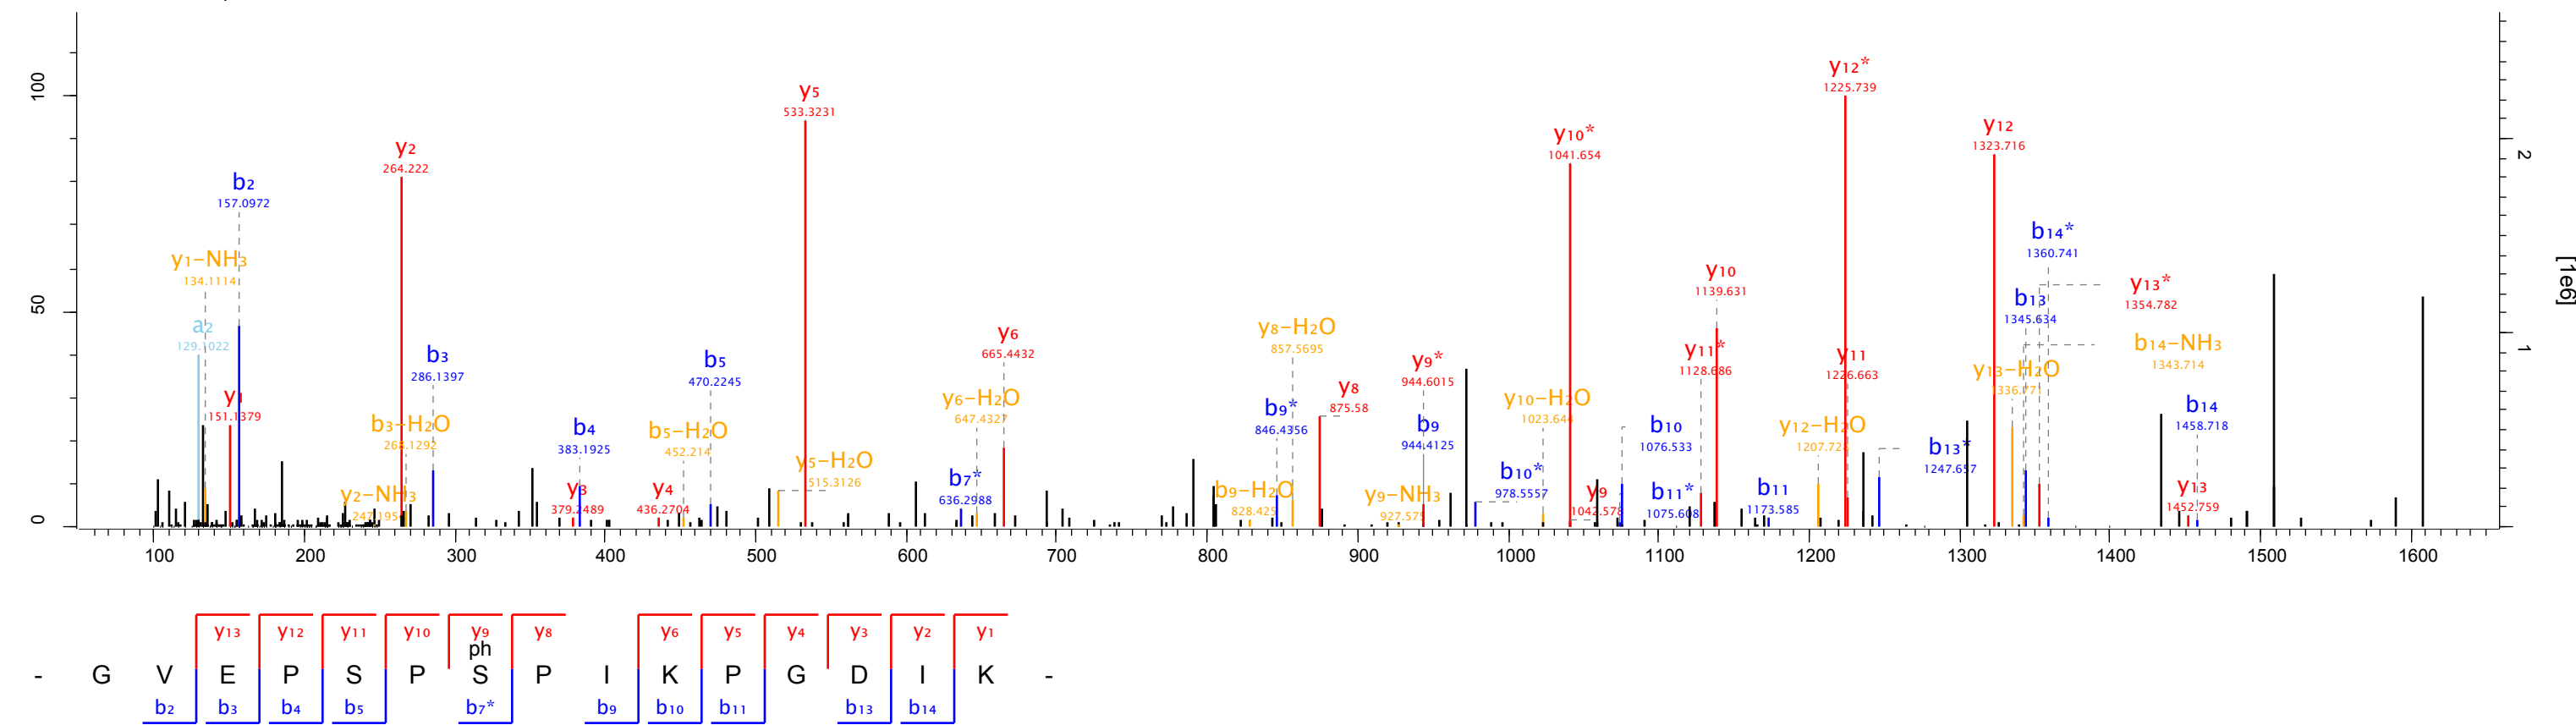

Raw file 20150812\_A375SR\_Phospho\_BR1\_10 Scan 12992 Method FTMS; HCD Score 147.62 m/z 521.26 Gene names SURF6

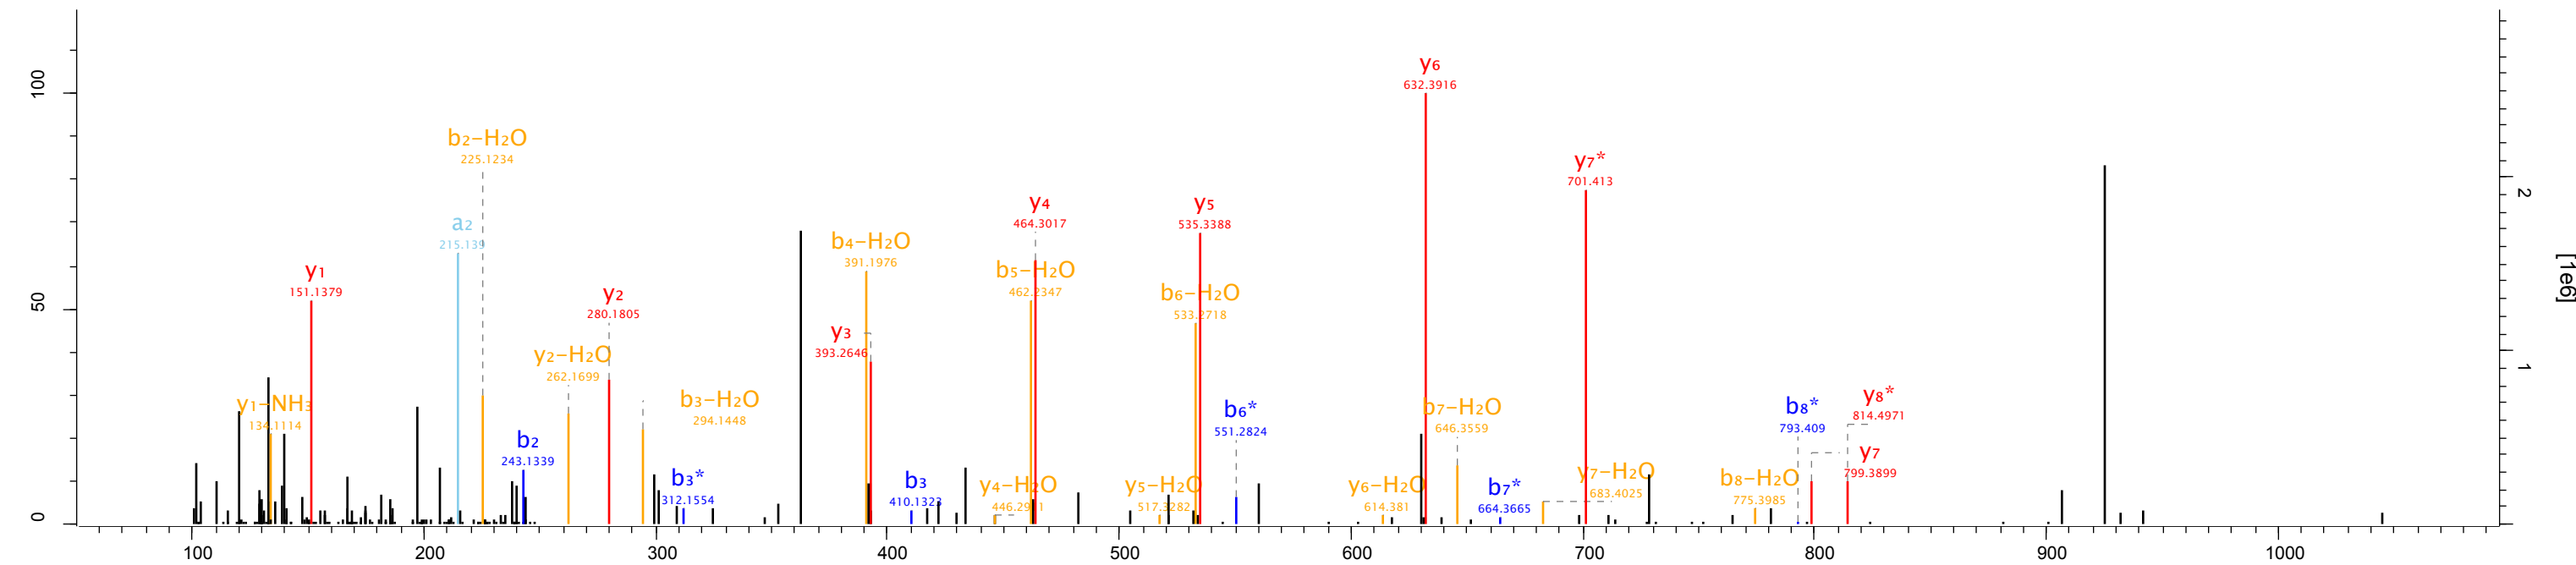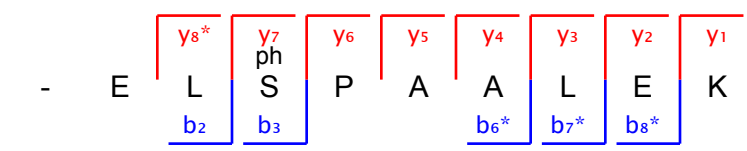

Raw file 20150812\_A375SR\_Phospho\_BR1\_10 Scan 13922 Method FTMS; HCD Score 113.52 m/z 618.83 Gene names WIZ

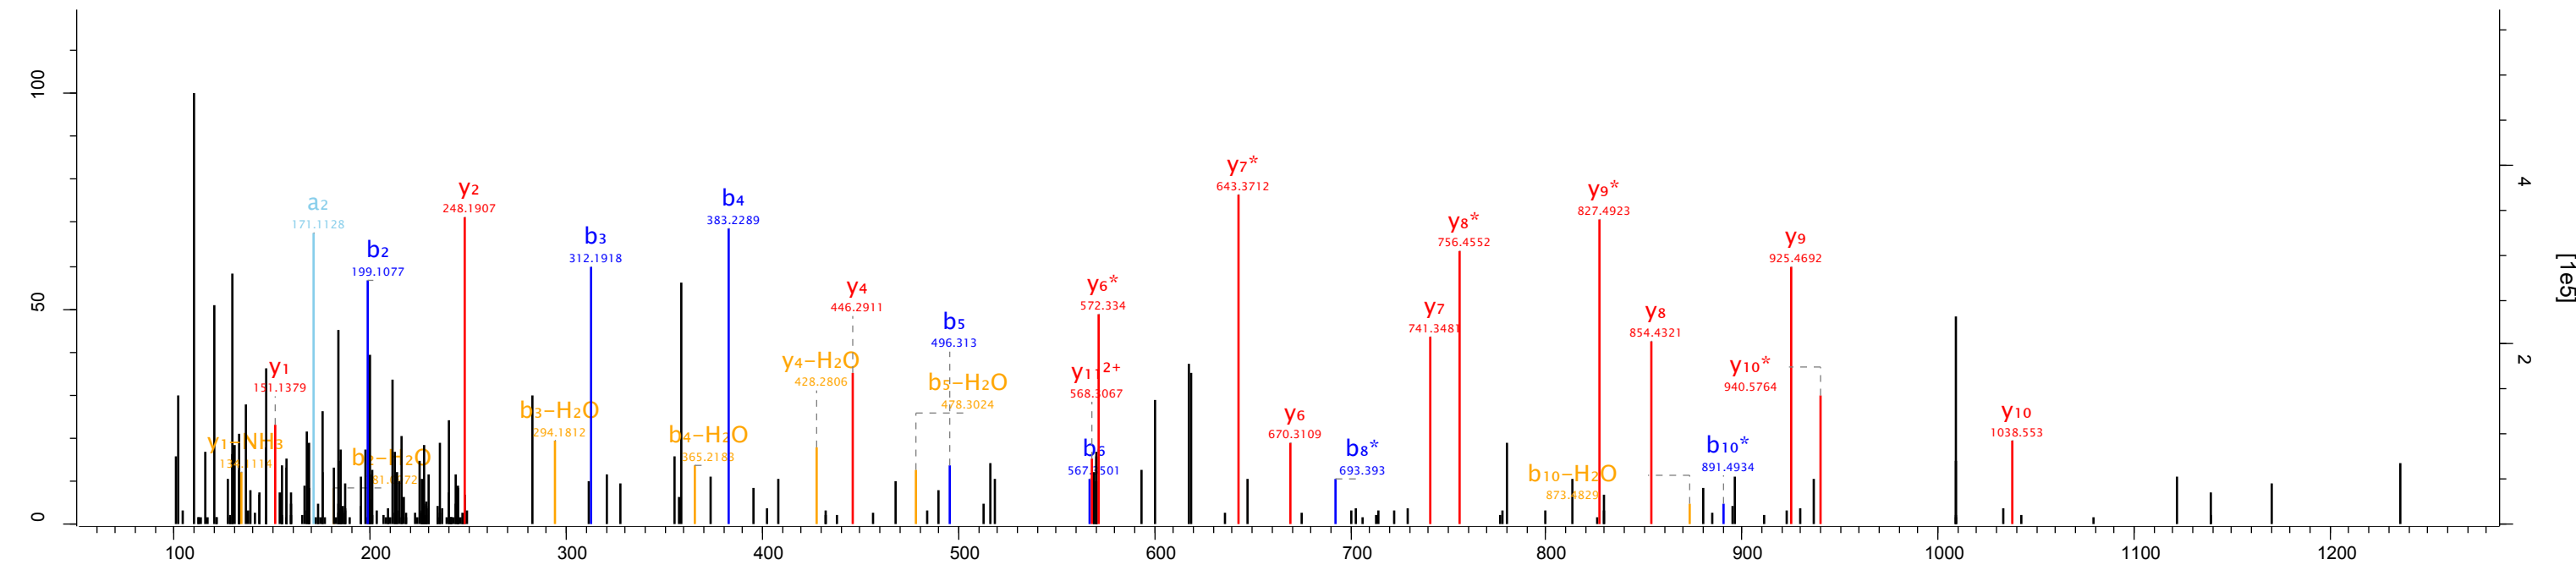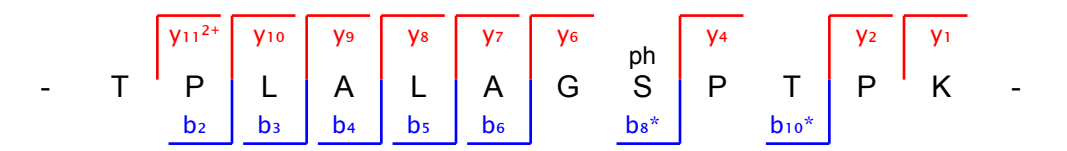

Raw file 20150812\_A375SR\_Phospho\_BR1\_10 Scan 16452 Method FTMS; HCD Score 259.2 m/z 873.07 Gene names MATR3

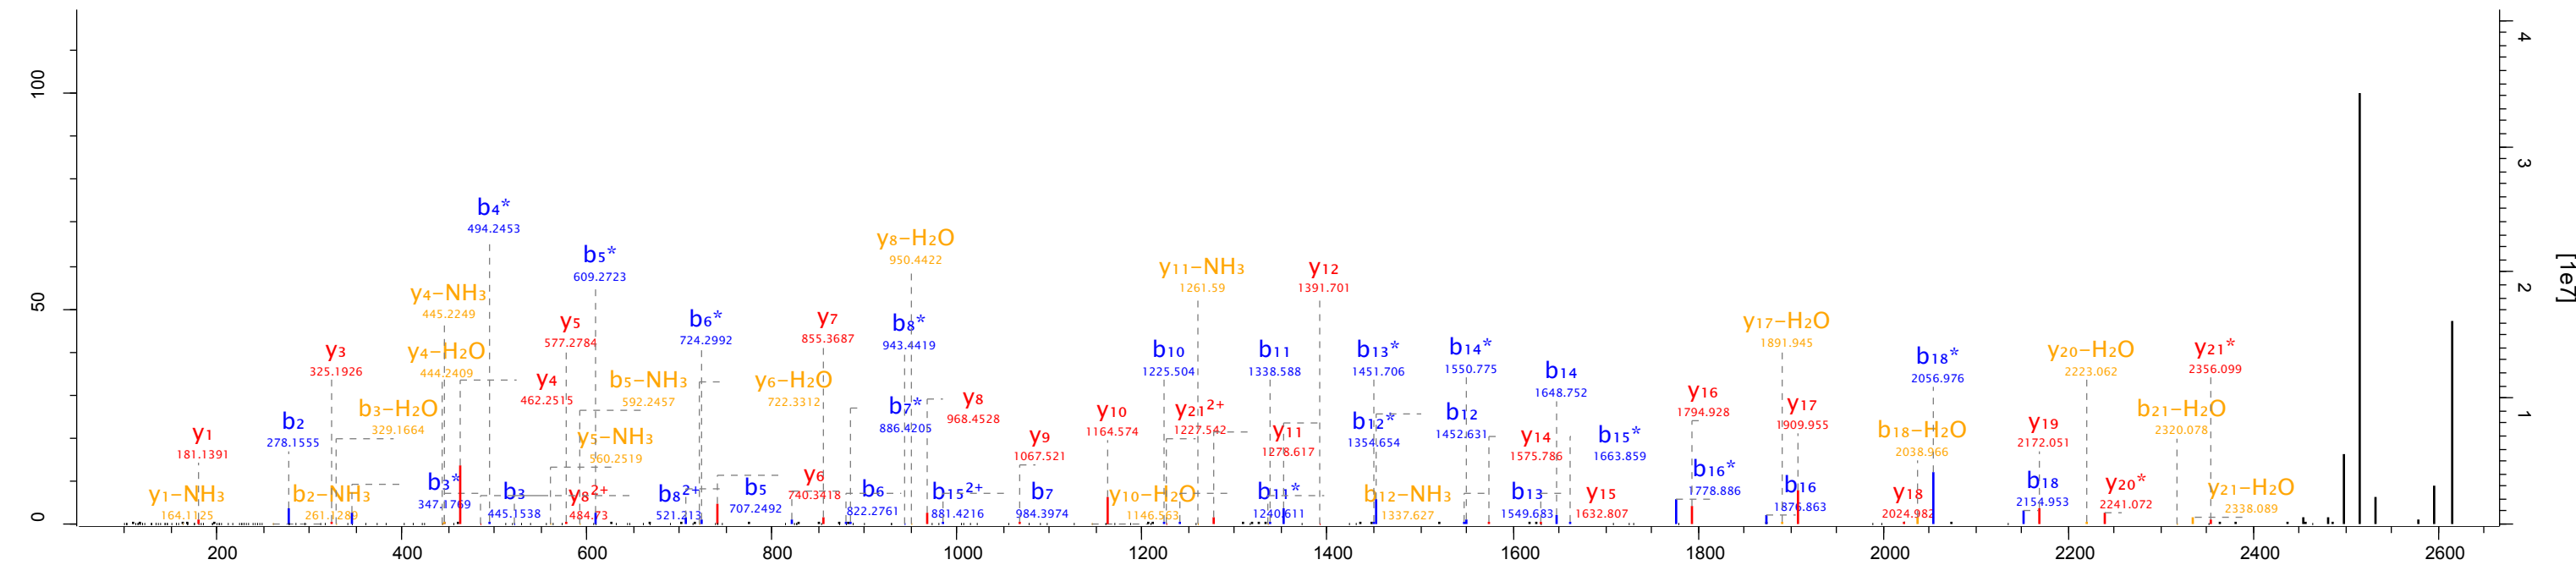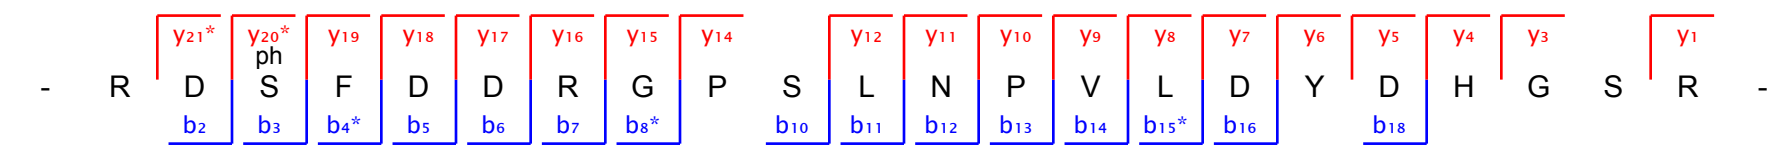



Raw file 20150812\_A375SR\_Phospho\_BR1\_10 Scan 18152 Method FTMS; HCD Score 236.2 m/z 761.7 Gene names CWF19L2

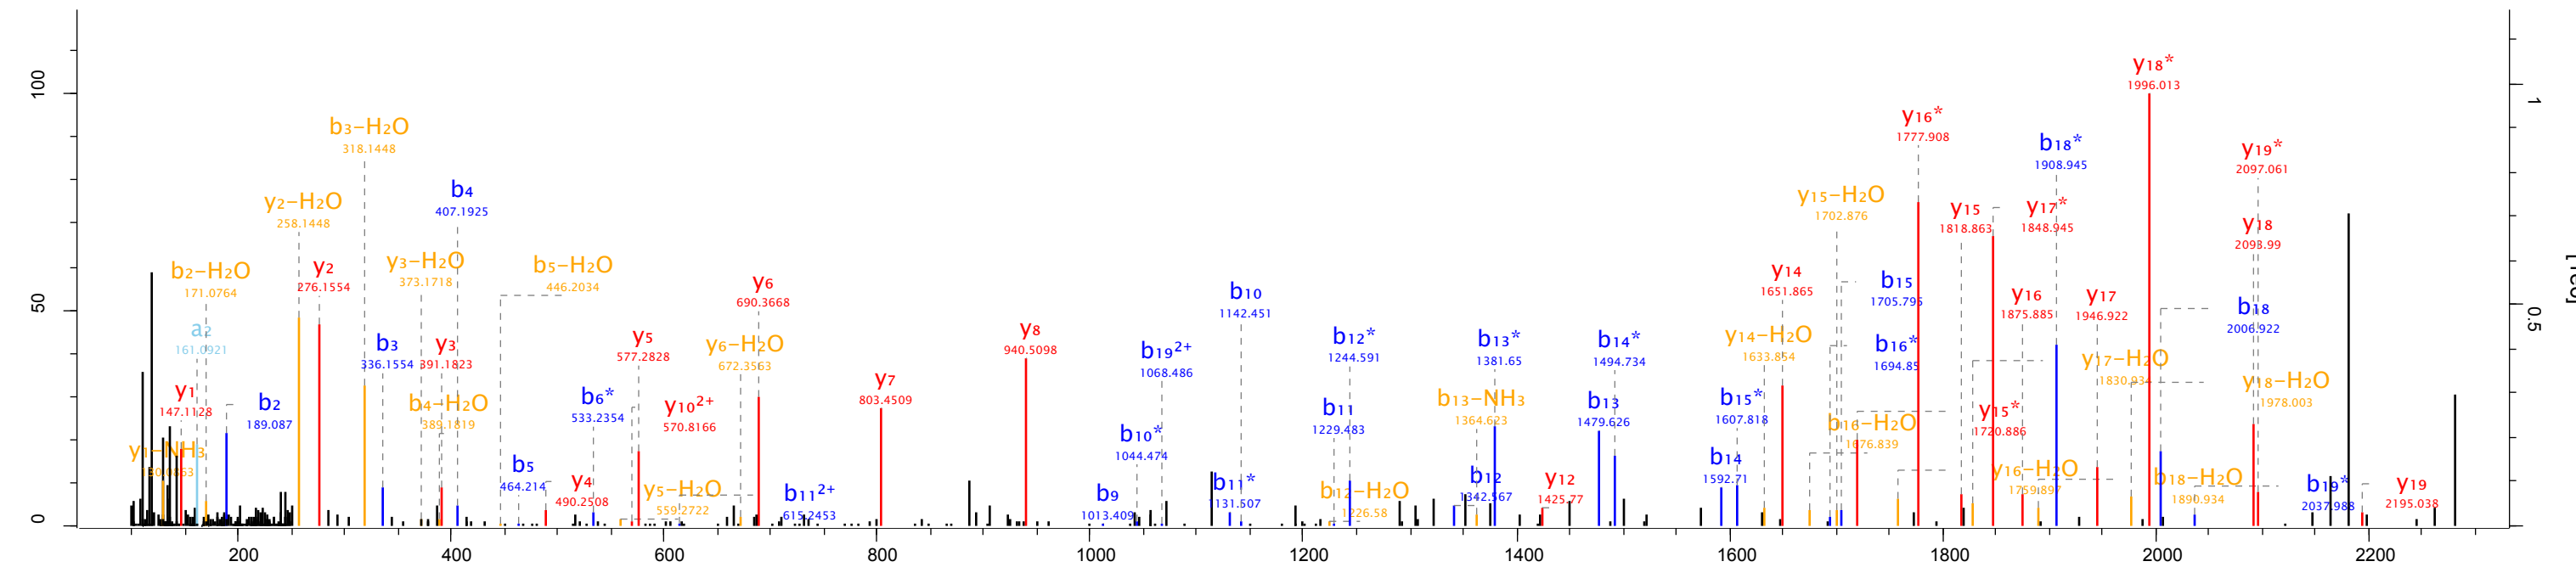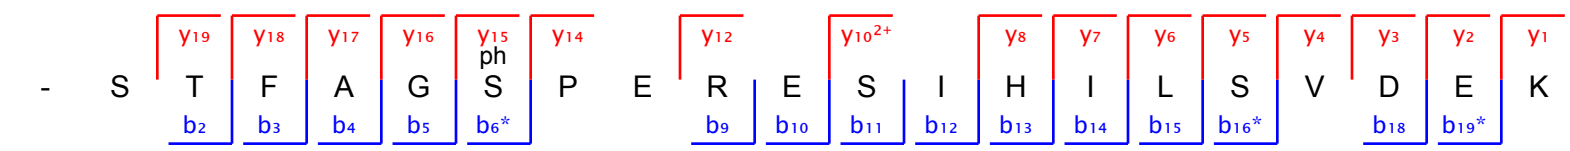

Raw file 20150812\_A375SR\_Phospho\_BR1\_10 Scan 22252 Method FTMS; HCD Score 69.24 m/z 773.38 Gene names MAP1B

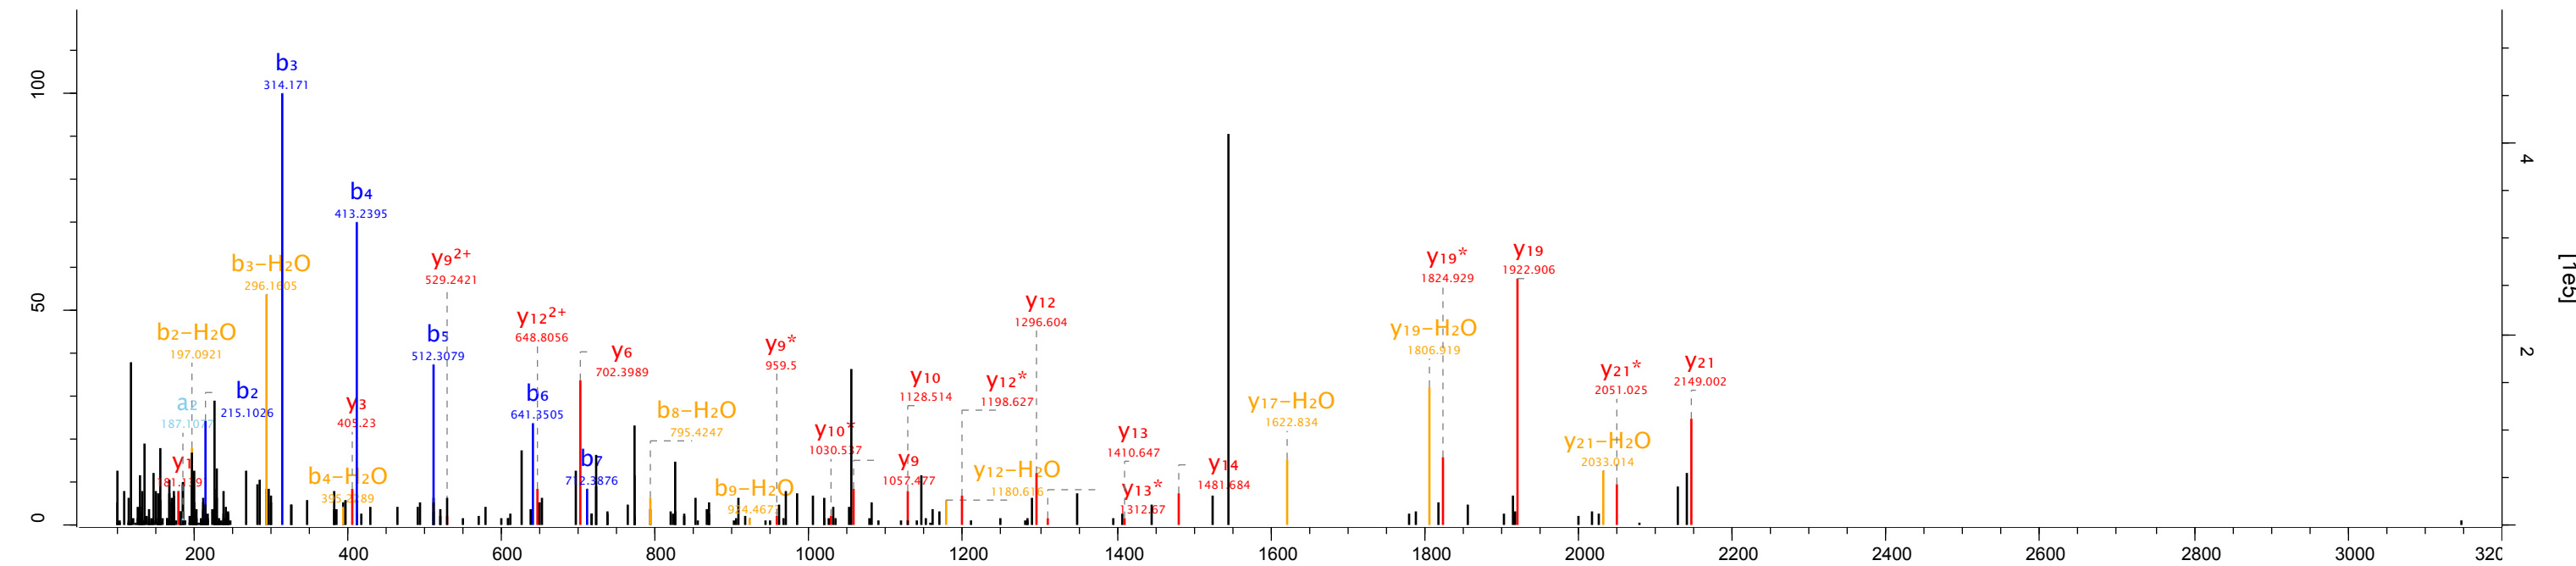

ac - A T V V V E A T E P E P S G S I A N P A A S T S P S L S H R -

b<sub>2</sub>
b<sub>3</sub>
b<sub>4</sub>
b<sub>5</sub>
b<sub>6</sub>
b<sub>7</sub>
y<sub>21</sub>
y<sub>19</sub>
y<sub>14</sub>
y<sub>13</sub>
y<sub>12</sub>
y<sub>10</sub>
y<sub>9</sub>
y<sub>6</sub>
y<sub>3</sub>
y<sub>1</sub>

Raw file 20150812\_A375SR\_Phospho\_BR1\_10 Scan 22572 Method FTMS; HCD Score 145.48 m/z 785.91 Gene names APBB2

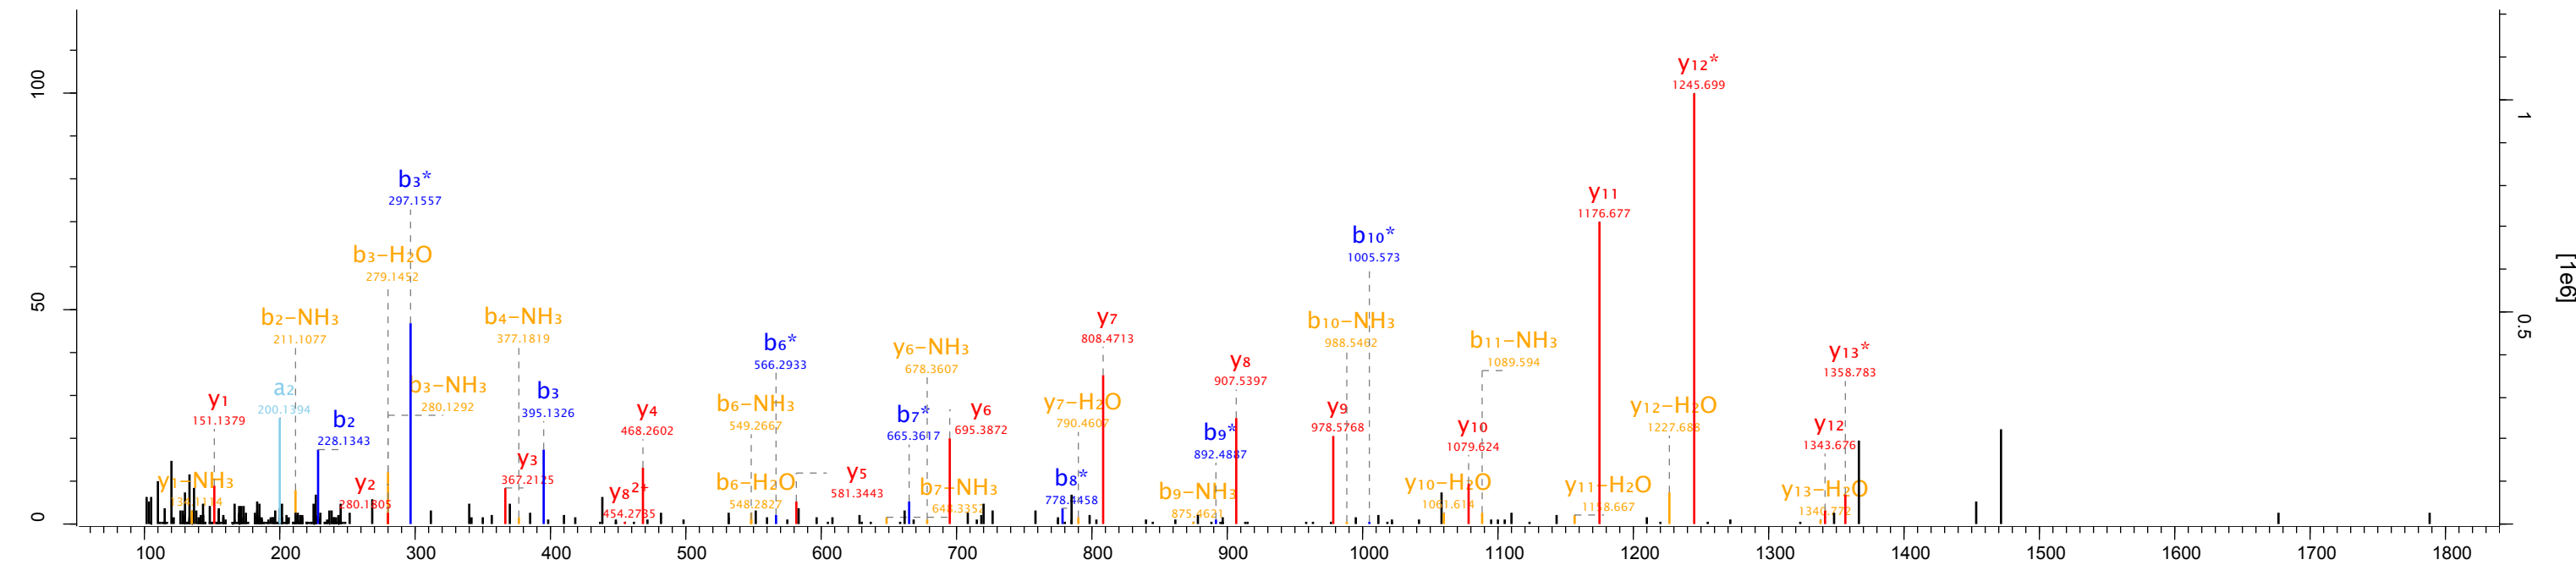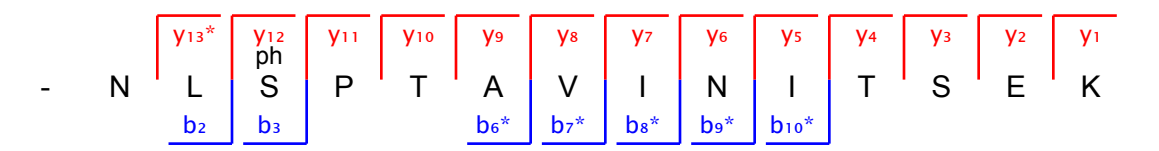

Raw file: 20150812\_A375SR\_Phospho\_BR1\_10  
 Scan: 28782 Method: FTMS; HCD Score: 146.77 m/z: 698.36 Gene names: AKT1S1

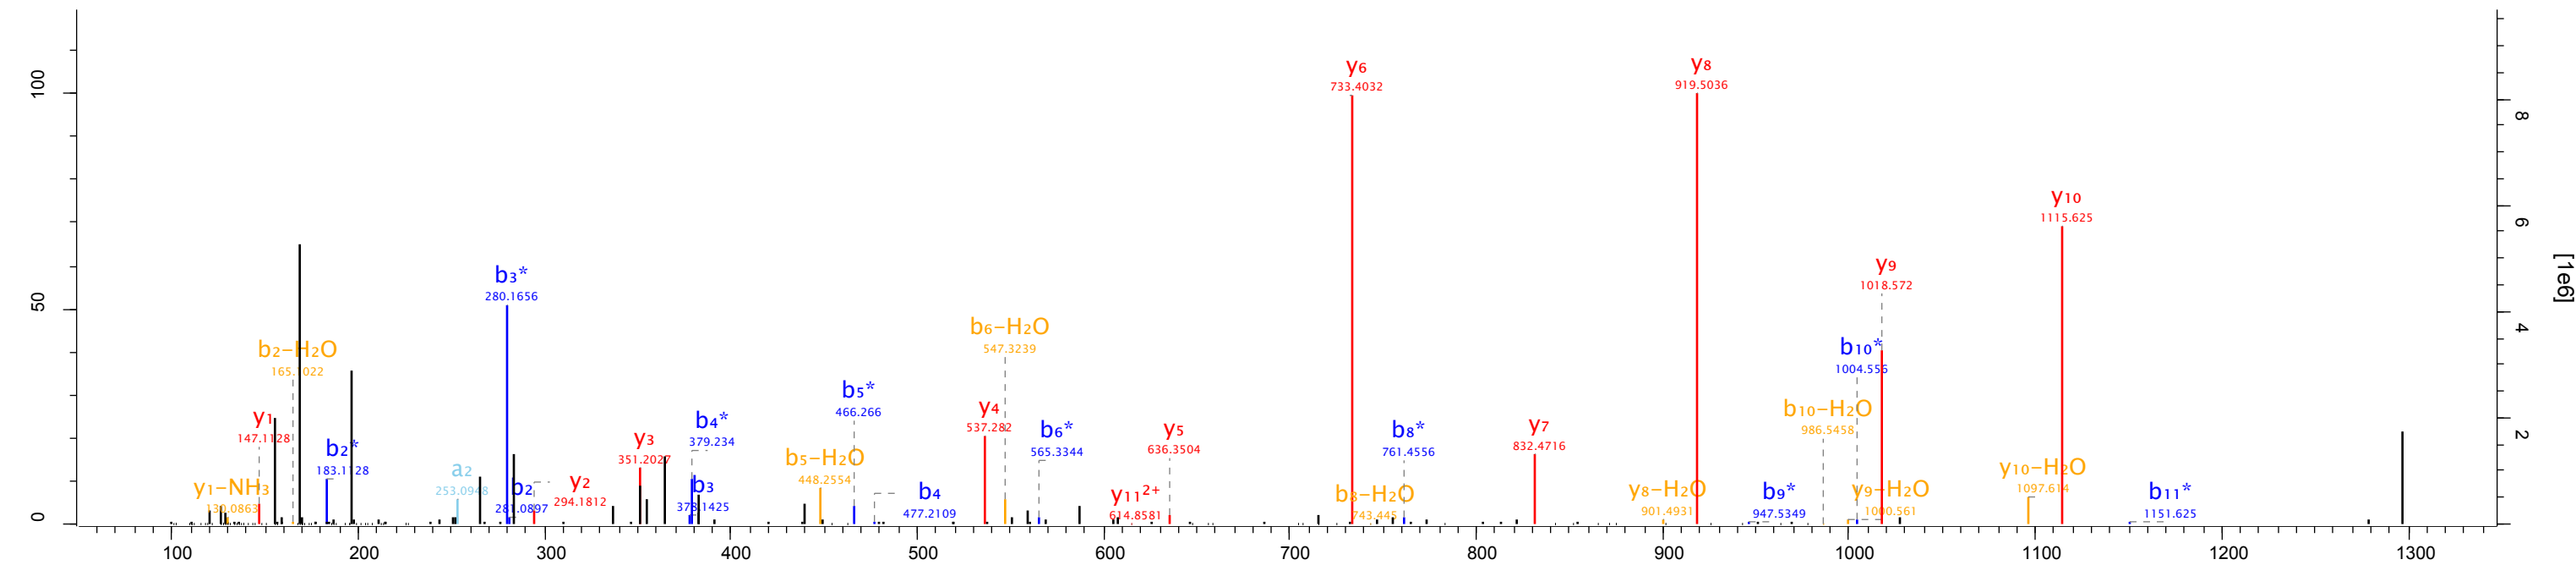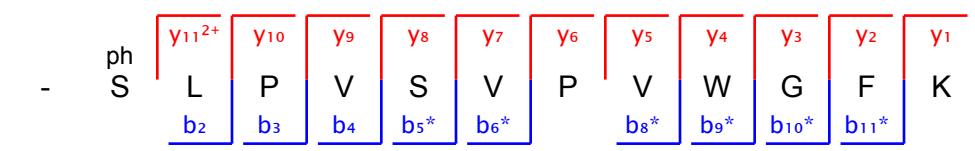

Raw file: 20150812\_A375SR\_Phospho\_BR1\_10  
 Scan: 3422 Method: FTMS; HCD Score: 196.48 m/z: 617.81 Gene names: ACIN1

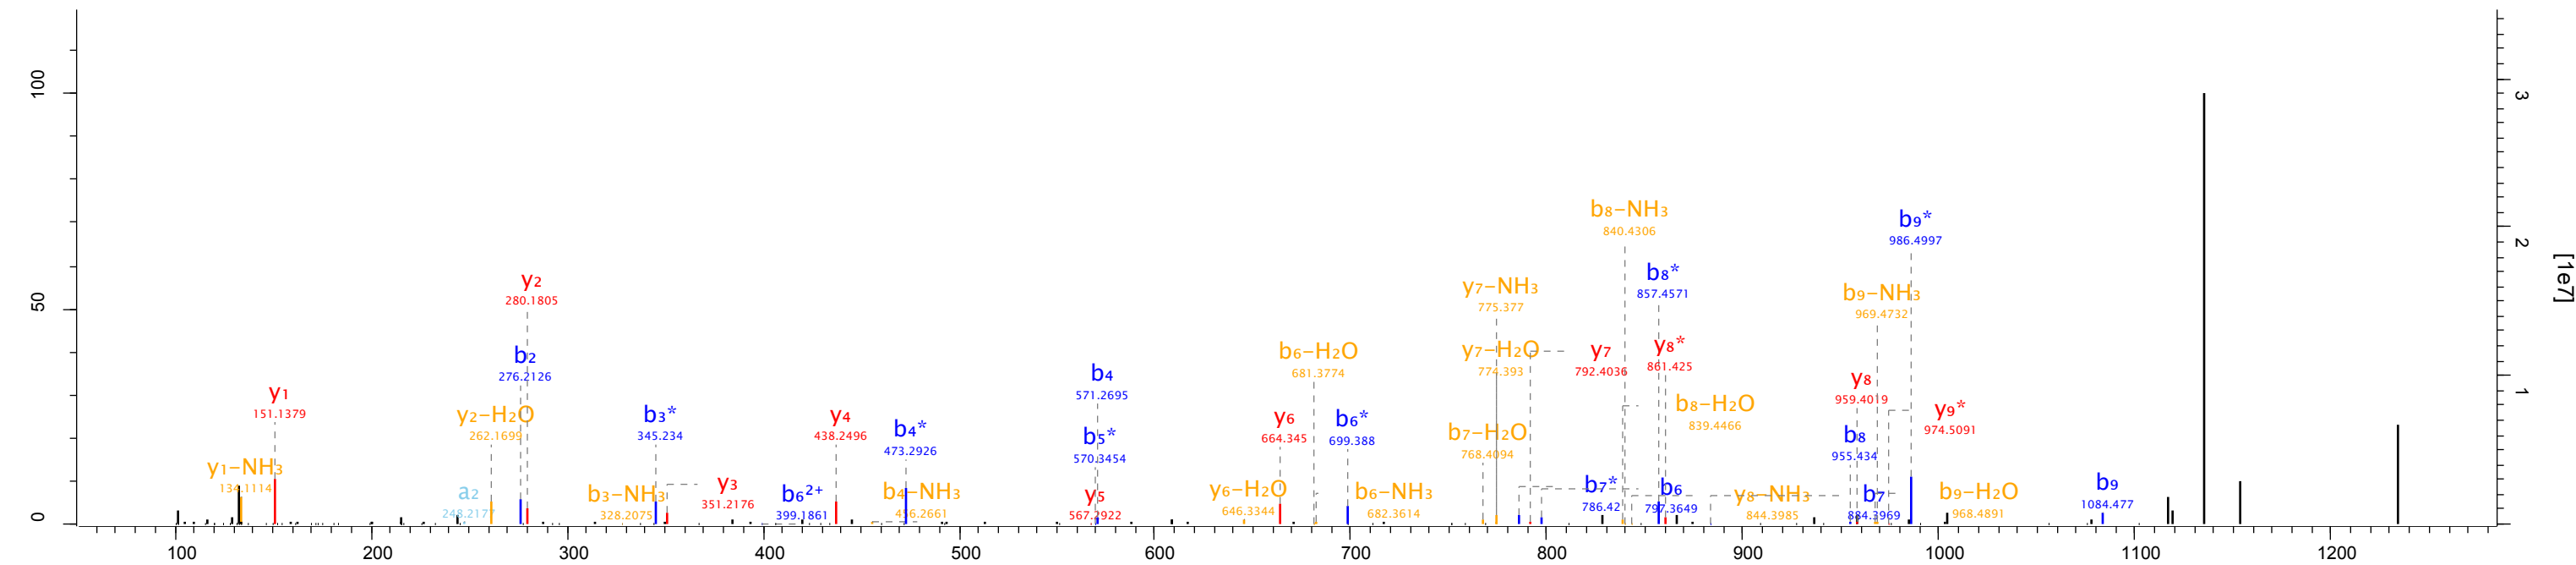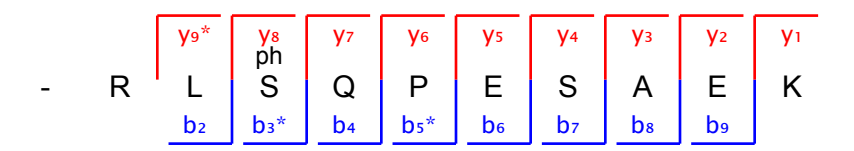

Raw file: 20150812\_A375SR\_Phospho\_BR1\_10  
 Scan: 3942 Method: FTMS; HCD Score: 156.02 m/z: 494.27 Gene names: SCAMP3

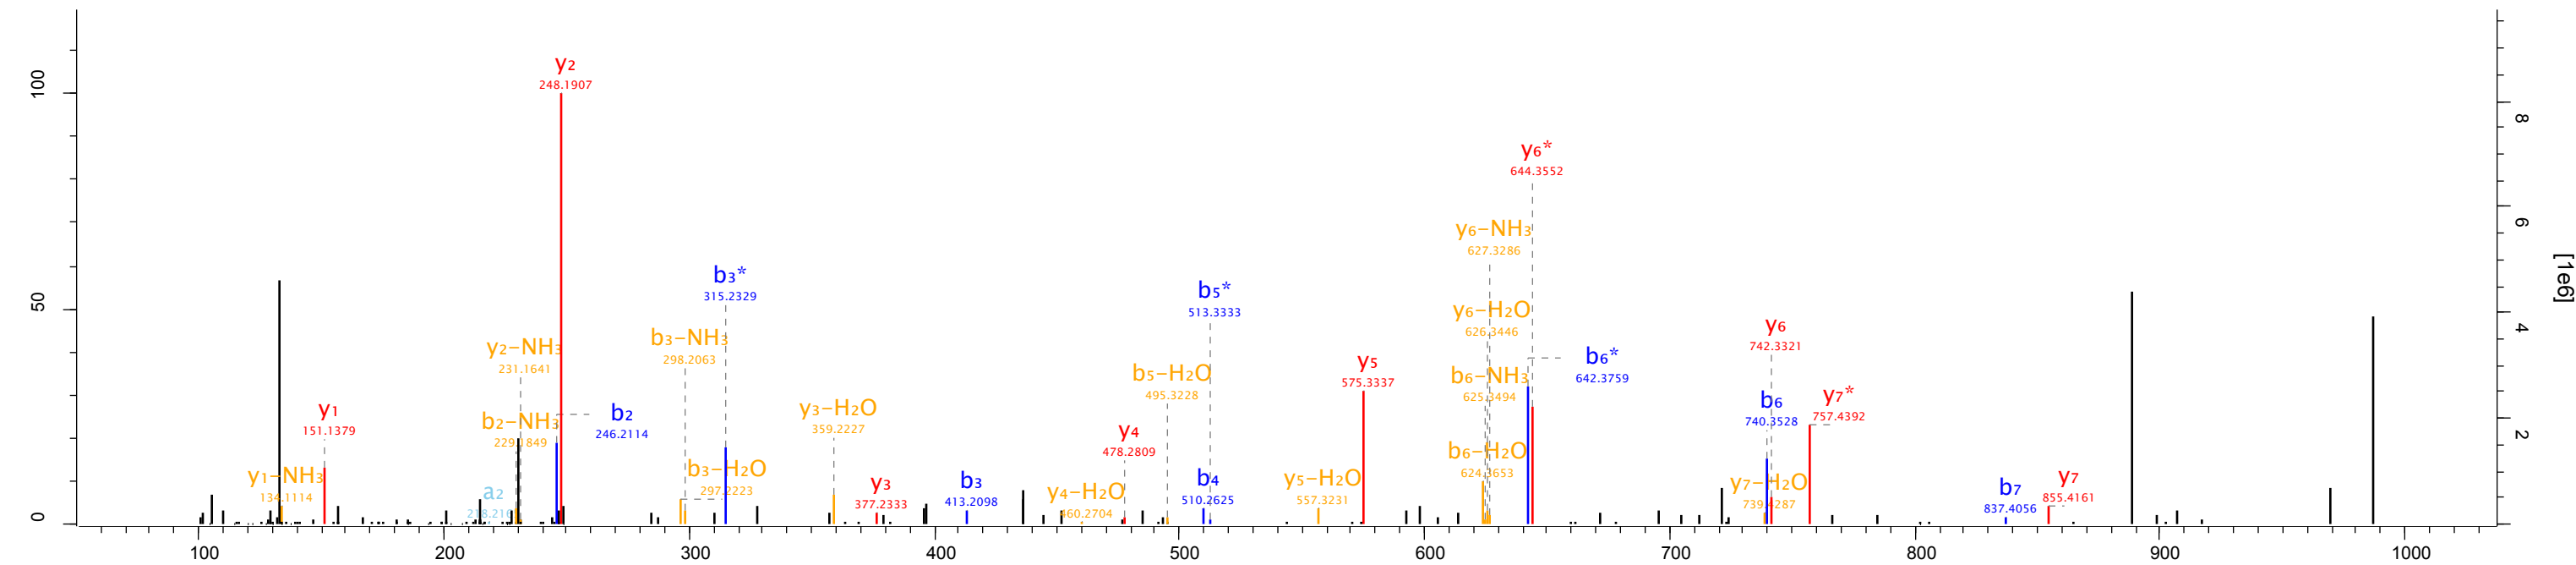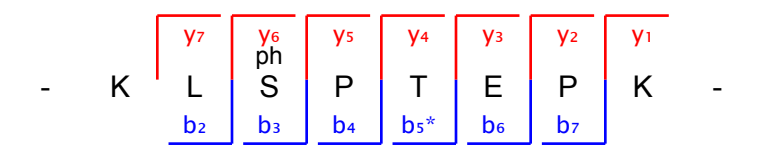

Raw file 20150812\_A375SR\_Phospho\_BR1\_10 Scan 9322 Method FTMS; HCD Score 156.62 m/z 431.2 Gene names CARHSP1

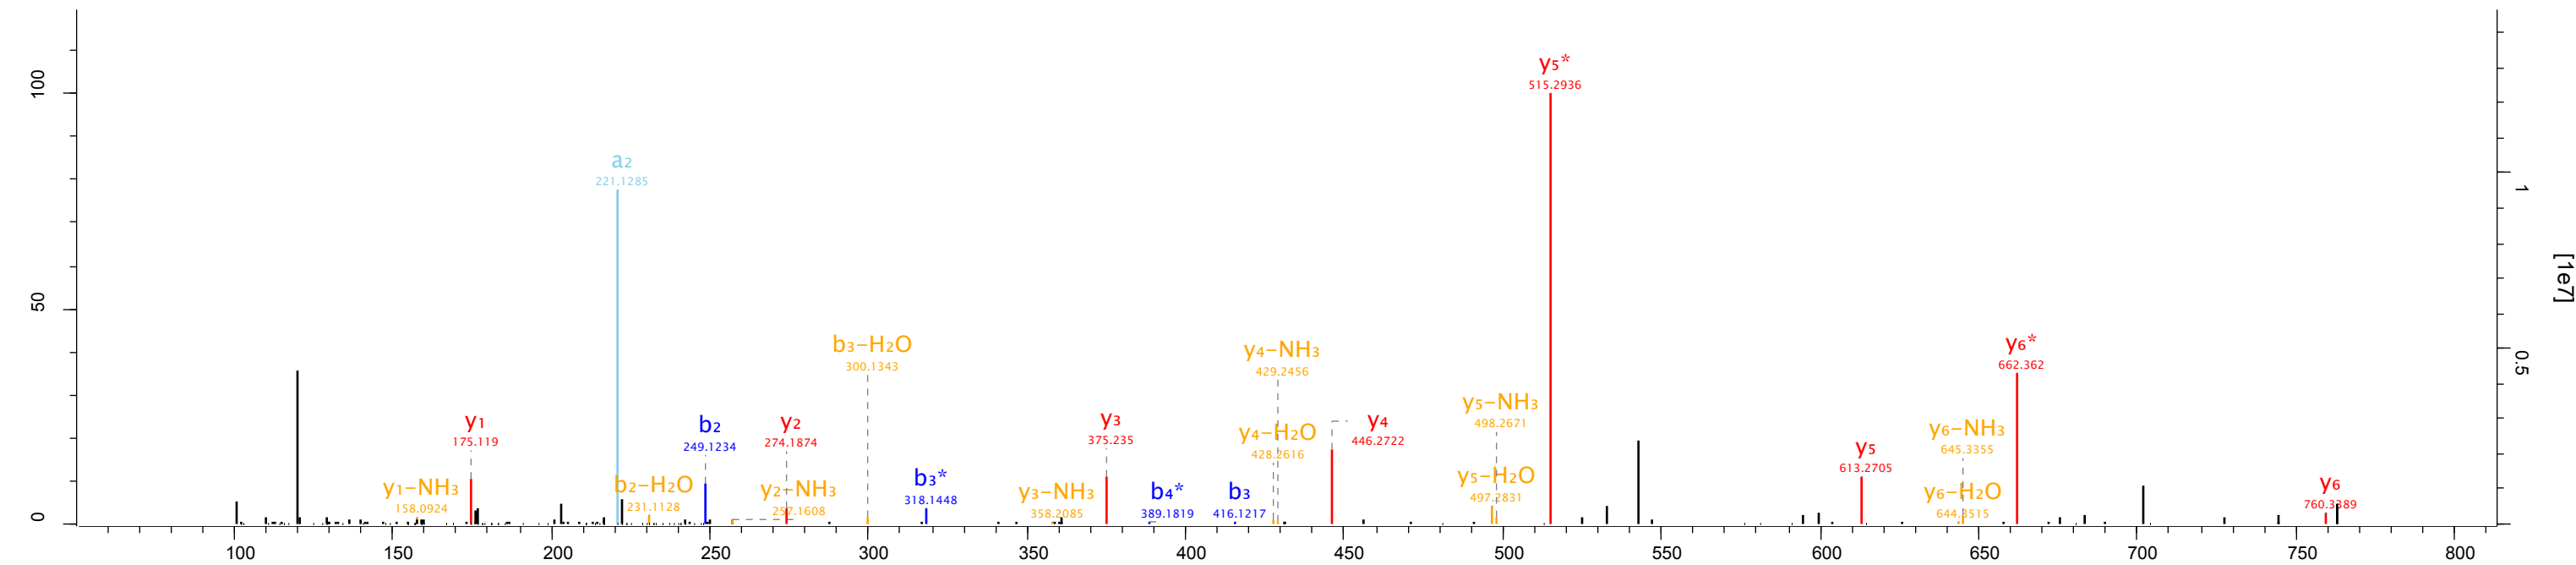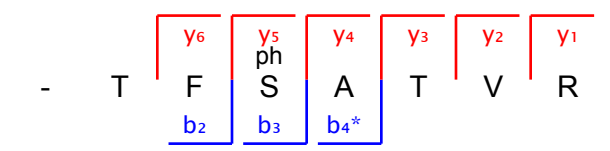

Raw file  
 20150812\_A375SR\_Phospho\_BR1\_01  
 Scan 11413 Method FTMS; HCD Score 181.14 m/z 1221.38 Gene names HTATSF1

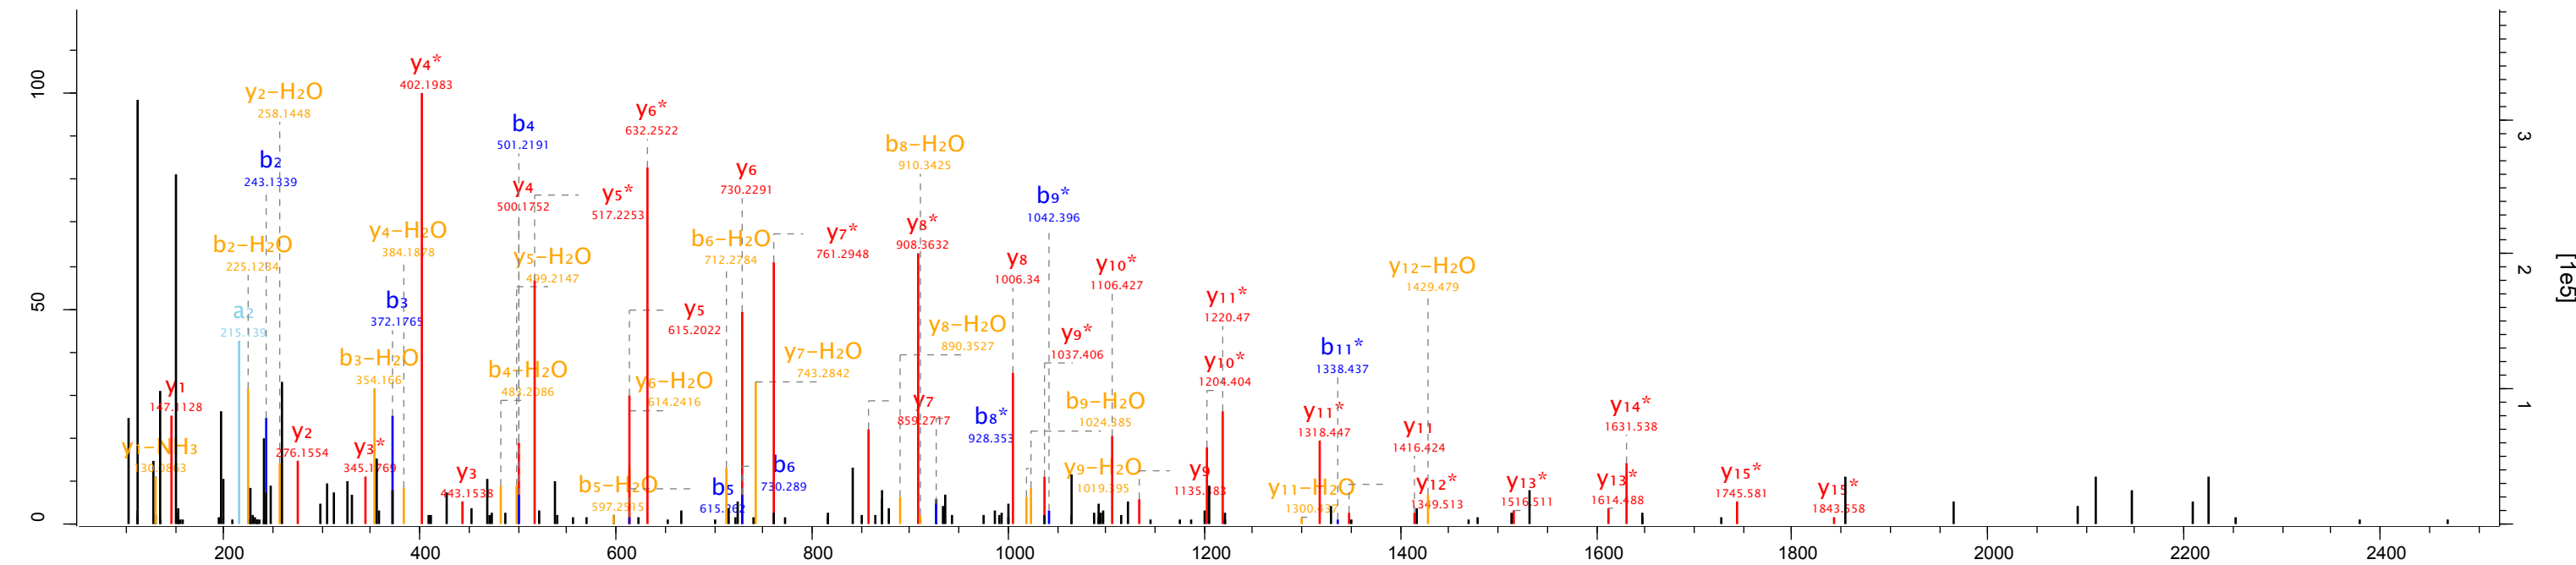

- E L E E N D S E N S E F E D D G S E K -

b<sub>2</sub>
b<sub>3</sub>
b<sub>4</sub>
y<sub>15</sub>\*
y<sub>14</sub>\*
y<sub>13</sub>\*
y<sub>12</sub>\*
y<sub>11</sub>
y<sub>10</sub>\*
y<sub>9</sub>
y<sub>8</sub>
y<sub>7</sub>
y<sub>6</sub>
y<sub>5</sub>
y<sub>4</sub>
y<sub>3</sub>
y<sub>2</sub>
y<sub>1</sub>

b<sub>8</sub>\*
b<sub>9</sub>\*
b<sub>11</sub>\*



Raw file: 20150812\_A375SR\_Phospho\_BR1\_01  
 Scan: 4583 Method: FTMS; HCD Score: 48.77 m/z: 1053.81 Gene names: RRP15

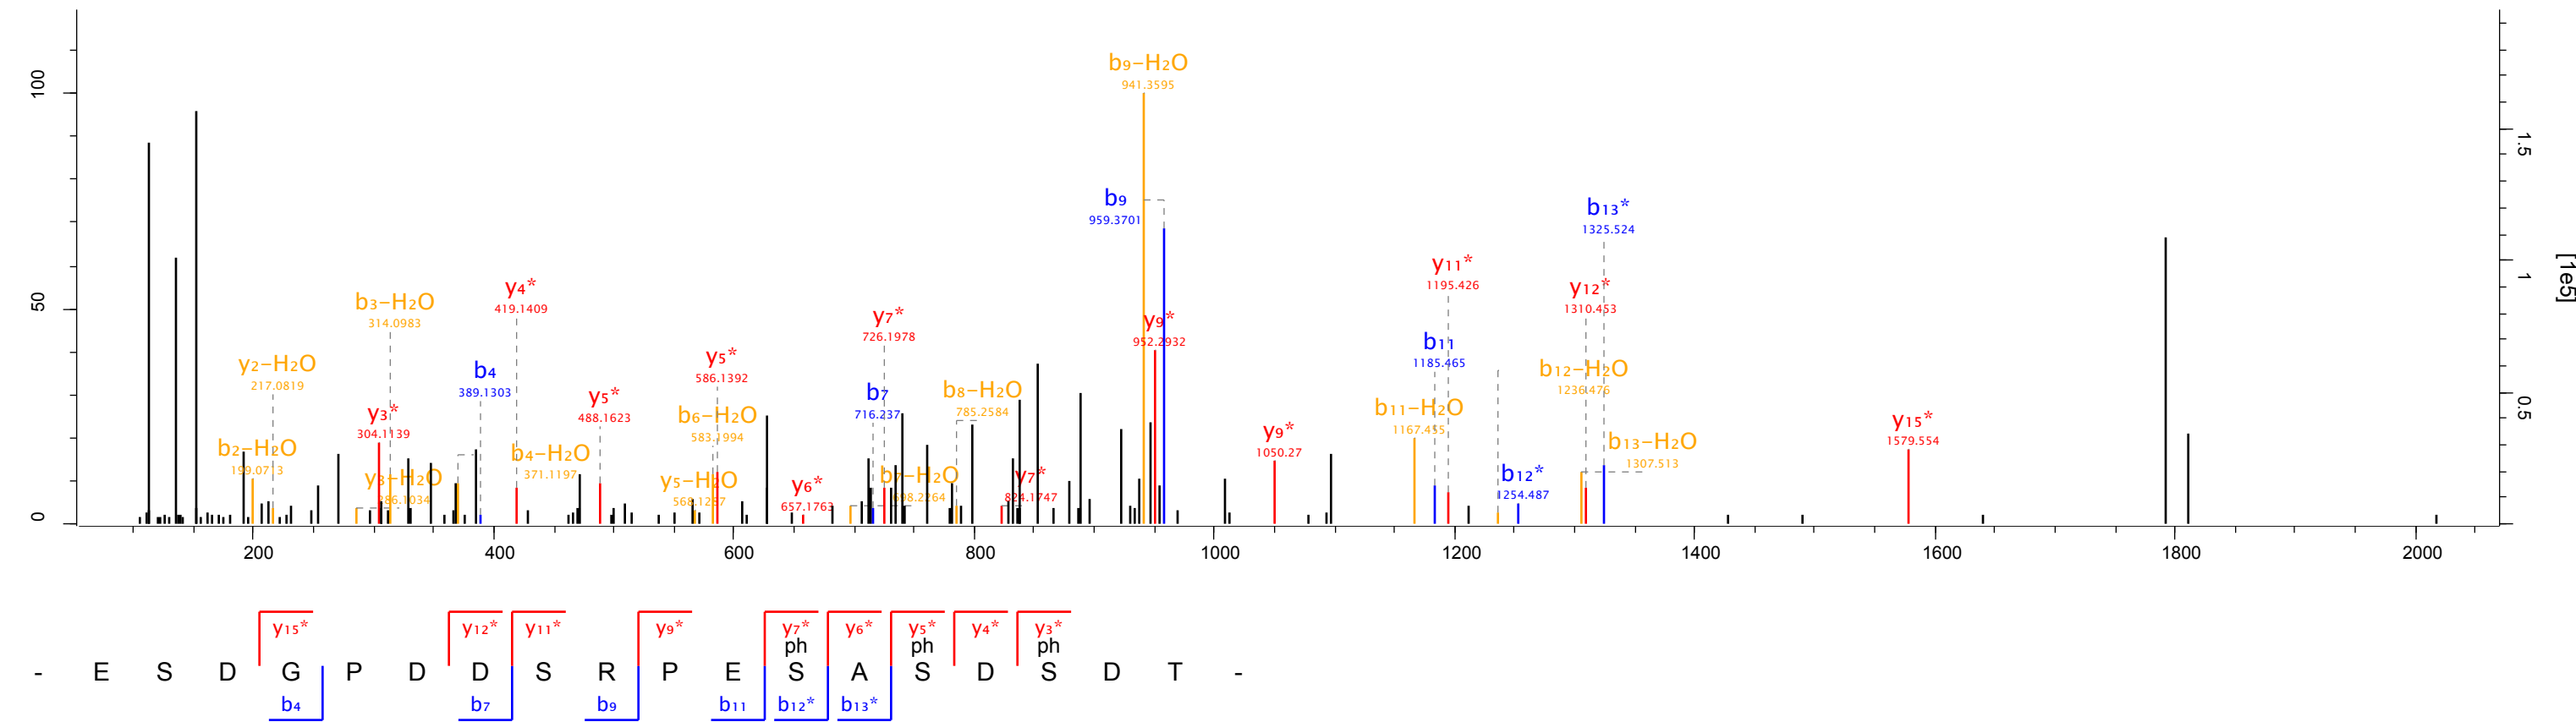

Raw file 20150812\_A375SR\_Phospho\_BR1\_01 Scan 6263 Method FTMS; HCD Score 117.46 m/z 898.8 Gene names CMTR1

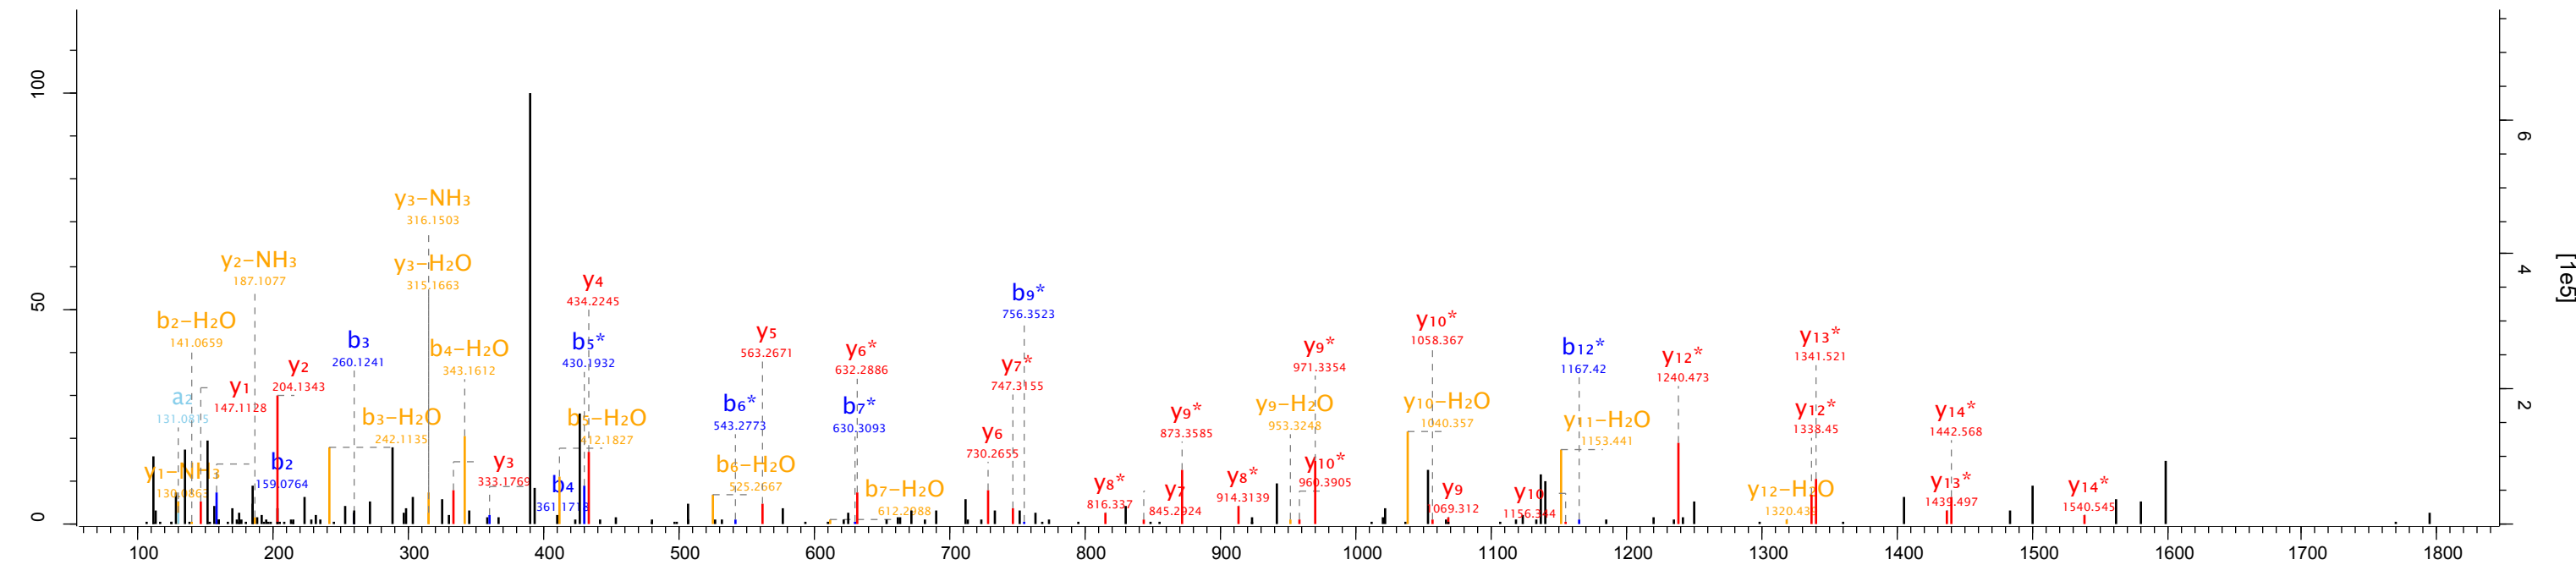

- A S T T S L S G S D S E T E G K -

b<sub>2</sub>
b<sub>3</sub>
b<sub>4</sub>
b<sub>5</sub>\*
b<sub>6</sub>\*
b<sub>7</sub>\*
b<sub>9</sub>\*
b<sub>12</sub>\*

y<sub>14</sub>\*
y<sub>13</sub>\*
y<sub>12</sub>\*
y<sub>10</sub>
y<sub>9</sub>
y<sub>8</sub>\*
y<sub>7</sub>
y<sub>6</sub>
y<sub>5</sub>
y<sub>4</sub>
y<sub>3</sub>
y<sub>2</sub>
y<sub>1</sub>

Raw file  
 20150812\_A375SR\_Phospho\_BR1\_01  
 Scan 7043 Method FTMS; HCD Score 70.67 m/z 1073.87 Gene names PRPF4B

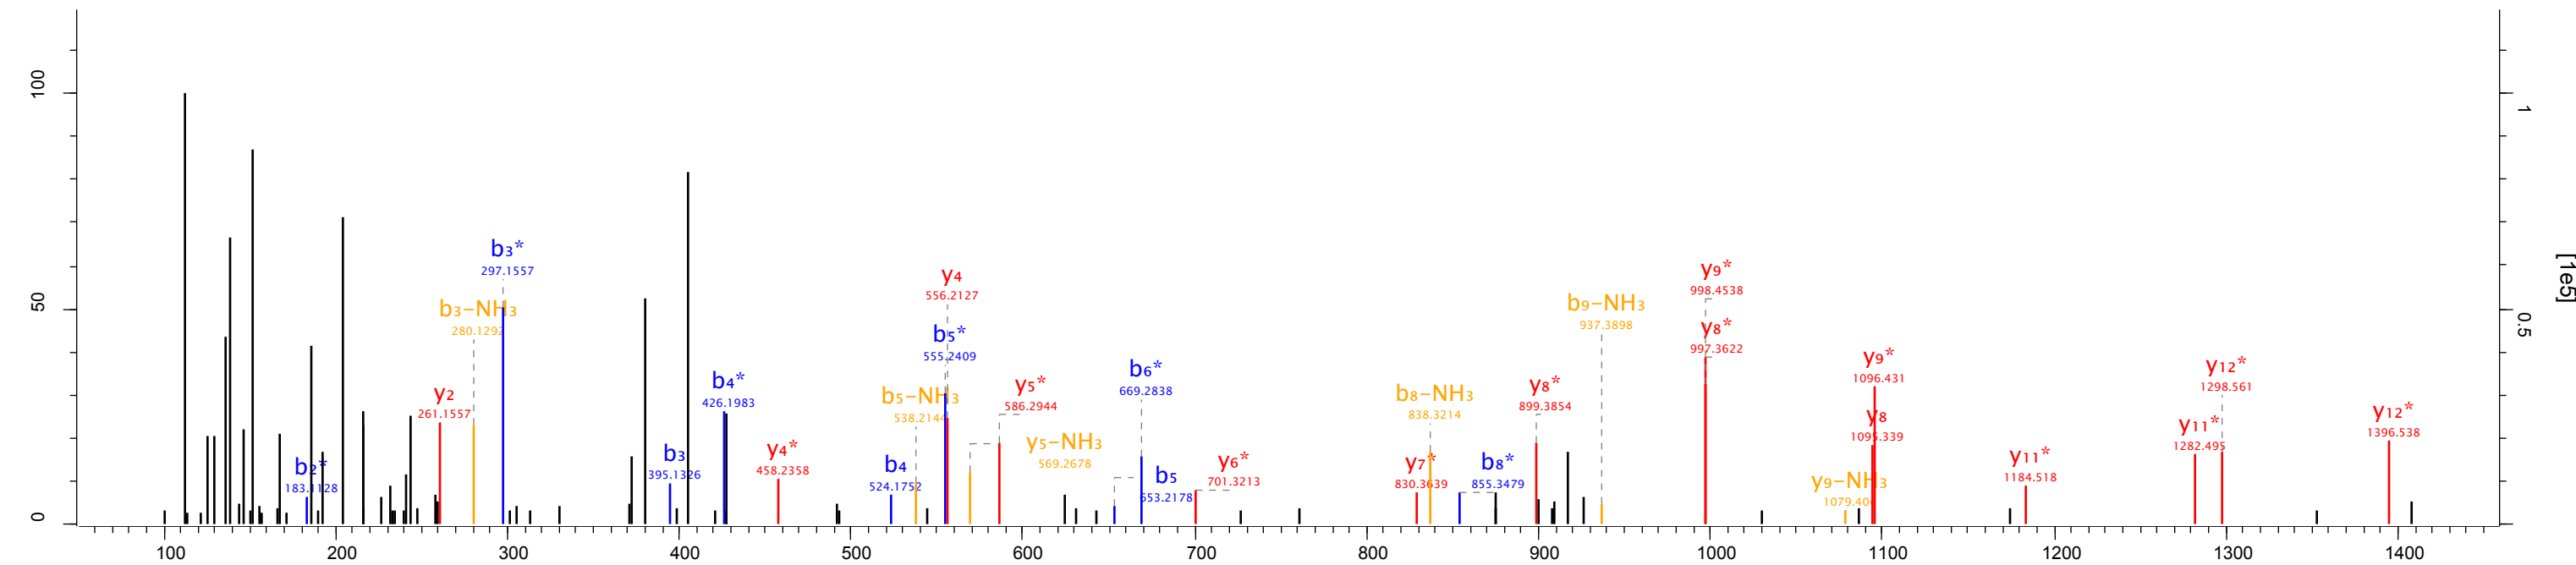

- pH S I N E E N G E V S E D Q S Q N K -  
 b2\* b3 b4 b5 b6\* b8\* y9\* y8 ph y7\* y6\* y5\* y4 ph y2

Raw file 20150812\_A375SR\_Phospho\_BR1\_01 Scan 7713 Method FTMS; HCD Score 133.79 m/z 1532.46 Gene names SMARCA4

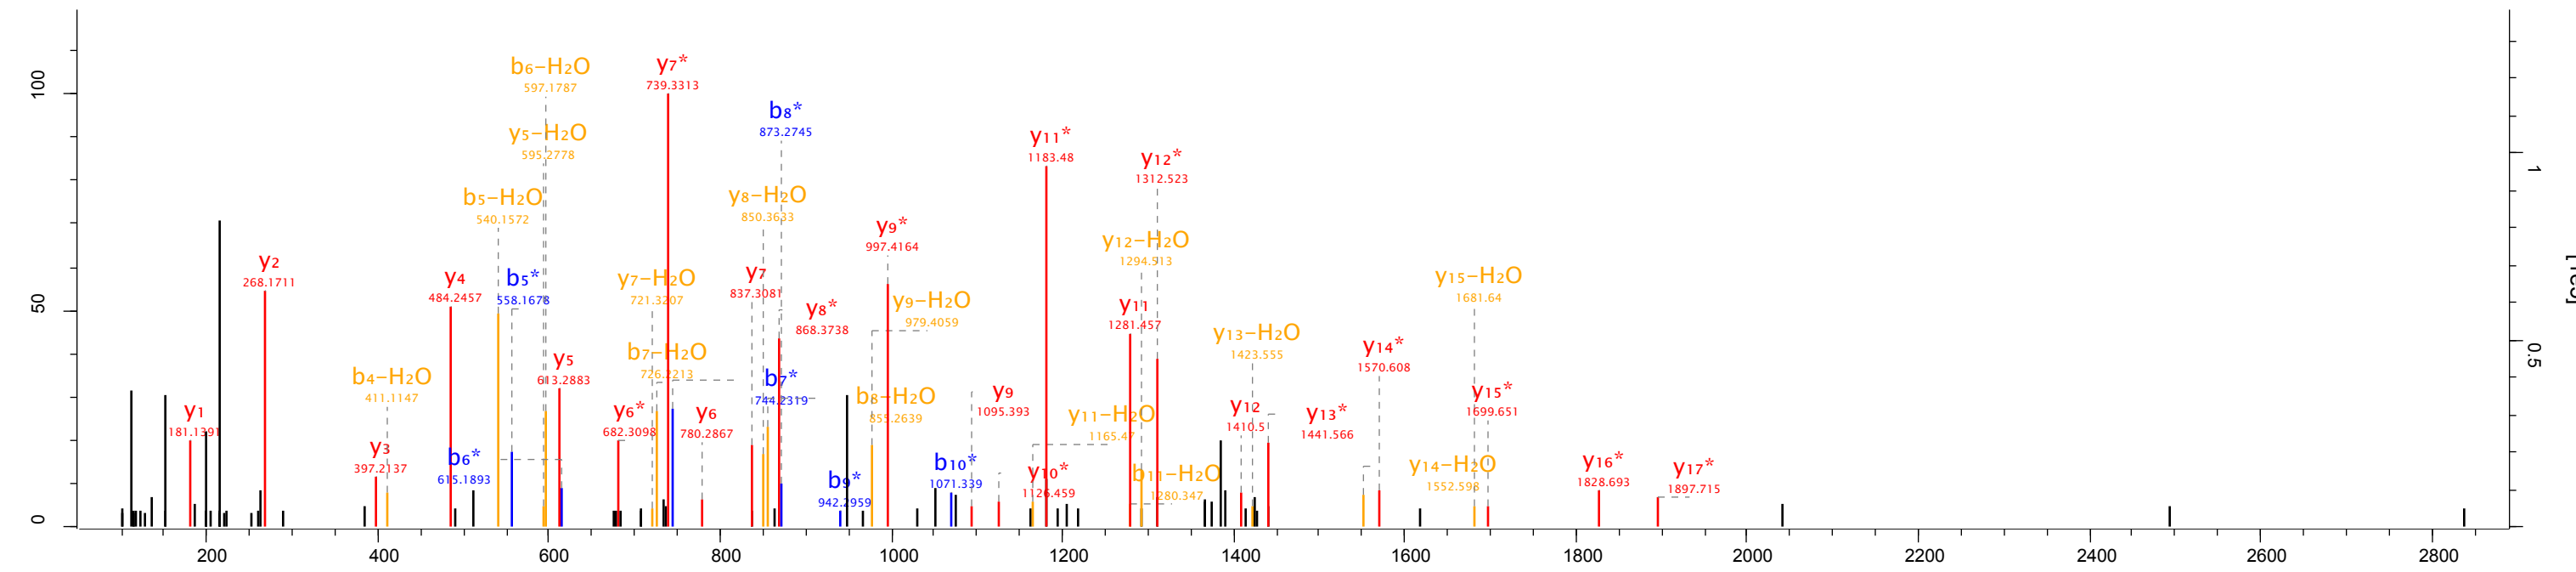

- E D D S E G E E y17\*  
ph  
S y16\*  
E y15\*  
E y14\*  
E y13\*  
E y12\*  
E y11\*  
G y10\*  
E y9\*  
E y8\*  
E y7\*  
G y6\*  
ph  
S y5\*  
E y4\*  
S y3\*  
E y2\*  
S y1\*  
R -

b5\* b6\* b7\* b8\* b9\* b10\*

Raw file 20150812\_A375SR\_Phospho\_BR1\_01 Scan 7743 Method FTMS; HCD Score 88.33 m/z 909.33 Gene names SUV39H2

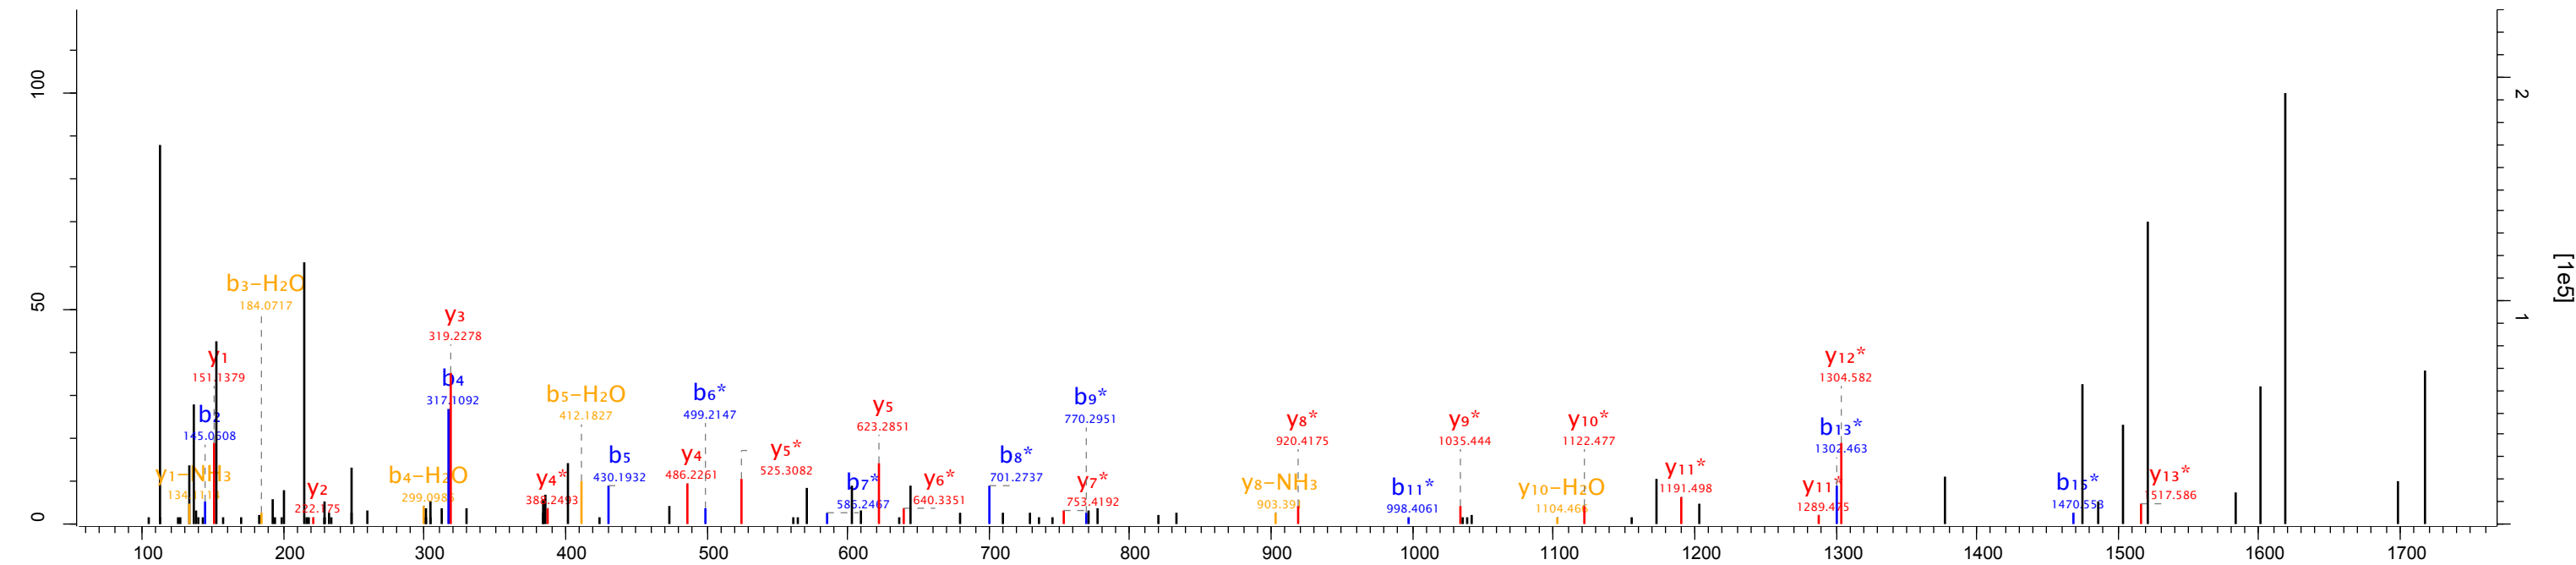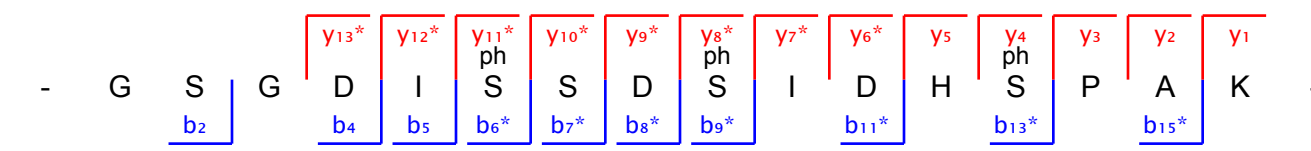

Raw file: 20150812\_A375SR\_Phospho\_BR1\_01  
 Scan: 8473 Method: FTMS; HCD Score: 42.07 m/z: 1061.88 Gene names: SLC9A3R1

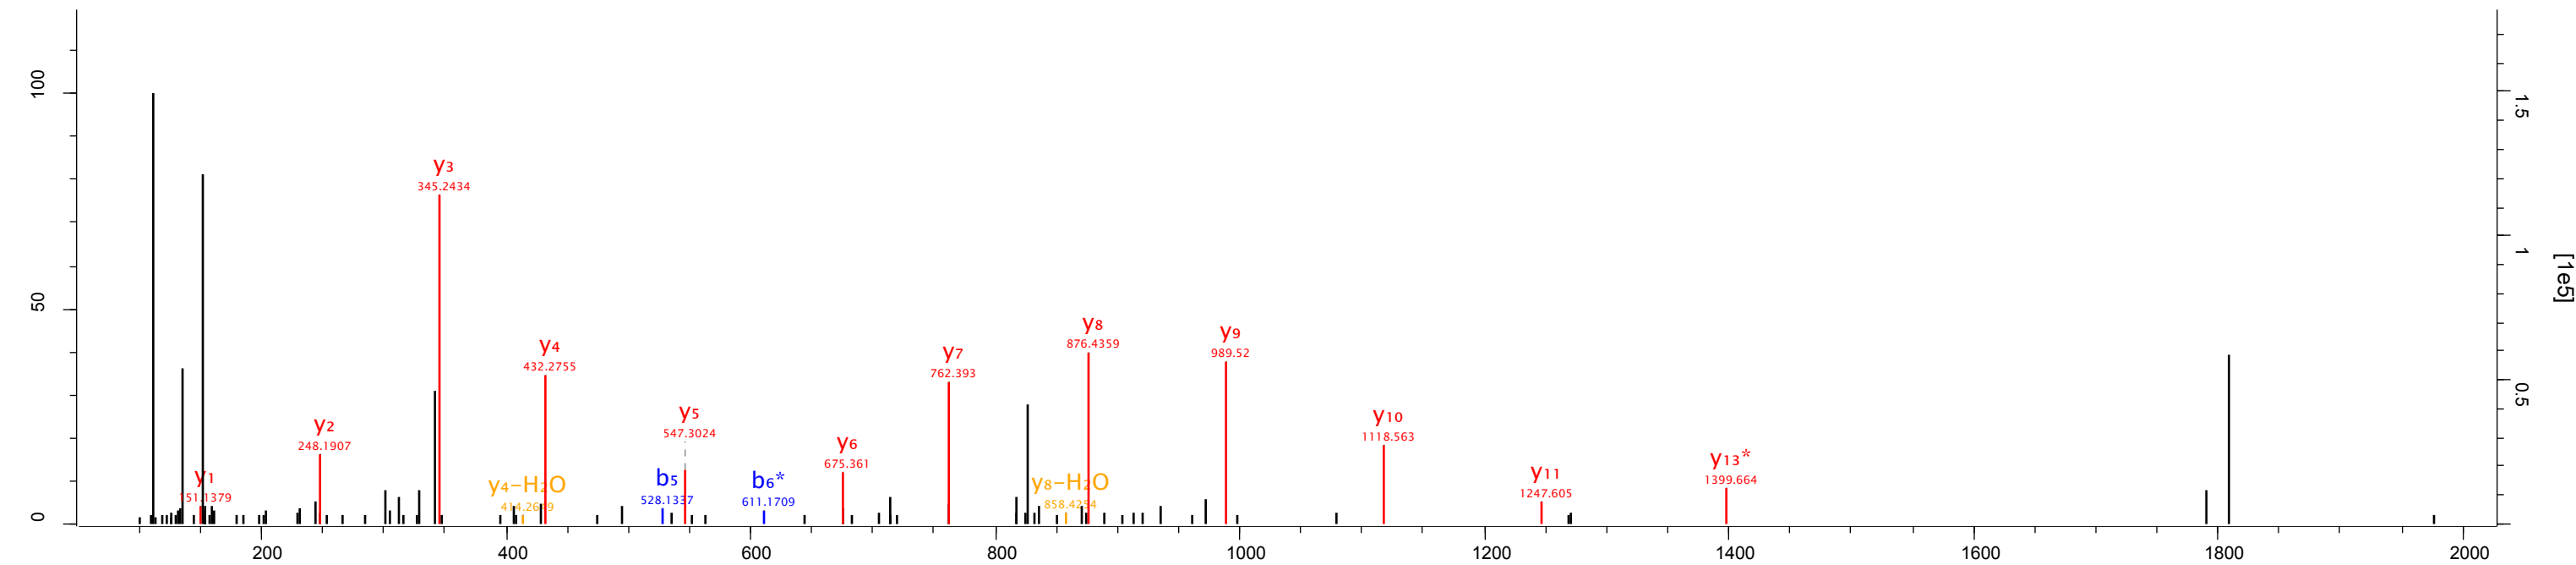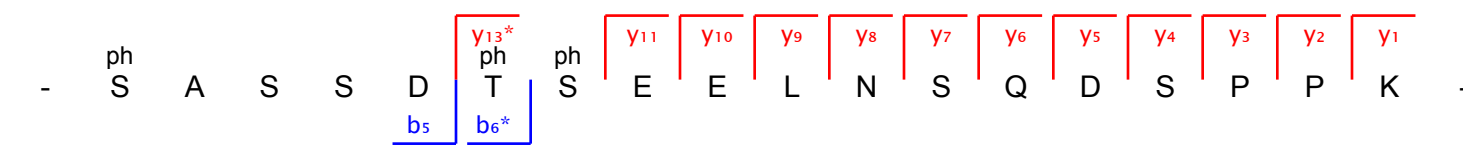

Raw file 20150812\_A375SR\_Phospho\_BR1\_02 Scan 10053 Method FTMS; HCD Score 156.88 m/z 861.38 Gene names ADD2

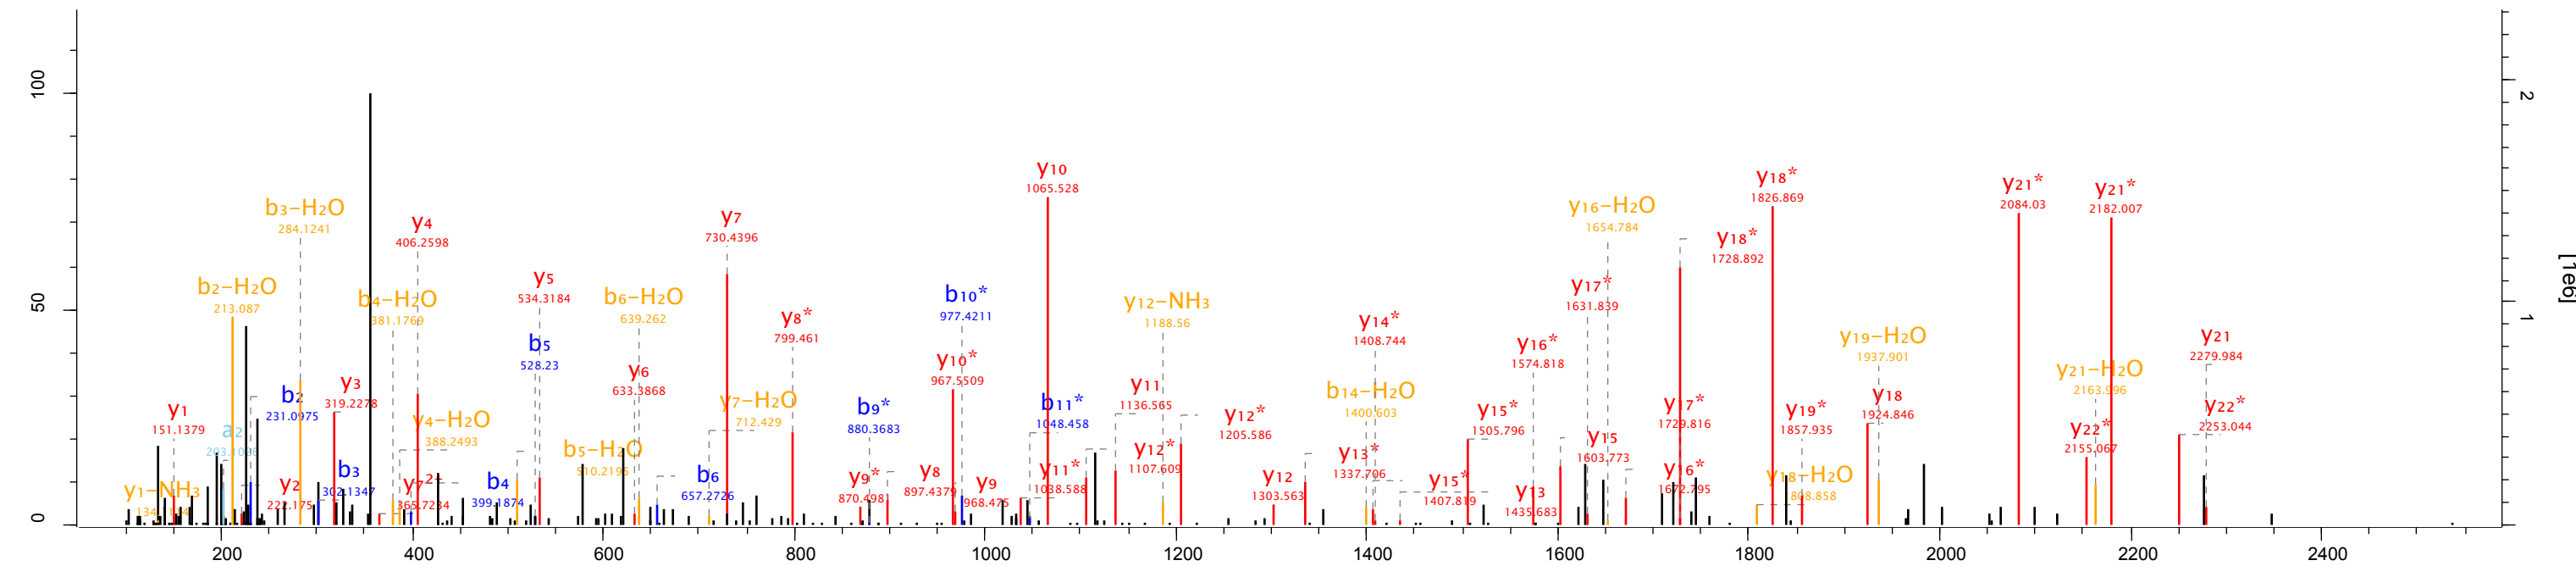

- E T A P E E P G S P A K S A P A S P V Q S P A K -

Fragmentation mapping (b and y ions):

- b2: T
- b3: A
- b4: P
- b5: E
- b6: E
- b9\*: S
- b10\*: P
- b11\*: A
- y1: K
- y2: P
- y3: S
- y4: Q
- y5: V
- y6: P
- y7: S
- y8: A
- y9: A
- y10: P
- y11: S
- y12: S
- y13: K
- y14: A
- y15: P
- y16: S
- y17: G
- y18: P
- y19: E
- y20: E
- y21: P
- y22: A

Raw file 20150812\_A375SR\_Phospho\_BR1\_02 Scan 10253 Method FTMS; HCD Score 98.58 m/z 809.74 Gene names PPP4R1

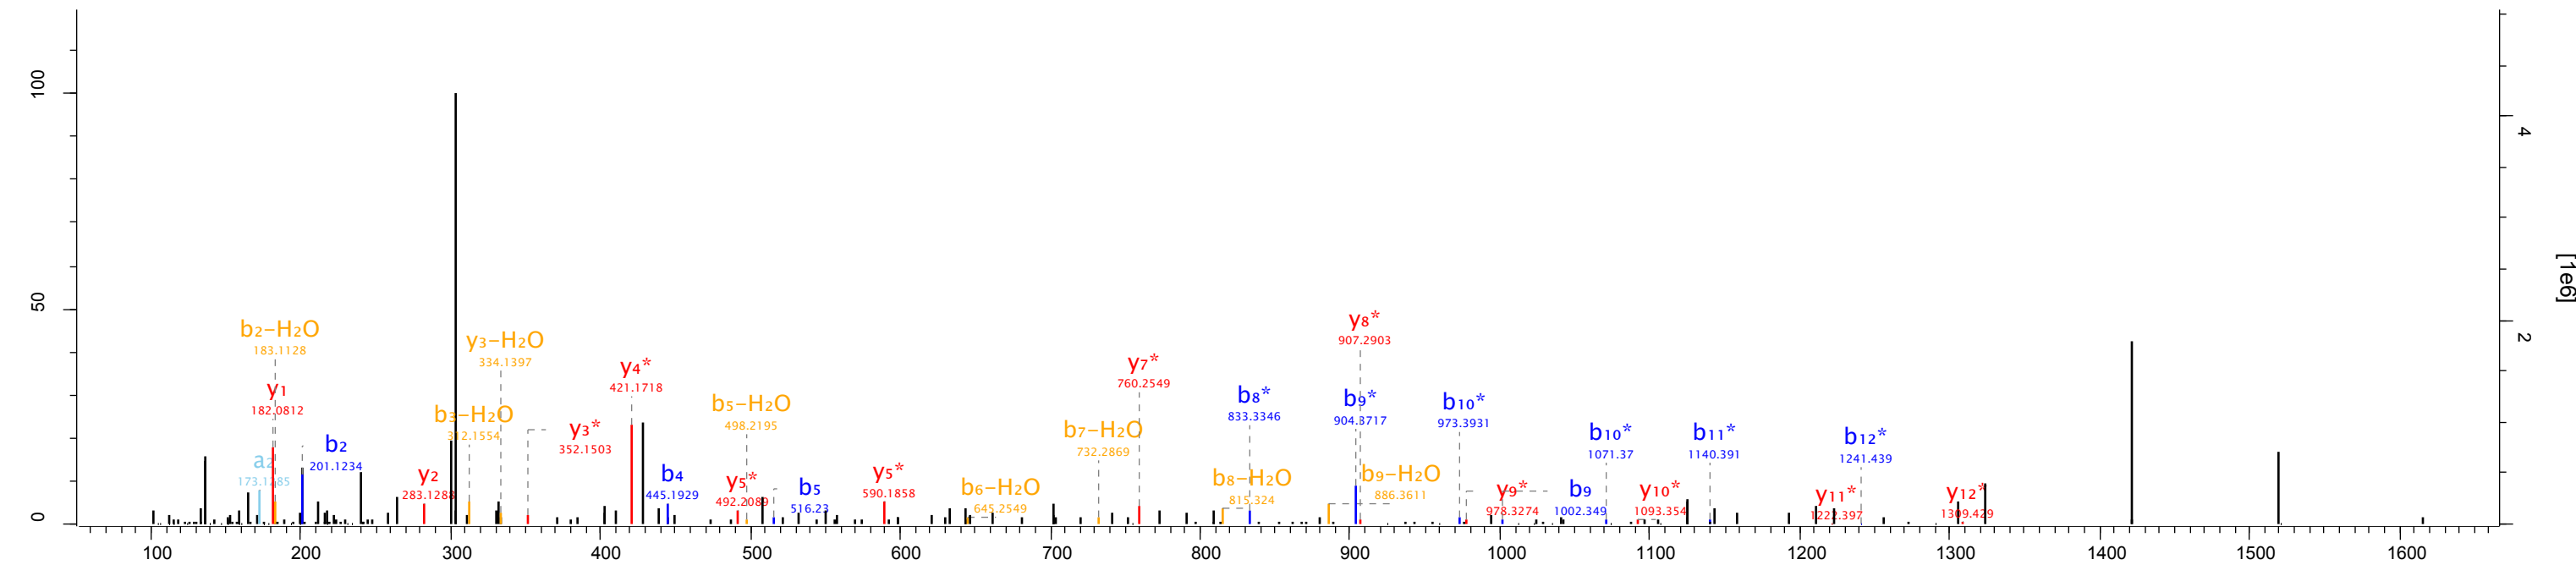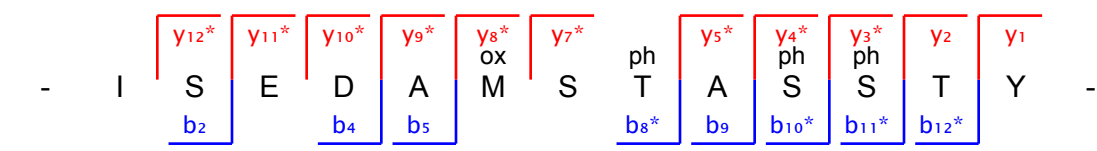



Raw file: 20150812\_A375SR\_Phospho\_BR1\_02  
 Scan: 10573 Method: FTMS; HCD Score: 128.75 m/z: 831.35 Gene names: FRMD6

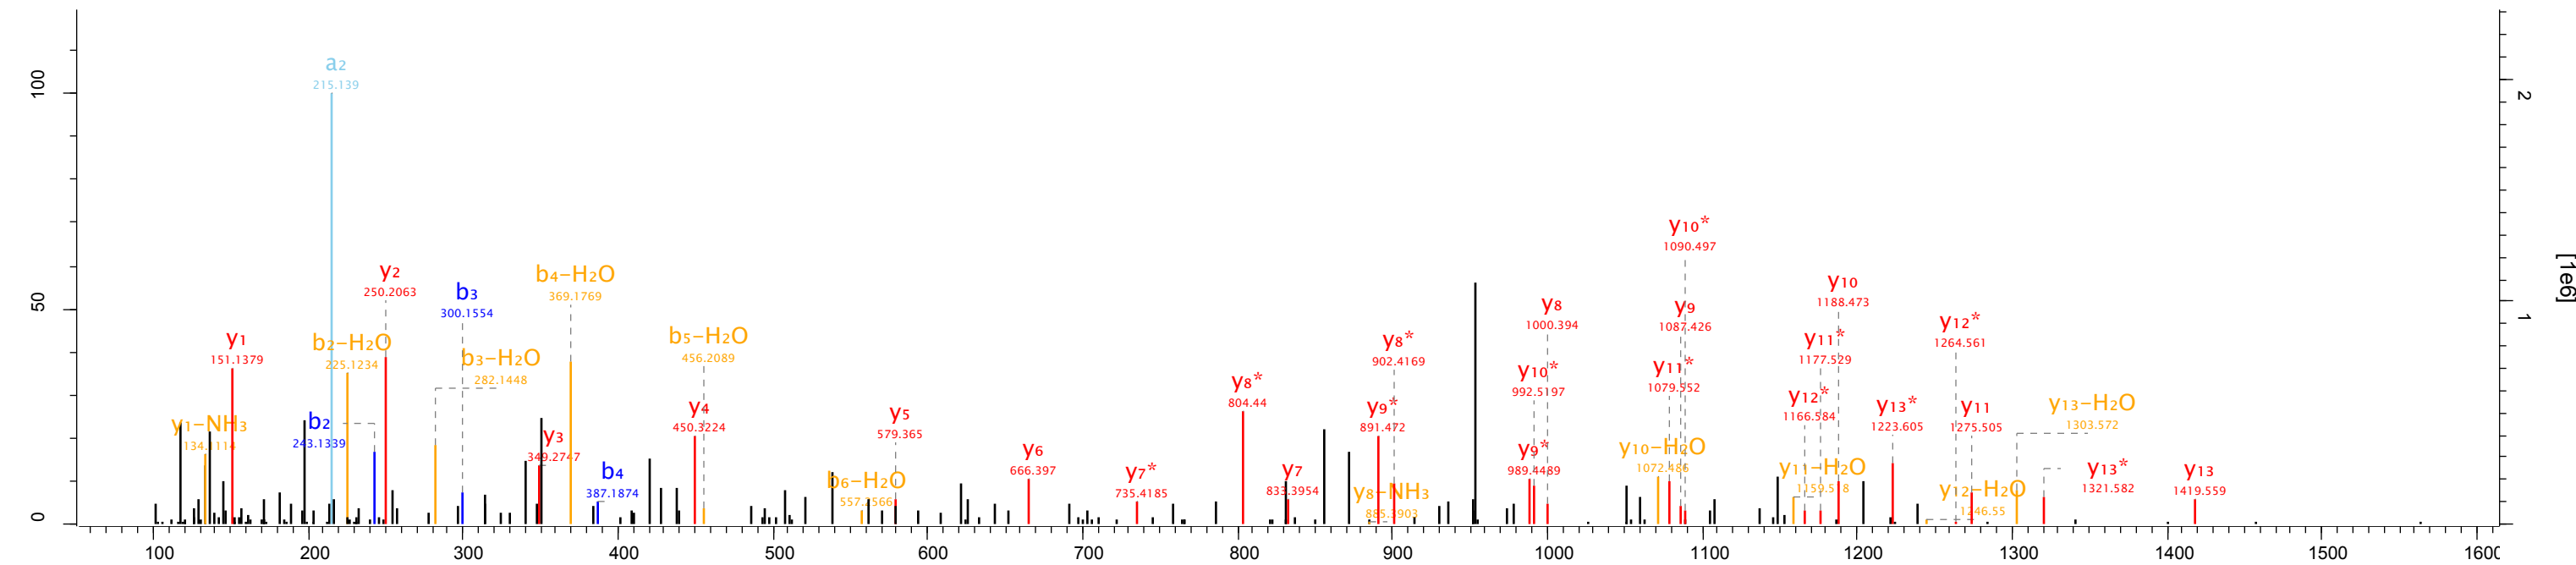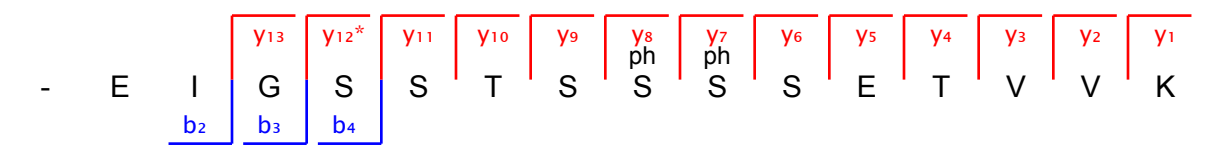

Raw file: 20150812\_A375SR\_Phospho\_BR1\_02  
 Scan: 10763 Method: FTMS; HCD Score: 360.57 m/z: 1089.94 Gene names: MORC2

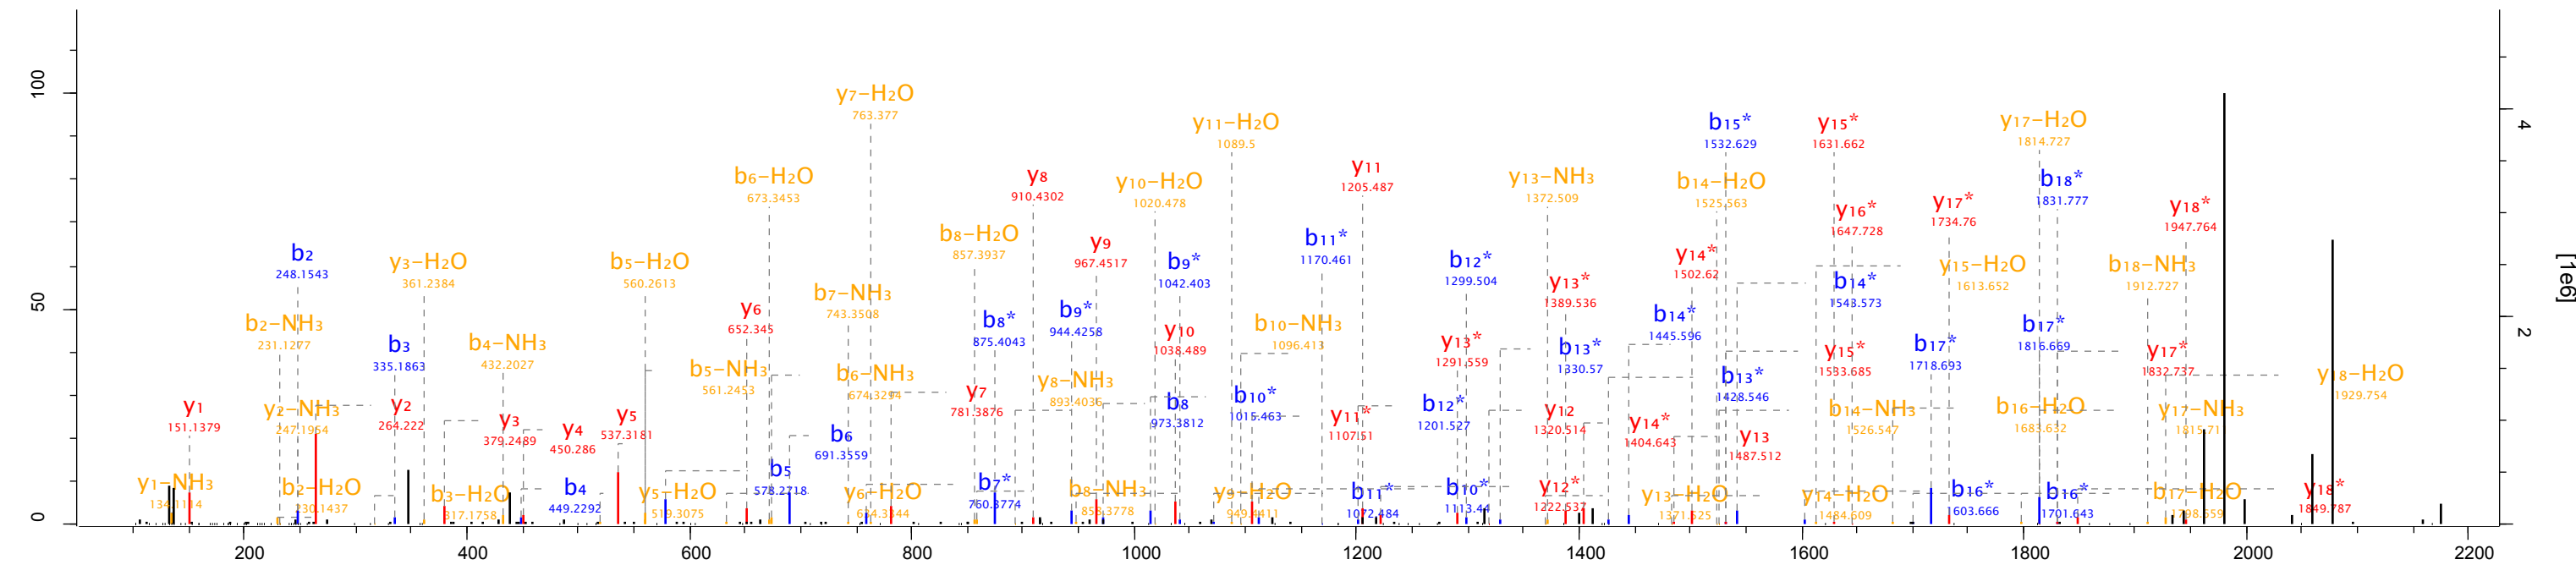

- K D S N E L S D S A G E E D S A D L K -

y18\*
y17\*
y16\*
y15\*
y14\*
y13
y12
y11
y10
y9
y8
y7
y6
y5
y4
y3
y2
y1

b2
b3
b4
b5
b6
b7\*
b8
b9\*
b10\*
b11\*
b12\*
b13\*
b14\*
b15\*
b16\*
b17\*
b18\*

Raw file: 20150812\_A375SR\_Phospho\_BR1\_02  
 Scan: 10783 Method: FTMS; HCD Score: 108.47 m/z: 964.41 Gene names: MAP4K4

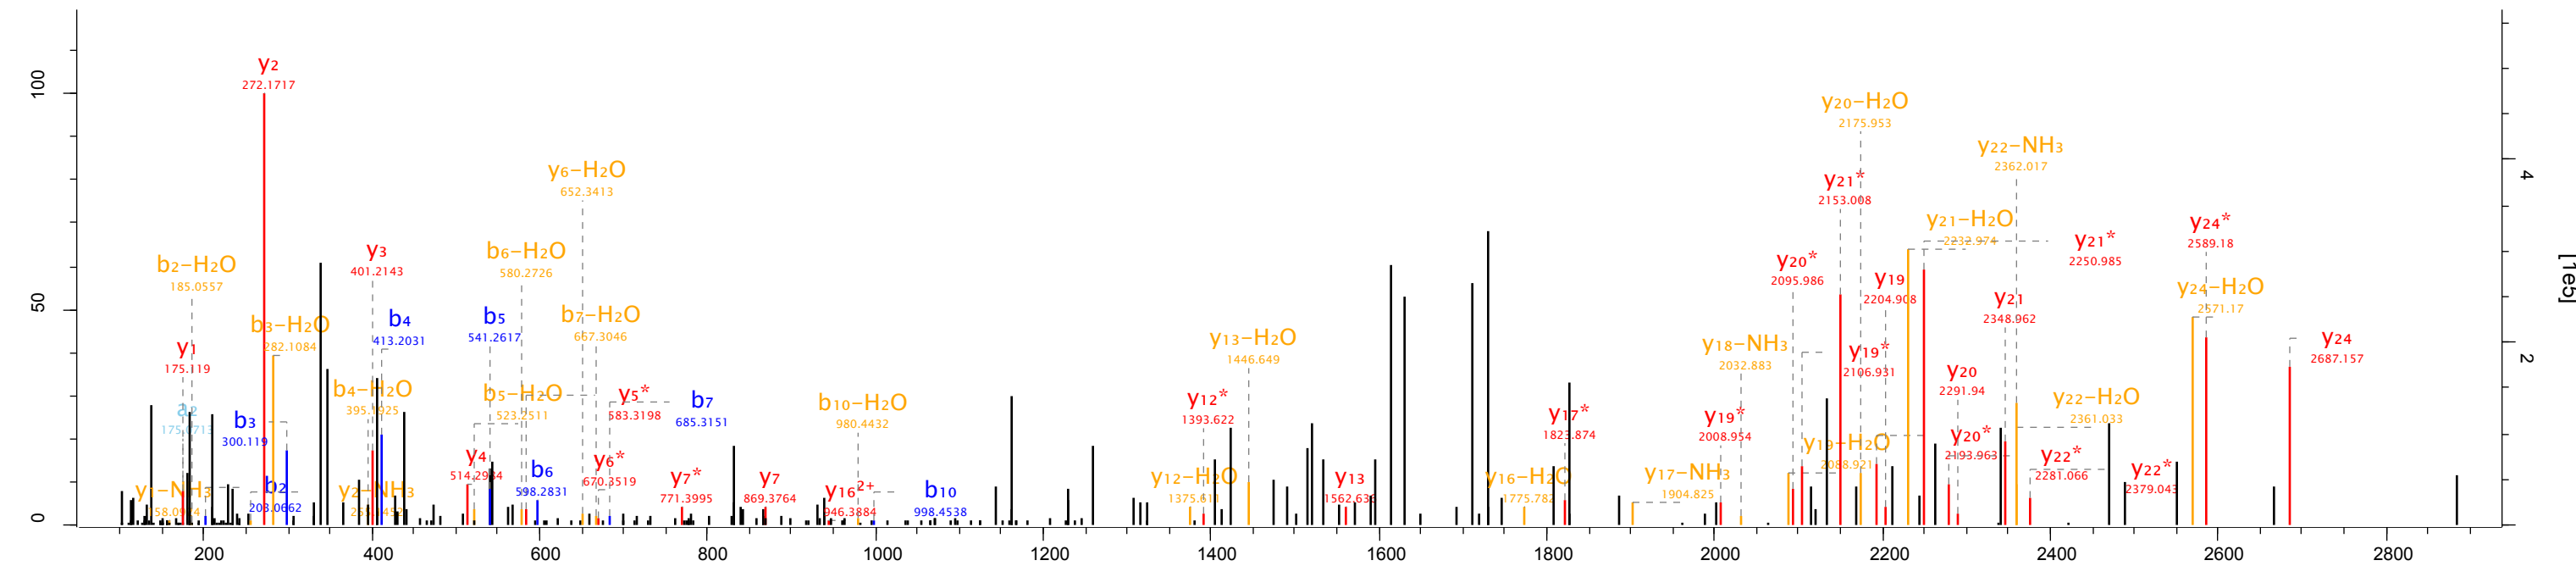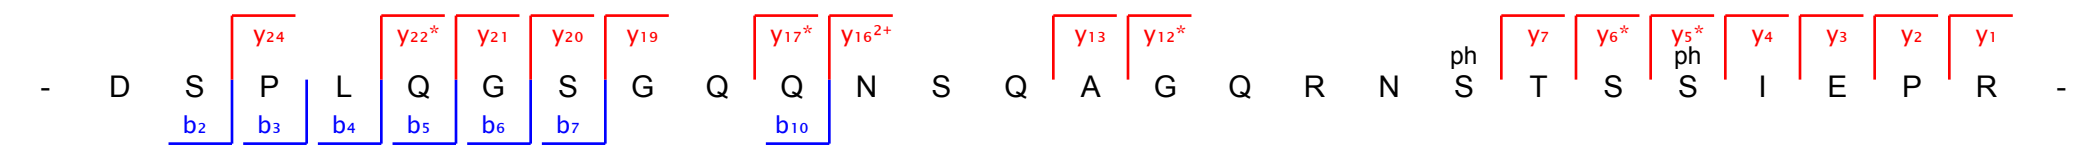

Raw file: 20150812\_A375SR\_Phospho\_BR1\_02  
 Scan: 10883 Method: FTMS; HCD Score: 51.88 m/z: 632.26 Gene names: RANBP2

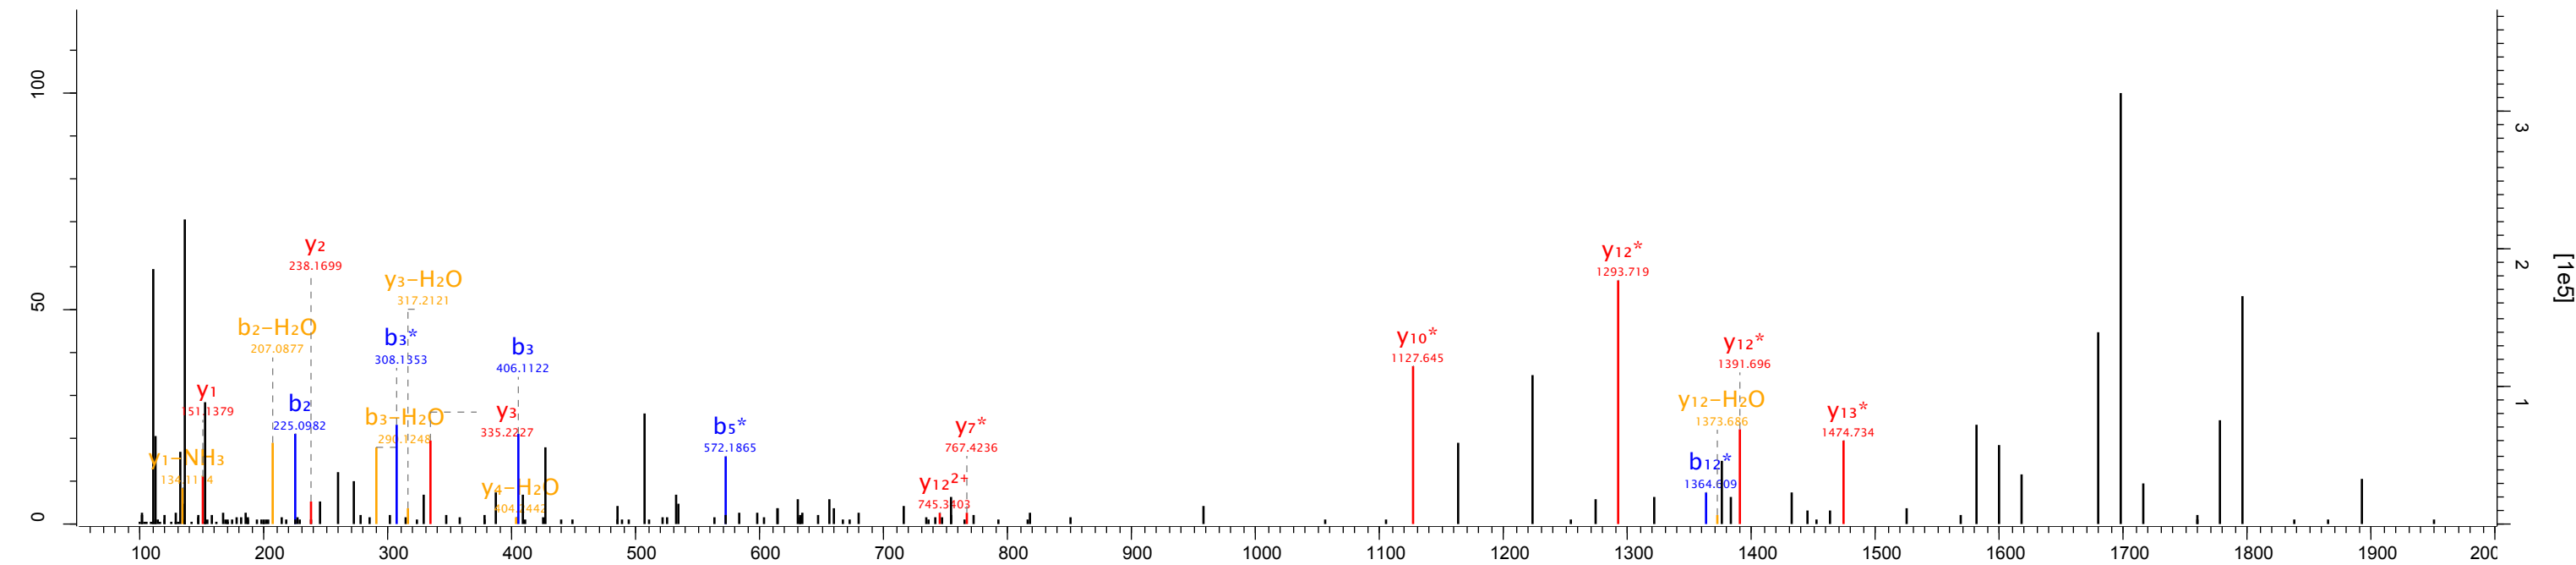

Protein sequence: - H S T P S P T R Y S L S P S K -

Fragmentation sites (b ions): b2 (S), b3 (T), b5\* (S), b12\* (S)

Fragmentation sites (y ions): y13\* (T), y12\* (P), y10\* (P), y7\* (Y), y3 (P), y2 (S), y1 (K)

Raw file: 20150812\_A375SR\_Phospho\_BR1\_02  
 Scan: 10953 Method: FTMS; HCD Score: 231.97 m/z: 928.82 Gene names: SRRM2

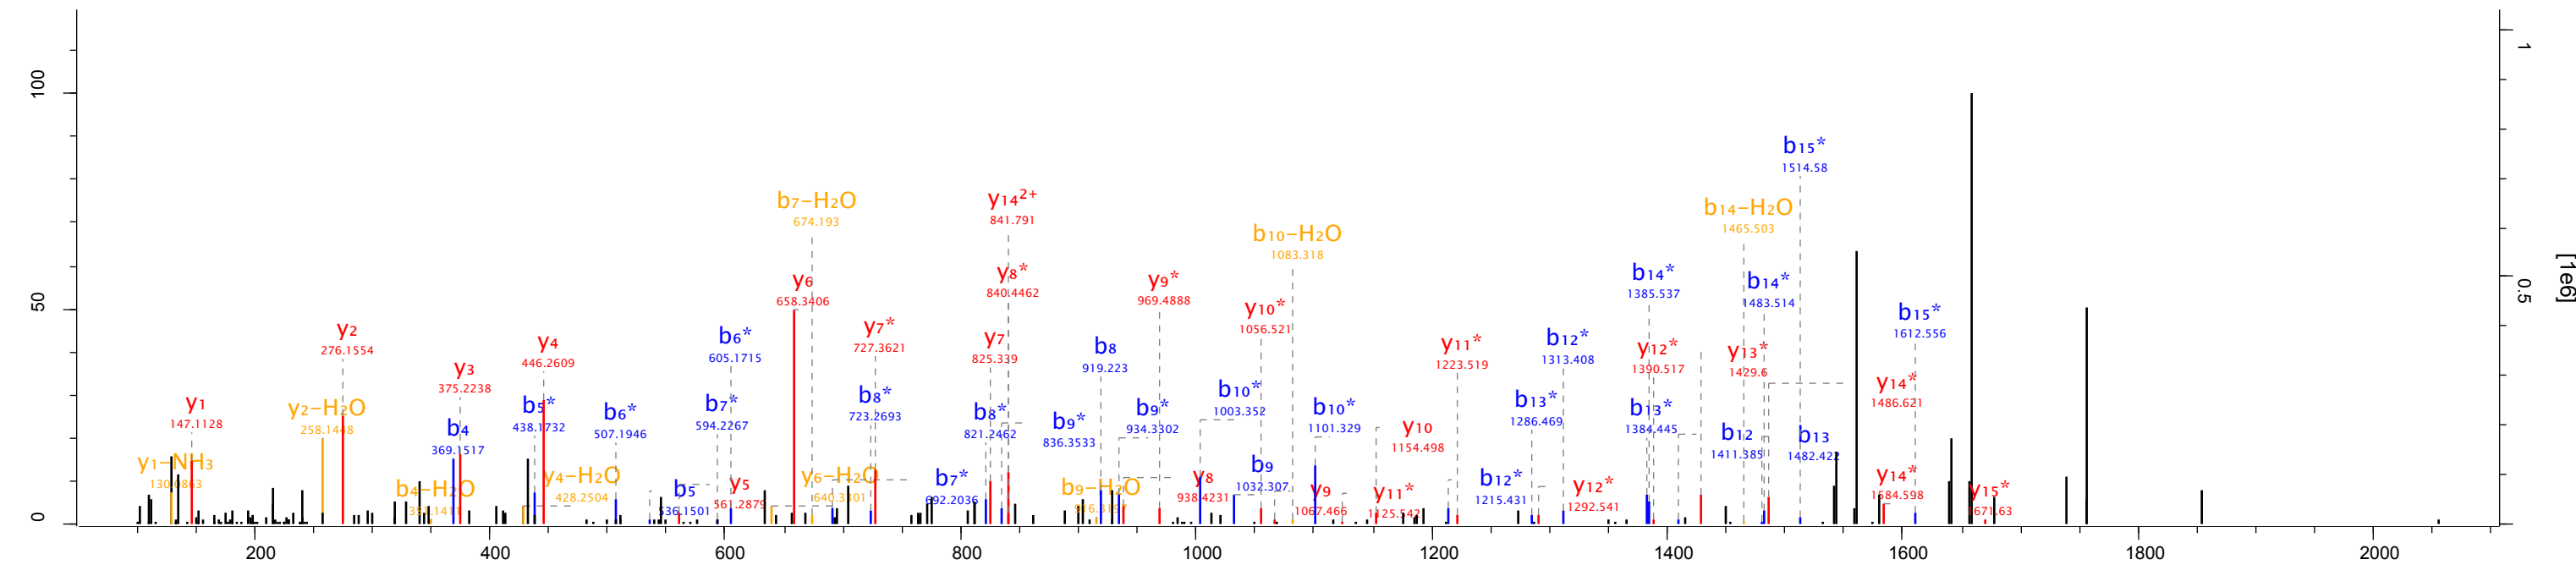

Raw file: 20150812\_A375SR\_Phospho\_BR1\_02  
 Scan: 10973 Method: FTMS; HCD Score: 97.84 m/z: 1065.94 Gene names: DYNC1LI1

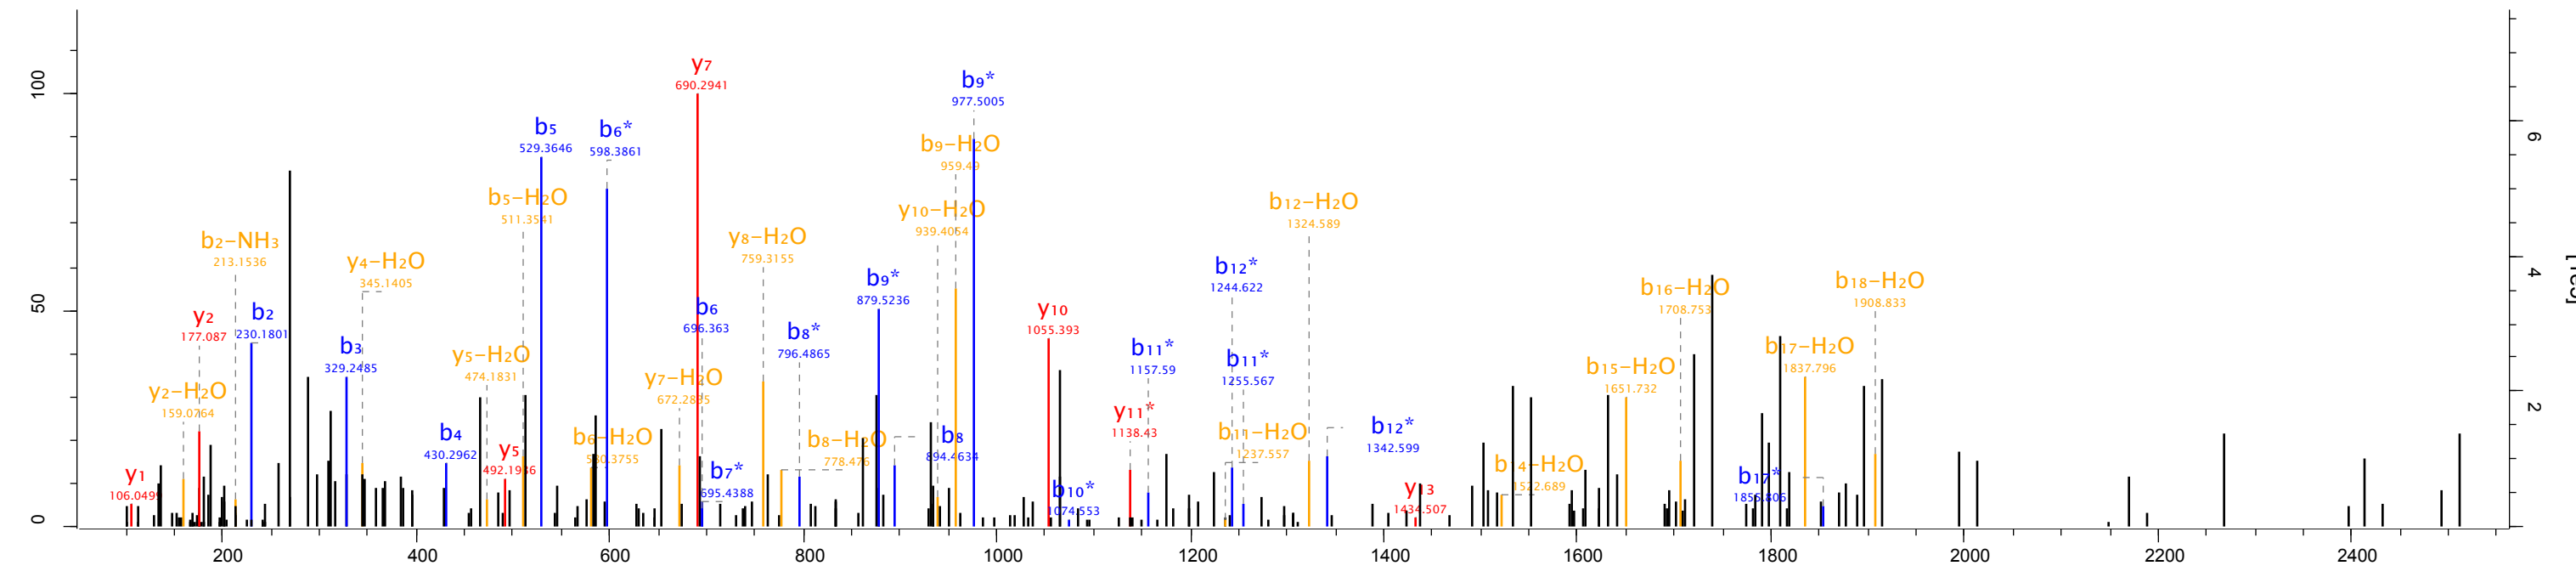

- K P V T V S P T P T S P T E G E A S -

Fragmentation mapping (b and y ions) is shown below the sequence:

- b ions (blue boxes):** b2 (P), b3 (V), b4 (T), b5 (V), b6 (S), b7\* (P), b8 (T), b9\* (P), b10\* (T), b11\* (S), b12\* (P), b17\* (E).
- y ions (red boxes):** y13 (P), y11\* (T), y10 (P), y7 (P), y5 (E), y2 (A), y1 (S).

Raw file 20150812\_A375SR\_Phospho\_BR1\_02 Scan 11463 Method FTMS; HCD Score 163.55 m/z 1231.03 Gene names KMT2A

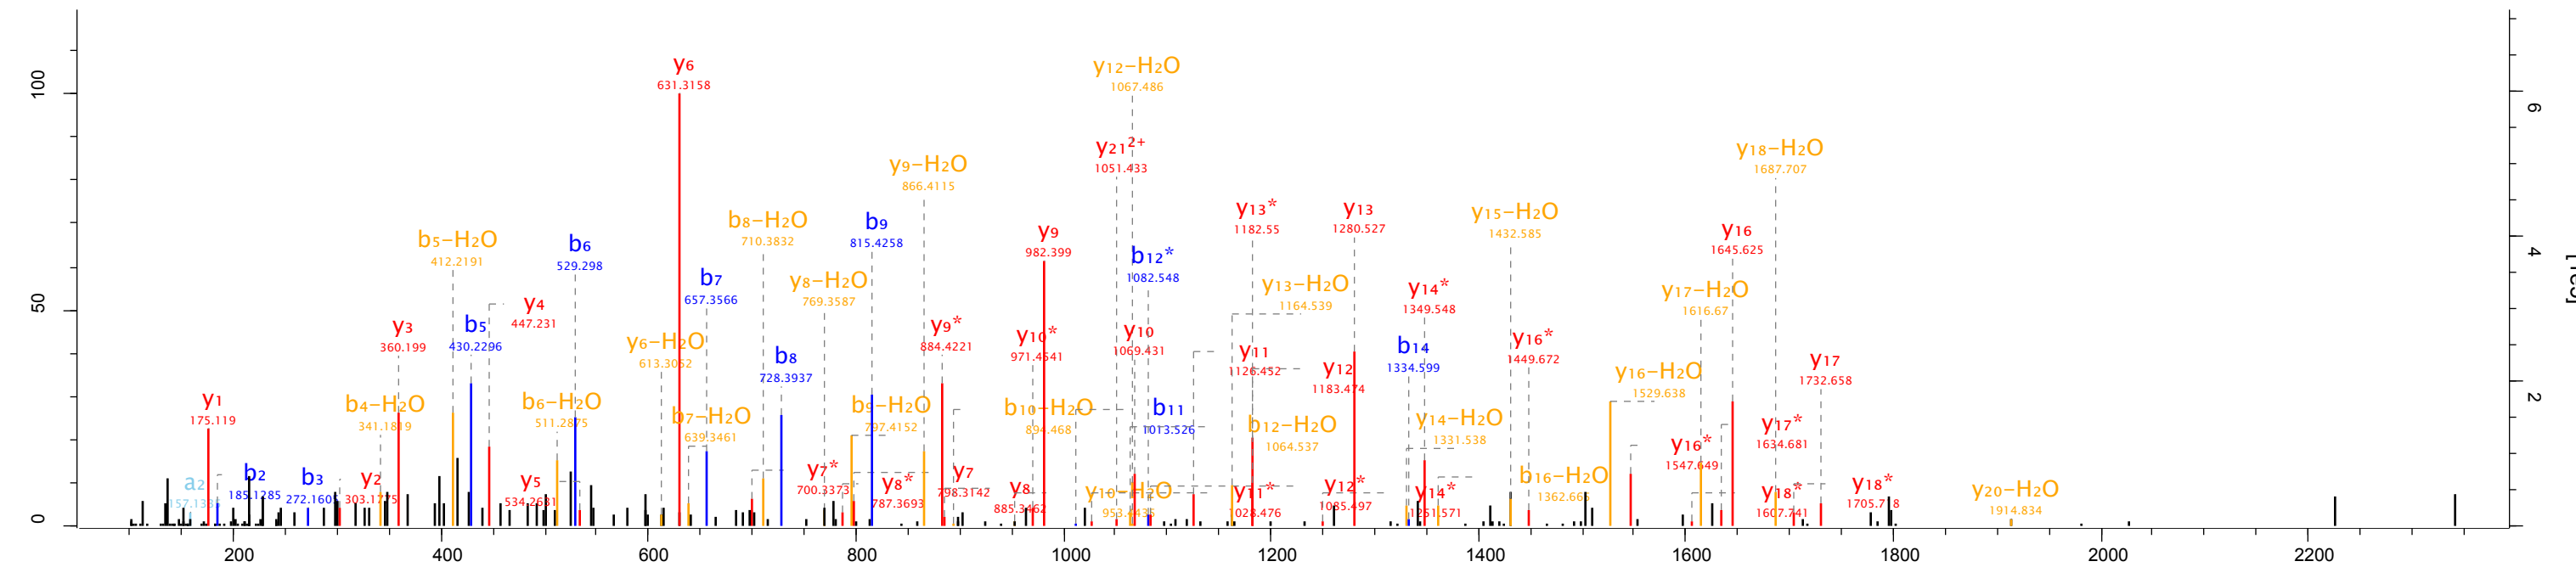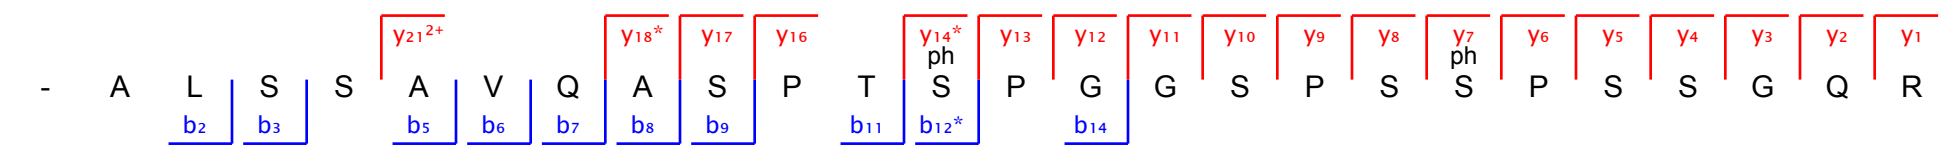

Raw file: 20150812\_A375SR\_Phospho\_BR1\_02  
 Scan: 11493 Method: FTMS; HCD Score: 85.97 m/z: 871.33 Gene names: FRMD6

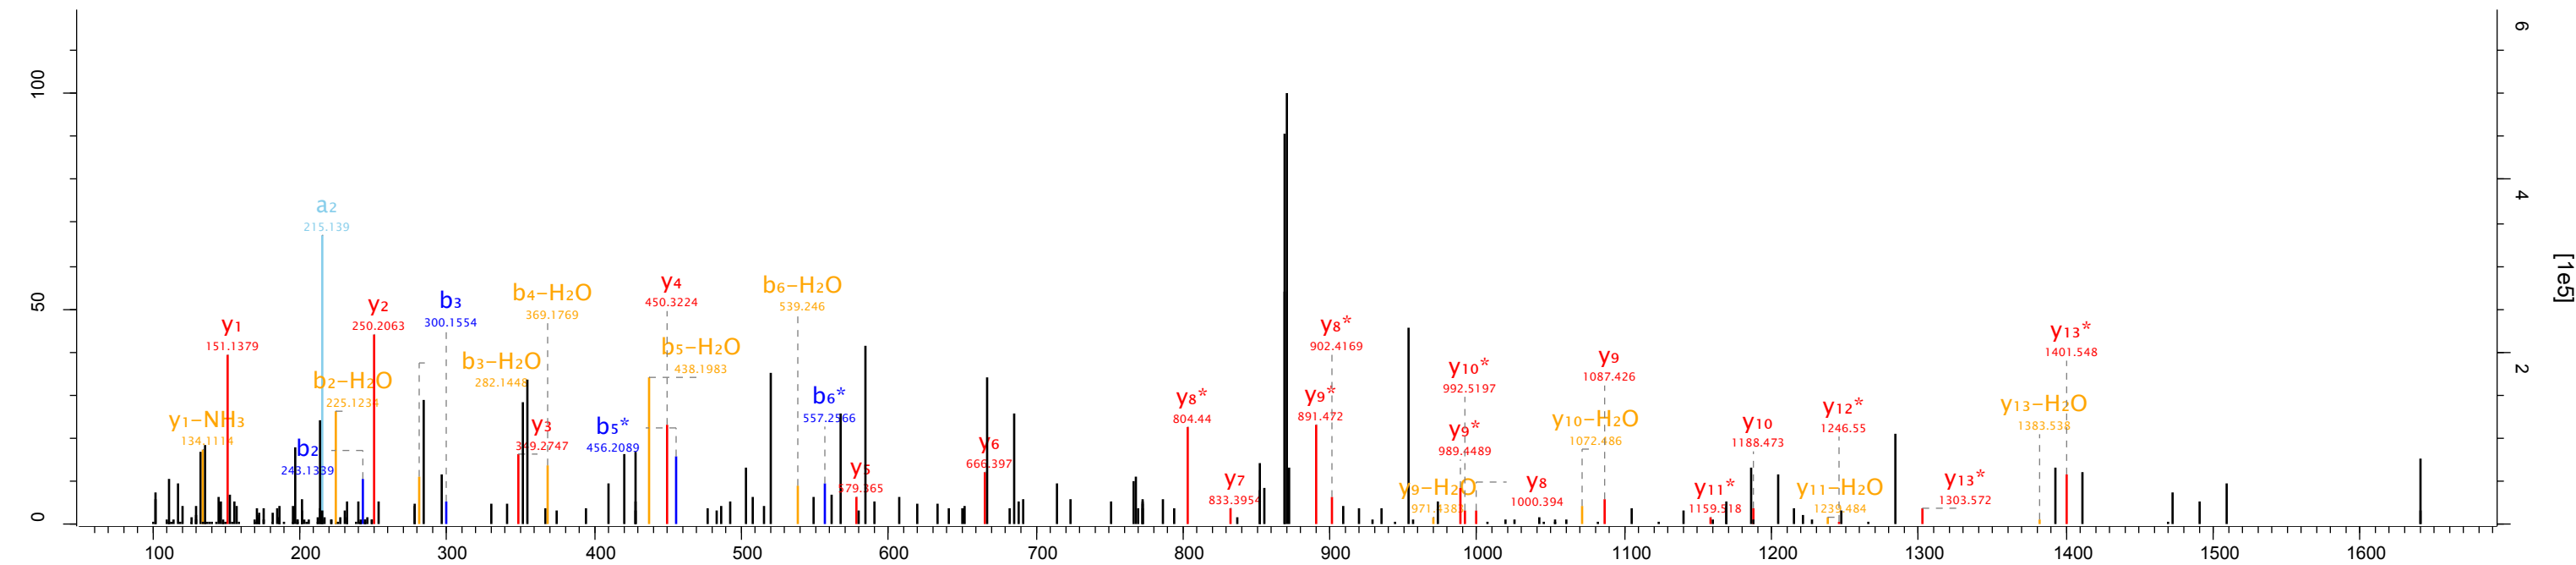

Sequence: - E I G S ph S T S ph S S E T V V K -

Fragmentation sites (b and y ions) are indicated by brackets below the sequence:

- b2: I-G
- b3: G-S
- b5\*: ph-S
- b6\*: S-T
- y1: V-K
- y2: V-V
- y3: V-T
- y4: T-E
- y5: E-S
- y6: S-S
- y7: ph-S
- y8: ph-S
- y10: S-ph
- y11: S-ph
- y12: S-ph
- y13: S-ph



Raw file 20150812\_A375SR\_Phospho\_BR1\_02 Scan 11623 Method FTMS; HCD Score 61.56 m/z 1062.1 Gene names IWS1

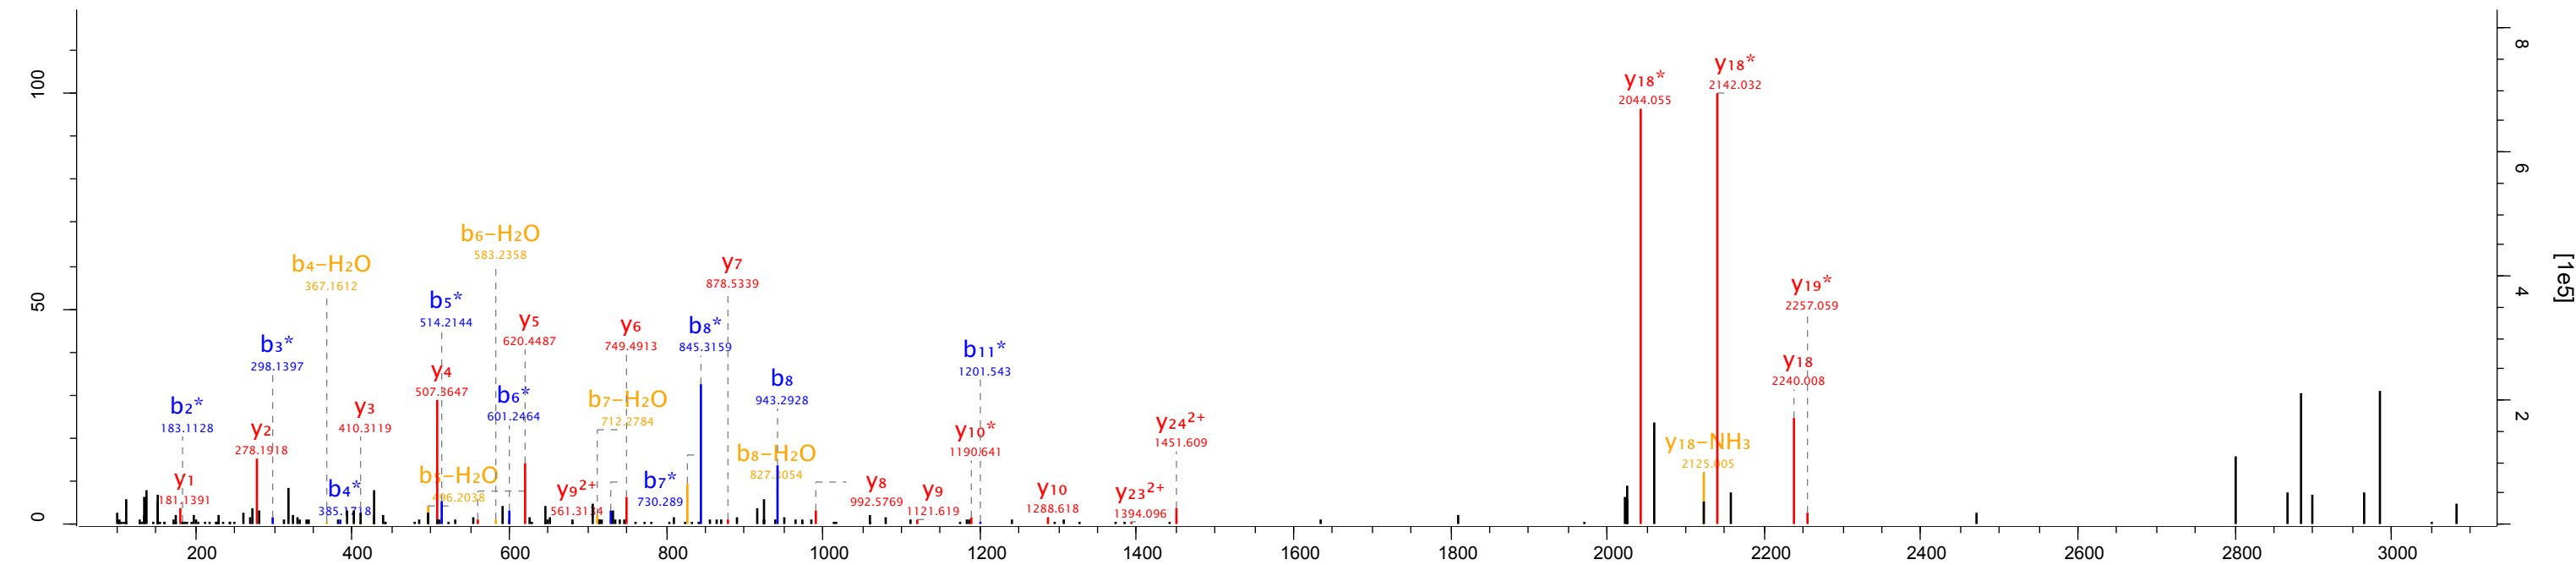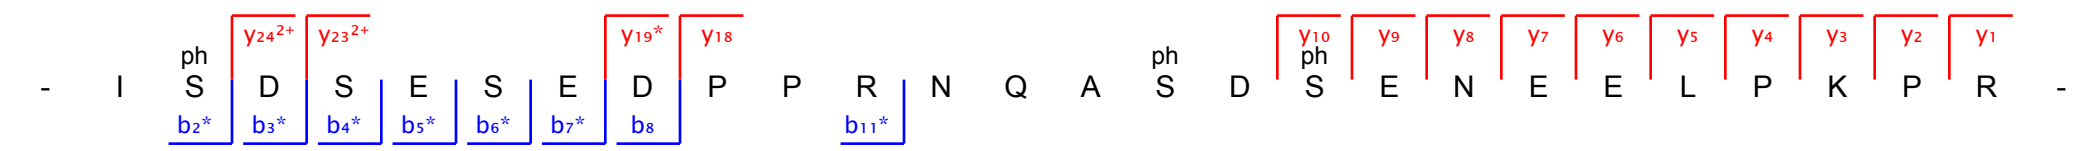

Raw file 20150812\_A375SR\_Phospho\_BR1\_02 Scan 11693 Method FTMS; HCD Score 177.91 m/z 975.8 Gene names NOL8

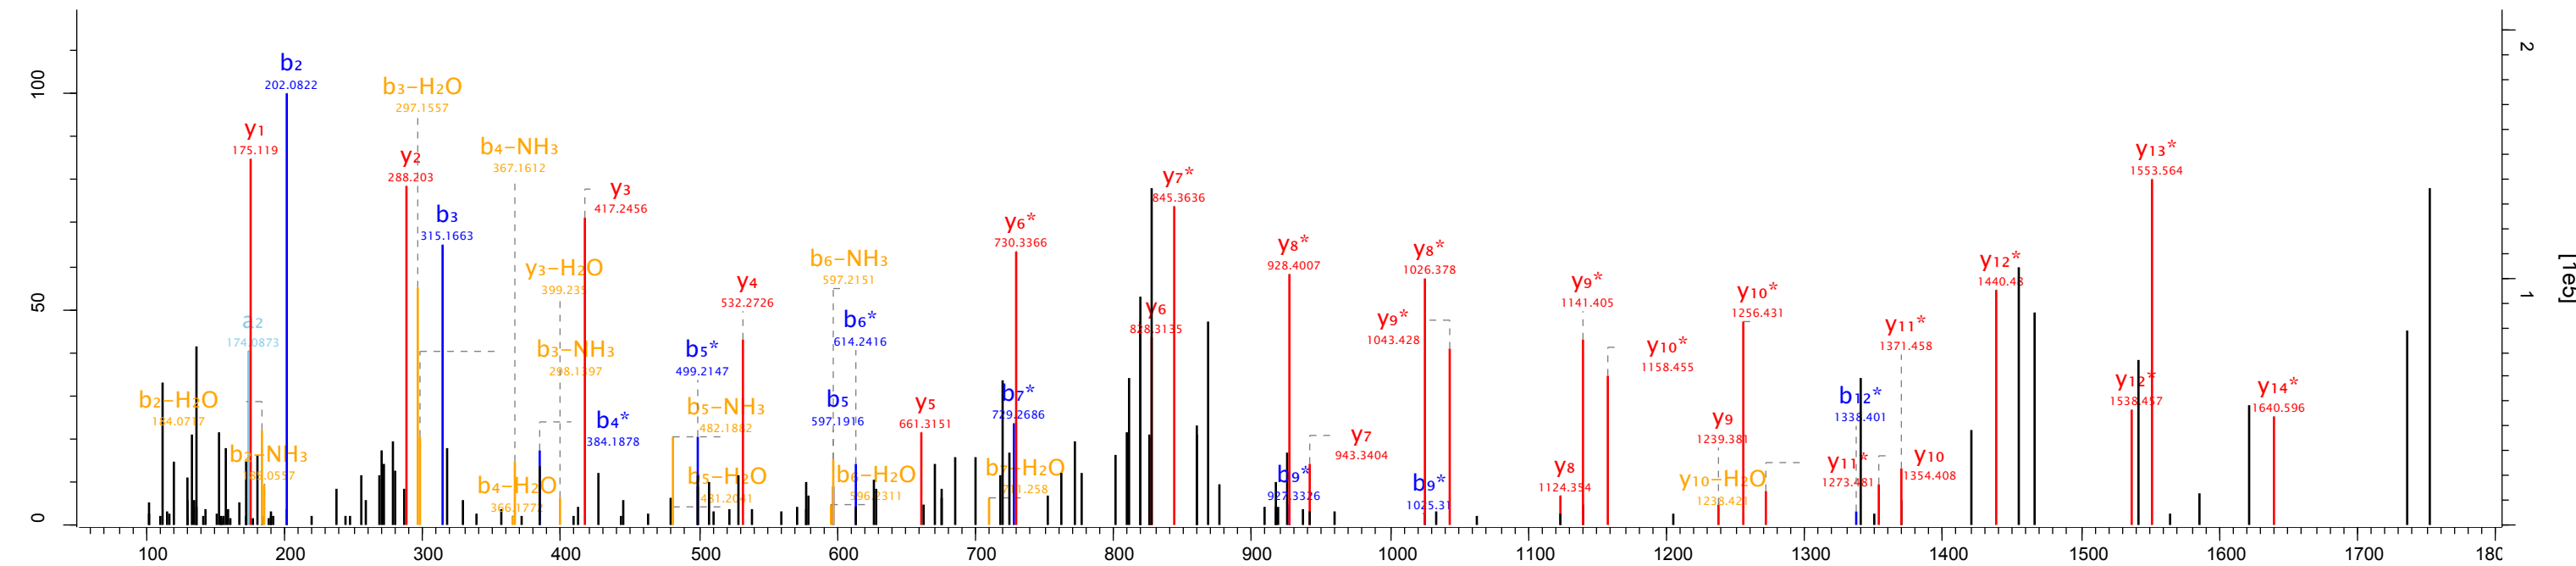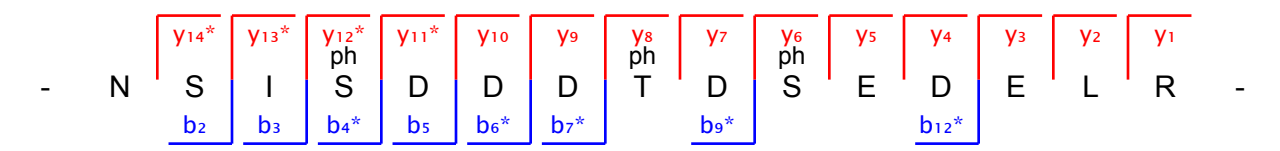

Raw file 20150812\_A375SR\_Phospho\_BR1\_02 Scan 11873 Method FTMS; HCD Score 66.89 m/z 906.37 Gene names PAXBP1

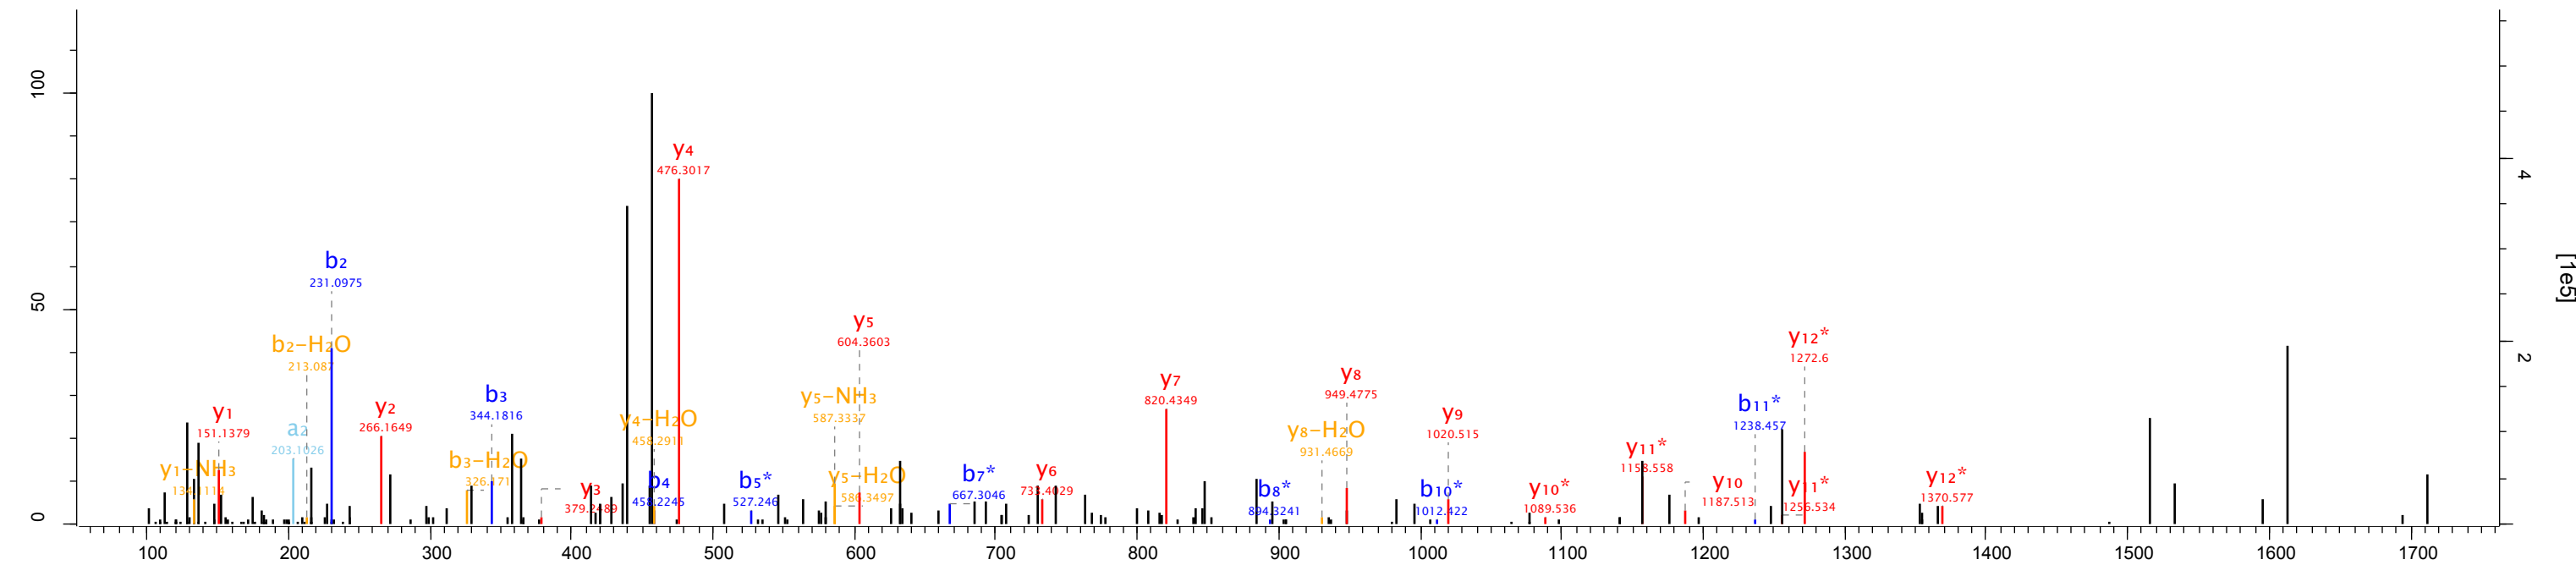

- T E L N S A E S E Q P L D K -

Fragmentation mapping (b-ions in blue, y-ions in red):

- b2: E
- b3: L
- b4: N
- b5\*: S
- b7\*: A
- b8\*: E
- b10\*: S
- b11\*: E
- y1: K
- y2: D
- y3: L
- y4: P
- y5: Q
- y6: E
- y7: S
- y8: A
- y9: N
- y10: S
- y11\*: S
- y12\*: N

Raw file: 20150812\_A375SR\_Phospho\_BR1\_02  
 Scan: 12083  
 Method: FTMS; HCD  
 Score: 120.2  
 m/z: 1091.44  
 Gene names: MIER1

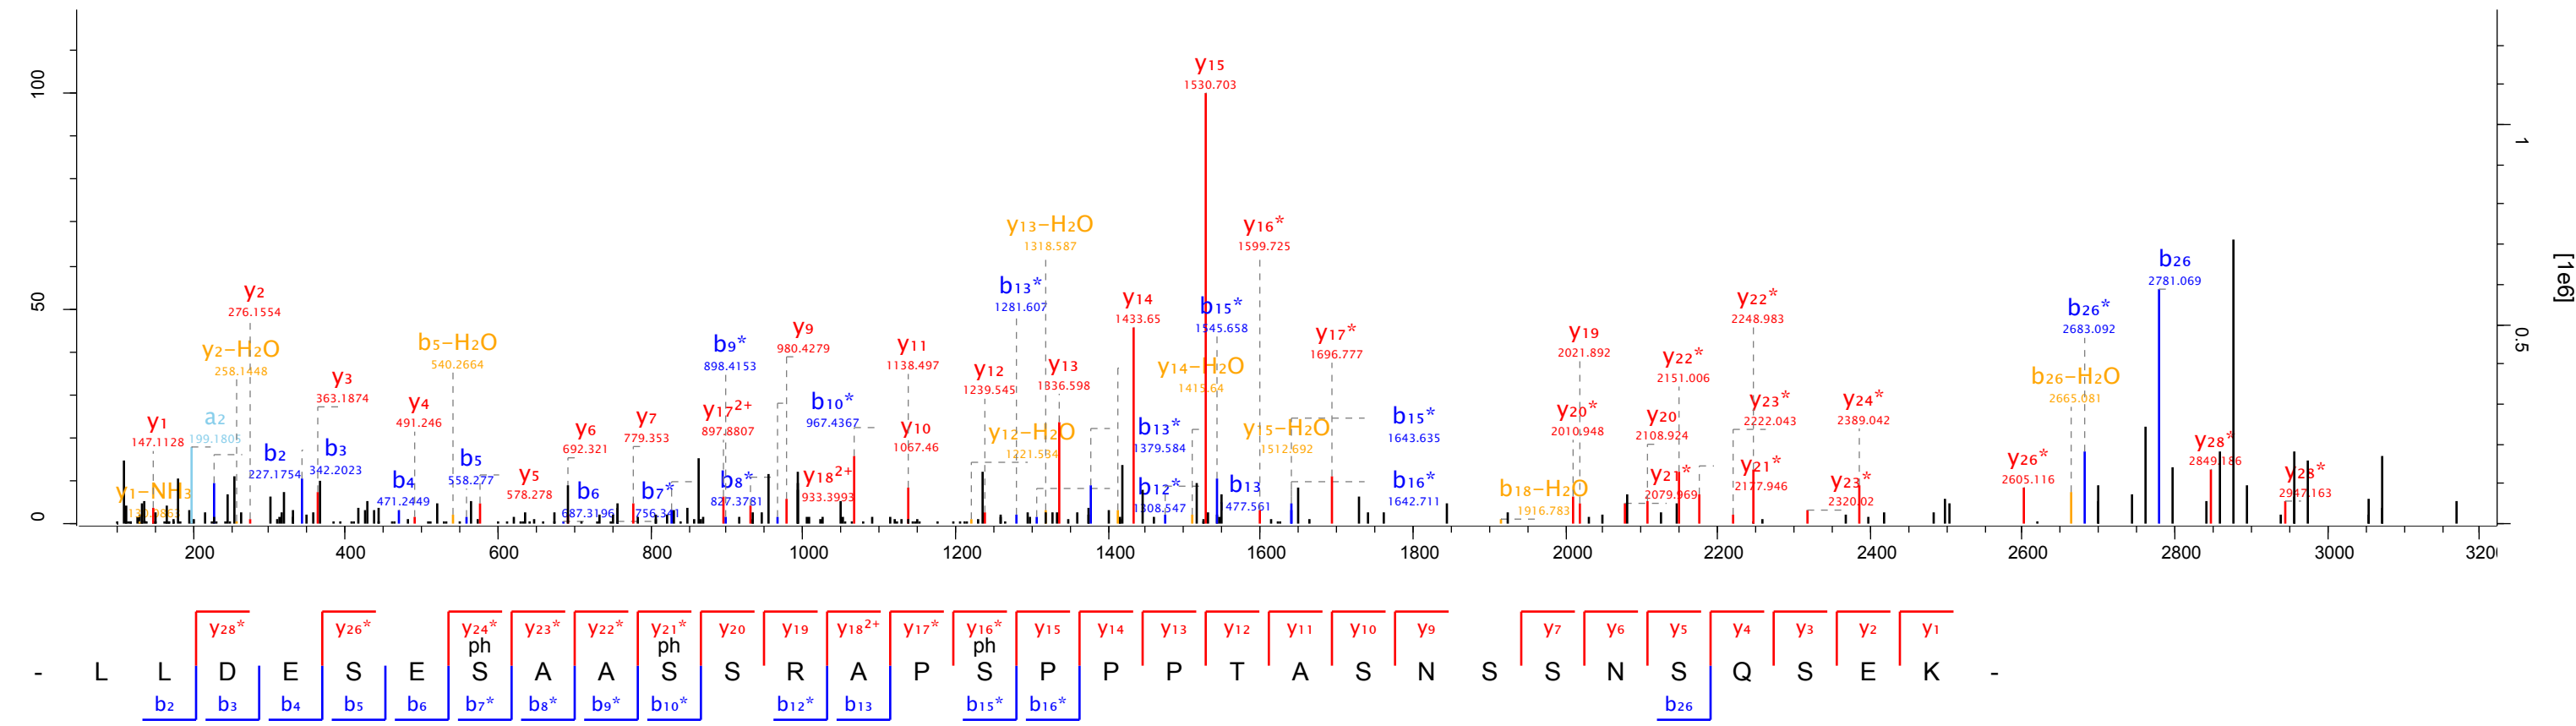

Raw file: 20150812\_A375SR\_Phospho\_BR1\_02  
 Scan: 12133 Method: FTMS; HCD Score: 70.41 m/z: 737.25 Gene names: TRAF7

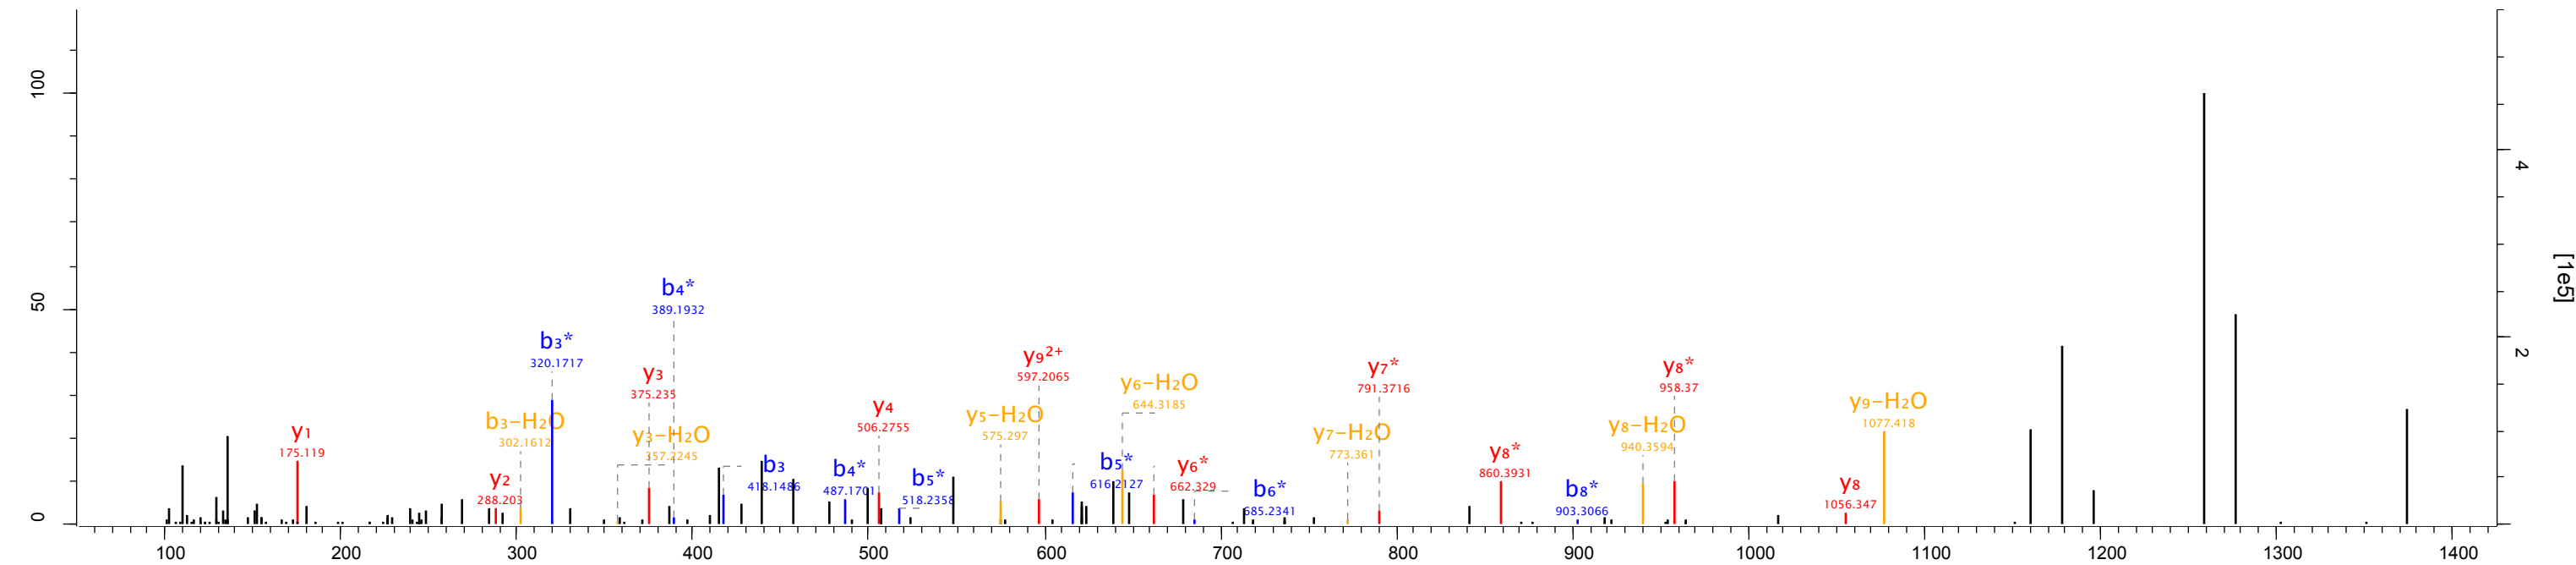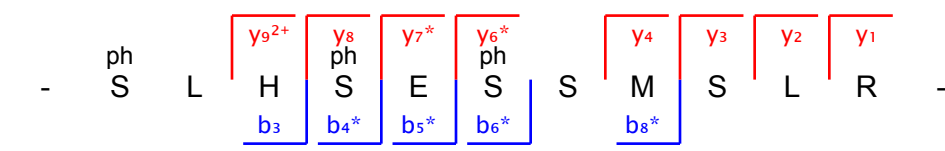

Raw file: 20150812\_A375SR\_Phospho\_BR1\_02  
 Scan: 12253  
 Method: FTMS; HCD  
 Score: 134.2  
 m/z: 506.69  
 Gene names: CDK12

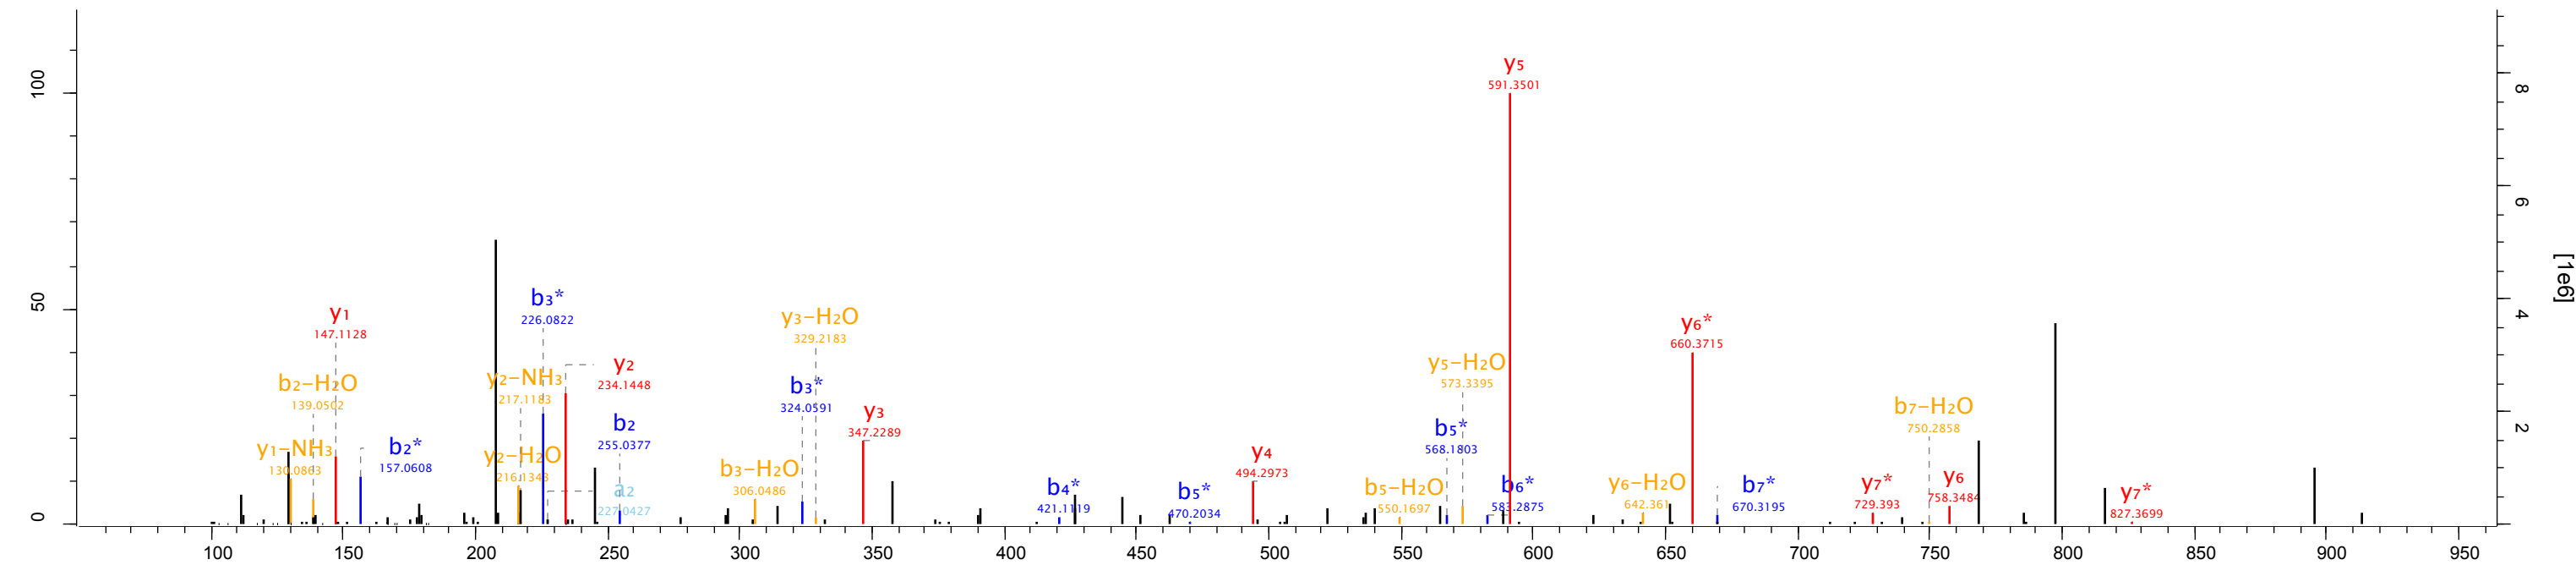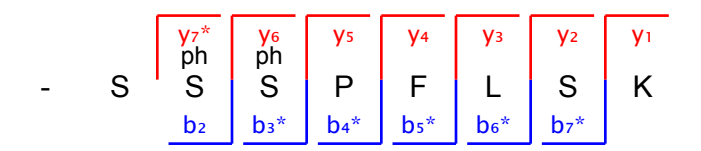

Raw file Scan Method Score m/z Gene names  
 20150812\_A375SR\_Phospho\_BR1\_02 12513 FTMS; HCD 135.88 774.56 RBM10

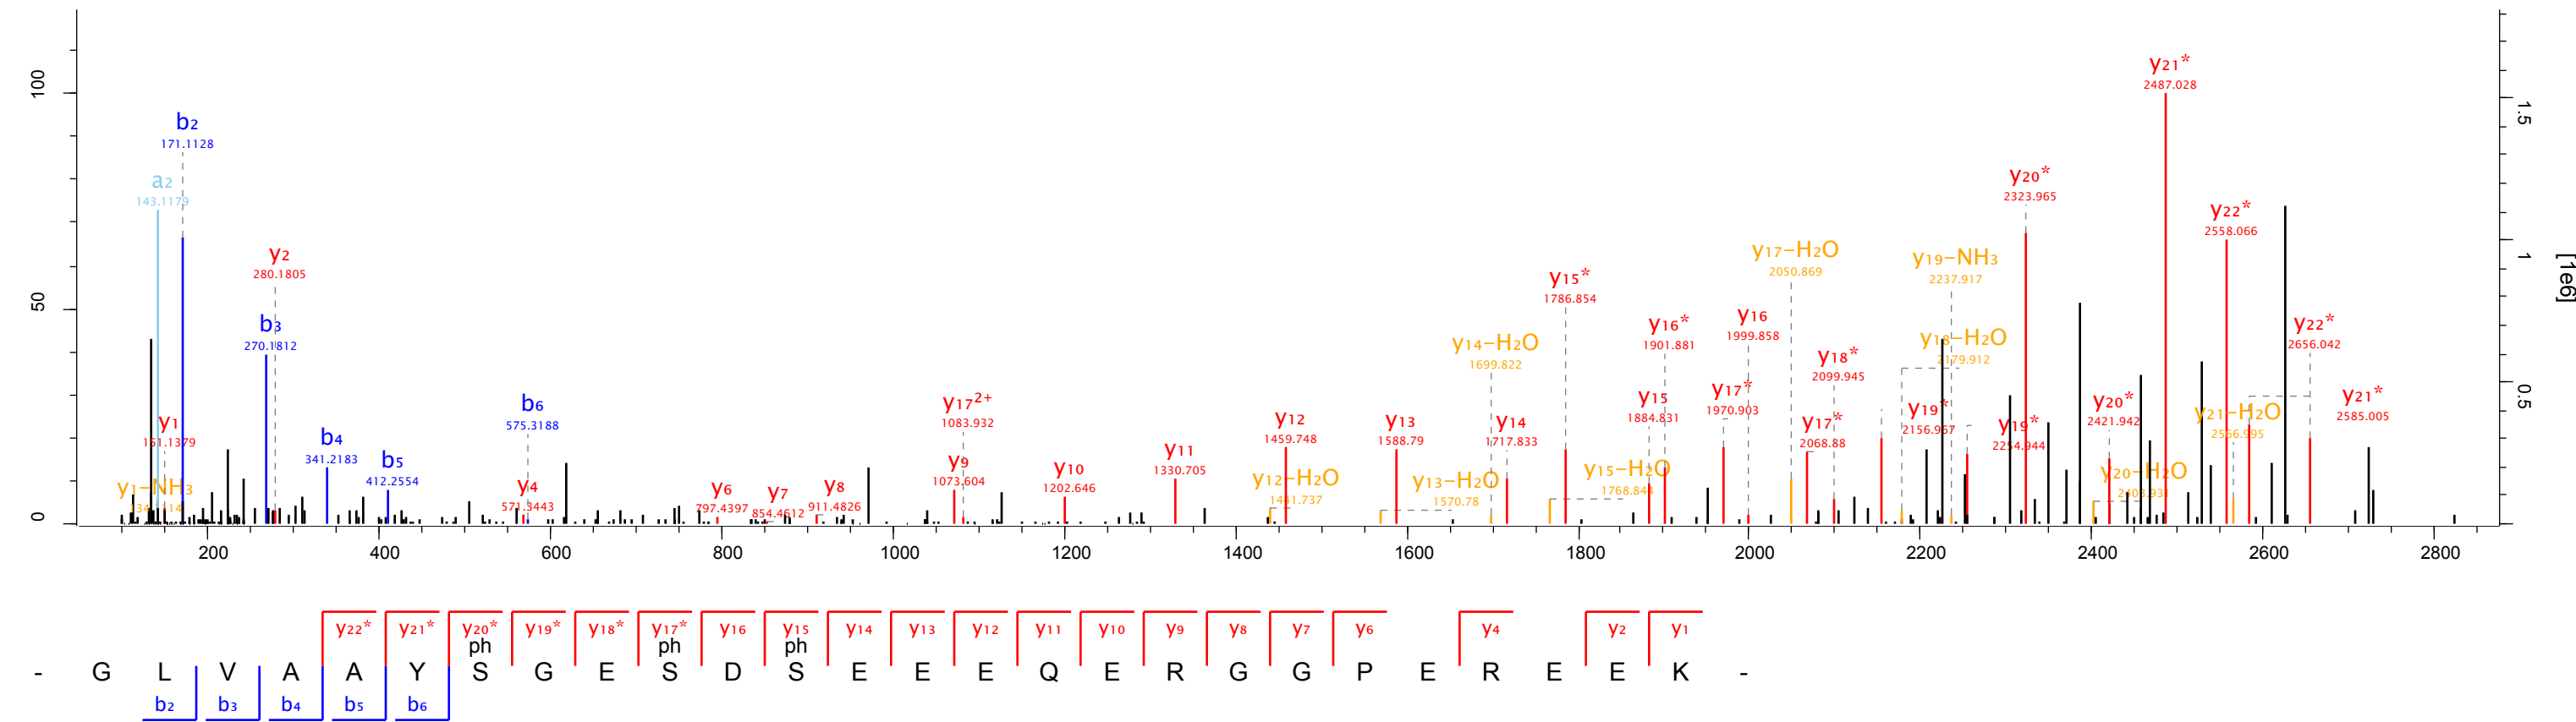

Raw file 20150812\_A375SR\_Phospho\_BR1\_02 Scan 12573 Method FTMS; HCD Score 132.39 m/z 640.92 Gene names CDK13

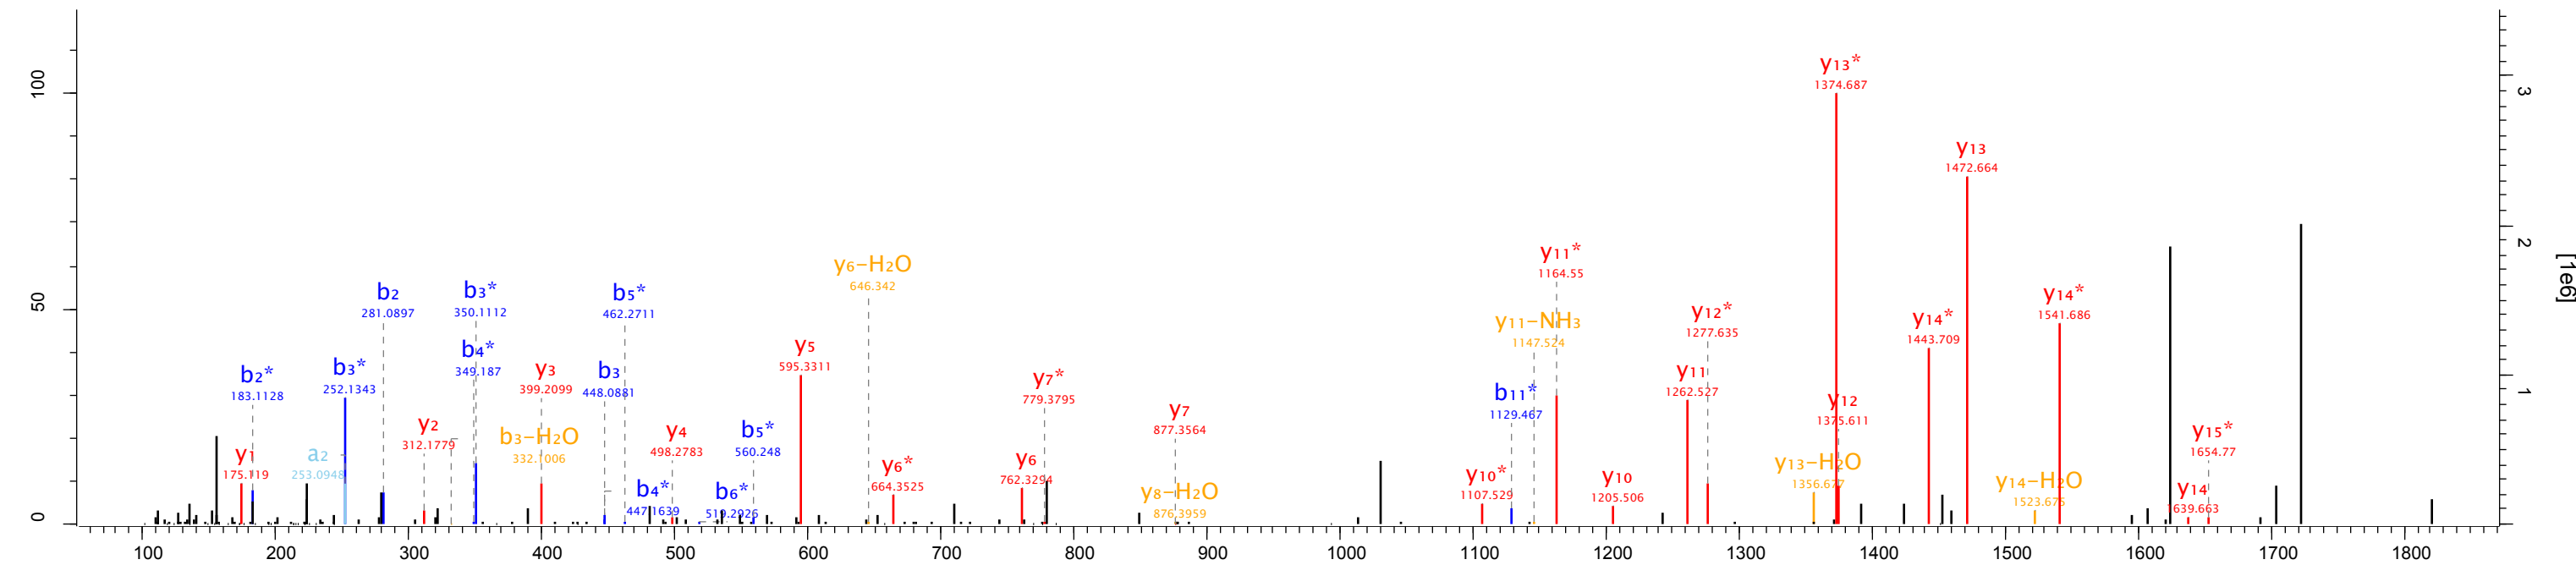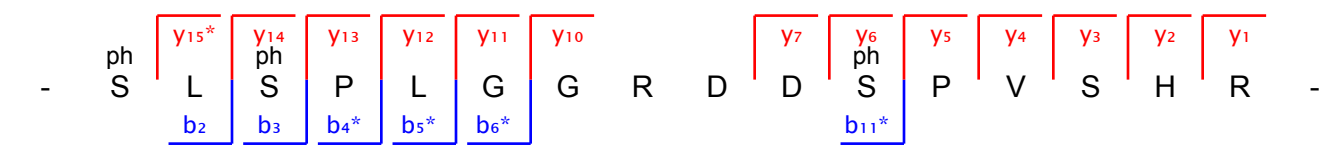



Raw file: 20150812\_A375SR\_Phospho\_BR1\_02  
 Scan: 12693 Method: FTMS; HCD Score: 86.21 m/z: 812.34 Gene names: PI4KA

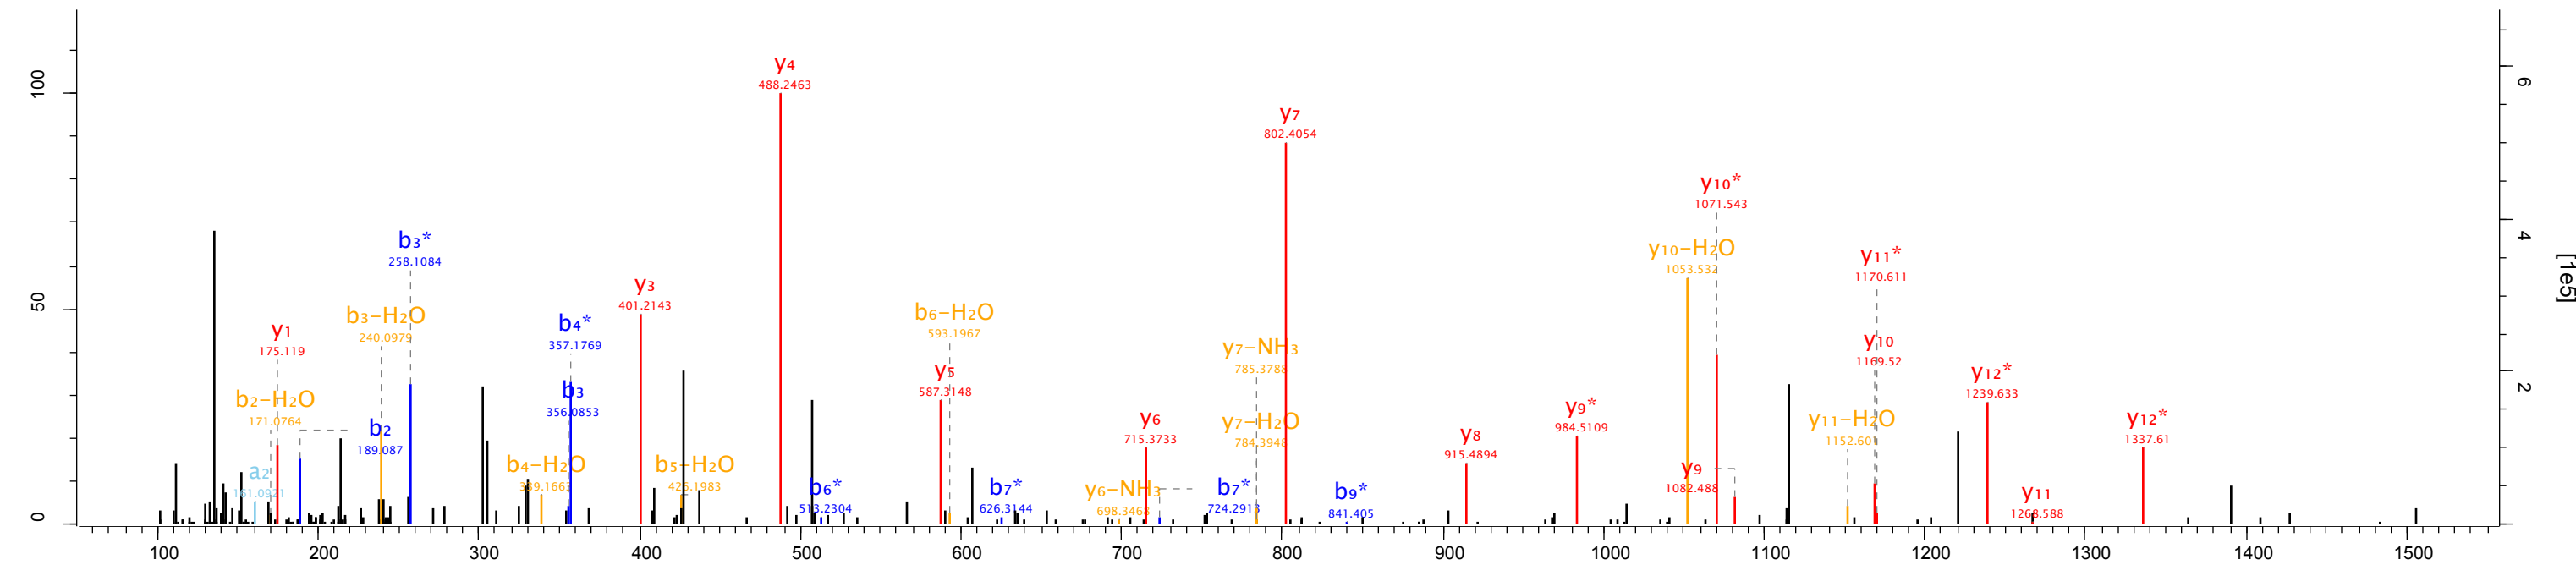

Sequence: - T S S V S I S Q V S P E R -

Fragmentation mapping (b-ions in blue, y-ions in red):

- b2: S
- b3: S
- b4\*: V
- b6\*: S
- b7\*: I
- b9\*: Q
- y1: R
- y3: P
- y4: S
- y5: V
- y6: Q
- y7: S
- y8: I
- y9: S
- y10: S
- y11: V
- y12\*: S

Raw file 20150812\_A375SR\_Phospho\_BR1\_02 Scan 12733 Method FTMS; HCD Score 217.65 m/z 1009.94 Gene names ADD3

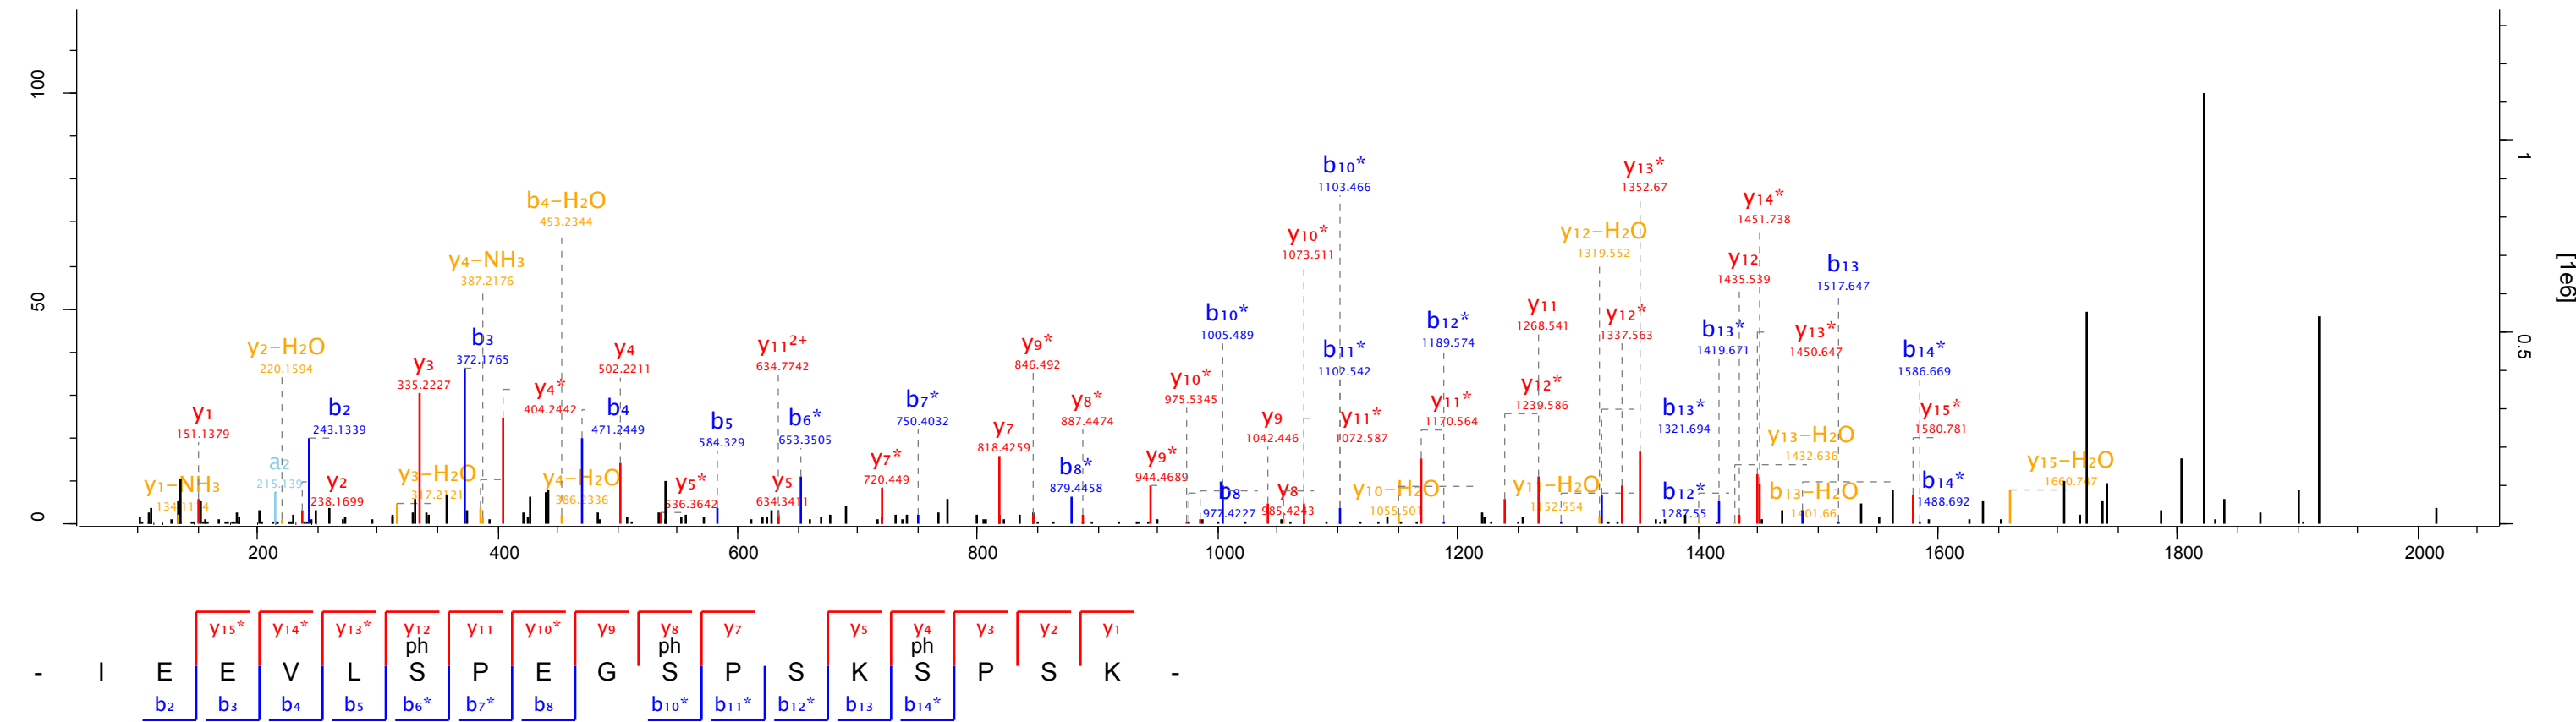

Raw file 20150812\_A375SR\_Phospho\_BR1\_02 Scan 12973 Method FTMS; HCD Score 359.7 m/z 782.7 Gene names HDGF

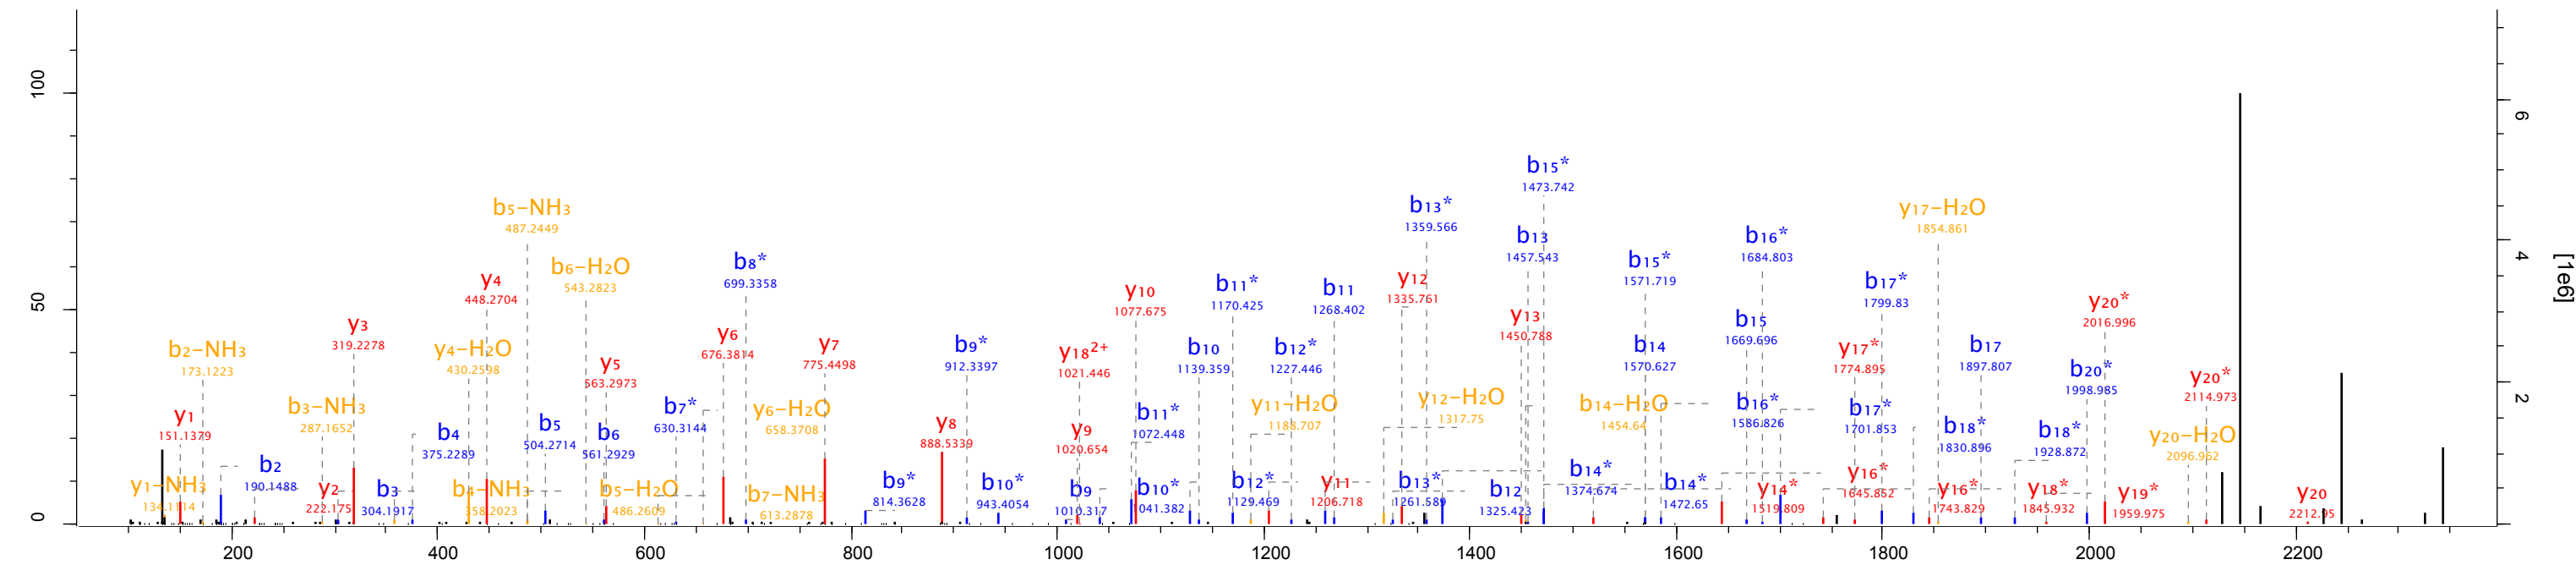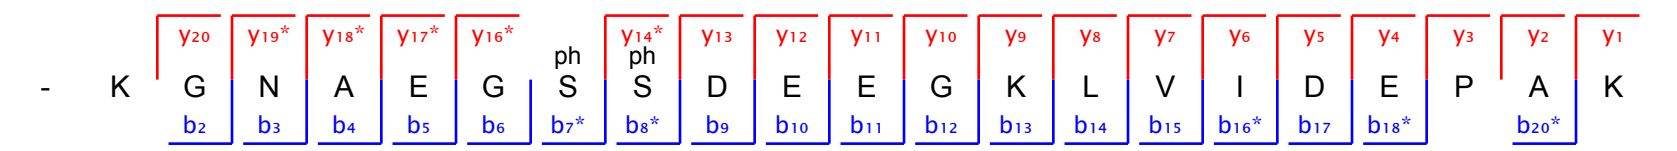

Raw file: 20150812\_A375SR\_Phospho\_BR1\_02  
 Scan: 13673 Method: FTMS; HCD Score: 135.58 m/z: 1028.89 Gene names: DEK

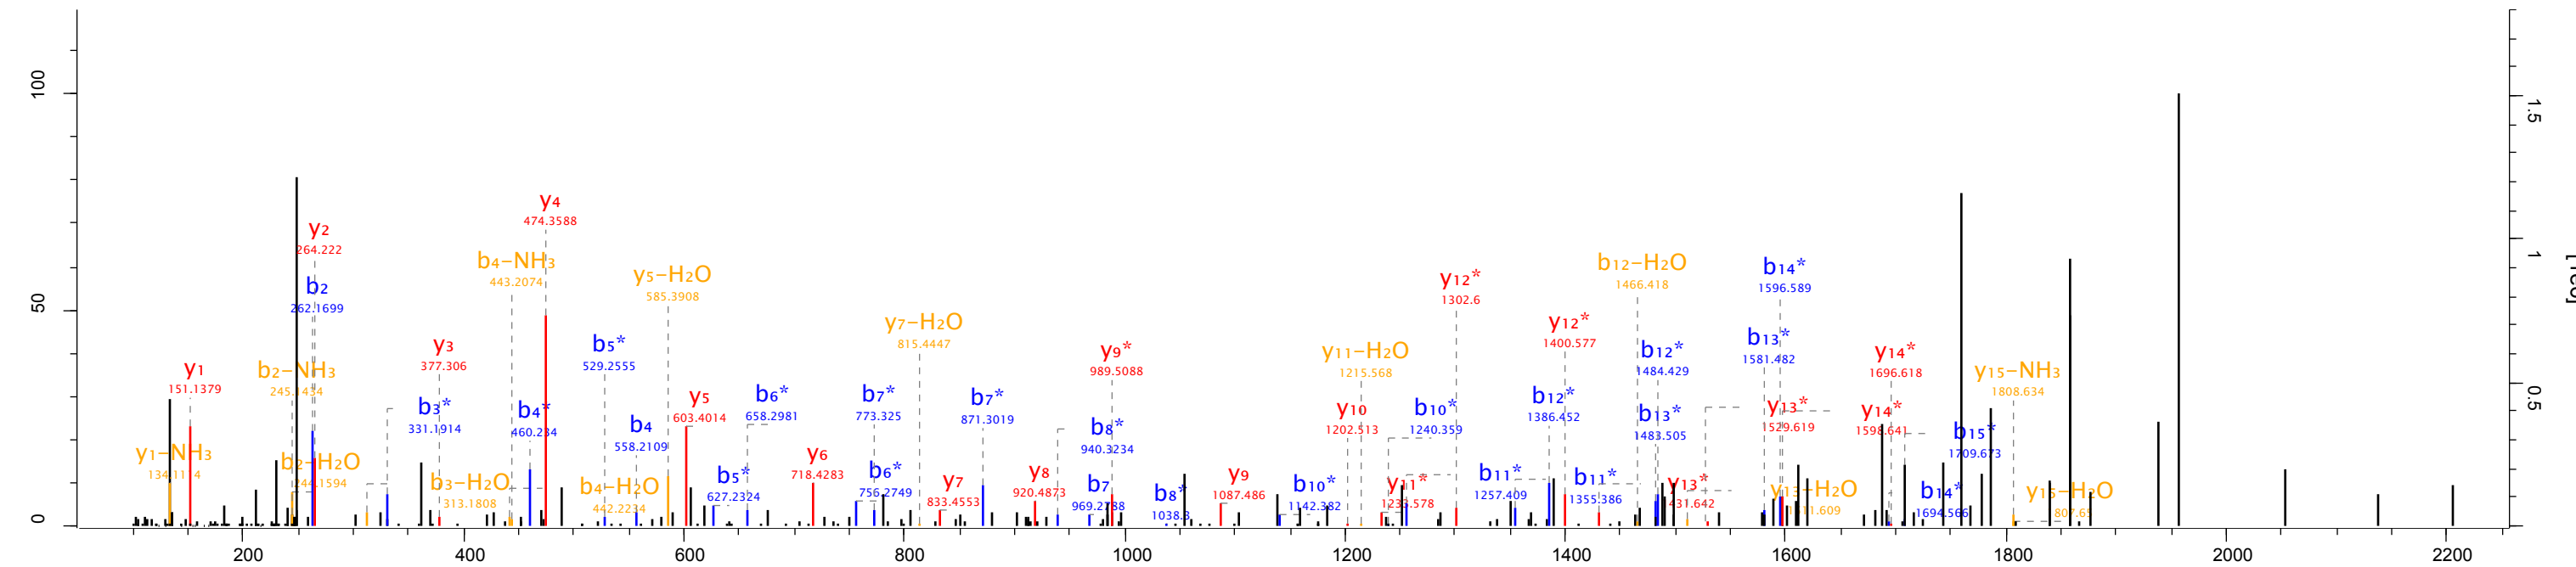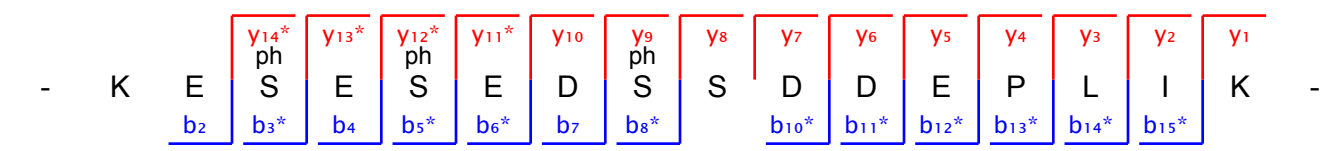

Raw file: 20150812\_A375SR\_Phospho\_BR1\_02  
 Scan: 13753 Method: FTMS; HCD Score: 204.61 m/z: 1095.41 Gene names: CENPU;MLF1IP

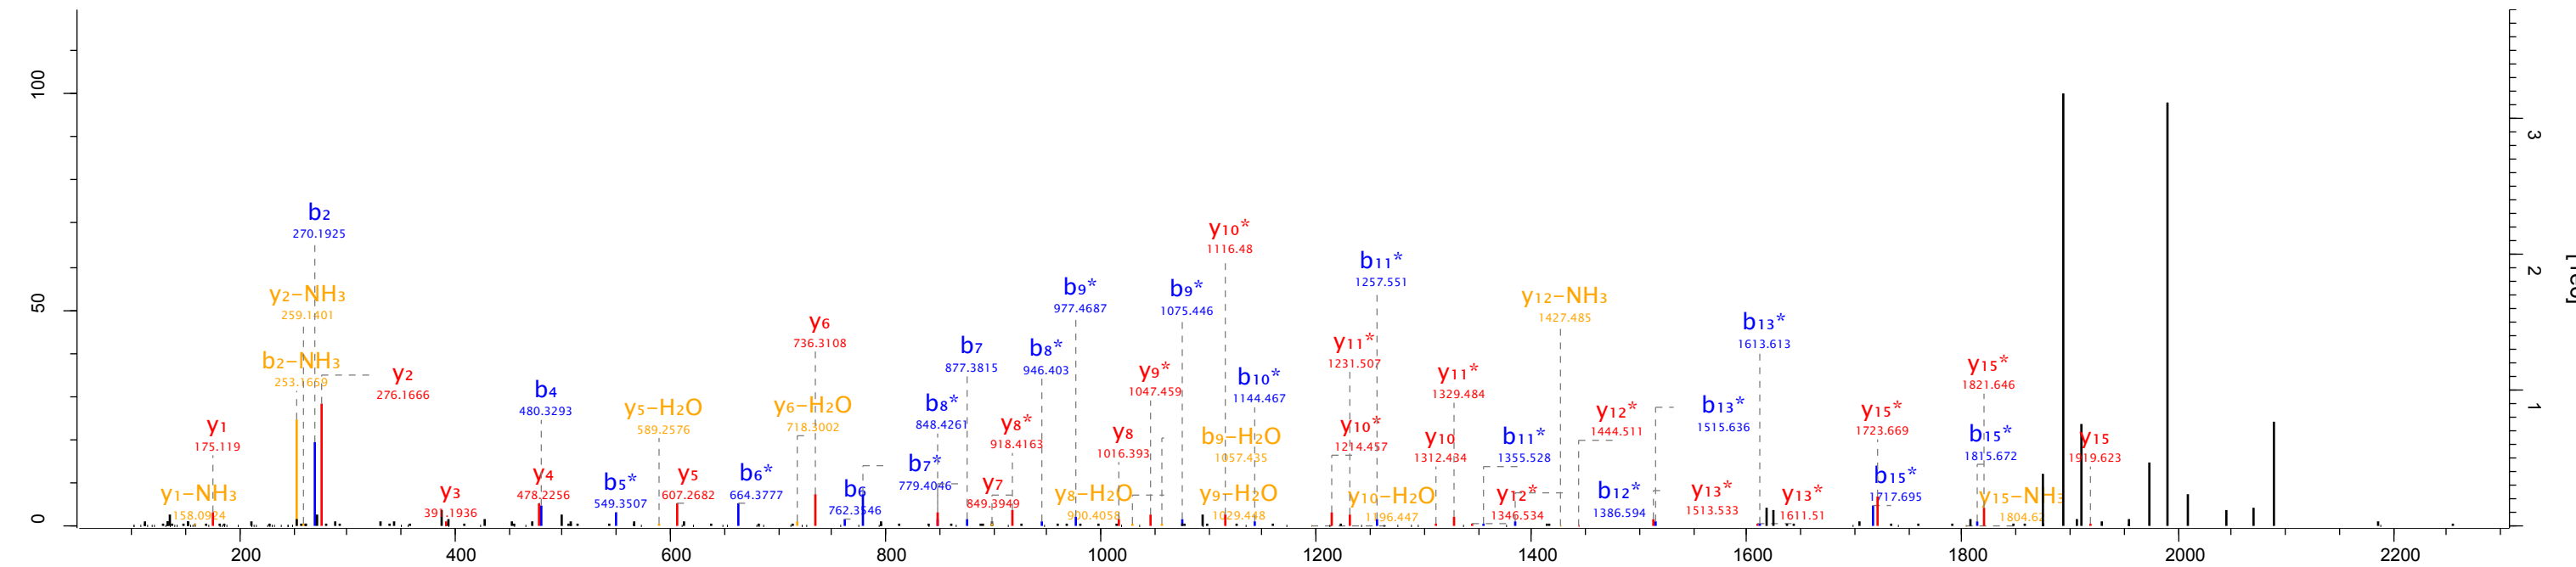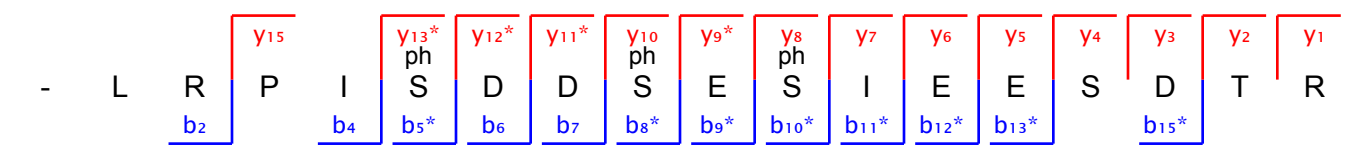

Raw file 20150812\_A375SR\_Phospho\_BR1\_02 Scan 13823 Method FTMS; HCD Score 77.4 m/z 769.8 Gene names REPS1

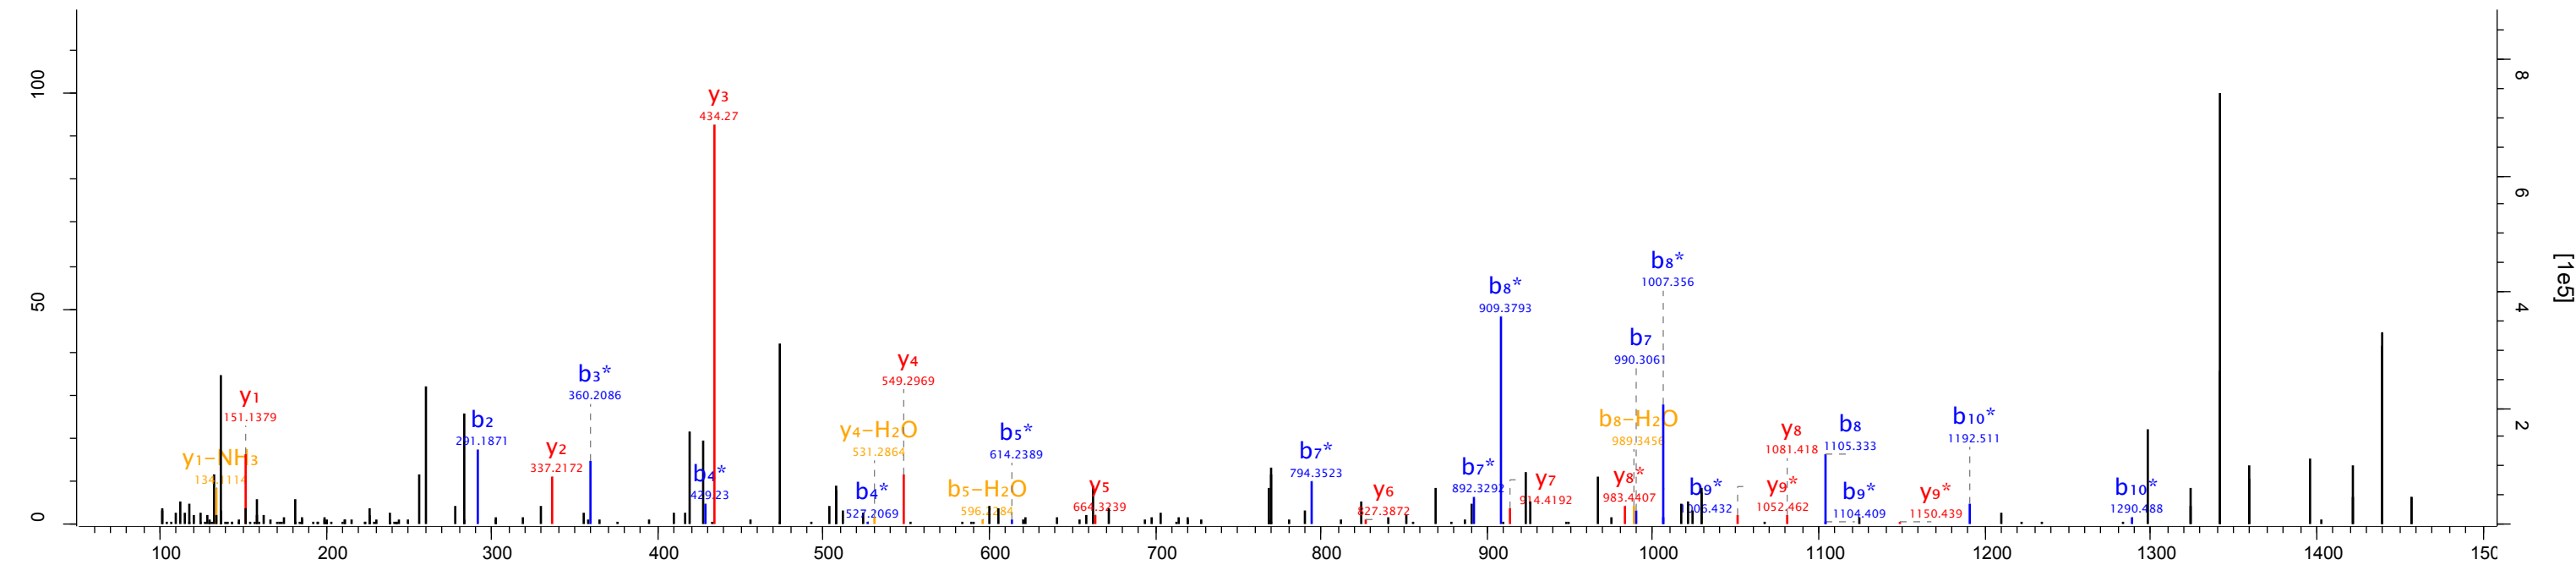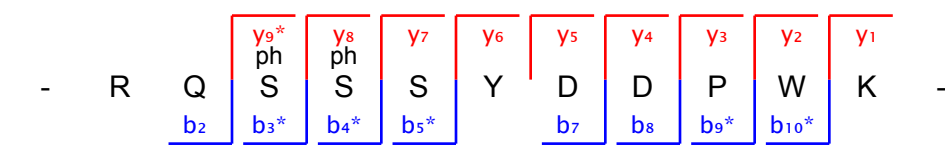

Raw file 20150812\_A375SR\_Phospho\_BR1\_02 Scan 13953 Method FTMS; HCD Score 230.3 m/z 1063 Gene names UBAP2L

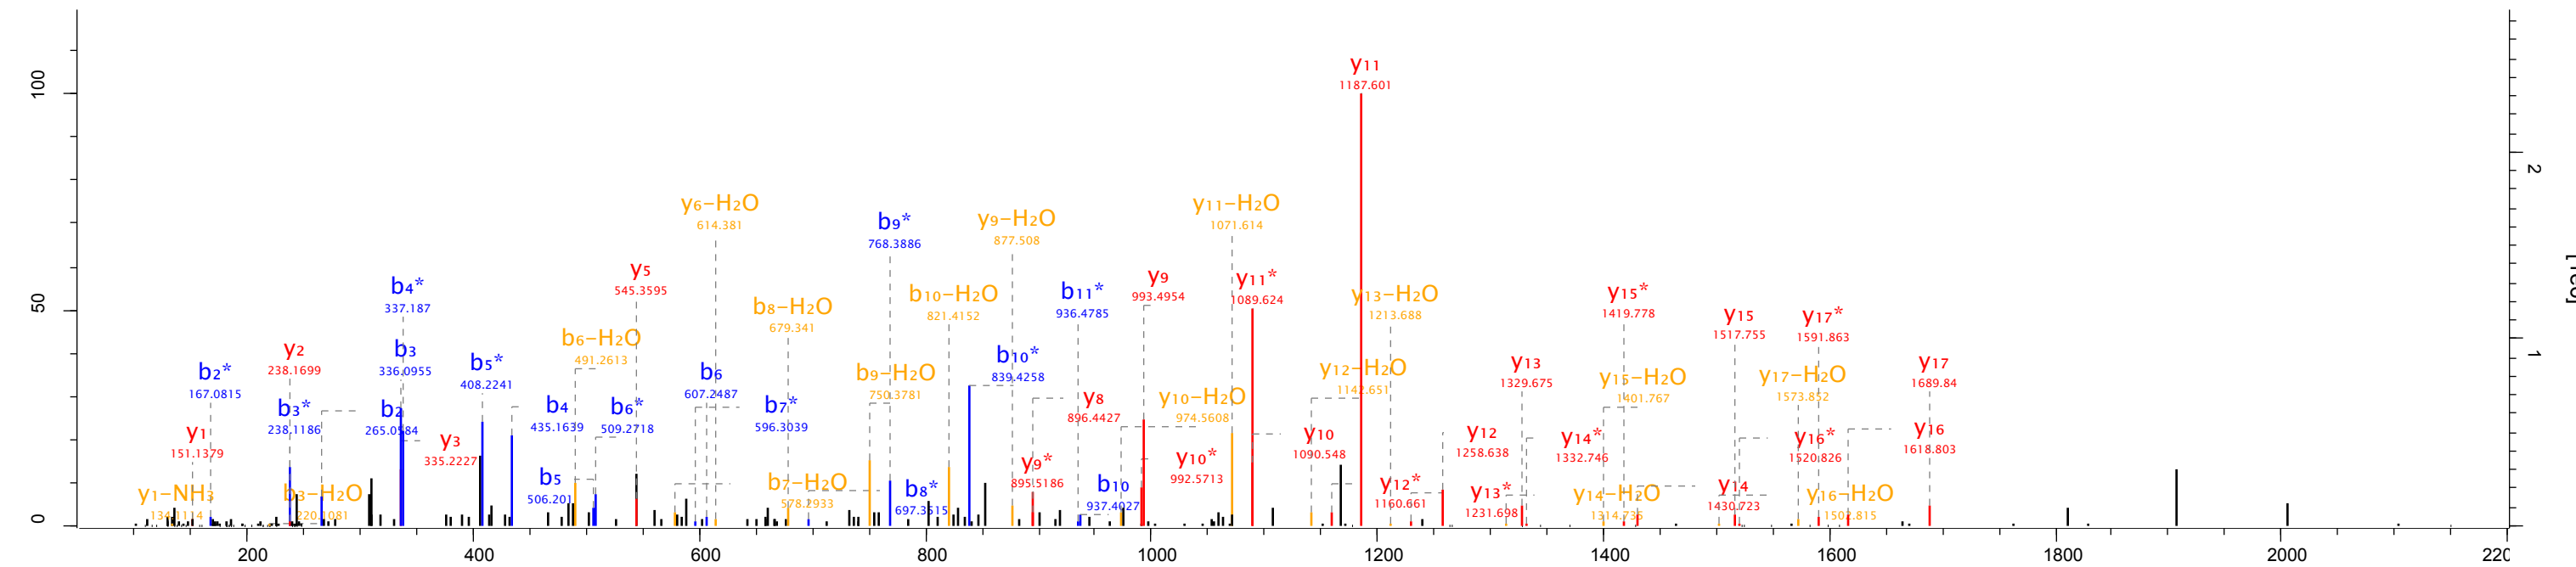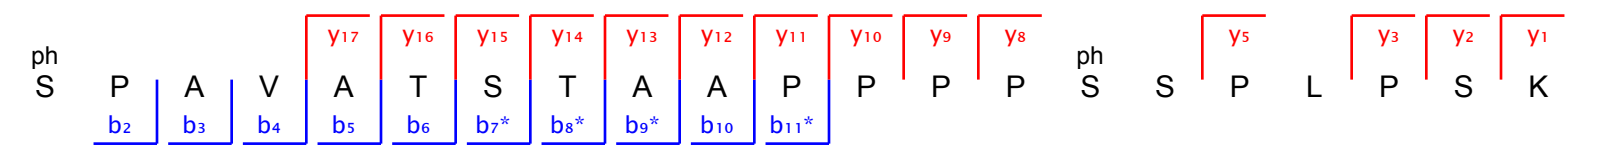

Raw file 20150812\_A375SR\_Phospho\_BR1\_02 Scan 14003 Method FTMS; HCD Score 125.9 m/z 958.84 Gene names DLG1

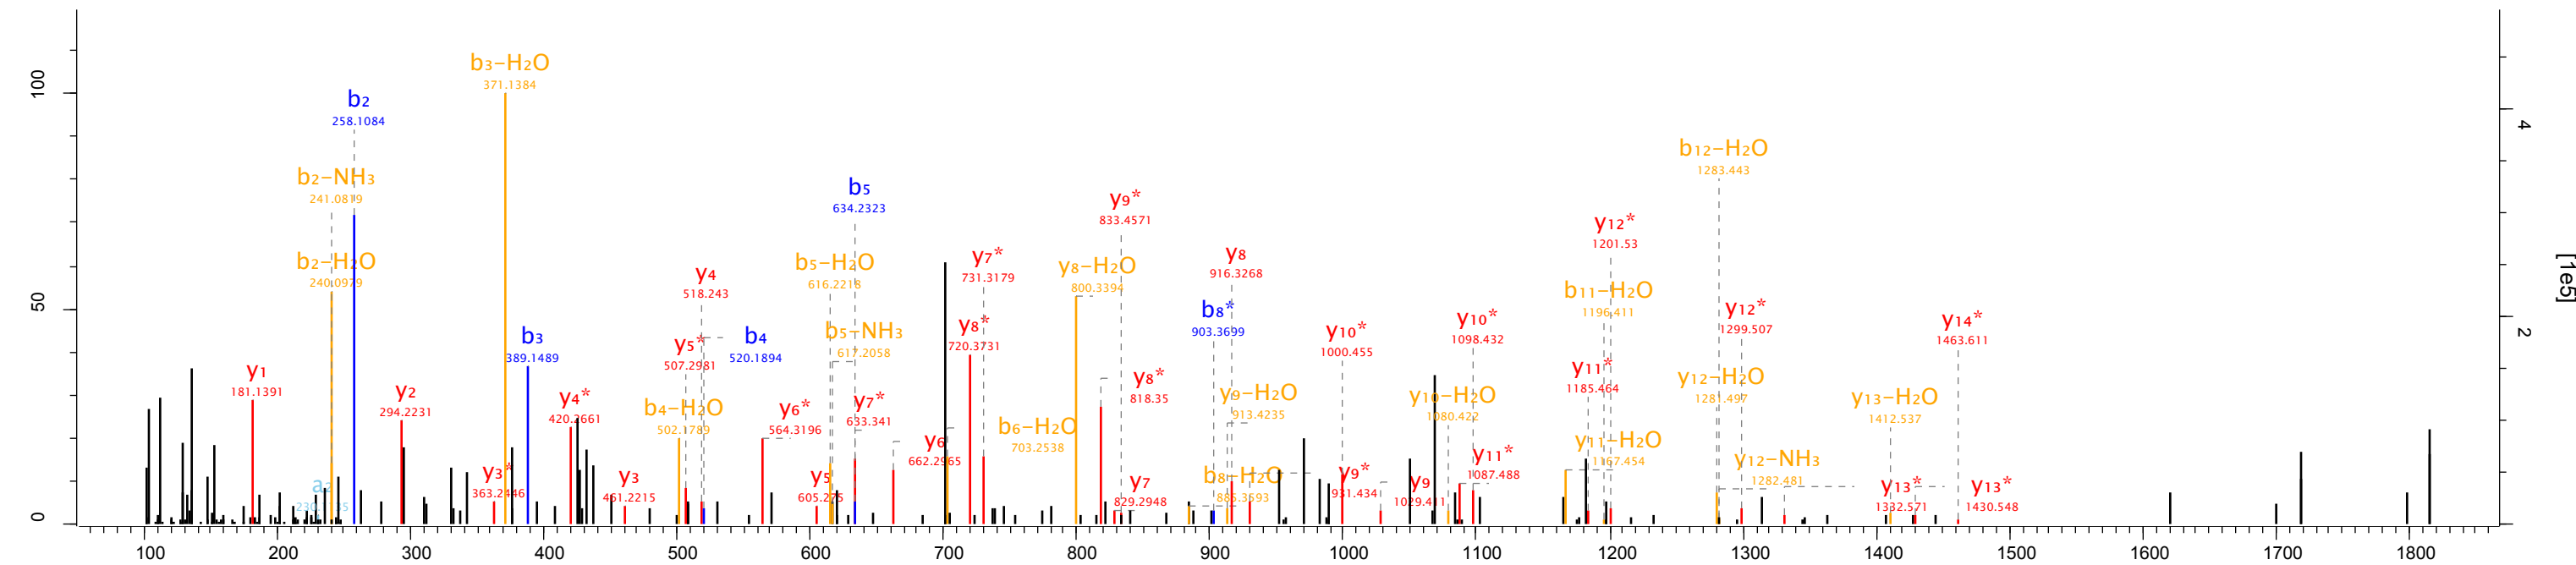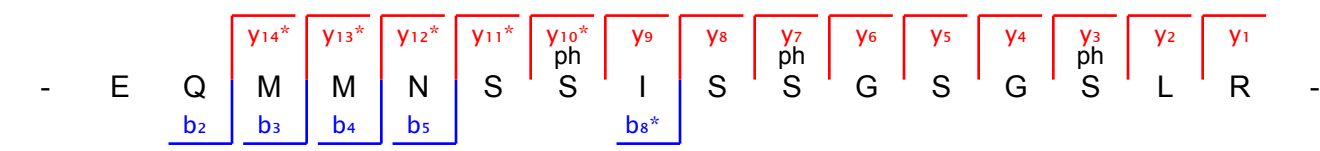



Raw file: 20150812\_A375SR\_Phospho\_BR1\_02  
 Scan: 14193 Method: FTMS; HCD Score: 78.53 m/z: 842.07 Gene names: TJP2

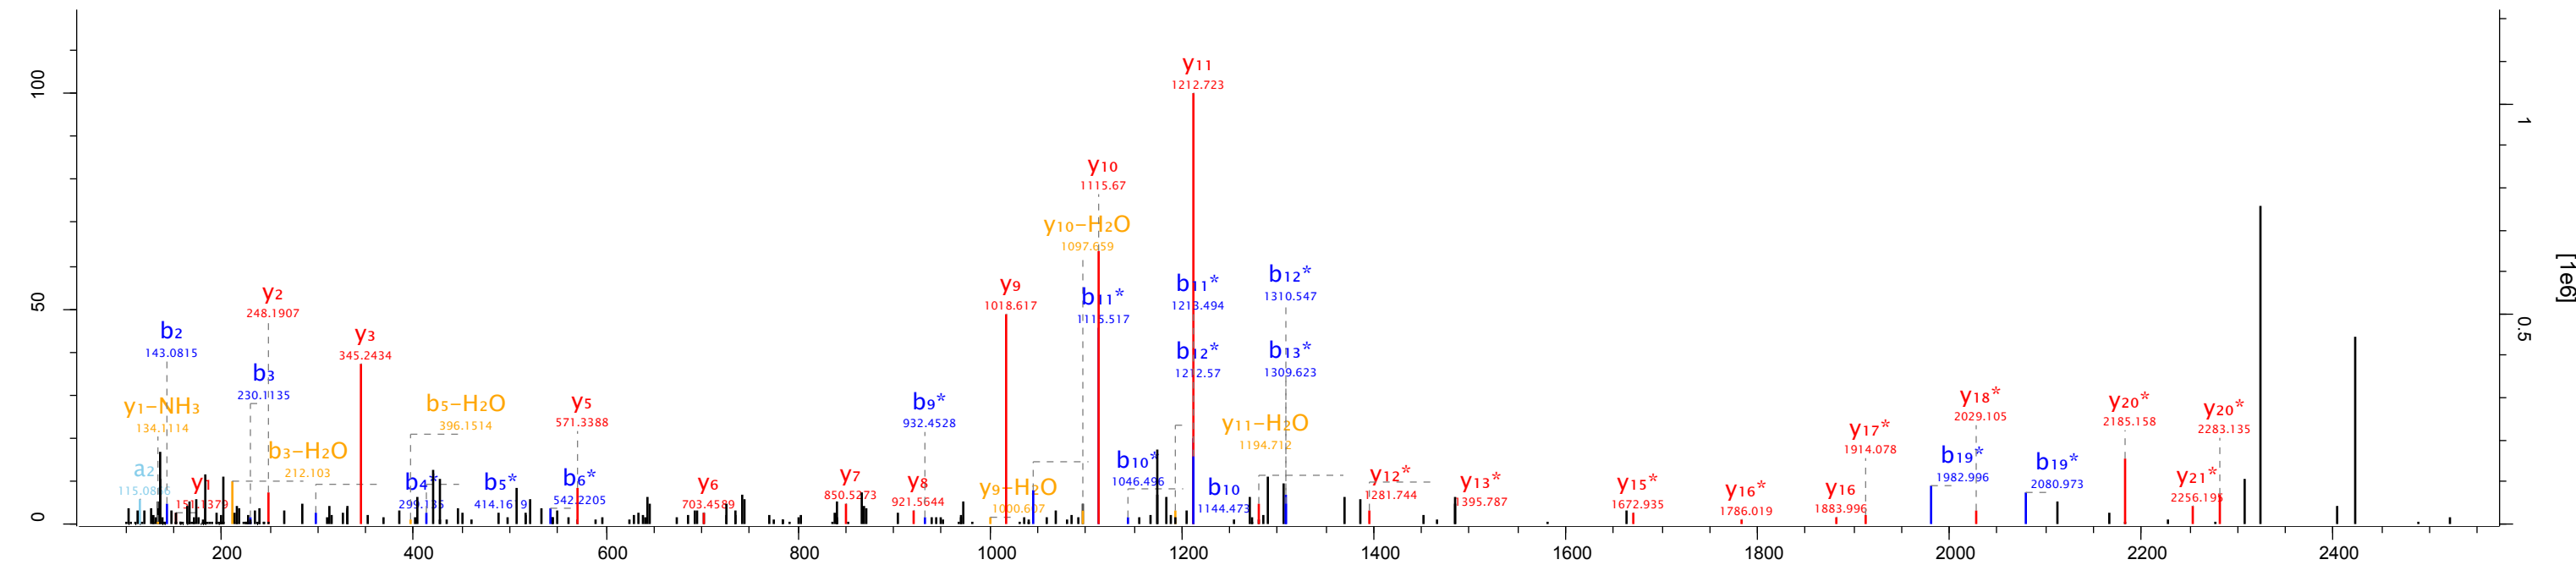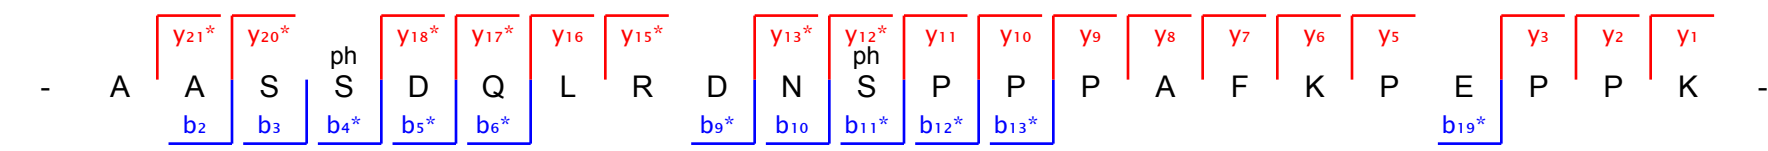

Raw file Scan Method Score m/z Gene names  
 20150812\_A375SR\_Phospho\_BR1\_02 14243 FTMS; HCD 117.53 1089.95 CADPS2

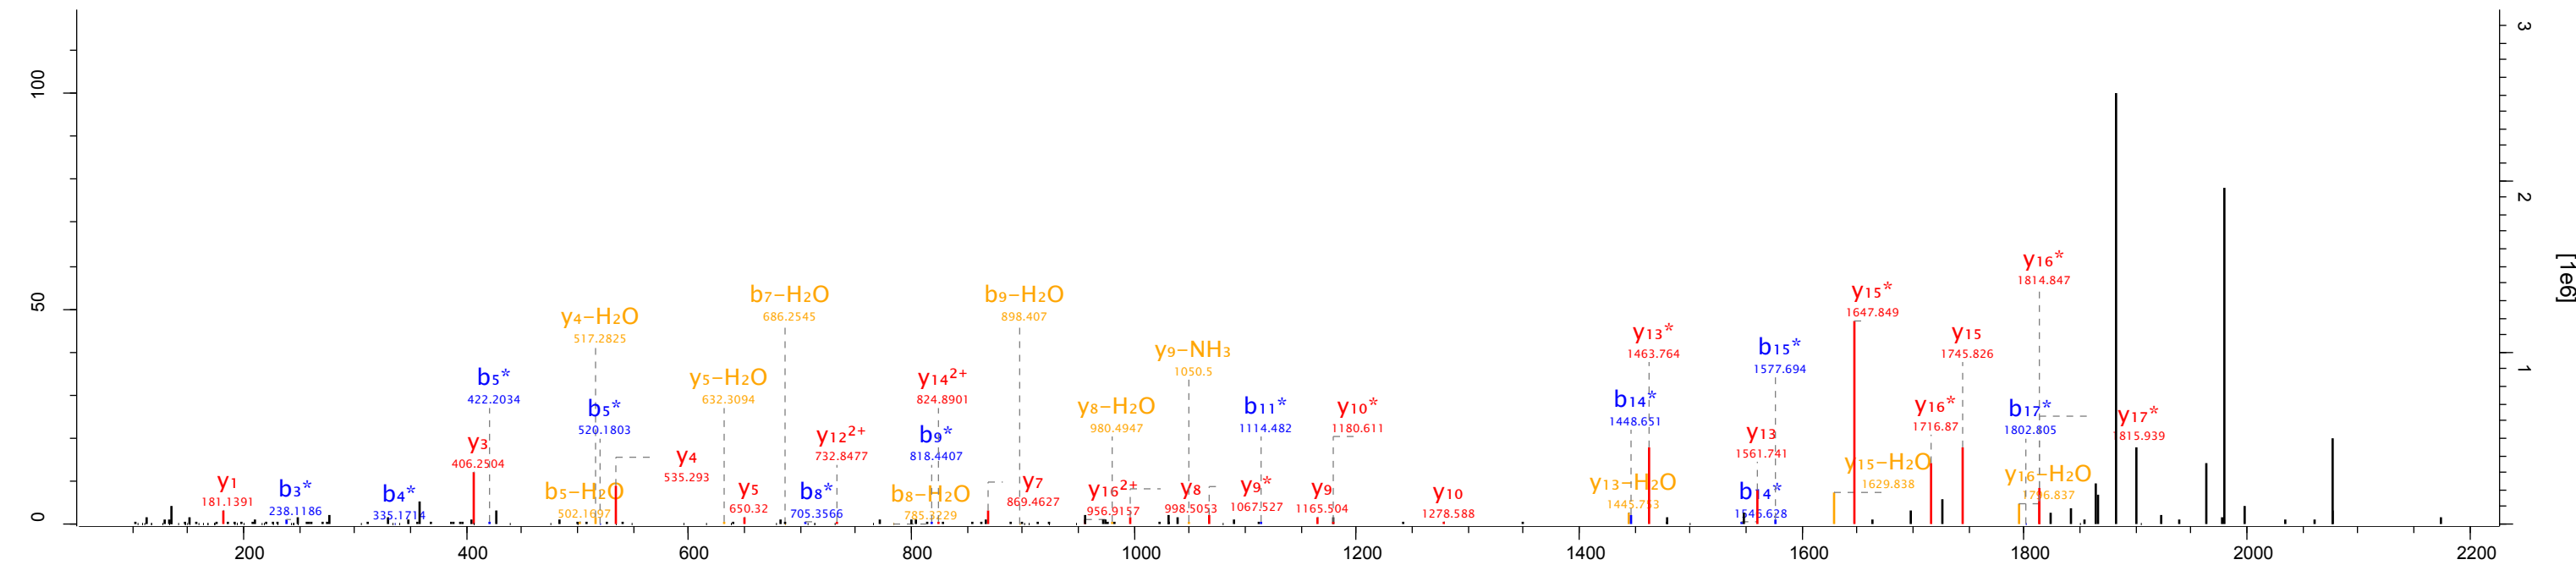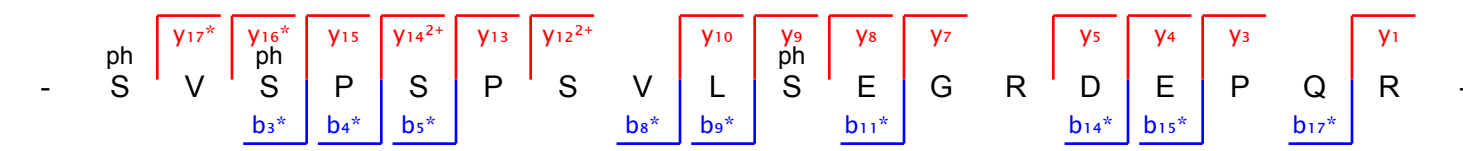

Raw file 20150812\_A375SR\_Phospho\_BR1\_02 Scan 14523 Method FTMS; HCD Score 148.84 m/z 1066.34 Gene names ARID4B

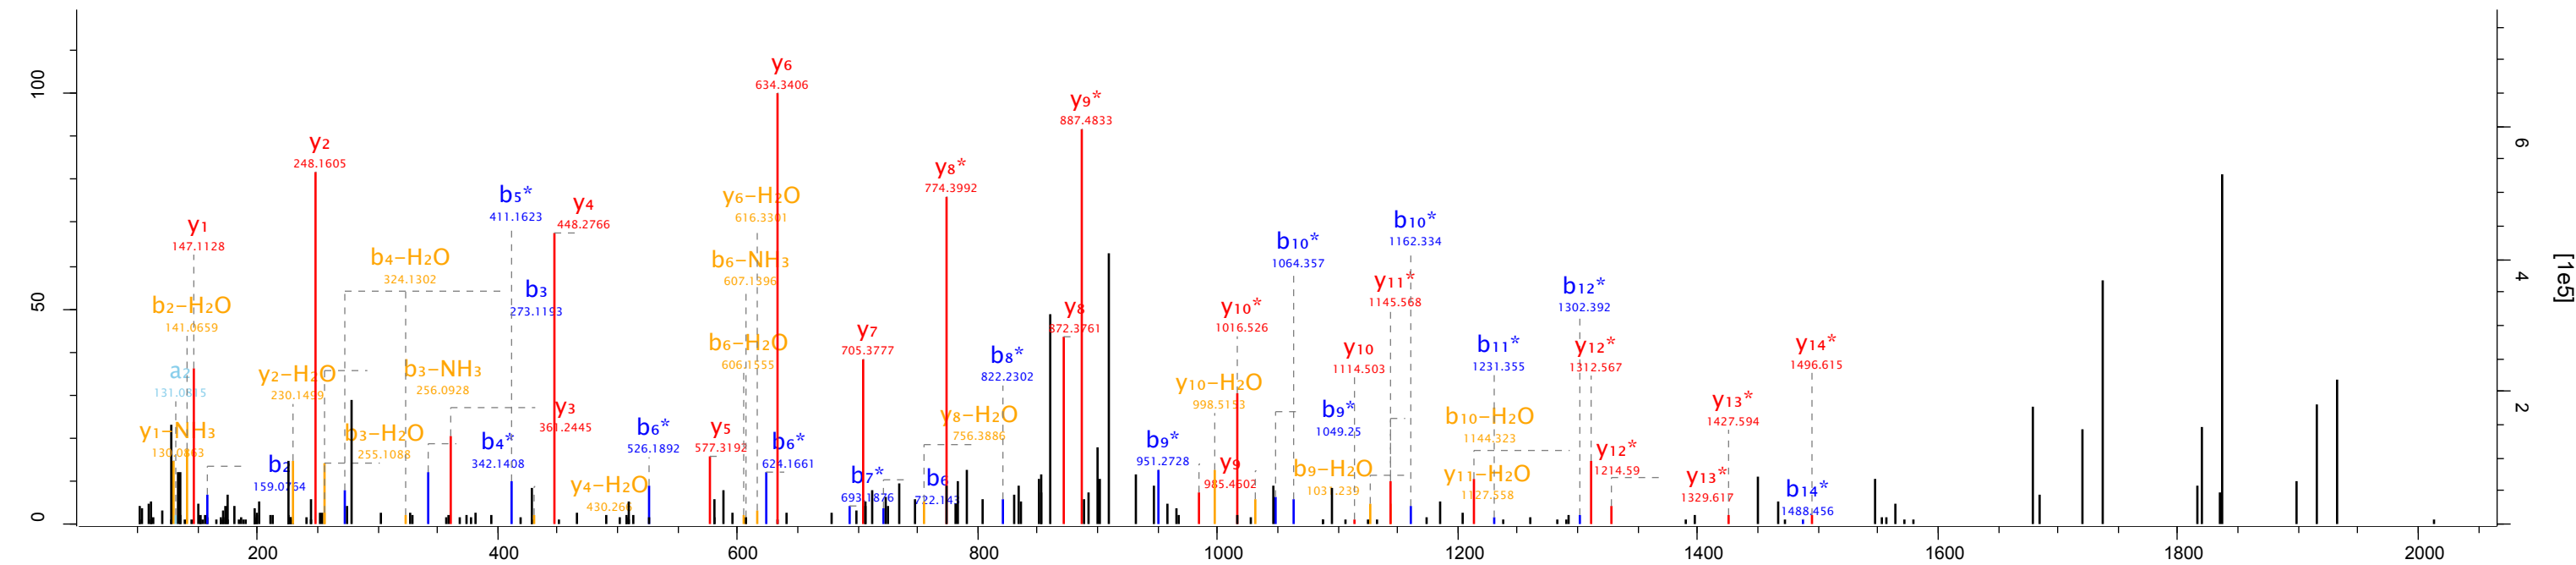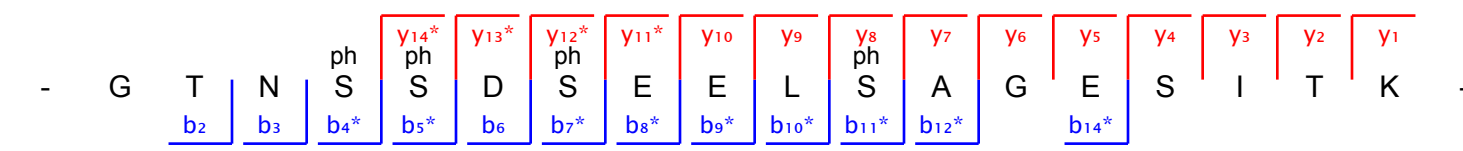

Raw file: 20150812\_A375SR\_Phospho\_BR1\_02  
 Scan: 14863 Method: FTMS; HCD Score: 52.33 m/z: 972.72 Gene names: CEP164

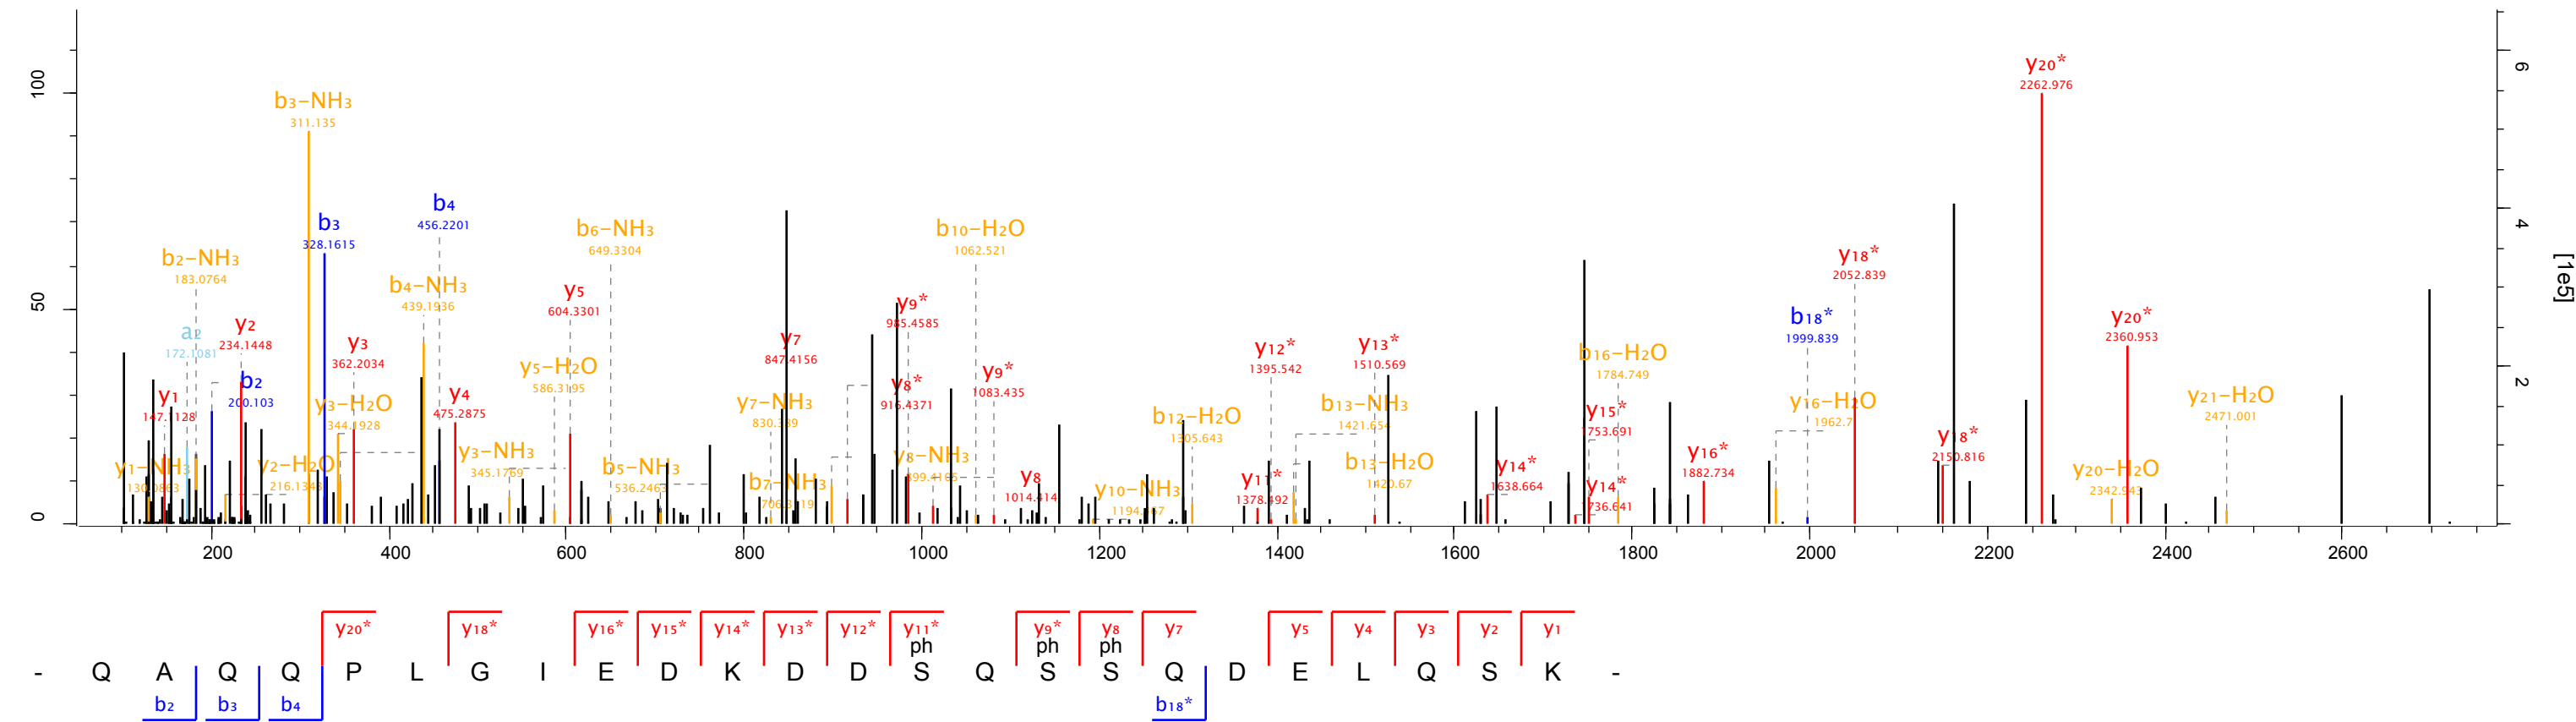

Raw file: 20150812\_A375SR\_Phospho\_BR1\_02  
 Scan: 15223 Method: FTMS; HCD Score: 204.93 m/z: 865.37 Gene names: TRIM28

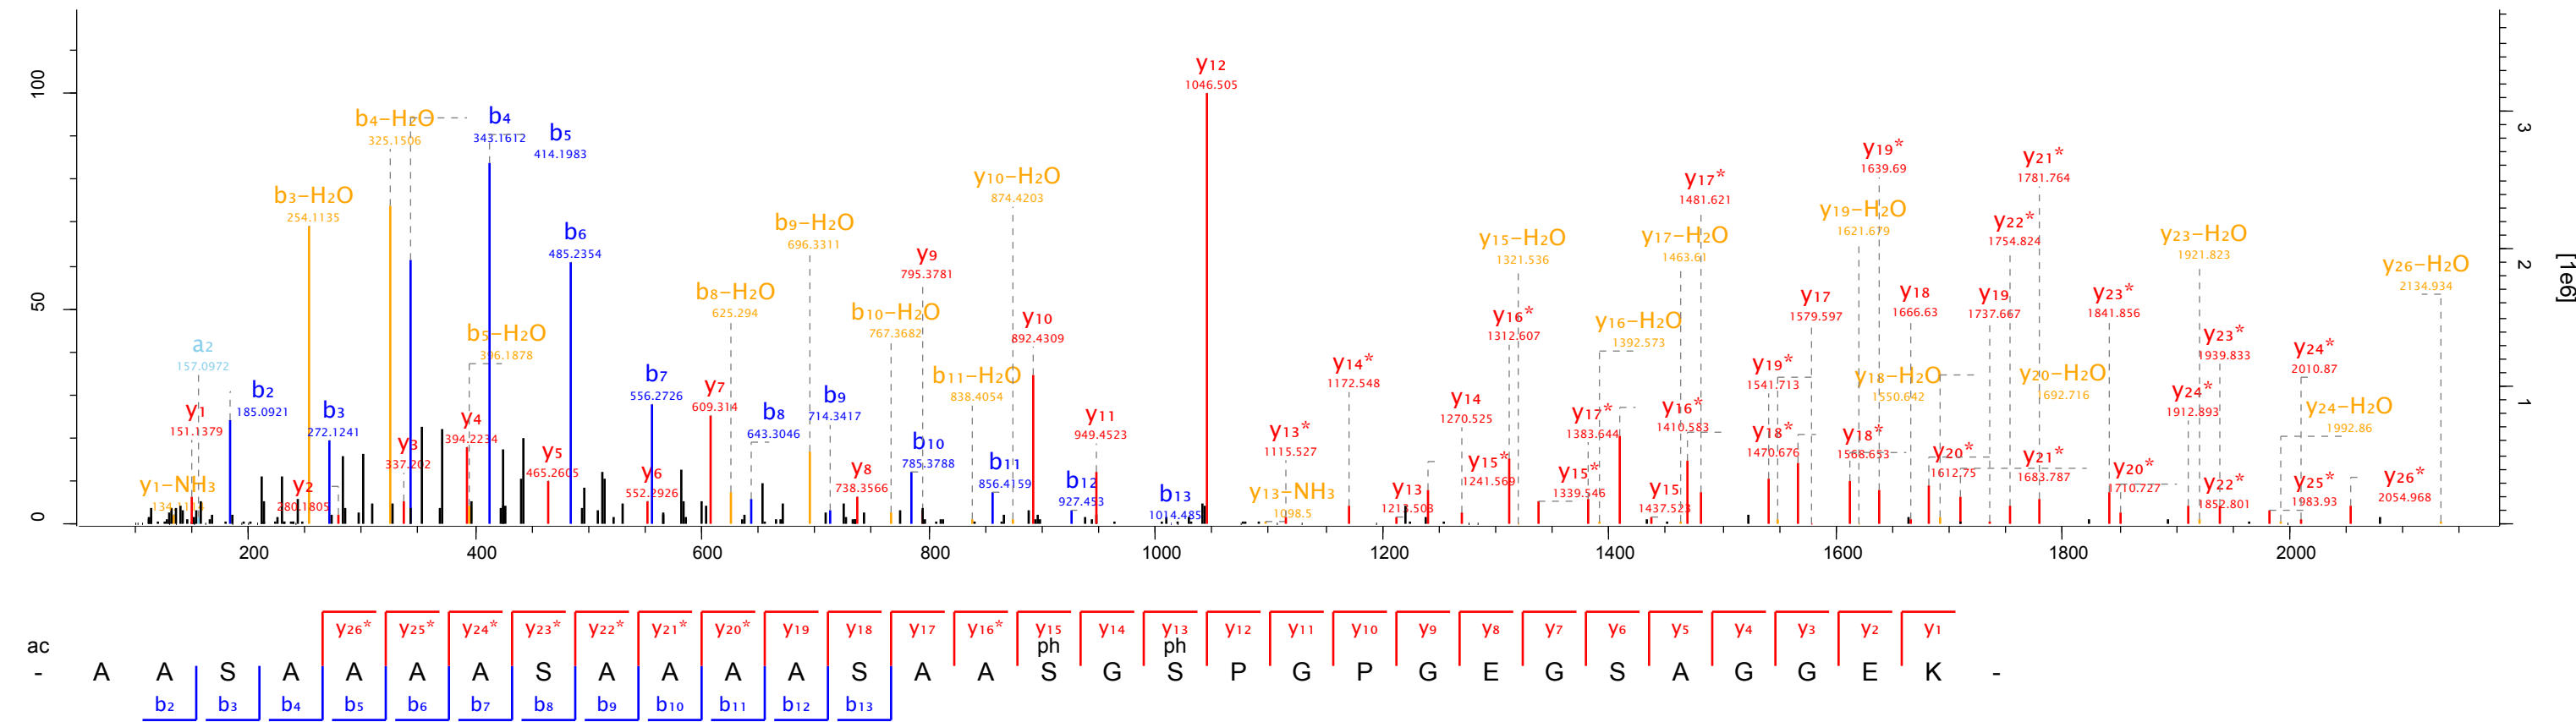

Raw file 20150812\_A375SR\_Phospho\_BR1\_02 Scan 15363 Method FTMS; HCD Score 245.22 m/z 821.34 Gene names NFIB

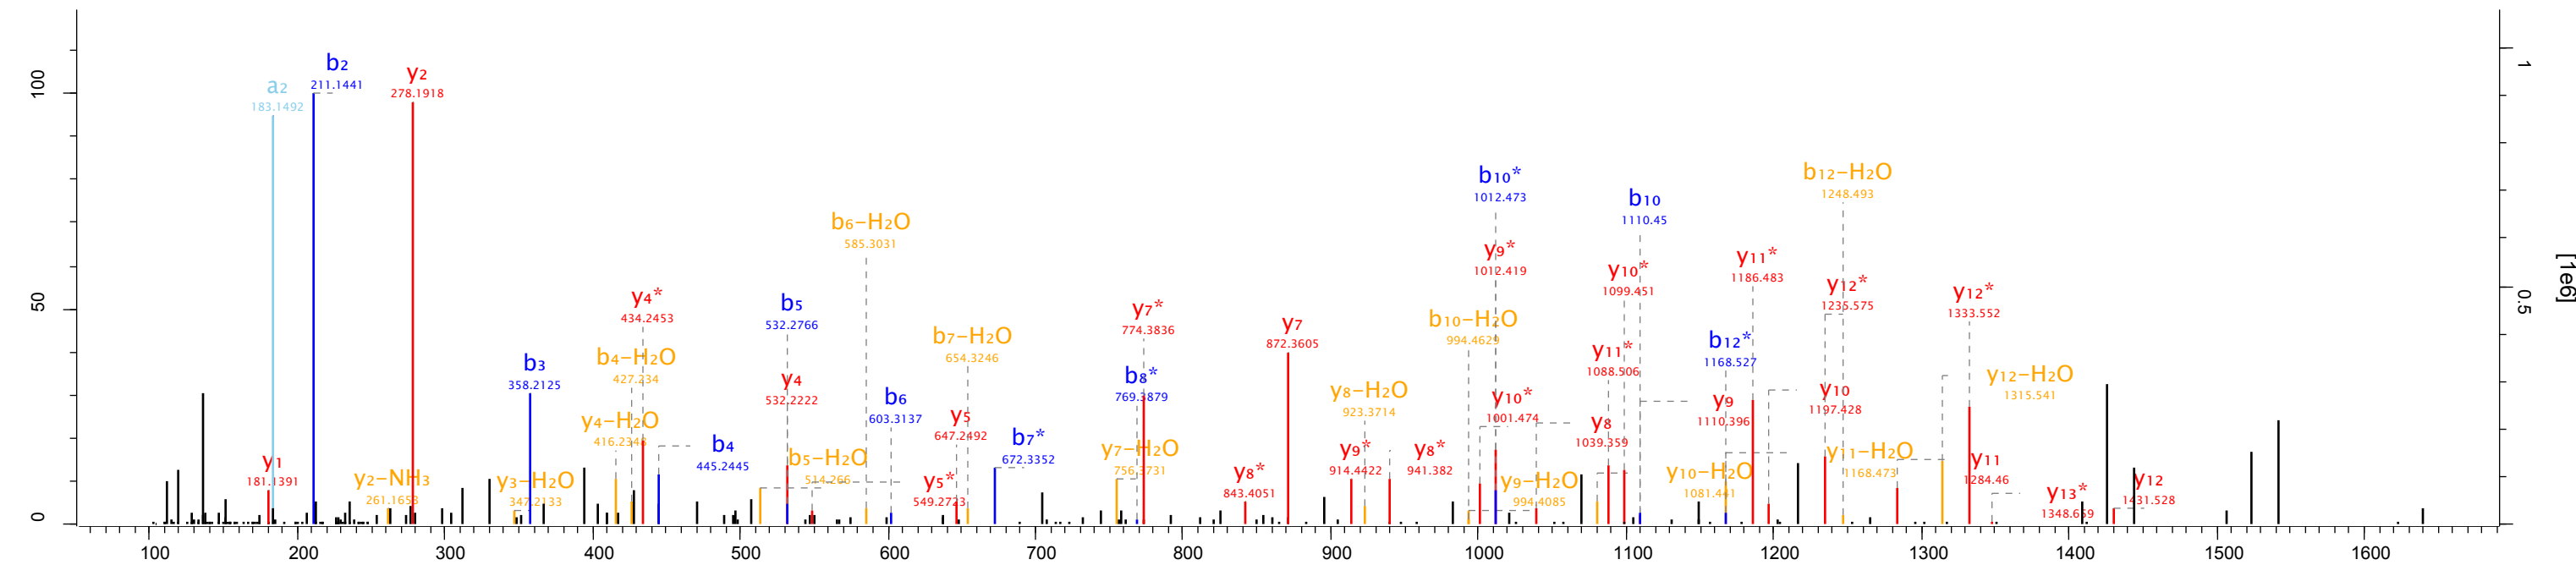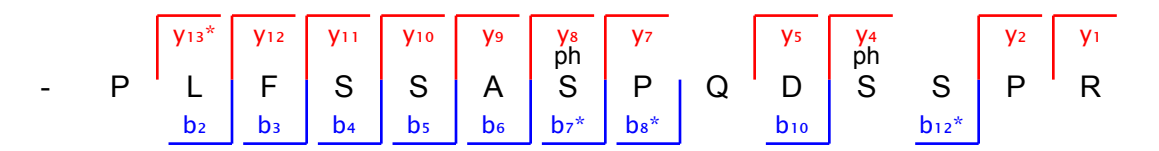

Raw file: 20150812\_A375SR\_Phospho\_BR1\_02  
 Scan: 15463 Method: FTMS; HCD Score: 273.18 m/z: 1155.94 Gene names: PHF14

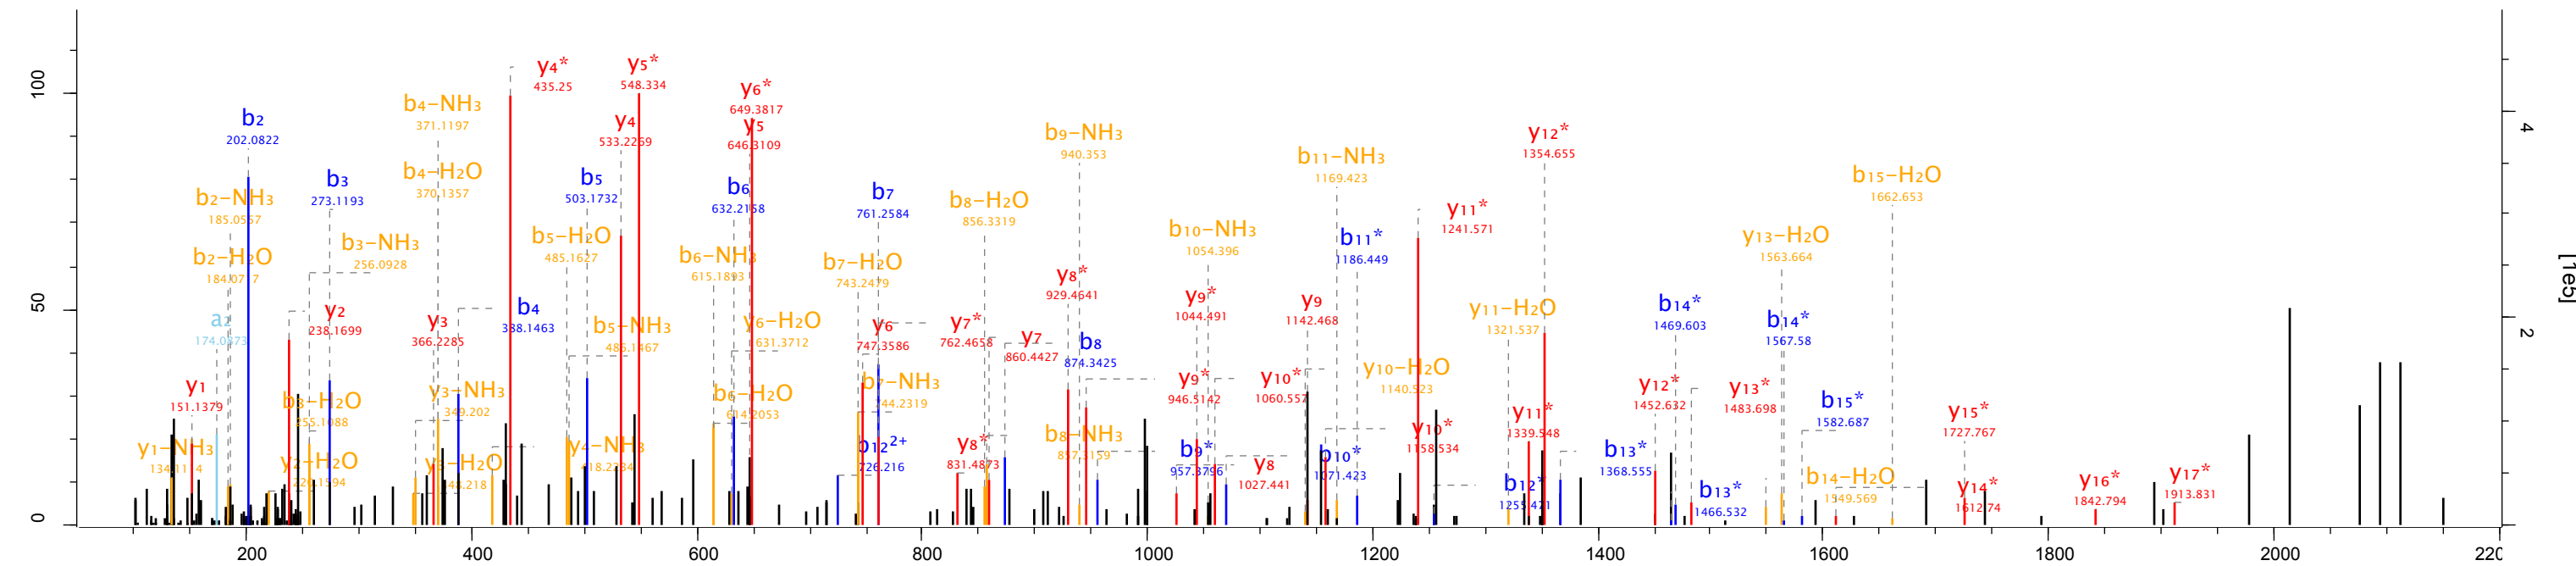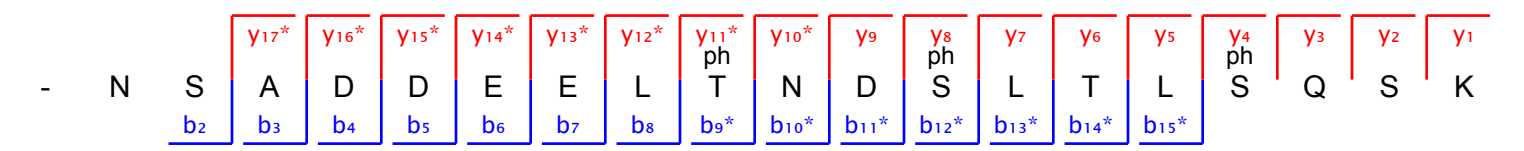

Raw file 20150812\_A375SR\_Phospho\_BR1\_02 Scan 15873 Method FTMS; HCD Score 130.02 m/z 1115.79 Gene names SCAF11

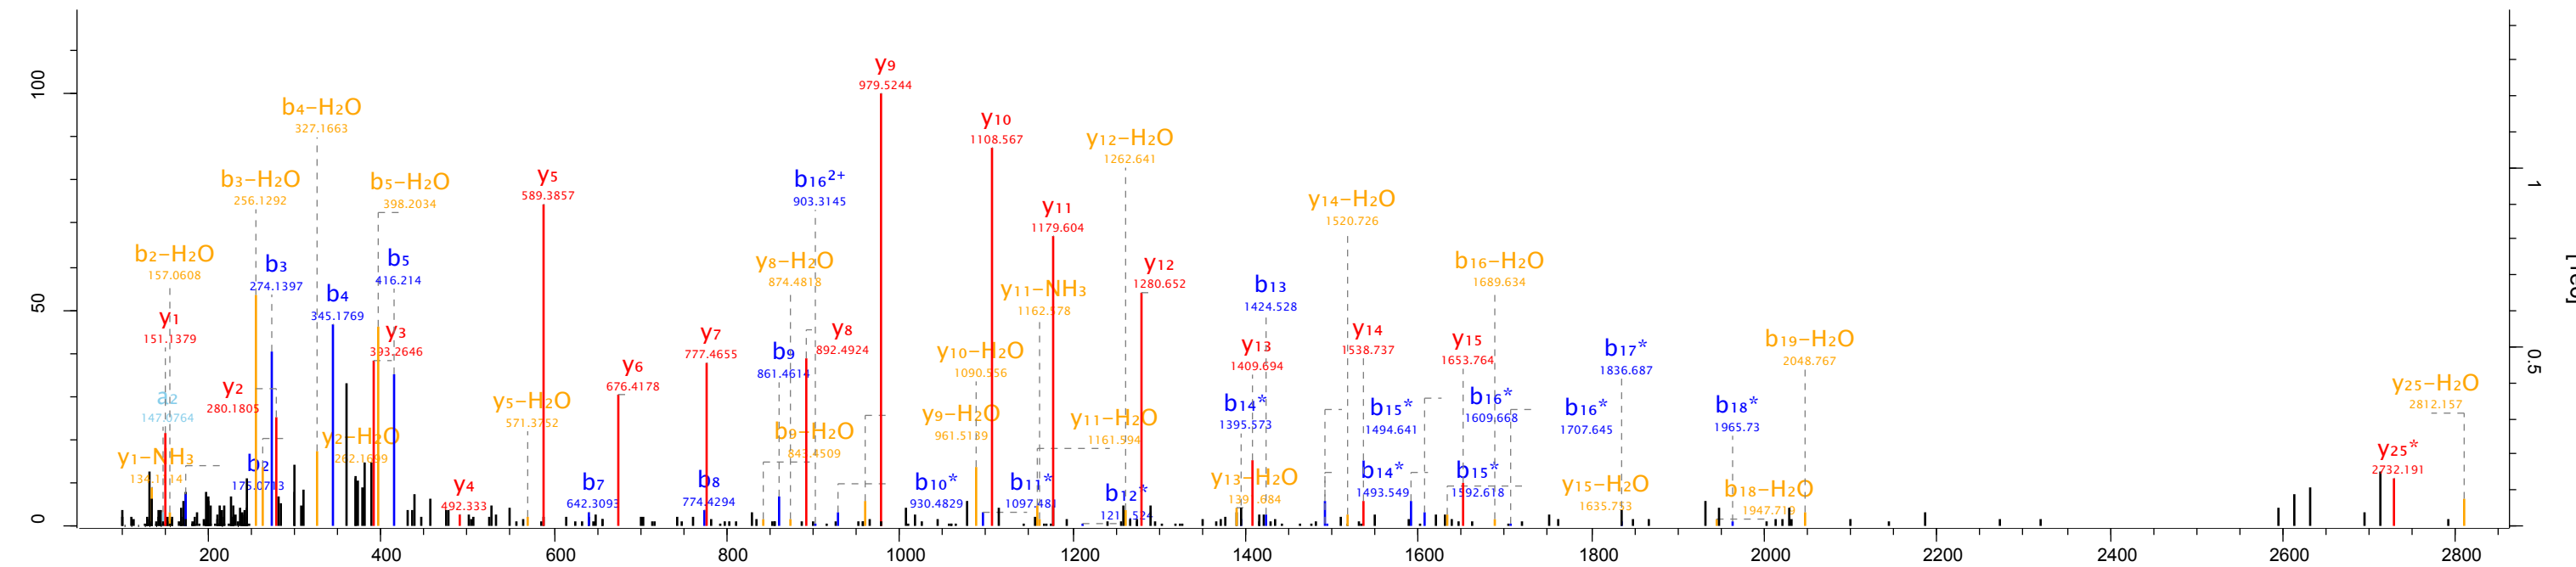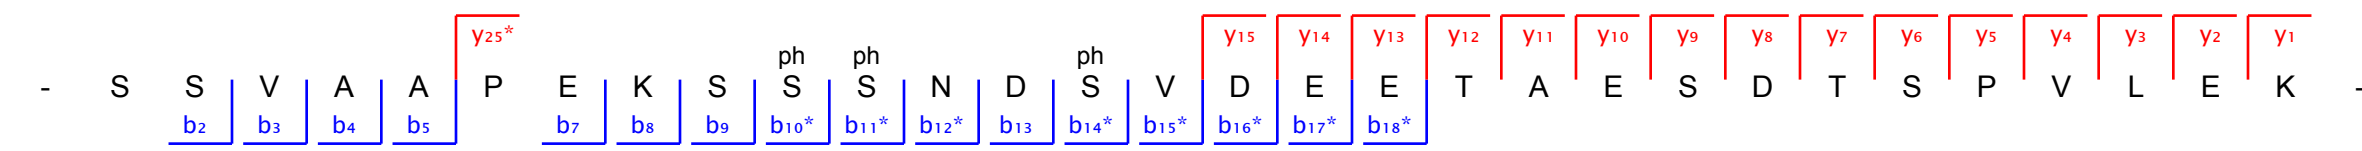



Raw file 20150812\_A375SR\_Phospho\_BR1\_02 Scan 16193 Method FTMS; HCD Score 154.39 m/z 810.84 Gene names LARP1

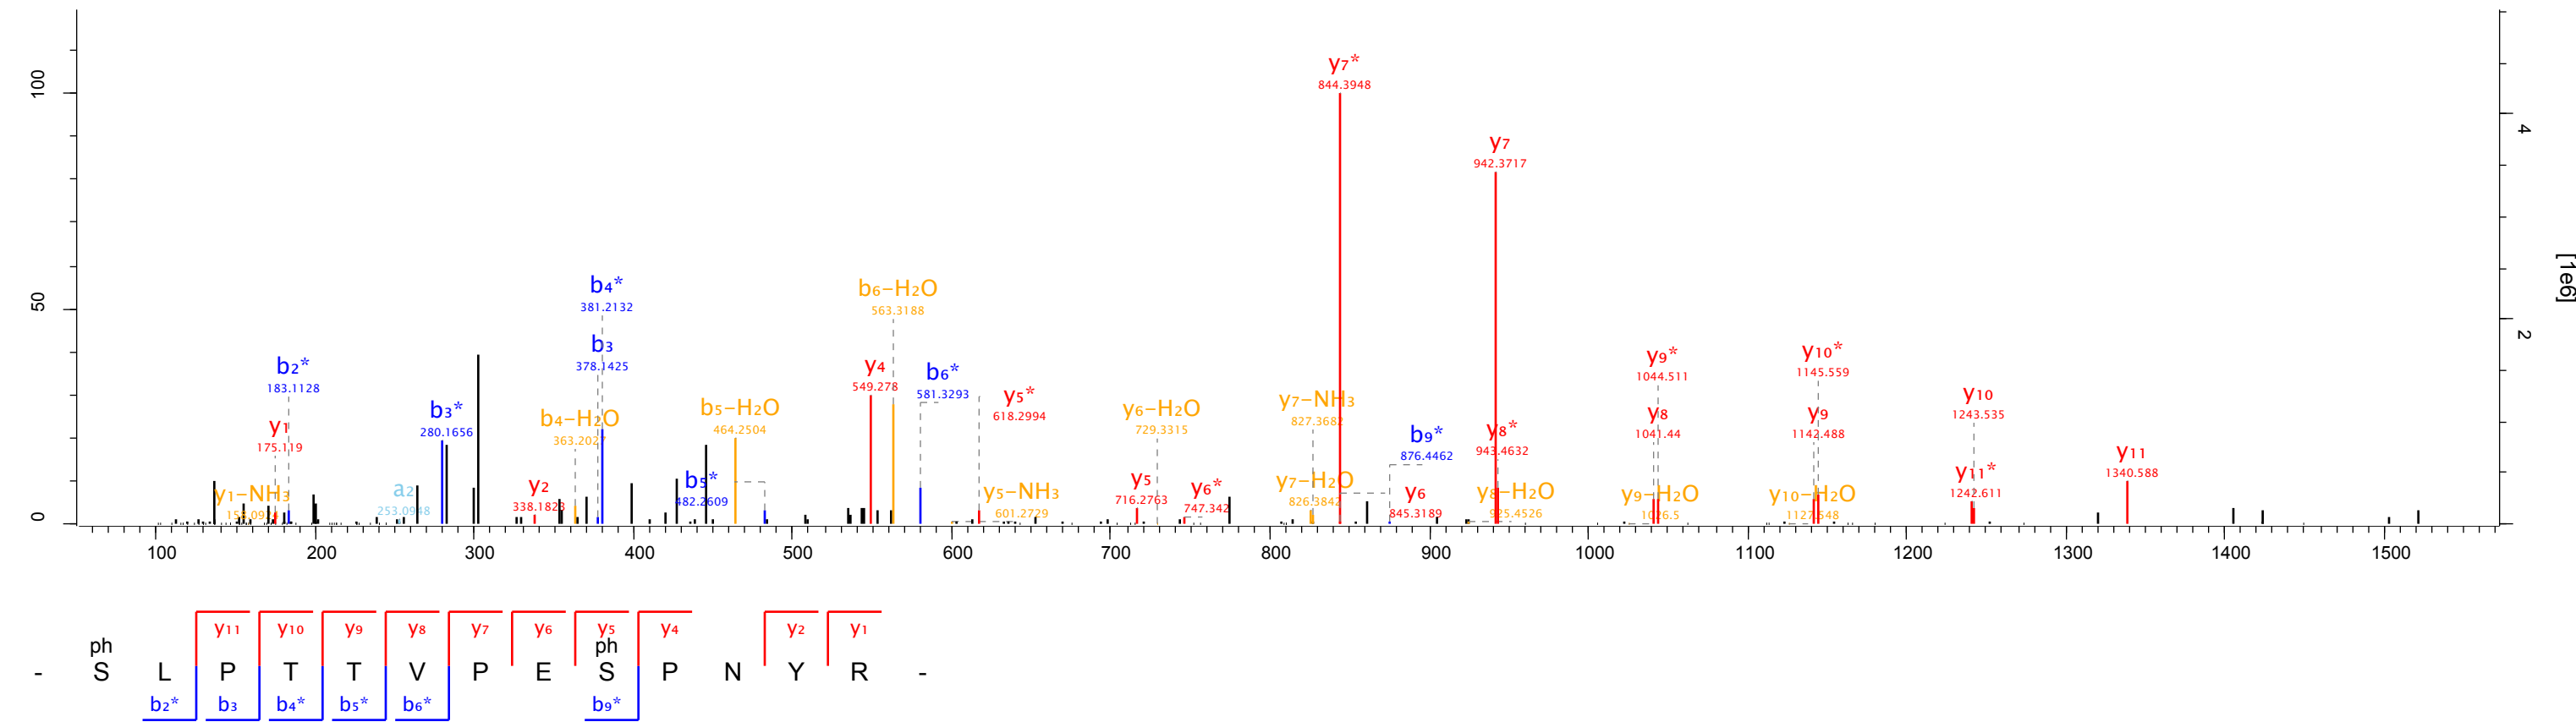

Raw file: 20150812\_A375SR\_Phospho\_BR1\_02  
 Scan: 16283 Method: FTMS; HCD Score: 84.38 m/z: 1194.5 Gene names: BCL7C

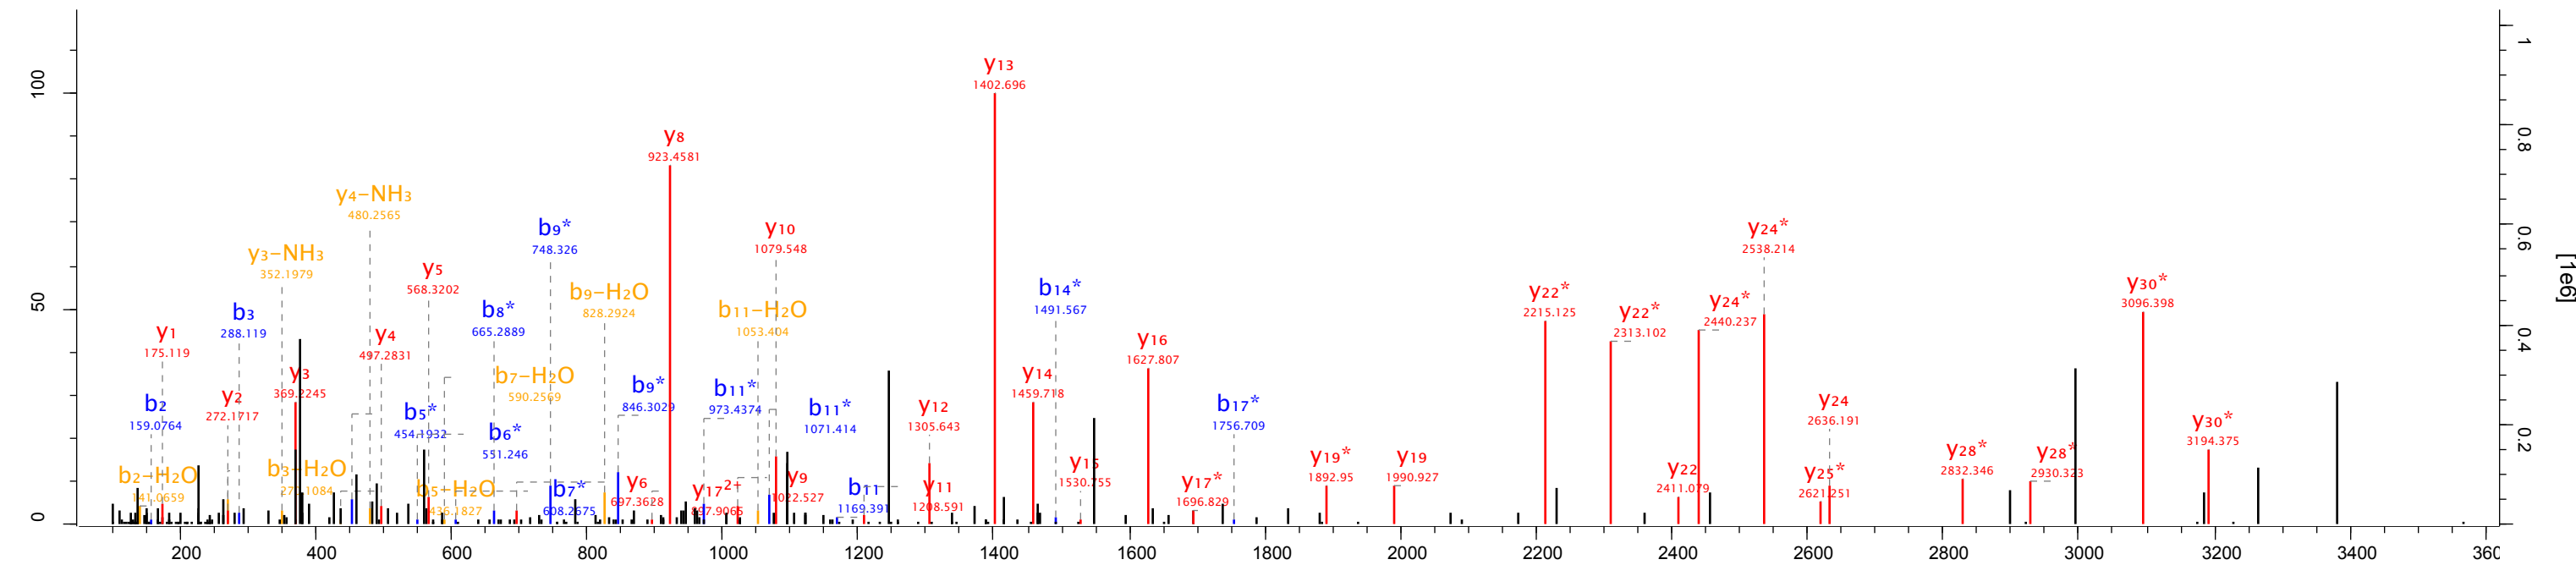

- G T E P ph S P G G ph T P Q P ph S R P V S P A G P P E G V P E E A Q P P R -  
 b<sub>2</sub> b<sub>3</sub> b<sub>5</sub>\* b<sub>6</sub>\* b<sub>7</sub>\* b<sub>8</sub>\* b<sub>9</sub>\* b<sub>11</sub> b<sub>14</sub>\* b<sub>17</sub>\* y<sub>1</sub> y<sub>2</sub> y<sub>3</sub> y<sub>4</sub> y<sub>5</sub> y<sub>6</sub> y<sub>8</sub> y<sub>9</sub> y<sub>10</sub> y<sub>11</sub> y<sub>12</sub> y<sub>13</sub> y<sub>14</sub> y<sub>15</sub> y<sub>16</sub> y<sub>17</sub>\* y<sub>19</sub> y<sub>22</sub> y<sub>24</sub> y<sub>25</sub>\* y<sub>28</sub>\* y<sub>30</sub>\*

Raw file  
 20150812\_A375SR\_Phospho\_BR1\_02  
 Scan 16353 Method FTMS; HCD Score 180.62 m/z 727.68 Gene names C2orf49

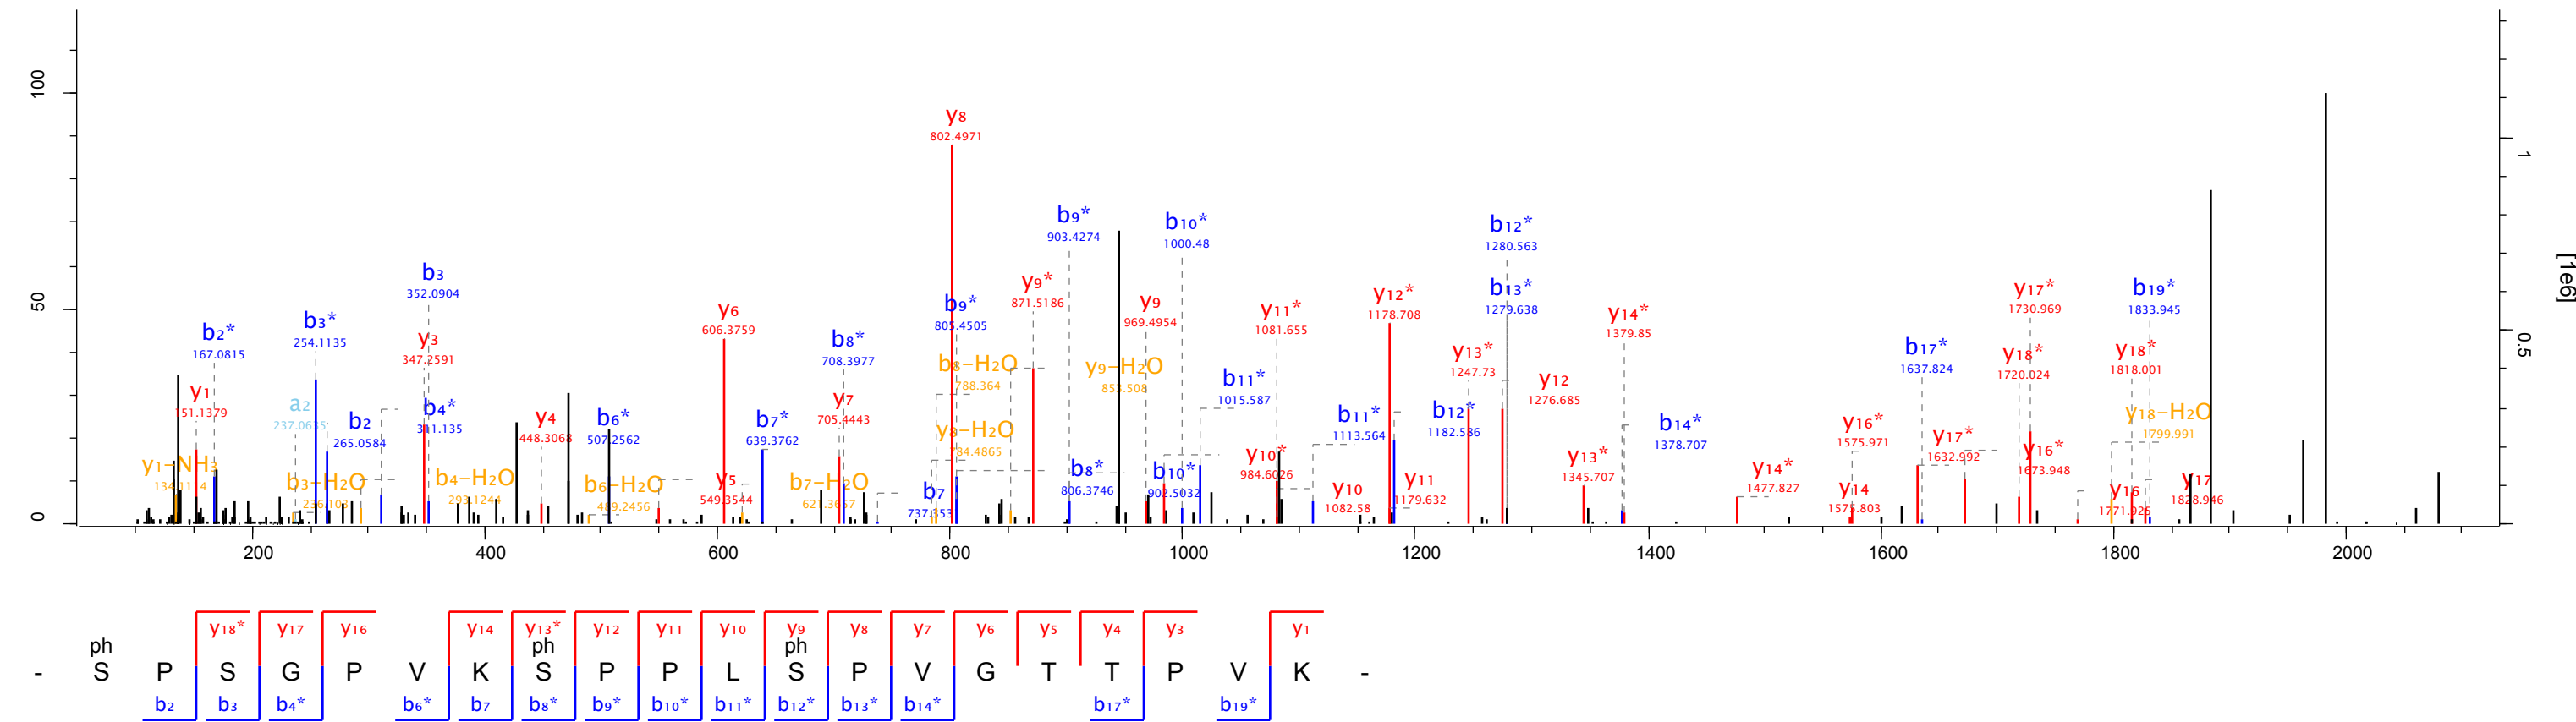

Raw file Scan Method Score m/z Gene names  
 20150812\_A375SR\_Phospho\_BR1\_02 16893 FTMS; HCD 206.57 1416.56 FAM169A

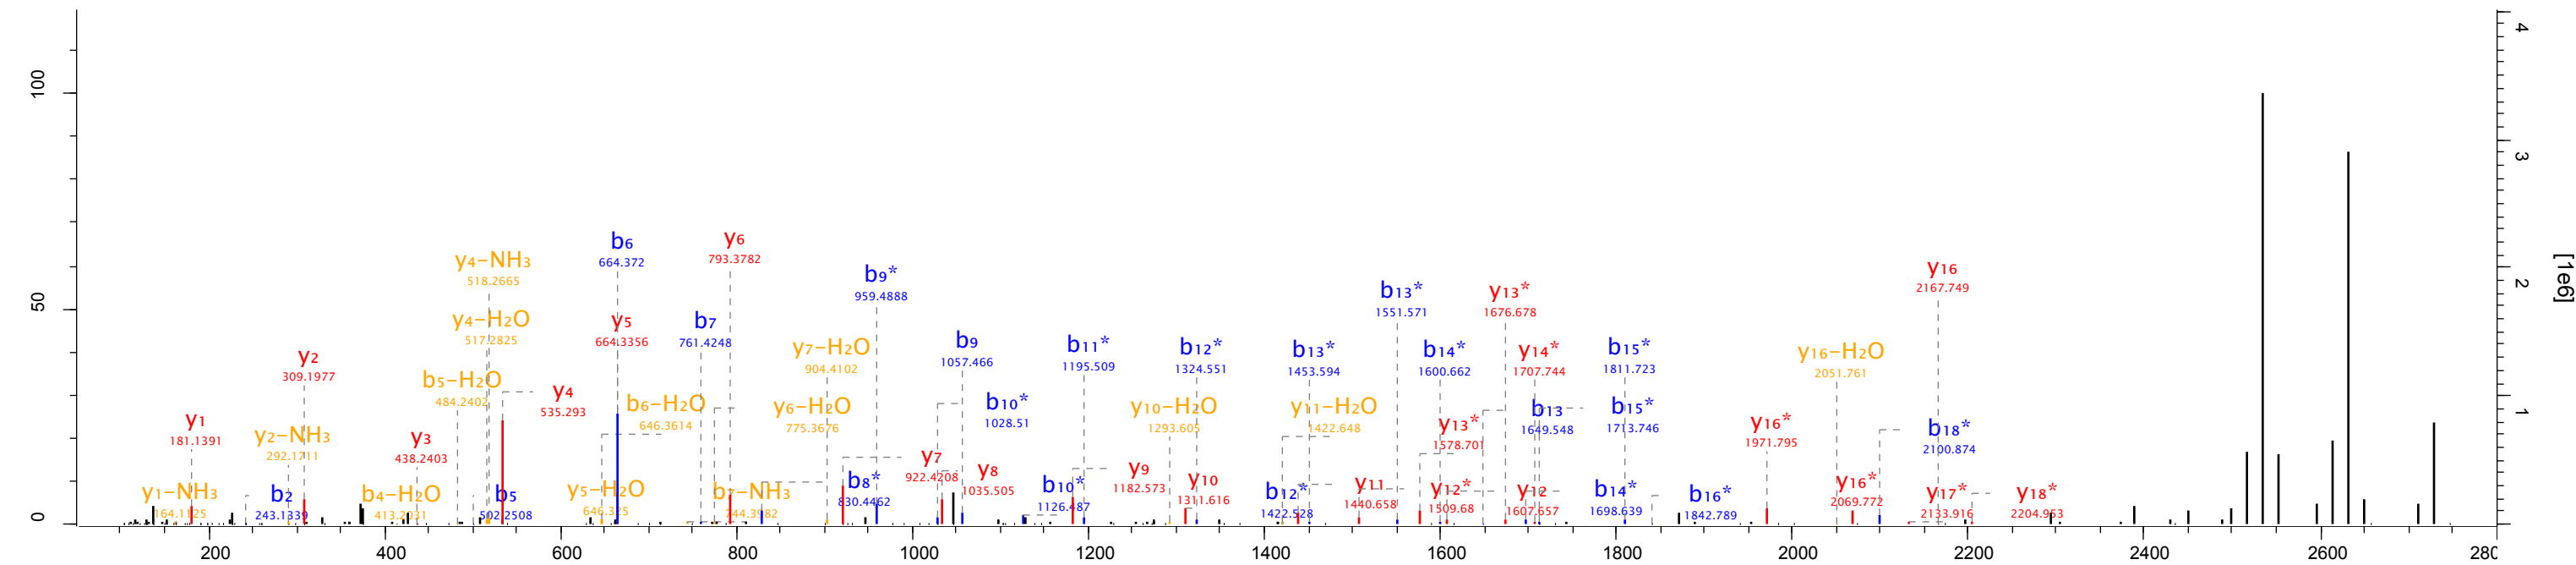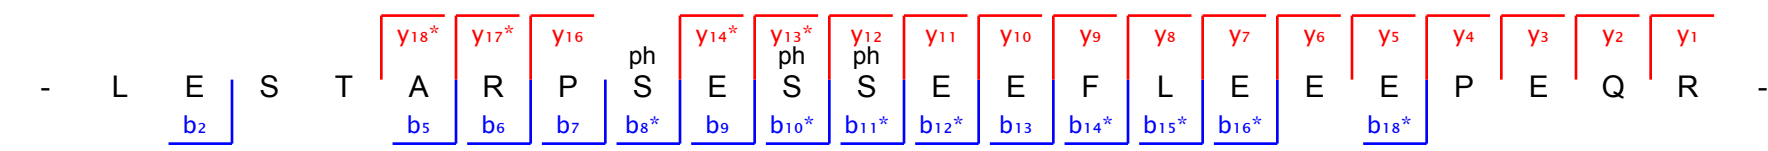

Raw file 20150812\_A375SR\_Phospho\_BR1\_02 Scan 16903 Method FTMS; HCD Score 66.57 m/z 1075.1

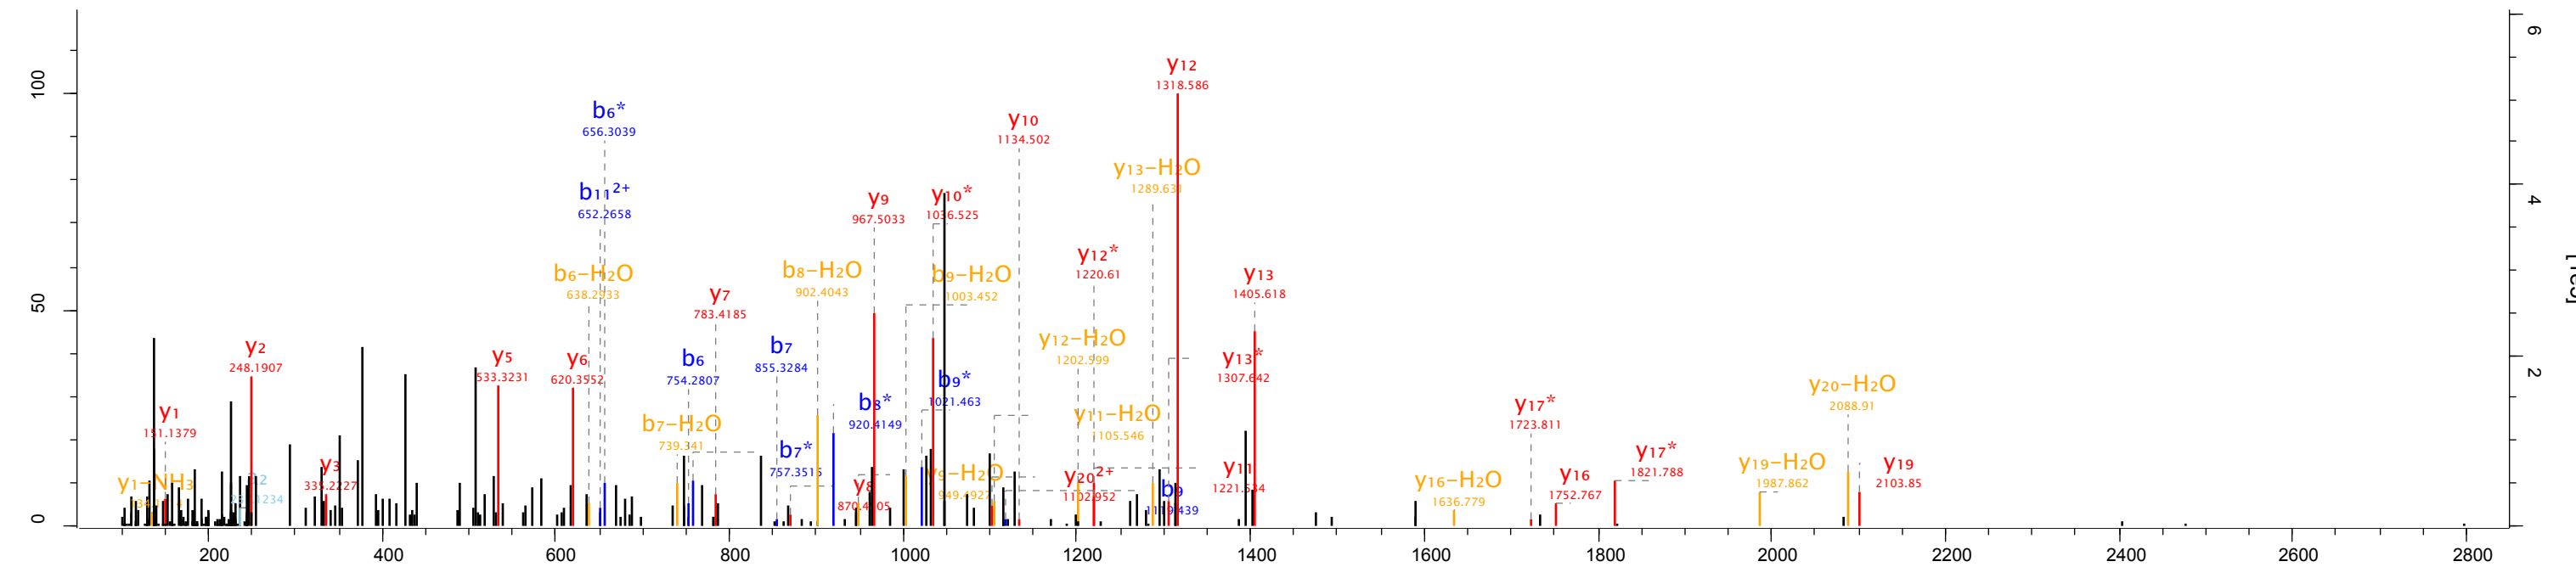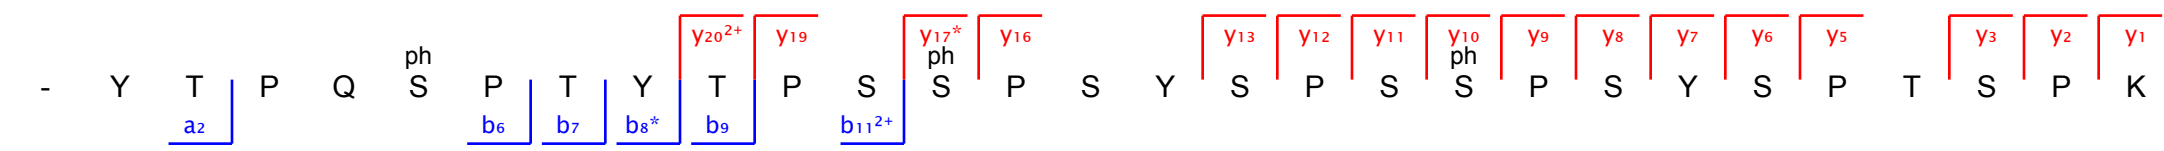

Raw file 20150812\_A375SR\_Phospho\_BR1\_02 Scan 17183 Method FTMS; HCD Score 63.82 m/z 1035.47 Gene names MDC1

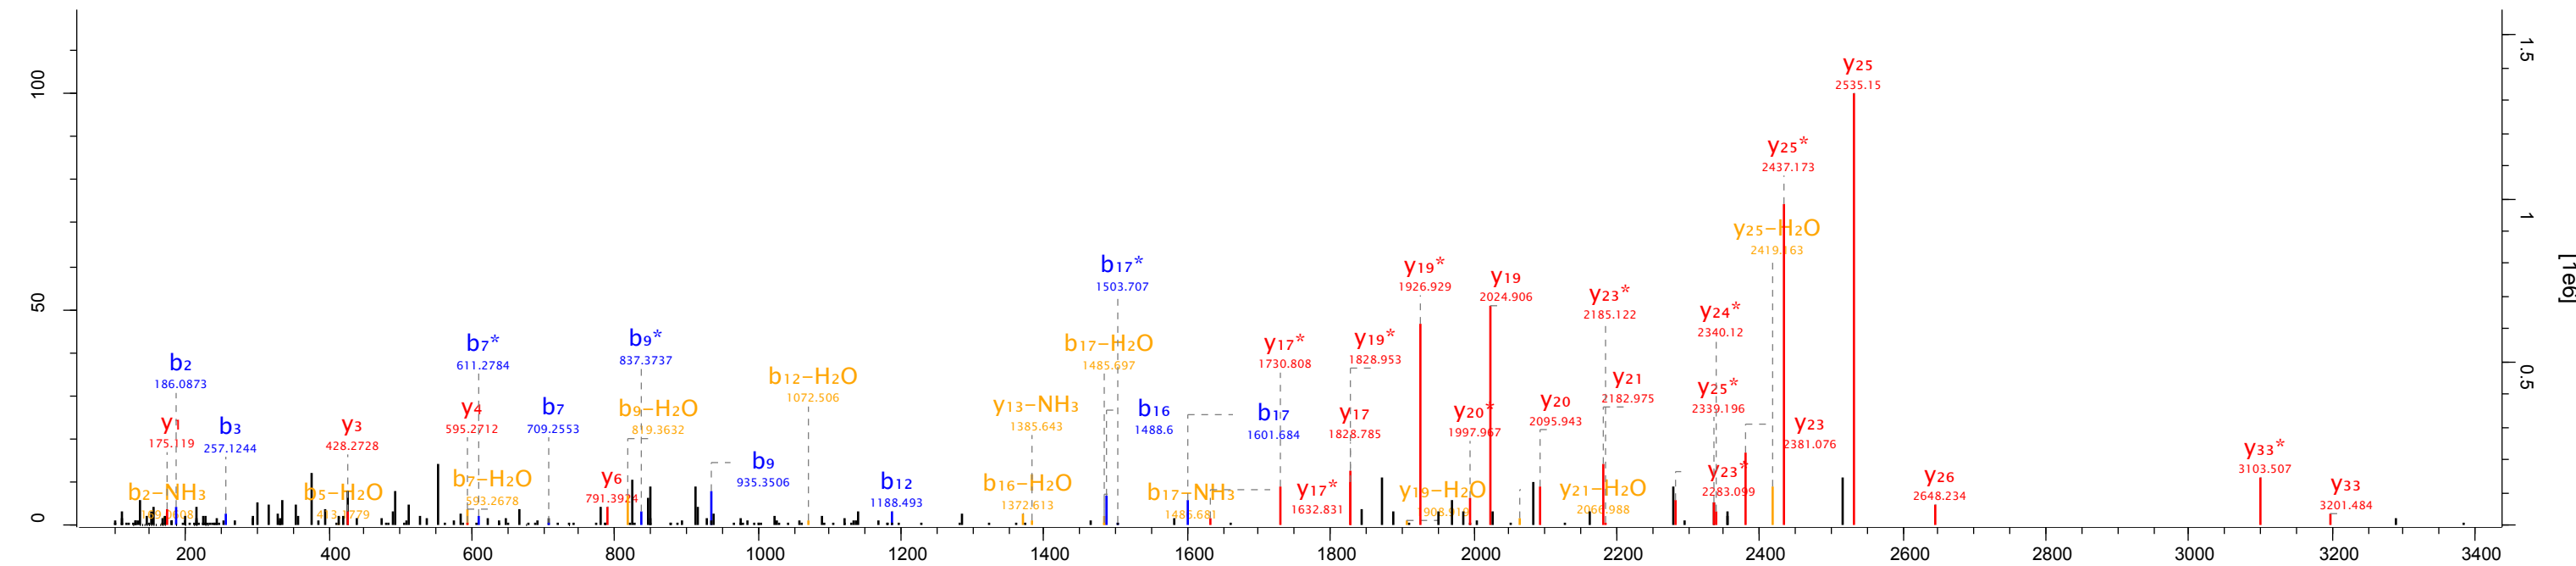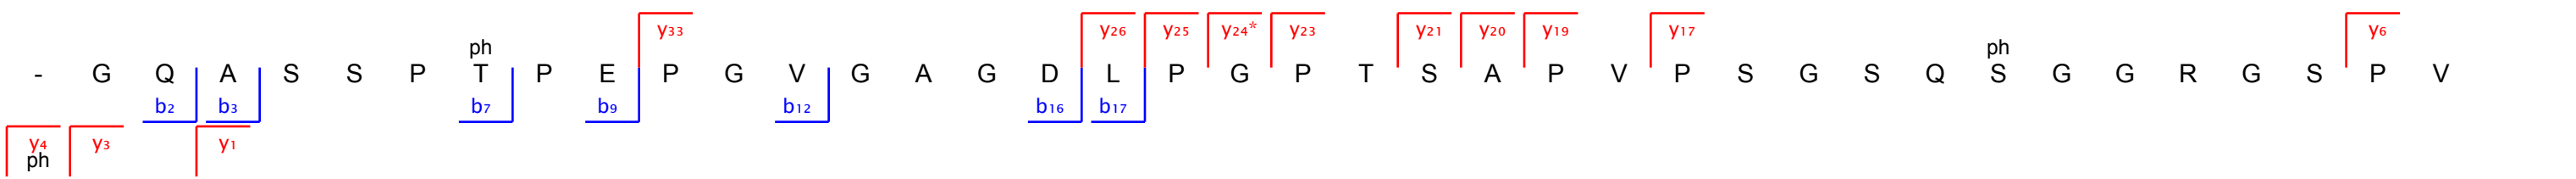

Raw file 20150812\_A375SR\_Phospho\_BR1\_02 Scan 18213 Method FTMS; HCD Score 68.68 m/z 849.35 Gene names PRKD3

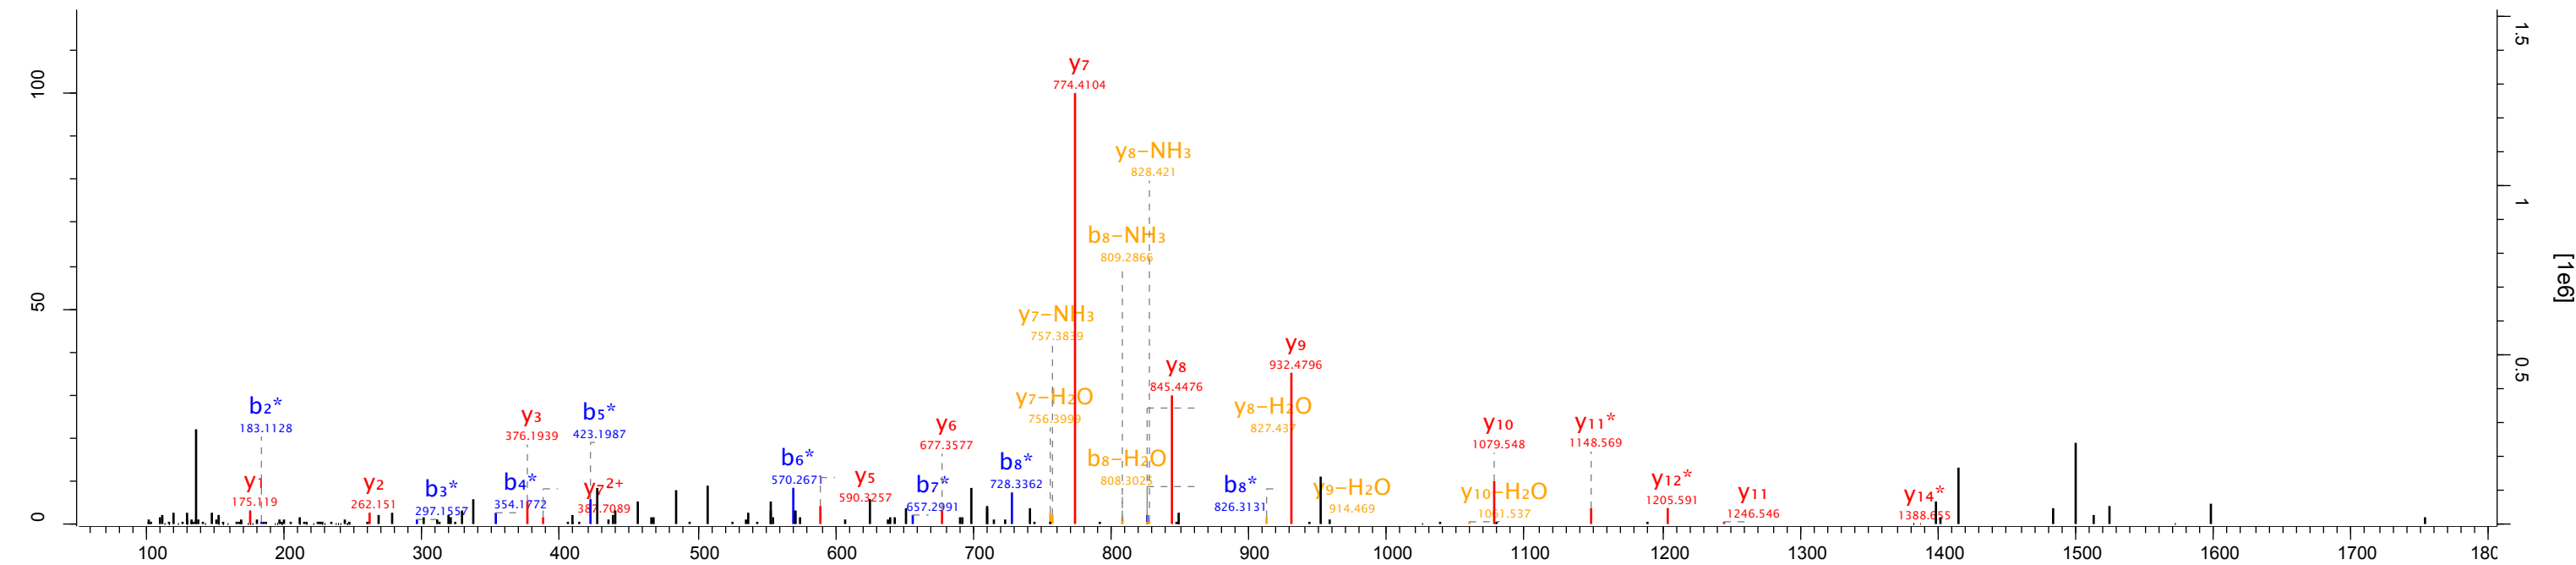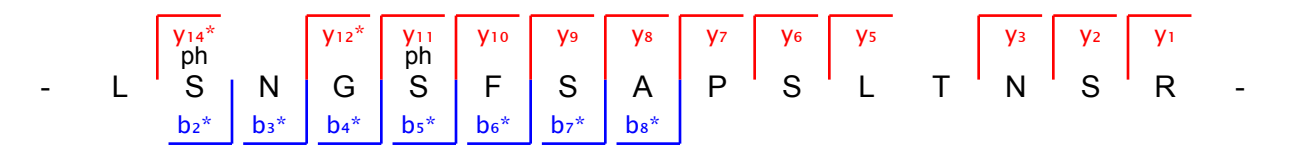

Raw file: 20150812\_A375SR\_Phospho\_BR1\_02  
 Scan: 18223 Method: FTMS; HCD Score: 175.95 m/z: 1429.11 Gene names: LARP1

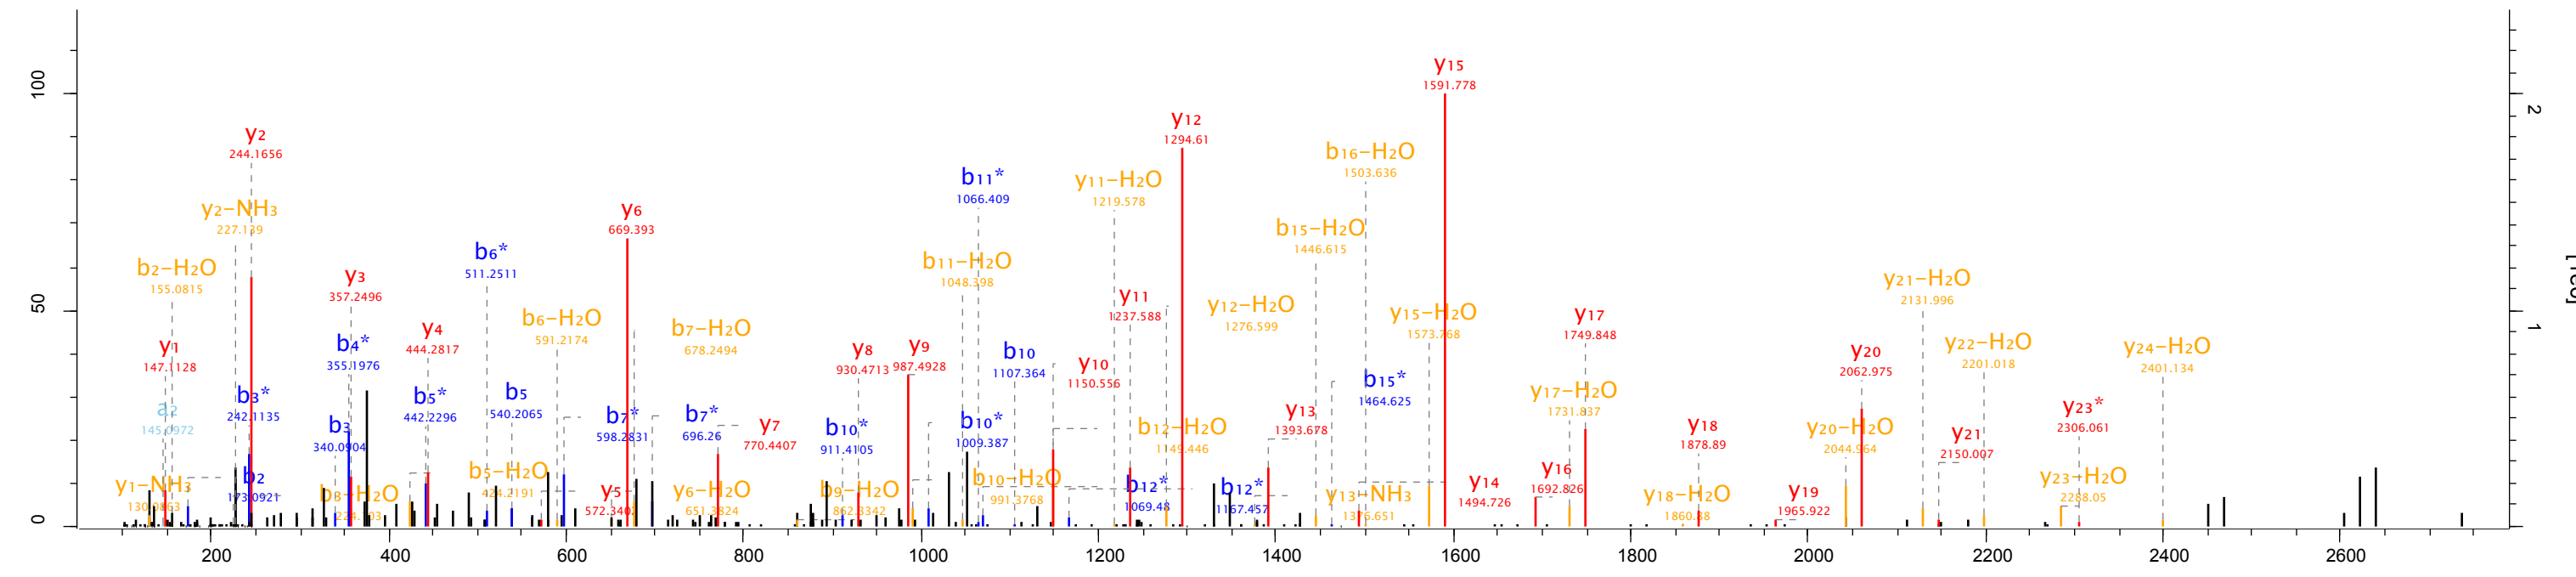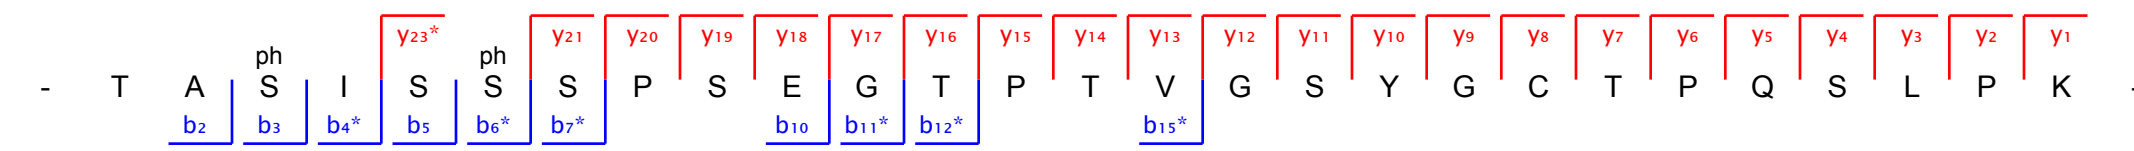



Raw file  
20150812\_A375SR\_Phospho\_BR1\_02

Scan 18583 Method FTMS; HCD Score 88.41 m/z 1129.43 Gene names ZNF217

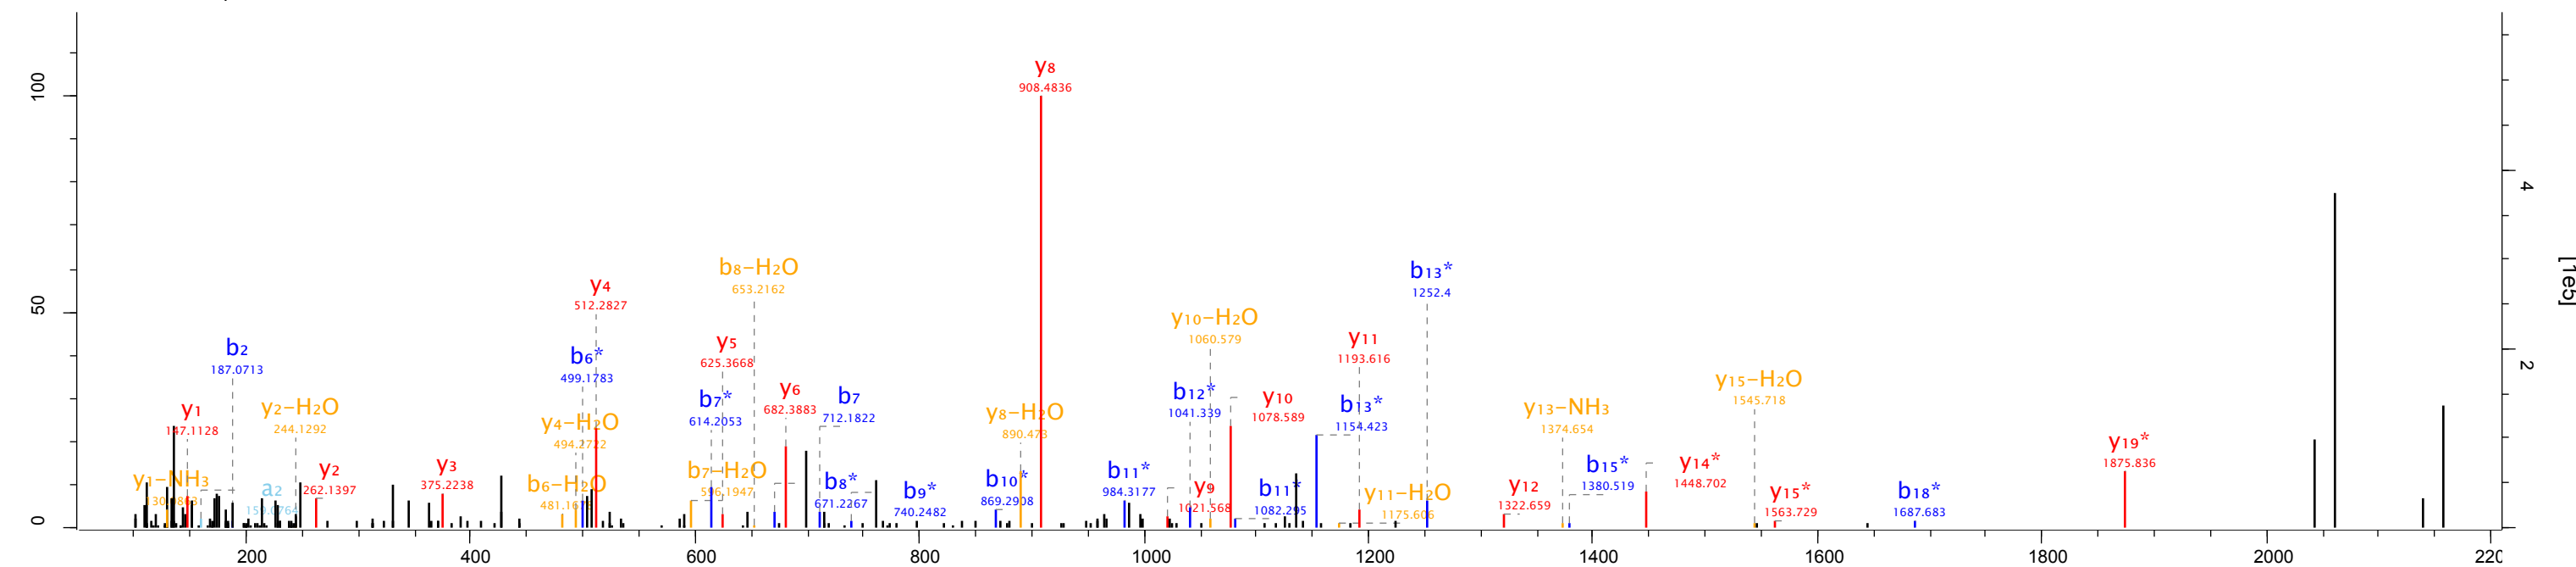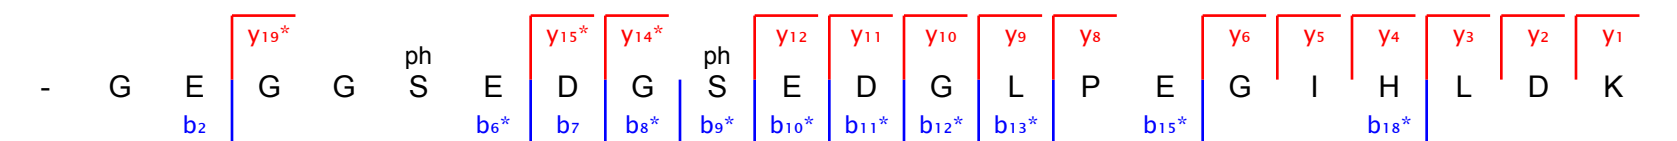

Raw file Scan Method Score m/z Gene names  
 20150812\_A375SR\_Phospho\_BR1\_02 18853 FTMS; HCD 237.33 841.39 MAP1B

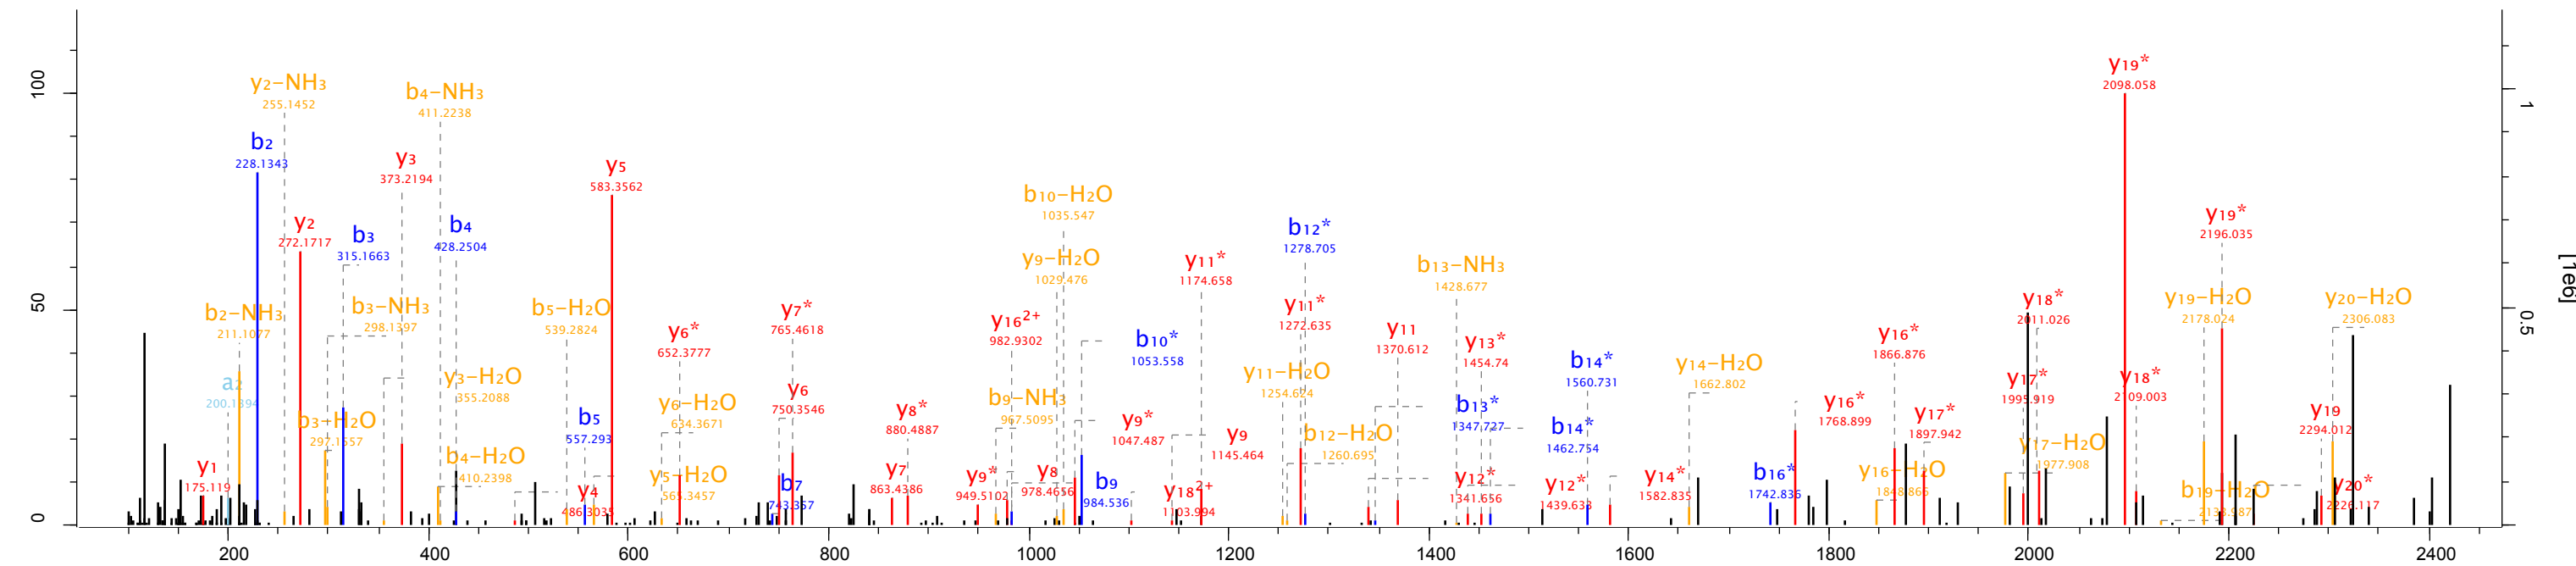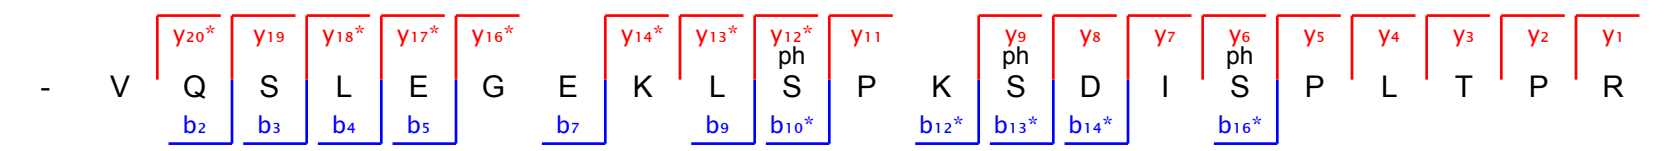

Raw file Scan Method Score m/z Gene names  
 20150812\_A375SR\_Phospho\_BR1\_02 19943 FTMS; HCD 51.03 908.69 APC

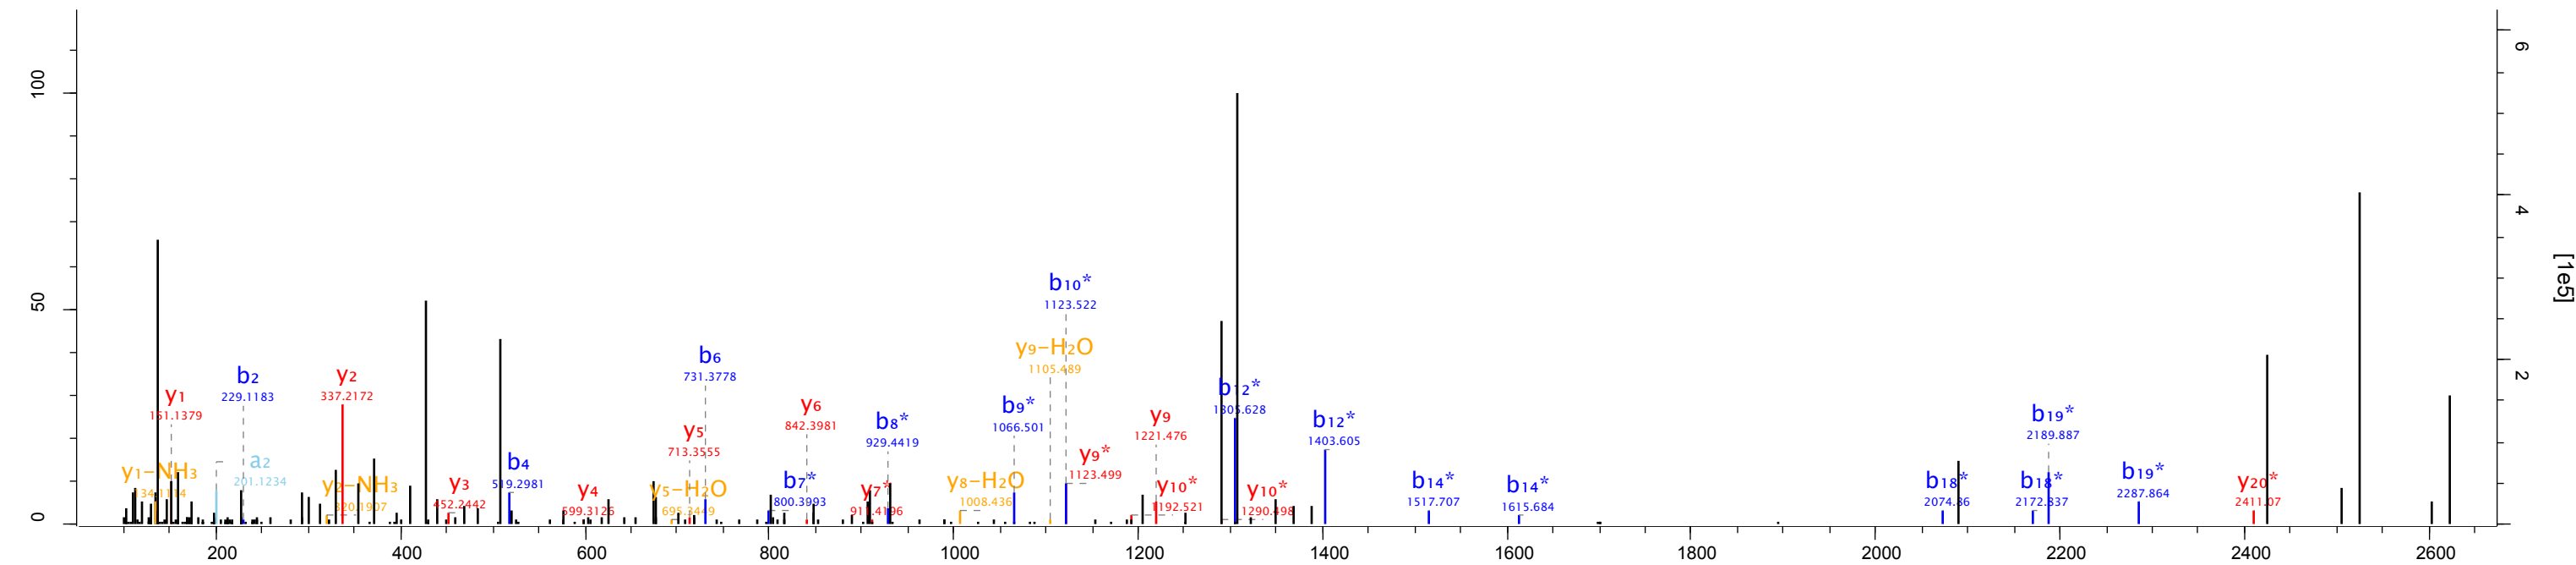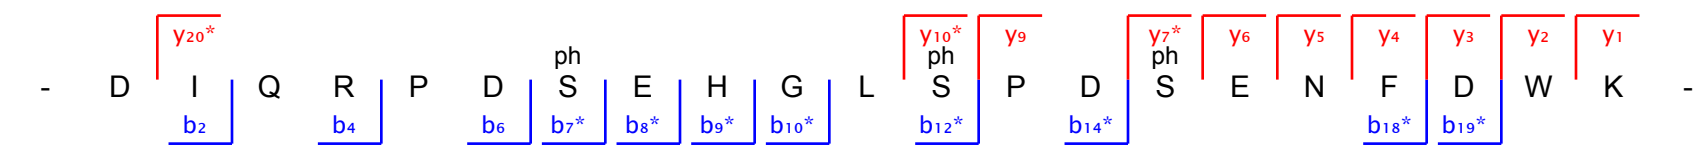

Raw file: 20150812\_A375SR\_Phospho\_BR1\_02  
 Scan: 20523 Method: FTMS; HCD Score: 225.34 m/z: 1092.95 Gene names: MAP1B

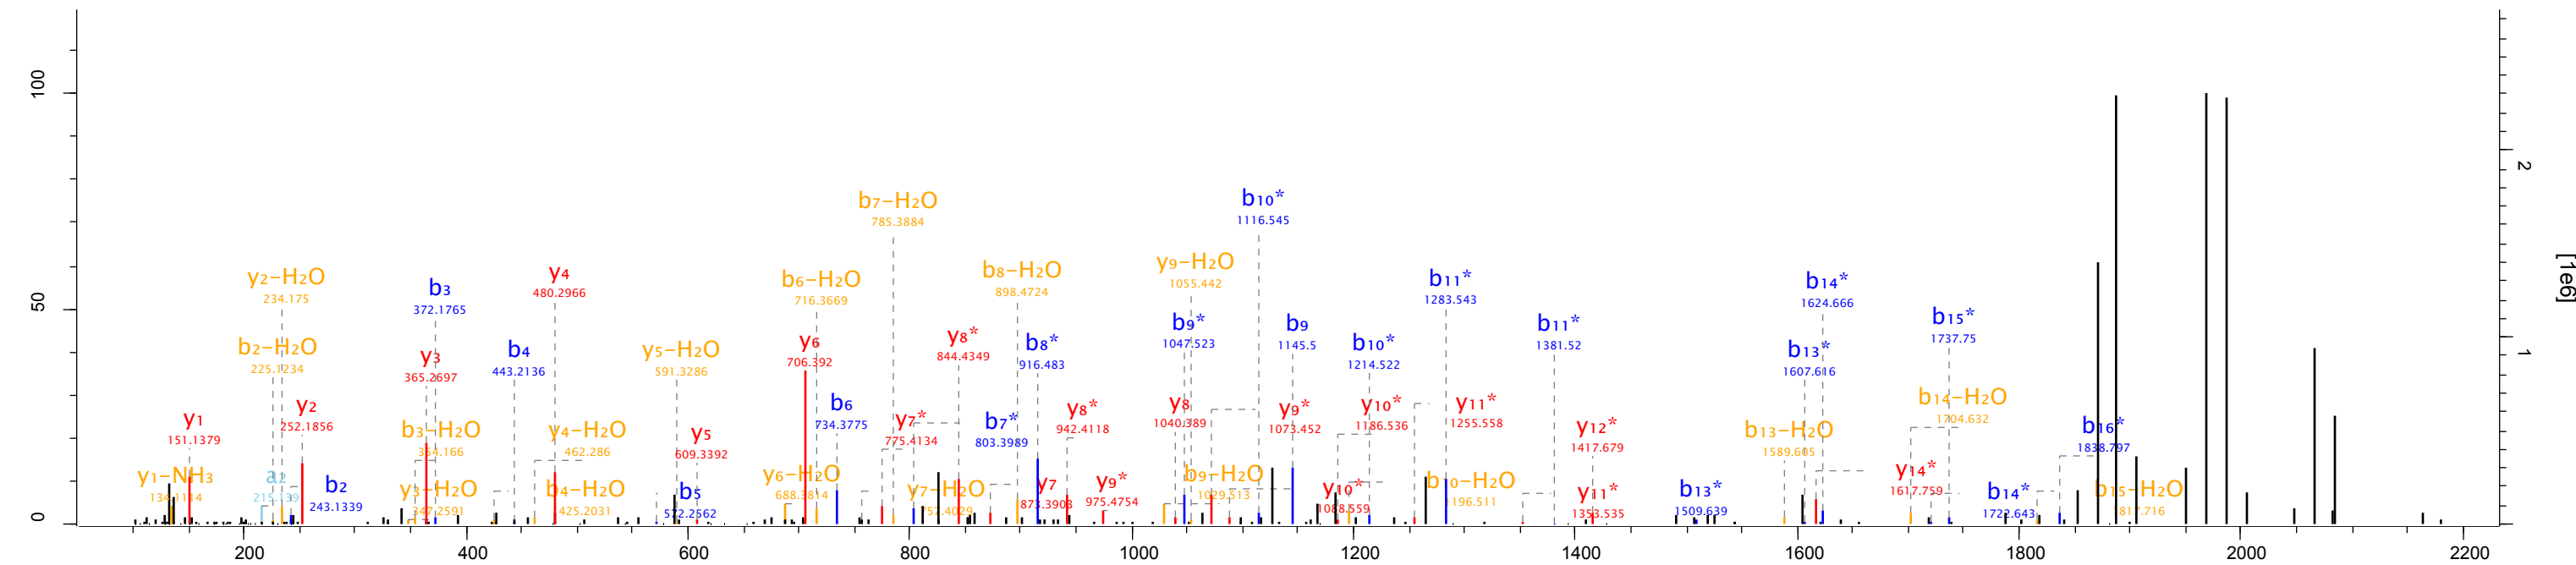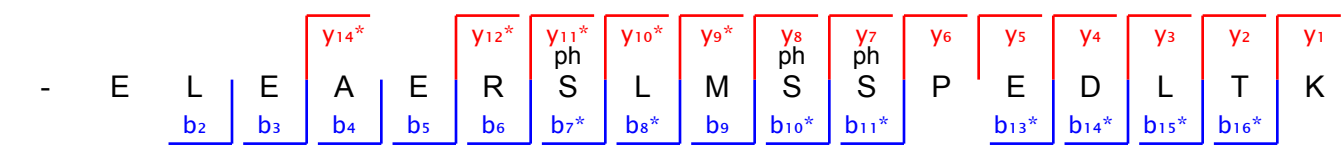

Raw file 20150812\_A375SR\_Phospho\_BR1\_02 Scan 20733 FTMS; HCD Score 117.15 m/z 1058.78 Gene names NCOA7

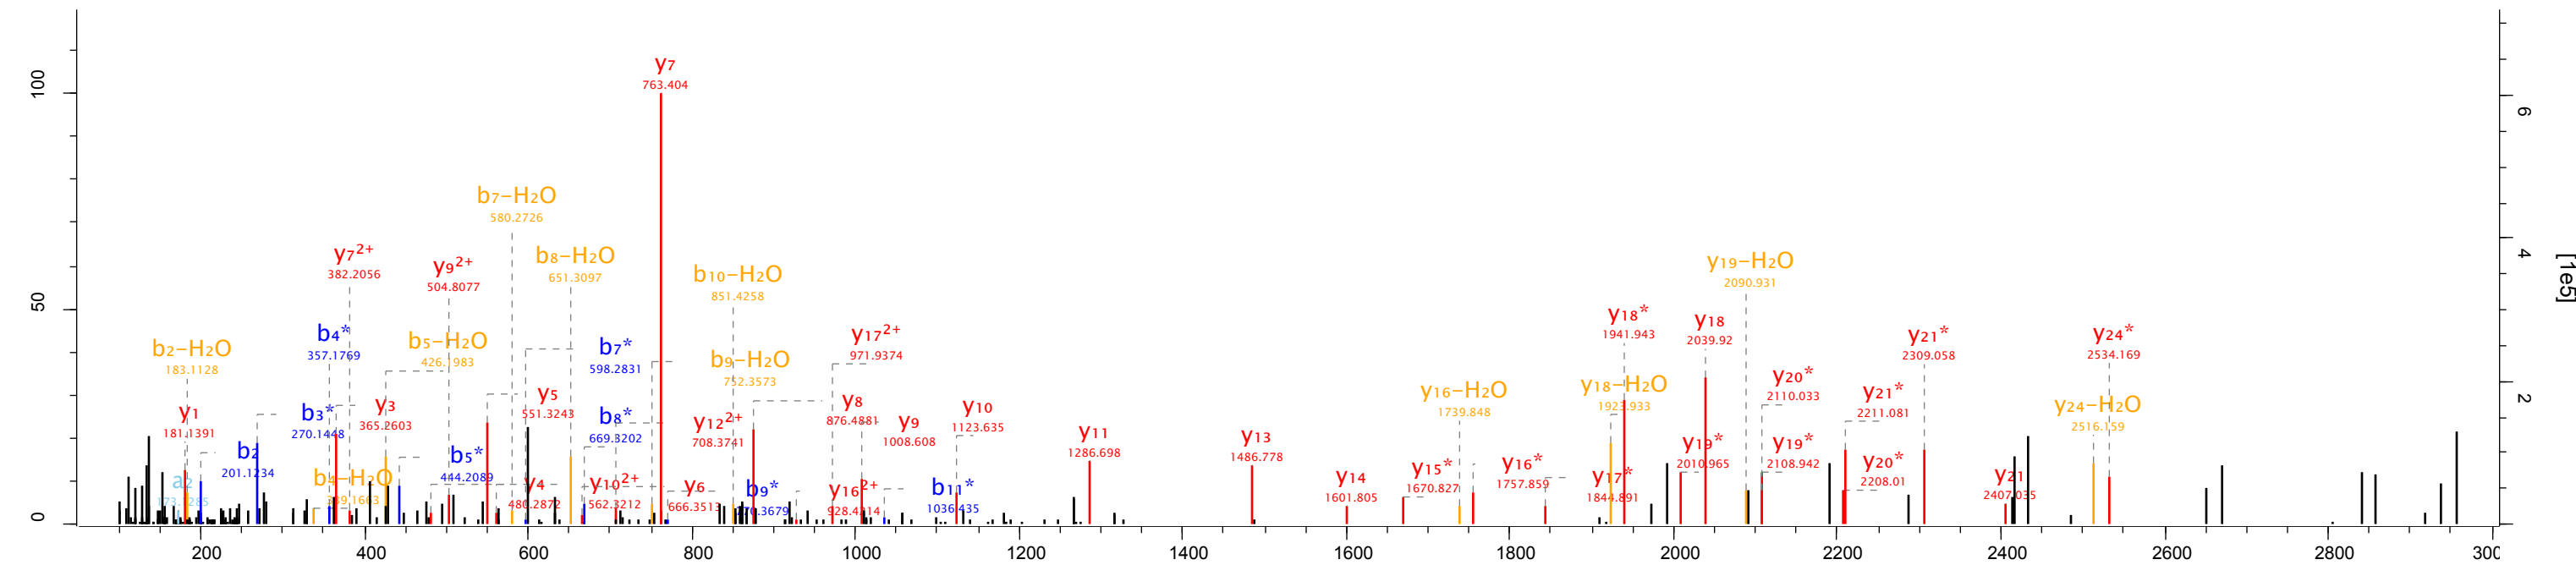

- L S ph S S S P G A T V S P S S S D A E Y D K L P D A D L A R -

b<sub>2</sub>
b<sub>3</sub><sup>\*</sup>
b<sub>4</sub><sup>\*</sup>
b<sub>5</sub><sup>\*</sup>
b<sub>7</sub><sup>\*</sup>
b<sub>8</sub><sup>\*</sup>
b<sub>9</sub><sup>\*</sup>
b<sub>11</sub><sup>\*</sup>
y<sub>24</sub><sup>\*</sup>
y<sub>21</sub>
y<sub>20</sub><sup>\*</sup>
y<sub>19</sub><sup>\*</sup>
y<sub>18</sub><sup>\*</sup>
y<sub>17</sub><sup>\*</sup>
y<sub>16</sub><sup>\*</sup>
y<sub>15</sub><sup>\*</sup>
y<sub>14</sub>
y<sub>13</sub>
y<sub>12</sub><sup>2+</sup>
y<sub>11</sub>
y<sub>10</sub>
y<sub>9</sub>
y<sub>8</sub>
y<sub>7</sub>
y<sub>6</sub>
y<sub>5</sub>
y<sub>4</sub>
y<sub>3</sub>
y<sub>1</sub>

Raw file 20150812\_A375SR\_Phospho\_BR1\_02 Scan 21003 Method FTMS; HCD Score 171.3 m/z 1150.46 Gene names ATRX

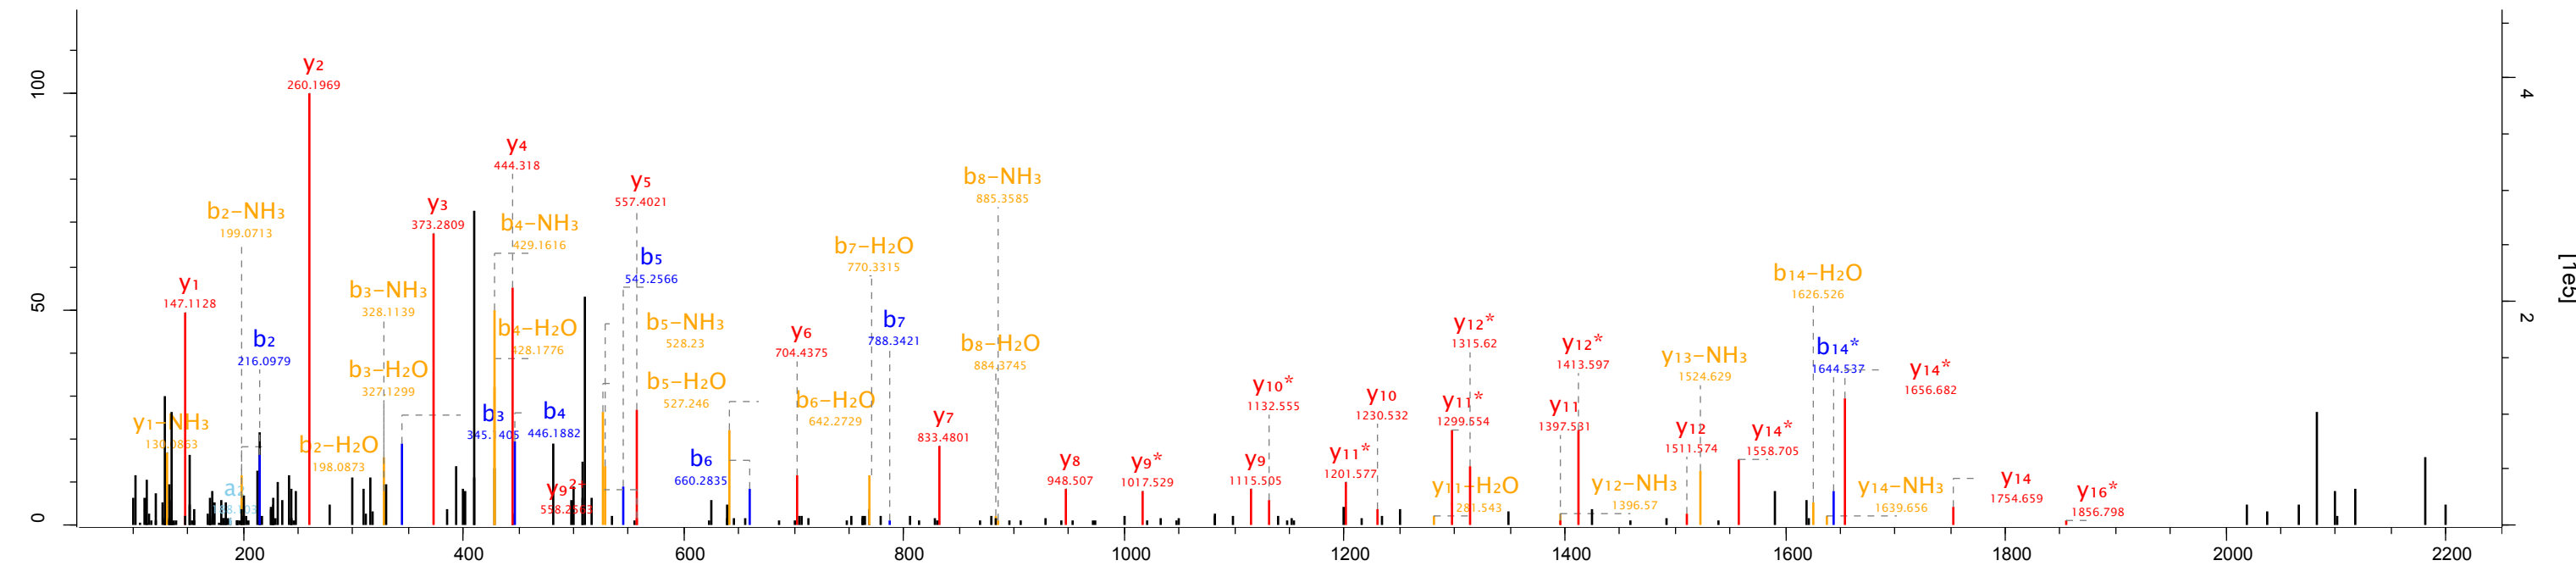

- Q S E T V D Q N S D S D E M L A I L K -

b<sub>2</sub>
b<sub>3</sub>
b<sub>4</sub>
b<sub>5</sub>
b<sub>6</sub>
b<sub>7</sub>
b<sub>14</sub>\*
y<sub>16</sub>\*
y<sub>14</sub>
y<sub>12</sub>
y<sub>11</sub> ph
y<sub>10</sub>
y<sub>9</sub> ph
y<sub>8</sub>
y<sub>7</sub>
y<sub>6</sub> OX
y<sub>5</sub>
y<sub>4</sub>
y<sub>3</sub>
y<sub>2</sub>
y<sub>1</sub>

Raw file 20150812\_A375SR\_Phospho\_BR1\_02 Scan 21053 Method FTMS; HCD Score 137.73 m/z 939.38 Gene names C9orf16

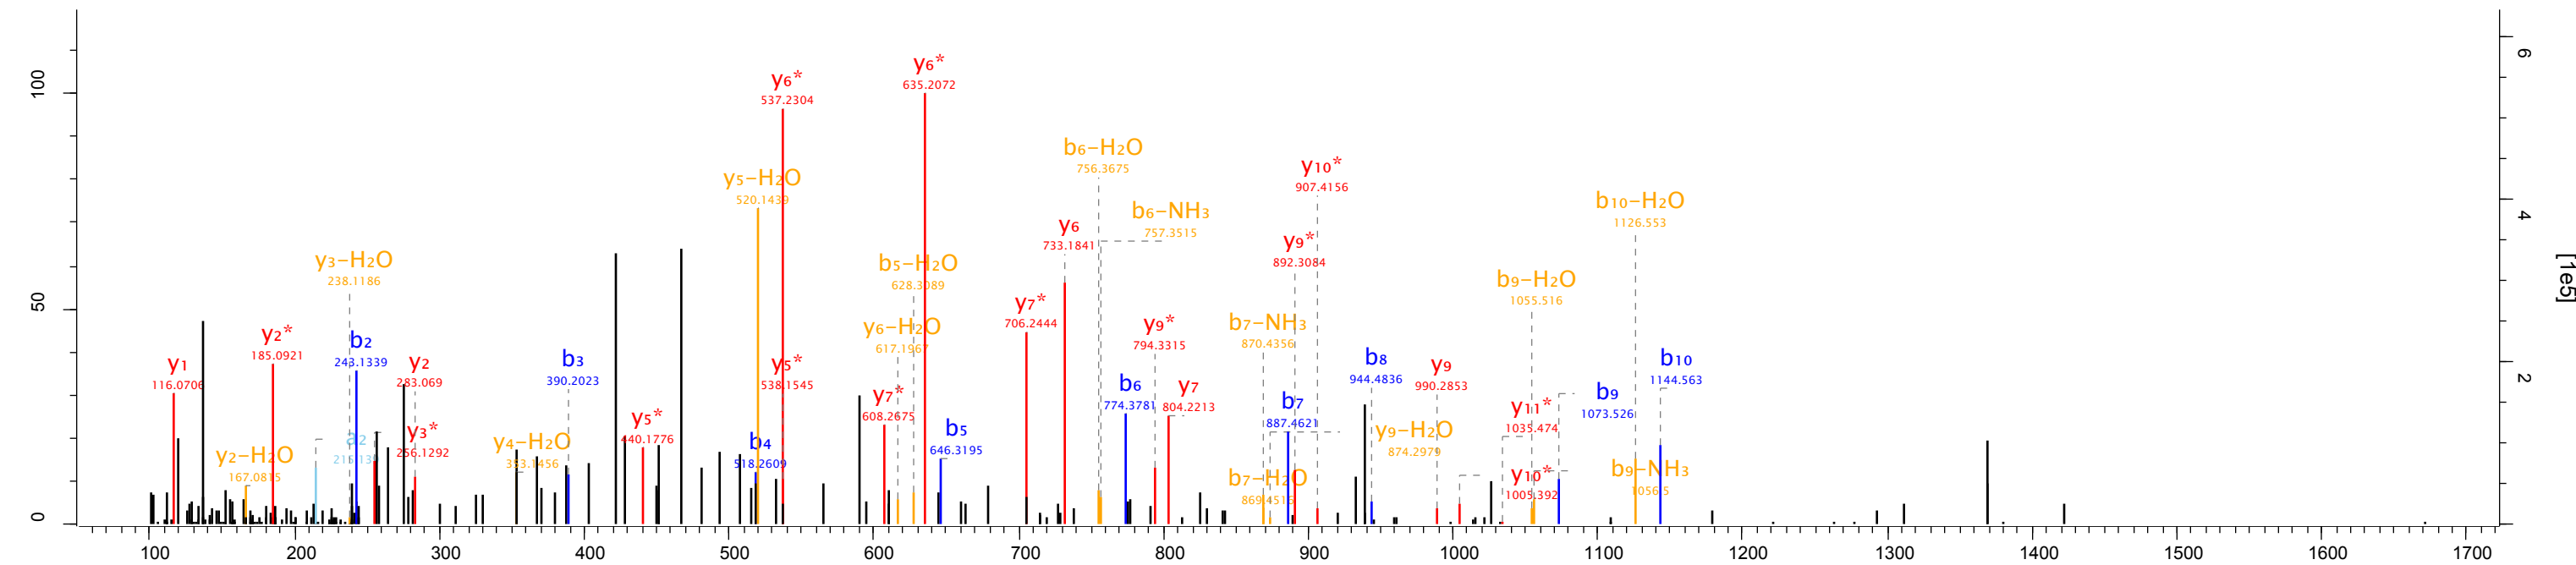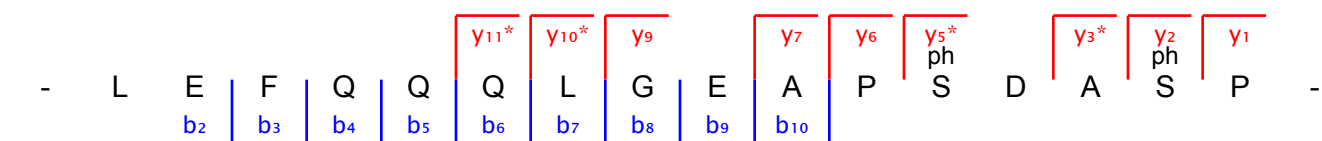

Raw file: 20150812\_A375SR\_Phospho\_BR1\_02  
 Scan: 21463 Method: FTMS; HCD Score: 82.73 m/z: 1256.49 Gene names: PML

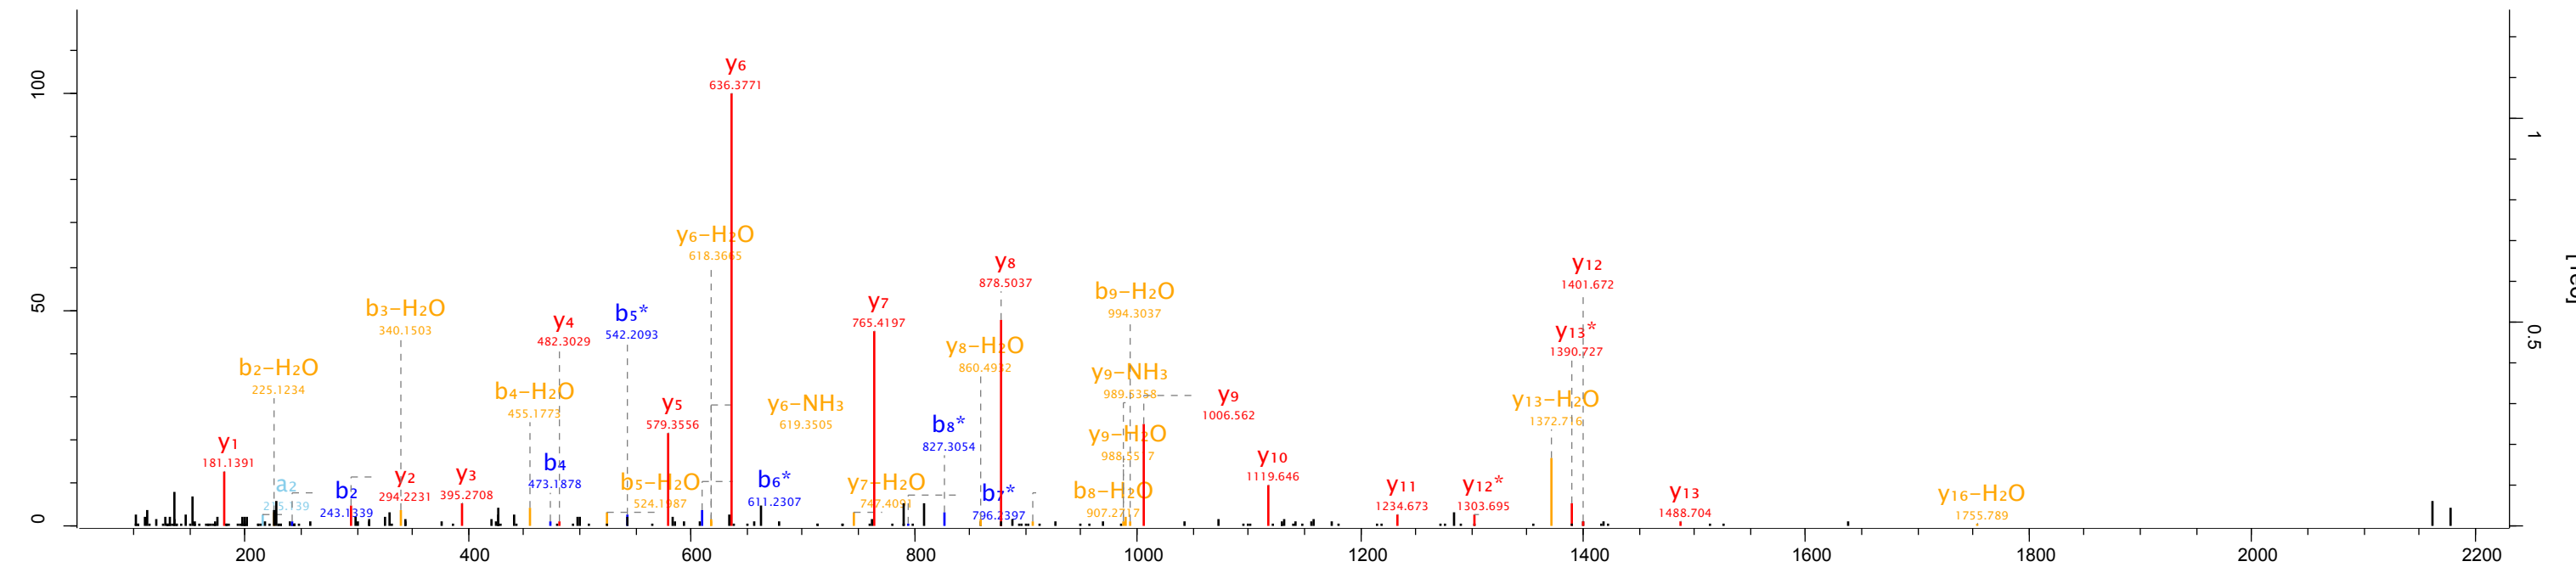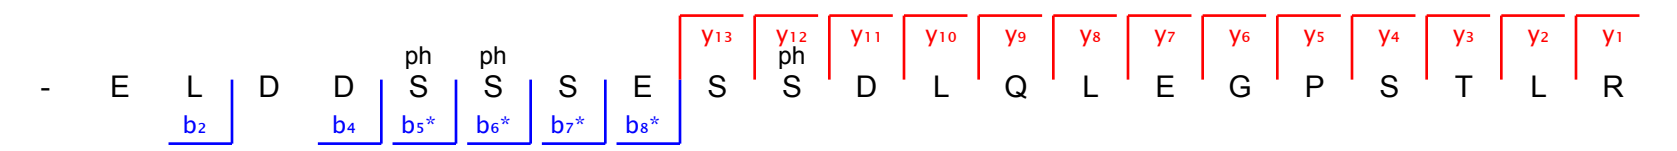



Raw file: 20150812\_A375SR\_Phospho\_BR1\_02  
 Scan: 21613 Method: FTMS; HCD Score: 91.64 m/z: 858.34 Gene names: CDC42BPA

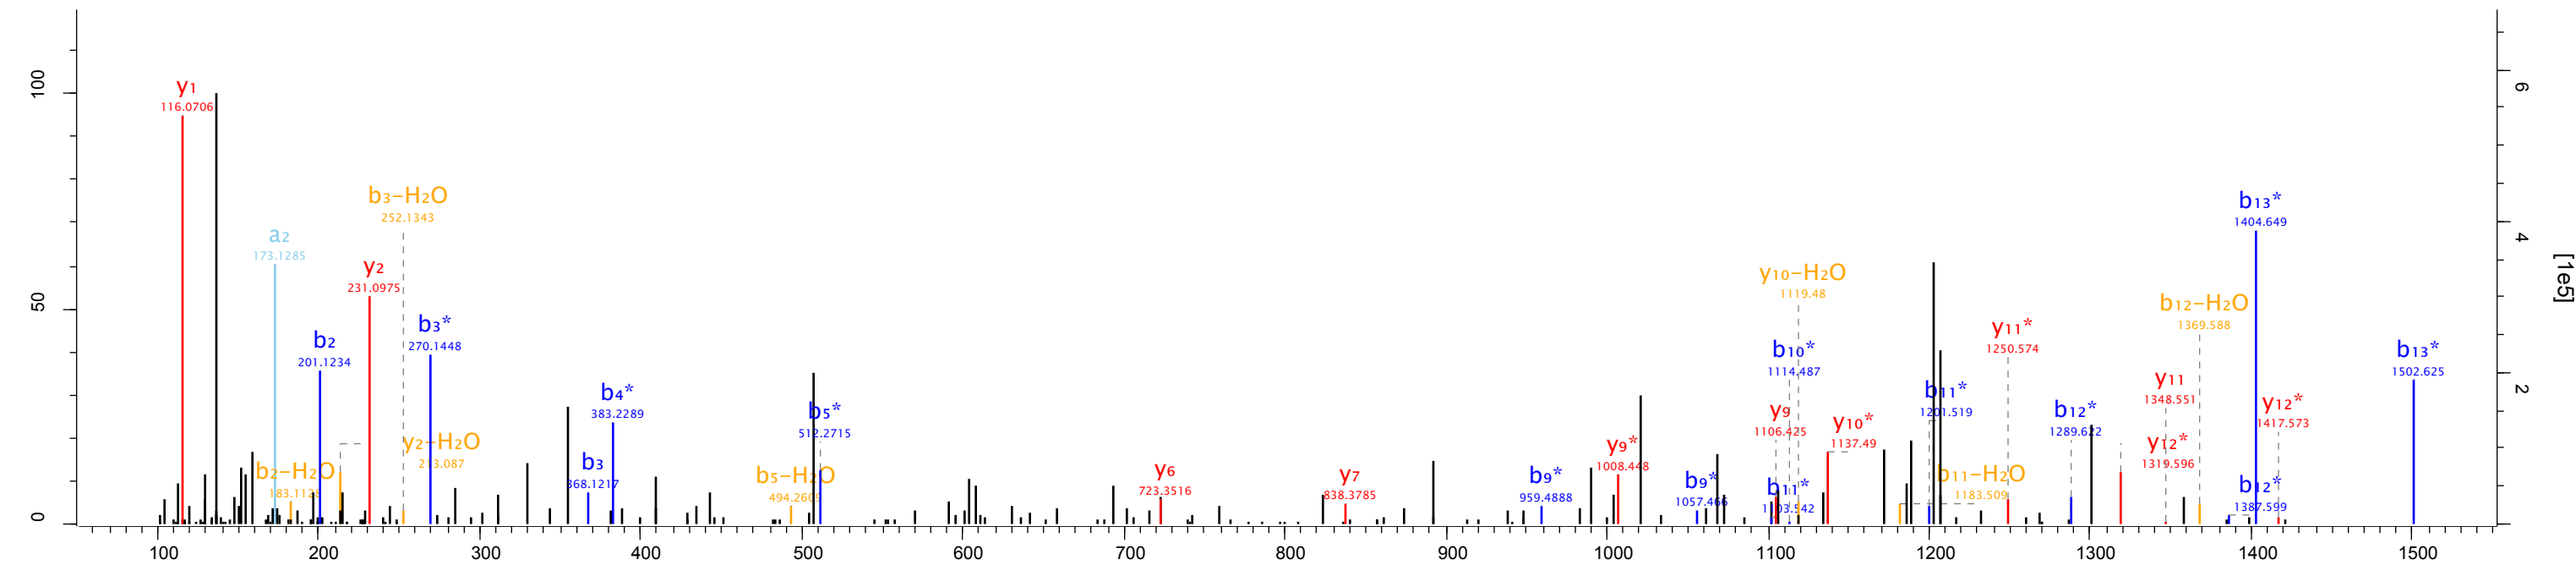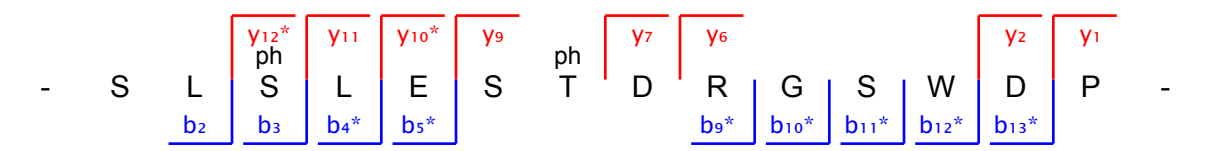

Raw file 20150812\_A375SR\_Phospho\_BR1\_02 Scan 21793 Method FTMS; HCD Score 43.38 m/z 891.38 Gene names FOXK1

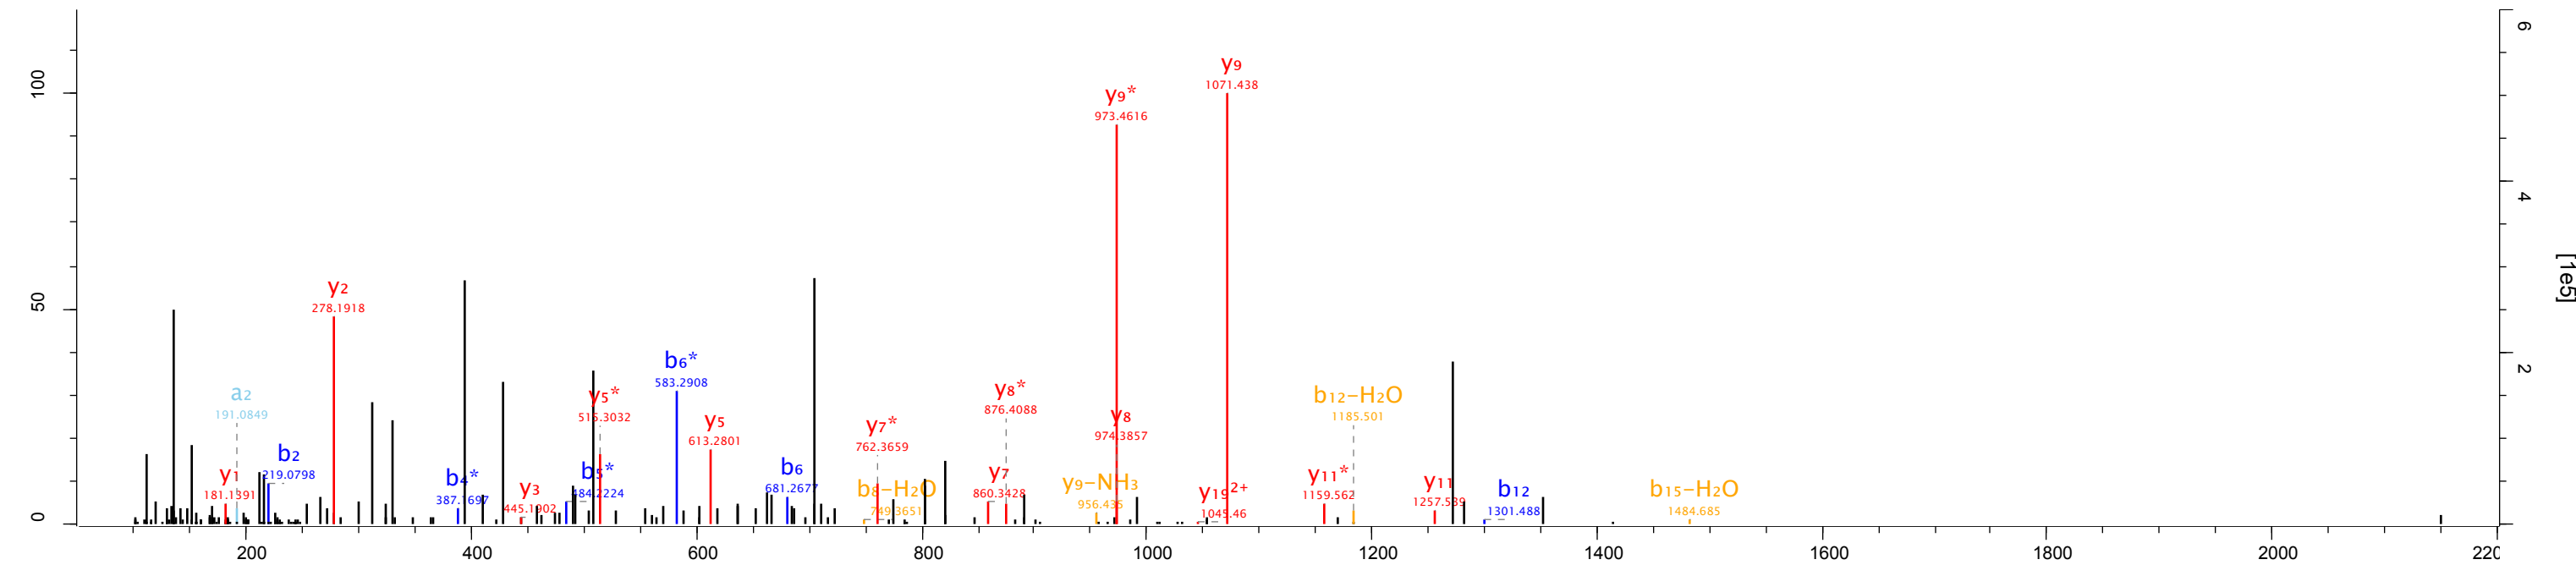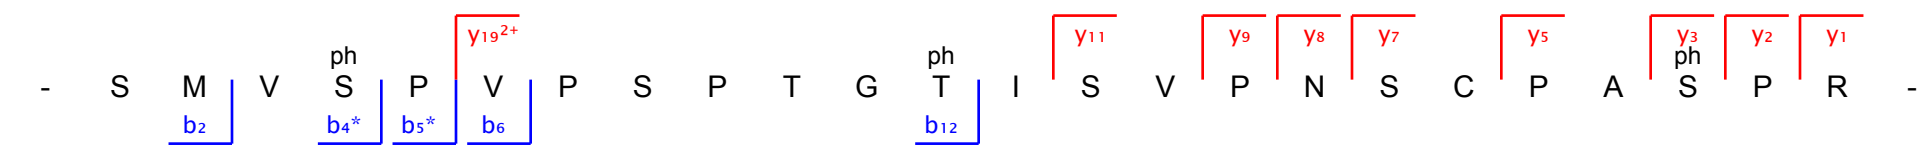

Raw file: 20150812\_A375SR\_Phospho\_BR1\_02  
 Scan: 22153 Method: FTMS; HCD Score: 115.74 m/z: 904.88 Gene names: AKAP11

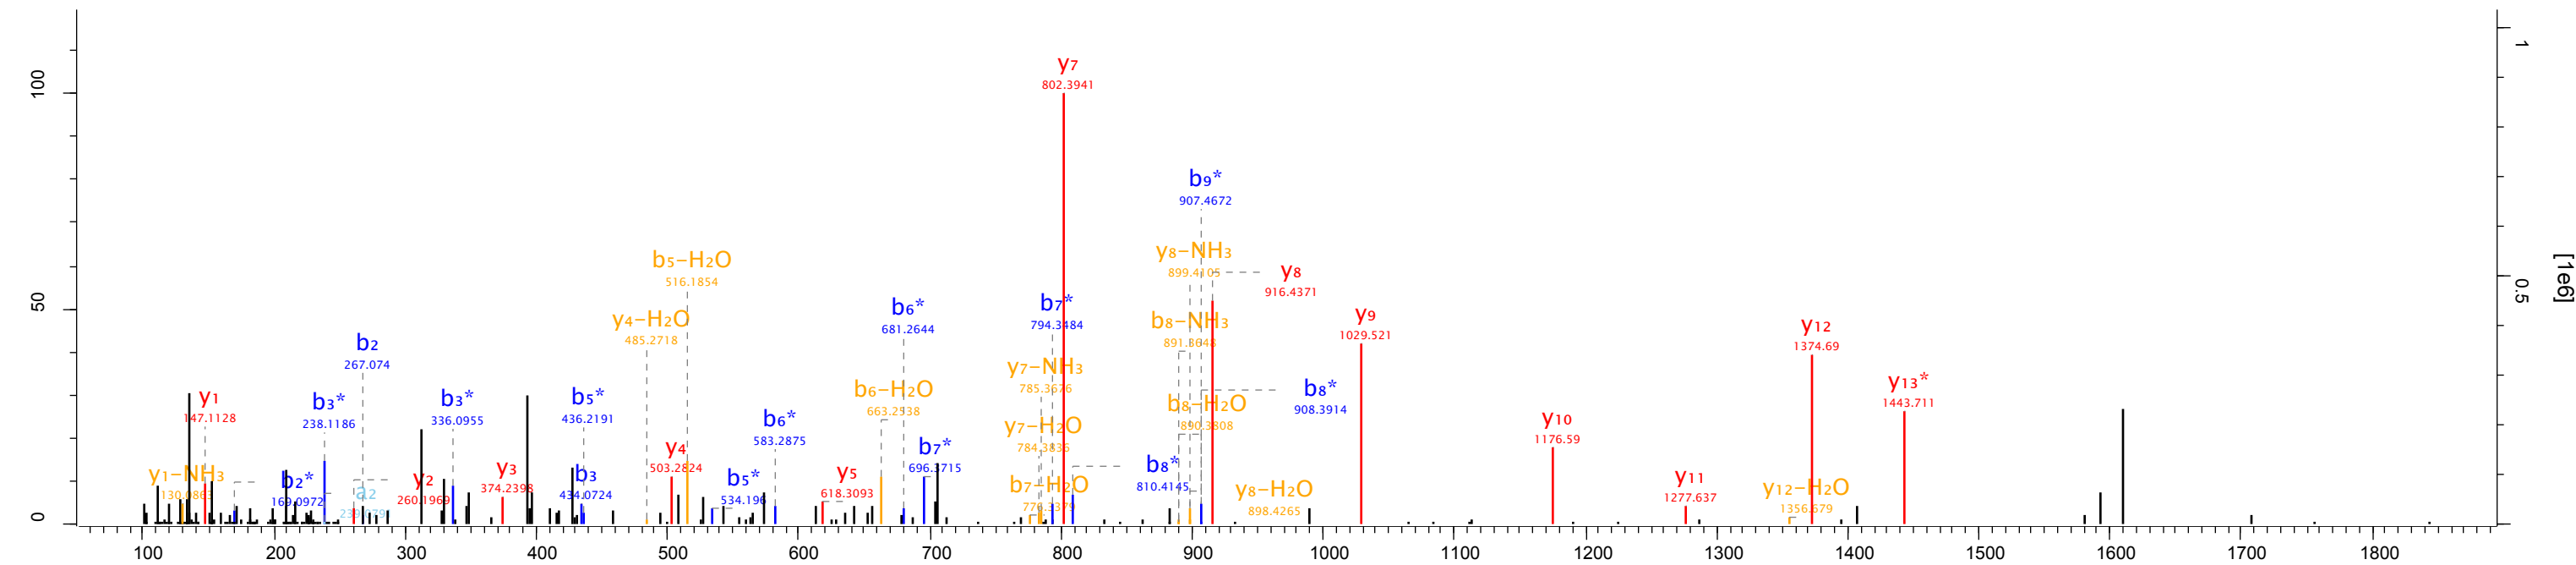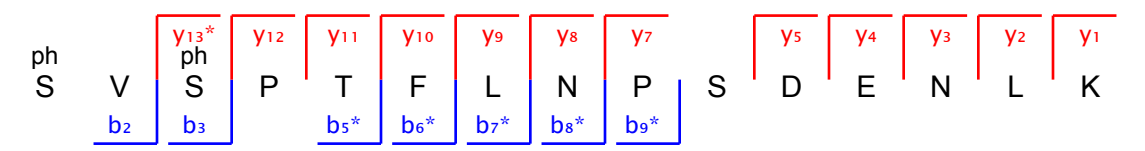

Raw file  
 20150812\_A375SR\_Phospho\_BR1\_02  
 Scan 25423 Method FTMS; HCD Score 98.64 m/z 943.39 Gene names PML

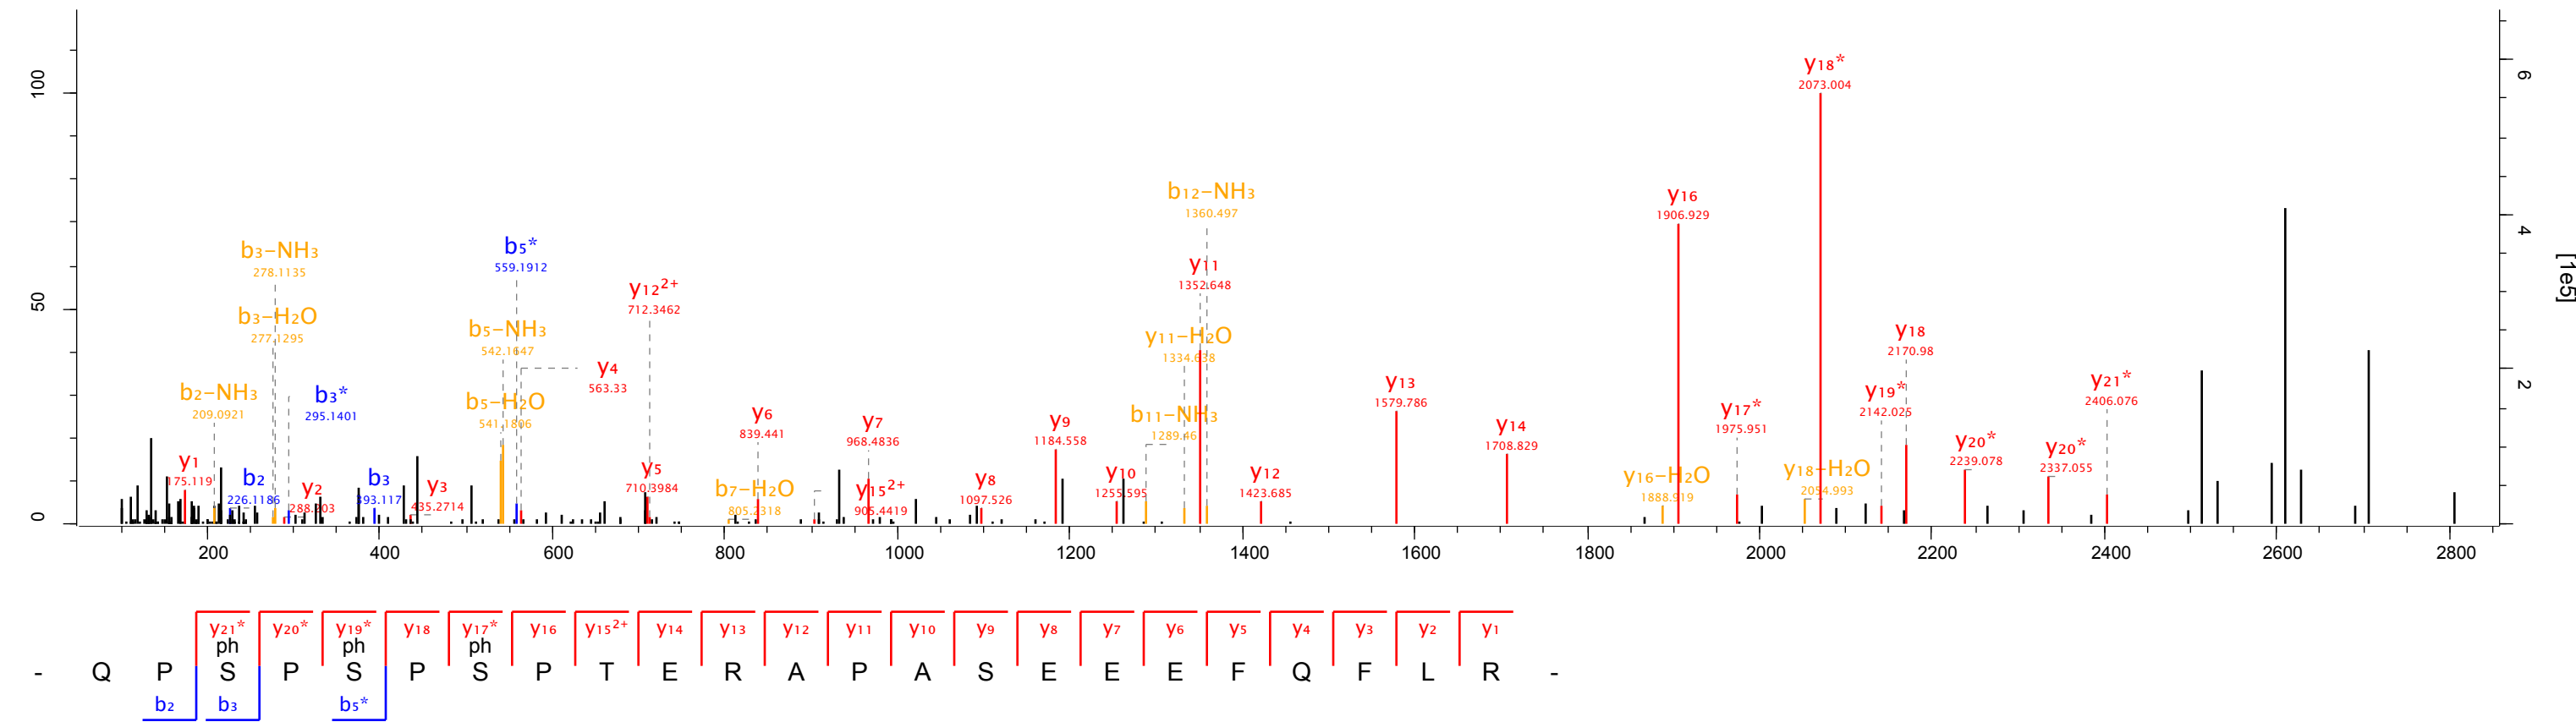

Raw file: 20150812\_A375SR\_Phospho\_BR1\_02  
 Scan: 2543 Method: FTMS; HCD Score: 169.06 m/z: 854.33 Gene names: CBX3

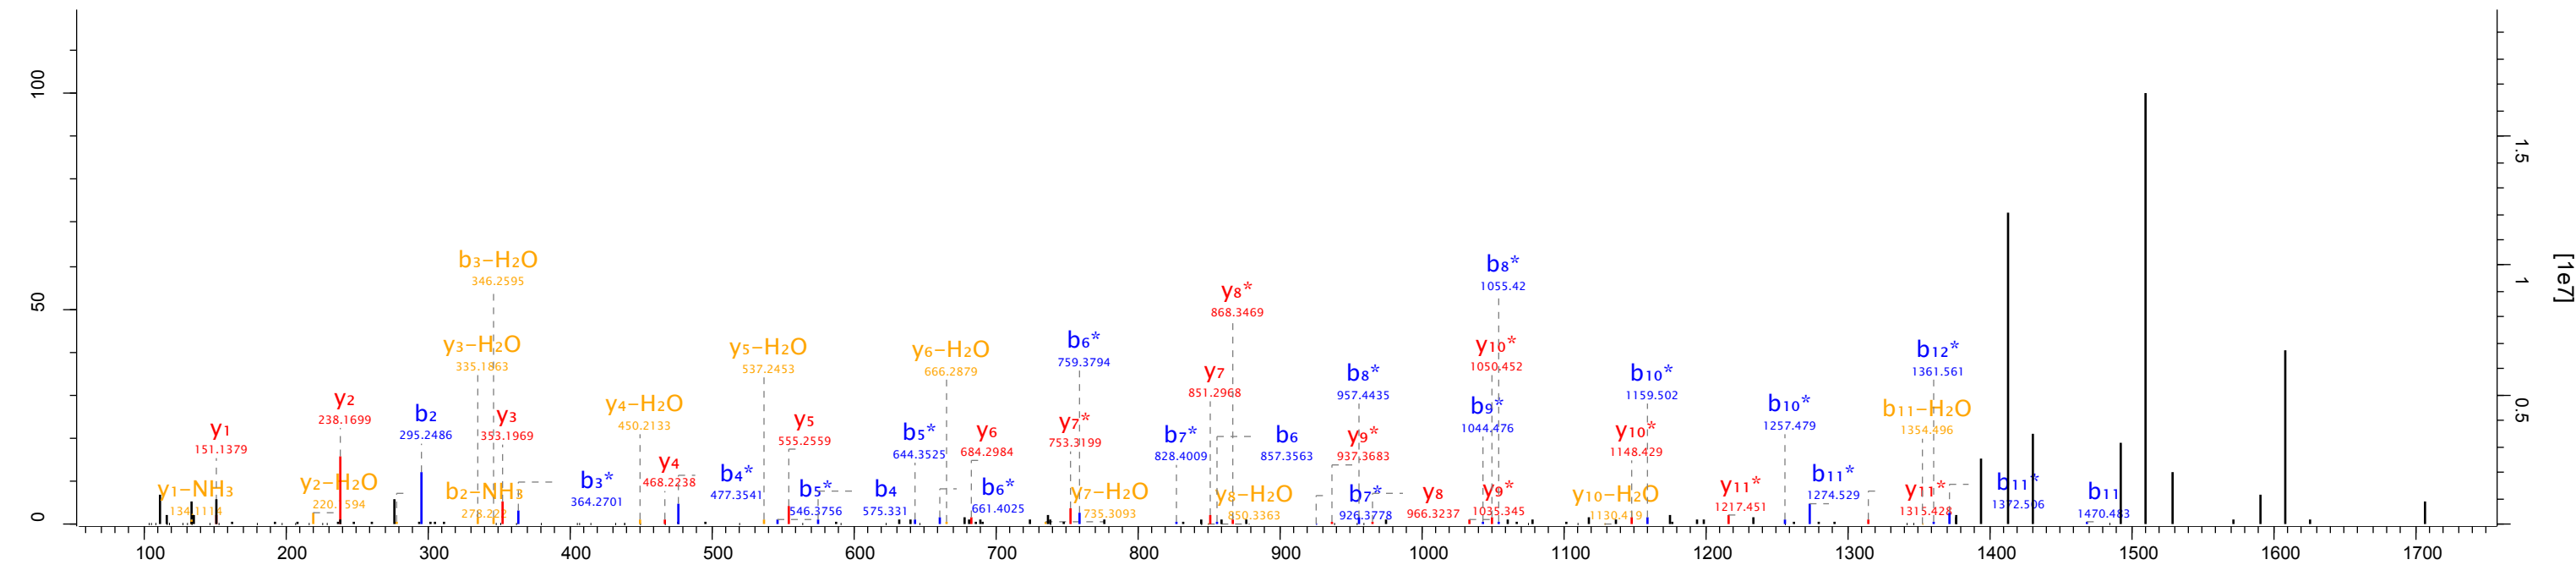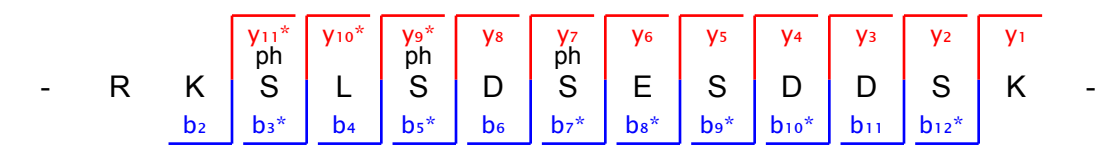

Raw file 20150812\_A375SR\_Phospho\_BR1\_02 Scan 25483 Method FTMS; HCD Score 110.67 m/z 1460 Gene names EIF3C;EIF3CL

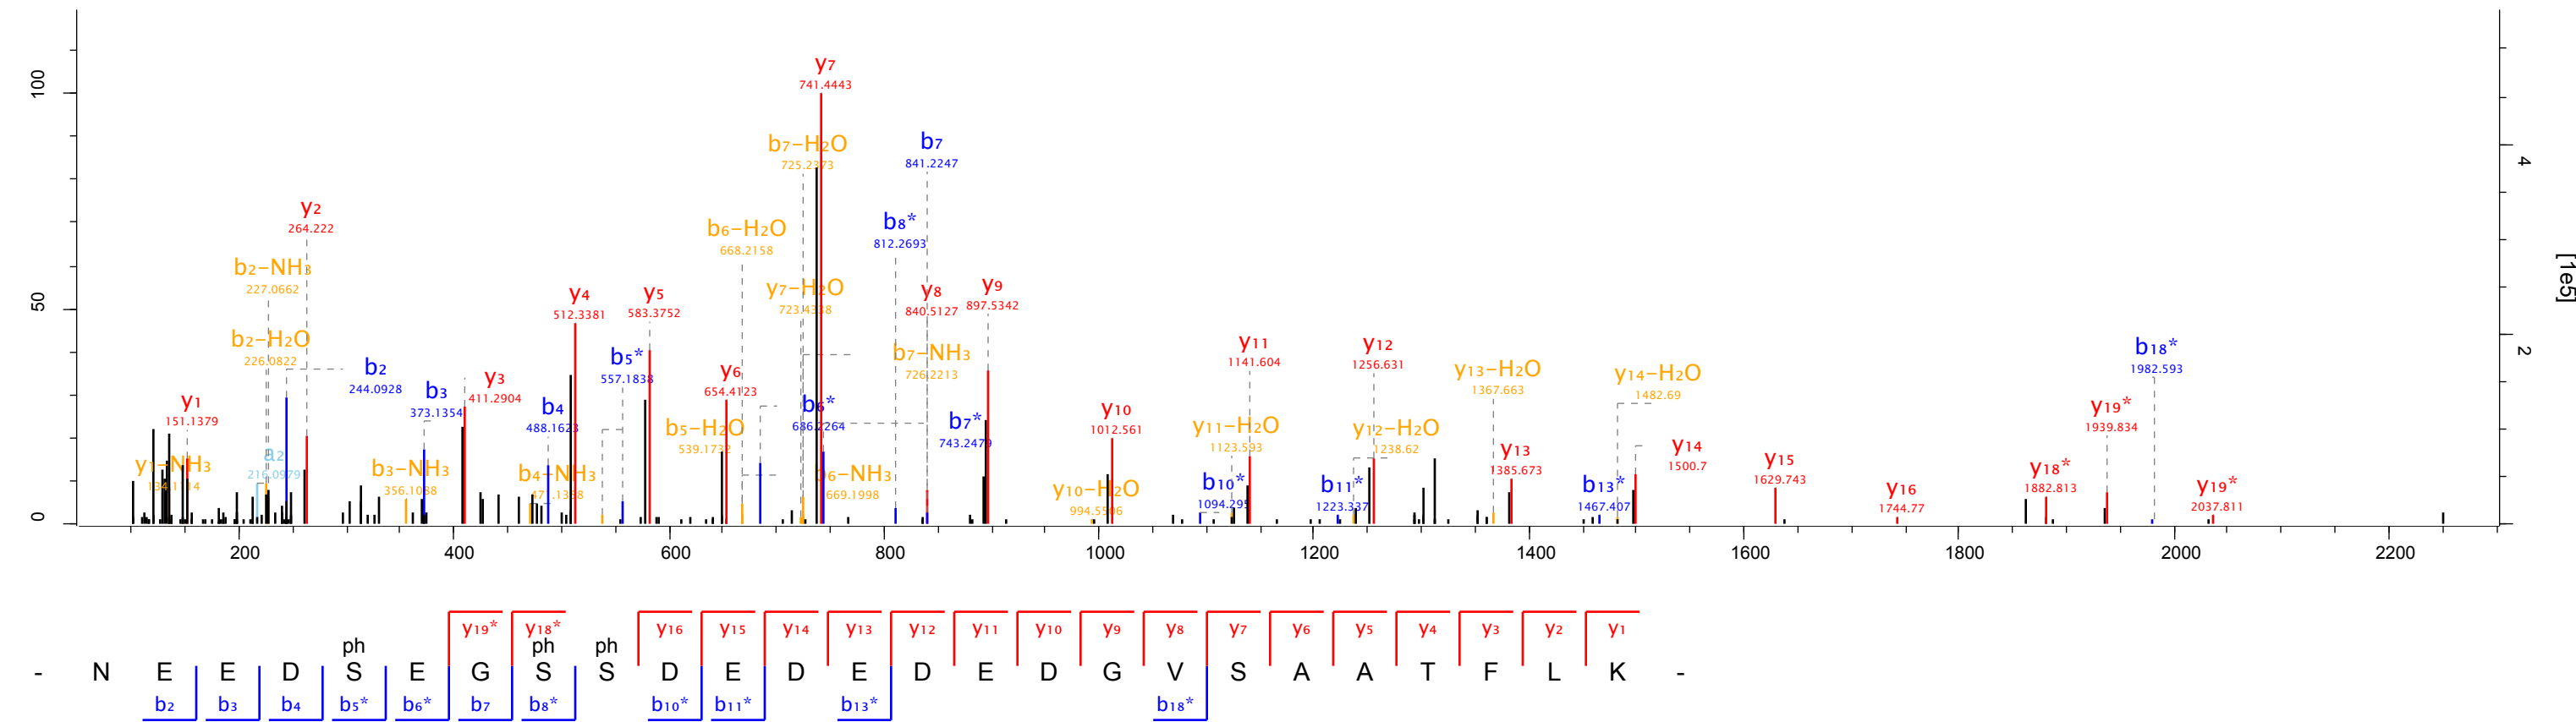

Raw file 20150812\_A375SR\_Phospho\_BR1\_02 Scan 25803 Method FTMS; HCD Score 149.36 m/z 800.87 Gene names TANC1

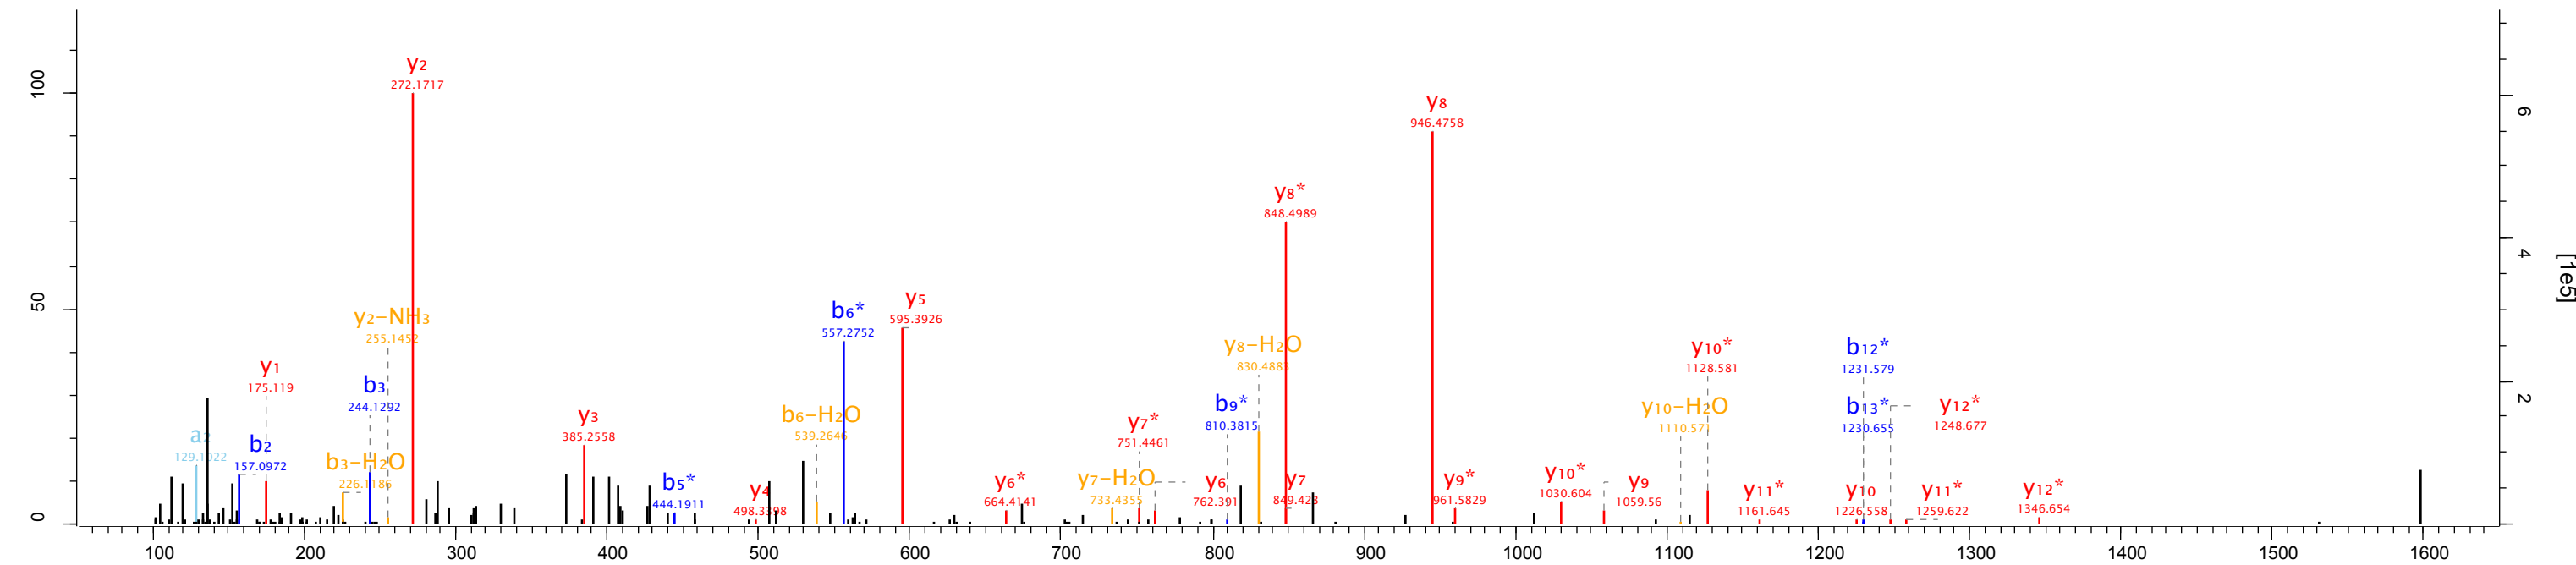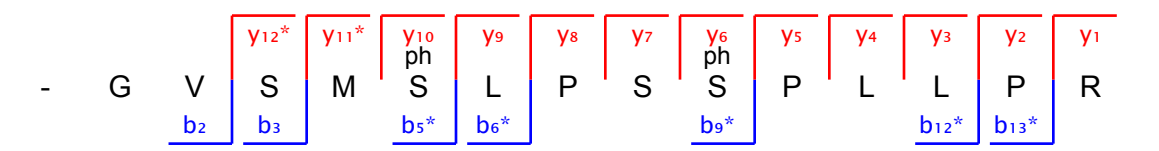

Raw file: 20150812\_A375SR\_Phospho\_BR1\_02  
 Scan: 25863 Method: FTMS; HCD Score: 65.5 m/z: 929.06 Gene names: HECA

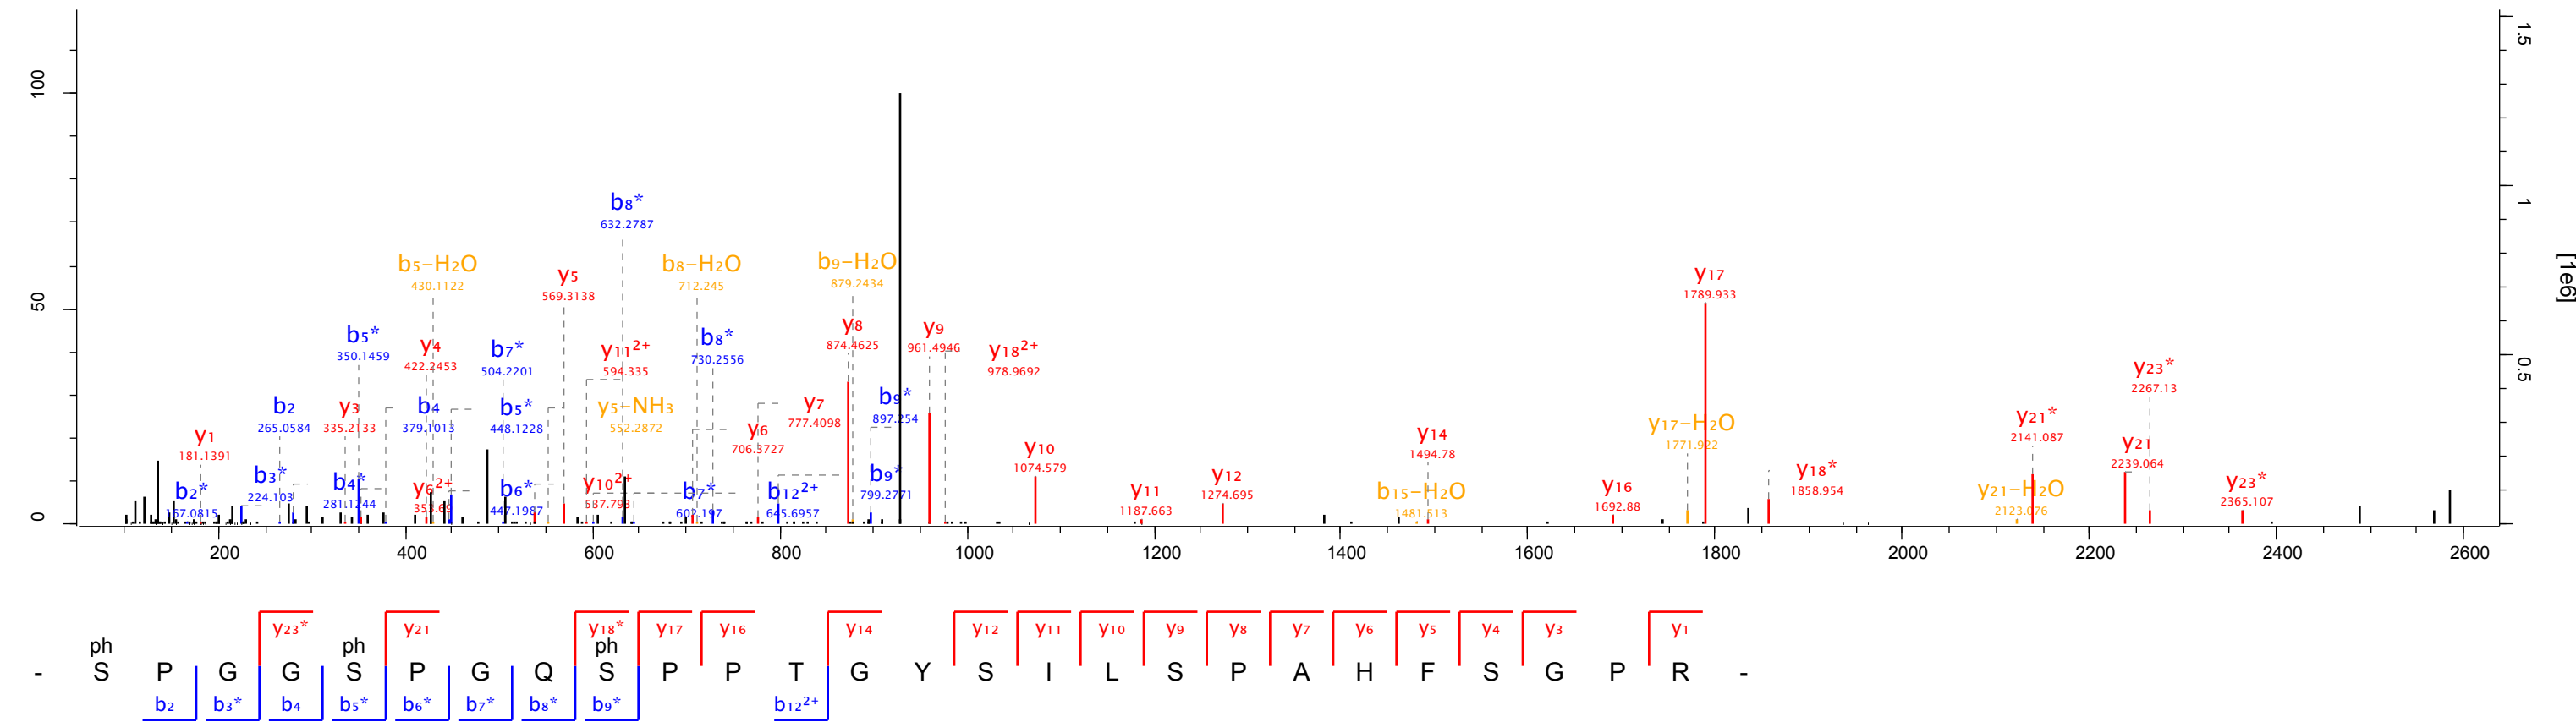



Raw file: 20150812\_A375SR\_Phospho\_BR1\_02  
 Scan: 2593 Method: FTMS; HCD Score: 50.96 m/z: 561.58 Gene names: SRRM2

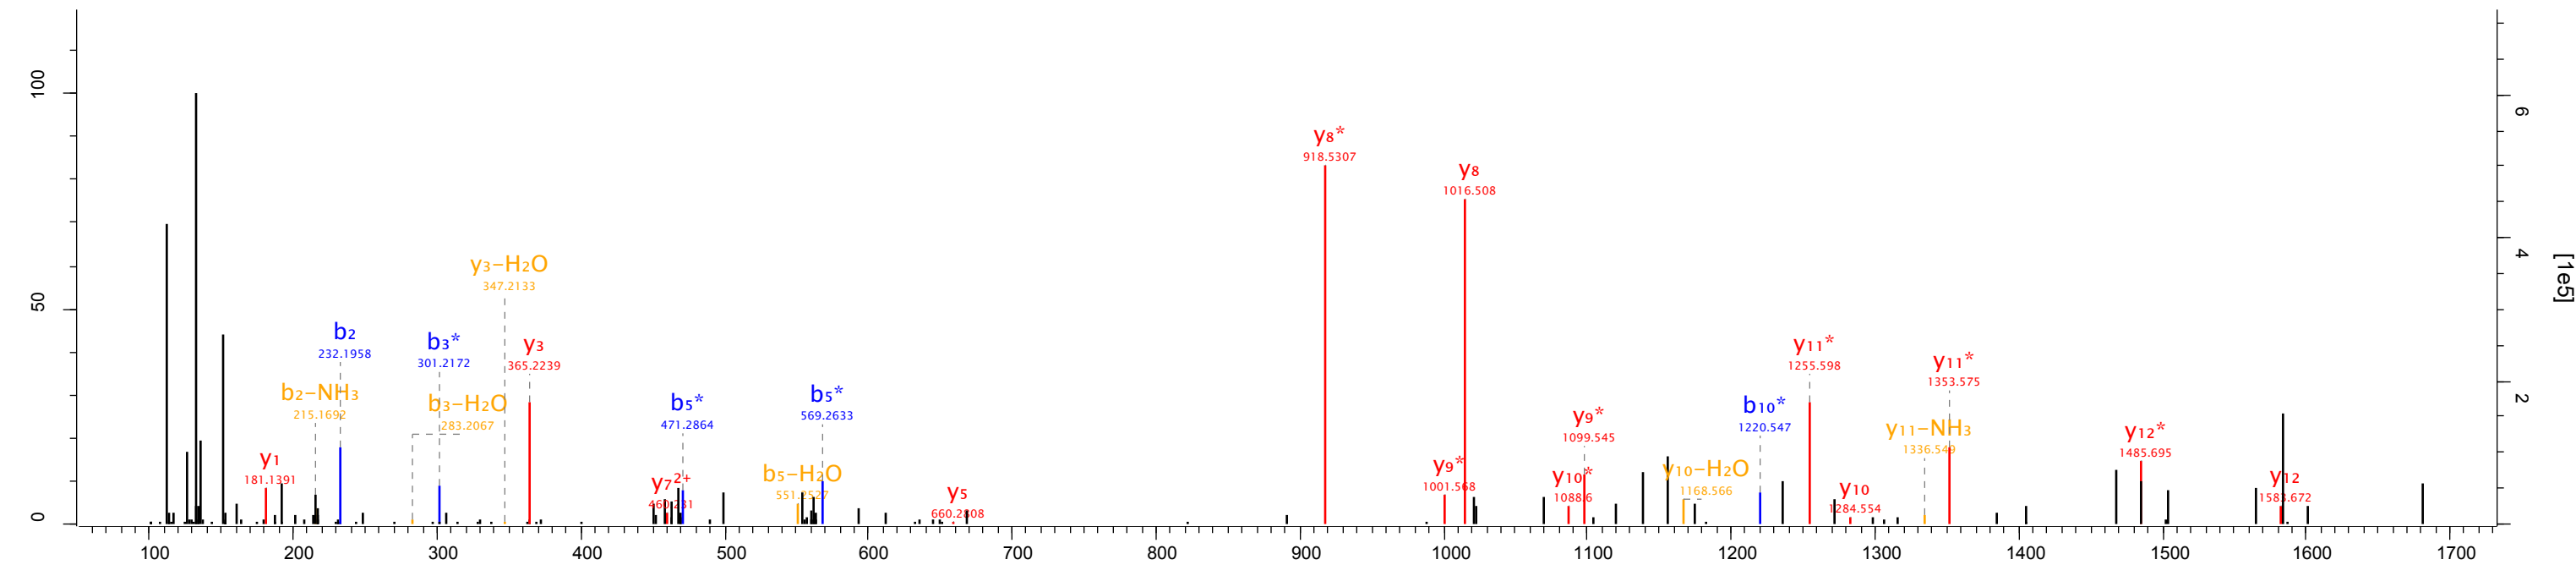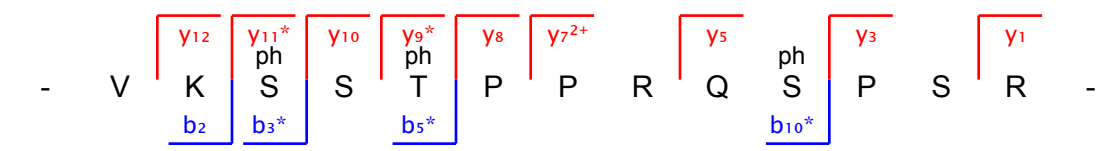

Raw file: 20150812\_A375SR\_Phospho\_BR1\_02  
 Scan: 26763 Method: FTMS; HCD Score: 88.02 m/z: 1055.16 Gene names: AMOTL2

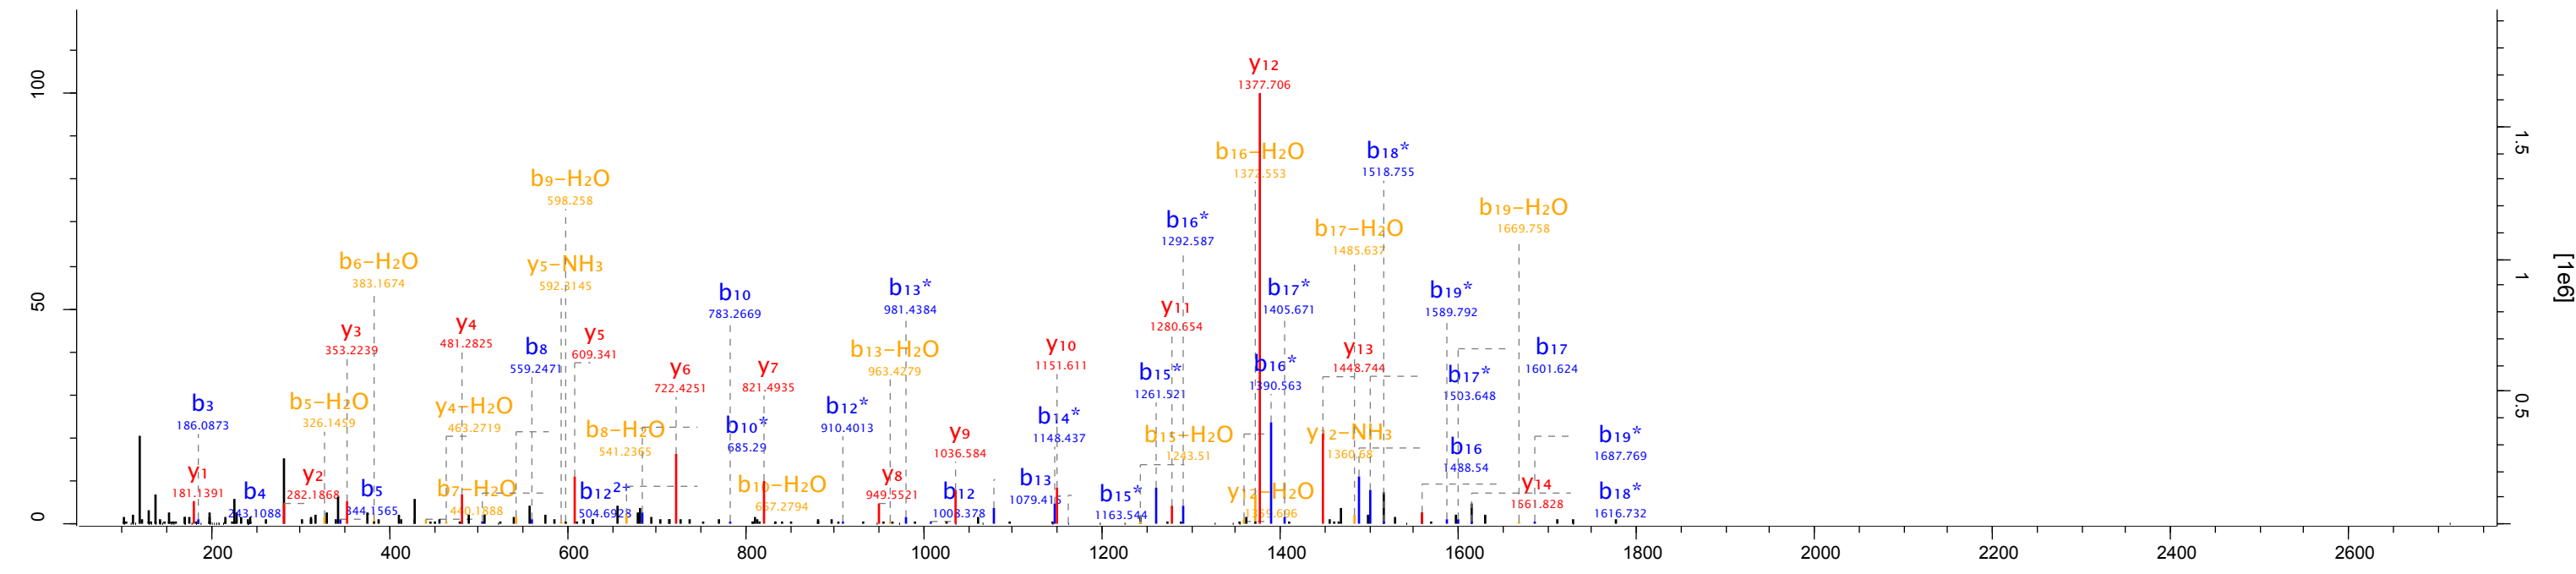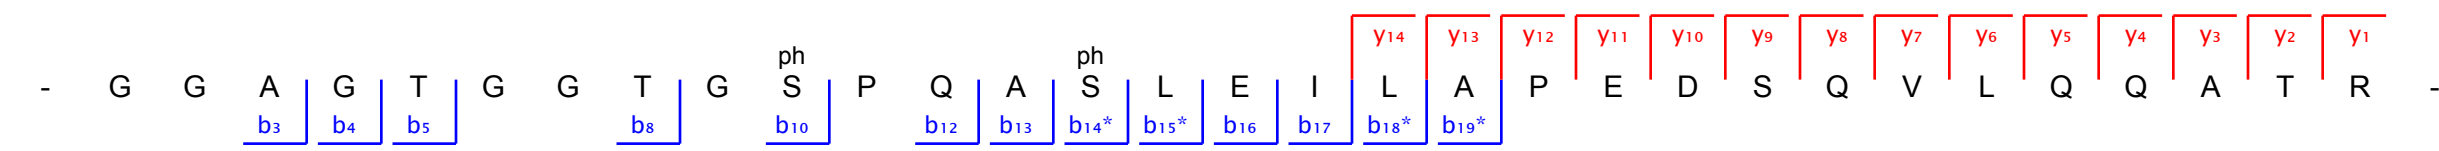

Raw file: 20150812\_A375SR\_Phospho\_BR1\_02  
 Scan: 27533 Method: FTMS; HCD Score: 42.38 m/z: 1423.65 Gene names: SCRIB

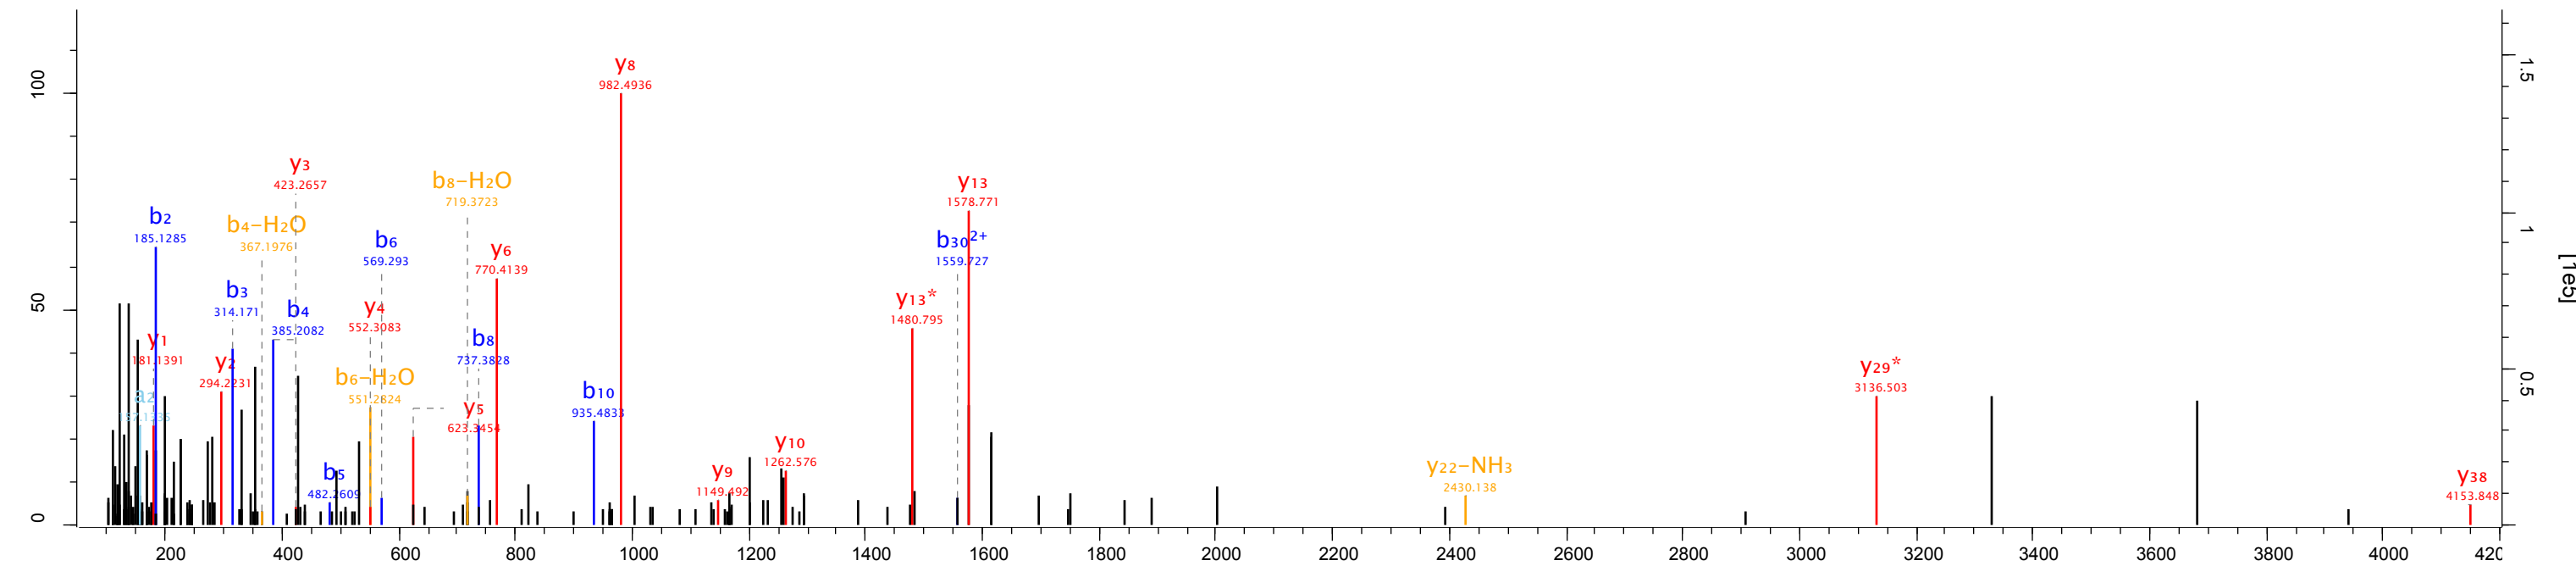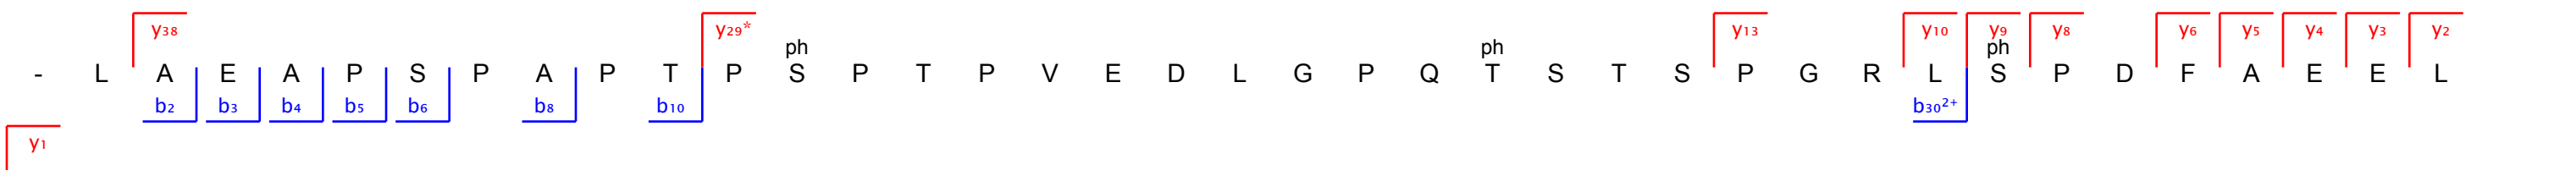

Raw file 20150812\_A375SR\_Phospho\_BR1\_02 Scan 28343 Method FTMS; HCD Score 79.57 m/z 1322.56 Gene names SEC16A

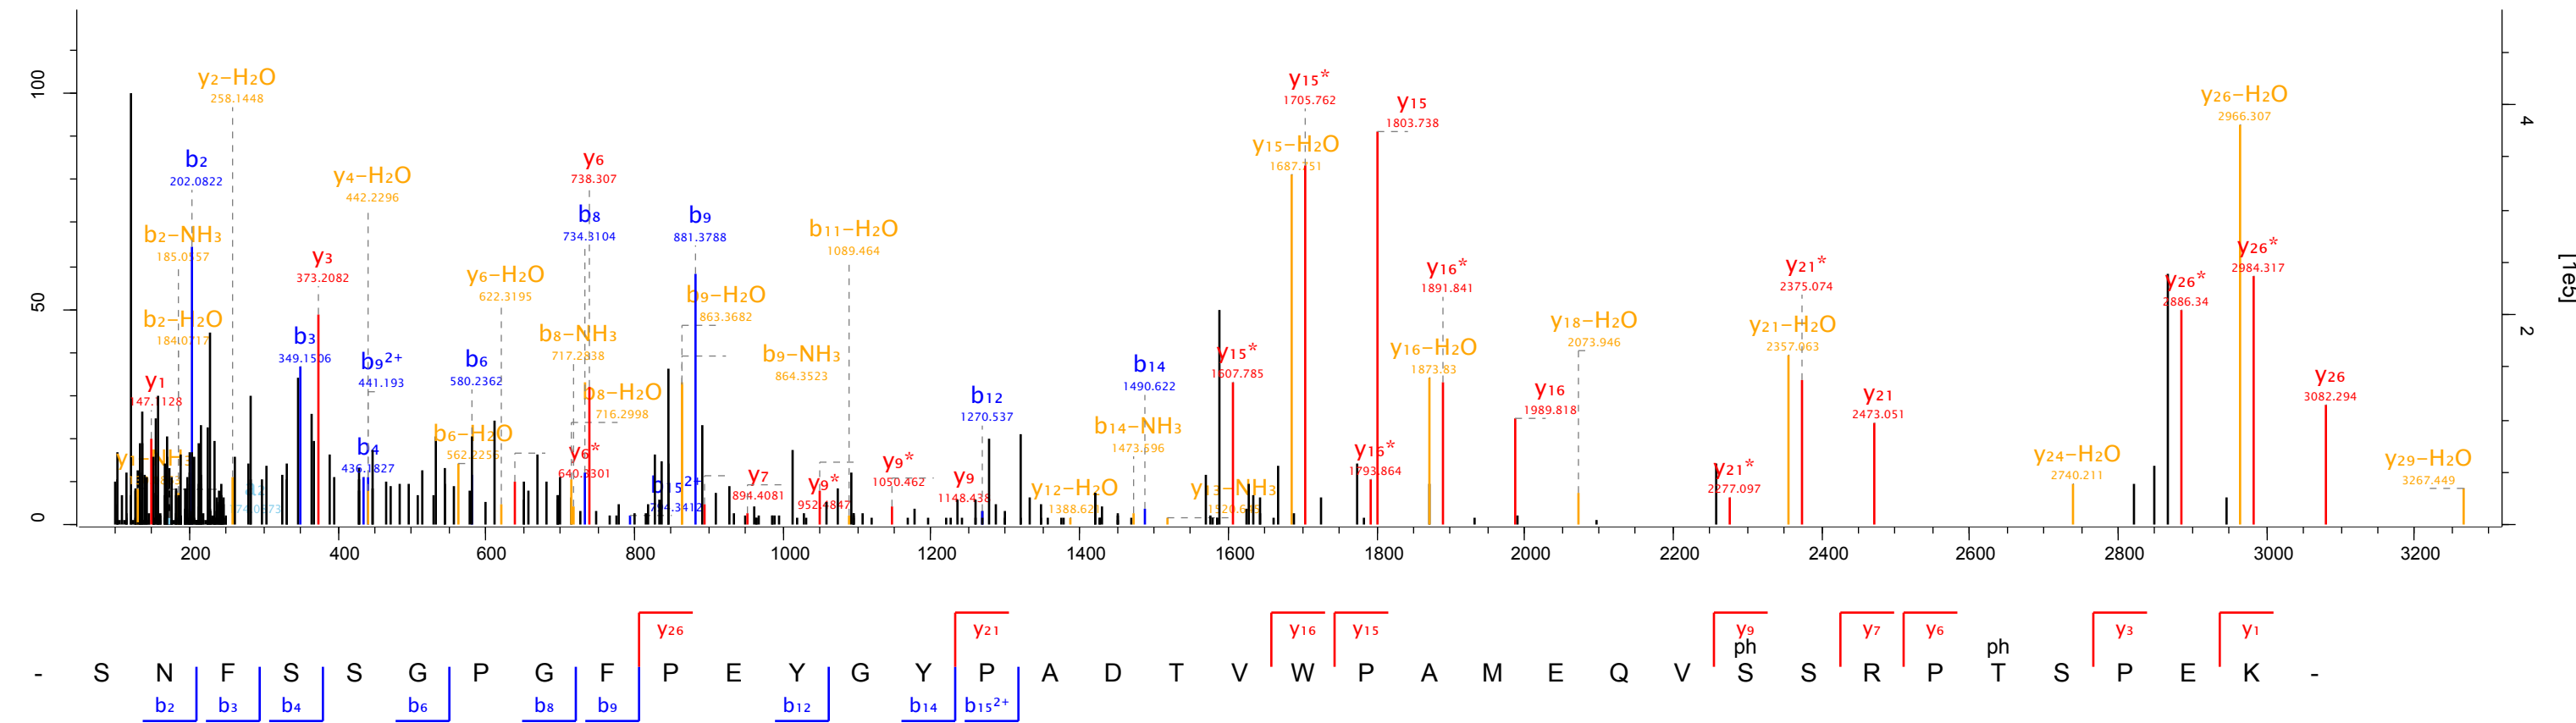

Raw file: 20150812\_A375SR\_Phospho\_BR1\_02  
 Scan: 3233 Method: FTMS; HCD Score: 41.54 m/z: 472.48 Gene names: SRRM1;TRA2B;TRA2A

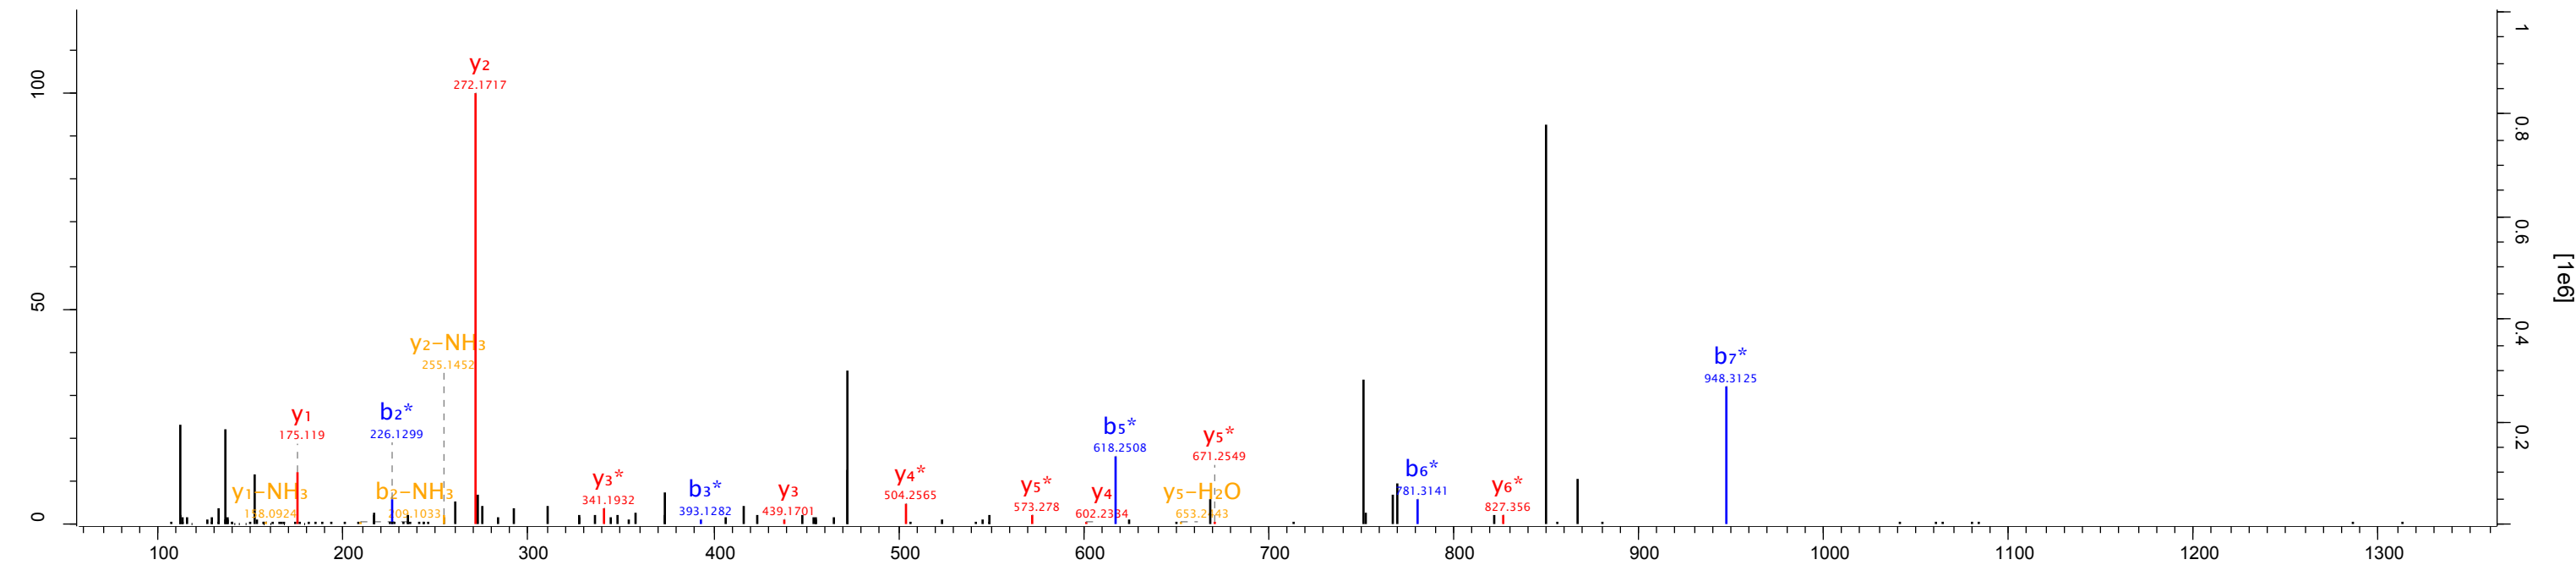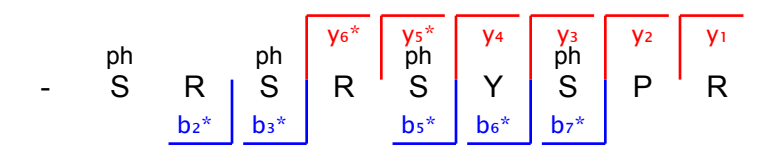



Raw file: 20150812\_A375SR\_Phospho\_BR1\_02  
 Scan: 3923 Method: FTMS; HCD Score: 78.81 m/z: 571.22 Gene names: SRRM2

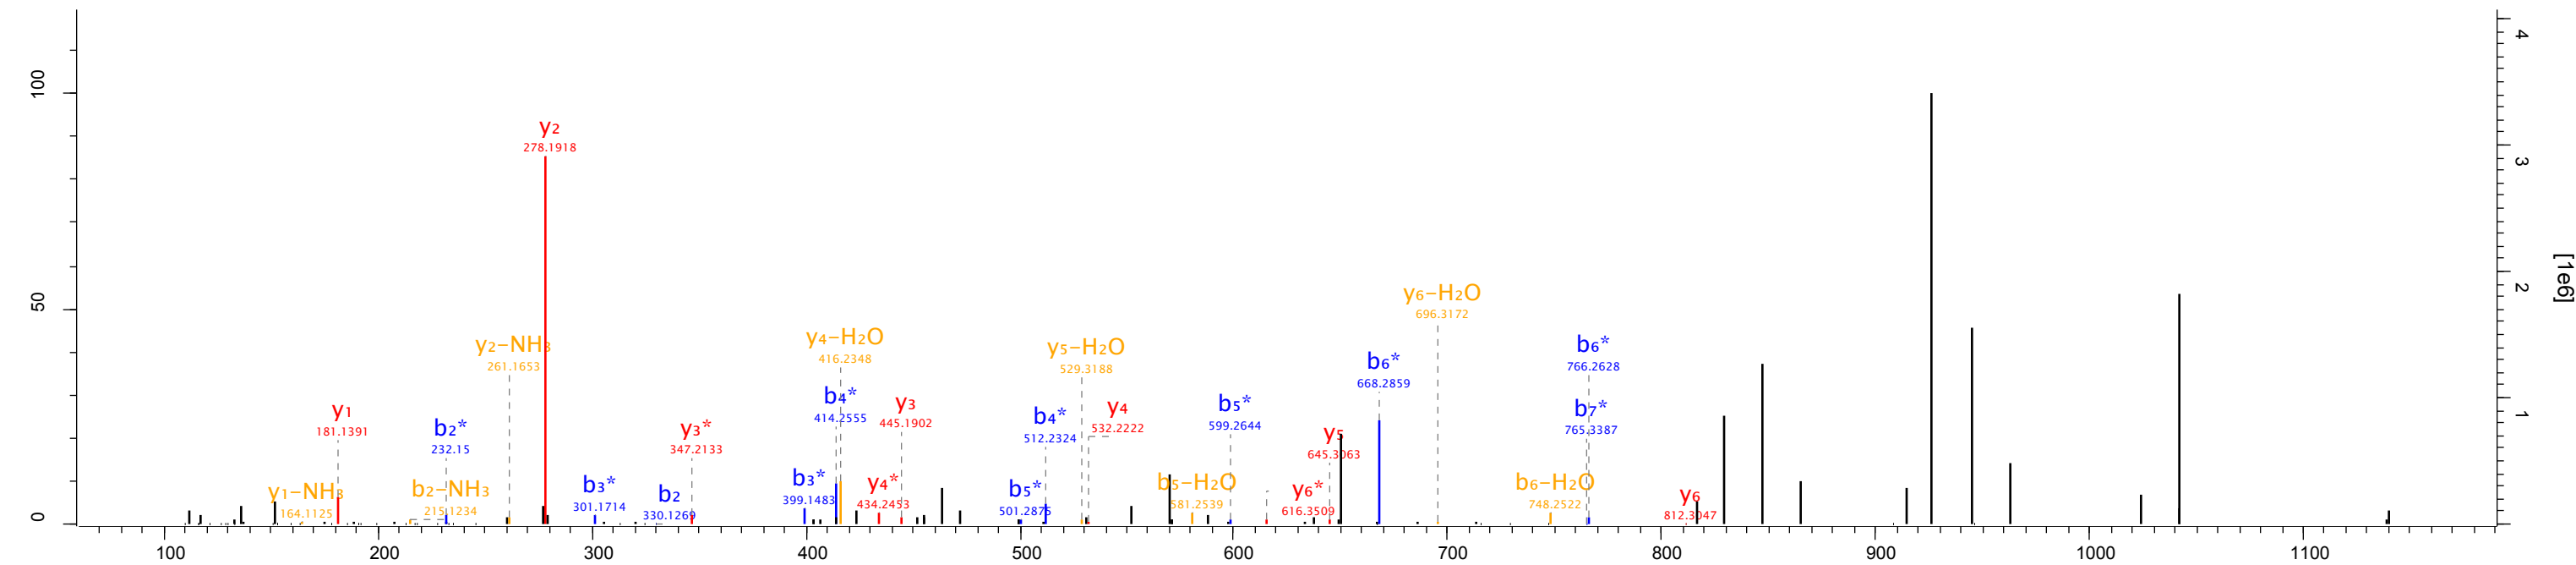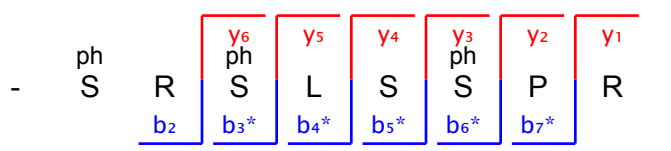

Raw file 20150812\_A375SR\_Phospho\_BR1\_02 Scan 3983 Method FTMS; HCD Score 80.84 m/z 842.83 Gene names NDNL2

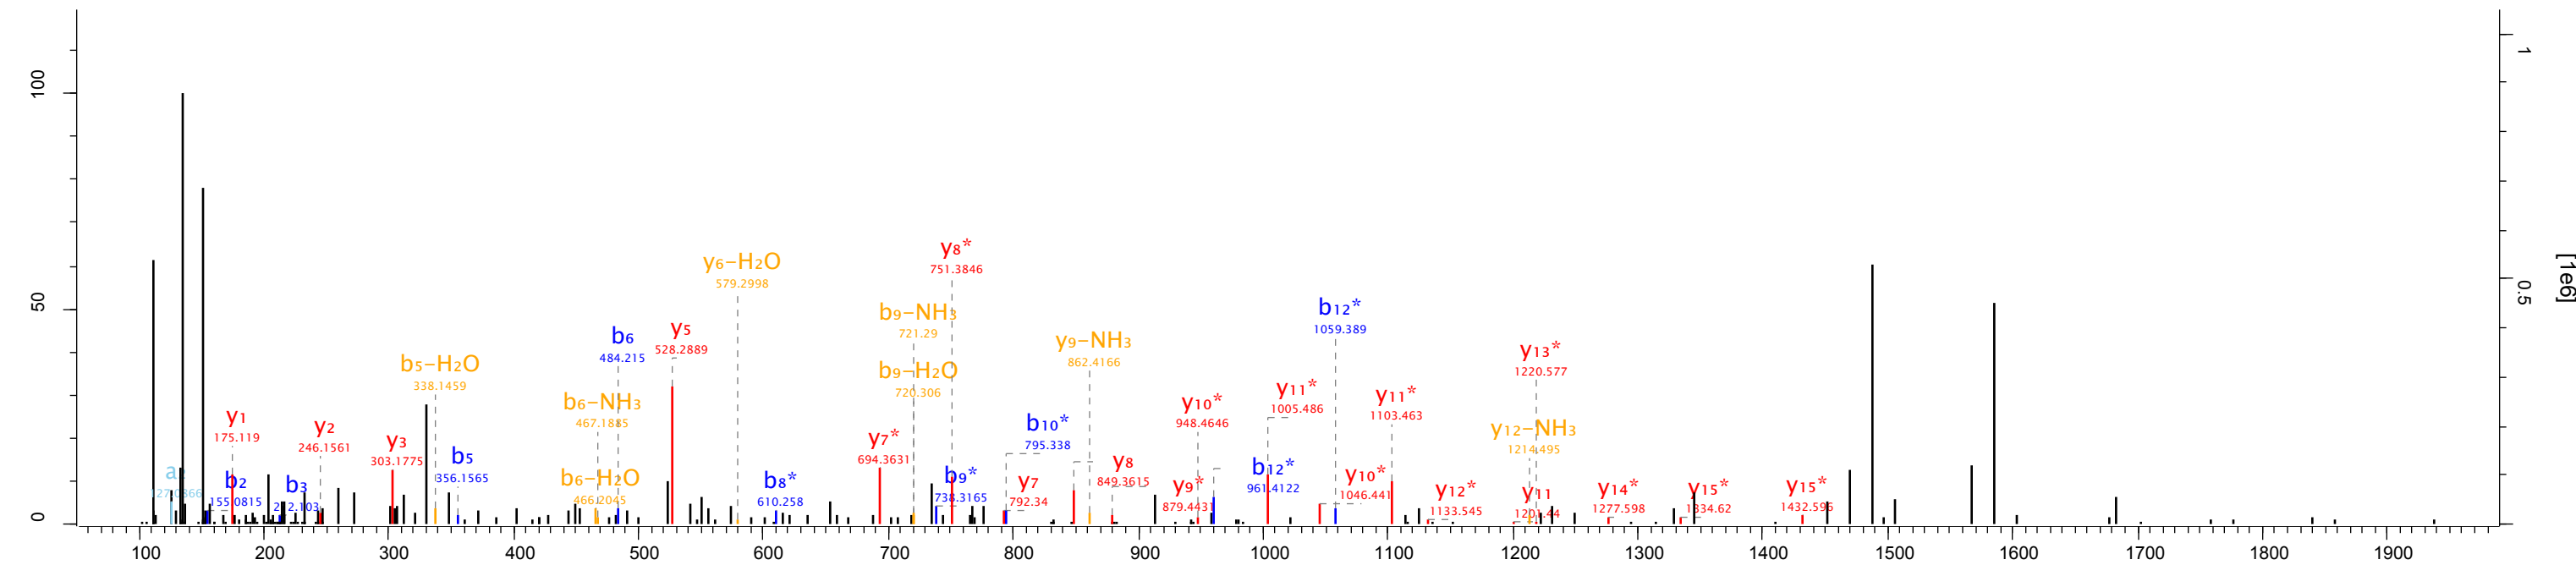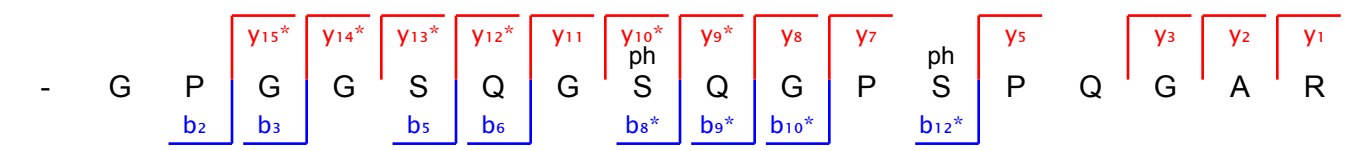



Raw file: 20150812\_A375SR\_Phospho\_BR1\_02  
 Scan: 4173 Method: FTMS; HCD Score: 68.97 m/z: 447.54 Gene names: SRSF1

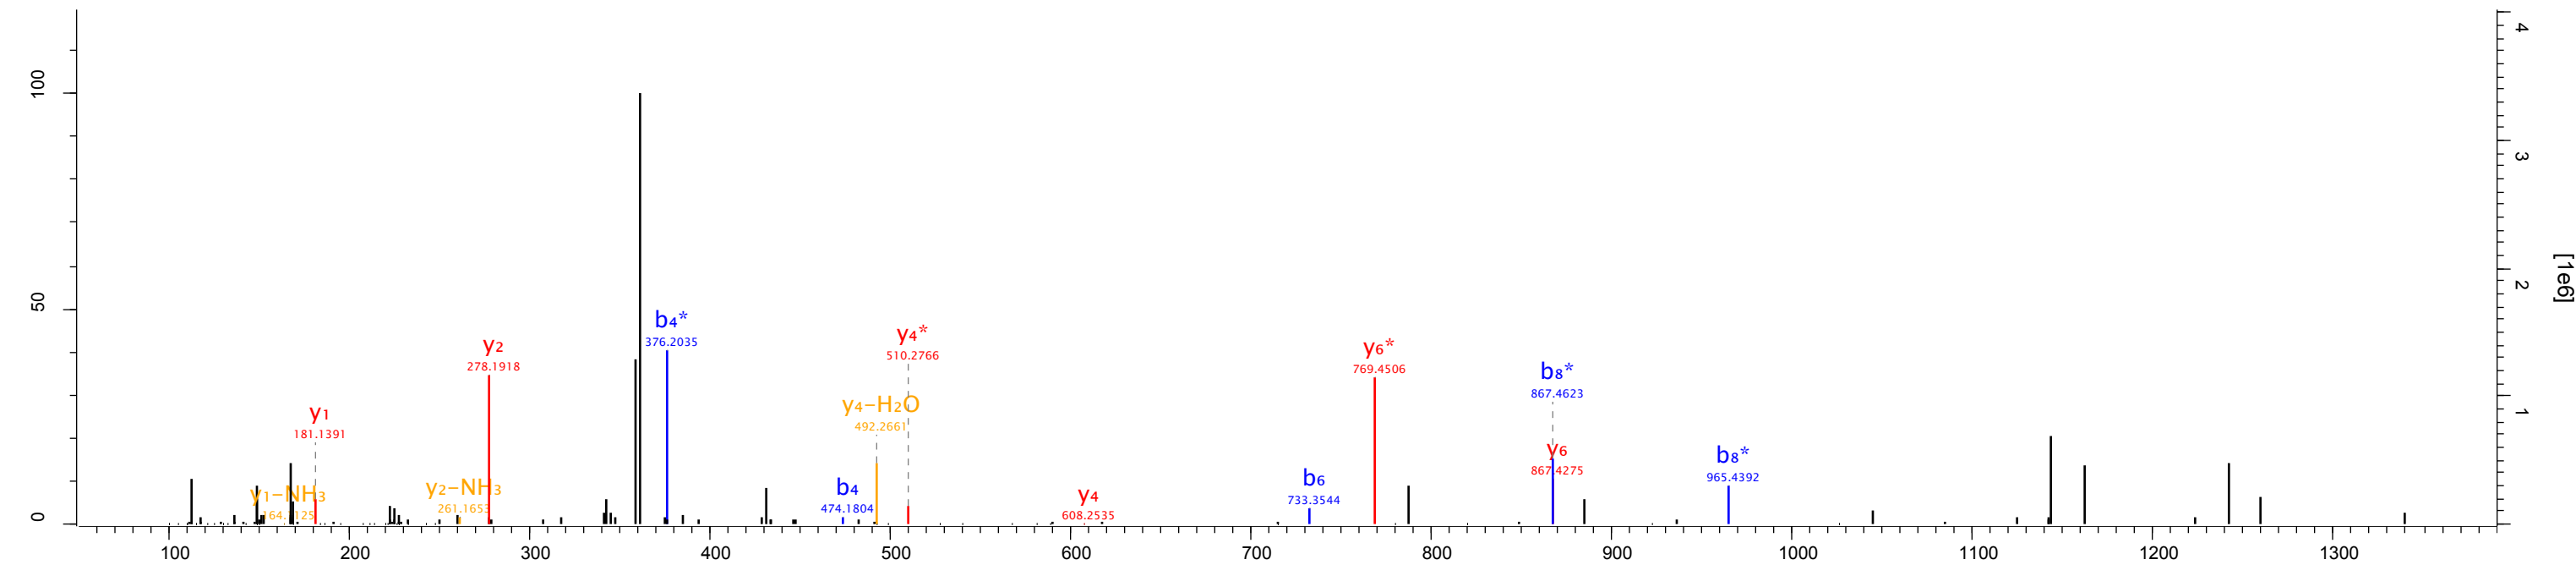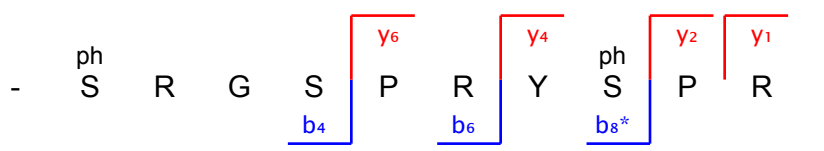

Raw file: 20150812\_A375SR\_Phospho\_BR1\_02  
 Scan: 4453 Method: FTMS; HCD Score: 105.21 m/z: 739.84 Gene names: NSUN5;NSUN5P2;NSUN5P1

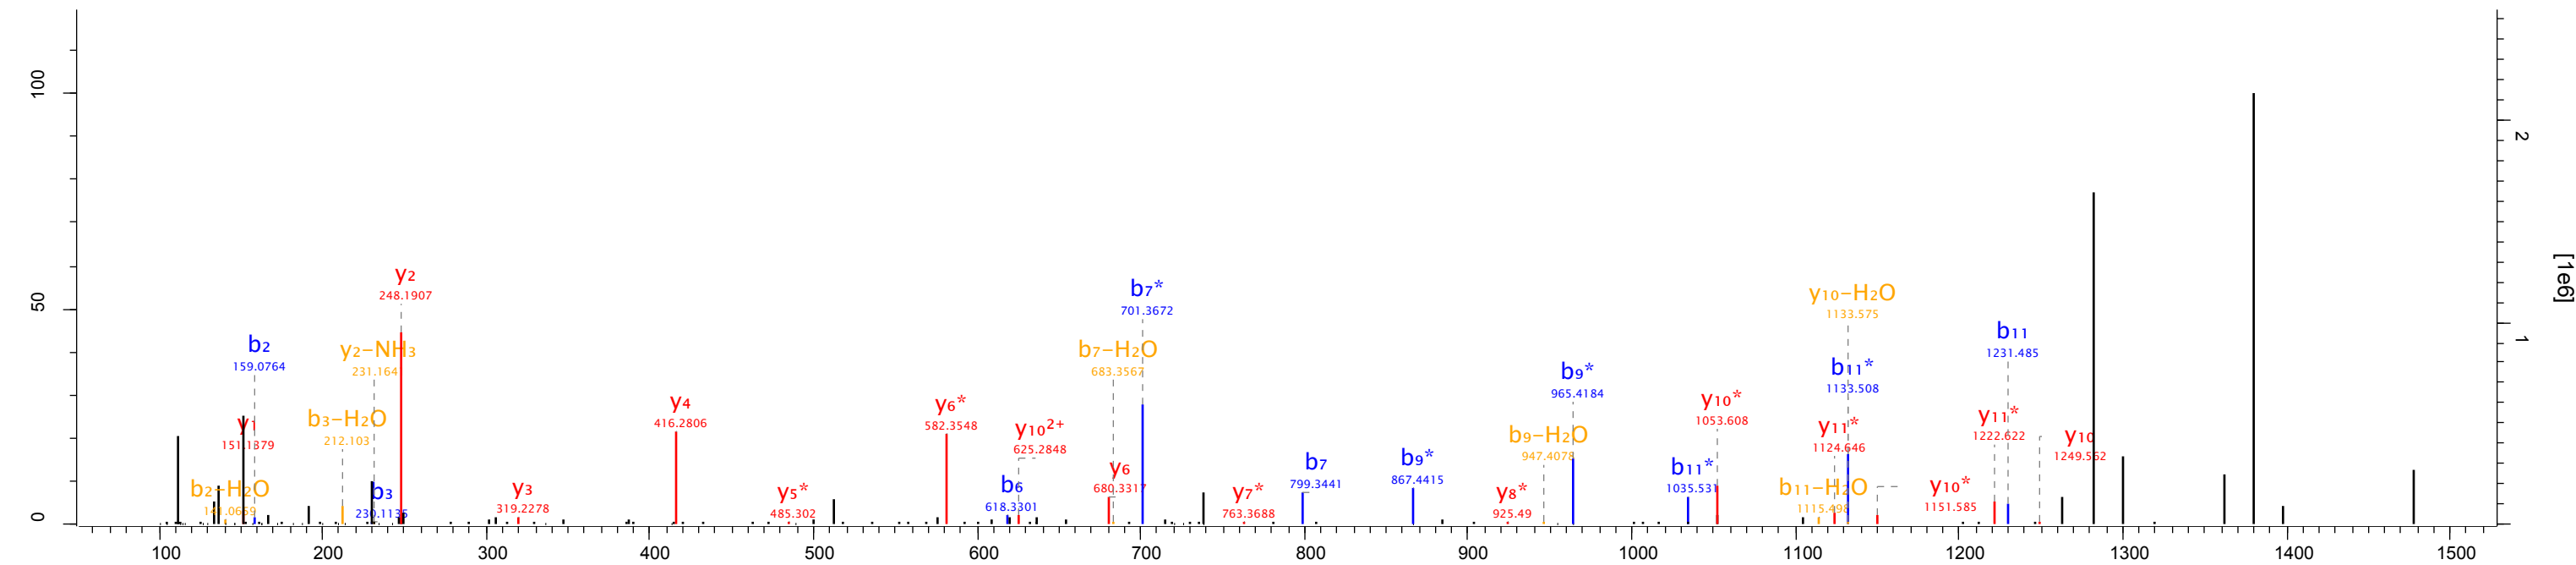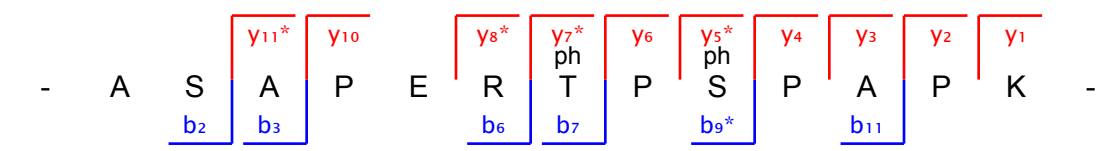

Raw file: 20150812\_A375SR\_Phospho\_BR1\_02  
 Scan: 4833 Method: FTMS; HCD Score: 81.79 m/z: 550.58 Gene names: LMNB1

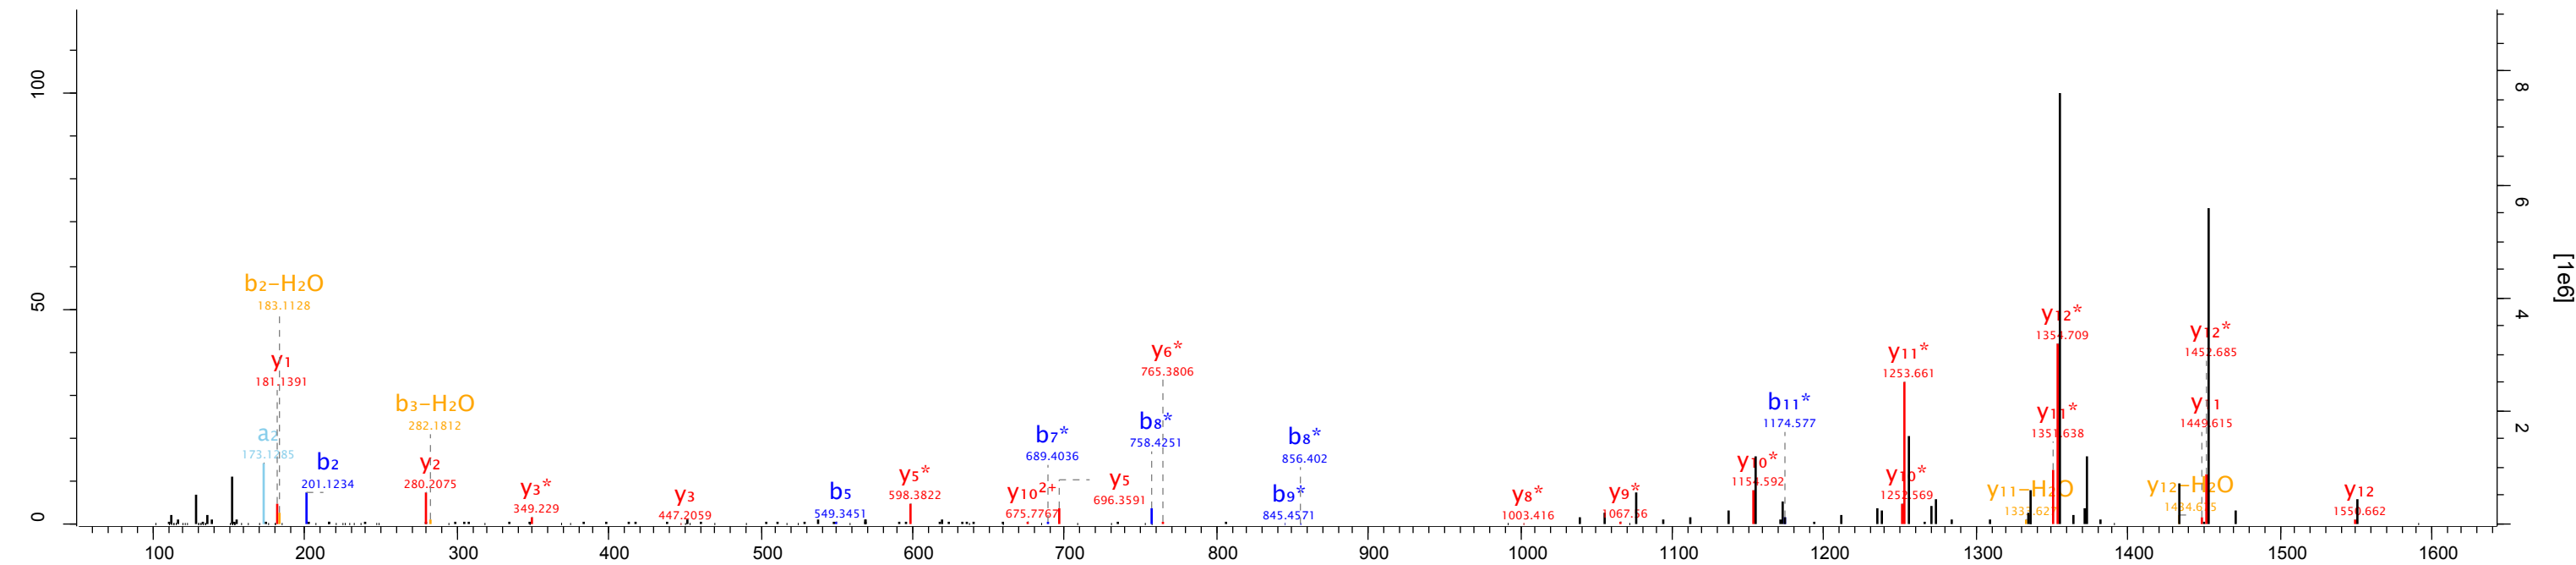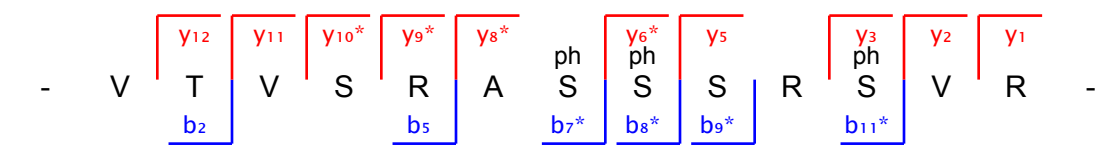

Raw file: 20150812\_A375SR\_Phospho\_BR1\_02  
 Scan: 5093 Method: FTMS; HCD Score: 164.66 m/z: 567.27 Gene names: IGF2BP1

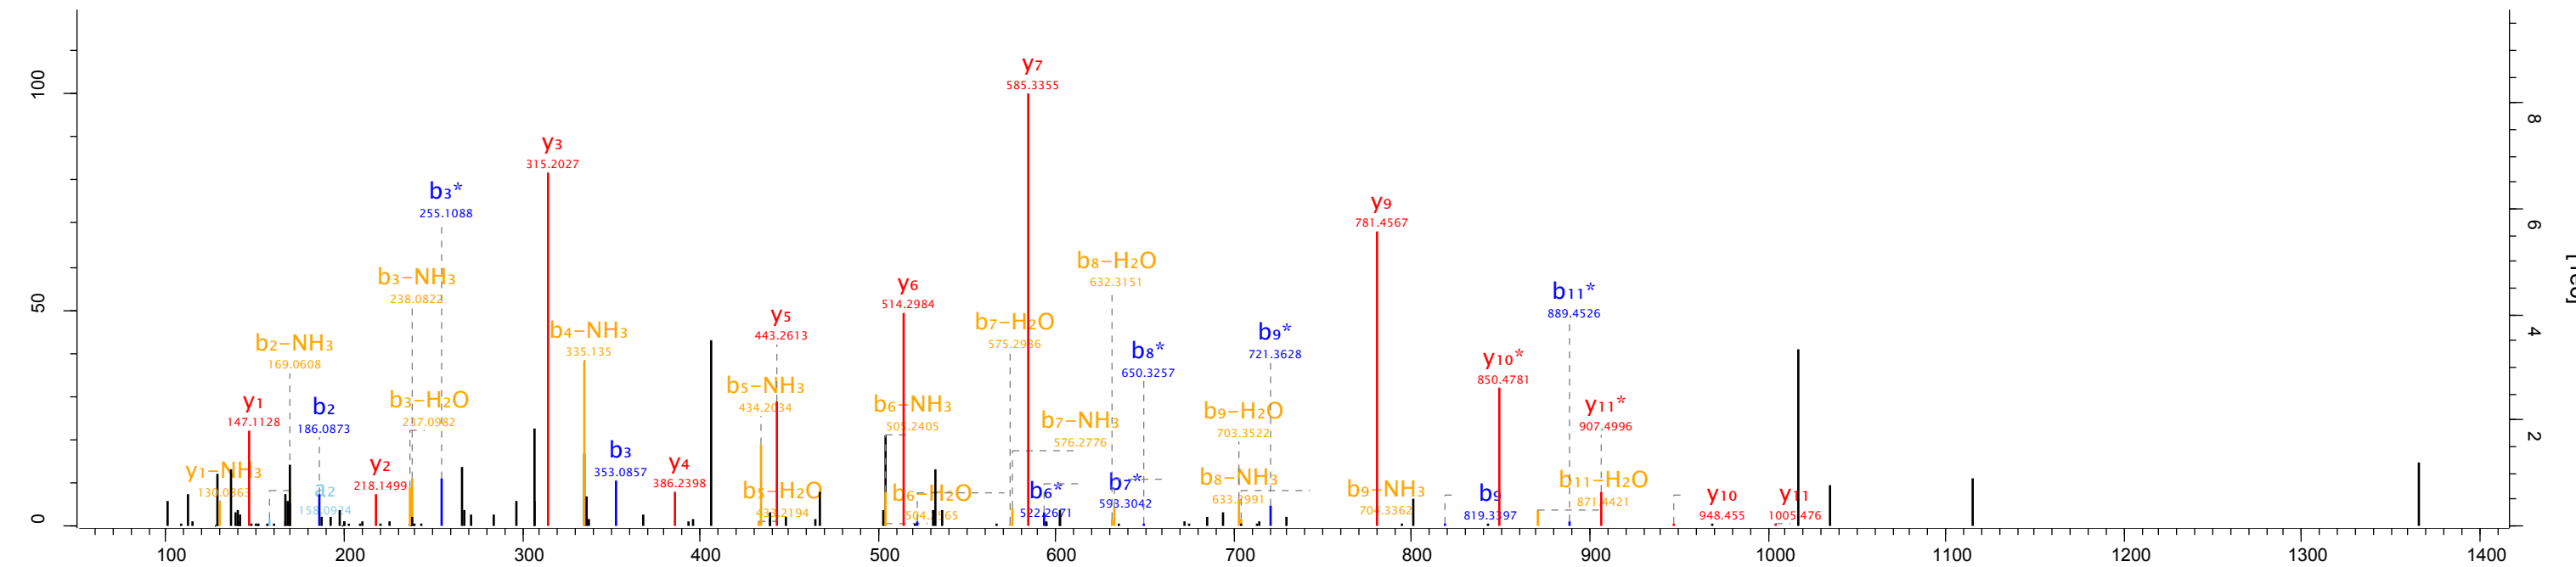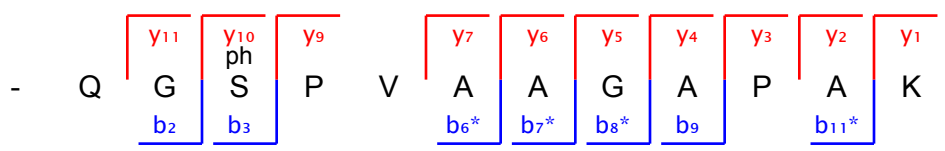

Raw file 20150812\_A375SR\_Phospho\_BR1\_02 Scan 5373 Method FTMS; HCD Score 196.86 m/z 954.39 Gene names CLASP1

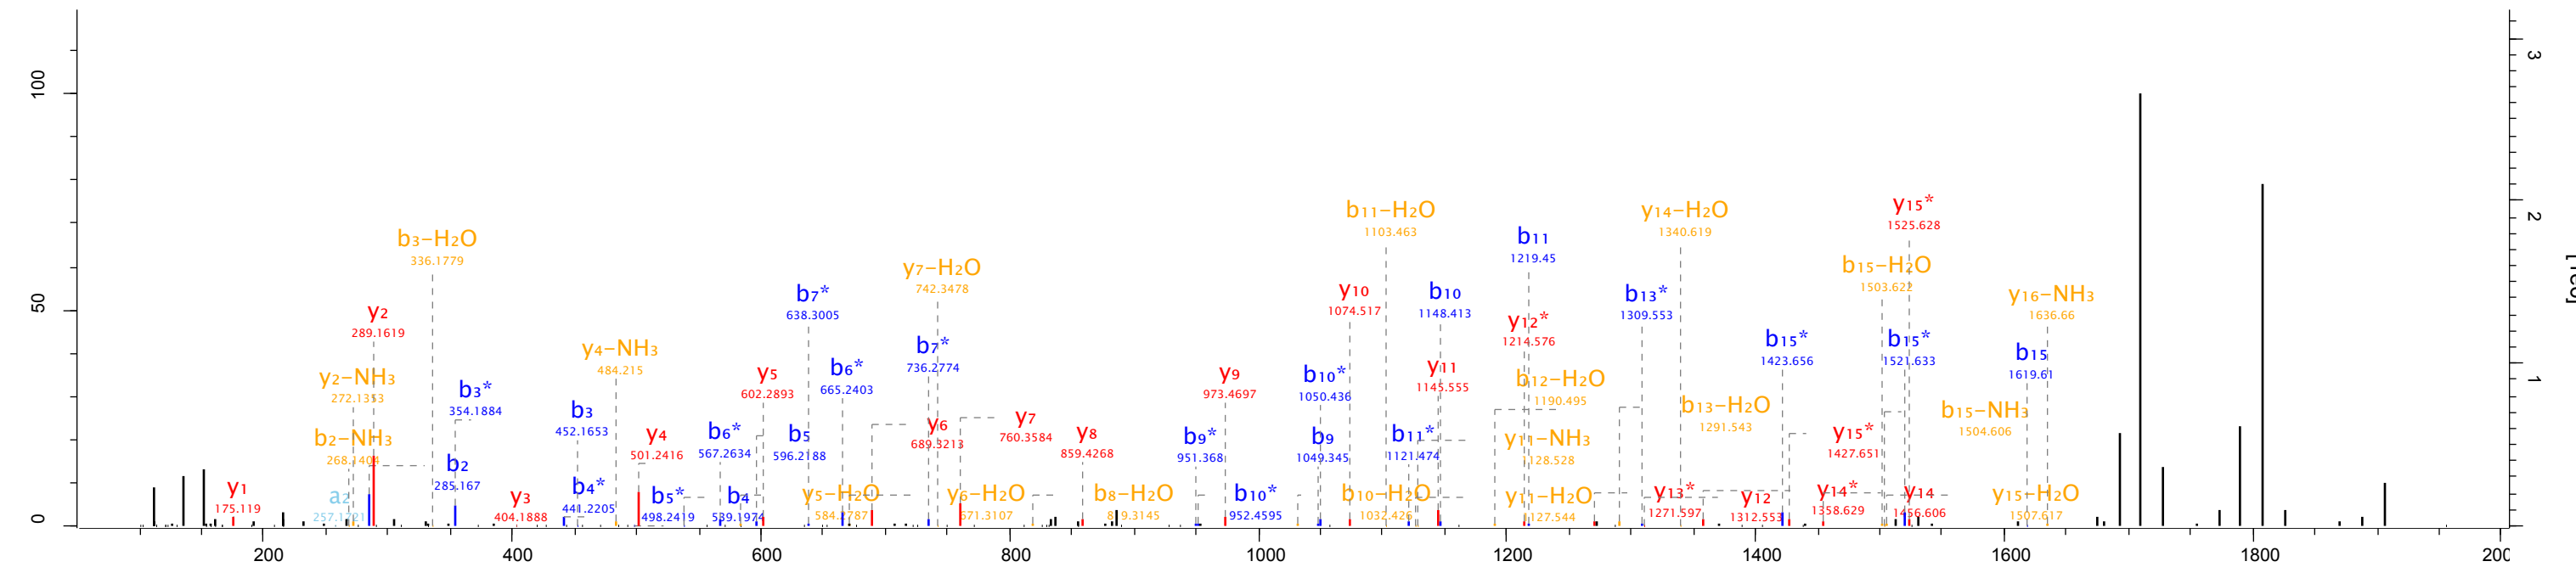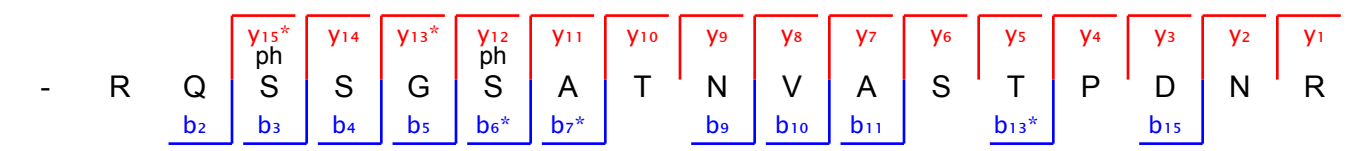

Raw file: 20150812\_A375SR\_Phospho\_BR1\_02  
 Scan: 6003 Method: FTMS; HCD Score: 62.74 m/z: 589.2 Gene names: BUD13

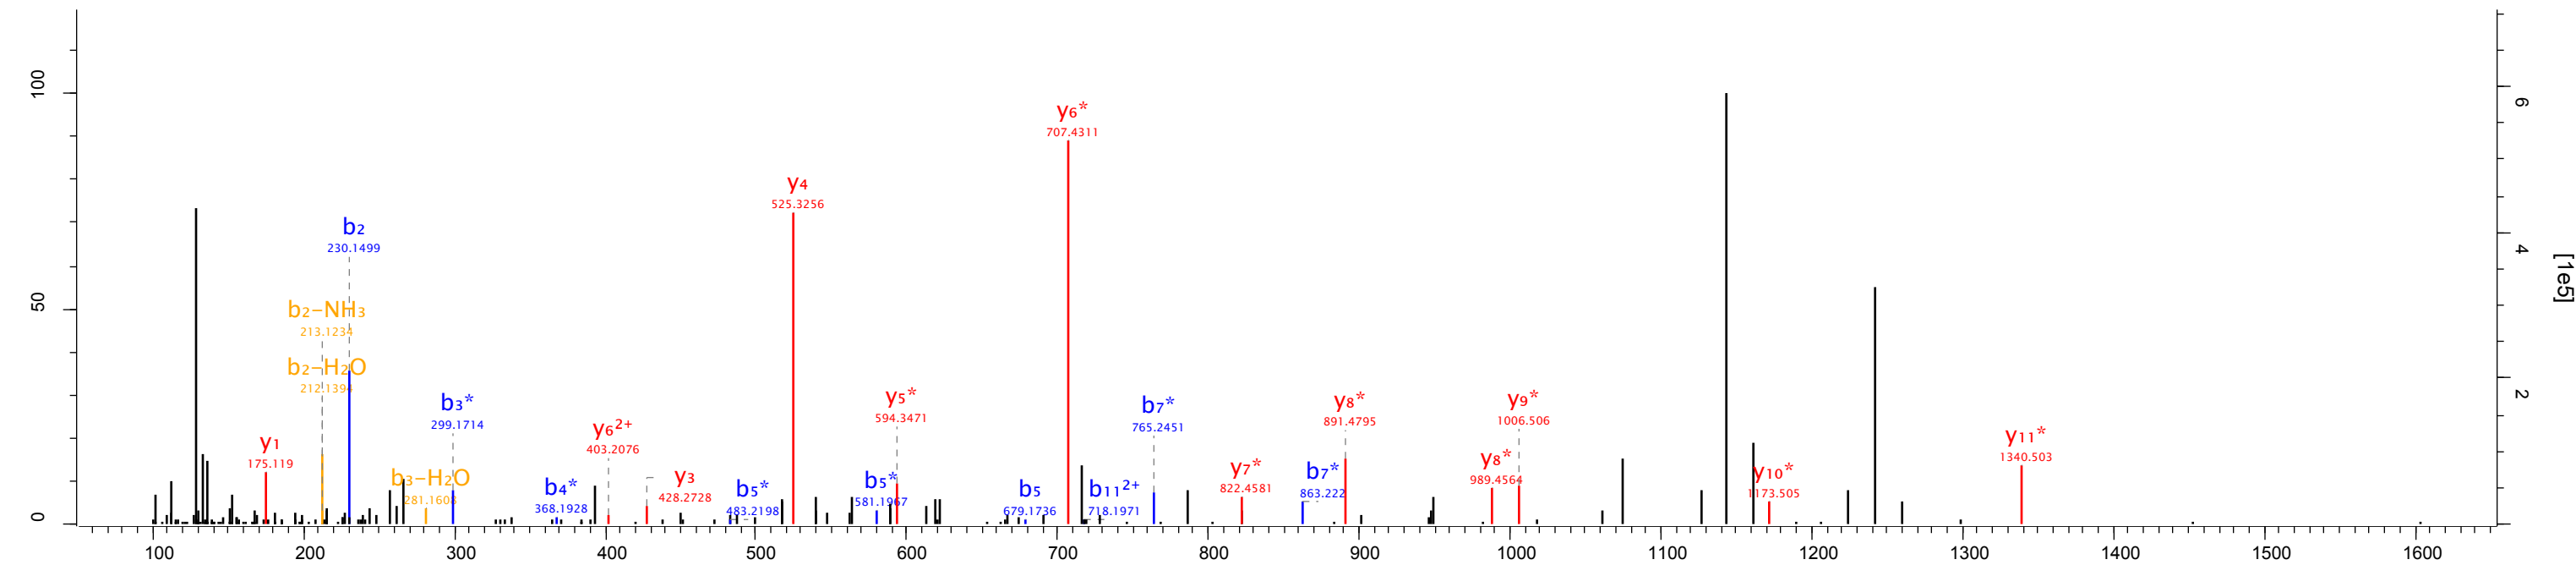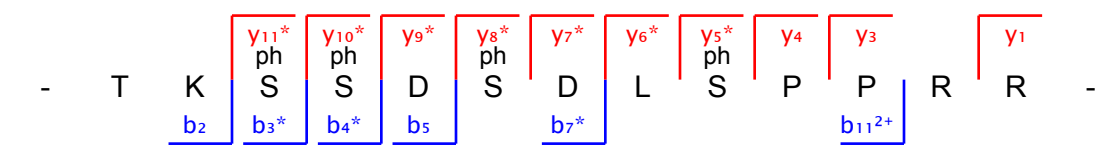

Raw file: 20150812\_A375SR\_Phospho\_BR1\_02  
 Scan: 6243 Method: FTMS; HCD Score: 142.94 m/z: 692.29 Gene names: SRRM1

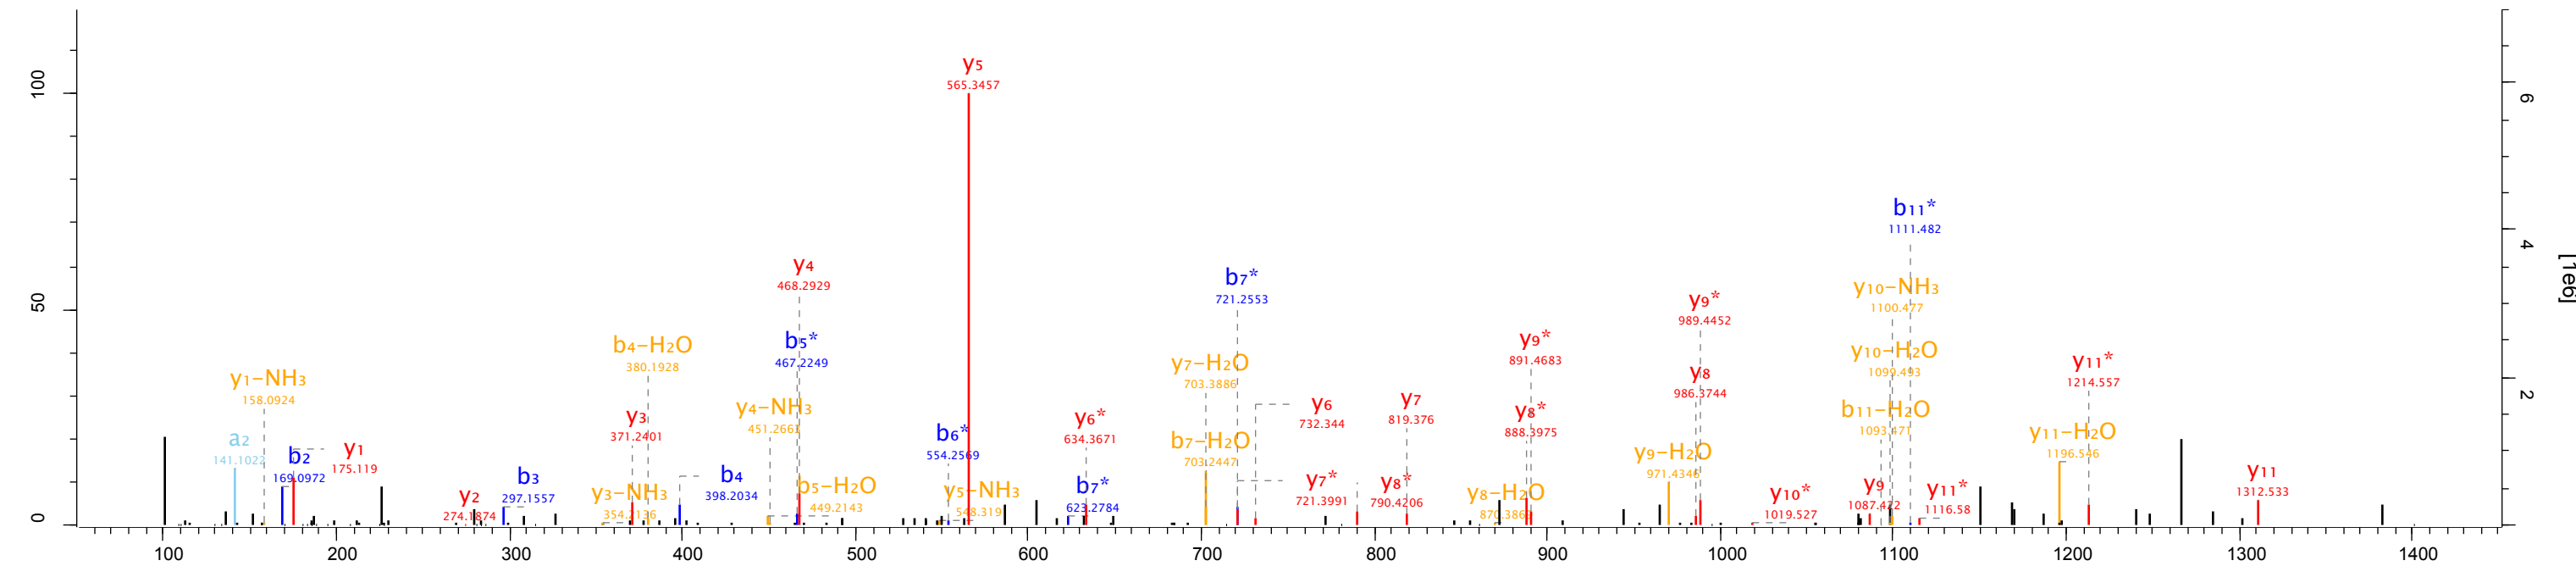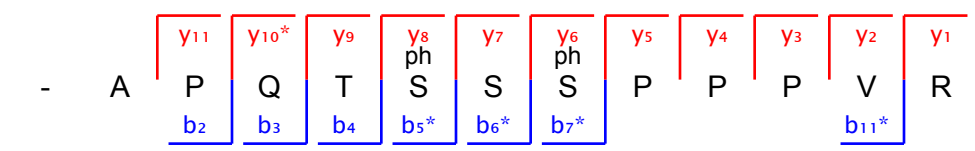

Raw file: 20150812\_A375SR\_Phospho\_BR1\_02  
 Scan: 6423 Method: FTMS; HCD Score: 54.9 m/z: 570.21 Gene names: NSMCE4A

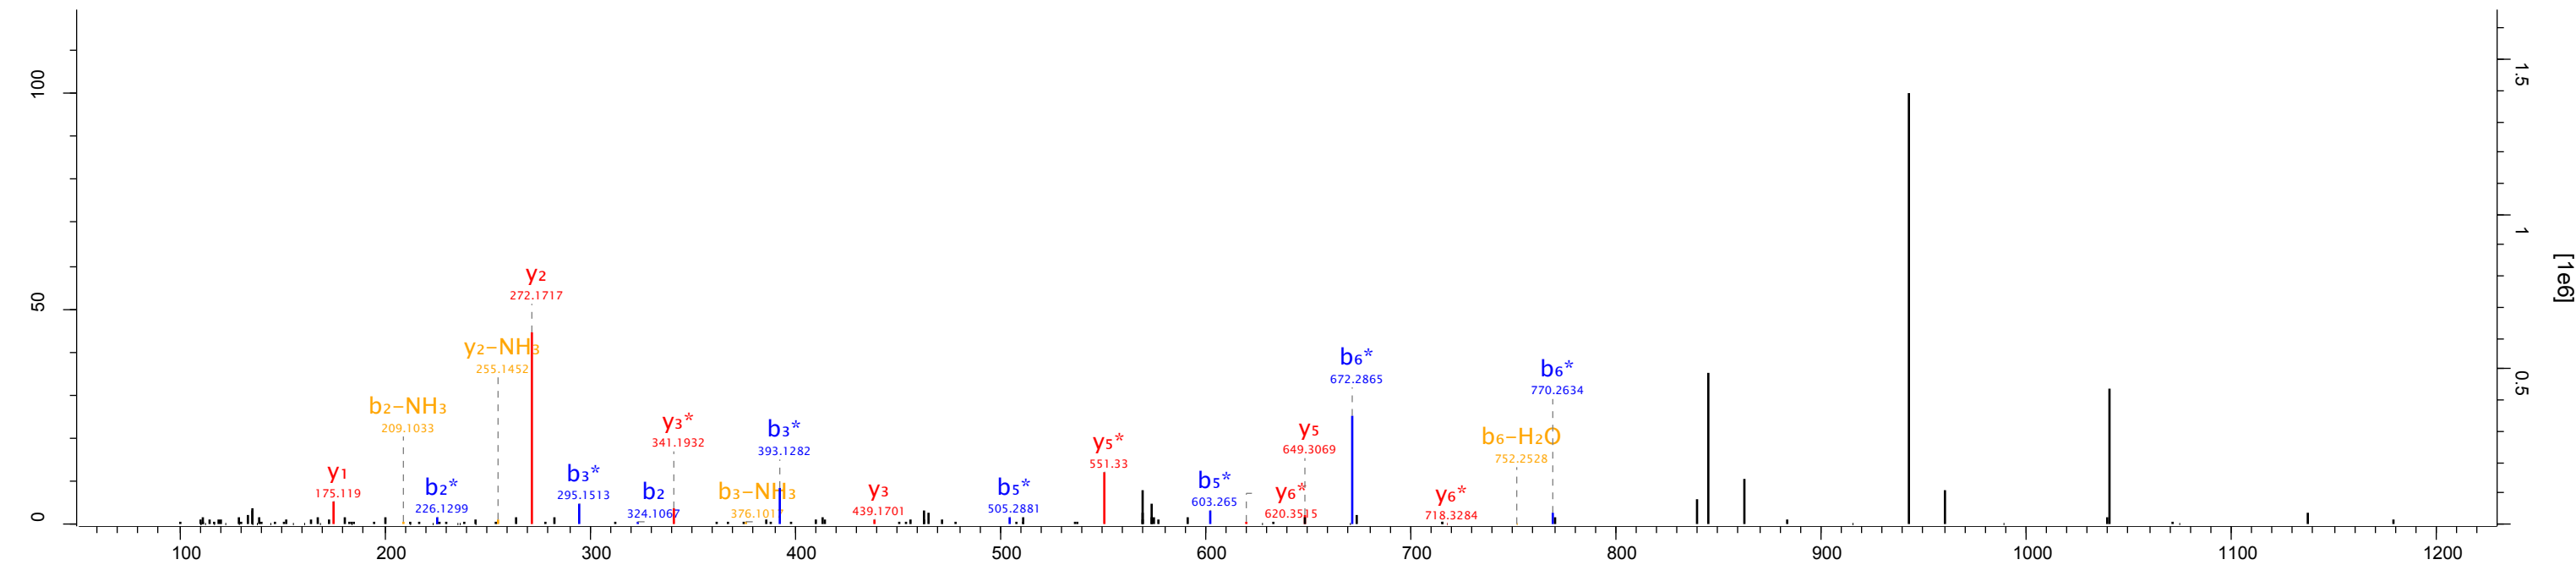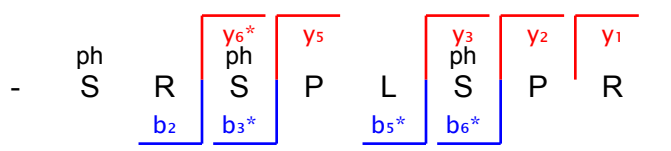



Raw file: 20150812\_A375SR\_Phospho\_BR1\_02  
 Scan: 6533 Method: FTMS; HCD Score: 67.25 m/z: 845.78 Gene names: SRSF7

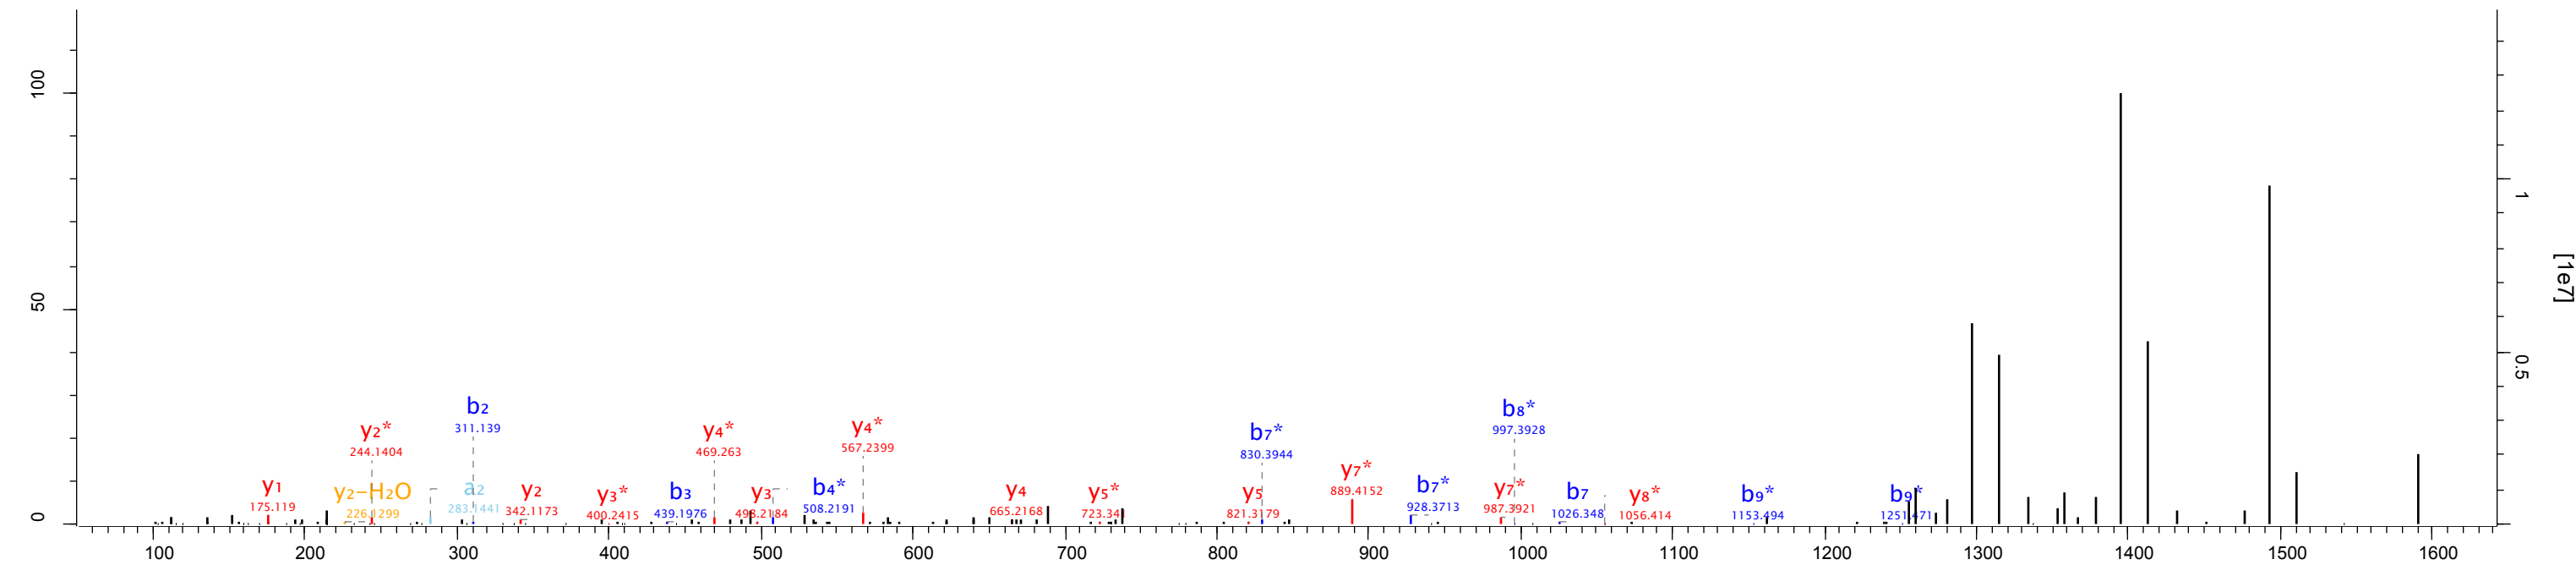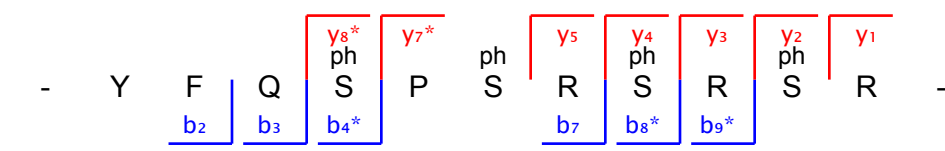

Raw file: 20150812\_A375SR\_Phospho\_BR1\_02  
 Scan: 6783 Method: FTMS; HCD Score: 73.46 m/z: 894.83 Gene names: ARHGEF11

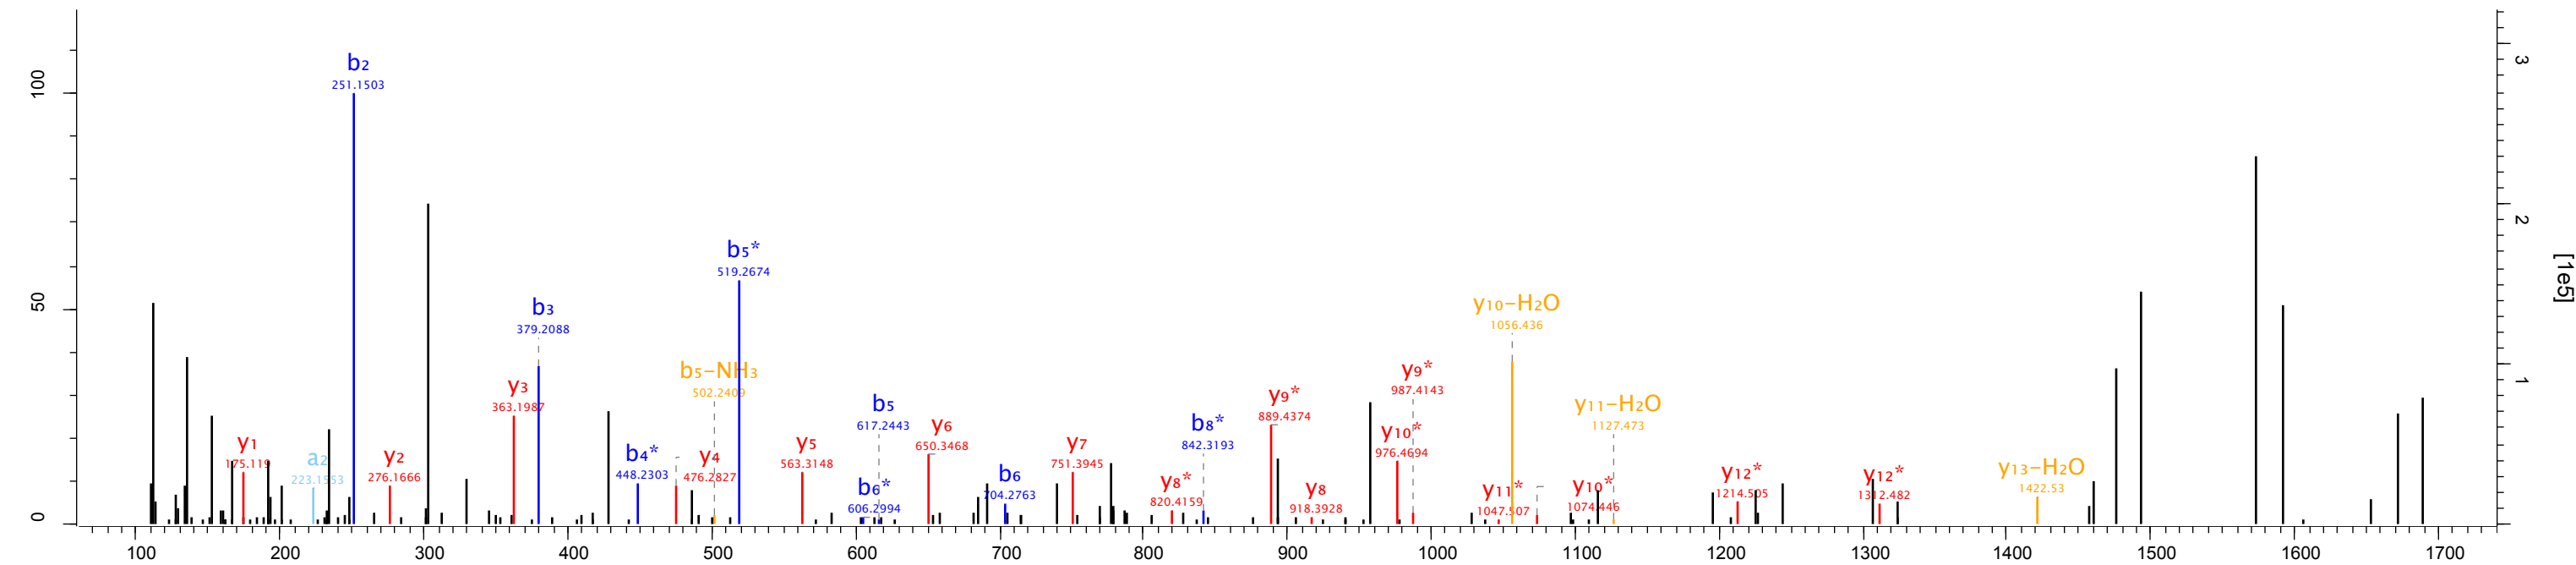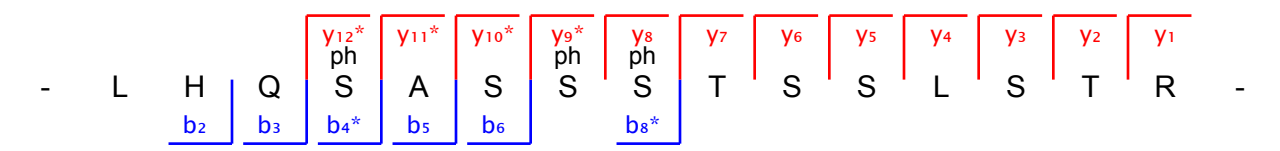

Raw file: 20150812\_A375SR\_Phospho\_BR1\_02  
 Scan: 6943 Method: FTMS; HCD Score: 191.9 m/z: 904.33 Gene names: NUFIP2

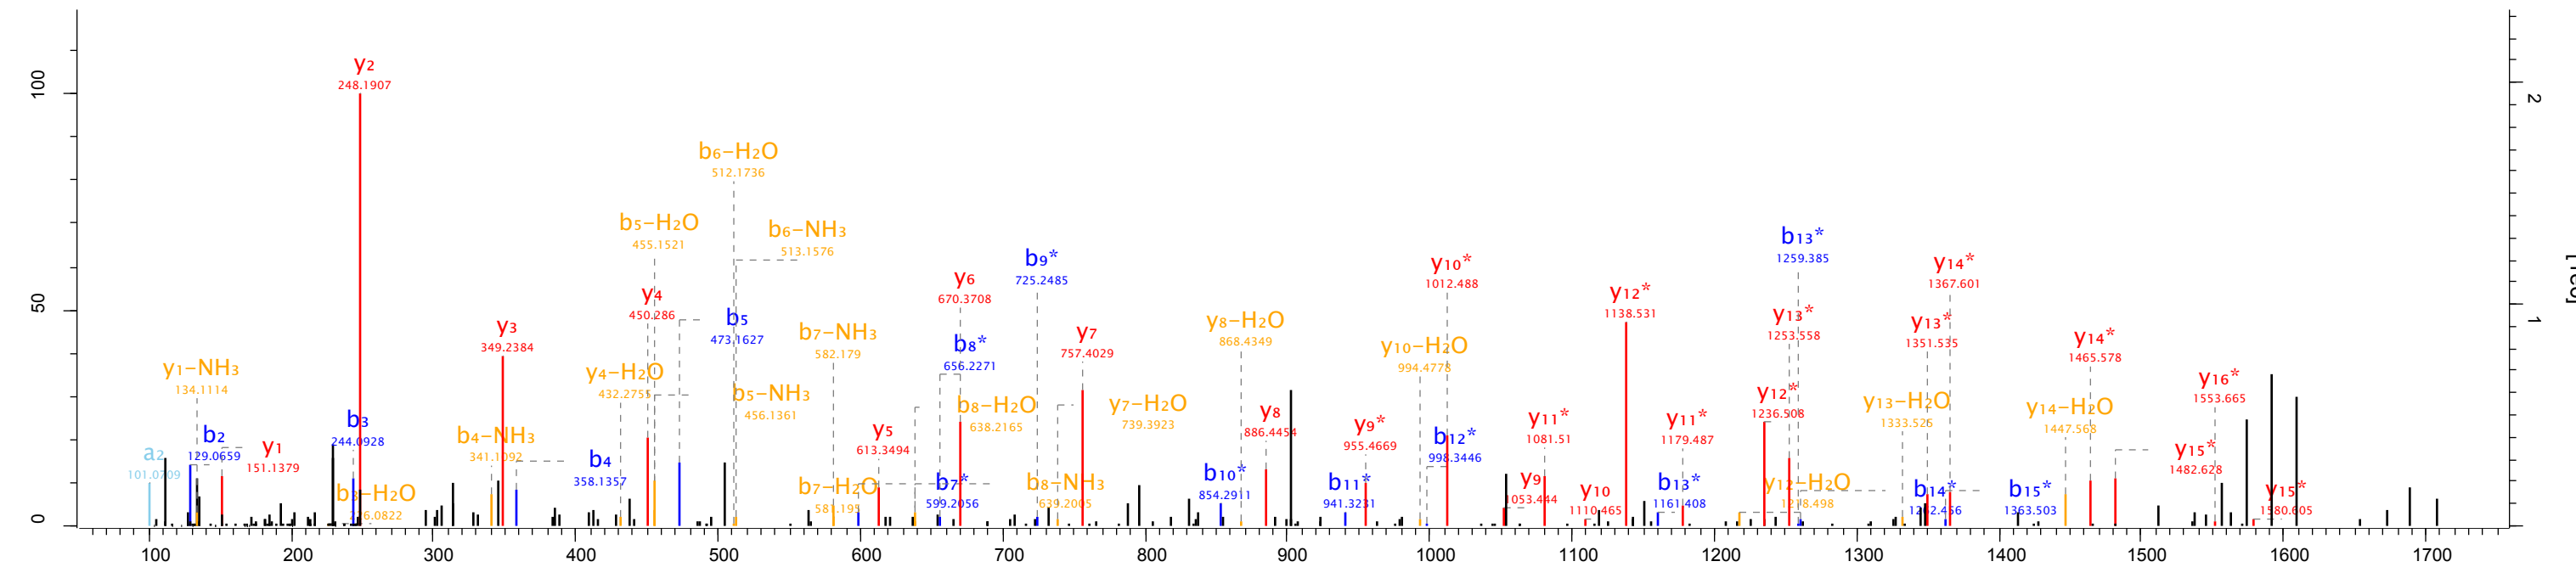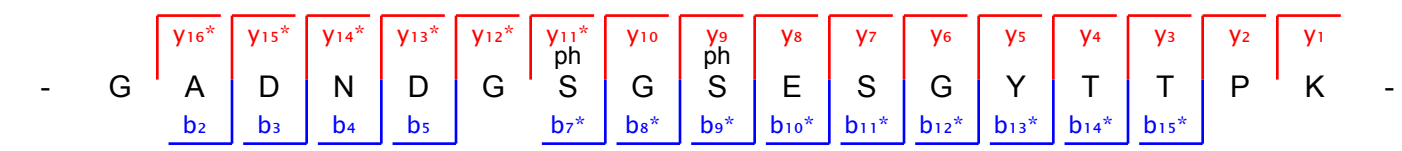

Raw file: 20150812\_A375SR\_Phospho\_BR1\_02  
 Scan: 6983 Method: FTMS; HCD Score: 59.01 m/z: 861.35 Gene names: KLF3

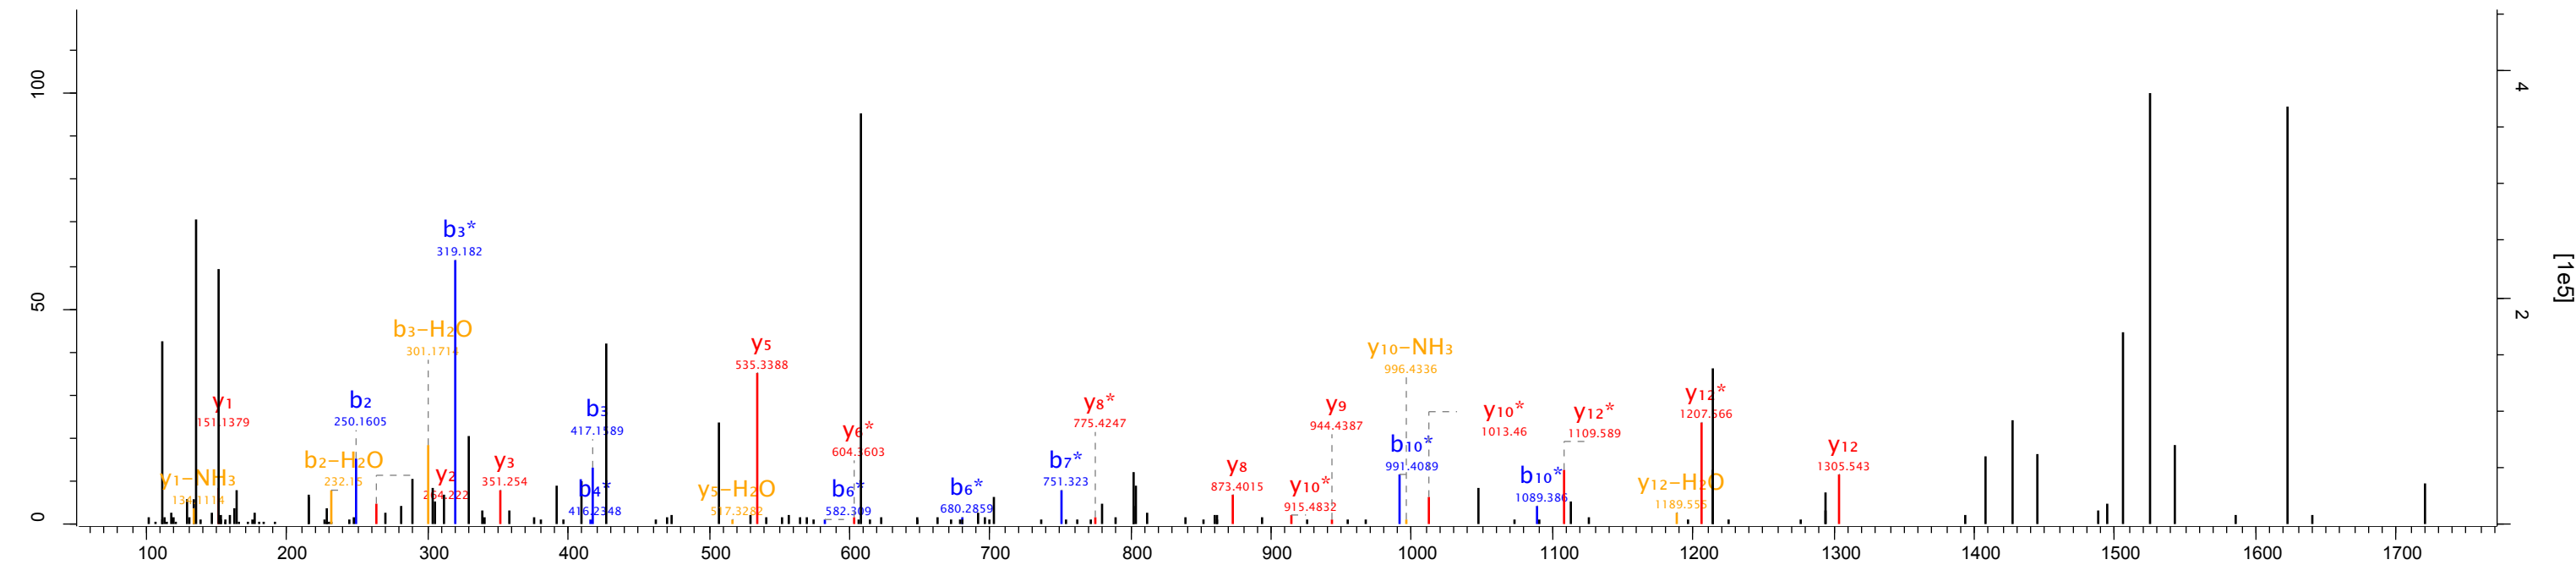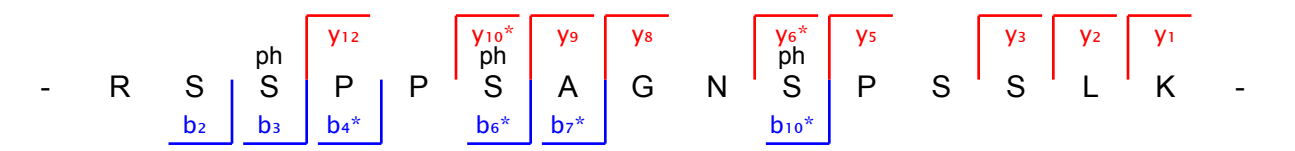

Raw file: 20150812\_A375SR\_Phospho\_BR1\_02  
 Scan: 7033 Method: FTMS; HCD Score: 131.98 m/z: 760.33 Gene names: RBM25

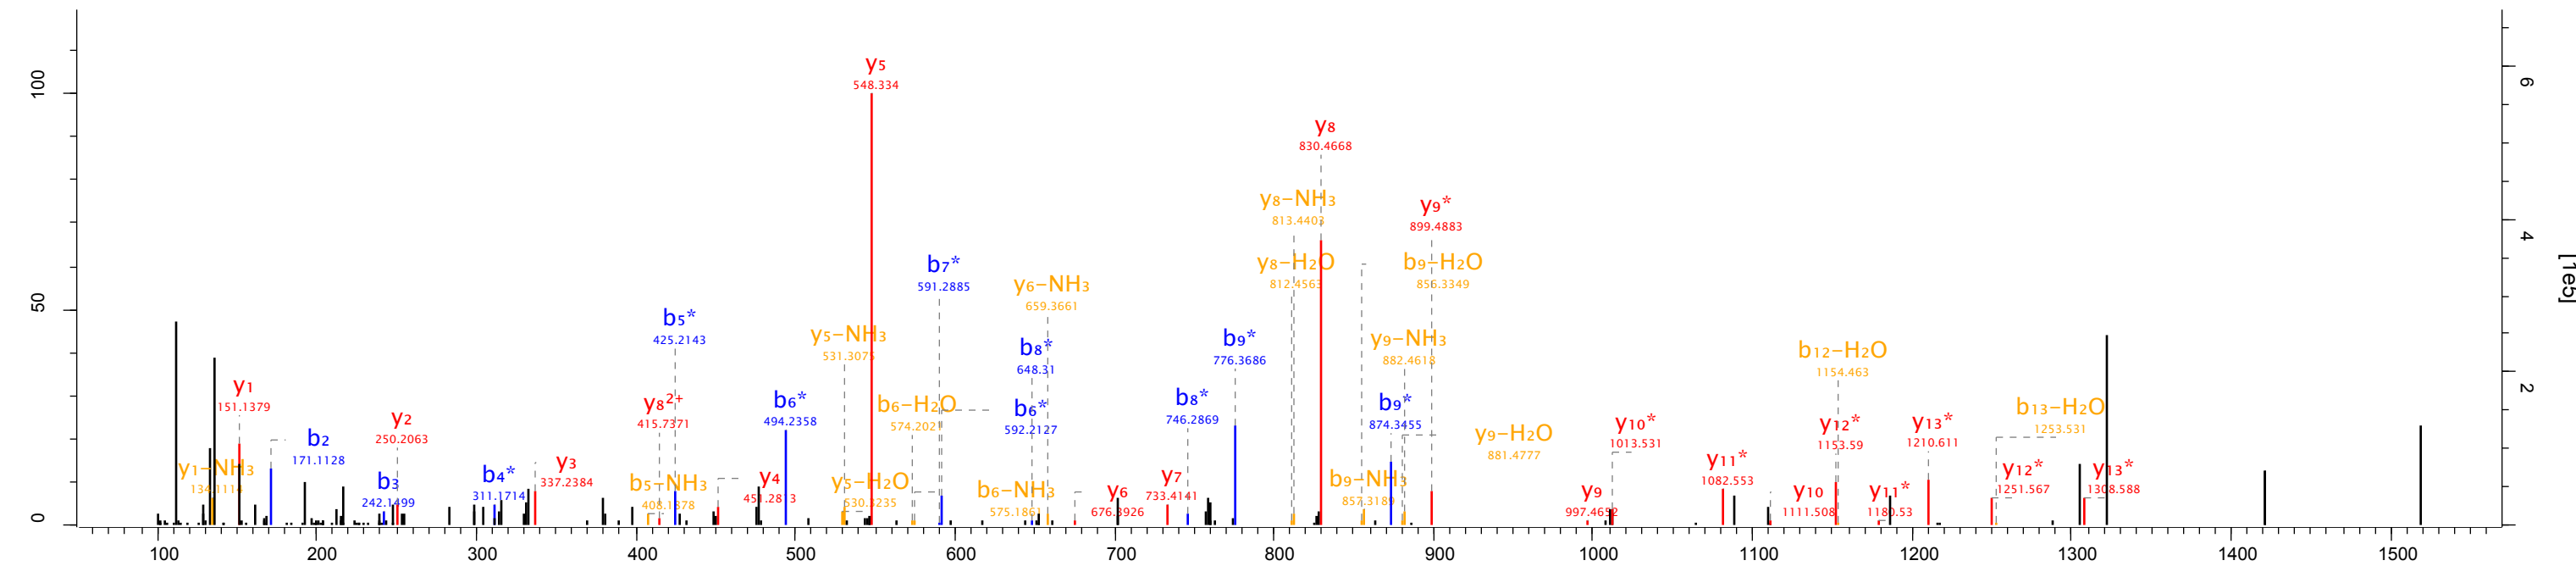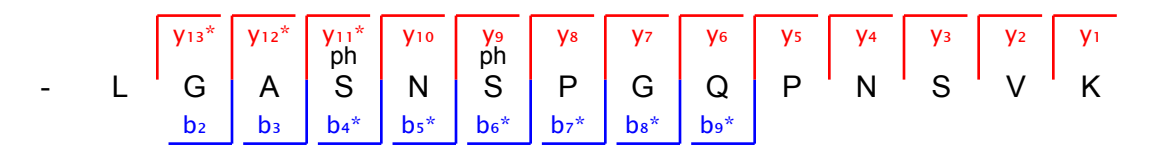

Raw file: 20150812\_A375SR\_Phospho\_BR1\_02  
 Scan: 7043 Method: FTMS; HCD Score: 130.27 m/z: 990.9 Gene names: HOXC10

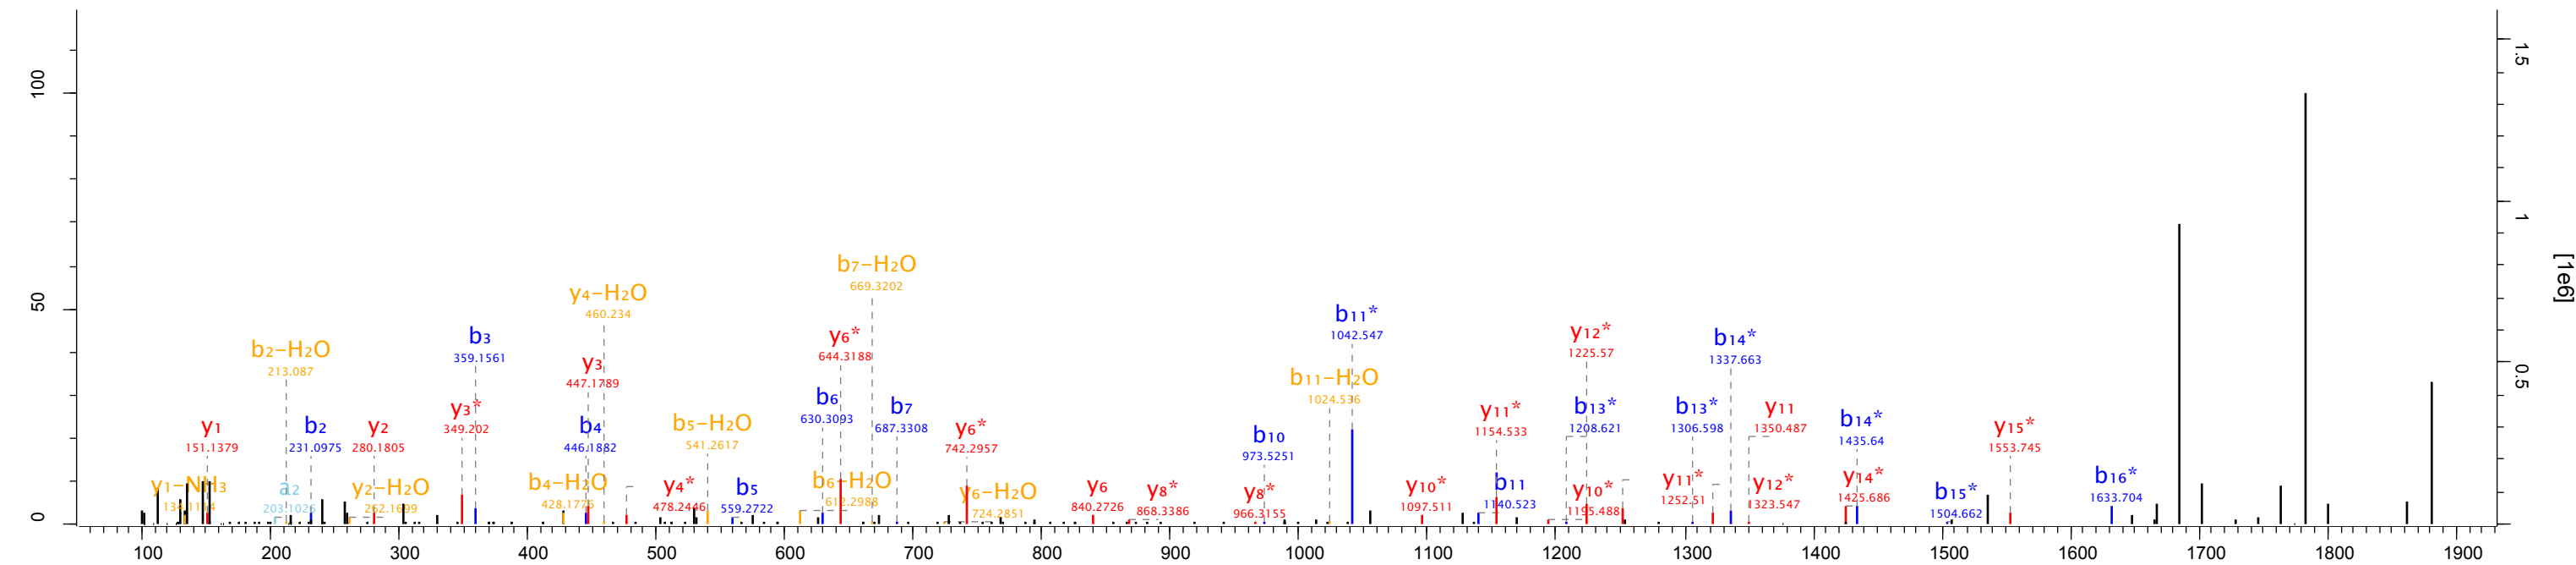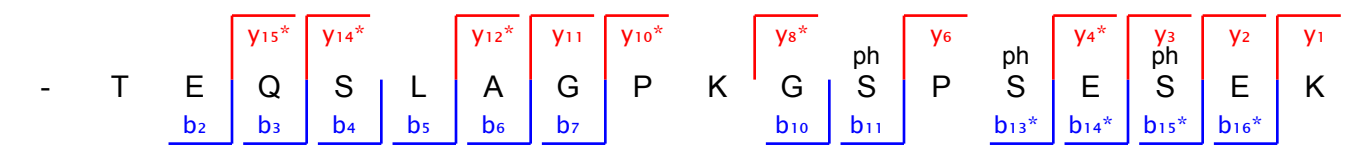

Raw file: 20150812\_A375SR\_Phospho\_BR1\_02  
 Scan: 7333 Method: FTMS; HCD Score: 46.46 m/z: 820.8 Gene names: SPTBN1

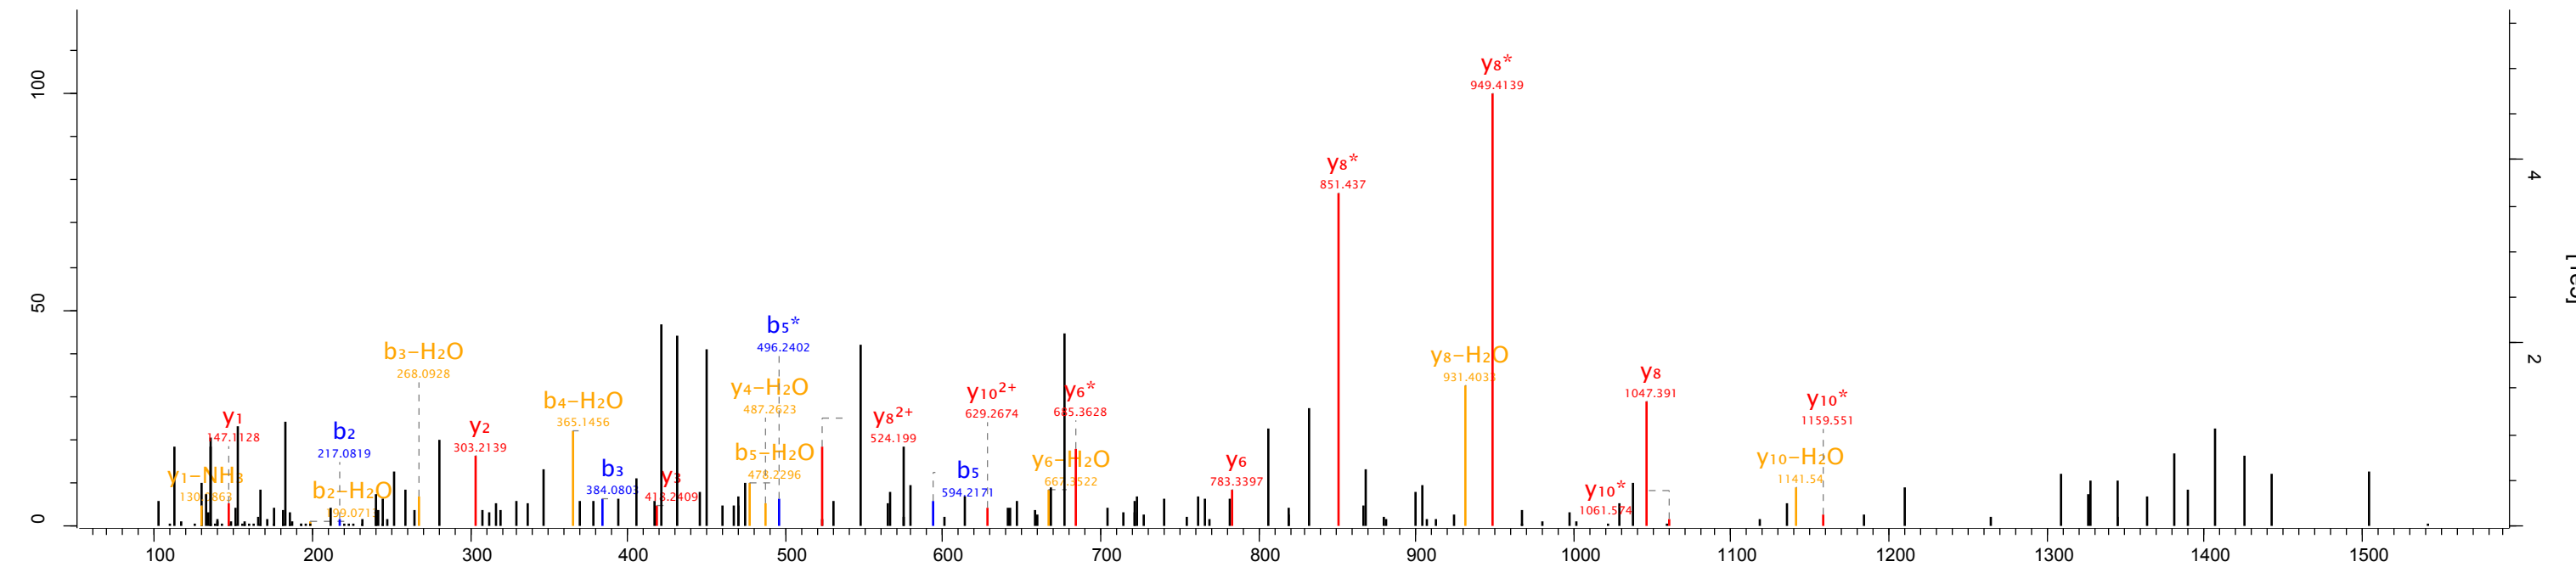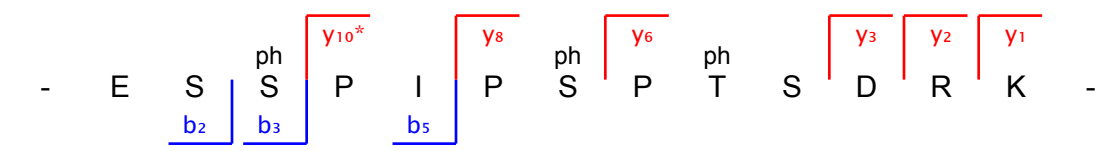

Raw file 20150812\_A375SR\_Phospho\_BR1\_02 Scan 7663 Method FTMS; HCD Score 89.56 m/z 762.26 Gene names KIF4A

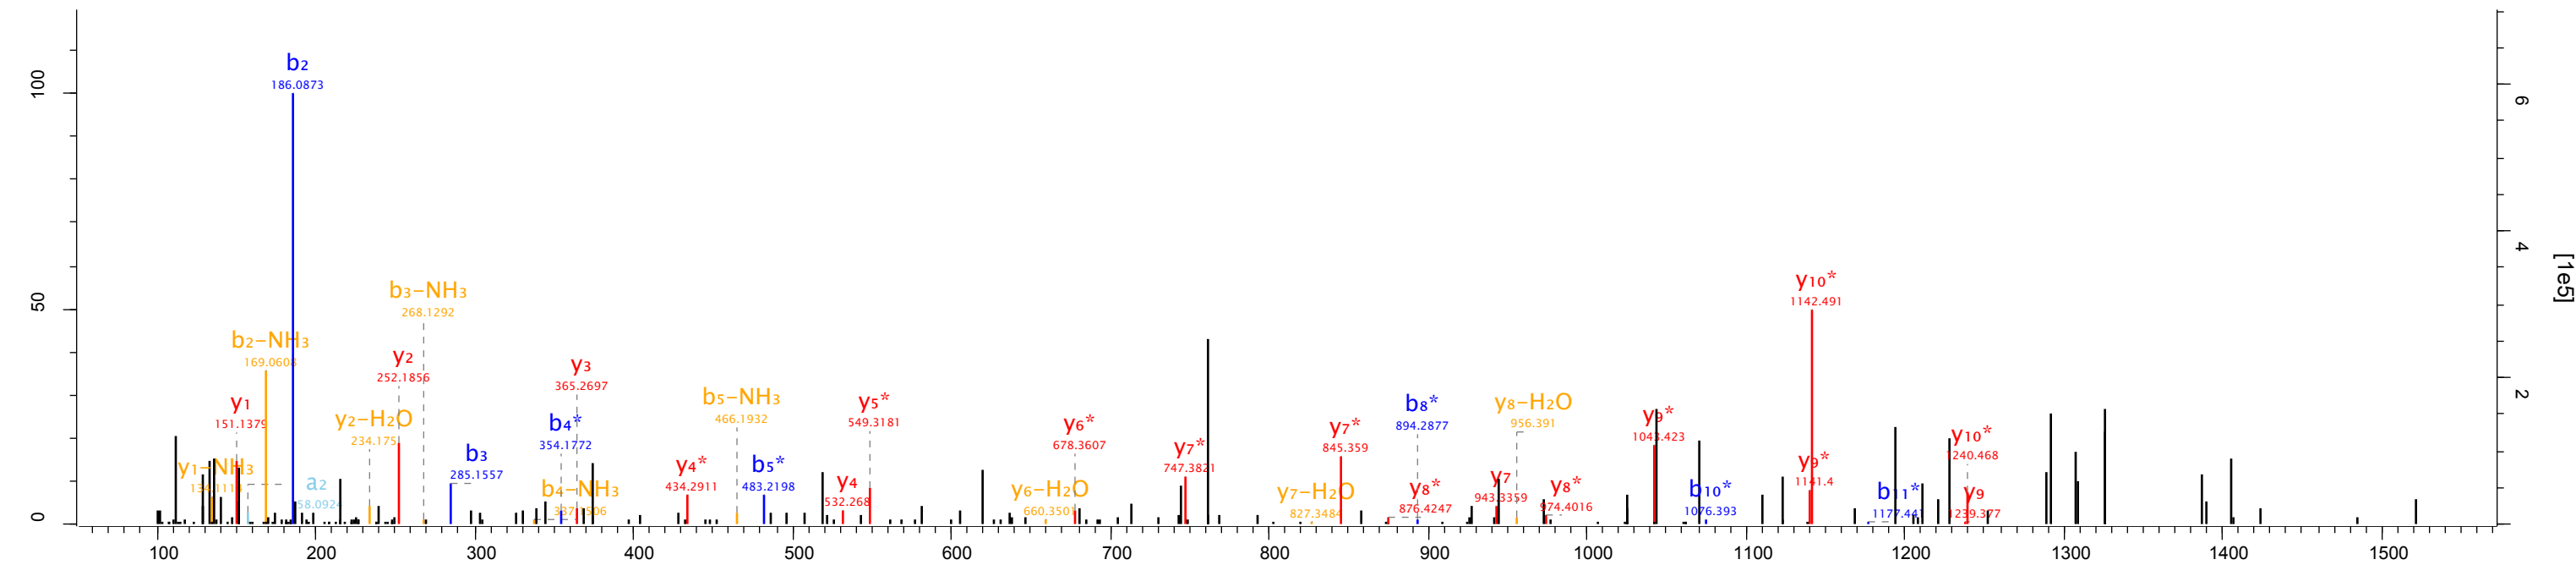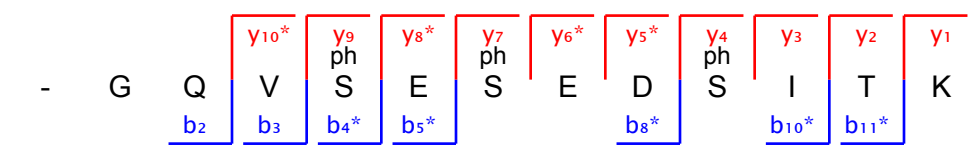



Raw file: 20150812\_A375SR\_Phospho\_BR1\_02  
 Scan: 7693 Method: FTMS; HCD Score: 186.7 m/z: 805.32 Gene names: LRRFIP2

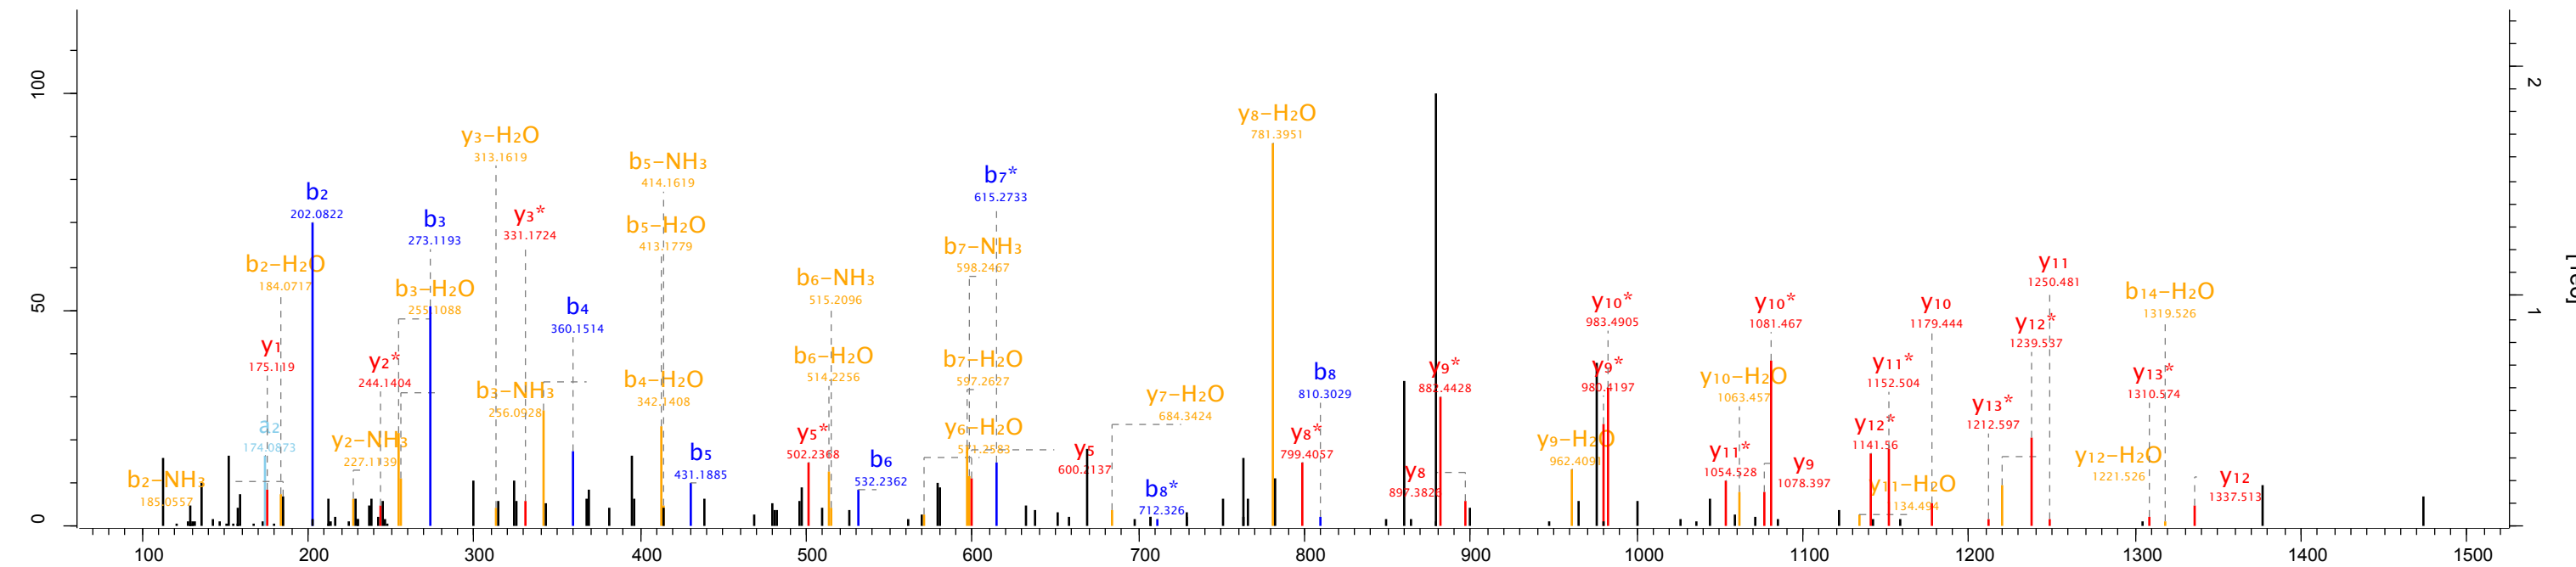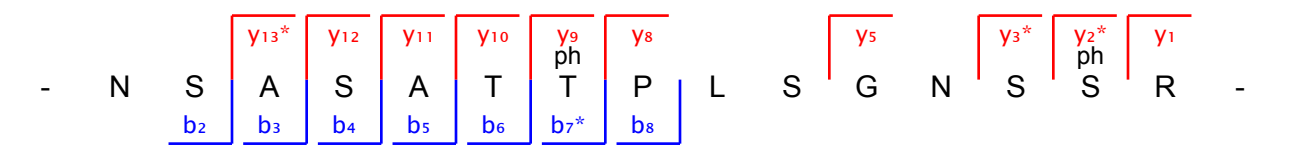

Raw file 20150812\_A375SR\_Phospho\_BR1\_02 Scan 7743 Method FTMS; HCD Score 98.88 m/z 737.31 Gene names EPB41L1

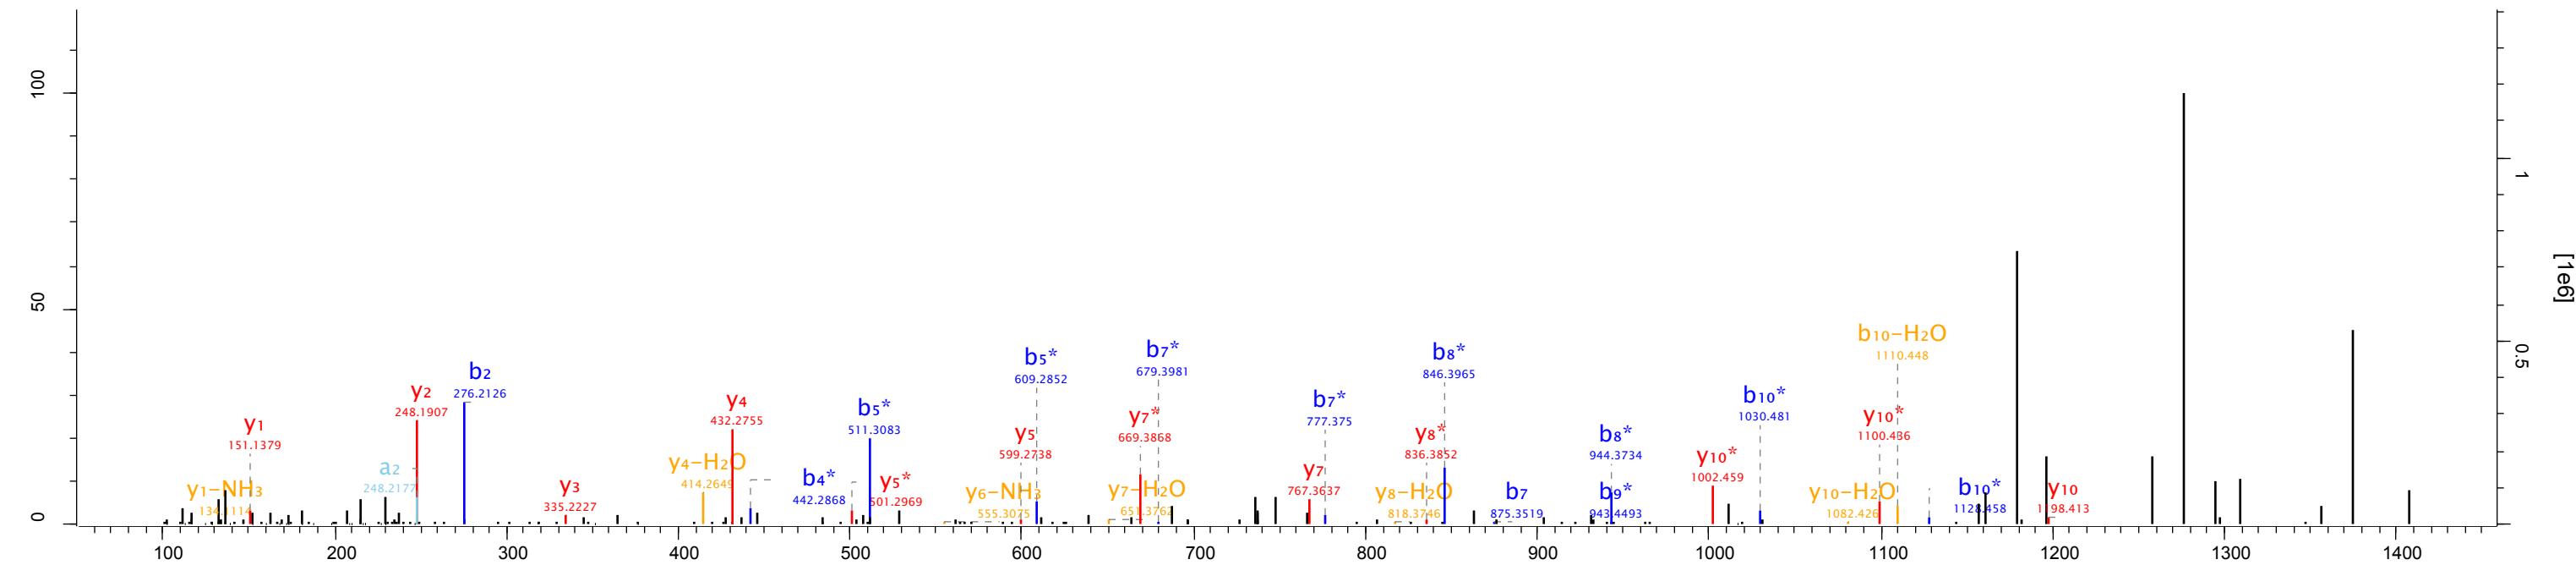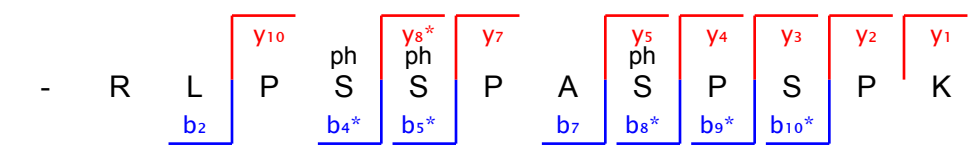

Raw file: 20150812\_A375SR\_Phospho\_BR1\_02  
 Scan: 7863 Method: FTMS; HCD Score: 76.8 m/z: 671.25 Gene names: SRRM2

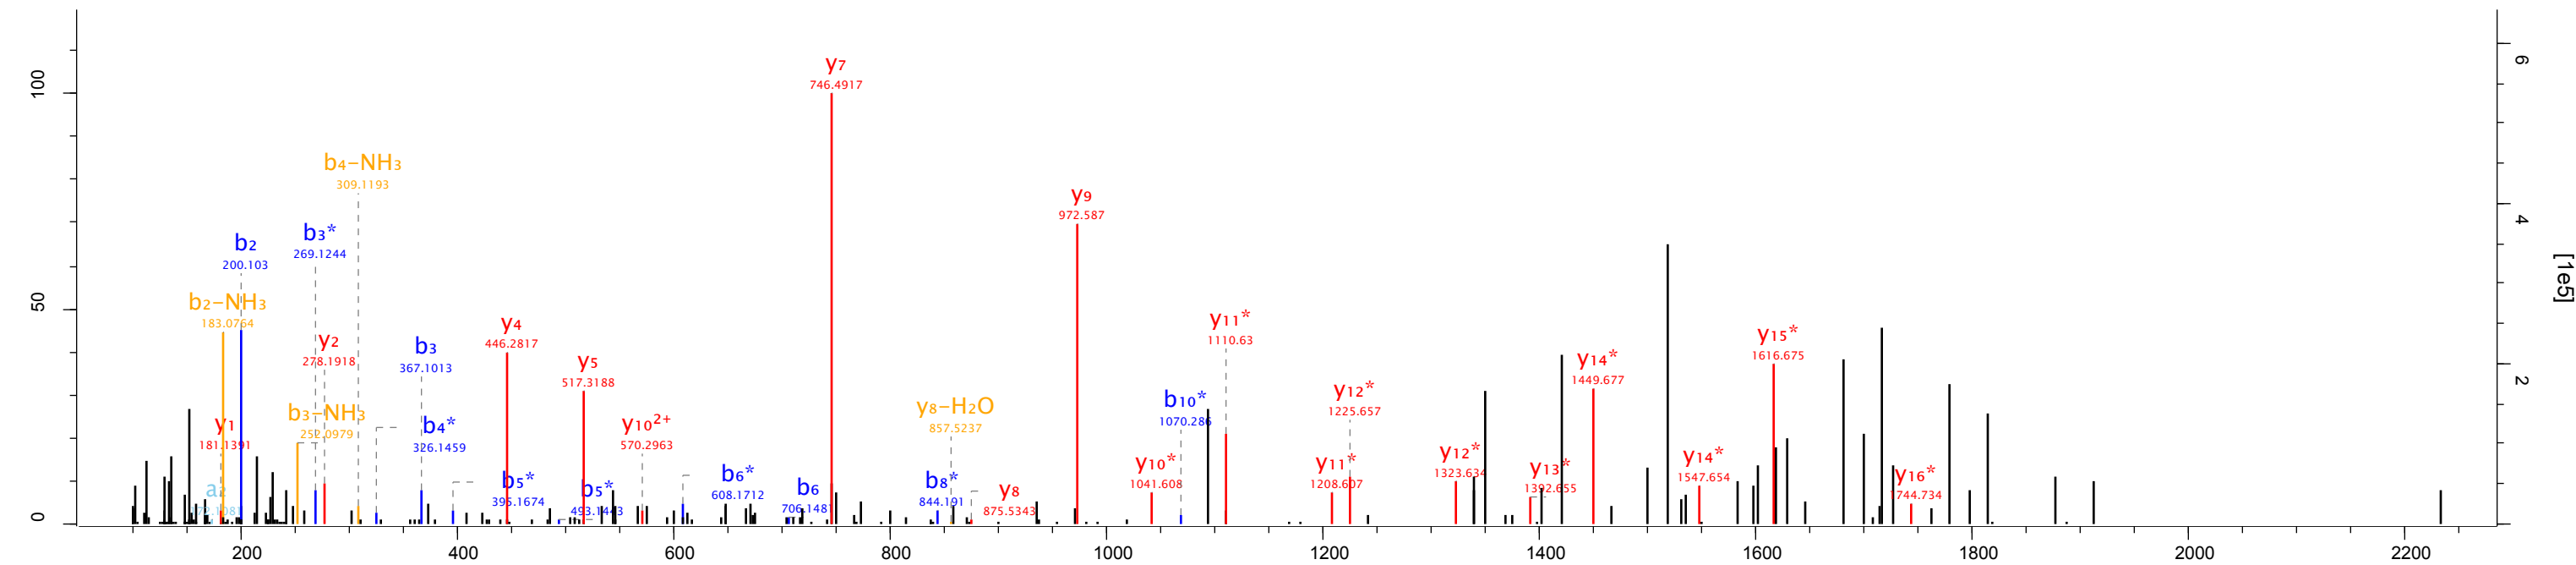

- A Q S G S D S S P E P K A P A P R -

b<sub>2</sub>
b<sub>3</sub>
b<sub>4</sub><sup>\*</sup>
b<sub>5</sub><sup>\*</sup>
b<sub>6</sub>
b<sub>8</sub><sup>\*</sup>
b<sub>10</sub><sup>\*</sup>
y<sub>1</sub>
y<sub>2</sub>
y<sub>4</sub>
y<sub>5</sub>
y<sub>7</sub>
y<sub>8</sub>
y<sub>9</sub>
y<sub>10</sub><sup>\*</sup>
y<sub>11</sub><sup>\*</sup>
y<sub>12</sub><sup>\*</sup>
y<sub>13</sub><sup>\*</sup>
y<sub>14</sub><sup>\*</sup>
y<sub>15</sub><sup>\*</sup>
y<sub>16</sub><sup>\*</sup>



Raw file 20150812\_A375SR\_Phospho\_BR1\_02 Scan 8063 Method FTMS; HCD Score 108.23 m/z 899.7 Gene names UBAP2L

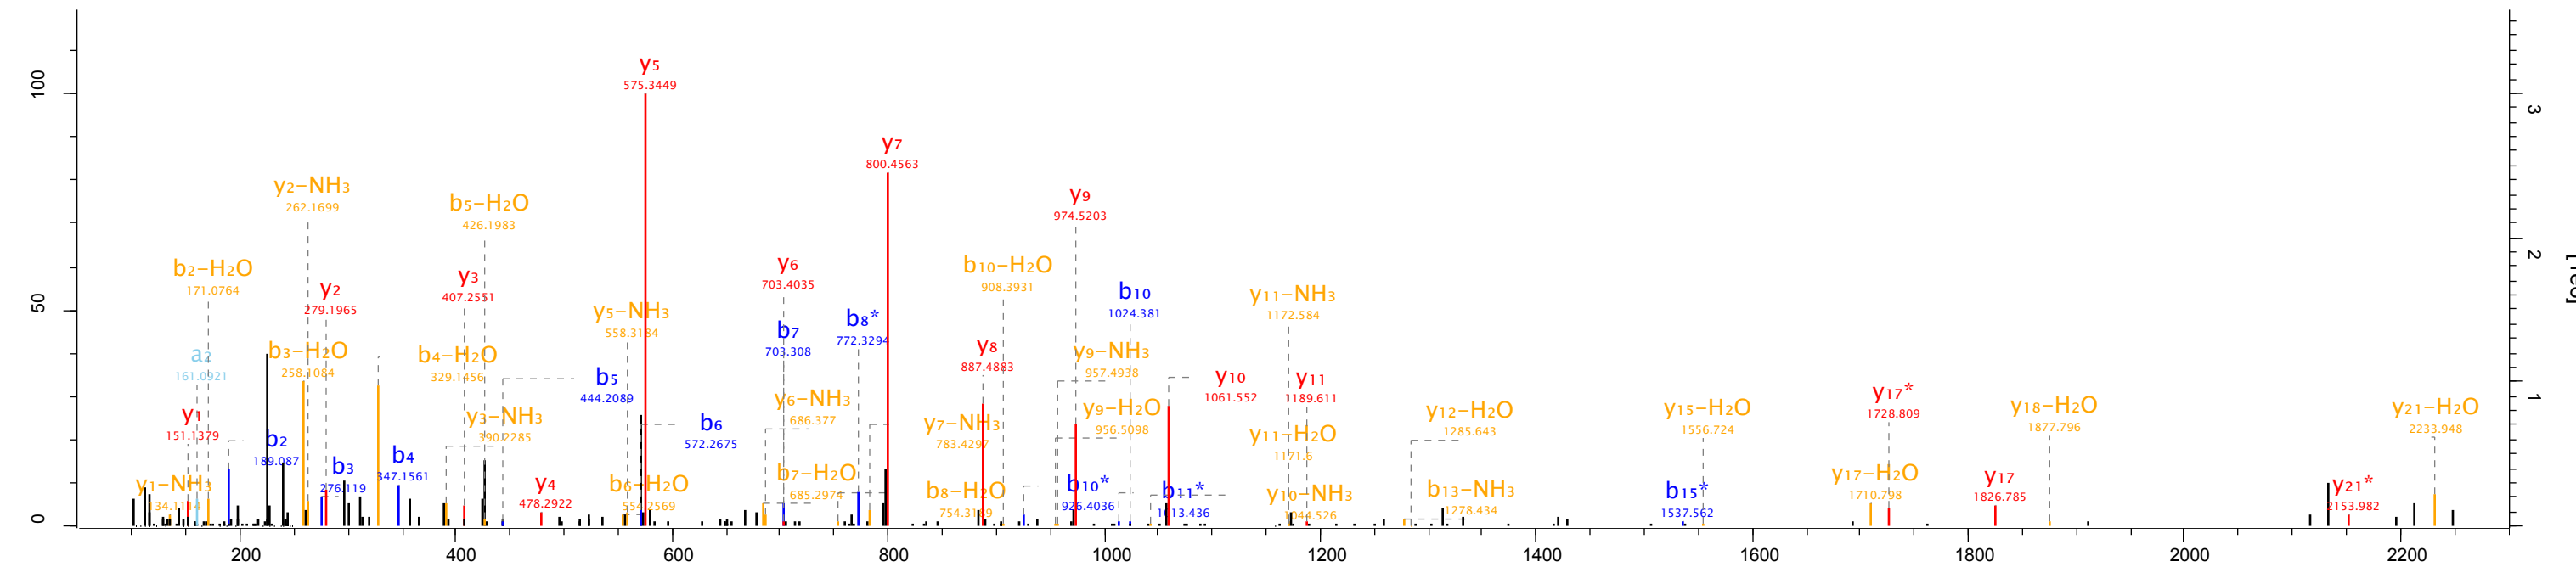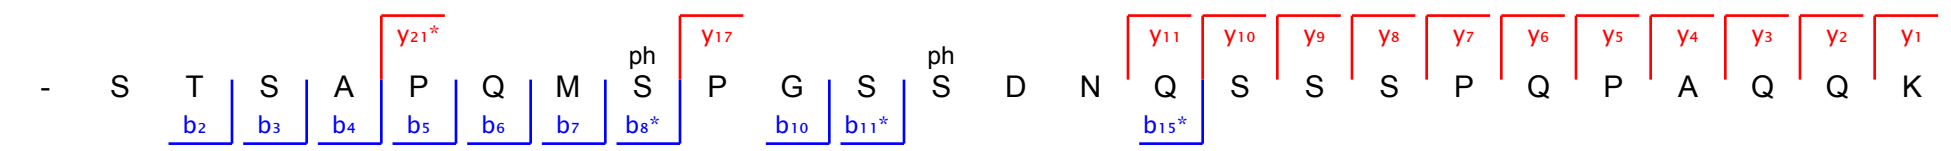

Raw file 20150812\_A375SR\_Phospho\_BR1\_02 Scan 8113 Method FTMS; HCD Score 225.8 m/z 1059.38 Gene names IWS1

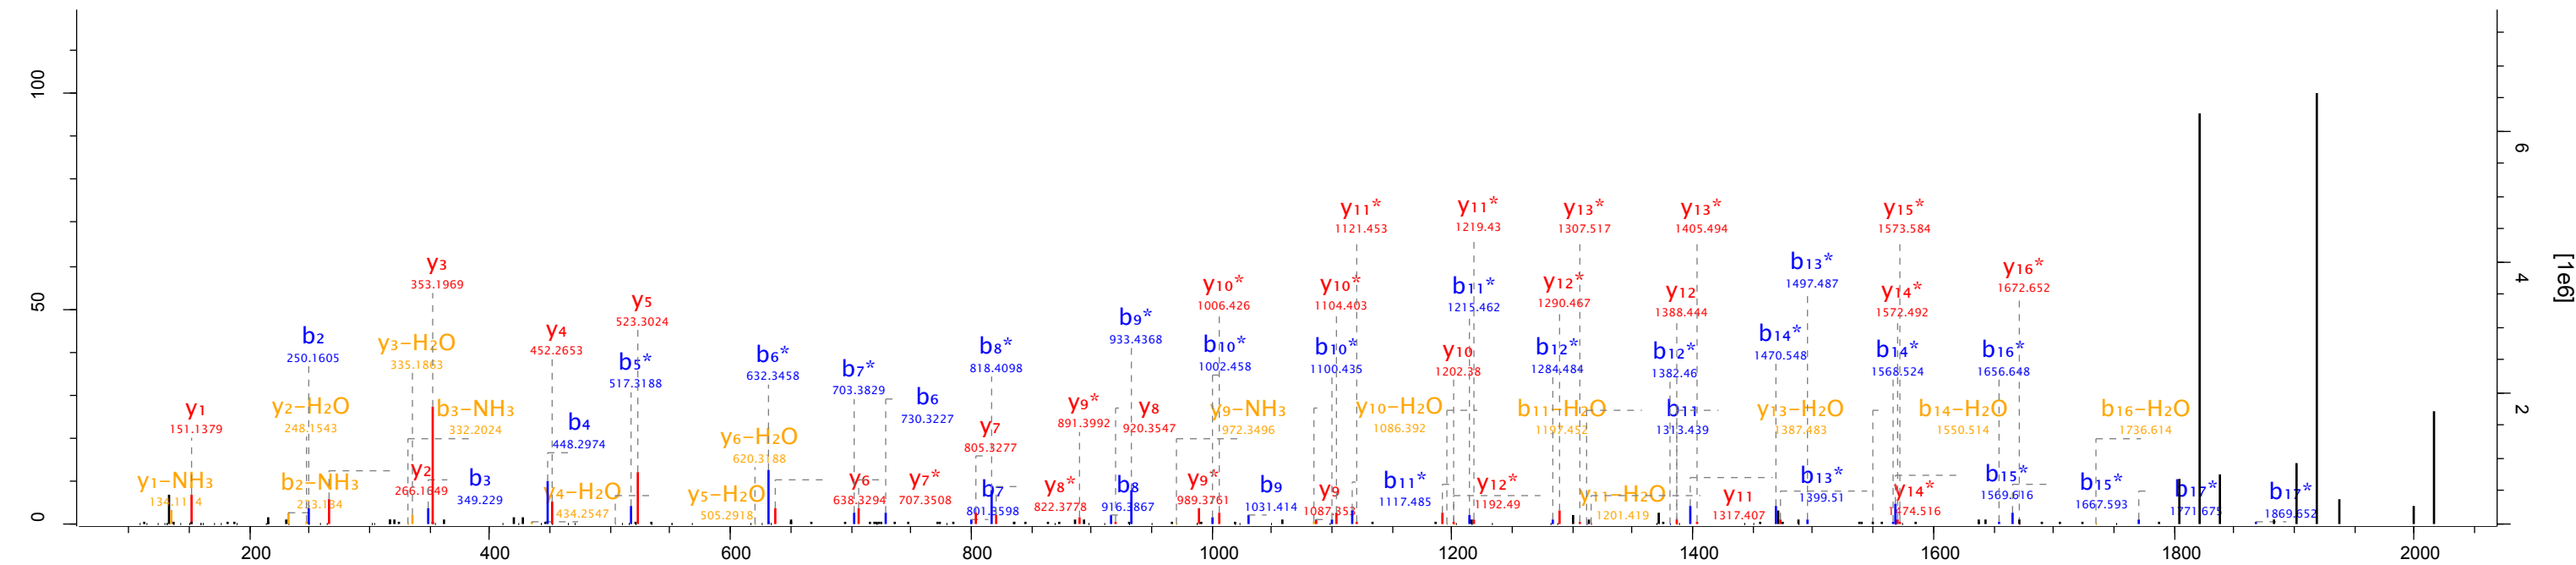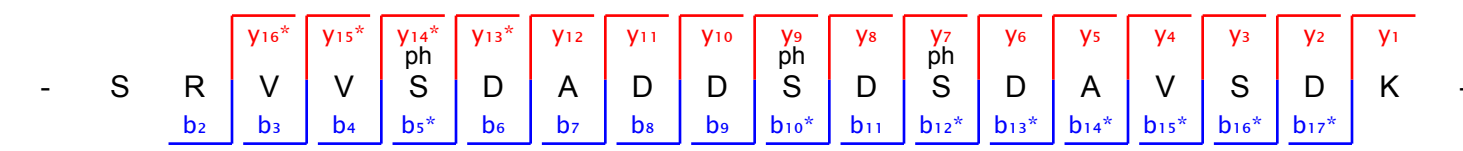

Raw file: 20150812\_A375SR\_Phospho\_BR1\_02  
 Scan: 8433 Method: FTMS; HCD Score: 109.39 m/z: 522.22 Gene names: RHBDF2

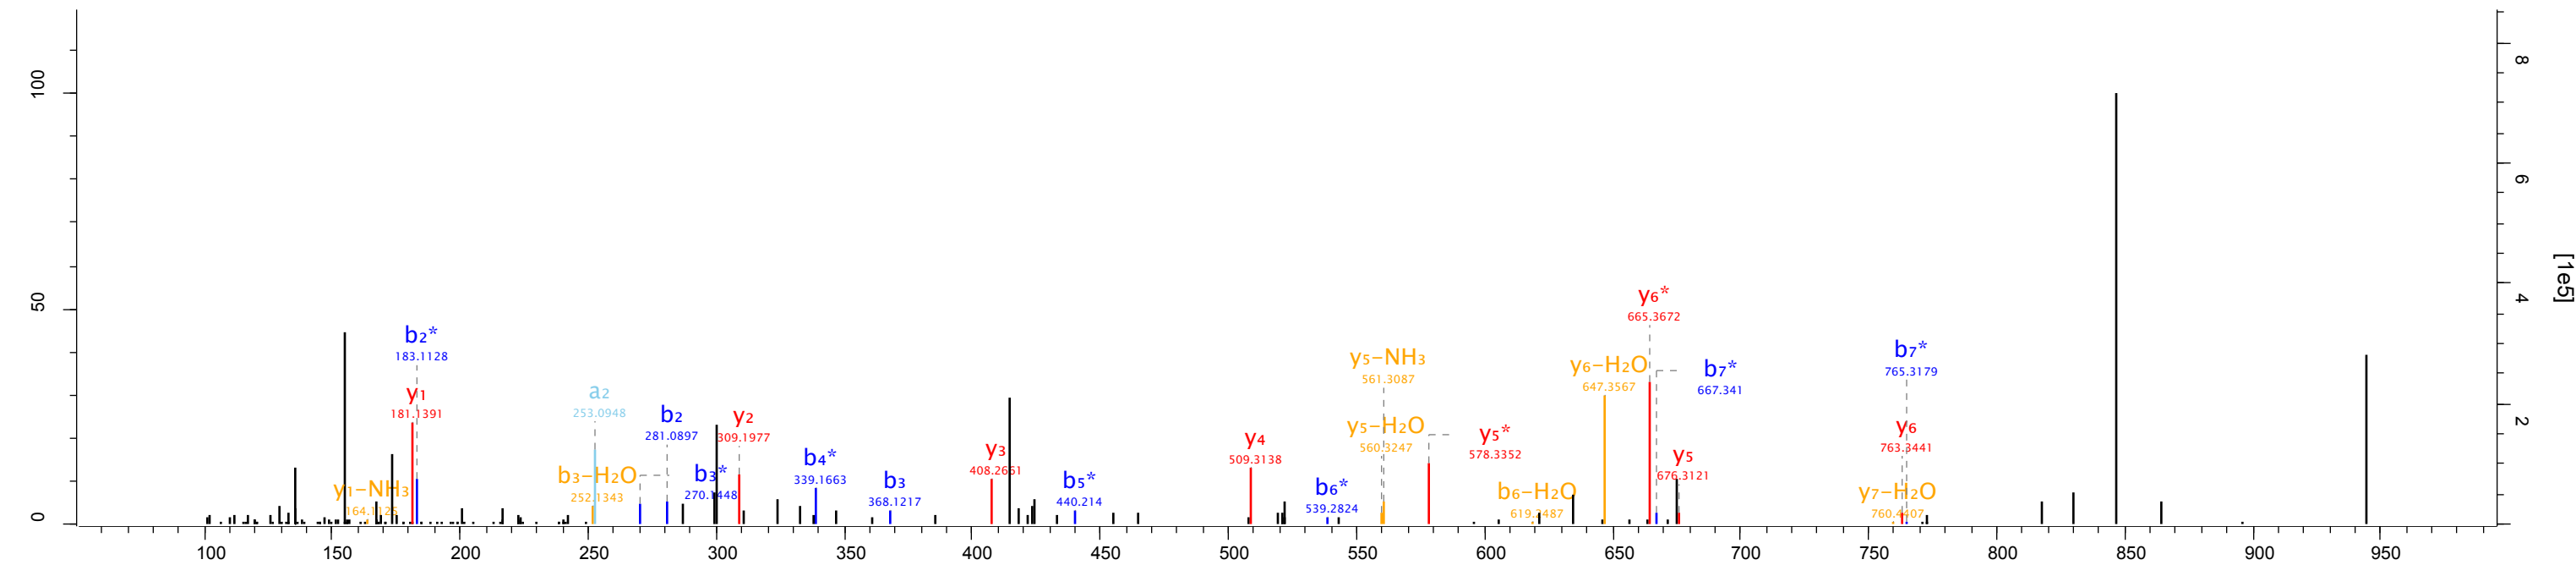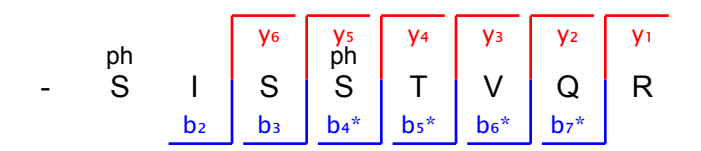

Raw file: 20150812\_A375SR\_Phospho\_BR1\_02  
 Scan: 8613 Method: FTMS; HCD Score: 44.93 m/z: 966.29 Gene names: GCFC2

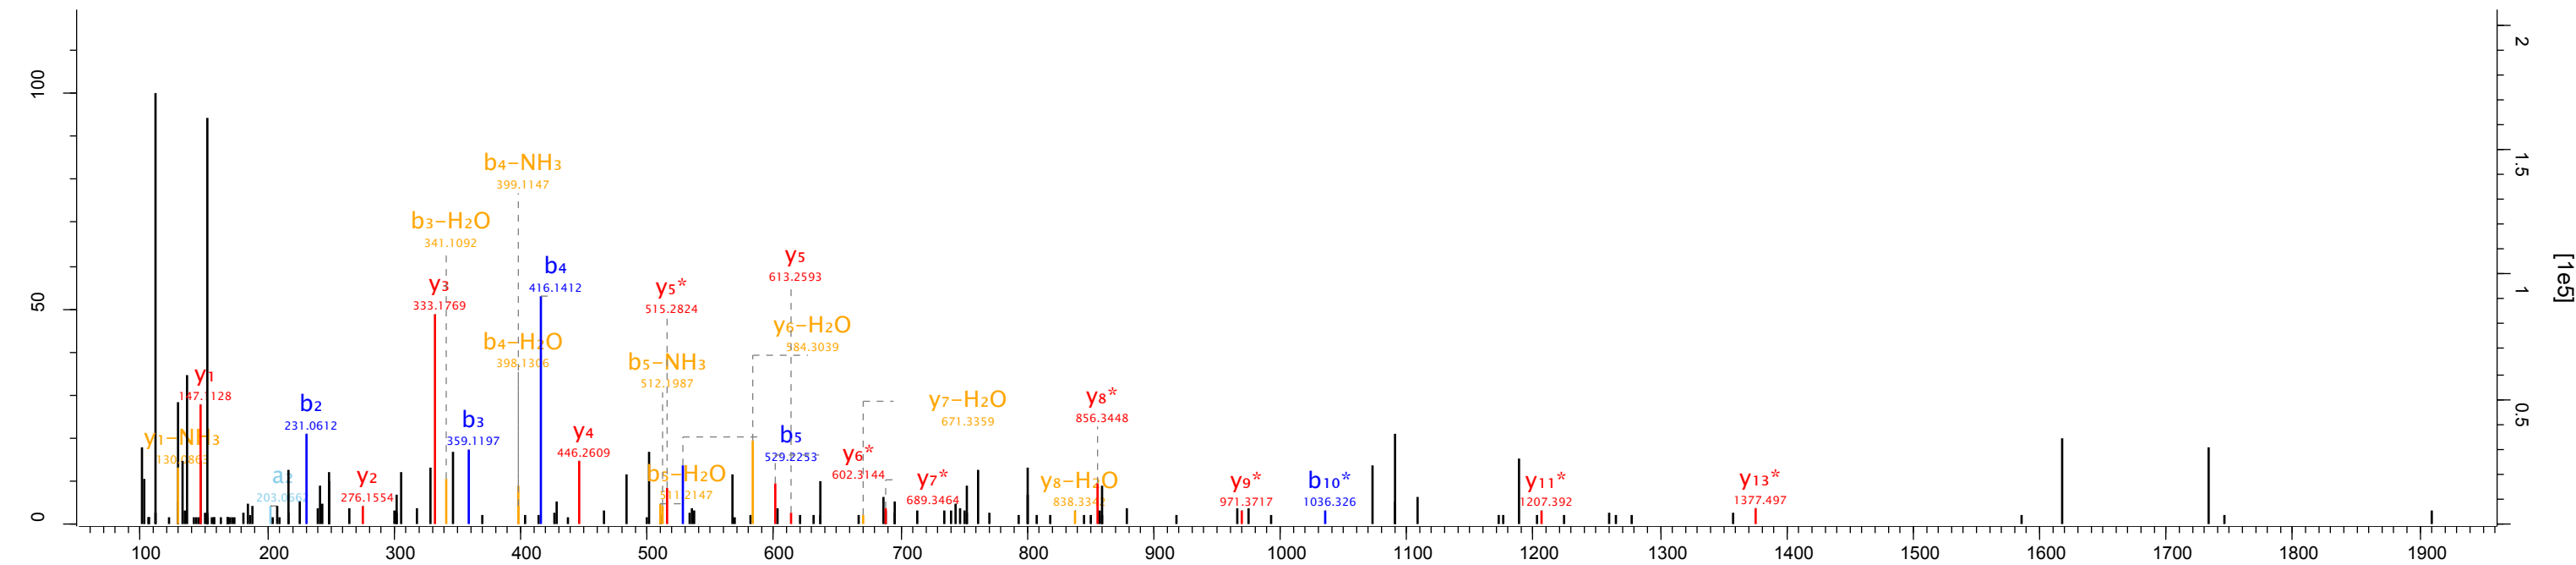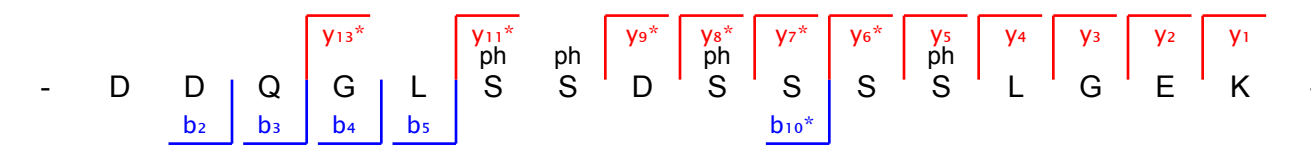



Raw file: 20150812\_A375SR\_Phospho\_BR1\_02  
 Scan: 8713 Method: FTMS; HCD Score: 150.48 m/z: 917.37 Gene names: NDRG1

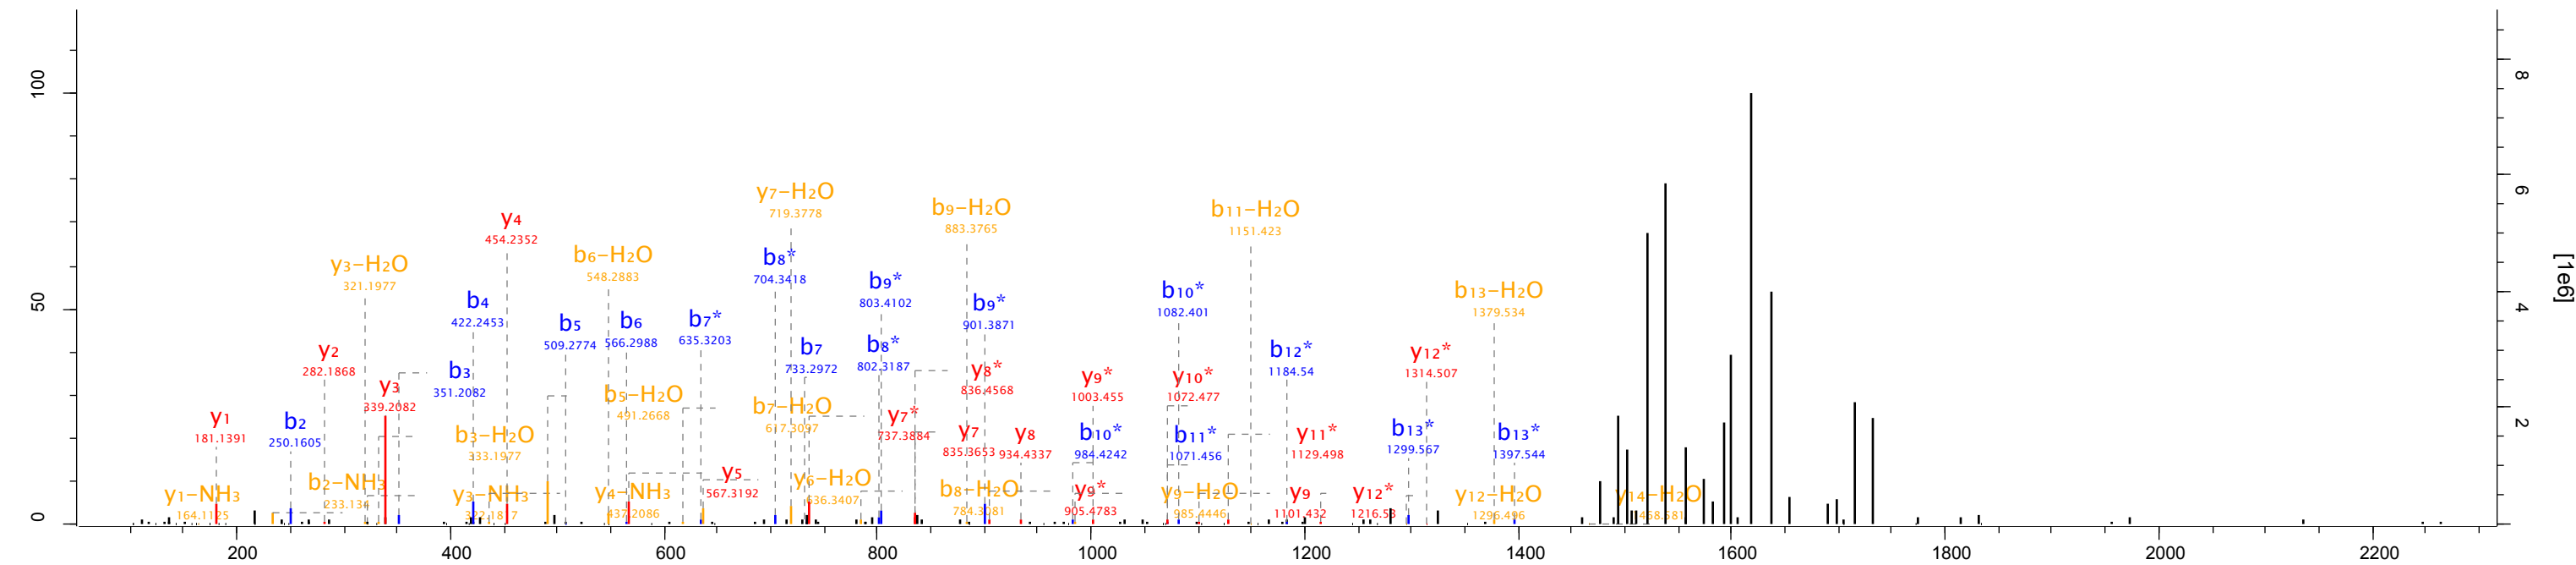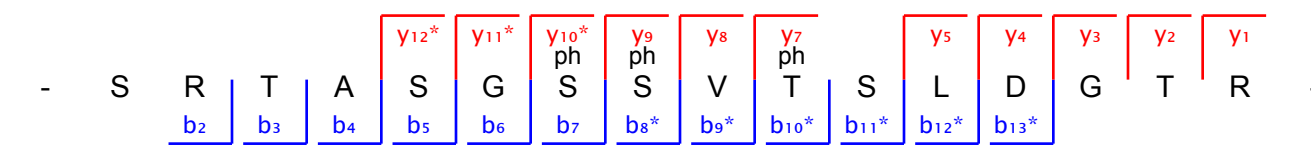

Raw file: 20150812\_A375SR\_Phospho\_BR1\_02  
 Scan: 8873 Method: FTMS; HCD Score: 58.93 m/z: 790.84 Gene names: TXNRD3

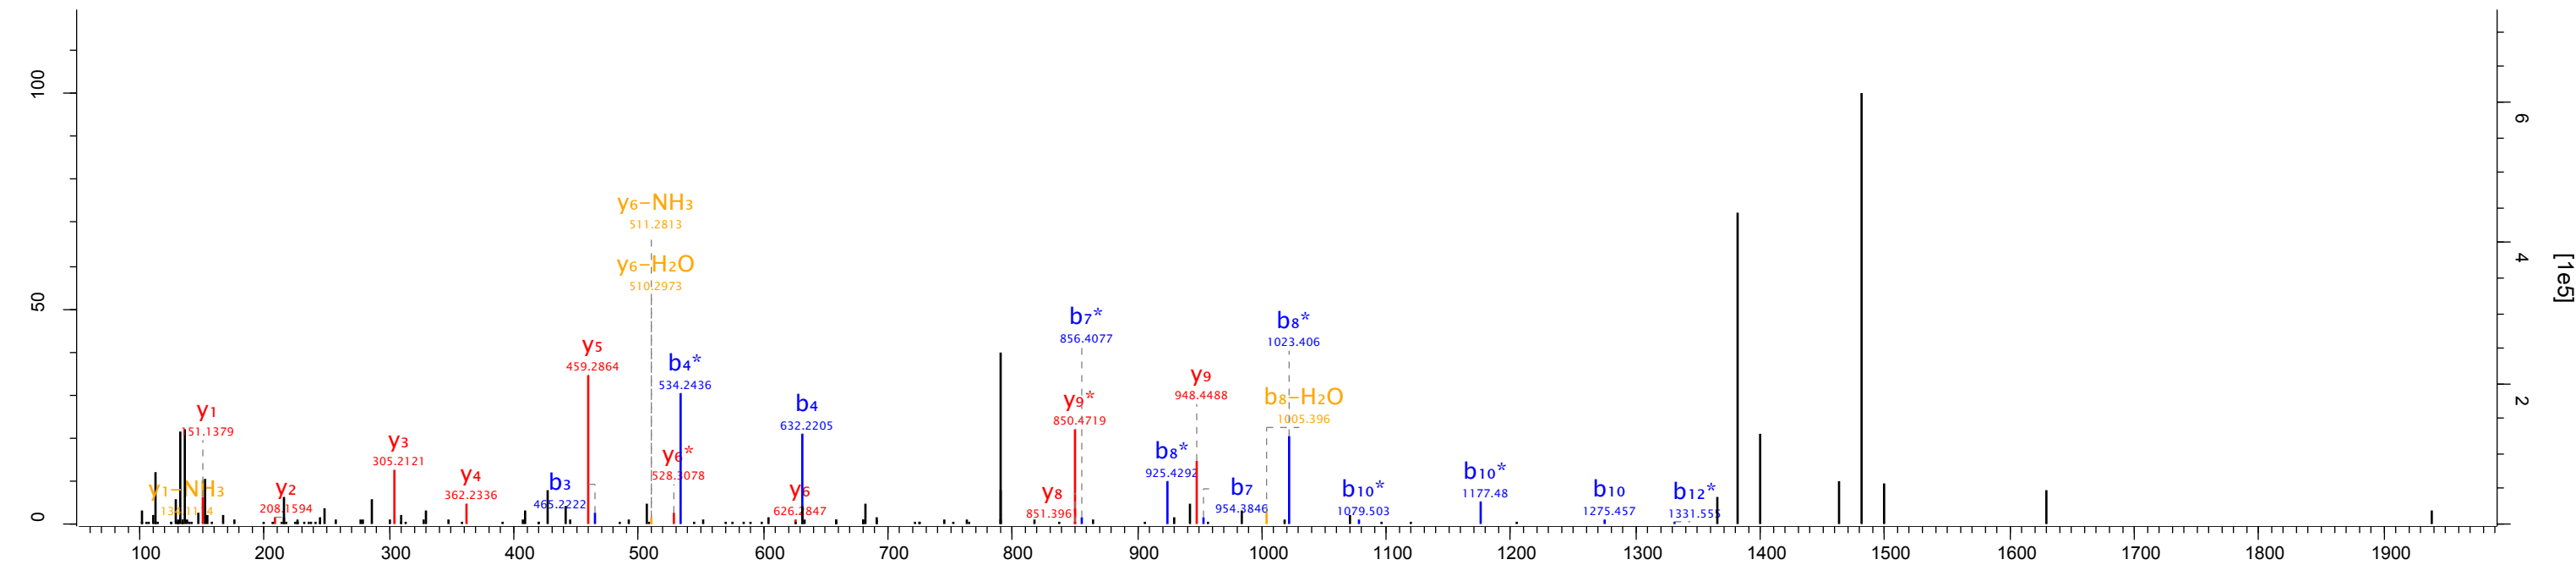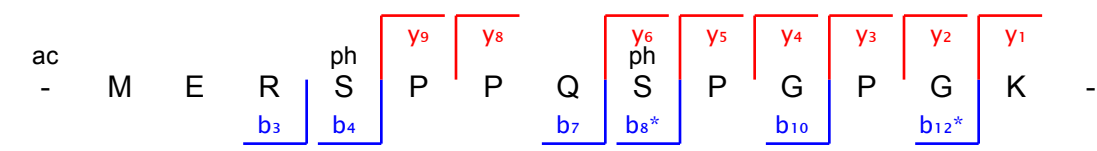

Raw file: 20150812\_A375SR\_Phospho\_BR1\_02  
 Scan: 8923 Method: FTMS; HCD Score: 111.93 m/z: 779.81 Gene names: NUP35

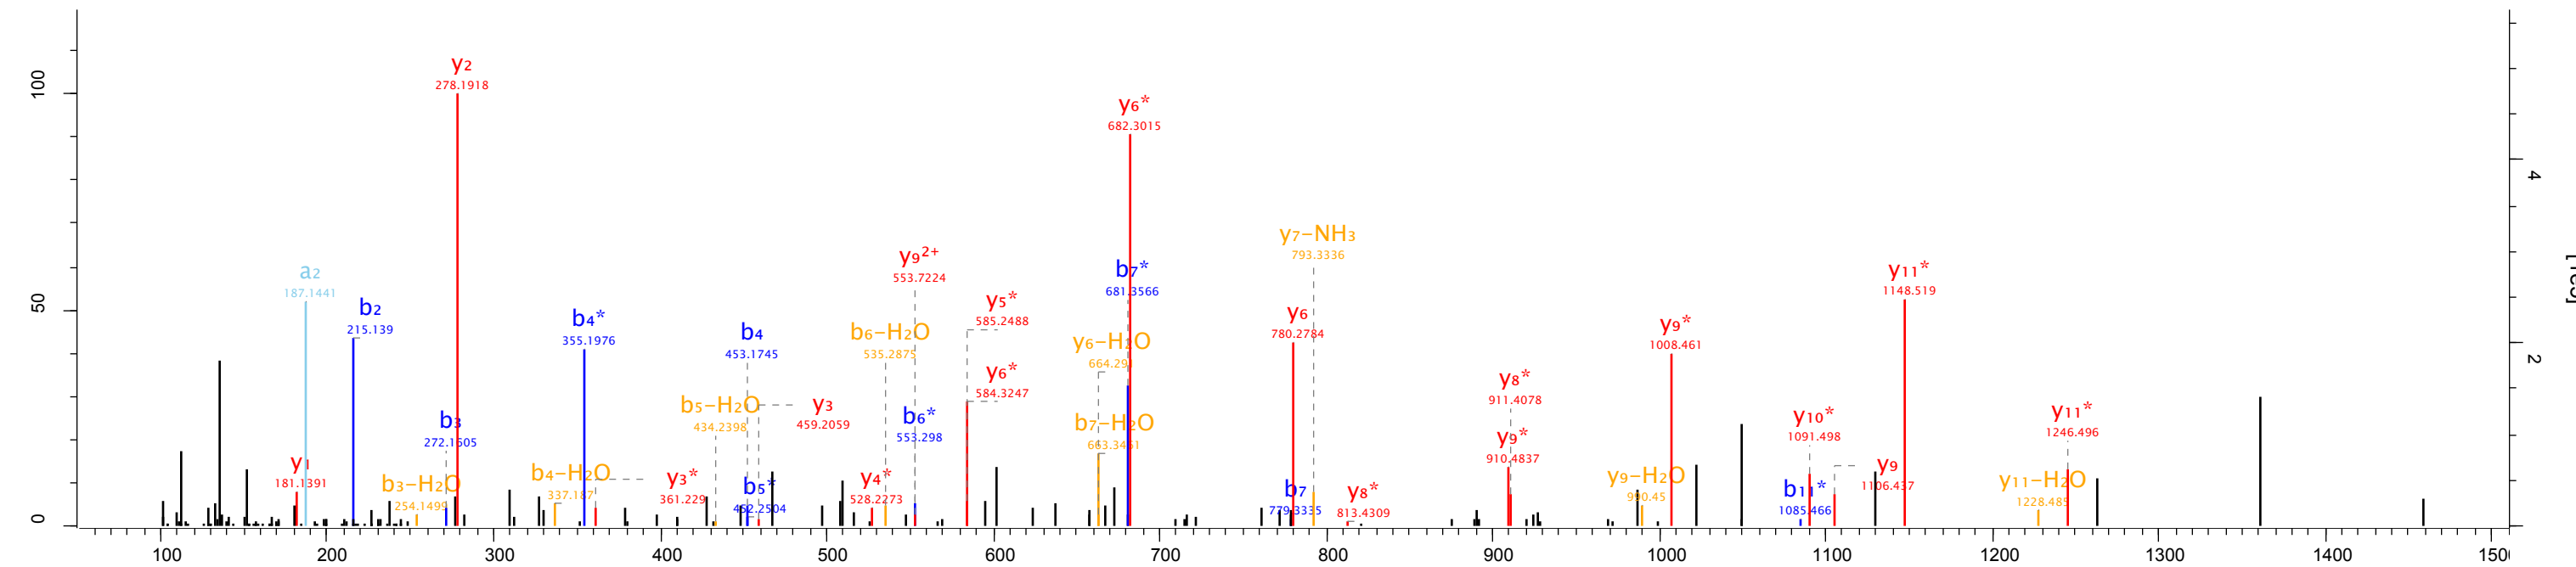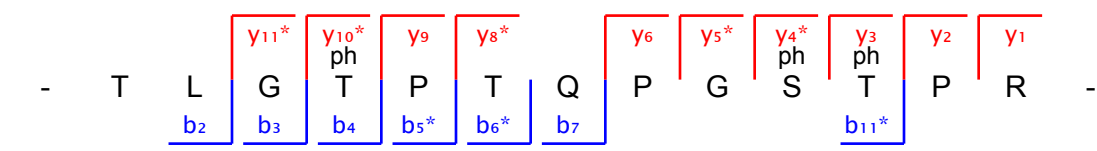

Raw file: 20150812\_A375SR\_Phospho\_BR1\_02  
 Scan: 9303 Method: FTMS; HCD Score: 133.8 m/z: 973.36 Gene names: IRF2BPL

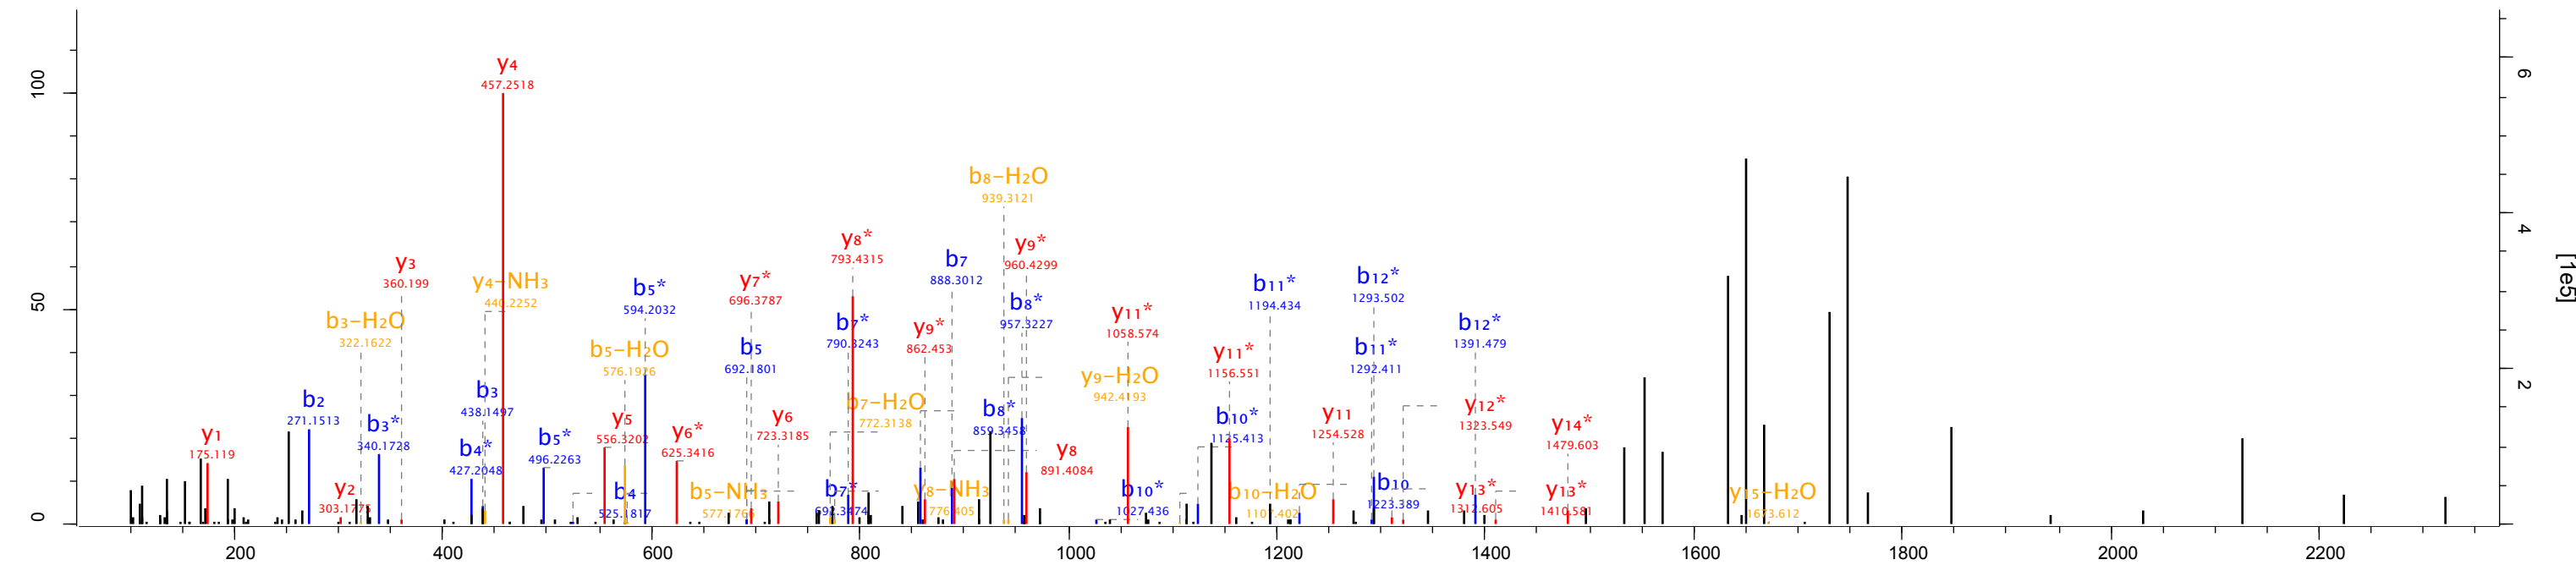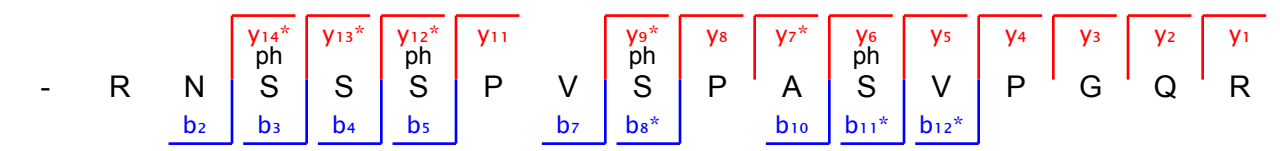

Raw file: 20150812\_A375SR\_Phospho\_BR1\_02  
 Scan: 9423 Method: FTMS; HCD Score: 134.58 m/z: 1020.38 Gene names: SLC9A3R1

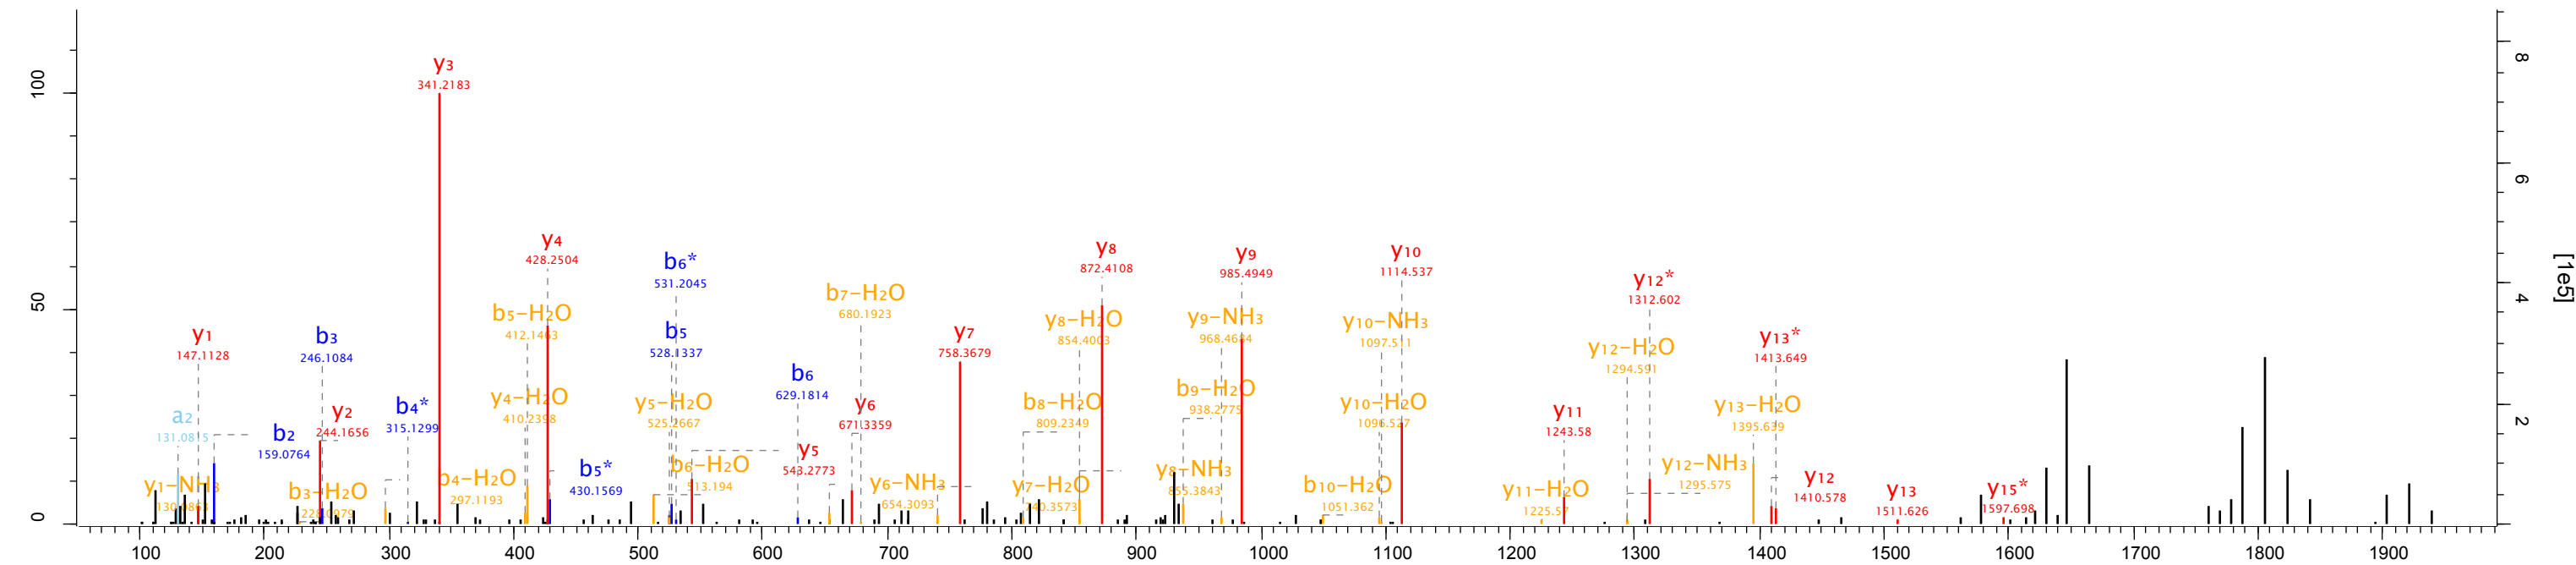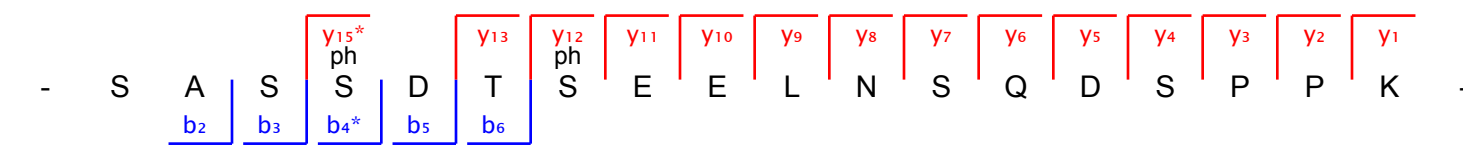

Raw file 20150812\_A375SR\_Phospho\_BR1\_02 Scan 9453 Method FTMS; HCD Score 116.93 m/z 801.82 Gene names FZR1

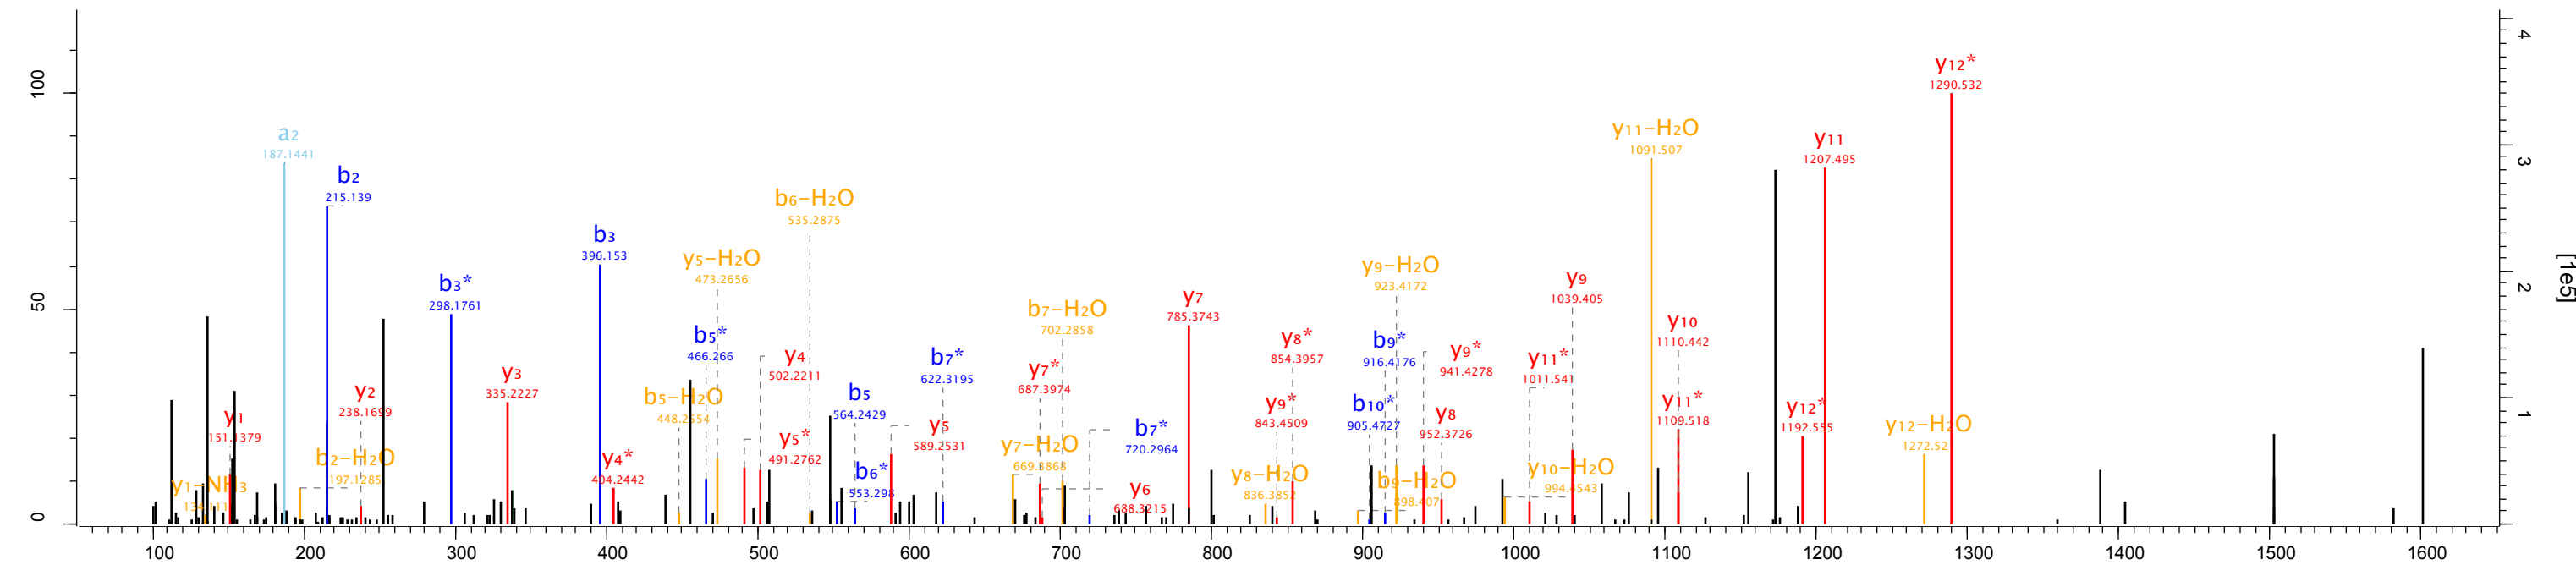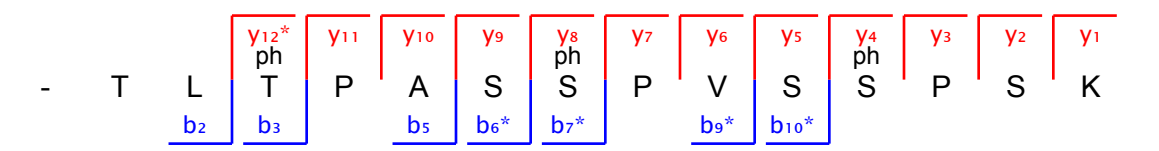

Raw file: 20150812\_A375SR\_Phospho\_BR1\_02  
 Scan: 9533 Method: FTMS; HCD Score: 144.54 m/z: 706.25 Gene names: GCFC2

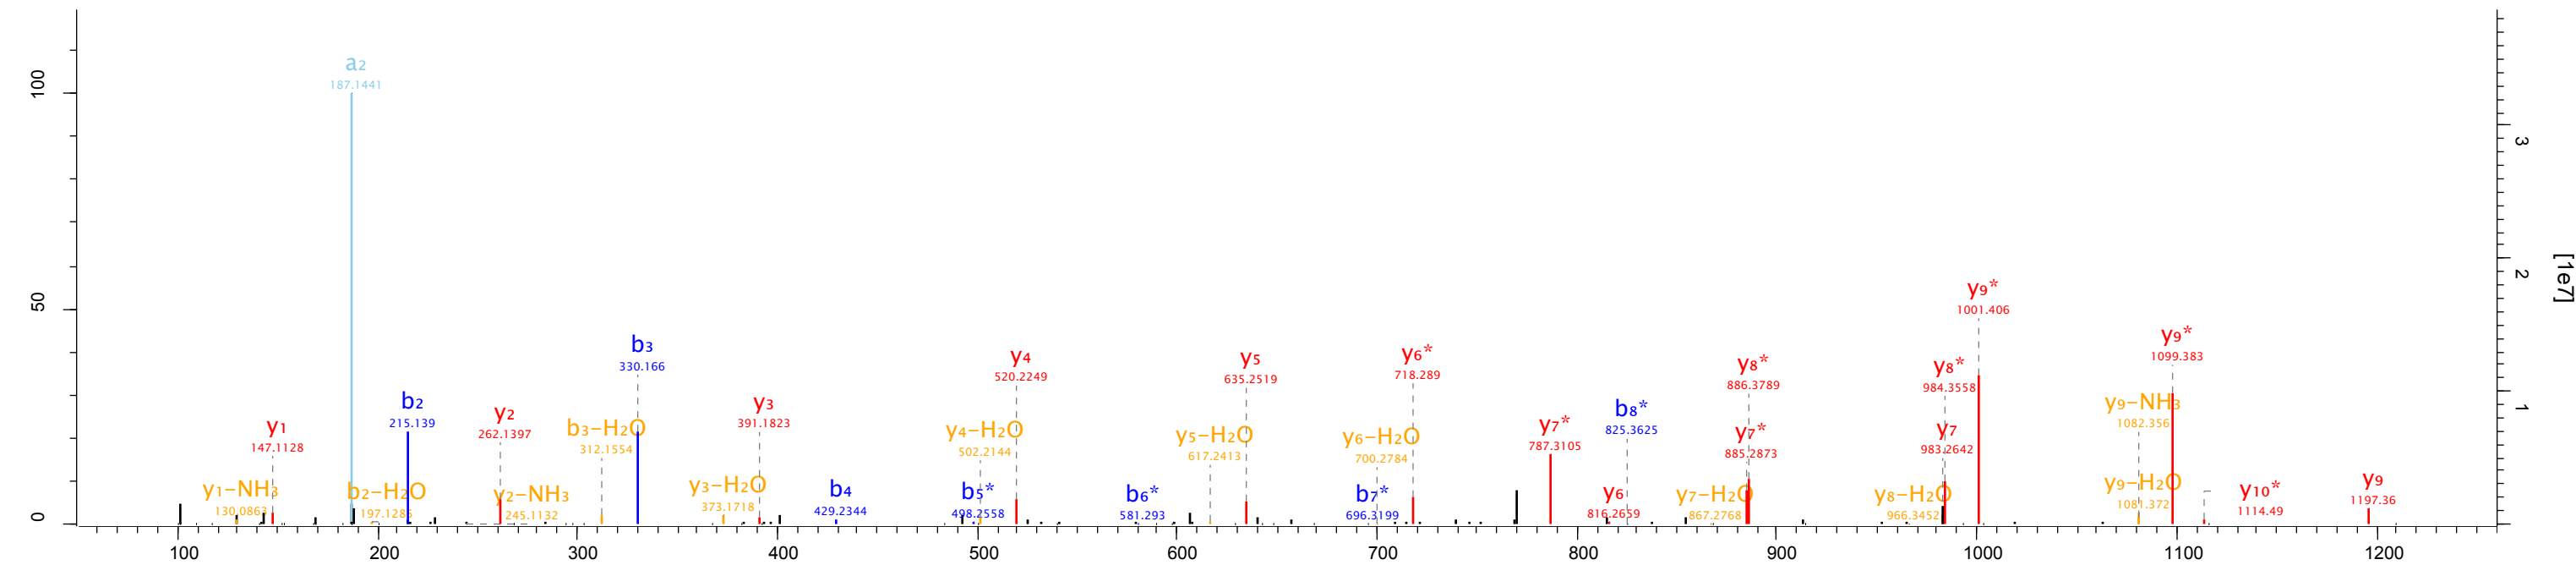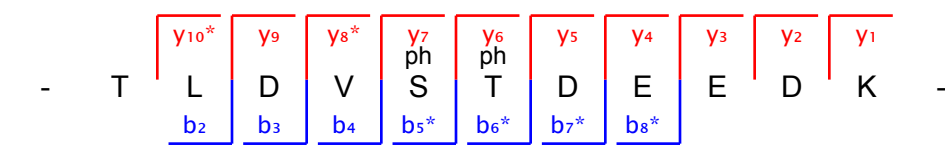

Raw file Scan Method Score m/z Gene names  
 20150812\_A375SR\_Phospho\_BR1\_02 9833 FTMS; HCD 272.46 1147.92 ARHGAP35

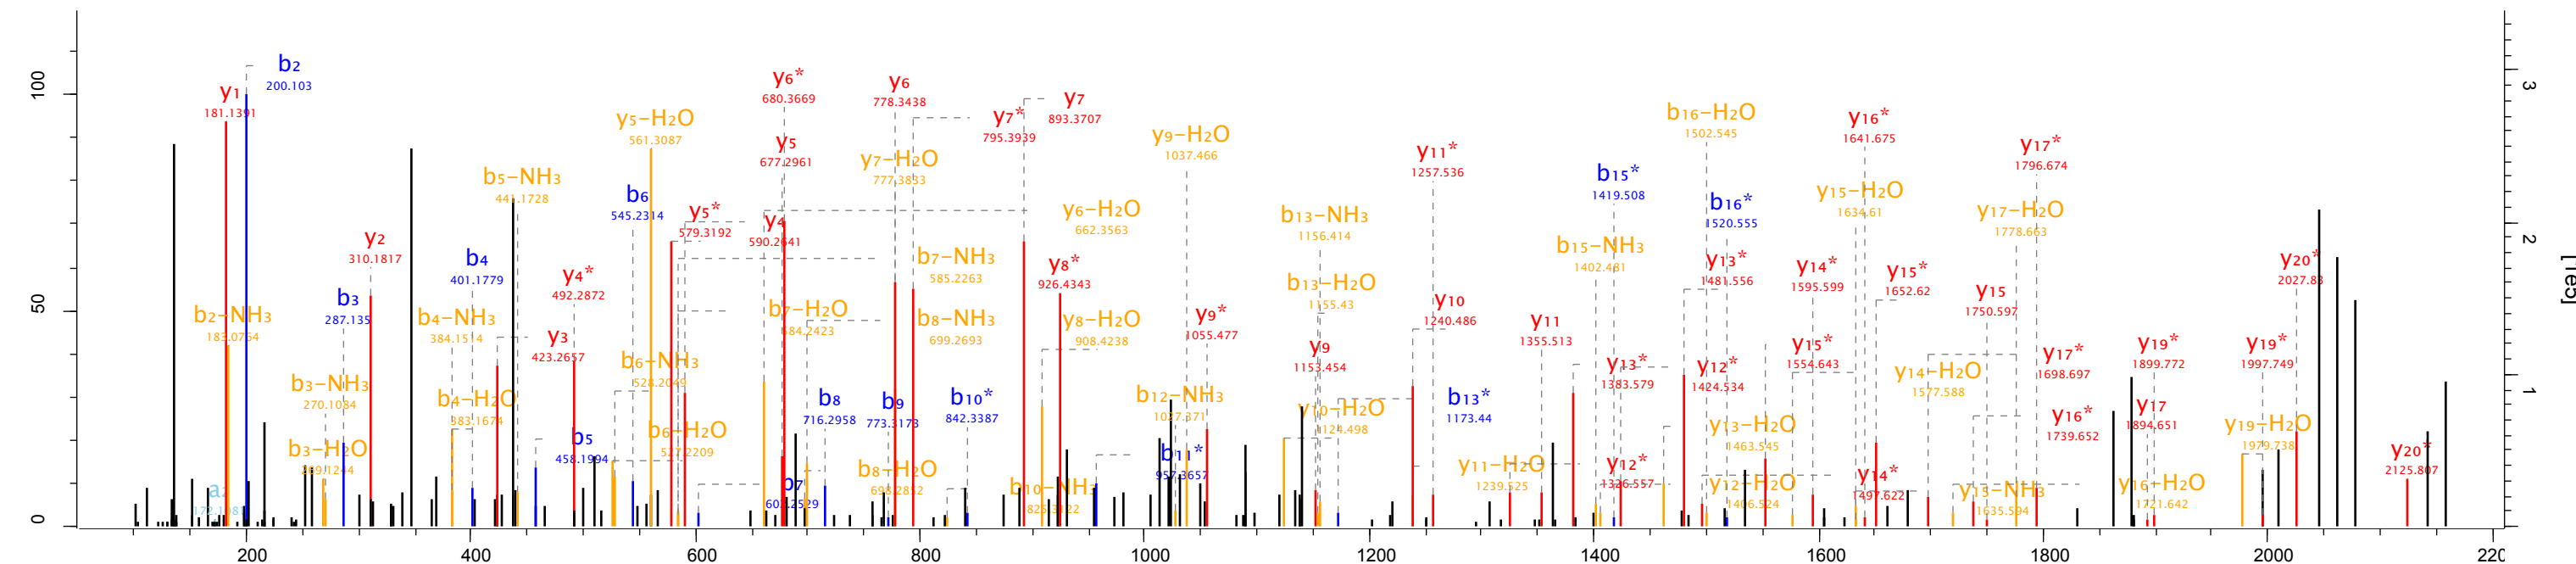

- A Q S N G S G N G S D S E M D T S S L E R -

Fragmentation mapping:

- Q: y20\*
- S: y19\*
- N: y17
- G: y16\*
- S: y15
- G: y14\*
- N: y13\*
- G: y12\* ph
- S: y11
- D: y10
- S: y9
- E: y8\*
- M: y7
- D: y6
- T: y5
- S: y4 ph
- S: y3
- L: y2
- E: y1

Fragmentation mapping (continued):

- b2: Q
- b3: S
- b4: N
- b5: G
- b6: S
- b7: G
- b8: N
- b9: G
- b10\*: S
- b11\*: D
- b13\*: S
- b15\*: M
- b16\*: D



Raw file: 20150812\_A375SR\_Phospho\_BR1\_03  
 Scan: 10103  
 Method: FTMS; HCD  
 Score: 98.9  
 m/z: 673.78  
 Gene names: ITPKB

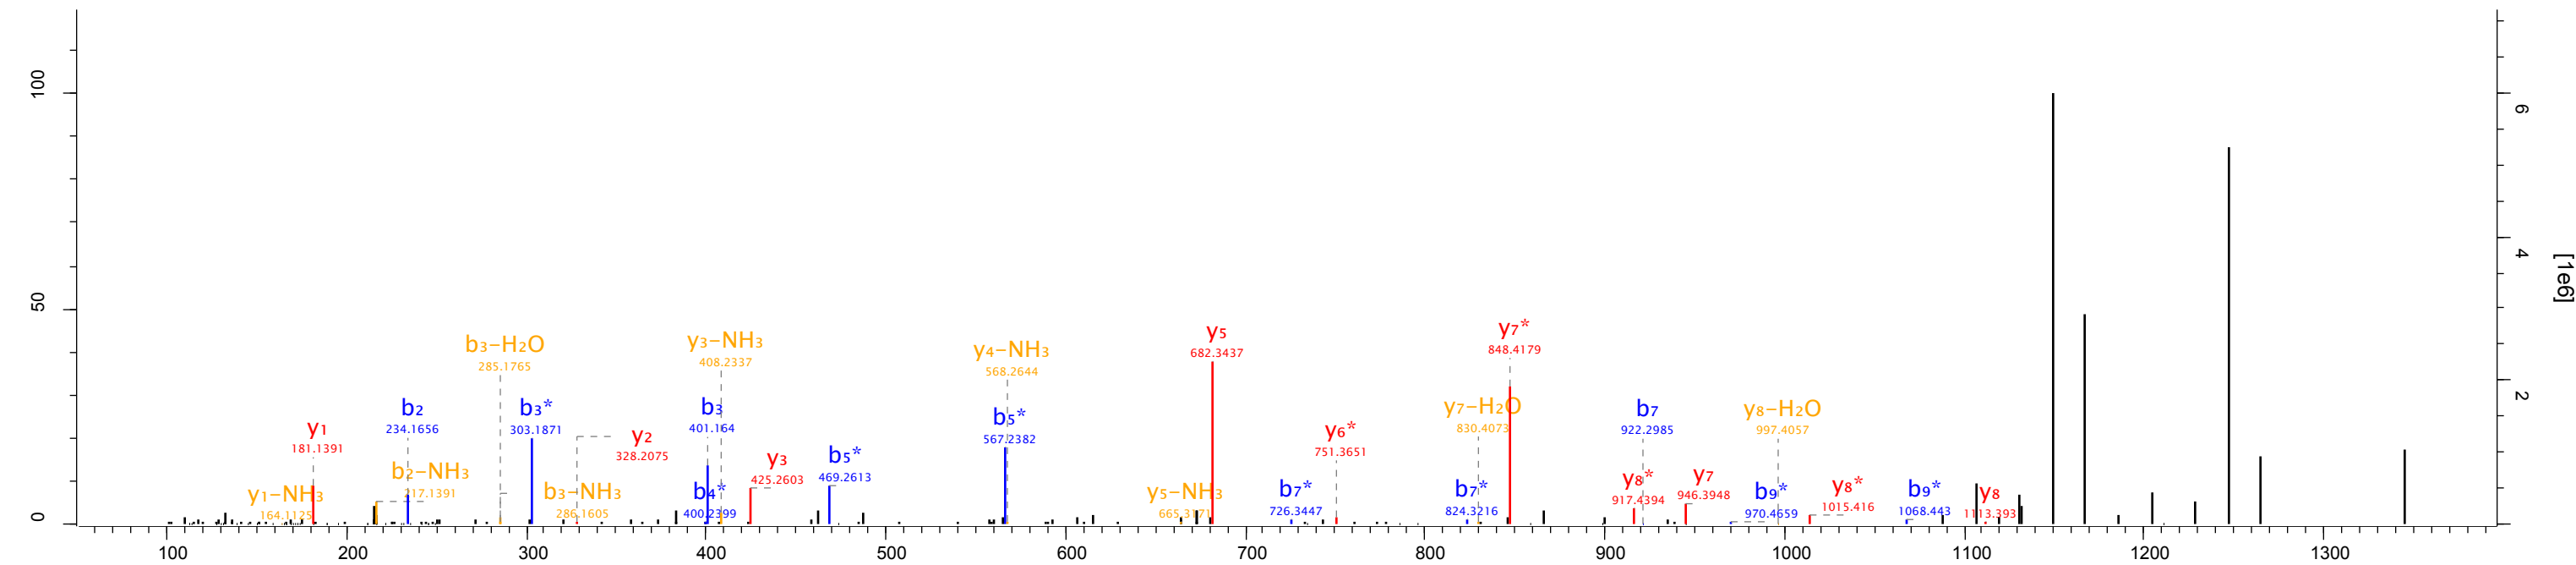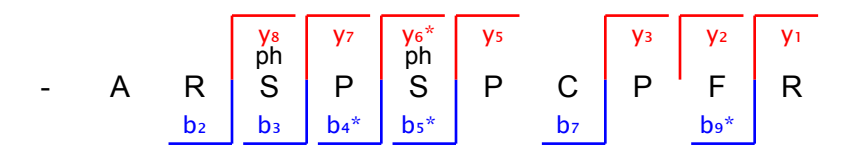

Raw file: 20150812\_A375SR\_Phospho\_BR1\_03  
 Scan: 10423 Method: FTMS; HCD Score: 378.38 m/z: 1347.53 Gene names: HMGN1

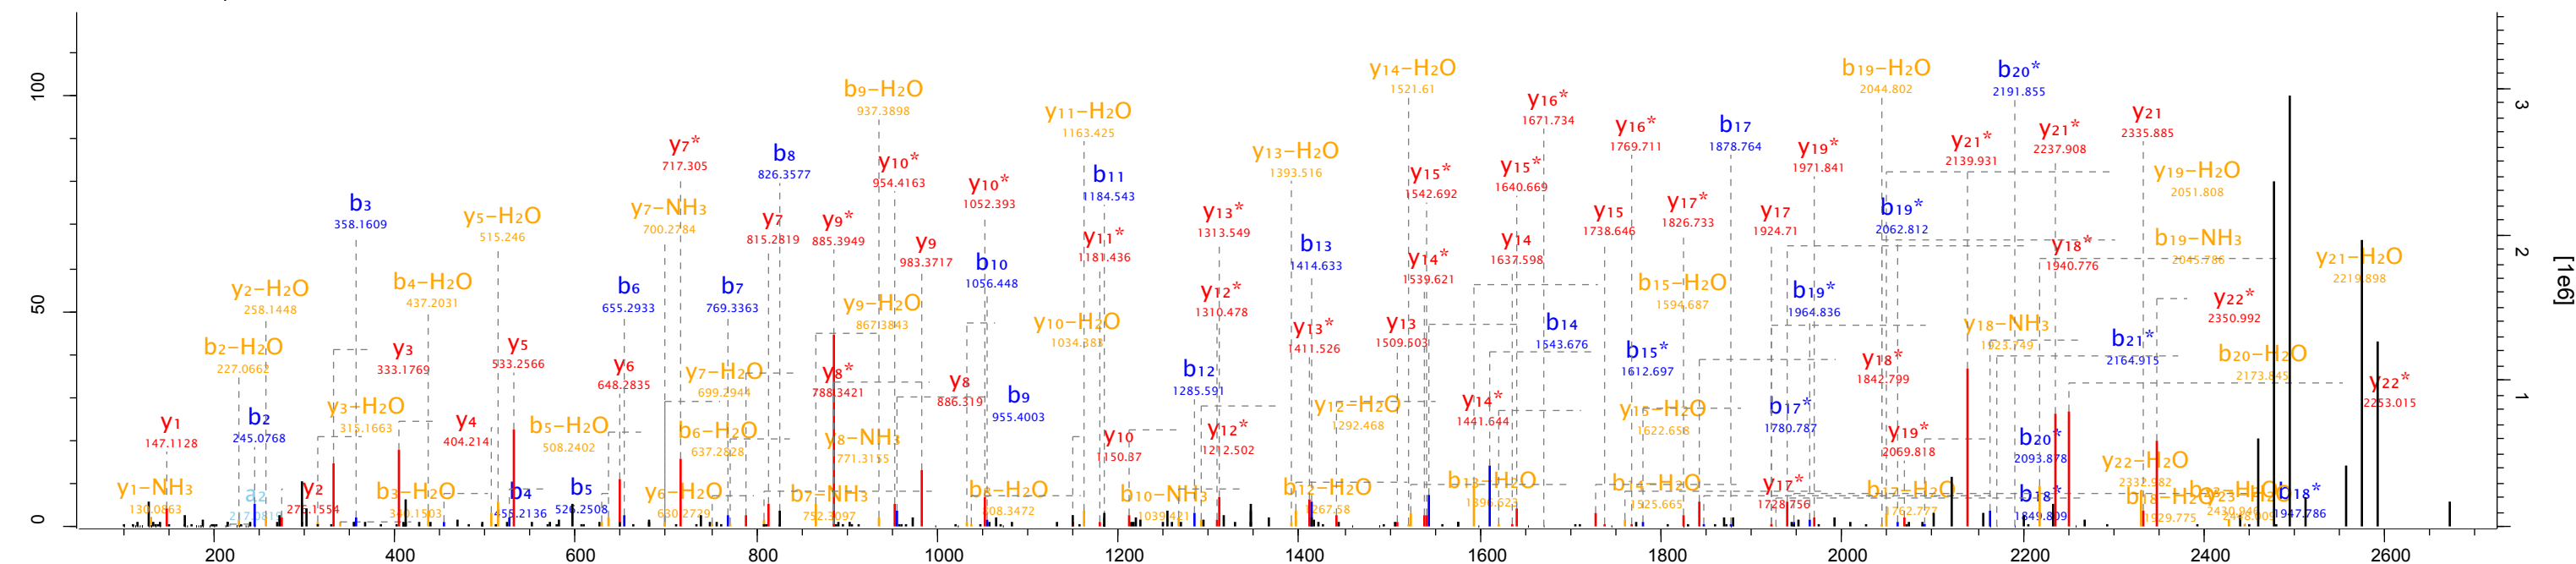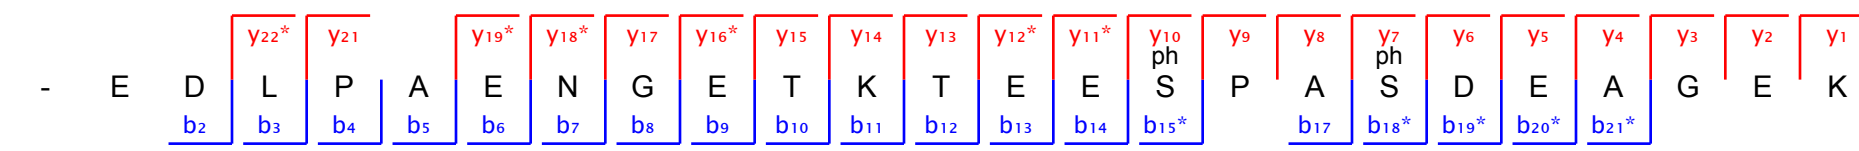

Raw file: 20150812\_A375SR\_Phospho\_BR1\_03  
 Scan: 10523 Method: FTMS; HCD Score: 141.76 m/z: 1257.52 Gene names: GSK3A

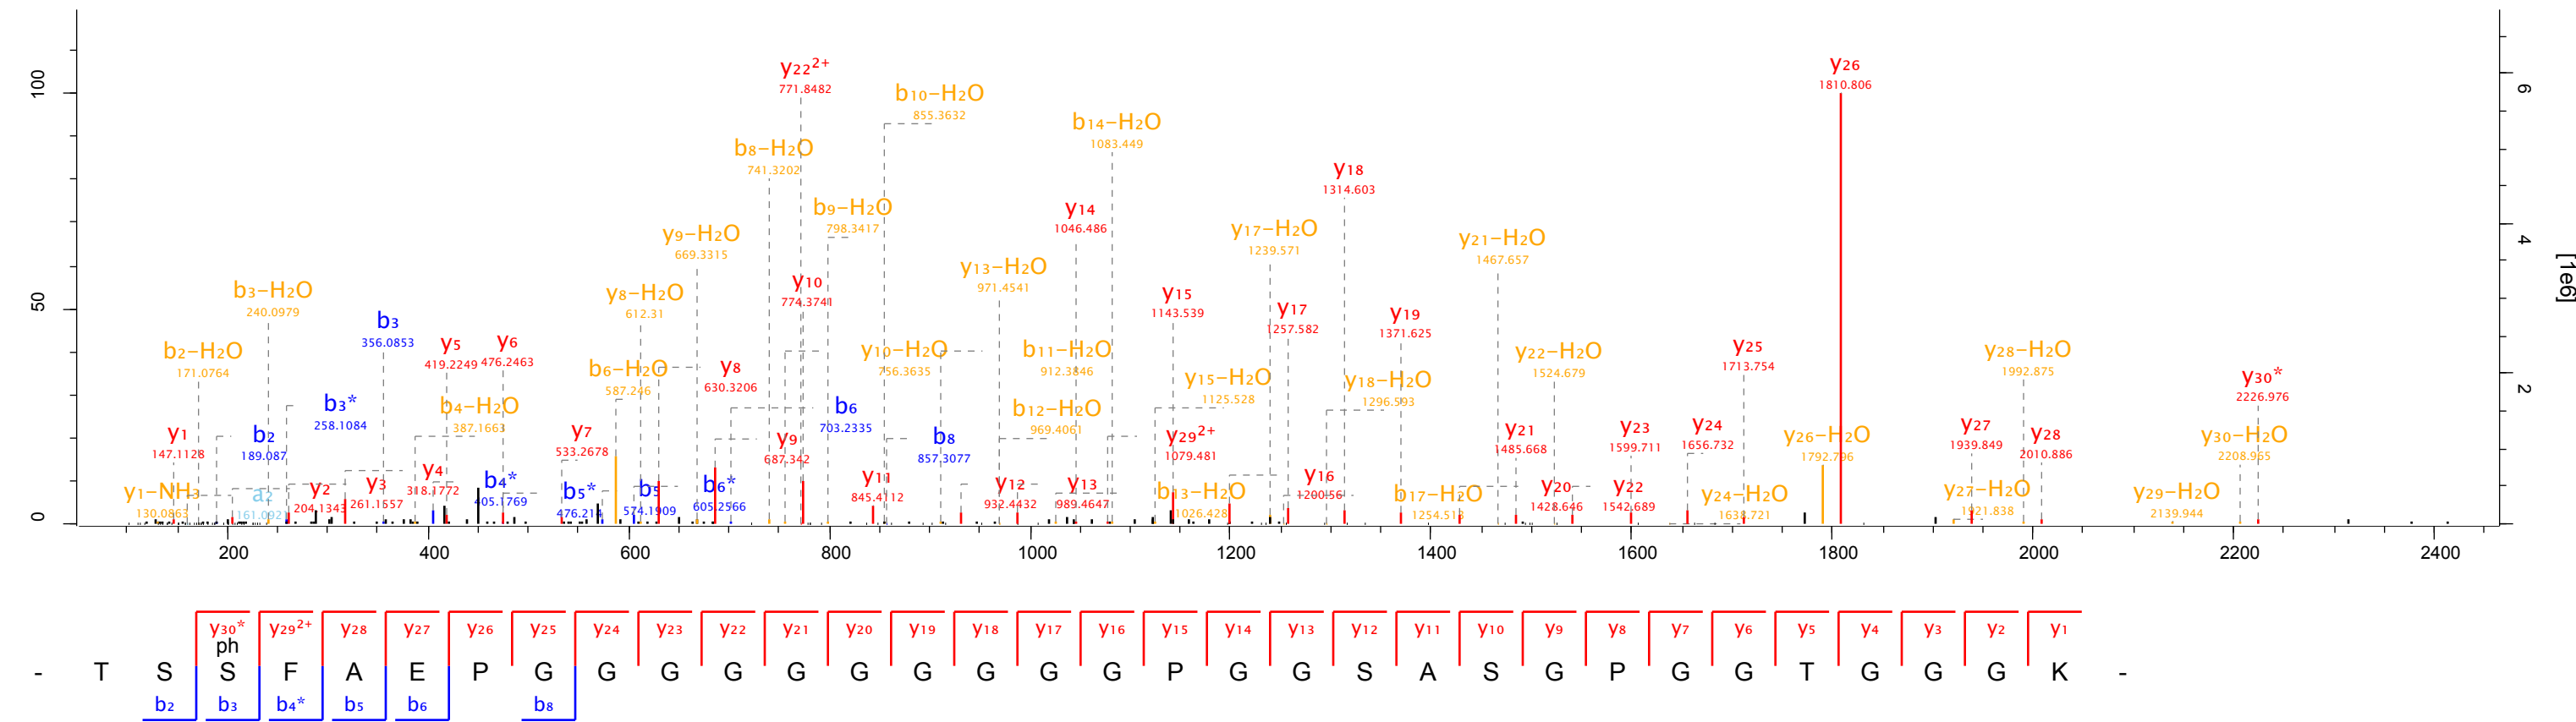

Raw file: 20150812\_A375SR\_Phospho\_BR1\_03  
 Scan: 10653 Method: FTMS; HCD Score: 228.95 m/z: 1160.96 Gene names: RBM3

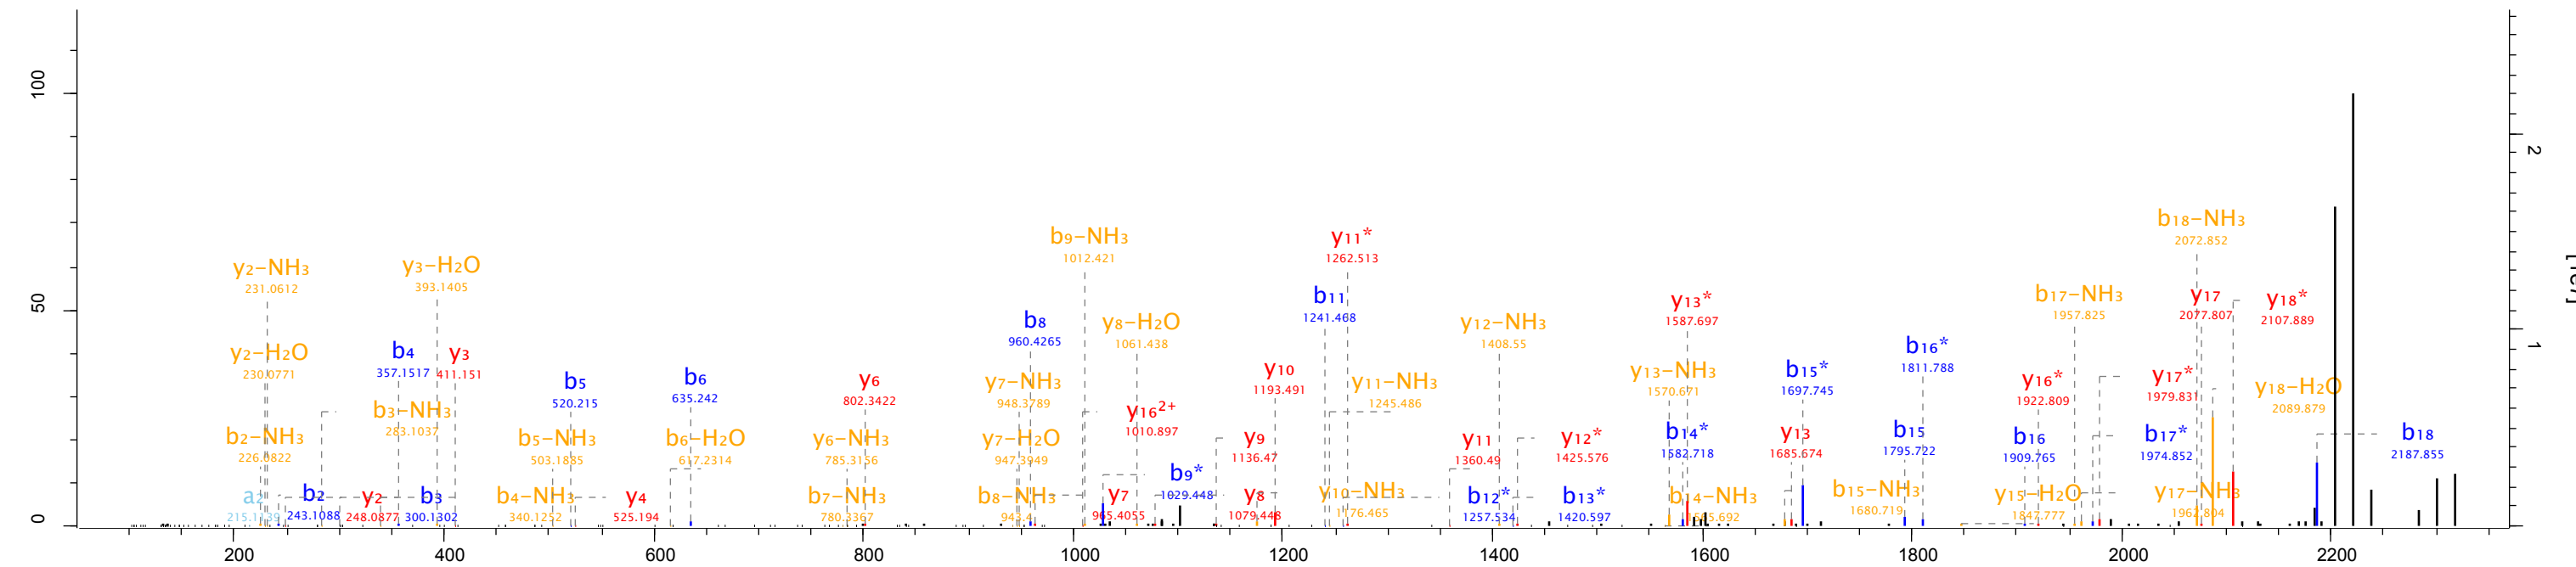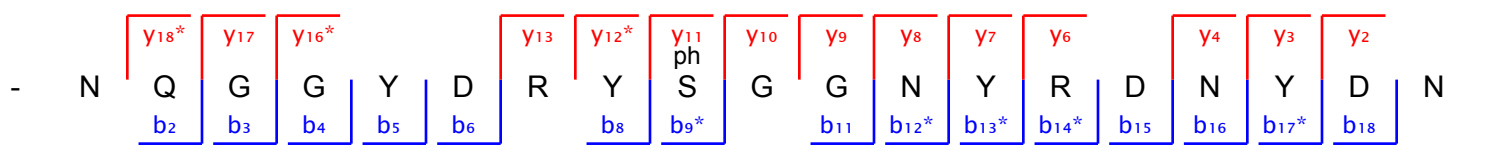

Raw file  
20150812\_A375SR\_Phospho\_BR1\_03

Scan 10703 Method FTMS; HCD Score 295.53 m/z 996.79 Gene names AKAP12

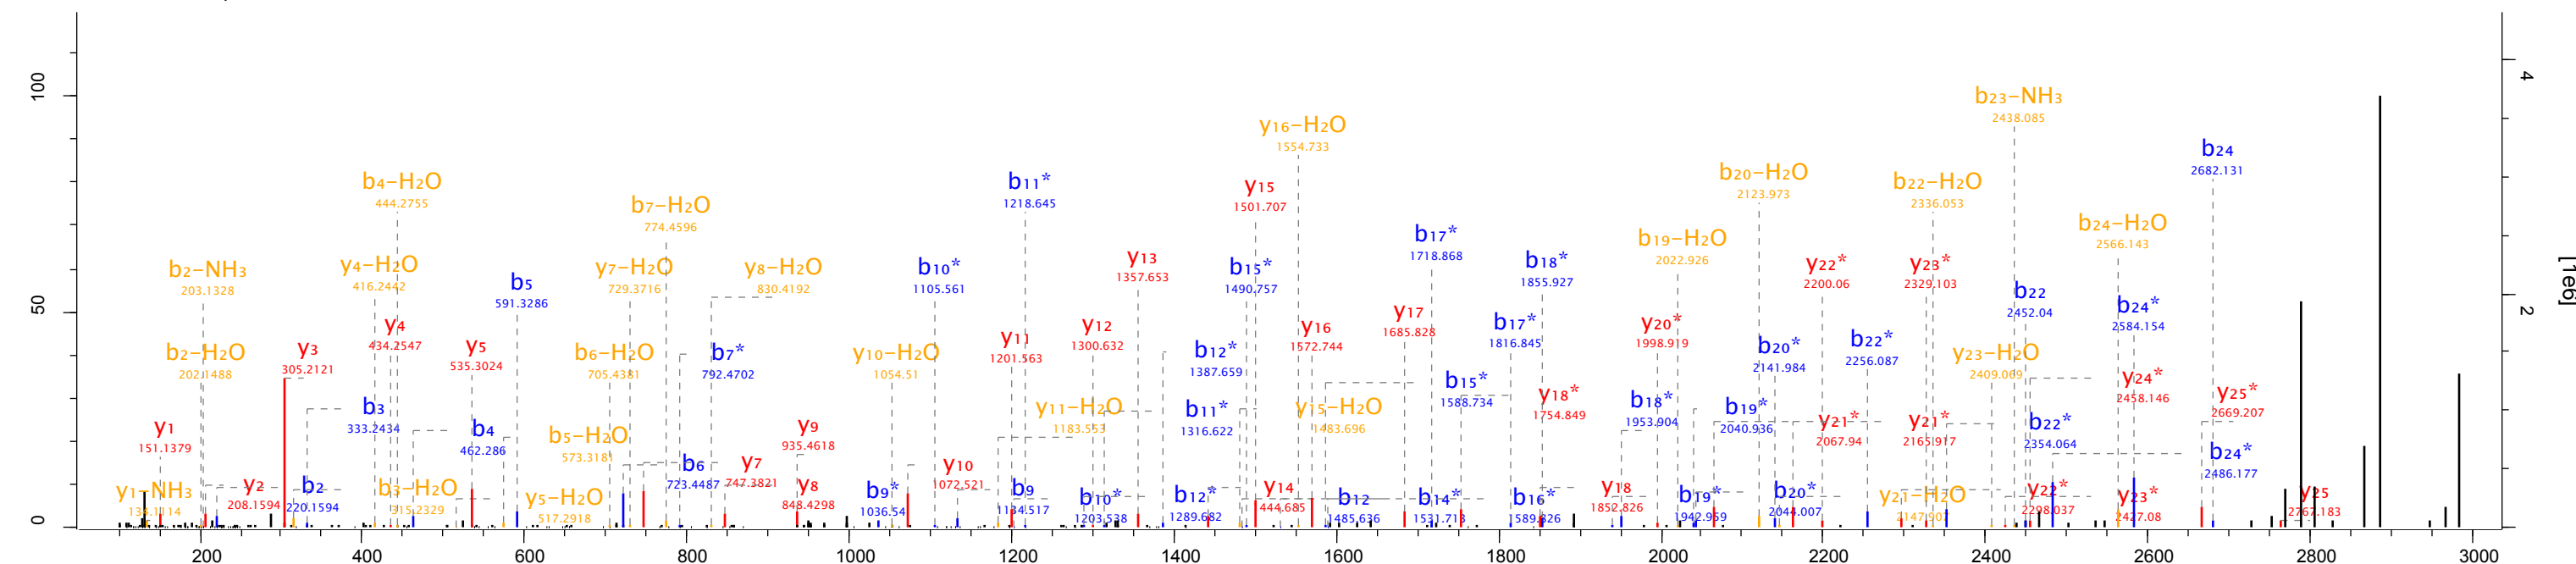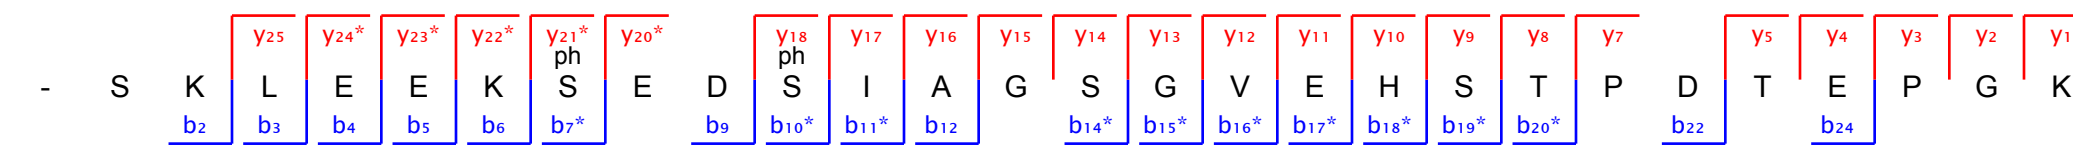

Raw file 20150812\_A375SR\_Phospho\_BR1\_03 Scan 11223 Method FTMS; HCD Score 100.83 m/z 771.02 Gene names ZC3H4

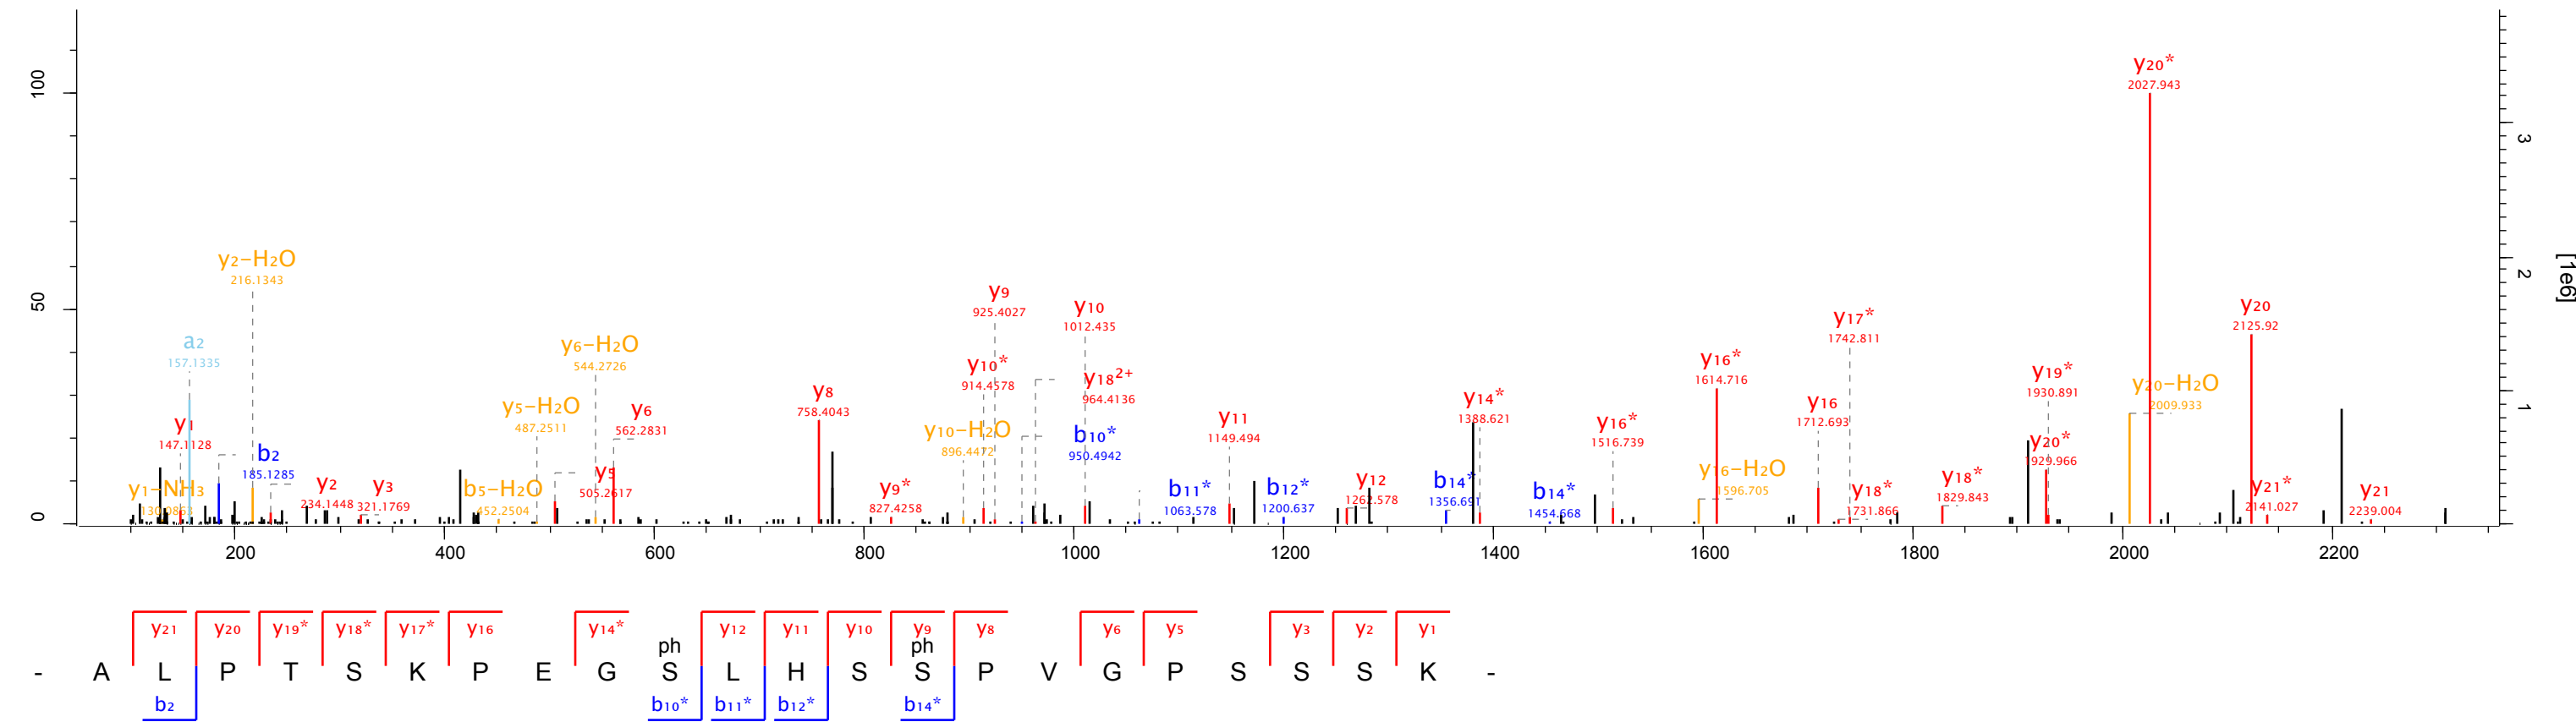

Raw file 20150812\_A375SR\_Phospho\_BR1\_03 Scan 11253 Method FTMS; HCD Score 152.07 m/z 678.29 Gene names SPAG9

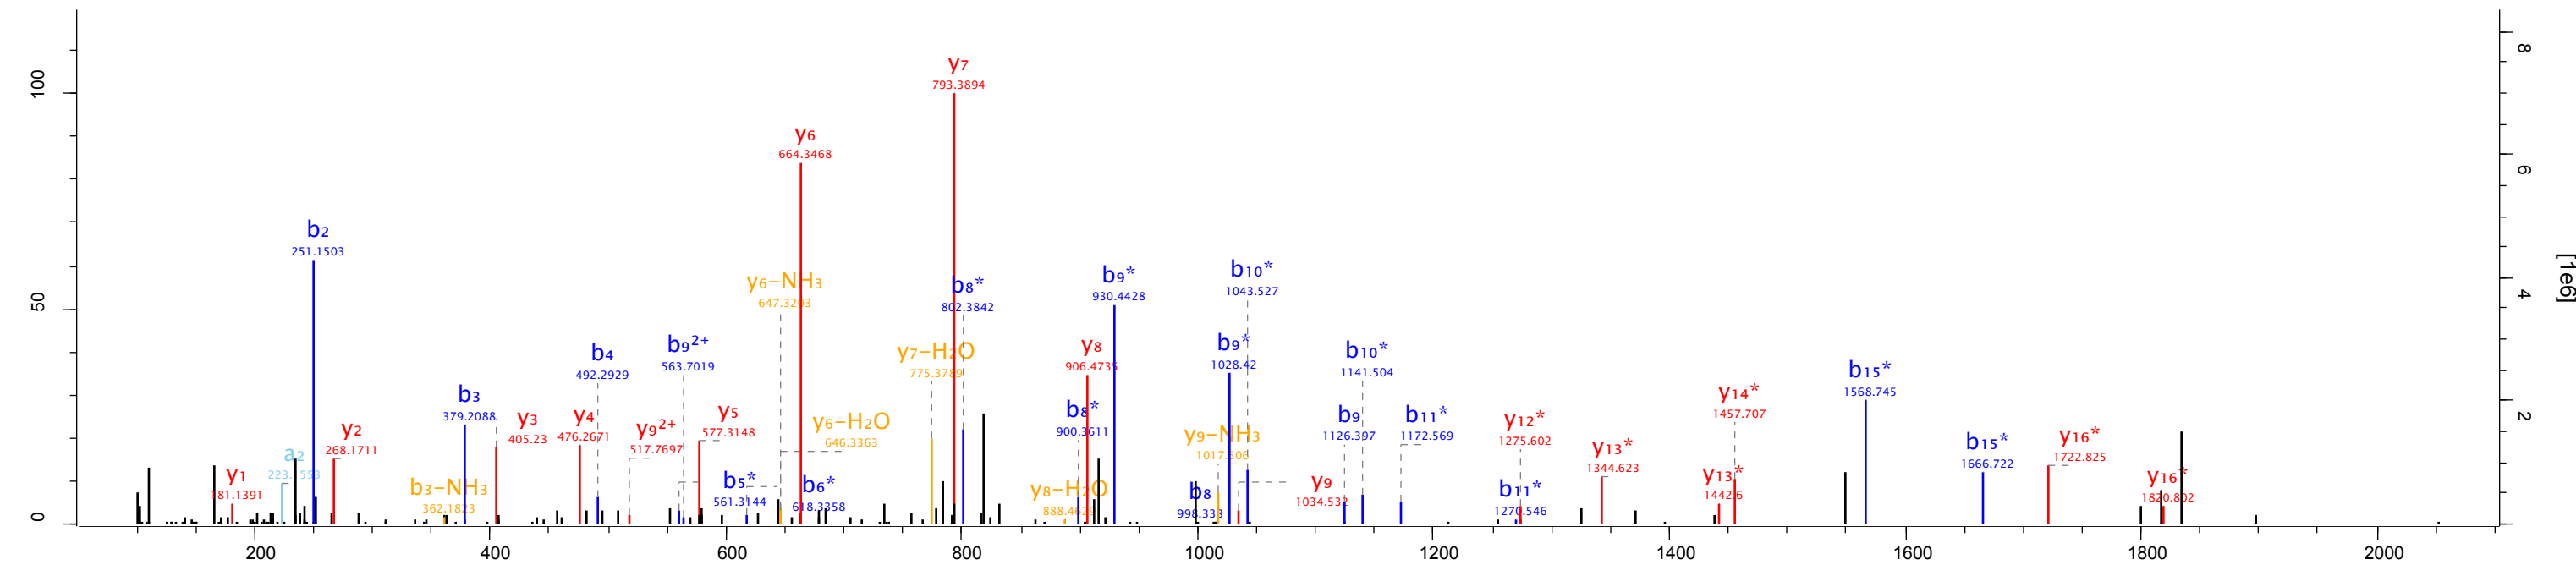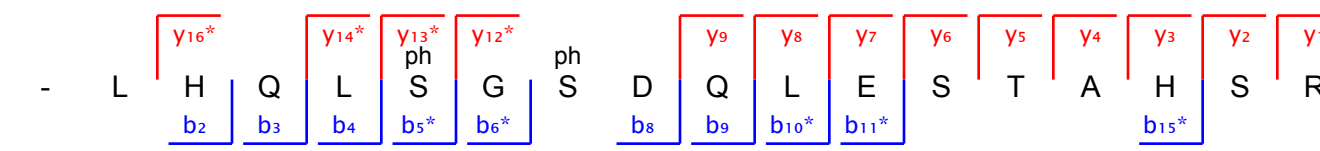

Raw file: 20150812\_A375SR\_Phospho\_BR1\_03  
 Scan: 11343 Method: FTMS; HCD Score: 143.58 m/z: 877.85 Gene names: SLK

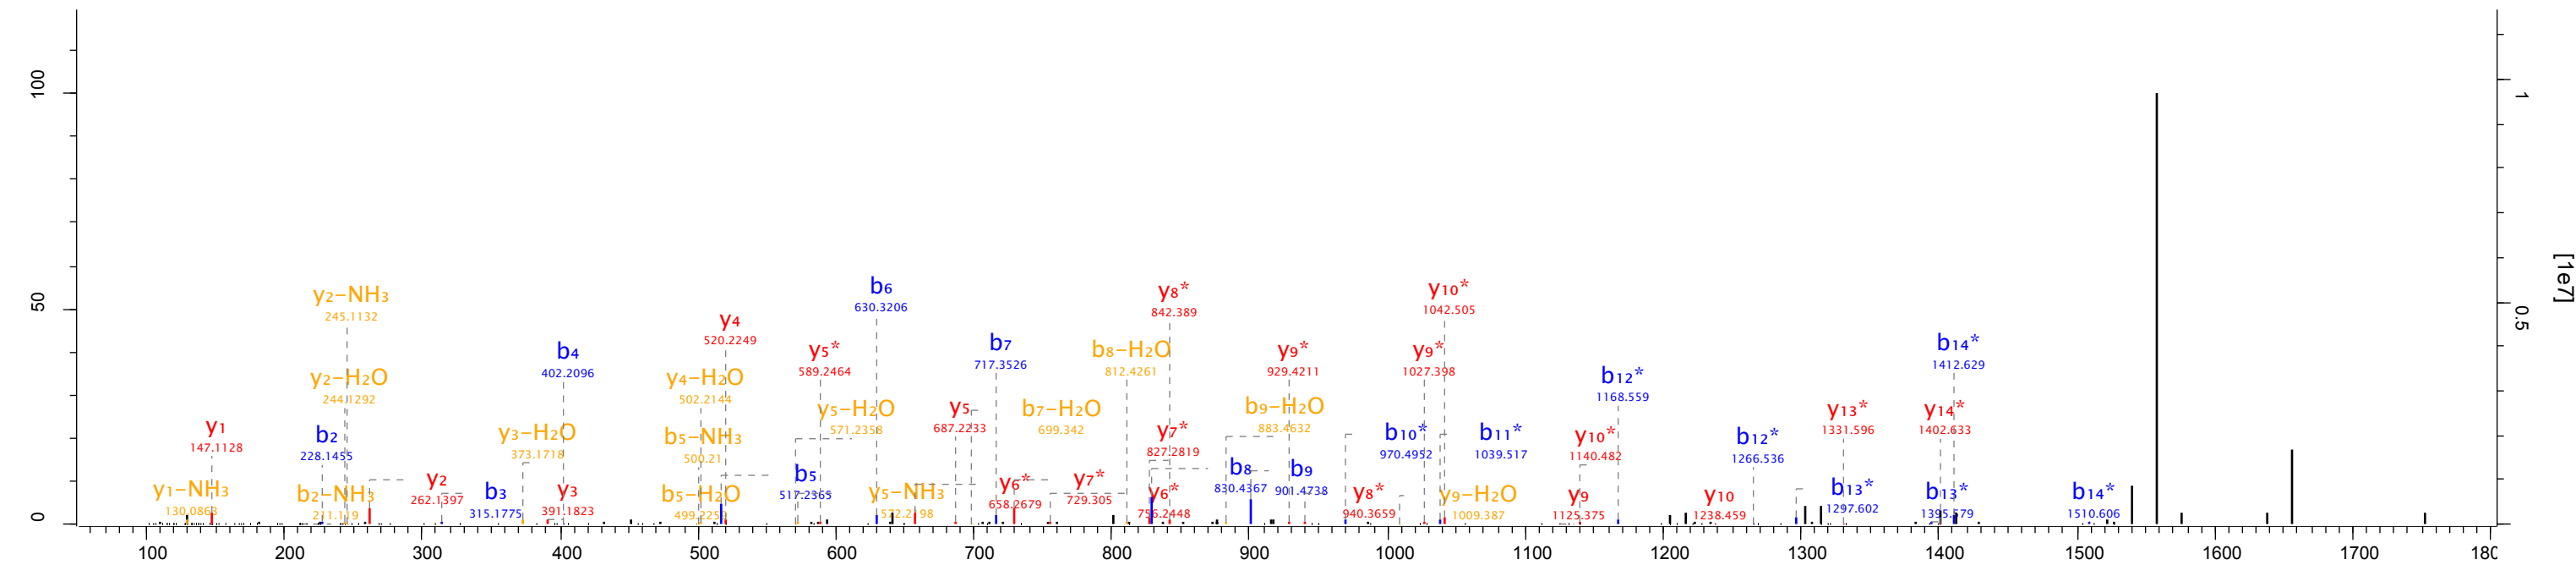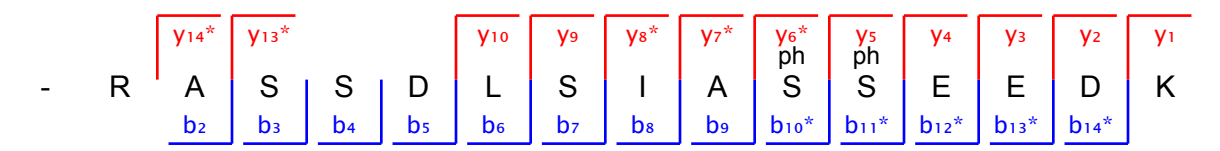



Raw file: 20150812\_A375SR\_Phospho\_BR1\_03  
 Scan: 11893 Method: FTMS; HCD Score: 126.84 m/z: 780.33 Gene names: DENND4C

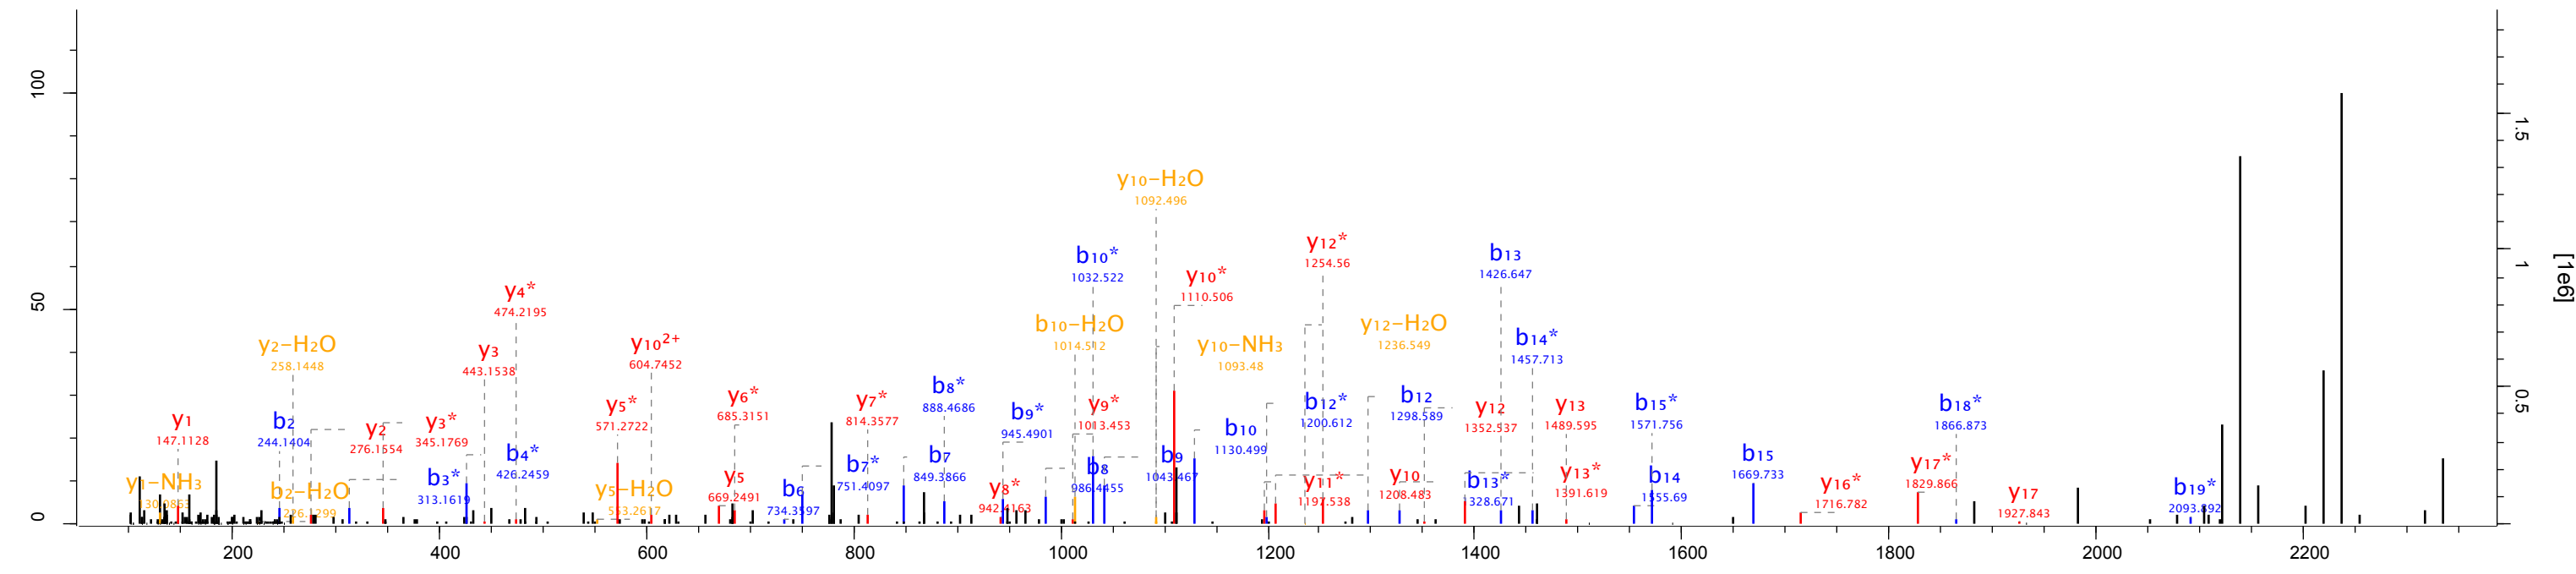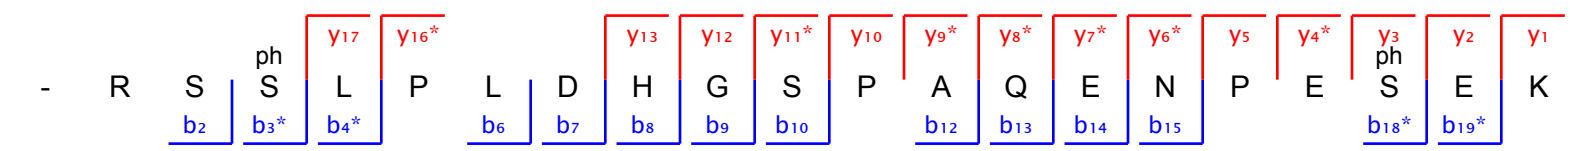

Raw file 20150812\_A375SR\_Phospho\_BR1\_03 Scan 11943 Method FTMS; HCD Score 141.57 m/z 615.27 Gene names AAK1

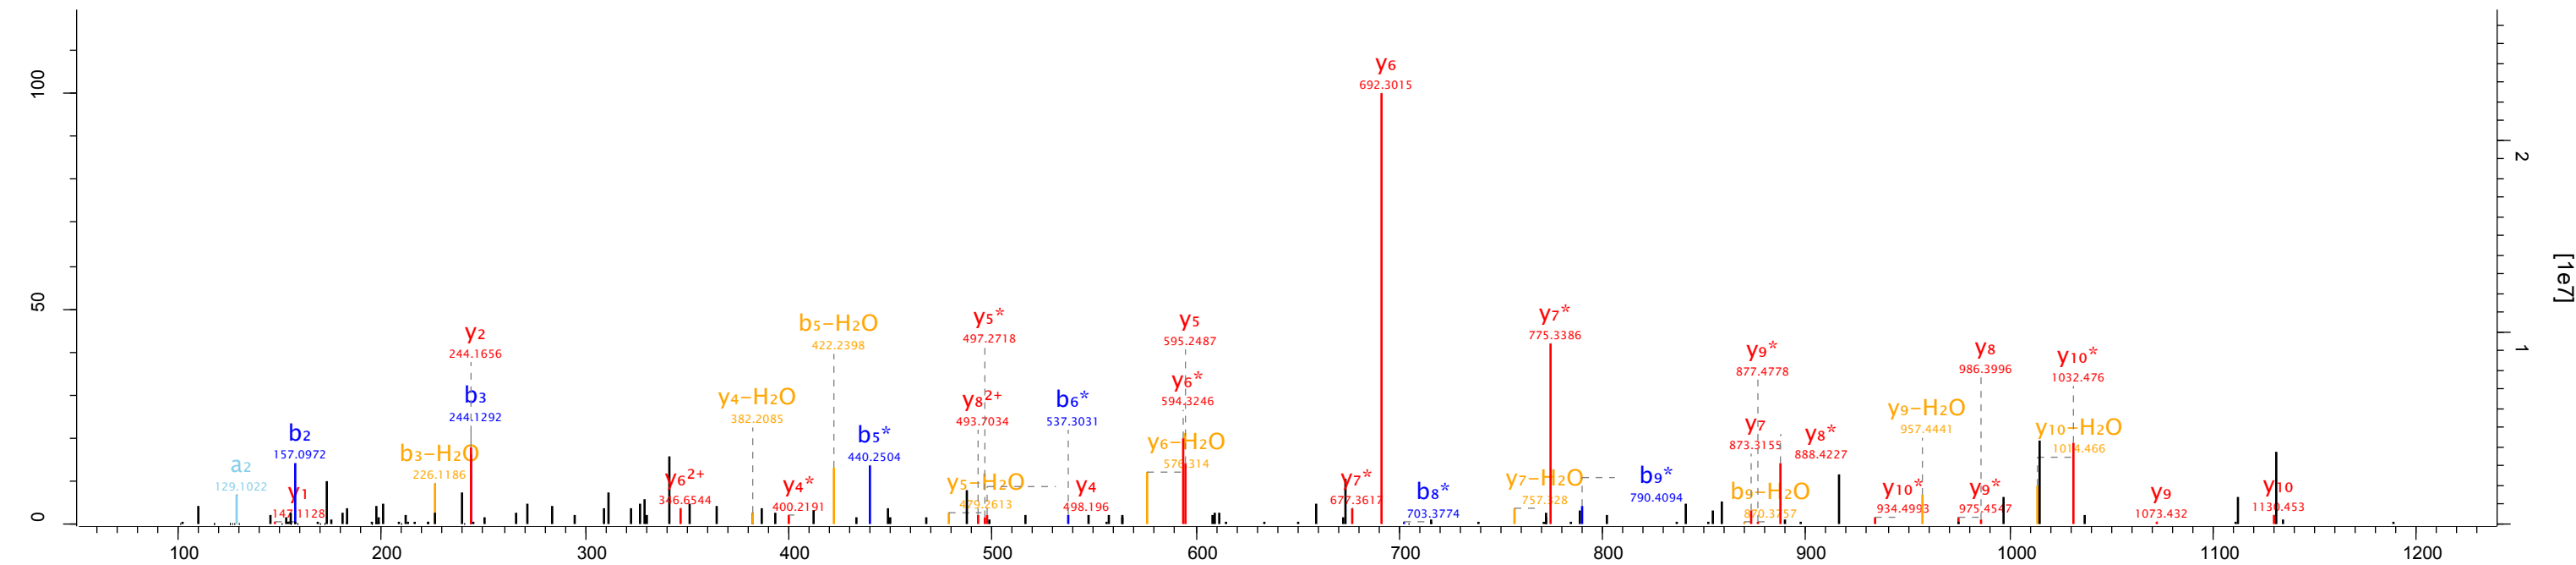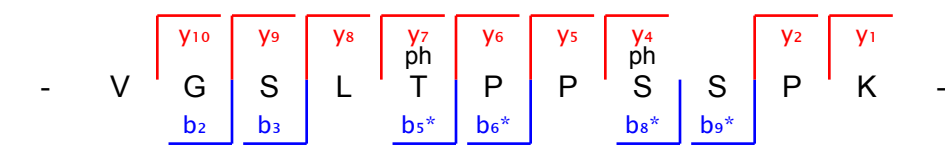

Raw file 20150812\_A375SR\_Phospho\_BR1\_03 Scan 12263 Method FTMS; HCD Score 221.14 m/z 955.84 Gene names MAX

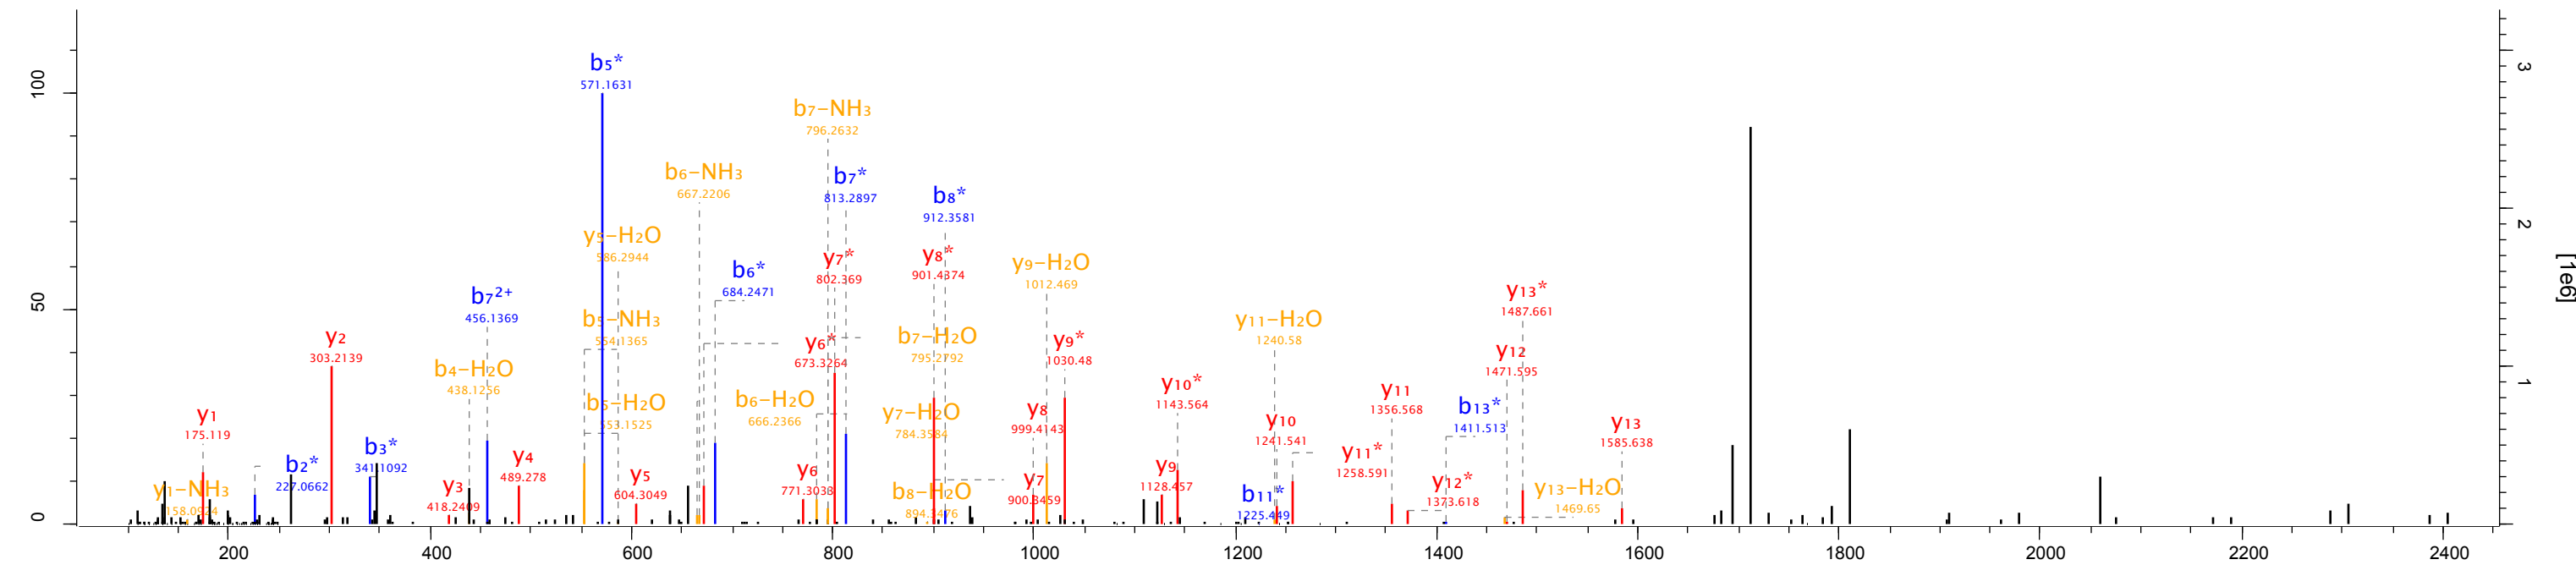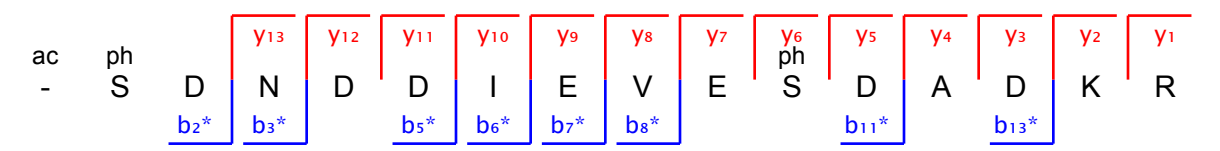

Raw file 20150812\_A375SR\_Phospho\_BR1\_03 Scan 12273 Method FTMS; HCD Score 180.32 m/z 776.81 Gene names SCAF11

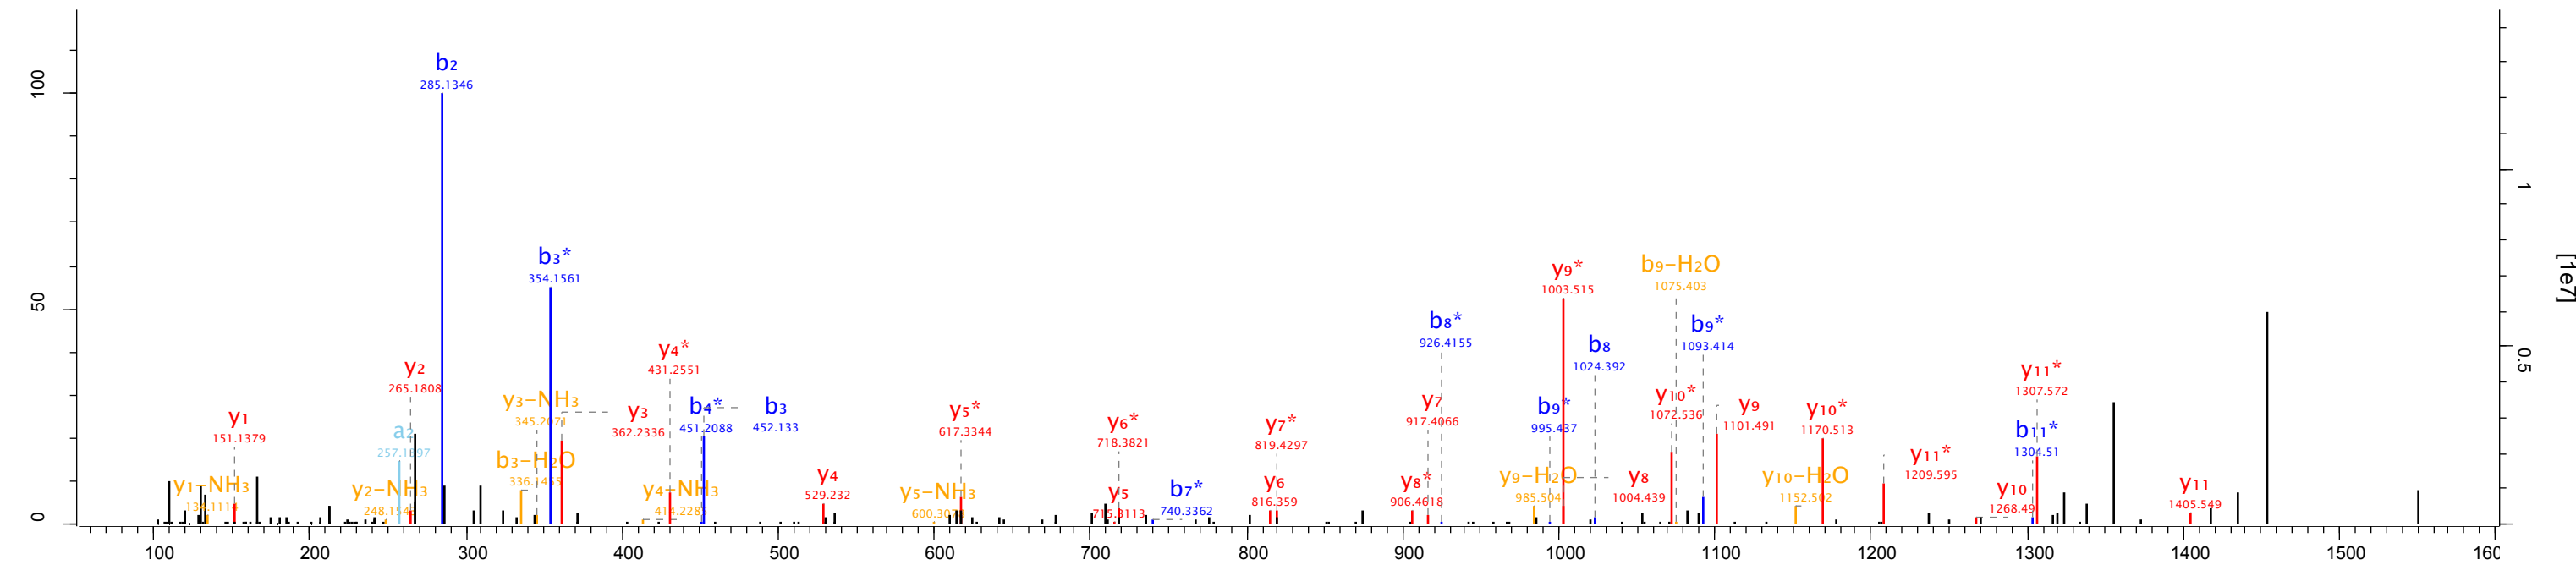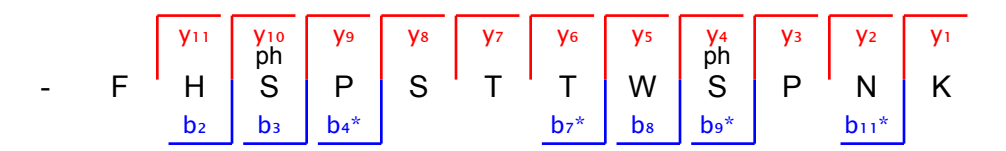

Raw file: 20150812\_A375SR\_Phospho\_BR1\_03  
 Scan: 12463 Method: FTMS; HCD Score: 166.88 m/z: 1188.07 Gene names: RALGPS2

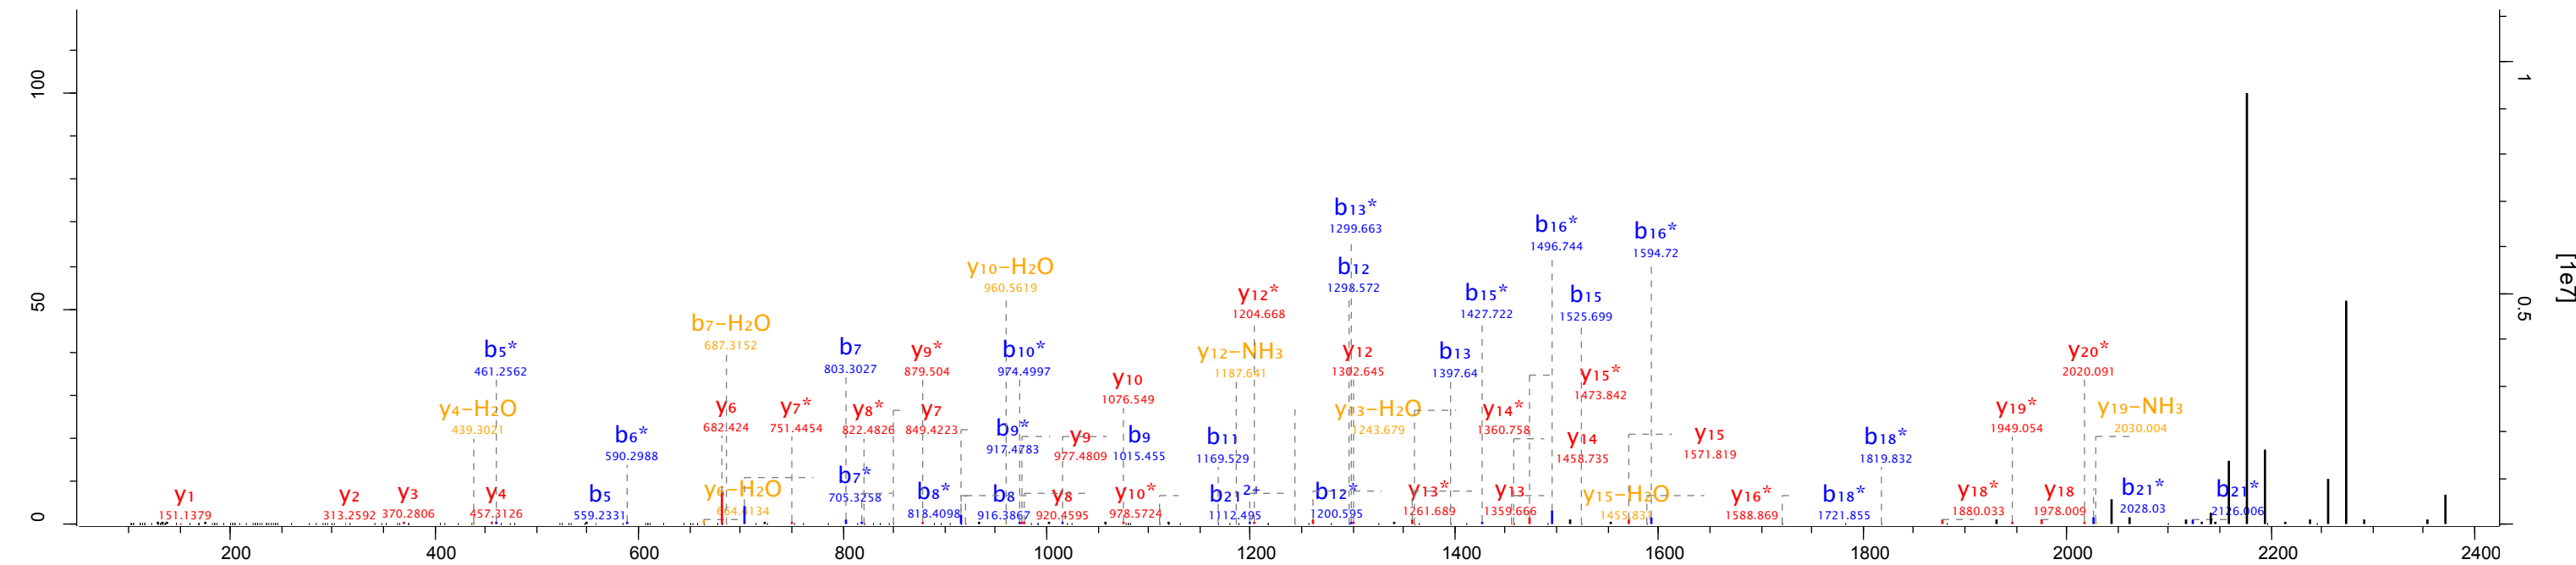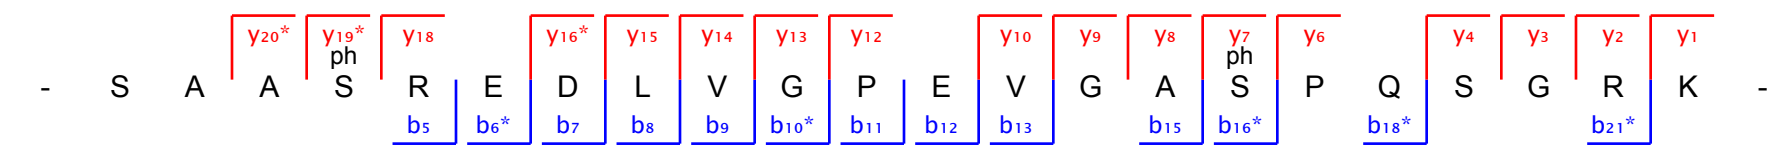

Raw file 20150812\_A375SR\_Phospho\_BR1\_03 Scan 12593 Method FTMS; HCD Score 296.37 m/z 1214.47 Gene names UTP18

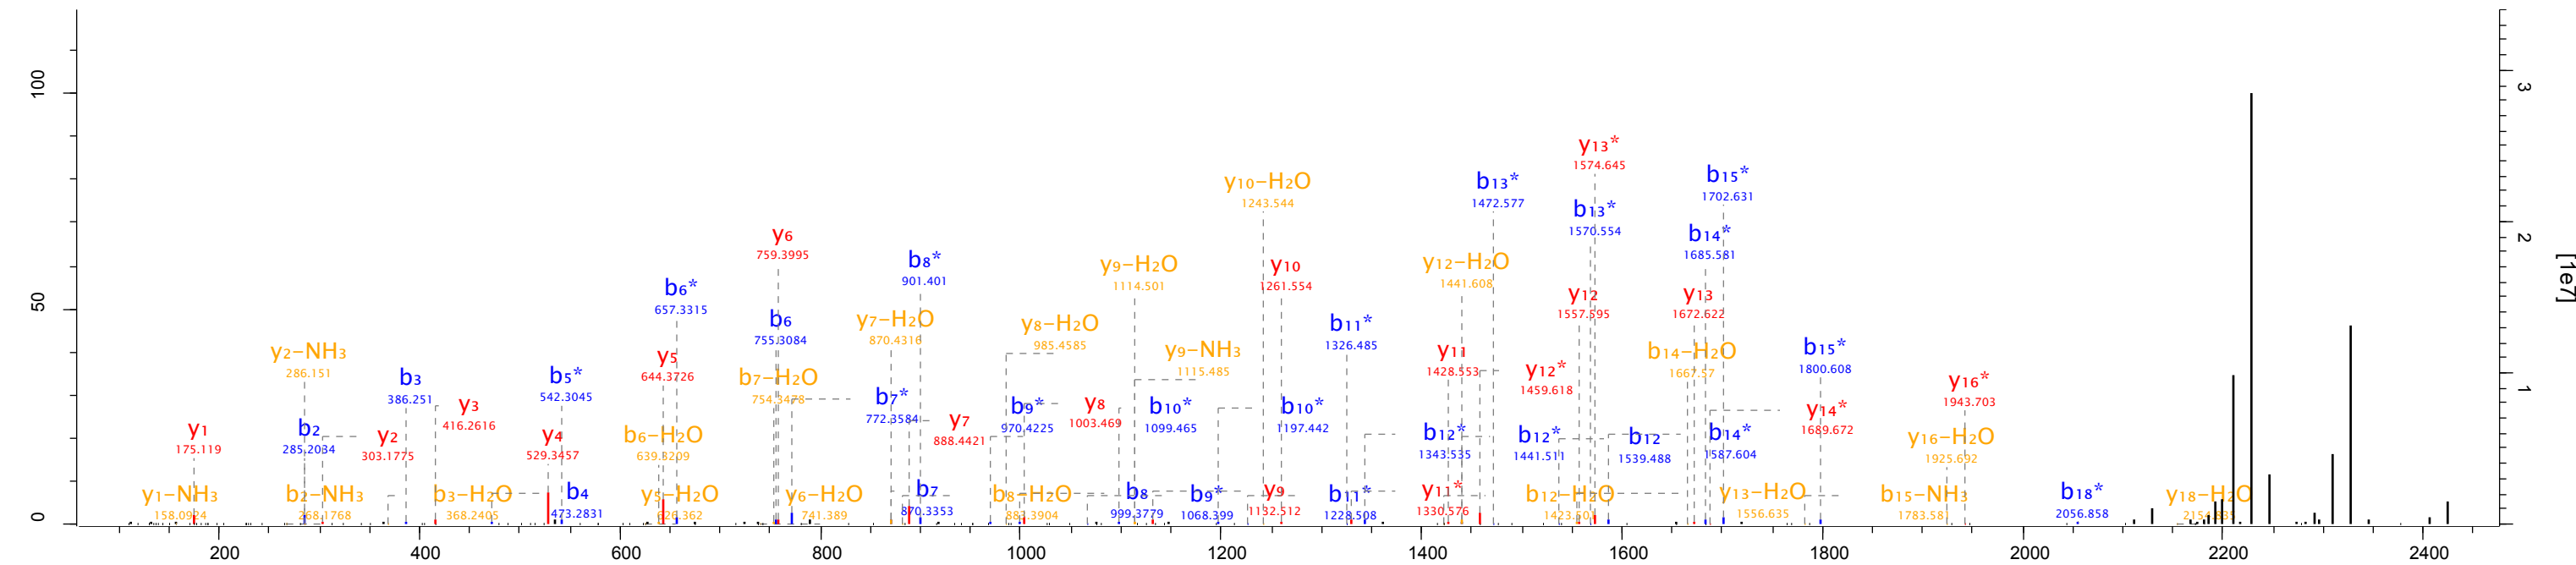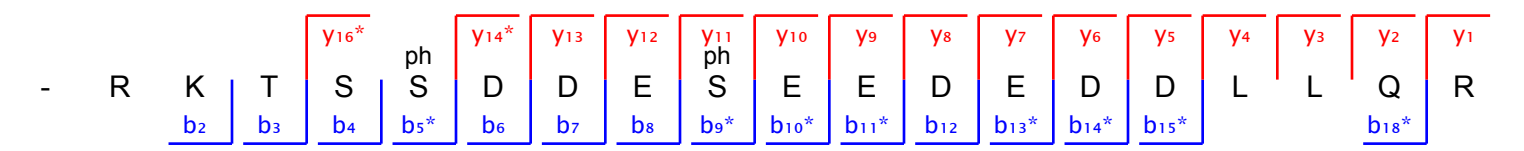

Raw file: 20150812\_A375SR\_Phospho\_BR1\_03  
 Scan: 12913 Method: FTMS; HCD Score: 151.68 m/z: 821.38 Gene names: RBL1

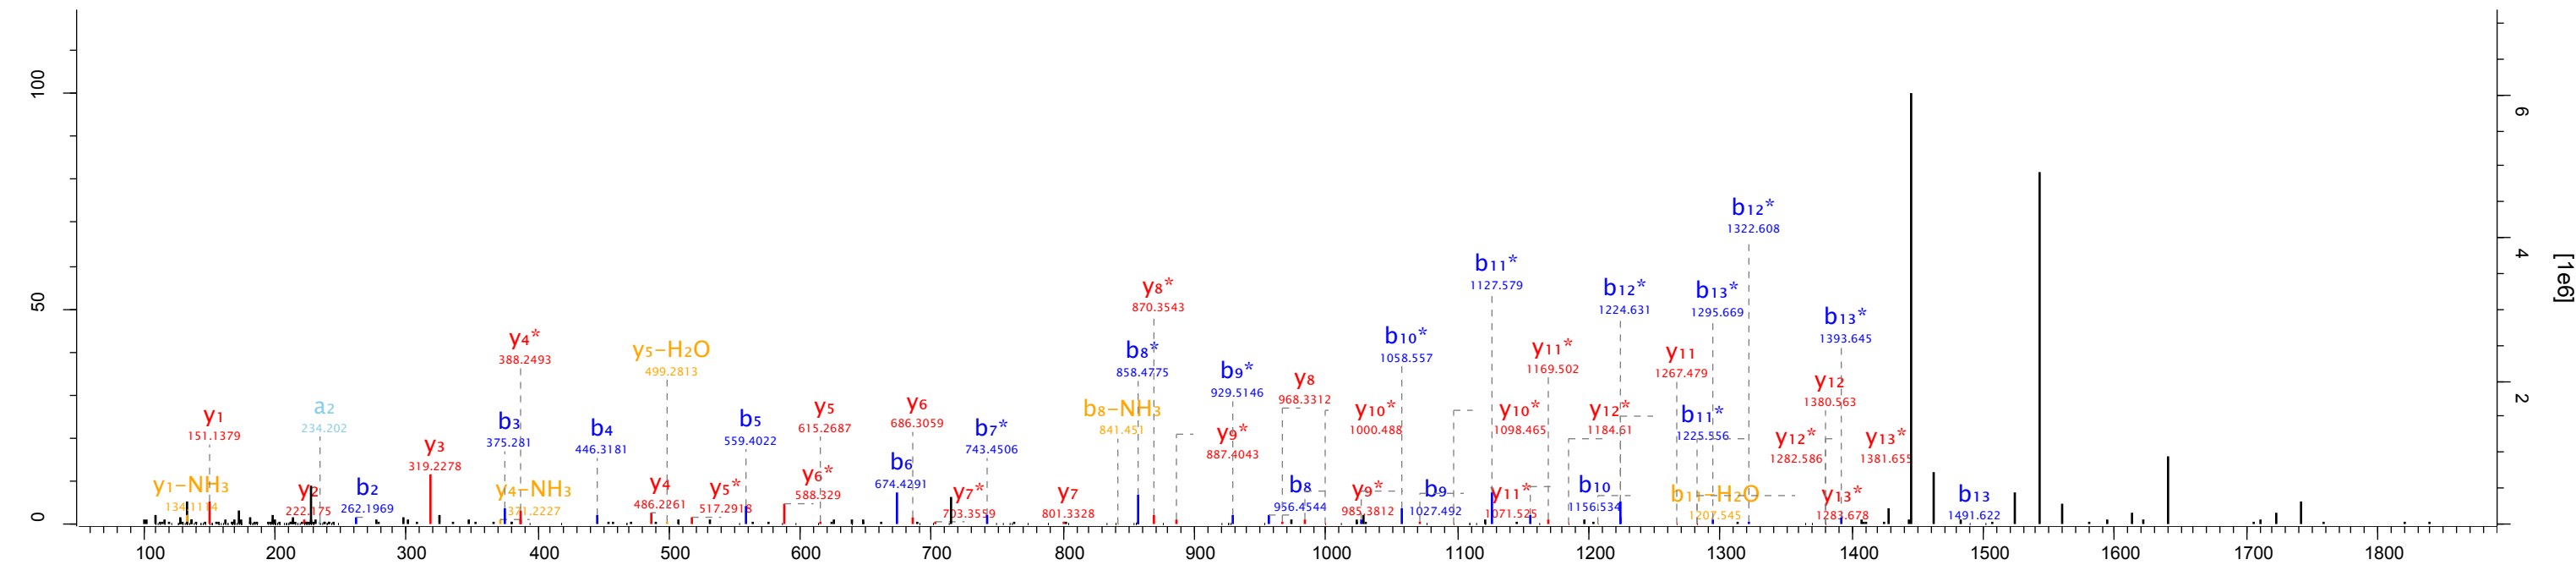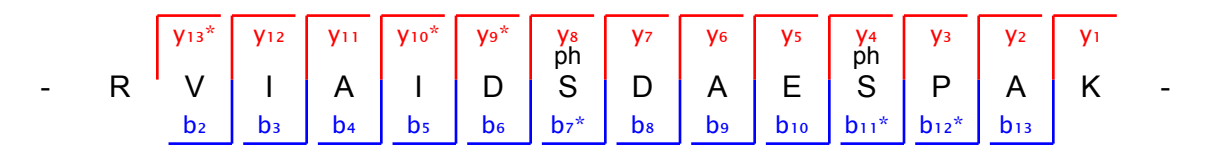

Raw file 20150812\_A375SR\_Phospho\_BR1\_03 Scan 12923 Method FTMS; HCD Score 150.61 m/z 815.83 Gene names PTMA

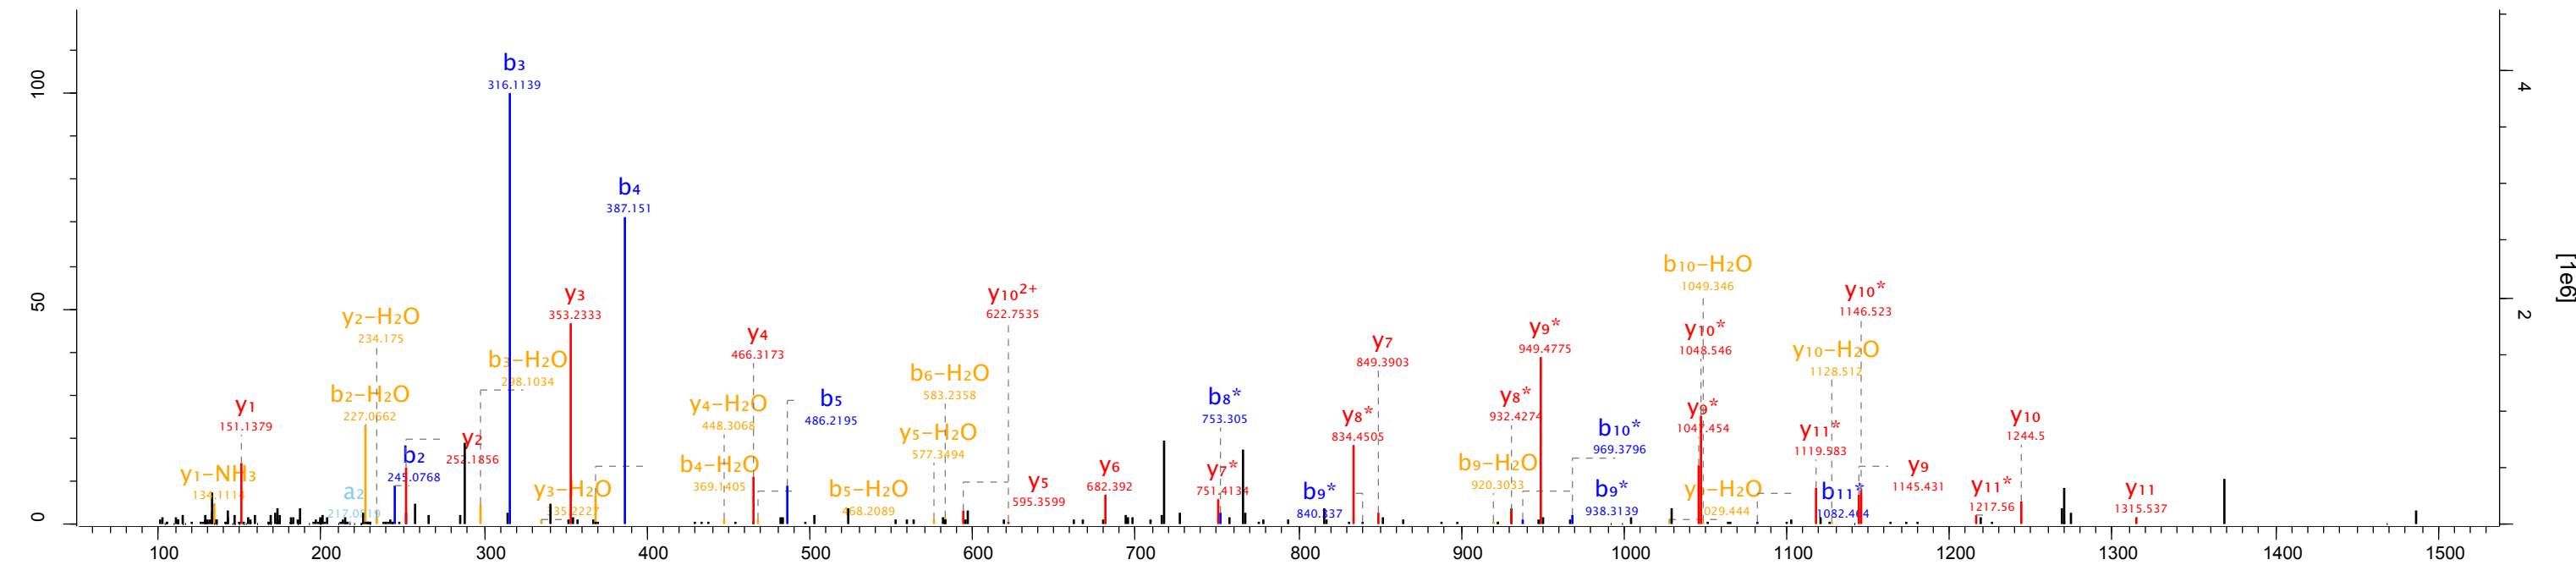

ac - S D A A V D T S S E I T T K -

Fragmentation mapping (b and y ions):

- b<sub>2</sub> (D), b<sub>3</sub> (A), b<sub>4</sub> (A), b<sub>5</sub> (V), b<sub>8</sub>\* (S), b<sub>9</sub>\* (S), b<sub>10</sub>\* (E), b<sub>11</sub>\* (I)
- y<sub>1</sub> (K), y<sub>2</sub> (T), y<sub>3</sub> (T), y<sub>4</sub> (I), y<sub>5</sub> (E), y<sub>6</sub> (S), y<sub>7</sub> (S), y<sub>8</sub>\* (T), y<sub>9</sub> (D), y<sub>10</sub> (V), y<sub>11</sub> (A)



Raw file  
 20150812\_A375SR\_Phospho\_BR1\_03  
 Scan 13053 Method FTMS; HCD Score 76.44 m/z 955.77 Gene names TMPO

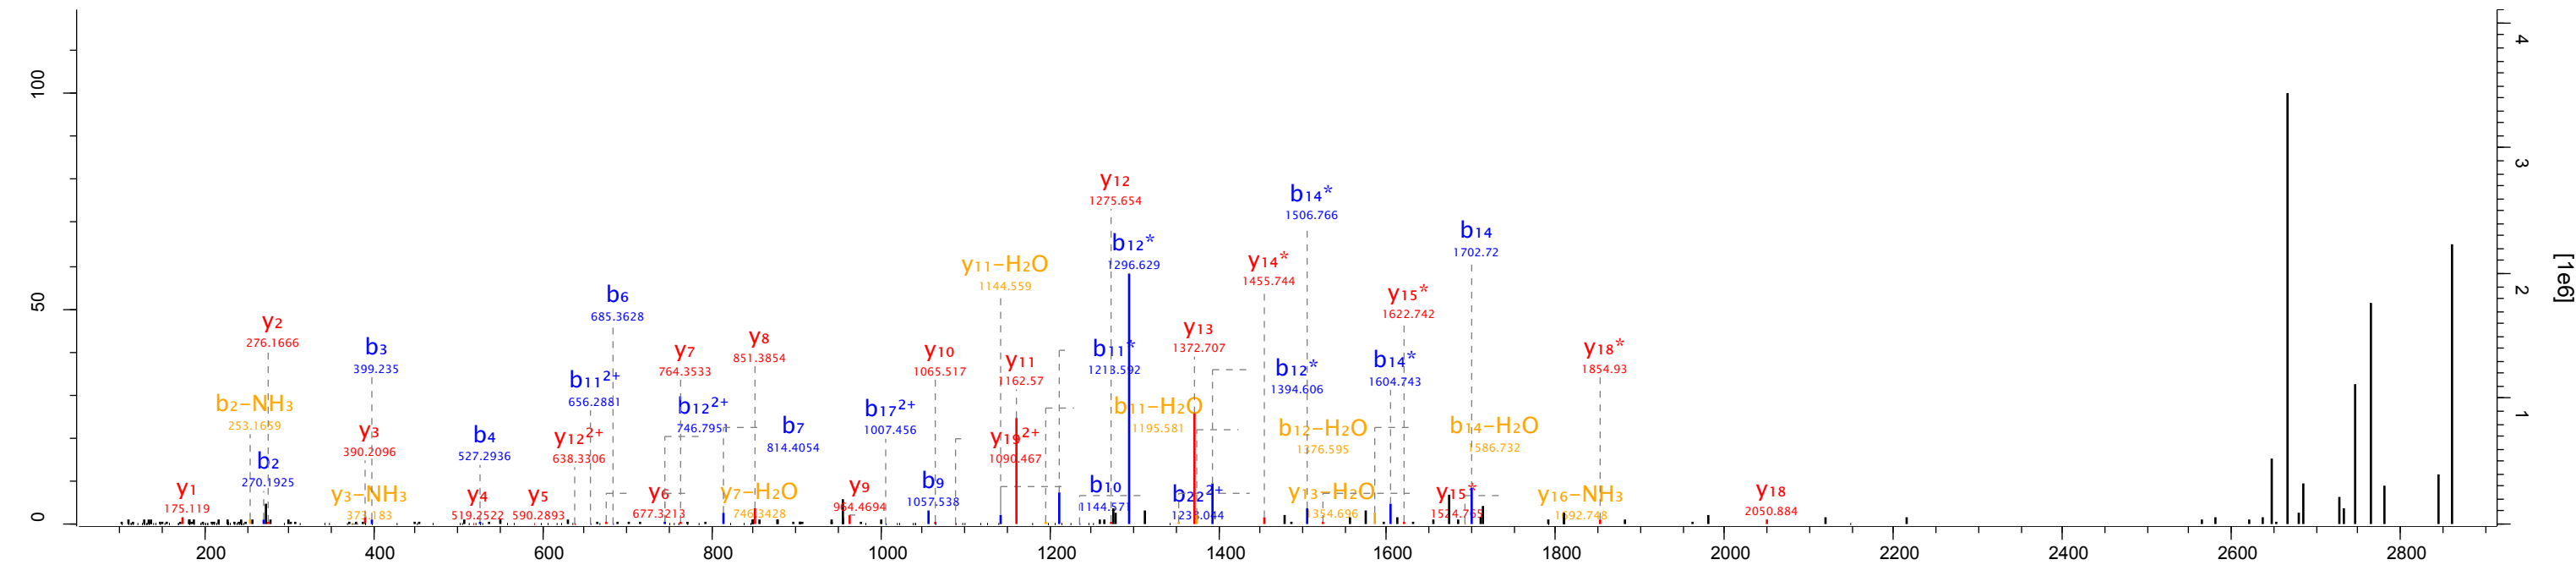

- L R E Q G T E S R S S ph S y15\* y14\* y13 y12 y11 y10 y9 y8 y7 y6 y5 y4 y3 y2 y1 -

b2 b3 b4 b6 b7 b9 b10 b11\* b12\* b14 b17<sup>2+</sup> b22<sup>2+</sup>

Raw file: 20150812\_A375SR\_Phospho\_BR1\_03  
 Scan: 13393 Method: FTMS; HCD Score: 83.75 m/z: 794.34 Gene names: ANKRD17

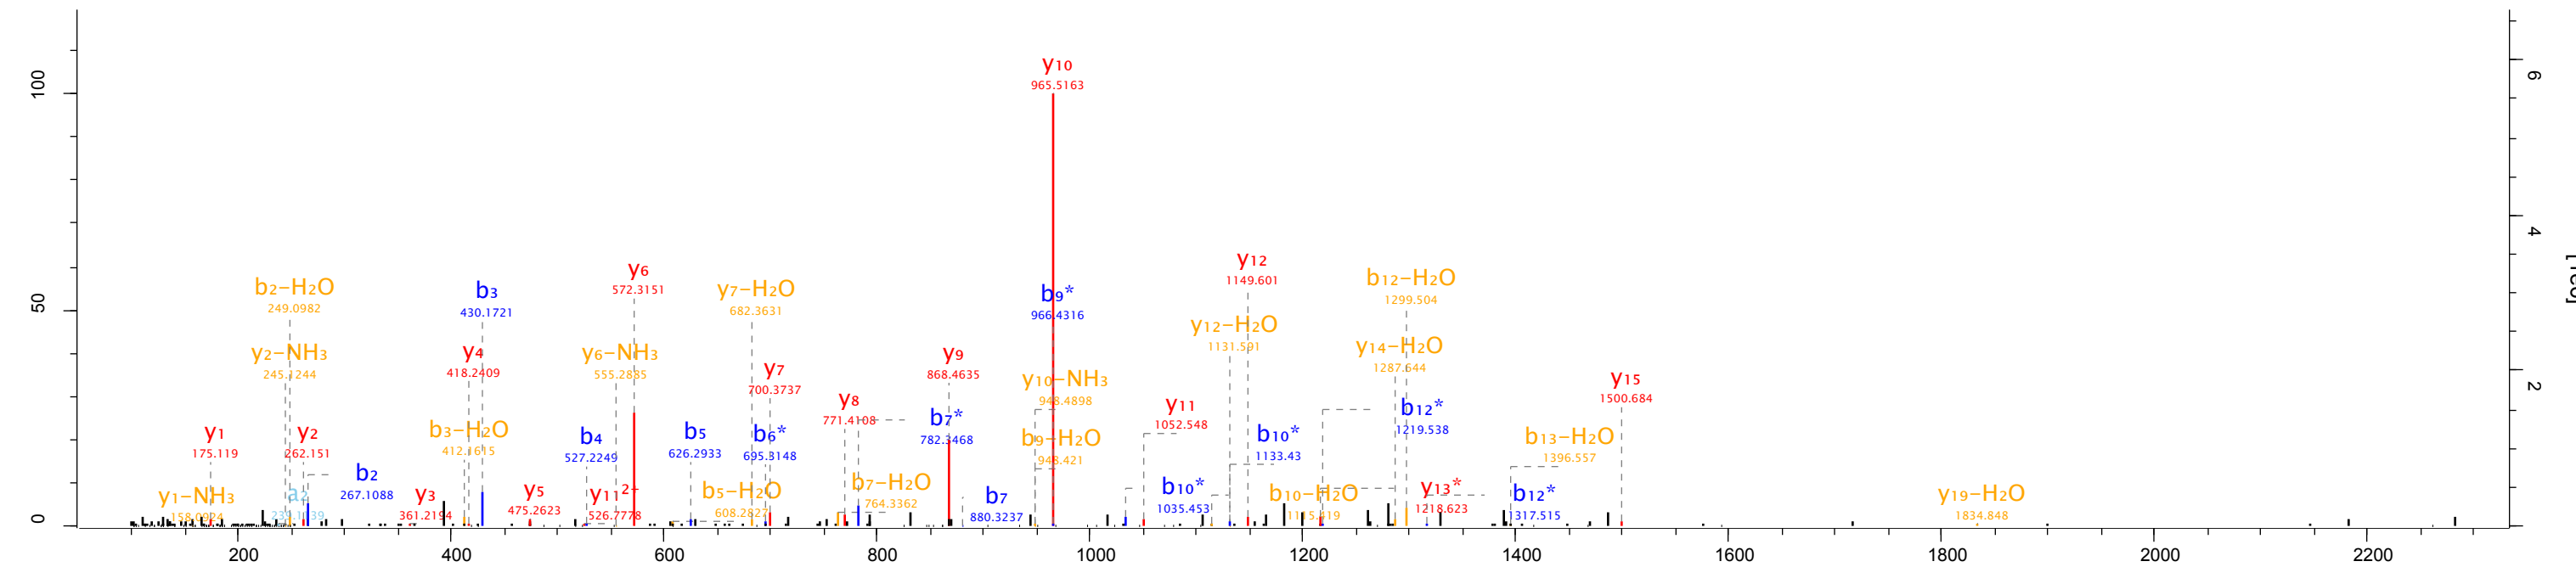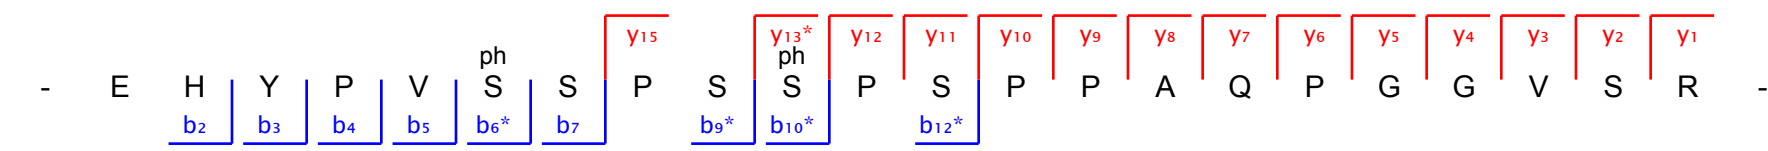

Raw file 20150812\_A375SR\_Phospho\_BR1\_03 Scan 13423 Method FTMS; HCD Score 131.13 m/z 969.07 Gene names FXR1

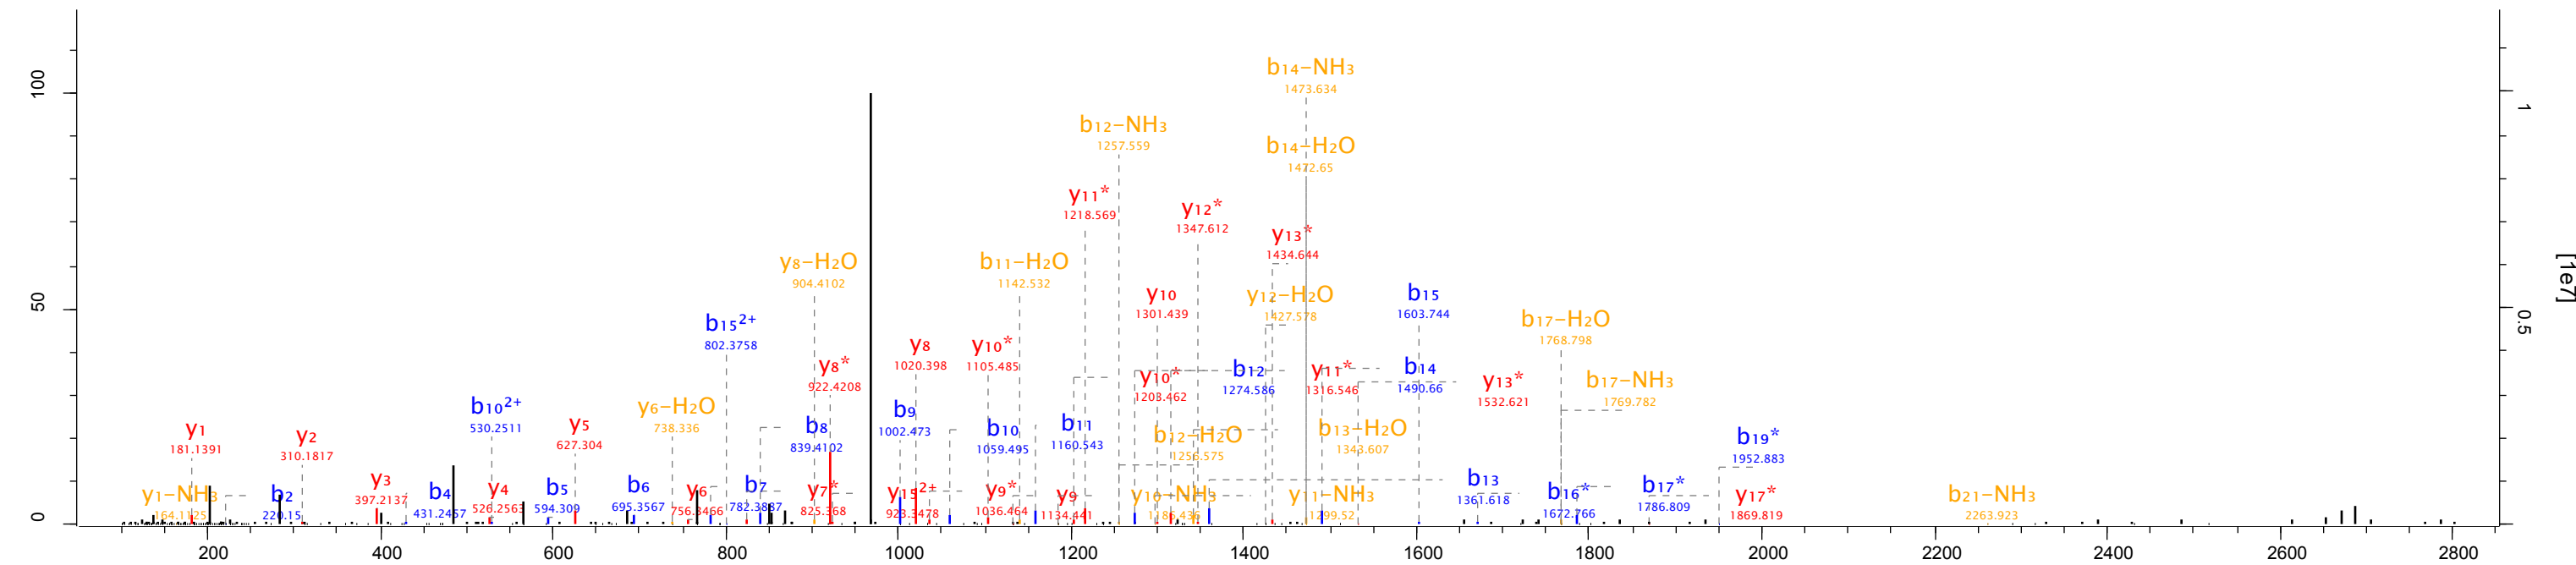

- R G P N Y T S G Y G T N S E L S N P S E T E S E R -

b<sub>2</sub>
b<sub>4</sub>
b<sub>5</sub>
b<sub>6</sub>
b<sub>7</sub>
b<sub>8</sub>
b<sub>9</sub>
b<sub>10</sub>
b<sub>11</sub>
b<sub>12</sub>
b<sub>13</sub>
b<sub>14</sub>
b<sub>15</sub>
b<sub>16</sub>\*
b<sub>17</sub>\*
b<sub>19</sub>\*
y<sub>17</sub>\*
y<sub>15</sub><sup>2+</sup>
y<sub>13</sub>\*
y<sub>12</sub>\*
y<sub>11</sub>\*
y<sub>10</sub>ph
y<sub>9</sub>
y<sub>8</sub>
y<sub>7</sub>ph
y<sub>6</sub>
y<sub>5</sub>
y<sub>4</sub>
y<sub>3</sub>
y<sub>2</sub>
y<sub>1</sub>

Raw file: 20150812\_A375SR\_Phospho\_BR1\_03  
 Scan: 13463 Method: FTMS; HCD Score: 83.64 m/z: 947.38 Gene names: FARP1

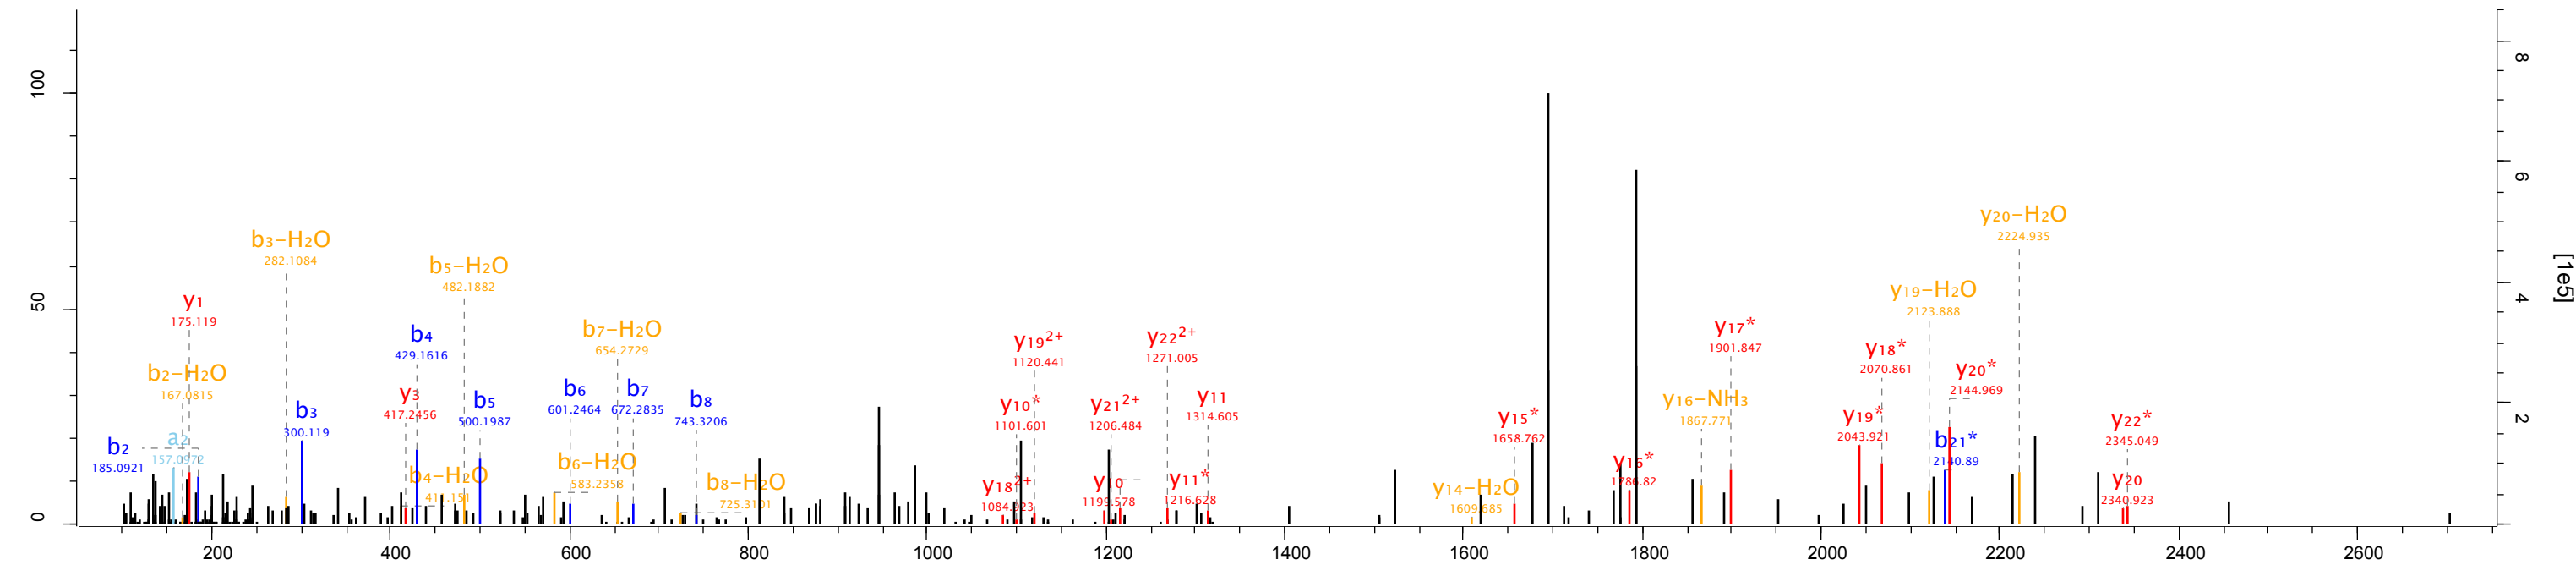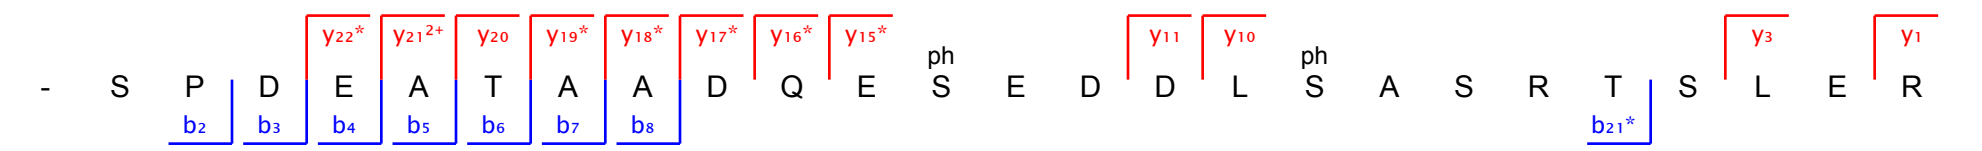

Raw file: 20150812\_A375SR\_Phospho\_BR1\_03  
 Scan: 13563 Method: FTMS; HCD Score: 198.87 m/z: 704.29 Gene names: ZC3H13

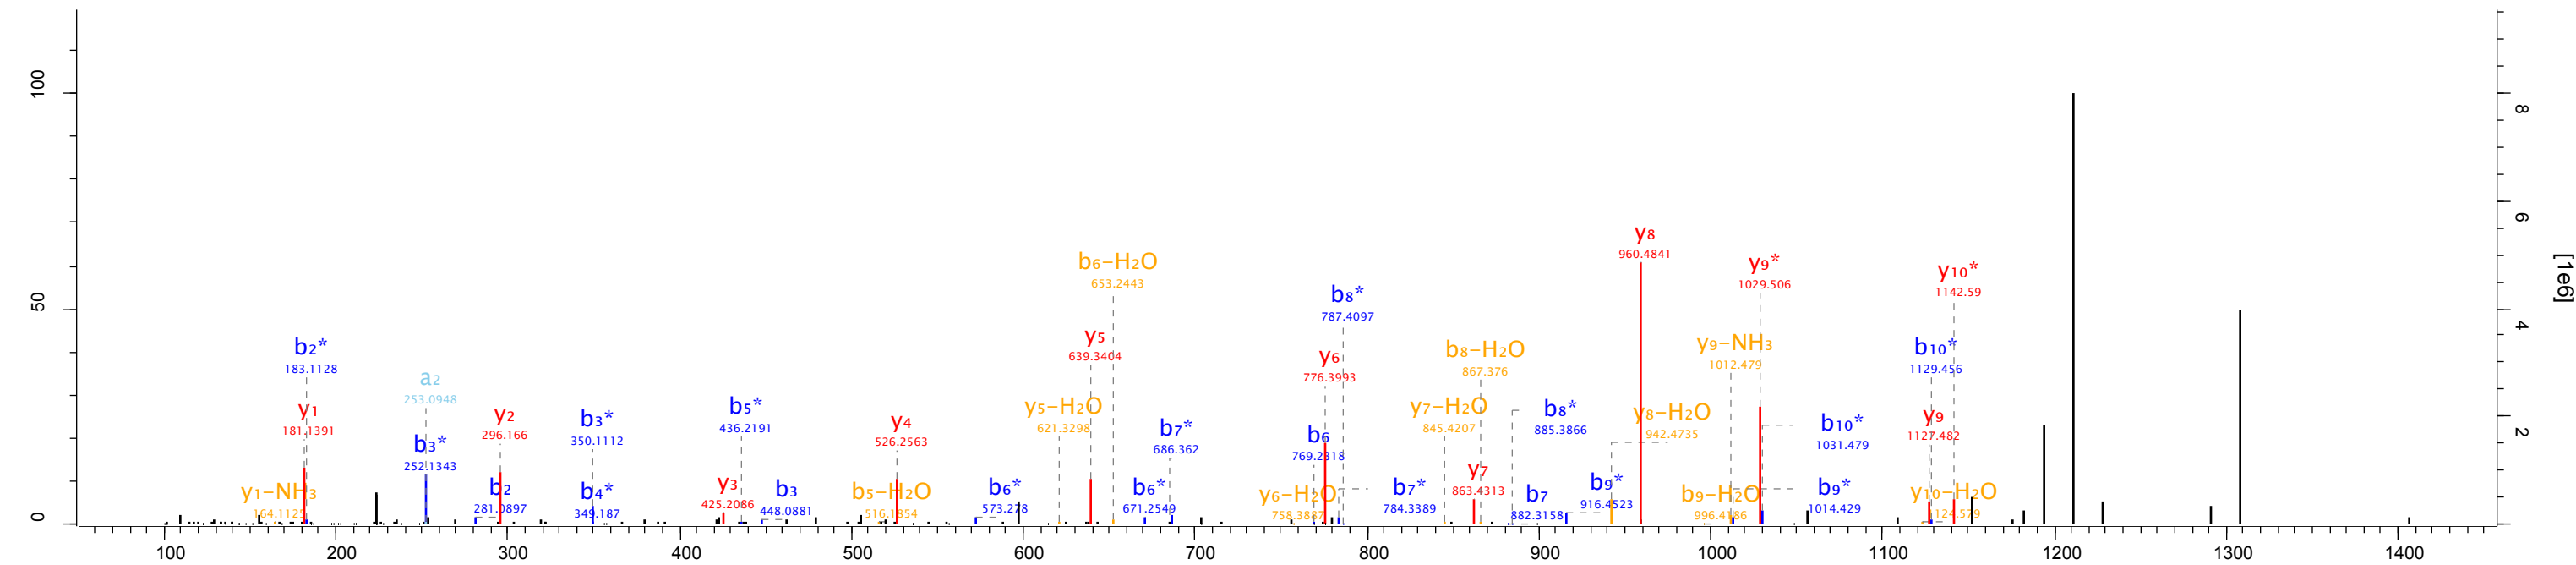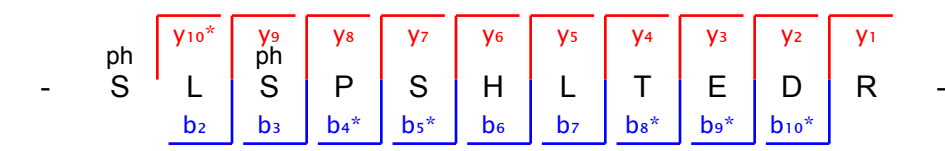

Raw file: 20150812\_A375SR\_Phospho\_BR1\_03  
 Scan: 13723 Method: FTMS; HCD Score: 89.46 m/z: 588.76 Gene names: TNIK

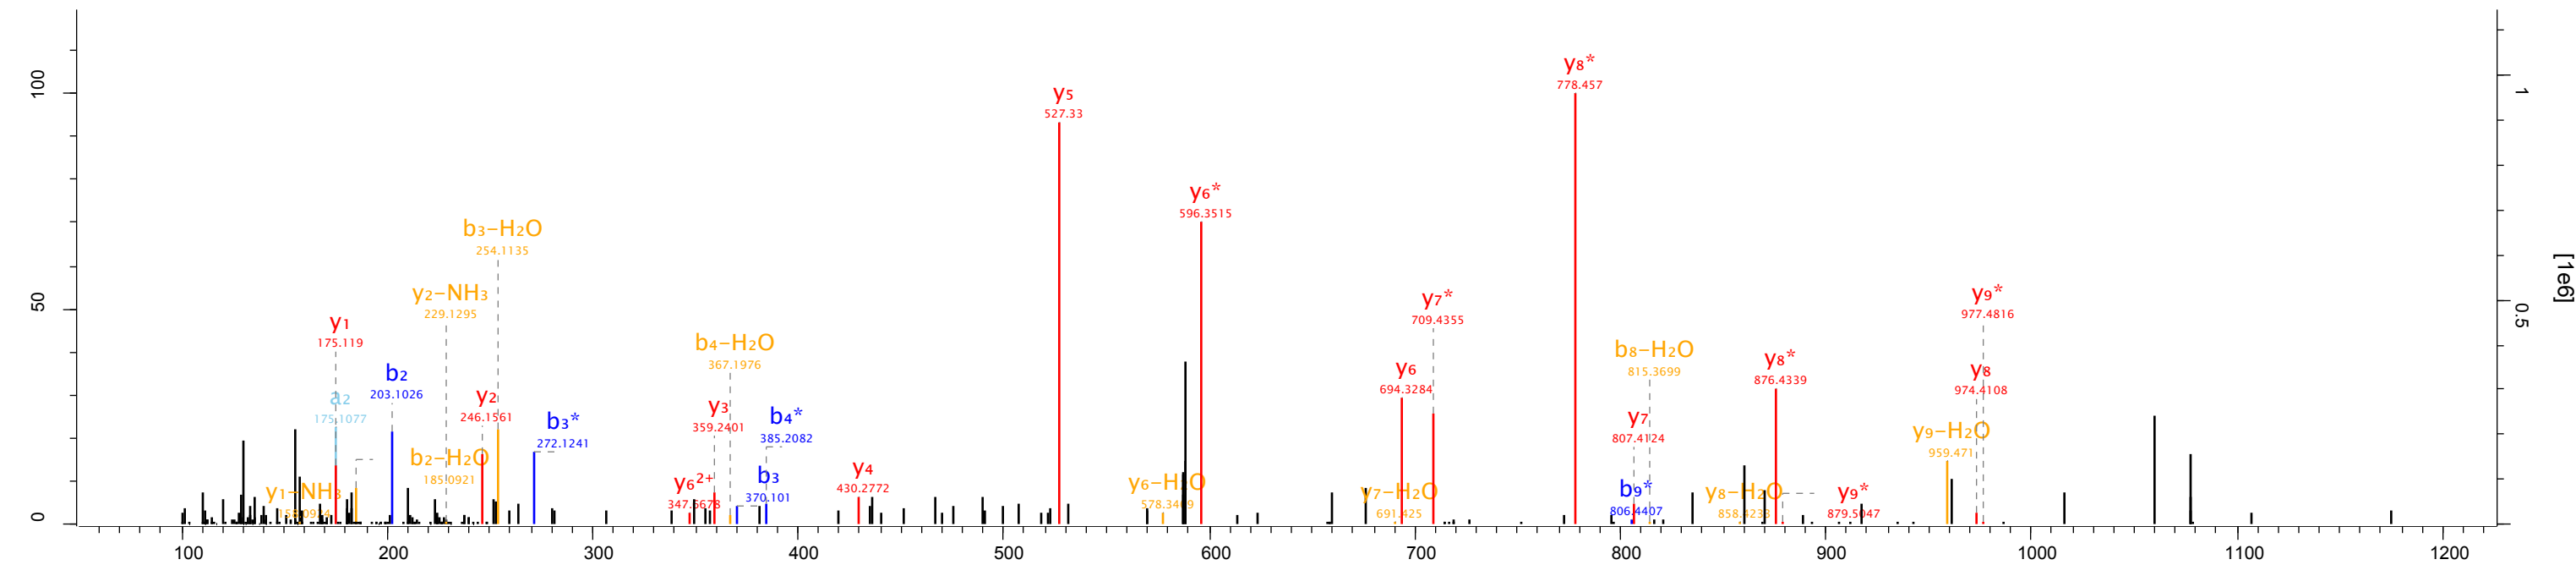

- T y9\* y8  
ph y7 y6  
ph y5 y4 y3 y2 y1 -

b2 b3 b4\* b9\*

T S I S P A L A R

Raw file 20150812\_A375SR\_Phospho\_BR1\_03 Scan 13823 Method FTMS; HCD Score 89.94 m/z 639.29 Gene names MSL3

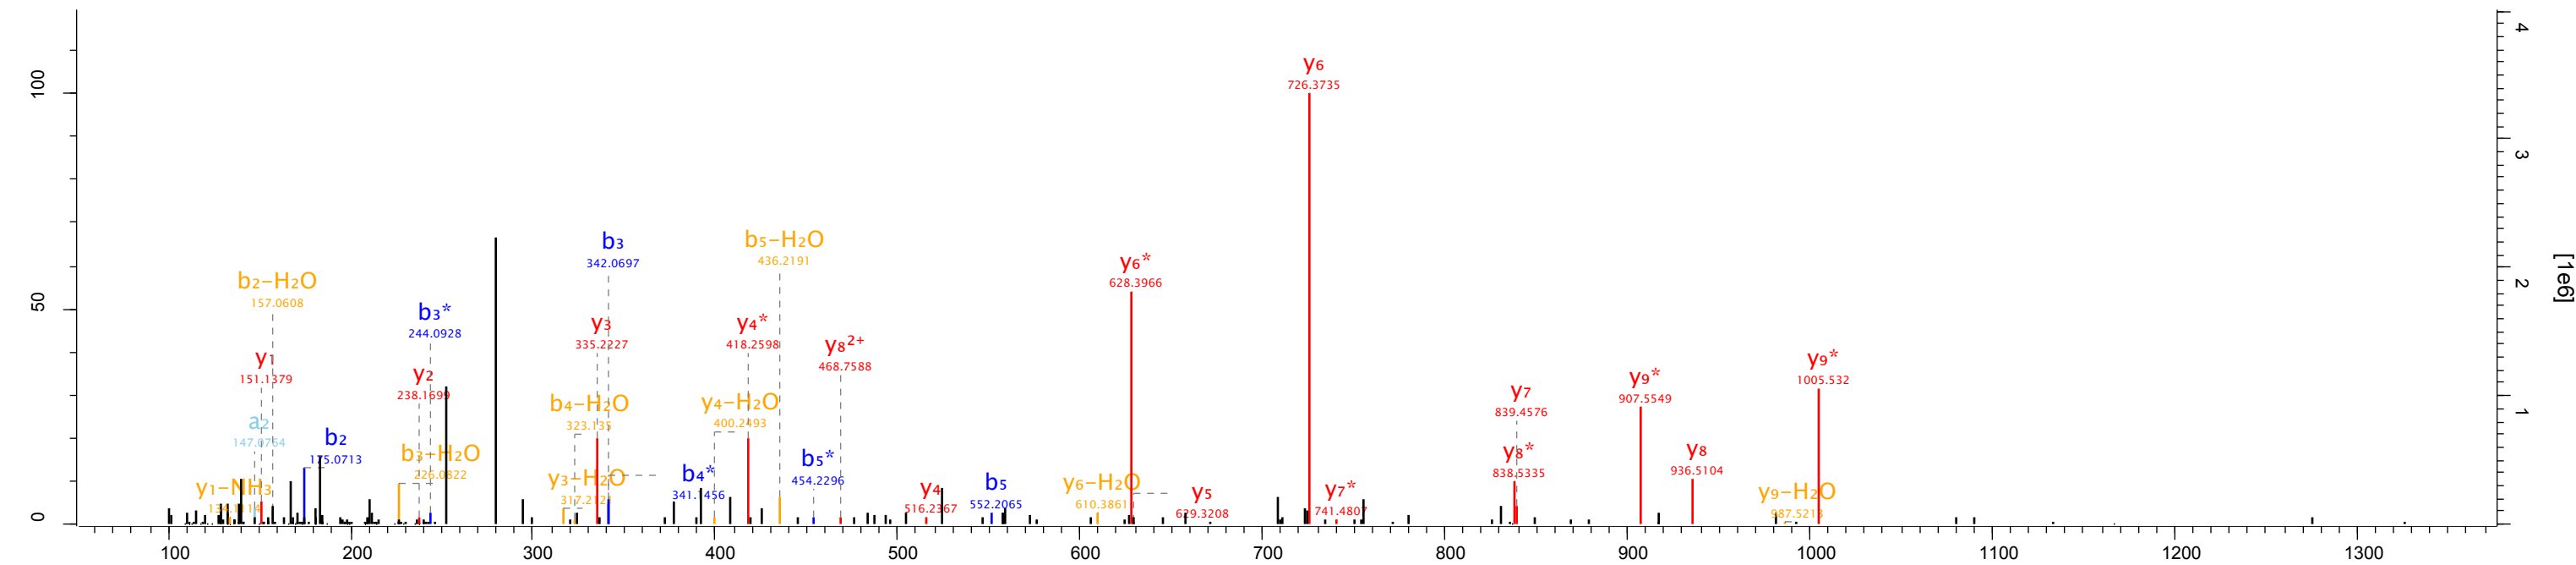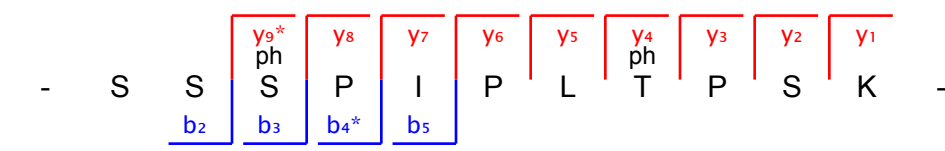

Raw file 20150812\_A375SR\_Phospho\_BR1\_03 Scan 13883 Method FTMS; HCD Score 257.64 m/z 947.71 Gene names FARP1

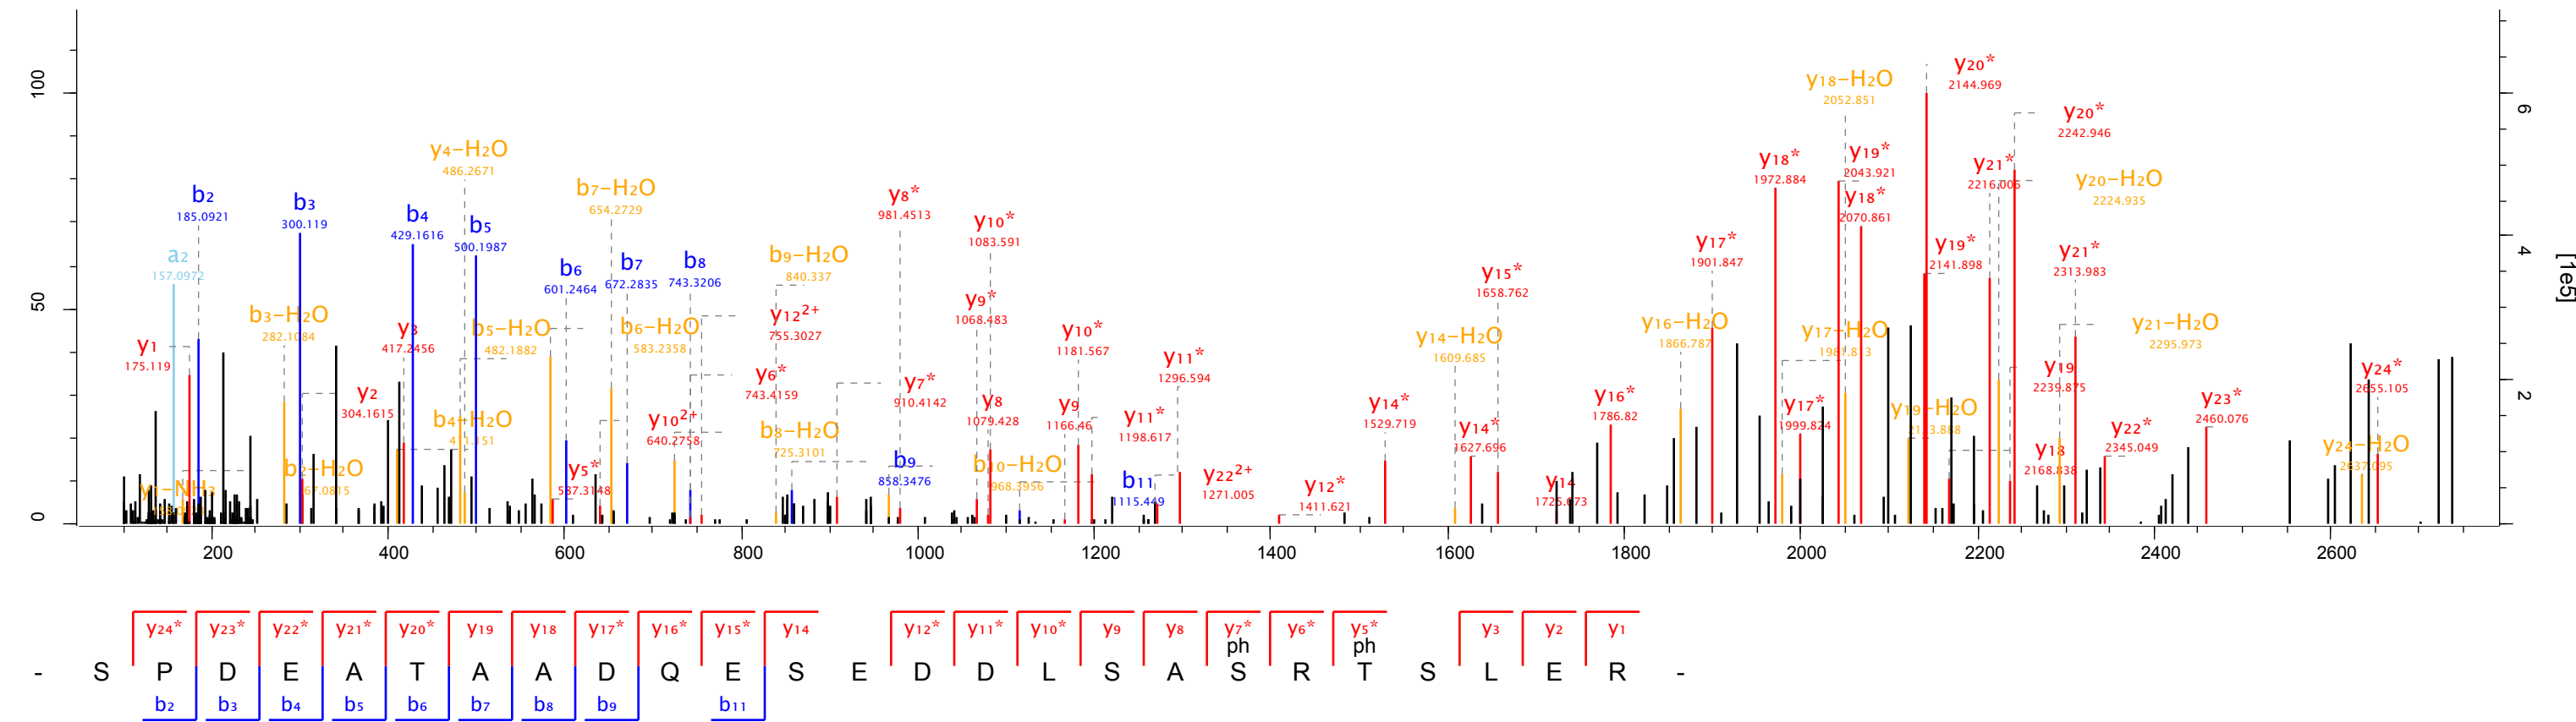



Raw file 20150812\_A375SR\_Phospho\_BR1\_03 Scan 14323 Method FTMS; HCD Score 177.18 m/z 1036.49 Gene names LSM14A

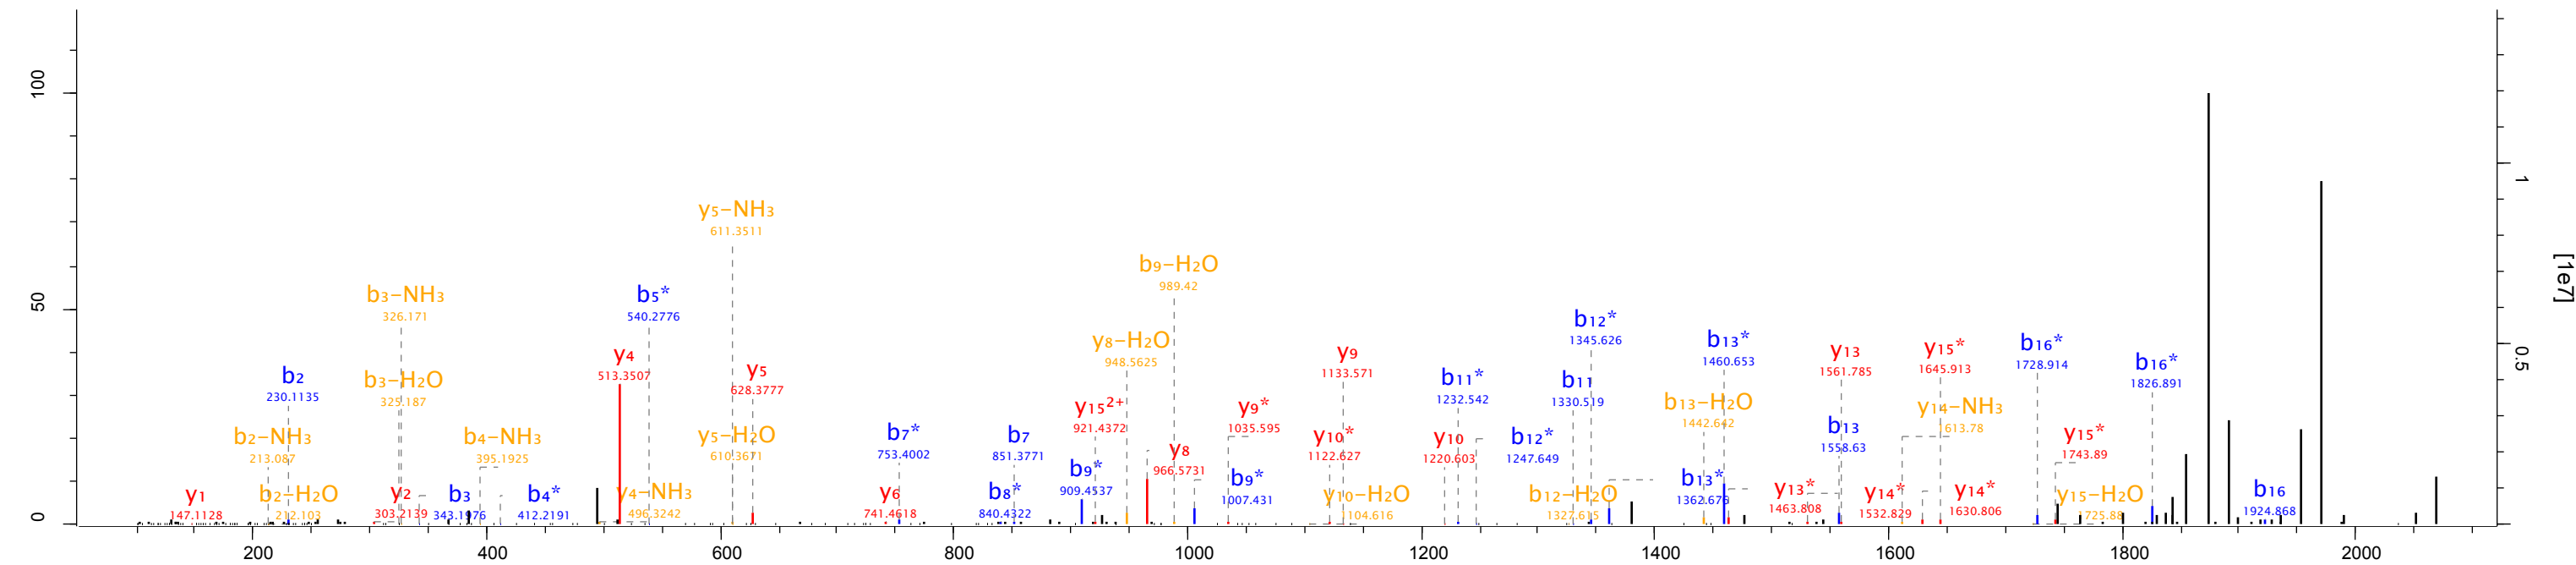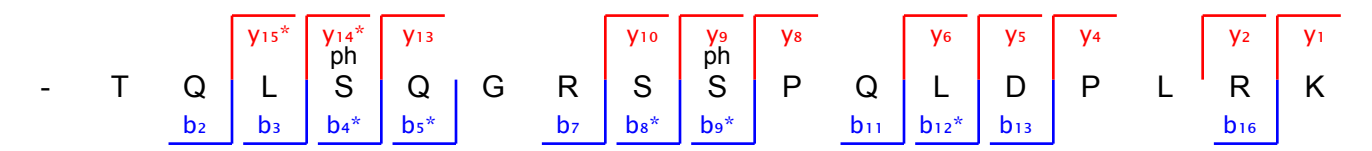

Raw file 20150812\_A375SR\_Phospho\_BR1\_03 Scan 14413 Method FTMS; HCD Score 224.57 m/z 1018.89 Gene names BOD1L1

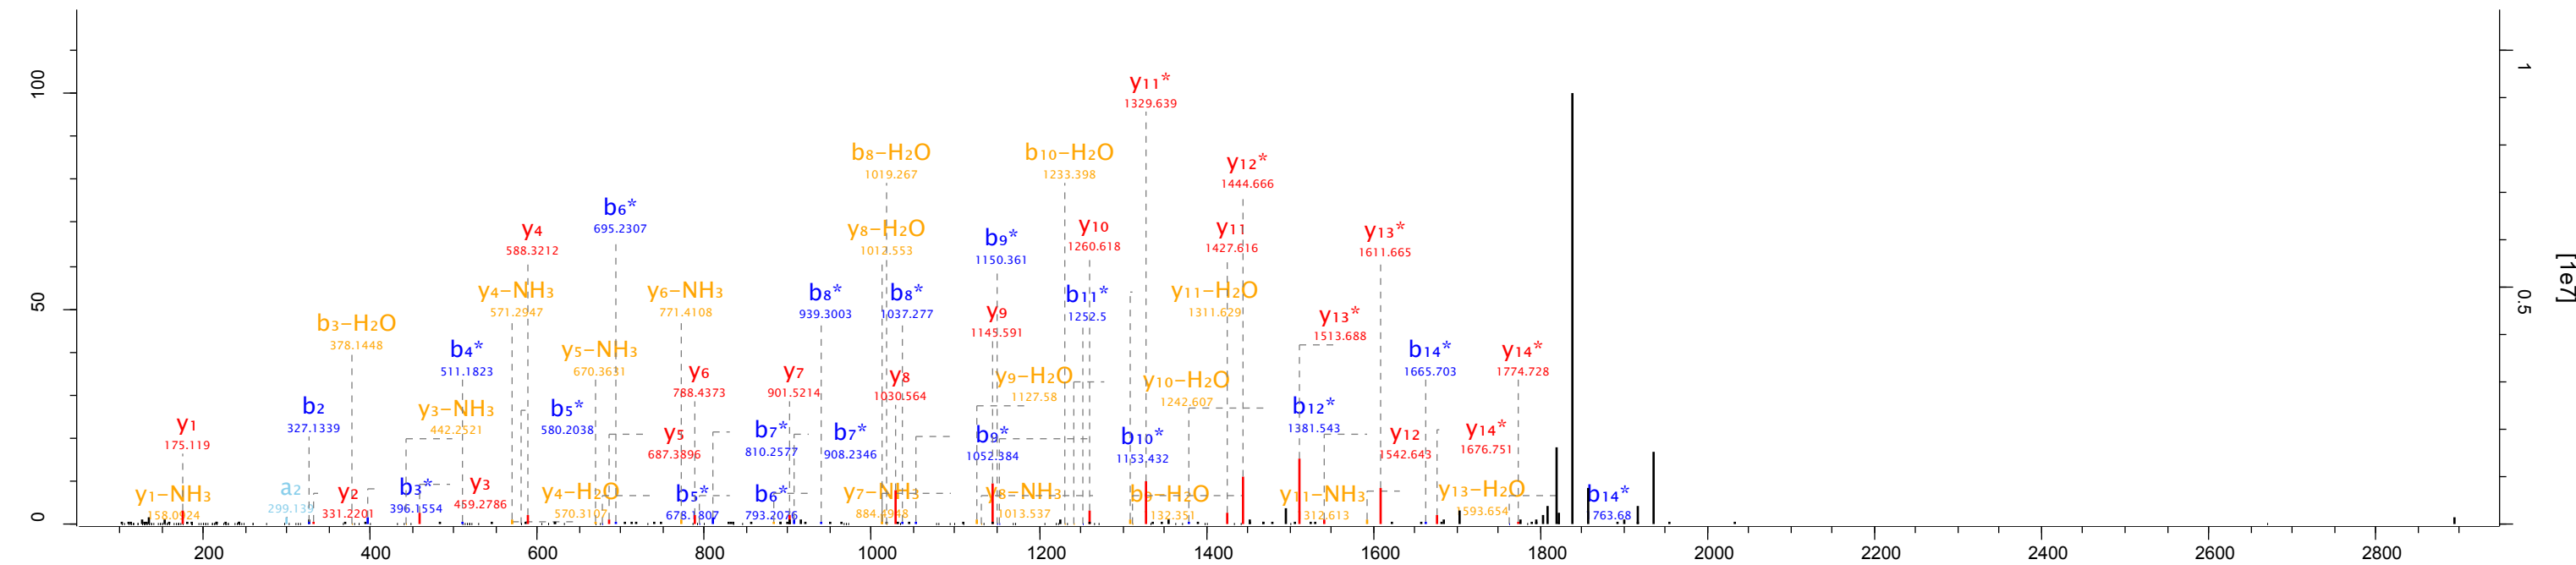

- Y Y<sup>14\*</sup> Y<sup>13\*</sup>  
ph  
S Y<sup>12</sup>  
D Y<sup>11</sup>  
ph  
S Y<sup>10</sup>  
D Y<sup>9</sup>  
D Y<sup>8</sup>  
E Y<sup>7</sup>  
L Y<sup>6</sup>  
T Y<sup>5</sup>  
V Y<sup>4</sup>  
E Y<sup>3</sup>  
Q Y<sup>2</sup>  
R Y<sup>1</sup>  
R -

b<sub>2</sub> b<sub>3</sub><sup>\*</sup> b<sub>4</sub><sup>\*</sup> b<sub>5</sub><sup>\*</sup> b<sub>6</sub><sup>\*</sup> b<sub>7</sub><sup>\*</sup> b<sub>8</sub><sup>\*</sup> b<sub>9</sub><sup>\*</sup> b<sub>10</sub><sup>\*</sup> b<sub>11</sub><sup>\*</sup> b<sub>12</sub><sup>\*</sup> b<sub>14</sub><sup>\*</sup>

Raw file  
20150812\_A375SR\_Phospho\_BR1\_03

Scan 14453 Method FTMS; HCD Score 128.08 m/z 865.4 Gene names TBX2

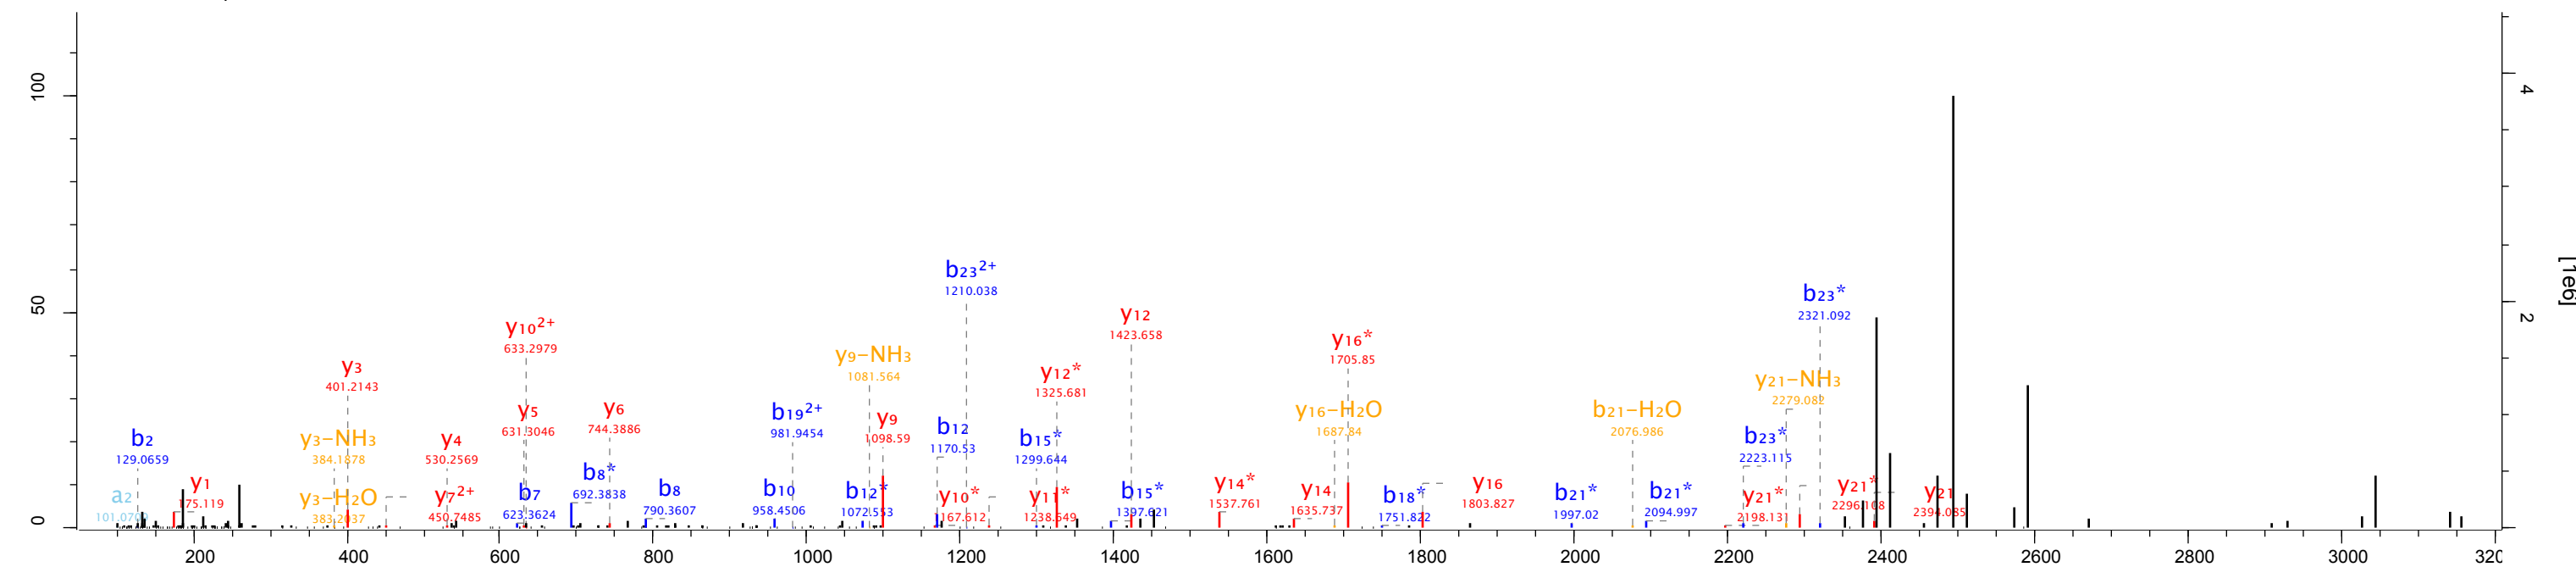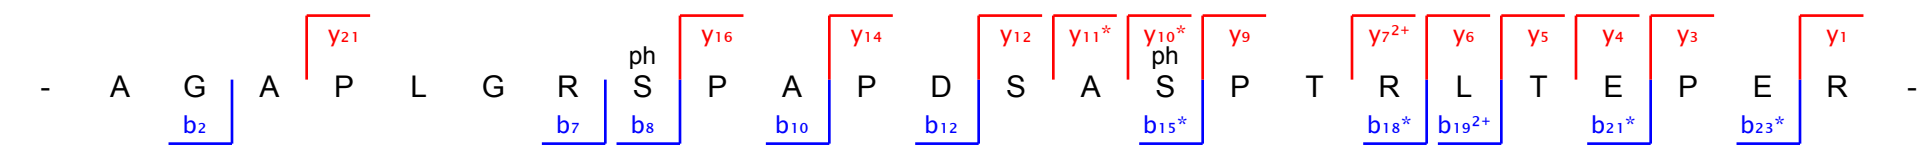

Raw file Scan Method Score m/z Gene names  
 20150812\_A375SR\_Phospho\_BR1\_03 14463 FTMS; HCD 190.79 762.32 NCKAP5L

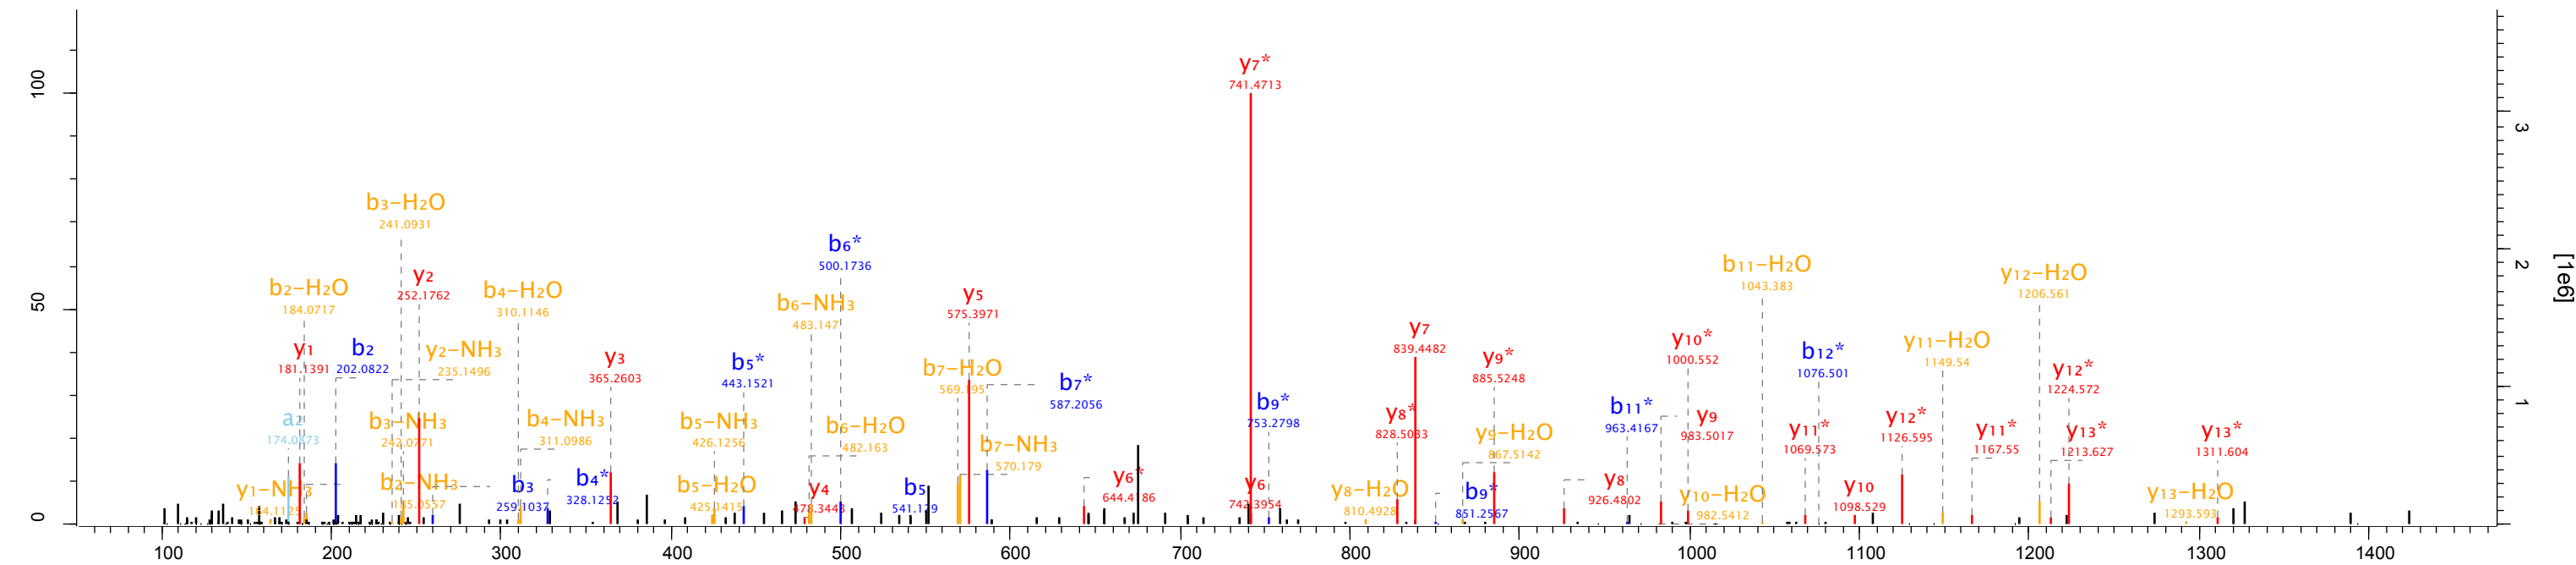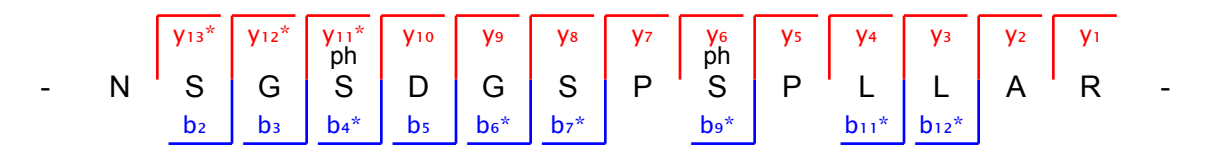

Raw file 20150812\_A375SR\_Phospho\_BR1\_03 Scan 14733 Method FTMS; HCD Score 111.22 m/z 672.25 Gene names KLC2

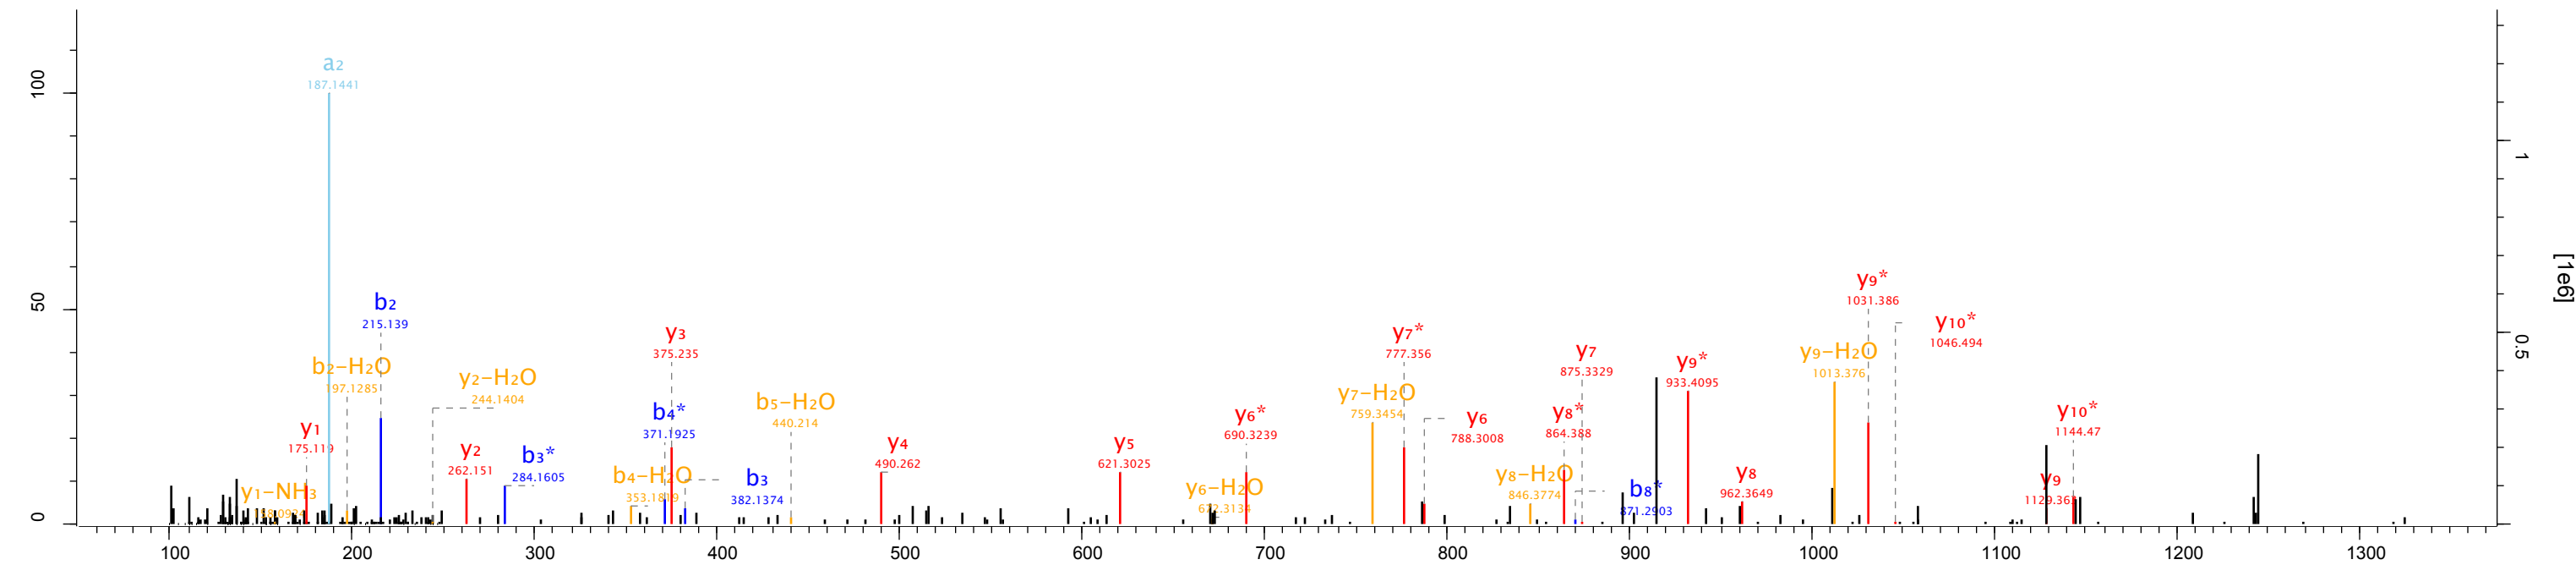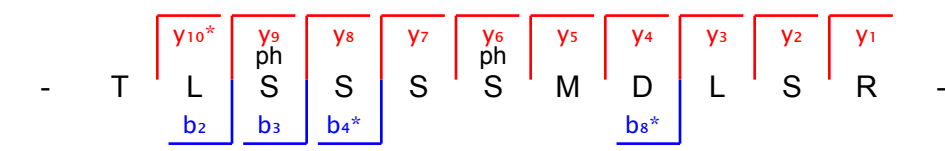

Raw file: 20150812\_A375SR\_Phospho\_BR1\_03  
 Scan: 14783 Method: FTMS; HCD Score: 82.54 m/z: 697.35 Gene names: WHSC1

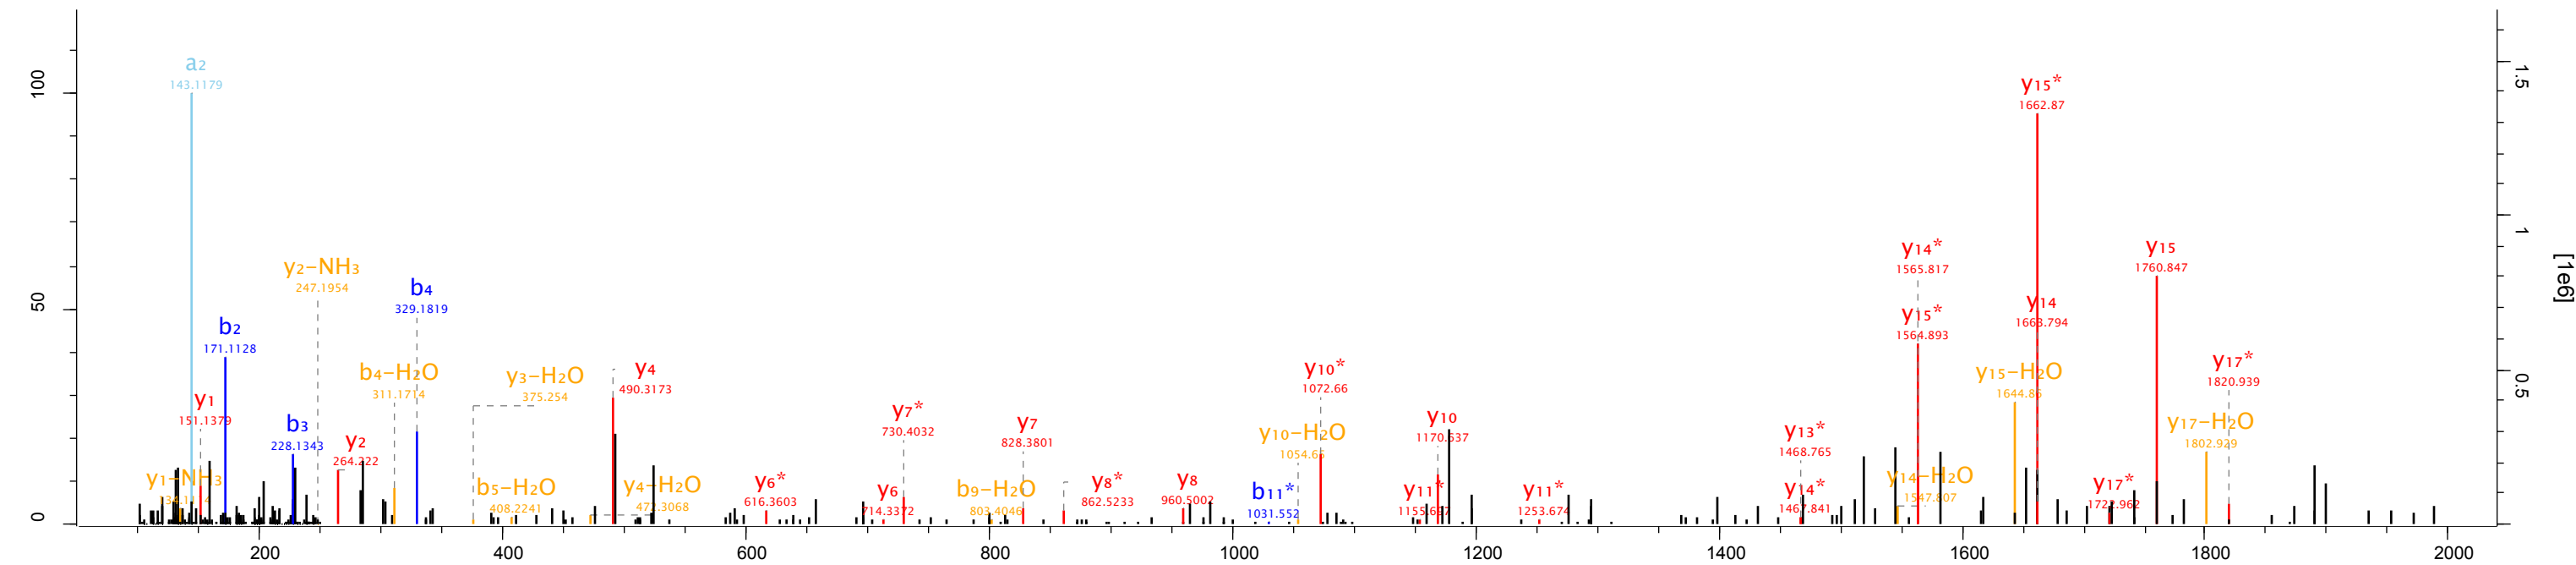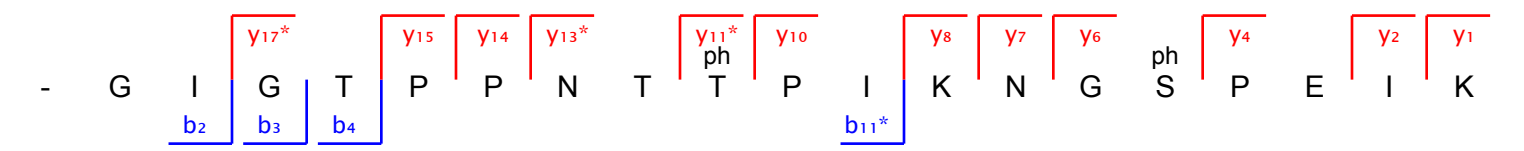

Raw file: 20150812\_A375SR\_Phospho\_BR1\_03  
 Scan: 14833 Method: FTMS; HCD Score: 183.75 m/z: 862.62 Gene names: ARHGEF2

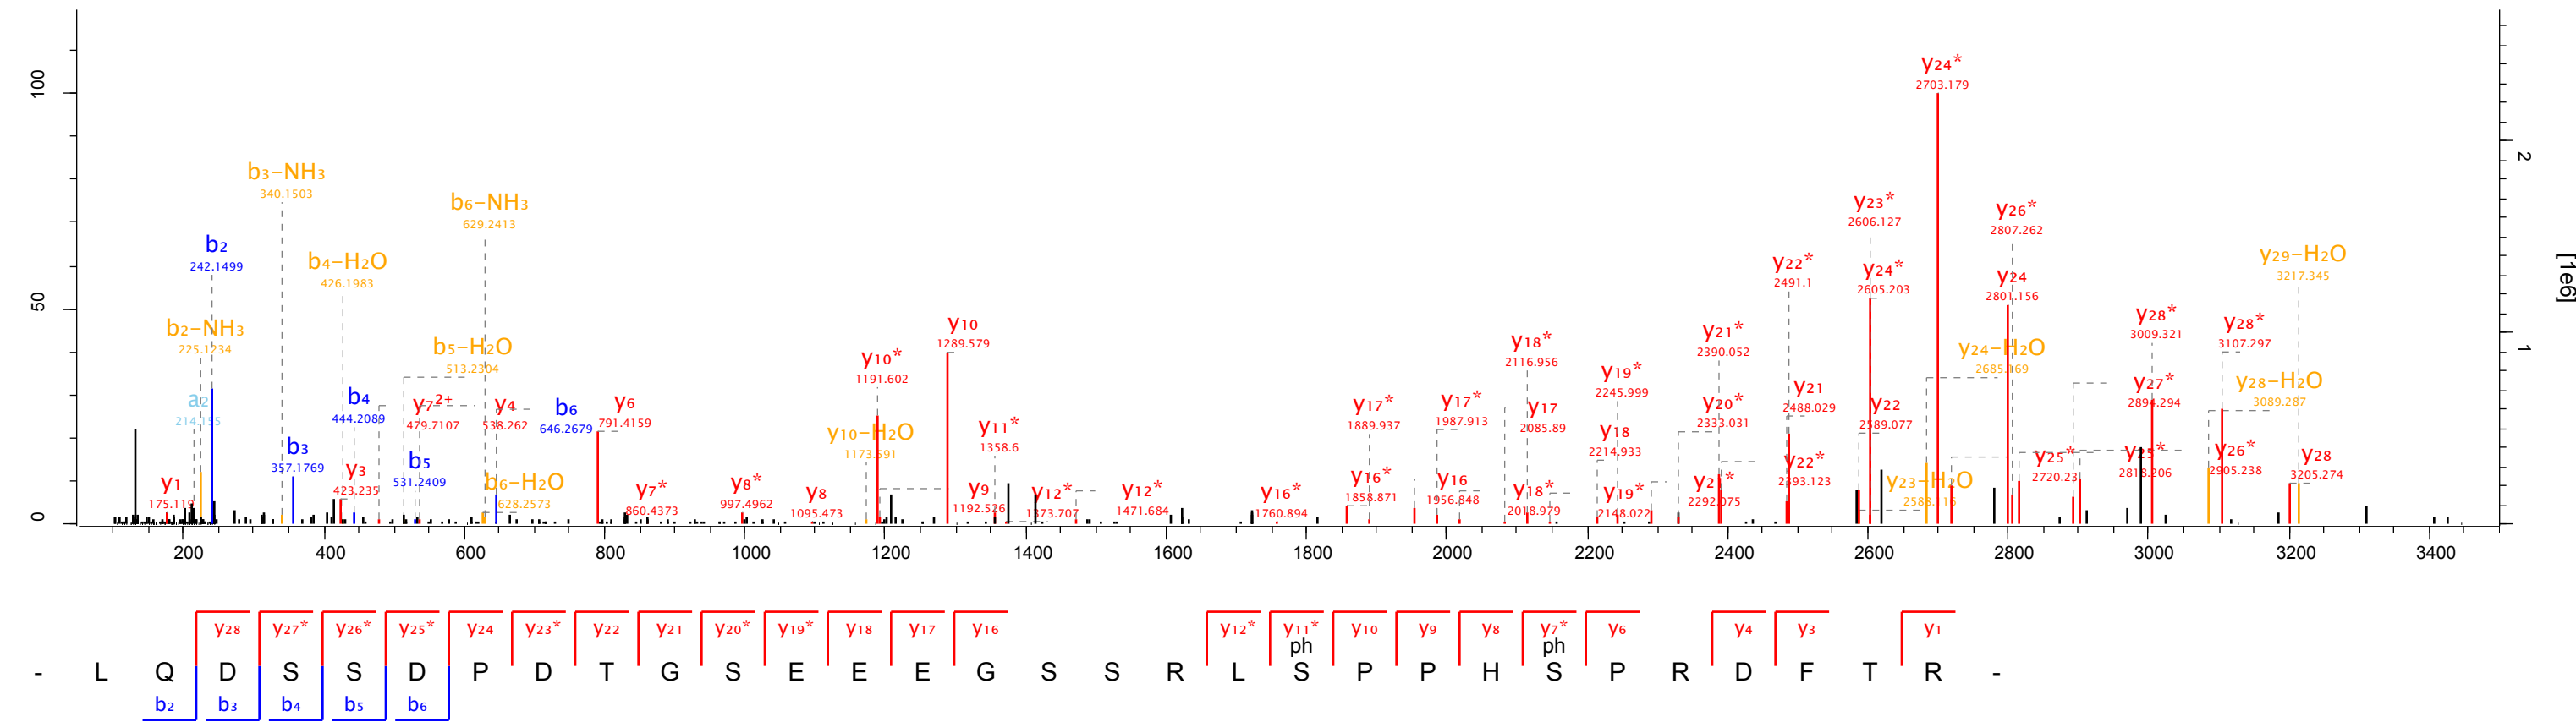

Raw file: 20150812\_A375SR\_Phospho\_BR1\_03  
 Scan: 14873 Method: FTMS; HCD Score: 209.8 m/z: 1059.09 Gene names: NSUN2

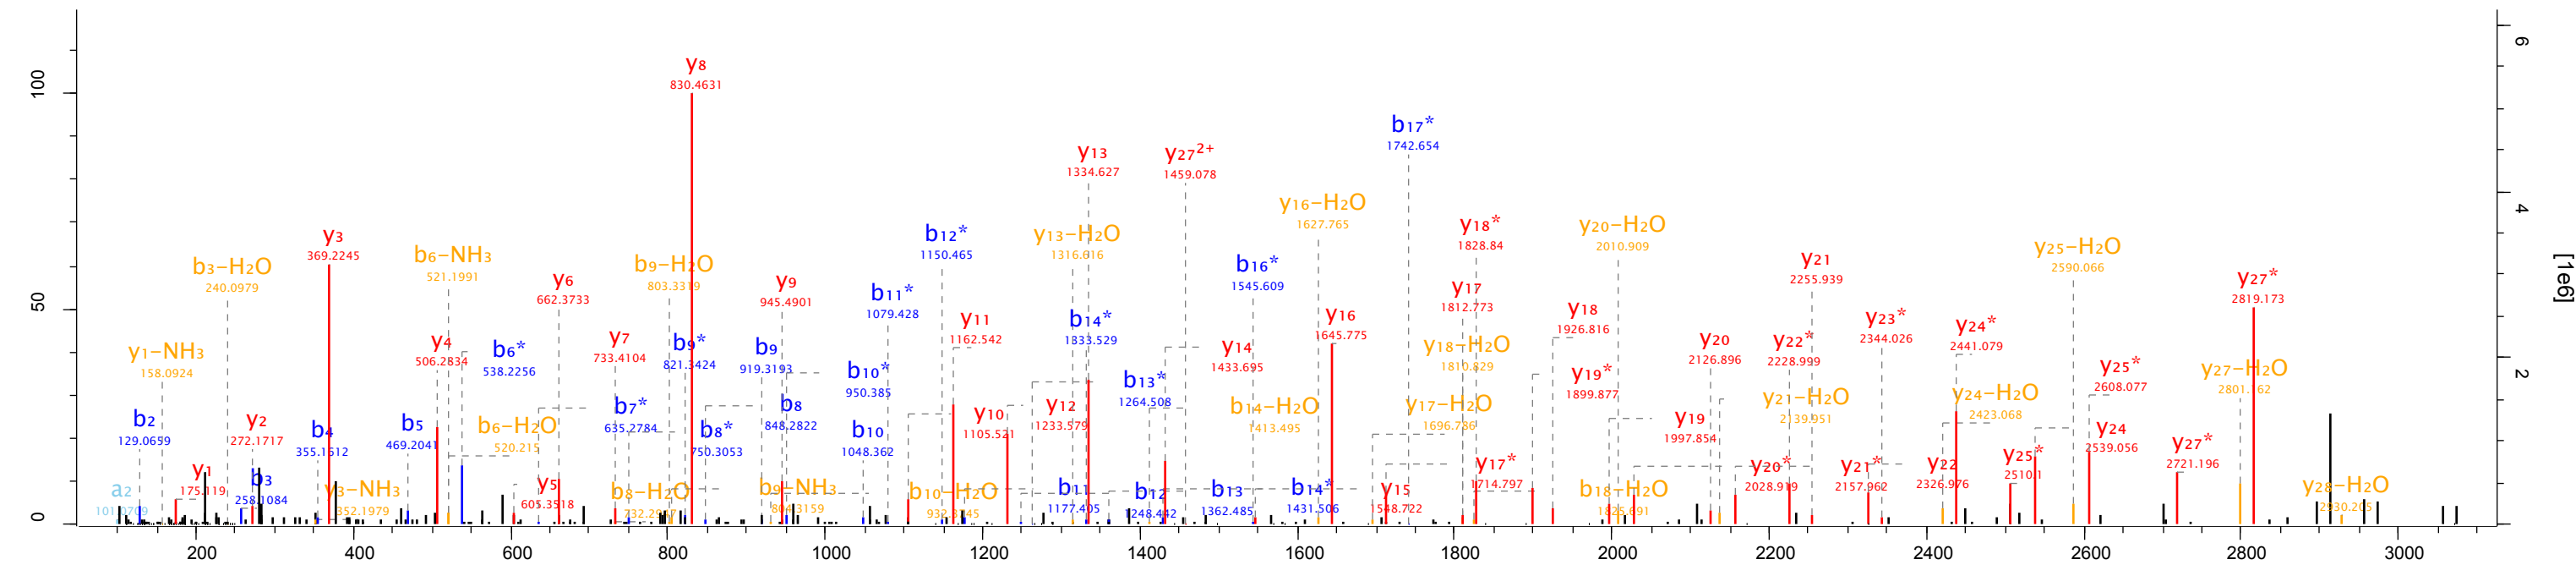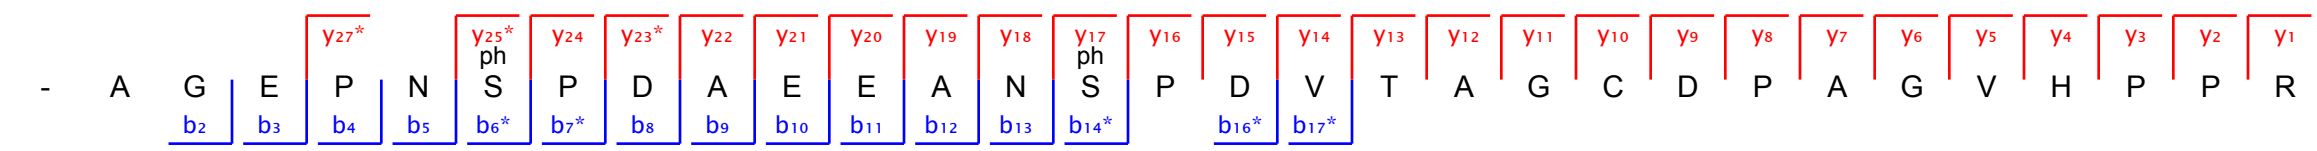



Raw file: 20150812\_A375SR\_Phospho\_BR1\_03  
 Scan: 14893 Method: FTMS; HCD Score: 57.73 m/z: 625.3 Gene names: BAIAP2L2

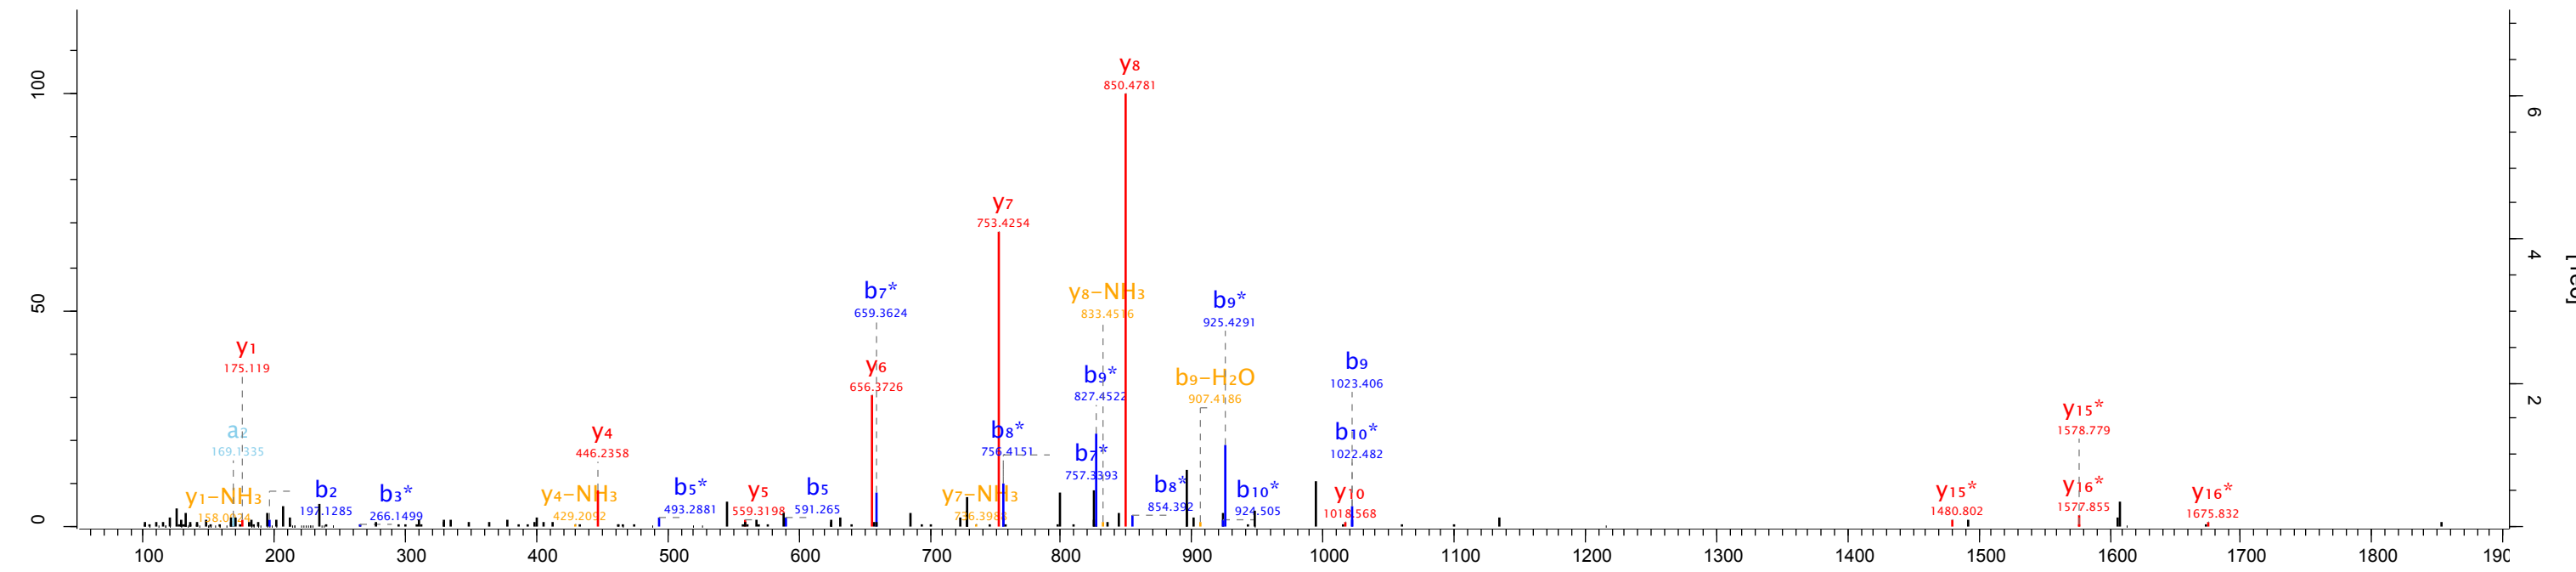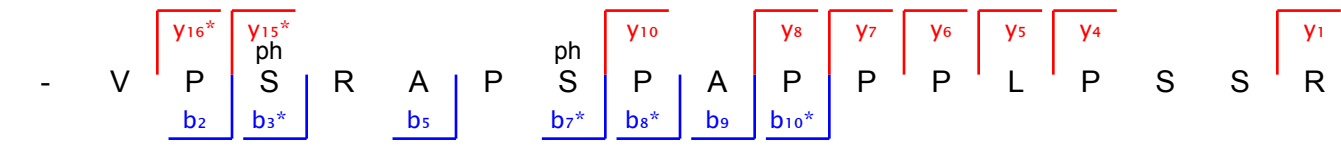

Raw file: 20150812\_A375SR\_Phospho\_BR1\_03  
 Scan: 14963 Method: FTMS; HCD Score: 146.37 m/z: 651.77 Gene names: PTPN3

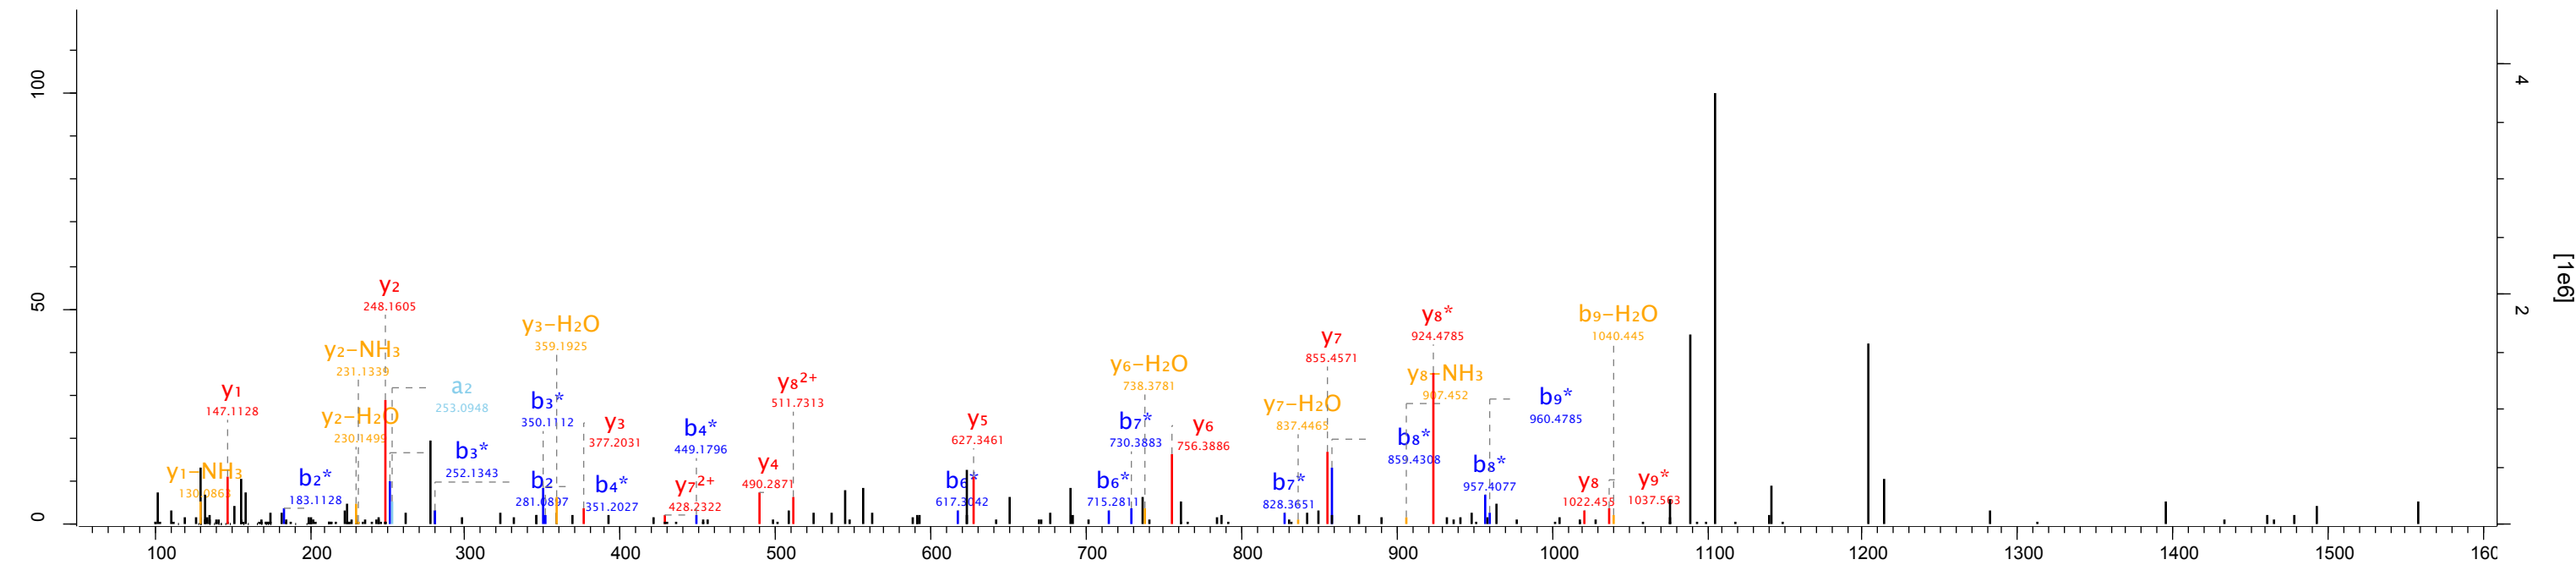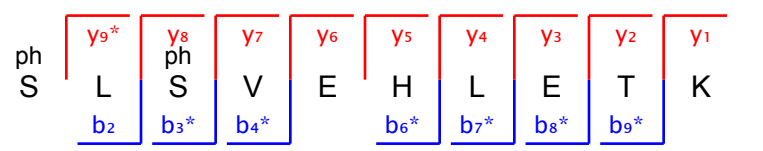

Raw file: 20150812\_A375SR\_Phospho\_BR1\_03  
 Scan: 15123 Method: FTMS; HCD Score: 206.03 m/z: 1133.47 Gene names: ARHGEF11

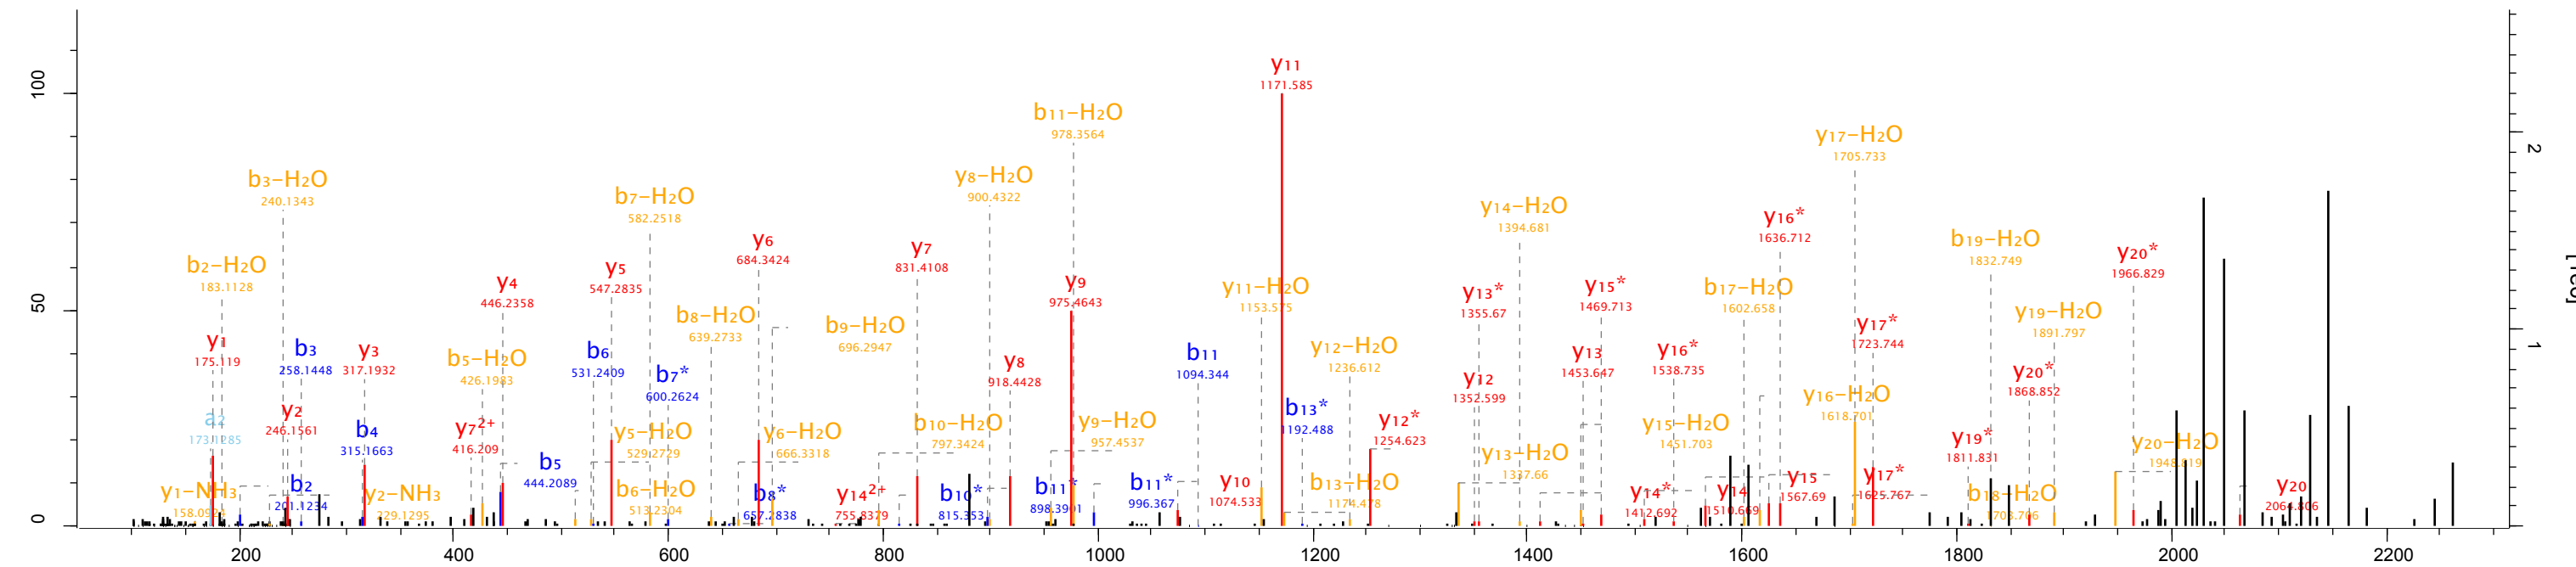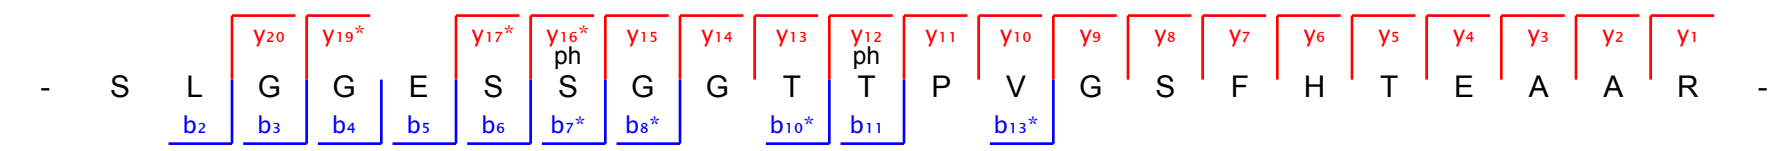

Raw file  
20150812\_A375SR\_Phospho\_BR1\_03

Scan 15173 Method FTMS; HCD Score 306.41 m/z 1420.57 Gene names MDC1

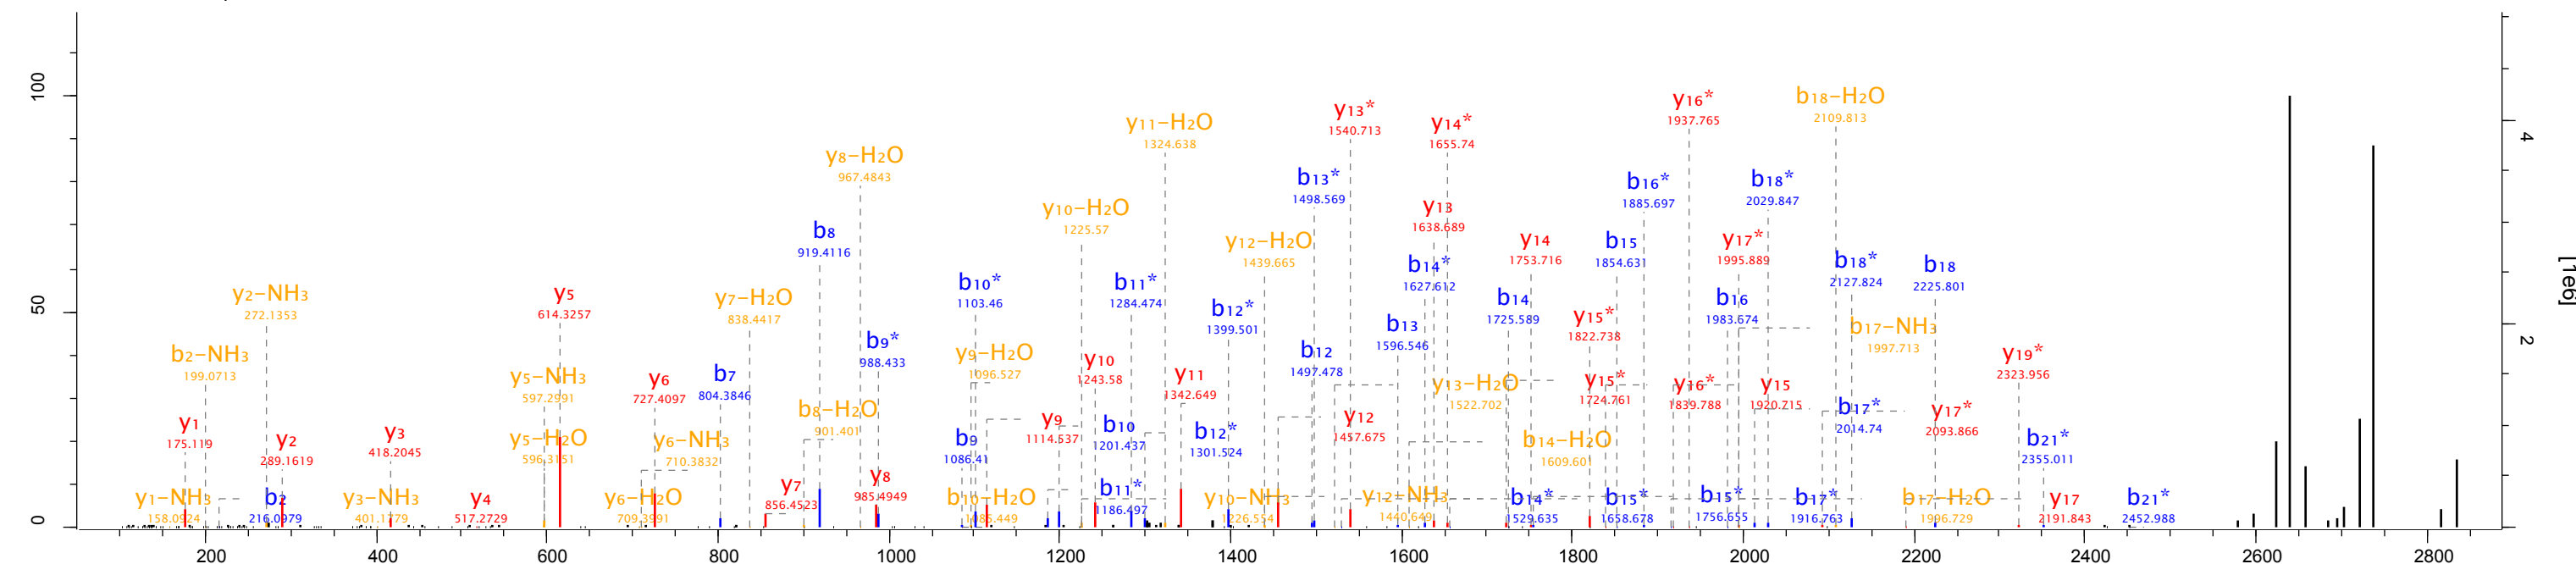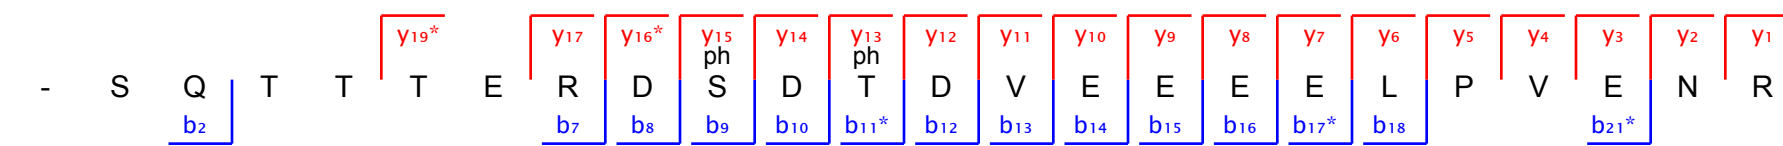

Raw file 20150812\_A375SR\_Phospho\_BR1\_03 Scan 1573 Method FTMS; HCD Score 51.46 m/z 419.86 Gene names SRRM2

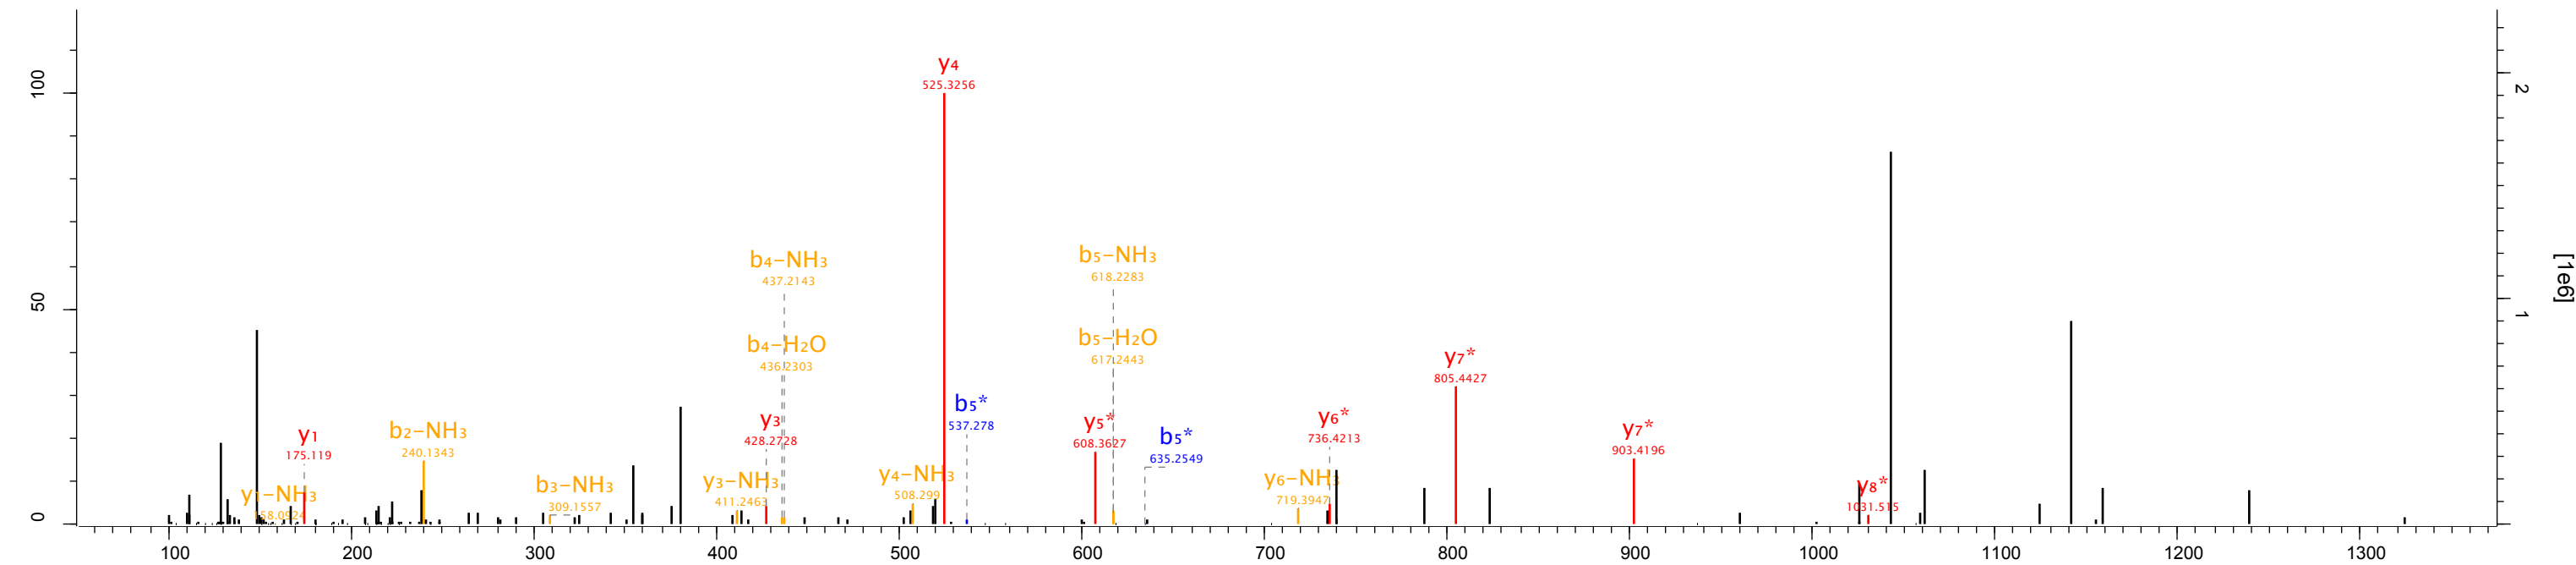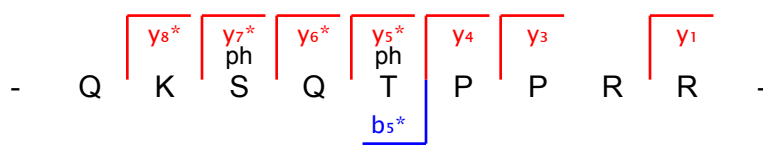

Raw file: 20150812\_A375SR\_Phospho\_BR1\_03  
 Scan: 15793 Method: FTMS; HCD Score: 268.09 m/z: 634.97 Gene names: GAS2L1

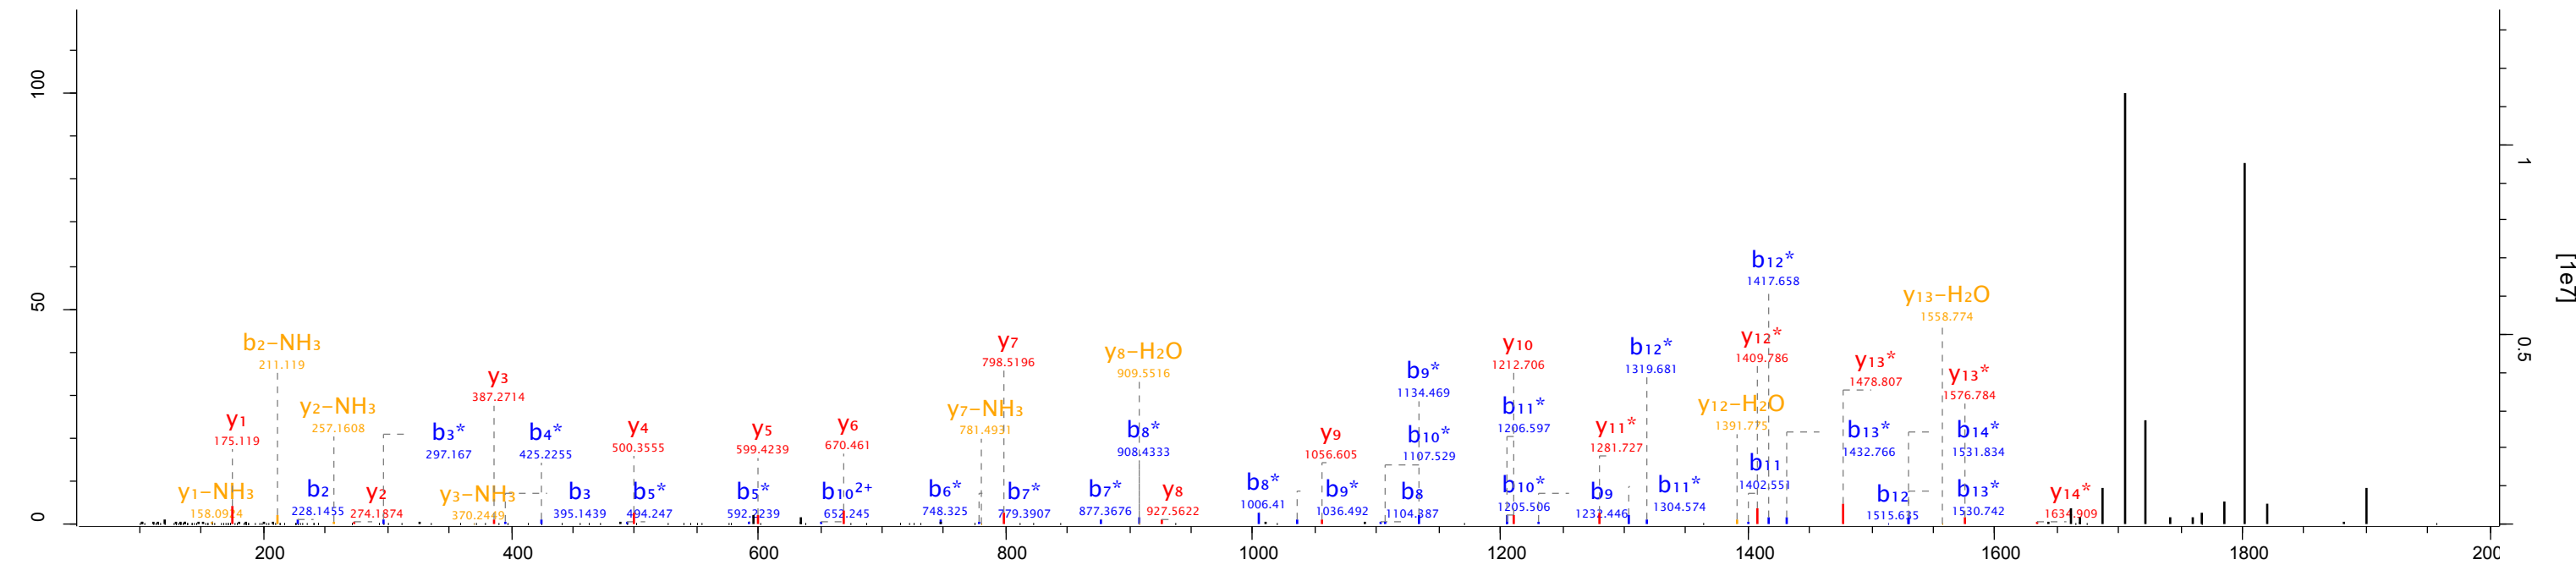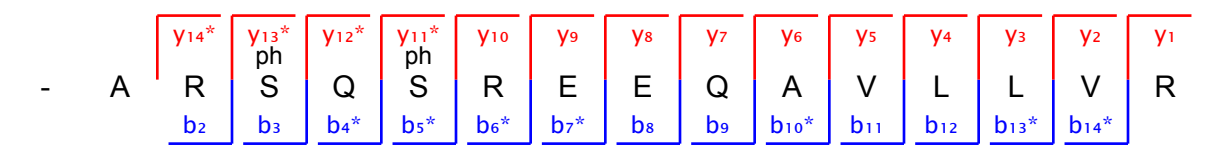

Raw file 20150812\_A375SR\_Phospho\_BR1\_03 Scan 15963 Method FTMS; HCD Score 200.65 m/z 698.34 Gene names C2orf49

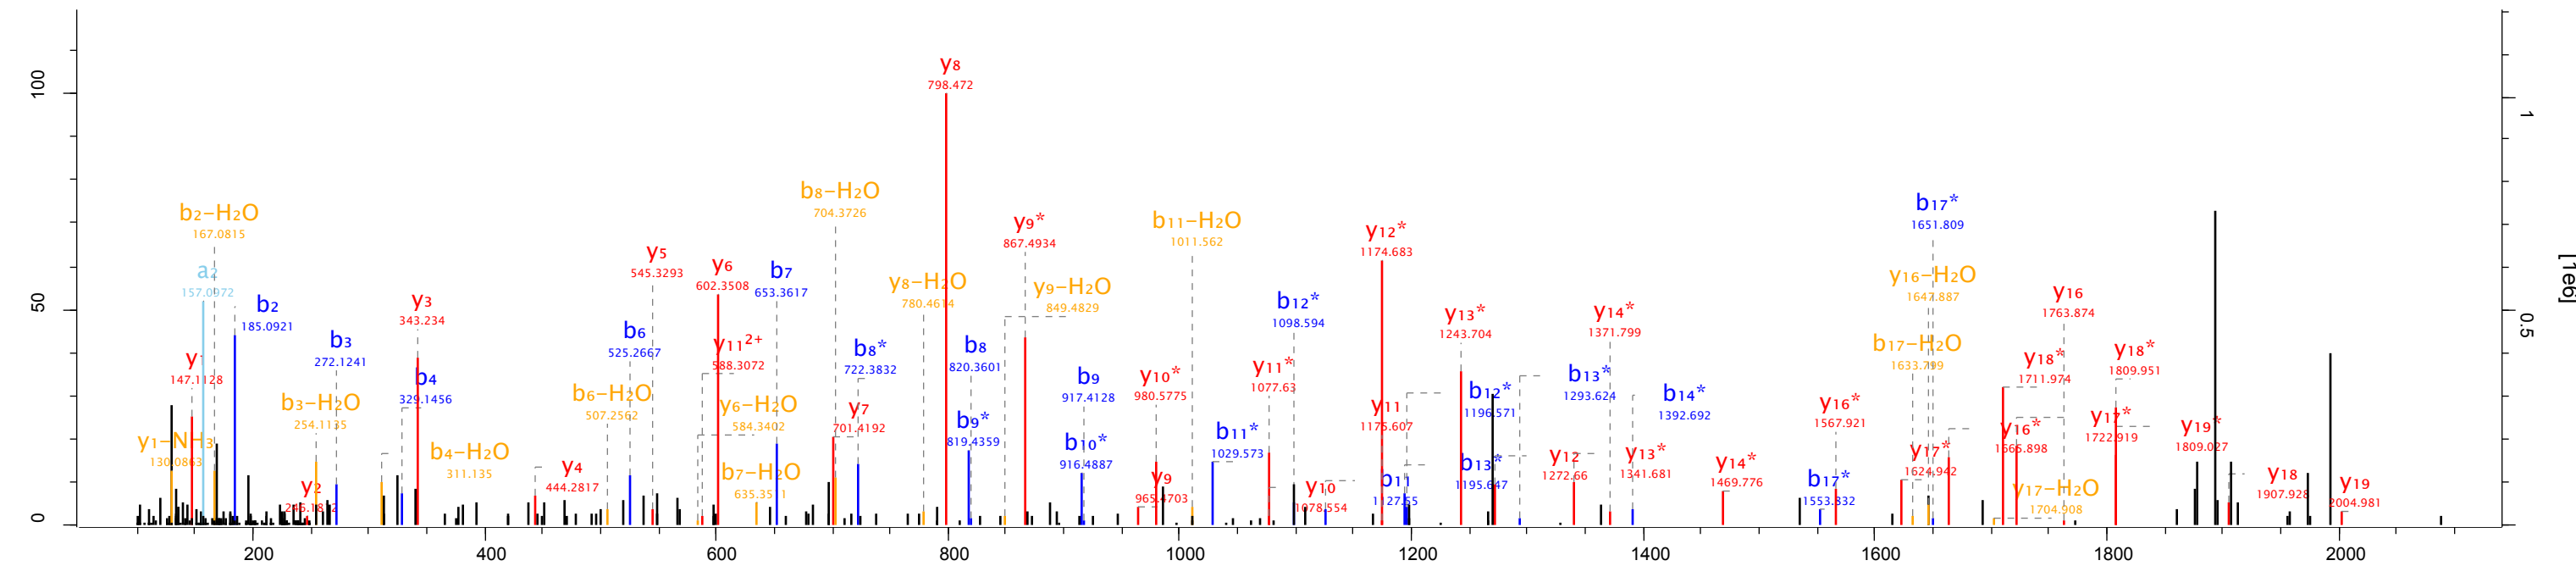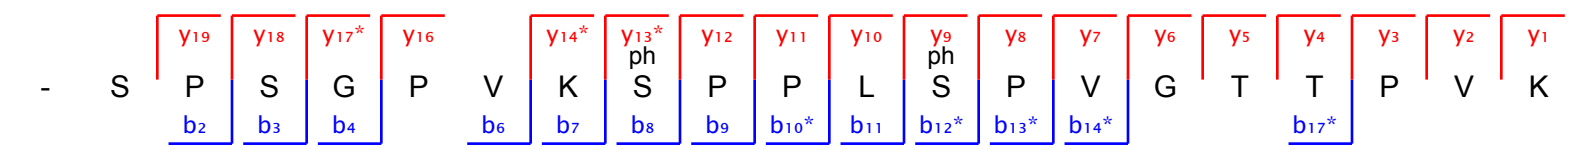

Raw file: 20150812\_A375SR\_Phospho\_BR1\_03  
 Scan: 15983 Method: FTMS; HCD Score: 91.27 m/z: 1012.04 Gene names: NSRP1;CCDC55

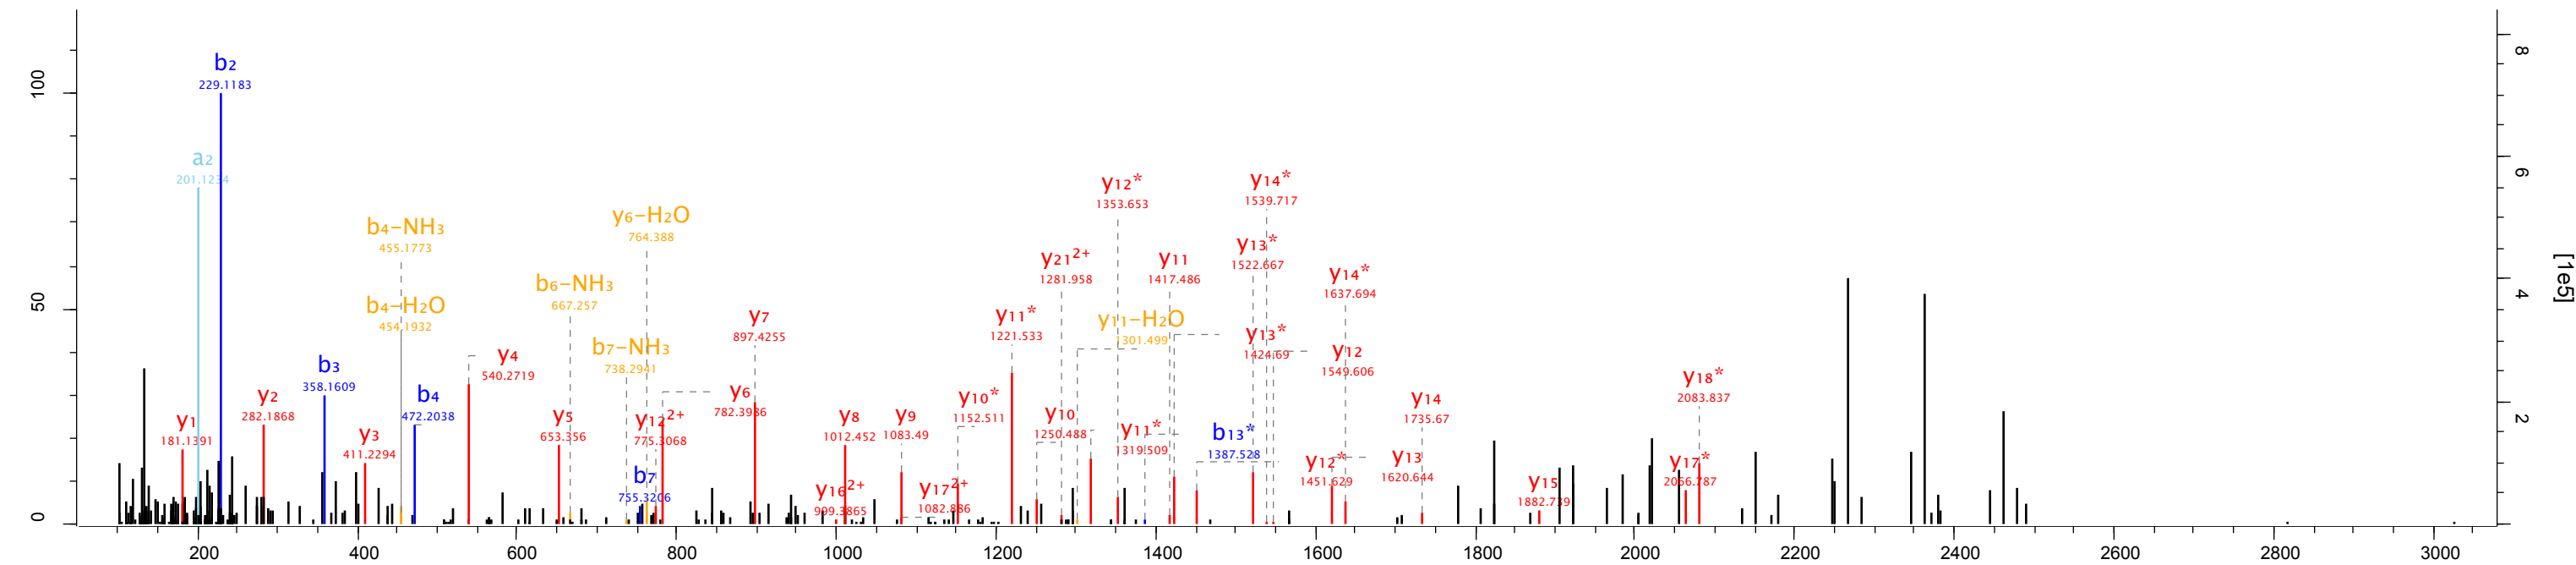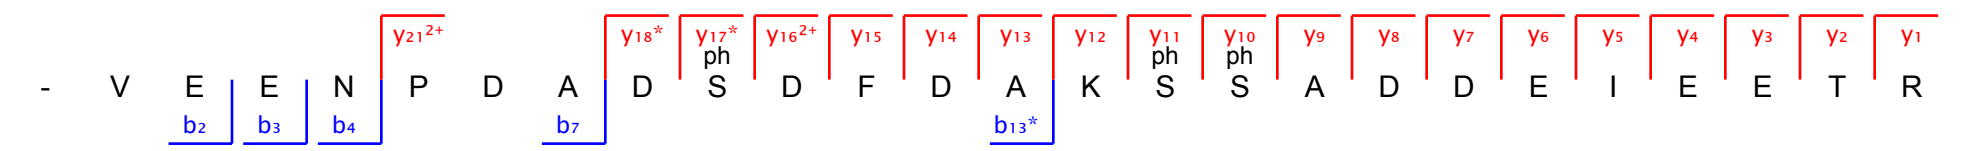



Raw file Scan Method Score m/z Gene names  
 20150812\_A375SR\_Phospho\_BR1\_03 16123 FTMS; HCD 252.09 879.88 CLIP1

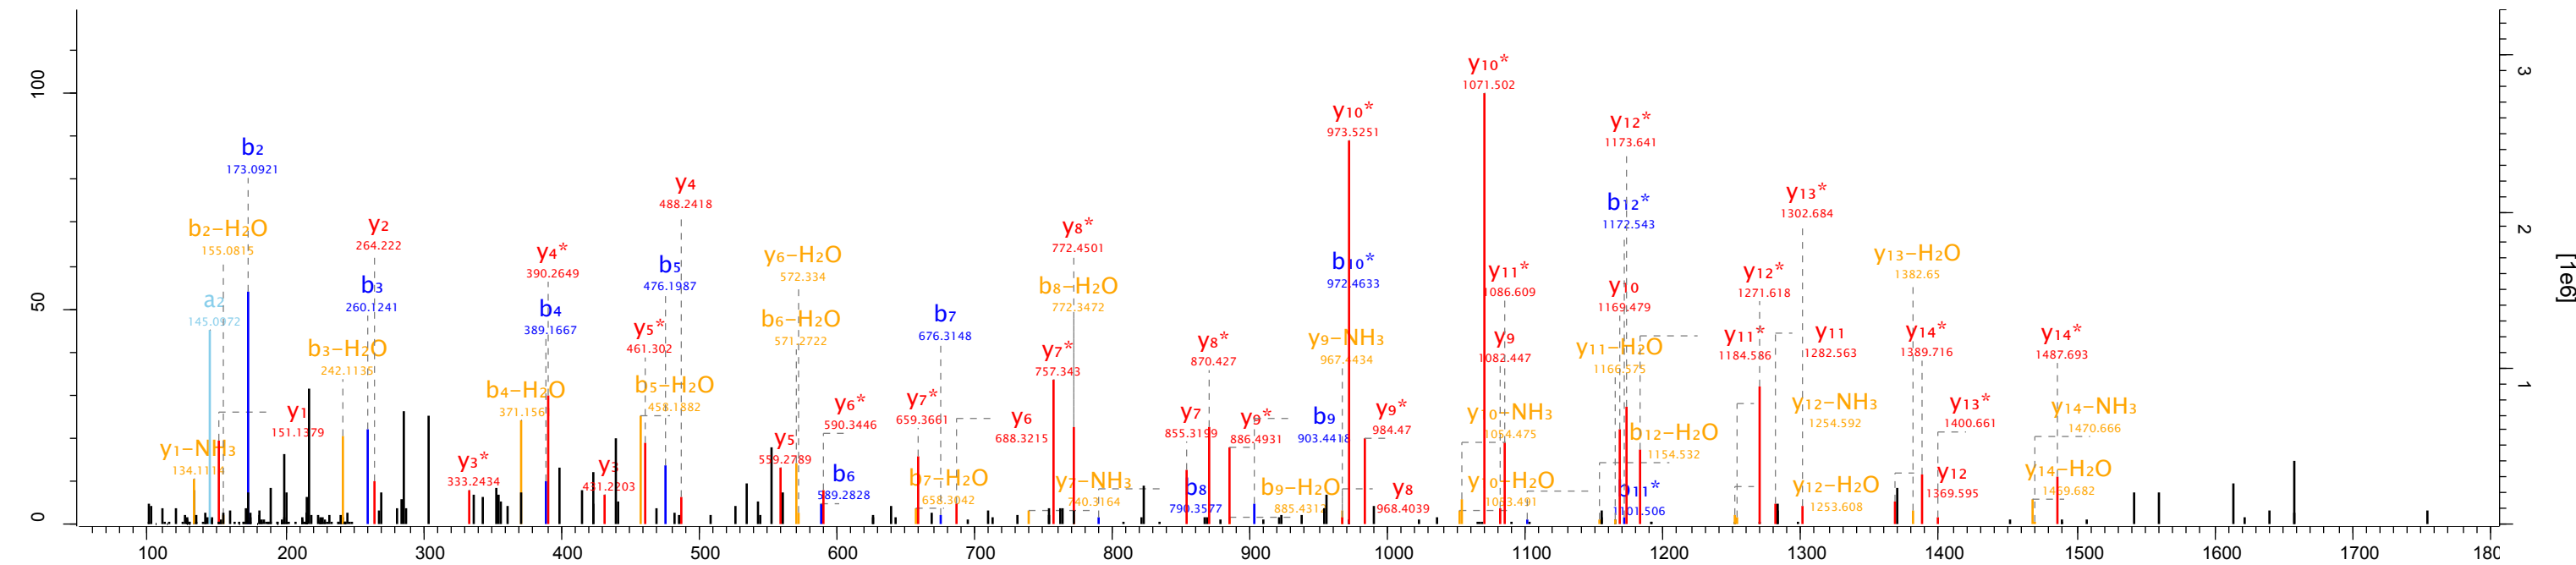

- T A S E S I S N L S E A G S I K -

Fragmentation mapping (b-ions in blue, y-ions in red):

|                |                |                |                |                |                |                |                |                   |                   |                   |                   |                   |                 |                 |                 |                |                |                              |                |                |                |                              |                |                |
|----------------|----------------|----------------|----------------|----------------|----------------|----------------|----------------|-------------------|-------------------|-------------------|-------------------|-------------------|-----------------|-----------------|-----------------|----------------|----------------|------------------------------|----------------|----------------|----------------|------------------------------|----------------|----------------|
| b <sub>2</sub> | b <sub>3</sub> | b <sub>4</sub> | b <sub>5</sub> | b <sub>6</sub> | b <sub>7</sub> | b <sub>8</sub> | b <sub>9</sub> | b <sub>10</sub> * | b <sub>11</sub> * | b <sub>12</sub> * | y <sub>14</sub> * | y <sub>13</sub> * | y <sub>12</sub> | y <sub>11</sub> | y <sub>10</sub> | y <sub>9</sub> | y <sub>8</sub> | y <sub>7</sub> <sub>ph</sub> | y <sub>6</sub> | y <sub>5</sub> | y <sub>4</sub> | y <sub>3</sub> <sub>ph</sub> | y <sub>2</sub> | y <sub>1</sub> |
|----------------|----------------|----------------|----------------|----------------|----------------|----------------|----------------|-------------------|-------------------|-------------------|-------------------|-------------------|-----------------|-----------------|-----------------|----------------|----------------|------------------------------|----------------|----------------|----------------|------------------------------|----------------|----------------|

Raw file 20150812\_A375SR\_Phospho\_BR1\_03 Scan 16163 Method FTMS; HCD Score 245.78 m/z 817.78 Gene names PUS1

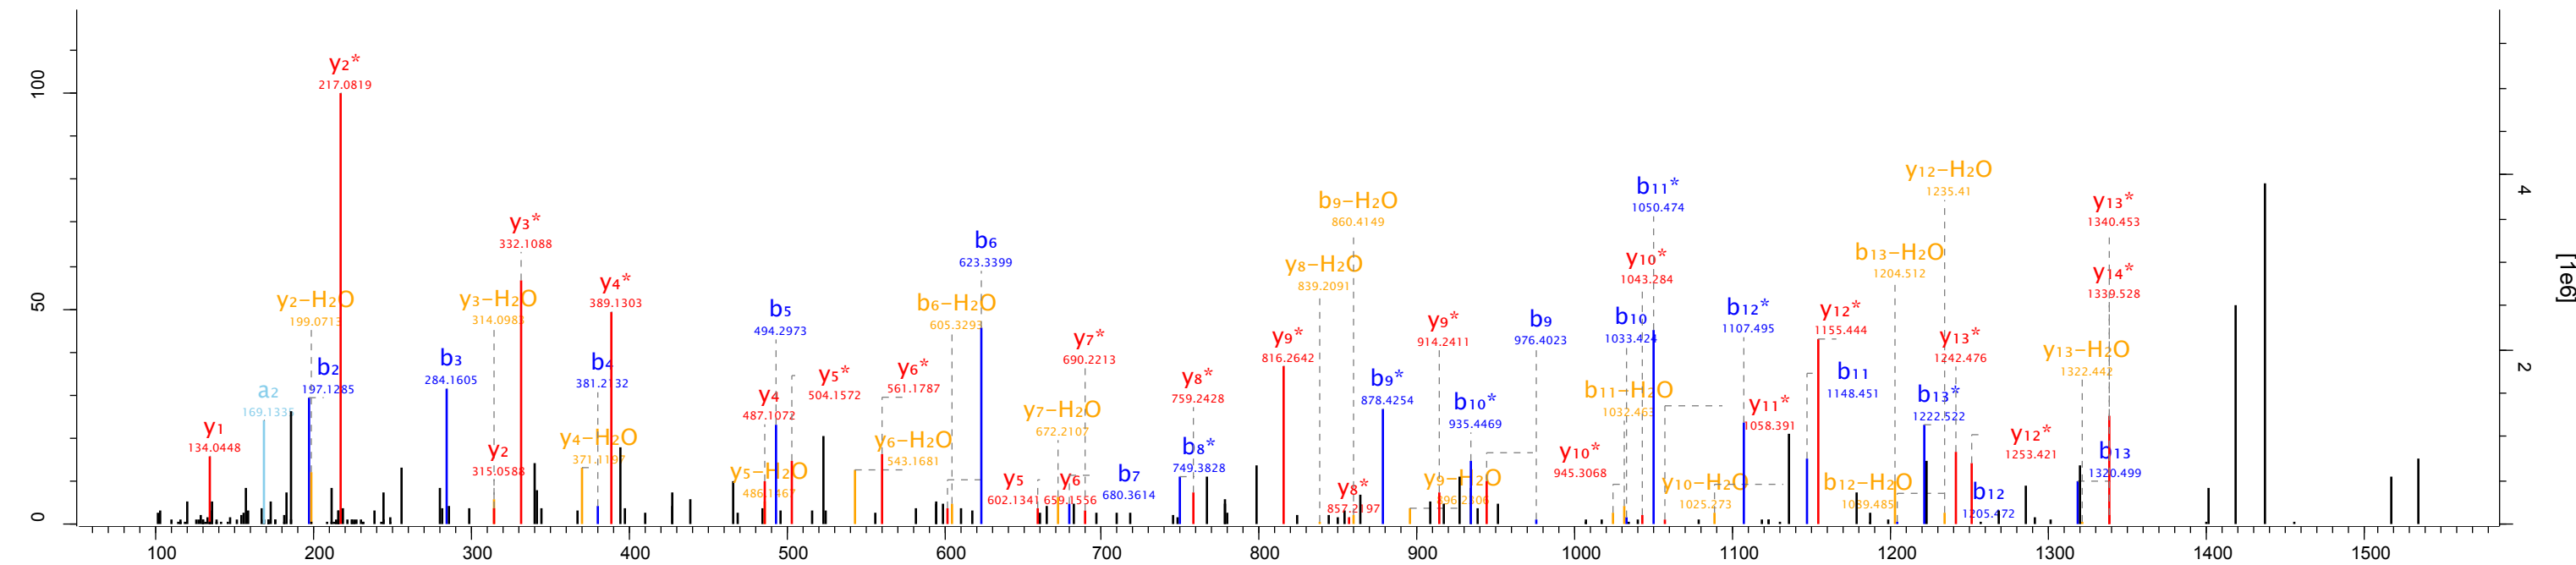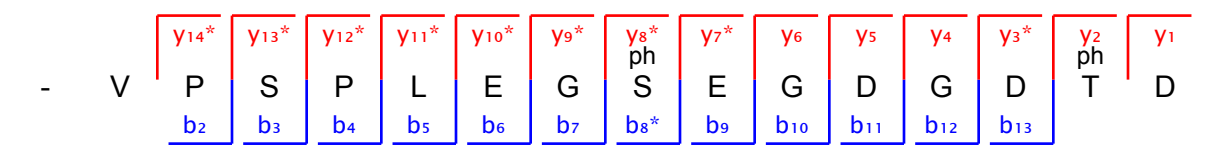

Raw file: 20150812\_A375SR\_Phospho\_BR1\_03  
 Scan: 1653 Method: FTMS; HCD Score: 213.5 m/z: 633.29 Gene names: PRRC2C

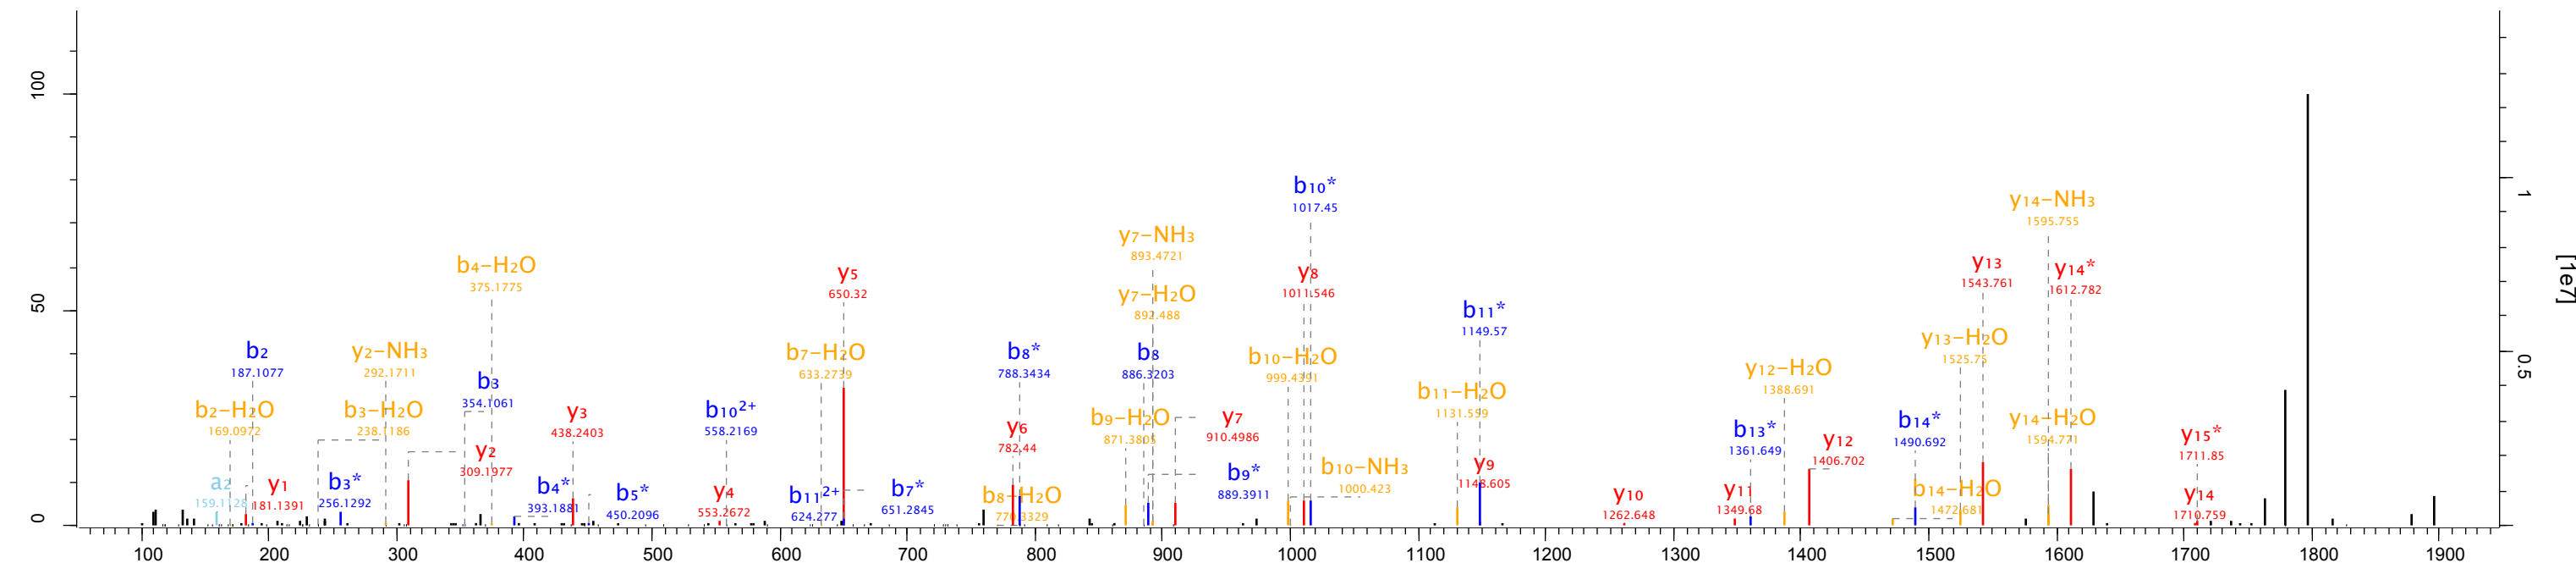

Sequence: S V S H G S N H T Q K P D E Q R -

Fragmentation sites (b and y ions) are indicated by boxes below the sequence:

- b<sub>2</sub> (V)
- b<sub>3</sub> (S)
- b<sub>4</sub>\*
- b<sub>5</sub>\*
- b<sub>7</sub>\*
- b<sub>8</sub> (H)
- b<sub>9</sub>\*
- b<sub>10</sub>\*
- b<sub>11</sub>\*
- b<sub>13</sub>\*
- b<sub>14</sub>\*

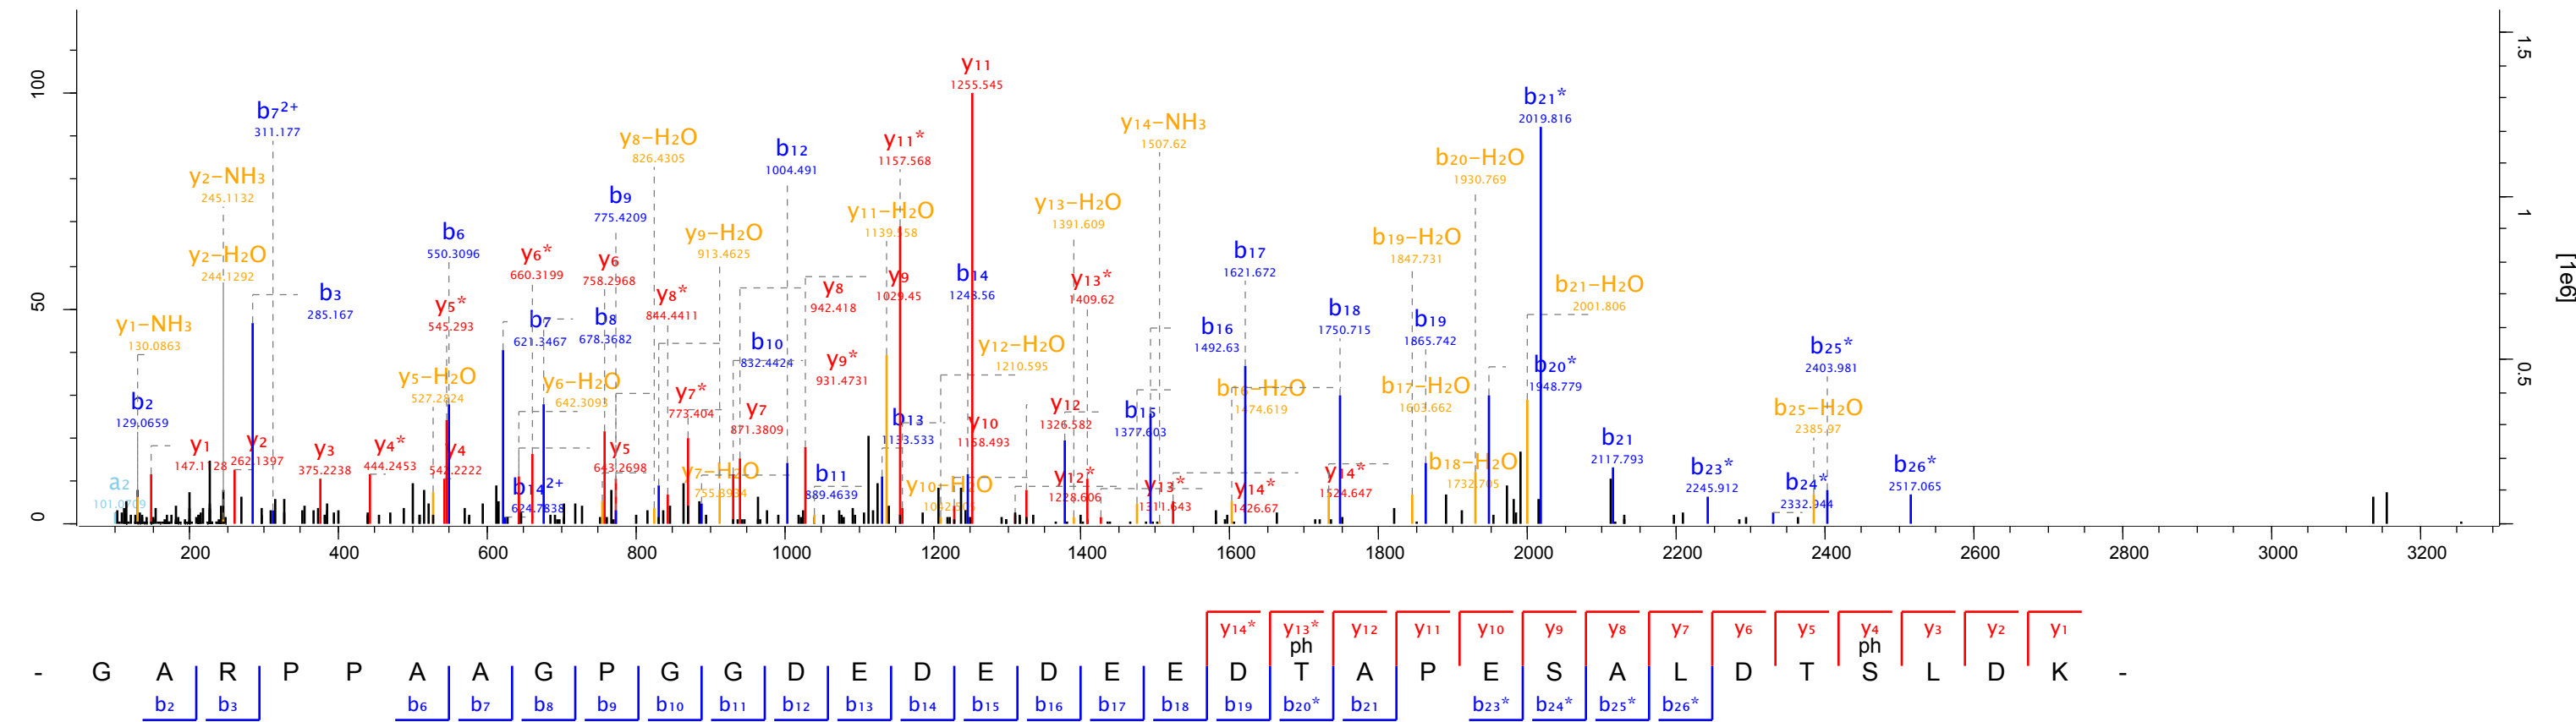

Raw file: 20150812\_A375SR\_Phospho\_BR1\_03  
 Scan: 16623 Method: FTMS; HCD Score: 168.35 m/z: 797.42 Gene names: NUSAP1

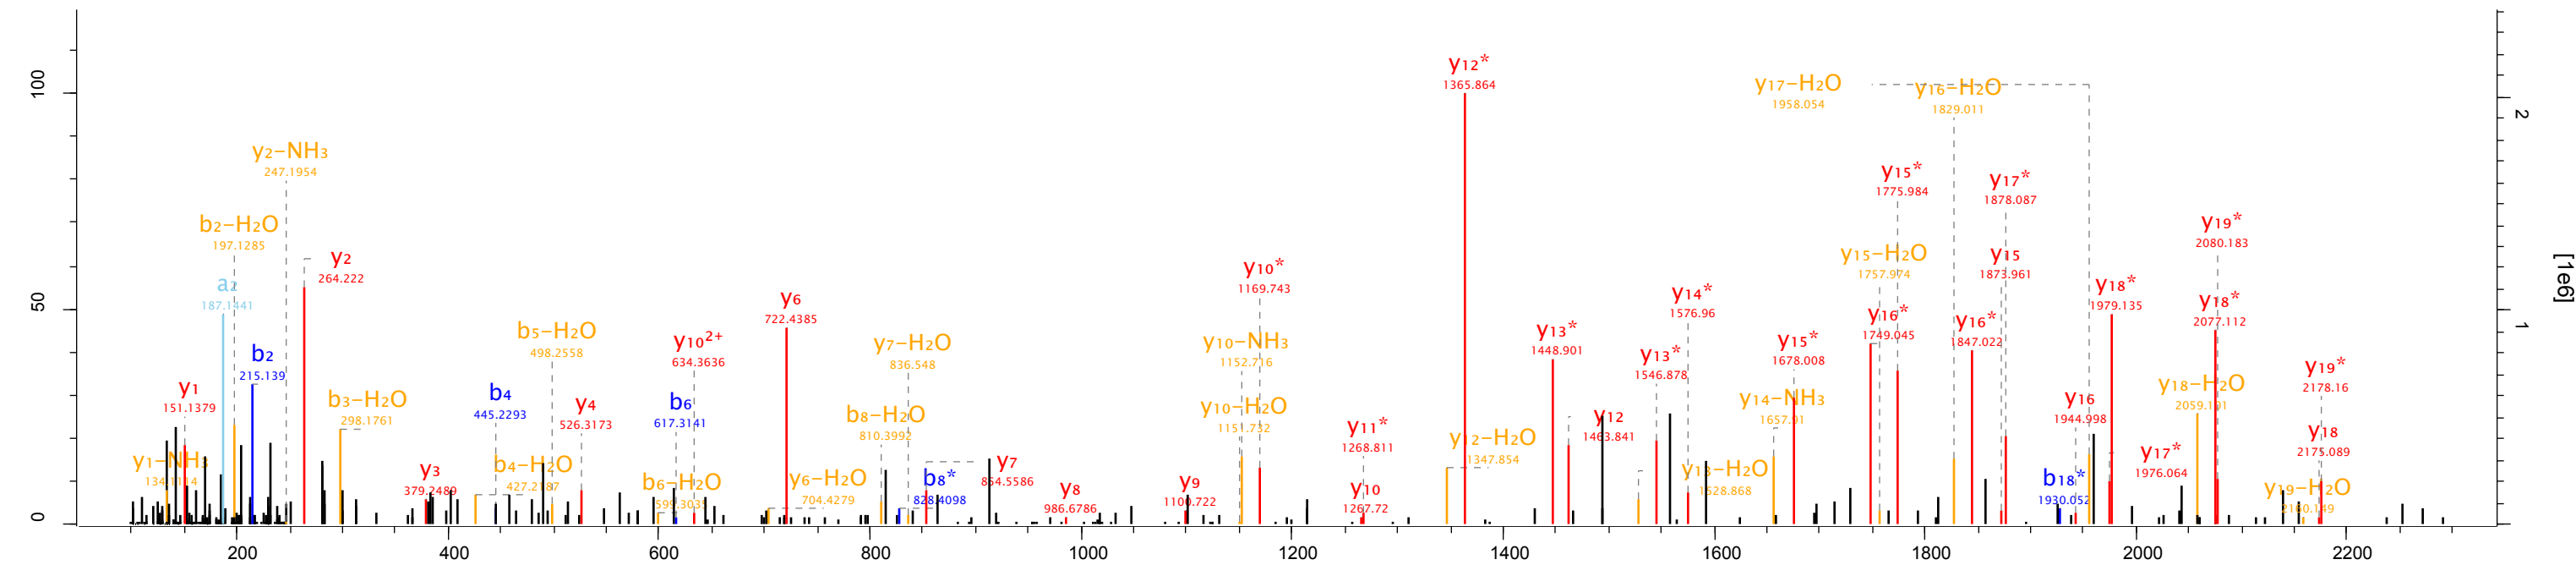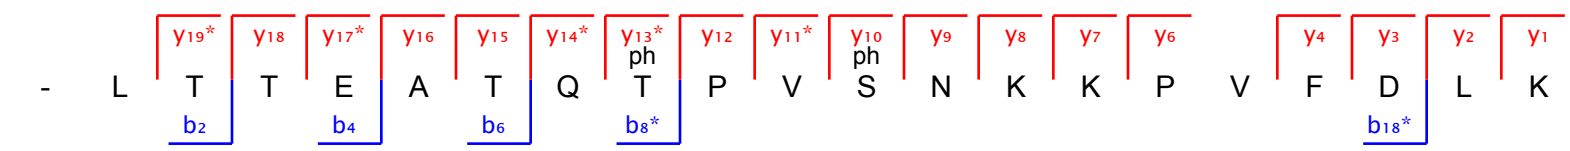

Raw file 20150812\_A375SR\_Phospho\_BR1\_03 Scan 16663 Method FTMS; HCD Score 80.18 m/z 884.64 Gene names KLHDC4

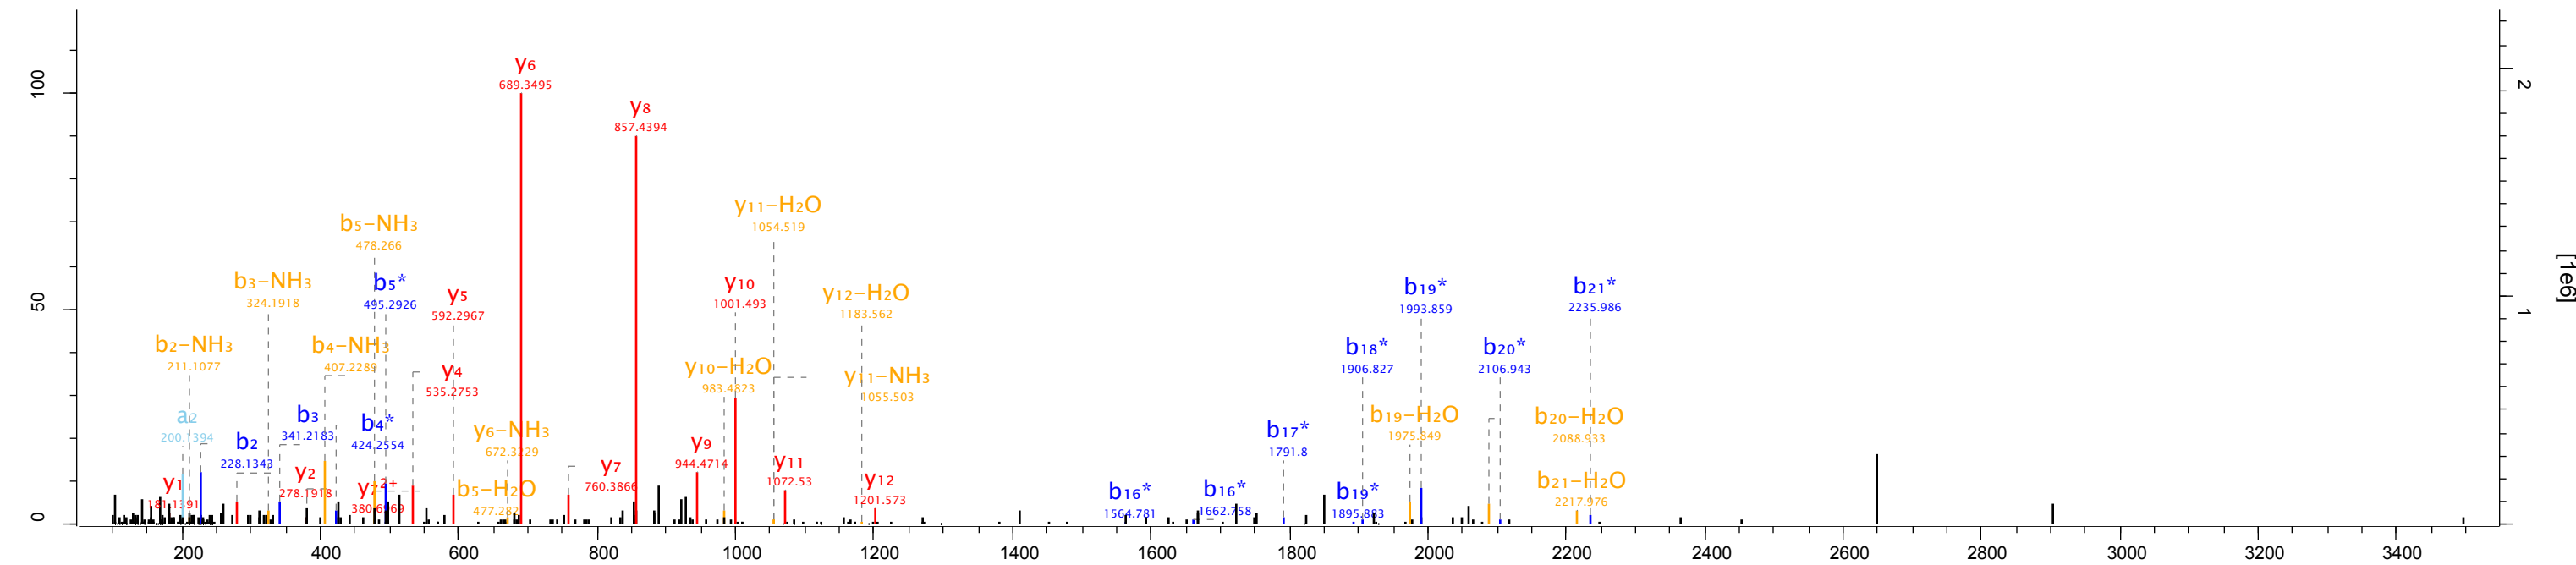

- Q V L T A P G S A G Q P R S E D E D S L E E A G S P A P G P C P R -

Fragmentation mapping:

- Blue boxes (b ions): V (b2), L (b3), T (b4\*), A (b5\*), D (b16\*), E (b17\*), D (b18\*), S (b19\*), L (b20\*), E (b21\*)
- Red boxes (y ions): E (y12), A (y11), G (y10), S (y9), P (y8), A (y7), P (y6), G (y5), P (y4), C (y2), R (y1)

Raw file 20150812\_A375SR\_Phospho\_BR1\_03 Scan 16713 Method FTMS; HCD Score 114.29 m/z 772.78 Gene names BRD1

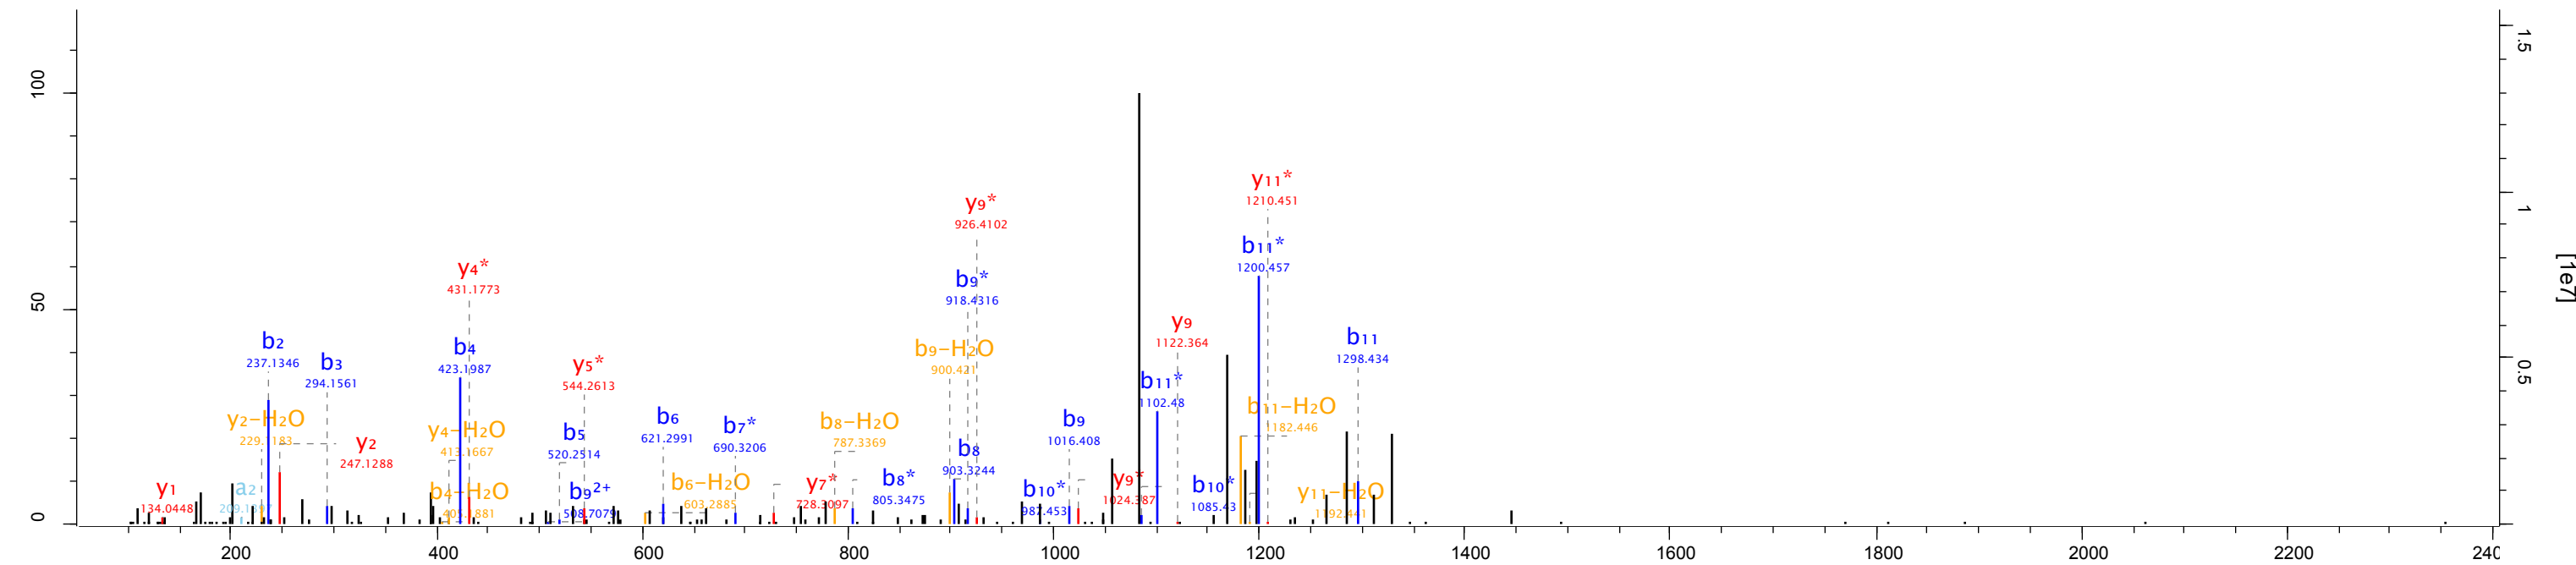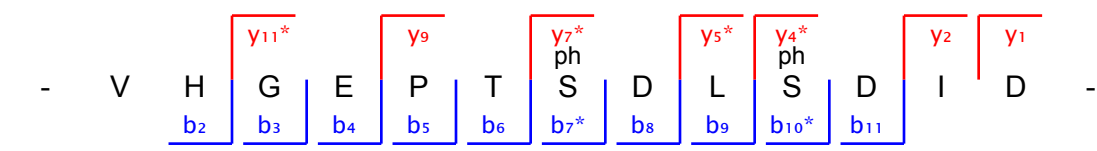

Raw file 20150812\_A375SR\_Phospho\_BR1\_03 Scan 16793 Method FTMS; HCD Score 157.2 m/z 778.64 Gene names CTPS1

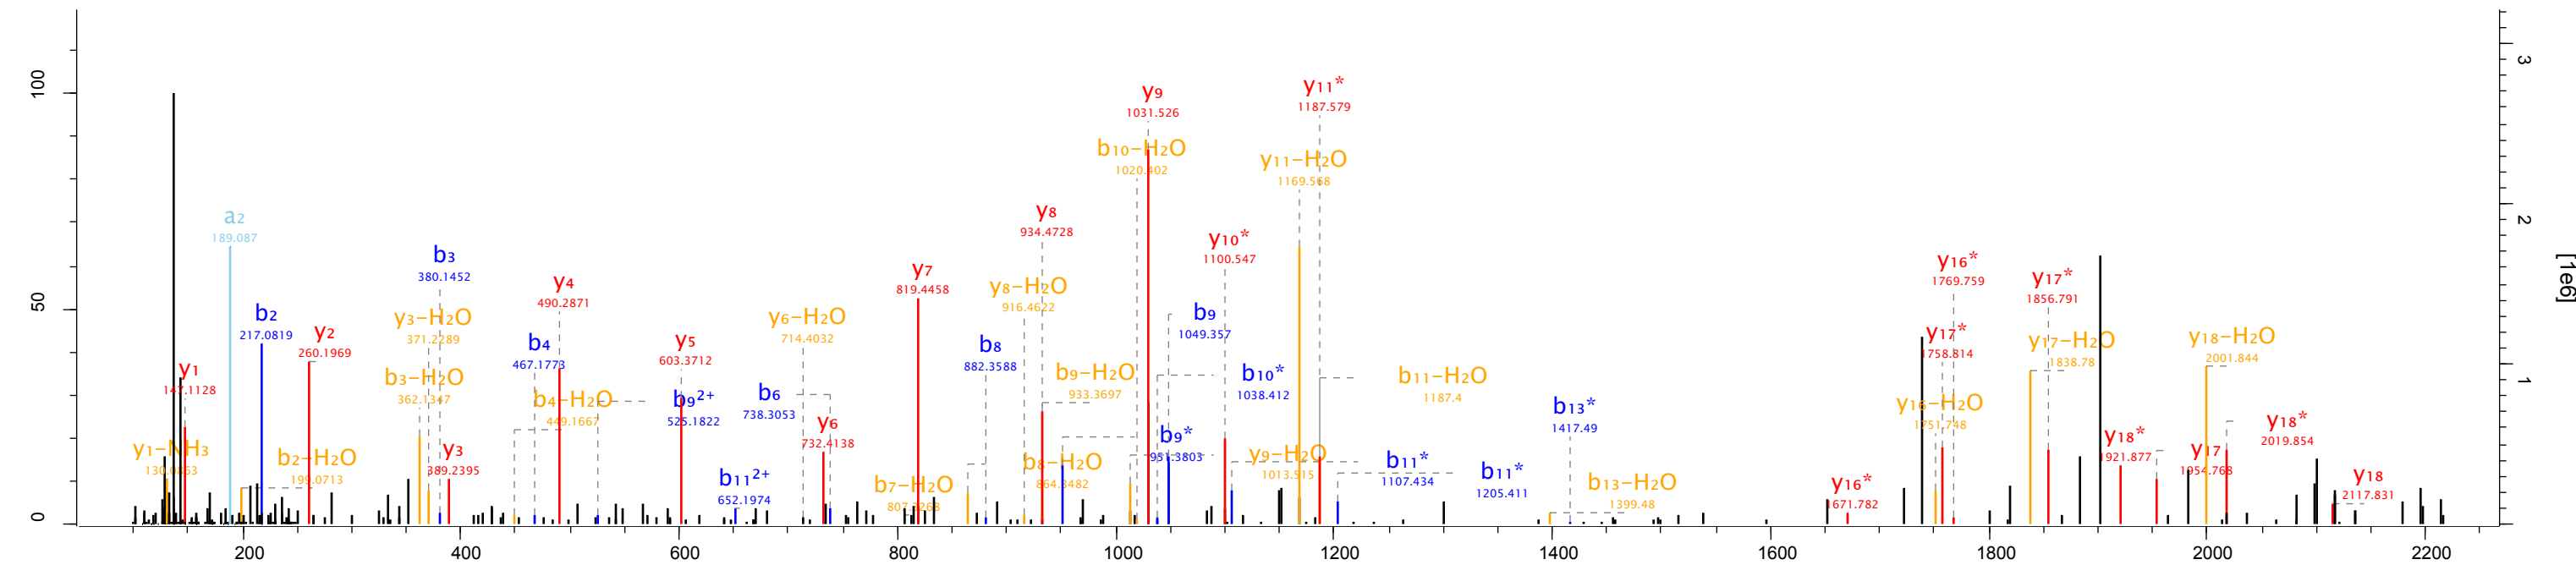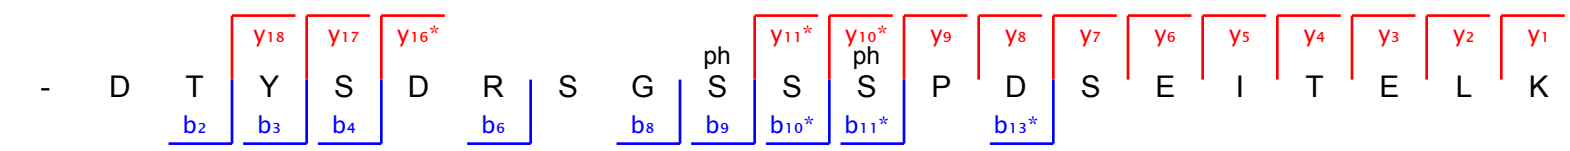



Raw file 20150812\_A375SR\_Phospho\_BR1\_03 Scan 16803 Method FTMS; HCD Score 279.11 m/z 1080.5 Gene names BCL9L

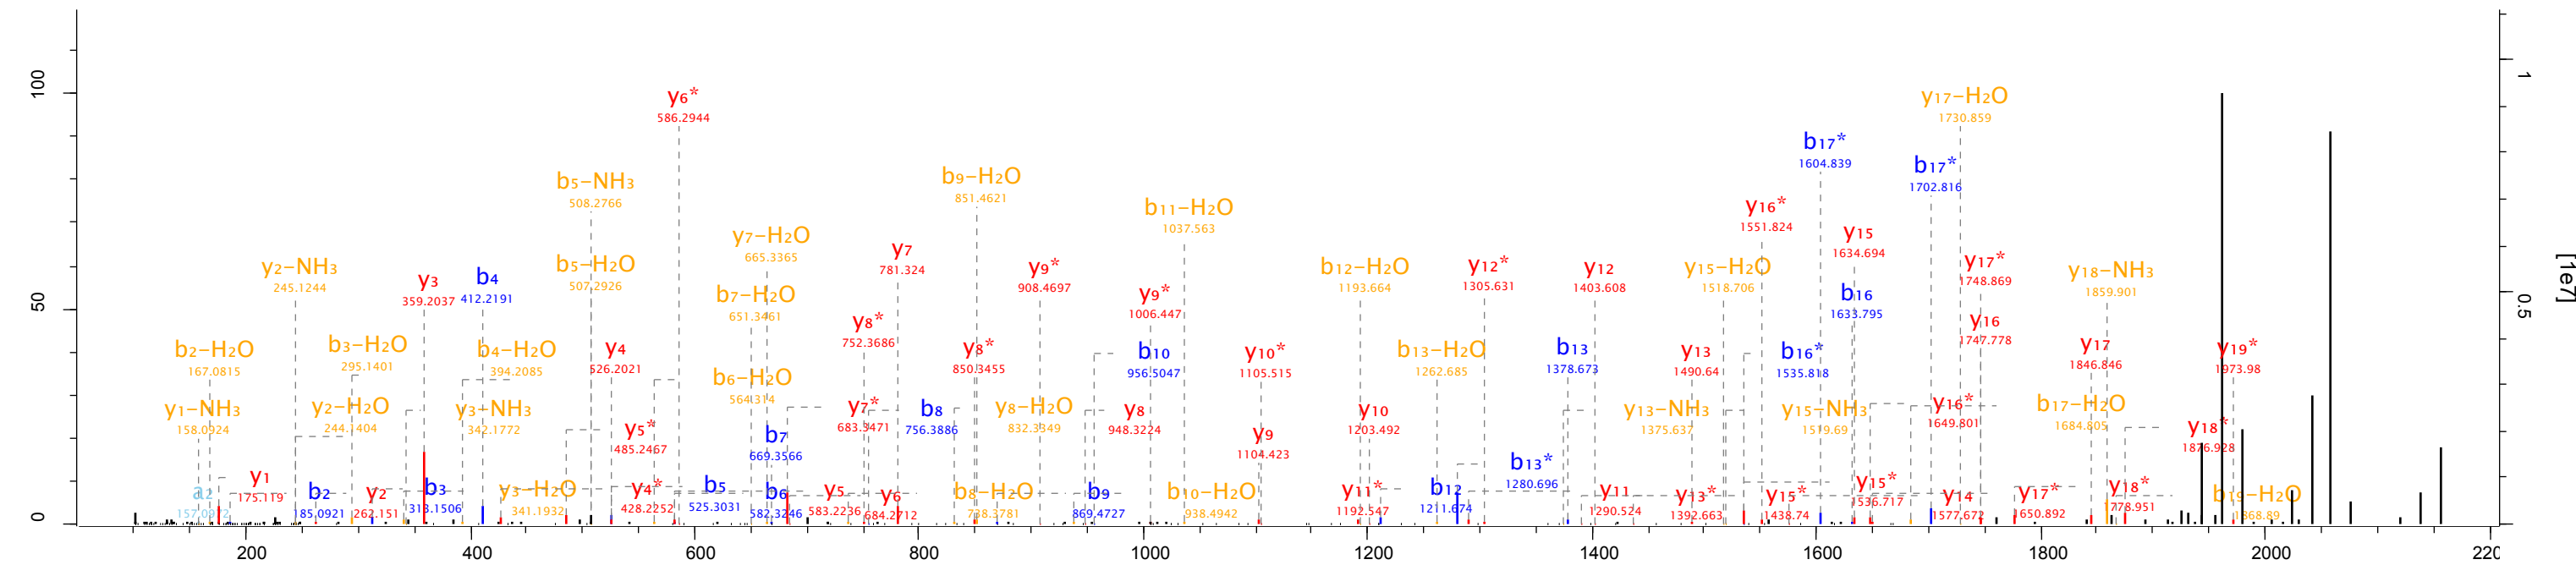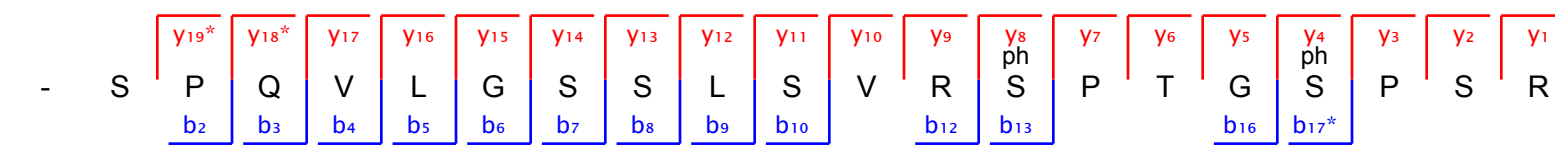

Raw file: 20150812\_A375SR\_Phospho\_BR1\_03  
 Scan: 16853 Method: FTMS; HCD Score: 69.92 m/z: 629.81 Gene names: SOWAHC

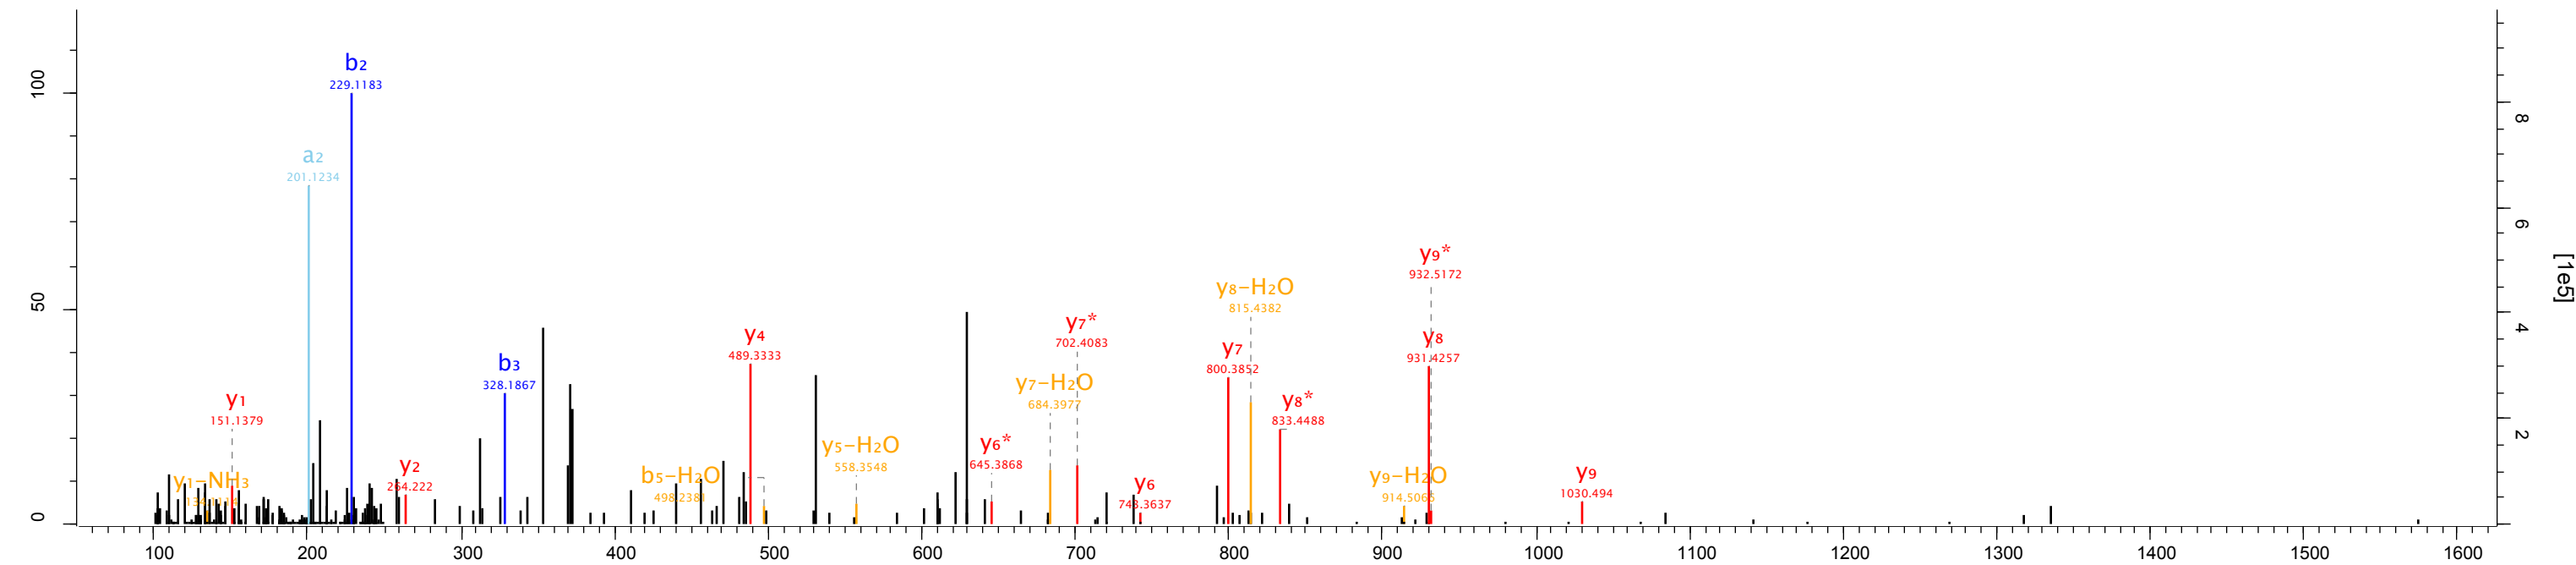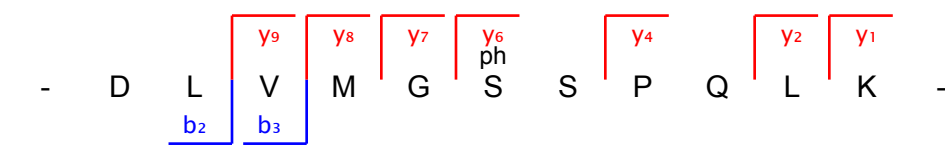

Raw file 20150812\_A375SR\_Phospho\_BR1\_03 Scan 17143 Method FTMS; HCD Score 210.51 m/z 948.43 Gene names UBE4B

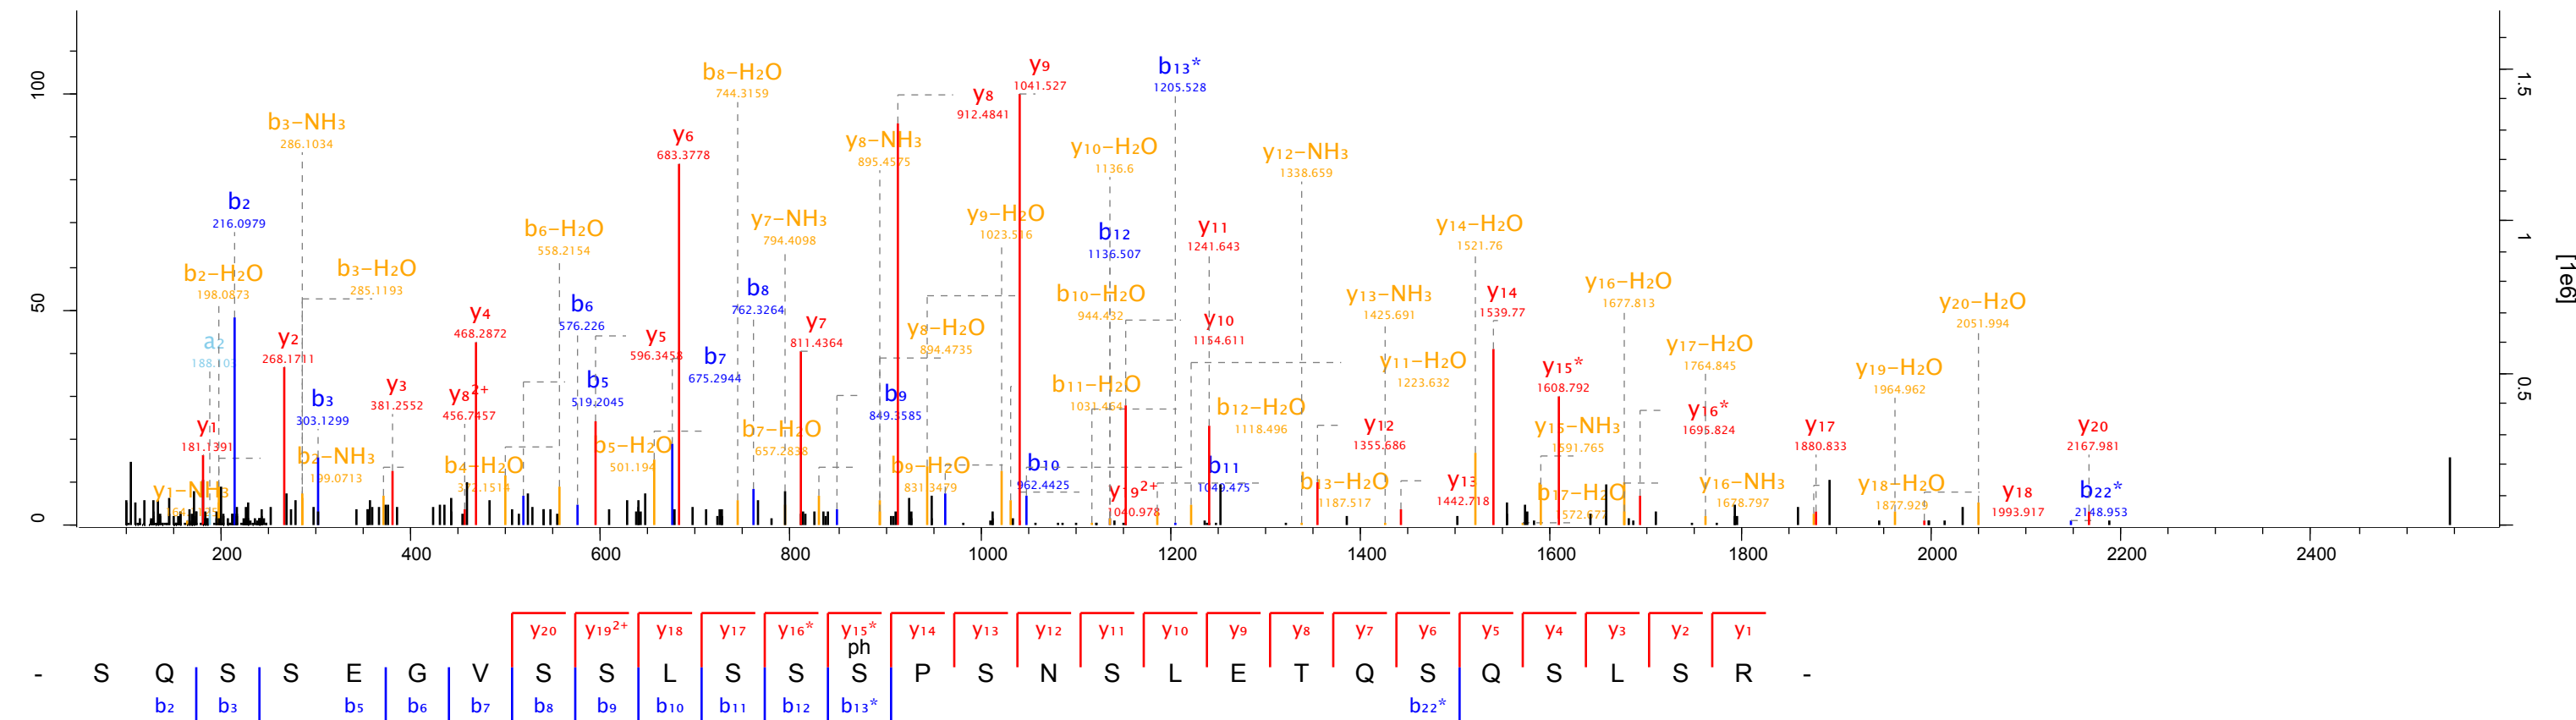

Raw file: 20150812\_A375SR\_Phospho\_BR1\_03  
 Scan: 17183 Method: FTMS; HCD Score: 45.81 m/z: 978.37 Gene names: TNKS1BP1

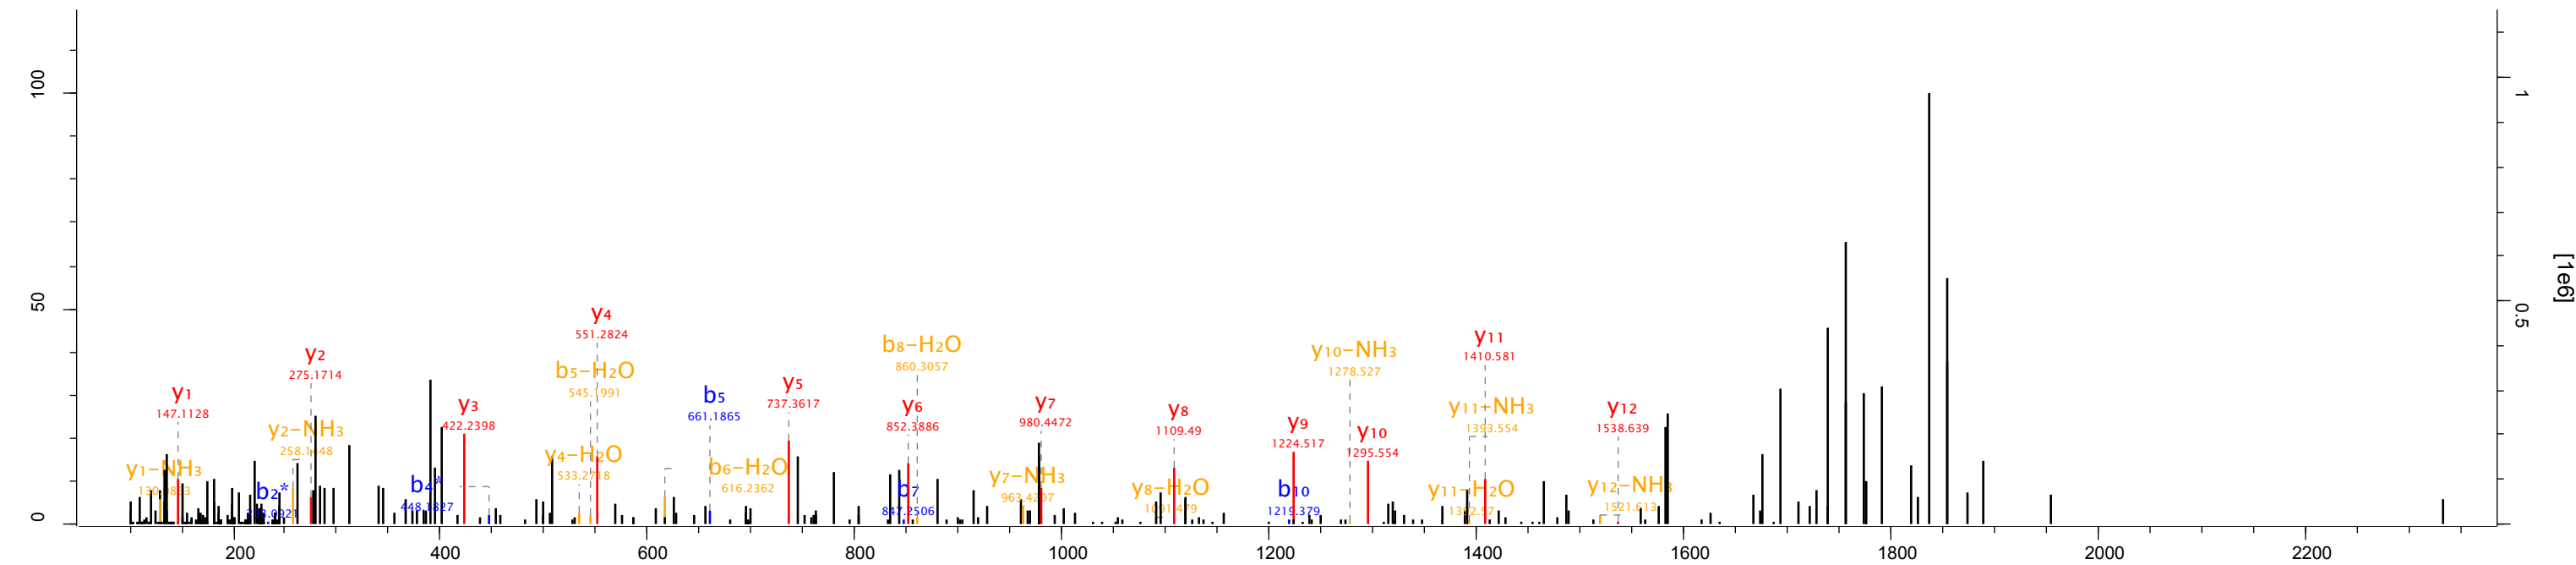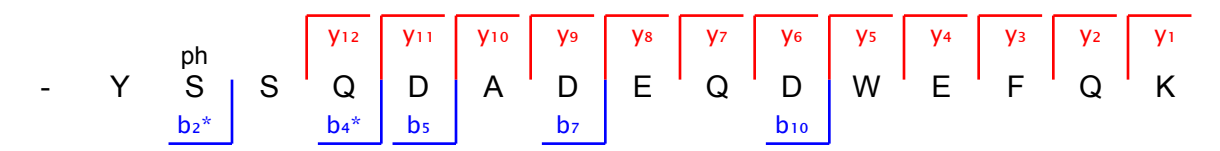

Raw file: 20150812\_A375SR\_Phospho\_BR1\_03  
 Scan: 1723 Method: FTMS; HCD Score: 89.23 m/z: 410.2 Gene names: SCAF11

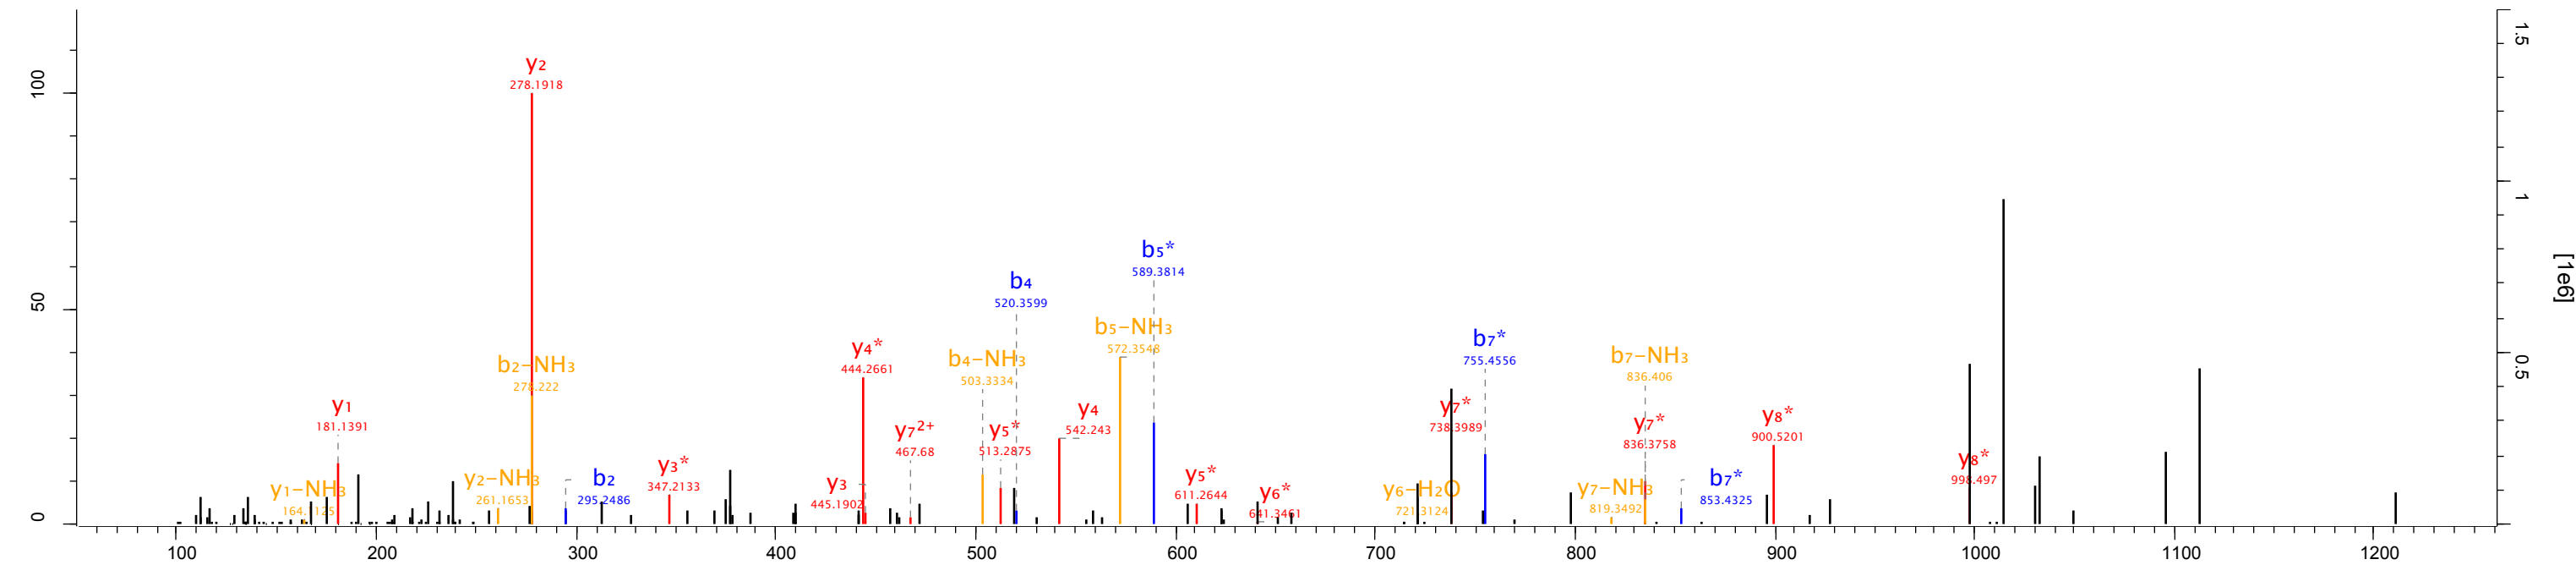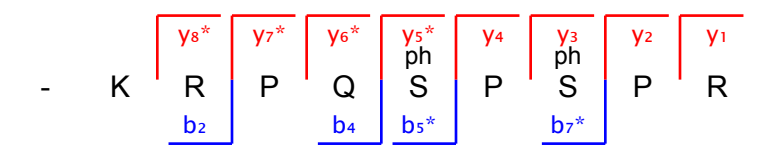

Raw file Scan Method Score m/z Gene names  
 20150812\_A375SR\_Phospho\_BR1\_03 17623 FTMS; HCD 92.42 1088.12 ILF3

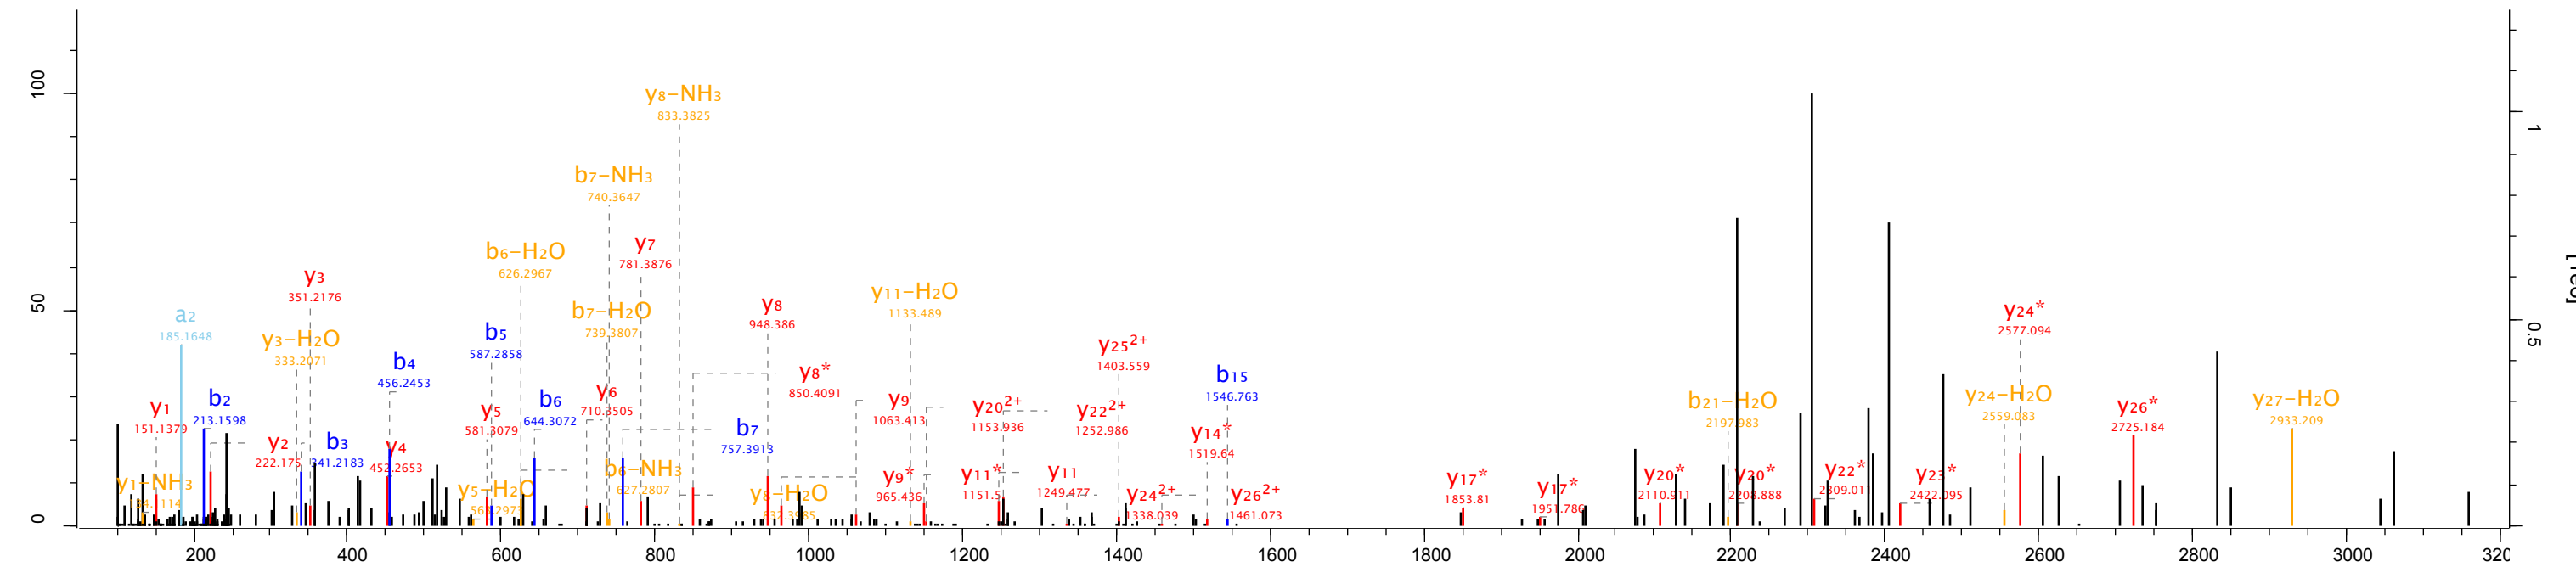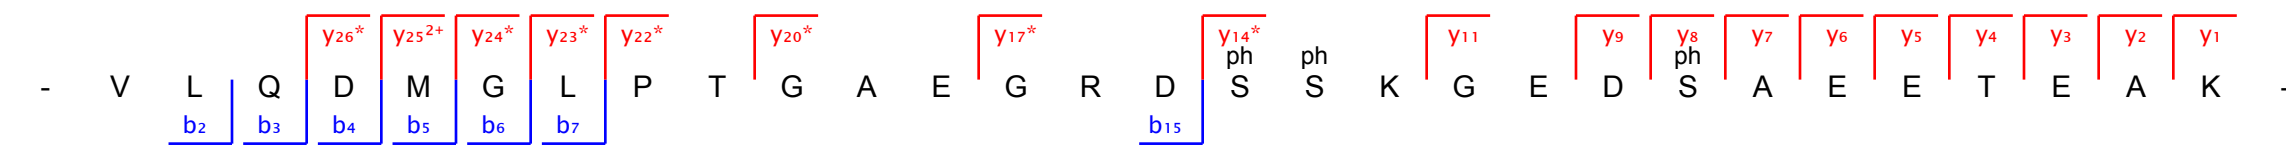

Raw file: 20150812\_A375SR\_Phospho\_BR1\_03  
 Scan: 17803  
 Method: FTMS; HCD  
 Score: 284.06  
 m/z: 1089.95  
 Gene names: MAP1B

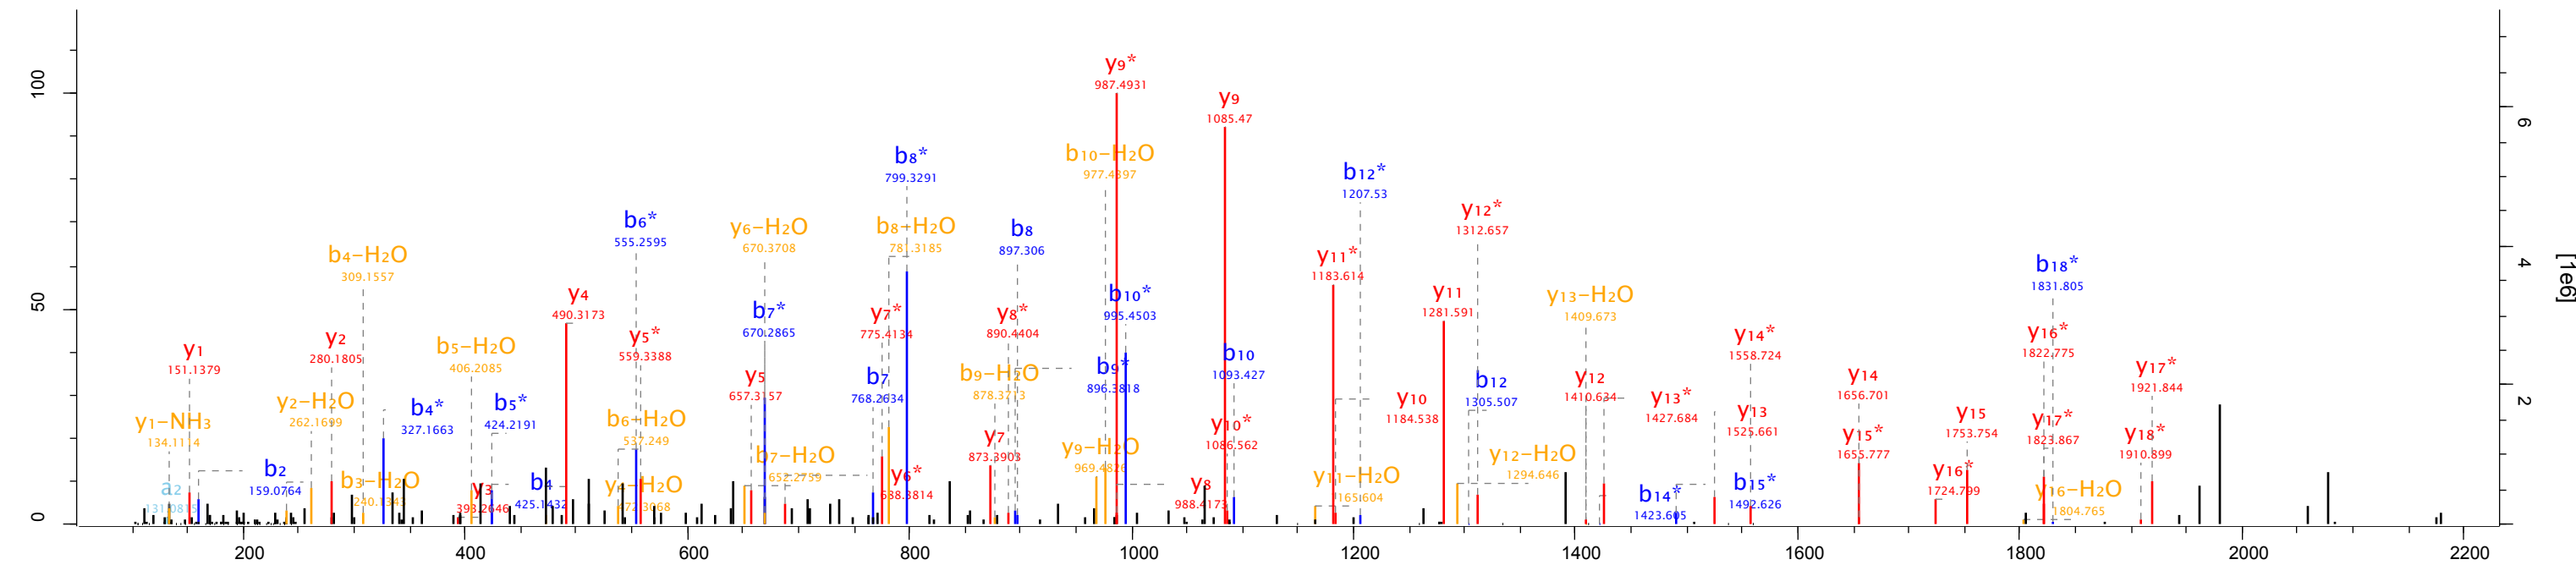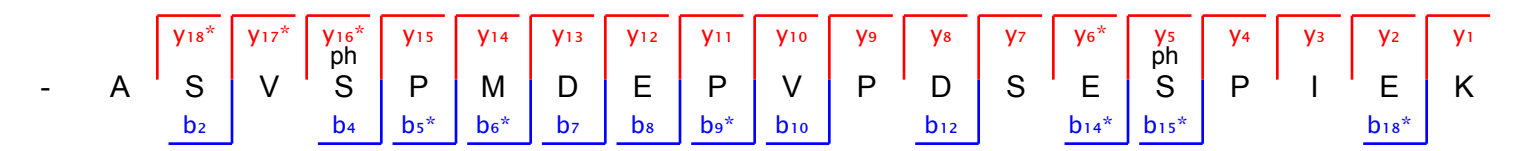

Raw file: 20150812\_A375SR\_Phospho\_BR1\_03  
 Scan: 18133 Method: FTMS; HCD Score: 173.81 m/z: 911.06 Gene names: TMPO

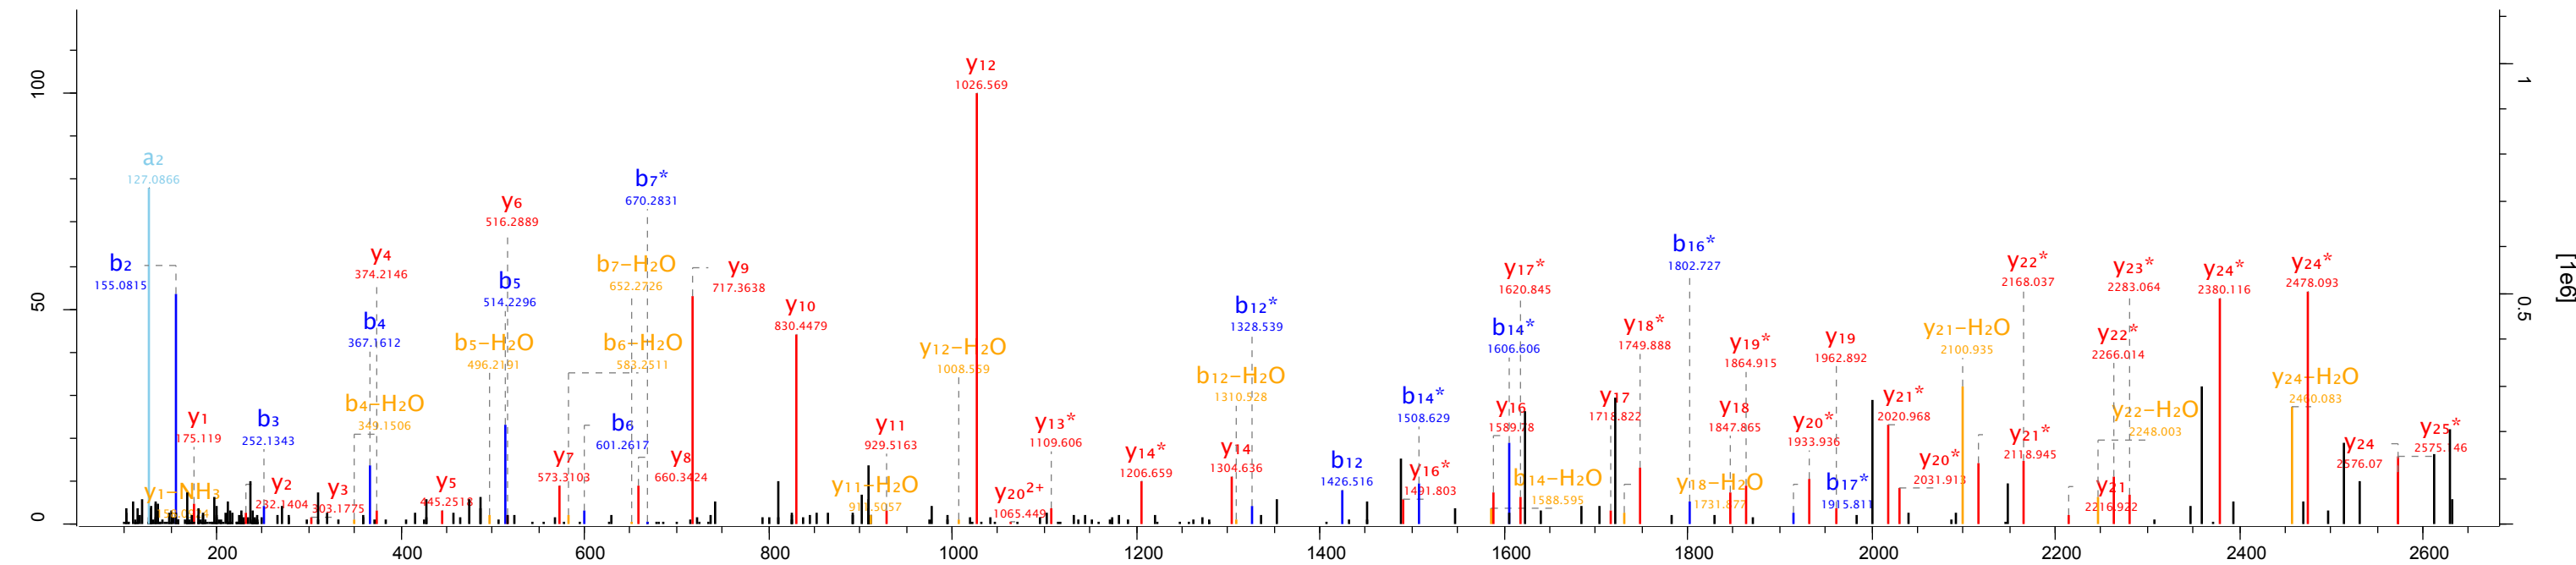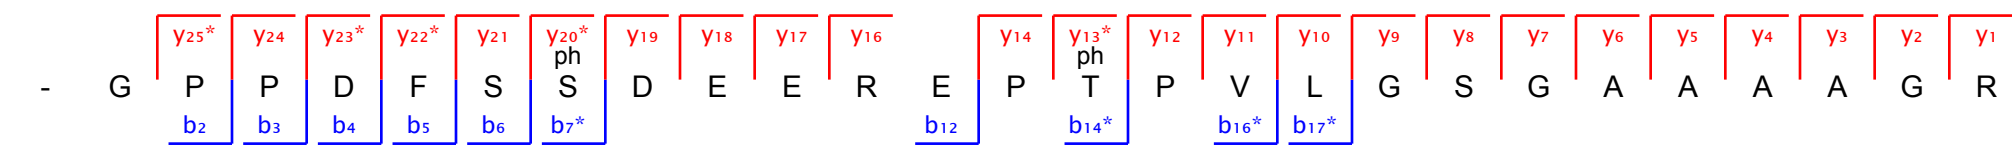



Raw file: 20150812\_A375SR\_Phospho\_BR1\_03  
 Scan: 18193 Method: FTMS; HCD Score: 122.45 m/z: 1038.51 Gene names: GTF2I

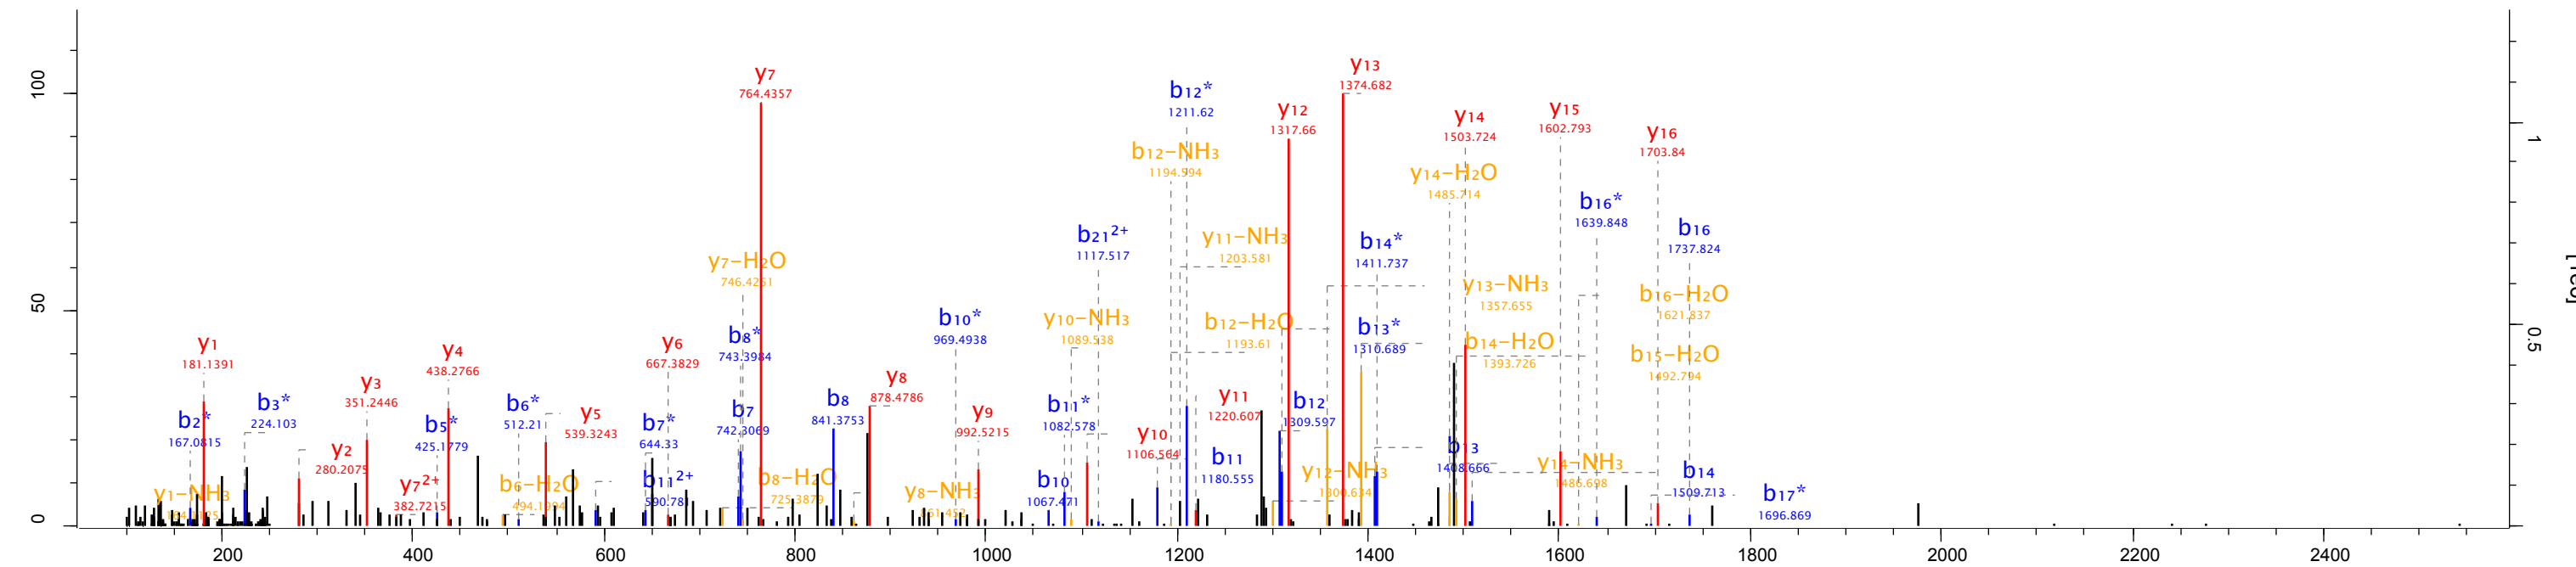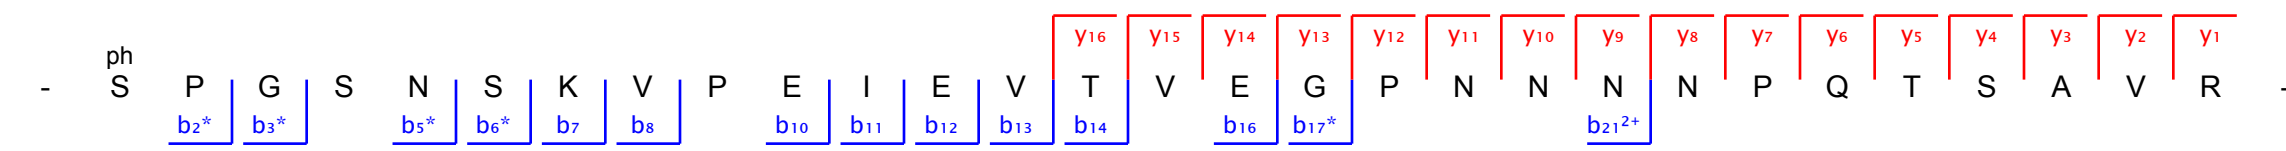

Raw file  
20150812\_A375SR\_Phospho\_BR1\_03

Scan Method Score m/z Gene names  
18213 FTMS; HCD 138.04 954.39 PHF6

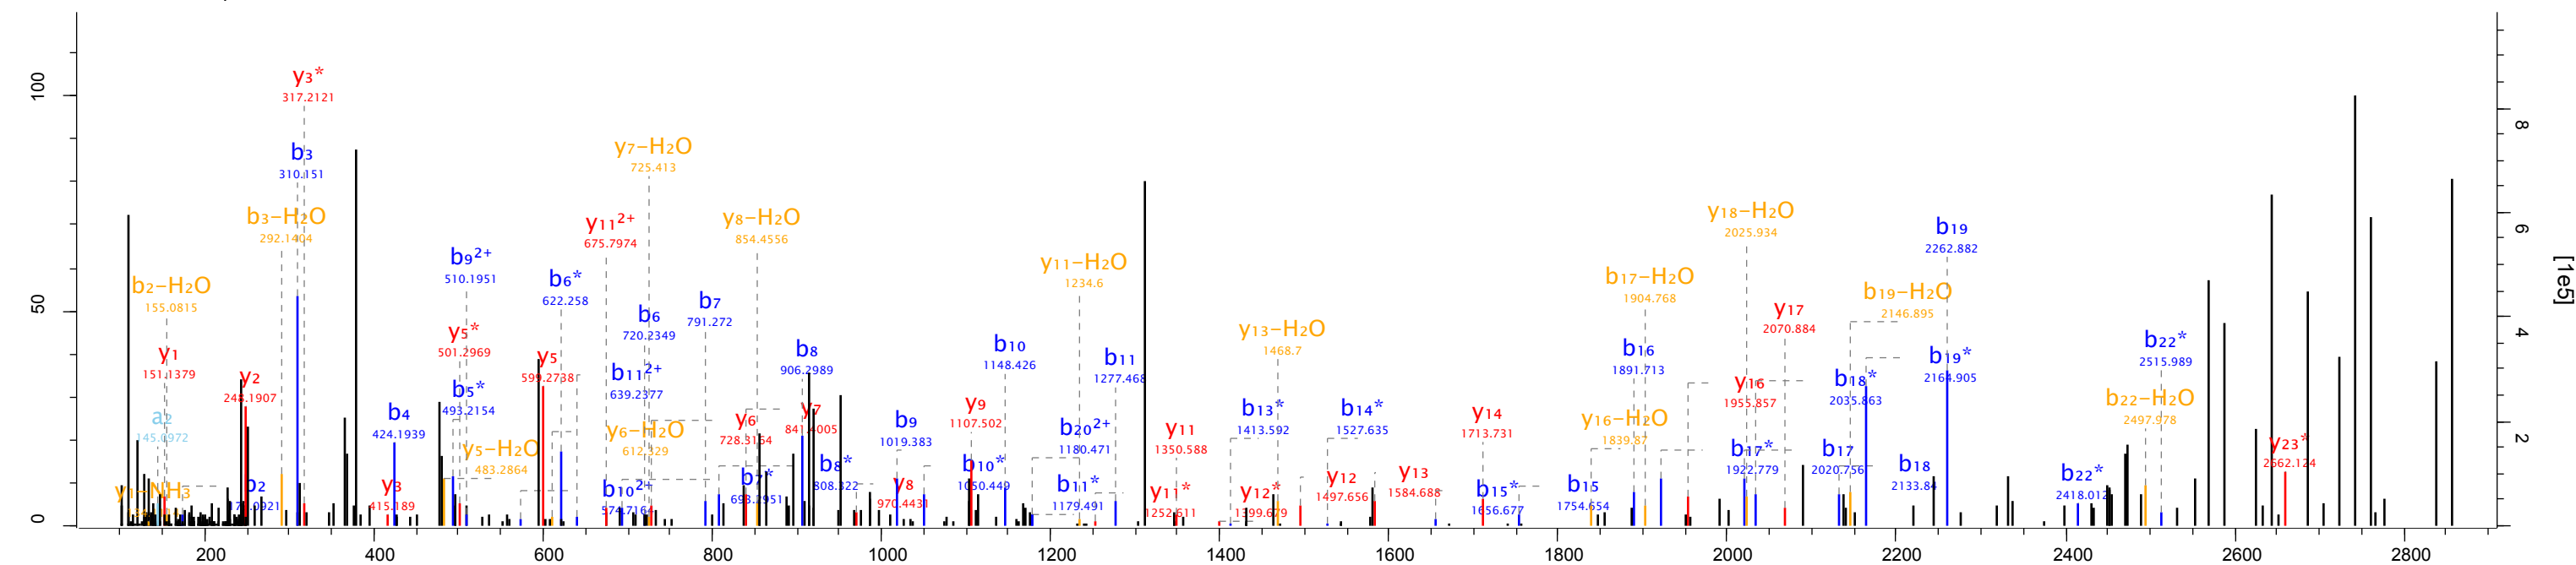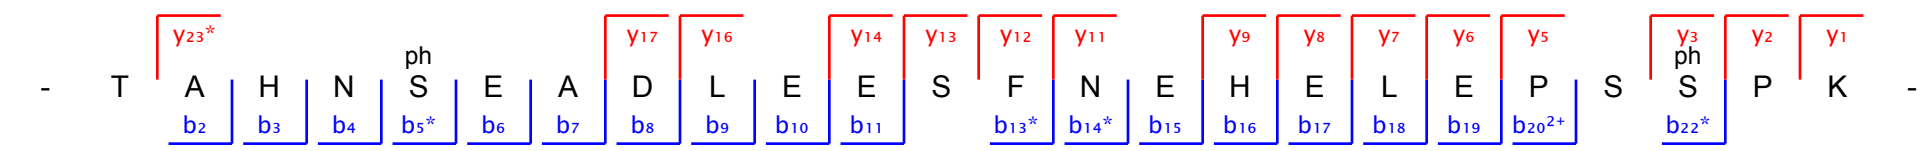

Raw file 20150812\_A375SR\_Phospho\_BR1\_03 Scan 18223 Method FTMS; HCD Score 112.74 m/z 899.46 Gene names TSPYL2

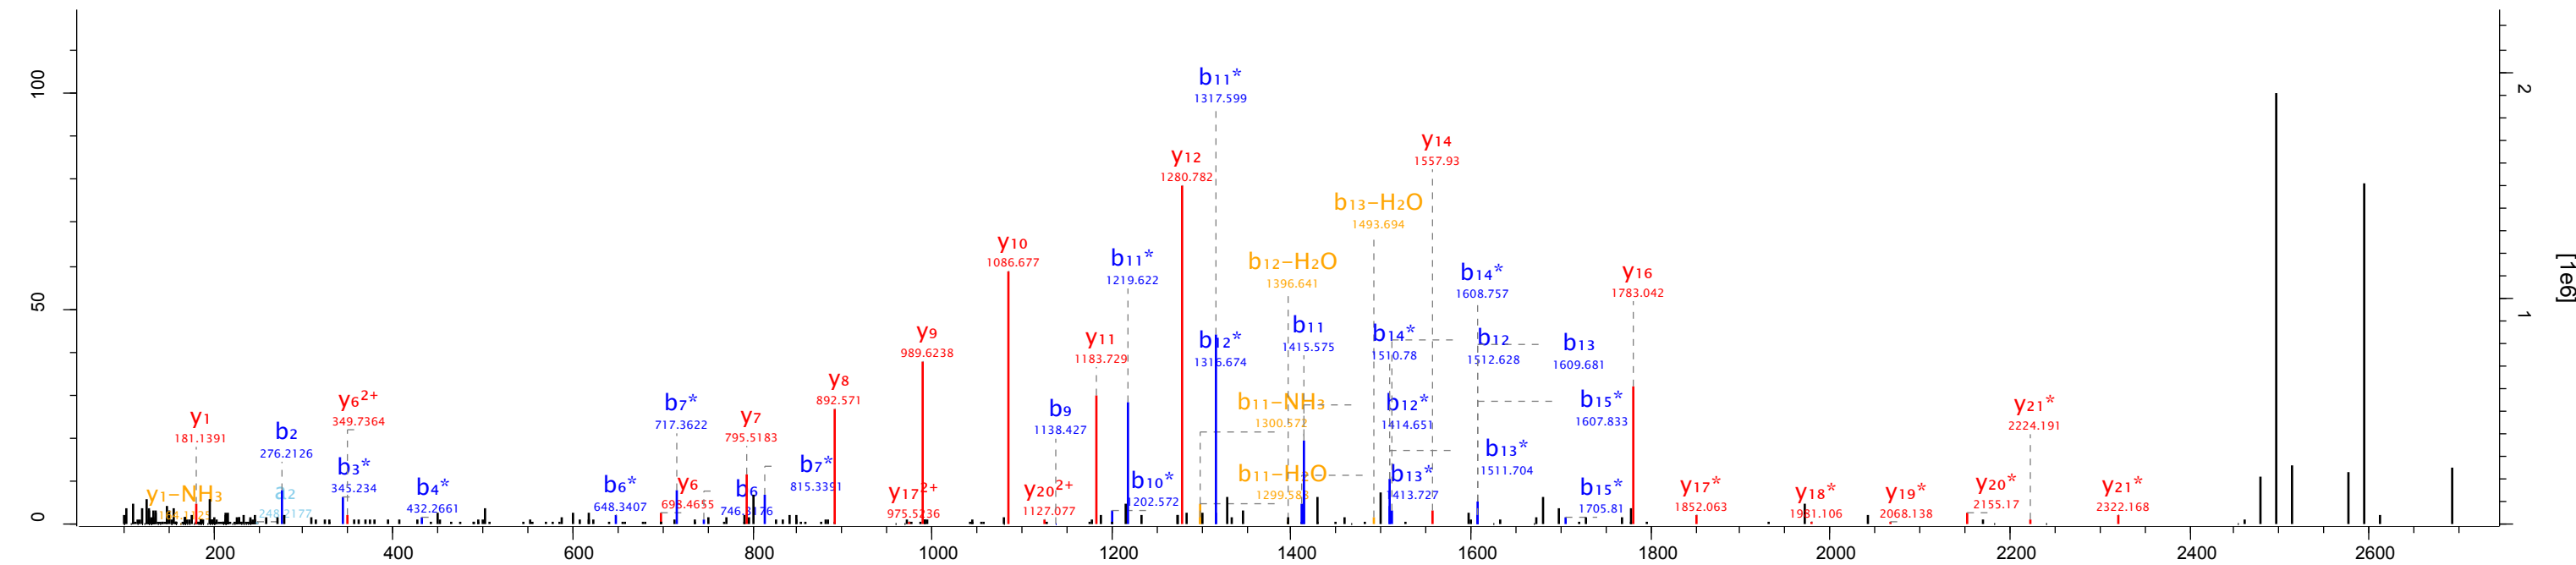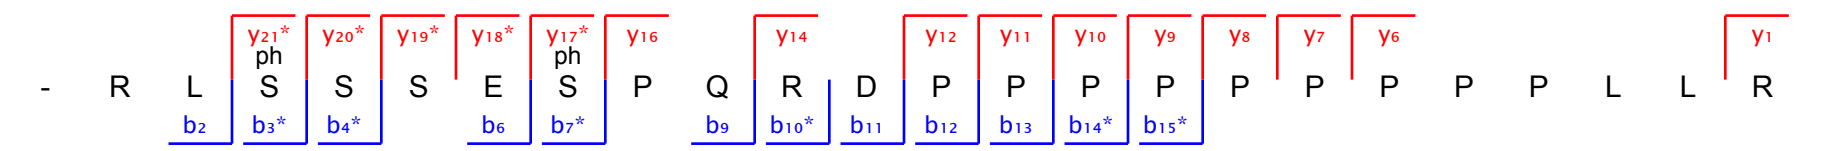

Raw file 20150812\_A375SR\_Phospho\_BR1\_03 Scan 18283 Method FTMS; HCD Score 318.74 m/z 1118.93 Gene names TTF1

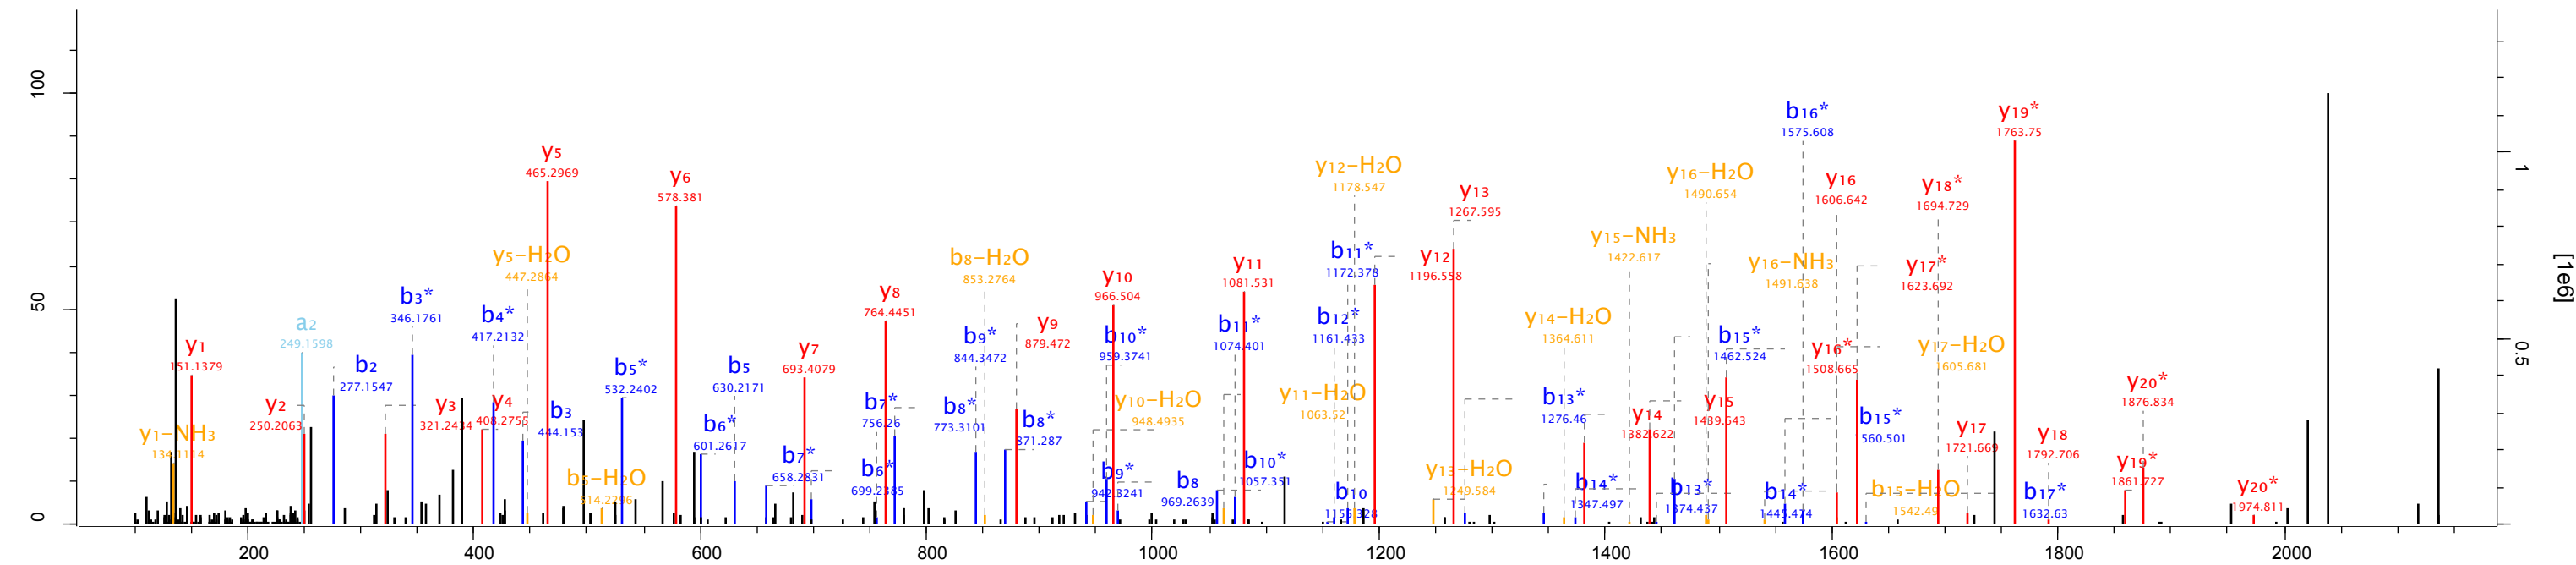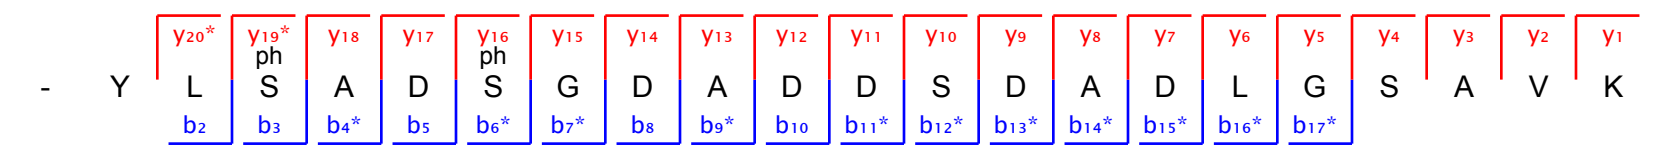

Raw file 20150812\_A375SR\_Phospho\_BR1\_03 Scan 18393 Method FTMS; HCD Score 342.11 m/z 1311.51 Gene names ARID4B

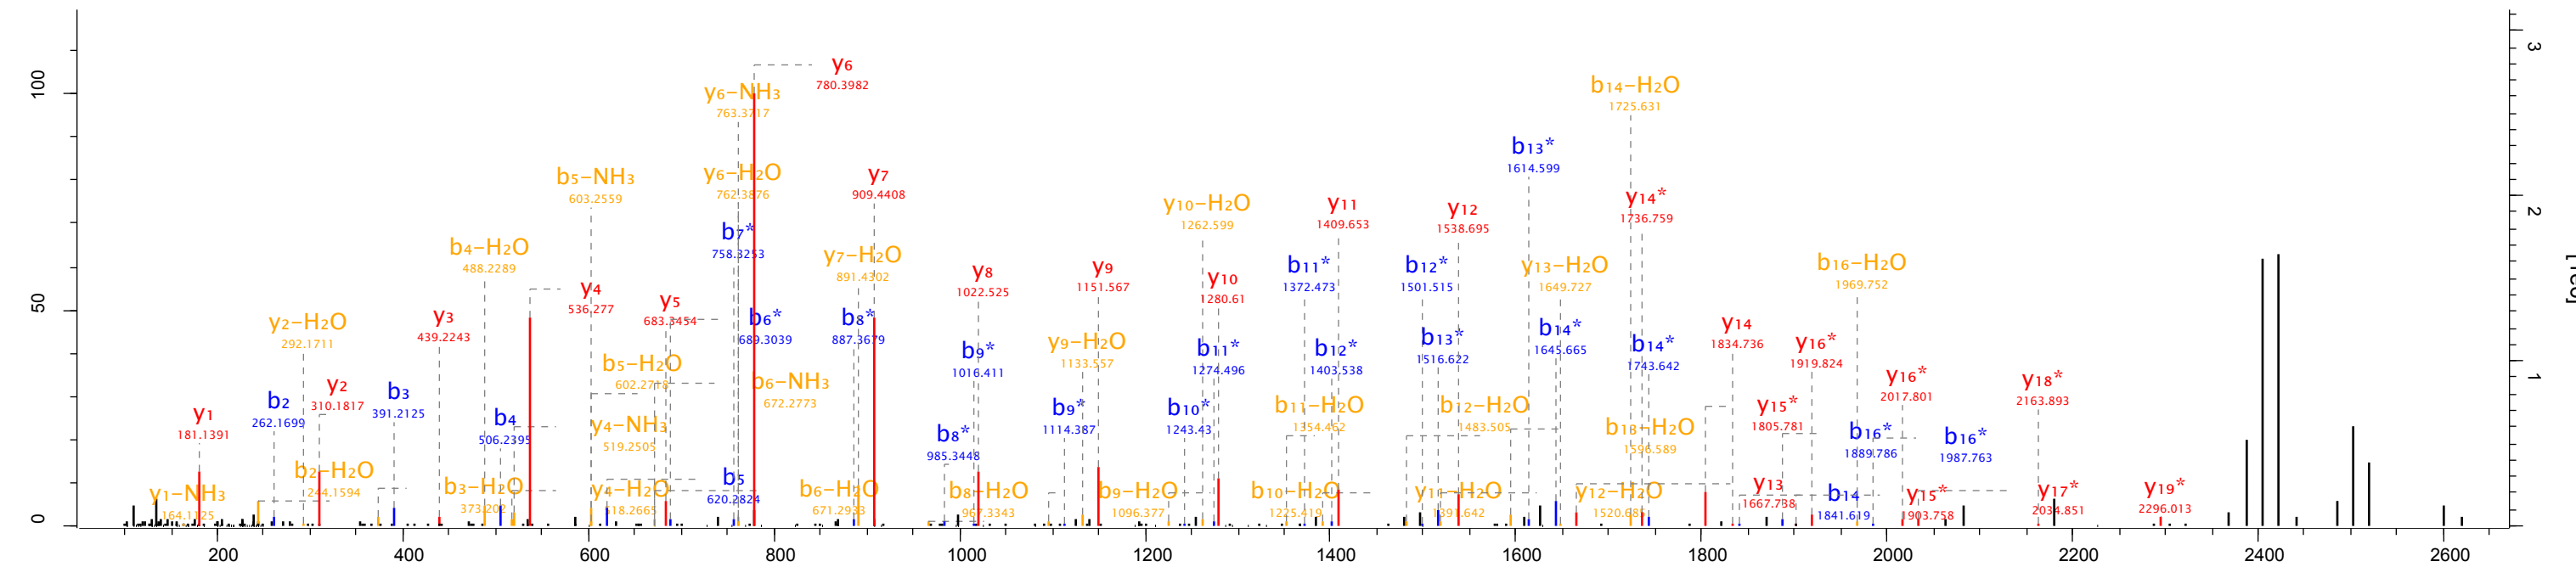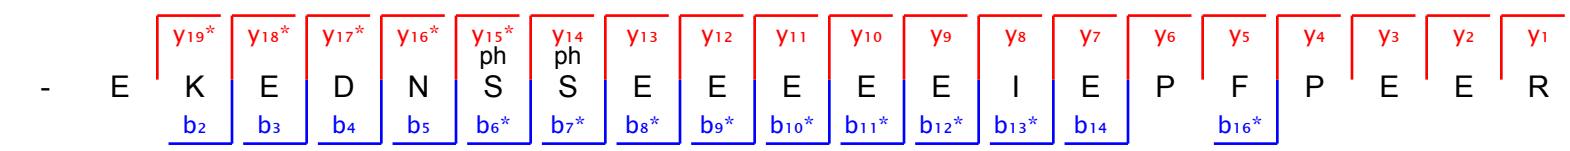

Raw file 20150812\_A375SR\_Phospho\_BR1\_03 Scan 1863 Method FTMS; HCD Score 243.09 m/z 938.86 Gene names IWS1

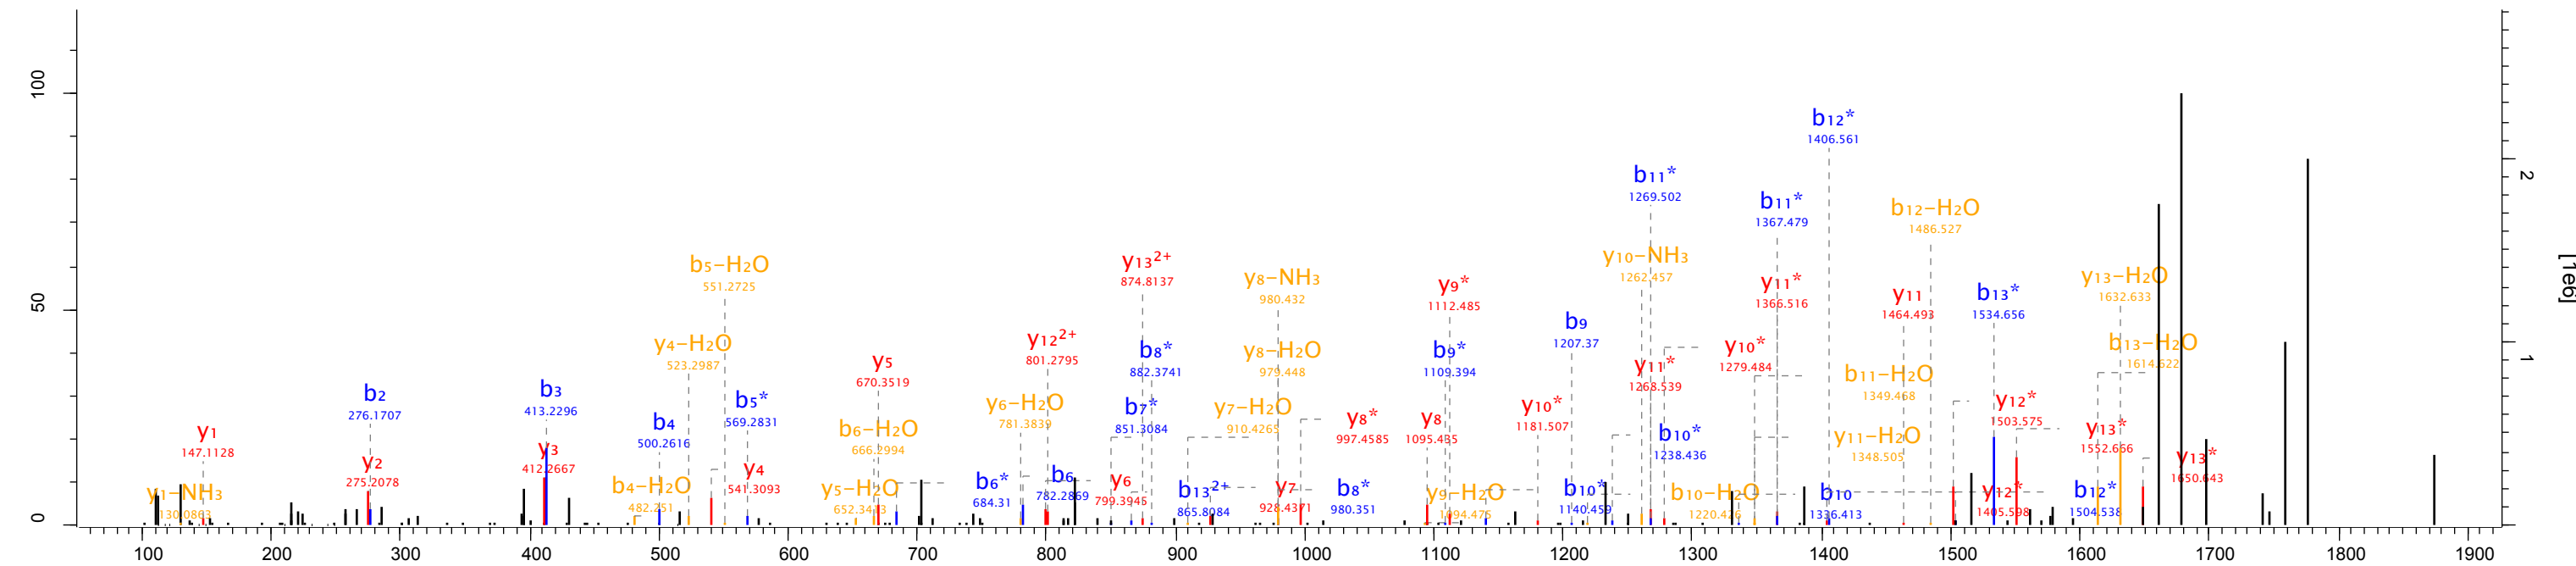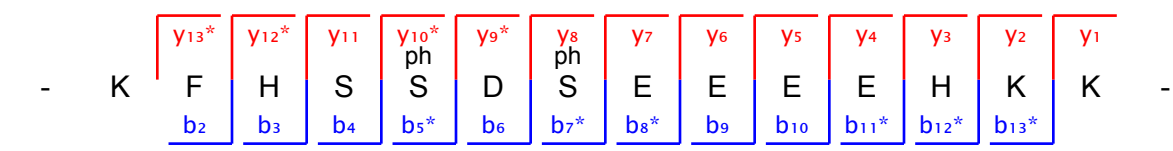

Raw file 20150812\_A375SR\_Phospho\_BR1\_03 Scan 18633 Method FTMS; HCD Score 128.58 m/z 781.03 Gene names LRCH1

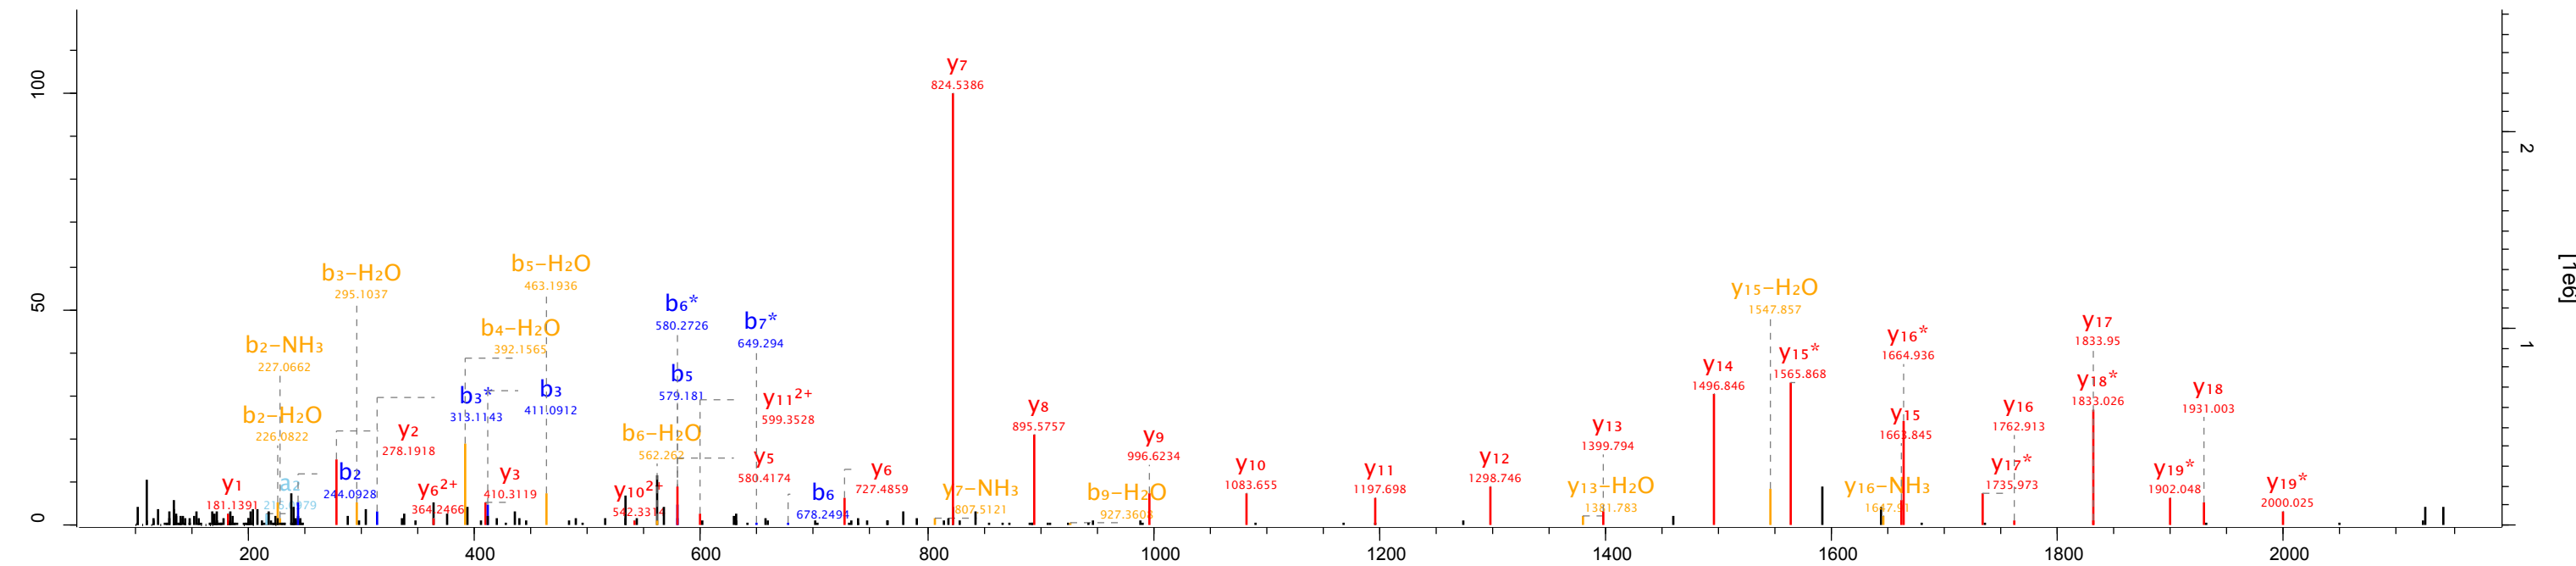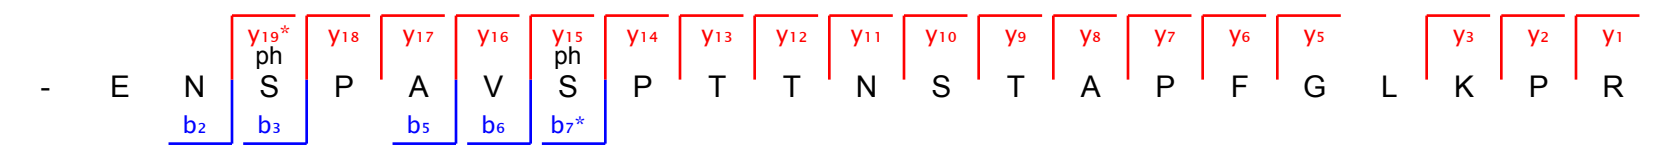

Raw file Scan Method Score m/z Gene names

20150812\_A375SR\_Phospho\_BR1\_03

19103 FTMS; HCD 103.9 1318 PPP1R12A

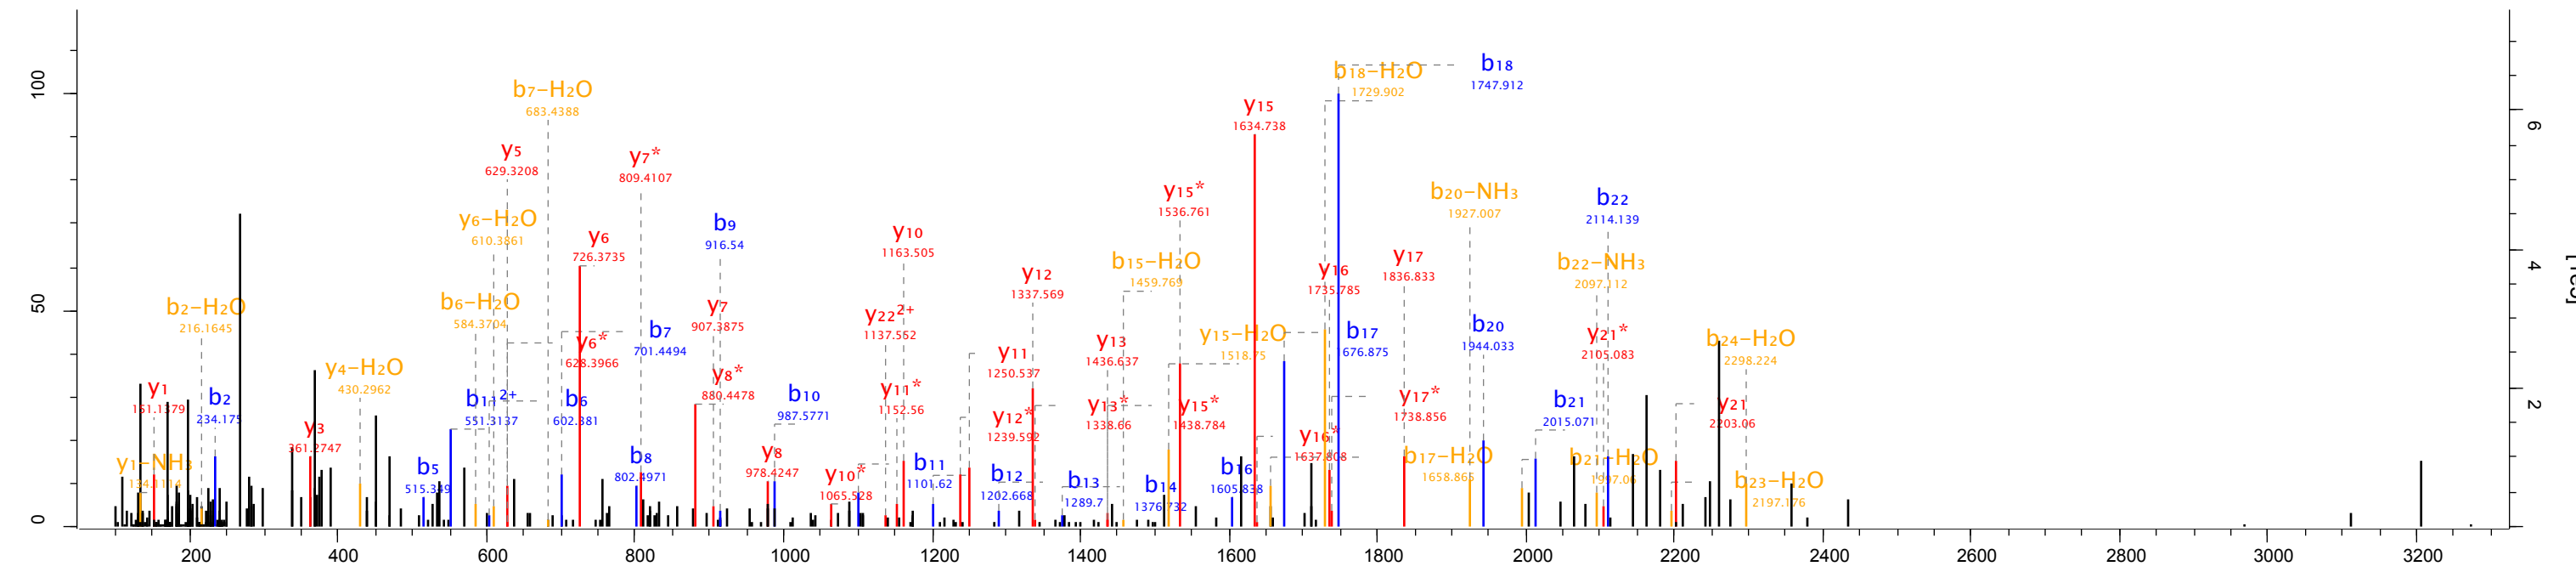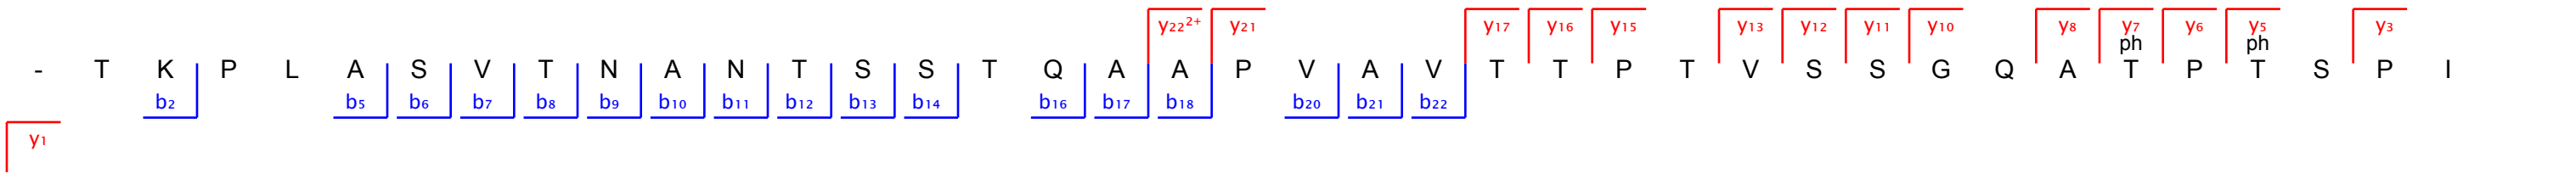



Raw file: 20150812\_A375SR\_Phospho\_BR1\_03  
 Scan: 19853 Method: FTMS; HCD Score: 82.41 m/z: 832.71 Gene names: SPEG

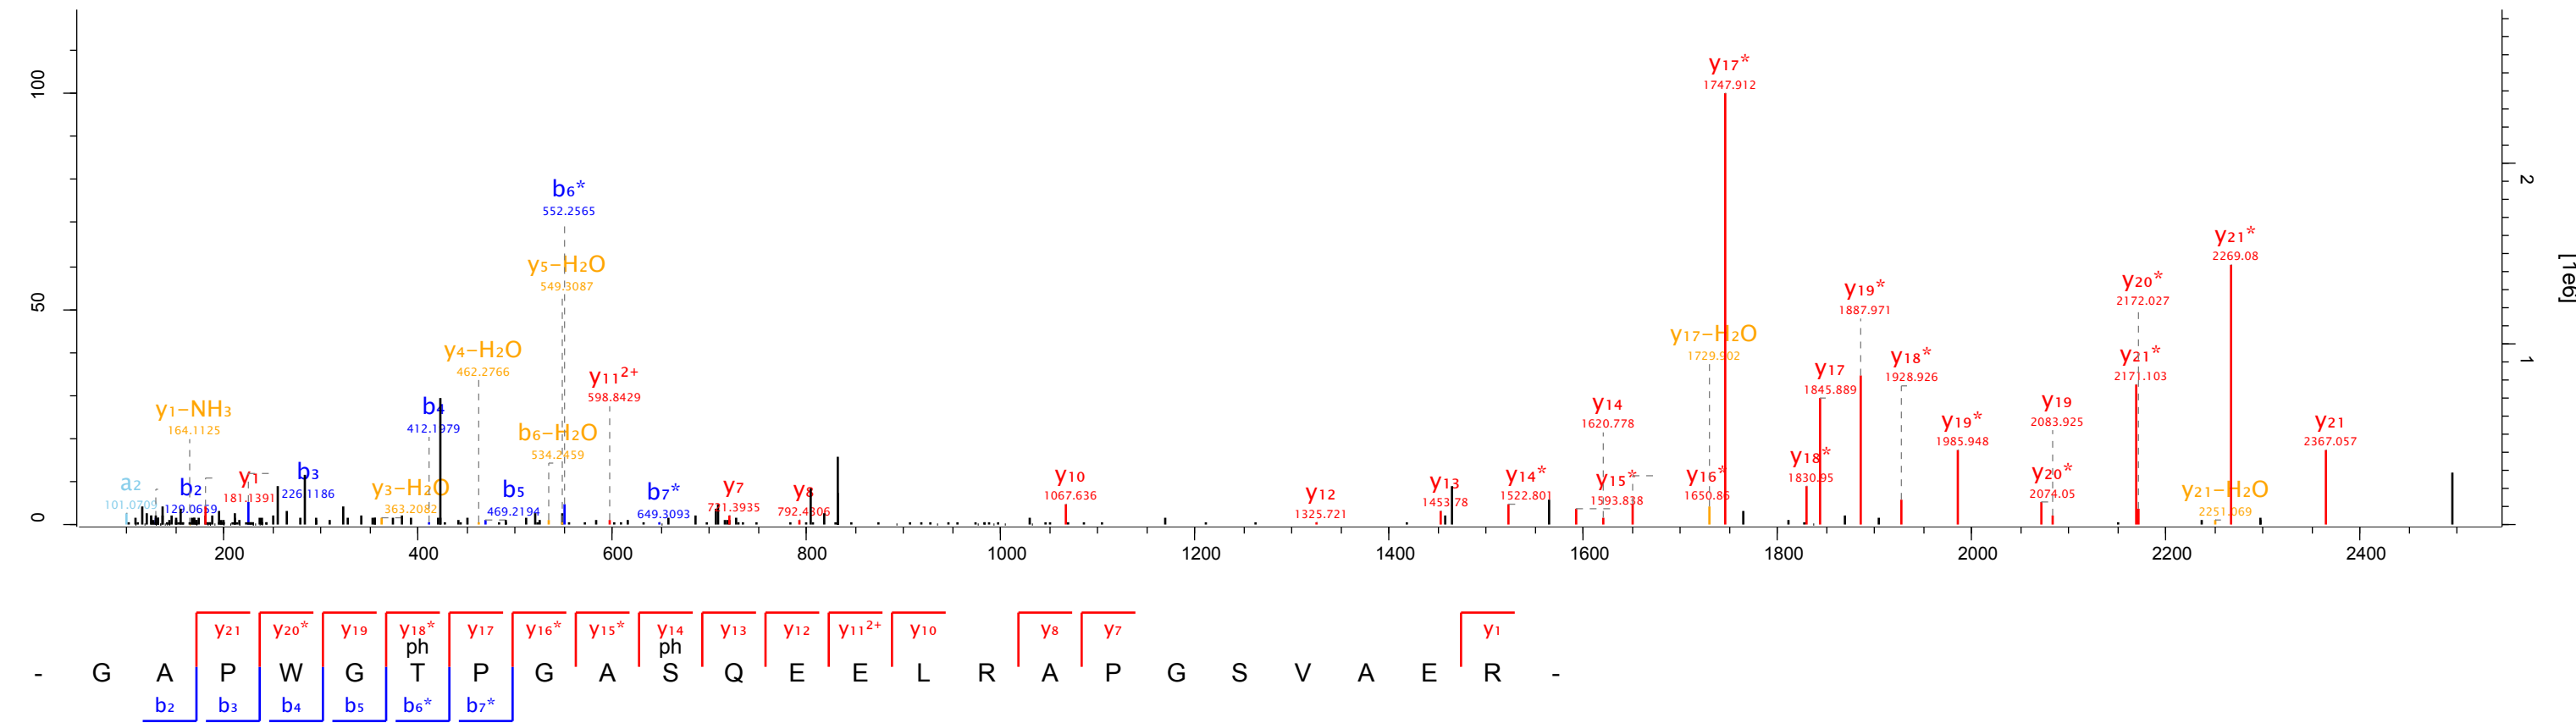



Raw file: 20150812\_A375SR\_Phospho\_BR1\_03  
 Scan: 20573 Method: FTMS; HCD Score: 241.52 m/z: 893.86 Gene names: HN1

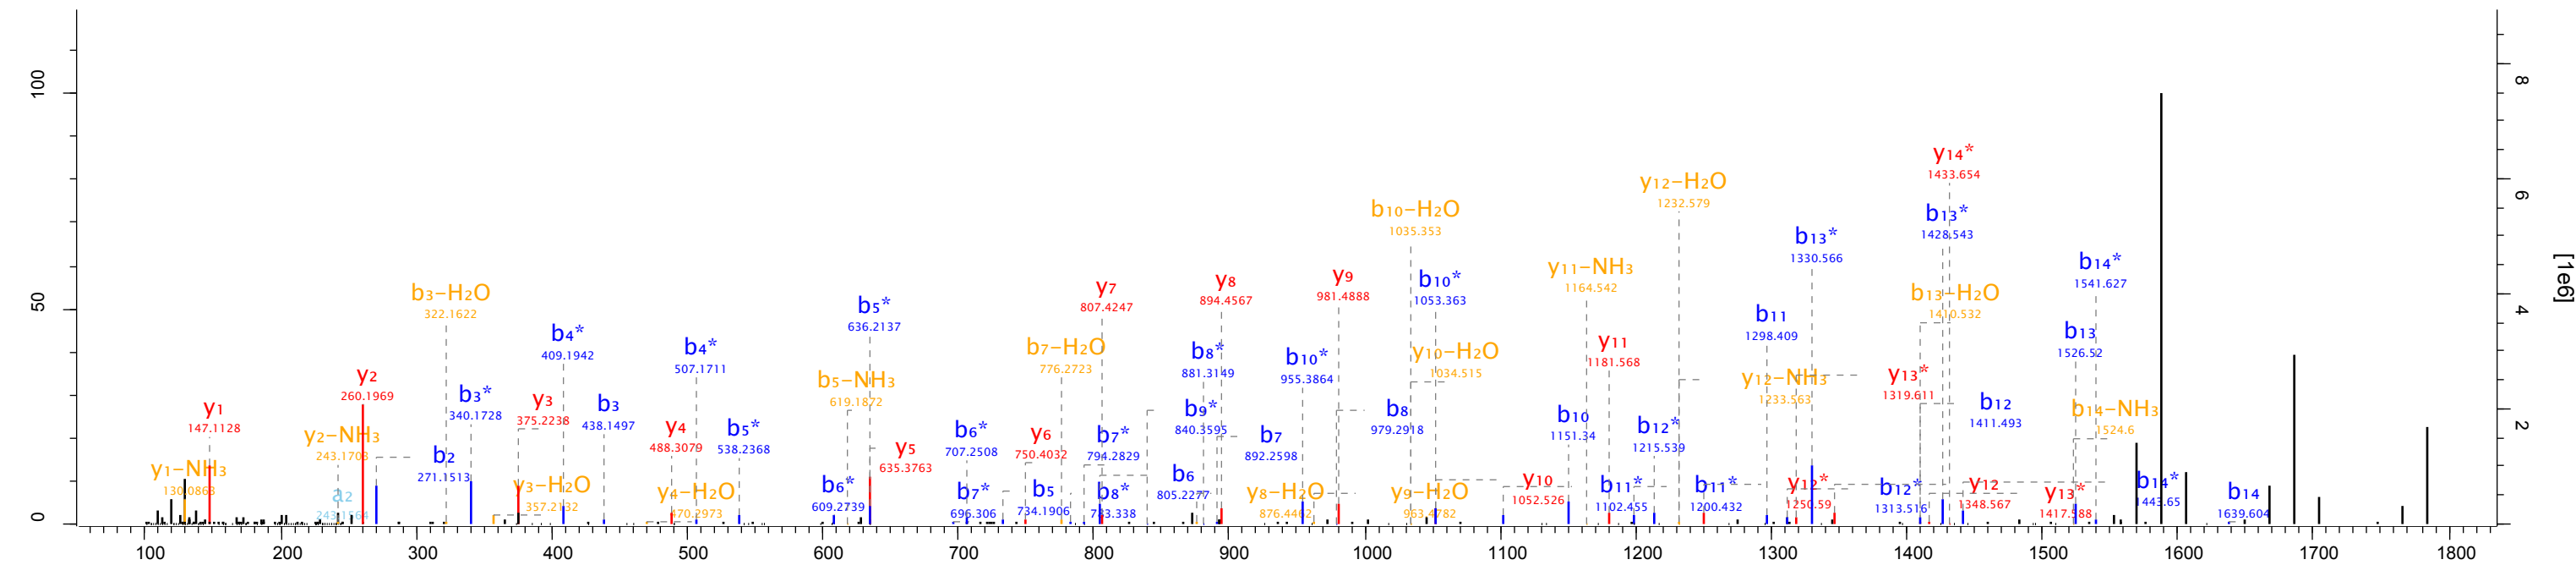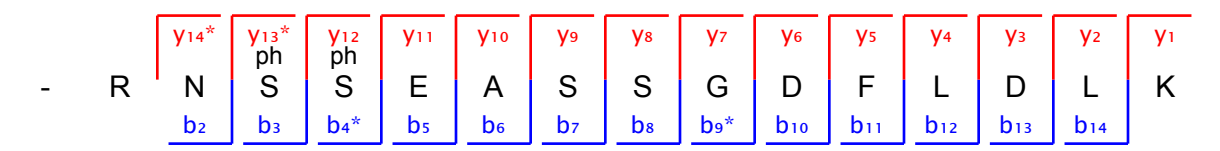

Raw file 20150812\_A375SR\_Phospho\_BR1\_03 Scan 20813 Method FTMS; HCD Score 198.4 m/z 770.68 Gene names FXR2

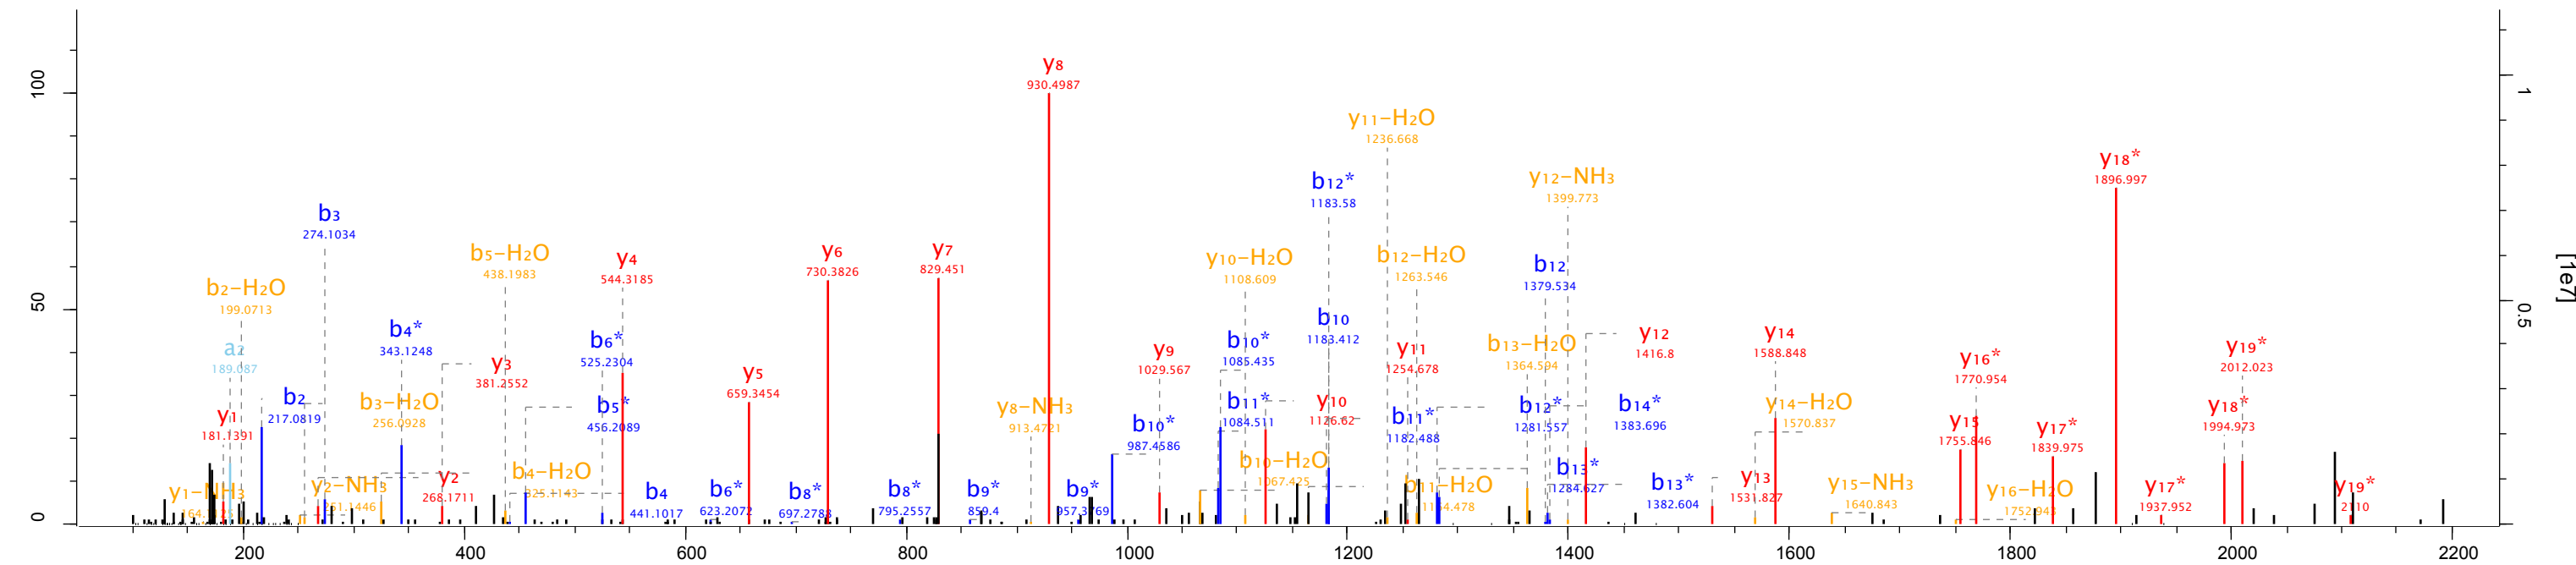

- T D G S I S G D R Q P V T V A D Y I S R -

b<sub>2</sub>
b<sub>3</sub>
b<sub>4</sub>
b<sub>5</sub>\*
b<sub>6</sub>\*
b<sub>8</sub>\*
b<sub>9</sub>\*
b<sub>10</sub>
b<sub>11</sub>\*
b<sub>12</sub>
b<sub>13</sub>\*
b<sub>14</sub>\*

y<sub>1</sub>
y<sub>2</sub>
y<sub>3</sub>
y<sub>4</sub>
y<sub>5</sub>
y<sub>6</sub>
y<sub>7</sub>
y<sub>8</sub>
y<sub>9</sub>
y<sub>10</sub>
y<sub>11</sub>
y<sub>12</sub>
y<sub>13</sub>
y<sub>14</sub>
y<sub>15</sub>
y<sub>16</sub>\*
y<sub>17</sub>\*
y<sub>18</sub>\*
y<sub>19</sub>\*

Raw file: 20150812\_A375SR\_Phospho\_BR1\_03  
 Scan: 20843 Method: FTMS; HCD Score: 90.58 m/z: 929.7 Gene names: IRS2

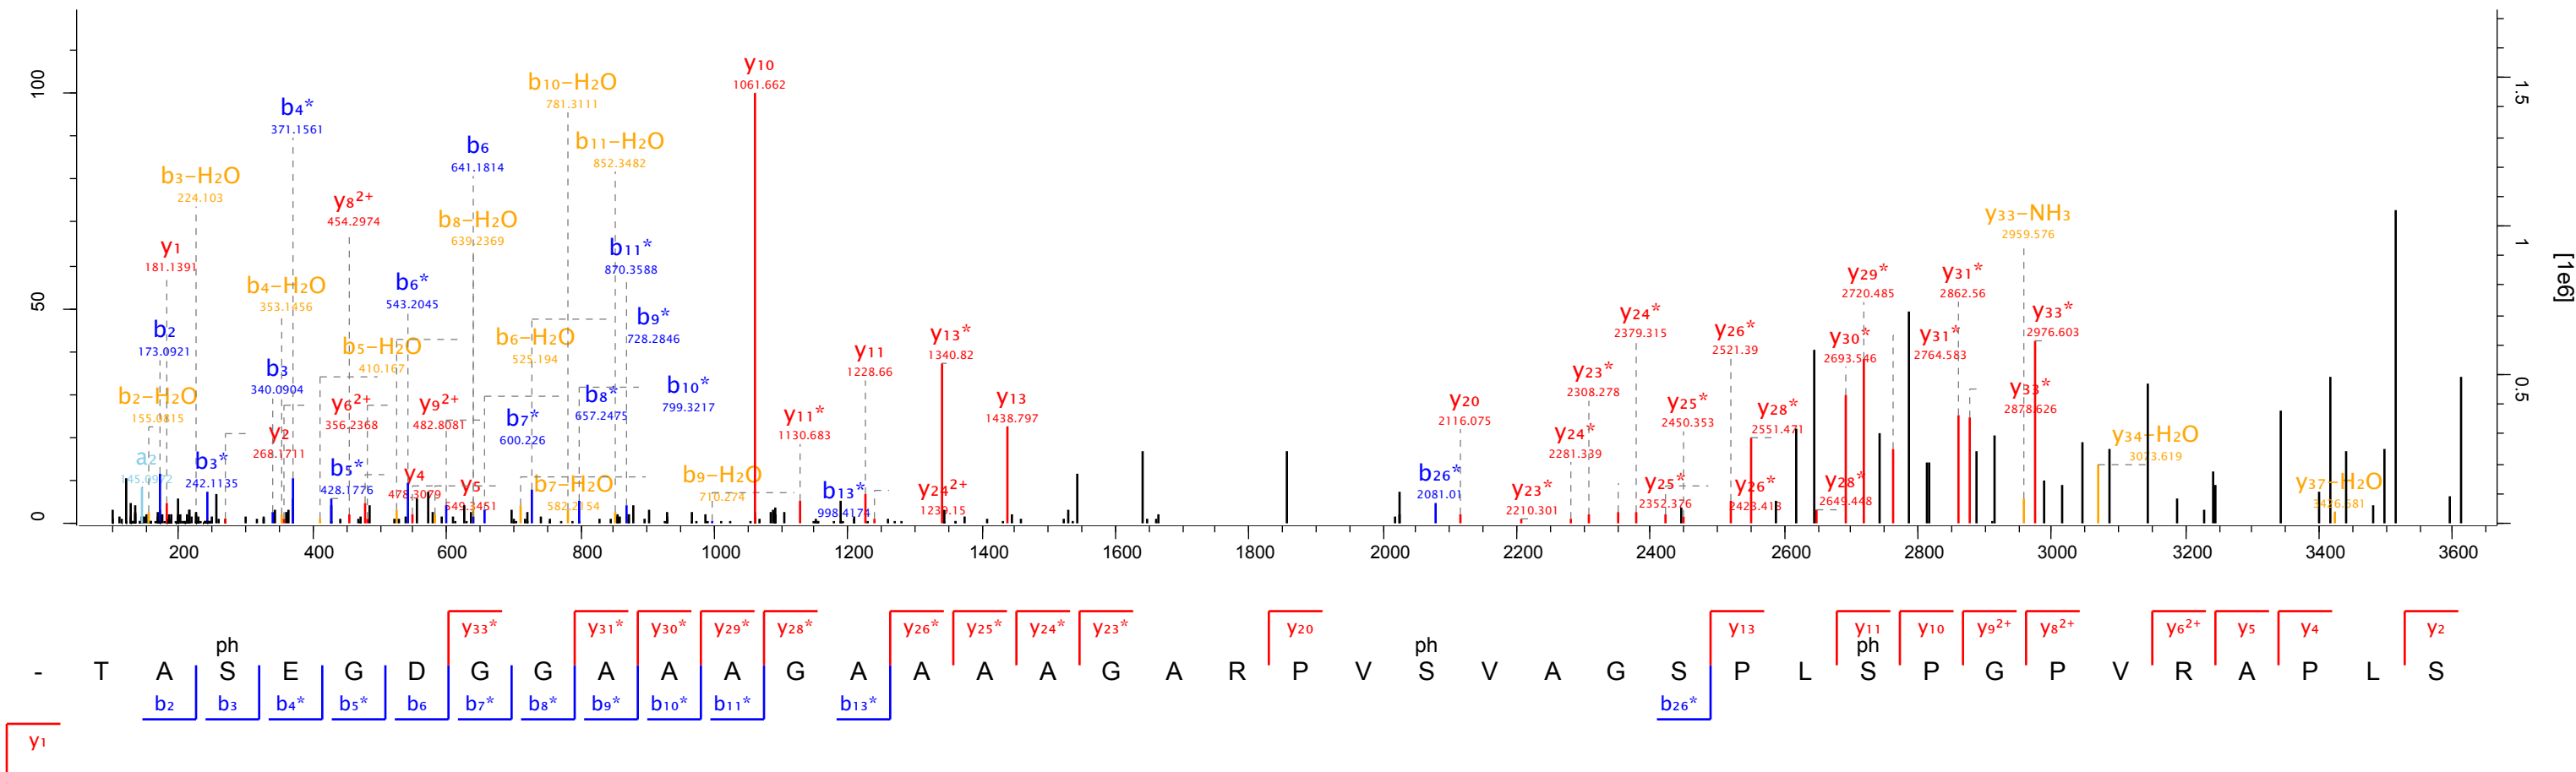

Raw file 21003 FTMS; HCD 162.15 1140.5 UBXN2B

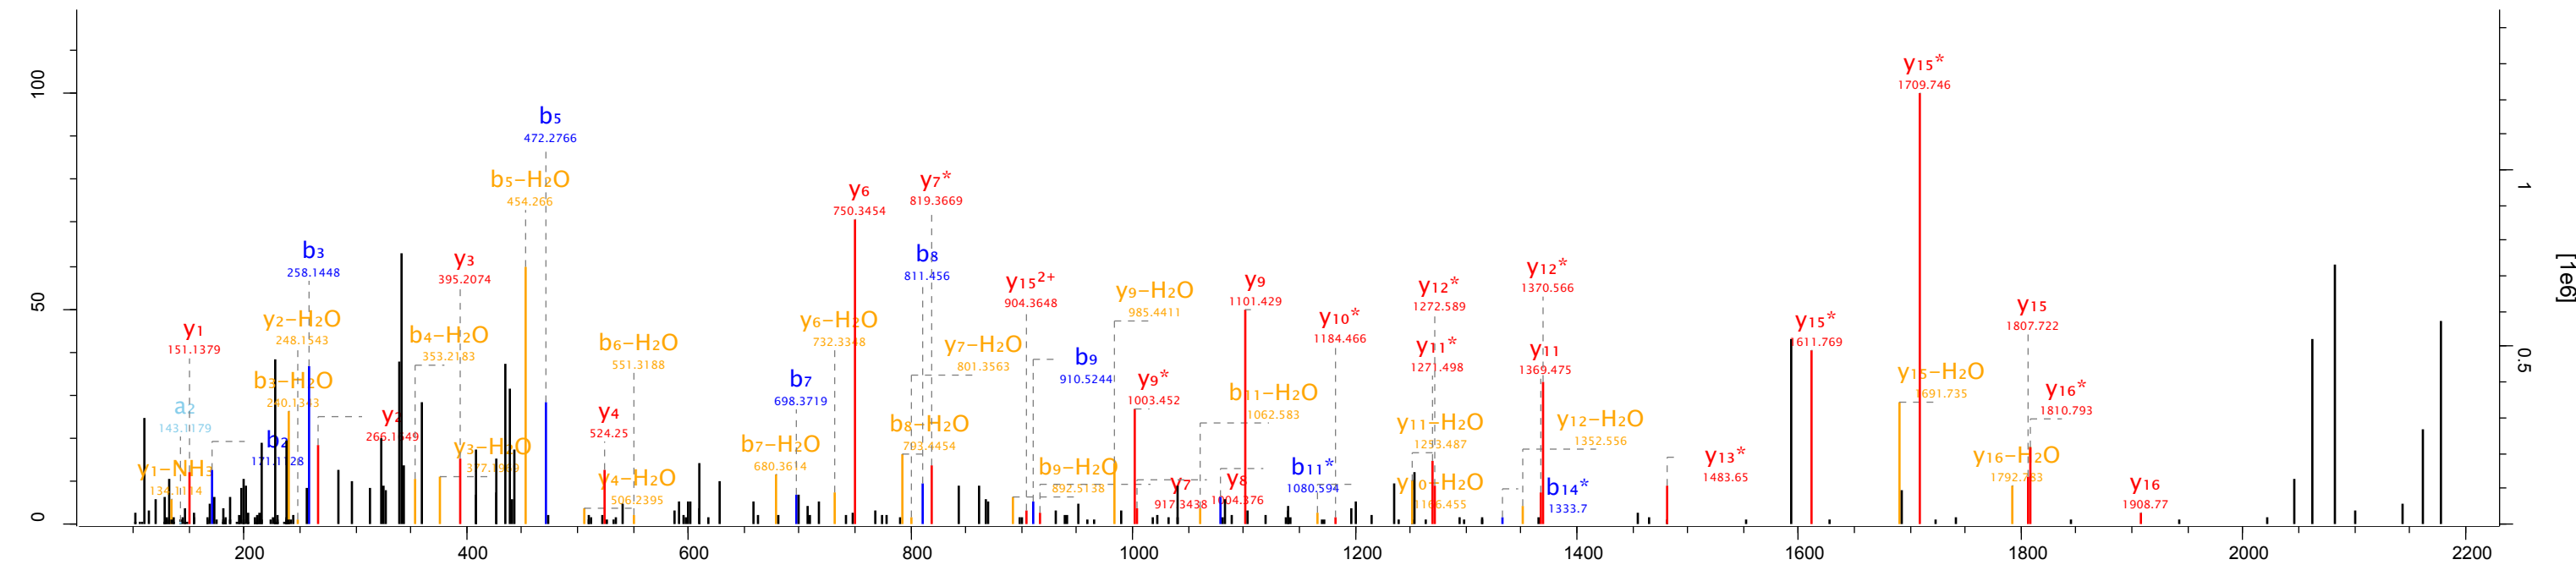

- L G S L T P E I V S T P S P E E E D K -

Fragmentation mapping (b and y ions):

- b2: G
- b3: S
- b5: T
- b7: E
- b8: I
- b9: V
- b11\*: T
- b14\*: S
- y1: K
- y2: D
- y3: E
- y4: E
- y6: P
- y7: S
- y8: S
- y9: P
- y10\*: T
- y11: S
- y12\*: V
- y13\*: I
- y15: E
- y16: L

Raw file  
 20150812\_A375SR\_Phospho\_BR1\_03  
 Scan 21163 Method FTMS; HCD Score 134.09 m/z 883.42 Gene names EPB41L3

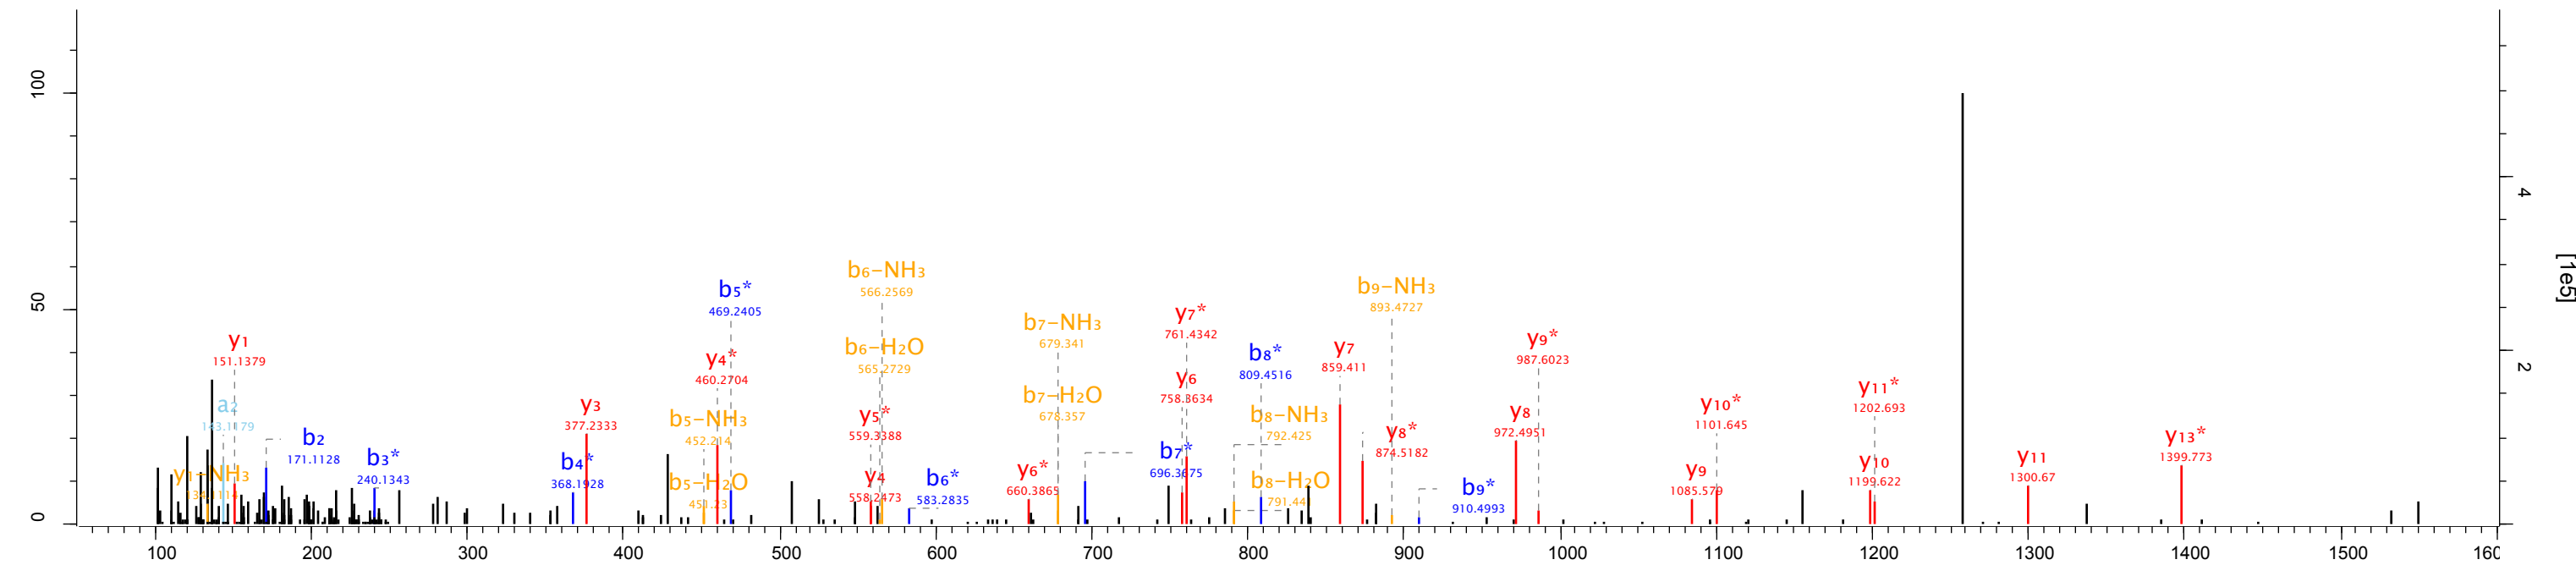

- G I S Q T N L I T T V T P E K -

b<sub>2</sub>
b<sub>3</sub><sup>\*</sup>
b<sub>4</sub><sup>\*</sup>
y<sub>13</sub><sup>\*</sup>
ph
S
Q
y<sub>11</sub>
T
y<sub>10</sub>
N
y<sub>9</sub>
L
y<sub>8</sub>
I
y<sub>7</sub>
T
y<sub>6</sub>
T
y<sub>5</sub><sup>\*</sup>
V
y<sub>4</sub>
ph
T
y<sub>3</sub>
P
E
y<sub>1</sub>
K

Raw file 20150812\_A375SR\_Phospho\_BR1\_03 Scan 21233 Method FTMS; HCD Score 325.11 m/z 1032.46 Gene names RAD51AP1

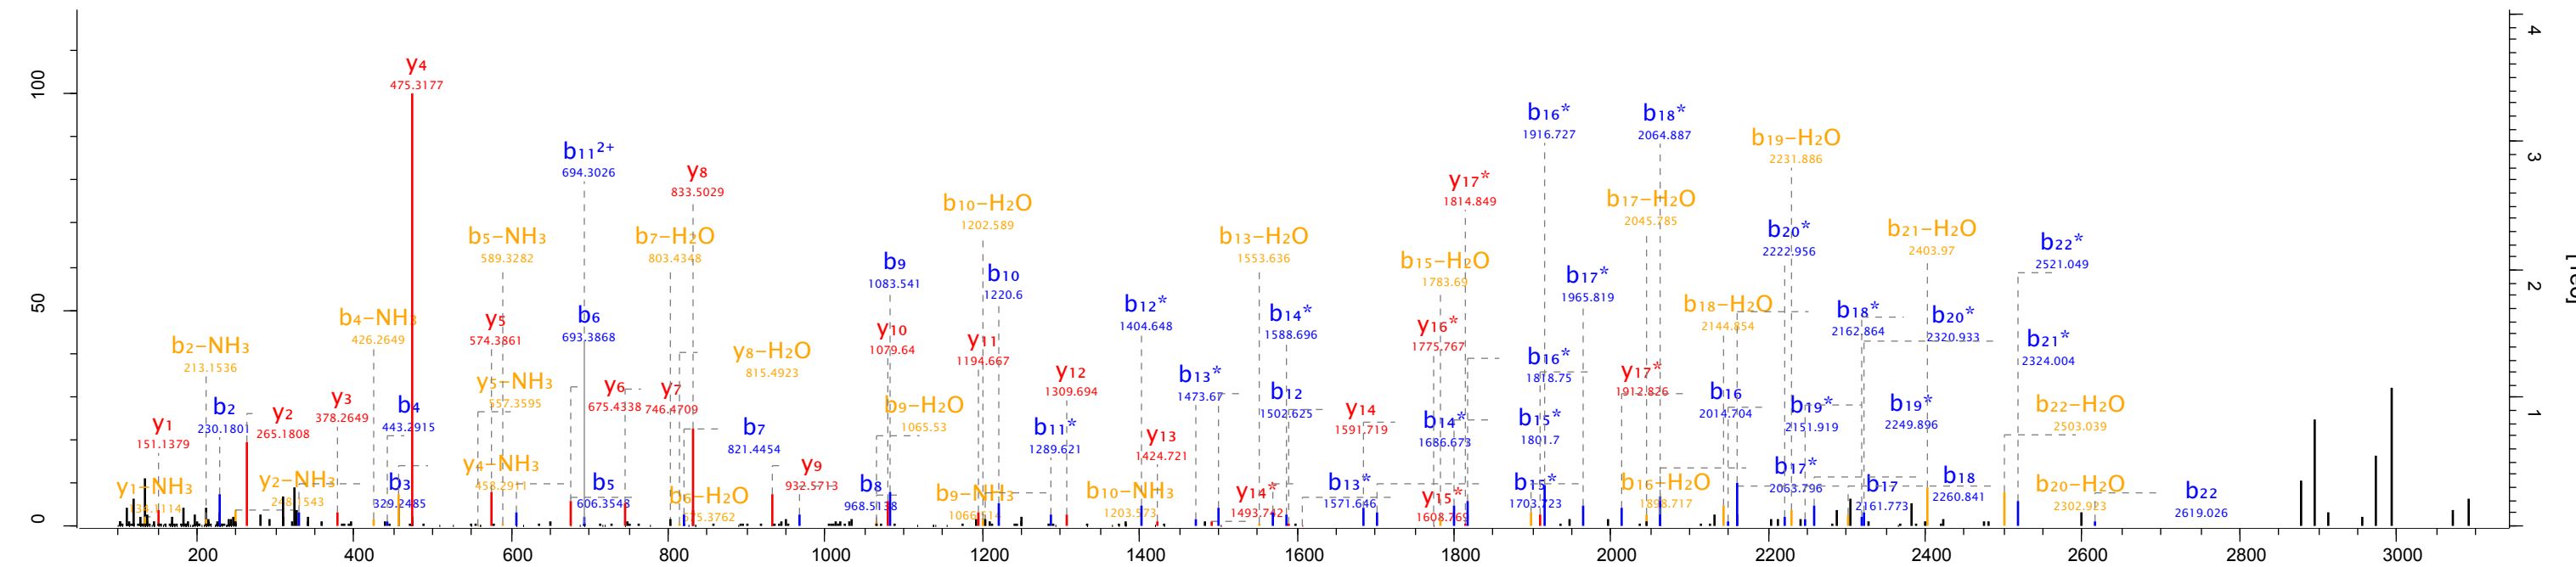

- K P V N Y S Q F D H S D S D D D F V S A T V P L N K -

b<sub>2</sub>
b<sub>3</sub>
b<sub>4</sub>
b<sub>5</sub>
b<sub>6</sub>
b<sub>7</sub>
b<sub>8</sub>
b<sub>9</sub>
y<sub>17</sub>\*
y<sub>16</sub>\*
y<sub>15</sub>\*
y<sub>14</sub>
y<sub>13</sub>
y<sub>12</sub>
y<sub>11</sub>
y<sub>10</sub>
y<sub>9</sub>
y<sub>8</sub>
y<sub>7</sub>
y<sub>6</sub>
y<sub>5</sub>
y<sub>4</sub>
y<sub>3</sub>
y<sub>2</sub>
y<sub>1</sub>



Raw file 20150812\_A375SR\_Phospho\_BR1\_03 Scan 21353 Method FTMS; HCD Score 266.45 m/z 1138.51 Gene names FAM169A

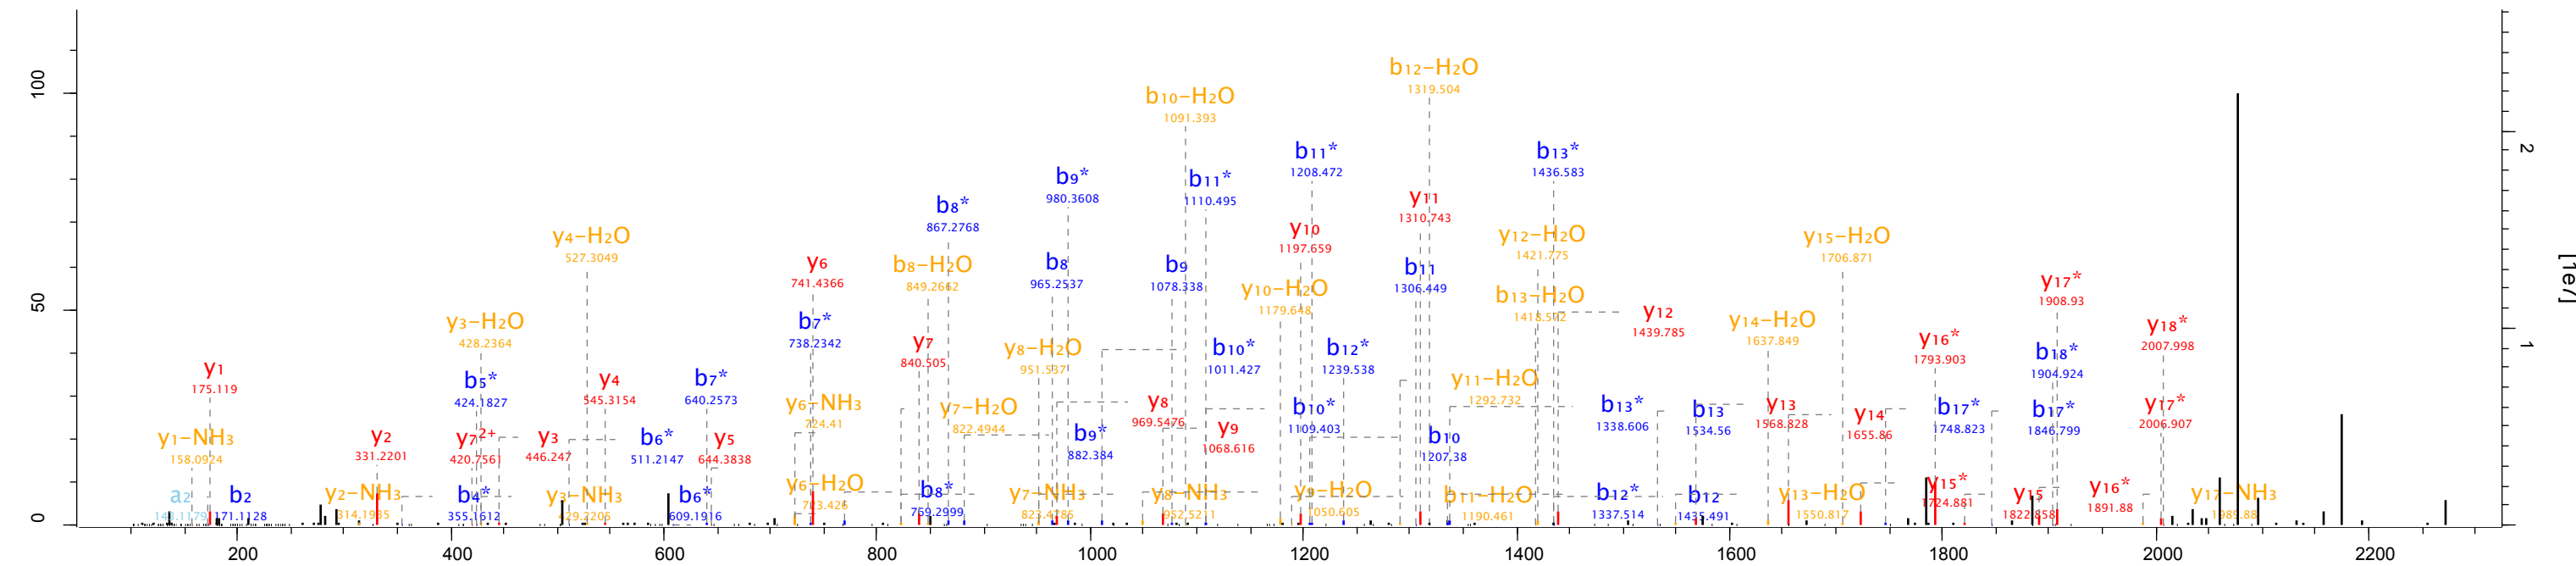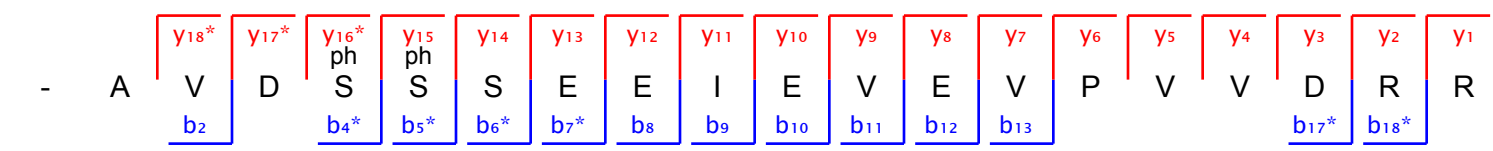

Raw file: 20150812\_A375SR\_Phospho\_BR1\_03  
 Scan: 21573 Method: FTMS; HCD Score: 156.7 m/z: 786.7 Gene names: SRGAP1

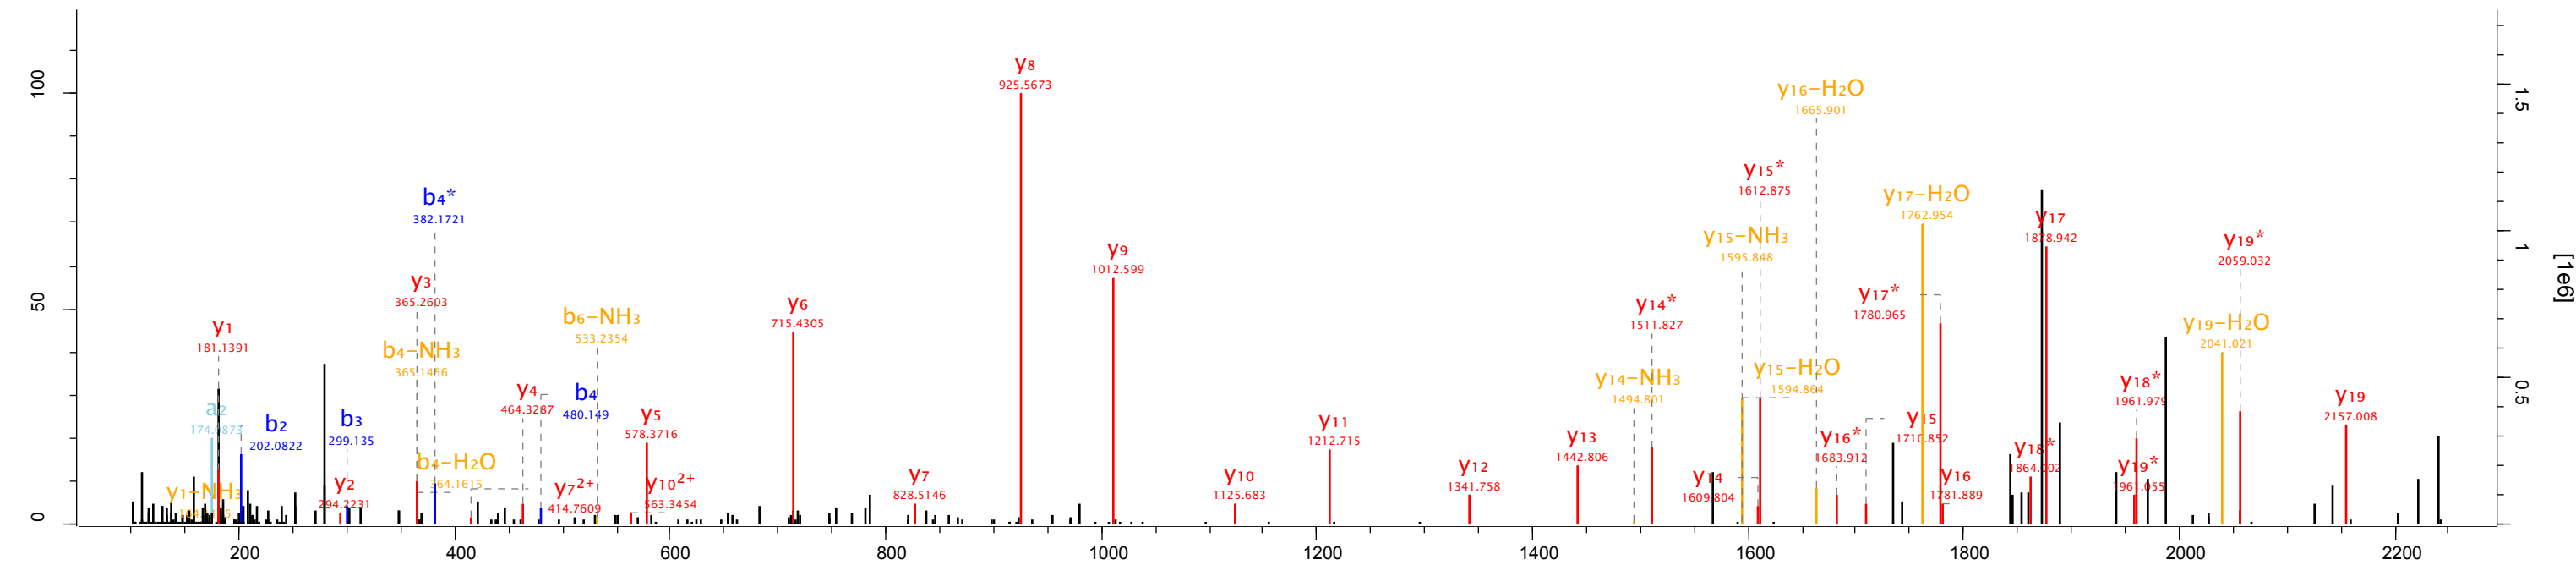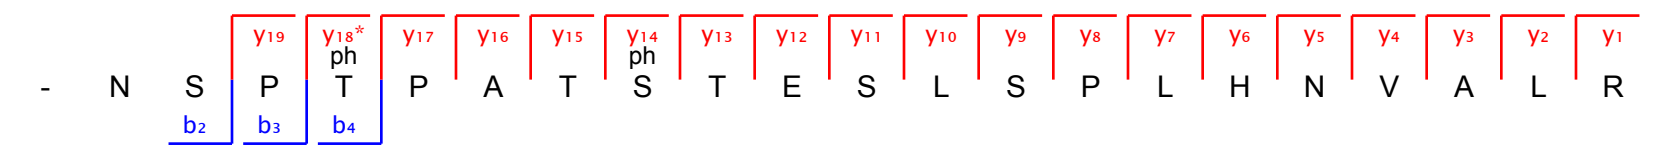

Raw file 20150812\_A375SR\_Phospho\_BR1\_03 Scan 21813 Method FTMS; HCD Score 101.63 m/z 828.42 Gene names C11orf30;EMSY

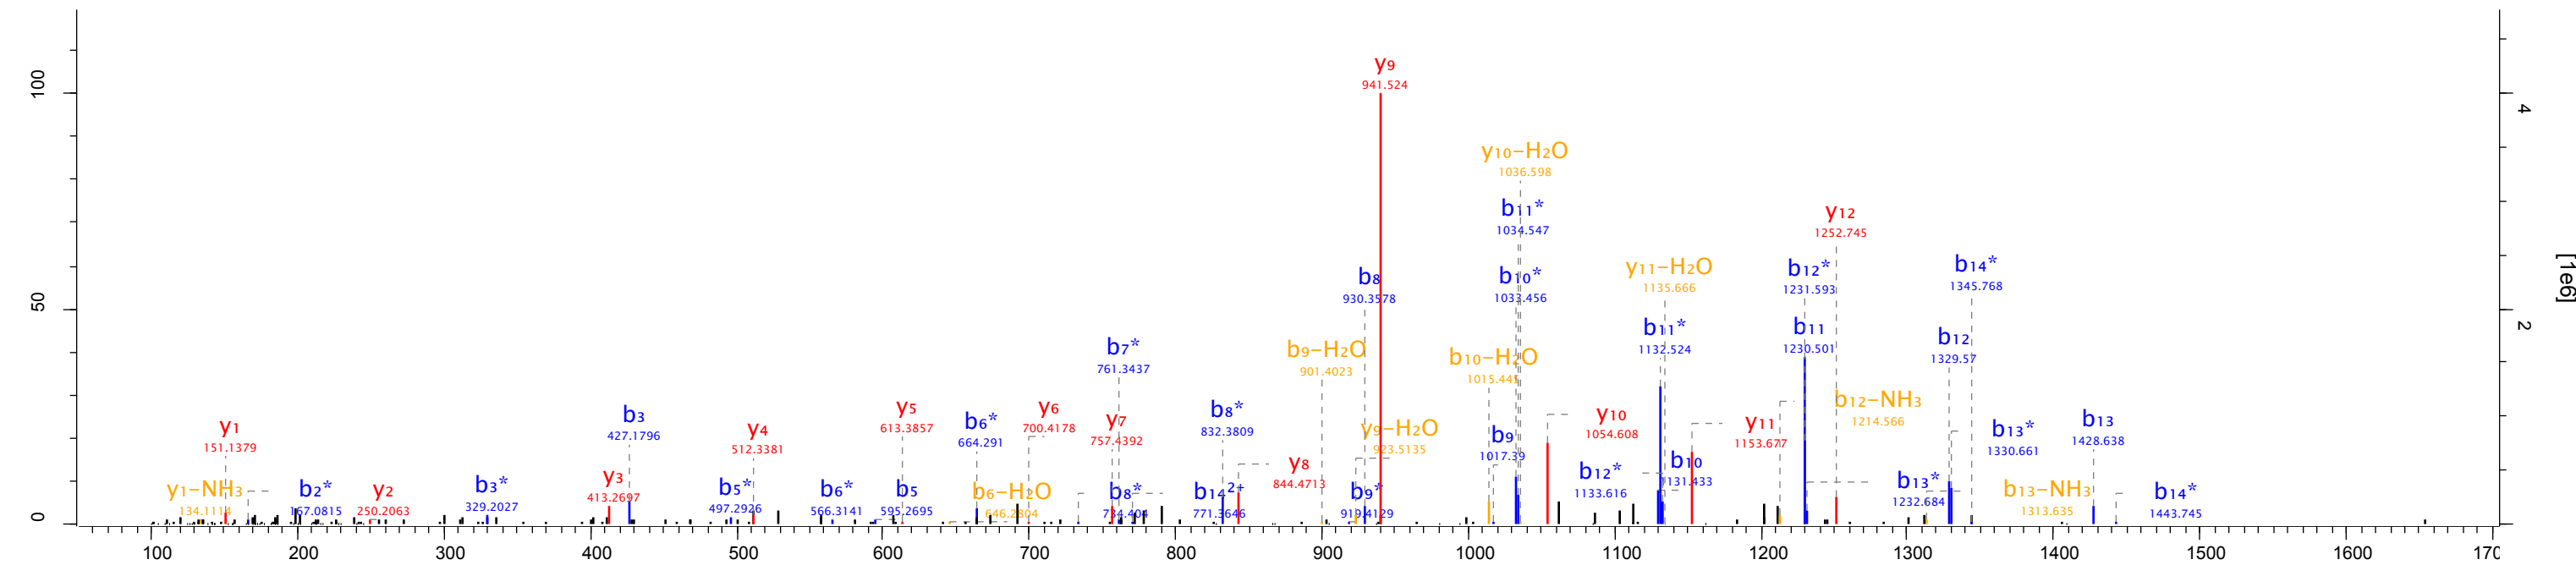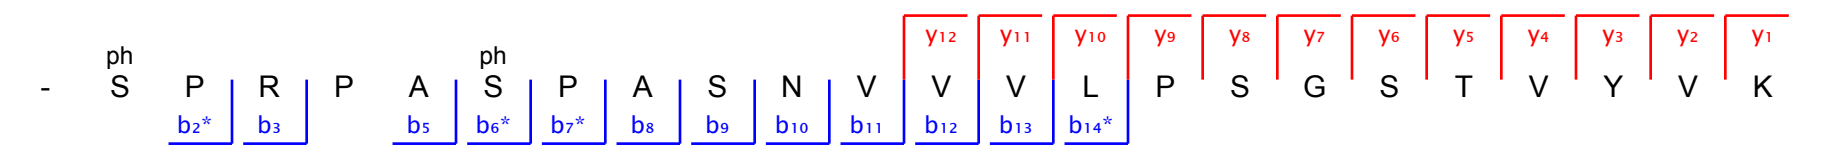

Raw file 20150812\_A375SR\_Phospho\_BR1\_03 Scan 2183 Method FTMS; HCD Score 85.18 m/z 626.78 Gene names SRRM1

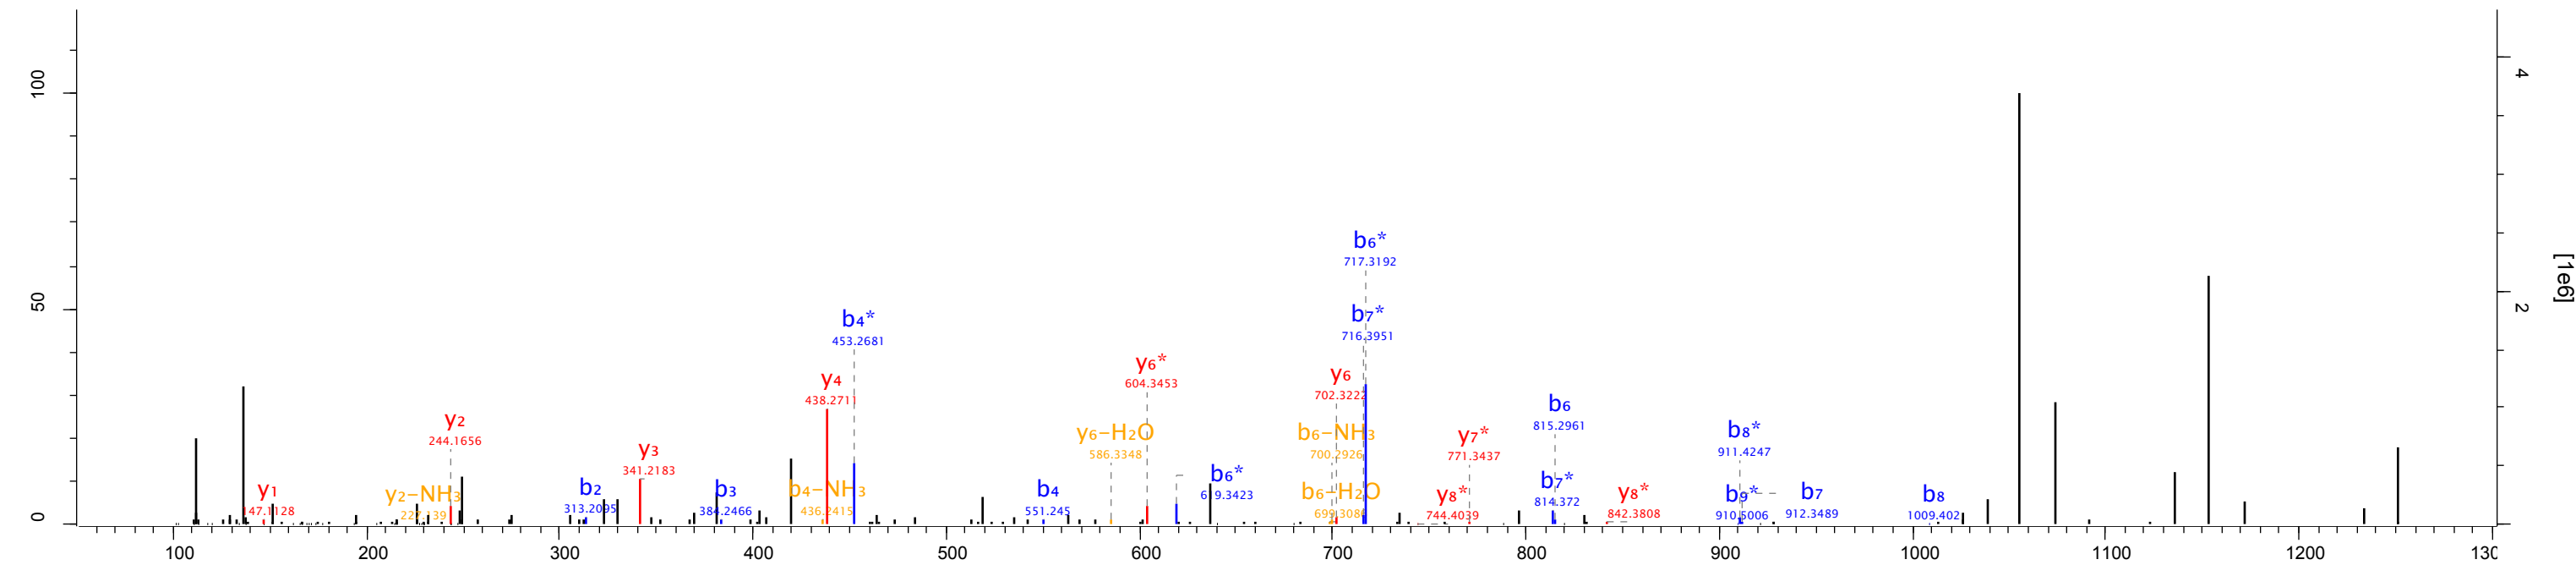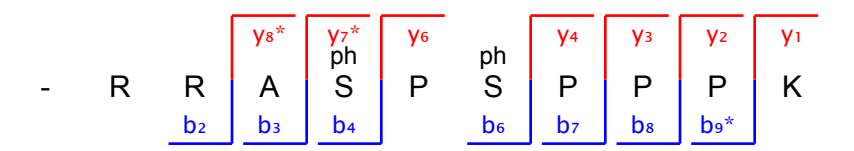

Raw file  
 20150812\_A375SR\_Phospho\_BR1\_03  
 Scan 22083 Method FTMS; HCD Score 66.11 m/z 846.82 Gene names KIAA1143

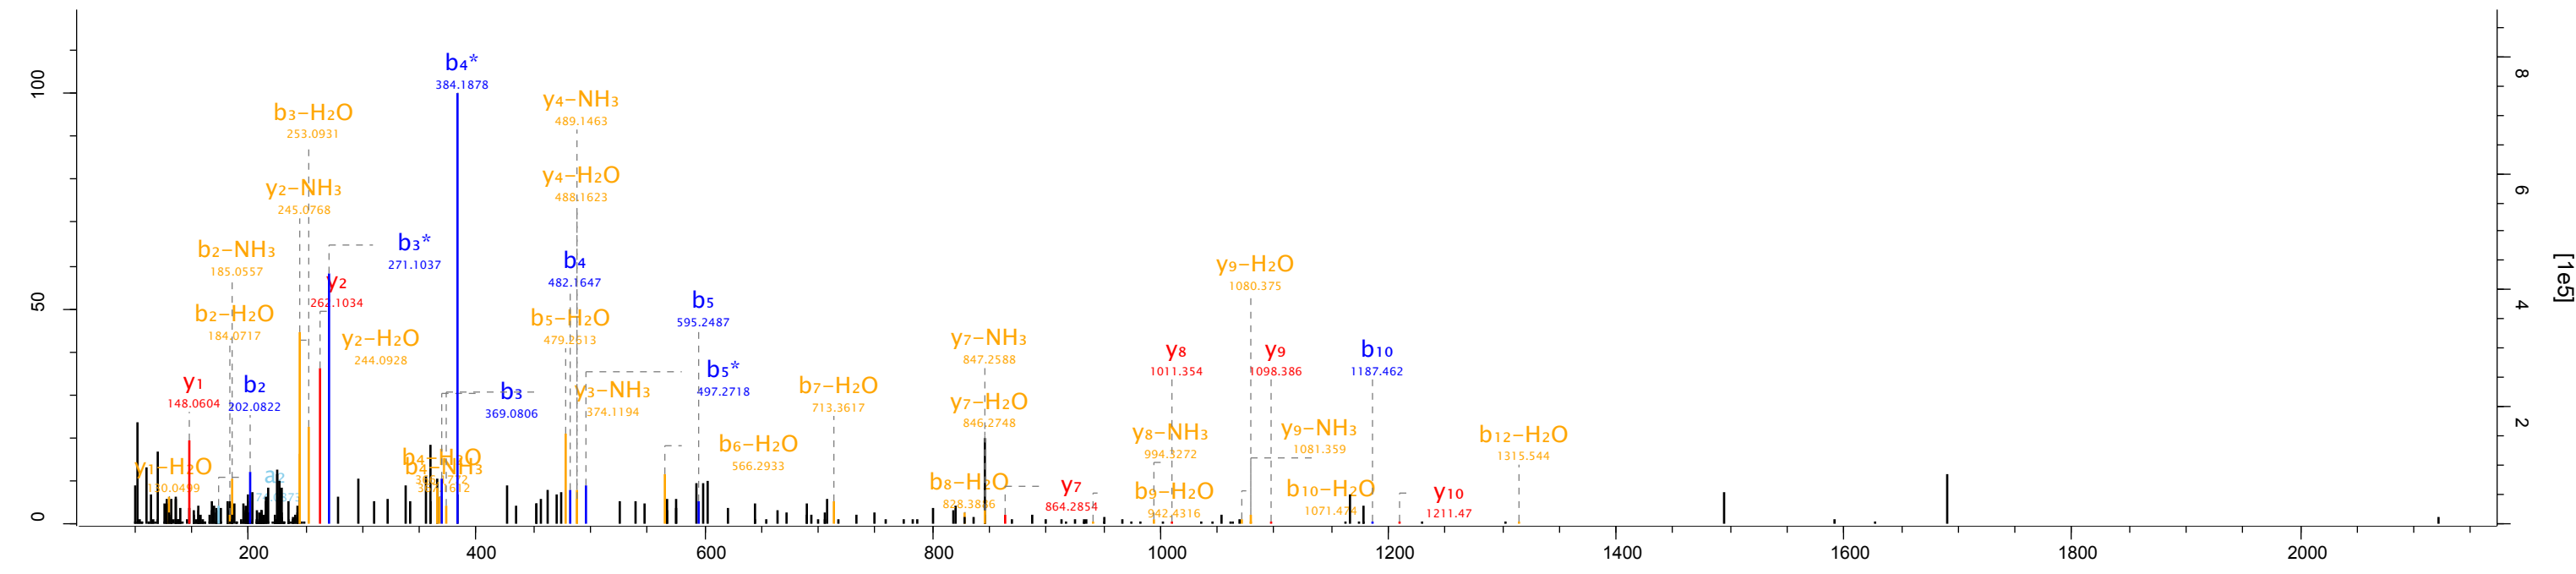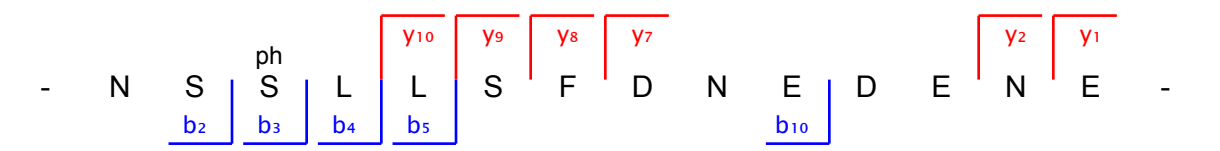

Raw file 20150812\_A375SR\_Phospho\_BR1\_03 Scan 22123 Method FTMS; HCD Score 152.89 m/z 1019.44 Gene names SSFA2

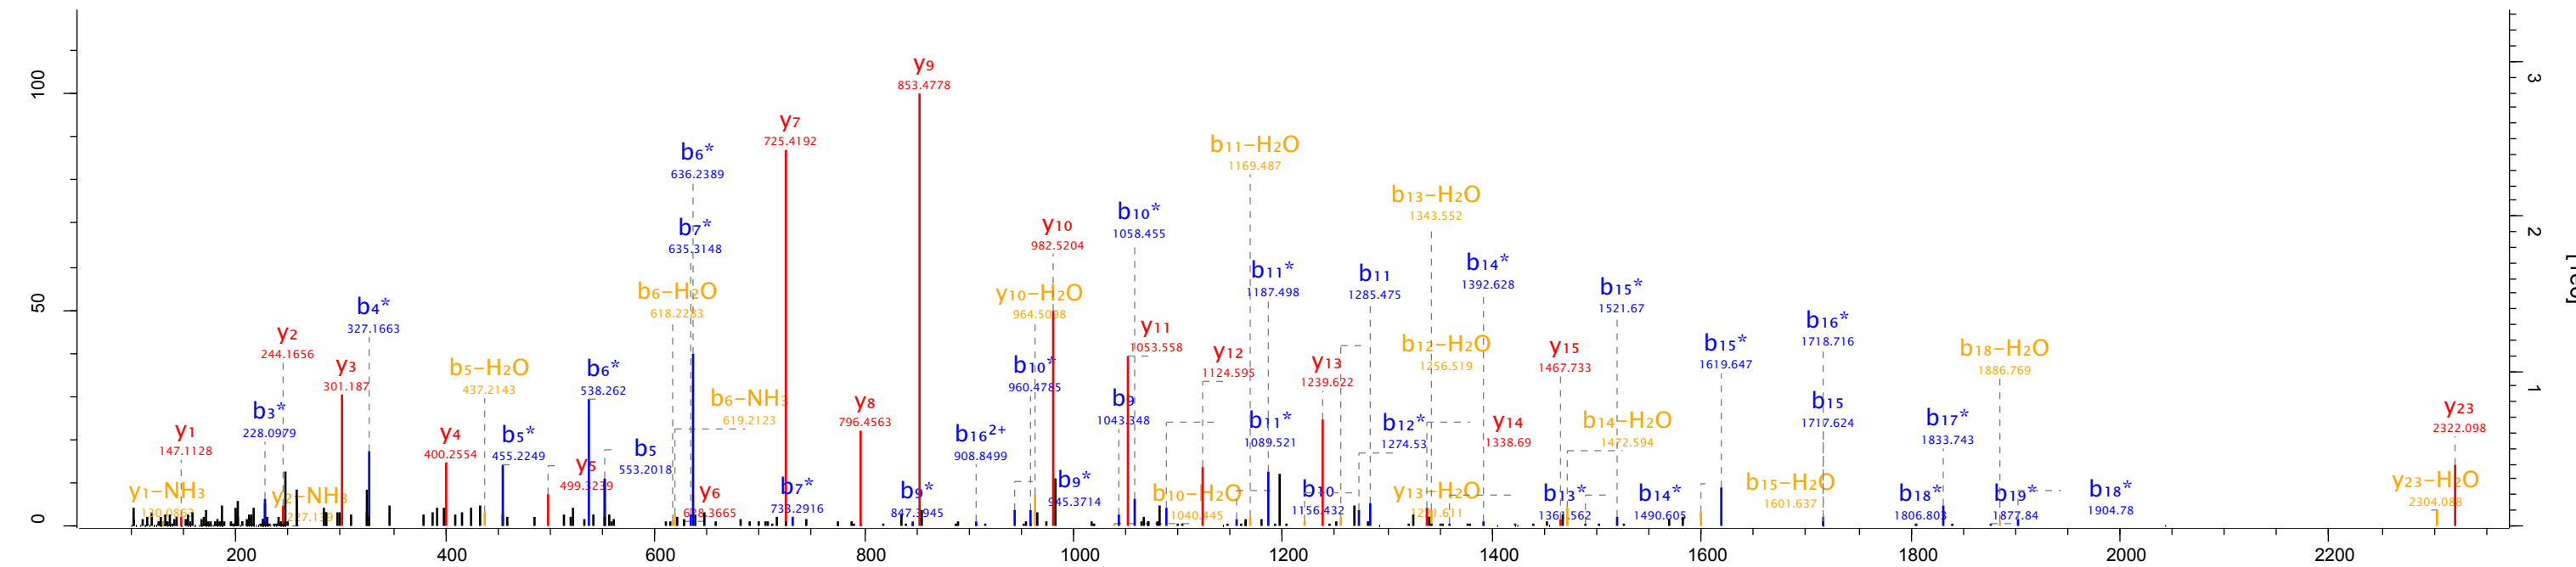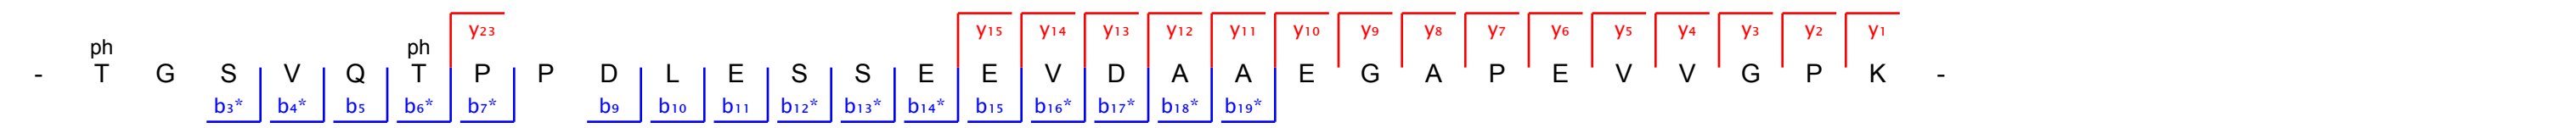

Raw file: 20150812\_A375SR\_Phospho\_BR1\_03  
 Scan: 22403 Method: FTMS; HCD Score: 210.31 m/z: 1092.94 Gene names: NOP56

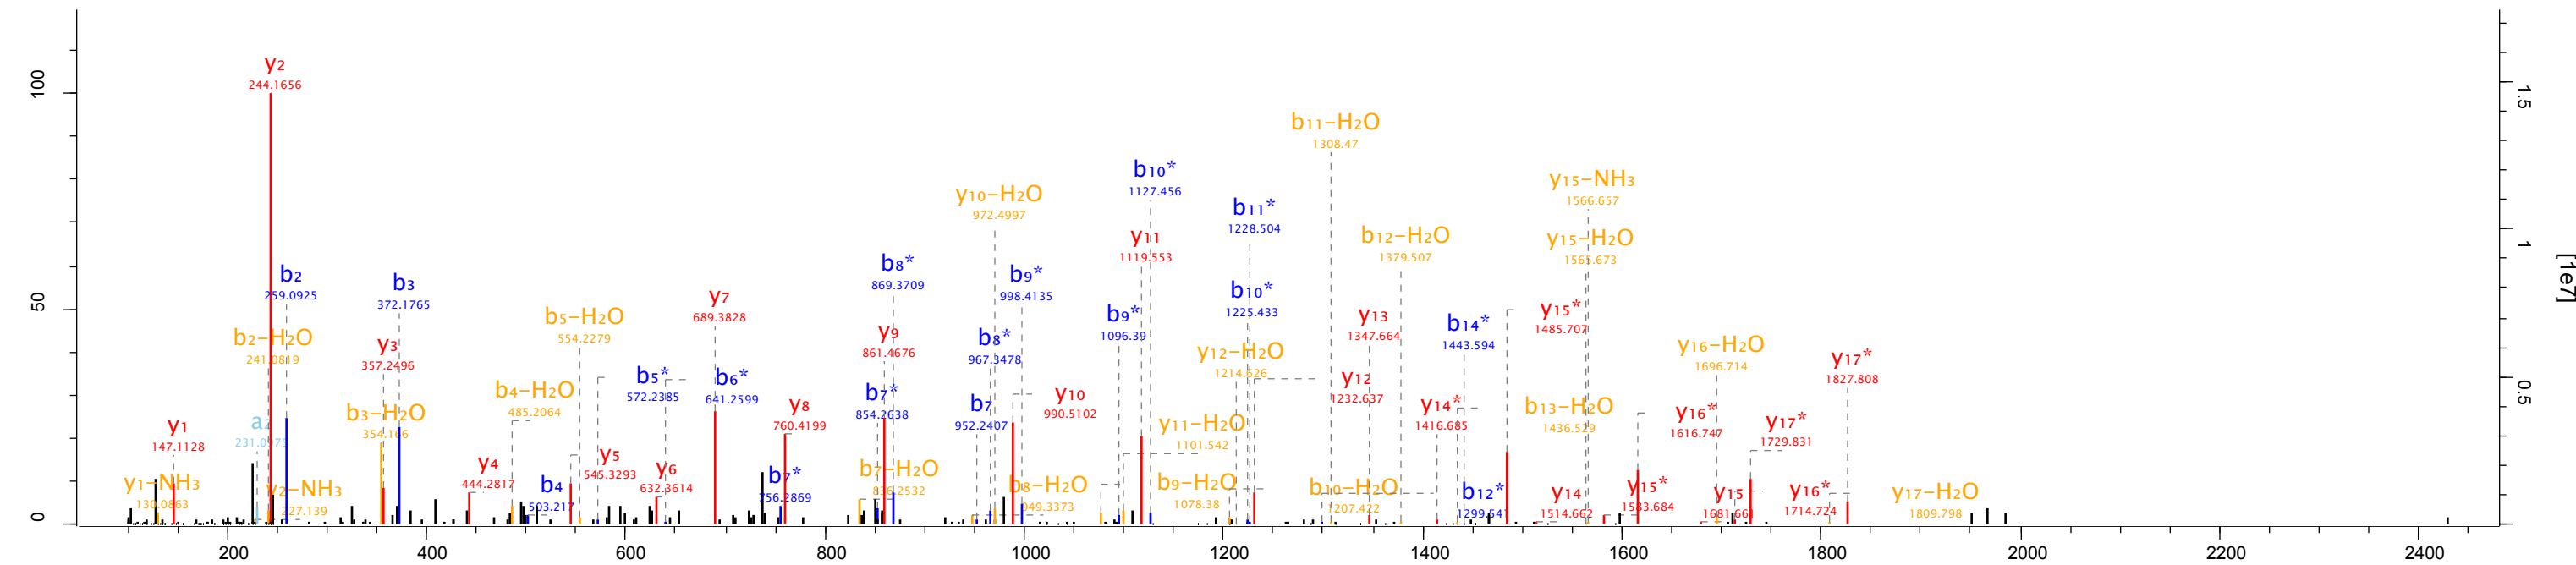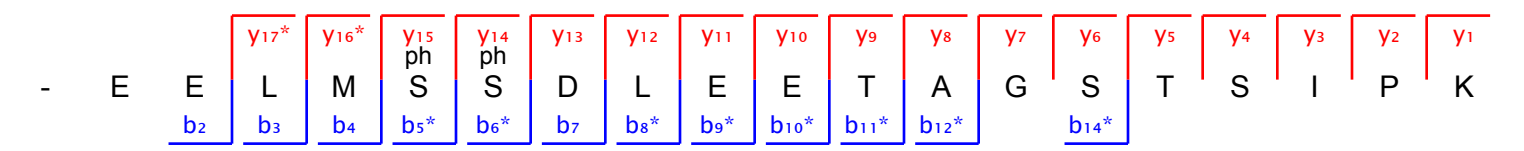

Raw file Scan Method Score m/z Gene names  
 20150812\_A375SR\_Phospho\_BR1\_03 22453 FTMS; HCD 198.81 868.01 BCLAF1

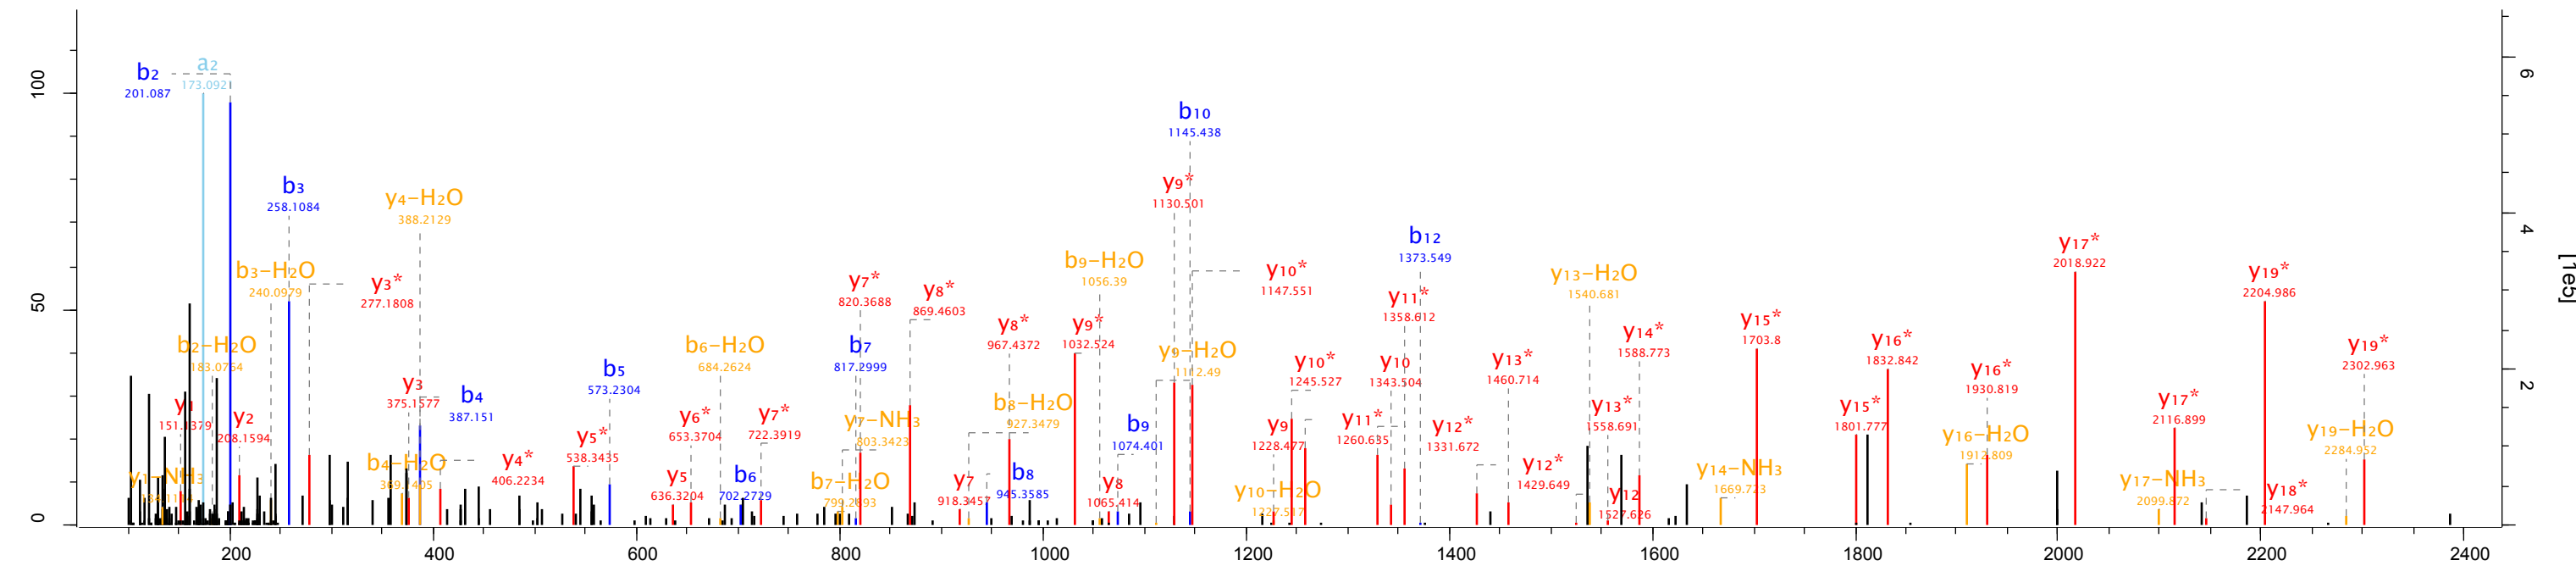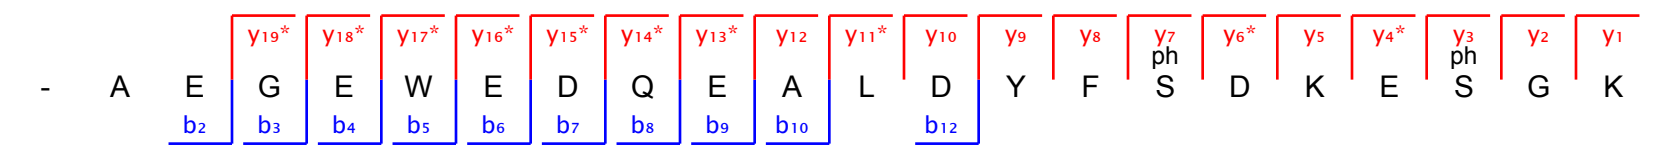



Raw file  
 20150812\_A375SR\_Phospho\_BR1\_03  
 Scan 22813 Method FTMS; HCD Score 69.85 m/z 982.42 Gene names NES

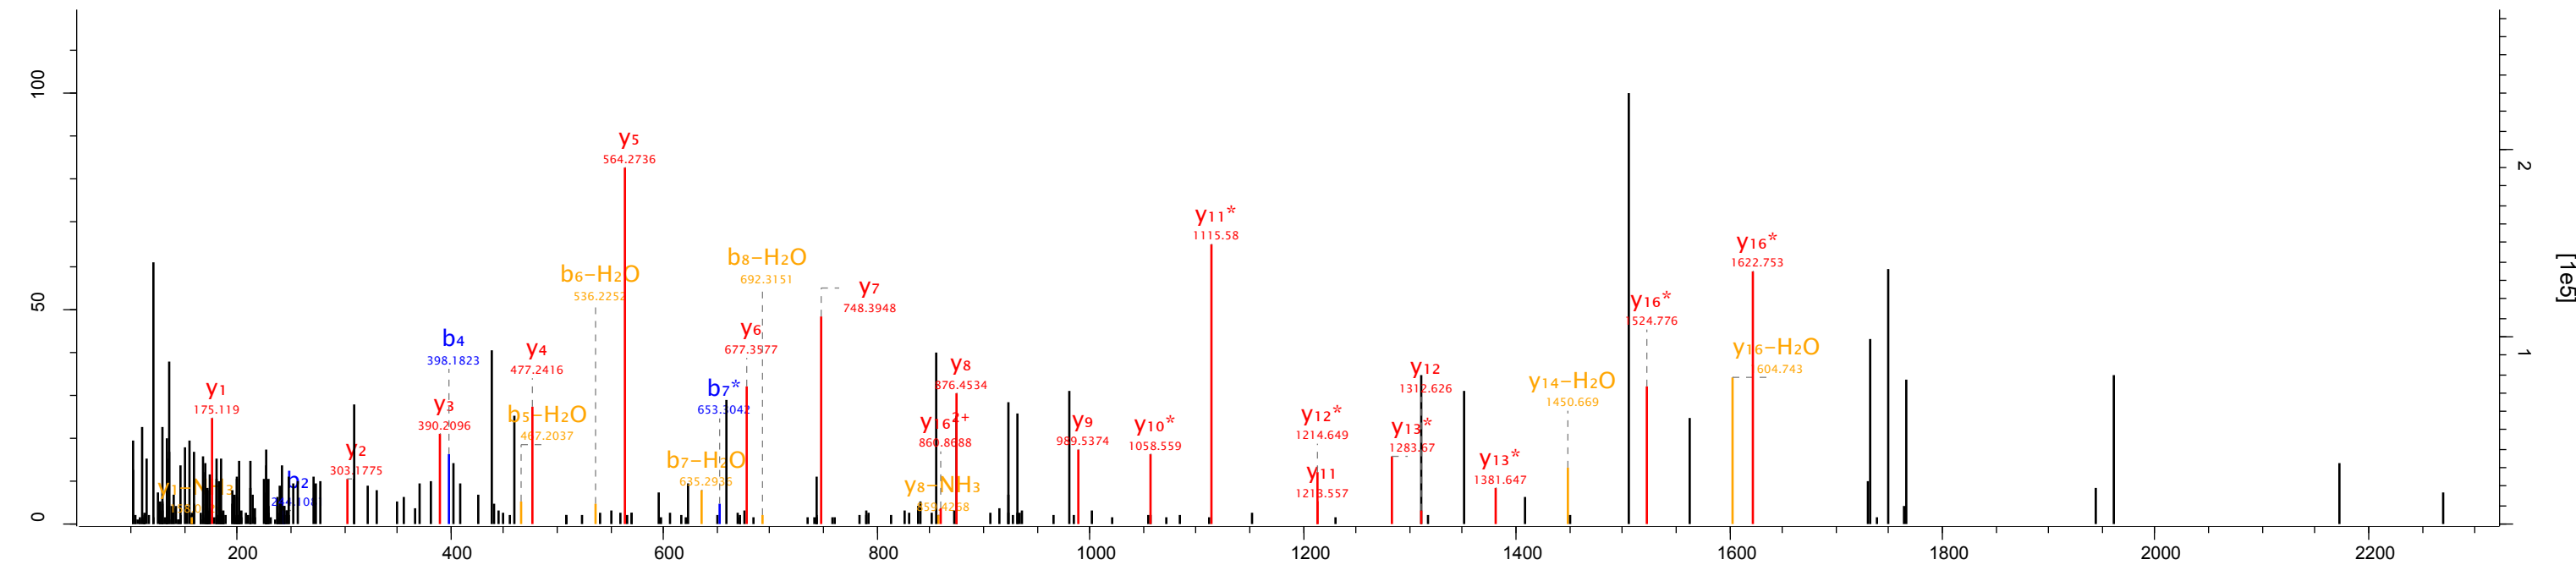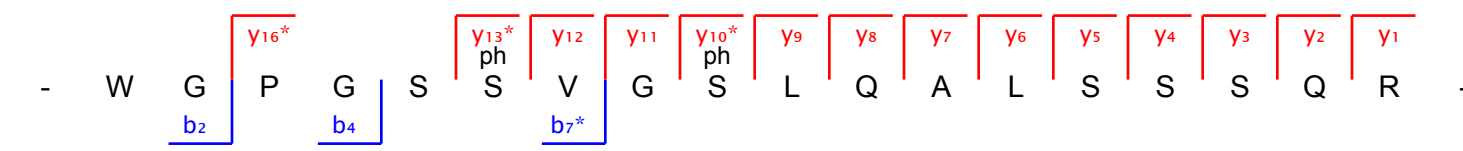

Raw file 20150812\_A375SR\_Phospho\_BR1\_03 Scan 22843 Method FTMS; HCD Score 126.02 m/z 934.96 Gene names CAAP1

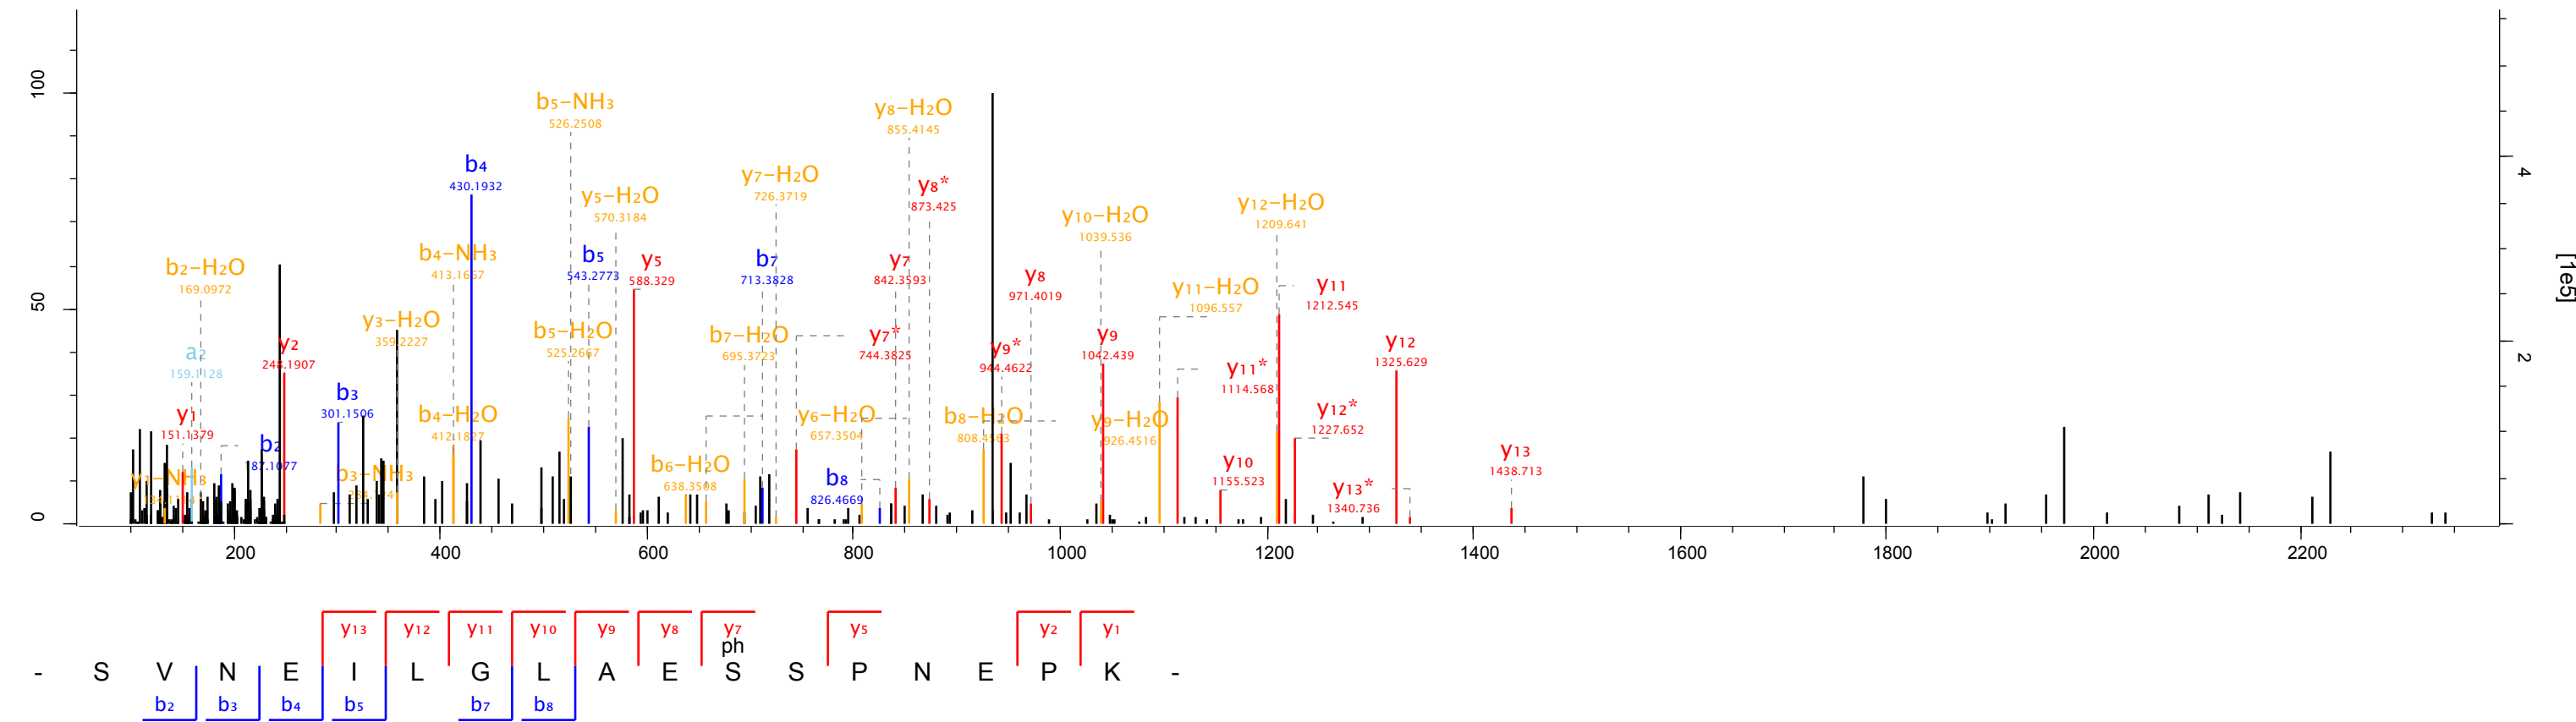

Raw file 20150812\_A375SR\_Phospho\_BR1\_03 Scan 23133 Method FTMS; HCD Score 132.09 m/z 848.37 Gene names MMACHC

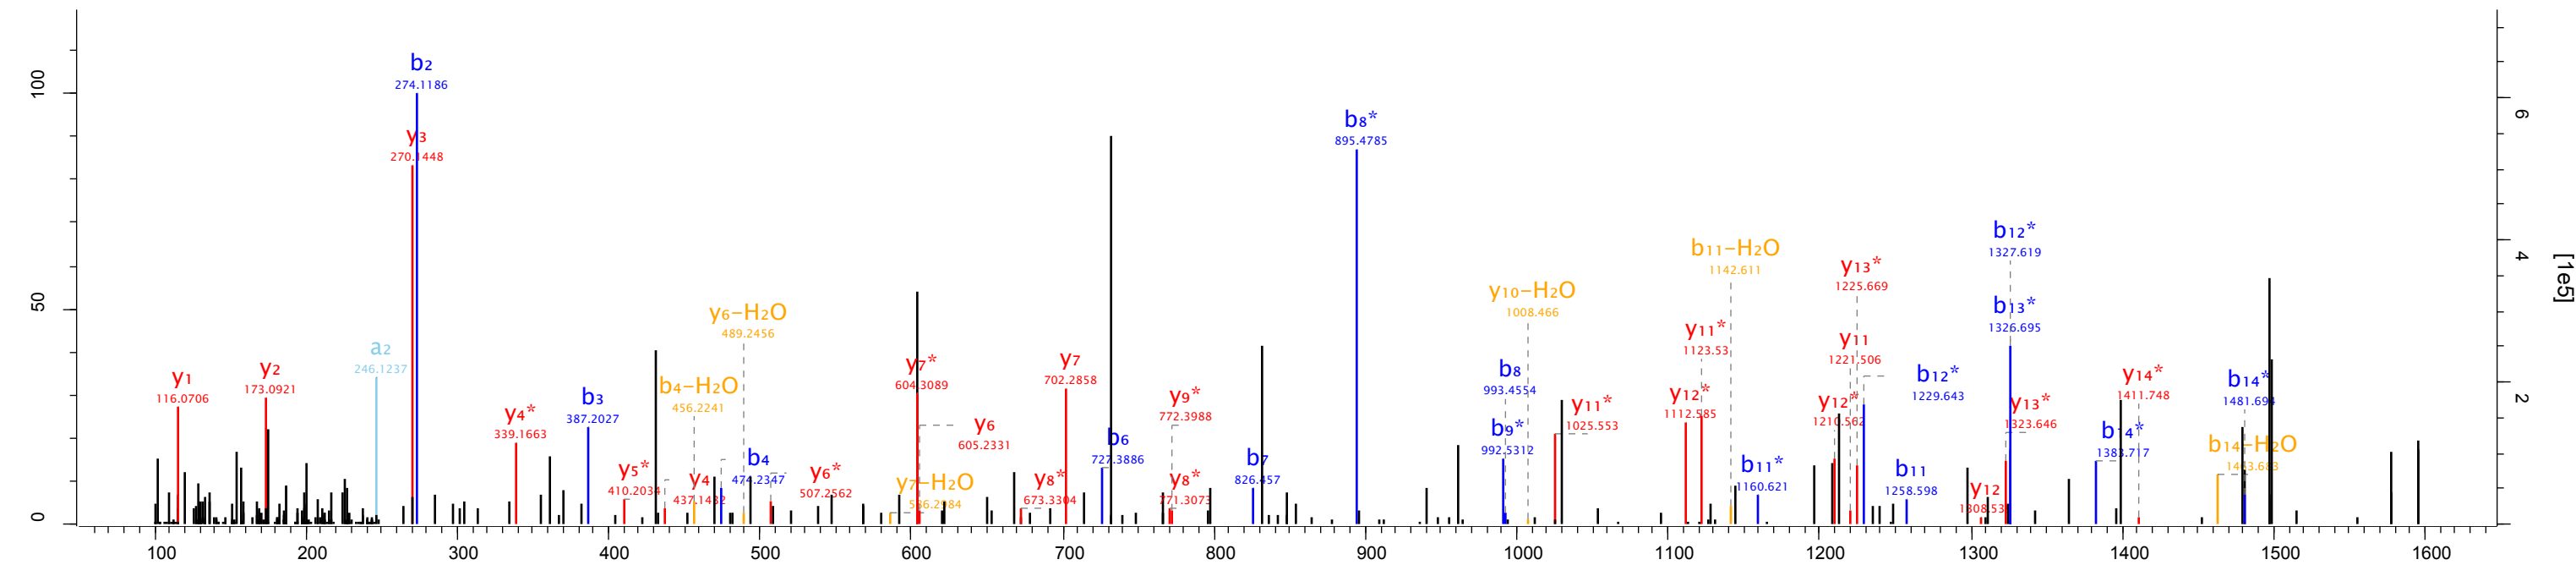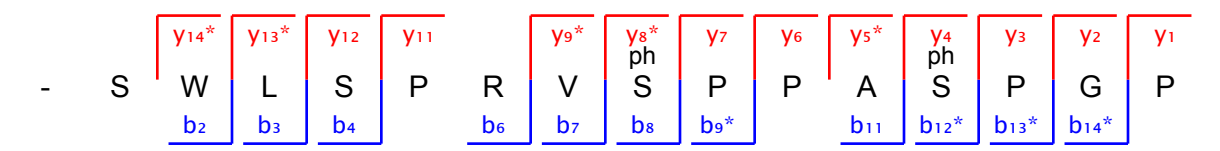

Raw file: 20150812\_A375SR\_Phospho\_BR1\_03  
 Scan: 2323 Method: FTMS; HCD Score: 69.46 m/z: 664.25 Gene names: BUD13

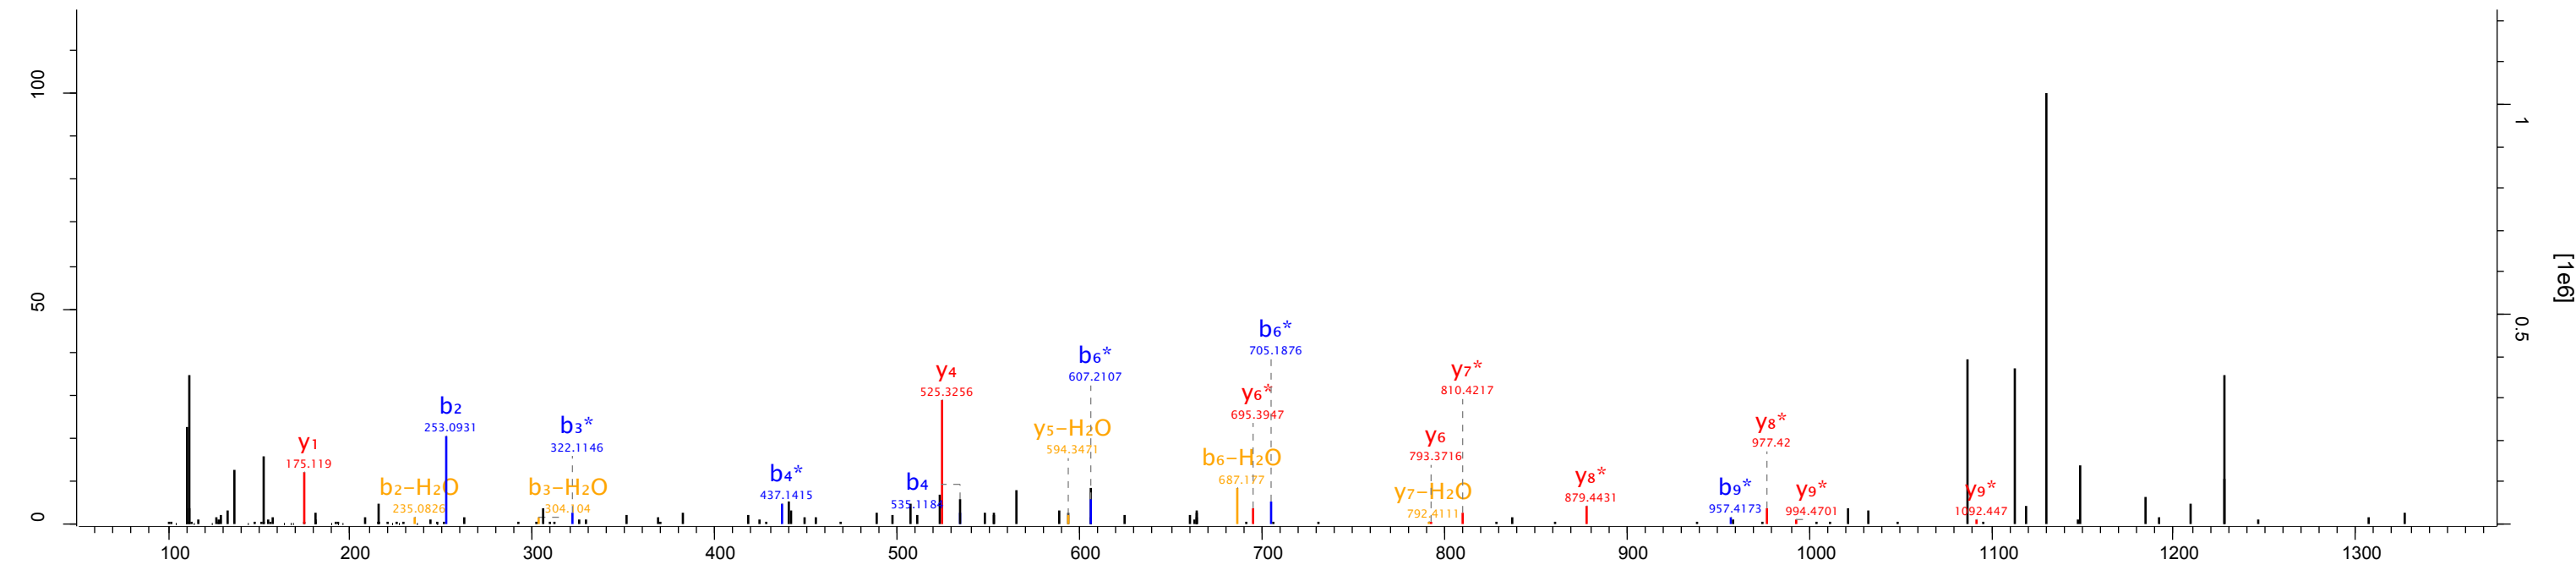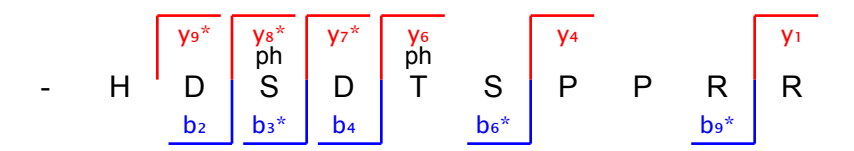

Raw file: 20150812\_A375SR\_Phospho\_BR1\_03  
 Scan: 23433 Method: FTMS; HCD Score: 169.26 m/z: 1012.93 Gene names: SMCR8

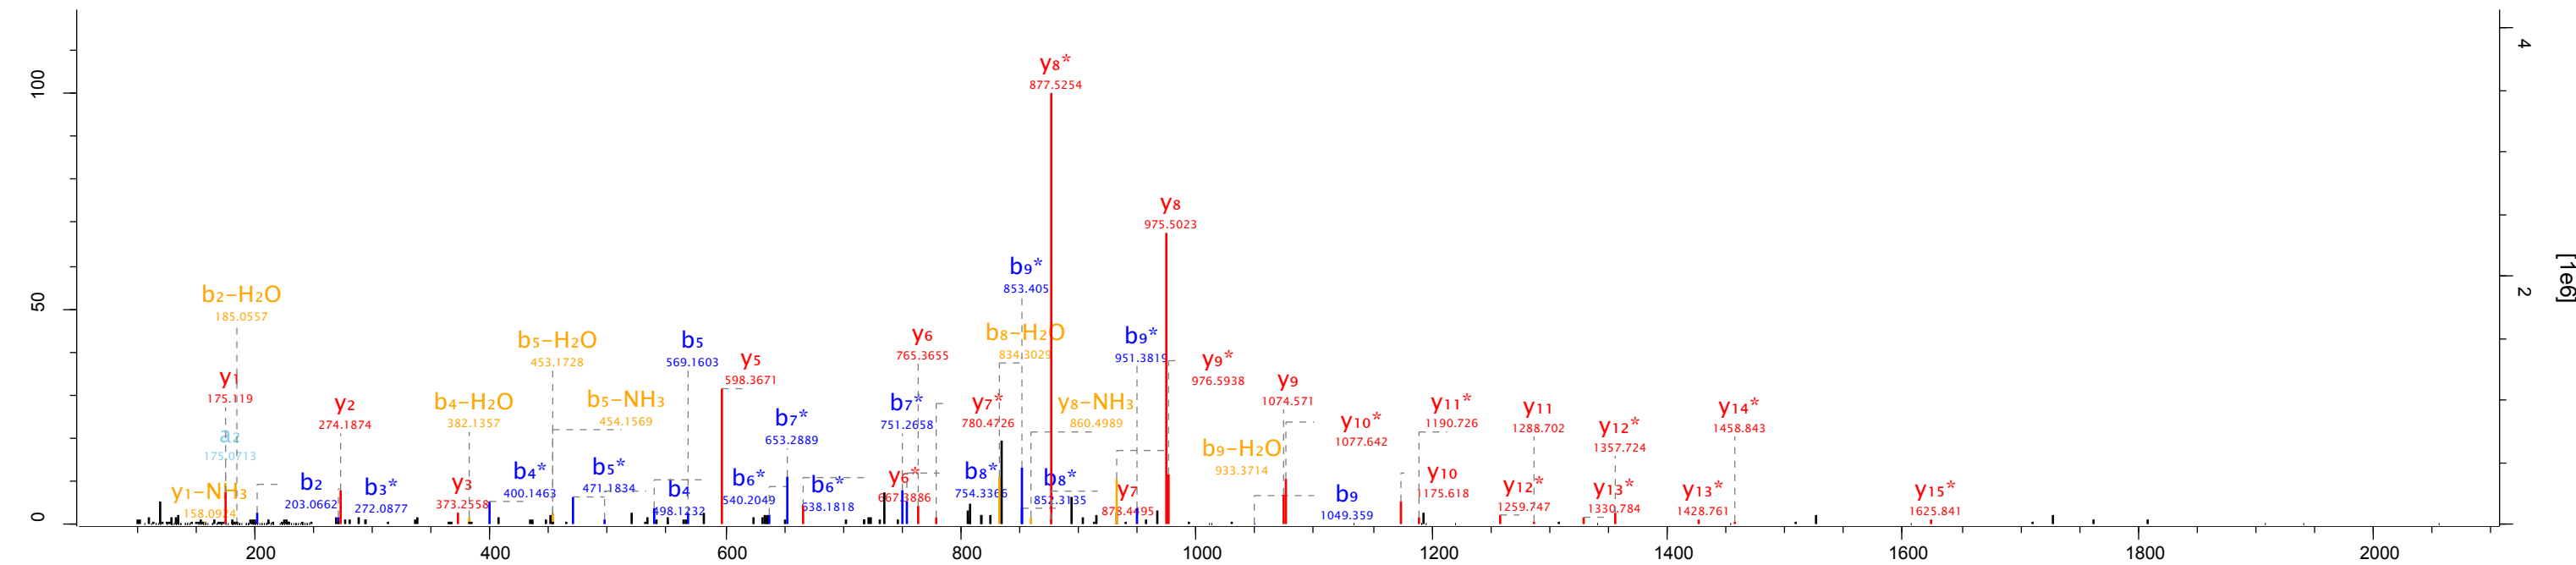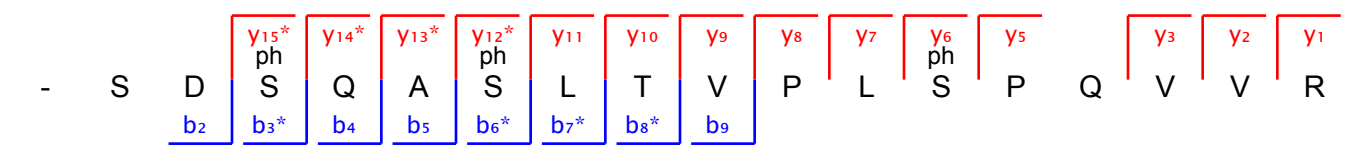

Raw file 20150812\_A375SR\_Phospho\_BR1\_03 Scan 23493 Method FTMS; HCD Score 141.29 m/z 1092.48 Gene names SERBP1

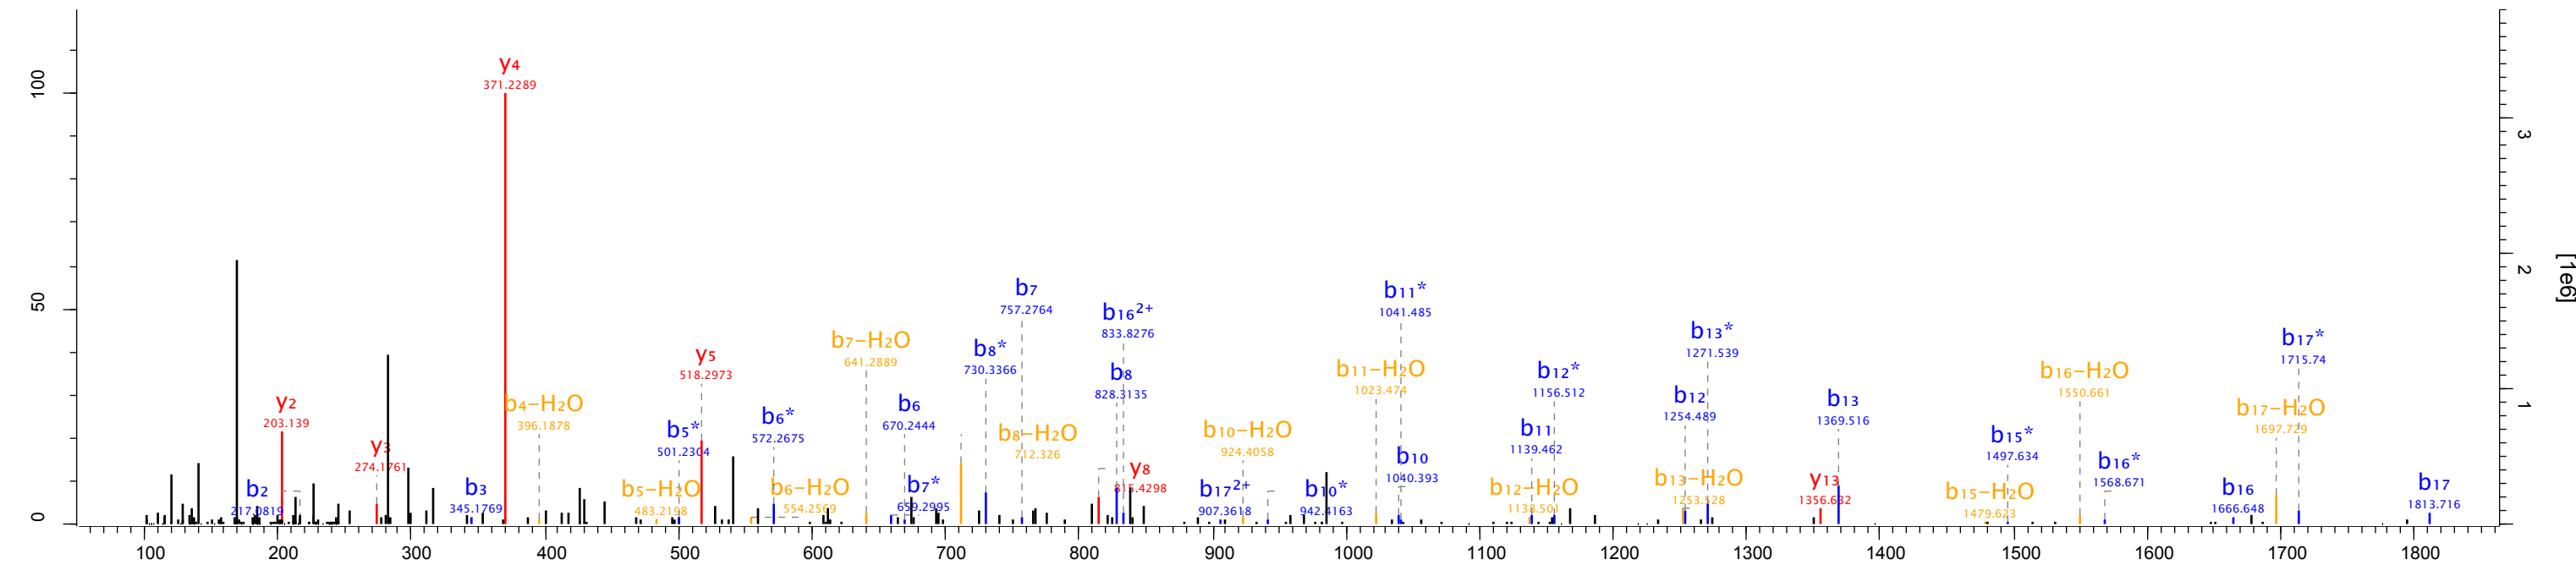

- T D K S S A S A P D V D D P E A F P A L A -

b<sub>2</sub>
b<sub>3</sub>
b<sub>5</sub>\*
b<sub>6</sub>
b<sub>7</sub>
b<sub>8</sub>
b<sub>10</sub>
b<sub>11</sub>
b<sub>12</sub>
b<sub>13</sub>
b<sub>15</sub>\*
b<sub>16</sub>
b<sub>17</sub>
y<sub>13</sub>
y<sub>8</sub>
y<sub>5</sub>
y<sub>4</sub>
y<sub>3</sub>
y<sub>2</sub>

Raw file 20150812\_A375SR\_Phospho\_BR1\_03 Scan 23503 Method FTMS; HCD Score 254.14 m/z 1367.6 Gene names DDX46

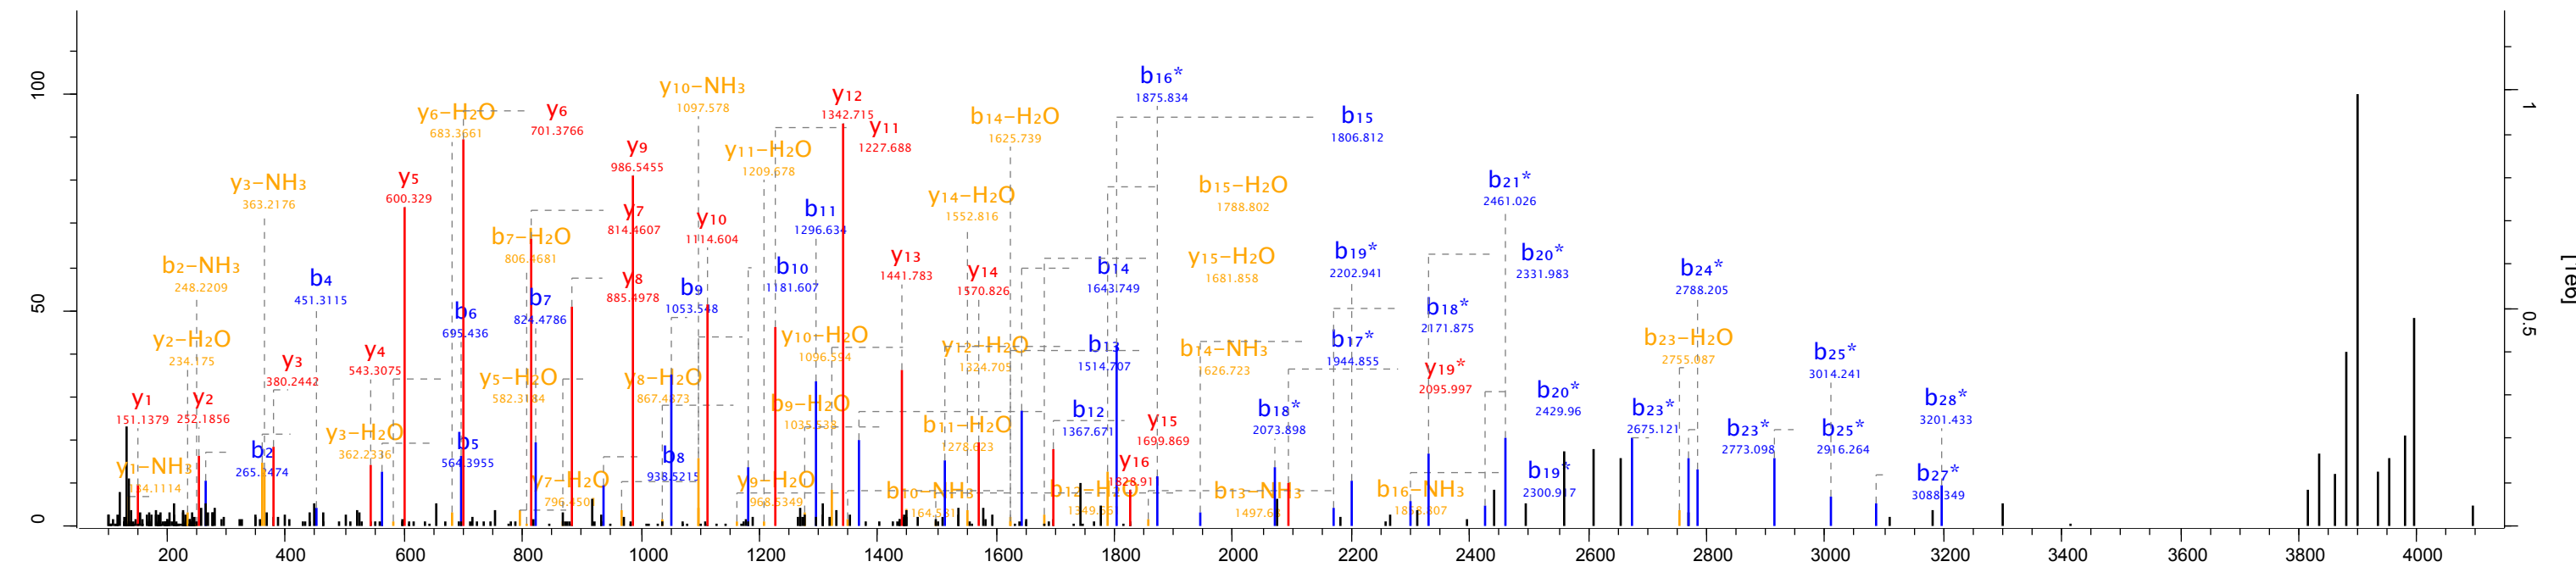

- K K G E L M E N D Q D A M E Y S S E E E V D L Q T A L T G Y Q T K -

Fragmentation mapping (b-ions in blue, y-ions in red):

- b<sub>2</sub> (K), b<sub>4</sub> (E), b<sub>5</sub> (L), b<sub>6</sub> (M), b<sub>7</sub> (E), b<sub>8</sub> (N), b<sub>9</sub> (D), b<sub>10</sub> (Q), b<sub>11</sub> (D), b<sub>12</sub> (A), b<sub>13</sub> (M<sup>ox</sup>), b<sub>14</sub> (E), b<sub>15</sub> (Y), b<sub>16</sub><sup>\*</sup> (S<sup>ph</sup>), b<sub>17</sub><sup>\*</sup> (S<sup>ph</sup>), b<sub>18</sub><sup>\*</sup> (E), b<sub>19</sub><sup>\*</sup> (E<sup>y16</sup>), b<sub>20</sub><sup>\*</sup> (E<sup>y15</sup>), b<sub>21</sub><sup>\*</sup> (E<sup>y14</sup>), b<sub>23</sub><sup>\*</sup> (V<sup>y13</sup>), b<sub>24</sub><sup>\*</sup> (D<sup>y12</sup>), b<sub>25</sub><sup>\*</sup> (L<sup>y11</sup>), b<sub>27</sub><sup>\*</sup> (Q<sup>y10</sup>), b<sub>28</sub><sup>\*</sup> (T<sup>y9</sup>), b<sub>27</sub><sup>\*</sup> (A<sup>y8</sup>), b<sub>28</sub><sup>\*</sup> (L<sup>y7</sup>)

Raw file: 20150812\_A375SR\_Phospho\_BR1\_03  
 Scan: 23593 Method: FTMS; HCD Score: 124.51 m/z: 745.97 Gene names: CDC42EP1

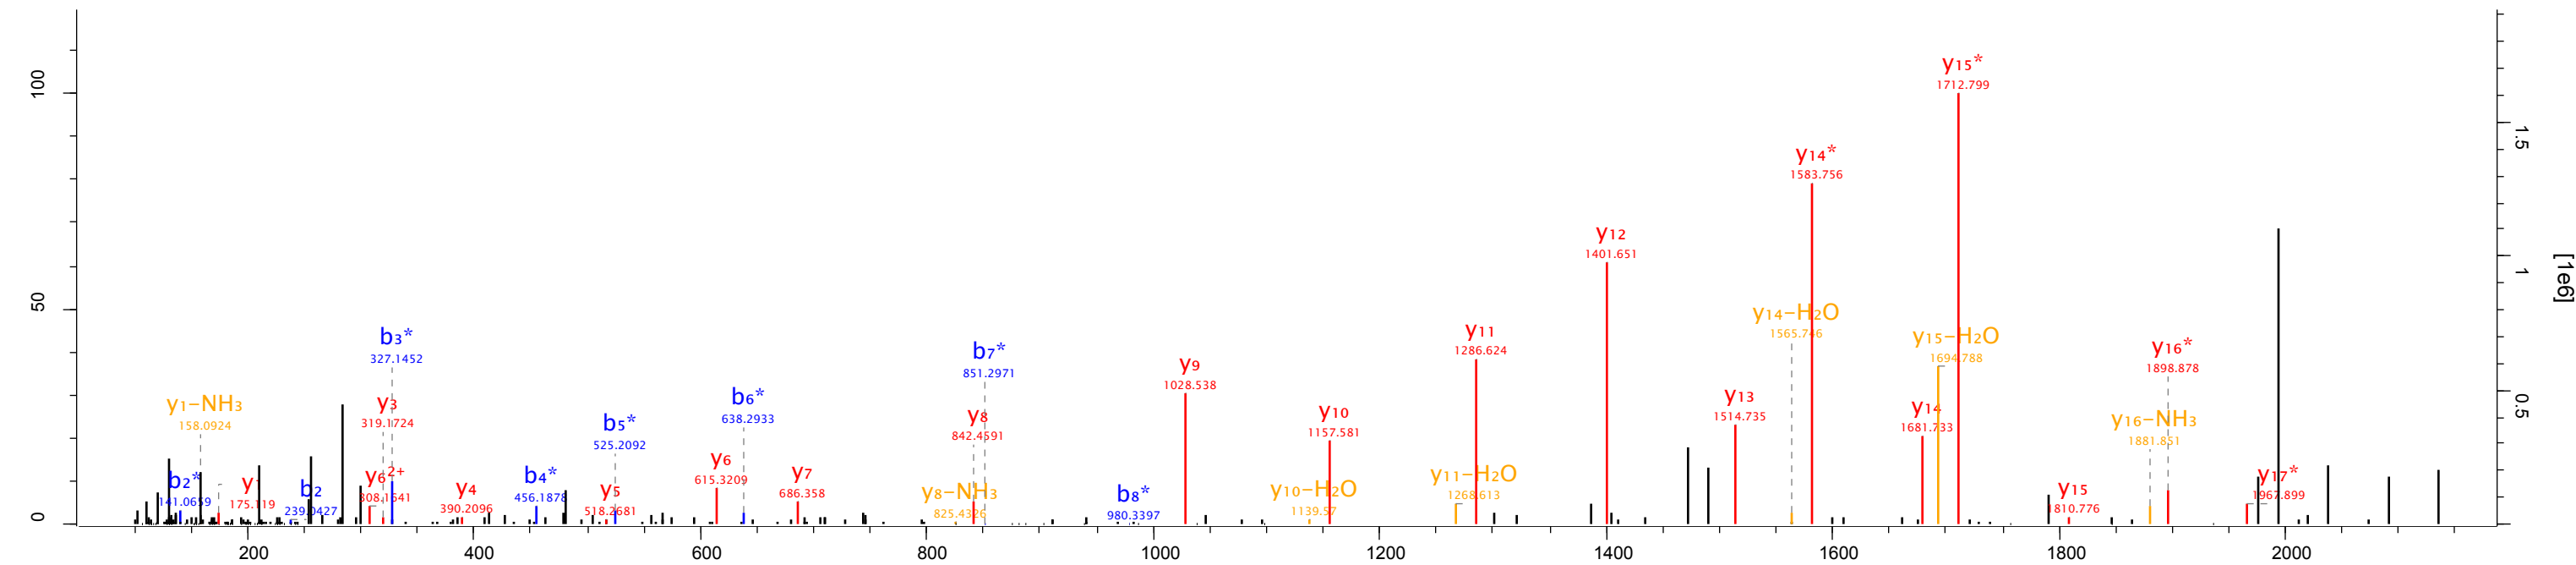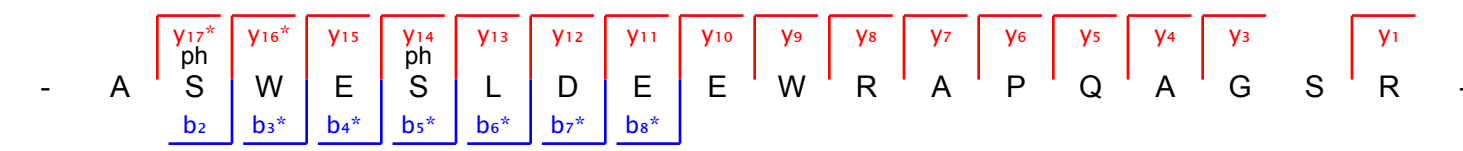



Raw file 20150812\_A375SR\_Phospho\_BR1\_03 Scan 23833 Method FTMS; HCD Score 108.81 m/z 1197.17 Gene names POLR2A

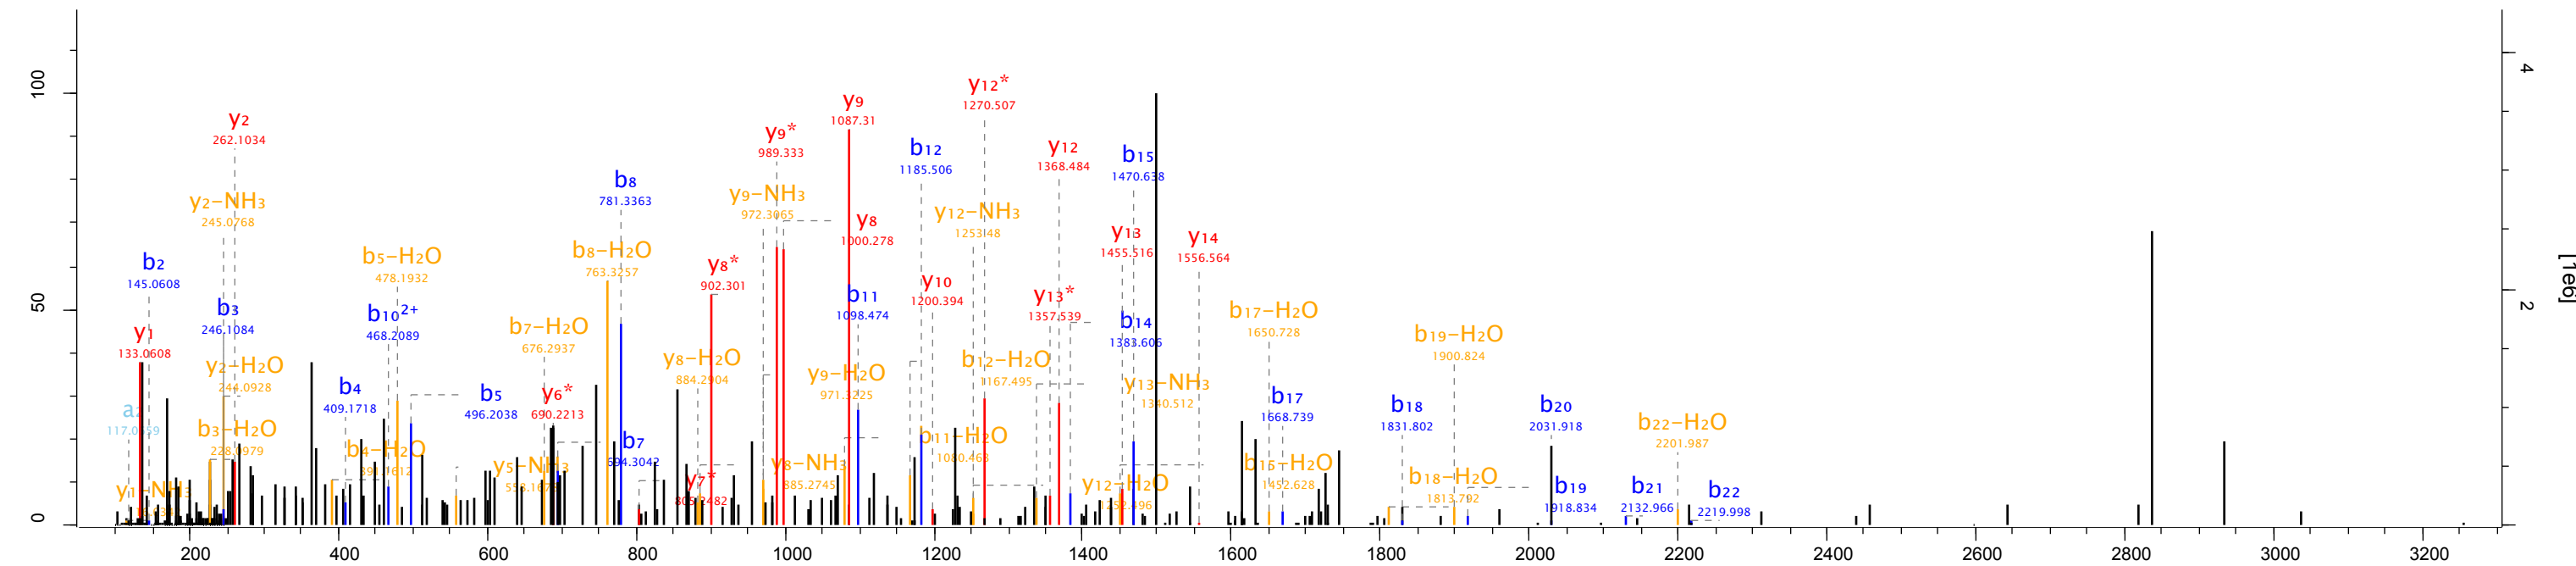

- G S T Y S P T S P G Y S P T S P T Y S L T S P A I S P D D ph S D E E N -

Fragmentation labels below the sequence: b2, b3, b4, b5, b7, b8, b10<sup>2+</sup>, b11, b12, b14, b15, b17, b18, b19, b20, b21, b22, y14, y13, y12, y10, y9, y8, y7\*, y6\*, y2, y1

Raw file 20150812\_A375SR\_Phospho\_BR1\_03 Scan 23983 Method FTMS; HCD Score 97.35 m/z 970.47 Gene names GIGYF2

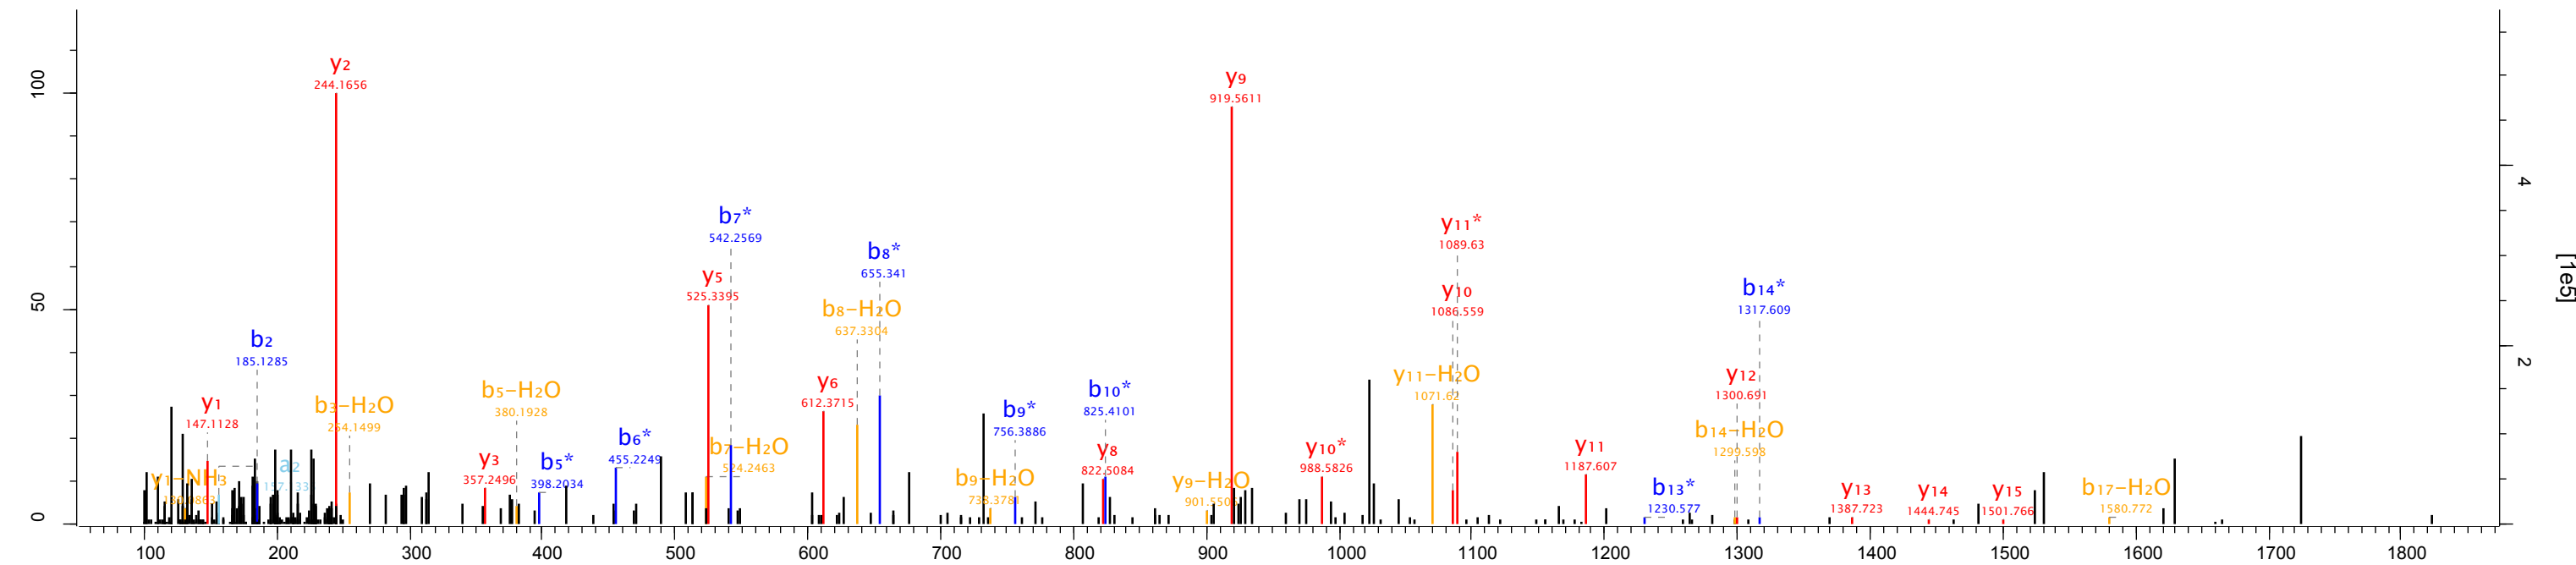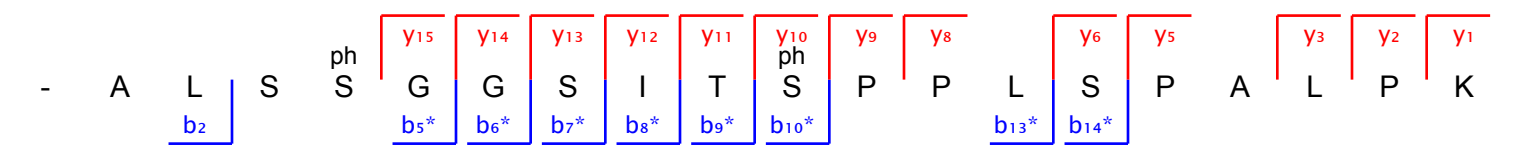

Raw file  
20150812\_A375SR\_Phospho\_BR1\_03

Scan 24053 Method FTMS; HCD Score 149.73 m/z 1026.22 Gene names PML

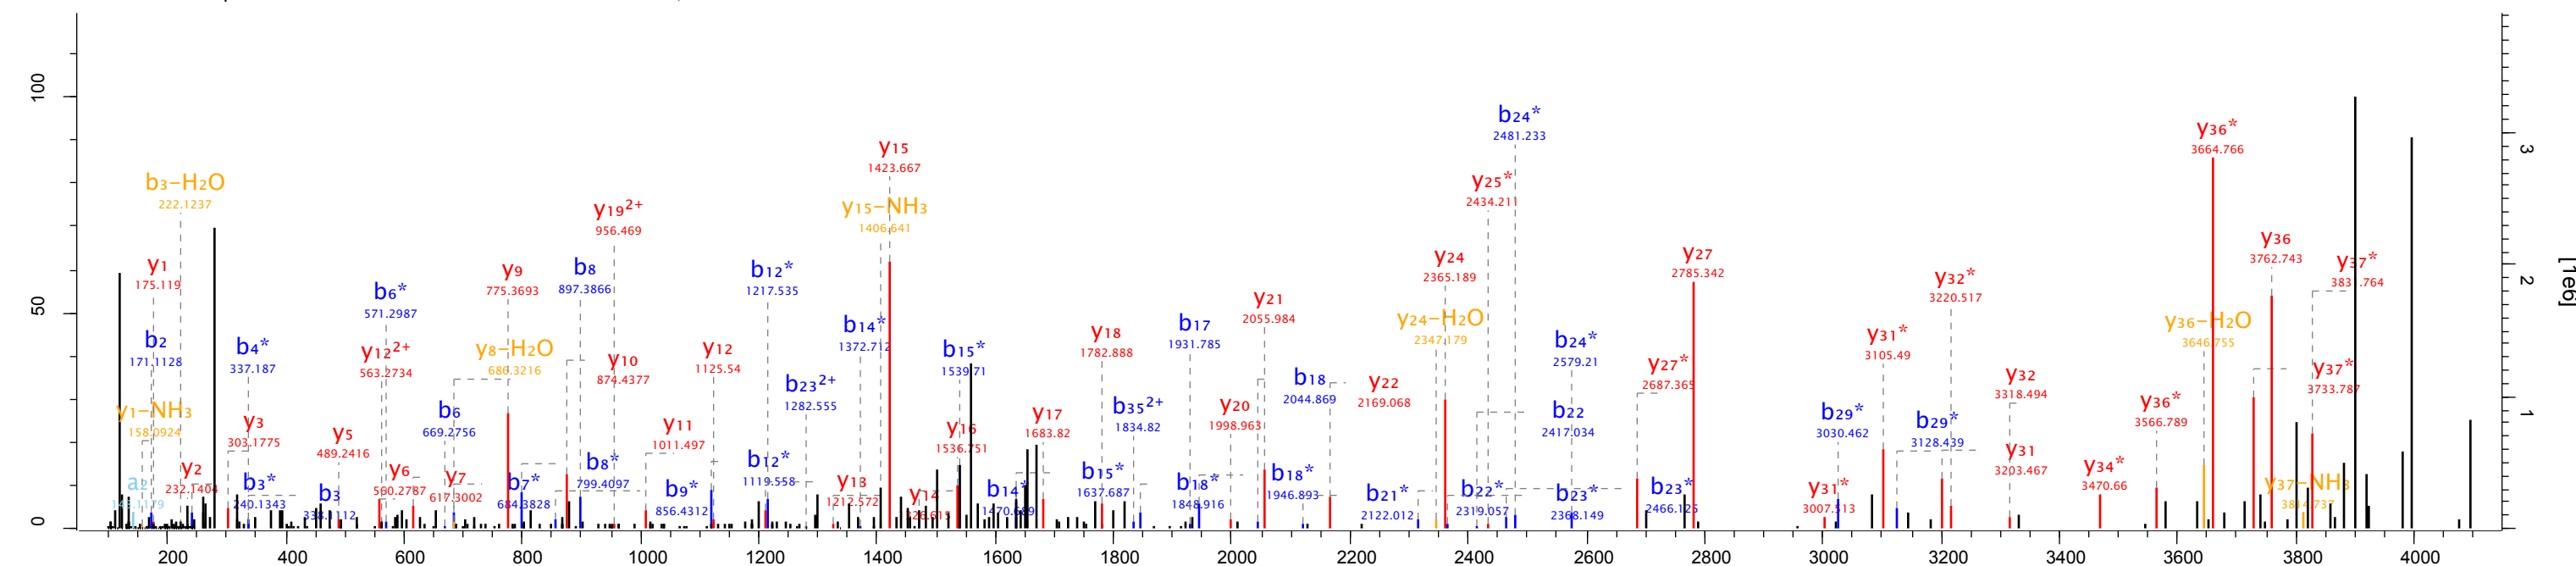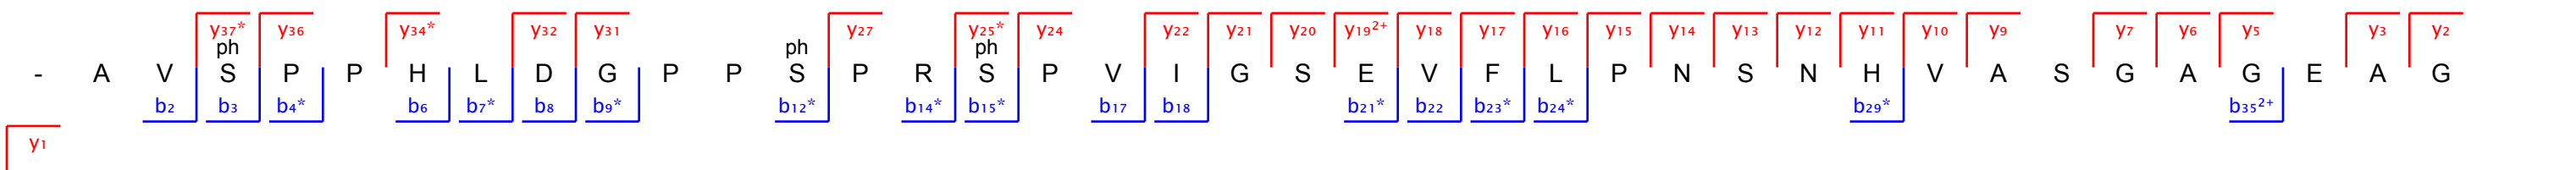

Raw file 20150812\_A375SR\_Phospho\_BR1\_03 Scan 24263 Method FTMS; HCD Score 88.25 m/z 948.16 Gene names MLPH

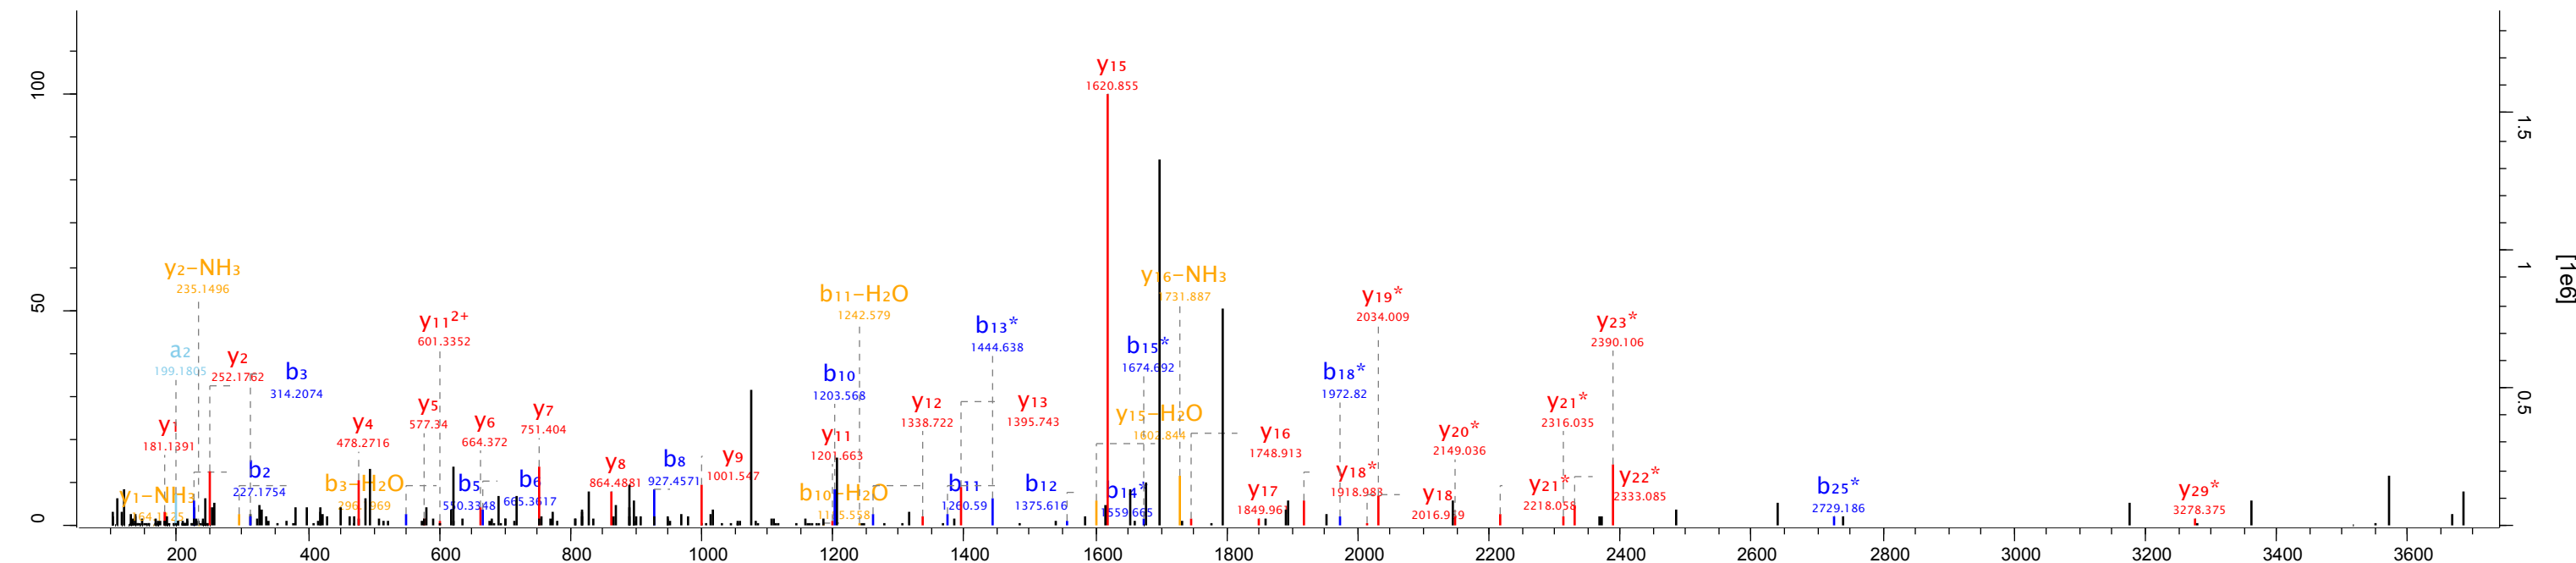

- L L S V H D F D F E G D S D D S T Q P Q G H S L H L S S V P E A R -

Fragmentation mapping (b and y ions) is shown below the sequence:

- Blue boxes (b ions): b2 (L), b3 (S), b5 (H), b6 (D), b8 (D), b10 (E), b11 (G), b12 (D), b13\* (S), b14\* (D), b15\* (D), b18\* (Q), b25\* (H)
- Red boxes (y ions): y29\* (H), y23\* (G), y22\* (D), y21\* (S), y20\* (D), y19\* (D), y18 (S), y17 (T), y16 (Q), y15 (P), y13 (G), y12 (H), y11 (S), y9 (H), y8 (L), y7 (S), y6 (S), y5 (V), y4 (P), y2 (A), y1 (R)

Raw file Scan Method Score m/z Gene names  
 20150812\_A375SR\_Phospho\_BR1\_03 24723 FTMS; HCD 73.11 1128.54 ATXN2

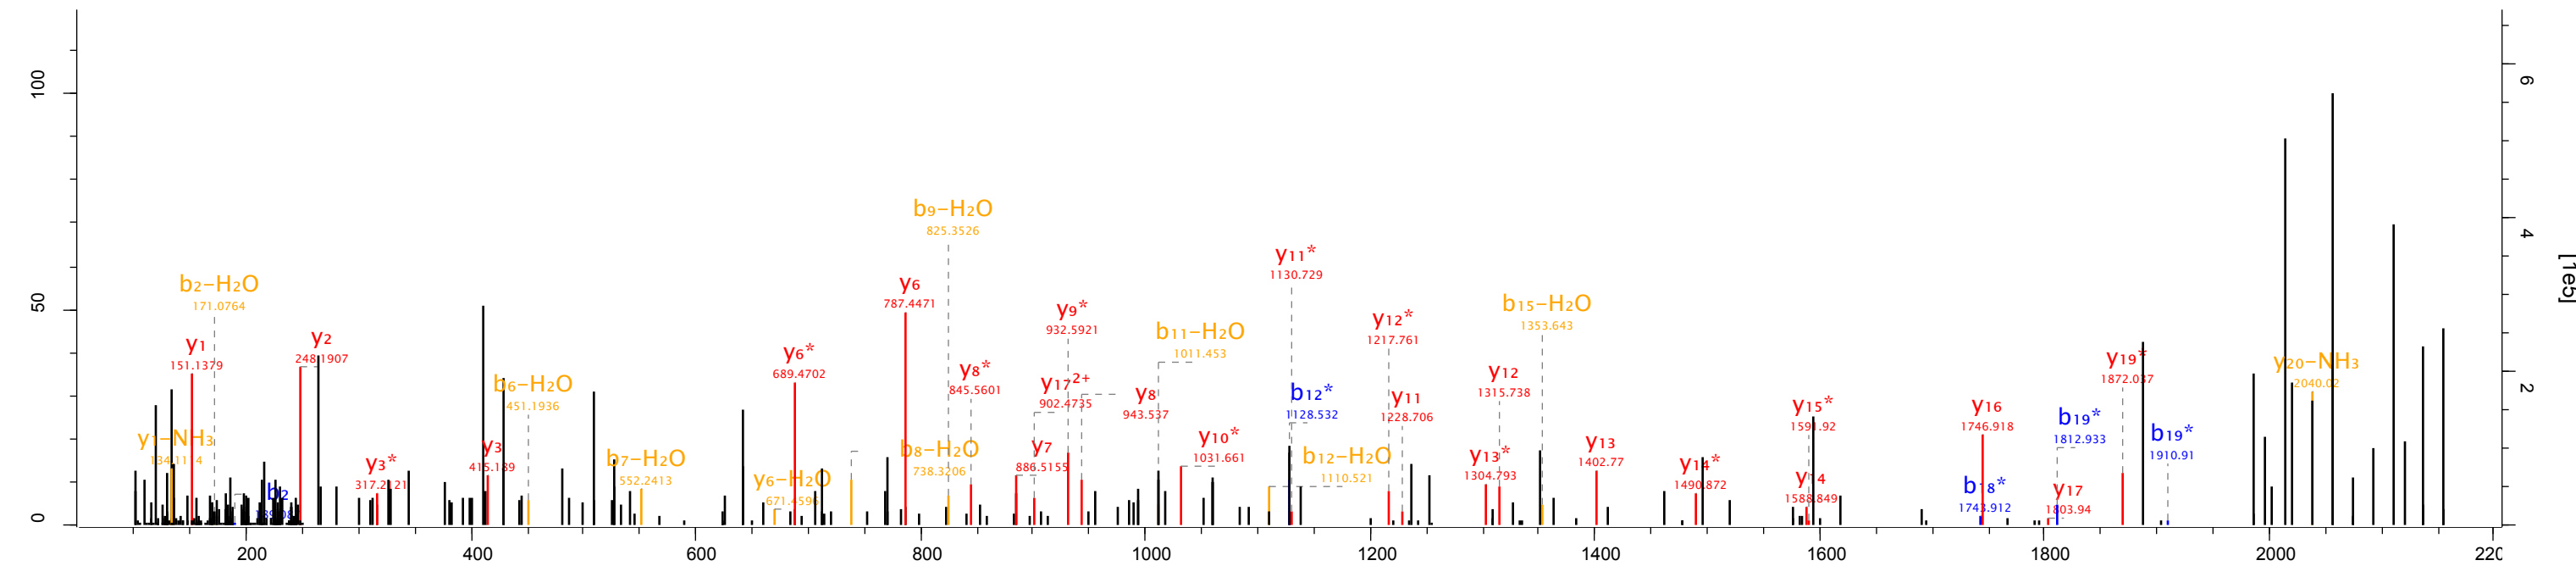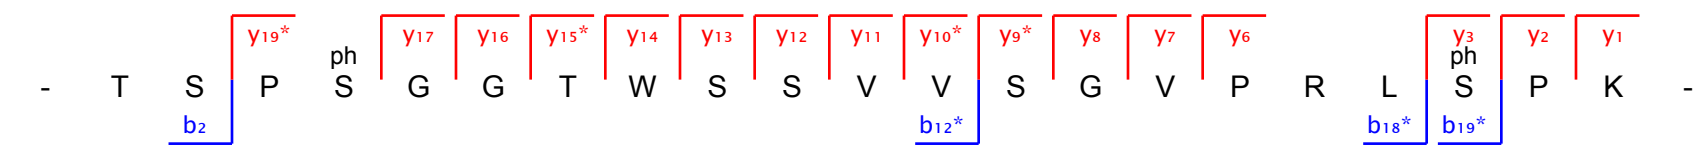

Raw file: 20150812\_A375SR\_Phospho\_BR1\_03  
 Scan: 24863 Method: FTMS; HCD Score: 128.82 m/z: 1042.04 Gene names: MKL2

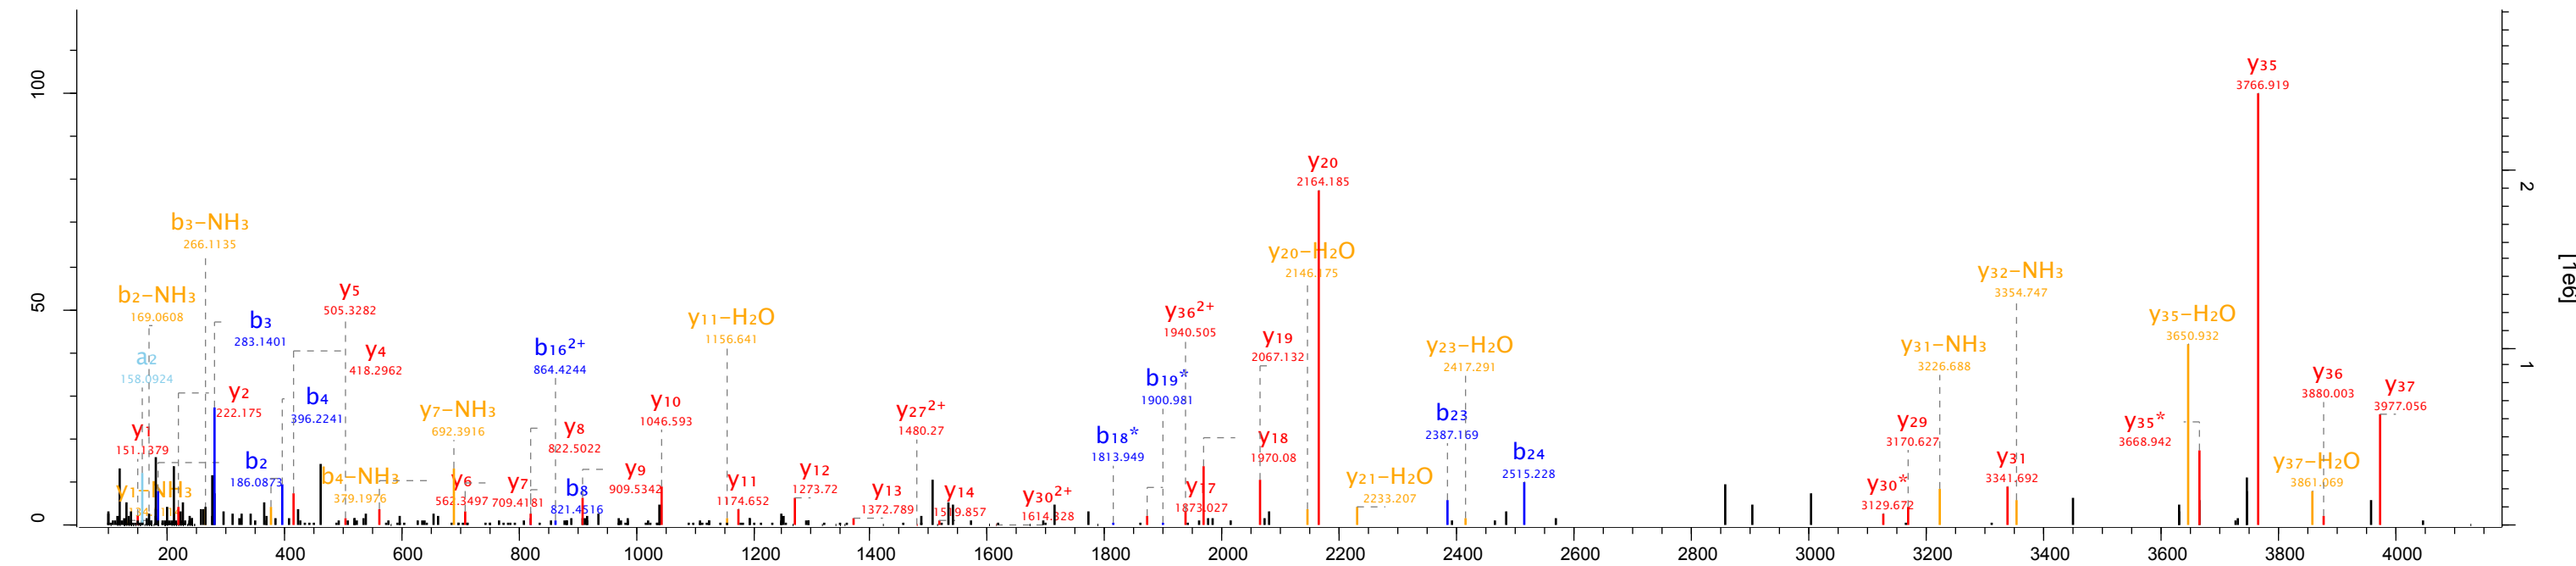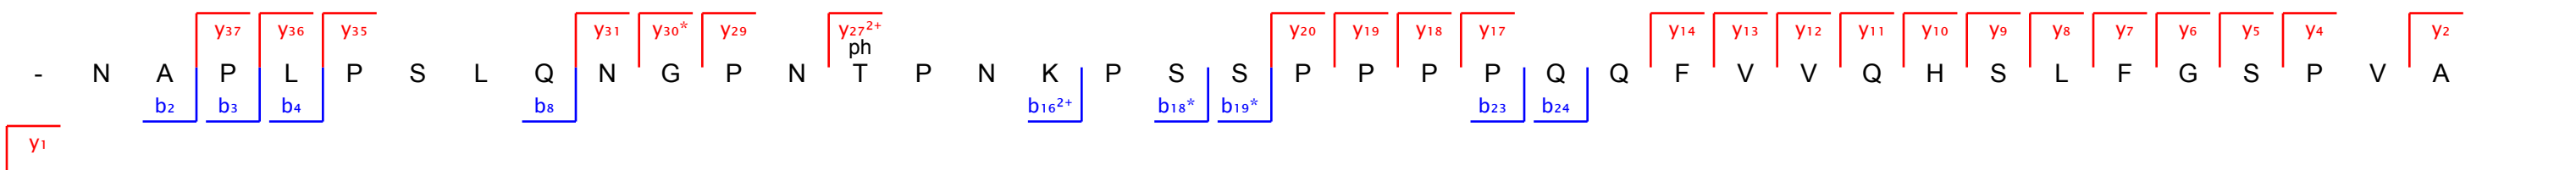

Raw file: 20150812\_A375SR\_Phospho\_BR1\_03  
 Scan: 26093 Method: FTMS; HCD Score: 118.32 m/z: 953.93 Gene names: GAS2L1

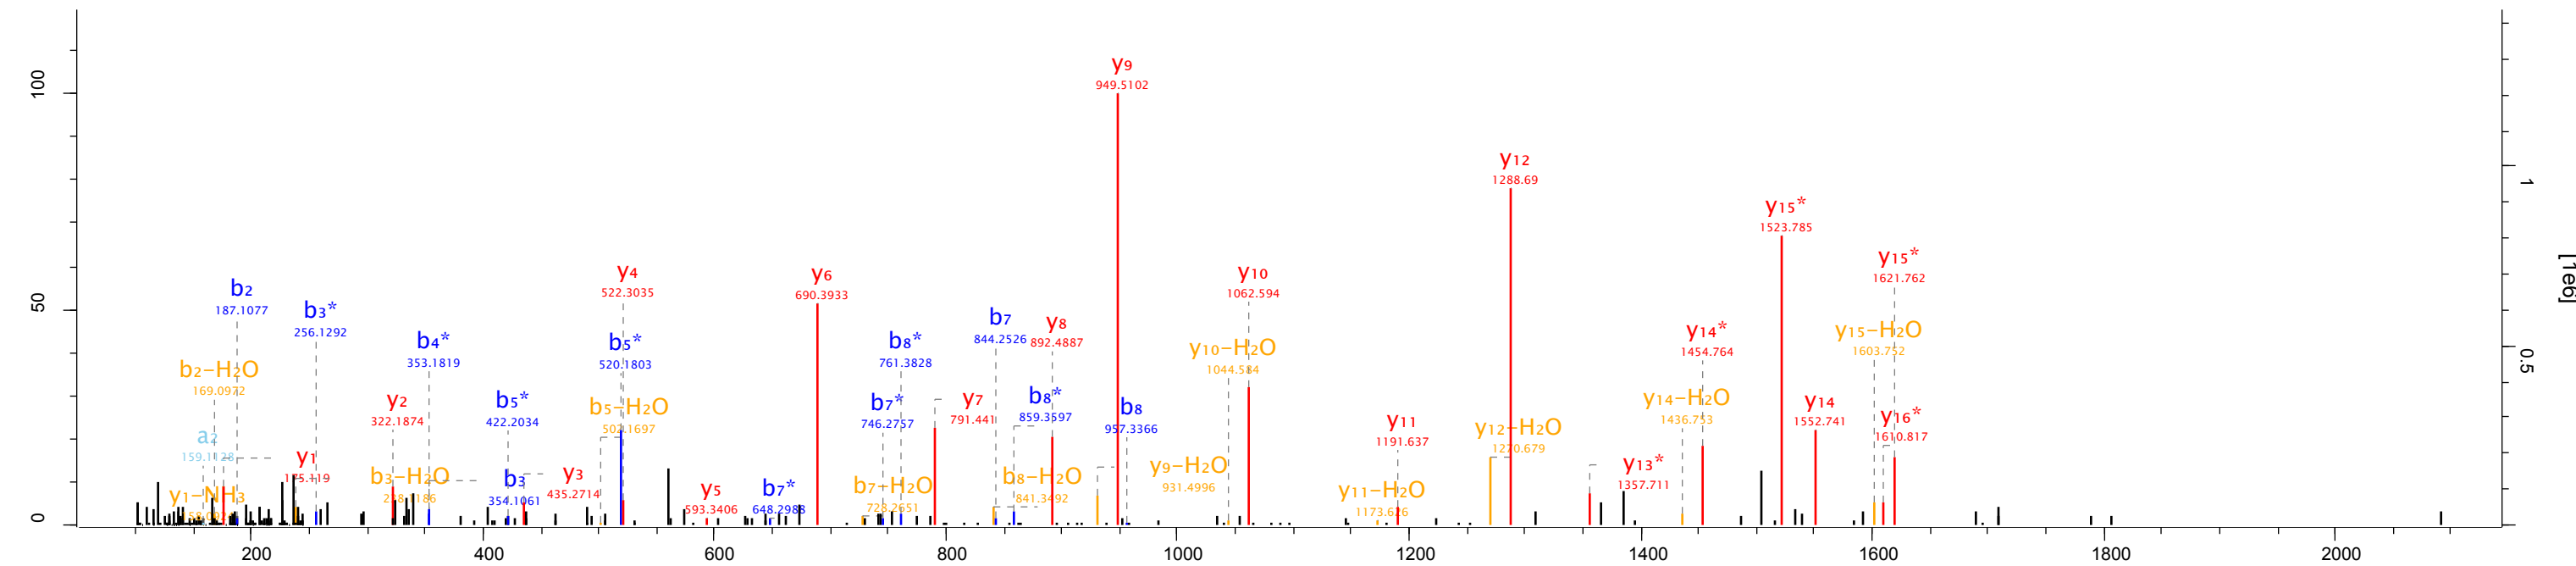

Sequence: V S P S P E L G T T P A S I F R -

Fragmentation sites (b and y ions) are indicated by boxes below the sequence:

- b<sub>2</sub> (S)
- b<sub>3</sub> (S)
- b<sub>4</sub>\*
- b<sub>5</sub>\*
- b<sub>7</sub>
- b<sub>8</sub>

Raw file: 20150812\_A375SR\_Phospho\_BR1\_03  
 Scan: 26383 Method: FTMS; HCD Score: 83.83 m/z: 945.44 Gene names: DENND4C

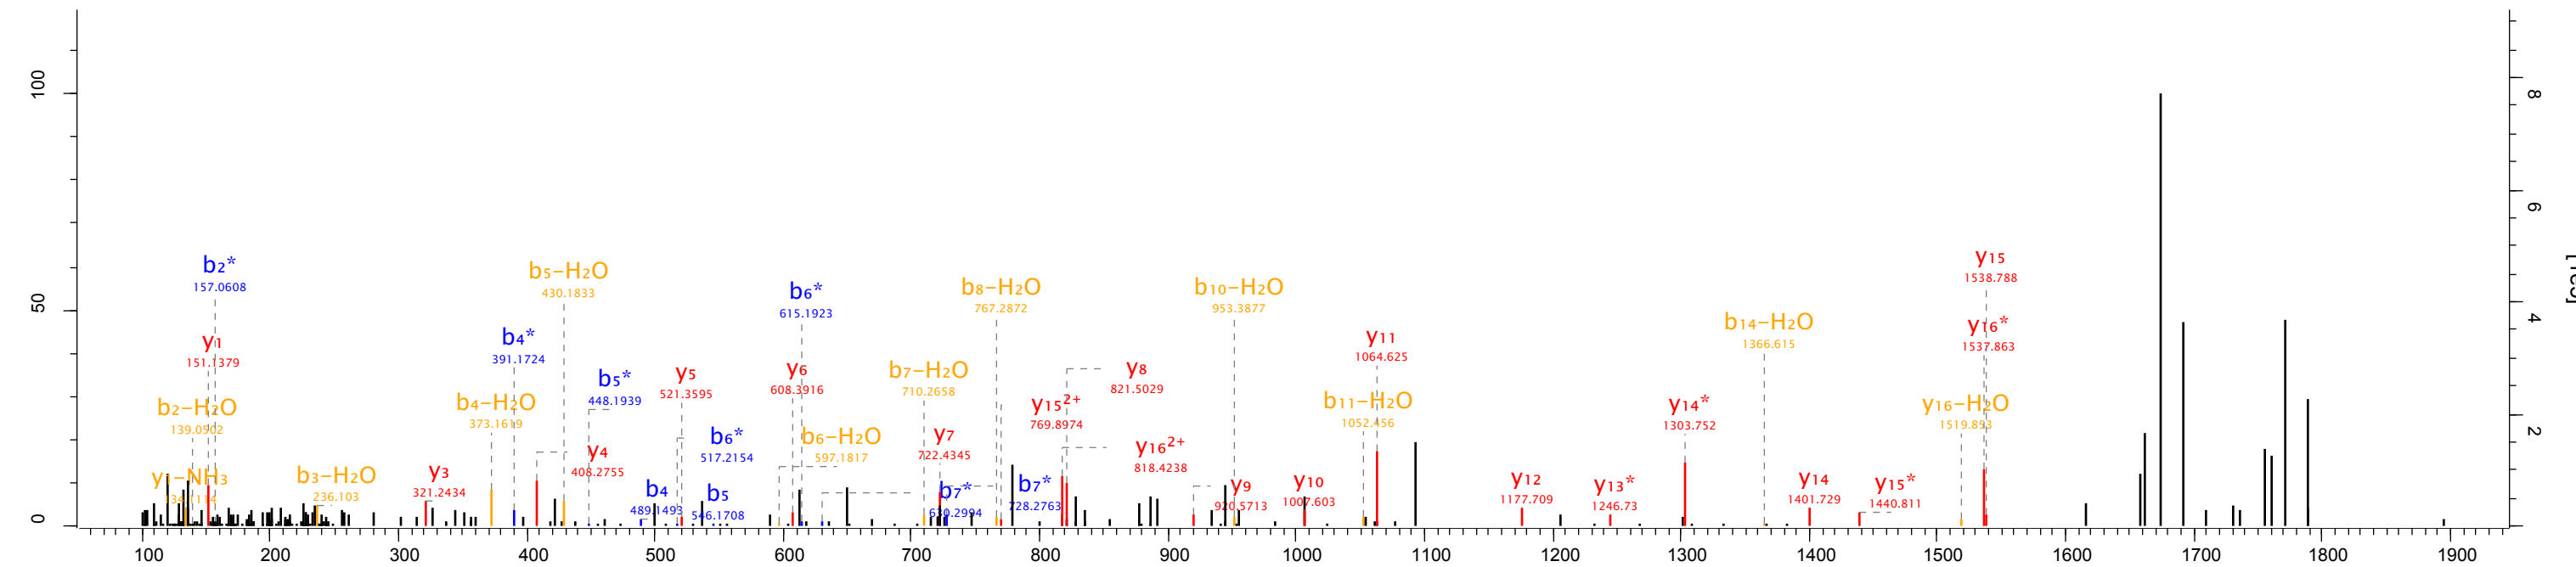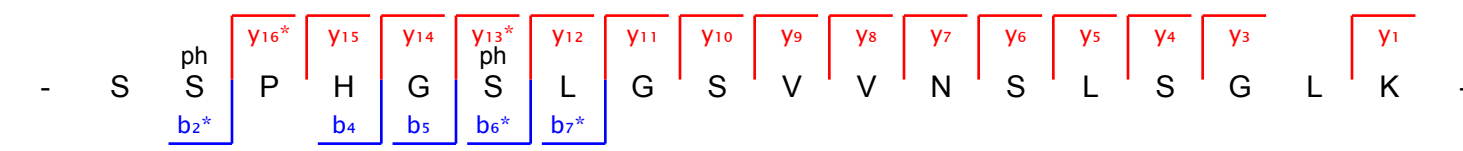



Raw file 20150812\_A375SR\_Phospho\_BR1\_03 Scan 26413 Method FTMS; HCD Score 149.14 m/z 892.76 Gene names RTN4

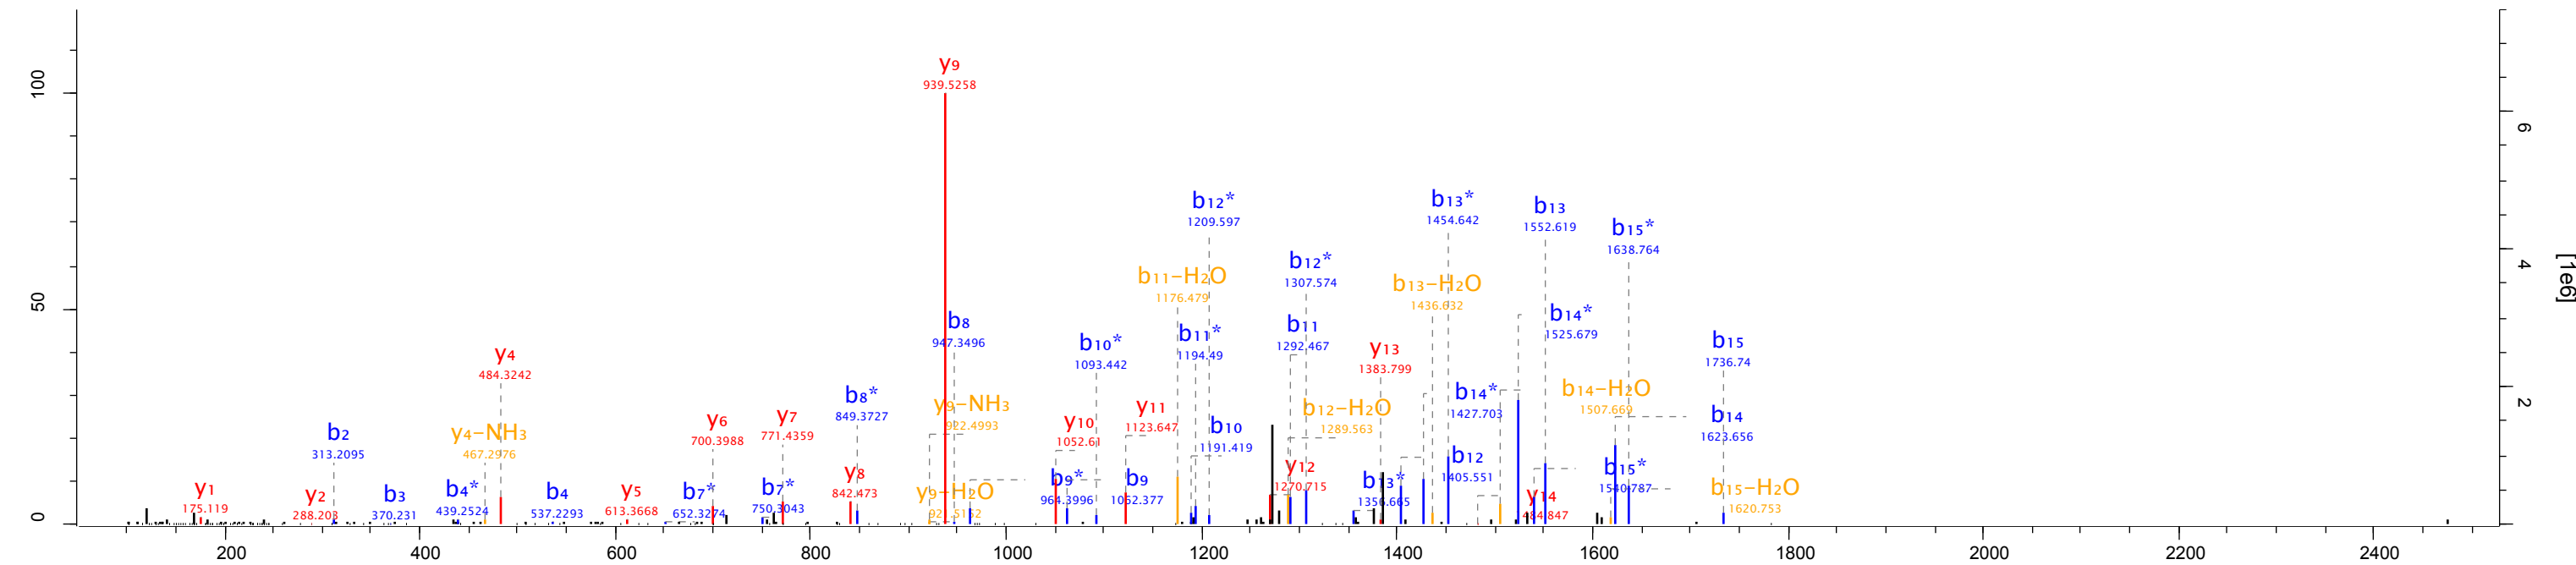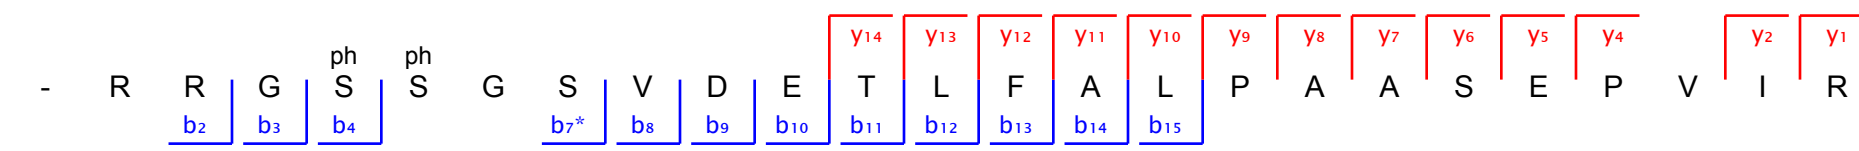

Raw file Scan Method Score m/z Gene names  
 20150812\_A375SR\_Phospho\_BR1\_03 2733 FTMS; HCD 90.61 364.83 SRSF7

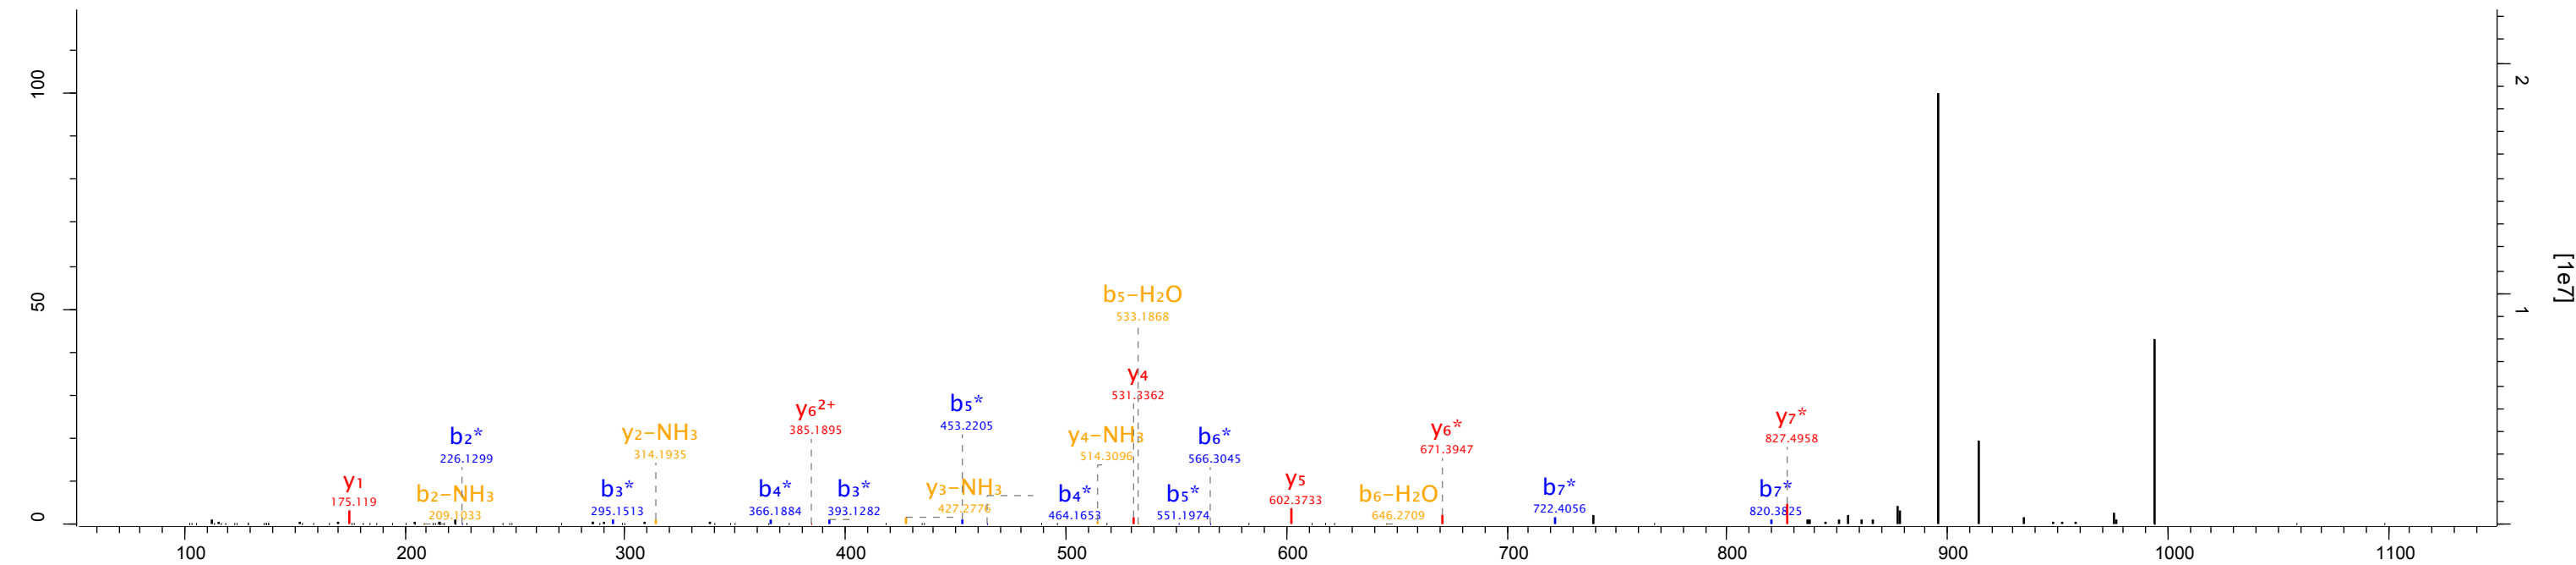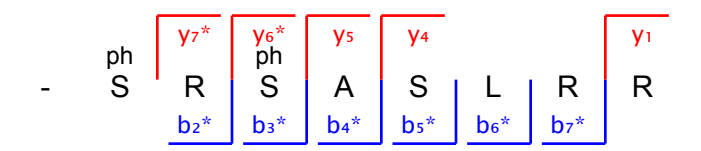

Raw file 20150812\_A375SR\_Phospho\_BR1\_03 Scan 27443 Method FTMS; HCD Score 107.51 m/z 783.82 Gene names EIF3K

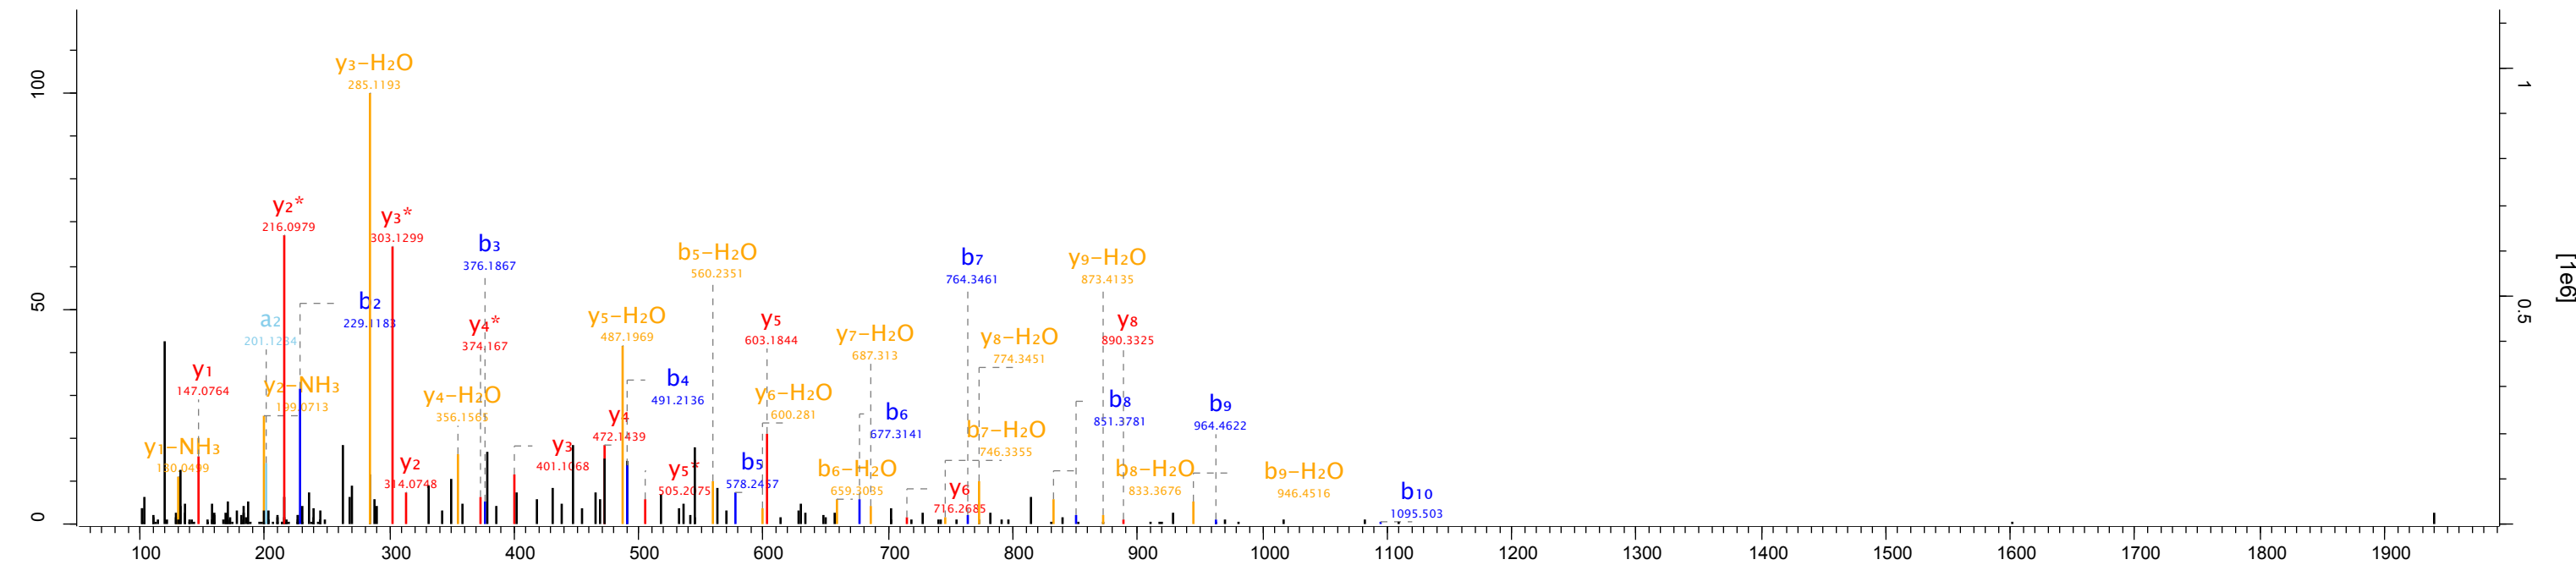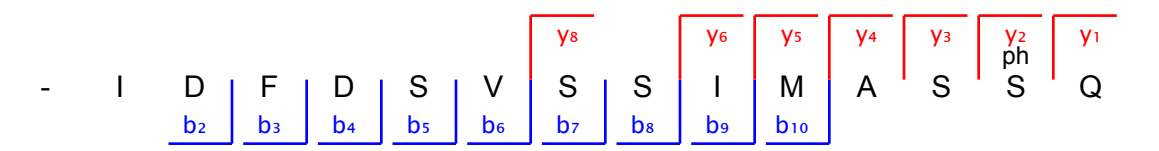

Raw file 20150812\_A375SR\_Phospho\_BR1\_03 Scan 27623 Method FTMS; HCD Score 138.35 m/z 1419.33 Gene names KDM3B

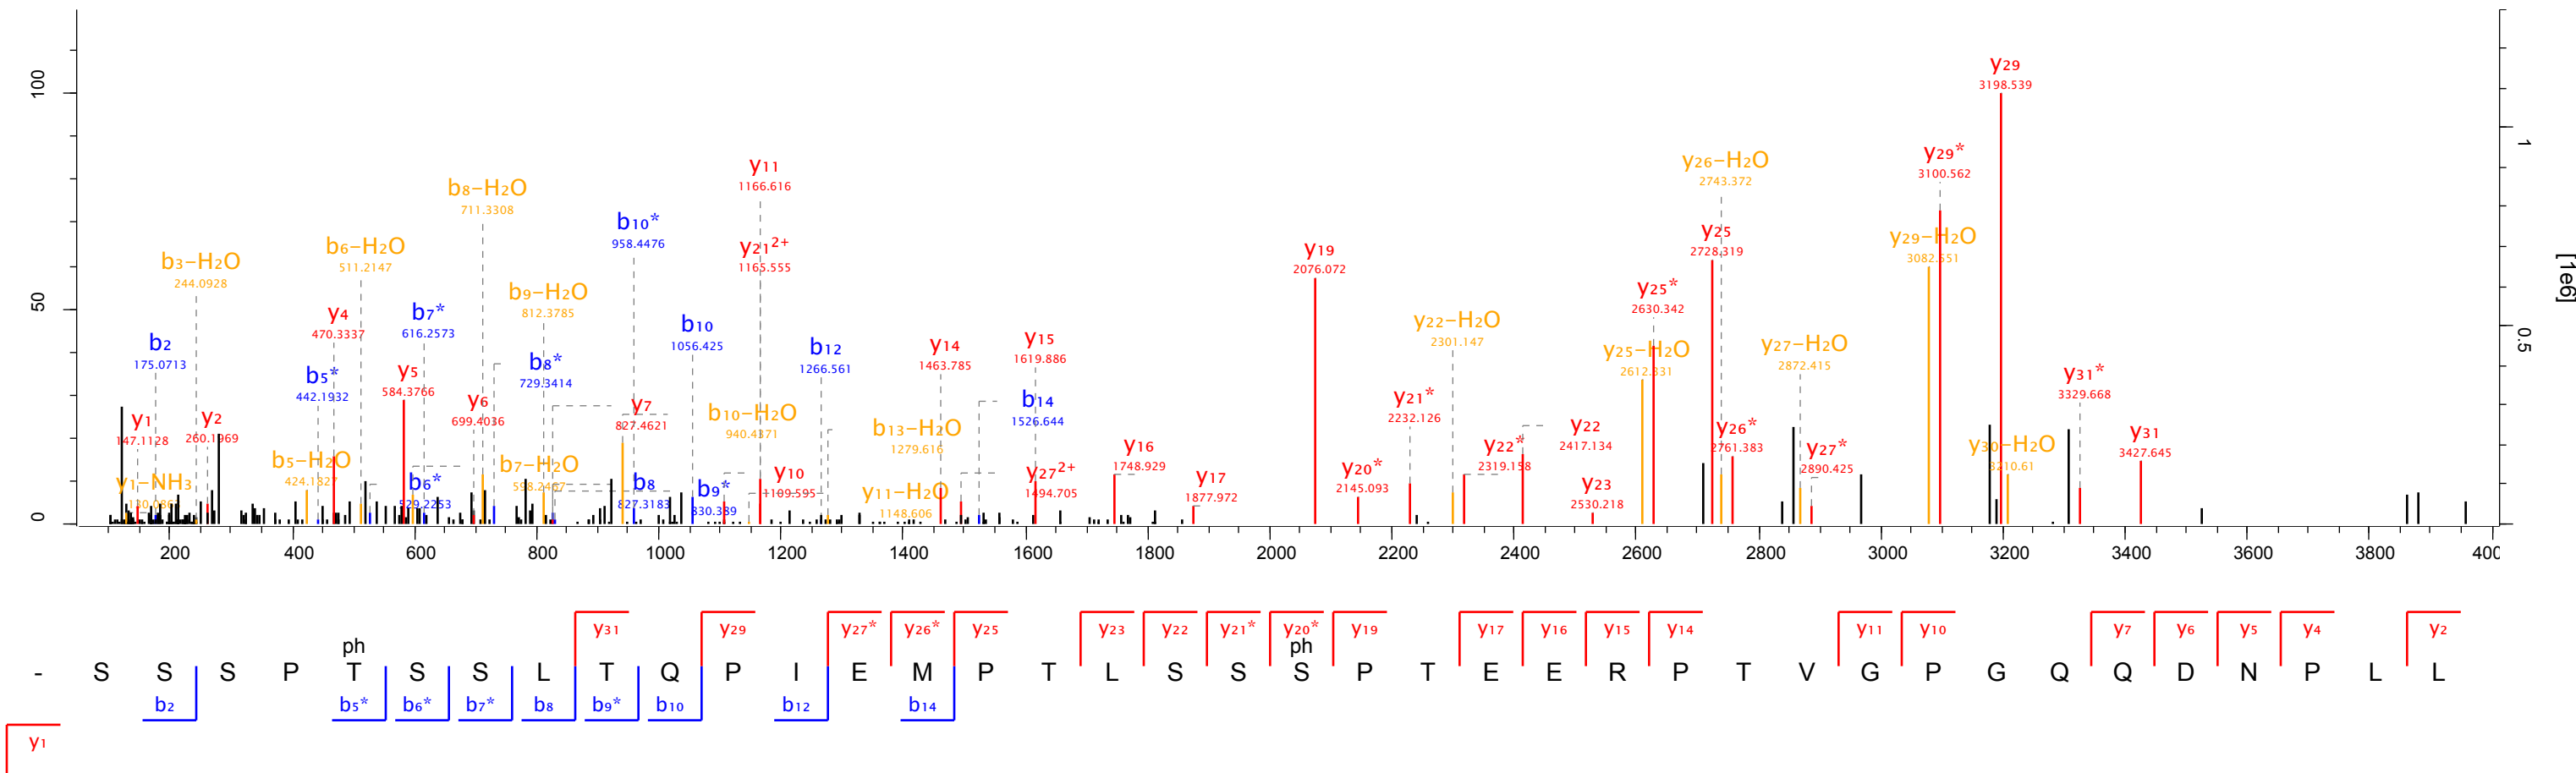

Raw file 20150812\_A375SR\_Phospho\_BR1\_03 Scan 27643 Method FTMS; HCD Score 139.7 m/z 990.89 Gene names FAM208A

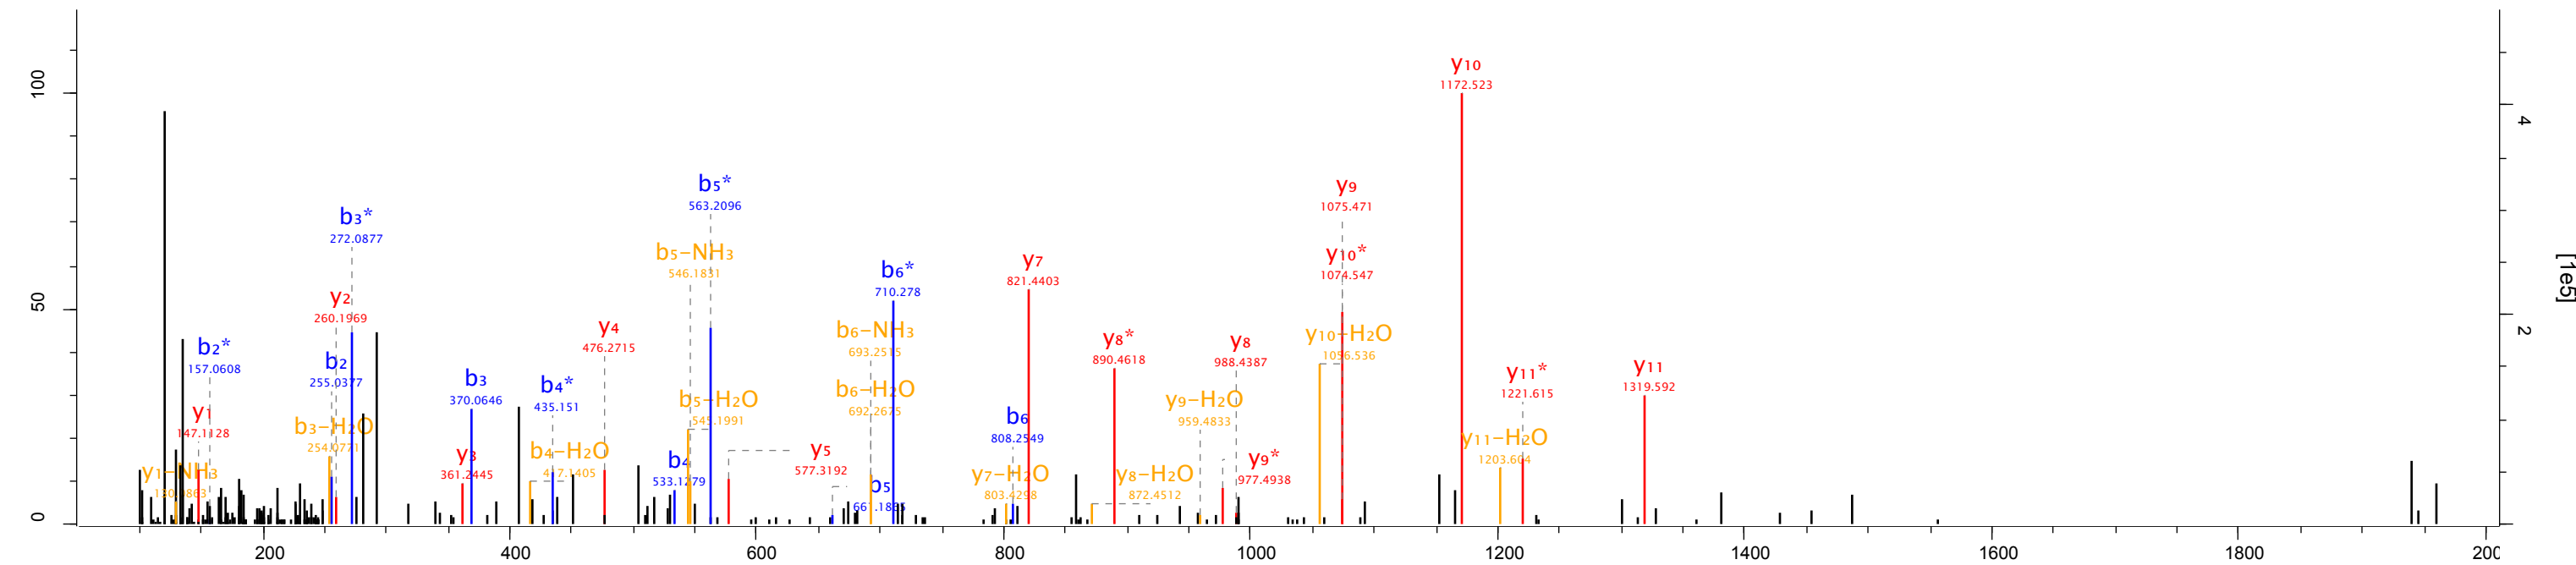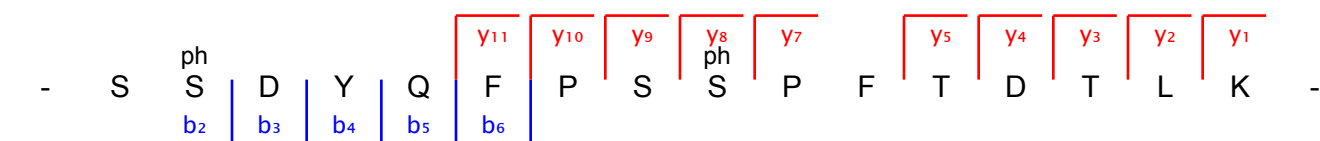

Raw file 20150812\_A375SR\_Phospho\_BR1\_03 Scan 27653 Method FTMS; HCD Score 211.78 m/z 1215.05 Gene names TP53BP1

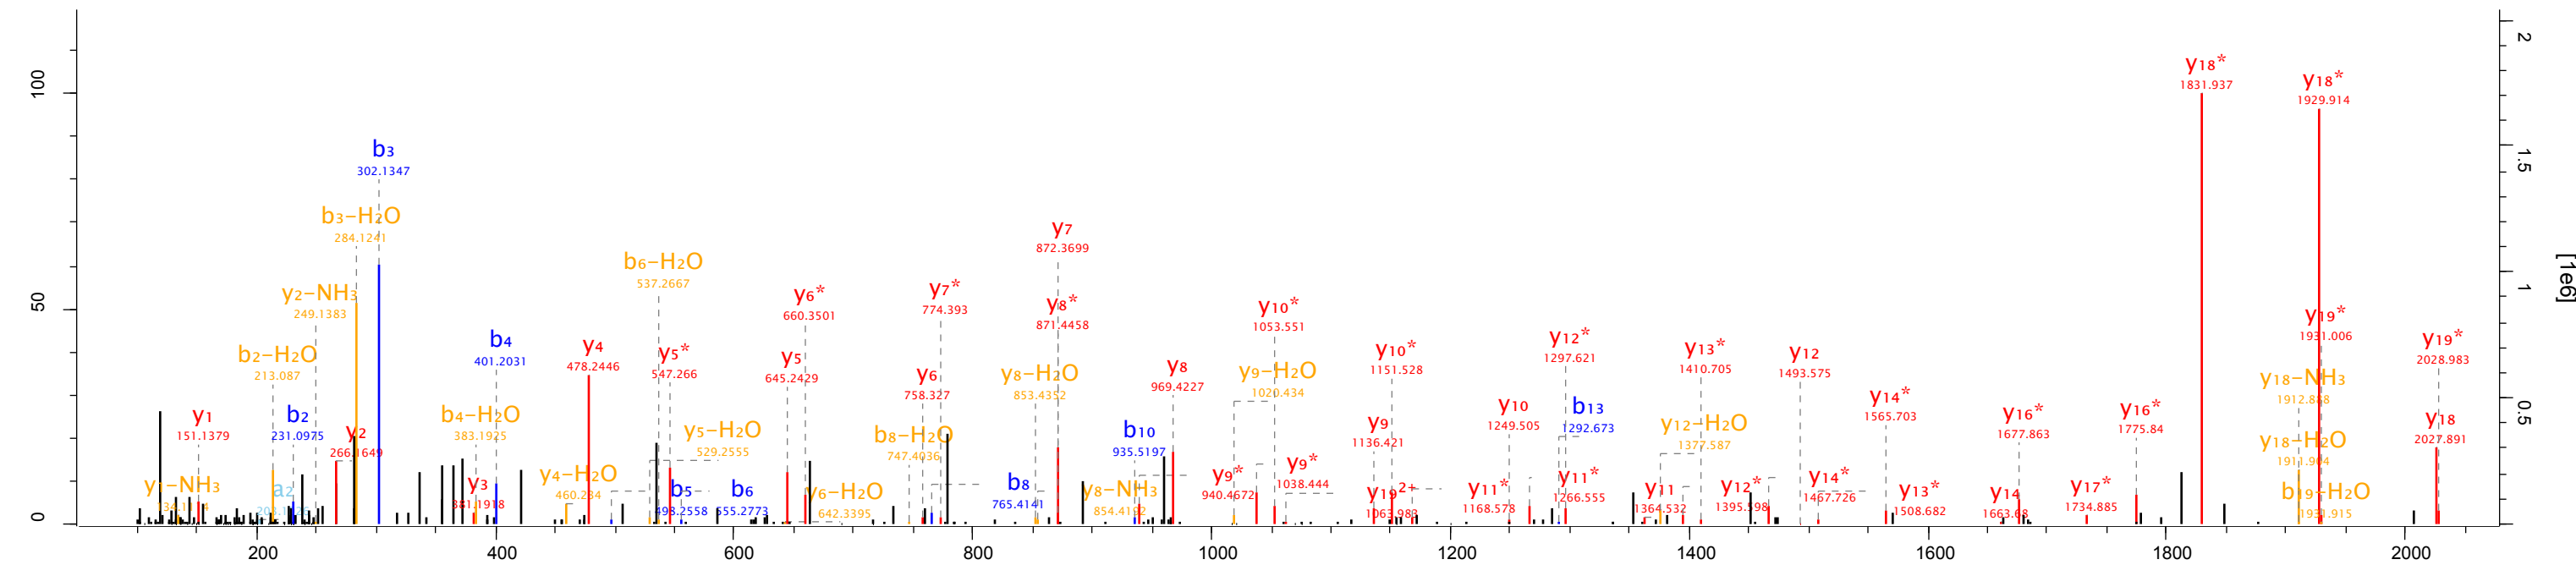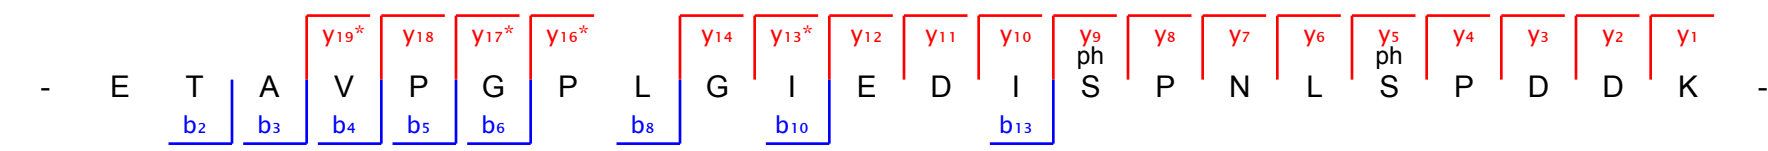

Raw file  
20150812\_A375SR\_Phospho\_BR1\_03

Scan 28383 Method FTMS; HCD Score 183.79 m/z 1182.55 Gene names DDX3X

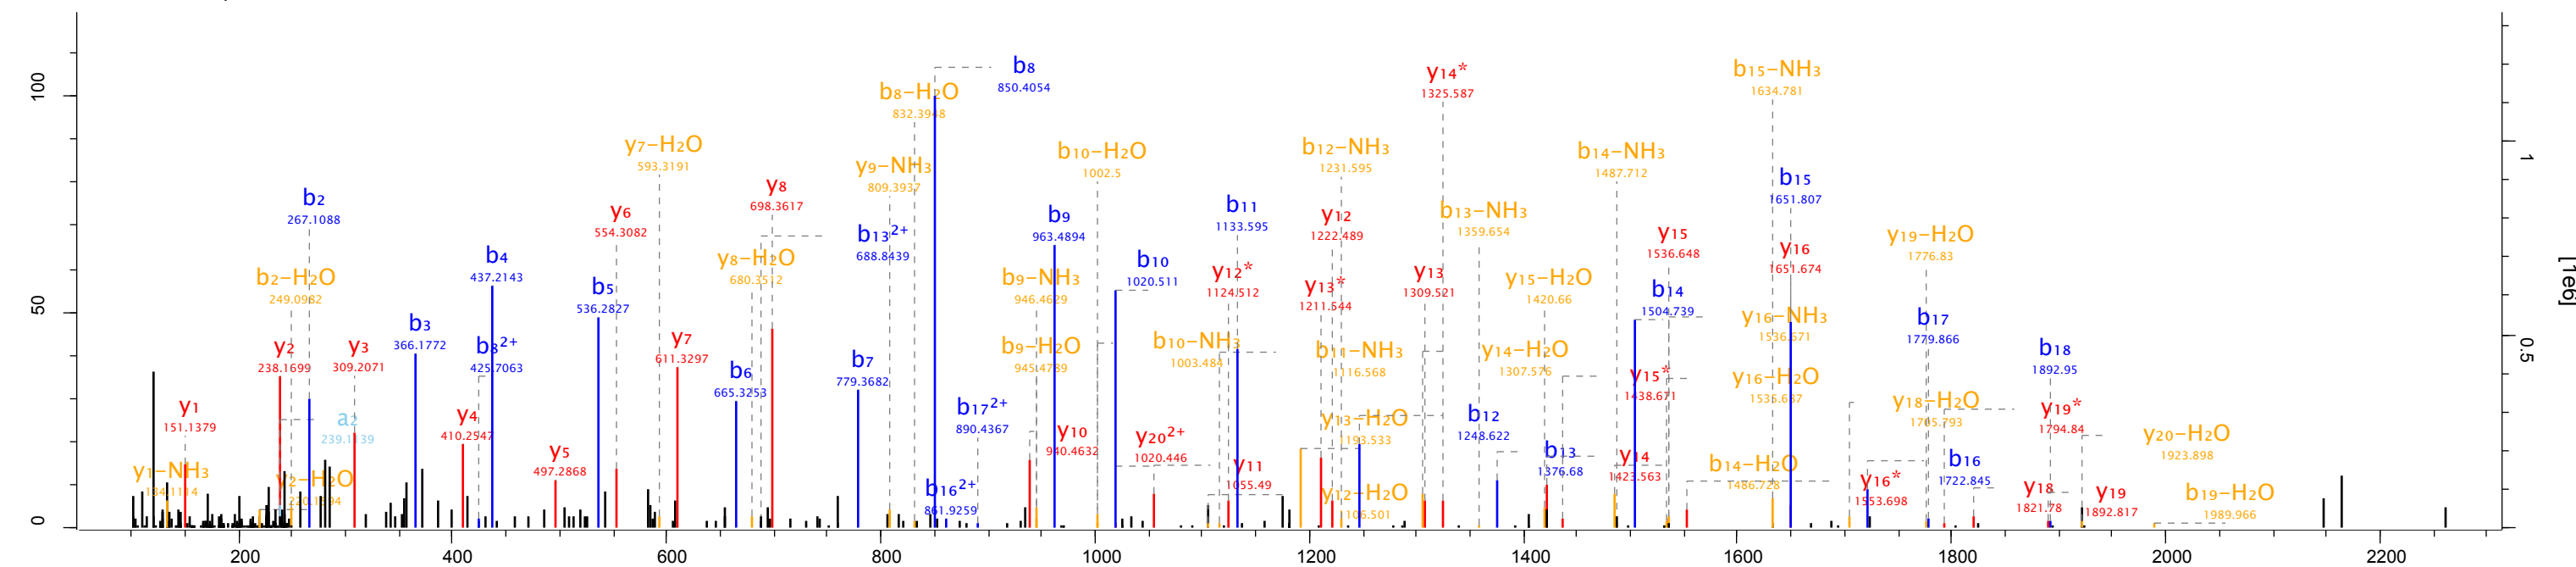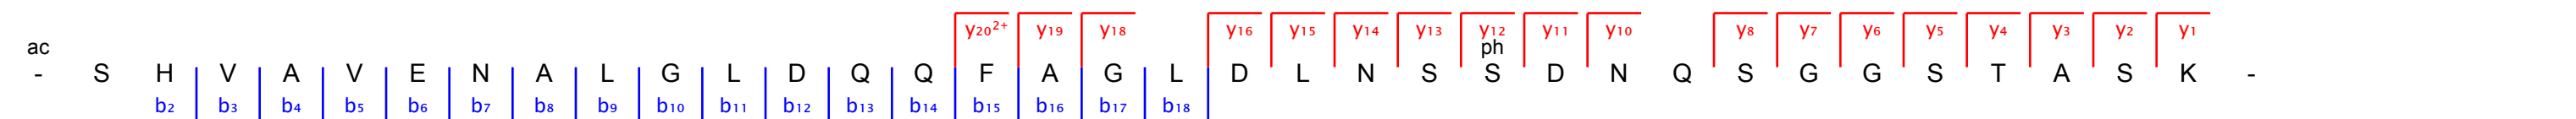

Raw file: 20150812\_A375SR\_Phospho\_BR1\_03  
 Scan: 28463 Method: FTMS; HCD Score: 121.41 m/z: 1265.07 Gene names: EIF6

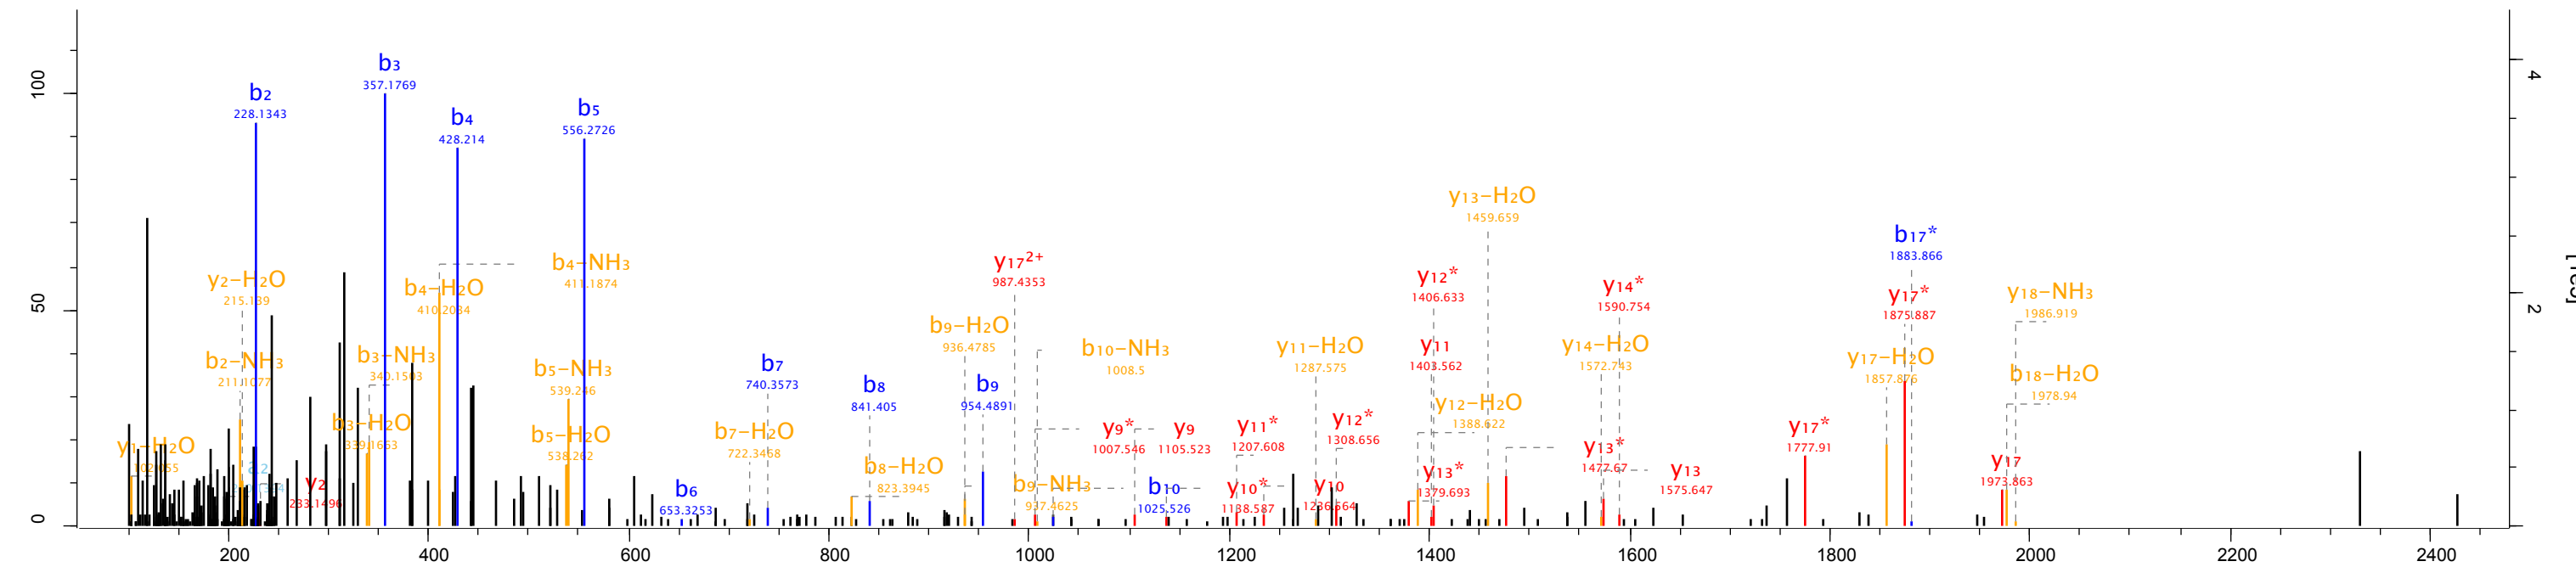

- L N E A Q P S T I A T S M R D S L I D S L T -  
 b2 b3 b4 b5 b6 b7 b8 b9 b10 b17\*  
 y17 y14\* y13 y12\* y11 ph y10 y9 y2



Raw file 20150812\_A375SR\_Phospho\_BR1\_03 Scan 28493 Method FTMS; HCD Score 280.2 m/z 1301.02 Gene names DNAJC2

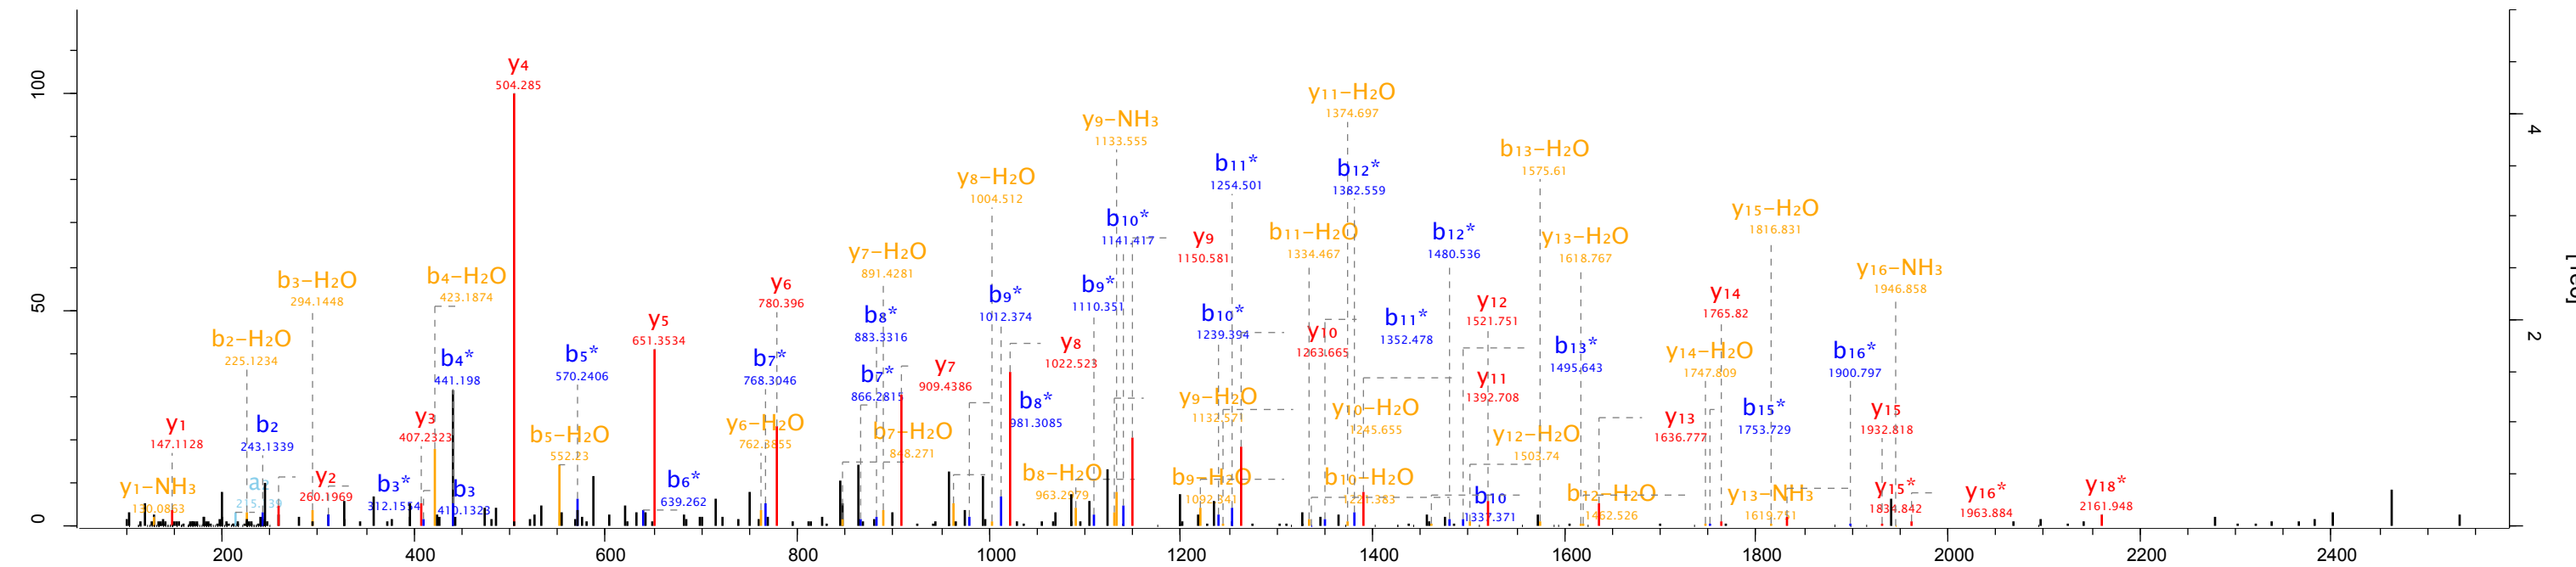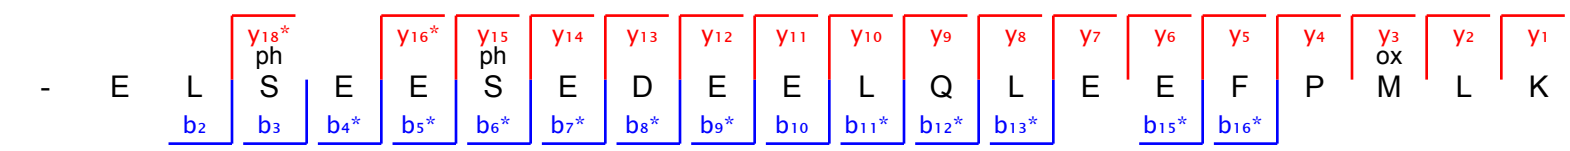

Raw file: 20150812\_A375SR\_Phospho\_BR1\_03  
 Scan: 28653 Method: FTMS; HCD Score: 75.28 m/z: 1325.58 Gene names: SEC16A

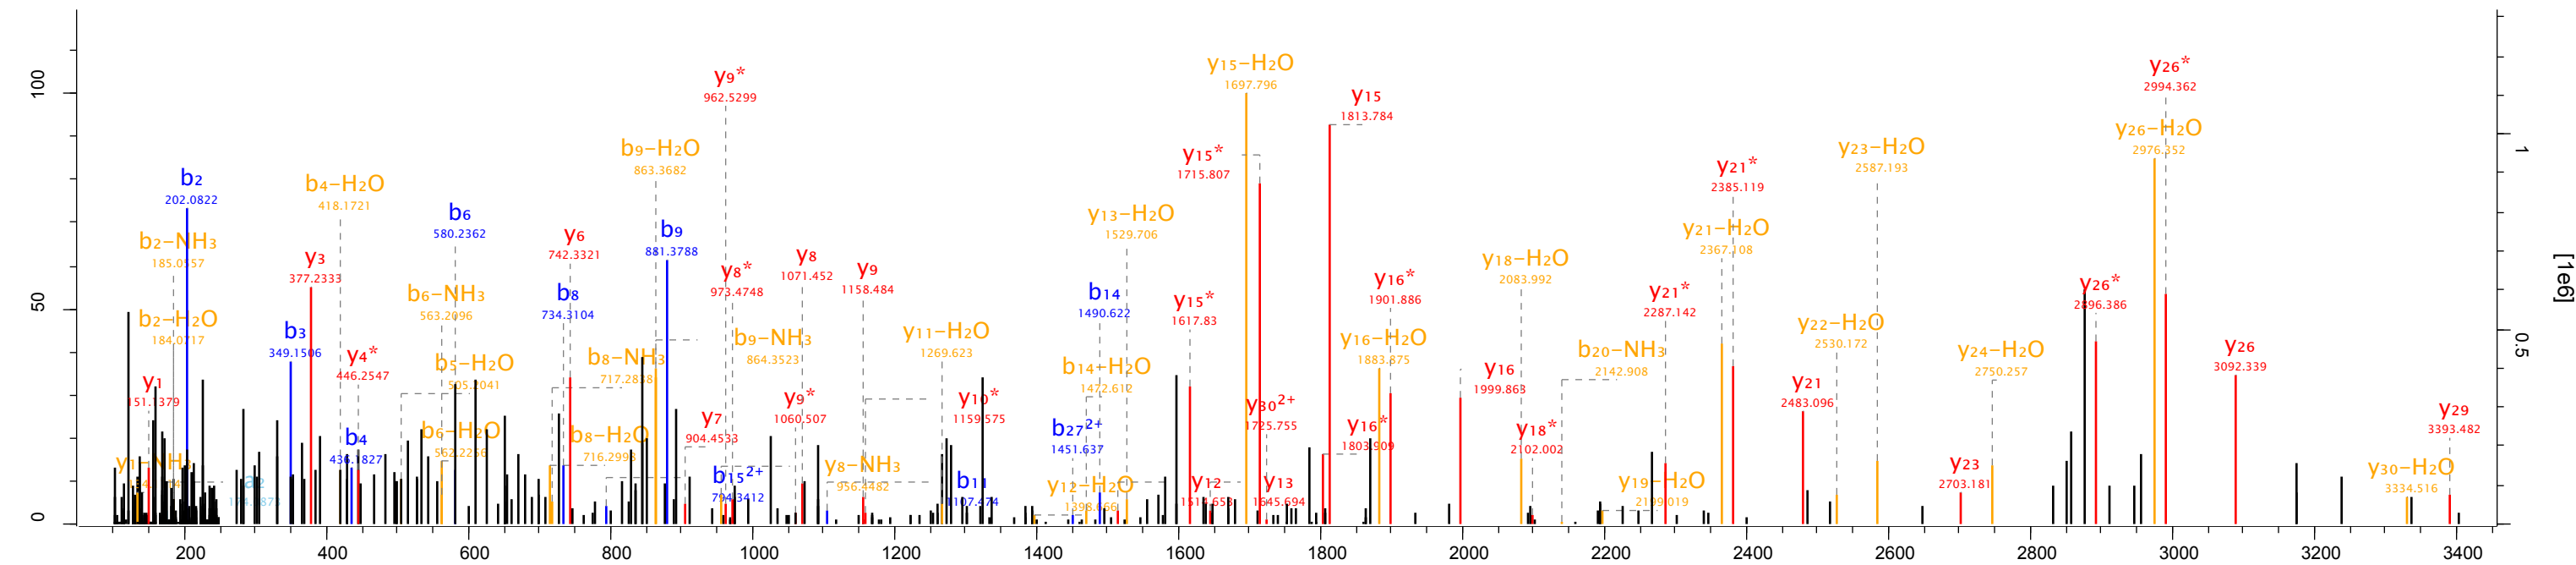

- S N F S S G P G F P E Y G Y P A D T V W P A M E Q V S S R P T S P E K -

Fragmentation mapping (b-ions in blue, y-ions in red):

- b<sub>2</sub> (N), b<sub>3</sub> (F), b<sub>4</sub> (S), b<sub>6</sub> (G), b<sub>8</sub> (G), b<sub>9</sub> (F), b<sub>11</sub> (P), b<sub>14</sub> (Y), b<sub>15</sub><sup>2+</sup> (P), b<sub>27</sub><sup>2+</sup> (S)
- y<sub>1</sub> (K), y<sub>3</sub> (P), y<sub>4</sub><sup>\*</sup> (S), y<sub>6</sub> (P), y<sub>7</sub> (R), y<sub>8</sub> (S), y<sub>9</sub> (S), y<sub>10</sub><sup>\*</sup> (V), y<sub>12</sub> (E), y<sub>13</sub> (M), y<sub>15</sub> (P), y<sub>16</sub> (W), y<sub>18</sub><sup>\*</sup> (T), y<sub>21</sub> (P), y<sub>23</sub> (G), y<sub>26</sub> (P), y<sub>29</sub> (P), y<sub>30</sub><sup>2+</sup> (G)

Raw file 20150812\_A375SR\_Phospho\_BR1\_03 Scan 2923 Method FTMS; HCD Score 47.73 m/z 844.82 Gene names CLASRP

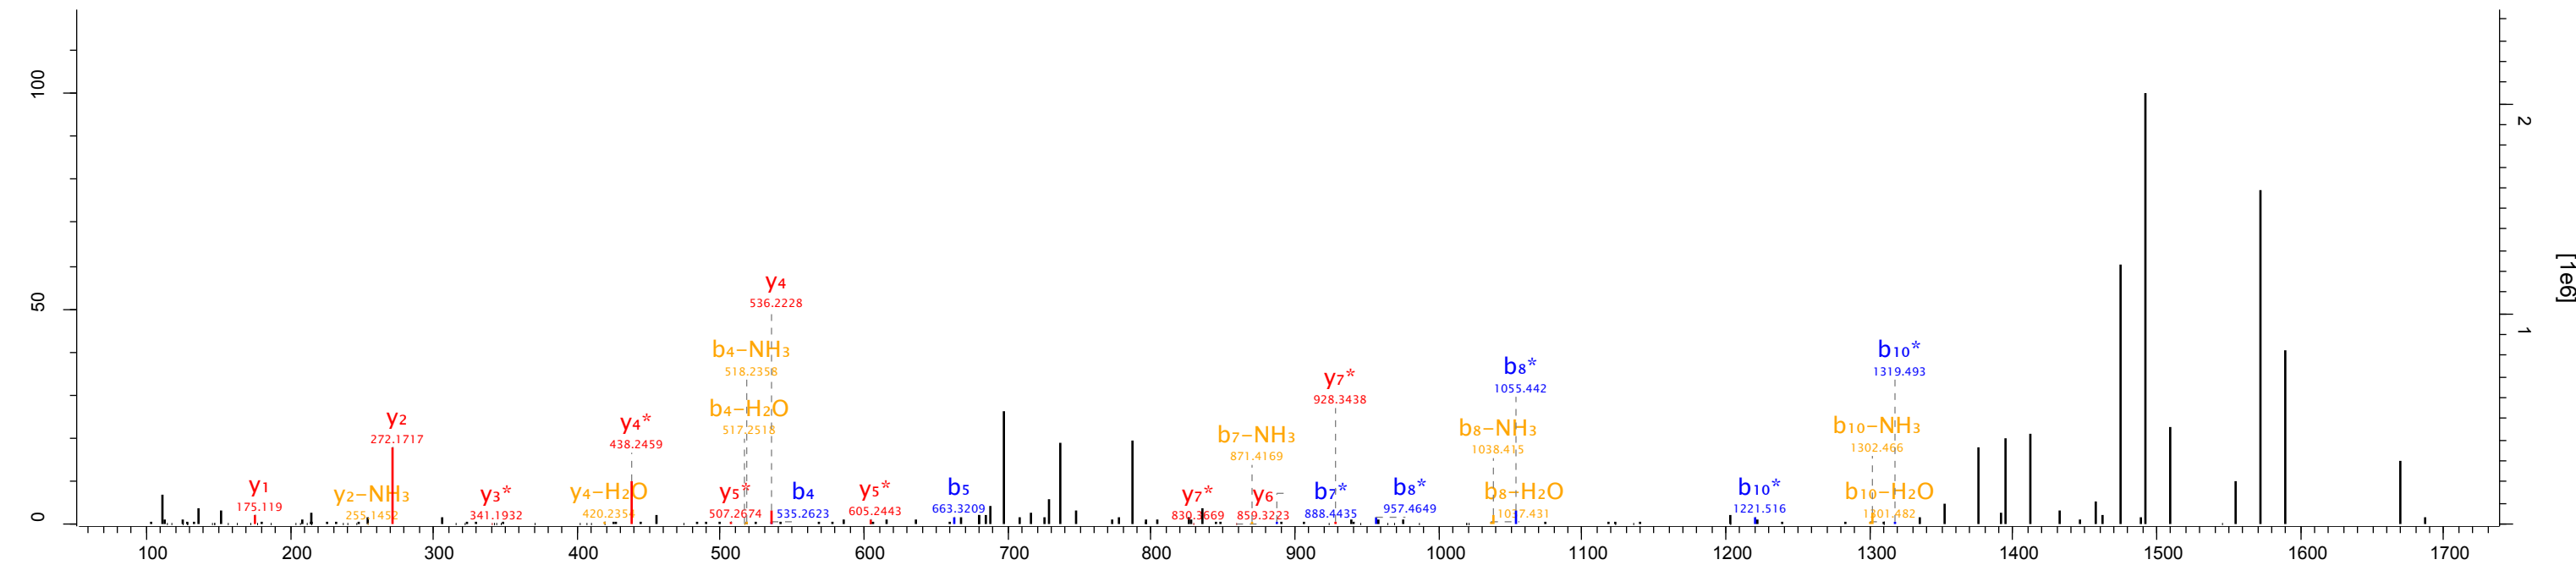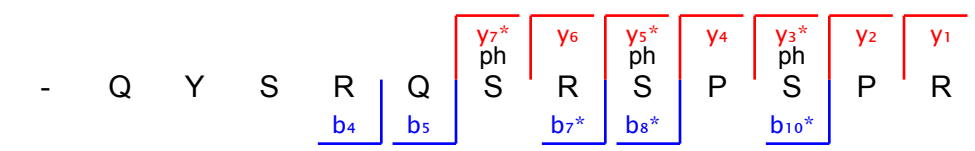

Raw file 20150812\_A375SR\_Phospho\_BR1\_03 Scan 3053 Method FTMS; HCD Score 100.92 m/z 505.22 Gene names RBM39

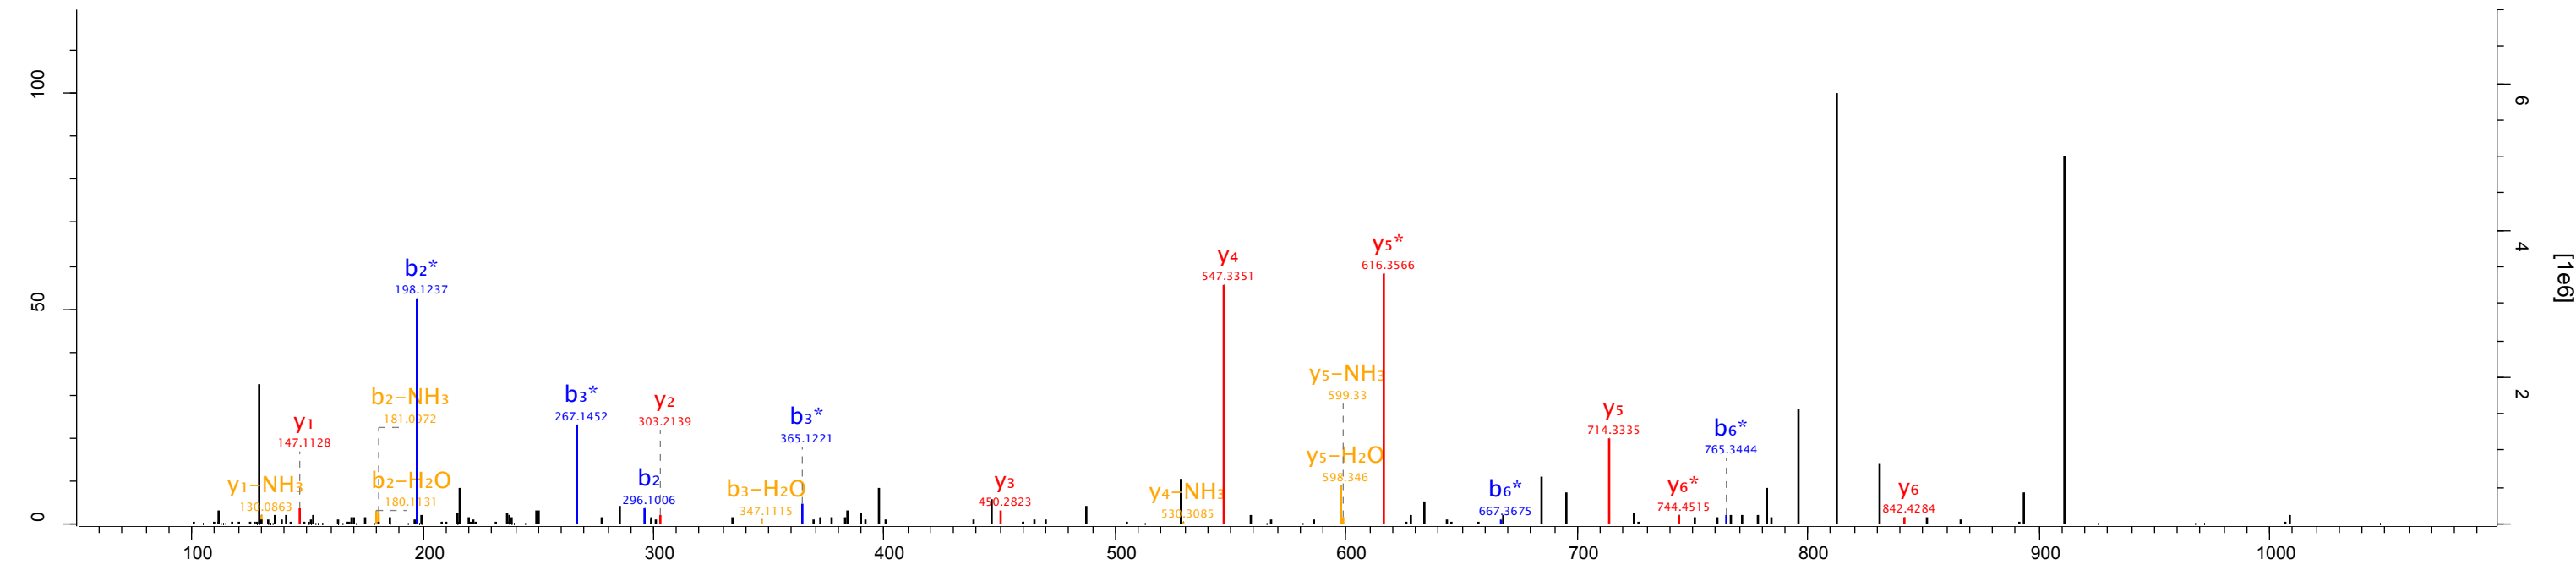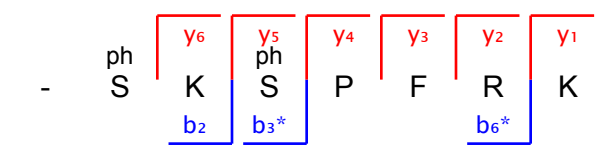

Raw file 20150812\_A375SR\_Phospho\_BR1\_03 Scan 3243 Method FTMS; HCD Score 194.04 m/z 1004.92 Gene names BCLAF1

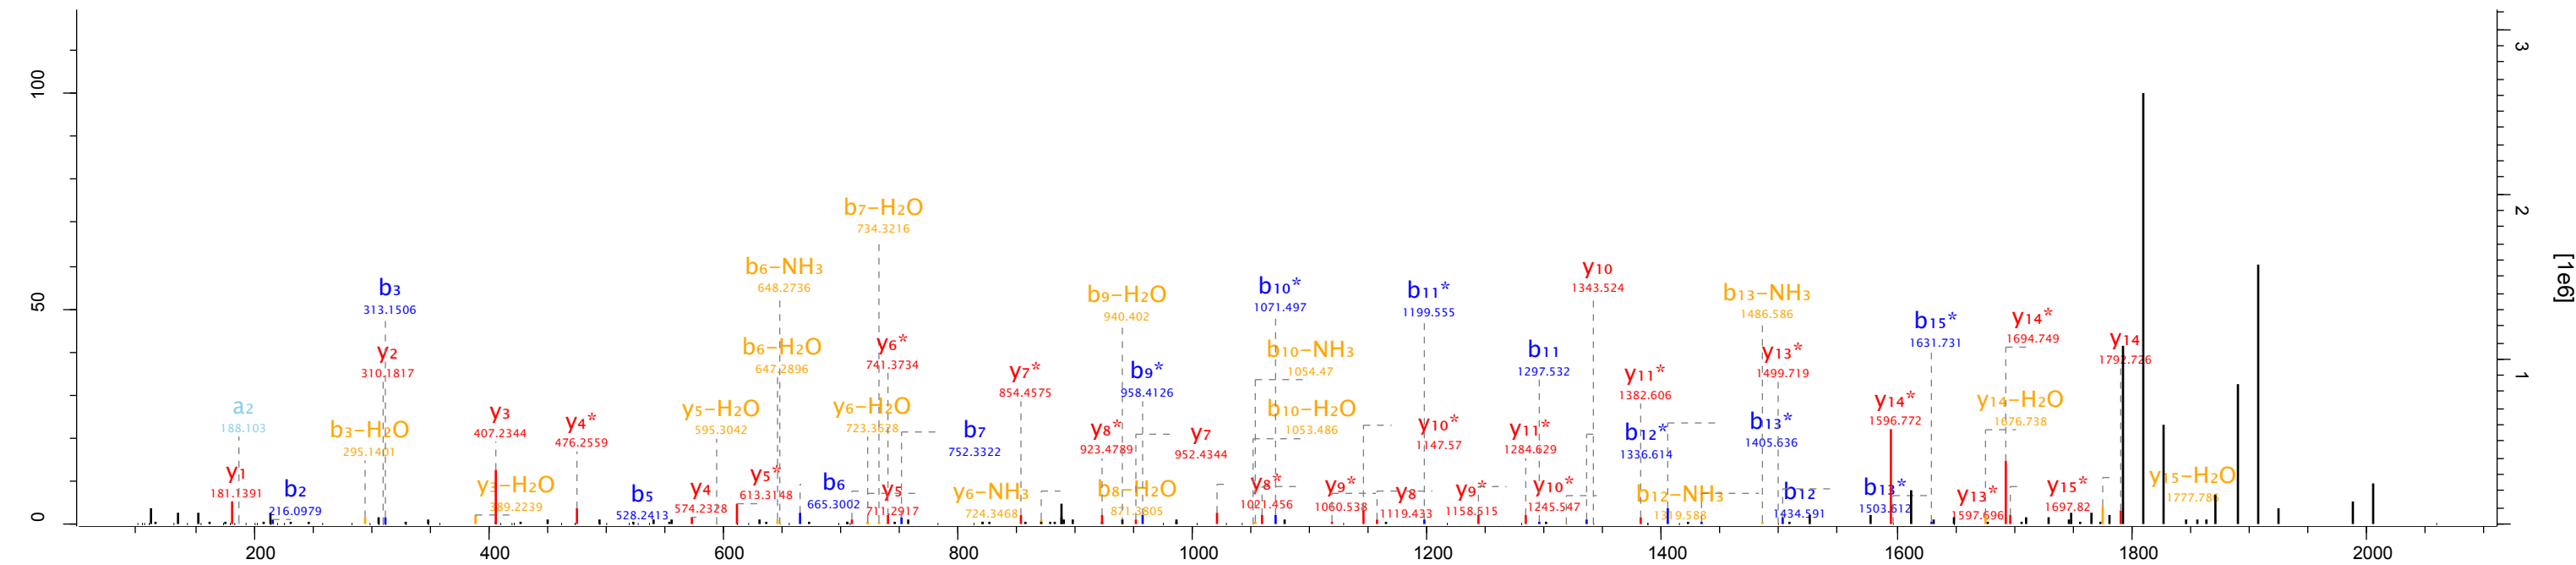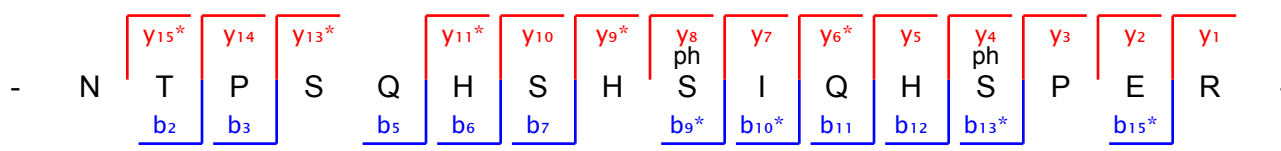

Raw file: 20150812\_A375SR\_Phospho\_BR1\_03  
 Scan: 3323 Method: FTMS; HCD Score: 71.64 m/z: 624.73 Gene names: SF3B1

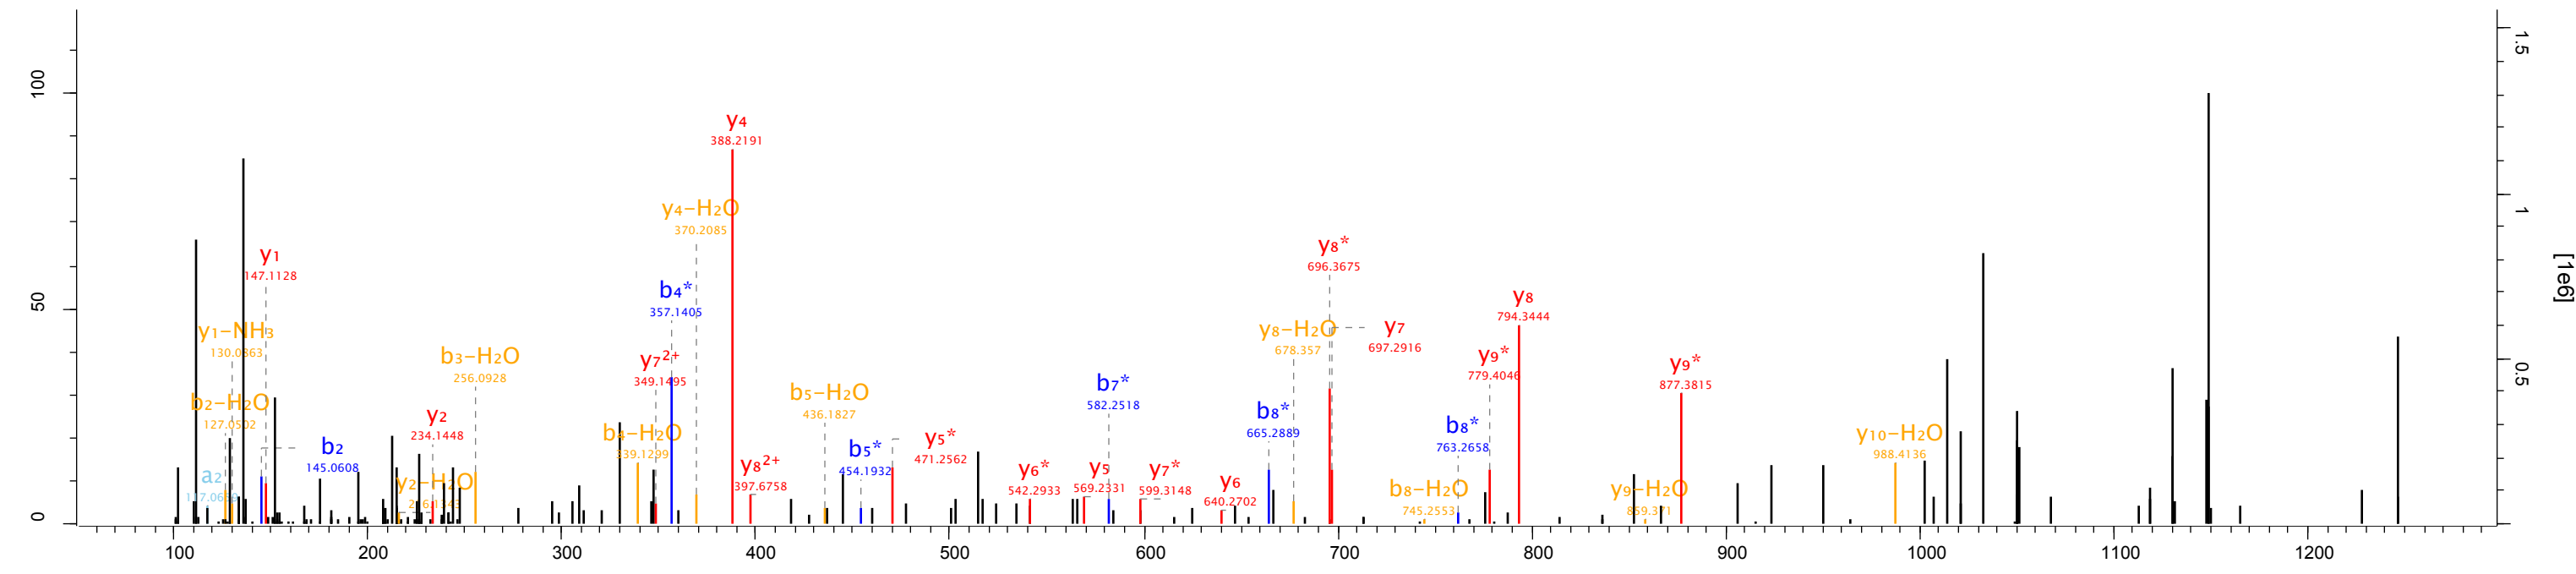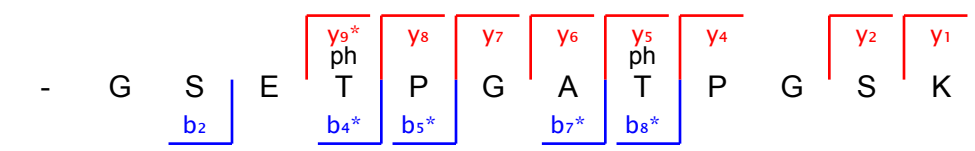

Raw file: 20150812\_A375SR\_Phospho\_BR1\_03  
 Scan: 4493 Method: FTMS; HCD Score: 46.49 m/z: 551.92 Gene names: CENPA

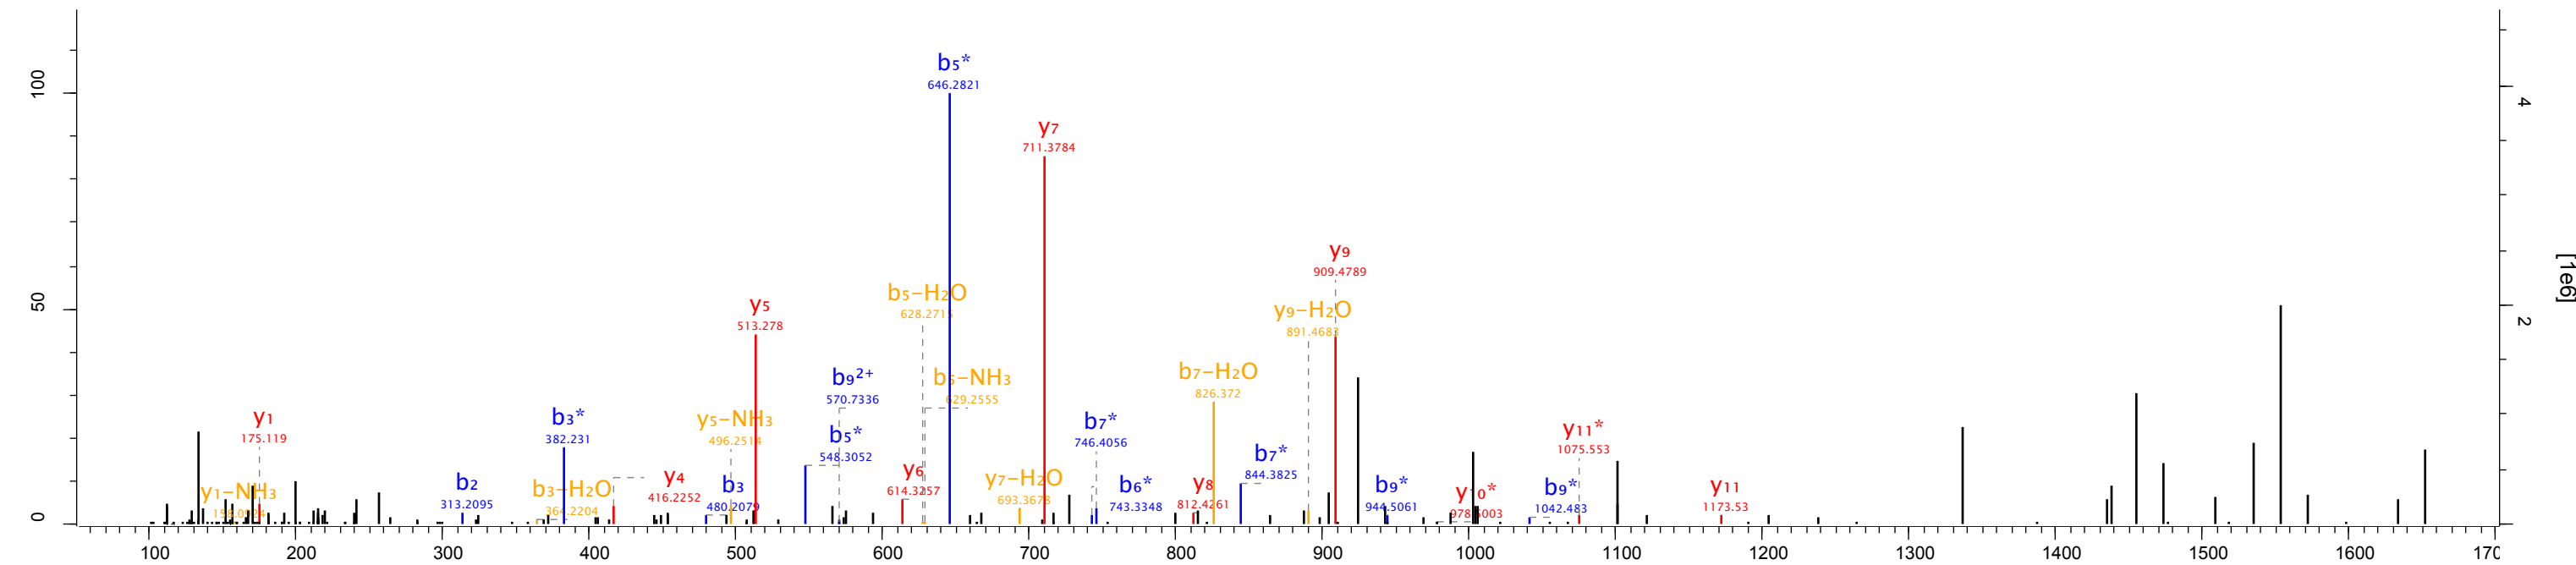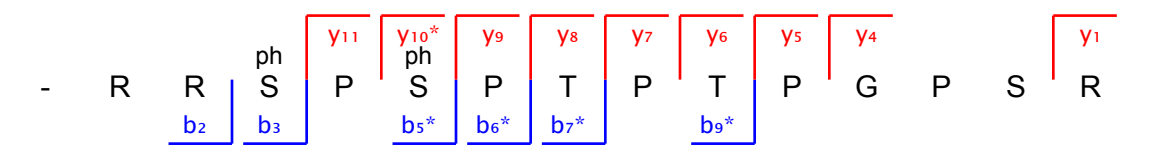

Raw file: 20150812\_A375SR\_Phospho\_BR1\_03  
 Scan: 4983 Method: FTMS; HCD Score: 118.76 m/z: 626.27 Gene names: CDK12

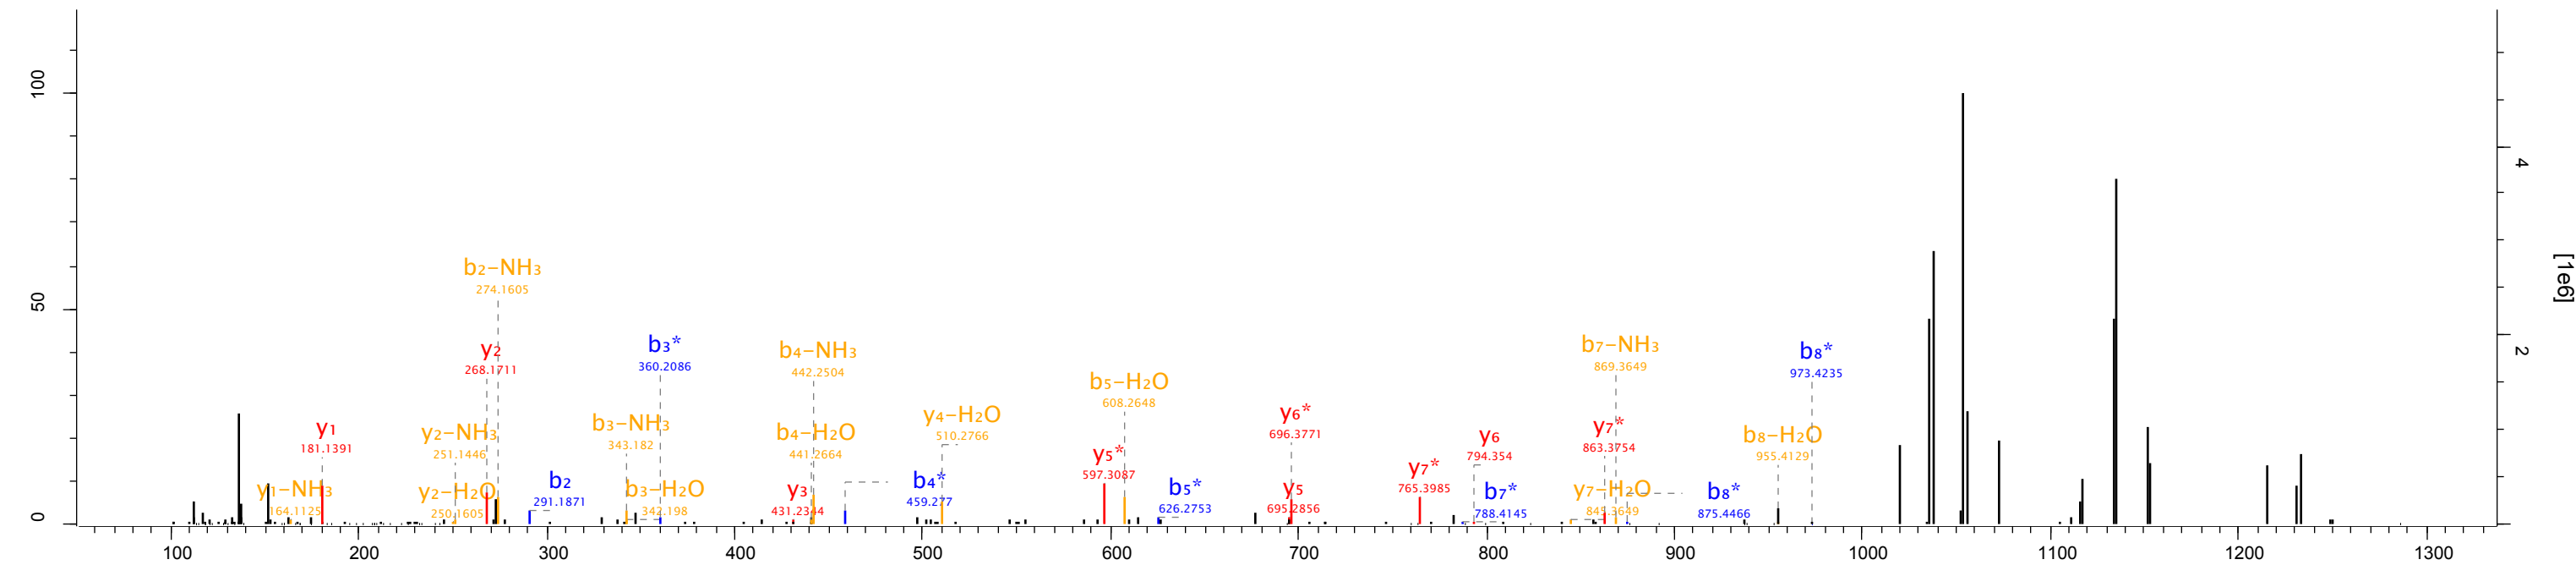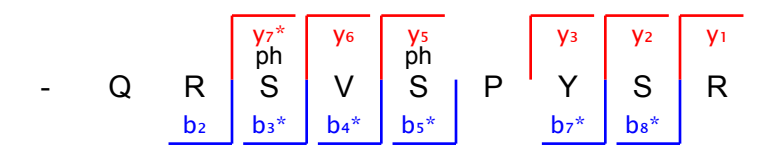



Raw file: 20150812\_A375SR\_Phospho\_BR1\_03  
 Scan: 5103 Method: FTMS; HCD Score: 92.59 m/z: 883.73 Gene names: UHRF1BP1L

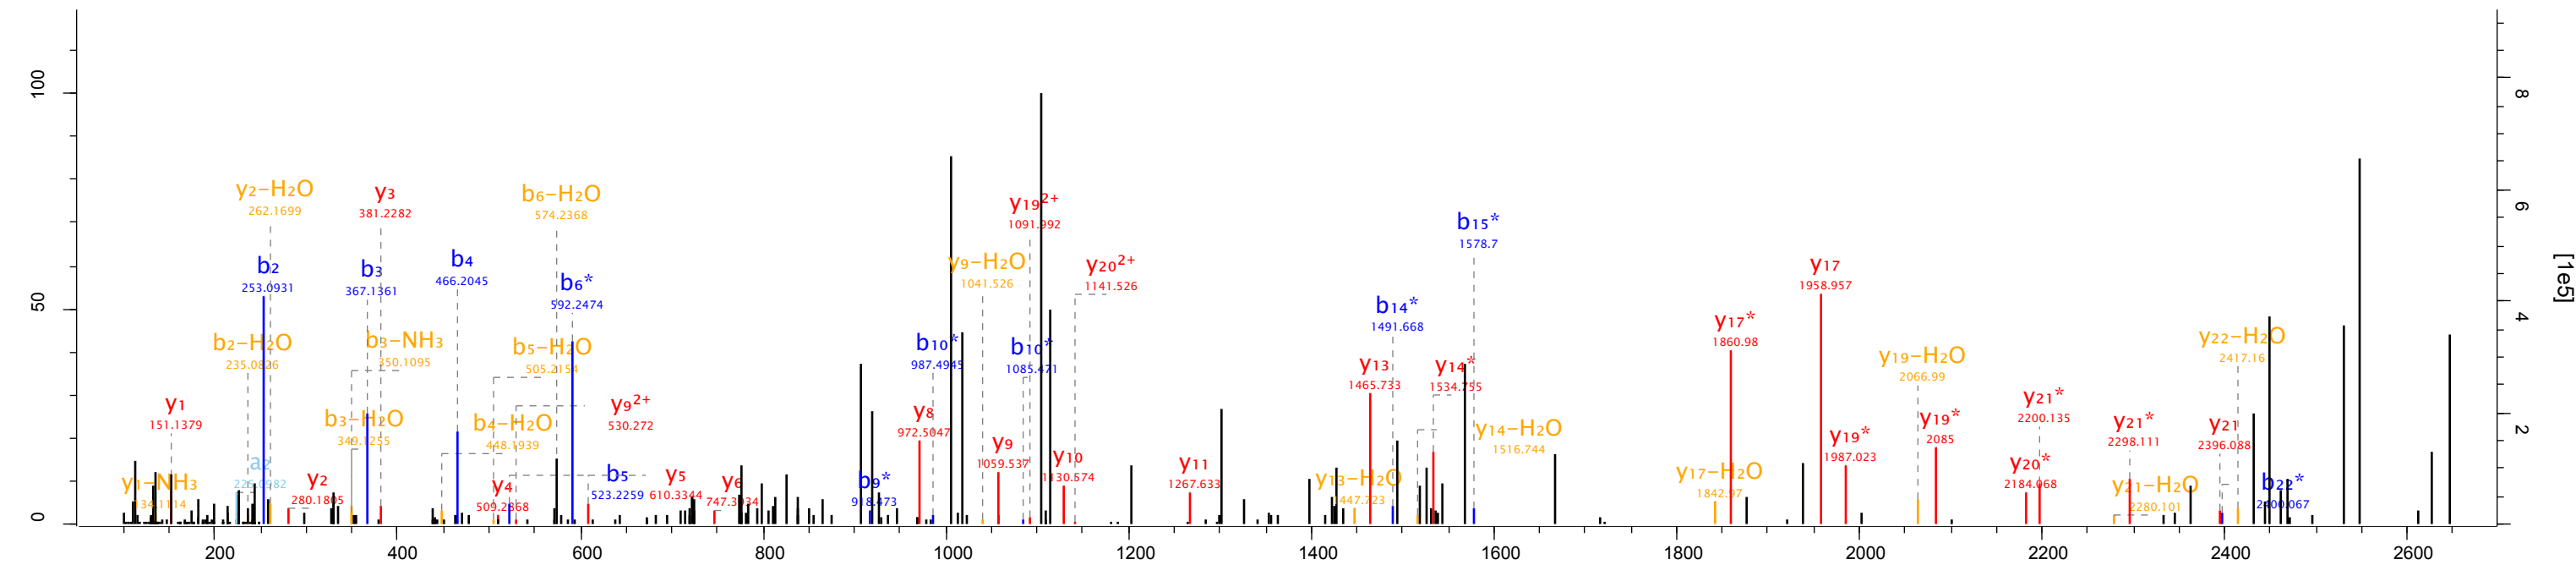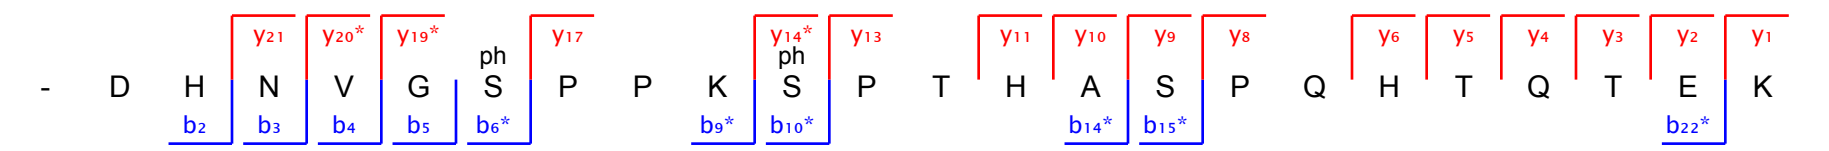

Raw file: 20150812\_A375SR\_Phospho\_BR1\_03  
 Scan: 5853 Method: FTMS; HCD Score: 114.76 m/z: 843.33 Gene names: OTUD7B

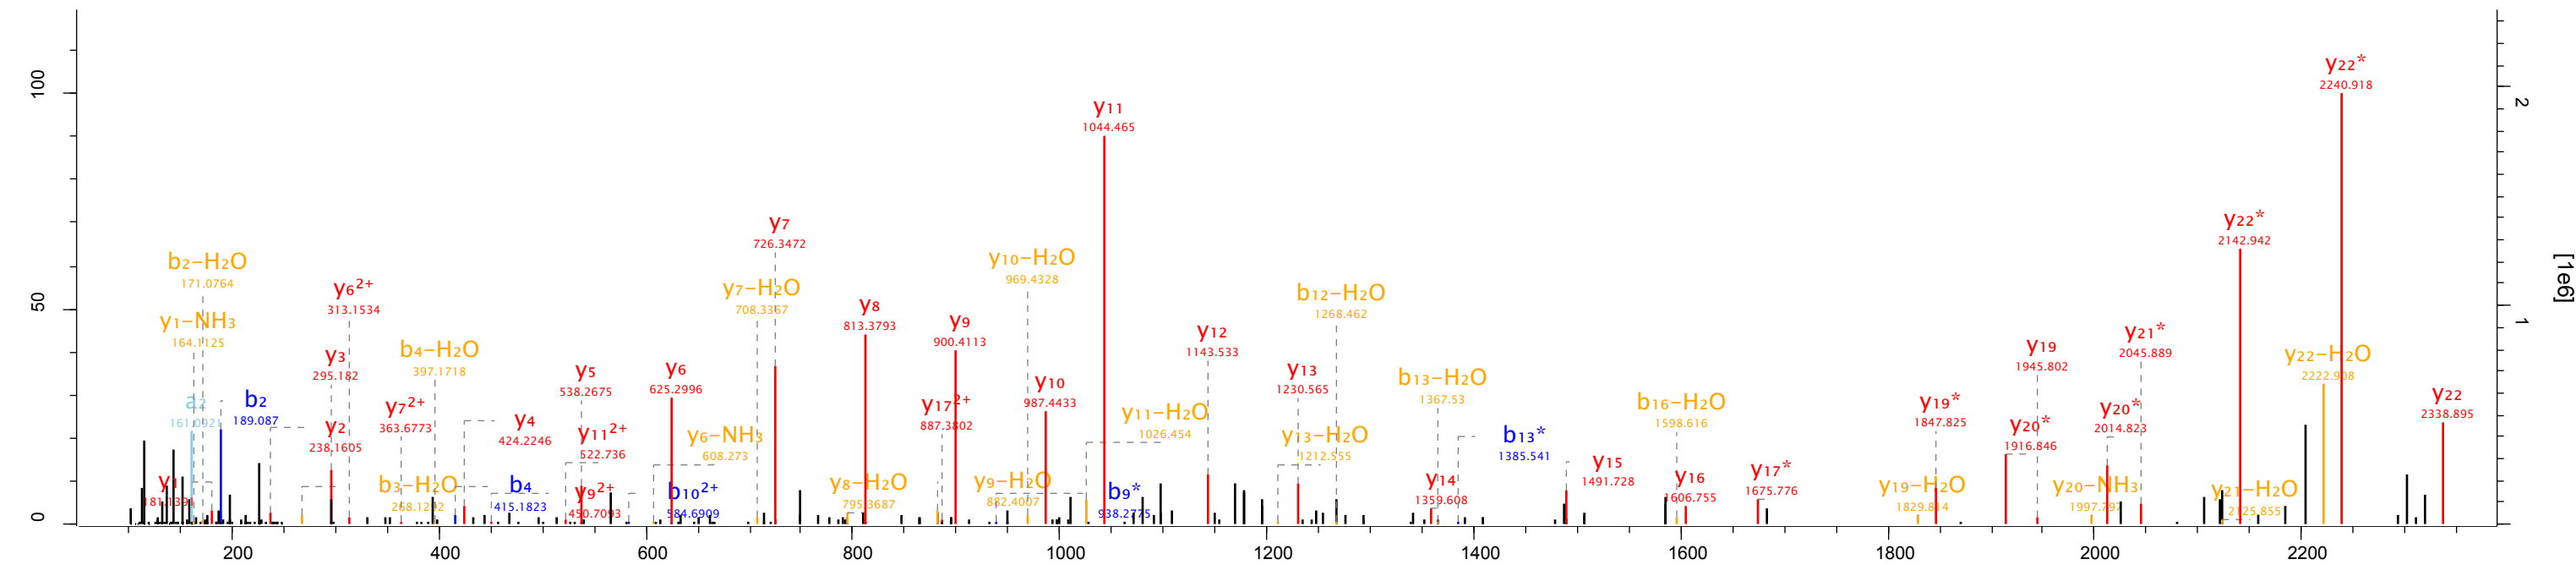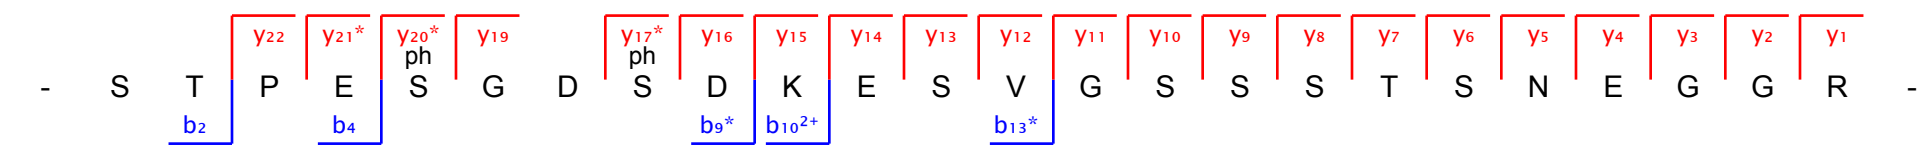

Raw file: 20150812\_A375SR\_Phospho\_BR1\_03  
 Scan: 5883 Method: FTMS; HCD Score: 100.21 m/z: 751.82 Gene names: TOX2

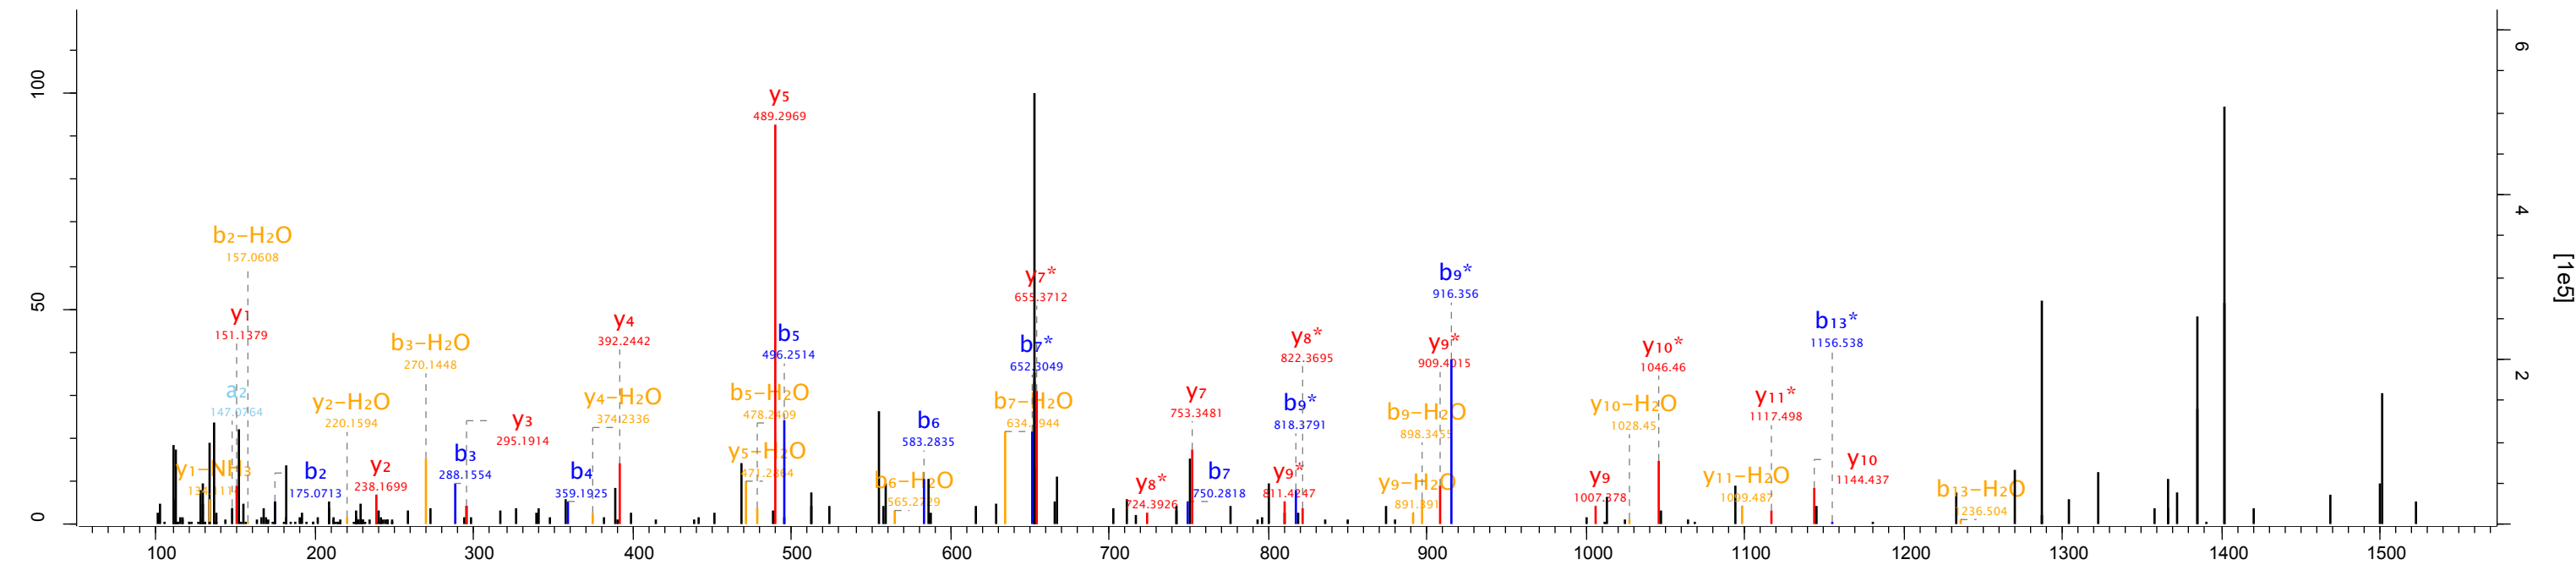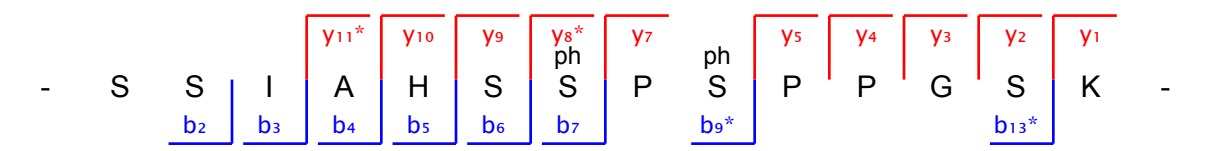

Raw file: 20150812\_A375SR\_Phospho\_BR1\_03  
 Scan: 6703 Method: FTMS; HCD Score: 59.67 m/z: 632.28 Gene names: MAP4K4

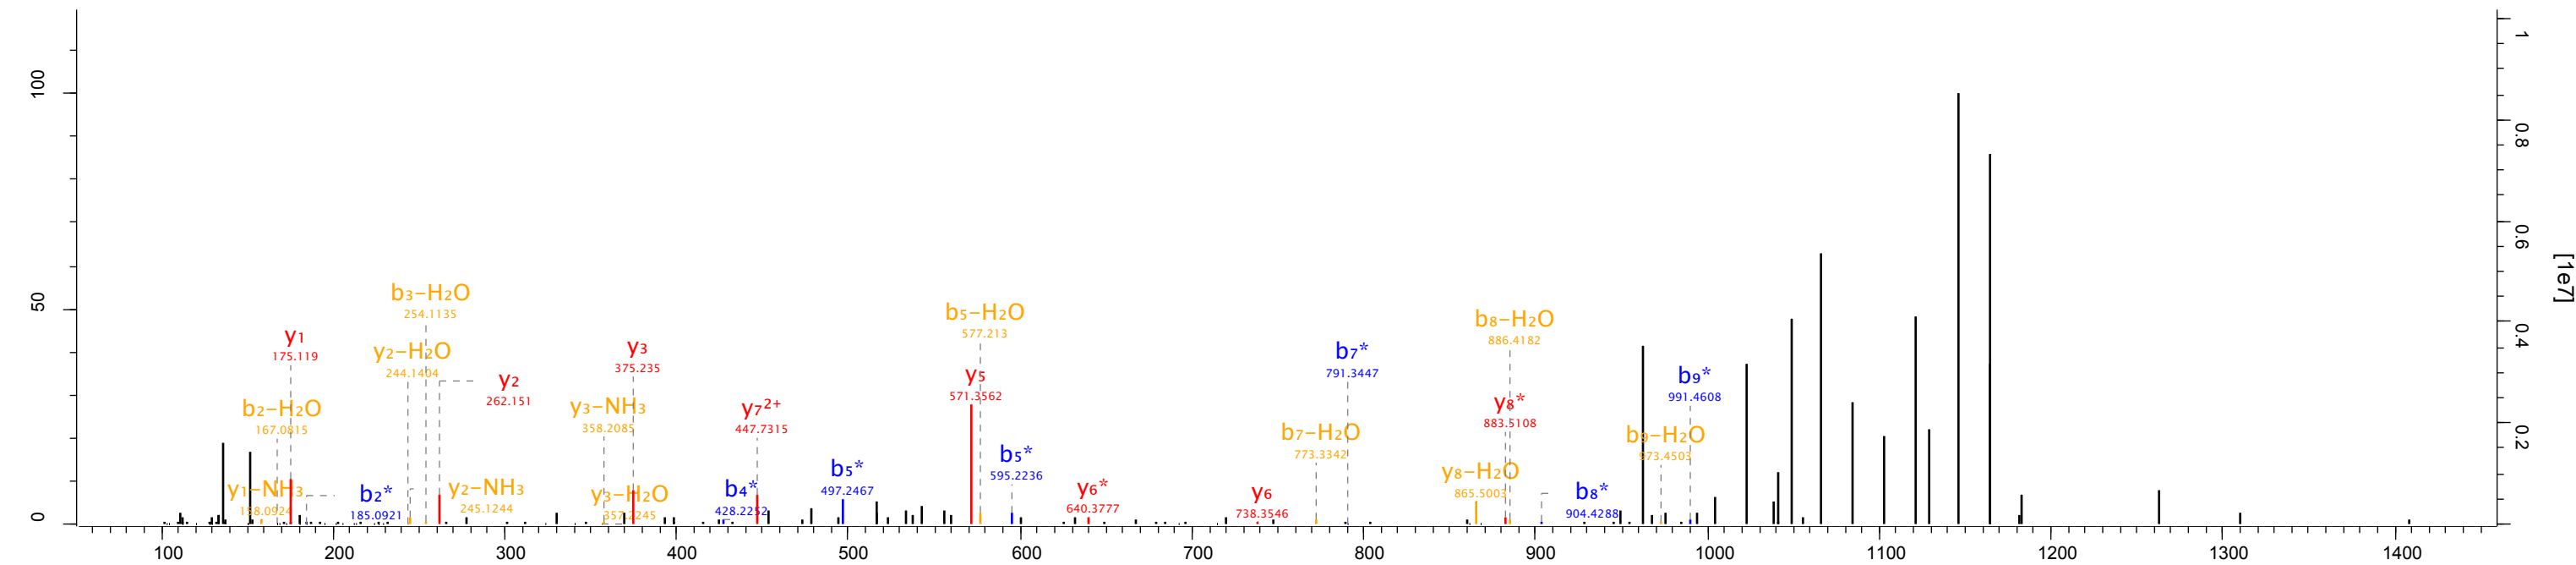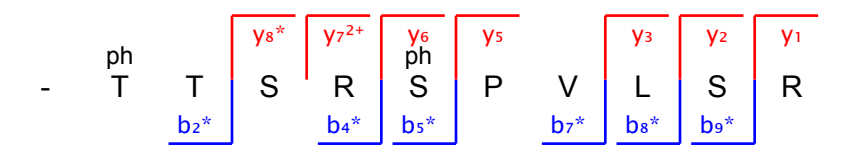

Raw file: 20150812\_A375SR\_Phospho\_BR1\_03  
 Scan: 6933 Method: FTMS; HCD Score: 58.89 m/z: 575.74 Gene names: TRAF7

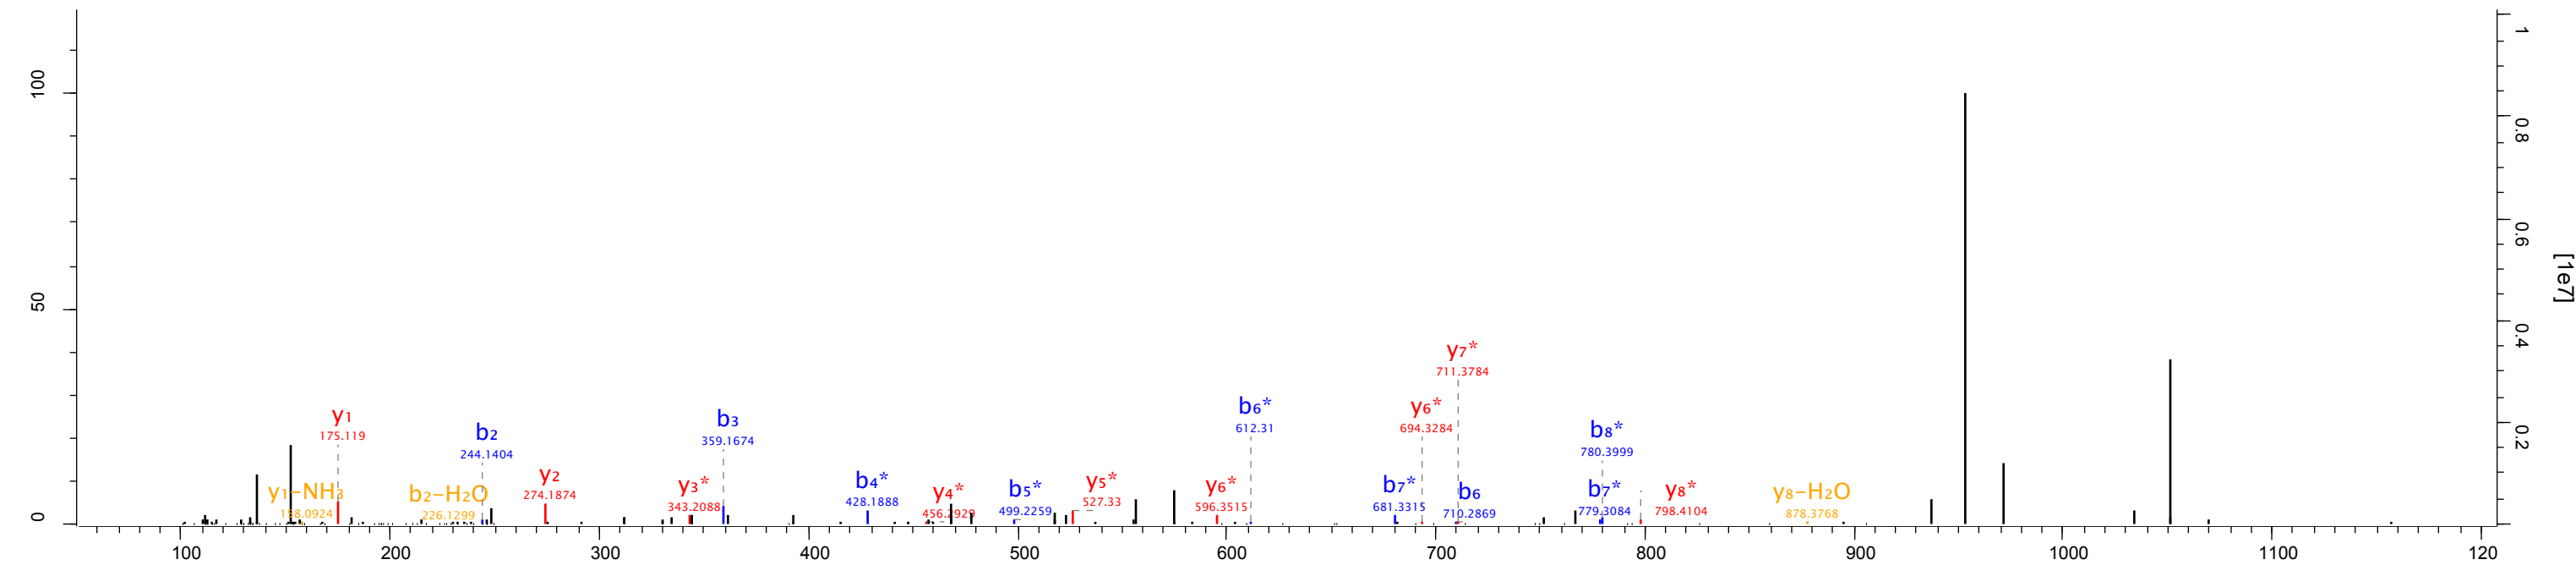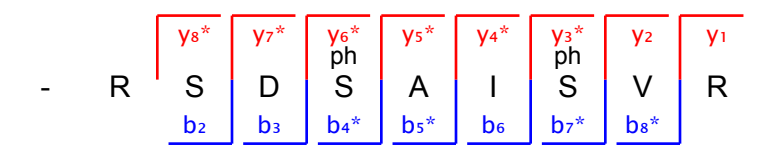

Raw file: 20150812\_A375SR\_Phospho\_BR1\_03  
 Scan: 6963 Method: FTMS; HCD Score: 180.23 m/z: 665.31 Gene names: AFF4

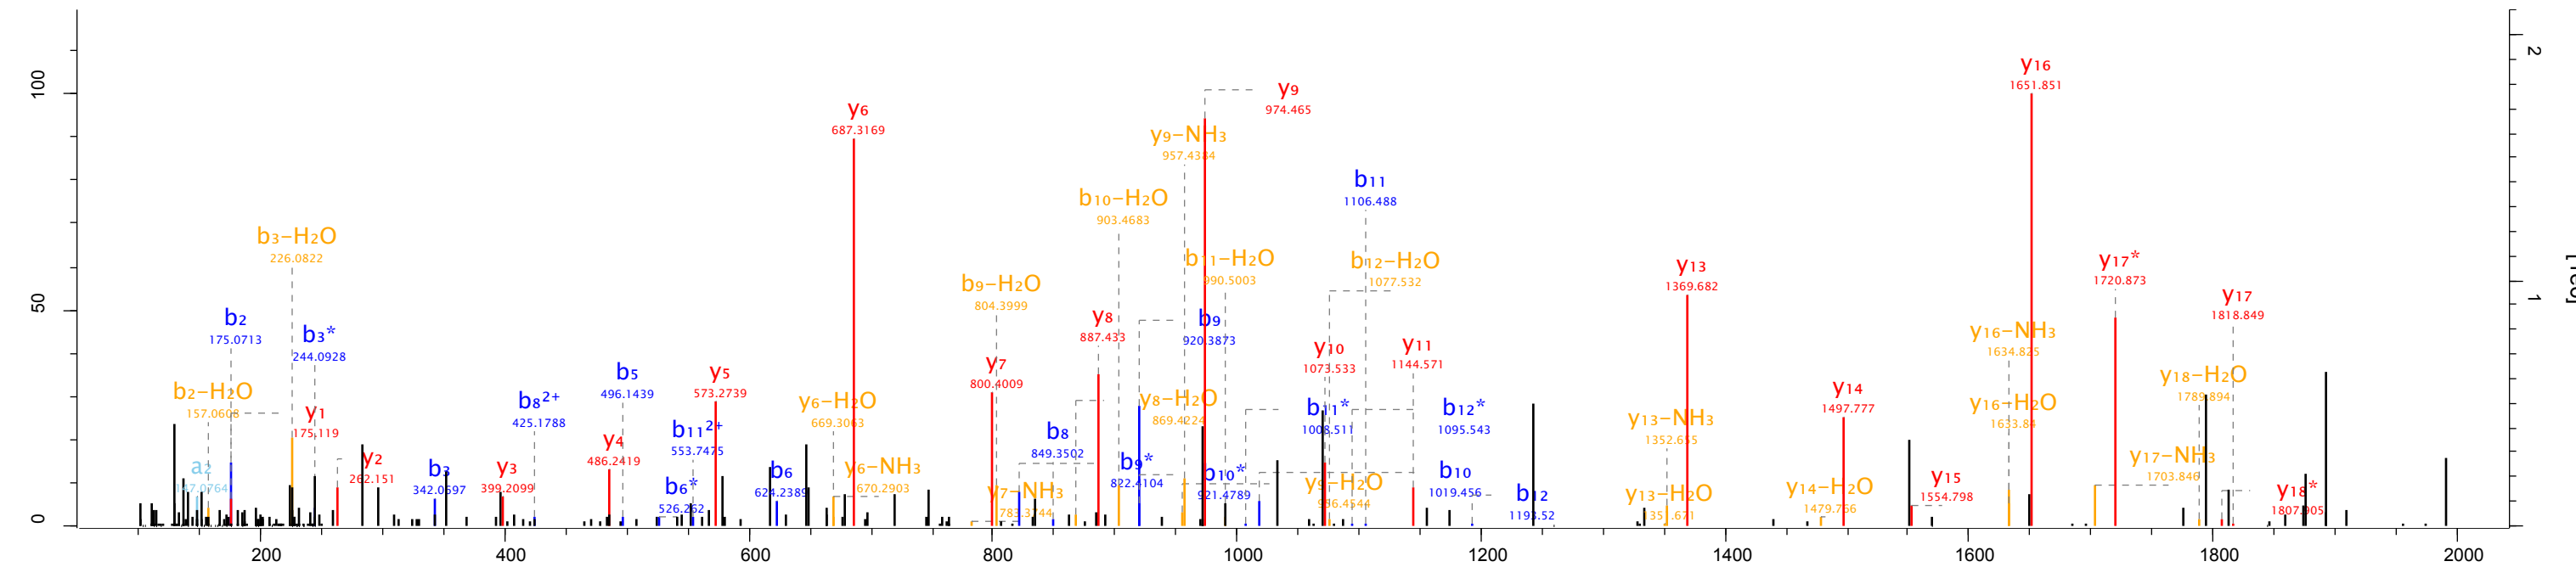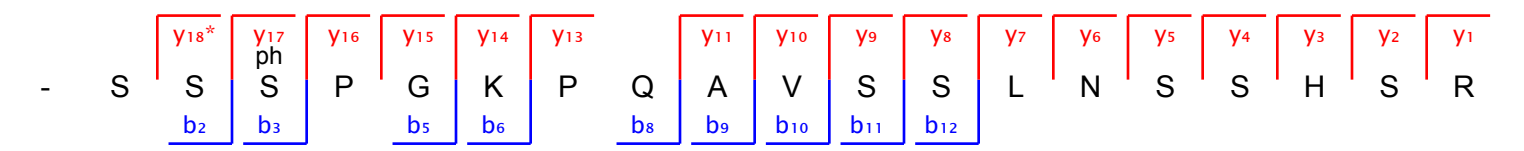

Raw file: 20150812\_A375SR\_Phospho\_BR1\_03  
 Scan: 7053 Method: FTMS; HCD Score: 172.83 m/z: 994.4 Gene names: EIF4B

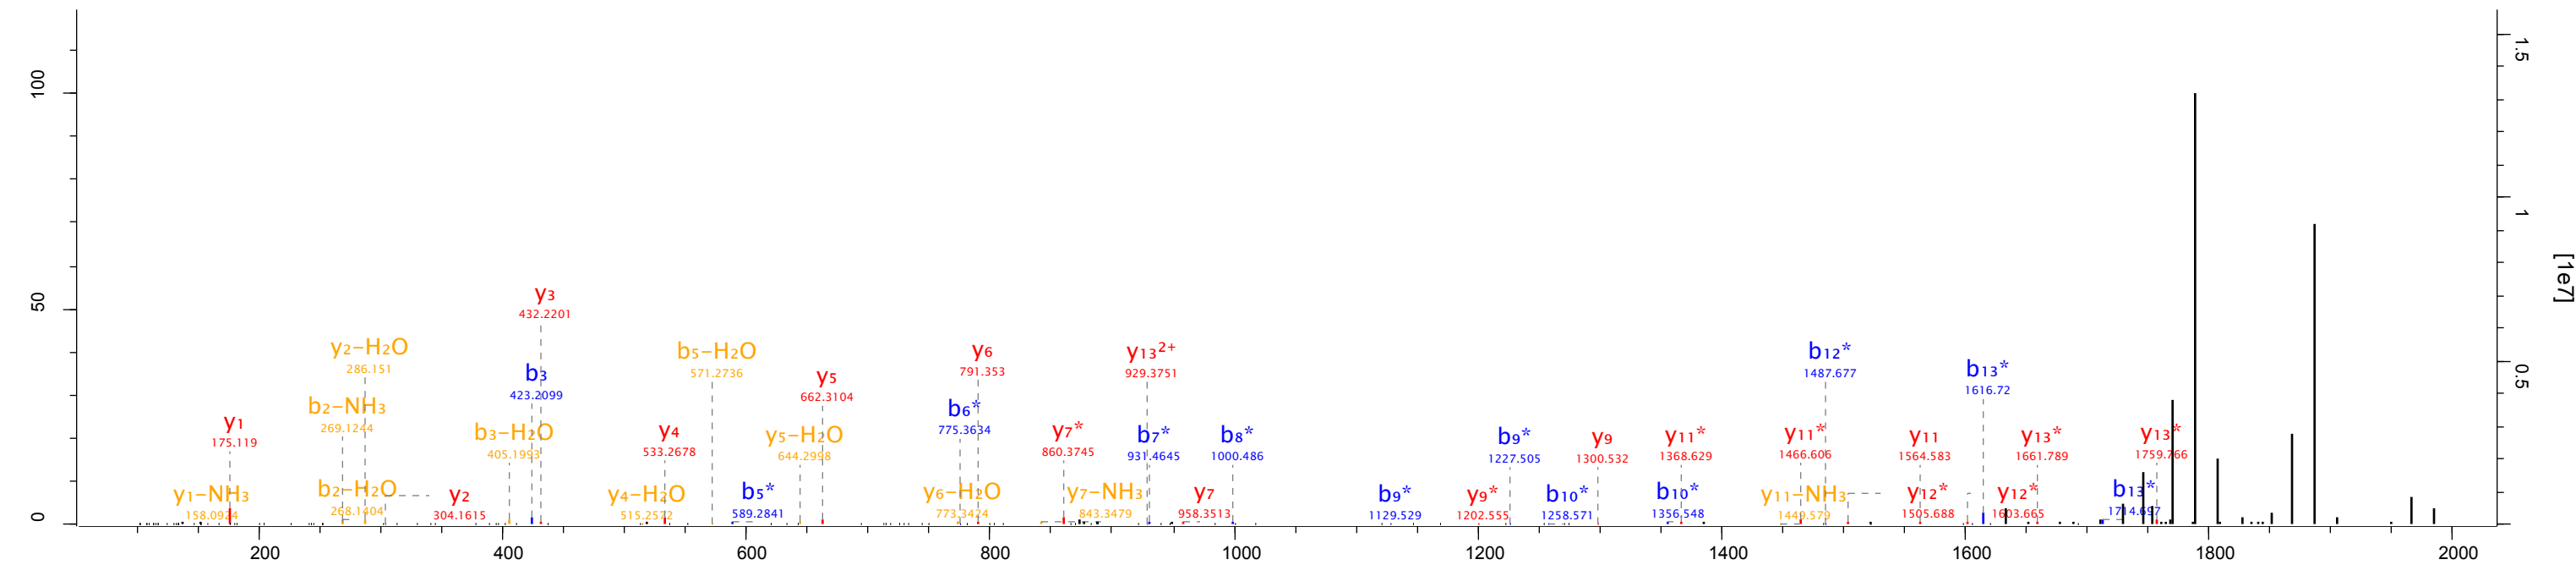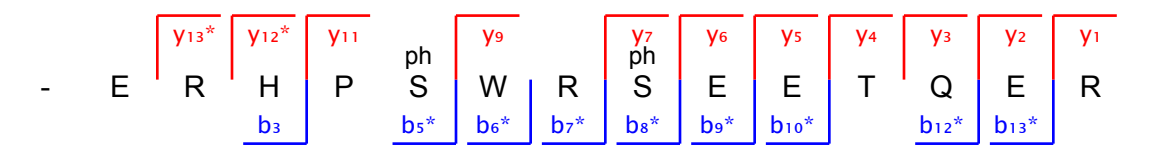

Raw file 20150812\_A375SR\_Phospho\_BR1\_03 Scan 7213 Method FTMS; HCD Score 109.44 m/z 611.74 Gene names PCYT1A

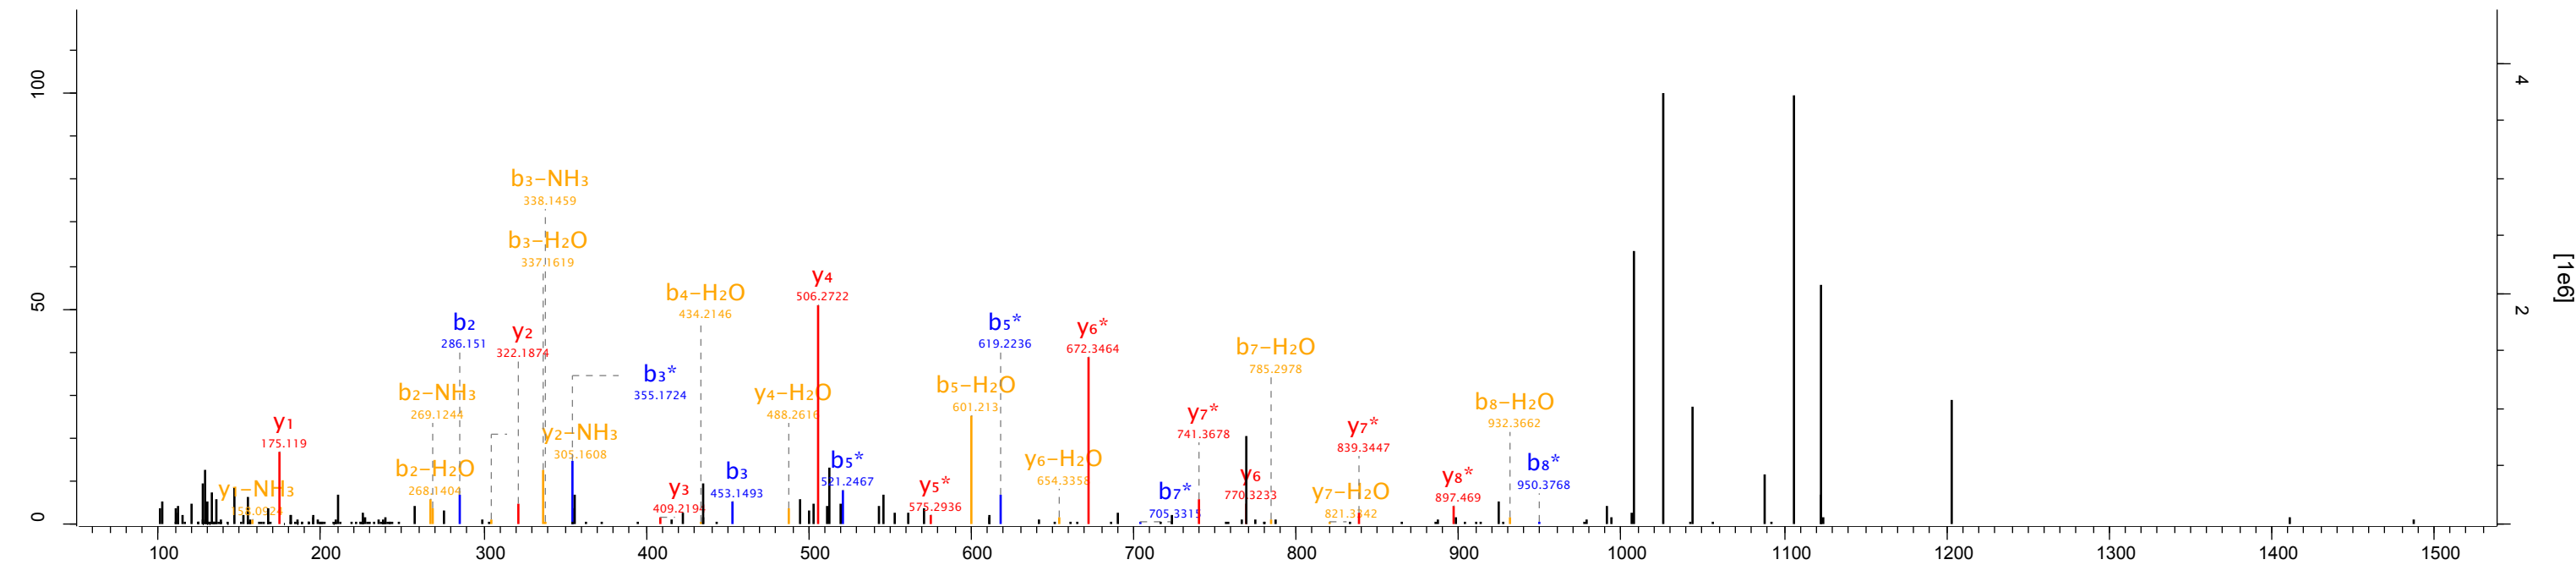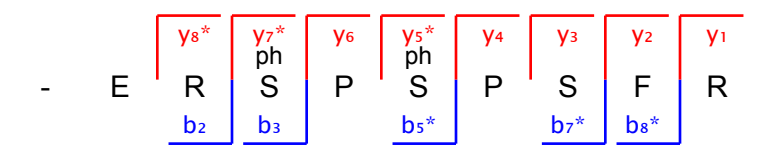



Raw file: 20150812\_A375SR\_Phospho\_BR1\_03  
 Scan: 7383 Method: FTMS; HCD Score: 86.55 m/z: 415.84 Gene names: RIN1

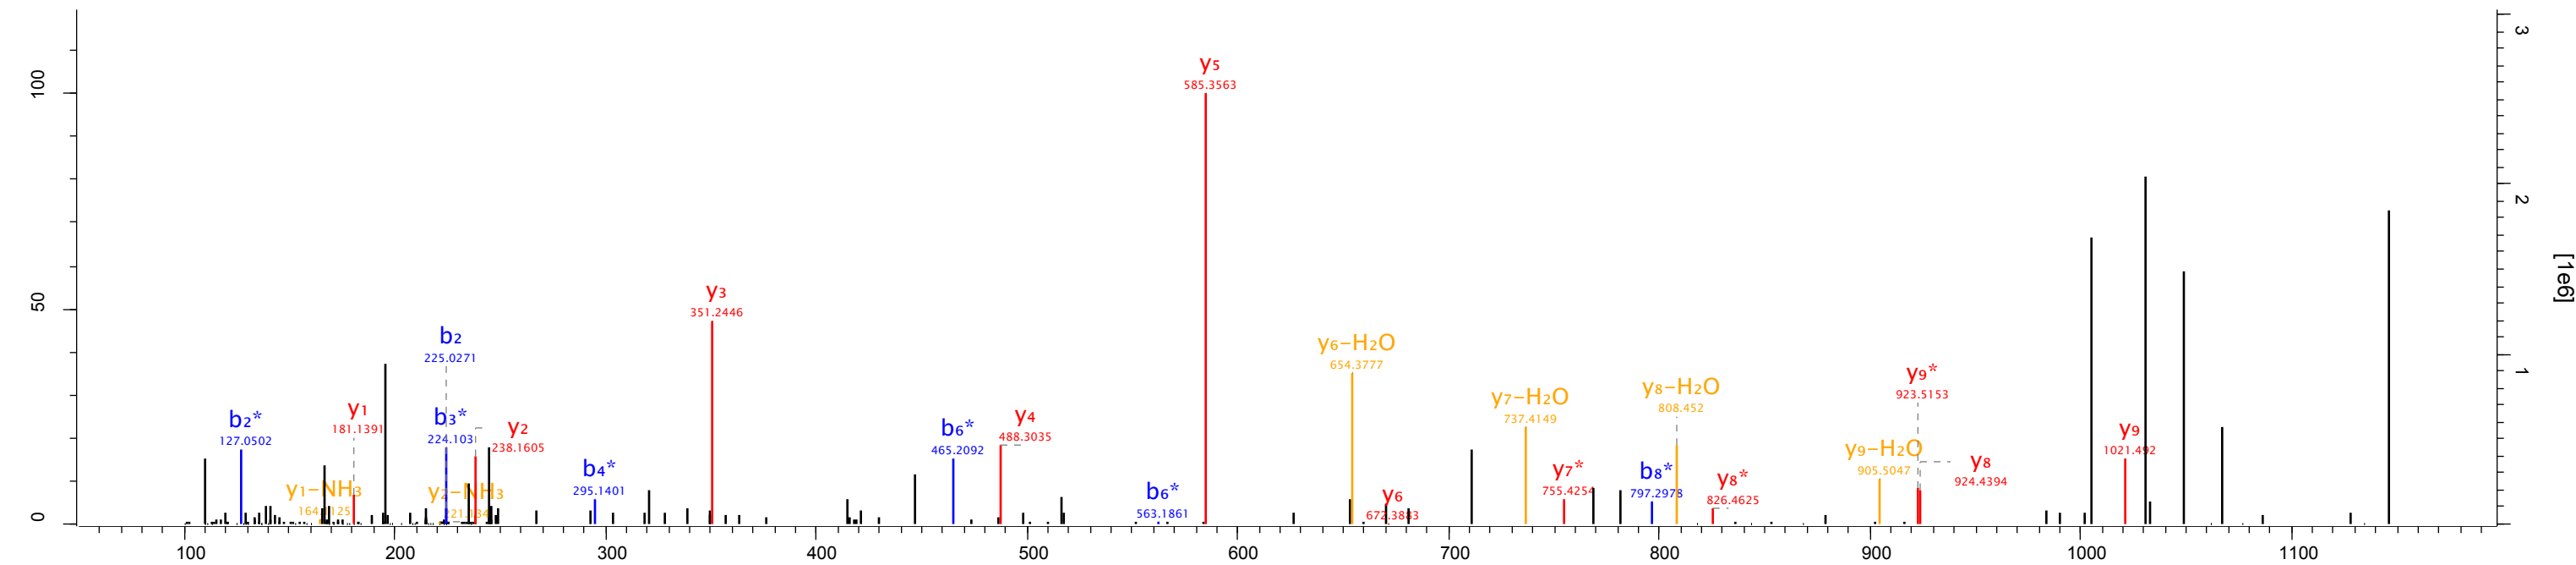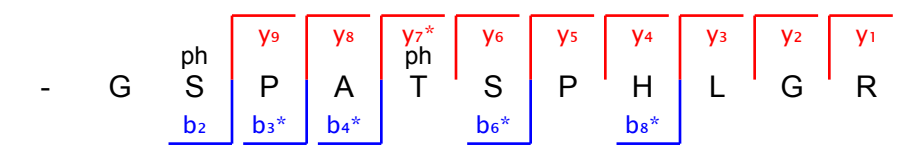

Raw file: 20150812\_A375SR\_Phospho\_BR1\_03  
 Scan: 7903 Method: FTMS; HCD Score: 143.88 m/z: 545.95 Gene names: SEPT7;DKFZp586I031

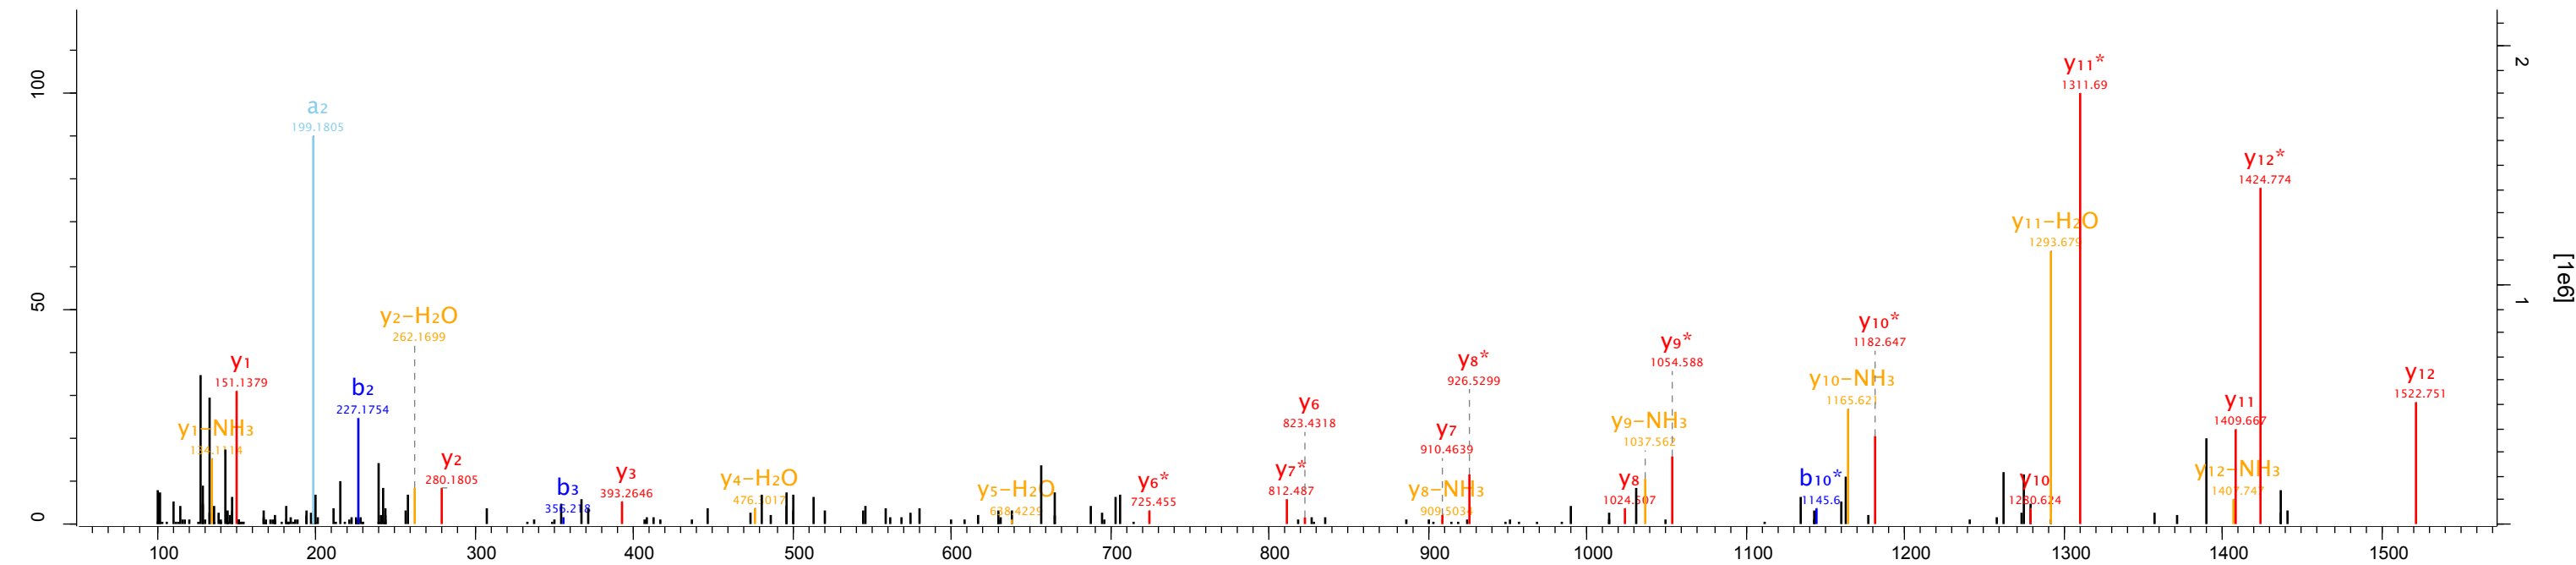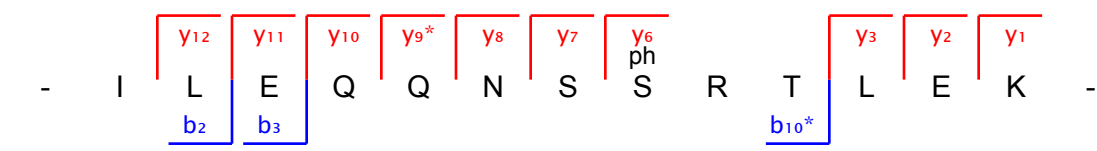



Raw file 20150812\_A375SR\_Phospho\_BR1\_03 Scan 8343 Method FTMS; HCD Score 78.19 m/z 419.88 Gene names OSER1

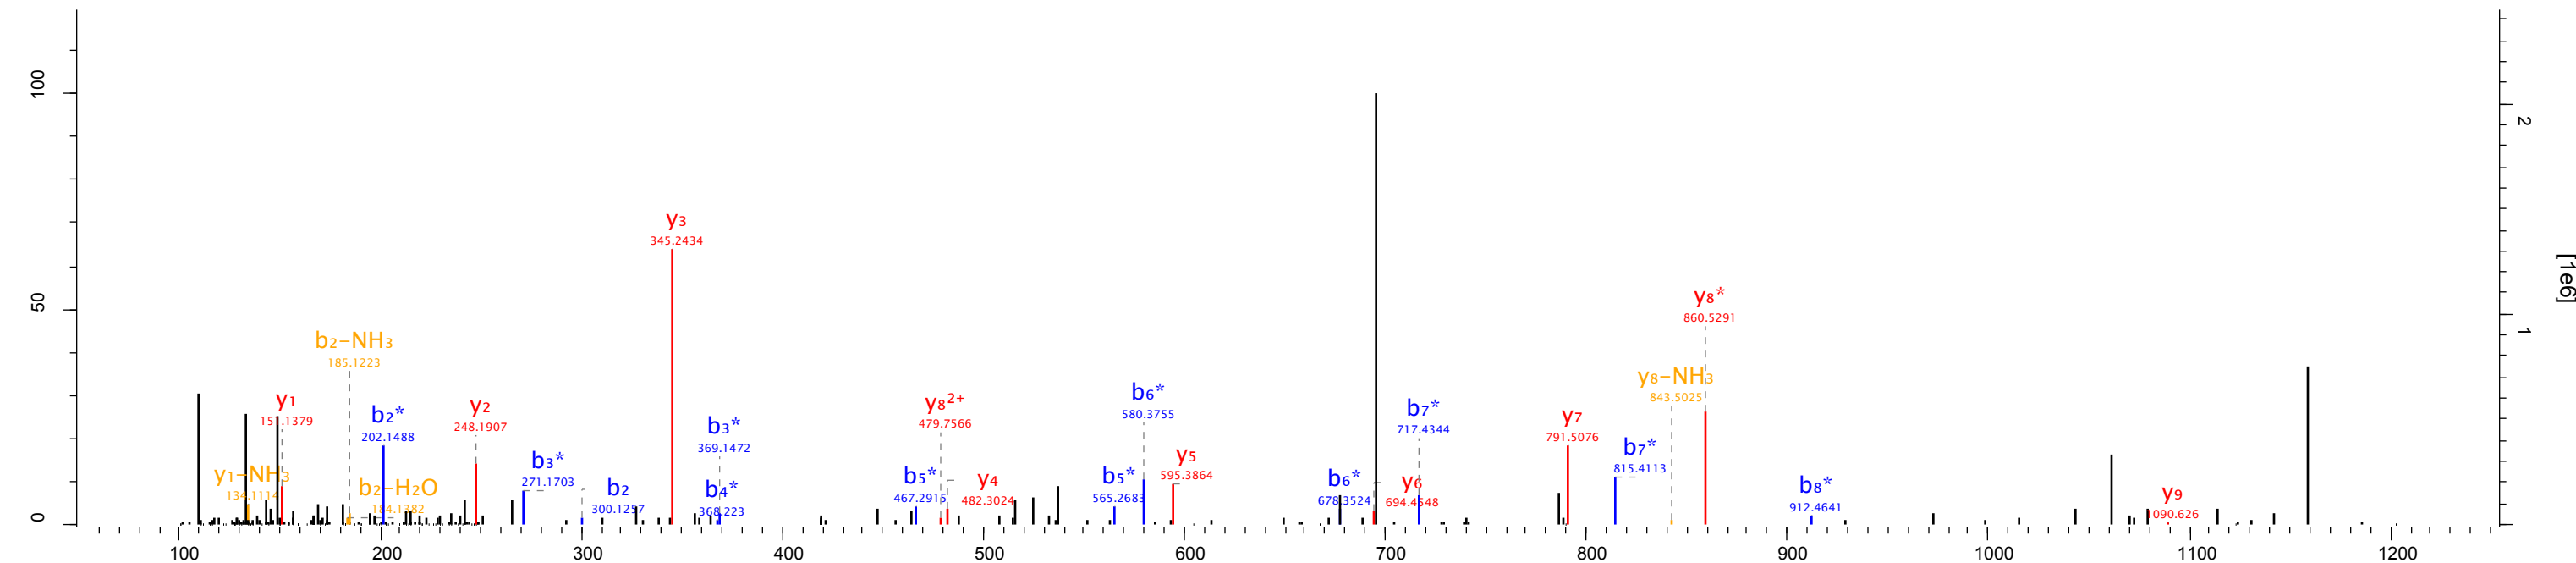

ph S -

|    |     |     |     |     |     |     |    |    |
|----|-----|-----|-----|-----|-----|-----|----|----|
| y9 | y8* | y7  | y6  | y5  | y4  | y3  | y2 | y1 |
| K  | S   | P   | V   | L   | H   | P   | P  | K  |
| b2 | b3* | b4* | b5* | b6* | b7* | b8* |    |    |

-

Raw file  
20150812\_A375SR\_Phospho\_BR1\_03

Scan 8373 Method FTMS; HCD Score 247.52 m/z 771.65 Gene names C18orf25;ARKL1

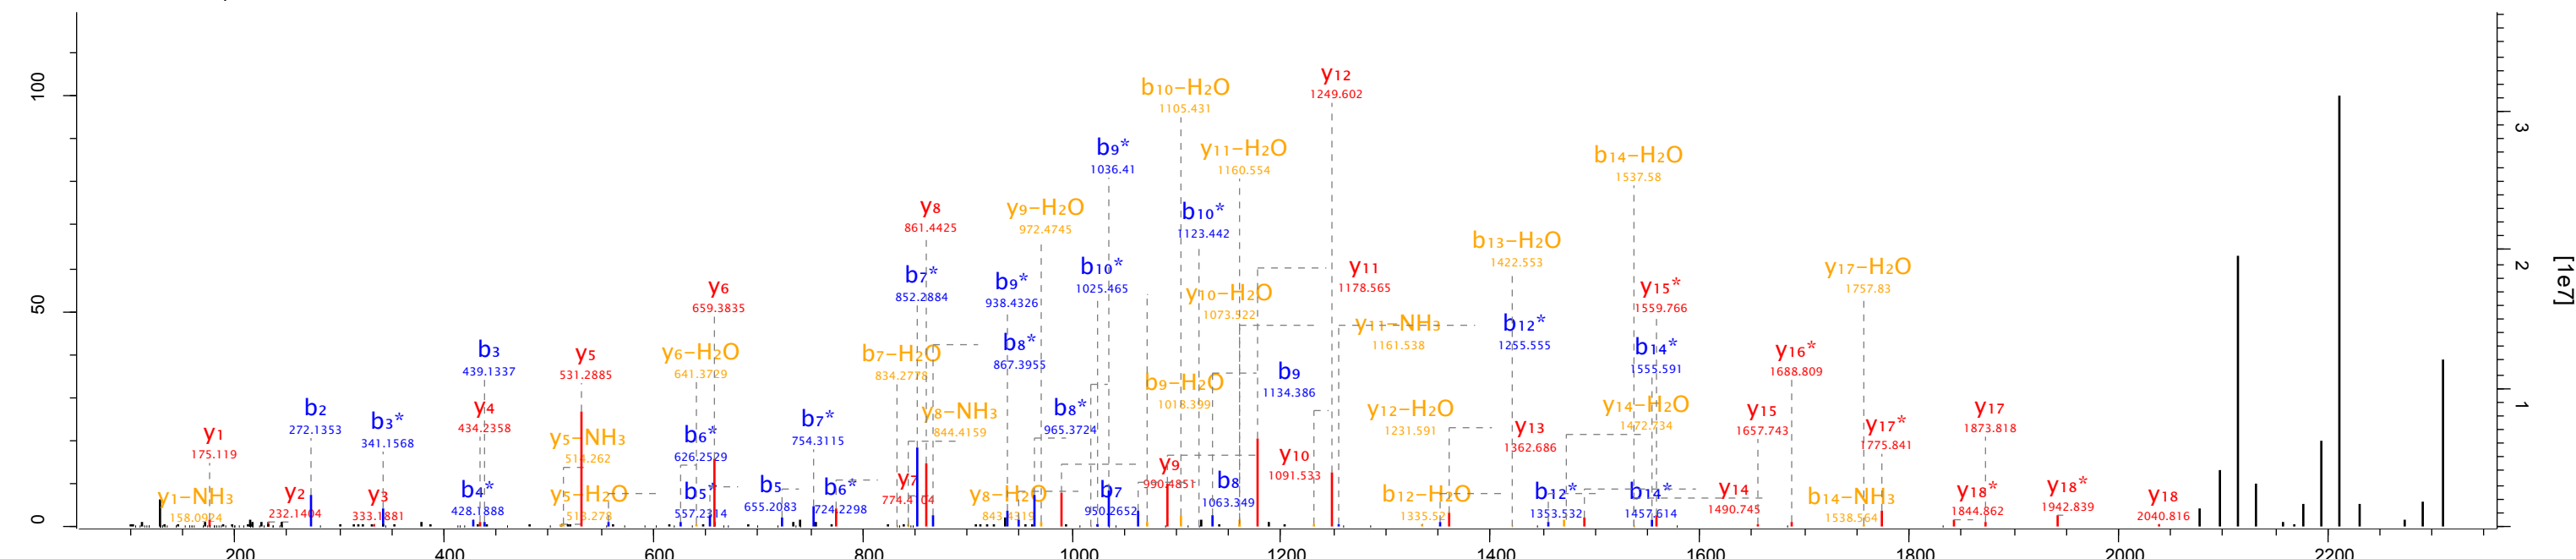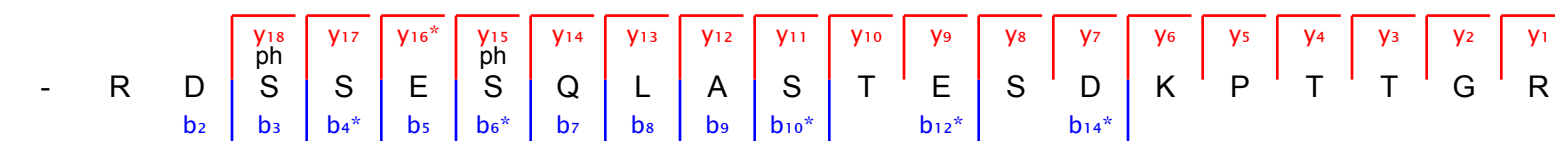

Raw file 20150812\_A375SR\_Phospho\_BR1\_03 Scan 8843 Method FTMS; HCD Score 75.38 m/z 775.79 Gene names ZC3HAV1

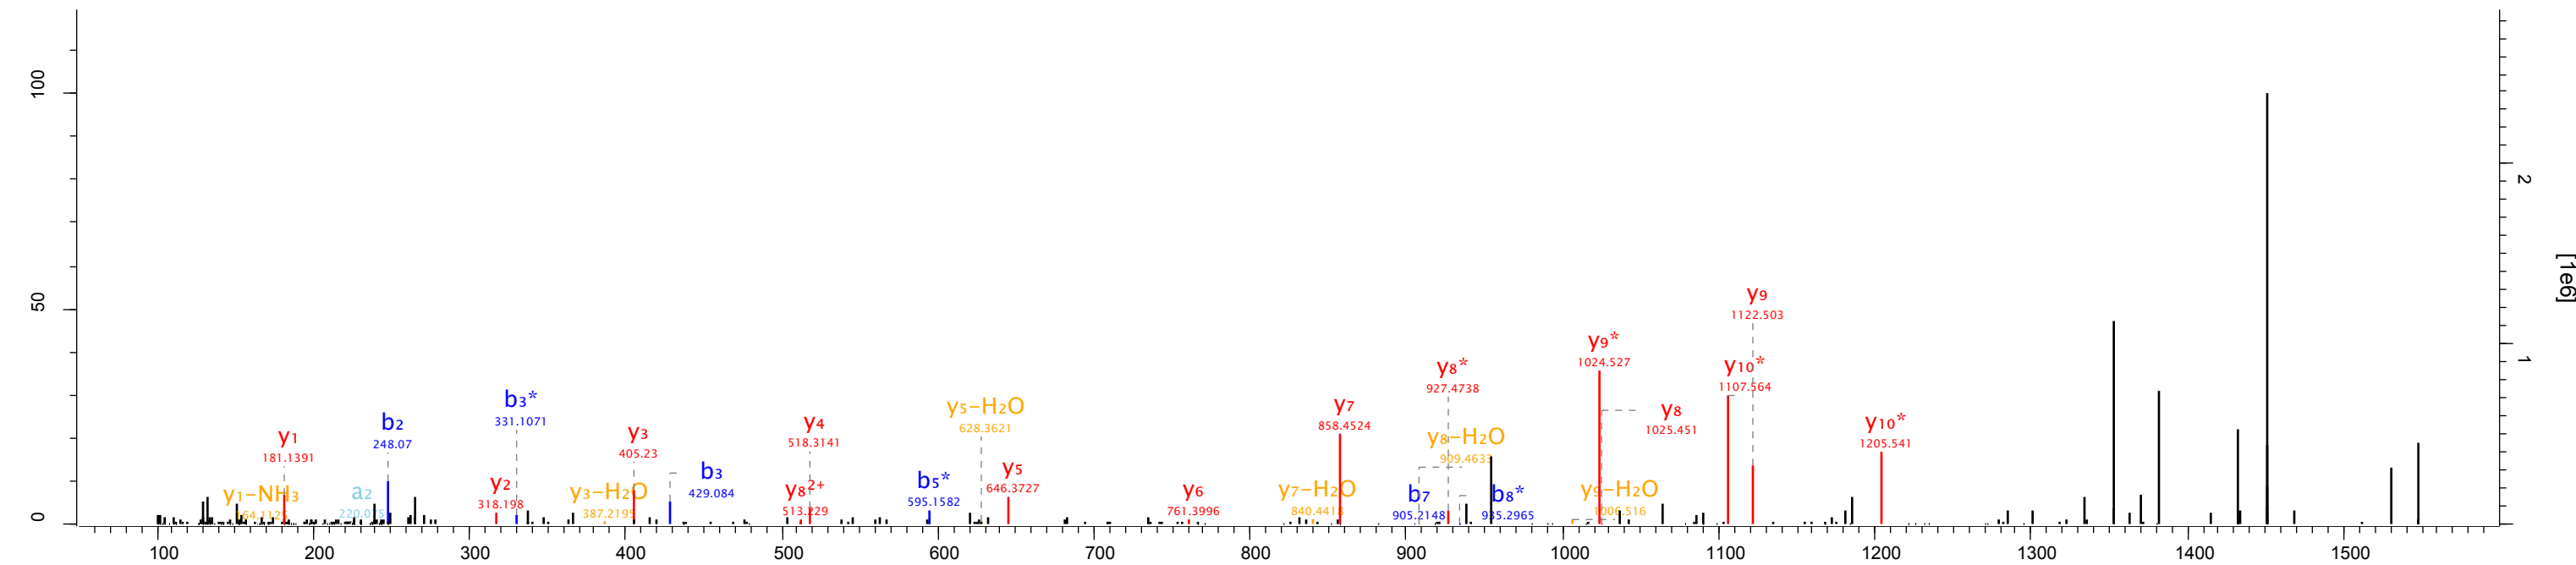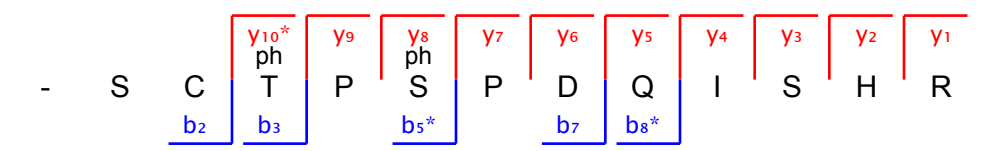

Raw file: 20150812\_A375SR\_Phospho\_BR1\_03  
 Scan: 9963 Method: FTMS; HCD Score: 404.46 m/z: 1215.02 Gene names: HSP90AB1;HSP90AB2P

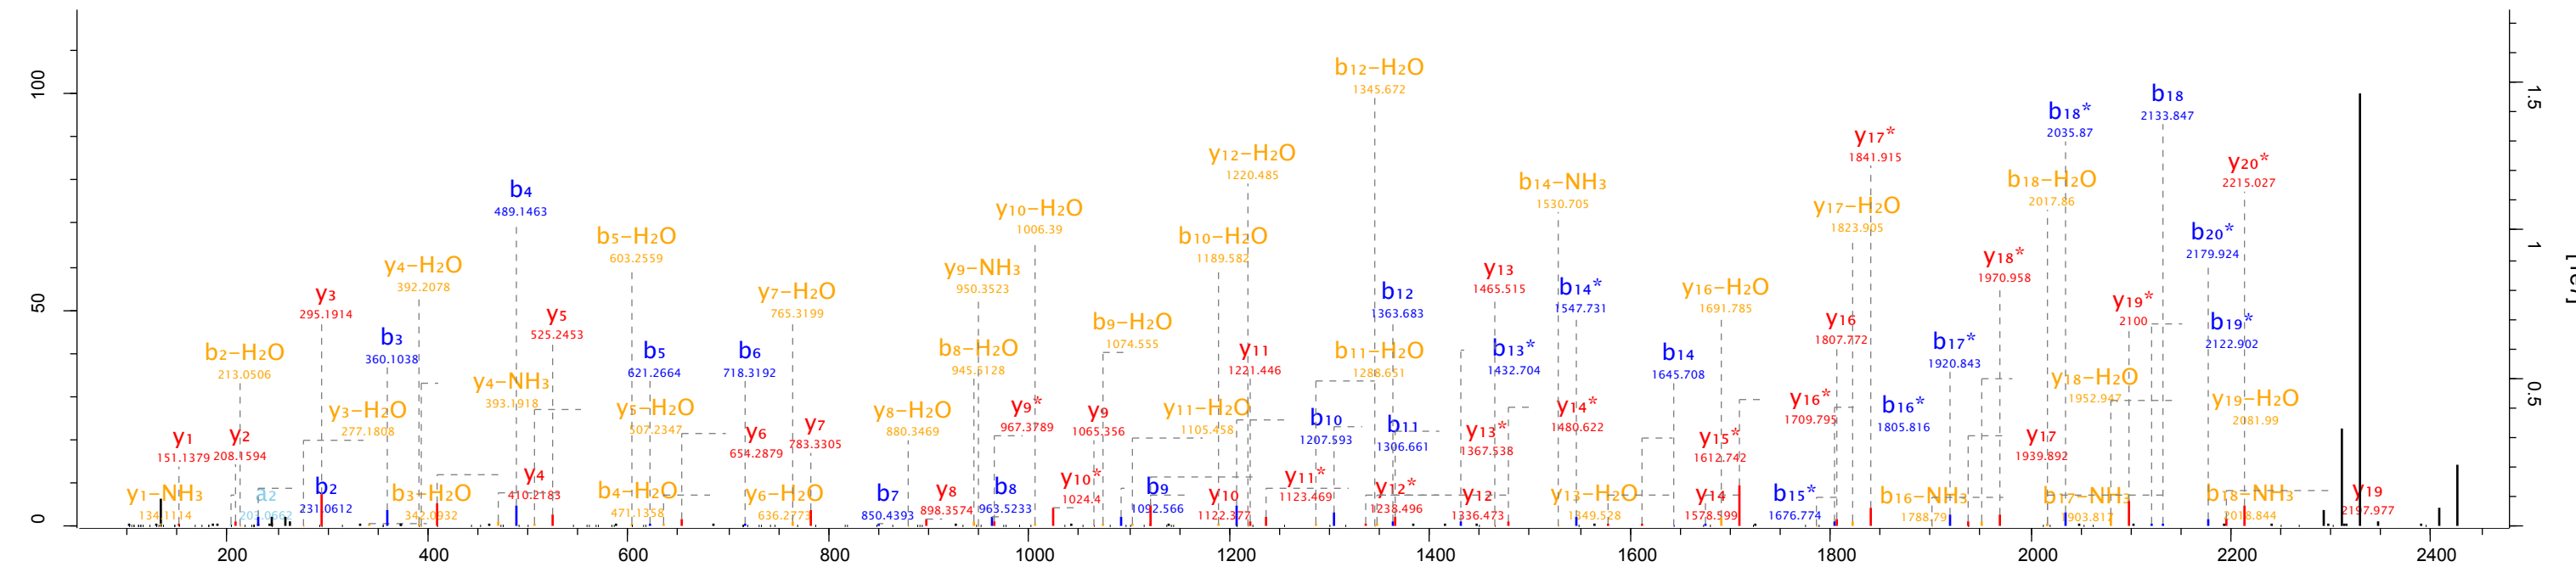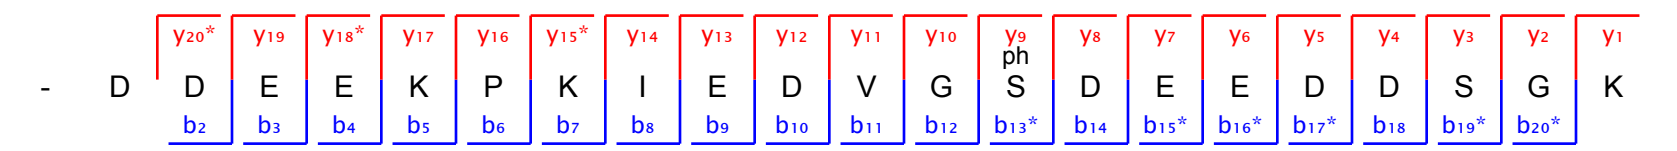

Raw file 20150812\_A375SR\_Phospho\_BR1\_04 Scan 10733 Method FTMS; HCD Score 78.65 m/z 776.02 Gene names MYH9

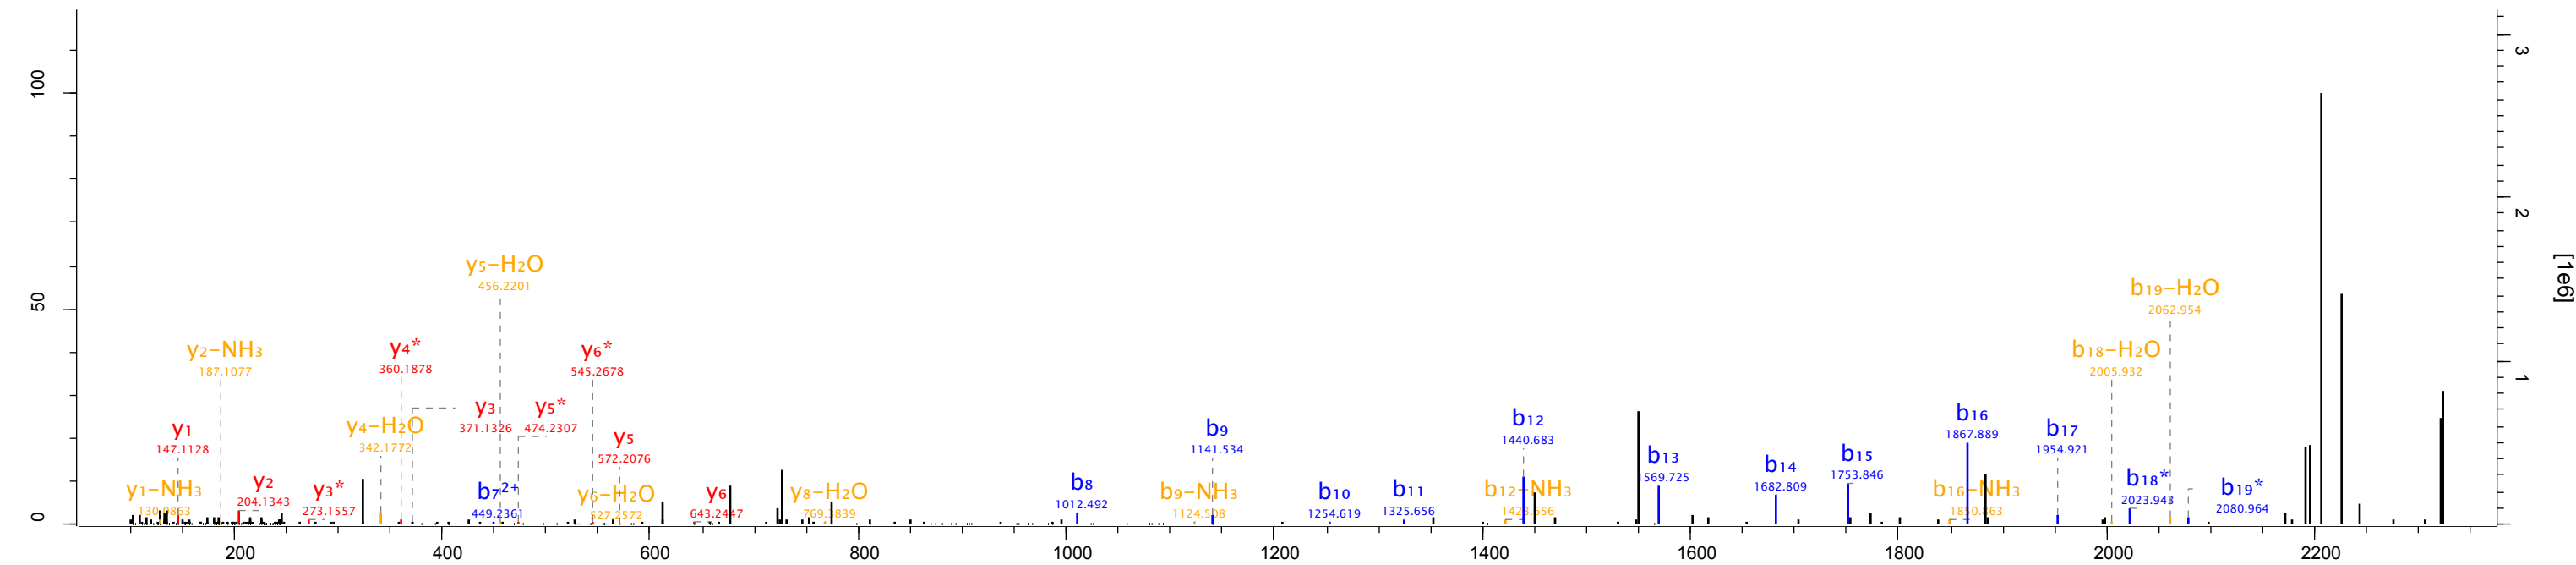

- R Q A Q Q E R D E L A D E I A N S ph S G K -

b7<sup>2+</sup>
b8
b9
b10
b11
b12
b13
b14
b15
b16
b17
b18\*
b19\*



Raw file 20150812\_A375SR\_Phospho\_BR1\_04 Scan 11053 Method FTMS; HCD Score 85.86 m/z 930.75 Gene names RPRD2

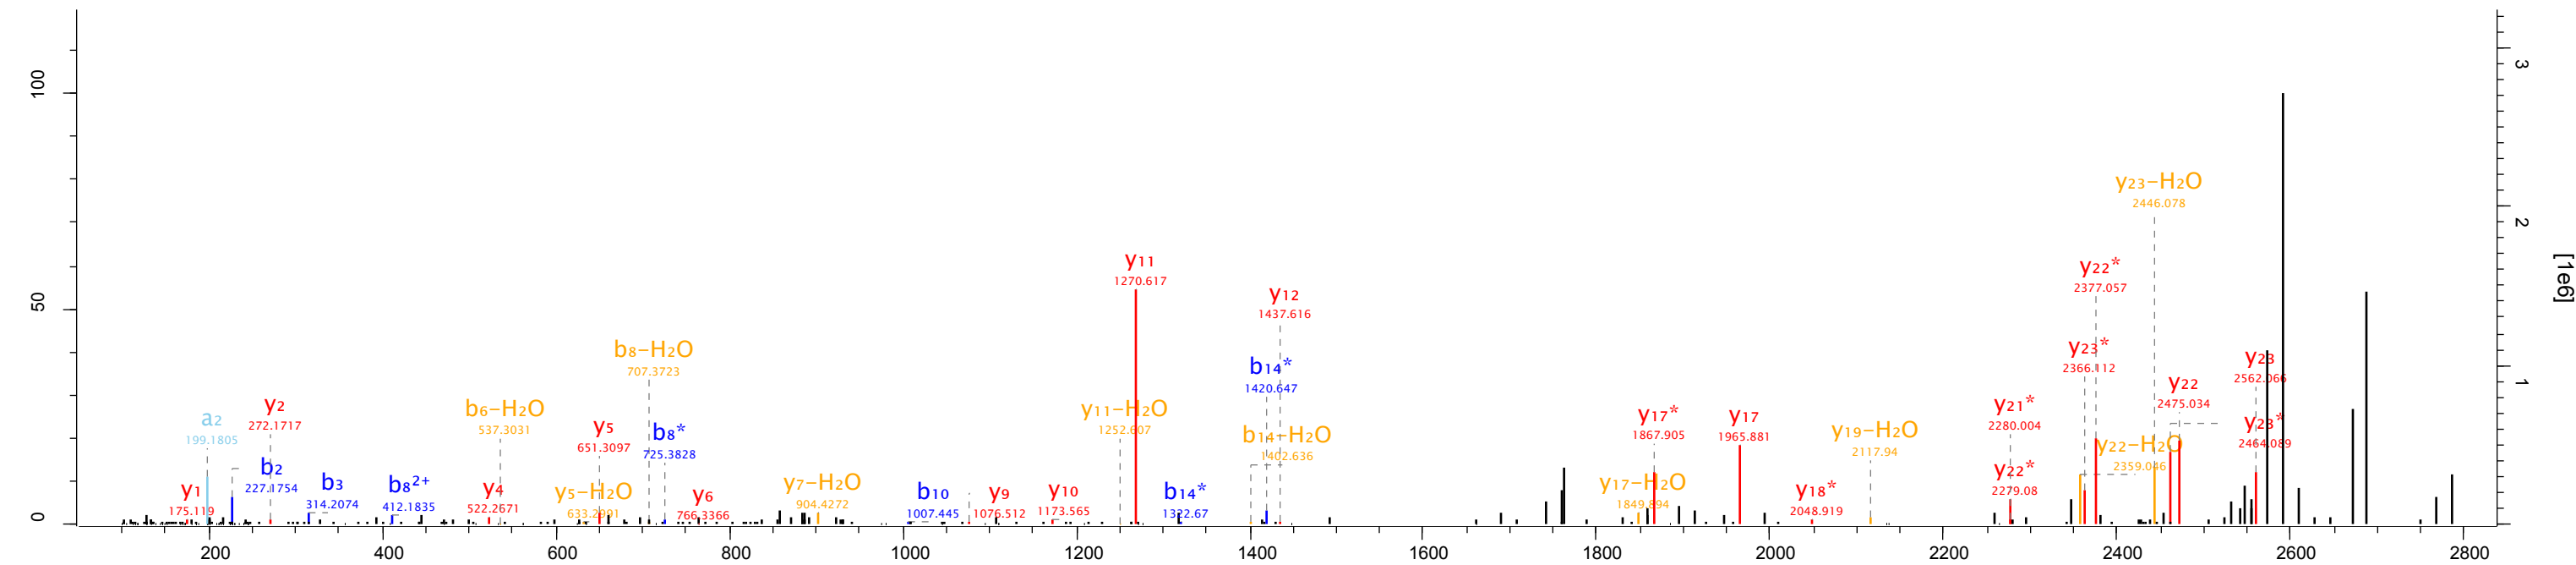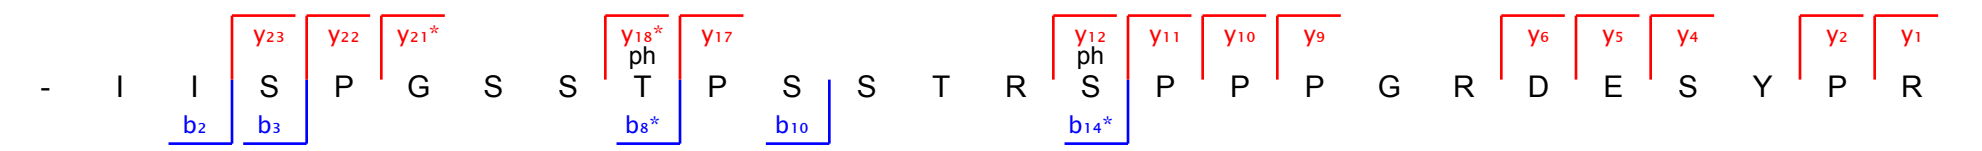

Raw file 20150812\_A375SR\_Phospho\_BR1\_04 Scan 11263 Method FTMS; HCD Score 341.9 m/z 853.39 Gene names DLGAP5

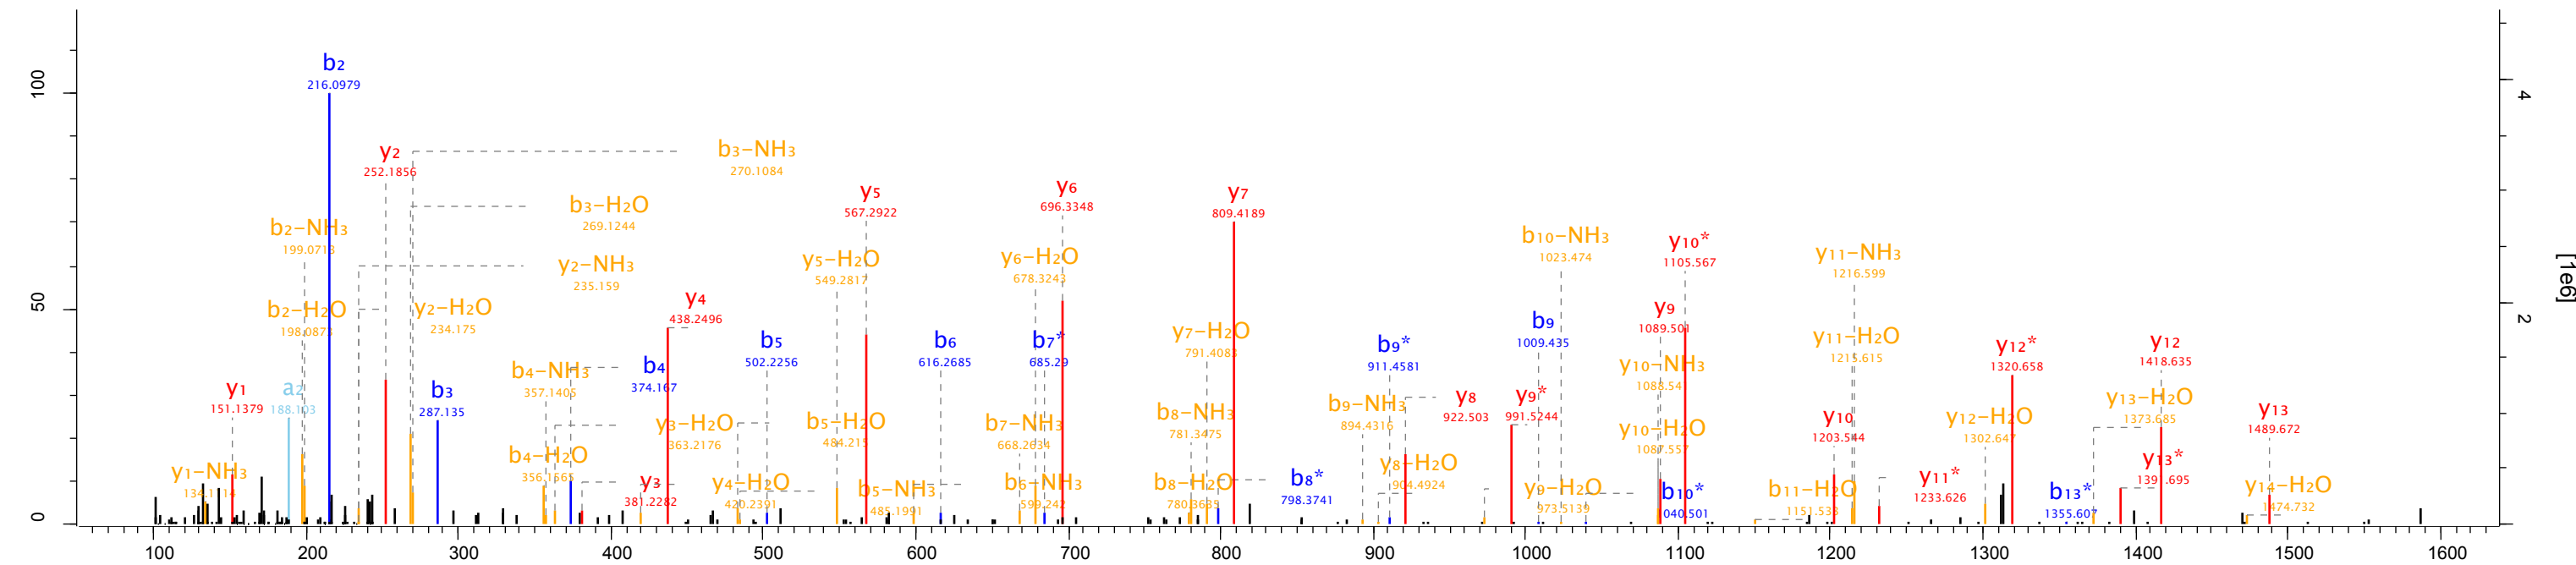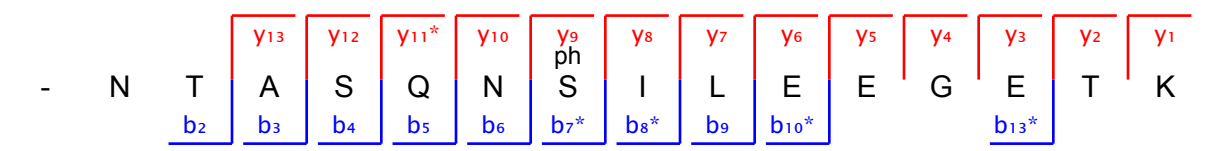

Raw file 20150812\_A375SR\_Phospho\_BR1\_04 Scan 13433 Method FTMS; HCD Score 209.83 m/z 1236.18 Gene names MARCKSL1

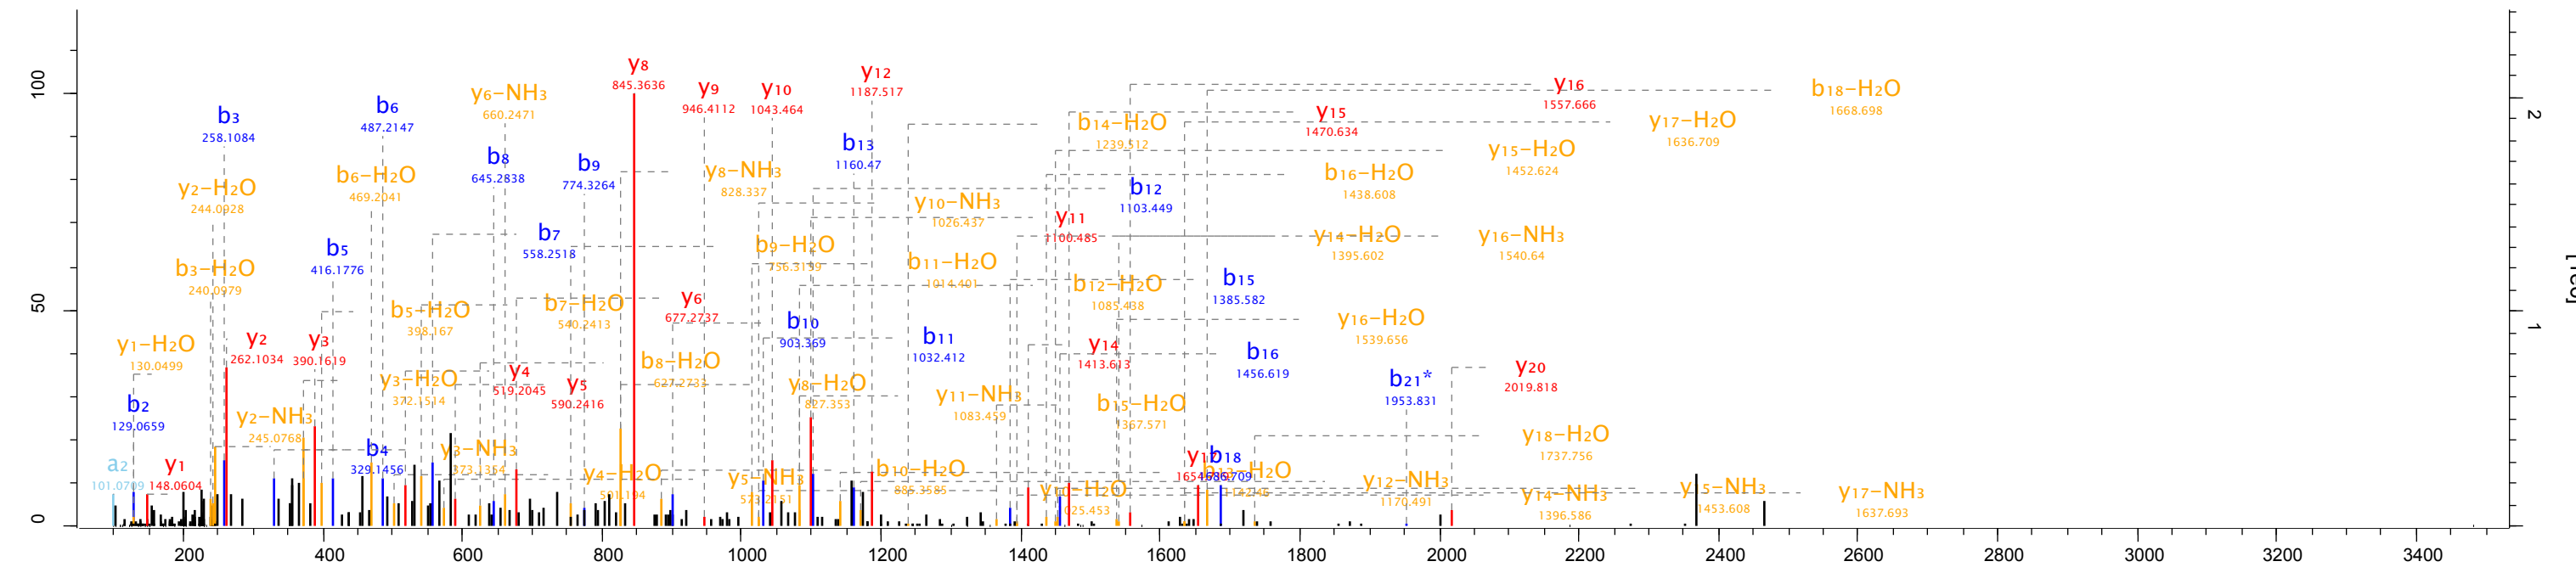

- G A E A S A A S E E E A G P Q A T E P S T P S G P E S G P T P A S A E Q N E

b<sub>2</sub>
b<sub>3</sub>
b<sub>4</sub>
b<sub>5</sub>
b<sub>6</sub>
b<sub>7</sub>
b<sub>8</sub>
b<sub>9</sub>
b<sub>10</sub>
b<sub>11</sub>
b<sub>12</sub>
b<sub>13</sub>
b<sub>15</sub>
b<sub>16</sub>
b<sub>18</sub>
b<sub>21</sub>\*
y<sub>1</sub>
y<sub>2</sub>
y<sub>3</sub>
y<sub>4</sub>
y<sub>5</sub>
y<sub>6</sub>
y<sub>8</sub>
y<sub>9</sub>
y<sub>10</sub>
y<sub>11</sub>
y<sub>12</sub>
y<sub>14</sub>
y<sub>15</sub>
y<sub>16</sub>
y<sub>17</sub>
y<sub>20</sub>

Raw file: 20150812\_A375SR\_Phospho\_BR1\_04  
 Scan: 13993 Method: FTMS; HCD Score: 164.46 m/z: 818.74 Gene names: STAU2

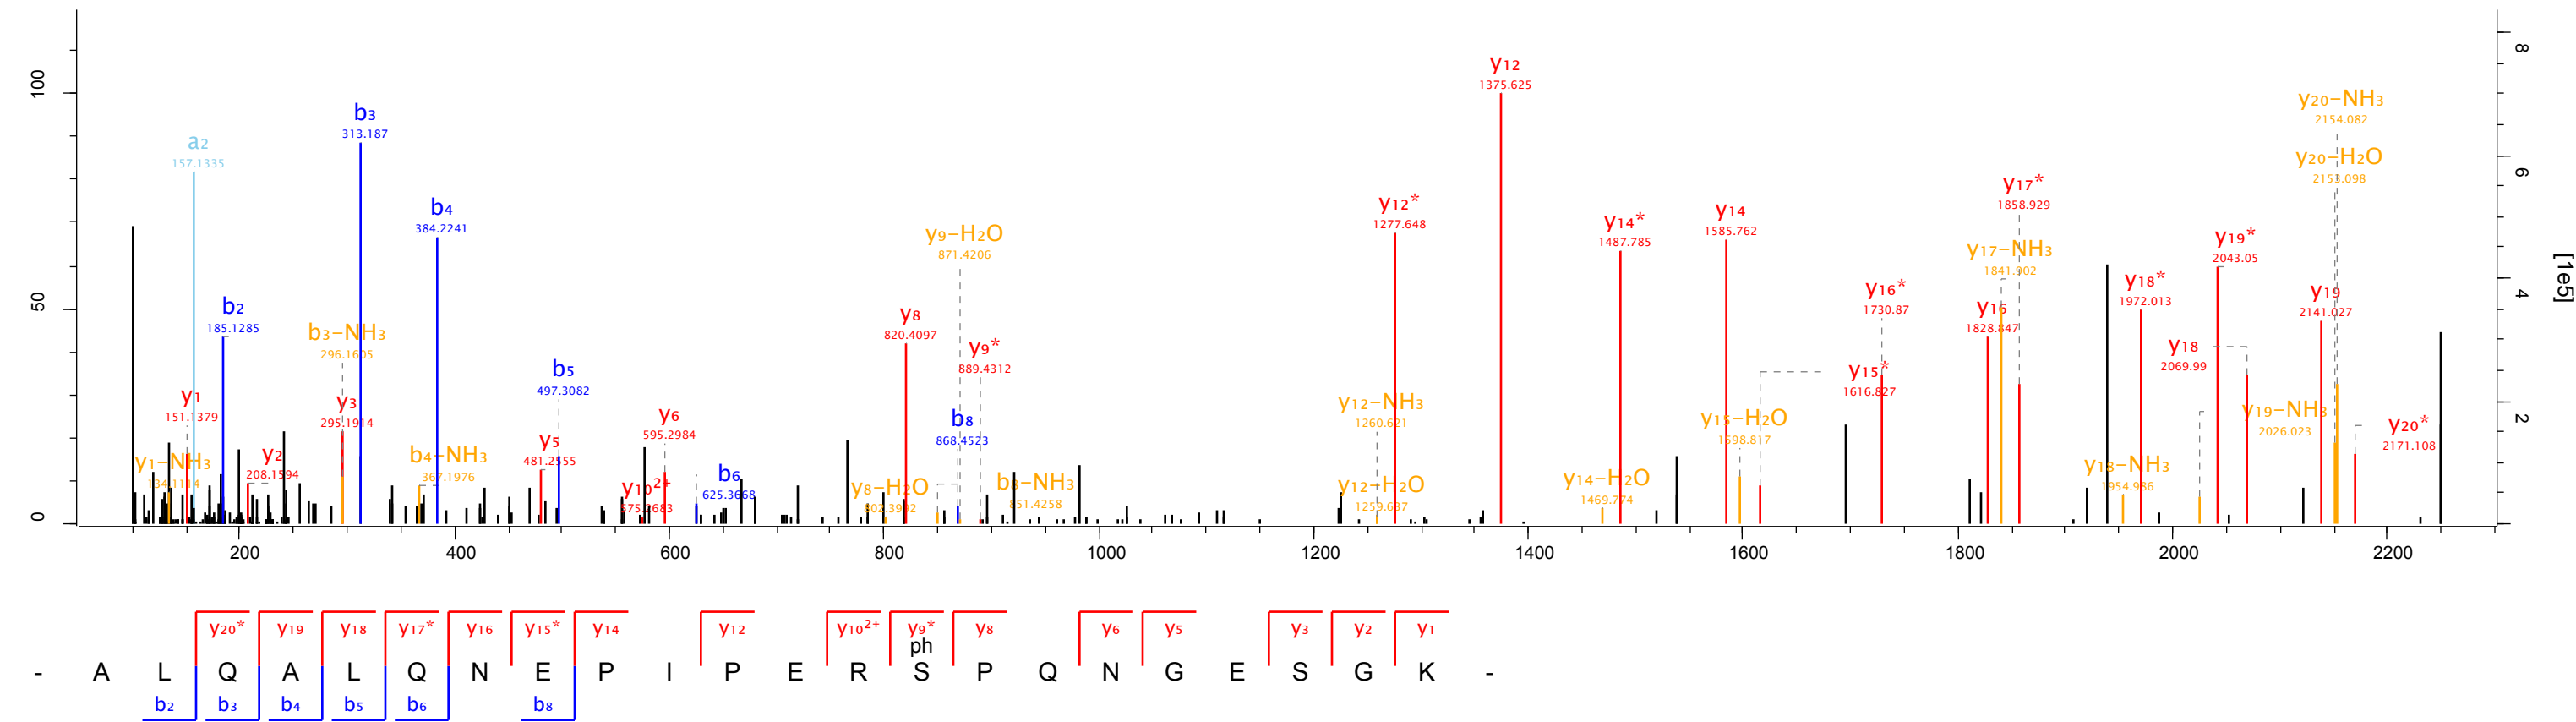



Raw file 20150812\_A375SR\_Phospho\_BR1\_04 Scan 14623 Method FTMS; HCD Score 211.06 m/z 806.34 Gene names UBA1

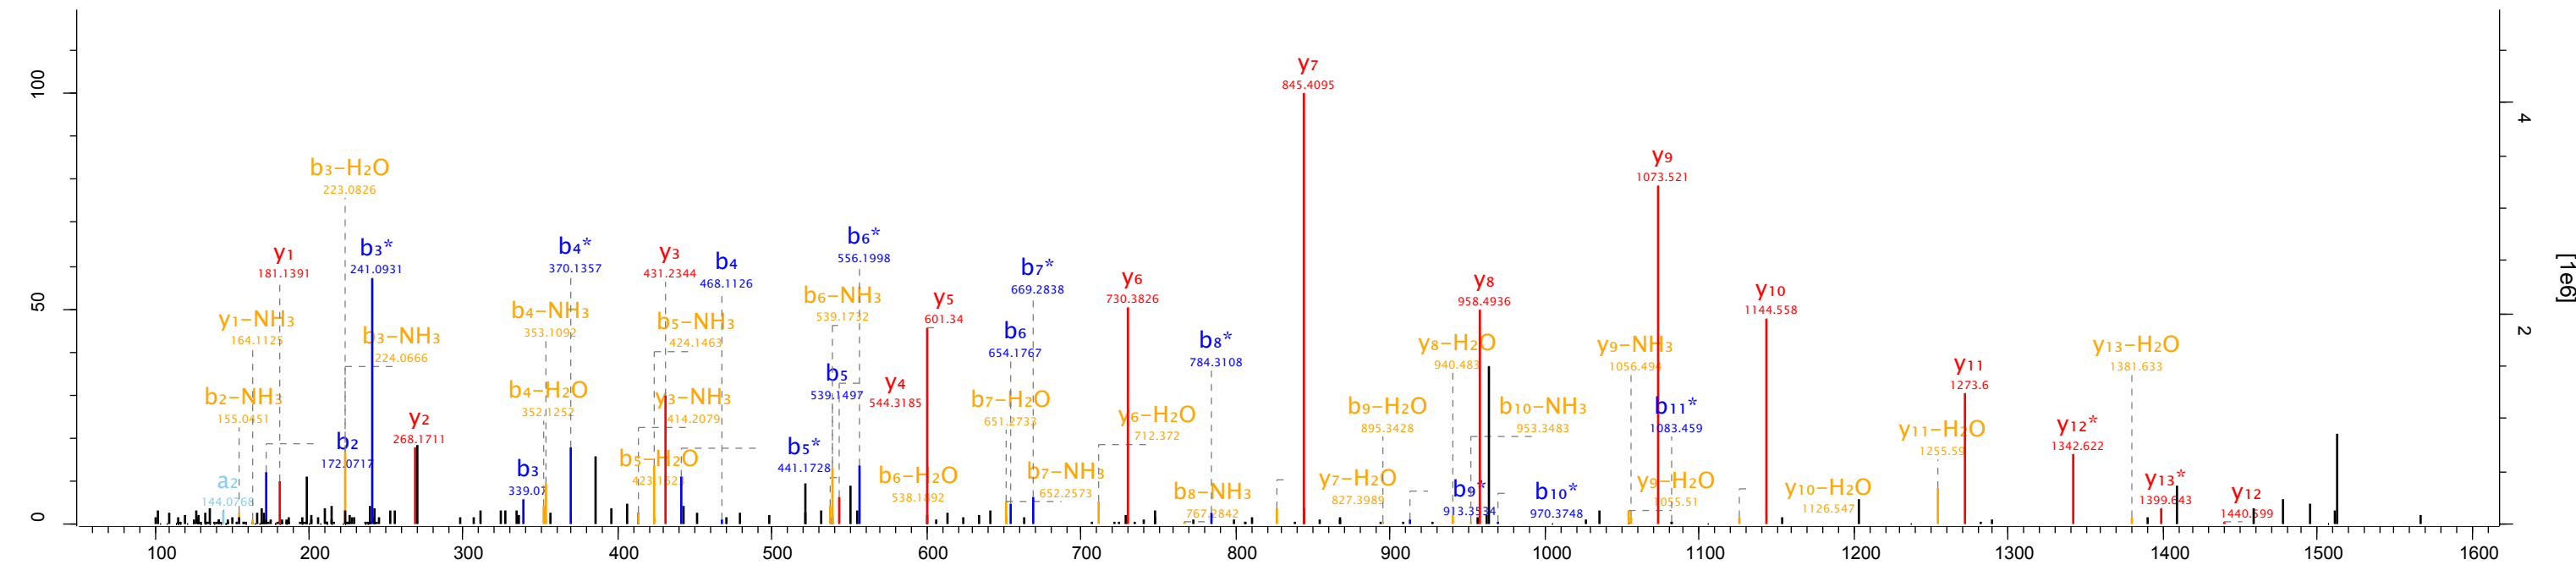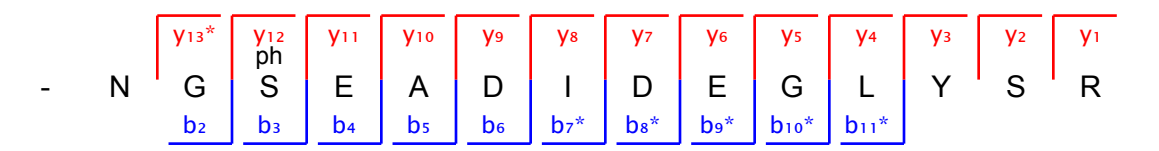

Raw file: 20150812\_A375SR\_Phospho\_BR1\_04  
 Scan: 14633 Method: FTMS; HCD Score: 81.35 m/z: 818.77 Gene names: TPR

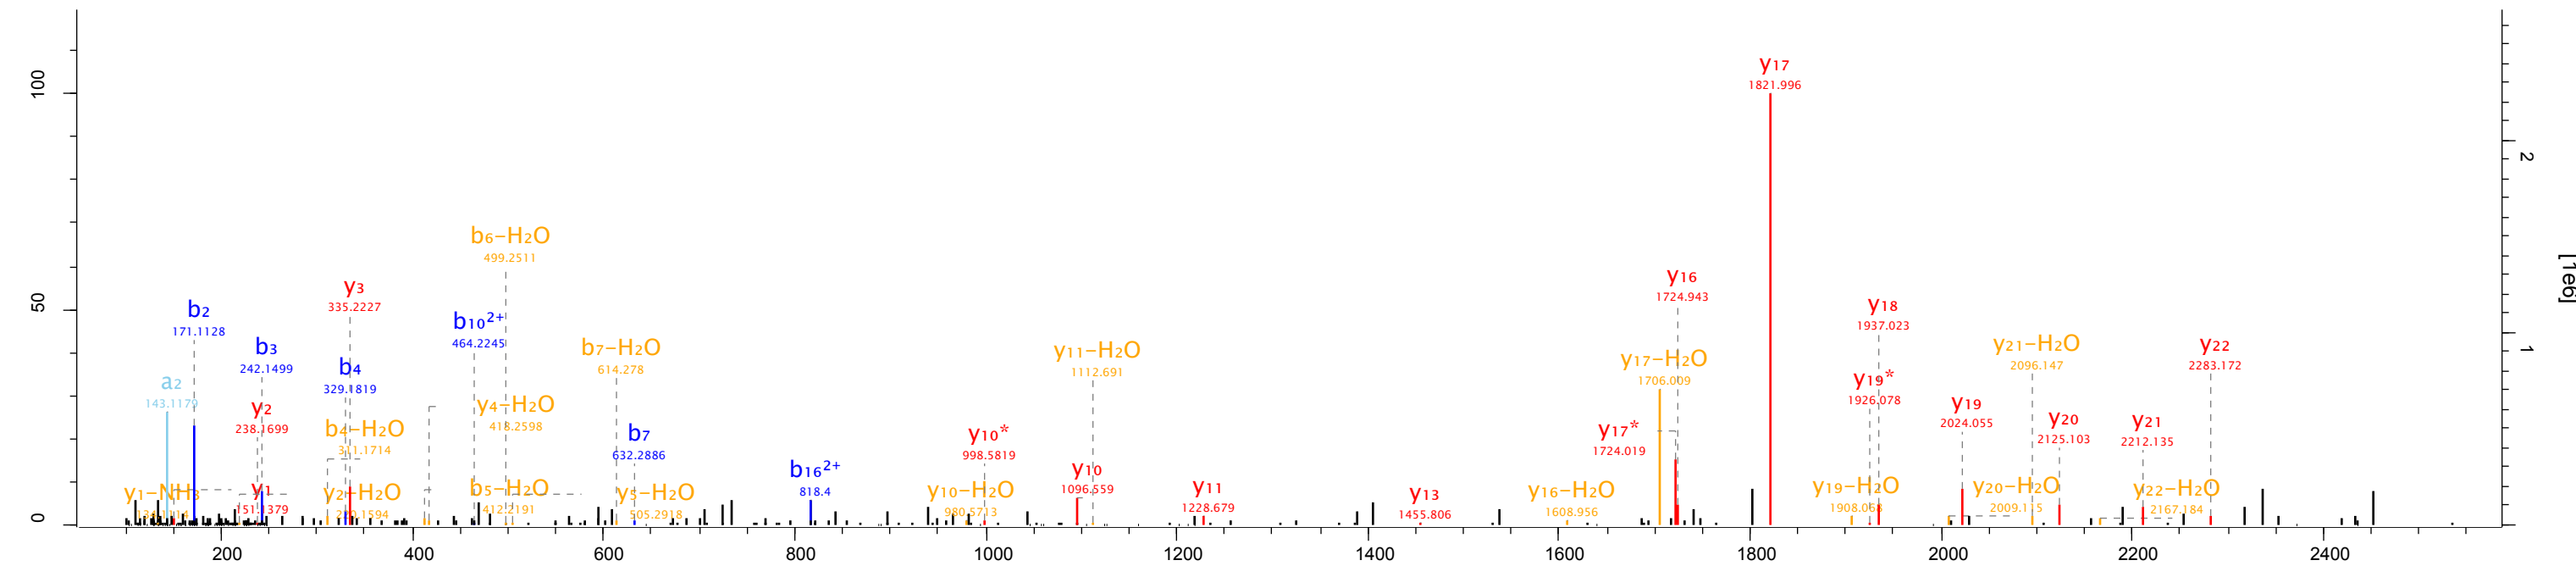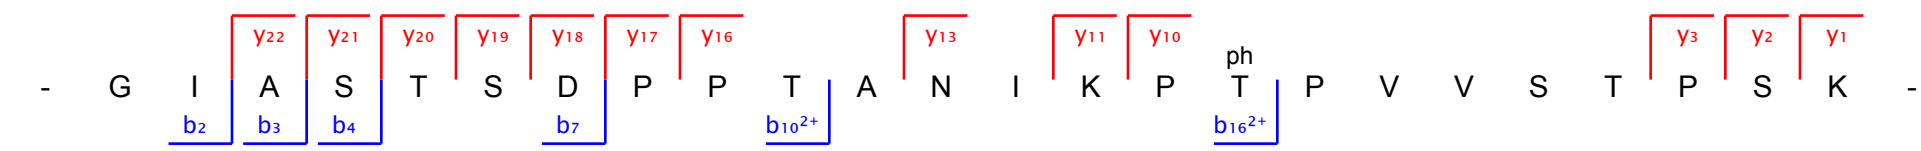

Raw file 20150812\_A375SR\_Phospho\_BR1\_04 Scan 15143 Method FTMS; HCD Score 81.33 m/z 816.38 Gene names PAGE5

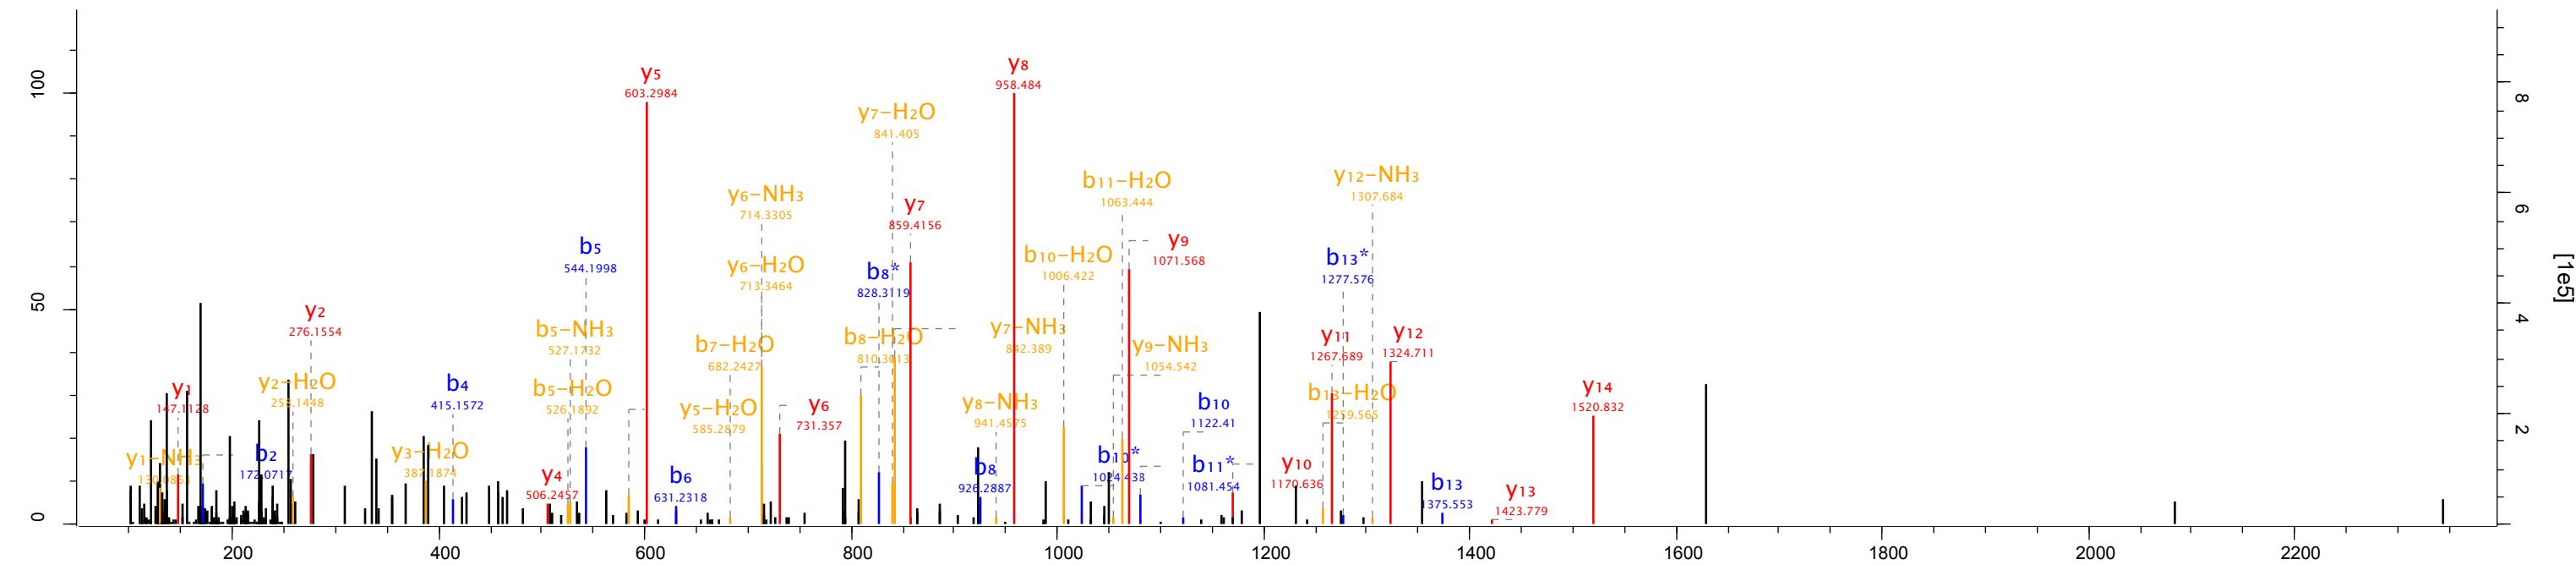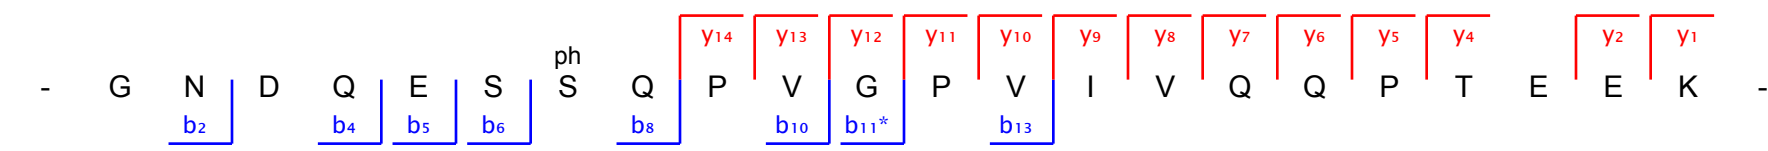



Raw file: 20150812\_A375SR\_Phospho\_BR1\_04  
 Scan: 15293 Method: FTMS; HCD Score: 106.58 m/z: 610.95 Gene names: ATN1

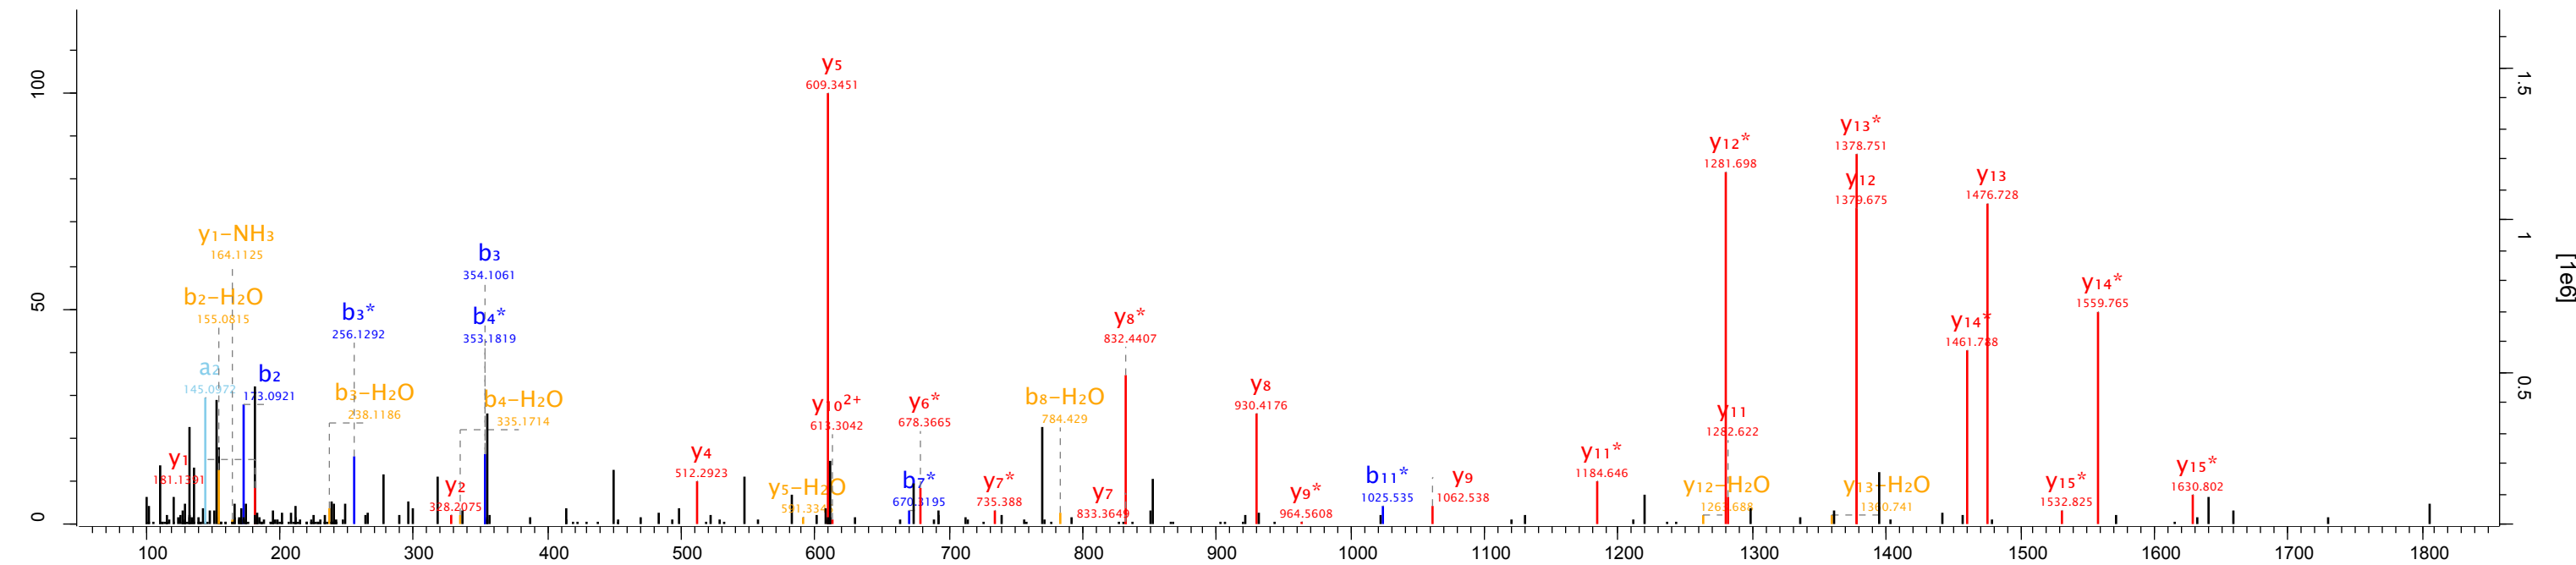

Sequence: - T A P P G Y K P G S F R -  
 Fragmentation sites: b<sub>2</sub>, b<sub>3</sub>, b<sub>4</sub>\* (under A, T, P); b<sub>7</sub>\* (under Y); b<sub>11</sub>\* (under S); y<sub>15</sub>\* (under A), y<sub>14</sub>\* ph (under T), y<sub>13</sub> (under P), y<sub>12</sub> (under P), y<sub>11</sub> (under G), y<sub>10</sub><sup>2+</sup> (under Y), y<sub>9</sub> (under K), y<sub>8</sub> (under P), y<sub>7</sub> (under G), y<sub>6</sub>\* ph (under S), y<sub>5</sub> (under P), y<sub>4</sub> (under P), y<sub>2</sub> (under F), y<sub>1</sub> (under R).

Raw file: 20150812\_A375SR\_Phospho\_BR1\_04  
 Scan: 15953 Method: FTMS; HCD Score: 158.8 m/z: 806.08 Gene names: BCL9L

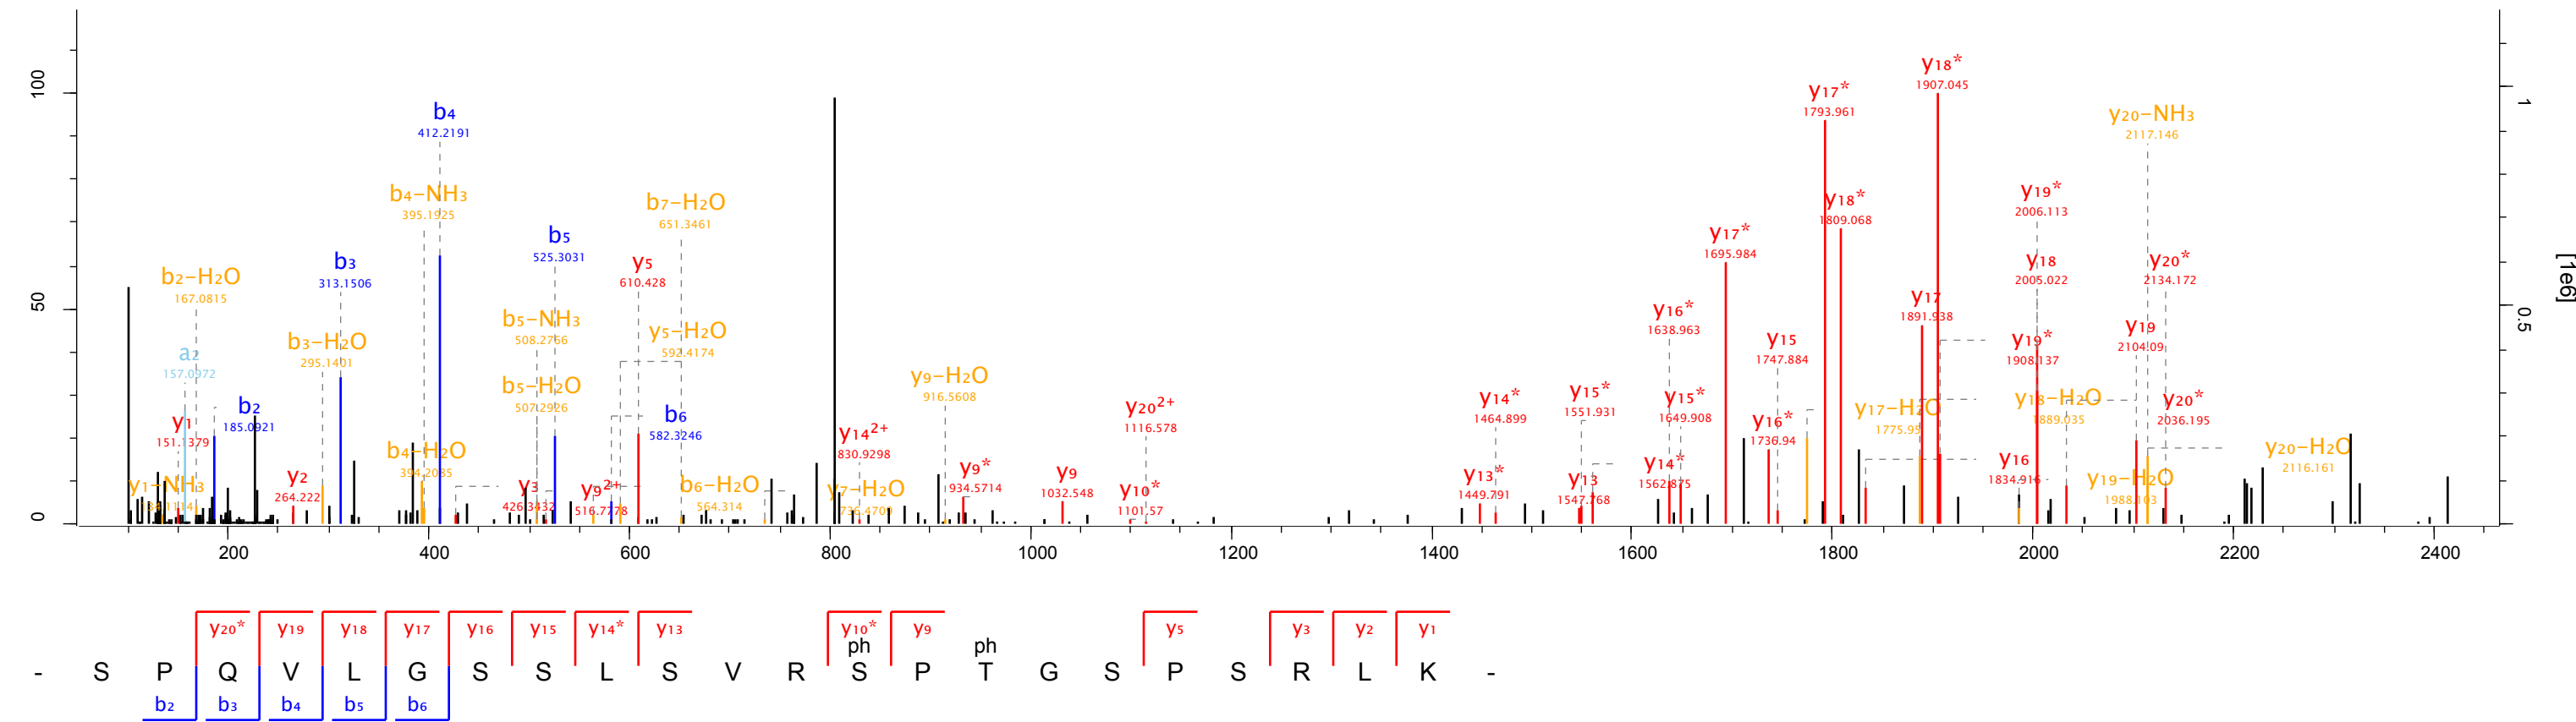

Raw file 20150812\_A375SR\_Phospho\_BR1\_04 Scan 16373 Method FTMS; HCD Score 106.6 m/z 1009.4 Gene names ZNF326

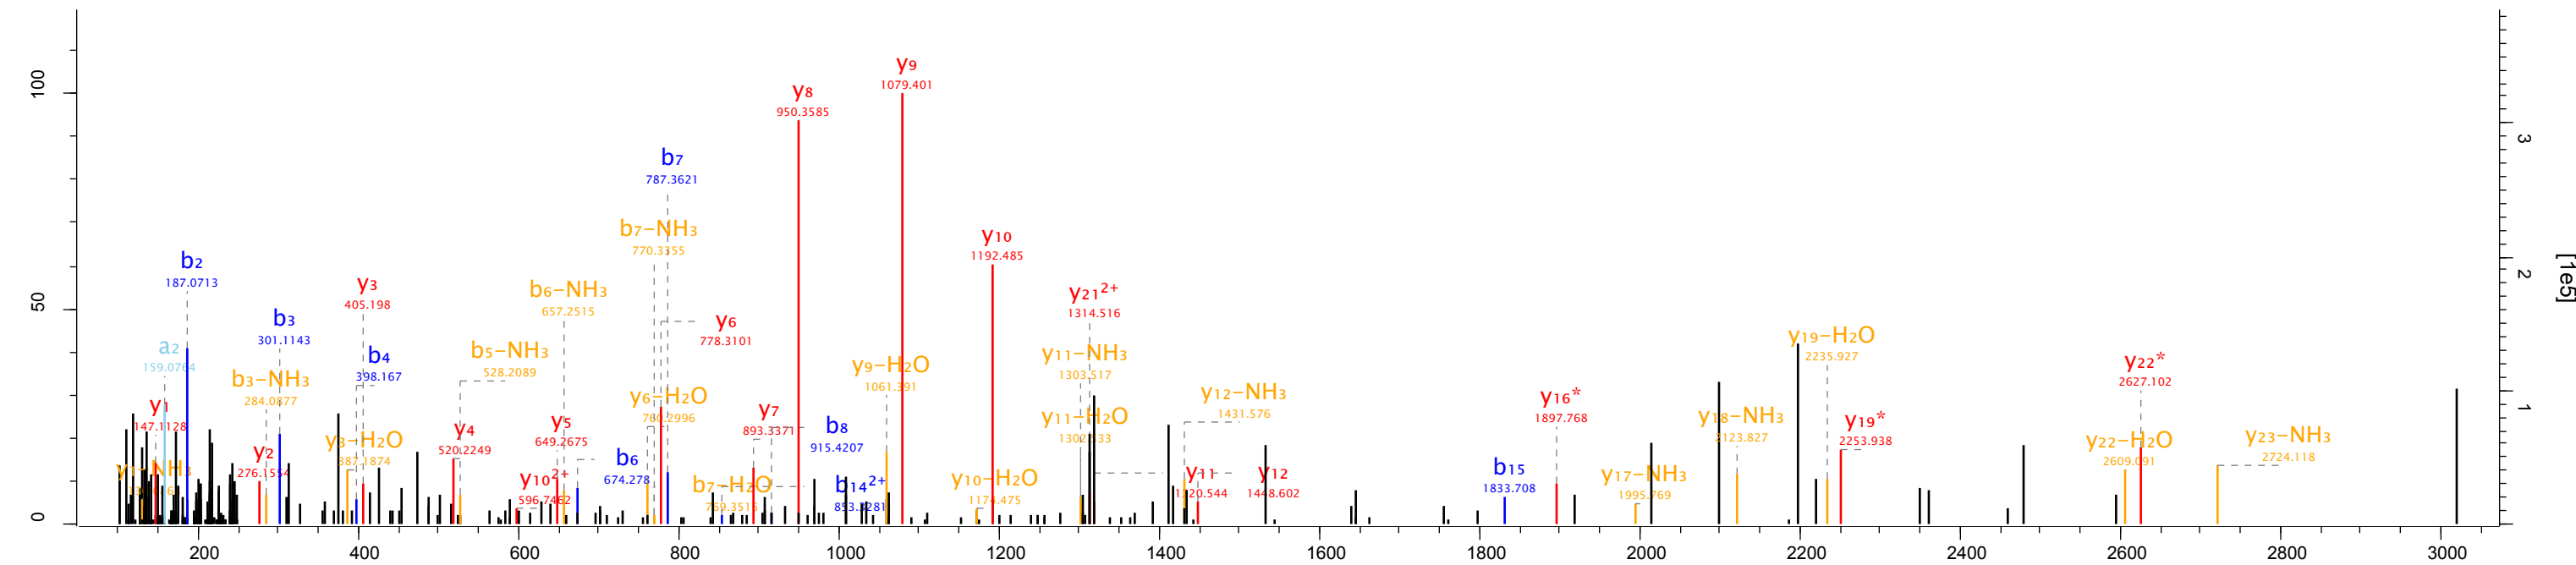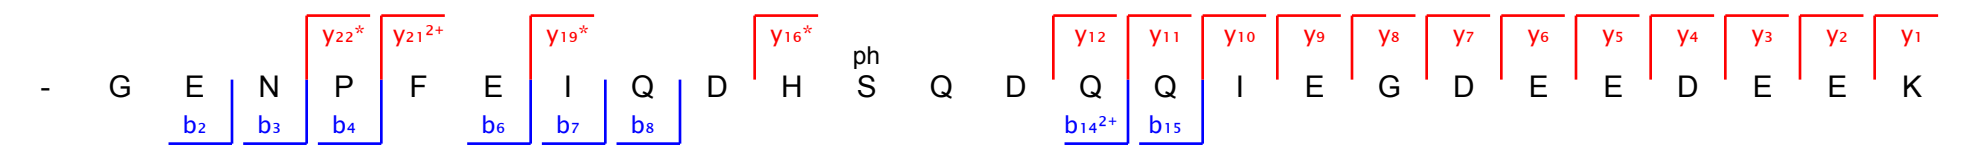

Raw file: 20150812\_A375SR\_Phospho\_BR1\_04  
 Scan: 16393 Method: FTMS; HCD Score: 48.68 m/z: 1299.93 Gene names: DDX42

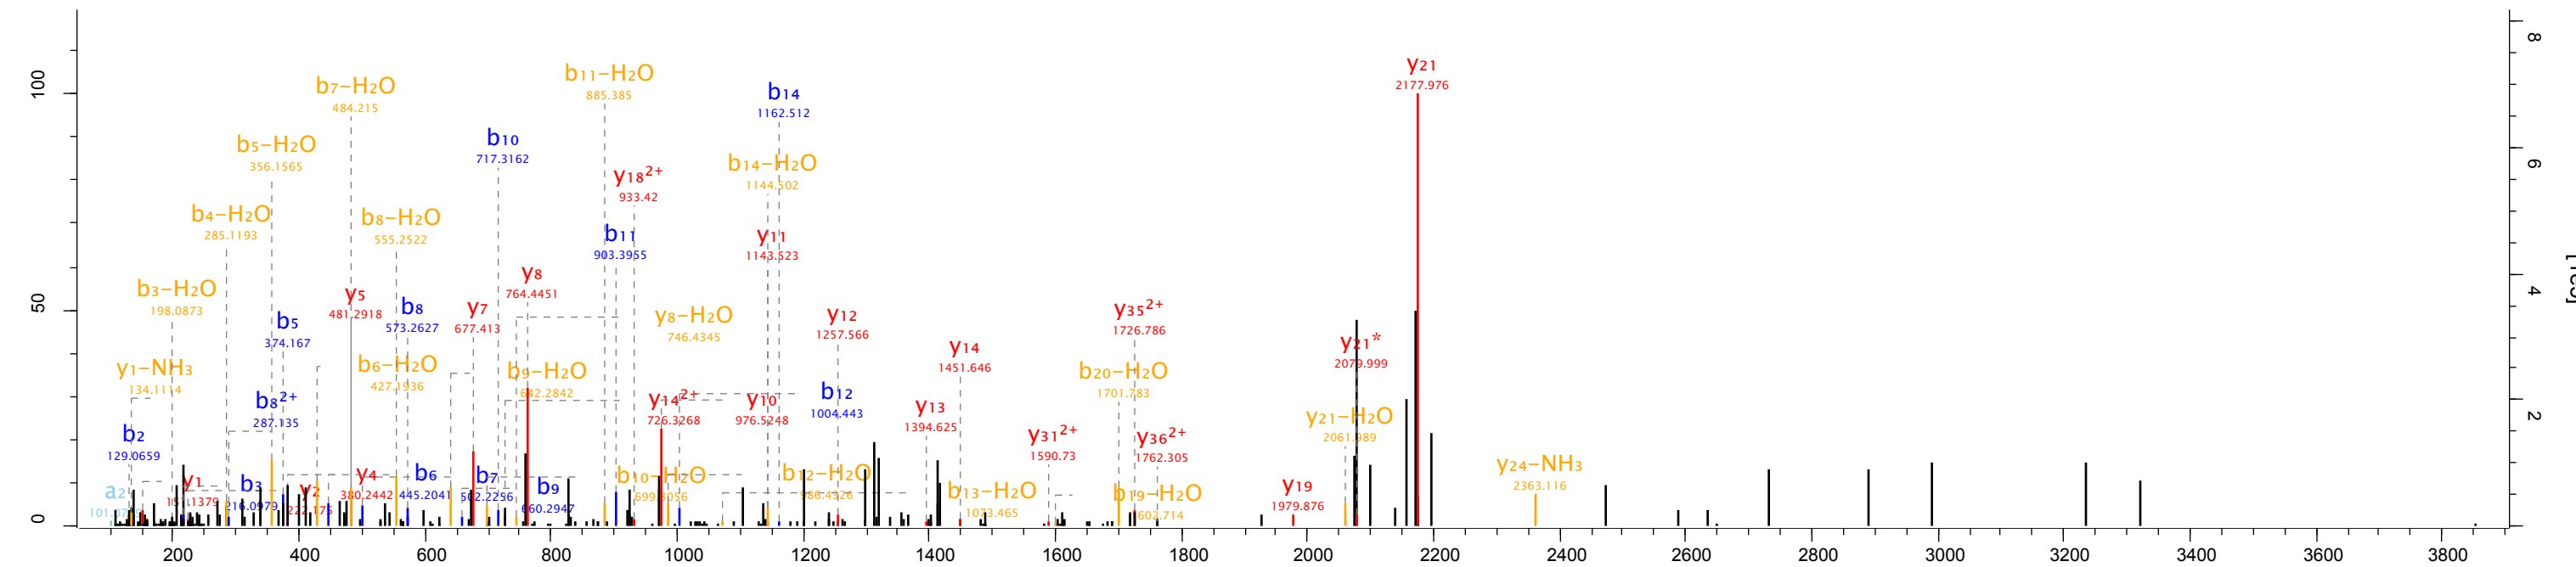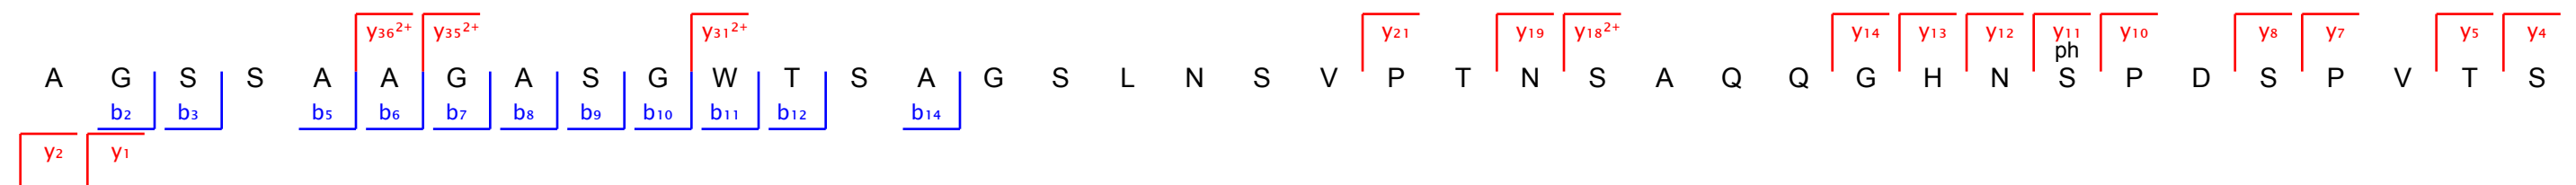

Raw file Scan Method Score m/z Gene names  
 20150812\_A375SR\_Phospho\_BR1\_04 16503 FTMS; HCD 296.04 993.48 CHAMP1

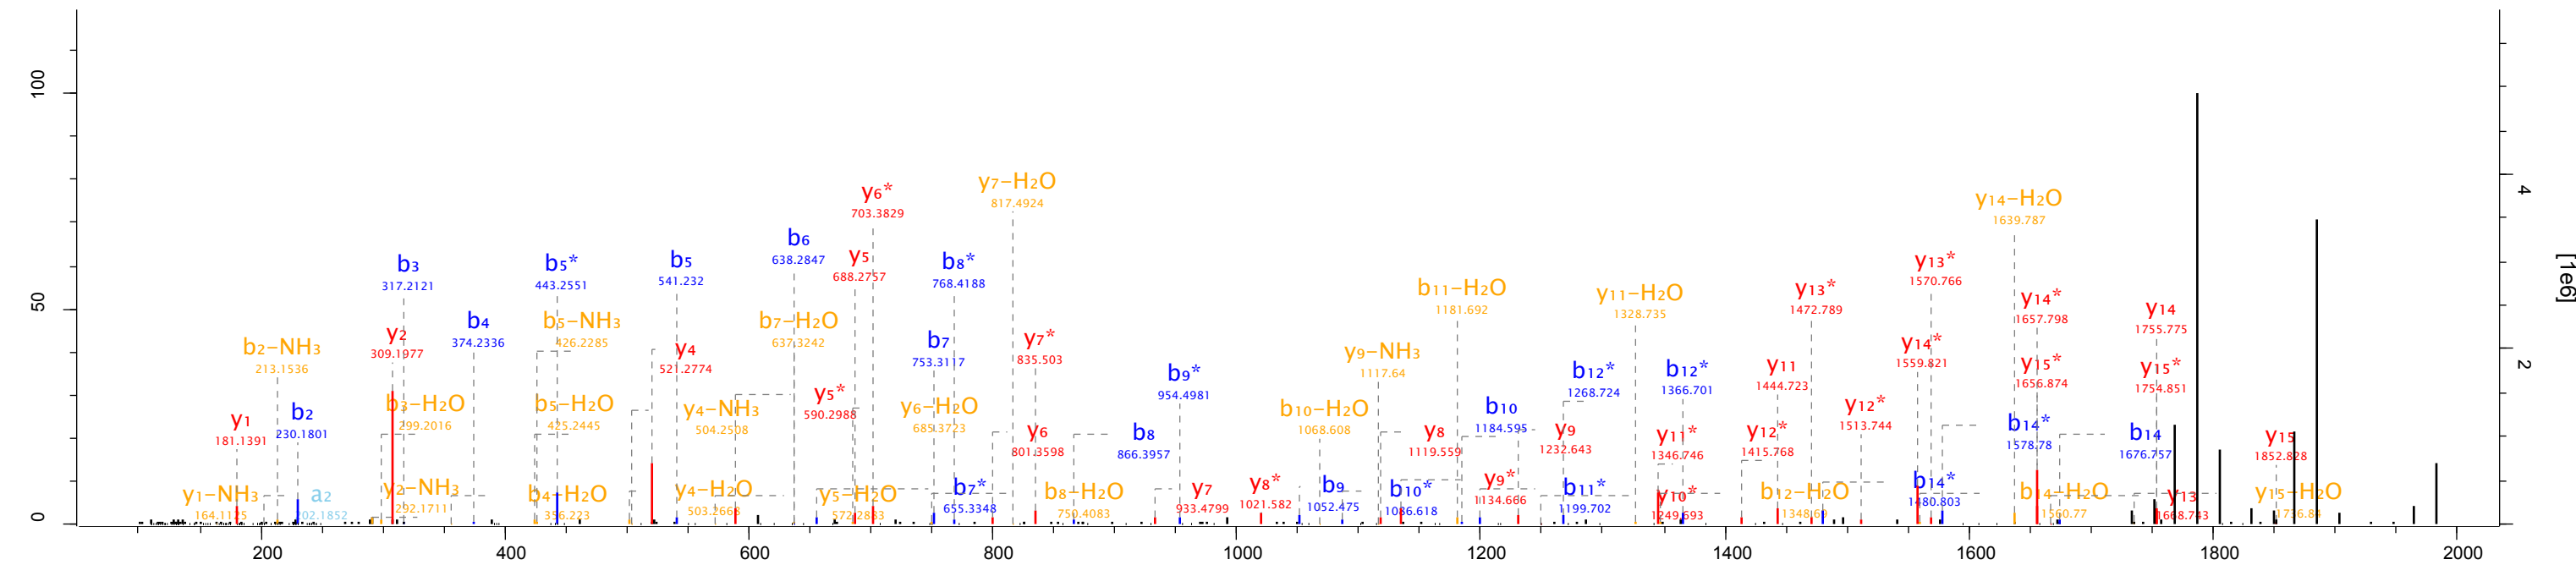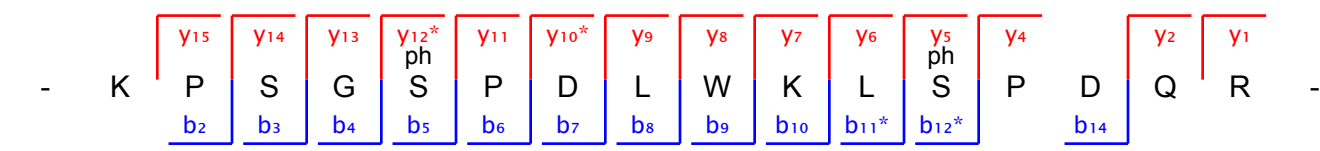

Raw file 20150812\_A375SR\_Phospho\_BR1\_04 Scan 16943 Method FTMS; HCD Score 112.34 m/z 813.87 Gene names COIL

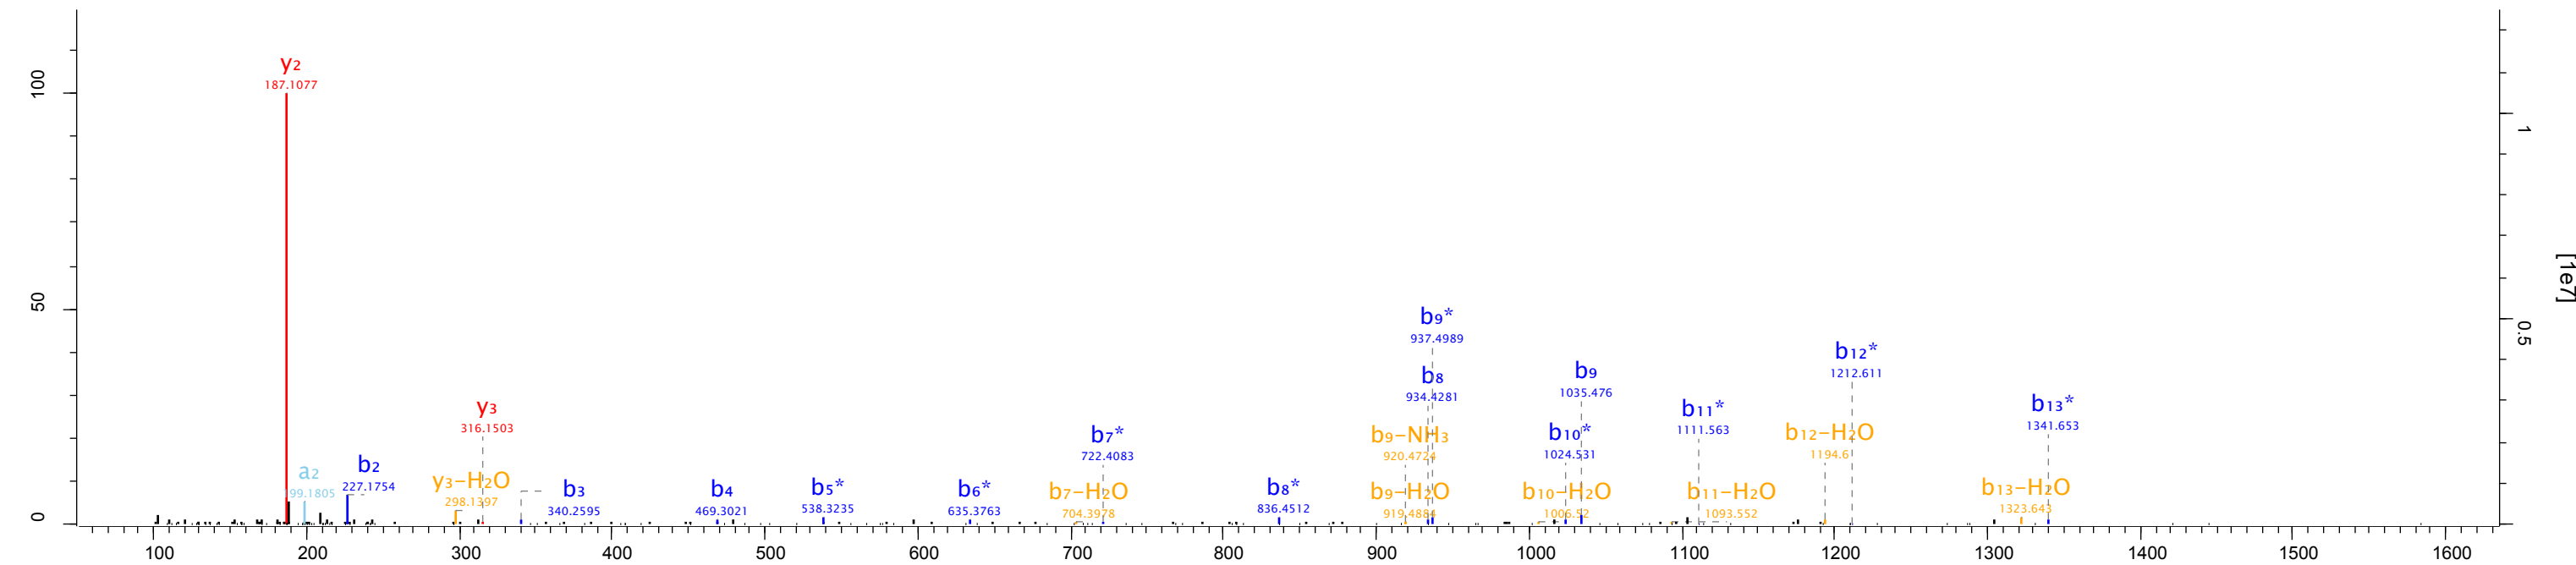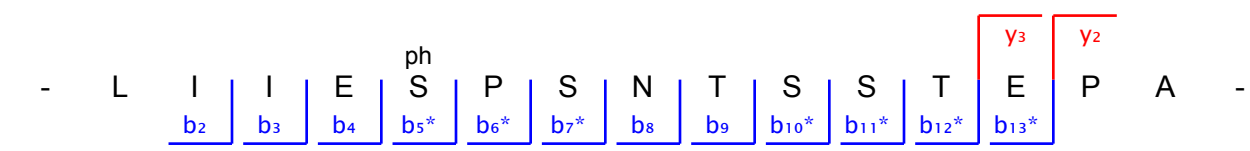

Raw file: 20150812\_A375SR\_Phospho\_BR1\_04  
 Scan: 1713 Method: FTMS; HCD Score: 88.18 m/z: 567.58 Gene names: AMOTL1

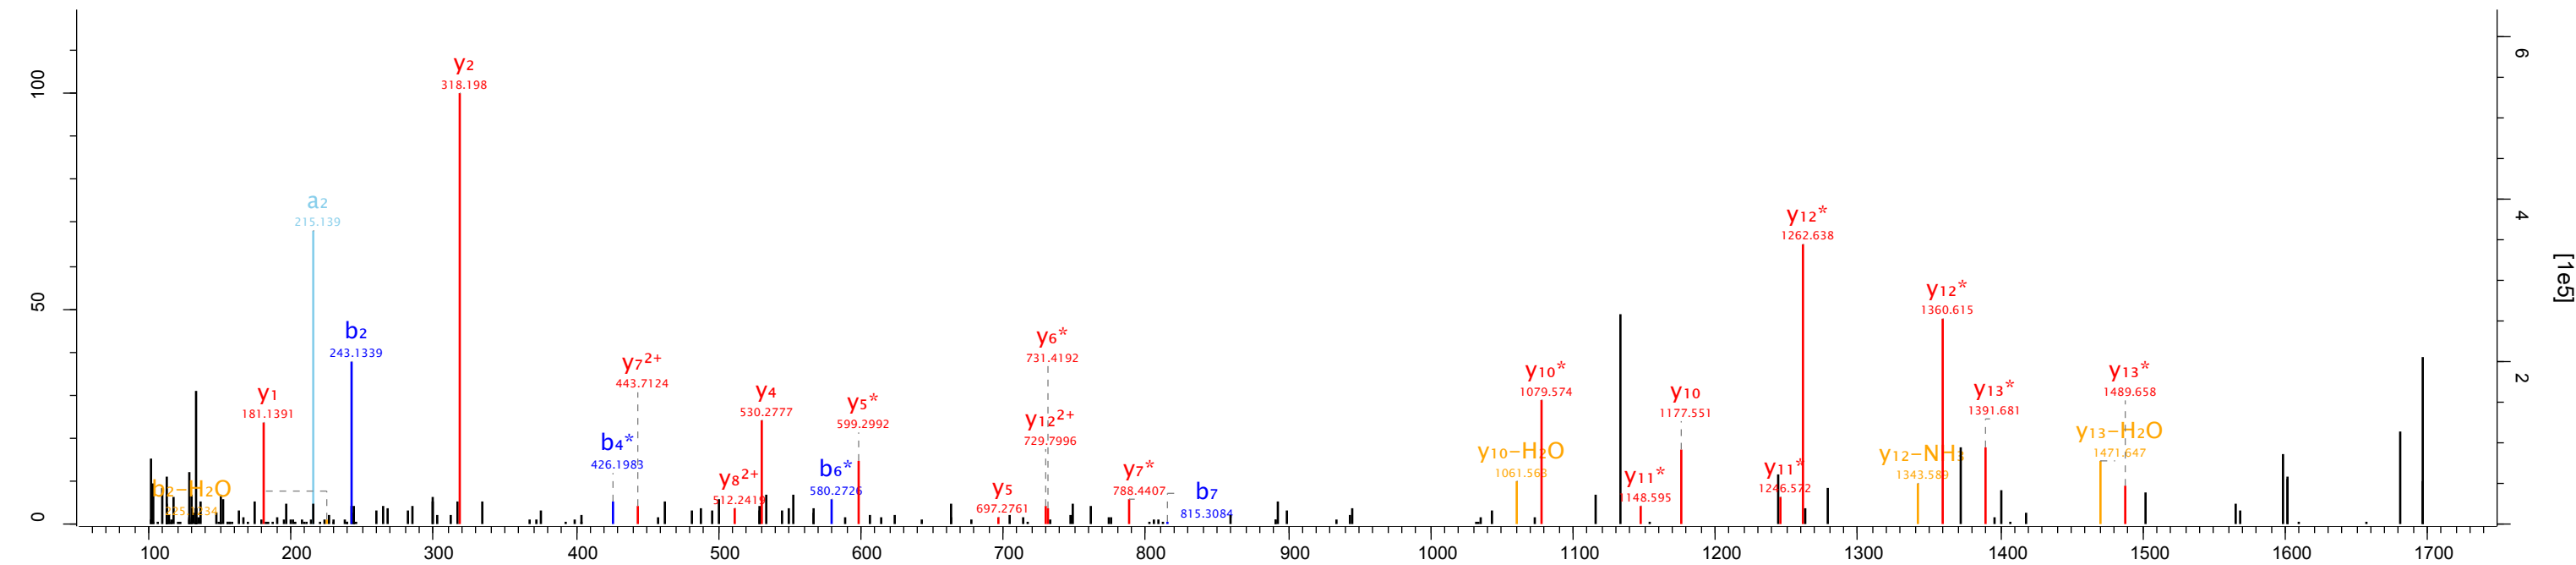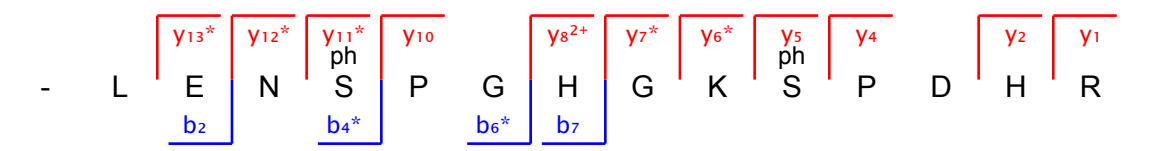

Raw file 20150812\_A375SR\_Phospho\_BR1\_04 Scan 17473 Method FTMS; HCD Score 129.9 m/z 654.01 Gene names PFKFB2

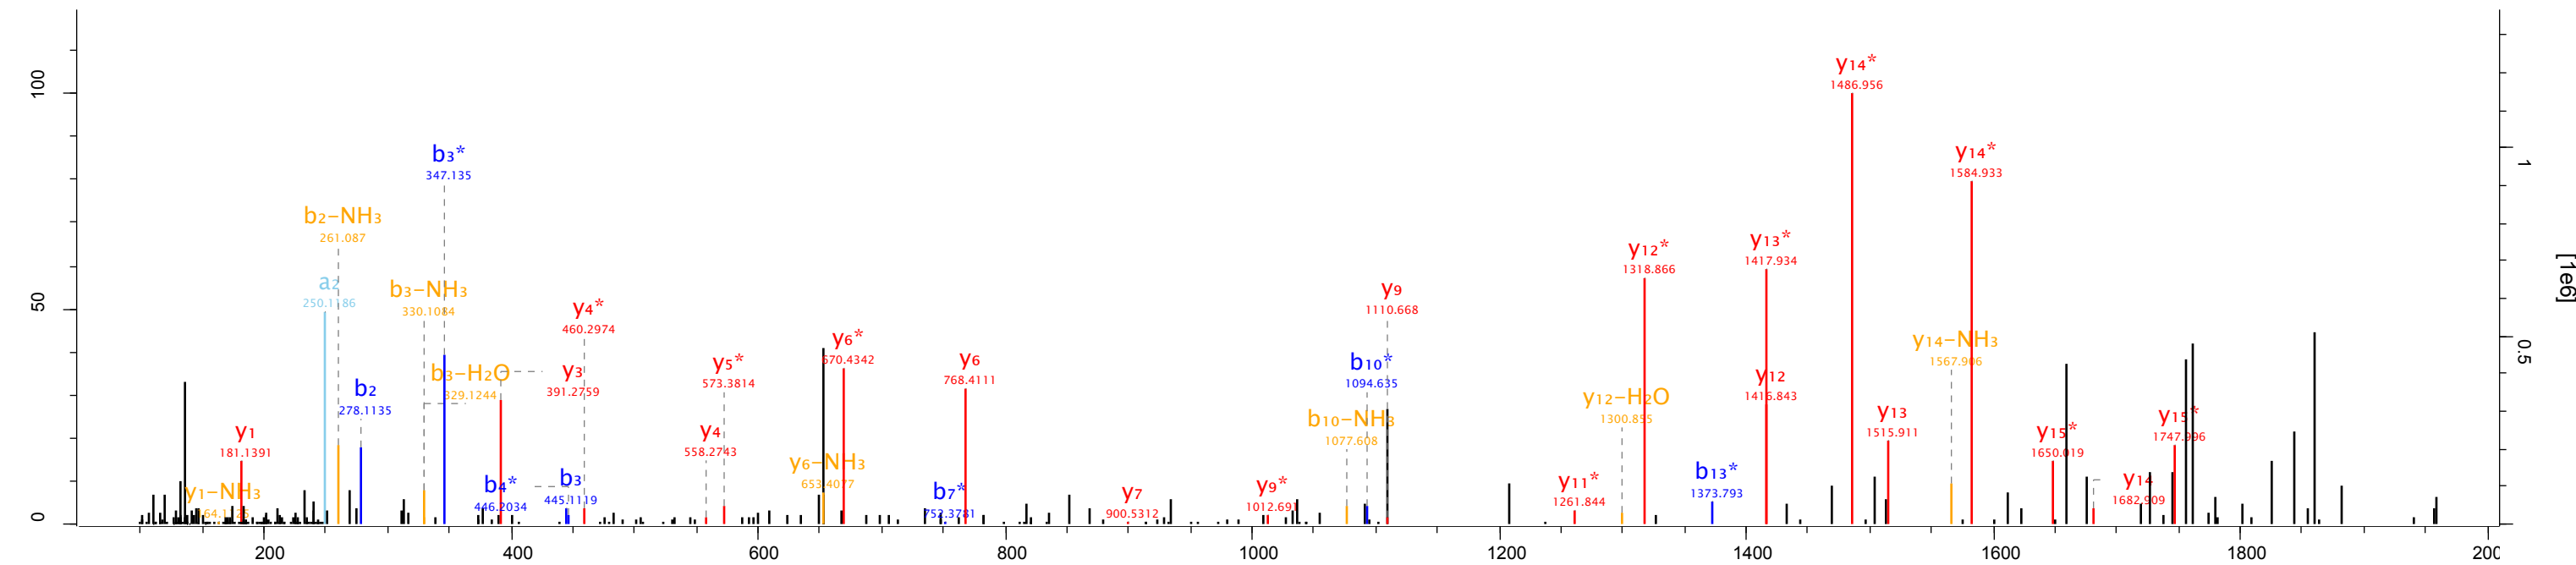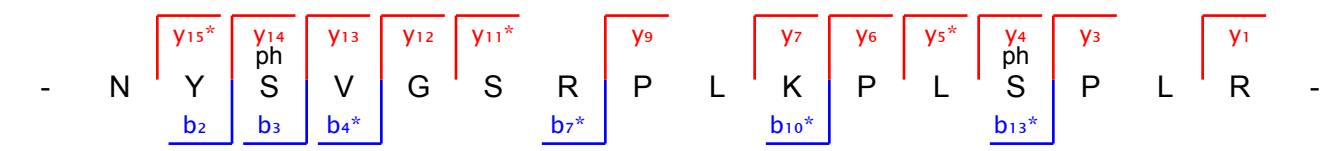



Raw file Scan Method Score m/z Gene names  
 20150812\_A375SR\_Phospho\_BR1\_04 17613 FTMS; HCD 301.93 1060.93 PRPF40A

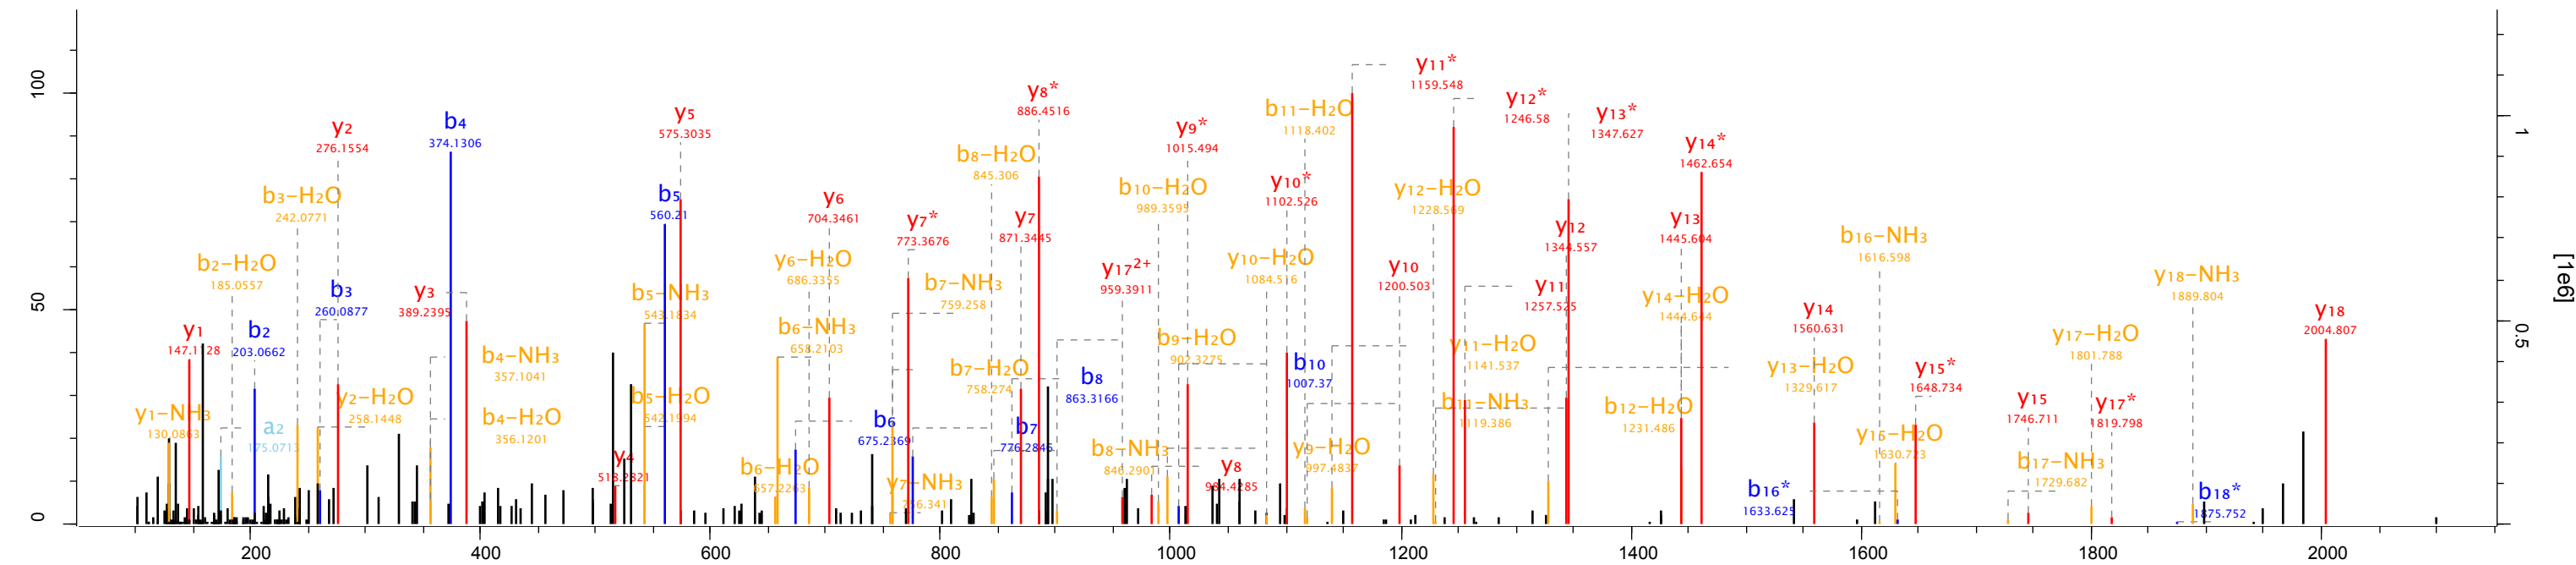

Raw file: 20150812\_A375SR\_Phospho\_BR1\_04  
 Scan: 17703 Method: FTMS; HCD Score: 86.01 m/z: 515.77 Gene names: PHF3

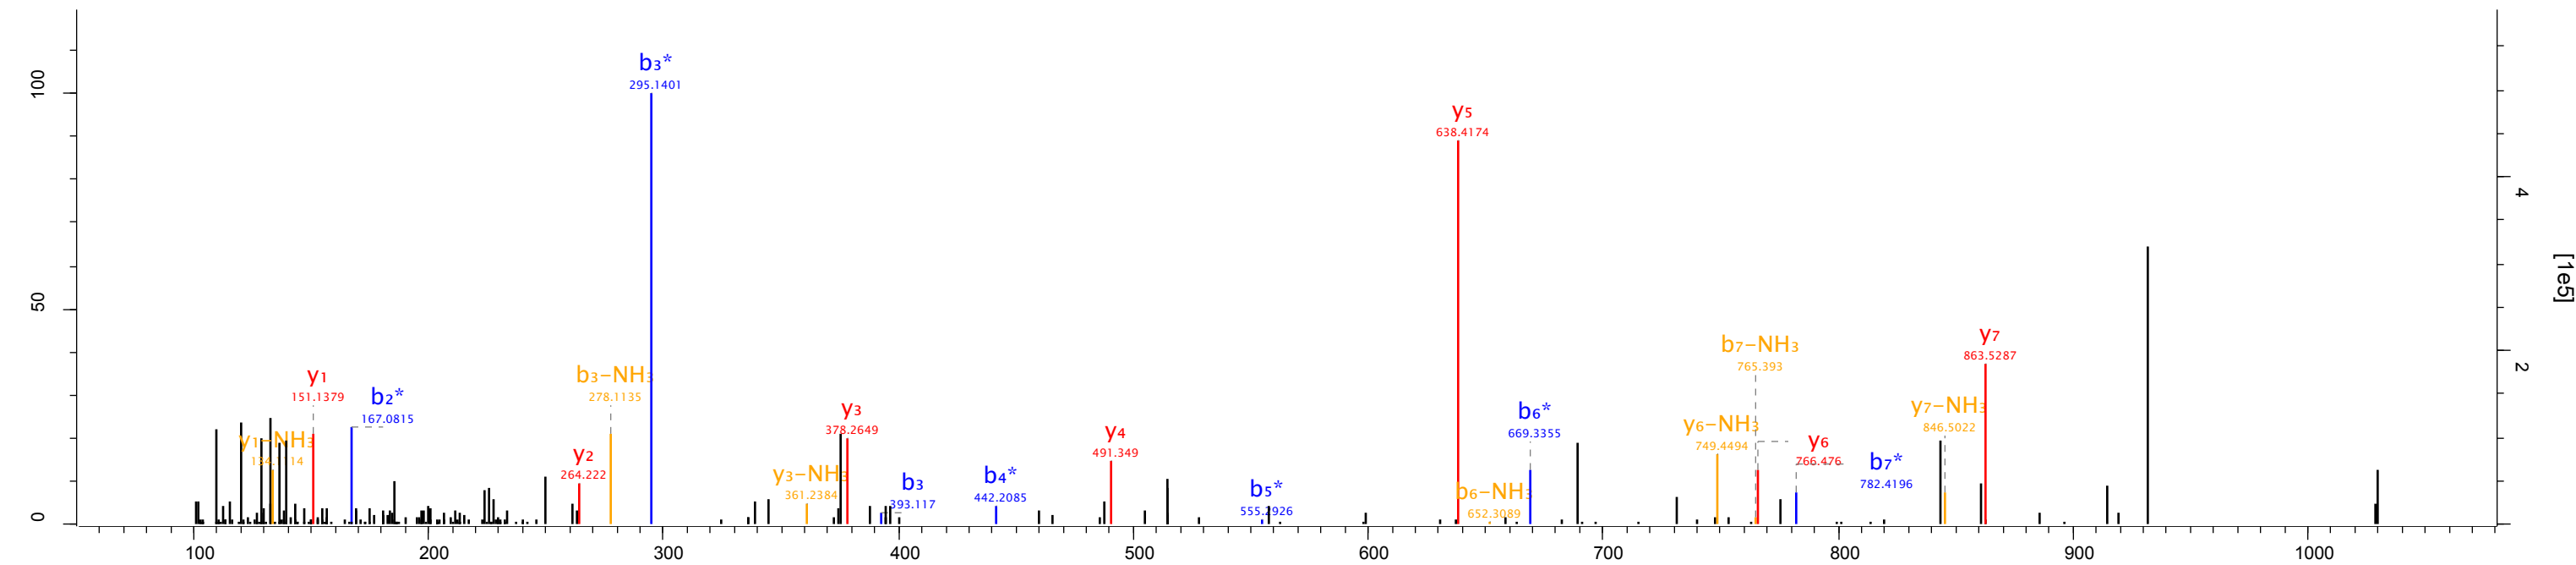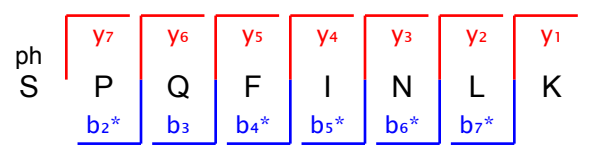

Raw file 20150812\_A375SR\_Phospho\_BR1\_04 Scan 17833 Method FTMS; HCD Score 164.06 m/z 1012.96 Gene names MAP1B

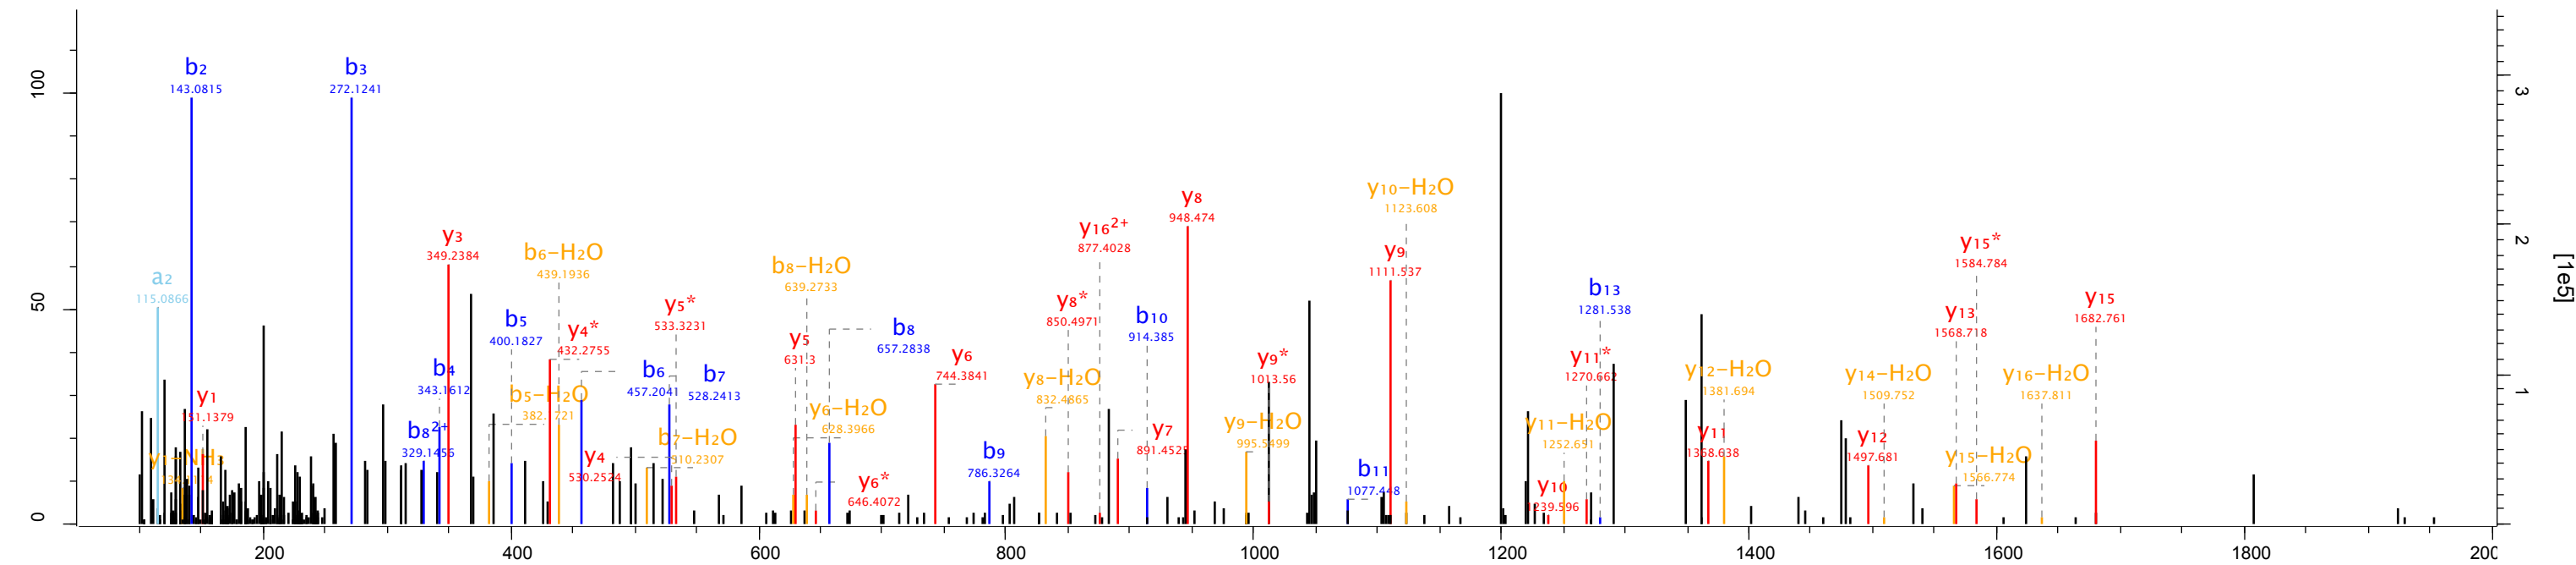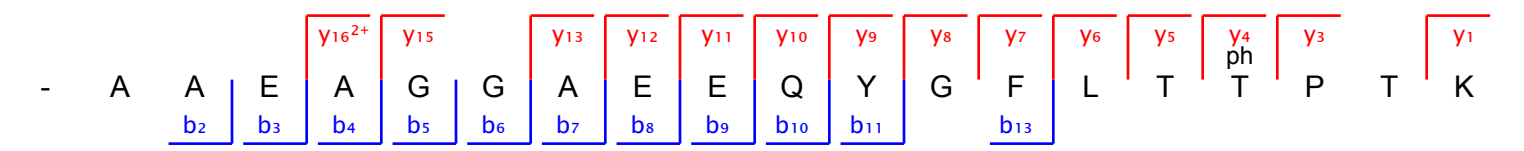

Raw file: 20150812\_A375SR\_Phospho\_BR1\_04  
 Scan: 17953 Method: FTMS; HCD Score: 155.56 m/z: 679.83 Gene names: CFL2

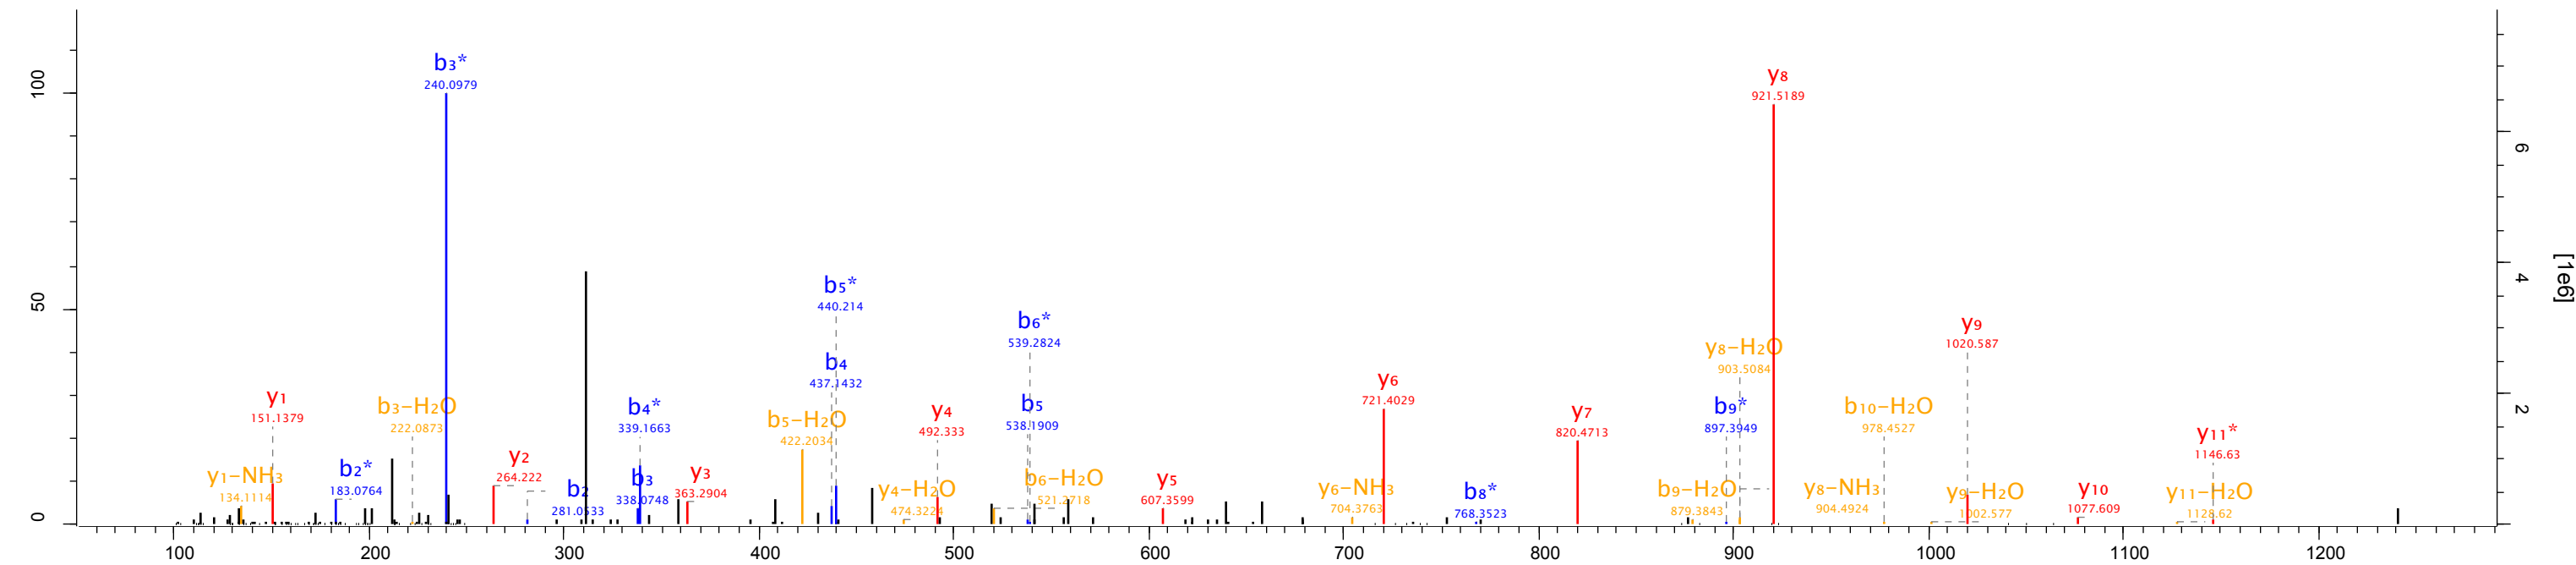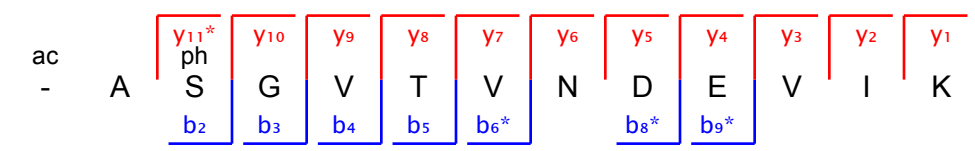

20150812\_A375SR\_Phospho\_BR1\_04

1833 FTMS; HCD 273.79 661.3 INO80C

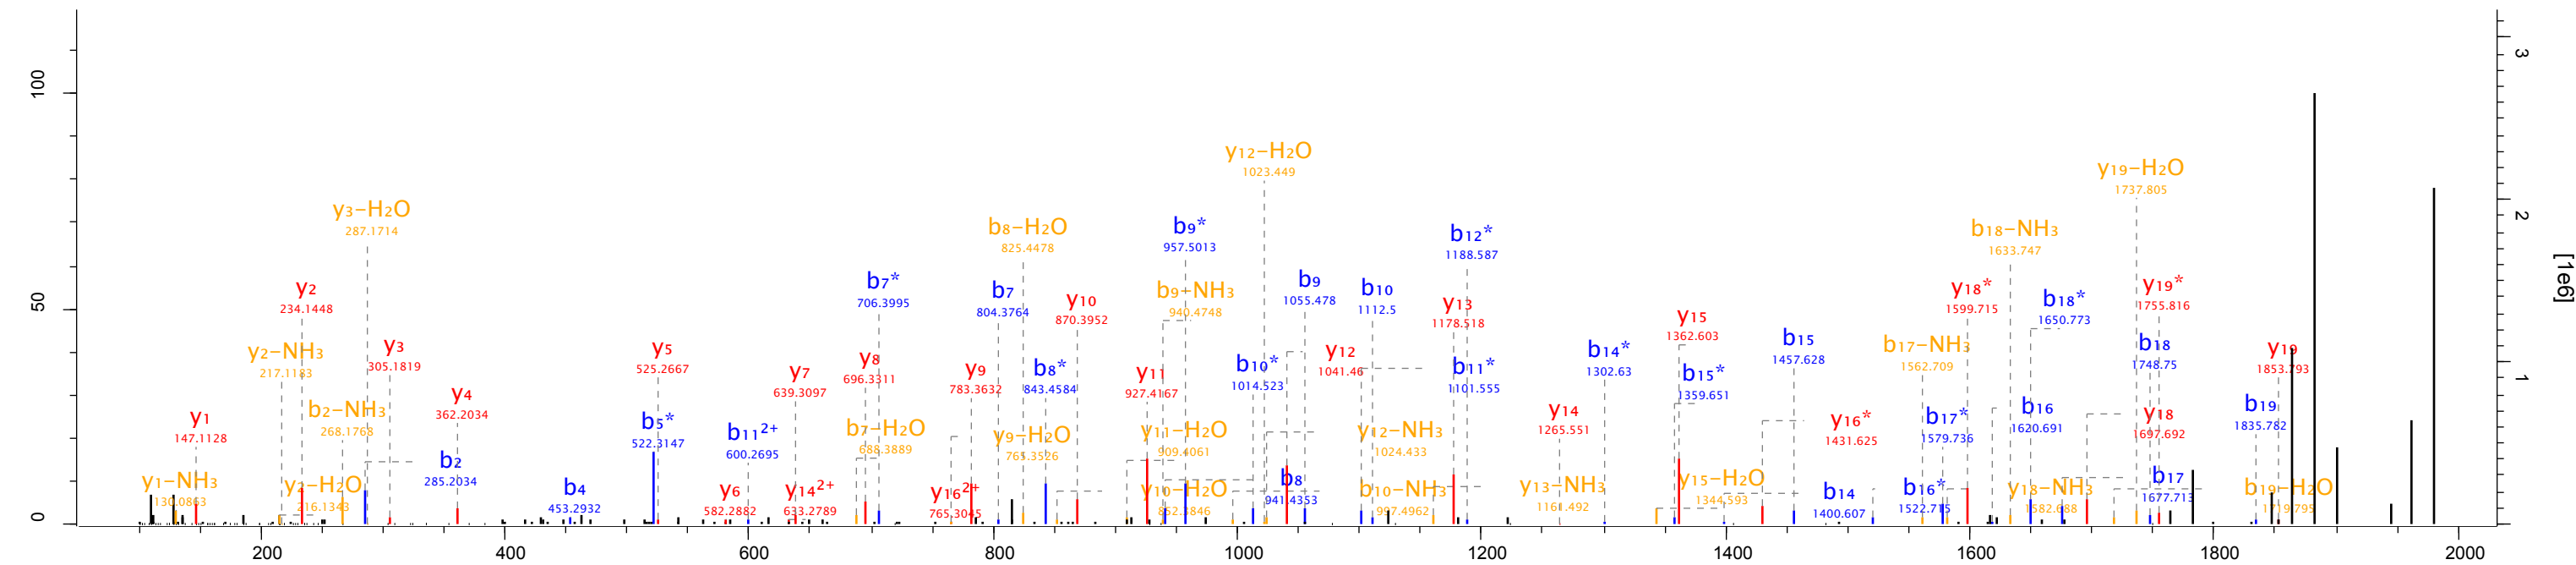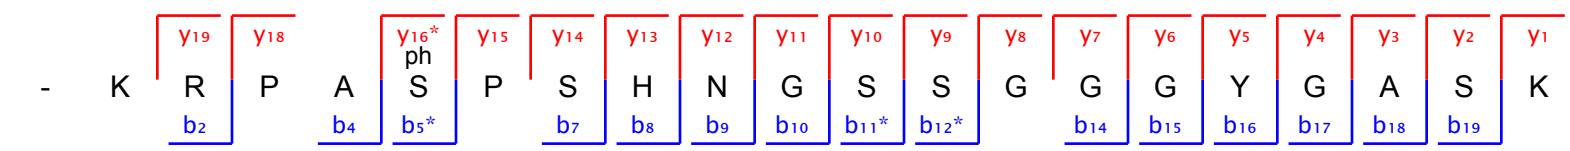

Raw file: 20150812\_A375SR\_Phospho\_BR1\_04  
 Scan: 18783 Method: FTMS; HCD Score: 60.95 m/z: 770.72 Gene names: BCAR1

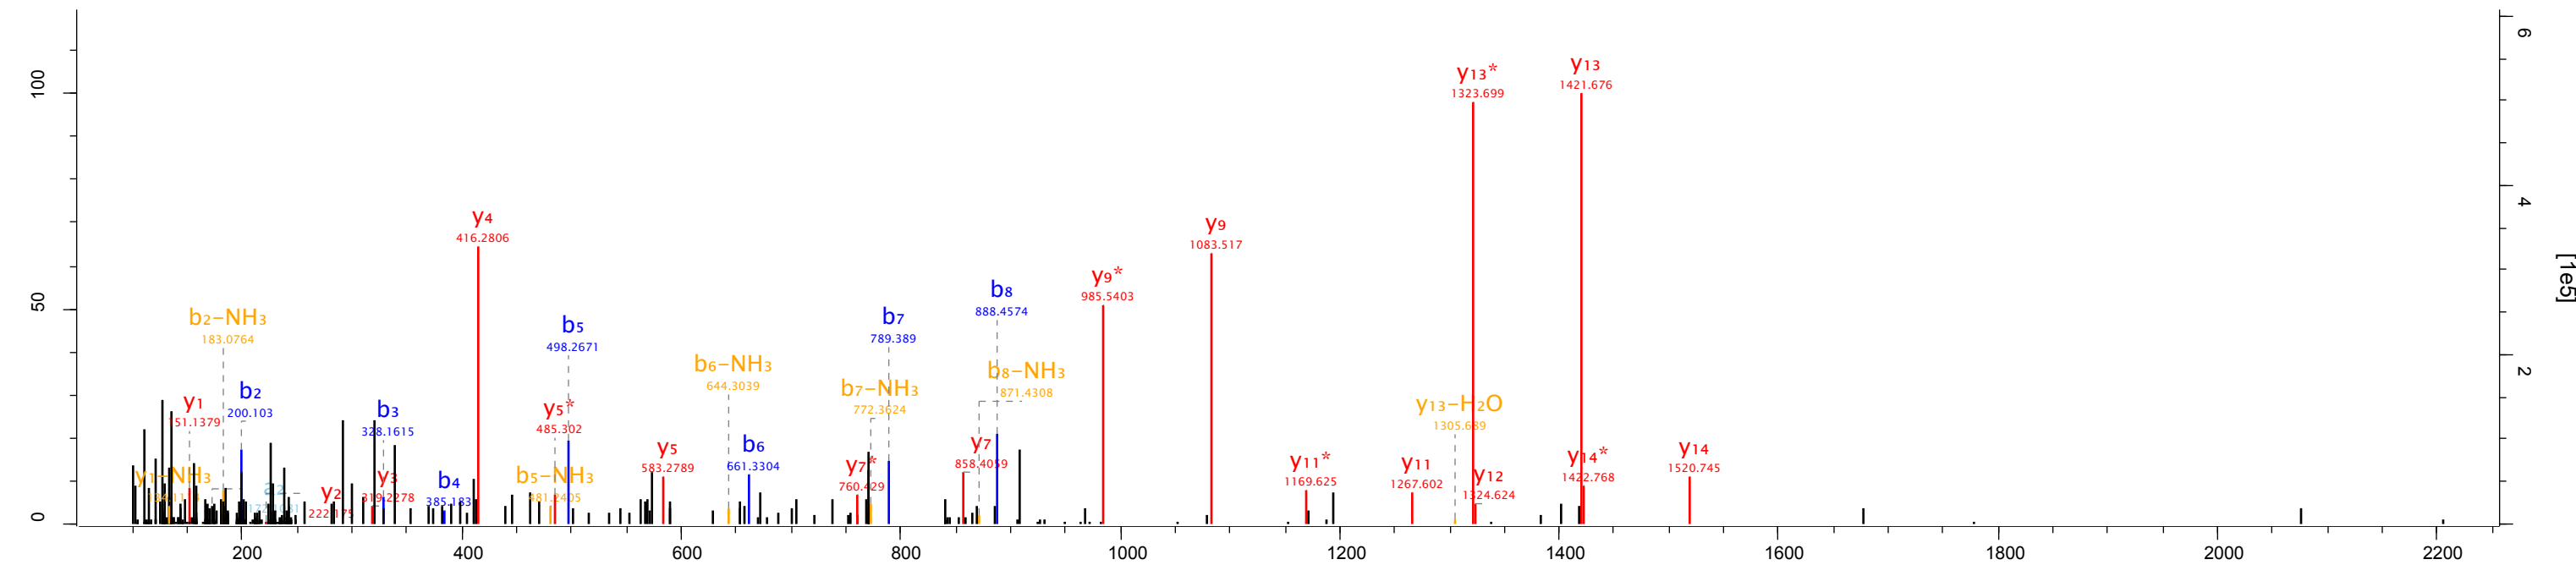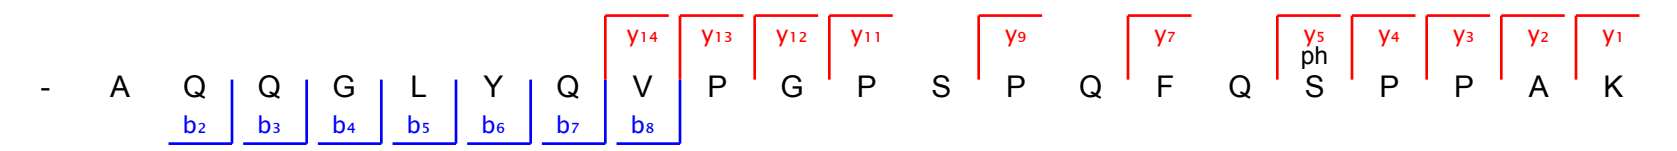

Raw file 20150812\_A375SR\_Phospho\_BR1\_04 Scan 19033 Method FTMS; HCD Score 102.65 m/z 656.83 Gene names SLX4

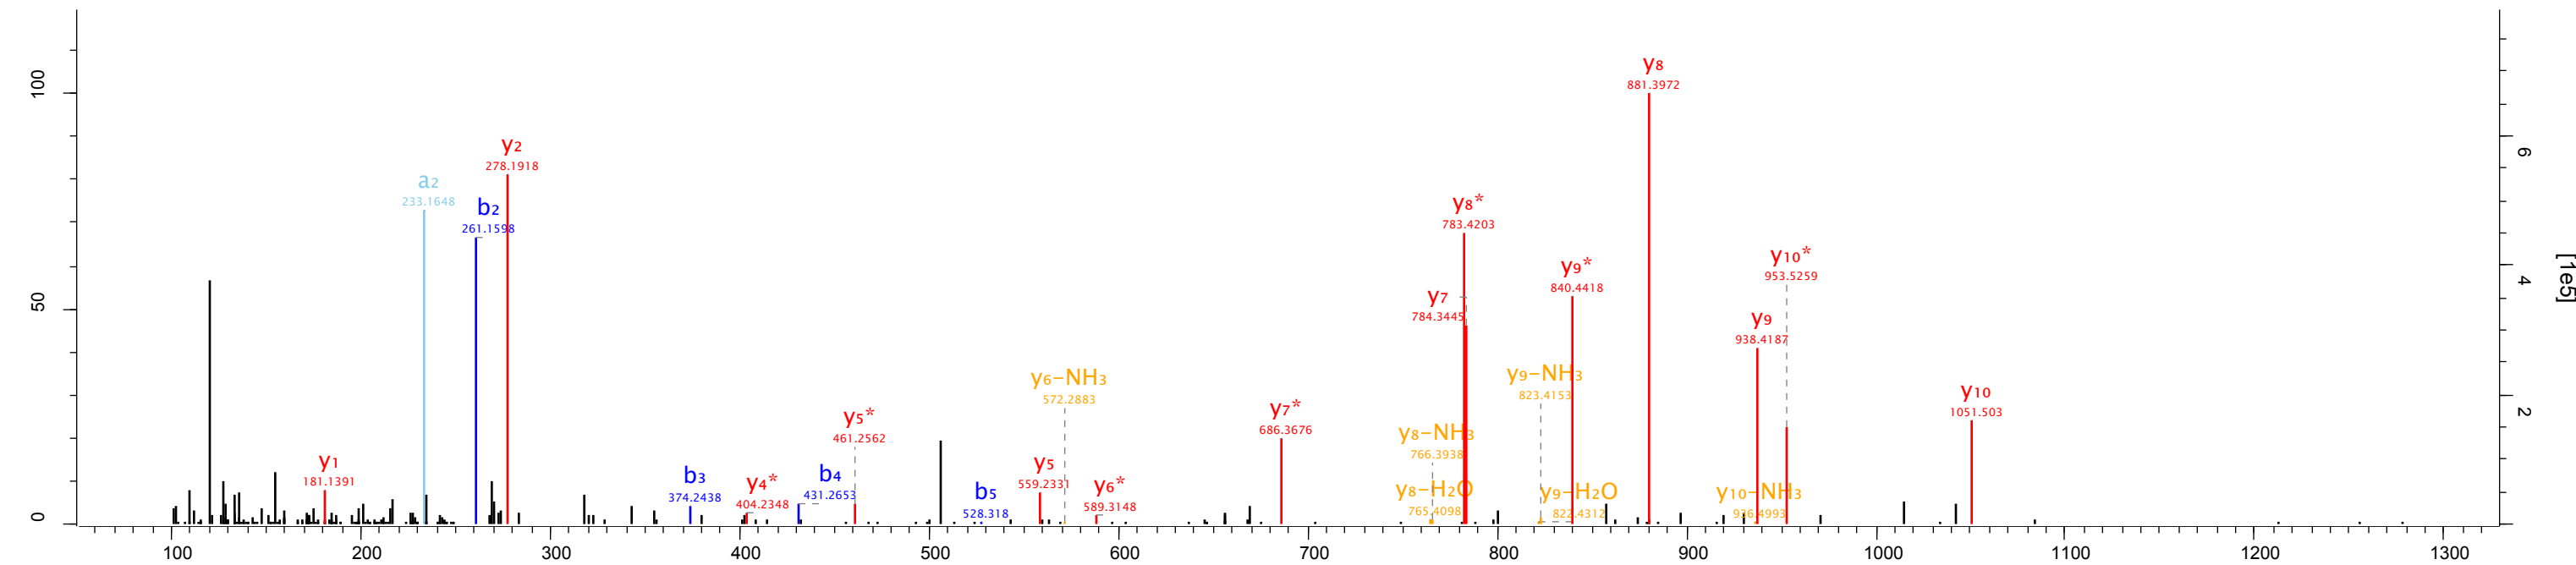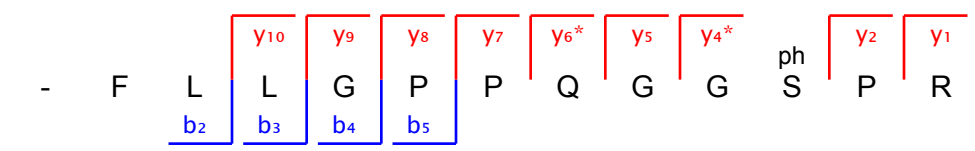

Raw file 20150812\_A375SR\_Phospho\_BR1\_04 Scan 19243 Method FTMS; HCD Score 171.13 m/z 926.98 Gene names ZFYVE16

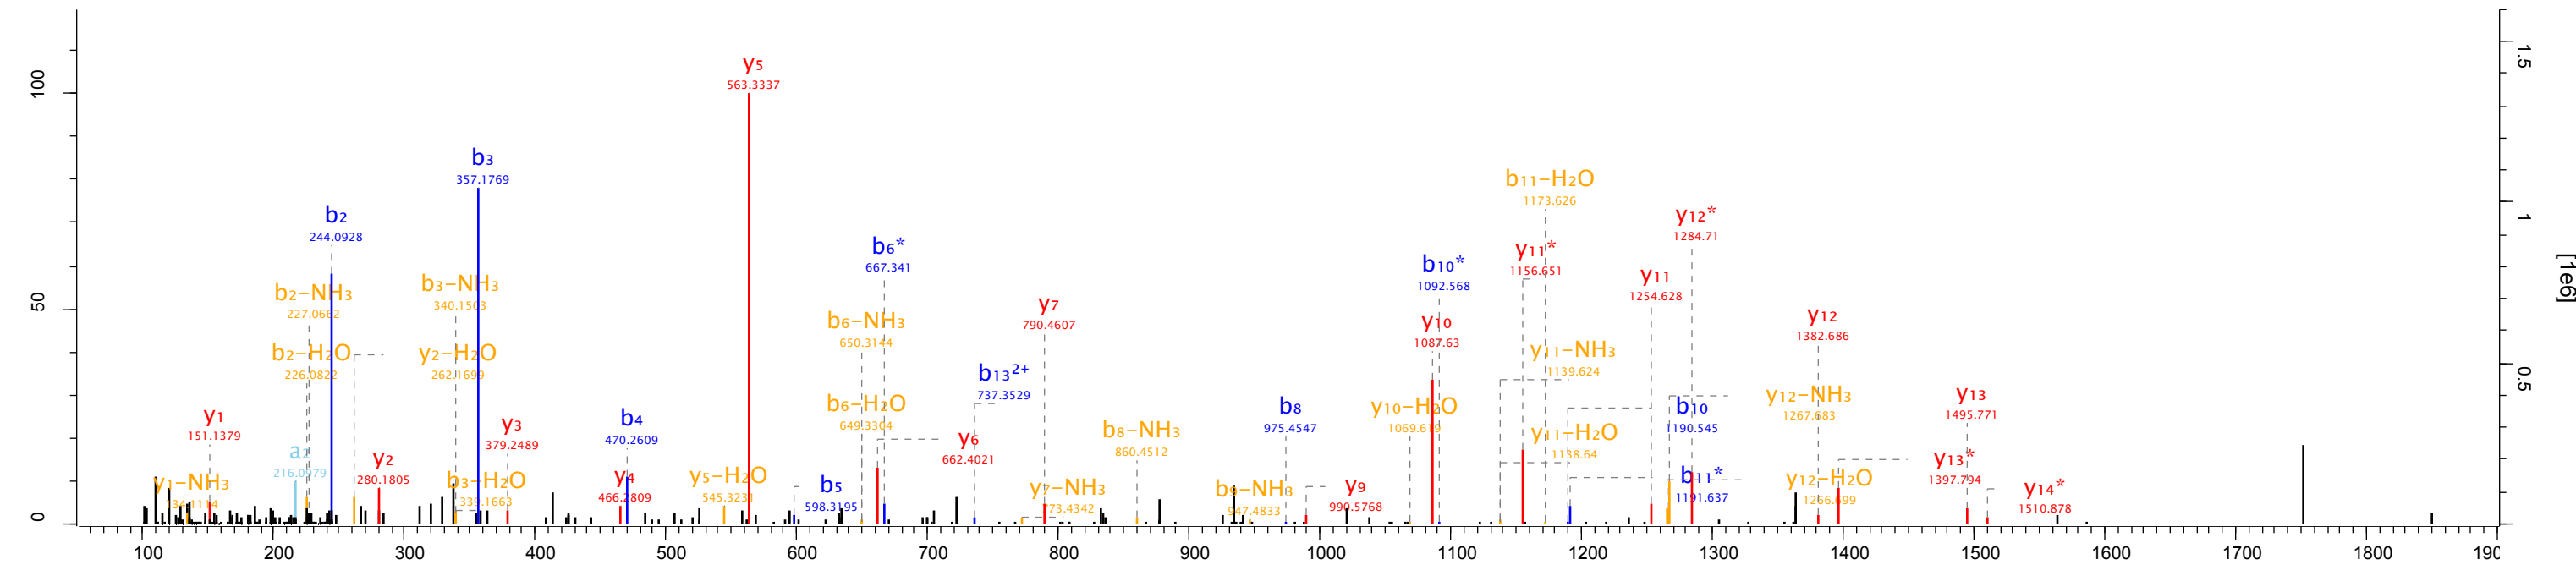

- N E I I Q S P I S Q V P S V E K -

Peptide sequence: E I I Q S P I S Q V P S V E K

Fragmentation sites (b ions): b2, b3, b4, b5, b6\*, b8, b10, b11\*, b13<sup>2+</sup>

Fragmentation sites (y ions): y1, y2, y3, y4, y5, y6, y7, y9, y10, y11, y12, y13, y14\*



Raw file: 20150812\_A375SR\_Phospho\_BR1\_04  
 Scan: 19333 Method: FTMS; HCD Score: 266.53 m/z: 919.97 Gene names: ARHGAP12

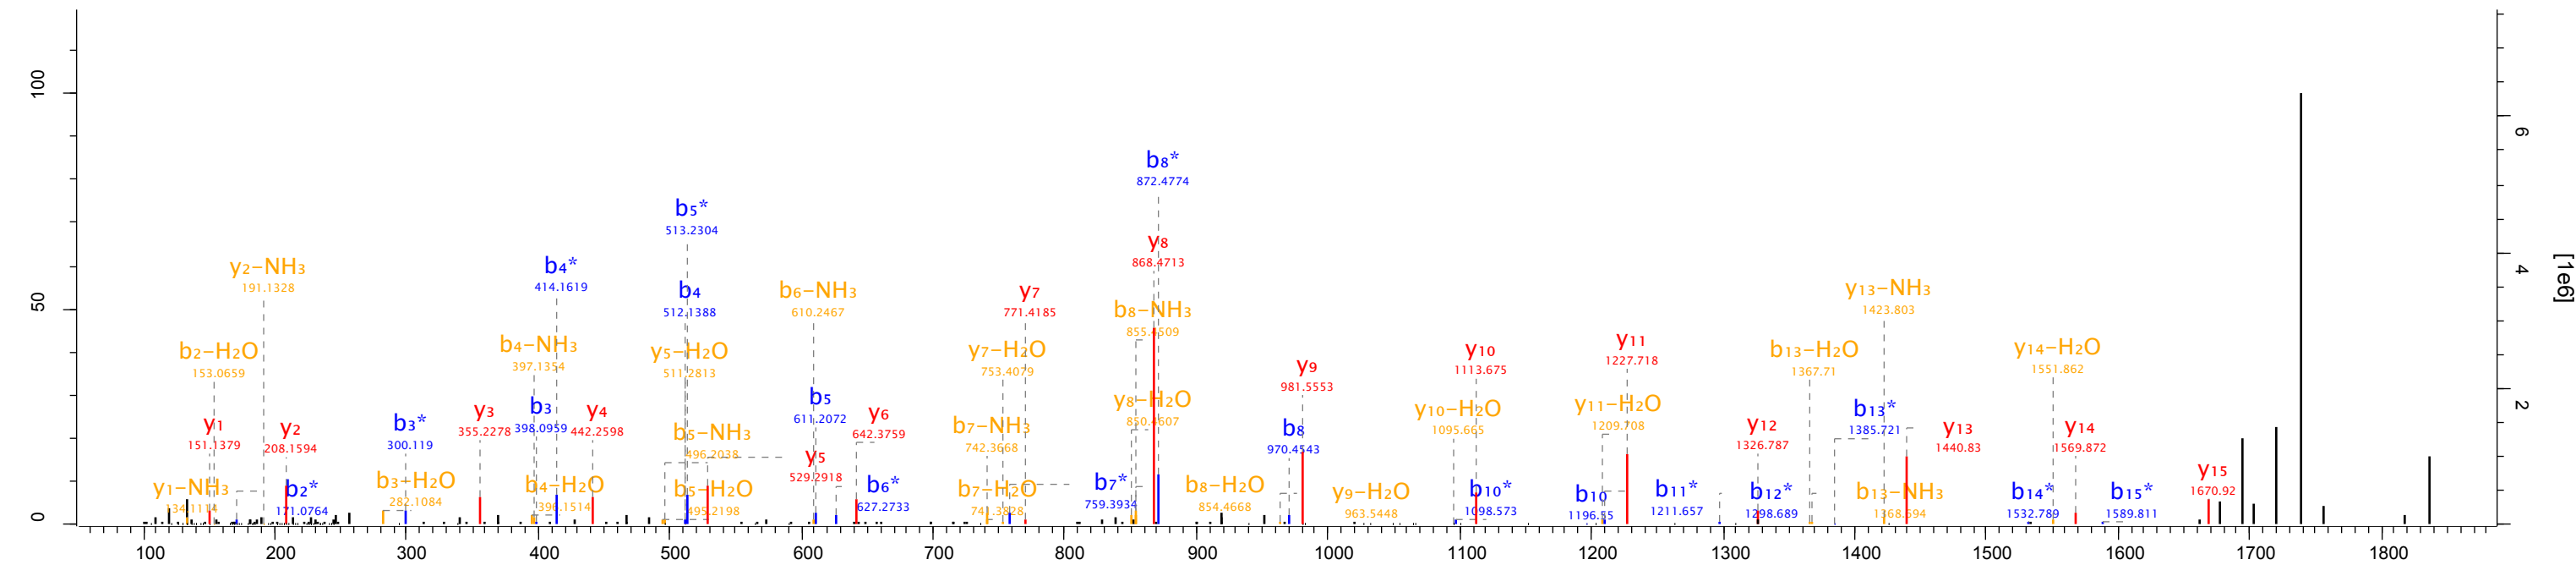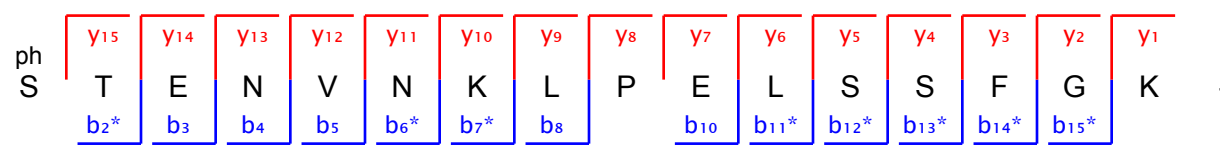

Raw file: 20150812\_A375SR\_Phospho\_BR1\_04  
 Scan: 19373 Method: FTMS; HCD Score: 187.19 m/z: 1279.08 Gene names: ARHGAP12

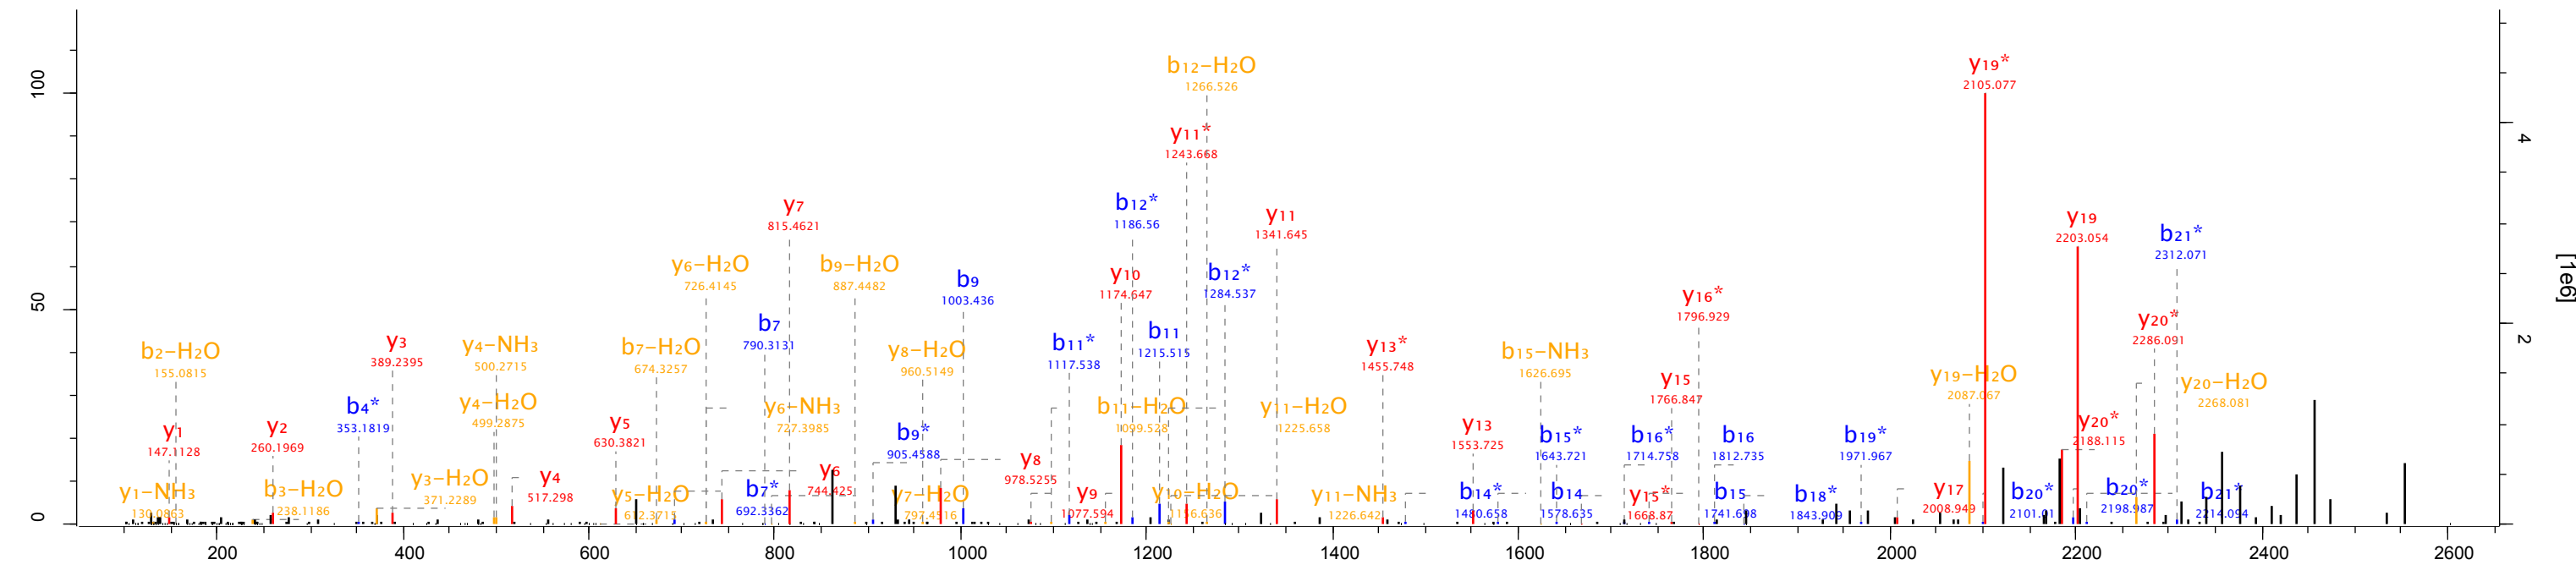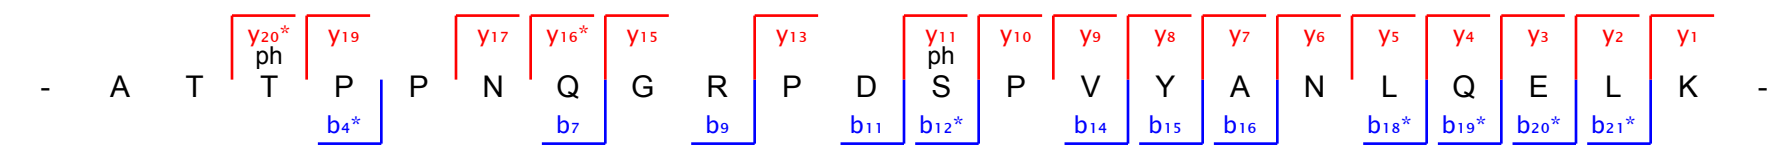

Raw file: 20150812\_A375SR\_Phospho\_BR1\_04  
 Scan: 1973 Method: FTMS; HCD Score: 151.28 m/z: 810.82 Gene names: ABI2

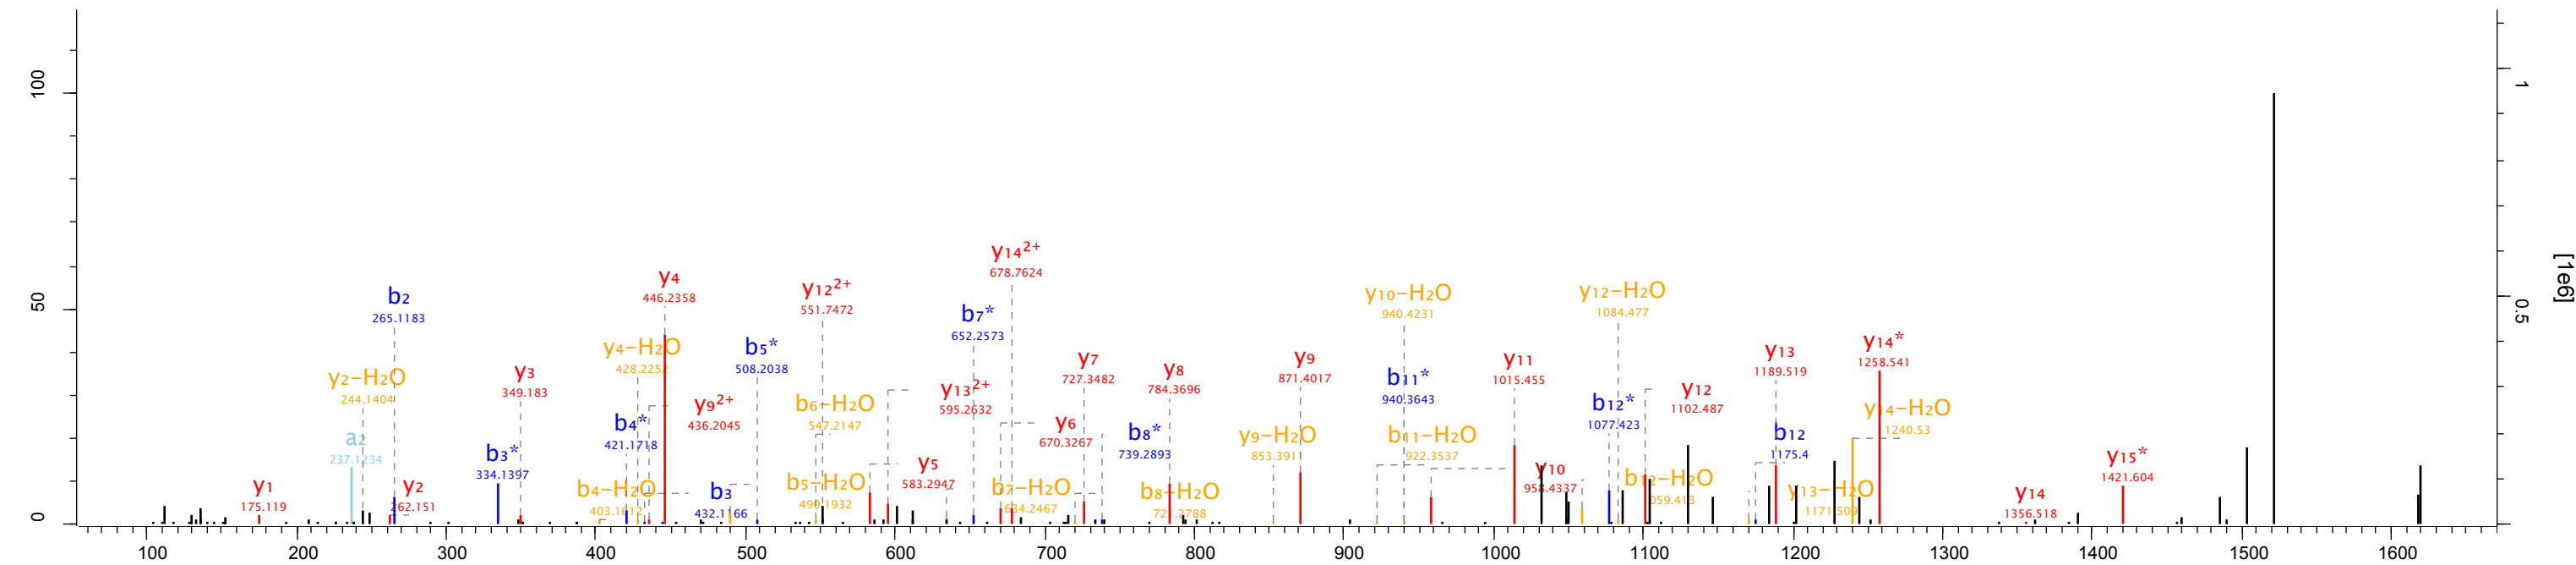

- T Y S S G S S G G S H P S S R -

Fragmentation mapping (b and y ions):

- Y15\* (b2)
- Y14 ph (b3)
- Y13 (b4\*)
- Y12 (b5\*)
- Y11 (G)
- Y10 (b7\*)
- Y9 (b8\*)
- Y8 (G)
- Y7 (G)
- Y6 (b11\*)
- Y5 (b12)
- Y4 (P)
- Y3 (S)
- Y2 (S)
- Y1 (R)

Raw file: 20150812\_A375SR\_Phospho\_BR1\_04  
 Scan: 20213 Method: FTMS; HCD Score: 185.63 m/z: 719.37 Gene names: SNX1

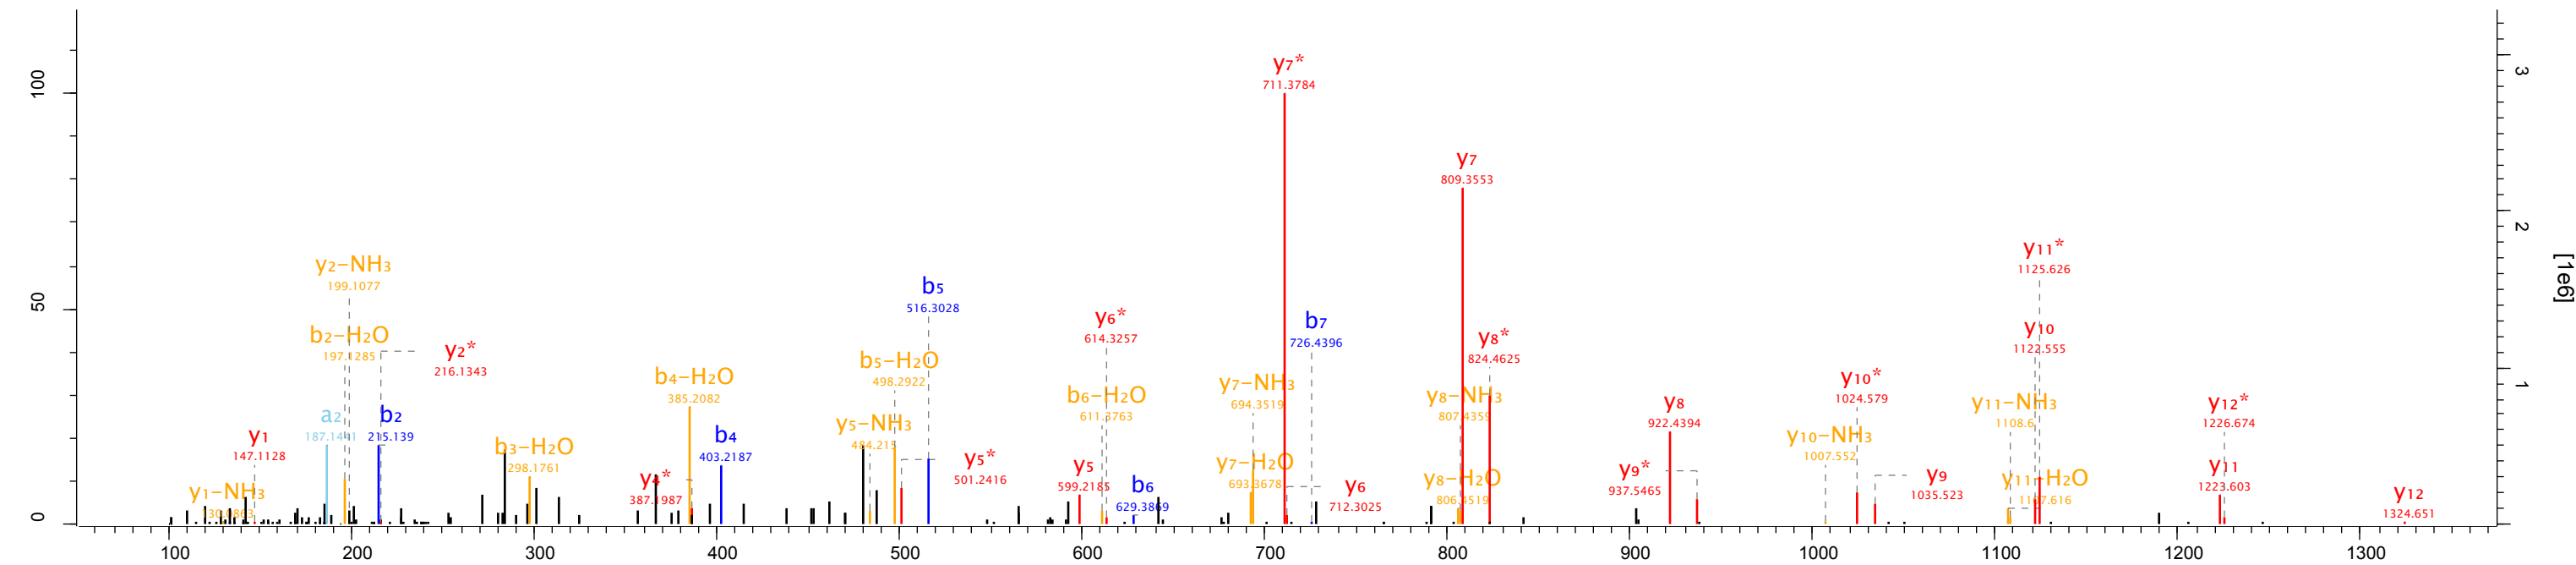

Sequence: I T T S L L P I N N G S K -  
 Fragmentation sites: b2 (under T), b4 (under S), b5 (under L), b6 (under L), b7 (under P), y4\* (under N), y2\* (under S), y1 (under K)

Raw file: 20150812\_A375SR\_Phospho\_BR1\_04  
 Scan: 21463 Method: FTMS; HCD Score: 372 m/z: 1255.14 Gene names: EPB41L2

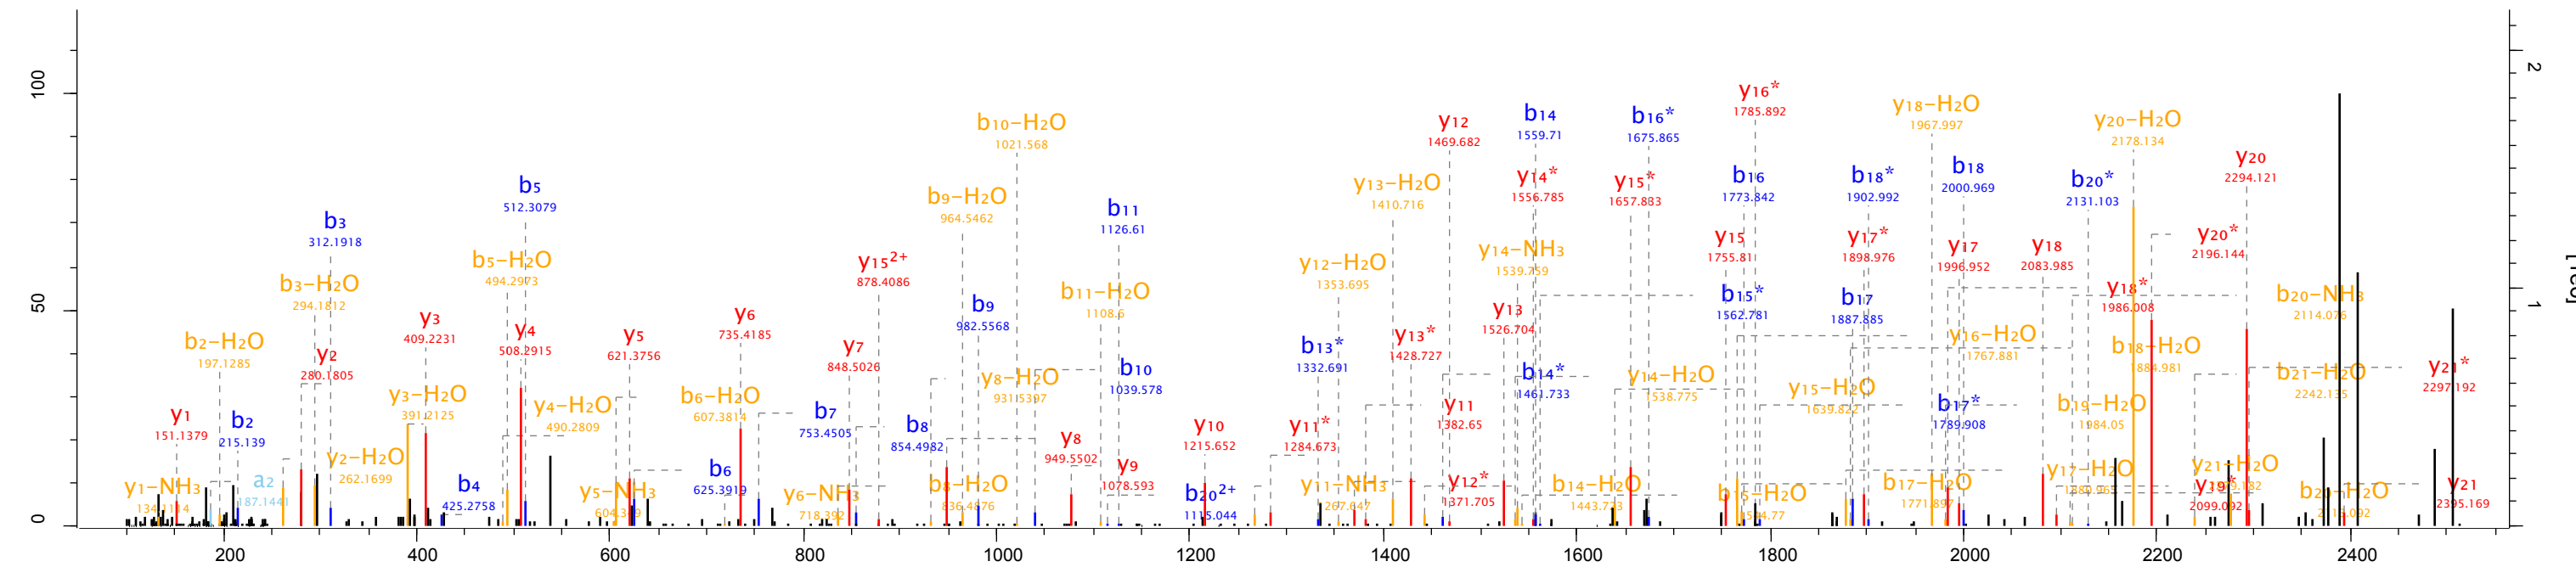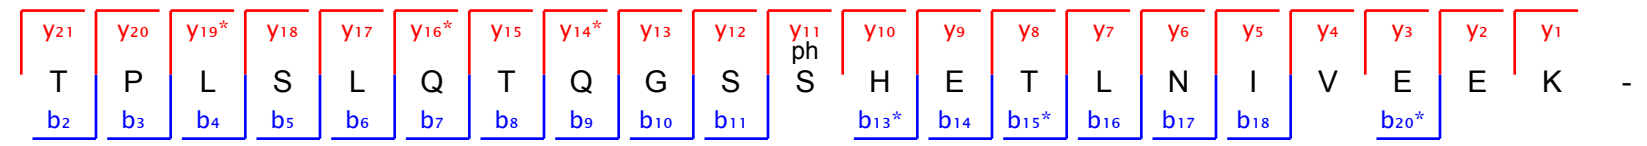

Raw file 20150812\_A375SR\_Phospho\_BR1\_04 Scan 21623 Method FTMS; HCD Score 117.8 m/z 960.43 Gene names PARP12

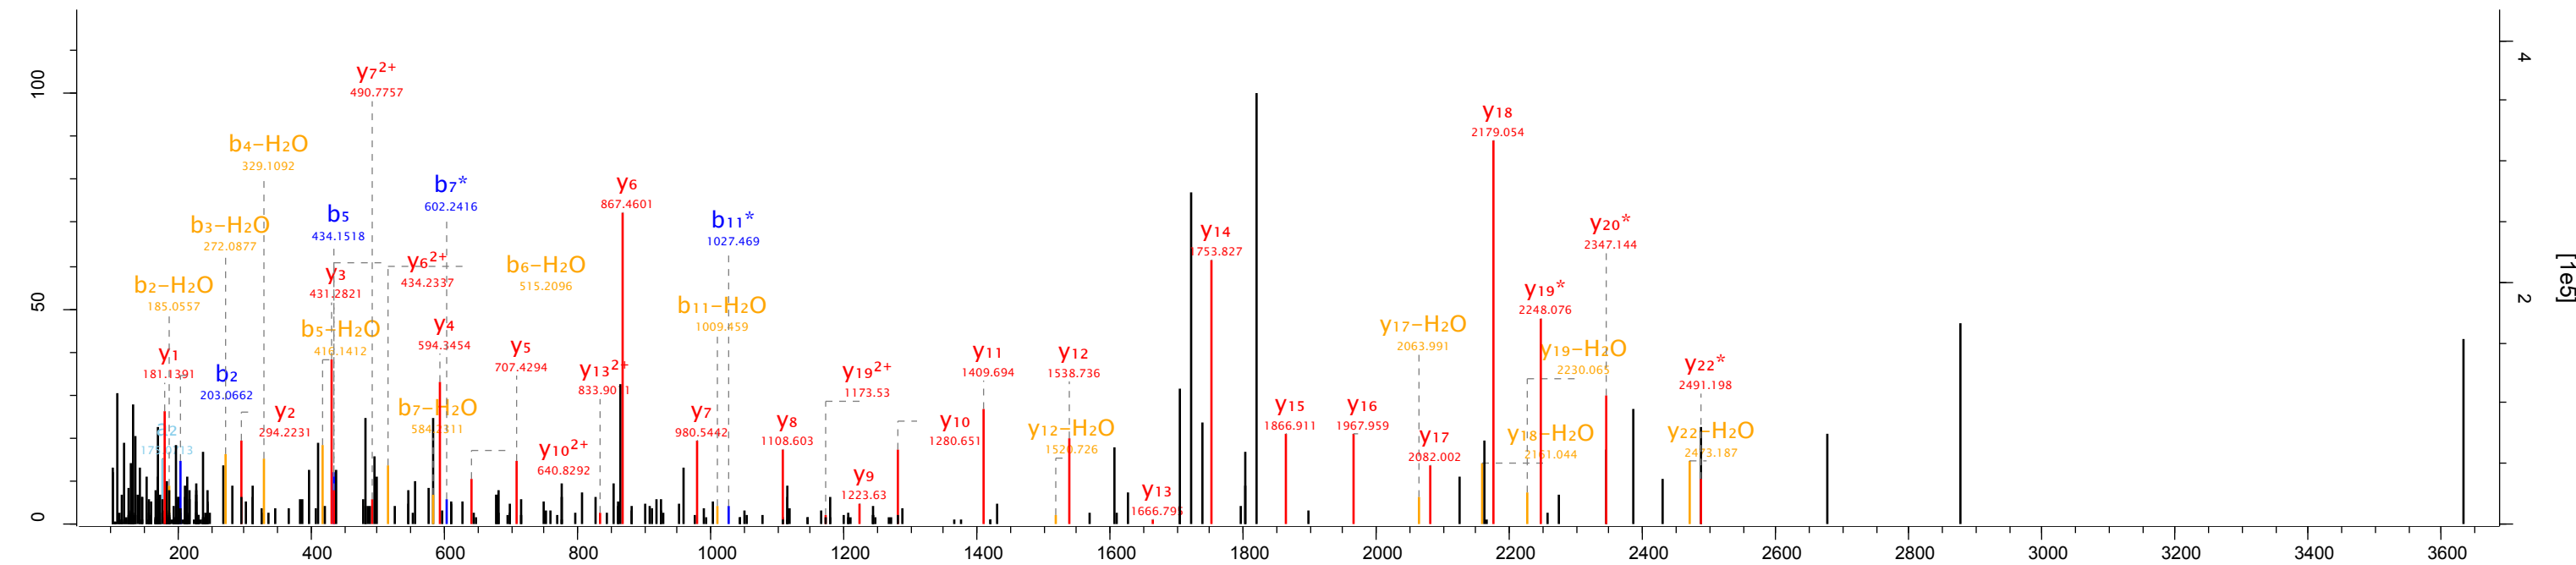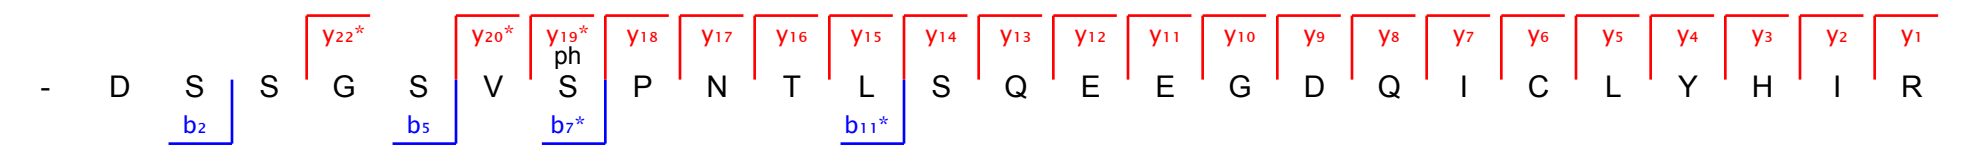

Raw file 20150812\_A375SR\_Phospho\_BR1\_04 Scan 21673 Method FTMS; HCD Score 59.79 m/z 1095.14 Gene names BRD8

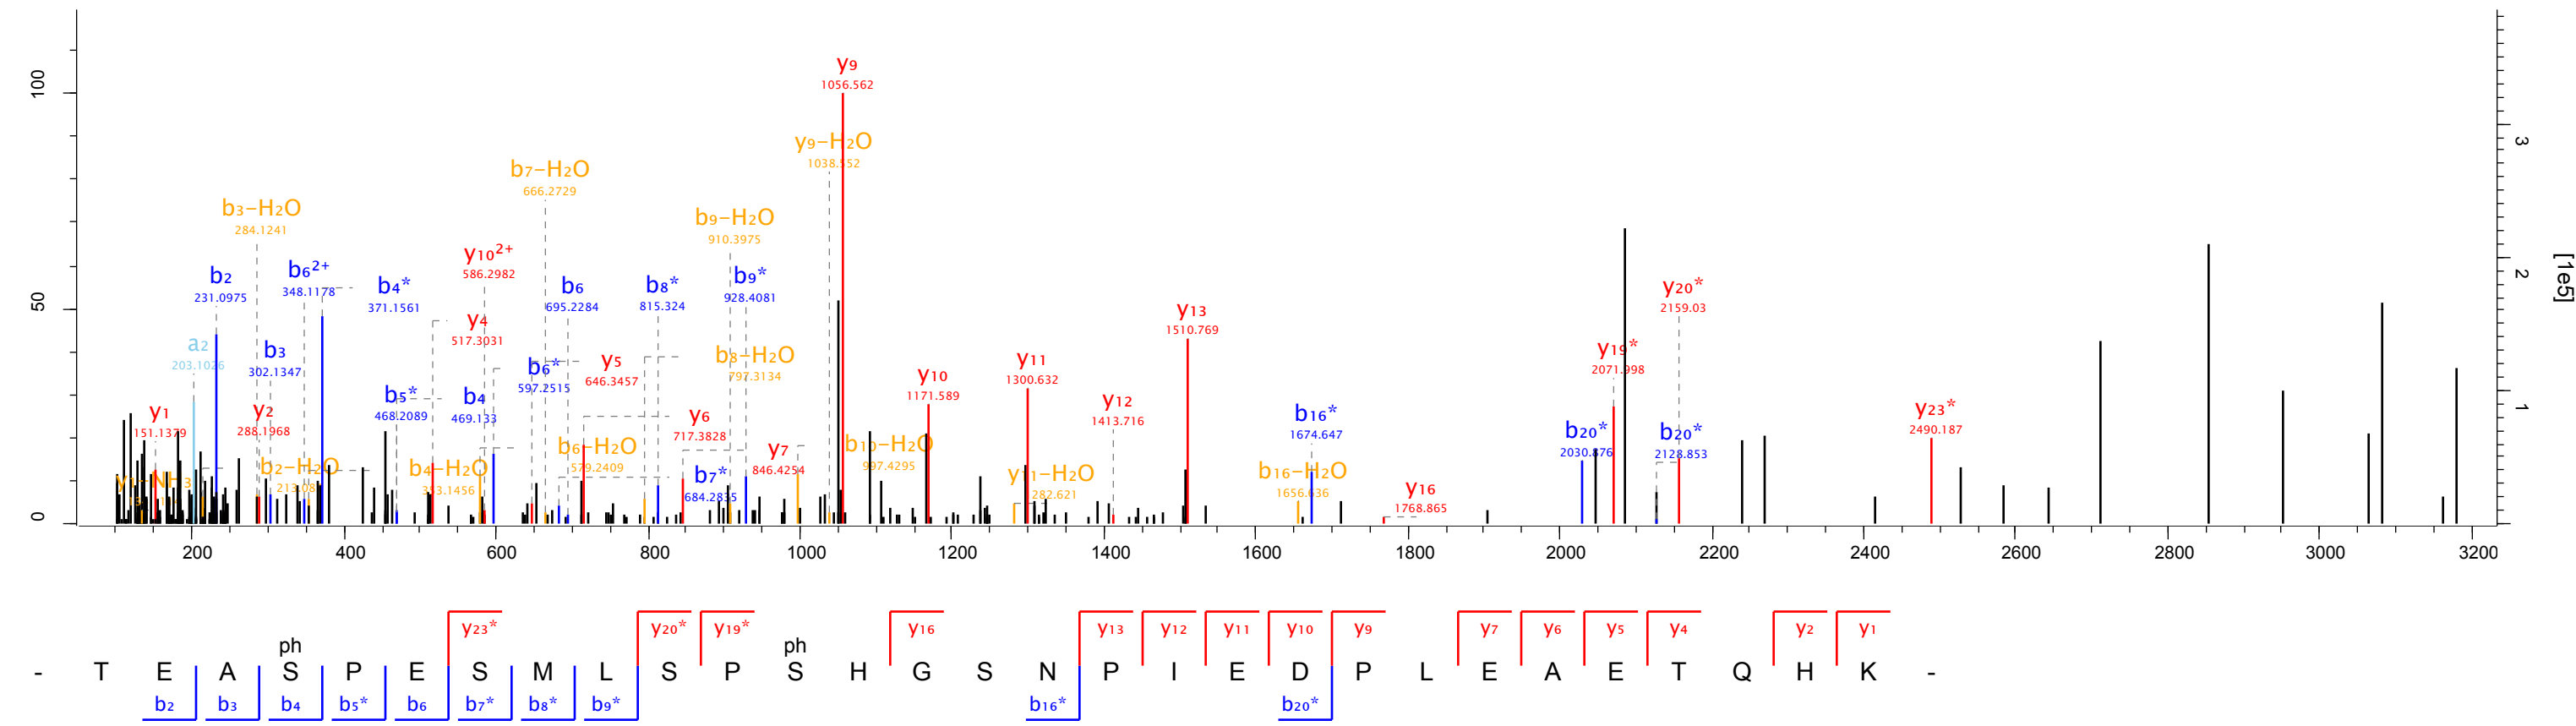

Raw file: 20150812\_A375SR\_Phospho\_BR1\_04  
 Scan: 21923 Method: FTMS; HCD Score: 109.27 m/z: 1012.07 Gene names: CAV2

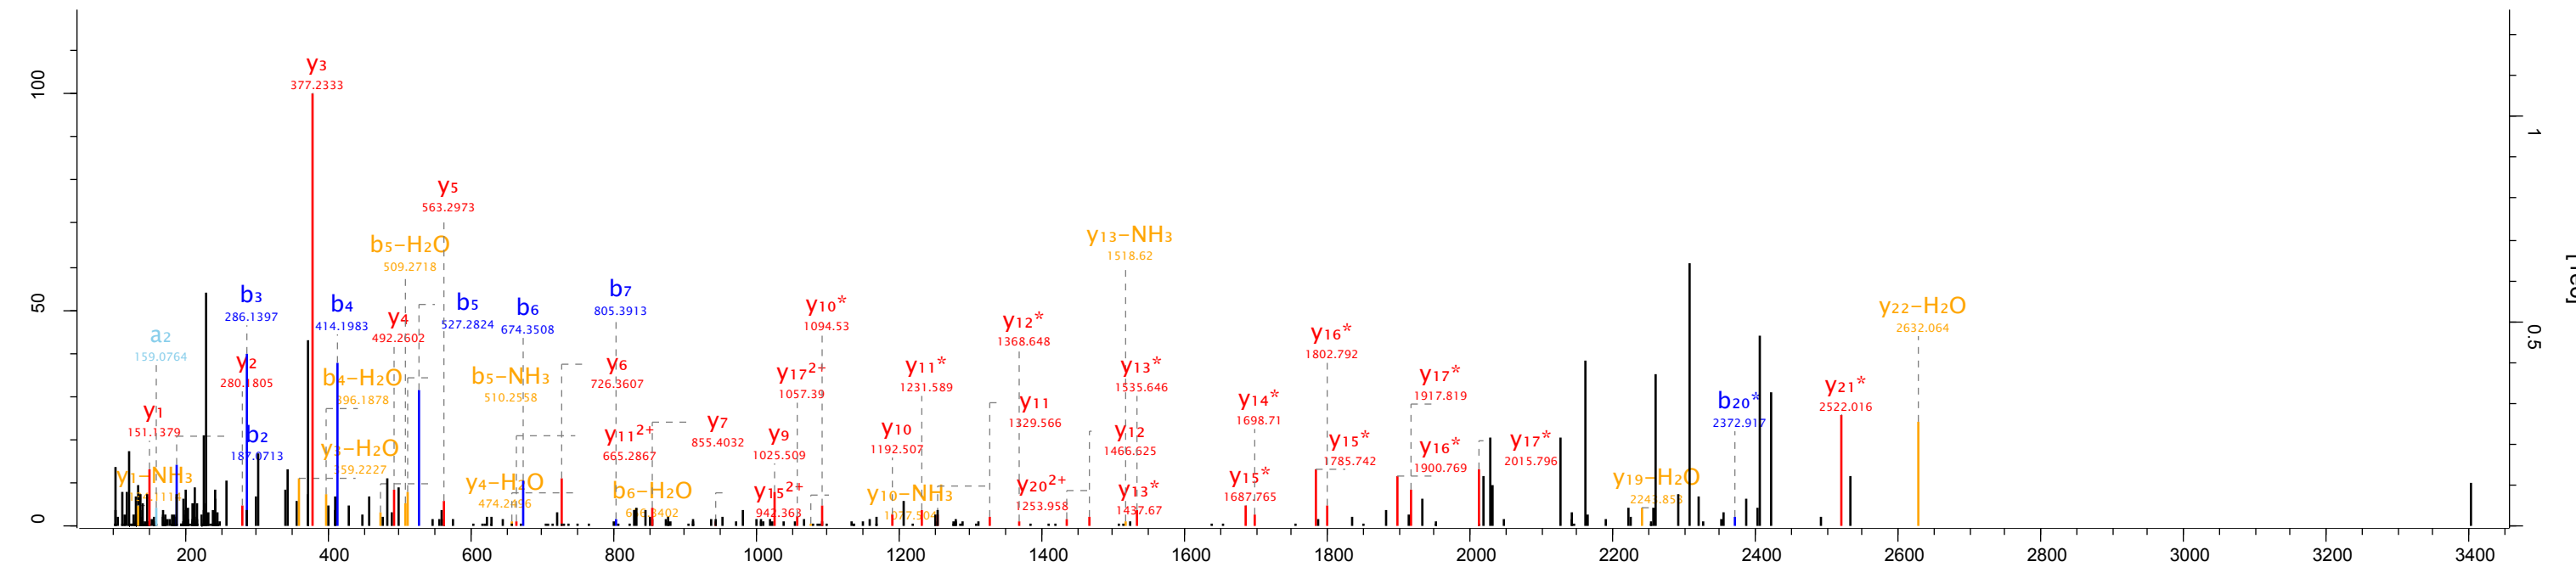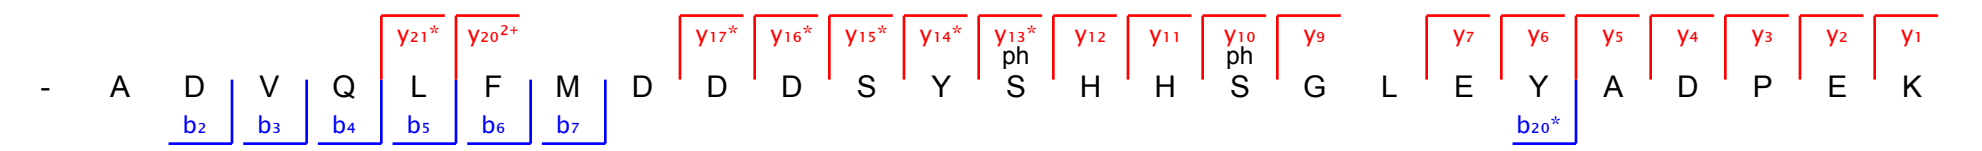



Raw file: 20150812\_A375SR\_Phospho\_BR1\_04  
 Scan: 22433 Method: FTMS; HCD Score: 102.97 m/z: 1001.44 Gene names: TLK2

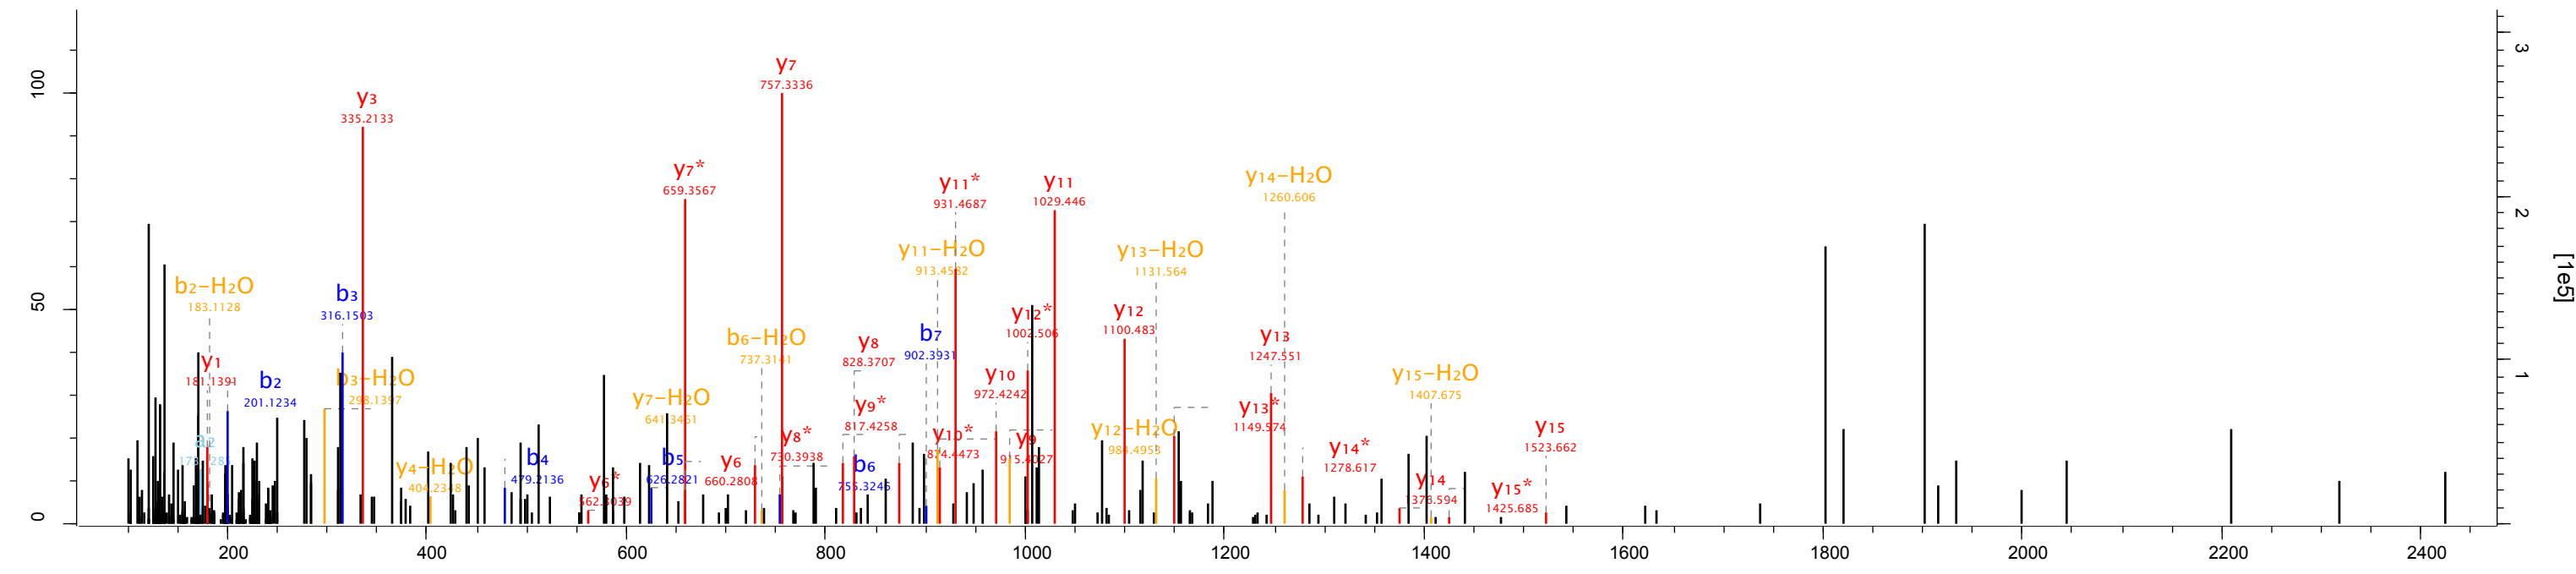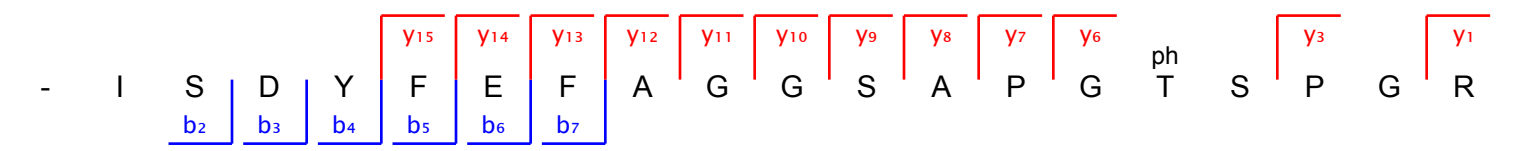

Raw file: 20150812\_A375SR\_Phospho\_BR1\_04  
 Scan: 23493 Method: FTMS; HCD Score: 237.15 m/z: 1025.88 Gene names: RPLP2;RPLP1

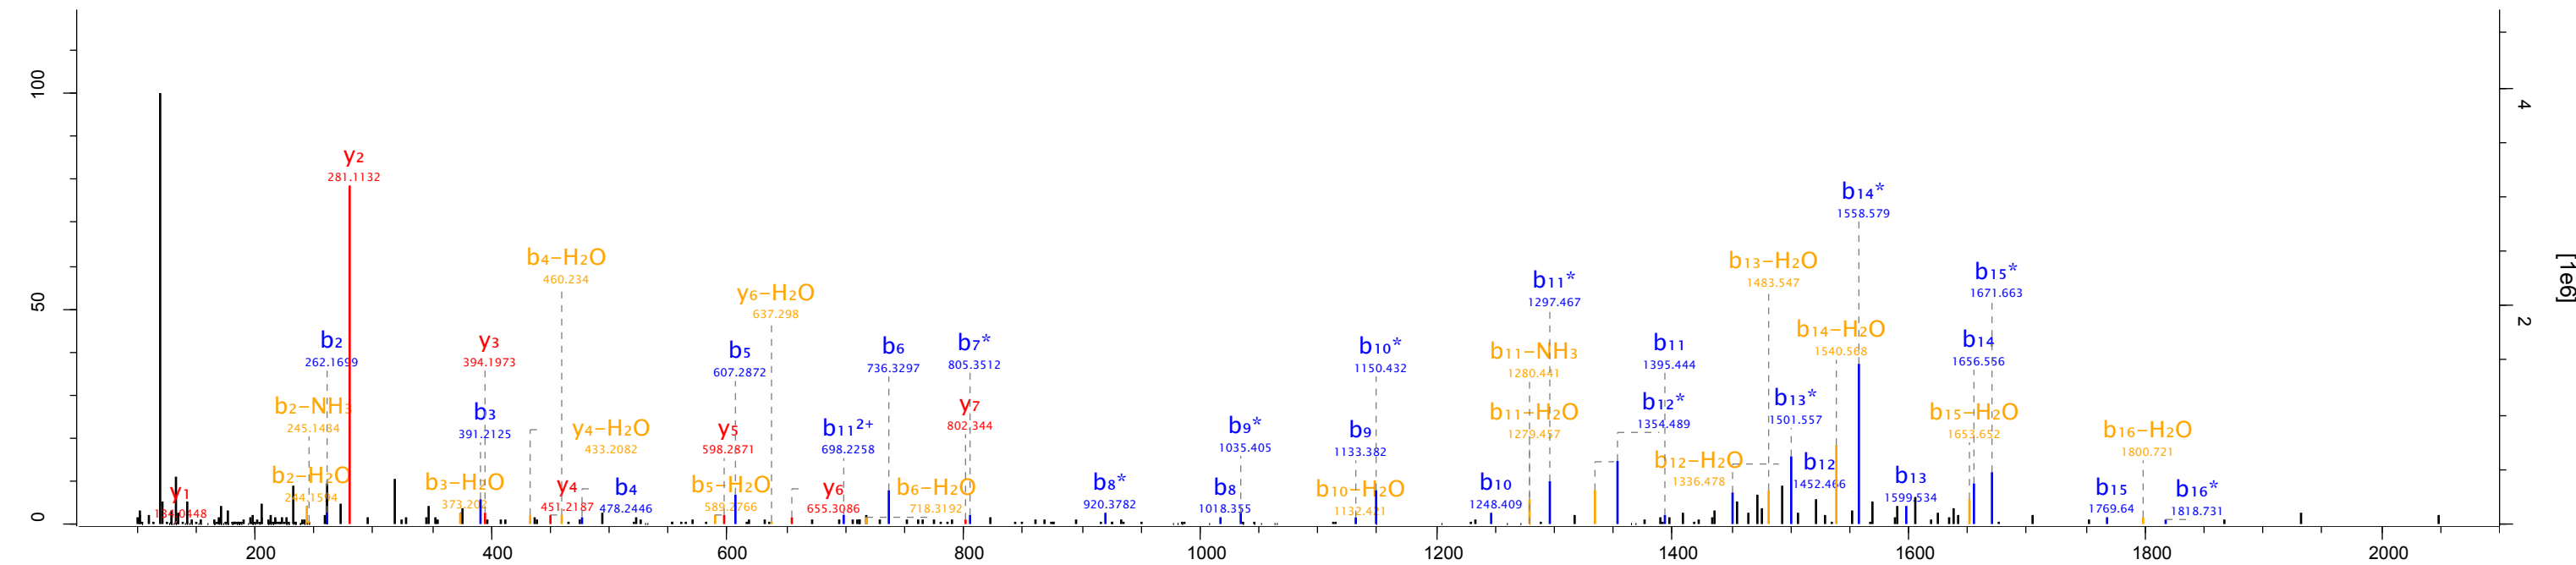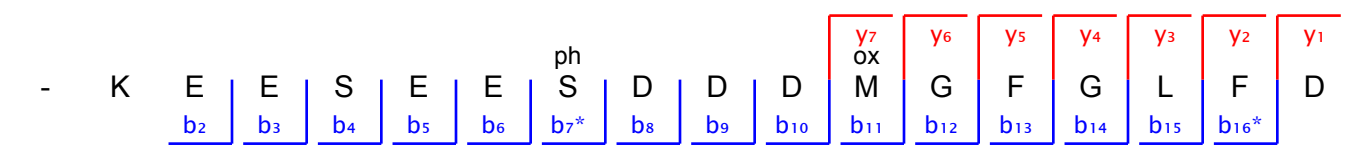

Raw file: 20150812\_A375SR\_Phospho\_BR1\_04  
 Scan: 24573 Method: FTMS; HCD Score: 211.72 m/z: 780.34 Gene names: SRRM2

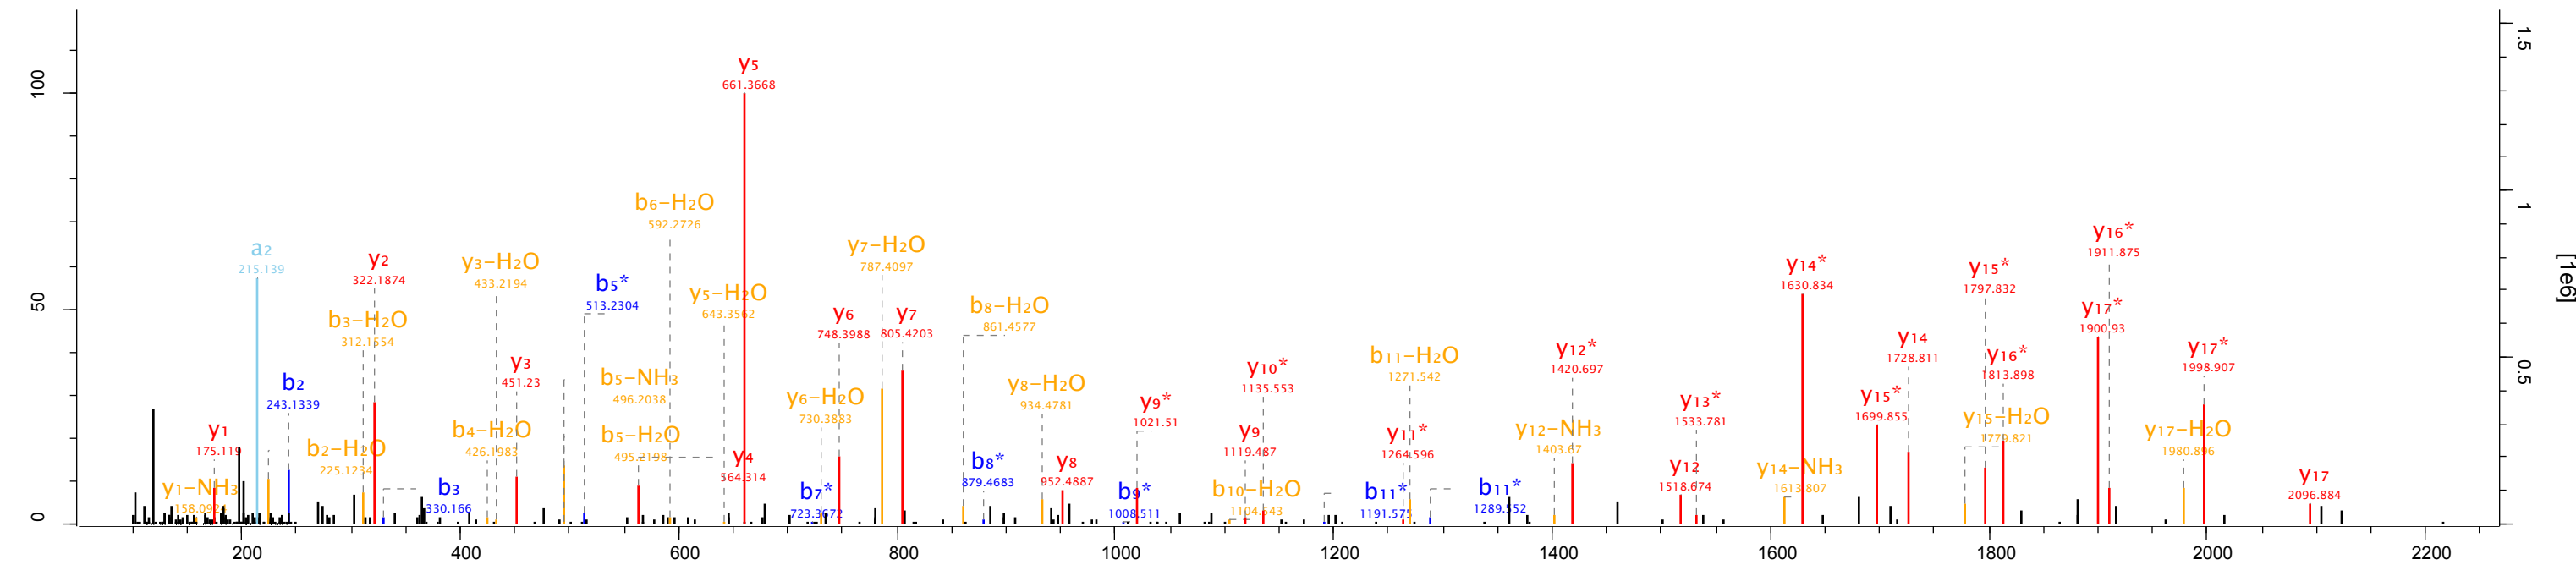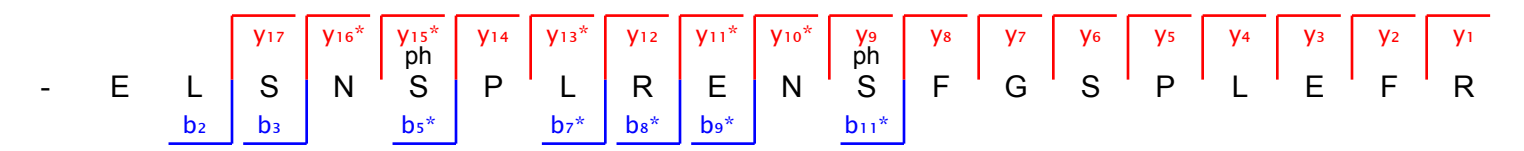

Raw file: 20150812\_A375SR\_Phospho\_BR1\_04  
 Scan: 25163 Method: FTMS; HCD Score: 136.63 m/z: 782.85 Gene names: CCDC88A

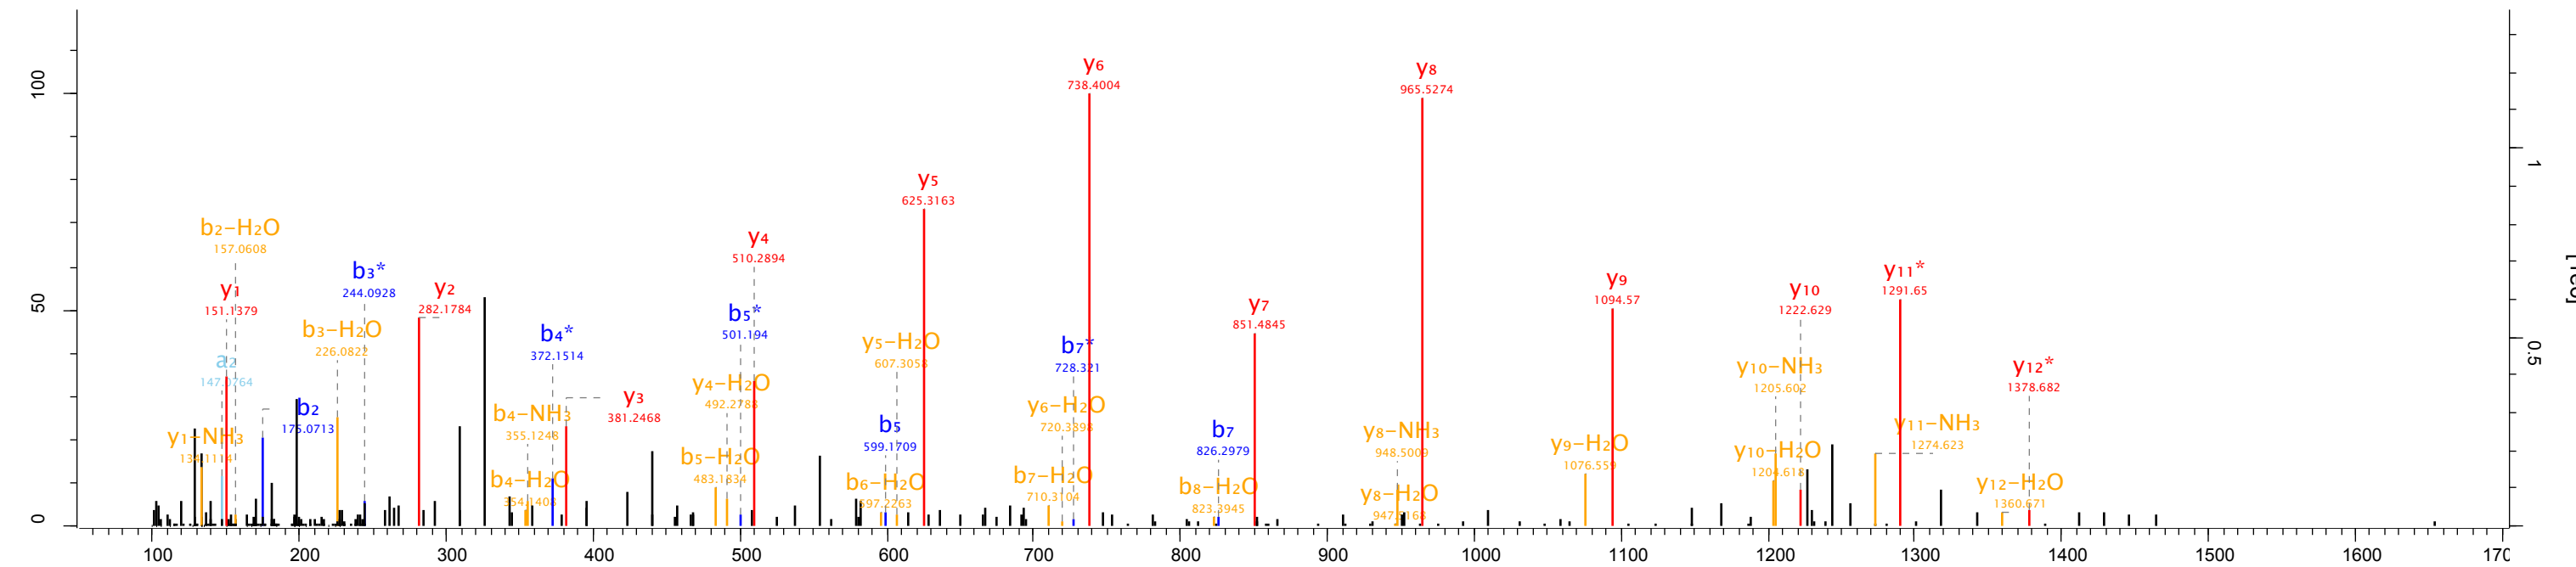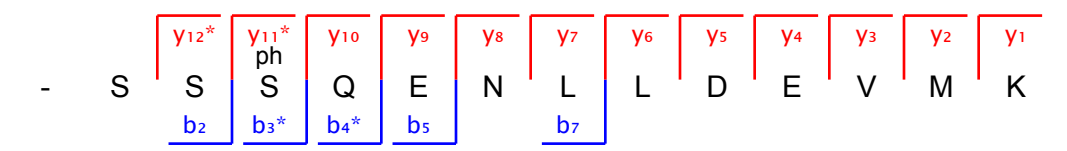

Raw file  
20150812\_A375SR\_Phospho\_BR1\_04

Scan Method Score m/z Gene names  
26053 FTMS; HCD 180.69 1036.49 DUT

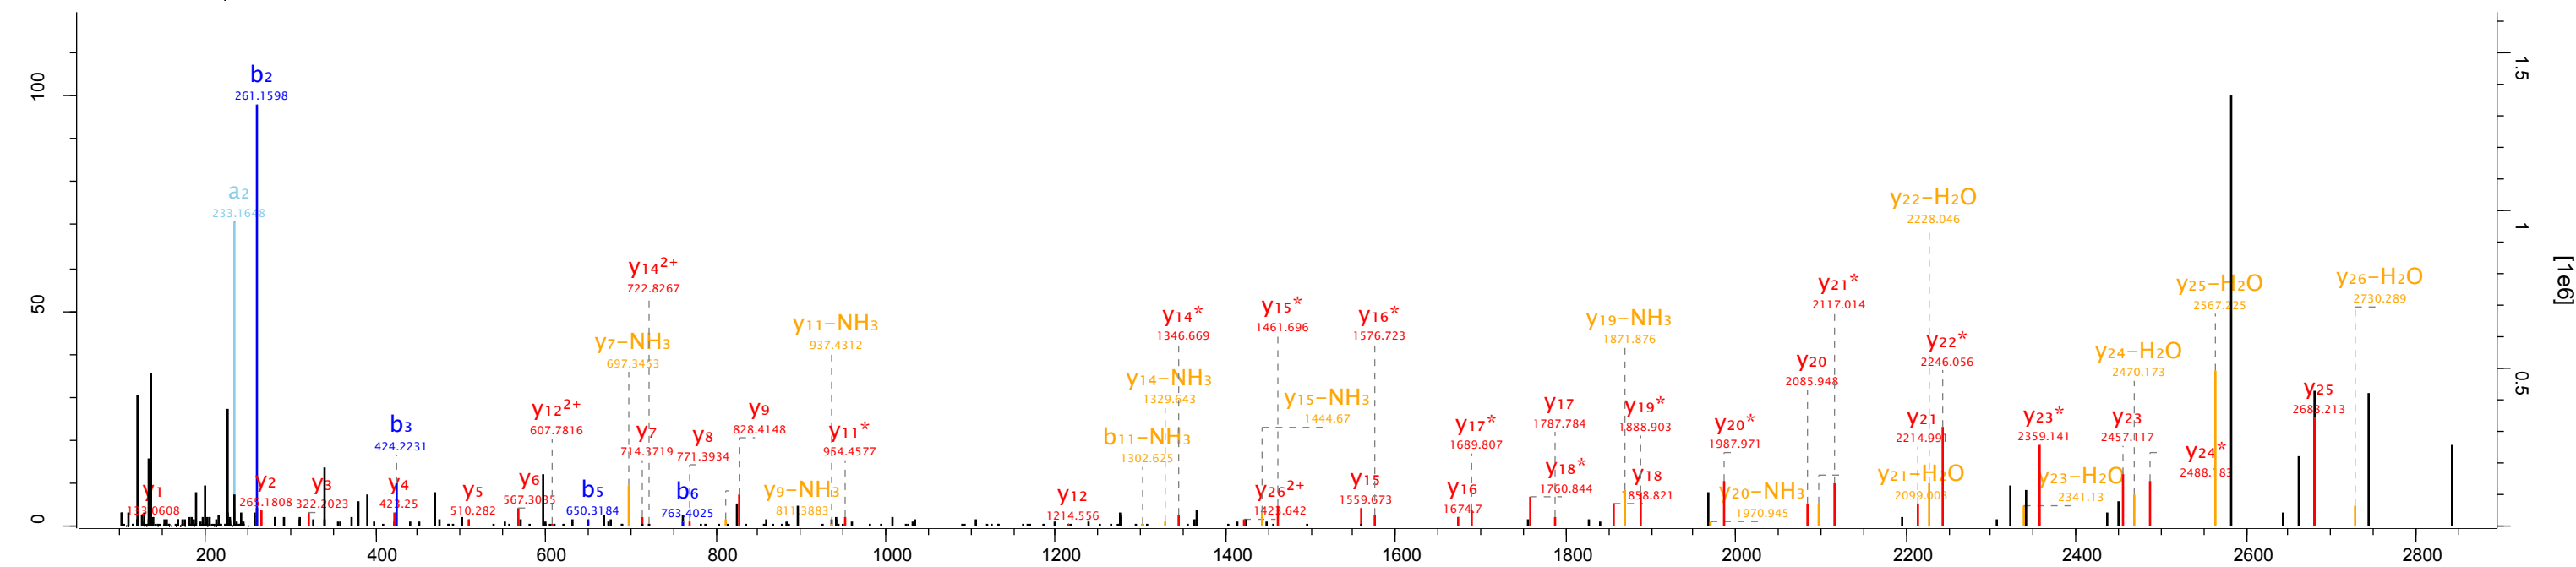

- I F Y P E I E E V Q A L D D T E R G S G G F G S T G K N -  
b2 b3 b5 b6 y26^2+ y25 y24^\* y23 y22^\* y21 y20 y19^\* y18 y17 y16 y15 y14^\* y12 y11^\* y9 y8 y7 y6 y5 y4 y3 y2 y1

Raw file: 20150812\_A375SR\_Phospho\_BR1\_04  
 Scan: 27413 Method: FTMS; HCD Score: 91.77 m/z: 829.7 Gene names: CELF1

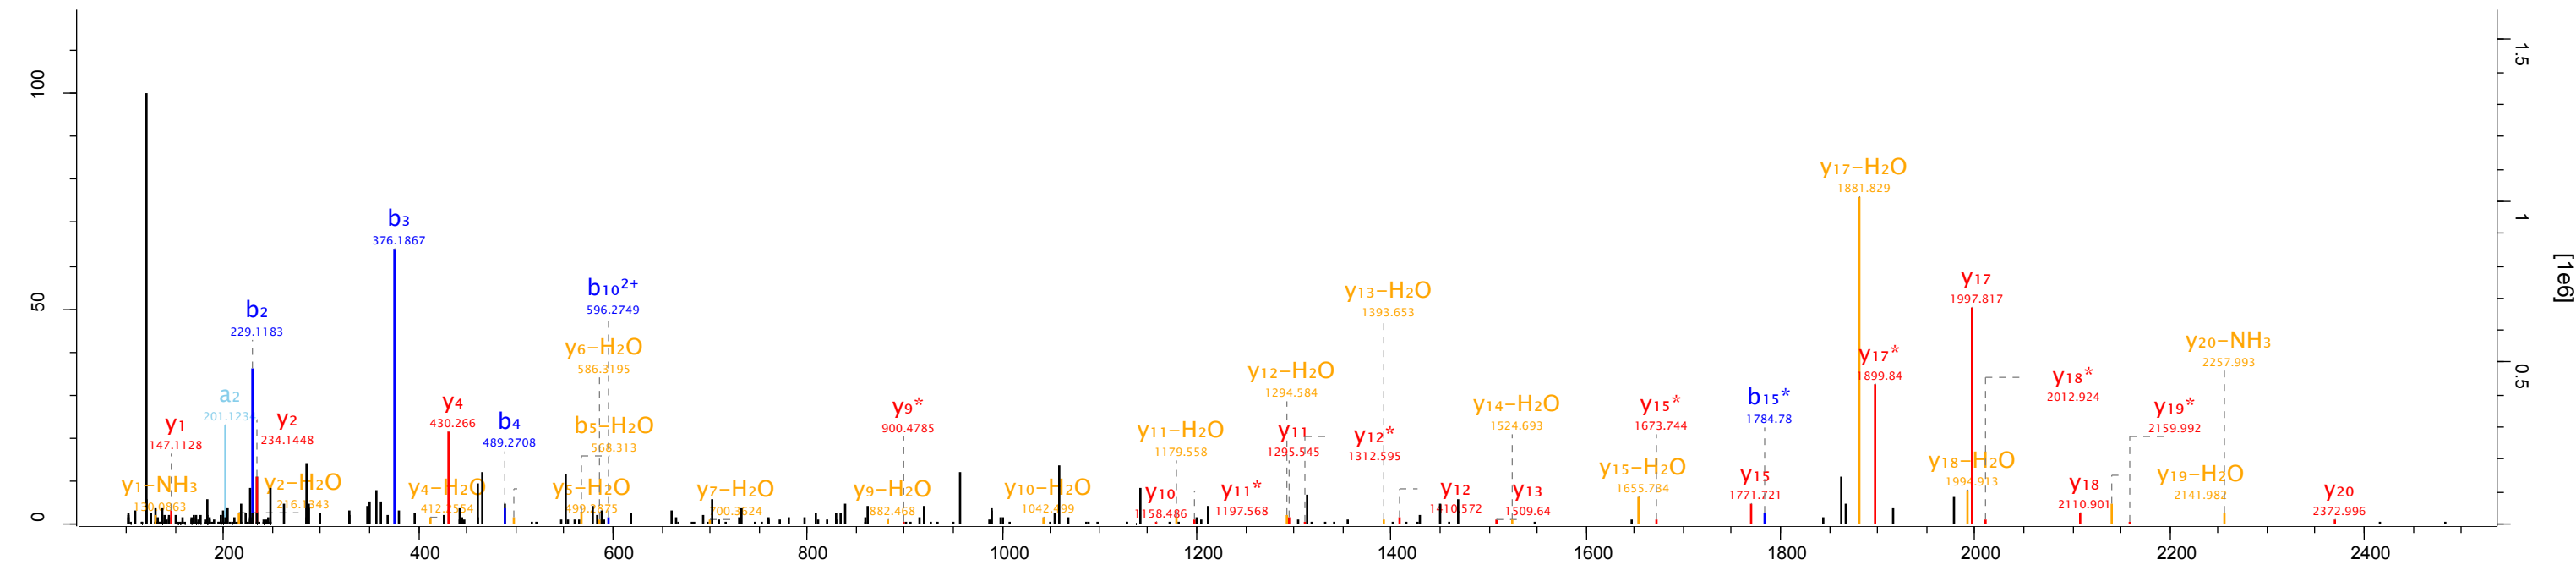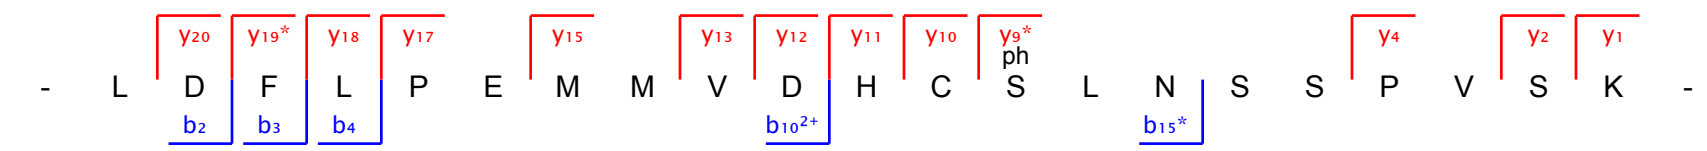

Raw file 20150812\_A375SR\_Phospho\_BR1\_04 Scan 28503 Method FTMS; HCD Score 141.36 m/z 1102.99 Gene names CNOT4

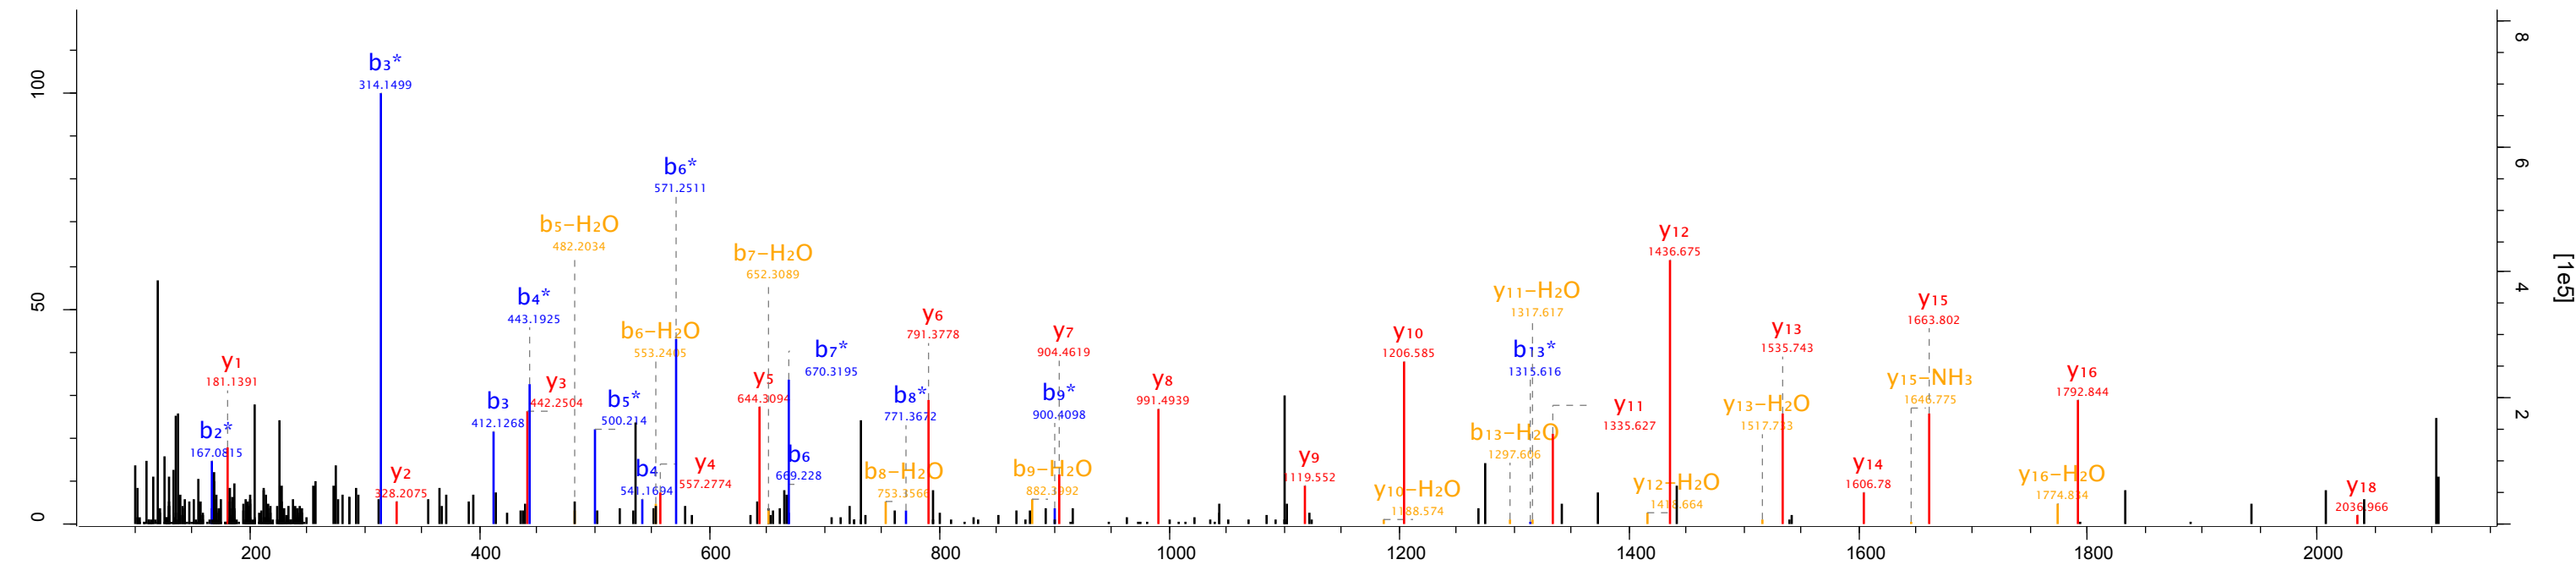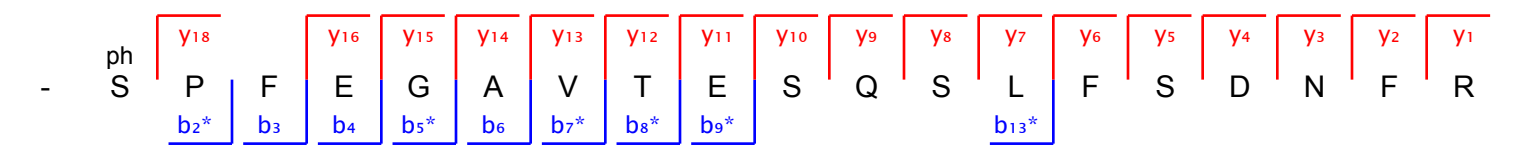





Raw file: 20150812\_A375SR\_Phospho\_BR1\_04  
 Scan: 3143 Method: FTMS; HCD Score: 276.69 m/z: 806.37 Gene names: MED1

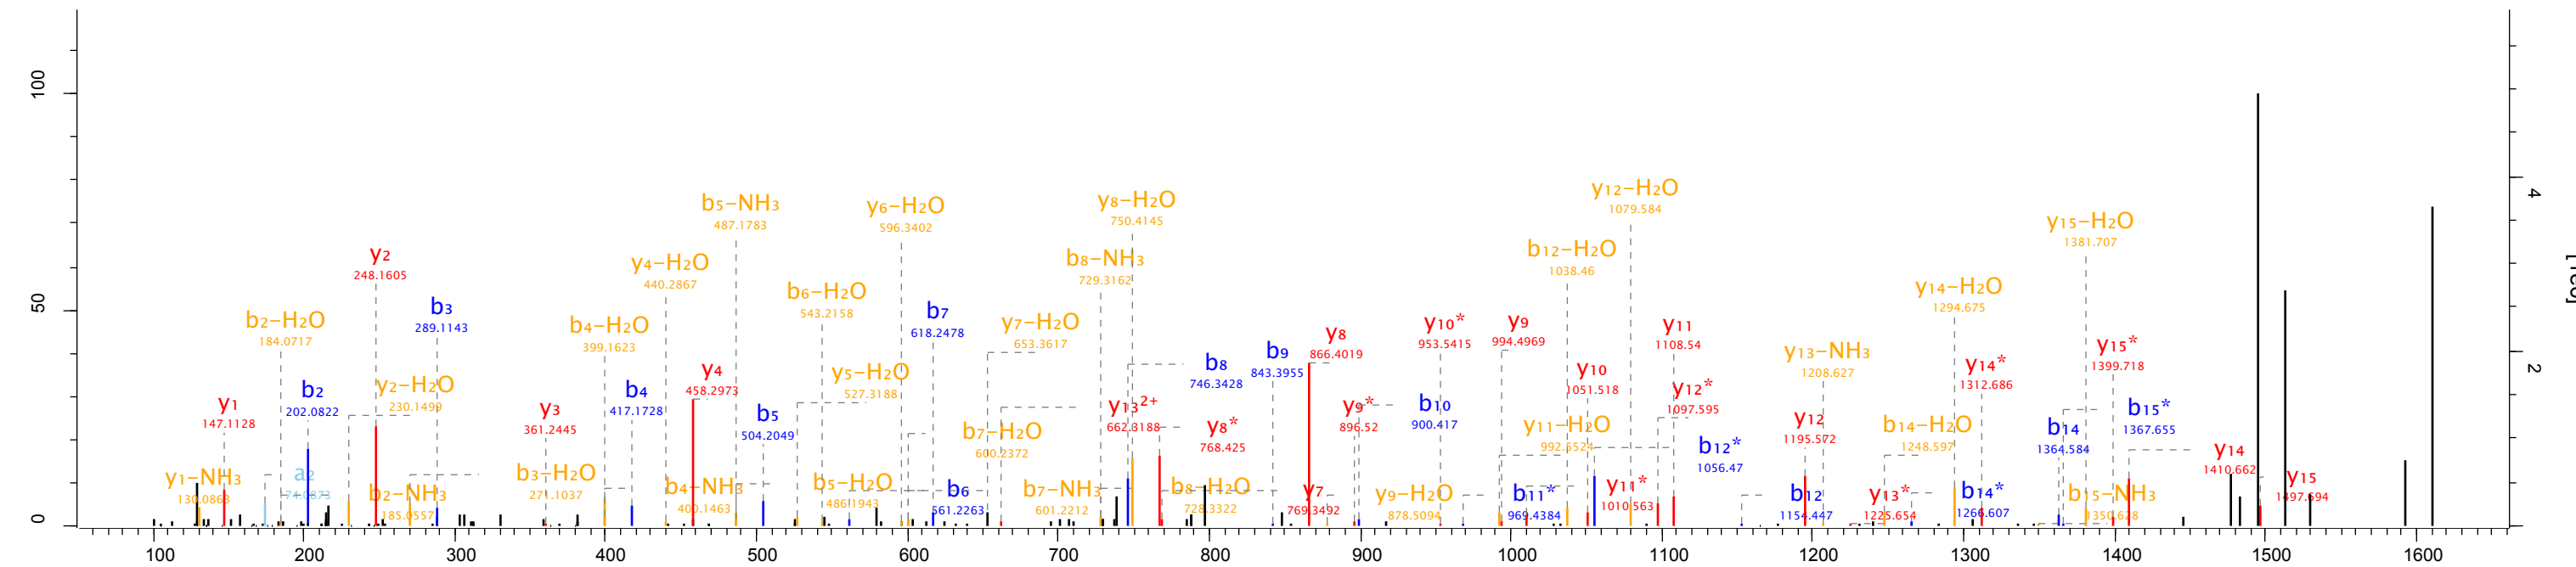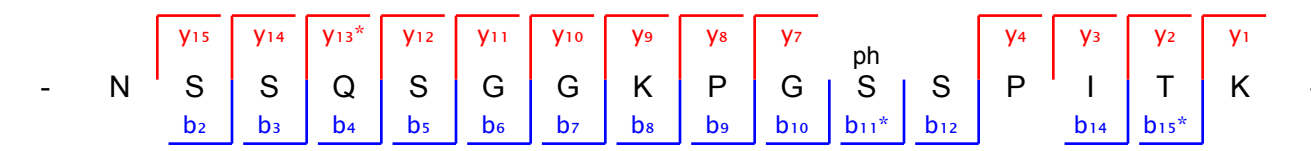

Raw file 20150812\_A375SR\_Phospho\_BR1\_04 Scan 3173 Method FTMS; HCD Score 168.5 m/z 713.32 Gene names PTBP1

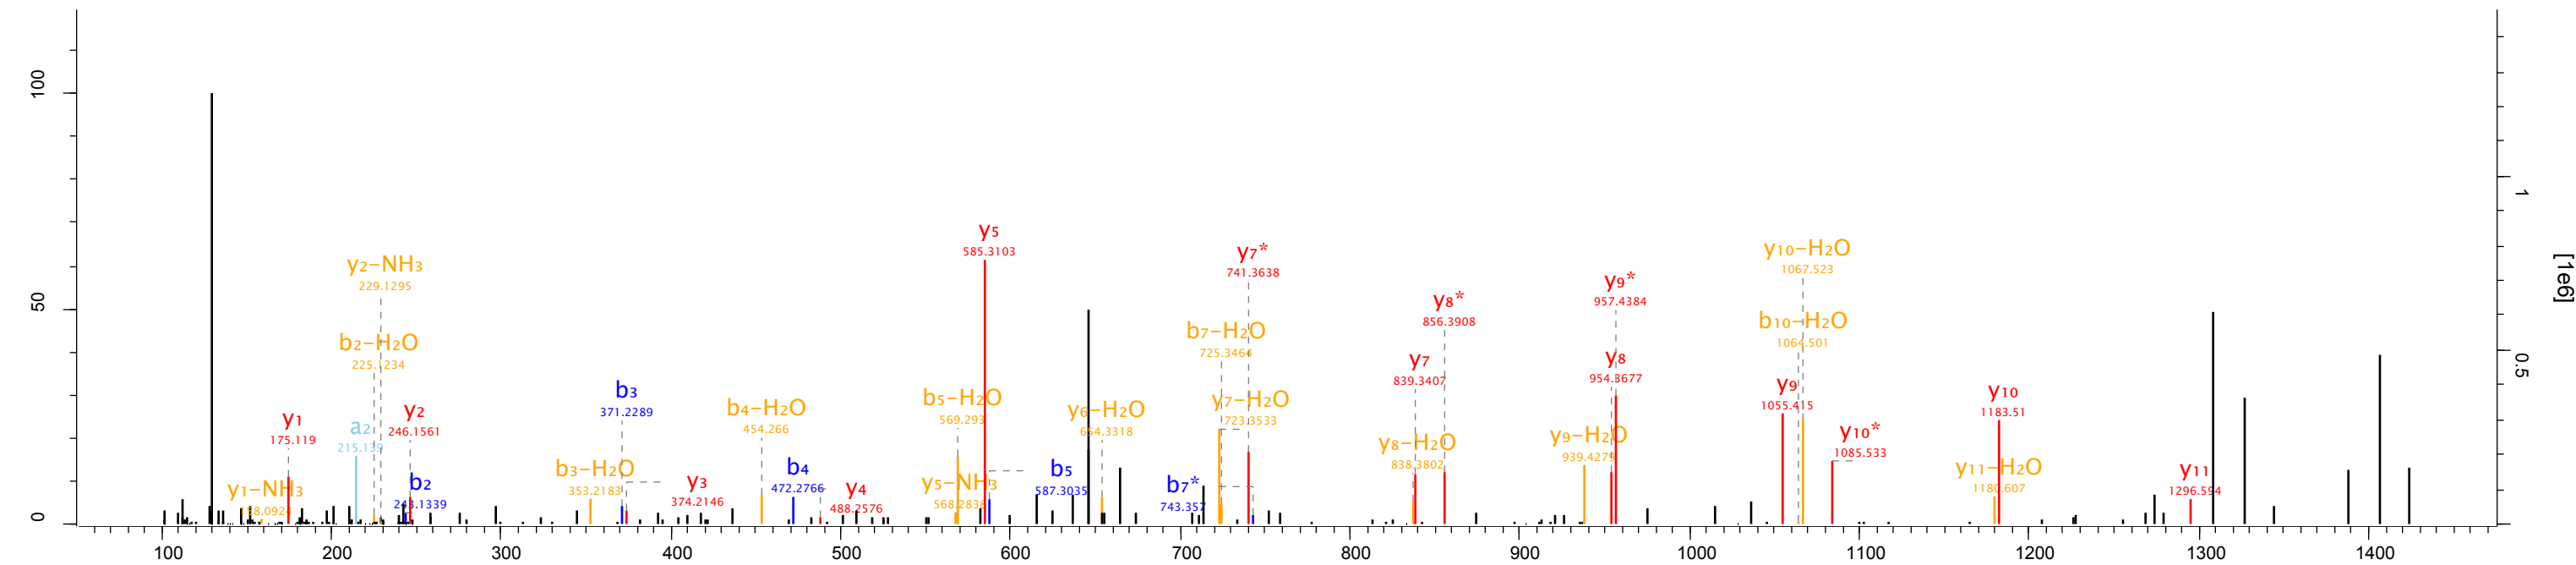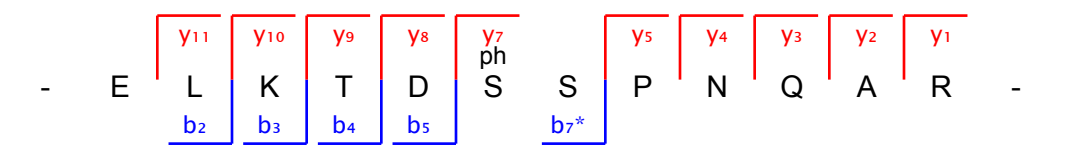

Raw file  
20150812\_A375SR\_Phospho\_BR1\_04

Scan 3183 Method FTMS; HCD Score 343.85 m/z 973.41 Gene names ACIN1

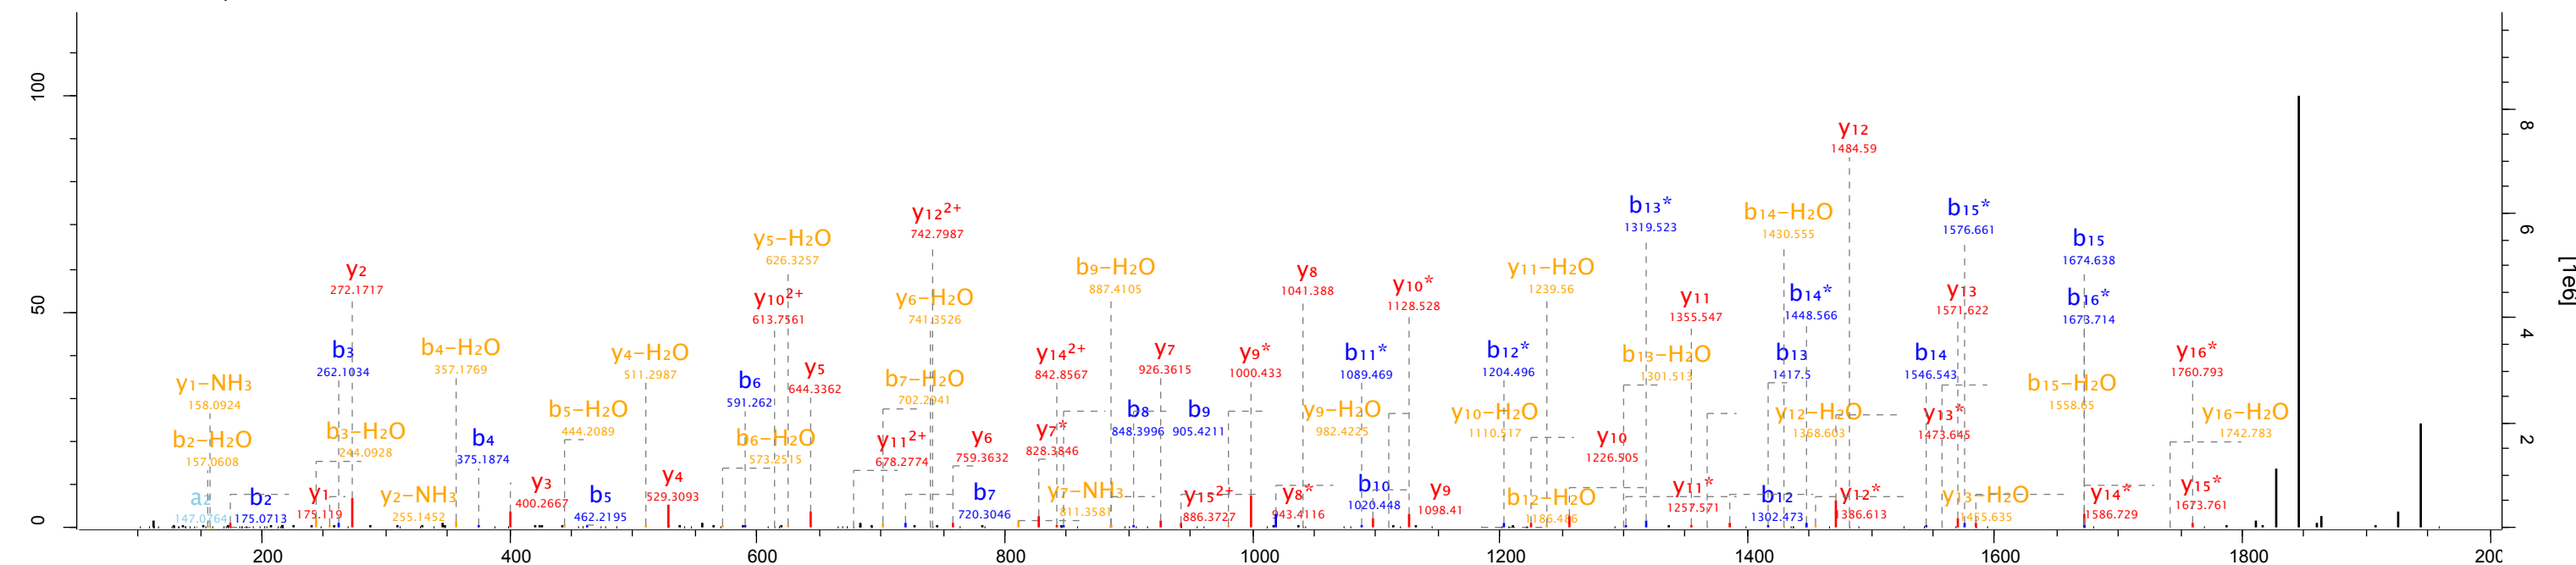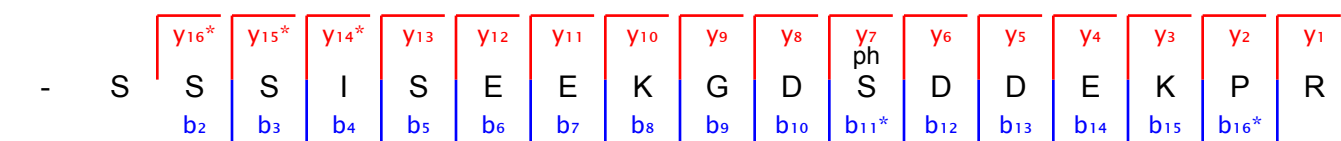

Raw file: 20150812\_A375SR\_Phospho\_BR1\_04  
 Scan: 3493 Method: FTMS; HCD Score: 140.28 m/z: 720.85 Gene names: PRRC2A

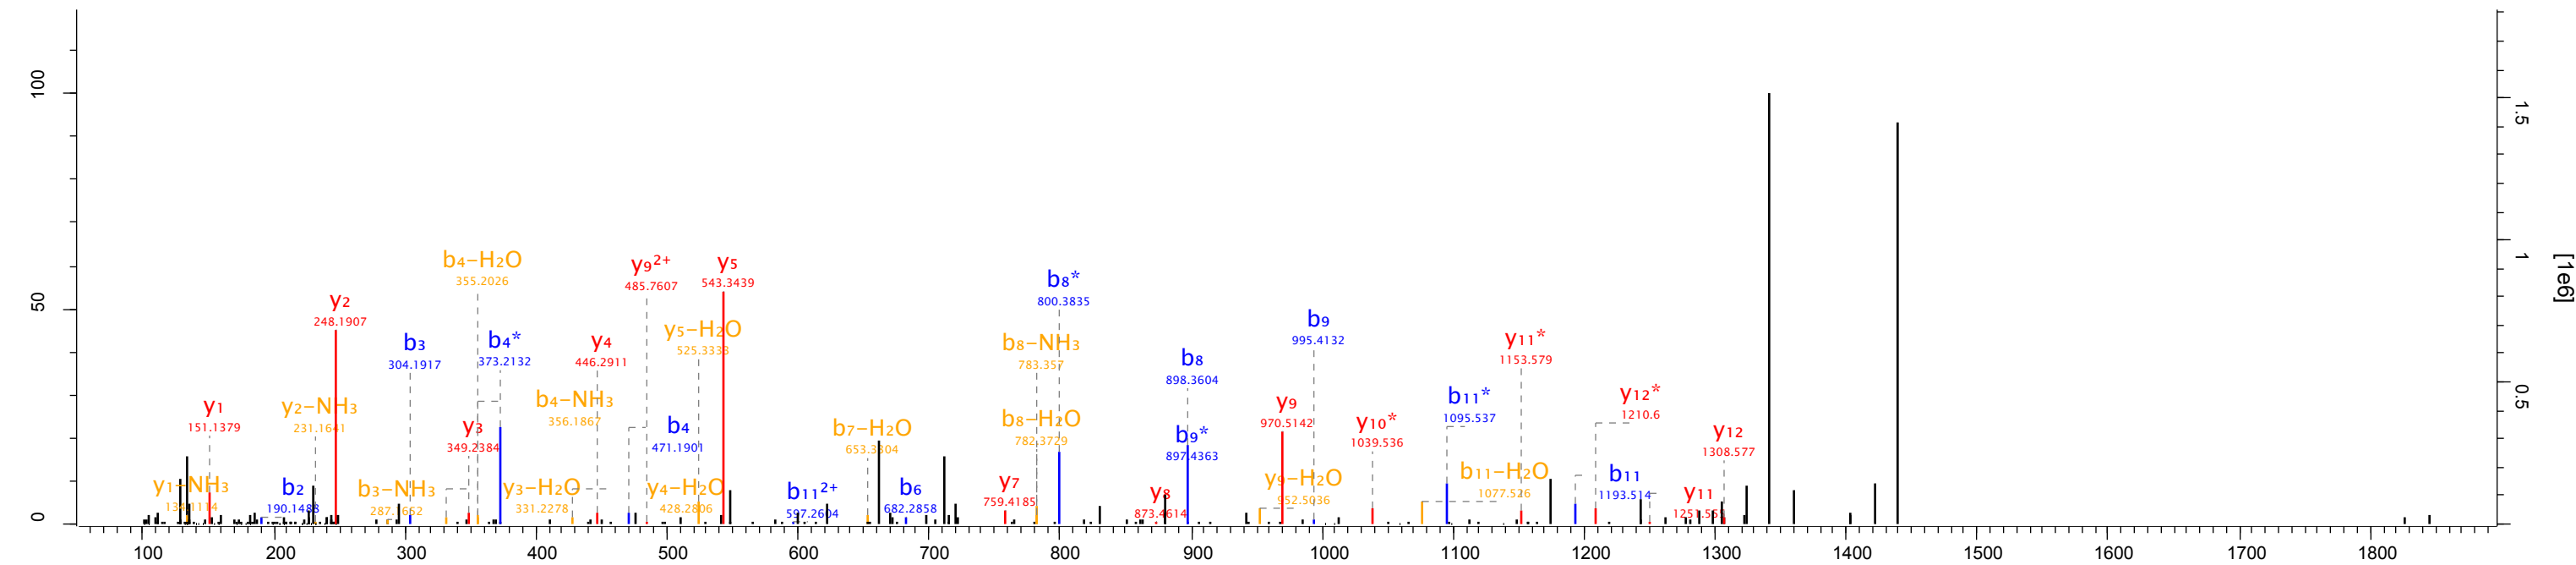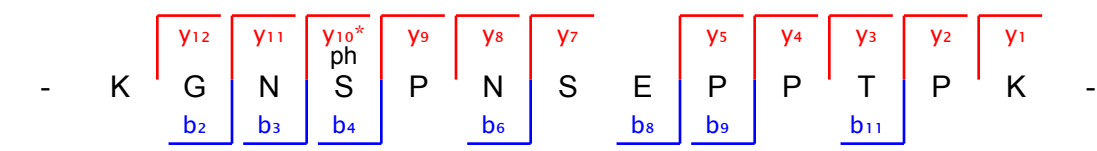

Raw file 20150812\_A375SR\_Phospho\_BR1\_04 Scan 3973 Method FTMS; HCD Score 42.72 m/z 522.61 Gene names APC

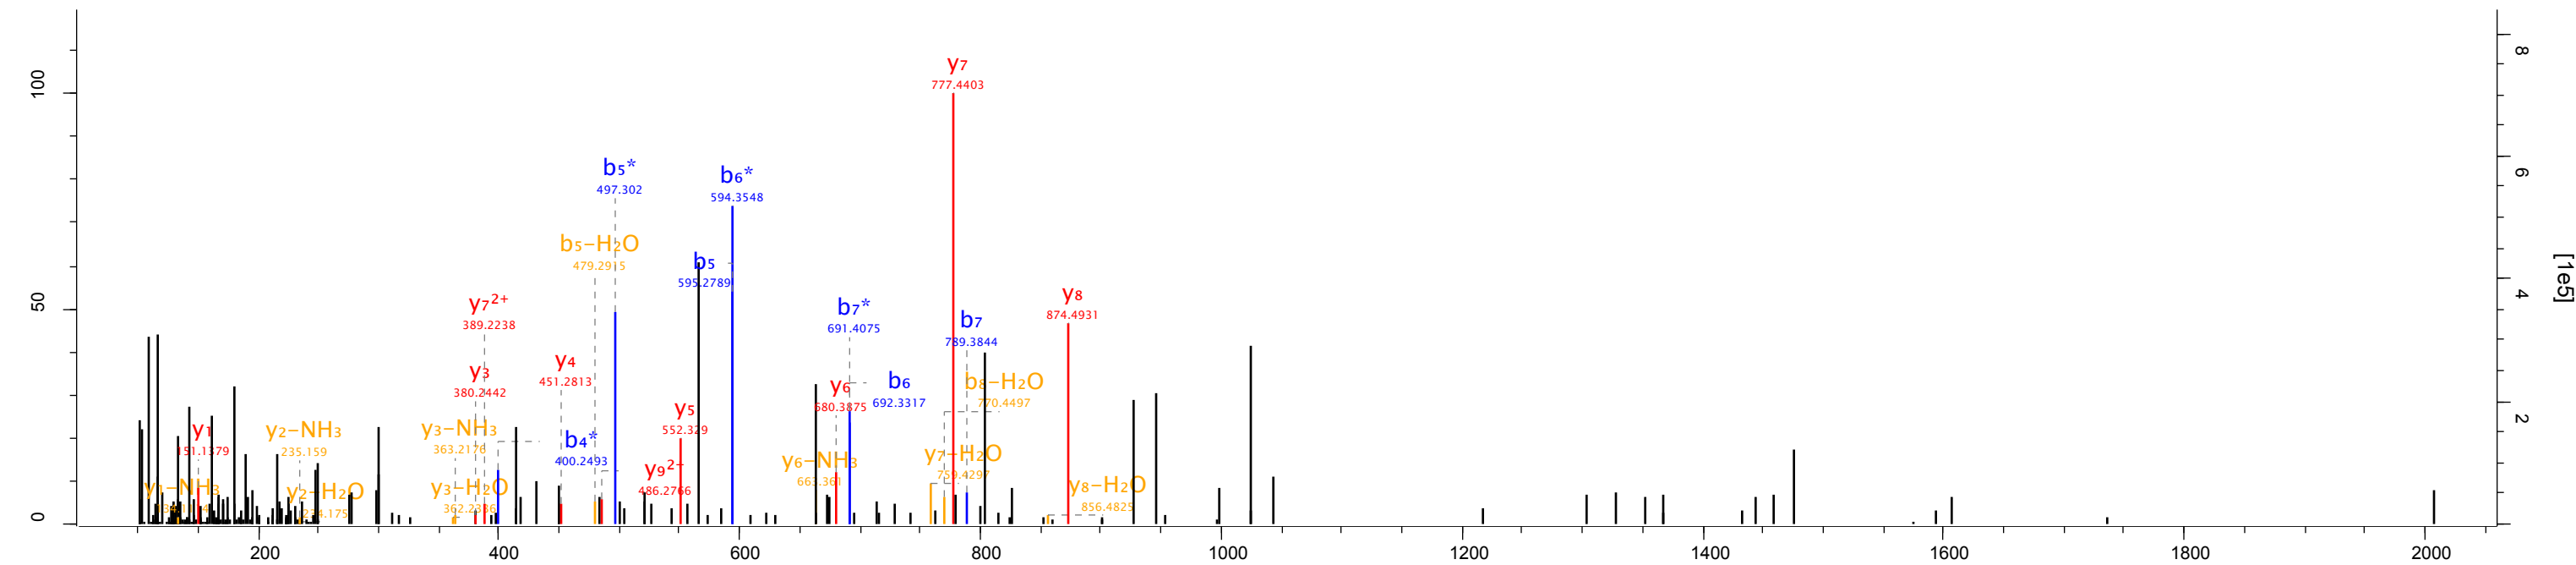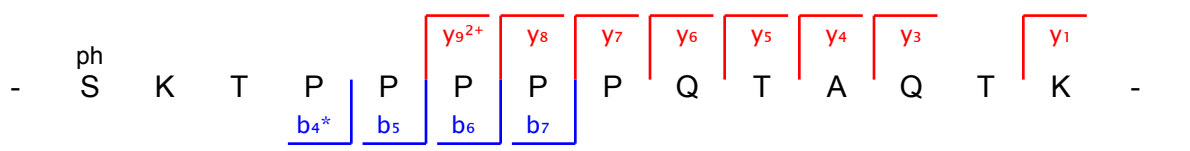

Raw file: 20150812\_A375SR\_Phospho\_BR1\_04  
 Scan: 3983 Method: FTMS; HCD Score: 162.13 m/z: 621.26 Gene names: SSH1

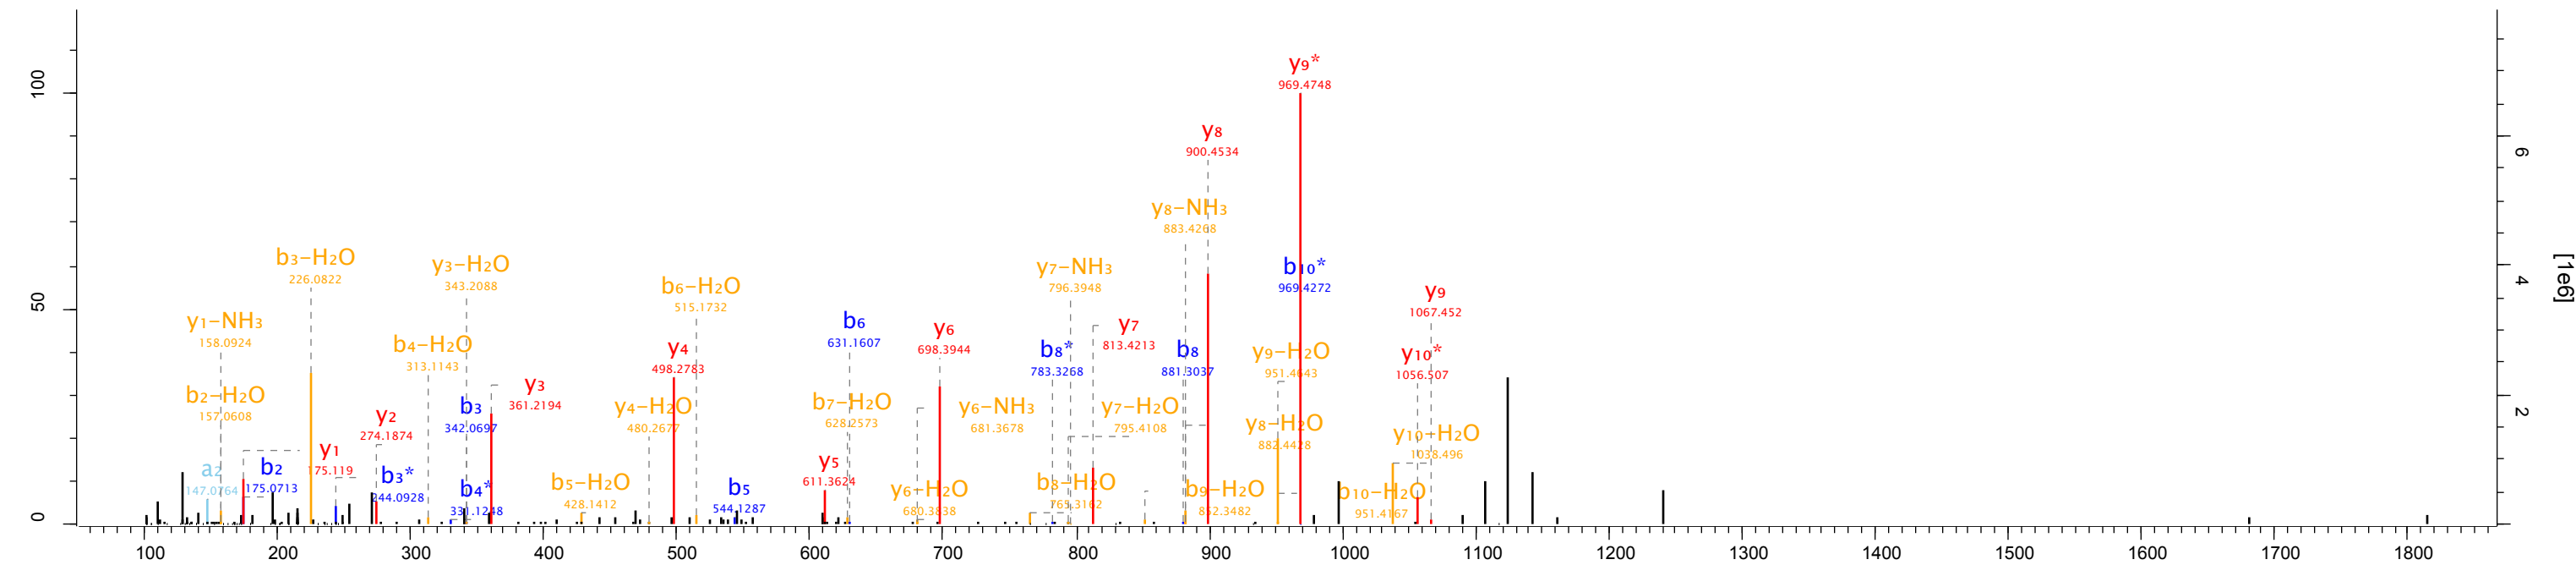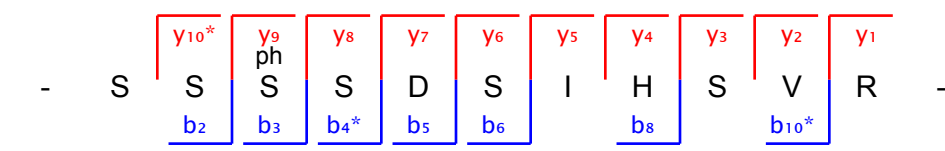

Raw file: 20150812\_A375SR\_Phospho\_BR1\_04  
 Scan: 4133 Method: FTMS; HCD Score: 68.28 m/z: 428.2 Gene names: ZNF318

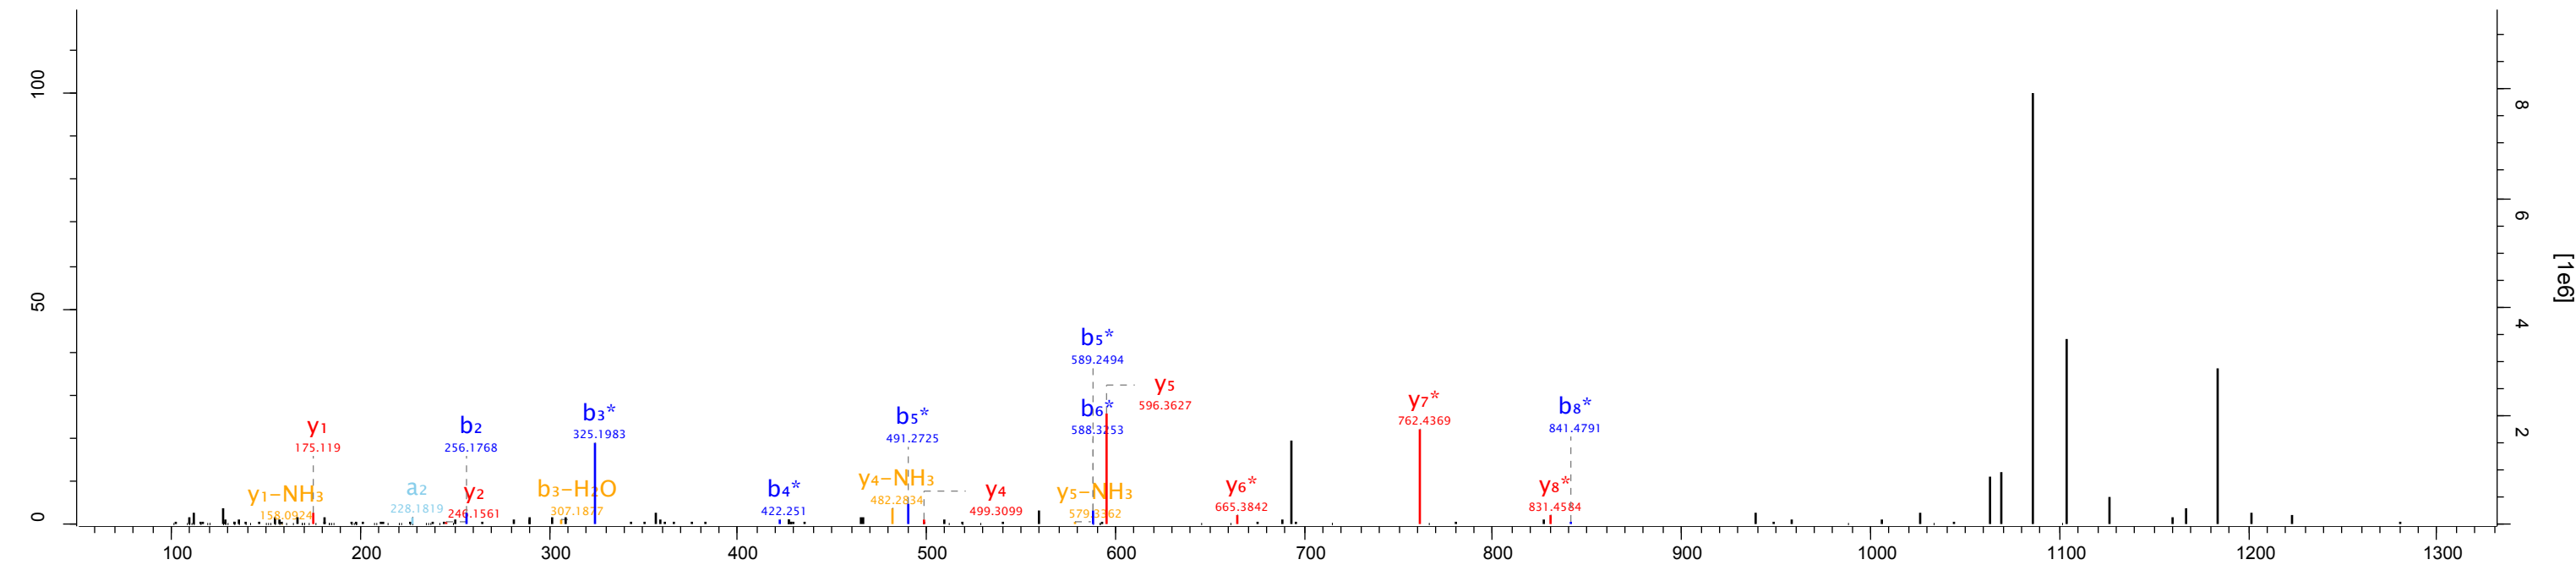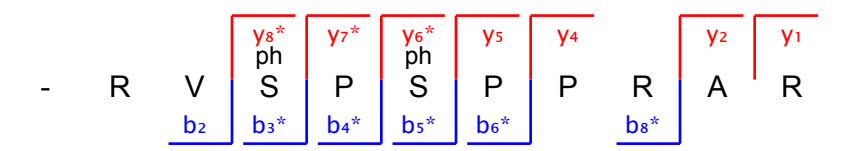

Raw file: 20150812\_A375SR\_Phospho\_BR1\_04  
 Scan: 4143 Method: FTMS; HCD Score: 146.69 m/z: 793.9 Gene names: TP53

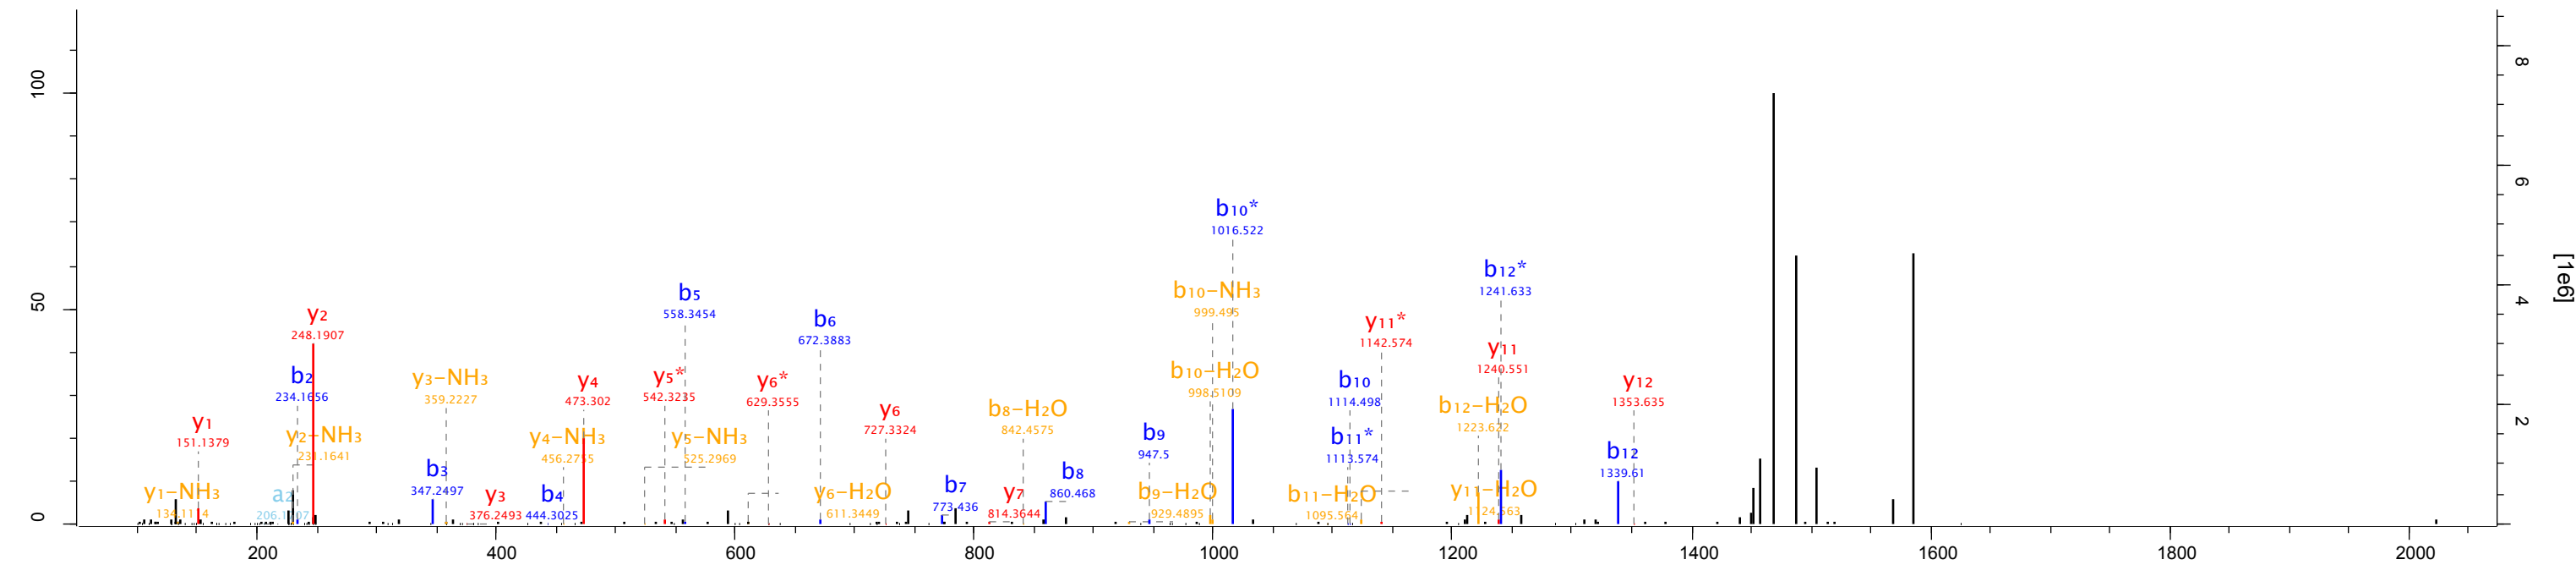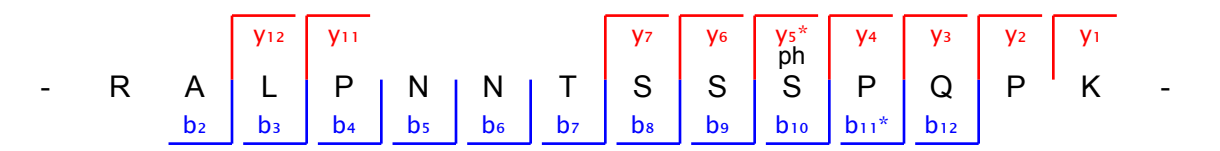



Raw file: 20150812\_A375SR\_Phospho\_BR1\_04  
 Scan: 4493 Method: FTMS; HCD Score: 144.97 m/z: 780.34 Gene names: TGOLN2

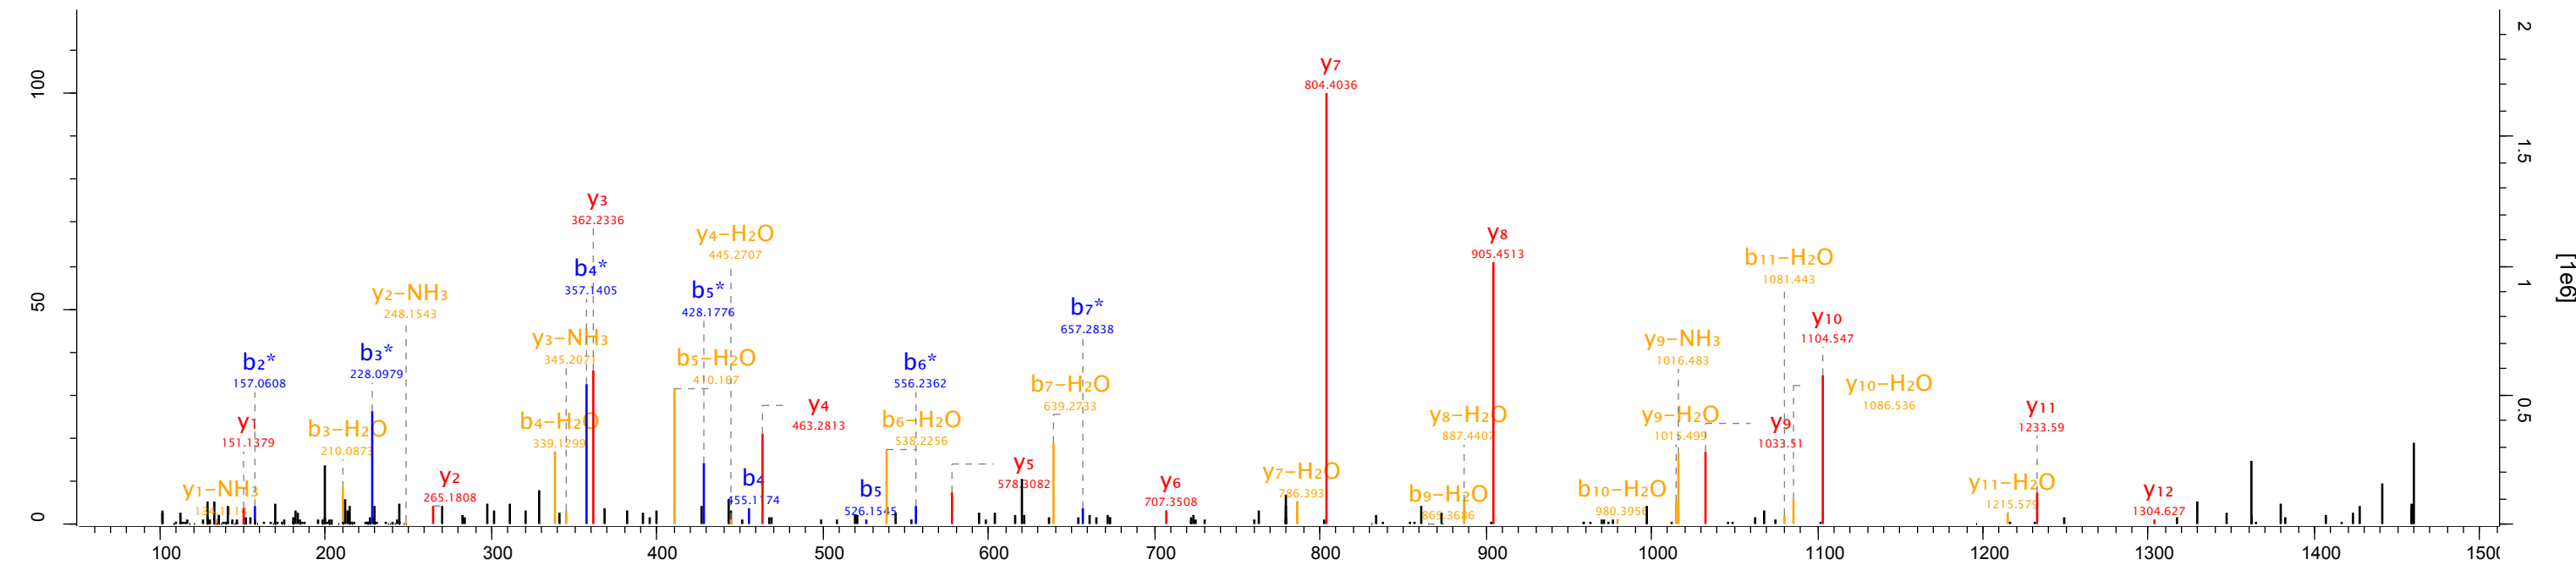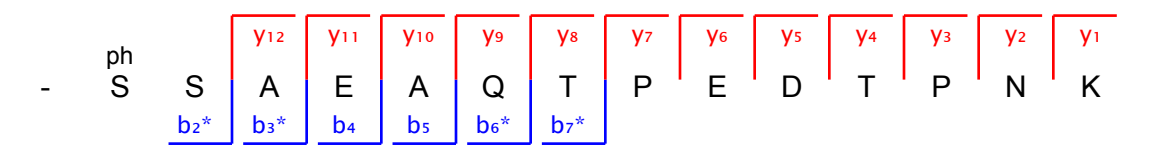

Raw file: 20150812\_A375SR\_Phospho\_BR1\_04  
 Scan: 4913 Method: FTMS; HCD Score: 134.13 m/z: 589.77 Gene names: DLG5

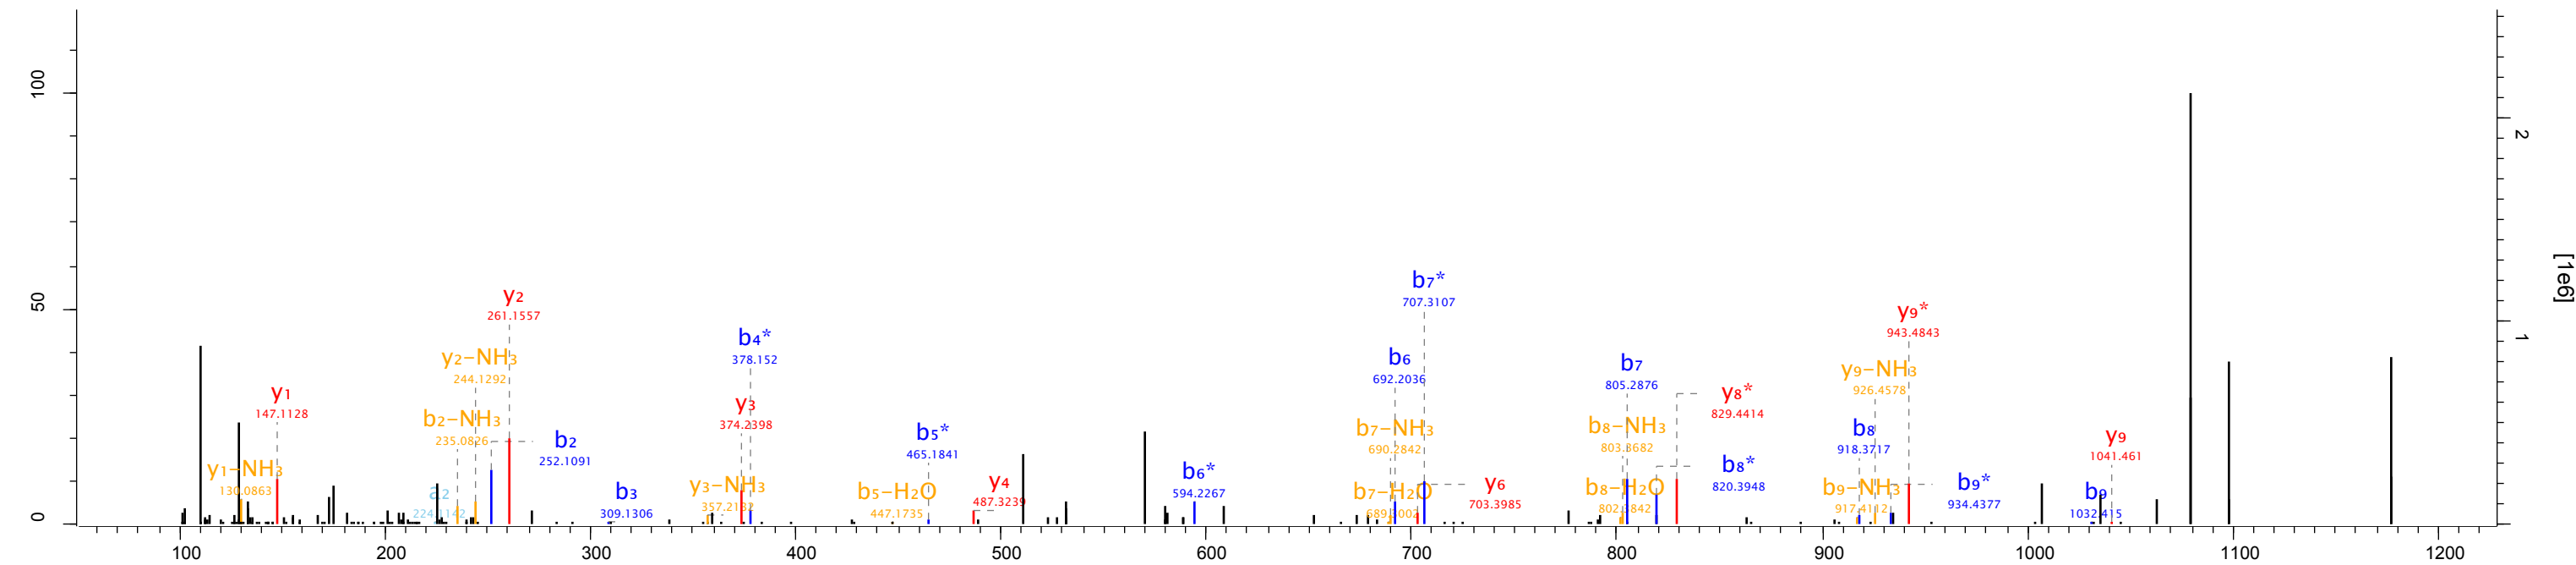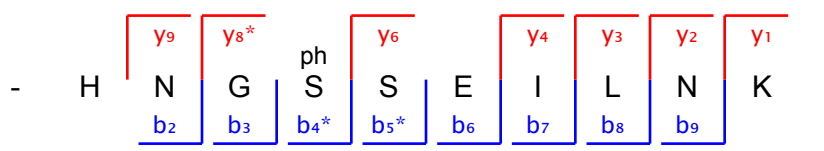

Raw file: 20150812\_A375SR\_Phospho\_BR1\_04  
 Scan: 5353 Method: FTMS; HCD Score: 170.04 m/z: 880.93 Gene names: EPB41L2

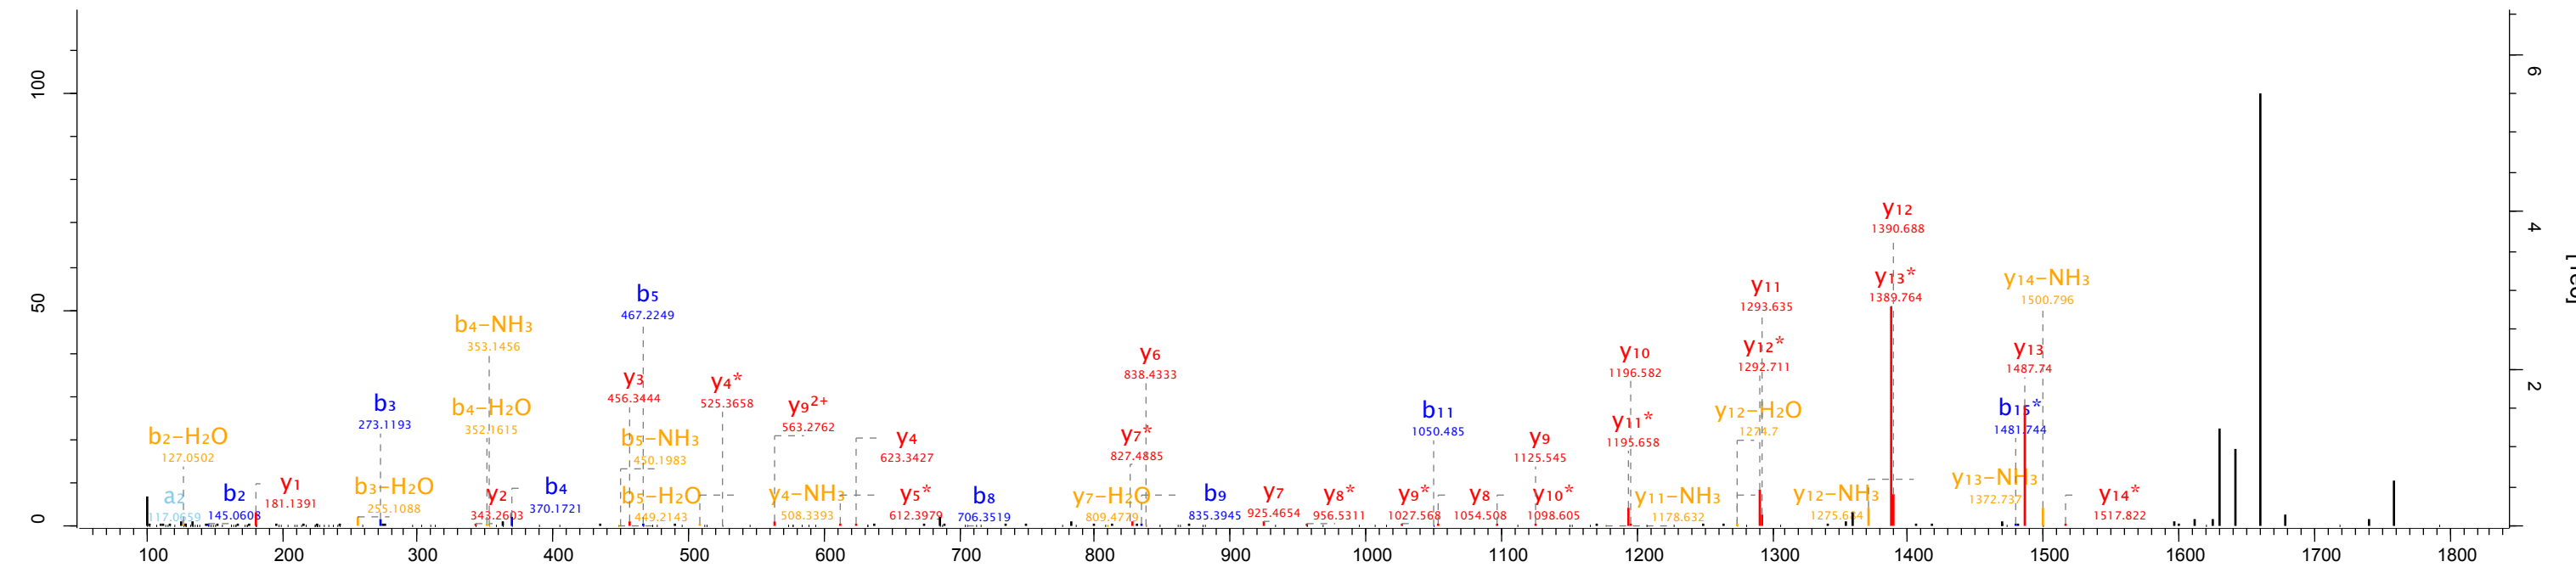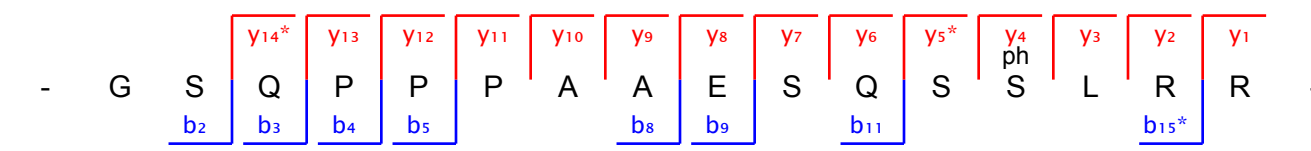

Raw file: 20150812\_A375SR\_Phospho\_BR1\_04  
 Scan: 5463 Method: FTMS; HCD Score: 320.9 m/z: 1208.52 Gene names: CASC3

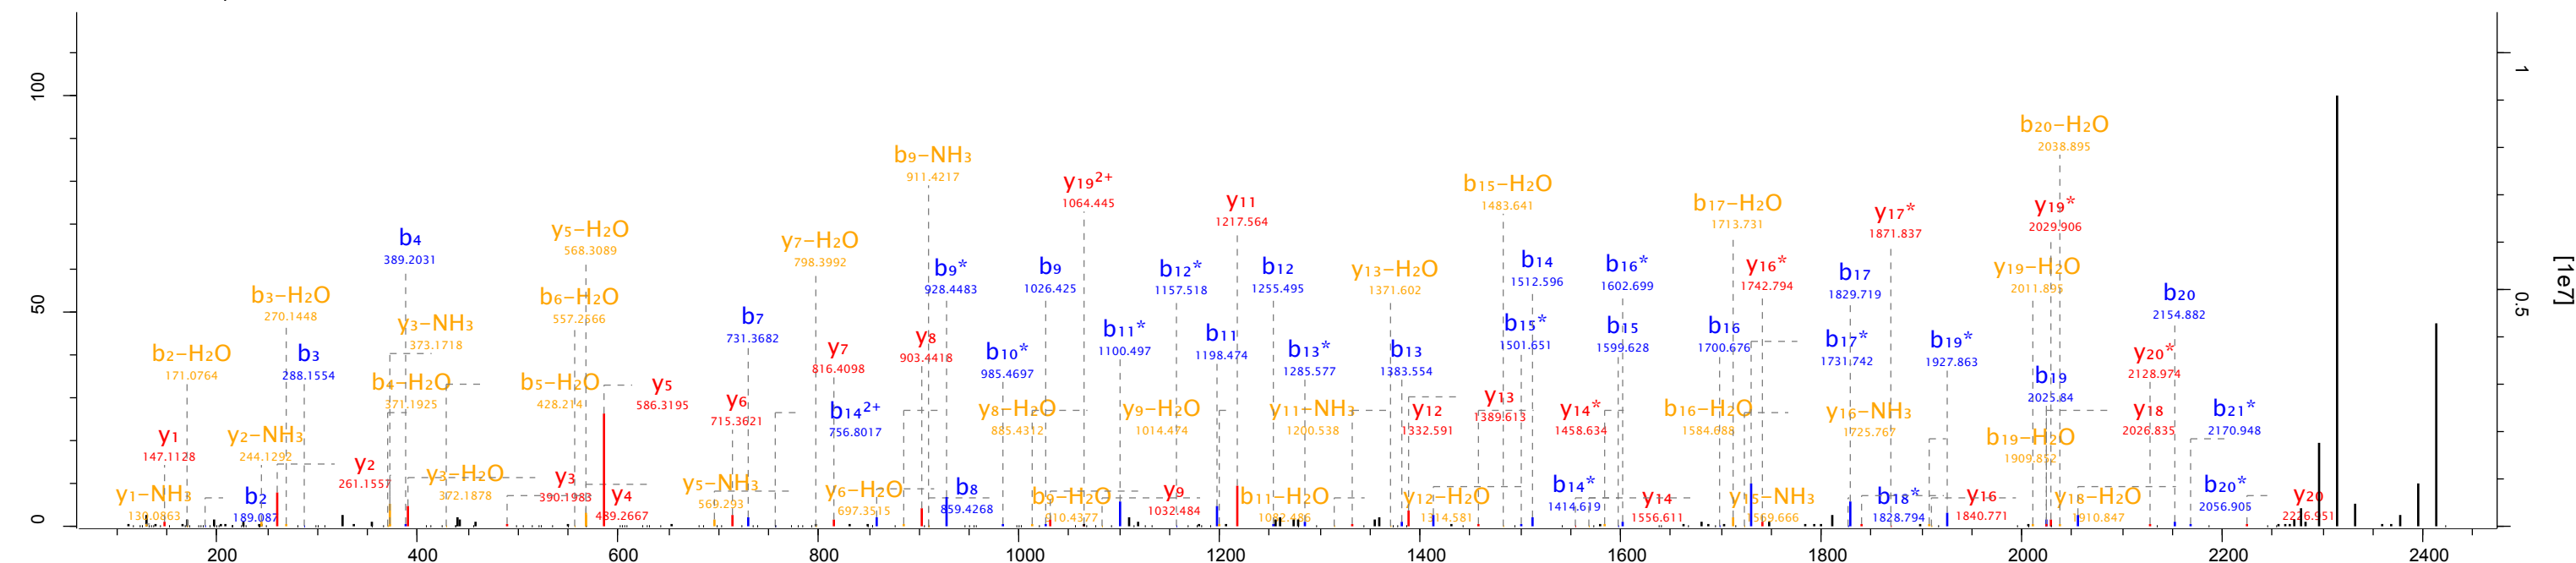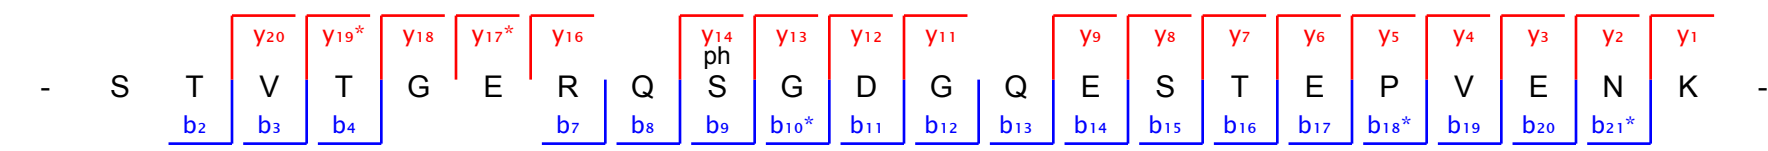

Raw file: 20150812\_A375SR\_Phospho\_BR1\_04  
 Scan: 5533 Method: FTMS; HCD Score: 171.49 m/z: 515.24 Gene names: ANKRD50

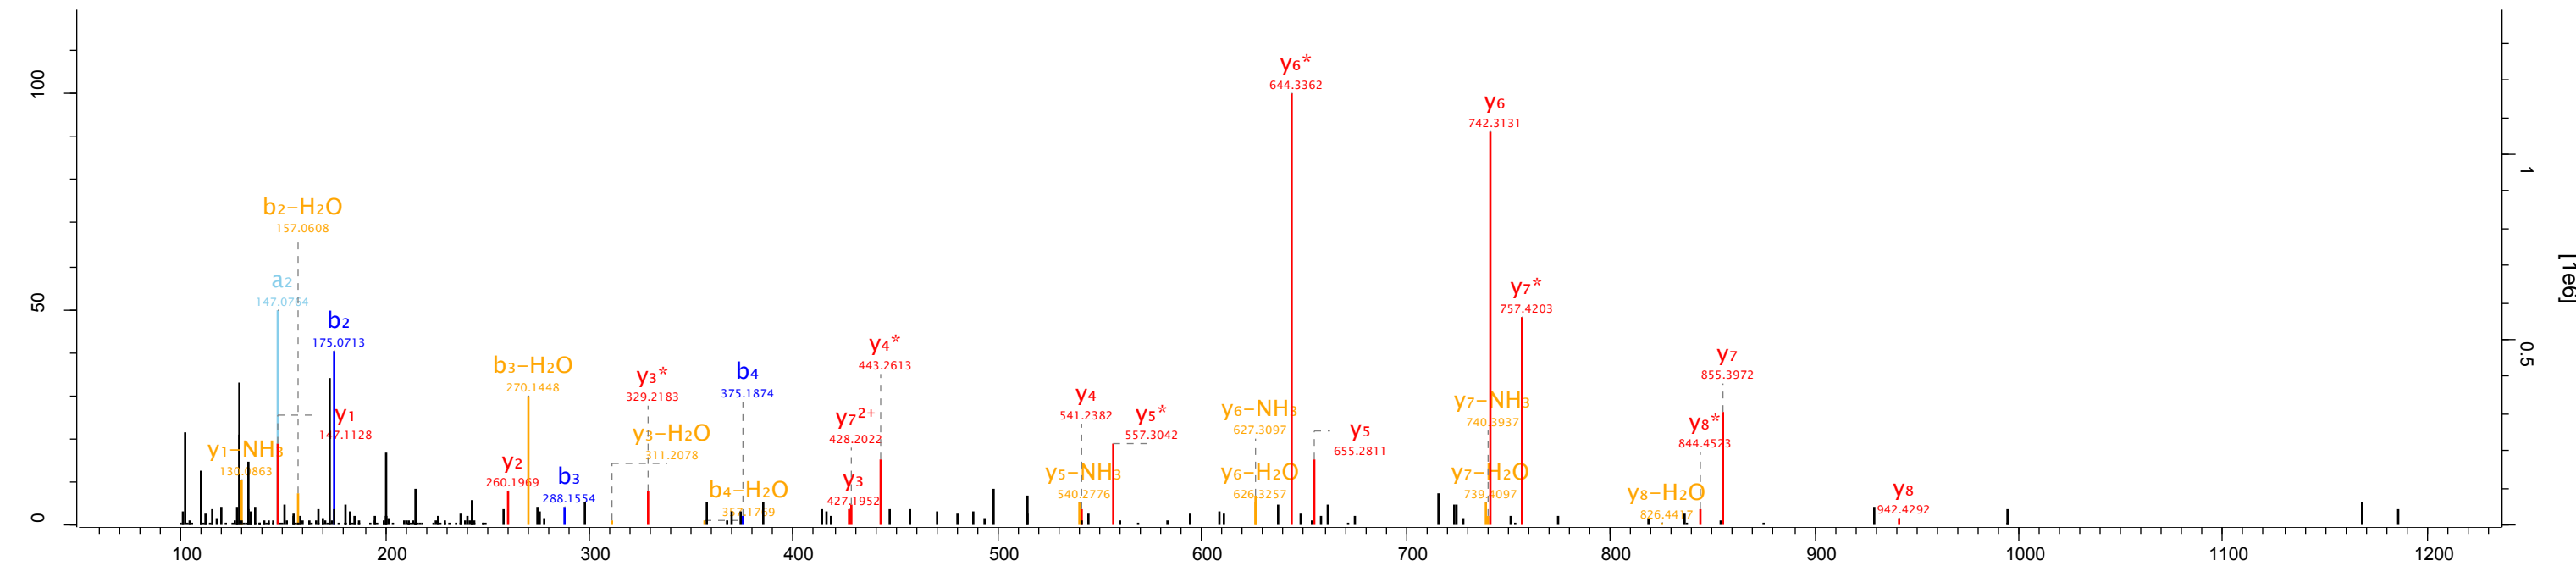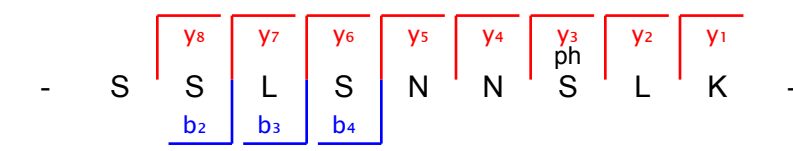

Raw file 20150812\_A375SR\_Phospho\_BR1\_04 Scan 5543 Method FTMS; HCD Score 277.07 m/z 1087.01 Gene names MYBBP1A

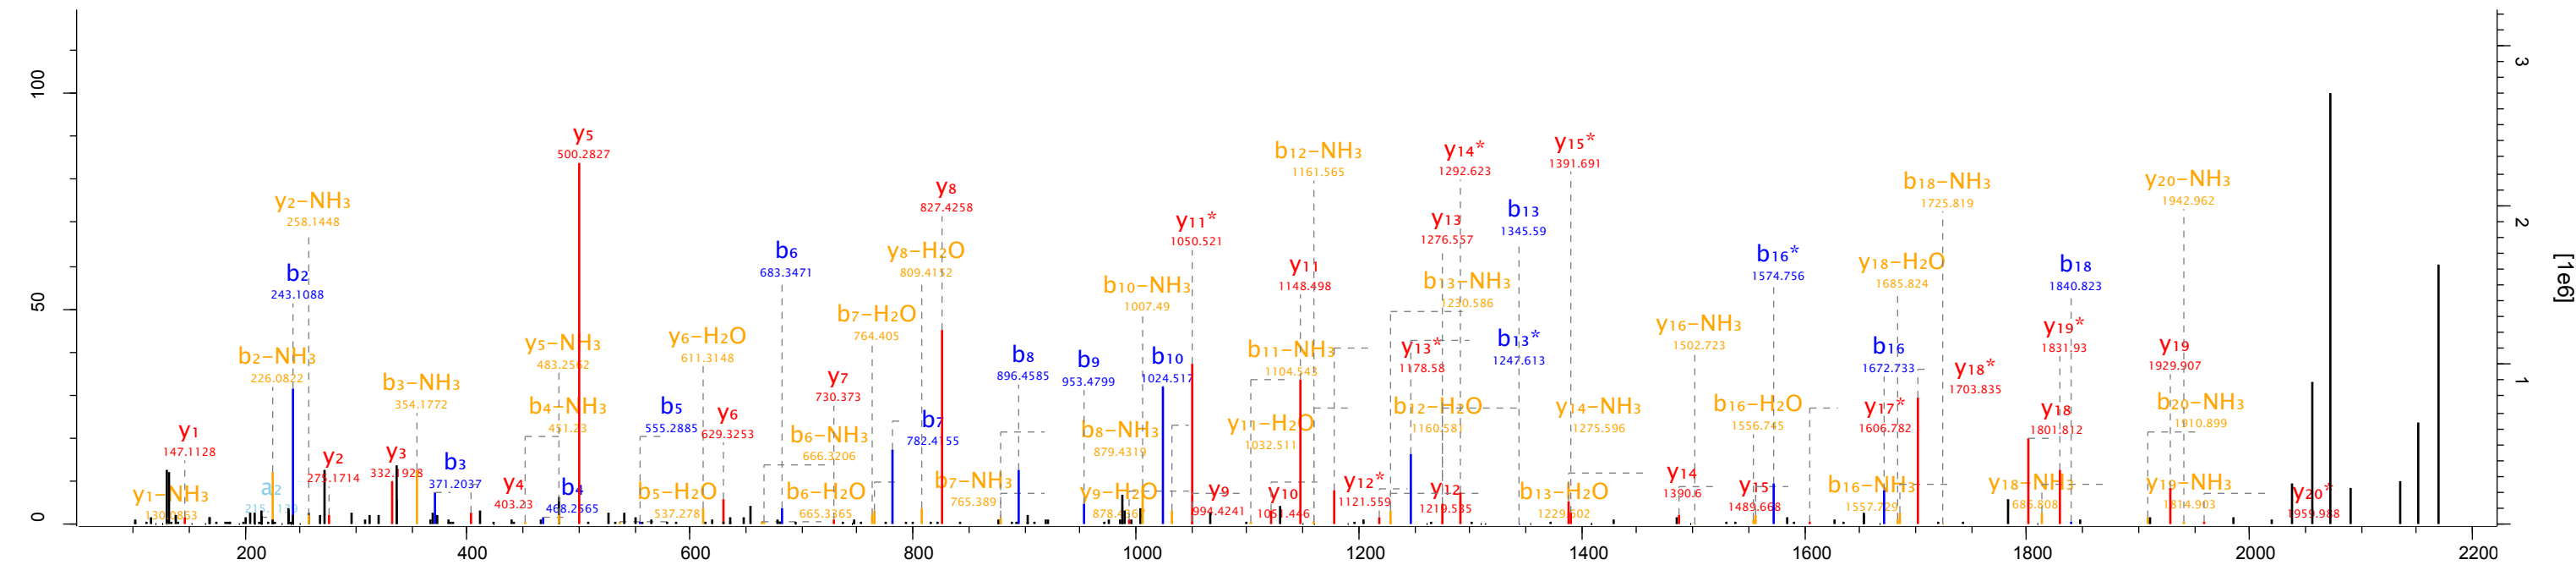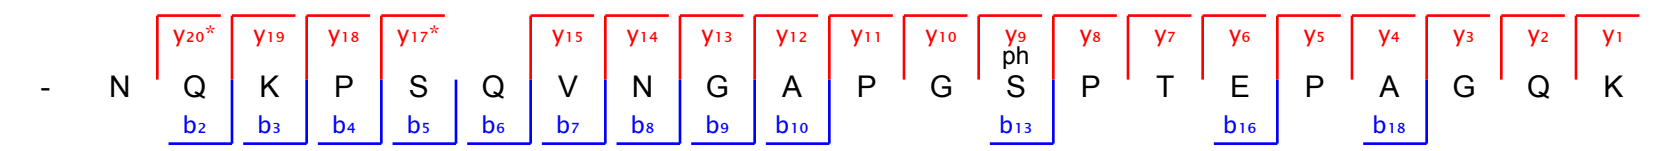

Raw file Scan Method Score m/z Gene names

20150812\_A375SR\_Phospho\_BR1\_04 6023 FTMS; HCD 167.34 865.4 SYTL5

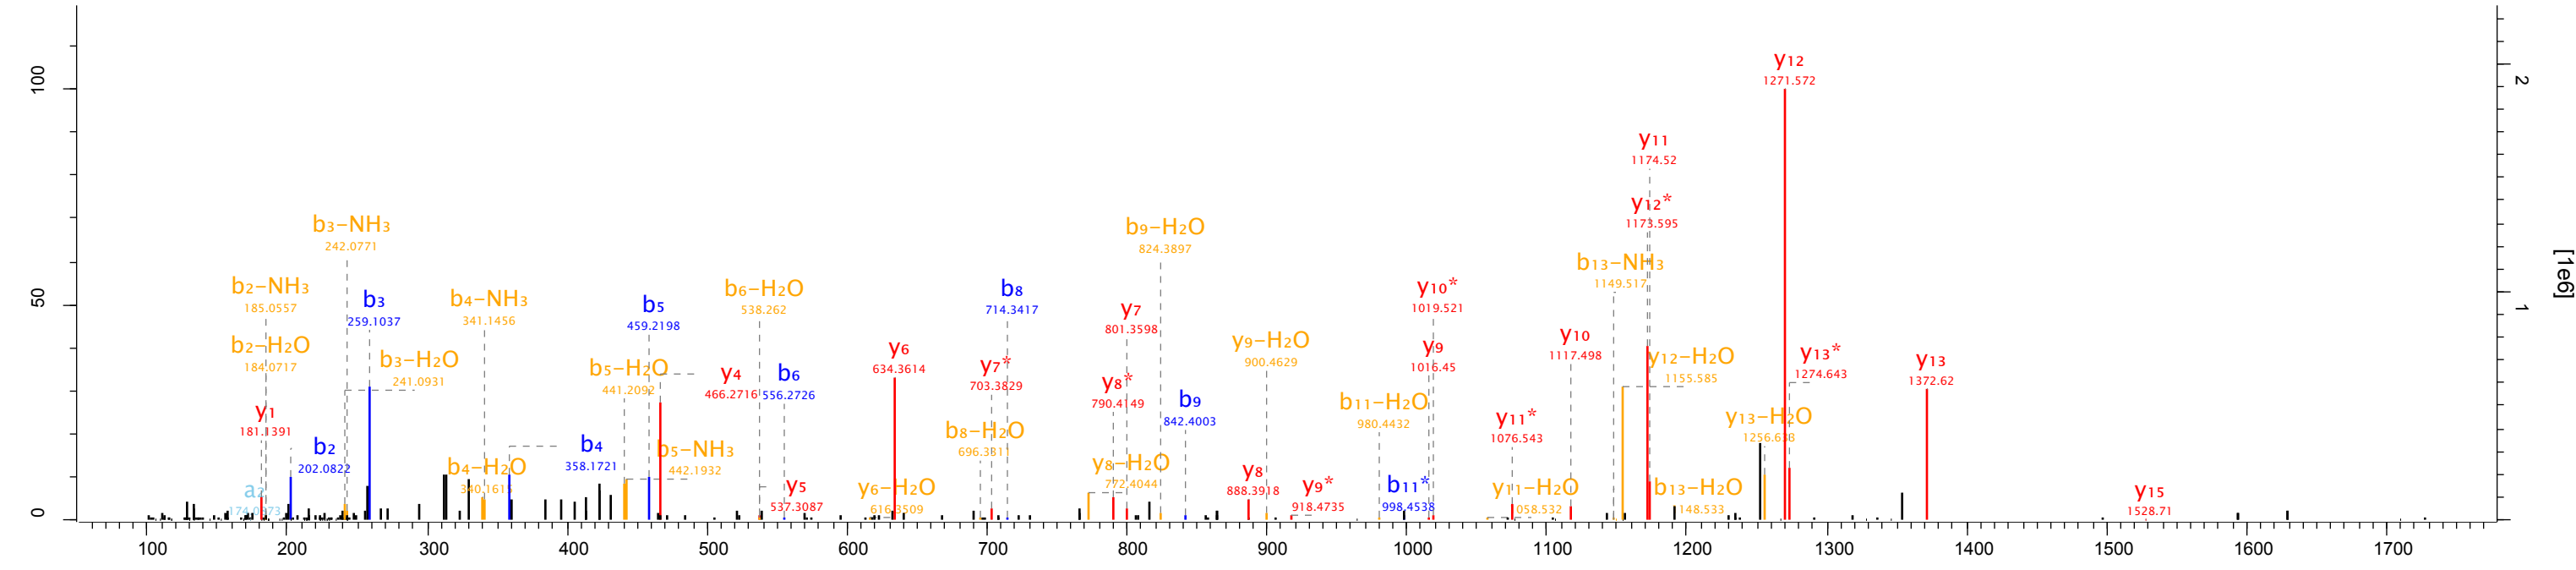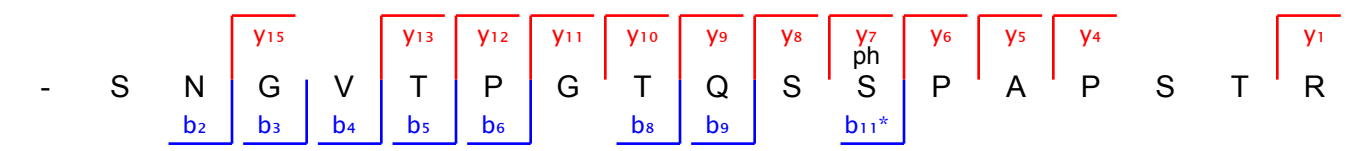

Raw file: 20150812\_A375SR\_Phospho\_BR1\_04  
 Scan: 6313 Method: FTMS; HCD Score: 274.29 m/z: 1154.07 Gene names: PSMD2

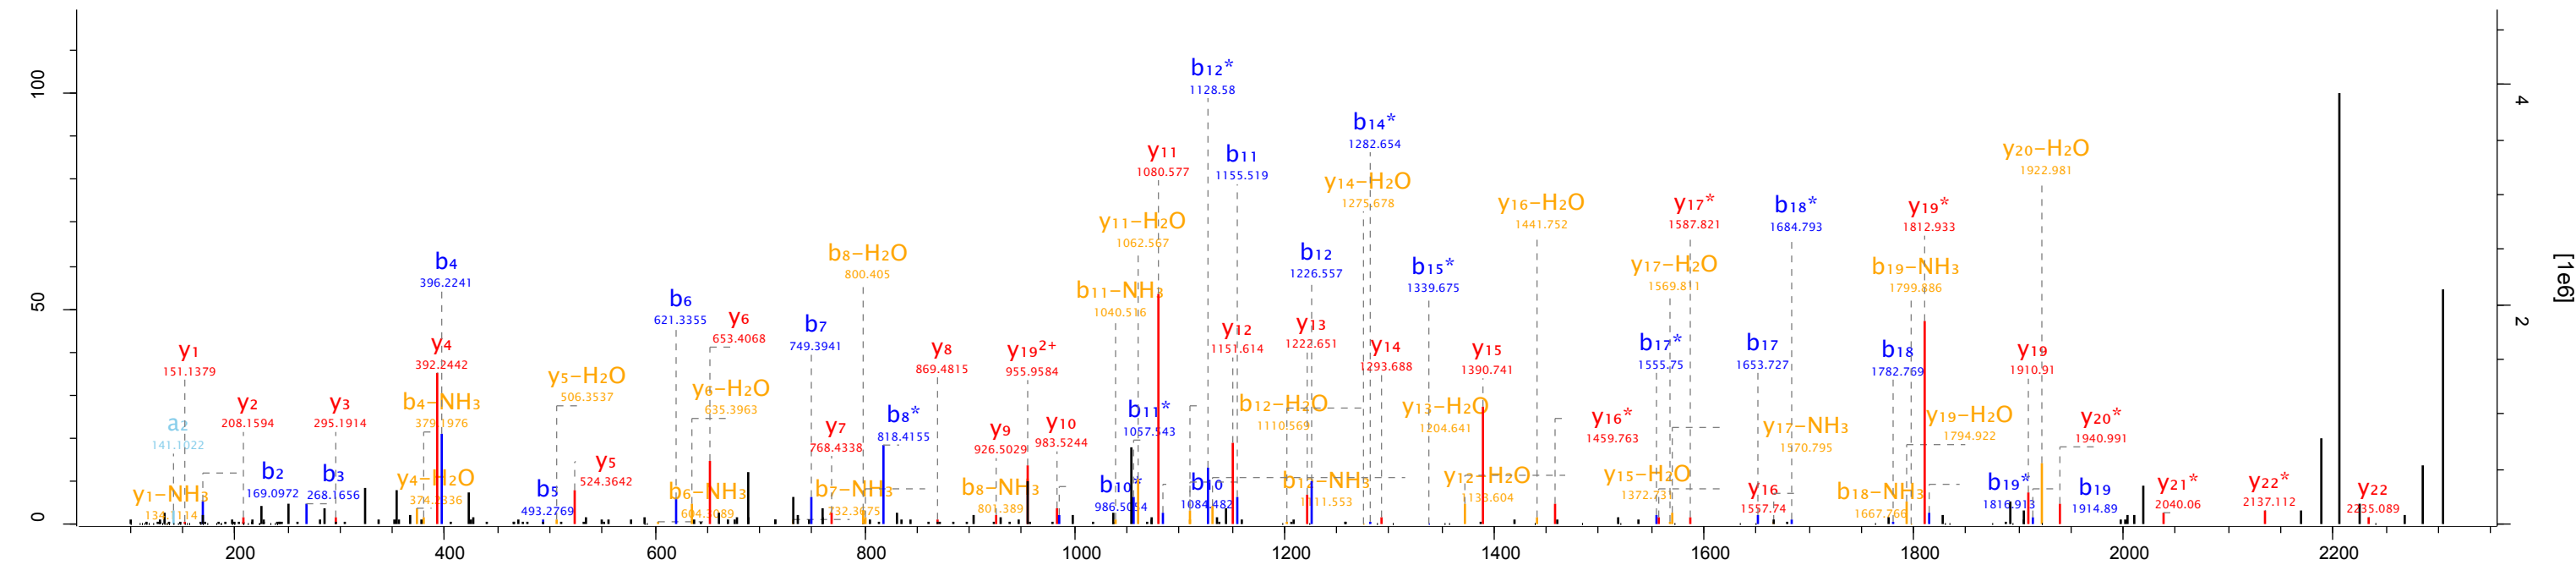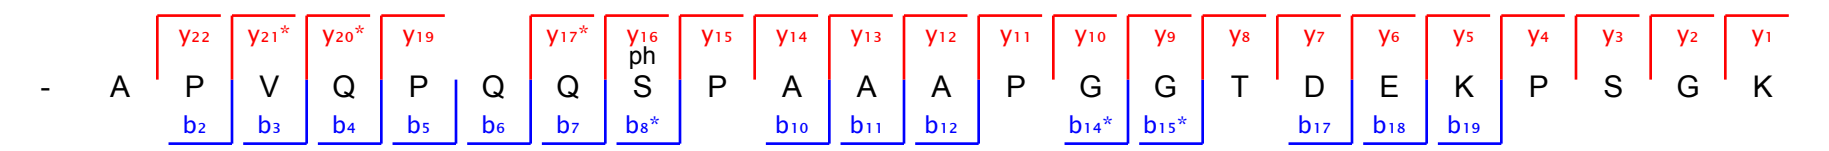



Raw file: 20150812\_A375SR\_Phospho\_BR1\_04  
 Scan: 6433 Method: FTMS; HCD Score: 105.22 m/z: 768.35 Gene names: WDR20

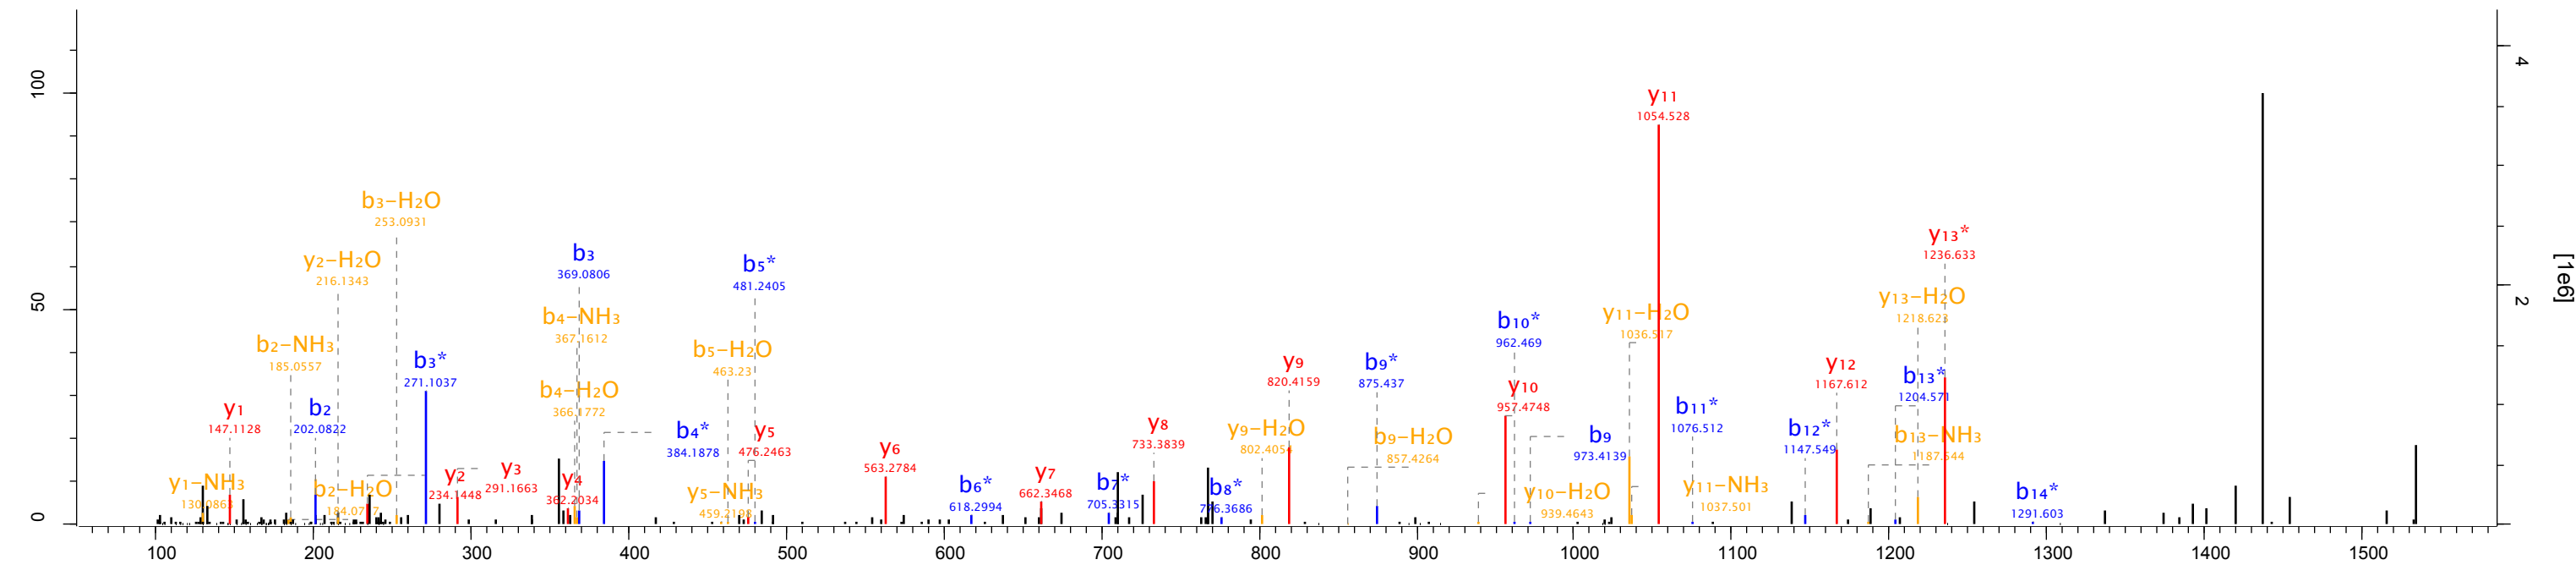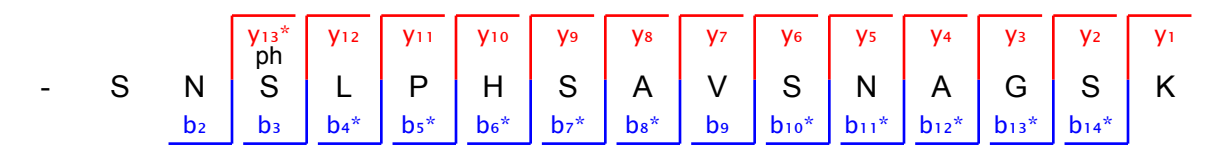

Raw file: 20150812\_A375SR\_Phospho\_BR1\_04  
 Scan: 7033 Method: FTMS; HCD Score: 221.46 m/z: 792.32 Gene names: IRF2BP2

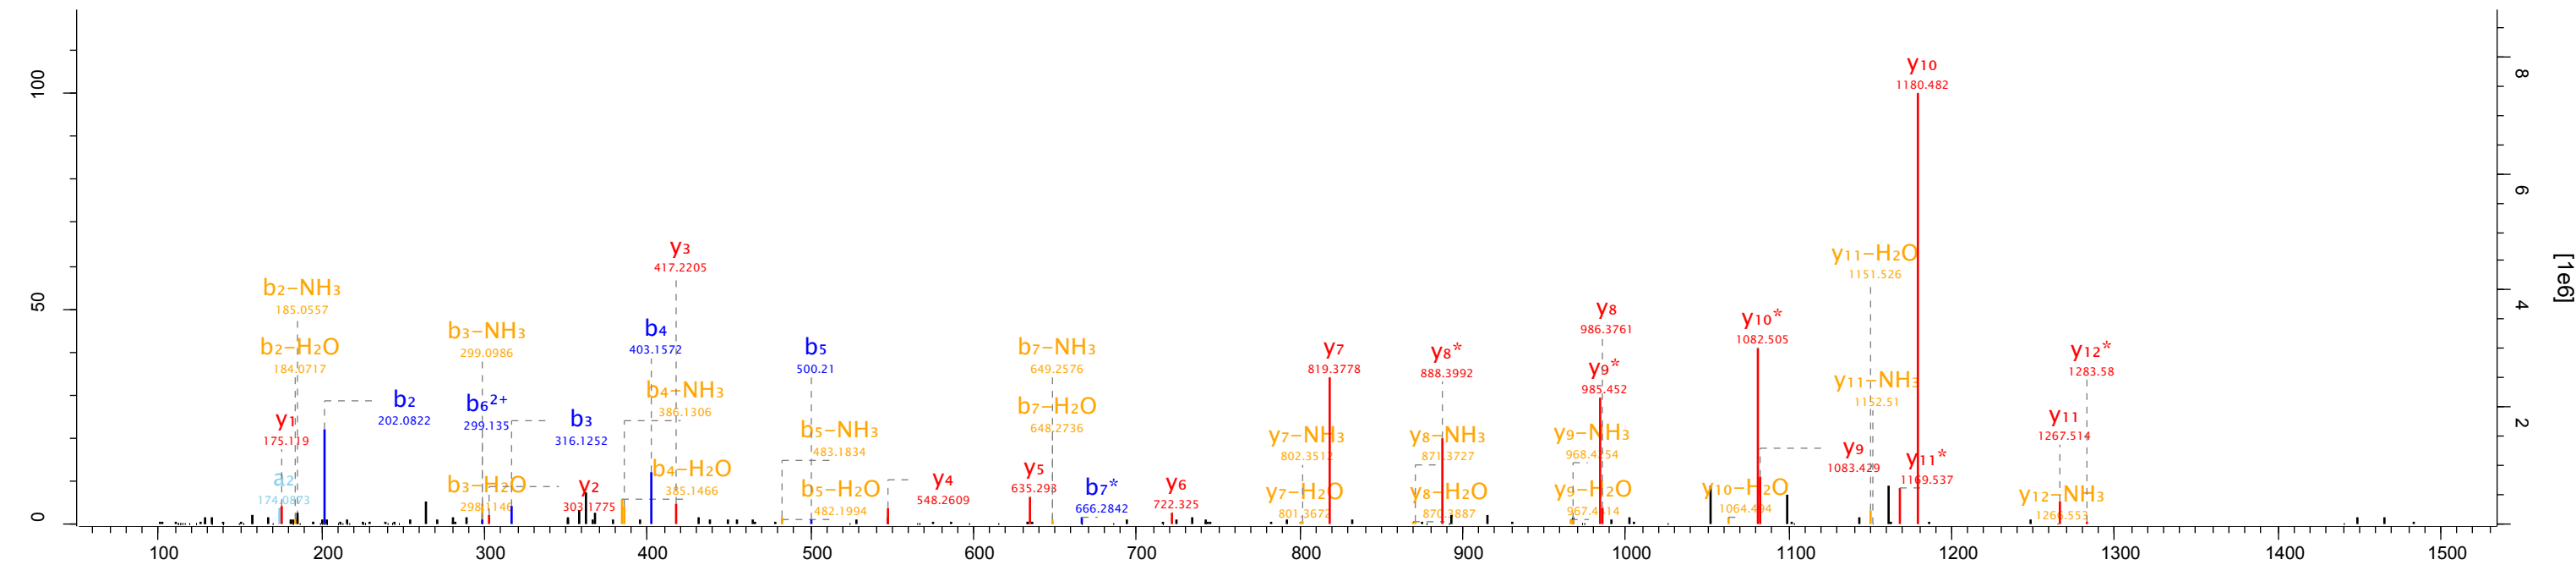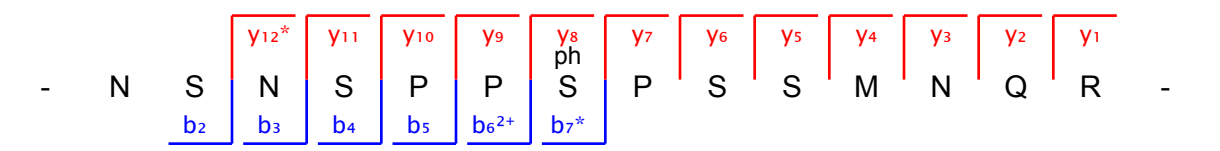

Raw file 20150812\_A375SR\_Phospho\_BR1\_04 Scan 7193 Method FTMS; HCD Score 194.21 m/z 1145.05 Gene names FKBP15

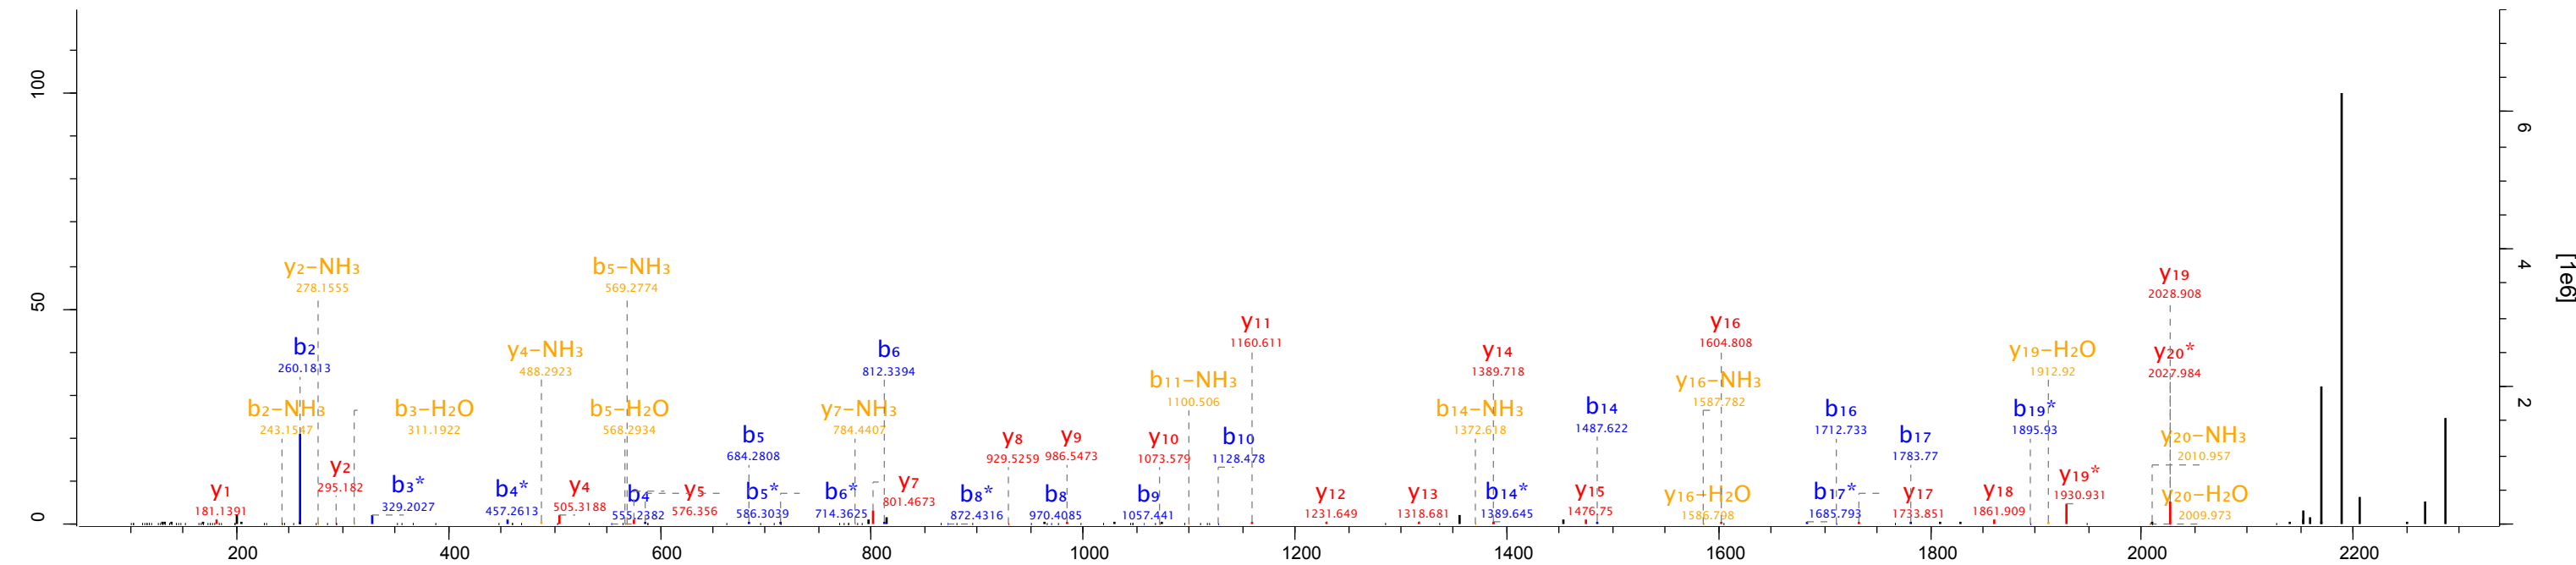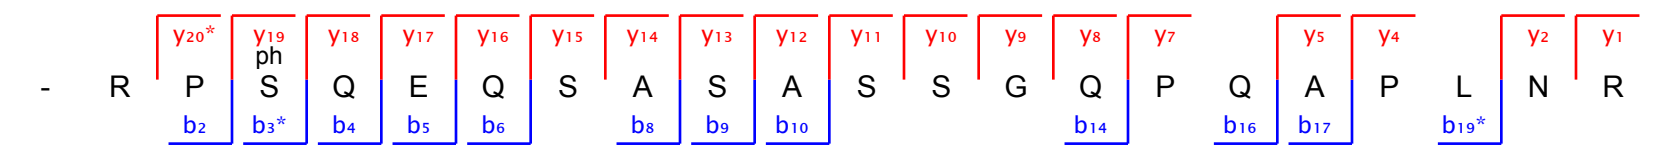

Raw file: 20150812\_A375SR\_Phospho\_BR1\_04  
 Scan: 7343 Method: FTMS; HCD Score: 159.66 m/z: 562.26 Gene names: MEOX2

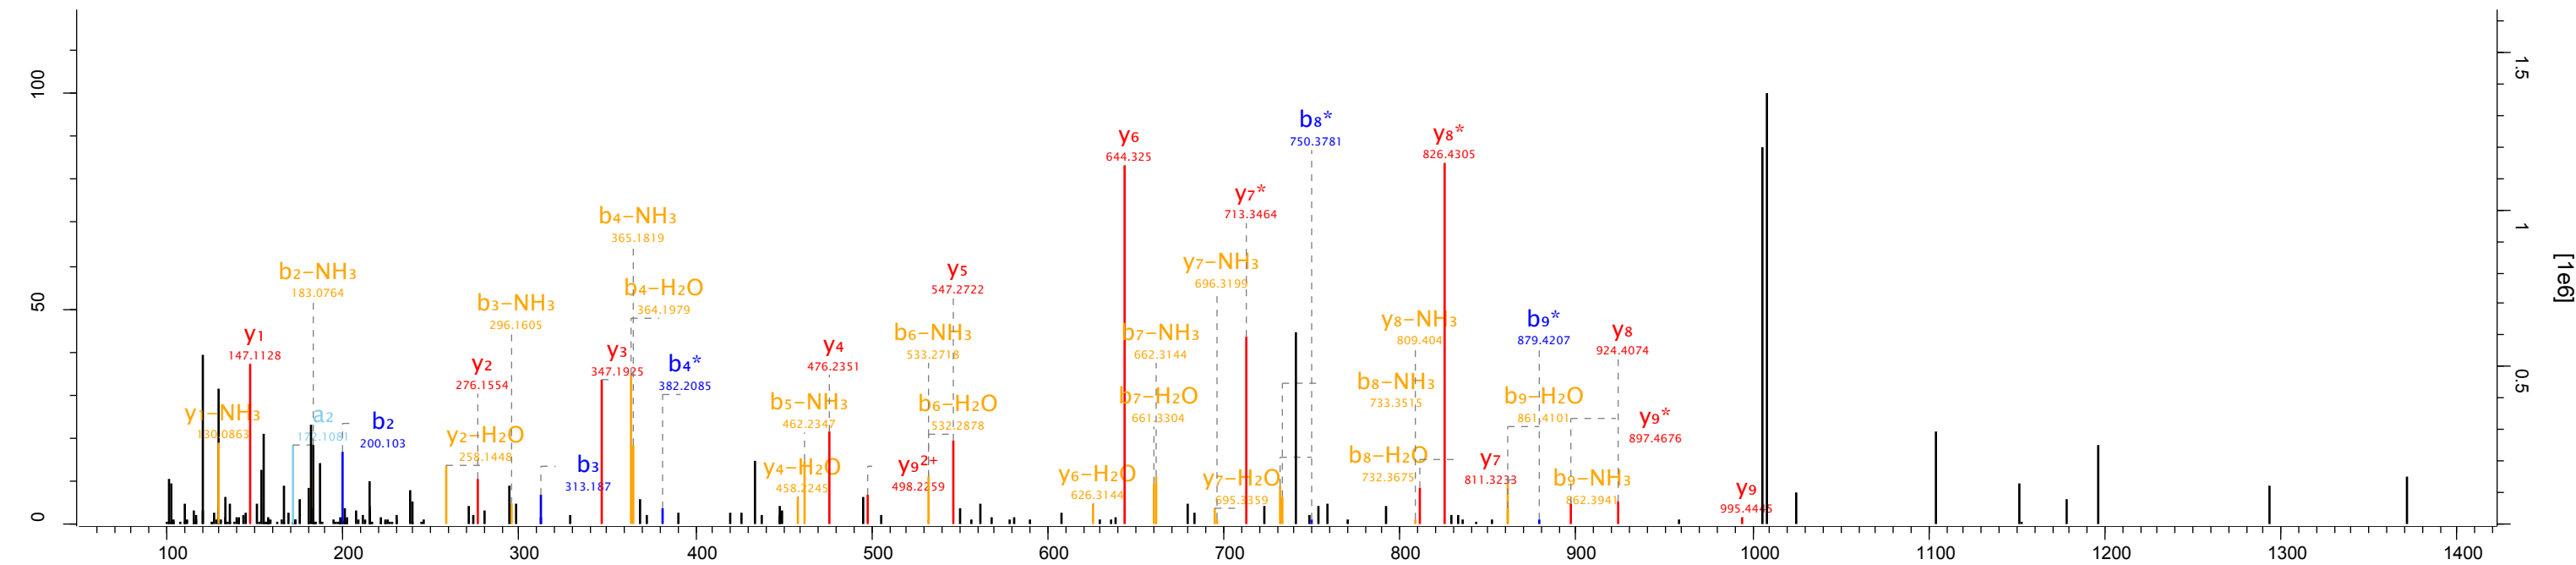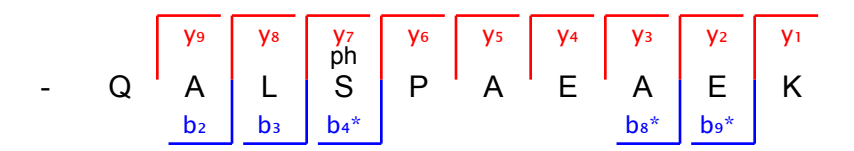

Raw file: 20150812\_A375SR\_Phospho\_BR1\_04  
 Scan: 7383 Method: FTMS; HCD Score: 172.55 m/z: 796.32 Gene names: ING5

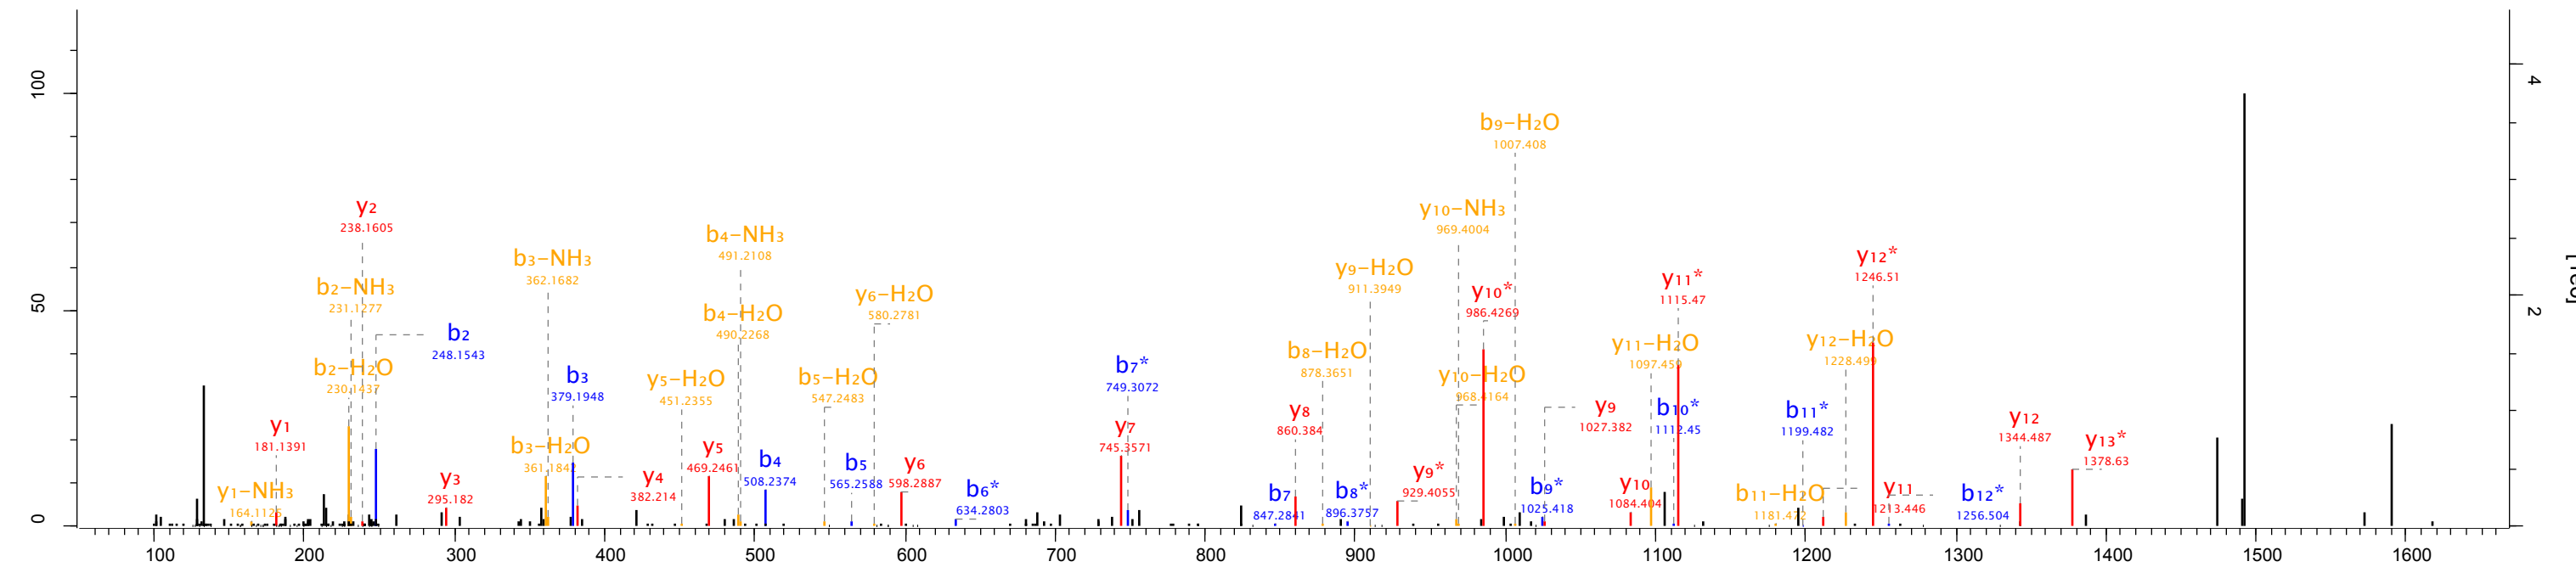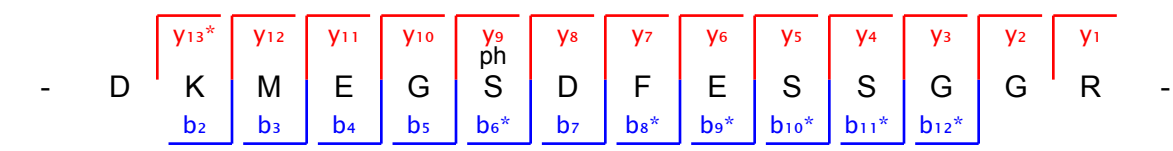

Raw file: 20150812\_A375SR\_Phospho\_BR1\_04  
 Scan: 8313 Method: FTMS; HCD Score: 226.67 m/z: 983.97 Gene names: ZNF106

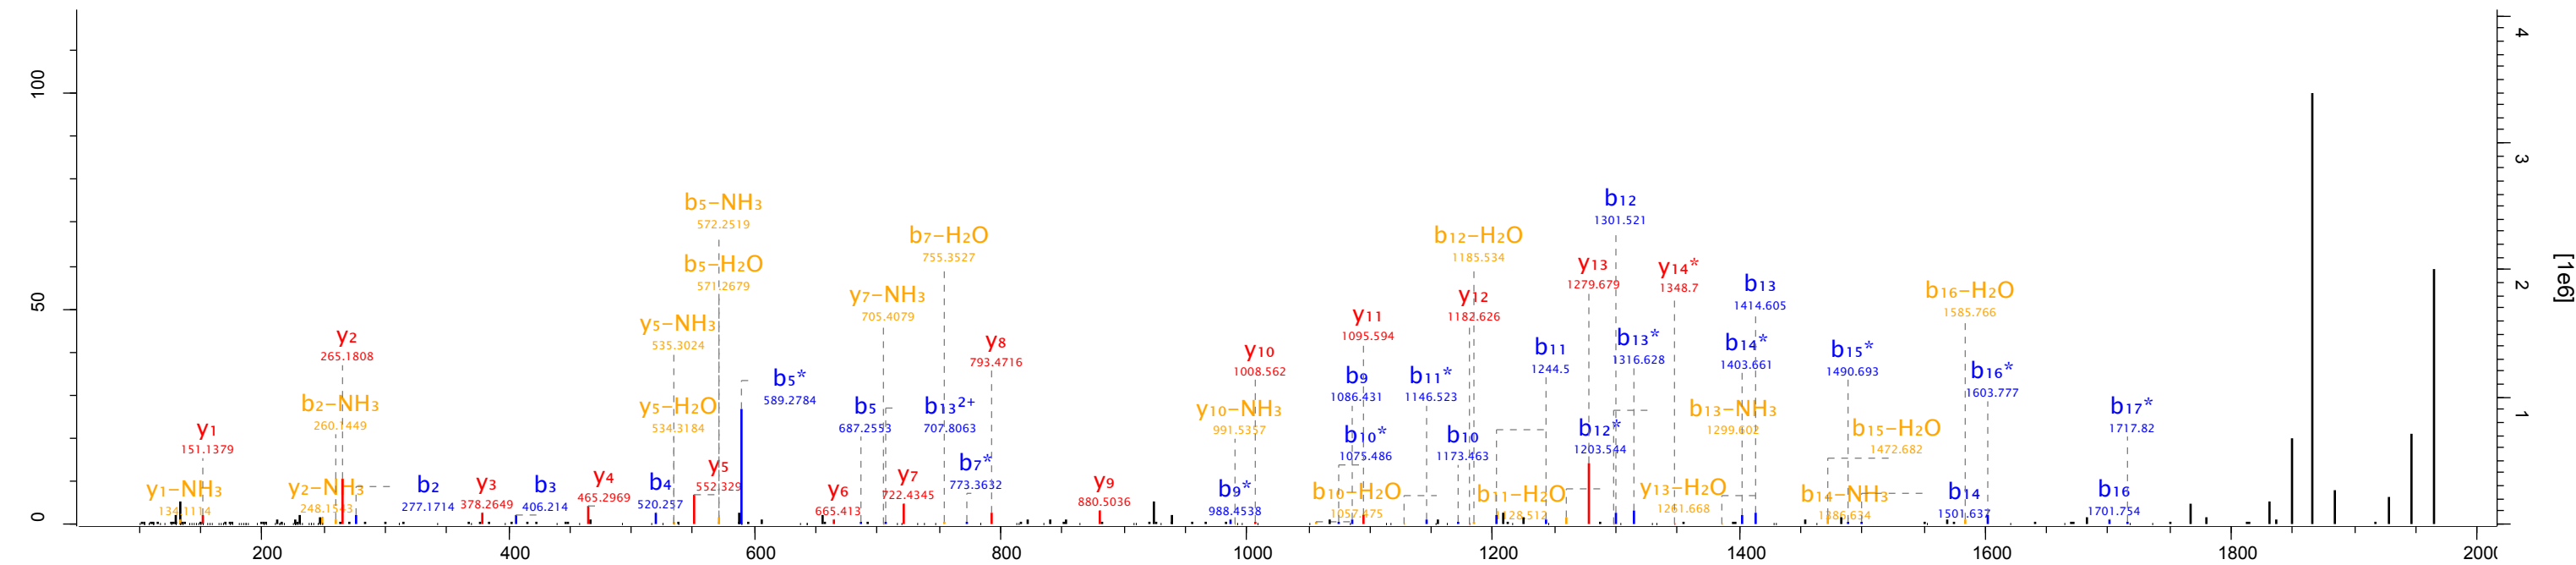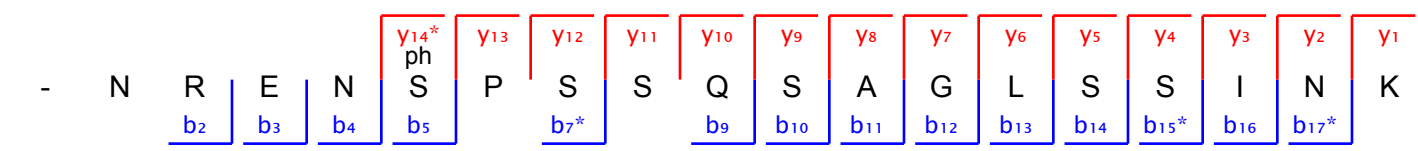

Raw file 20150812\_A375SR\_Phospho\_BR1\_04 Scan 9613 Method FTMS; HCD Score 123.2 m/z 584.78 Gene names CAMSAP2

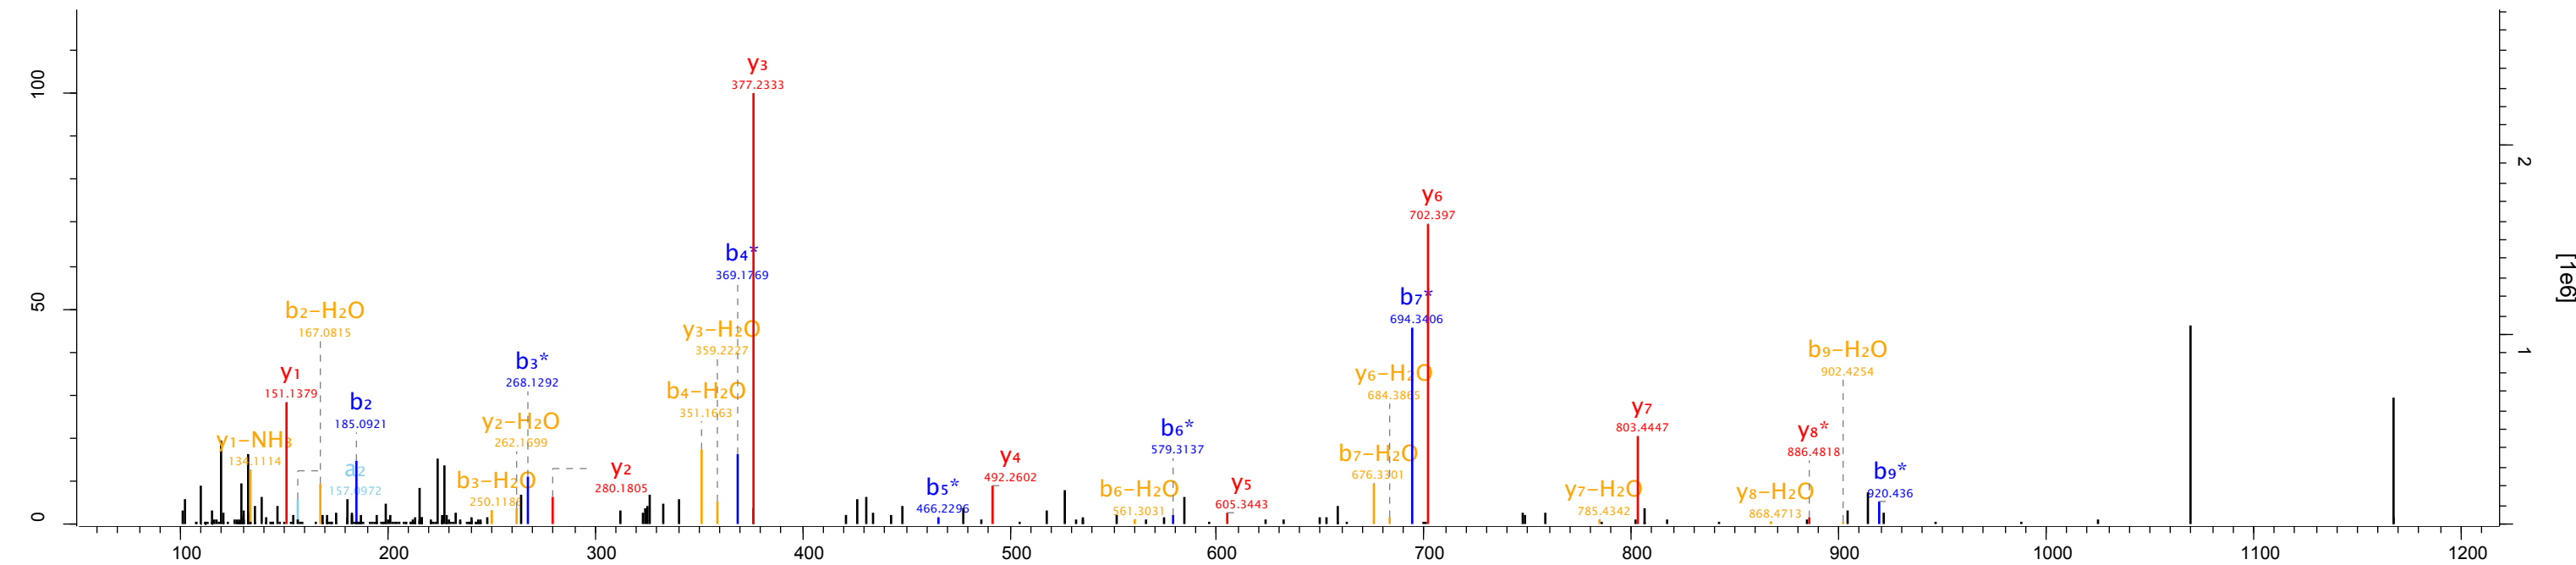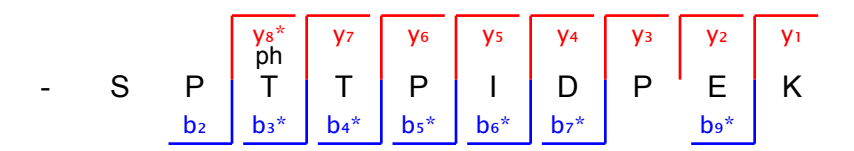

Raw file Scan Method Score m/z Gene names

20150812\_A375SR\_Phospho\_BR1\_04 9783 FTMS; HCD 247.74 875.37 TMPO

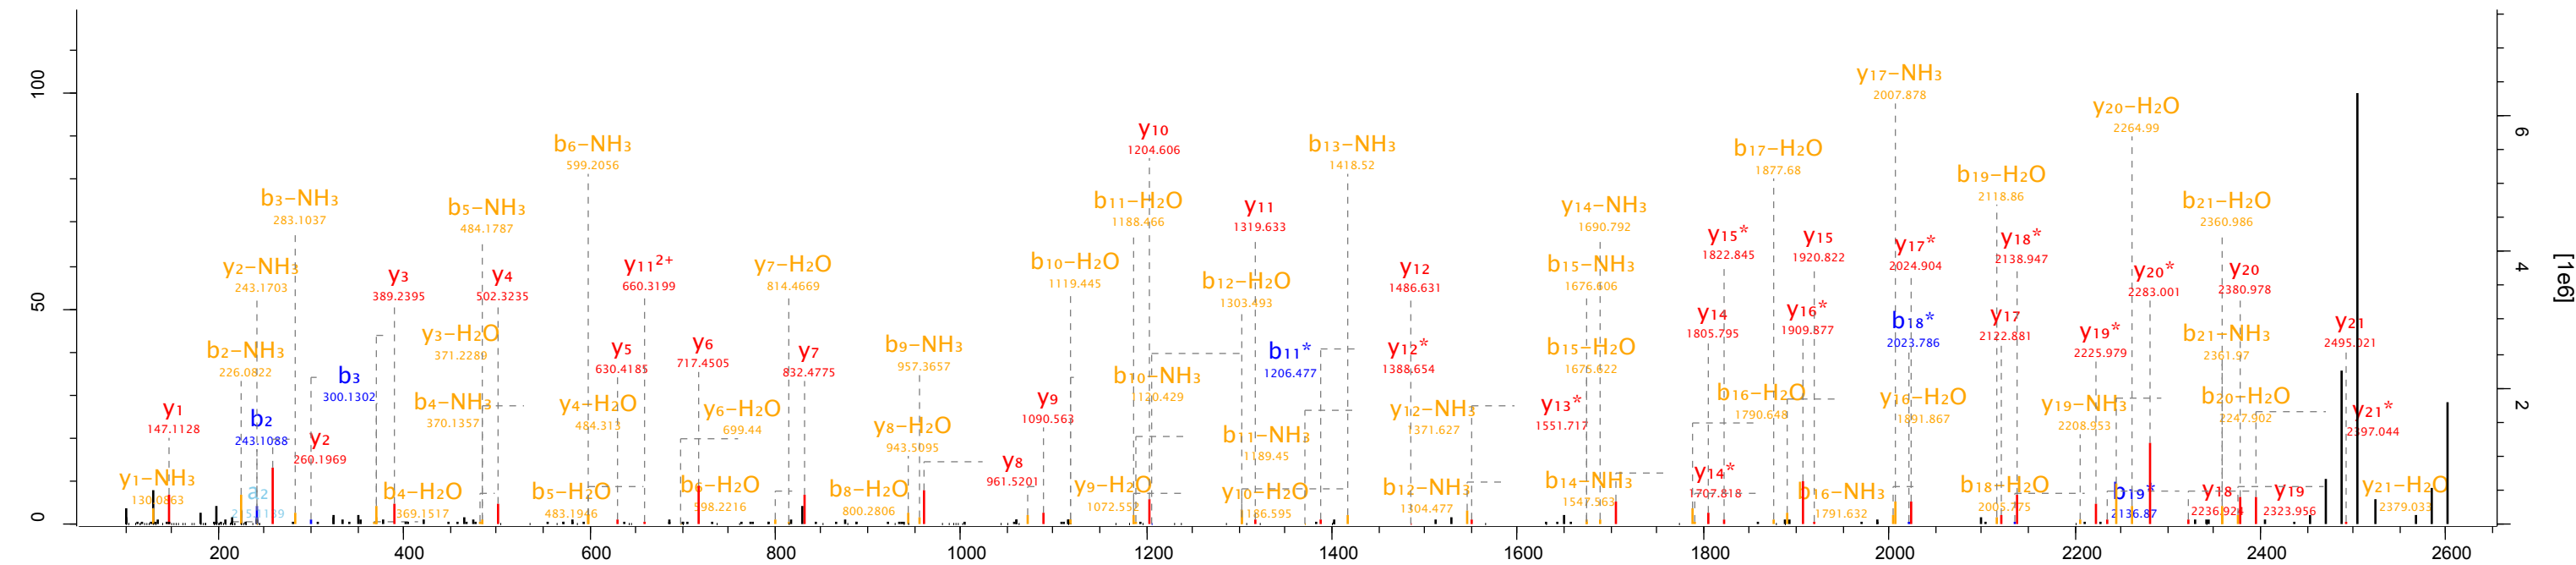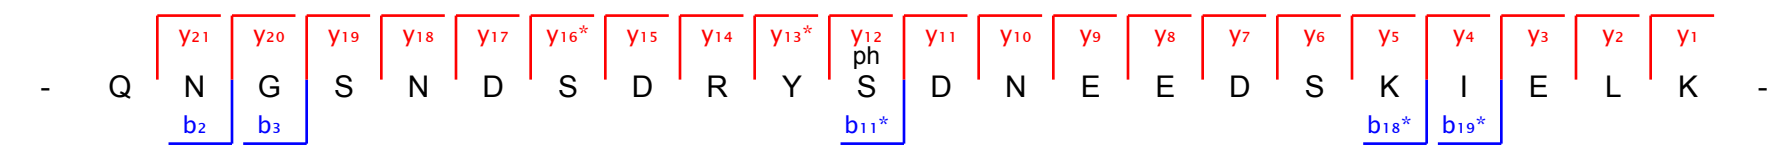



Raw file: 20150812\_A375SR\_Phospho\_BR1\_05  
 Scan: 10423 Method: FTMS; HCD Score: 61.52 m/z: 865.4 Gene names: LRWD1

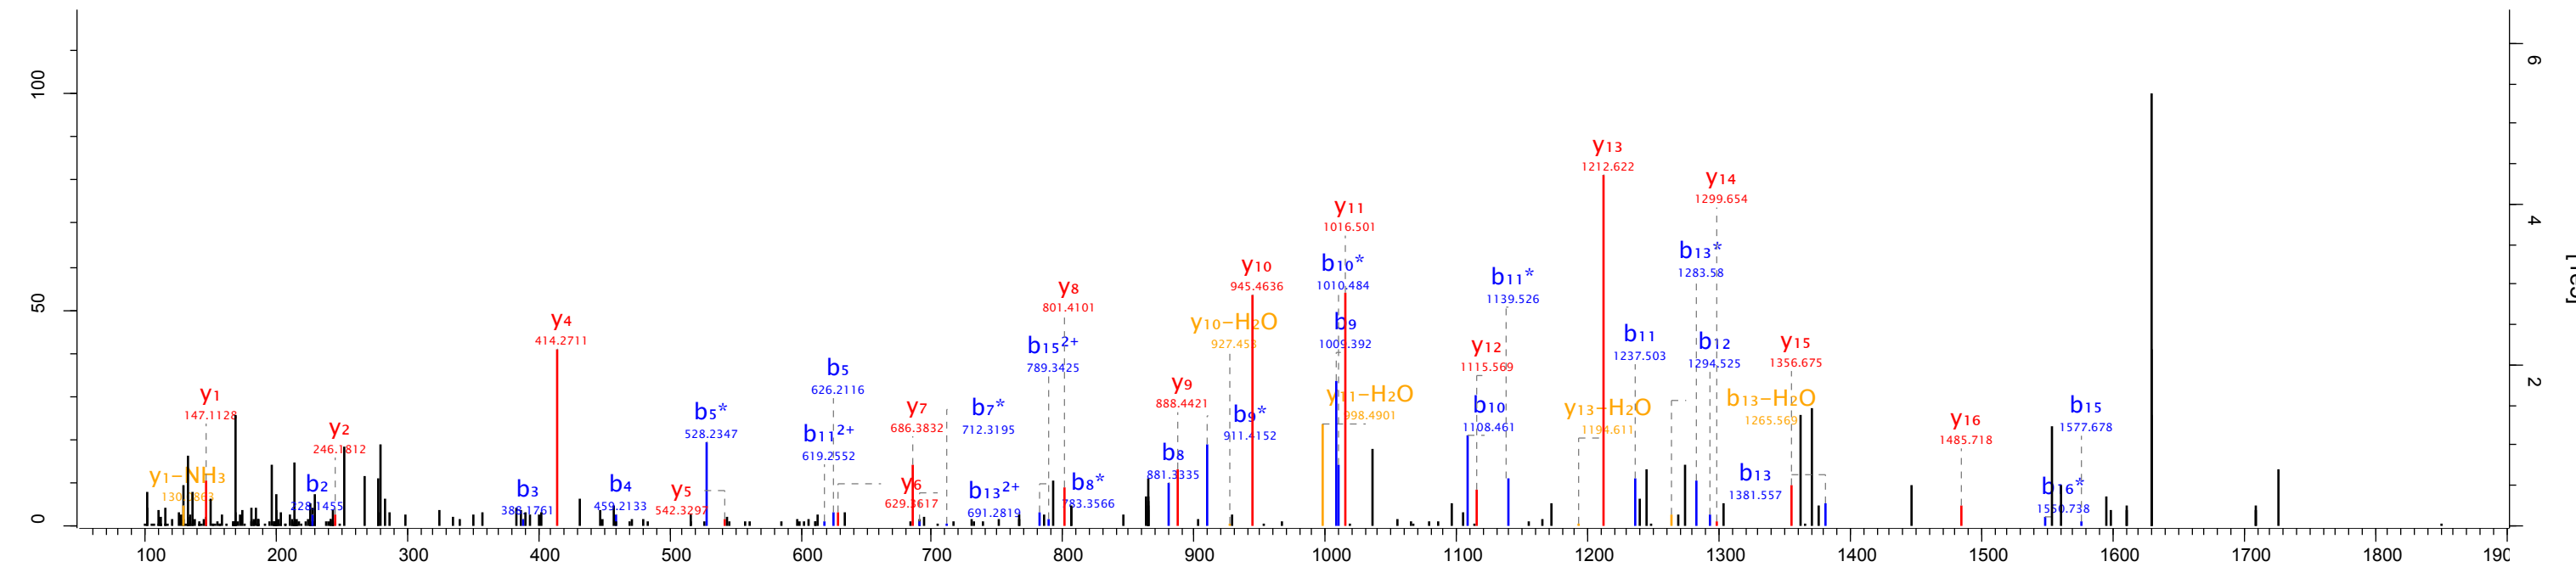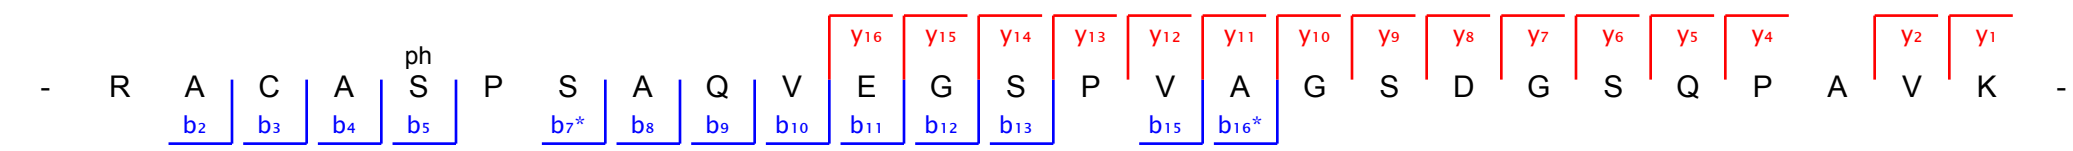

Raw file  
20150812\_A375SR\_Phospho\_BR1\_05

Scan 10563 Method FTMS; HCD Score 180.71 m/z 1209.05 Gene names ZBTB7A

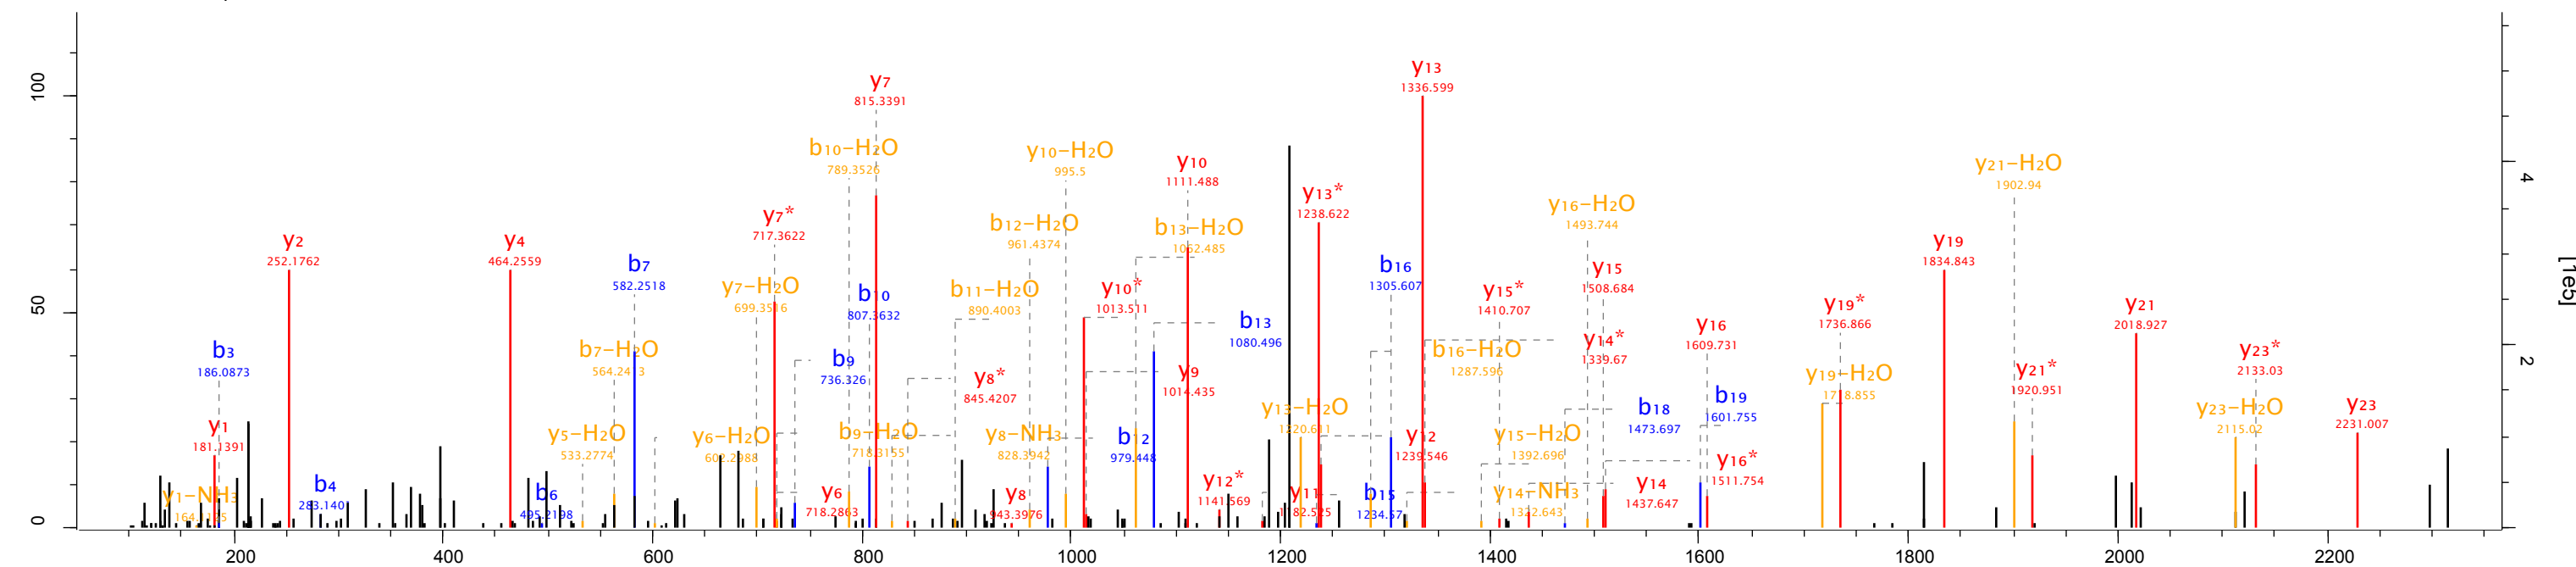

- G G A P D P S P G A T A T P G A P A Q P S S P D A R -

Fragmentation mapping (b-ions in blue, y-ions in red):

- b<sub>3</sub> (A), b<sub>4</sub> (P)
- b<sub>6</sub> (P), b<sub>7</sub> (S)
- b<sub>9</sub> (G), b<sub>10</sub> (A)
- b<sub>12</sub> (T), b<sub>13</sub> (A)
- b<sub>15</sub> (G), b<sub>16</sub> (A)
- b<sub>18</sub> (P), b<sub>19</sub> (A)
- y<sub>1</sub> (R), y<sub>2</sub> (D), y<sub>4</sub> (S), y<sub>6</sub> (S), y<sub>7</sub> (P), y<sub>8</sub> (Q), y<sub>9</sub> (A), y<sub>10</sub> (P), y<sub>11</sub> (A), y<sub>12</sub> (G), y<sub>13</sub> (P), y<sub>14</sub> (T), y<sub>15</sub> (A), y<sub>16</sub> (T), y<sub>19</sub> (P), y<sub>21</sub> (P), y<sub>23</sub> (A)

Raw file 20150812\_A375SR\_Phospho\_BR1\_05 Scan 10903 Method FTMS; HCD Score 193.53 m/z 783.72 Gene names MAPRE3

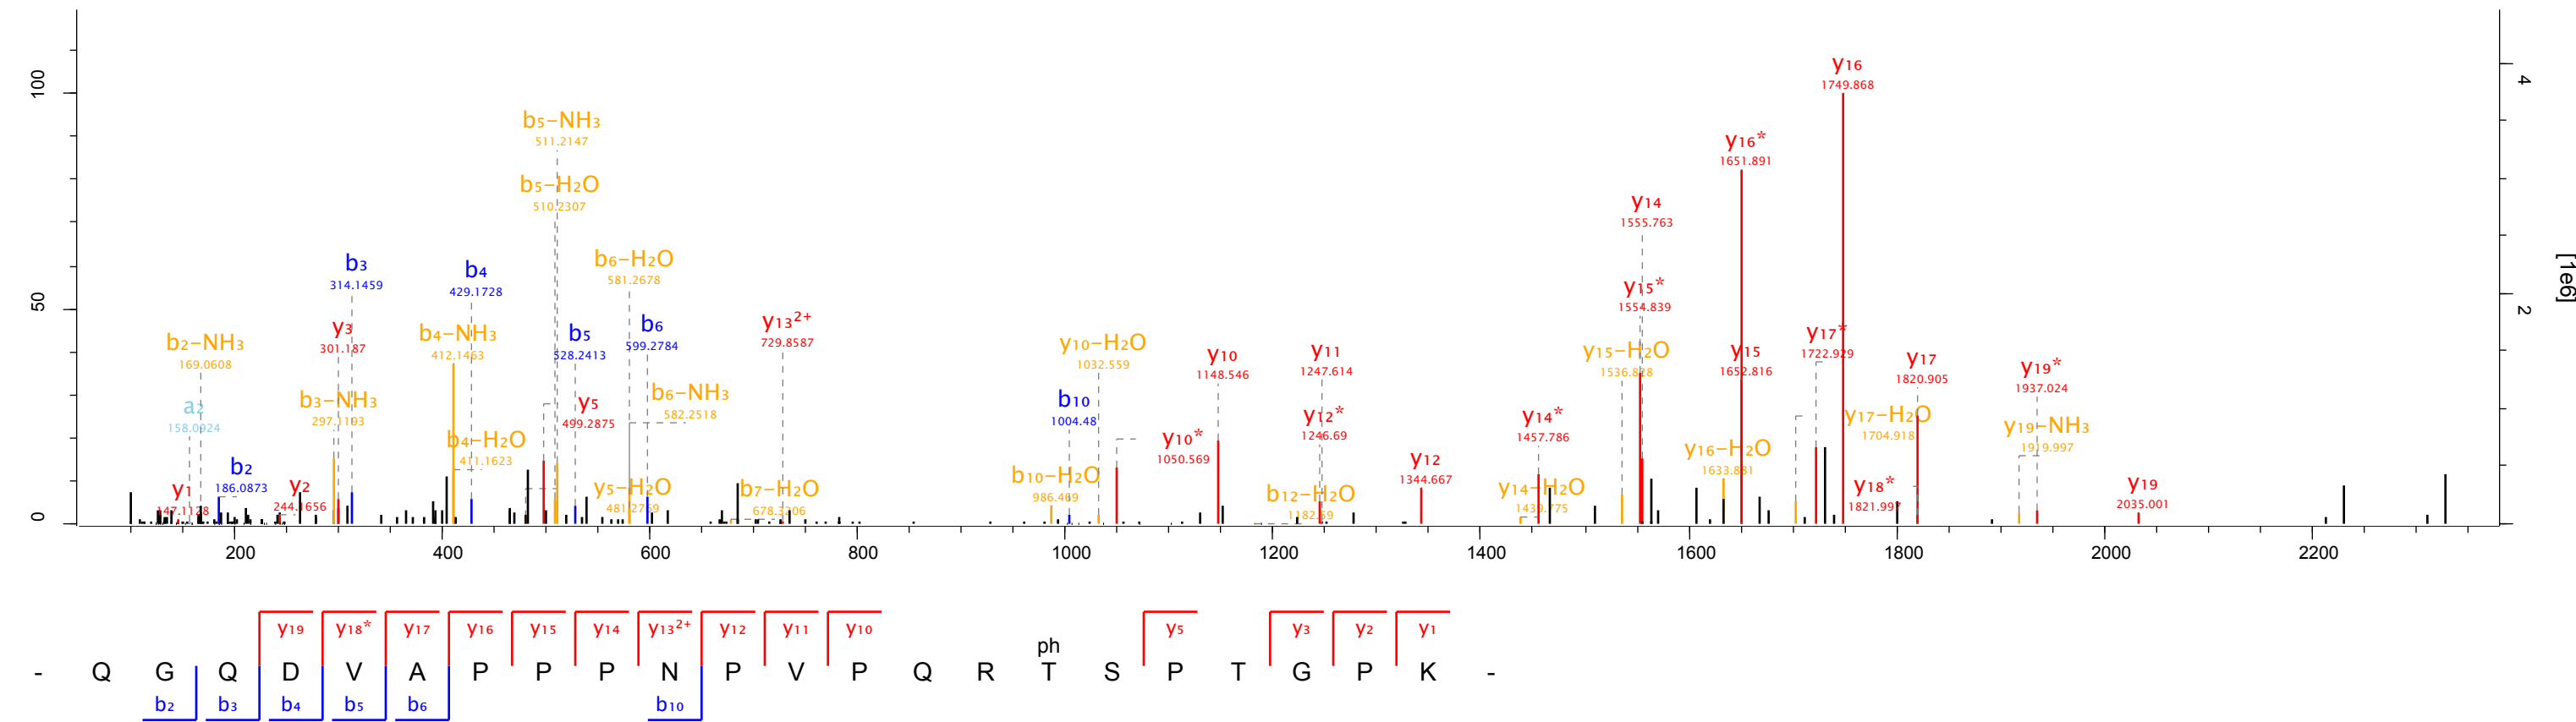

Raw file 20150812\_A375SR\_Phospho\_BR1\_05 Scan 10923 Method FTMS; HCD Score 173.89 m/z 717.33 Gene names SF3B2

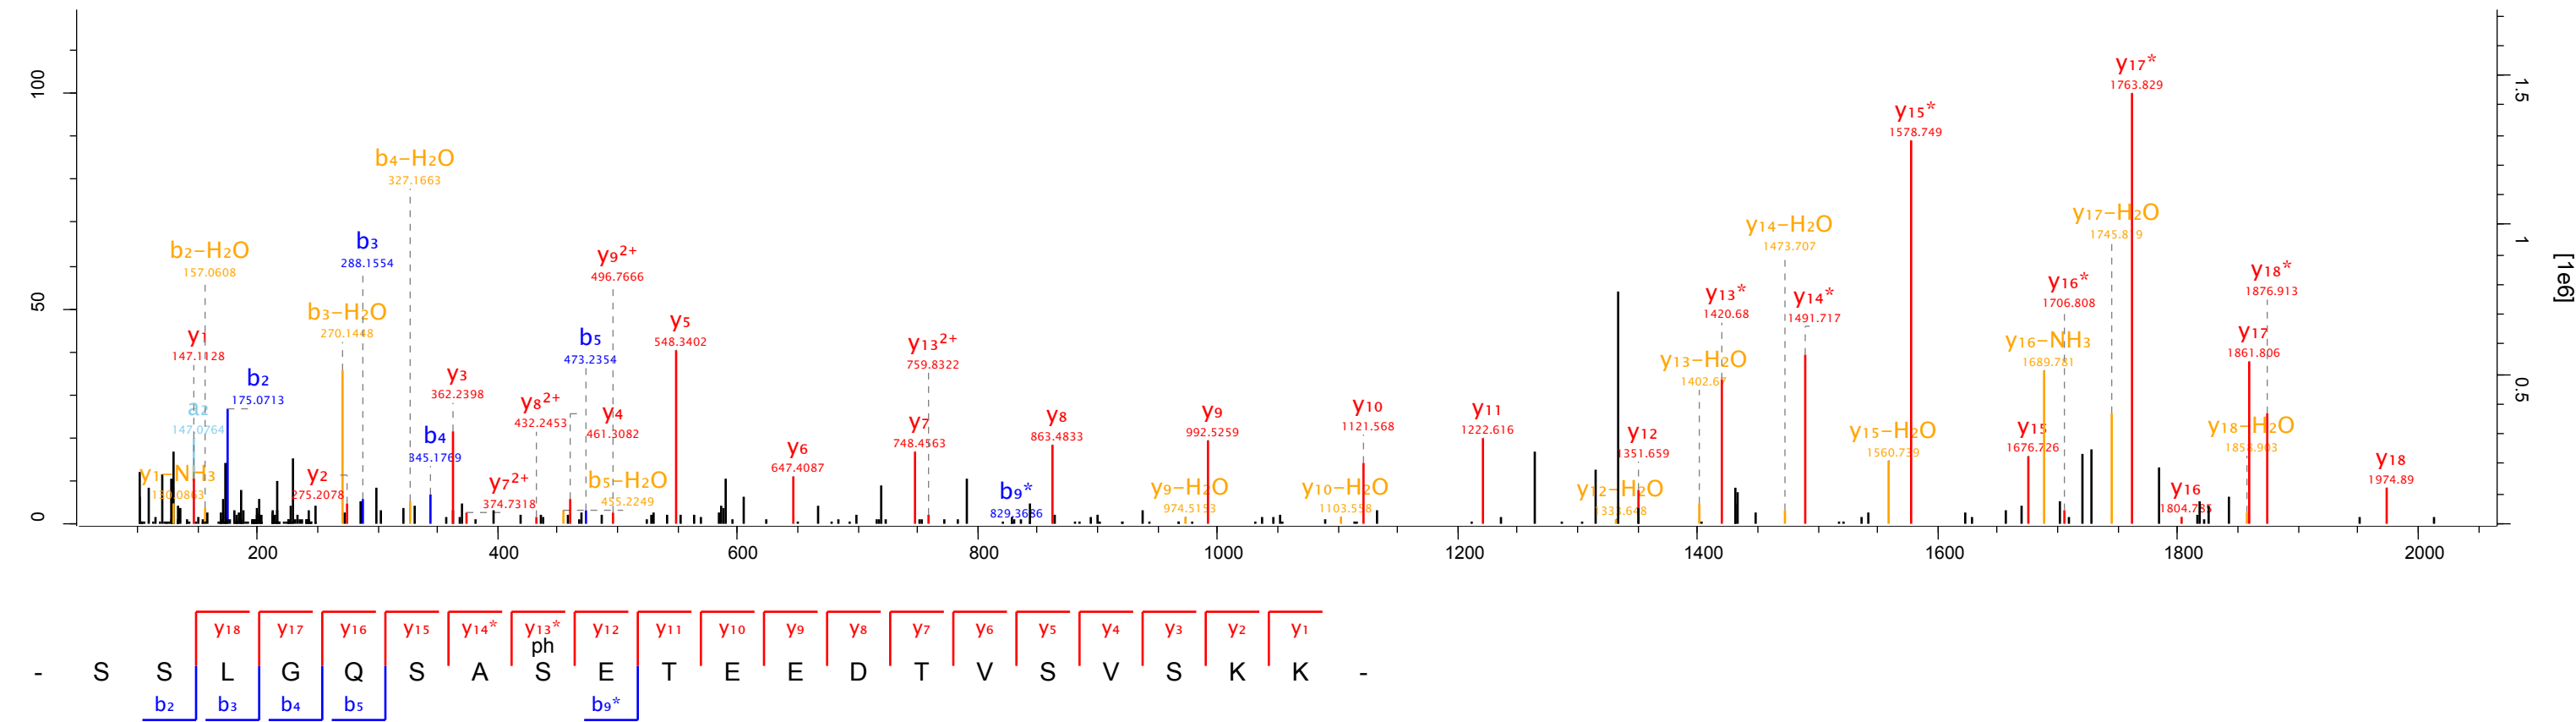

Raw file  
 20150812\_A375SR\_Phospho\_BR1\_05  
 Scan 11783 Method FTMS; HCD Score 124.51 m/z 585.33 Gene names RALY

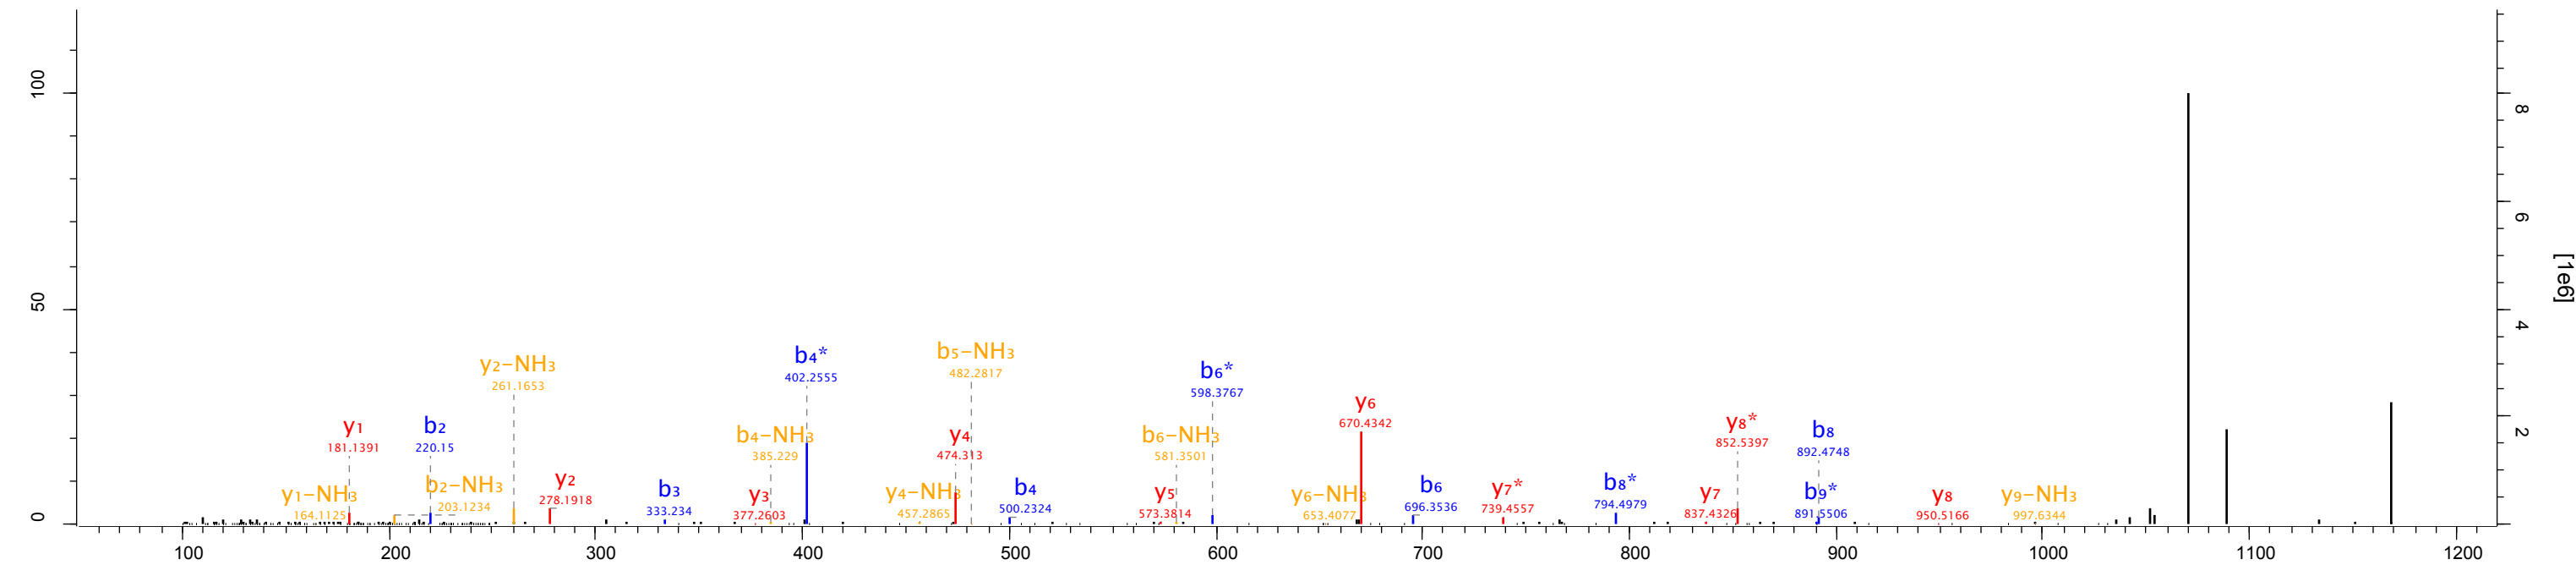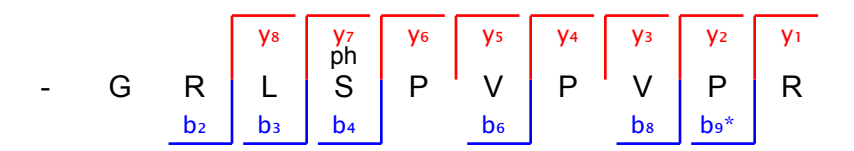

Raw file: 20150812\_A375SR\_Phospho\_BR1\_05  
 Scan: 11963  
 Method: FTMS; HCD  
 Score: 111.53  
 m/z: 1048.43  
 Gene names: TCF12

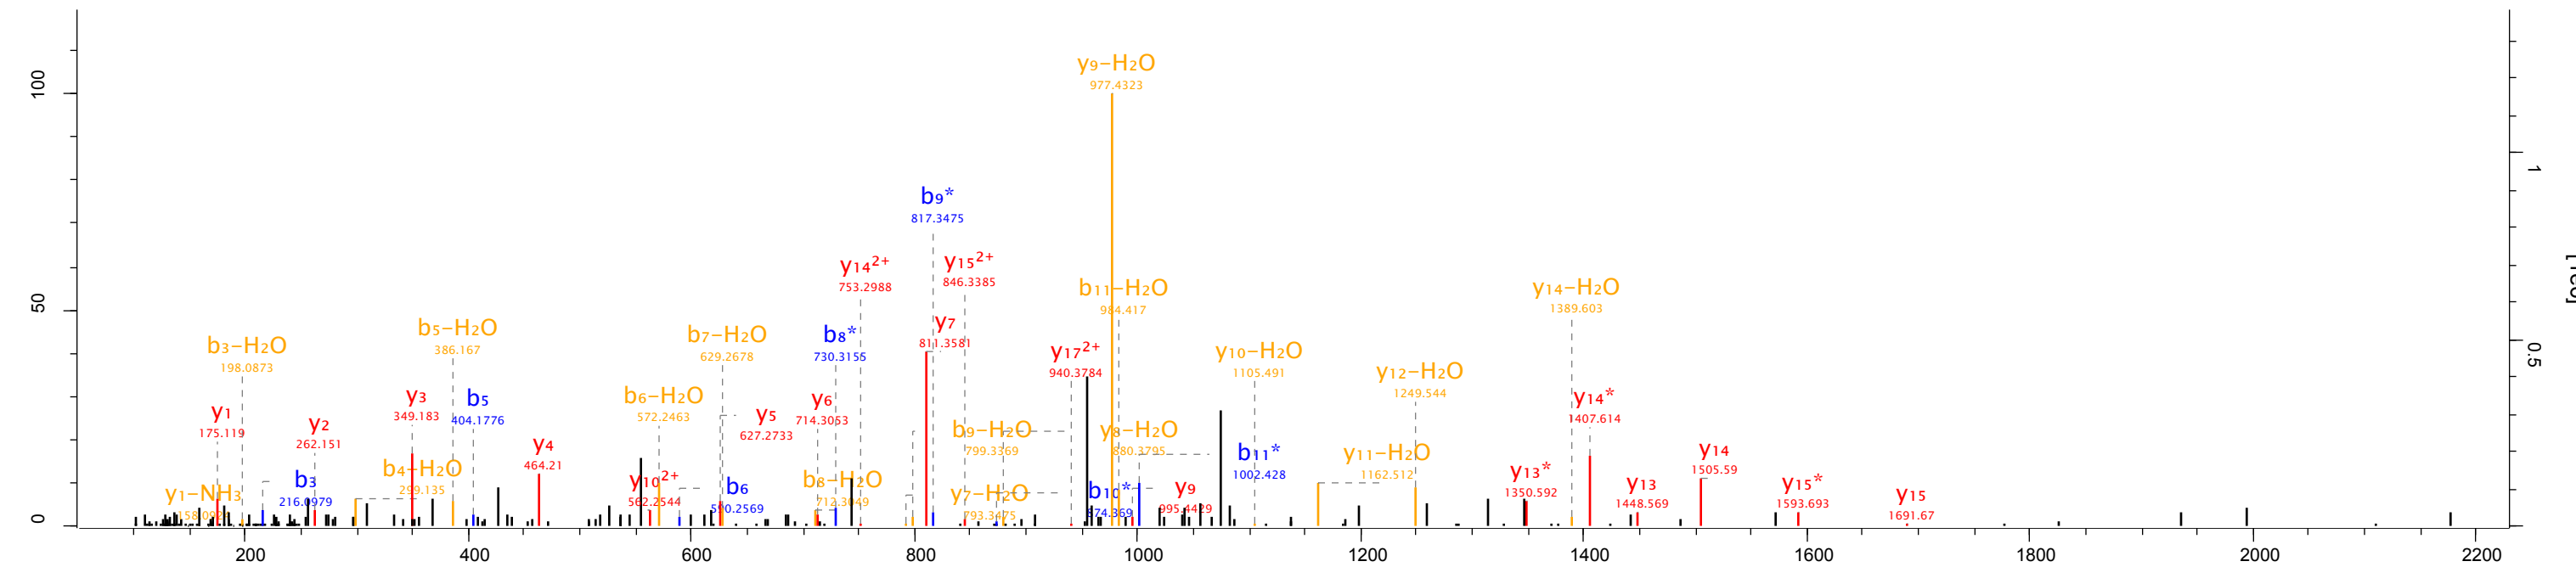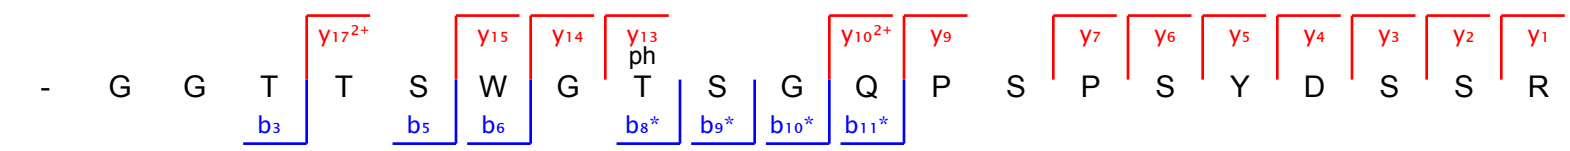

Raw file 20150812\_A375SR\_Phospho\_BR1\_05 Scan 12133 Method FTMS; HCD Score 278.27 m/z 930.4 Gene names HDLBP

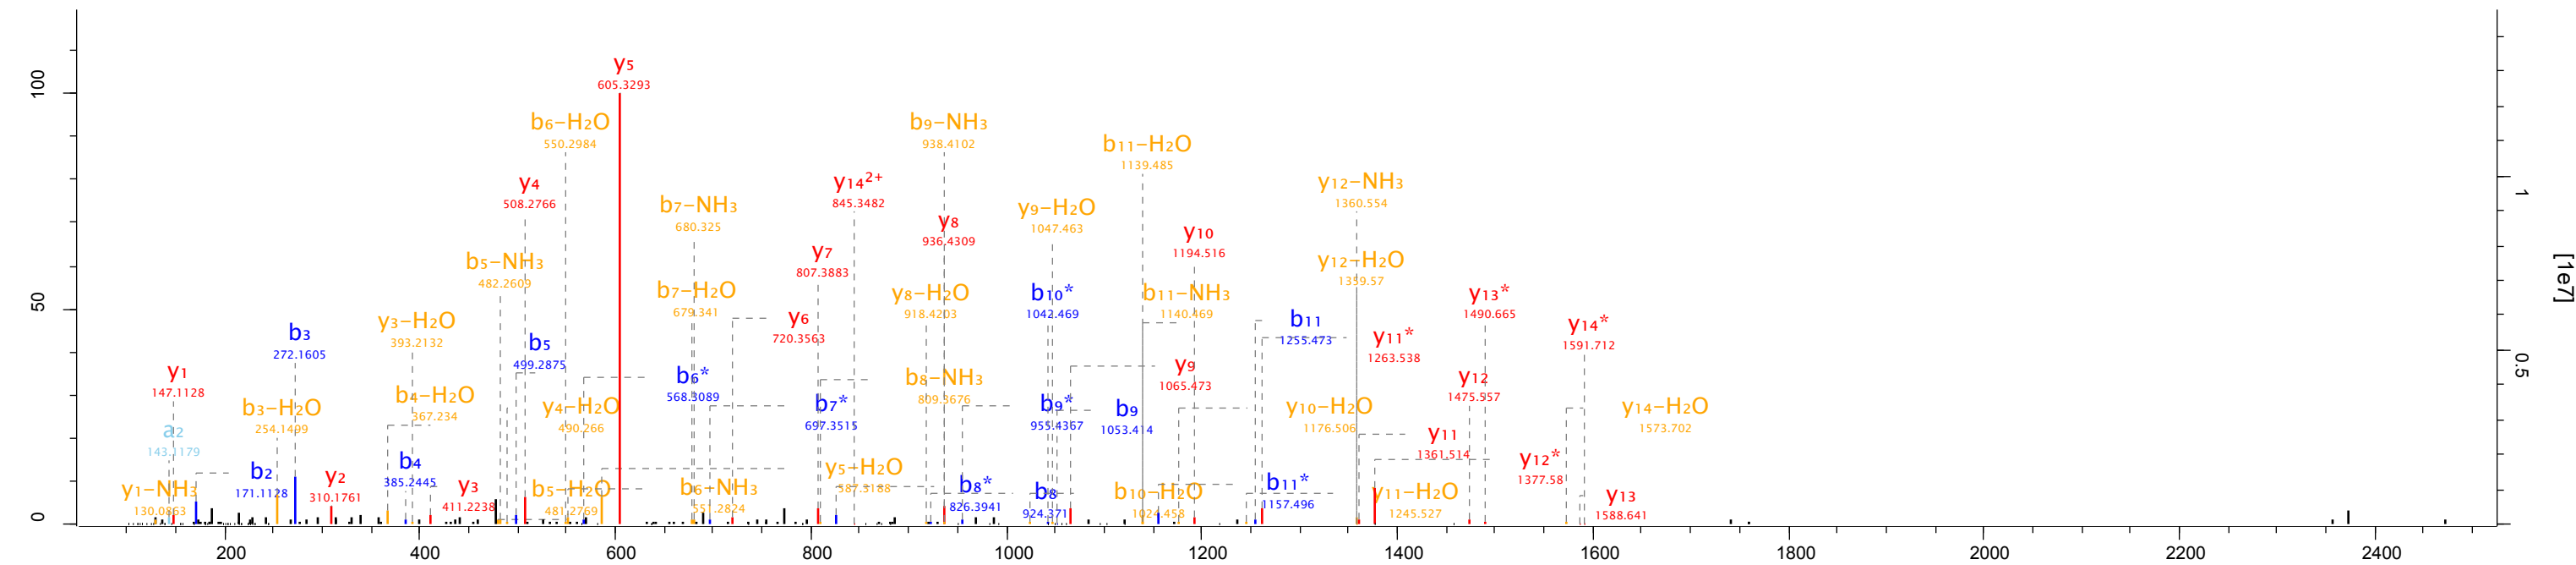

- V A T L N S E E E S D P P T Y K -

b<sub>2</sub>
b<sub>3</sub>
b<sub>4</sub>
b<sub>5</sub>
b<sub>6</sub>\*
b<sub>7</sub>\*
b<sub>8</sub>
b<sub>9</sub>
b<sub>10</sub>\*
b<sub>11</sub>

y<sub>14</sub>\*
y<sub>13</sub>
y<sub>12</sub>
y<sub>11</sub>
ph
y<sub>10</sub>
y<sub>9</sub>
y<sub>8</sub>
y<sub>7</sub>
y<sub>6</sub>
y<sub>5</sub>
y<sub>4</sub>
y<sub>3</sub>
y<sub>2</sub>
y<sub>1</sub>

Raw file: 20150812\_A375SR\_Phospho\_BR1\_05  
 Scan: 1223 Method: FTMS; HCD Score: 221.86 m/z: 967.39 Gene names: CEP170

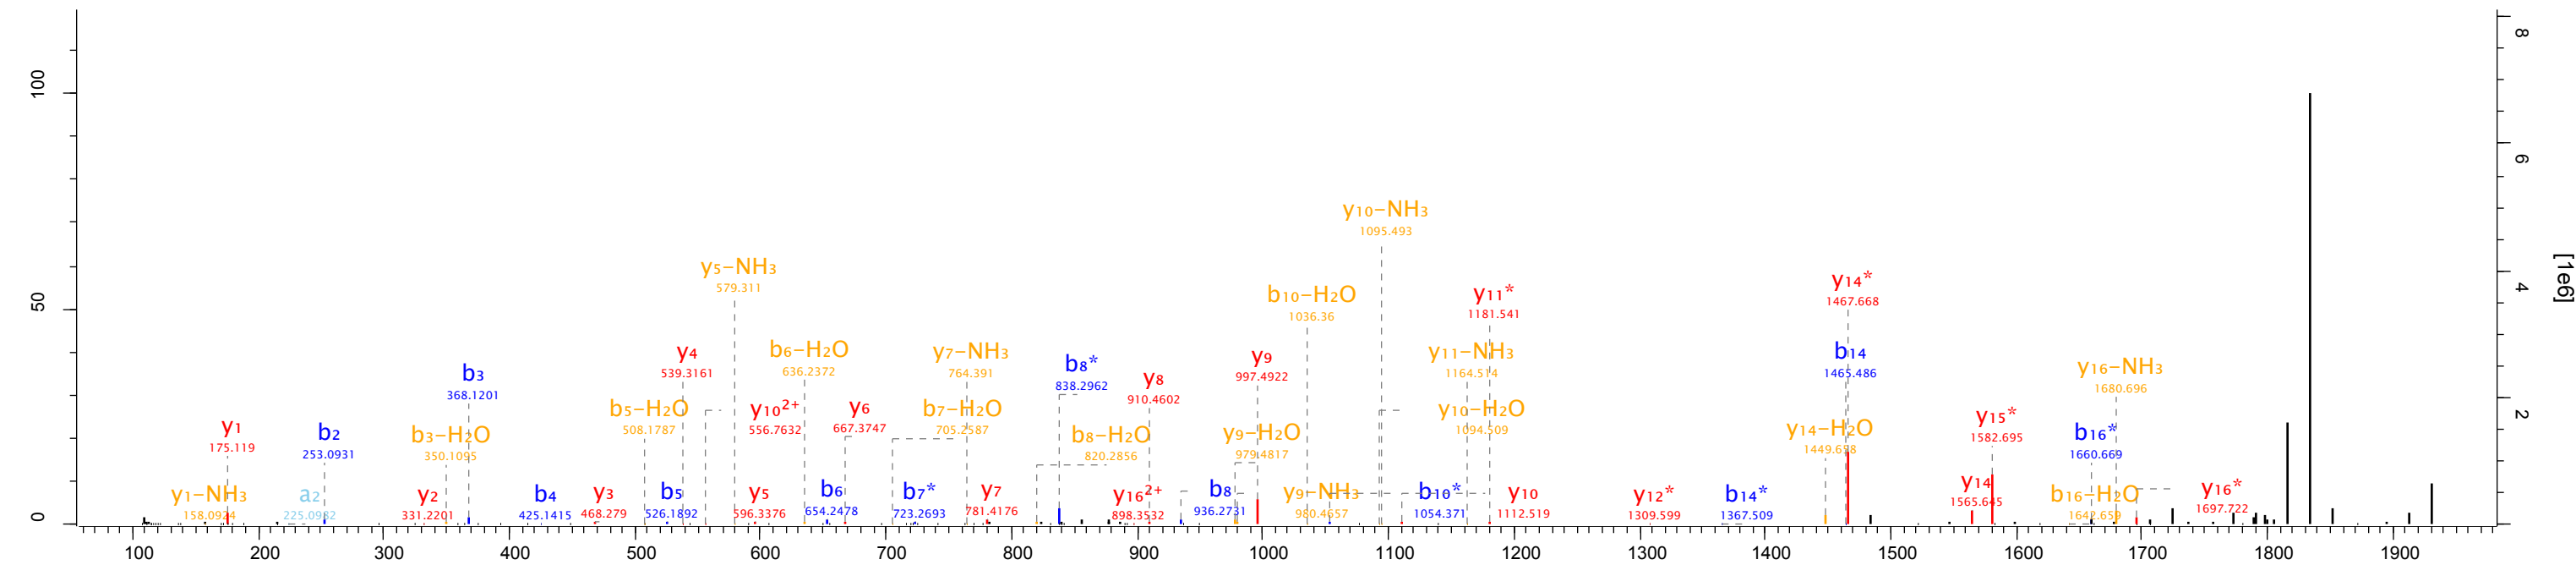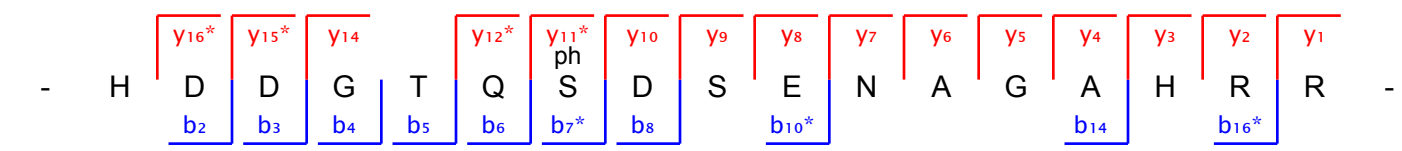



Raw file 20150812\_A375SR\_Phospho\_BR1\_05 Scan 12973 Method FTMS; HCD Score 293.72 m/z 974.93 Gene names ZHX3

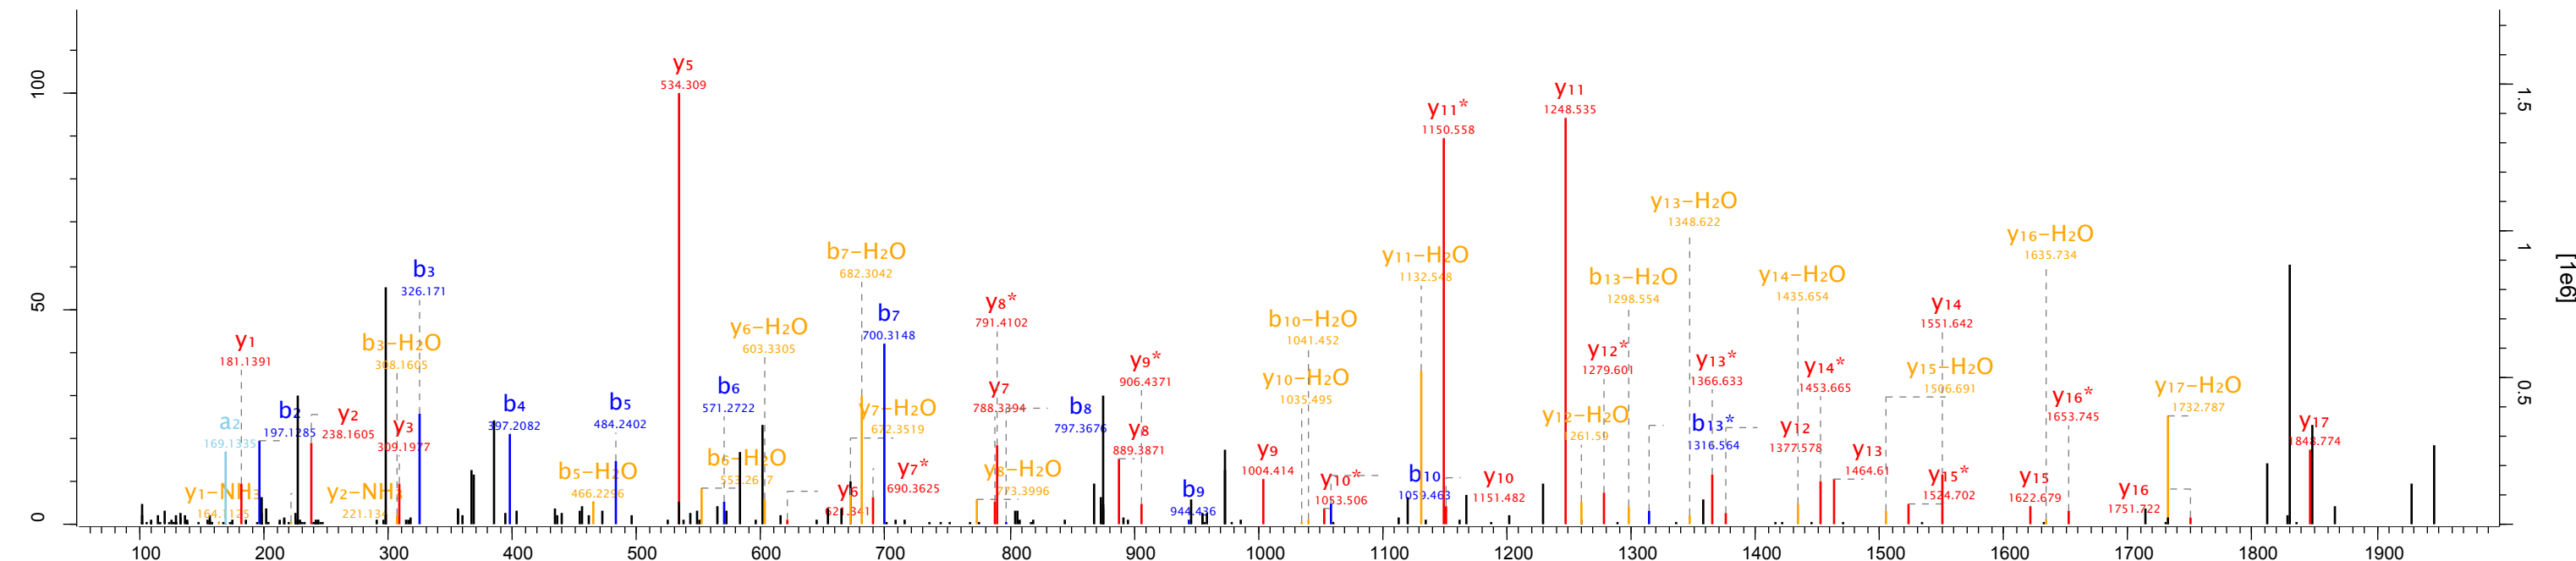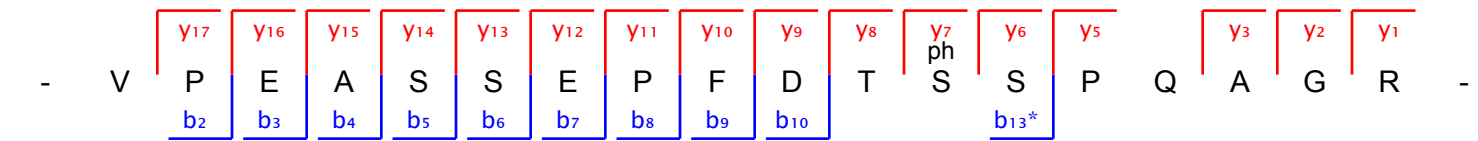

Raw file 20150812\_A375SR\_Phospho\_BR1\_05 Scan 13533 Method FTMS; HCD Score 277.02 m/z 843.96 Gene names MLLT3

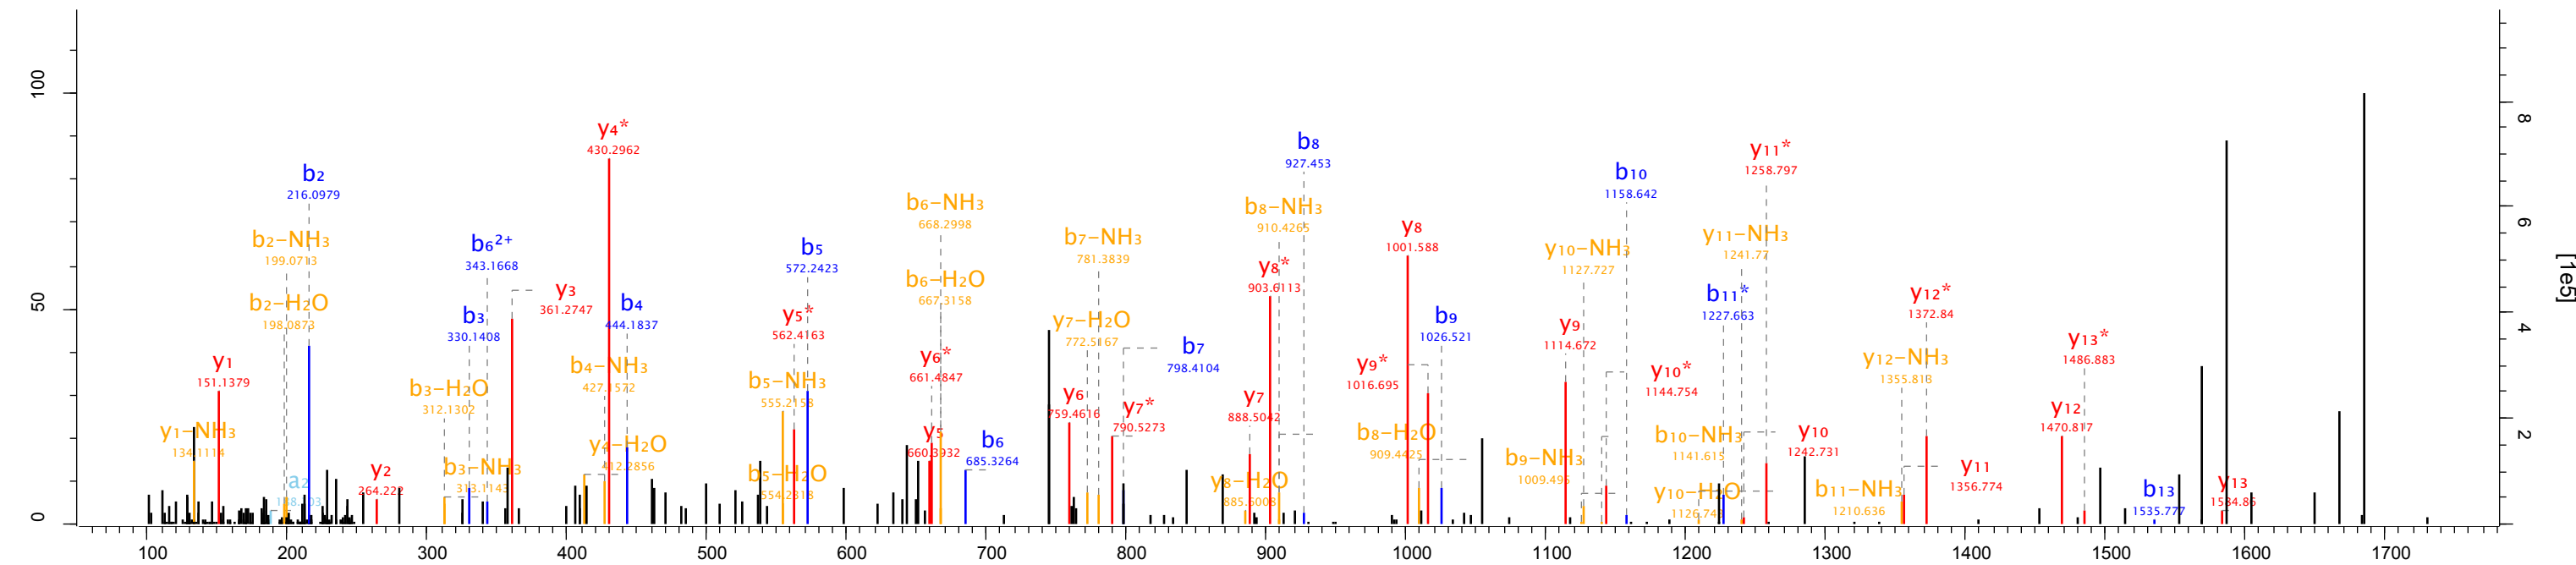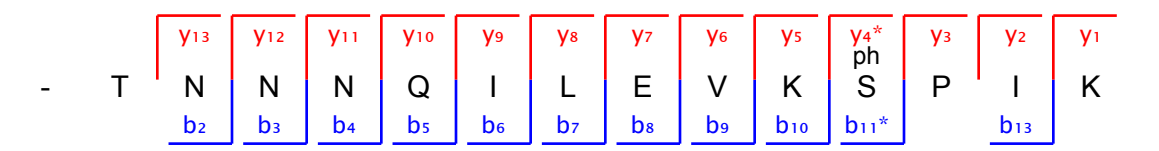

Raw file: 20150812\_A375SR\_Phospho\_BR1\_05  
 Scan: 13743 Method: FTMS; HCD Score: 241.92 m/z: 1012.86 Gene names: LTV1;ZC2HC1B

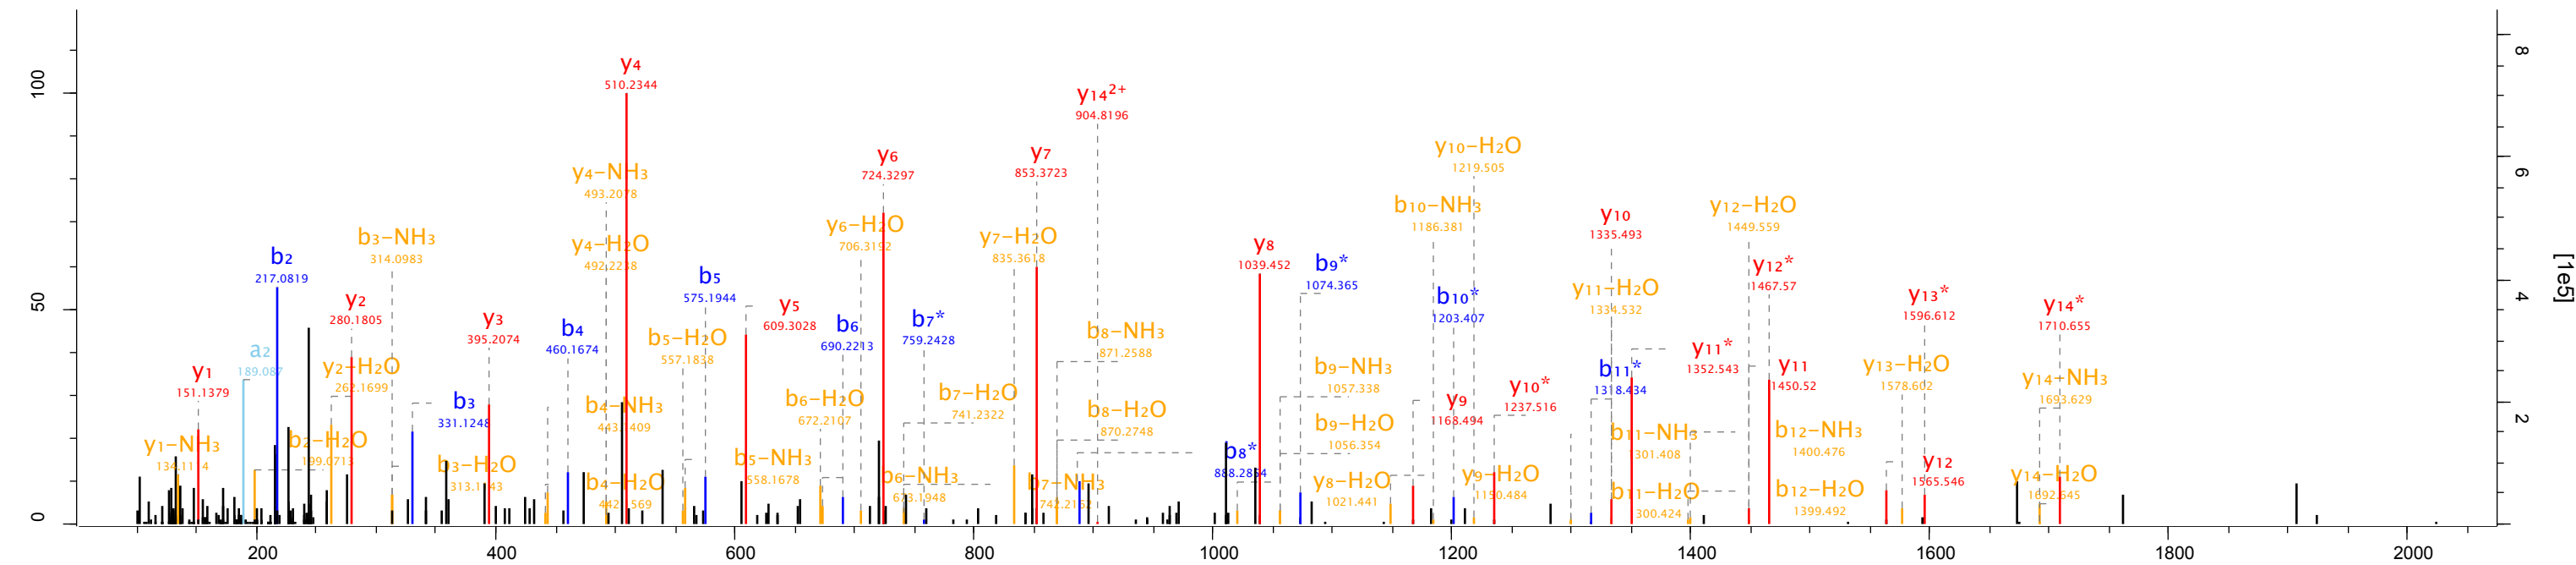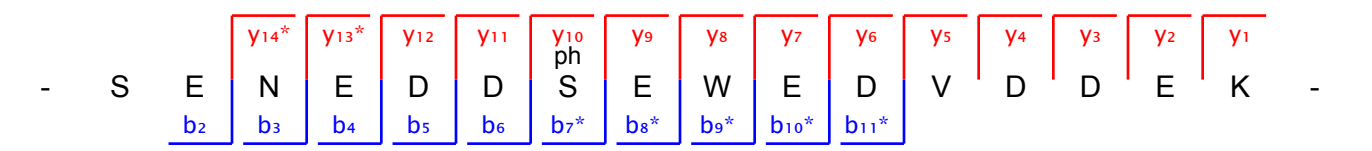

Raw file 20150812\_A375SR\_Phospho\_BR1\_05 Scan 14133 Method FTMS; HCD Score 125.33 m/z 740.8 Gene names CLUAP1

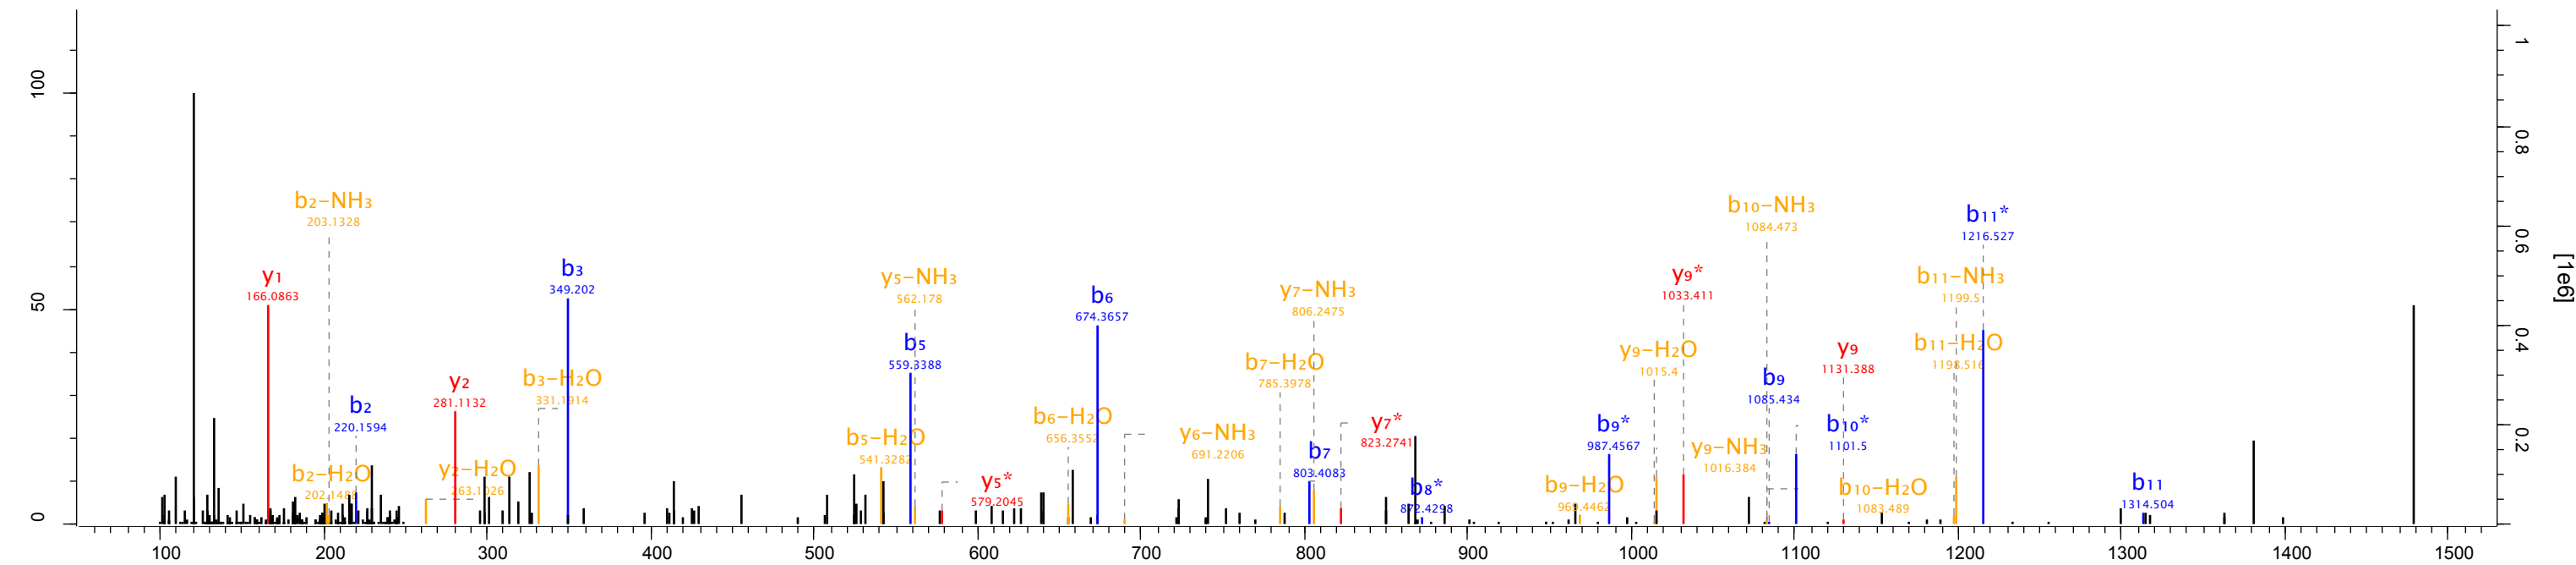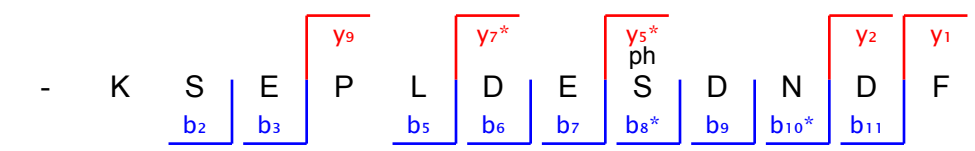

Raw file  
 20150812\_A375SR\_Phospho\_BR1\_05  
 Scan 14373 Method FTMS; HCD Score 74.7 m/z 660.96 Gene names SNTB1

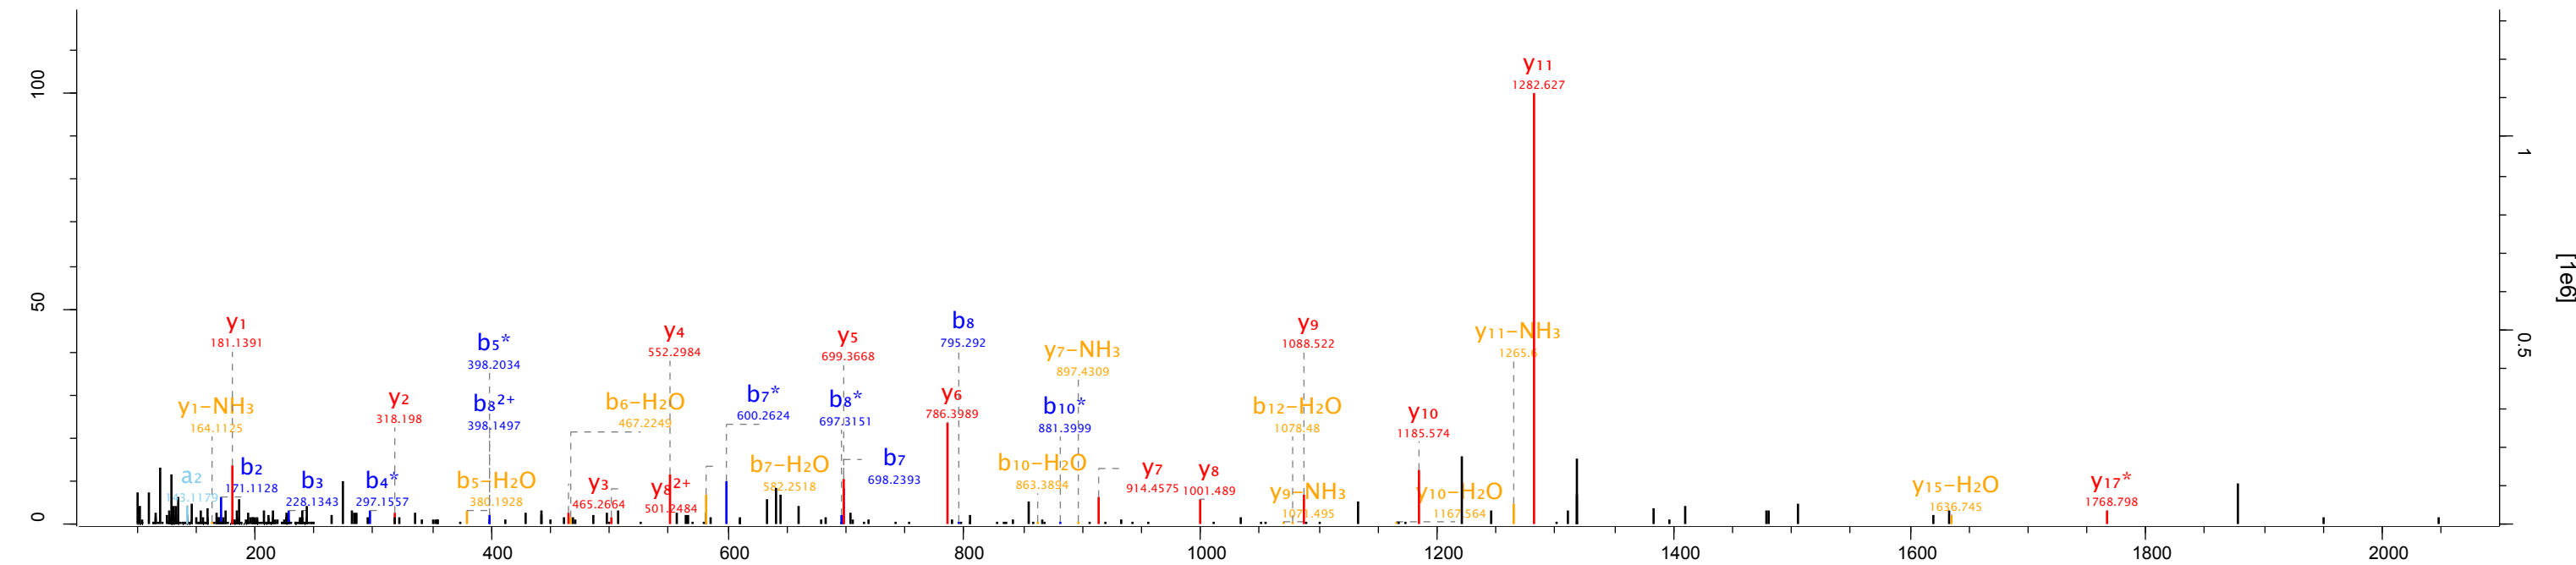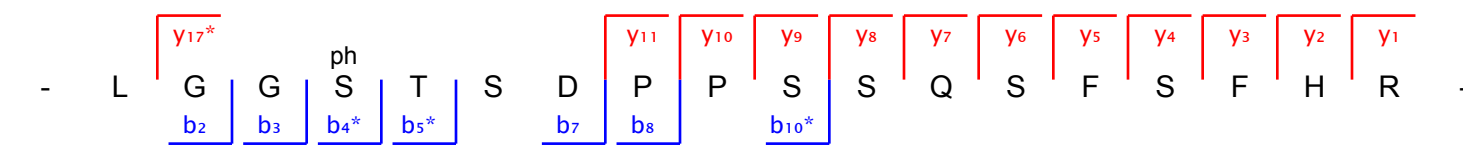

Raw file 20150812\_A375SR\_Phospho\_BR1\_05 Scan 14583 Method FTMS; HCD Score 243.16 m/z 830.4 Gene names RACGAP1

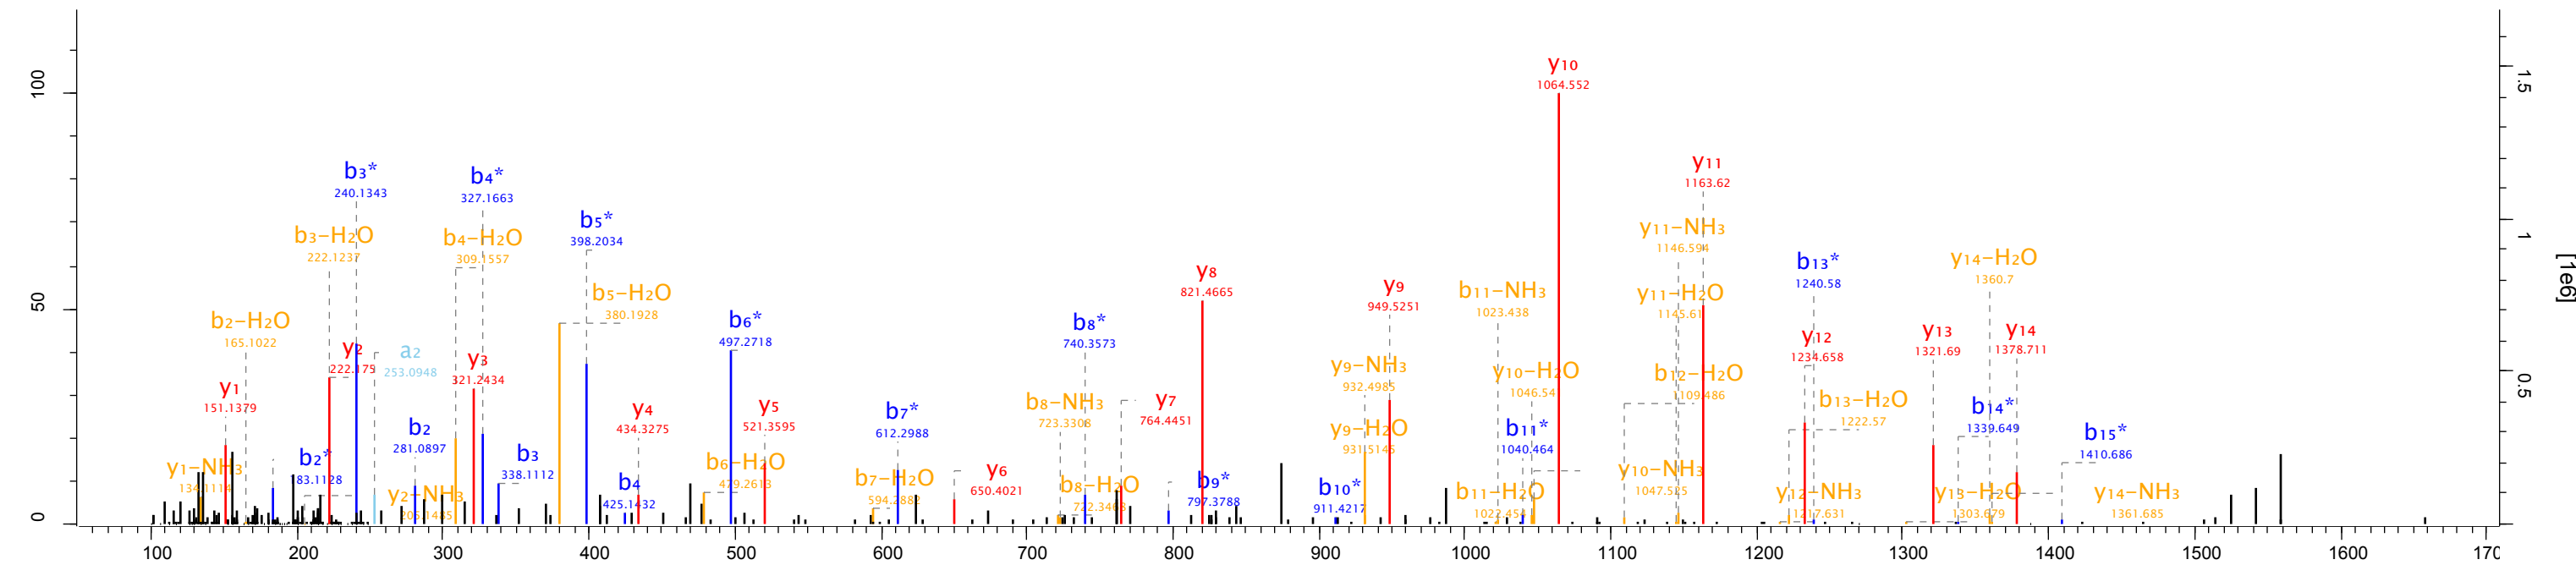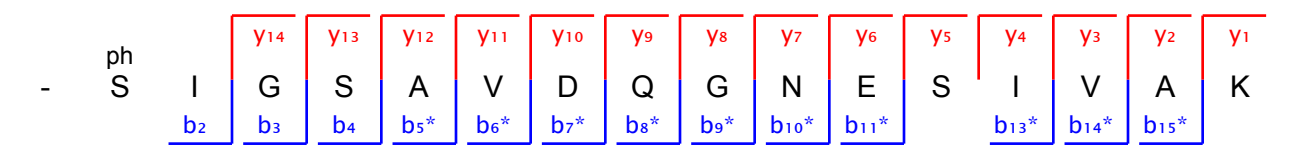

Raw file: 20150812\_A375SR\_Phospho\_BR1\_05  
 Scan: 14743 Method: FTMS; HCD Score: 203.06 m/z: 758.86 Gene names: PPHLN1

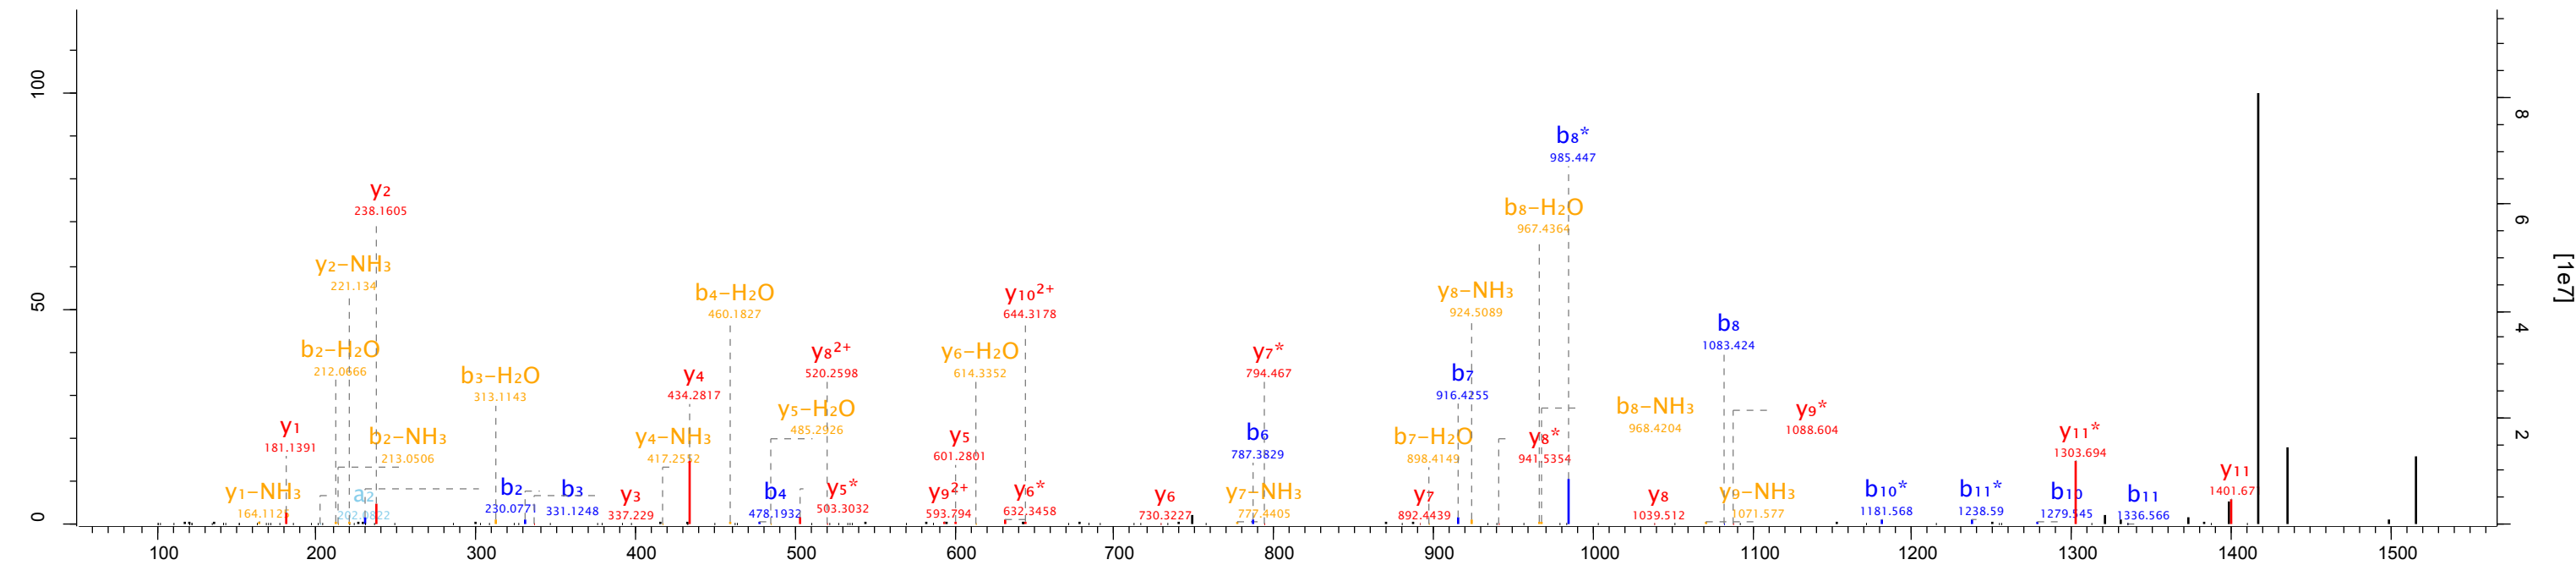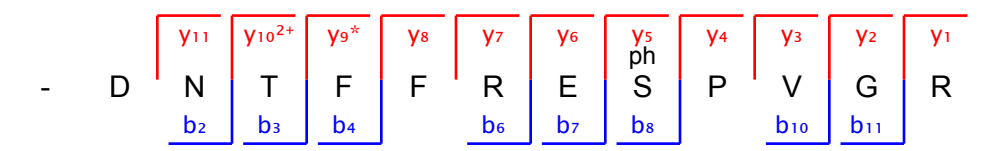

Raw file 20150812\_A375SR\_Phospho\_BR1\_05 Scan 15943 Method FTMS; HCD Score 145.49 m/z 1029.96 Gene names CTDSPL2

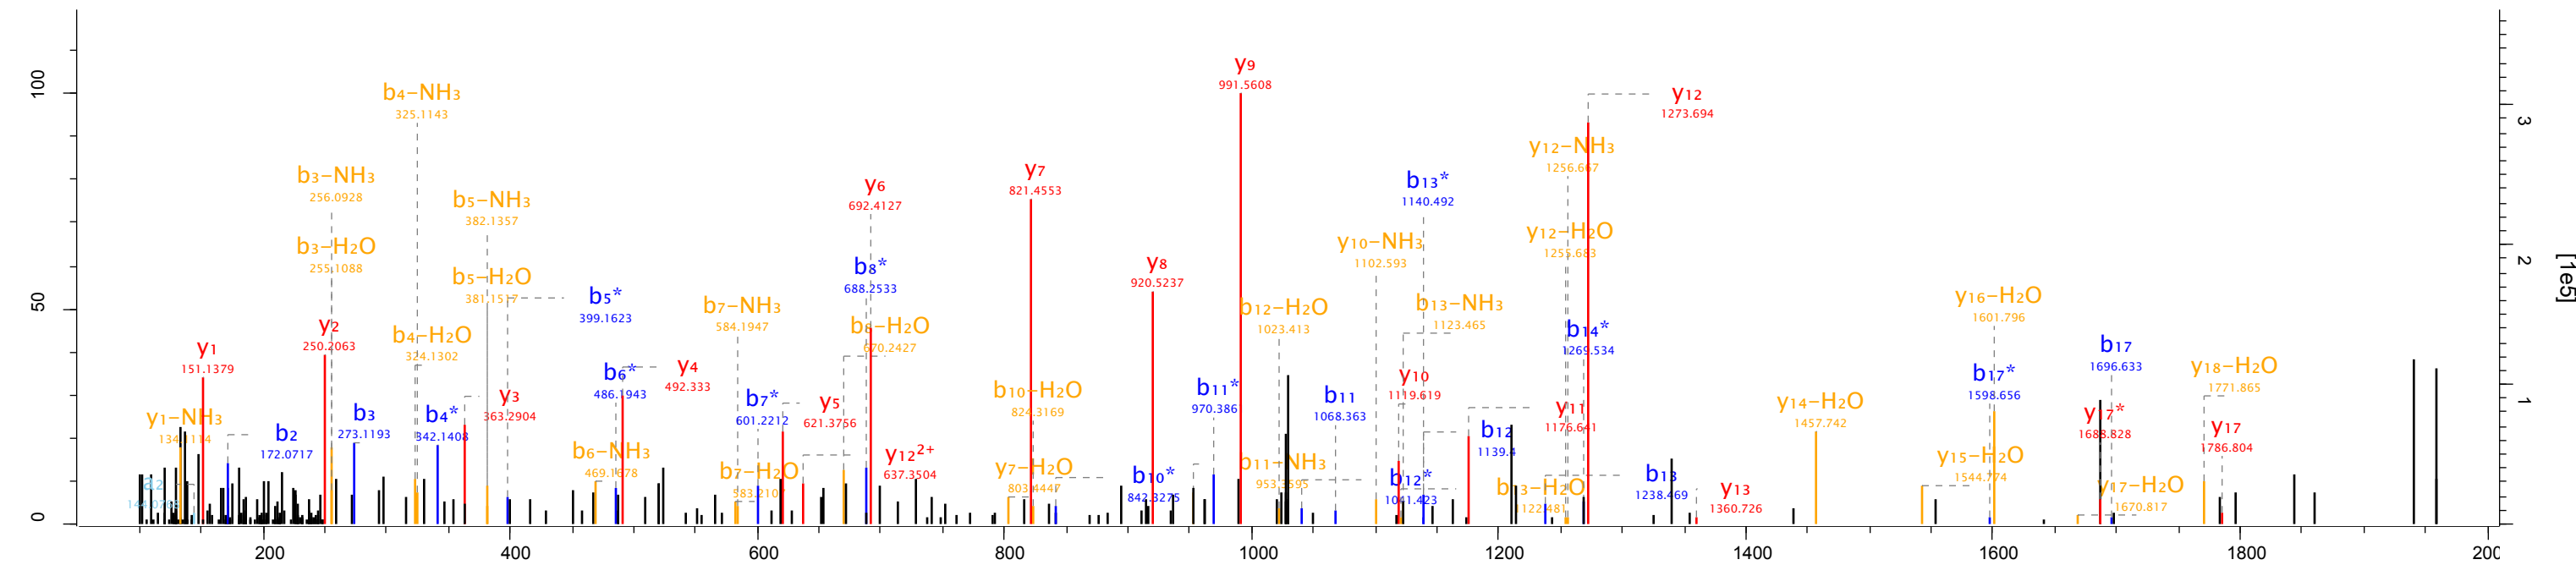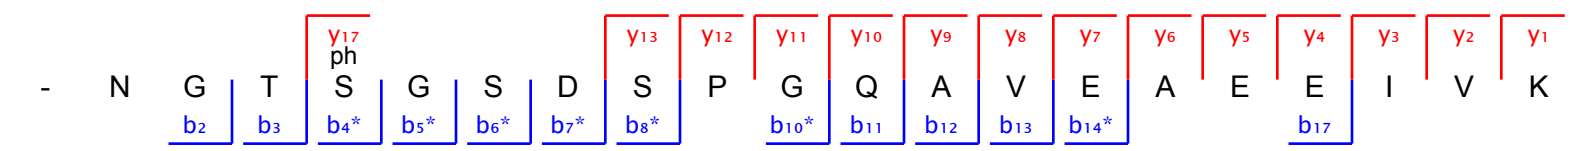



Raw file: 20150812\_A375SR\_Phospho\_BR1\_05  
 Scan: 16043 Method: FTMS; HCD Score: 332.37 m/z: 1039.14 Gene names: CT45A3;CT45A1

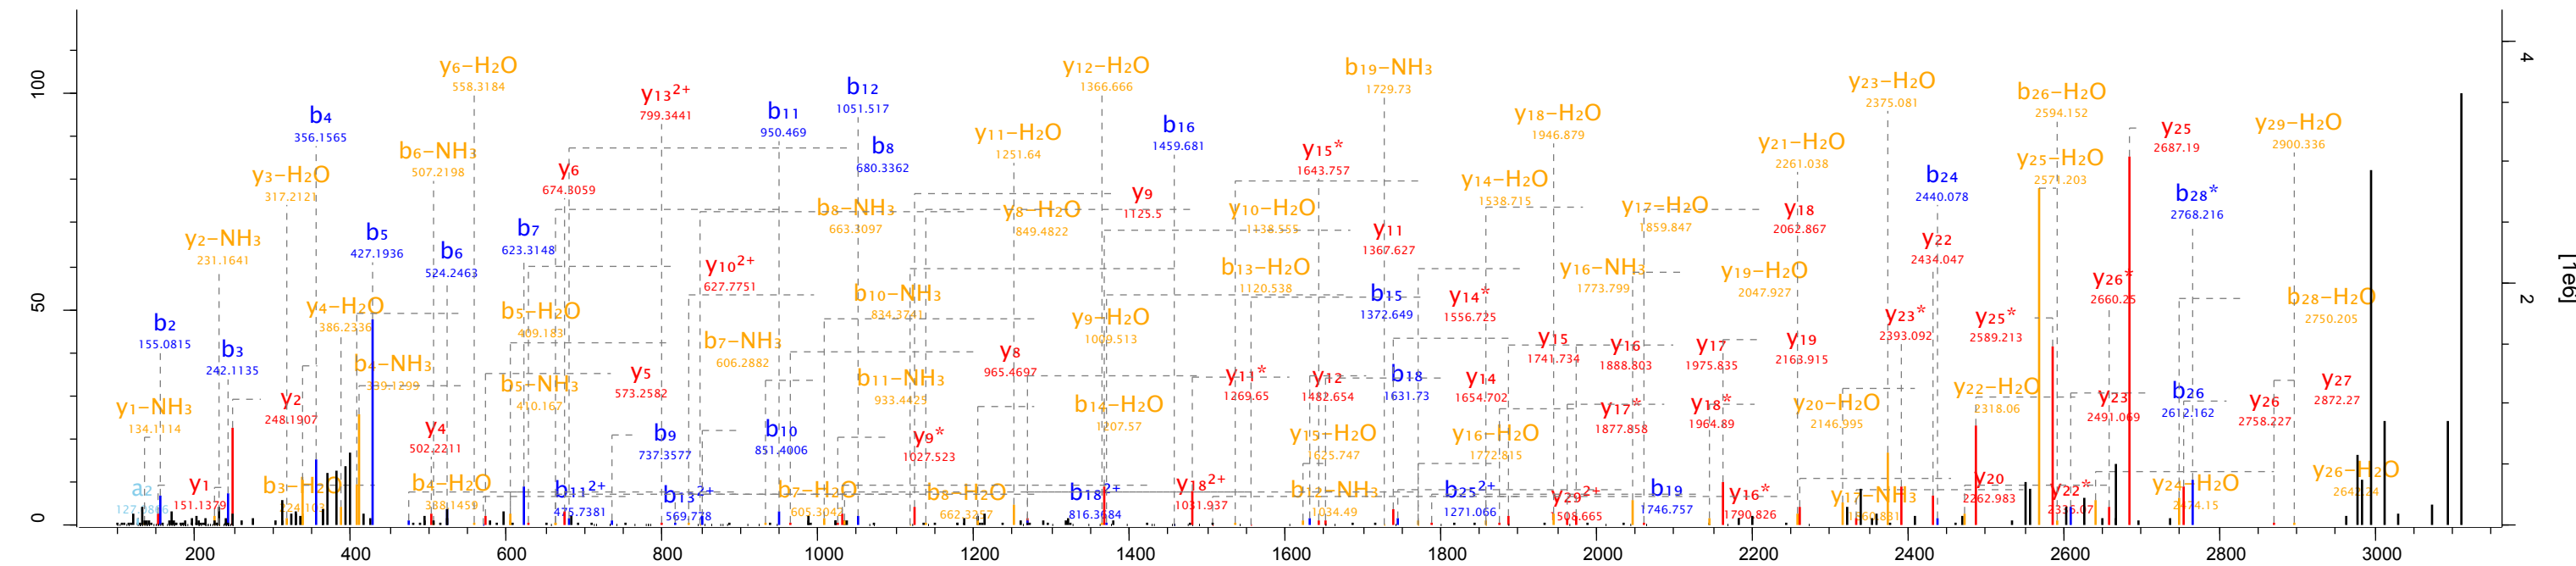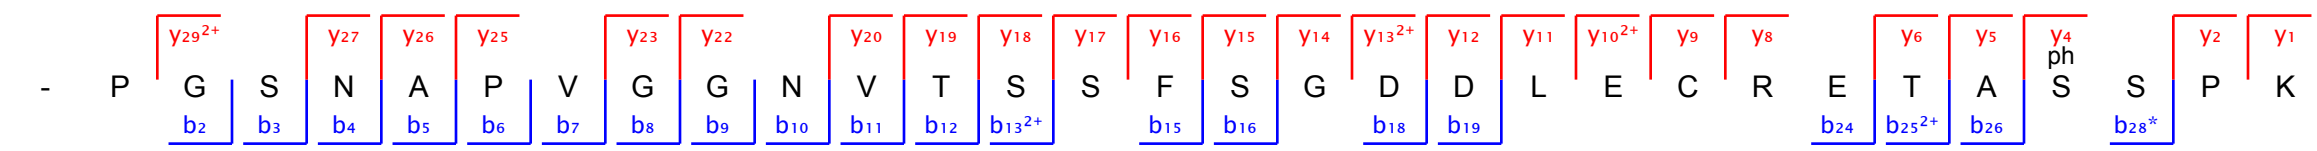

Raw file Scan Method Score m/z Gene names  
 20150812\_A375SR\_Phospho\_BR1\_05 1613 FTMS; HCD 118.91 619.78 MZT2B

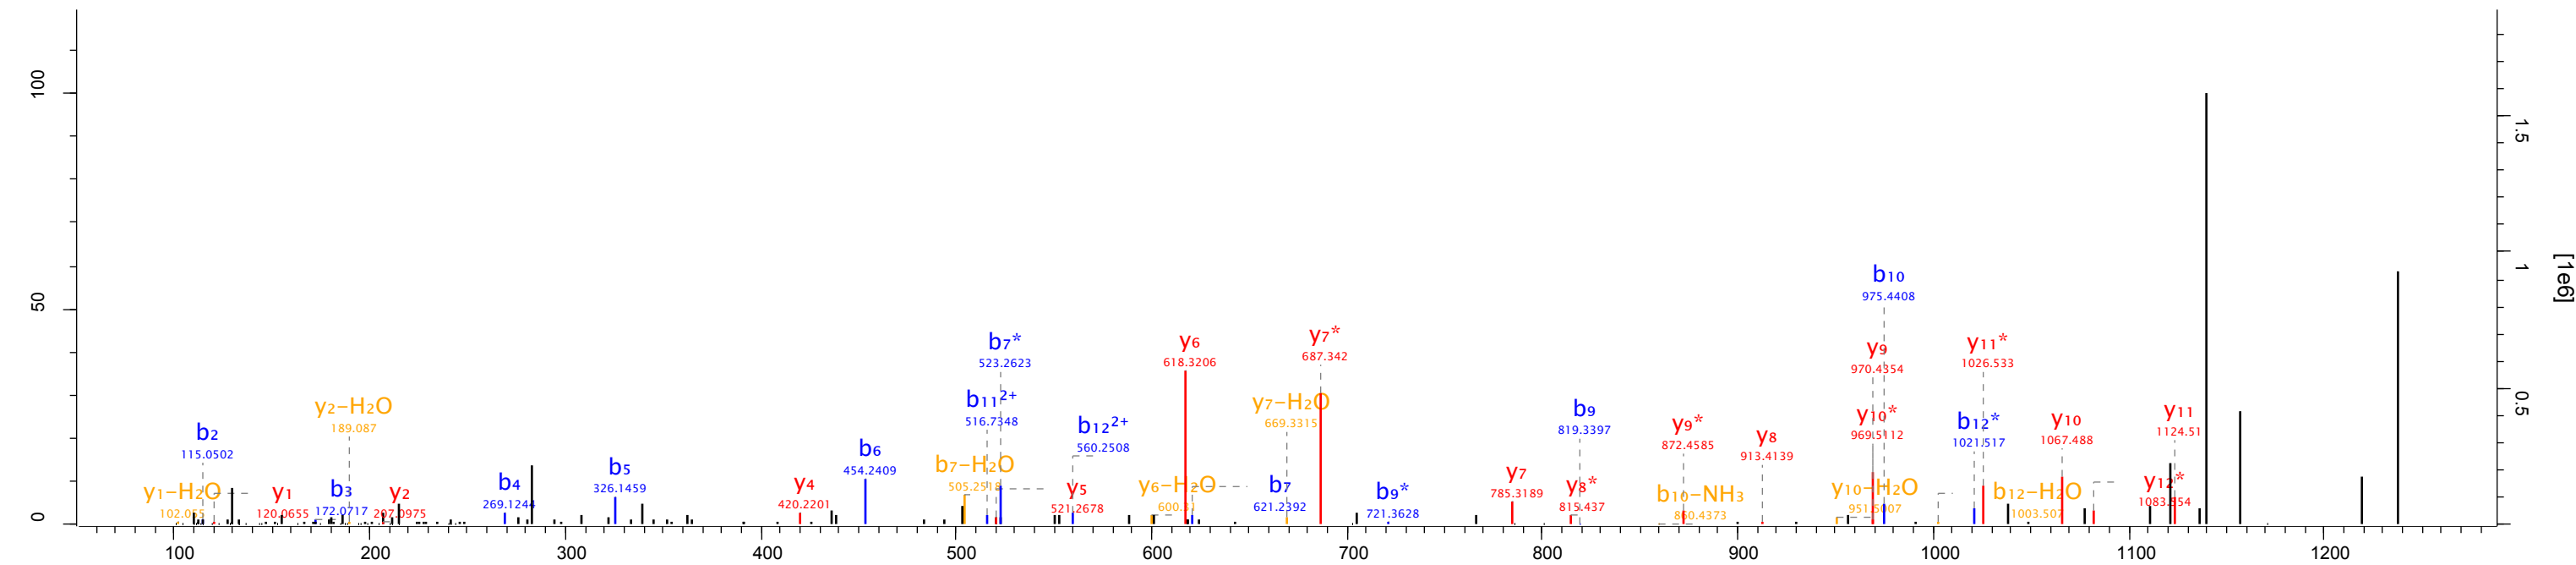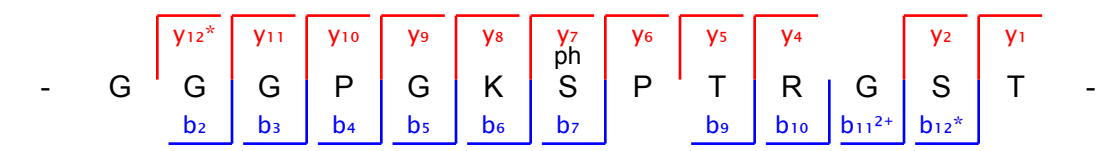

Raw file 20150812\_A375SR\_Phospho\_BR1\_05 Scan 1623 Method FTMS; HCD Score 64.22 m/z 540.74 Gene names ZMYND8

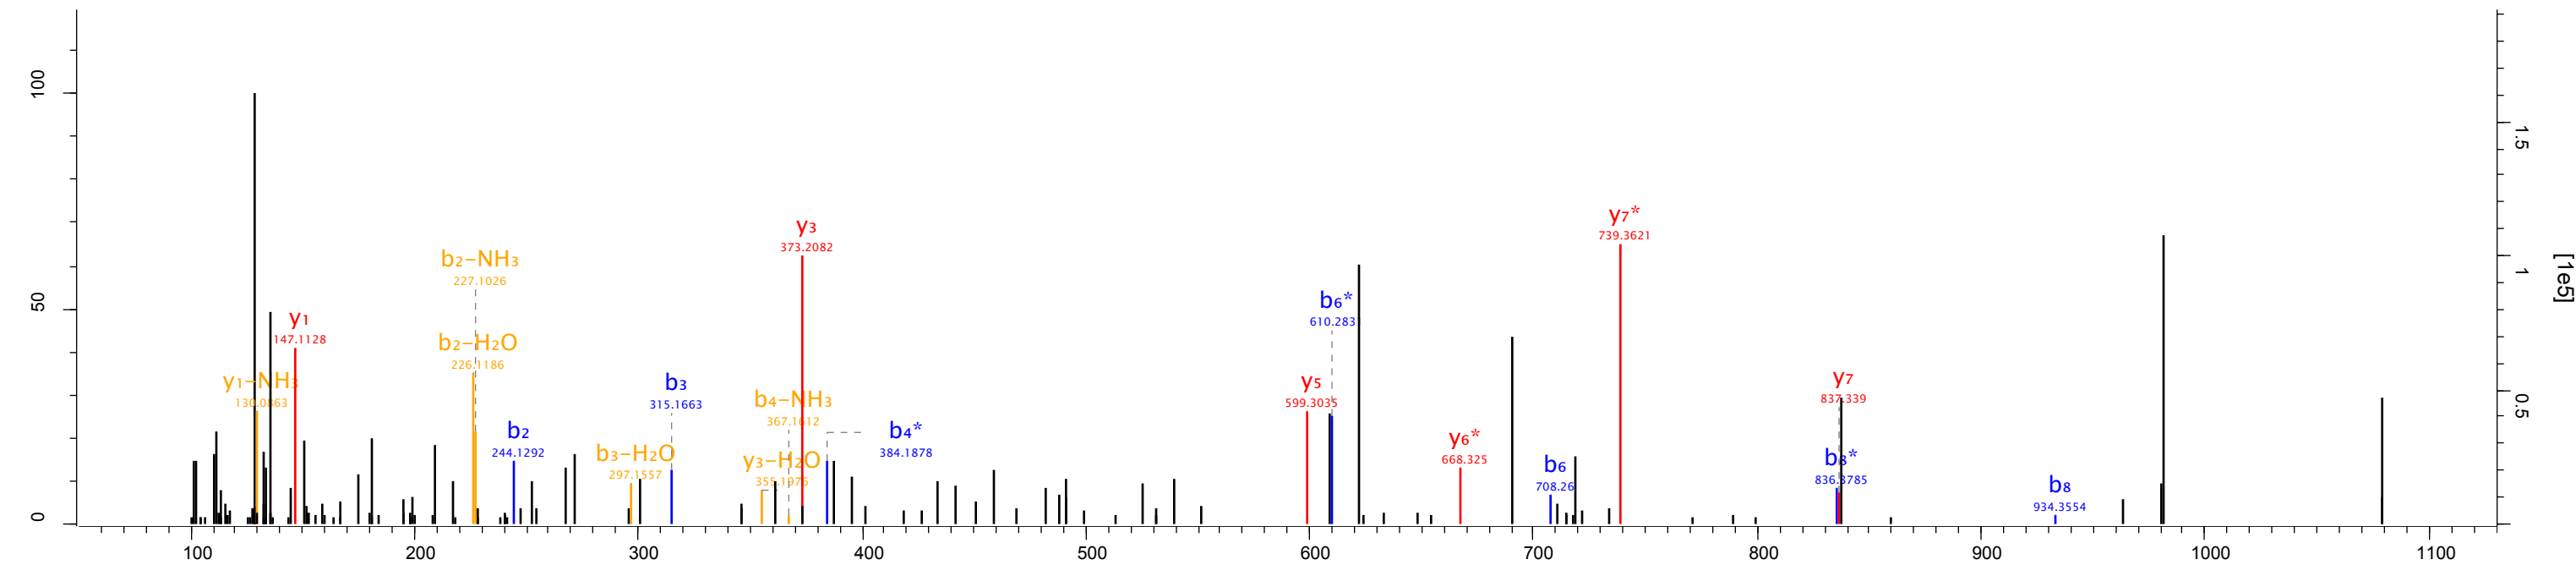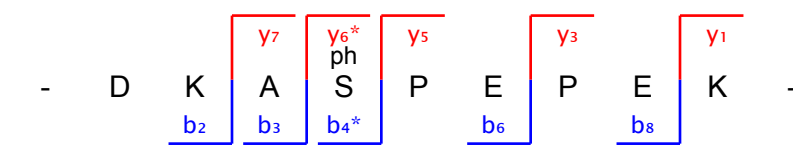

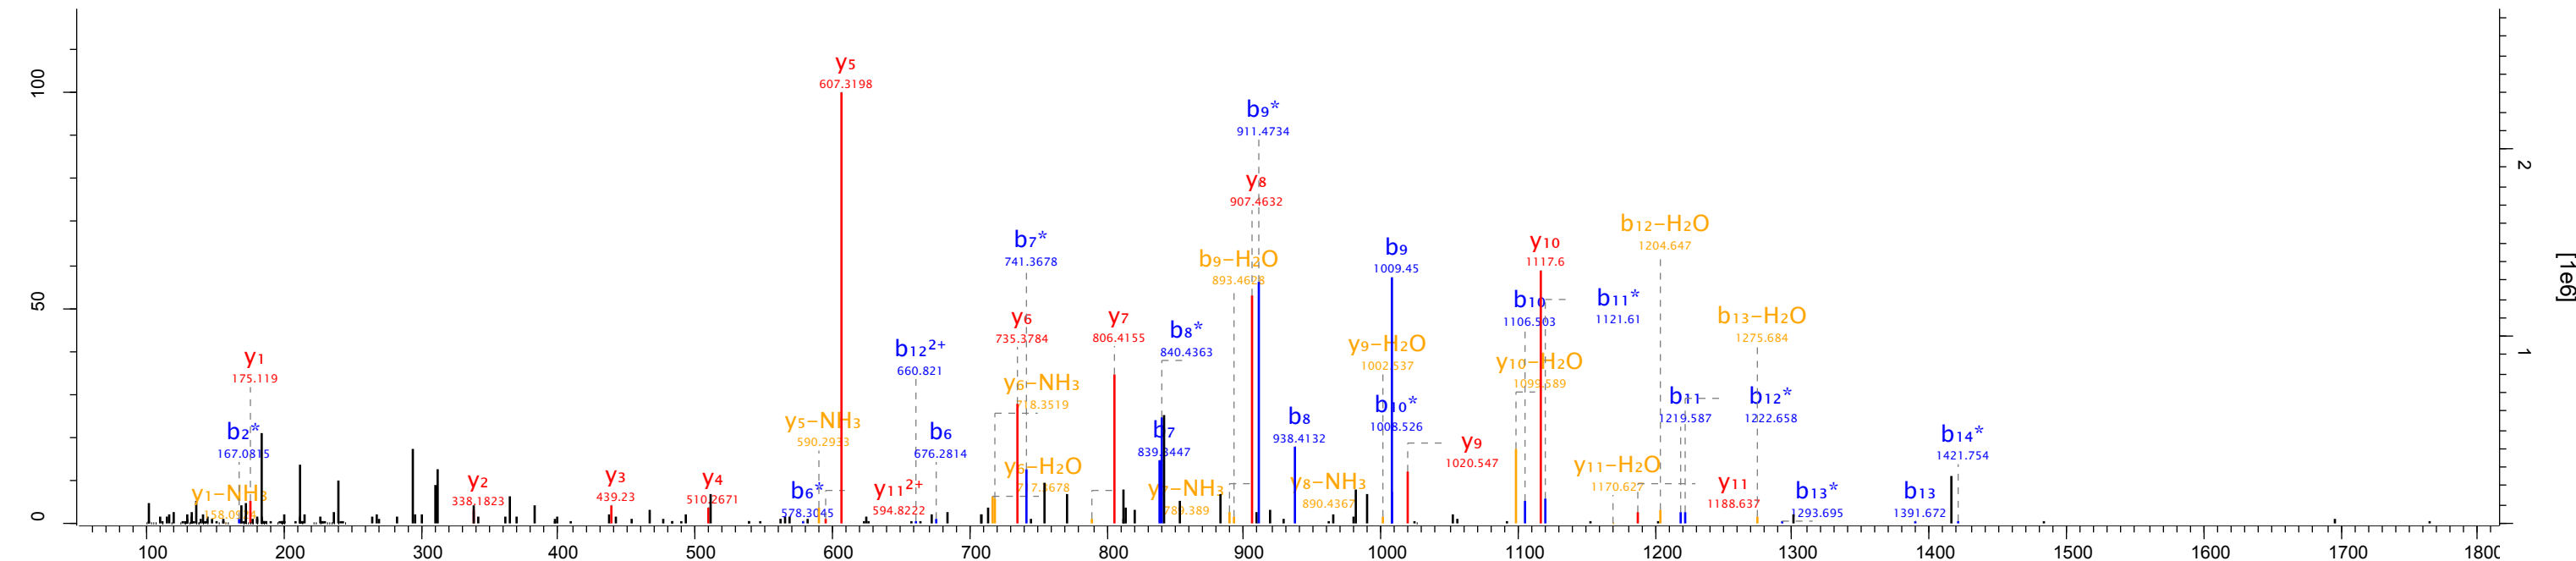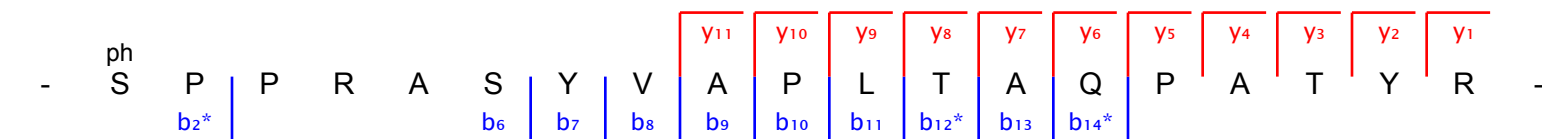

Raw file 20150812\_A375SR\_Phospho\_BR1\_05 Scan 17293 Method FTMS; HCD Score 229.71 m/z 1001.44 Gene names CTNND1

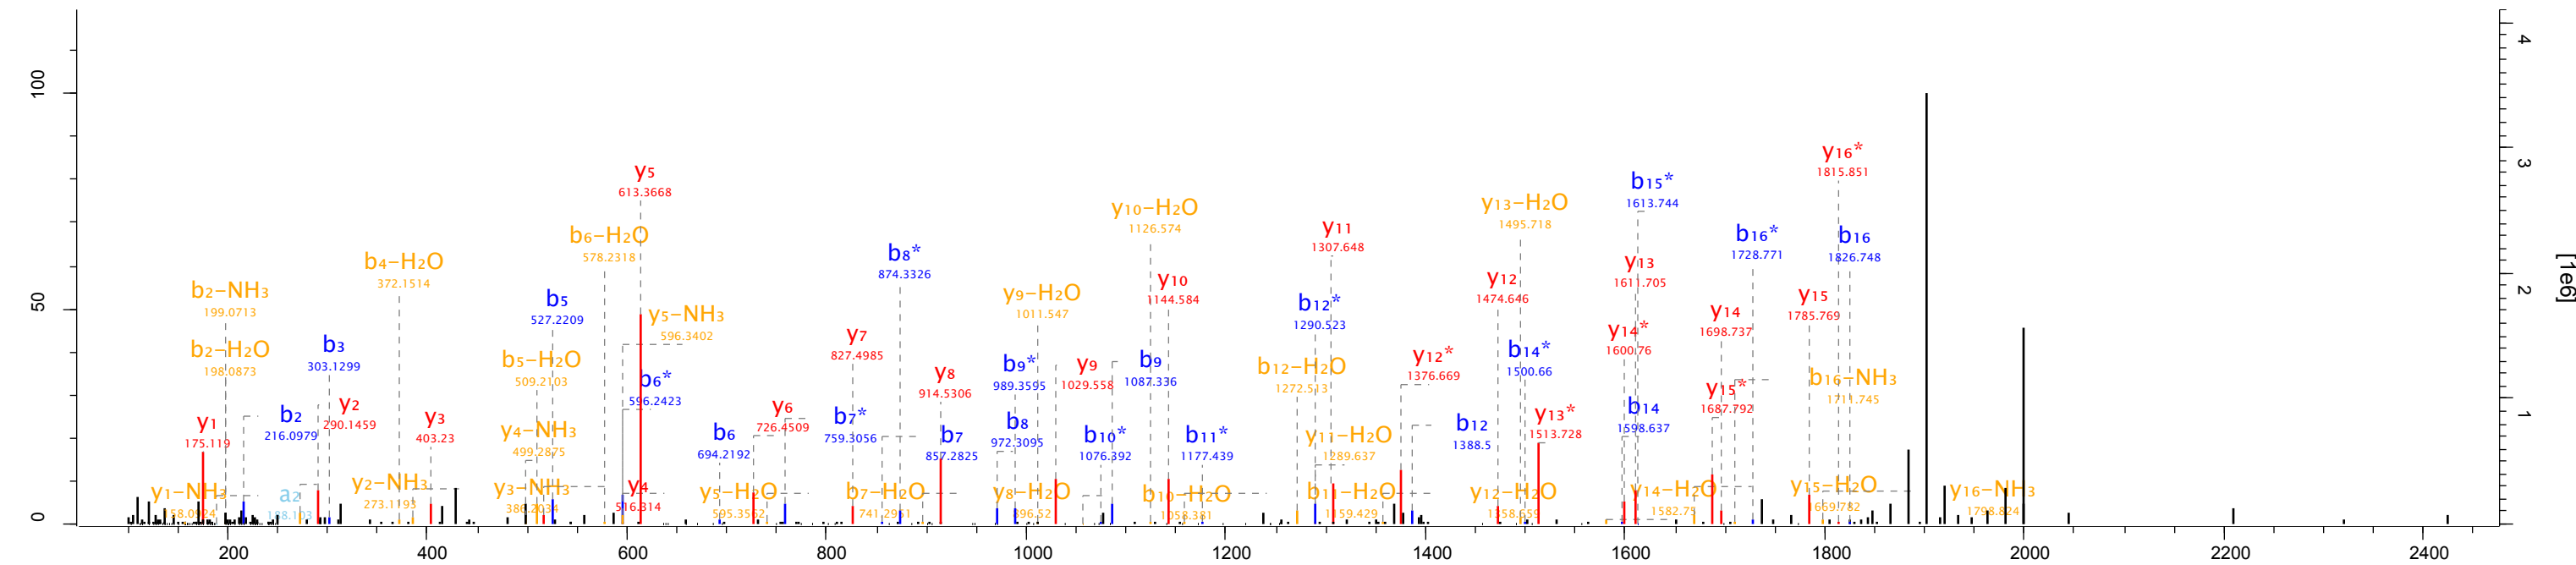

- S Q S S H S Y D D S T L P L I D R -

Fragmentation mapping (b and y ions) is shown below the sequence:

- Q: b2, y16\*
- S: b3, y15
- S: y14
- H: b5, y13
- S: b6, y12 ph
- Y: b7, y11
- D: b8, y10
- D: b9, y9
- S: b10\*, y8
- T: b11\*, y7
- L: b12, y6
- P: y5
- L: b14, y4
- I: b15\*, y3
- D: b16, y2
- R: y1

Raw file: 20150812\_A375SR\_Phospho\_BR1\_05  
 Scan: 18253  
 Method: FTMS; HCD  
 Score: 95  
 m/z: 1077.19  
 Gene names: PTPN23

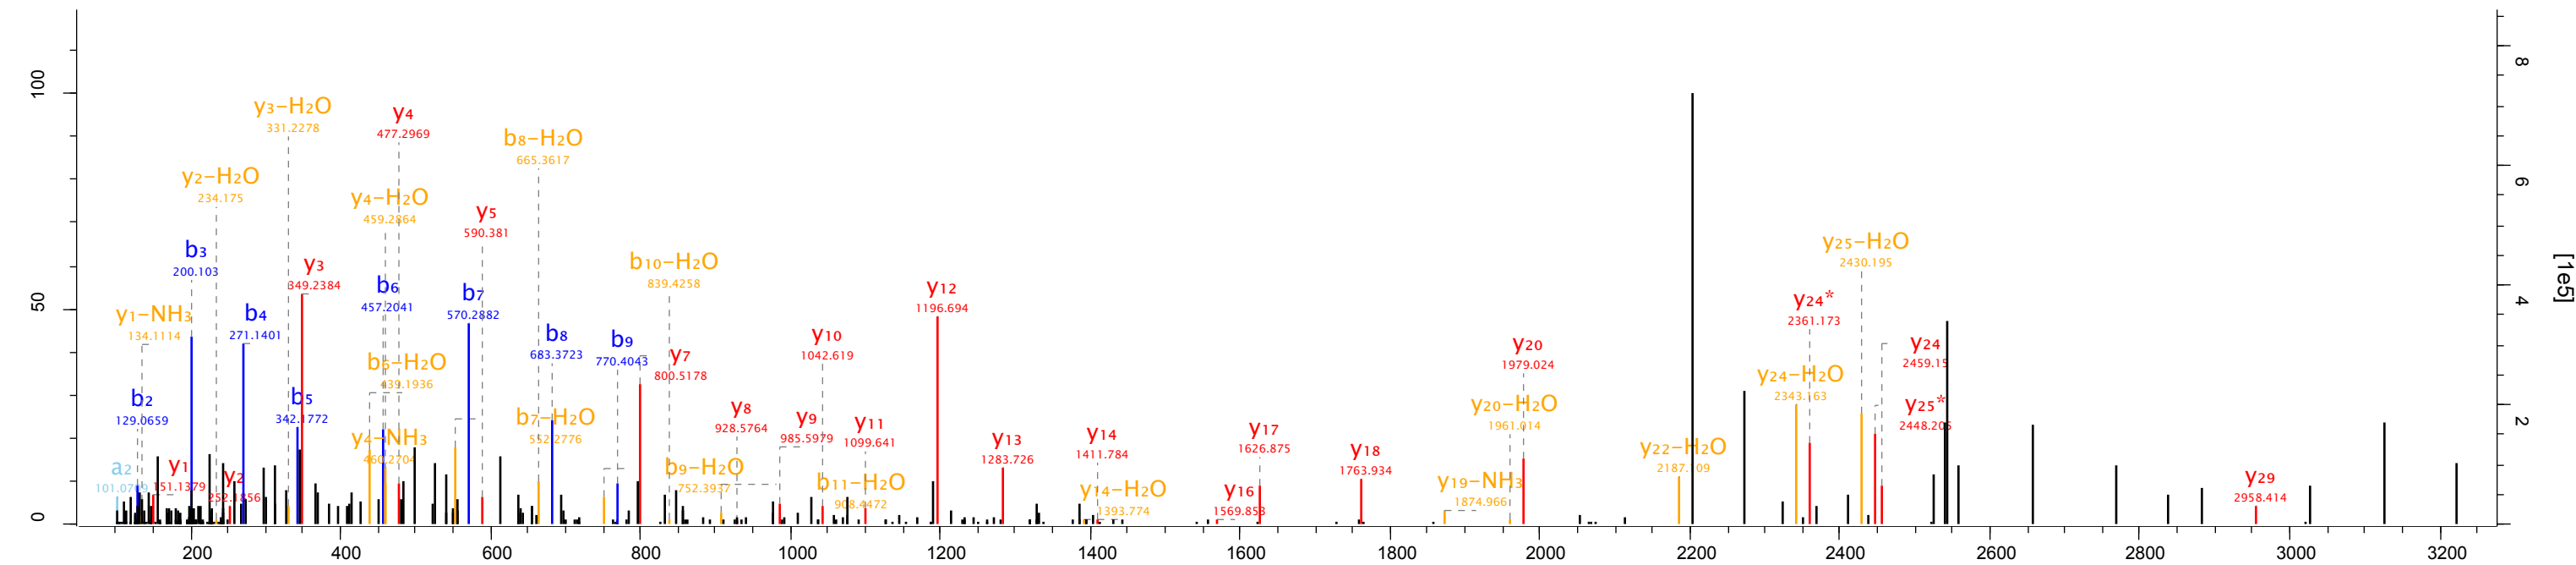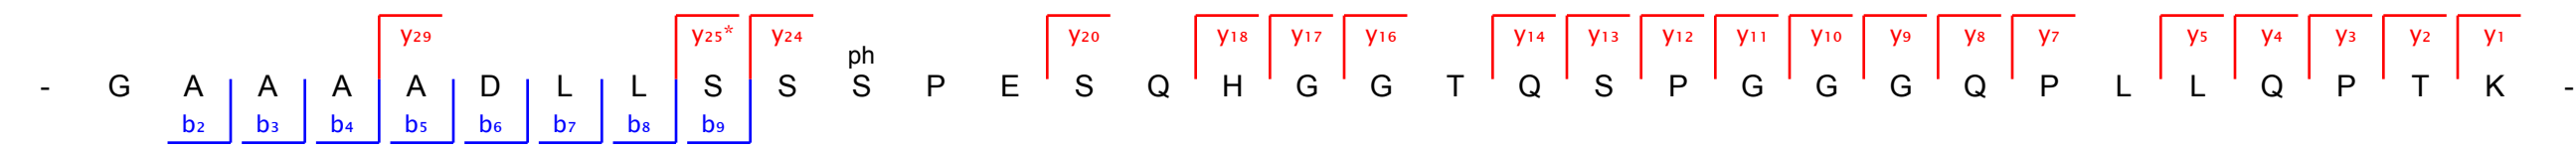

Raw file  
 20150812\_A375SR\_Phospho\_BR1\_05  
 Scan 19633 Method FTMS; HCD Score 123.22 m/z 920.46 Gene names KIF14

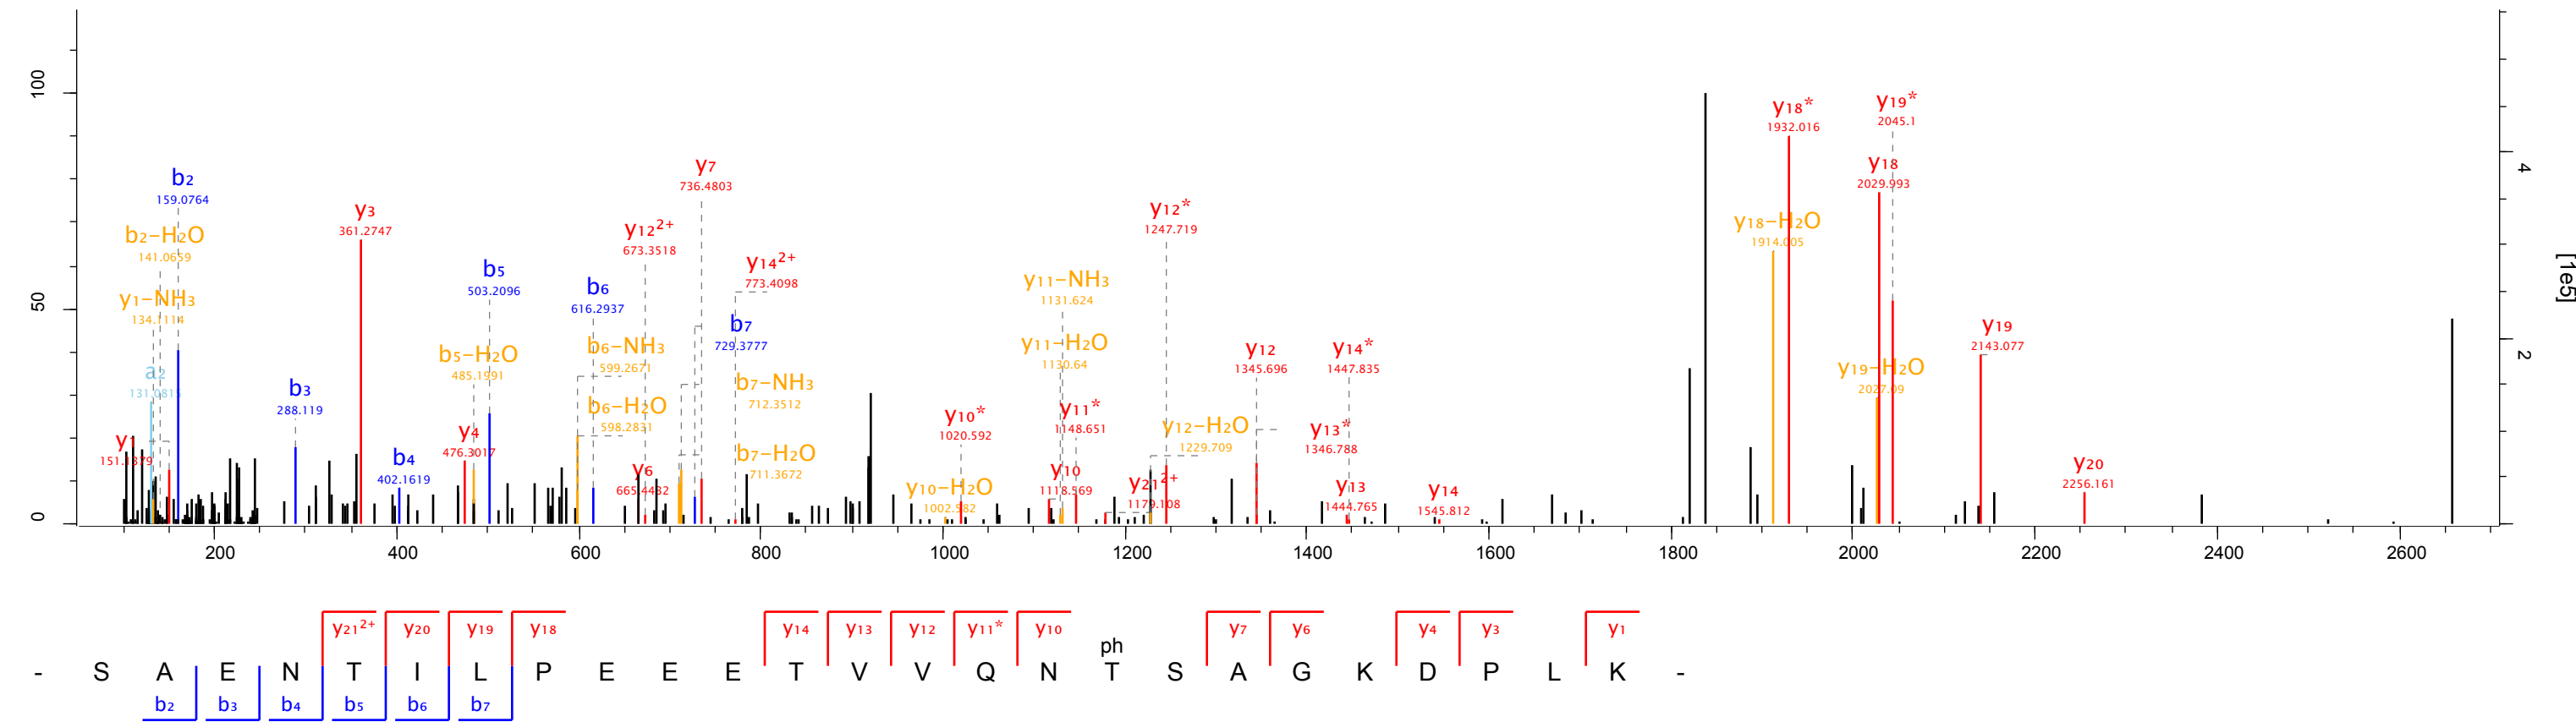

Raw file: 20150812\_A375SR\_Phospho\_BR1\_05  
 Scan: 19923 Method: FTMS; HCD Score: 90.15 m/z: 450.21 Gene names: ARHGAP29

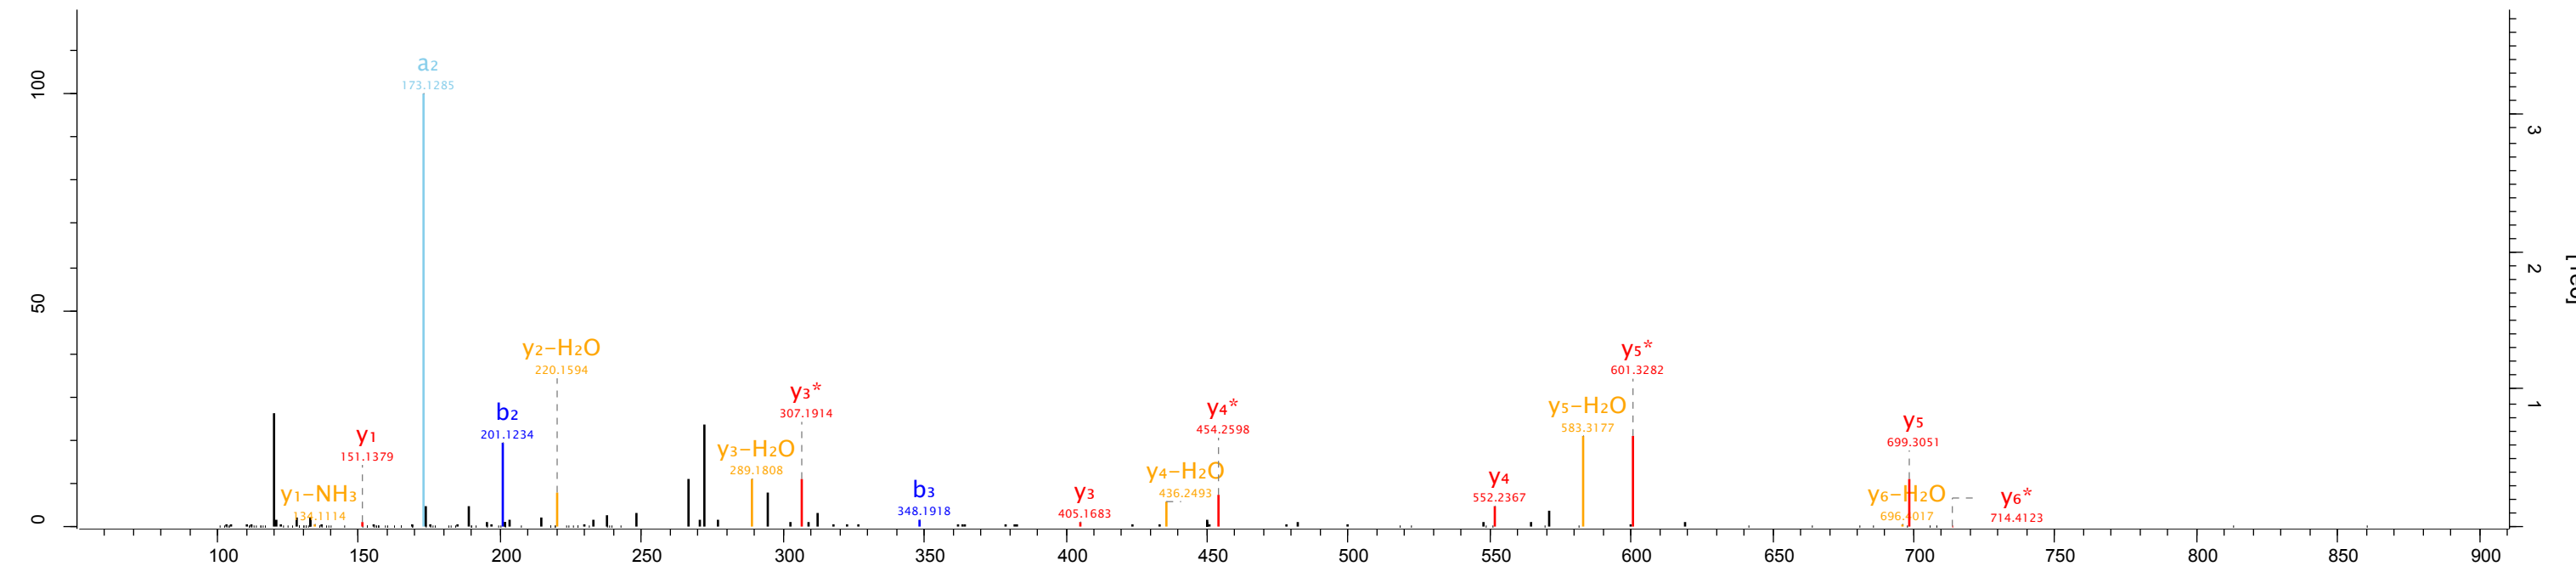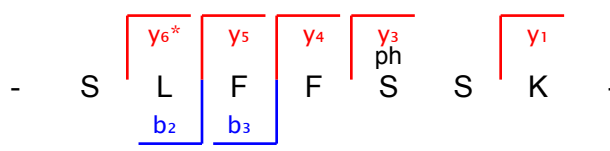



Raw file 20150812\_A375SR\_Phospho\_BR1\_05 Scan 19933 Method FTMS; HCD Score 126.69 m/z 866.34 Gene names FERMT2

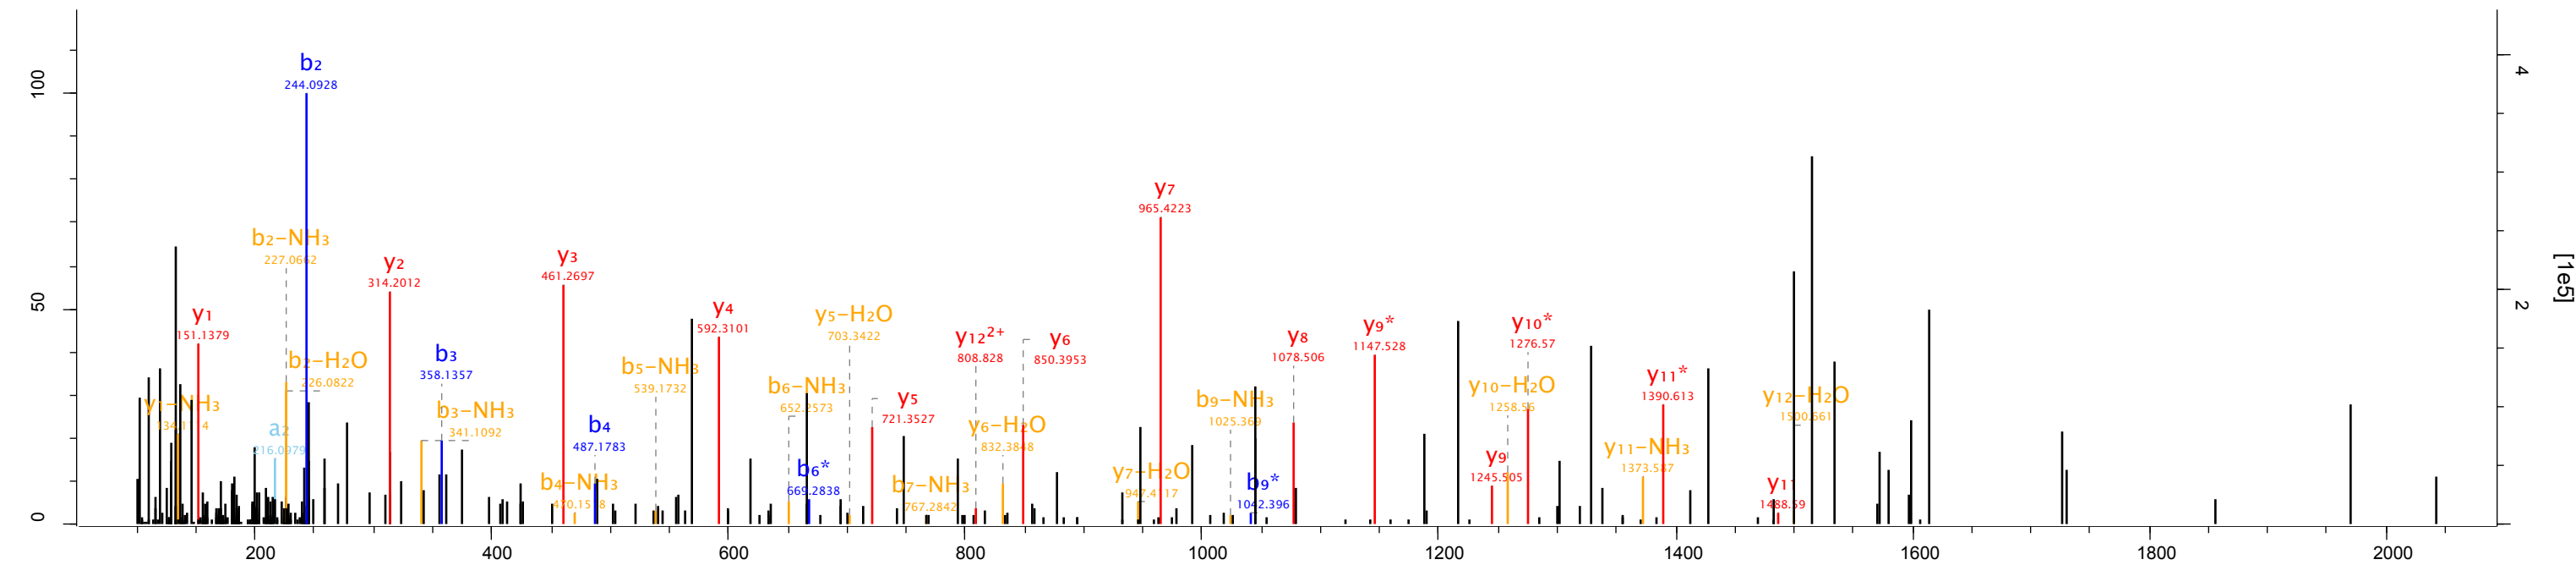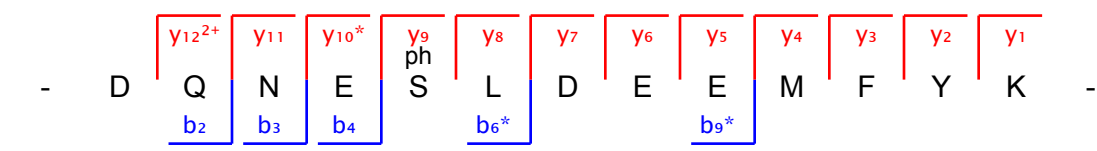

Raw file: 20150812\_A375SR\_Phospho\_BR1\_05  
 Scan: 20763 Method: FTMS; HCD Score: 138.46 m/z: 855.93 Gene names: ASXL2

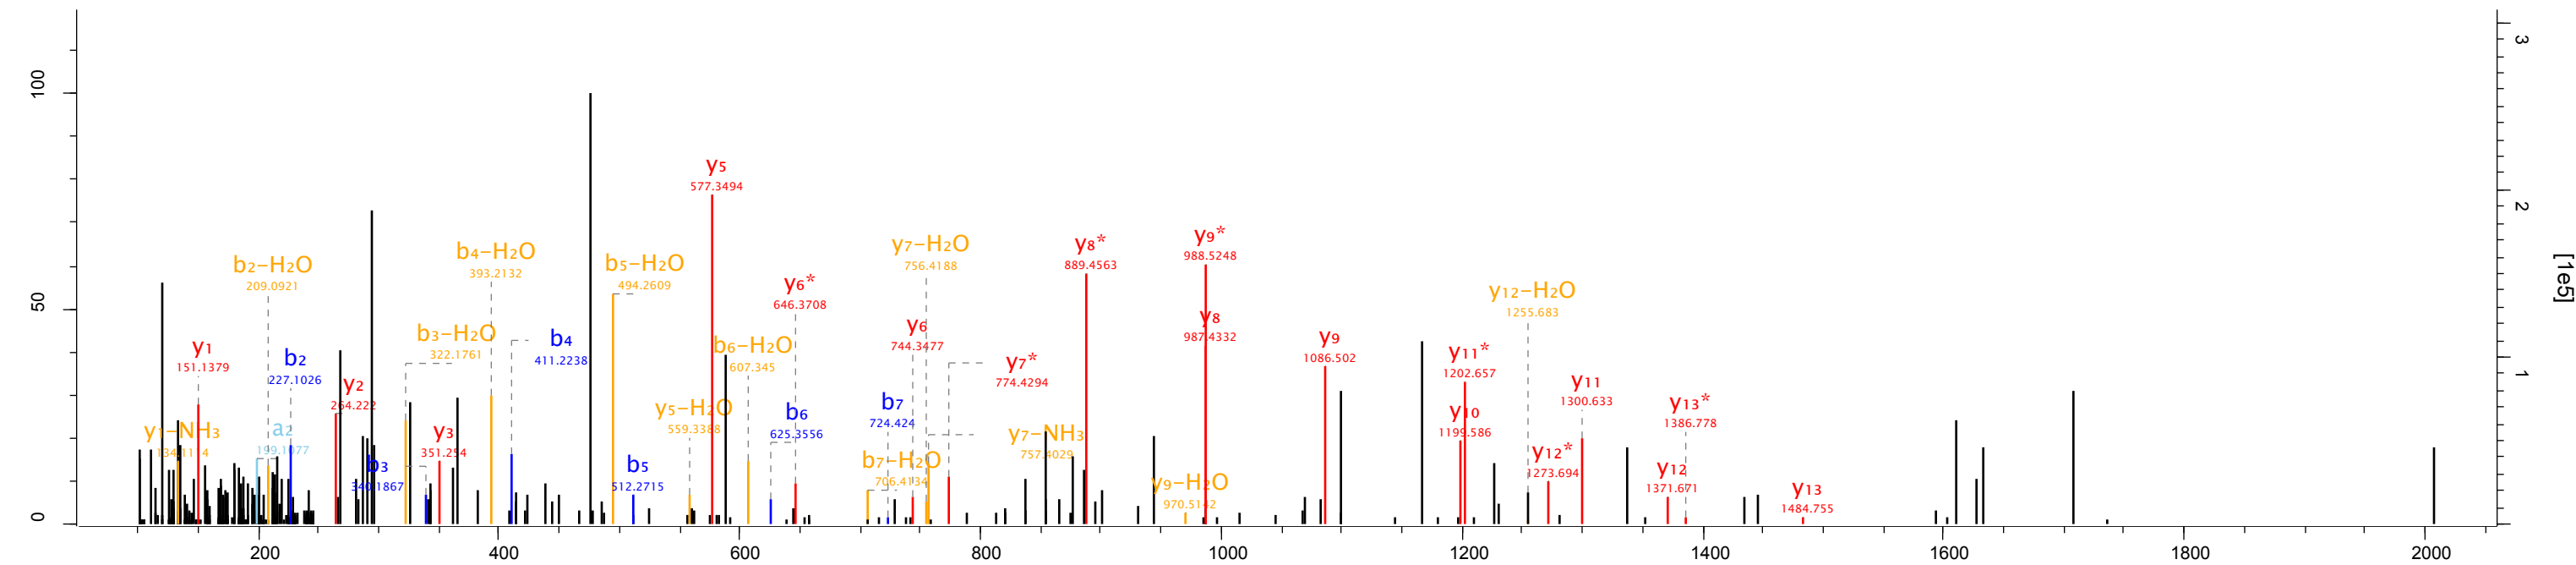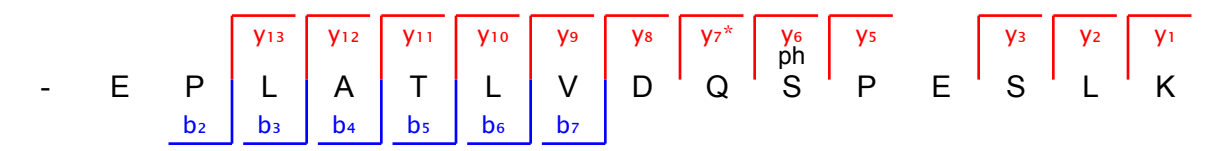

Raw file: 20150812\_A375SR\_Phospho\_BR1\_05  
 Scan: 20793 Method: FTMS; HCD Score: 143.5 m/z: 1167.54 Gene names: EIF4EBP1

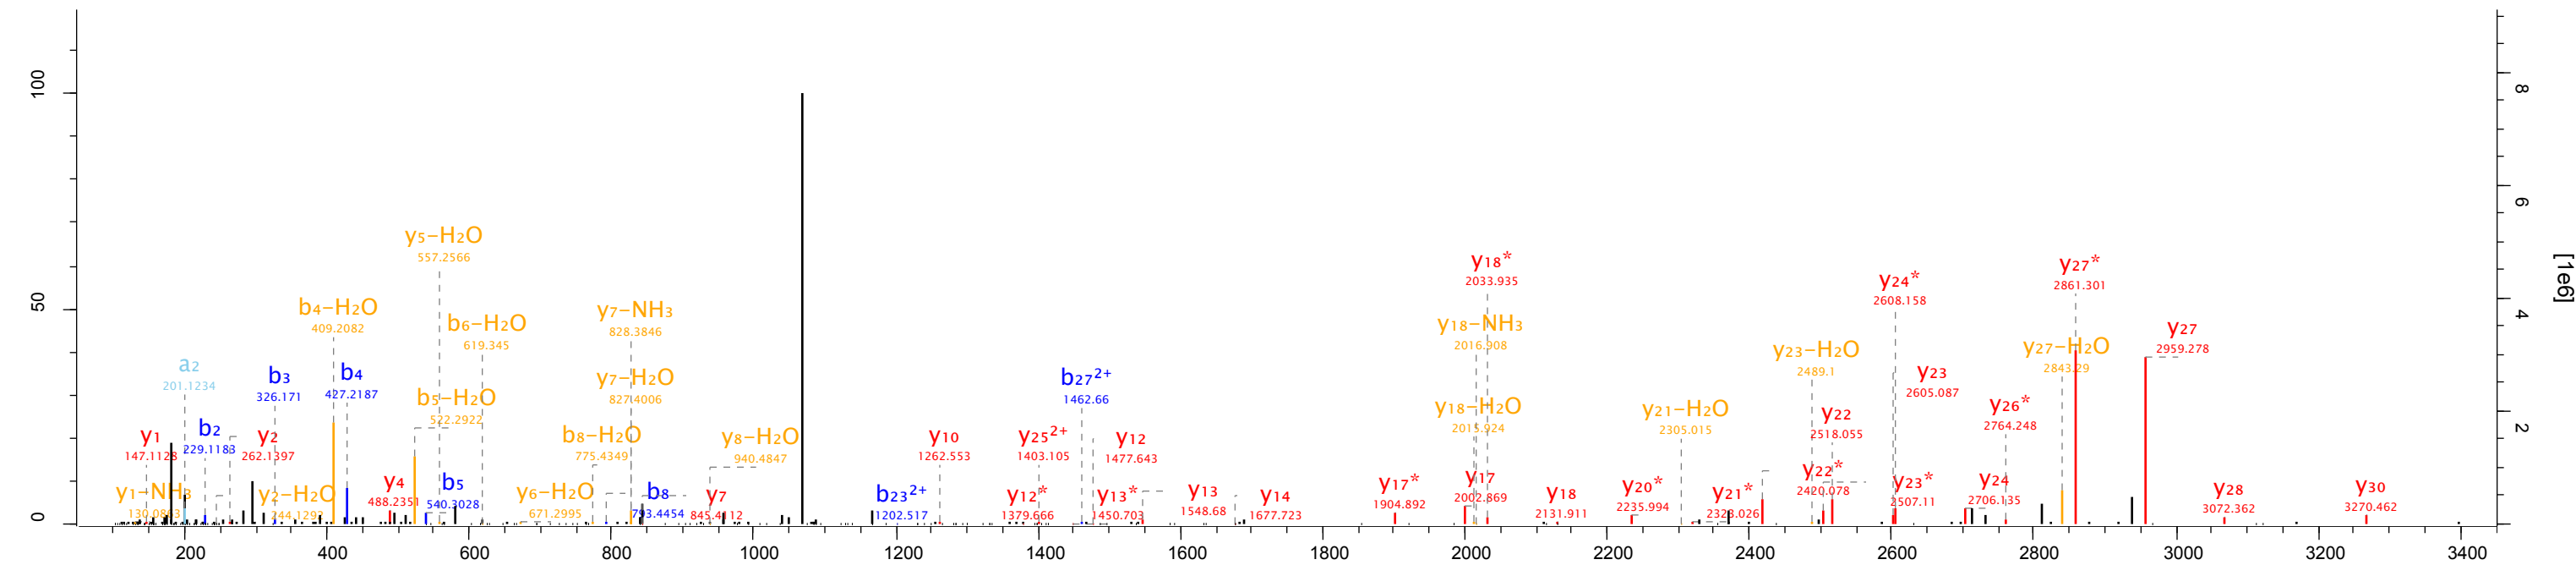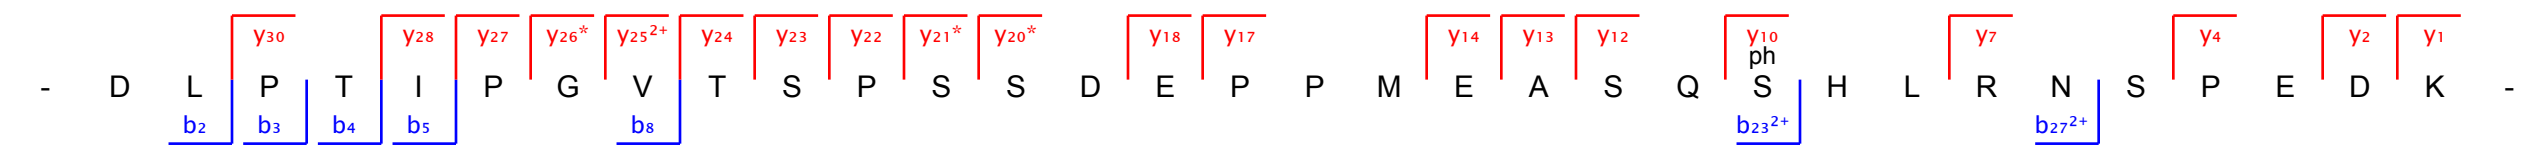

Raw file  
20150812\_A375SR\_Phospho\_BR1\_05

Scan 20803 Method FTMS; HCD Score 183.07 m/z 1044.03 Gene names KLC4

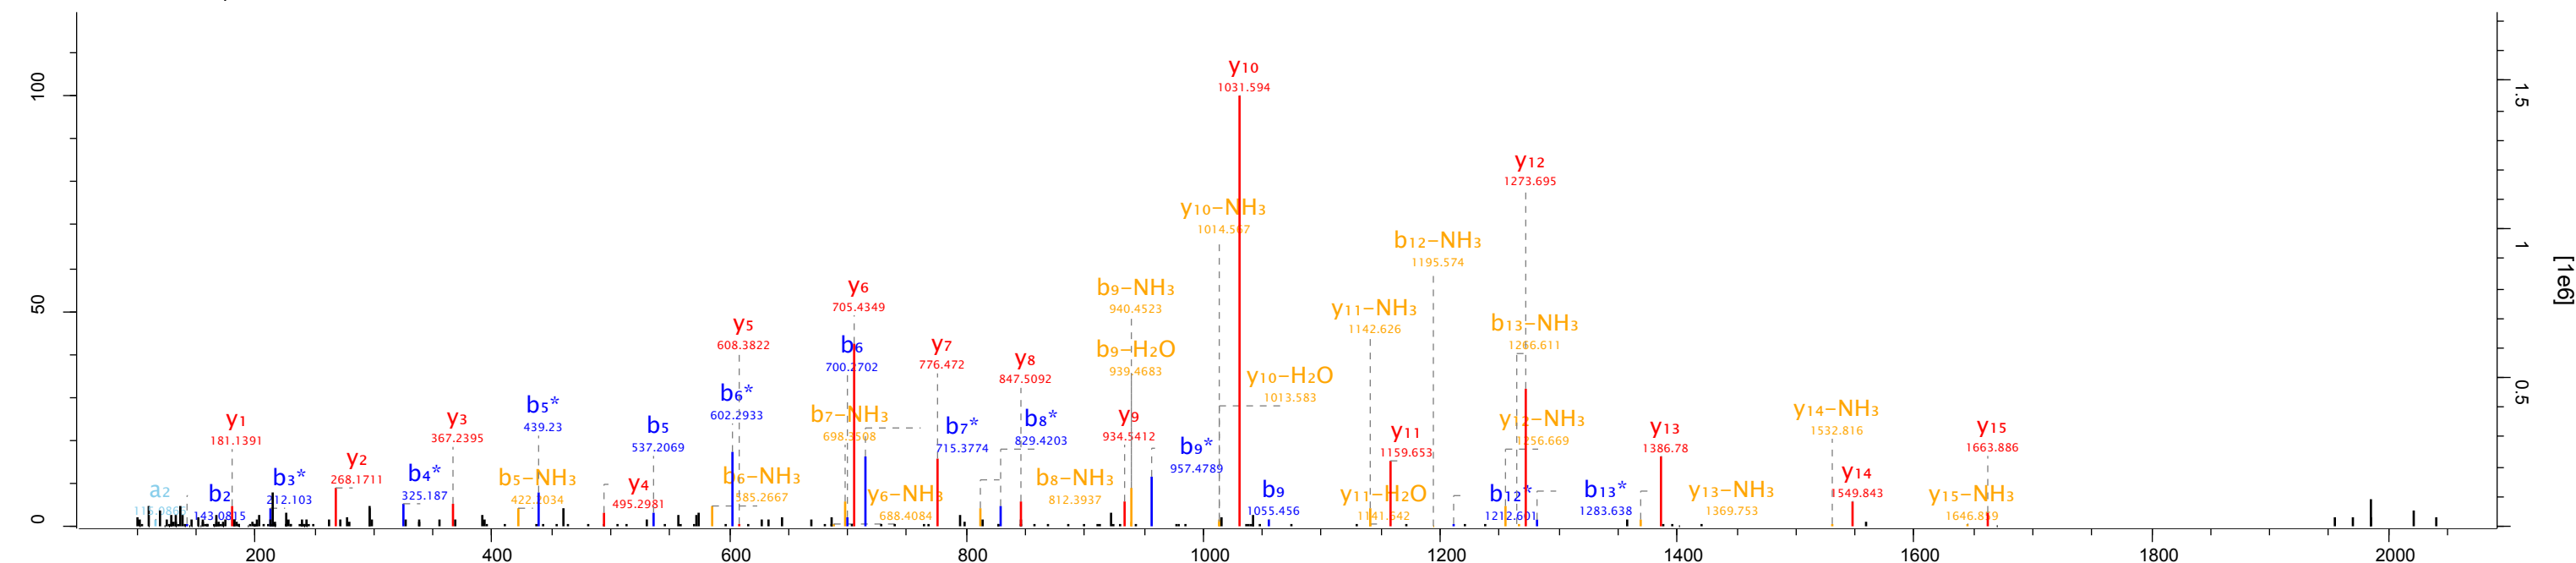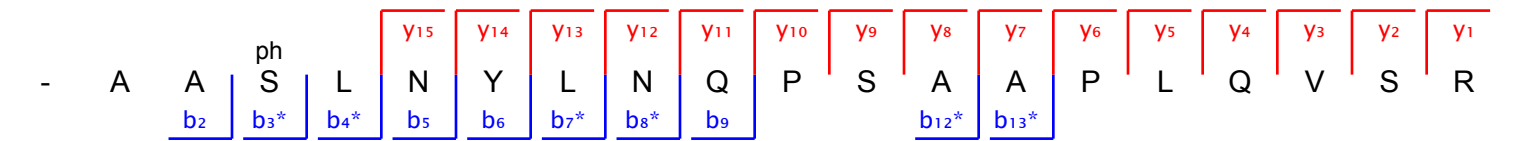

Raw file: 20150812\_A375SR\_Phospho\_BR1\_05  
 Scan: 21833 Method: FTMS; HCD Score: 97.94 m/z: 1052.1 Gene names: DBN1

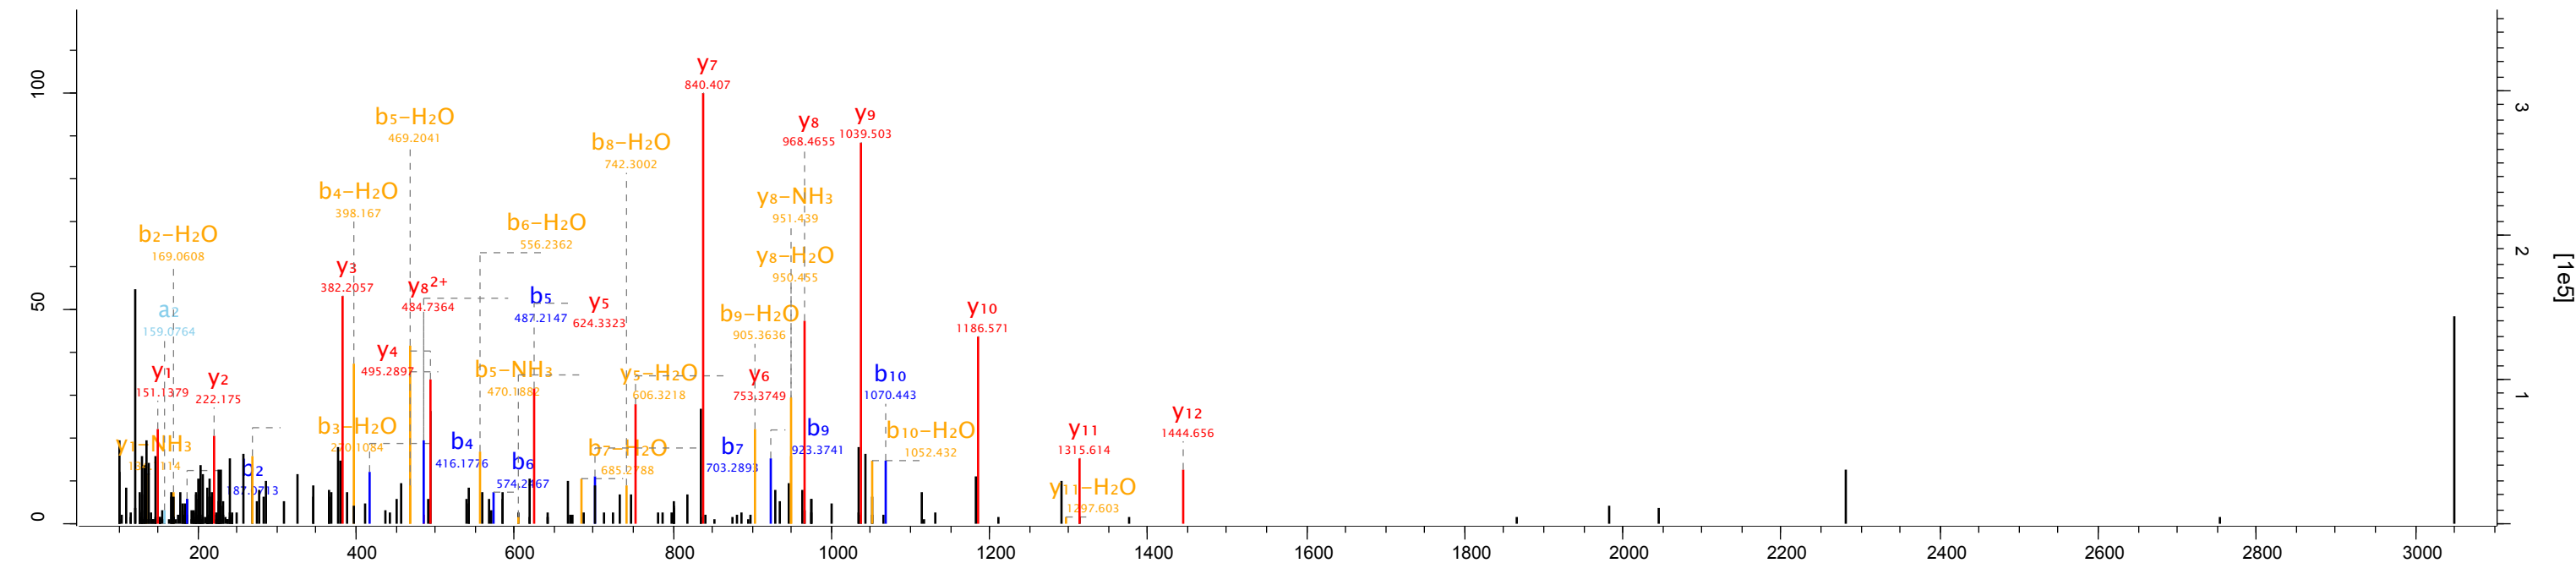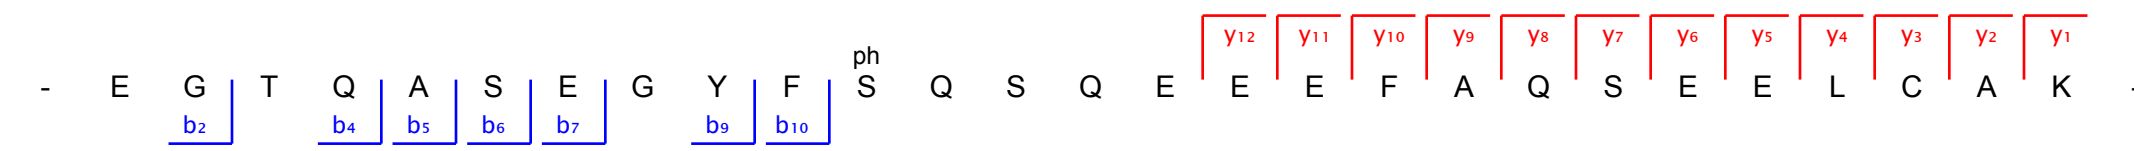

Raw file 20150812\_A375SR\_Phospho\_BR1\_05 Scan 21933 Method FTMS; HCD Score 187.98 m/z 930.39 Gene names TFIP11

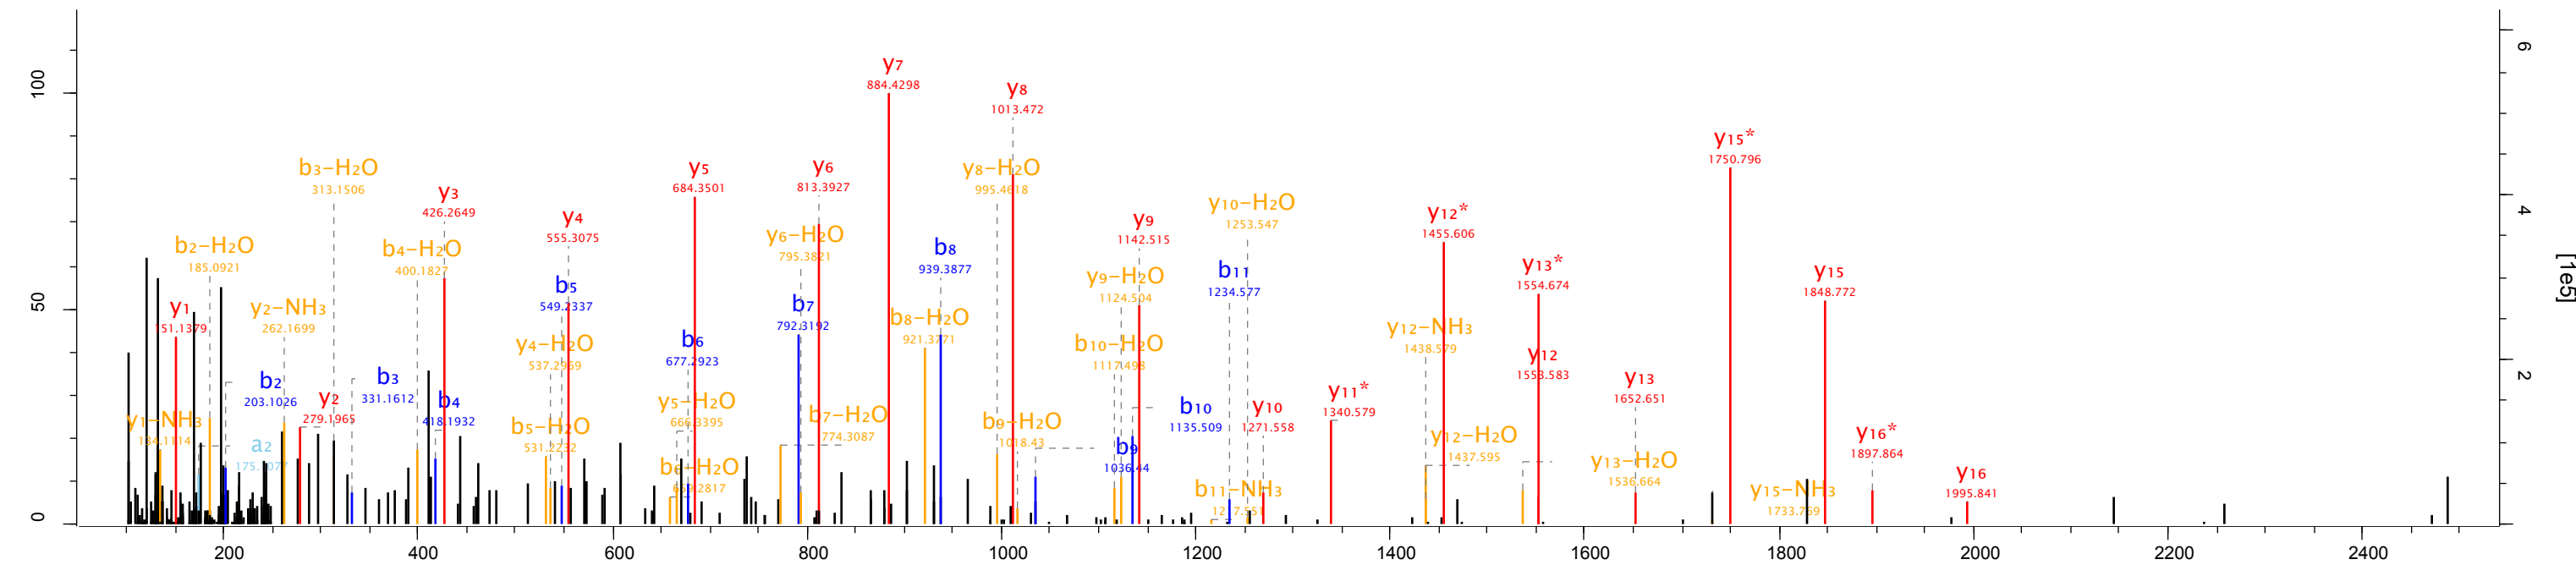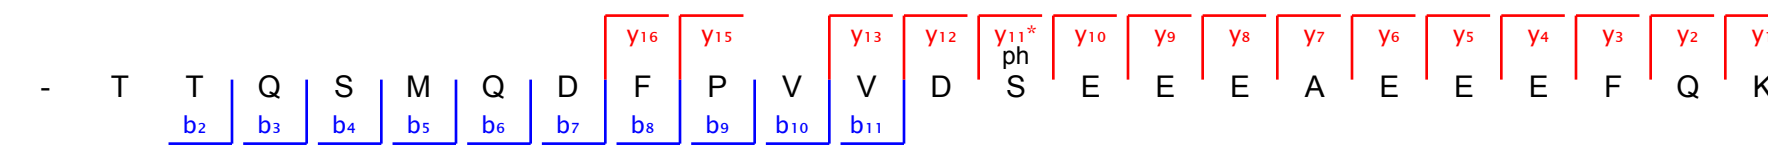

Raw file: 20150812\_A375SR\_Phospho\_BR1\_05  
 Scan: 22453 Method: FTMS; HCD Score: 90.91 m/z: 933.09 Gene names: RALGAPA1

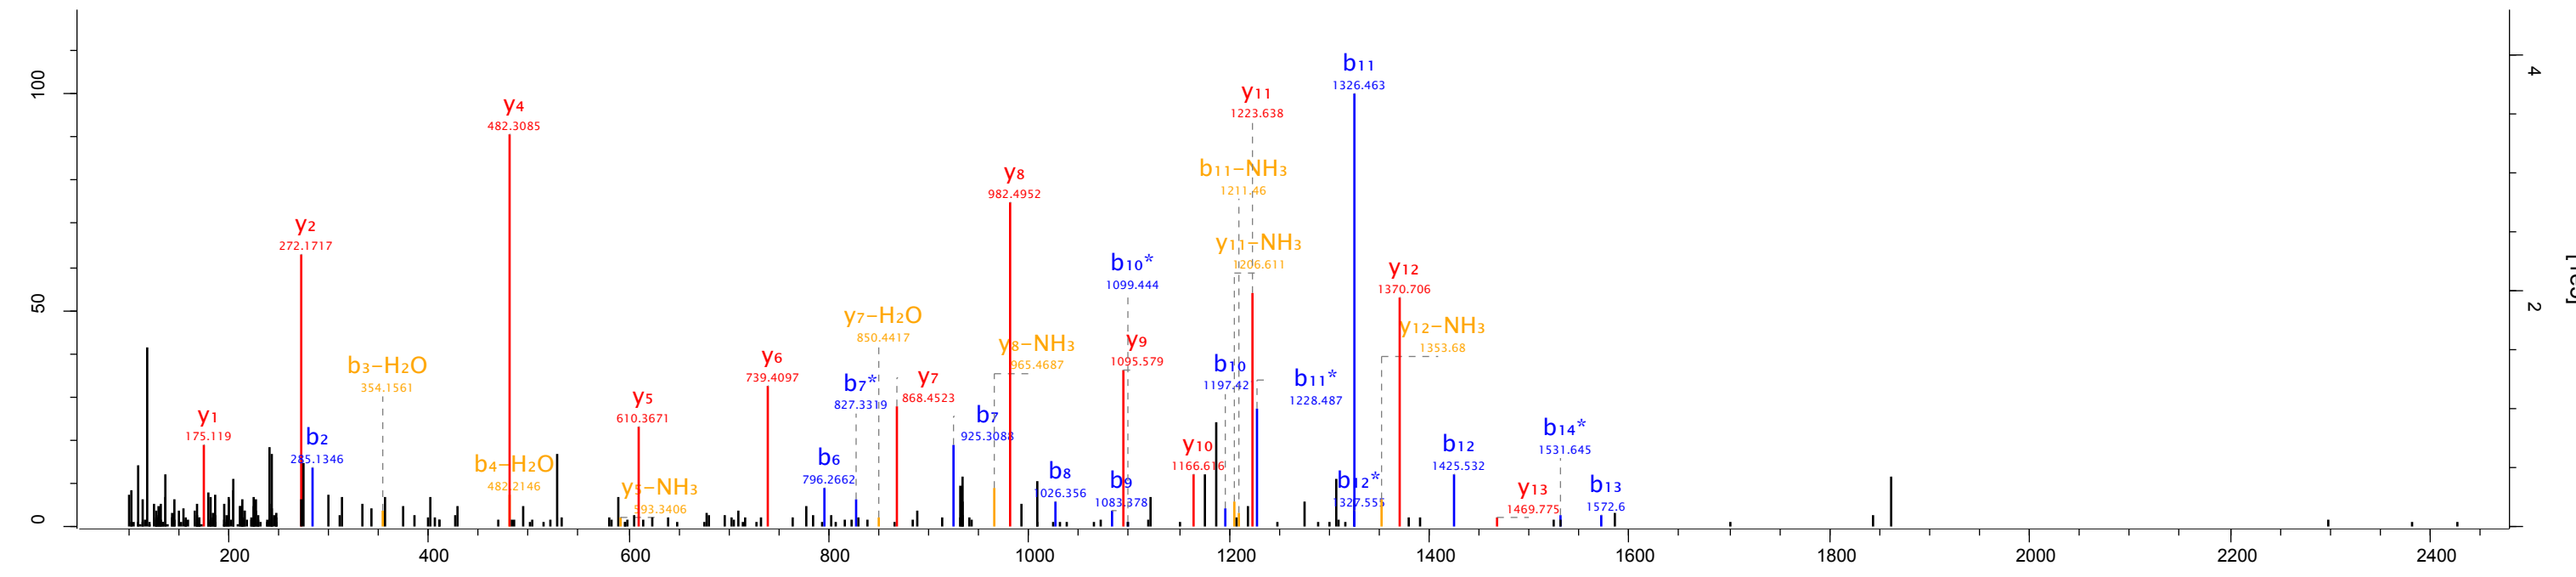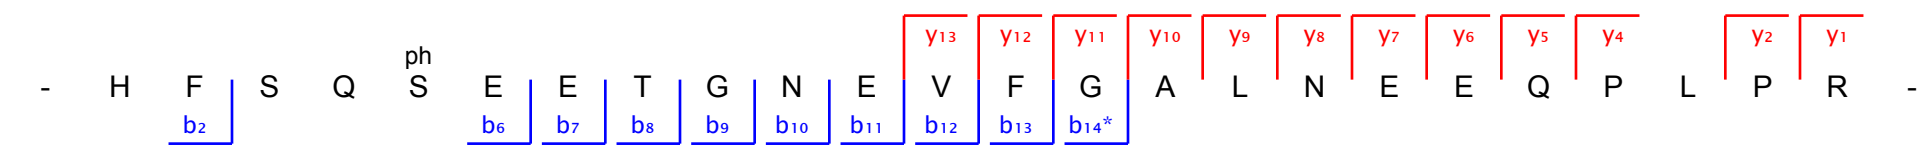

Raw file: 20150812\_A375SR\_Phospho\_BR1\_05  
 Scan: 23583 Method: FTMS; HCD Score: 154.86 m/z: 810.41 Gene names: NUMA1

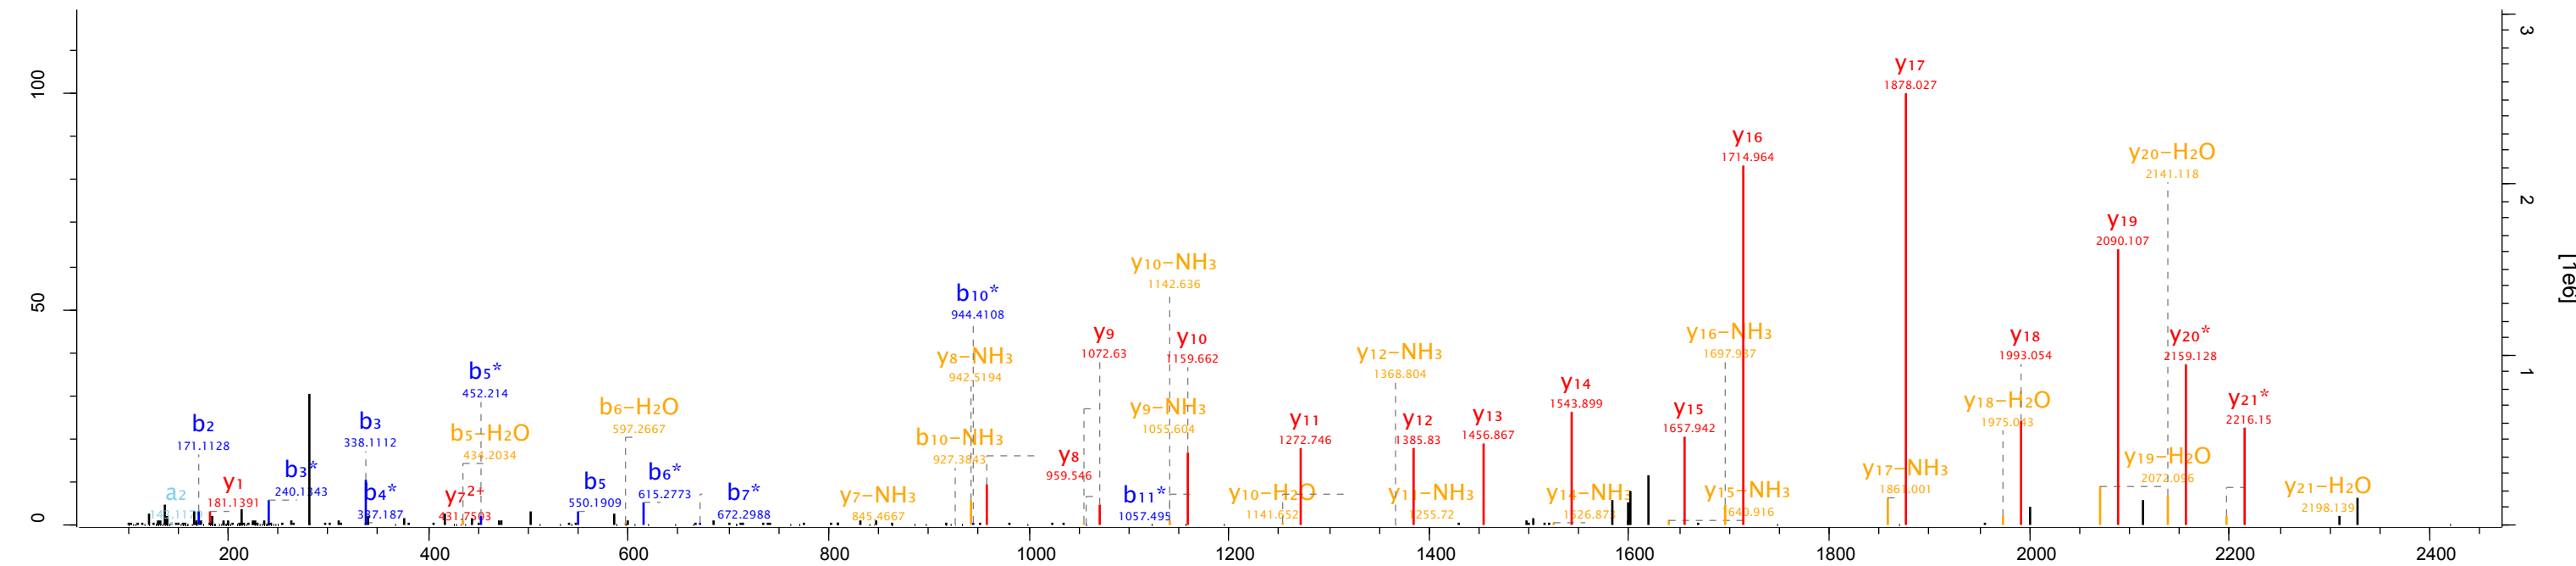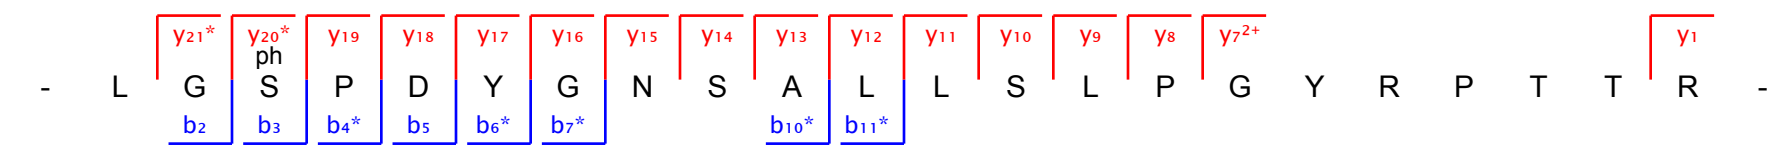



Raw file  
 20150812\_A375SR\_Phospho\_BR1\_05  
 Scan 23703 Method FTMS; HCD Score 101.47 m/z 1212.53 Gene names DDX39A

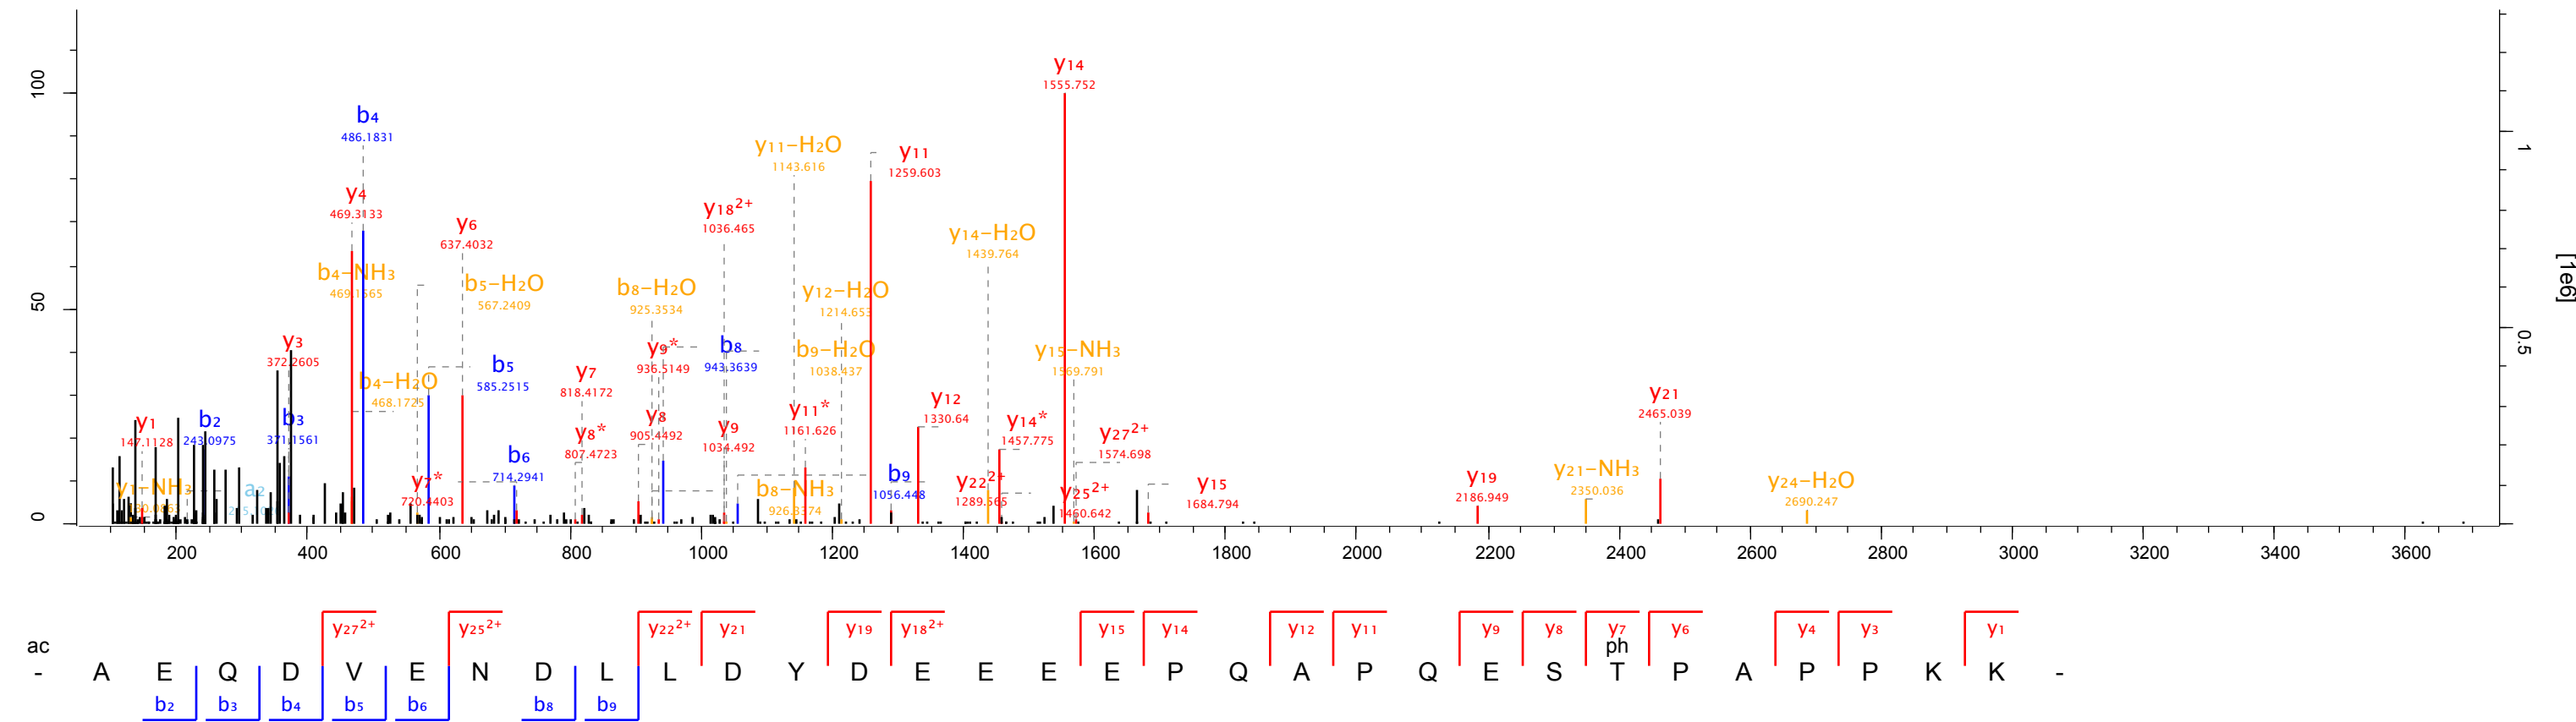

Raw file: 20150812\_A375SR\_Phospho\_BR1\_05  
 Scan: 2403 Method: FTMS; HCD Score: 157.37 m/z: 695.84 Gene names: PML

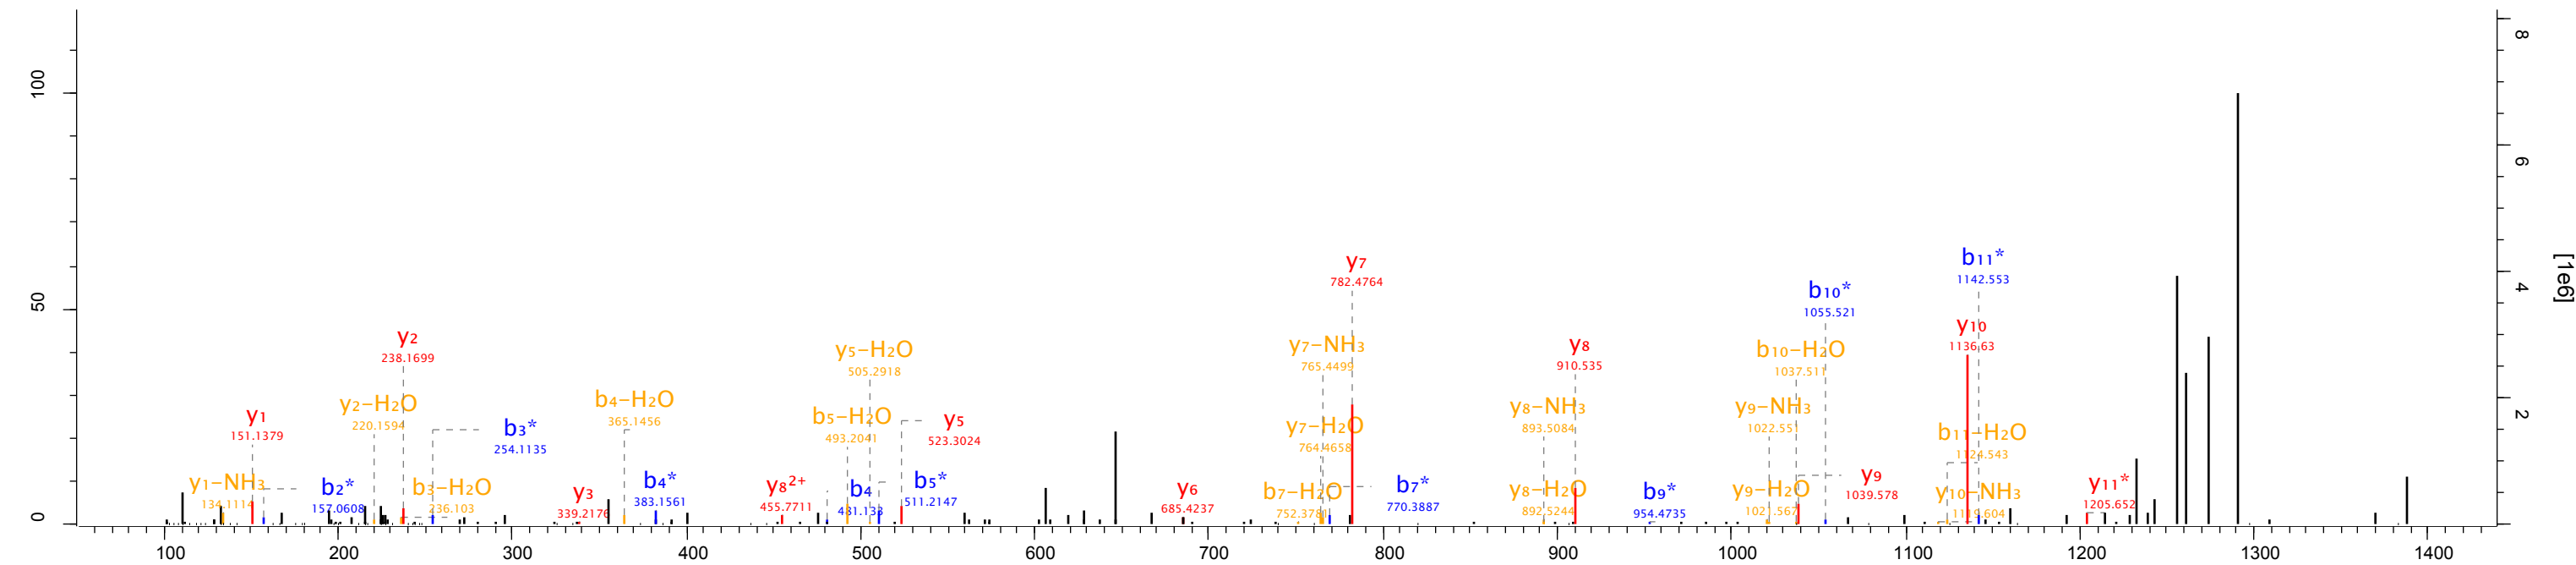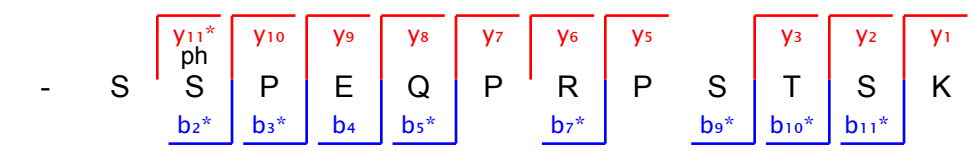

Raw file: 20150812\_A375SR\_Phospho\_BR1\_05  
 Scan: 25383 Method: FTMS; HCD Score: 79.07 m/z: 1211.29 Gene names: MAP1A

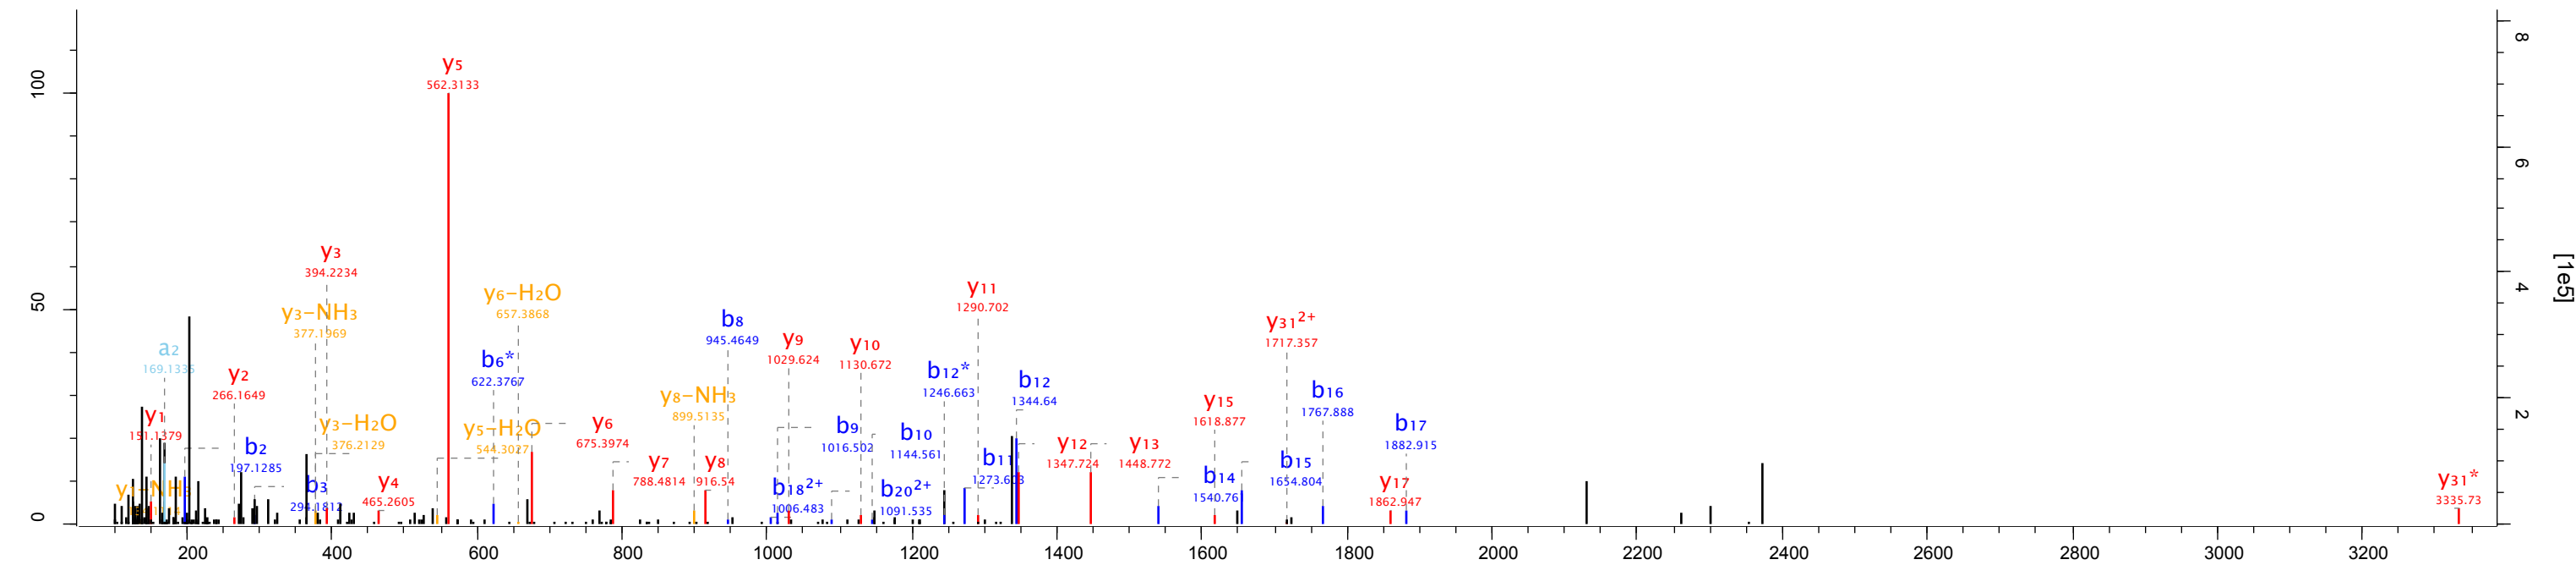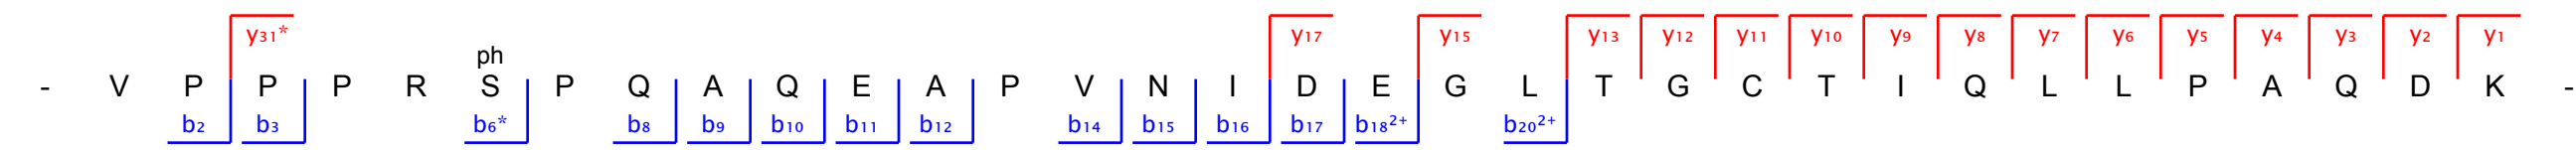

Raw file: 20150812\_A375SR\_Phospho\_BR1\_05  
 Scan: 2923 Method: FTMS; HCD Score: 159.44 m/z: 732.34 Gene names: ERC1

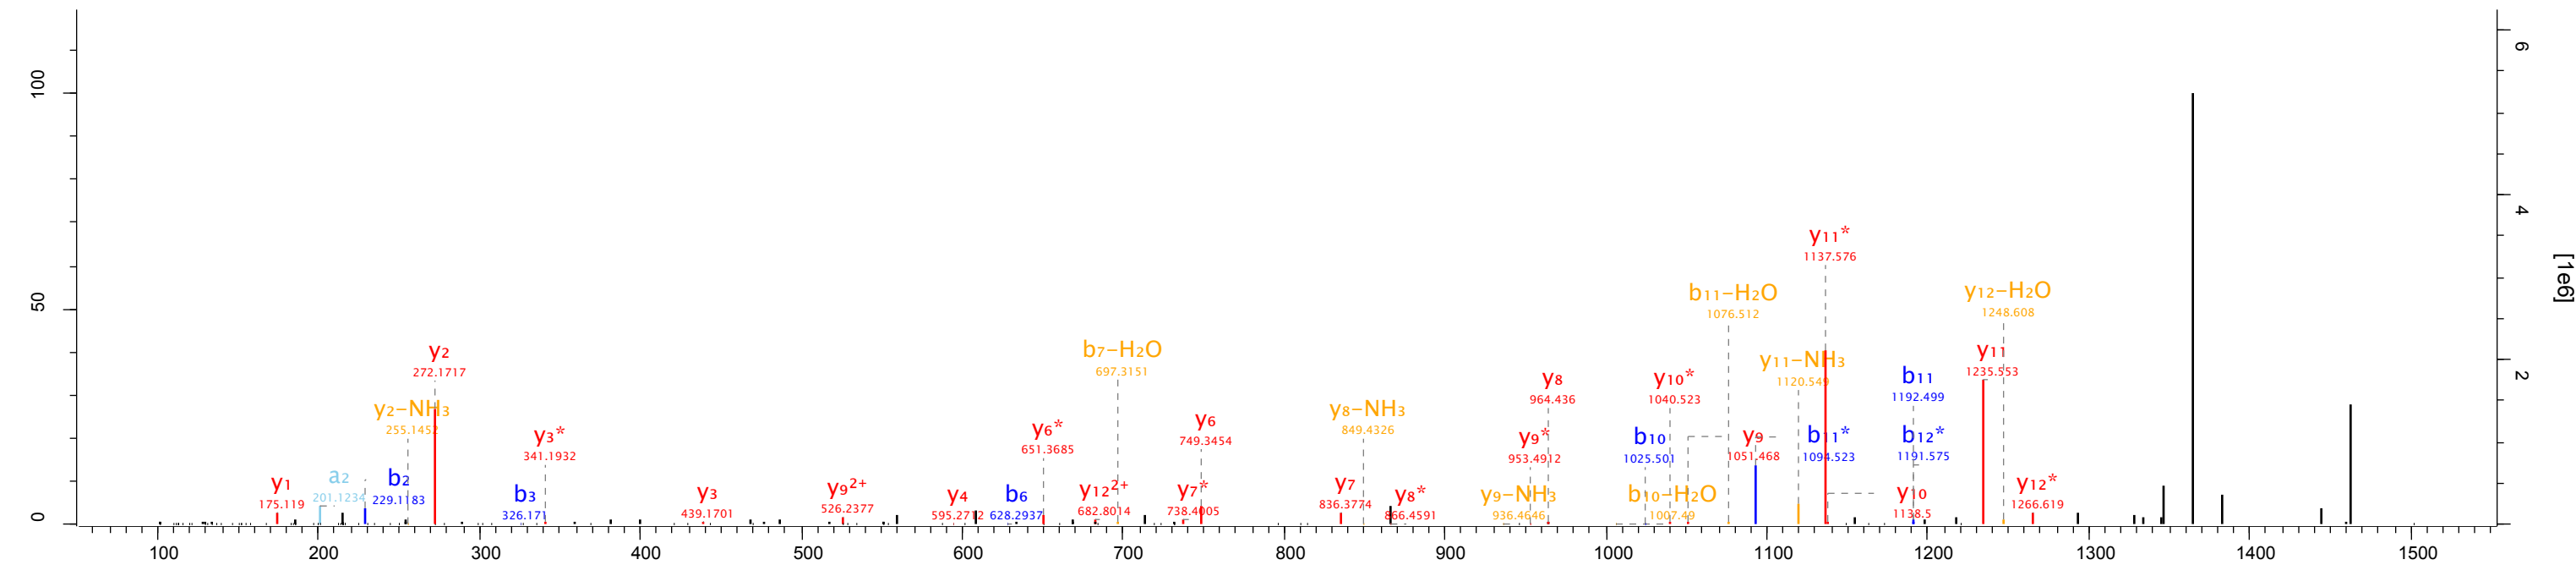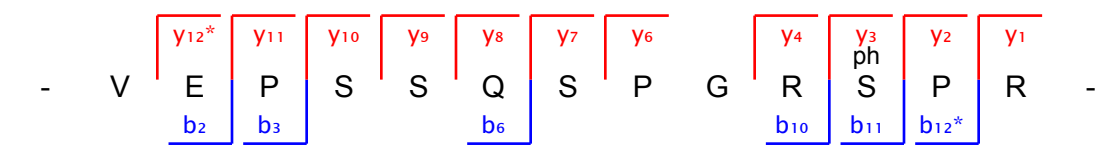

Raw file: 20150812\_A375SR\_Phospho\_BR1\_05  
 Scan: 3983 Method: FTMS; HCD Score: 95.66 m/z: 648.8 Gene names: POLR2M;GCOM1;MYZAP

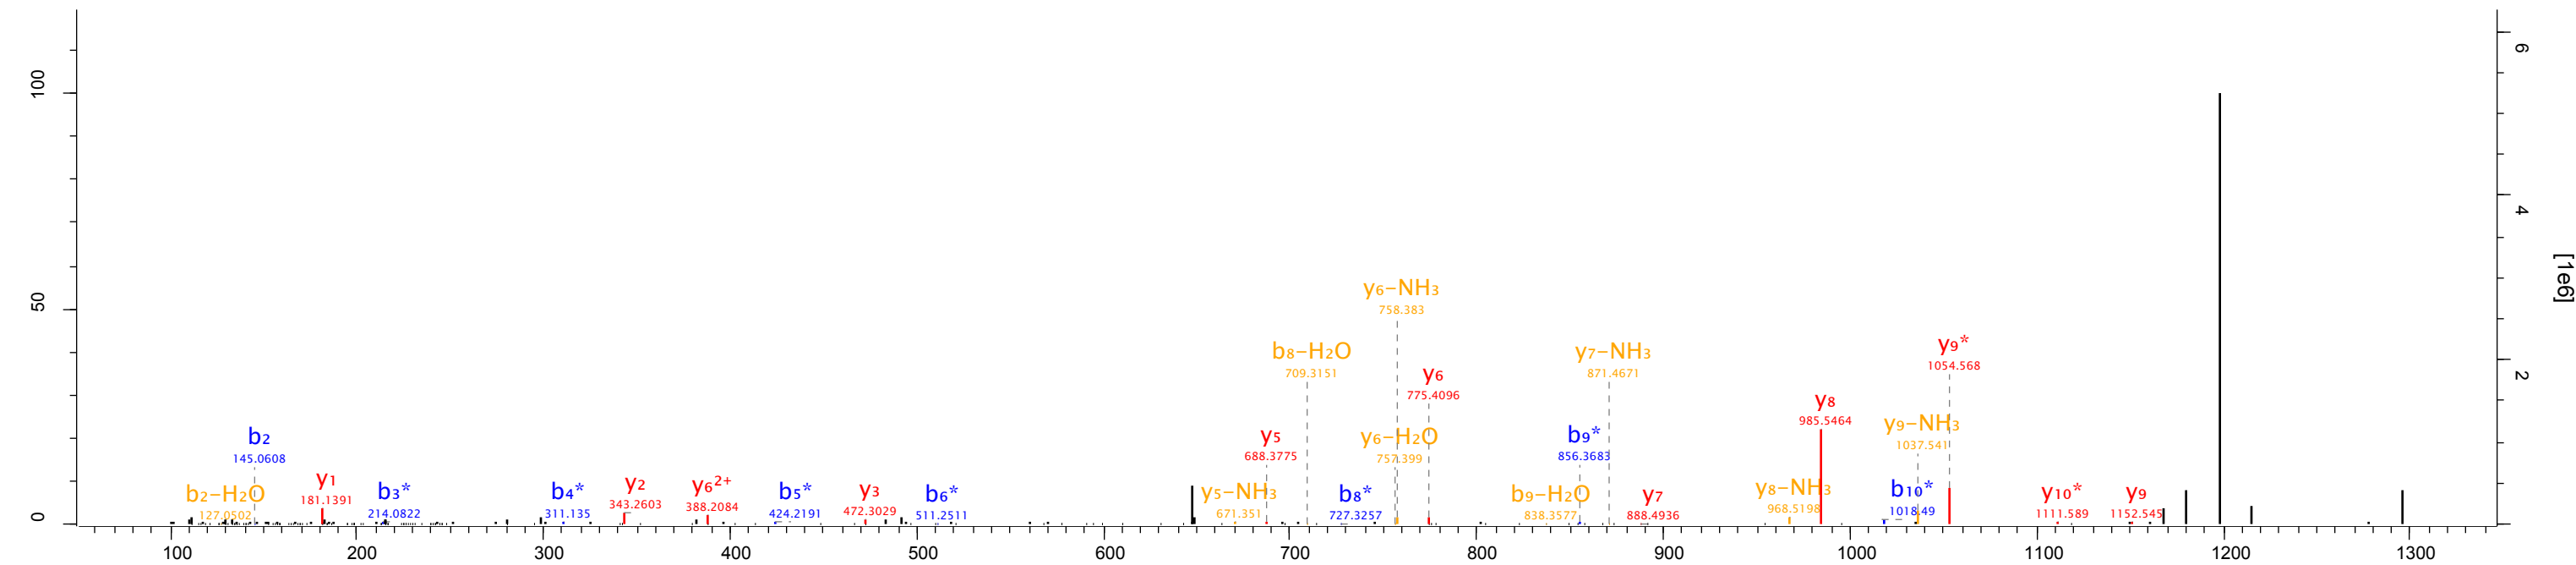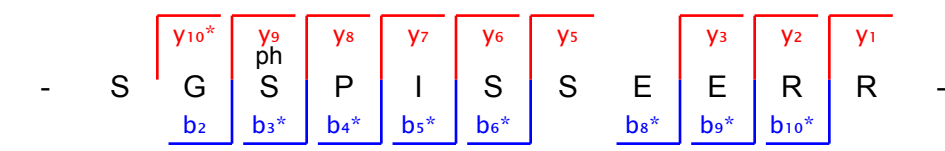

Raw file  
 20150812\_A375SR\_Phospho\_BR1\_05  
 Scan 4983 Method FTMS; HCD Score 134.37 m/z 786.29 Gene names RBM25

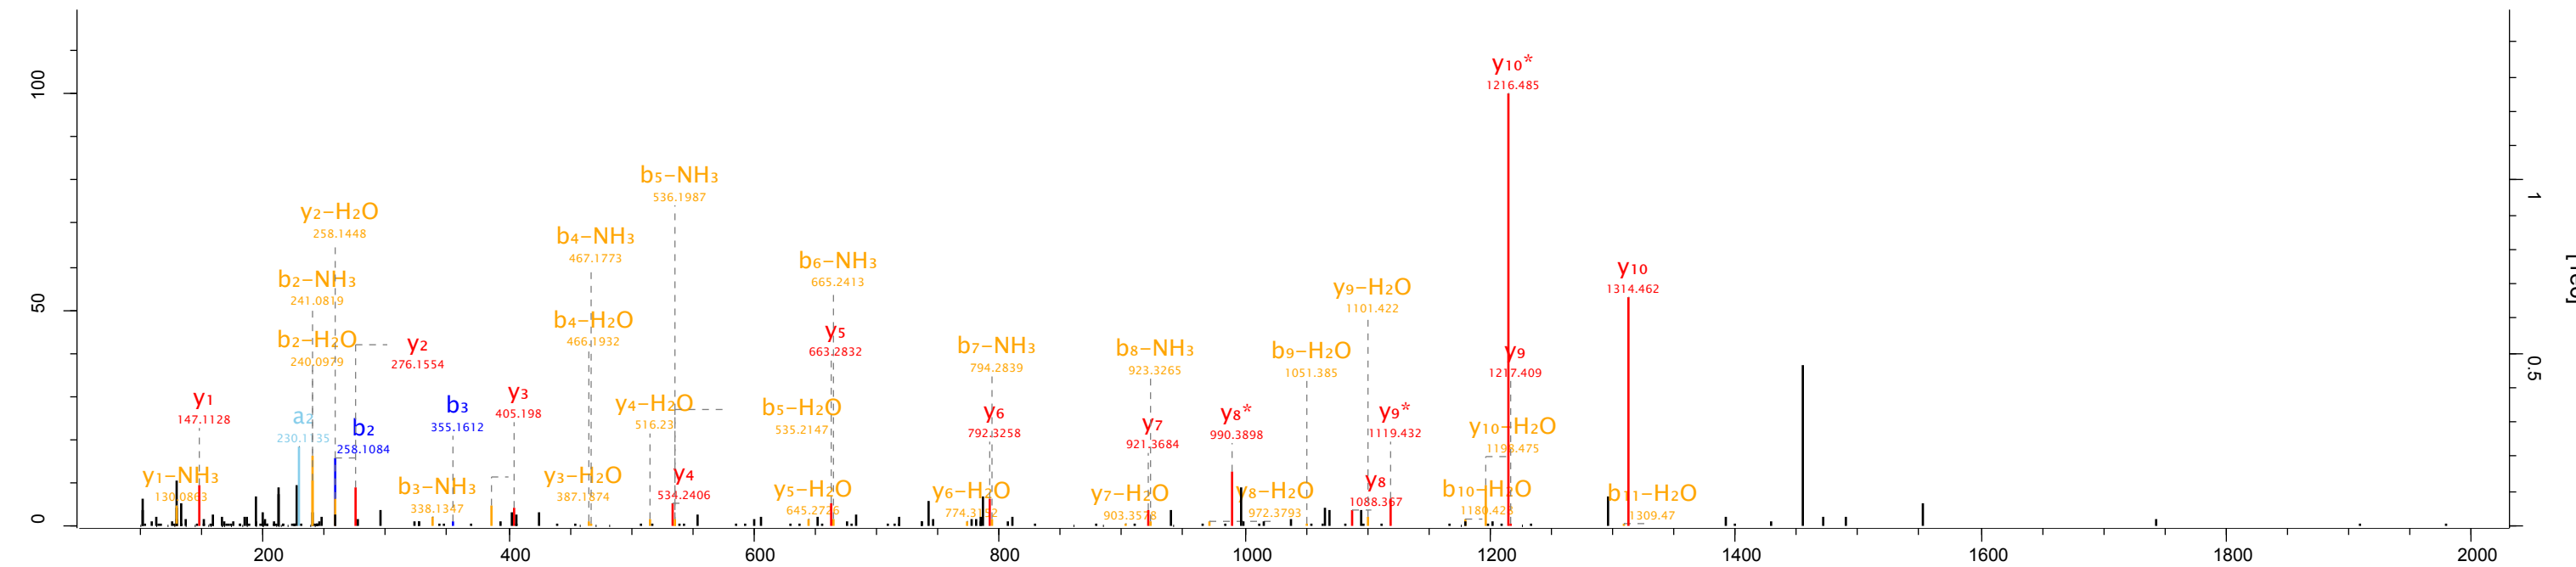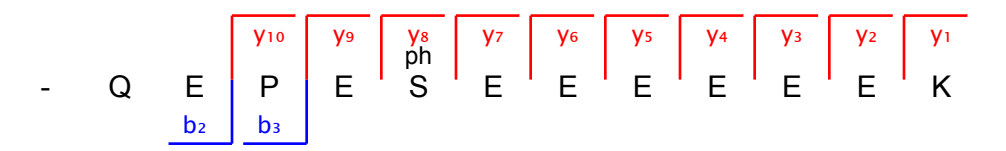

Raw file: 20150812\_A375SR\_Phospho\_BR1\_05  
 Scan: 5893 Method: FTMS; HCD Score: 102.97 m/z: 629.78 Gene names: PRRC2C

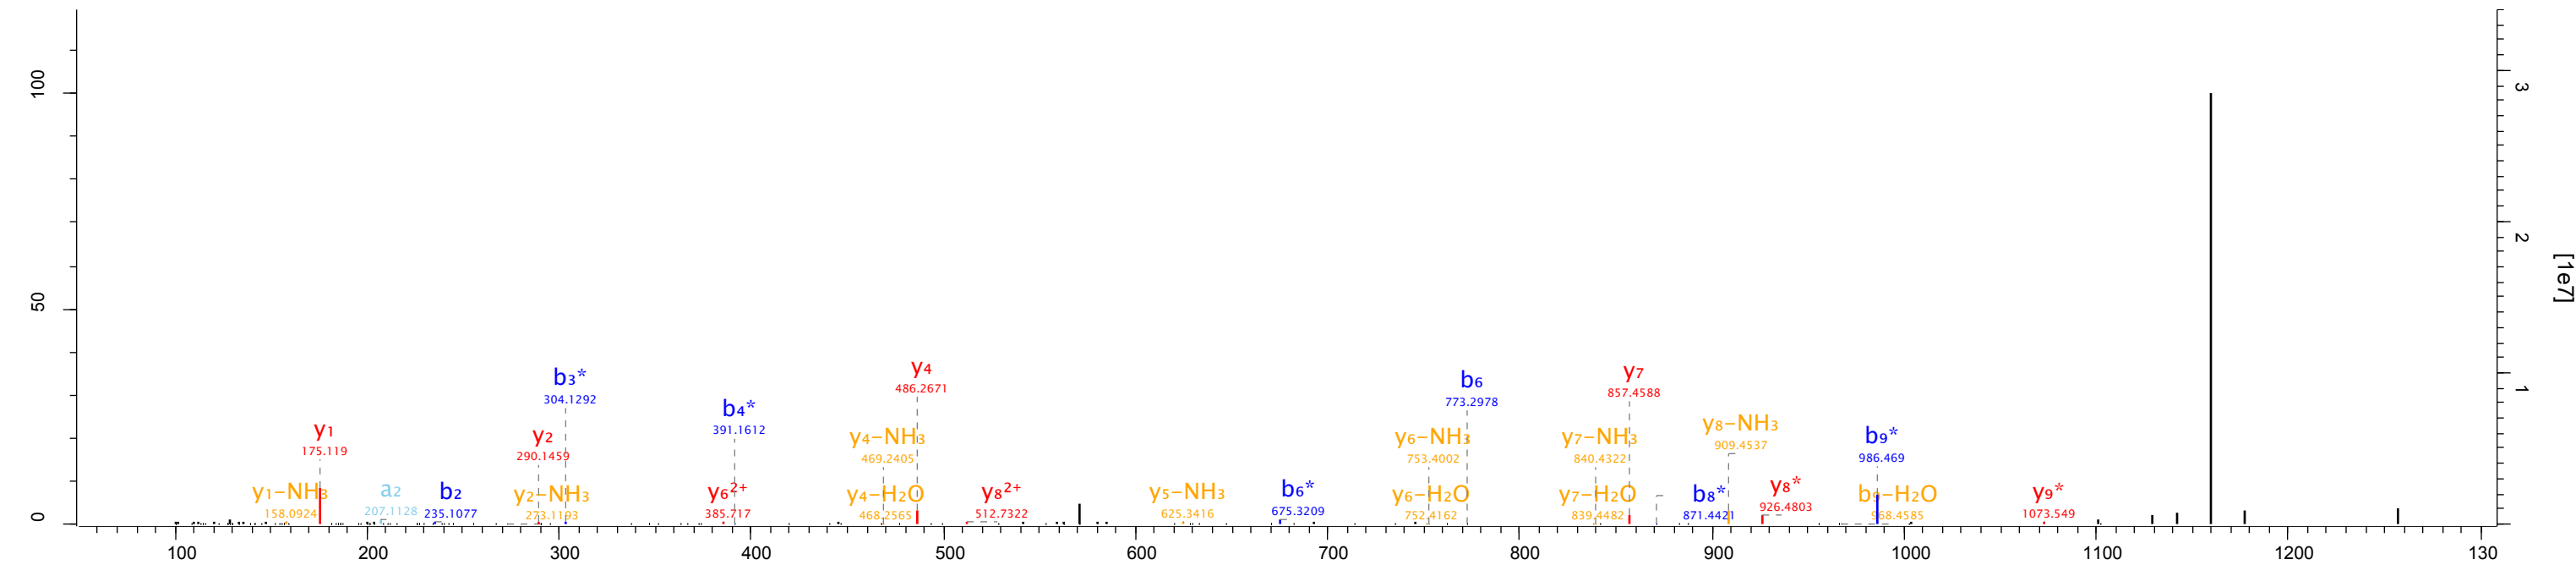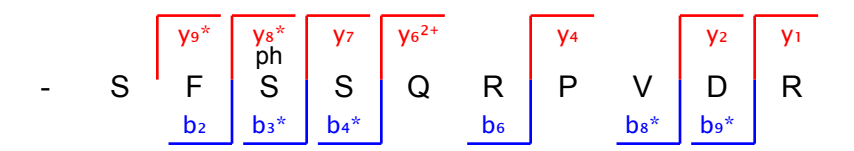

Raw file: 20150812\_A375SR\_Phospho\_BR1\_05  
 Scan: 7053 Method: FTMS; HCD Score: 80.96 m/z: 450.87 Gene names: GIGYF2

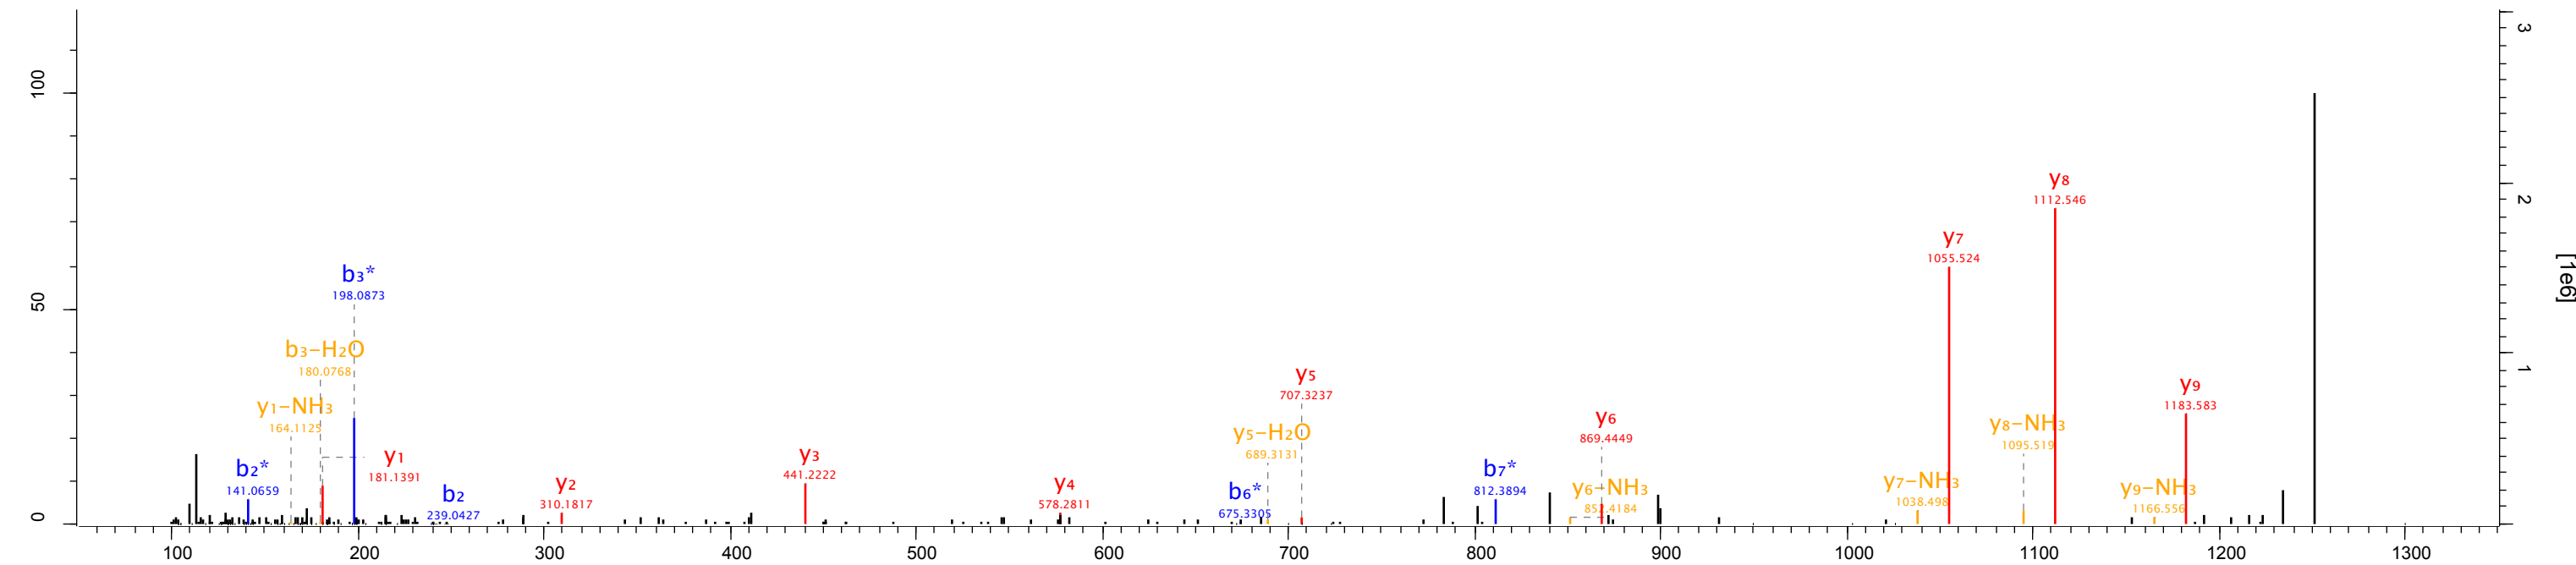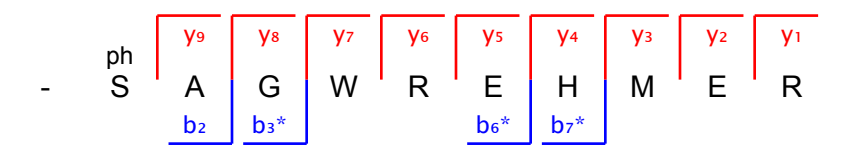



Raw file: 20150812\_A375SR\_Phospho\_BR1\_05  
 Scan: 7093 Method: FTMS; HCD Score: 161.48 m/z: 589.27 Gene names: KIAA1522

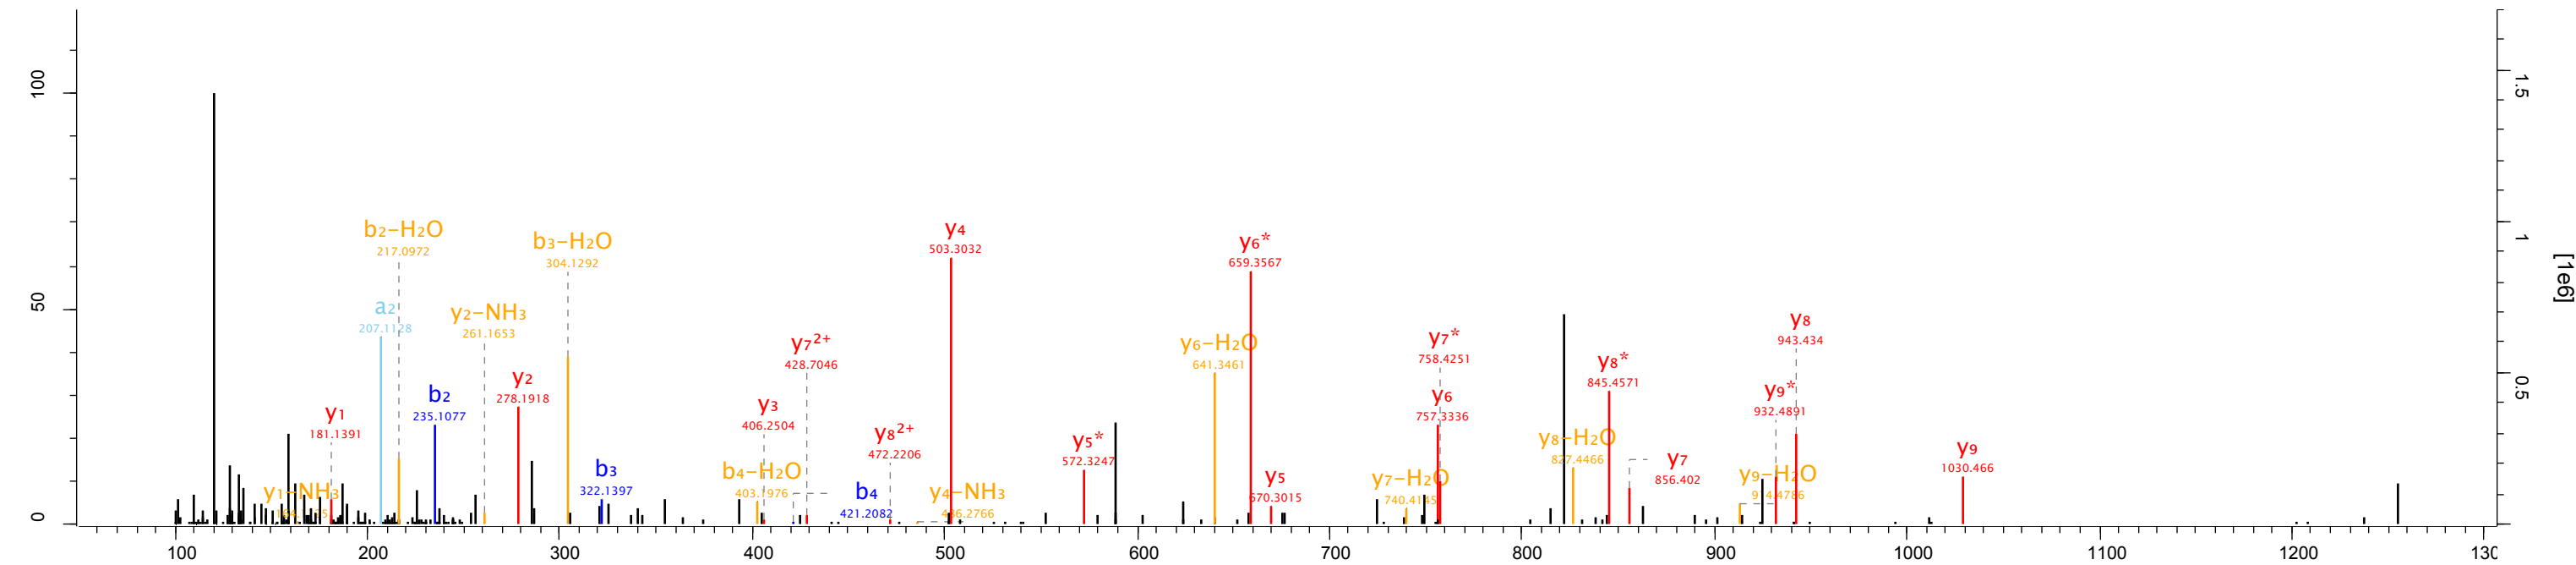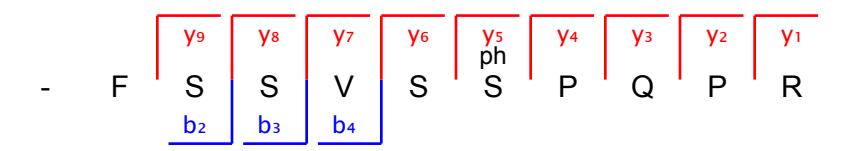

Raw file: 20150812\_A375SR\_Phospho\_BR1\_05  
 Scan: 7143 Method: FTMS; HCD Score: 148.24 m/z: 601.78 Gene names: IRF2BP1

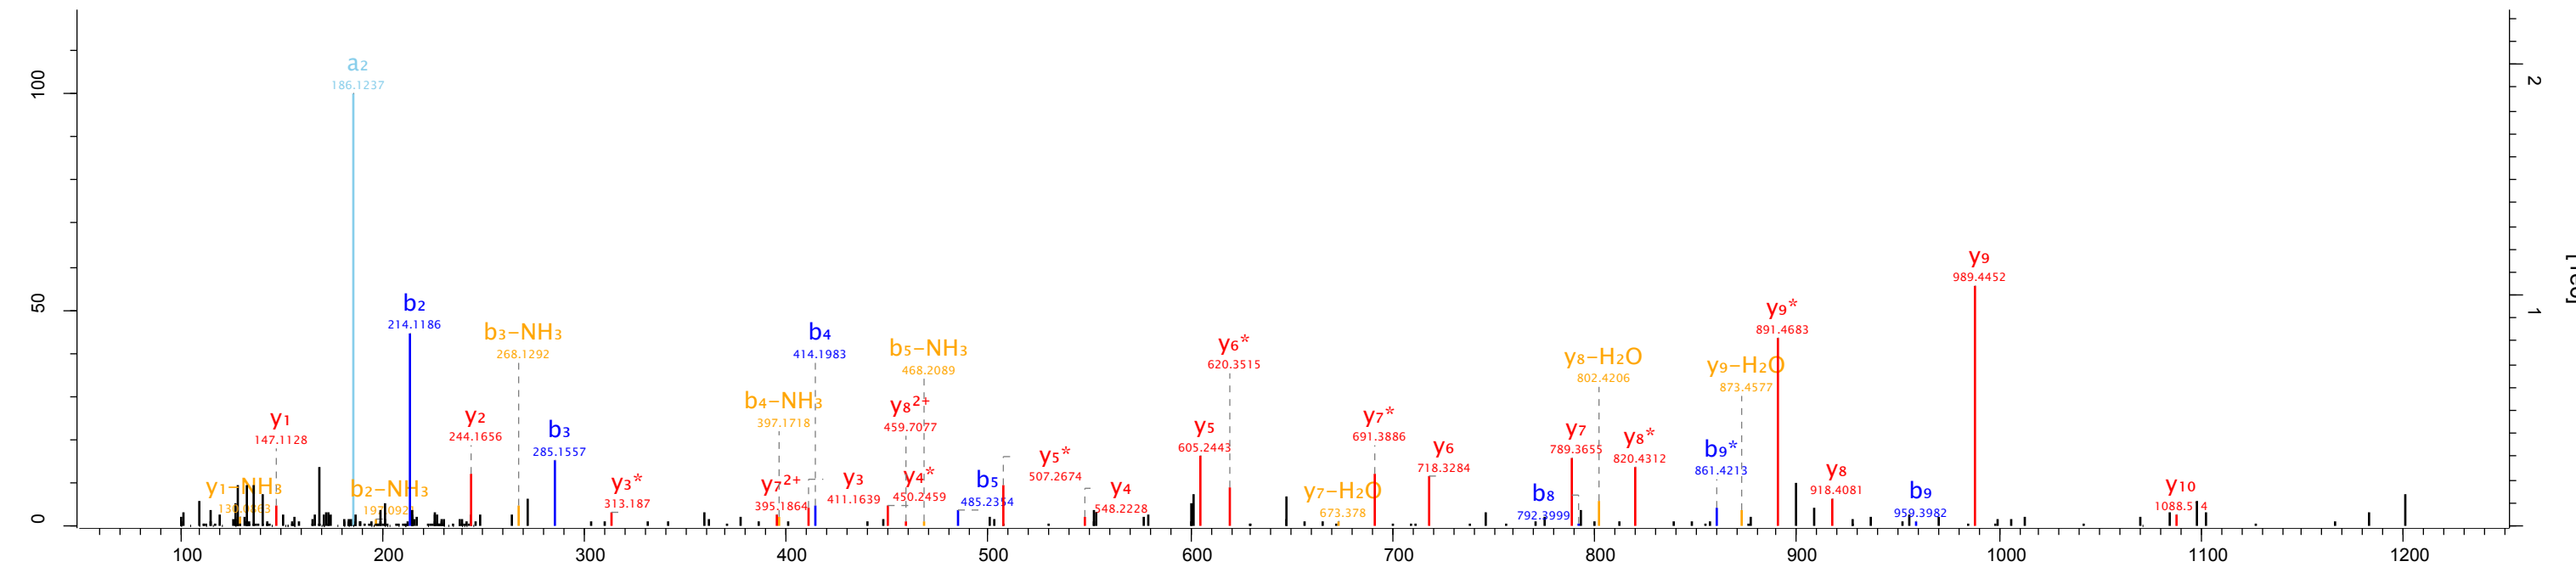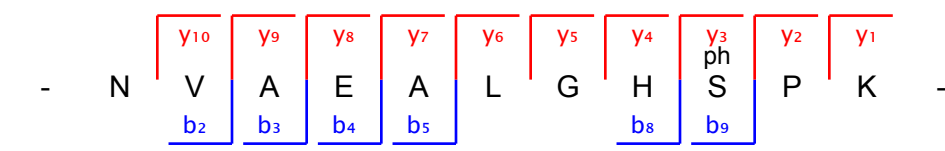

Raw file: 20150812\_A375SR\_Phospho\_BR1\_05  
 Scan: 8143 Method: FTMS; HCD Score: 149.96 m/z: 581.32 Gene names: ZC3H13

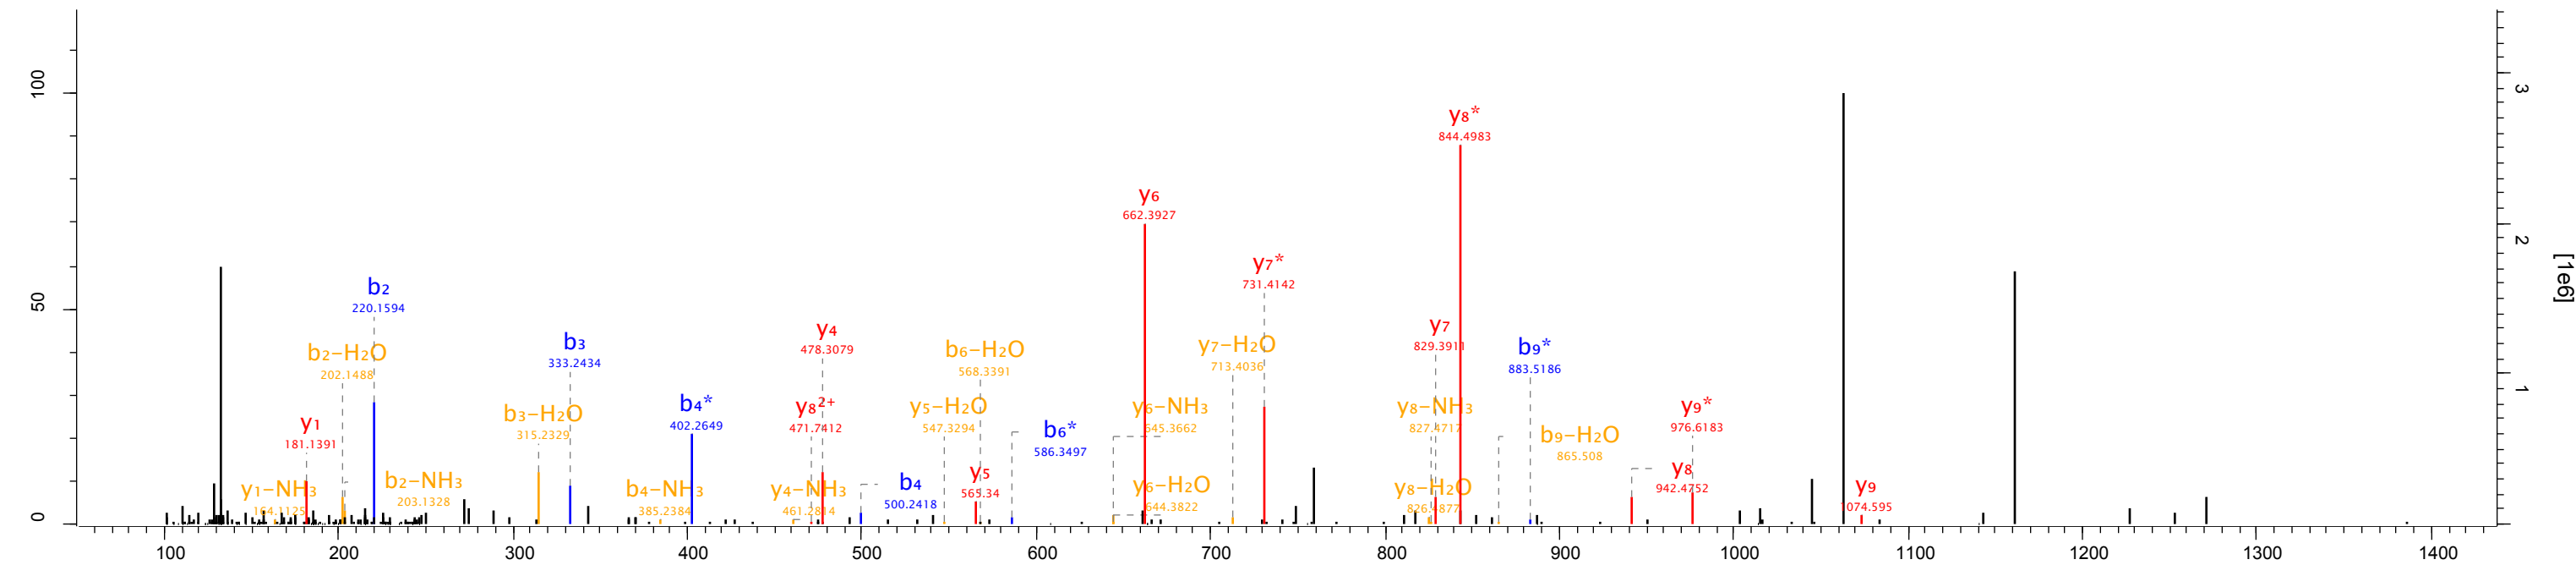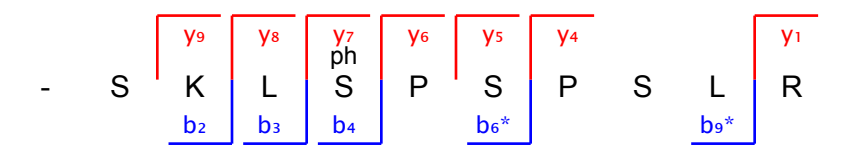

Raw file: 20150812\_A375SR\_Phospho\_BR1\_05  
 Scan: 8813 Method: FTMS; HCD Score: 212.85 m/z: 874.36 Gene names: RBMX

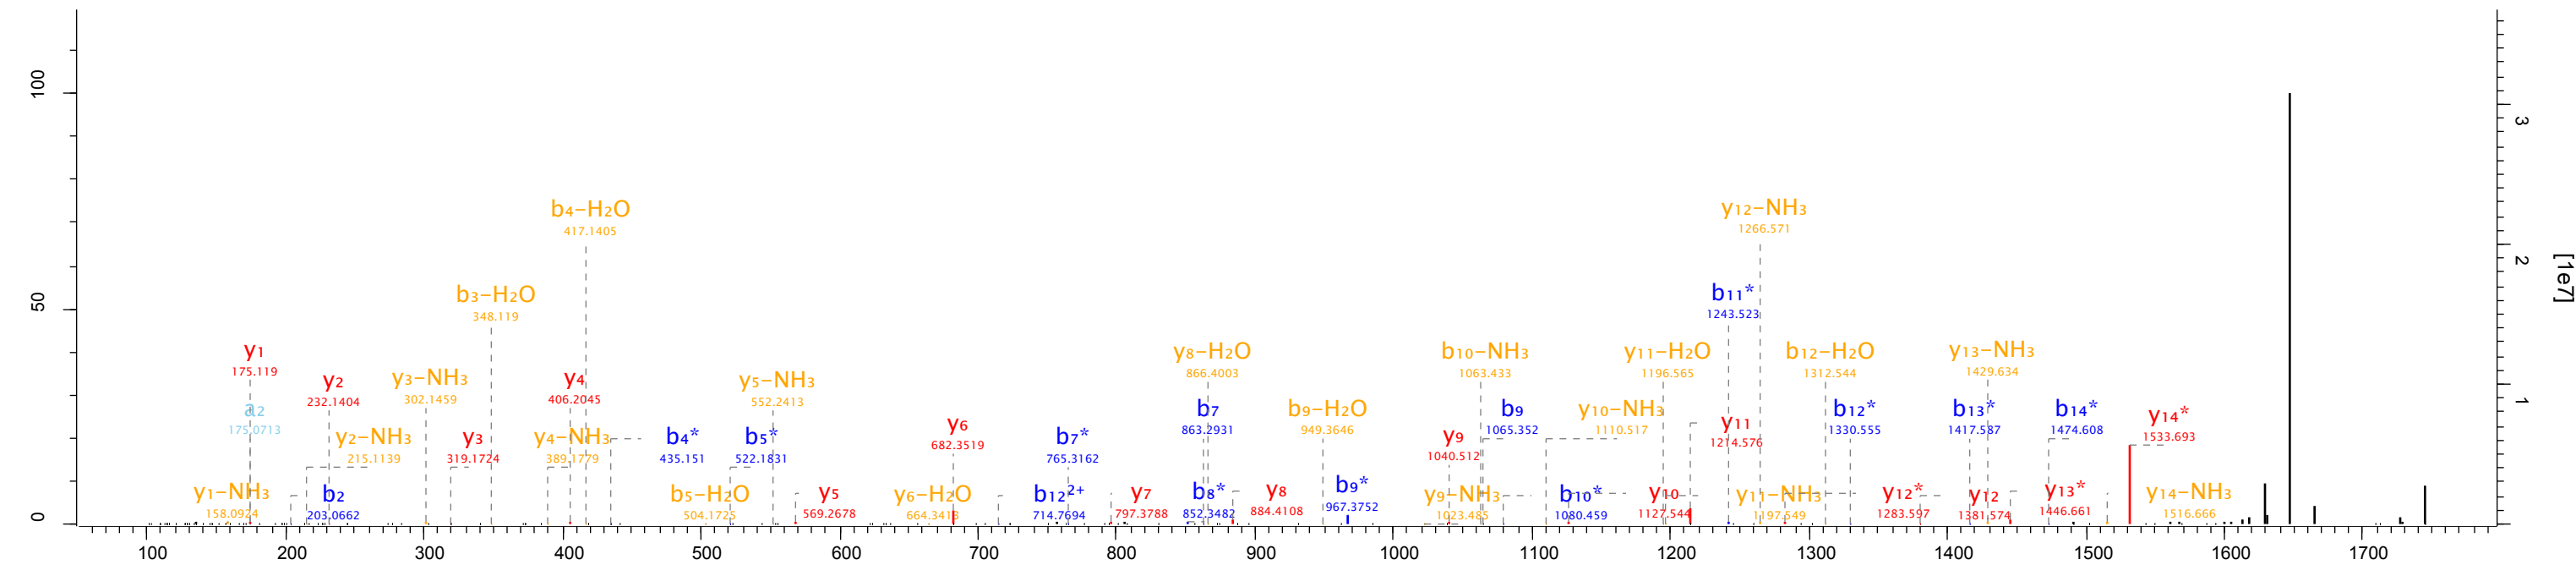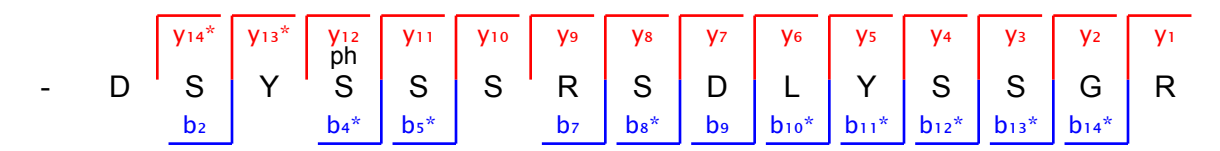

Raw file 20150812\_A375SR\_Phospho\_BR1\_05 Scan 9333 Method FTMS; HCD Score 93.72 m/z 604.8 Gene names TNS1

20150812\_A375SR\_Phospho\_BR1\_05

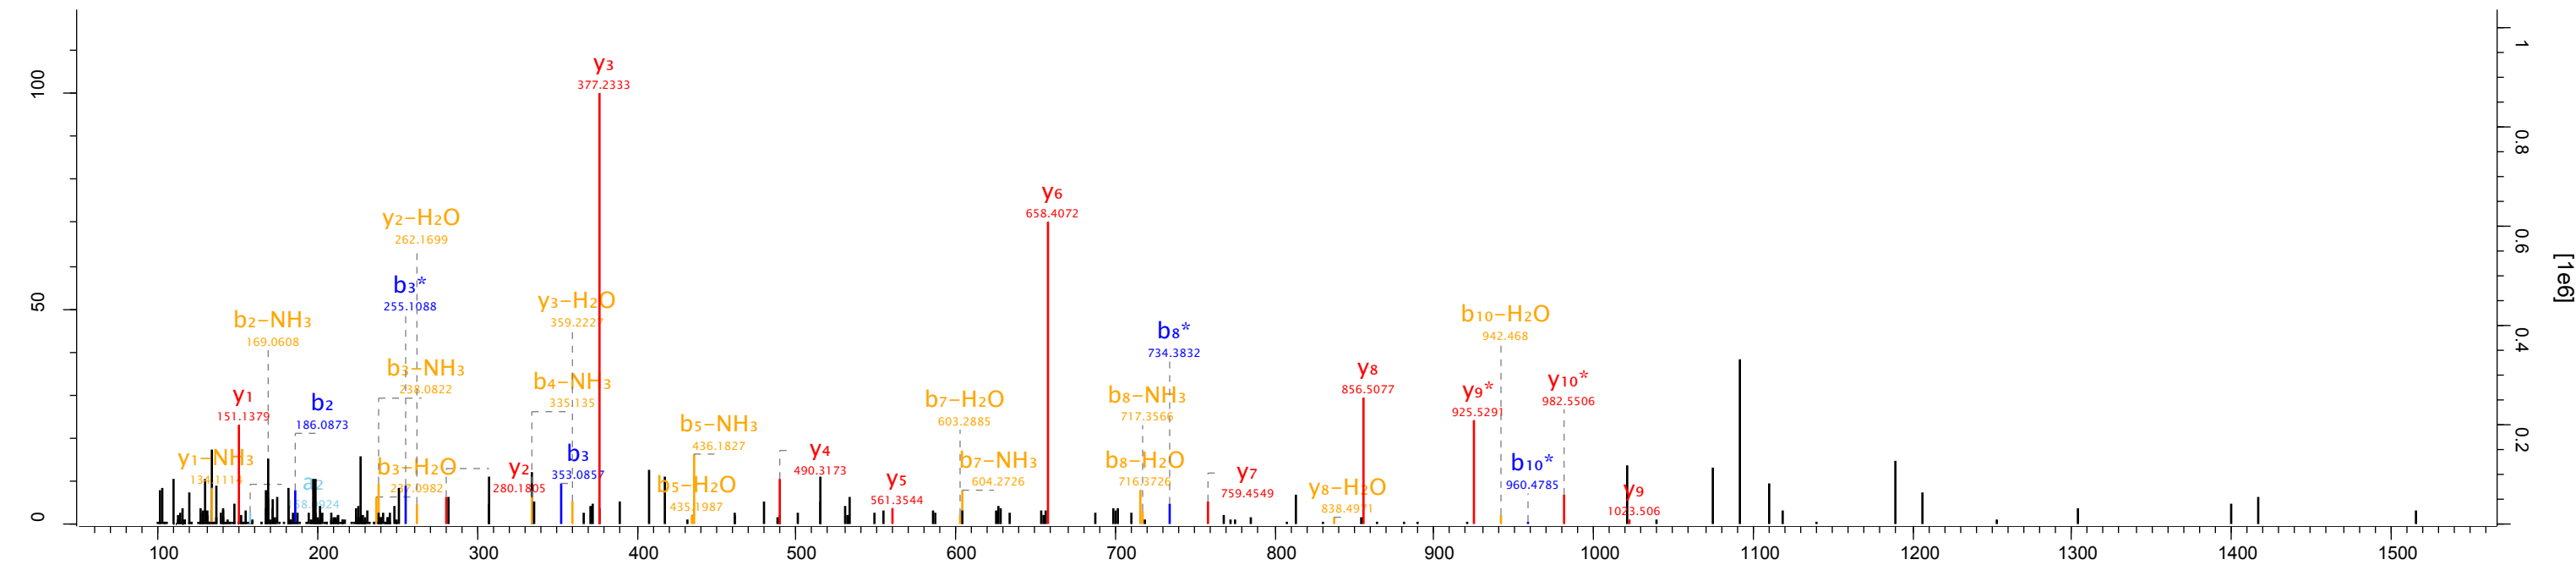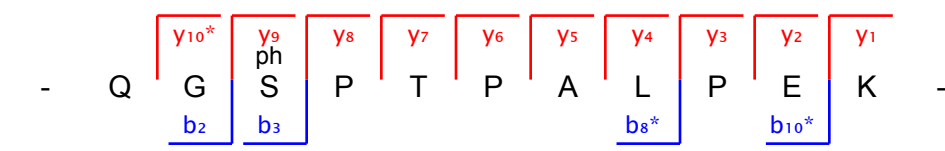

Raw file 20150812\_A375SR\_Phospho\_BR1\_05 Scan 9743 Method FTMS; HCD Score 217.18 m/z 960.43 Gene names CHD3

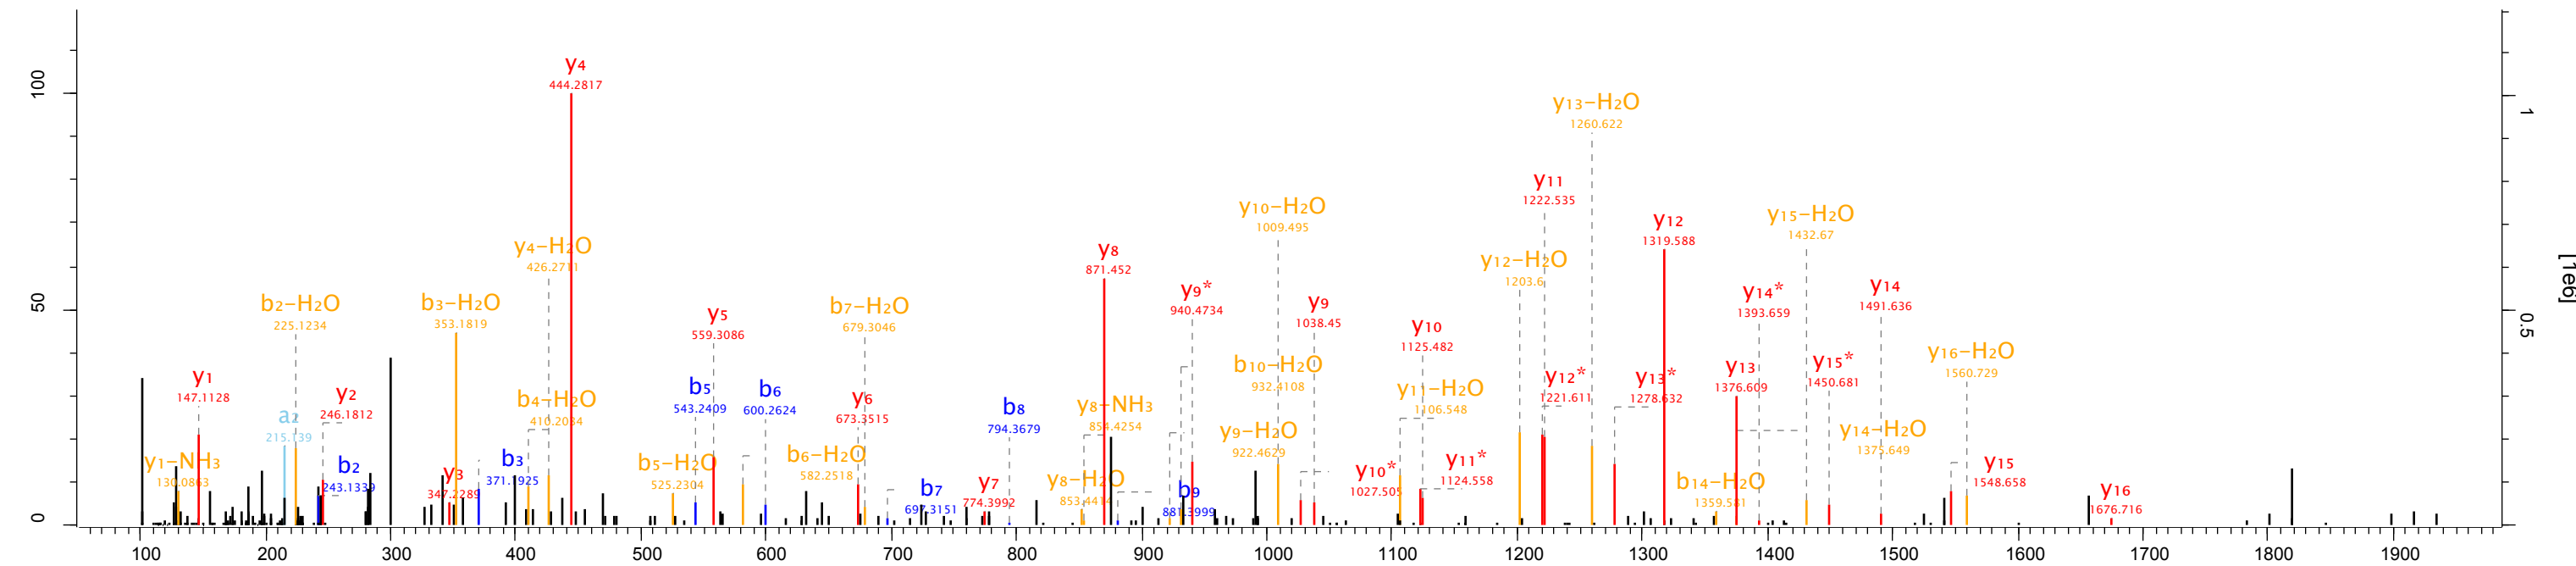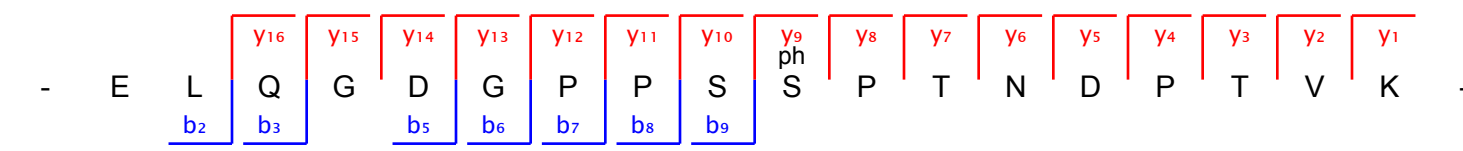

Raw file  
 20150812\_A375SR\_Phospho\_BR1\_06  
 Scan 11013 Method FTMS; HCD Score 154.52 m/z 742.81 Gene names PARD6B

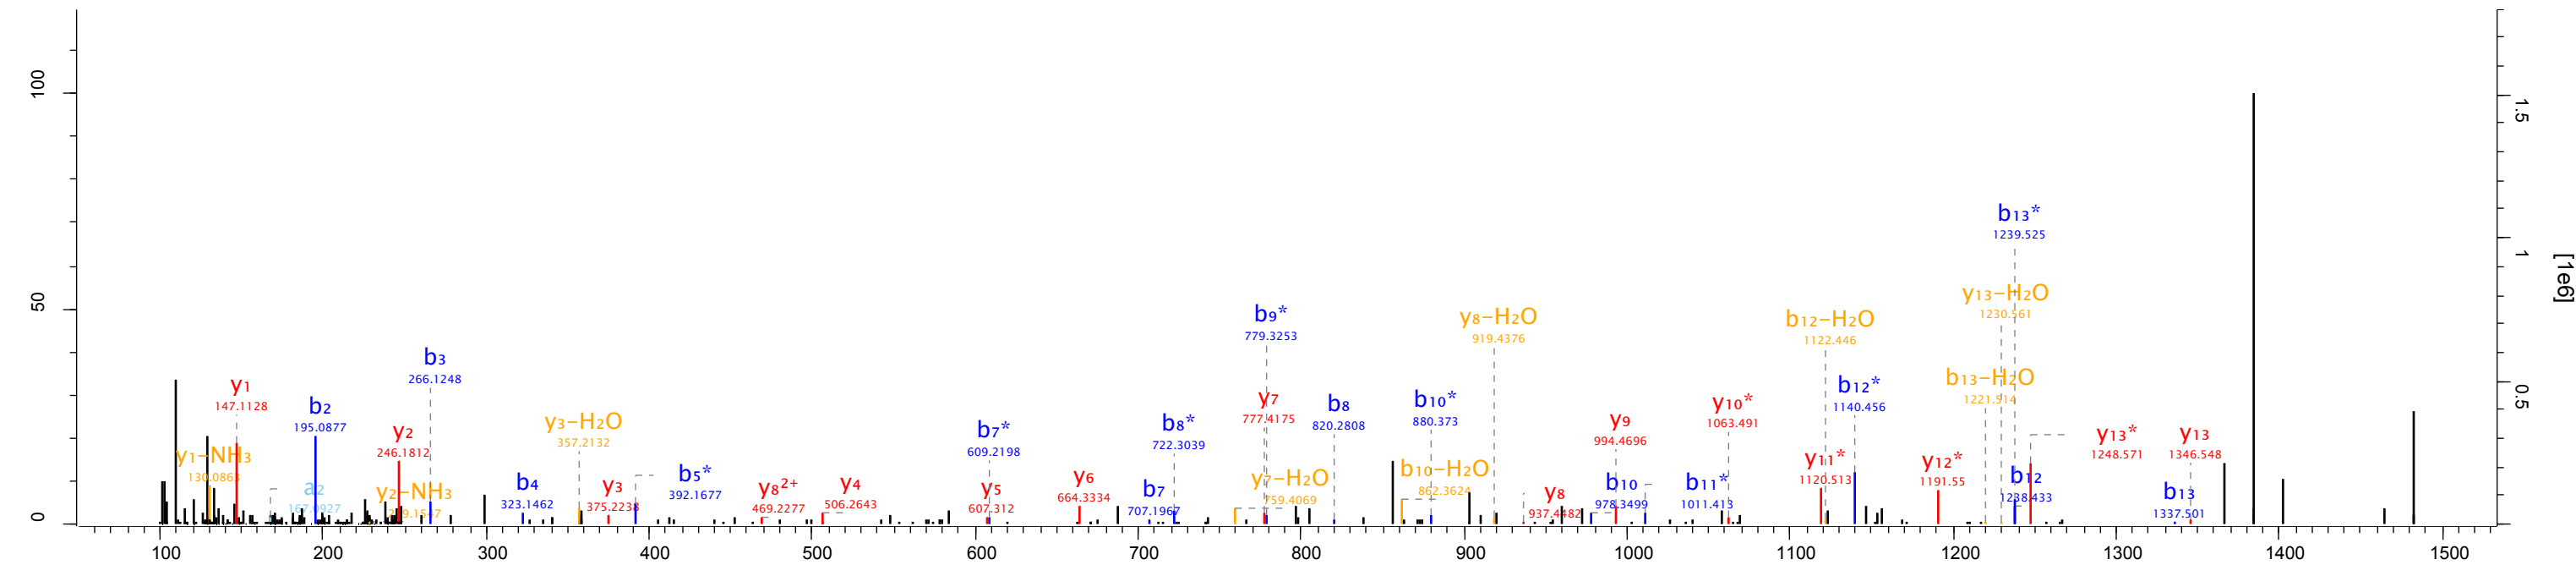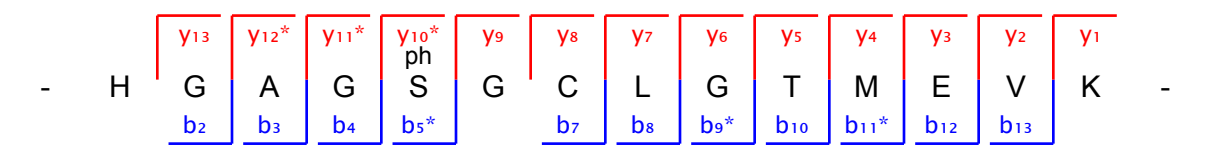

Raw file 20150812\_A375SR\_Phospho\_BR1\_06 Scan 12113 Method FTMS; HCD Score 158.52 m/z 773.86 Gene names RREB1

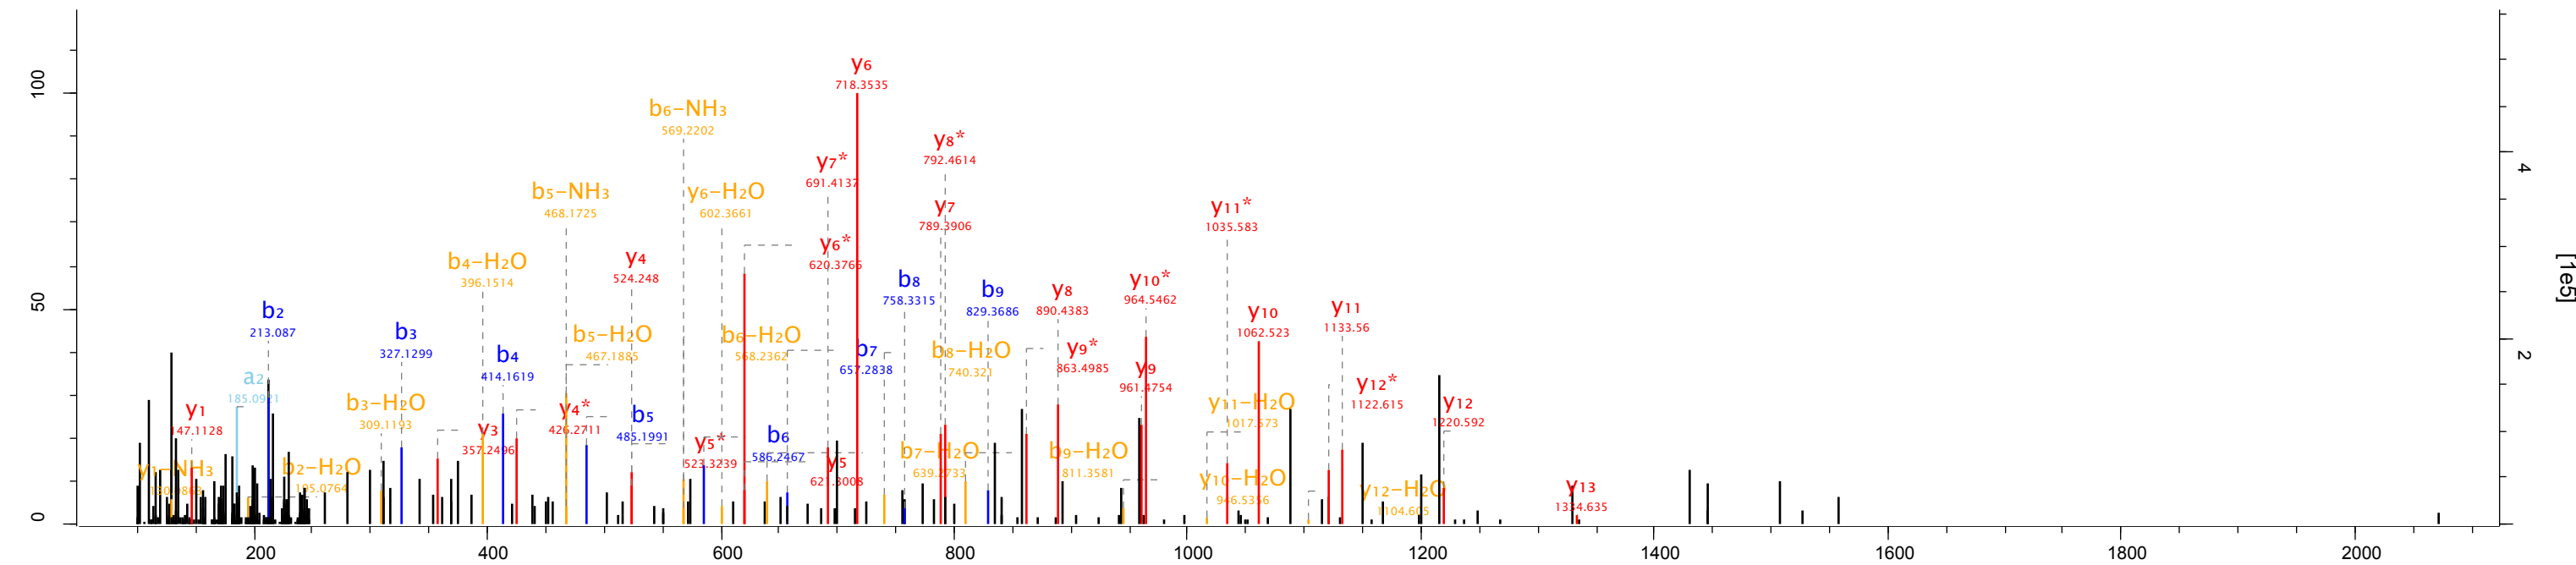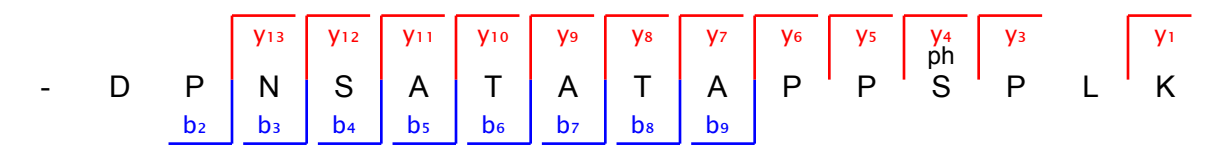



Raw file 20150812\_A375SR\_Phospho\_BR1\_06 Scan 12183 Method FTMS; HCD Score 187.43 m/z 629.99 Gene names EPB41L2

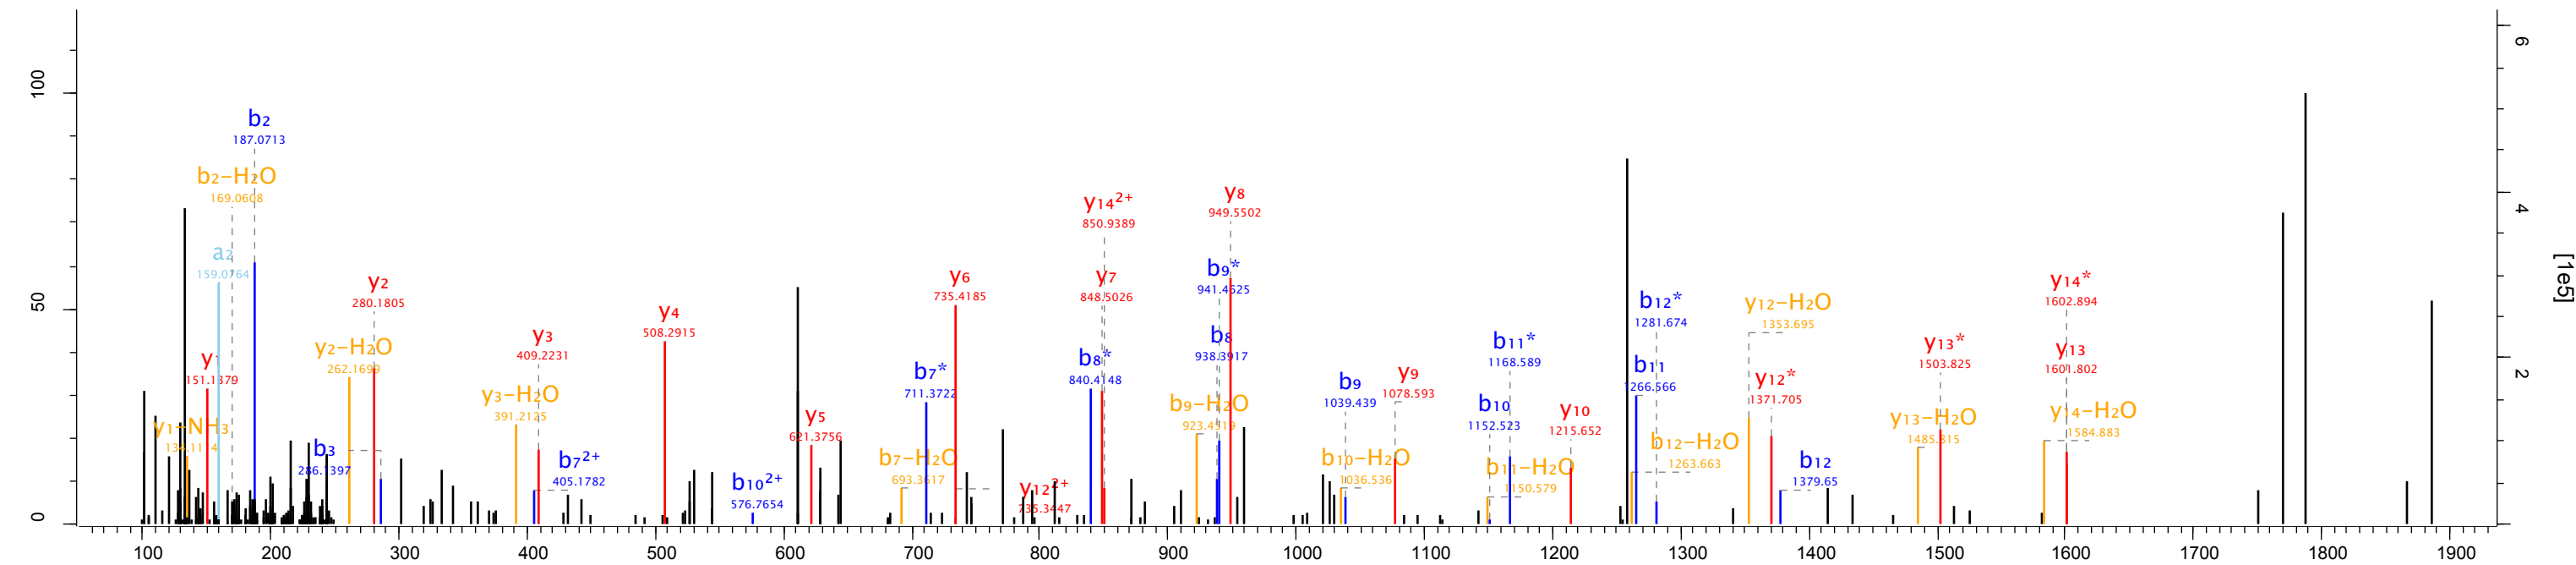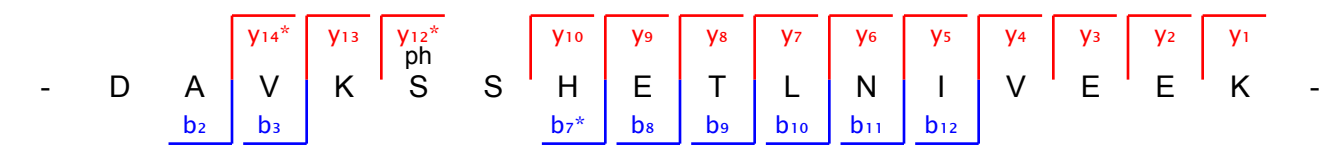

Raw file 20150812\_A375SR\_Phospho\_BR1\_06 Scan 12253 Method FTMS; HCD Score 120.29 m/z 577.77 Gene names PPFIA1

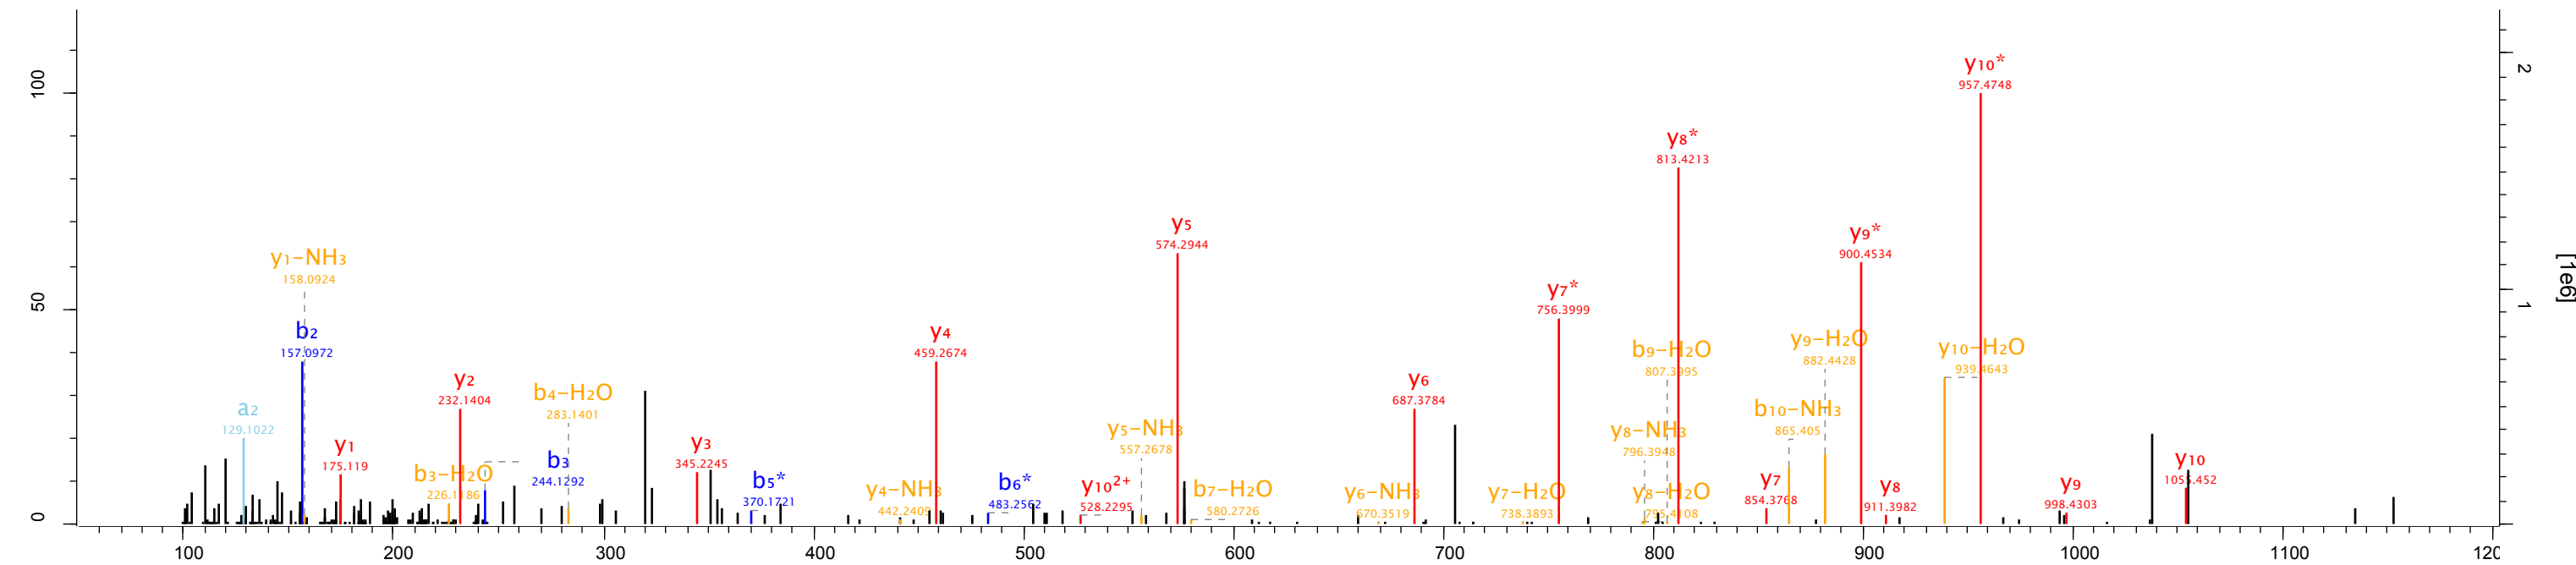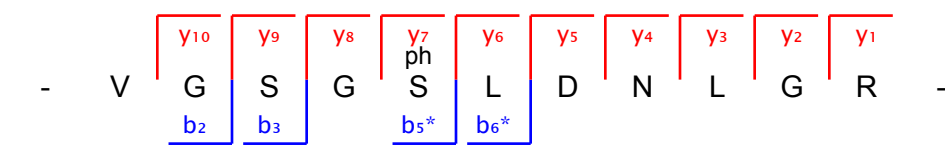

Raw file 20150812\_A375SR\_Phospho\_BR1\_06 Scan 12773 Method FTMS; HCD Score 202.63 m/z 761.34 Gene names RPRD2

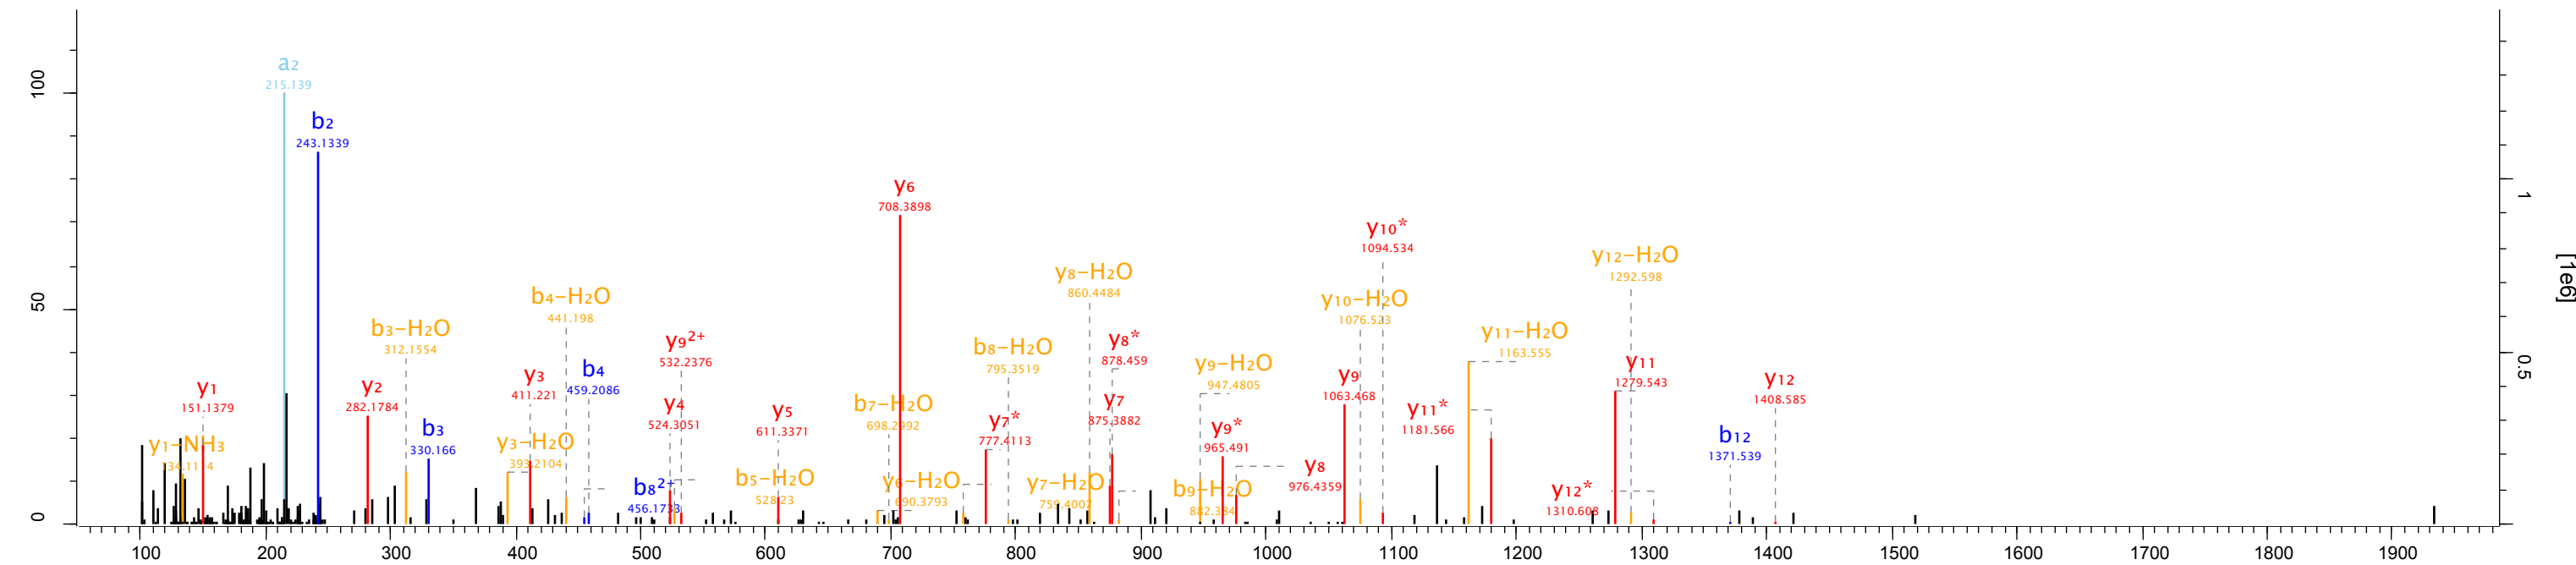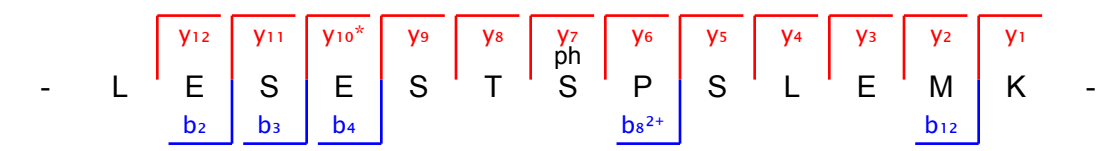

Raw file: 20150812\_A375SR\_Phospho\_BR1\_06  
 Scan: 12973 Method: FTMS; HCD Score: 73.63 m/z: 479.21 Gene names: BRSK1;BRSK2

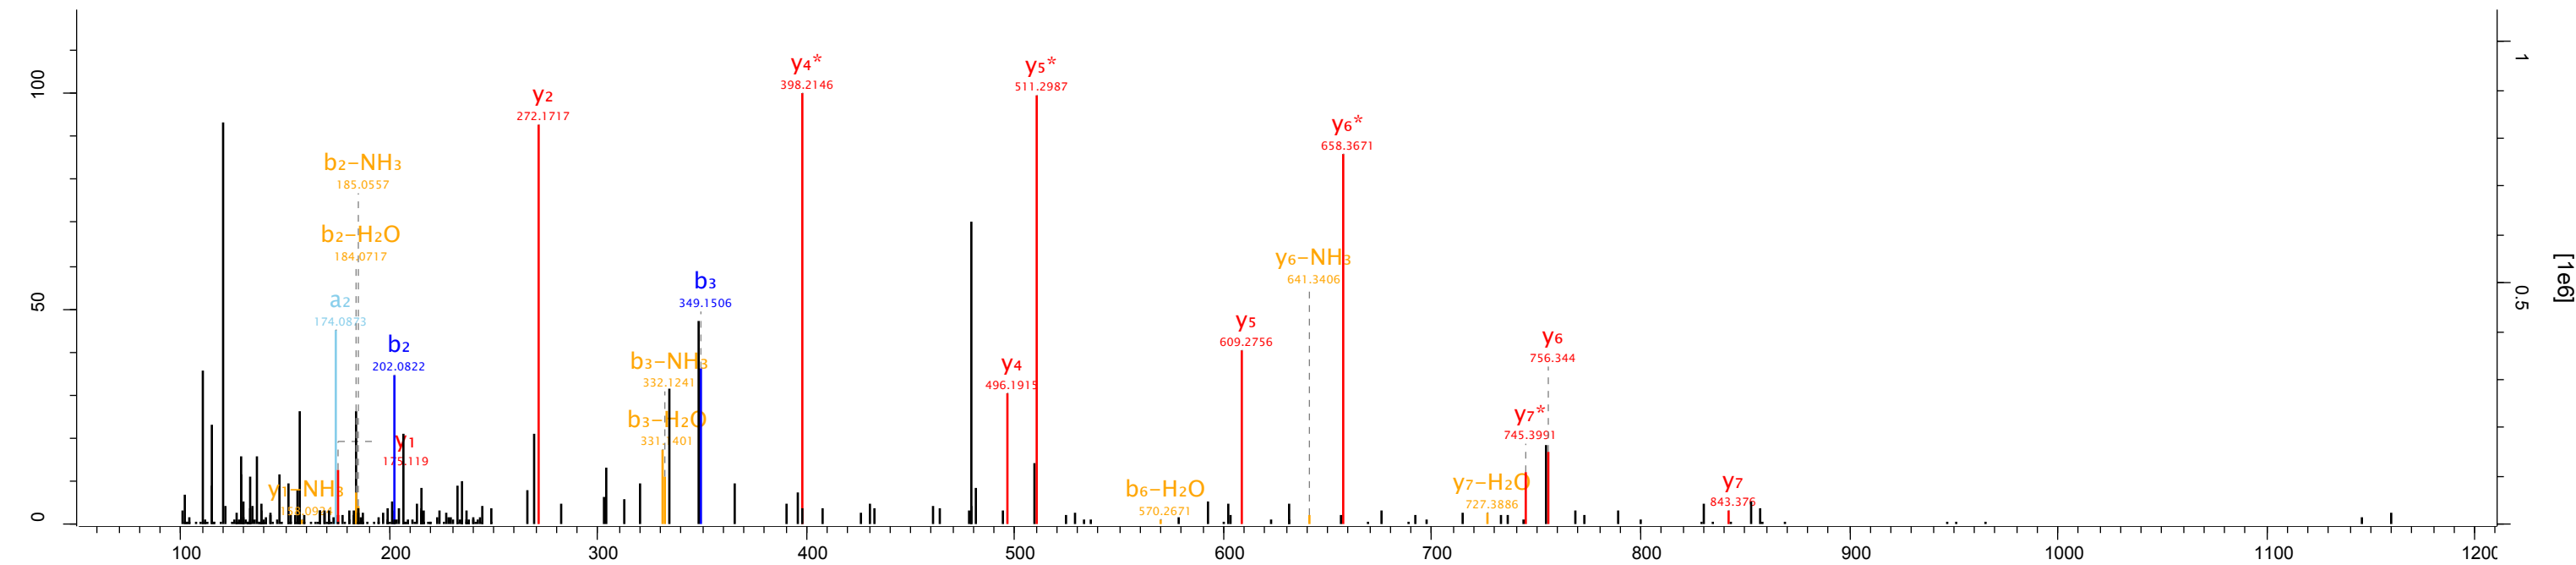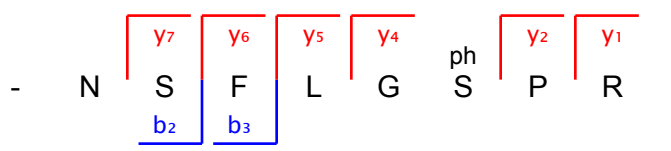



Raw file: 20150812\_A375SR\_Phospho\_BR1\_06  
 Scan: 1403 Method: FTMS; HCD Score: 78.88 m/z: 532.76 Gene names: NPM1

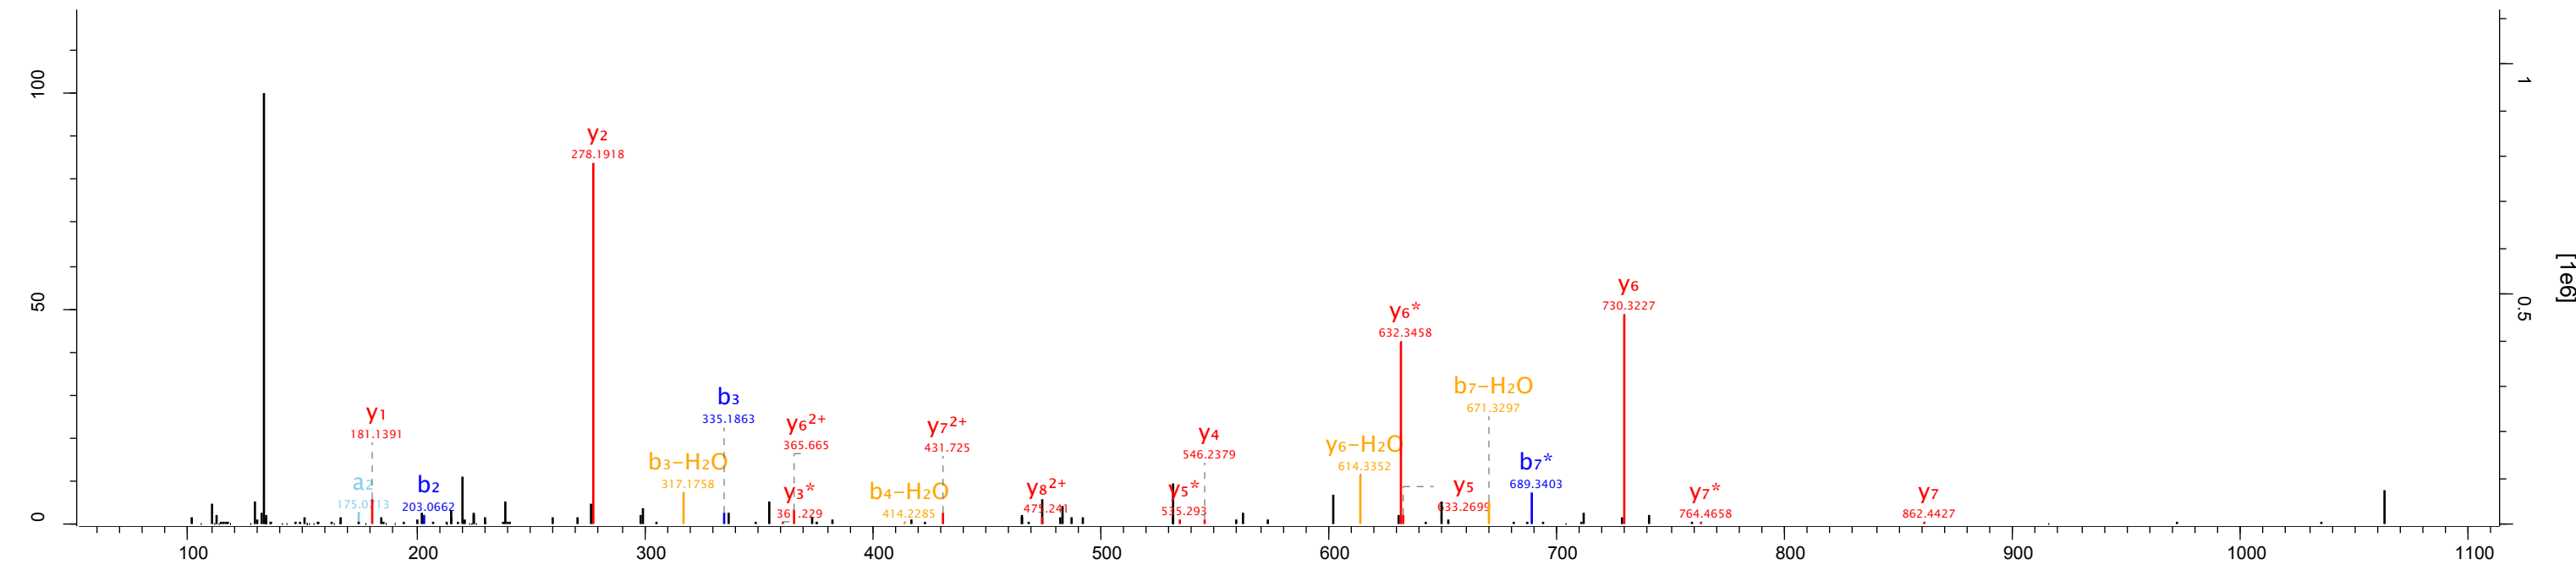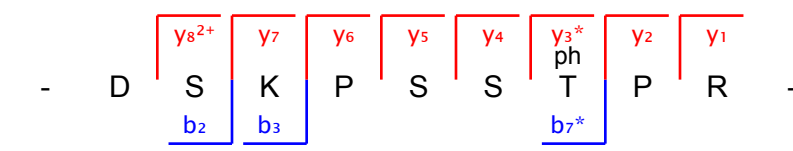

Raw file  
 20150812\_A375SR\_Phospho\_BR1\_06  
 Scan 14613 Method FTMS; HCD Score 125.04 m/z 650.66 Gene names ESCO2

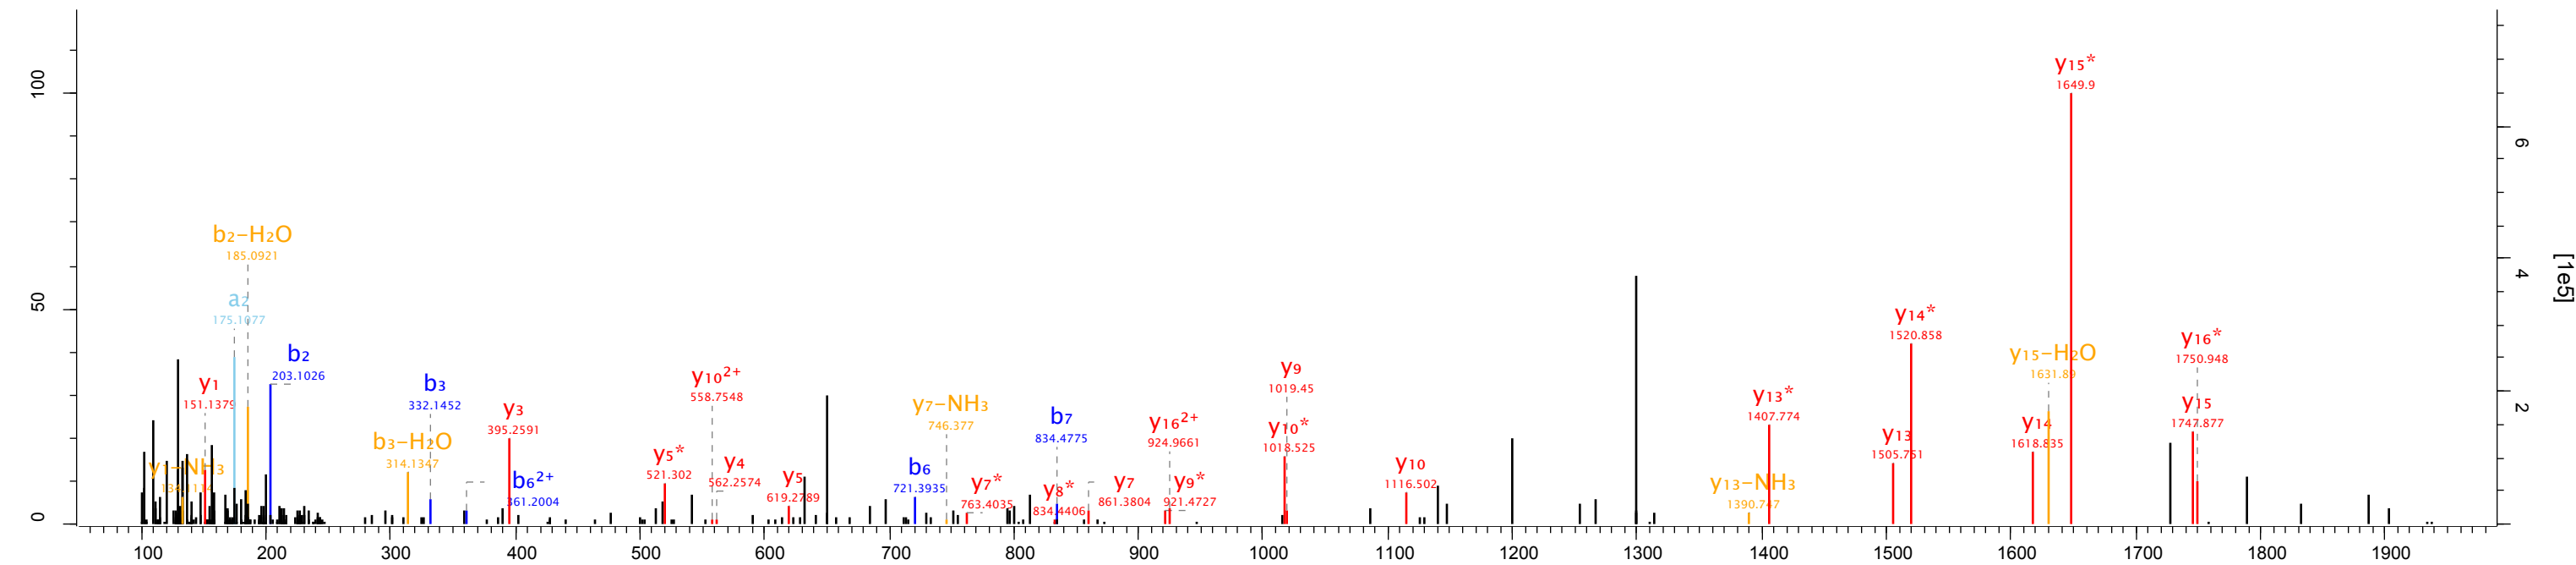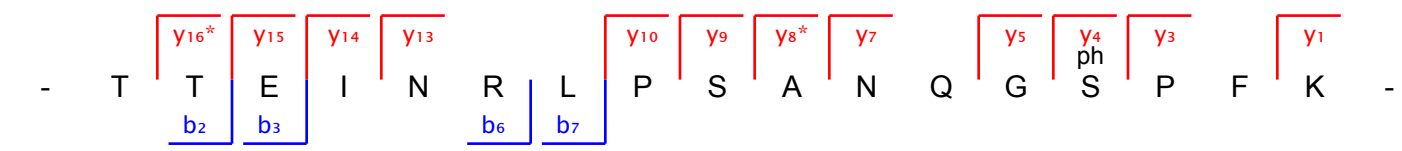

Raw file Scan Method Score m/z Gene names  
 20150812\_A375SR\_Phospho\_BR1\_06 14713 FTMS; HCD 251.33 1160.1 HABP4

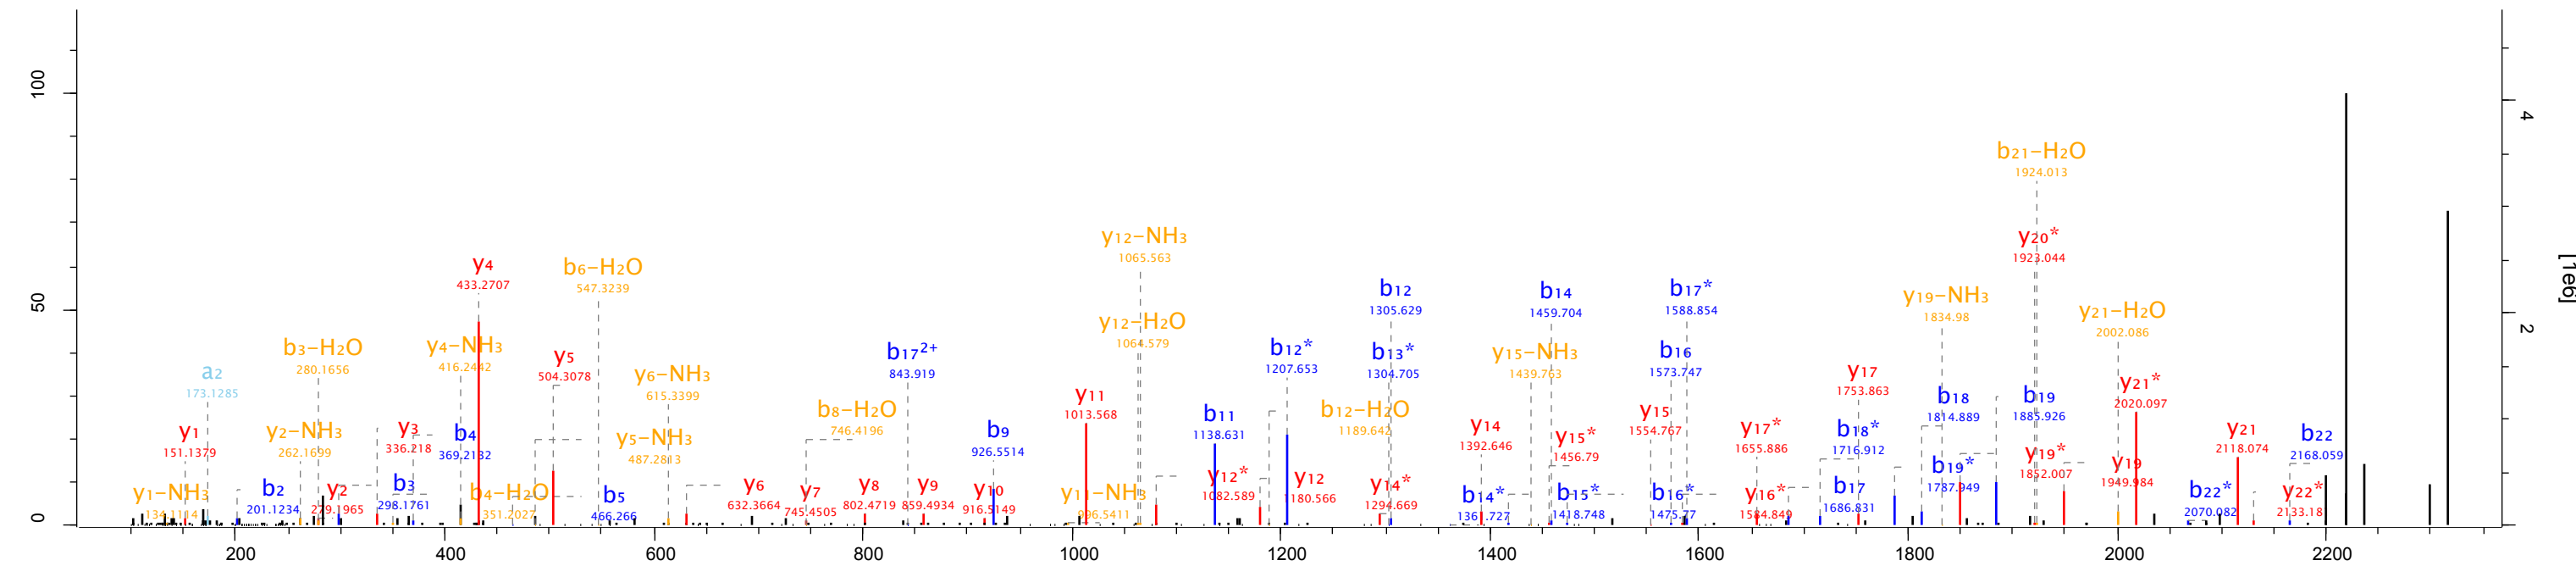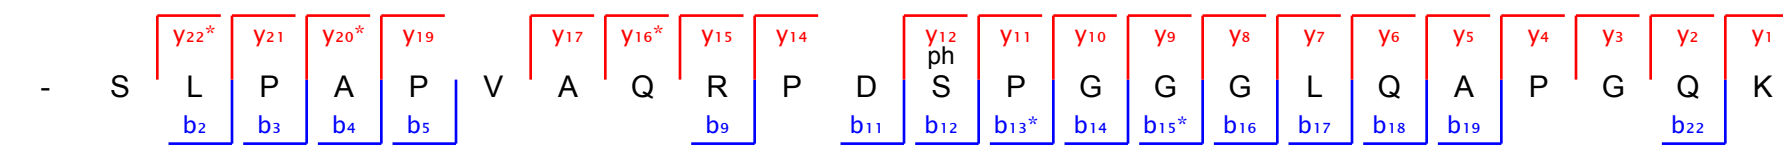



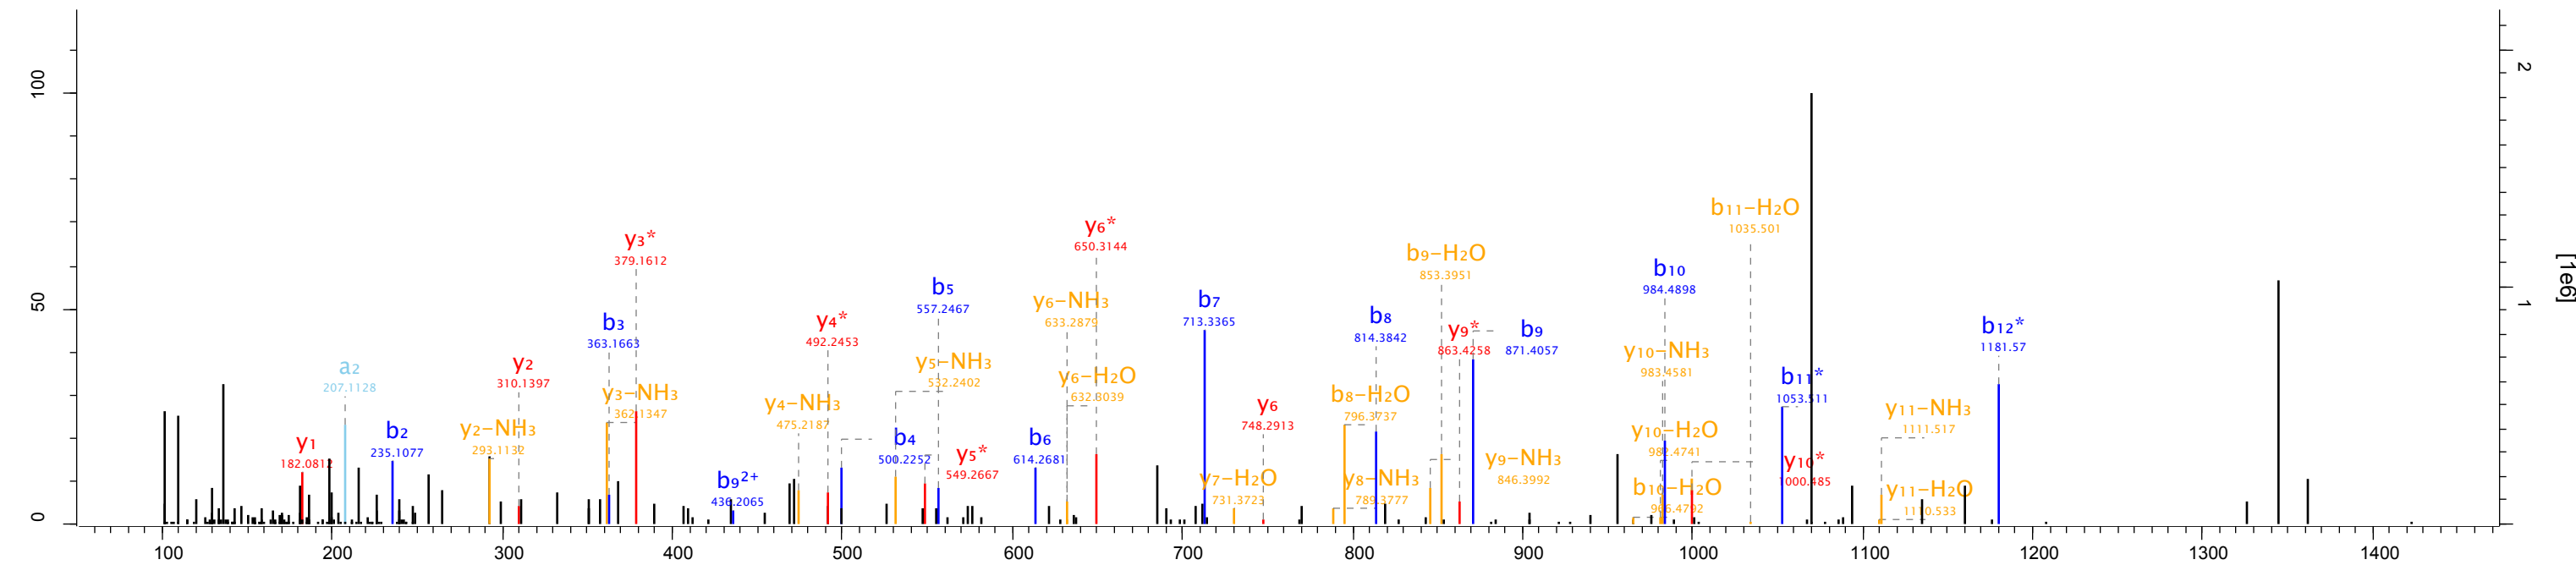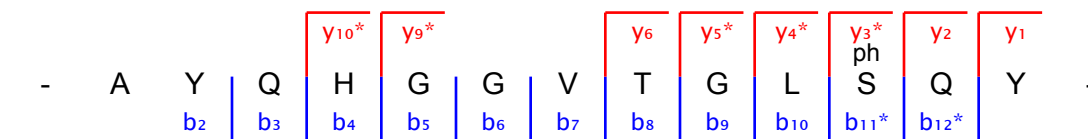

Raw file 20150812\_A375SR\_Phospho\_BR1\_06 Scan 16113 Method FTMS; HCD Score 74.89 m/z 717.33 Gene names FLG

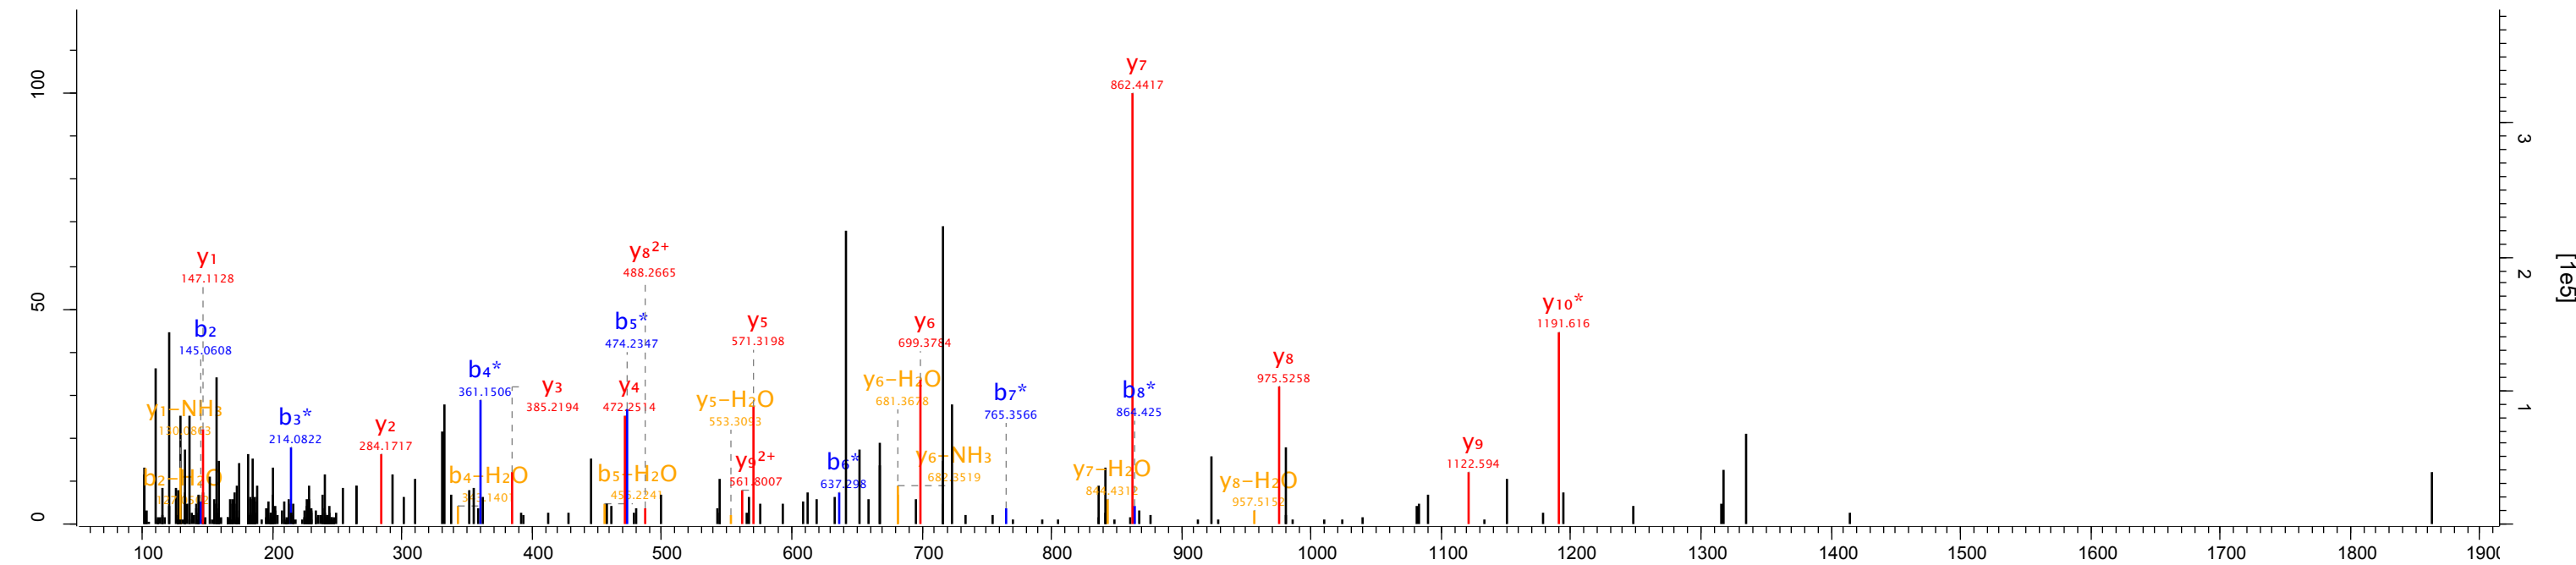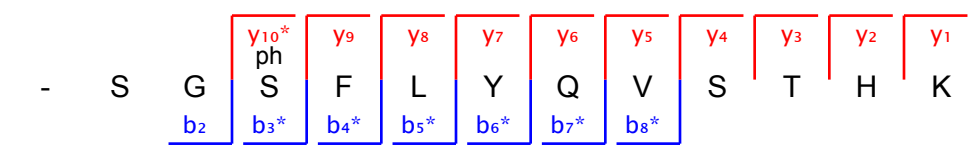

Raw file 20150812\_A375SR\_Phospho\_BR1\_06 Scan 17373 Method FTMS; HCD Score 185.48 m/z 881.75 Gene names GAPVD1

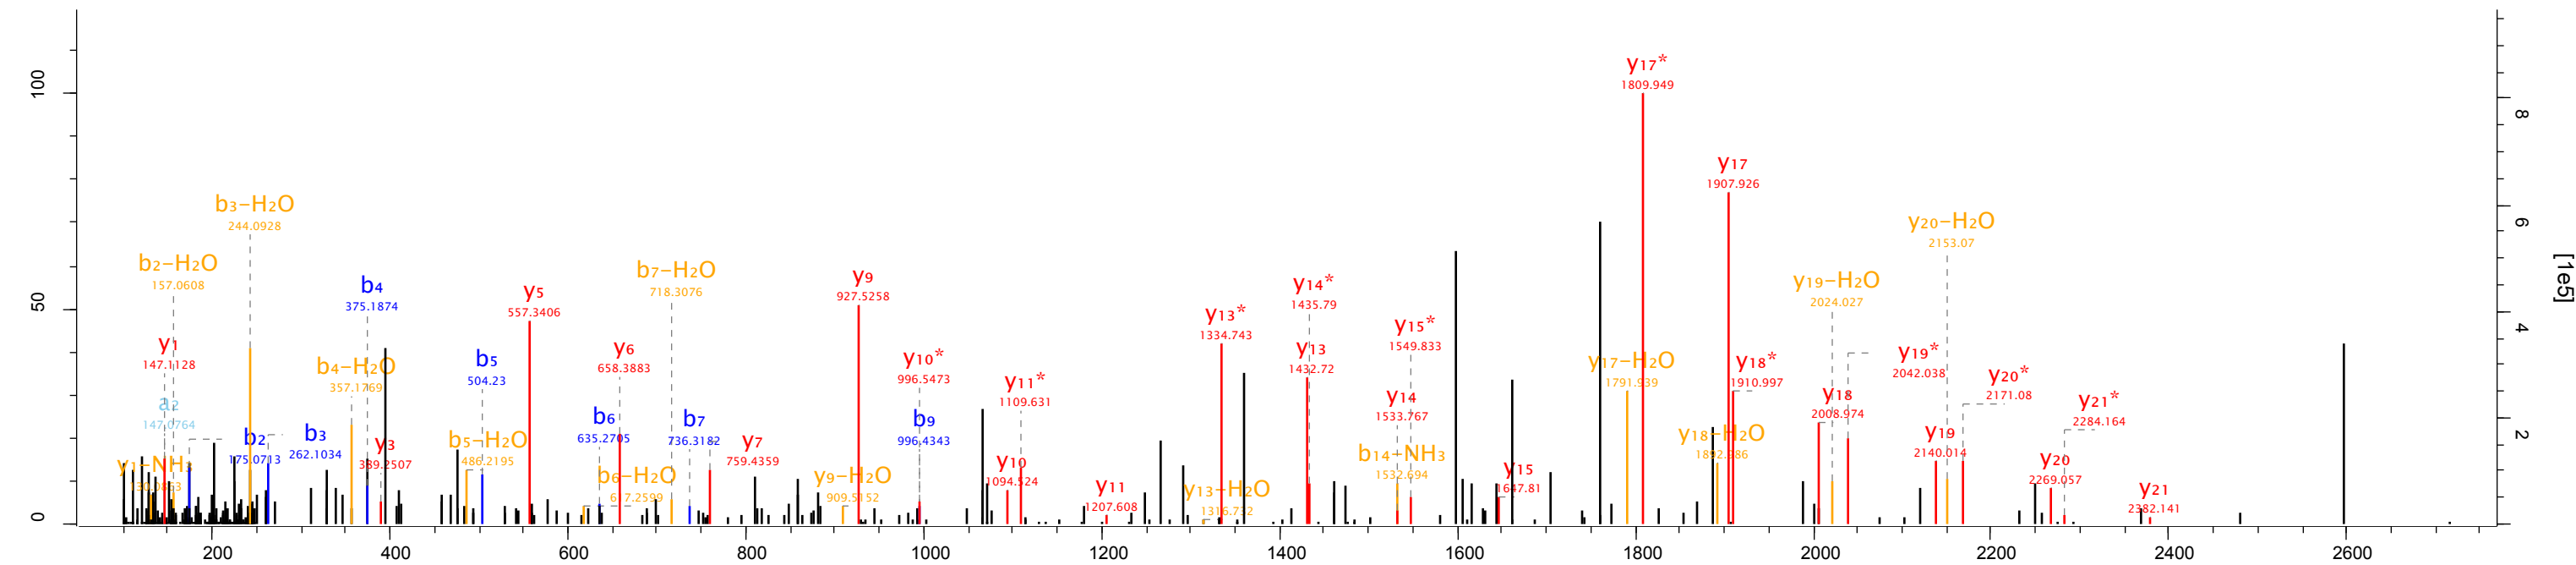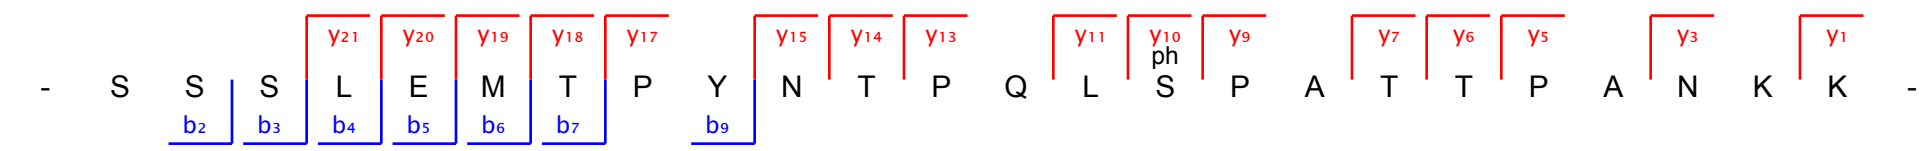

Raw file 20150812\_A375SR\_Phospho\_BR1\_06 Scan 17623 Method FTMS; HCD Score 83.65 m/z 520.25 Gene names FLRT3;FLRT1

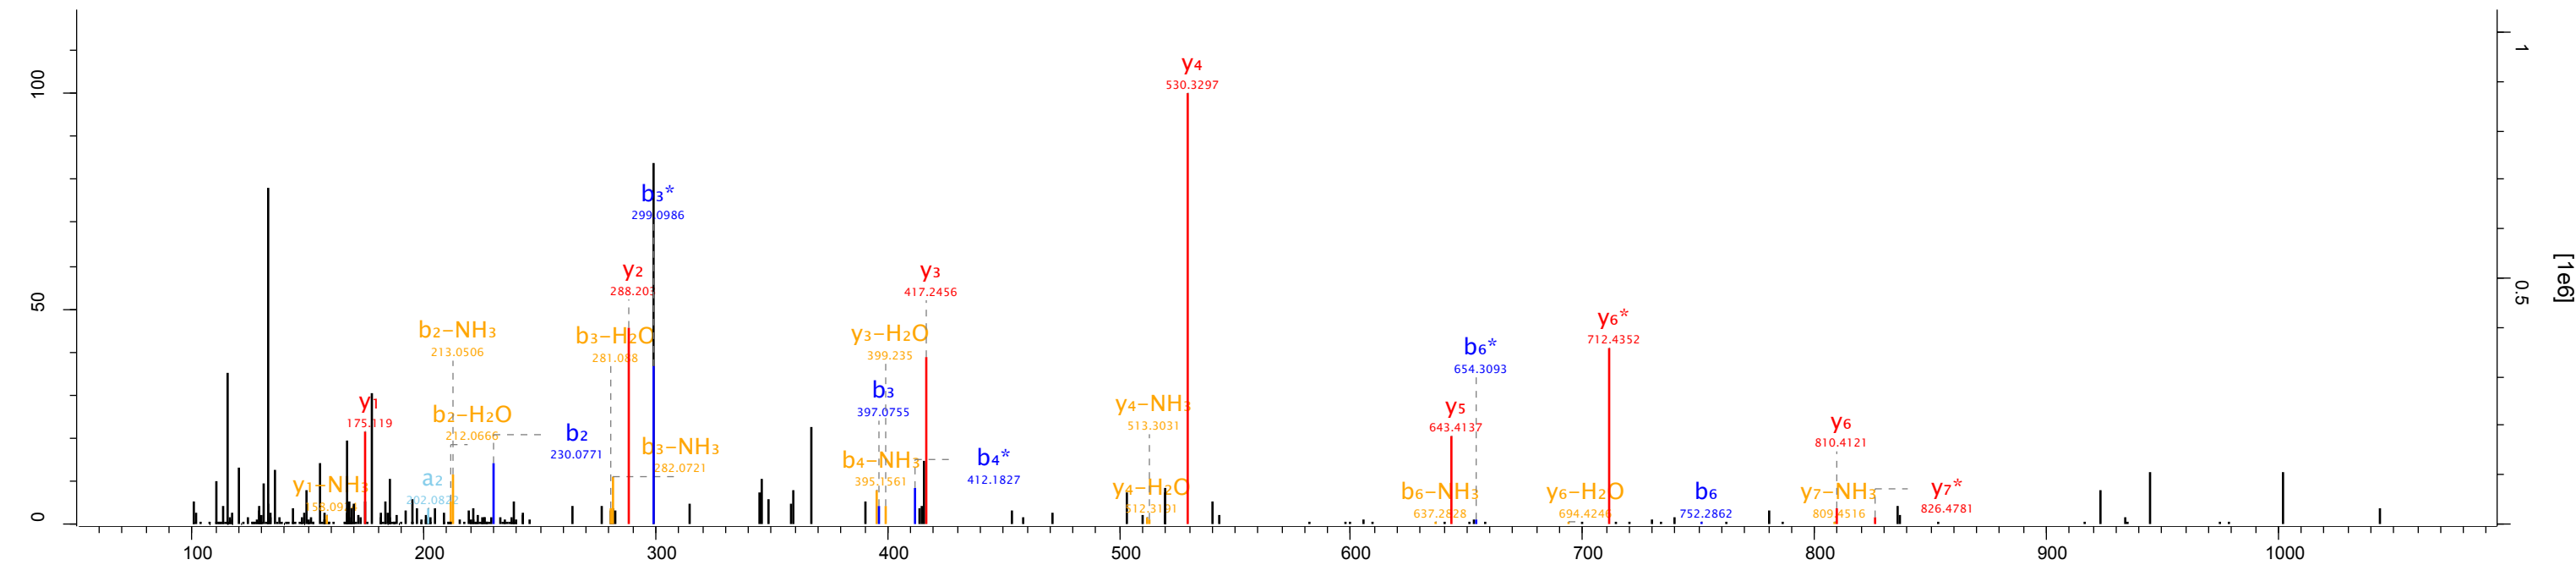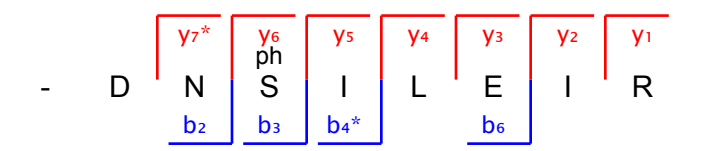



Raw file Scan Method Score m/z Gene names  
 20150812\_A375SR\_Phospho\_BR1\_06 19643 FTMS; HCD 473.19 1243.51 NSRP1

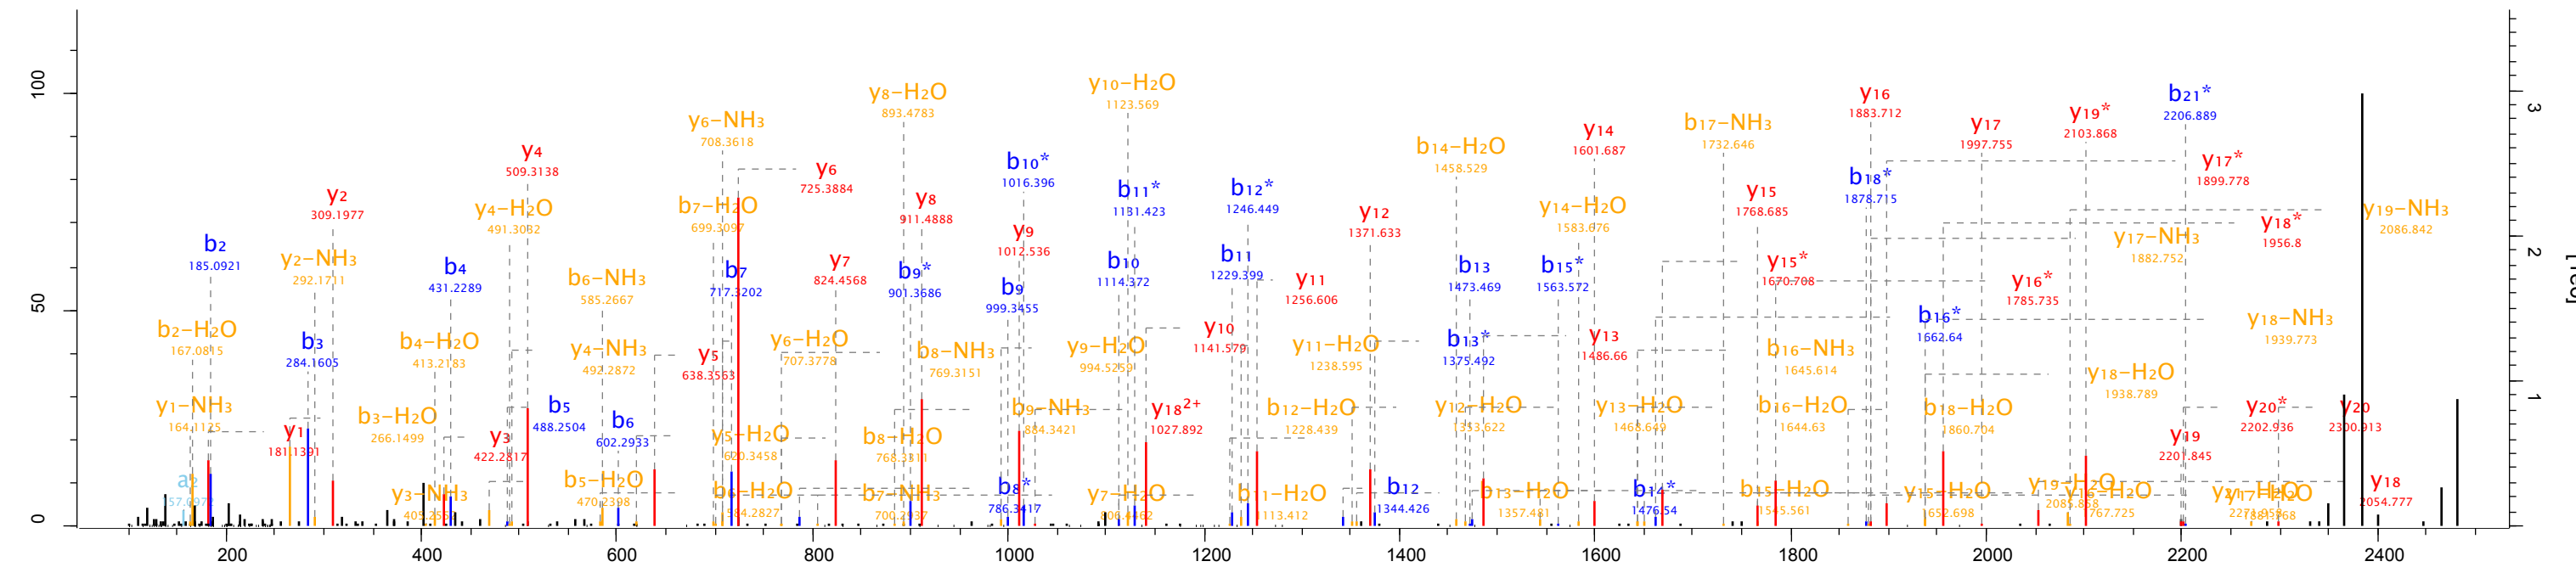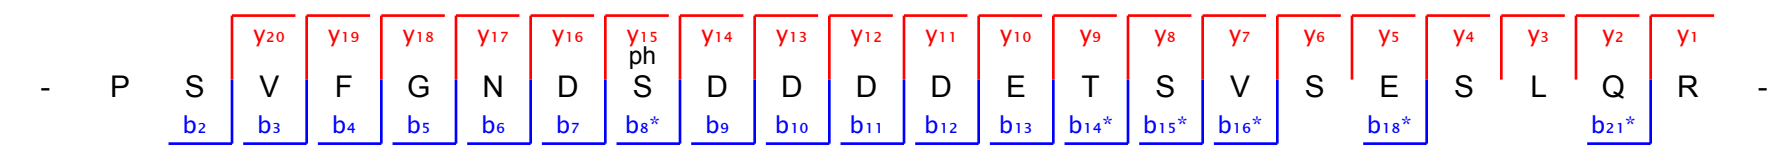

Raw file: 20150812\_A375SR\_Phospho\_BR1\_06  
 Scan: 20473 Method: FTMS; HCD Score: 155.26 m/z: 709.32 Gene names: LIMCH1

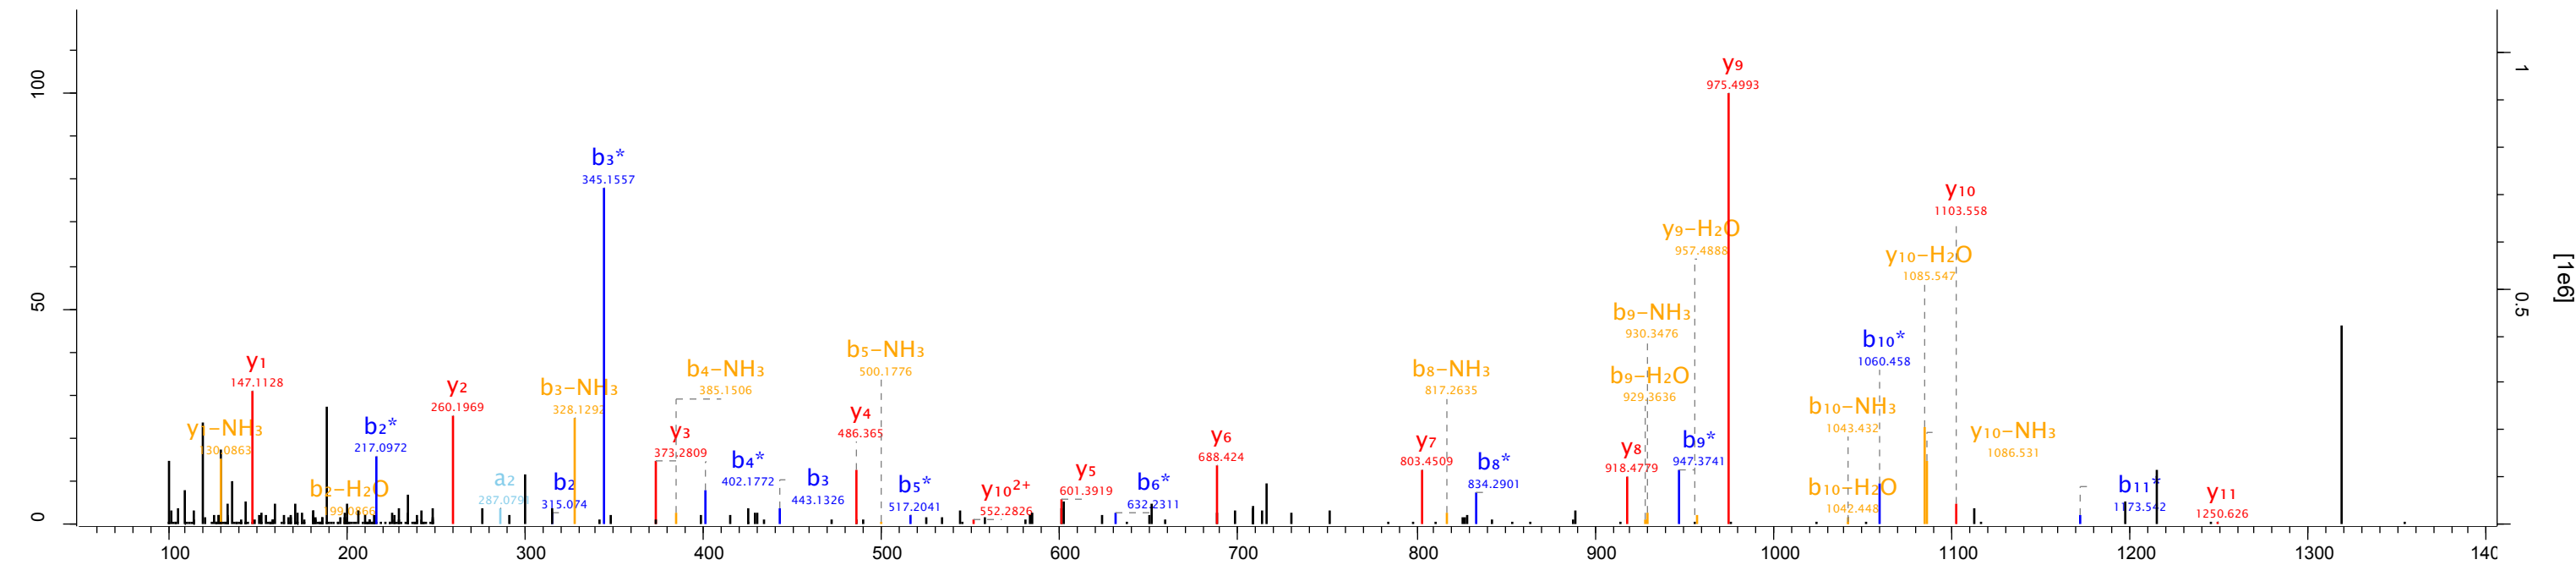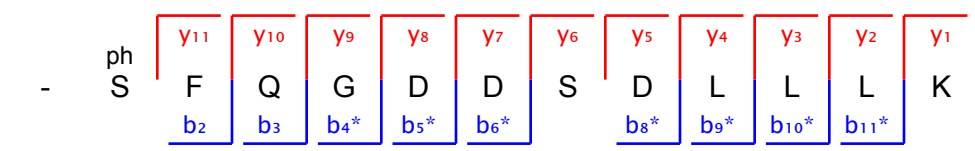

Raw file 20150812\_A375SR\_Phospho\_BR1\_06 Scan 20563 Method FTMS; HCD Score 286.71 m/z 972.42 Gene names SMEK2

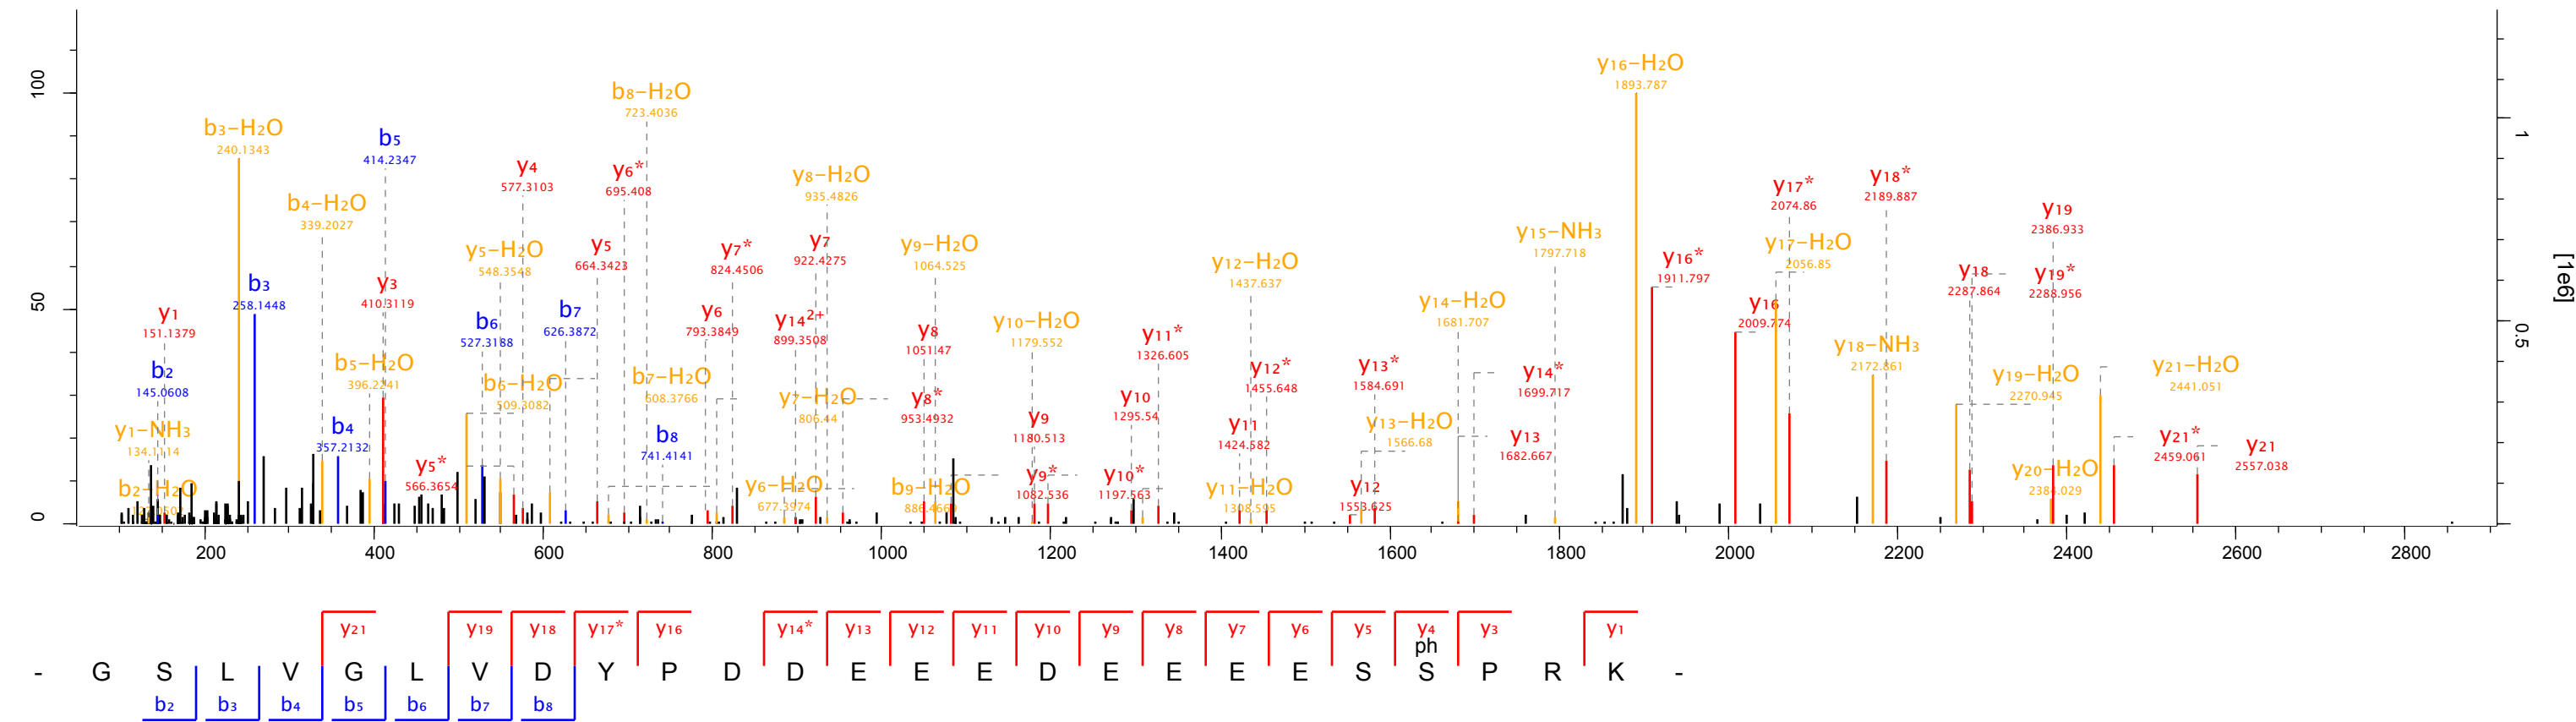



Raw file: 20150812\_A375SR\_Phospho\_BR1\_06  
 Scan: 2073 Method: FTMS; HCD Score: 216.89 m/z: 716.34 Gene names: NUFIP2

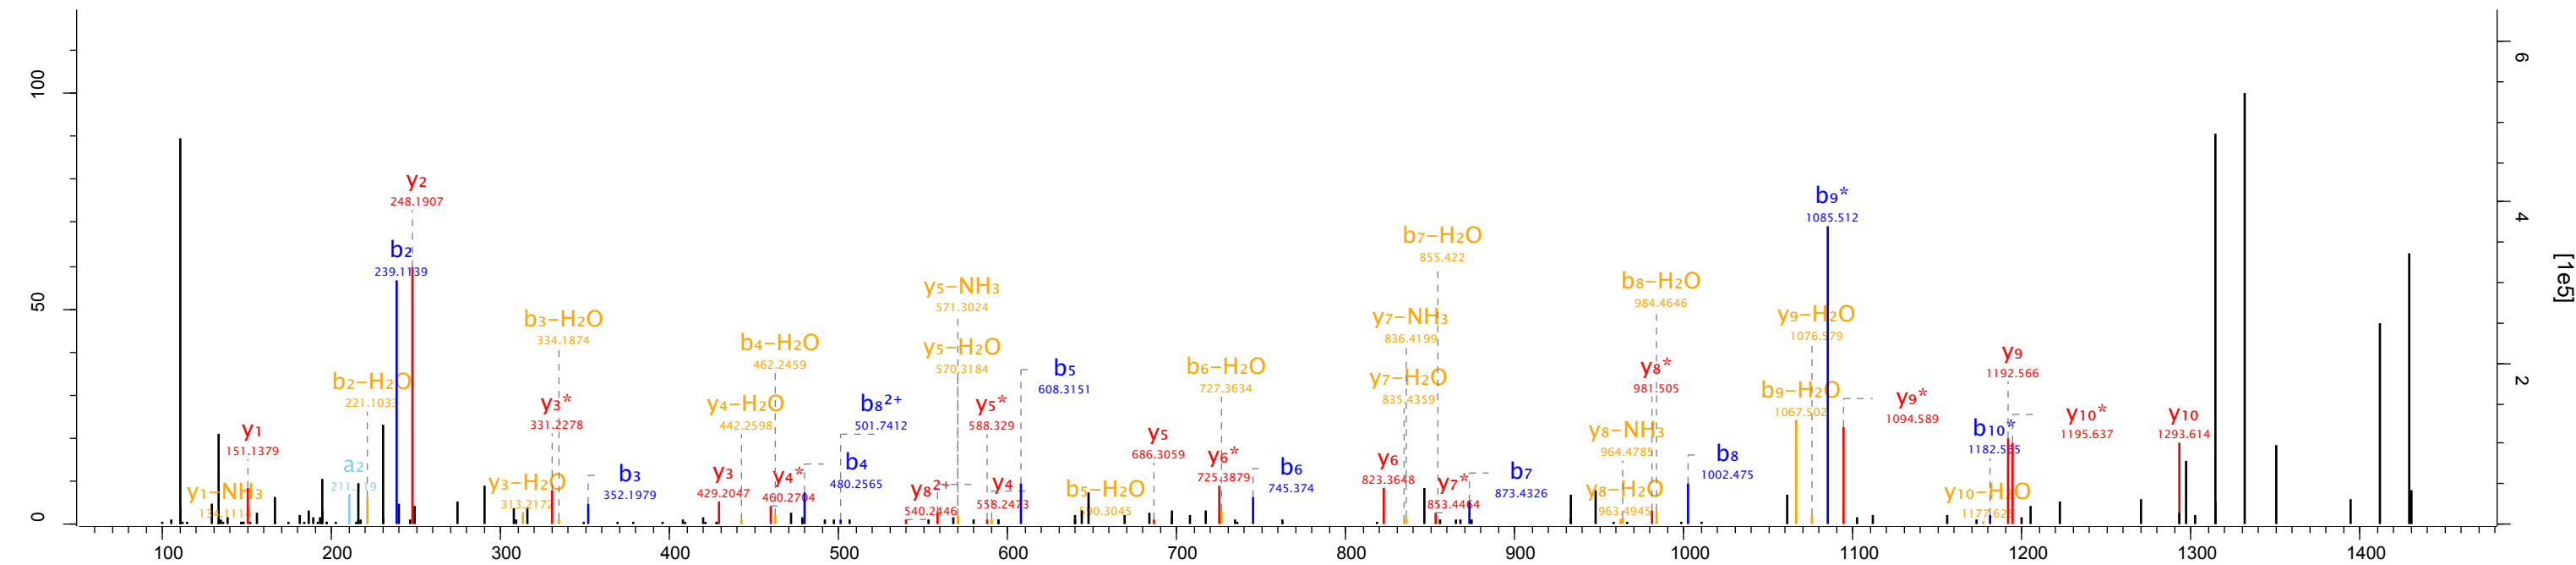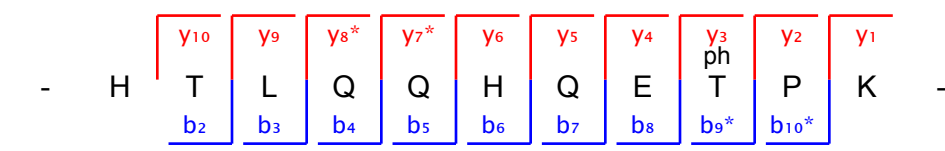

Raw file: 20150812\_A375SR\_Phospho\_BR1\_06  
 Scan: 2383 Method: FTMS; HCD Score: 164.48 m/z: 515.78 Gene names: ARHGEF7

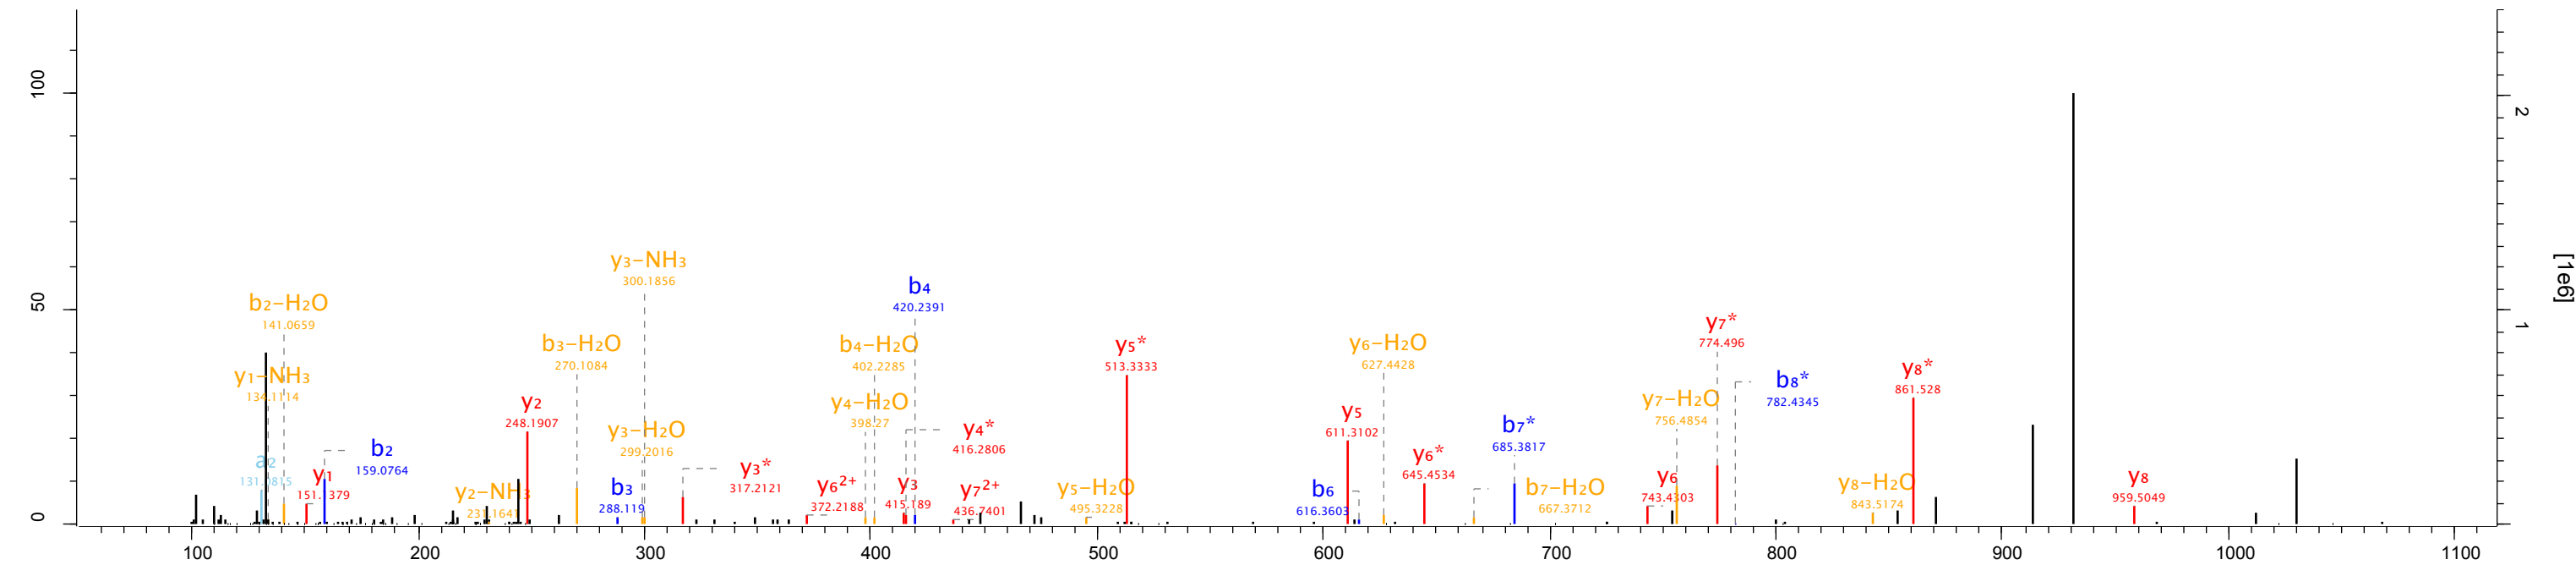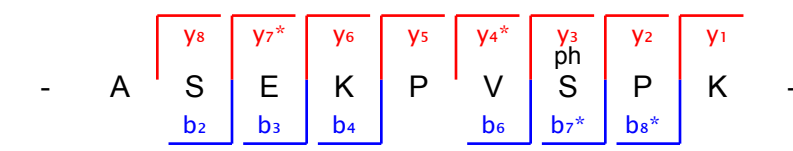

Raw file 20150812\_A375SR\_Phospho\_BR1\_06 Scan 23903 Method FTMS; HCD Score 75.34 m/z 904.17 Gene names SQSTM1

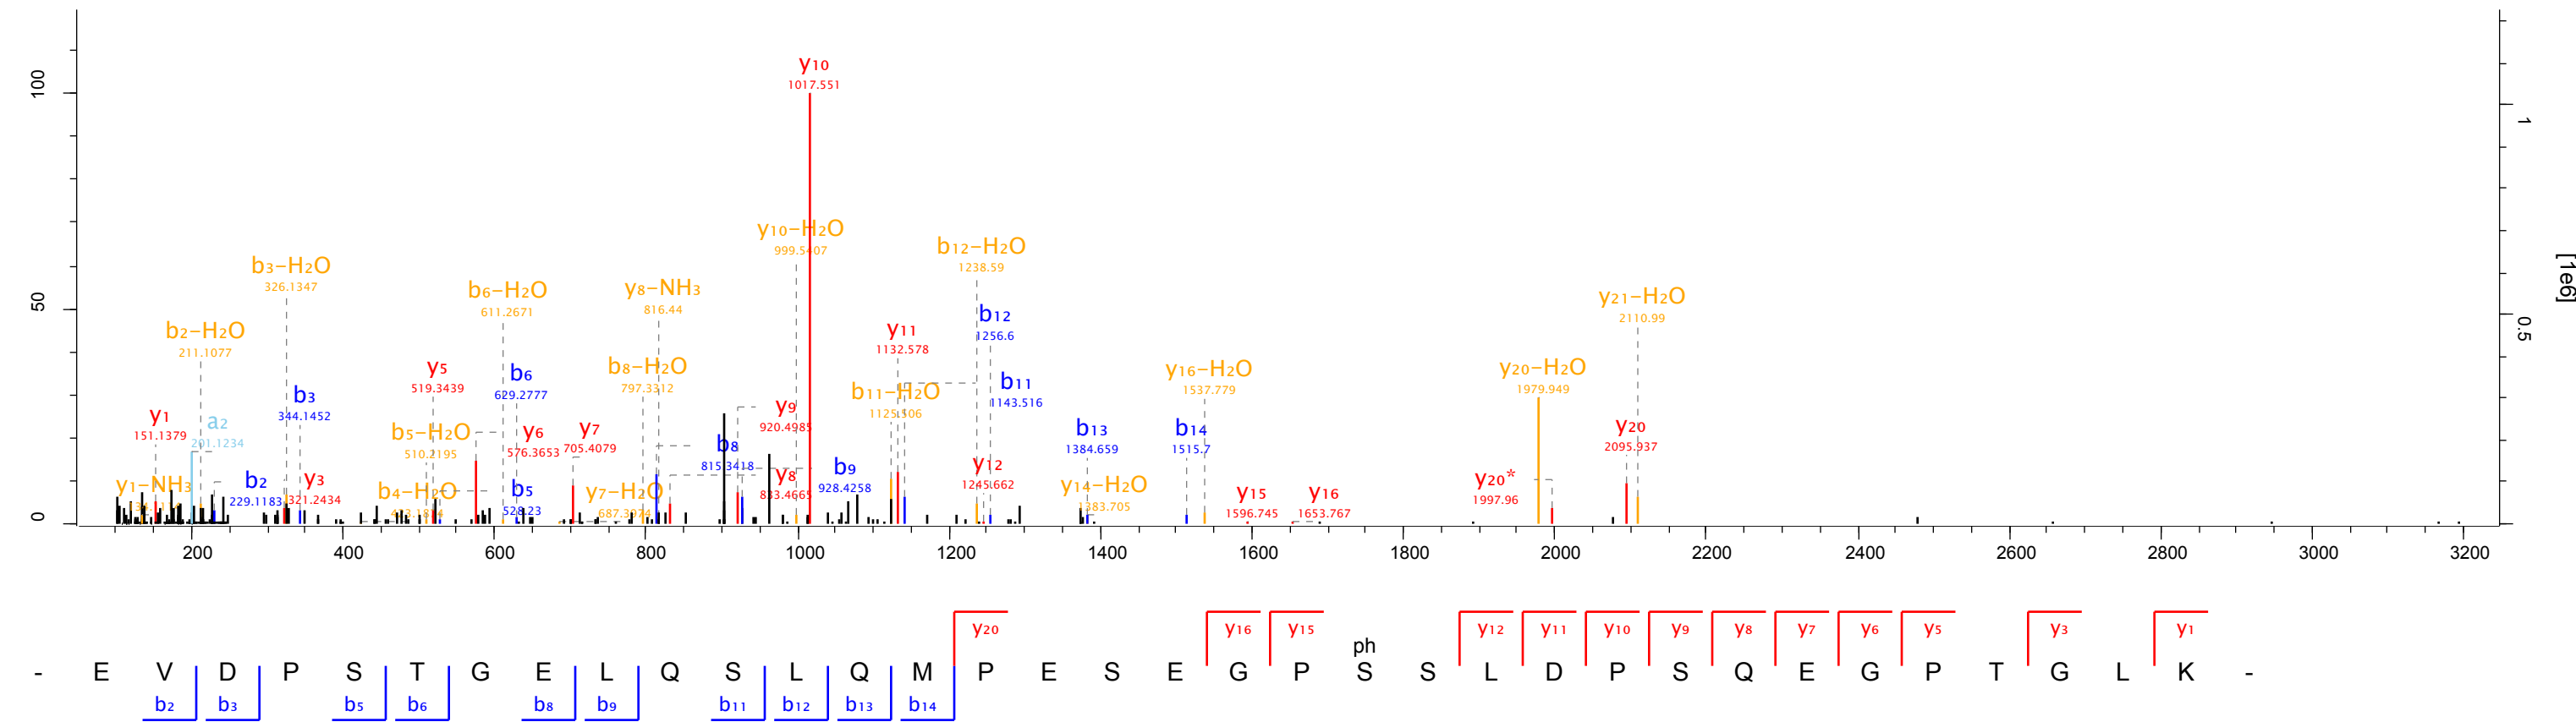

Raw file: 20150812\_A375SR\_Phospho\_BR1\_06  
 Scan: 2433 Method: FTMS; HCD Score: 112.62 m/z: 535.24 Gene names: MLF2

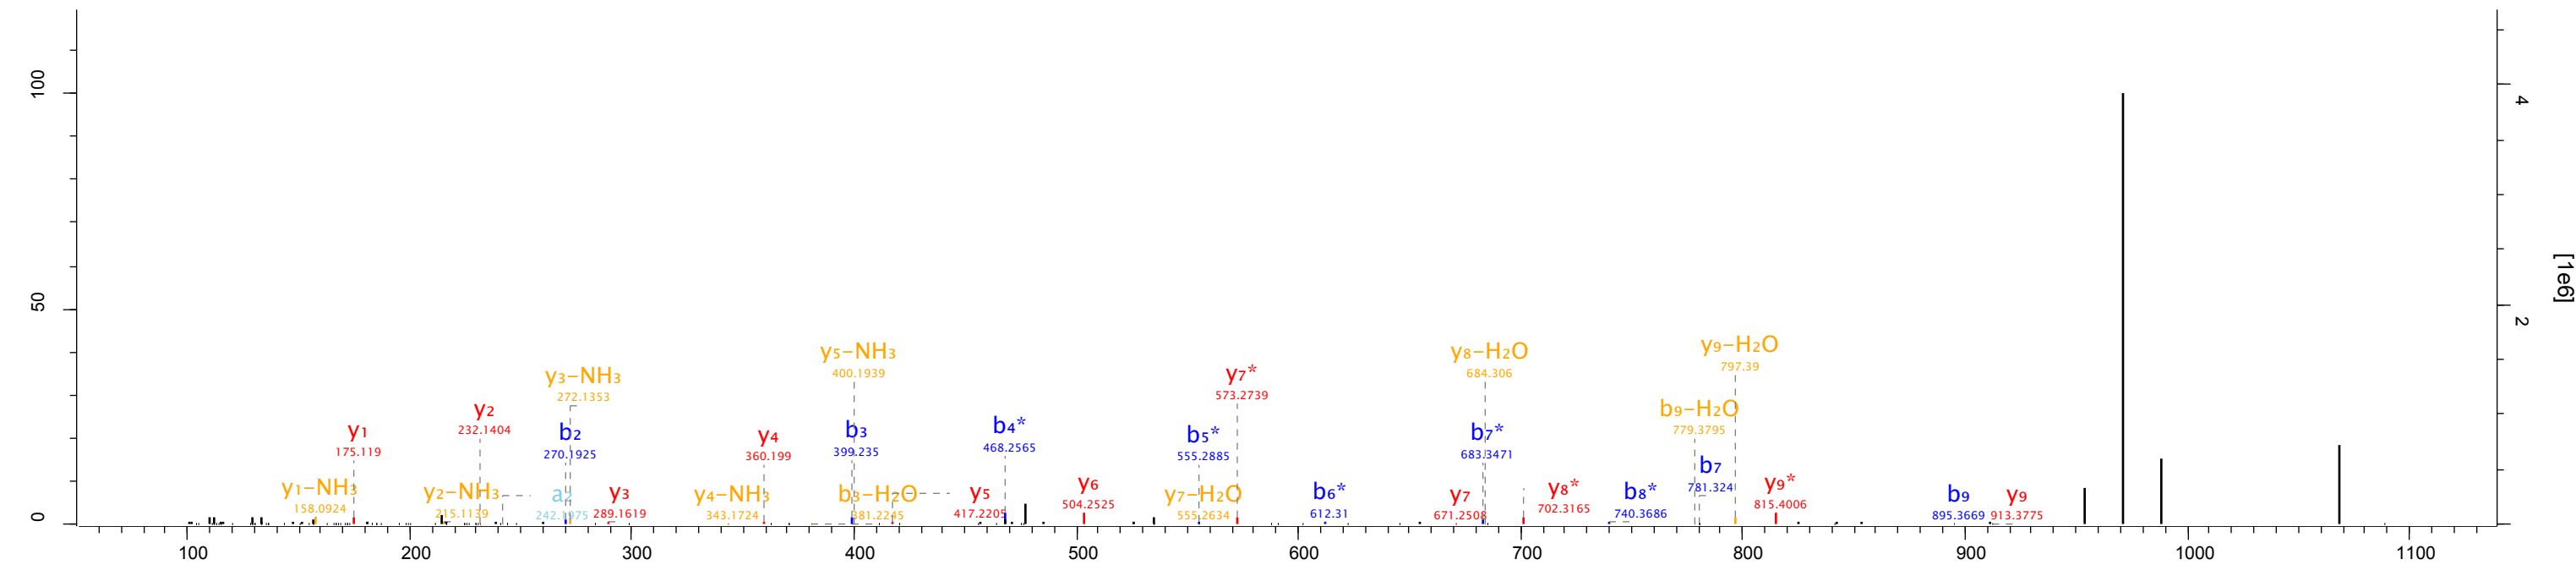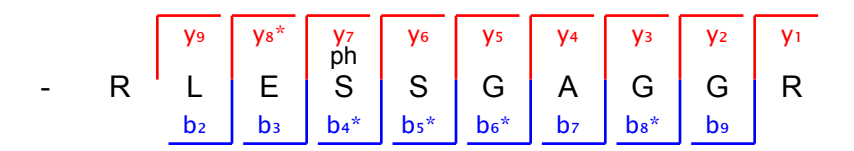

Raw file 20150812\_A375SR\_Phospho\_BR1\_06 Scan 25253 Method FTMS; HCD Score 73.8 m/z 1116.2 Gene names DDX24

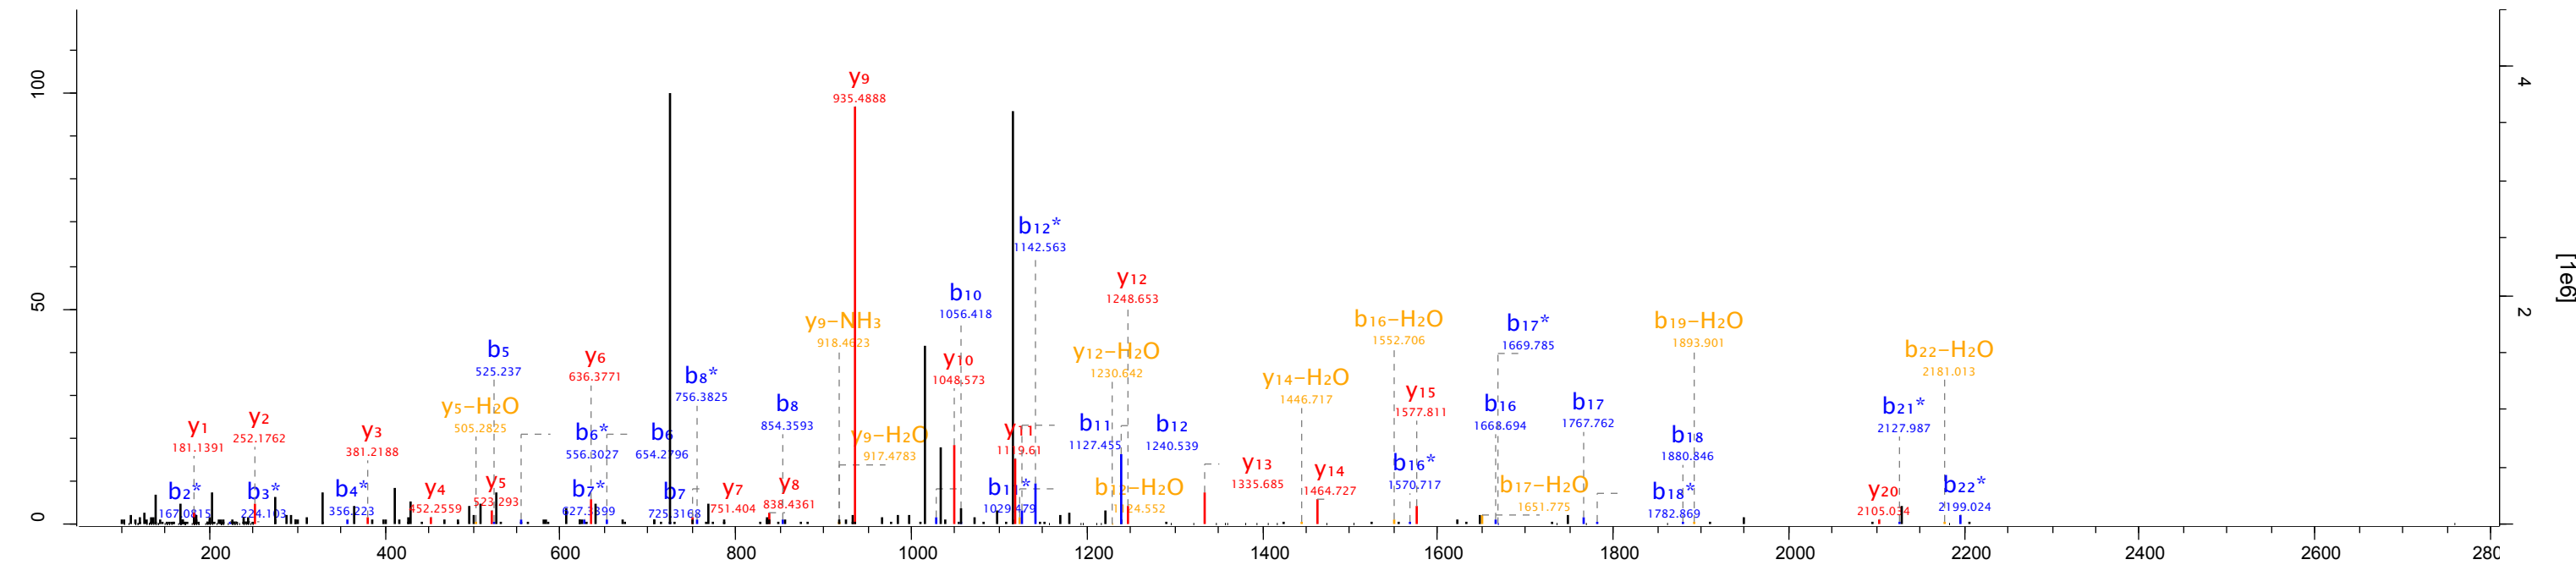

Sequence: S P G K A E A E S D A L P D D T V I E S E A L P S D I A A E A R

Fragmentation sites (b ions): b2\*, b3\*, b4\*, b5, b6, b7, b8, b10, b11, b12, b16, b17, b18, b21\*, b22\*

Fragmentation sites (y ions): y20, y15, y14, y13, y12, y11, y10, y9, y8, y7, y6, y5, y4, y3, y2, y1

Raw file: 20150812\_A375SR\_Phospho\_BR1\_06  
 Scan: 3113 Method: FTMS; HCD Score: 132.08 m/z: 386.93 Gene names: RBM15

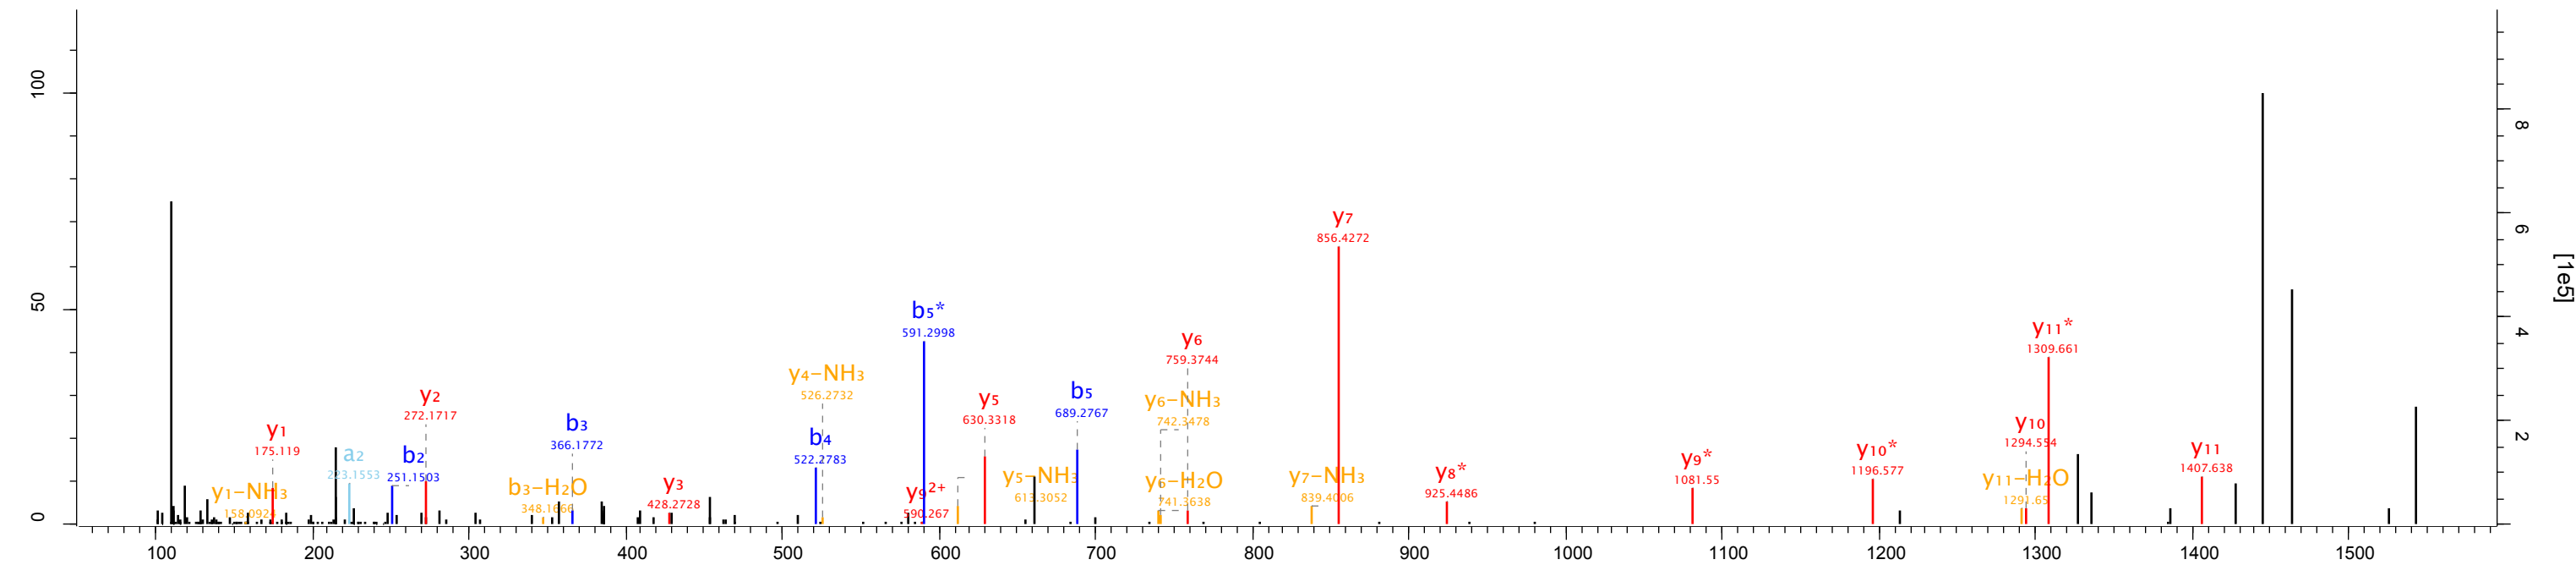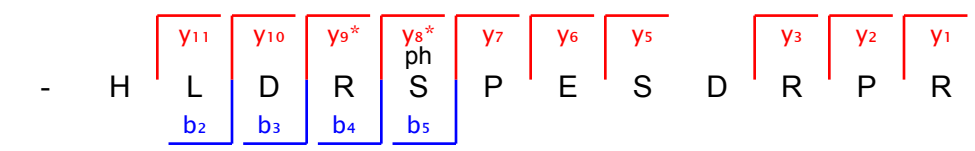

Raw file: 20150812\_A375SR\_Phospho\_BR1\_06  
 Scan: 3313 Method: FTMS; HCD Score: 57.15 m/z: 488.56 Gene names: ERC1

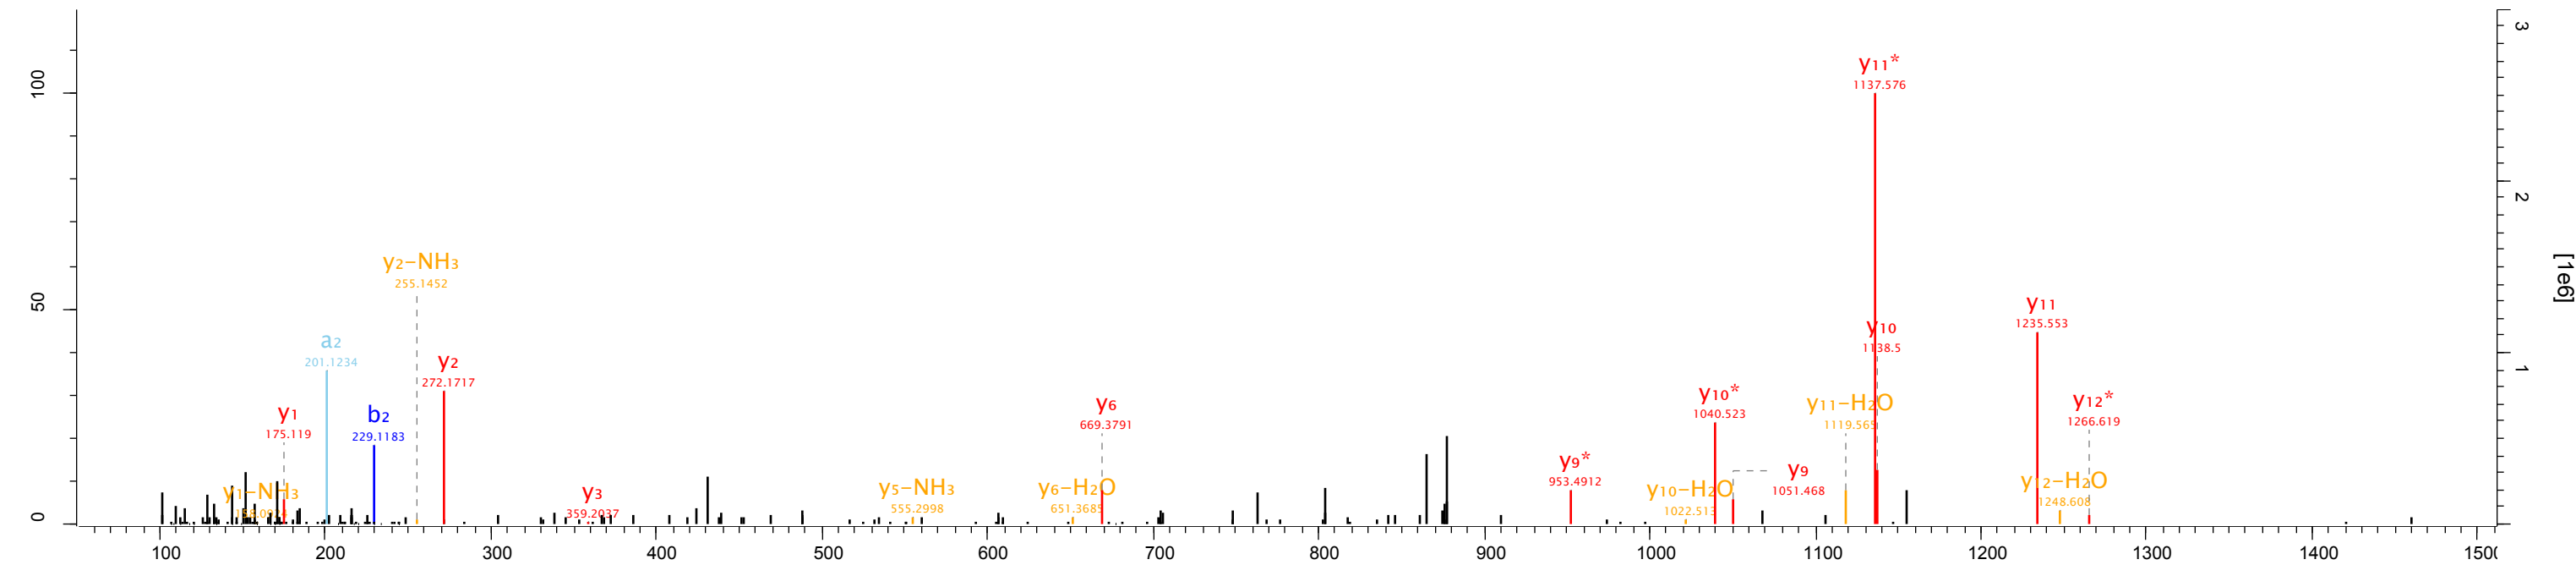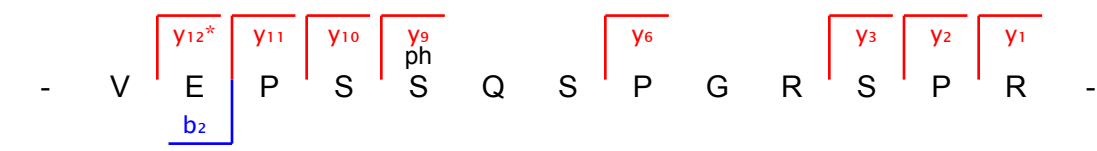

Raw file 20150812\_A375SR\_Phospho\_BR1\_06 Scan 3413 Method FTMS; HCD Score 312.39 m/z 831.37 Gene names TBC1D4

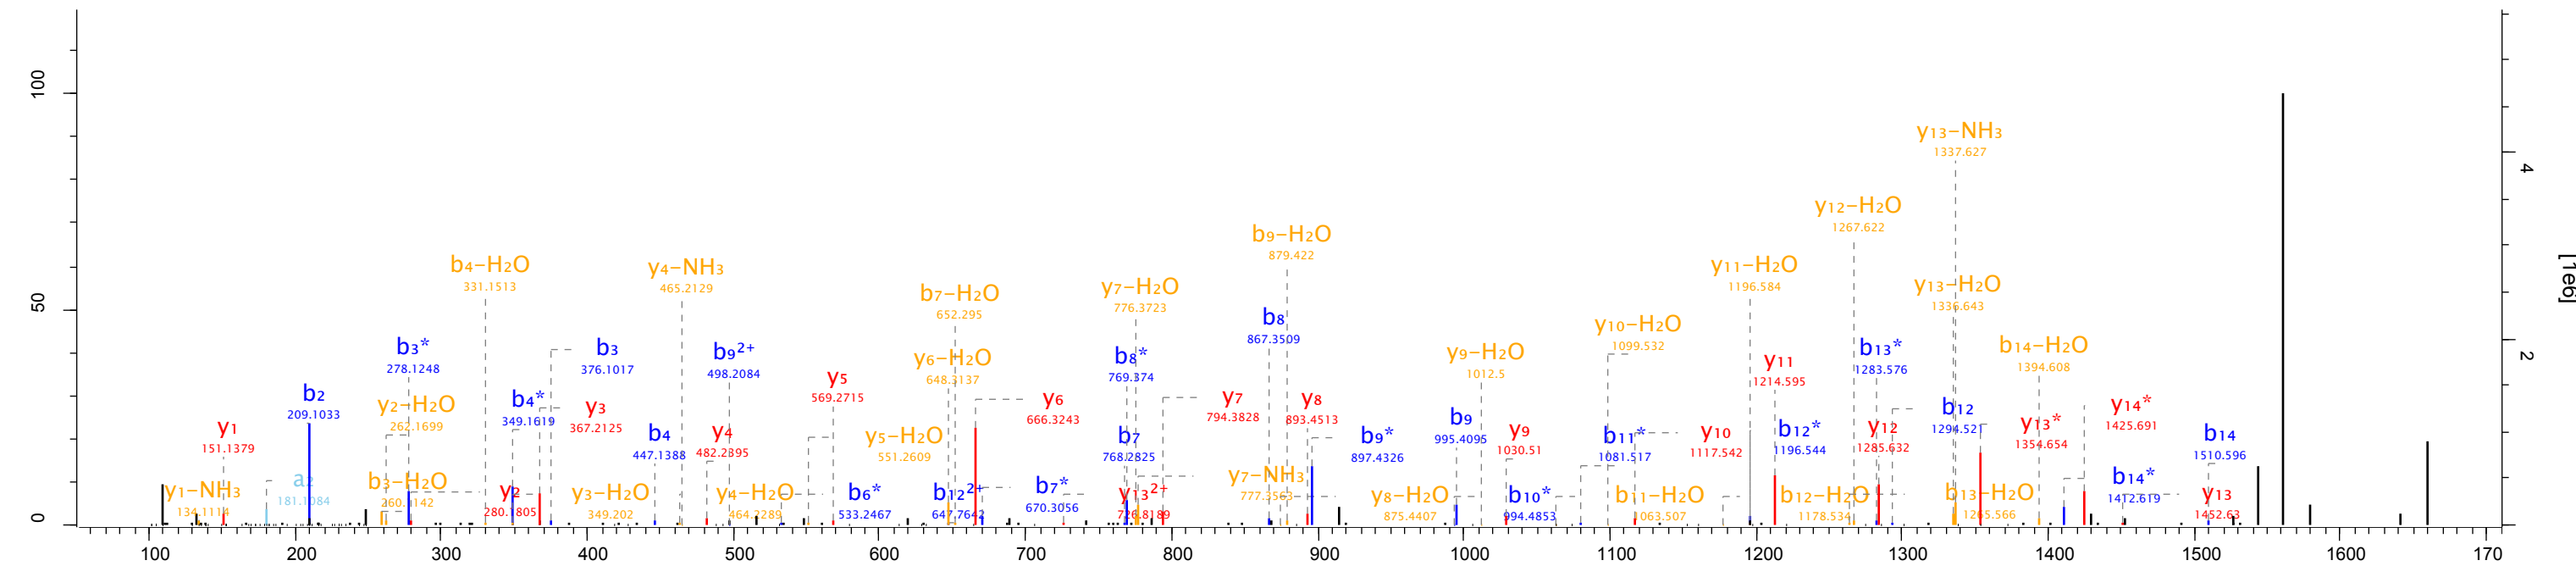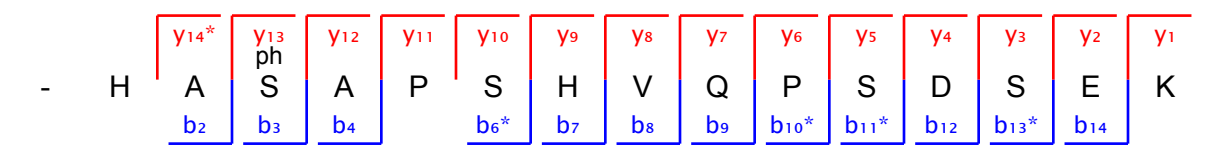



Raw file: 20150812\_A375SR\_Phospho\_BR1\_06  
 Scan: 3703 Method: FTMS; HCD Score: 83.36 m/z: 463.21 Gene names: CTPS1

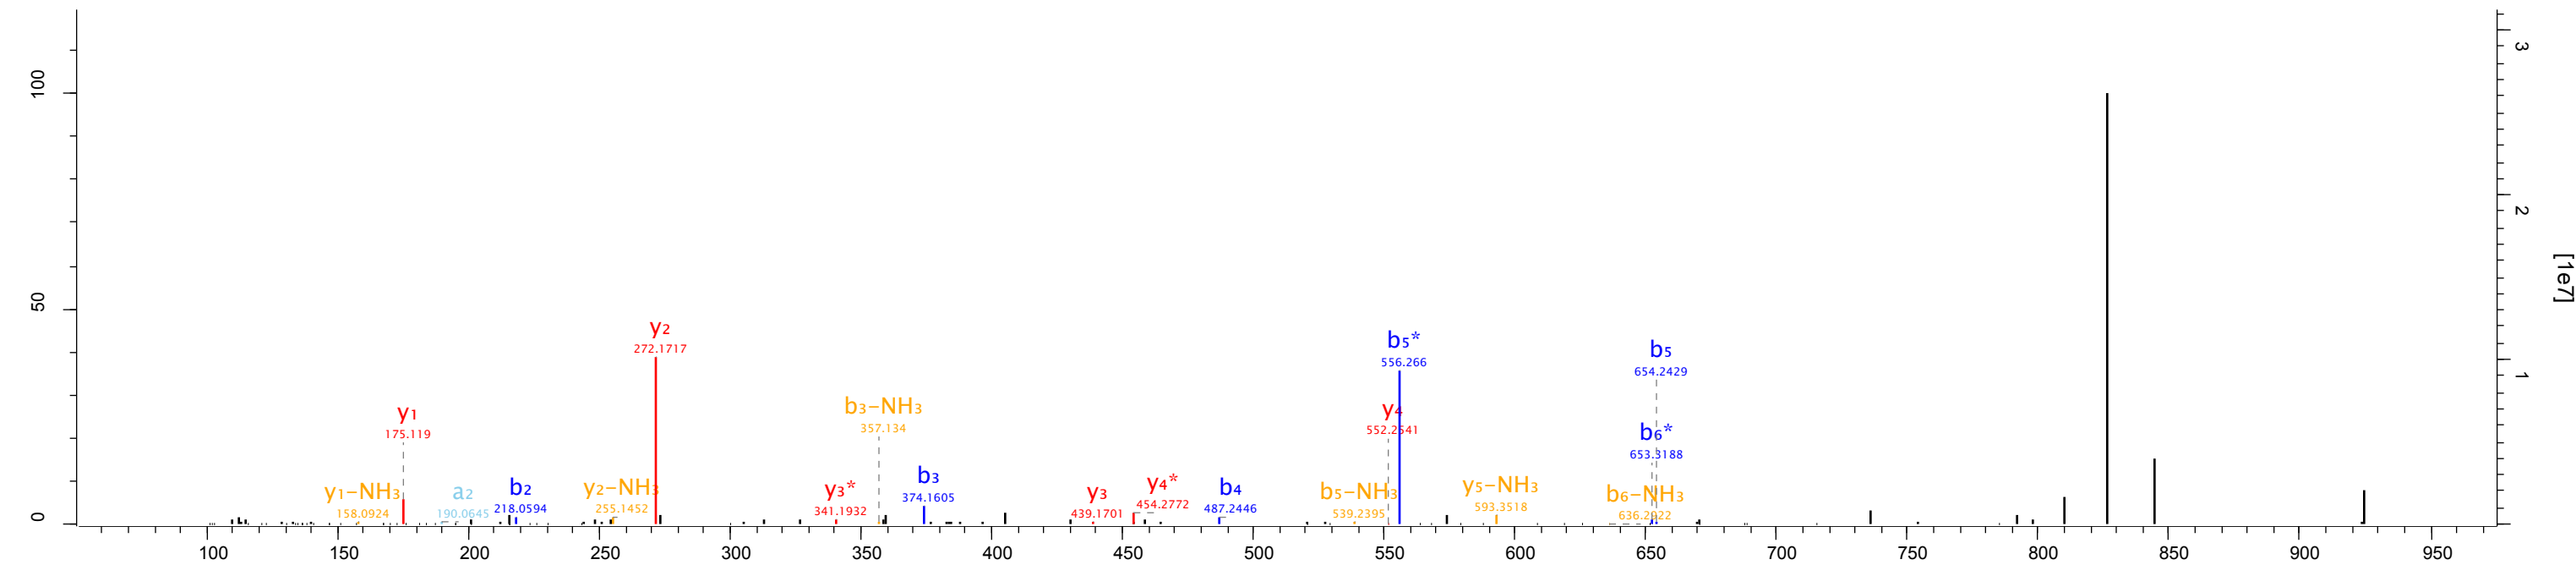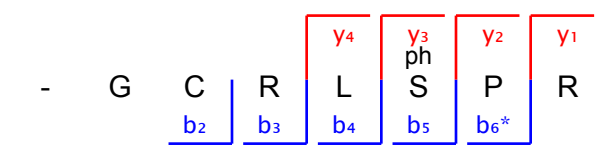

Raw file: 20150812\_A375SR\_Phospho\_BR1\_06  
 Scan: 4173 Method: FTMS; HCD Score: 48.61 m/z: 466.19 Gene names: SRRT

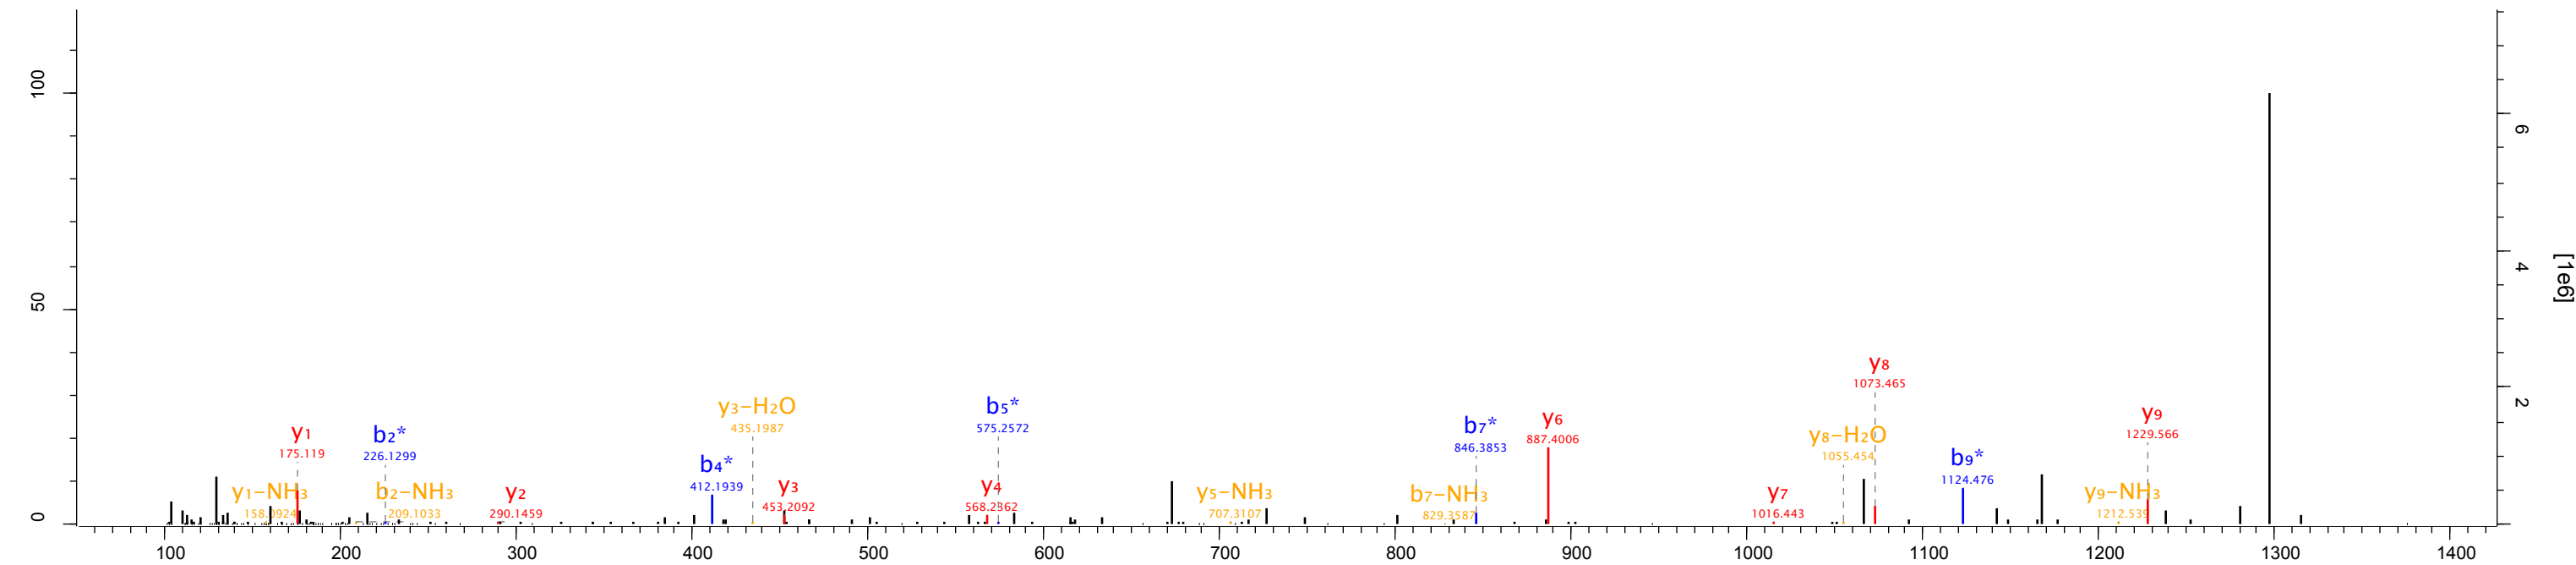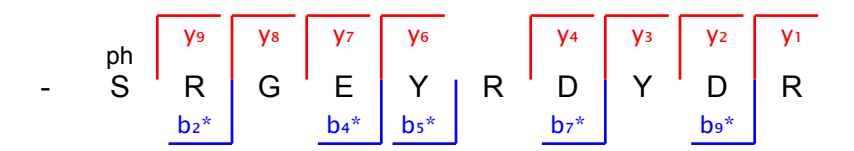

Raw file: 20150812\_A375SR\_Phospho\_BR1\_06  
 Scan: 5773 Method: FTMS; HCD Score: 80.01 m/z: 544.75 Gene names: ERBB2IP

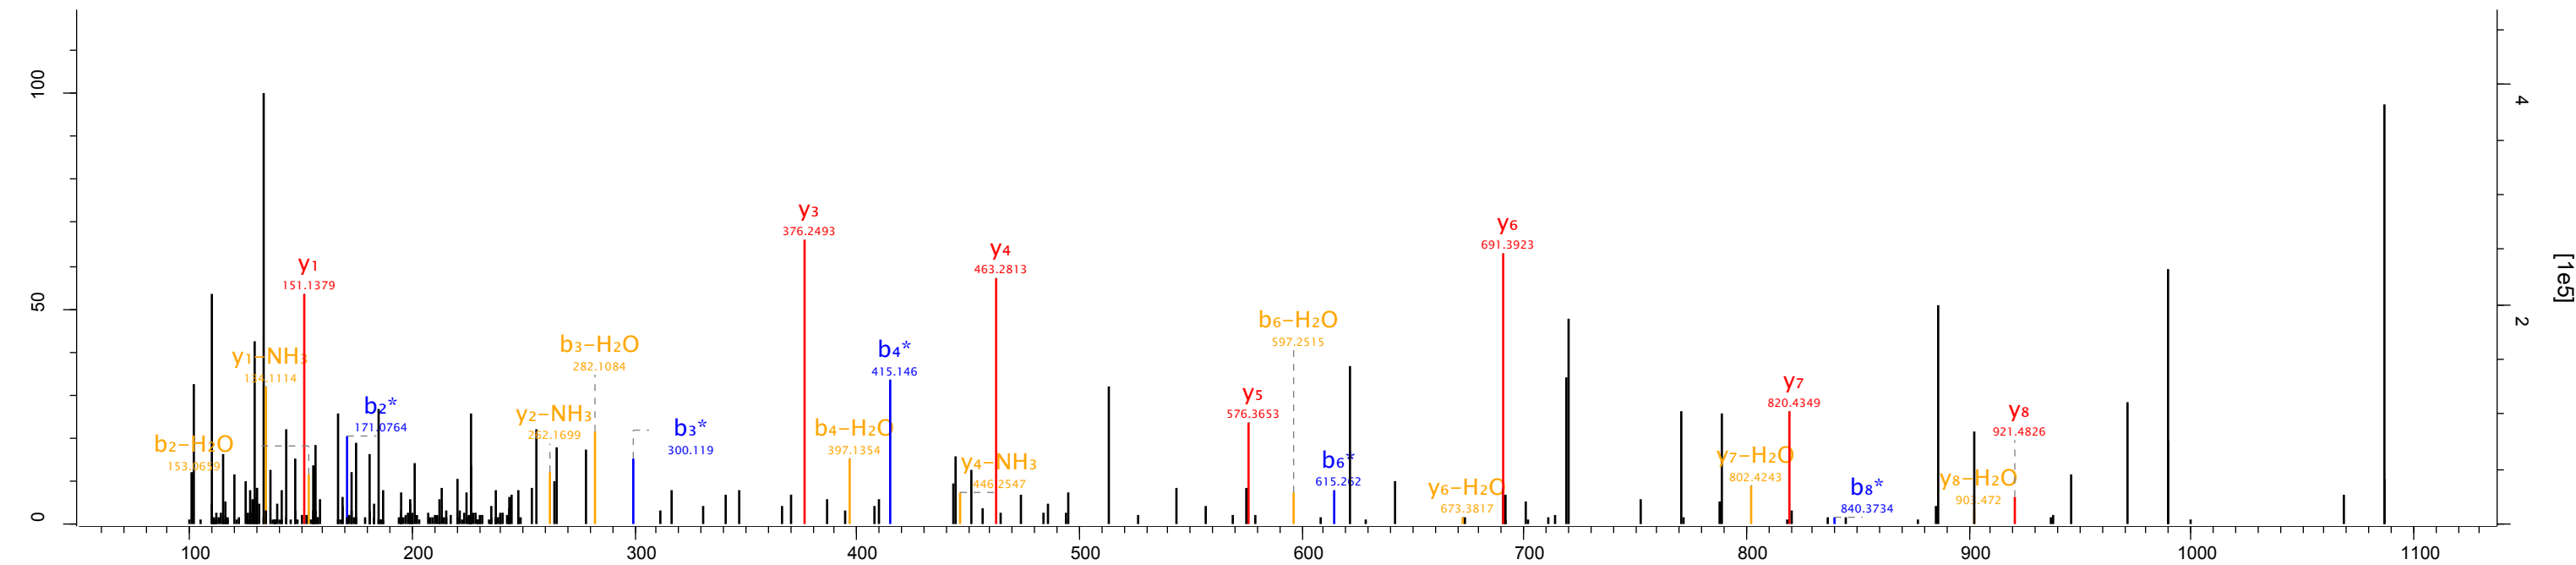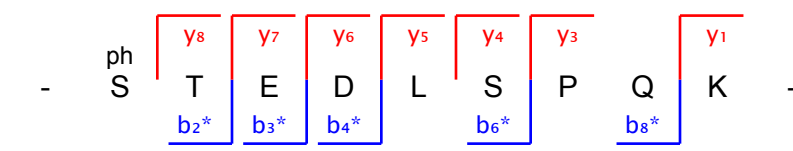

Raw file 20150812\_A375SR\_Phospho\_BR1\_06 Scan 6113 Method FTMS; HCD Score 95.51 m/z 487.23 Gene names EXOC1

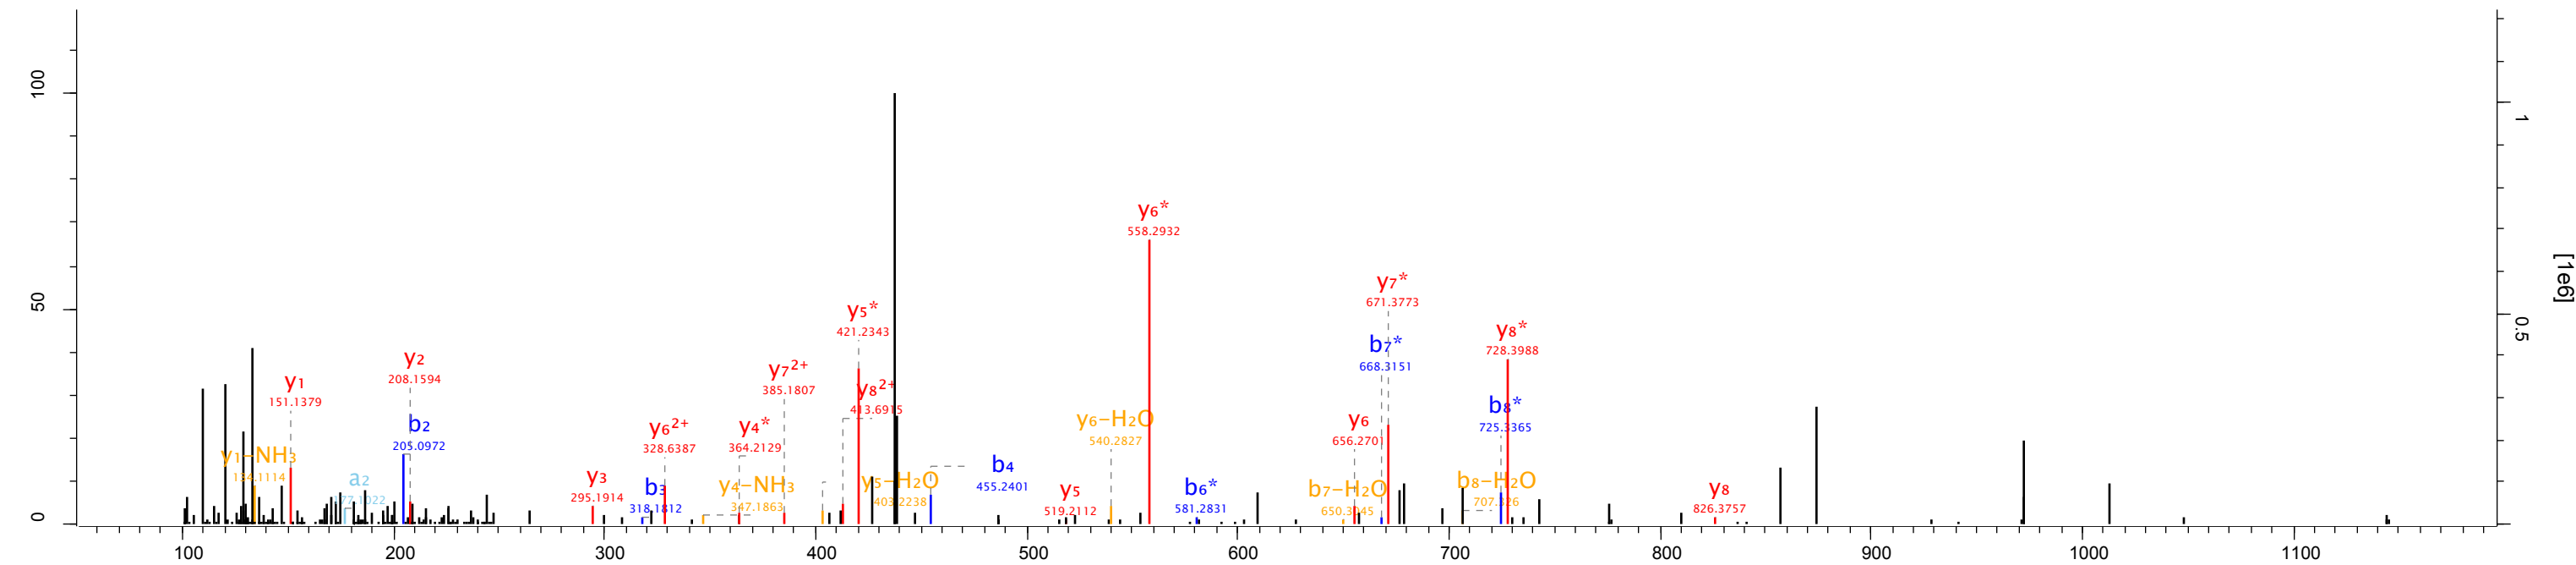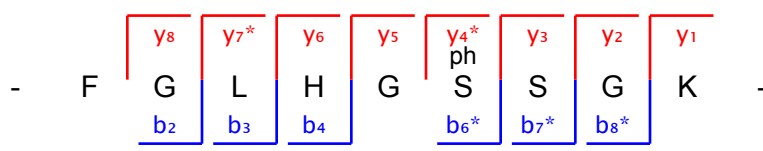

Raw file: 20150812\_A375SR\_Phospho\_BR1\_06  
 Scan: 6833 Method: FTMS; HCD Score: 162.44 m/z: 809.41 Gene names: GPATCH8

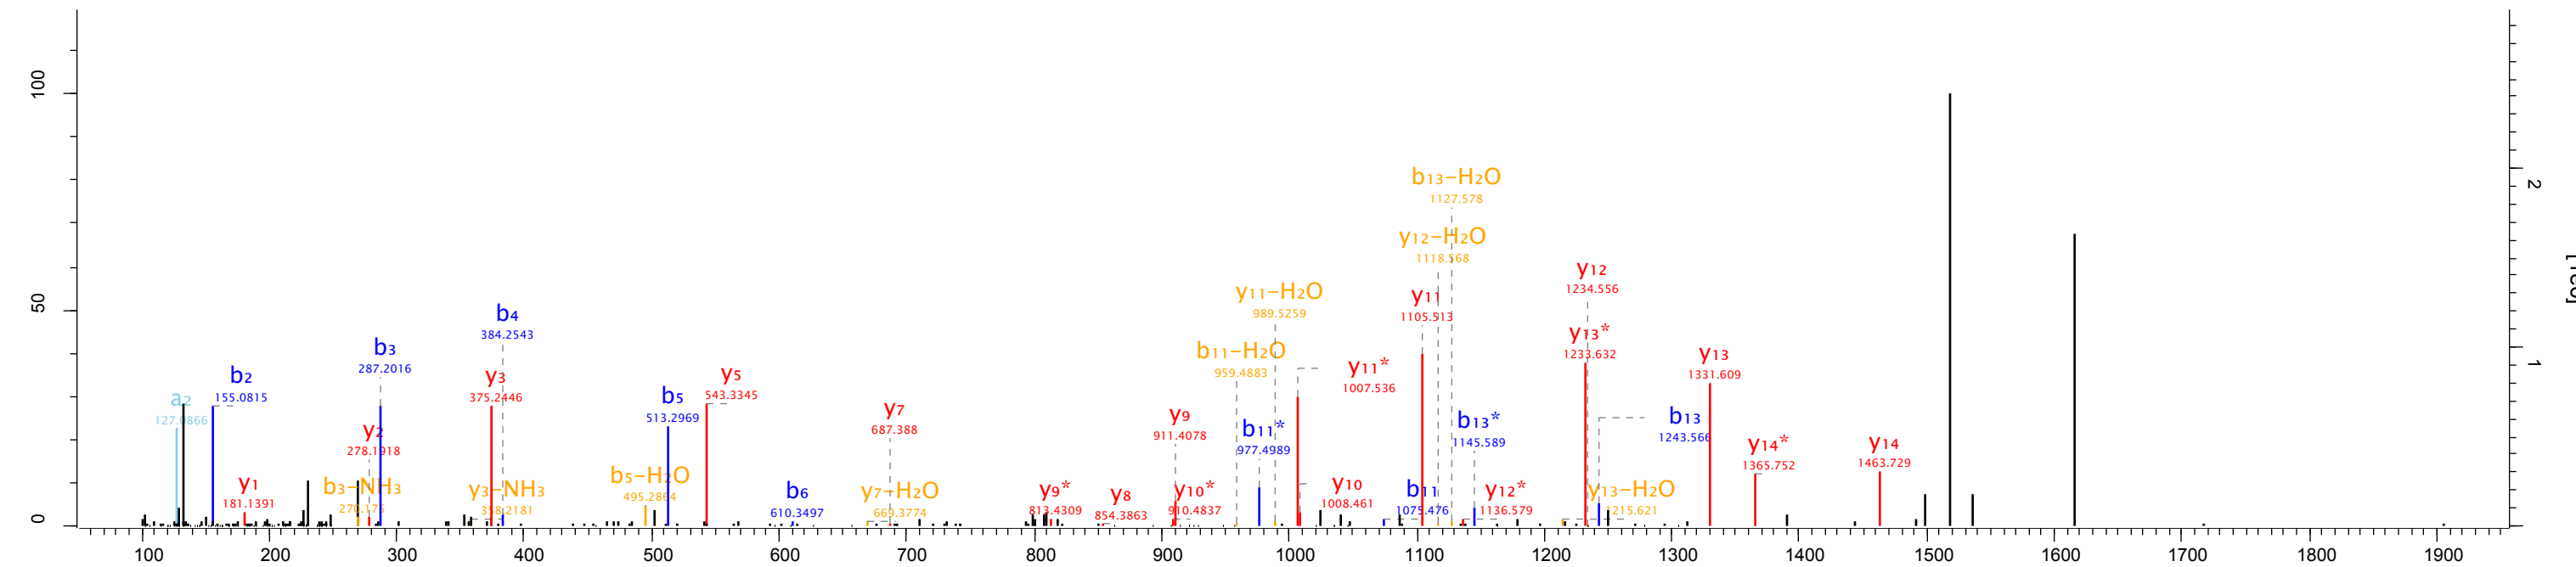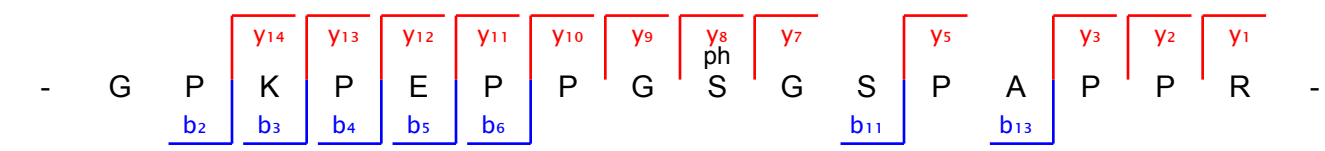

Raw file 20150812\_A375SR\_Phospho\_BR1\_06 Scan 7193 Method FTMS; HCD Score 65.02 m/z 851.86

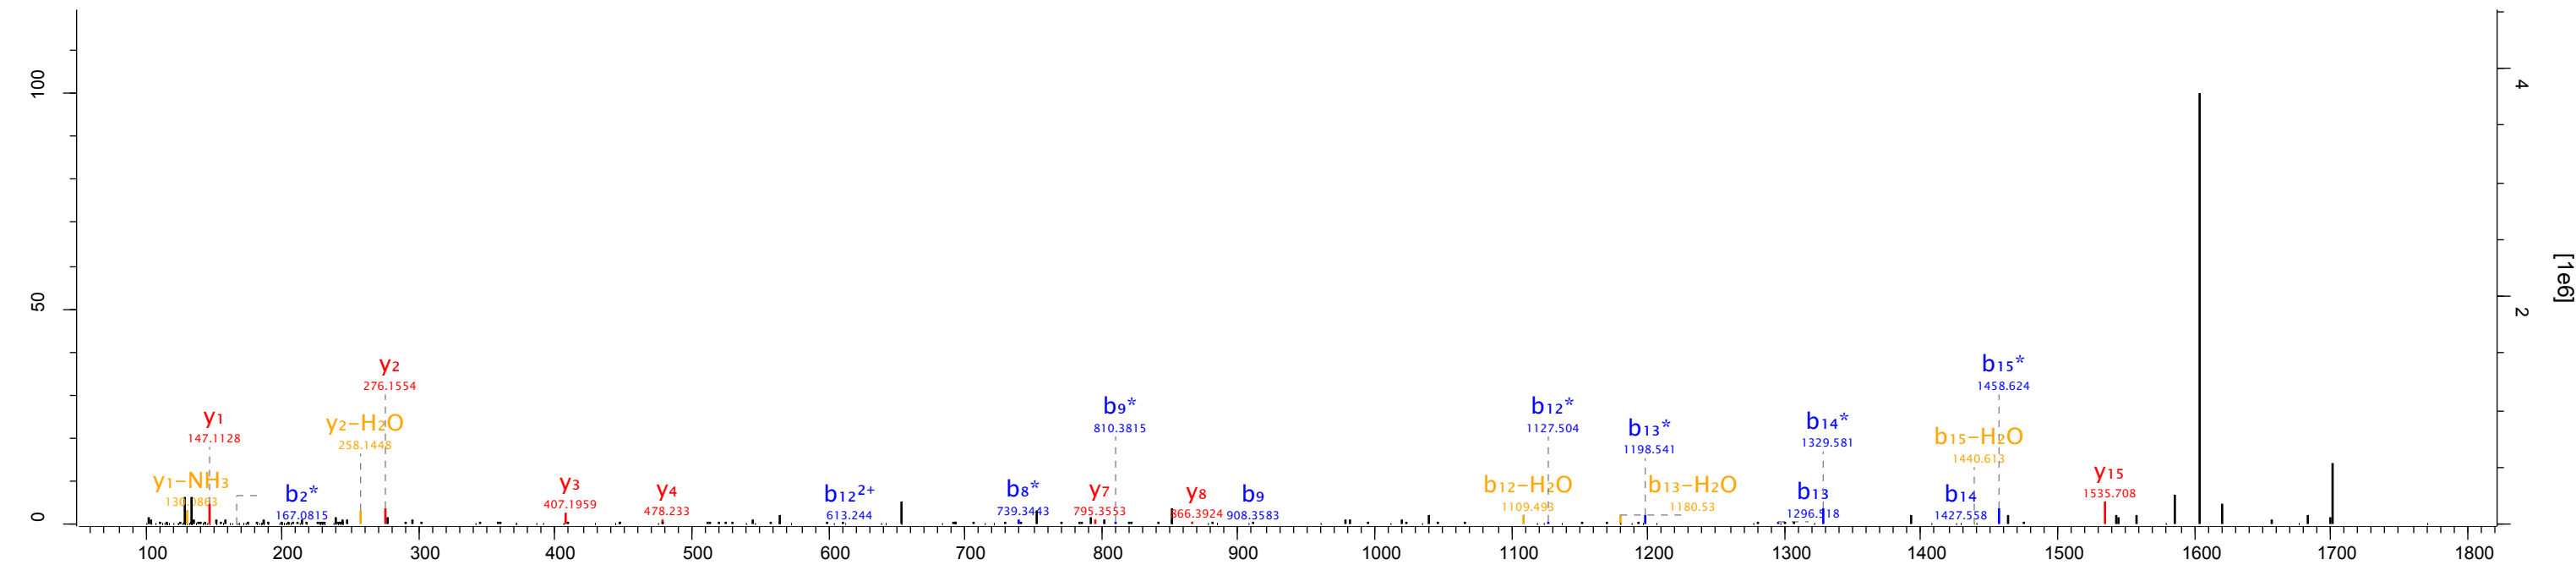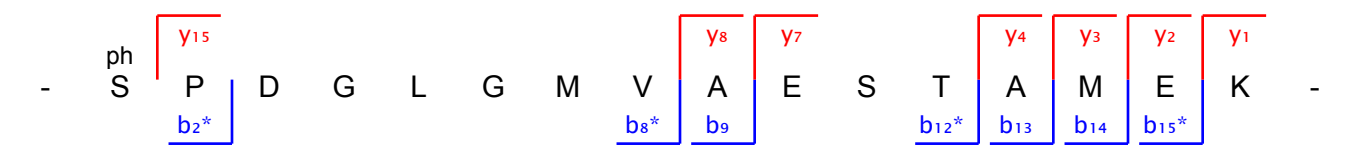

Raw file: 20150812\_A375SR\_Phospho\_BR1\_06  
 Scan: 7673 Method: FTMS; HCD Score: 73.5 m/z: 483.7 Gene names: TCF20

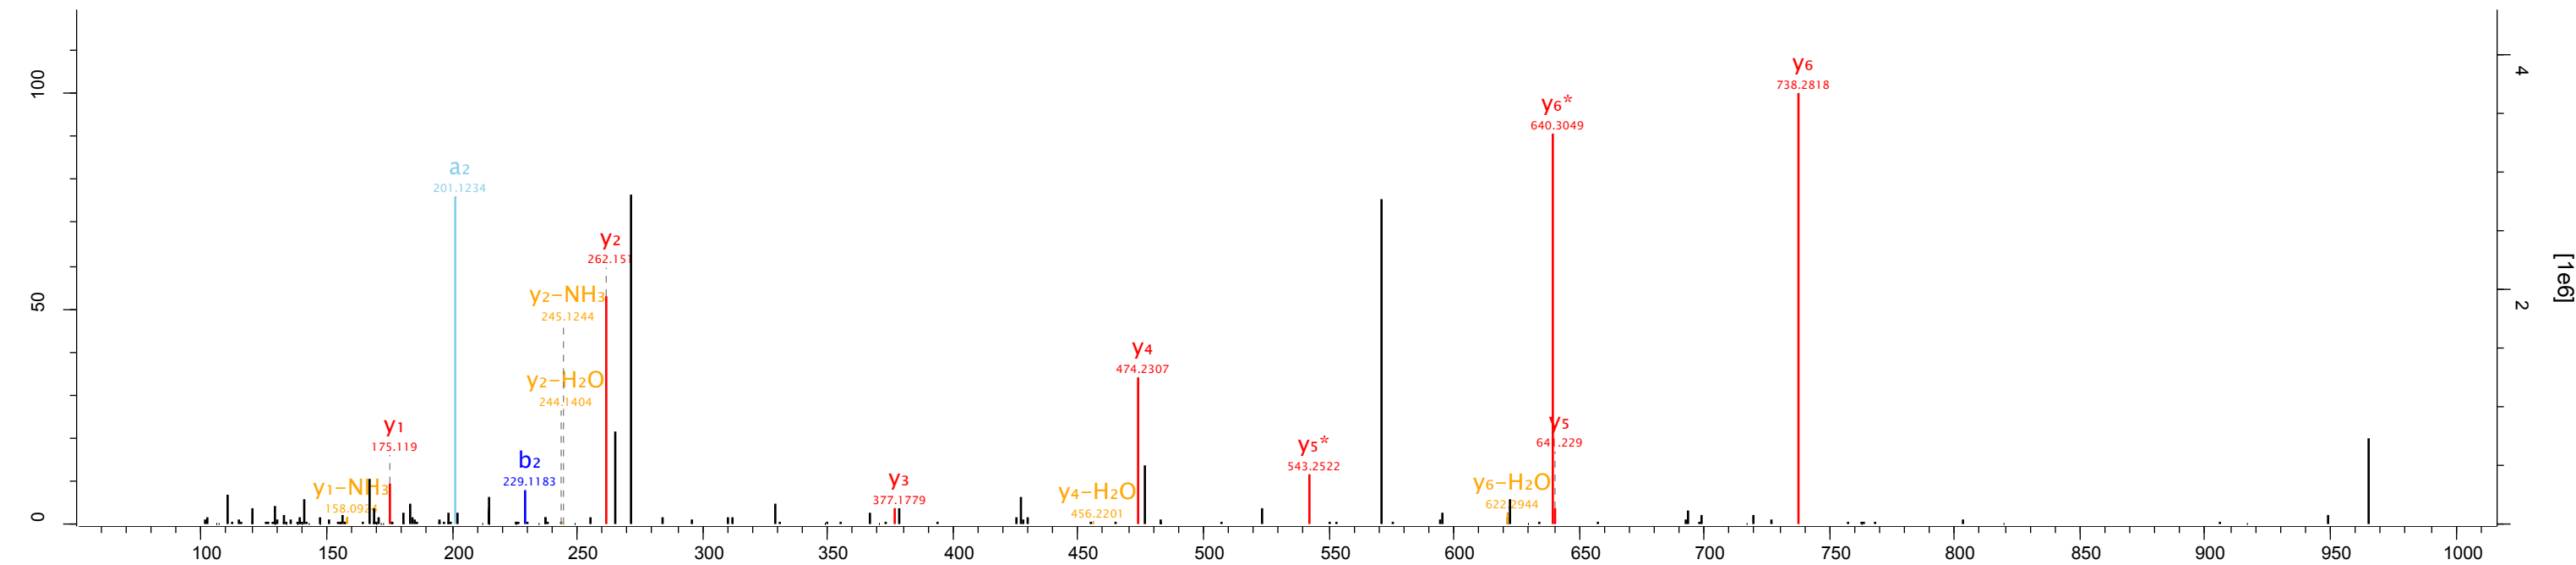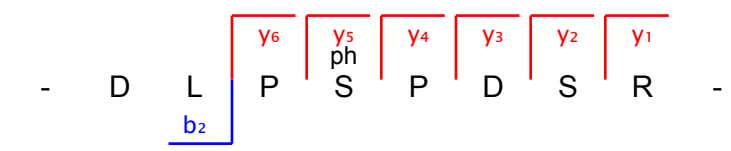

Raw file: 20150812\_A375SR\_Phospho\_BR1\_06  
 Scan: 8033 Method: FTMS; HCD Score: 79.24 m/z: 593.74 Gene names: LUC7L2;C7orf55

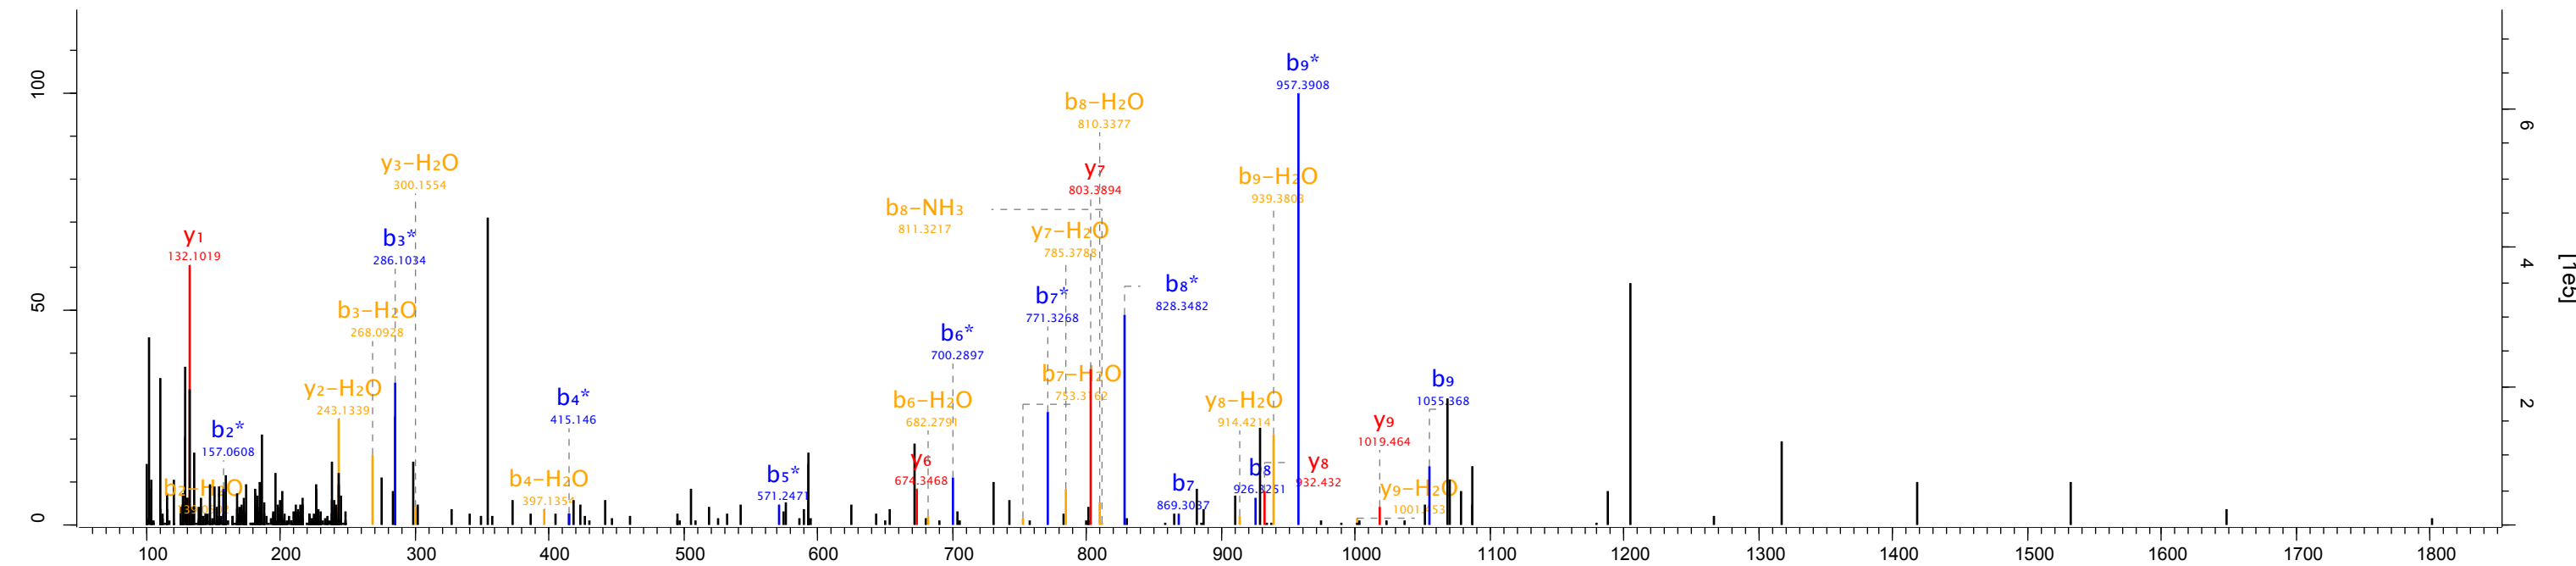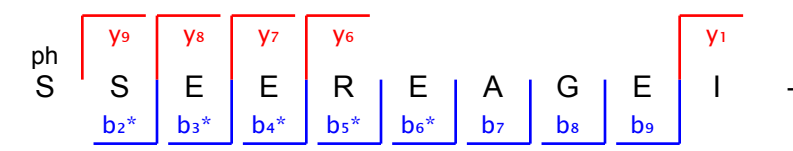



Raw file 20150812\_A375SR\_Phospho\_BR1\_06 Scan 8093 Method FTMS; HCD Score 163.62 m/z 611.27 Gene names SERBP1

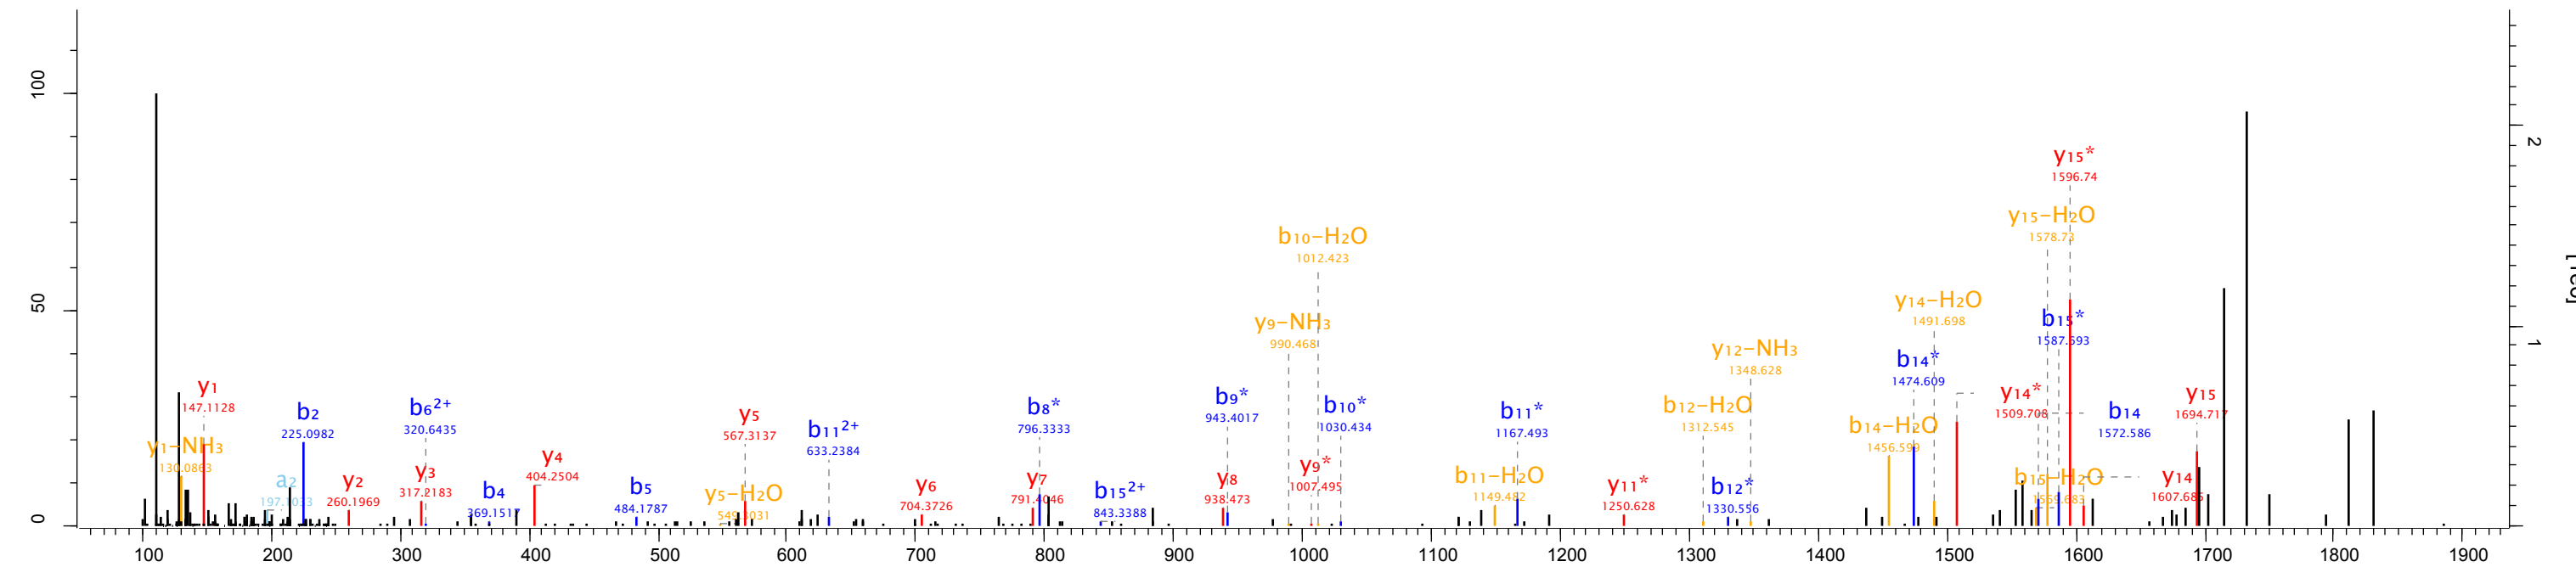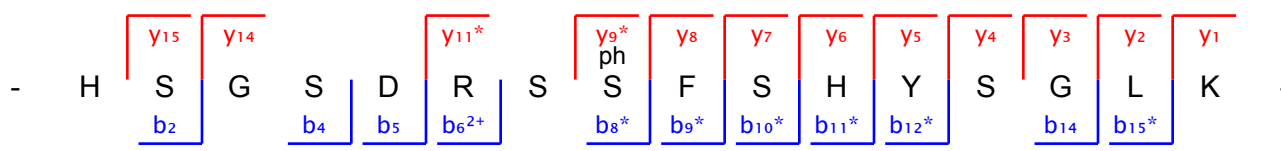

Raw file: 20150812\_A375SR\_Phospho\_BR1\_06  
 Scan: 9063 Method: FTMS; HCD Score: 151.44 m/z: 642.82 Gene names: GAPVD1

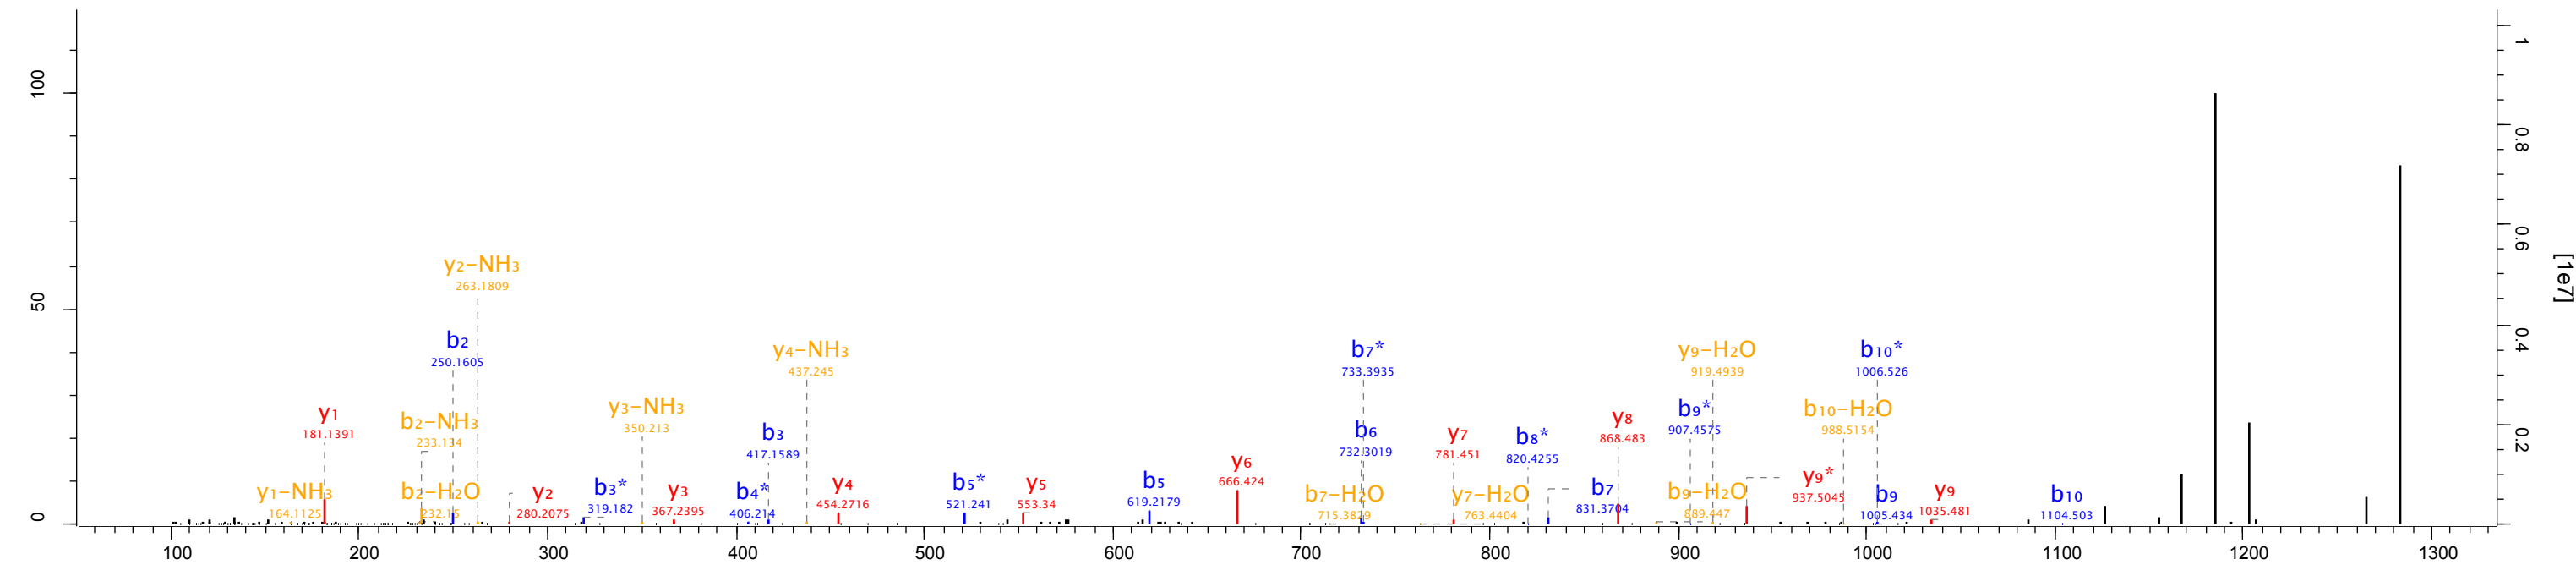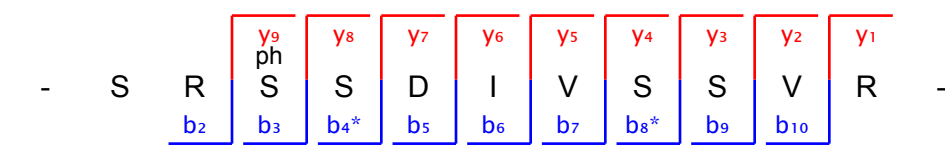

Raw file: 20150812\_A375SR\_Phospho\_BR1\_07  
 Scan: 11923 Method: FTMS; HCD Score: 86.8 m/z: 719.35 Gene names: ZNF532

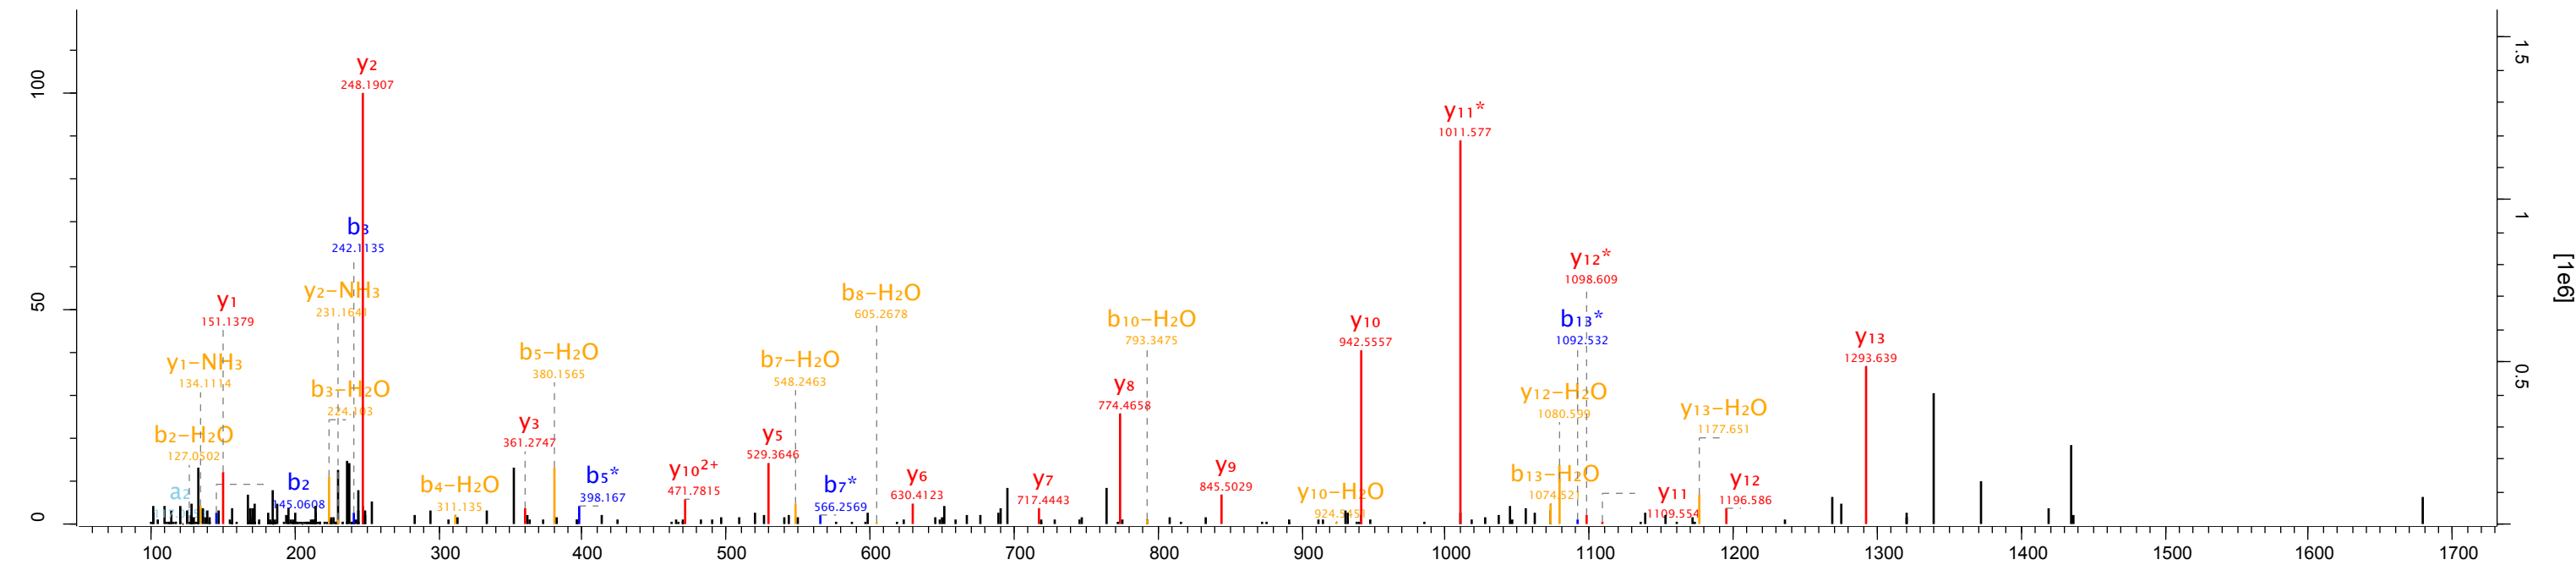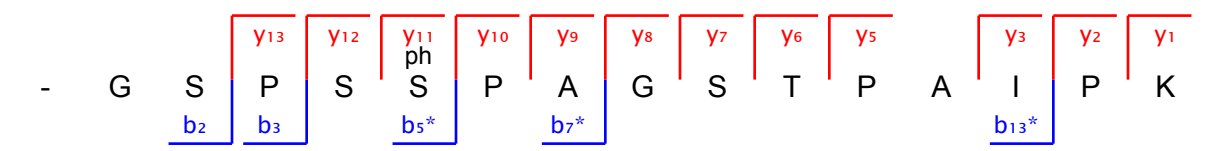

Raw file 20150812\_A375SR\_Phospho\_BR1\_07 Scan 13653 Method FTMS; HCD Score 122.33 m/z 591.79 Gene names CFL1

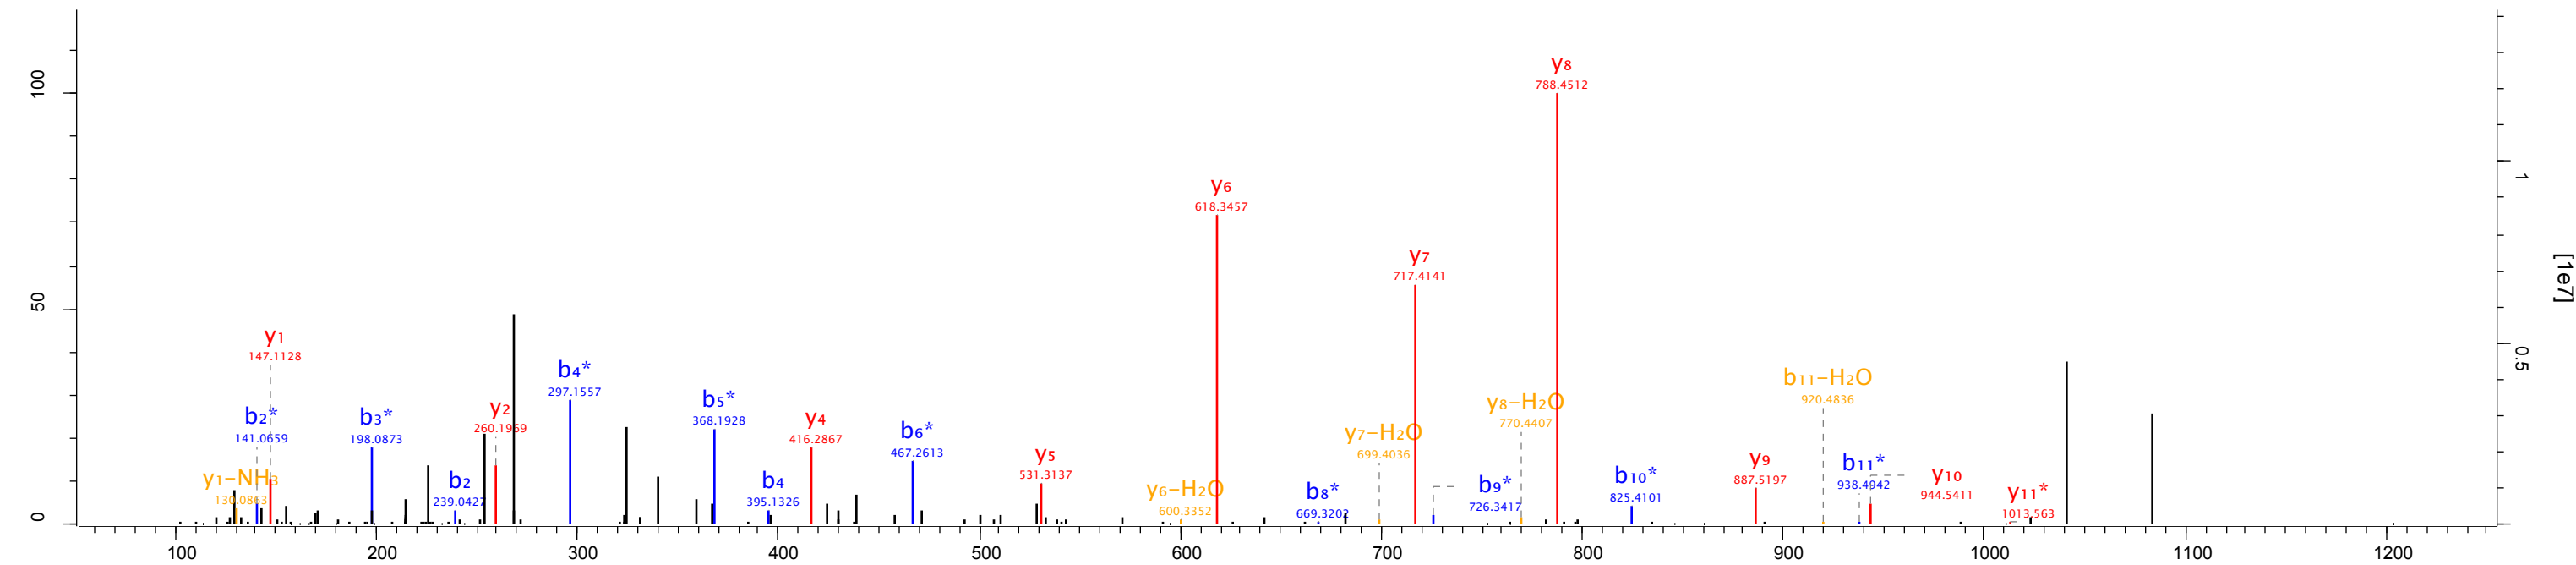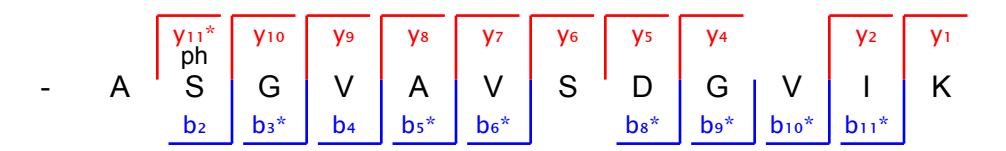

Raw file: 20150812\_A375SR\_Phospho\_BR1\_07  
 Scan: 18903 Method: FTMS; HCD Score: 343.51 m/z: 1203.89 Gene names: LARP1

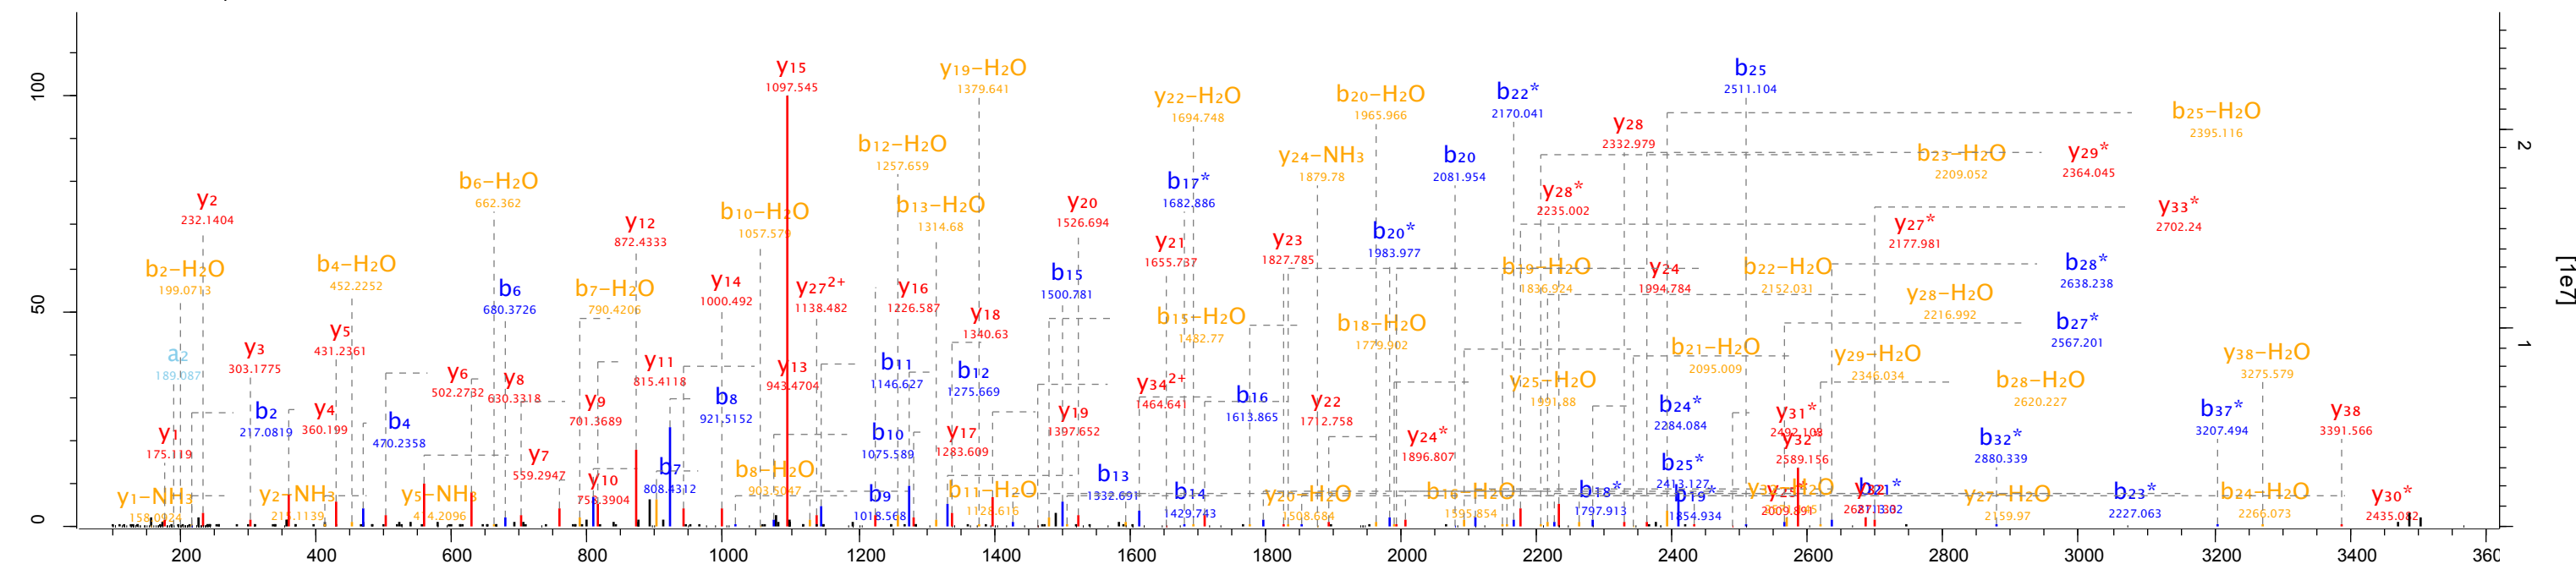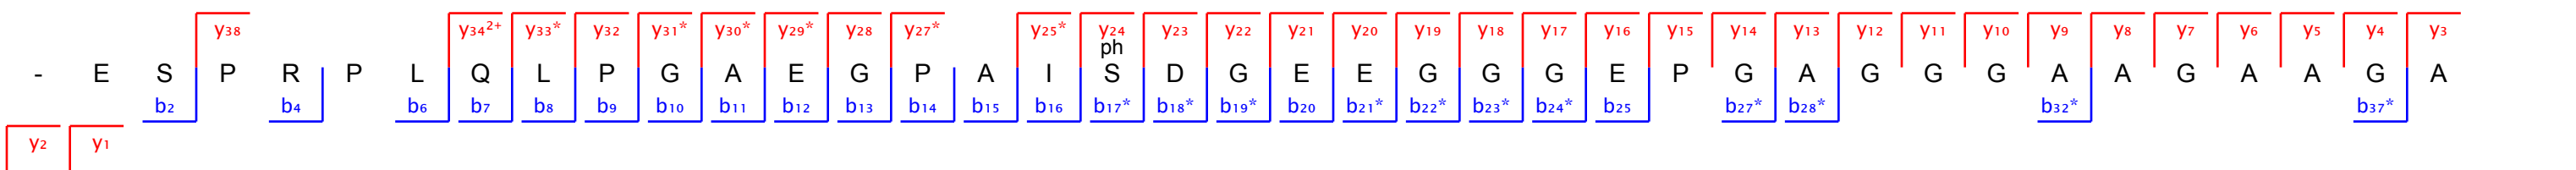

Raw file 20150812\_A375SR\_Phospho\_BR1\_07 Scan 19863 Method FTMS; HCD Score 190.25 m/z 874.91 Gene names VIM

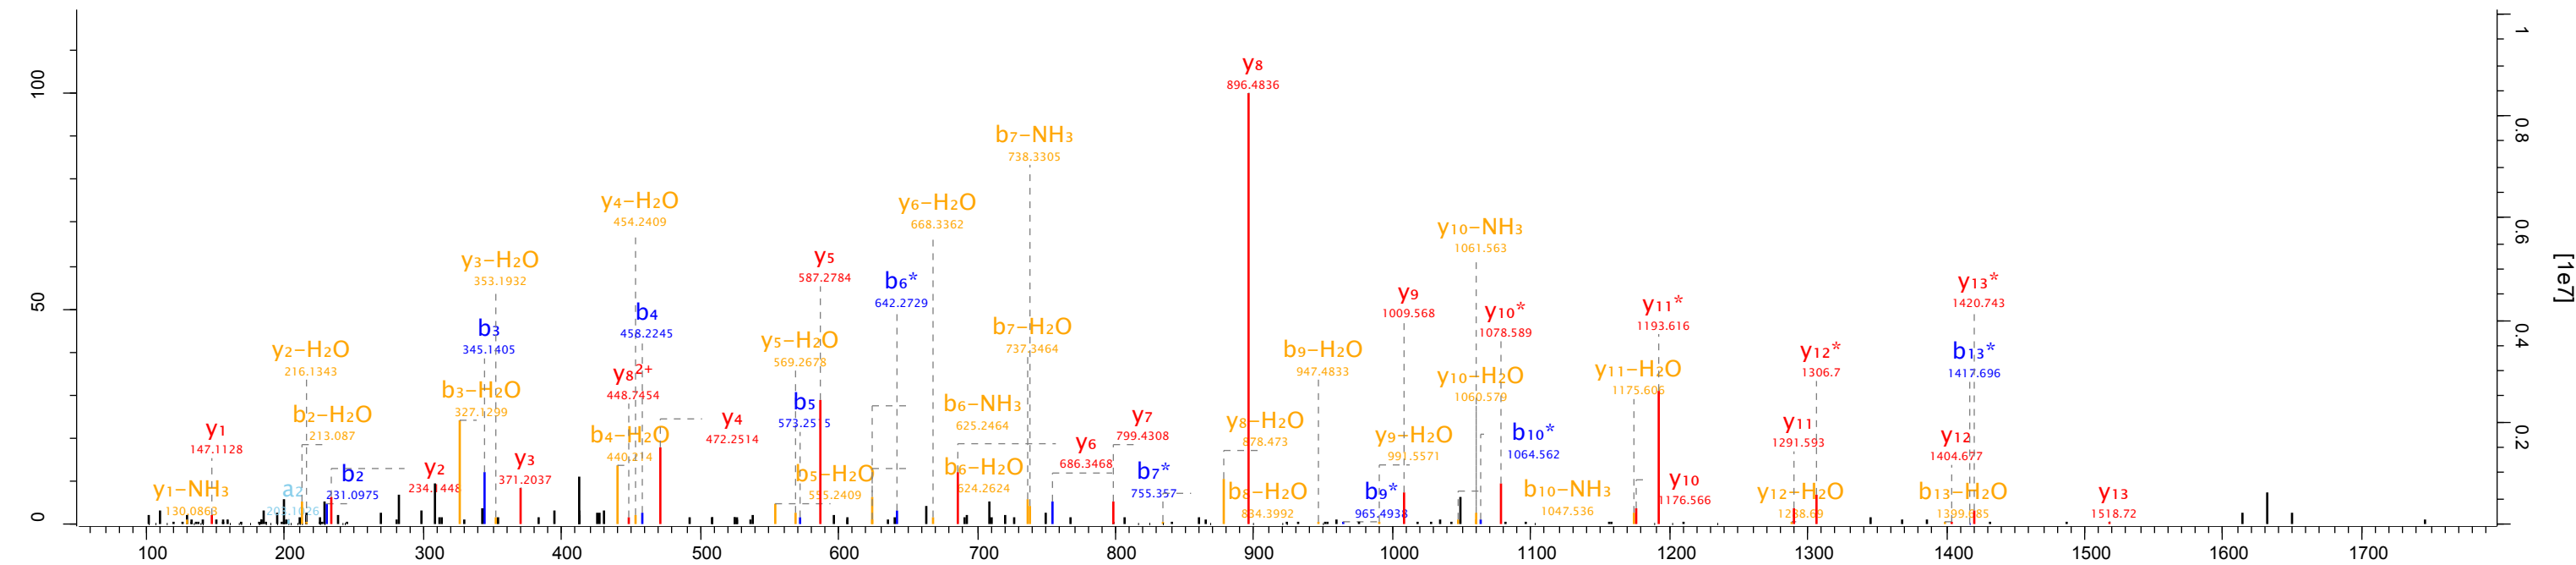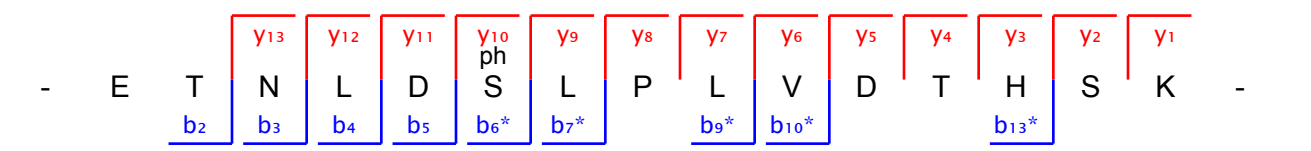

Raw file  
20150812\_A375SR\_Phospho\_BR1\_07

Scan 21183 Method FTMS; HCD Score 147.41 m/z 948.96 Gene names SMAP2

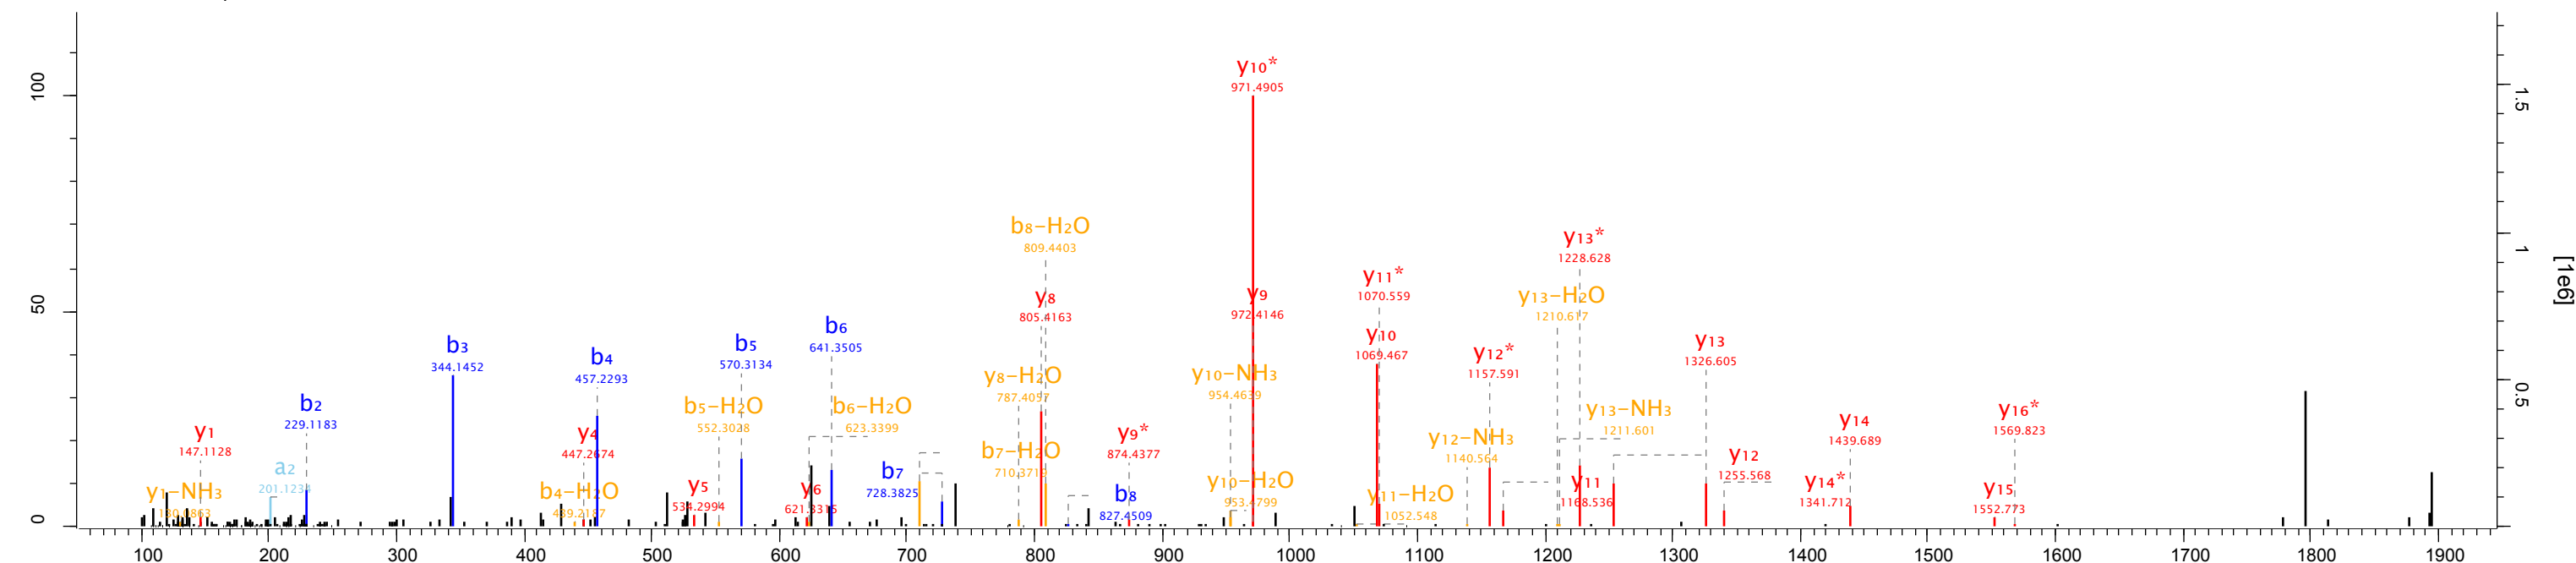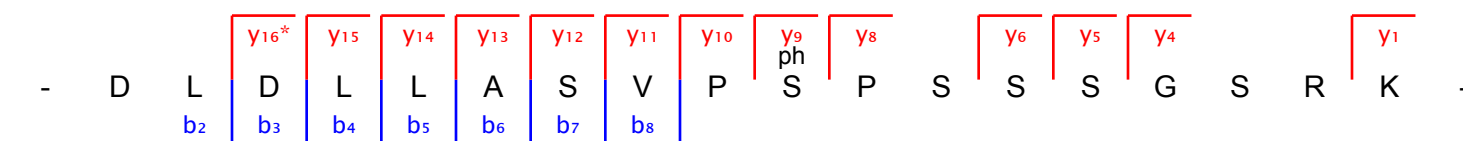

Raw file 20150812\_A375SR\_Phospho\_BR1\_07 Scan 21393 Method FTMS; HCD Score 163.91 m/z 757.33 Gene names CSRP1

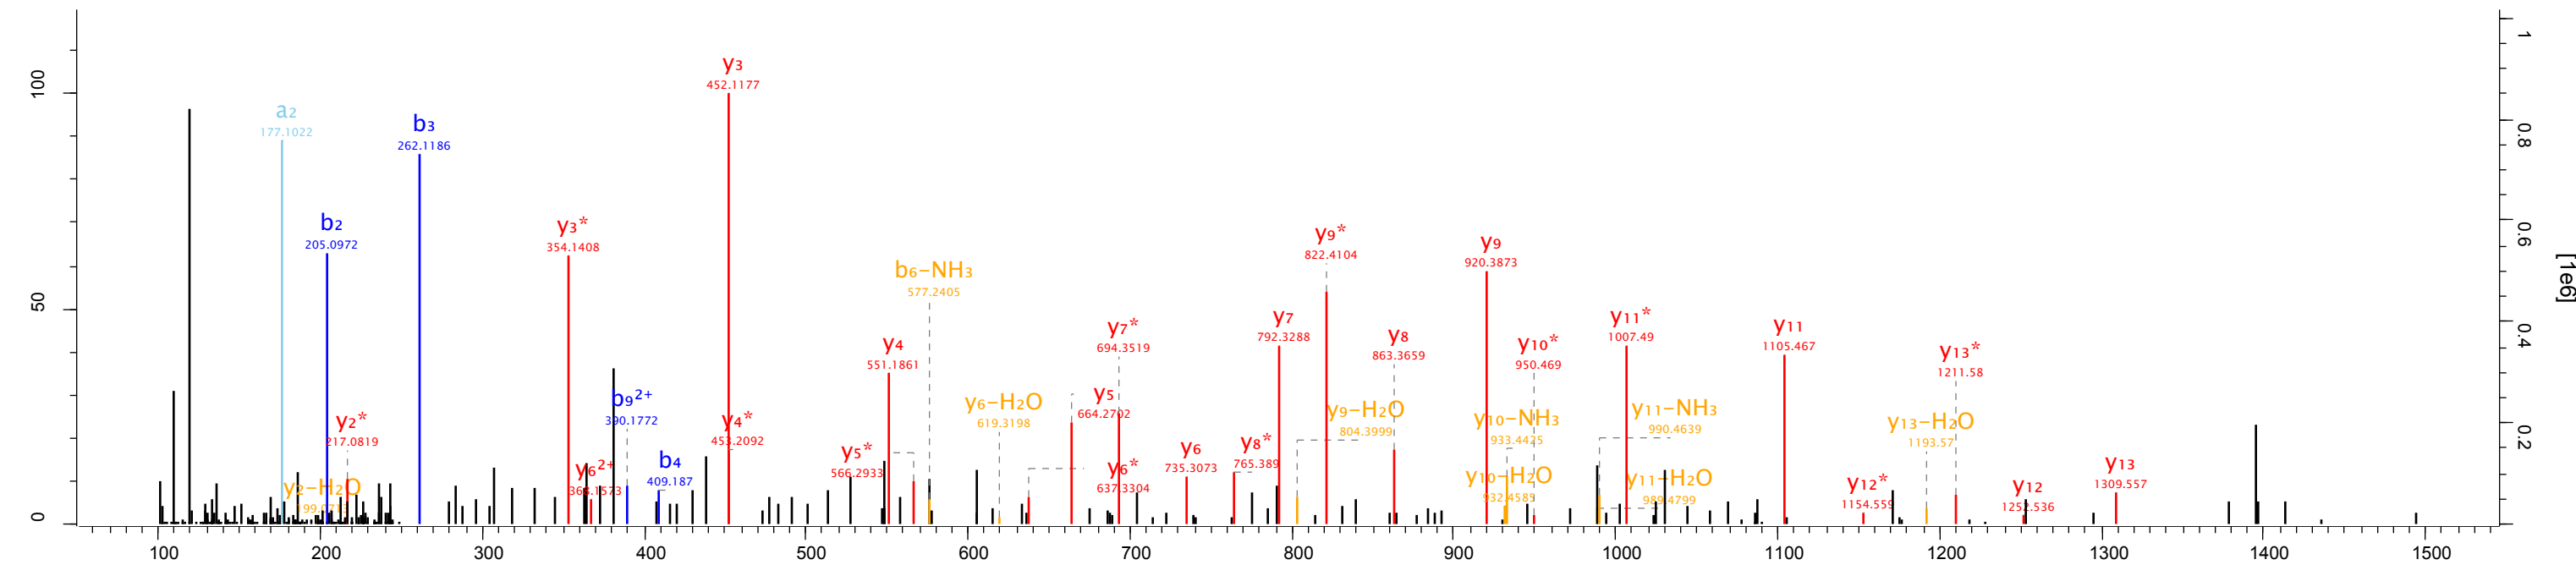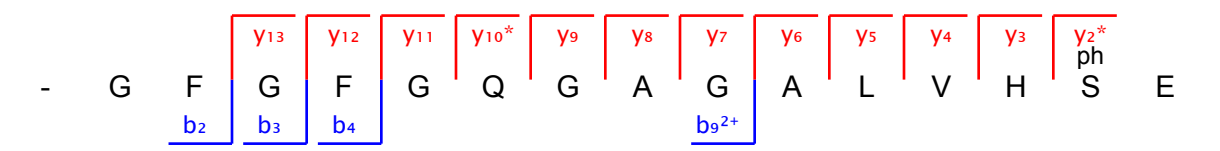



Raw file: 20150812\_A375SR\_Phospho\_BR1\_07  
 Scan: 22593 Method: FTMS; HCD Score: 166.32 m/z: 929.11 Gene names: SAFB

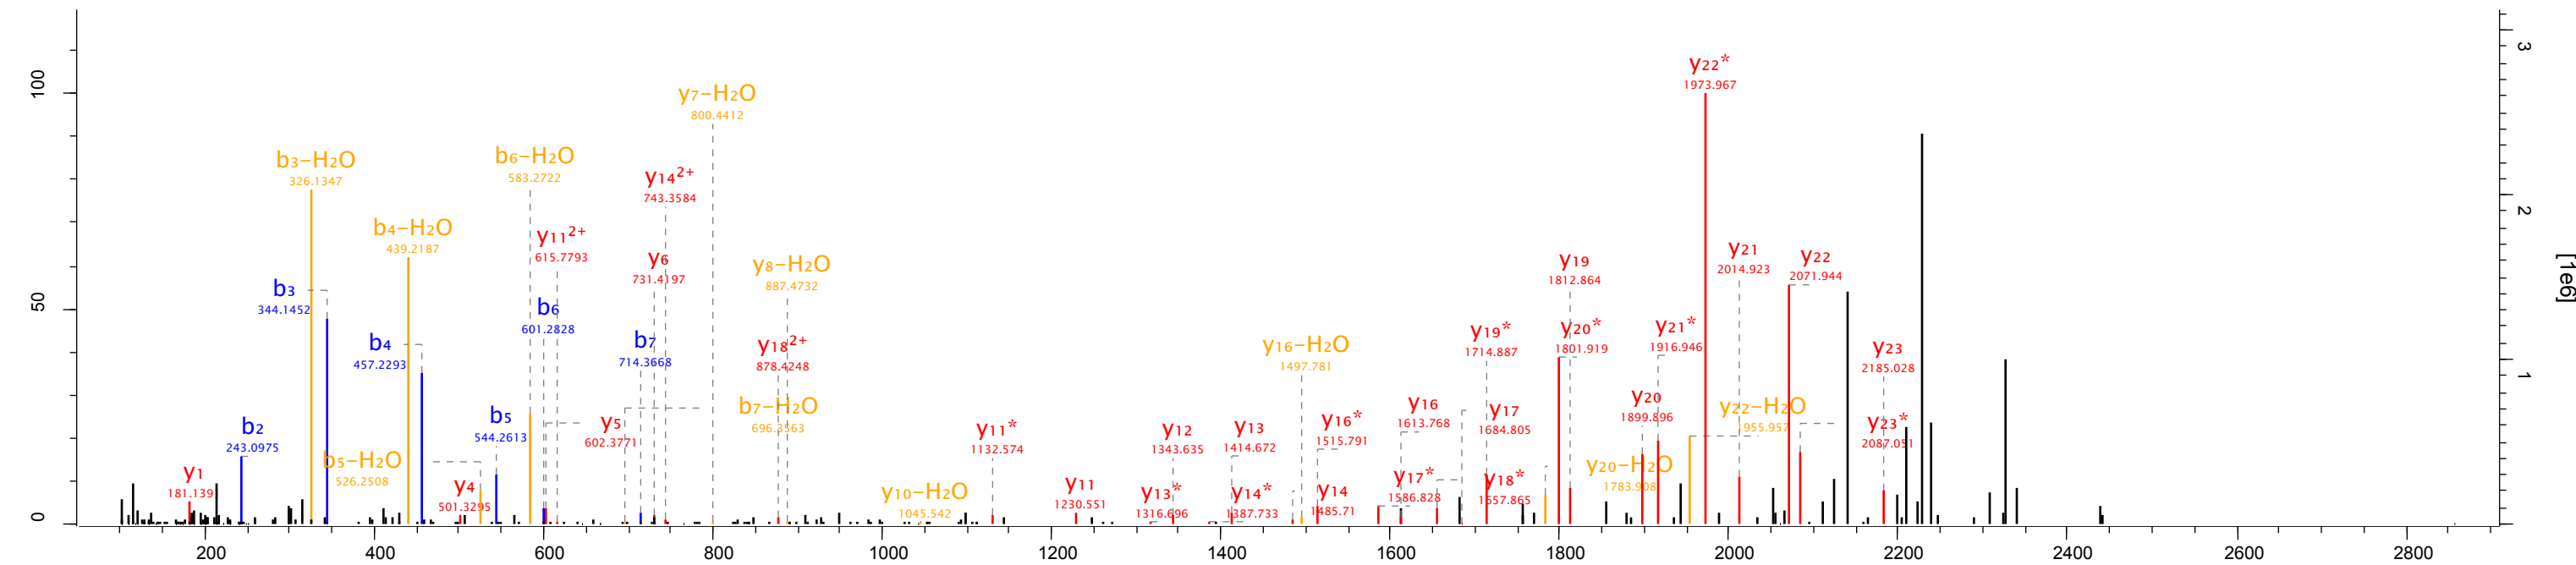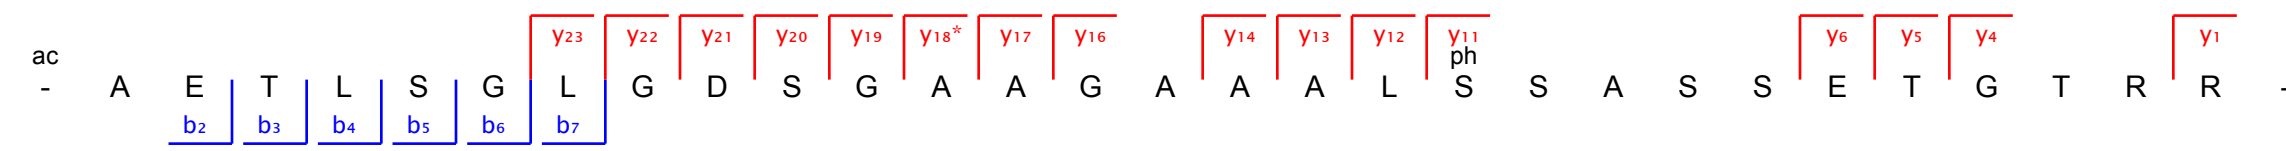

Raw file: 20150812\_A375SR\_Phospho\_BR1\_07  
 Scan: 3053 Method: FTMS; HCD Score: 81.8 m/z: 583.28 Gene names: EPB41L1

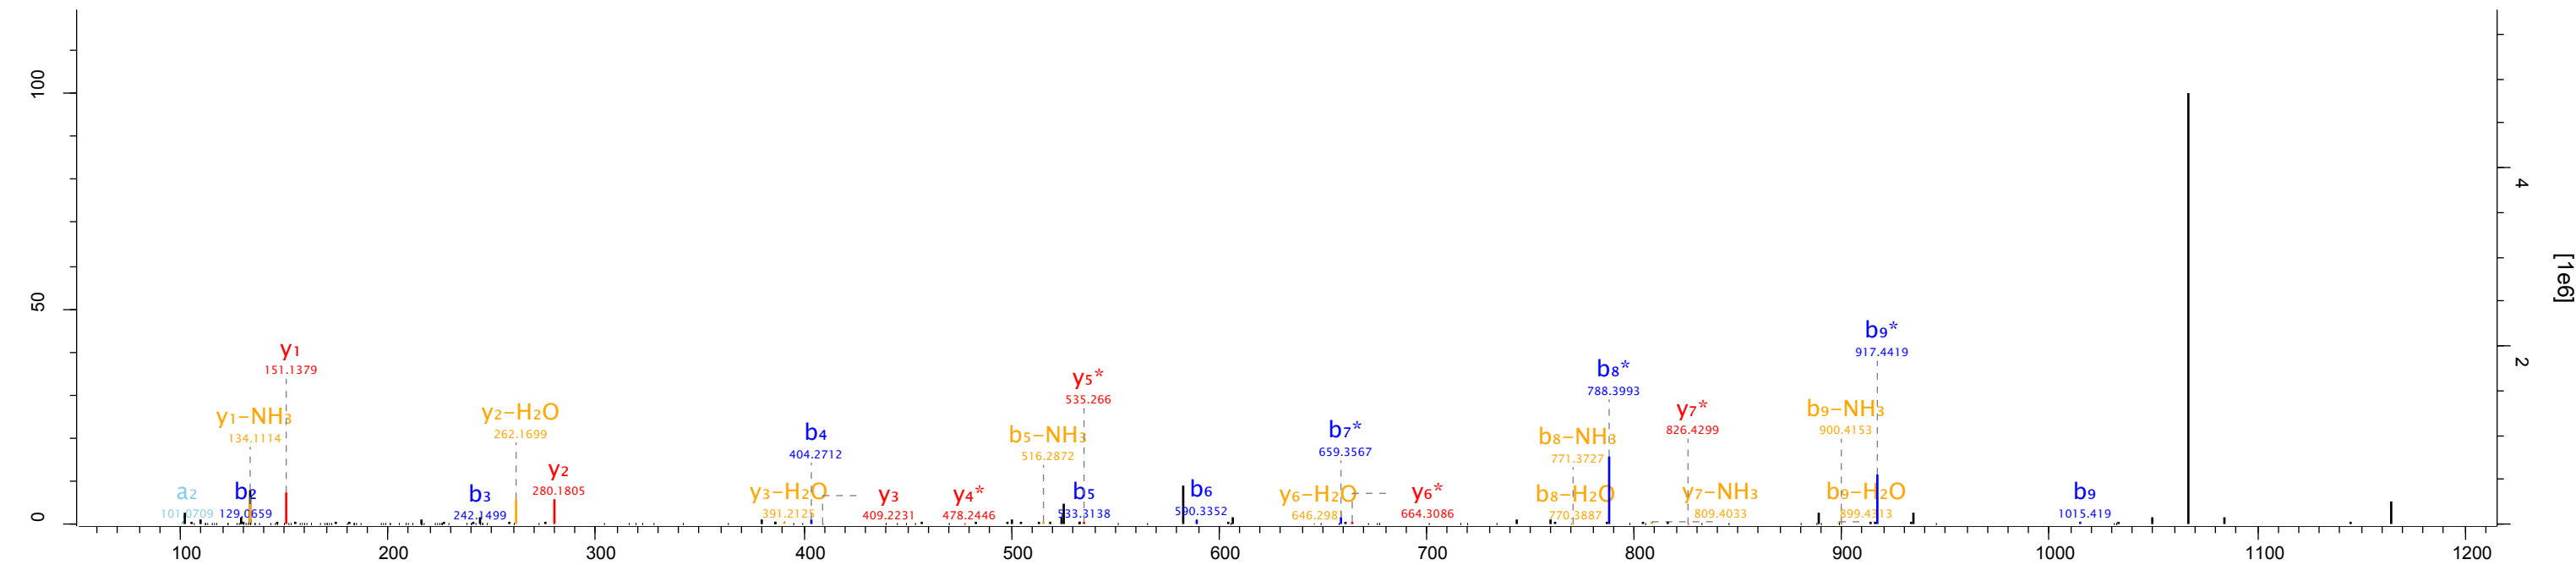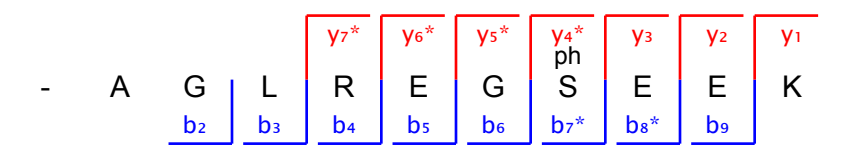

Raw file: 20150812\_A375SR\_Phospho\_BR1\_07  
 Scan: 3753 Method: FTMS; HCD Score: 133.13 m/z: 604.31 Gene names: MLLT1

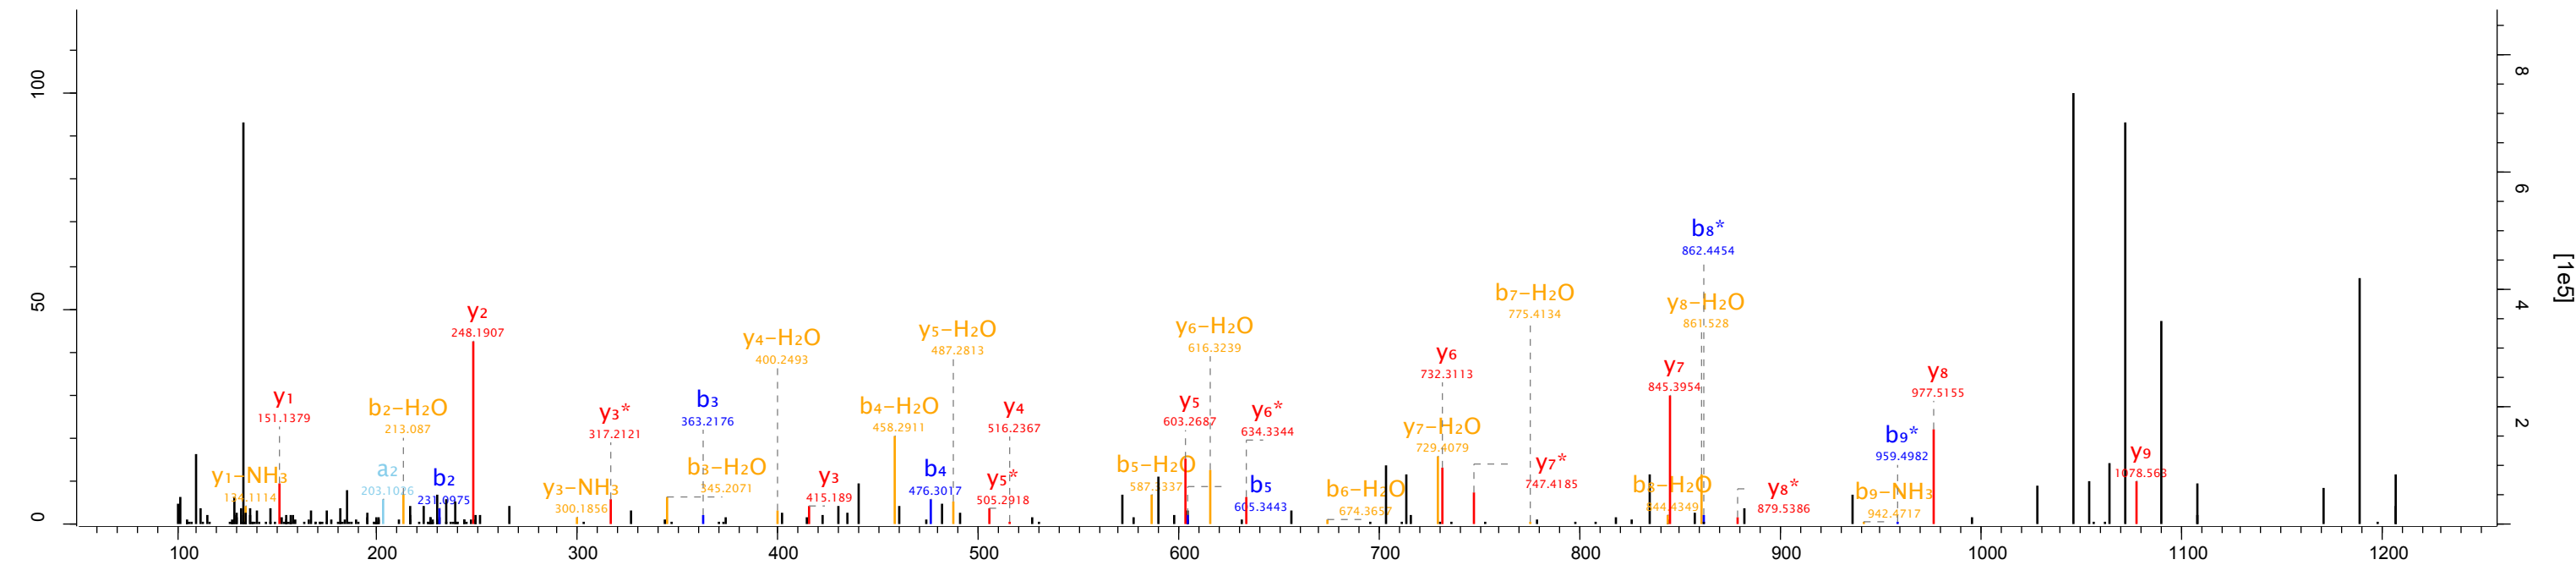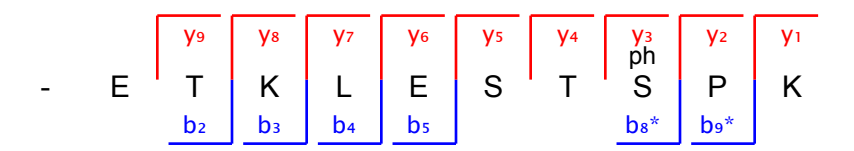

Raw file 20150812\_A375SR\_Phospho\_BR1\_07 Scan 4213 Method FTMS; HCD Score 86.19 m/z 483.73 Gene names PPP1R18

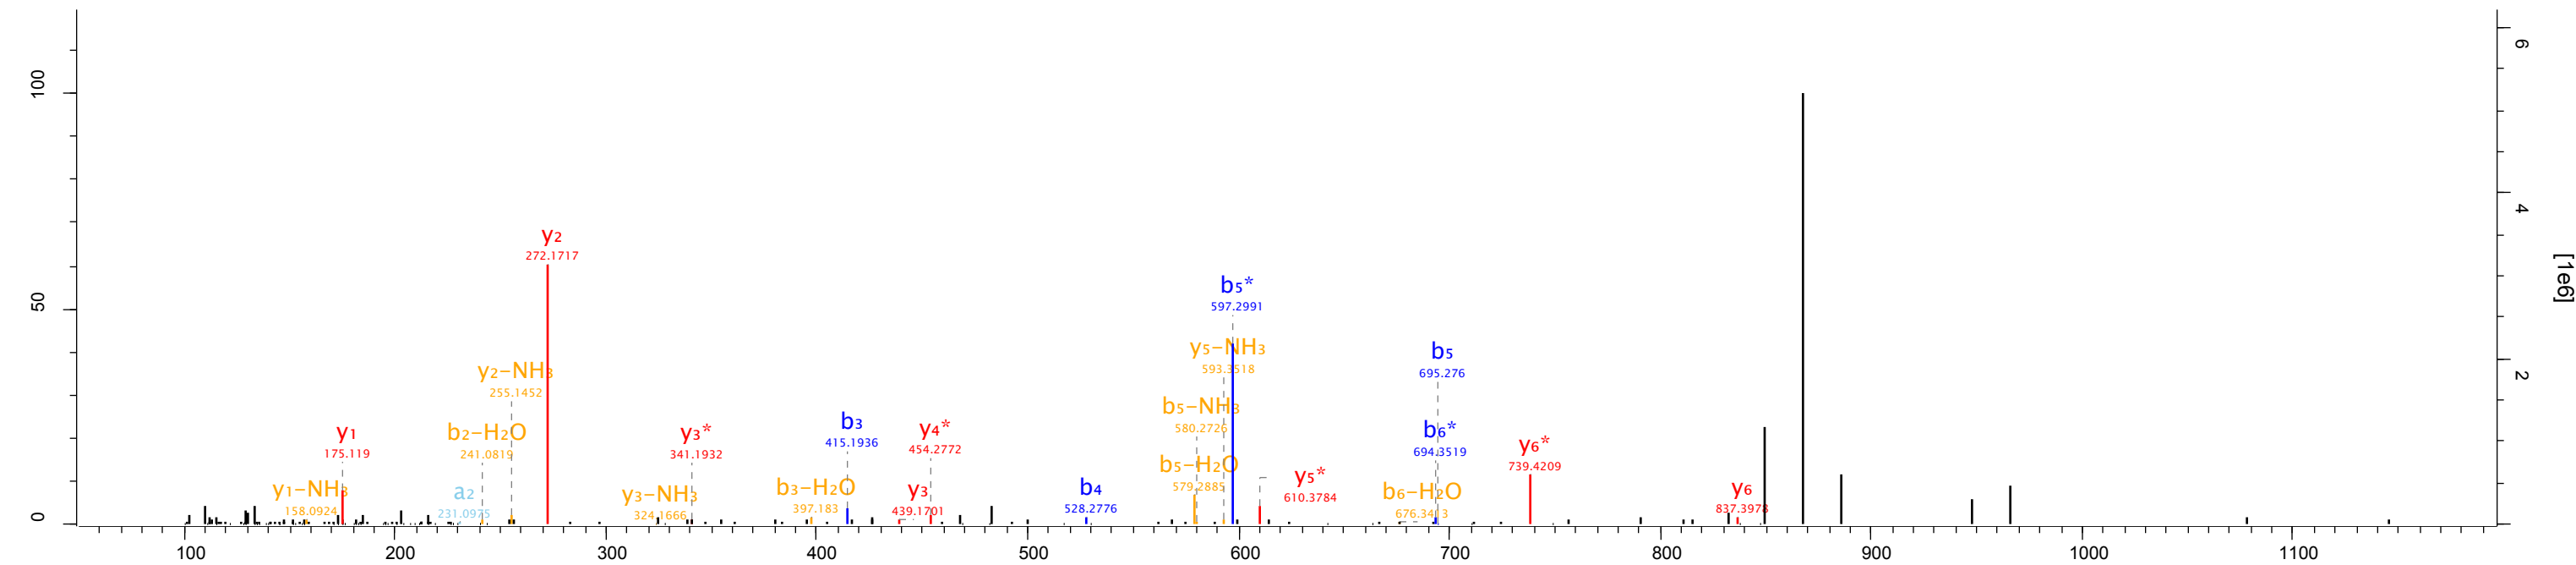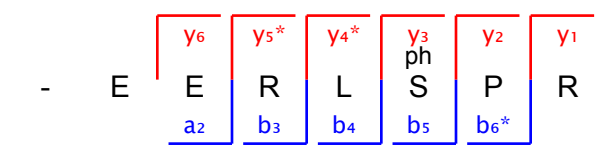

Raw file 20150812\_A375SR\_Phospho\_BR1\_07 Scan 4883 Method FTMS; HCD Score 91.65 m/z 696.84 Gene names MKI67

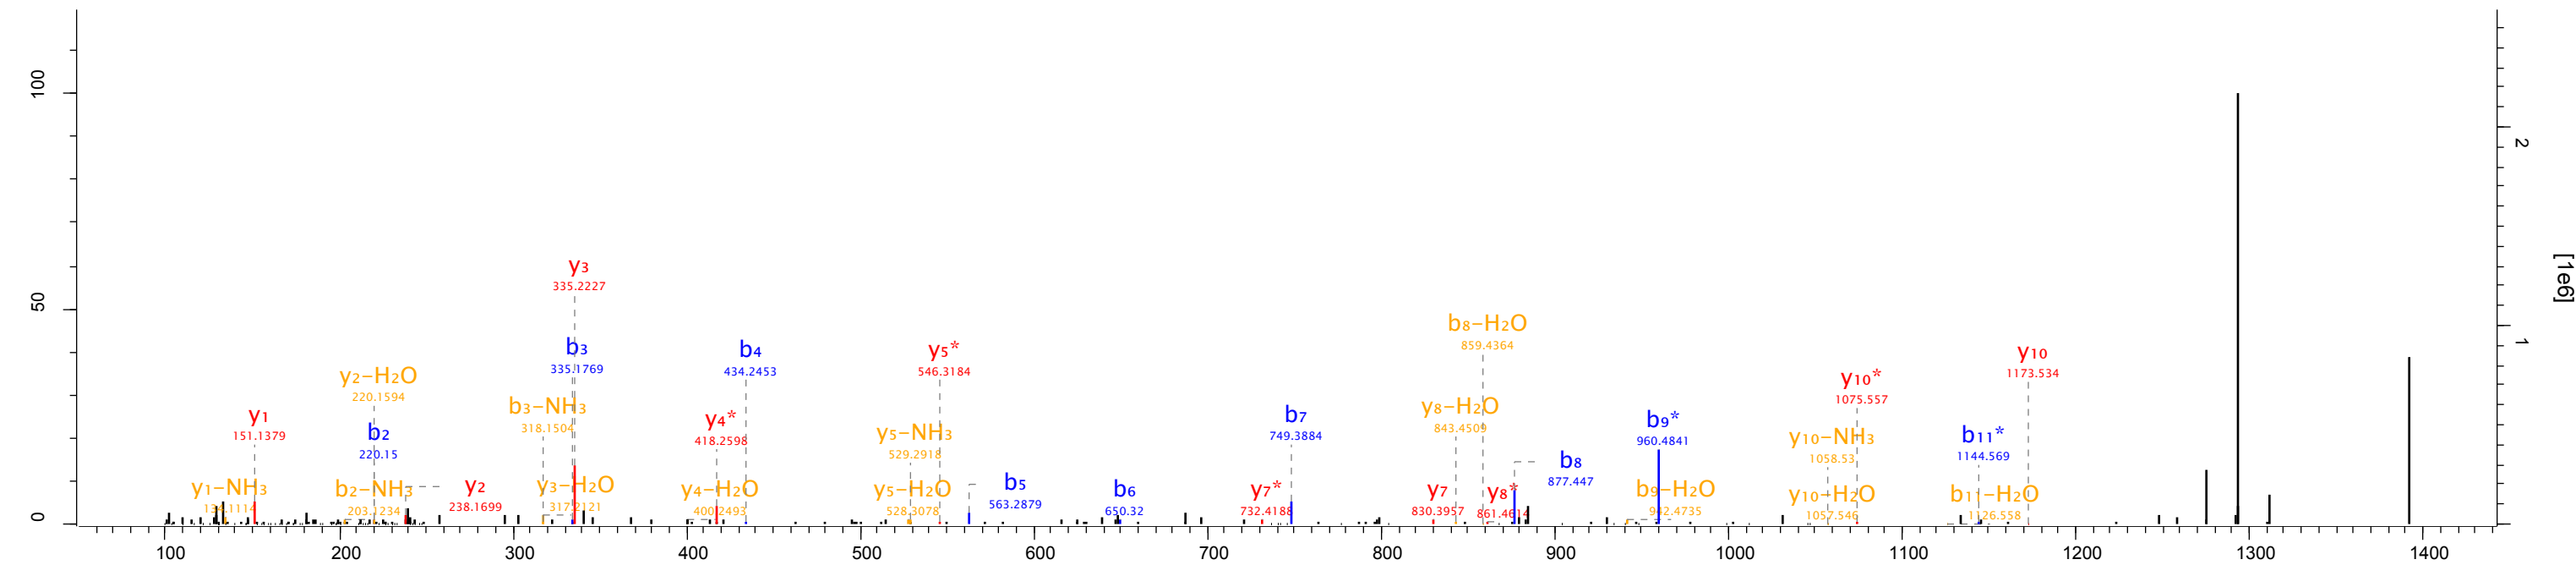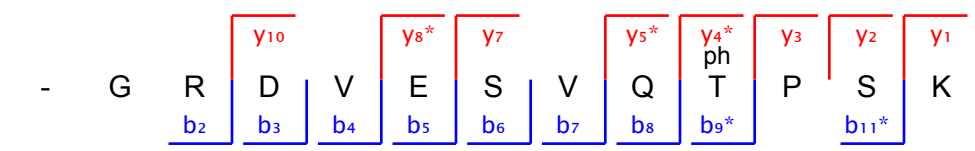

Raw file 20150812\_A375SR\_Phospho\_BR1\_07 Scan 6873 Method FTMS; HCD Score 41.51 m/z 506.58 Gene names HNRNPA1;HNRNPA1L2

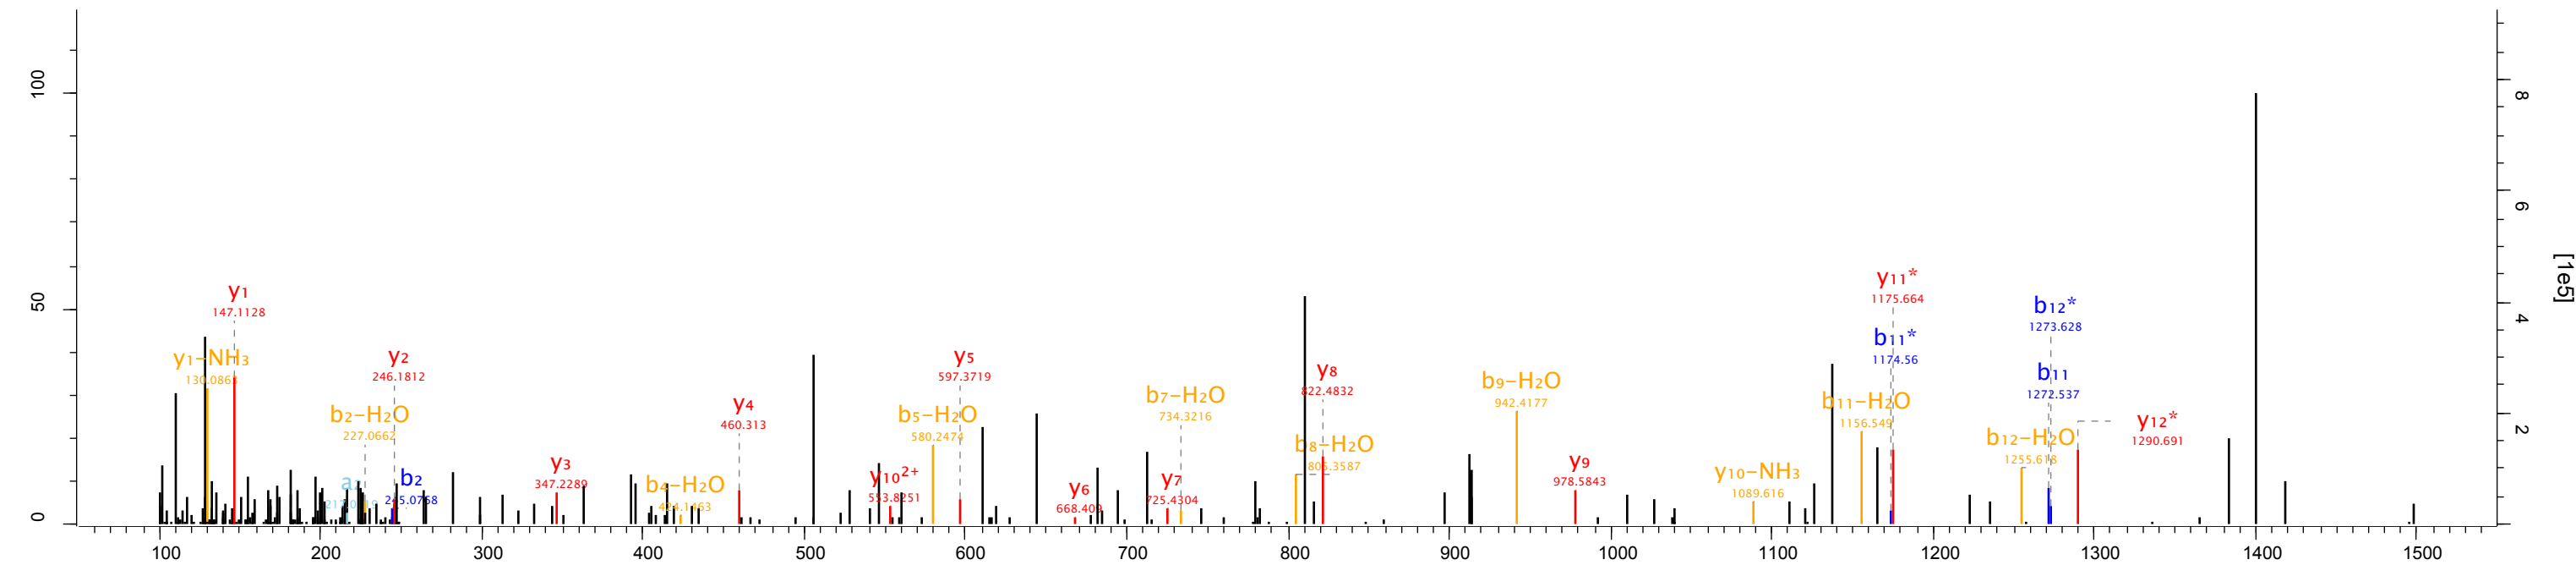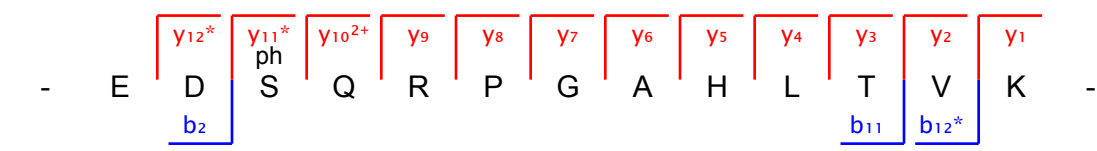

Raw file: 20150812\_A375SR\_Phospho\_BR1\_07  
 Scan: 7213 Method: FTMS; HCD Score: 228.09 m/z: 755.35 Gene names: EEF1D

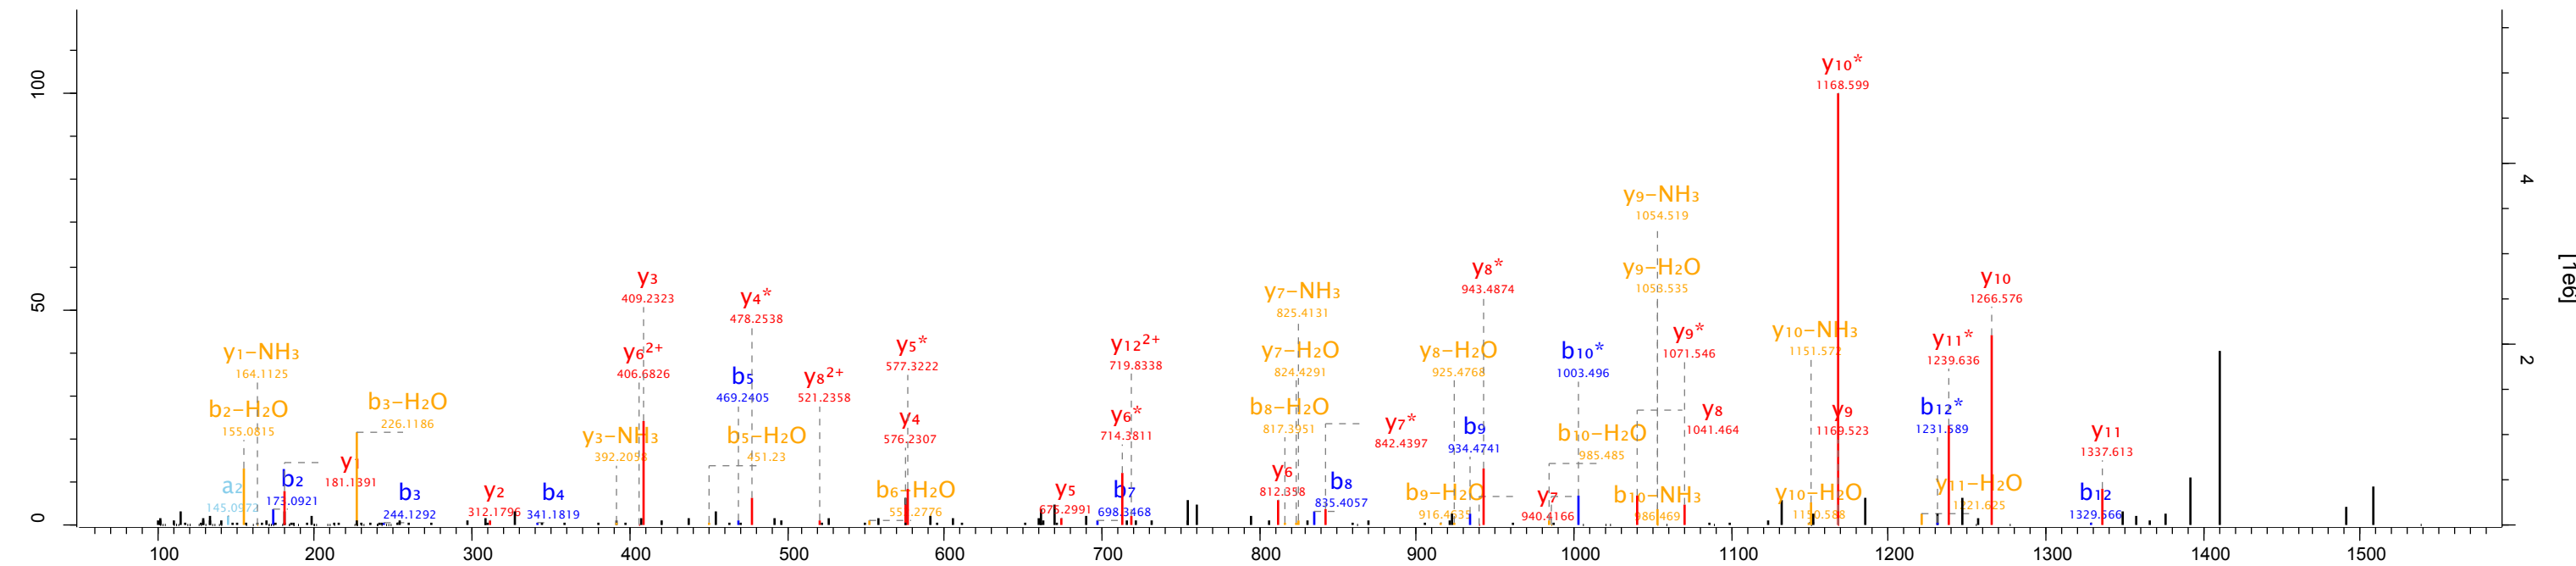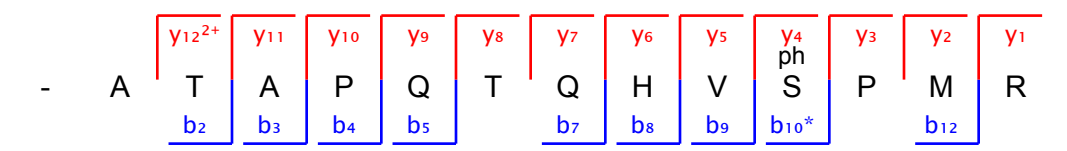

Raw file 20150812\_A375SR\_Phospho\_BR1\_07 Scan 7333 Method FTMS; HCD Score 226.57 m/z 727.32 Gene names MARCKSL1

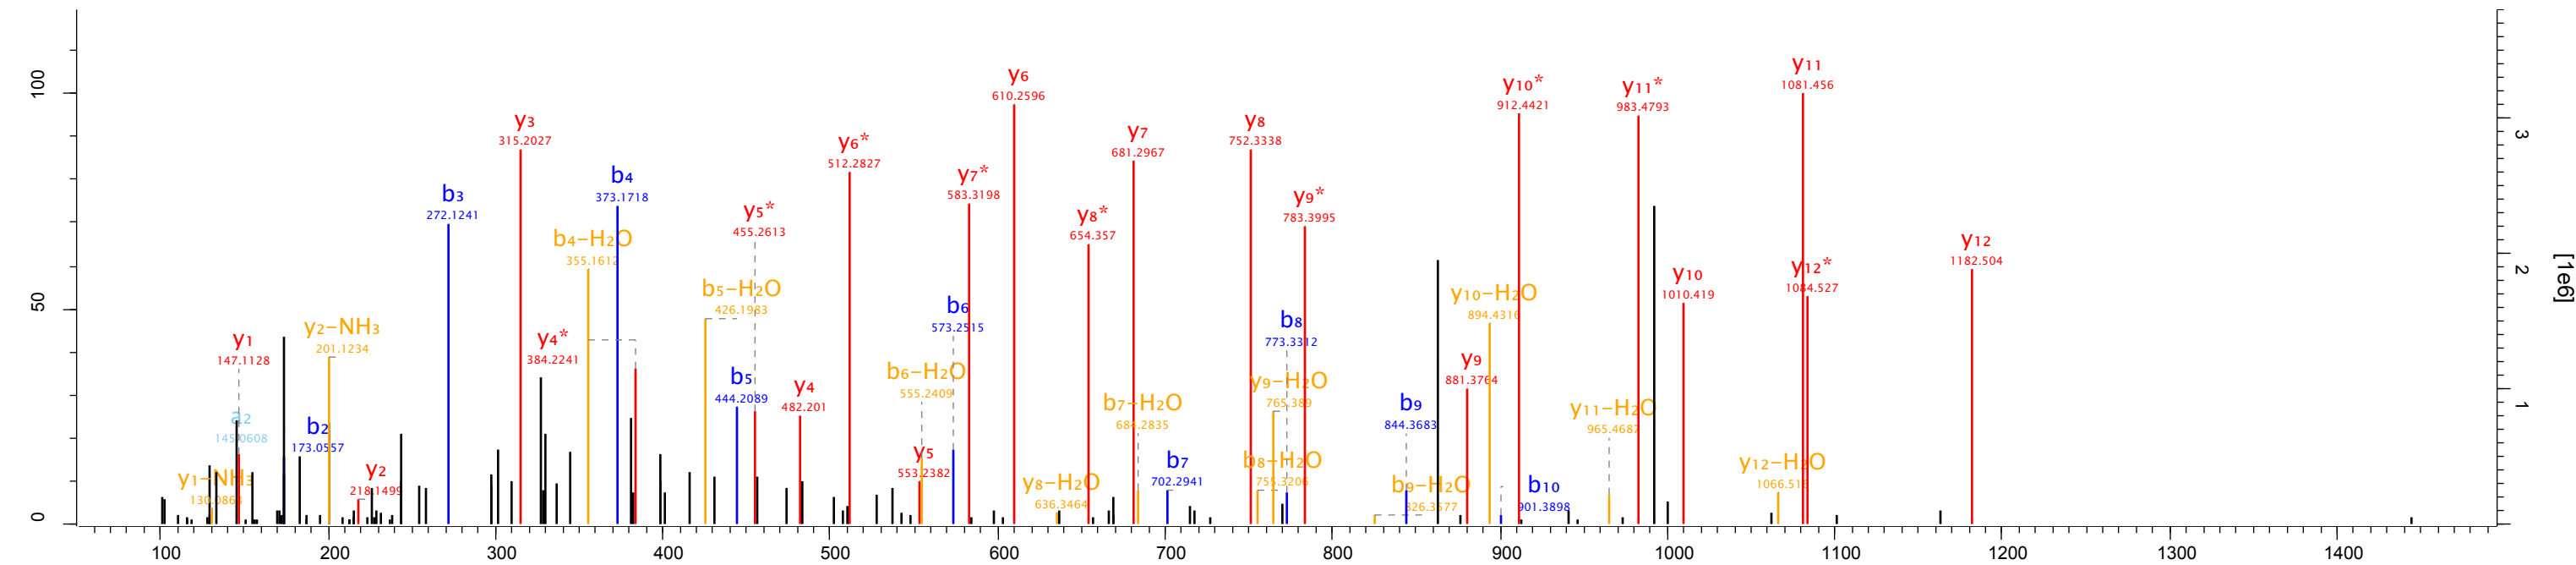

- G D V T A E E A A G A S P A K -

b<sub>2</sub>
b<sub>3</sub>
b<sub>4</sub>
b<sub>5</sub>
b<sub>6</sub>
b<sub>7</sub>
b<sub>8</sub>
b<sub>9</sub>
b<sub>10</sub>
y<sub>12</sub>
y<sub>11</sub>
y<sub>10</sub>
y<sub>9</sub>
y<sub>8</sub>
y<sub>7</sub>
y<sub>6</sub>
y<sub>5</sub>
y<sub>4</sub>
y<sub>3</sub>
y<sub>2</sub>
y<sub>1</sub>



Raw file 20150812\_A375SR\_Phospho\_BR1\_07 Scan 8563 Method FTMS; HCD Score 127.3 m/z 728.32 Gene names GPSM1

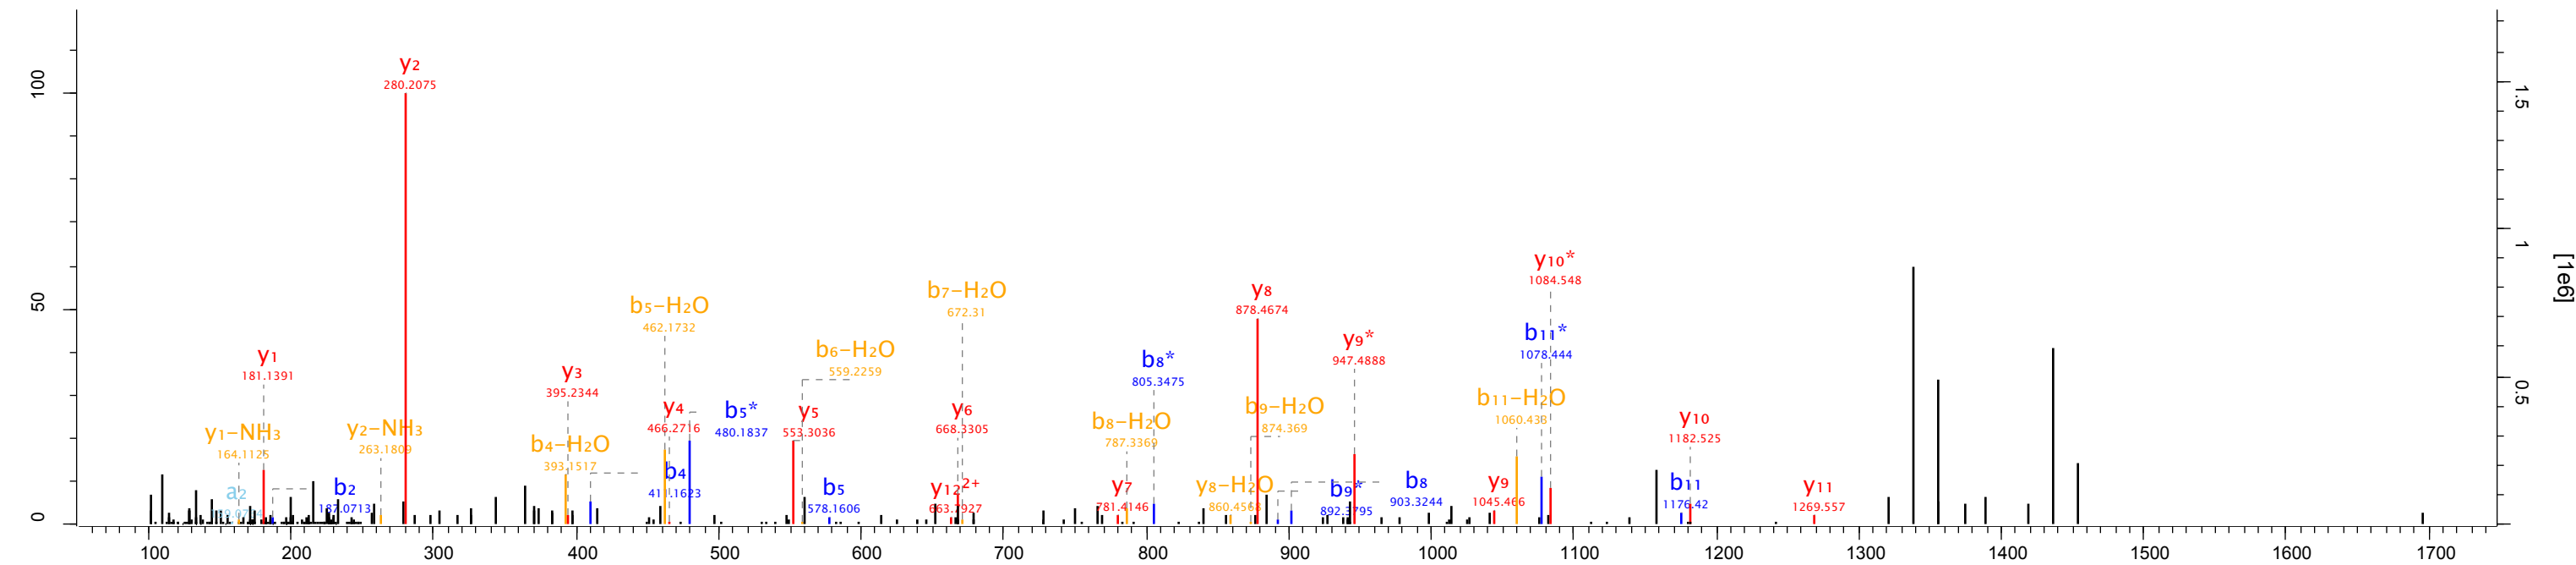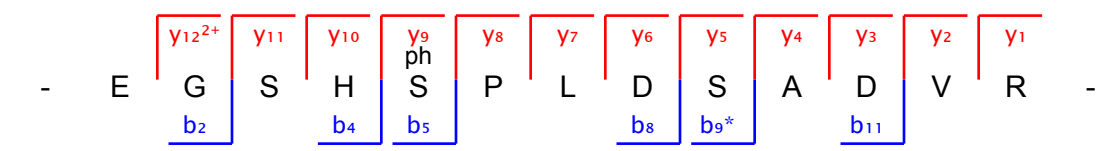

Raw file 20150812\_A375SR\_Phospho\_BR1\_08 Scan 11883 Method FTMS; HCD Score 138.05 m/z 730.89 Gene names SORBS2

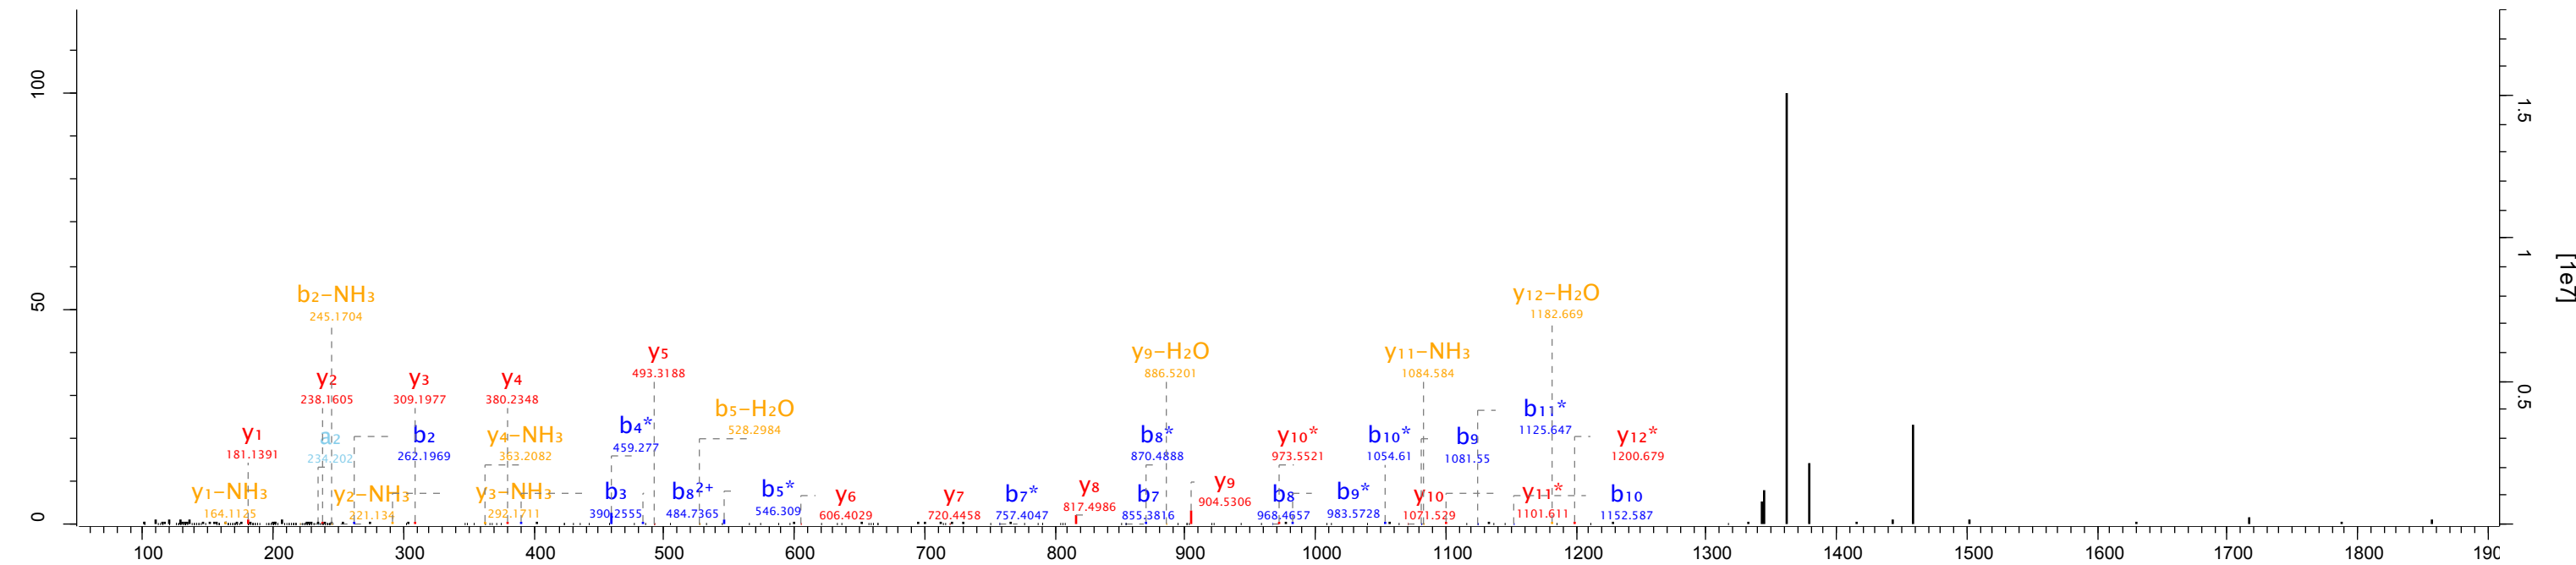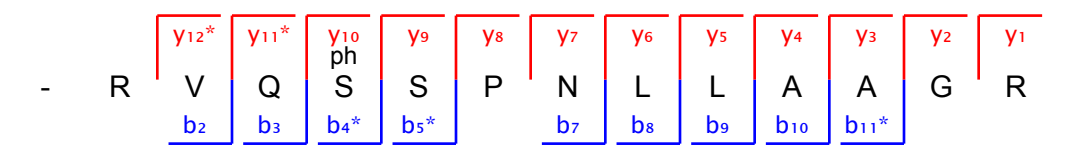

Raw file: 20150812\_A375SR\_Phospho\_BR1\_08  
 Scan: 11923 Method: FTMS; HCD Score: 128.08 m/z: 896.75 Gene names: GOLGA3

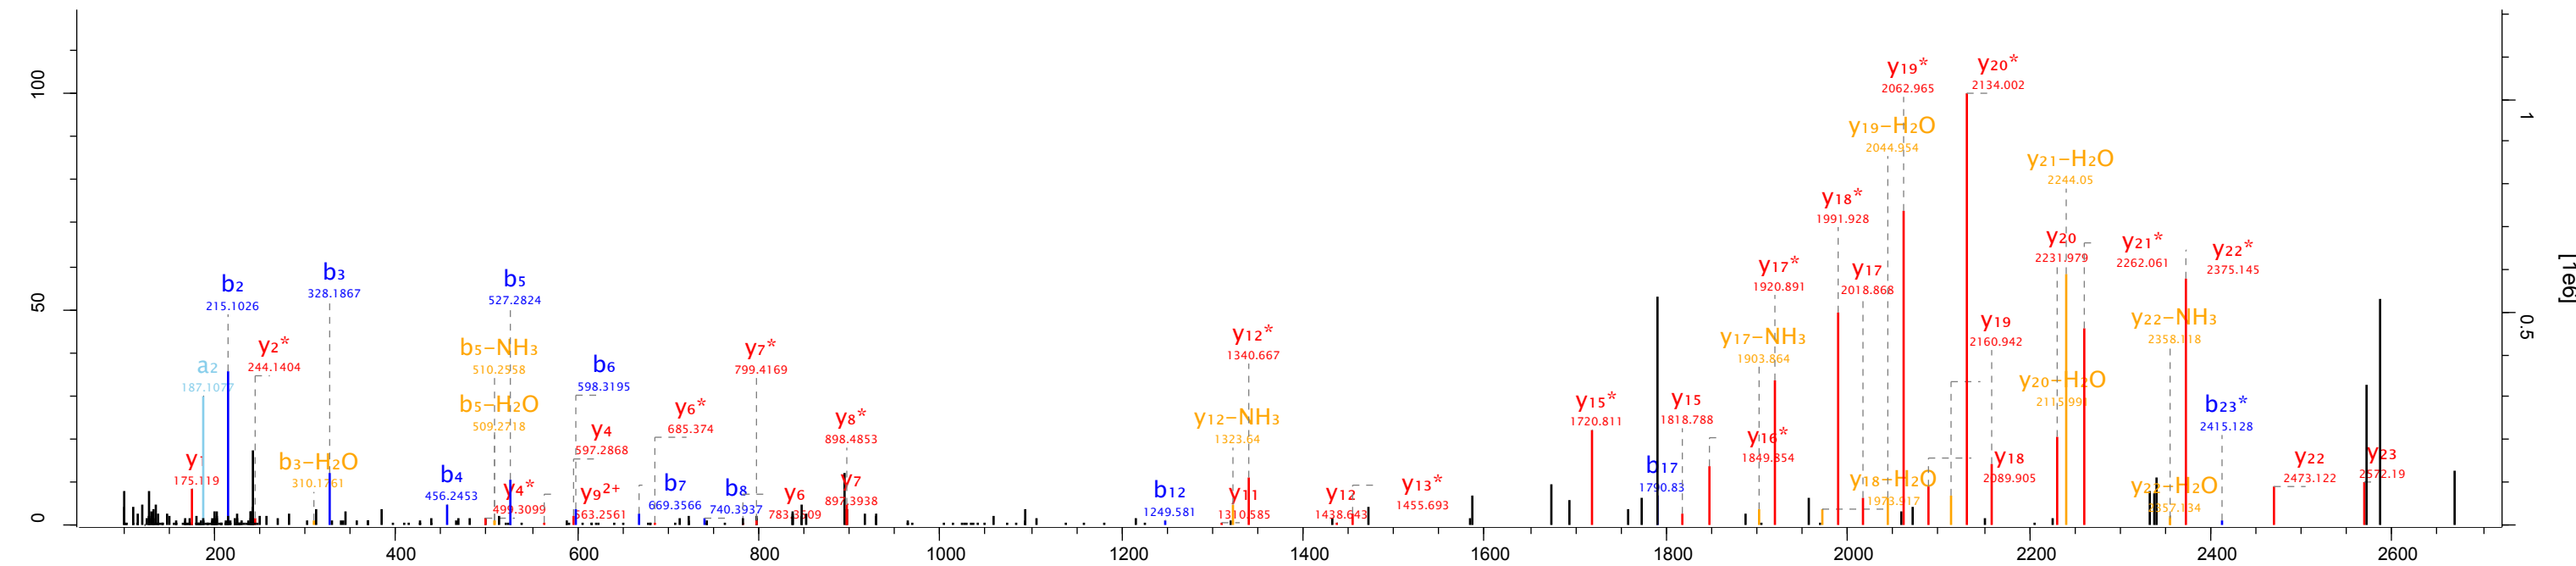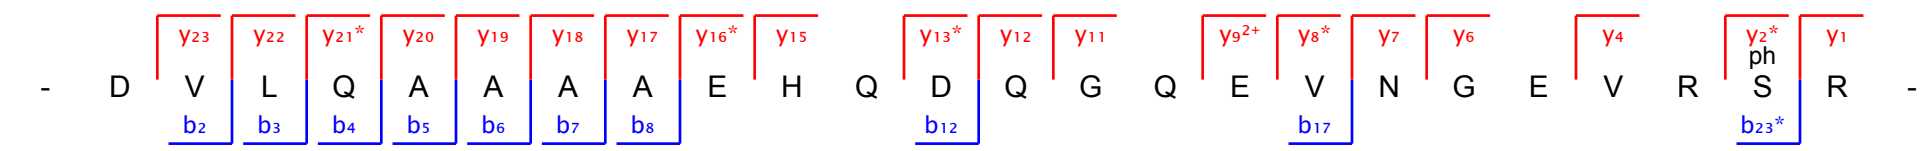

Raw file Scan Method Score m/z Gene names  
 20150812\_A375SR\_Phospho\_BR1\_08 11993 FTMS; HCD 423.8 1040.45 THRAP3

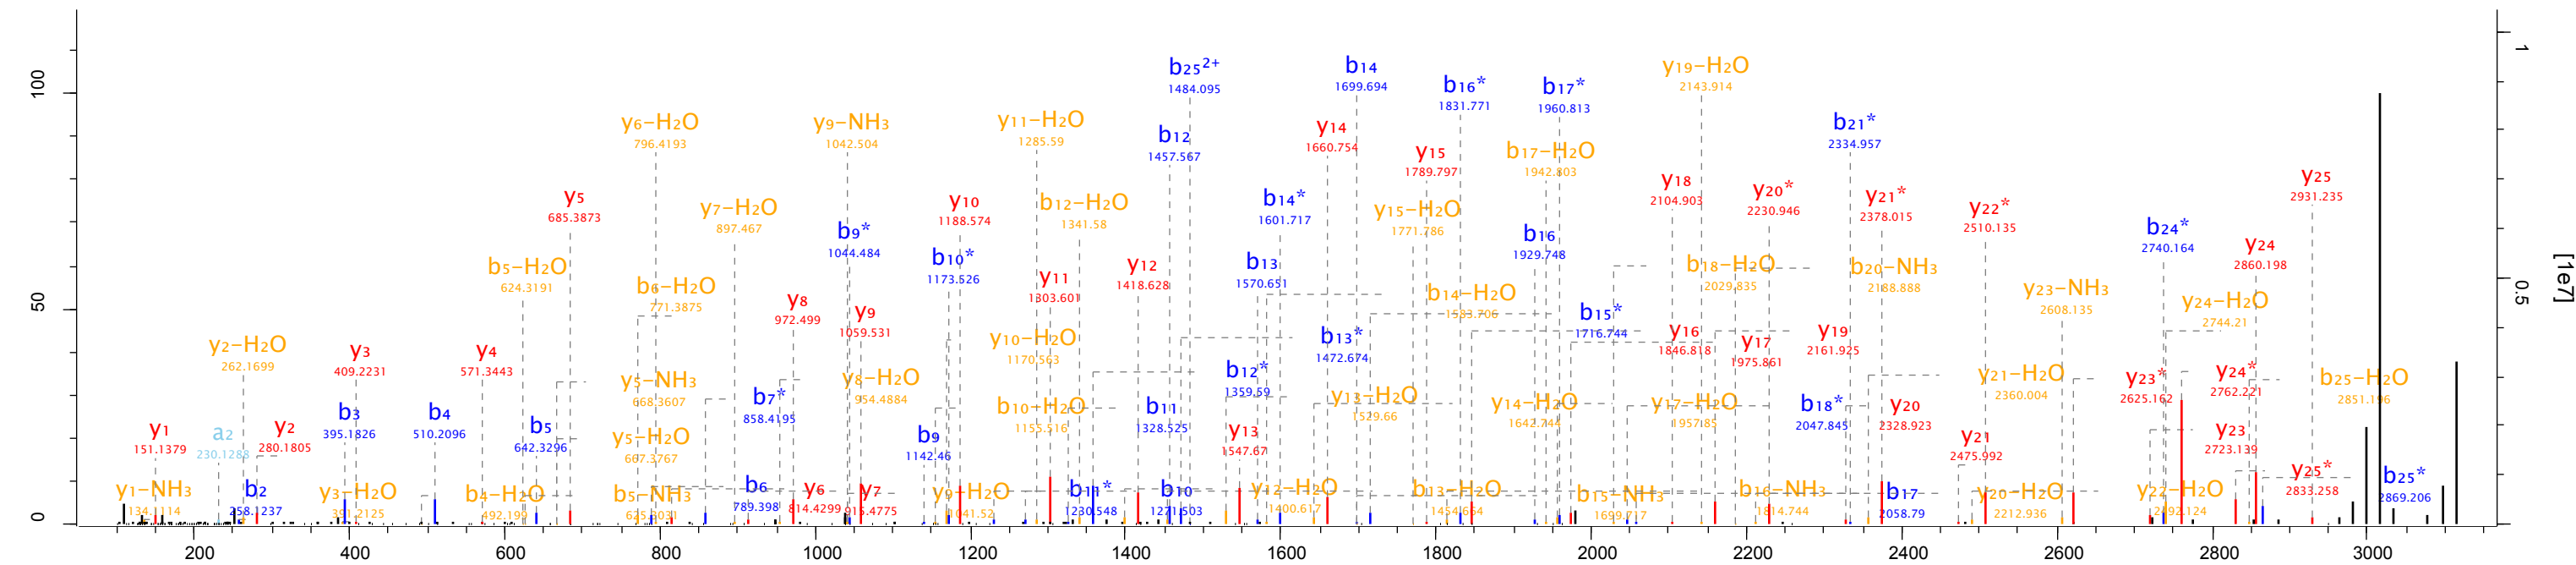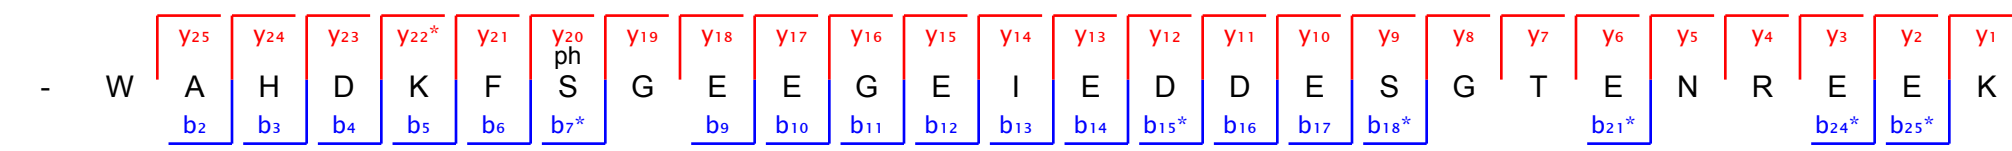

Raw file 20150812\_A375SR\_Phospho\_BR1\_08 Scan 12073 Method FTMS; HCD Score 156.83 m/z 839.38 Gene names TRAFD1

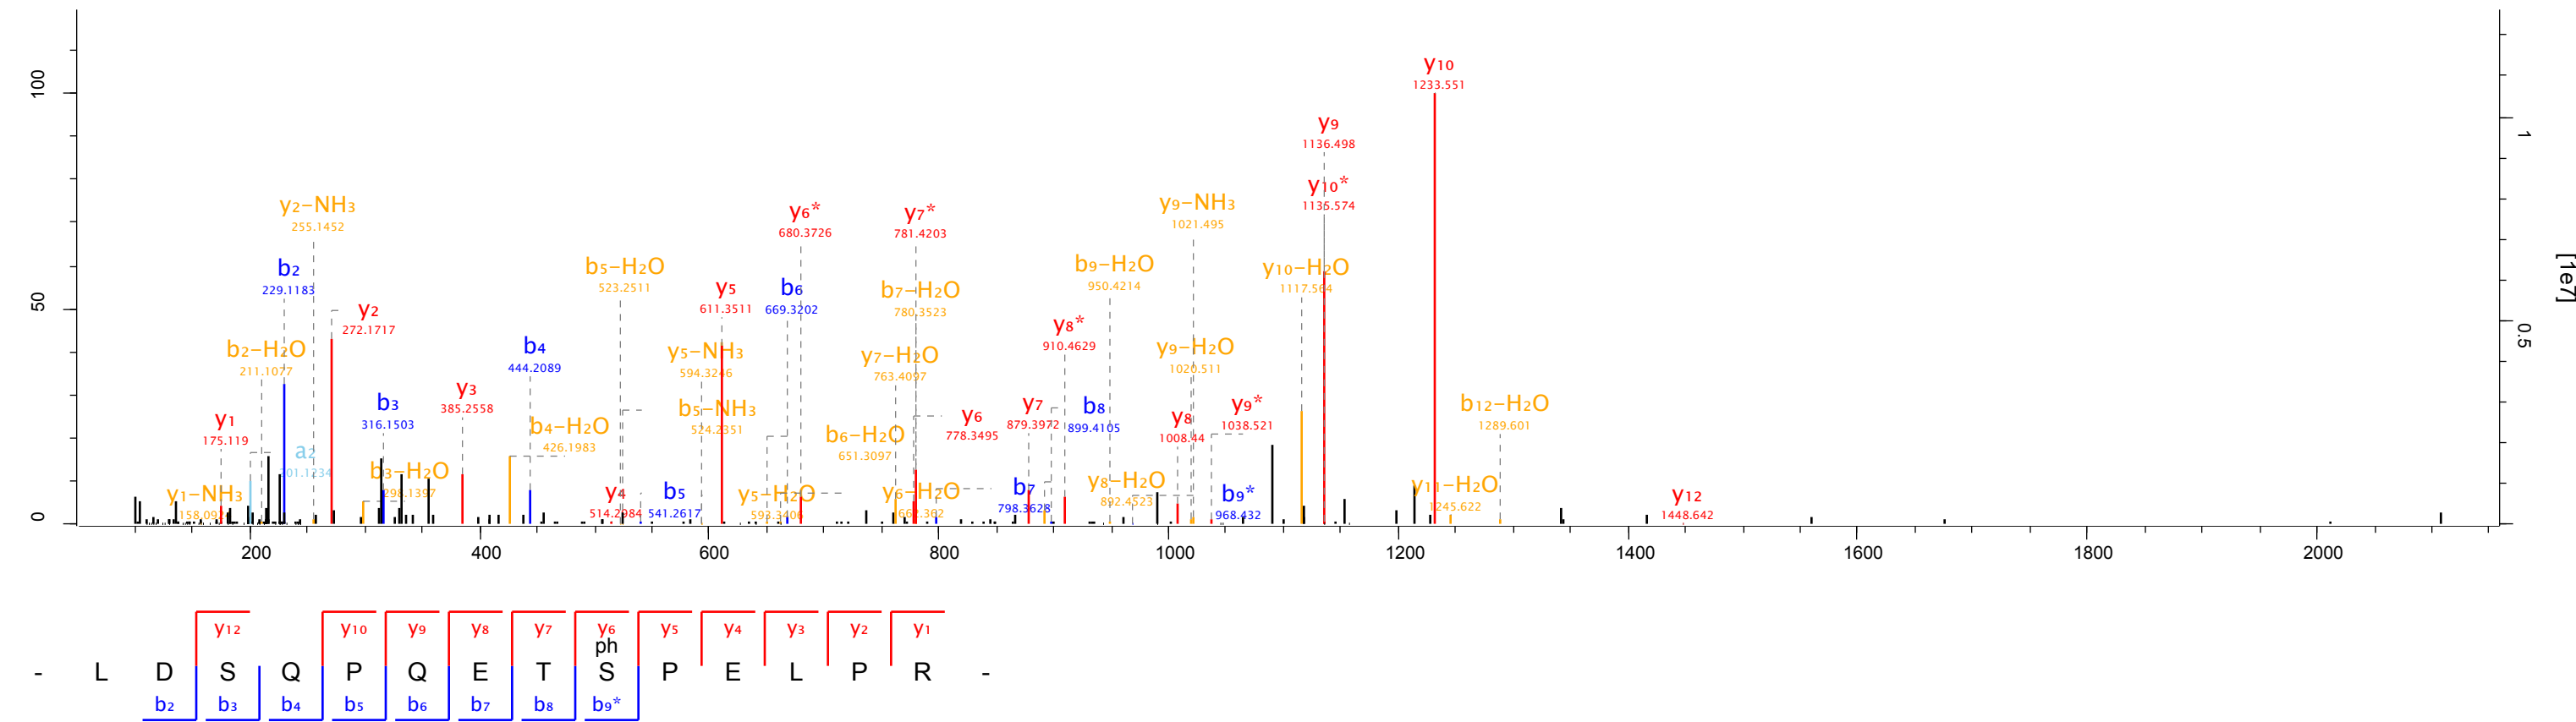

Raw file Scan Method Score m/z Gene names  
 20150812\_A375SR\_Phospho\_BR1\_08 12433 FTMS; HCD 49.27 640.97 ENO1

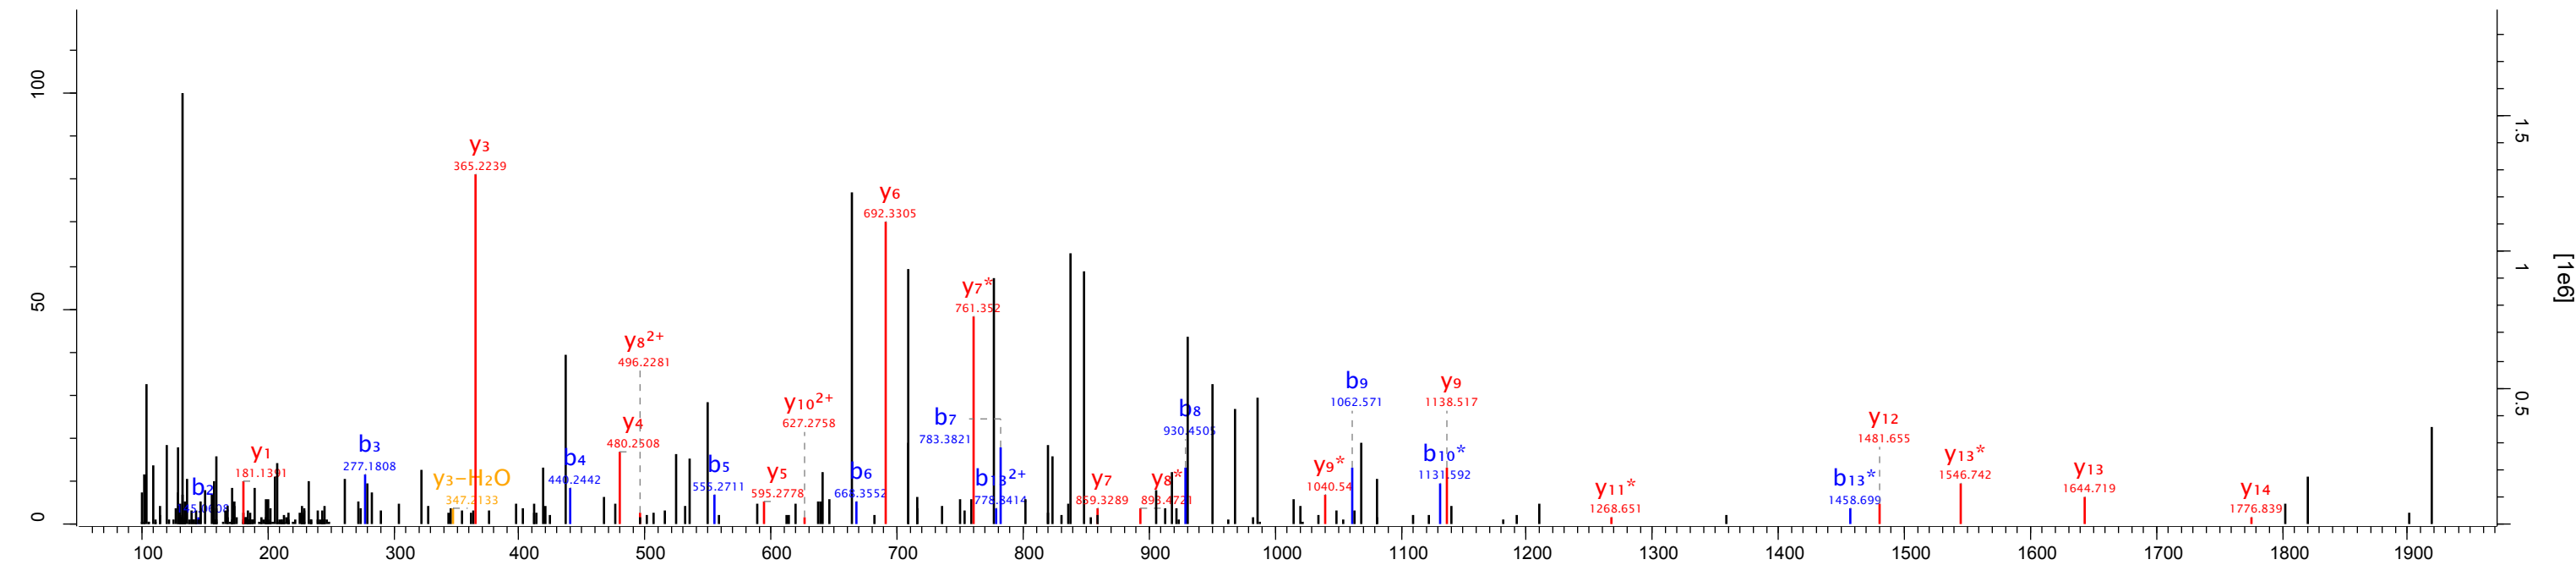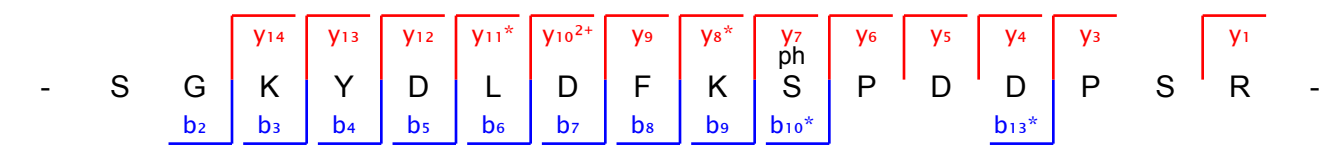

Raw file 20150812\_A375SR\_Phospho\_BR1\_08 Scan 13073 Method FTMS; HCD Score 95.26 m/z 643.84 Gene names WIZ

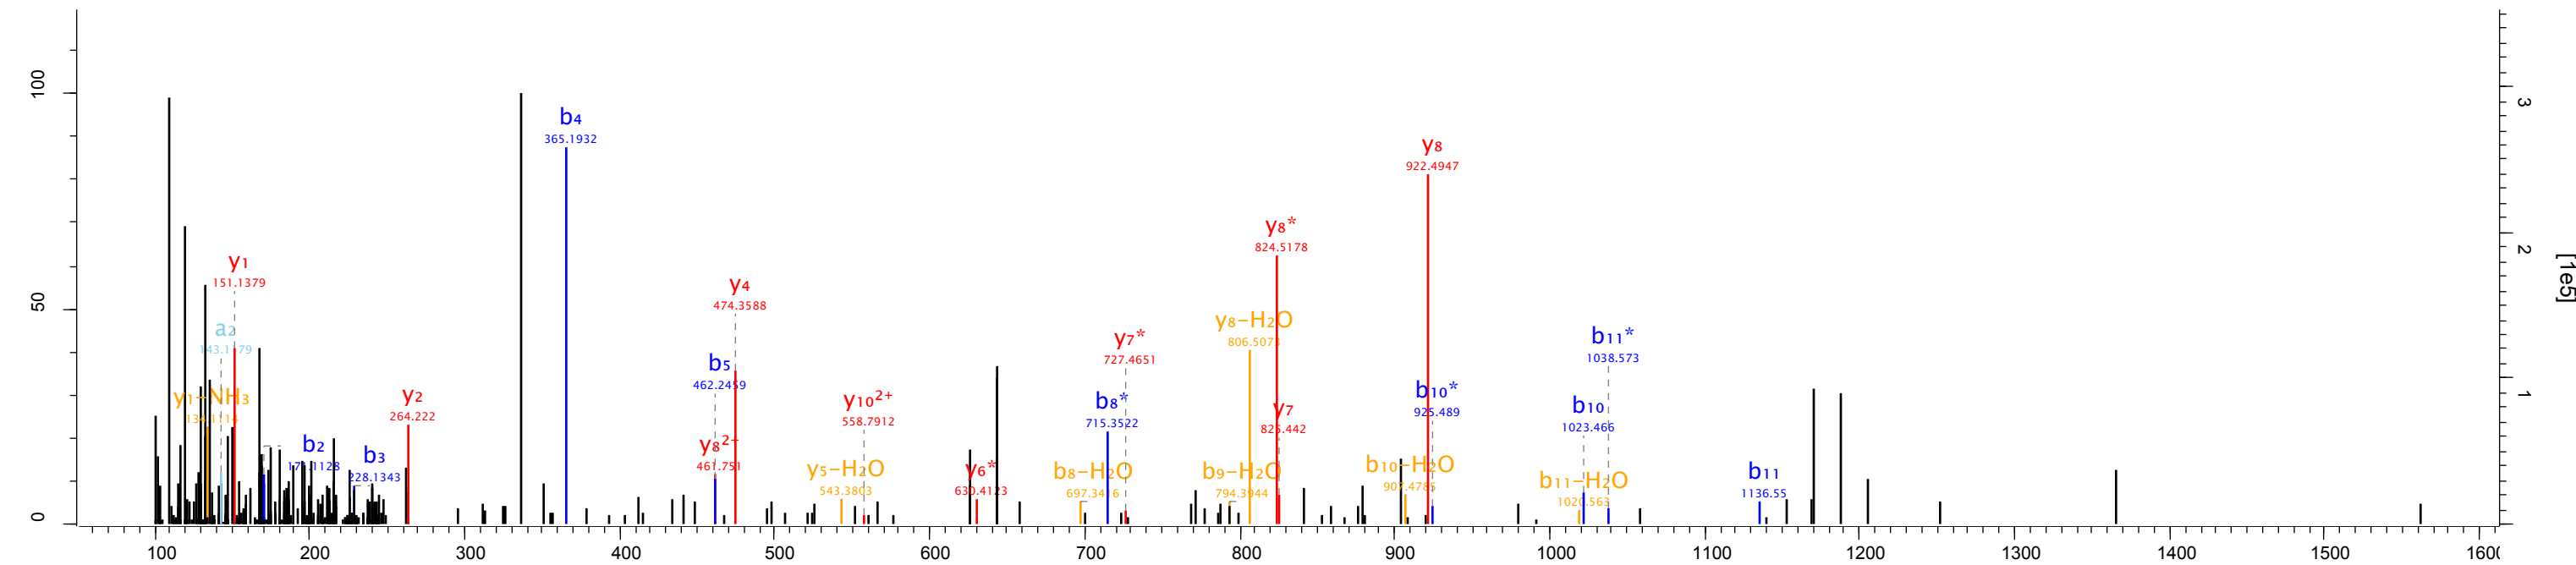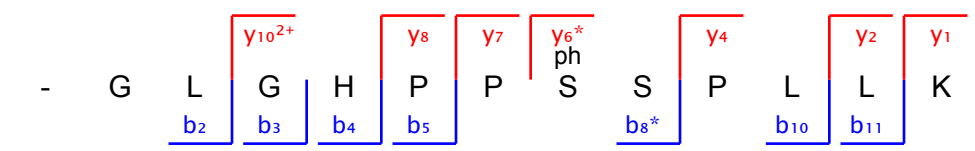

Raw file 20150812\_A375SR\_Phospho\_BR1\_08 Scan 14223 Method FTMS; HCD Score 150.17 m/z 1180.03 Gene names POLR2A

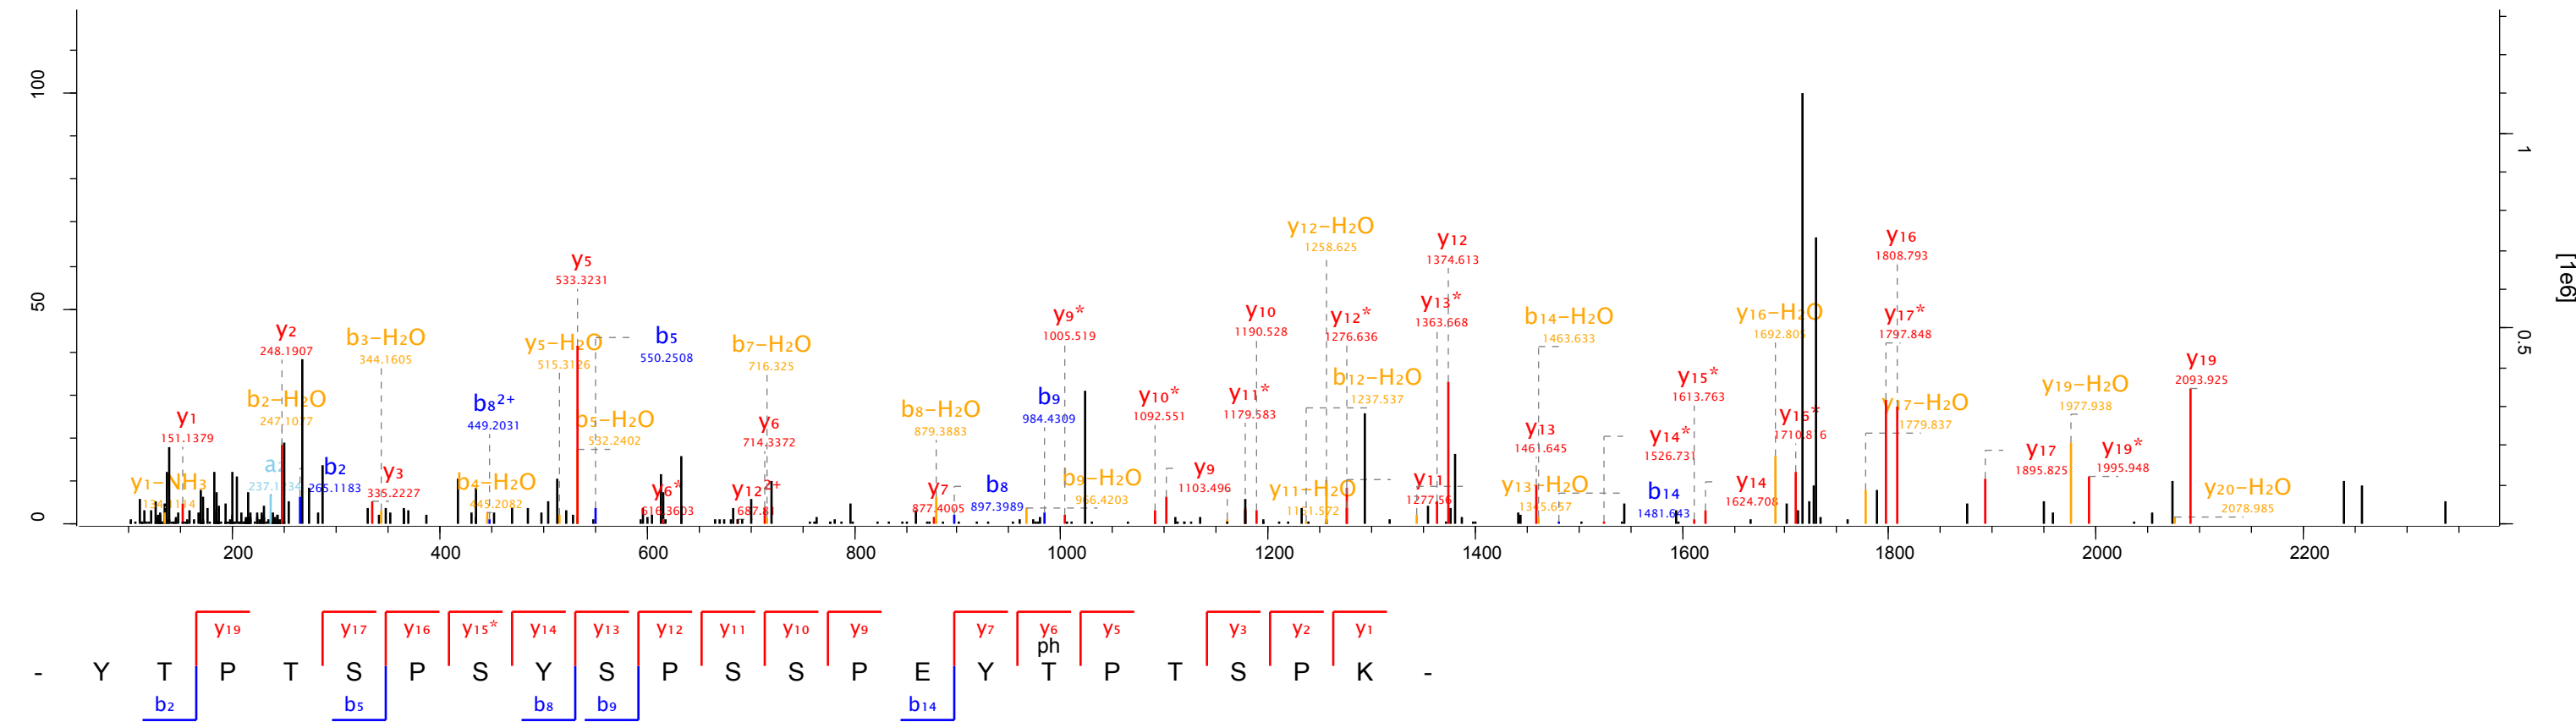



Raw file: 20150812\_A375SR\_Phospho\_BR1\_08  
 Scan: 14523 Method: FTMS; HCD Score: 98.96 m/z: 843.44 Gene names: ARHGEF7

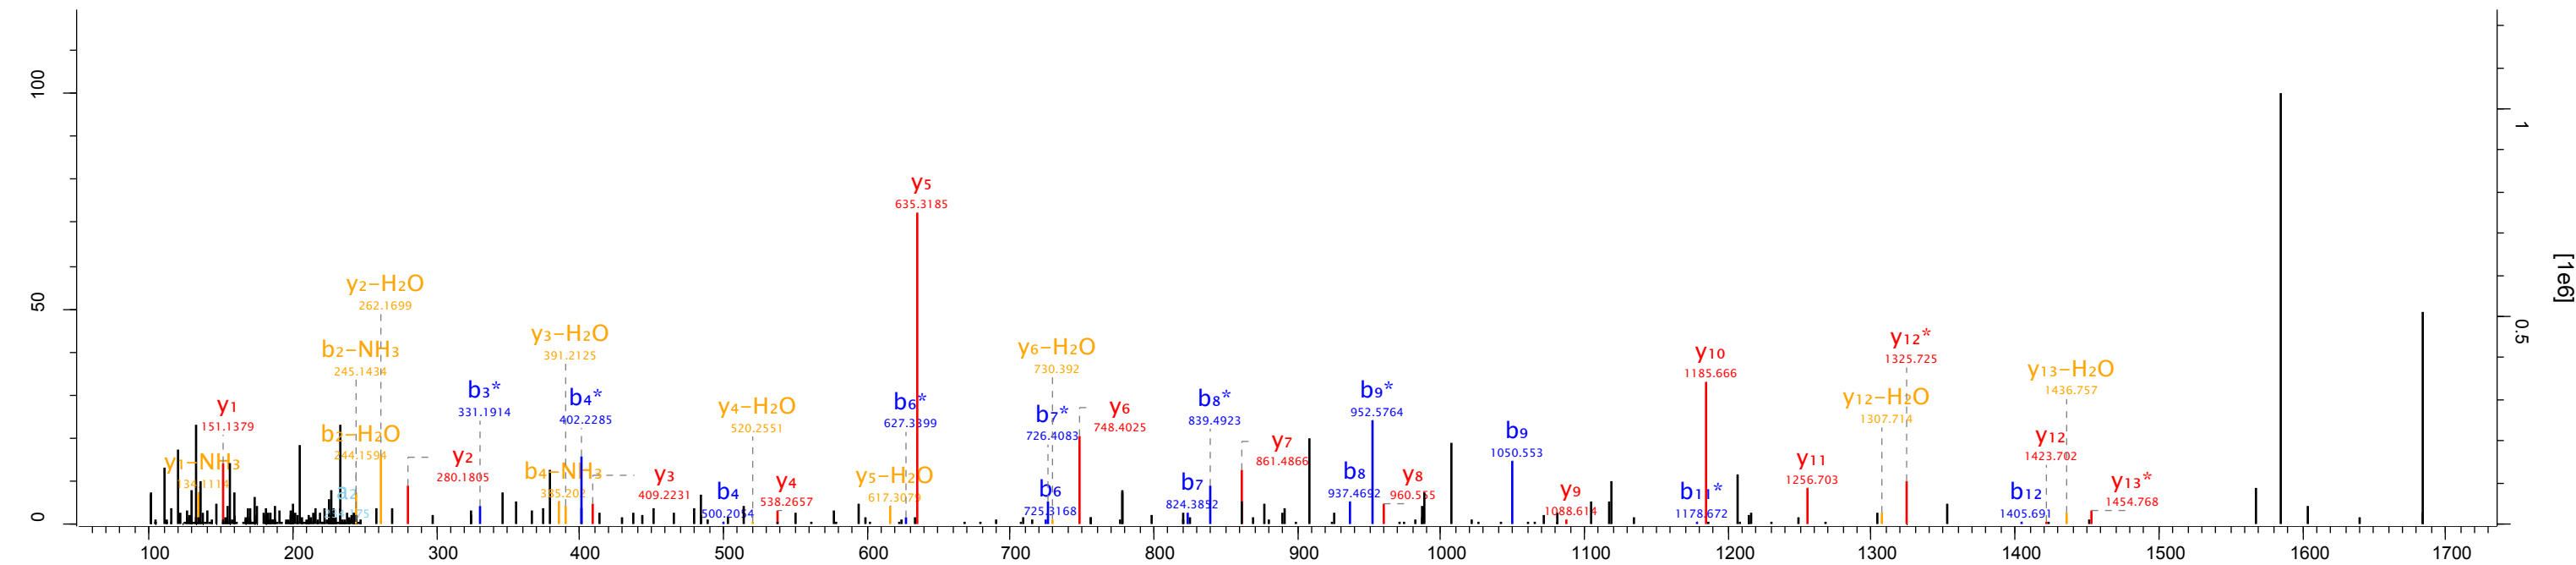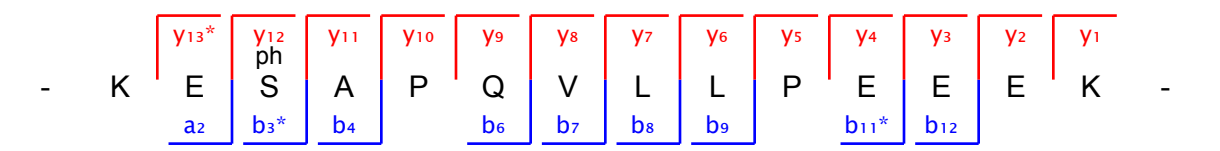

Raw file: 20150812\_A375SR\_Phospho\_BR1\_08  
 Scan: 14963 Method: FTMS; HCD Score: 137.82 m/z: 864.43 Gene names: RPRD2

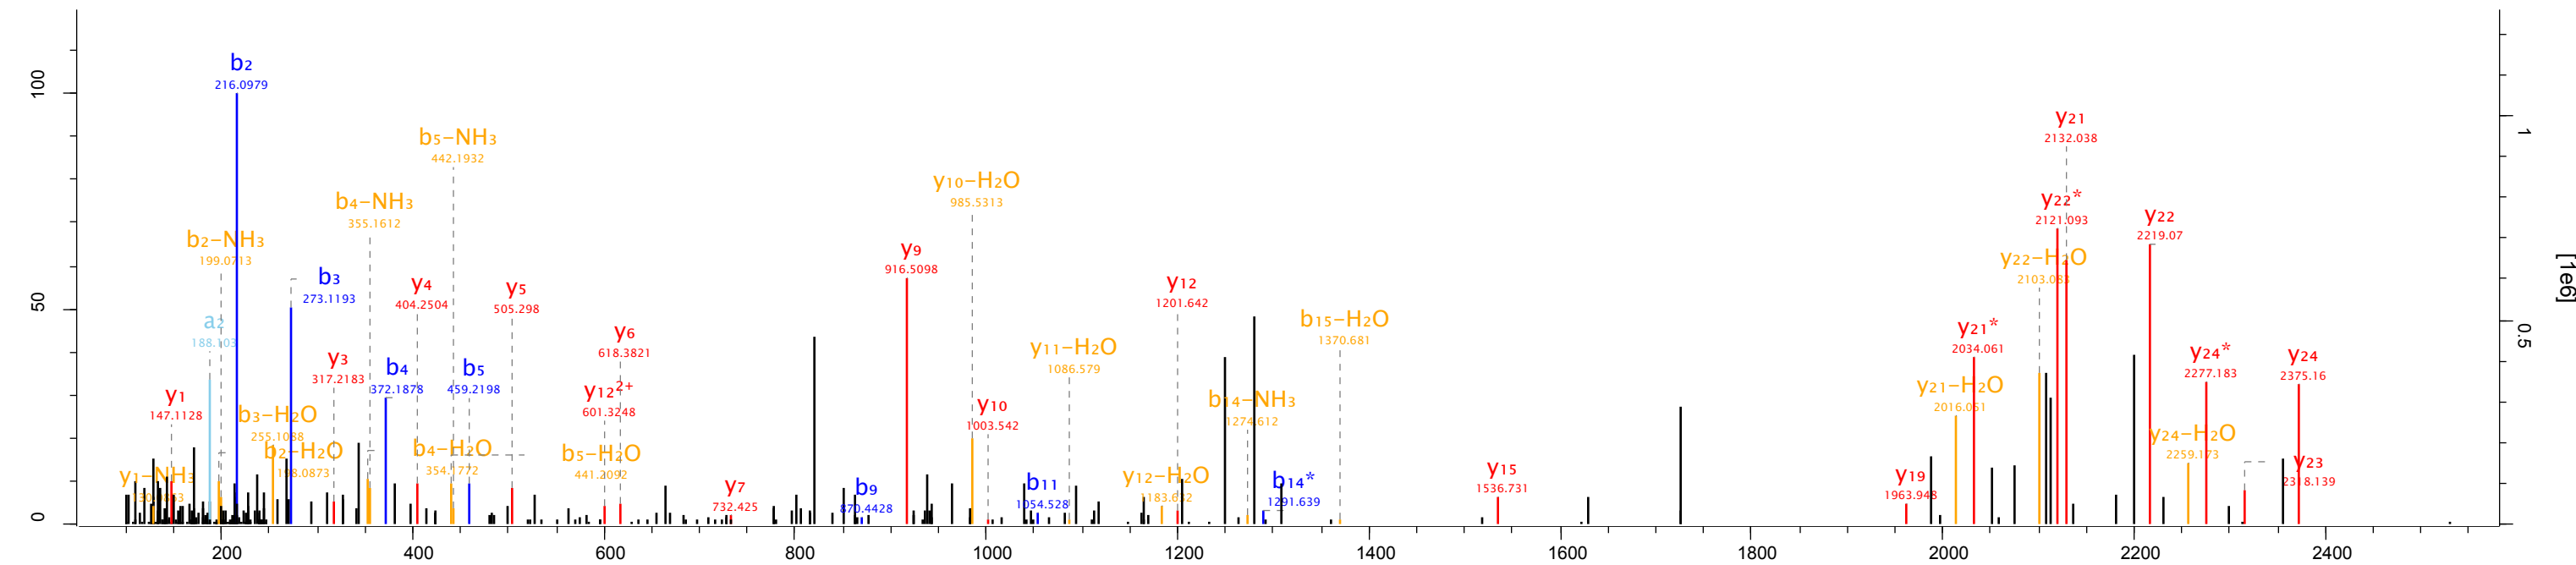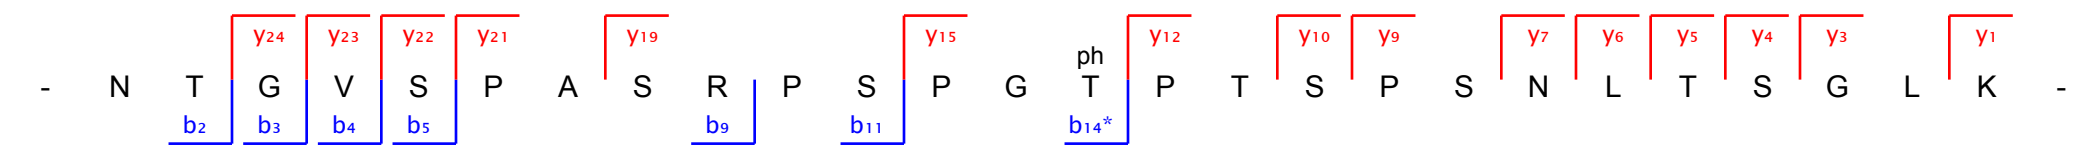

Raw file: 20150812\_A375SR\_Phospho\_BR1\_08  
 Scan: 1643 Method: FTMS; HCD Score: 94.37 m/z: 527.9 Gene names: PPP1R18

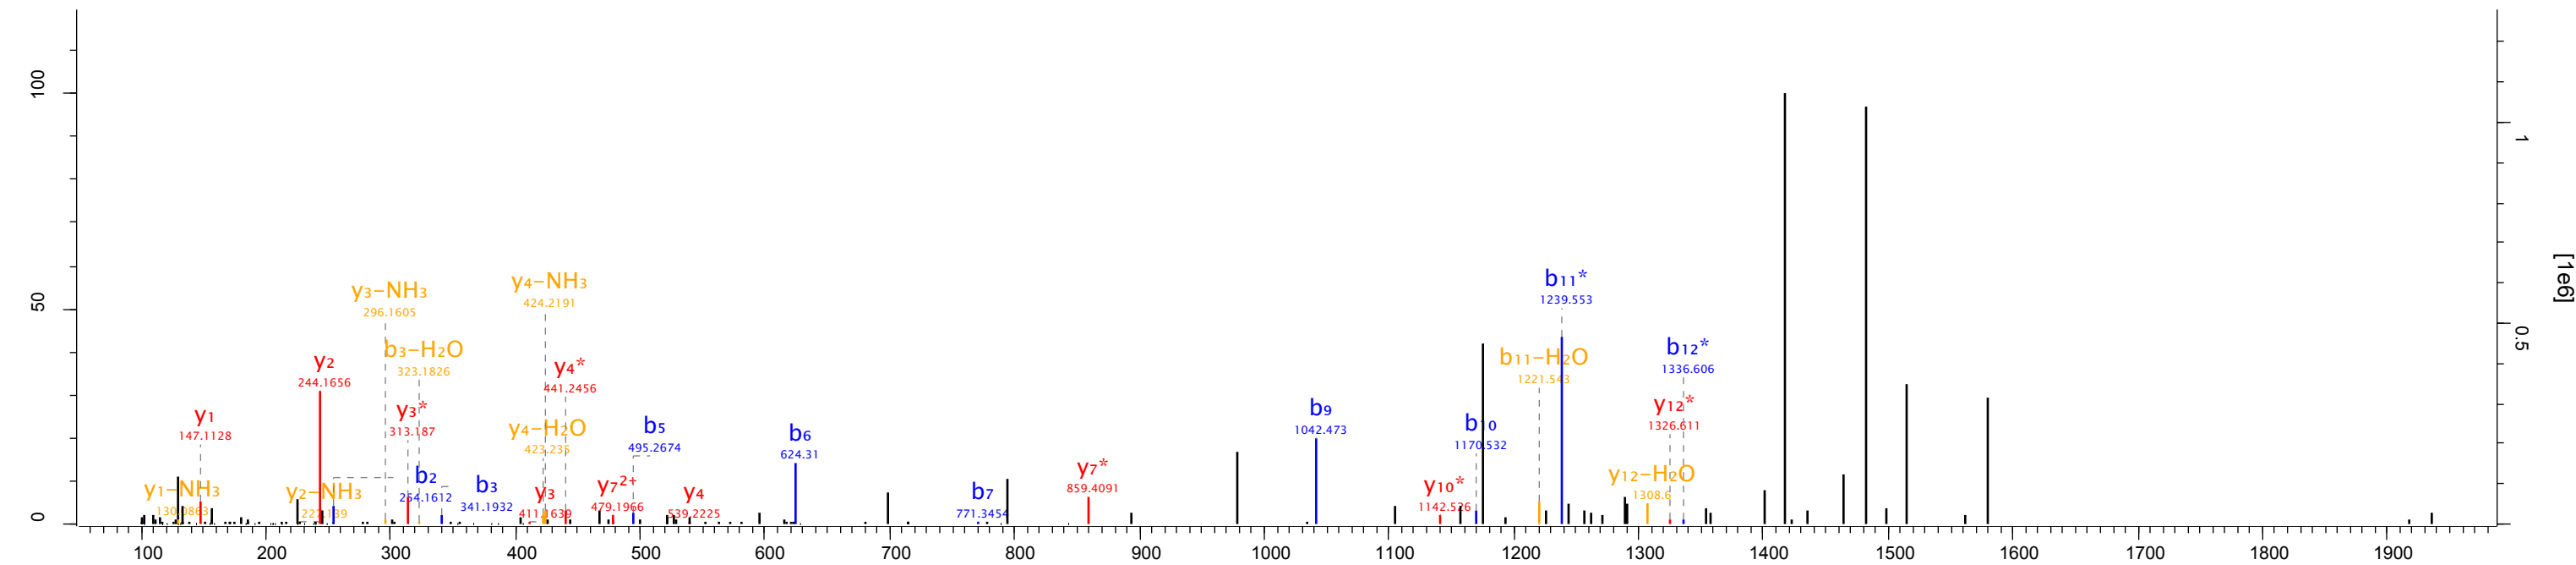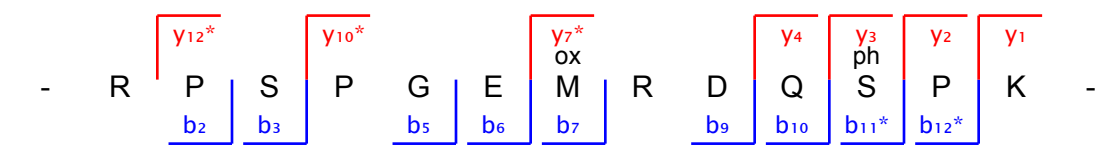

Raw file  
20150812\_A375SR\_Phospho\_BR1\_08

Scan 18603 Method FTMS; HCD Score 120.44 m/z 888.45 Gene names GLCCI1

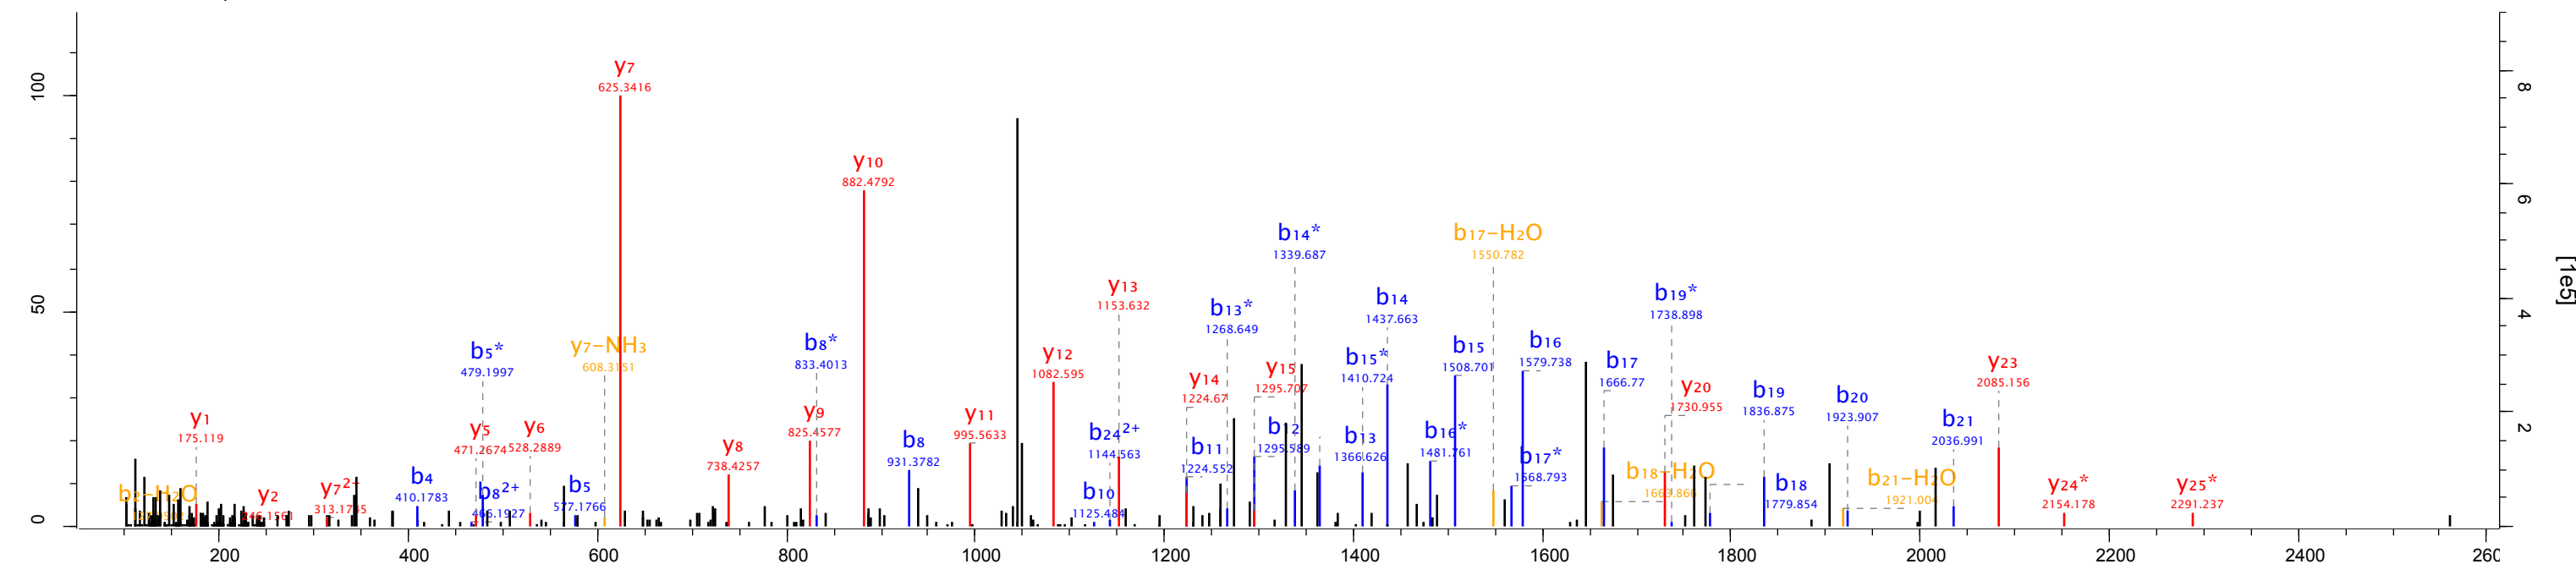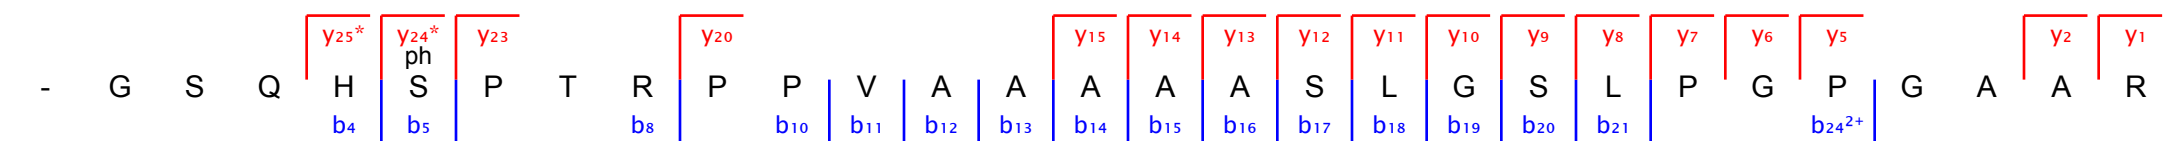

Raw file: 20150812\_A375SR\_Phospho\_BR1\_08  
 Scan: 1903 Method: FTMS; HCD Score: 77.28 m/z: 421.9 Gene names: MAP7D1

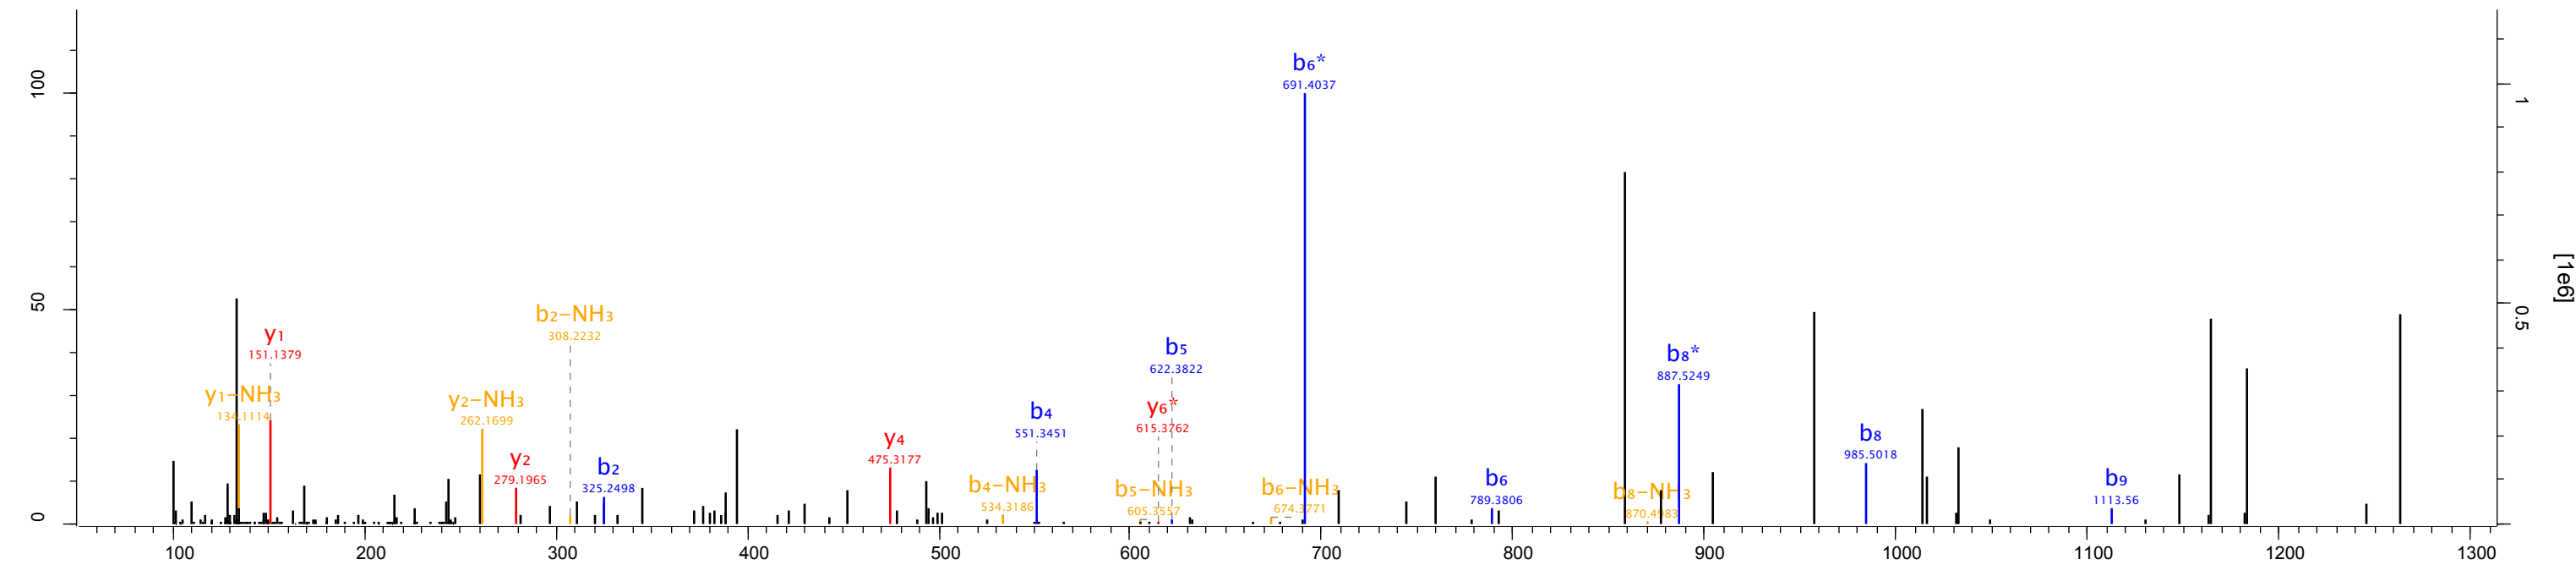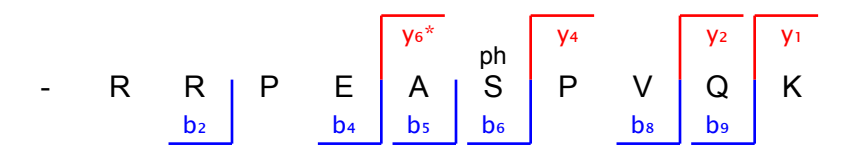



Raw file Scan Method Score m/z Gene names  
 20150812\_A375SR\_Phospho\_BR1\_08 24573 FTMS; HCD 218.01 843.44 PLEKHG5

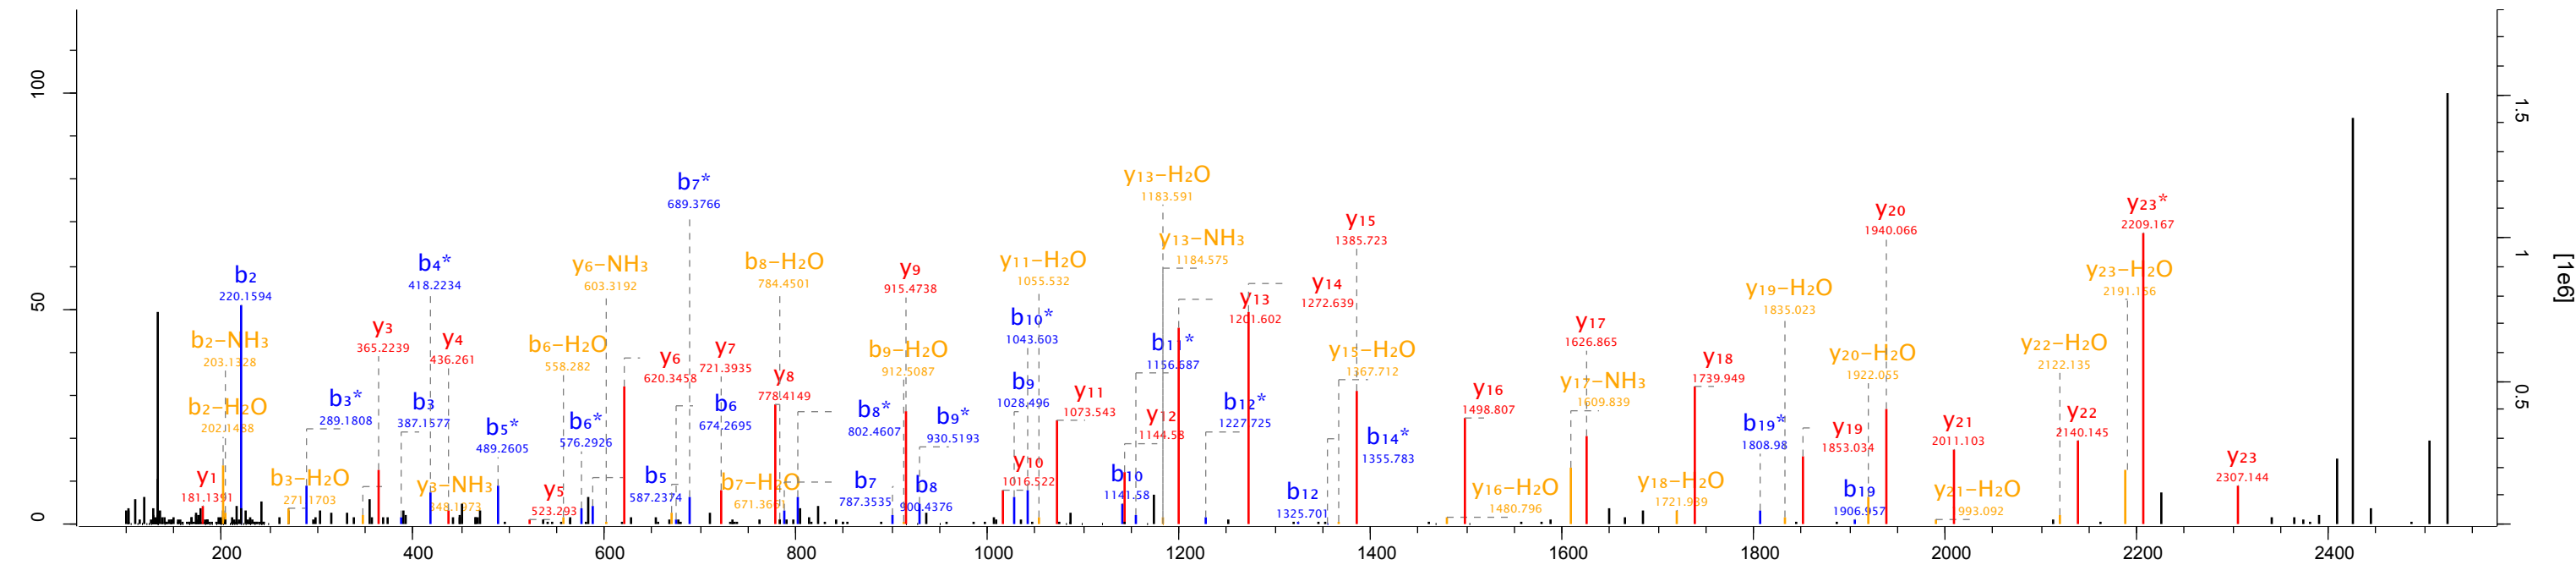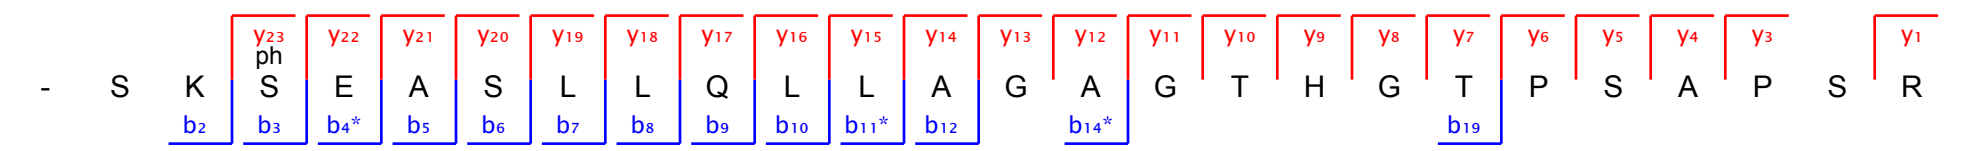

Raw file: 20150812\_A375SR\_Phospho\_BR1\_08  
 Scan: 4283 Method: FTMS; HCD Score: 148.7 m/z: 811.9 Gene names: RSRC2

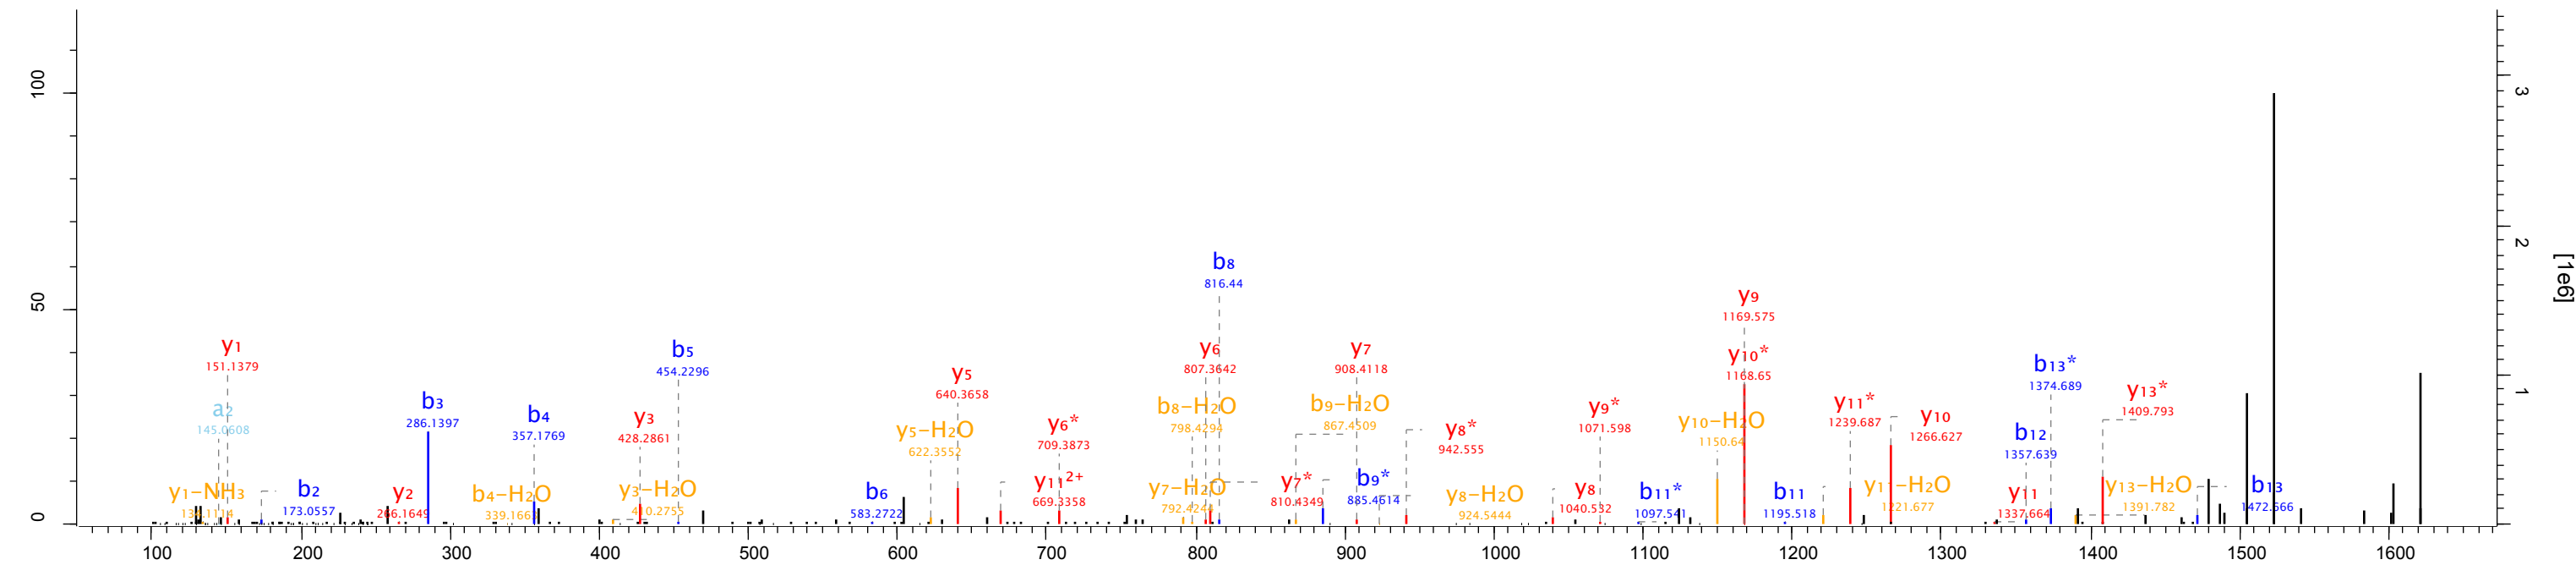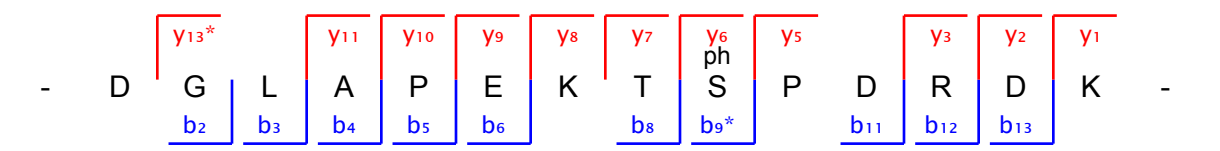



Raw file: 20150812\_A375SR\_Phospho\_BR1\_08  
 Scan: 4883 Method: FTMS; HCD Score: 226.09 m/z: 690.82 Gene names: ARPP19

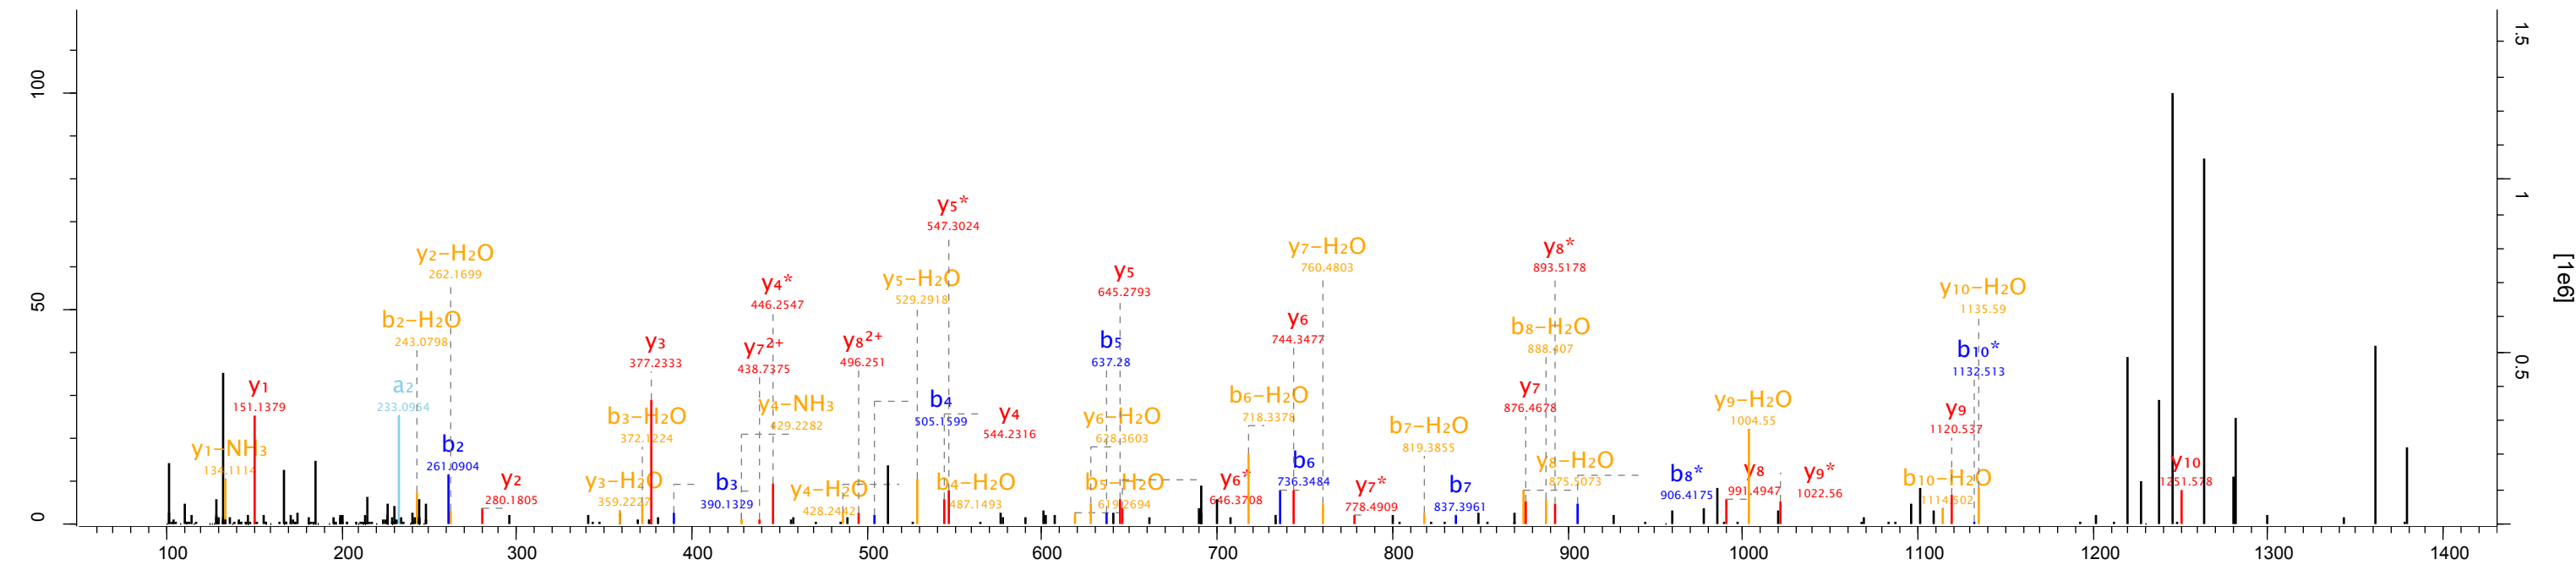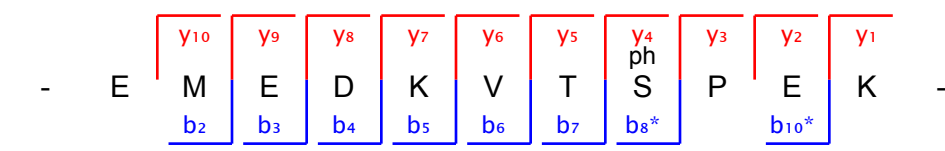

20150812\_A375SR\_Phospho\_BR1\_08 5503 FTMS; HCD 104.72 744.68 TP53BP1

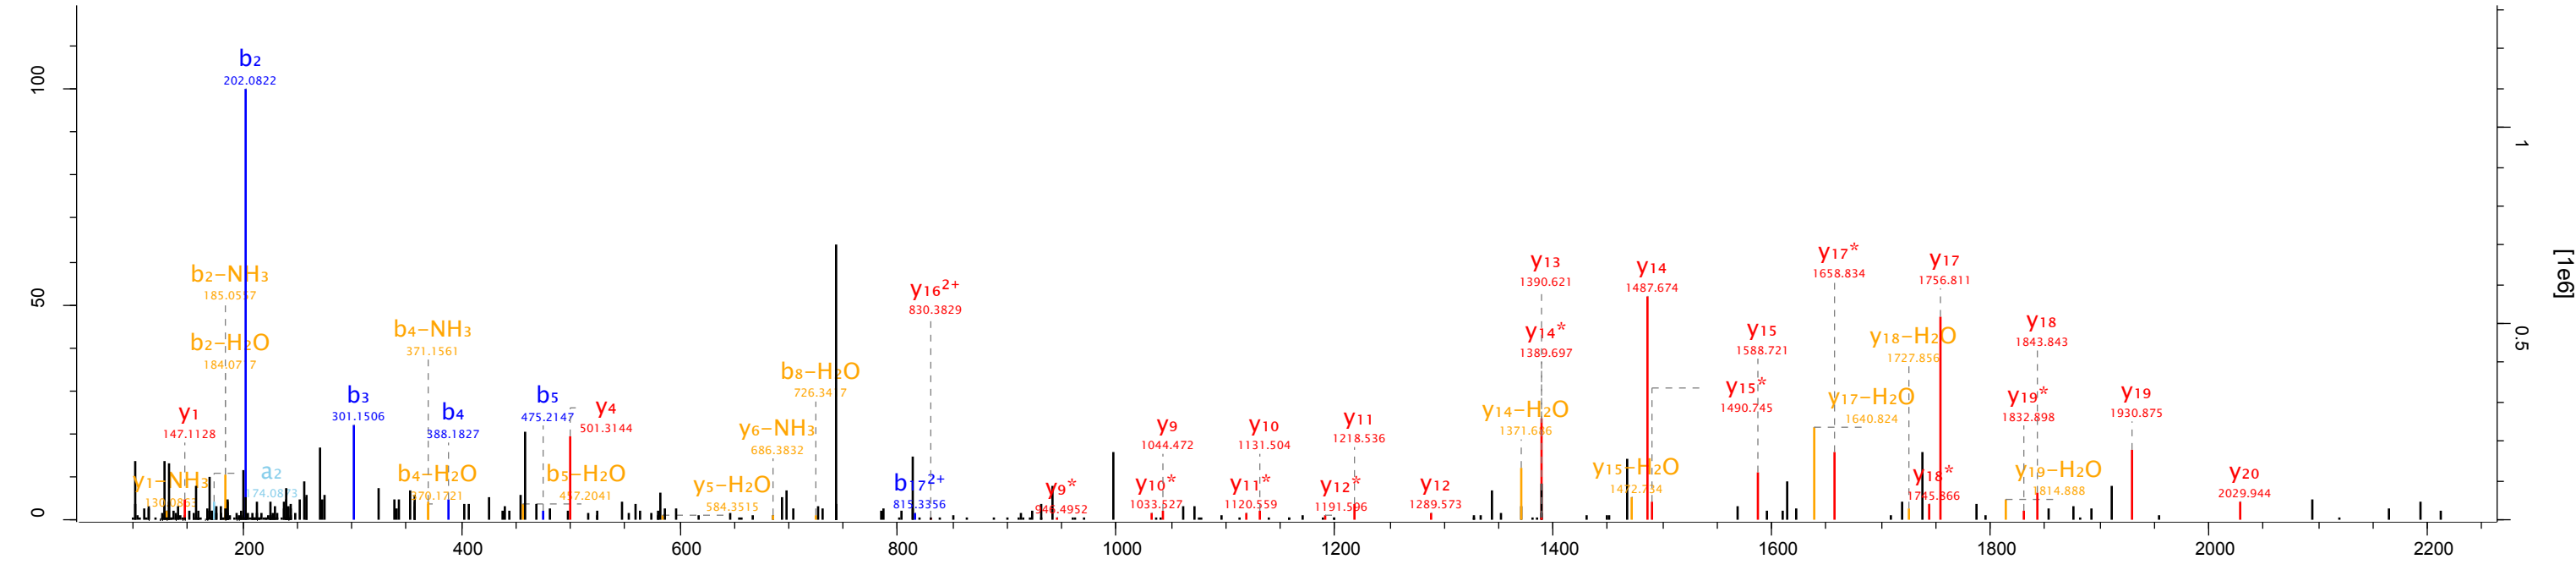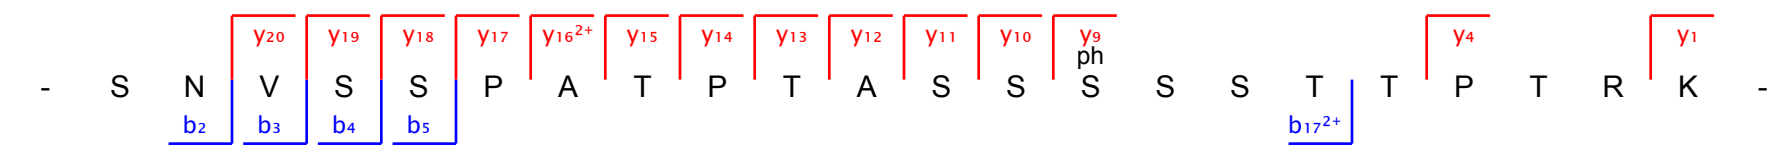

Raw file 20150812\_A375SR\_Phospho\_BR1\_08 Scan 5673 Method FTMS; HCD Score 278.64 m/z 721.35 Gene names PDE1C

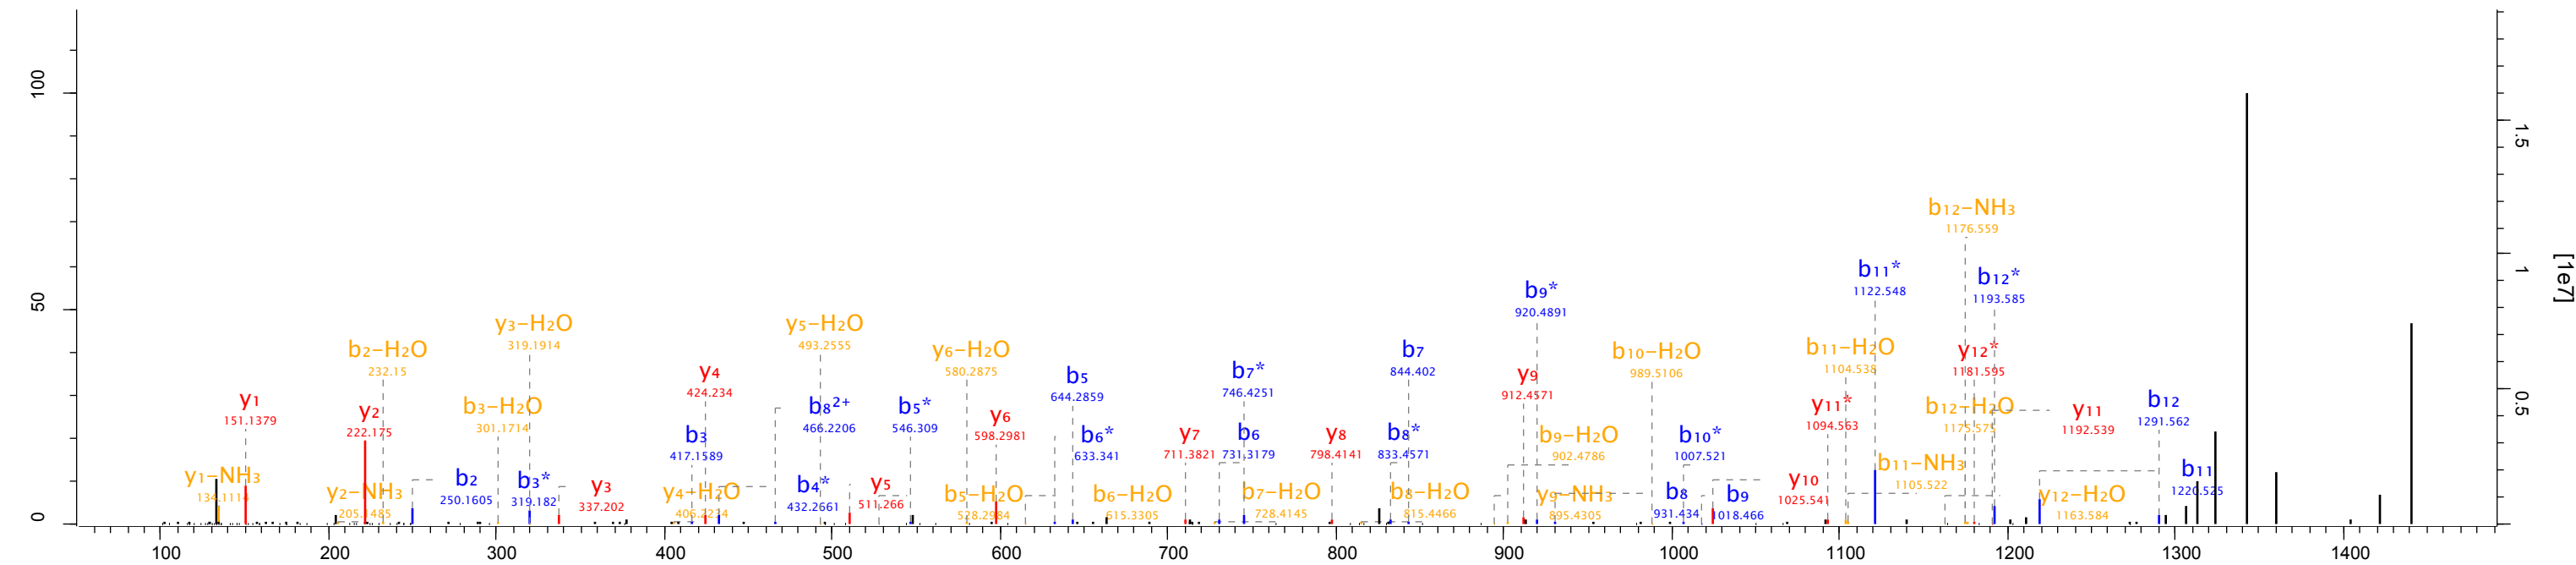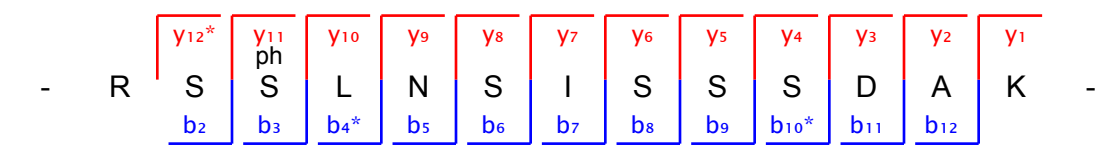

Raw file 20150812\_A375SR\_Phospho\_BR1\_08 Scan 5713 Method FTMS; HCD Score 85.67 m/z 558.29 Gene names SRRM2

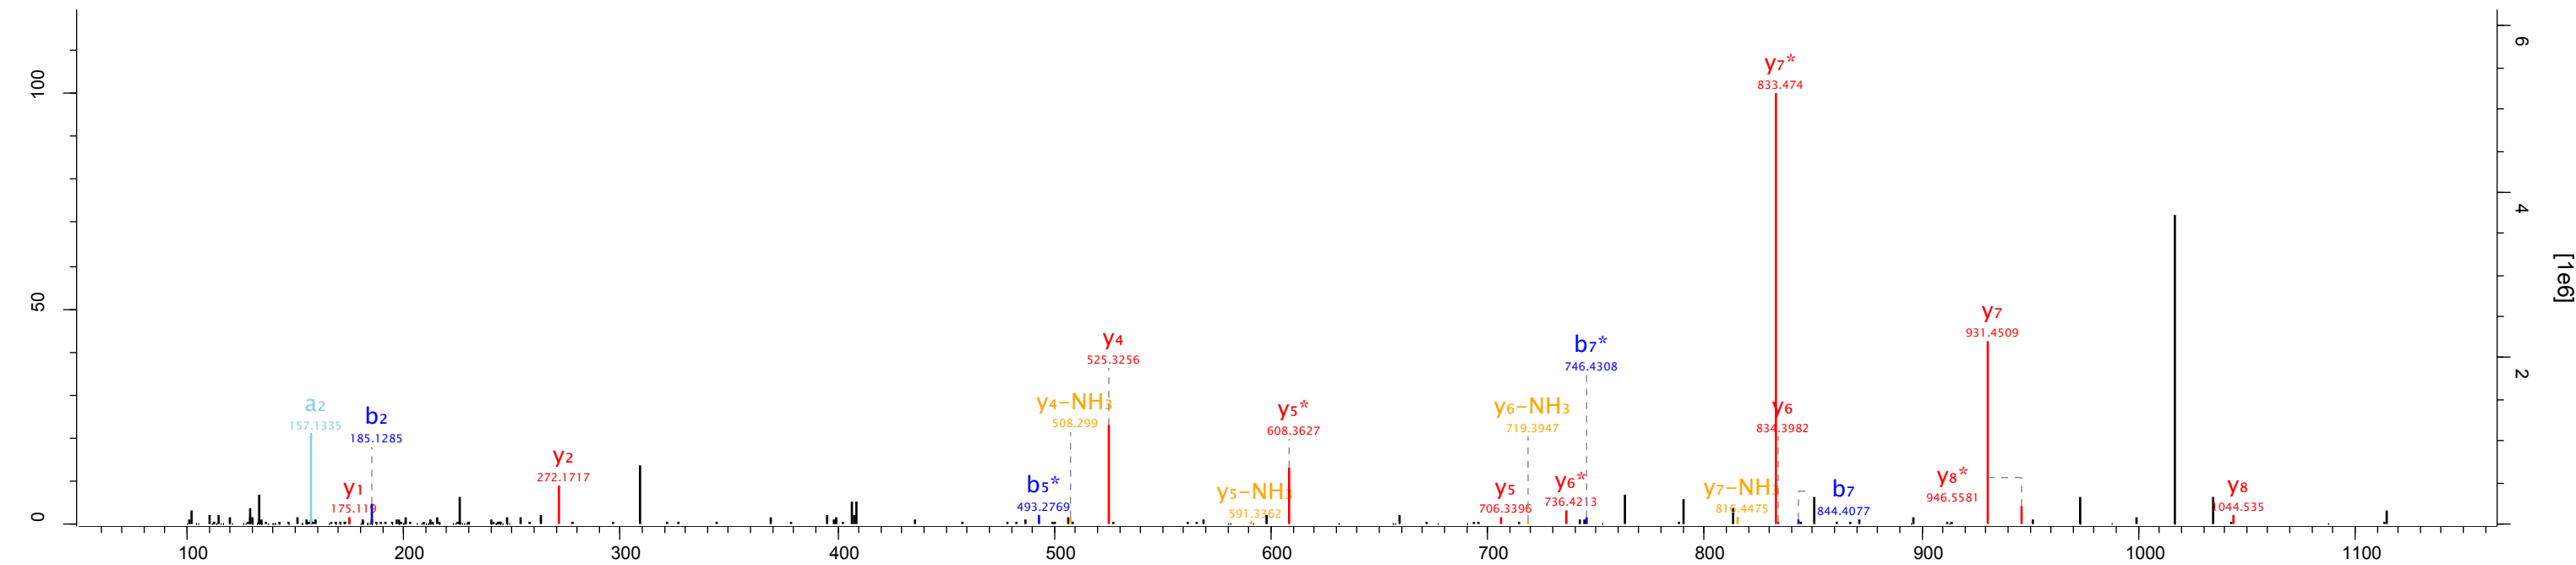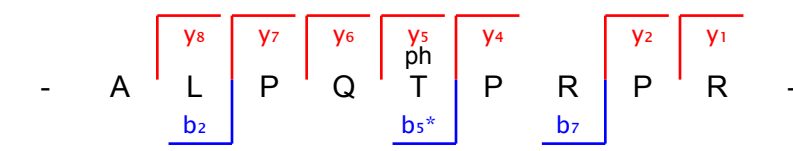

Raw file: 20150812\_A375SR\_Phospho\_BR1\_08  
 Scan: 8113 Method: FTMS; HCD Score: 155.66 m/z: 608.76 Gene names: NCOR1

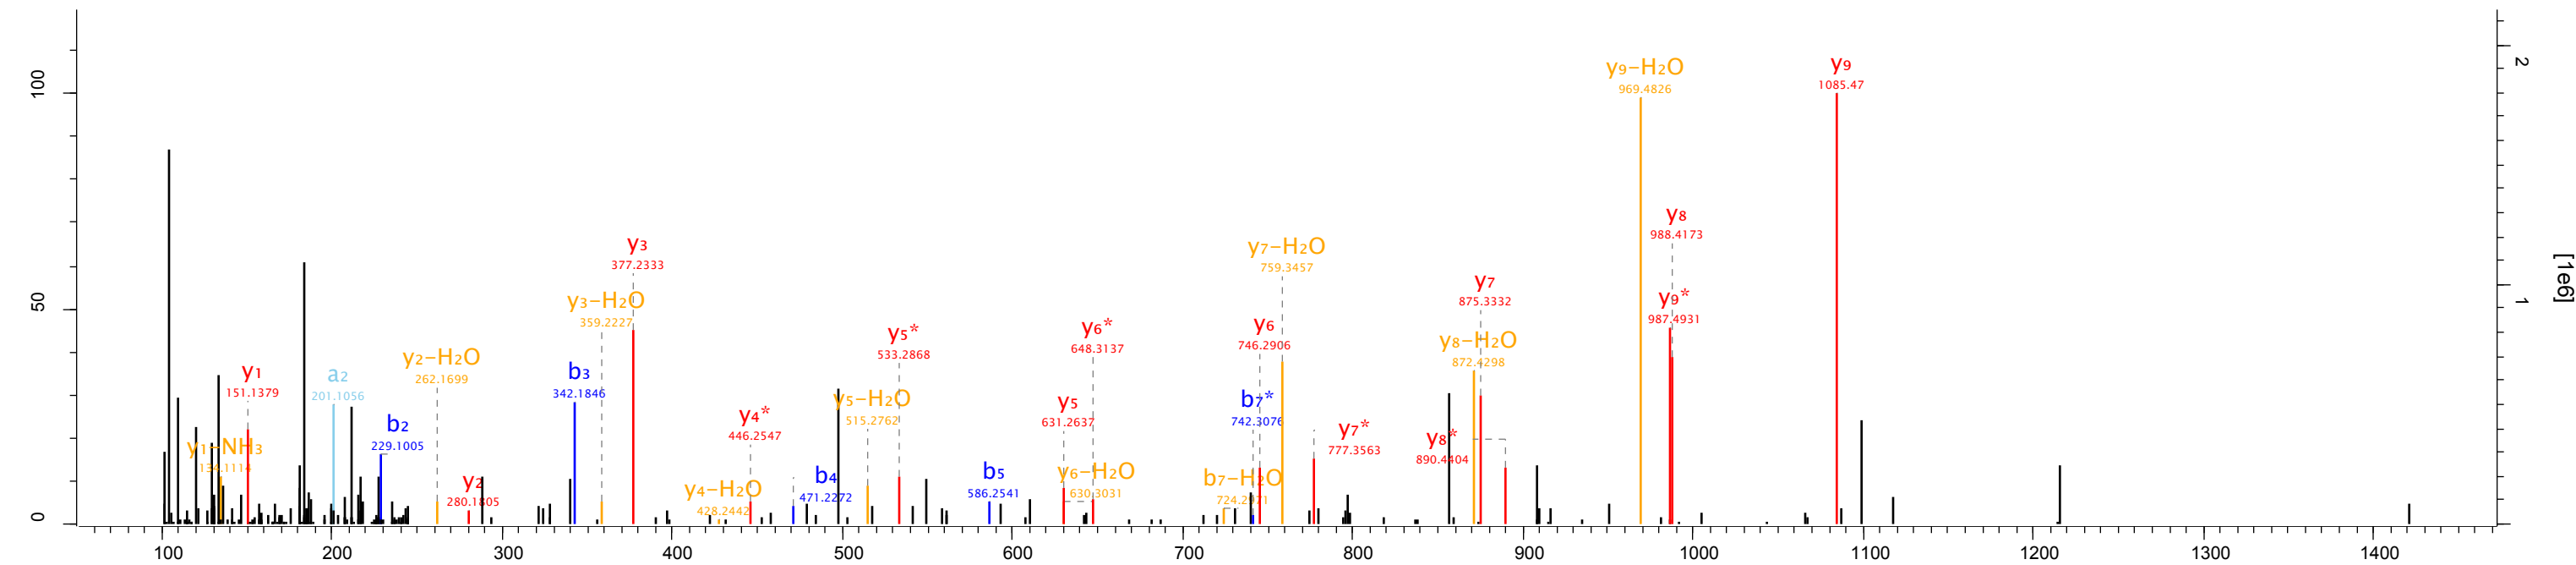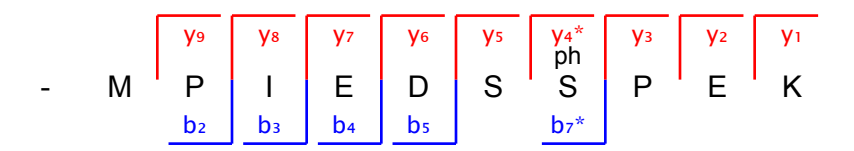

Raw file: 20150812\_A375SR\_Phospho\_BR1\_08  
 Scan: 9223 Method: FTMS; HCD Score: 149.12 m/z: 725.86 Gene names: WNK1

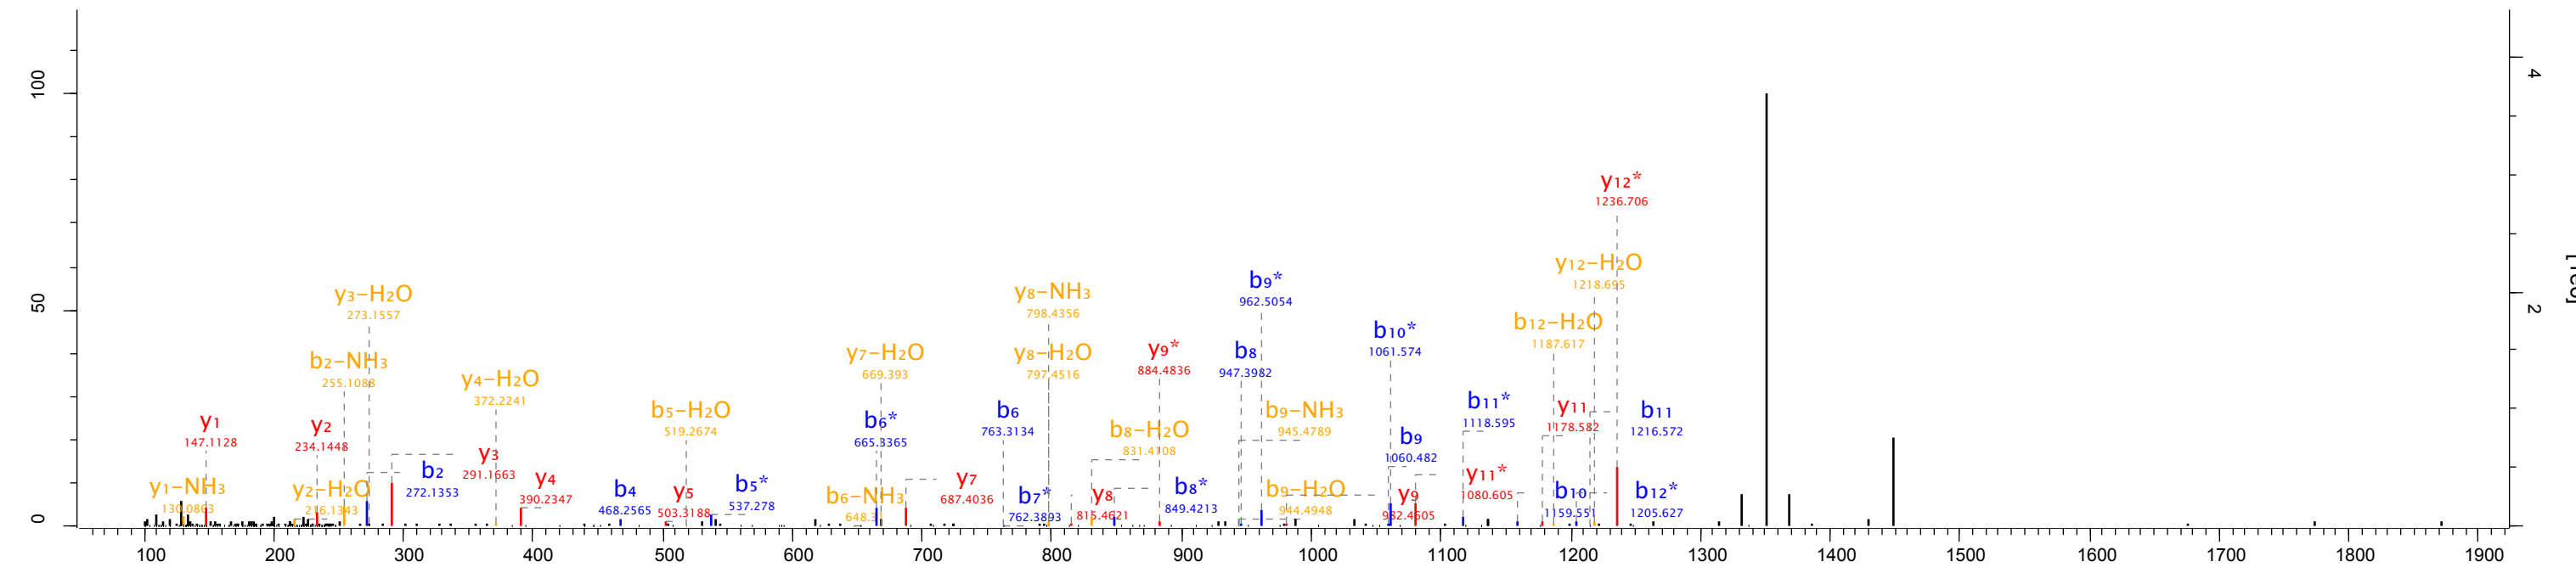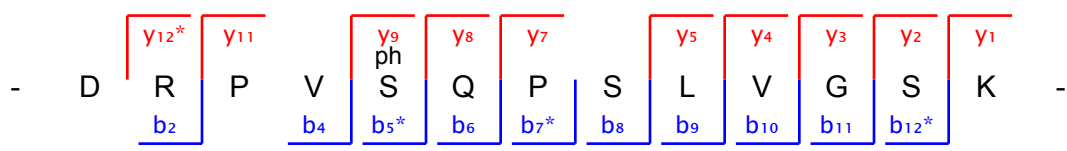

Raw file: 20150812\_A375SR\_Phospho\_BR1\_09  
 Scan: 10703  
 Method: FTMS; HCD  
 Score: 121.82  
 m/z: 609.28  
 Gene names: AMOTL2

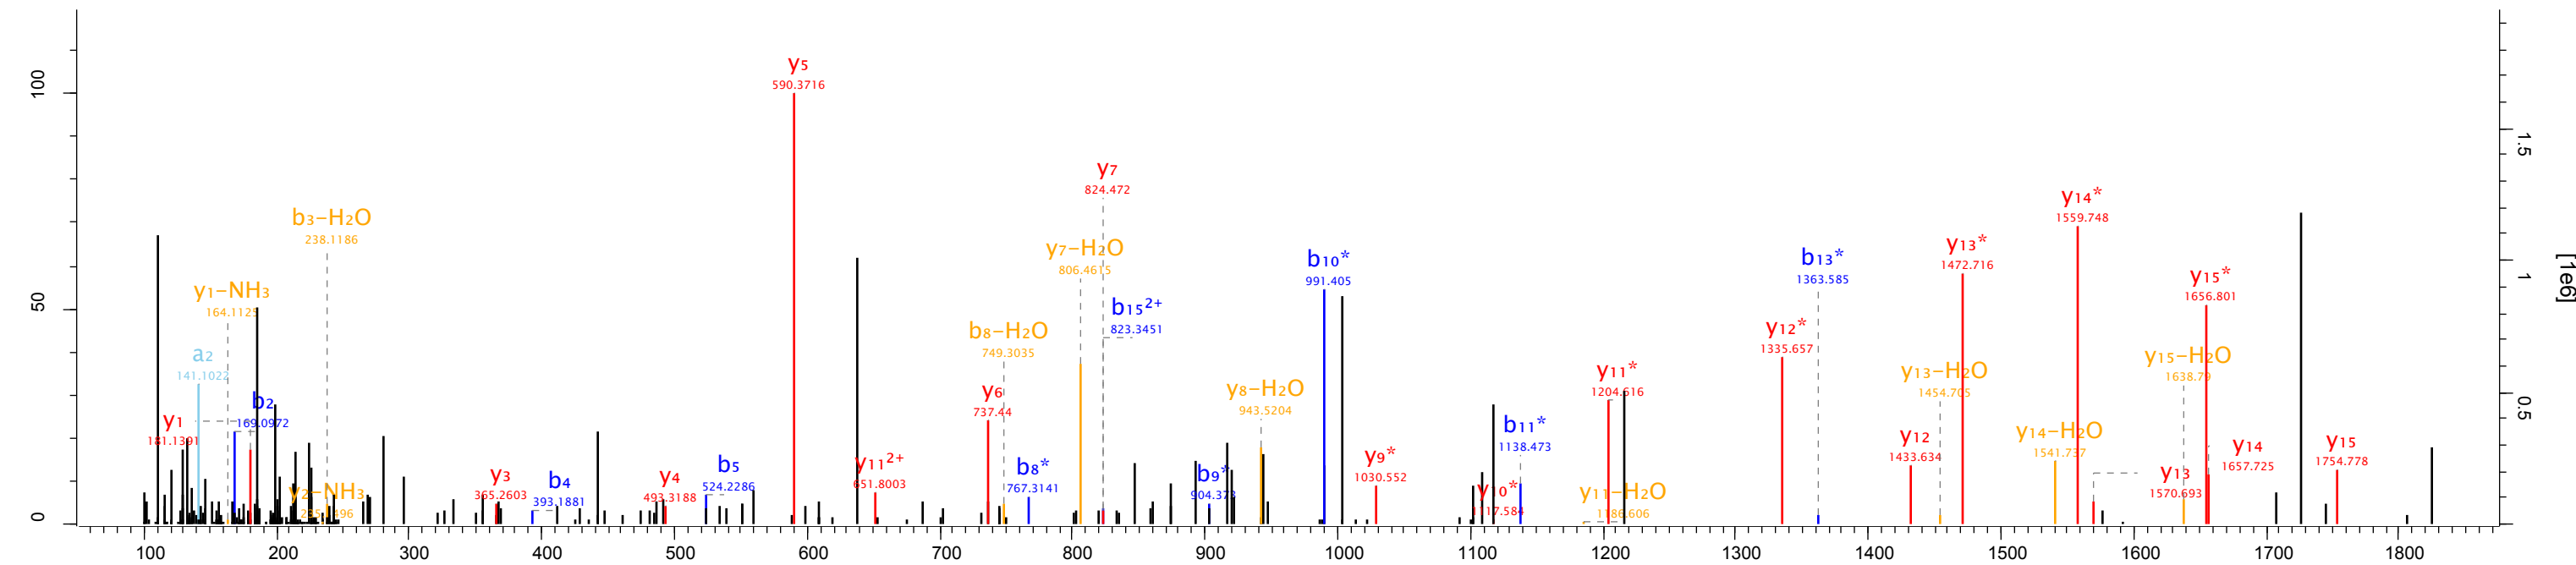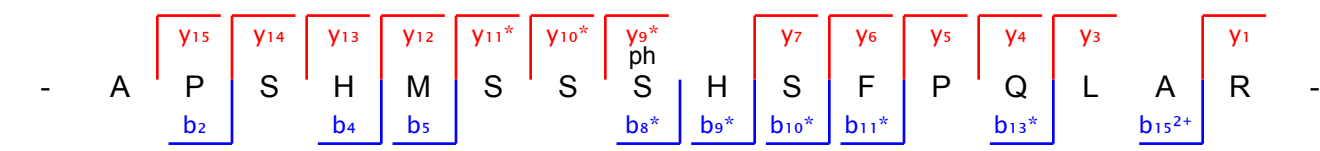

Raw file: 20150812\_A375SR\_Phospho\_BR1\_09  
 Scan: 10863 Method: FTMS; HCD Score: 70.94 m/z: 597.66 Gene names: TJAP1

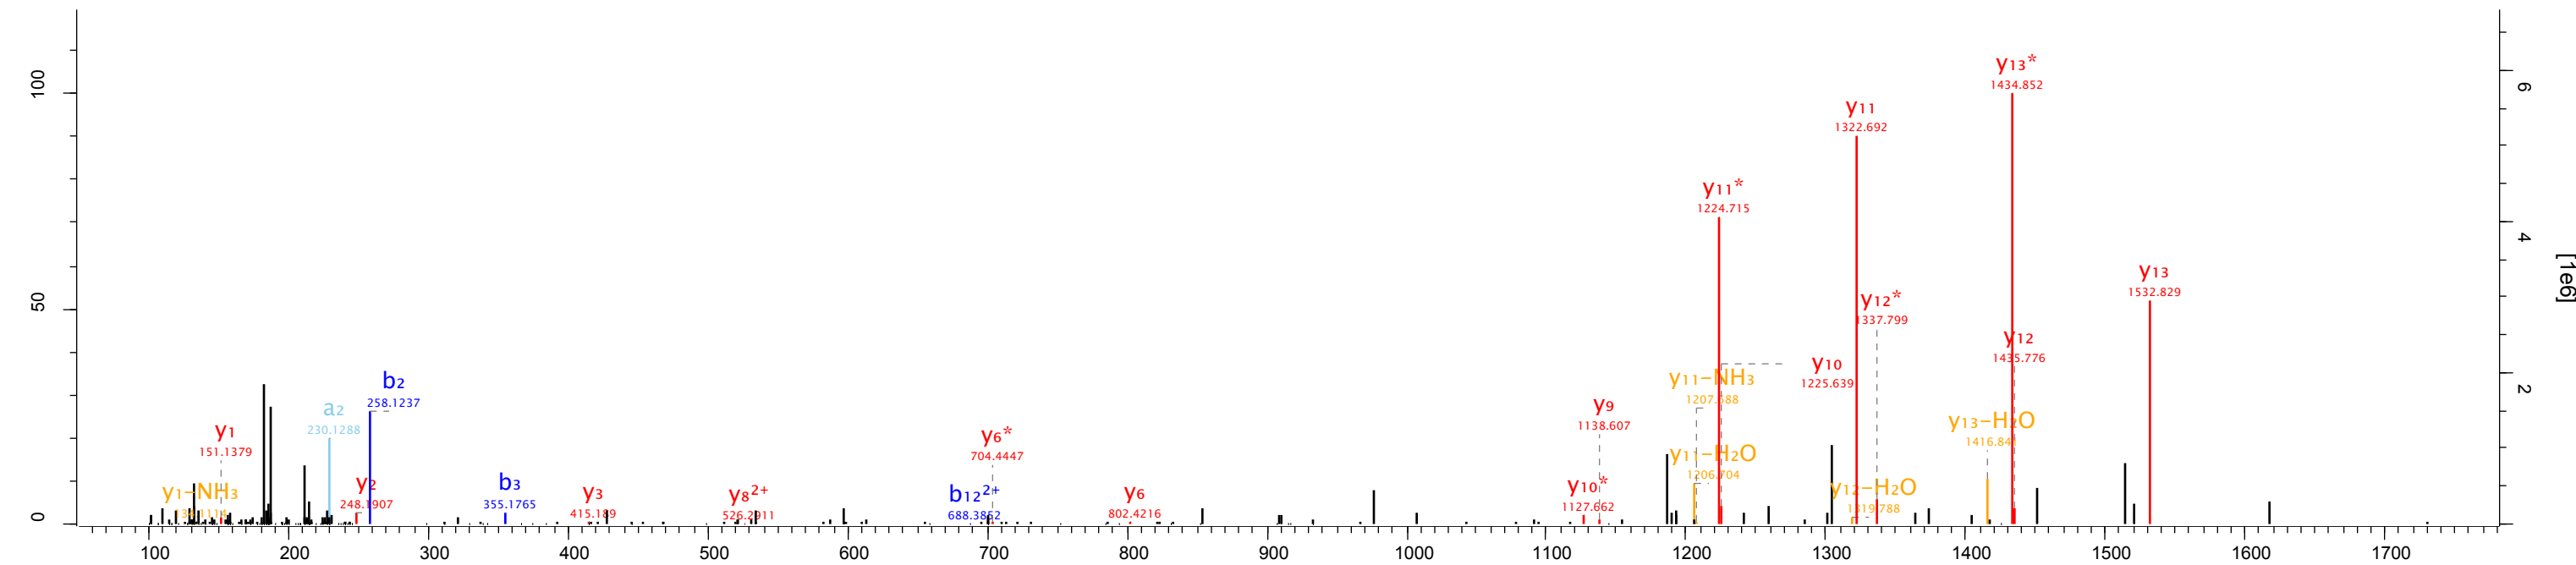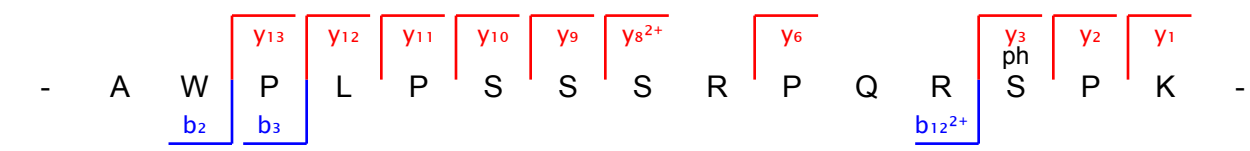



Raw file 20150812\_A375SR\_Phospho\_BR1\_09 Scan 12723 Method FTMS; HCD Score 123.58 m/z 775.89 Gene names DCUN1D5

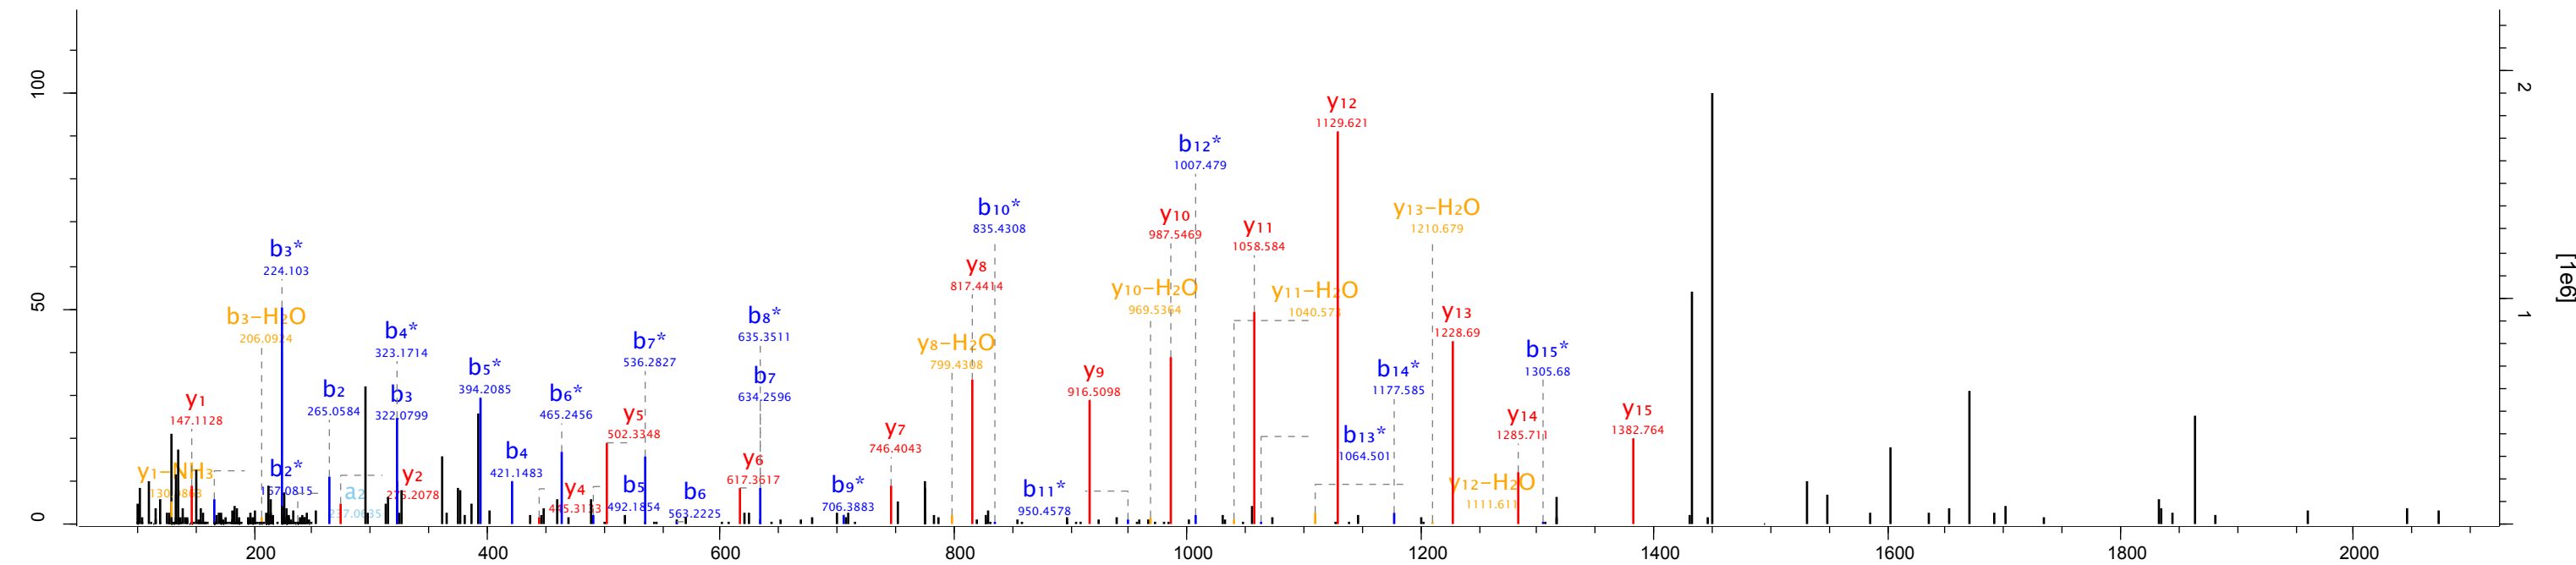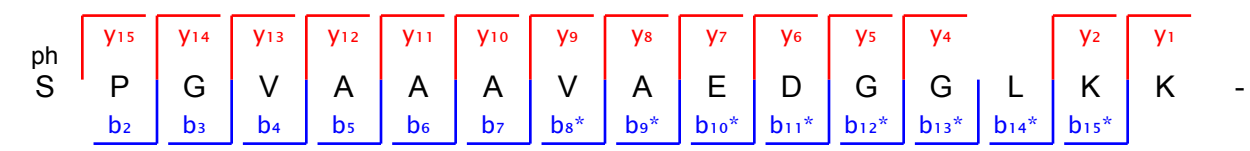

Raw file 20150812\_A375SR\_Phospho\_BR1\_09 Scan 13283 Method FTMS; HCD Score 458.98 m/z 977.43 Gene names SRRM1

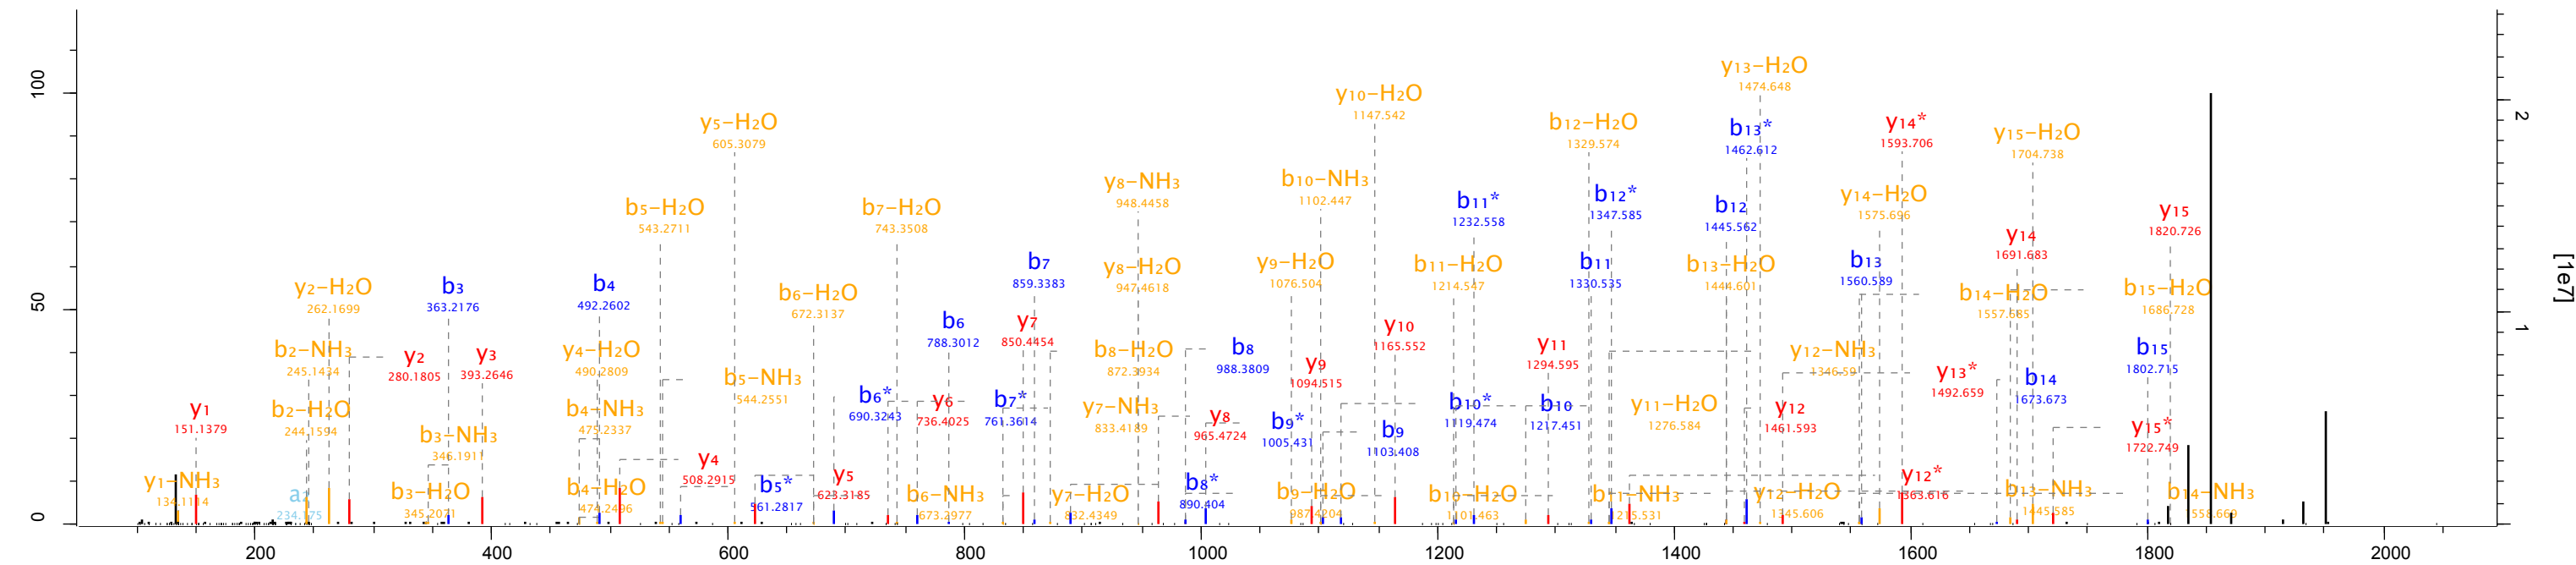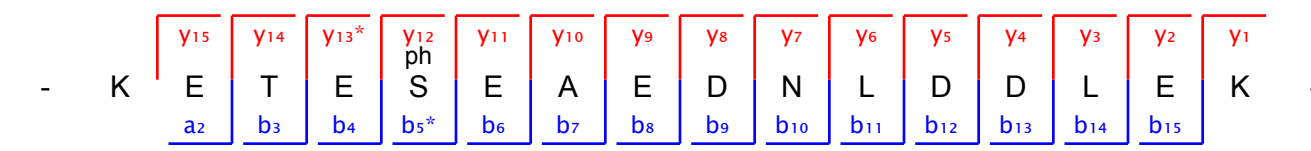

Raw file: 20150812\_A375SR\_Phospho\_BR1\_09  
 Scan: 1383 Method: FTMS; HCD Score: 136.34 m/z: 480.24 Gene names: MAP4

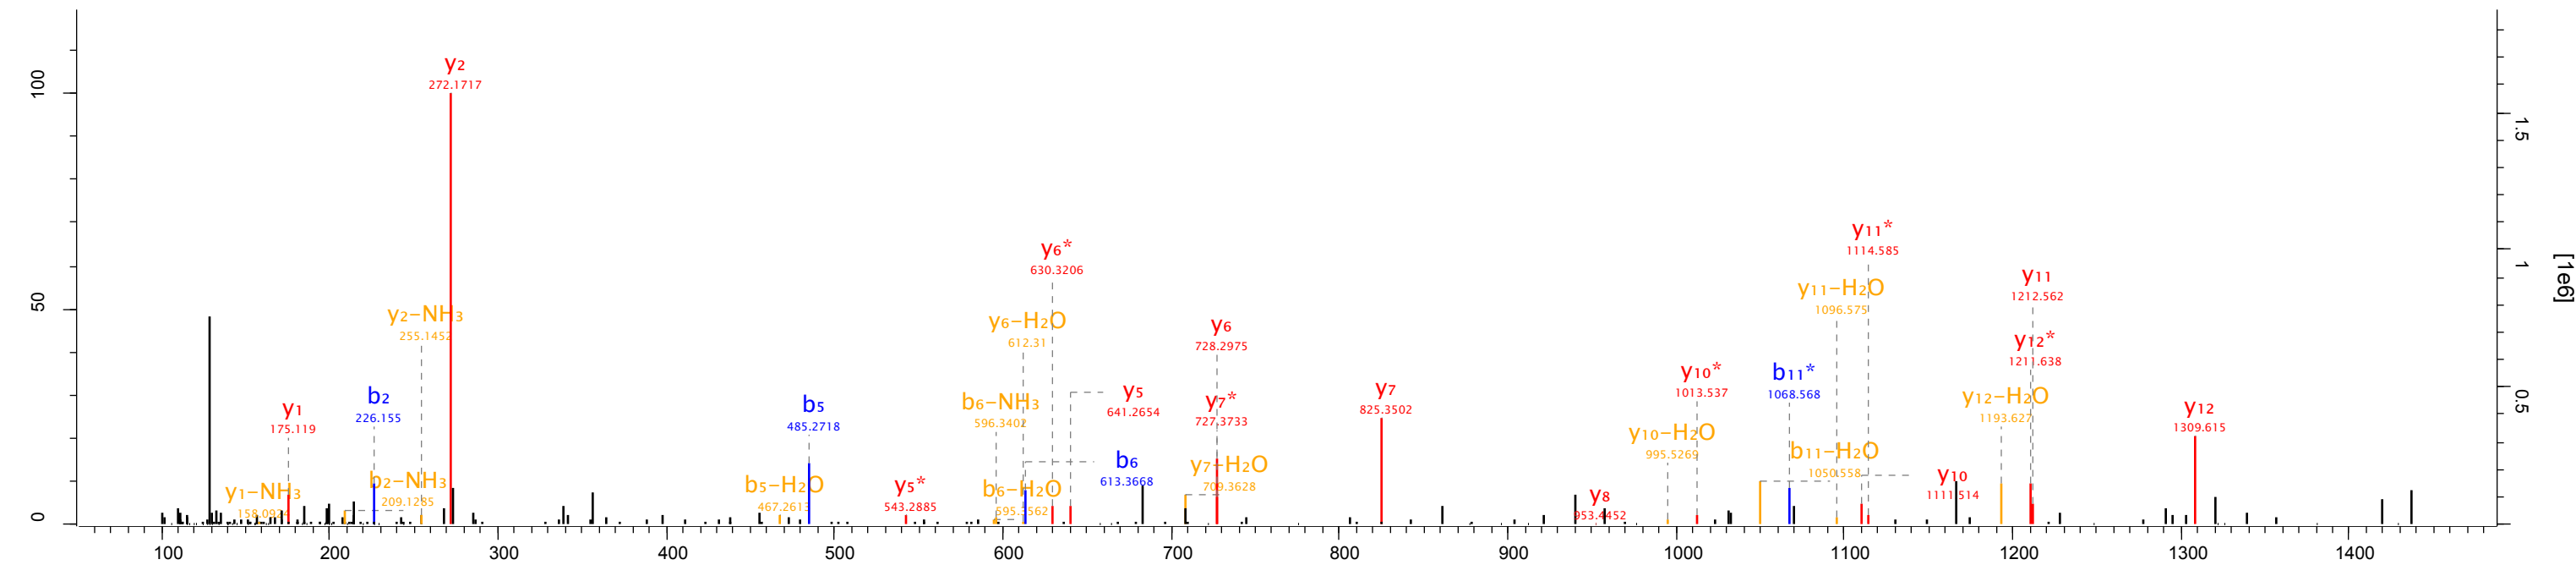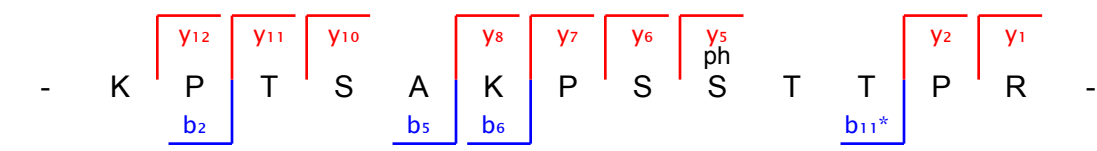

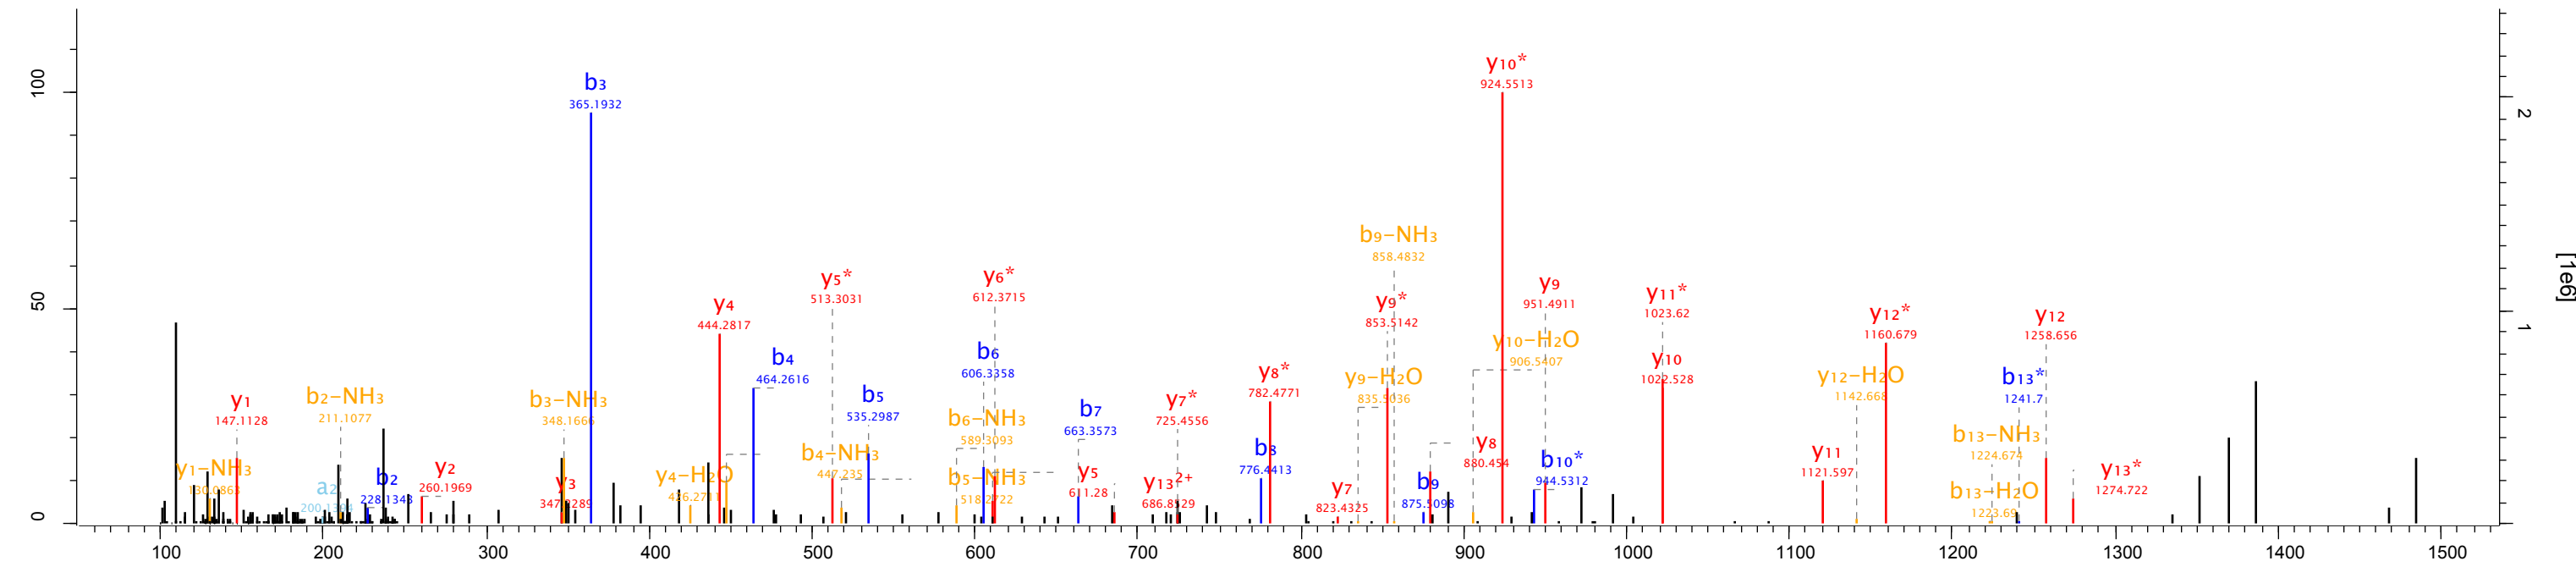

- L y13\* y12 y11 y10 y9 y8 y7 y6\* y5 y4 y3 y2 y1 -

N H V A A G L V S P S L K

b2 b3 b4 b5 b6 b7 b8 b9 b10\* b13\*

Raw file 20150812\_A375SR\_Phospho\_BR1\_09 Scan 15023 Method FTMS; HCD Score 146.81 m/z 605.33 Gene names KHSRP

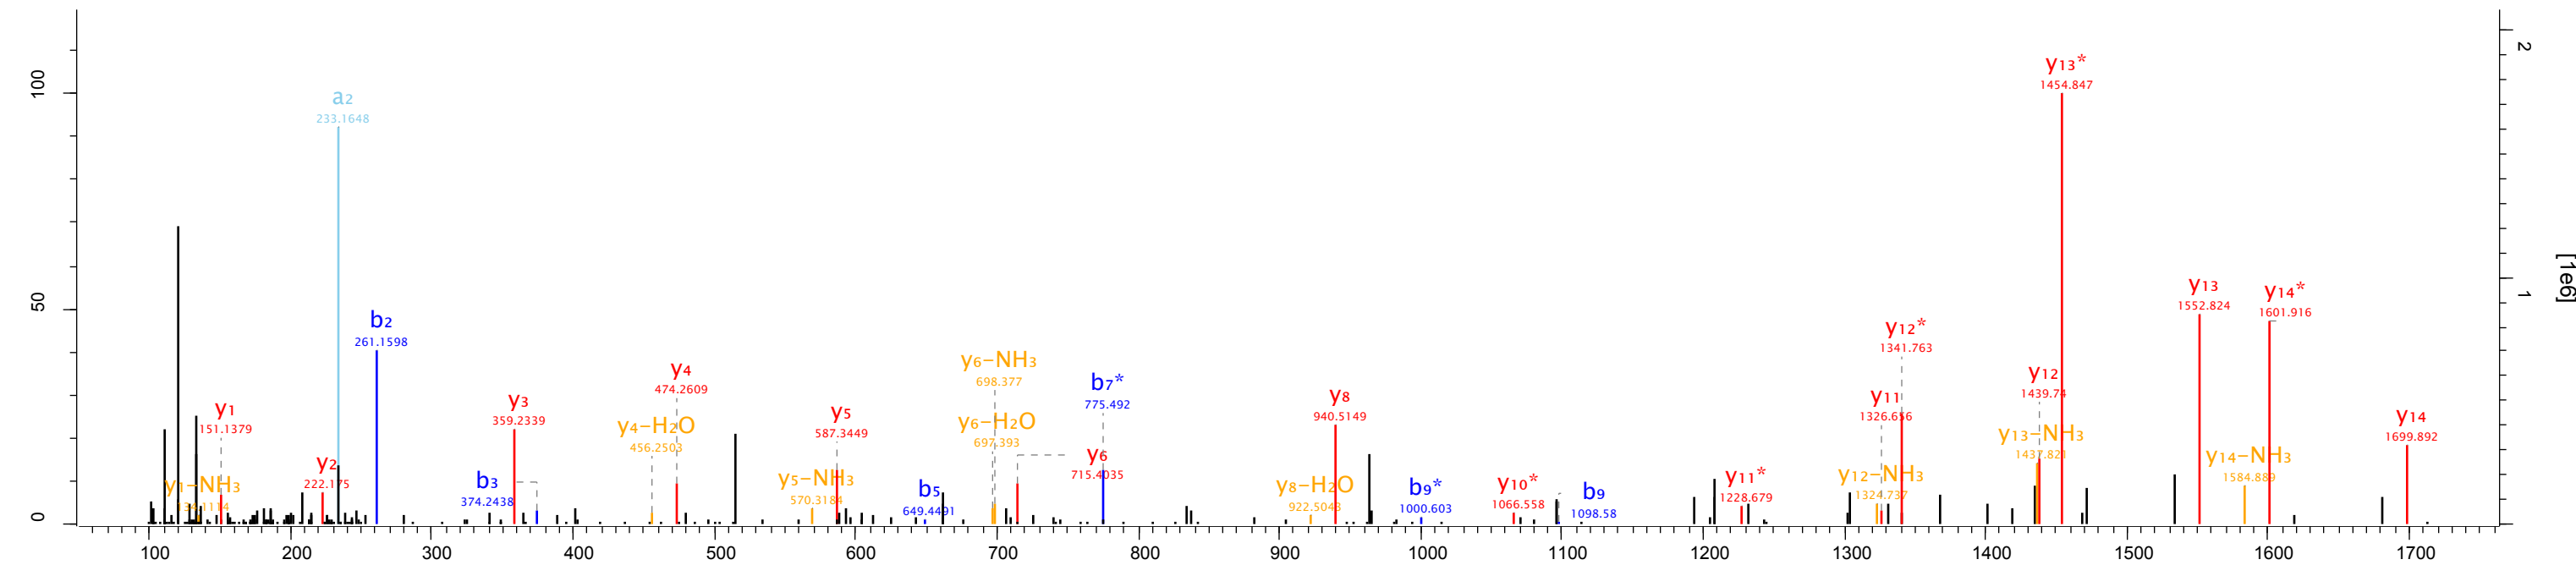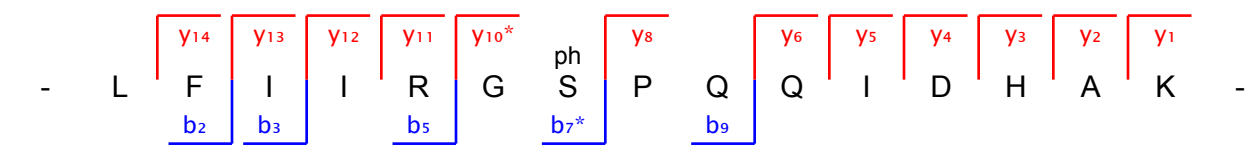

Raw file Scan Method Score m/z Gene names  
 20150812\_A375SR\_Phospho\_BR1\_09 16833 FTMS; HCD 296.86 1070.54 SPTBN1

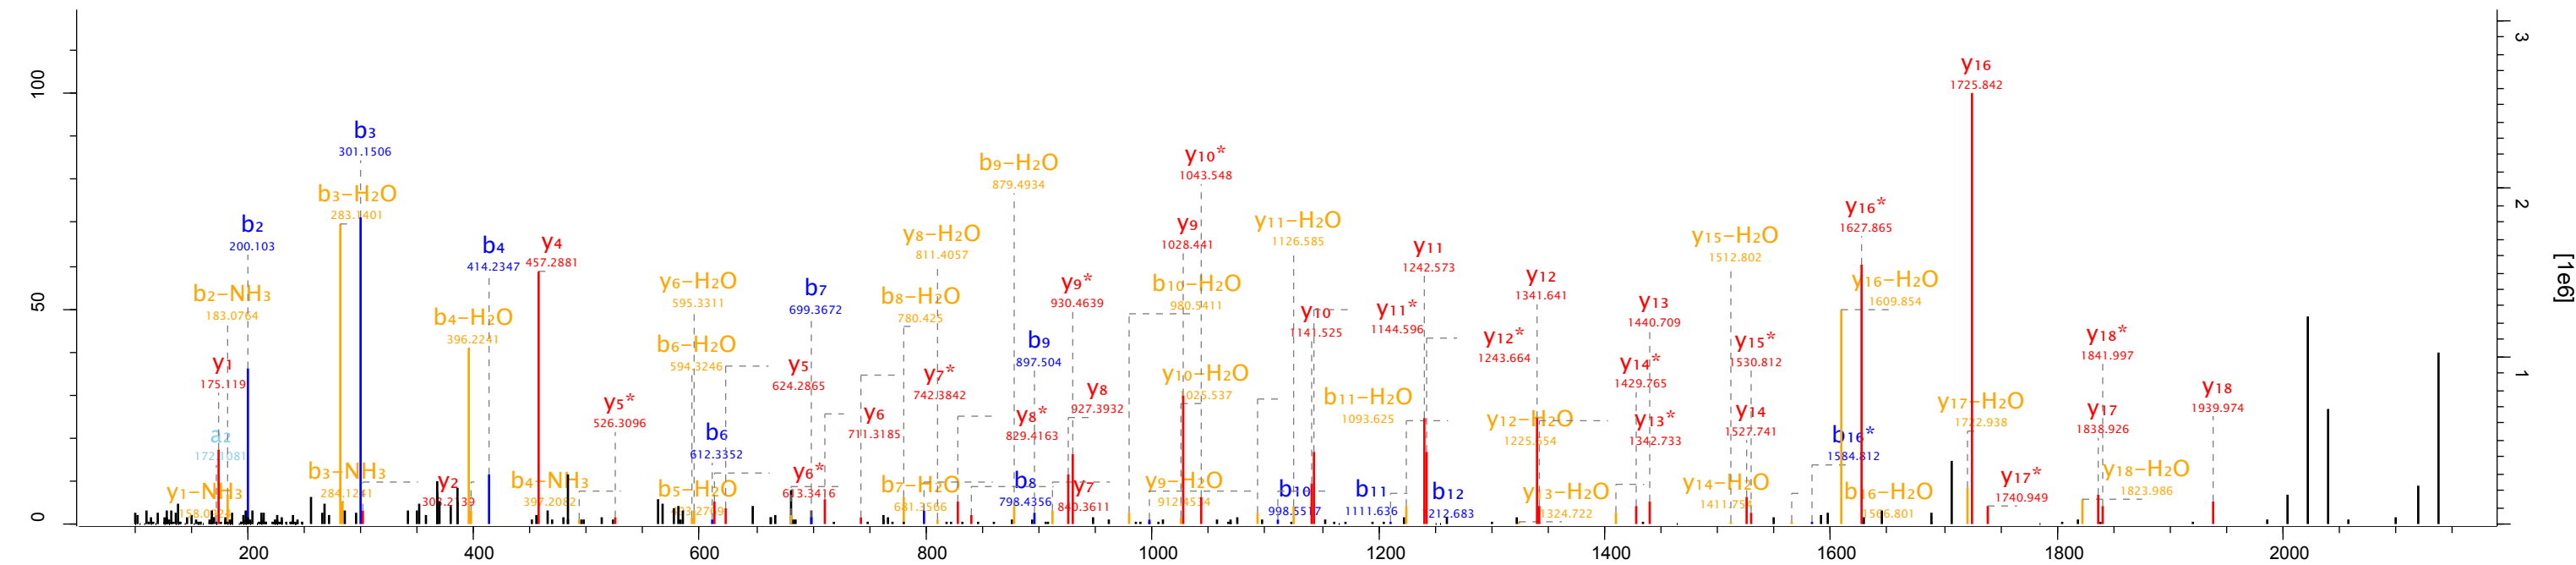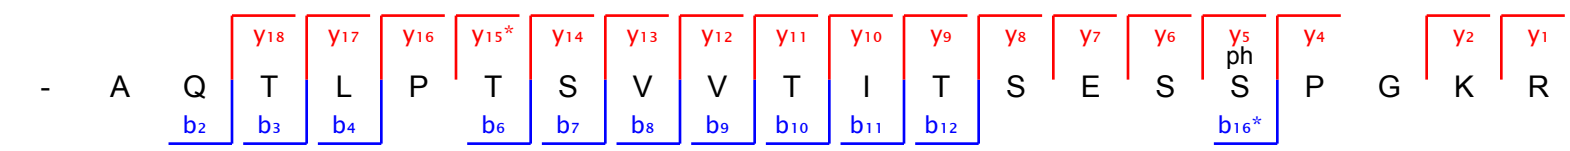

Raw file: 20150812\_A375SR\_Phospho\_BR1\_09  
 Scan: 19633 Method: FTMS; HCD Score: 51.95 m/z: 948.22 Gene names: RBM17

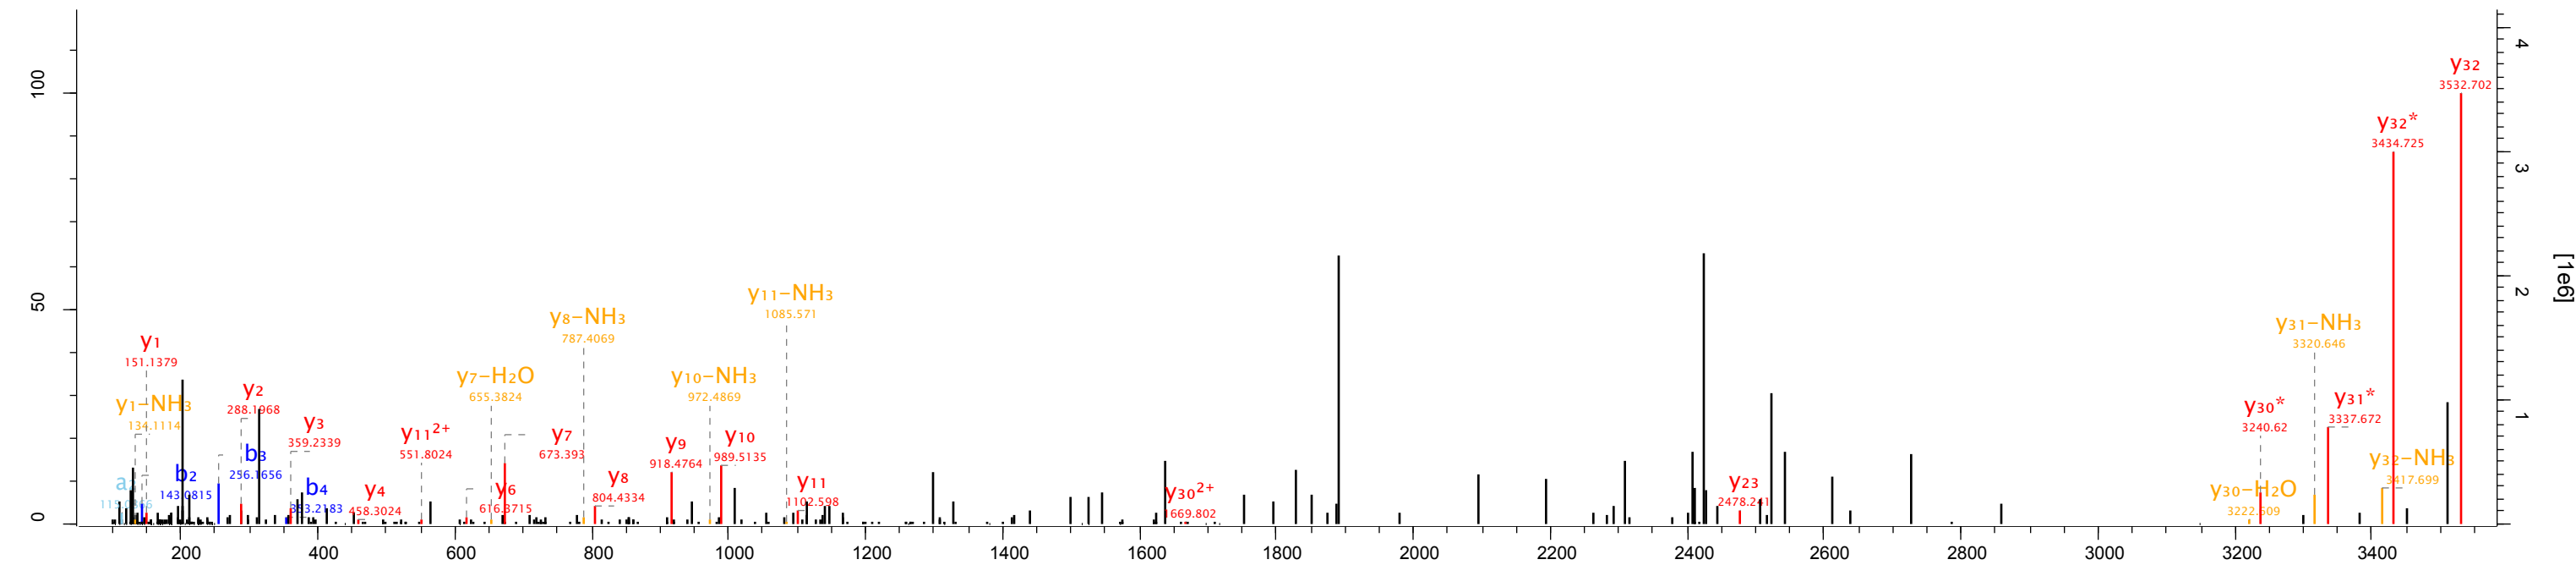

- A A I P P P V Y E E Q D R P R S P T G P S N S F L A N M G G T V A H K -

Fragmentation mapping (red boxes):

- y32: P
- y31\*: P
- y30\*: P
- y23: R
- y11: L
- y10: A
- y9: N
- y8: M
- y7: G
- y6: G
- y4: V
- y3: A
- y2: H
- y1: K

Fragmentation mapping (blue boxes):

- b2: A
- b3: I
- b4: P

Raw file  
 20150812\_A375SR\_Phospho\_BR1\_09  
 Scan 20243 Method FTMS; HCD Score 147.35 m/z 955.43 Gene names RPRD2

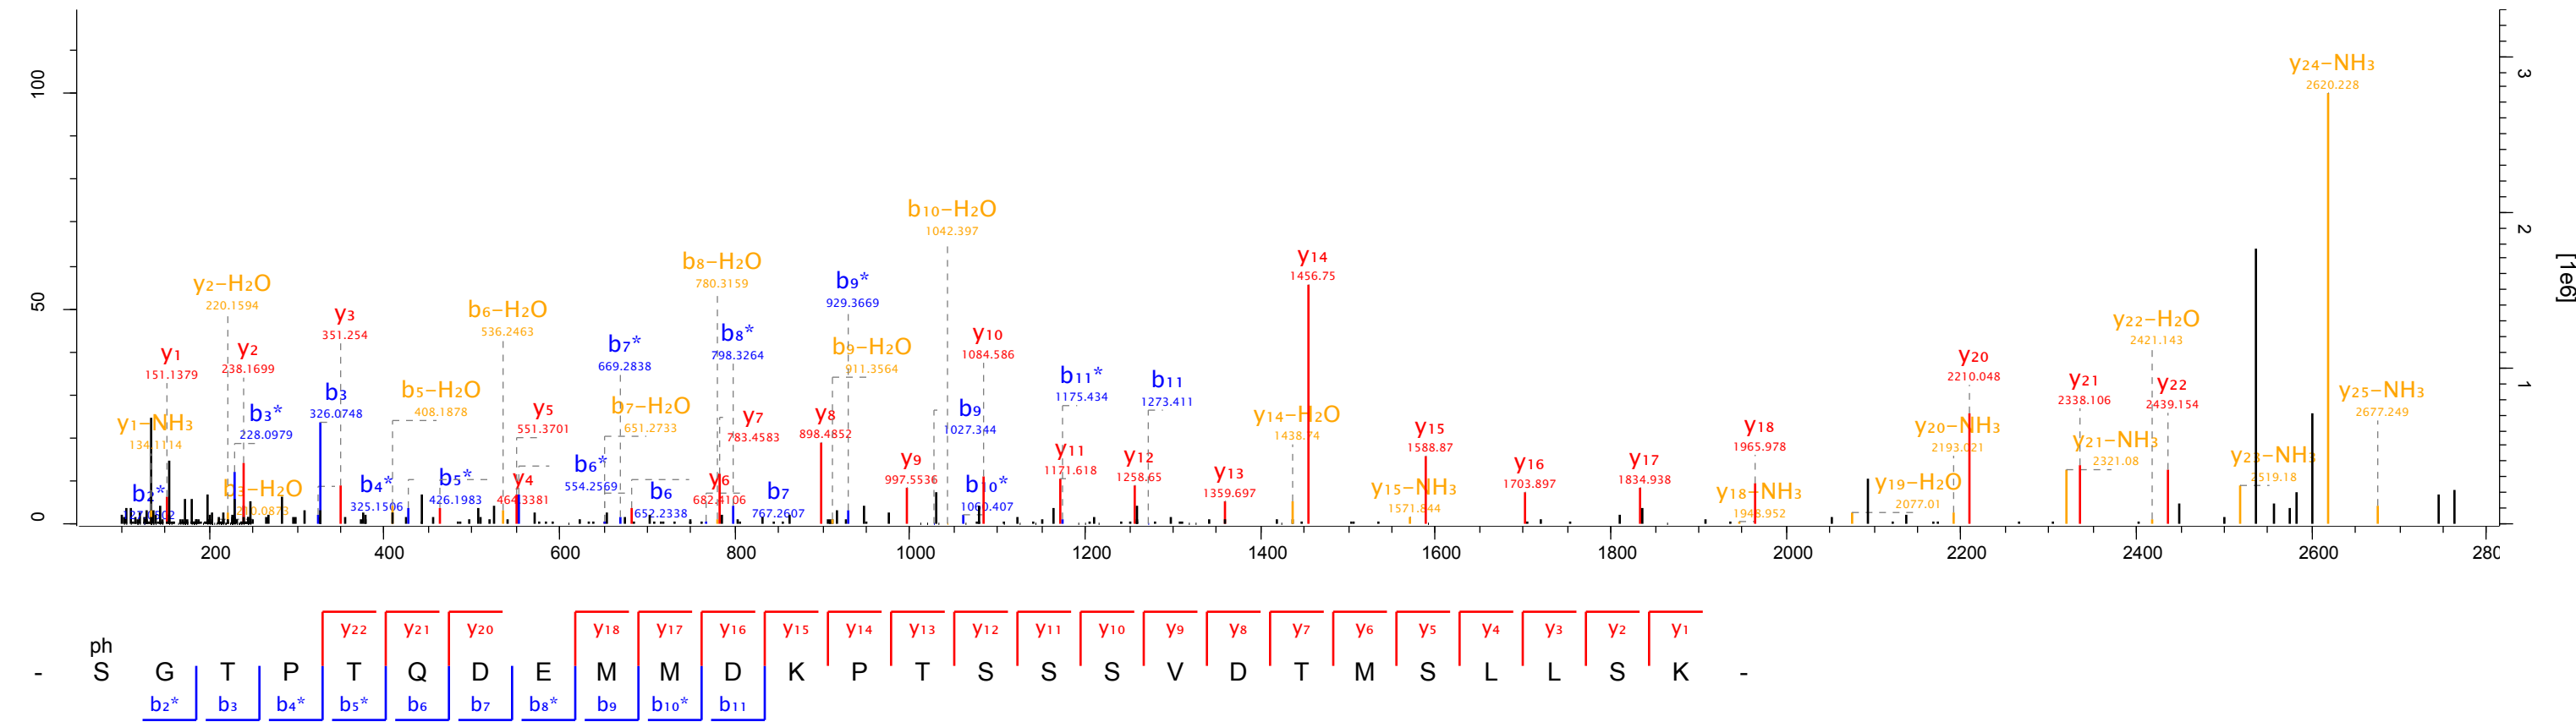



Raw file 20150812\_A375SR\_Phospho\_BR1\_09 Scan 20553 Method FTMS; HCD Score 44.51 m/z 634.99 Gene names C1orf61

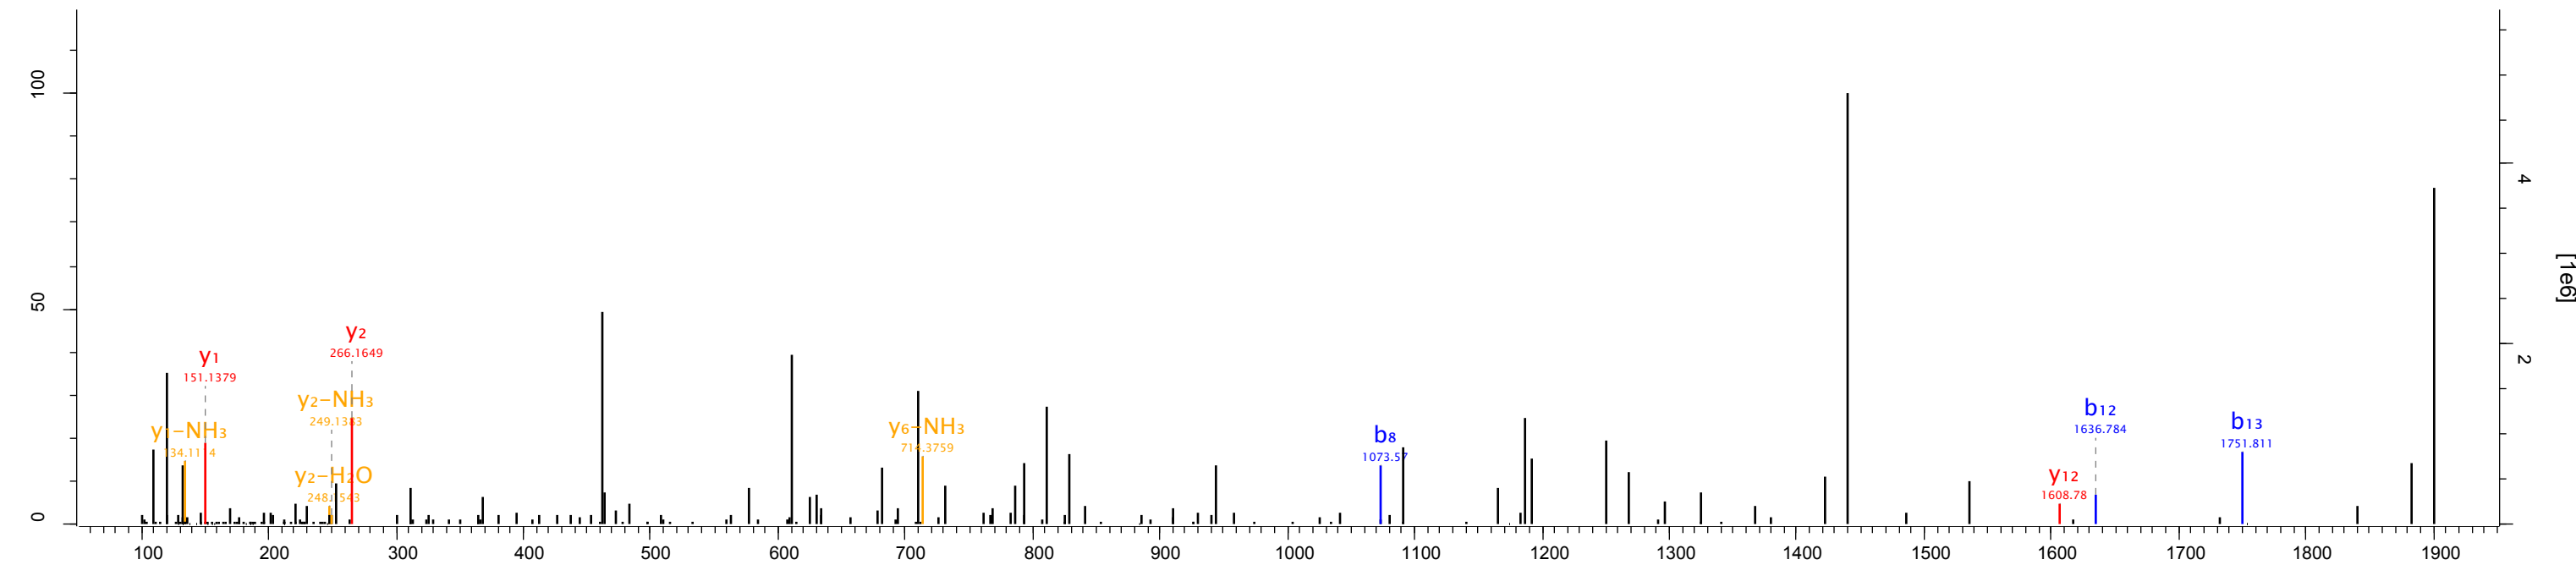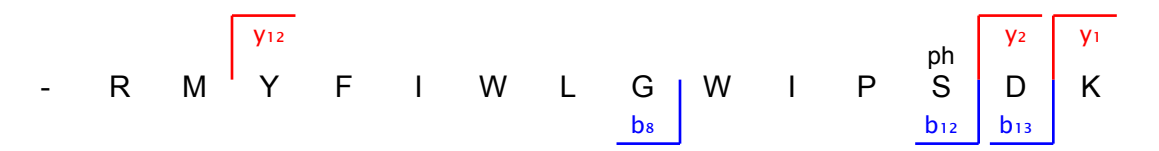

Raw file: 20150812\_A375SR\_Phospho\_BR1\_09  
 Scan: 27003  
 Method: FTMS; HCD  
 Score: 332.55  
 m/z: 1176.23  
 Gene names: CRTC2

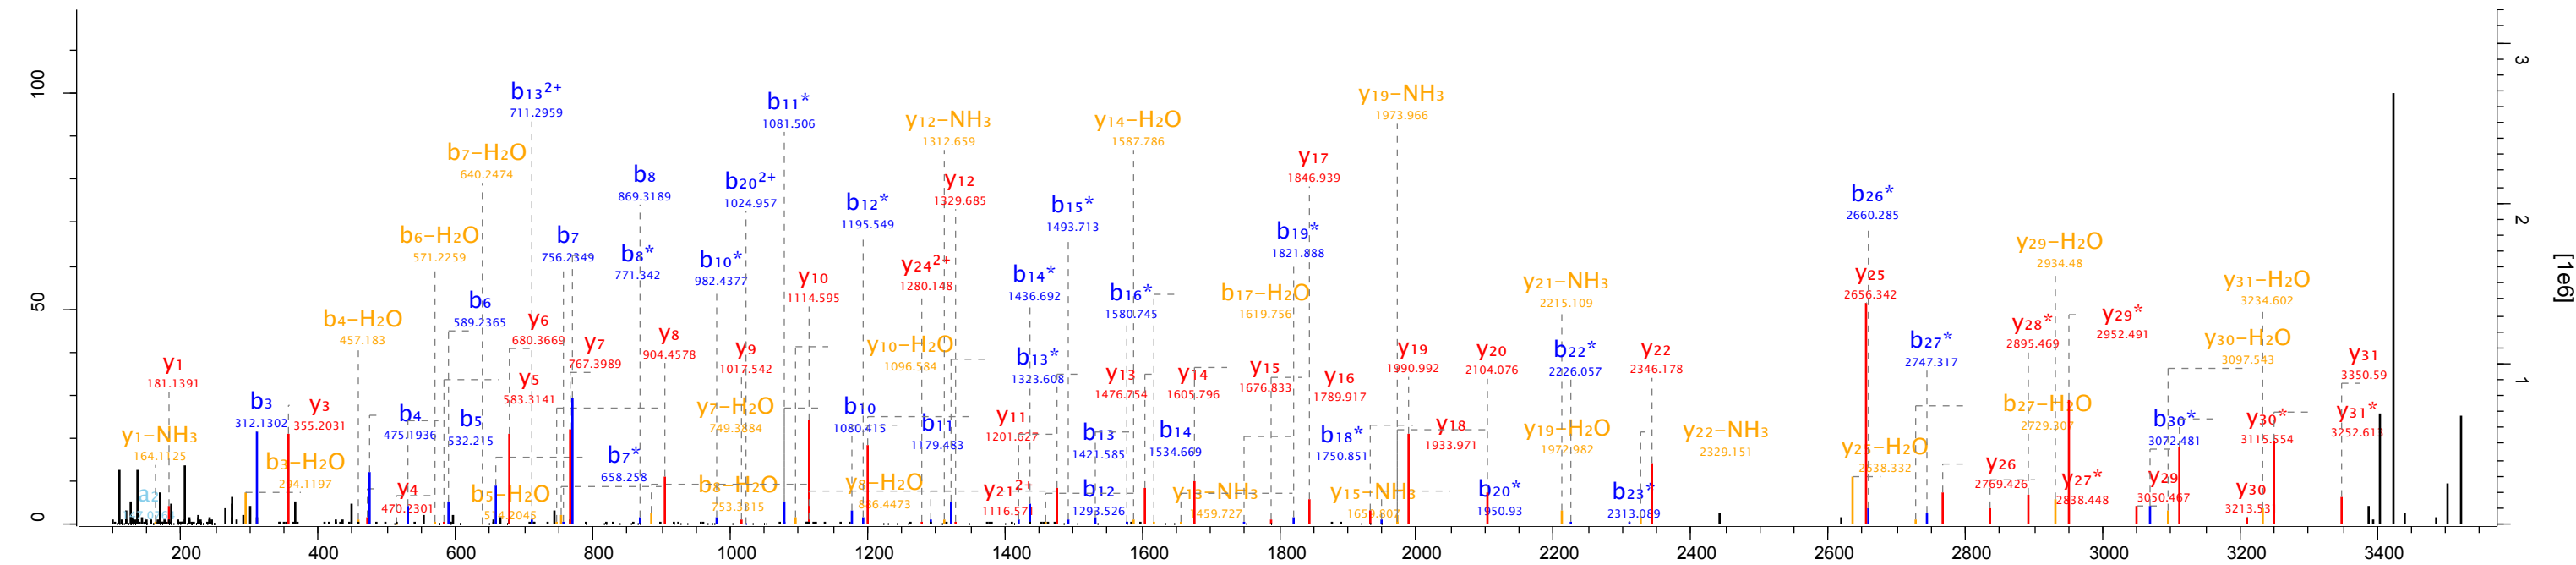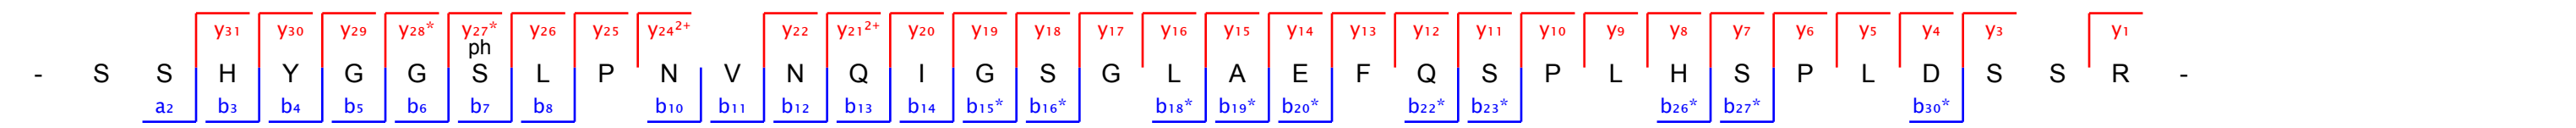

Raw file: 20150812\_A375SR\_Phospho\_BR1\_09  
 Scan: 3463 Method: FTMS; HCD Score: 151.96 m/z: 555.98 Gene names: NOL7

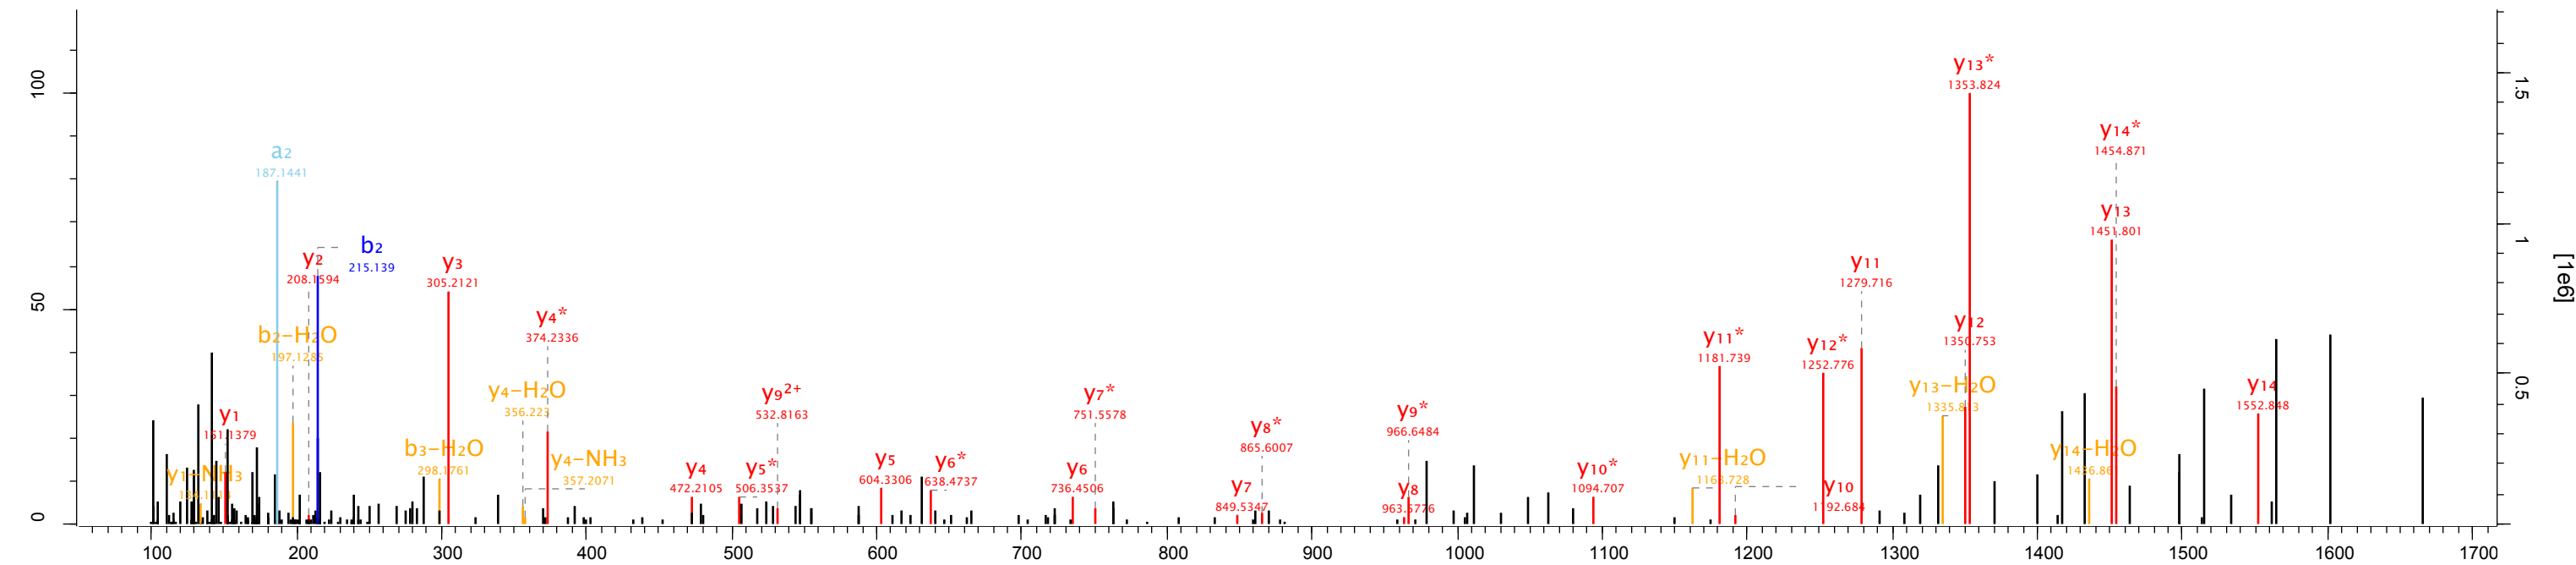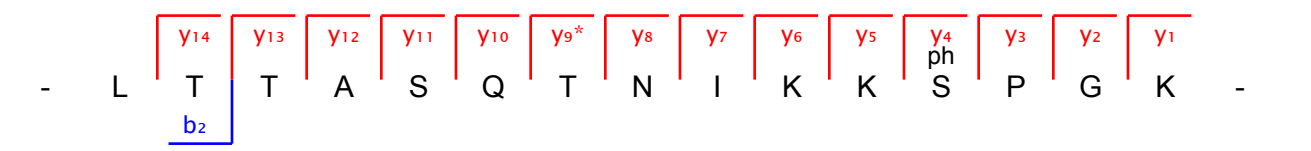

Raw file: 20150812\_A375SR\_Phospho\_BR1\_09  
 Scan: 4793 Method: FTMS; HCD Score: 278.64 m/z: 849.35 Gene names: SFSWAP

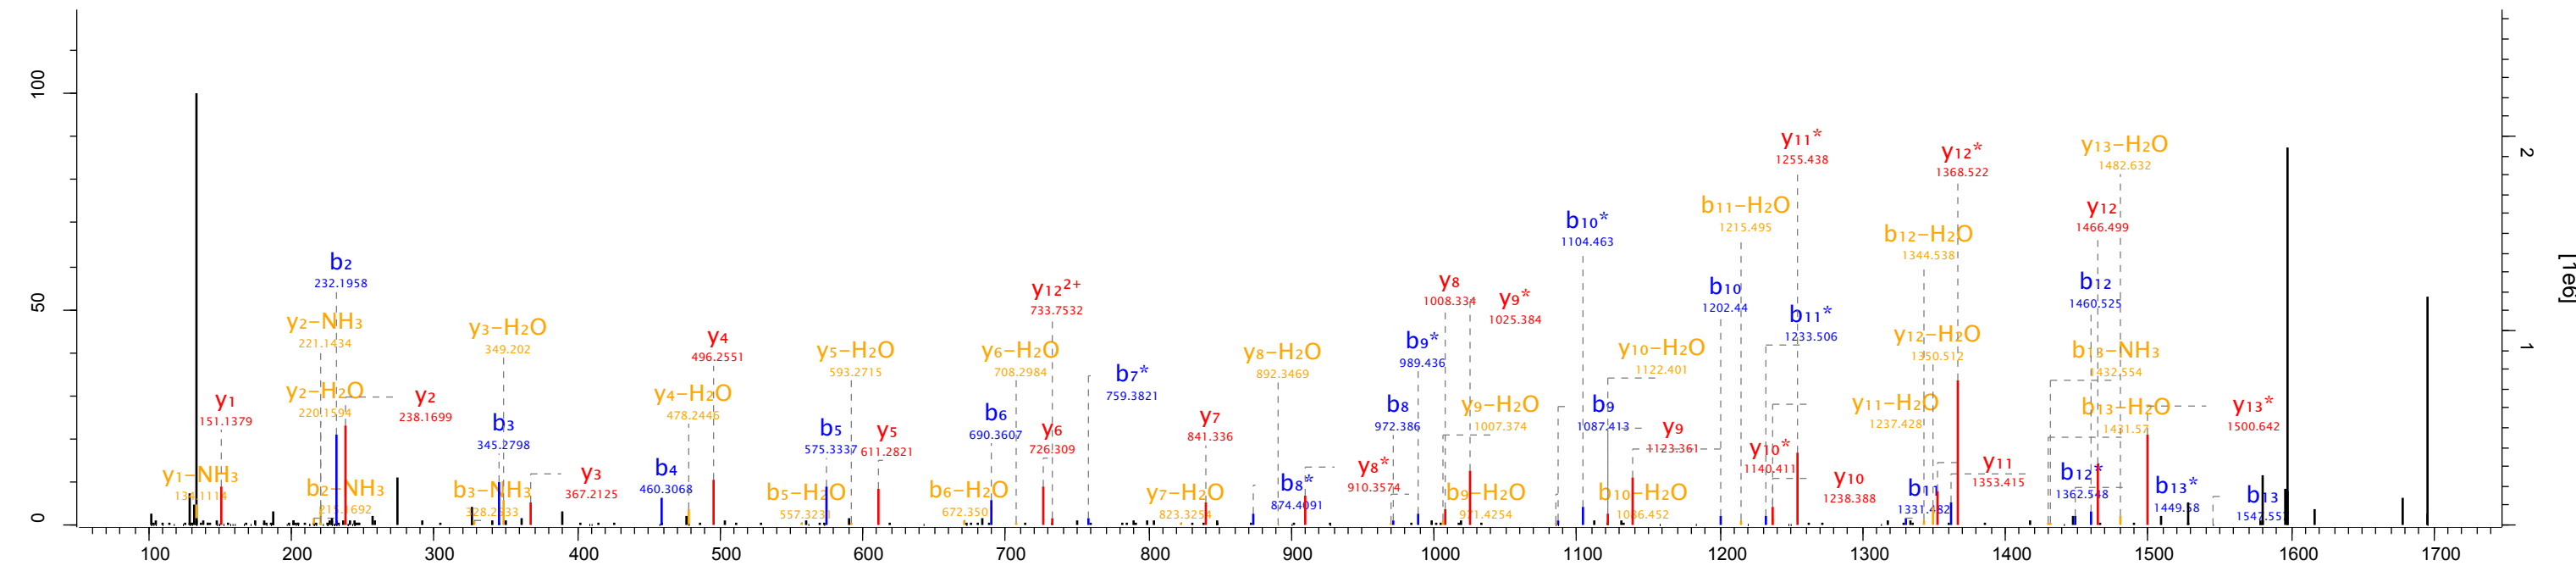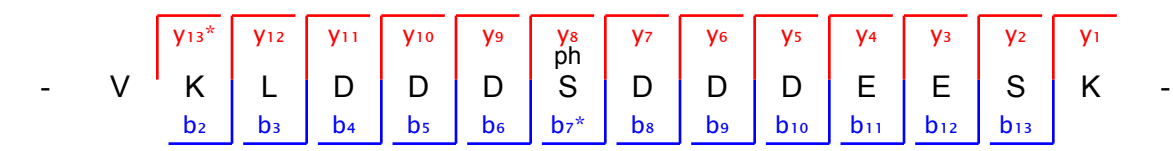

Raw file: 20150812\_A375SR\_Phospho\_BR1\_09  
 Scan: 5303 Method: FTMS; HCD Score: 432.18 m/z: 1159.96 Gene names: HSP90AB1;HSP90AB3P

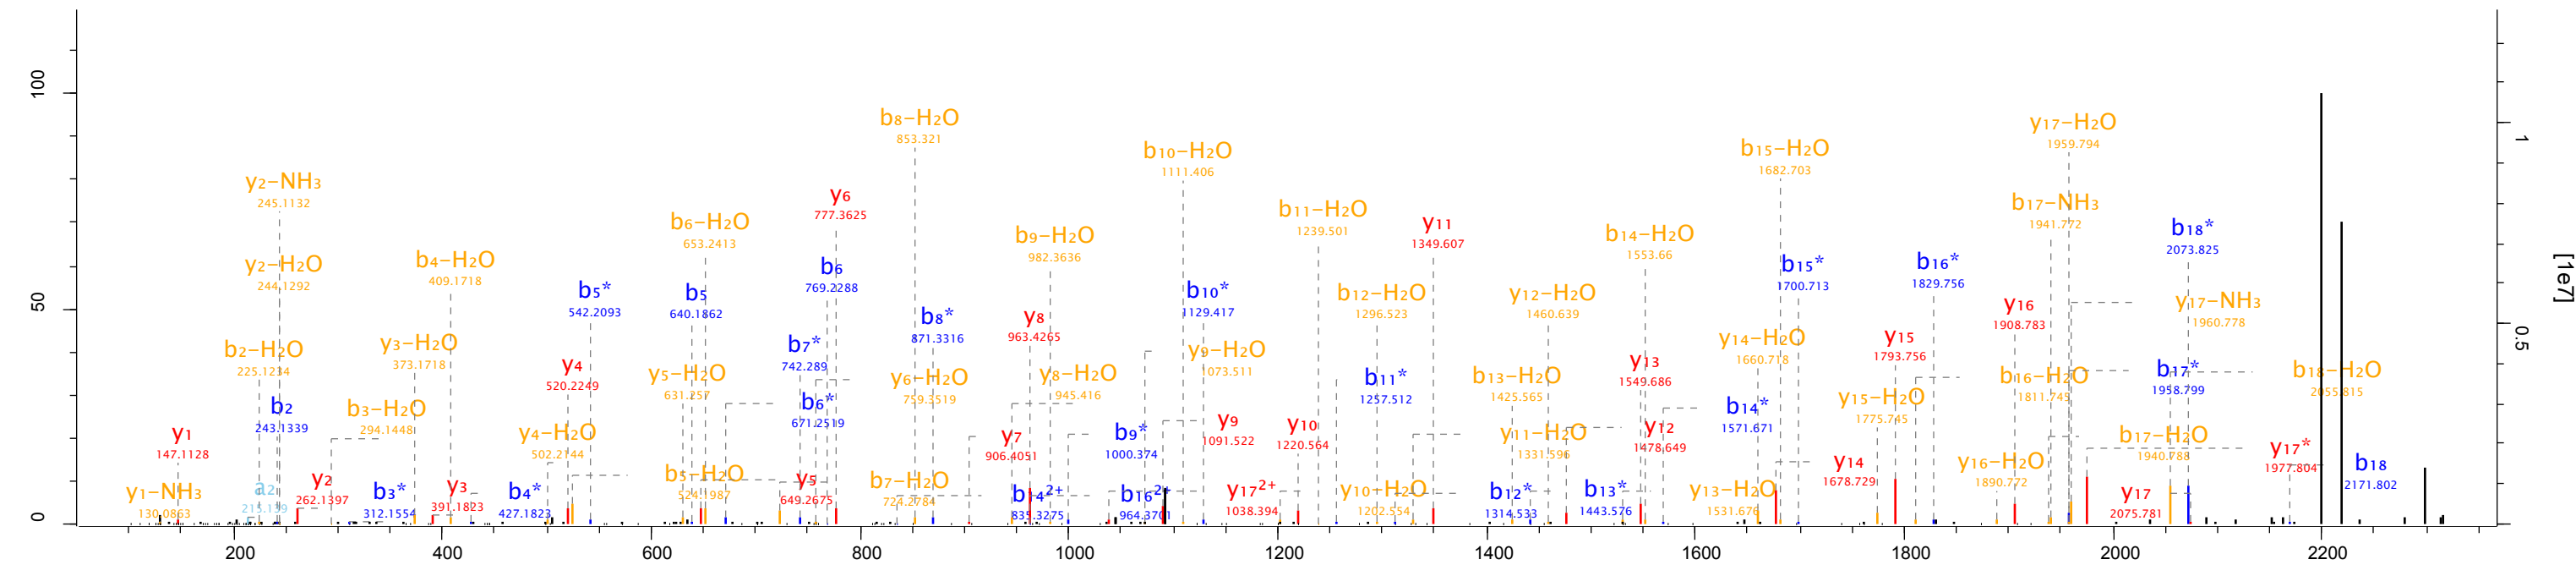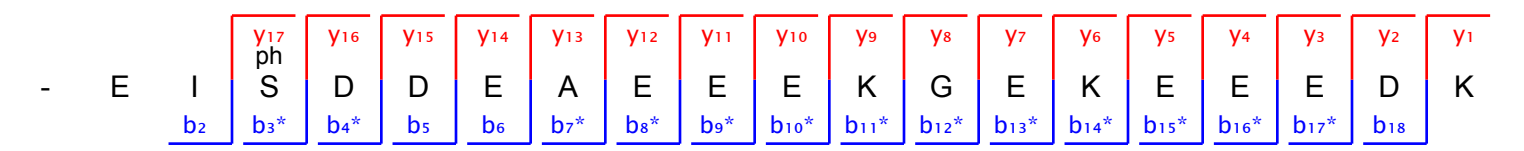

Raw file: 20150812\_A375SR\_Phospho\_BR1\_09  
 Scan: 5463 Method: FTMS; HCD Score: 207.41 m/z: 741.84 Gene names: LIMCH1

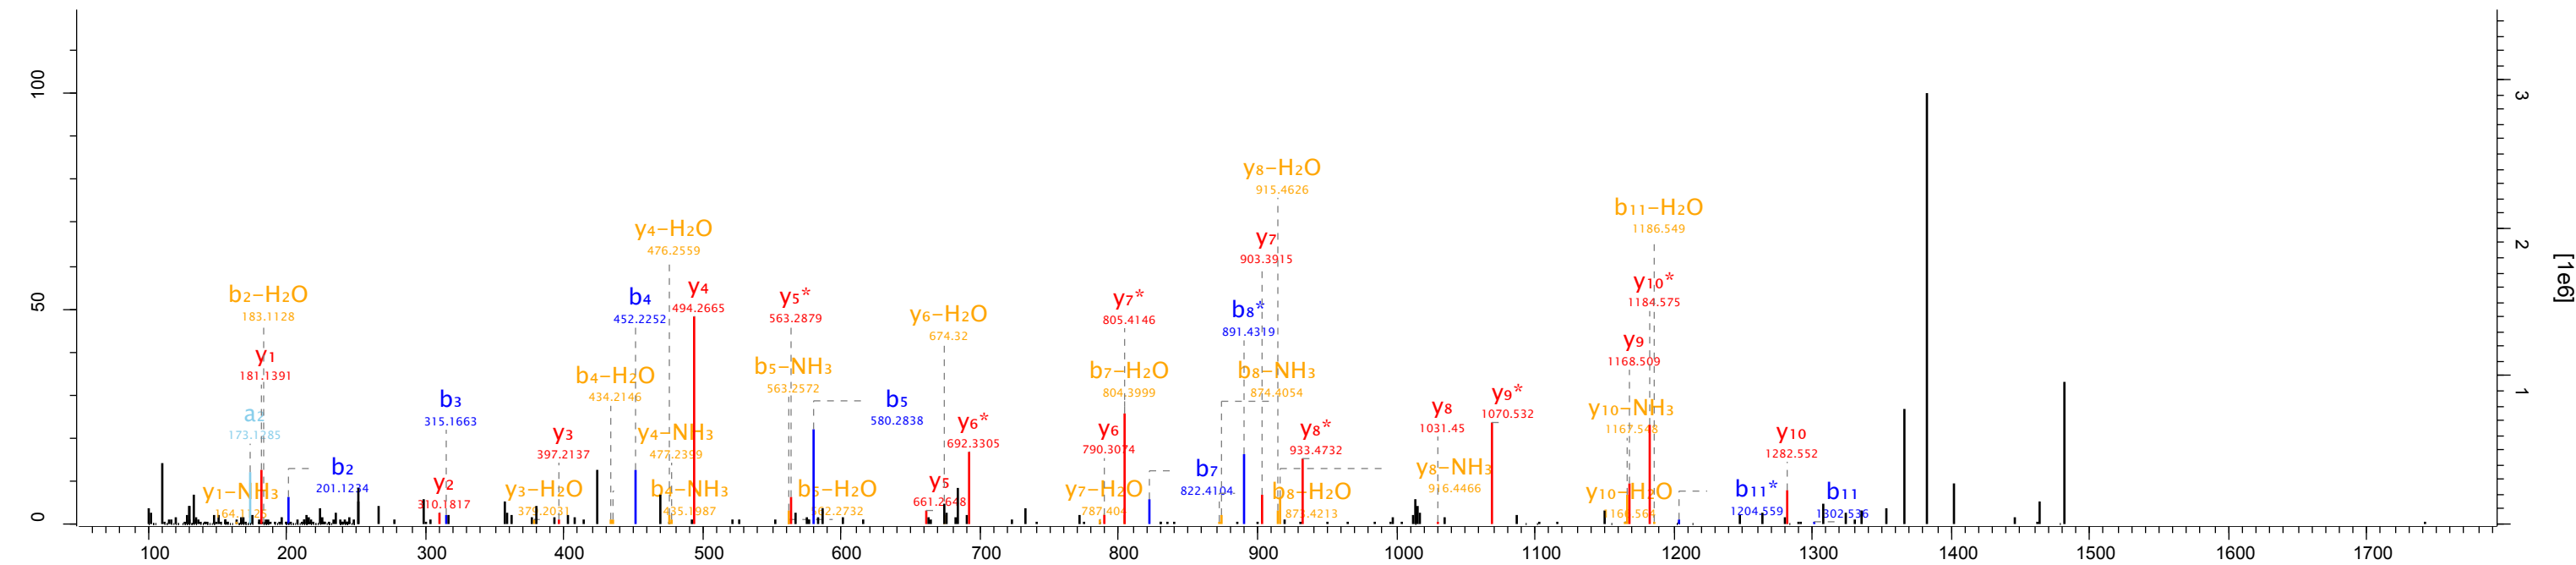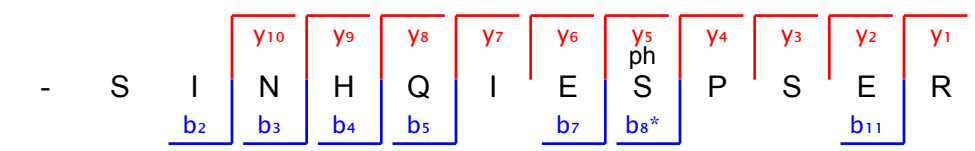

Raw file  
20150812\_A375SR\_Phospho\_BR1\_09

Scan 9383 Method FTMS; HCD Score 372.25 m/z 1030.95 Gene names PPP4R2

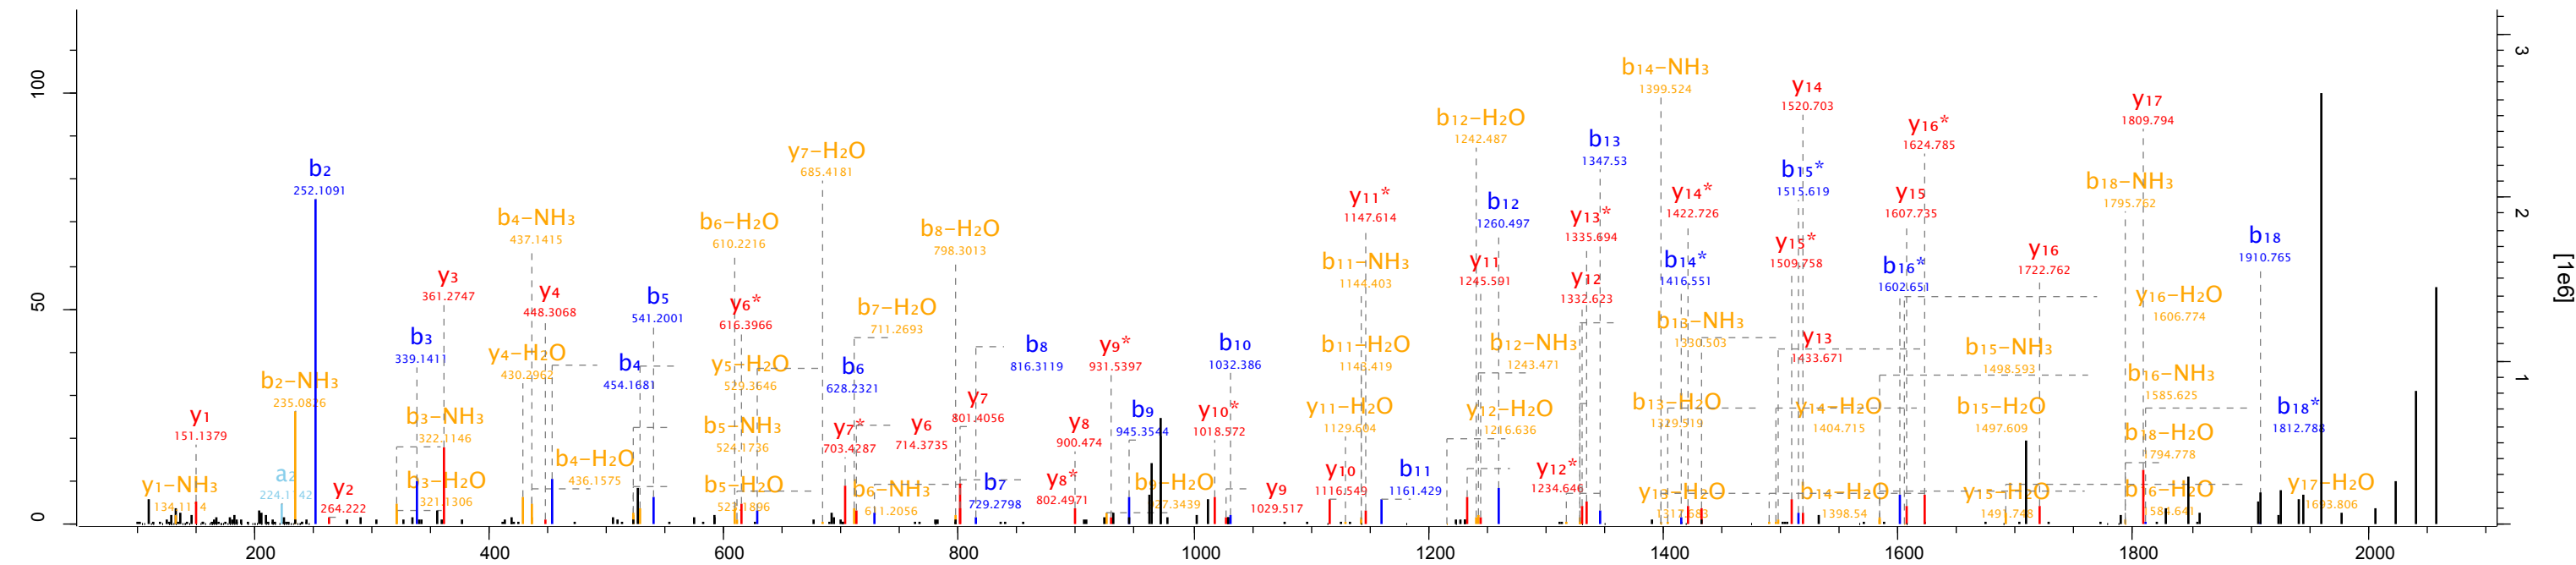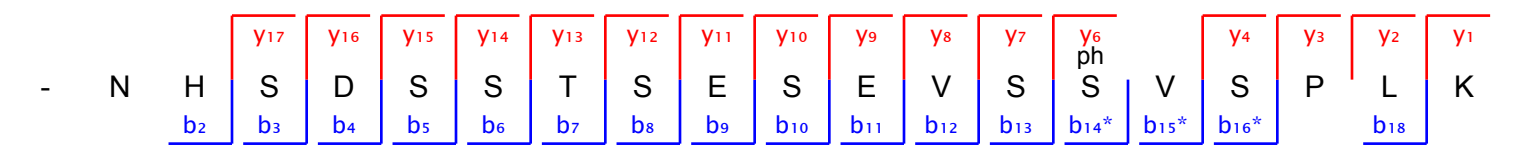

Raw file 20150812\_A375SR\_Phospho\_BR1\_10 Scan 10463 Method FTMS; HCD Score 125.53 m/z 607.29 Gene names GRIP1

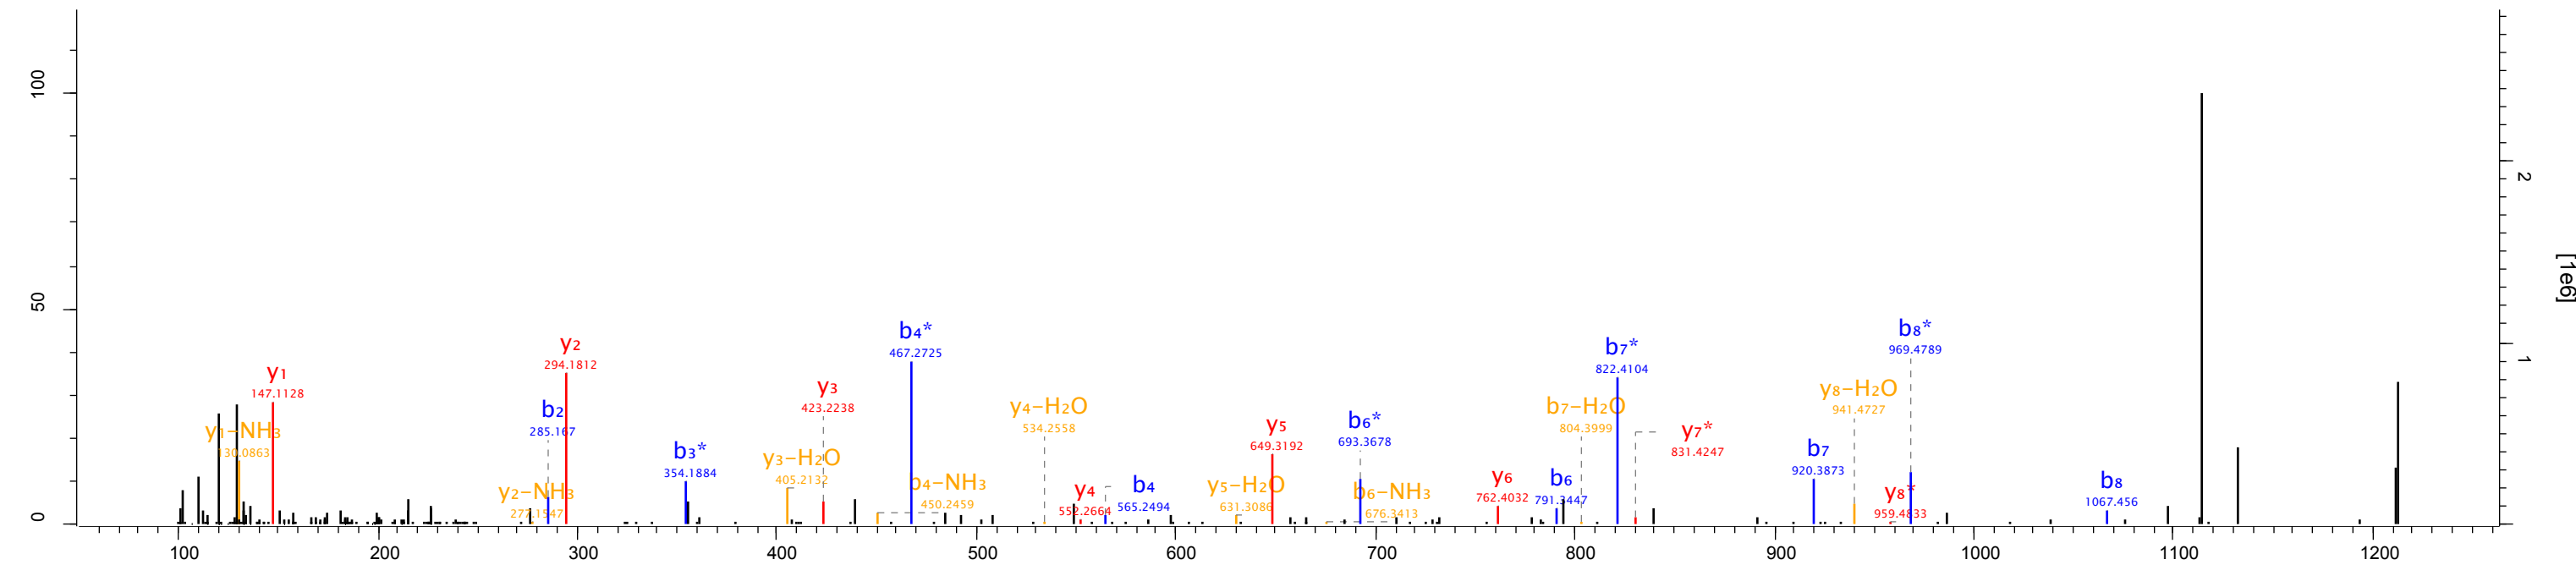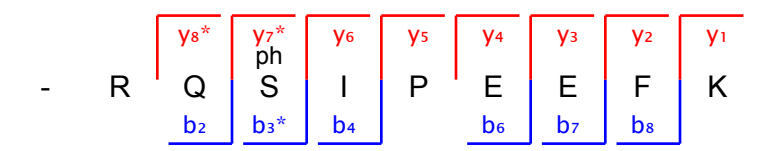



Raw file: 20150812\_A375SR\_Phospho\_BR1\_10  
 Scan: 10473 Method: FTMS; HCD Score: 105.65 m/z: 543.26 Gene names: NF2

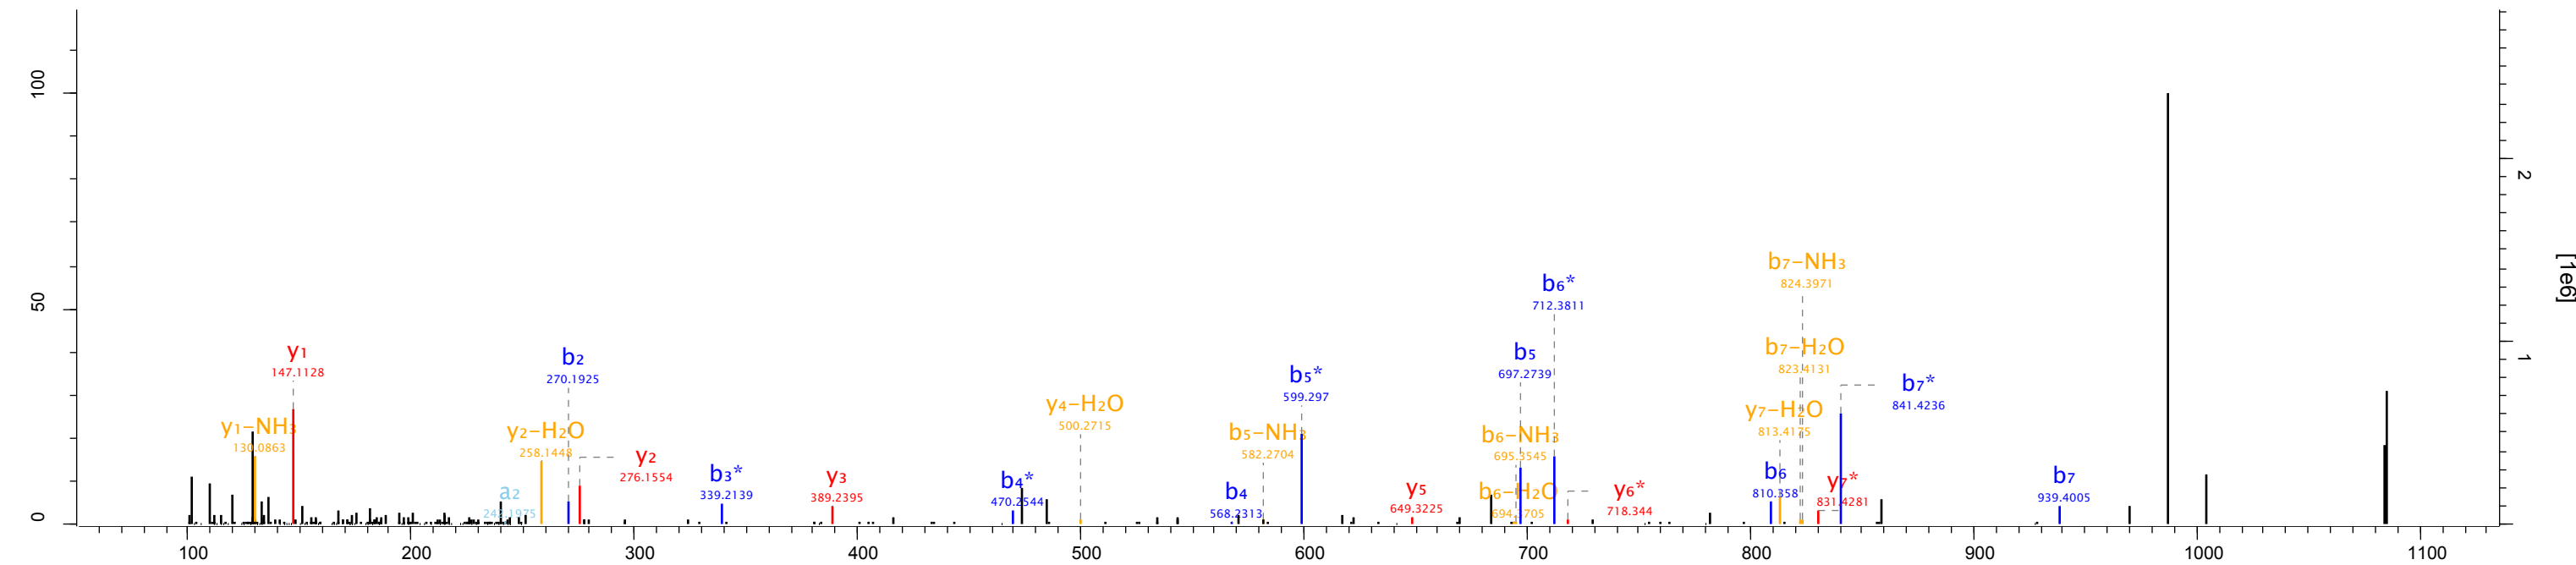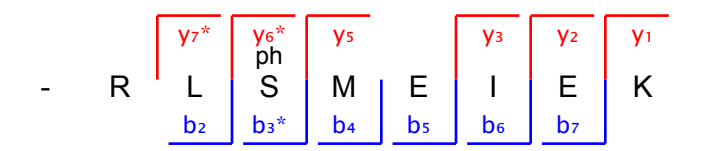

Raw file: 20150812\_A375SR\_Phospho\_BR1\_10  
 Scan: 11903  
 Method: FTMS; HCD  
 Score: 124.62  
 m/z: 817.74  
 Gene names: PPP1CB

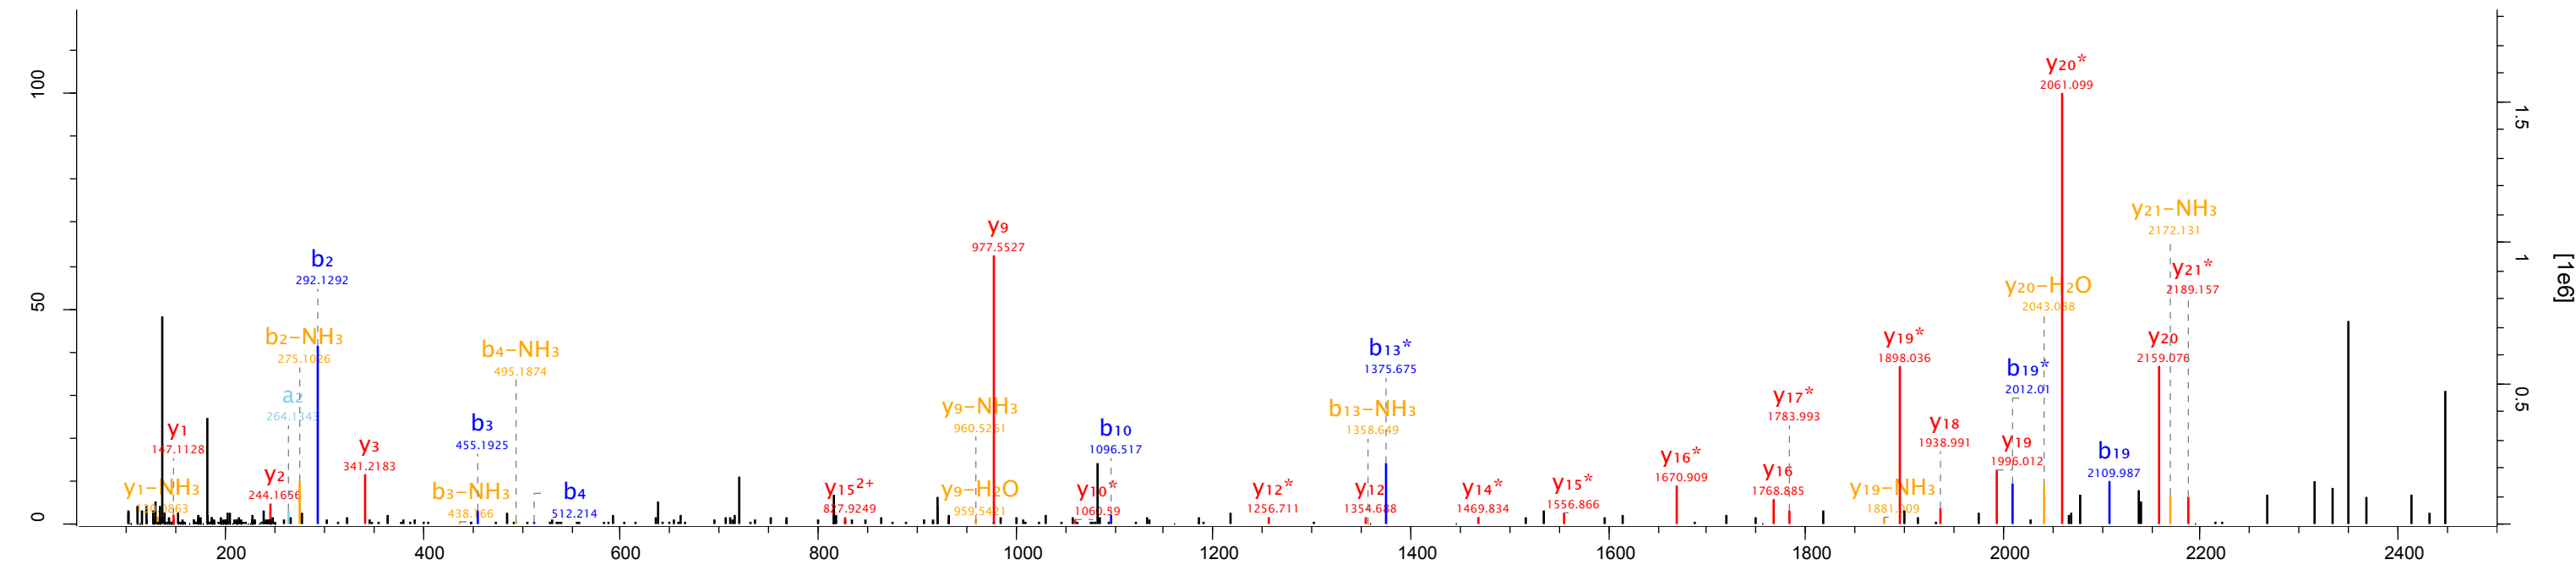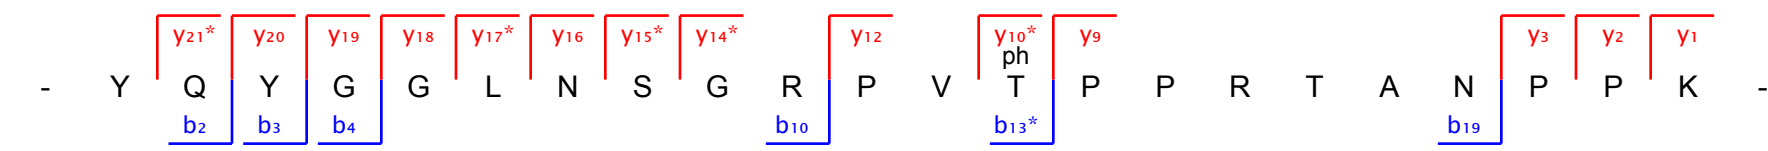

Raw file: 20150812\_A375SR\_Phospho\_BR1\_10  
 Scan: 1263 Method: FTMS; HCD Score: 165.44 m/z: 653.86 Gene names: TCOF1

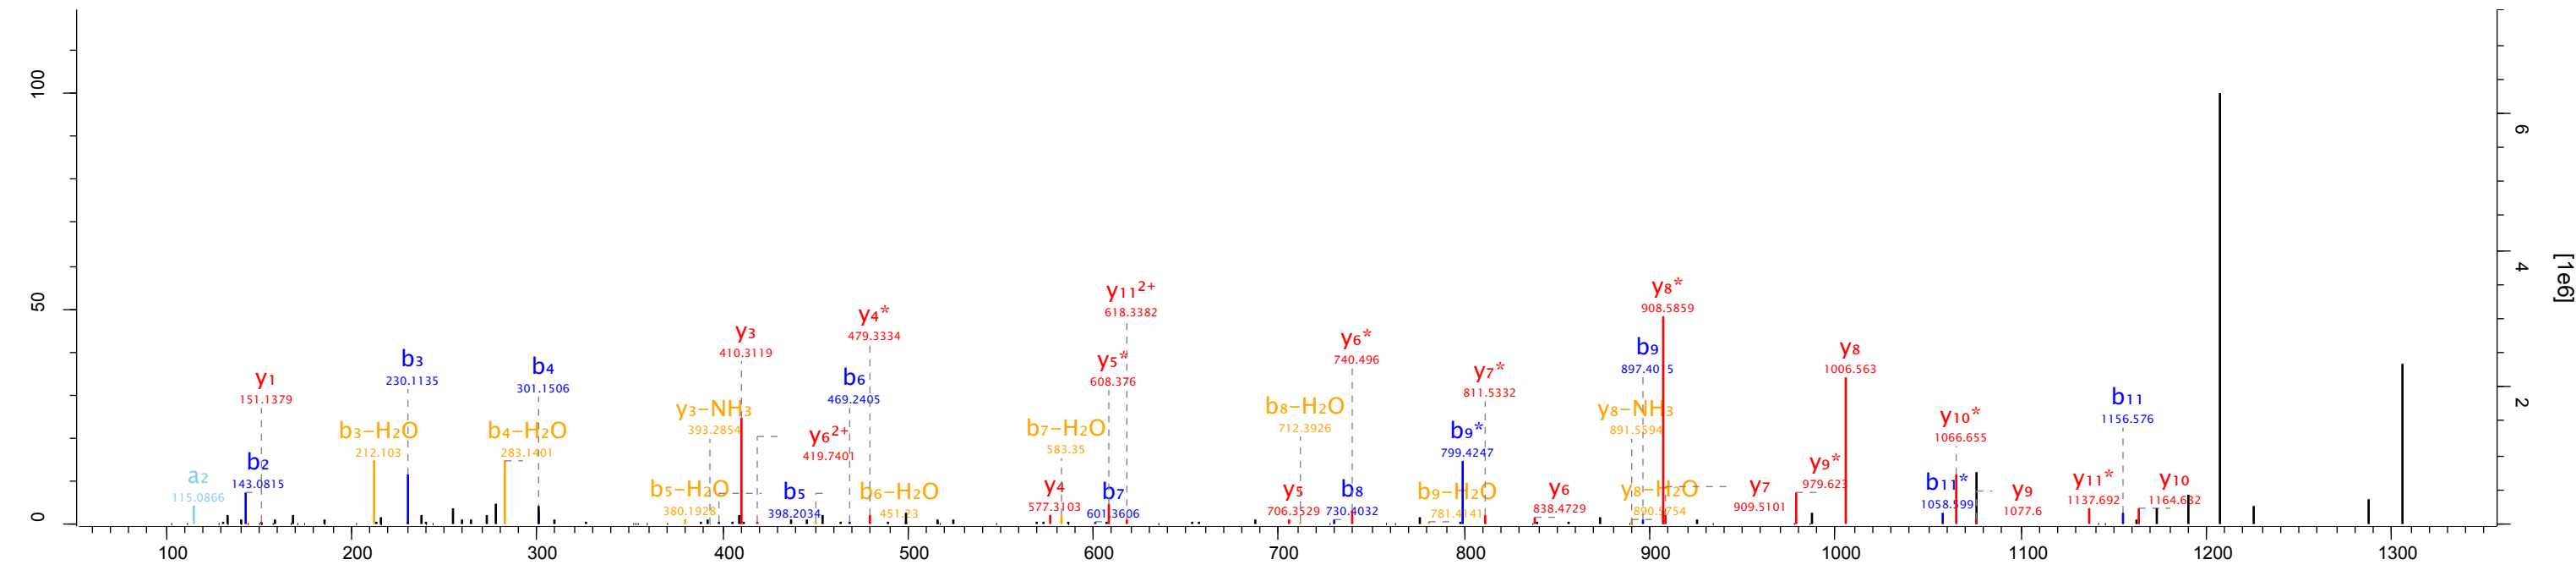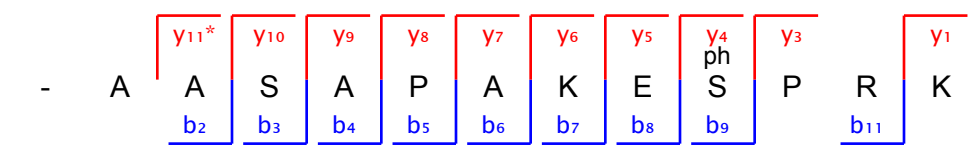

Raw file Scan Method Score m/z Gene names  
 20150812\_A375SR\_Phospho\_BR1\_10 12993 FTMS; HCD 249.26 849.43 RAVR1

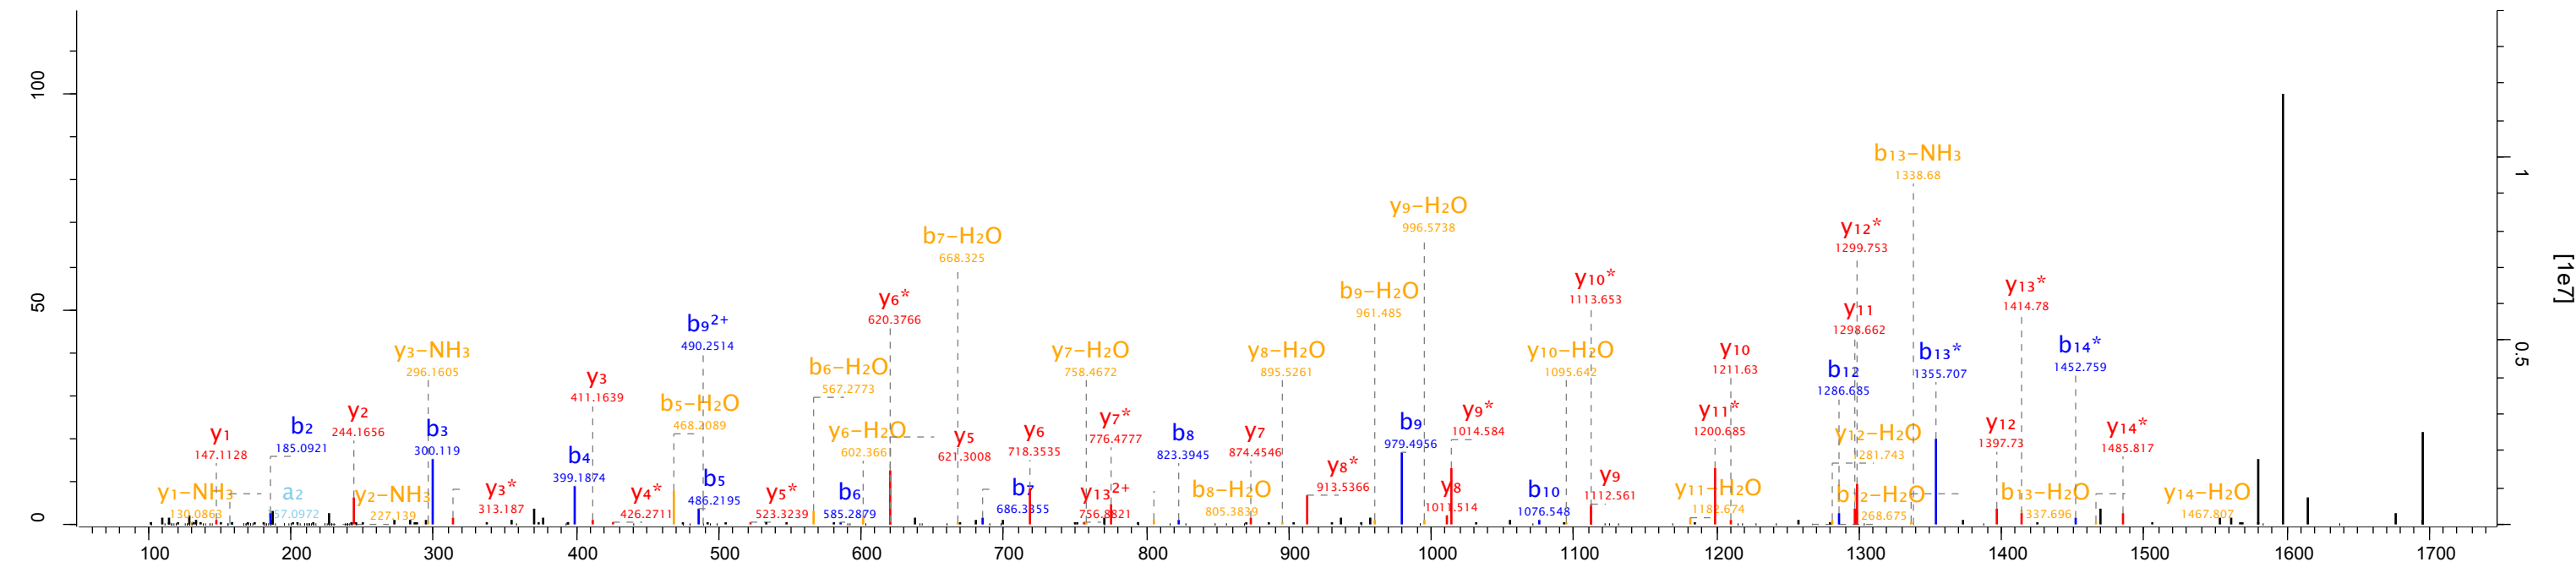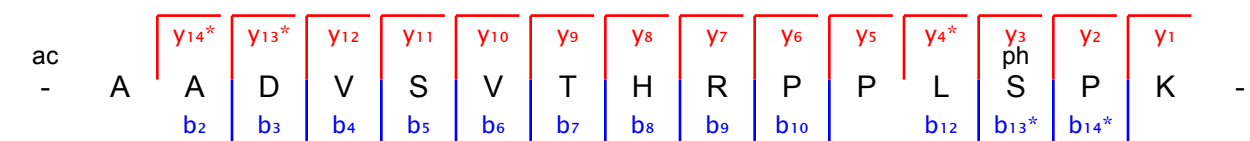

Raw file 20150812\_A375SR\_Phospho\_BR1\_10 Scan 14653 Method FTMS; HCD Score 229.62 m/z 804.39 Gene names NUP50

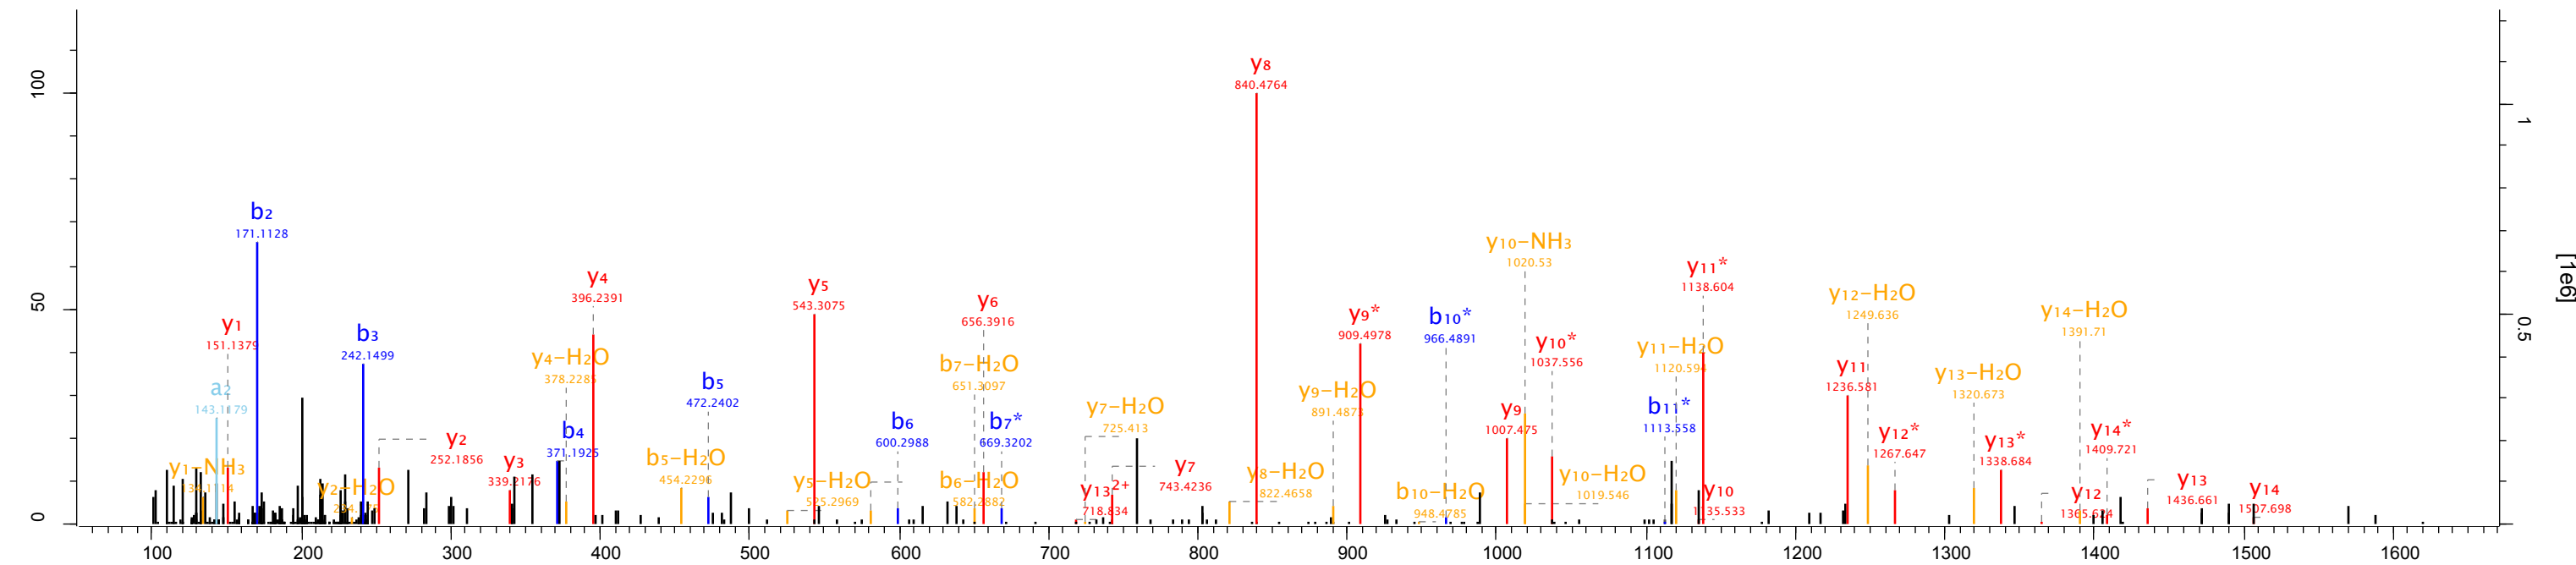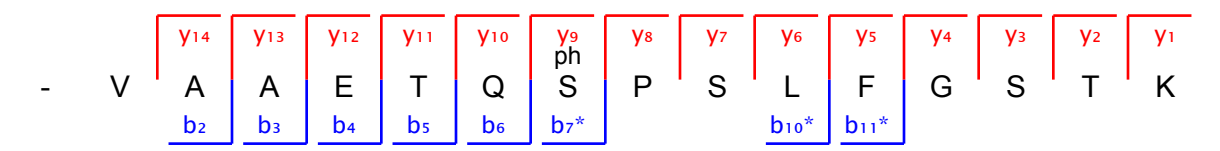

Raw file 20150812\_A375SR\_Phospho\_BR1\_10 Scan 1693 Method FTMS; HCD Score 41.62 m/z 425.54 Gene names KEAP1

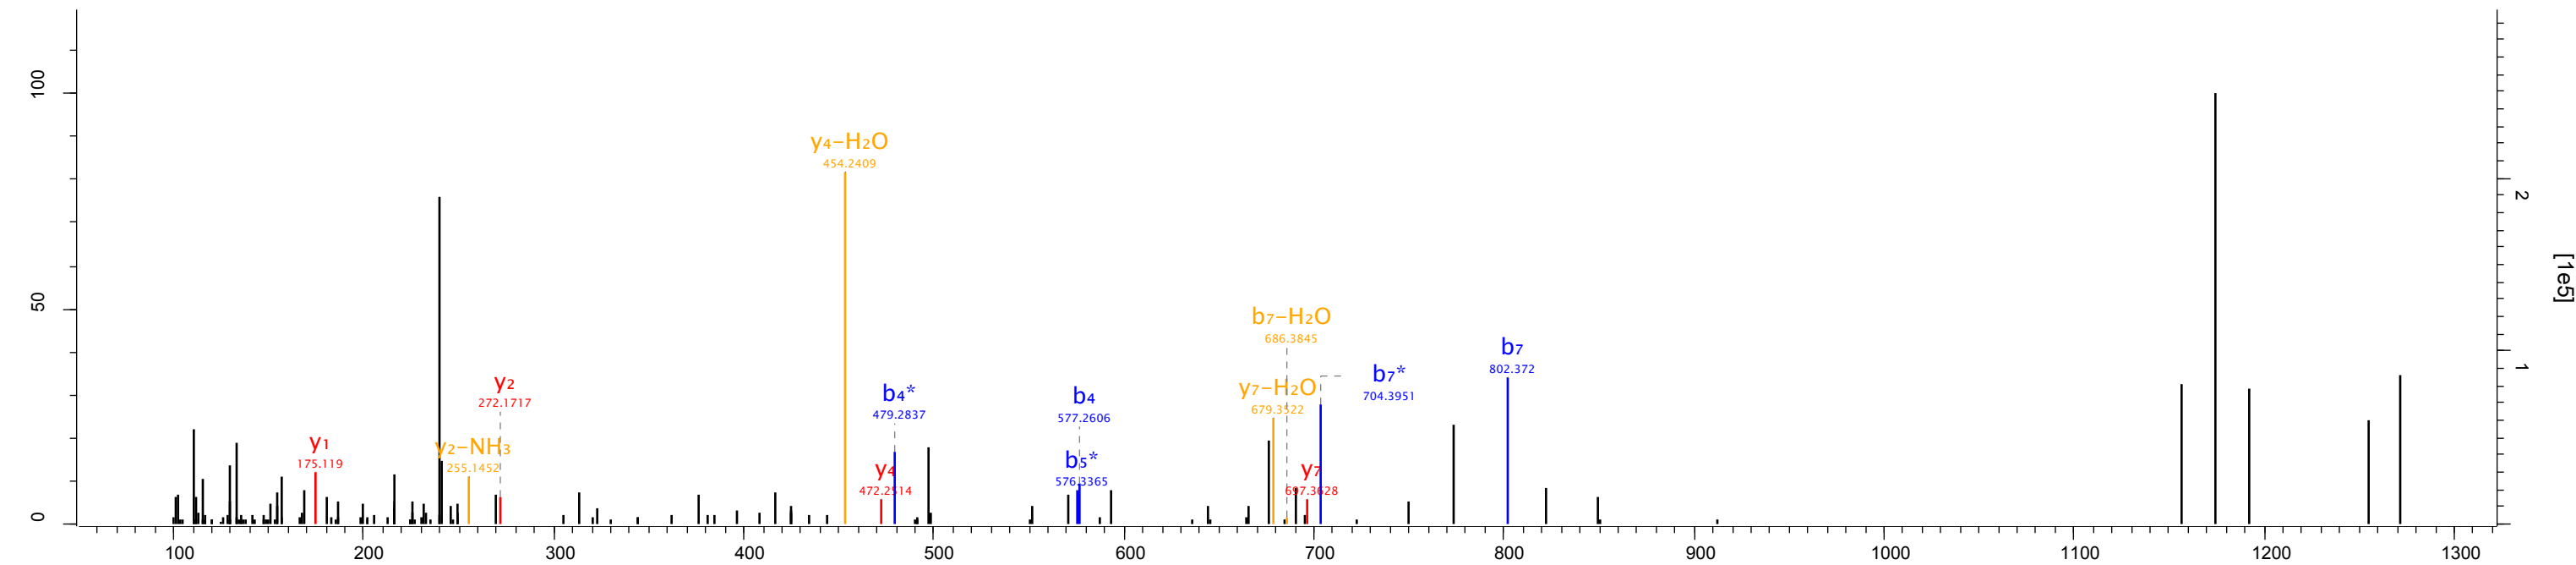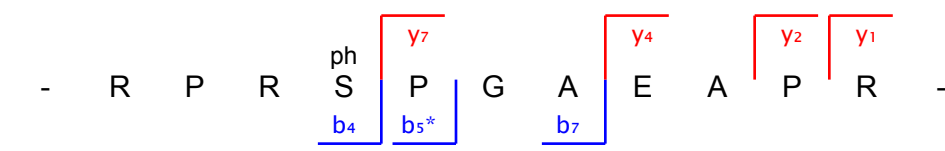

Raw file: 20150812\_A375SR\_Phospho\_BR1\_10  
 Scan: 16943 Method: FTMS; HCD Score: 140.03 m/z: 712.86 Gene names: FHOD1

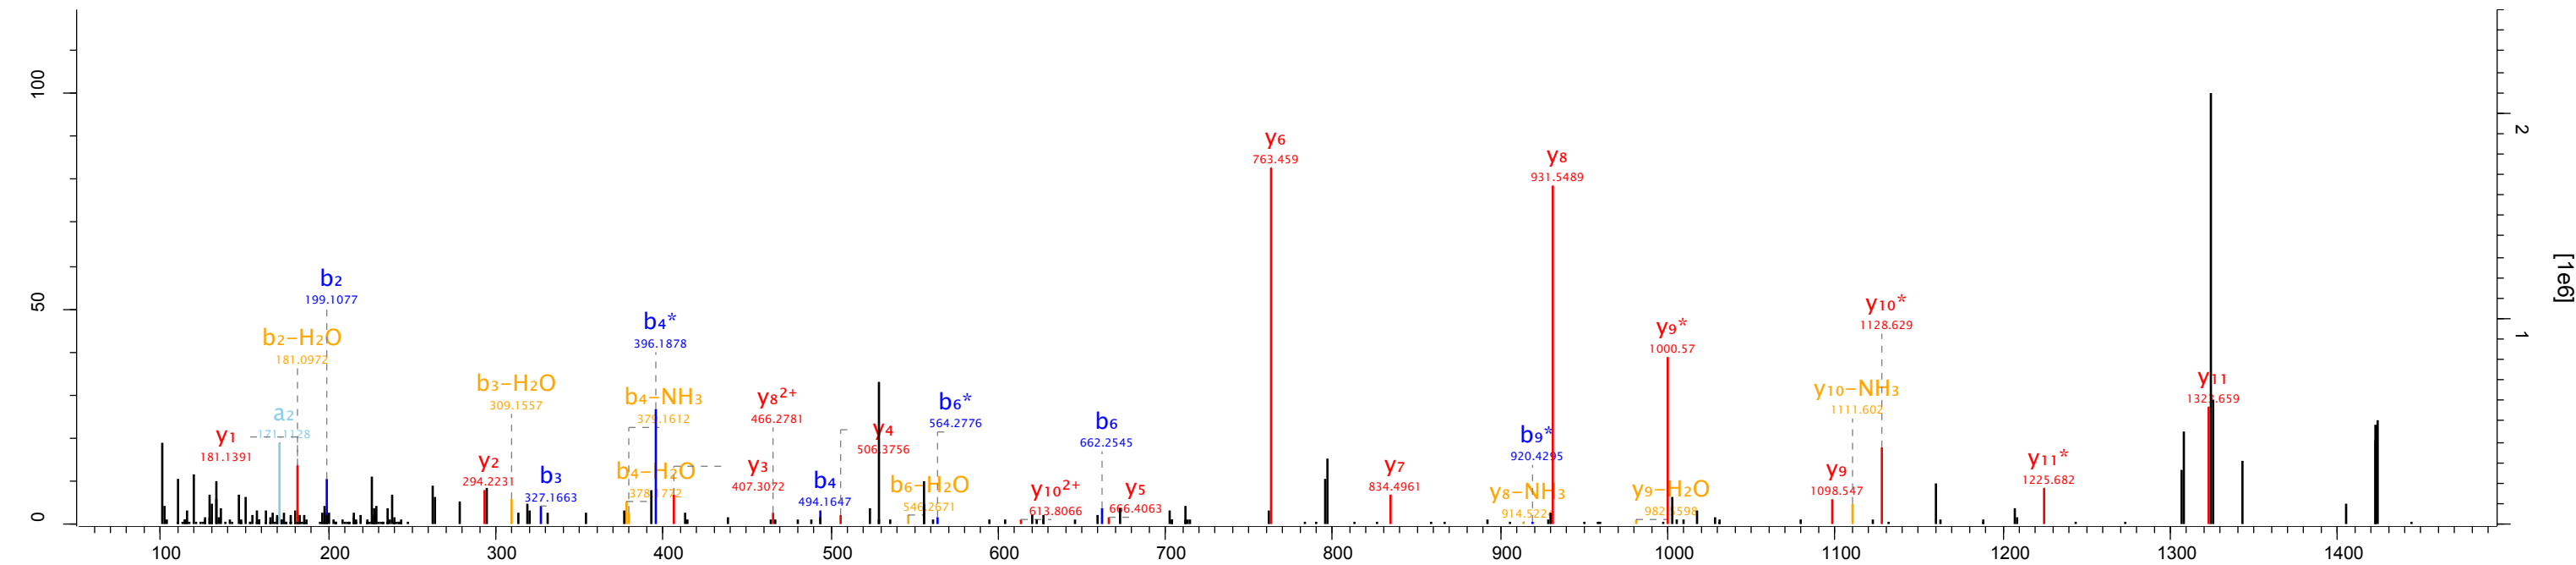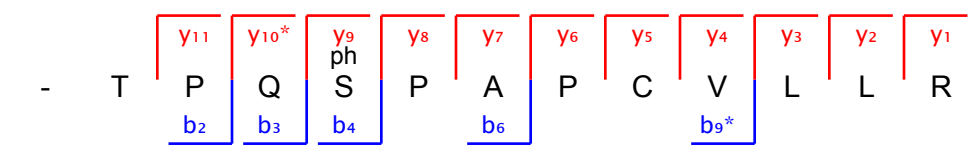

Raw file 20150812\_A375SR\_Phospho\_BR1\_10 Scan 19693 Method FTMS; HCD Score 128.61 m/z 663.33 Gene names PLEKHA5

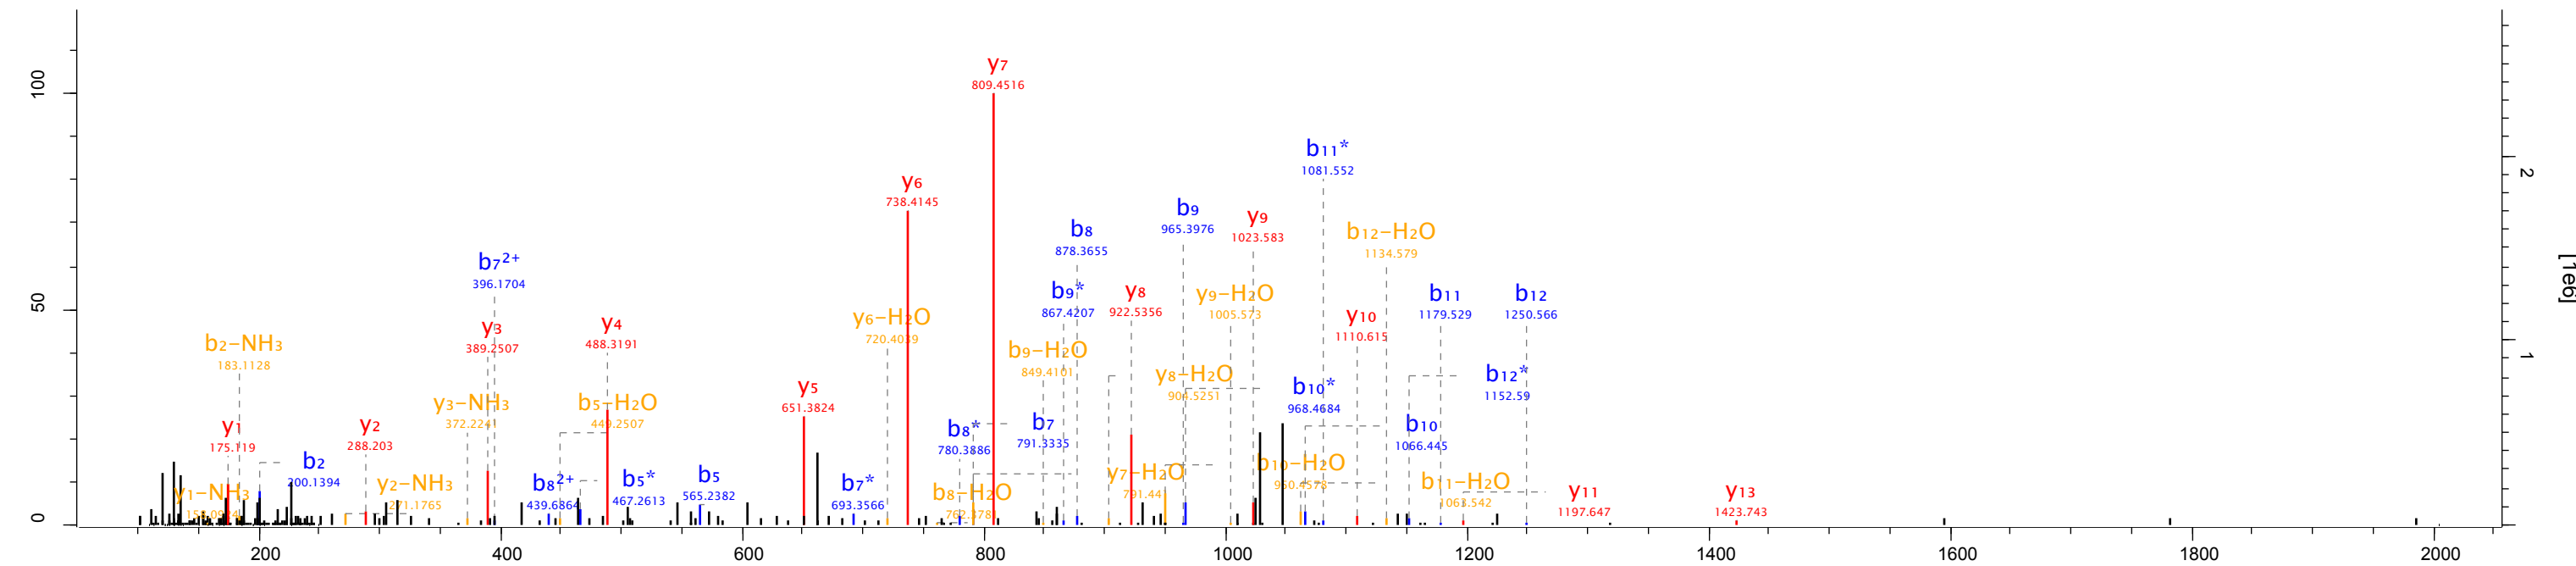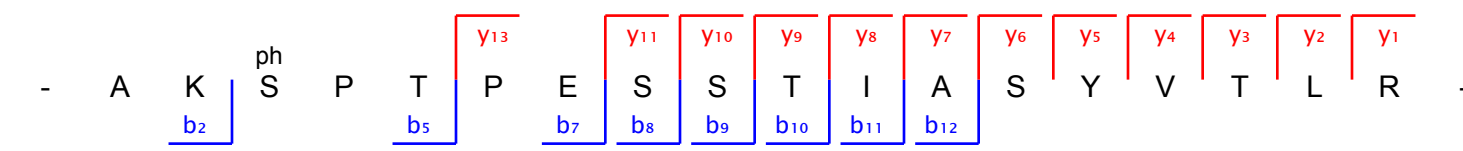



Raw file 20150812\_A375SR\_Phospho\_BR1\_10 Scan 2273 Method FTMS; HCD Score 144.88 m/z 379.86 Gene names SKP1

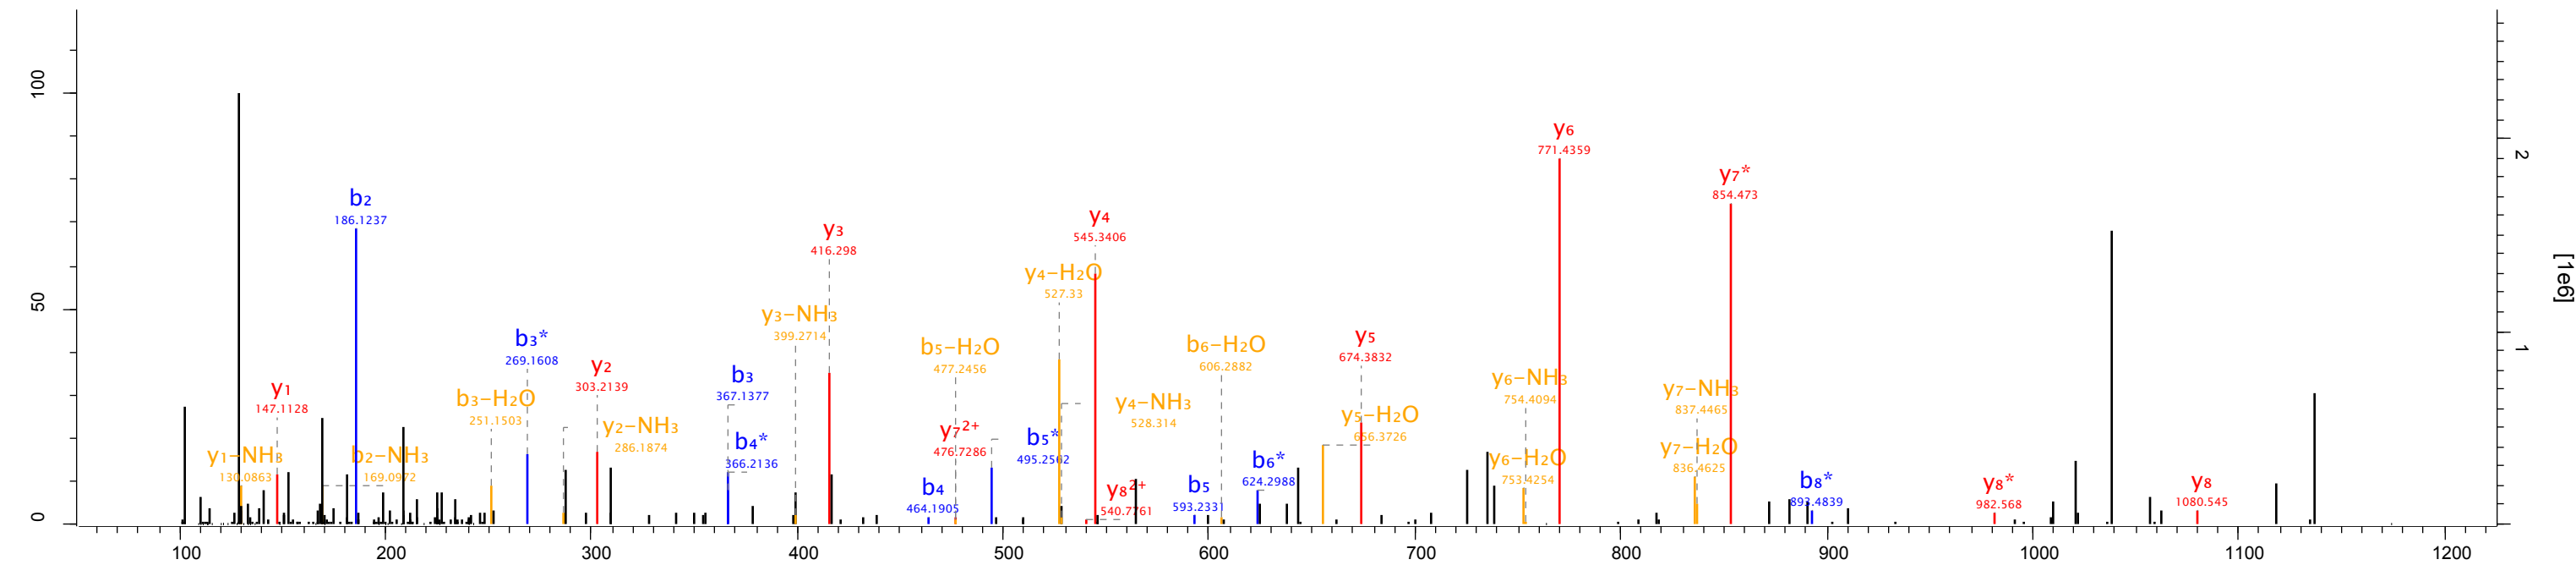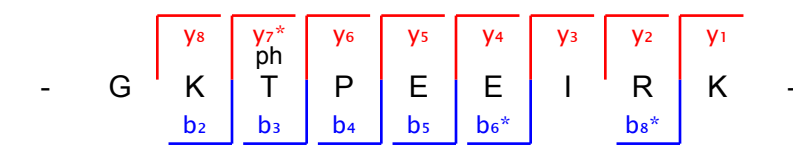

Raw file Scan Method Score m/z Gene names  
 20150812\_A375SR\_Phospho\_BR1\_10 27363 FTMS; HCD 292.29 945.97 DNAJC5

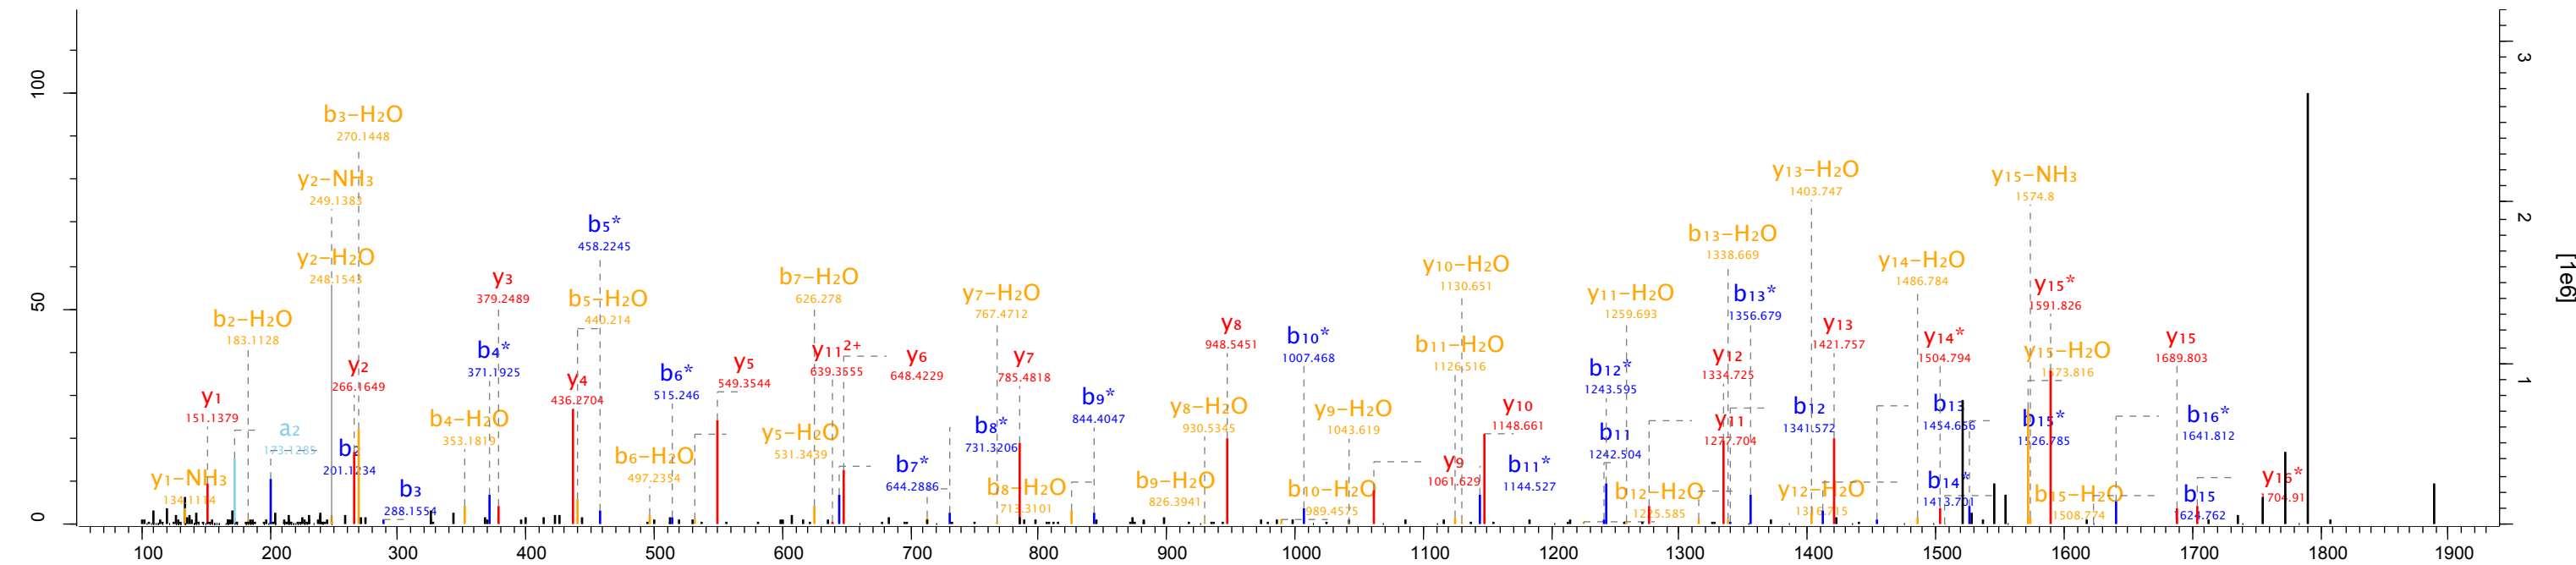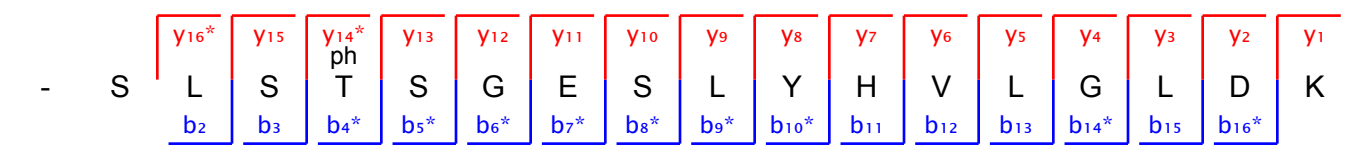

Raw file: 20150812\_A375SR\_Phospho\_BR1\_10  
 Scan: 27393 Method: FTMS; HCD Score: 155.39 m/z: 1138.07 Gene names: TPX2

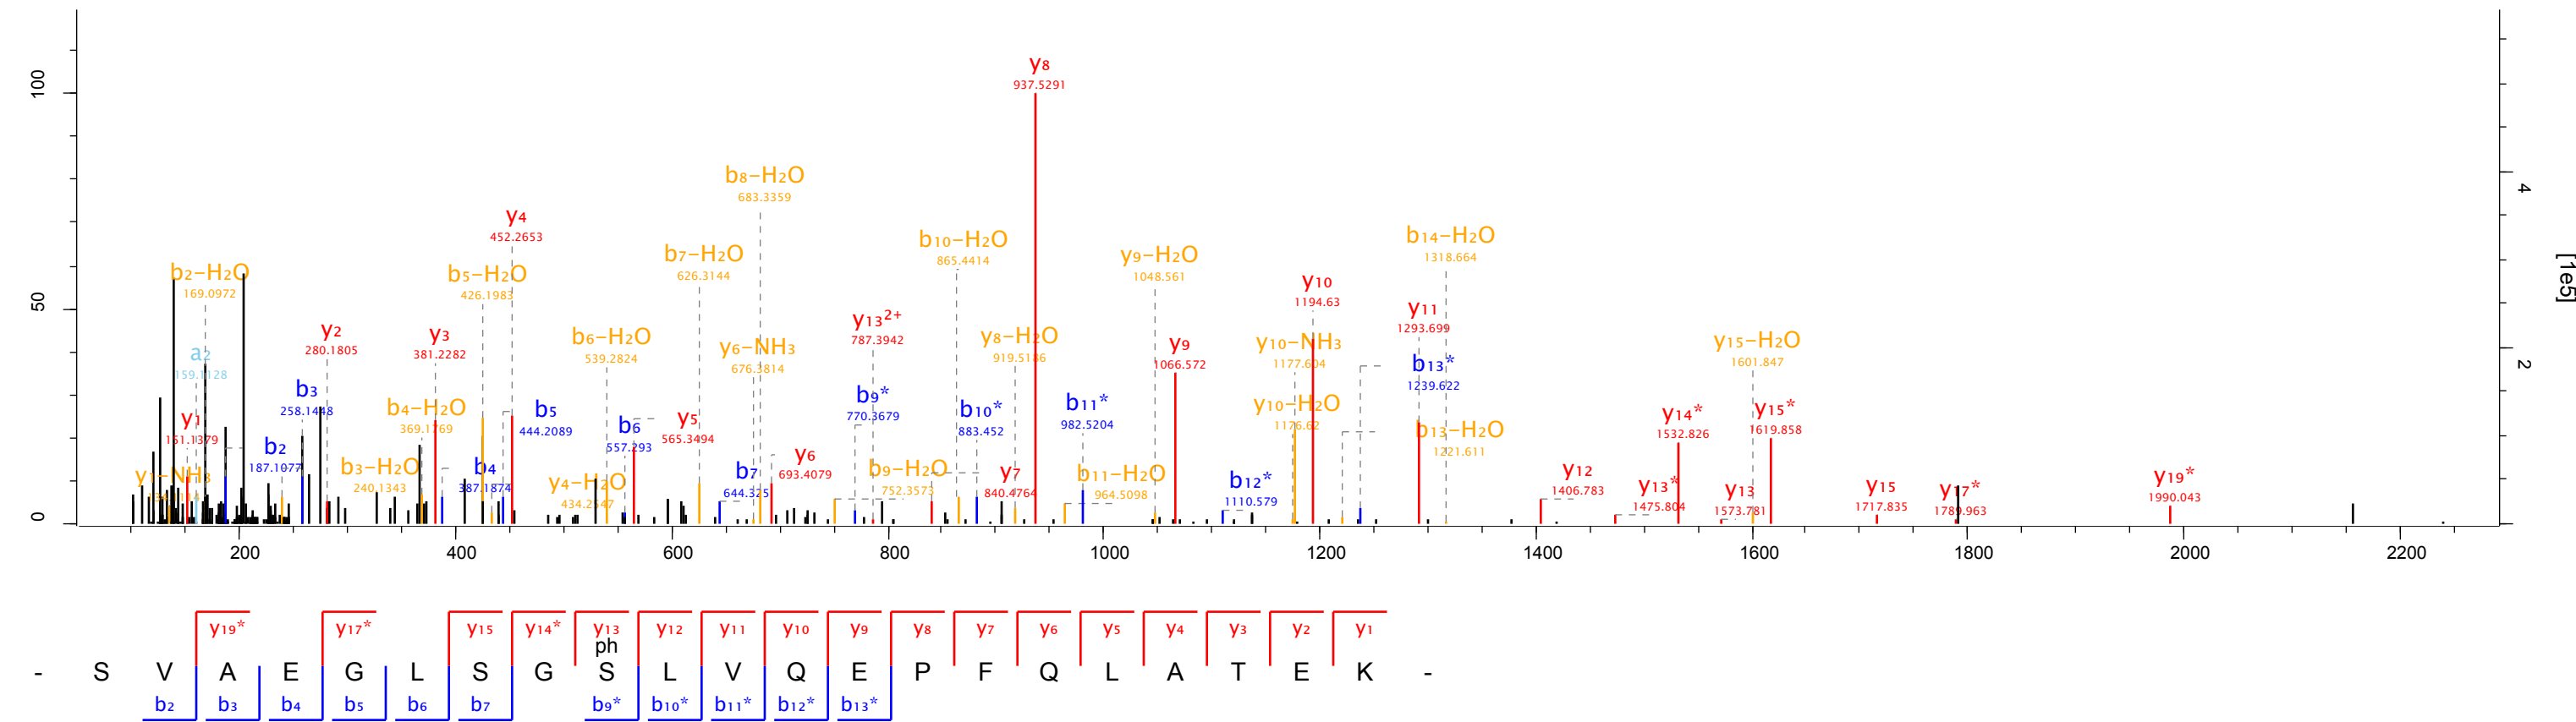

Raw file: 20150812\_A375SR\_Phospho\_BR1\_10  
 Scan: 27993 Method: FTMS; HCD Score: 82.19 m/z: 1270.33 Gene names: KHDRBS1

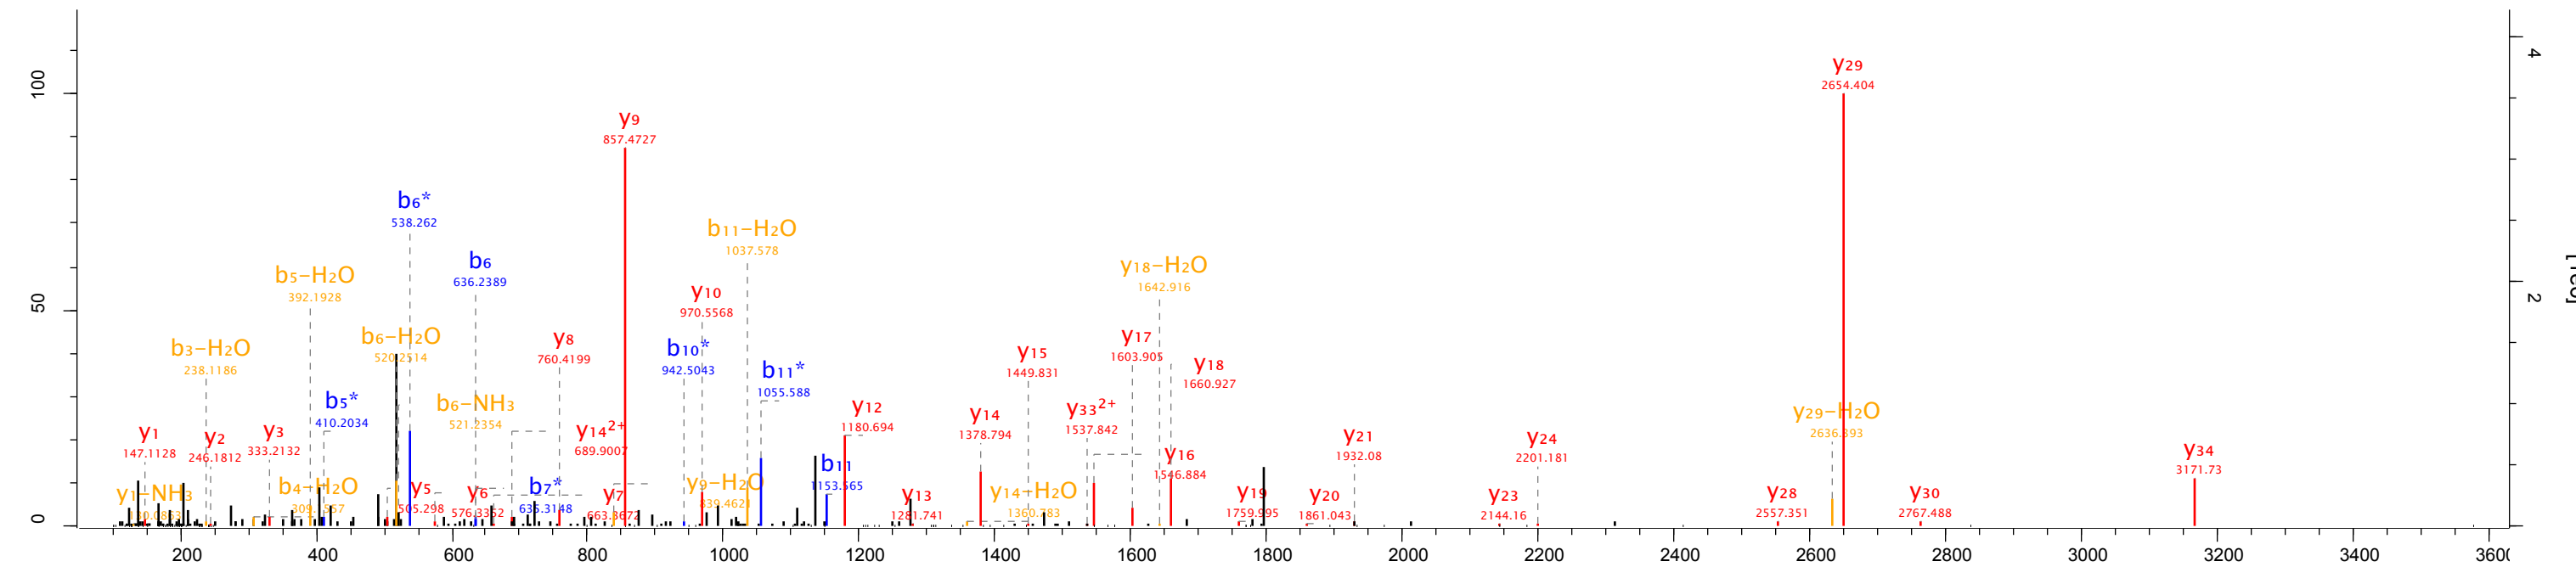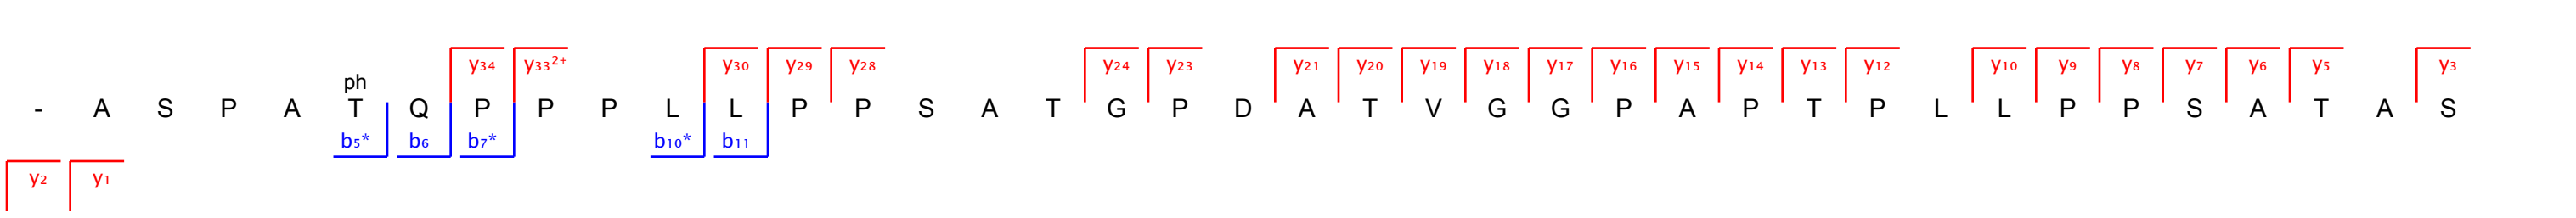

Raw file: 20150812\_A375SR\_Phospho\_BR1\_10  
 Scan: 3313 Method: FTMS; HCD Score: 156.2 m/z: 688 Gene names: THRAP3

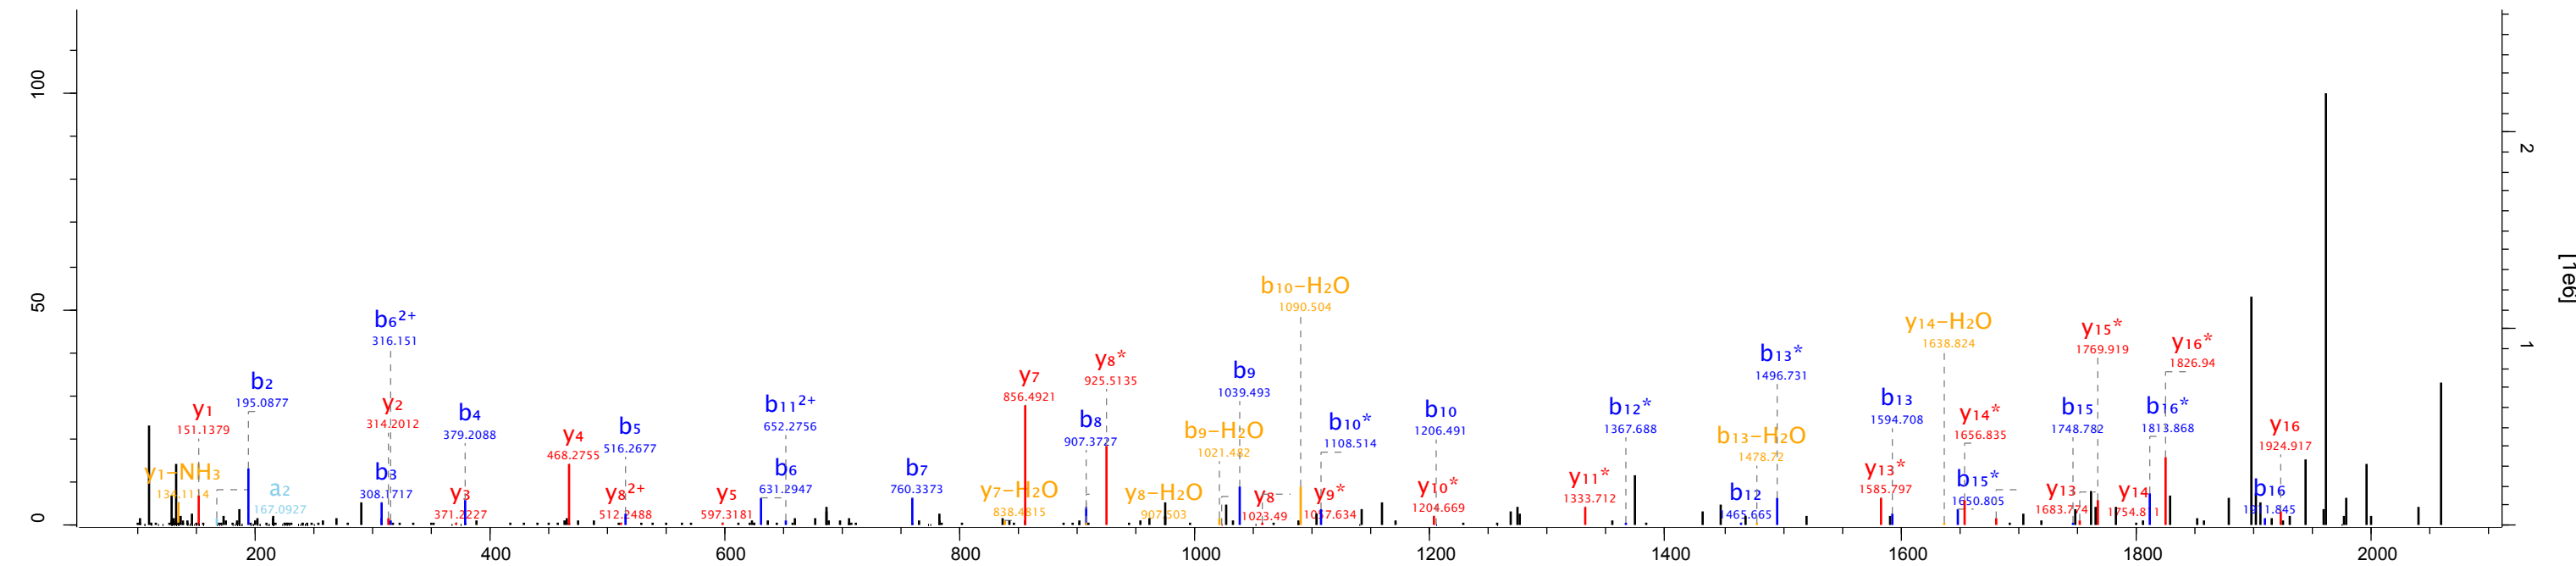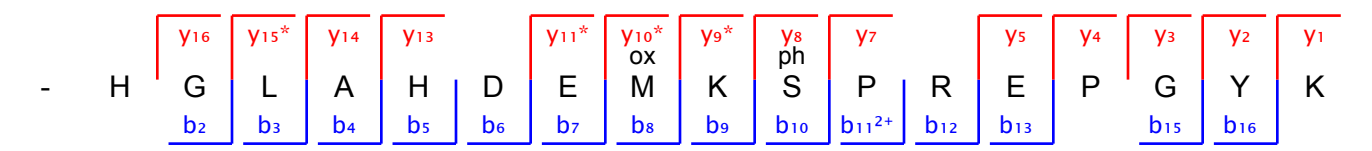

Raw file: 20150812\_A375SR\_Phospho\_BR1\_10  
 Scan: 5113 Method: FTMS; HCD Score: 137.55 m/z: 484.75 Gene names: RAPGEF6

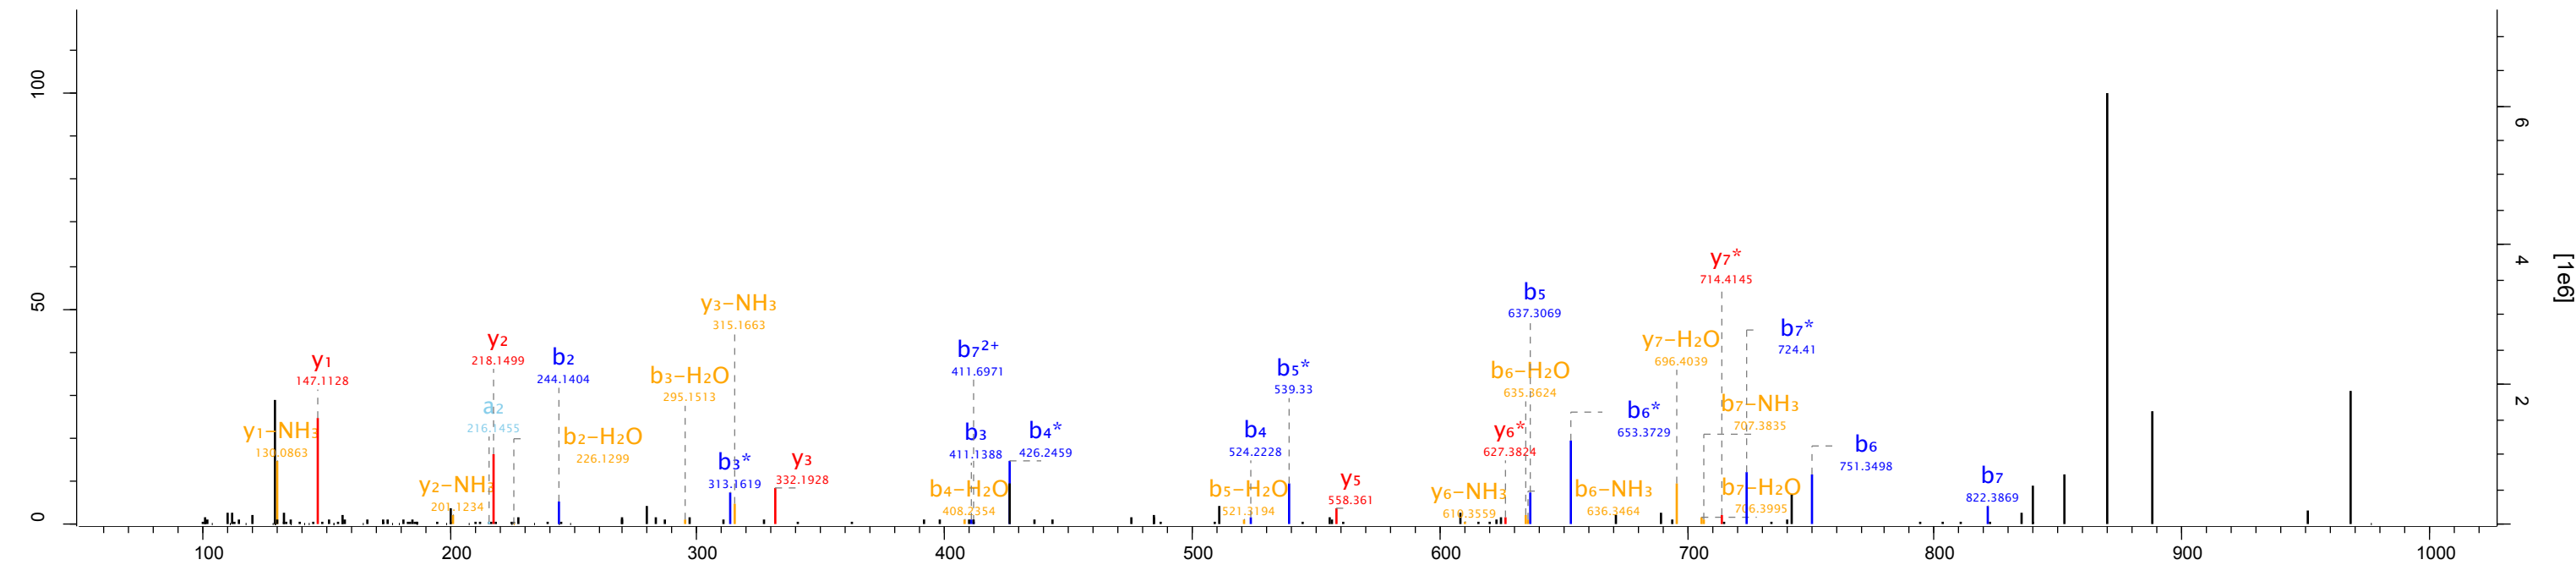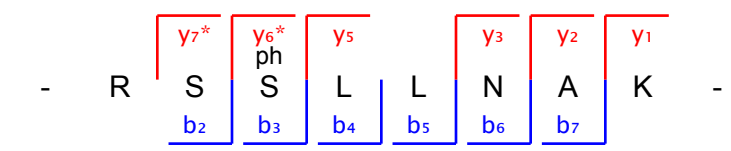

Raw file 20150812\_A375SR\_Phospho\_BR1\_10 Scan 6703 Method FTMS; HCD Score 217.91 m/z 720.84 Gene names PPF1BP1

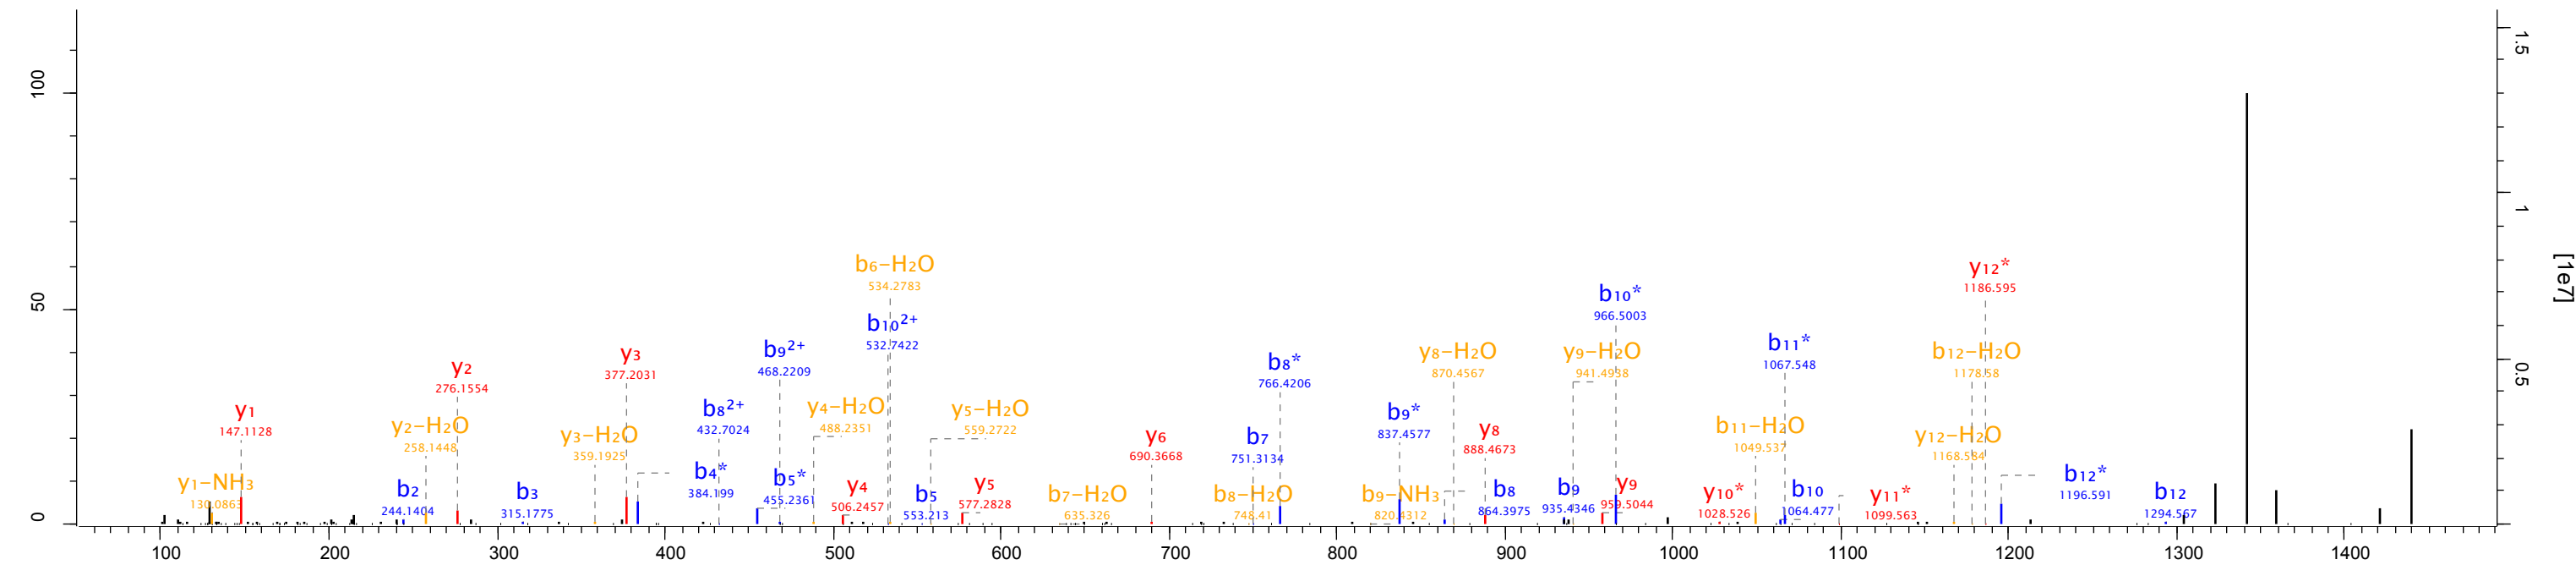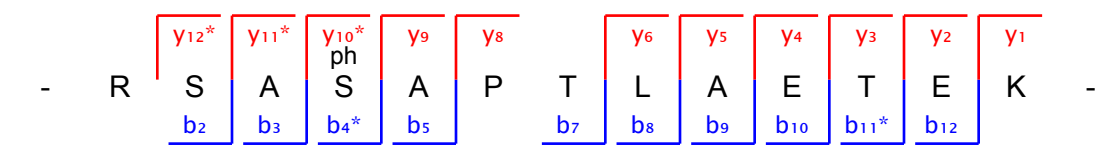

Raw file 20150812\_A375SR\_Phospho\_BR1\_10 Scan 6823 Method FTMS; HCD Score 112.91 m/z 559.94 Gene names PTPN14

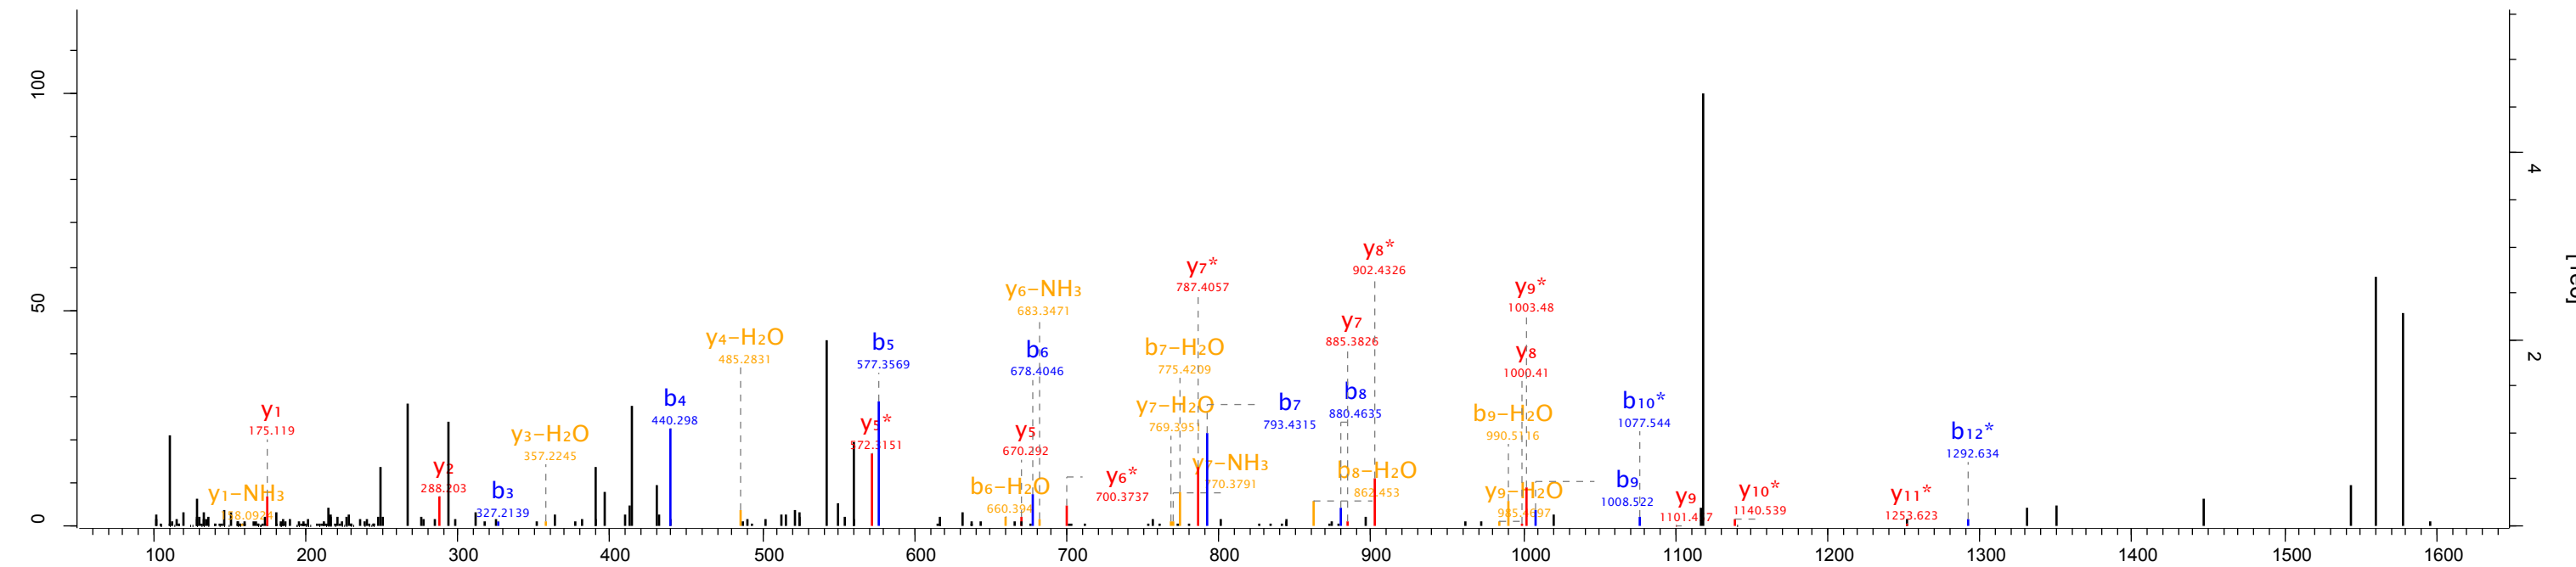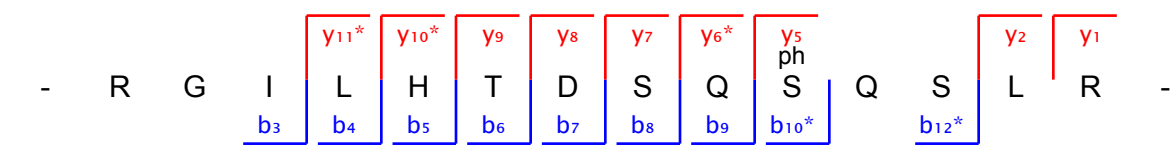



Raw file: 20150812\_A375SR\_Phospho\_BR1\_10  
 Scan: 9823 Method: FTMS; HCD Score: 178.01 m/z: 637.81 Gene names: MAP7D1

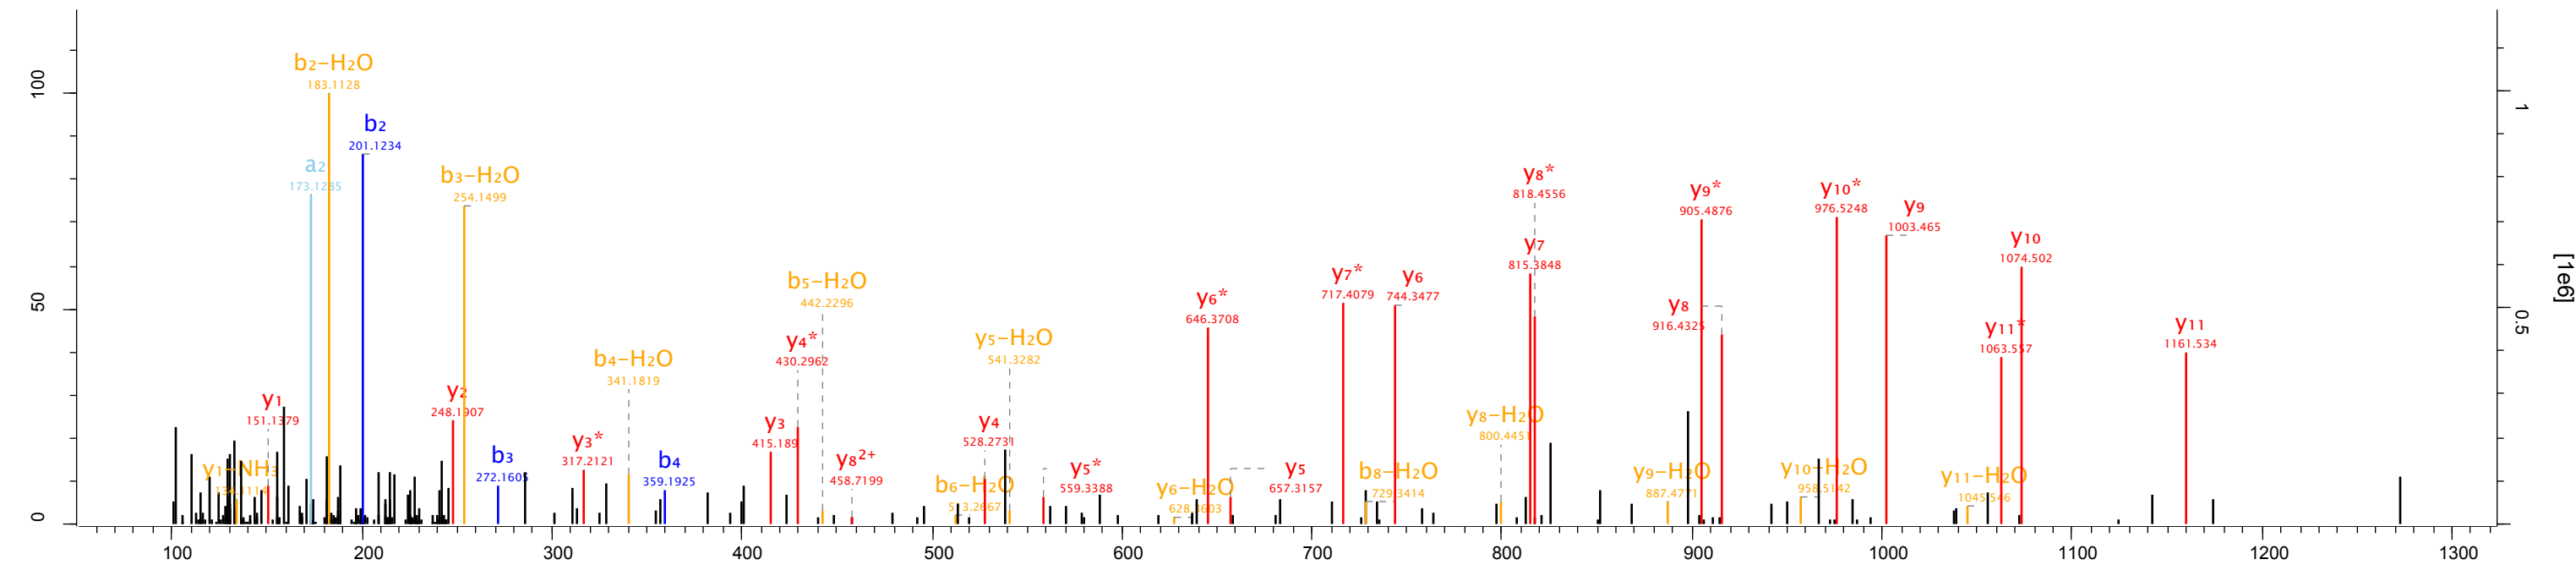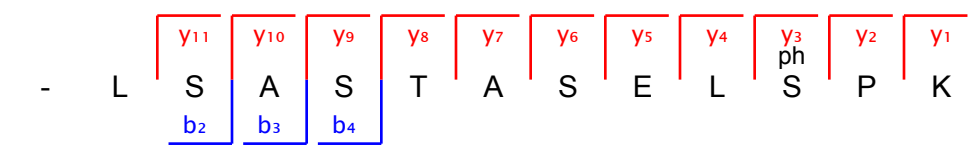

Raw file: 20150812\_A375SR\_Phospho\_BR1\_01  
 Scan: 5834 Method: FTMS; HCD Score: 71.88 m/z: 879.32 Gene names: SRRM2

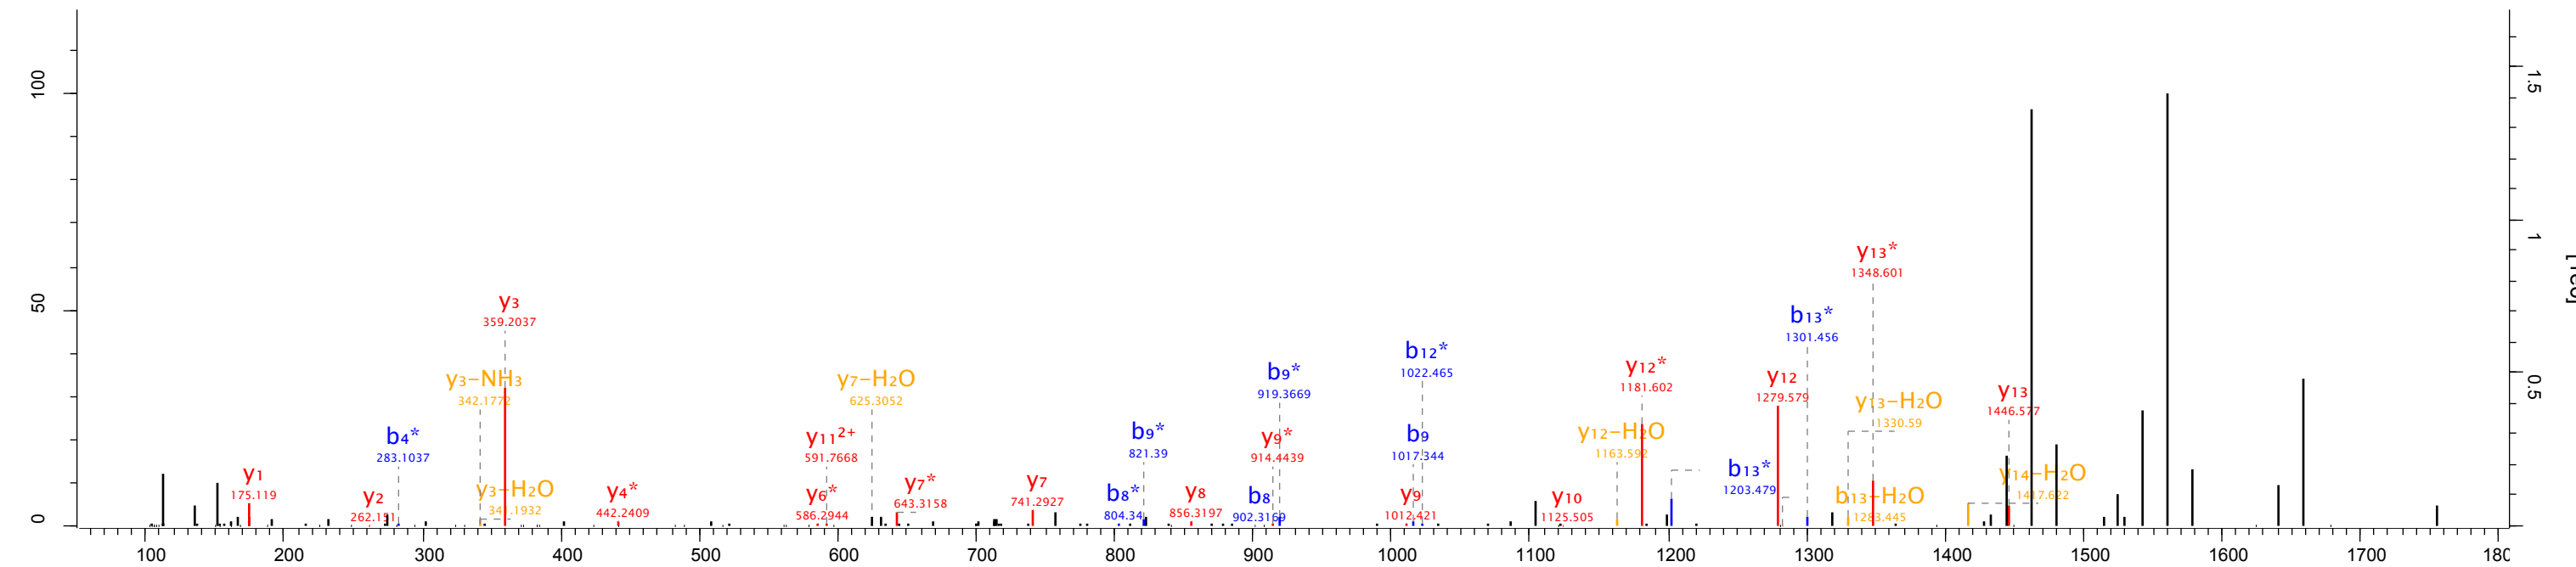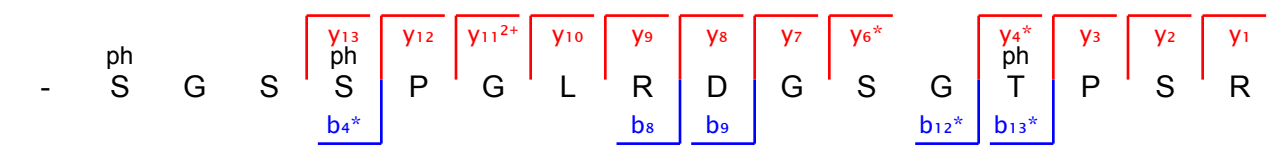

Raw file: 20150812\_A375SR\_Phospho\_BR1\_01  
 Scan: 7534 Method: FTMS; HCD Score: 67.22 m/z: 842.82 Gene names: MKI67

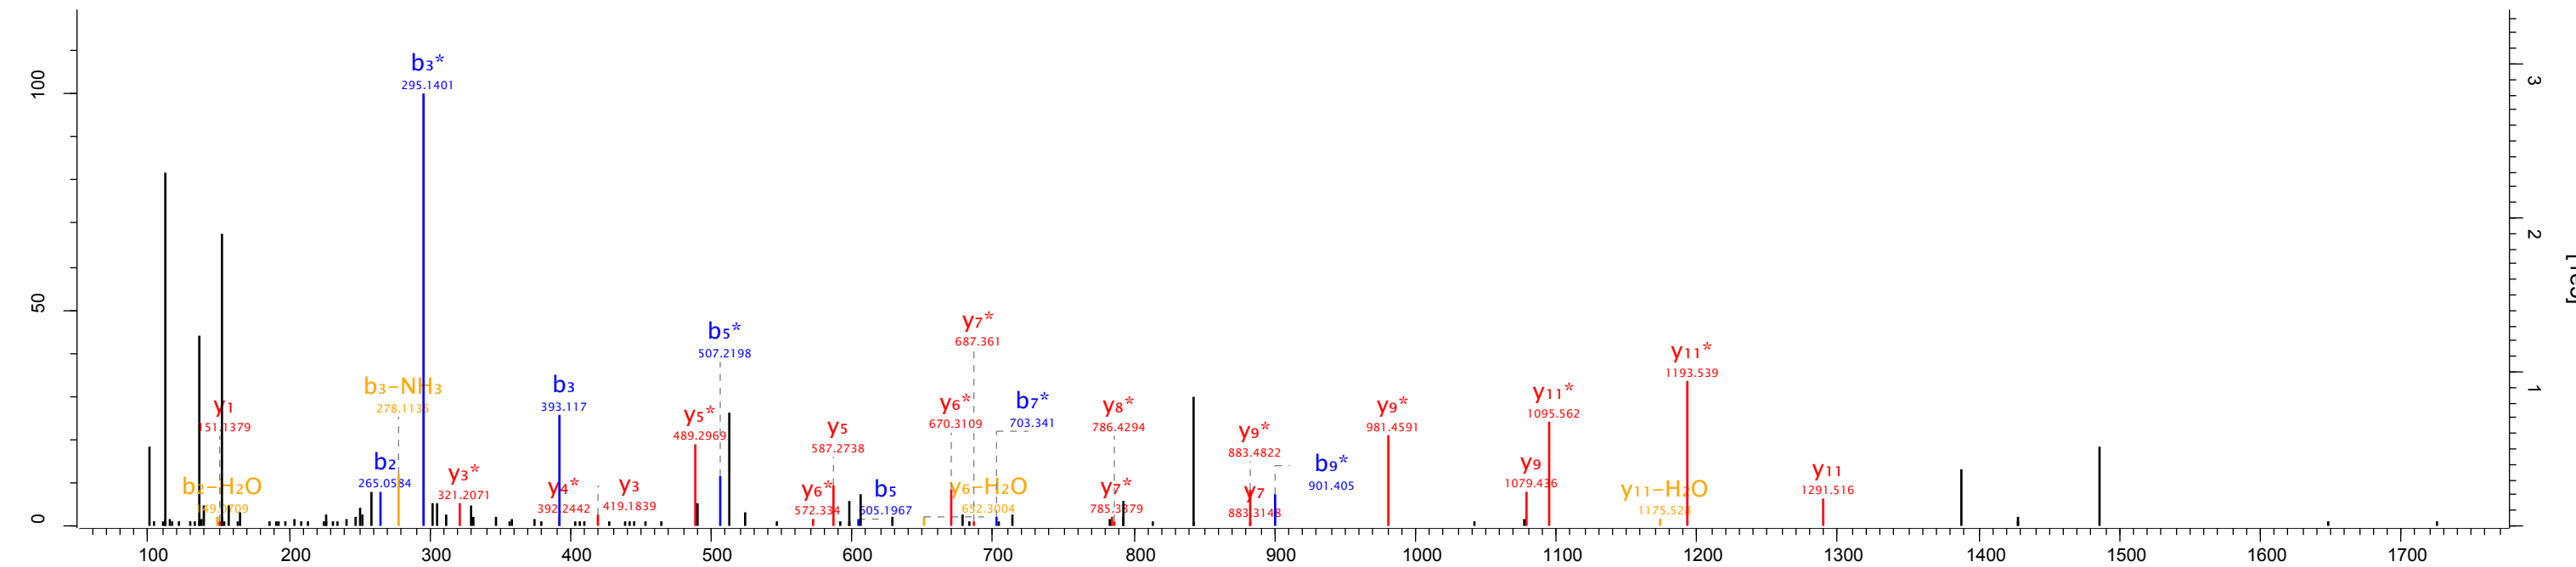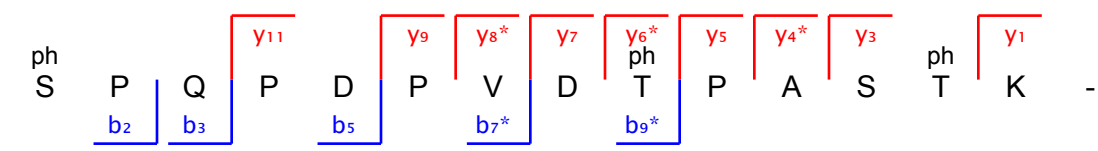

Raw file 20150812\_A375SR\_Phospho\_BR1\_01 Scan 7804 Method FTMS; HCD Score 56.71 m/z 1210.88 Gene names GNL2

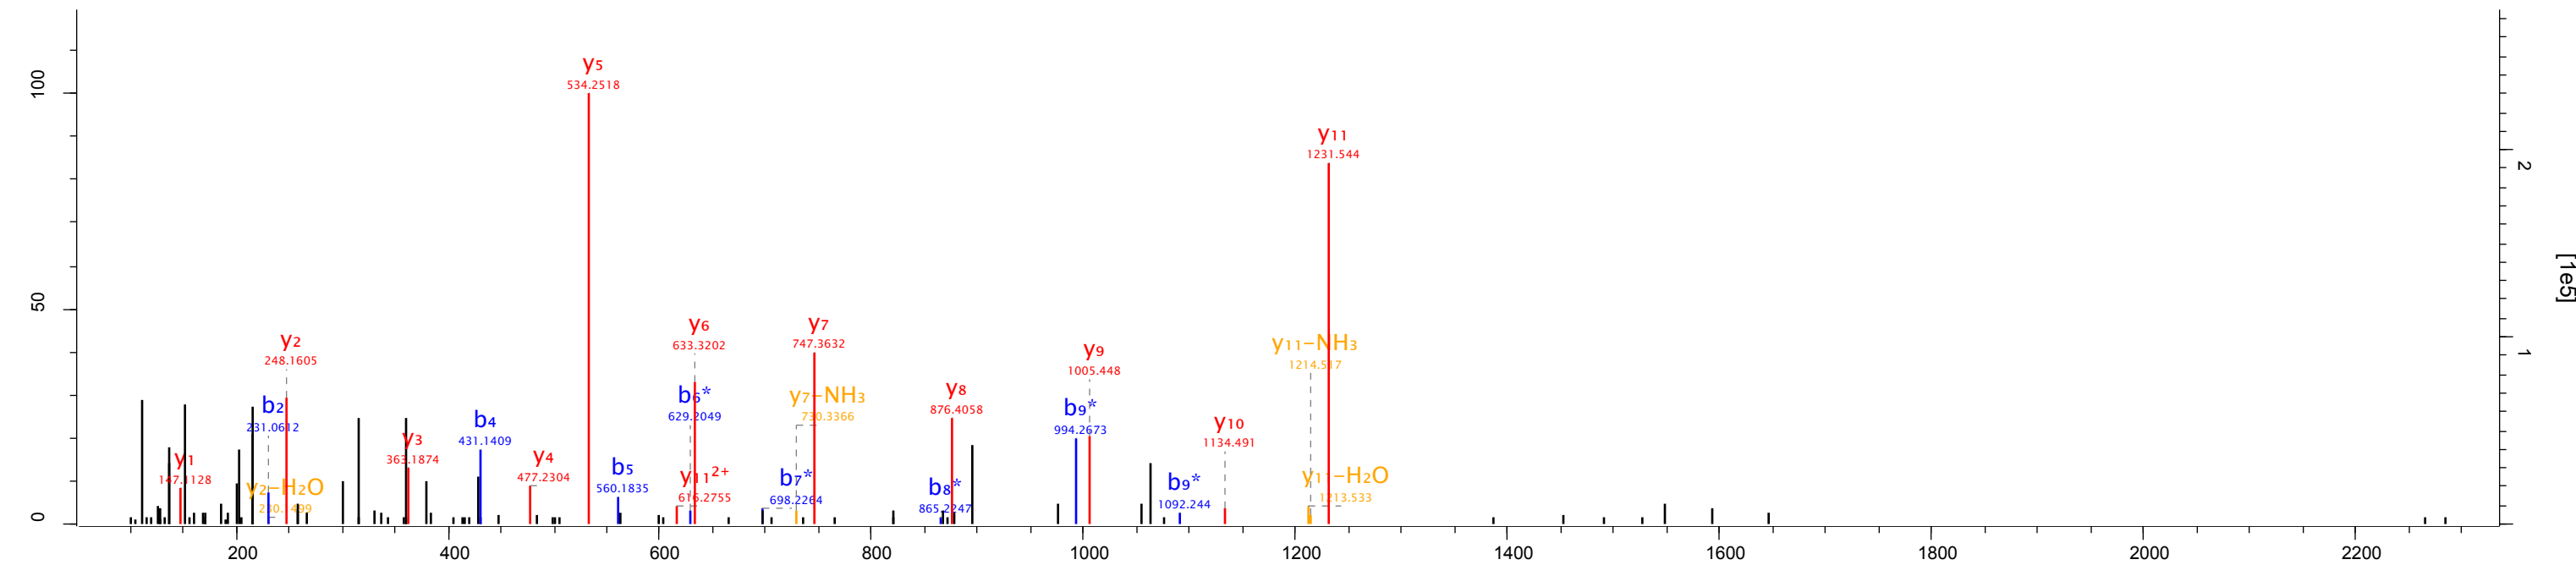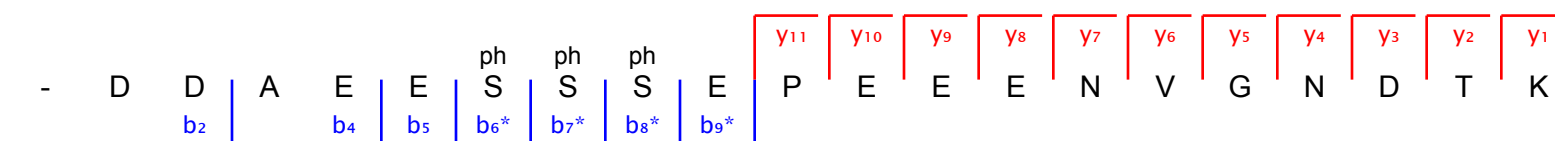

Raw file: 20150812\_A375SR\_Phospho\_BR1\_02  
 Scan: 10014 Method: FTMS; HCD Score: 105.54 m/z: 1140.95 Gene names: CEP170

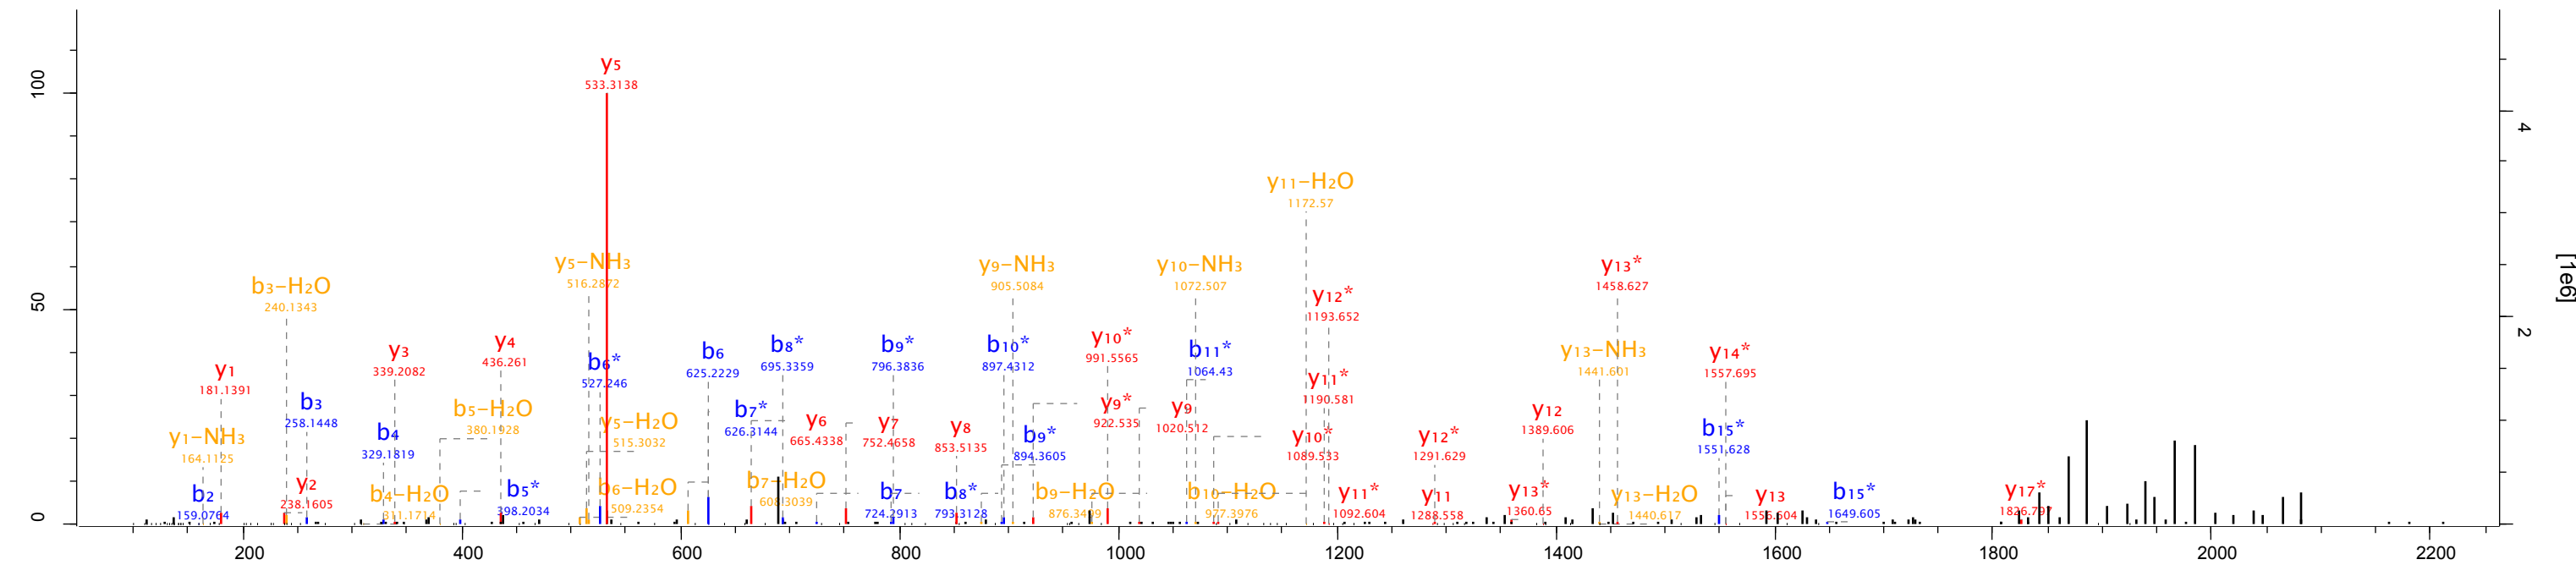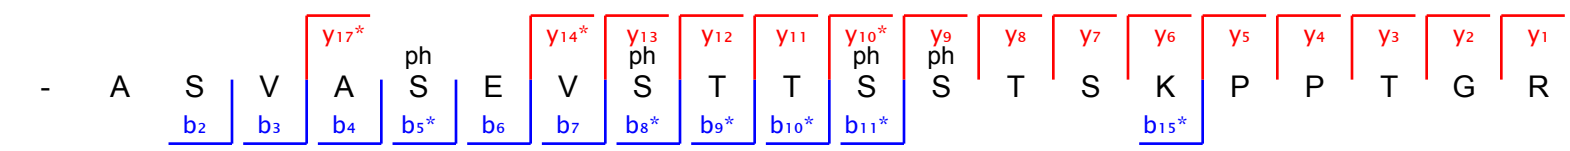

Raw file: 20150812\_A375SR\_Phospho\_BR1\_02  
 Scan: 10244 Method: FTMS; HCD Score: 135.12 m/z: 792.79 Gene names: NDRG1

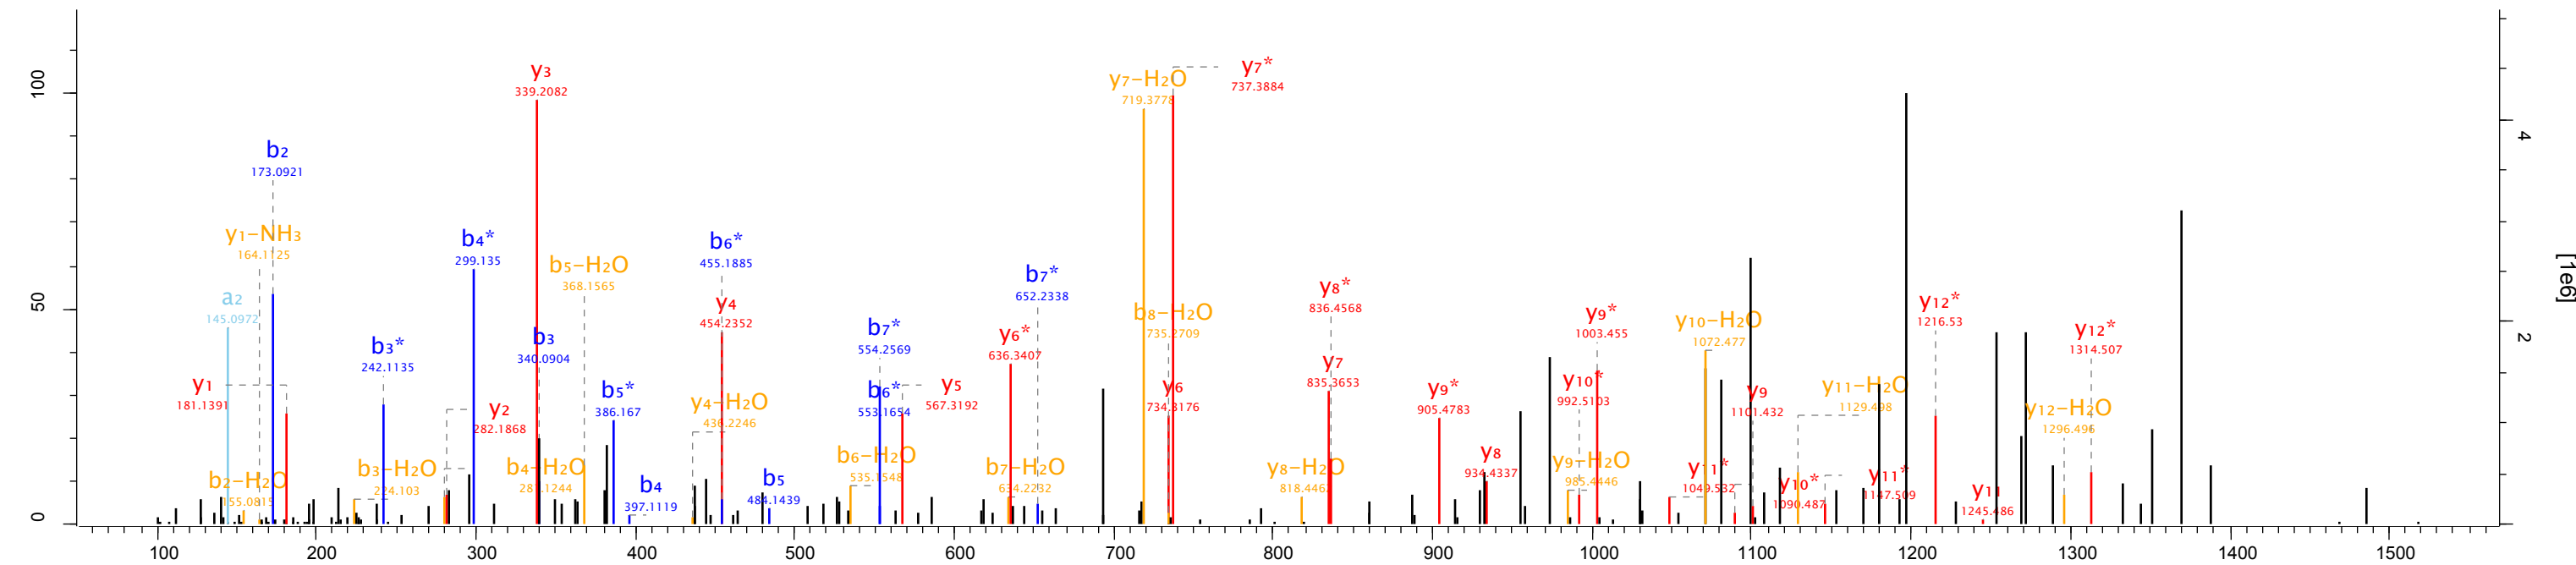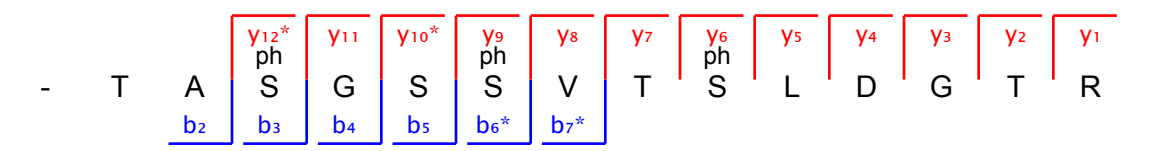

Raw file: 20150812\_A375SR\_Phospho\_BR1\_02  
 Scan: 10294 Method: FTMS; HCD Score: 137.75 m/z: 769.75 Gene names: PPP4R1

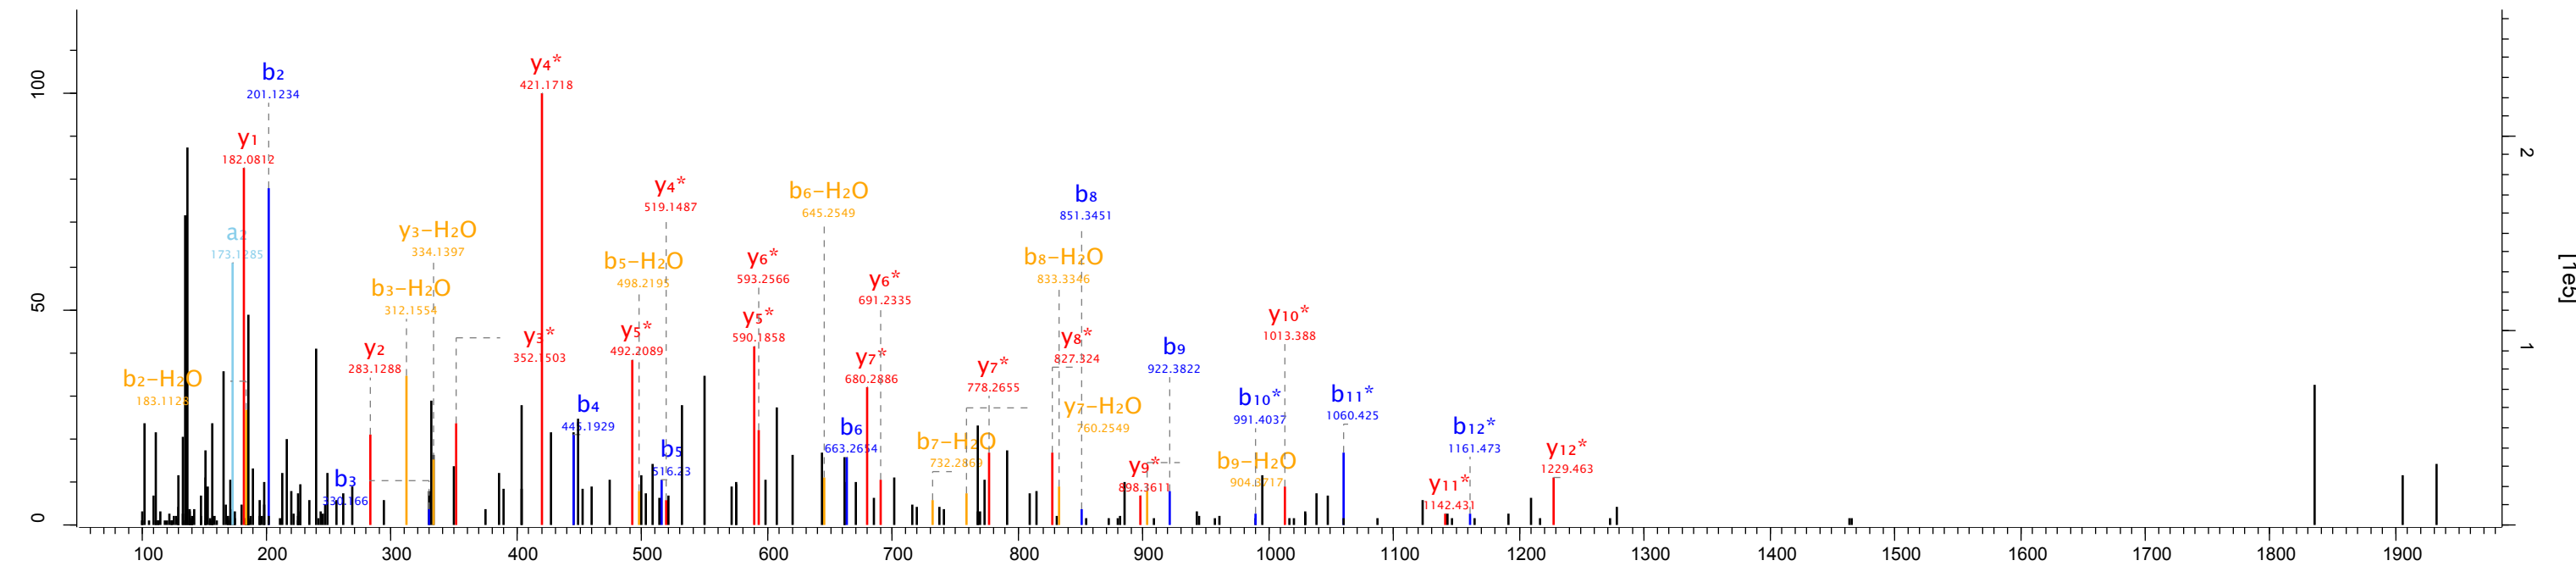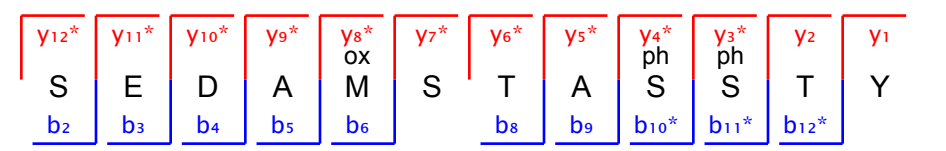

Raw file: 20150812\_A375SR\_Phospho\_BR1\_02  
 Scan: 10574 Method: FTMS; HCD Score: 149.6 m/z: 722.82 Gene names: BAG3

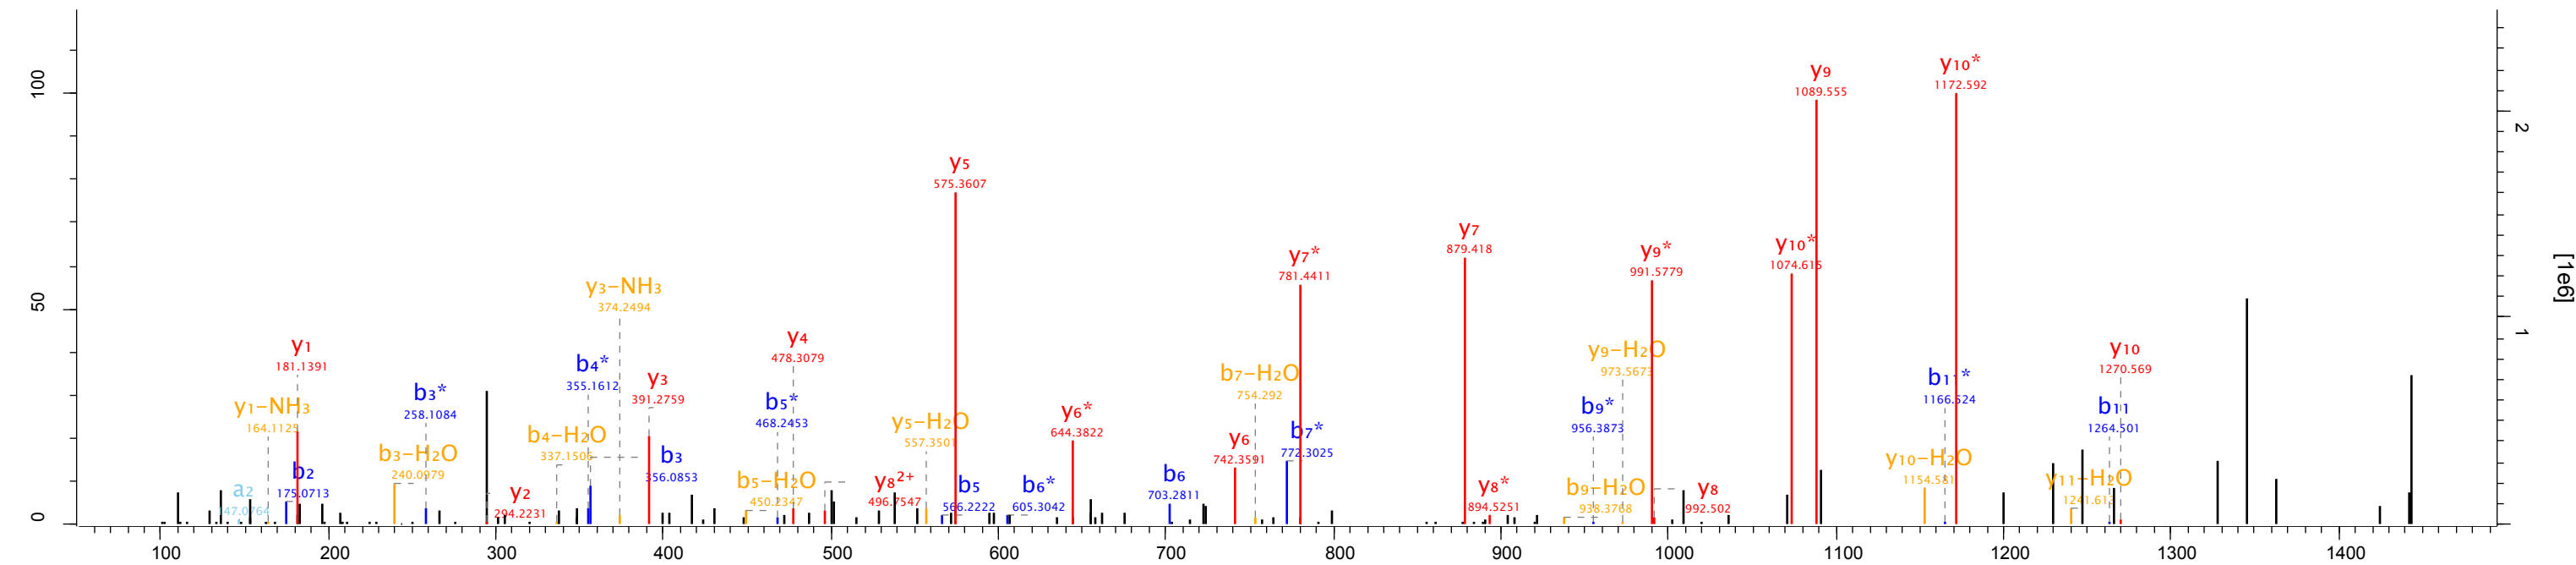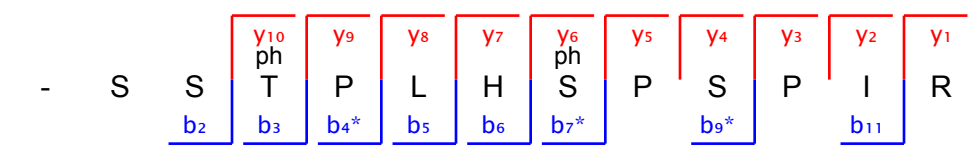



Raw file 20150812\_A375SR\_Phospho\_BR1\_02 Scan 11094 Method FTMS; HCD Score 88.63 m/z 780.8 Gene names PPIP5K2

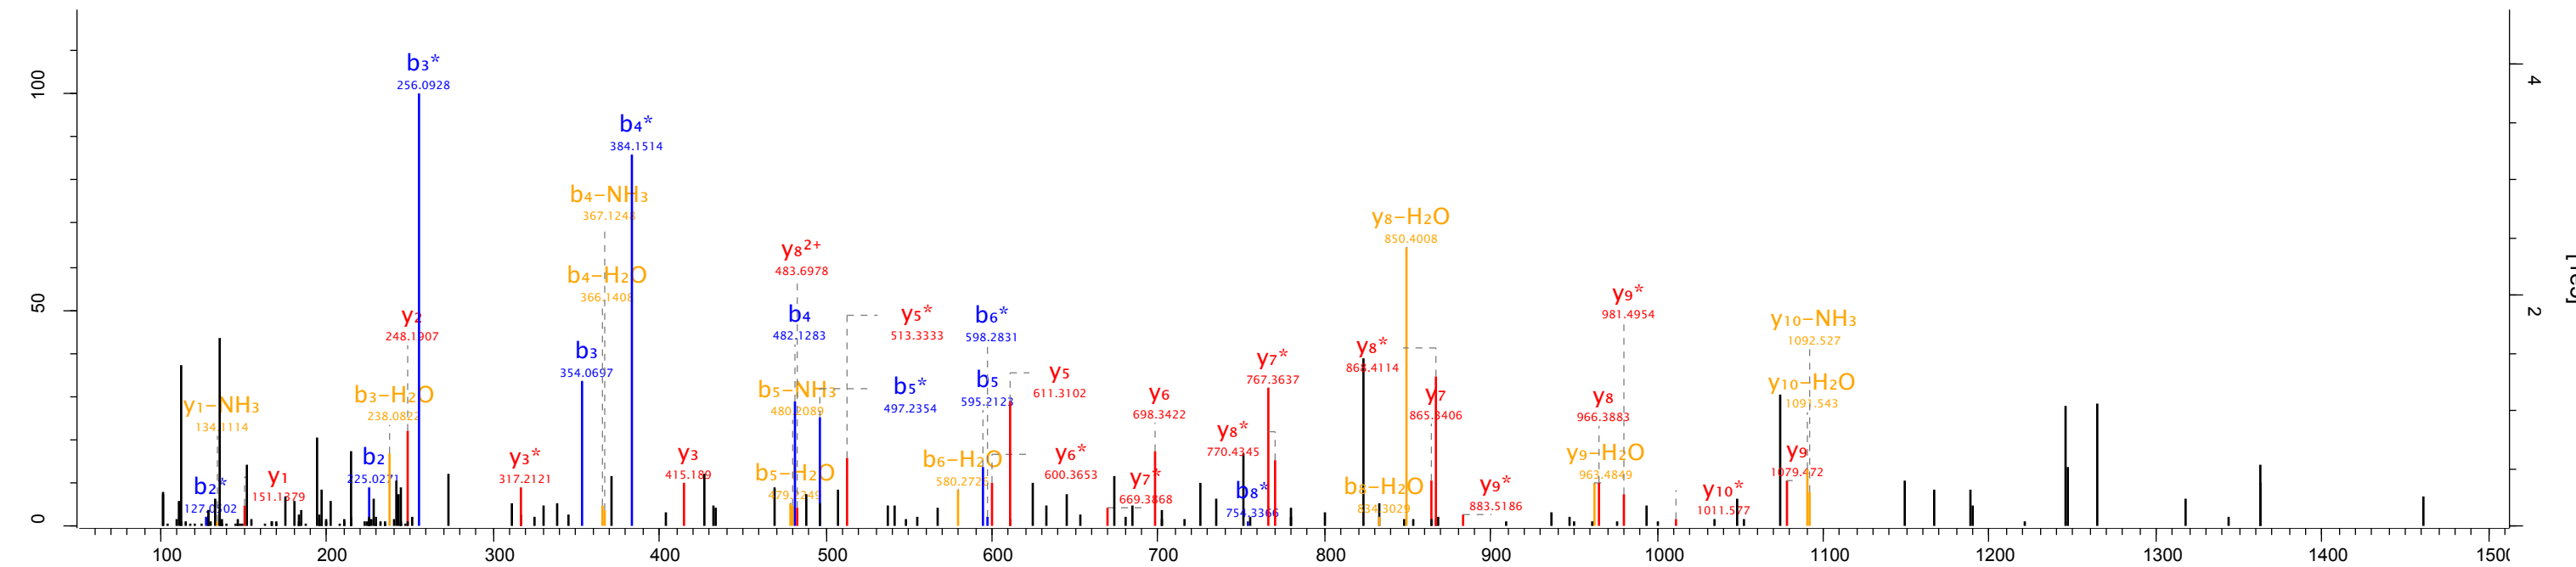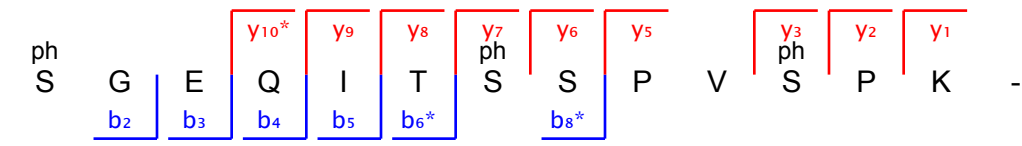

Raw file: 20150812\_A375SR\_Phospho\_BR1\_02  
 Scan: 11134  
 Method: FTMS; HCD  
 Score: 172.98  
 m/z: 968.37  
 Gene names: CENPT

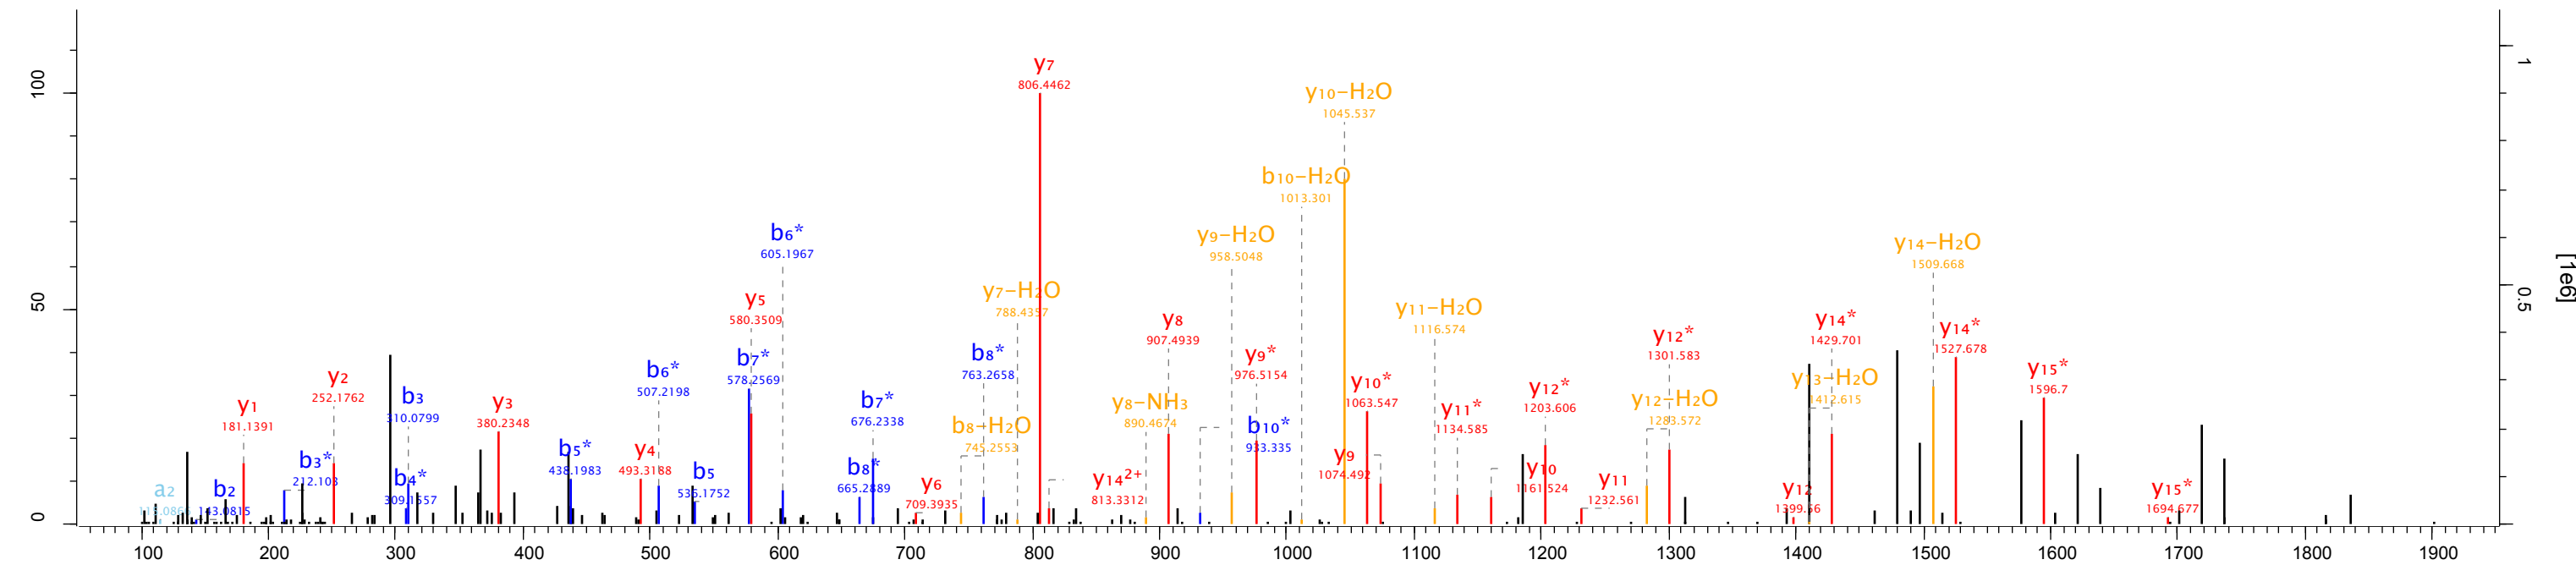

Peptide sequence: A A S P E S A S T P E S L Q A R -

Fragmentation sites (b ions): b2, b3, b4\*, b5, b6\*, b7\*, b8\*, b10\*

Fragmentation sites (y ions): y1, y2, y3, y4, y5, y6, y7, y8, y9, y9 ph, y8, y7, y6, y5, y4, y3, y2, y1

Raw file 20150812\_A375SR\_Phospho\_BR1\_02 Scan 11214 Method FTMS; HCD Score 105.03 m/z 901.05 Gene names ZC3HC1

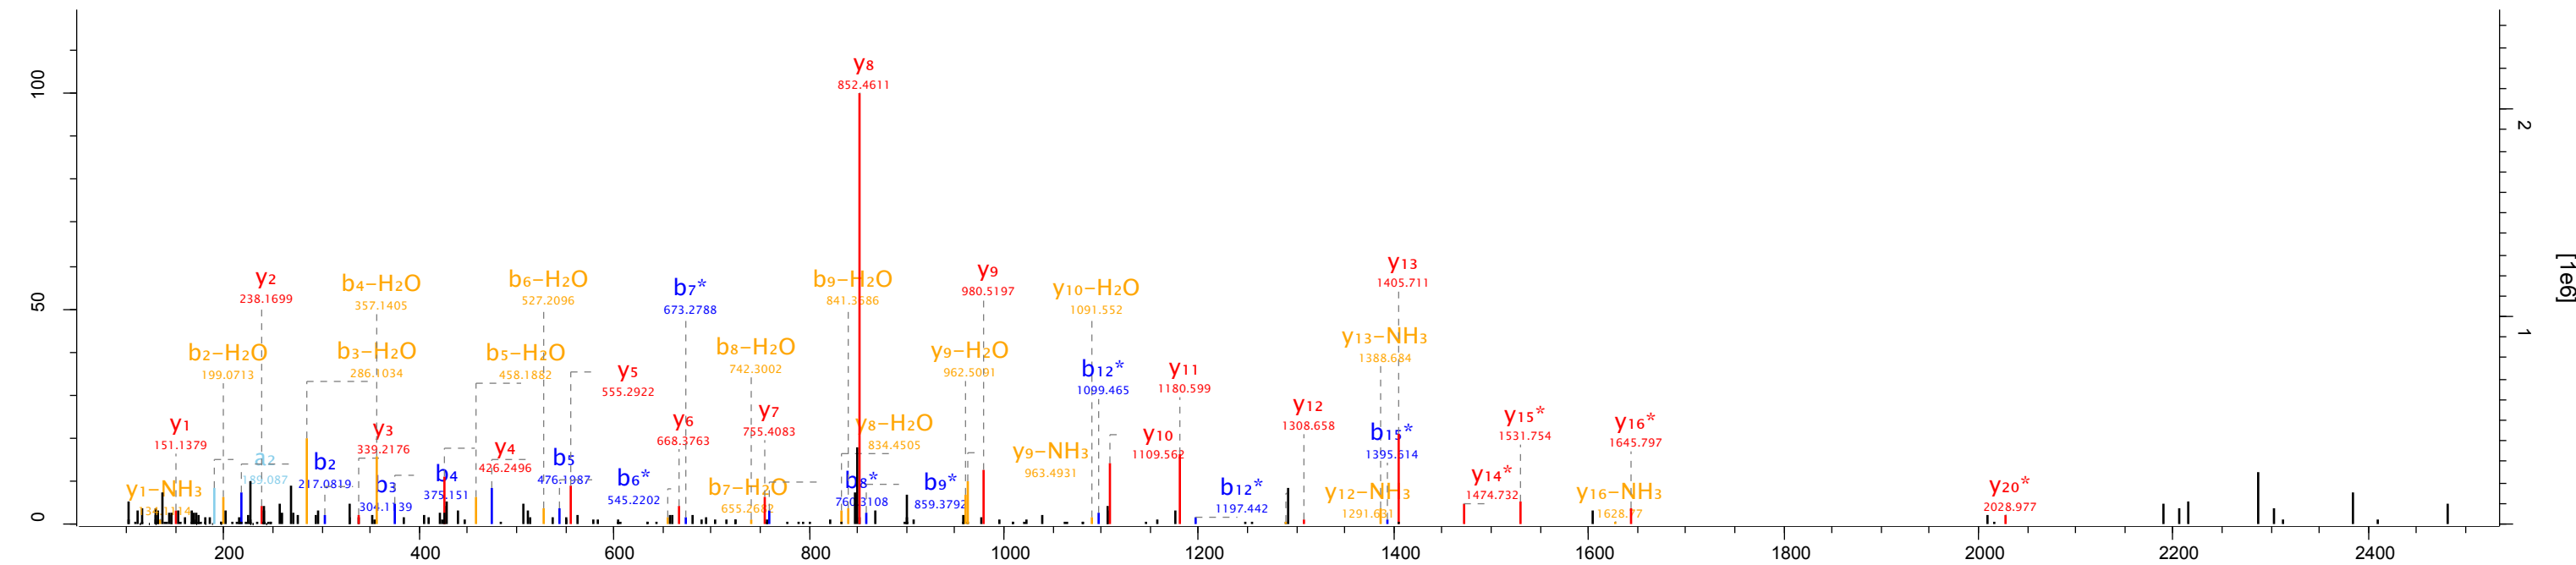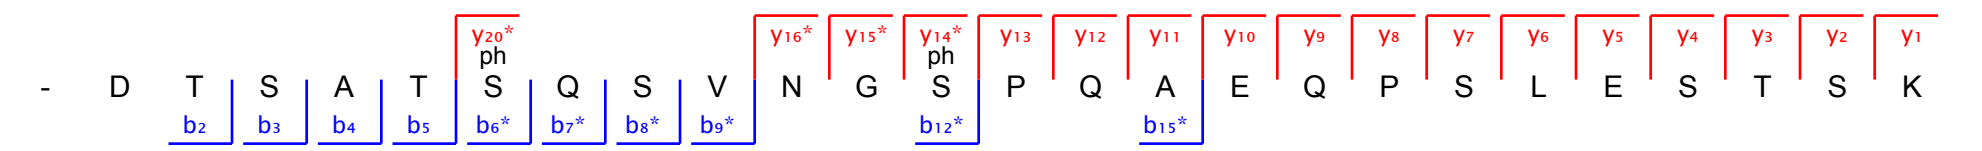

Raw file 20150812\_A375SR\_Phospho\_BR1\_02 Scan 11504 Method FTMS; HCD Score 114.49 m/z 1092.43 Gene names BAIAP2L1

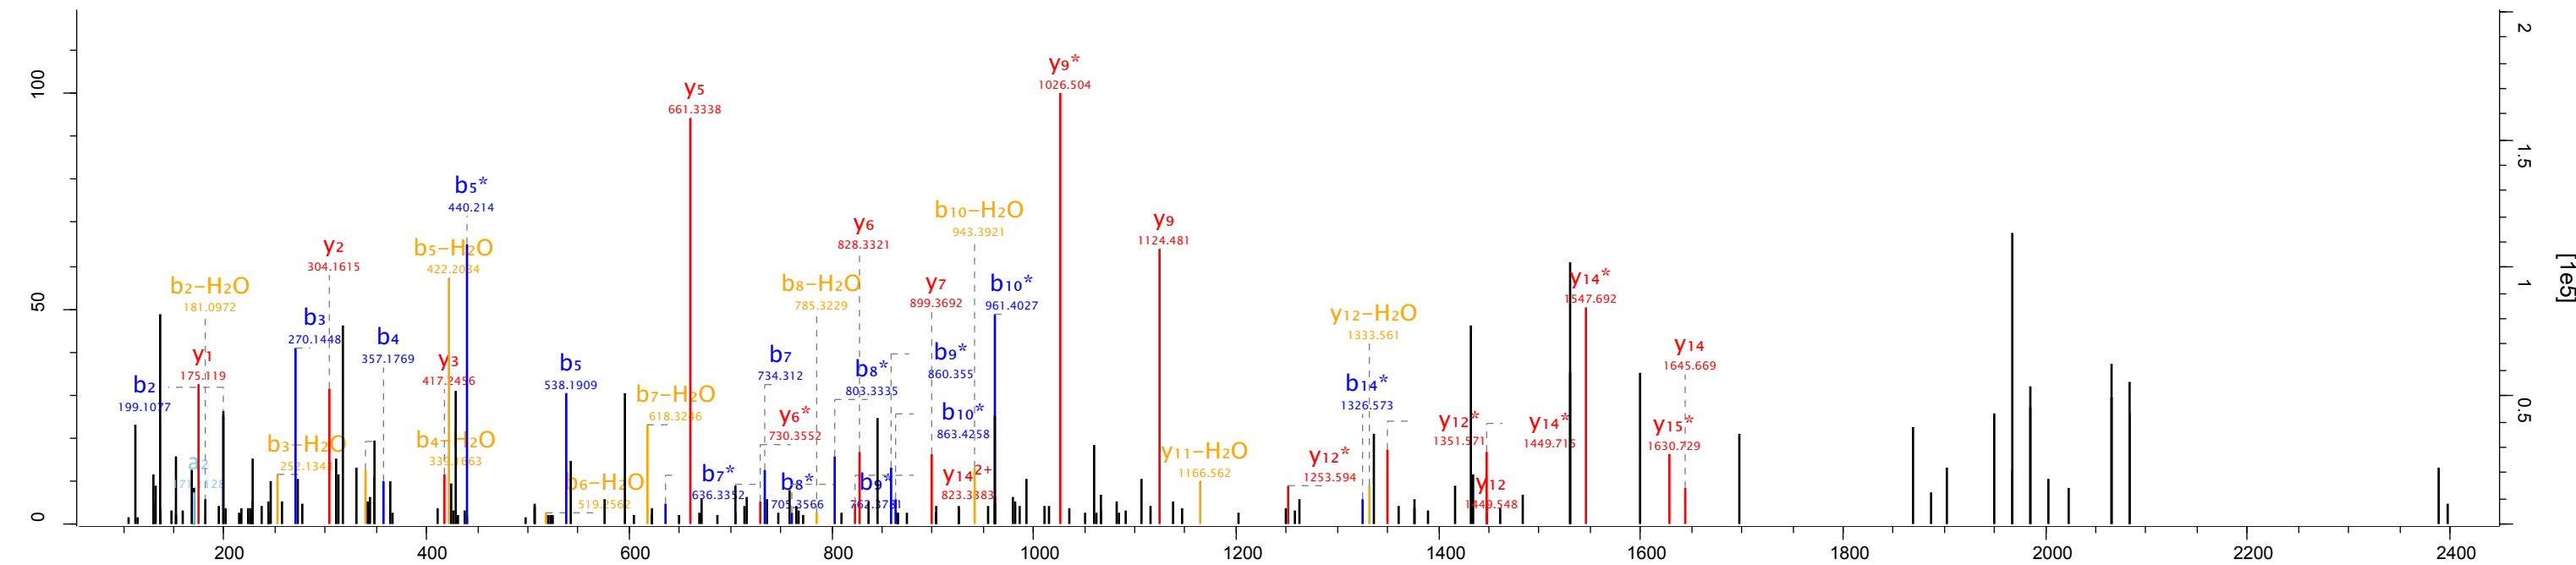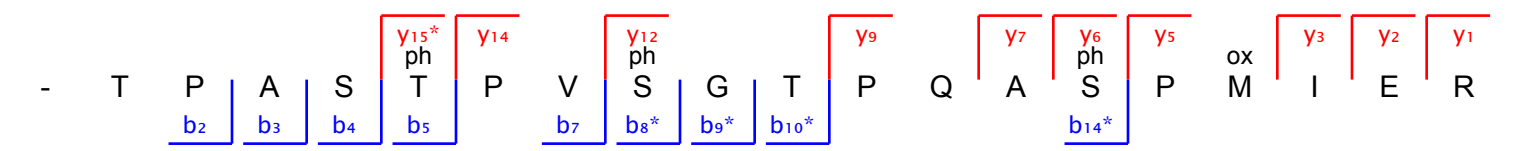

Raw file 20150812\_A375SR\_Phospho\_BR1\_02 Scan 11624 Method FTMS; HCD Score 70.15 m/z 901.05 Gene names ZC3HC1

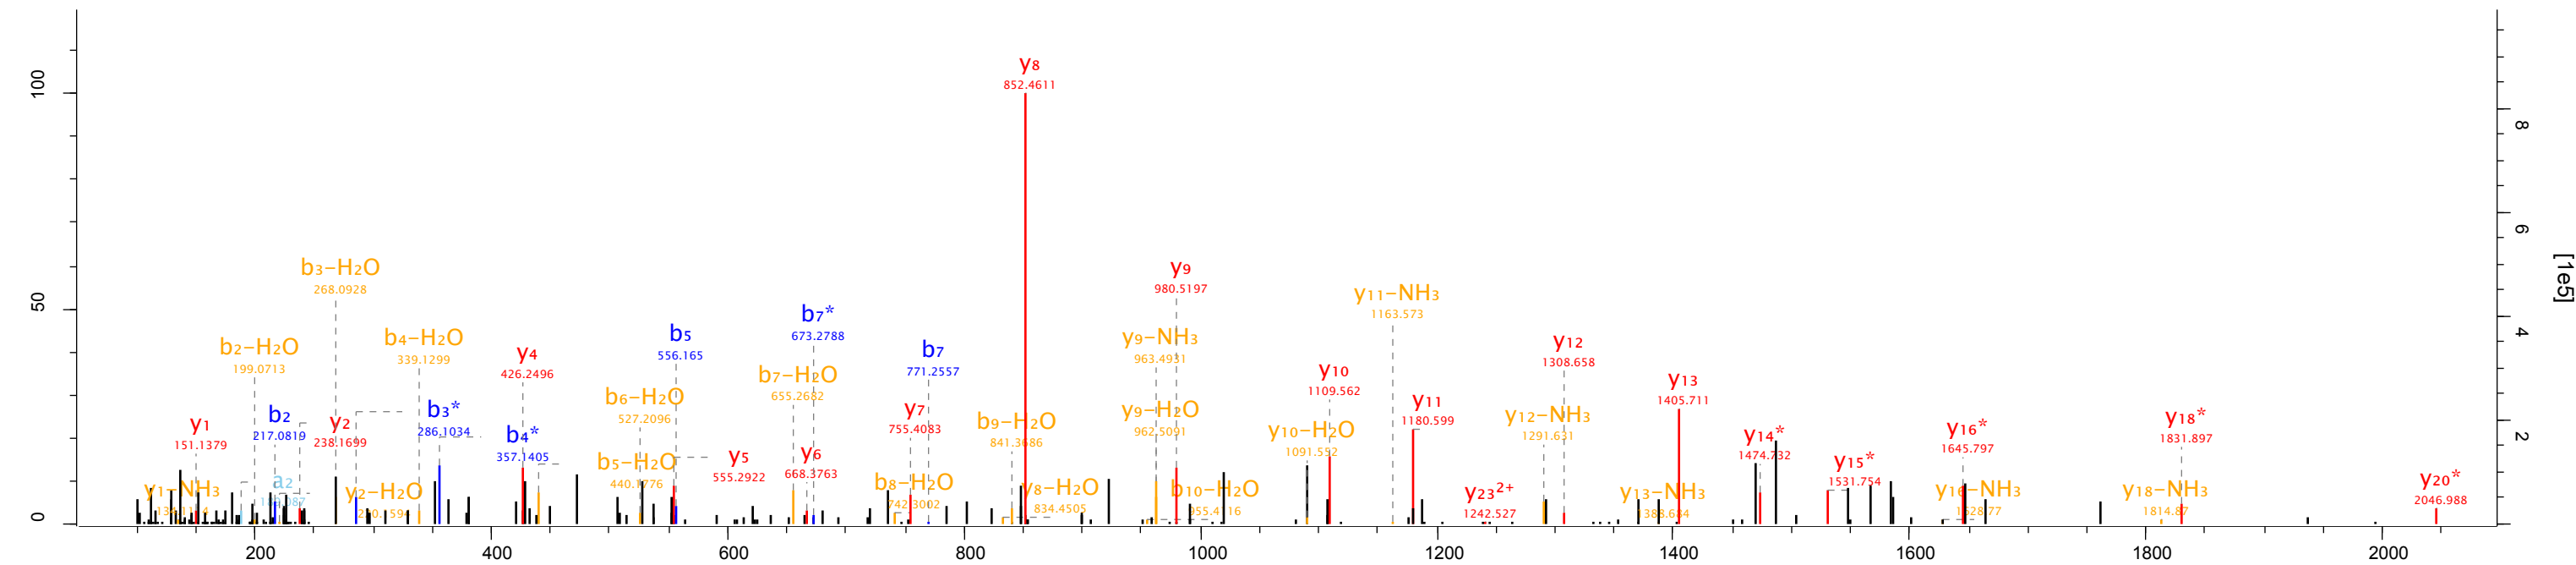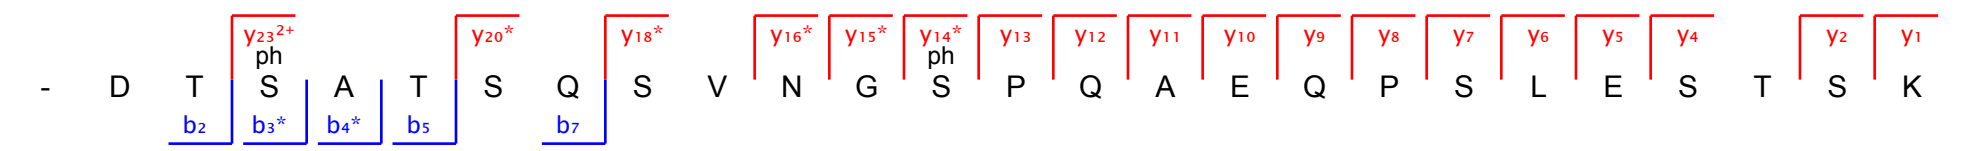

Raw file Scan Method Score m/z Gene names  
 20150812\_A375SR\_Phospho\_BR1\_02 11974 FTMS; HCD 233.49 998.43 AHNAK

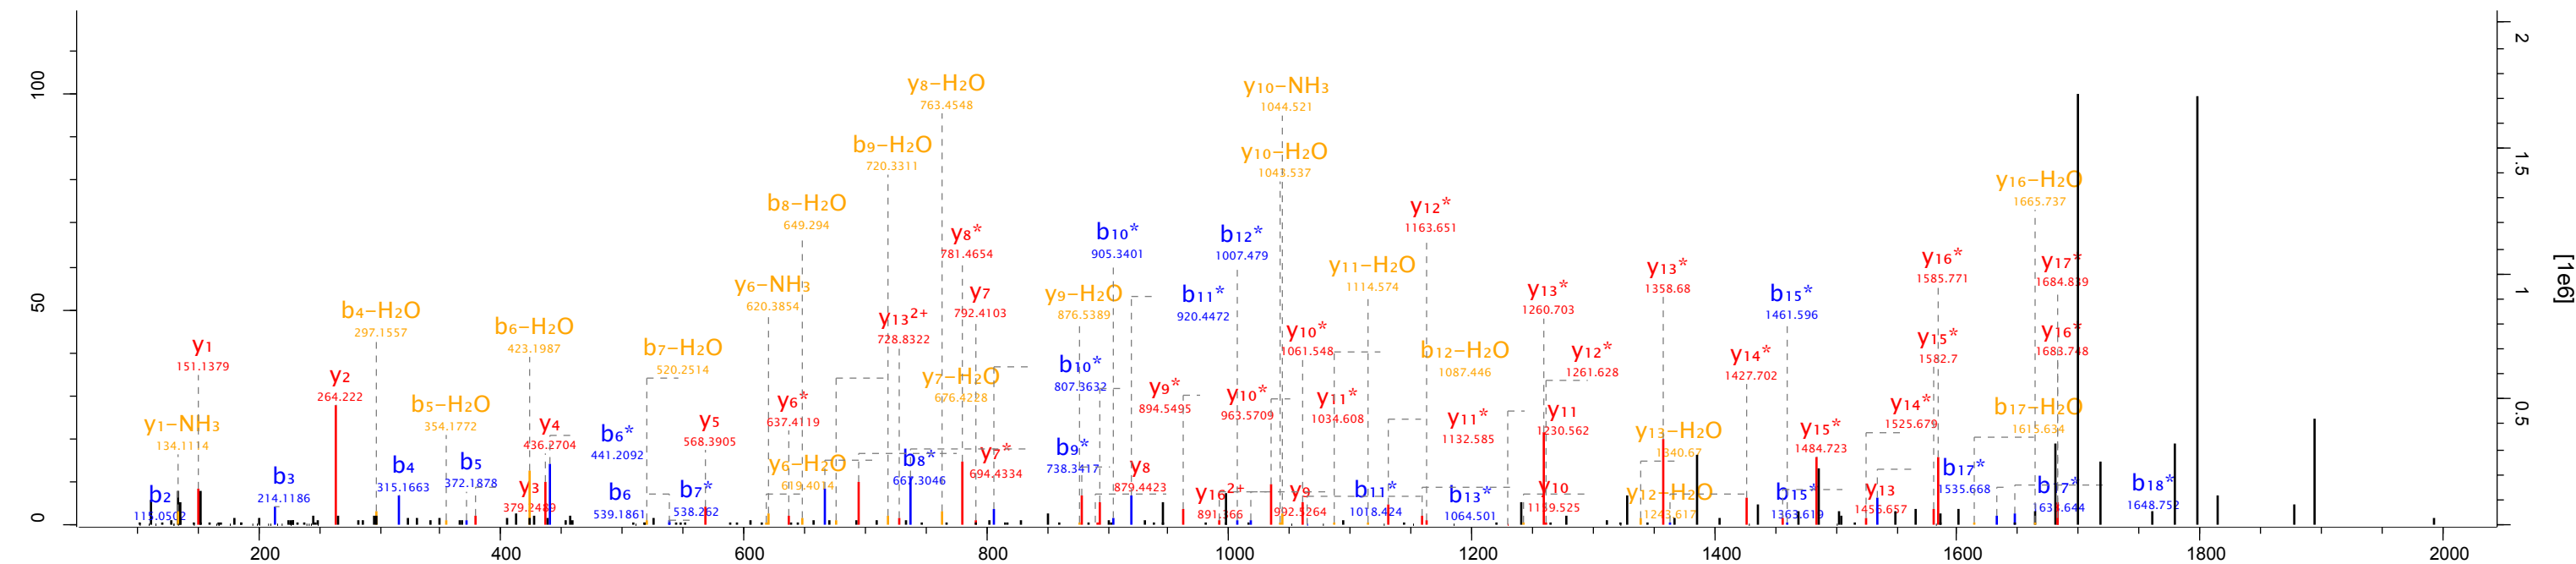

- G G V T G S P E A S I S G S K G D L K -

b<sub>2</sub>
b<sub>3</sub>
b<sub>4</sub>
b<sub>5</sub>
b<sub>6</sub>
b<sub>7</sub>\*
b<sub>8</sub>\*
b<sub>9</sub>\*
b<sub>10</sub>\*
b<sub>11</sub>\*
b<sub>12</sub>\*
b<sub>13</sub>\*
b<sub>15</sub>\*
b<sub>17</sub>\*
b<sub>18</sub>\*

y<sub>17</sub>\*
y<sub>16</sub>\*
y<sub>15</sub>\*
y<sub>14</sub>\*
y<sub>13</sub>
y<sub>12</sub>\*
y<sub>11</sub>
y<sub>10</sub>
y<sub>9</sub>
y<sub>8</sub>
y<sub>7</sub>
y<sub>6</sub>\*
y<sub>5</sub>
y<sub>4</sub>
y<sub>3</sub>
y<sub>2</sub>
y<sub>1</sub>

Raw file 20150812\_A375SR\_Phospho\_BR1\_02 Scan 12324 Method FTMS; HCD Score 45.04 m/z 812.66 Gene names PACS1

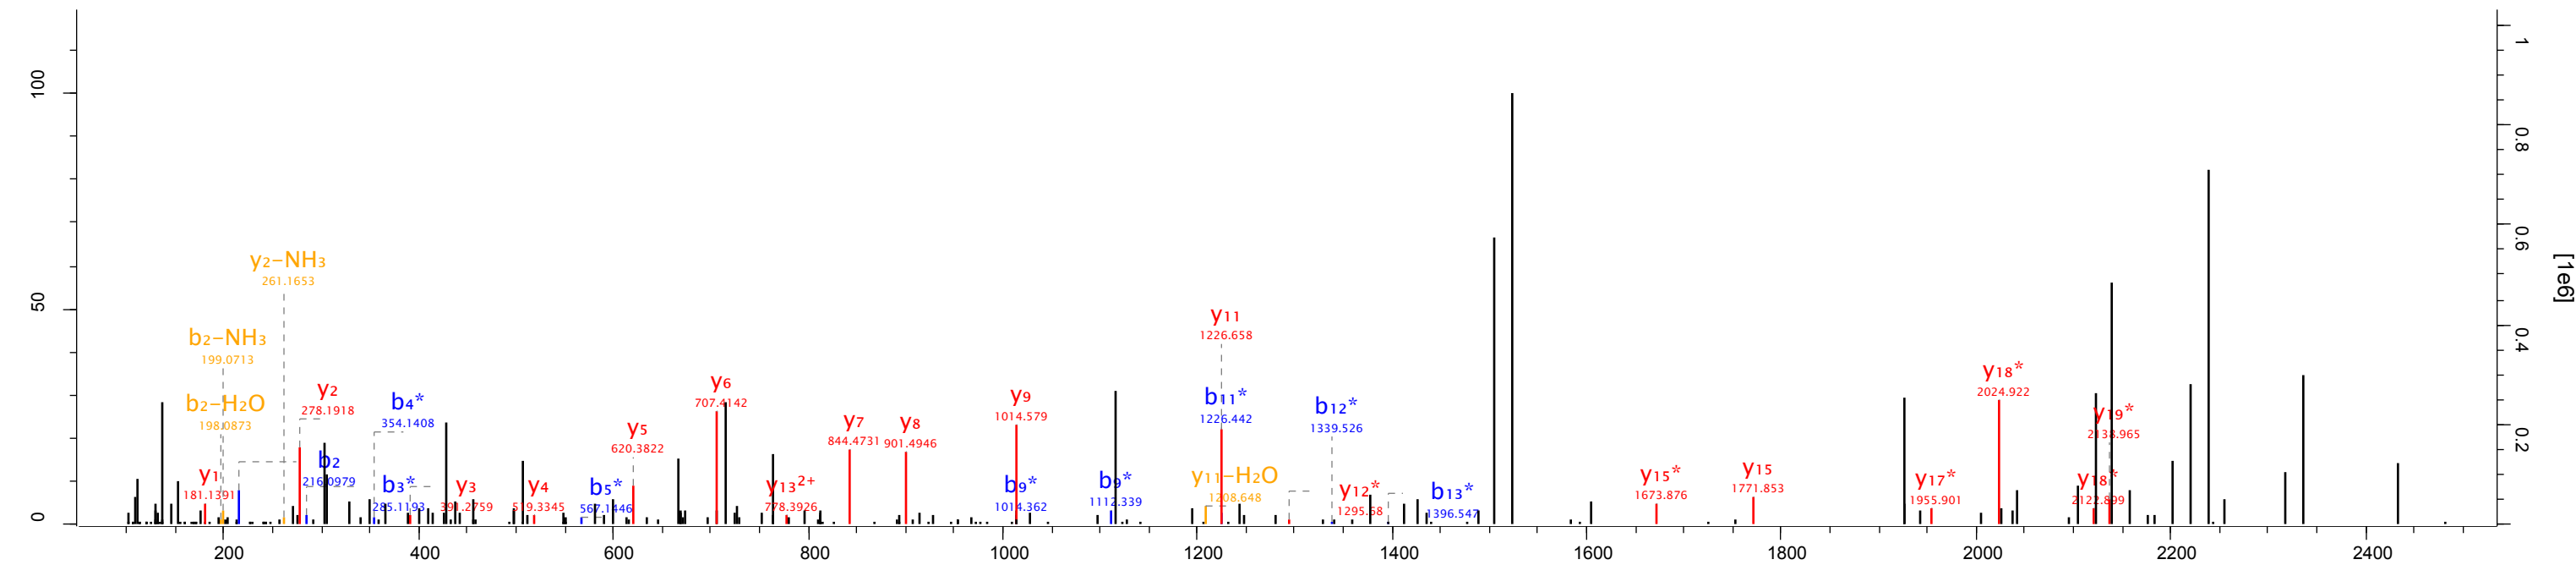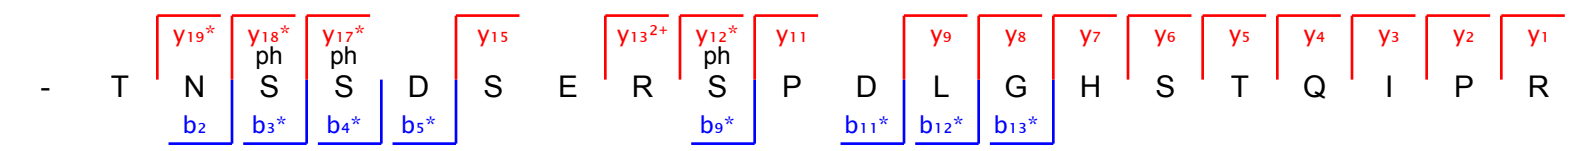

Raw file: 20150812\_A375SR\_Phospho\_BR1\_02  
 Scan: 12384 Method: FTMS; HCD Score: 47.6 m/z: 624.27 Gene names: PRPF4B

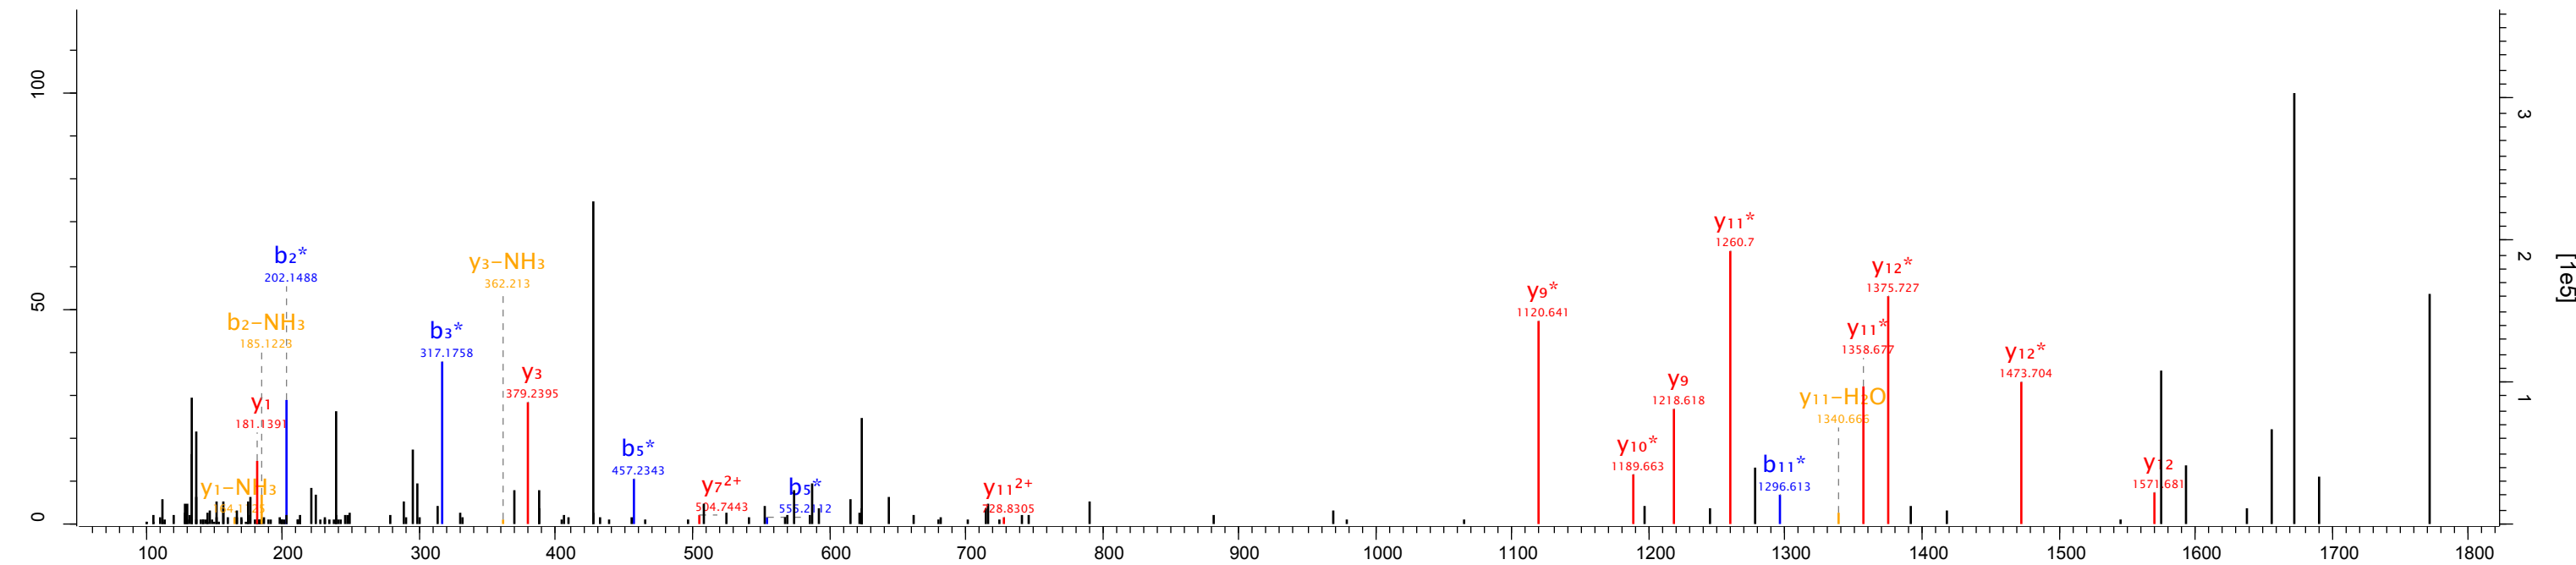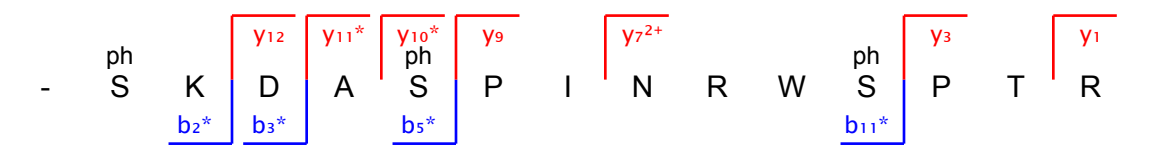



Raw file 20150812\_A375SR\_Phospho\_BR1\_02 Scan 12614 Method FTMS; HCD Score 77.63 m/z 886.34 Gene names POLR2A

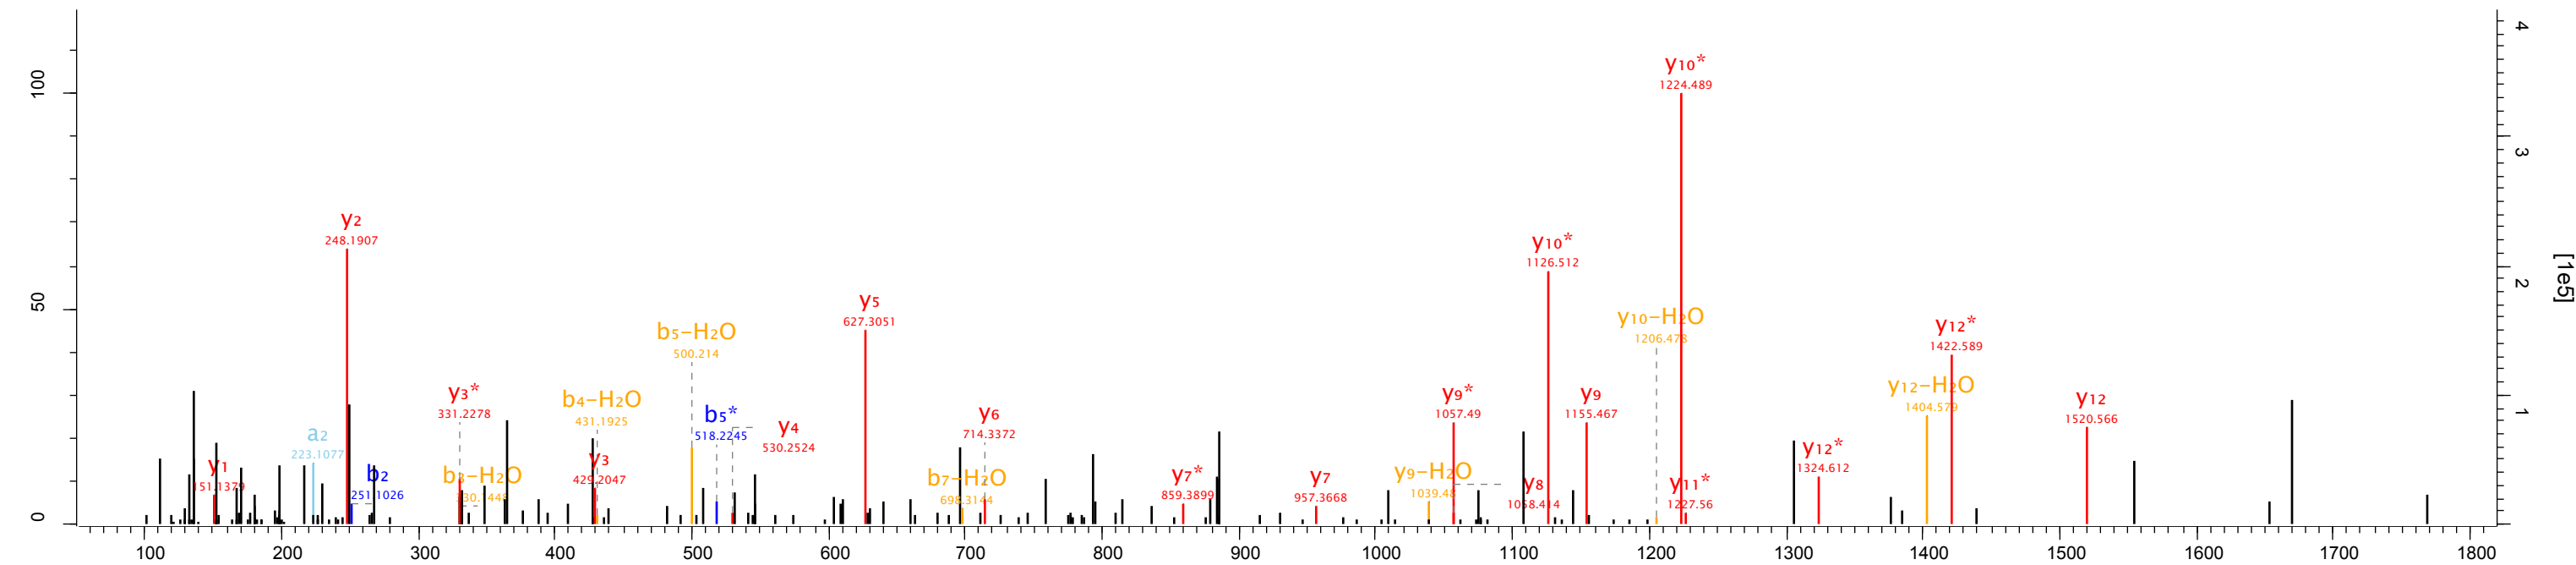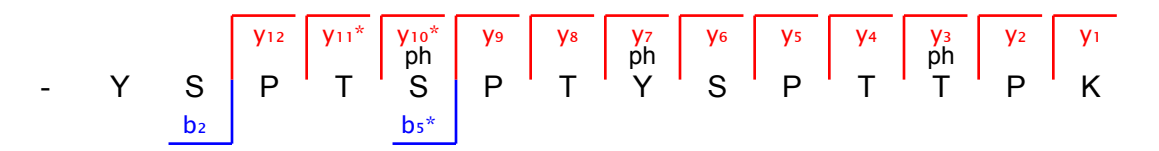

Raw file: 20150812\_A375SR\_Phospho\_BR1\_02  
 Scan: 12744 Method: FTMS; HCD Score: 76.31 m/z: 821 Gene names: ANKRD17

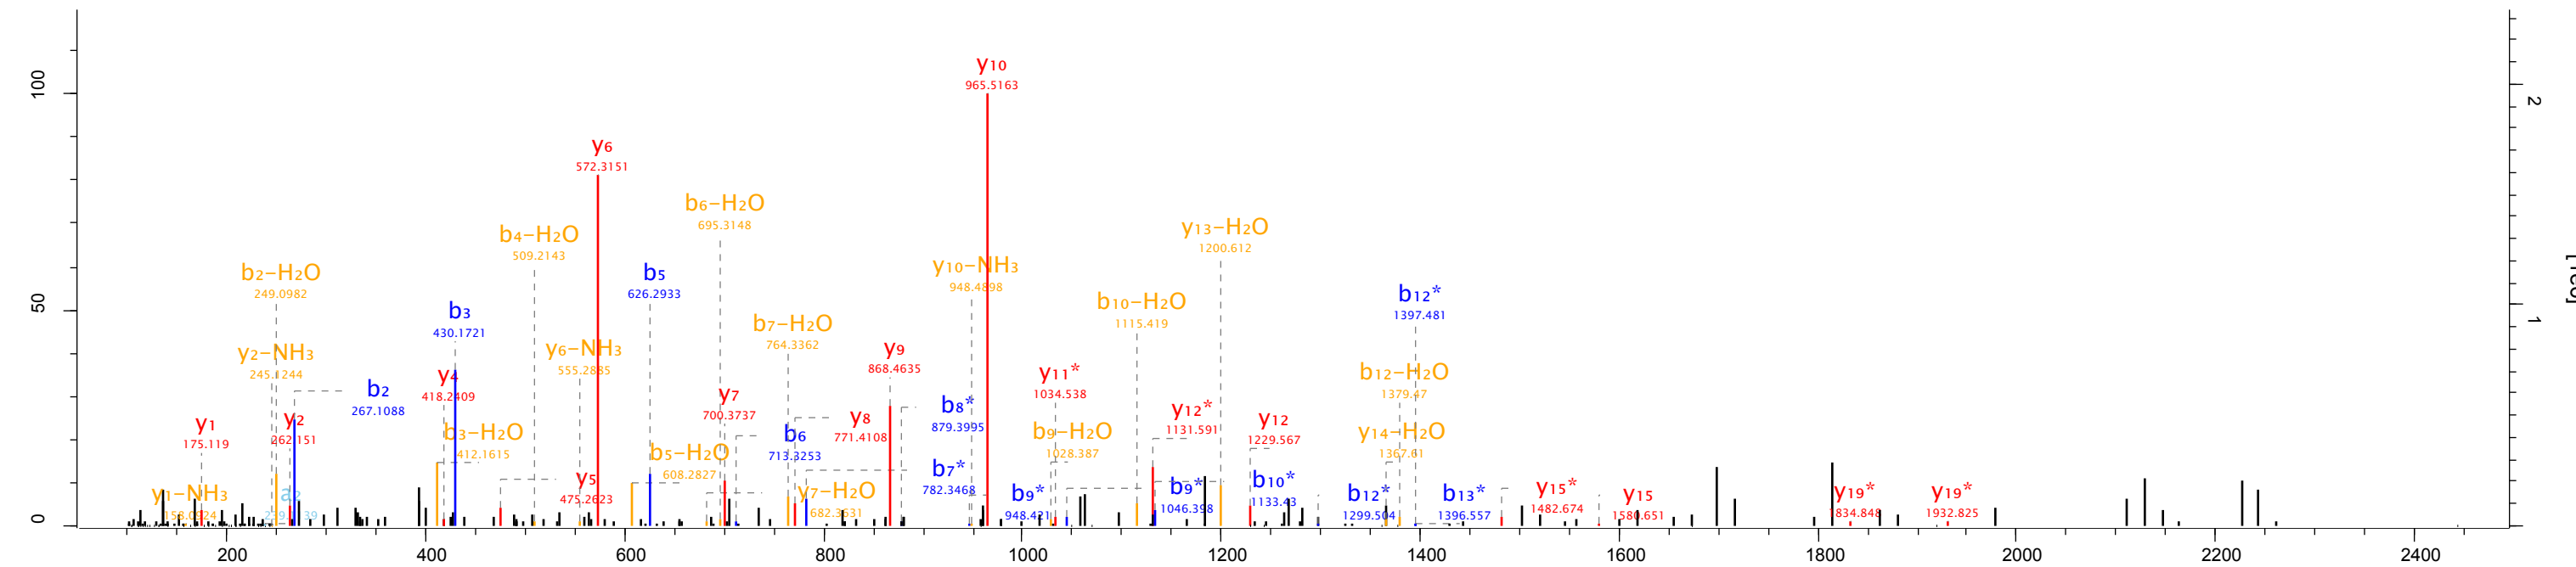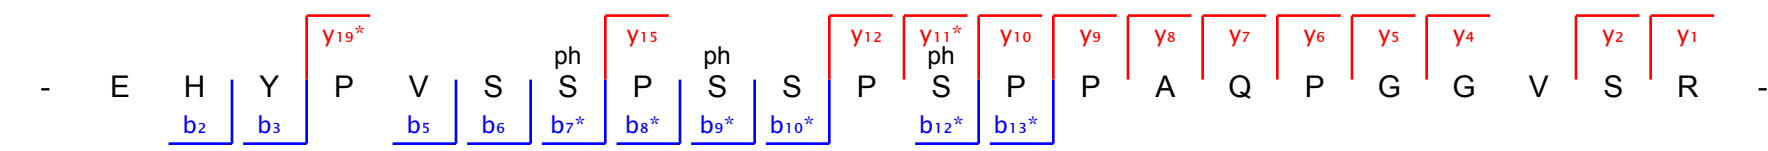

Raw file: 20150812\_A375SR\_Phospho\_BR1\_02  
 Scan: 12904 Method: FTMS; HCD Score: 43.73 m/z: 942.33 Gene names: ANKRD50

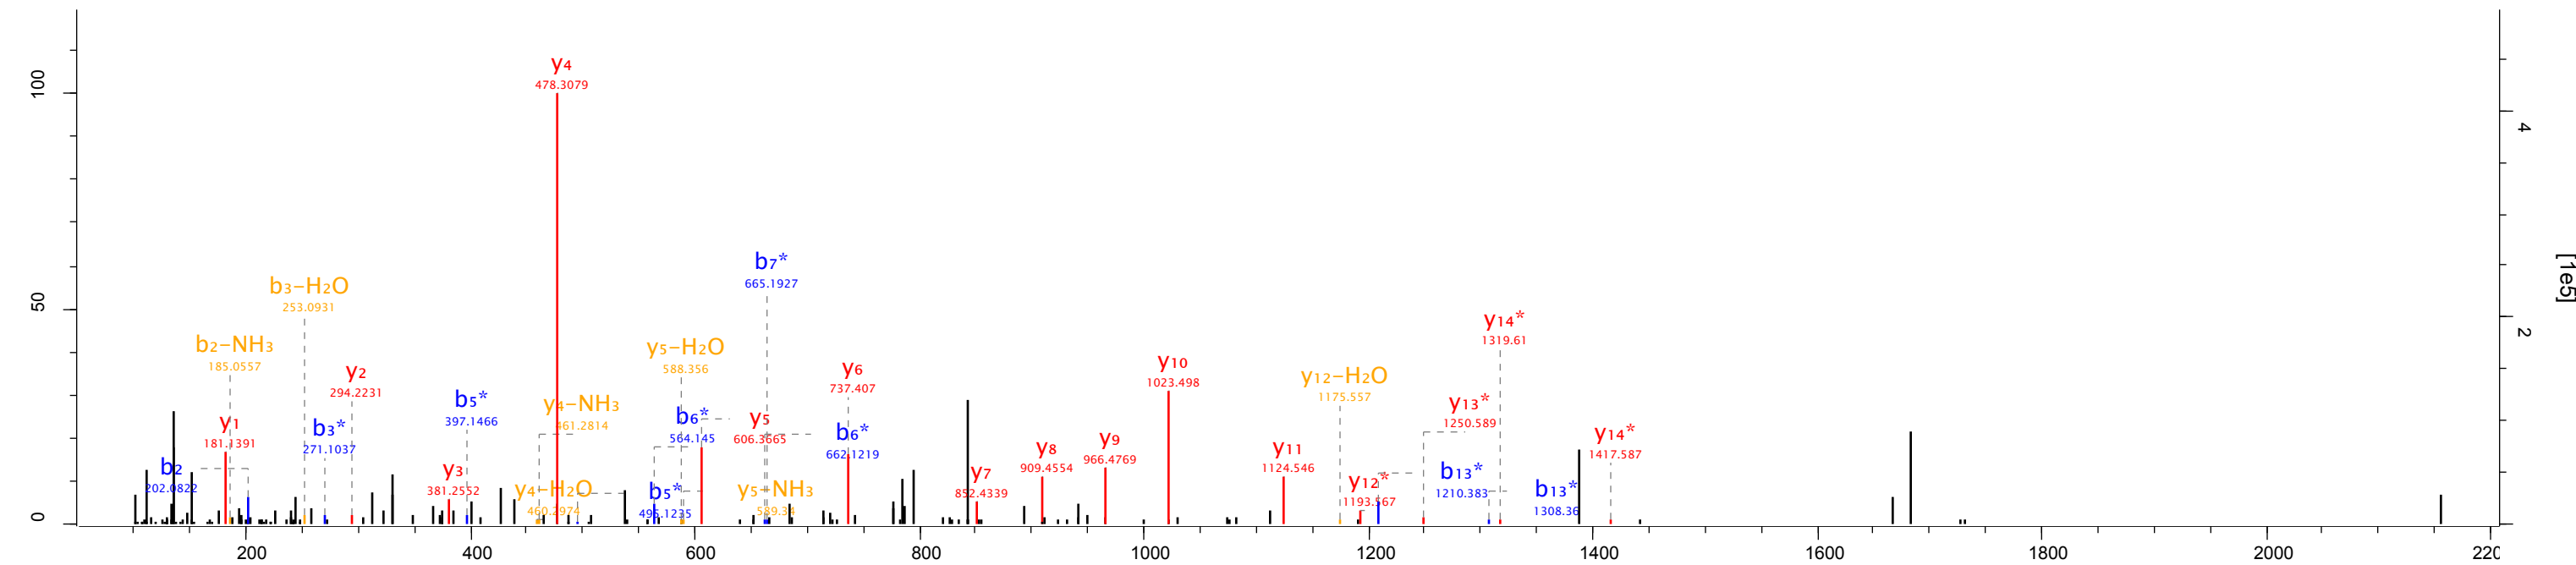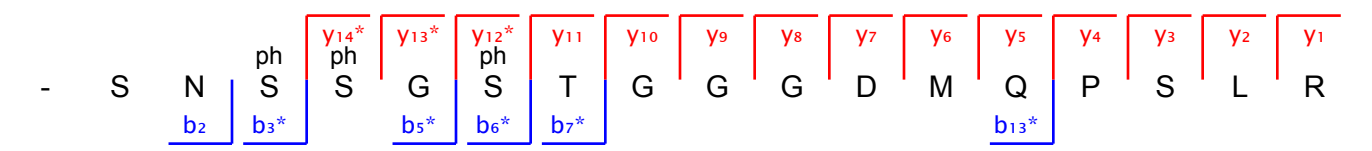

Raw file 20150812\_A375SR\_Phospho\_BR1\_02 Scan 12974 Method FTMS; HCD Score 110.4 m/z 873.84 Gene names TENC1

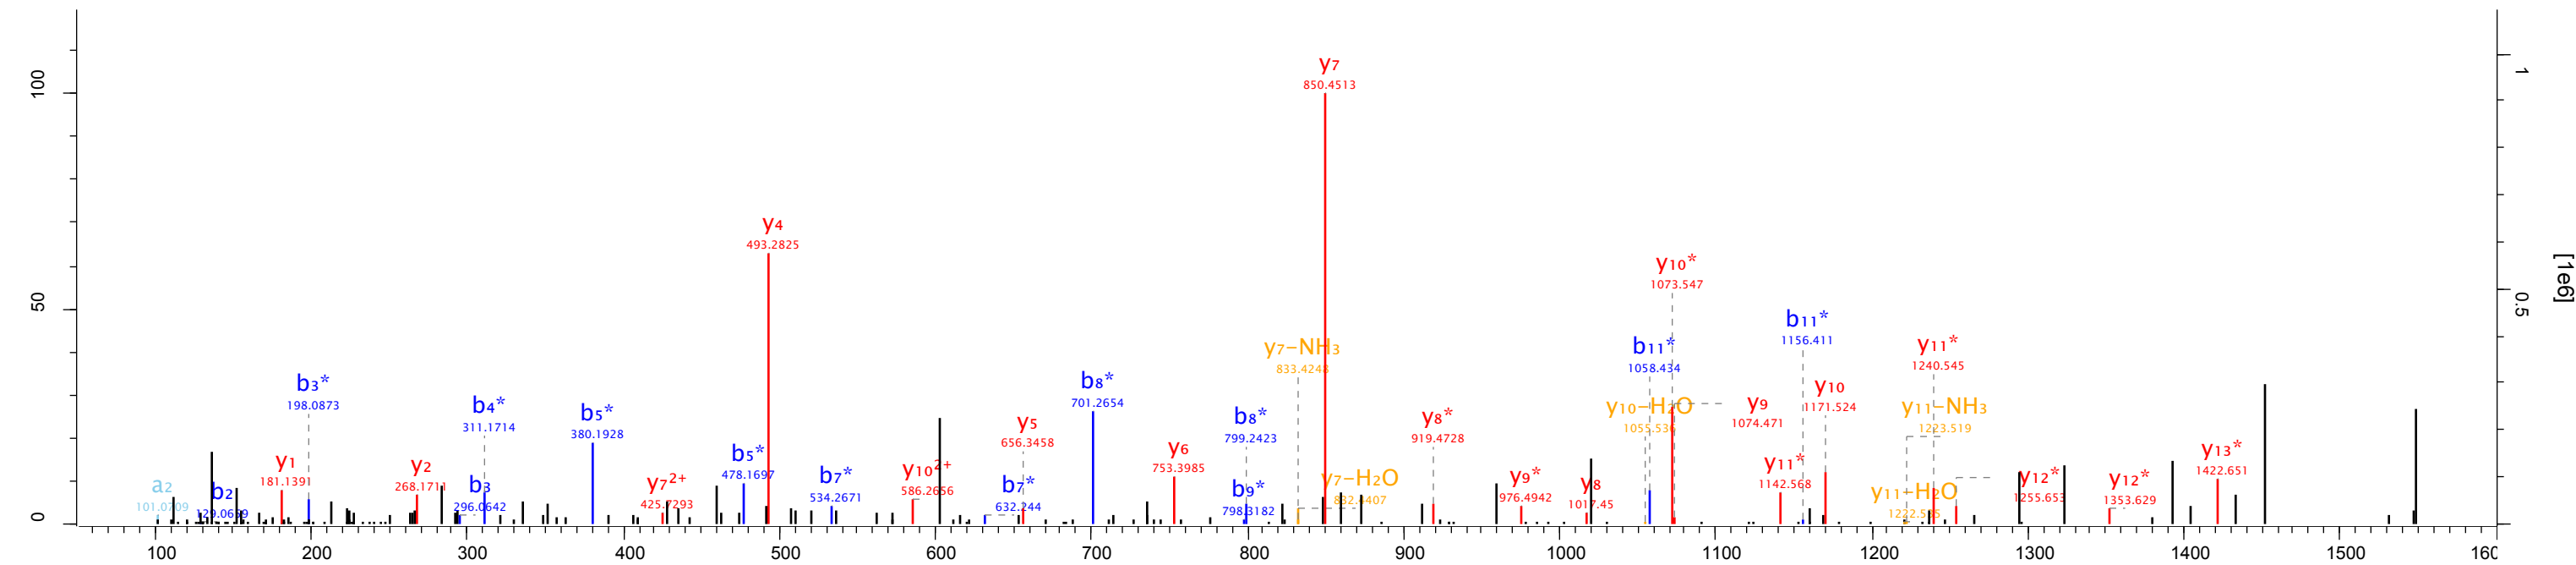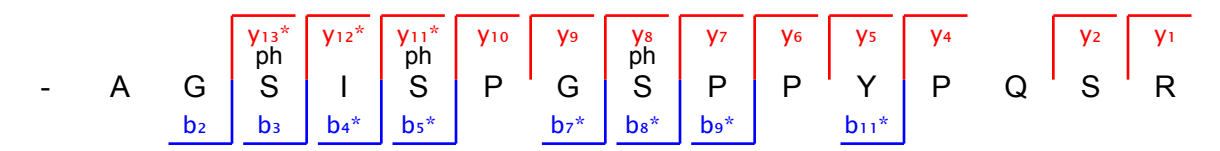



Raw file 20150812\_A375SR\_Phospho\_BR1\_02 Scan 13624 Method FTMS; HCD Score 104.78 m/z 814.31 Gene names RSRC1

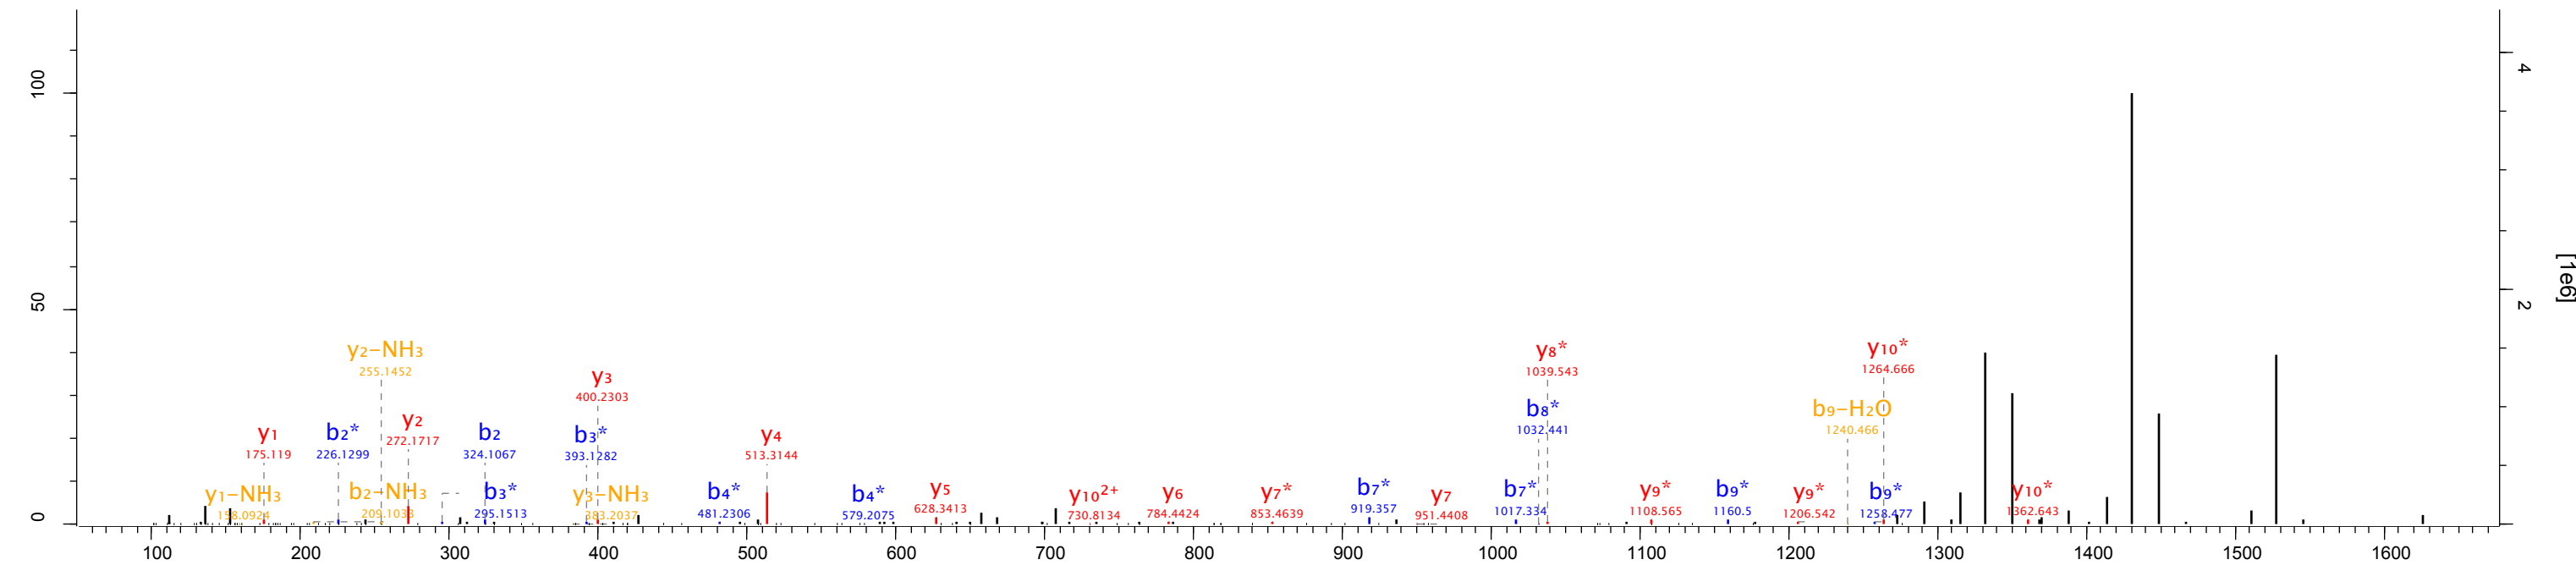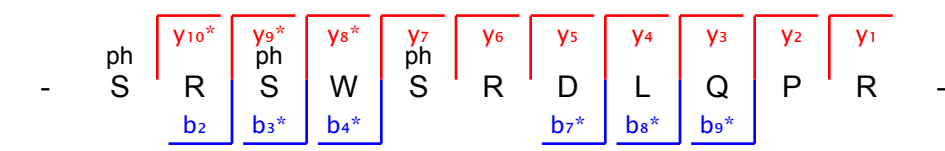

Raw file: 20150812\_A375SR\_Phospho\_BR1\_02  
 Scan: 13764 Method: FTMS; HCD Score: 43.24 m/z: 1053.95 Gene names: ABCC3

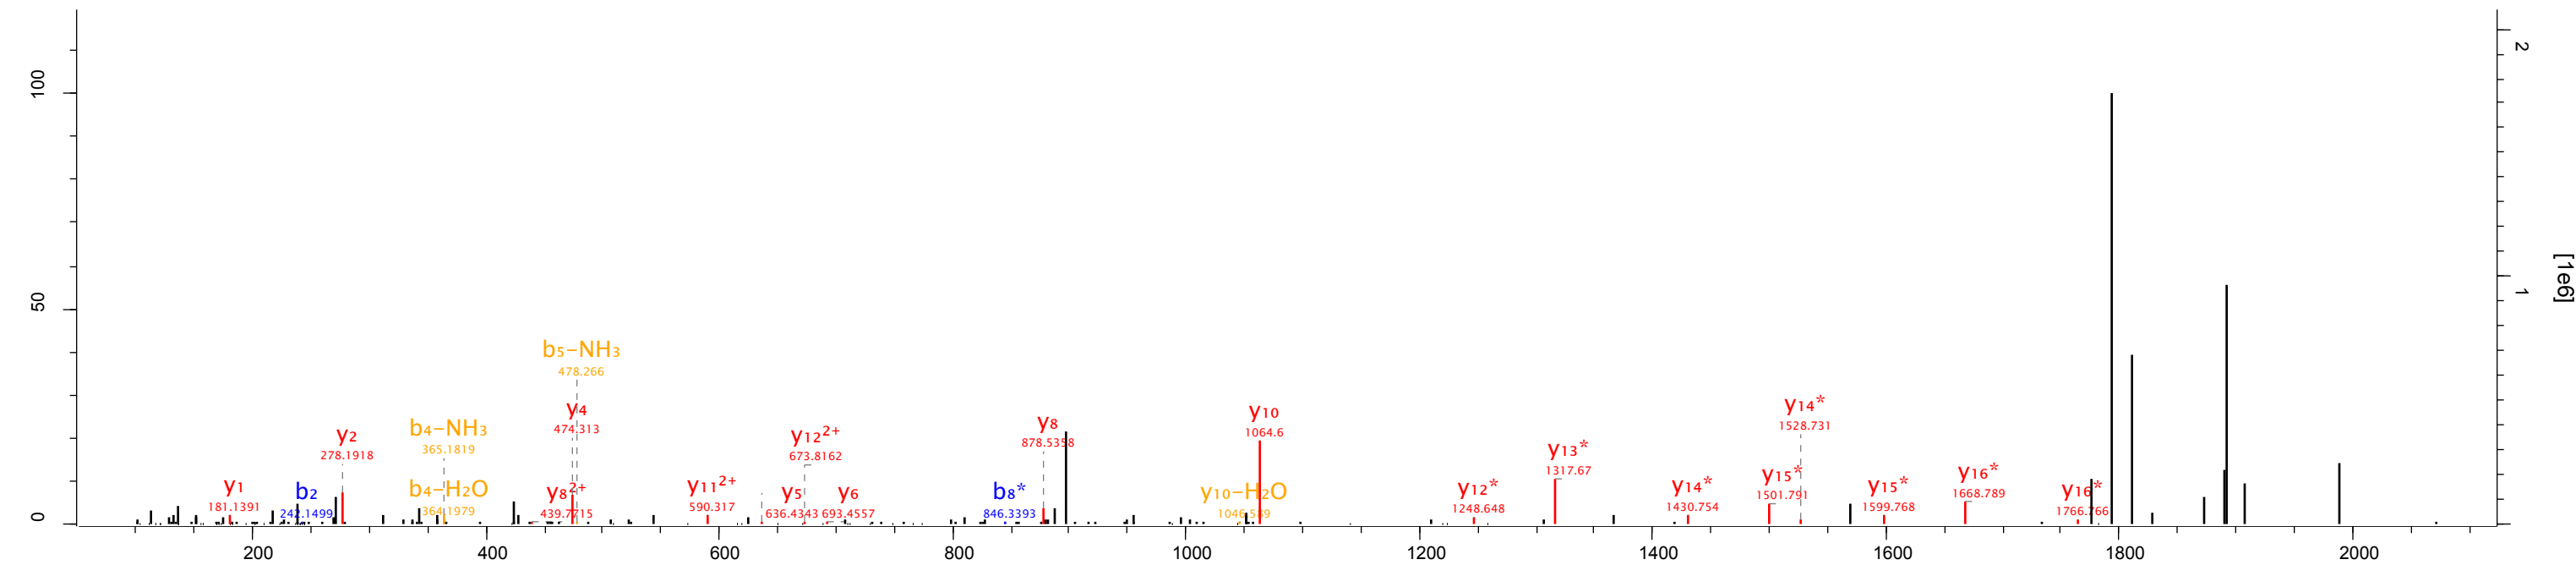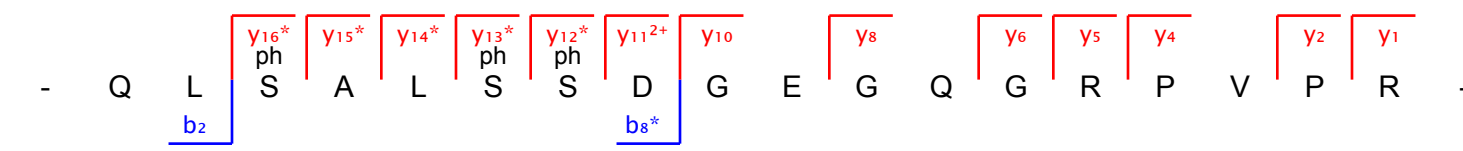

Raw file: 20150812\_A375SR\_Phospho\_BR1\_02  
 Scan: 13884 Method: FTMS; HCD Score: 68.59 m/z: 1038.42 Gene names: UBQLN1

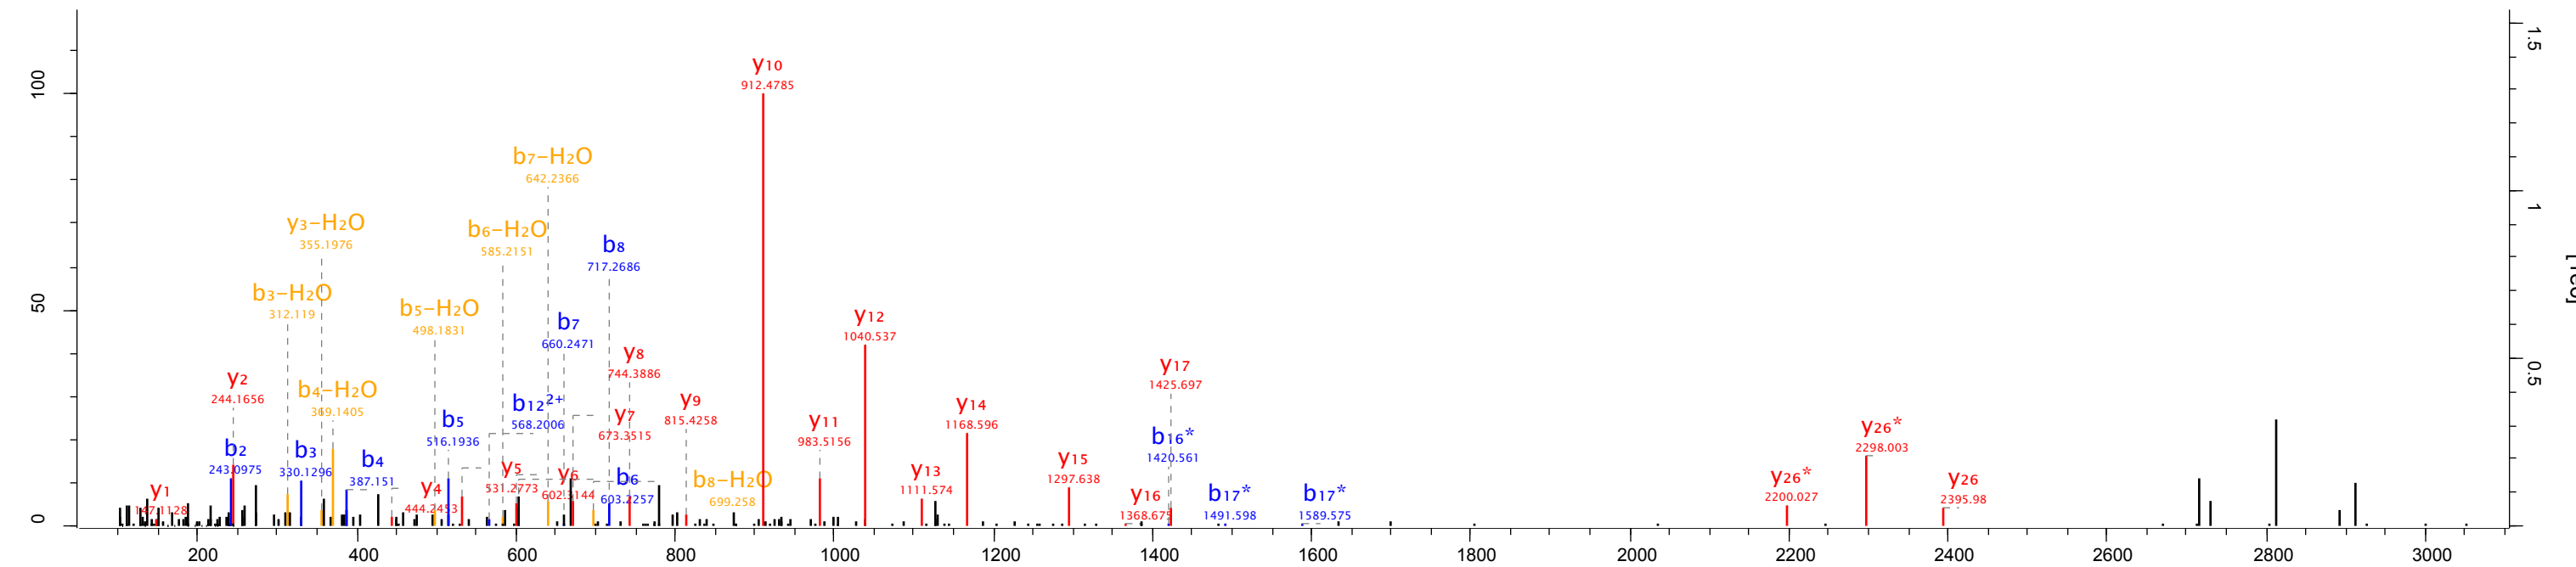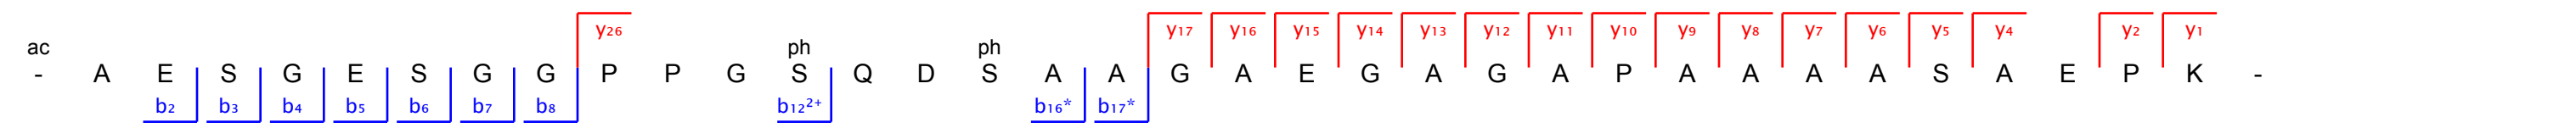



Raw file Scan Method Score m/z Gene names  
 20150812\_A375SR\_Phospho\_BR1\_02 13984 FTMS; HCD 131.1 830.82 TLK2

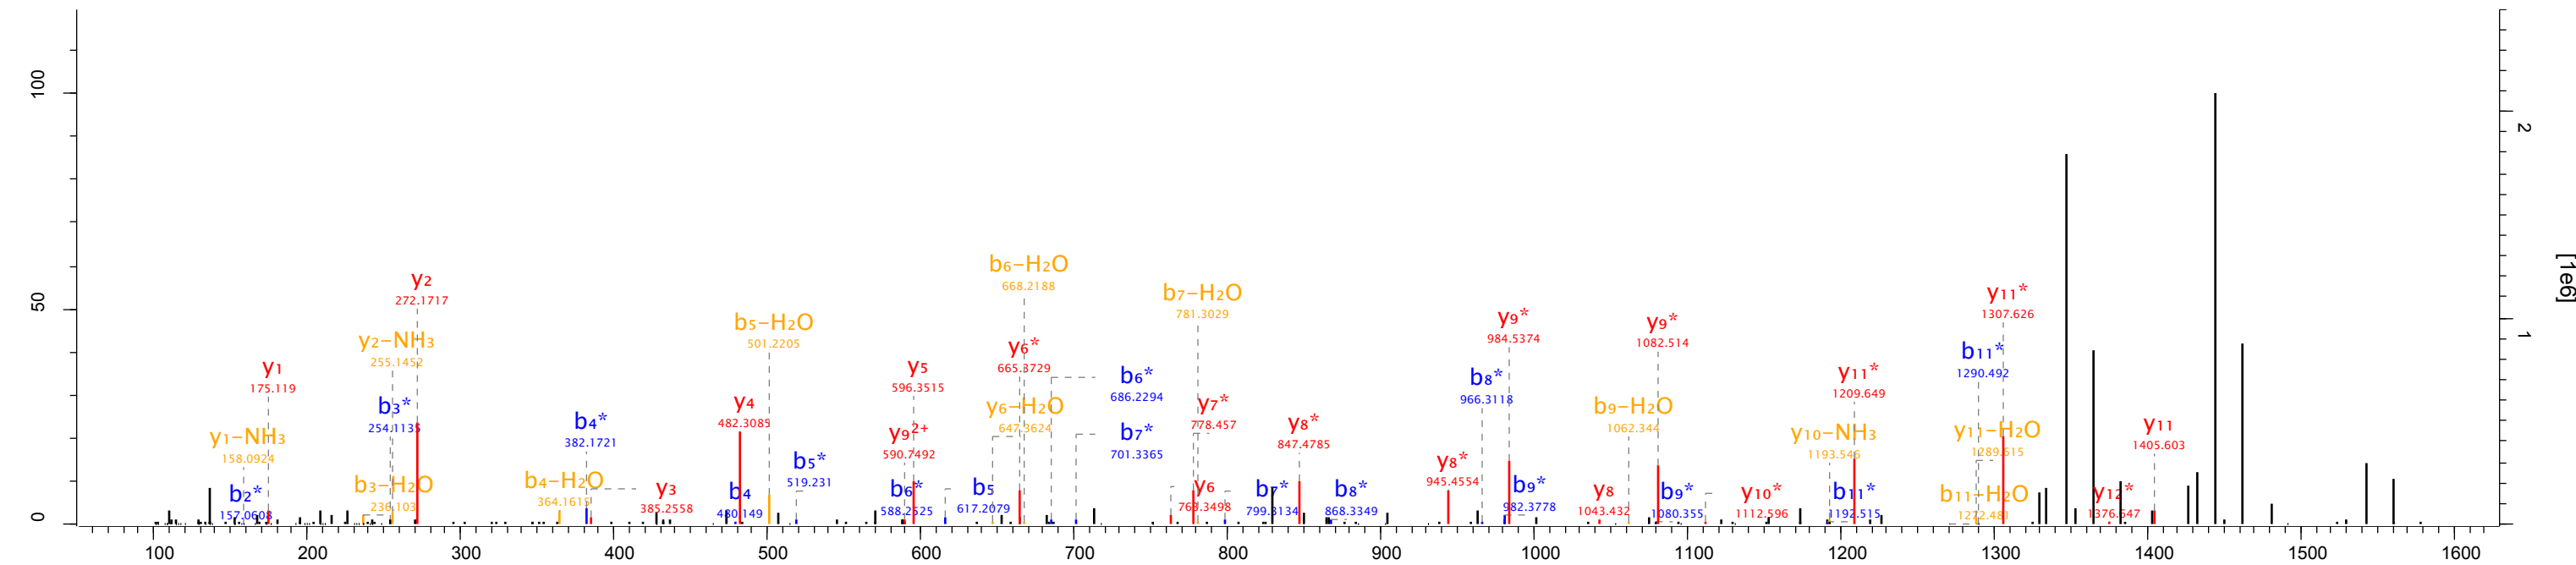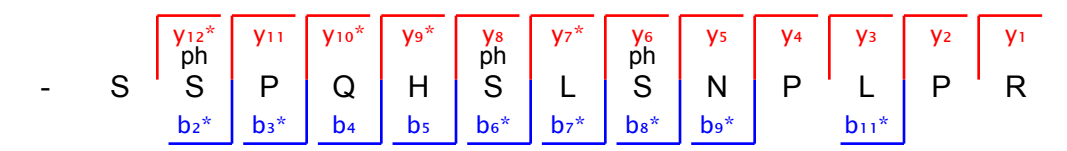

Raw file: 20150812\_A375SR\_Phospho\_BR1\_02  
 Scan: 14014 Method: FTMS; HCD Score: 116.19 m/z: 639.22 Gene names: SRRM2

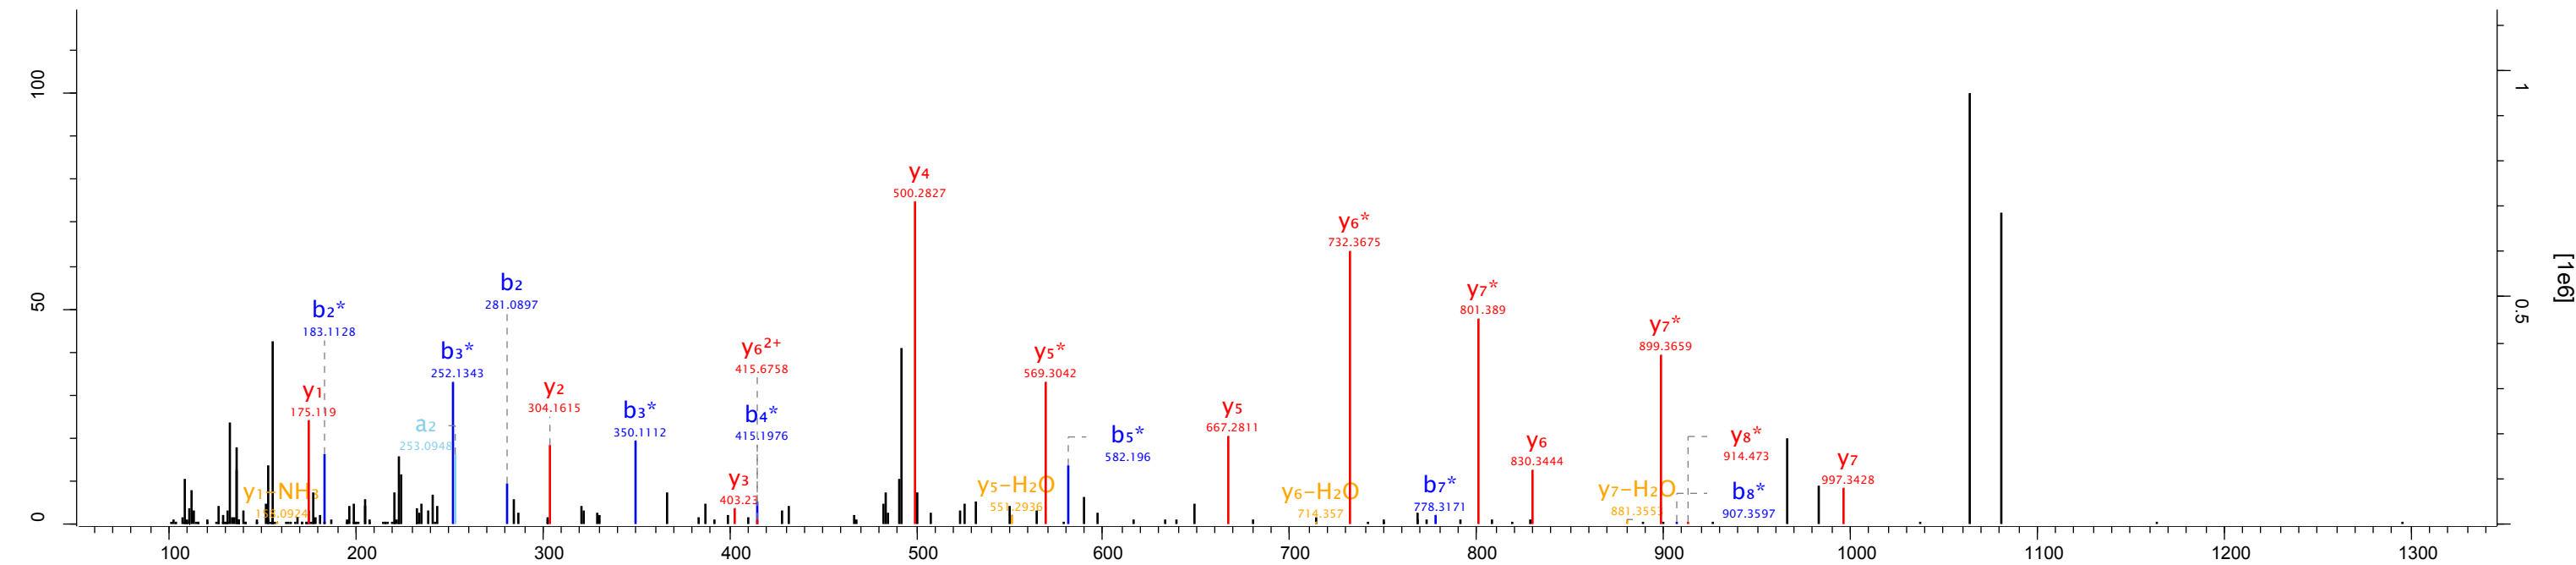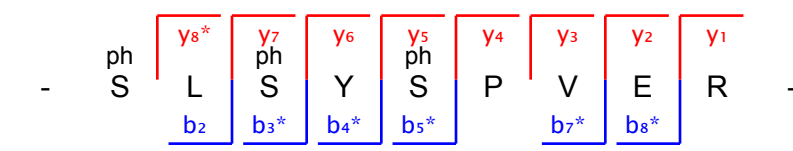

Raw file 20150812\_A375SR\_Phospho\_BR1\_02 Scan 14054 Method FTMS; HCD Score 68.76 m/z 990.47 Gene names INCENP

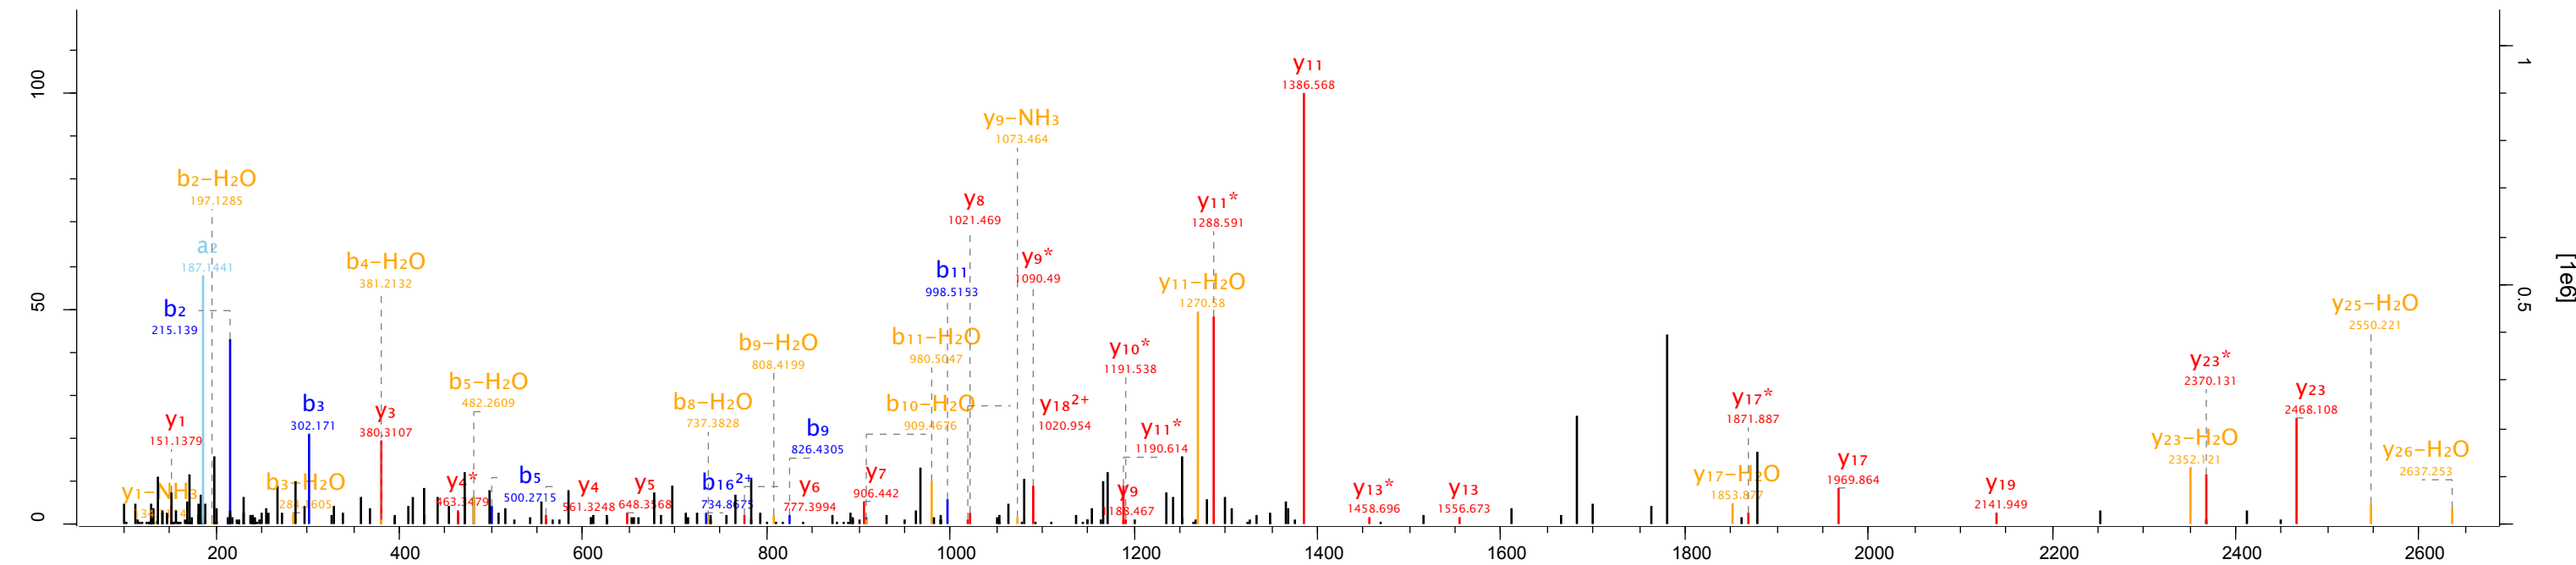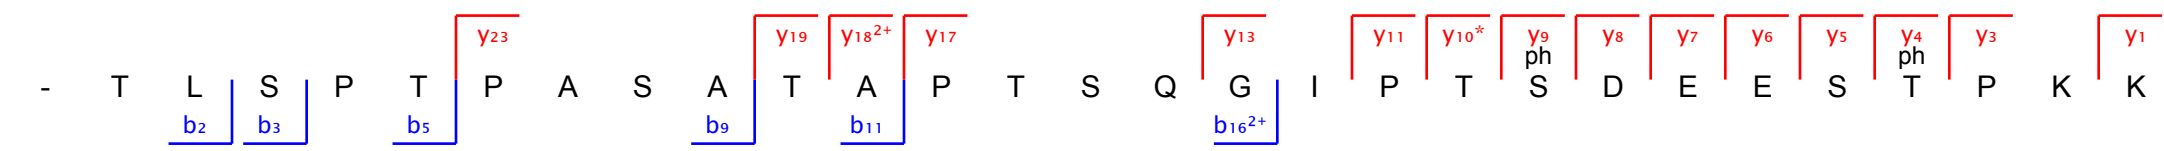

Raw file: 20150812\_A375SR\_Phospho\_BR1\_02  
 Scan: 14114 Method: FTMS; HCD Score: 96.88 m/z: 840.32 Gene names: MAP7D1

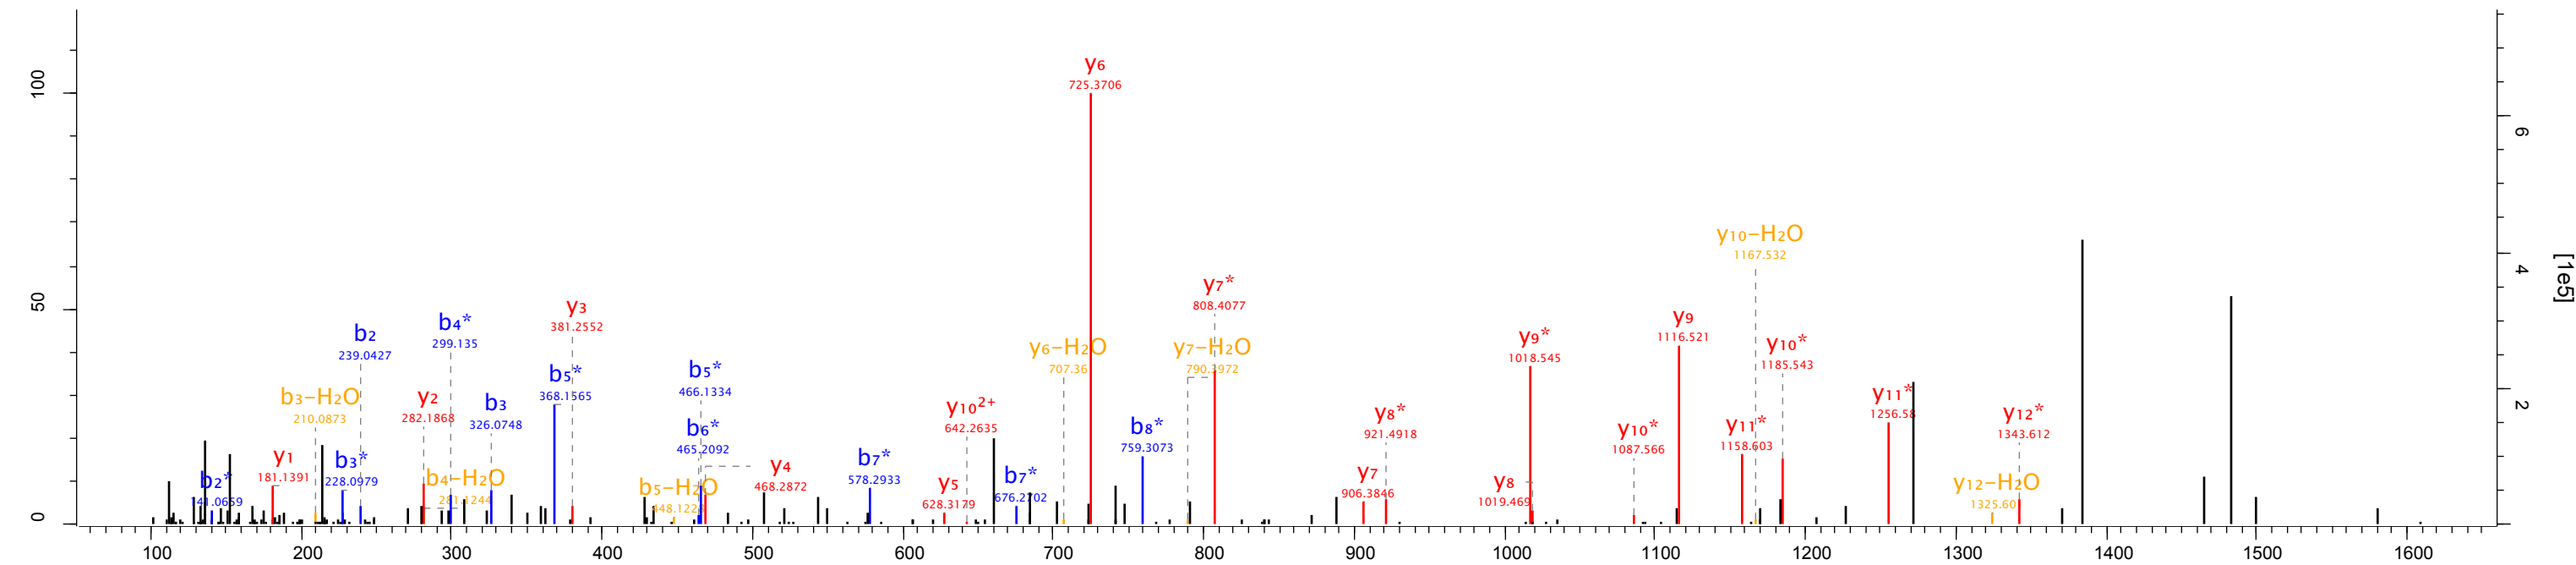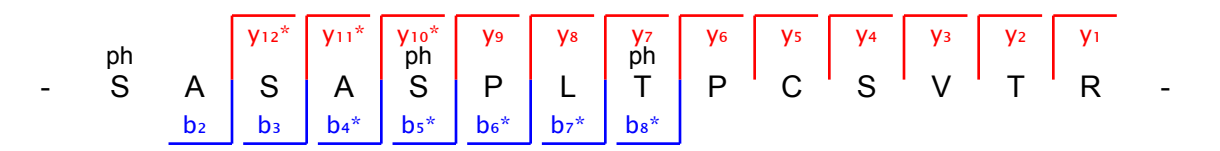

Raw file 20150812\_A375SR\_Phospho\_BR1\_02 Scan 14144 Method FTMS; HCD Score 219.3 m/z 986.9 Gene names RICTOR

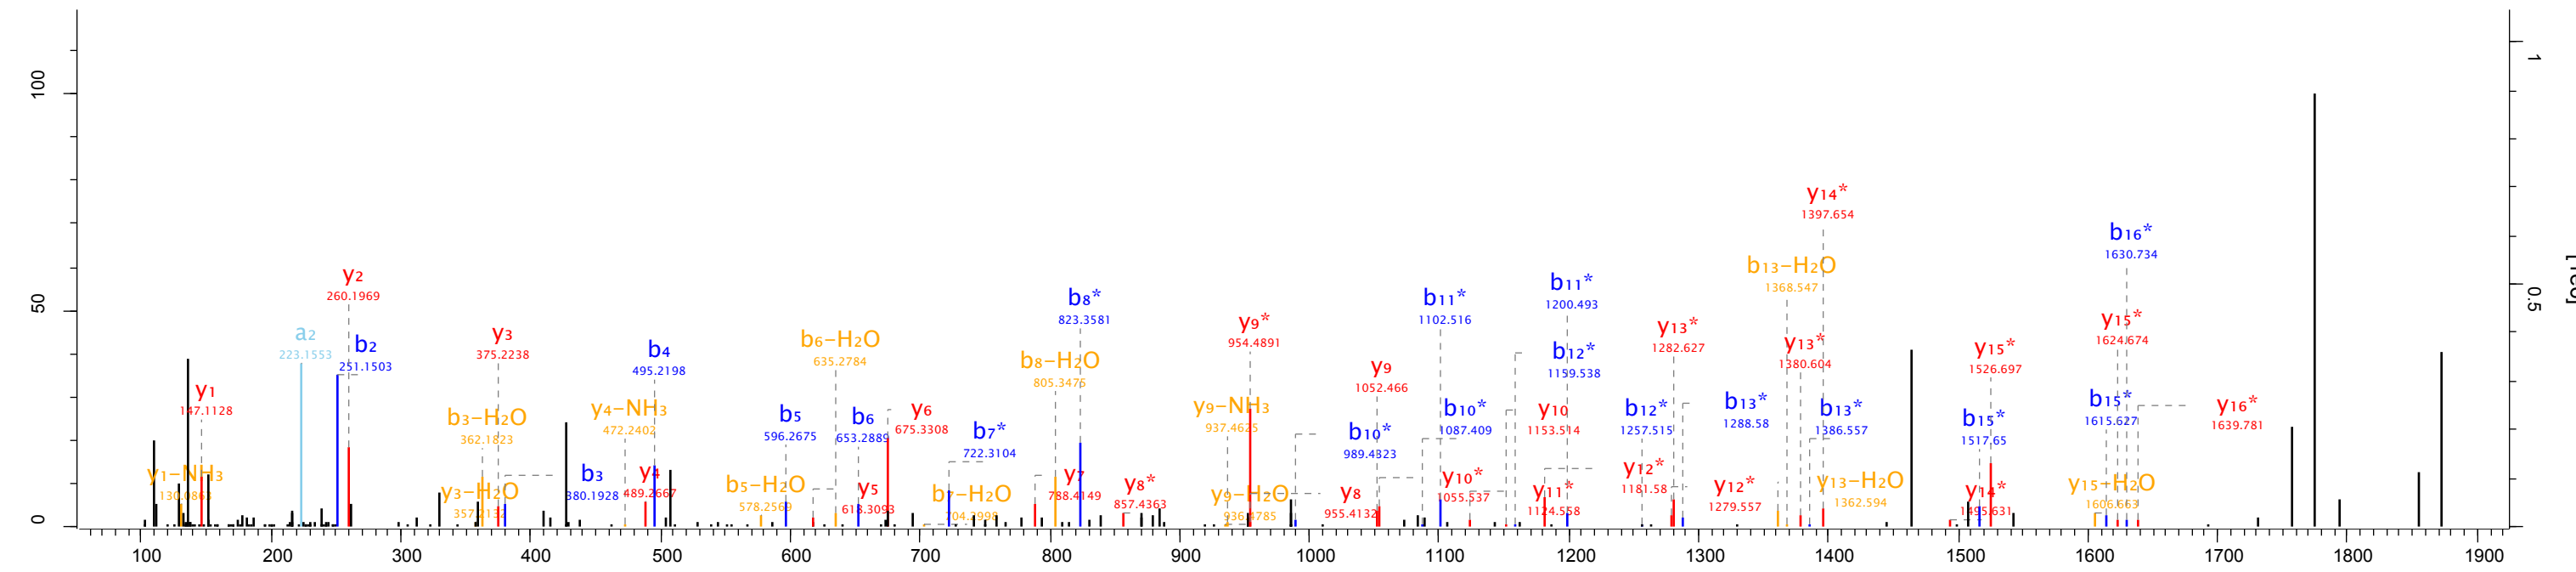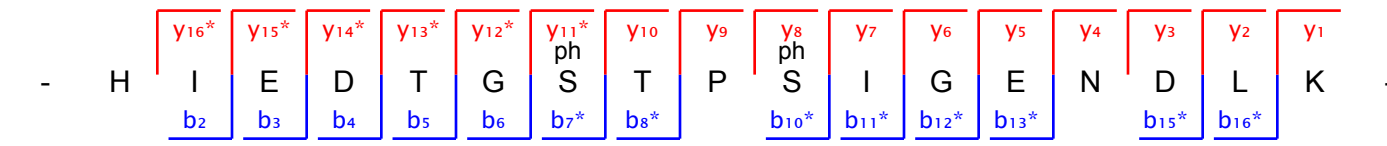

Raw file Scan Method m/z Gene names  
 20150812\_A375SR\_Phospho\_BR1\_02 14334 FTMS; HCD 254.39 1089.88 SNRPA1

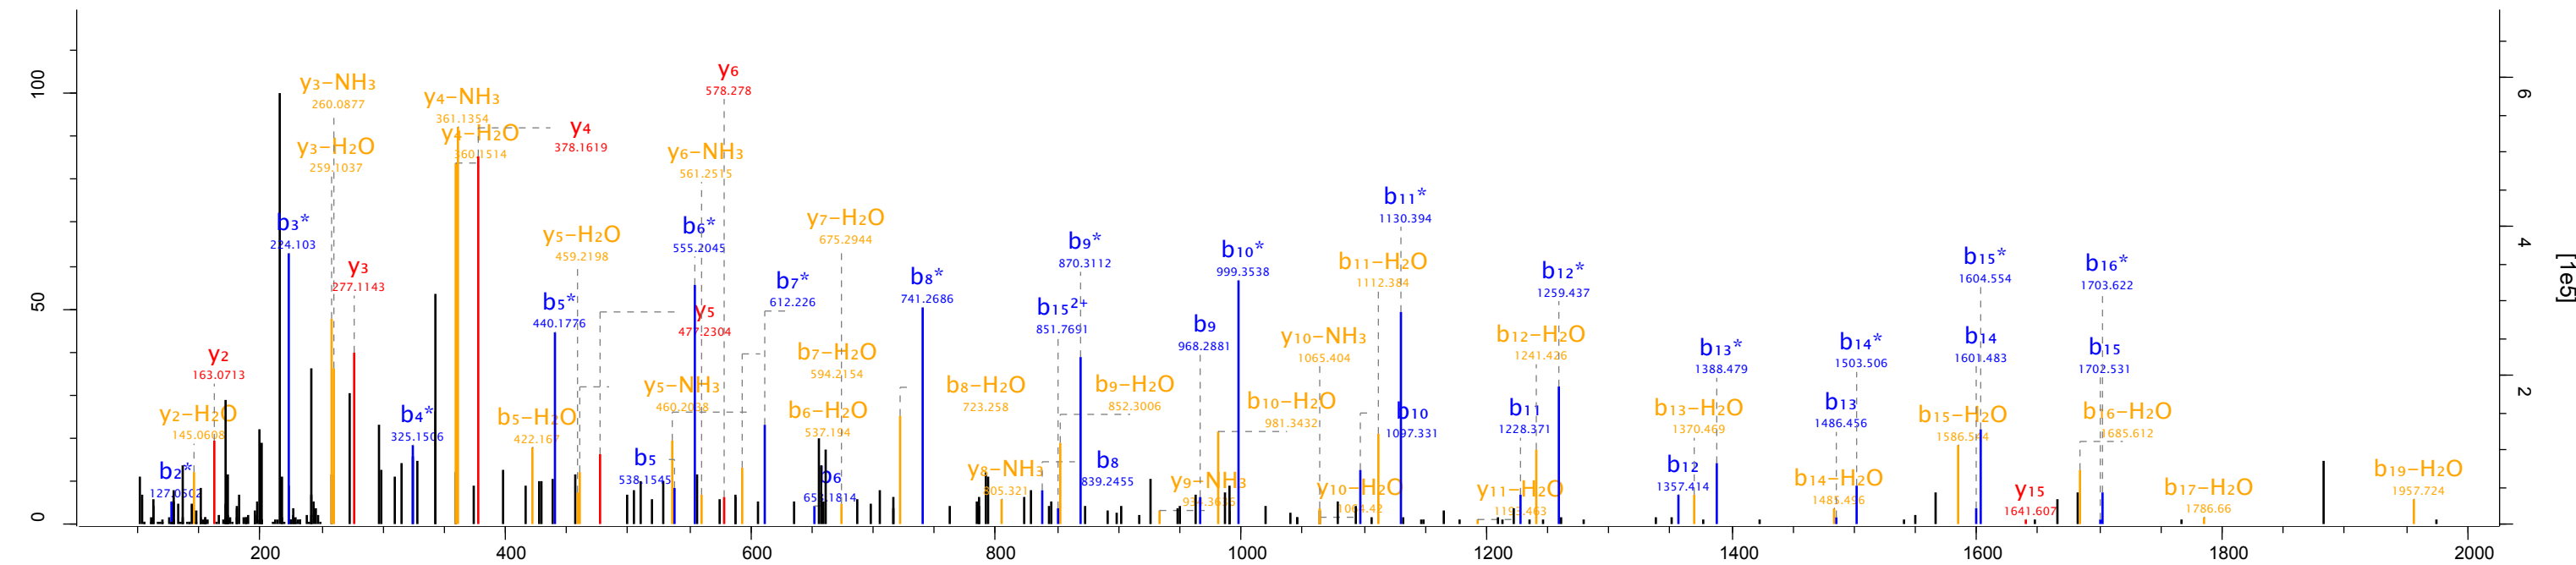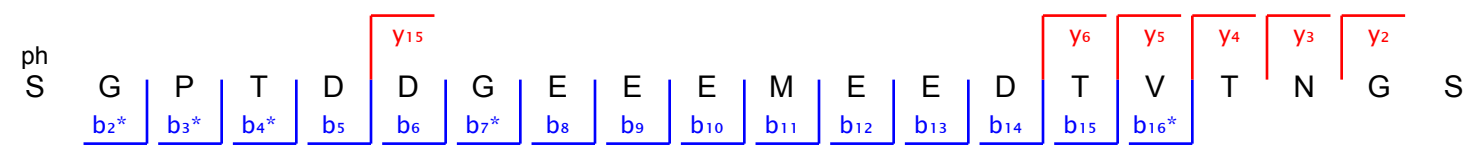

Raw file 20150812\_A375SR\_Phospho\_BR1\_02 Scan 14344 Method FTMS; HCD Score 182.95 m/z 1162.97 Gene names C2CD5

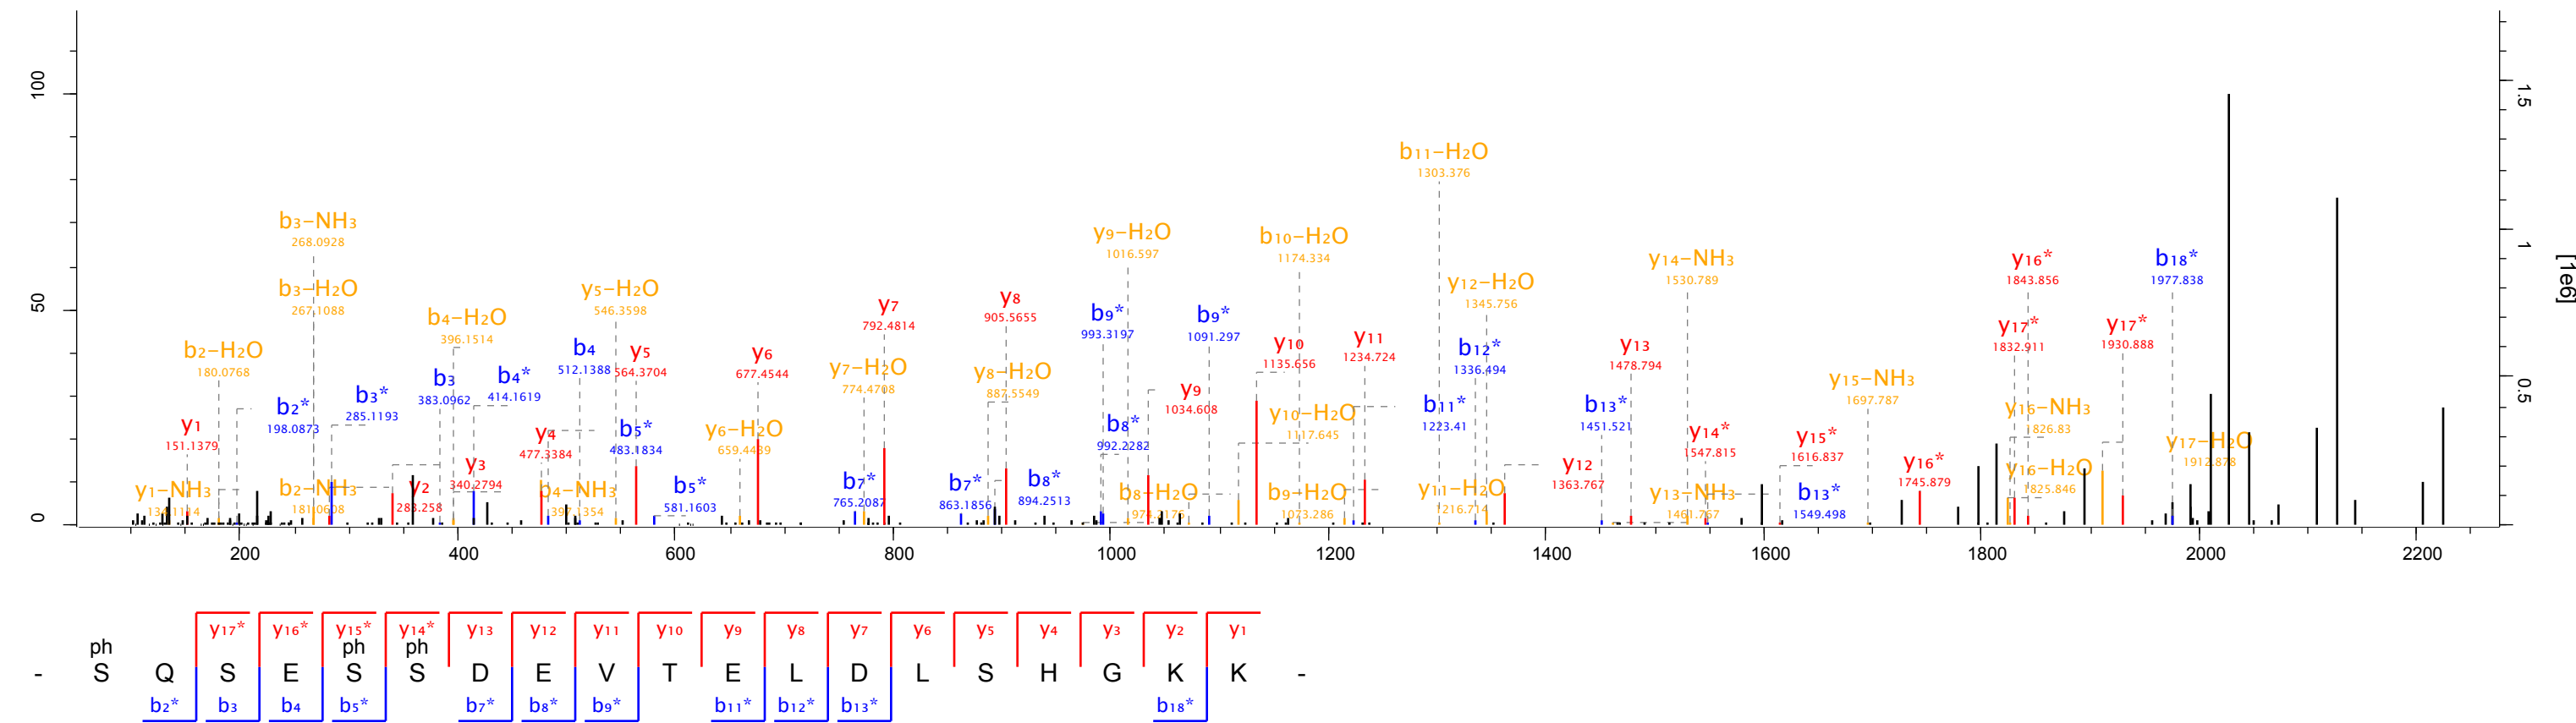

Raw file: 20150812\_A375SR\_Phospho\_BR1\_02  
 Scan: 14524 Method: FTMS; HCD Score: 133.95 m/z: 760.81 Gene names: MOCOS

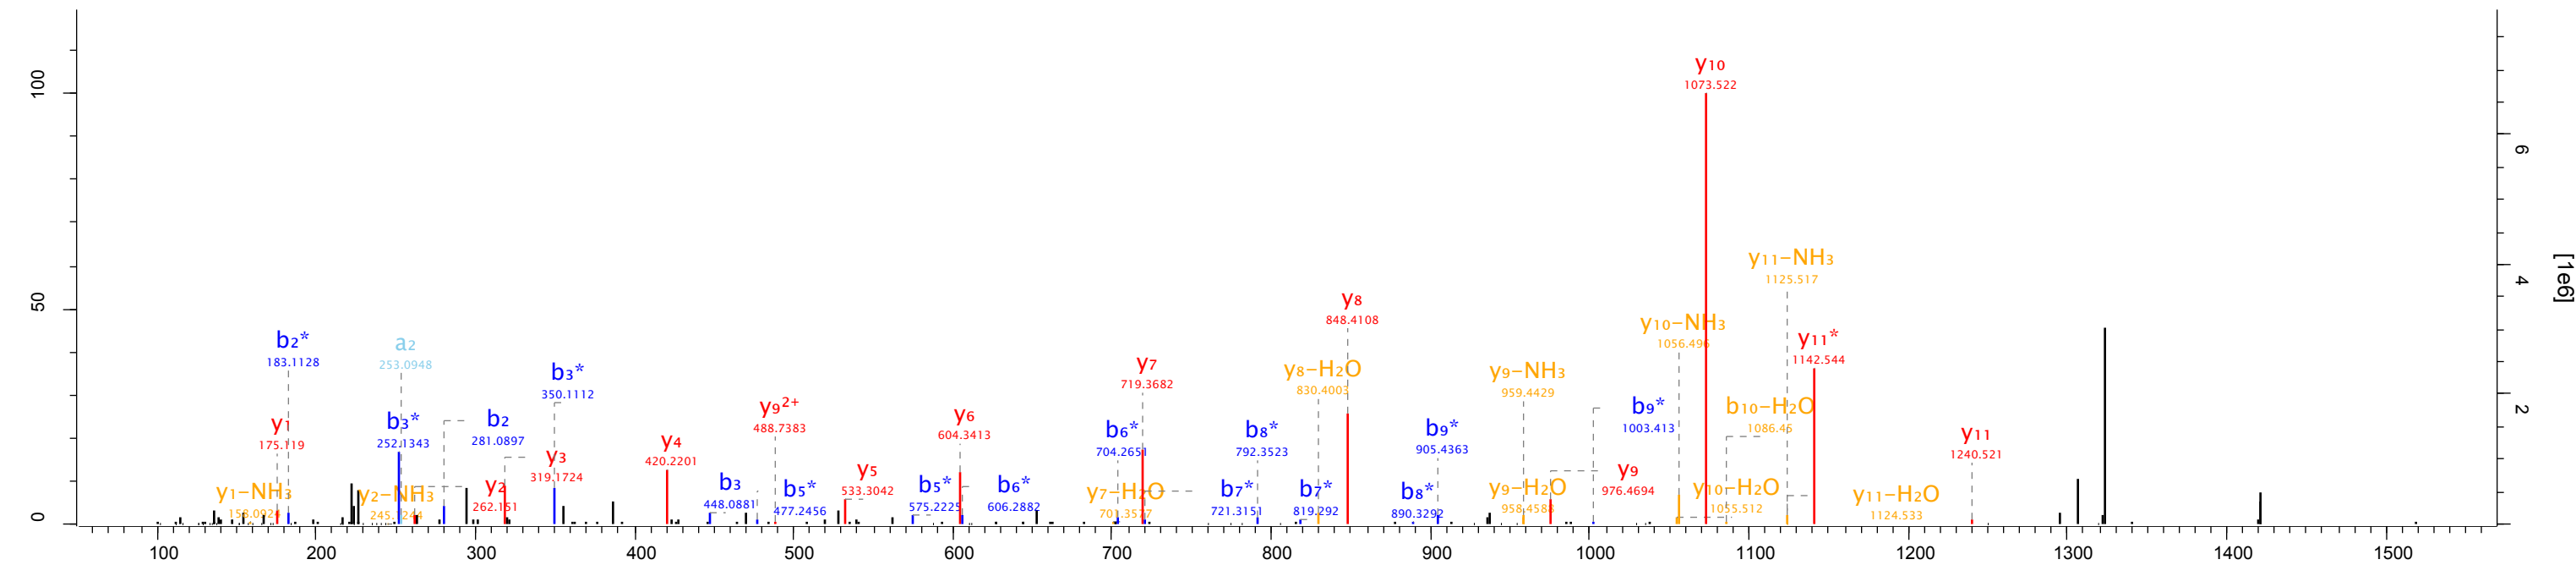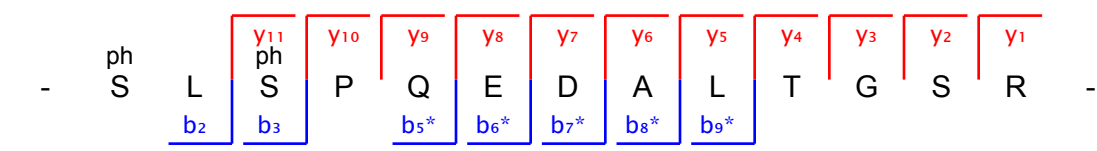



Raw file Scan Method Score m/z Gene names  
 20150812\_A375SR\_Phospho\_BR1\_02 14674 FTMS; HCD 172.11 846.37 RYBP

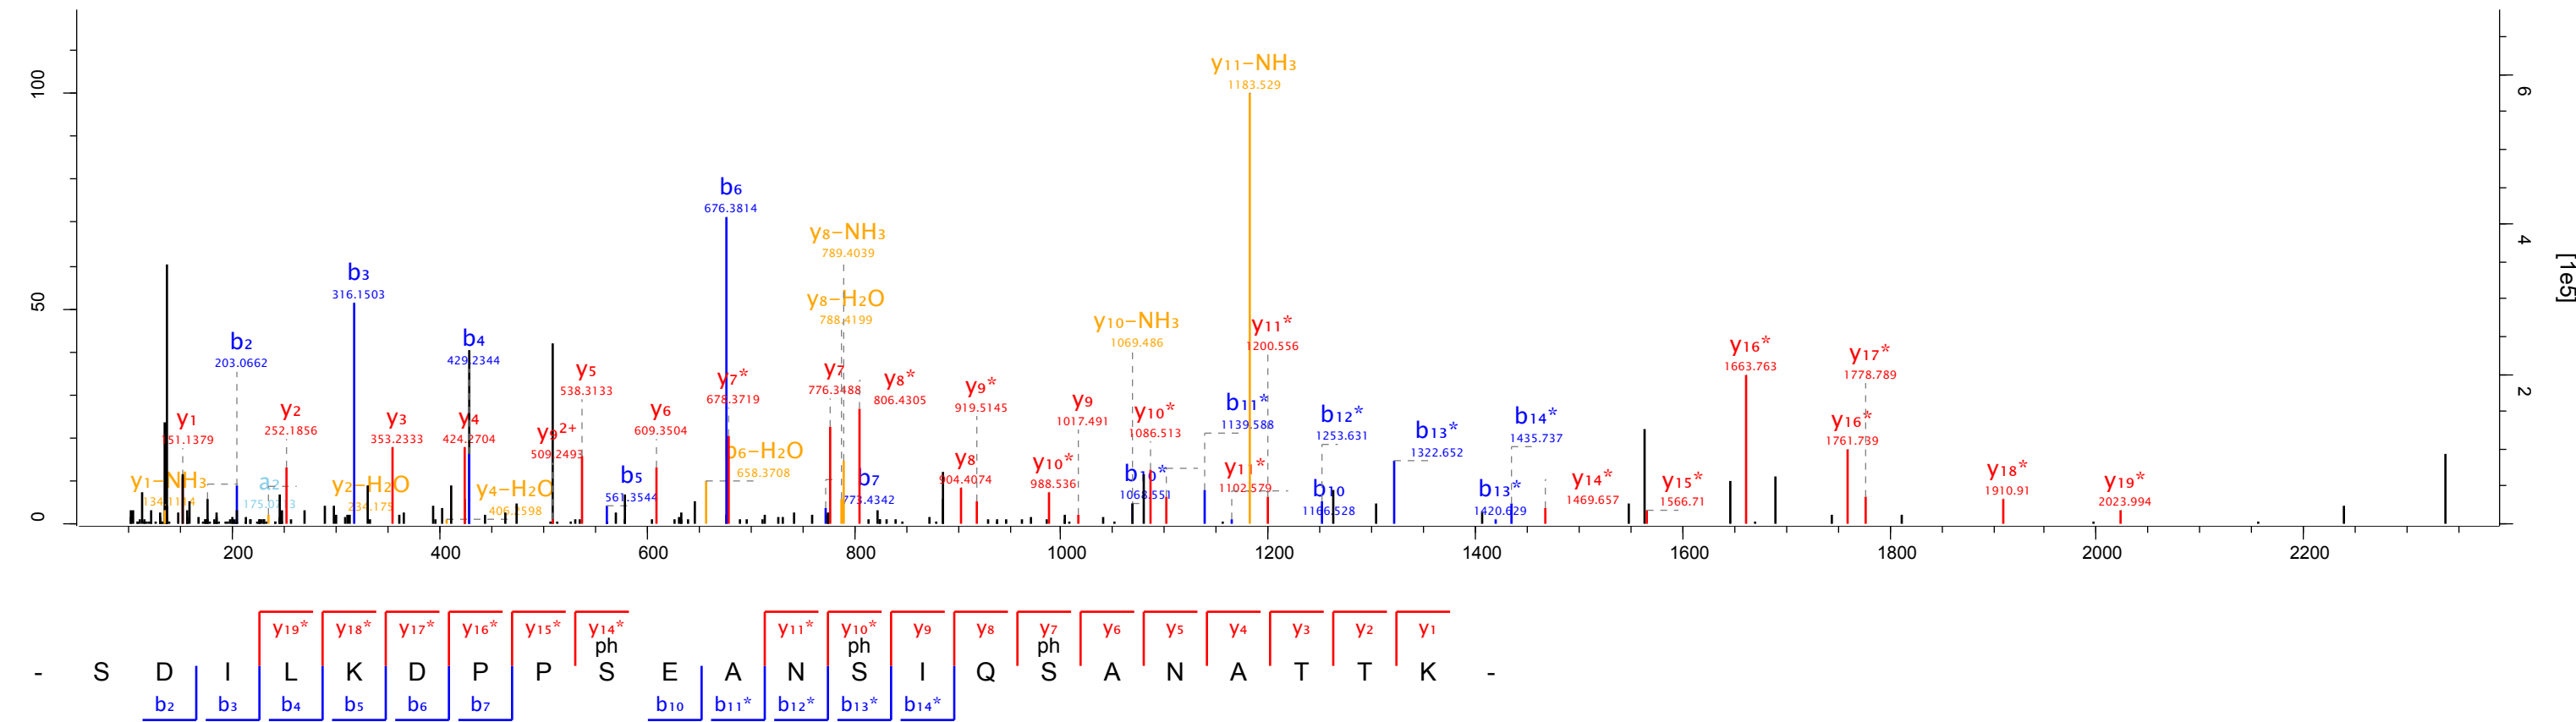

Raw file 20150812\_A375SR\_Phospho\_BR1\_02 Scan 14954 Method FTMS; HCD Score 88.21 m/z 725.33 Gene names NHSL1

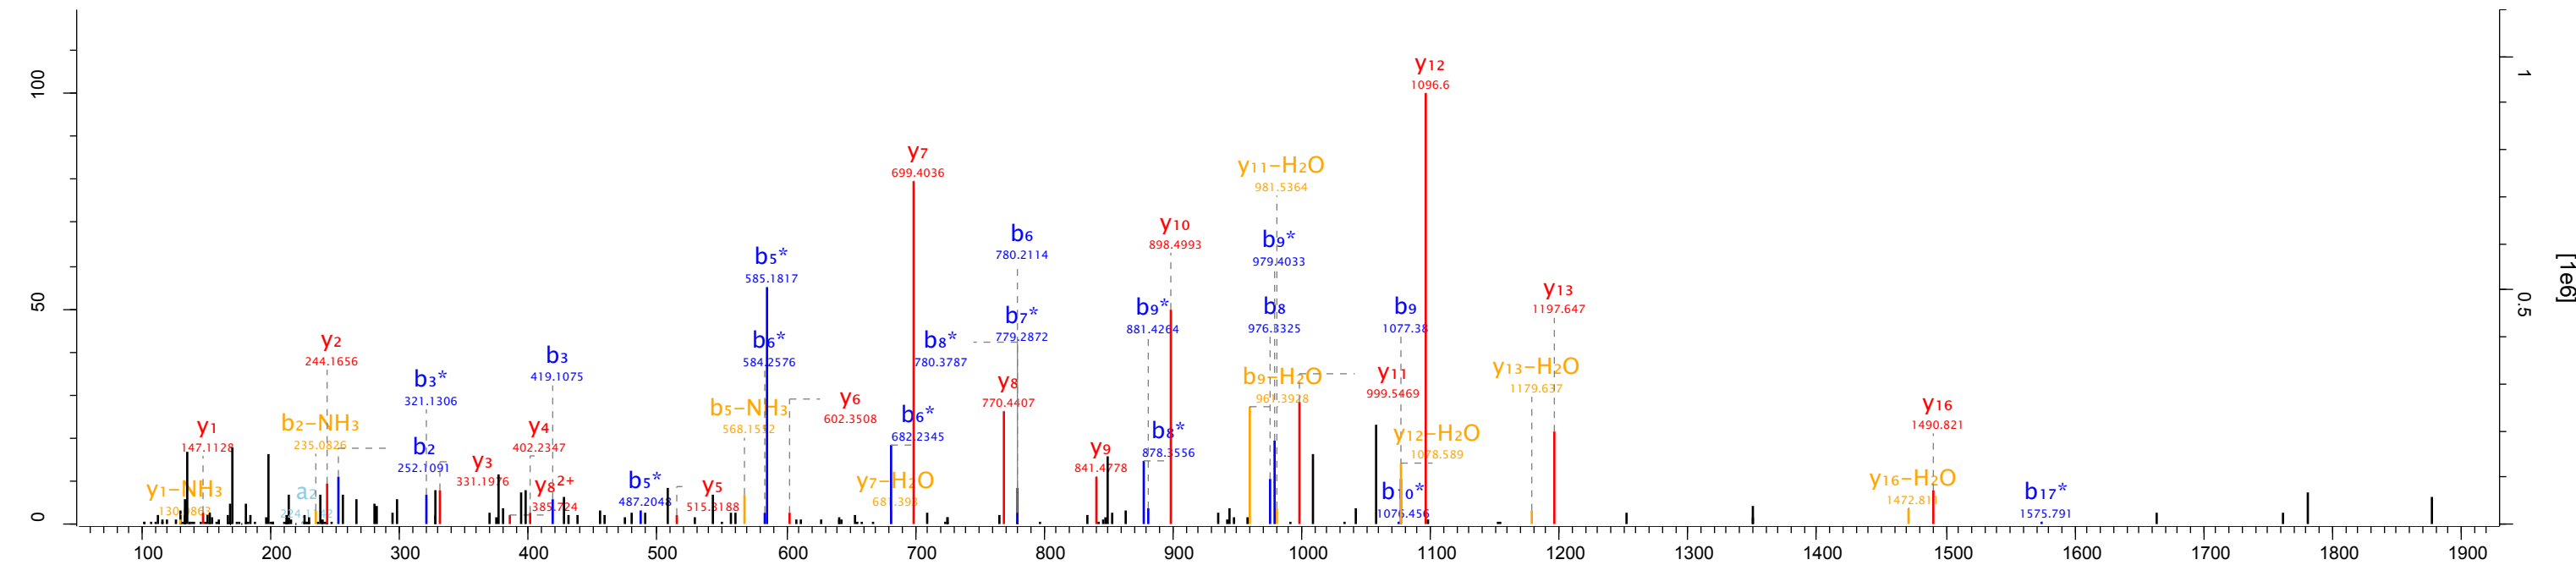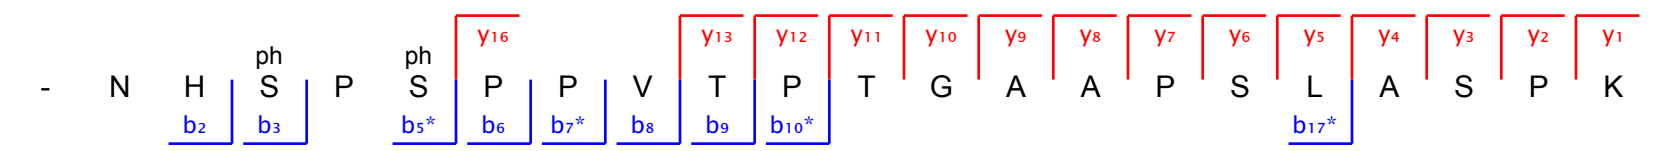

Raw file: 20150812\_A375SR\_Phospho\_BR1\_02  
 Scan: 15184 Method: FTMS; HCD Score: 101.45 m/z: 1097.45 Gene names: TBC1D4

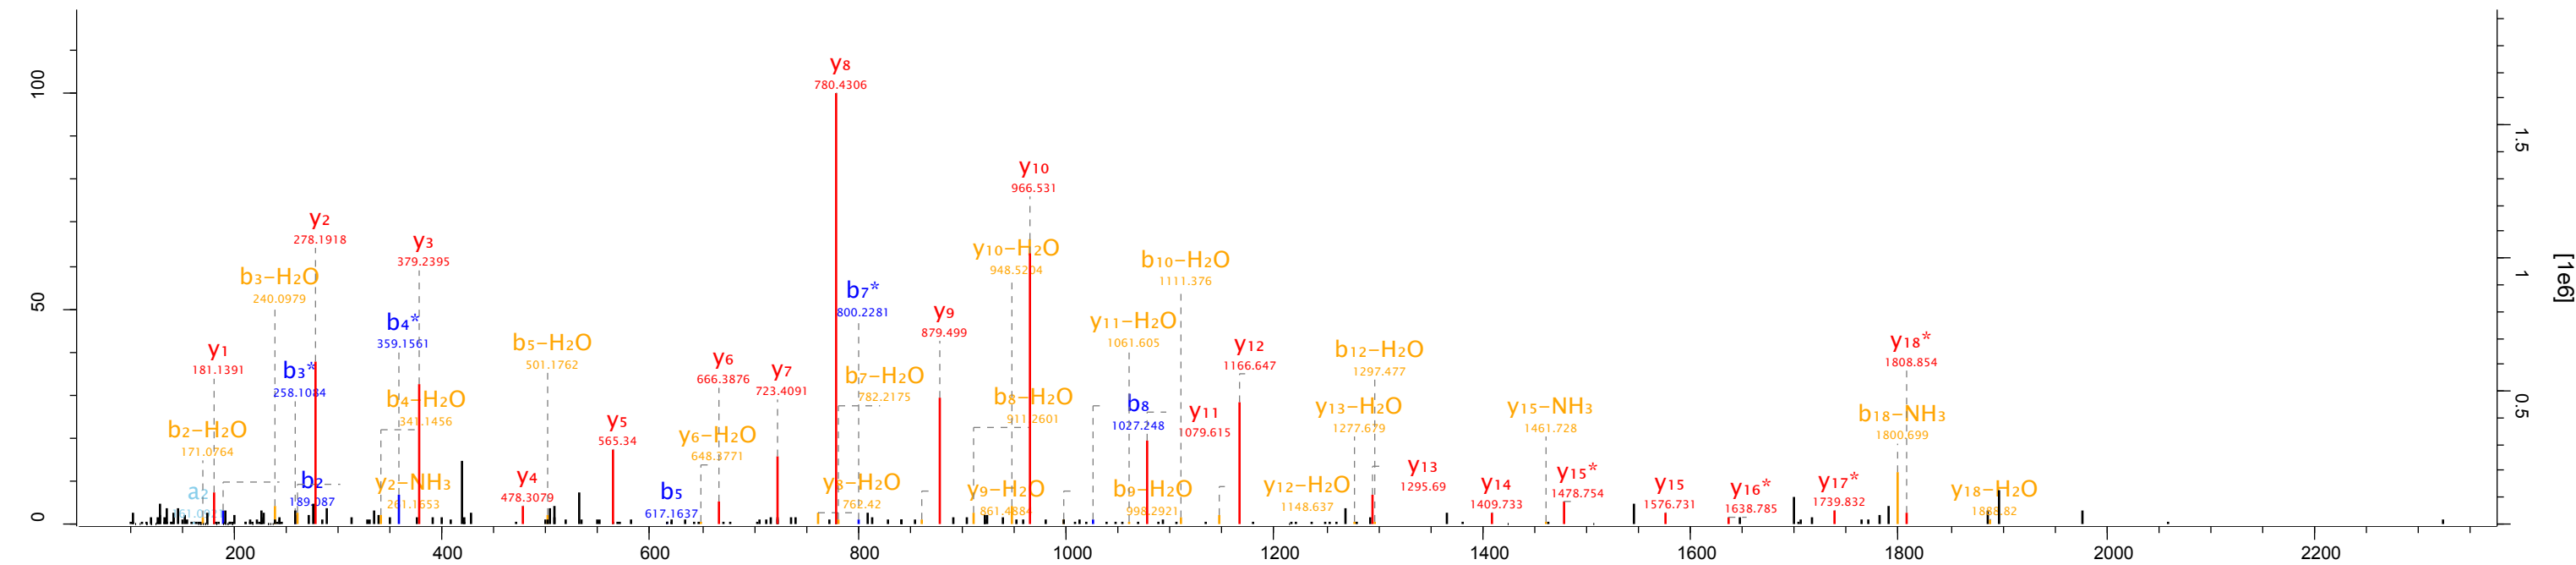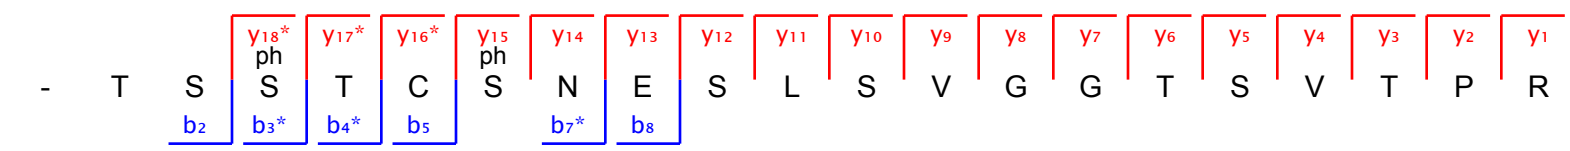

Raw file Scan Method Score m/z Gene names  
 20150812\_A375SR\_Phospho\_BR1\_02 15384 FTMS; HCD 243.19 1119.95 PLEC

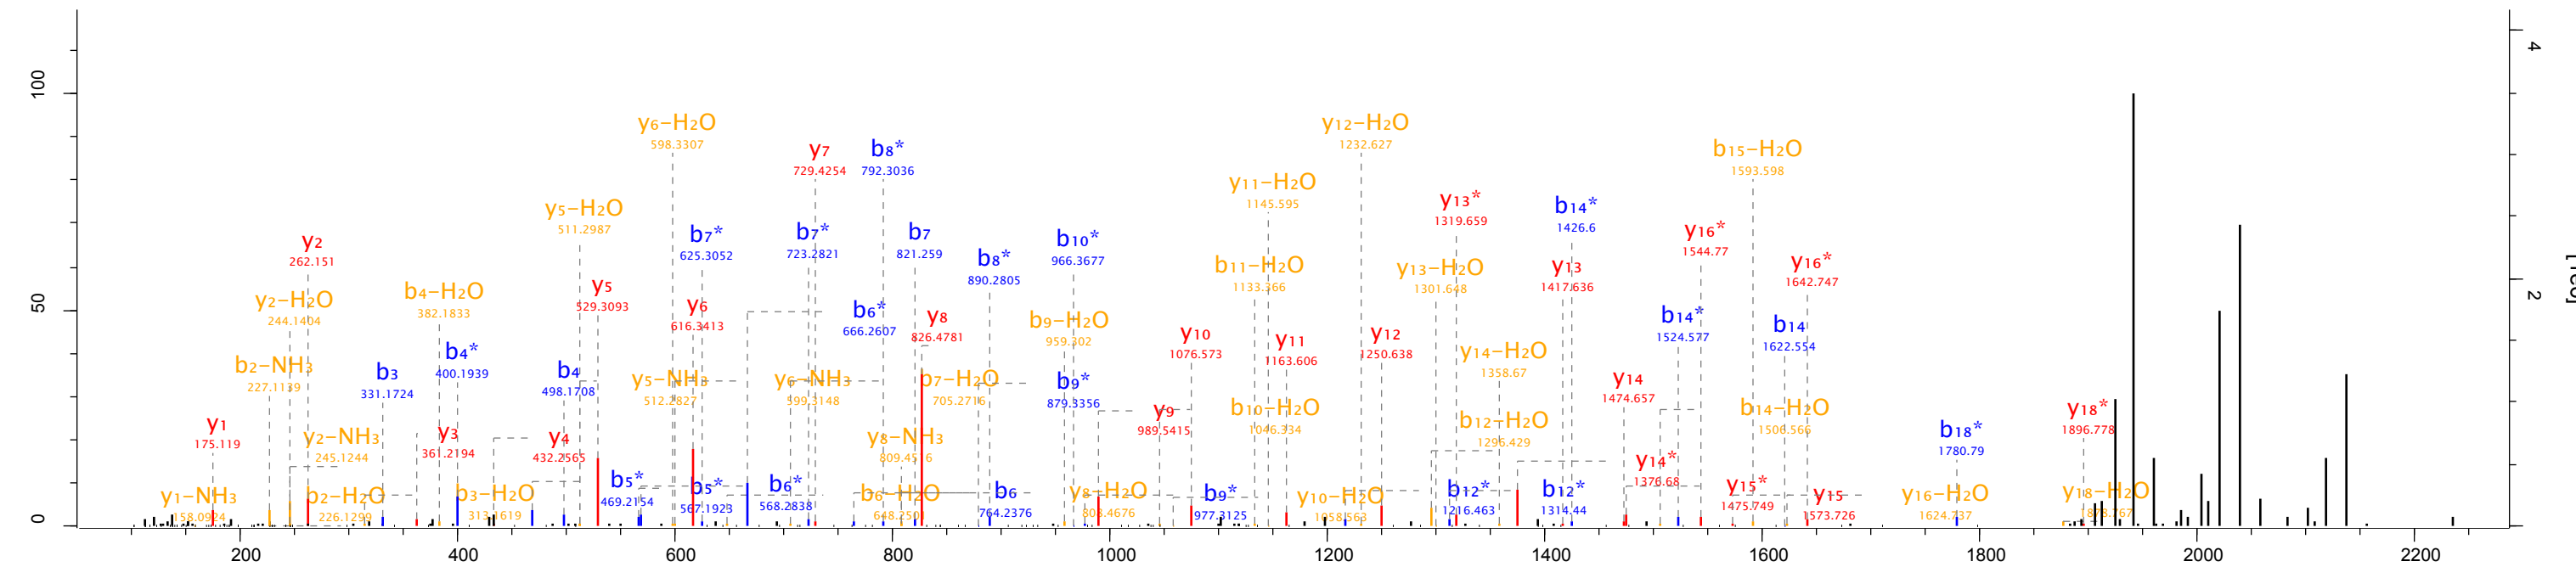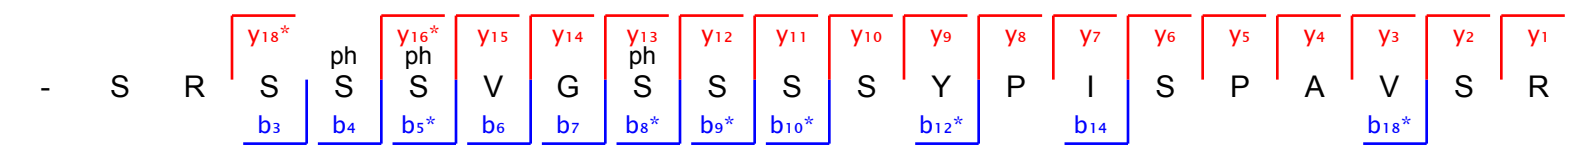

Raw file 20150812\_A375SR\_Phospho\_BR1\_02 Scan 15394 Method FTMS; HCD Score 102.98 m/z 797.83 Gene names LIMCH1

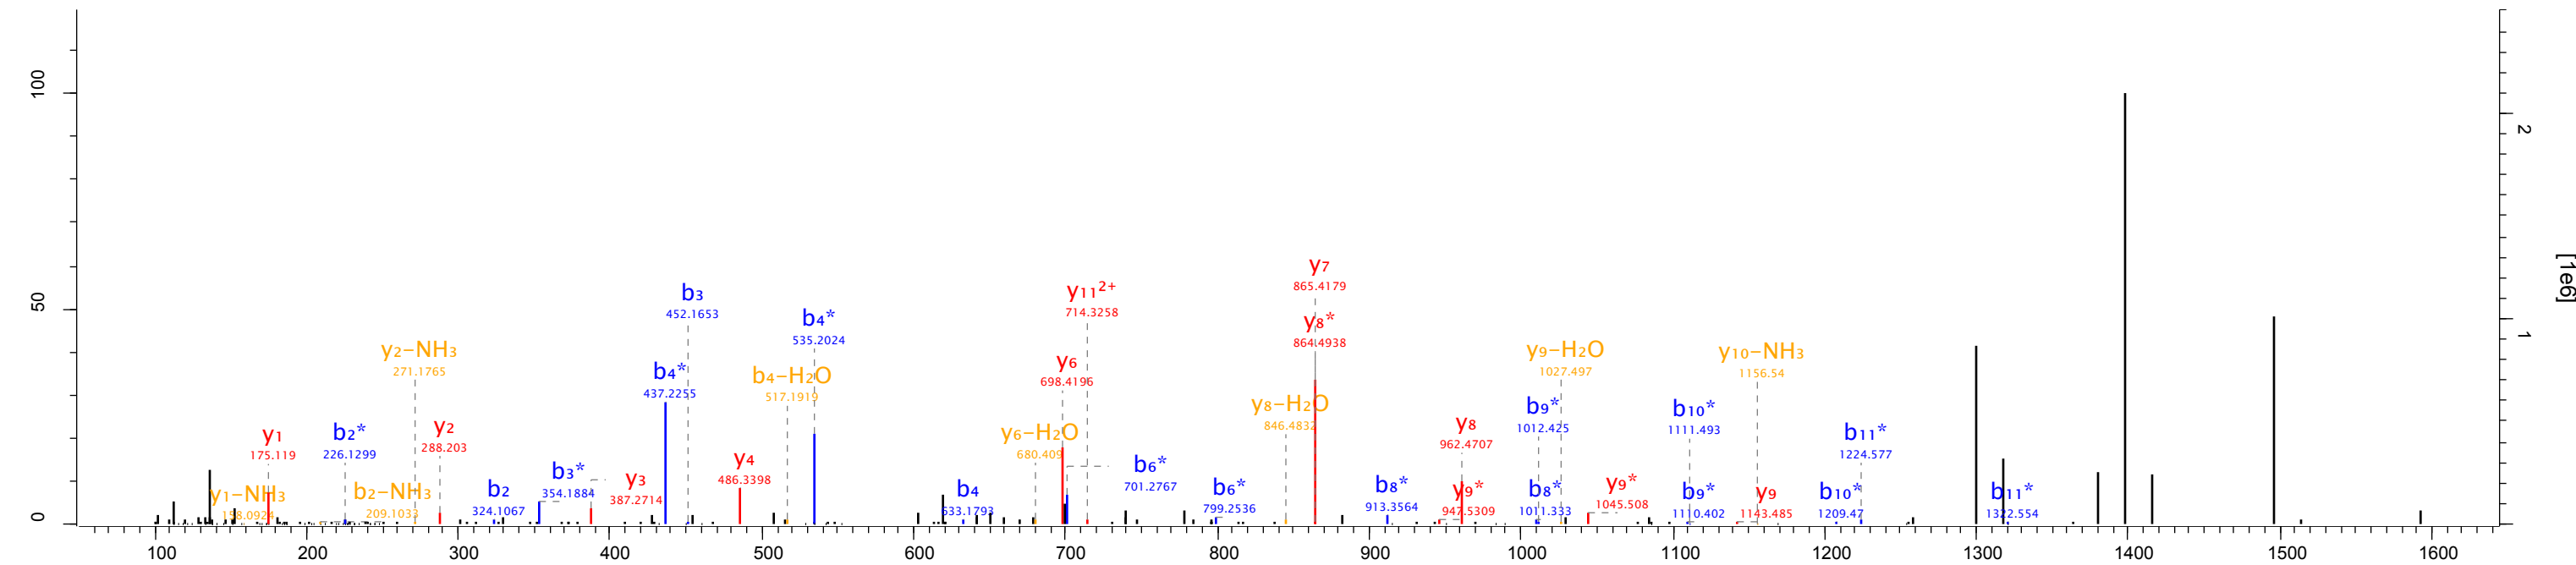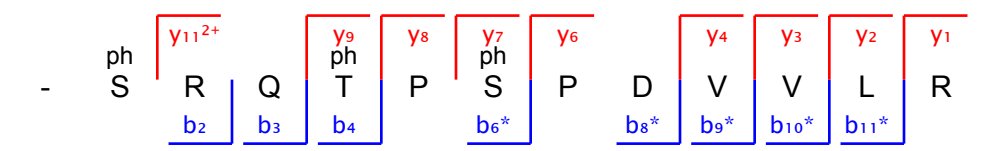

Raw file  
 20150812\_A375SR\_Phospho\_BR1\_02  
 Scan 15484 Method FTMS; HCD Score 45.21 m/z 1067.43 Gene names SETD2

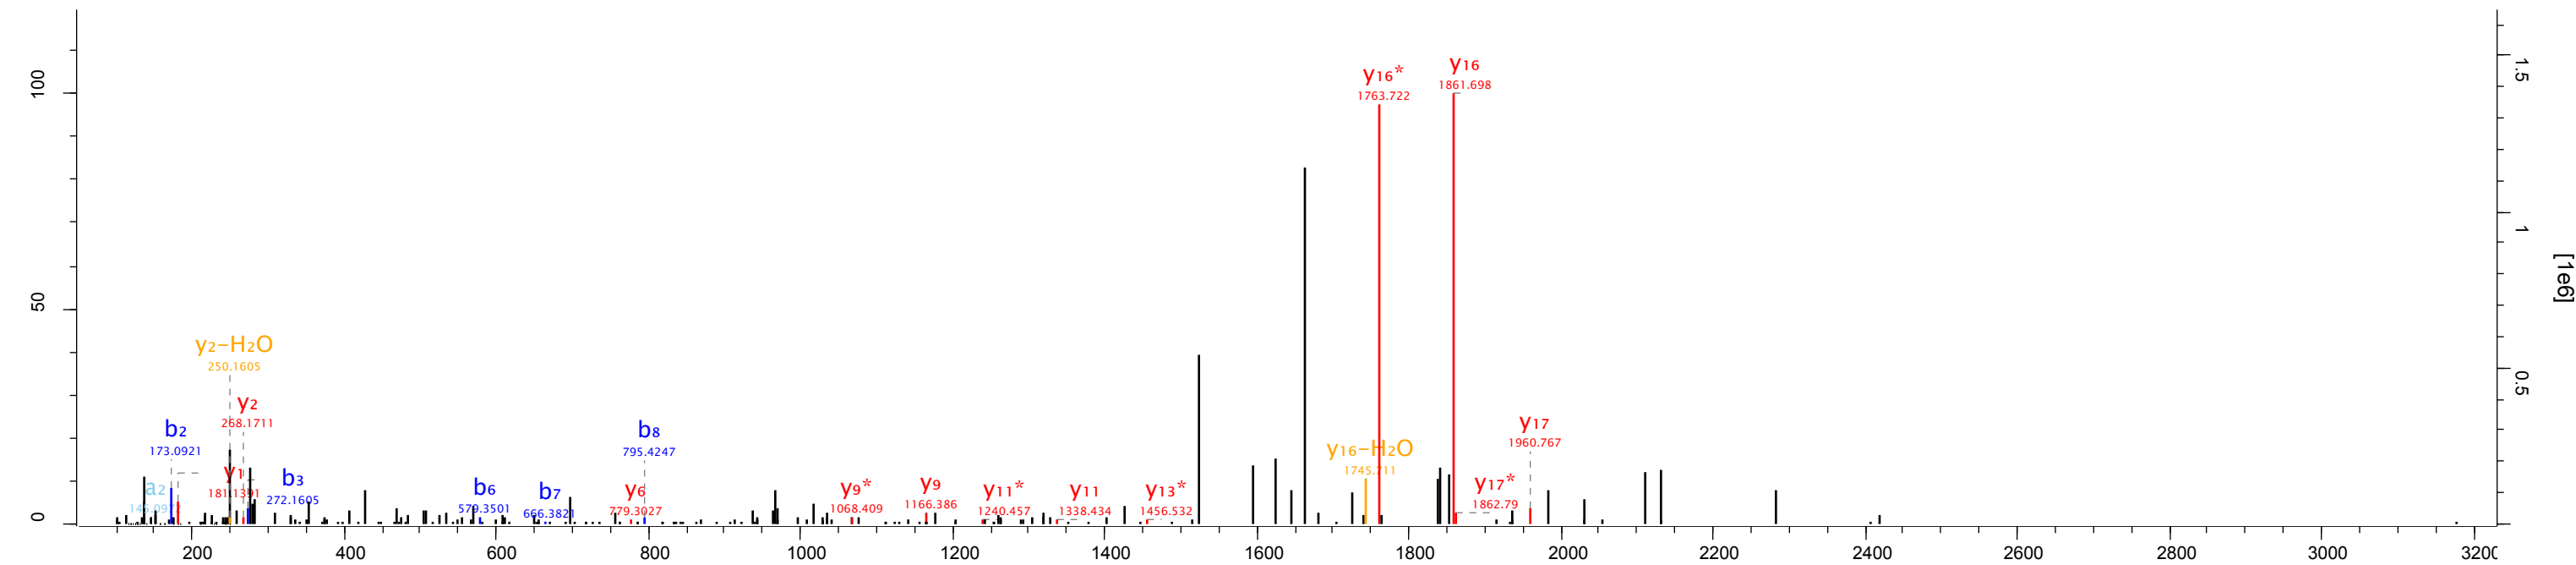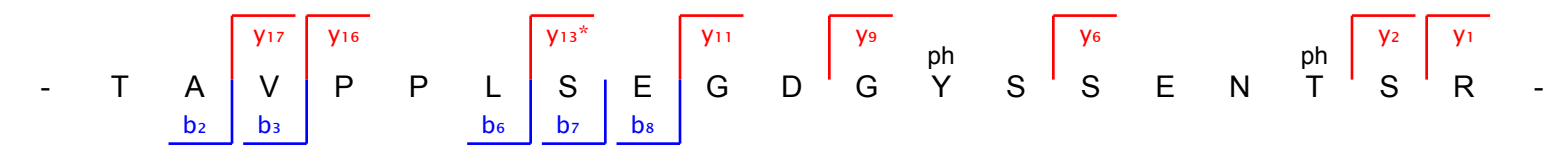

Raw file 20150812\_A375SR\_Phospho\_BR1\_02 Scan 16114 Method FTMS; HCD Score 258.26 m/z 1167.46 Gene names CTPS1

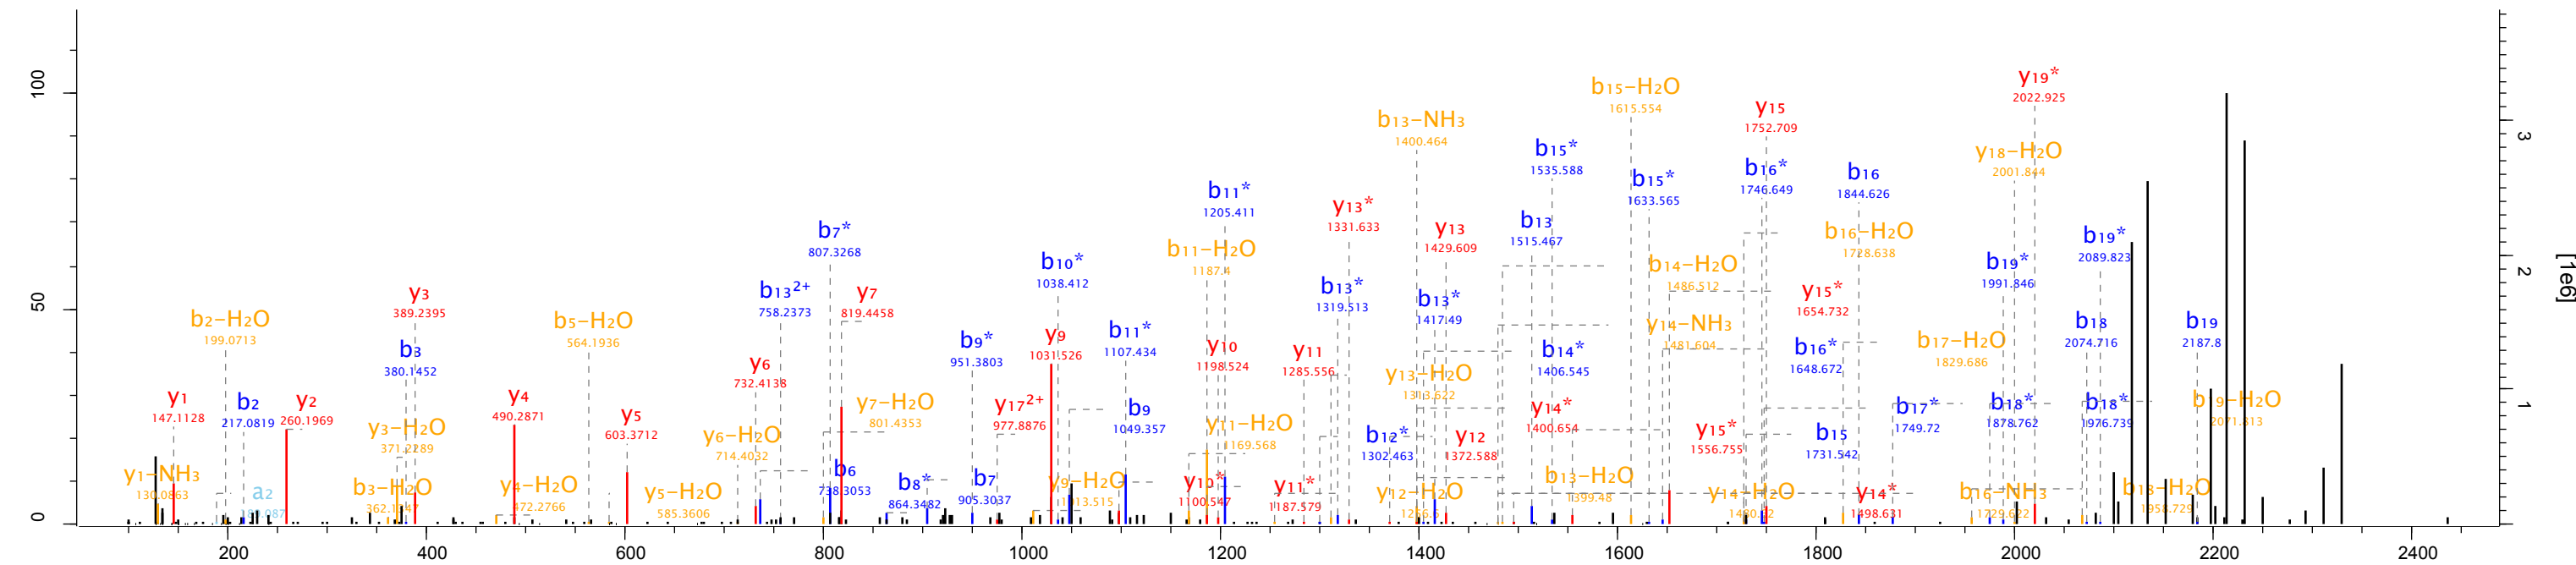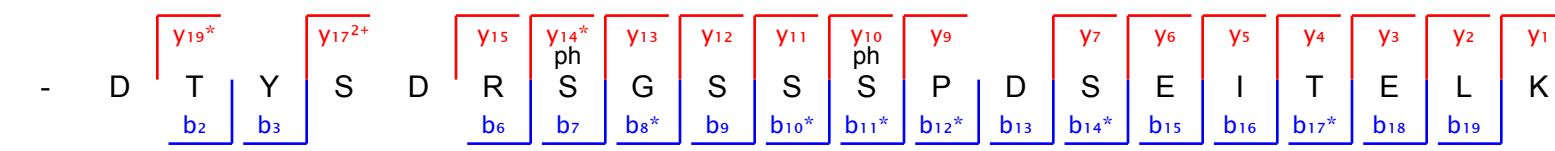

Raw file 20150812\_A375SR\_Phospho\_BR1\_02 Scan 16164 Method FTMS; HCD Score 95.23 m/z 835.82 Gene names PLEC

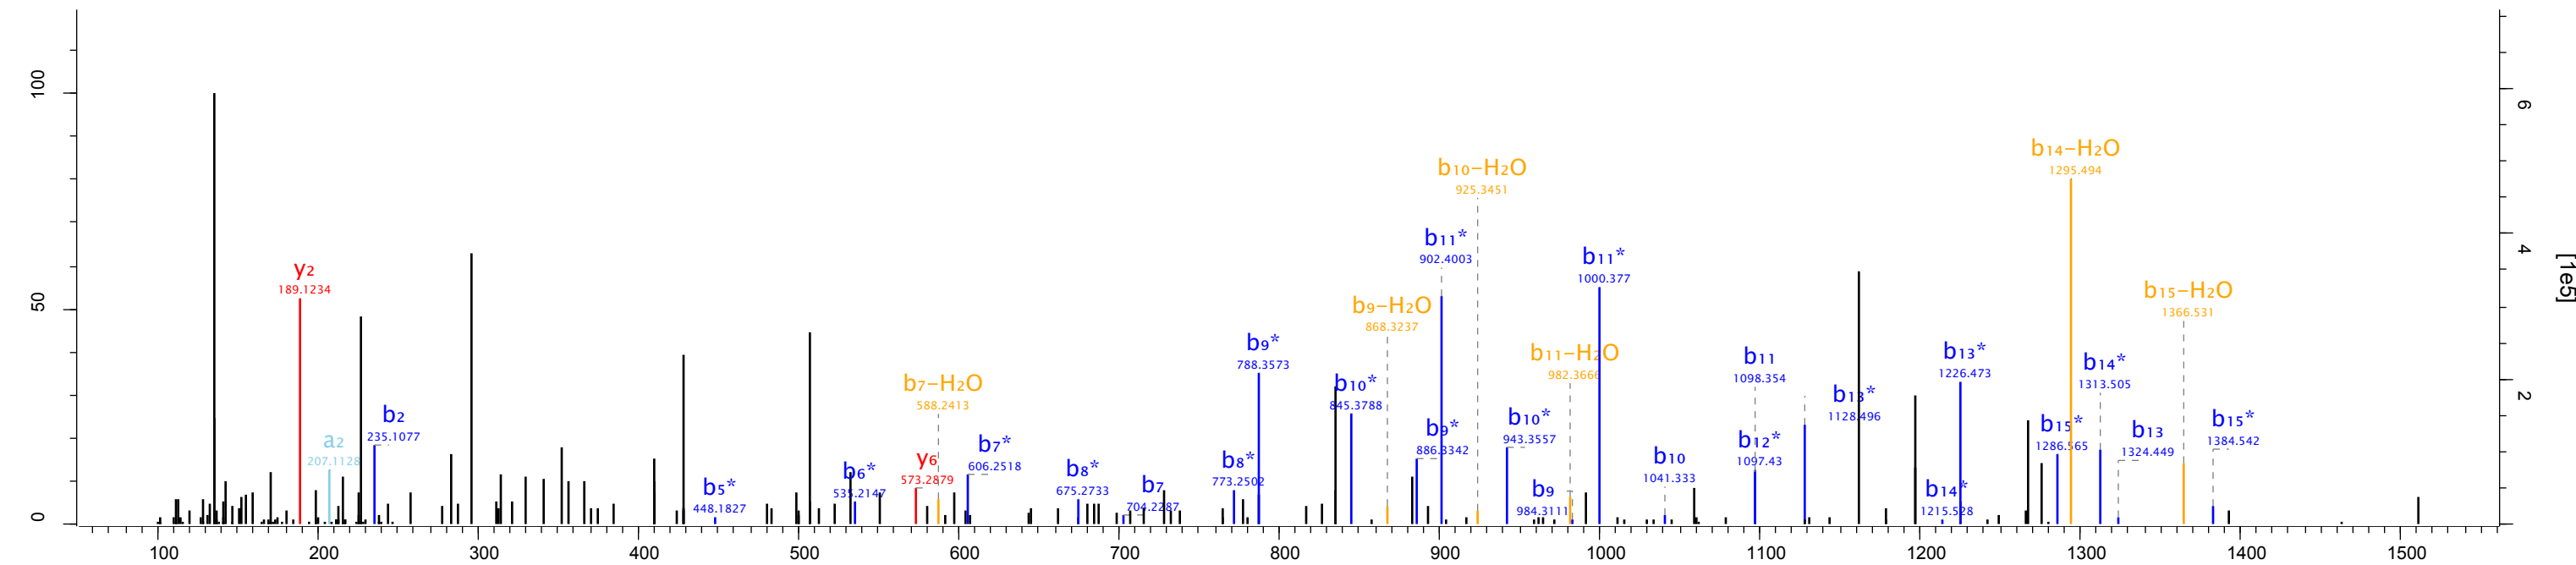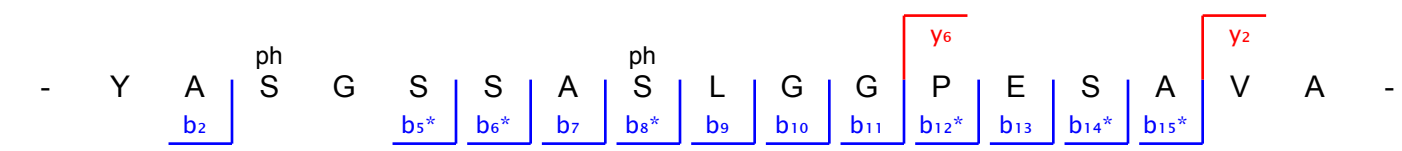



Raw file  
 20150812\_A375SR\_Phospho\_BR1\_02  
 Scan 16224 Method FTMS; HCD Score 124.68 m/z 697.31 Gene names DGCR14

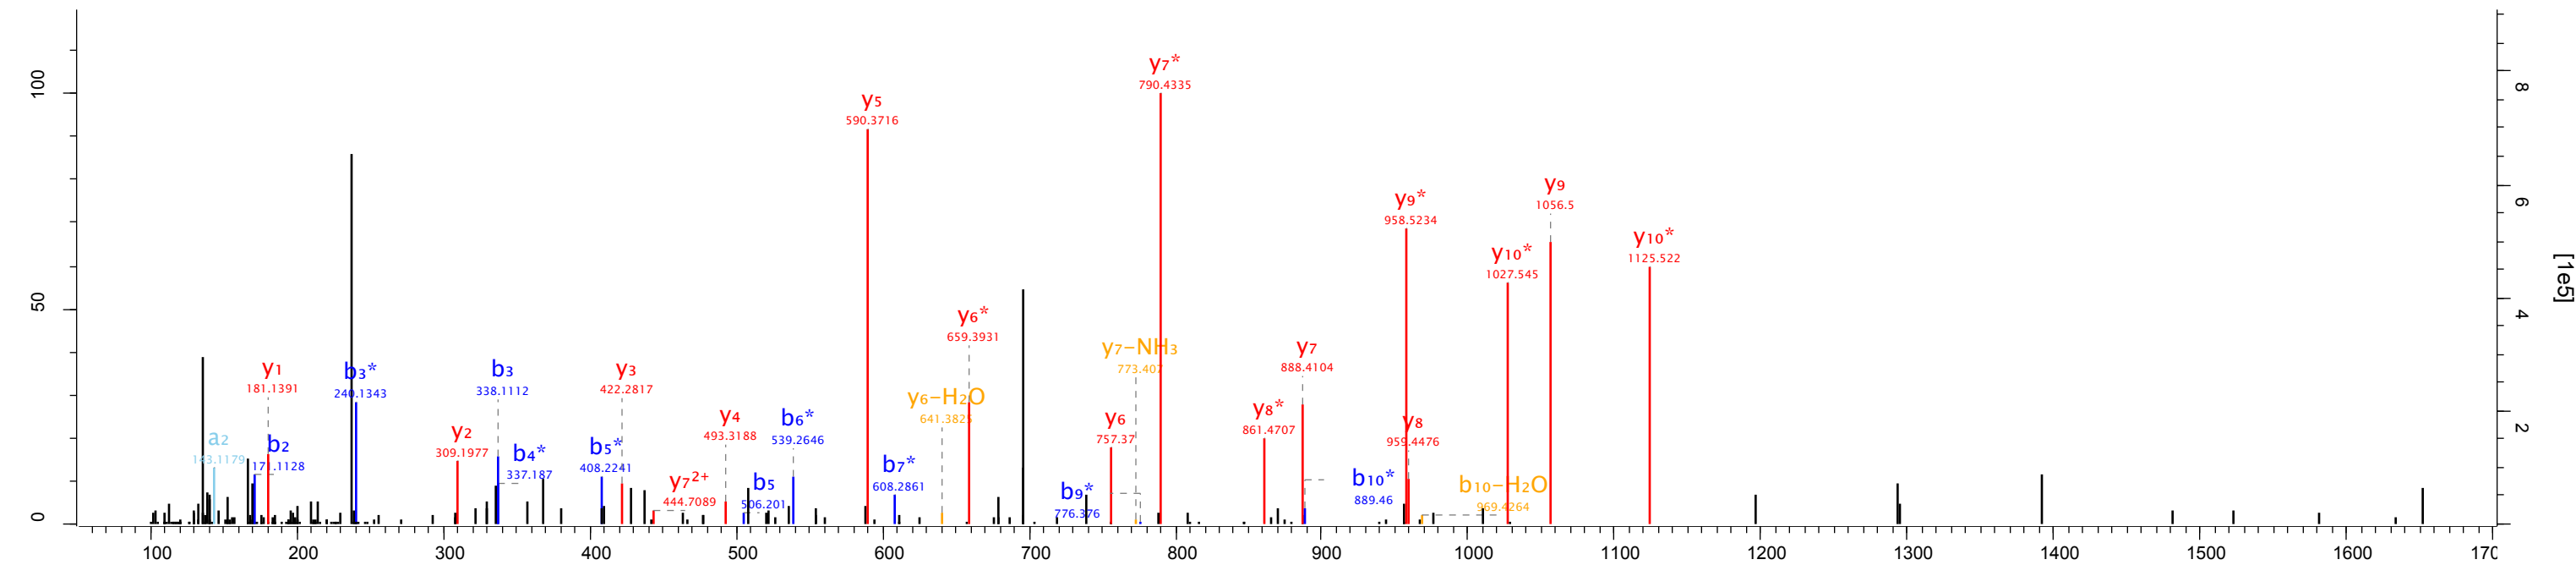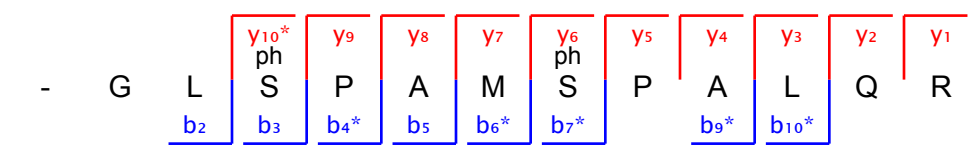

Raw file Scan Method Score m/z Gene names  
 20150812\_A375SR\_Phospho\_BR1\_02 16324 FTMS; HCD 241.33 1304.96 TRIM24

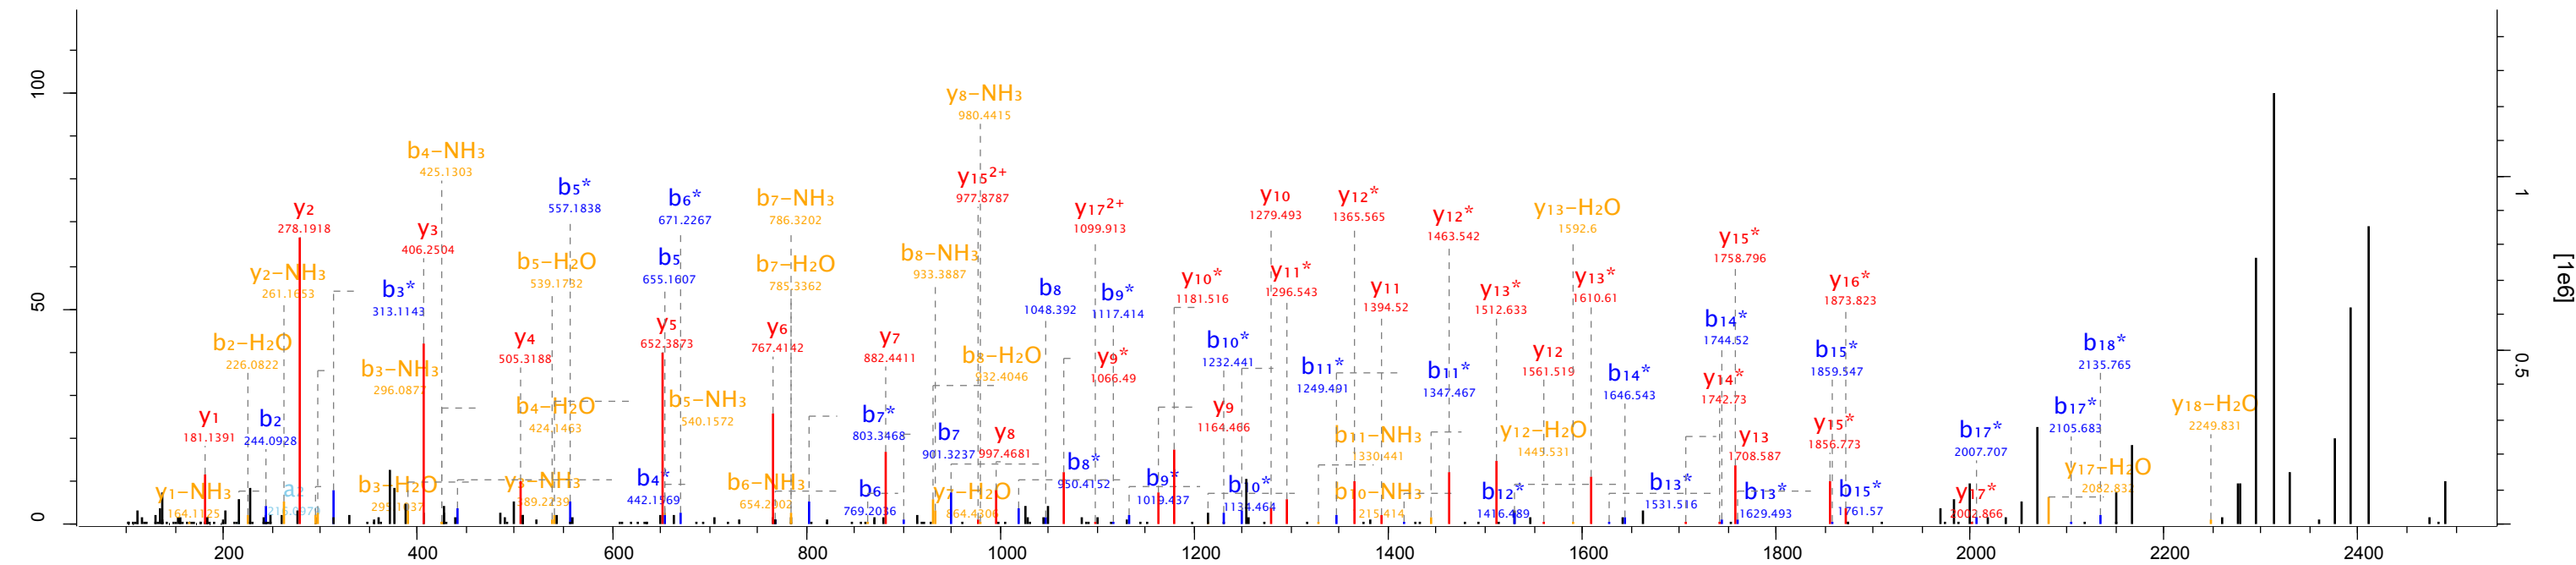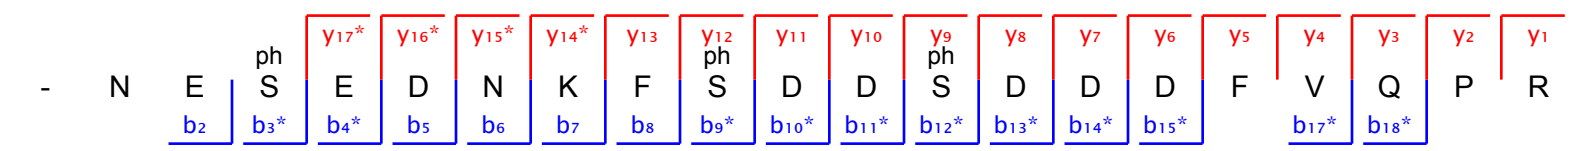

Raw file: 20150812\_A375SR\_Phospho\_BR1\_02  
 Scan: 16454 Method: FTMS; HCD Score: 76.53 m/z: 1288.04 Gene names: CHERP

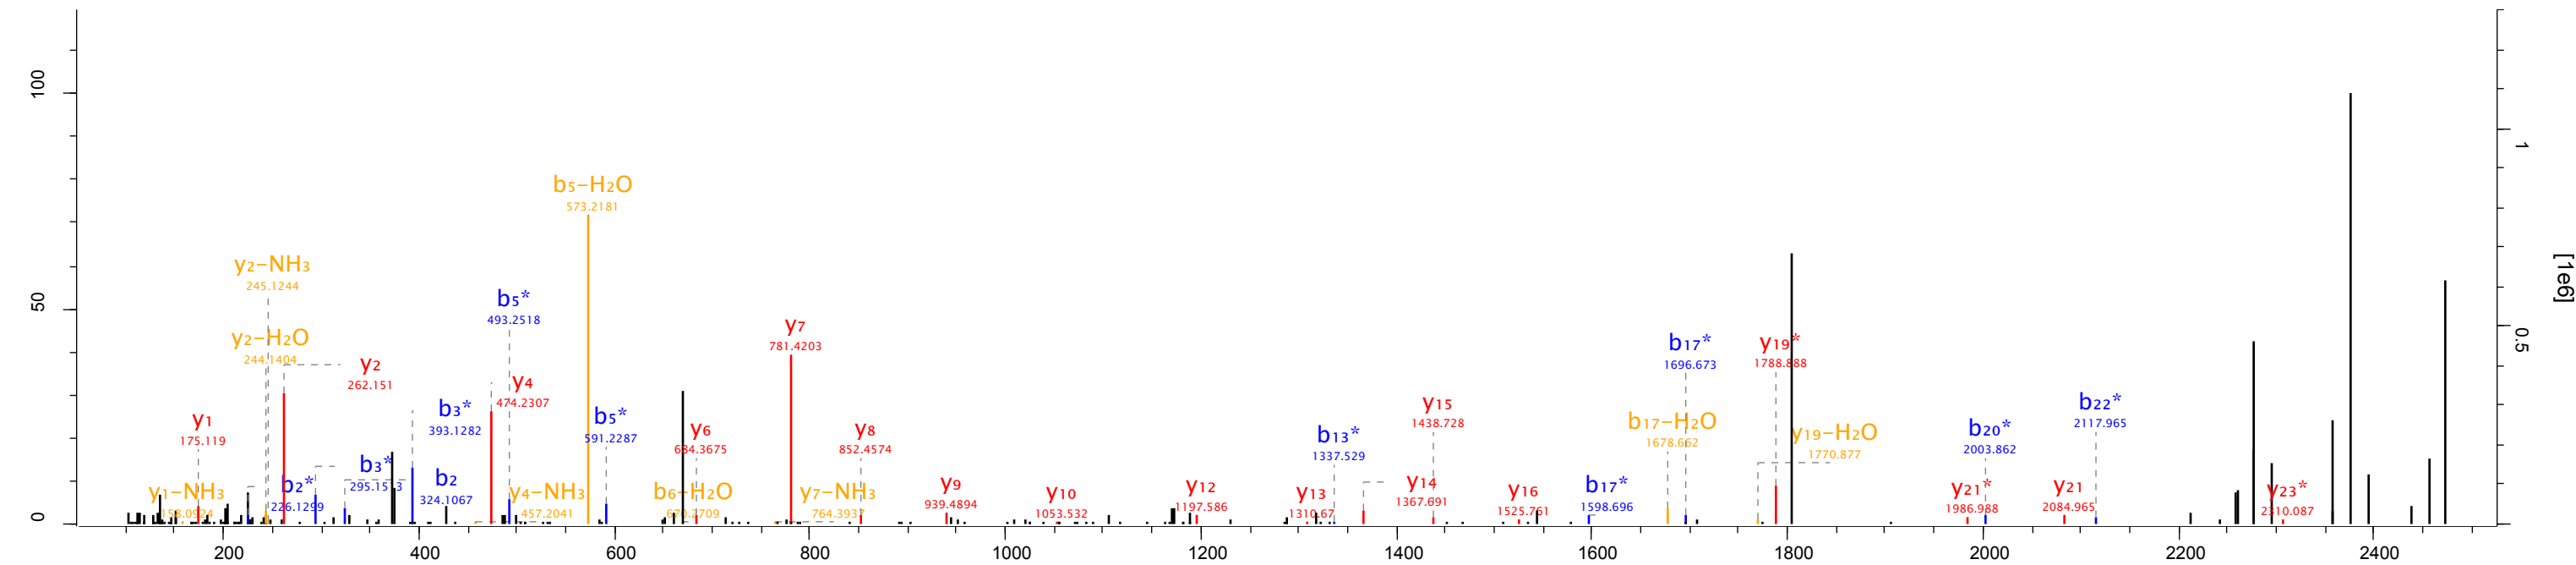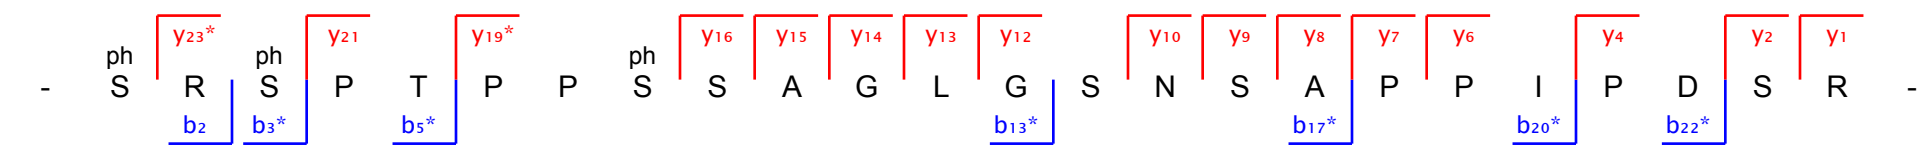

Raw file 20150812\_A375SR\_Phospho\_BR1\_02 Scan 16484 Method FTMS; HCD Score 136.57 m/z 758.29 Gene names DNAJC1

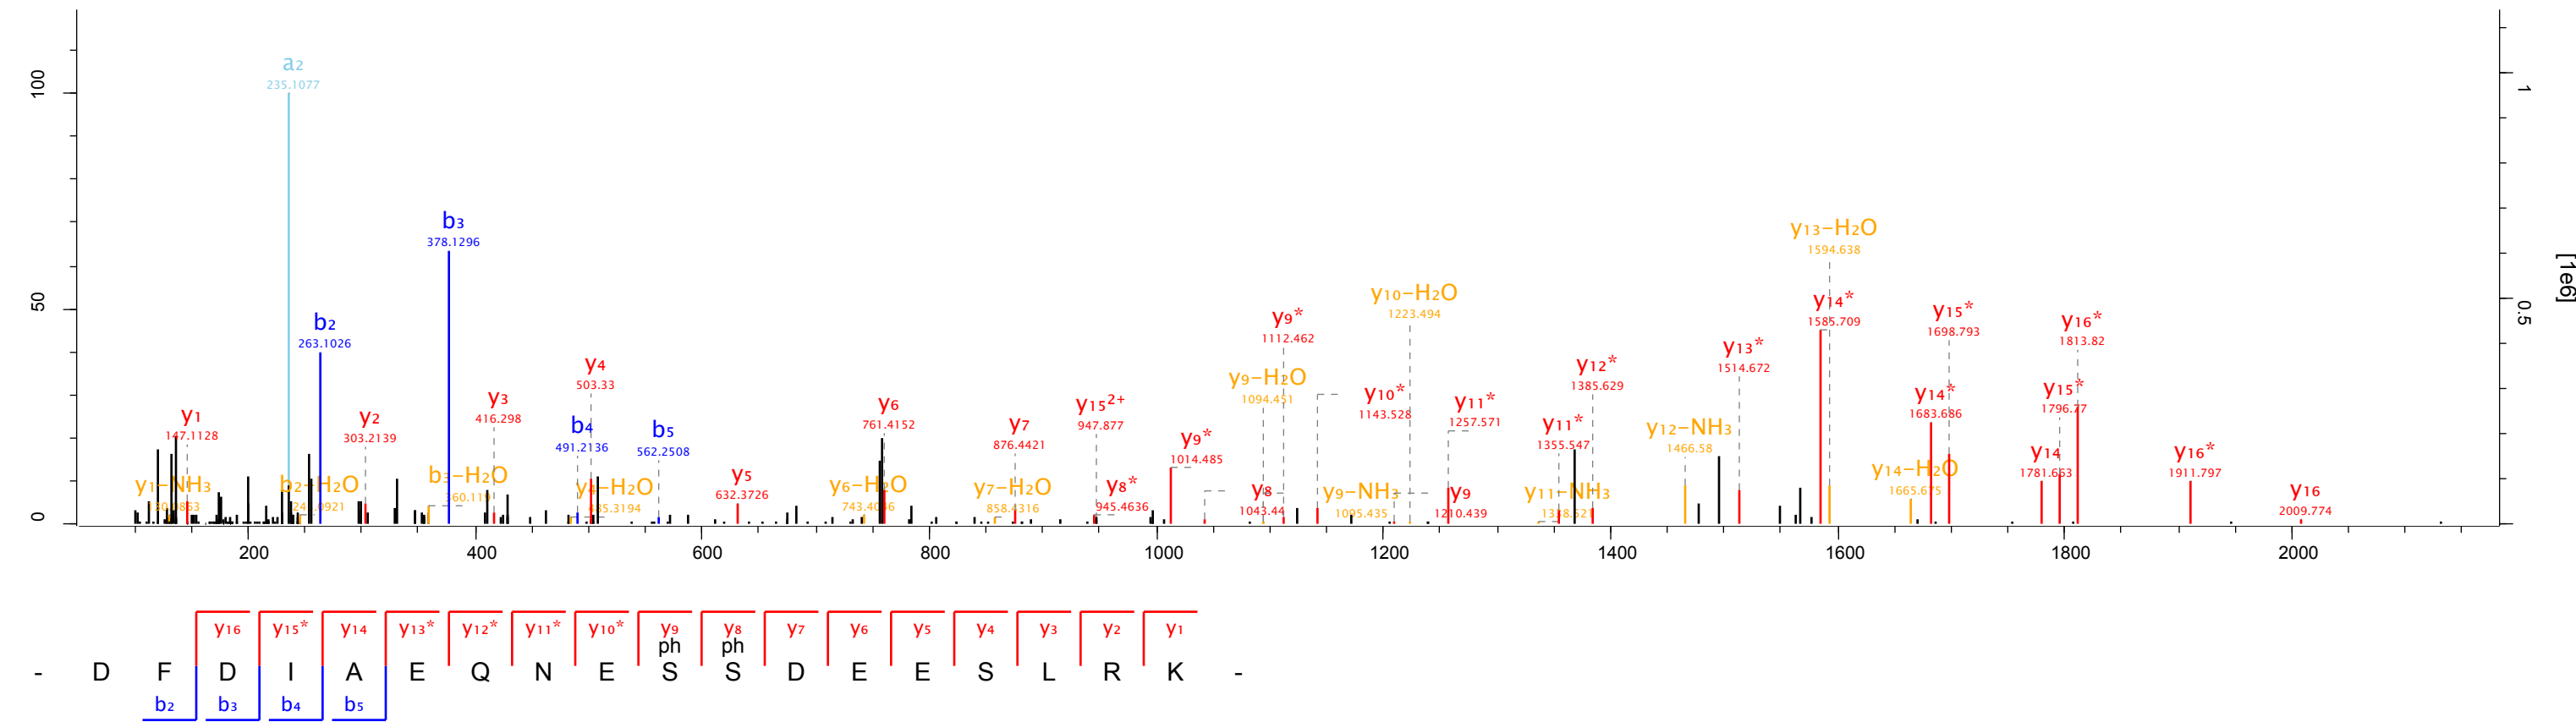

Raw file: 20150812\_A375SR\_Phospho\_BR1\_02  
 Scan: 16524 Method: FTMS; HCD Score: 118.67 m/z: 961.07 Gene names: INPP5F

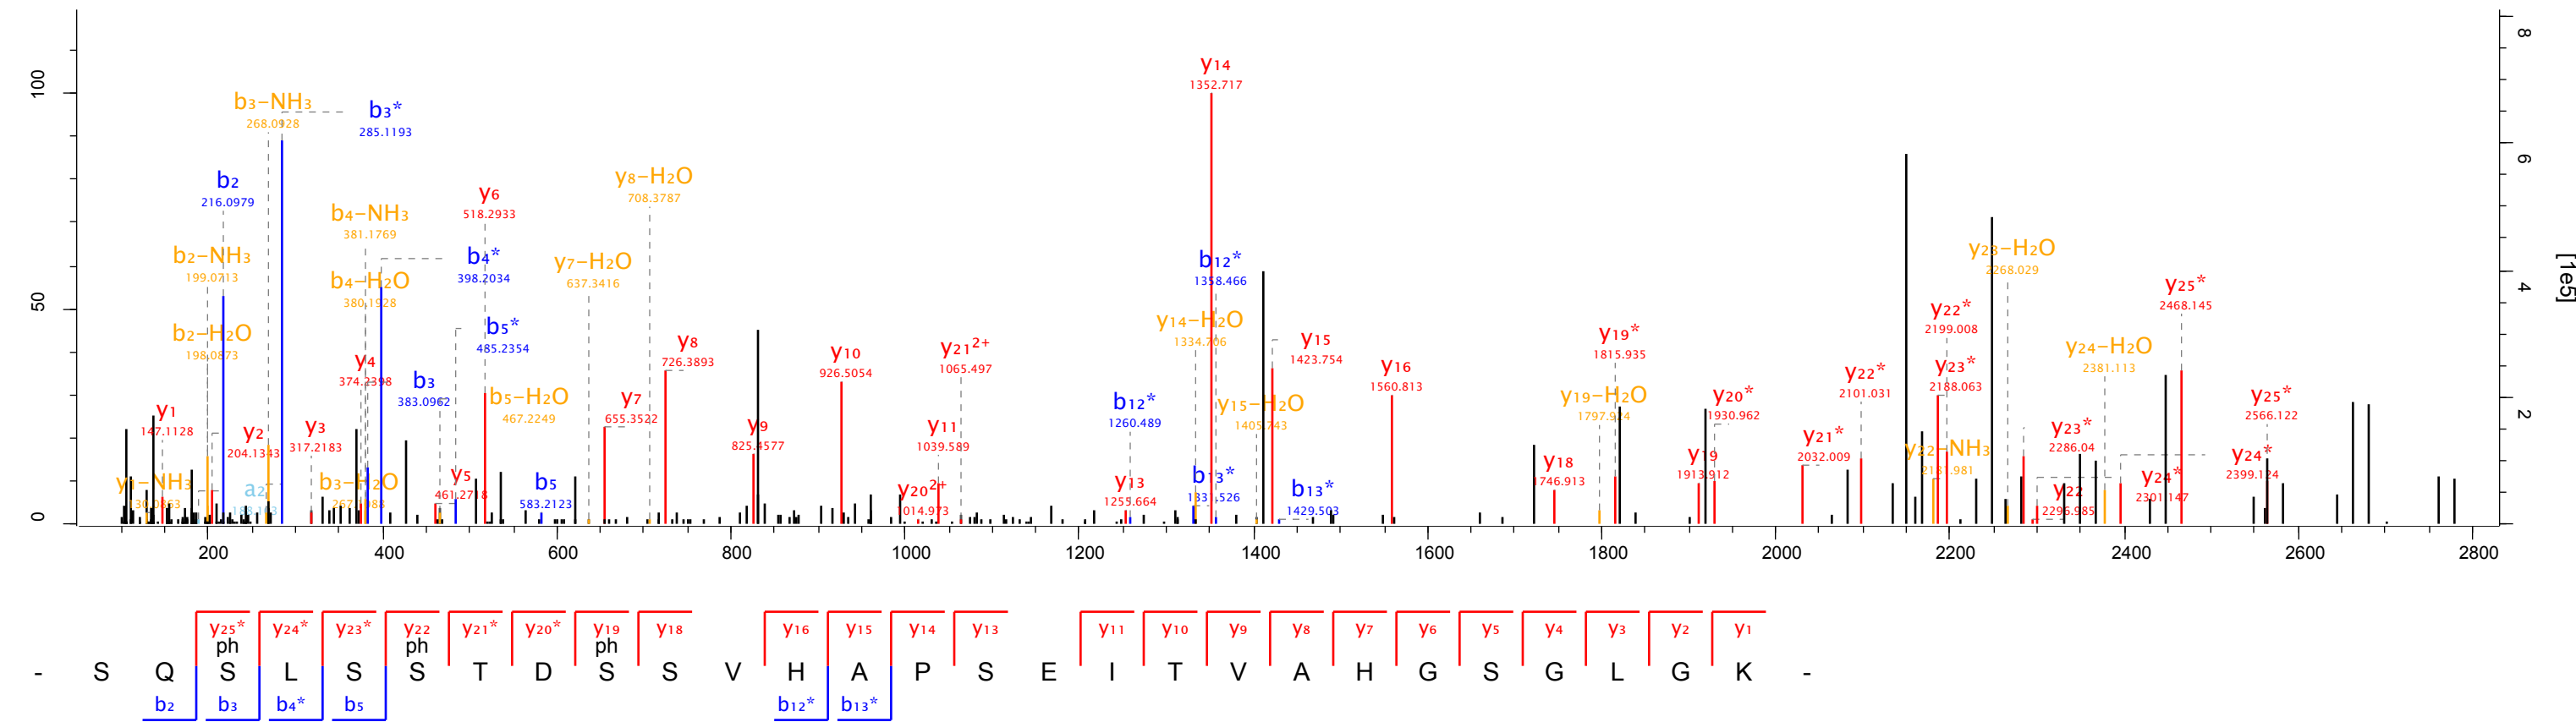

Raw file: 20150812\_A375SR\_Phospho\_BR1\_02  
 Scan: 16654  
 Method: FTMS; HCD  
 Score: 164.28  
 m/z: 1123.79  
 Gene names: RBM6

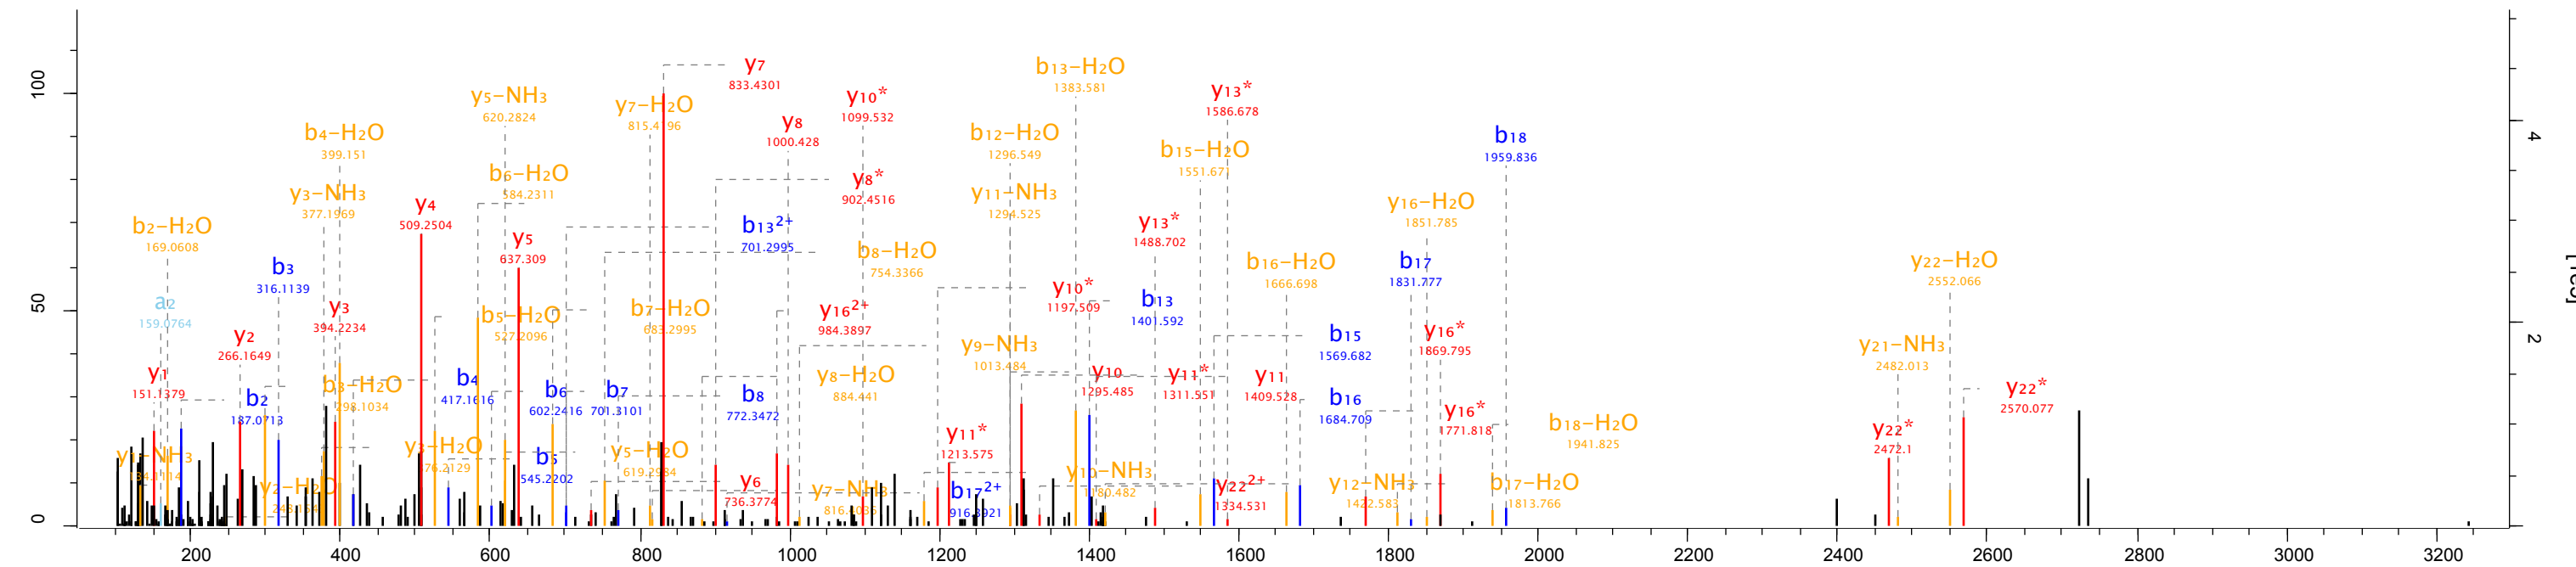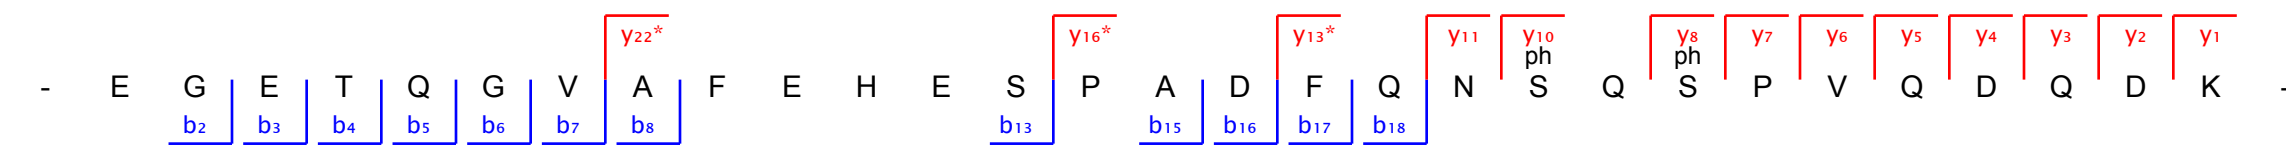

Raw file  
20150812\_A375SR\_Phospho\_BR1\_02

Scan 16754 Method FTMS; HCD Score 82.94 m/z 1027.44 Gene names UNK

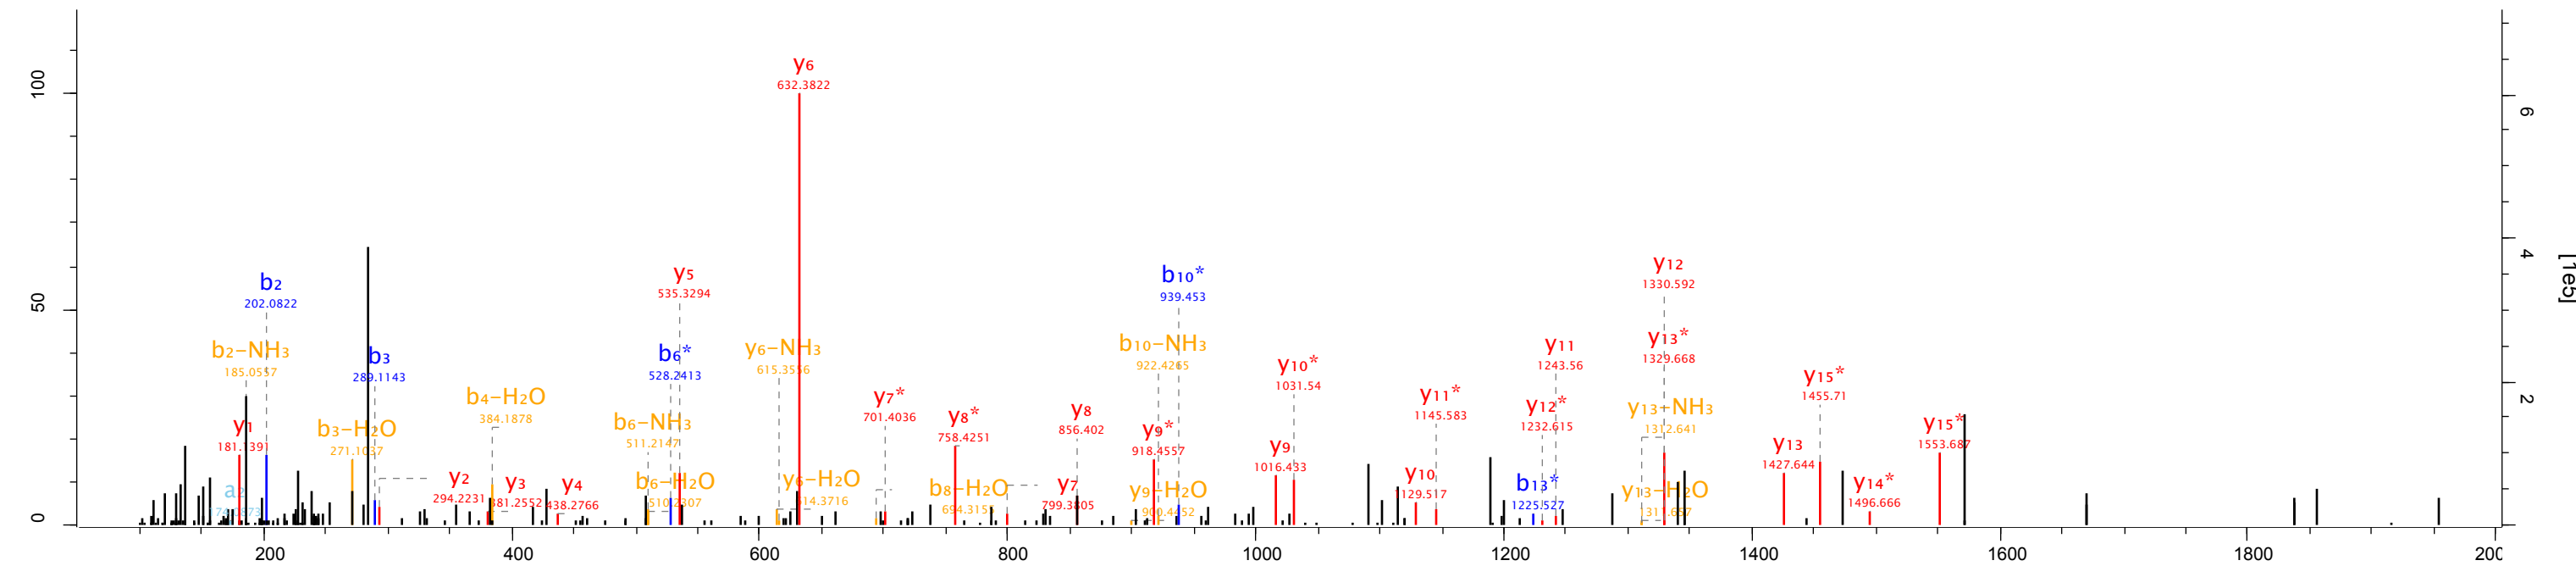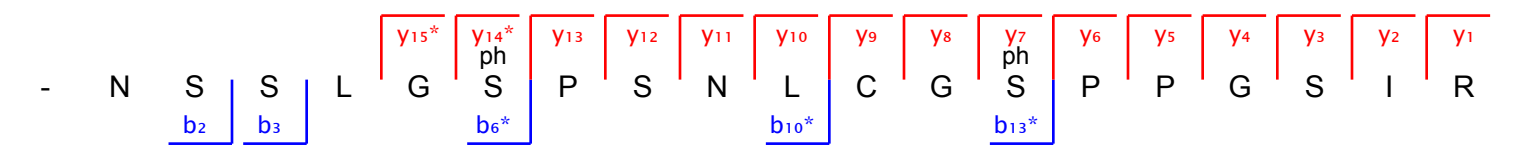

Raw file Scan Method Score m/z Gene names  
 20150812\_A375SR\_Phospho\_BR1\_02 16884 FTMS; HCD 118.96 844.79 ERCC5;BIVM-ERCC5

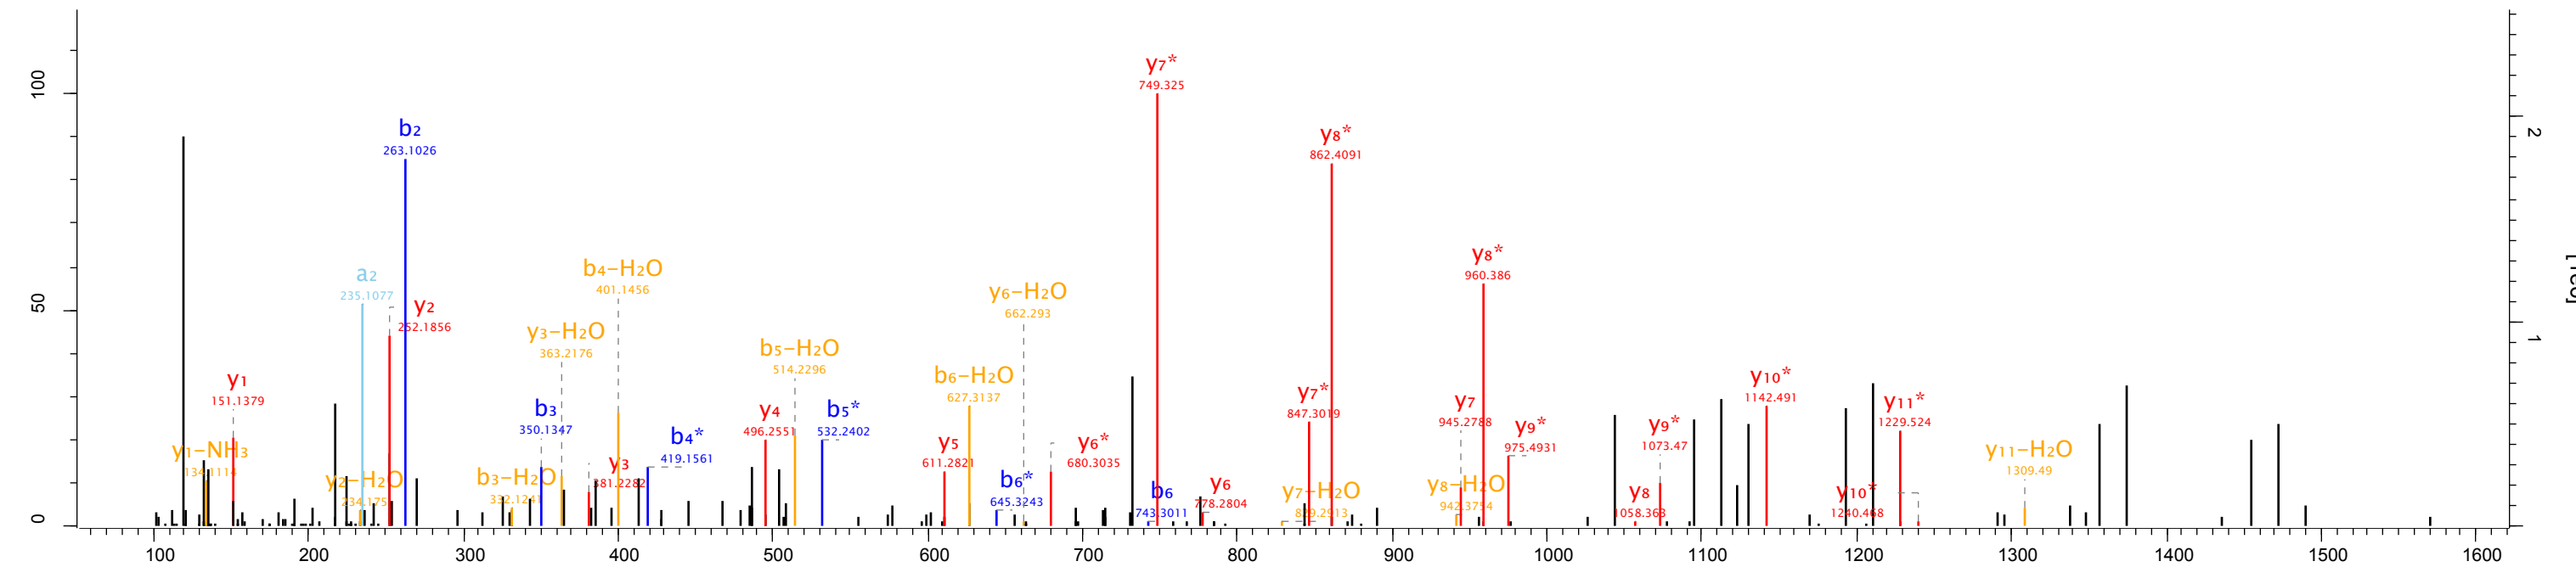

- F D S S L L S S D D E T K -  
 b2 b3 b4\* b5\* b6  
 y11\* y10\* ph y9\* y8 y7 ph y6 ph y5 y4 y3 y2 y1



Raw file: 20150812\_A375SR\_Phospho\_BR1\_02  
 Scan: 17134 Method: FTMS; HCD Score: 141.83 m/z: 947.86 Gene names: MCM2

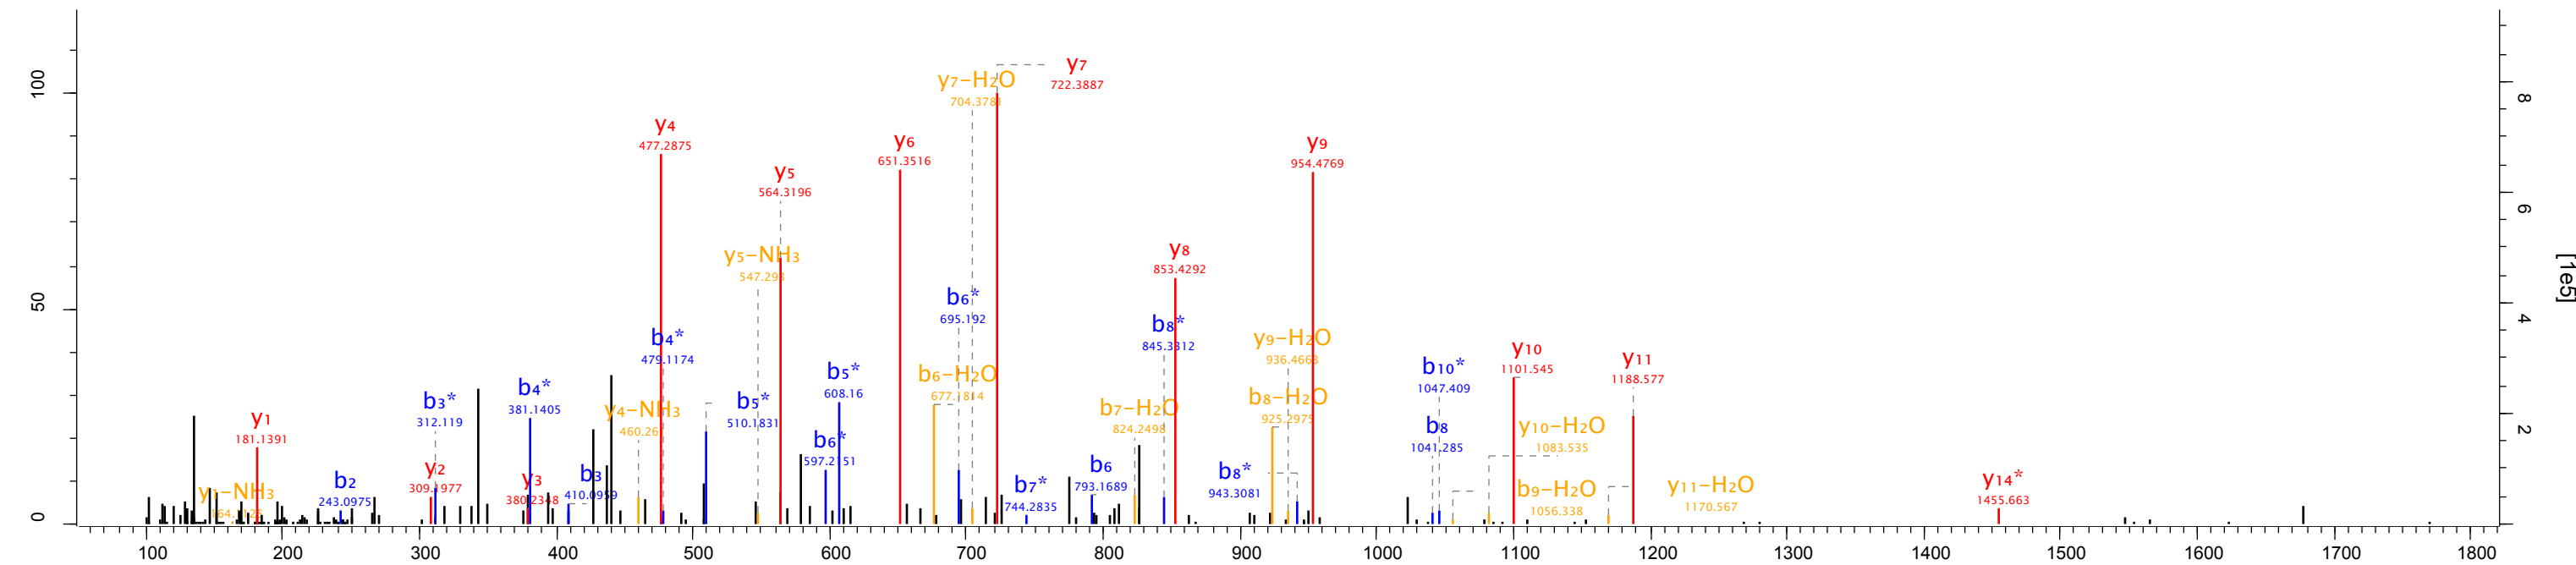

ac - A E E S ph S E S F T M A S S P A Q R -  
 b2 b3 b4\* b5\* b6 b7\* b8 b10\*



Raw file 20150812\_A375SR\_Phospho\_BR1\_02 Scan 17454 Method FTMS; HCD Score 113.7 m/z 870.39 Gene names RACGAP1

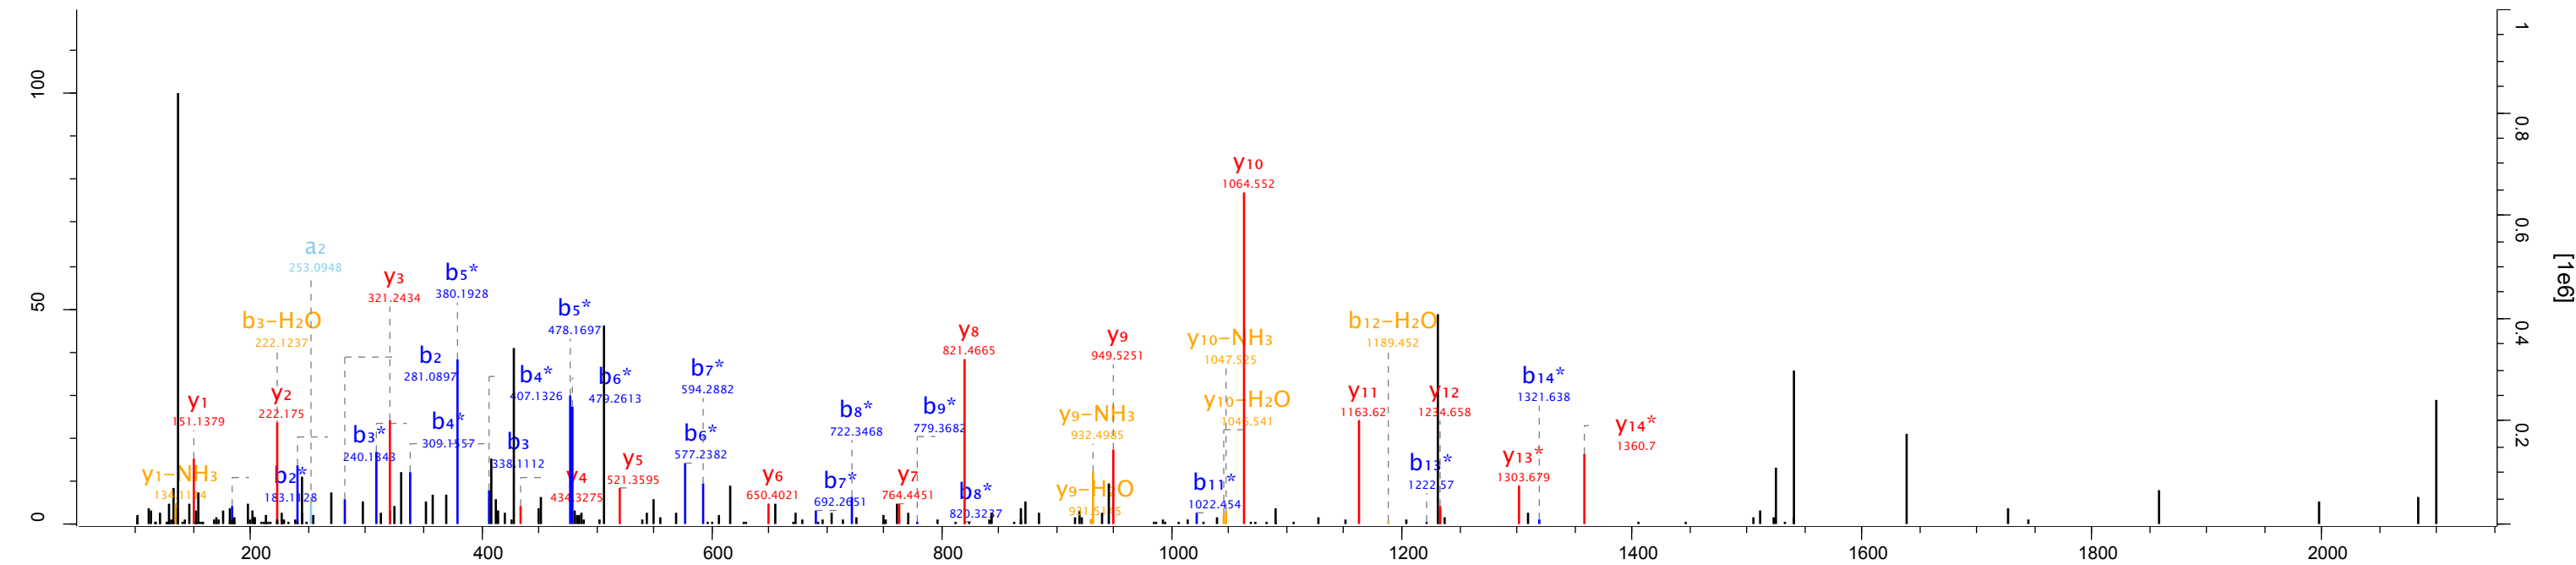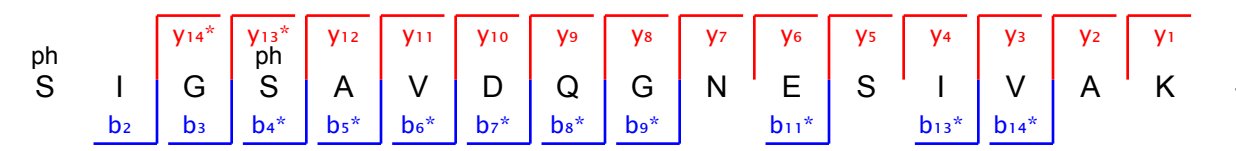

Raw file 20150812\_A375SR\_Phospho\_BR1\_02 Scan 17644 Method FTMS; HCD Score 180.05 m/z 1128.37 Gene names RIC8B

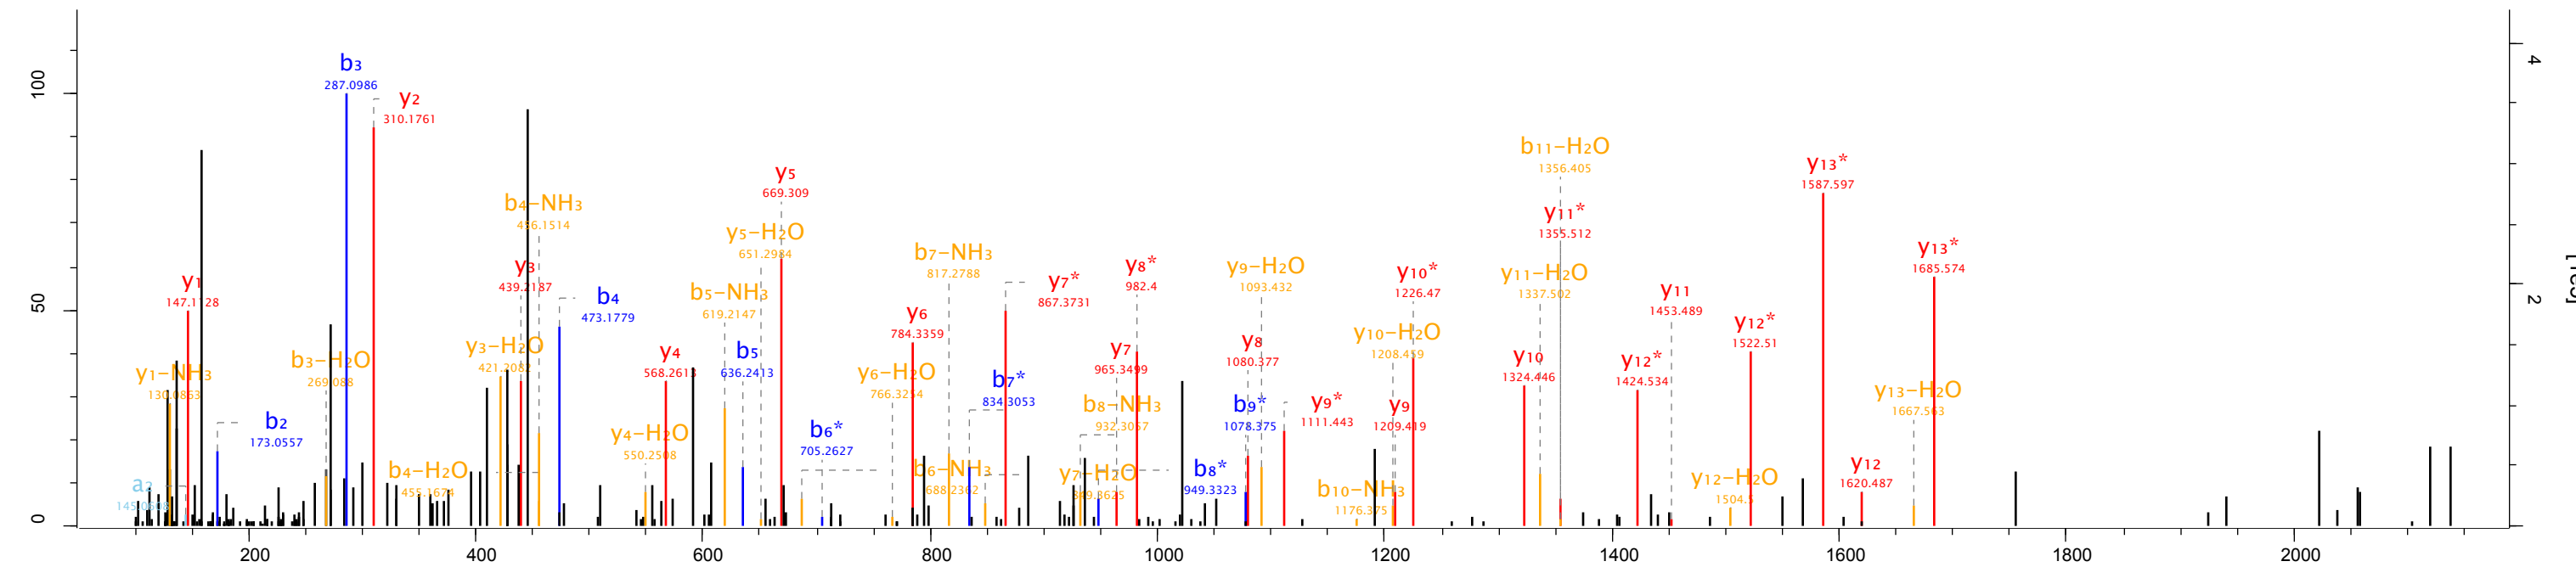

- G D N W Y S E D E D T D T E E Y K -

Fragmentation mapping (b and y ions) is shown below the sequence:

- b<sub>2</sub> (under D)
- b<sub>3</sub> (under N)
- b<sub>4</sub> (under W)
- b<sub>5</sub> (under Y)
- b<sub>6</sub>\*
- b<sub>7</sub>\*
- b<sub>8</sub>\*
- b<sub>9</sub>\*

Fragmentation mapping (y ions) is shown below the sequence:

- y<sub>13</sub>\*
- y<sub>12</sub> ph
- y<sub>11</sub>
- y<sub>10</sub>
- y<sub>9</sub>
- y<sub>8</sub>
- y<sub>7</sub> ph
- y<sub>6</sub>
- y<sub>5</sub>
- y<sub>4</sub>
- y<sub>3</sub>
- y<sub>2</sub>
- y<sub>1</sub>

Raw file 20150812\_A375SR\_Phospho\_BR1\_02 Scan 17994 Method FTMS; HCD Score 91.17 m/z 878.83 Gene names ZEB1

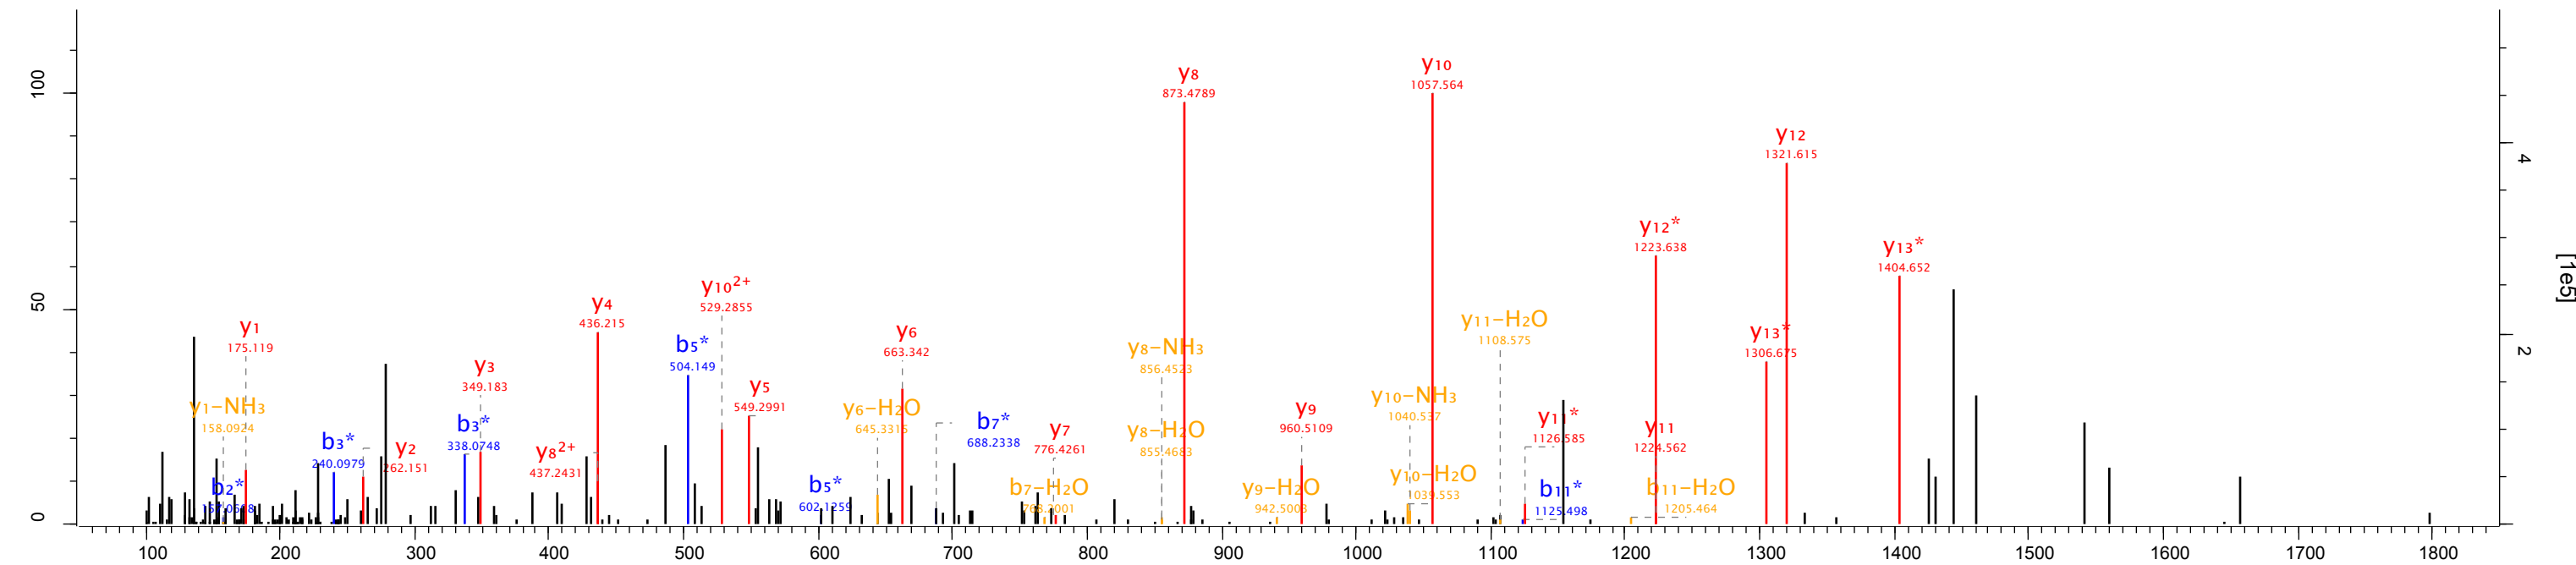

- S ph S b2\* b3\* y13\* ph T y12 P y11 ph S b5\* P y10 S y9 S b7\* P y8 L y7 N y6 L y5 b11\* S y4 S y3 S y2 S y1 R -

20150812\_A375SR\_Phospho\_BR1\_02

18544 FTMS; HCD 231.36 1062.82 IRS2

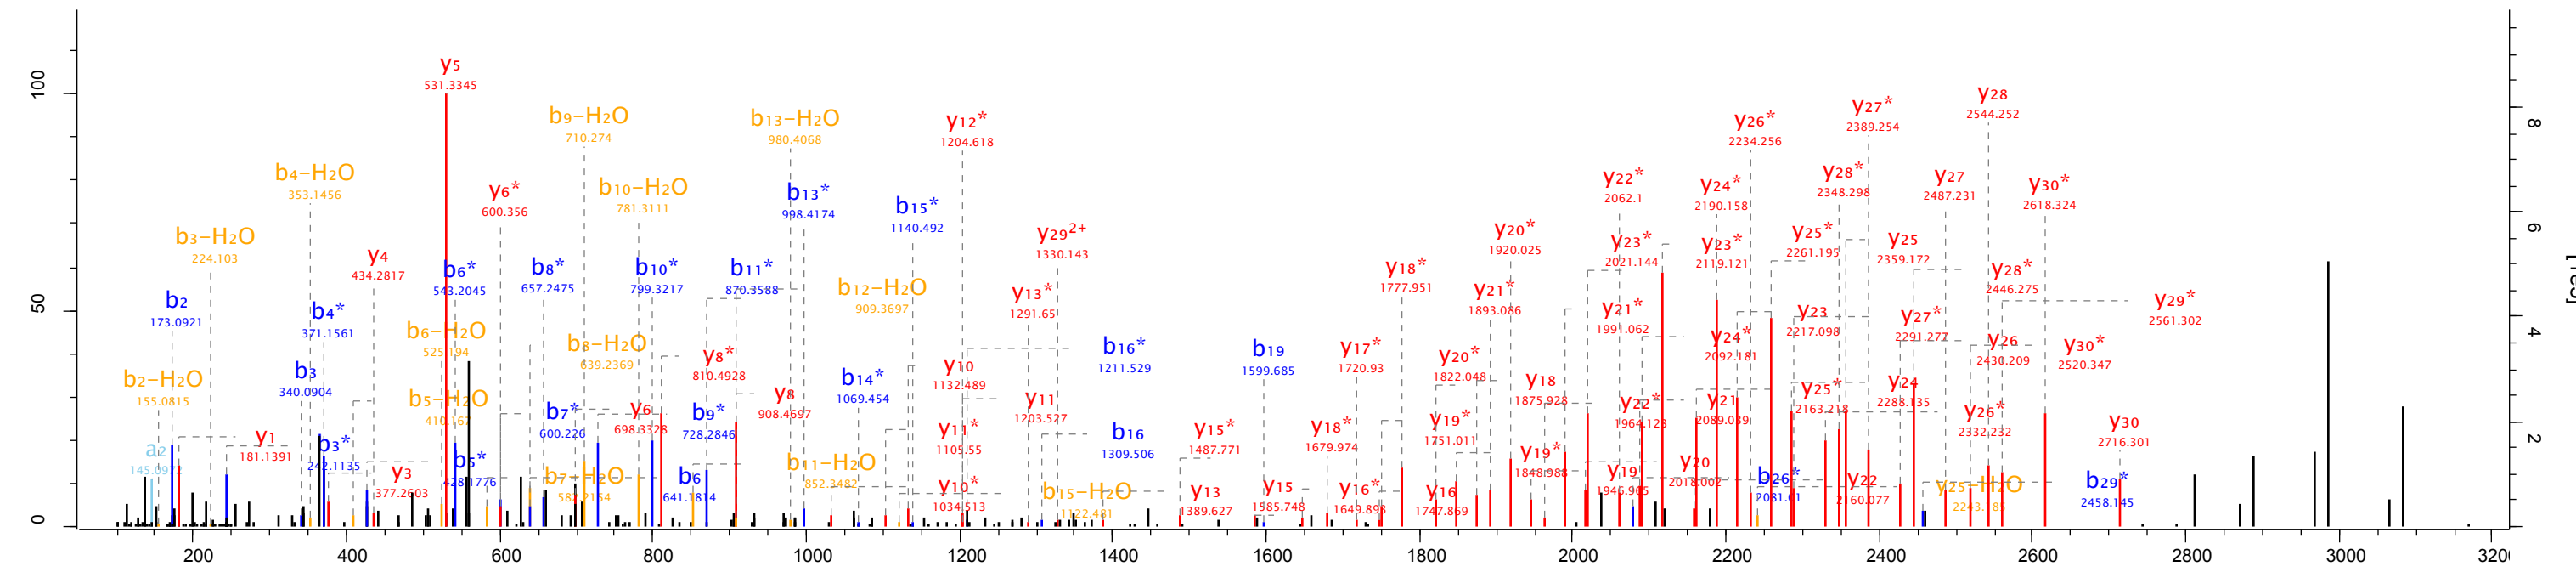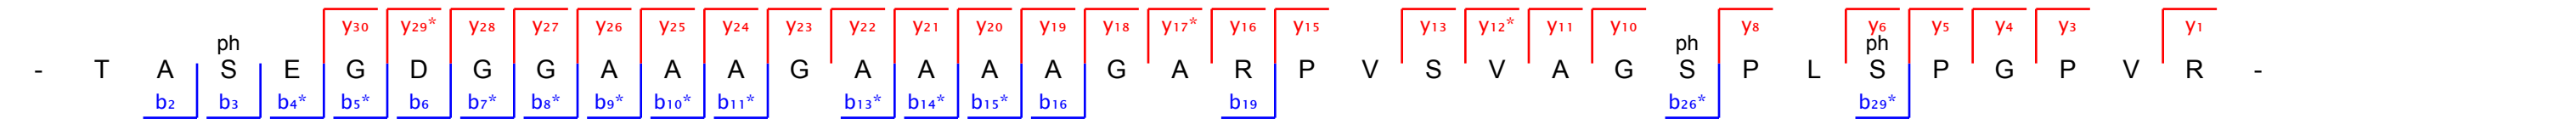



Raw file  
 20150812\_A375SR\_Phospho\_BR1\_02  
 Scan 19034 Method FTMS; HCD Score 67.91 m/z 858.97 Gene names ATRX

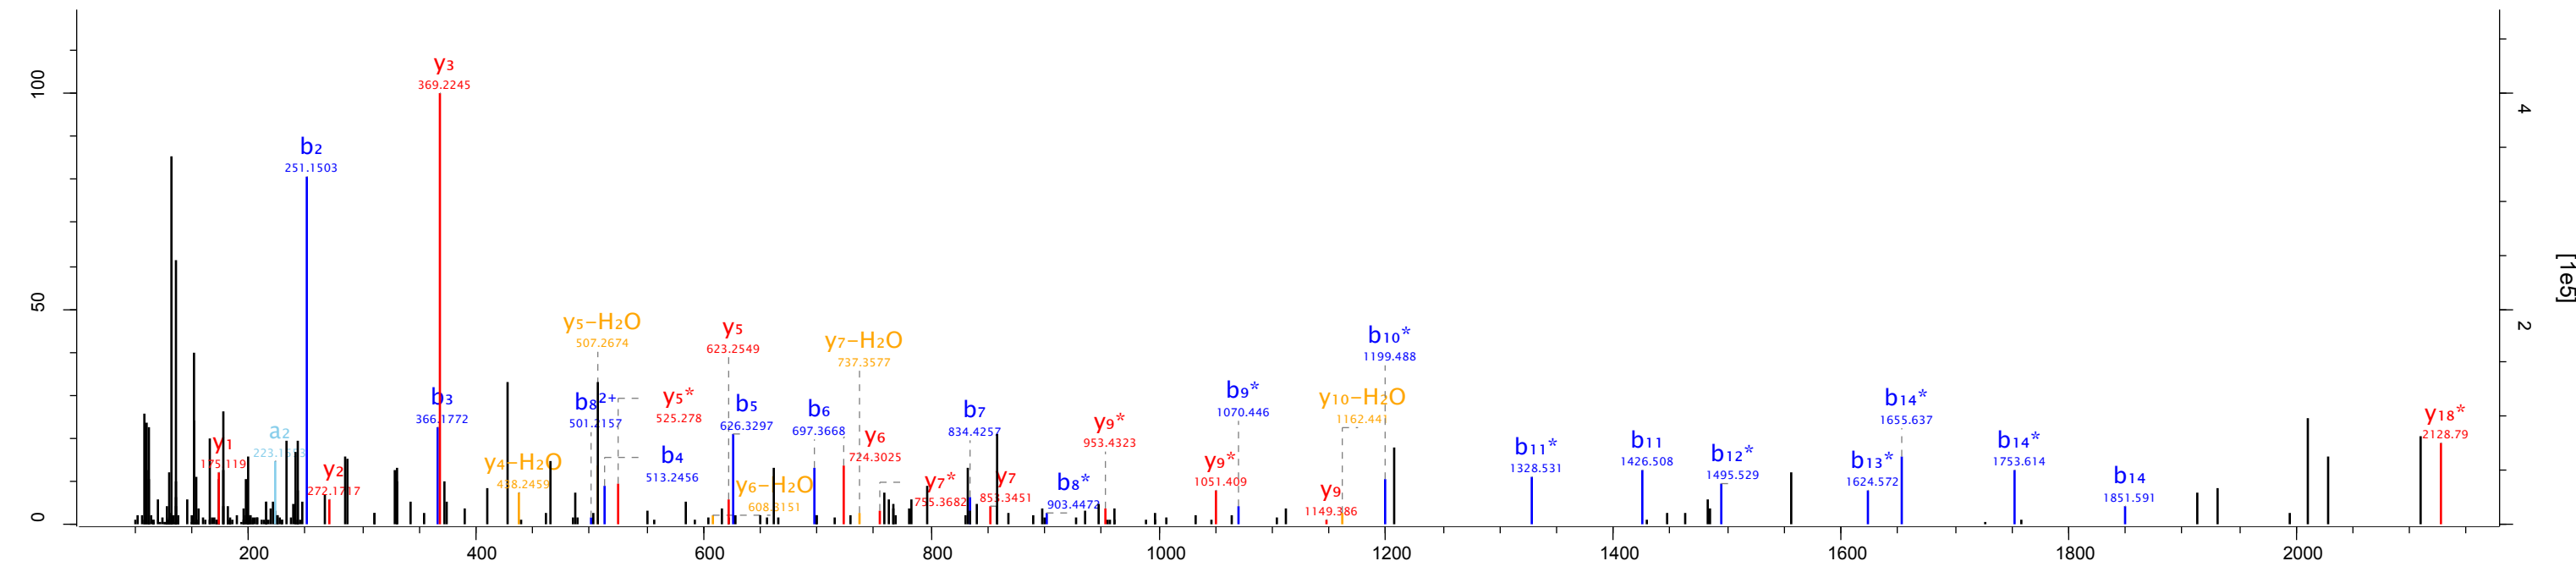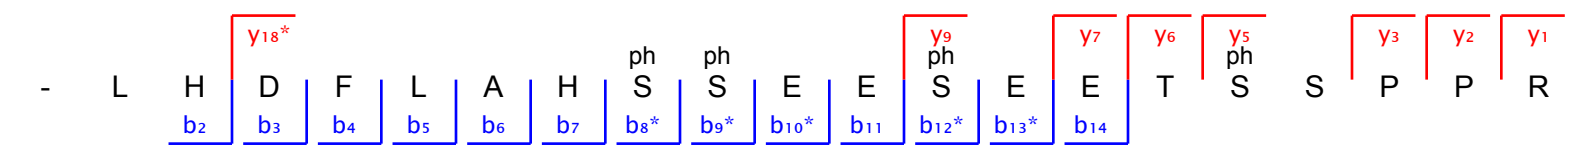



Raw file 20150812\_A375SR\_Phospho\_BR1\_02 Scan 19084 Method FTMS; HCD Score 141.7 m/z 745.84 Gene names ARHGAP23

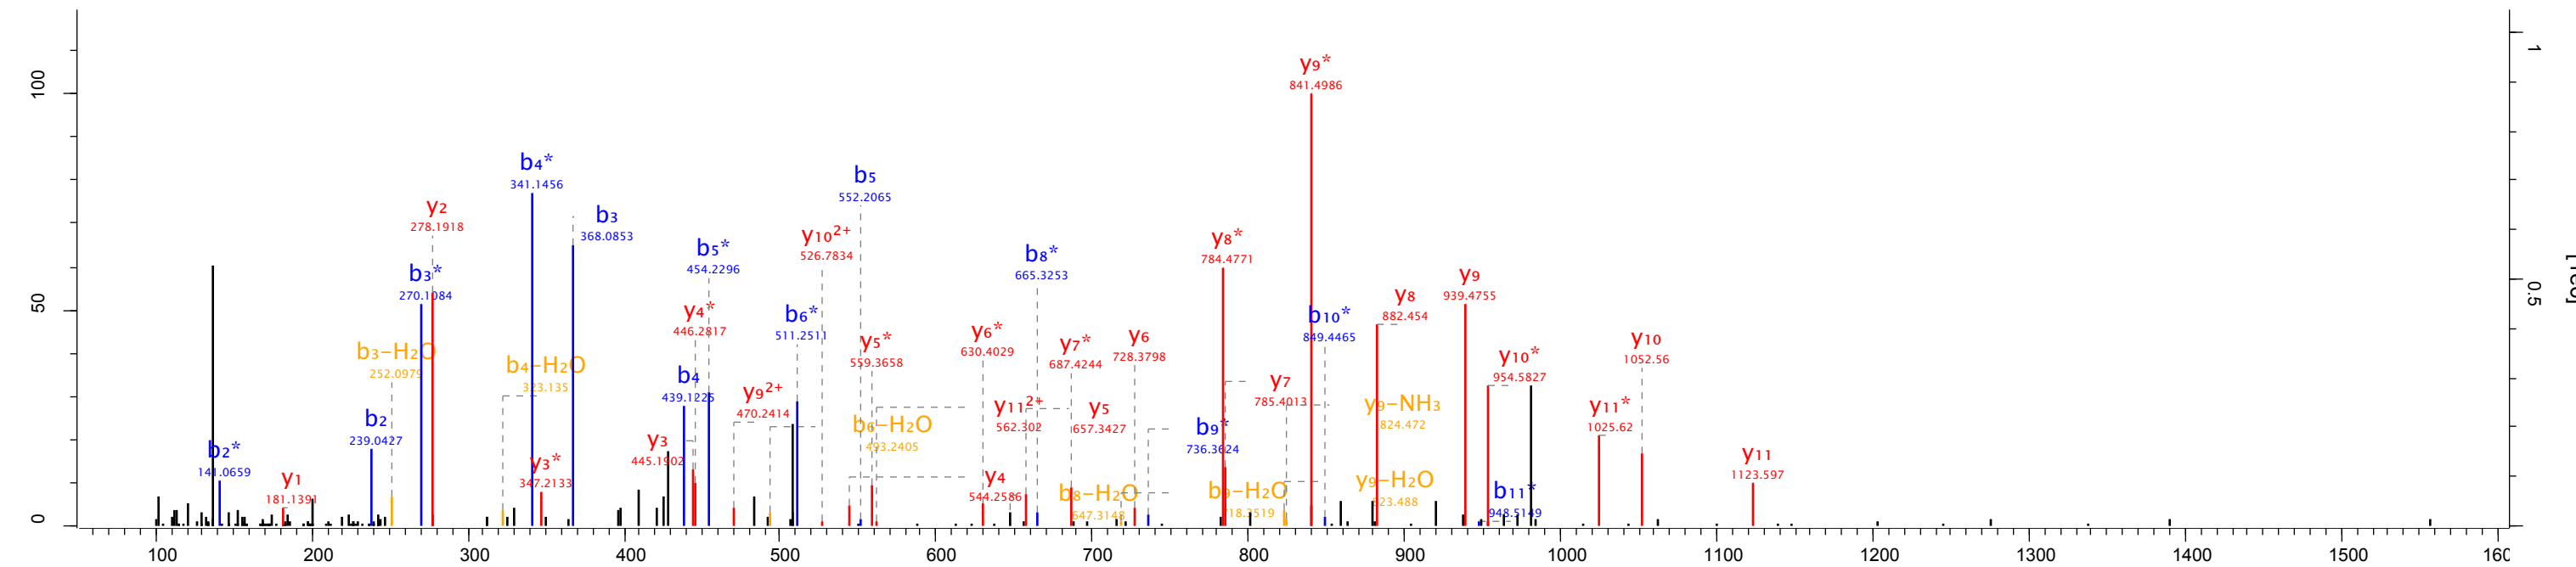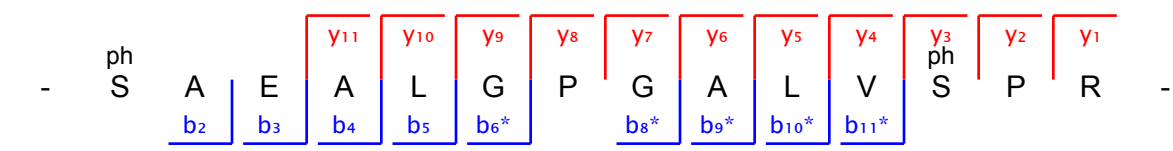

Raw file 20150812\_A375SR\_Phospho\_BR1\_02 Scan 19244 Method FTMS; HCD Score 159.76 m/z 962.91 Gene names GTSE1

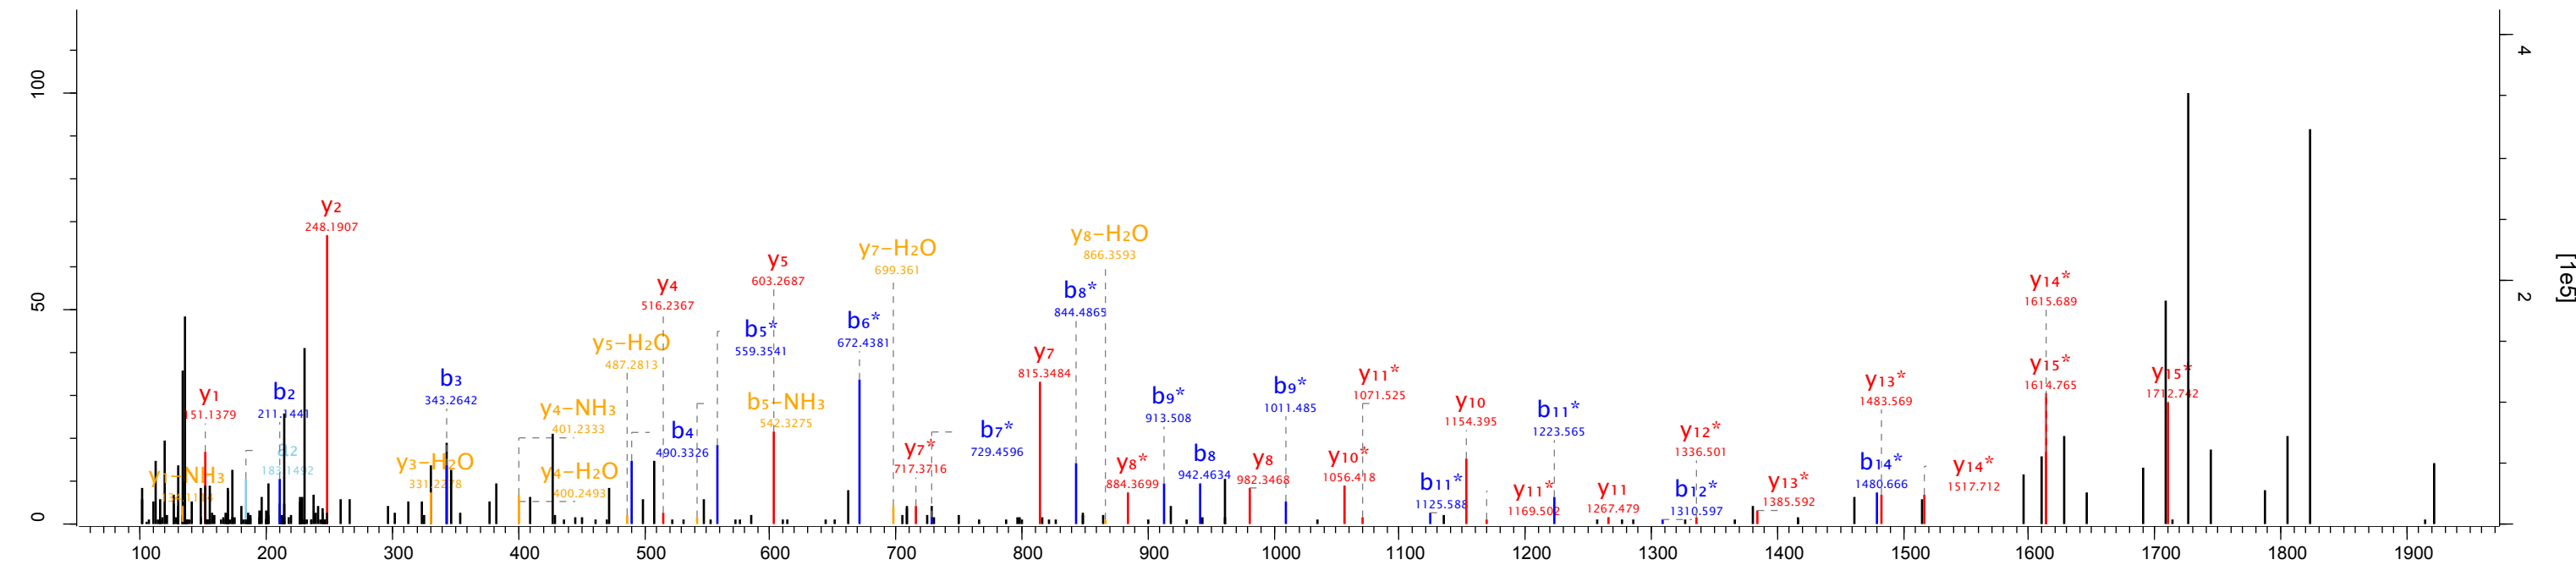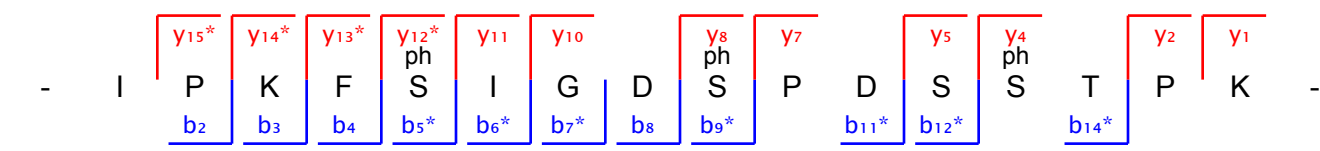

Raw file 20150812\_A375SR\_Phospho\_BR1\_02 Scan 19264 Method FTMS; HCD Score 233.87 m/z 1362.53 Gene names SMAP;C11orf58

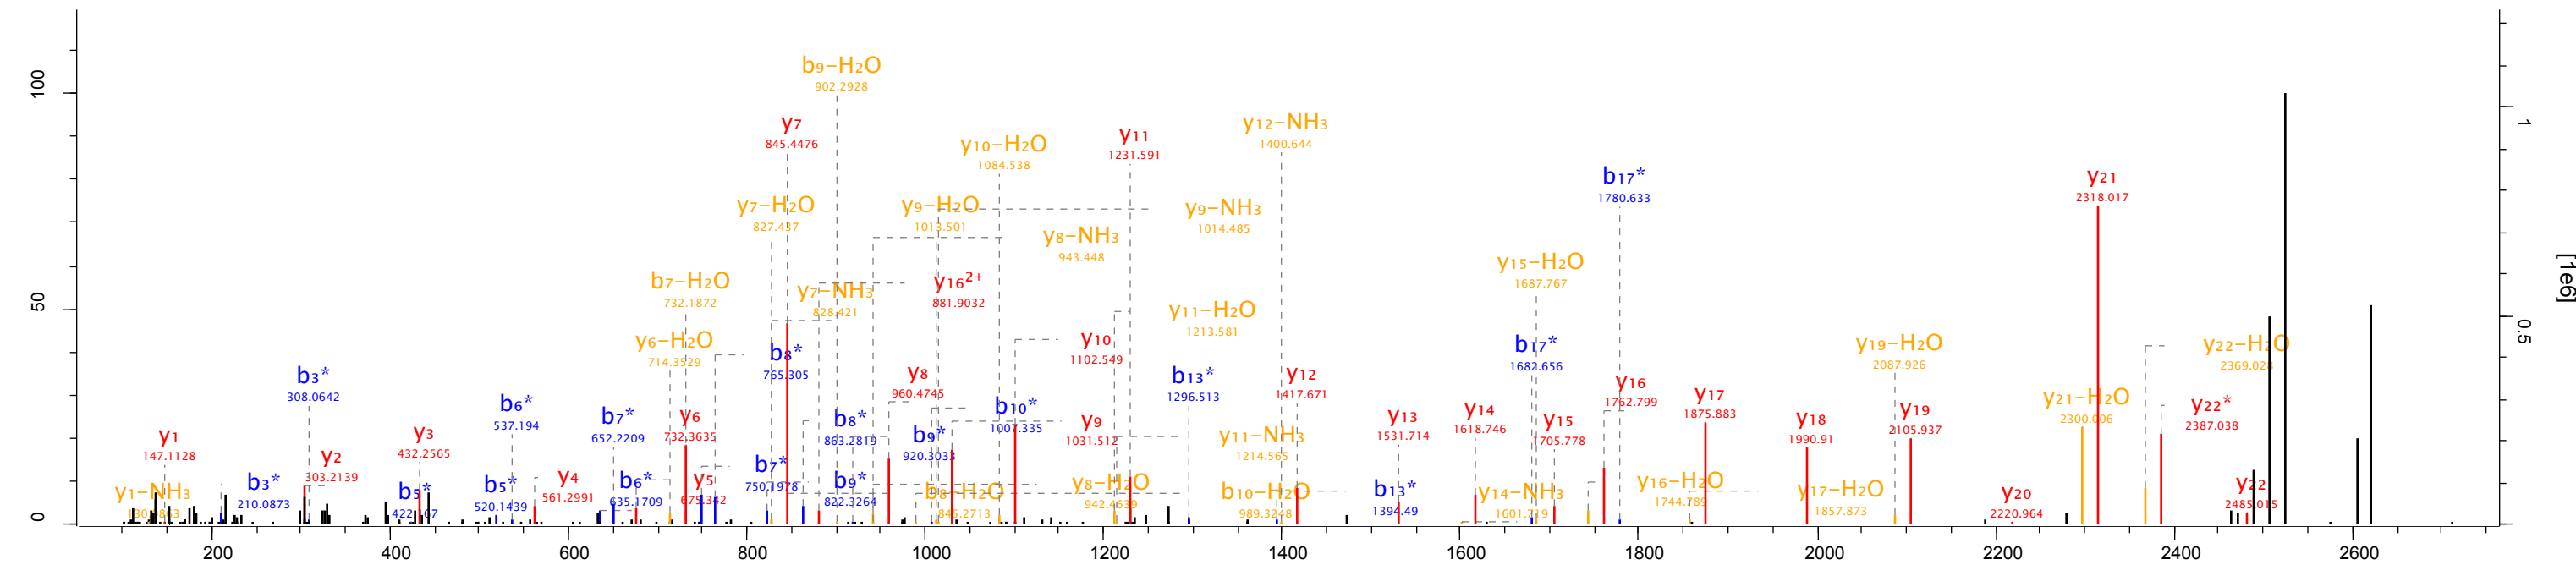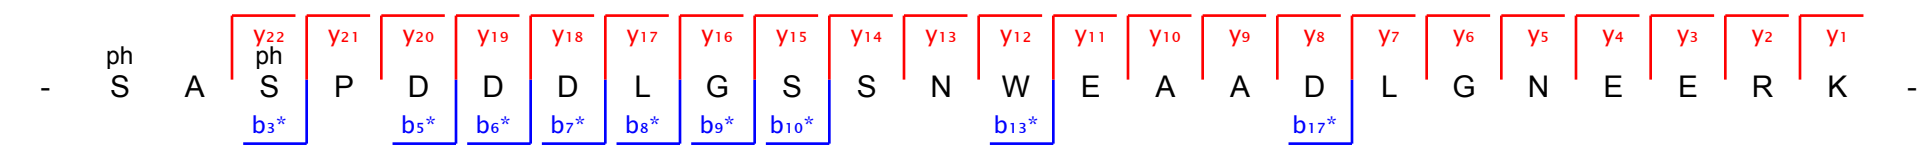

Raw file 20150812\_A375SR\_Phospho\_BR1\_02 Scan 19724 Method FTMS; HCD Score 143.03 m/z 1044.97 Gene names EHBP1

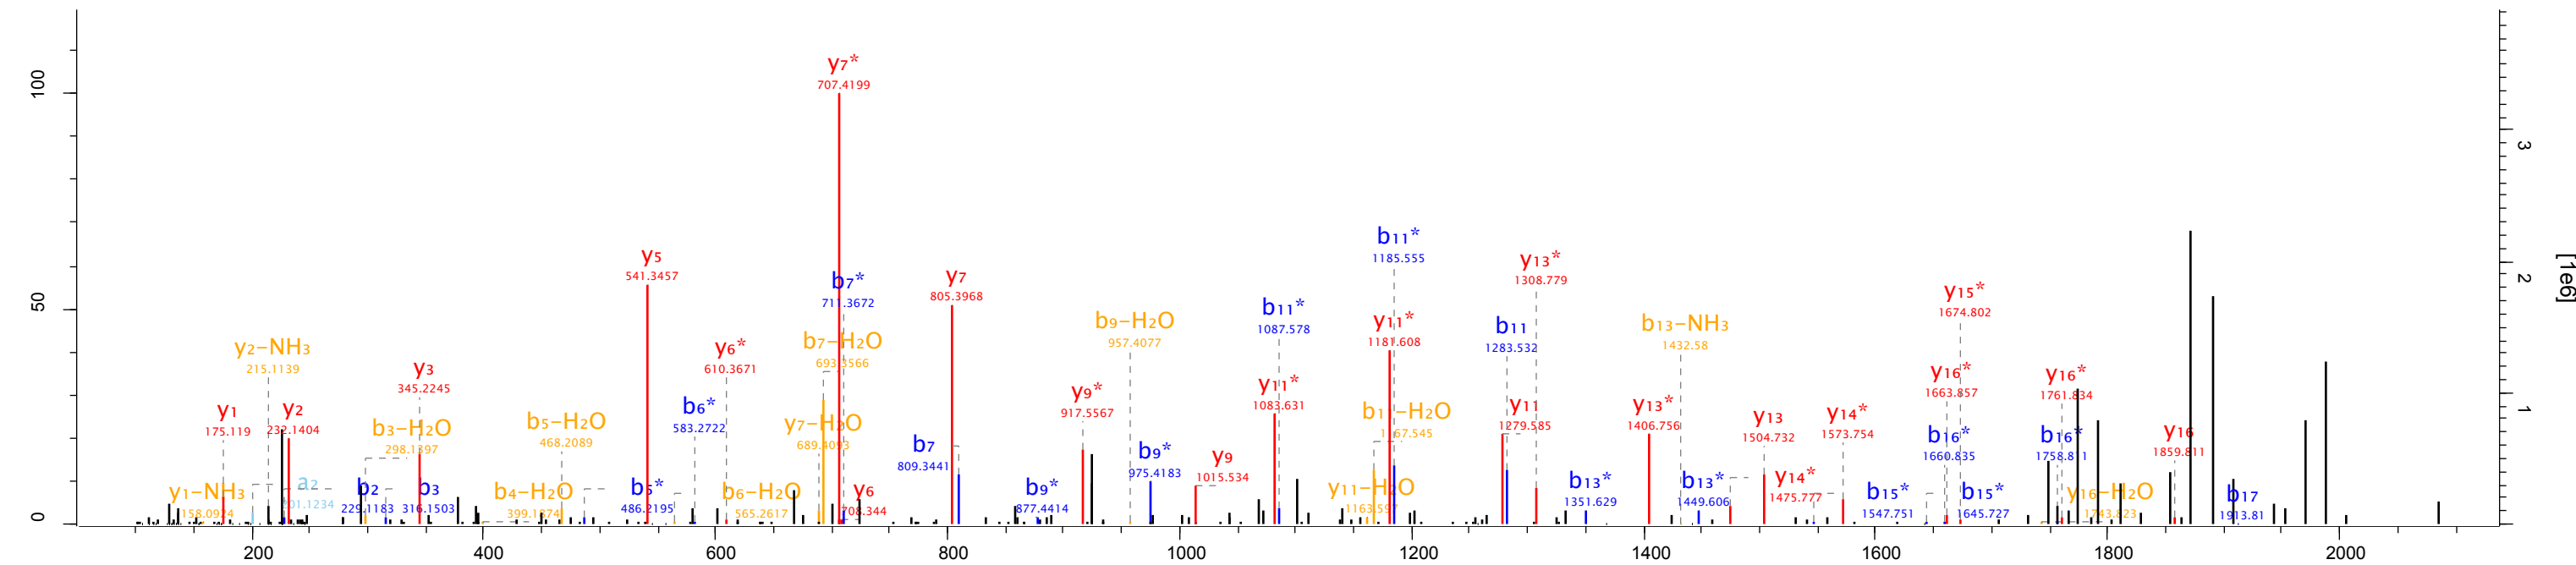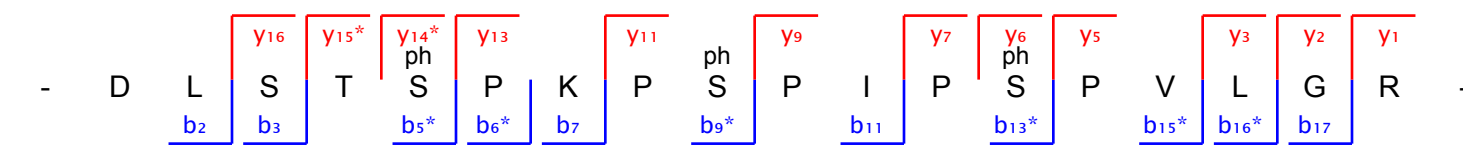

Raw file 20150812\_A375SR\_Phospho\_BR1\_02 Scan 19804 Method FTMS; HCD Score 181.35 m/z 897.04 Gene names AHNAK

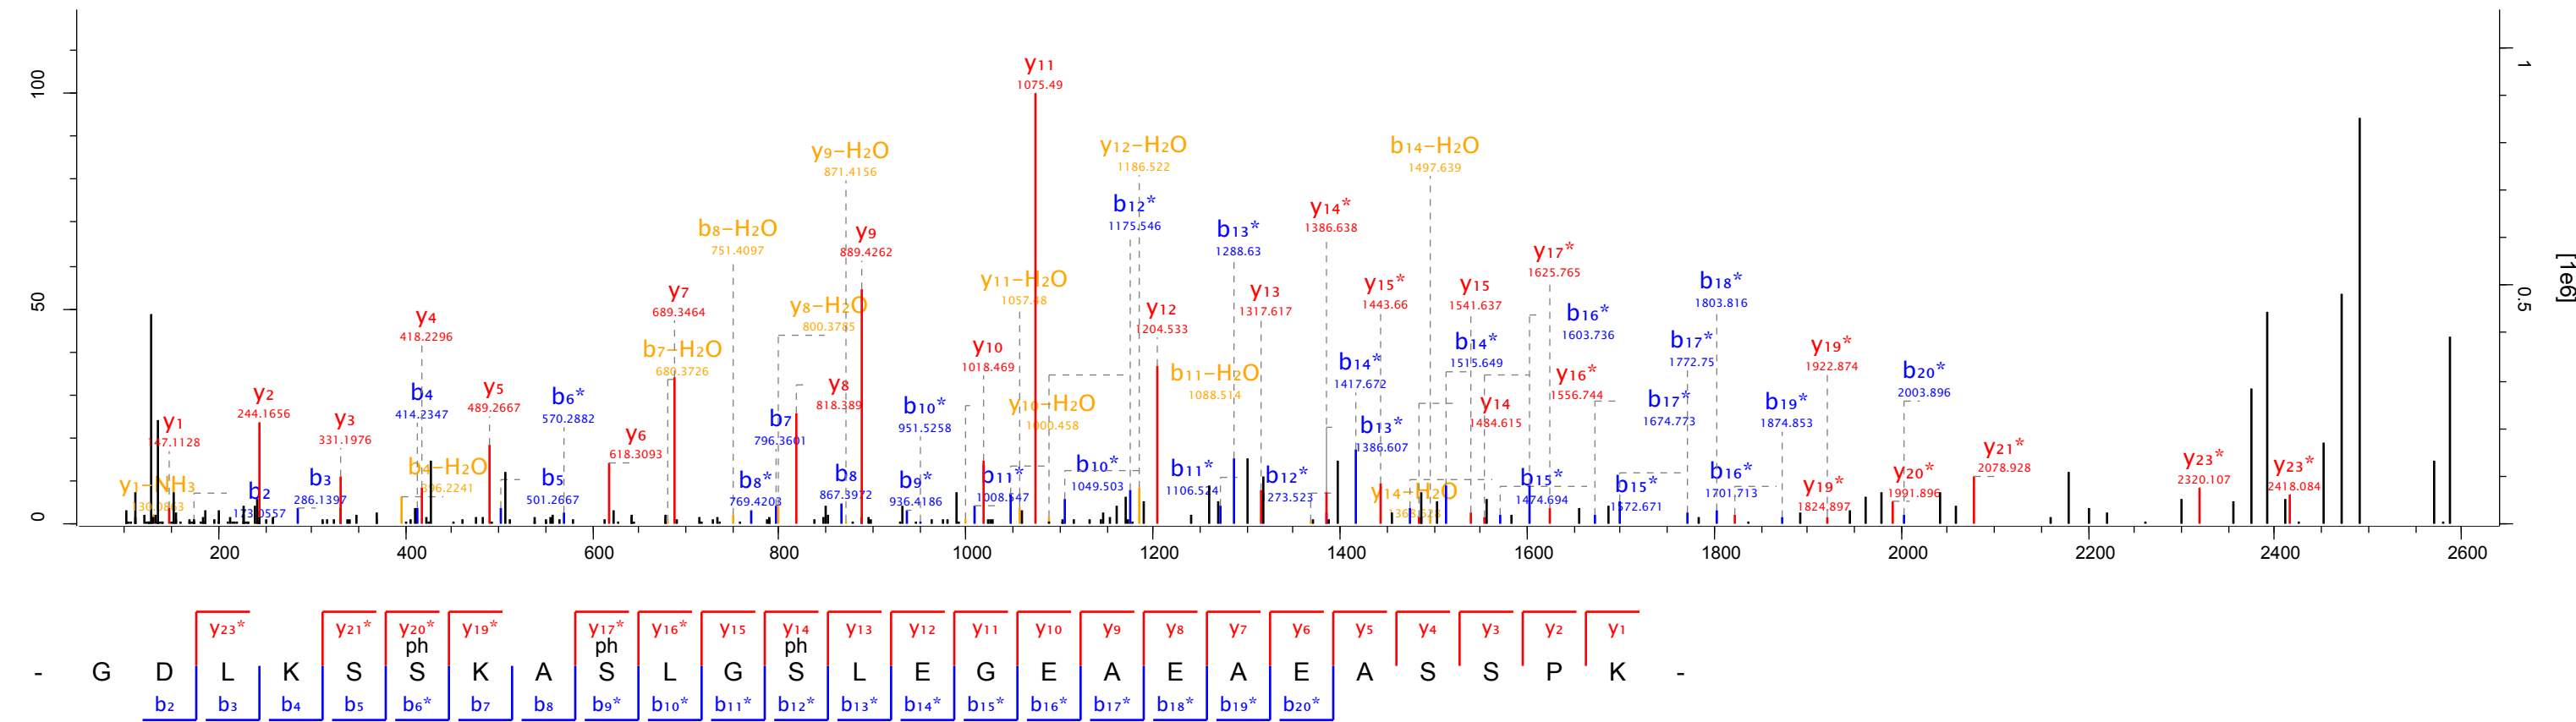

Raw file  
20150812\_A375SR\_Phospho\_BR1\_02

Scan 20064 Method FTMS; HCD Score 71.81 m/z 776.33 Gene names POLA2

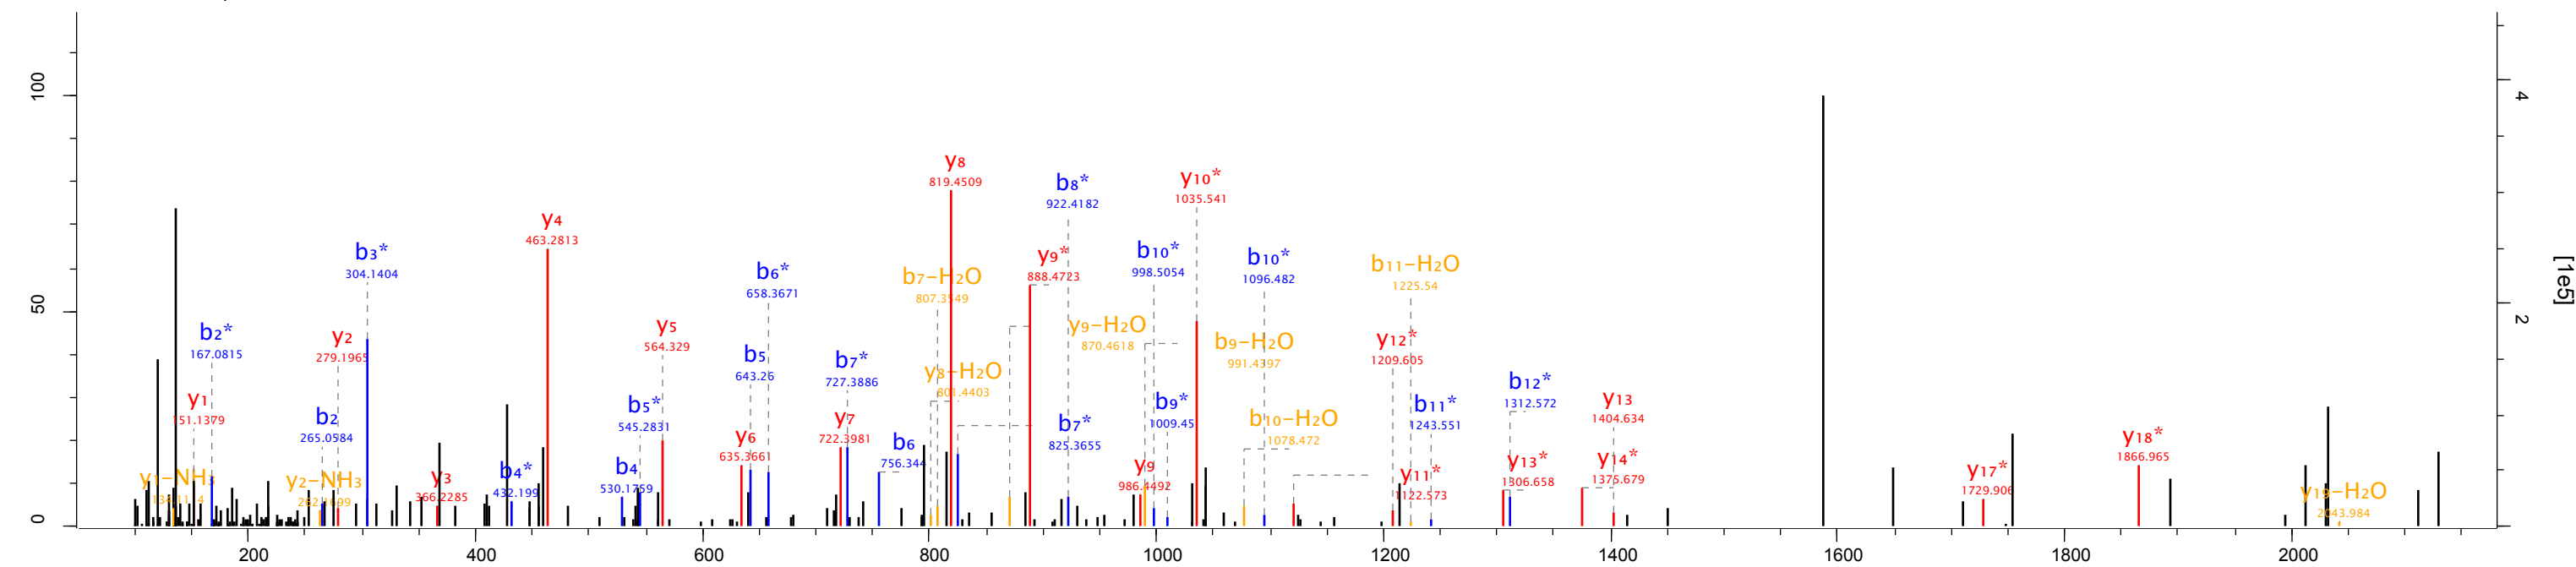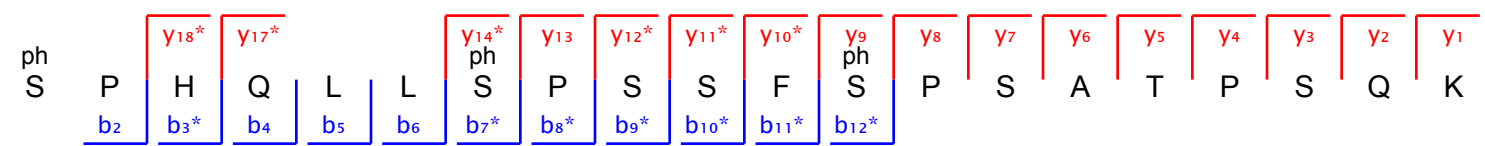



Raw file: 20150812\_A375SR\_Phospho\_BR1\_02  
 Scan: 20884 Method: FTMS; HCD Score: 220.2 m/z: 1138.45 Gene names: AHNAK

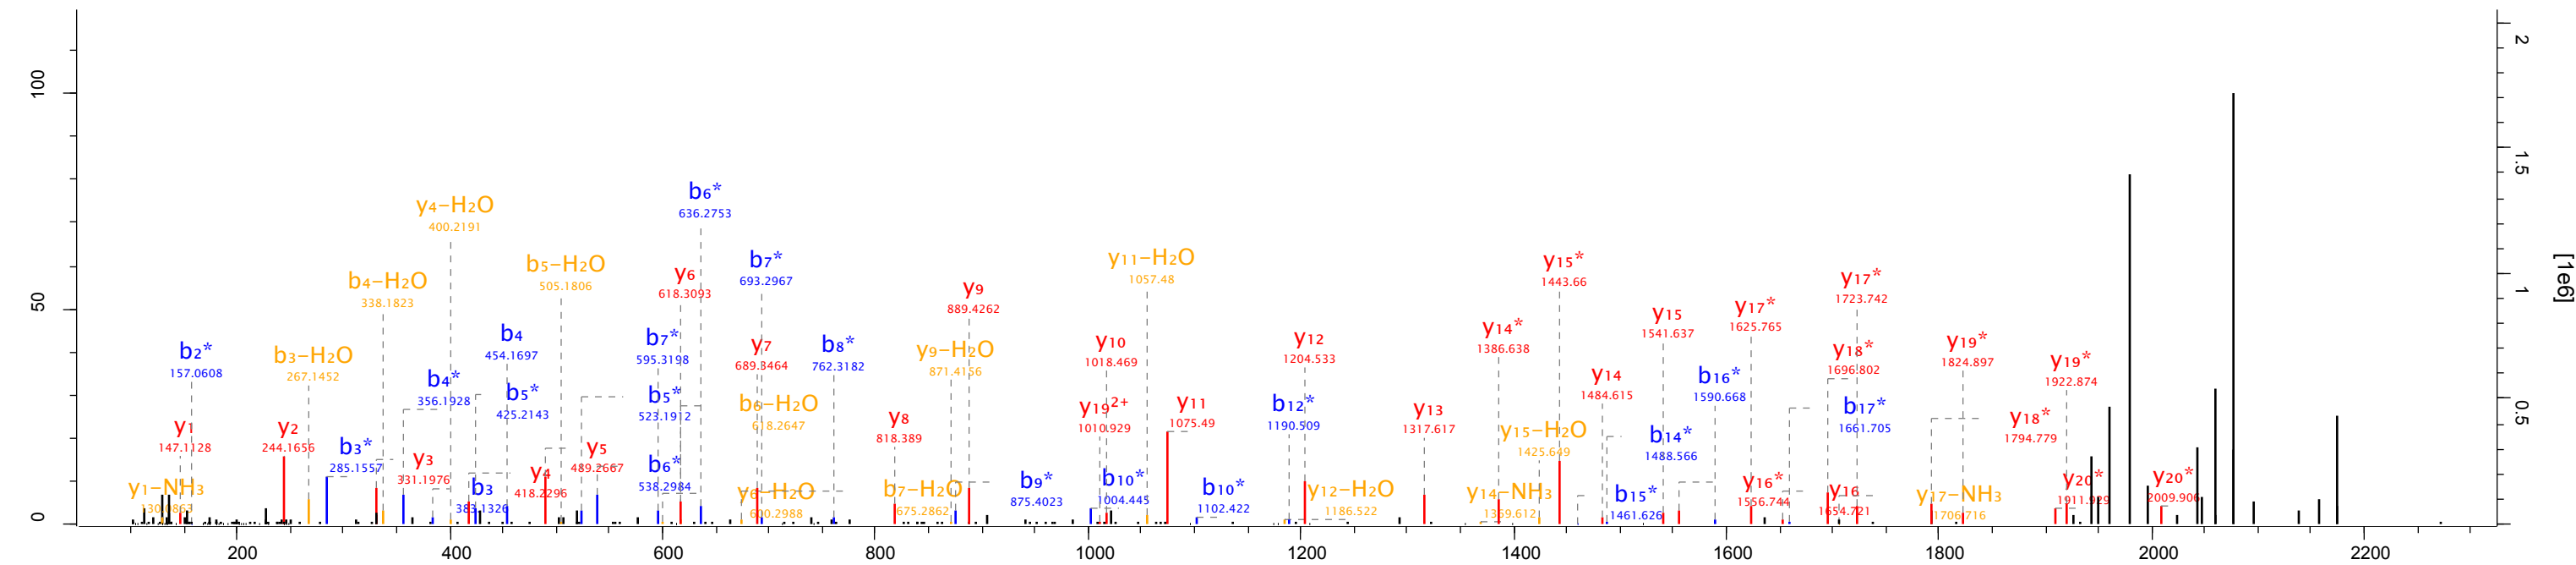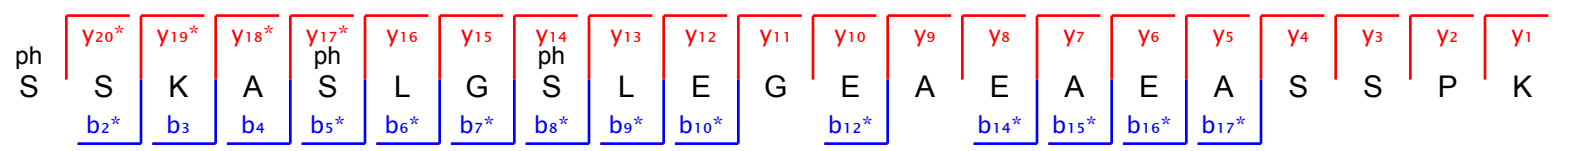



Raw file 20150812\_A375SR\_Phospho\_BR1\_02 Scan 21884 Method FTMS; HCD Score 176.11 m/z 1062.93 Gene names CDC42EP3

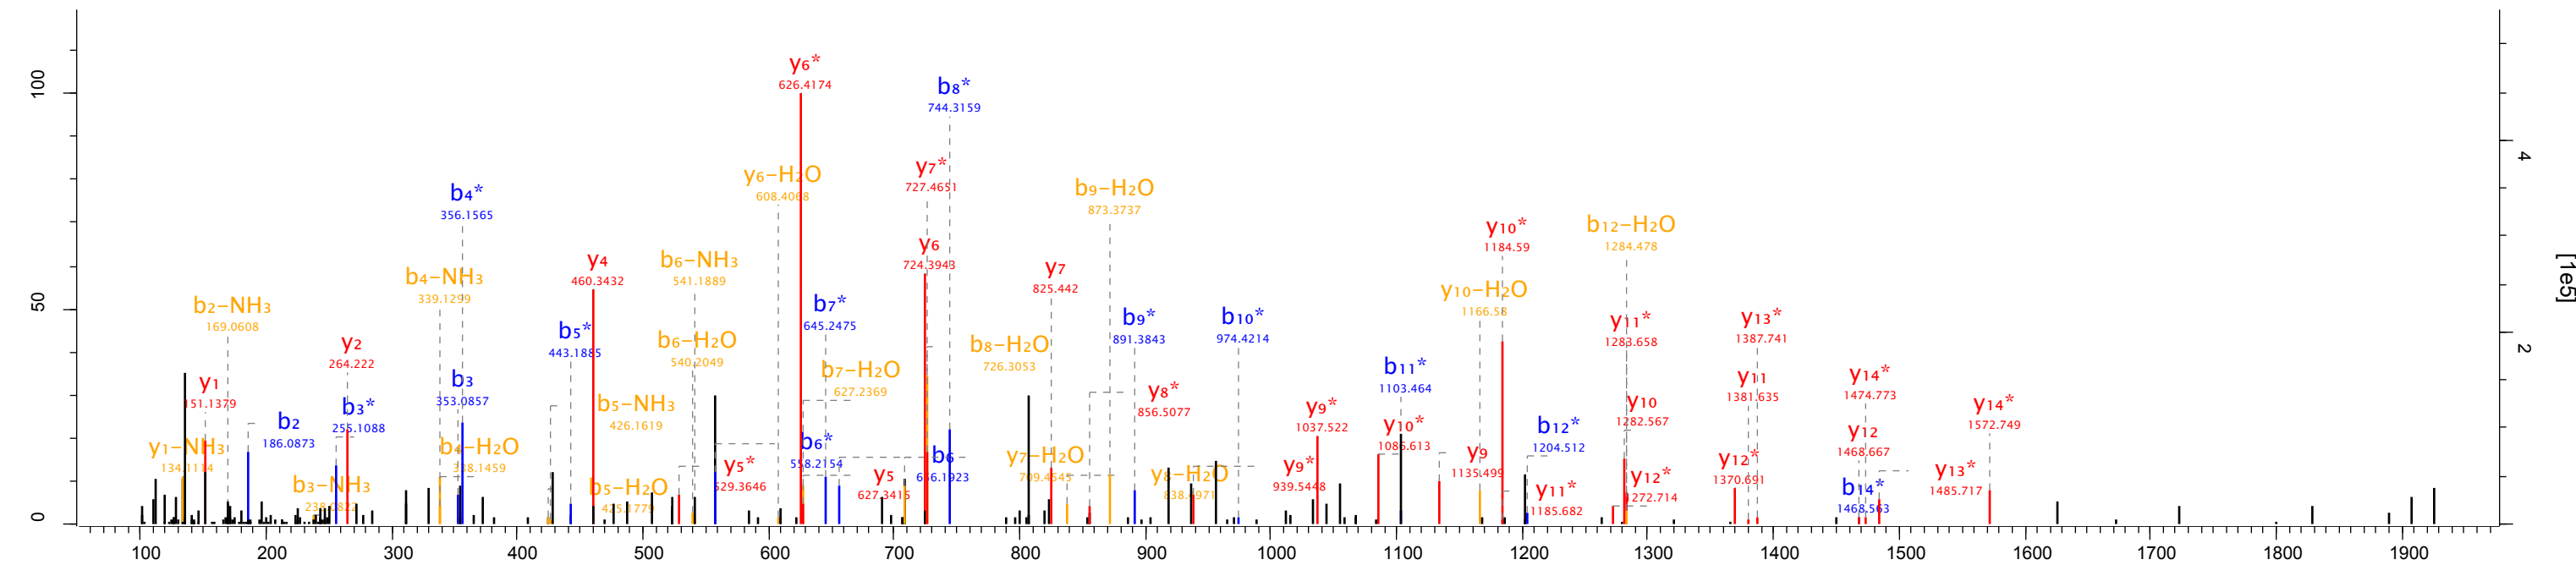

- A N S T S D S V F T P V L K -

b<sub>2</sub>
b<sub>3</sub>
b<sub>4</sub>\*
b<sub>5</sub>\*
b<sub>6</sub>
b<sub>7</sub>\*
b<sub>8</sub>\*
b<sub>9</sub>\*
b<sub>10</sub>\*
b<sub>11</sub>\*
b<sub>12</sub>\*
b<sub>14</sub>\*
y<sub>14</sub>\*
y<sub>13</sub>\*
y<sub>12</sub>
y<sub>11</sub>
y<sub>10</sub>
y<sub>9</sub>
y<sub>8</sub>\*
y<sub>7</sub>
y<sub>6</sub>
y<sub>5</sub>
y<sub>4</sub>
y<sub>2</sub>
y<sub>1</sub>

Raw file: 20150812\_A375SR\_Phospho\_BR1\_02  
 Scan: 22384 Method: FTMS; HCD Score: 176.22 m/z: 933.34 Gene names: HN1

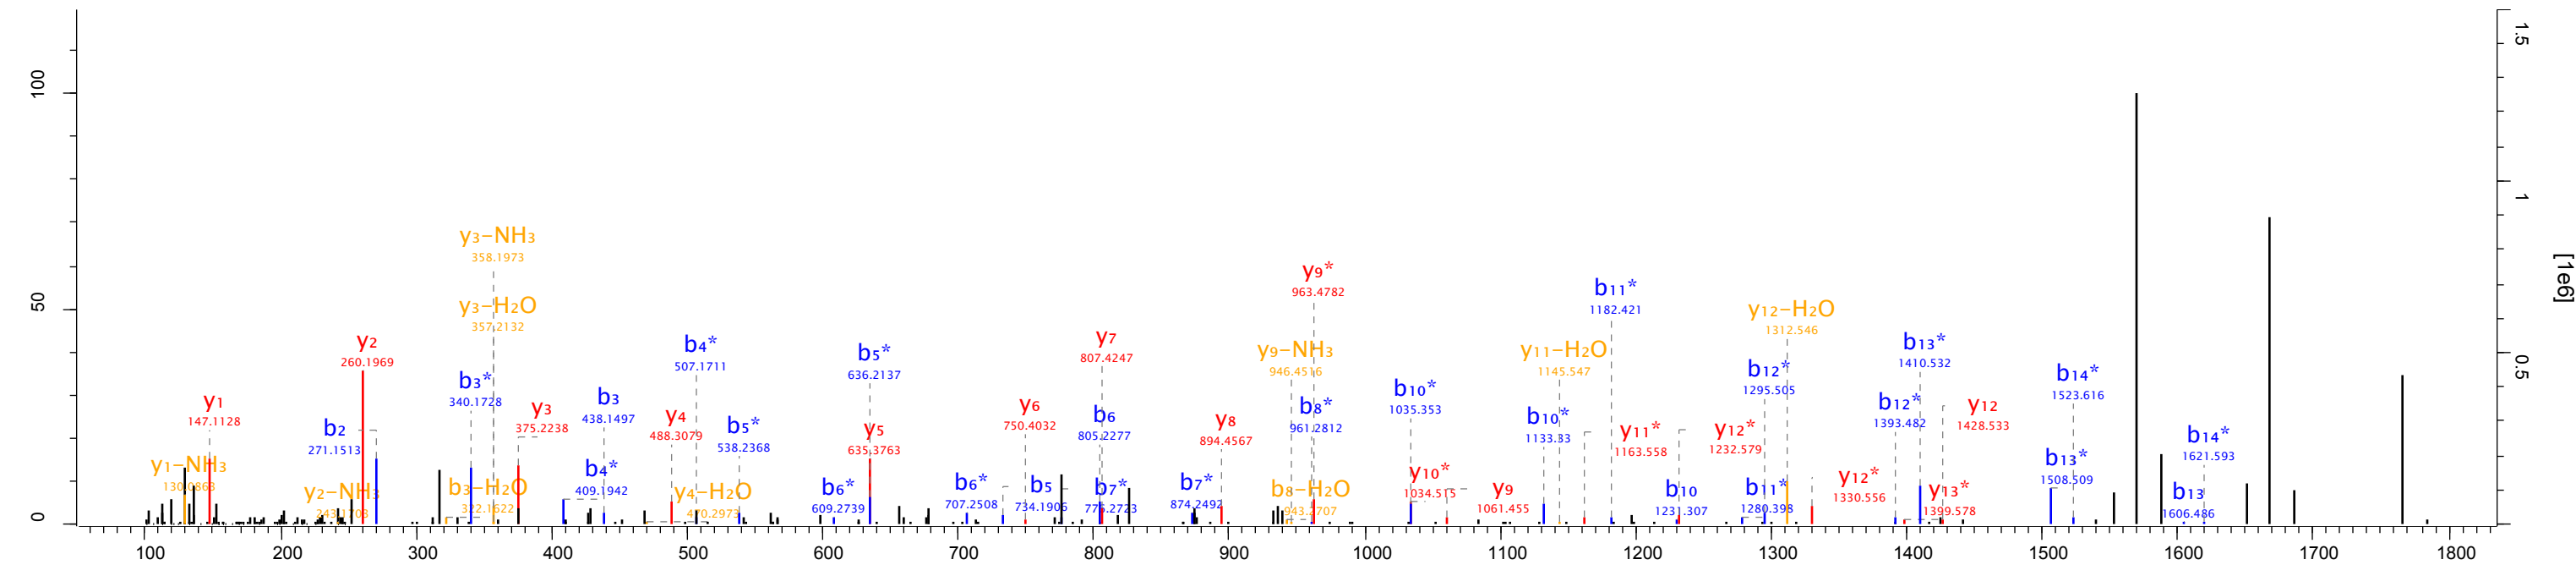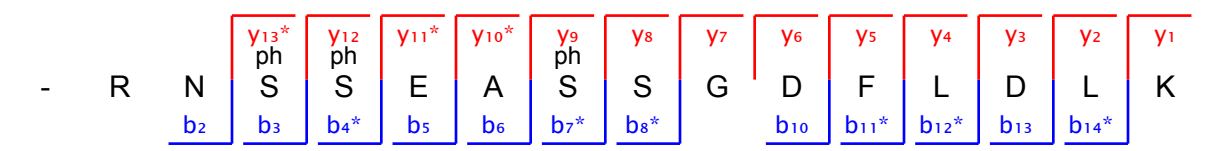

Raw file 20150812\_A375SR\_Phospho\_BR1\_02 Scan 22564 Method FTMS; HCD Score 167.03 m/z 1025.42 Gene names RANBP1

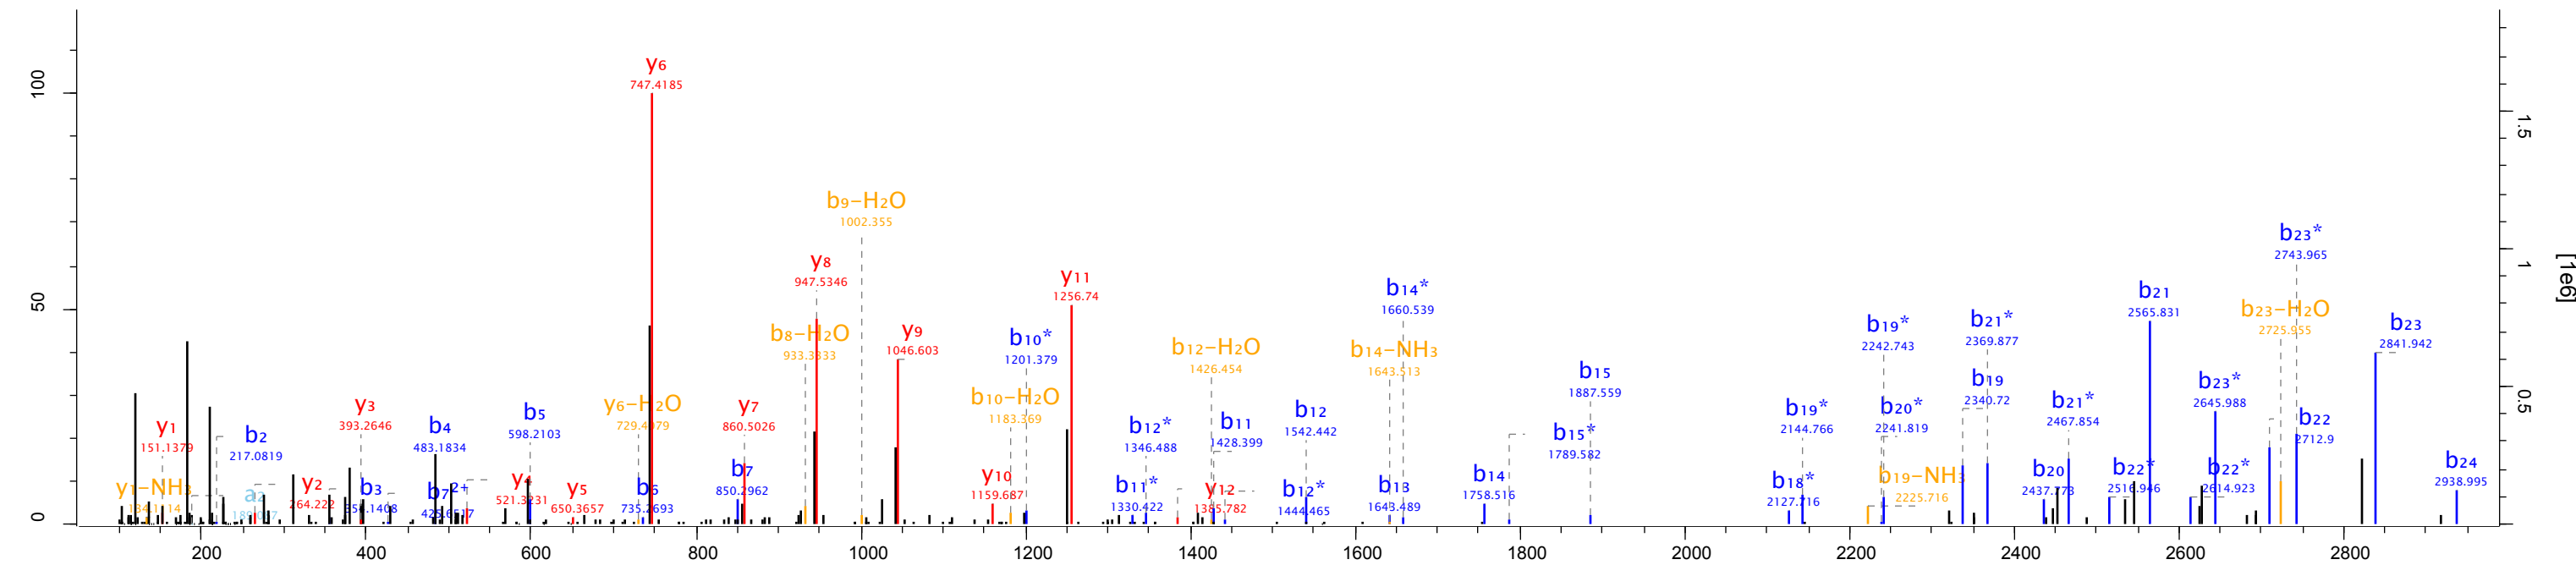

- D T H E D H D T S T E N T D E S N H D P Q F E P I V S L P E Q E I K -

b<sub>2</sub>
b<sub>3</sub>
b<sub>4</sub>
b<sub>5</sub>
b<sub>6</sub>
b<sub>7</sub>
b<sub>10</sub><sup>\*</sup>
b<sub>11</sub>
b<sub>12</sub>
b<sub>13</sub>
b<sub>14</sub>
b<sub>15</sub>
b<sub>18</sub><sup>\*</sup>
b<sub>19</sub>
b<sub>20</sub>
b<sub>21</sub>
b<sub>22</sub>
b<sub>23</sub>
b<sub>24</sub>
y<sub>12</sub>
y<sub>11</sub>
y<sub>10</sub>
y<sub>9</sub>
y<sub>8</sub>
y<sub>7</sub>
y<sub>6</sub>
y<sub>5</sub>
y<sub>4</sub>
y<sub>3</sub>
y<sub>2</sub>
y<sub>1</sub>

Raw file Scan Method Score m/z Gene names  
 20150812\_A375SR\_Phospho\_BR1\_02 22594 FTMS; HCD 241.45 1181.98 MFAP1

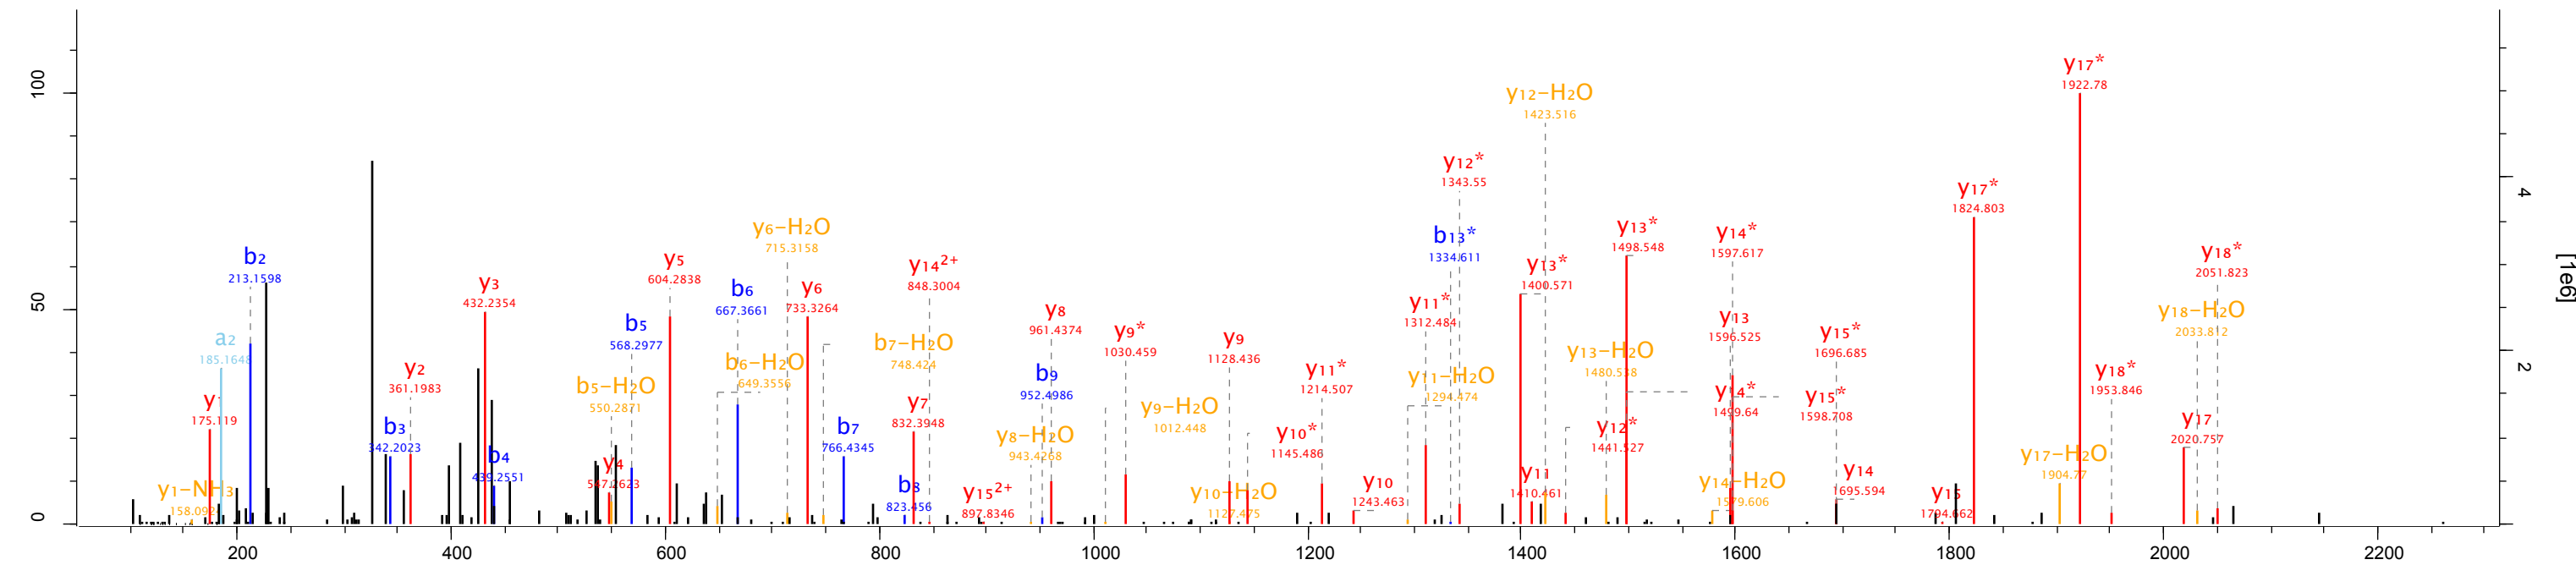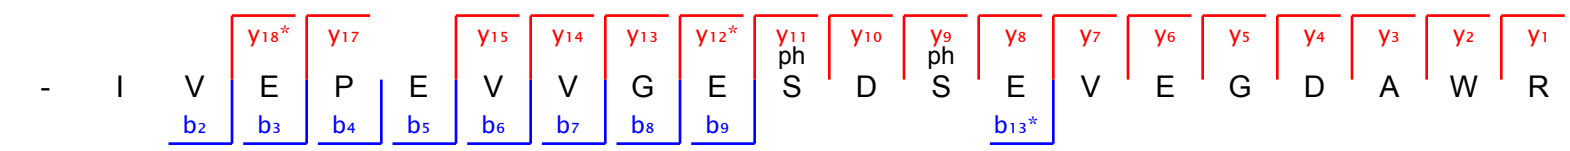

Raw file 20150812\_A375SR\_Phospho\_BR1\_02 Scan 22874 Method FTMS; HCD Score 54.43 m/z 1222.87 Gene names PALLD

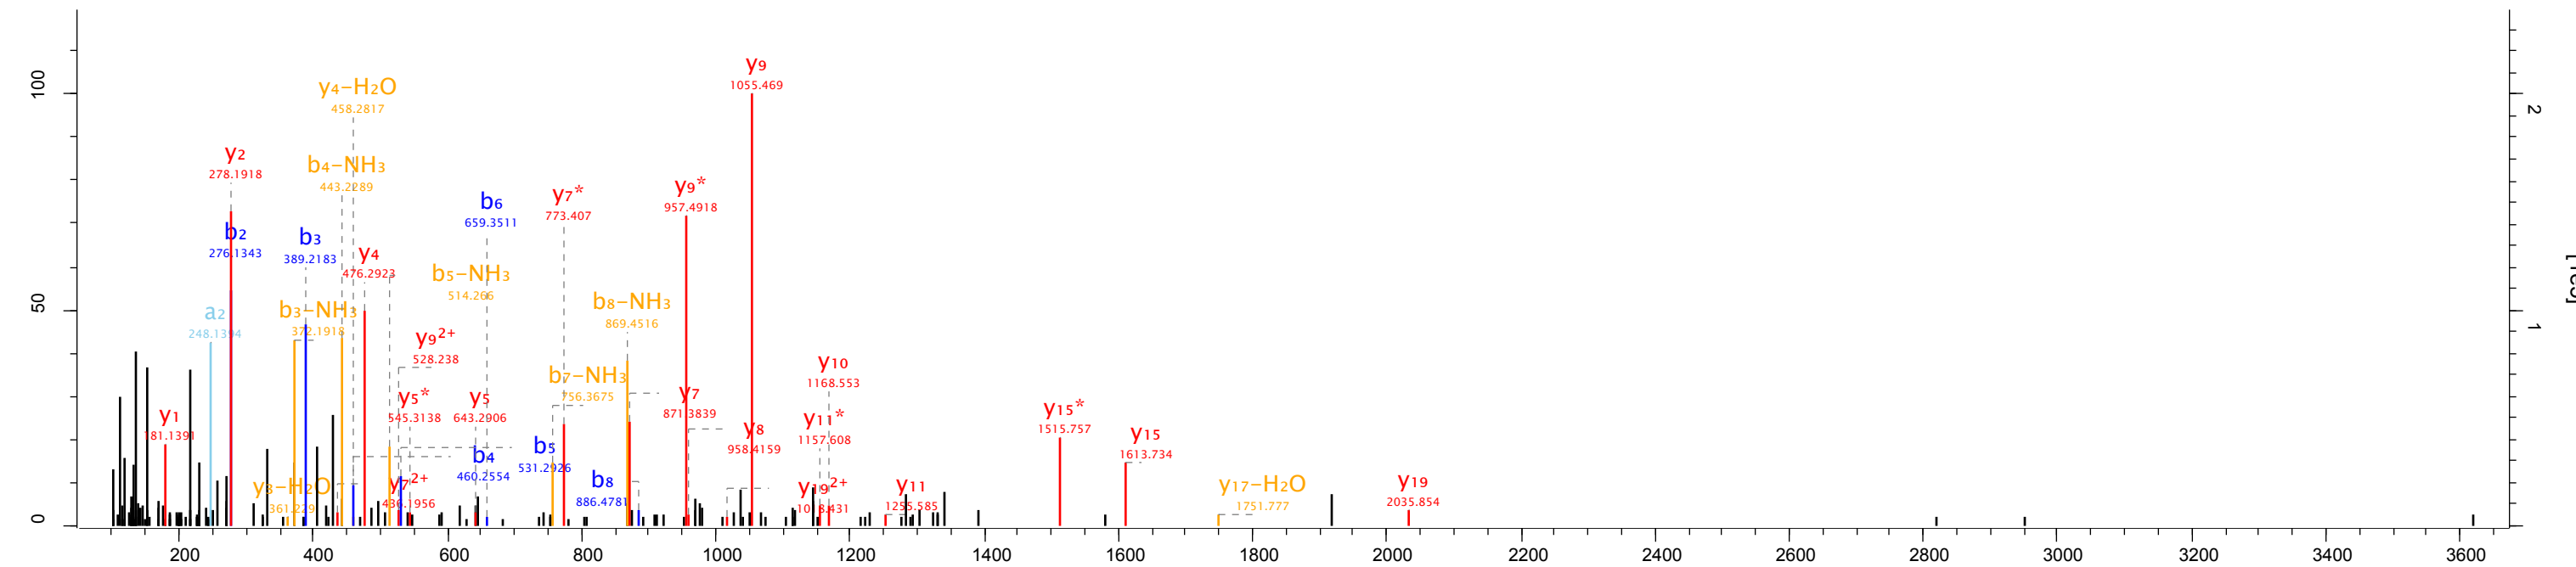

- Q F I A A Q N L G P A S G H G T P A S S P S S S S S L P S P M S P T P R -

Fragmentation sites are indicated by brackets below the sequence: b2 (under F), b3 (under I), b4 (under A), b5 (under A), b6 (under Q), b8 (under L), y19 (over P), y15 (over P), y11 (over S), y10 (over L), y9 (over P), y8 (over S), y7 (over P), y5 (over S), y4 (over P), y2 (over P), y1 (over R).

Raw file  
 20150812\_A375SR\_Phospho\_BR1\_02  
 Scan 23114 Method FTMS; HCD Score 79.69 m/z 1099.92 Gene names CLIP1

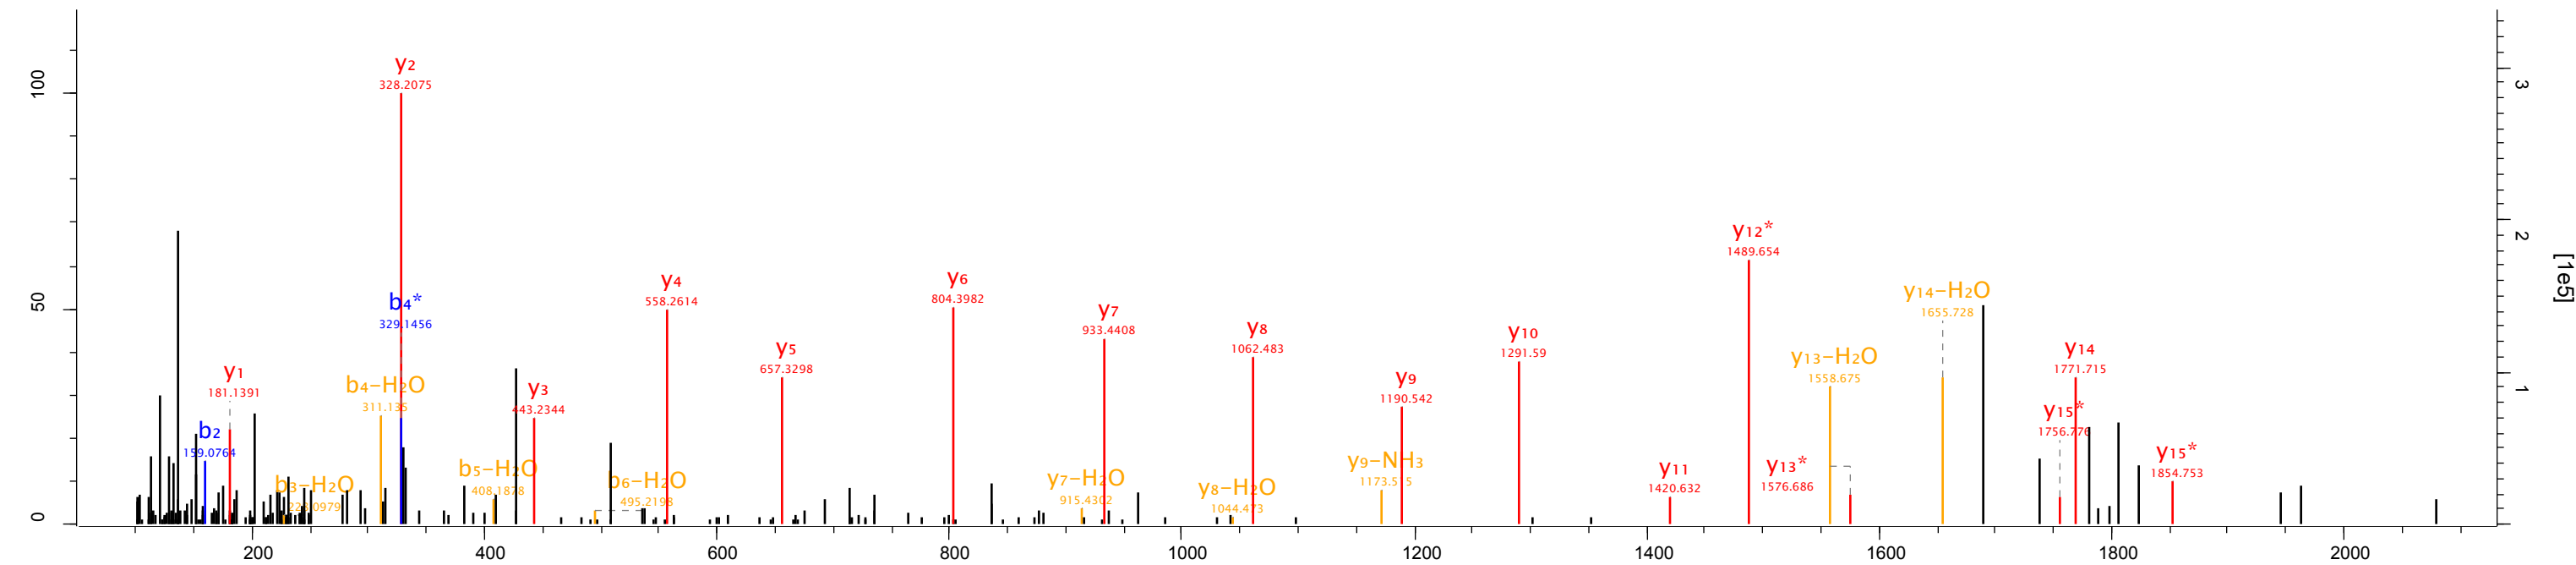

- A S S y15\*  
ph  
T y14 y13\* y12\*  
ph y11 y10 y9 y8 y7 y6 y5 y4 y3 y2 y1 -

- A S b2 S b4\* P S S E T Q E E F V D D F R -

Raw file  
20150812\_A375SR\_Phospho\_BR1\_02

Scan 23484 Method FTMS; HCD Score 62.56 m/z 933.41 Gene names FRYL

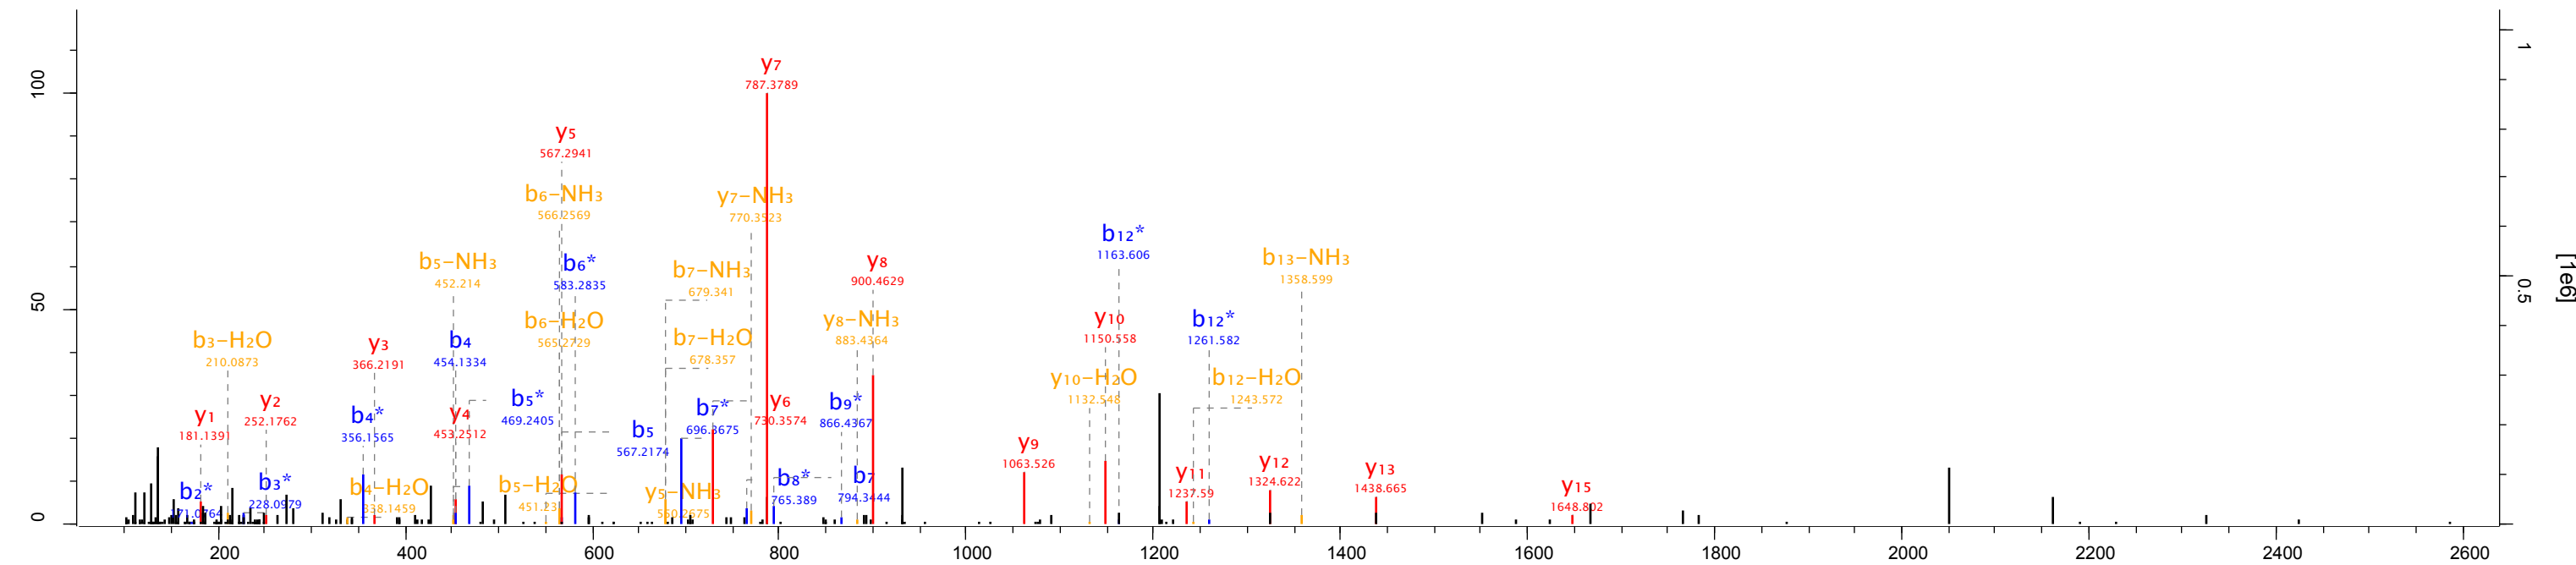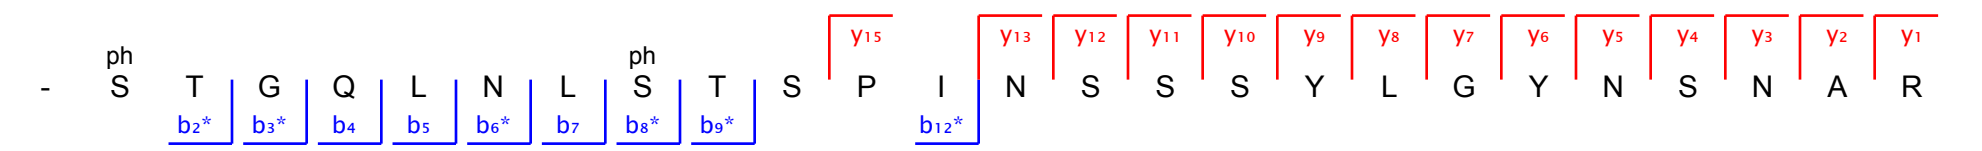

Raw file 20150812\_A375SR\_Phospho\_BR1\_02 Scan 24984 Method FTMS; HCD Score 153.55 m/z 1043.15 Gene names PRDM2

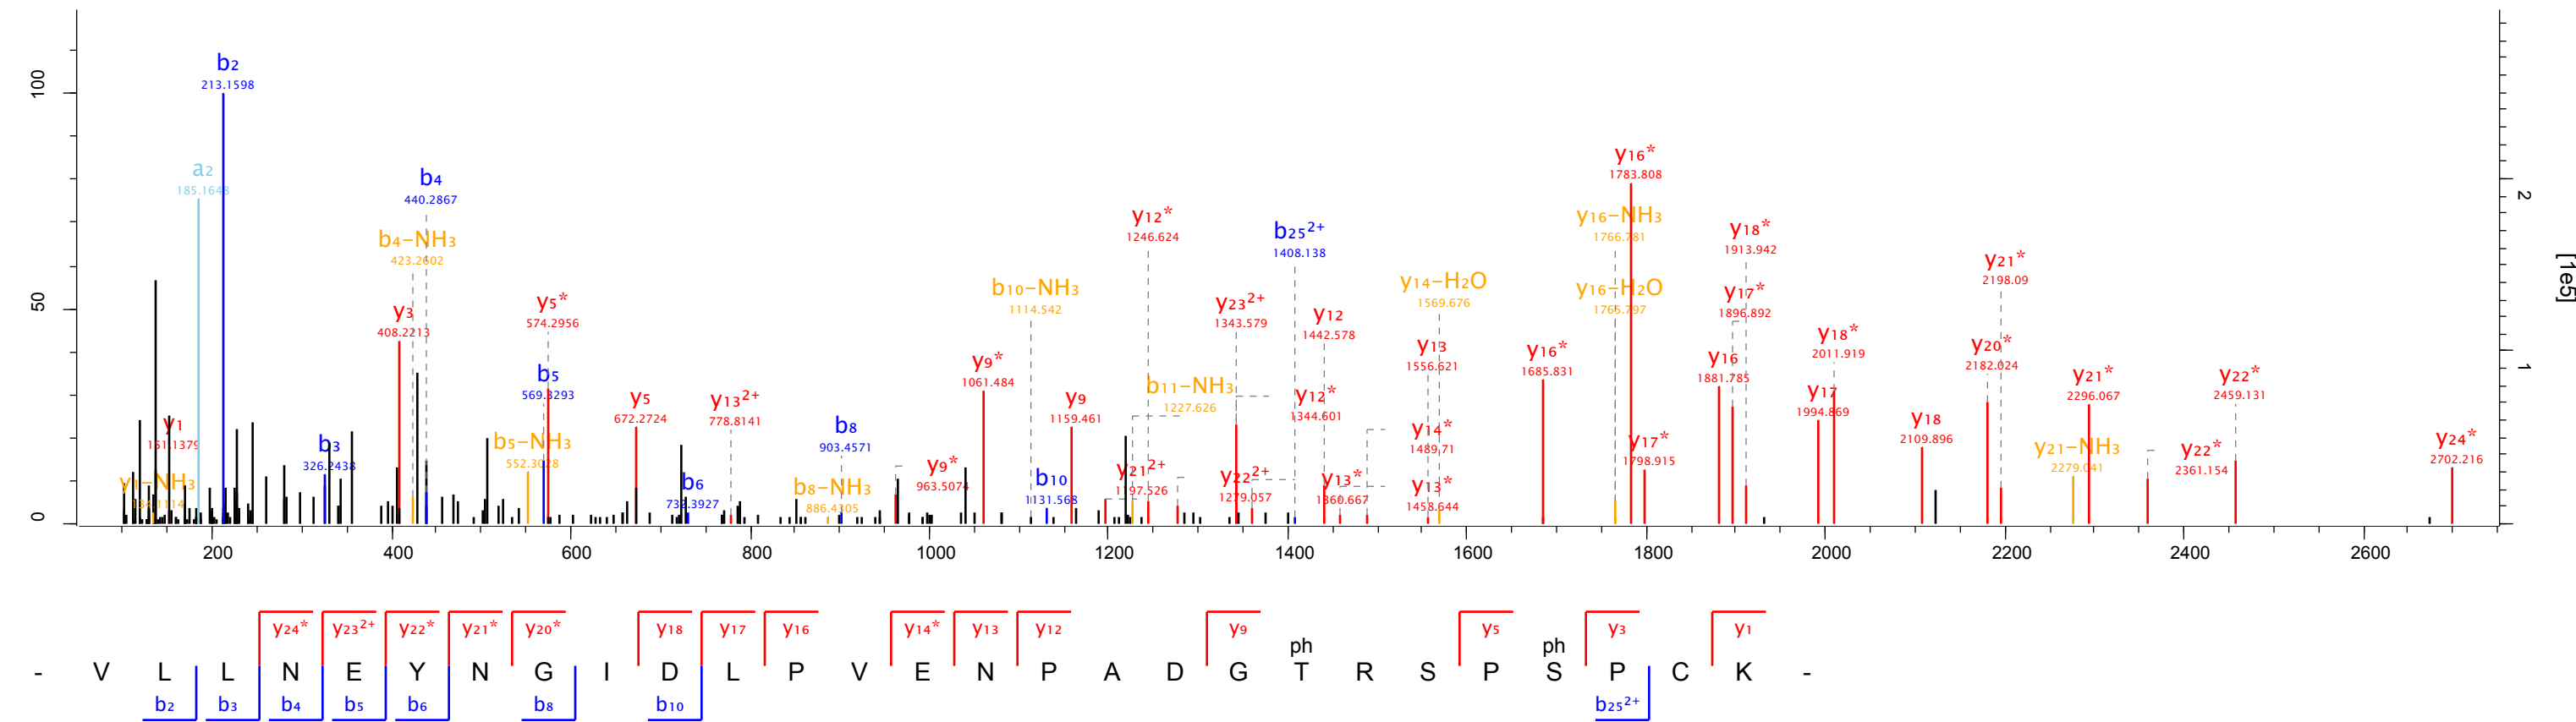



Raw file 20150812\_A375SR\_Phospho\_BR1\_02 Scan 25794 Method FTMS; HCD Score 74.66 m/z 995.76 Gene names ROCK1

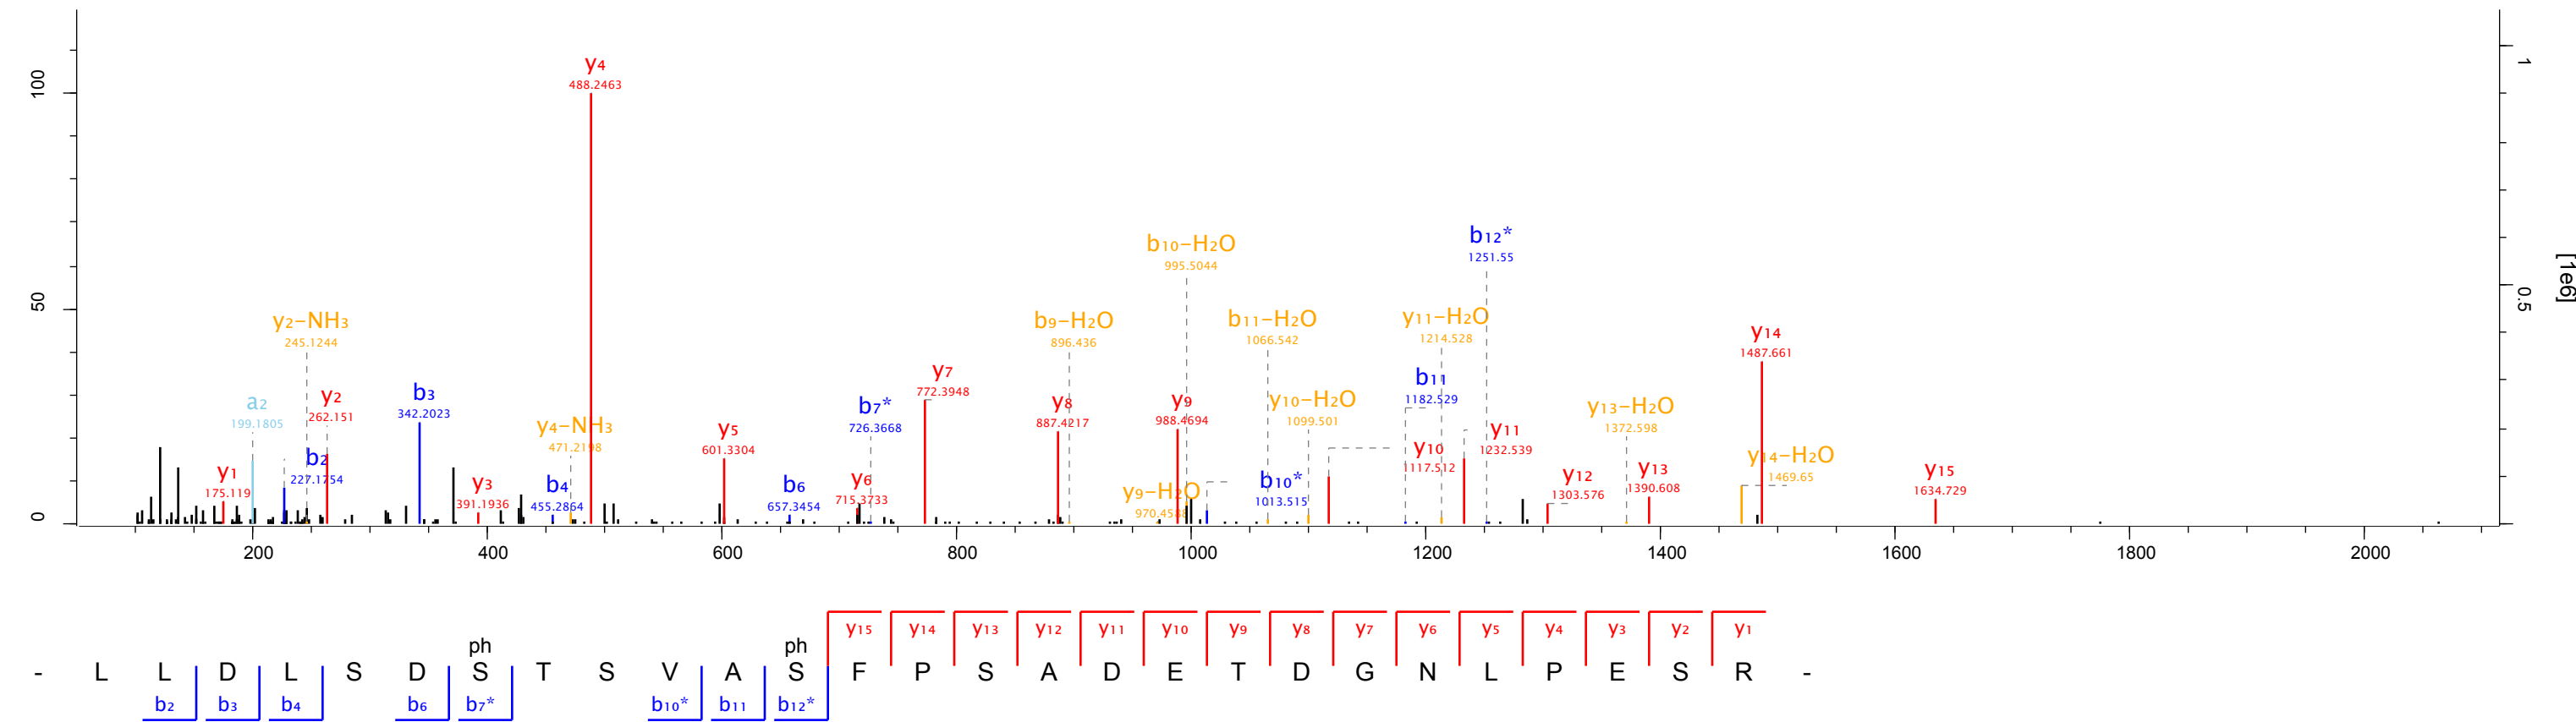

Raw file 20150812\_A375SR\_Phospho\_BR1\_02 Scan 3024 Method FTMS; HCD Score 76.47 m/z 586.72 Gene names SRSF7

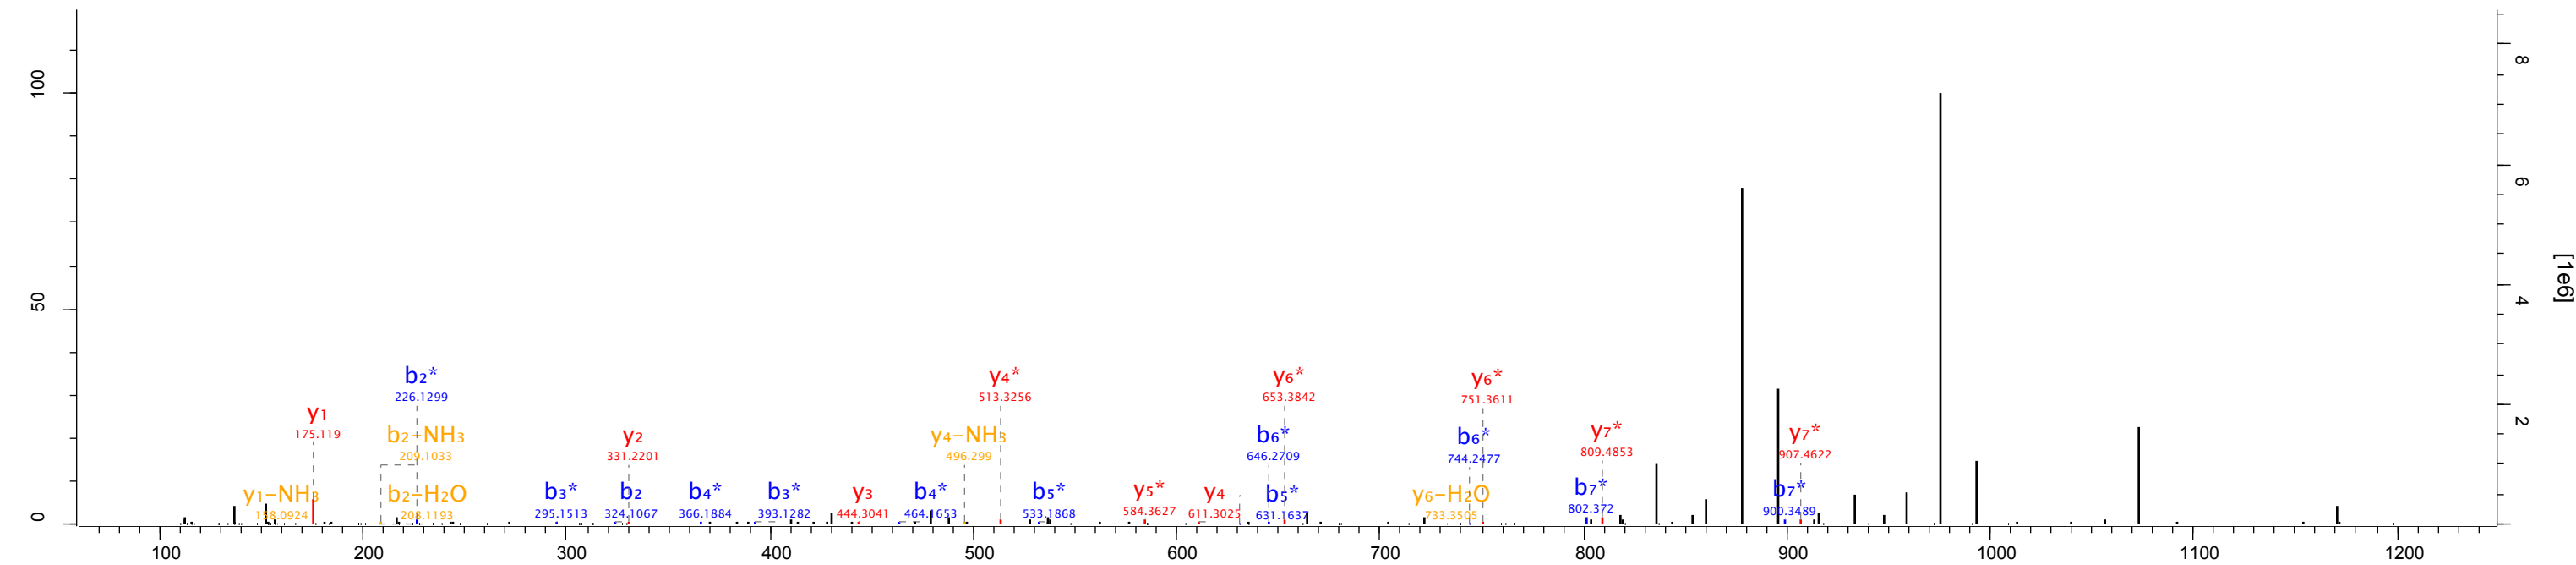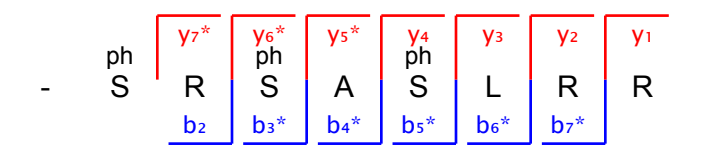

Raw file: 20150812\_A375SR\_Phospho\_BR1\_02  
 Scan: 3824 Method: FTMS; HCD Score: 204.81 m/z: 882.81 Gene names: MATR3

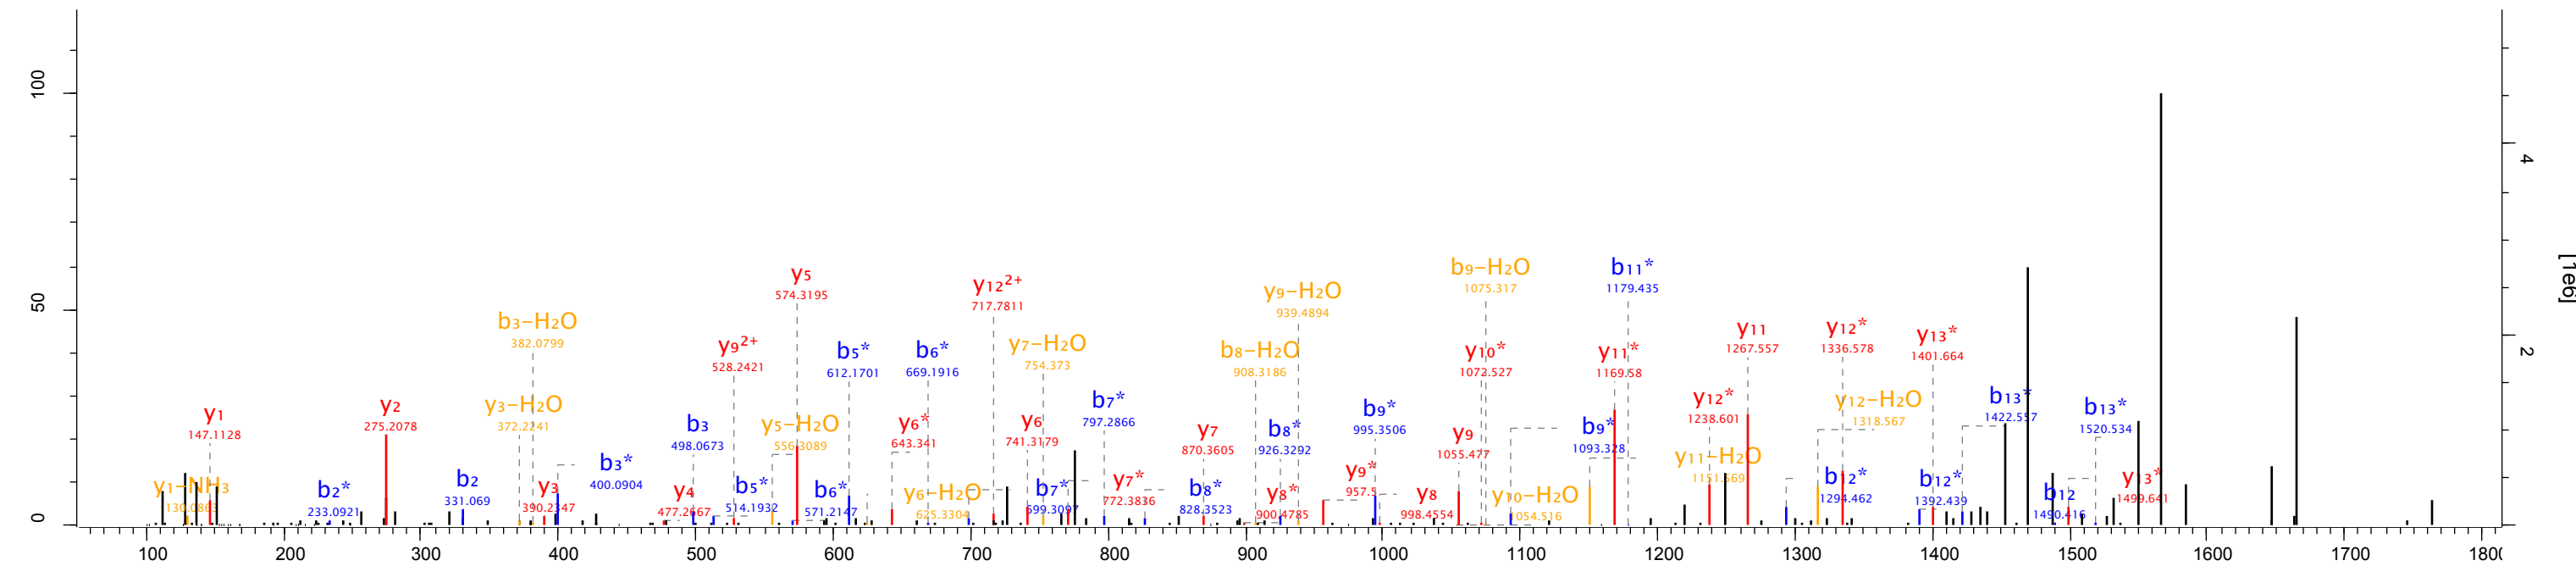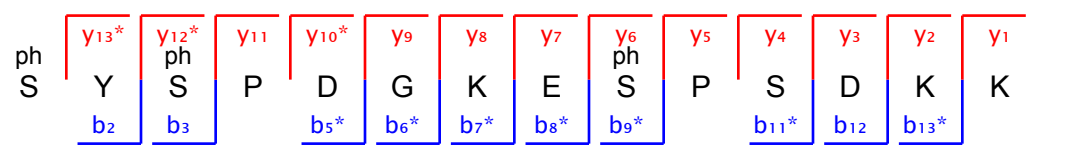

Raw file 20150812\_A375SR\_Phospho\_BR1\_02 Scan 4294 Method FTMS; HCD Score 110.1 m/z 769.3 Gene names NMT2

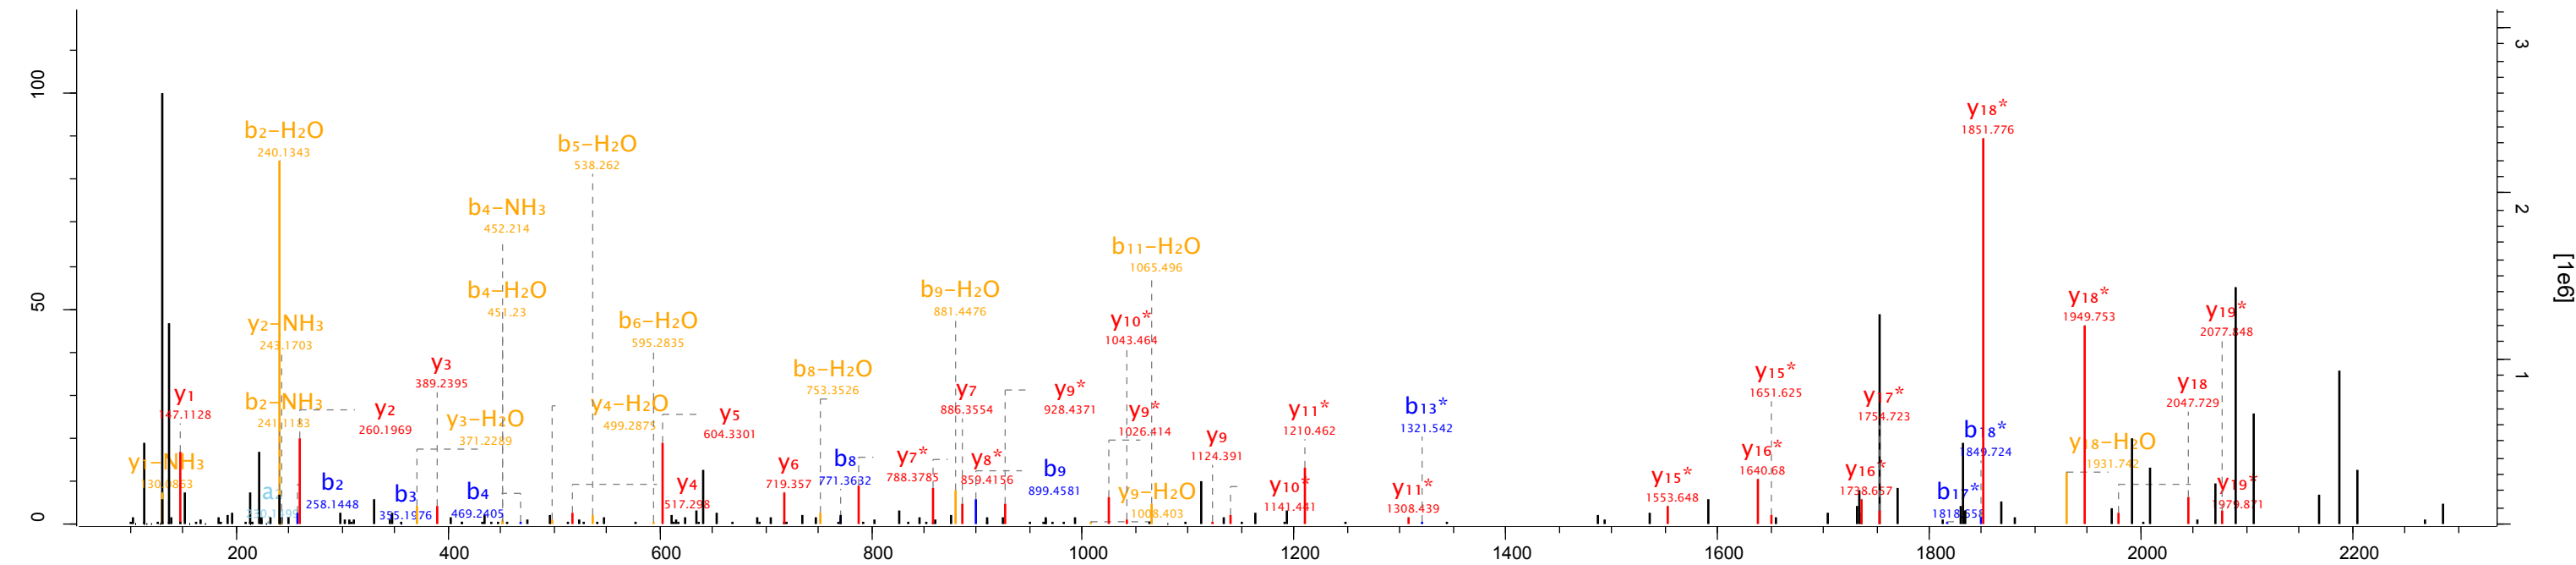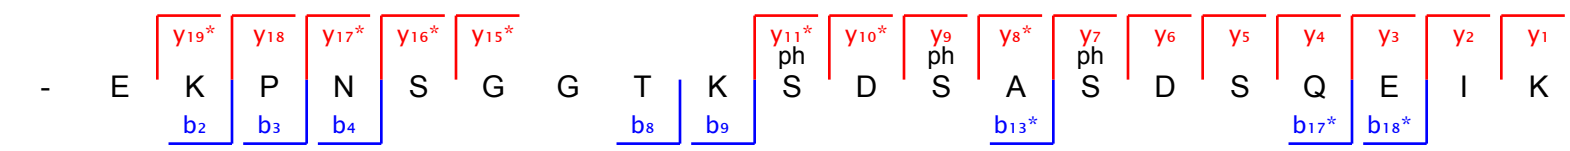

Raw file: 20150812\_A375SR\_Phospho\_BR1\_02  
 Scan: 4364 Method: FTMS; HCD Score: 64.57 m/z: 590.23 Gene names: CHD4

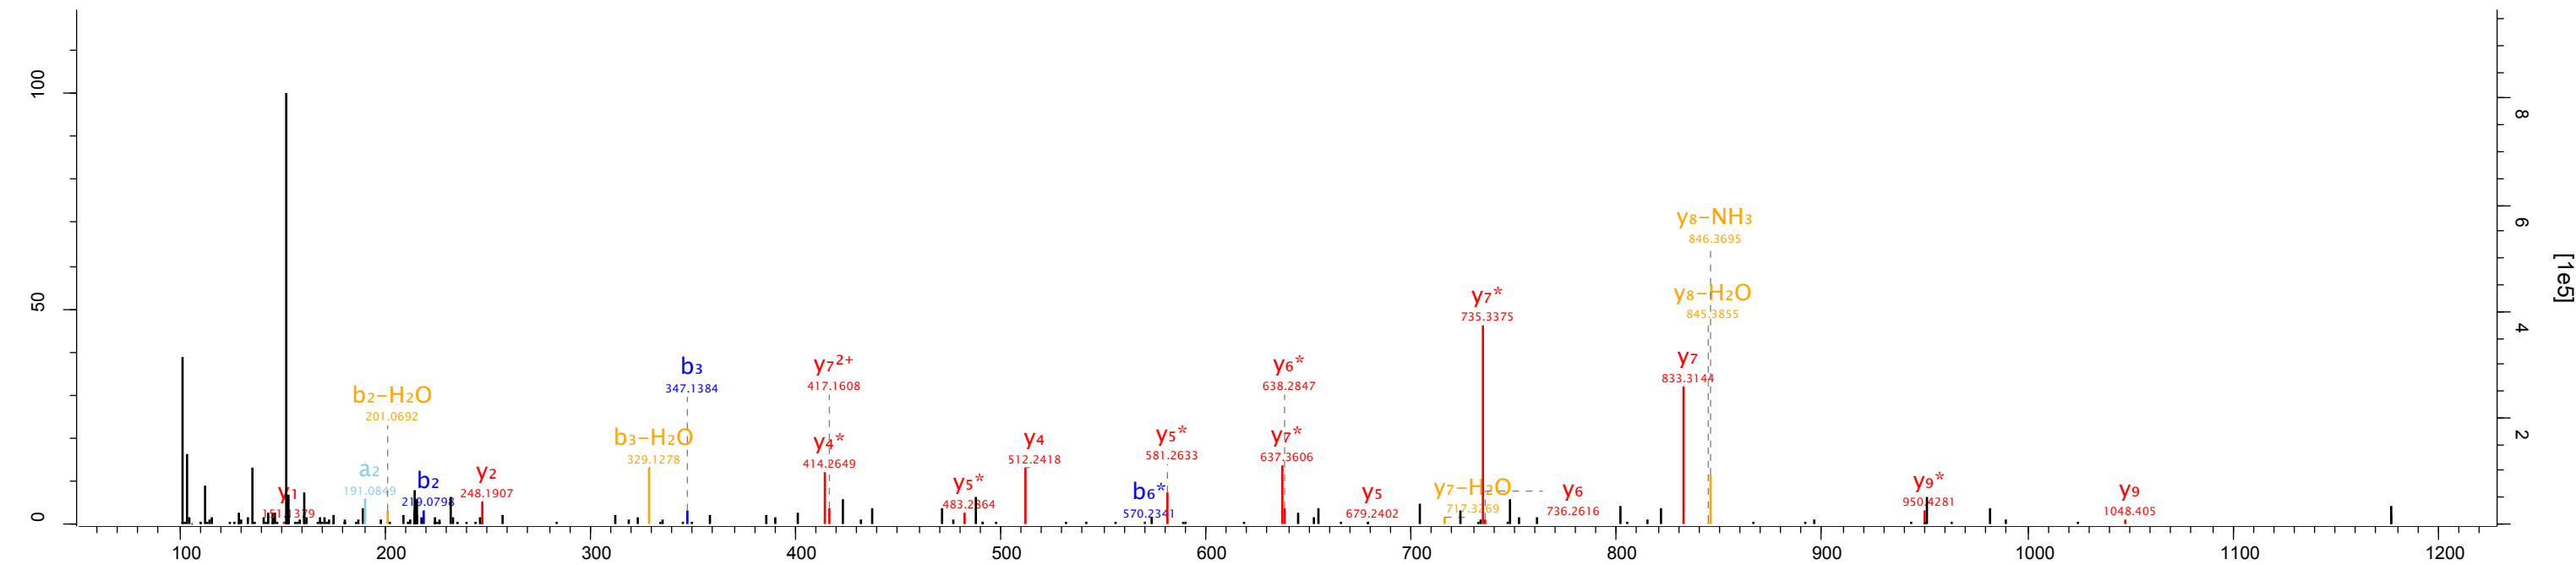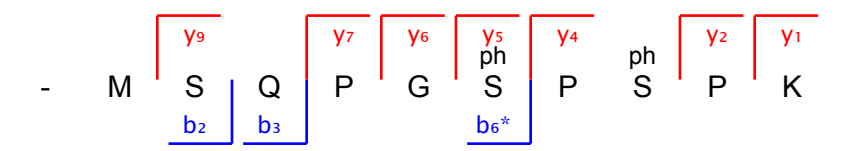

Raw file  
20150812\_A375SR\_Phospho\_BR1\_02

Scan 4814 Method FTMS; HCD Score 94.35 m/z 866.99 Gene names MAGED2

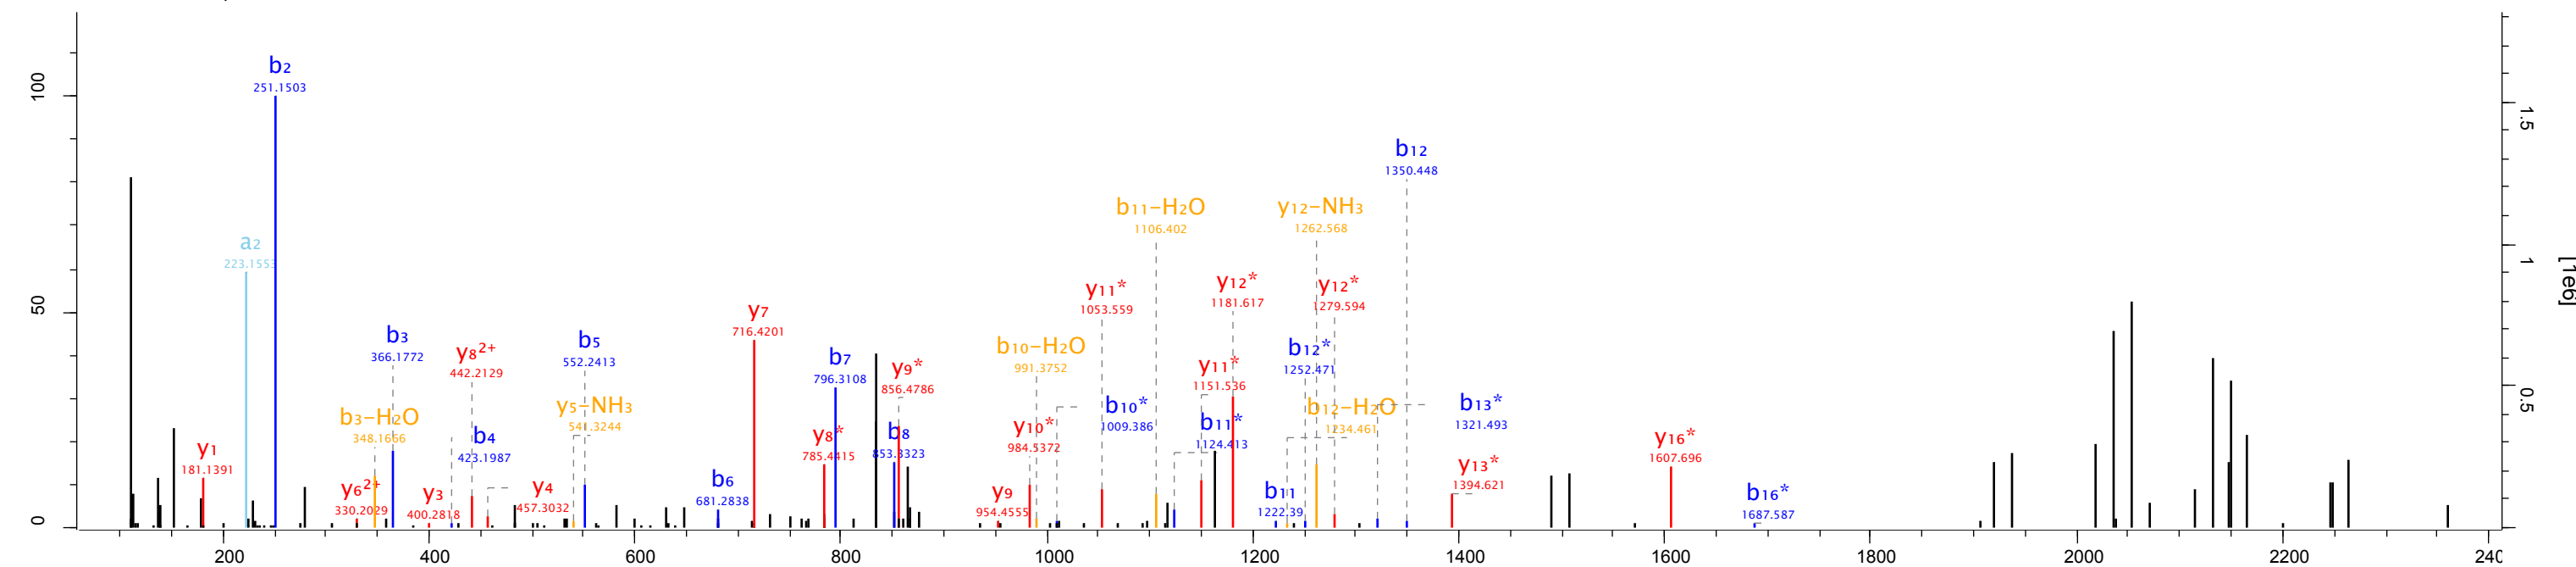

- H L D G E E D G S ph S D Q S Q A S G T T G G R R -

Fragmentation mapping:  
- b2 (L) b3 (D) b4 (G) b5 (E) b6 (E) b7 (D) b8 (G) b10\* (ph) b11 (D) b12 (Q) b13\* (S) b16\* (S) y1 (R) y3 (G) y4 (G) y6<sup>2+</sup> (T) y7 (G) y8\* (ph) y9 (A) y10\* (Q) y11\* (S) y12\* (D) y13\* (S) y16\* (R)

Raw file 20150812\_A375SR\_Phospho\_BR1\_02 Scan 4904 Method FTMS; HCD Score 40.24 m/z 886.92 Gene names GBF1

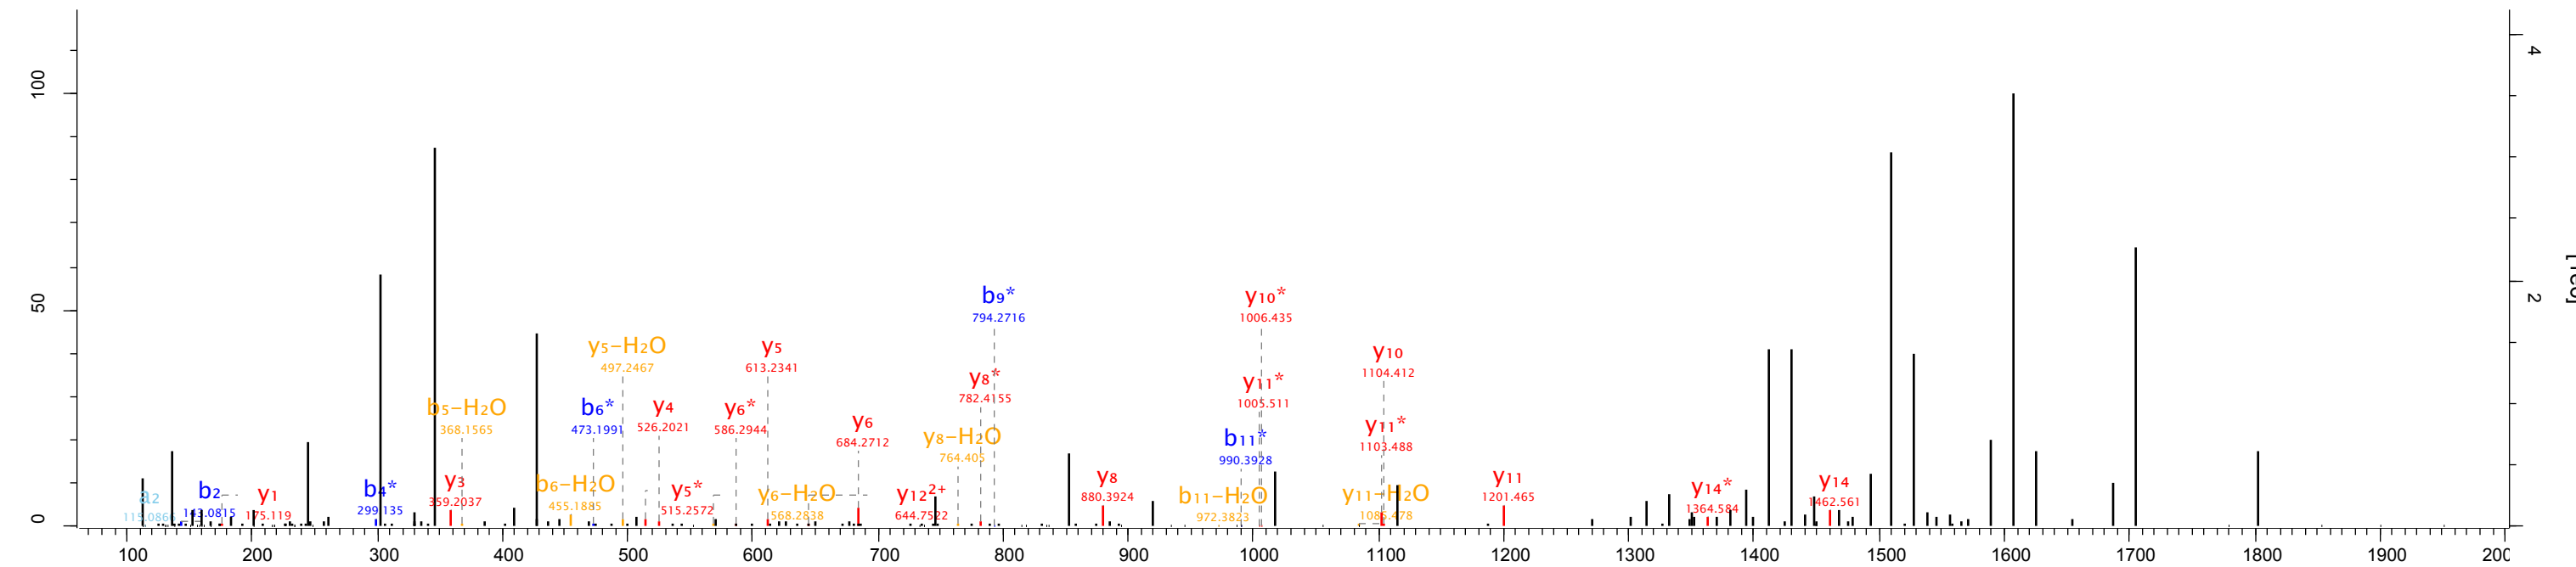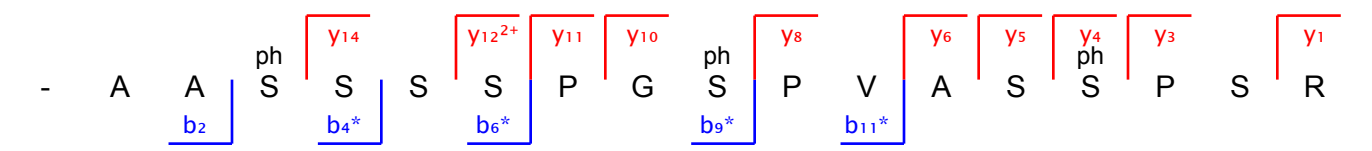

Raw file: 20150812\_A375SR\_Phospho\_BR1\_02  
 Scan: 5204 Method: FTMS; HCD Score: 141.14 m/z: 1226.89 Gene names: IWS1

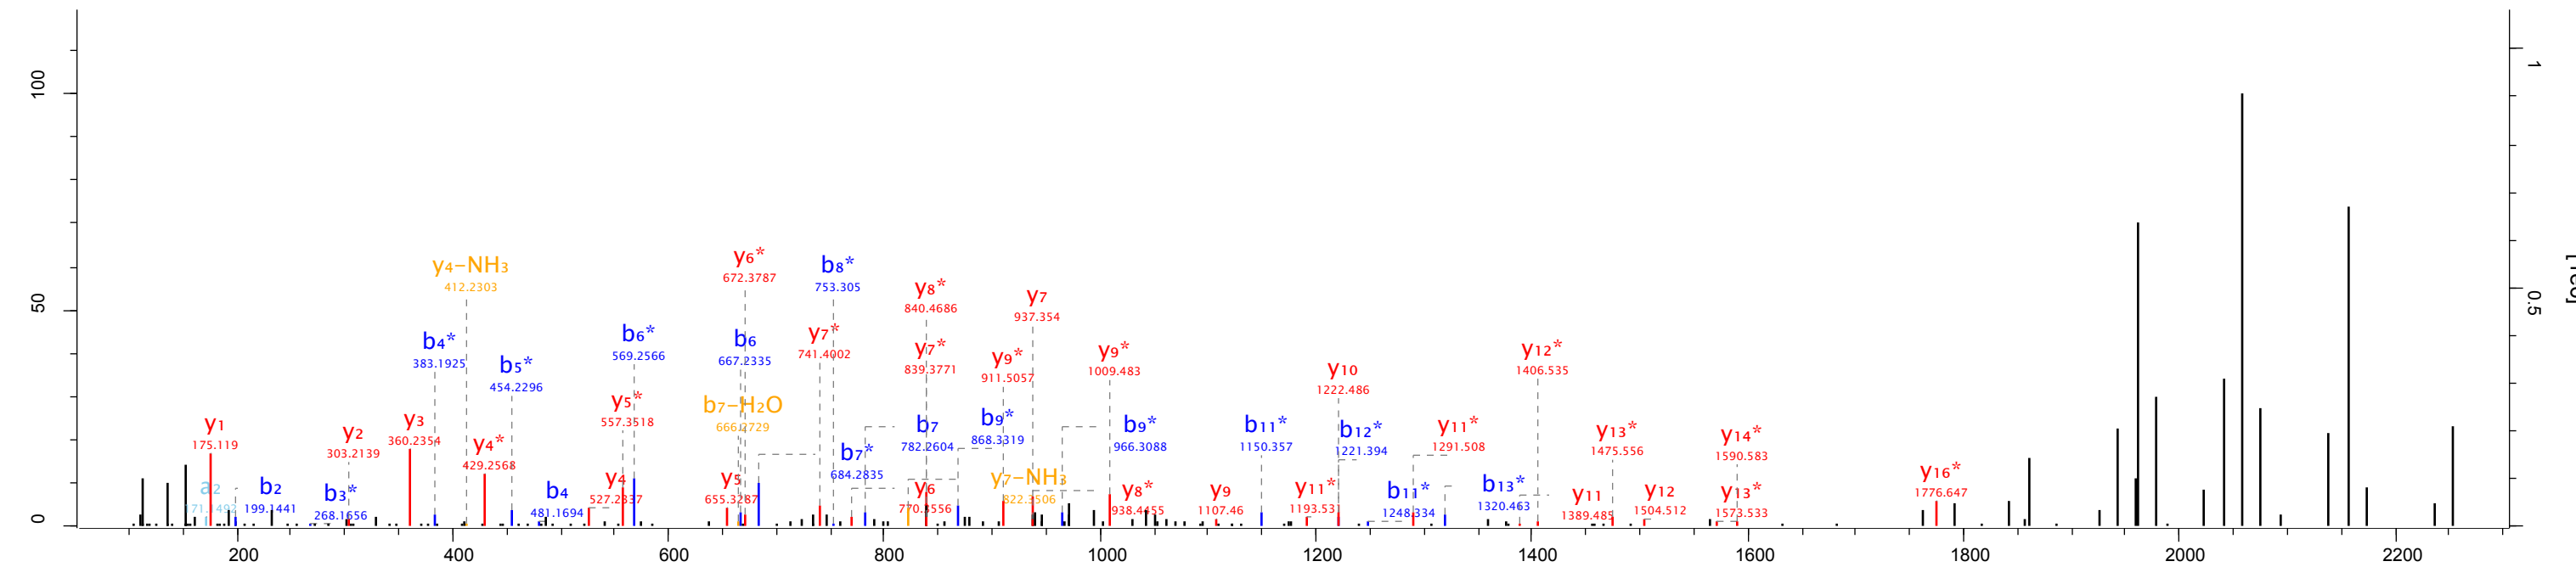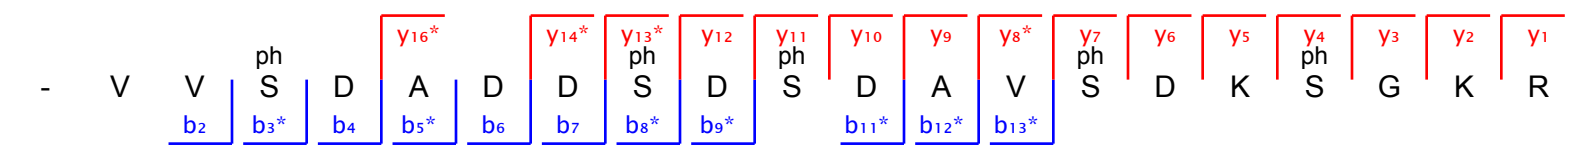



Raw file 20150812\_A375SR\_Phospho\_BR1\_02 Scan 5224 Method FTMS; HCD Score 99.73 m/z 578.77 Gene names C17orf85

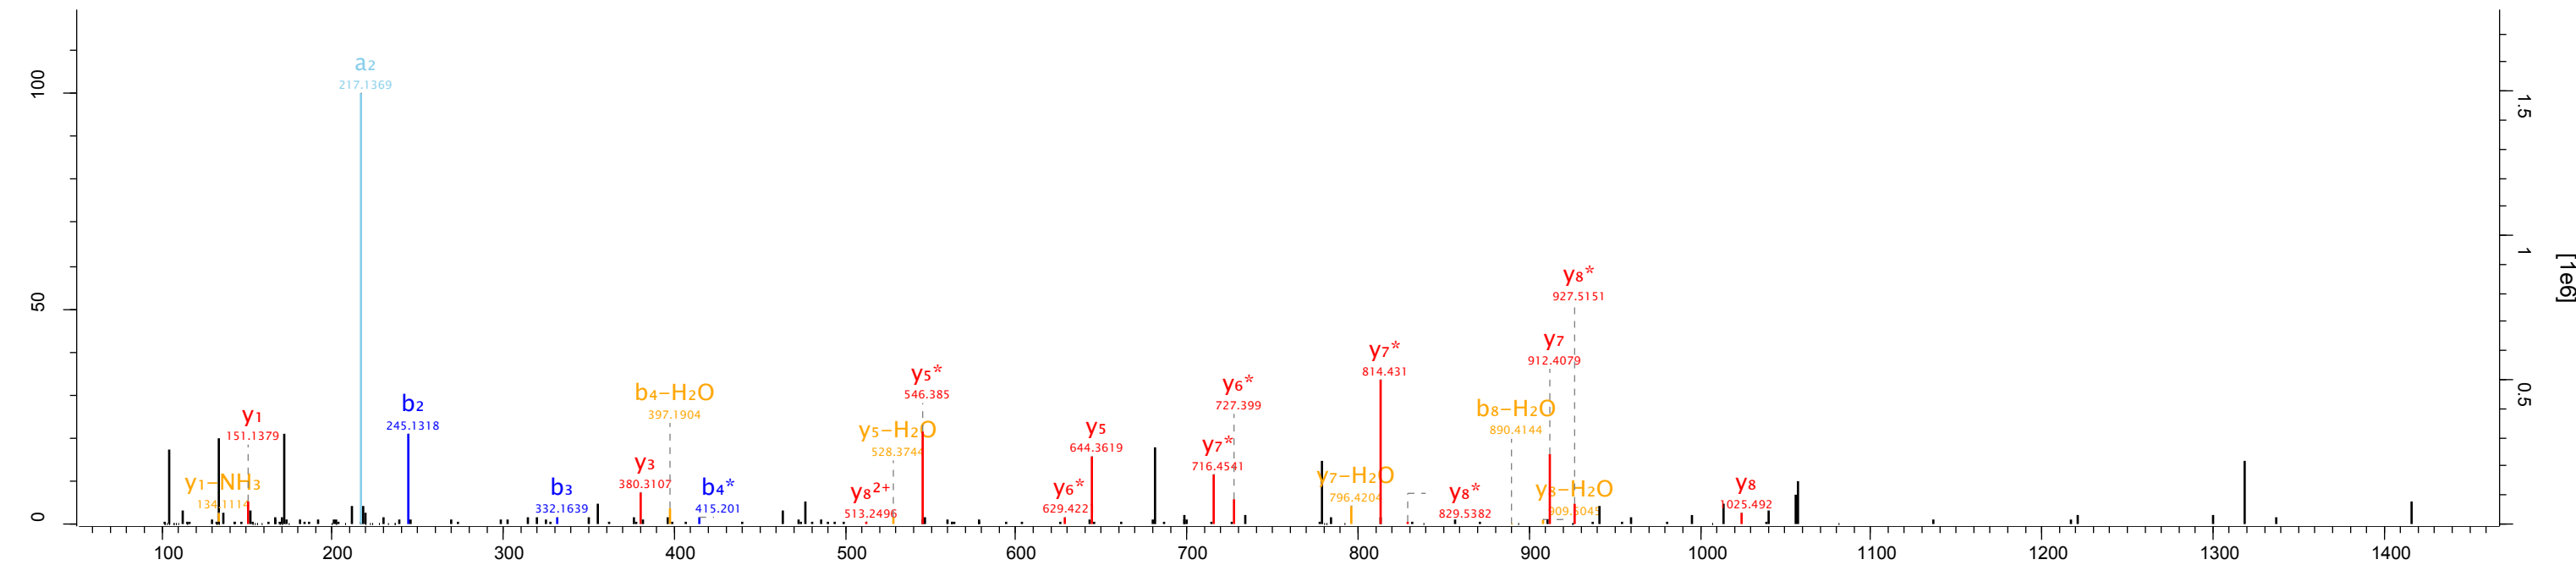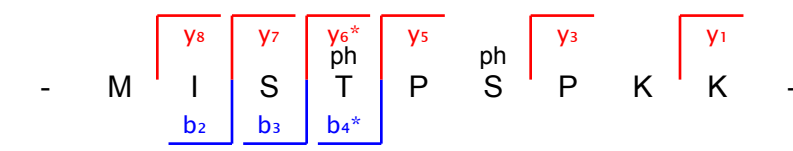

Raw file: 20150812\_A375SR\_Phospho\_BR1\_02  
 Scan: 5414 Method: FTMS; HCD Score: 129.26 m/z: 1006.38 Gene names: TSC2

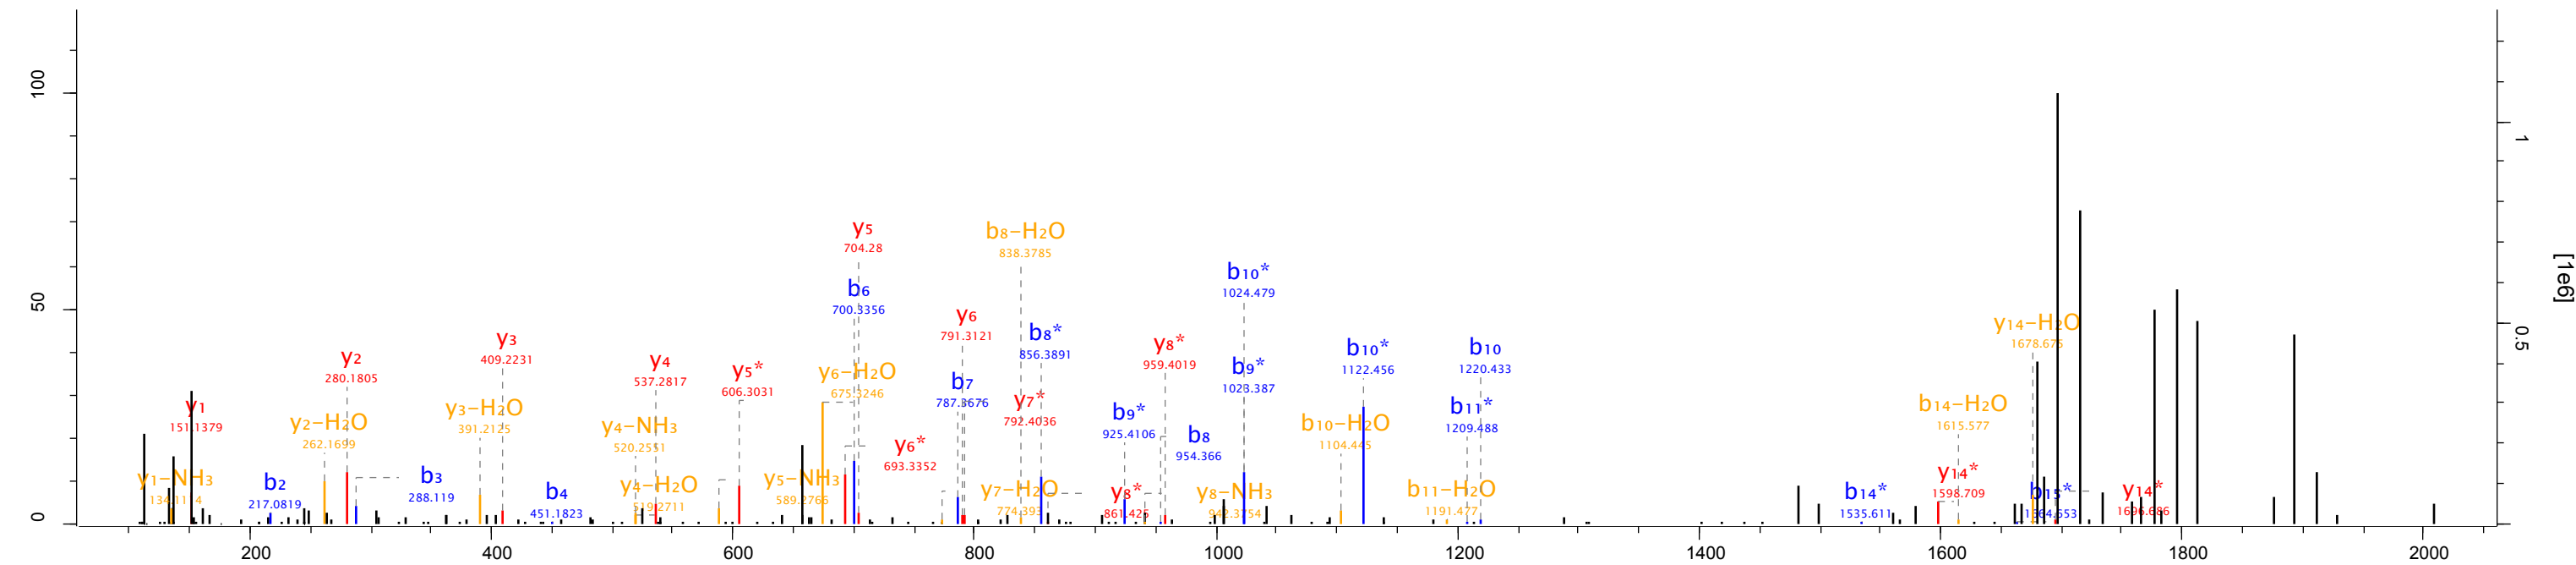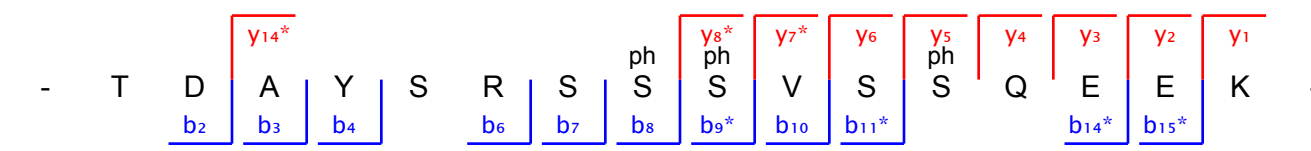

Raw file: 20150812\_A375SR\_Phospho\_BR1\_02  
 Scan: 5584 Method: FTMS; HCD Score: 145.83 m/z: 739.61 Gene names: TRA2B

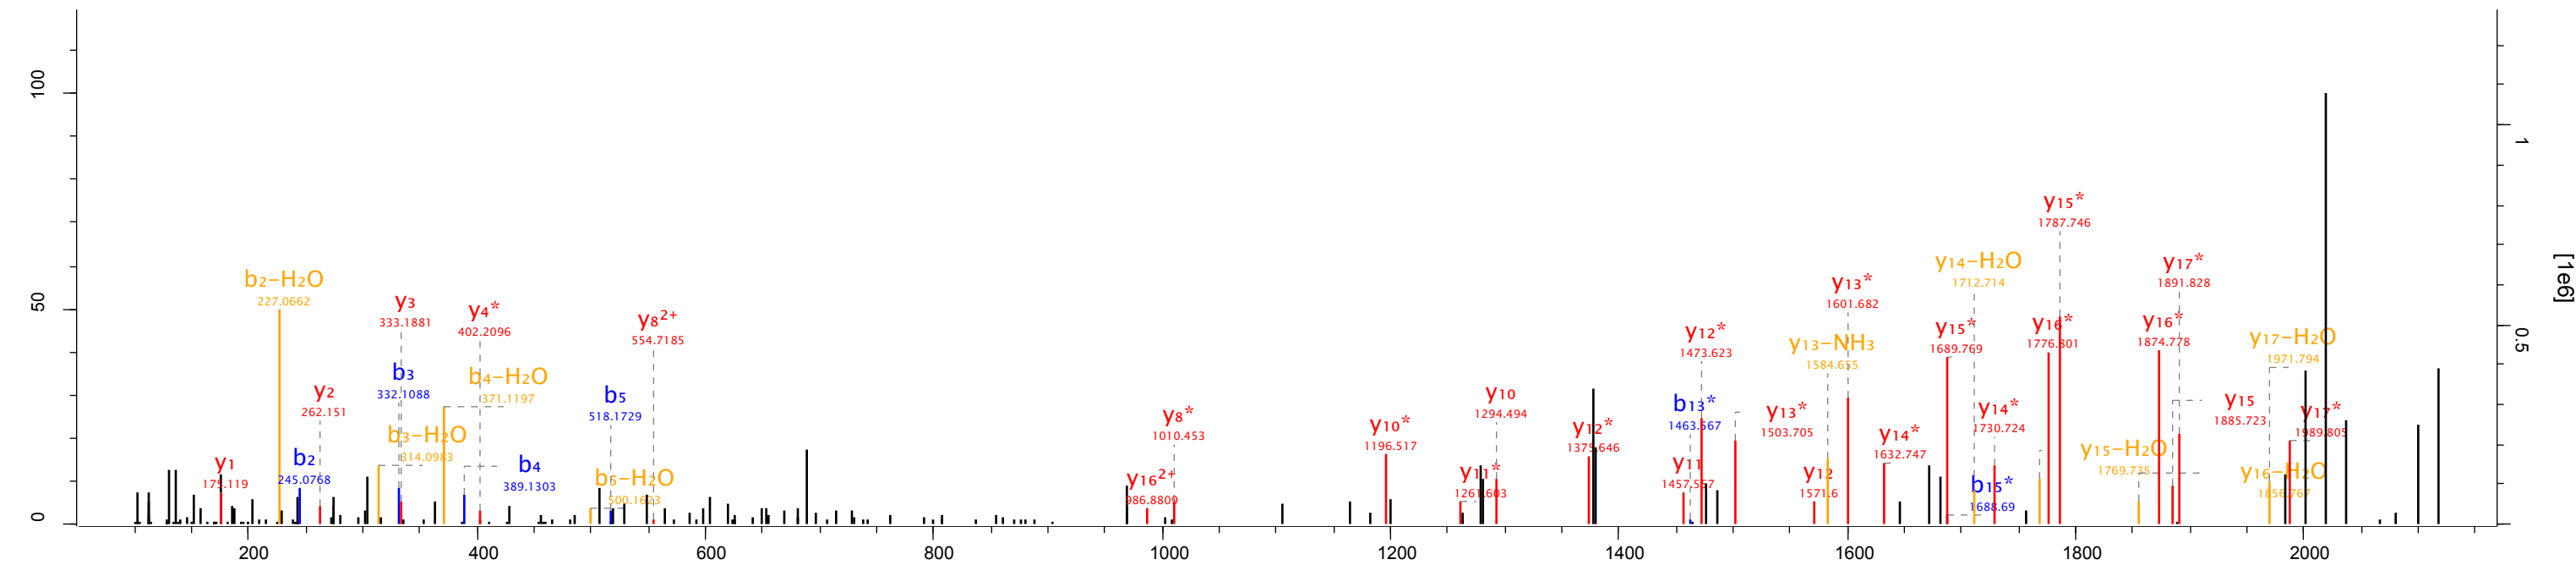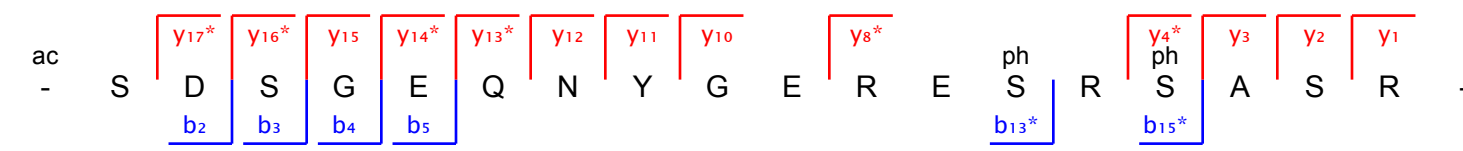

Raw file: 20150812\_A375SR\_Phospho\_BR1\_02  
 Scan: 6294 Method: FTMS; HCD Score: 110.56 m/z: 816.85 Gene names: HMGA1;C2orf81

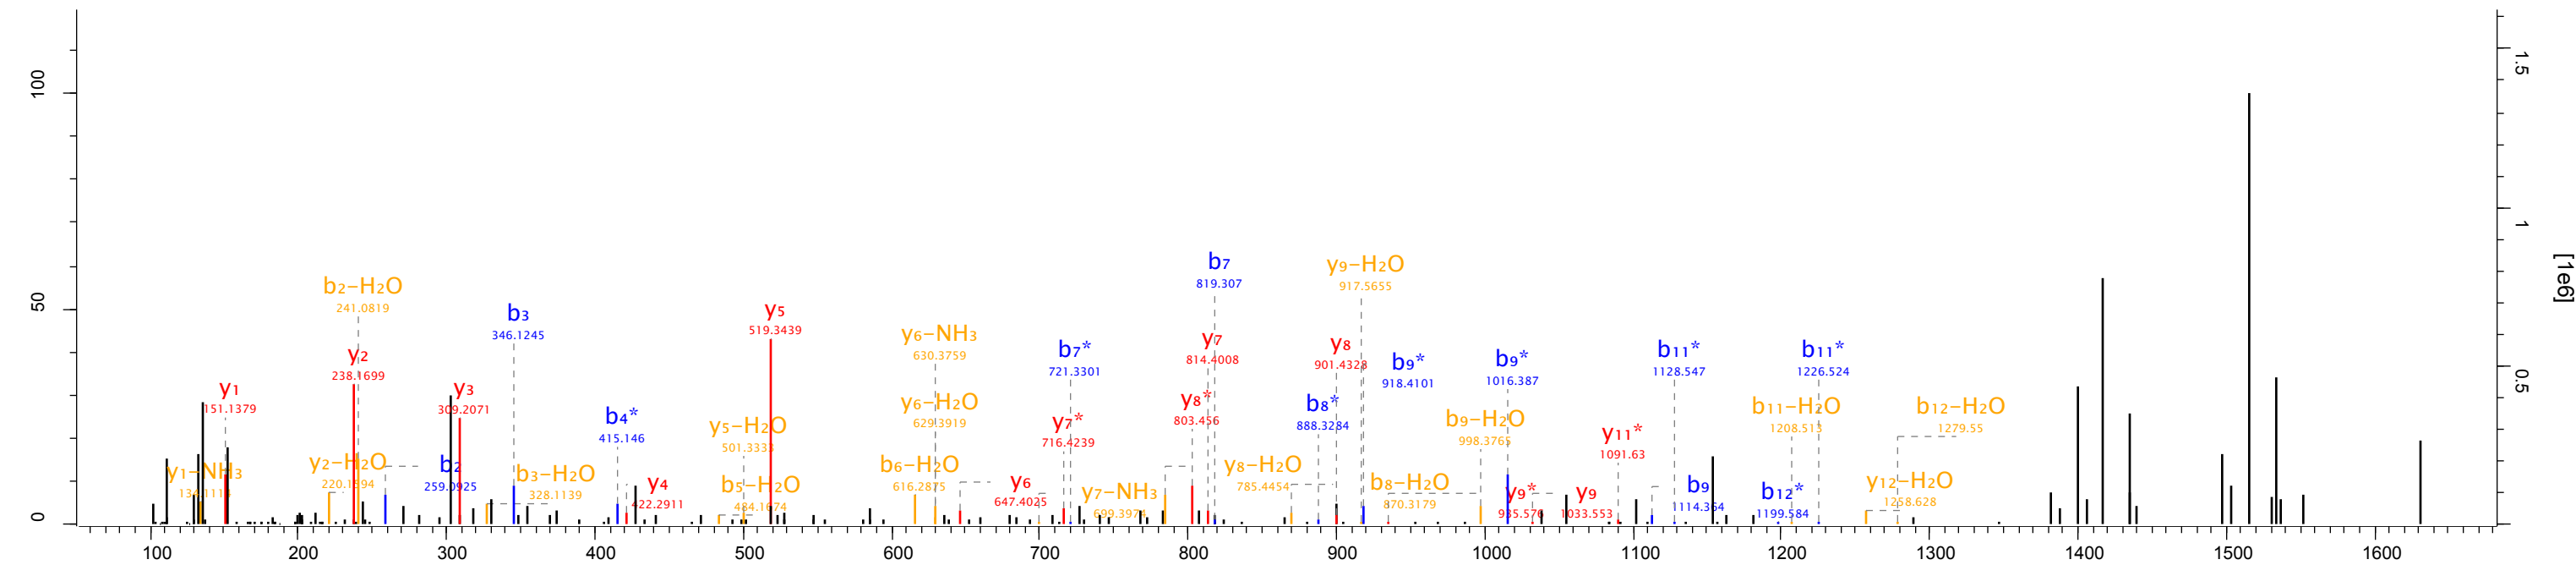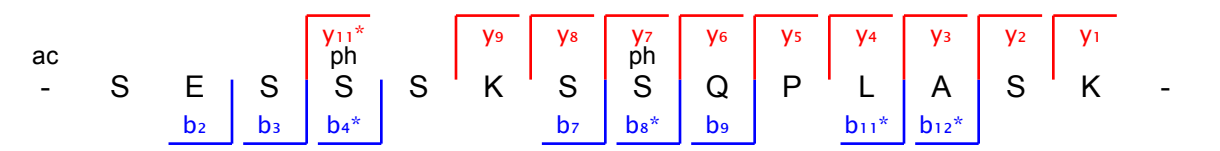

Raw file  
 20150812\_A375SR\_Phospho\_BR1\_02  
 Scan 6544 Method FTMS; HCD Score 51.62 m/z 999.84 Gene names LIMCH1

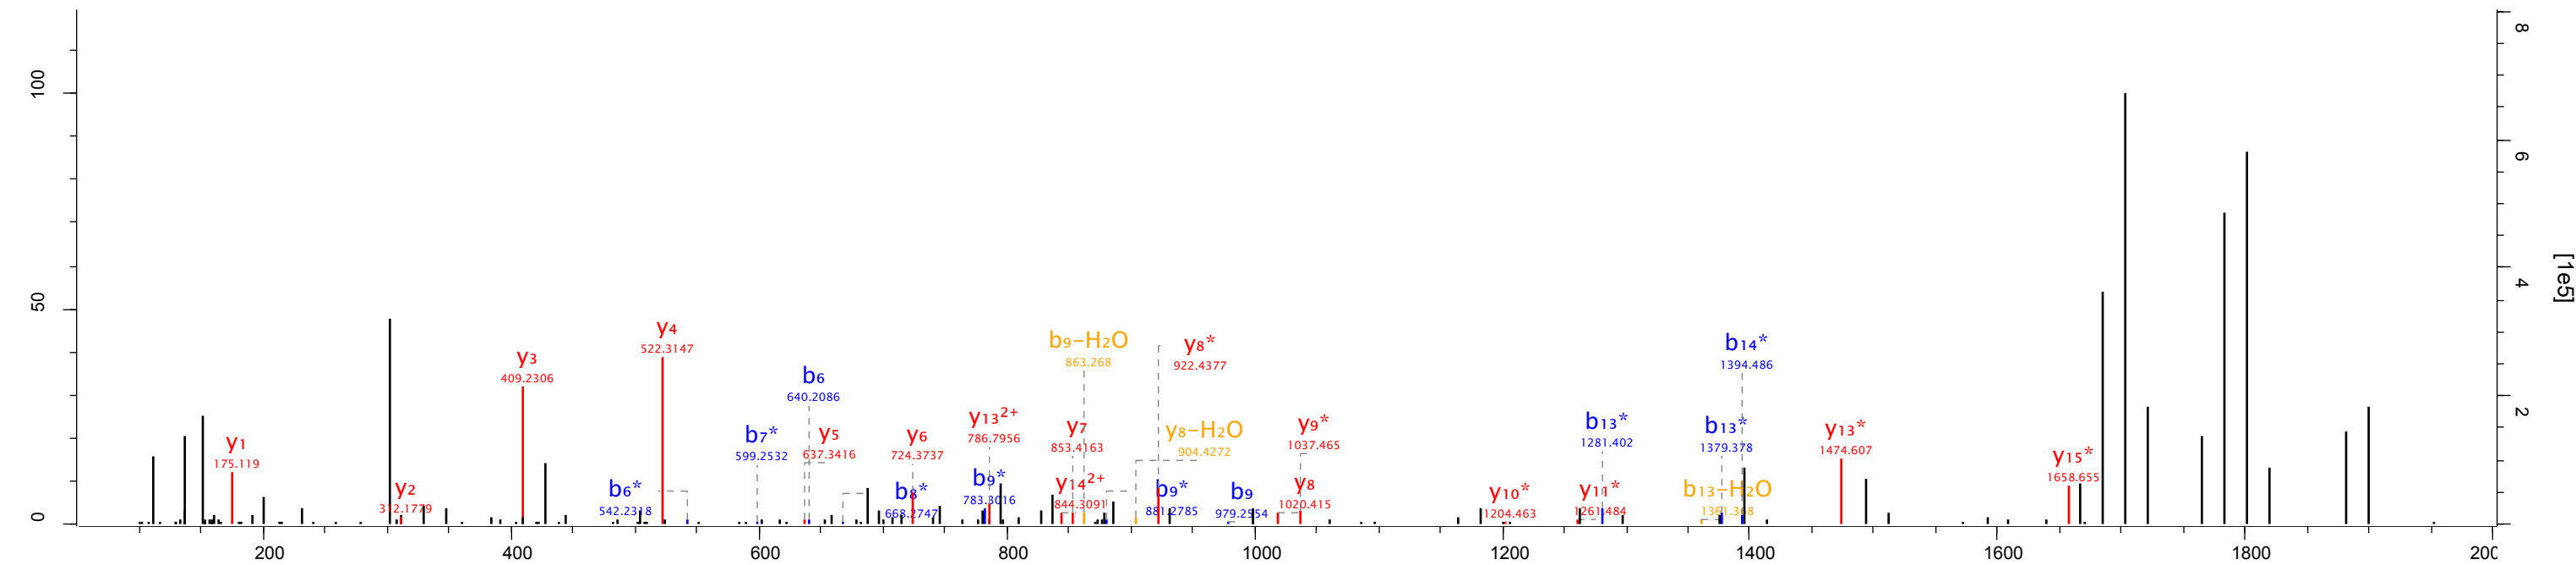

- G S y15\*  
ph y14 2+ y13\* R y11\*  
ph y10\*  
S y9\* y8  
ph y7 y6 y5 y4 y3 y2 y1 -

b6 b7\* b8\* b9 b13\* b14\*

Raw file 20150812\_A375SR\_Phospho\_BR1\_02 Scan 6704 Method FTMS; HCD Score 67.02 m/z 529.72 Gene names CHAF1A

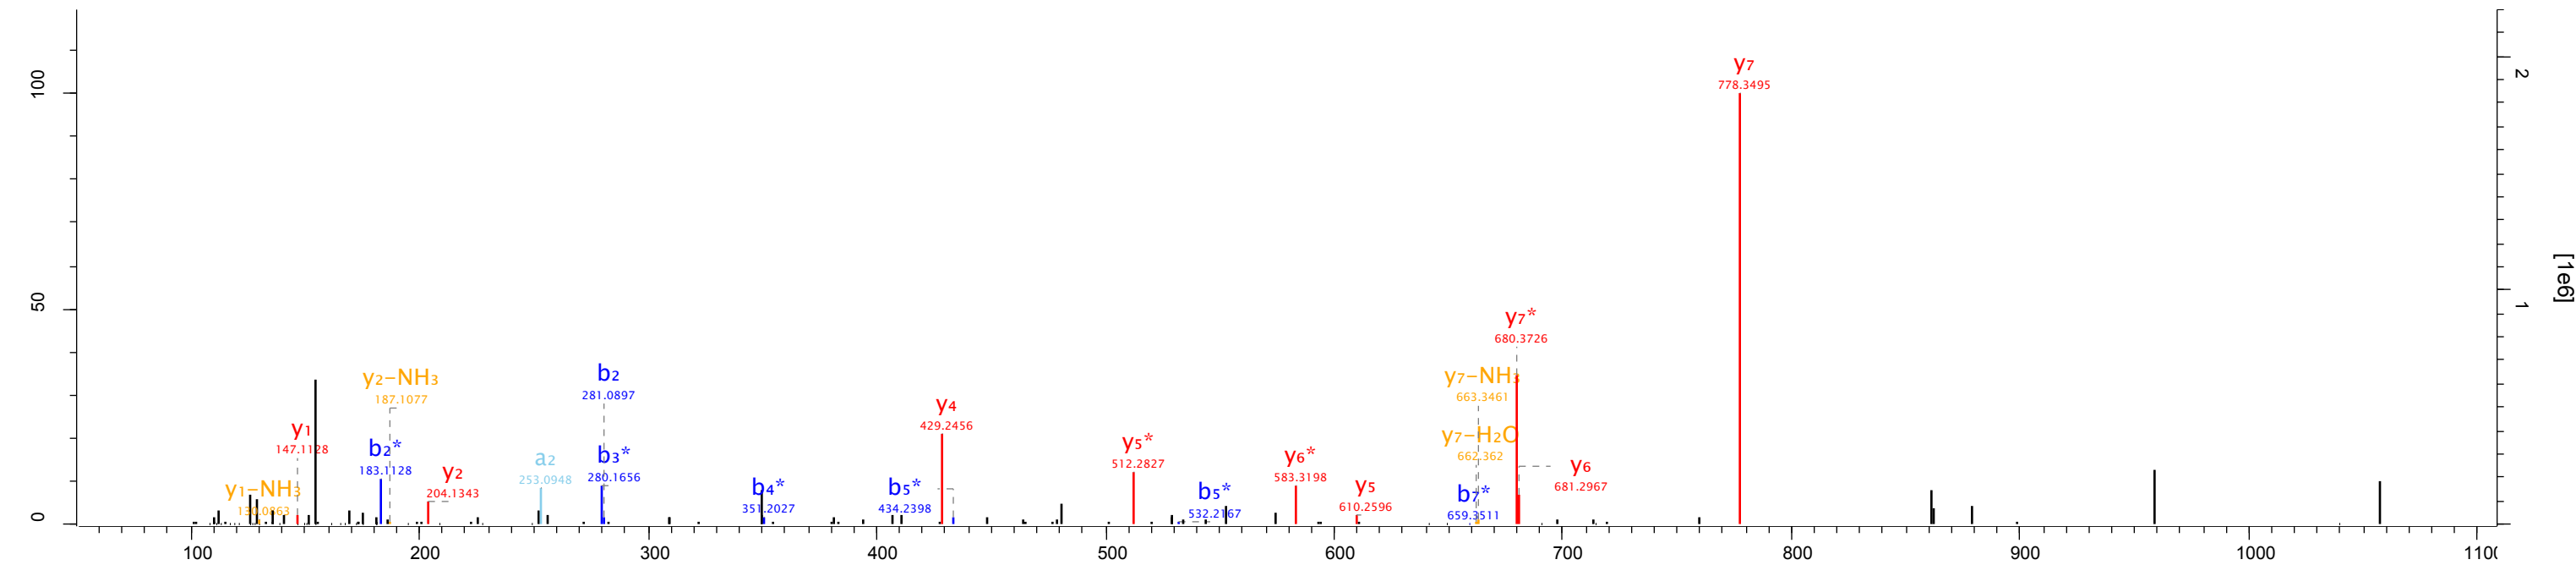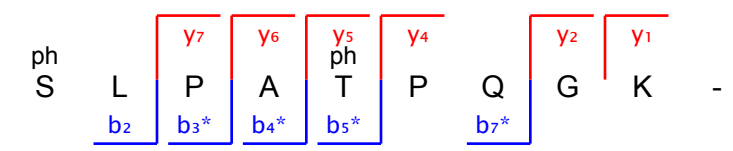

Raw file: 20150812\_A375SR\_Phospho\_BR1\_02  
 Scan: 6944 Method: FTMS; HCD Score: 262.37 m/z: 770.86 Gene names: ADD2

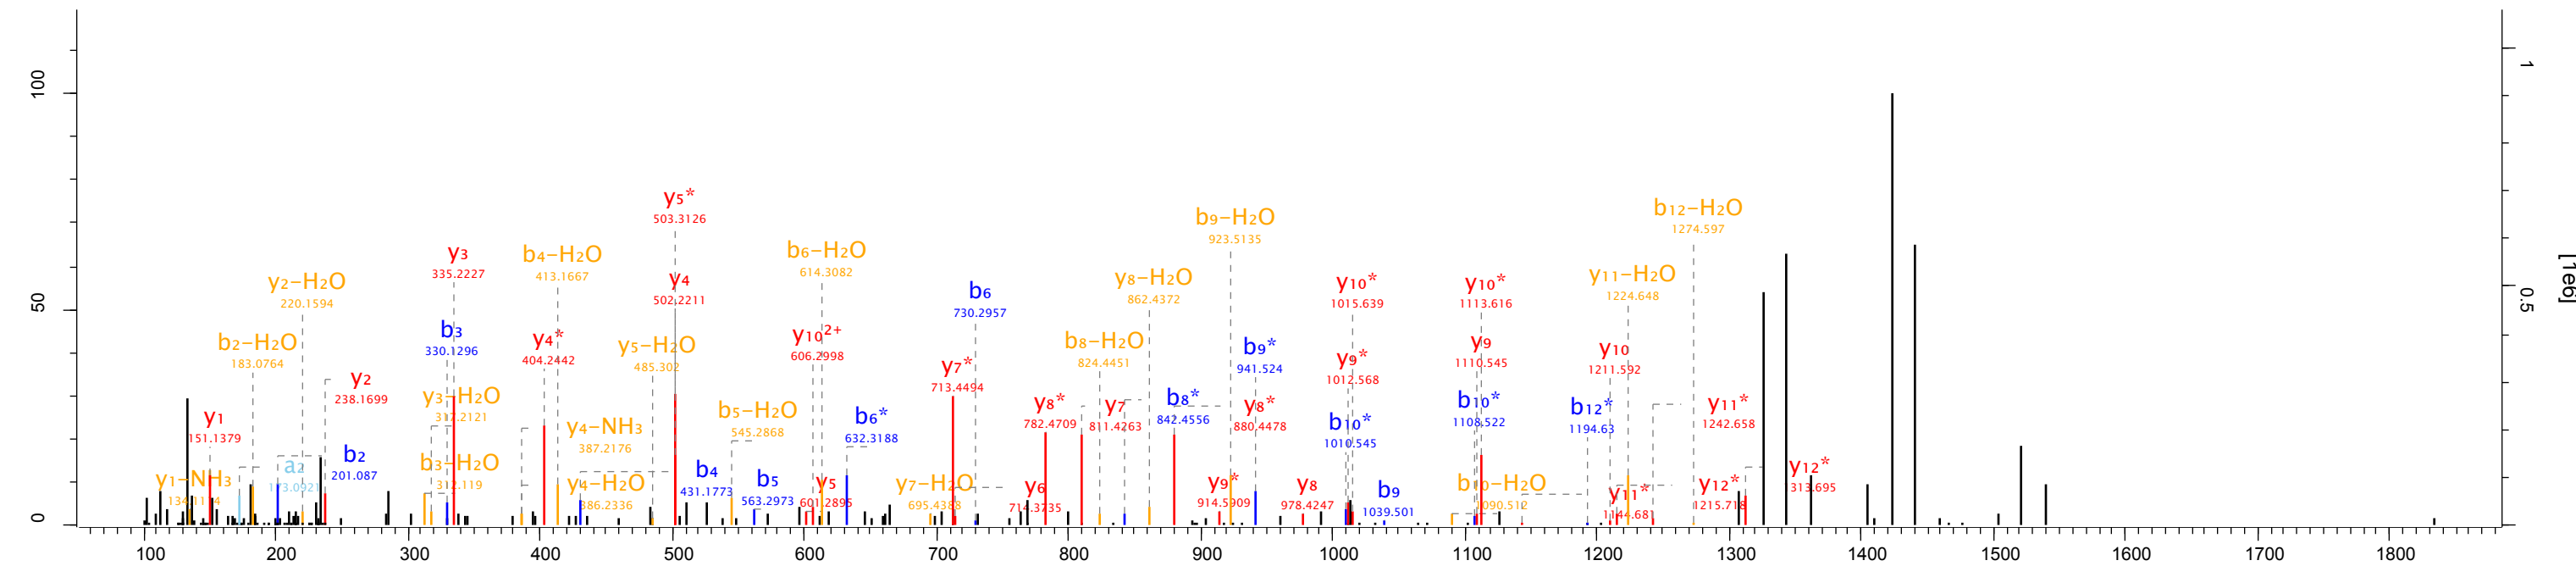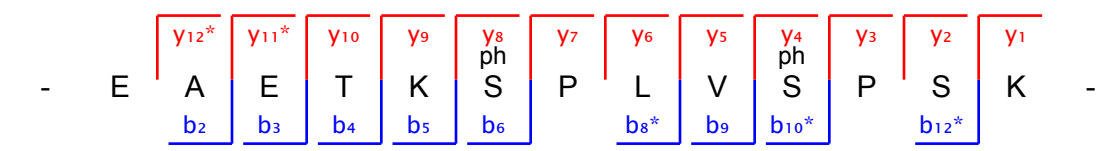

Raw file 20150812\_A375SR\_Phospho\_BR1\_02 Scan 6974 Method FTMS; HCD Score 210.11 m/z 1048.41 Gene names SRRM2

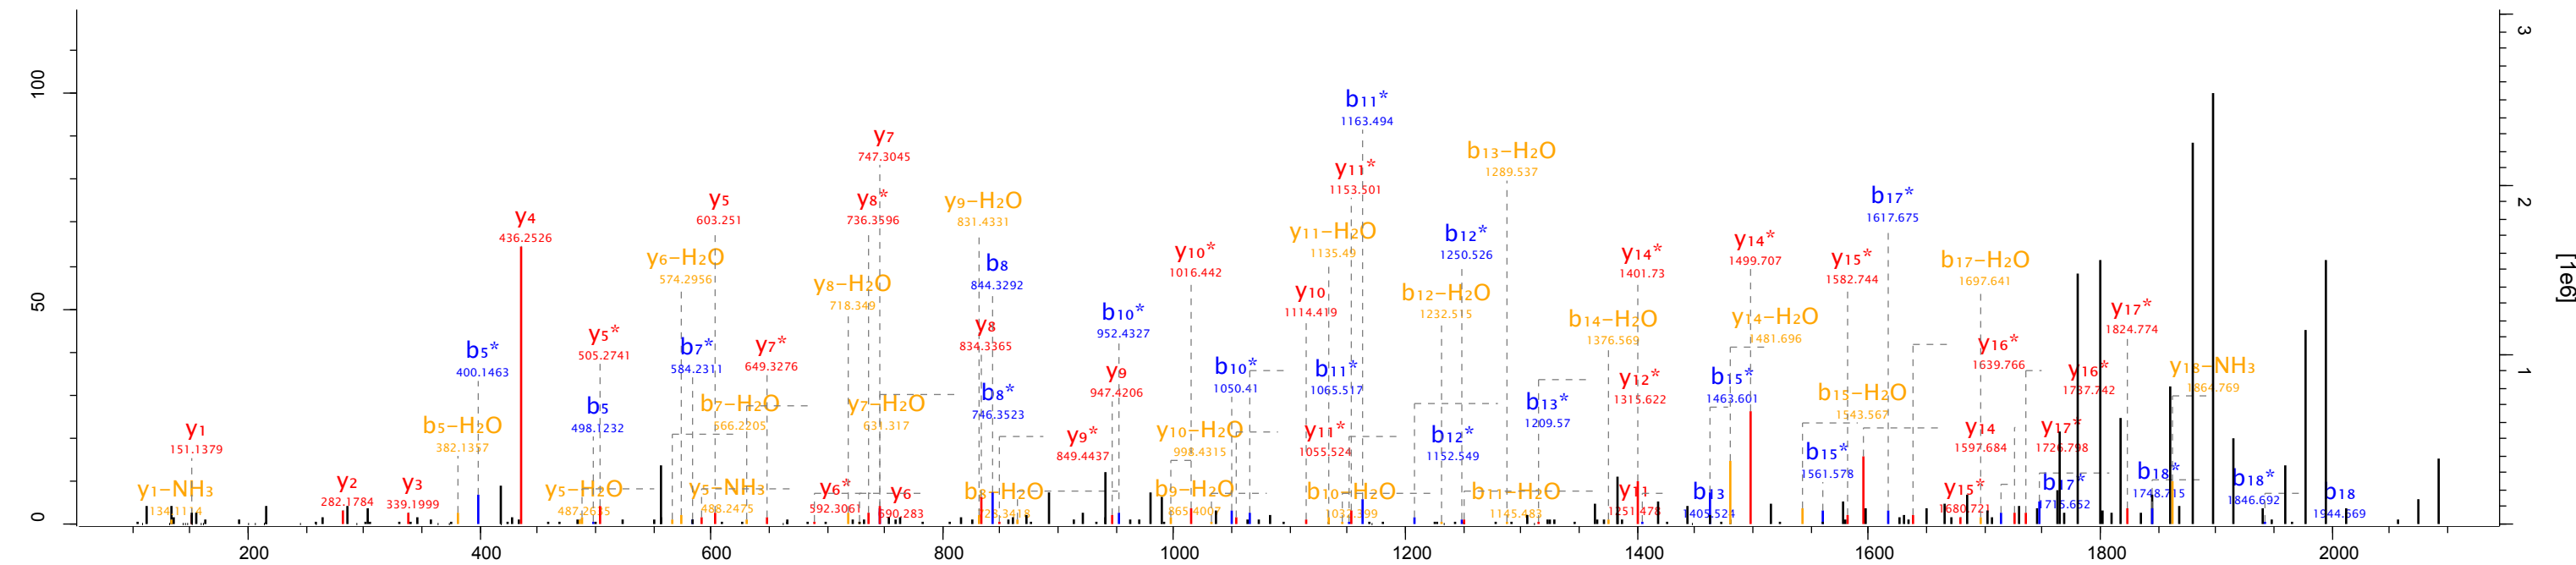

- D G S G T P S R H S L S S P G M K -

y17\*
y16\*
y15\*  
ph
y14
y12\*
y11
y10  
ph
y9
y8
y7
y6
y5  
ph
y4
y3
y2
y1

b5
b7\*
b8
b10\*
b11\*
b12\*
b13
b15\*
b17\*
b18



Raw file: 20150812\_A375SR\_Phospho\_BR1\_02  
 Scan: 7124 Method: FTMS; HCD Score: 109.64 m/z: 650.24 Gene names: SNRNP27

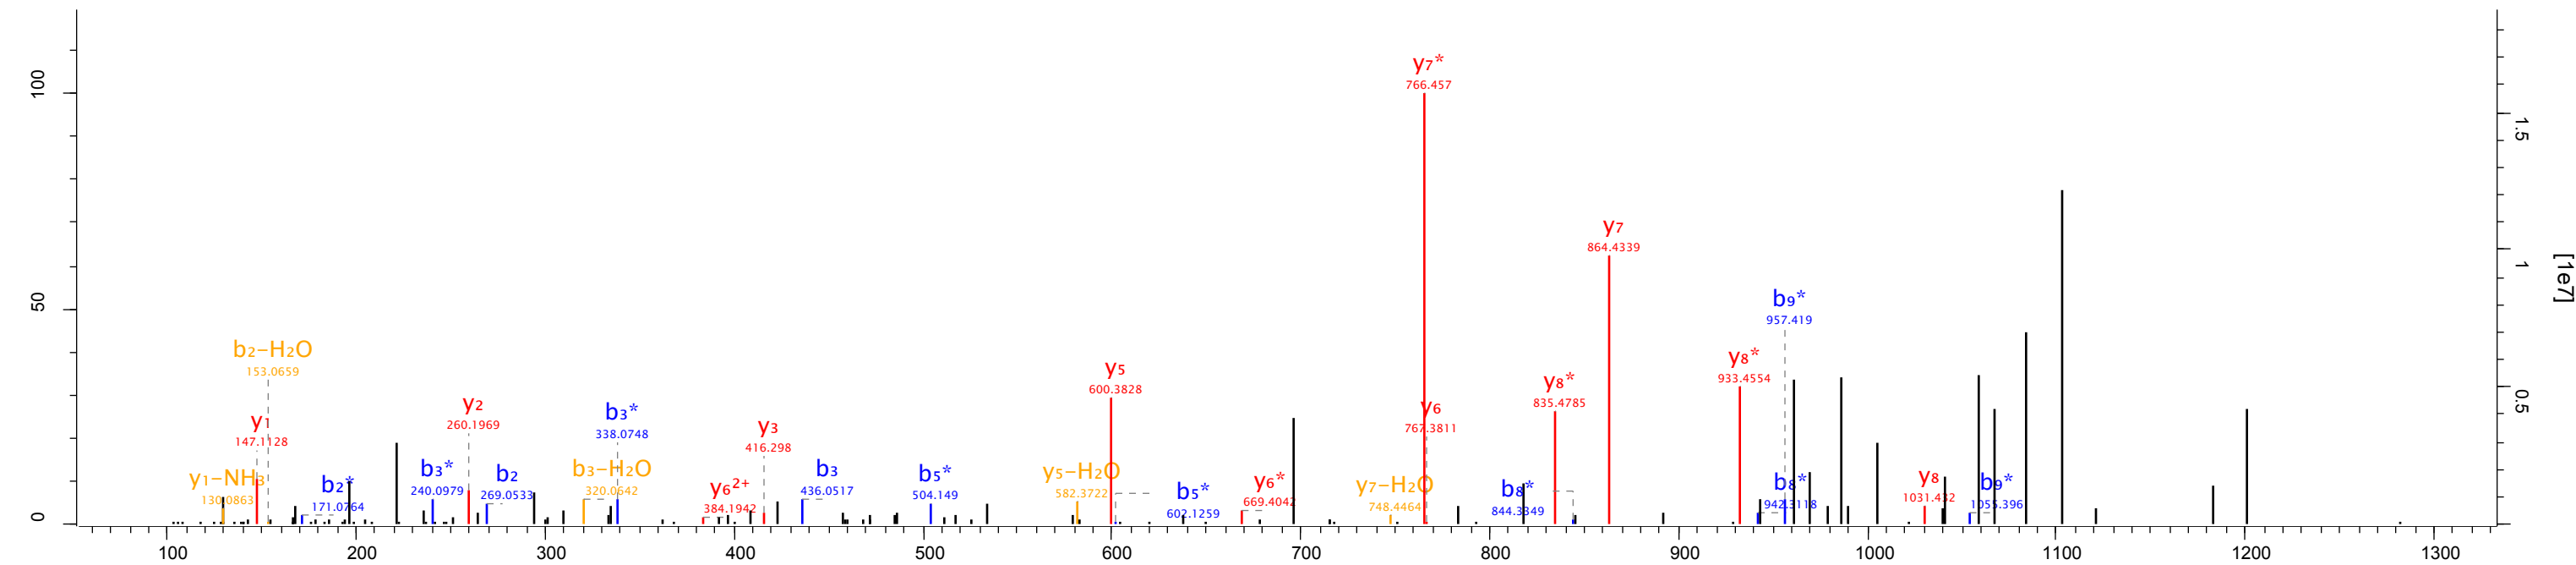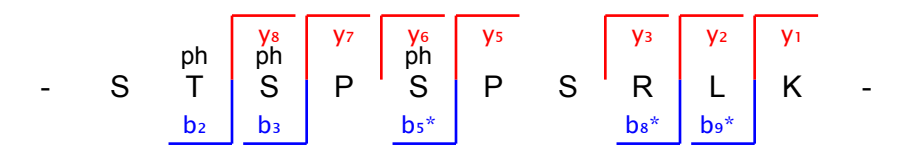

Raw file 20150812\_A375SR\_Phospho\_BR1\_02 Scan 7244 Method FTMS; HCD Score 135.03 m/z 1087.89 Gene names SRRM2

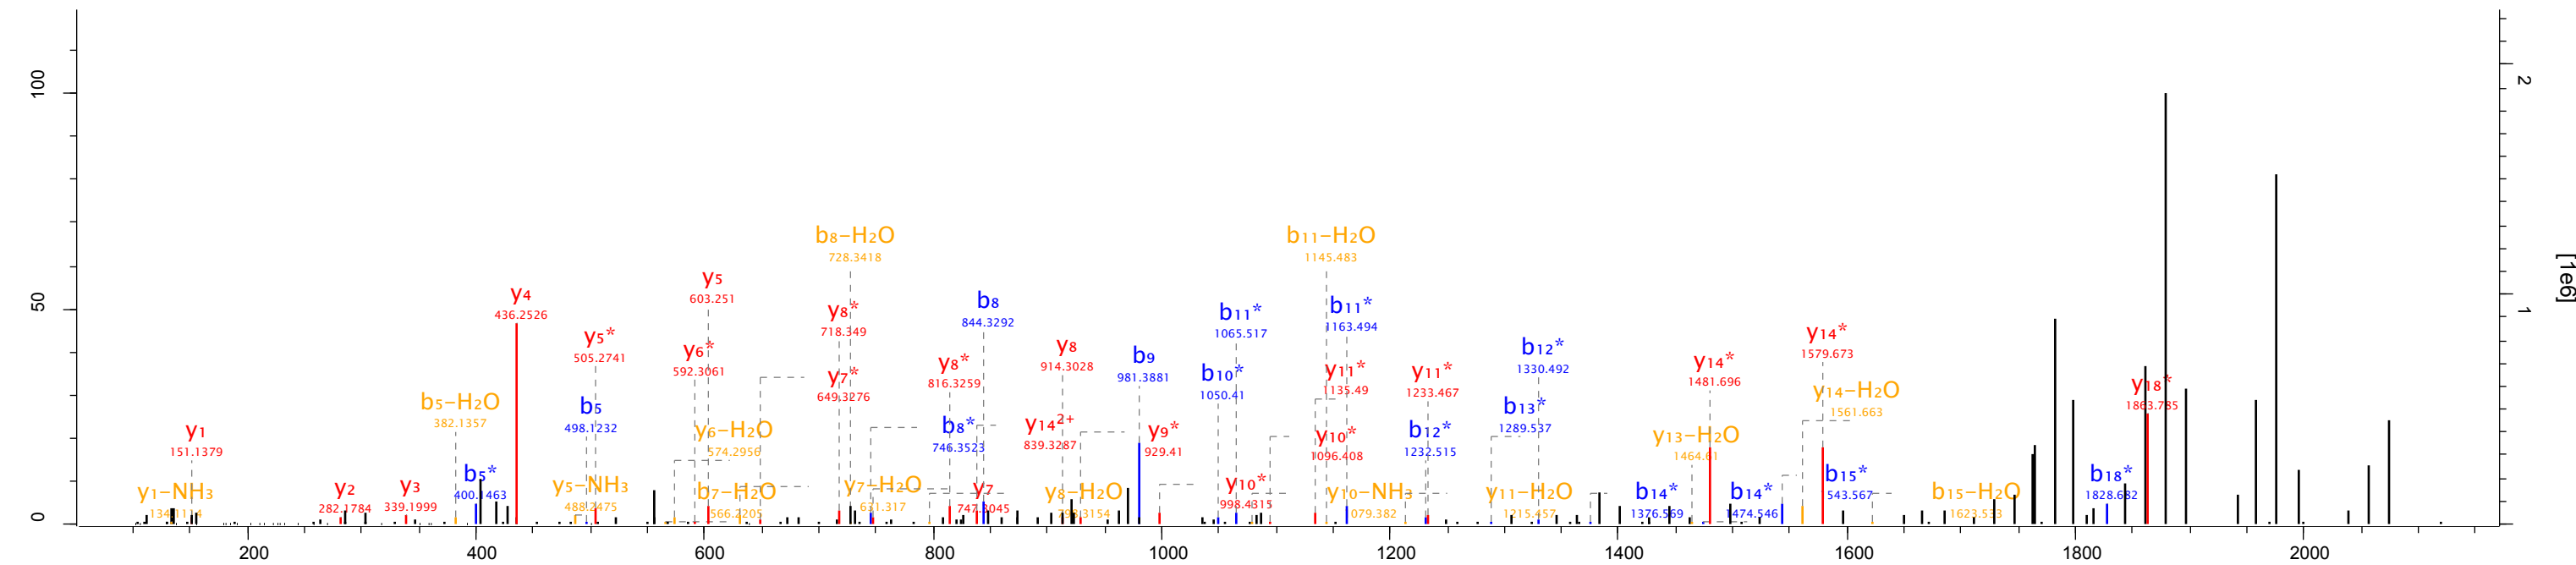

- D G S G ph T P S R H S L S G S S P G M K -

Fragmentation mapping (b and y ions):

- Red boxes (y ions): y18\* (G), y14\* (P), y11\* (H), y10\* (S), y9\* (L), y8\* (S), y7\* (G), y6\* (S), y5\* (S), y4\* (P), y3\* (G), y2\* (M), y1\* (K).
- Blue boxes (b ions): b5 (ph), b8 (R), b9 (H), b10\* (S), b11\* (L), b12\* (S), b13\* (G), b14\* (S), b15\* (S), b18\* (M).

Raw file Scan Method Score m/z Gene names  
 20150812\_A375SR\_Phospho\_BR1\_02 7324 FTMS; HCD 330.36 1217.99 NUCKS1

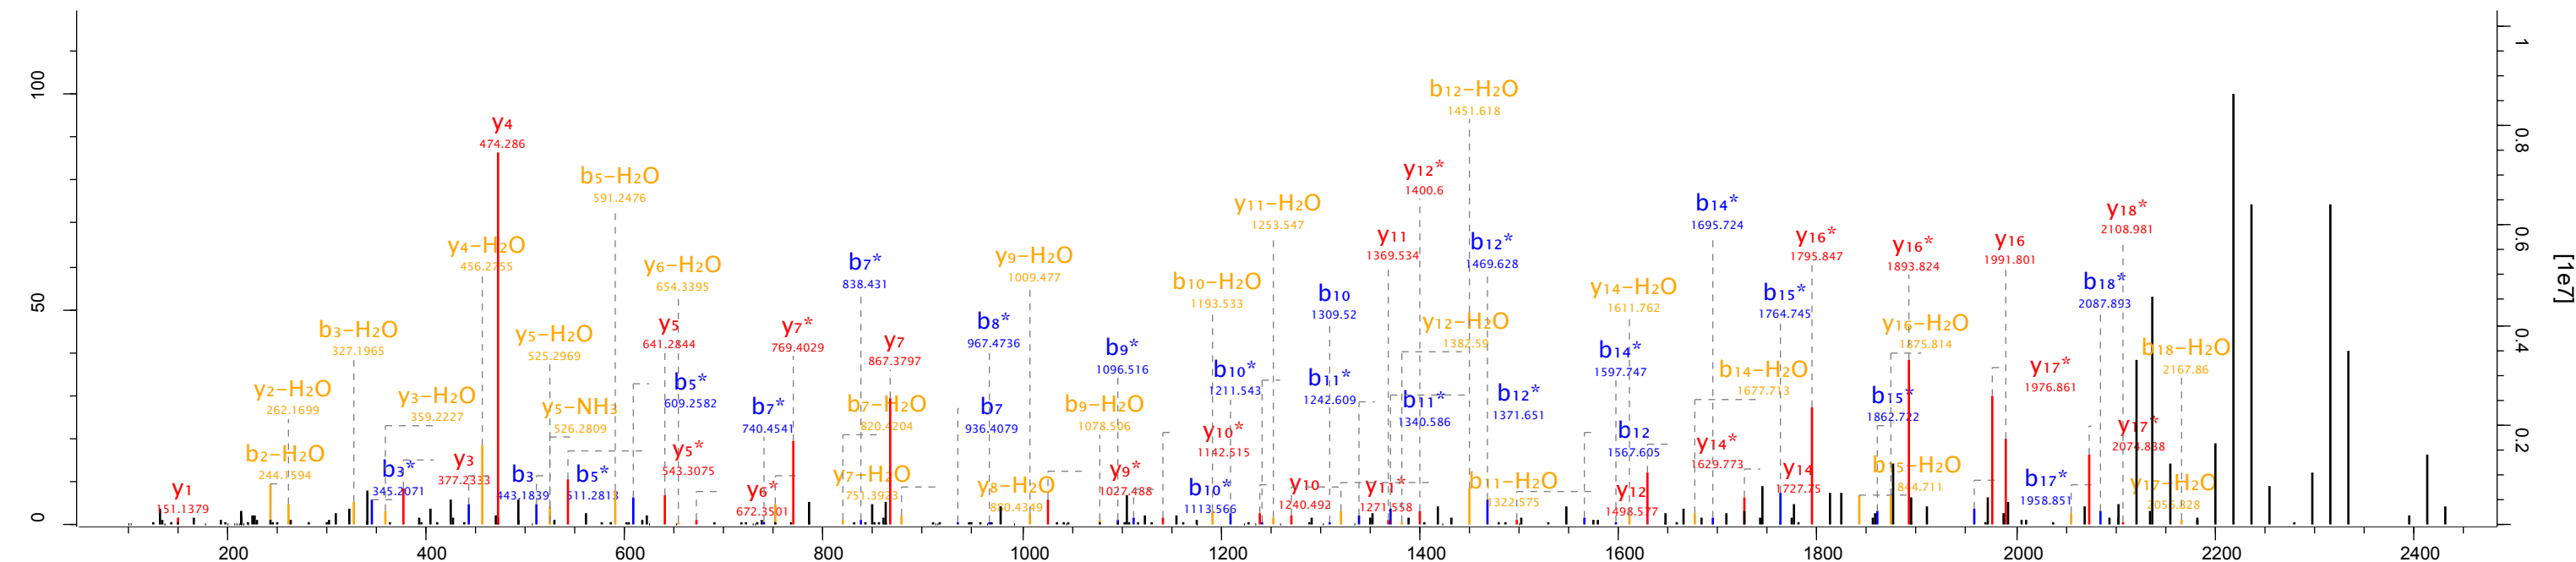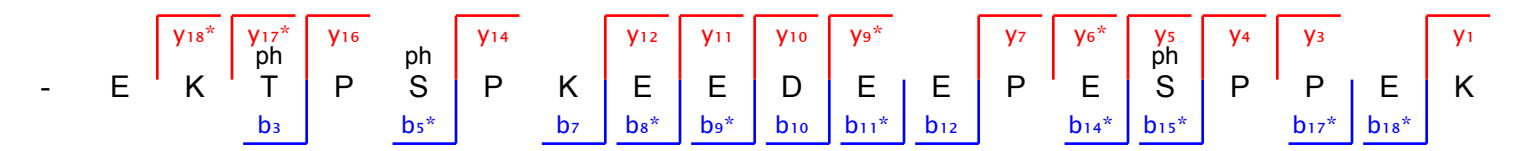

Raw file 20150812\_A375SR\_Phospho\_BR1\_02 Scan 7384 Method FTMS; HCD Score 63.56 m/z 547.24 Gene names PPFIBP1

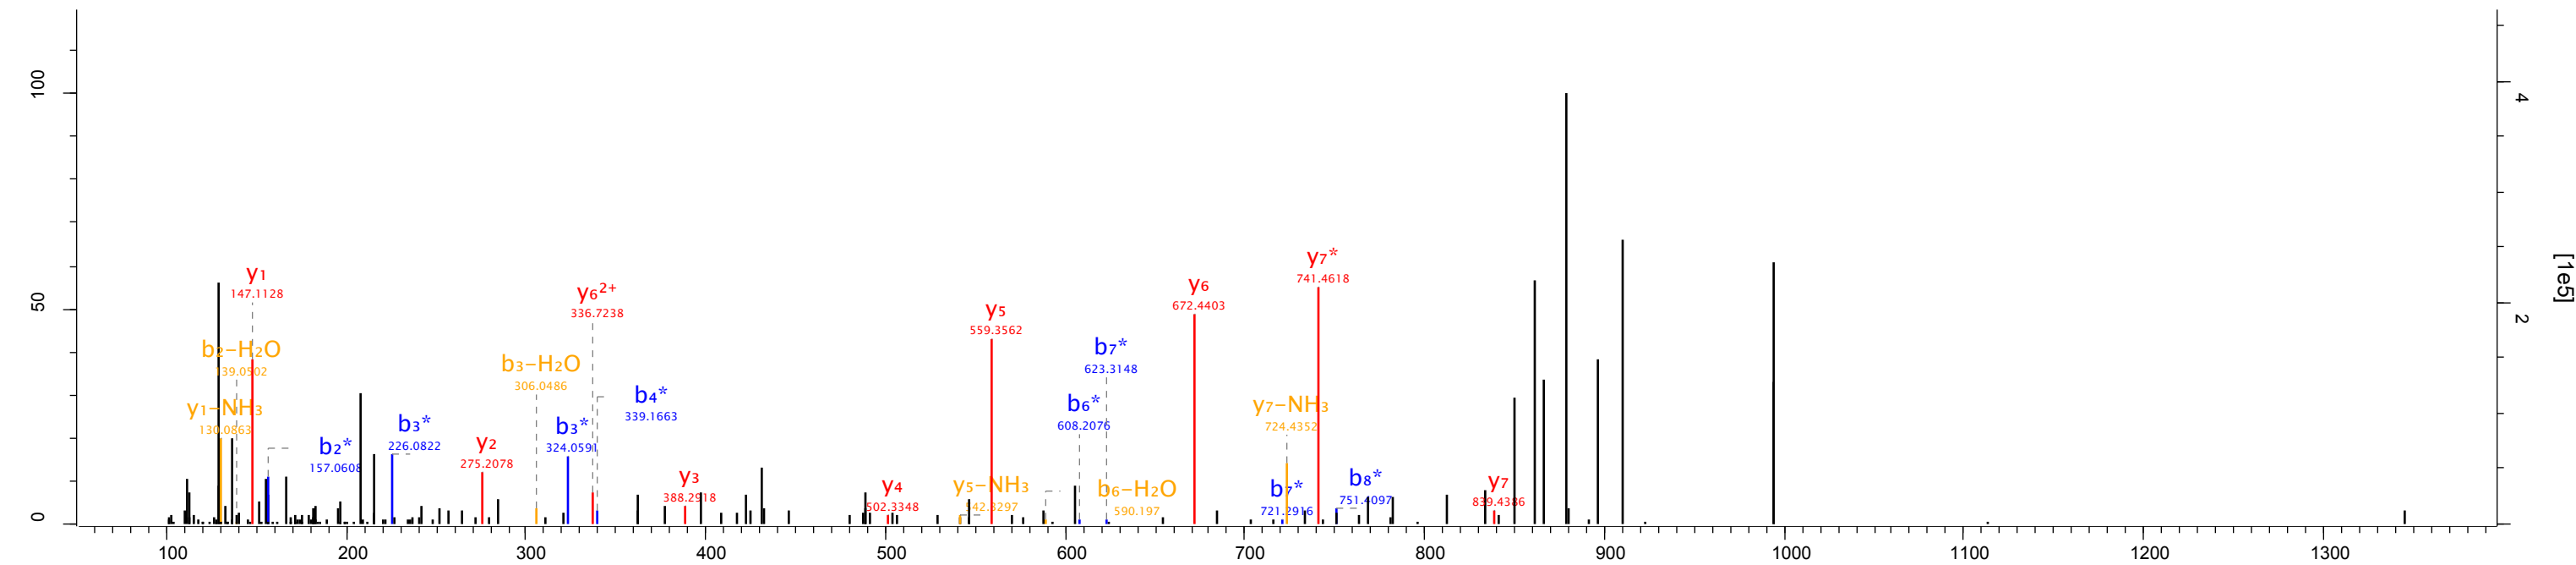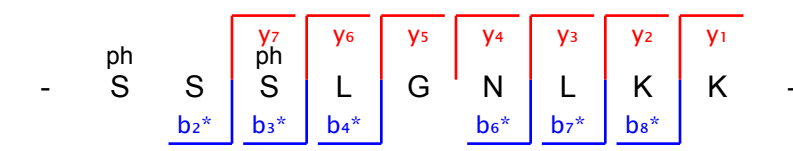

Raw file: 20150812\_A375SR\_Phospho\_BR1\_02  
 Scan: 7734 Method: FTMS; HCD Score: 145.33 m/z: 672.78 Gene names: DNAJC6

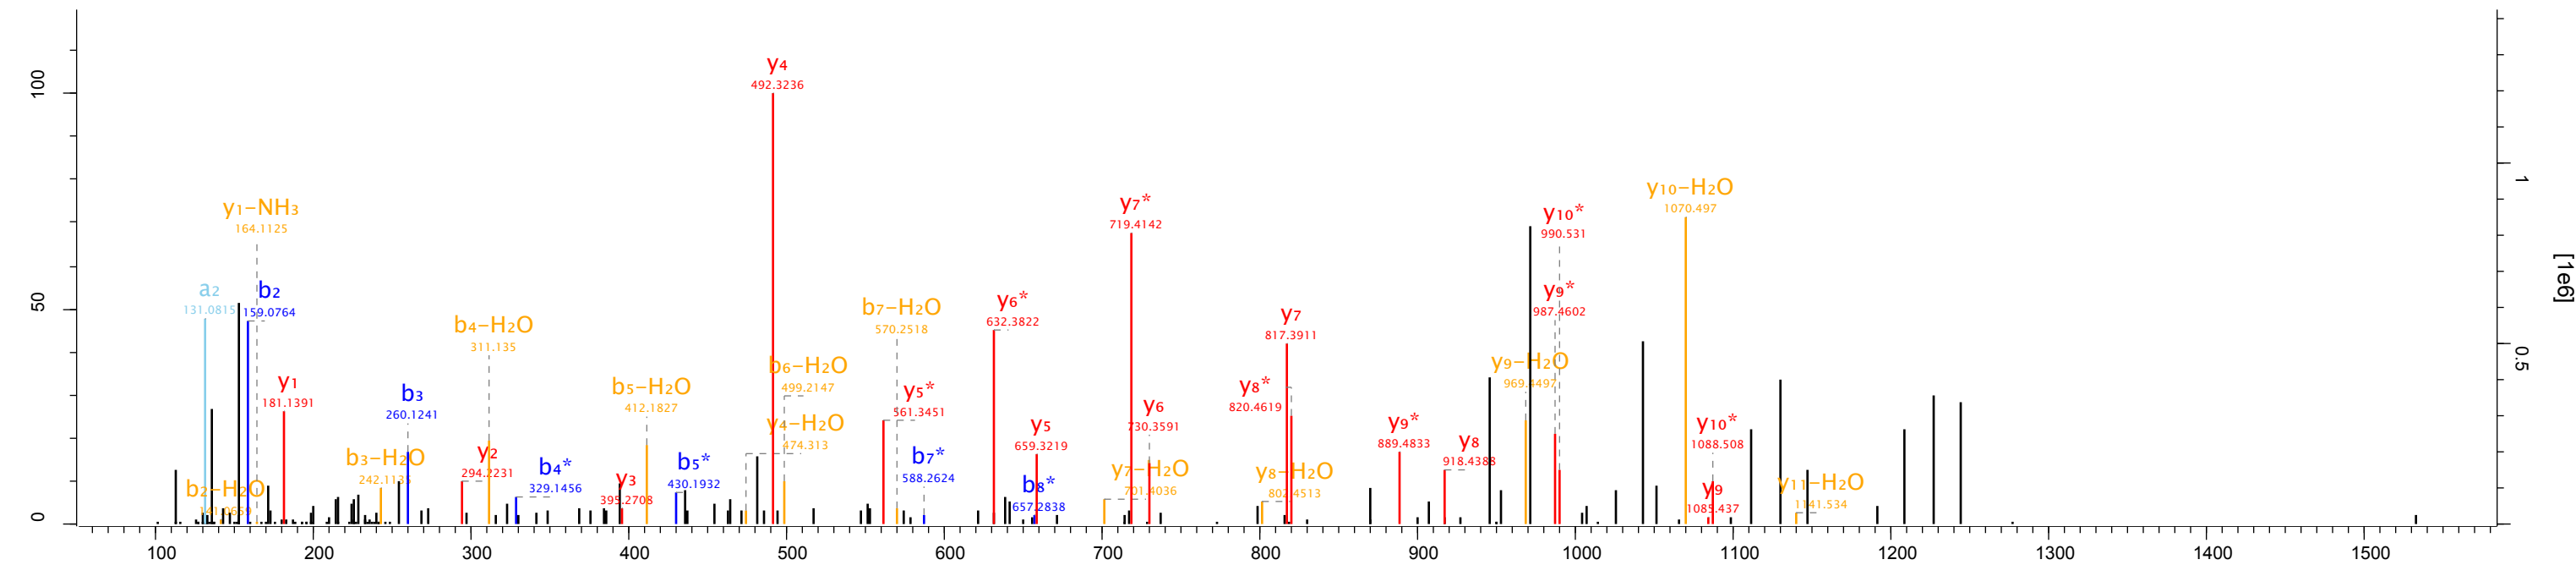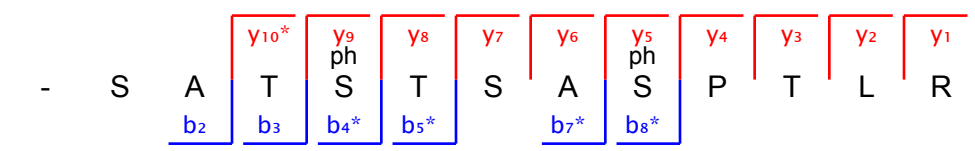

Raw file: 20150812\_A375SR\_Phospho\_BR1\_02  
 Scan: 8204 Method: FTMS; HCD Score: 96.6 m/z: 545.23 Gene names: SPEN

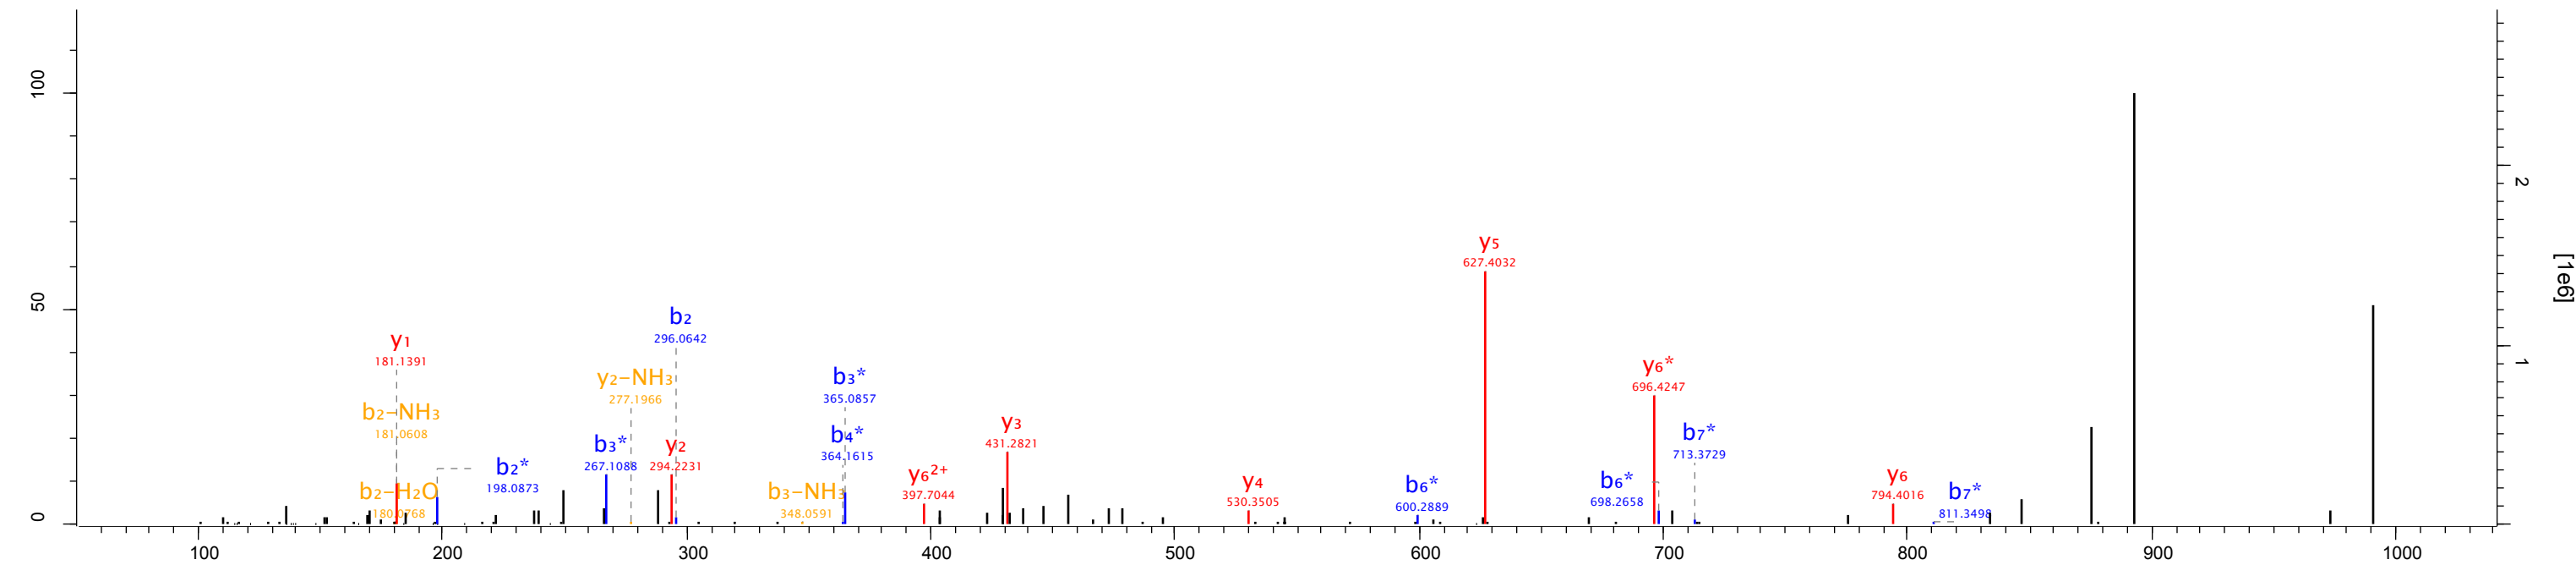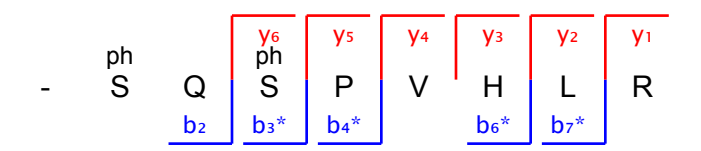

Raw file  
20150812\_A375SR\_Phospho\_BR1\_02

Scan 8774 Method FTMS; HCD Score 234.27 m/z 1243.48 Gene names HMGA1

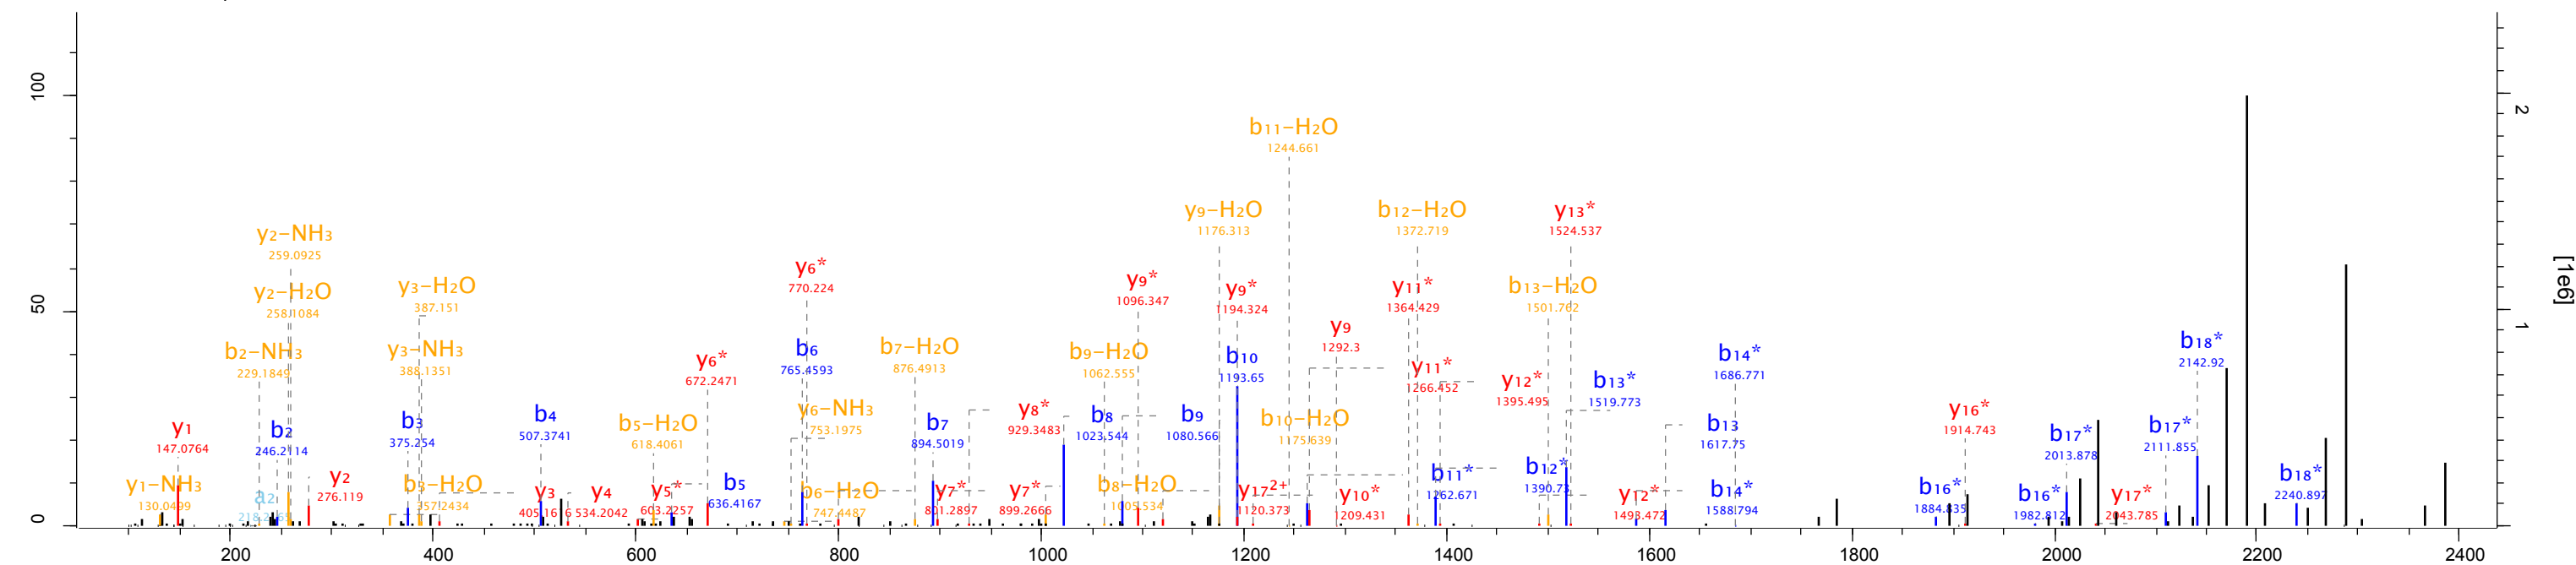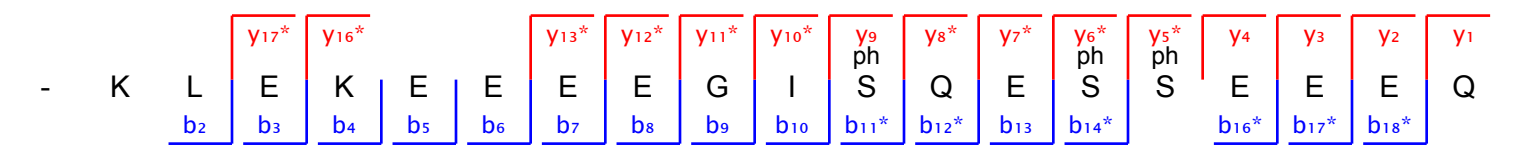

Raw file: 20150812\_A375SR\_Phospho\_BR1\_02  
 Scan: 8944 Method: FTMS; HCD Score: 57.9 m/z: 785.03 Gene names: SRRM2

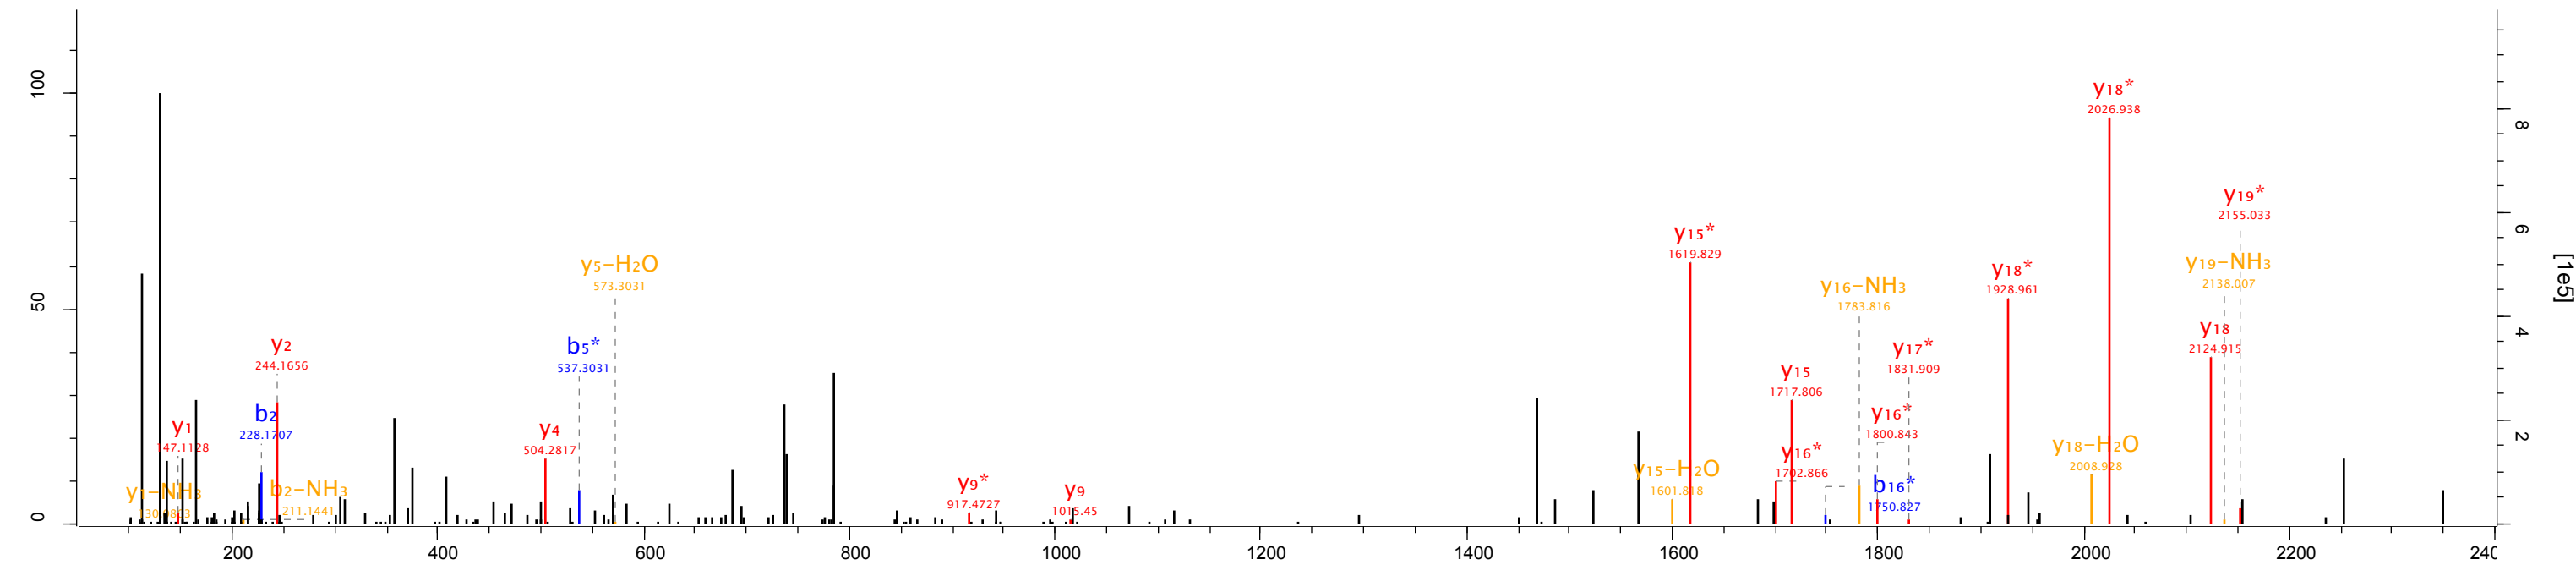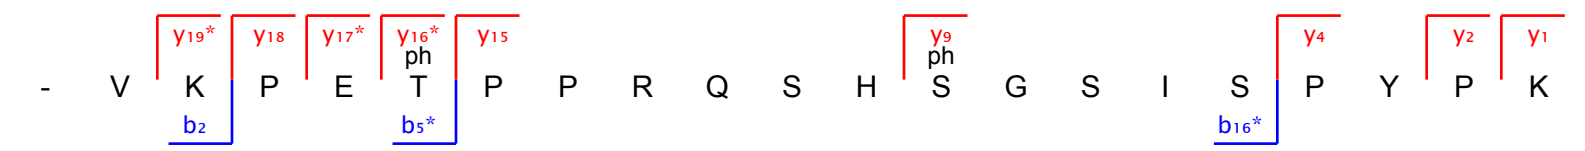



Raw file 20150812\_A375SR\_Phospho\_BR1\_02 Scan 9304 Method FTMS; HCD Score 129.05 m/z 660.79 Gene names LMNB1

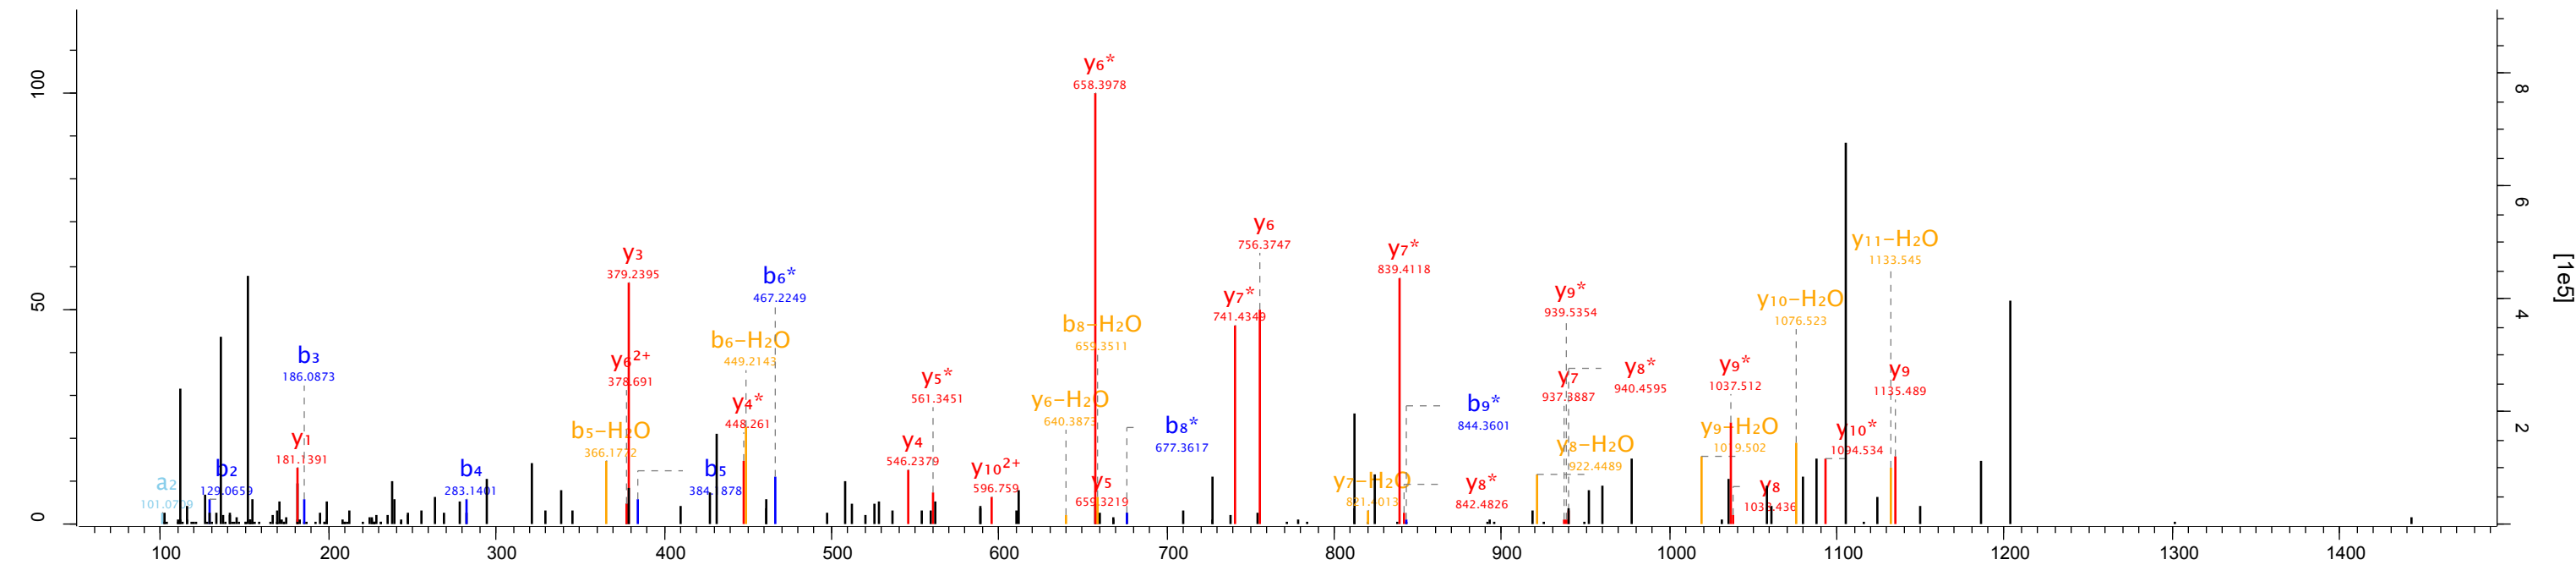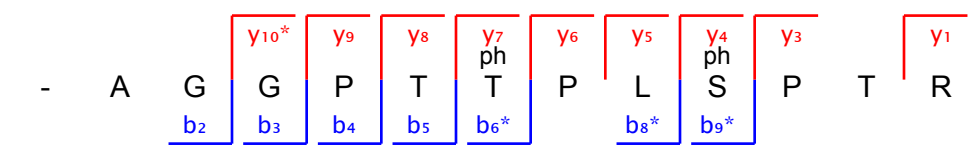

Raw file: 20150812\_A375SR\_Phospho\_BR1\_02  
 Scan: 9484 Method: FTMS; HCD Score: 170 m/z: 981.91 Gene names: YBX3

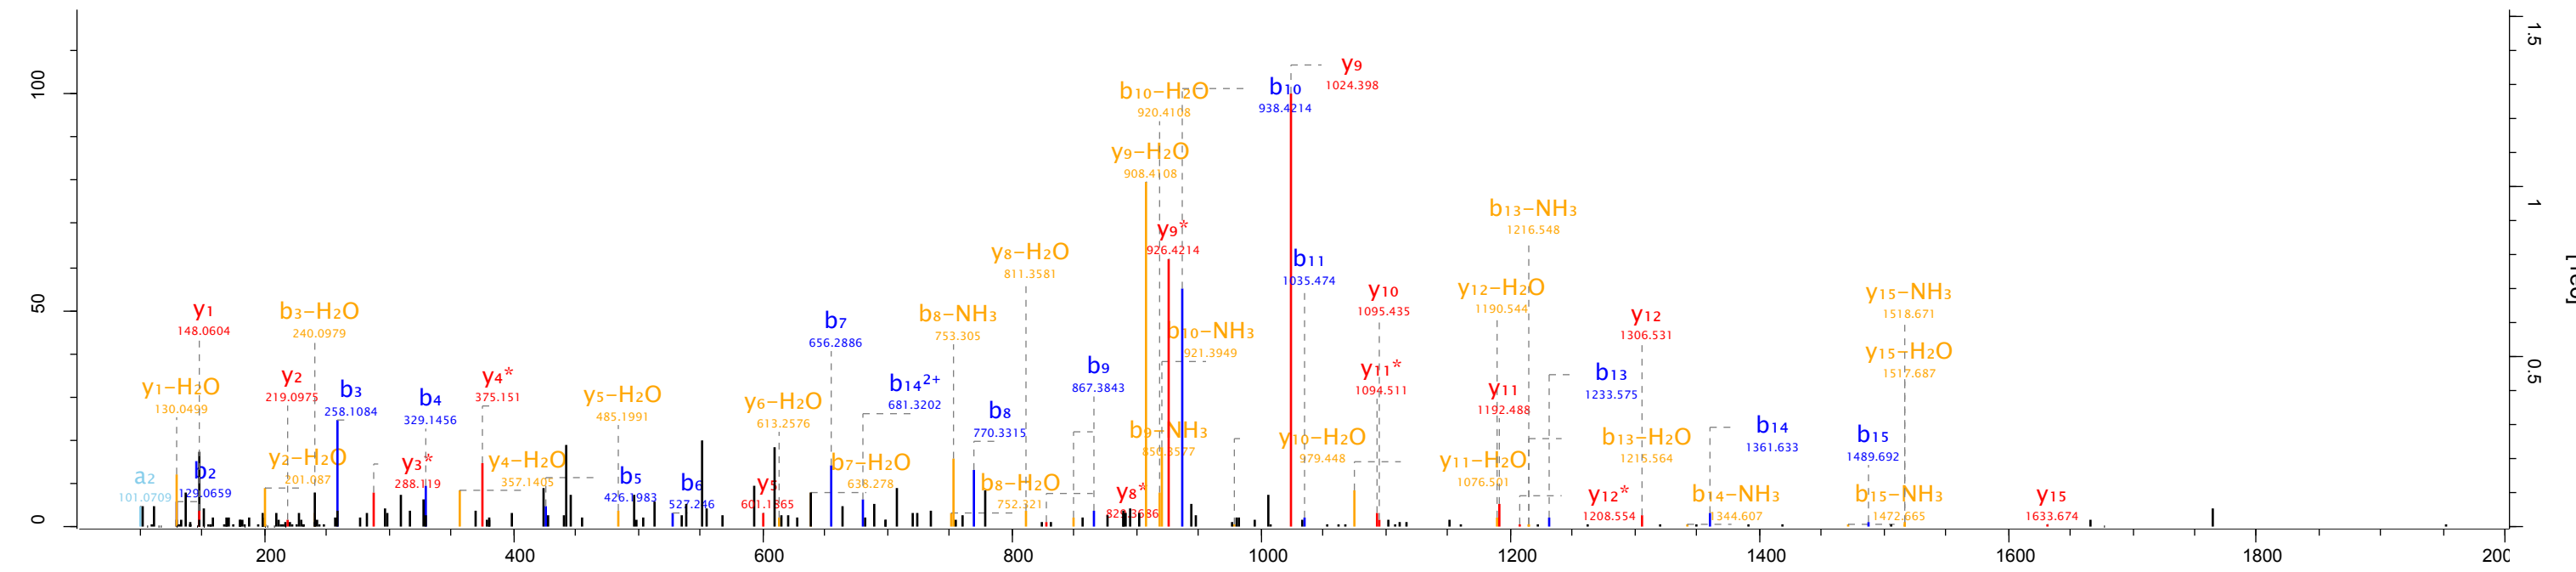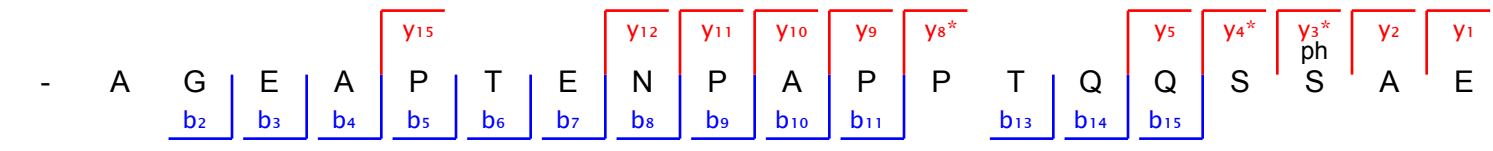

Raw file: 20150812\_A375SR\_Phospho\_BR1\_02  
 Scan: 9814 Method: FTMS; HCD Score: 98.34 m/z: 600.27 Gene names: SRRM2

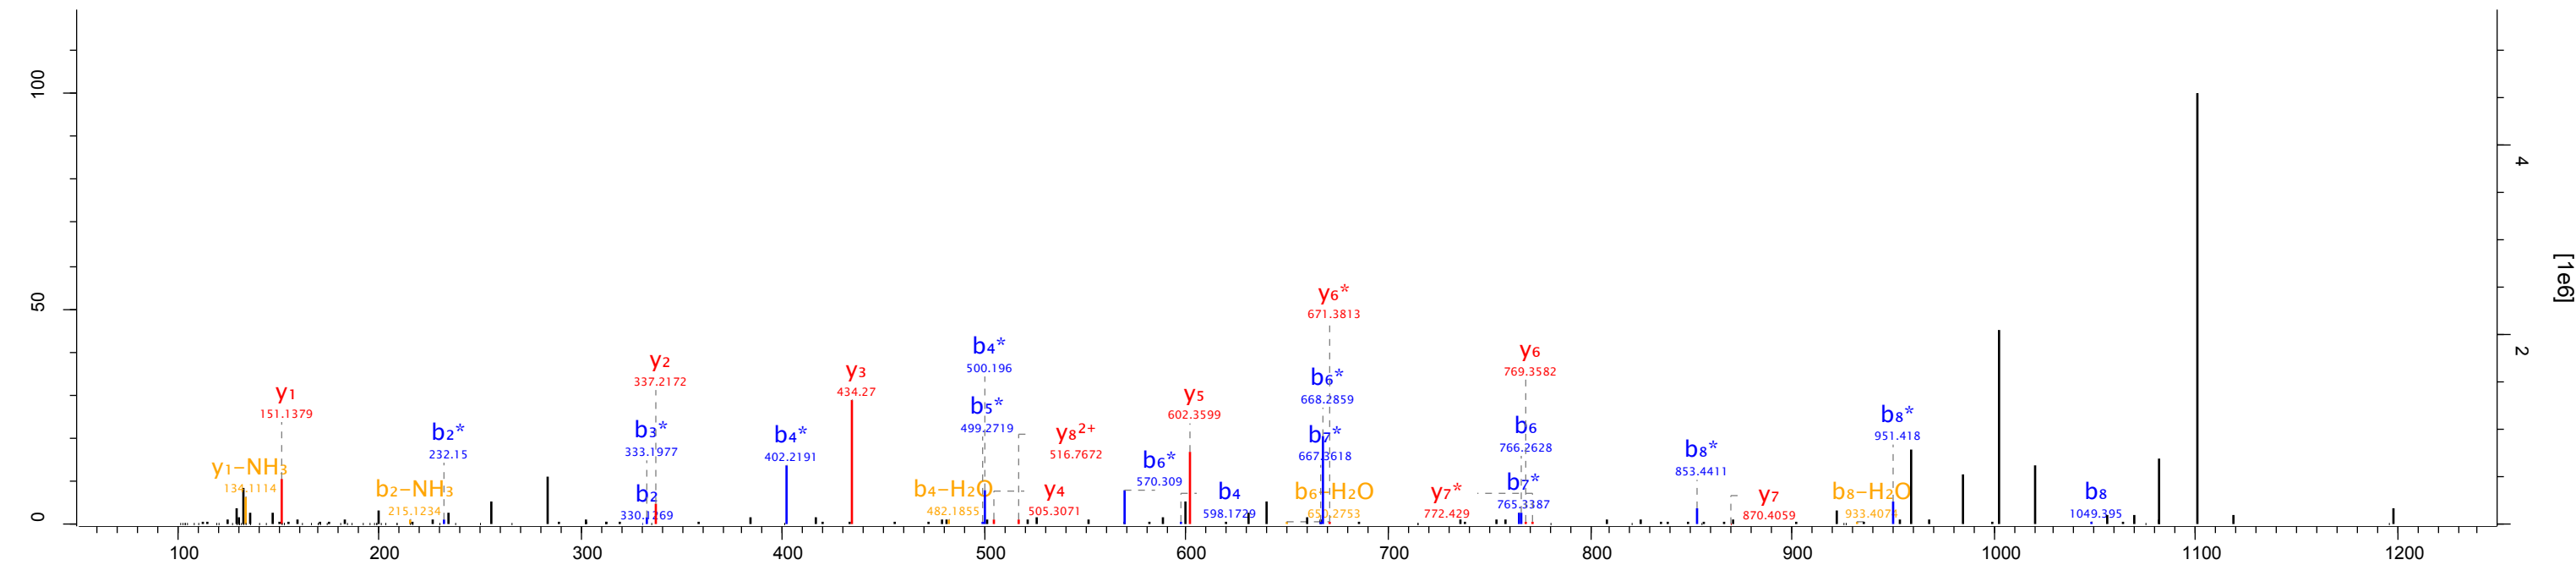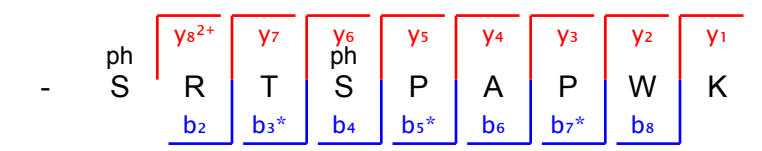

Raw file 20150812\_A375SR\_Phospho\_BR1\_02 Scan 9974 Method FTMS; HCD Score 181.14 m/z 1120.42 Gene names NCK2

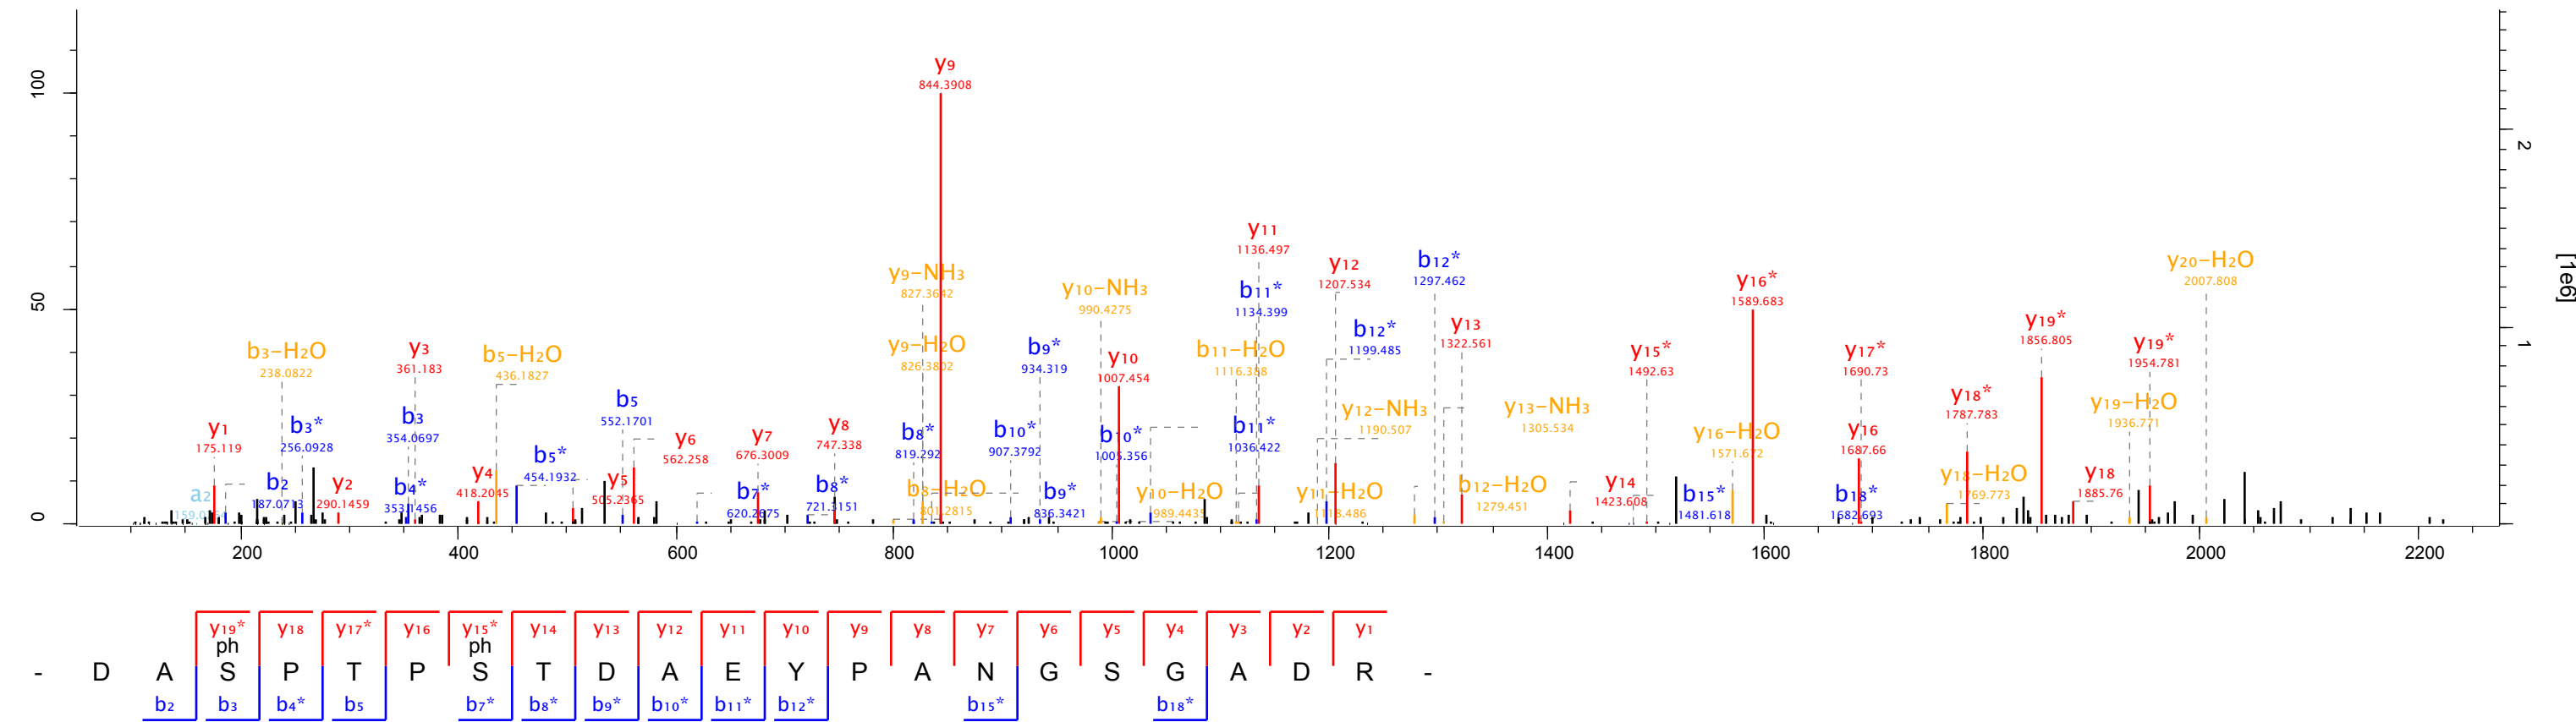

Raw file: 20150812\_A375SR\_Phospho\_BR1\_03  
 Scan: 10094 Method: FTMS; HCD Score: 97.73 m/z: 533.26 Gene names: SH3PXD2A

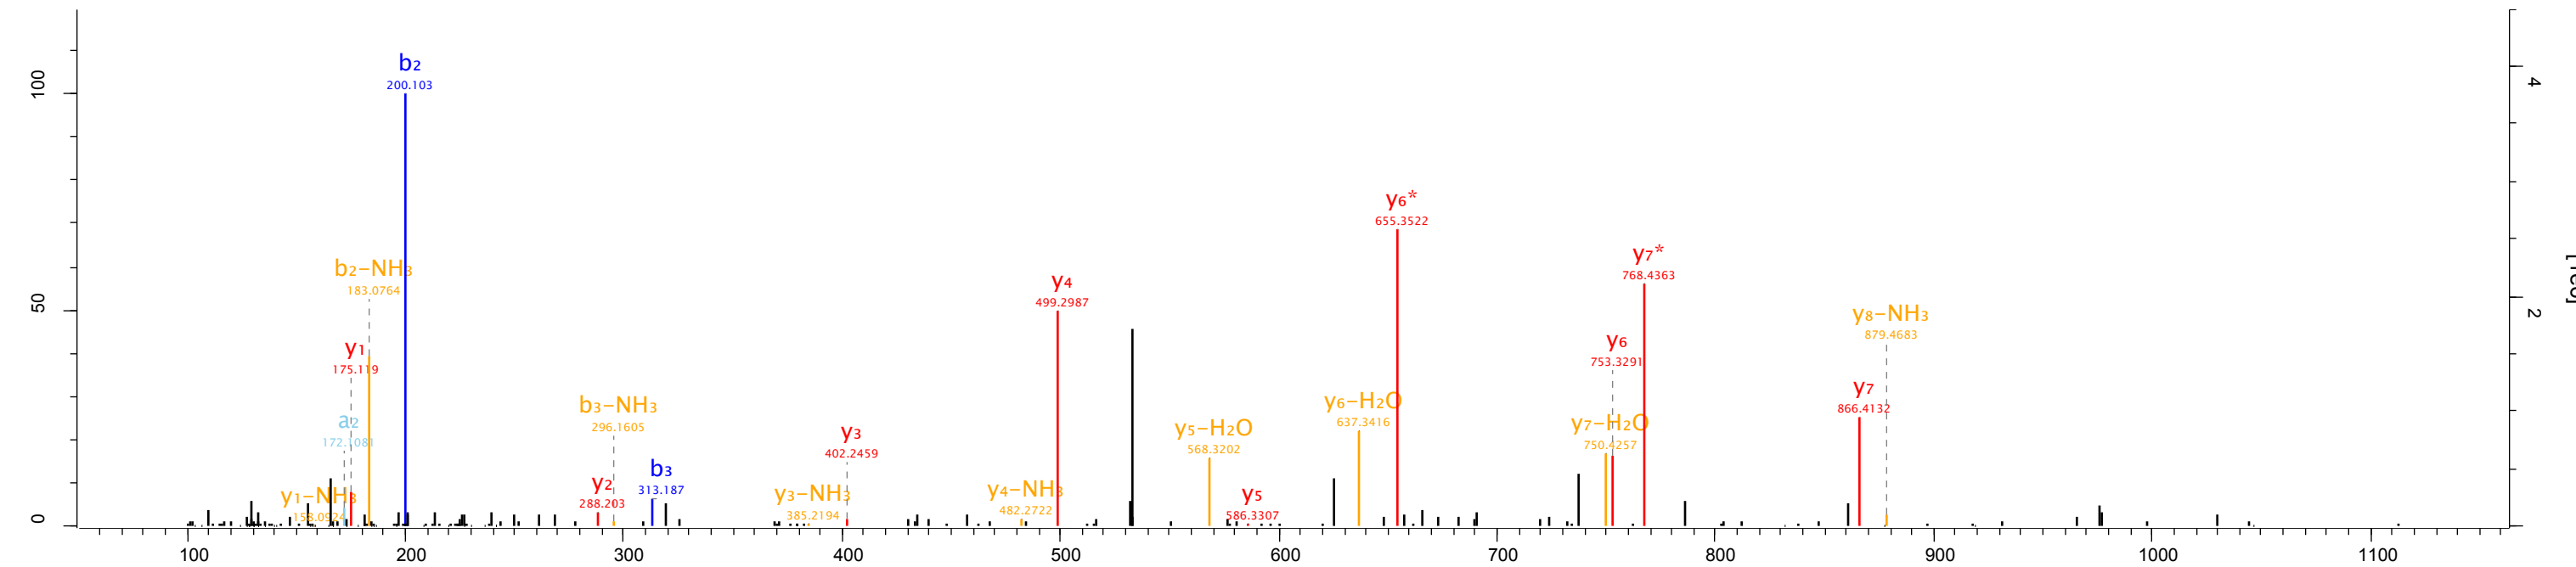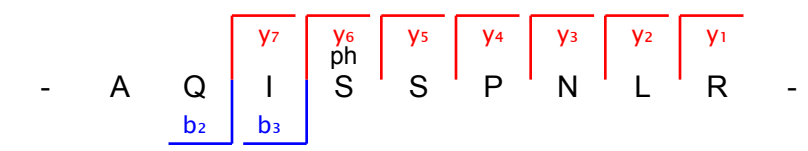

Raw file 20150812\_A375SR\_Phospho\_BR1\_03 Scan 10434 Method FTMS; HCD Score 90.45 m/z 408.18 Gene names PPIG

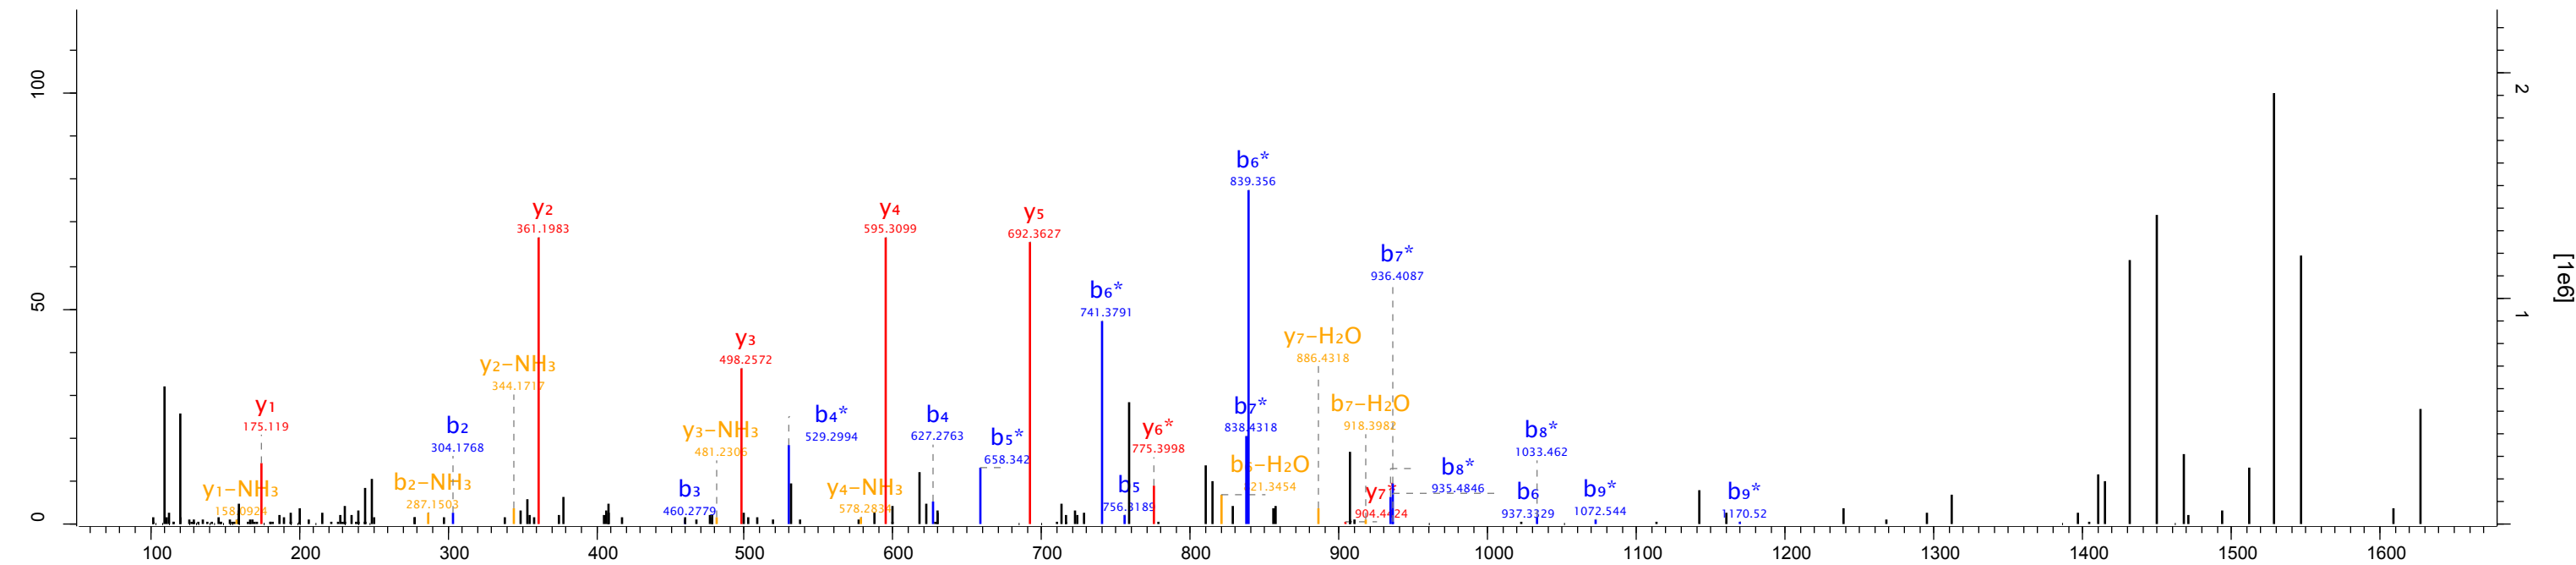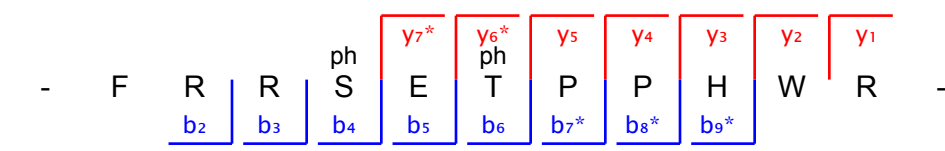

Raw file  
 20150812\_A375SR\_Phospho\_BR1\_03  
 Scan 10474 Method FTMS; HCD Score 103.62 m/z 974.43 Gene names SRRM2

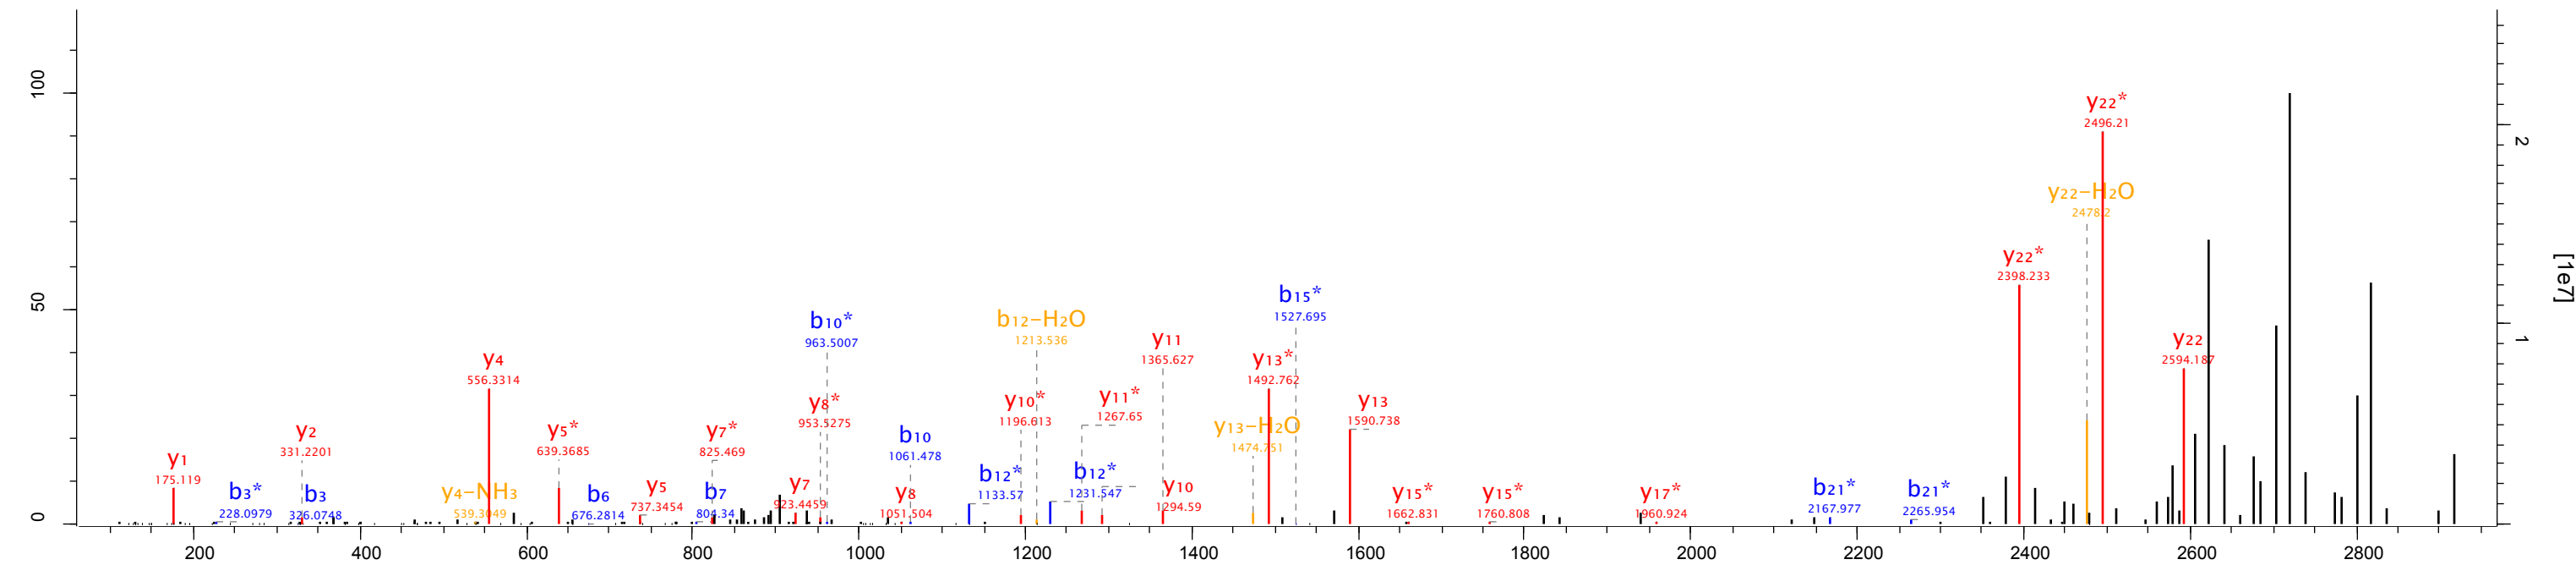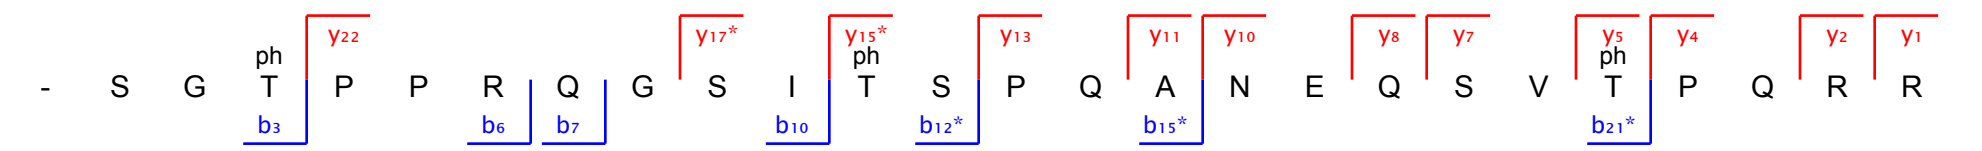

Raw file Scan Method Score m/z Gene names  
 20150812\_A375SR\_Phospho\_BR1\_03 11204 FTMS; HCD 194.19 704.78 AKAP13

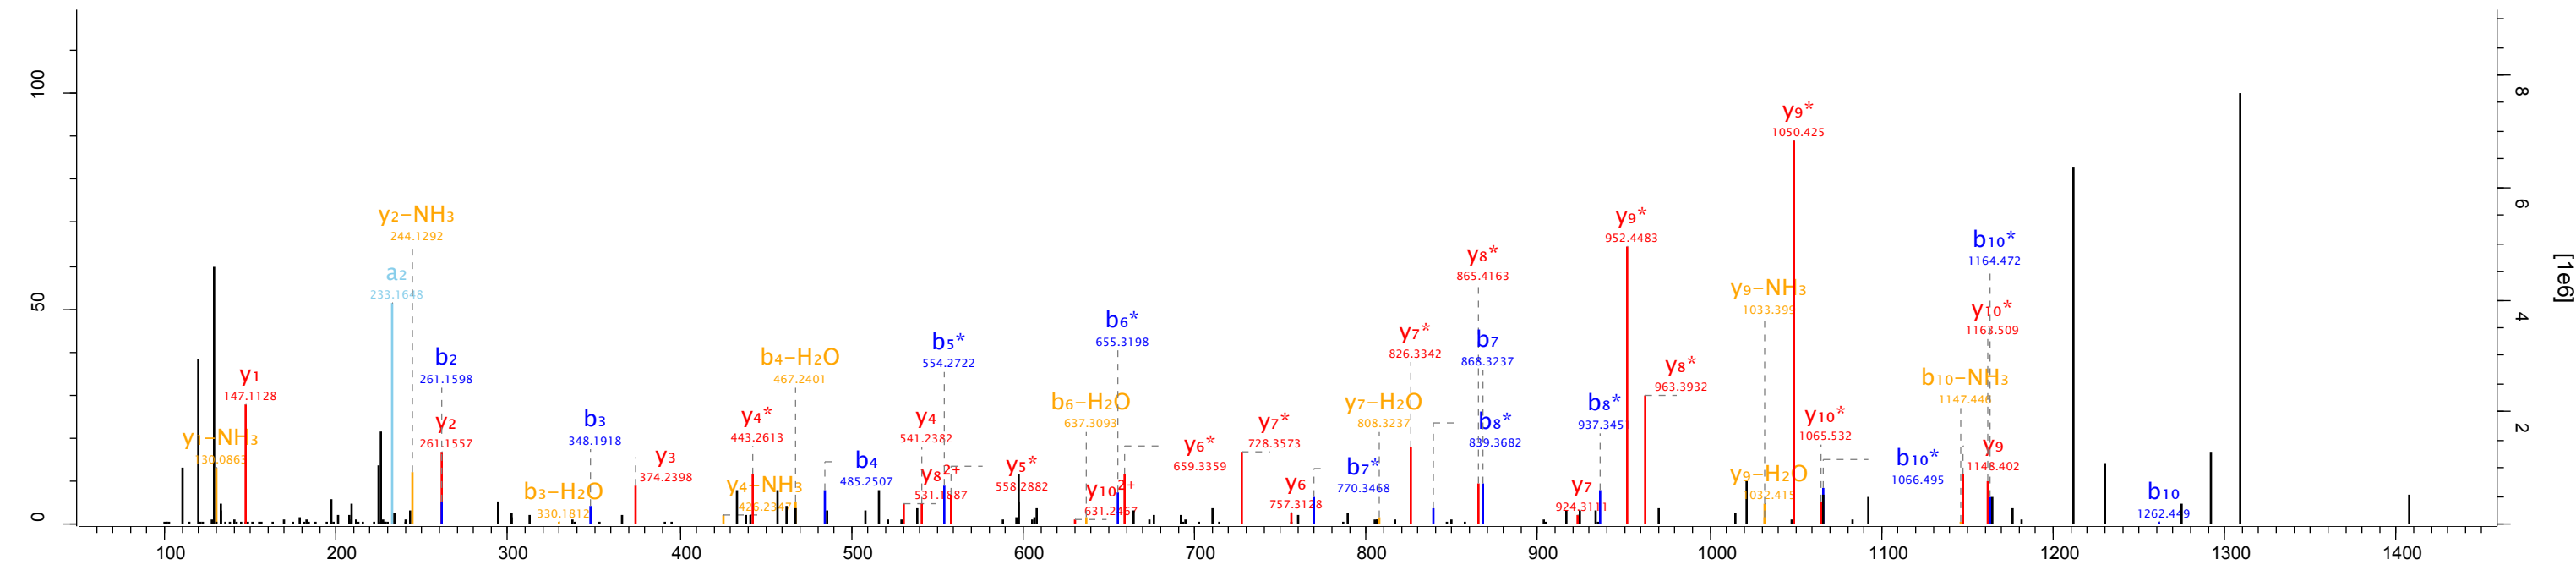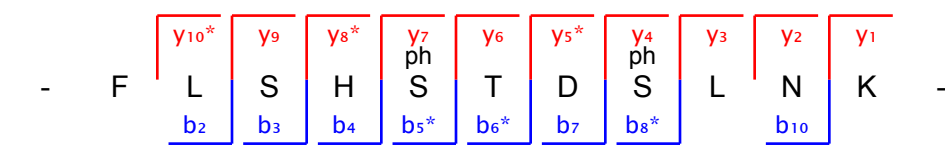



Raw file 20150812\_A375SR\_Phospho\_BR1\_03 Scan 11284 Method FTMS; HCD Score 142.66 m/z 665.8 Gene names AFAP1

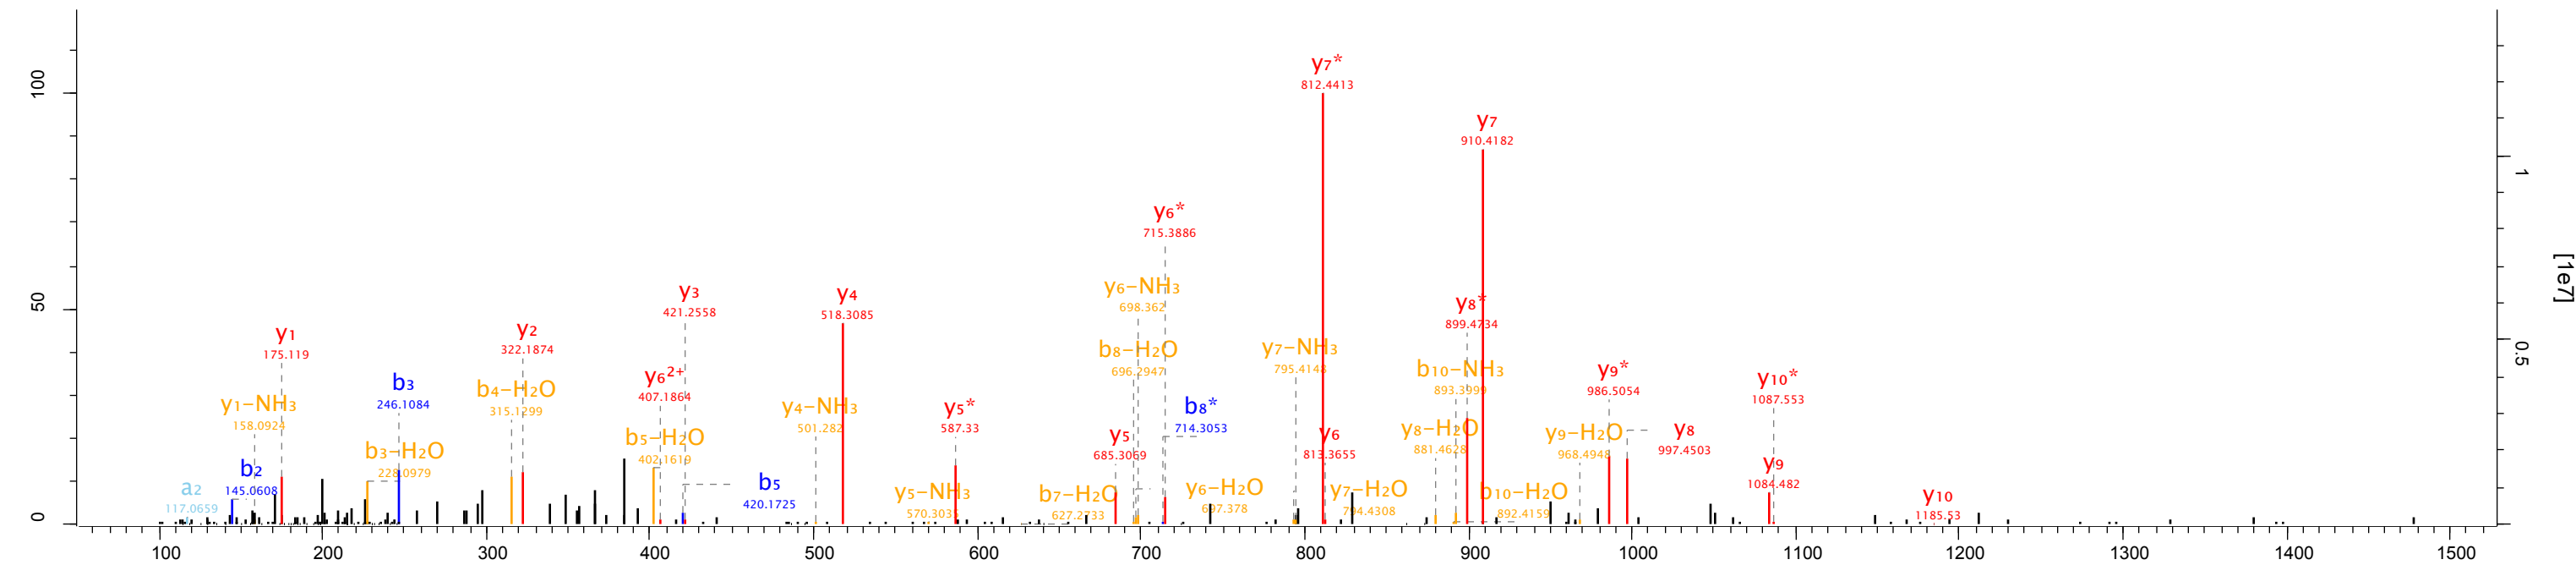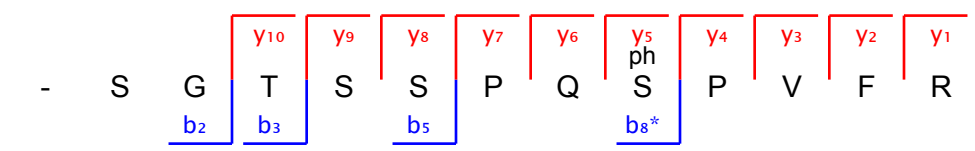

Raw file 20150812\_A375SR\_Phospho\_BR1\_03 Scan 11294 Method FTMS; HCD Score 216.75 m/z 838.34 Gene names PCM1

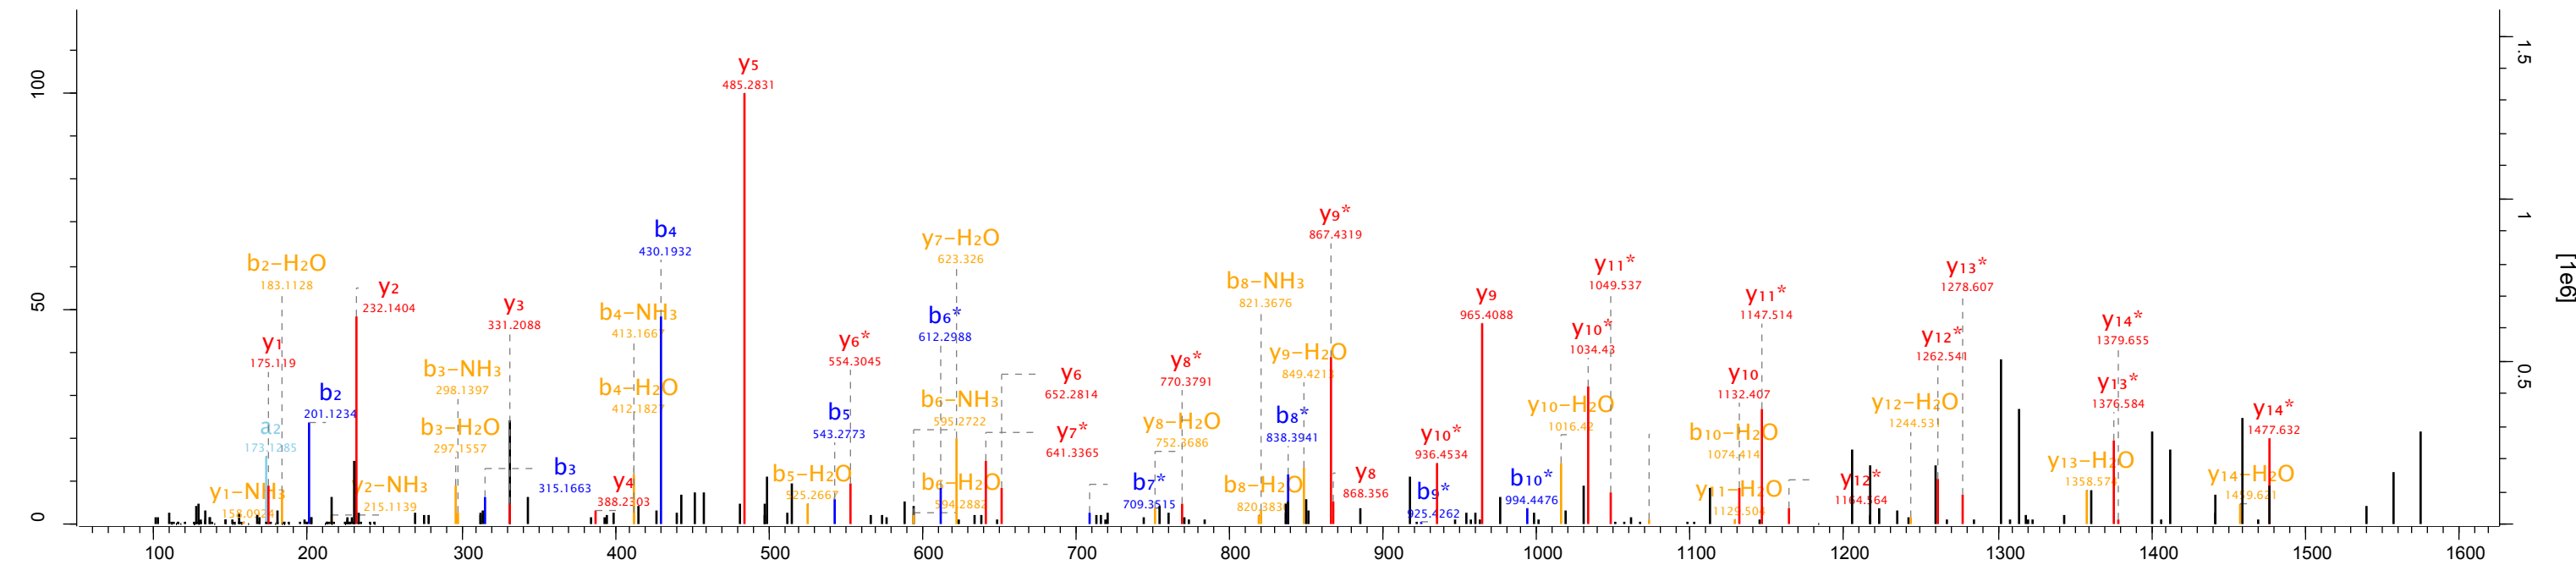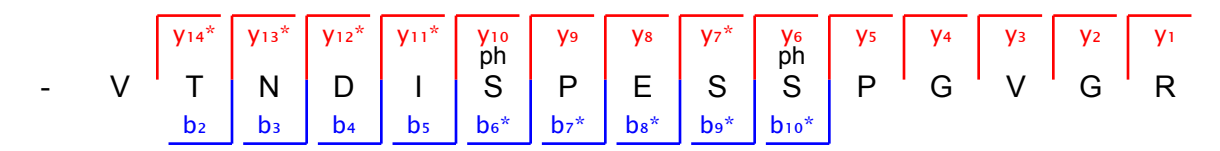

Raw file: 20150812\_A375SR\_Phospho\_BR1\_03  
 Scan: 11394 Method: FTMS; HCD Score: 187.8 m/z: 972.09 Gene names: BCLAF1

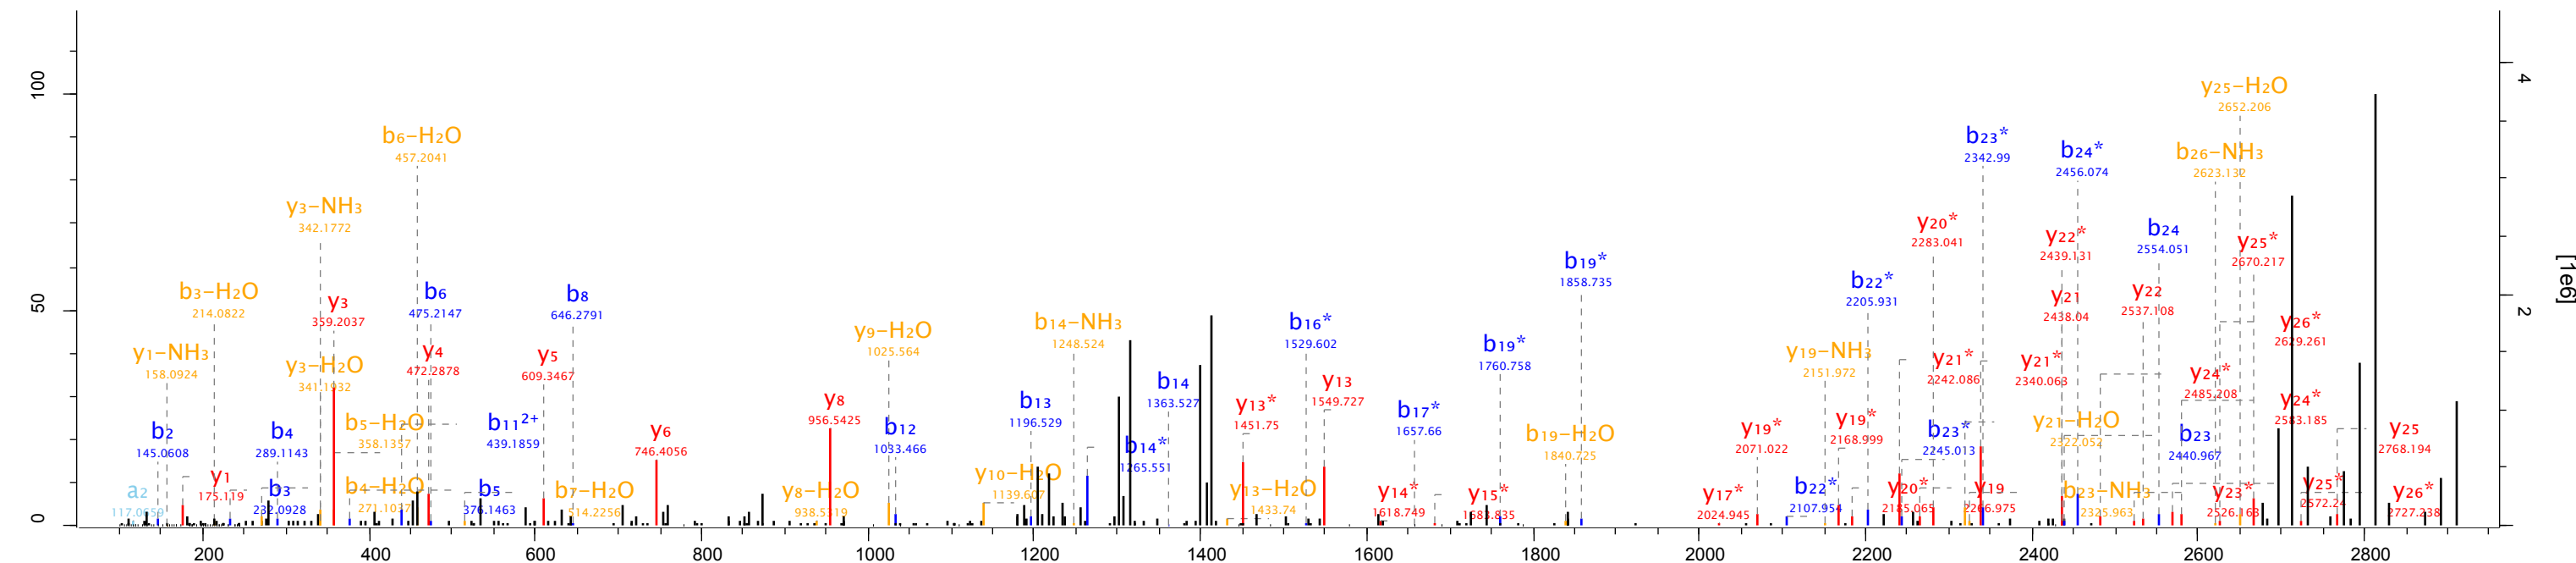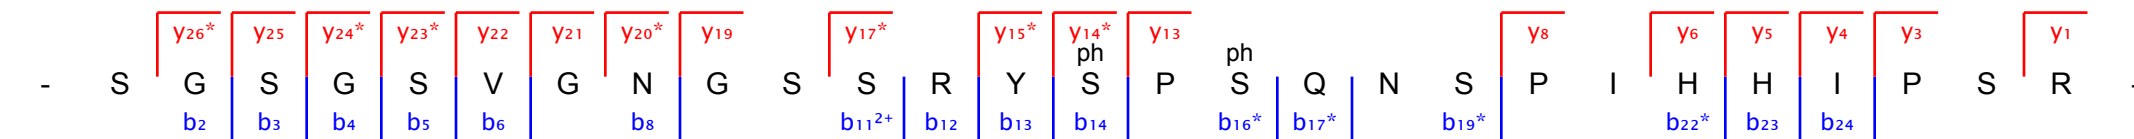

Raw file: 20150812\_A375SR\_Phospho\_BR1\_03  
 Scan: 11474 Method: FTMS; HCD Score: 105.77 m/z: 607.97 Gene names: FOXH1;XRCC1

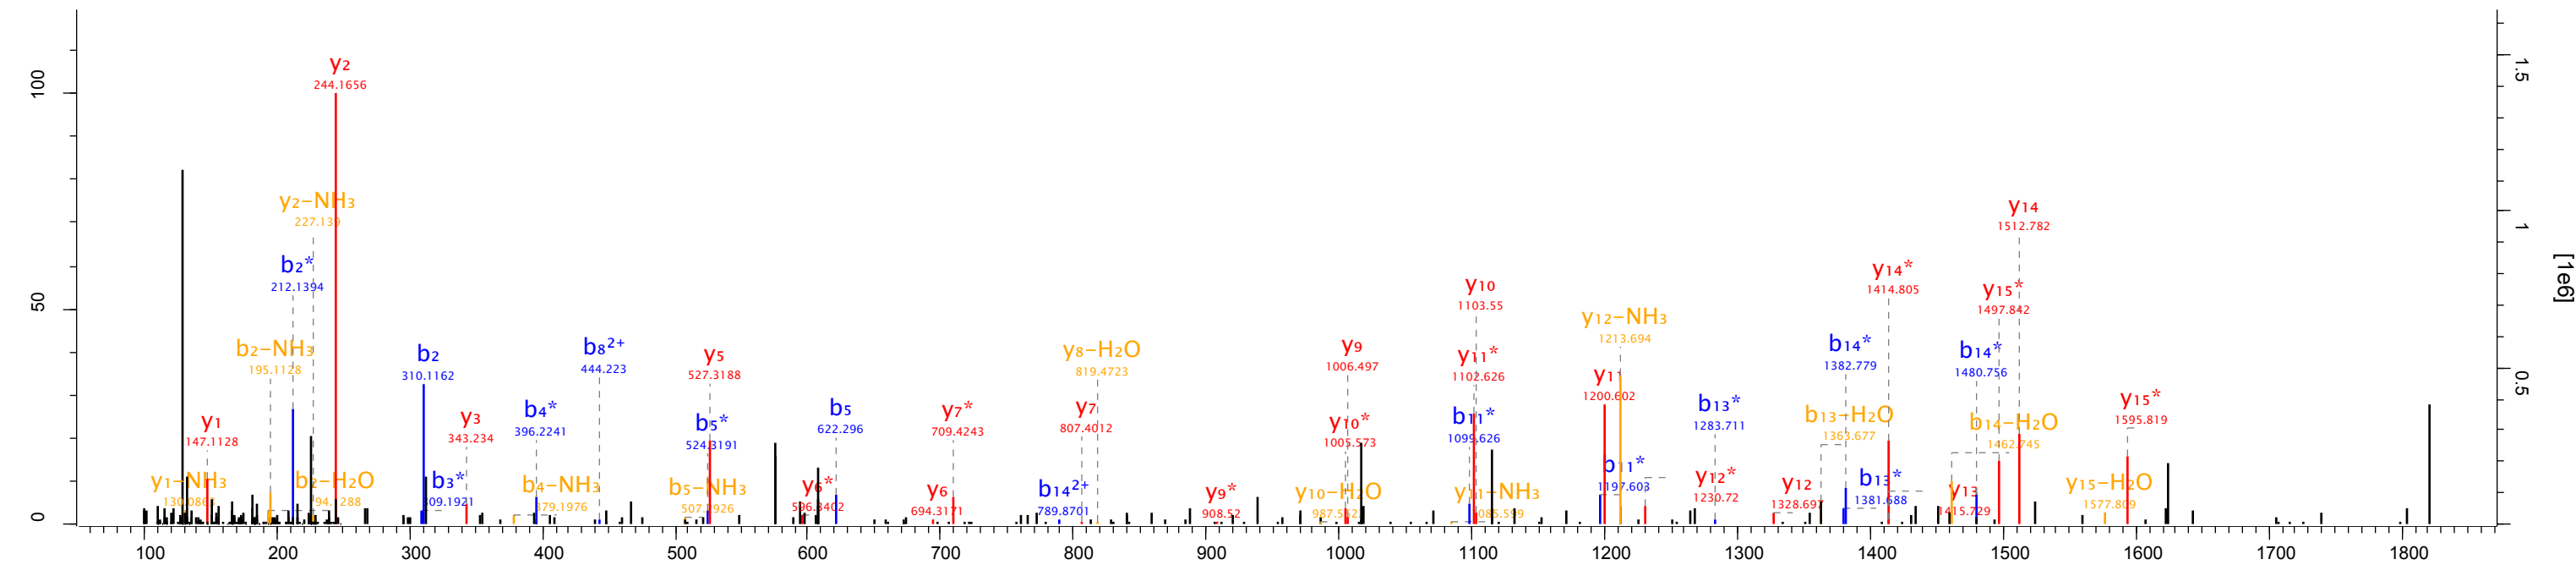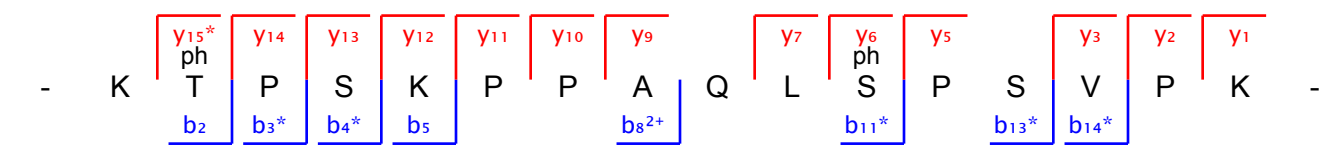

Raw file: 20150812\_A375SR\_Phospho\_BR1\_03  
 Scan: 11644 Method: FTMS; HCD Score: 234.18 m/z: 786.34 Gene names: PACS1

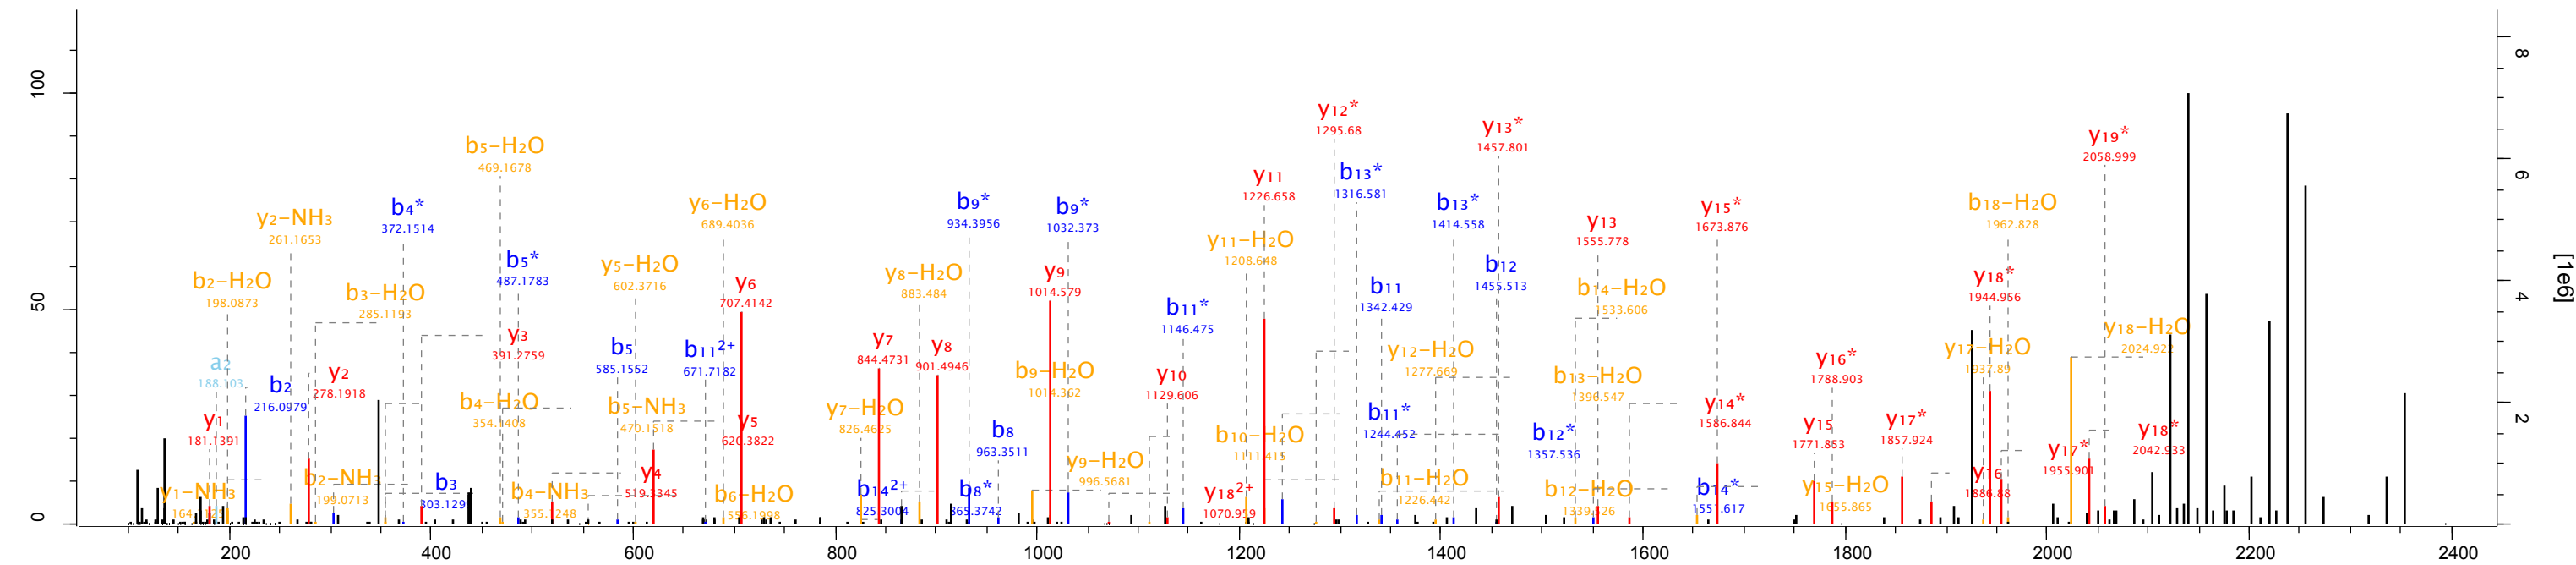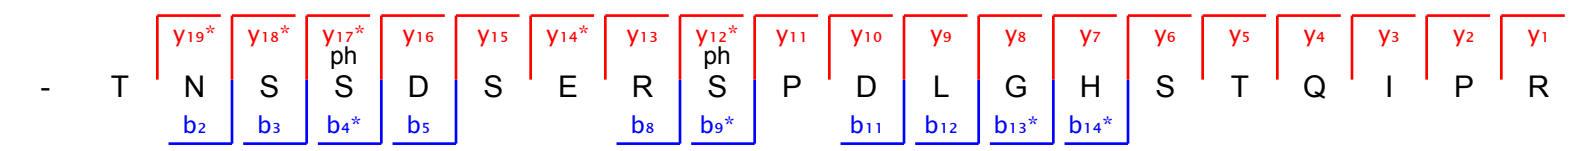

Raw file  
20150812\_A375SR\_Phospho\_BR1\_03

Scan 11664 Method FTMS; HCD Score 270.94 m/z 885.37 Gene names GTF3C1

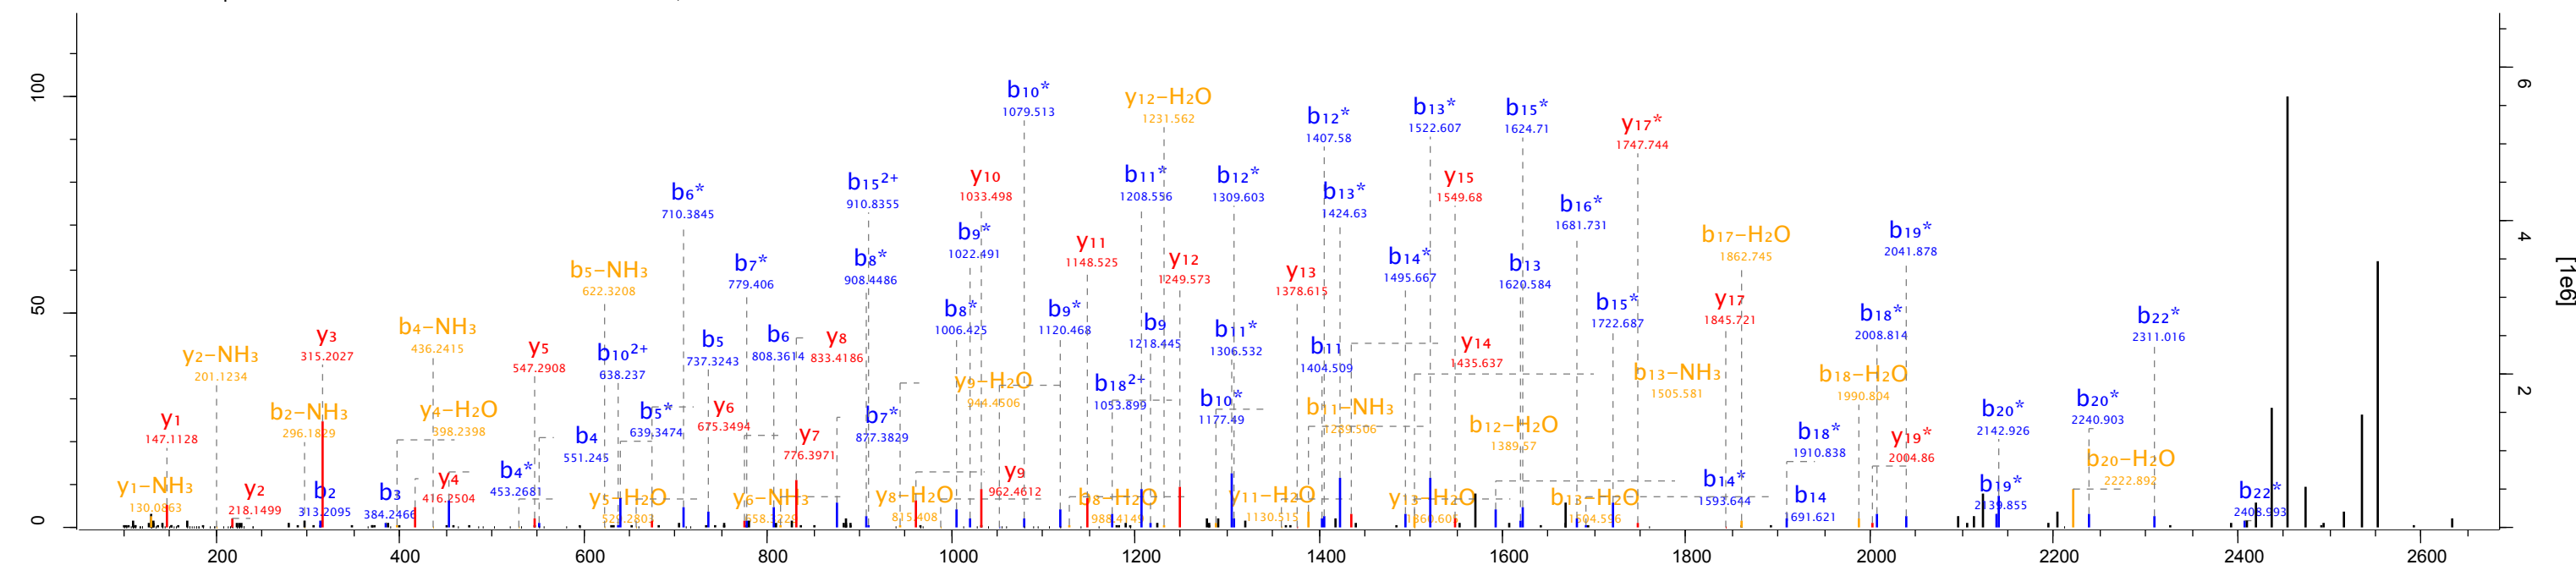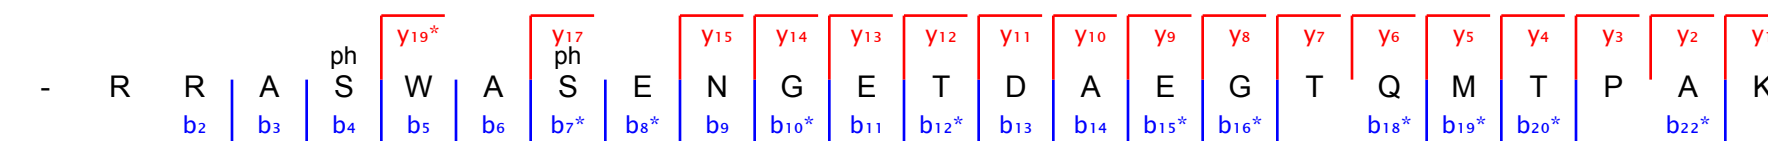

Raw file: 20150812\_A375SR\_Phospho\_BR1\_03  
 Scan: 11704 Method: FTMS; HCD Score: 67.47 m/z: 670.31 Gene names: KNOP1

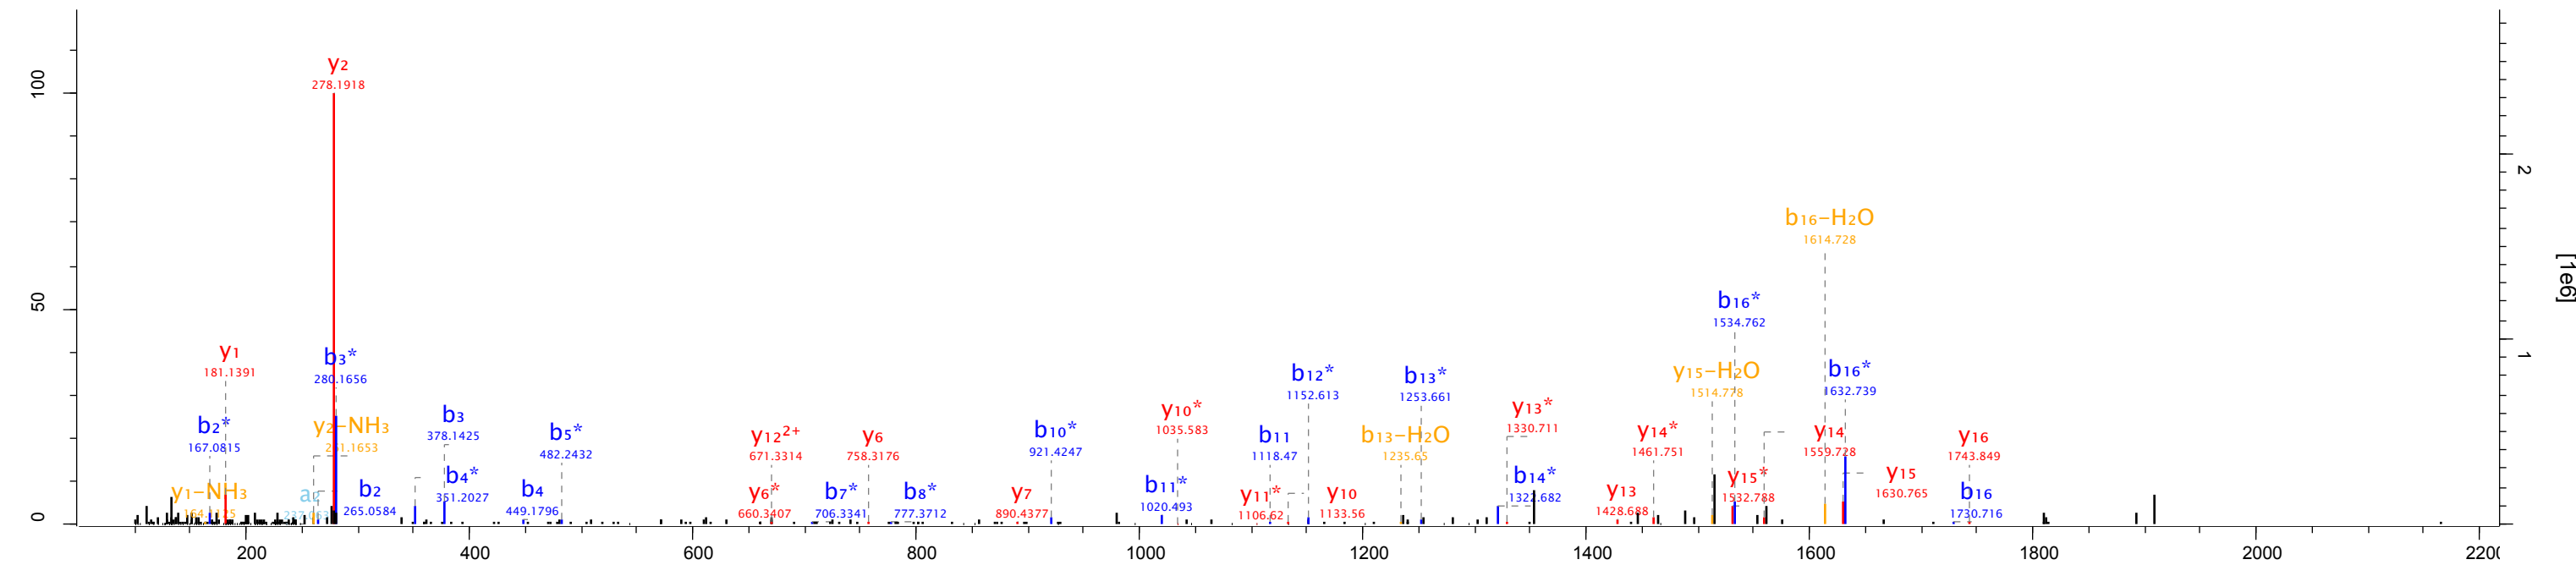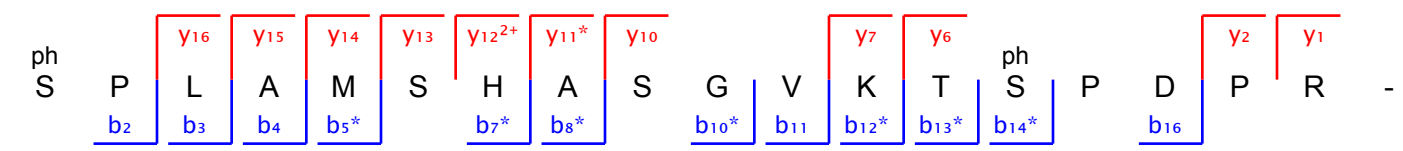

Raw file 20150812\_A375SR\_Phospho\_BR1\_03 Scan 11924 Method FTMS; HCD Score 85.45 m/z 895.4 Gene names SRRM2

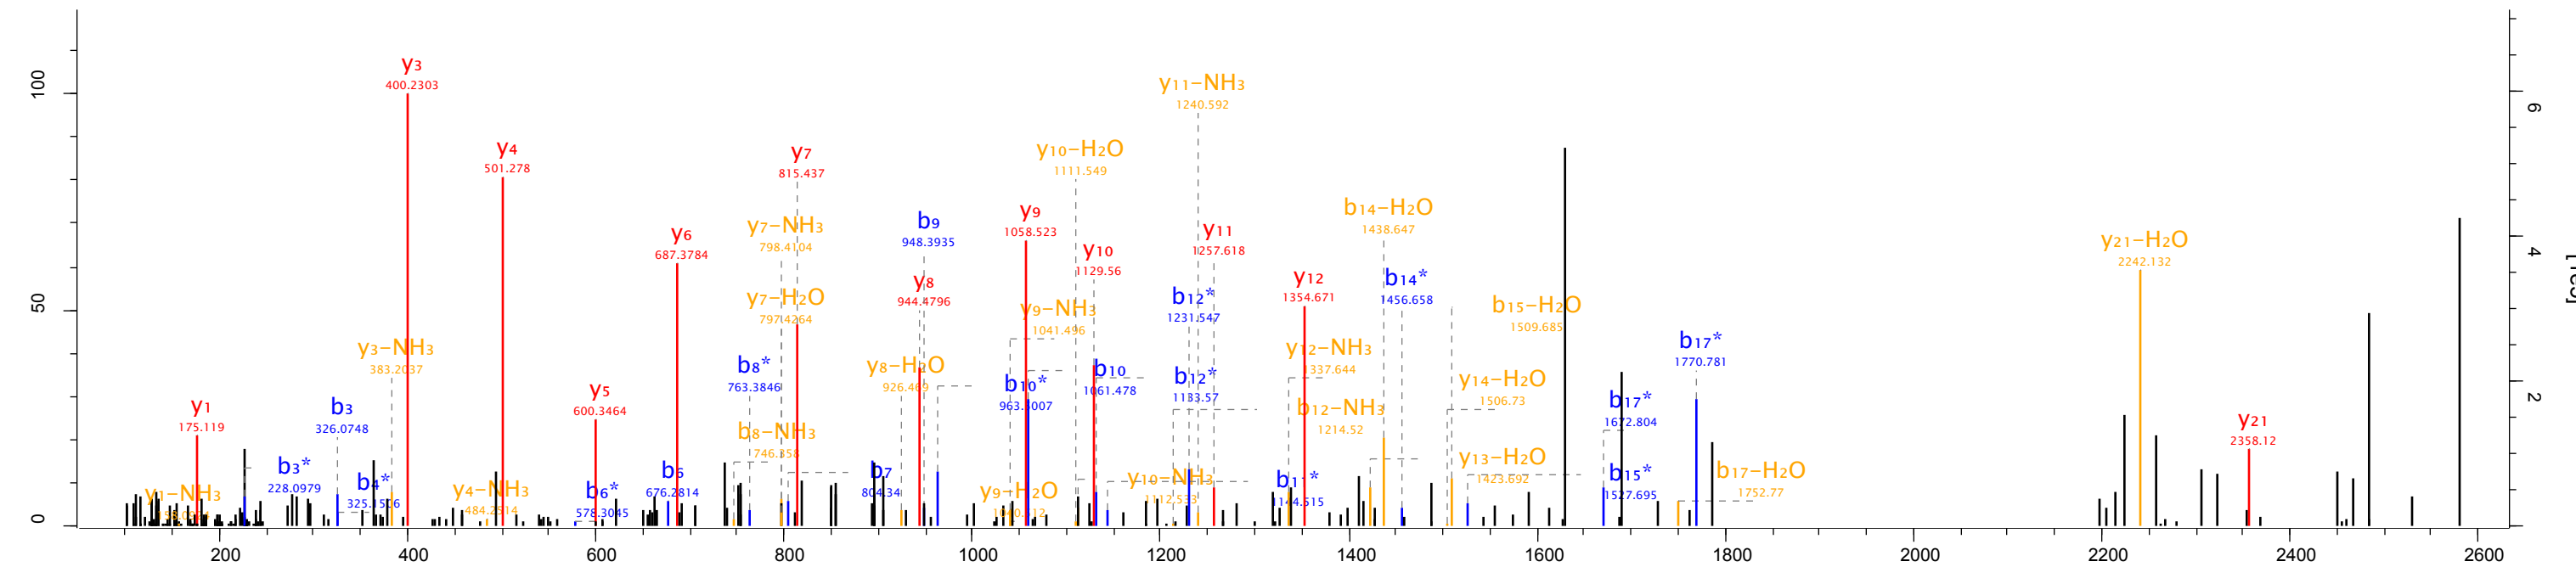

- ph S G T P P R Q G S I T S P Q A N E Q S V T P Q R -  
 b3 b4\* b6 b7 b8\* b9 b10 b11\* b12\* b14\* b15\* b17\*

[1e5]



Raw file  
 20150812\_A375SR\_Phospho\_BR1\_03  
 Scan 12004 Method FTMS; HCD Score 144.18 m/z 960.41 Gene names SHROOM2

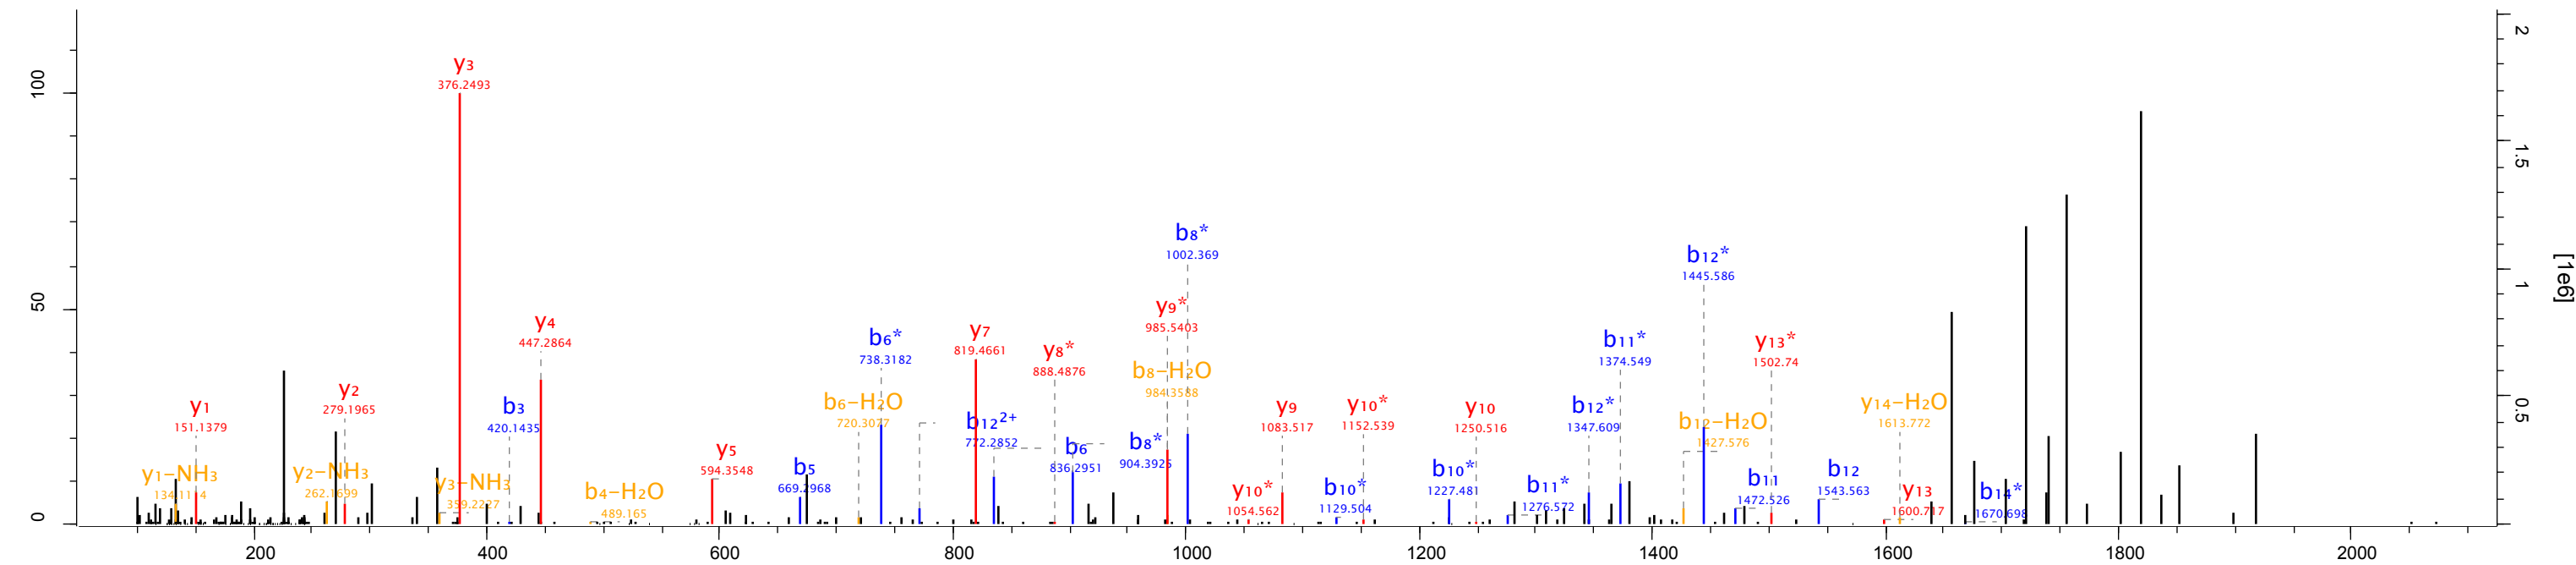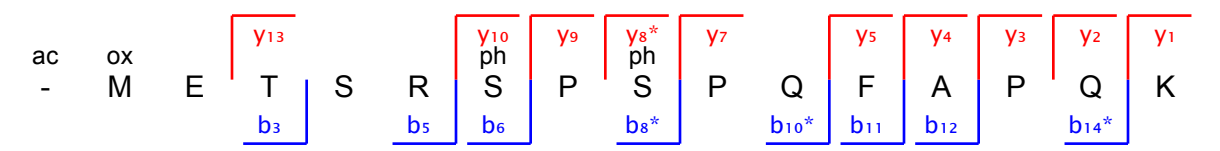

Raw file 20150812\_A375SR\_Phospho\_BR1\_03 Scan 12224 Method FTMS; HCD Score 112.88 m/z 581.94 Gene names PLEKHG5

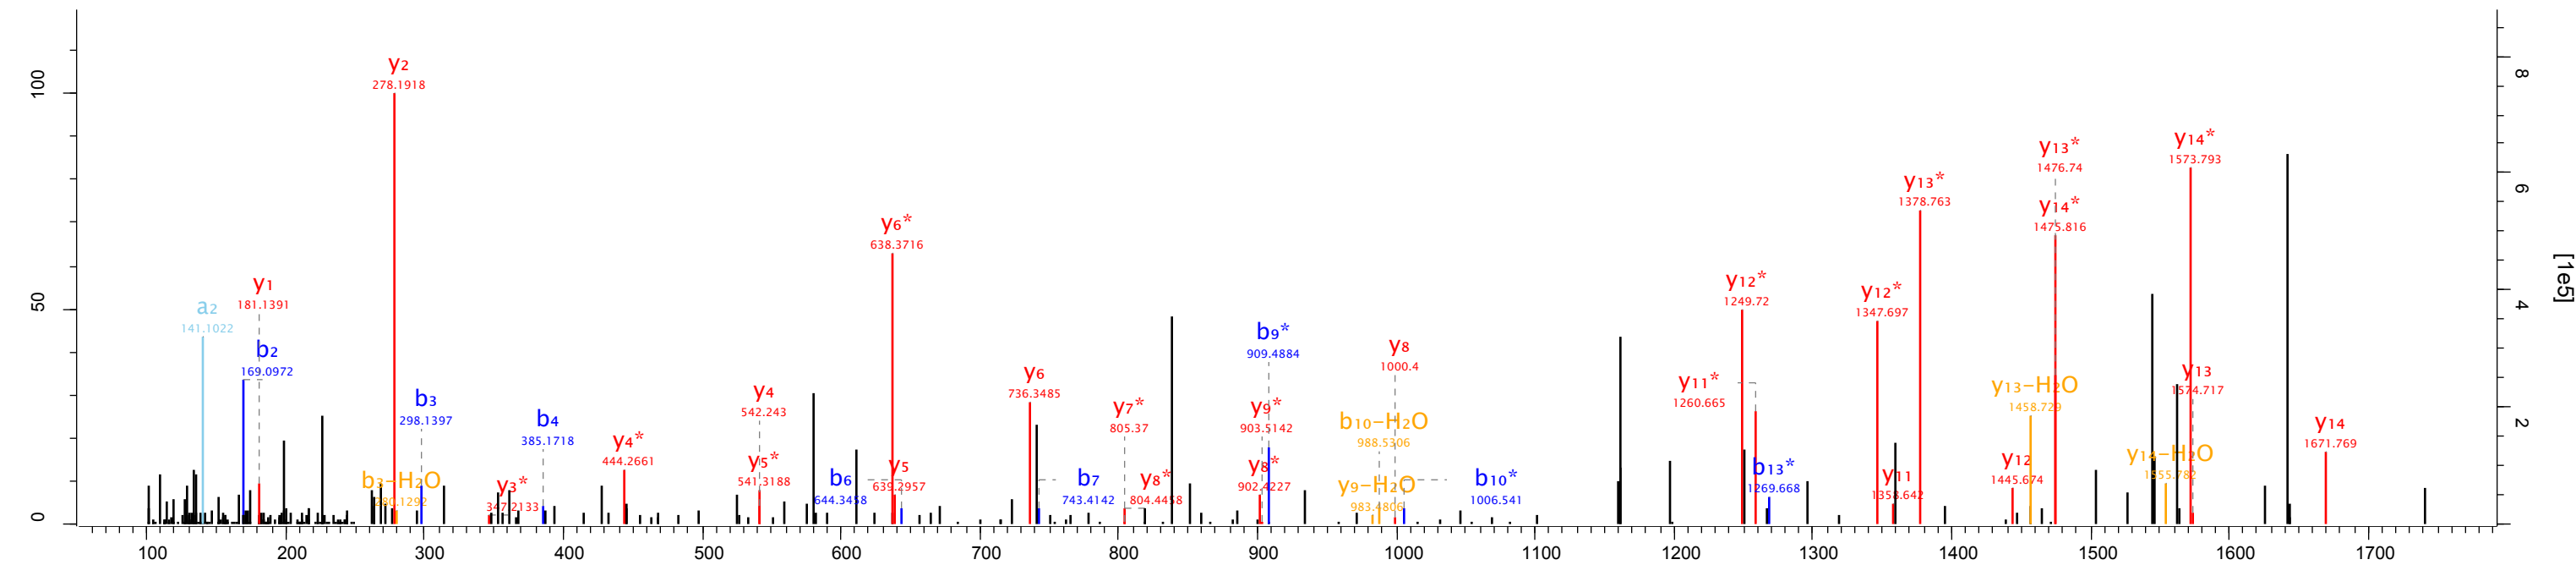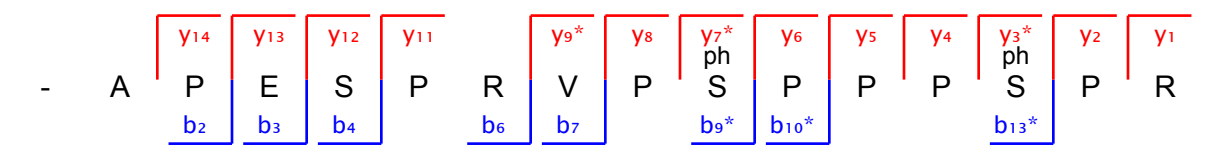

Raw file: 20150812\_A375SR\_Phospho\_BR1\_03  
 Scan: 12784 Method: FTMS; HCD Score: 214.01 m/z: 1000.41 Gene names: RBM10

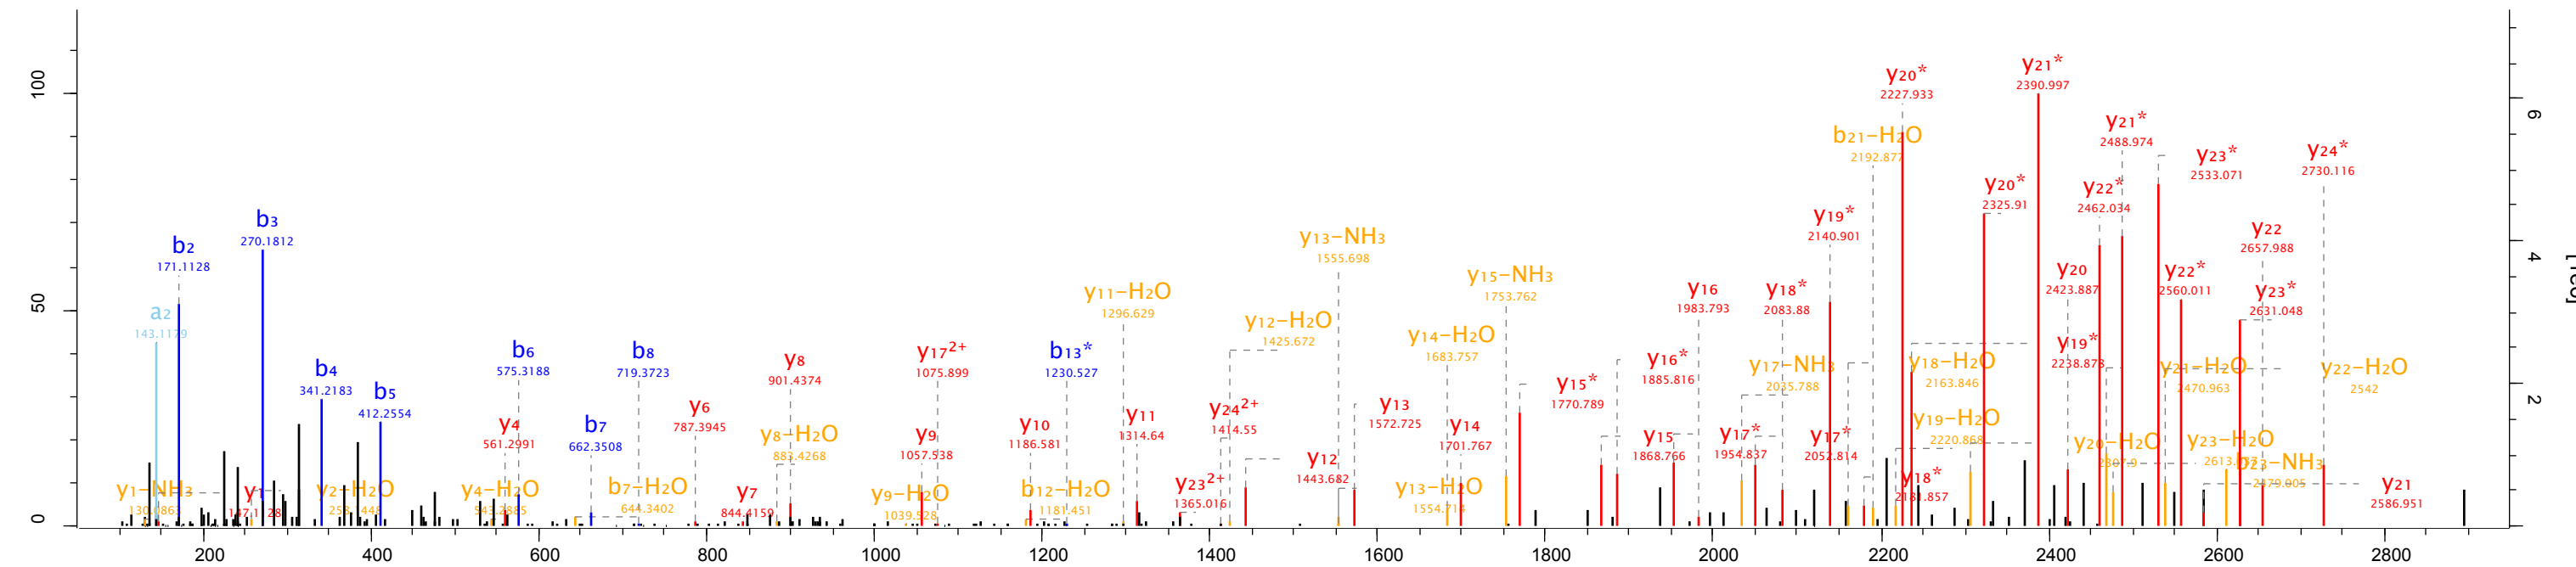

Sequence: - G L V A A Y S G E S D S E E E Q E R G G P E R E E K -  
 Fragmentation sites: b<sub>2</sub>, b<sub>3</sub>, b<sub>4</sub>, b<sub>5</sub>, b<sub>6</sub>, b<sub>7</sub>, b<sub>8</sub>, b<sub>13</sub>\* (blue boxes); y<sub>1</sub>, y<sub>4</sub>, y<sub>6</sub>, y<sub>7</sub>, y<sub>8</sub>, y<sub>9</sub>, y<sub>10</sub>, y<sub>11</sub>, y<sub>12</sub>, y<sub>13</sub>, y<sub>14</sub>, y<sub>15</sub>, y<sub>16</sub>, y<sub>17</sub>ph, y<sub>18</sub>, y<sub>19</sub>, y<sub>20</sub>, y<sub>21</sub>, y<sub>22</sub>, y<sub>23</sub>, y<sub>24</sub>\* (red boxes).

Raw file 20150812\_A375SR\_Phospho\_BR1\_03 Scan 12924 Method FTMS; HCD Score 268.98 m/z 1149.94 Gene names HTATSF1

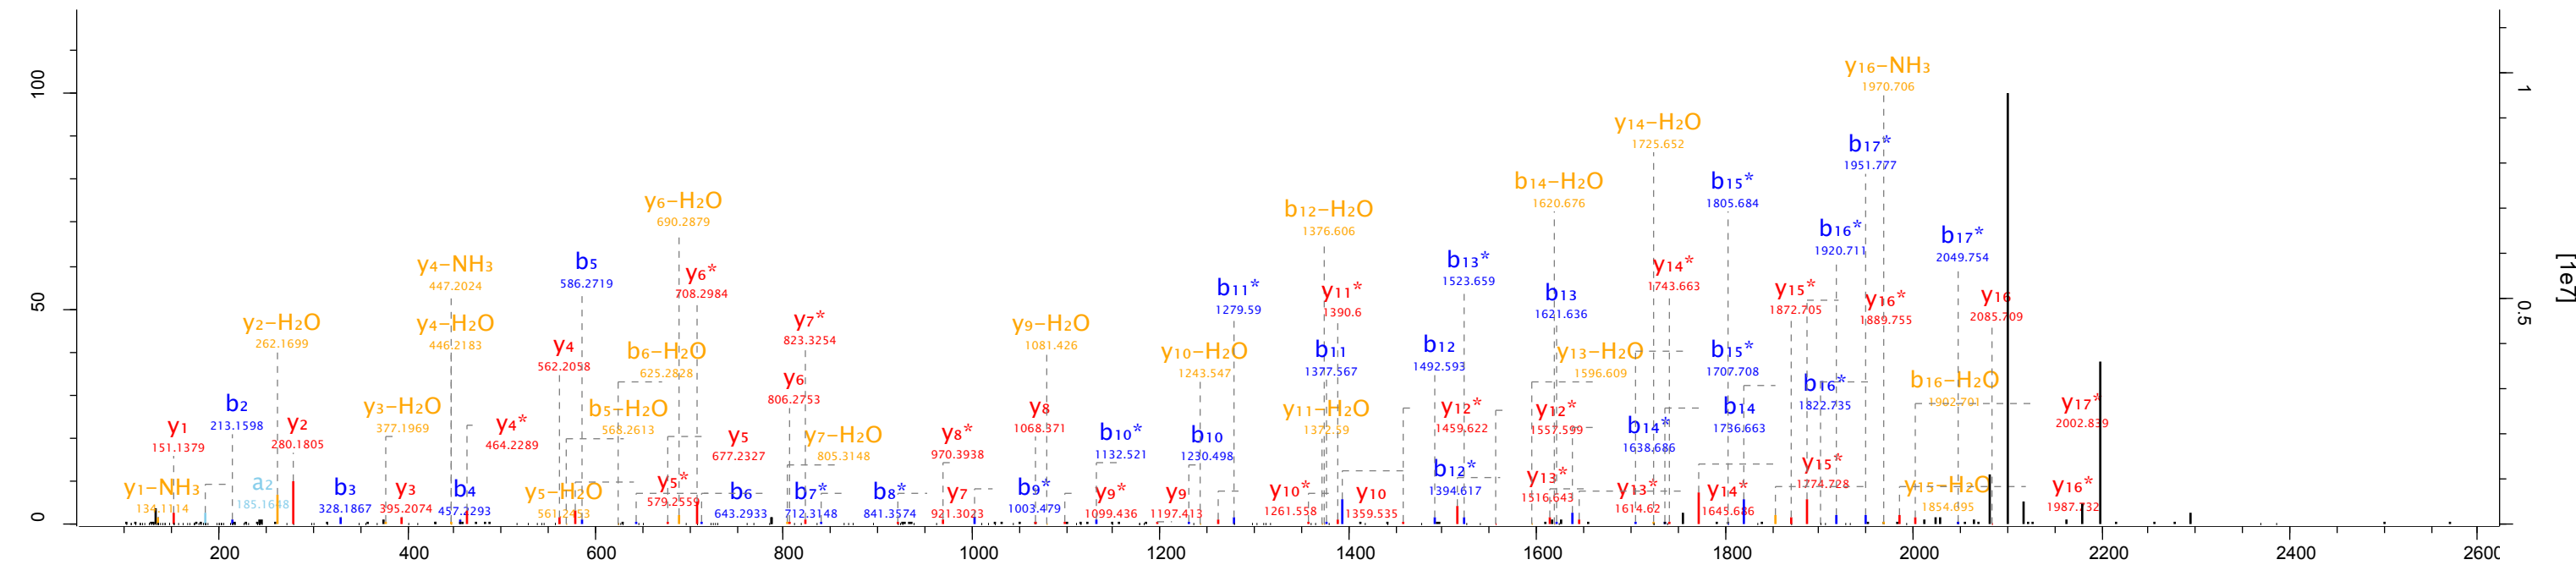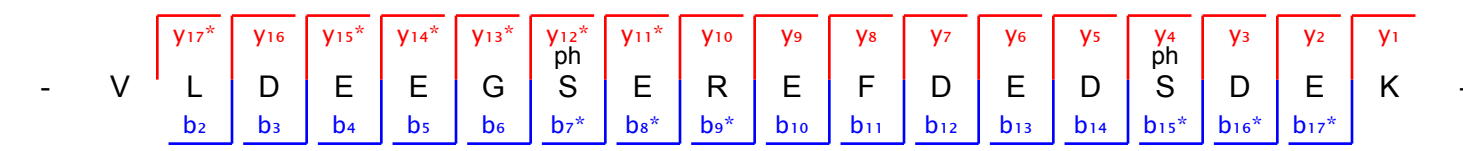

Raw file: 20150812\_A375SR\_Phospho\_BR1\_03  
 Scan: 13044 Method: FTMS; HCD Score: 93.63 m/z: 914.89 Gene names: ABLIM3

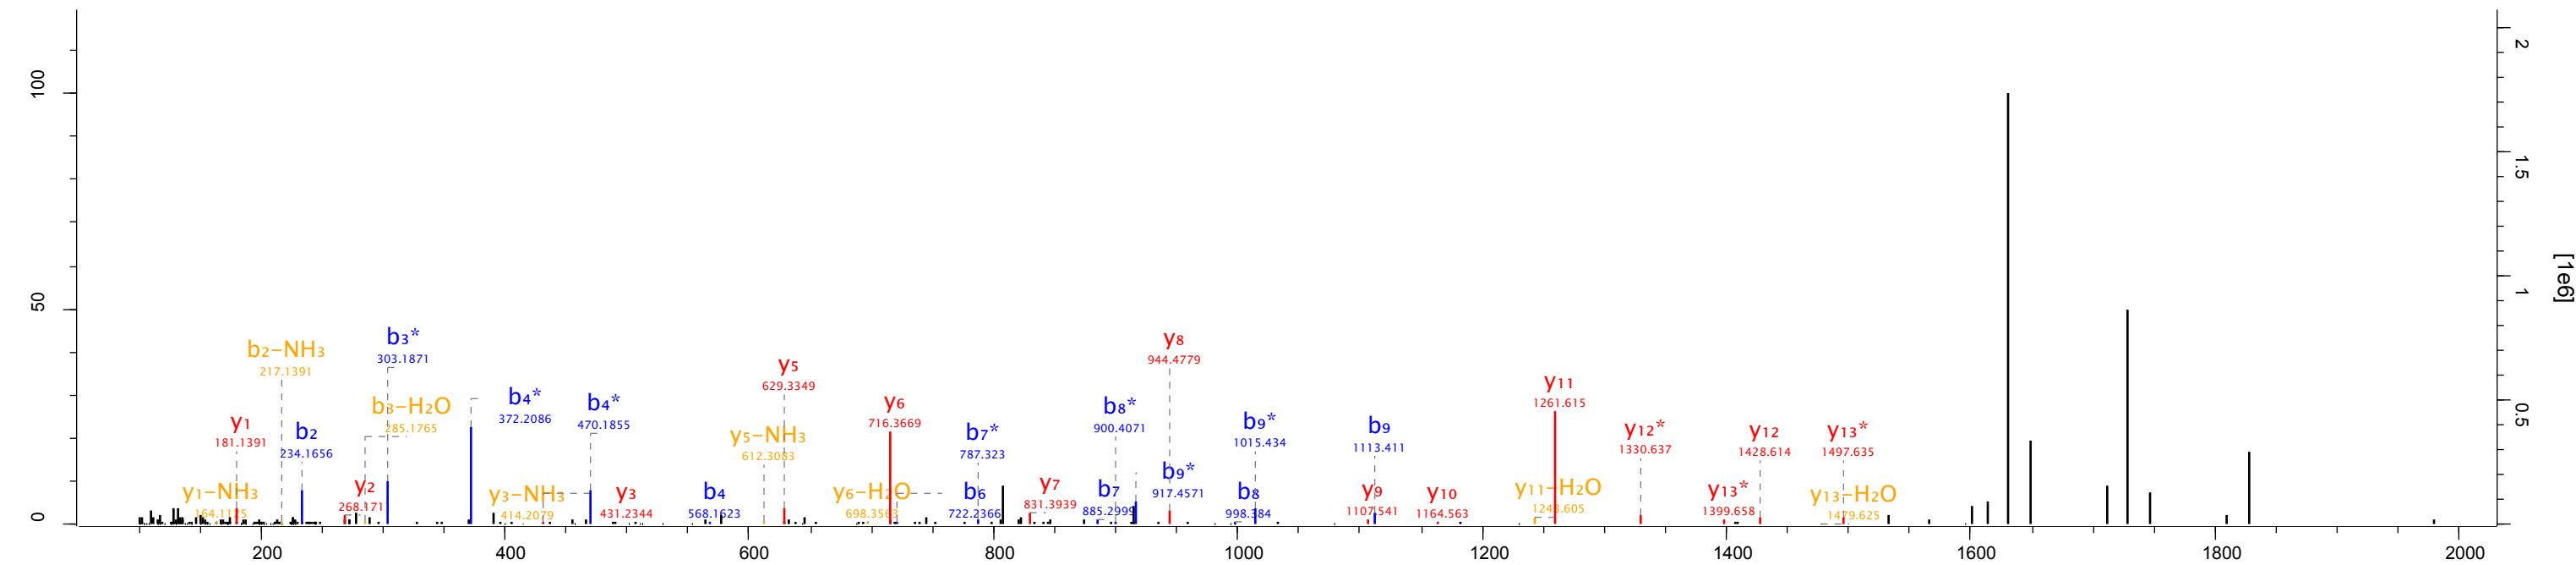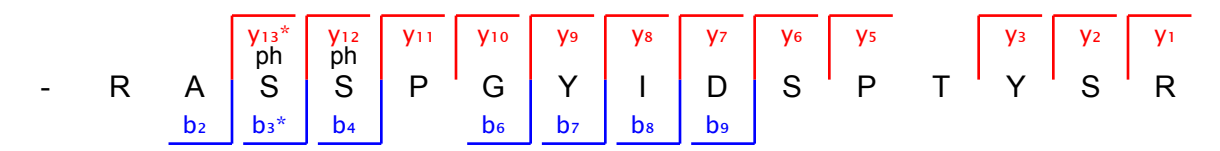

Raw file: 20150812\_A375SR\_Phospho\_BR1\_03  
 Scan: 13064 Method: FTMS; HCD Score: 128.03 m/z: 964.42 Gene names: EPB41L1

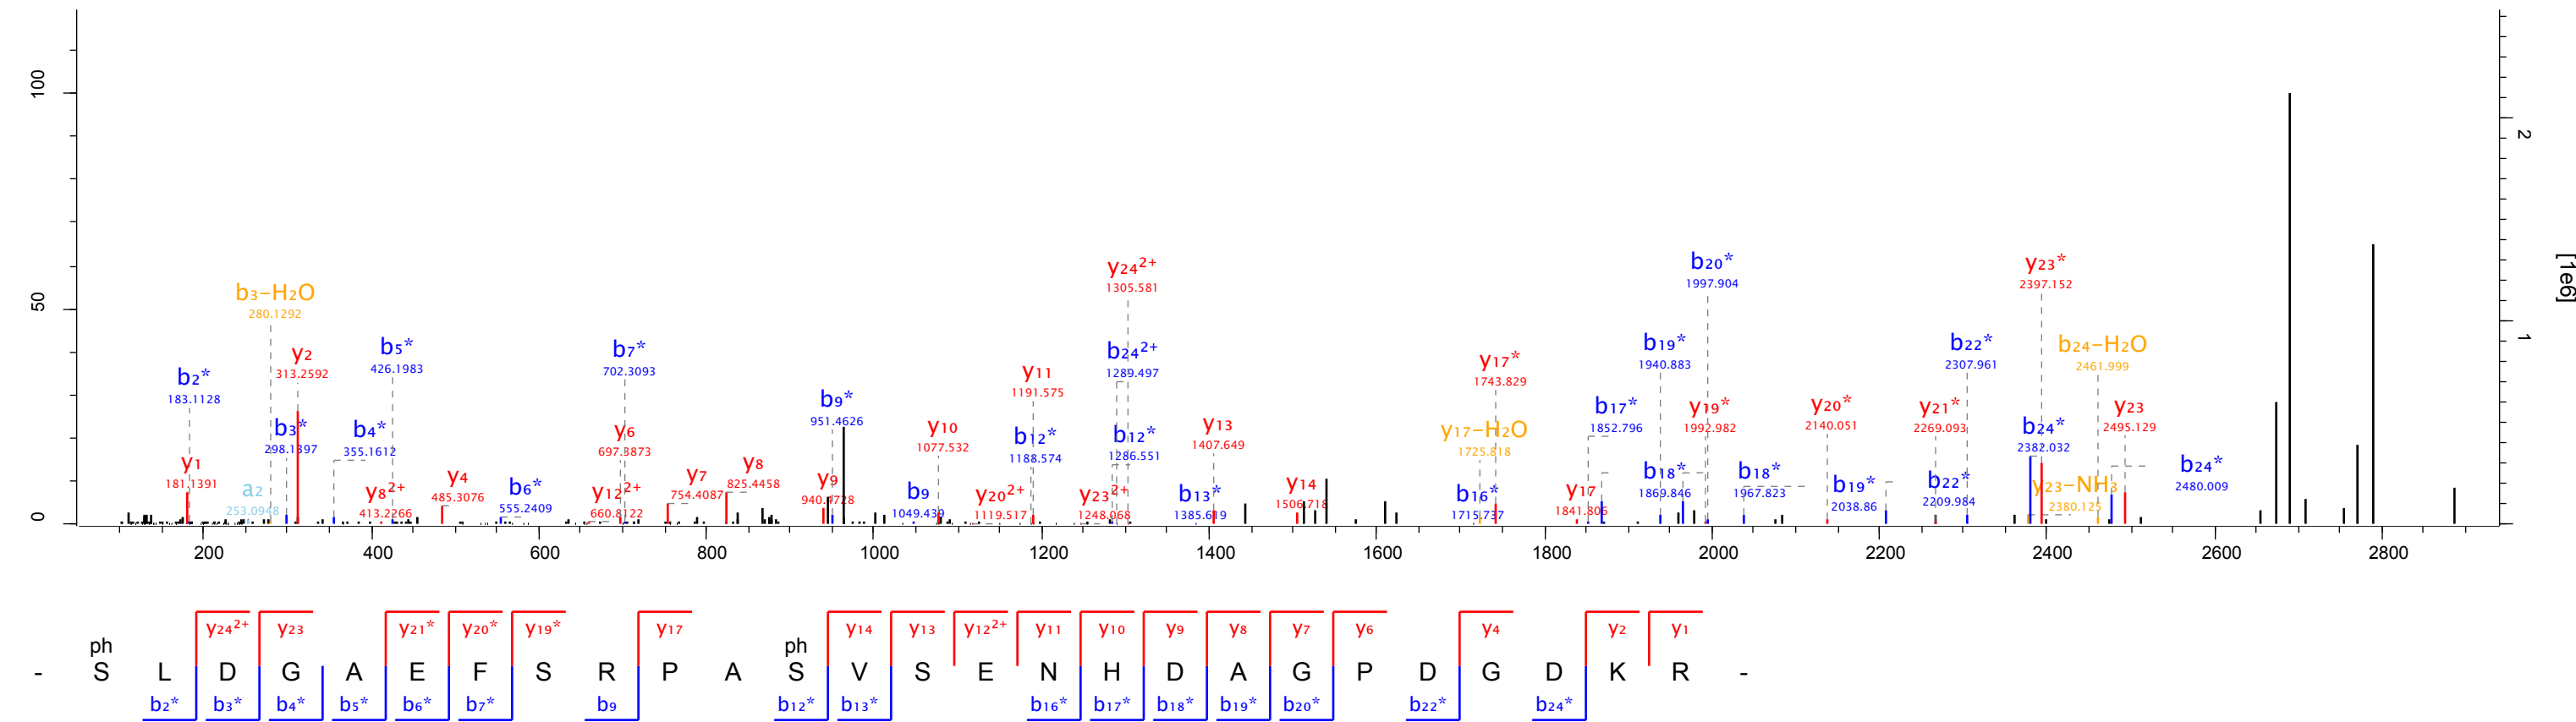

Raw file: 20150812\_A375SR\_Phospho\_BR1\_03  
 Scan: 13464 Method: FTMS; HCD Score: 89.39 m/z: 957.73 Gene names: CNKSR2

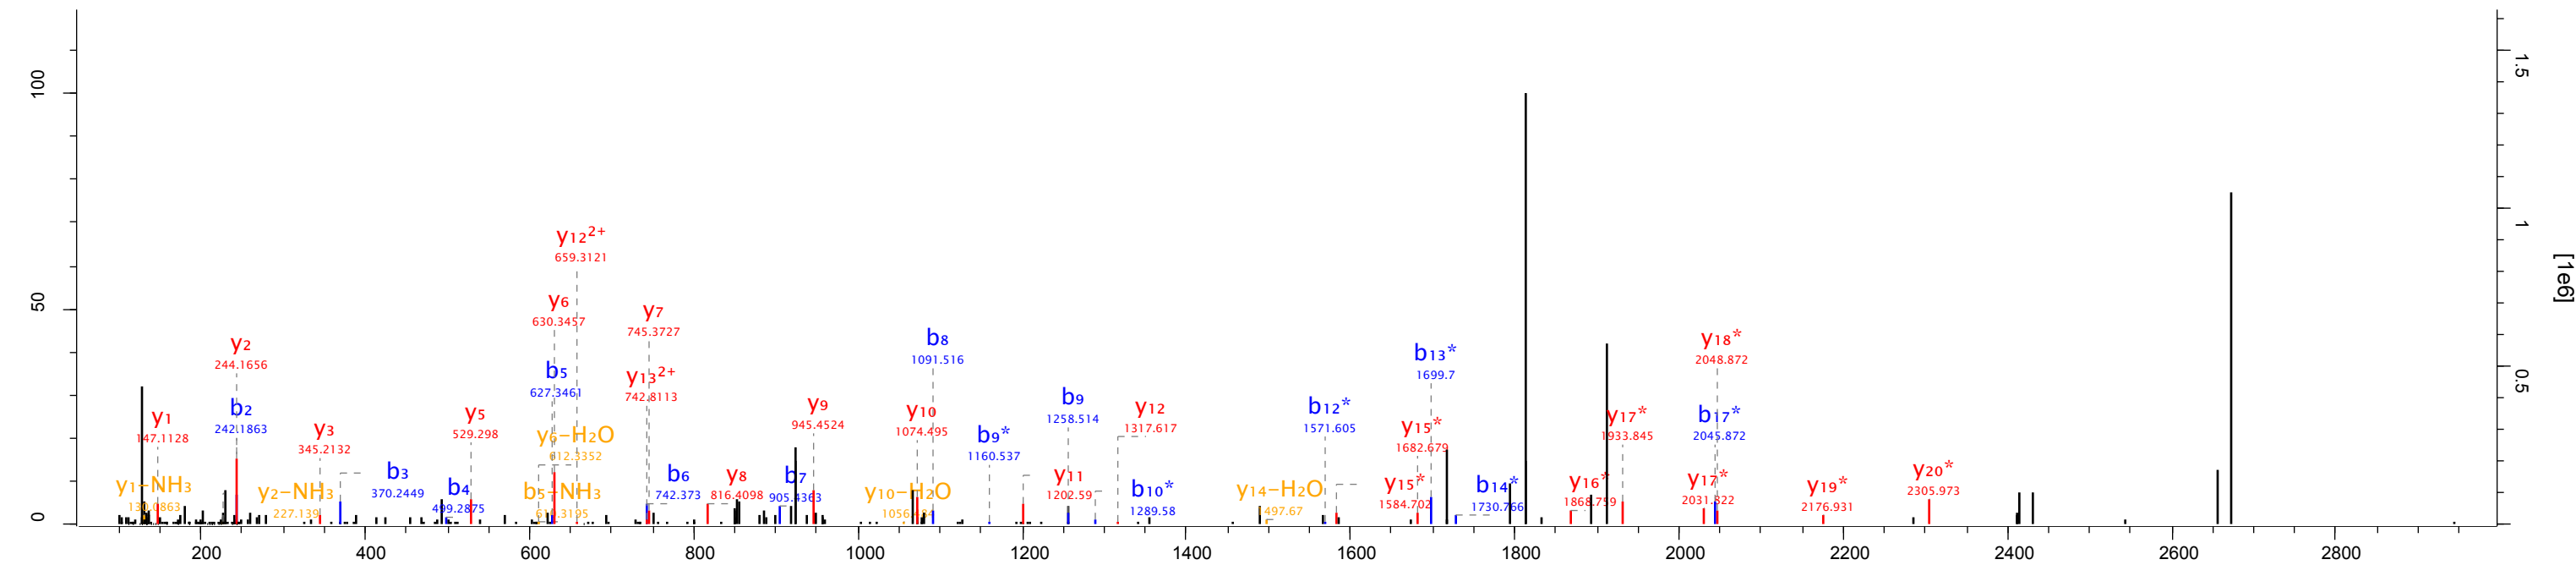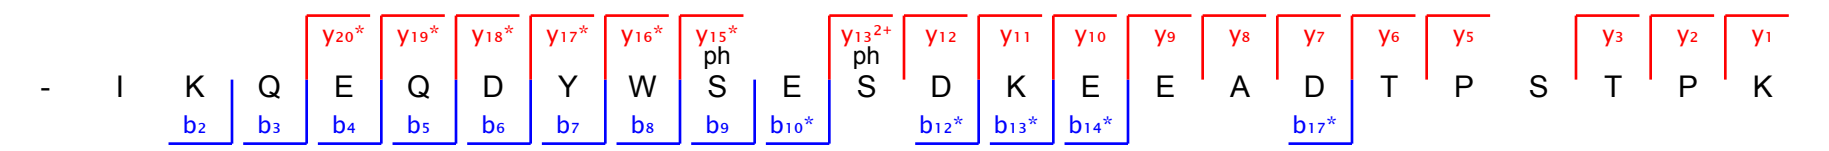

Raw file 20150812\_A375SR\_Phospho\_BR1\_03 Scan 13554 Method FTMS; HCD Score 282.46 m/z 811.32 Gene names PTPN2

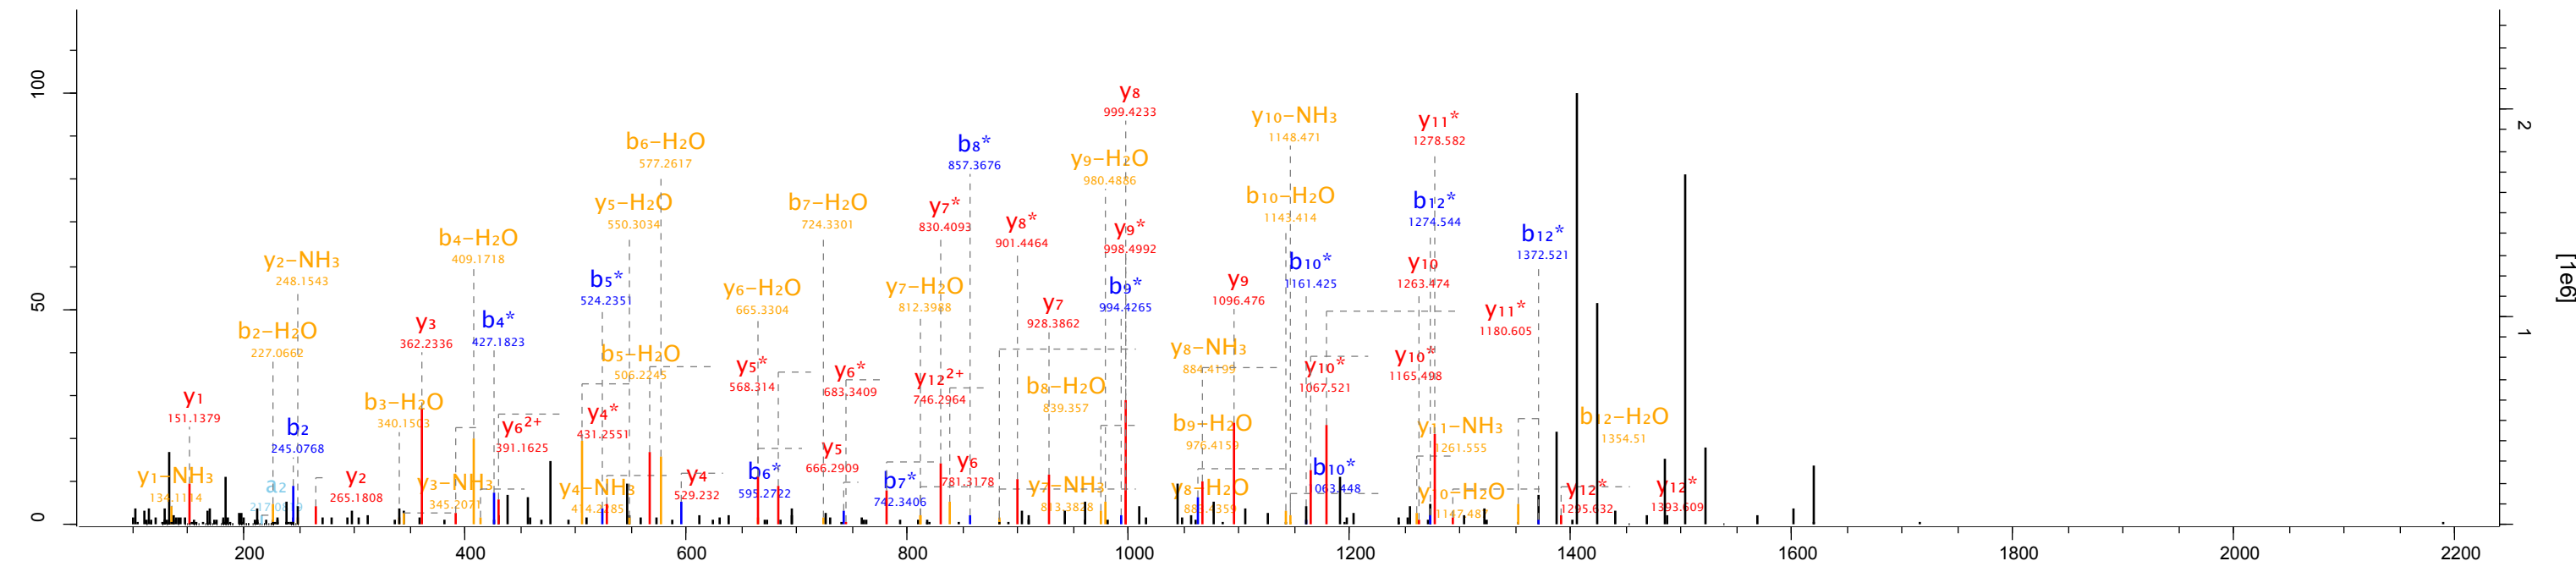

- E y<sub>12</sub><sup>\*</sup> y<sub>11</sub><sup>\*</sup> y<sub>10</sub> ph y<sub>9</sub> y<sub>8</sub> y<sub>7</sub> y<sub>6</sub> y<sub>5</sub> y<sub>4</sub> ph y<sub>3</sub> y<sub>2</sub> y<sub>1</sub> -  
b<sub>2</sub> L b<sub>4</sub><sup>\*</sup> b<sub>5</sub><sup>\*</sup> b<sub>6</sub><sup>\*</sup> b<sub>7</sub><sup>\*</sup> b<sub>8</sub><sup>\*</sup> b<sub>9</sub><sup>\*</sup> b<sub>10</sub><sup>\*</sup> P b<sub>12</sub><sup>\*</sup> K -



Raw file Scan Method Score m/z Gene names  
 20150812\_A375SR\_Phospho\_BR1\_03 13764 FTMS; HCD 68.41 885.84 POLR2A

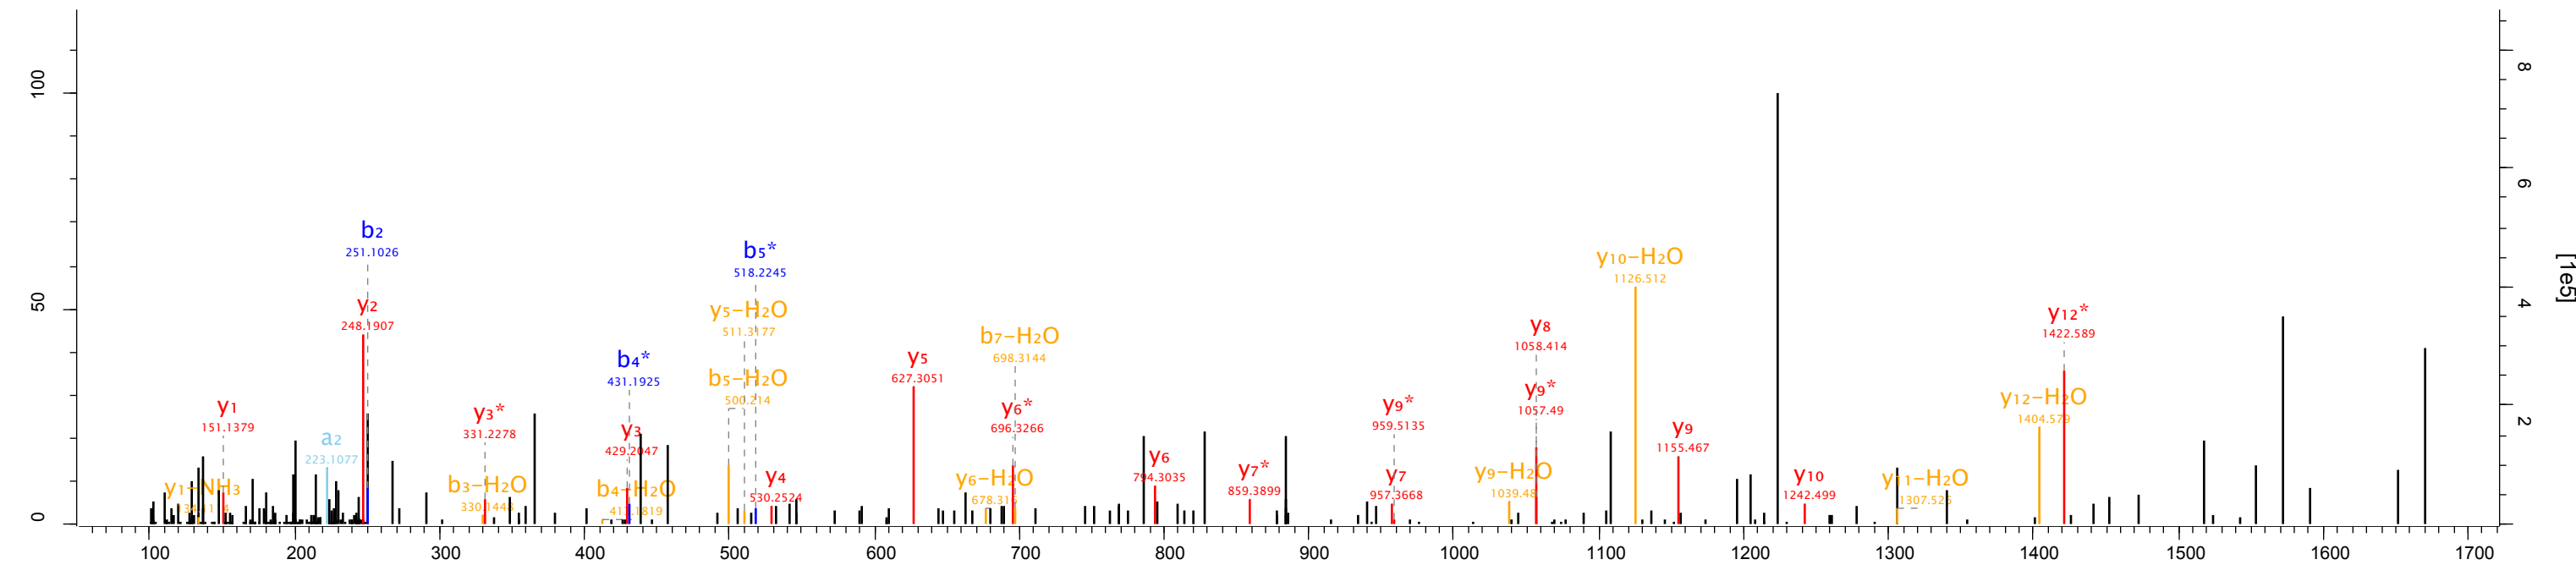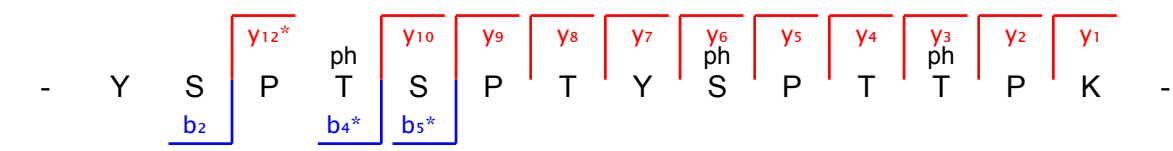

Raw file 20150812\_A375SR\_Phospho\_BR1\_03 Scan 14024 Method FTMS; HCD Score 79.38 m/z 727.69

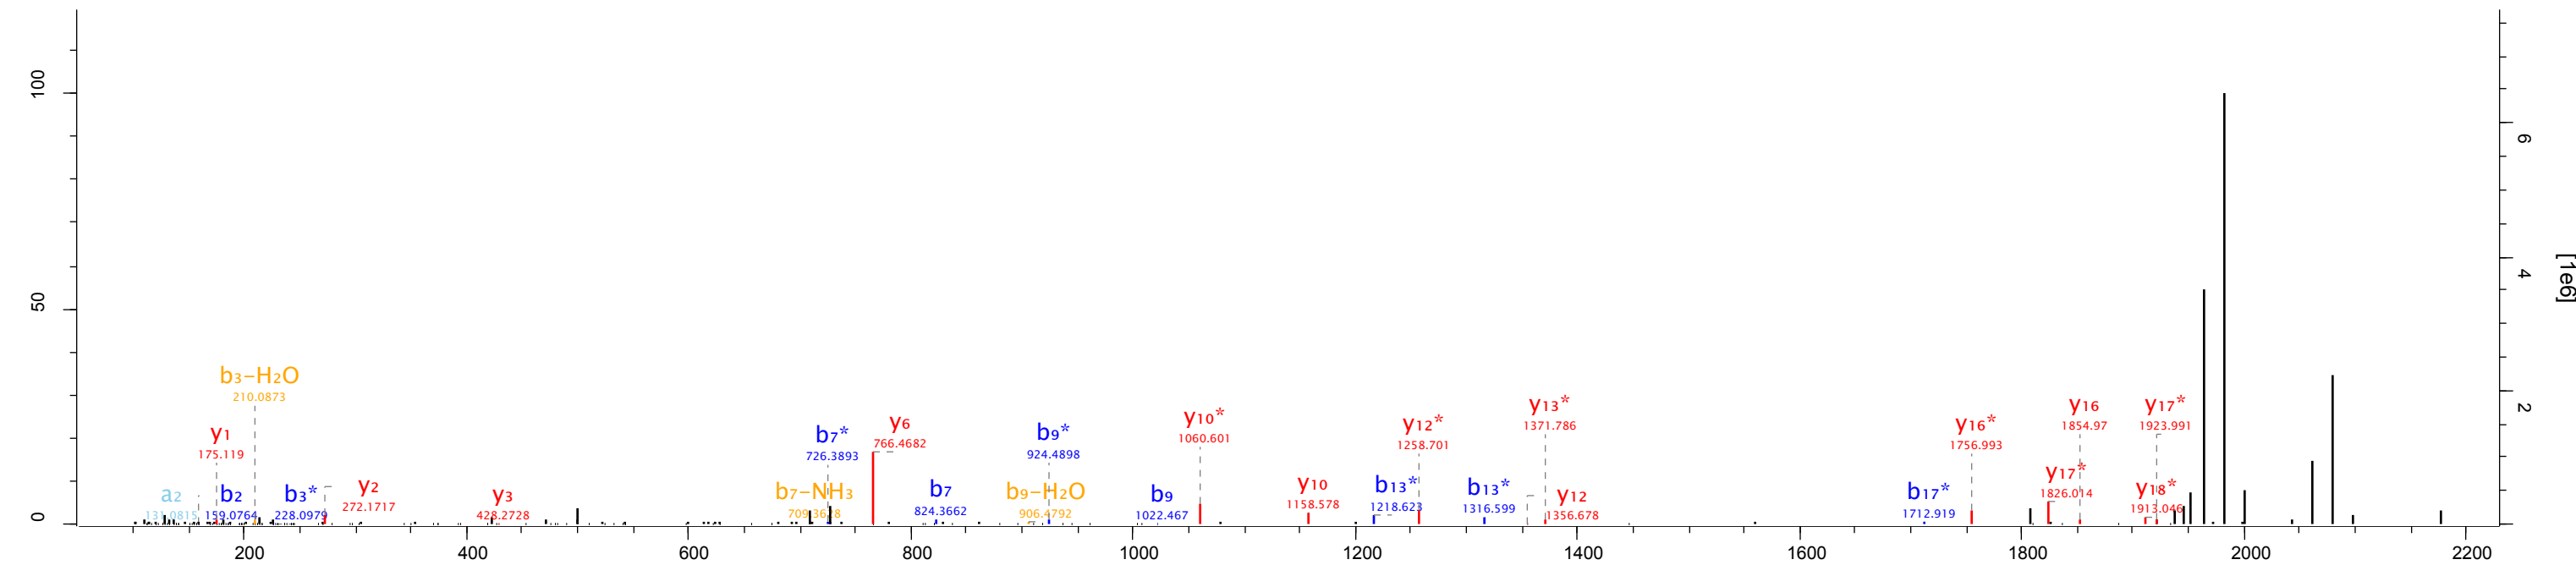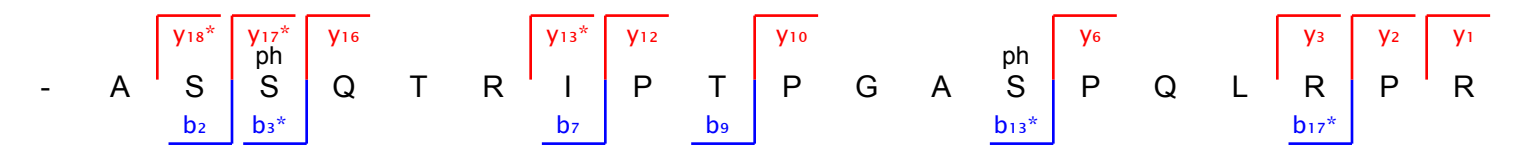

Raw file 20150812\_A375SR\_Phospho\_BR1\_03 Scan 14084 Method FTMS; HCD Score 166.36 m/z 952.41 Gene names PSD3

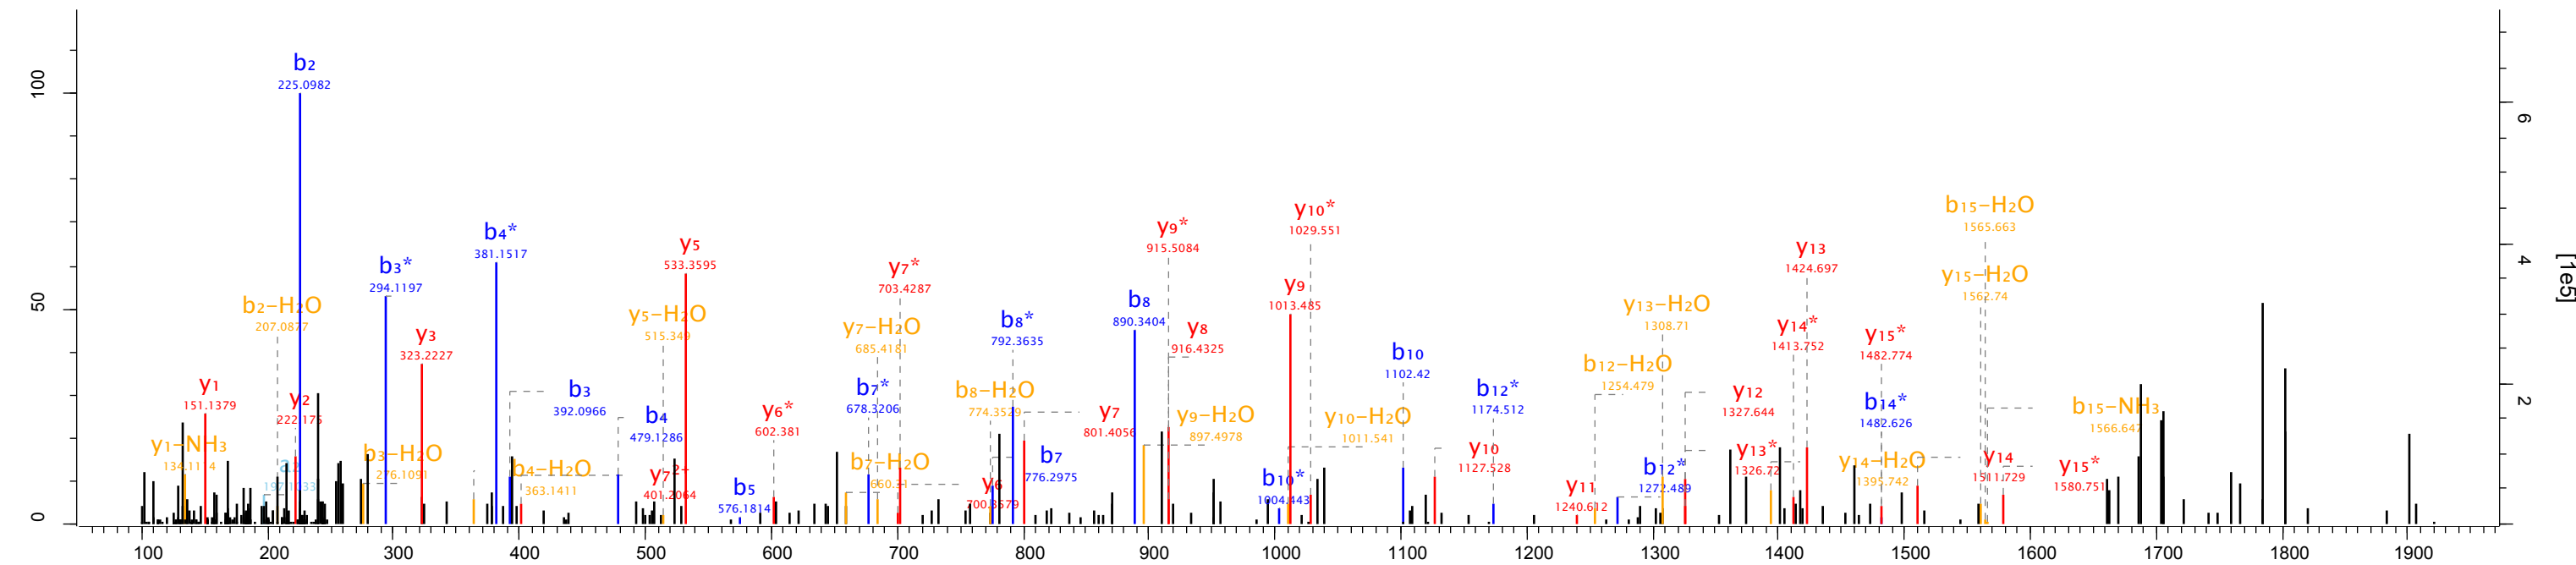

- S H S S P S L N P D T S P I T A K -

b<sub>2</sub>
b<sub>3</sub>
b<sub>4</sub>
b<sub>5</sub>
b<sub>7</sub>
b<sub>8</sub>
b<sub>10</sub>
b<sub>12</sub>\*
b<sub>14</sub>\*

y<sub>15</sub>\*
y<sub>14</sub>
y<sub>13</sub>
y<sub>12</sub>
y<sub>11</sub>
y<sub>10</sub>
y<sub>9</sub>
y<sub>8</sub>
y<sub>7</sub>
y<sub>6</sub>
y<sub>5</sub>
y<sub>3</sub>
y<sub>2</sub>
y<sub>1</sub>

Raw file: 20150812\_A375SR\_Phospho\_BR1\_03  
 Scan: 14124 Method: FTMS; HCD Score: 183.6 m/z: 758.34 Gene names: LIMCH1

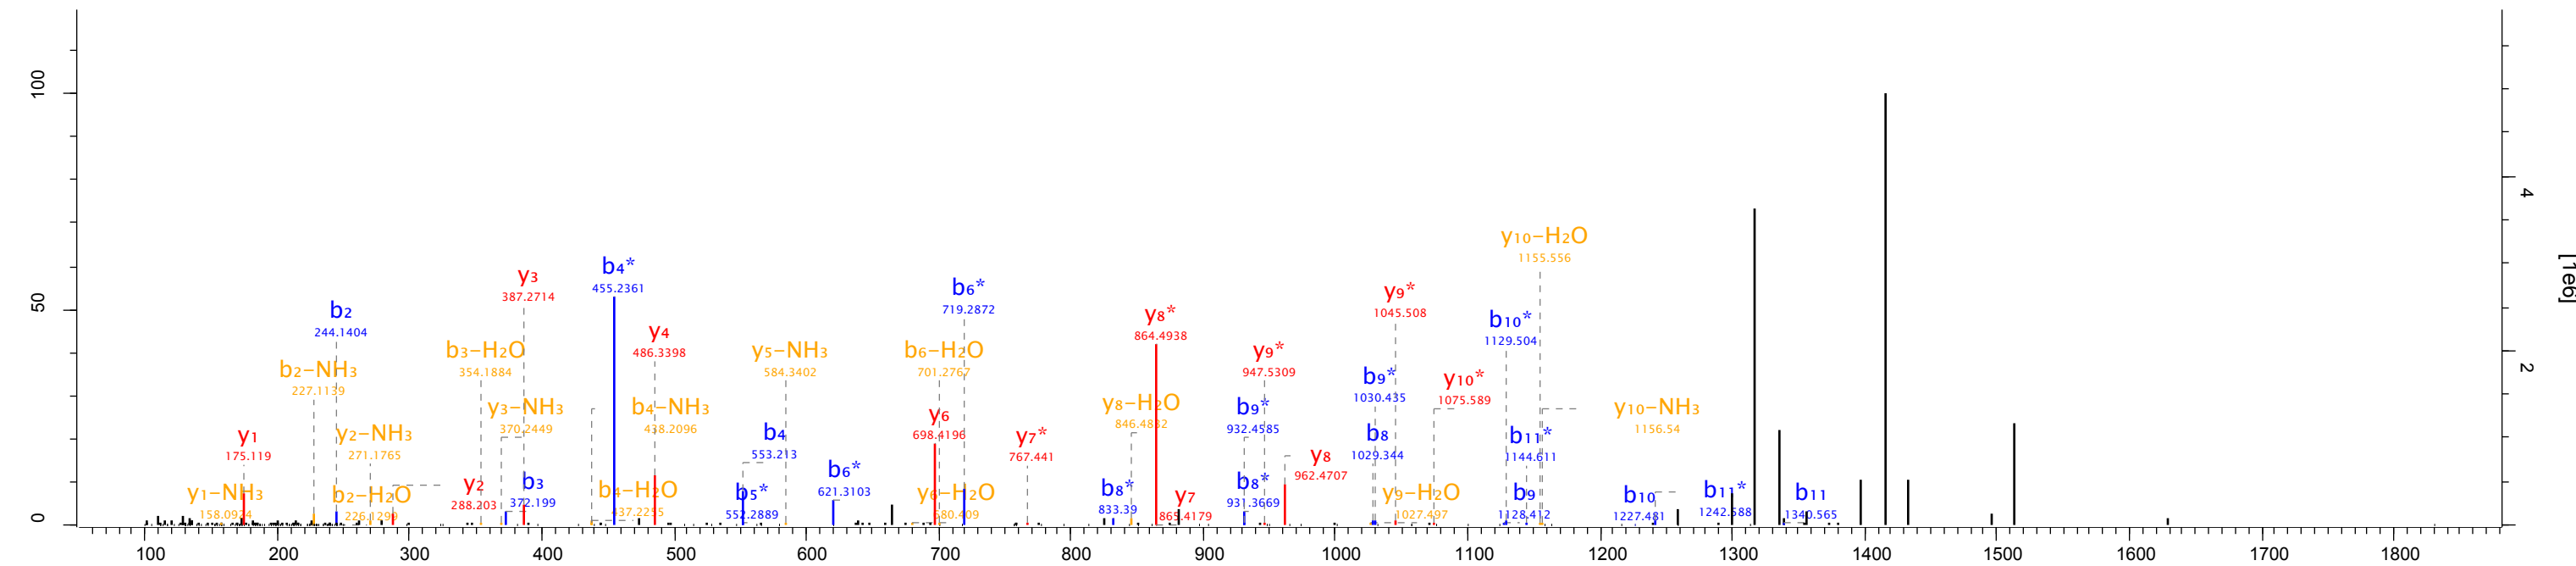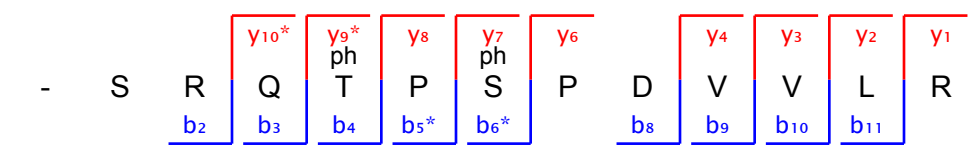

Raw file: 20150812\_A375SR\_Phospho\_BR1\_03  
 Scan: 14144 Method: FTMS; HCD Score: 264.72 m/z: 1178.99 Gene names: PLEC

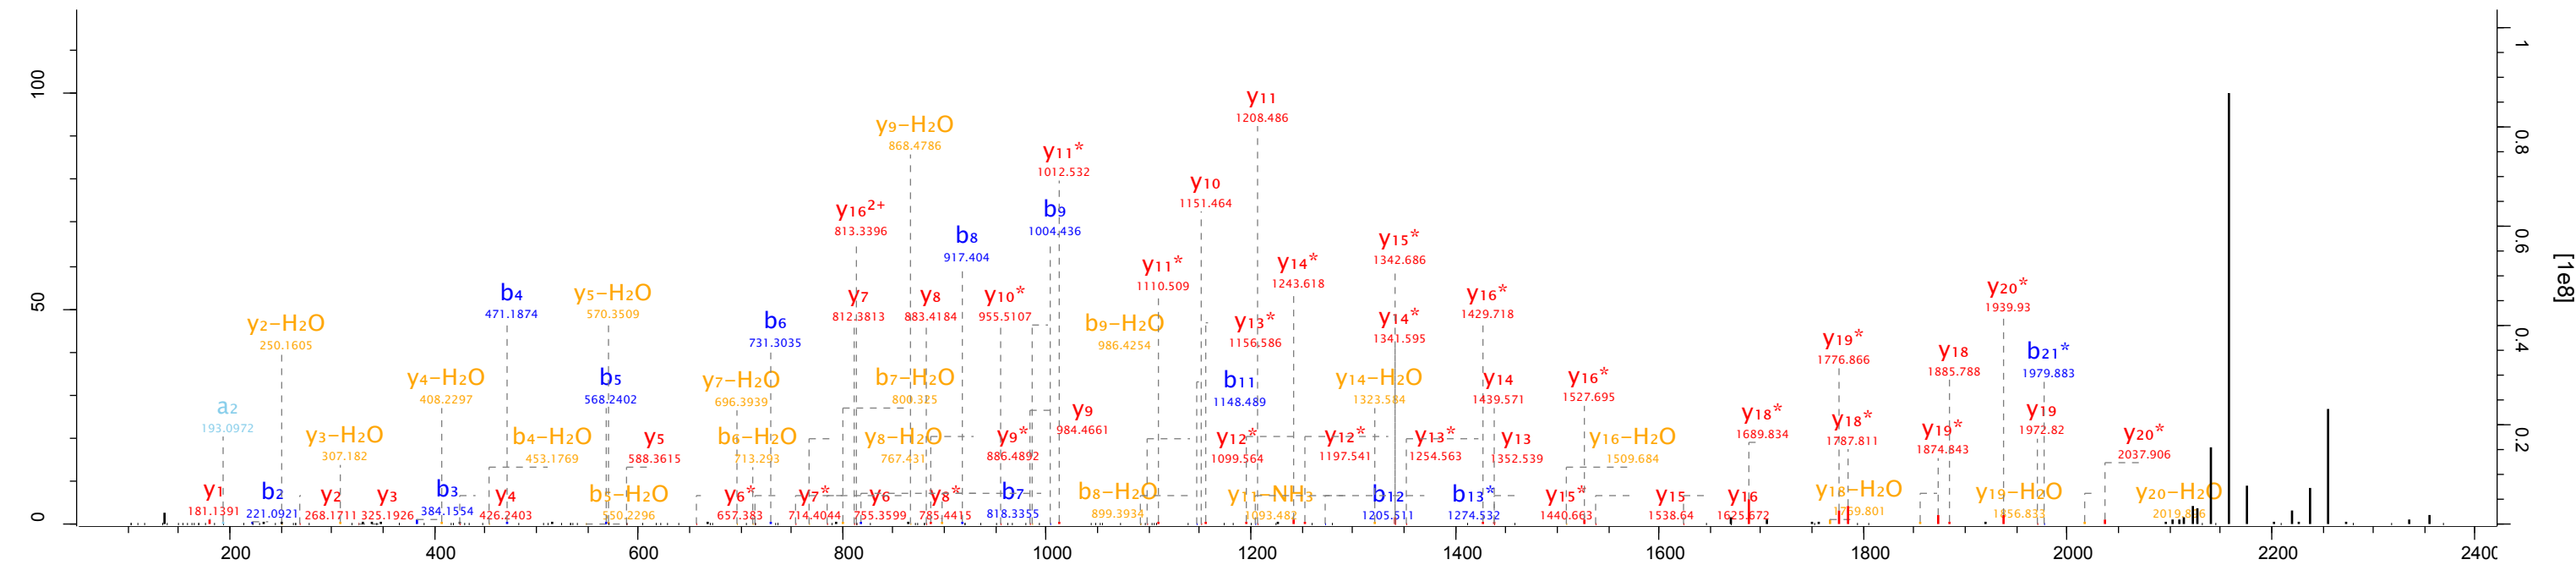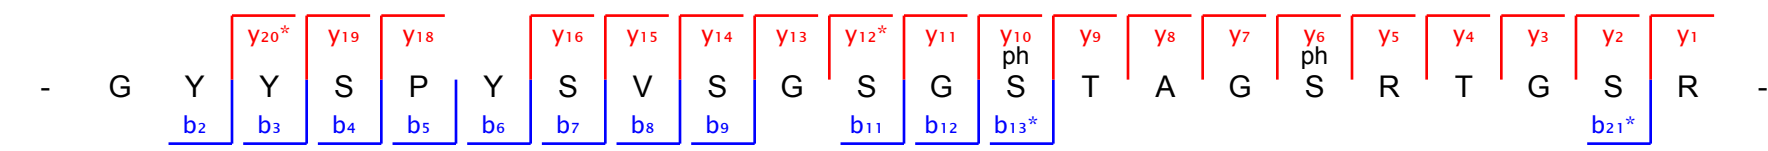

Raw file: 20150812\_A375SR\_Phospho\_BR1\_03  
 Scan: 14354 Method: FTMS; HCD Score: 89.7 m/z: 927.64 Gene names: MARCKSL1

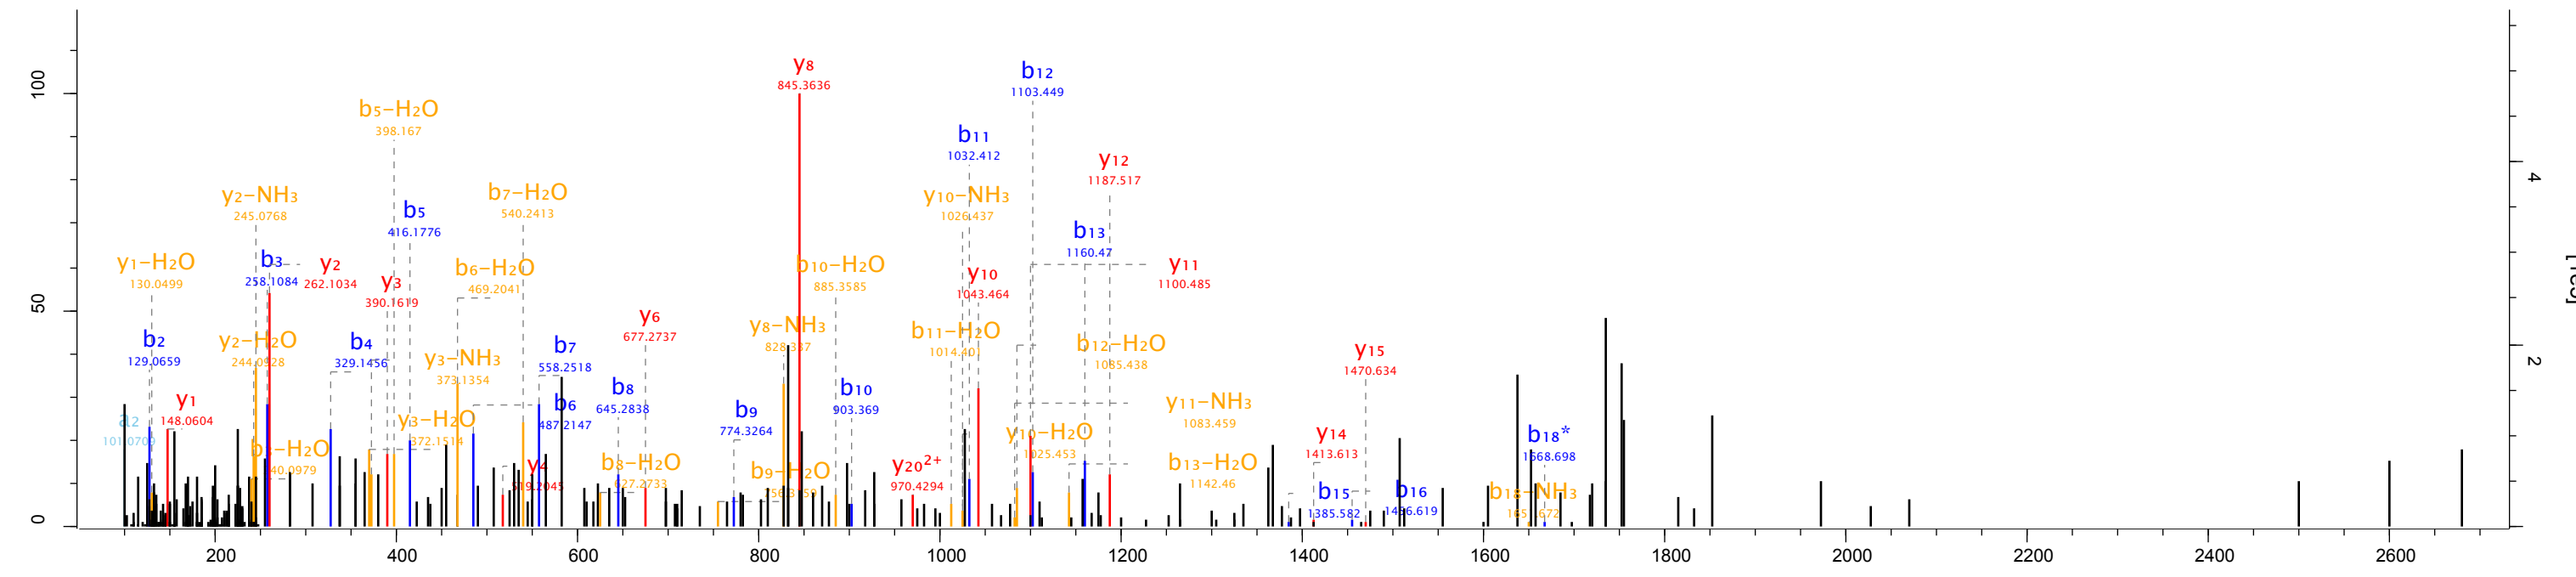

Protein sequence: - G A E A S A A S E E E A G P Q A P T E P S T P S G P E S G P T P A S A E Q N E

Fragmentation mapping (b and y ions):

- b<sub>2</sub> (A), b<sub>3</sub> (E), b<sub>4</sub> (A), b<sub>5</sub> (S), b<sub>6</sub> (A), b<sub>7</sub> (A), b<sub>8</sub> (S), b<sub>9</sub> (E), b<sub>10</sub> (E), b<sub>11</sub> (E), b<sub>12</sub> (A), b<sub>13</sub> (G), b<sub>15</sub> (Q), b<sub>16</sub> (A), b<sub>18</sub>\* (P)
- y<sub>1</sub> (E), y<sub>2</sub> (N), y<sub>3</sub> (Q), y<sub>4</sub> (E), y<sub>6</sub> (S), y<sub>8</sub> (P), y<sub>10</sub> (P), y<sub>11</sub> (G), y<sub>12</sub> (S), y<sub>14</sub> (P), y<sub>15</sub> (G), y<sub>20</sub><sup>2+</sup> (E)

Raw file Scan Method Score m/z Gene names  
 20150812\_A375SR\_Phospho\_BR1\_03 14364 FTMS; HCD 263.75 1026.9 PRRC2B

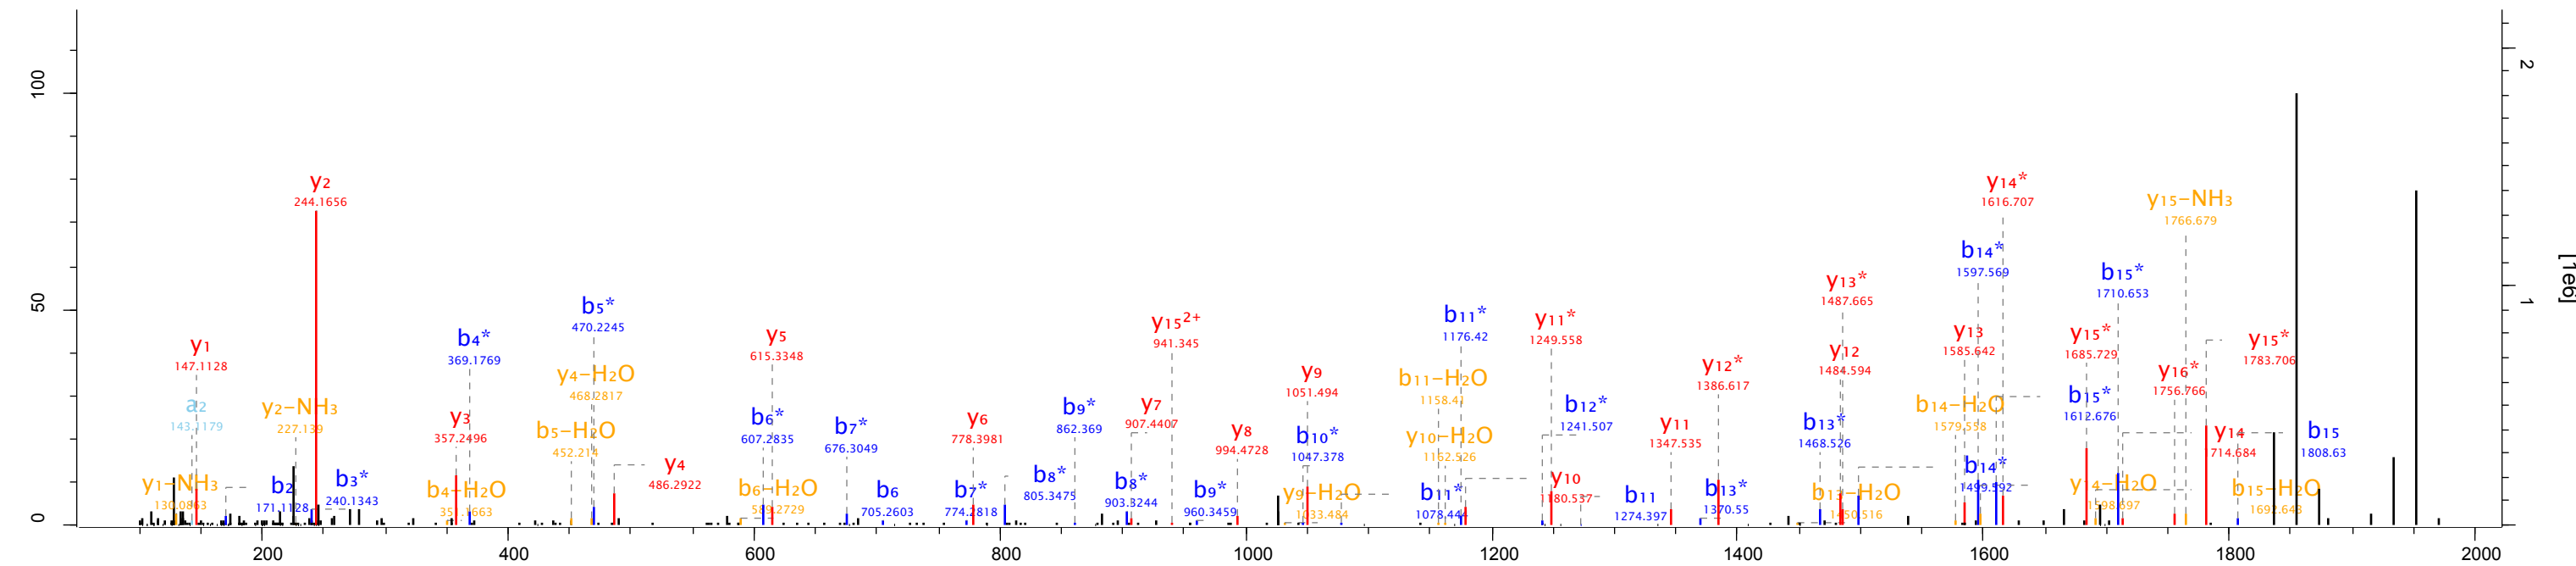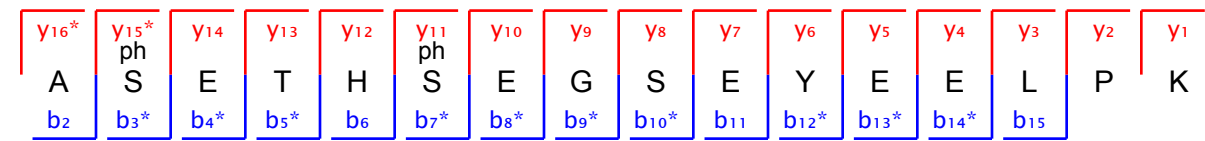

Raw file: 20150812\_A375SR\_Phospho\_BR1\_03  
 Scan: 14754 Method: FTMS; HCD Score: 271.77 m/z: 1135.04 Gene names: ABCF1

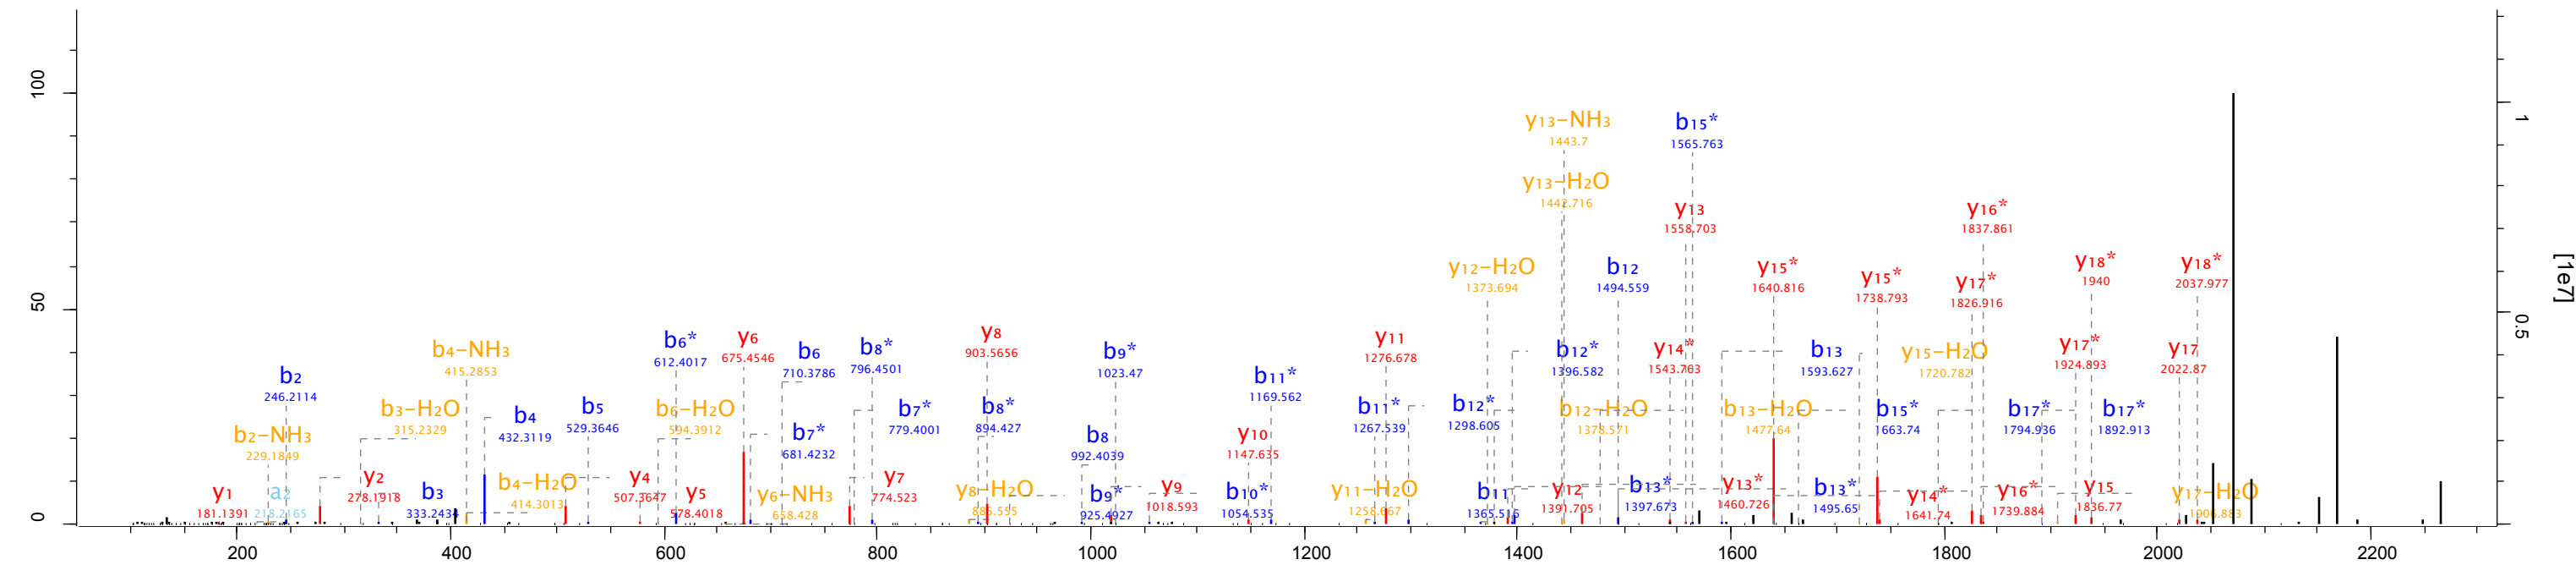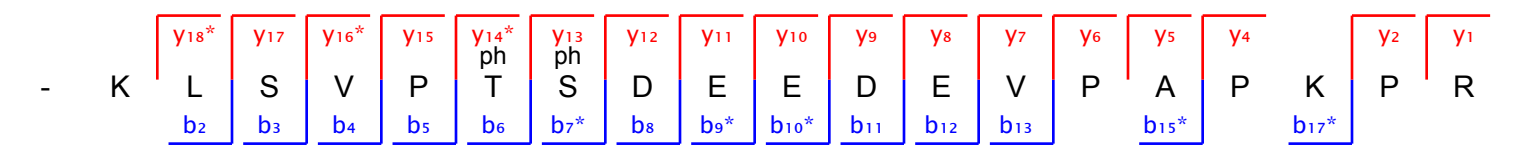



Raw file 20150812\_A375SR\_Phospho\_BR1\_03 Scan 15084 Method FTMS; HCD Score 244.57 m/z 849.38 Gene names ZC3HC1

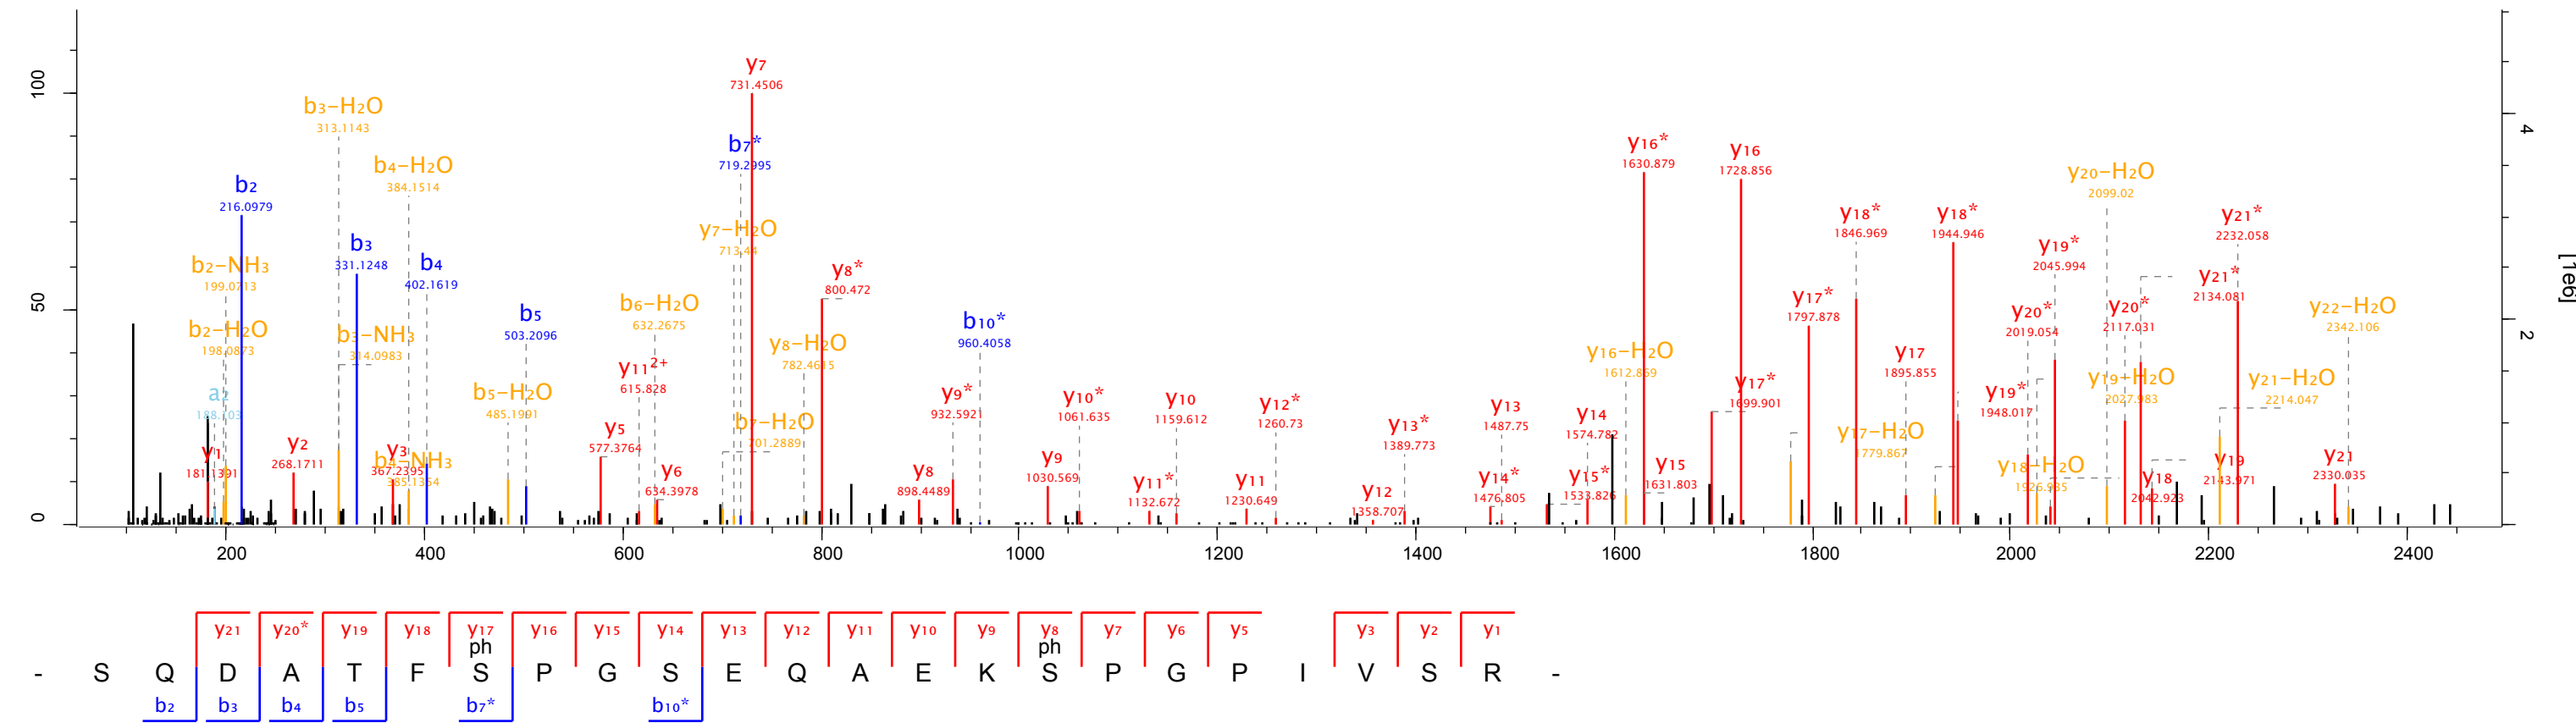

Raw file: 20150812\_A375SR\_Phospho\_BR1\_03  
 Scan: 15364 Method: FTMS; HCD Score: 274.63 m/z: 1044.45 Gene names: BAIAP2L1

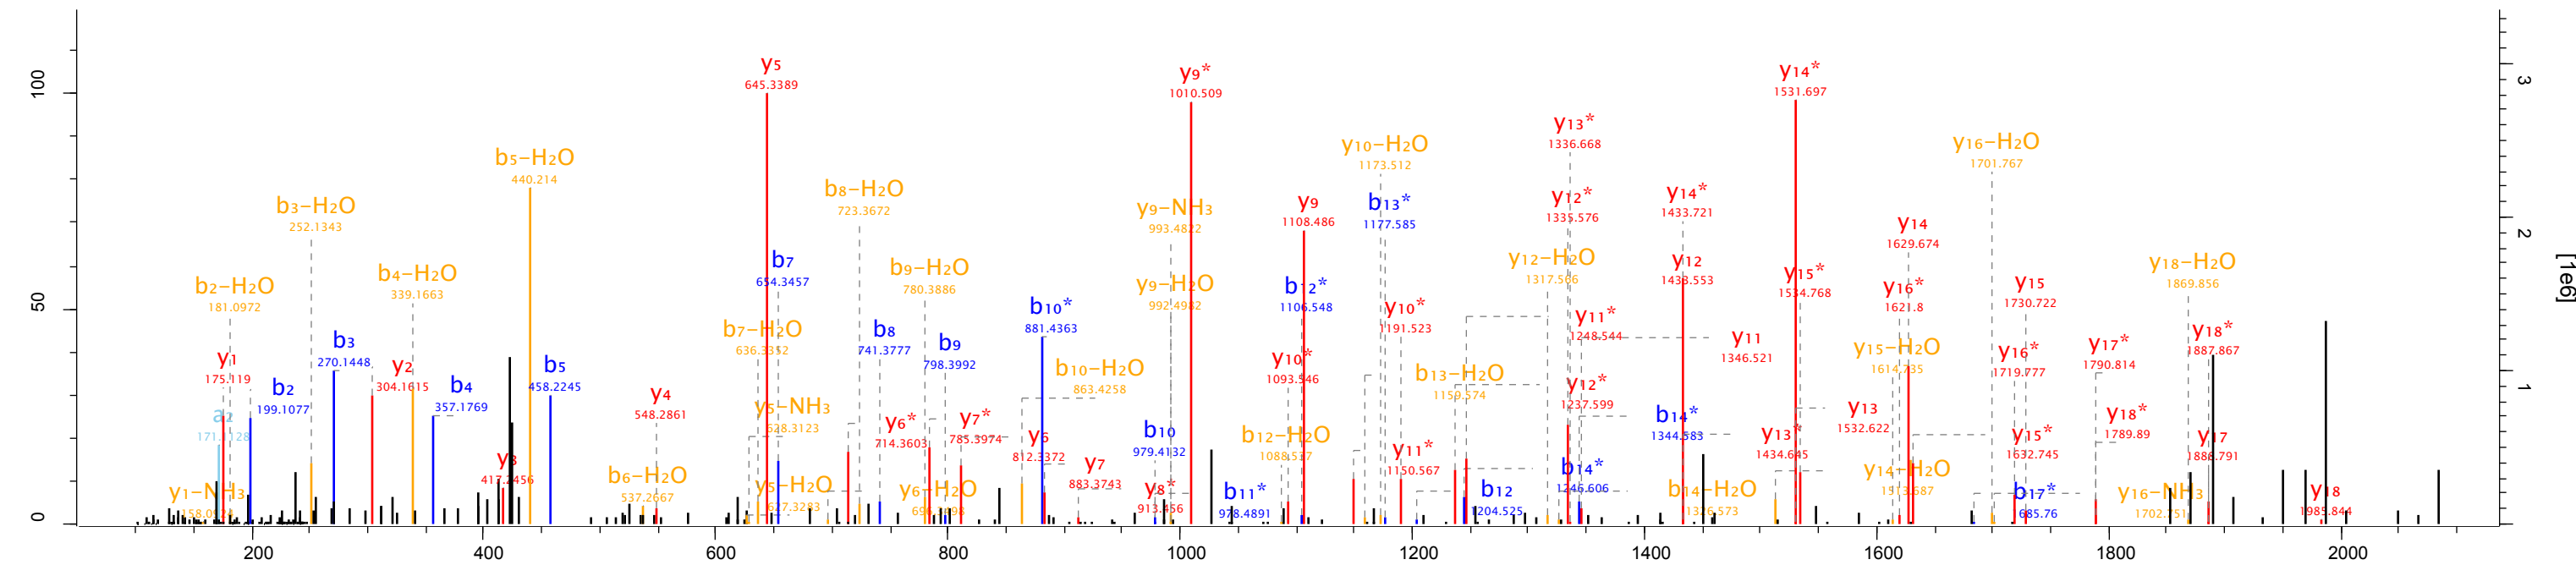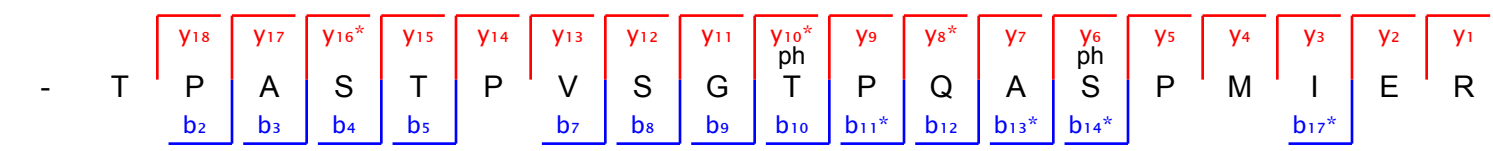

Raw file: 20150812\_A375SR\_Phospho\_BR1\_03  
 Scan: 15684 Method: FTMS; HCD Score: 82.76 m/z: 1023.13 Gene names: NES

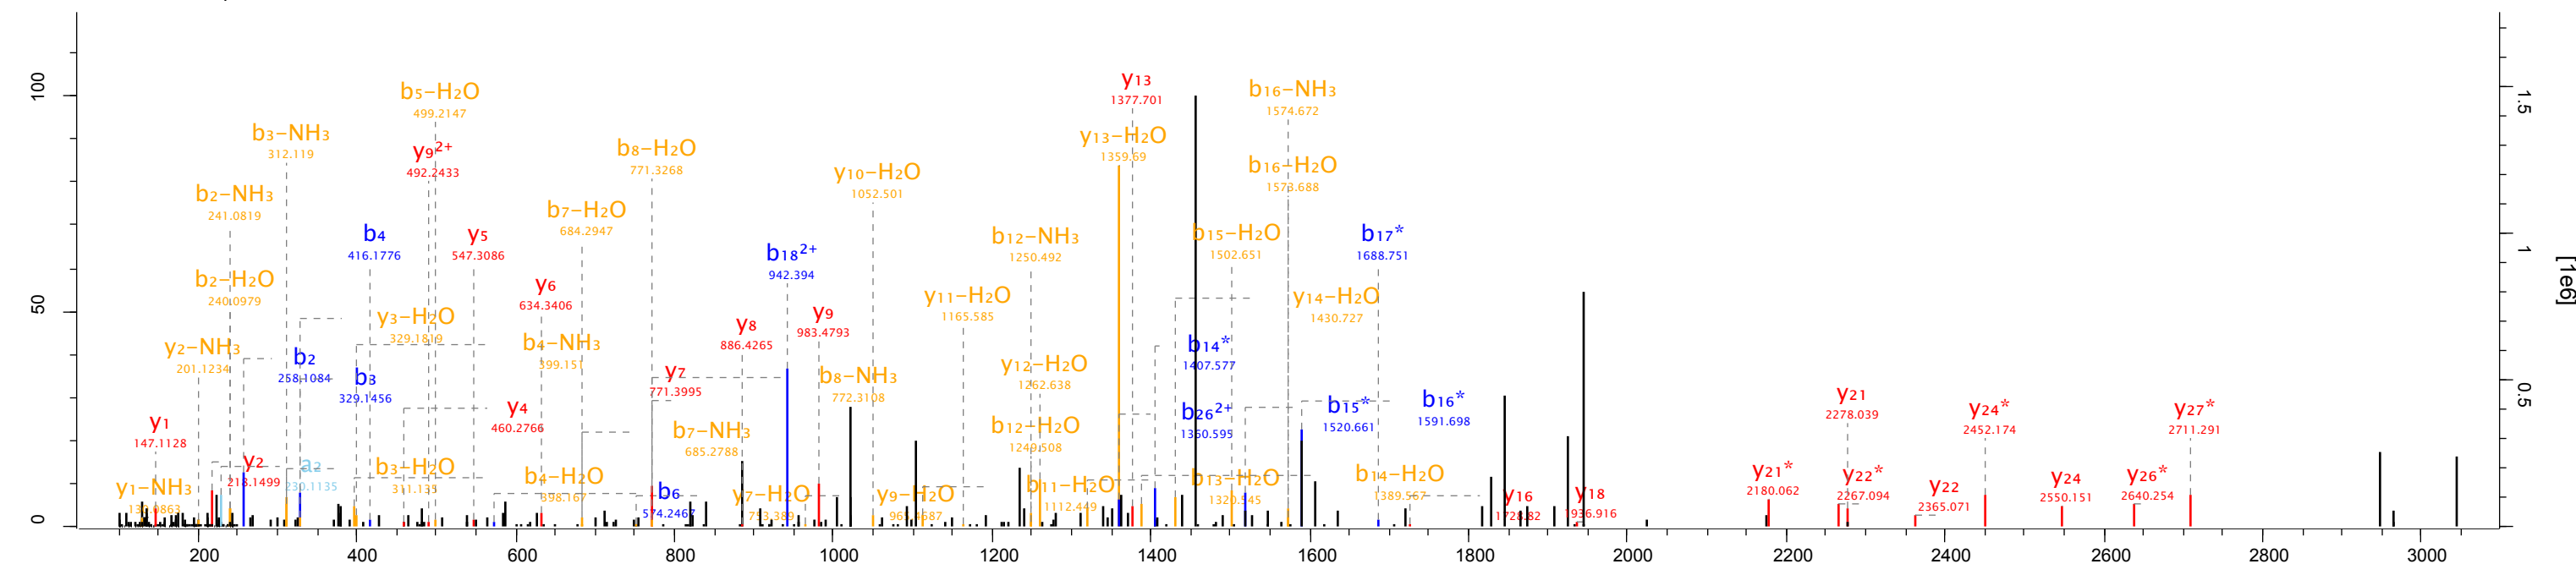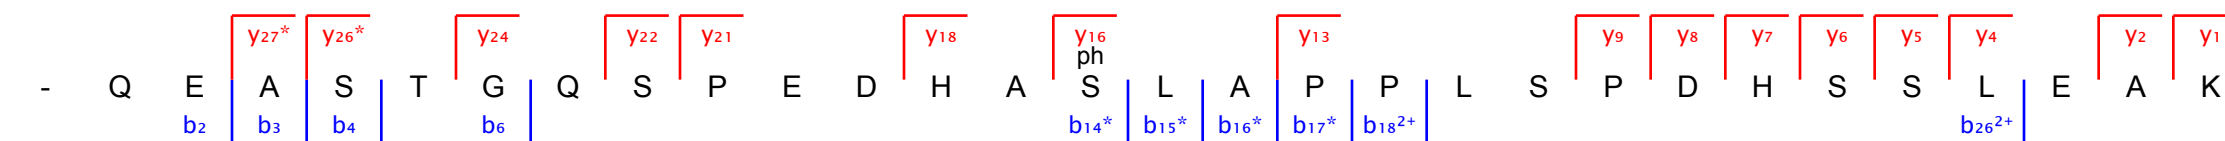

Raw file 20150812\_A375SR\_Phospho\_BR1\_03 Scan 16254 Method FTMS; HCD Score 94.27 m/z 951.91 Gene names MED14

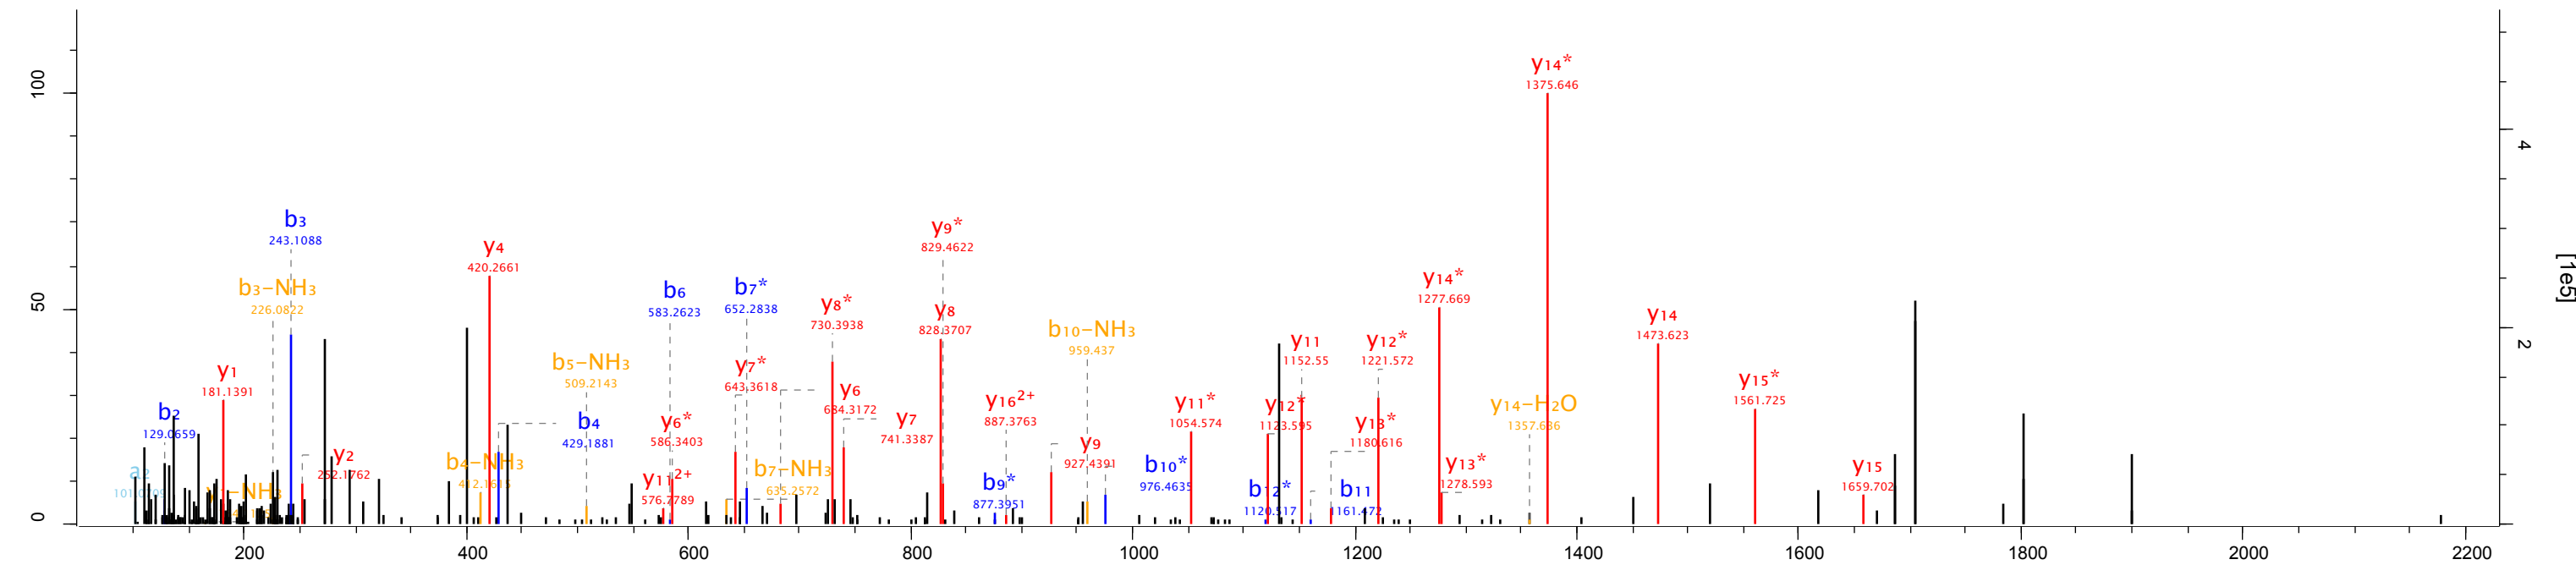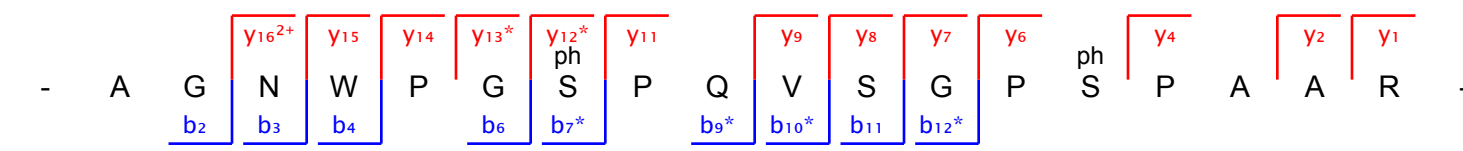

Raw file 20150812\_A375SR\_Phospho\_BR1\_03 Scan 16324 Method FTMS; HCD Score 154.59 m/z 1008.45 Gene names TNRC6B

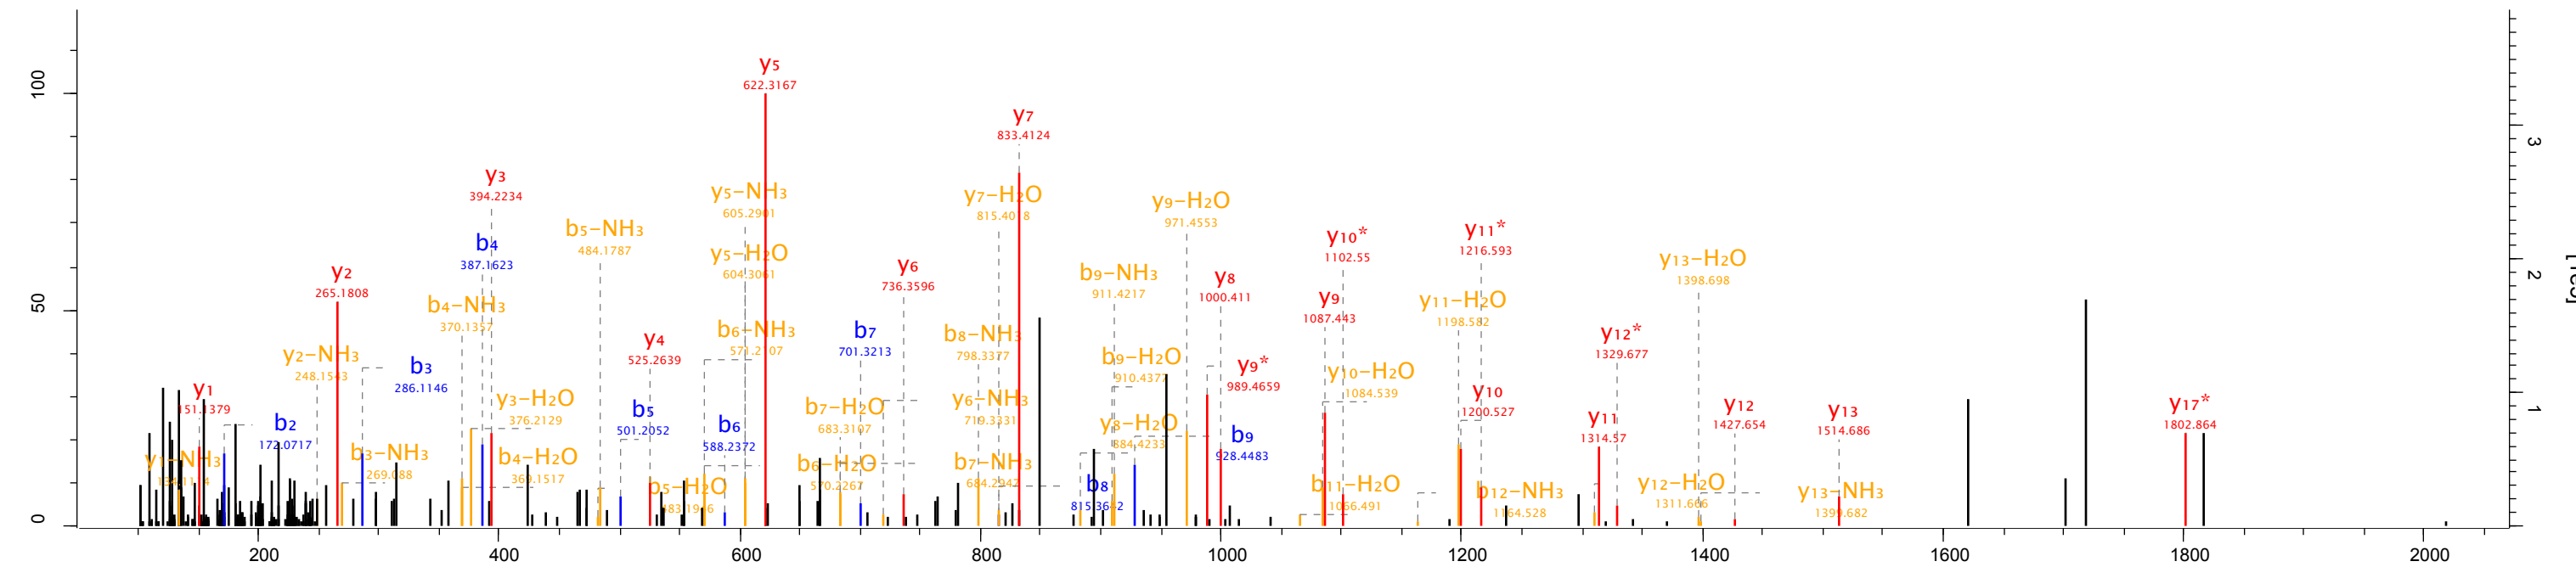

Raw file: 20150812\_A375SR\_Phospho\_BR1\_03  
 Scan: 16524 Method: FTMS; HCD Score: 86.32 m/z: 632.3 Gene names: TNRC18

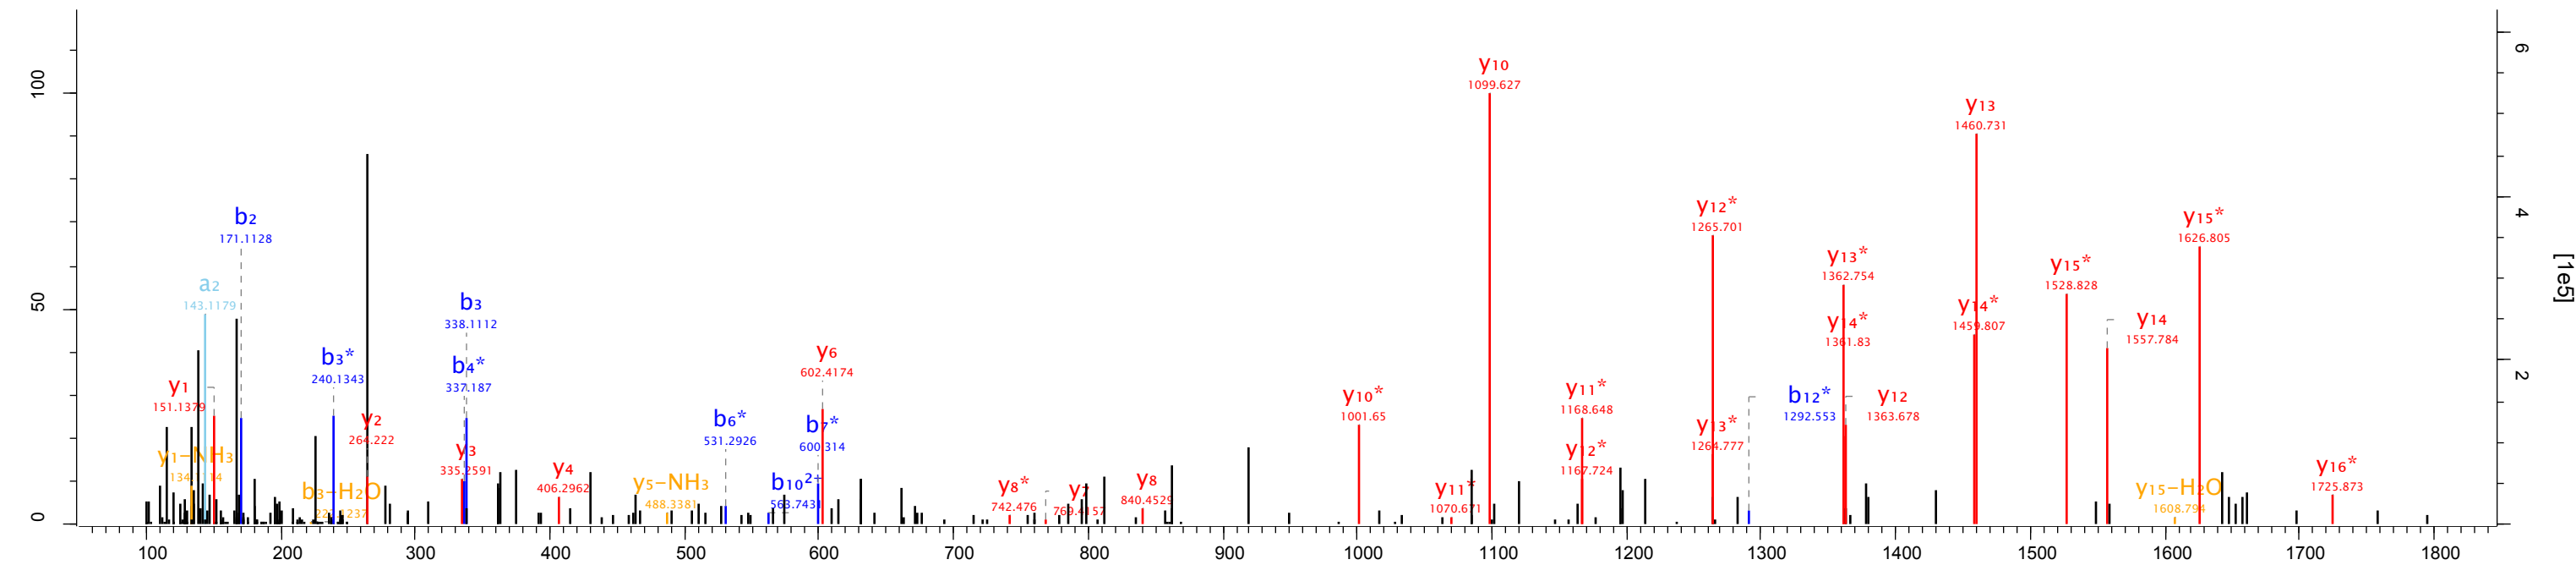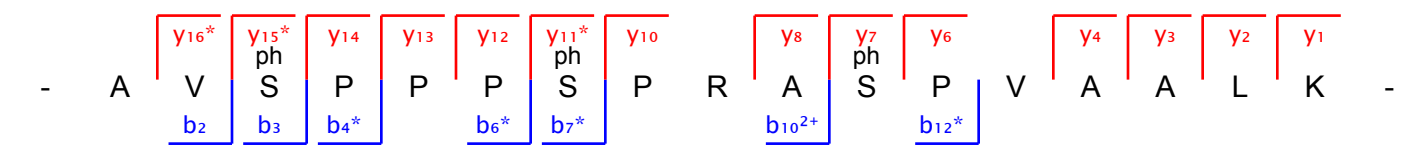

Raw file: 20150812\_A375SR\_Phospho\_BR1\_03  
 Scan: 16594 Method: FTMS; HCD Score: 169.7 m/z: 810.05 Gene names: EZH2

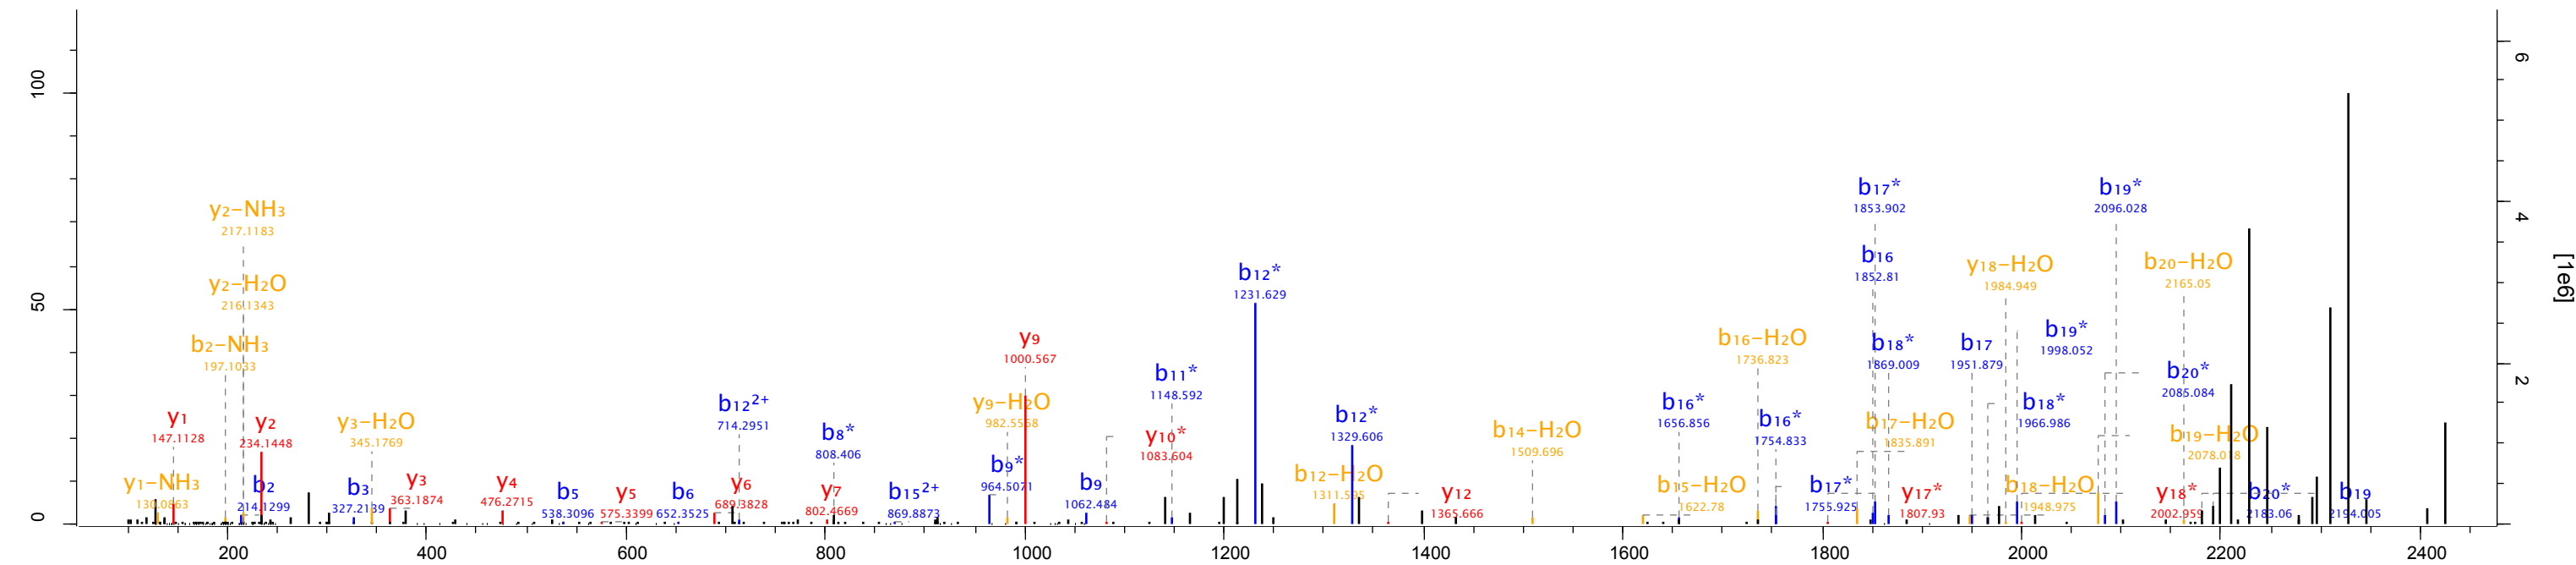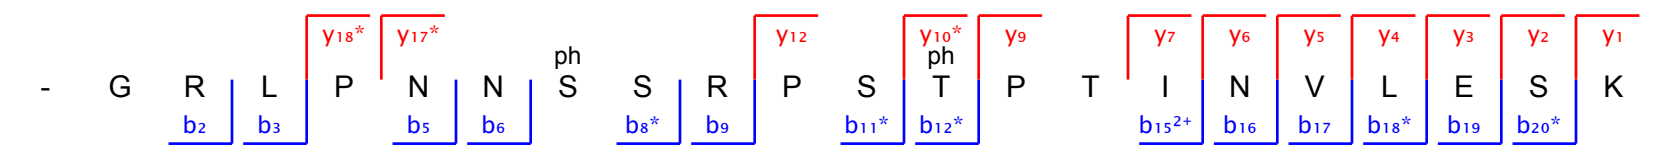

Raw file Scan Method Score m/z Gene names  
 20150812\_A375SR\_Phospho\_BR1\_03 16774 FTMS; HCD 162.58 862.39 ARFGF2

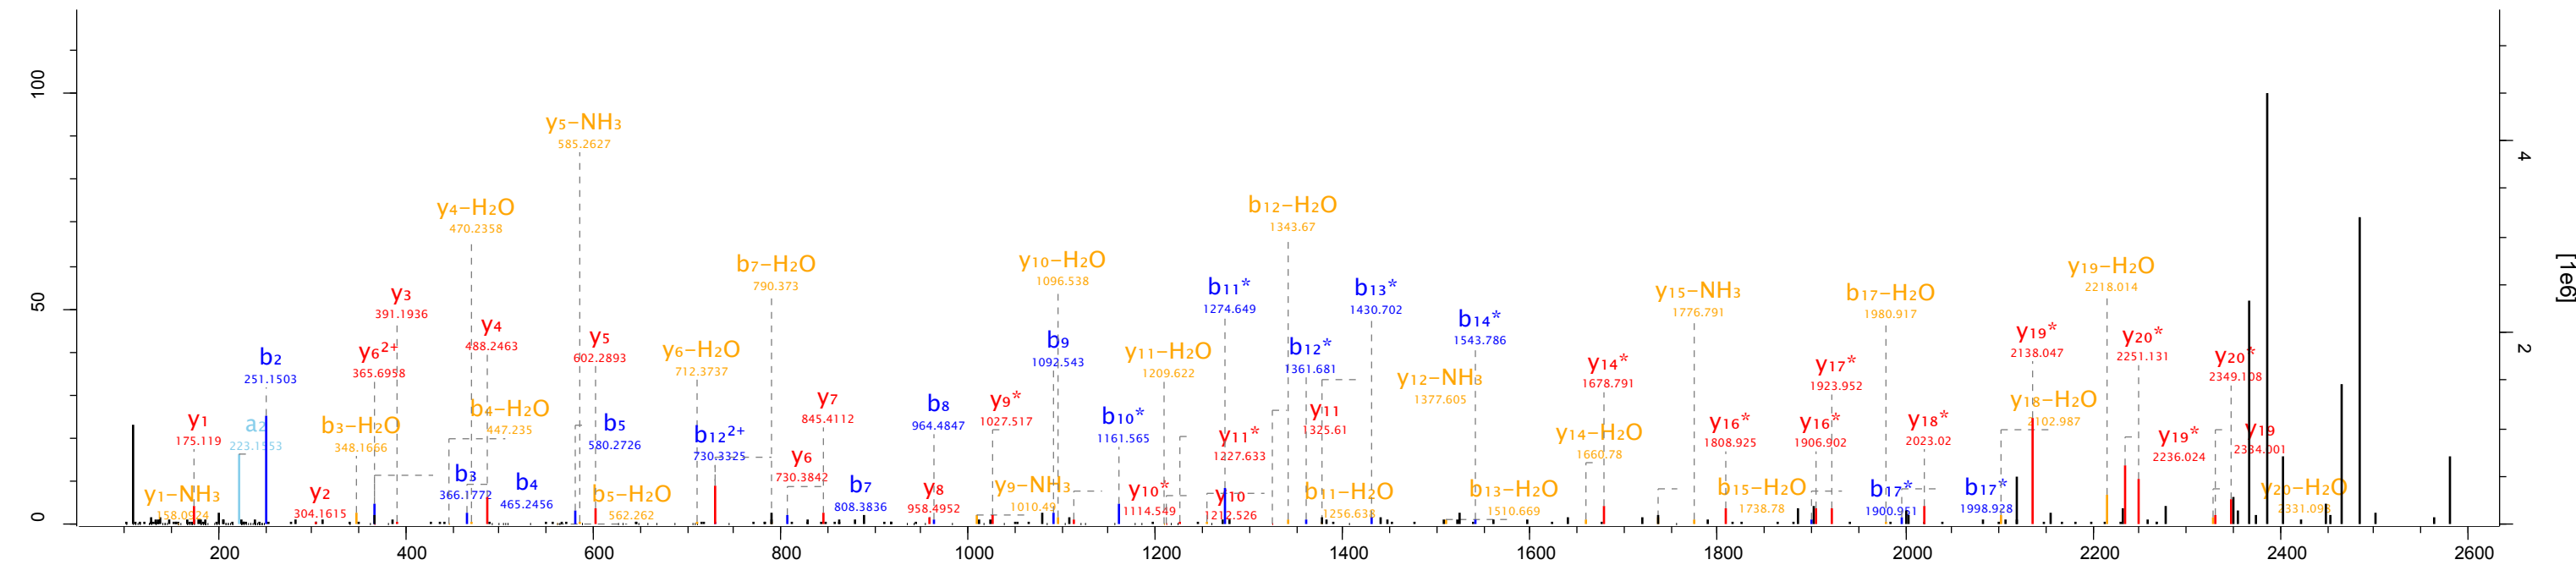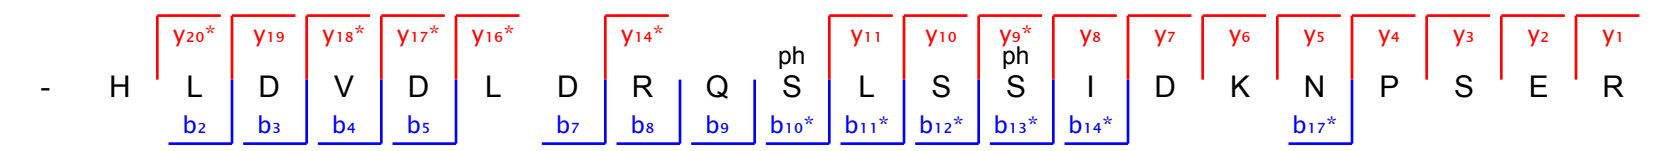



Raw file 20150812\_A375SR\_Phospho\_BR1\_03 Scan 16794 Method FTMS; HCD Score 84.03 m/z 949.15 Gene names TP53BP1

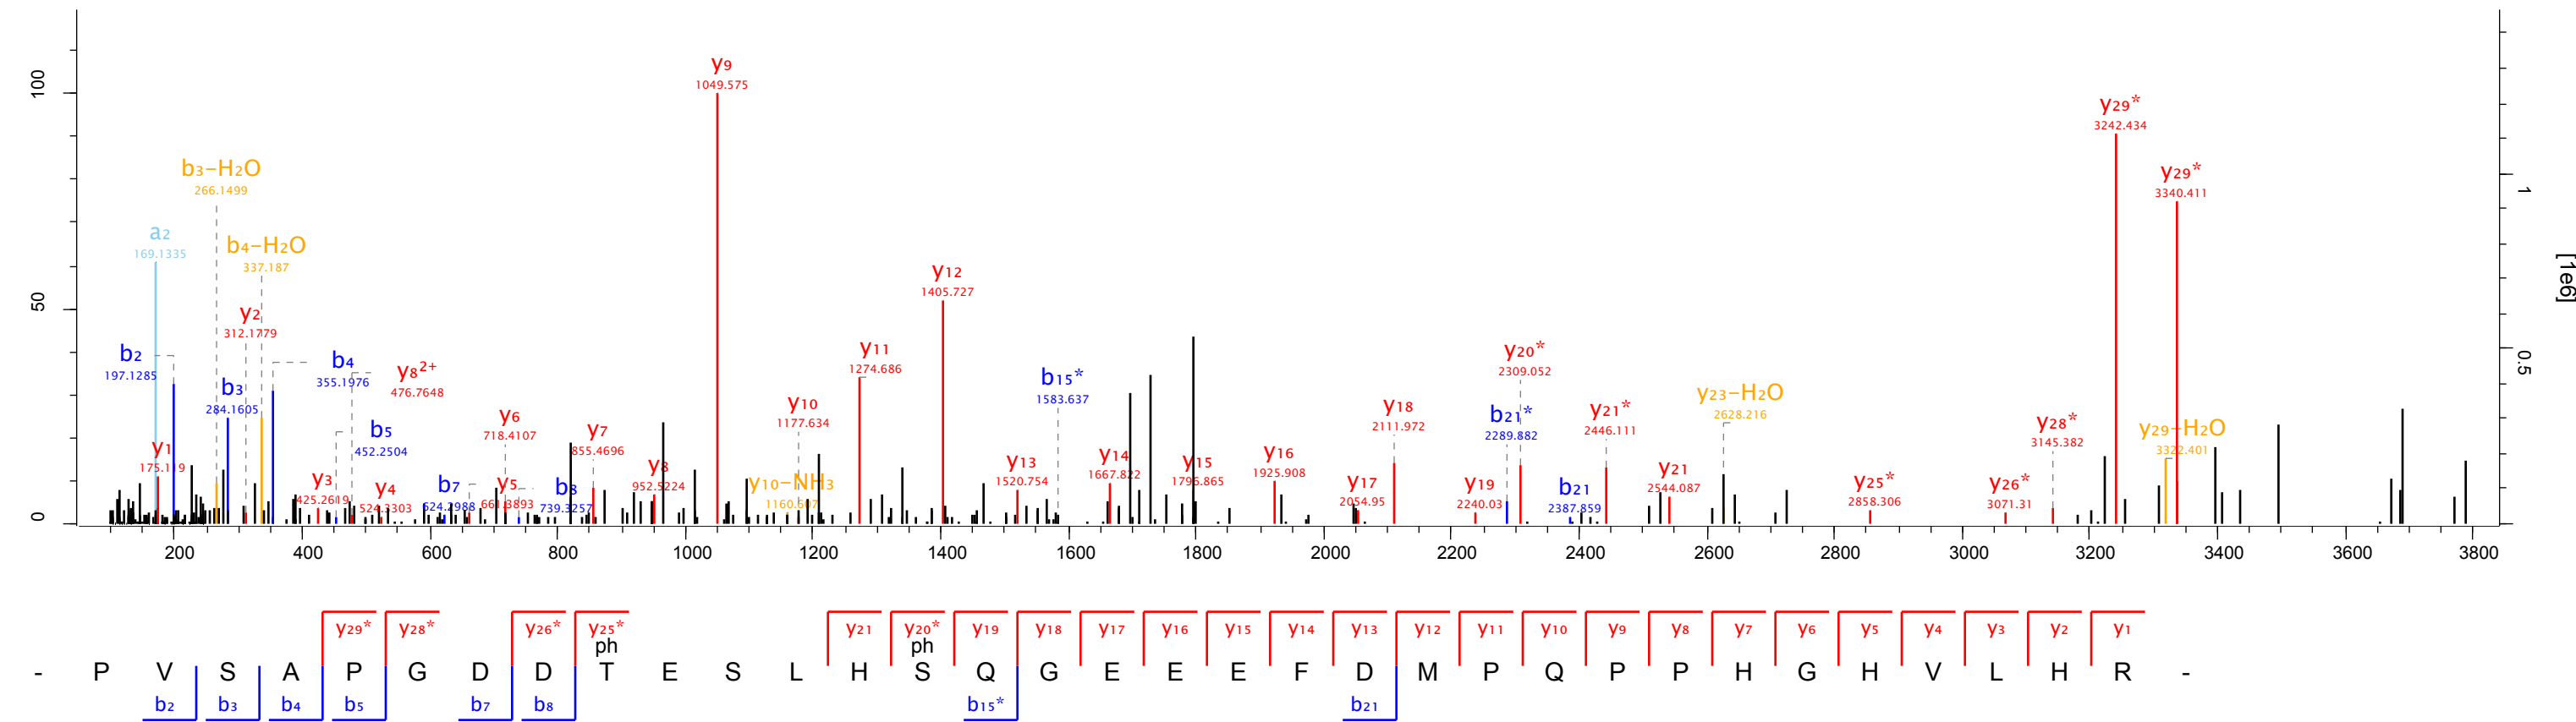

Raw file: 20150812\_A375SR\_Phospho\_BR1\_03  
 Scan: 16854 Method: FTMS; HCD Score: 91.22 m/z: 1046.13 Gene names: LARP4B

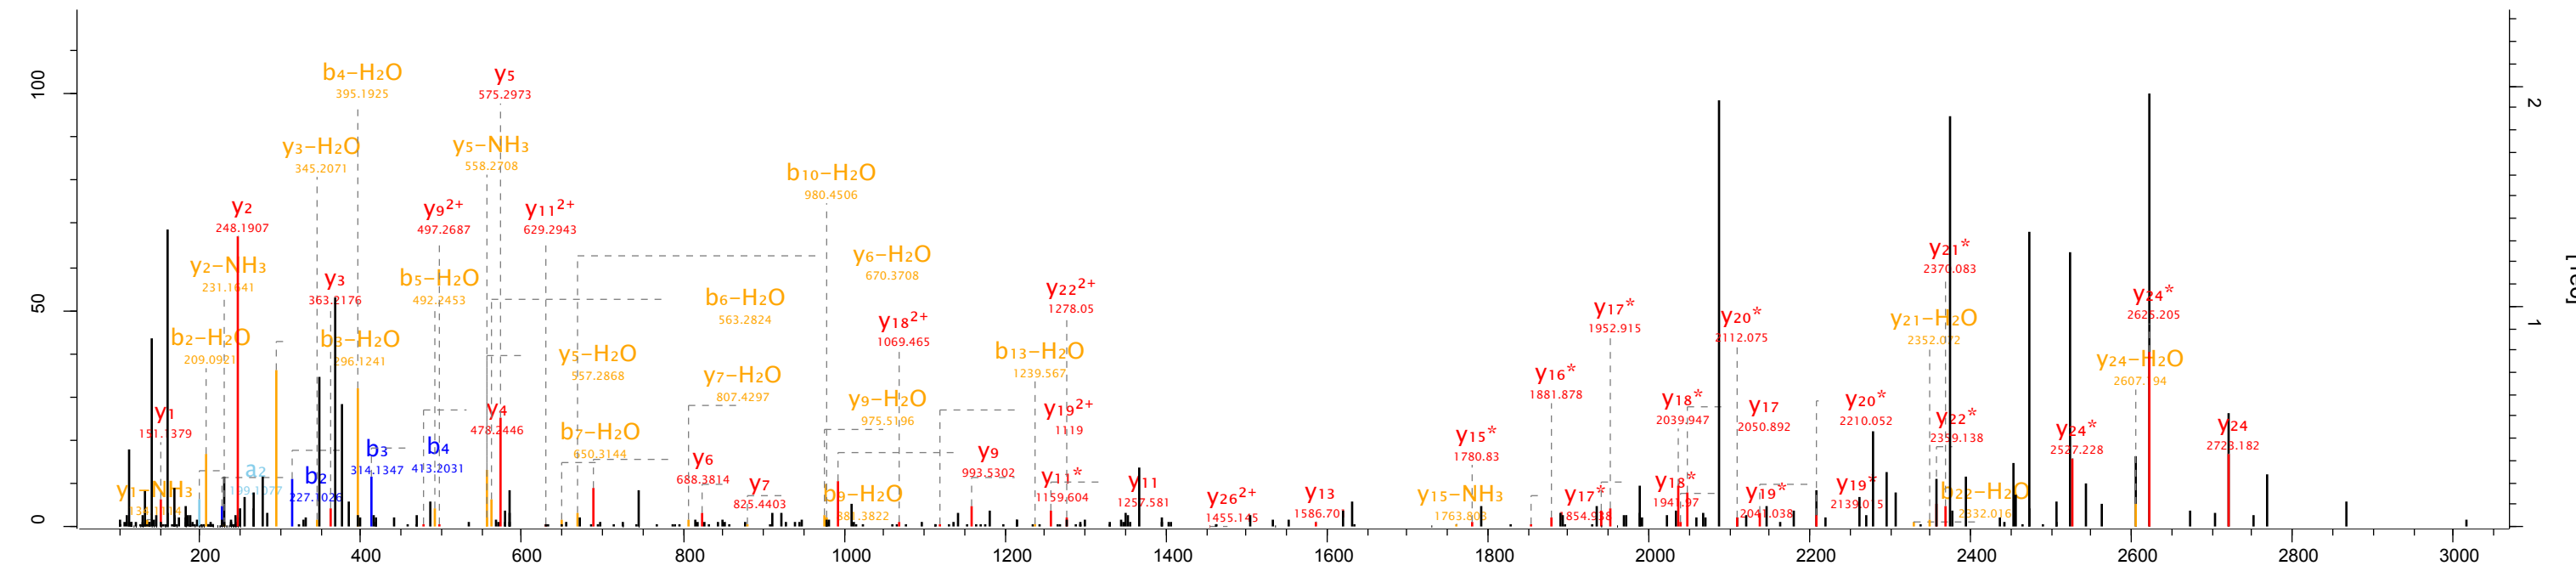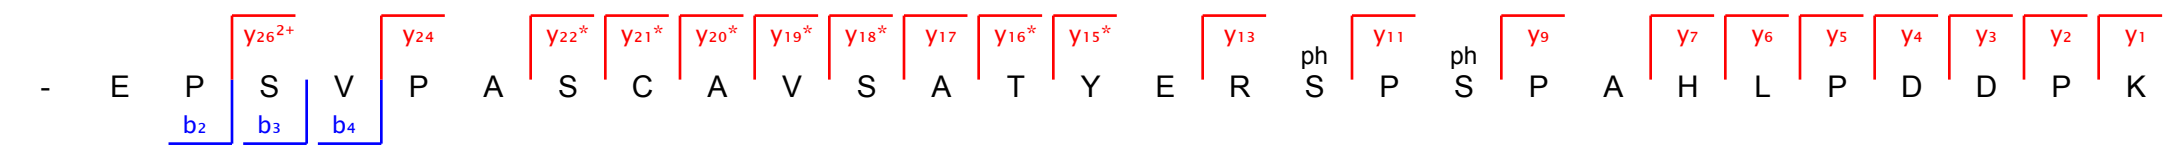

Raw file 20150812\_A375SR\_Phospho\_BR1\_03 Scan 17354 Method FTMS; HCD Score 122.56 m/z 709.31 Gene names YTHDF2

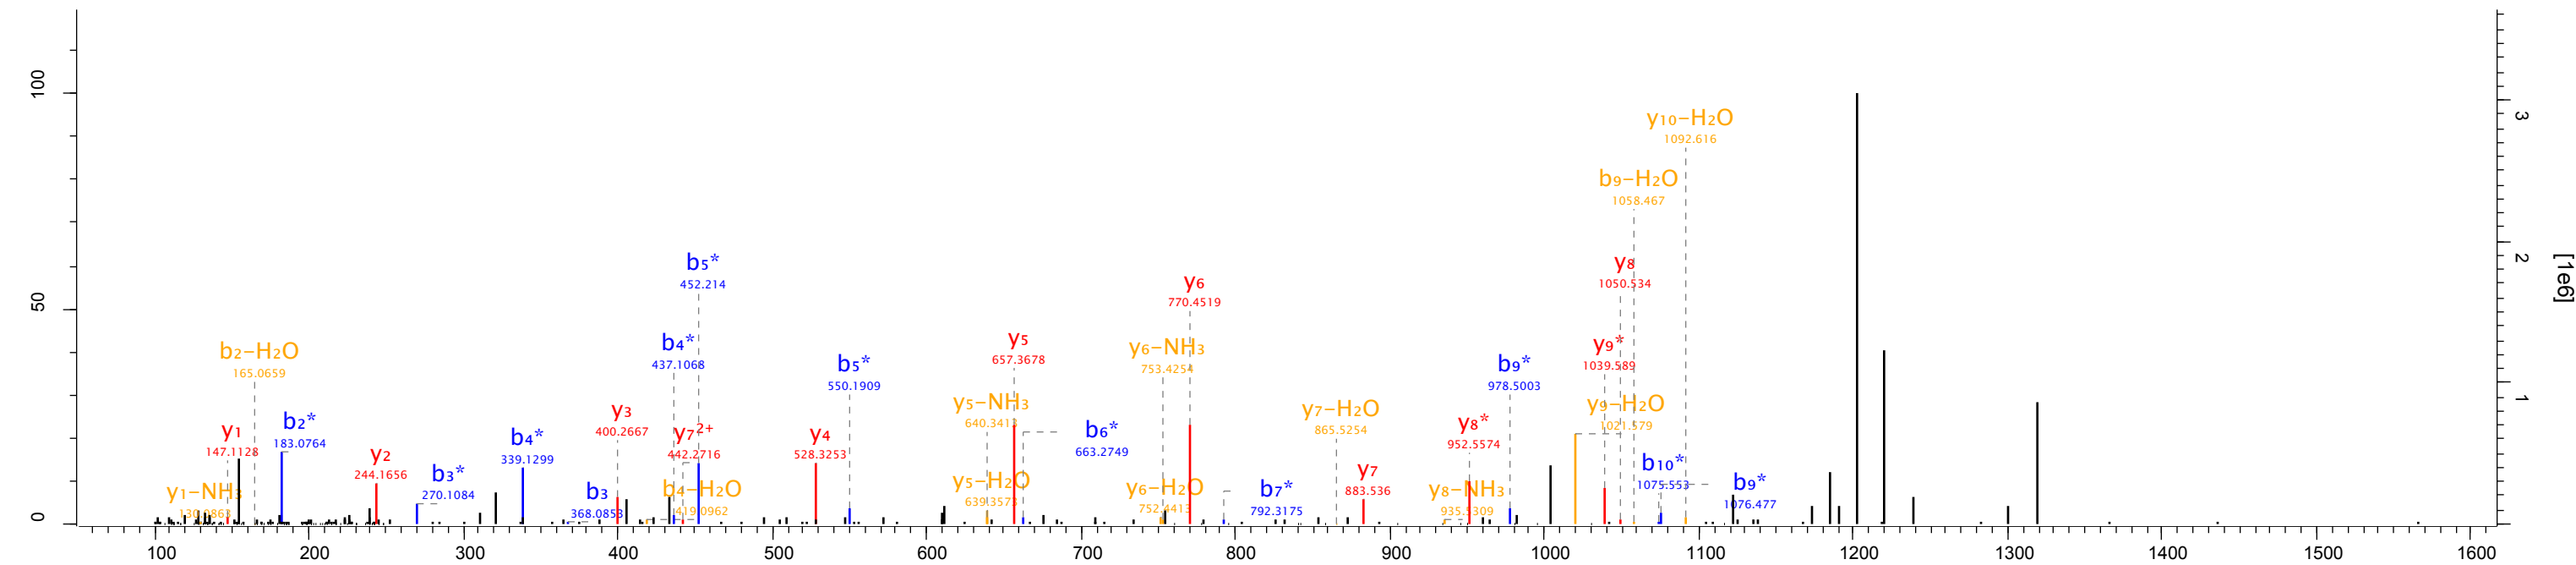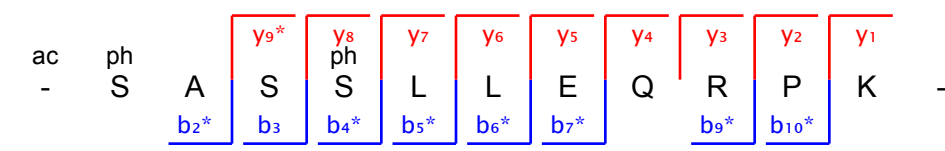

Raw file: 20150812\_A375SR\_Phospho\_BR1\_03  
 Scan: 17714 Method: FTMS; HCD Score: 52.64 m/z: 872.62 Gene names: WDR44

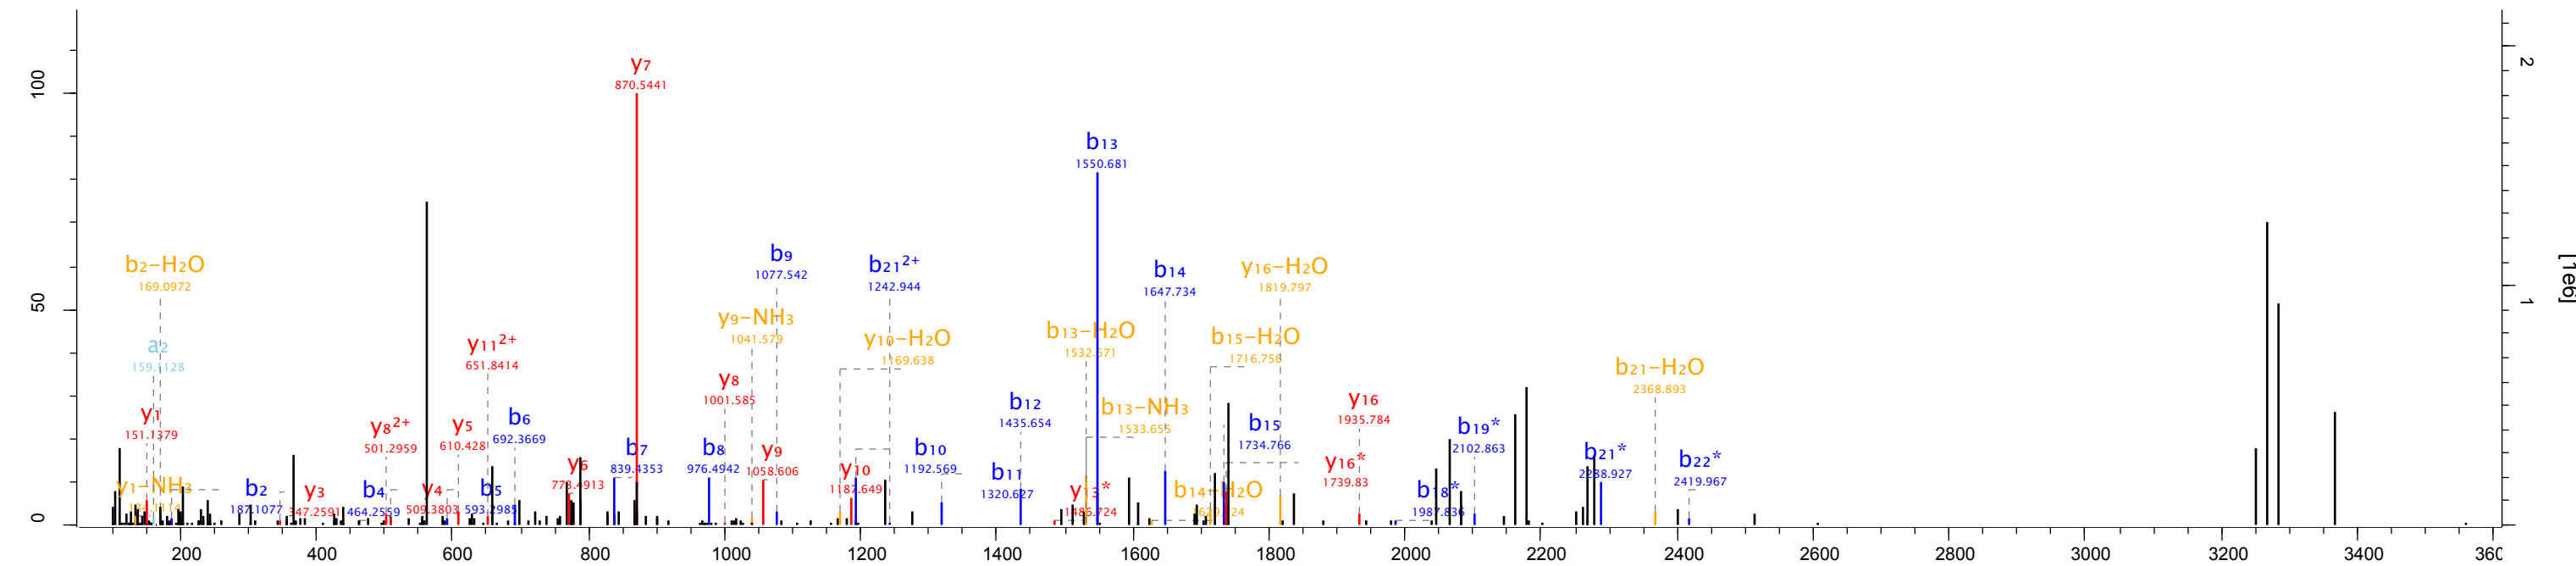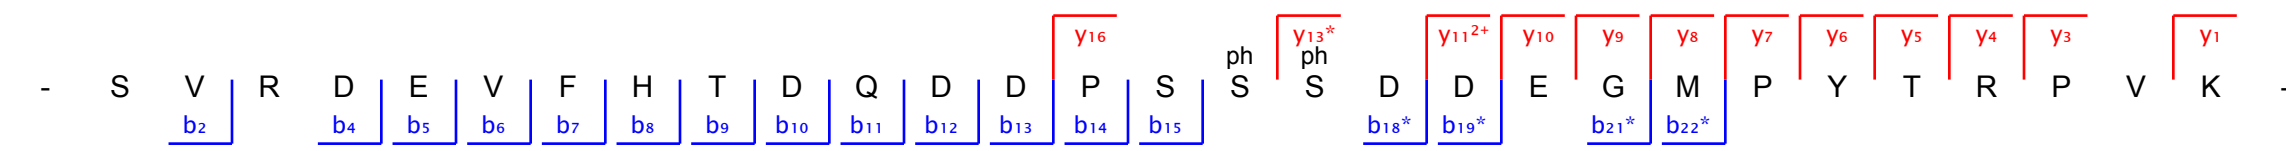

Raw file: 20150812\_A375SR\_Phospho\_BR1\_03  
 Scan: 17834 Method: FTMS; HCD Score: 179.81 m/z: 656.28 Gene names: PHF14

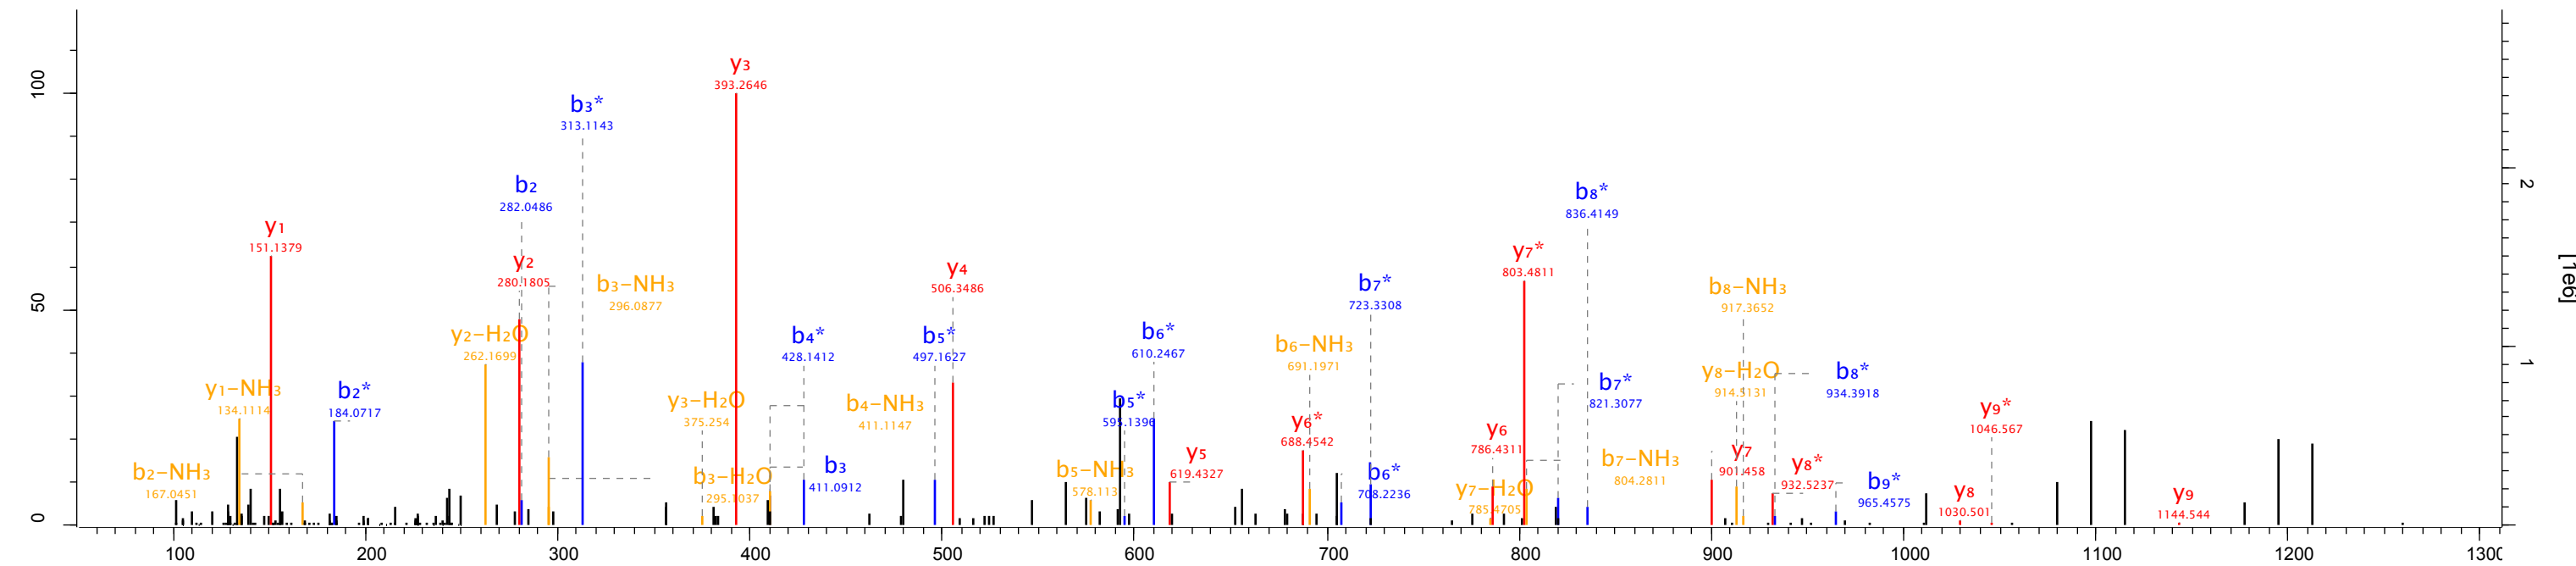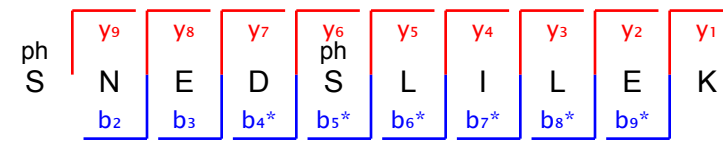

Raw file: 20150812\_A375SR\_Phospho\_BR1\_03  
 Scan: 1784 Method: FTMS; HCD Score: 40.19 m/z: 506.23 Gene names: U2SURP

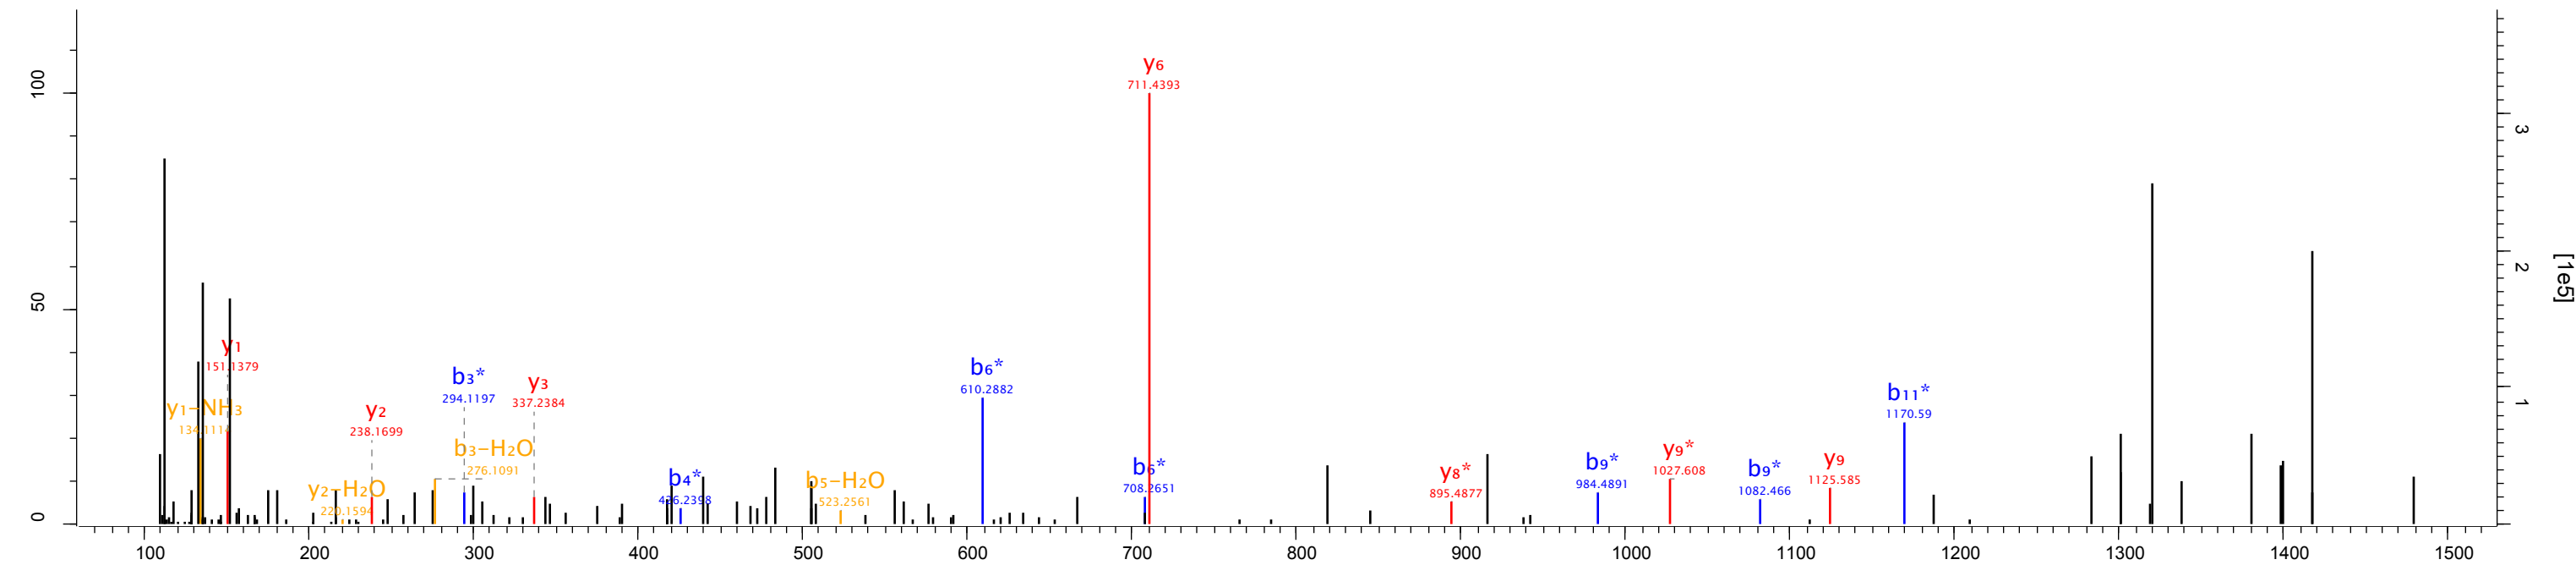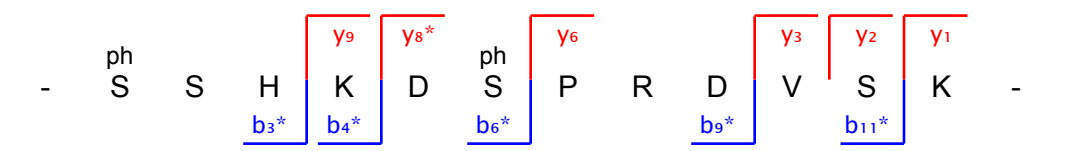

Raw file: 20150812\_A375SR\_Phospho\_BR1\_03  
 Scan: 18094 Method: FTMS; HCD Score: 113.97 m/z: 854.72 Gene names: FBXW9

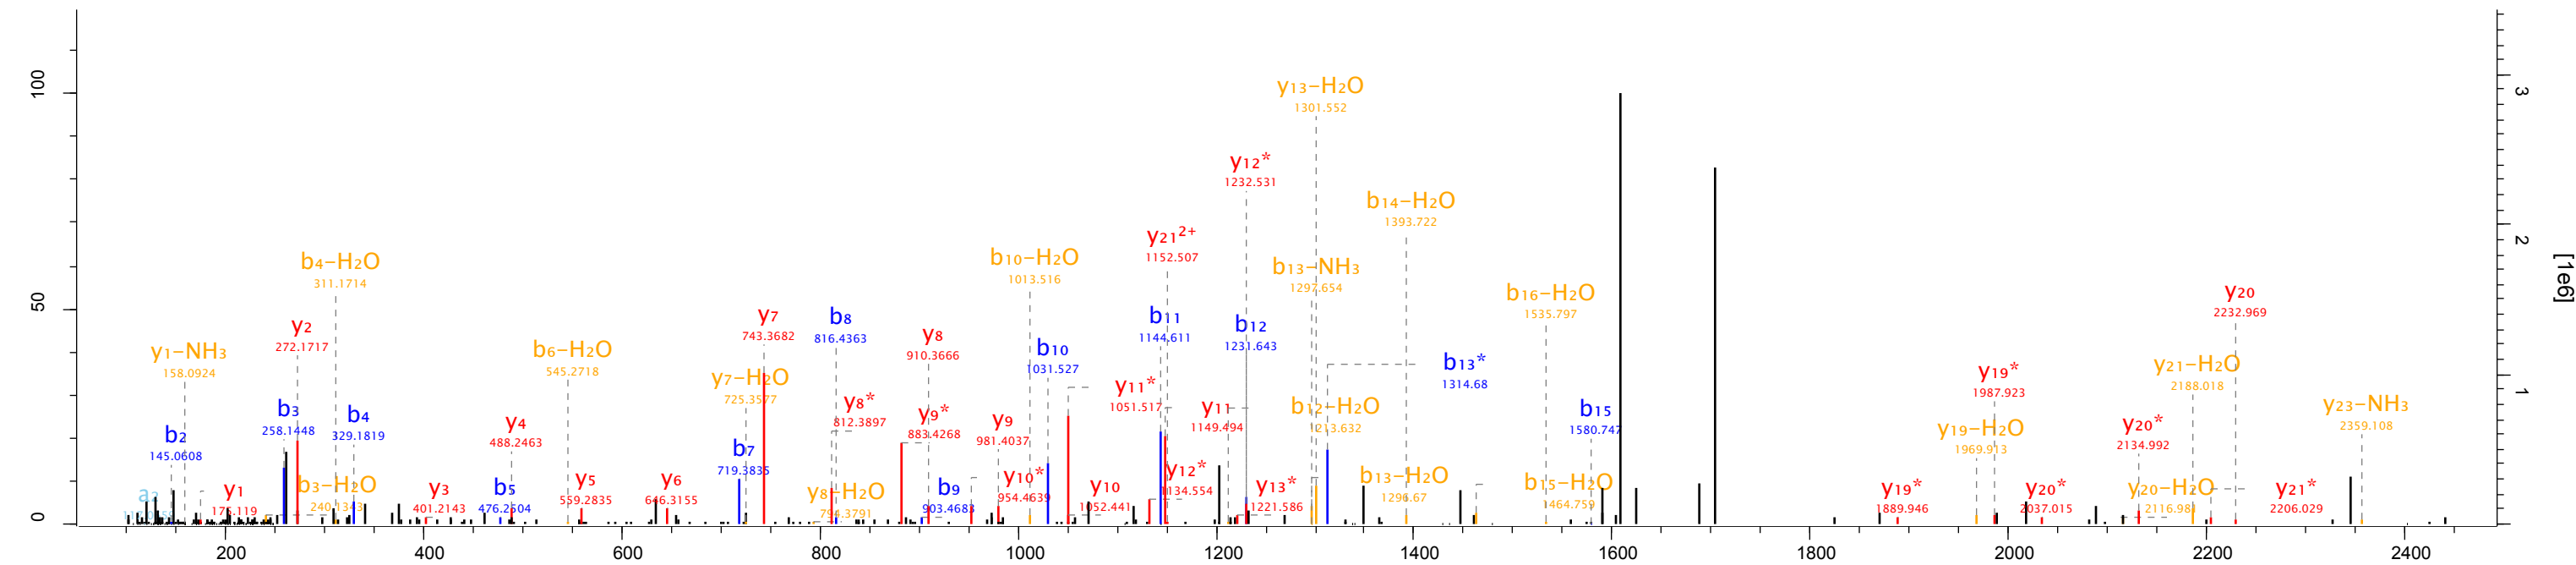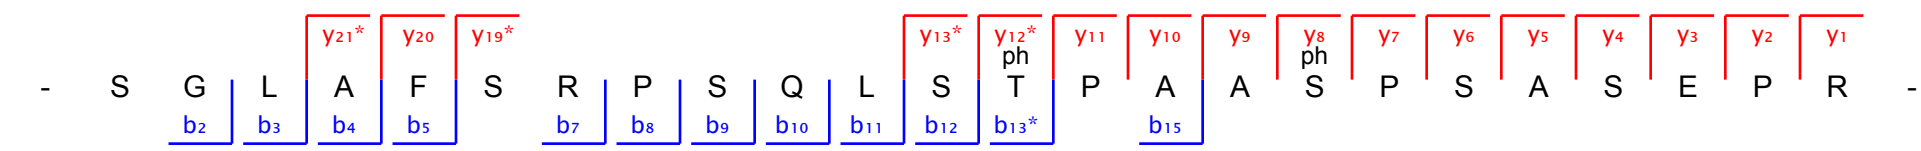

Raw file: 20150812\_A375SR\_Phospho\_BR1\_03  
 Scan: 18254 Method: FTMS; HCD Score: 200.52 m/z: 823.99 Gene names: KIAA0907

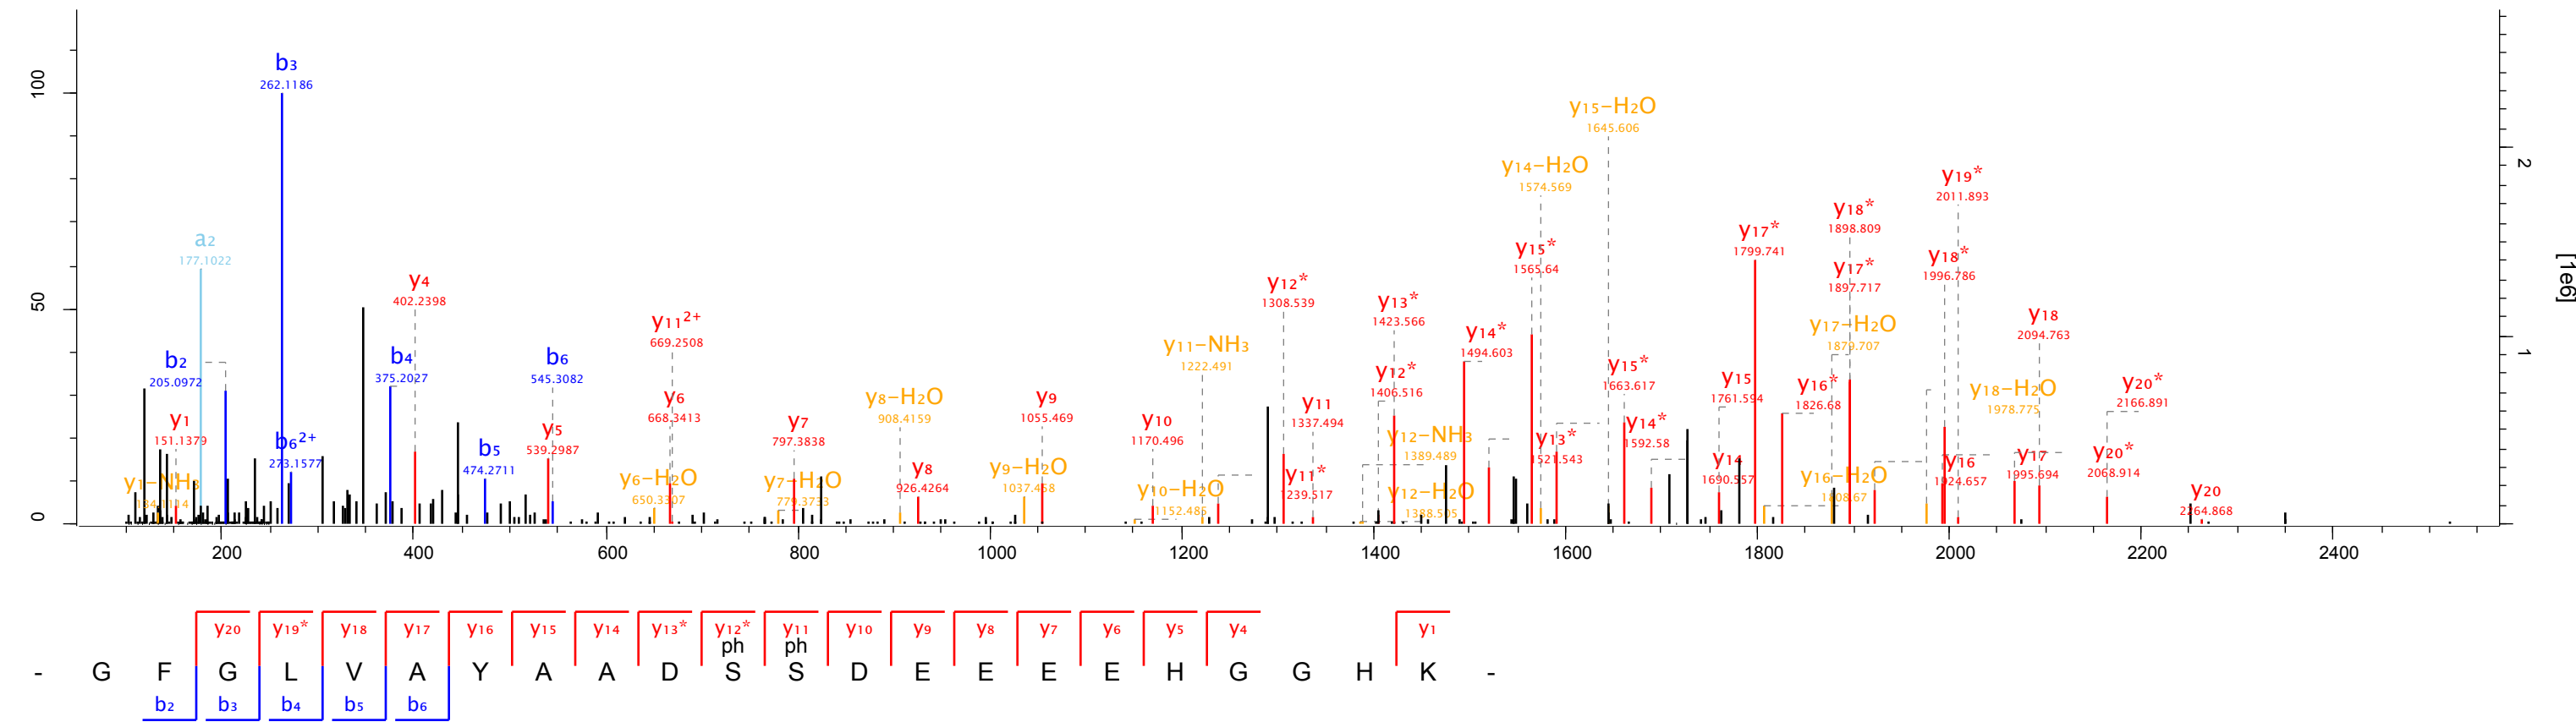



Raw file 20150812\_A375SR\_Phospho\_BR1\_03 Scan 18394 Method FTMS; HCD Score 141.37 m/z 661.76 Gene names KLC4

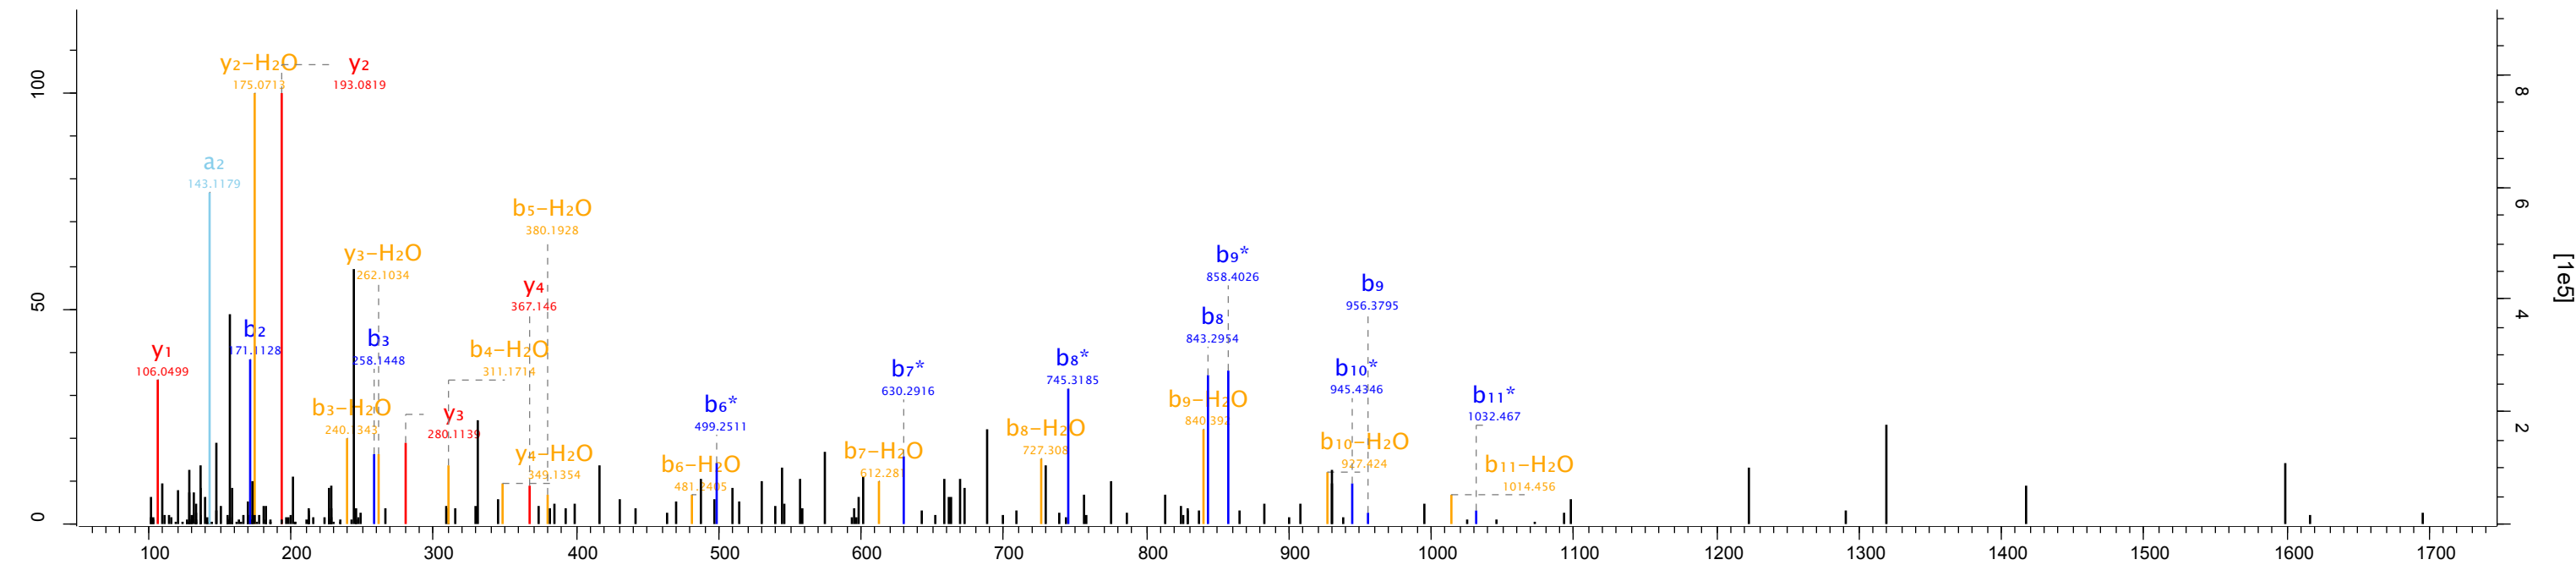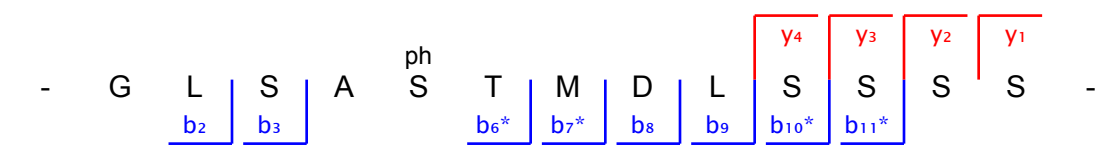

Raw file 20150812\_A375SR\_Phospho\_BR1\_03 Scan 18754 Method FTMS; HCD Score 320.33 m/z 1261.58 Gene names MAP1B

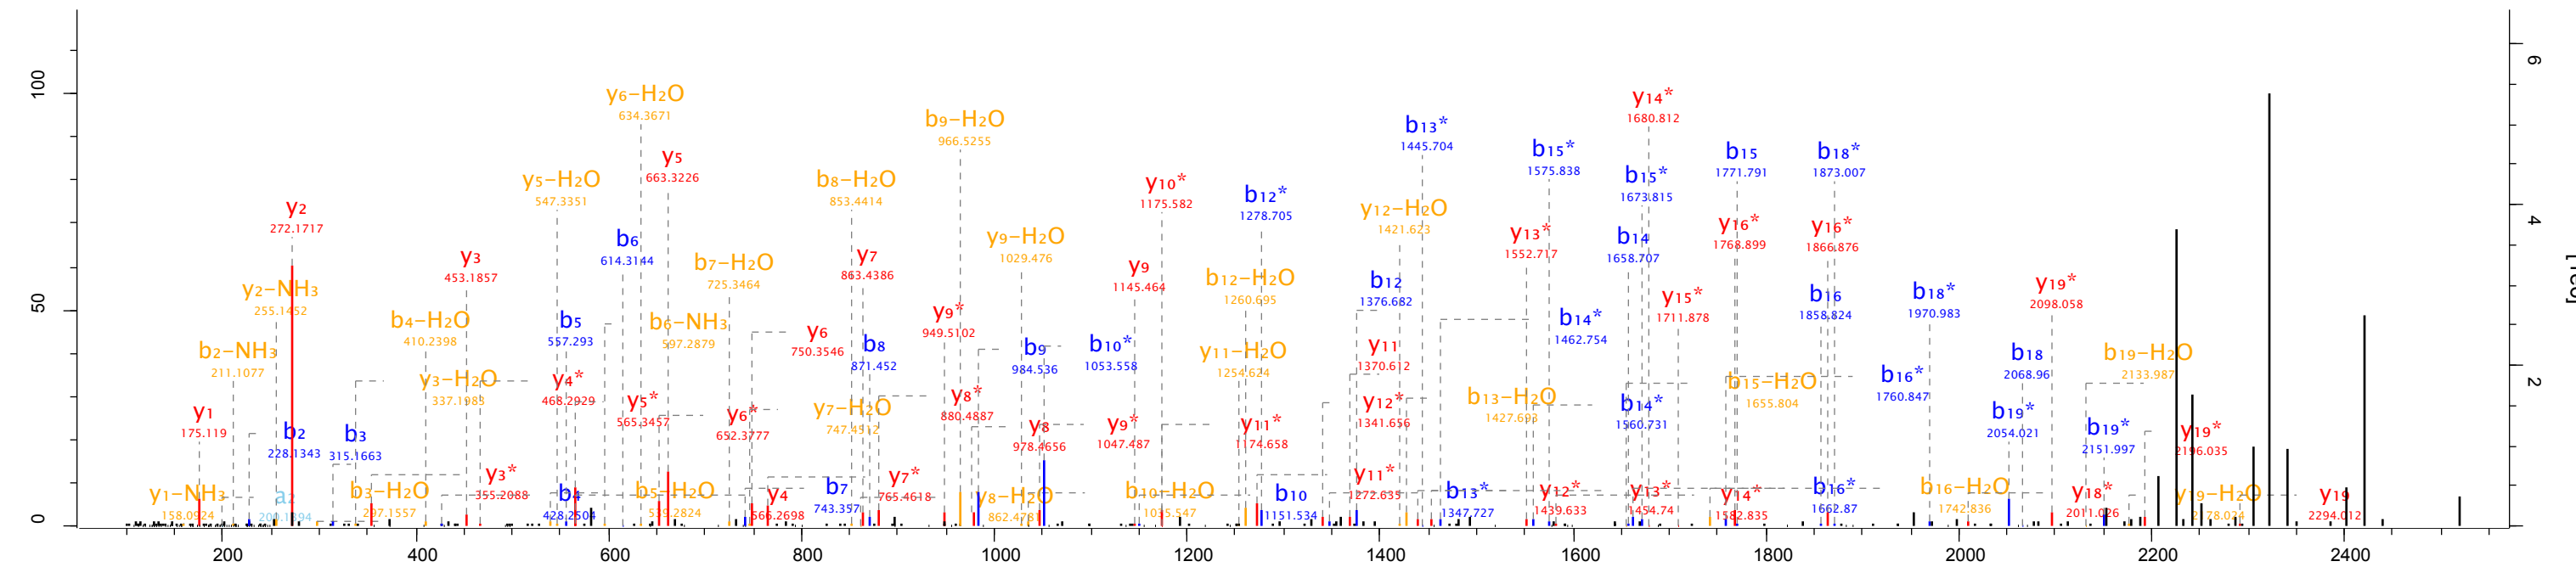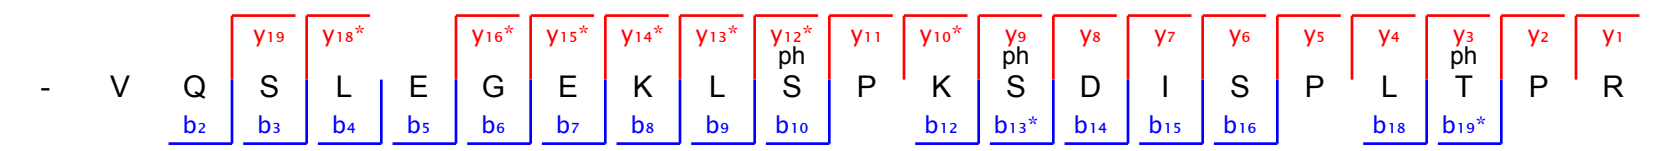

Raw file 20150812\_A375SR\_Phospho\_BR1\_03 Scan 18774 Method FTMS; HCD Score 115.78 m/z 1219.18 Gene names TRIM28

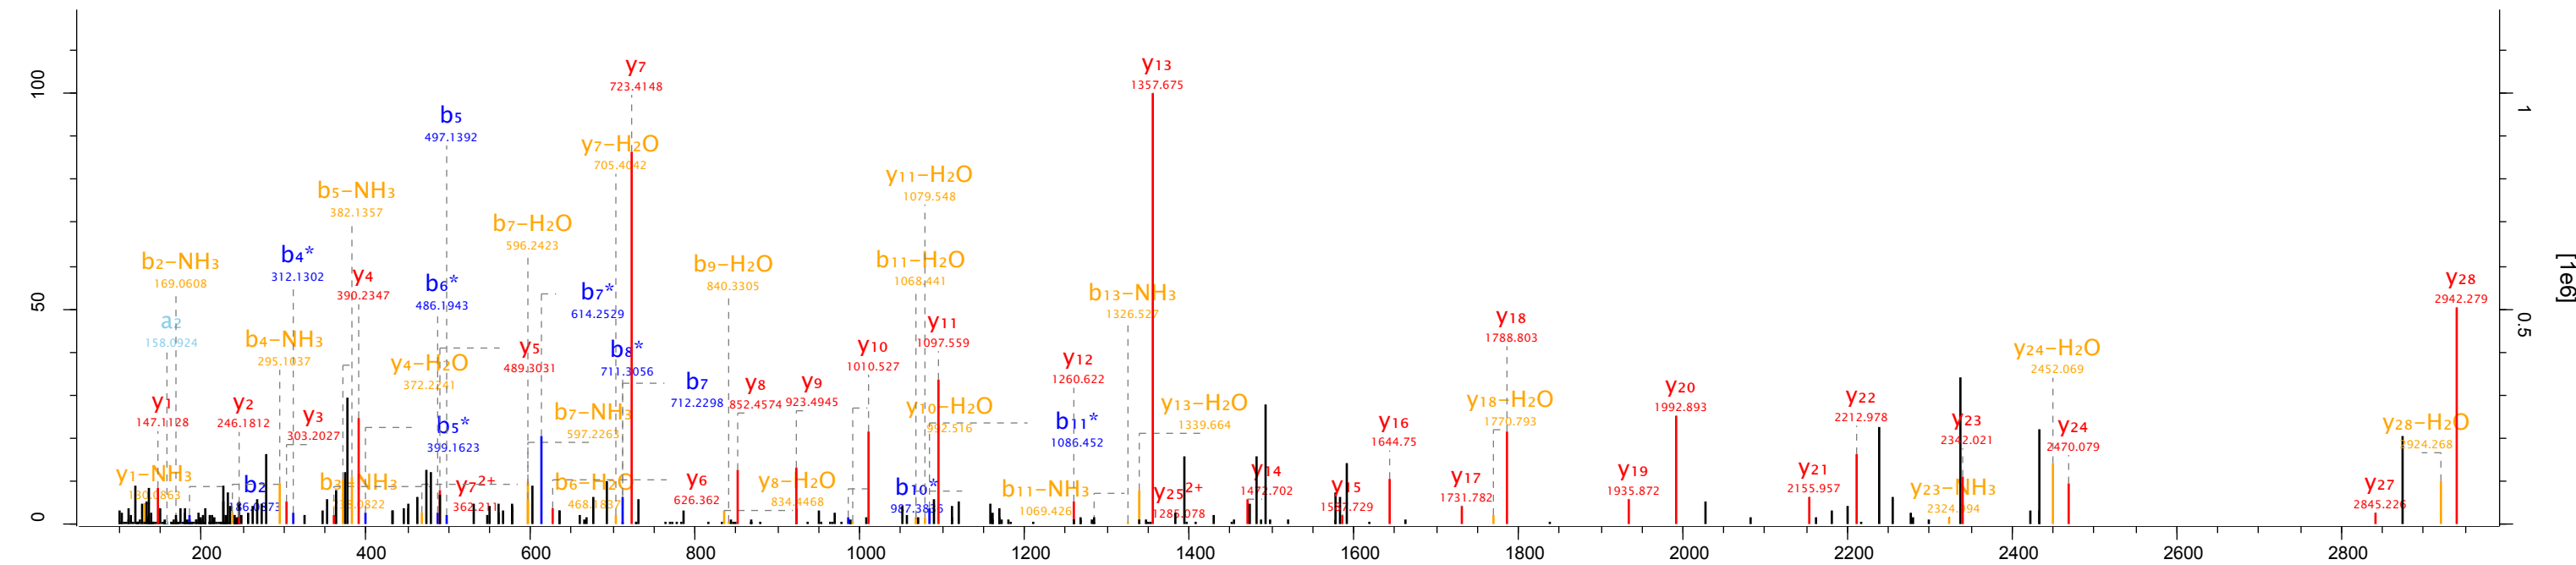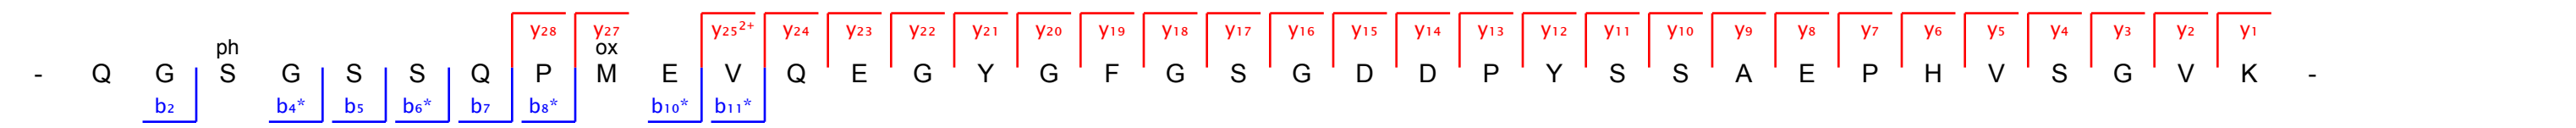

Raw file: 20150812\_A375SR\_Phospho\_BR1\_03  
 Scan: 18944 Method: FTMS; HCD Score: 147.49 m/z: 1429.11 Gene names: LARP1

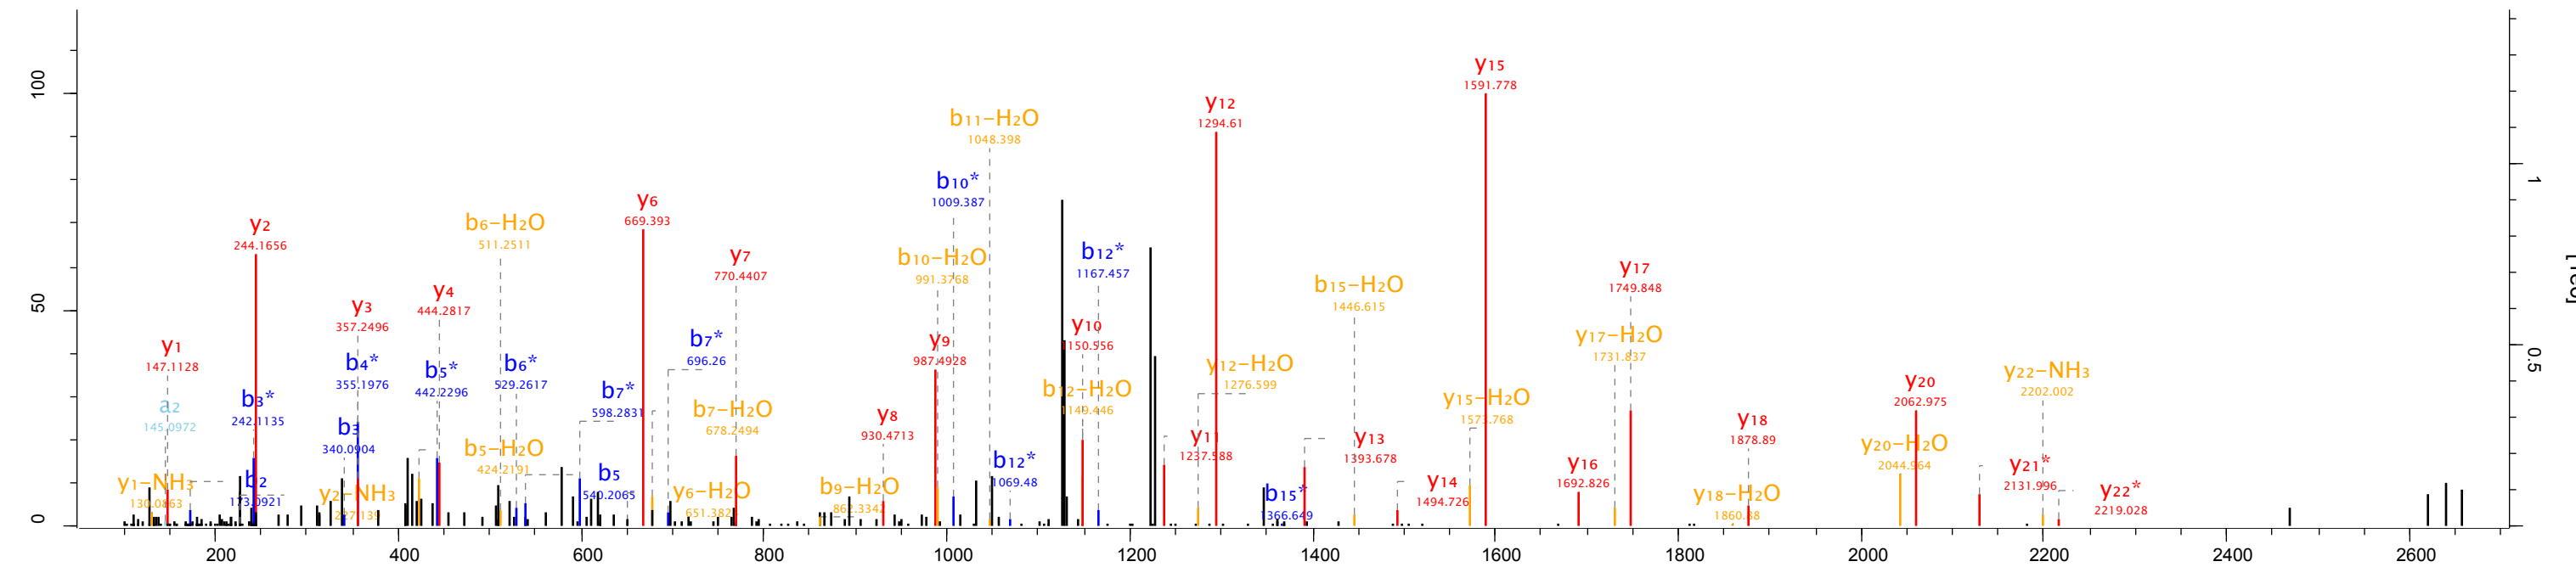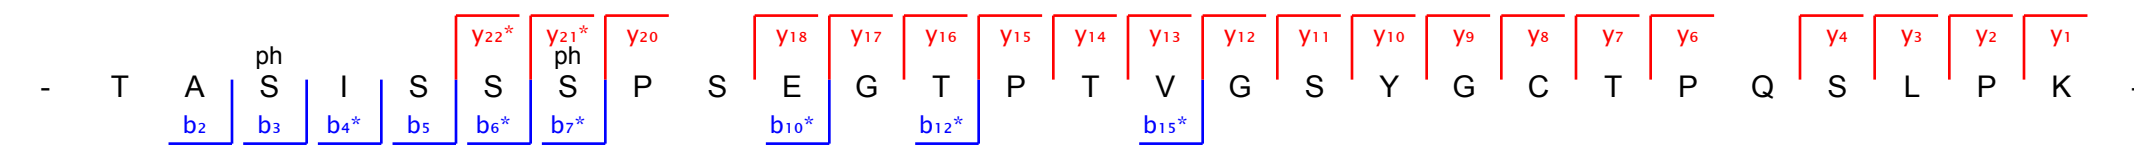

Raw file: 20150812\_A375SR\_Phospho\_BR1\_03  
 Scan: 19084 Method: FTMS; HCD Score: 70.36 m/z: 1011.76 Gene names: FOXK1

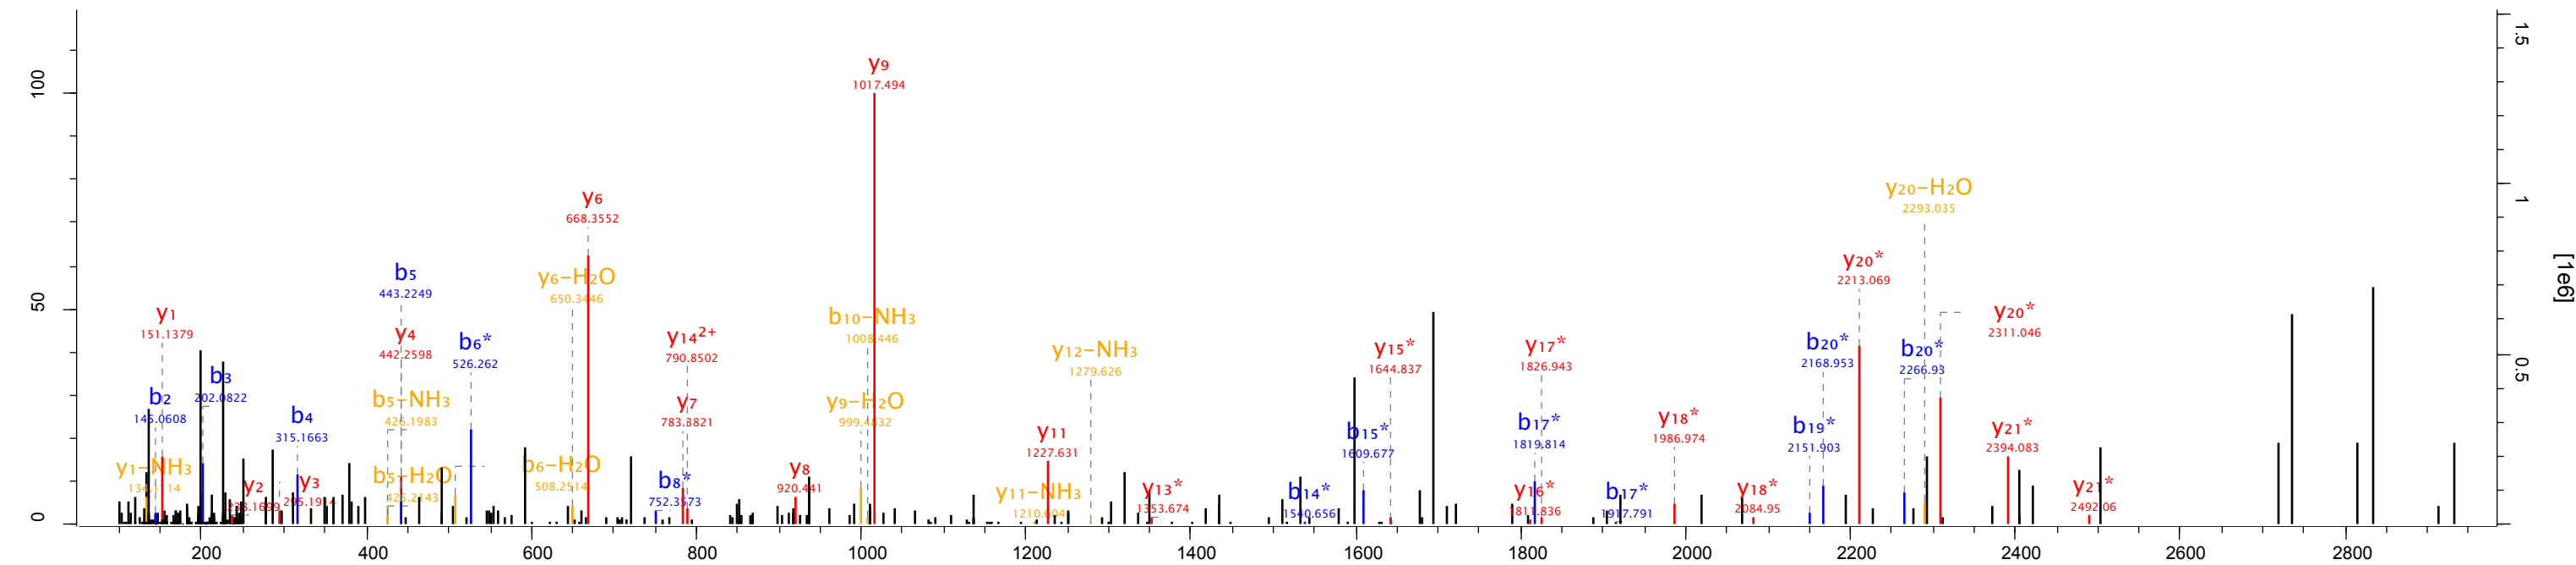

- S G G L Q T P E C L S R E G S P I P H D P E F G S K -

Fragmentation labels (b and y ions) are shown below the corresponding amino acids in the sequence:

- b<sub>2</sub> (under G), b<sub>3</sub> (under G), b<sub>4</sub> (under L), b<sub>5</sub> (under Q), b<sub>6</sub><sup>\*</sup> (under T), b<sub>8</sub><sup>\*</sup> (under E), b<sub>14</sub><sup>\*</sup> (under G), b<sub>15</sub><sup>\*</sup> (under S), b<sub>17</sub><sup>\*</sup> (under I), b<sub>19</sub><sup>\*</sup> (under H), b<sub>20</sub><sup>\*</sup> (under D)
- y<sub>1</sub> (under K), y<sub>2</sub> (under S), y<sub>3</sub> (under G), y<sub>4</sub> (under F), y<sub>6</sub> (under P), y<sub>7</sub> (under D), y<sub>8</sub> (under H), y<sub>9</sub> (under P), y<sub>11</sub> (under S), y<sub>13</sub><sup>\*</sup> (under G), y<sub>14</sub><sup>2+</sup> (under E), y<sub>15</sub><sup>\*</sup> (under R), y<sub>16</sub><sup>\*</sup> (under S), y<sub>17</sub><sup>\*</sup> (under L), y<sub>18</sub><sup>\*</sup> (under C), y<sub>21</sub><sup>\*</sup> (under T), y<sub>20</sub><sup>\*</sup> (under P)

Raw file: 20150812\_A375SR\_Phospho\_BR1\_03  
 Scan: 19324 Method: FTMS; HCD Score: 154.77 m/z: 1101.43 Gene names: KPNA3

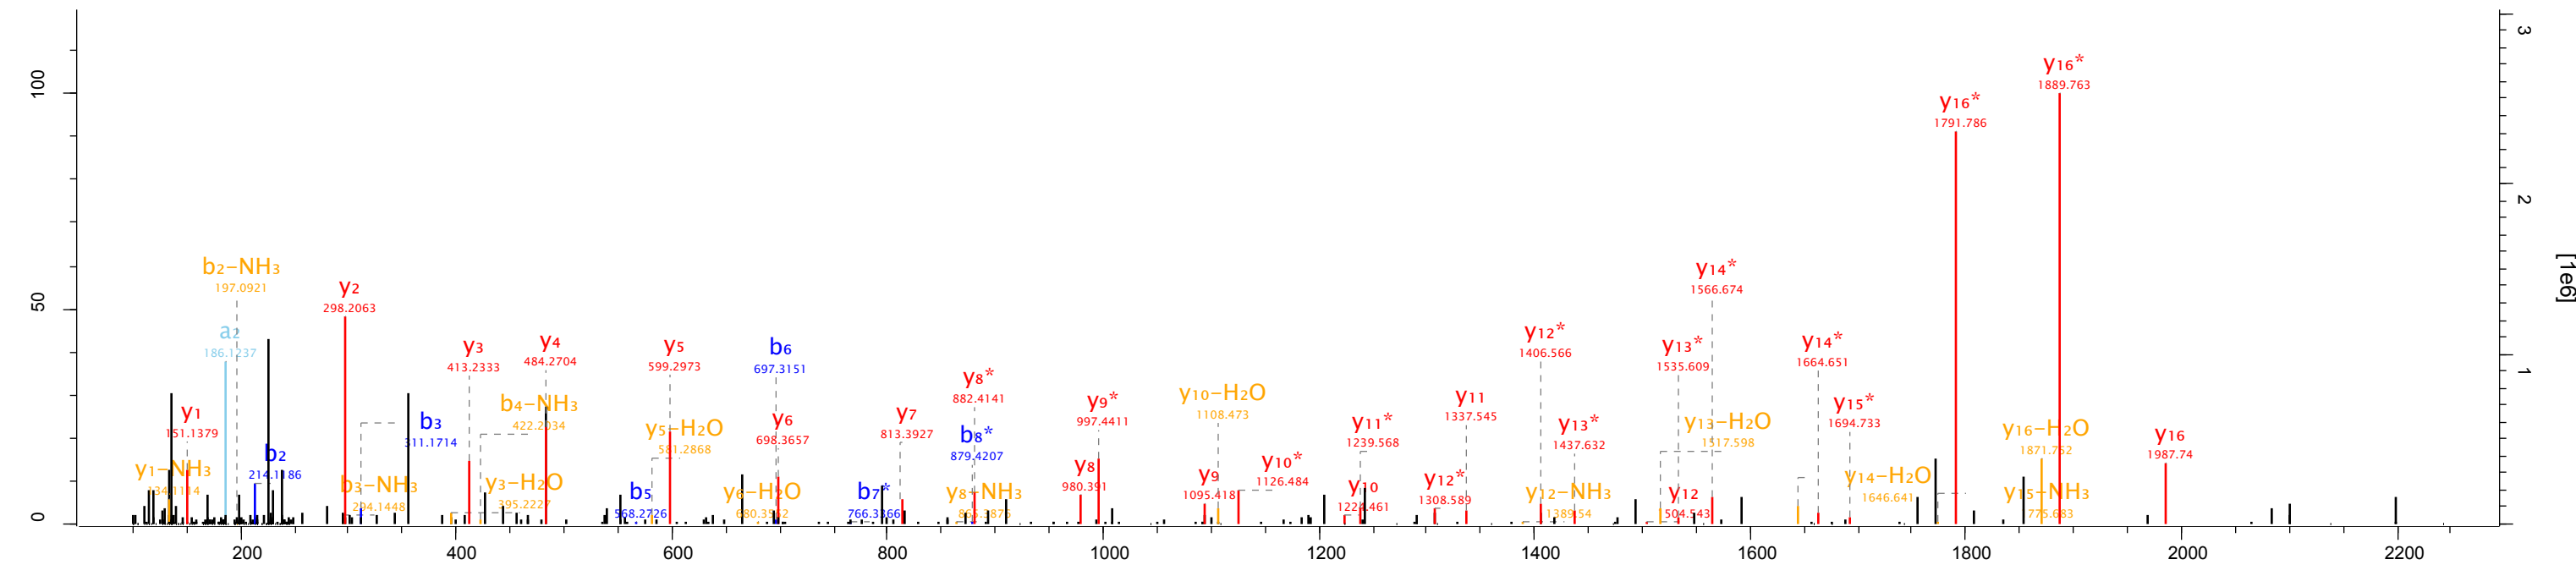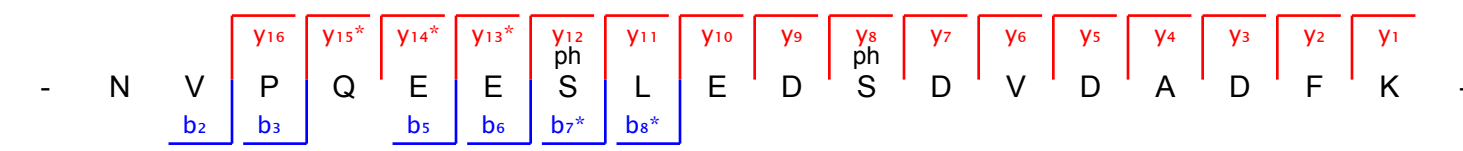

Raw file: 20150812\_A375SR\_Phospho\_BR1\_03  
 Scan: 19364 Method: FTMS; HCD Score: 200.68 m/z: 971.42 Gene names: MYO18A

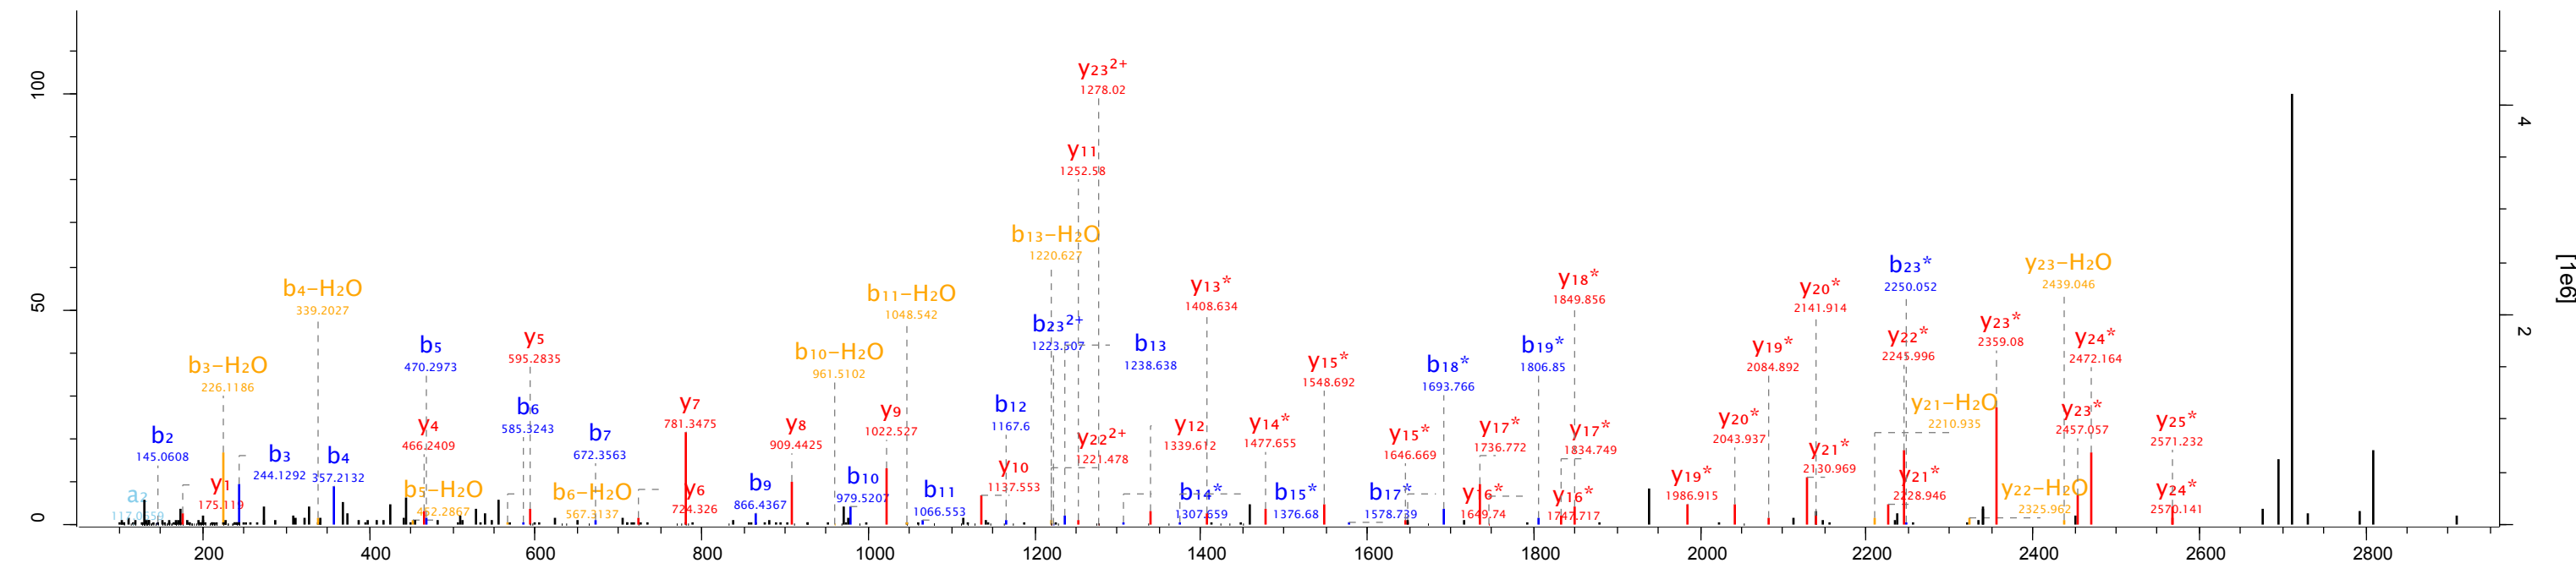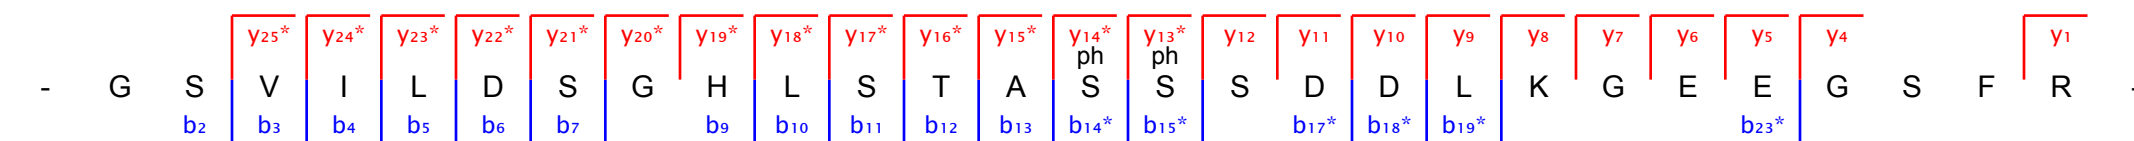

Raw file: 20150812\_A375SR\_Phospho\_BR1\_03  
 Scan: 19374 Method: FTMS; HCD Score: 222.42 m/z: 1113.48 Gene names: SEC31A

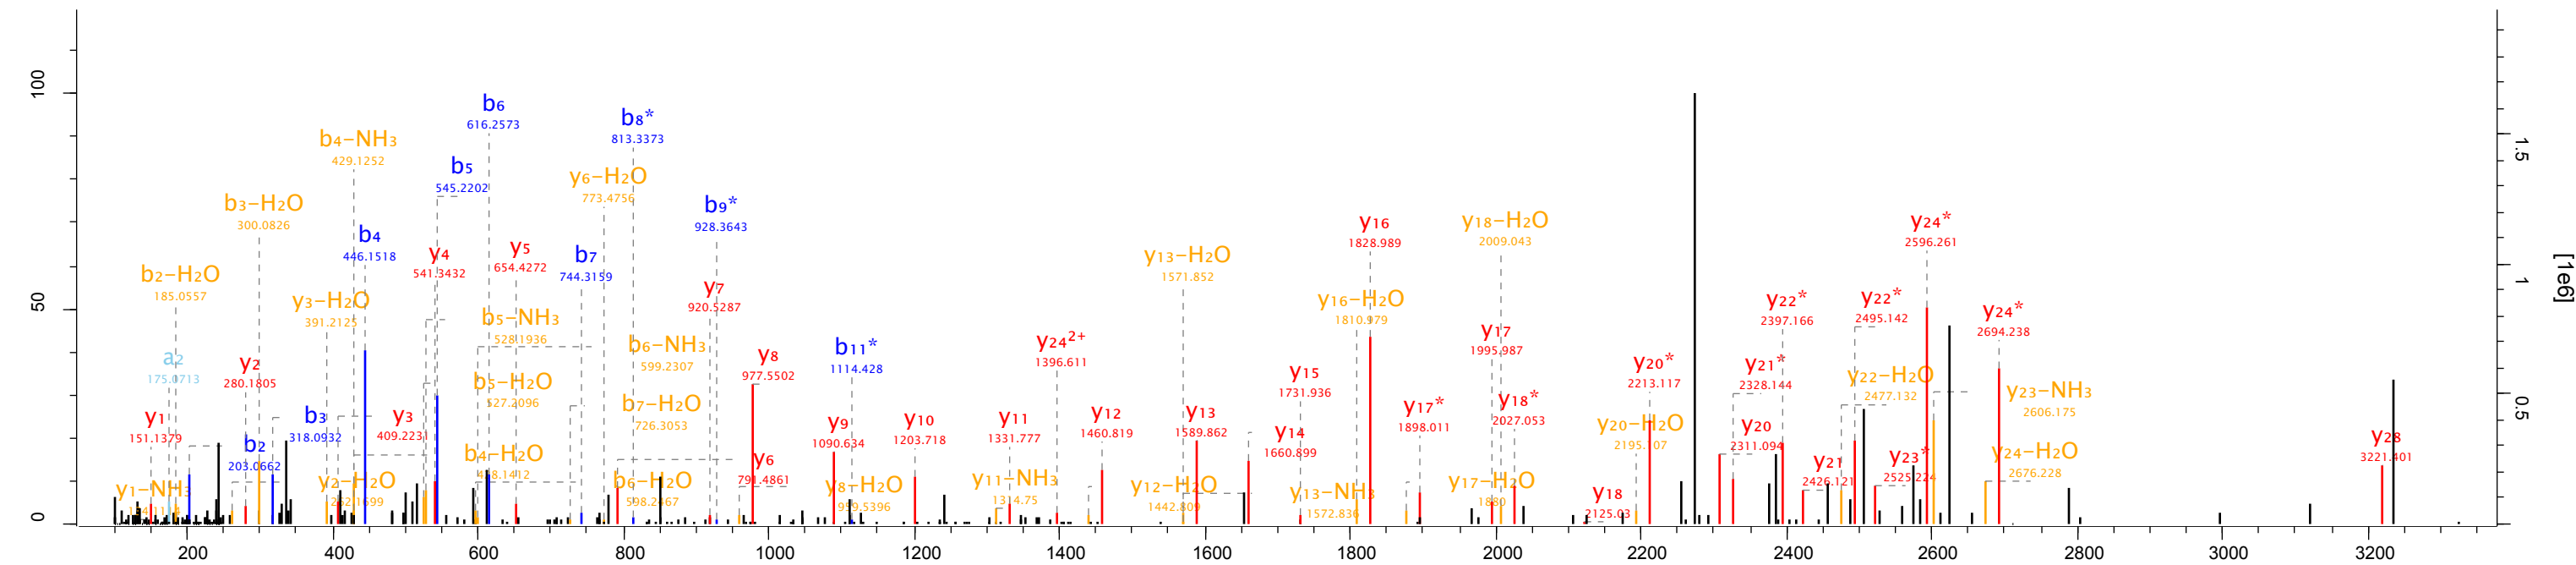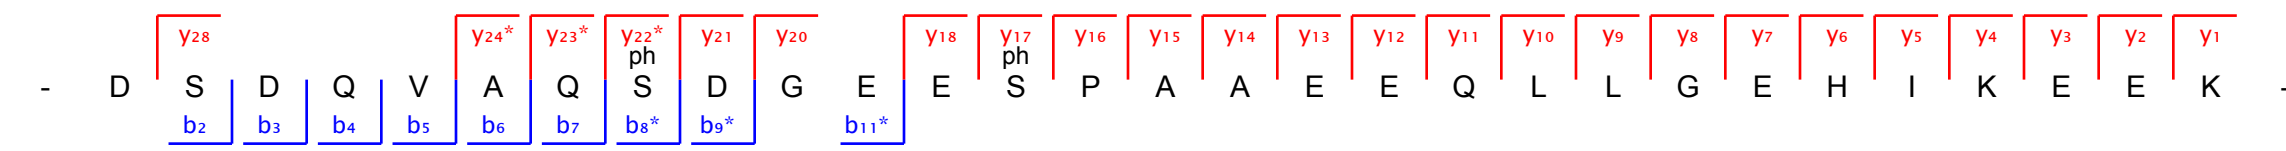



Raw file 20150812\_A375SR\_Phospho\_BR1\_03 Scan 19514 Method FTMS; HCD Score 296.97 m/z 1372.1 Gene names TMPO

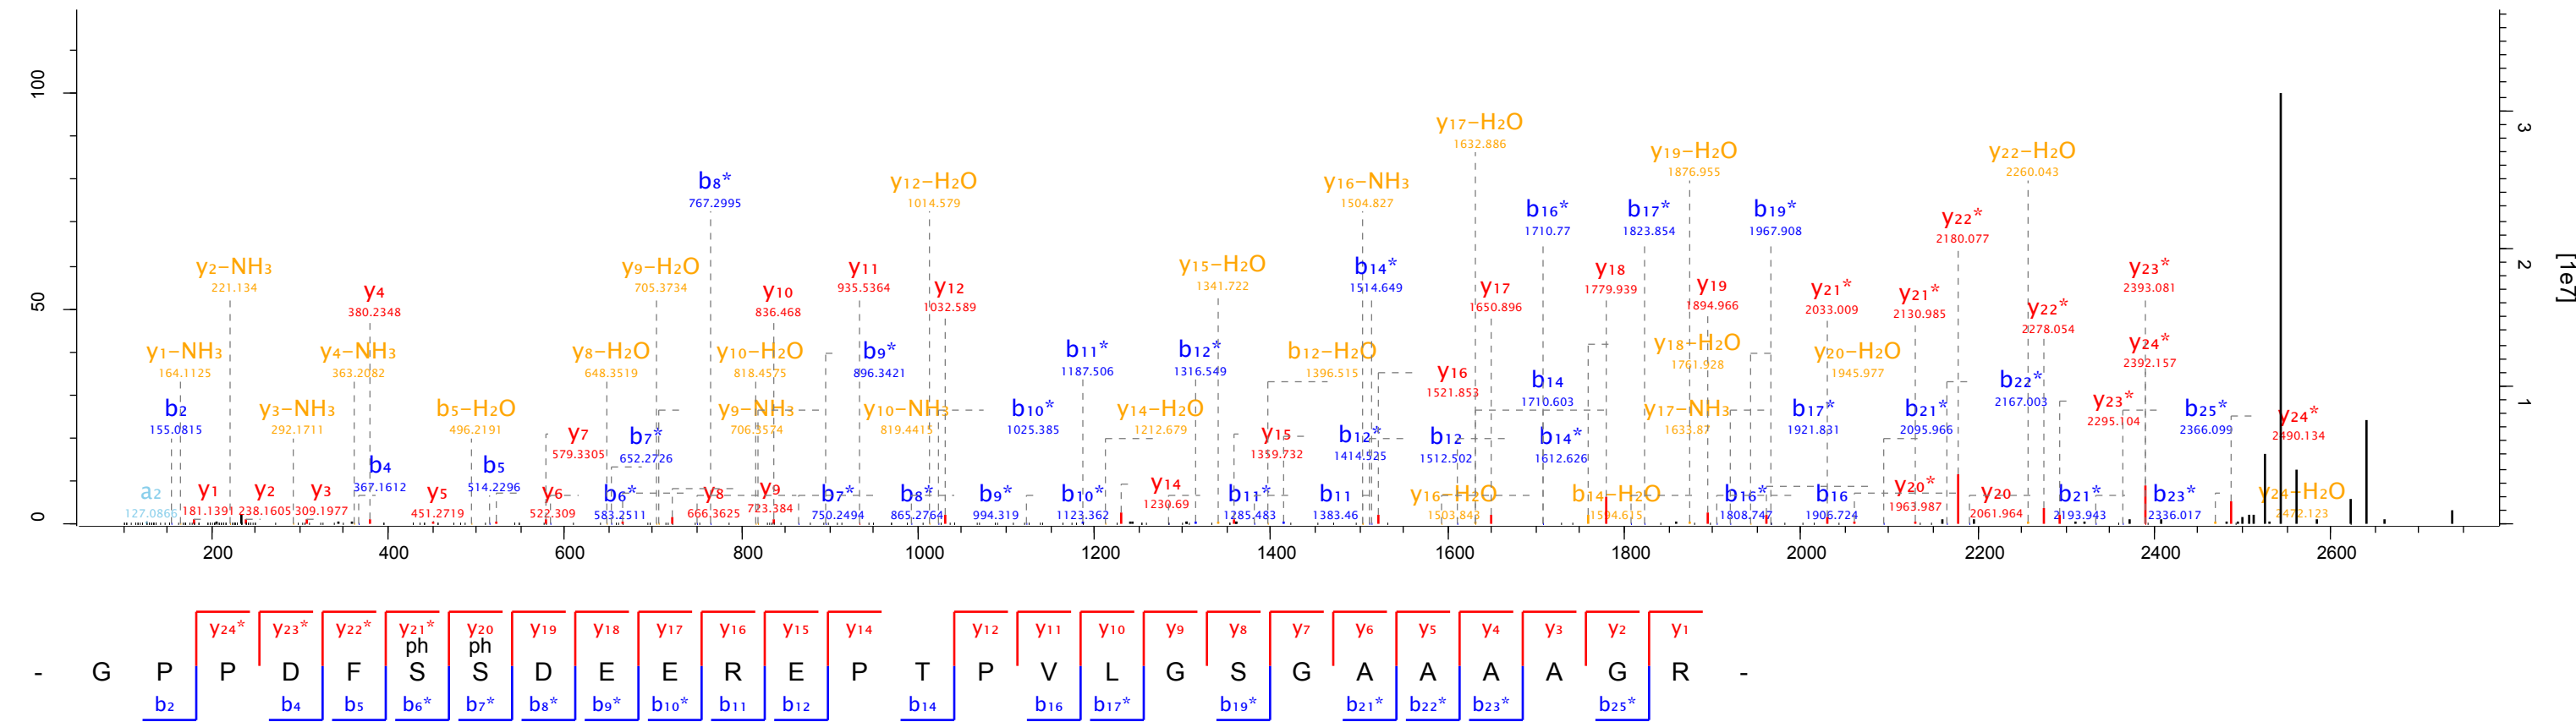

Raw file Scan Method Score m/z  
 20150812\_A375SR\_Phospho\_BR1\_03 19604 FTMS; HCD 102.28 554.24

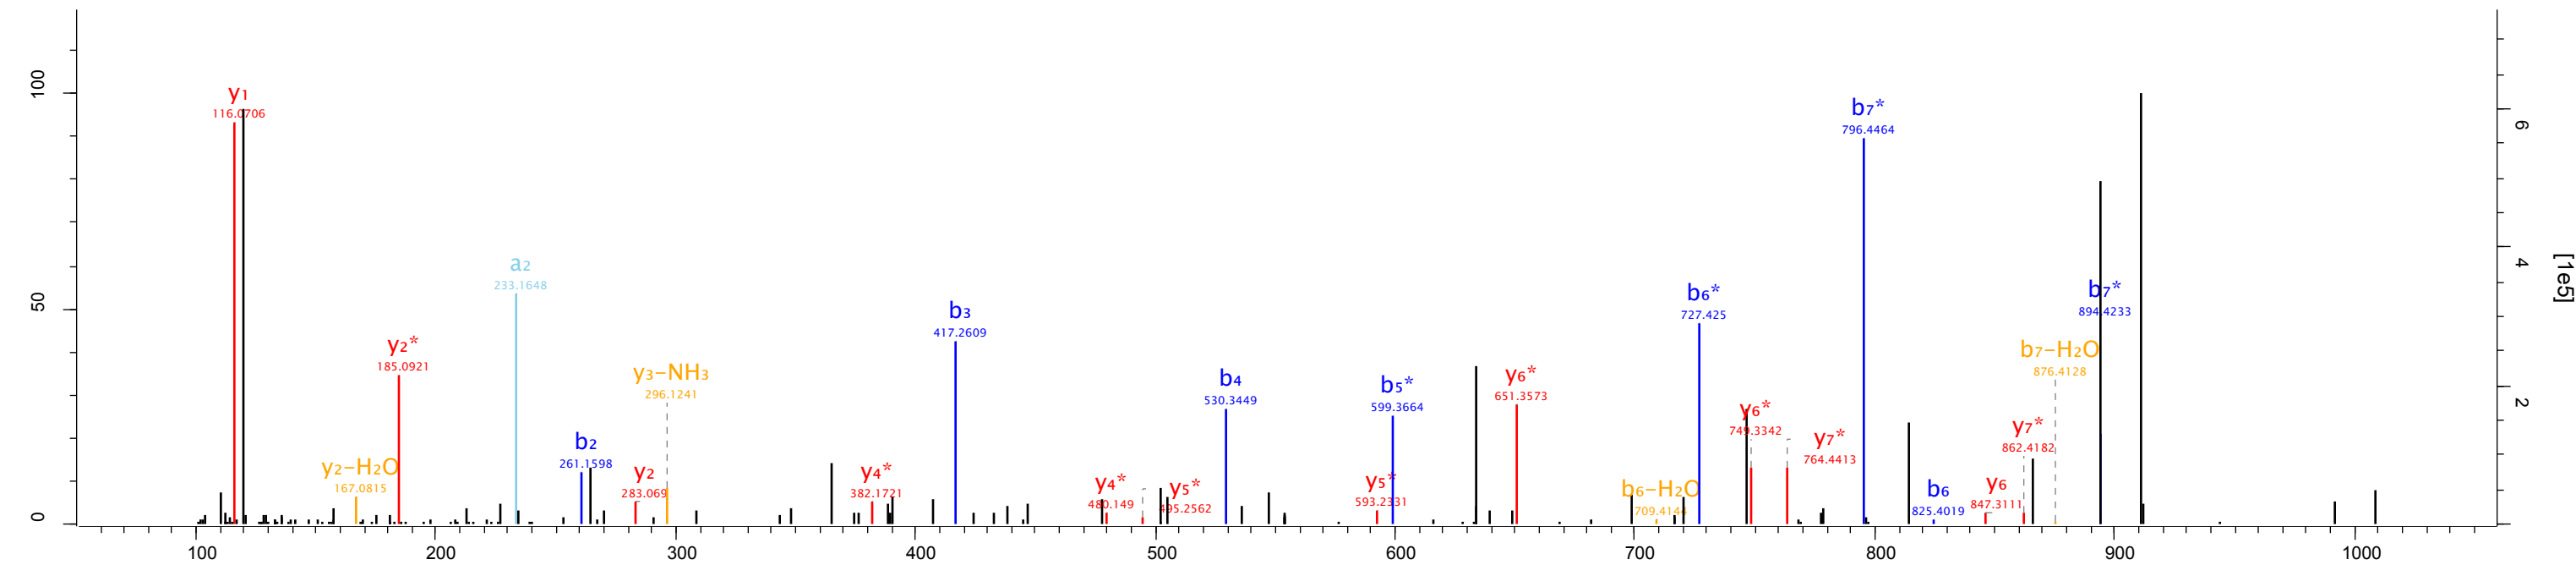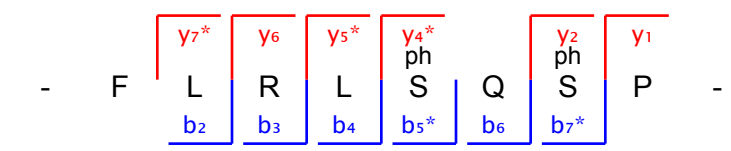

Raw file: 20150812\_A375SR\_Phospho\_BR1\_03  
 Scan: 19714 Method: FTMS; HCD Score: 180.84 m/z: 925.93 Gene names: RALGPS2

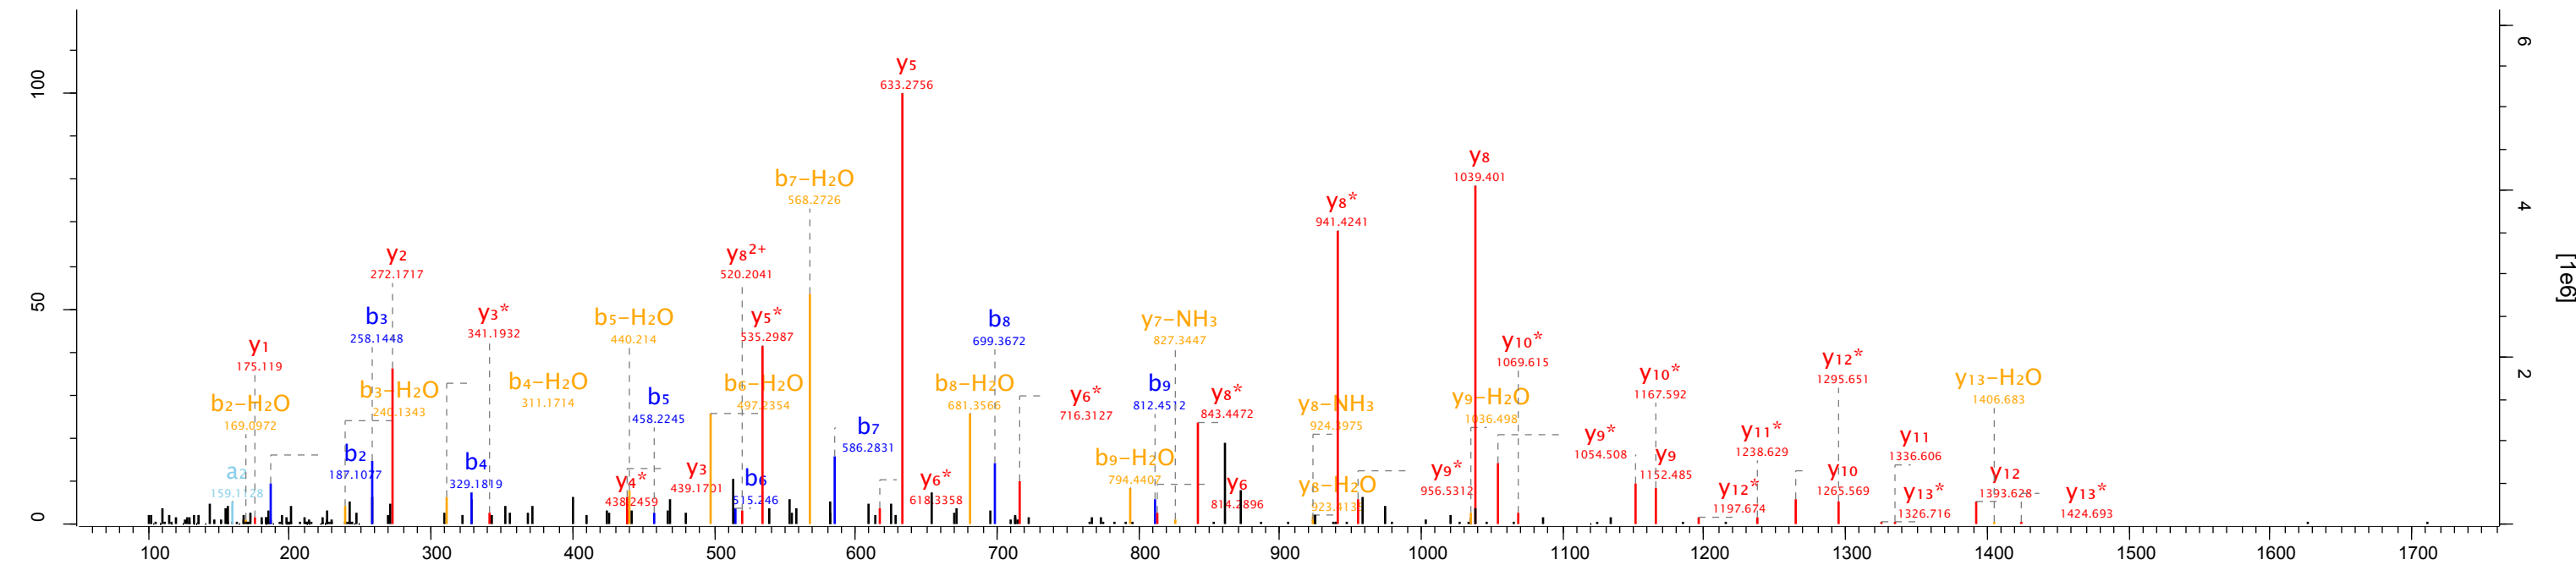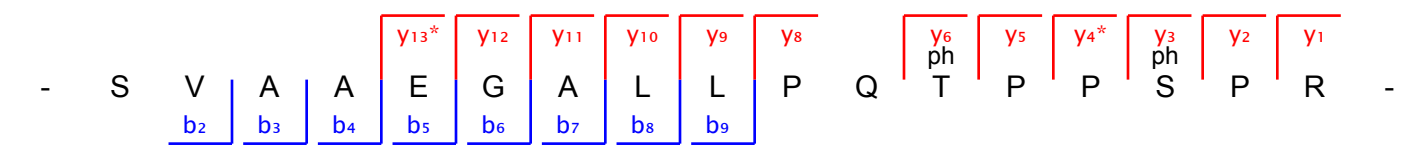

Raw file: 20150812\_A375SR\_Phospho\_BR1\_03  
 Scan: 19884 Method: FTMS; HCD Score: 93.48 m/z: 657.77 Gene names: AHNAK

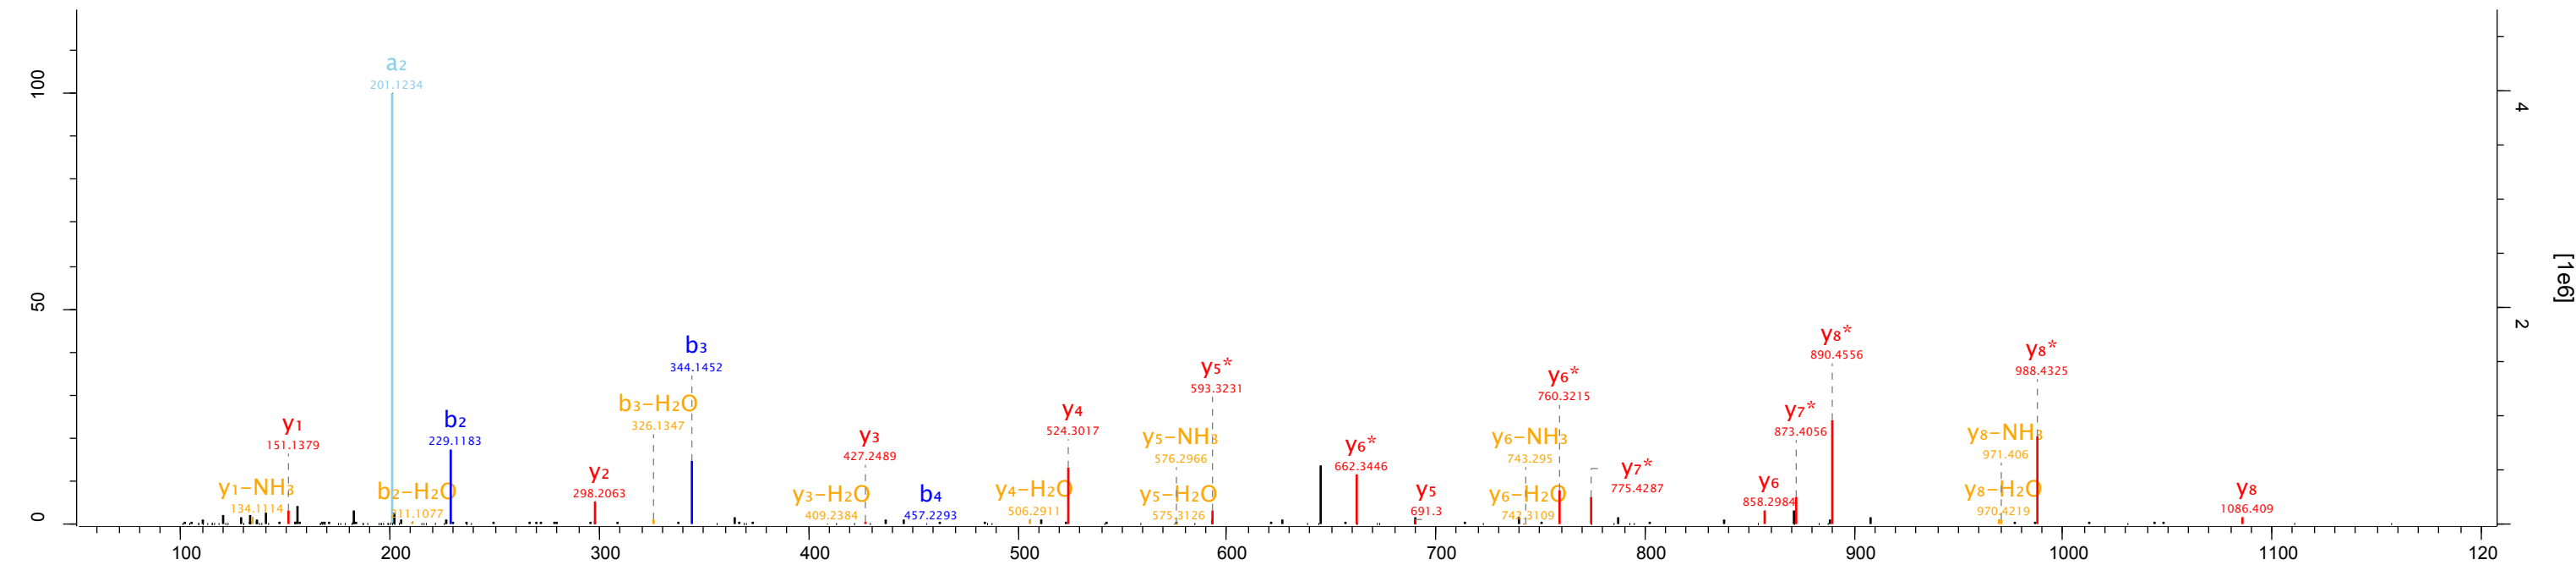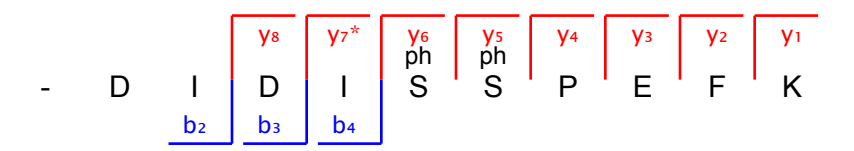

Raw file 20150812\_A375SR\_Phospho\_BR1\_03 Scan 20084 Method FTMS; HCD Score 148.11 m/z 1090.53 Gene names PRCC

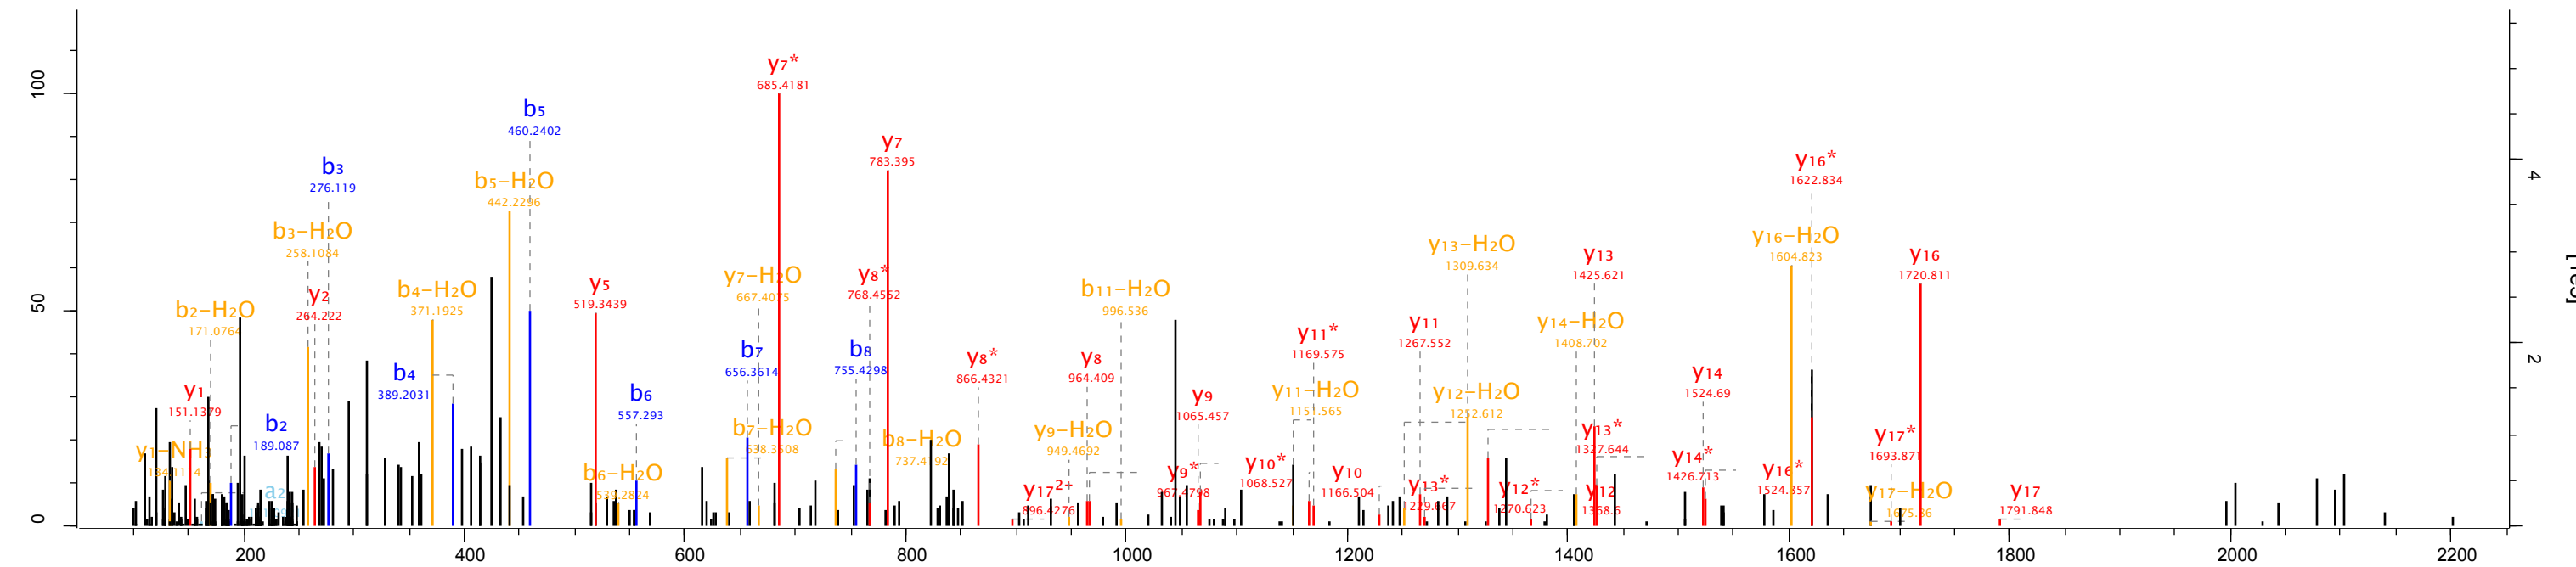

- T S S L A P V V G T T T T T T P S P S A I K -

b<sub>2</sub>
b<sub>3</sub>
b<sub>4</sub>
b<sub>5</sub>
b<sub>6</sub>
b<sub>7</sub>
b<sub>8</sub>
y<sub>17</sub>
y<sub>16</sub>
y<sub>14</sub>
y<sub>13</sub>
y<sub>12</sub>
y<sub>11</sub>
y<sub>10</sub>
y<sub>9</sub>
y<sub>8</sub>
y<sub>7</sub>
y<sub>5</sub>
y<sub>2</sub>
y<sub>1</sub>

Raw file: 20150812\_A375SR\_Phospho\_BR1\_03  
 Scan: 20454 Method: FTMS; HCD Score: 210.94 m/z: 1097.73 Gene names: DDX41

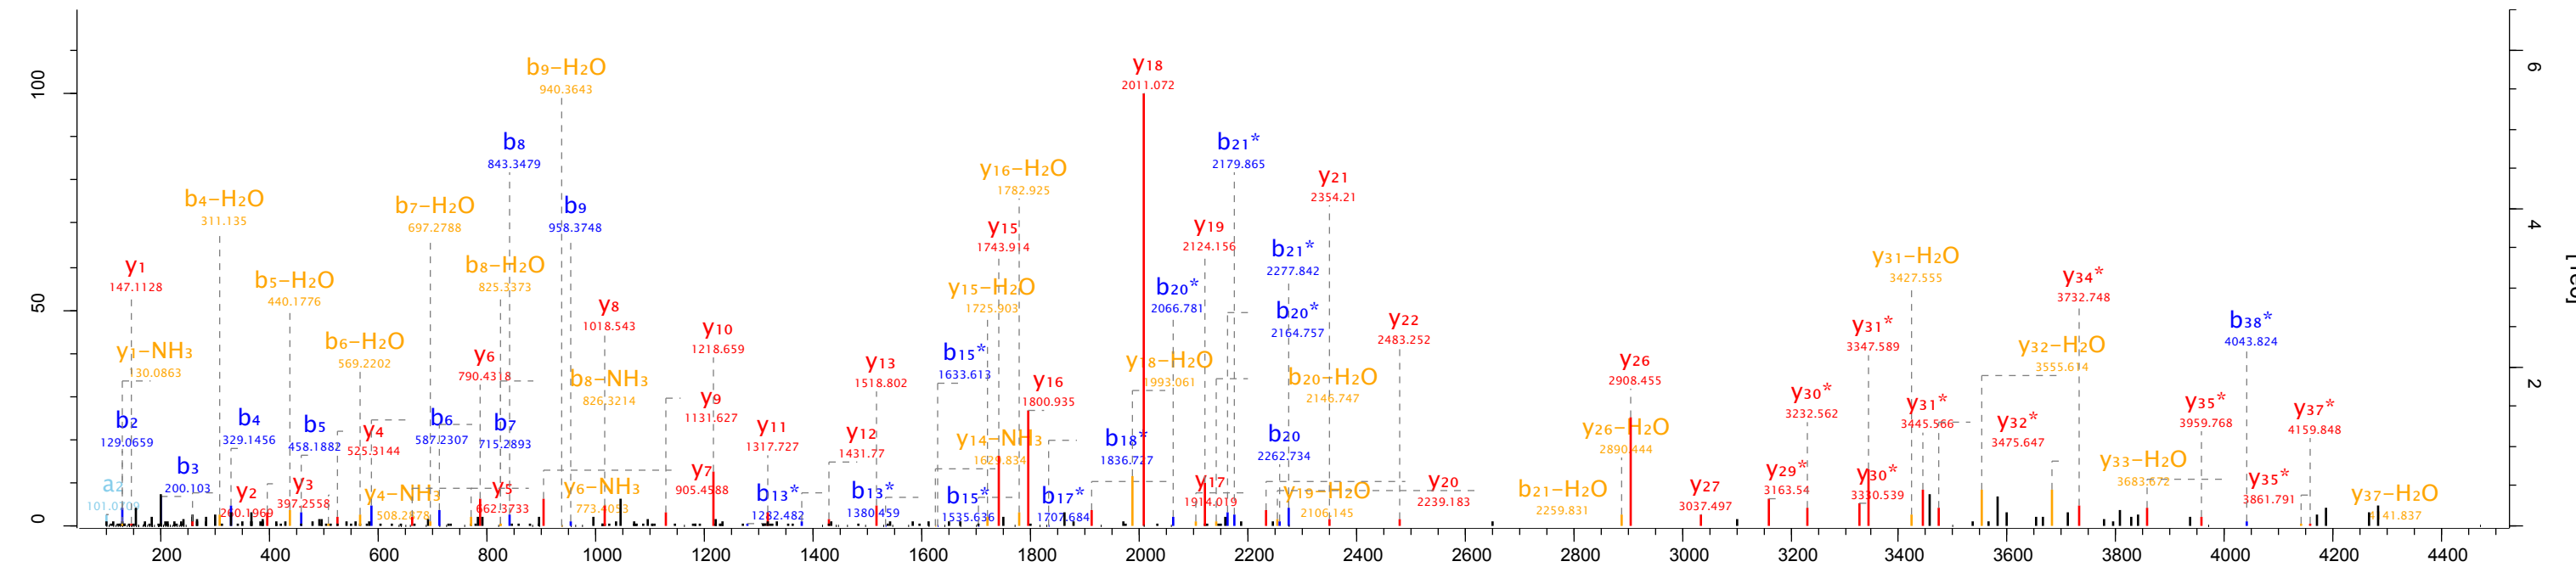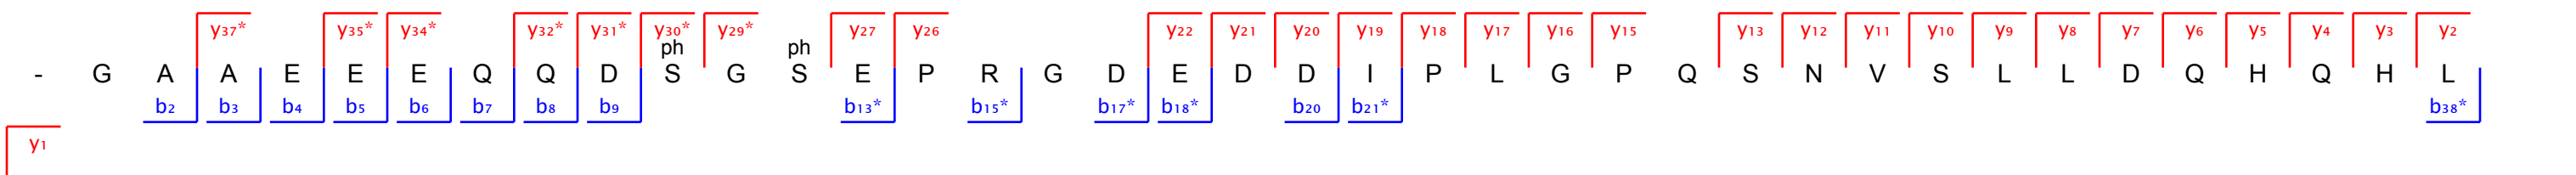

Raw file: 20150812\_A375SR\_Phospho\_BR1\_03  
 Scan: 20754 Method: FTMS; HCD Score: 216.34 m/z: 899.4 Gene names: C9orf16

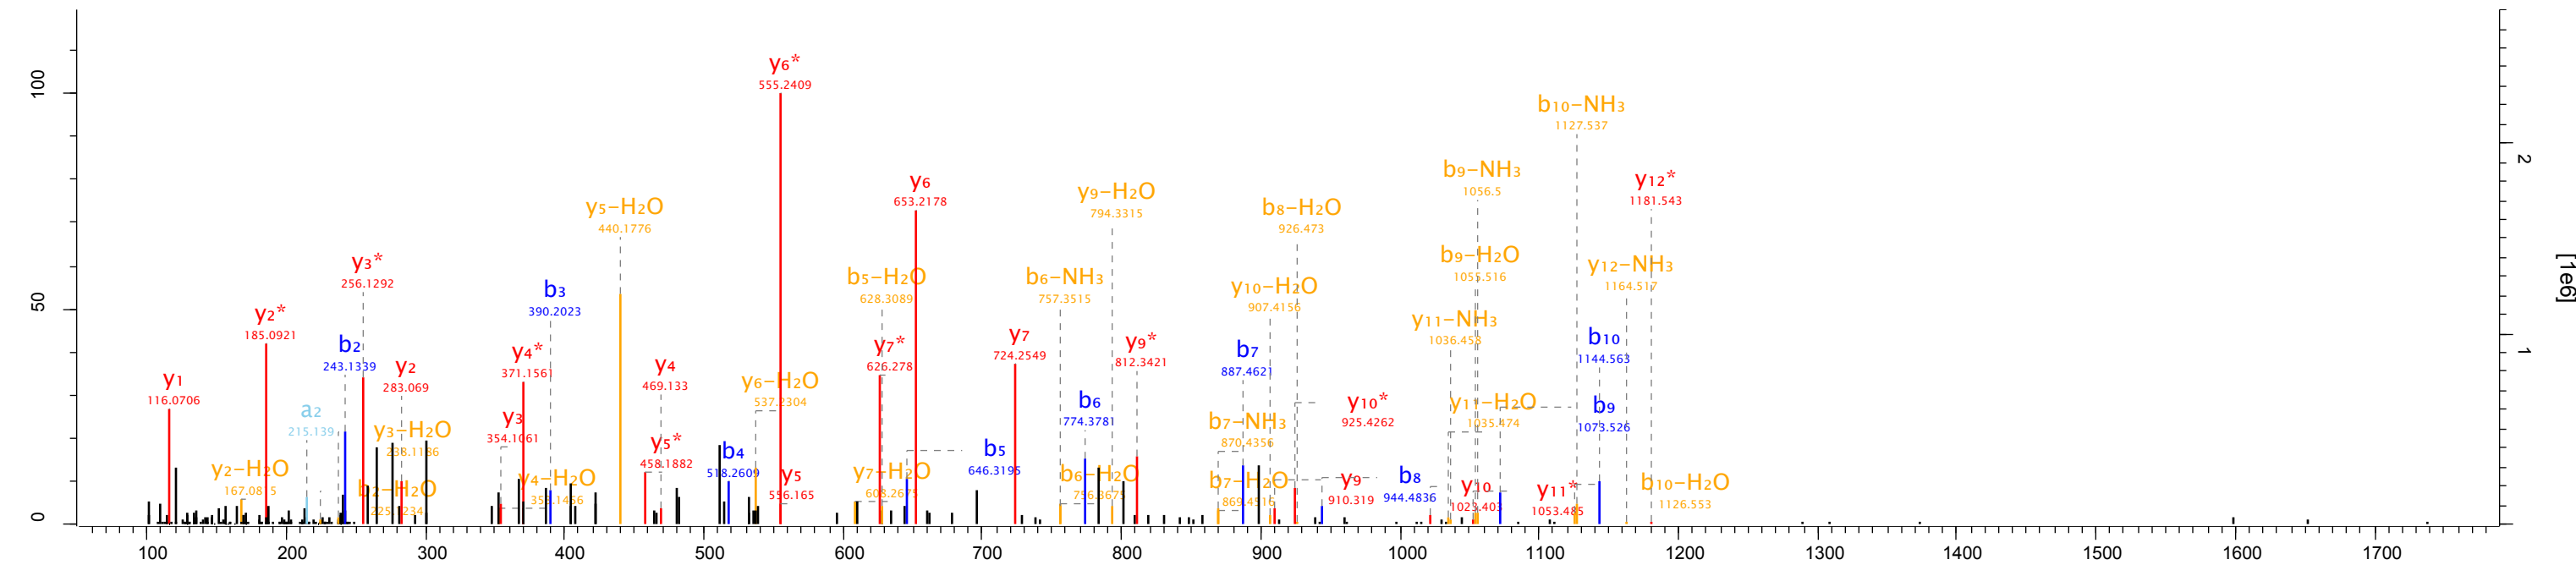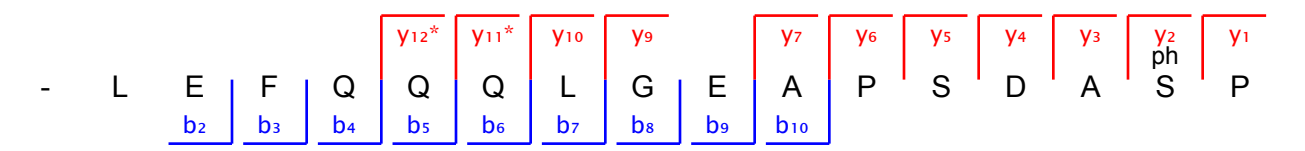

Raw file: 20150812\_A375SR\_Phospho\_BR1\_03  
 Scan: 20824 Method: FTMS; HCD Score: 268.75 m/z: 1143.06 Gene names: AHNAK

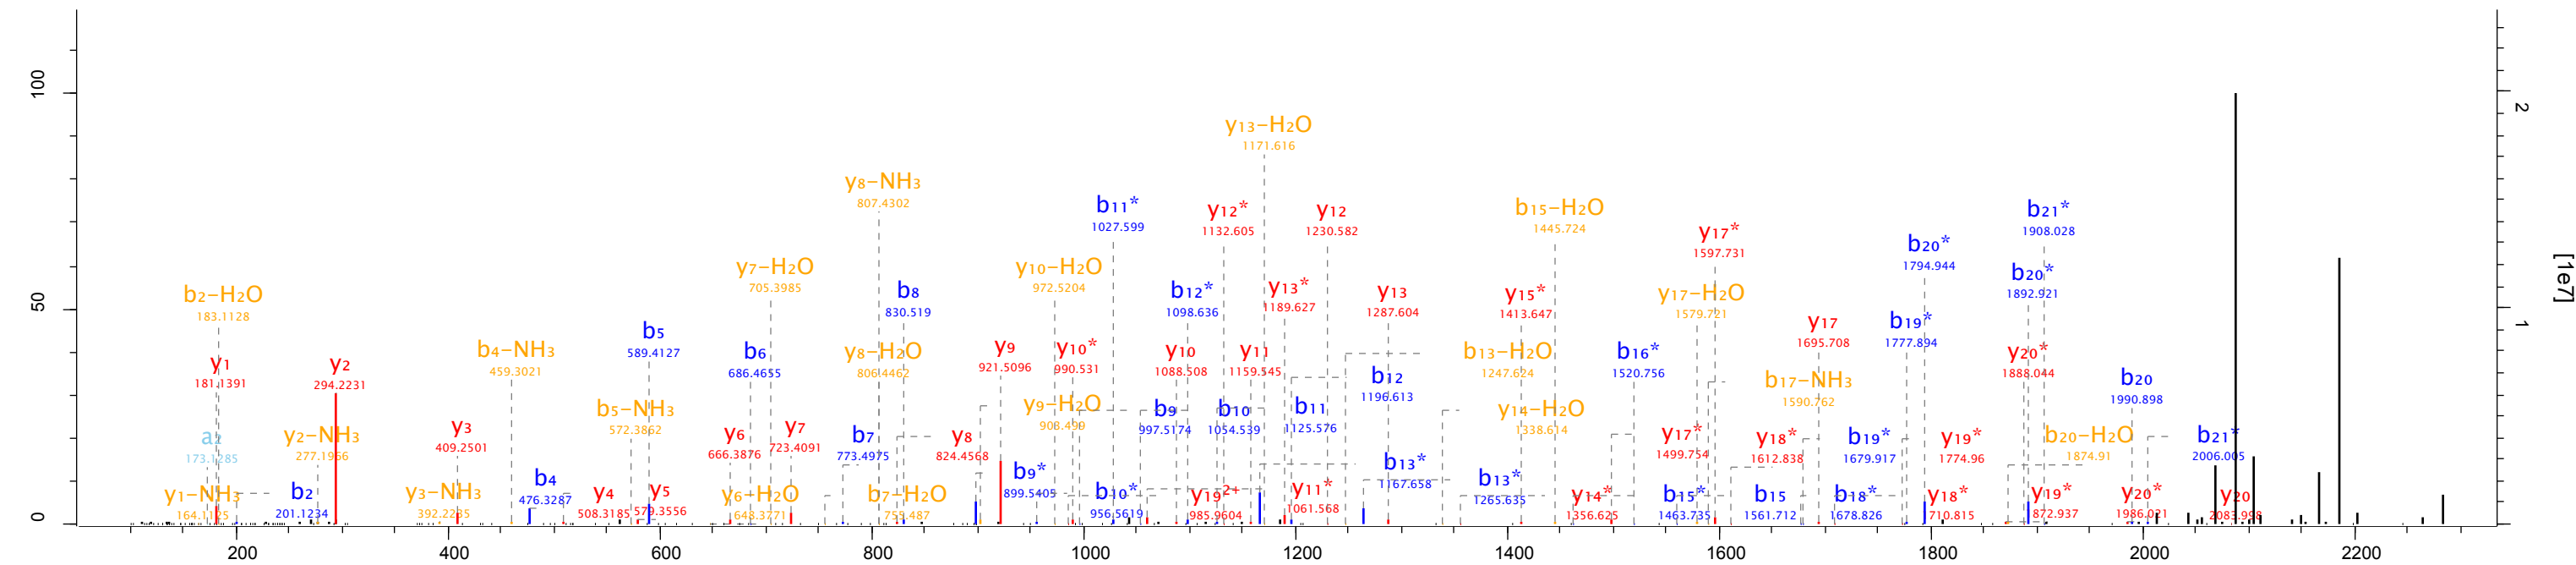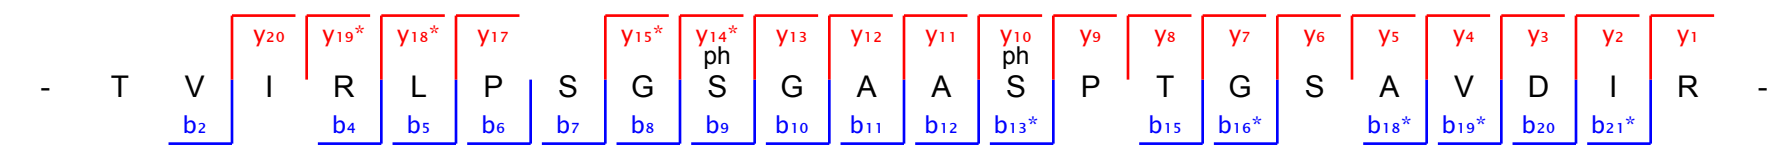



Raw file: 20150812\_A375SR\_Phospho\_BR1\_03  
 Scan: 20914 Method: FTMS; HCD Score: 124.88 m/z: 1007.16 Gene names: BRD2

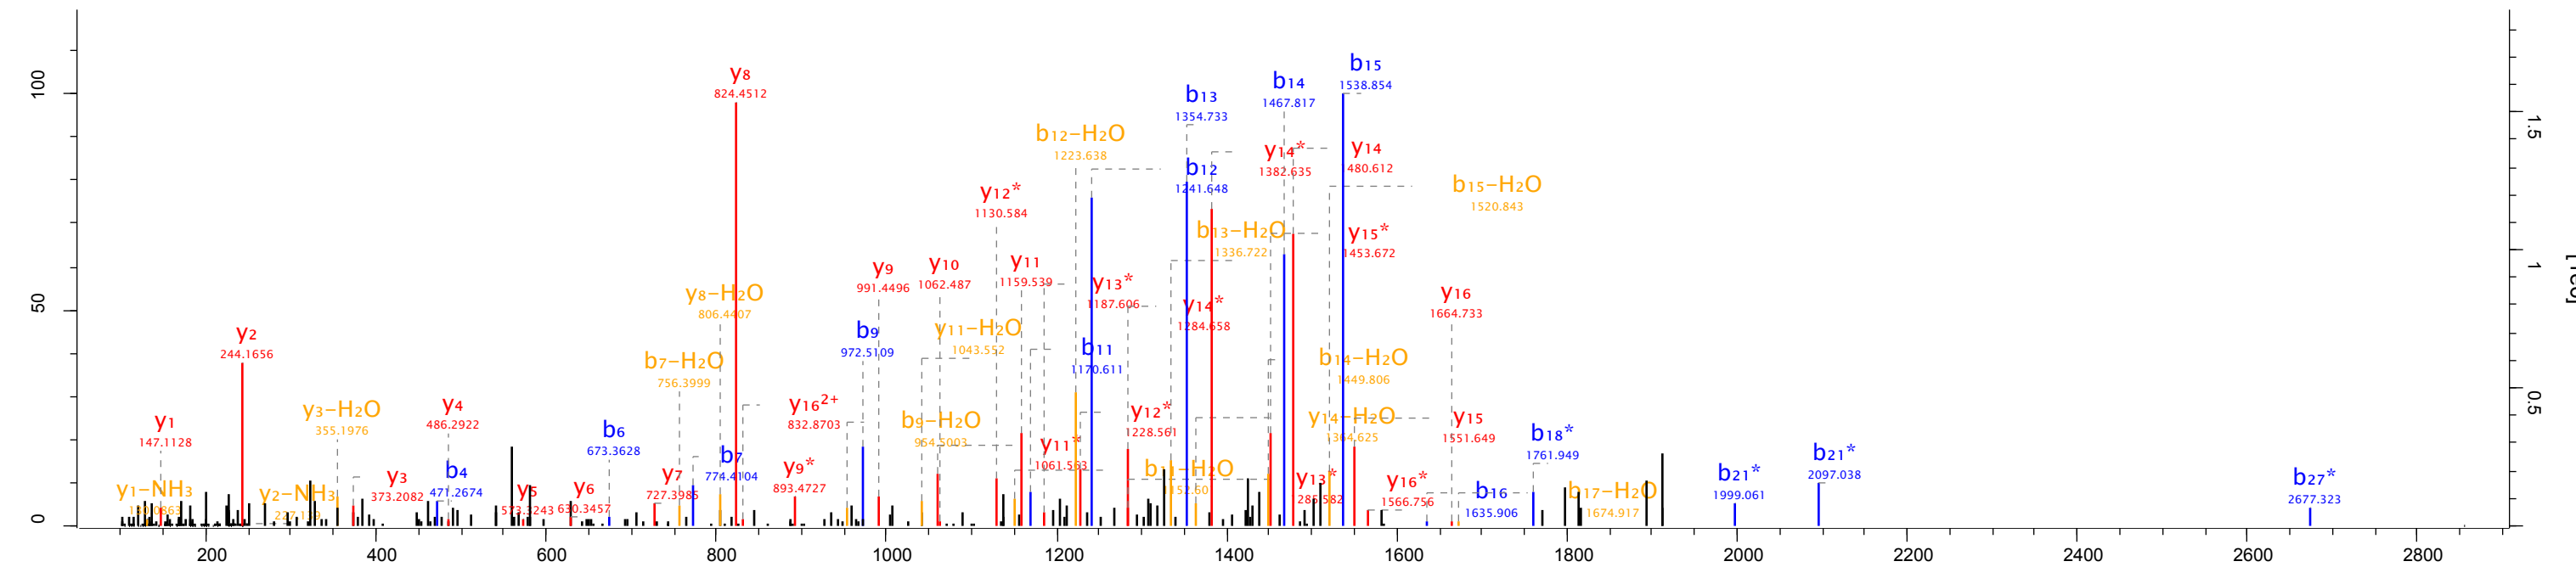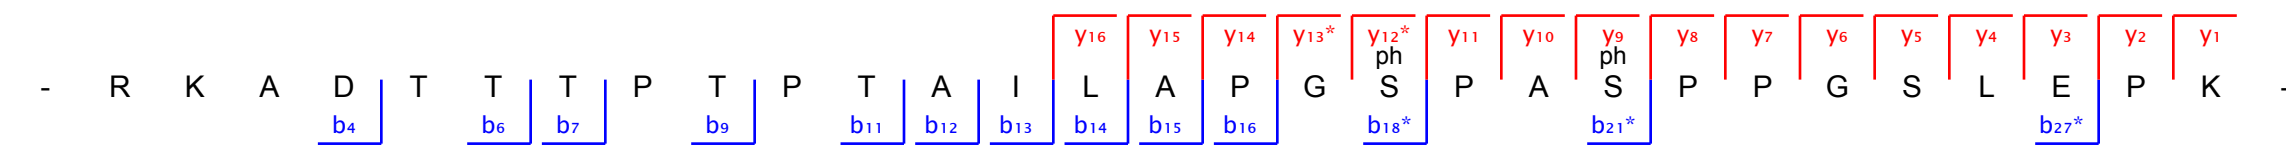

Raw file 20150812\_A375SR\_Phospho\_BR1\_03 Scan 21034 Method FTMS; HCD Score 267.56 m/z 1145.44 Gene names ARID4B

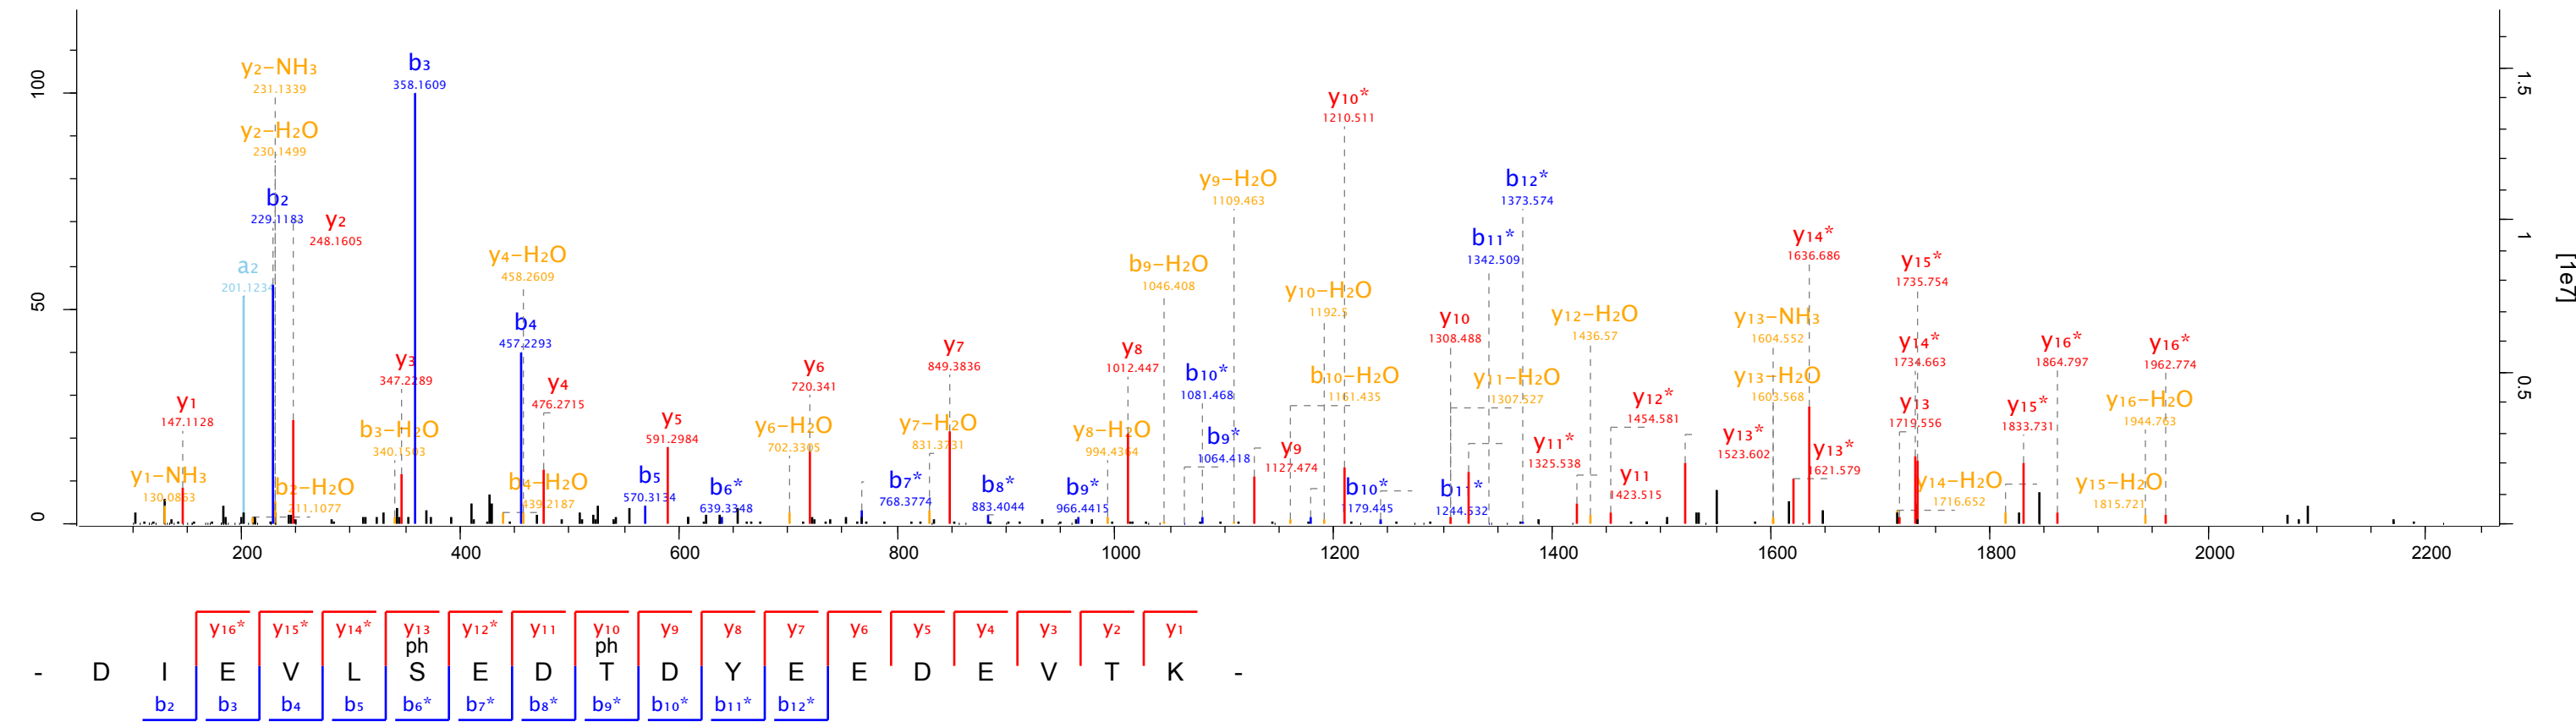



Raw file Scan Method Score m/z Gene names  
 20150812\_A375SR\_Phospho\_BR1\_03 21584 FTMS; HCD 197.77 1156.83 DTNBPI

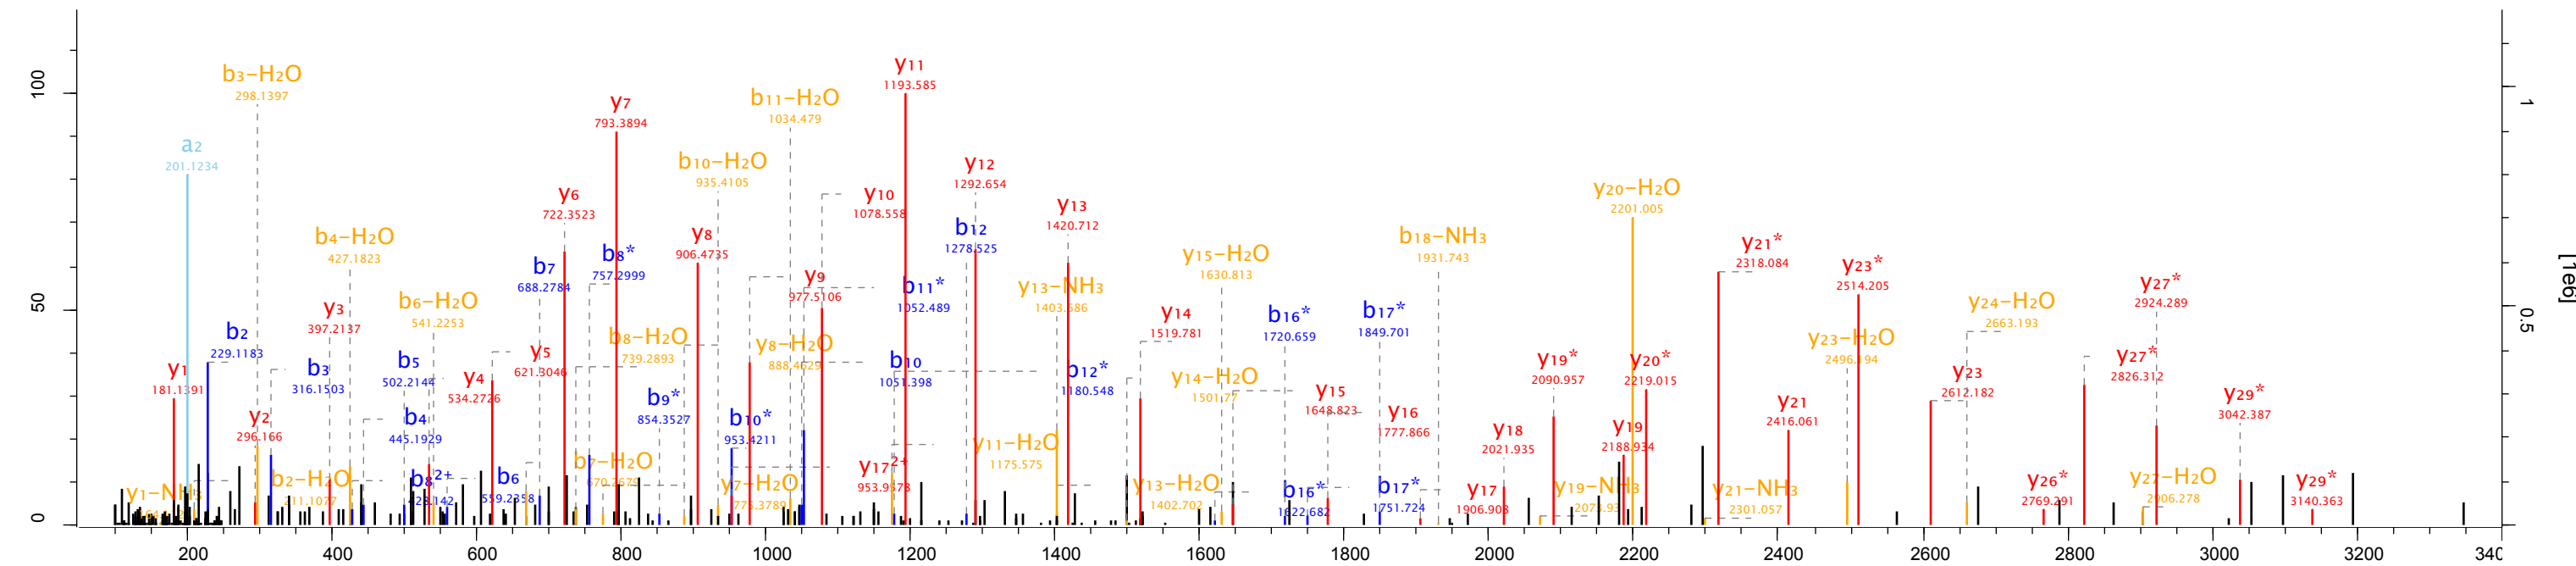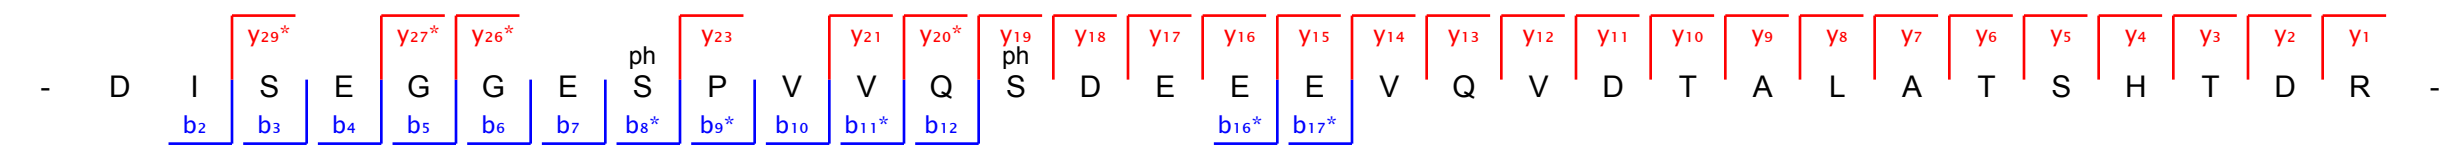

Raw file: 20150812\_A375SR\_Phospho\_BR1\_03  
 Scan: 22254 Method: FTMS; HCD Score: 315.44 m/z: 1302.58 Gene names: AHNAK

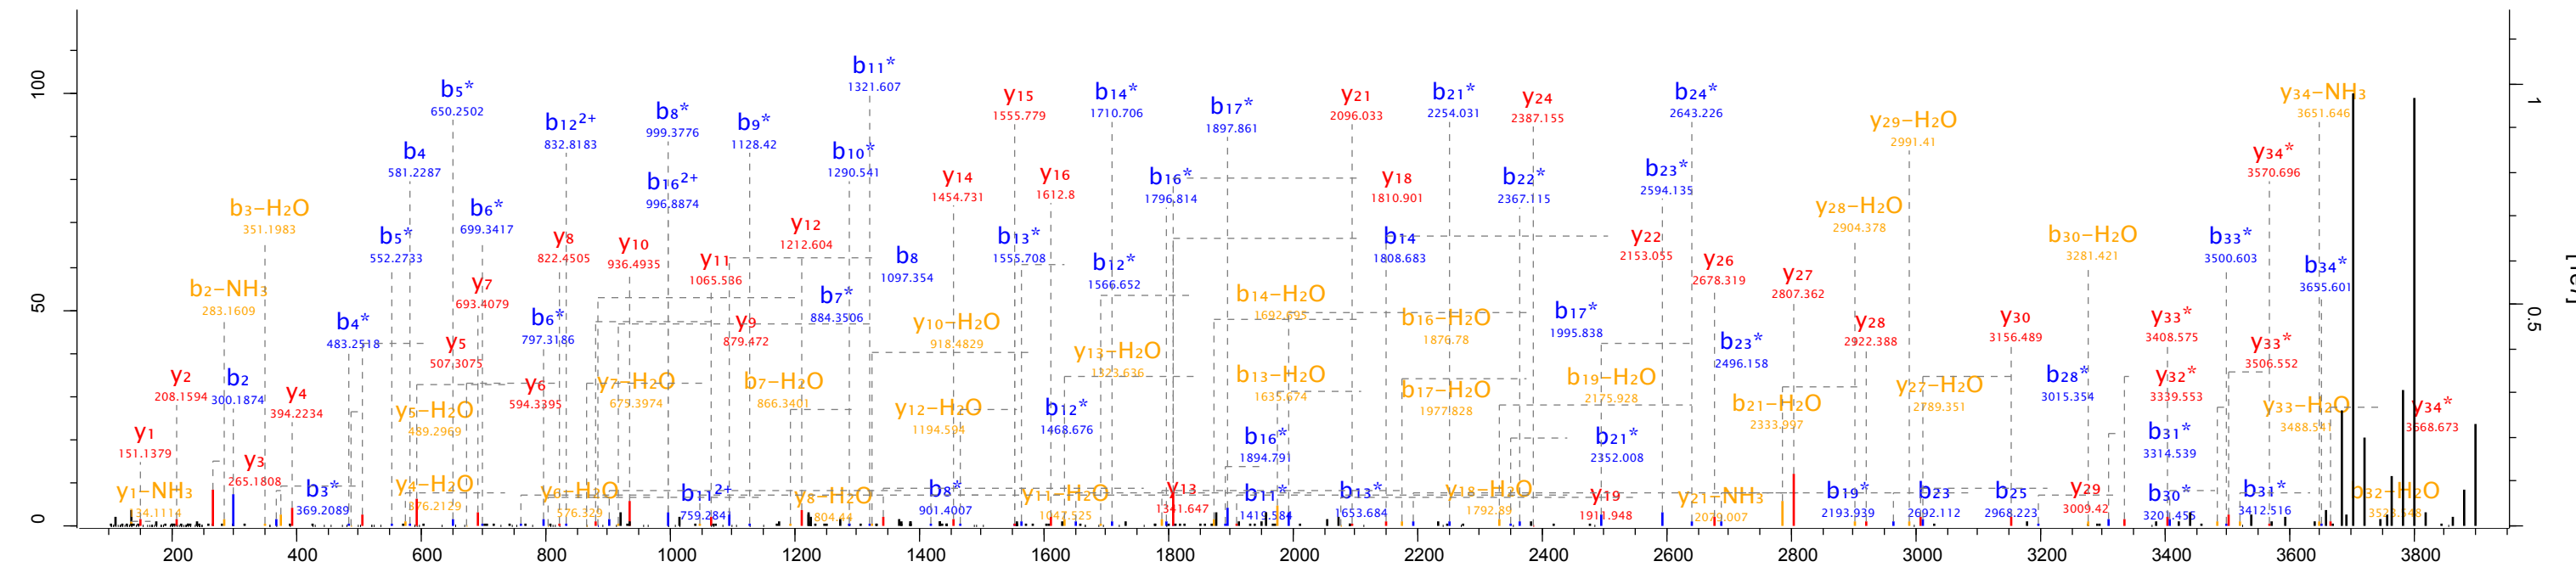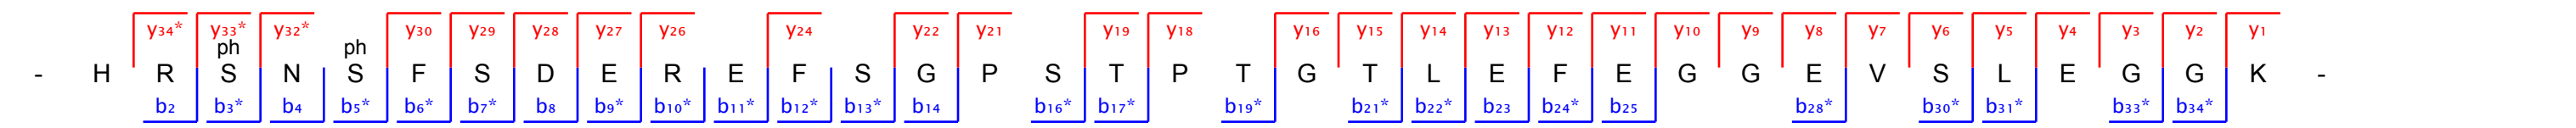

Raw file: 20150812\_A375SR\_Phospho\_BR1\_03  
 Scan: 22324 Method: FTMS; HCD Score: 150.46 m/z: 1236.87 Gene names: SQSTM1

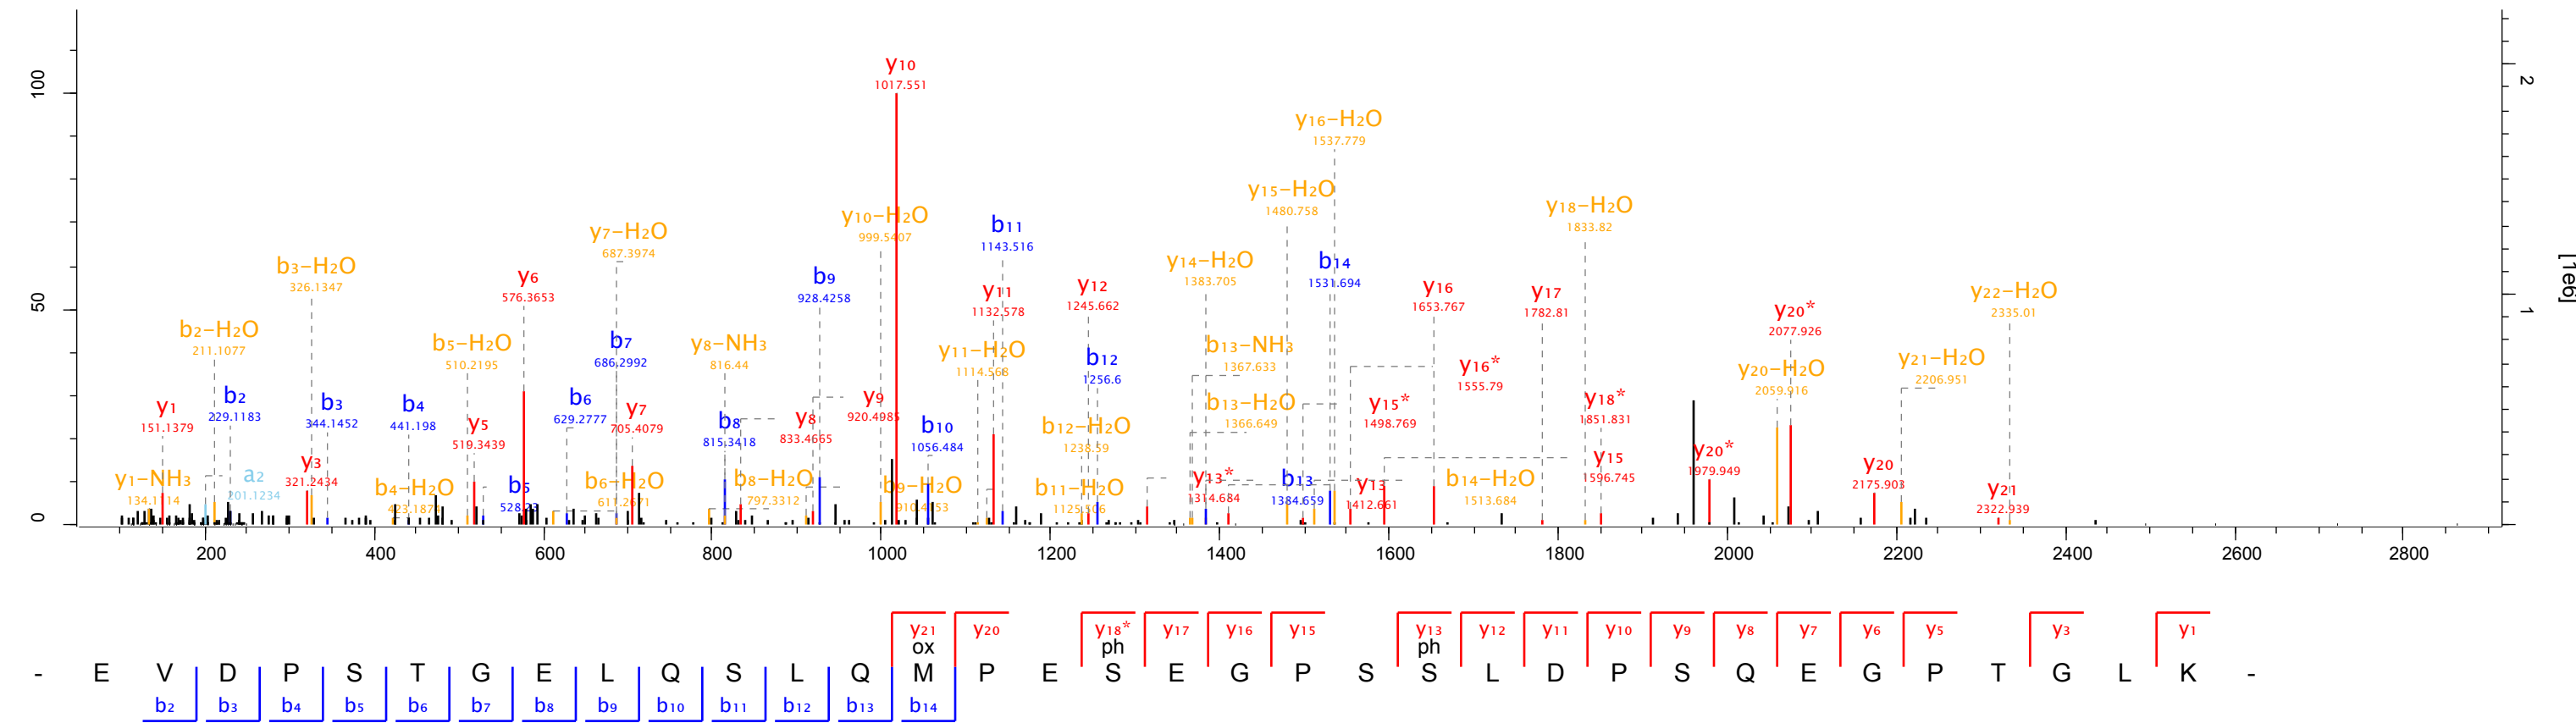

Raw file  
20150812\_A375SR\_Phospho\_BR1\_03

Scan 22434 Method FTMS; HCD Score 267.97 m/z 1119.56 Gene names MAPRE2

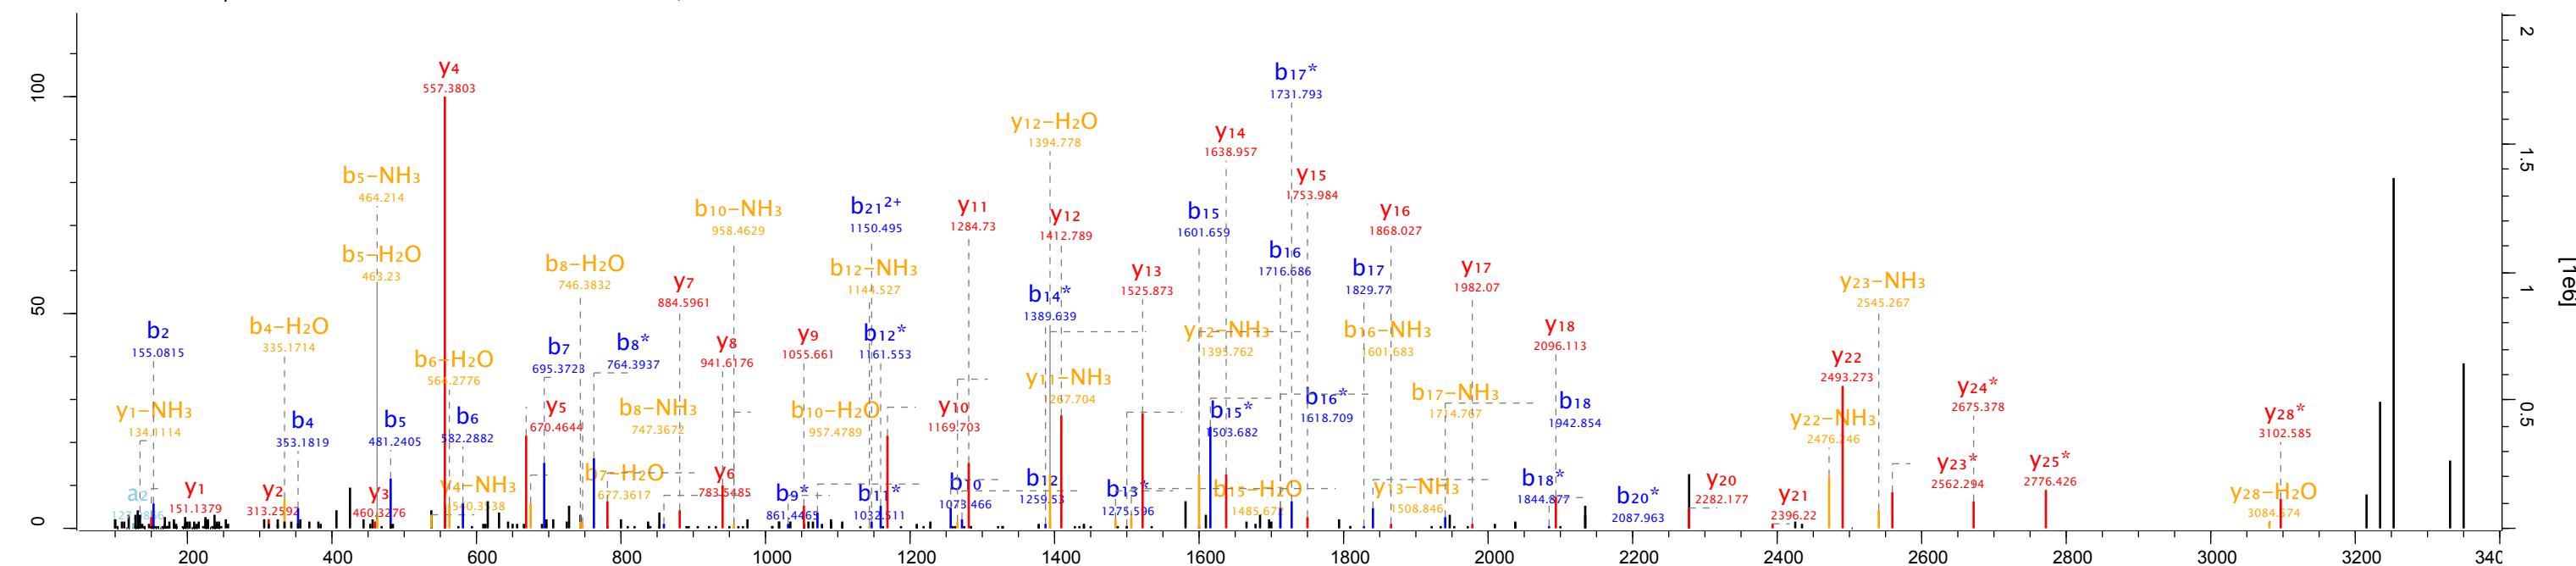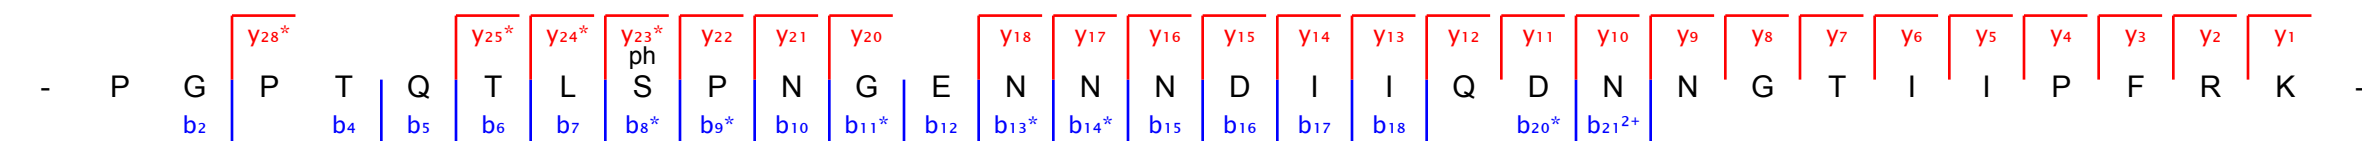

Raw file: 20150812\_A375SR\_Phospho\_BR1\_03  
 Scan: 22474 Method: FTMS; HCD Score: 139.25 m/z: 879.38 Gene names: CRAMP1L

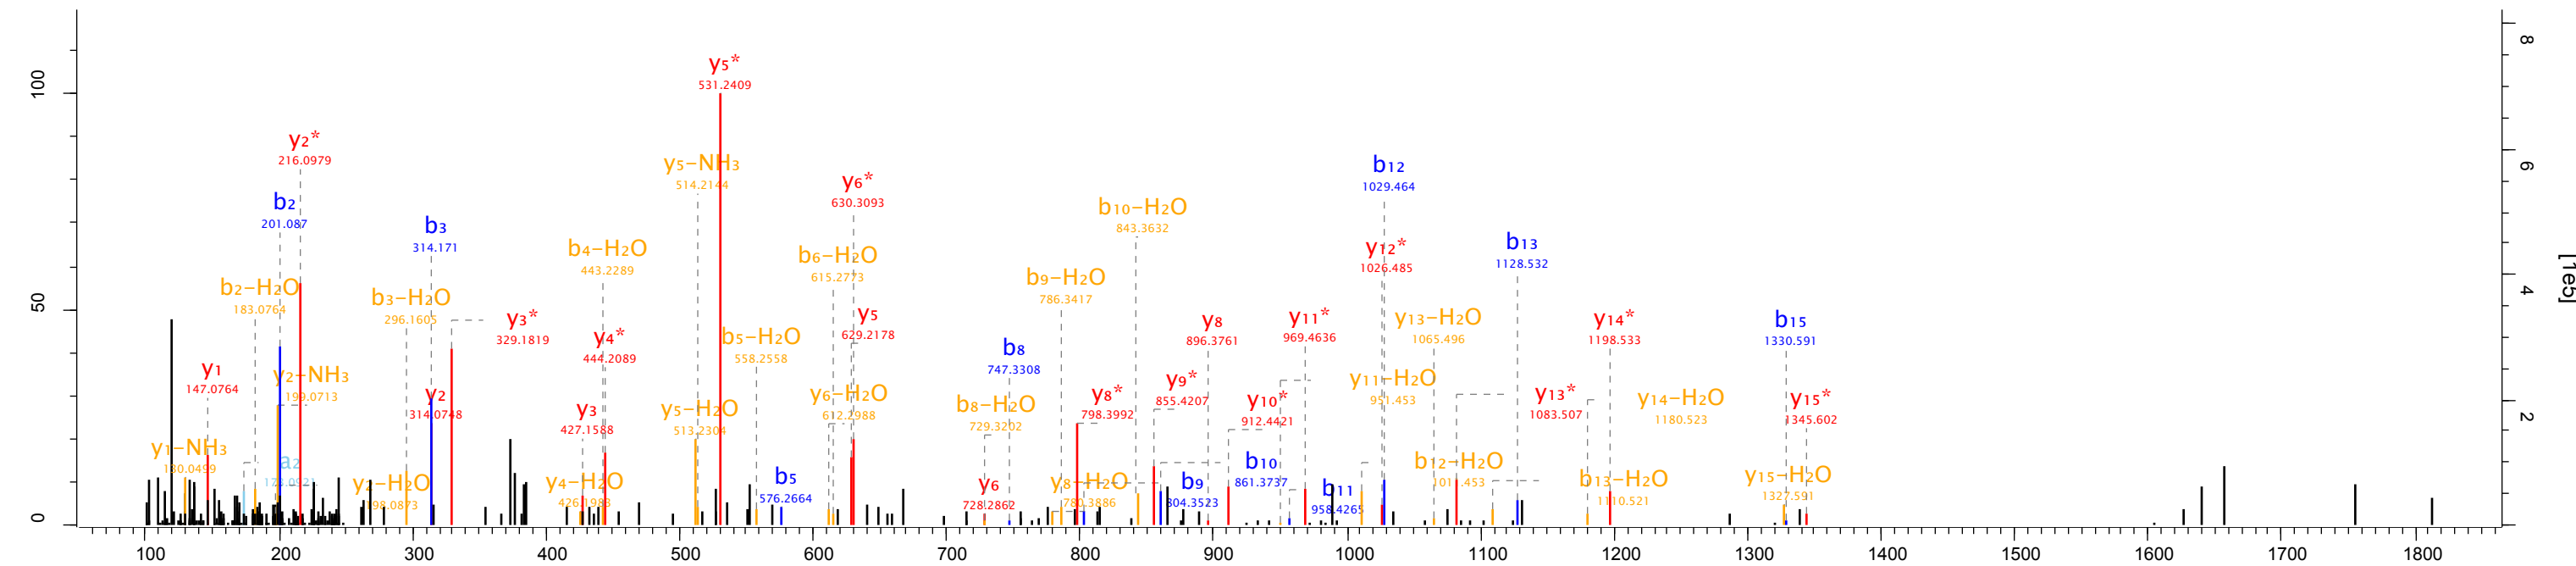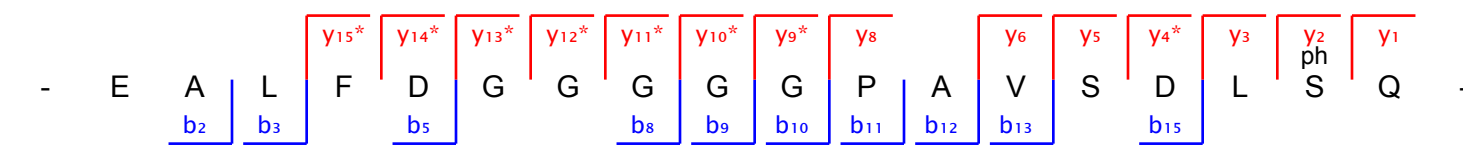



Raw file: 20150812\_A375SR\_Phospho\_BR1\_03  
 Scan: 2254 Method: FTMS; HCD Score: 62.74 m/z: 656.6 Gene names: PRRC2C

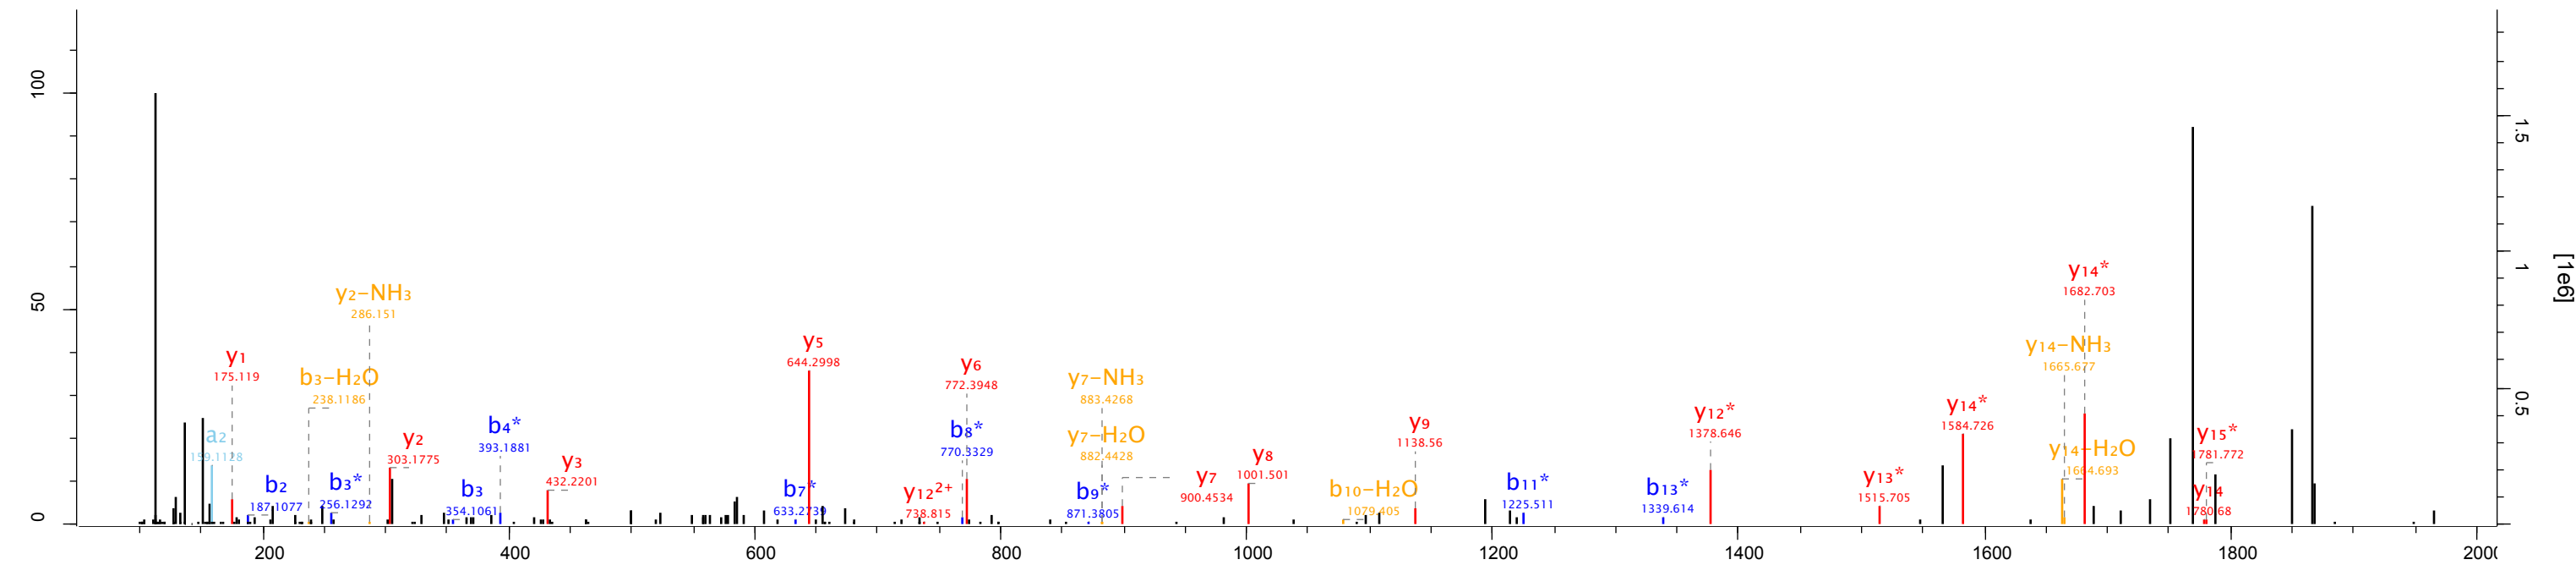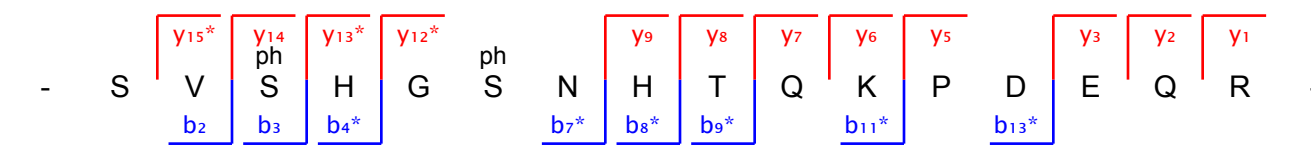

Raw file Scan Method Score m/z Gene names  
 20150812\_A375SR\_Phospho\_BR1\_03 22634 FTMS; HCD 123.54 1026.92 HELB

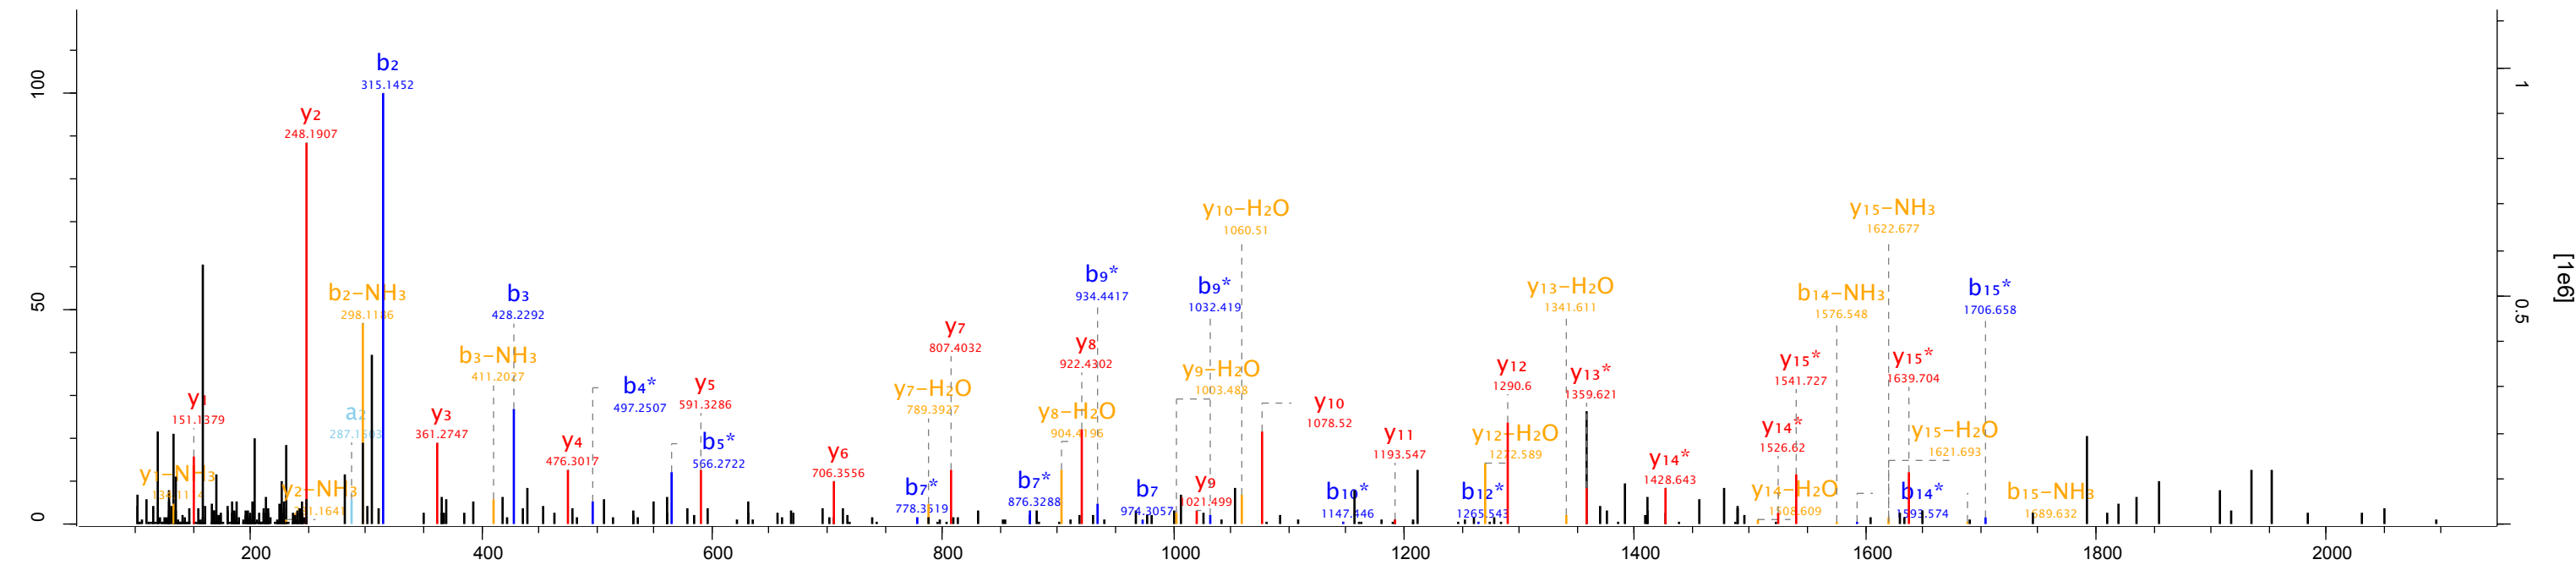

- W Q L S P D G V D T D D D L P K -

Fragmentation mapping (b and y ions) is shown below the sequence:

- b2: Q
- b3: L
- b4\*: S
- b5\*: S
- b7: D
- b9\*: V
- b10\*: D
- b12\*: D
- b14\*: D
- b15\*: L
- y1: K
- y2: P
- y3: D
- y4: D
- y5: D
- y6: D
- y7: T
- y8: D
- y9: V
- y10: G
- y11: D
- y12: P
- y13\*: S
- y14\*: S
- y15\*: L

Raw file  
 20150812\_A375SR\_Phospho\_BR1\_03  
 Scan 22864 Method FTMS; HCD Score 98.58 m/z 1040.45 Gene names BCL9L

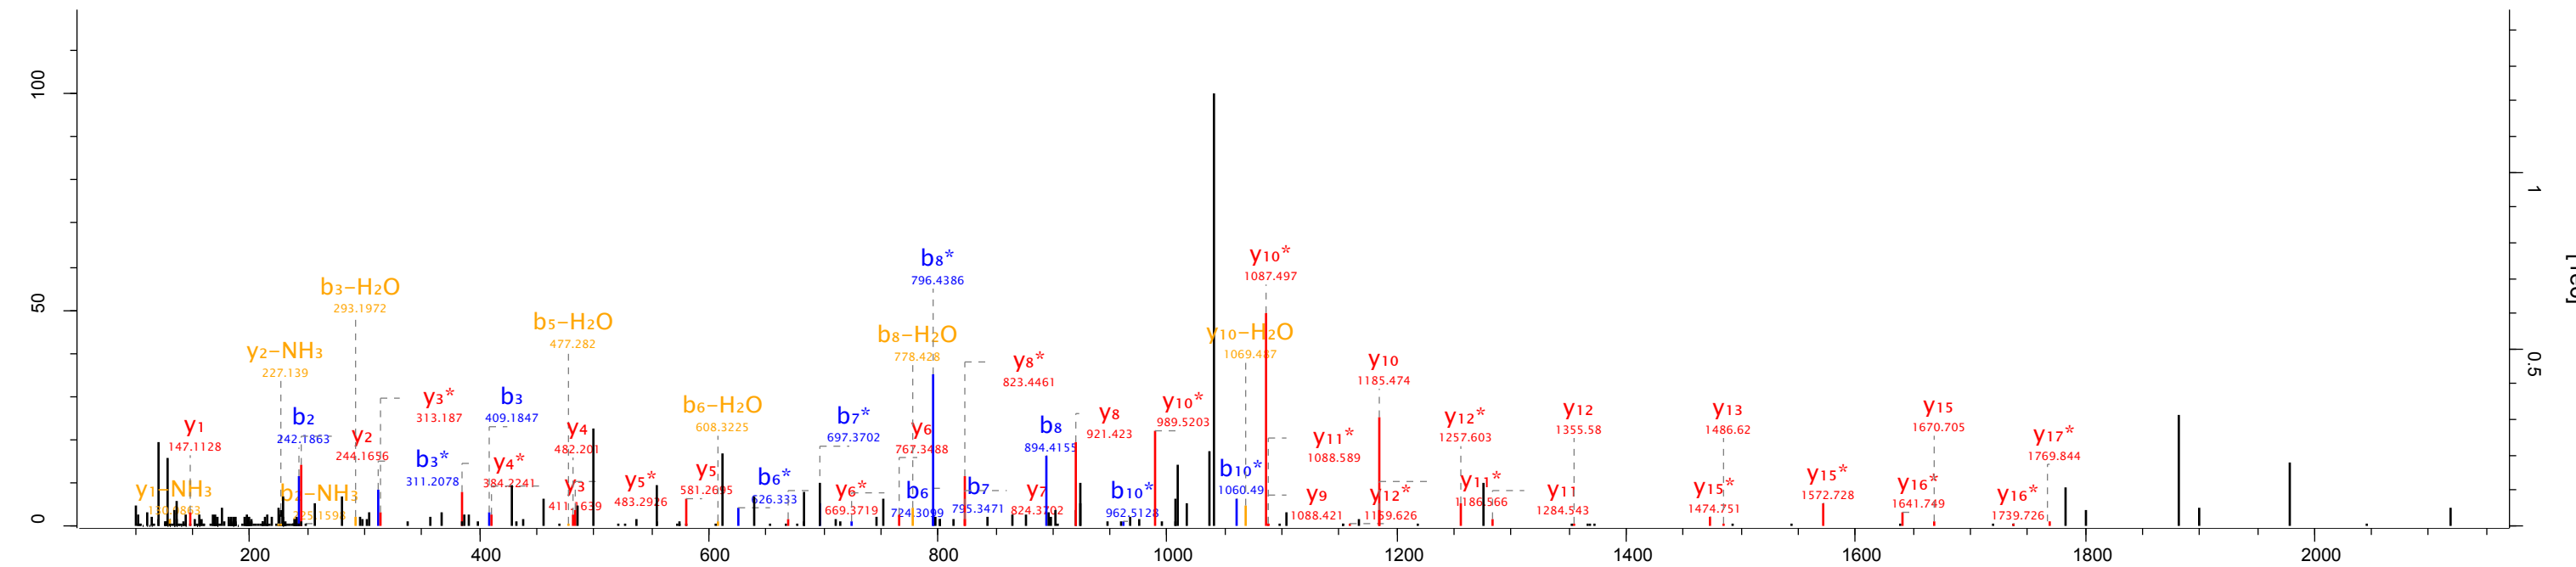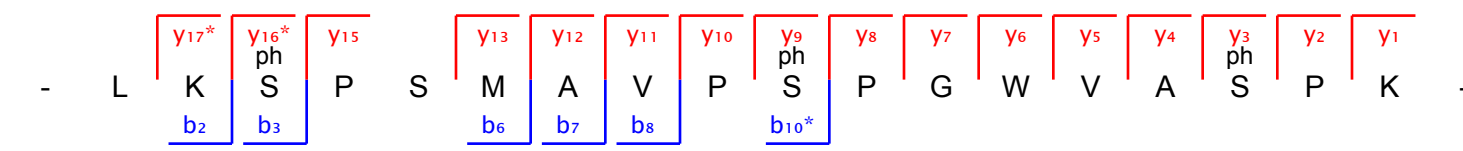

Raw file: 20150812\_A375SR\_Phospho\_BR1\_03  
 Scan: 2344 Method: FTMS; HCD Score: 51.94 m/z: 447.18 Gene names: BUD13

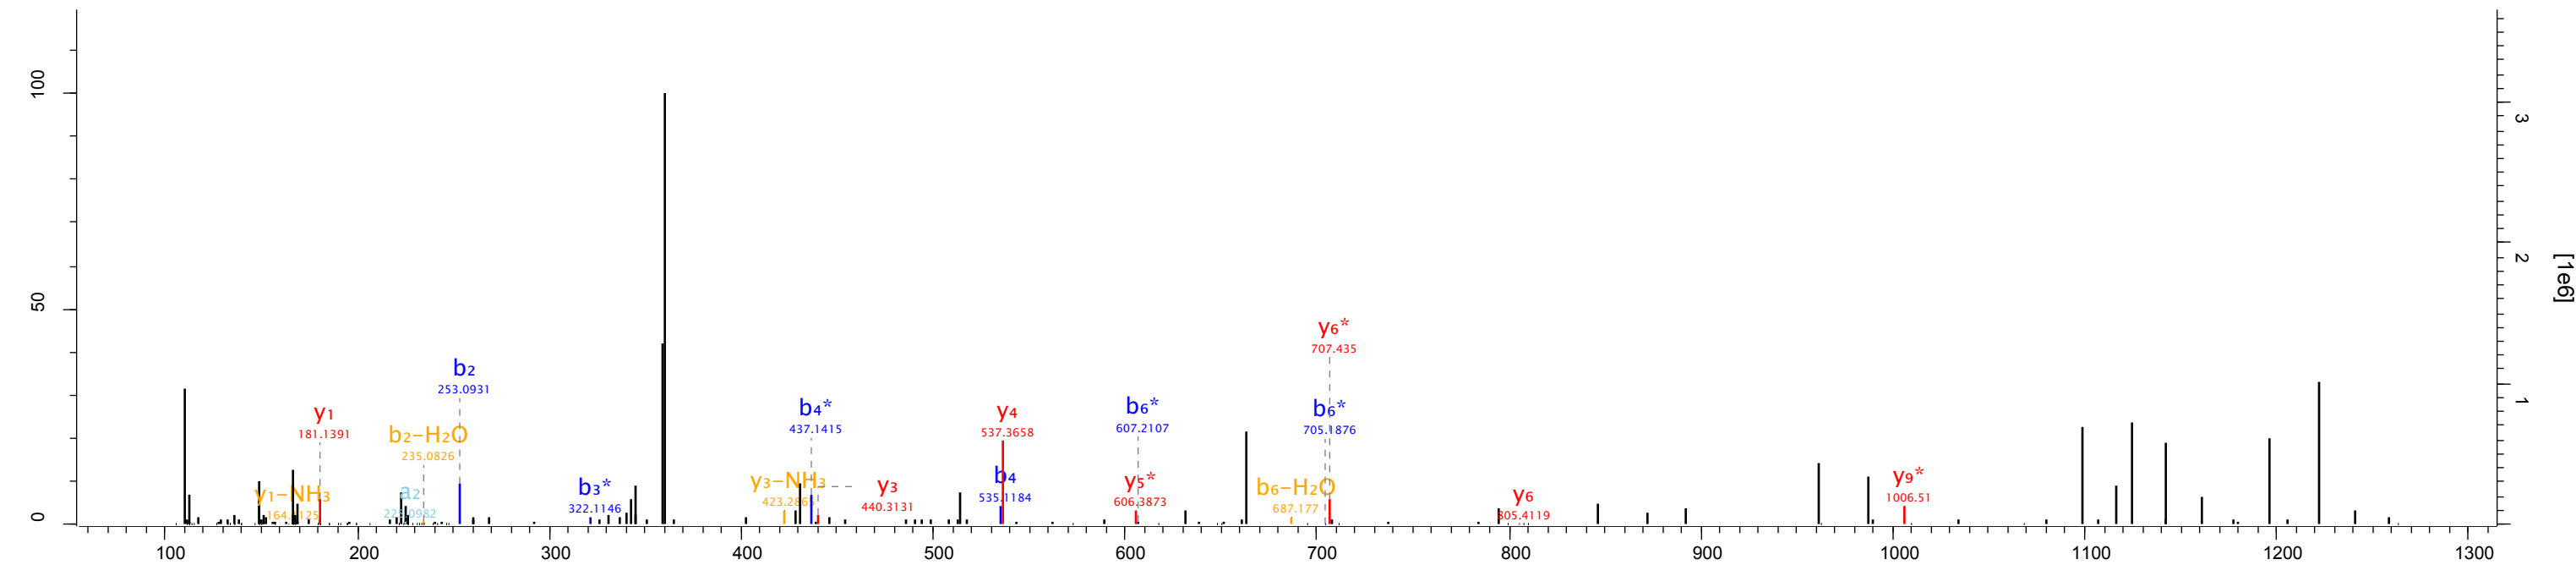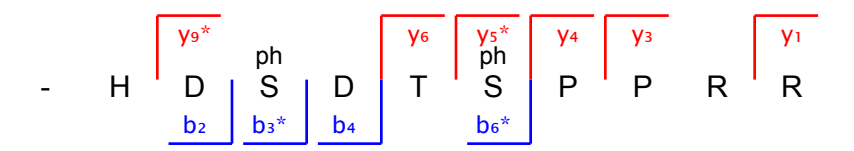

Raw file: 20150812\_A375SR\_Phospho\_BR1\_03  
 Scan: 23704 Method: FTMS; HCD Score: 75.59 m/z: 793.03 Gene names: TJP1

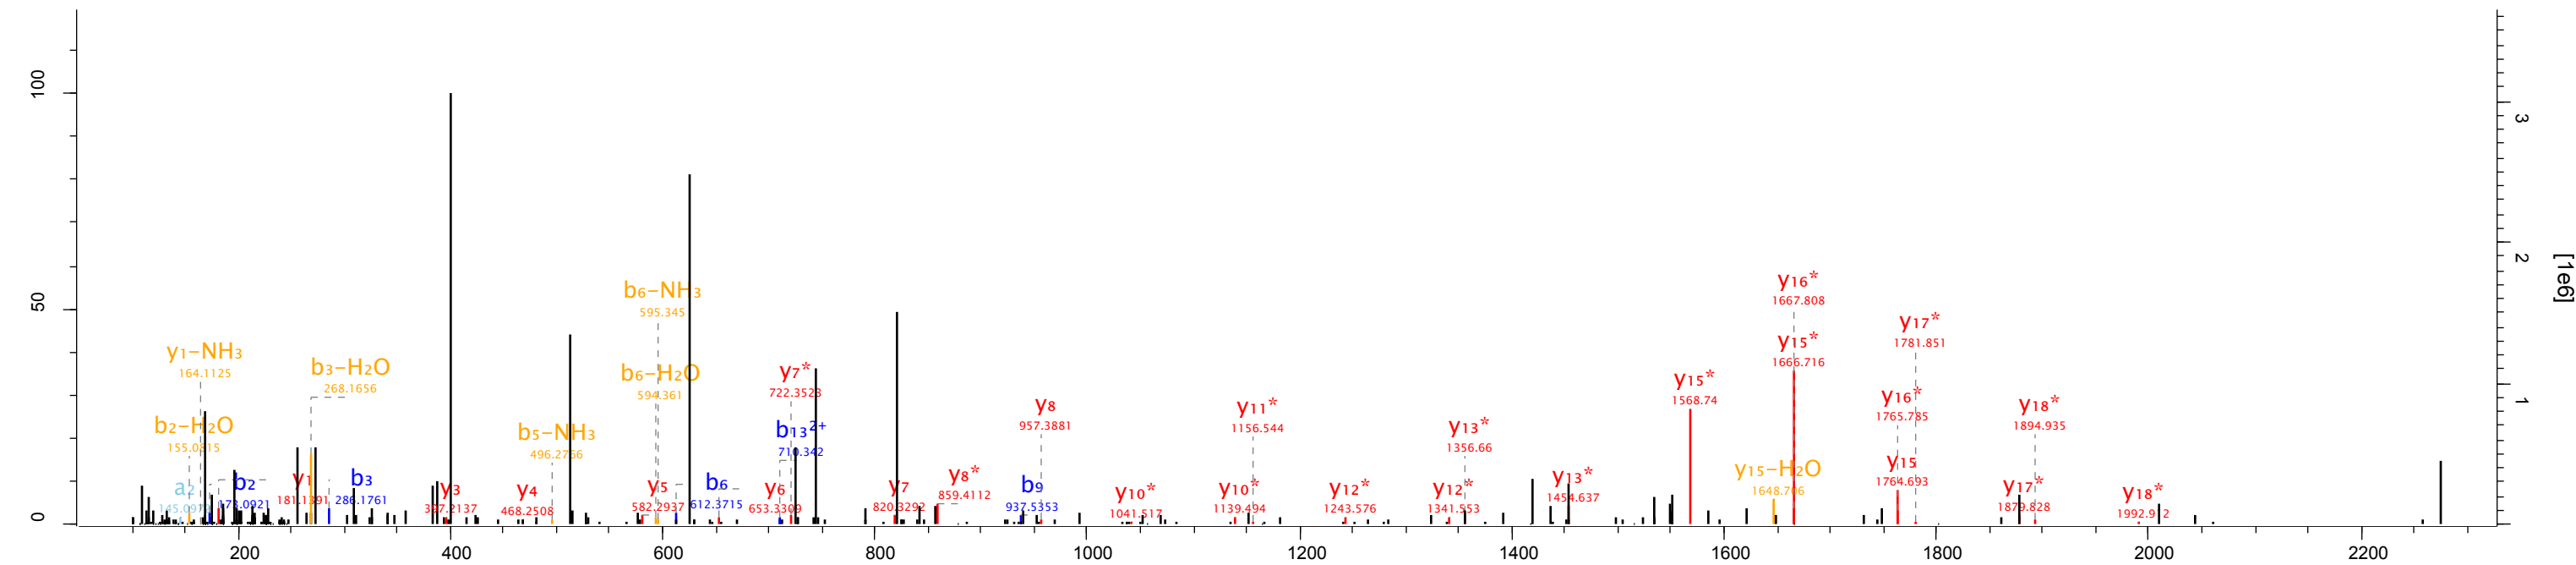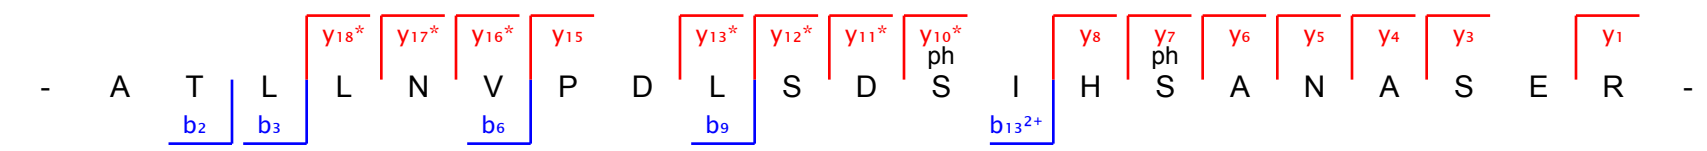

Raw file  
20150812\_A375SR\_Phospho\_BR1\_03

Scan 23884 Method FTMS; HCD Score 130.53 m/z 963.21 Gene names RB1

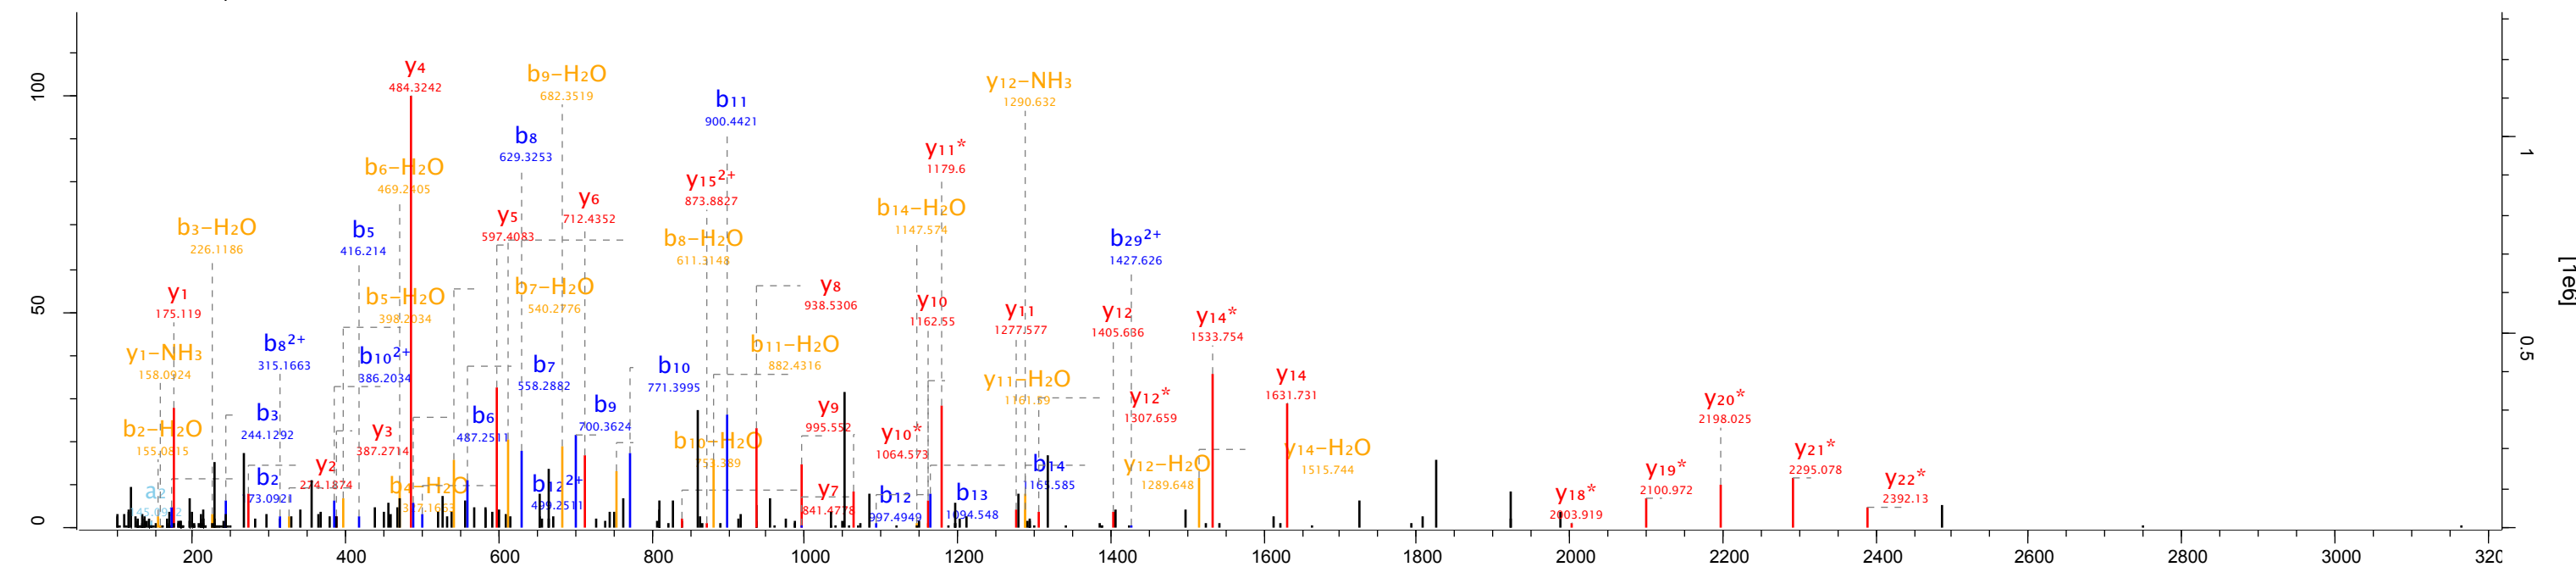

- T A A T A A A A A A E P P A P P P P P P P P E E D P E Q D S G P E D L P L V R

b<sub>2</sub> b<sub>3</sub> b<sub>5</sub> b<sub>6</sub> b<sub>7</sub> b<sub>8</sub> b<sub>9</sub> b<sub>10</sub> b<sub>11</sub> b<sub>12</sub> b<sub>13</sub> b<sub>14</sub> b<sub>29</sub><sup>2+</sup> y<sub>22</sub>\* y<sub>21</sub>\* y<sub>20</sub>\* y<sub>19</sub>\* y<sub>18</sub>\* y<sub>15</sub><sup>2+</sup> y<sub>14</sub> y<sub>12</sub> y<sub>11</sub> y<sub>10</sub> ph y<sub>9</sub> y<sub>8</sub> y<sub>7</sub> y<sub>6</sub> y<sub>5</sub> y<sub>4</sub> y<sub>3</sub> y<sub>2</sub> y<sub>1</sub>

Raw file: 20150812\_A375SR\_Phospho\_BR1\_03  
 Scan: 24254 Method: FTMS; HCD Score: 144.89 m/z: 1137.51 Gene names: LMO7

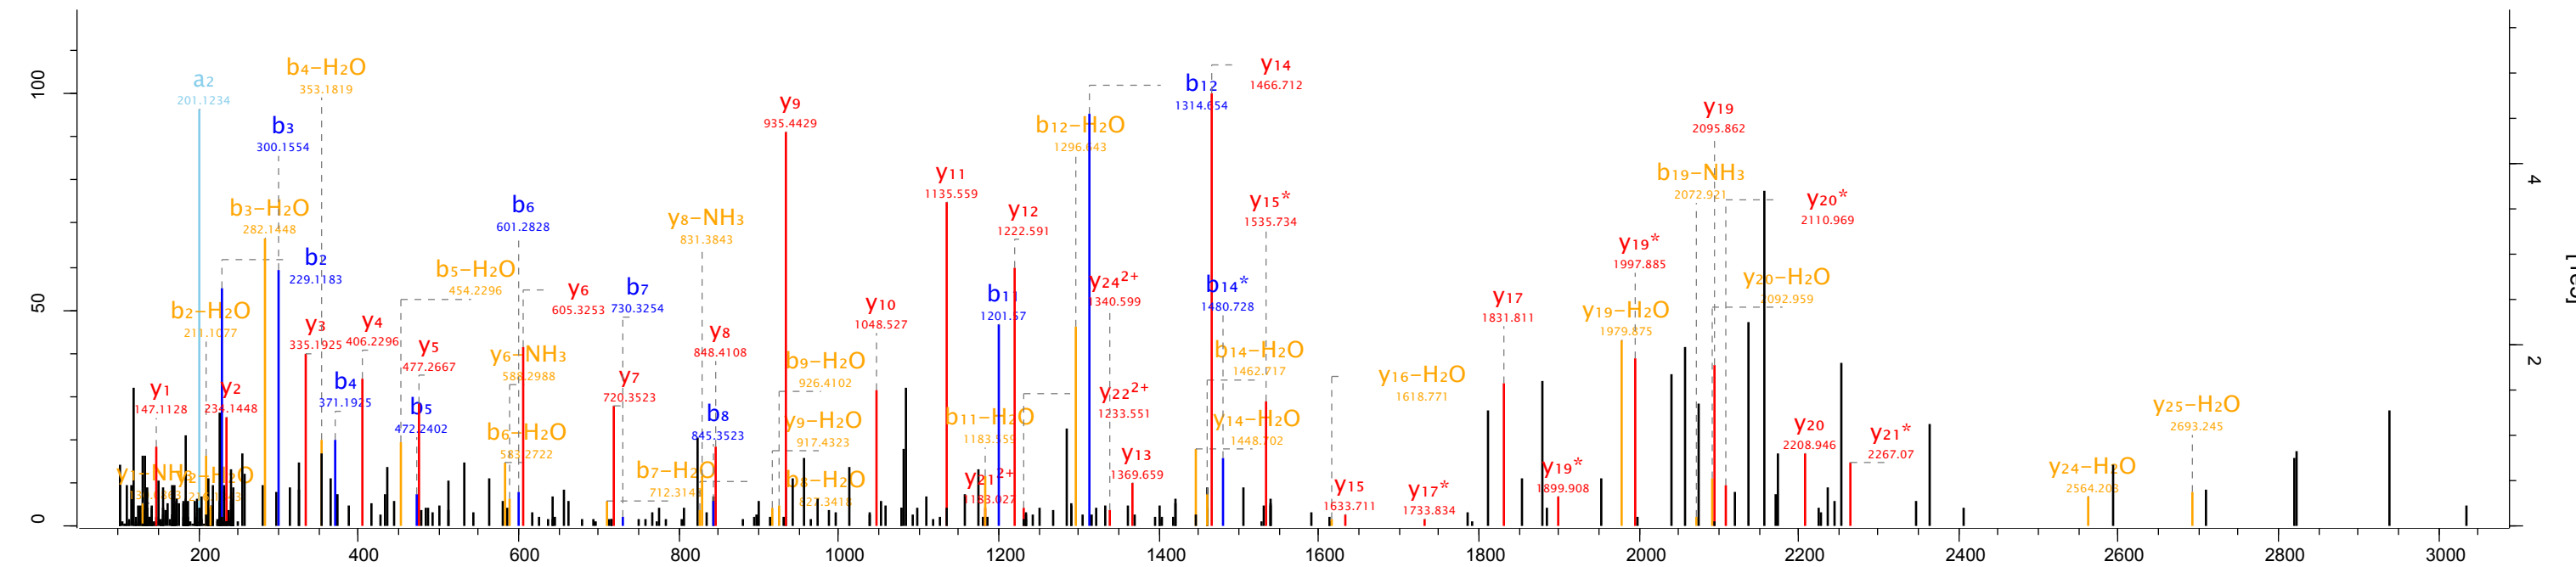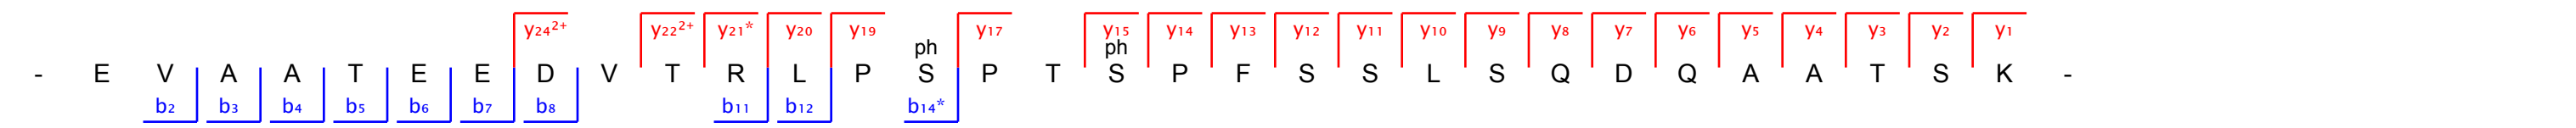

Raw file: 20150812\_A375SR\_Phospho\_BR1\_03  
 Scan: 24424 Method: FTMS; HCD Score: 172.95 m/z: 1353.11 Gene names: PXN

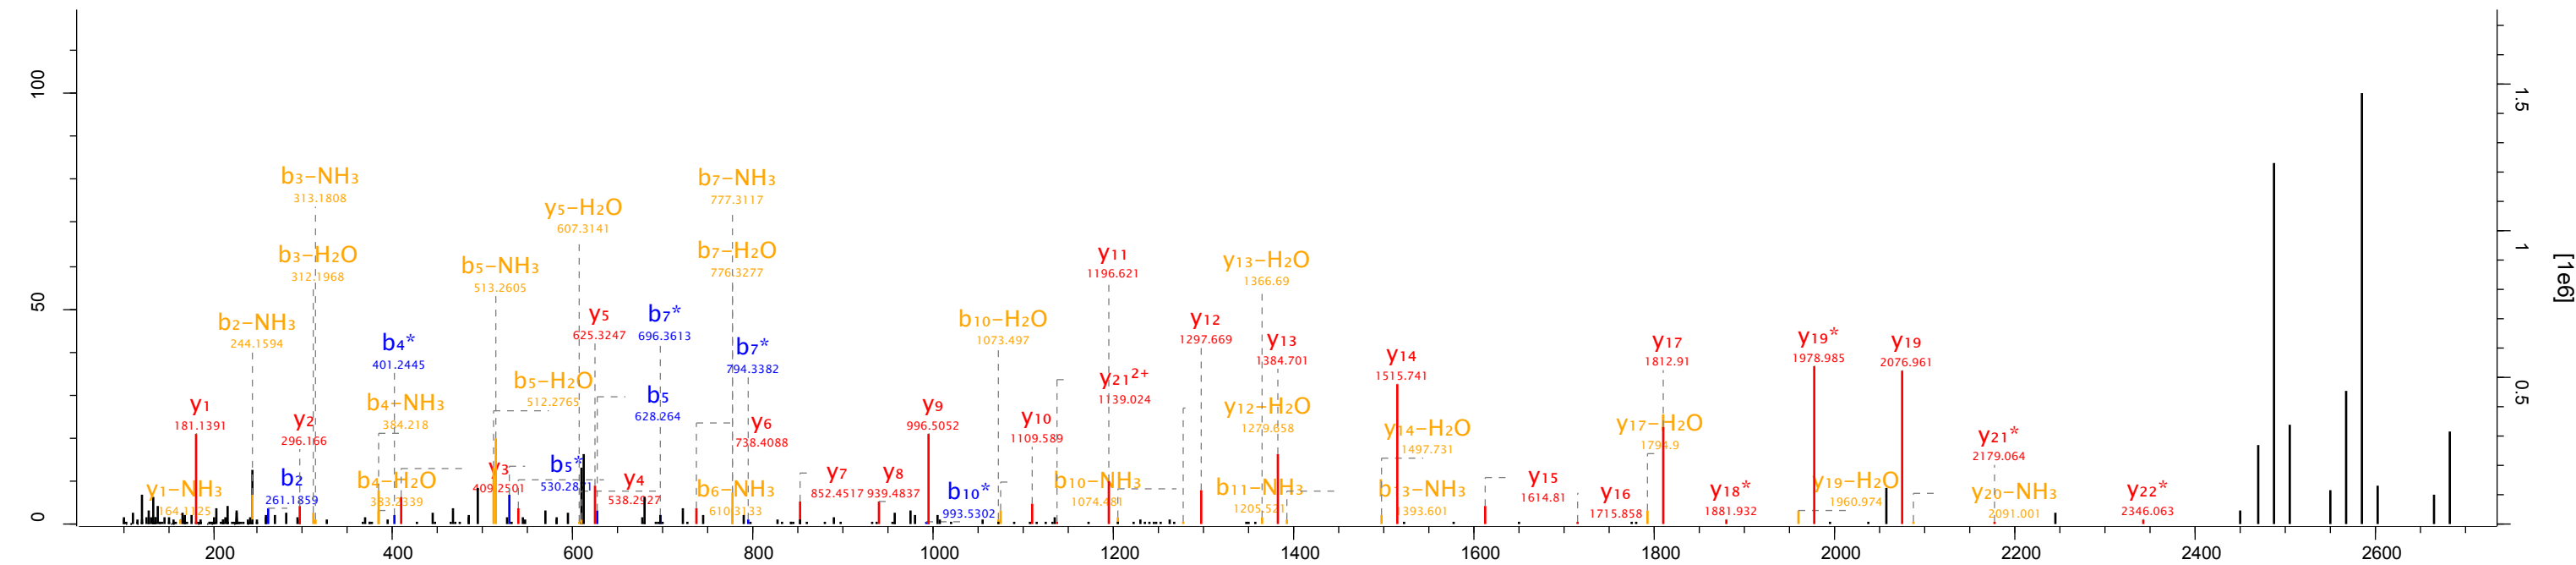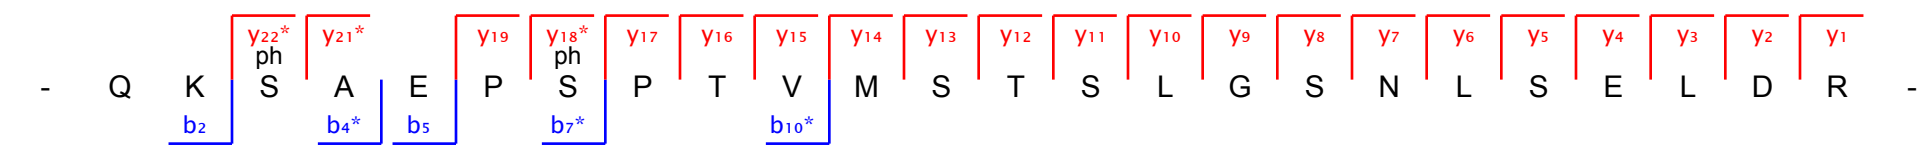



Raw file 20150812\_A375SR\_Phospho\_BR1\_03 Scan 24894 Method FTMS; HCD Score 108.28 m/z 996.45 Gene names NUFIP1

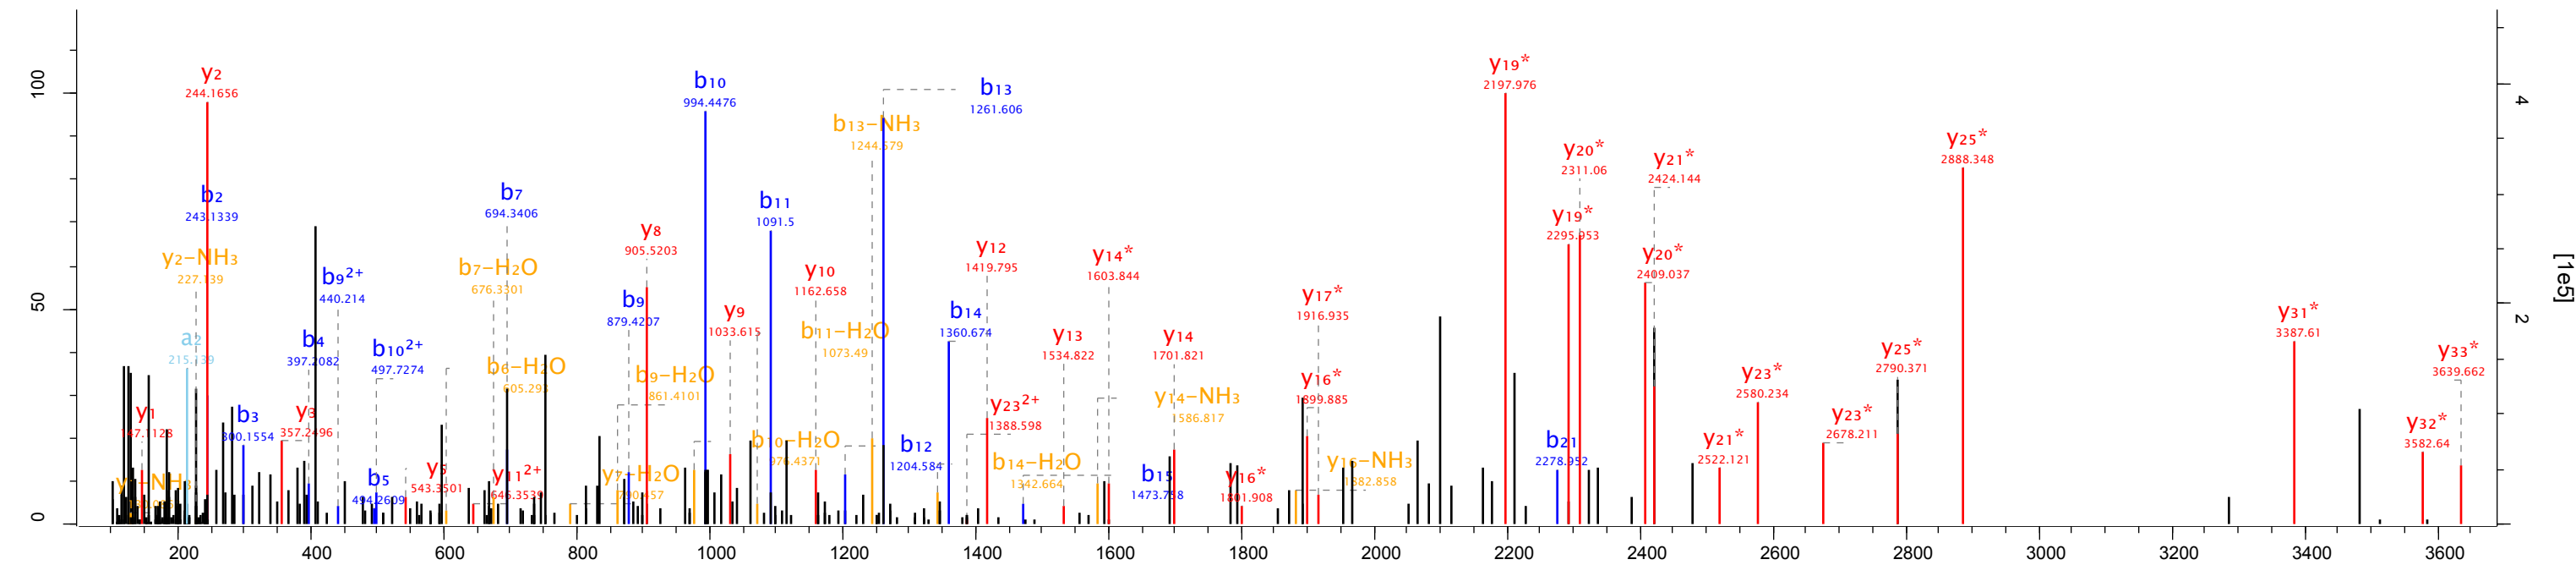

- L E G P P E A N A D P L G V L I N S D S E S D K E E K P Q H S V I P K -

b<sub>2</sub>
b<sub>3</sub>
b<sub>4</sub>
b<sub>5</sub>
b<sub>7</sub>
b<sub>9</sub>
b<sub>10</sub>
b<sub>11</sub>
b<sub>12</sub>
b<sub>13</sub>
b<sub>14</sub>
b<sub>15</sub>
b<sub>21</sub>
y<sub>14</sub> ph
y<sub>13</sub>
y<sub>12</sub>
y<sub>11</sub><sup>2+</sup>
y<sub>10</sub>
y<sub>9</sub>
y<sub>8</sub>
y<sub>5</sub>
y<sub>3</sub>
y<sub>2</sub>
y<sub>1</sub>
y<sub>33</sub><sup>\*</sup>
y<sub>32</sub><sup>\*</sup>
y<sub>31</sub><sup>\*</sup>
y<sub>25</sub><sup>\*</sup>
y<sub>23</sub><sup>\*</sup>
y<sub>21</sub><sup>\*</sup>
y<sub>19</sub><sup>\*</sup>
y<sub>17</sub><sup>\*</sup>
y<sub>16</sub><sup>\*</sup> ph
y<sub>14</sub>-NH<sub>3</sub>
y<sub>13</sub>
y<sub>12</sub>
y<sub>11</sub>-H<sub>2</sub>O
y<sub>10</sub>
y<sub>9</sub>
y<sub>8</sub>
y<sub>7</sub>-H<sub>2</sub>O
y<sub>6</sub>-H<sub>2</sub>O
y<sub>5</sub>
y<sub>4</sub>-H<sub>2</sub>O
y<sub>3</sub>
y<sub>2</sub>-NH<sub>3</sub>
y<sub>2</sub>
y<sub>1</sub>-NH<sub>3</sub>
b<sub>13</sub>-NH<sub>3</sub>
b<sub>11</sub>-H<sub>2</sub>O
b<sub>8</sub>-H<sub>2</sub>O
b<sub>7</sub>-H<sub>2</sub>O
b<sub>9</sub>-H<sub>2</sub>O
b<sub>9</sub><sup>2+</sup>
b<sub>10</sub><sup>2+</sup>
b<sub>14</sub>-H<sub>2</sub>O
b<sub>14</sub>
b<sub>13</sub>
b<sub>11</sub>
b<sub>10</sub>
b<sub>9</sub>
b<sub>7</sub>
b<sub>2</sub>

Raw file  
20150812\_A375SR\_Phospho\_BR1\_03

Scan 25174 Method FTMS; HCD Score 193.18 m/z 1172.57 Gene names FOXK2

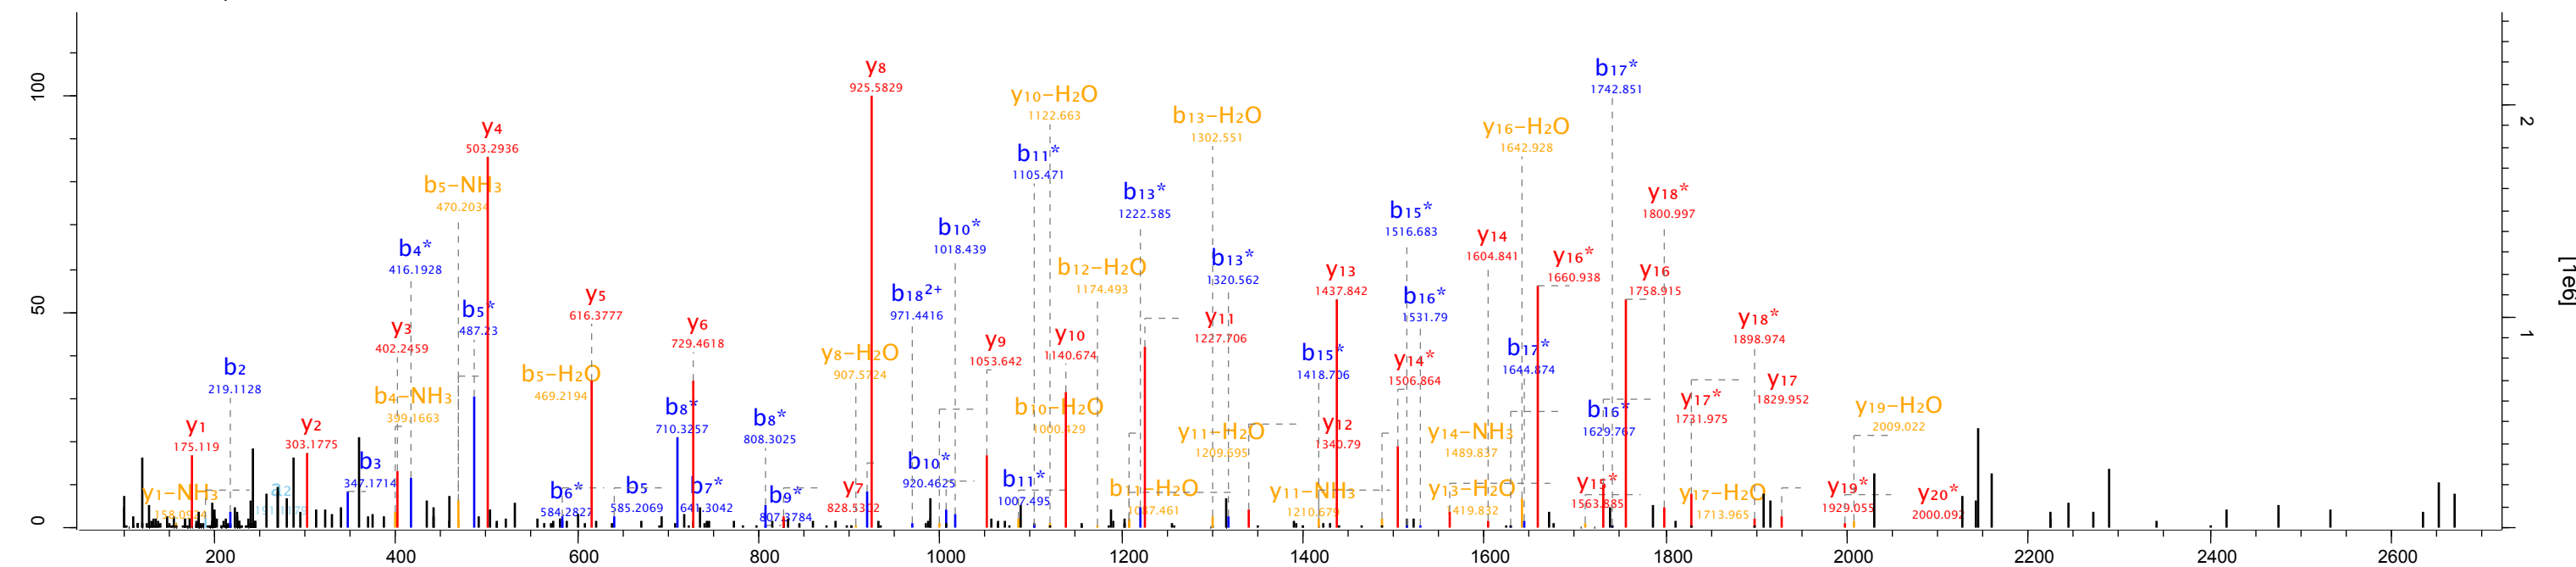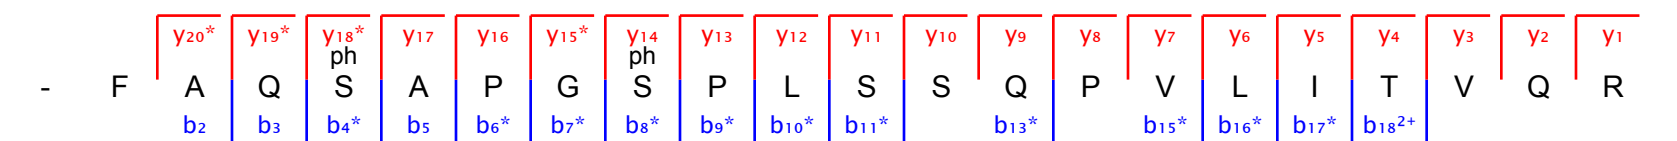

Raw file: 20150812\_A375SR\_Phospho\_BR1\_03  
 Scan: 2534 Method: FTMS; HCD Score: 109.87 m/z: 754.79 Gene names: SRSF10

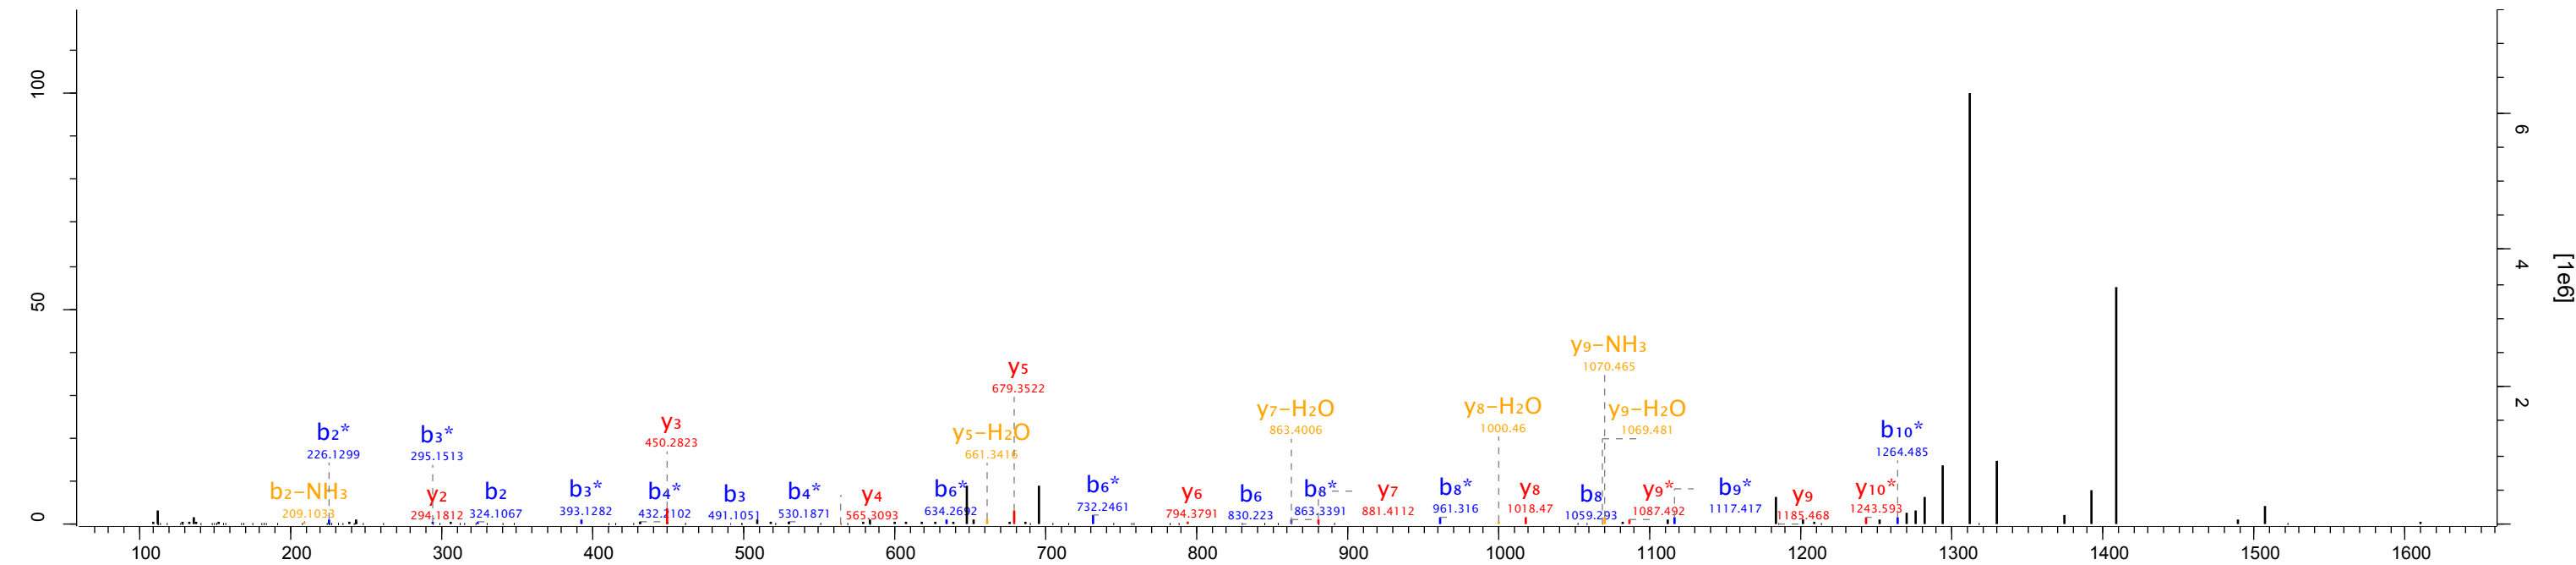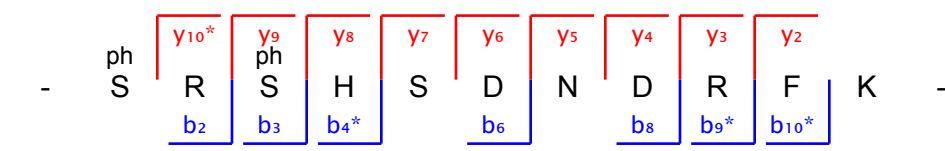

20150812\_A375SR\_Phospho\_BR1\_03

25514 FTMS; HCD 196.06 1151 RGS12

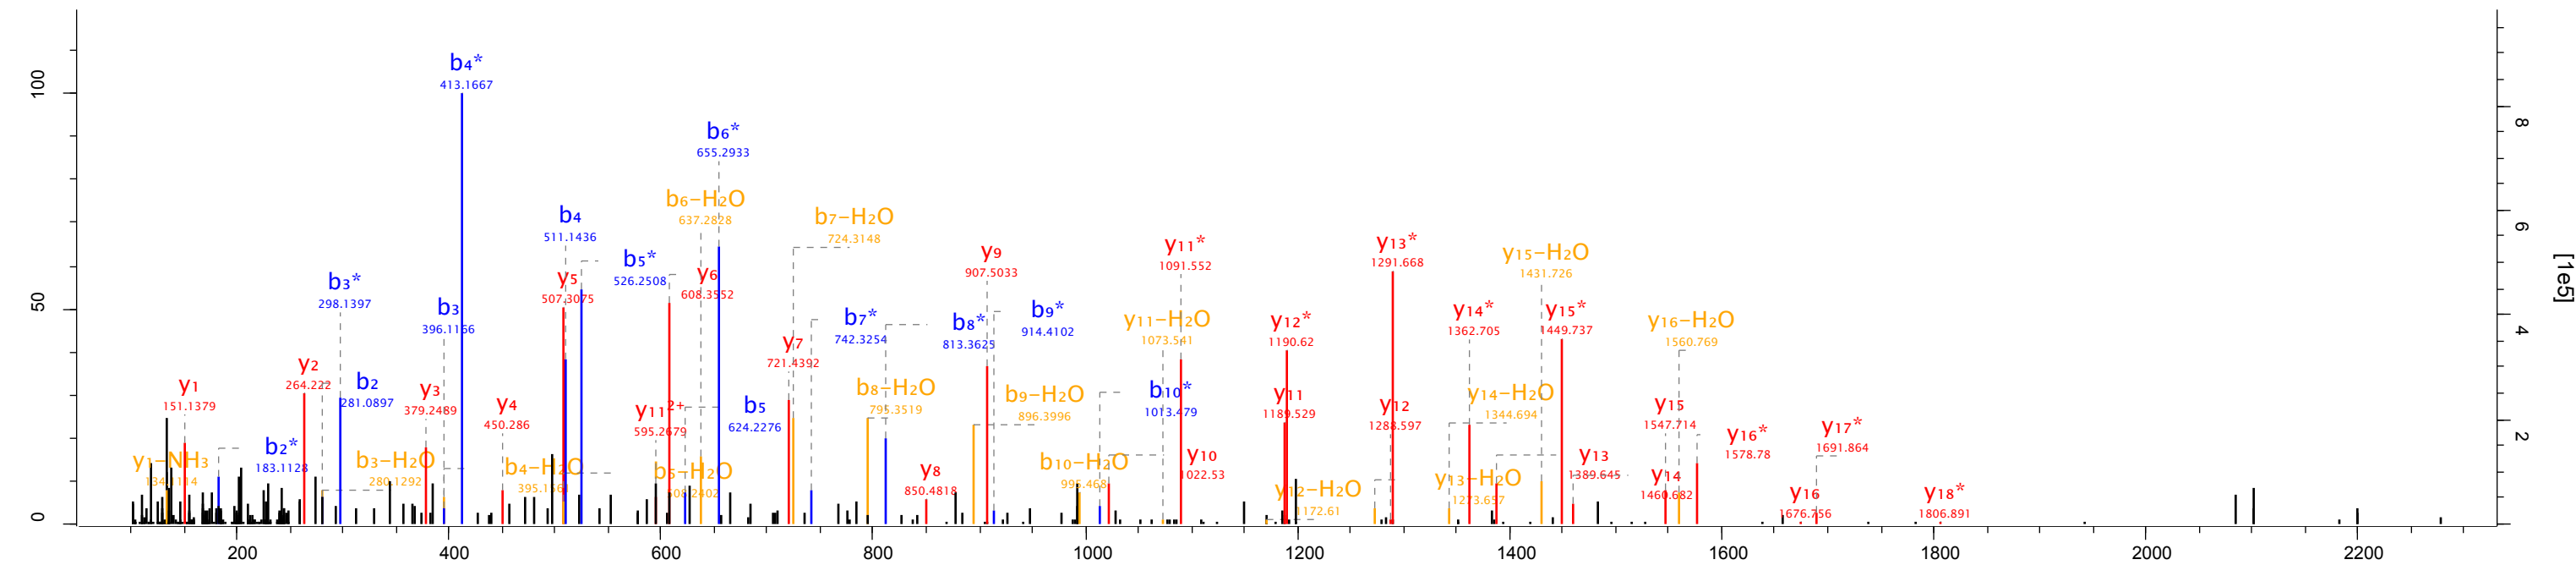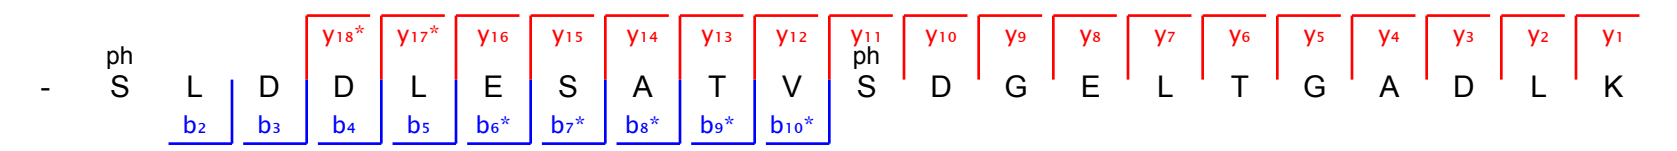

Raw file: 20150812\_A375SR\_Phospho\_BR1\_03  
 Scan: 25524 Method: FTMS; HCD Score: 142.62 m/z: 918.4 Gene names: ZMYND8

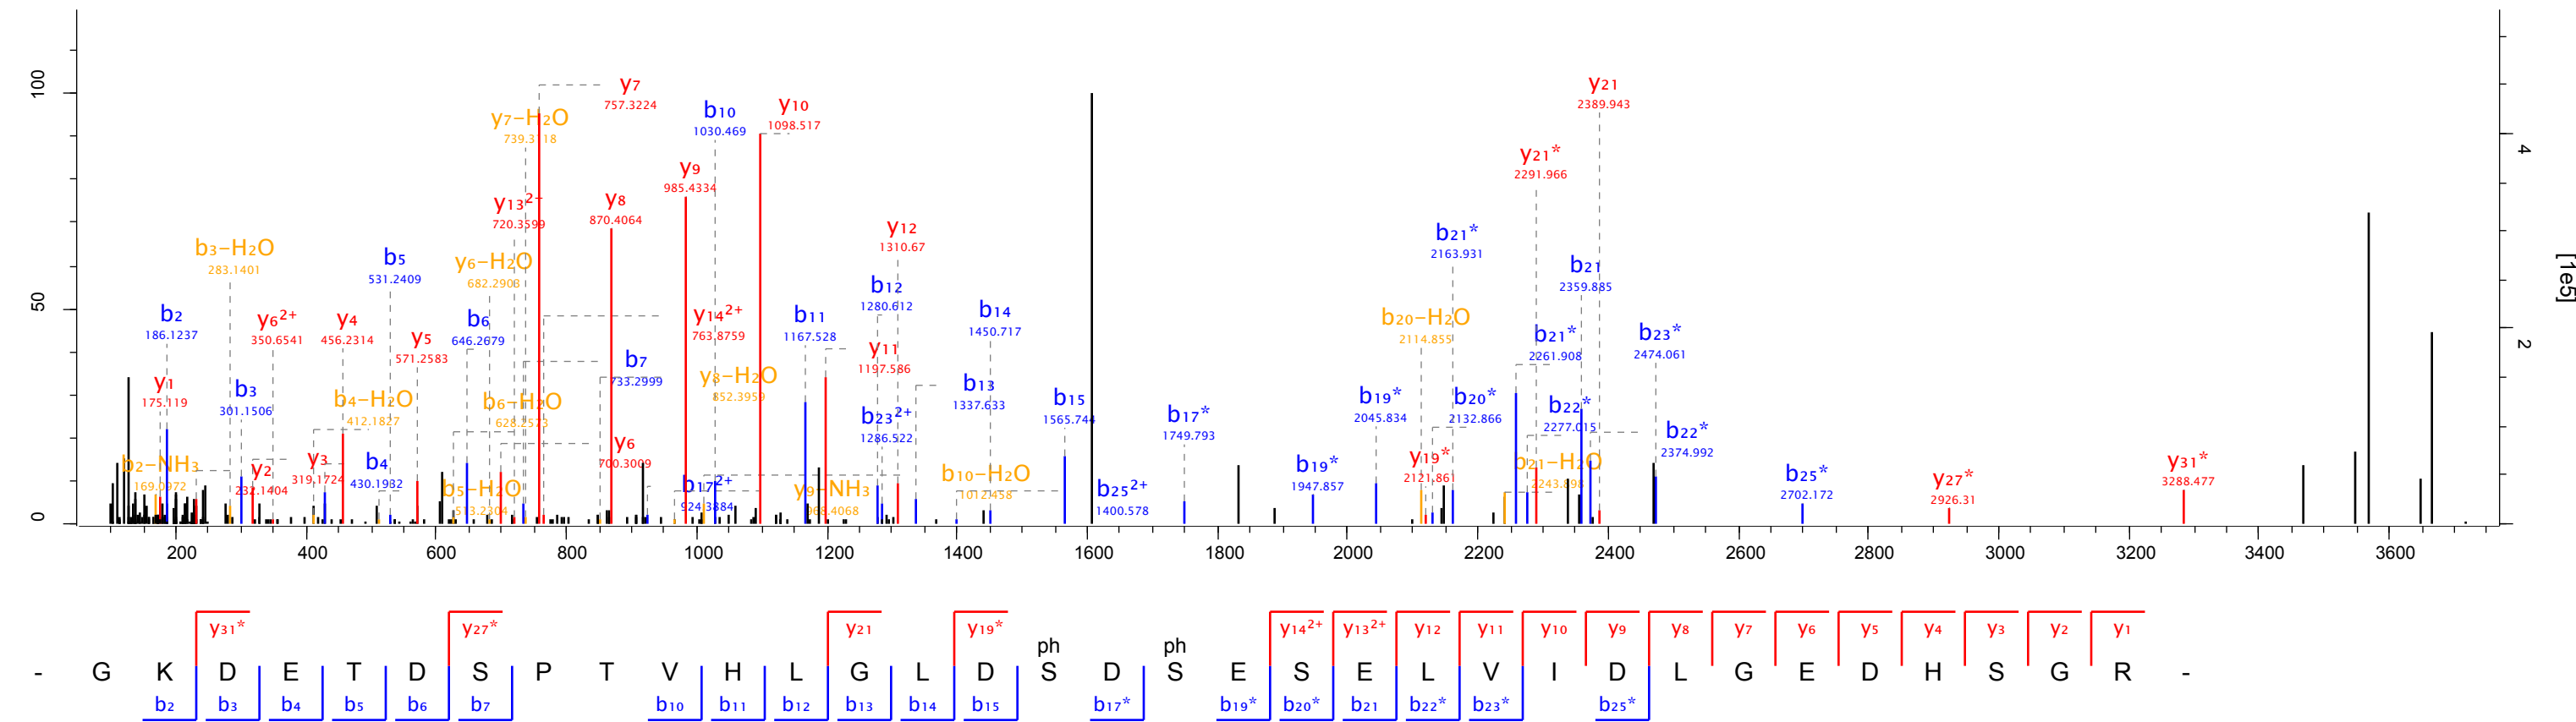

Raw file: 20150812\_A375SR\_Phospho\_BR1\_03  
 Scan: 25584 Method: FTMS; HCD Score: 65.22 m/z: 1112.45 Gene names: TNRC18

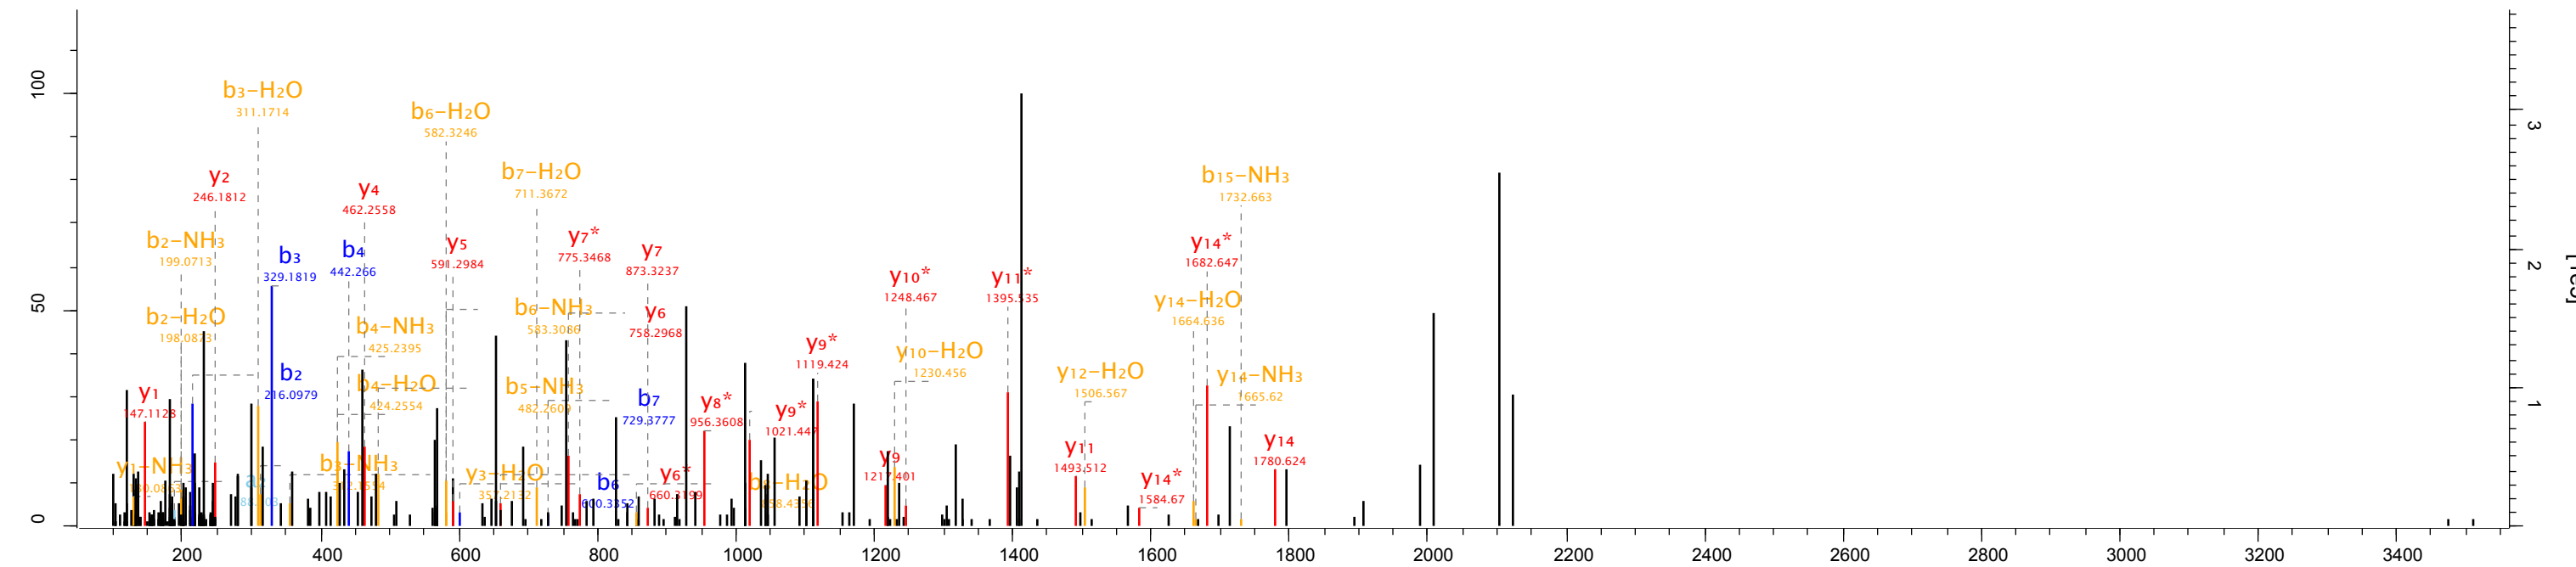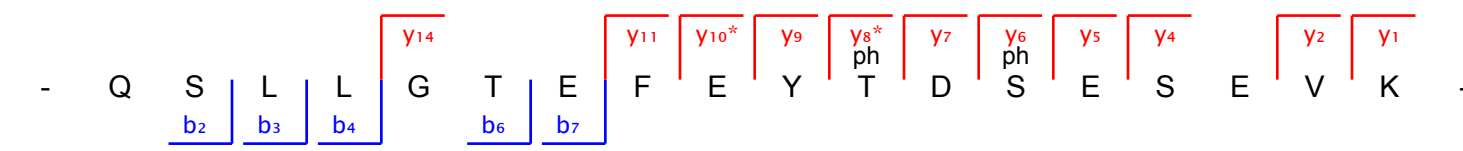

Raw file Scan Method Score m/z Gene names  
 20150812\_A375SR\_Phospho\_BR1\_03 25664 FTMS; HCD 328.47 1426.64 UTP14A

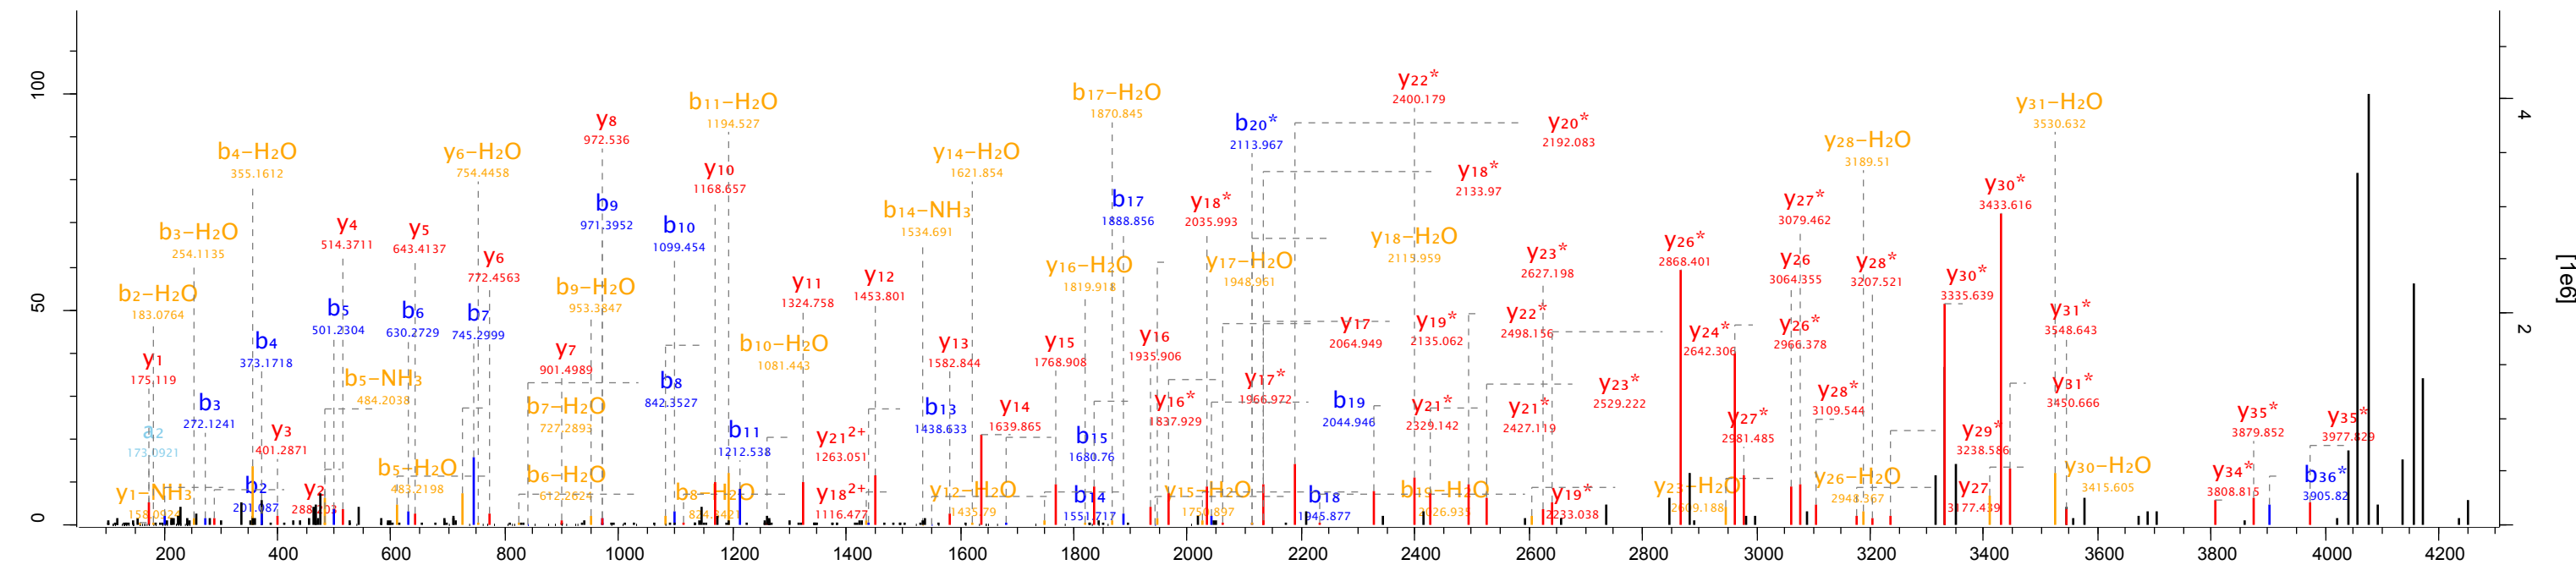

- E A A T Q E D P E Q L P E L E A H G V S E S E G E E R P V A E E E I L L R -

b<sub>2</sub>
b<sub>3</sub>
b<sub>4</sub>
b<sub>5</sub>
b<sub>6</sub>
b<sub>7</sub>
b<sub>8</sub>
b<sub>9</sub>
b<sub>10</sub>
b<sub>11</sub>
b<sub>13</sub>
b<sub>14</sub>
b<sub>15</sub>
b<sub>17</sub>
b<sub>18</sub>
b<sub>19</sub>
b<sub>20</sub>\*
y<sub>1</sub>
y<sub>2</sub>
y<sub>3</sub>
y<sub>4</sub>
y<sub>5</sub>
y<sub>6</sub>
y<sub>7</sub>
y<sub>8</sub>
y<sub>10</sub>
y<sub>11</sub>
y<sub>12</sub>
y<sub>13</sub>
y<sub>14</sub>
y<sub>15</sub>
y<sub>16</sub>
y<sub>17</sub>
y<sub>18</sub>\*
y<sub>19</sub>\*
y<sub>20</sub>\*
y<sub>21</sub>\*
y<sub>22</sub>\*
y<sub>23</sub>\*
y<sub>24</sub>\*
y<sub>26</sub>\*
y<sub>27</sub>\*
y<sub>28</sub>\*
y<sub>29</sub>\*
y<sub>30</sub>\*
y<sub>31</sub>\*
y<sub>34</sub>\*
y<sub>35</sub>\*
y<sub>36</sub>\*

20150812\_A375SR\_Phospho\_BR1\_03

26034 FTMS; HCD 107.16 1298.55 KLC2

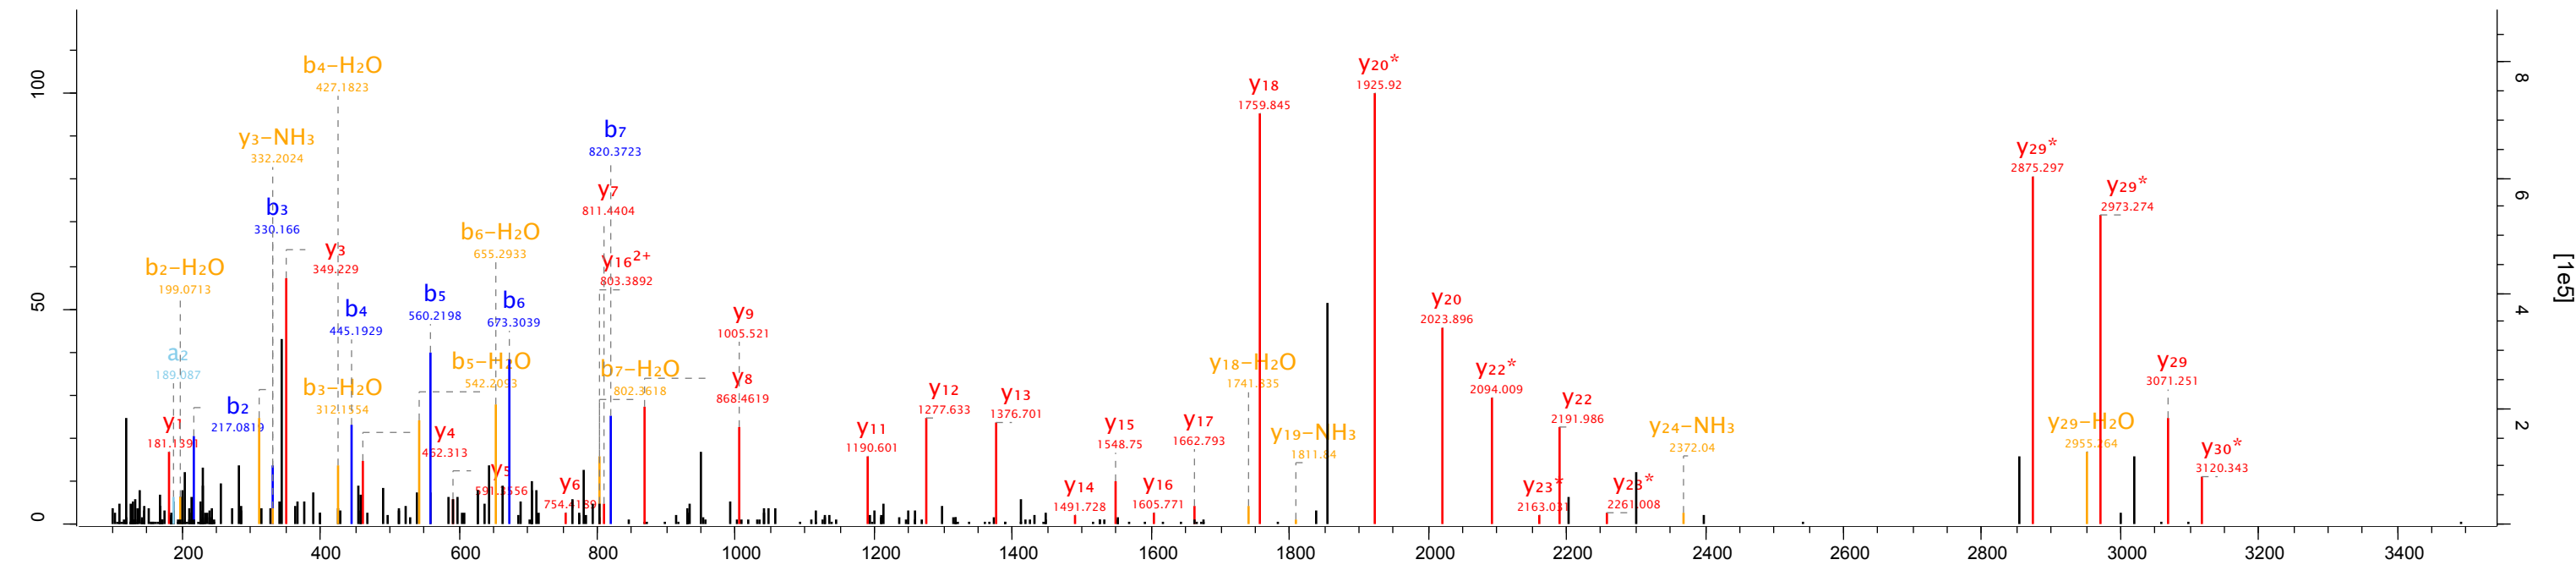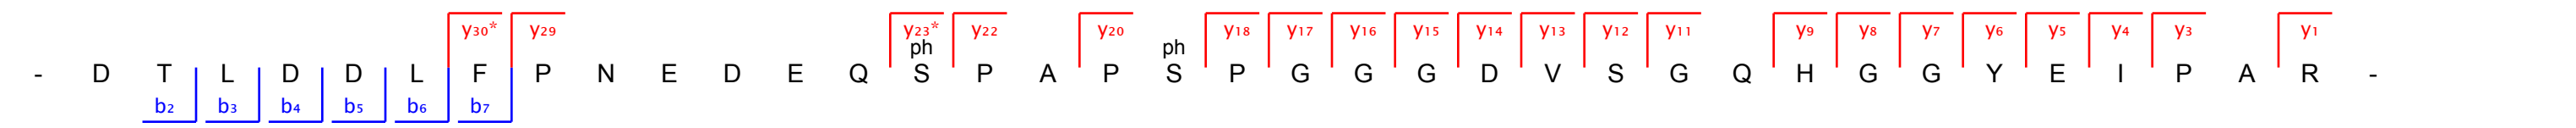



Raw file 20150812\_A375SR\_Phospho\_BR1\_03 Scan 26064 Method FTMS; HCD Score 115.42 m/z 849.83 Gene names KIAA1468

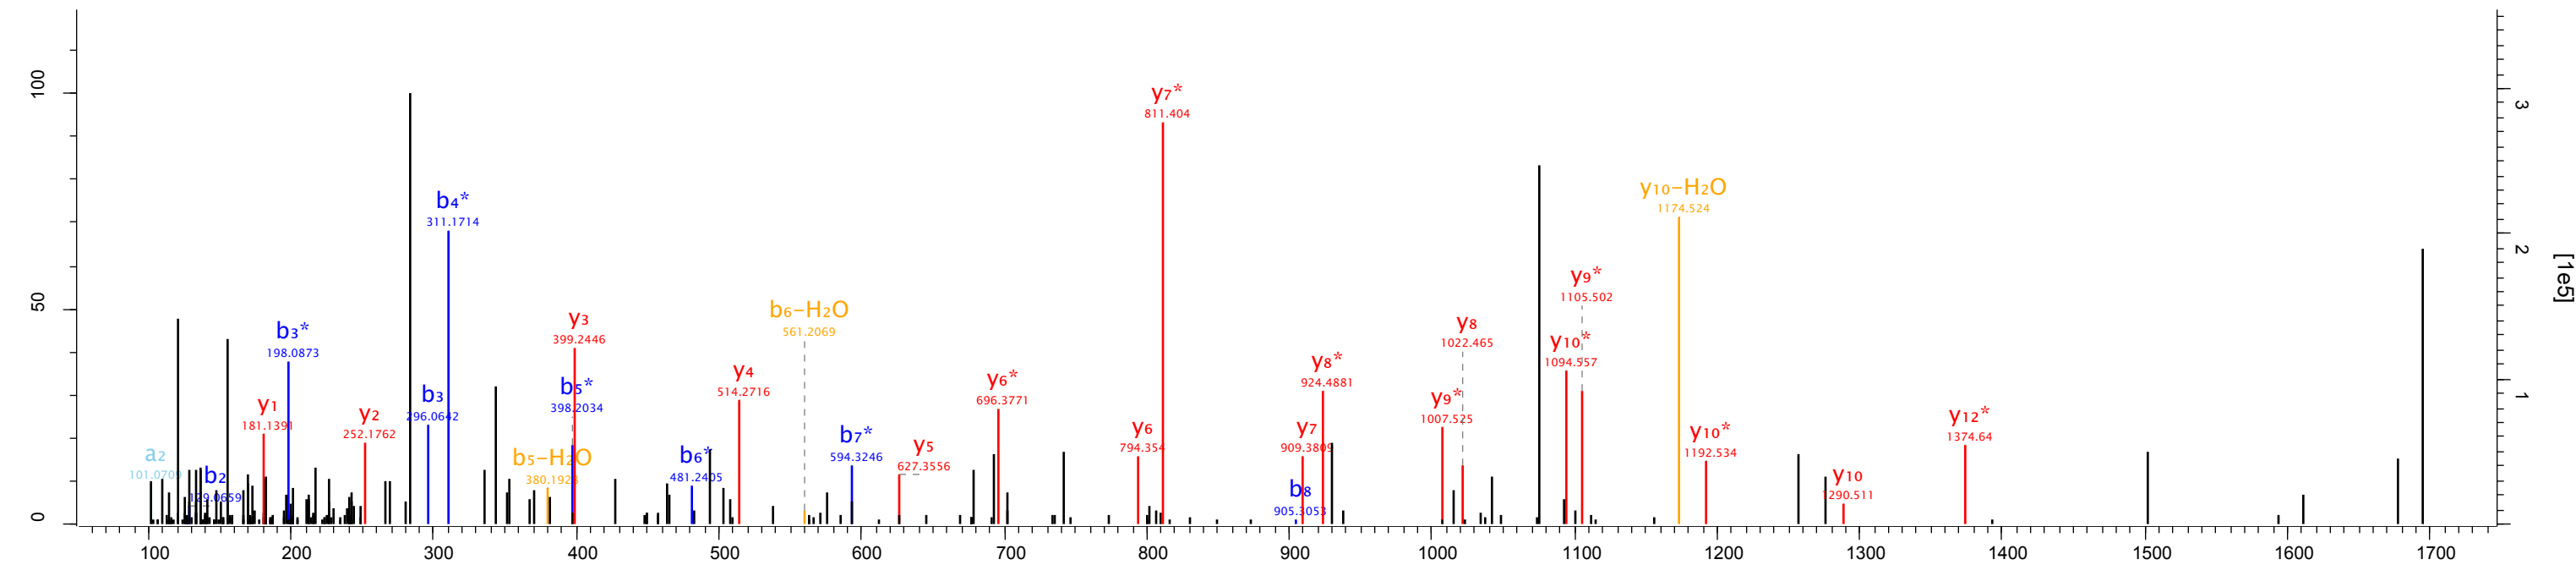

- A G S I S T L D S L D F A R -

Fragmentation mapping (b and y ions):

- b2: G
- b3: S
- b4\*: I
- b5\*: S
- b6\*: T
- b7\*: L
- b8: D
- y1: R
- y2: A
- y3: F
- y4: D
- y5: L
- y6: S
- y7: D
- y8: L
- y9: T
- y10: S
- y12\*: R

Raw file  
 20150812\_A375SR\_Phospho\_BR1\_03  
 Scan 26374 Method FTMS; HCD Score 144.53 m/z 1167.28 Gene names CD3EAP

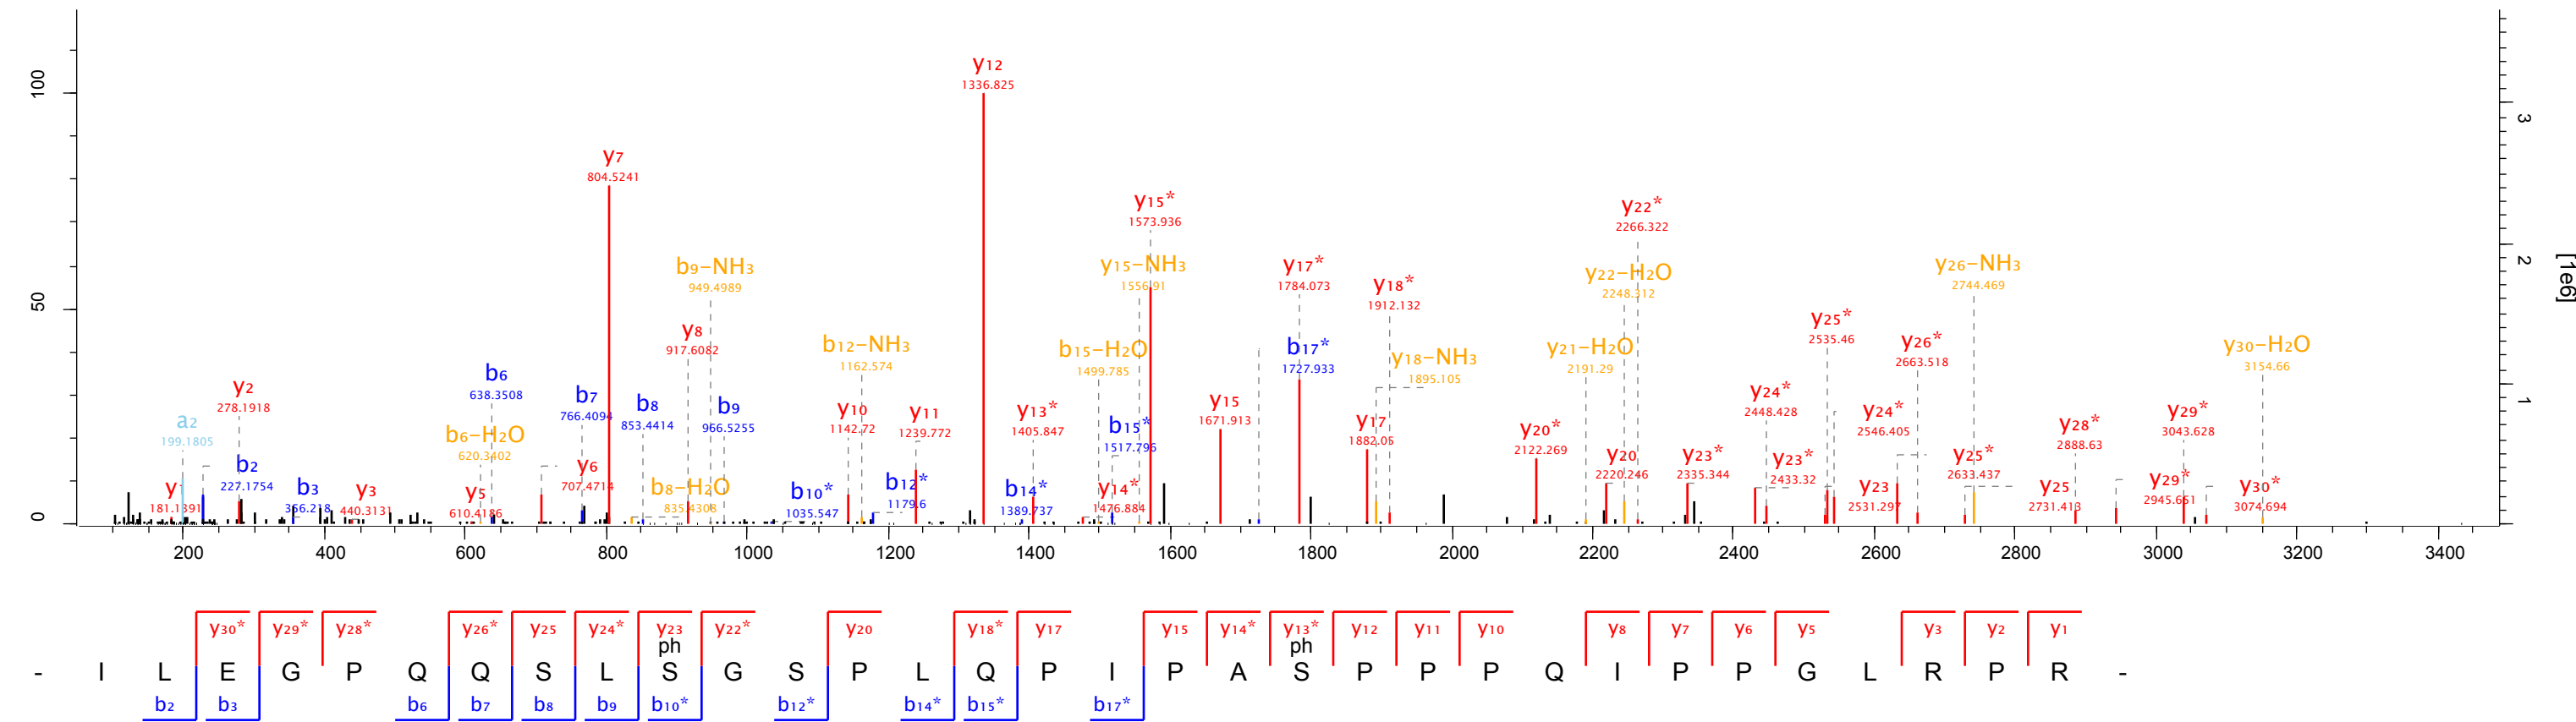

Raw file: 20150812\_A375SR\_Phospho\_BR1\_03  
 Scan: 27164 Method: FTMS; HCD Score: 166.78 m/z: 1219.93 Gene names: RPLP0;RPLP0P6

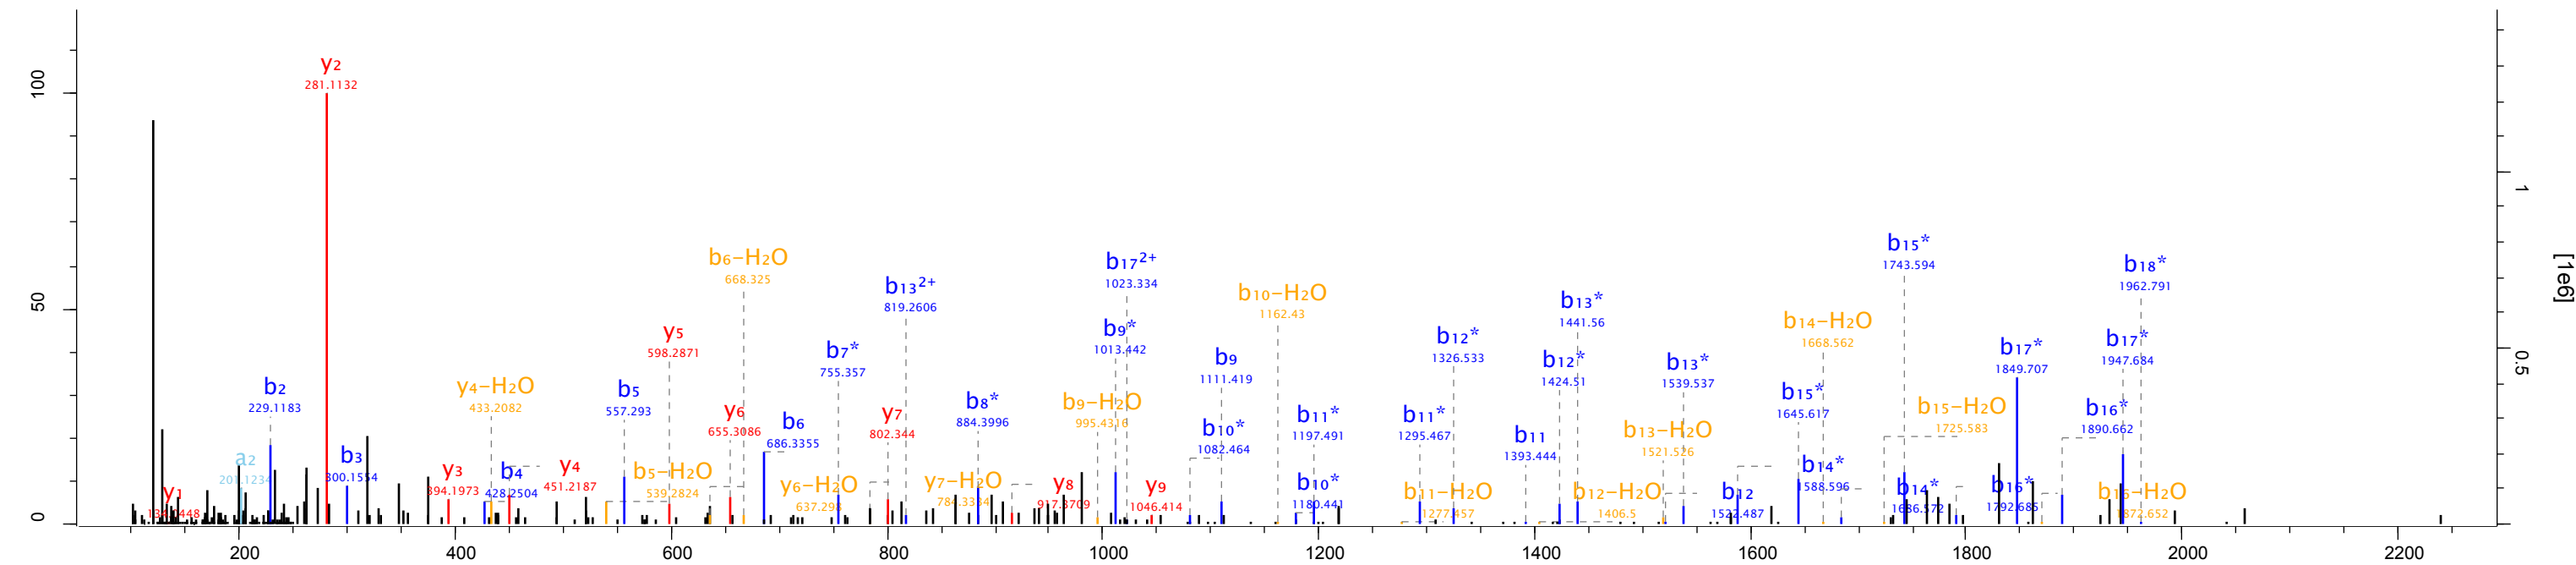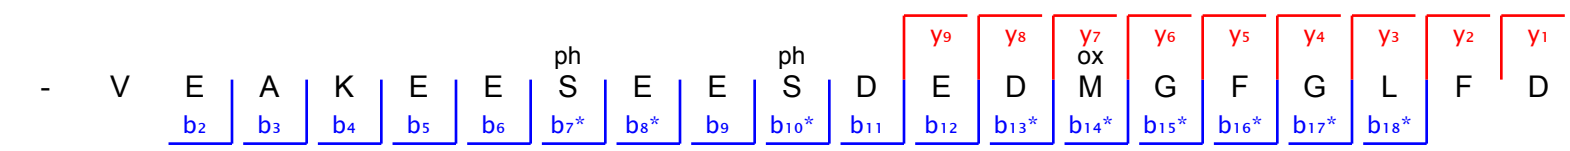

Raw file Scan Method Score m/z Gene names  
 20150812\_A375SR\_Phospho\_BR1\_03 28024 FTMS; HCD 89.81 999.08 ARHGAP35

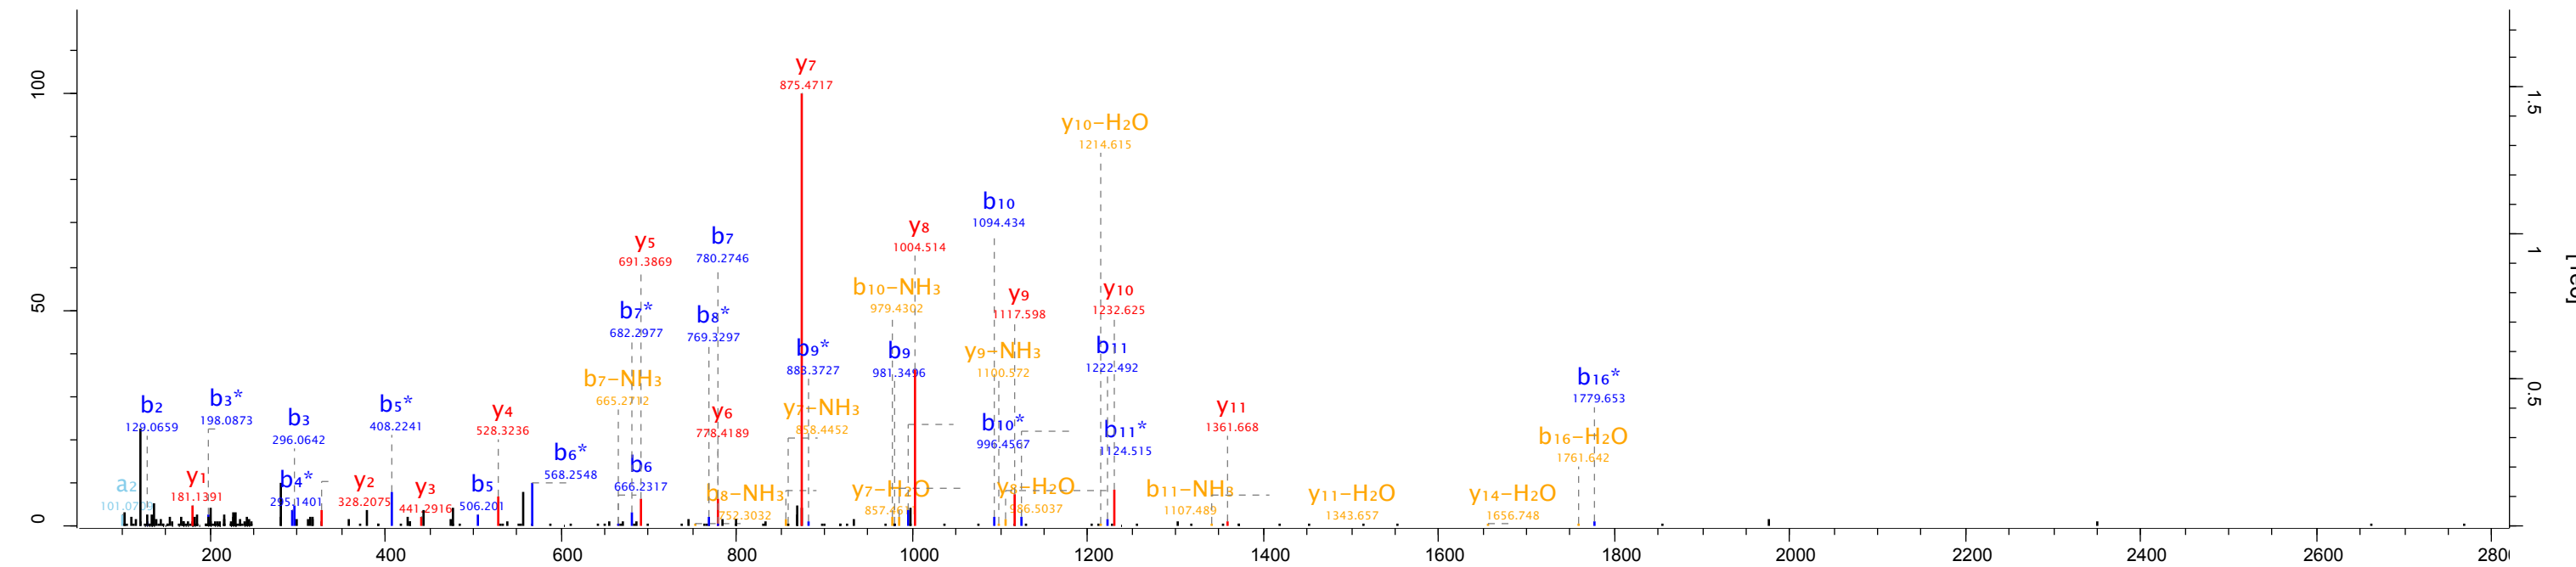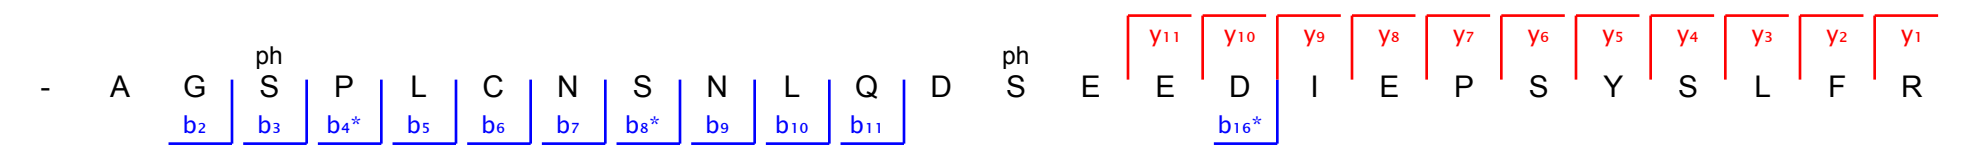

Raw file 20150812\_A375SR\_Phospho\_BR1\_03 Scan 28104 Method FTMS; HCD Score 99.06 m/z 1129.99 Gene names EME1

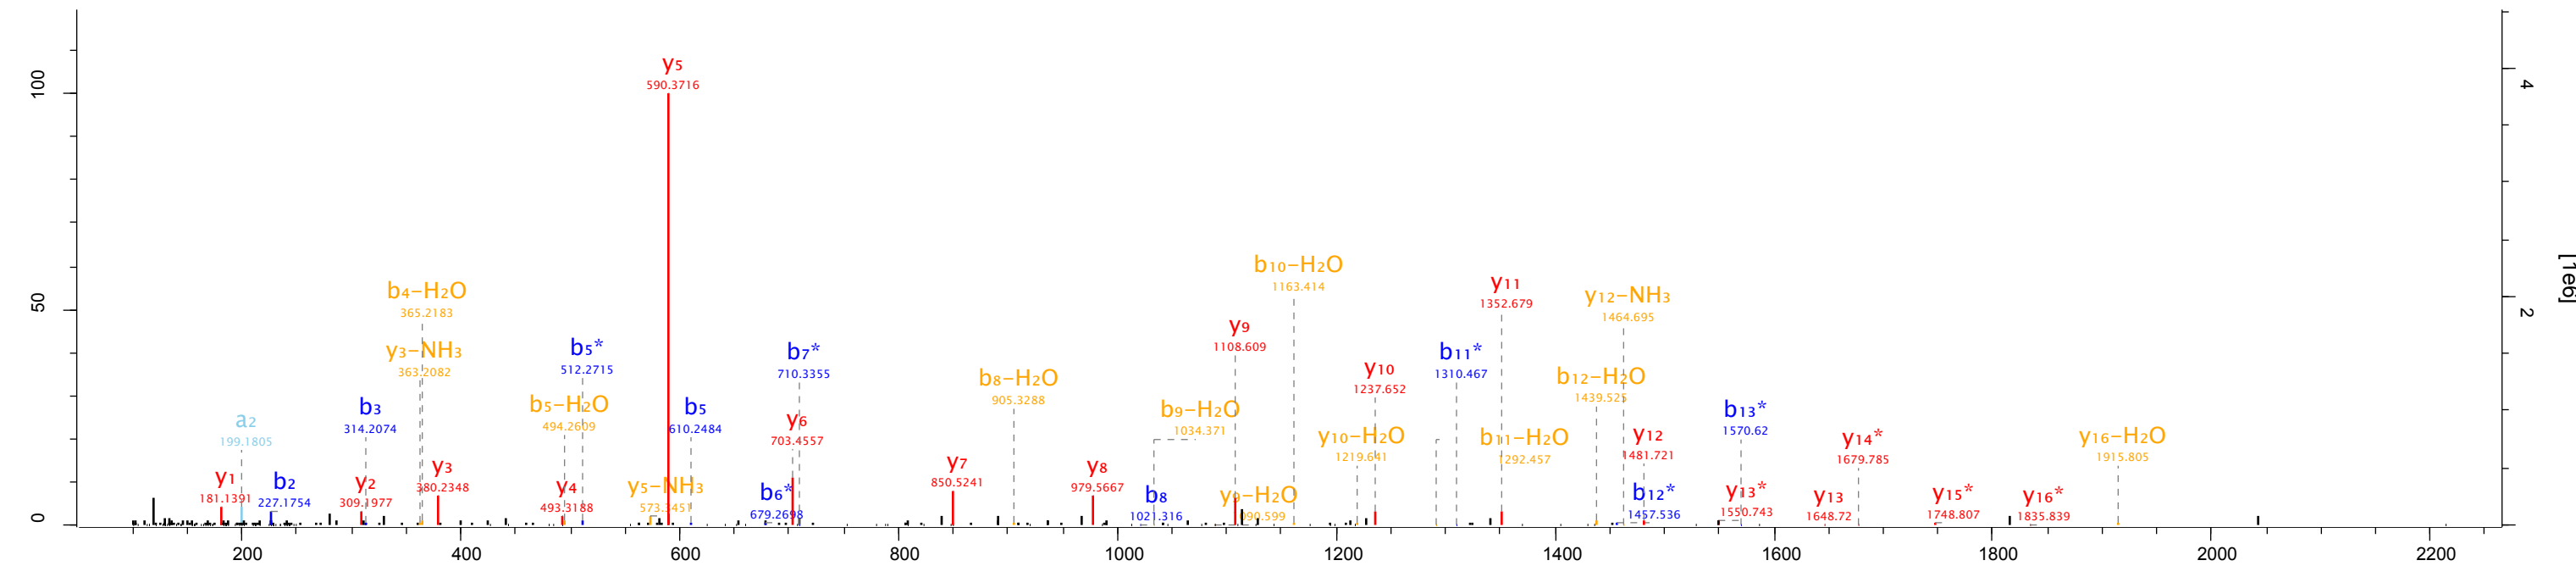

- L L S S E S E D E E E F I P L A Q R -

b<sub>2</sub>
b<sub>3</sub>
b<sub>5</sub>
b<sub>6</sub><sup>\*</sup>
b<sub>7</sub><sup>\*</sup>
b<sub>8</sub>
b<sub>11</sub><sup>\*</sup>
b<sub>12</sub><sup>\*</sup>
b<sub>13</sub><sup>\*</sup>

y<sub>16</sub><sup>\*</sup>
y<sub>15</sub><sup>\*</sup>
y<sub>14</sub><sup>\*</sup>
y<sub>13</sub>
y<sub>12</sub>
y<sub>11</sub>
y<sub>10</sub>
y<sub>9</sub>
y<sub>8</sub>
y<sub>7</sub>
y<sub>6</sub>
y<sub>5</sub>
y<sub>4</sub>
y<sub>3</sub>
y<sub>2</sub>
y<sub>1</sub>

Raw file 20150812\_A375SR\_Phospho\_BR1\_03 Scan 28694 Method FTMS; HCD Score 225.34 m/z 961.38 Gene names EHBP1

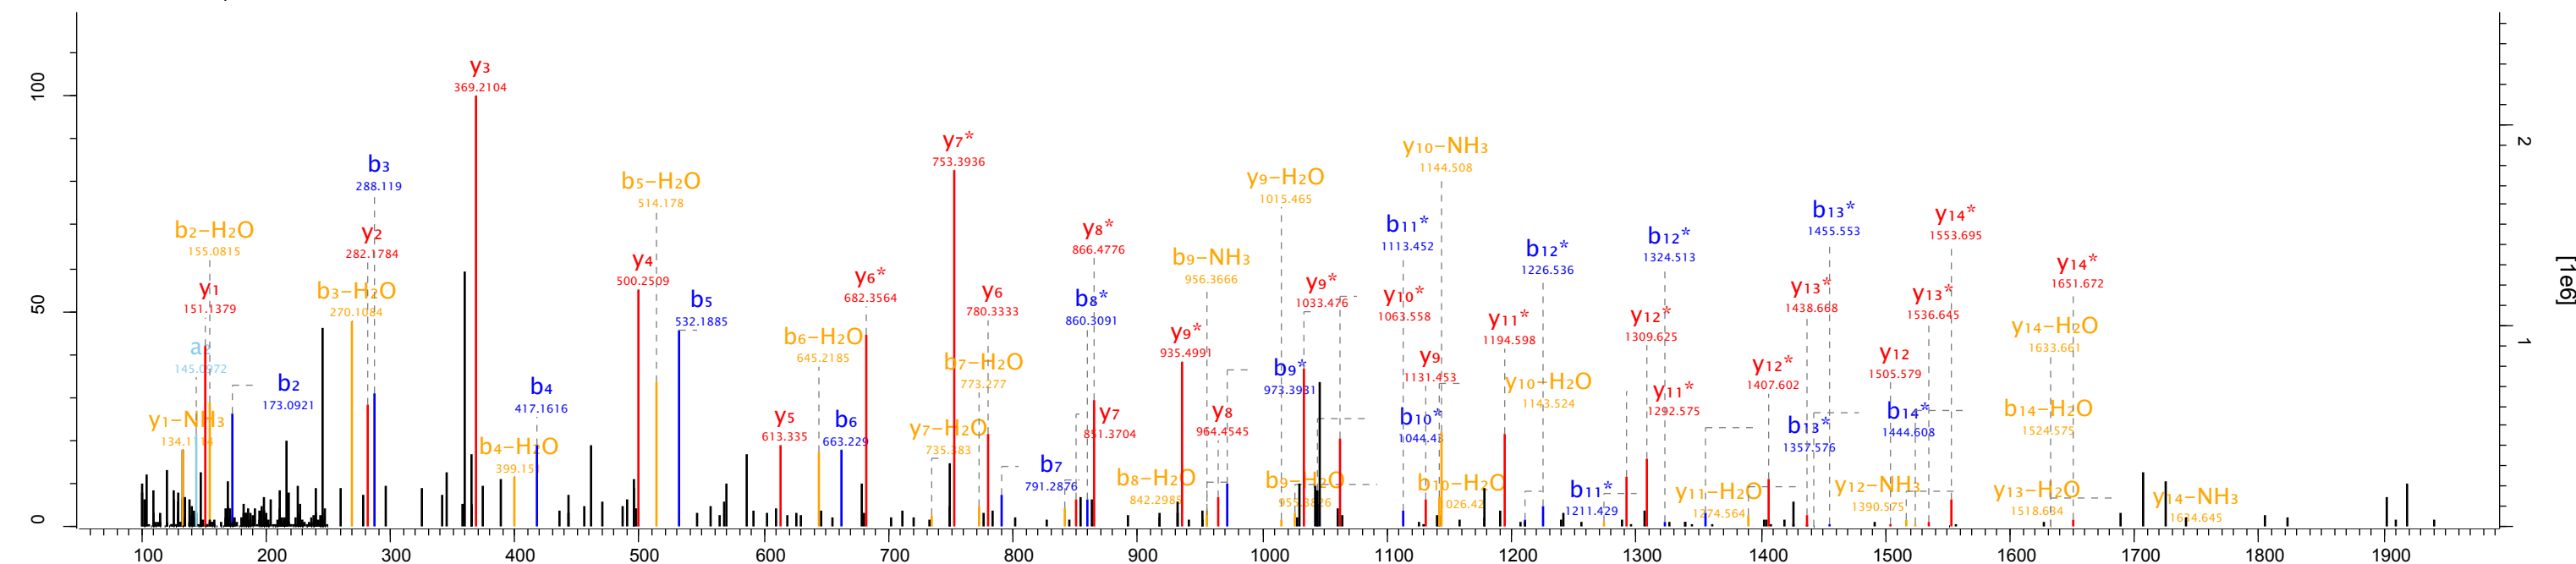

- A T D E D M Q S L A S L M S M K -

b<sub>2</sub>
b<sub>3</sub>
b<sub>4</sub>
b<sub>5</sub>
b<sub>6</sub>
b<sub>7</sub>
b<sub>8</sub>\*
b<sub>9</sub>\*
b<sub>10</sub>\*
b<sub>11</sub>\*
b<sub>12</sub>\*
b<sub>13</sub>\*
b<sub>14</sub>\*

y<sub>14</sub>\*
y<sub>13</sub>\*
y<sub>12</sub>
y<sub>11</sub>\*
y<sub>10</sub>\*
y<sub>9</sub>ph
y<sub>8</sub>
y<sub>7</sub>
y<sub>6</sub>ph
y<sub>5</sub>
y<sub>4</sub>
y<sub>3</sub>
y<sub>2</sub>
y<sub>1</sub>

Raw file: 20150812\_A375SR\_Phospho\_BR1\_03  
 Scan: 2984 Method: FTMS; HCD Score: 250.98 m/z: 750.32 Gene names: RSL1D1

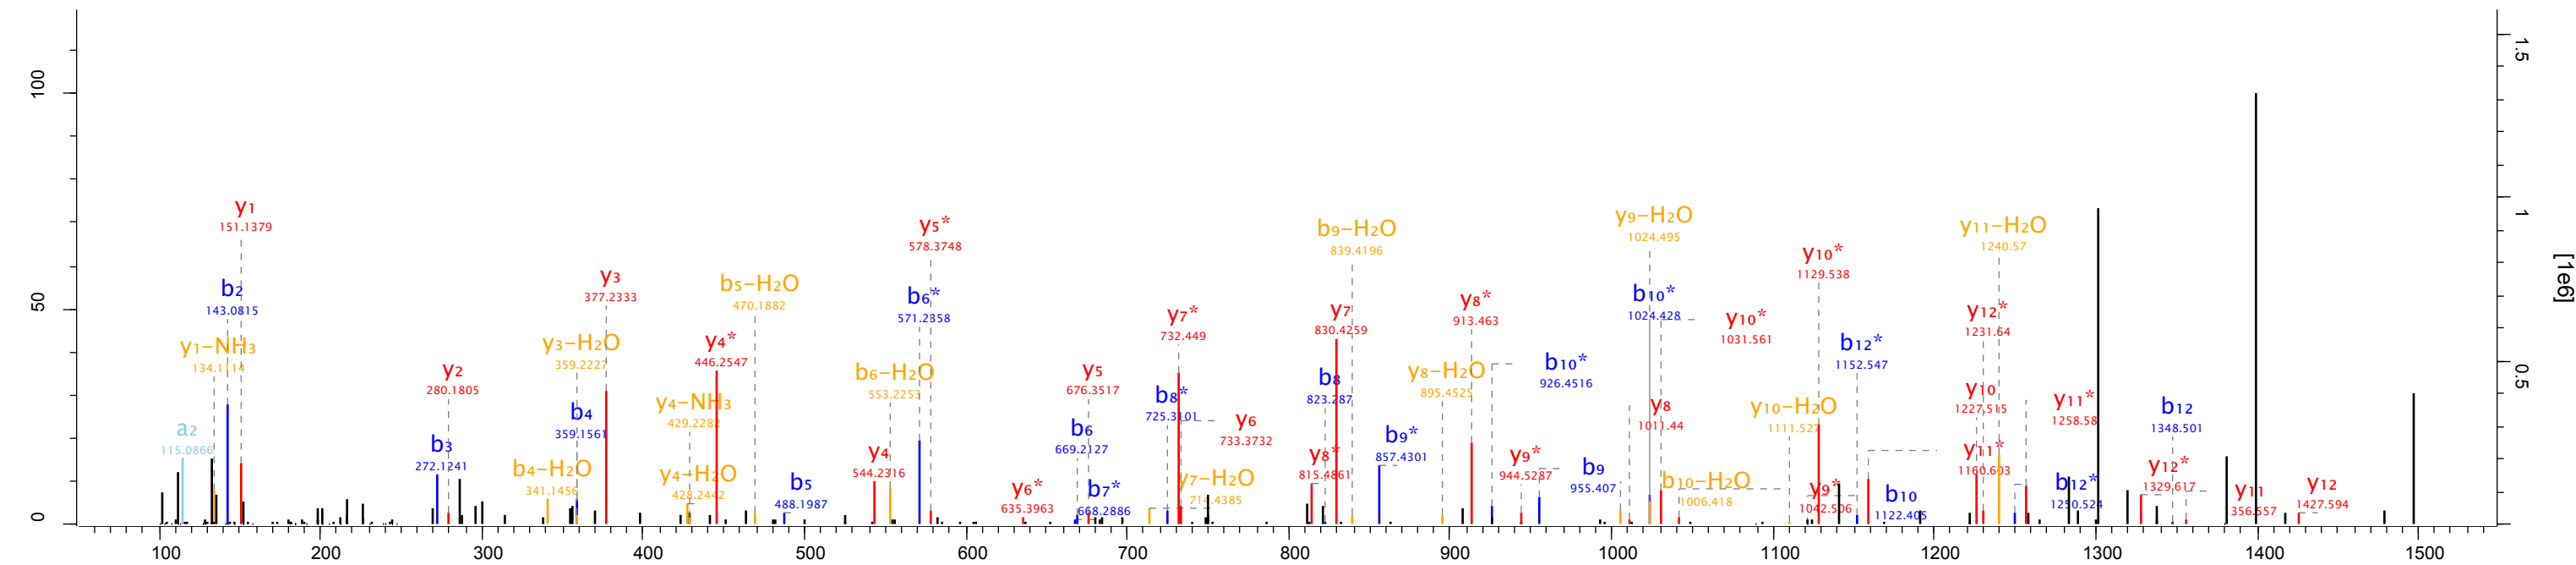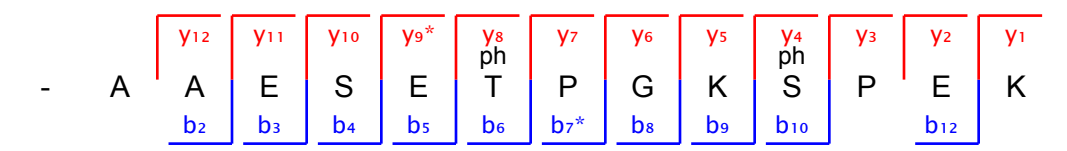

Raw file 20150812\_A375SR\_Phospho\_BR1\_03 Scan 3014 Method FTMS; HCD Score 87.36 m/z 634.25 Gene names SRSF11

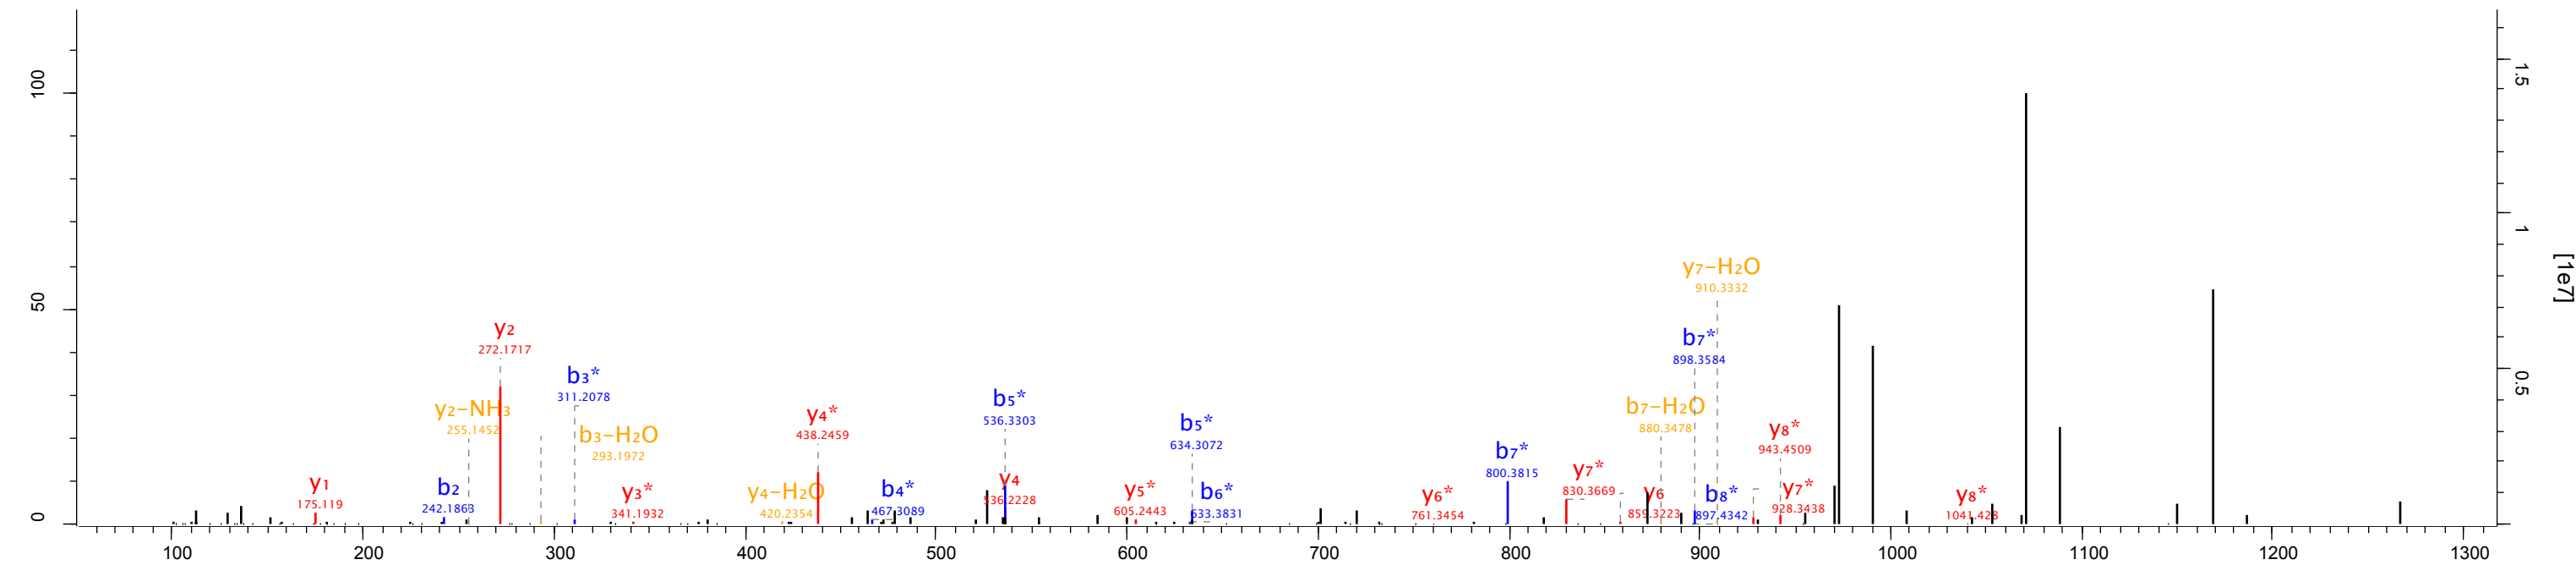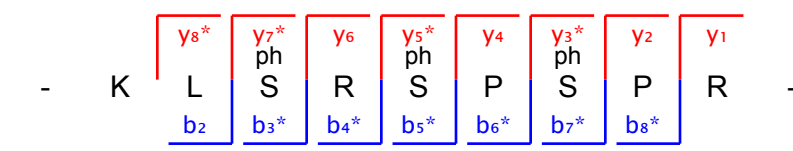



Raw file 20150812\_A375SR\_Phospho\_BR1\_03 Scan 3194 Method FTMS; HCD Score 164.8 m/z 732.79 Gene names BUD13

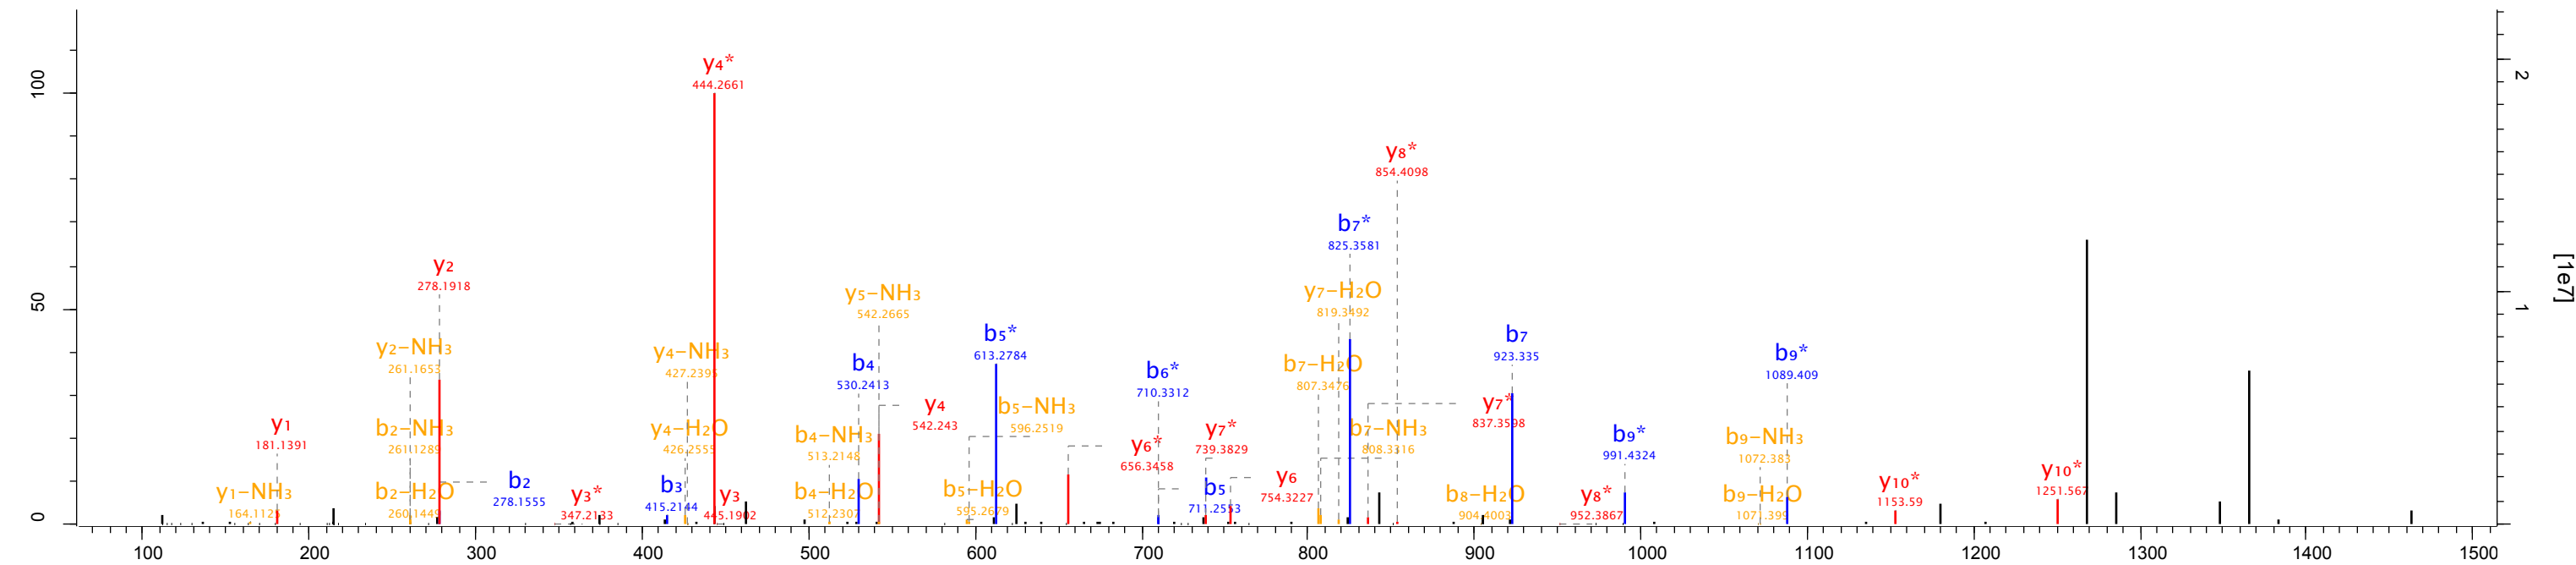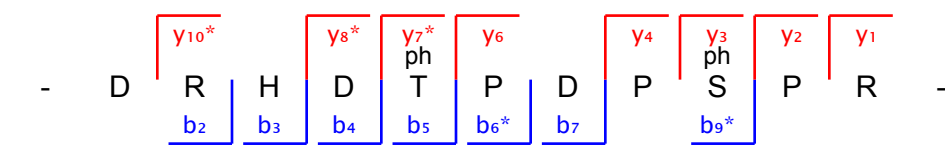

Raw file: 20150812\_A375SR\_Phospho\_BR1\_03  
 Scan: 3534 Method: FTMS; HCD Score: 109.38 m/z: 729.29 Gene names: SNX11

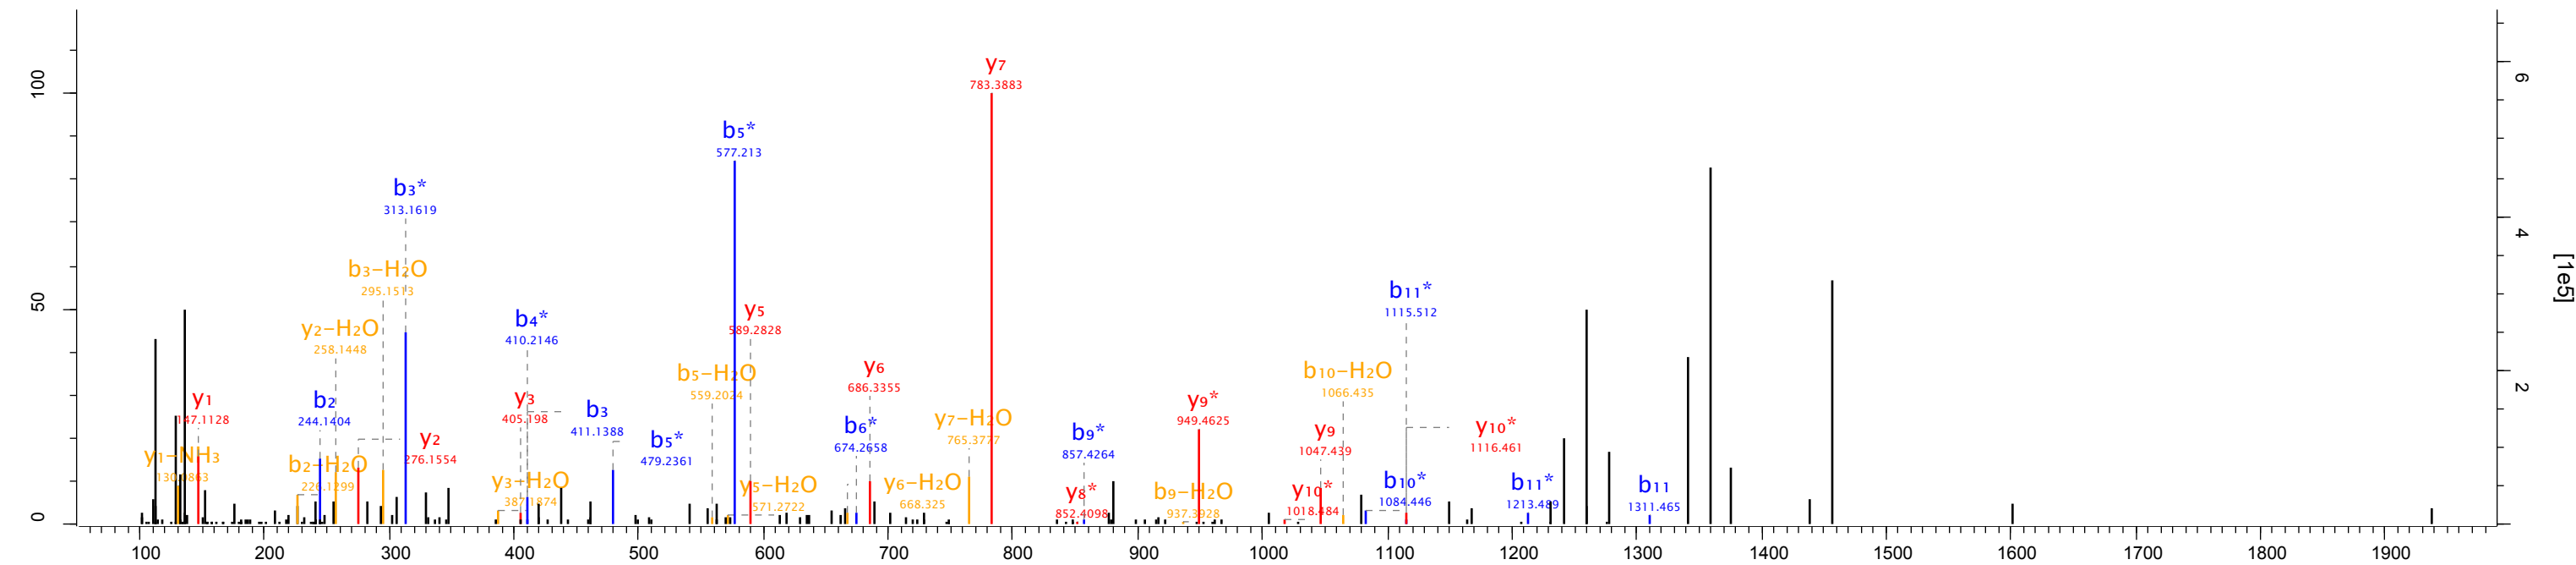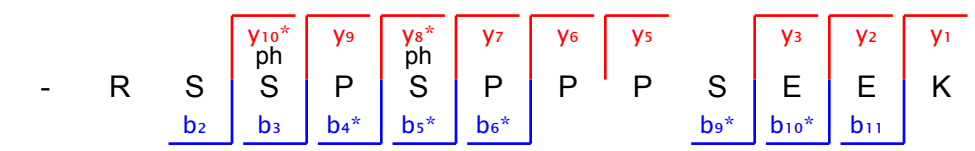

Raw file 20150812\_A375SR\_Phospho\_BR1\_03 Scan 3544 Method FTMS; HCD Score 136.02 m/z 455.24 Gene names RAD18

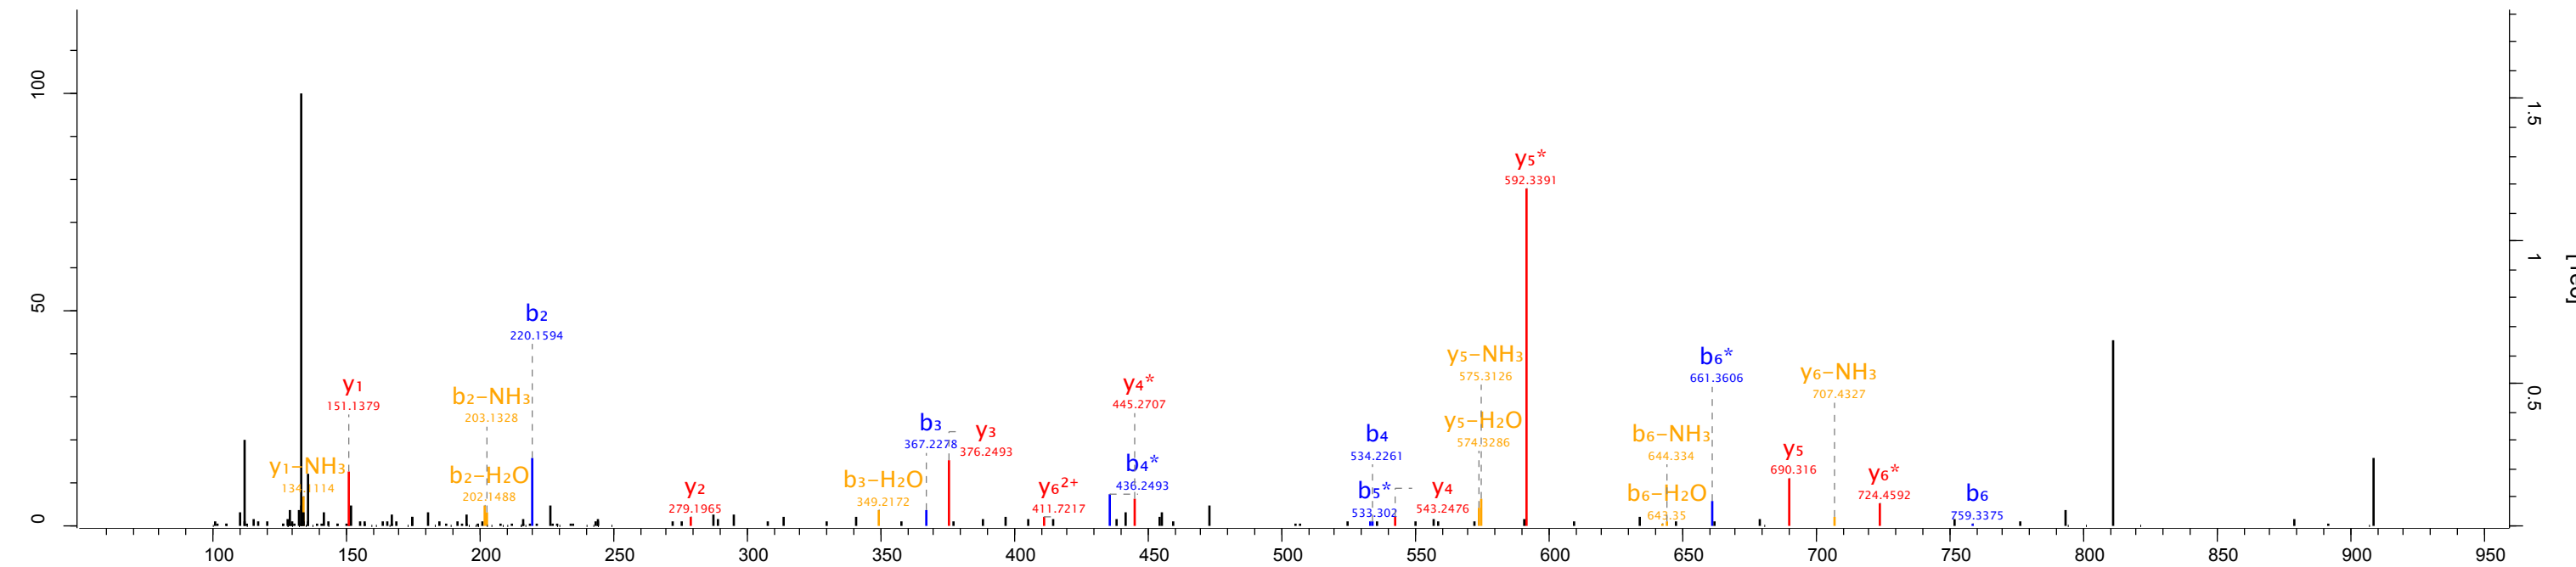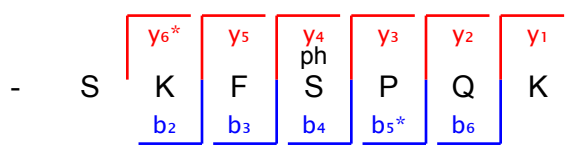

Raw file: 20150812\_A375SR\_Phospho\_BR1\_03  
 Scan: 3654  
 Method: FTMS; HCD  
 Score: 177.4  
 m/z: 601.72  
 Gene names: BUD13

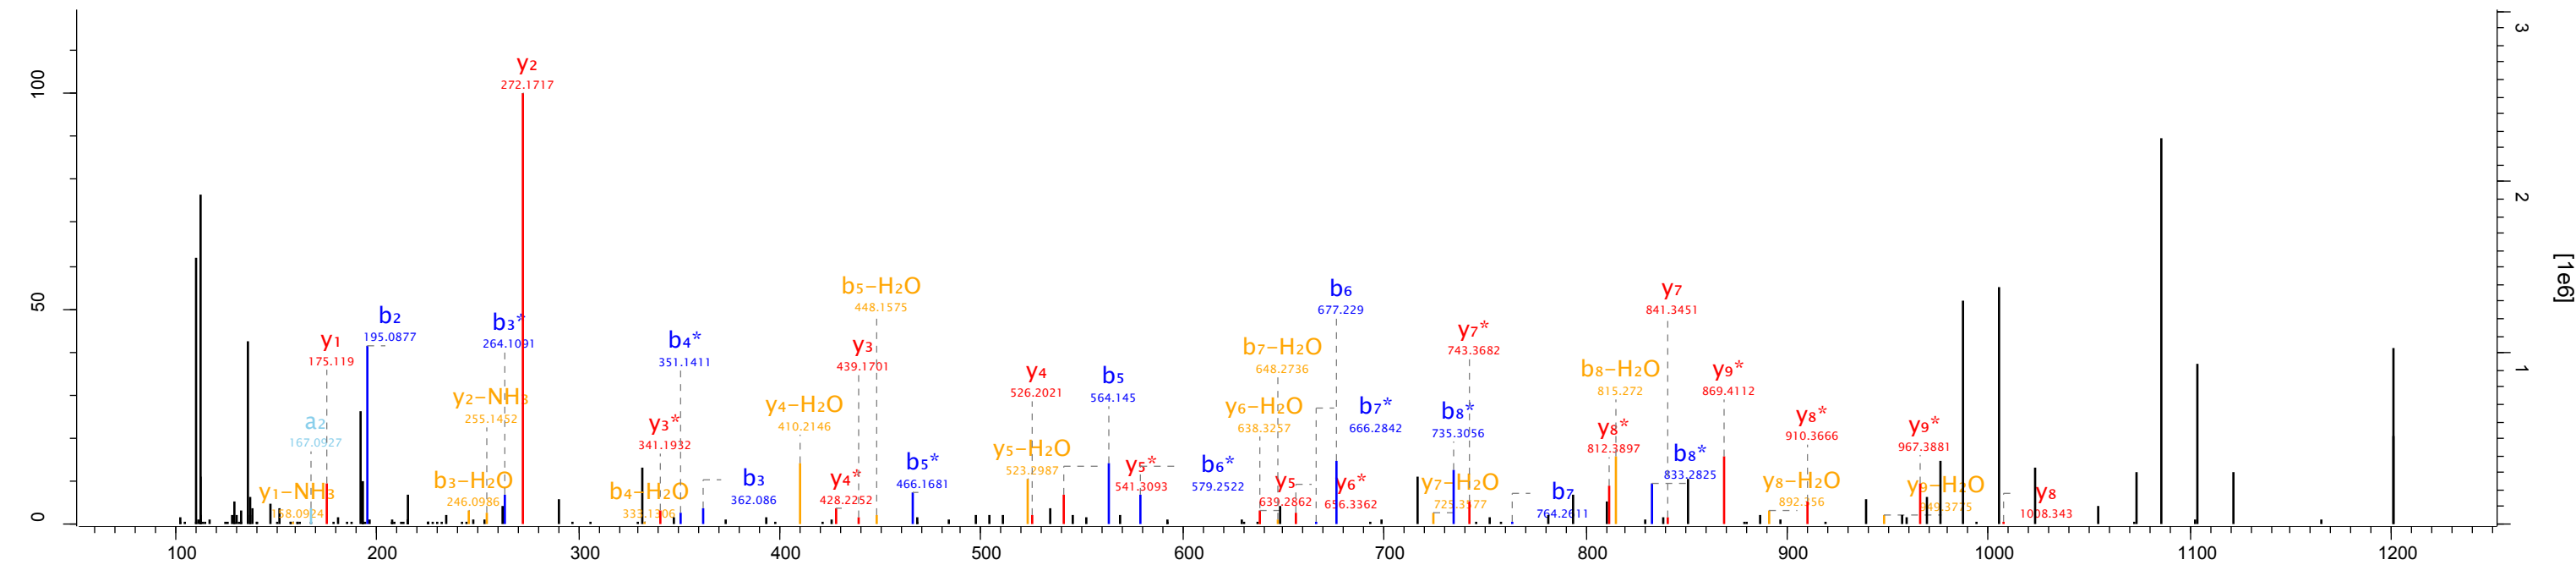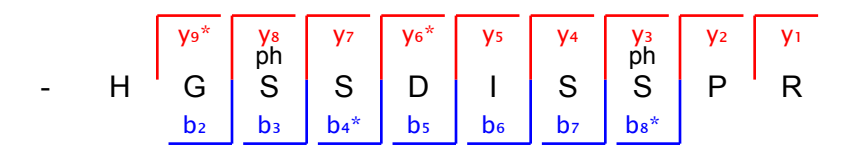

Raw file: 20150812\_A375SR\_Phospho\_BR1\_03  
 Scan: 4094 Method: FTMS; HCD Score: 395.55 m/z: 771.82 Gene names: HNRNPD

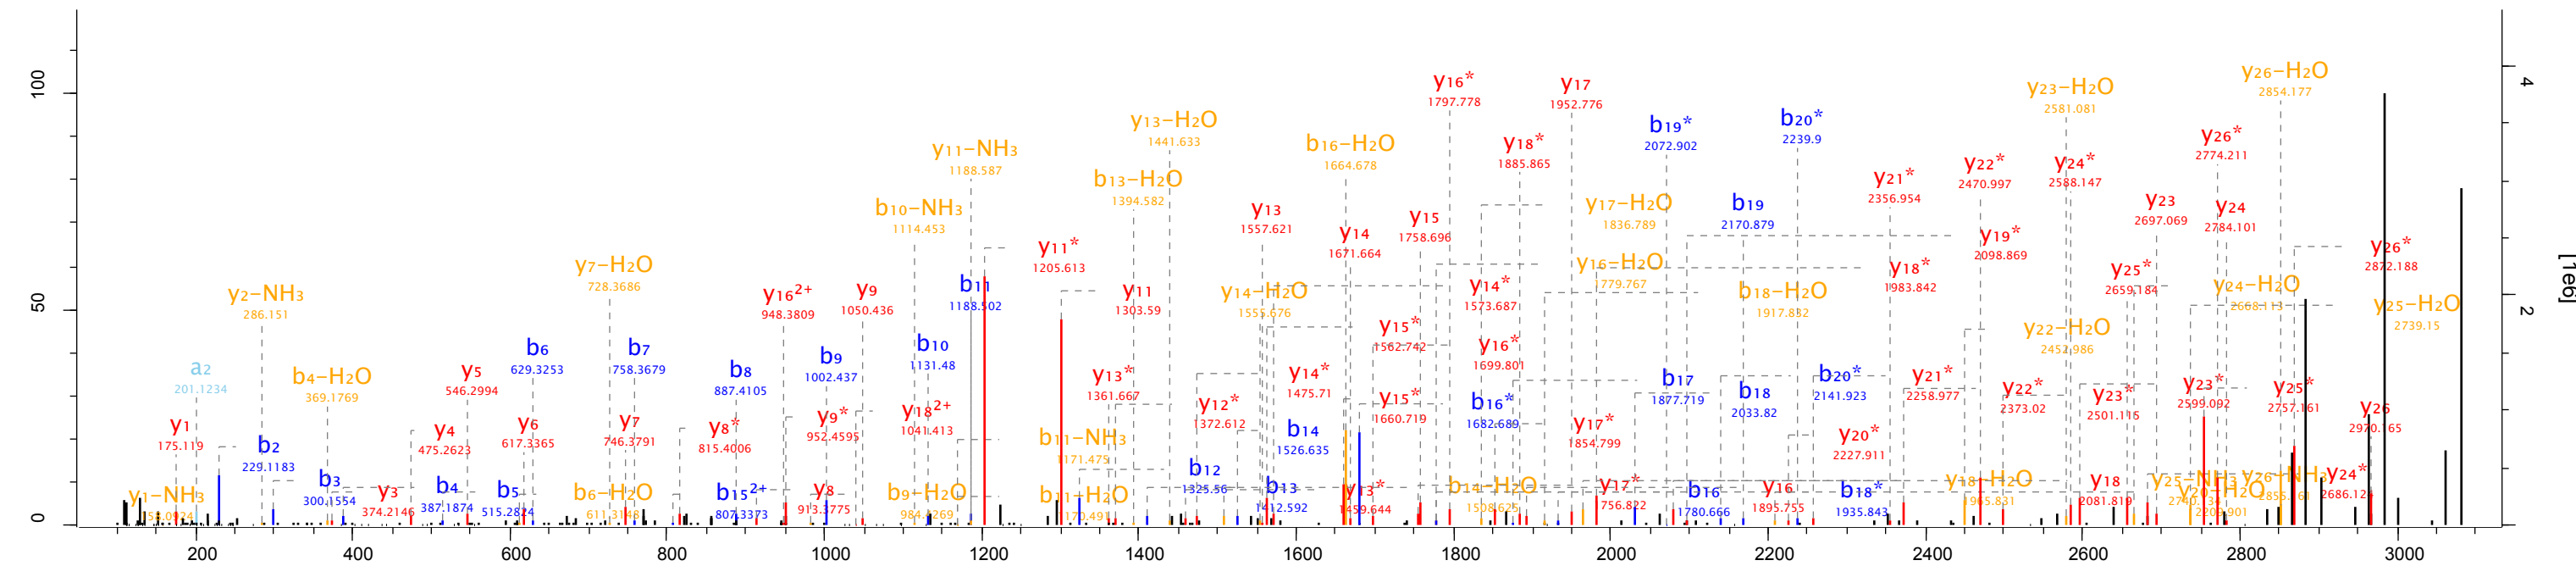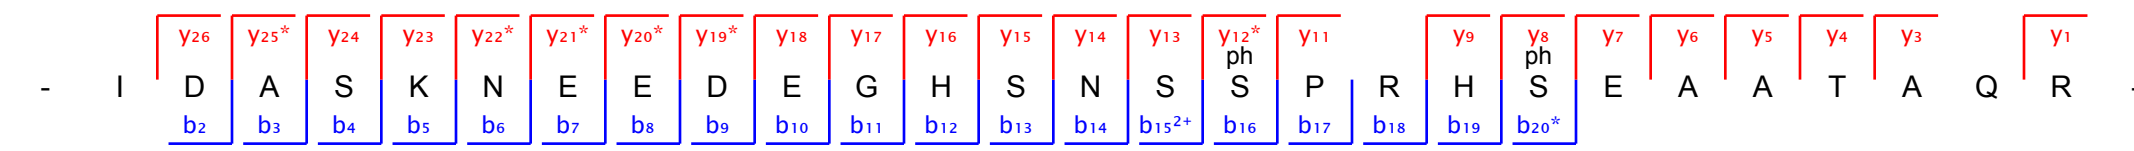

Raw file: 20150812\_A375SR\_Phospho\_BR1\_03  
 Scan: 4474 Method: FTMS; HCD Score: 146.2 m/z: 958.04 Gene names: TGS1

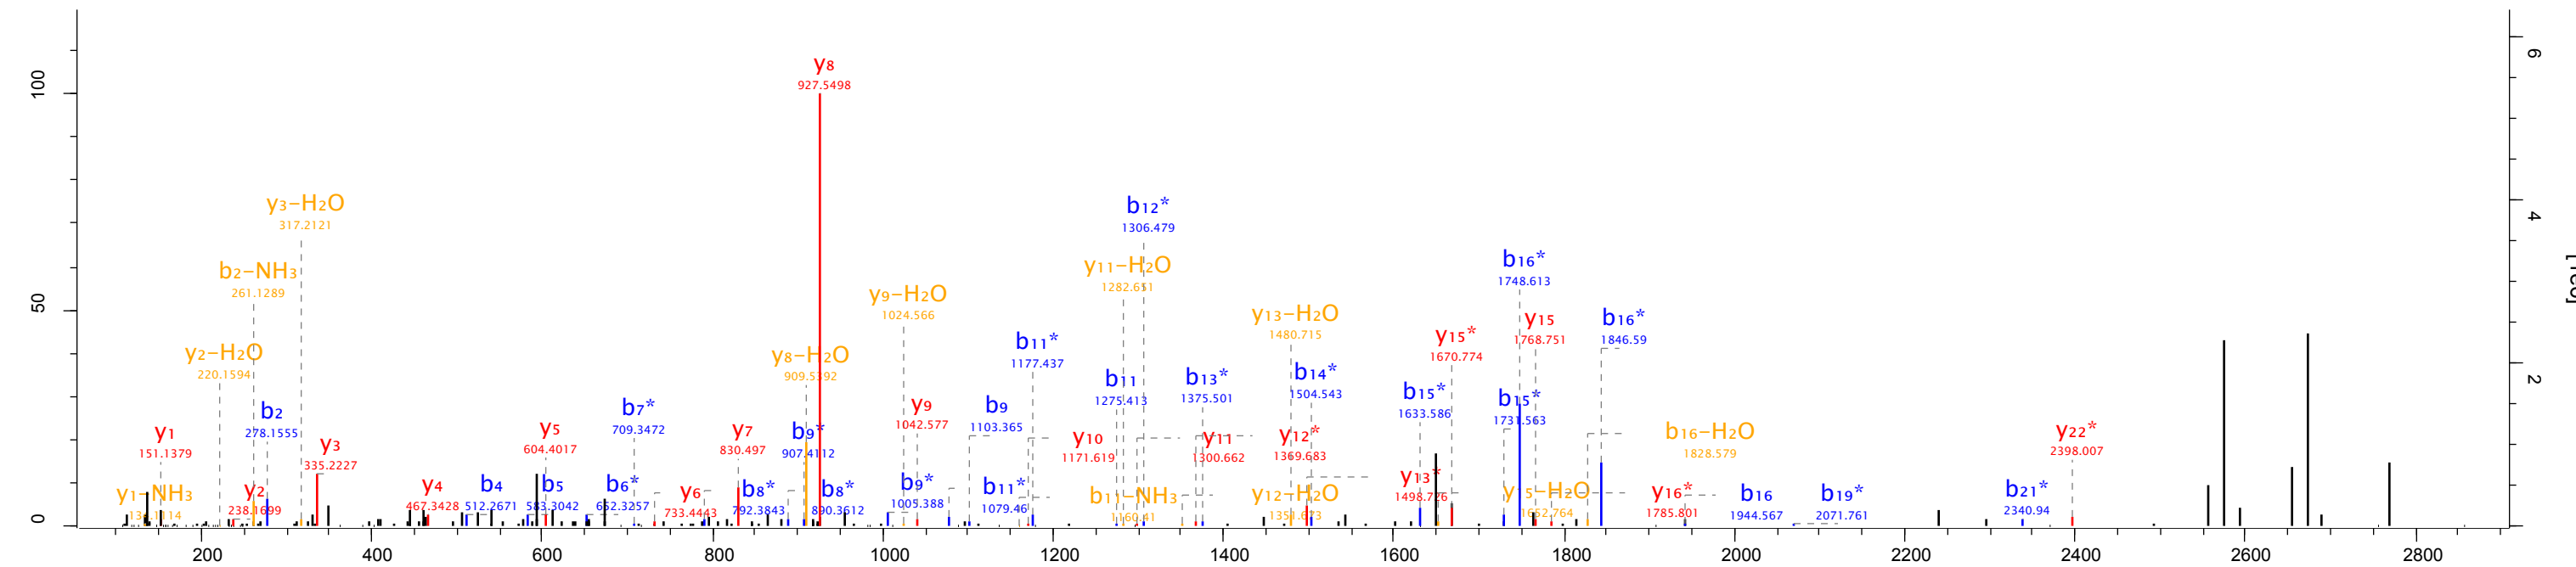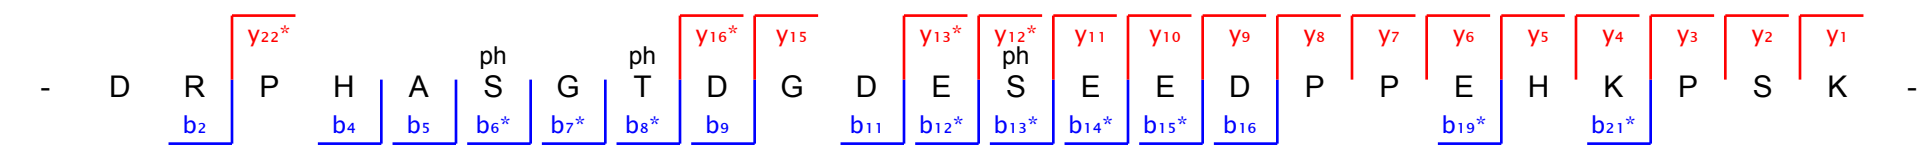

Raw file 20150812\_A375SR\_Phospho\_BR1\_03 Scan 4984 Method FTMS; HCD Score 302.94 m/z 1086.45 Gene names HNRNPC

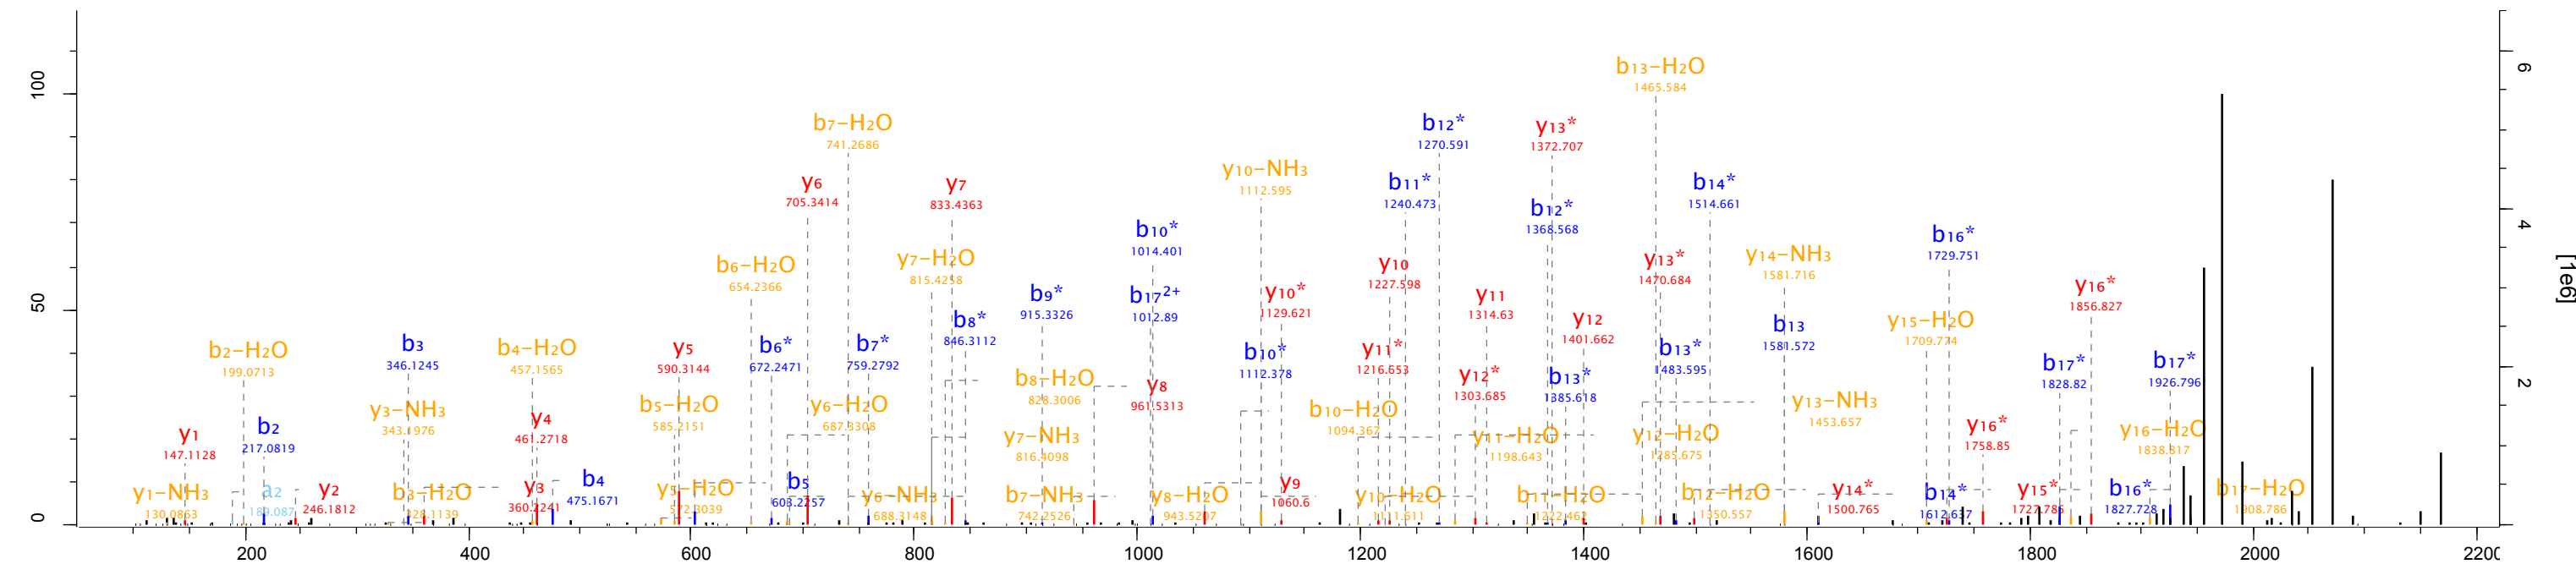

- S E E E Q S S S S V K K D E T N V K -

b<sub>2</sub> b<sub>3</sub> b<sub>4</sub> b<sub>5</sub> b<sub>6</sub><sup>\*</sup> b<sub>7</sub><sup>\*</sup> b<sub>8</sub><sup>\*</sup> b<sub>9</sub><sup>\*</sup> b<sub>10</sub><sup>\*</sup> b<sub>11</sub><sup>\*</sup> b<sub>12</sub><sup>\*</sup> b<sub>13</sub> b<sub>14</sub><sup>\*</sup> b<sub>16</sub><sup>\*</sup> b<sub>17</sub><sup>\*</sup>

y<sub>16</sub><sup>\*</sup> y<sub>15</sub><sup>\*</sup> y<sub>14</sub><sup>\*</sup> y<sub>13</sub><sup>\*</sup> ph y<sub>12</sub> y<sub>11</sub> y<sub>10</sub> ph y<sub>9</sub> y<sub>8</sub> y<sub>7</sub> y<sub>6</sub> y<sub>5</sub> y<sub>4</sub> y<sub>3</sub> y<sub>2</sub> y<sub>1</sub>

Raw file 20150812\_A375SR\_Phospho\_BR1\_03 Scan 5034 Method FTMS; HCD Score 122.13 m/z 811.82 Gene names MKI67

20150812\_A375SR\_Phospho\_BR1\_03

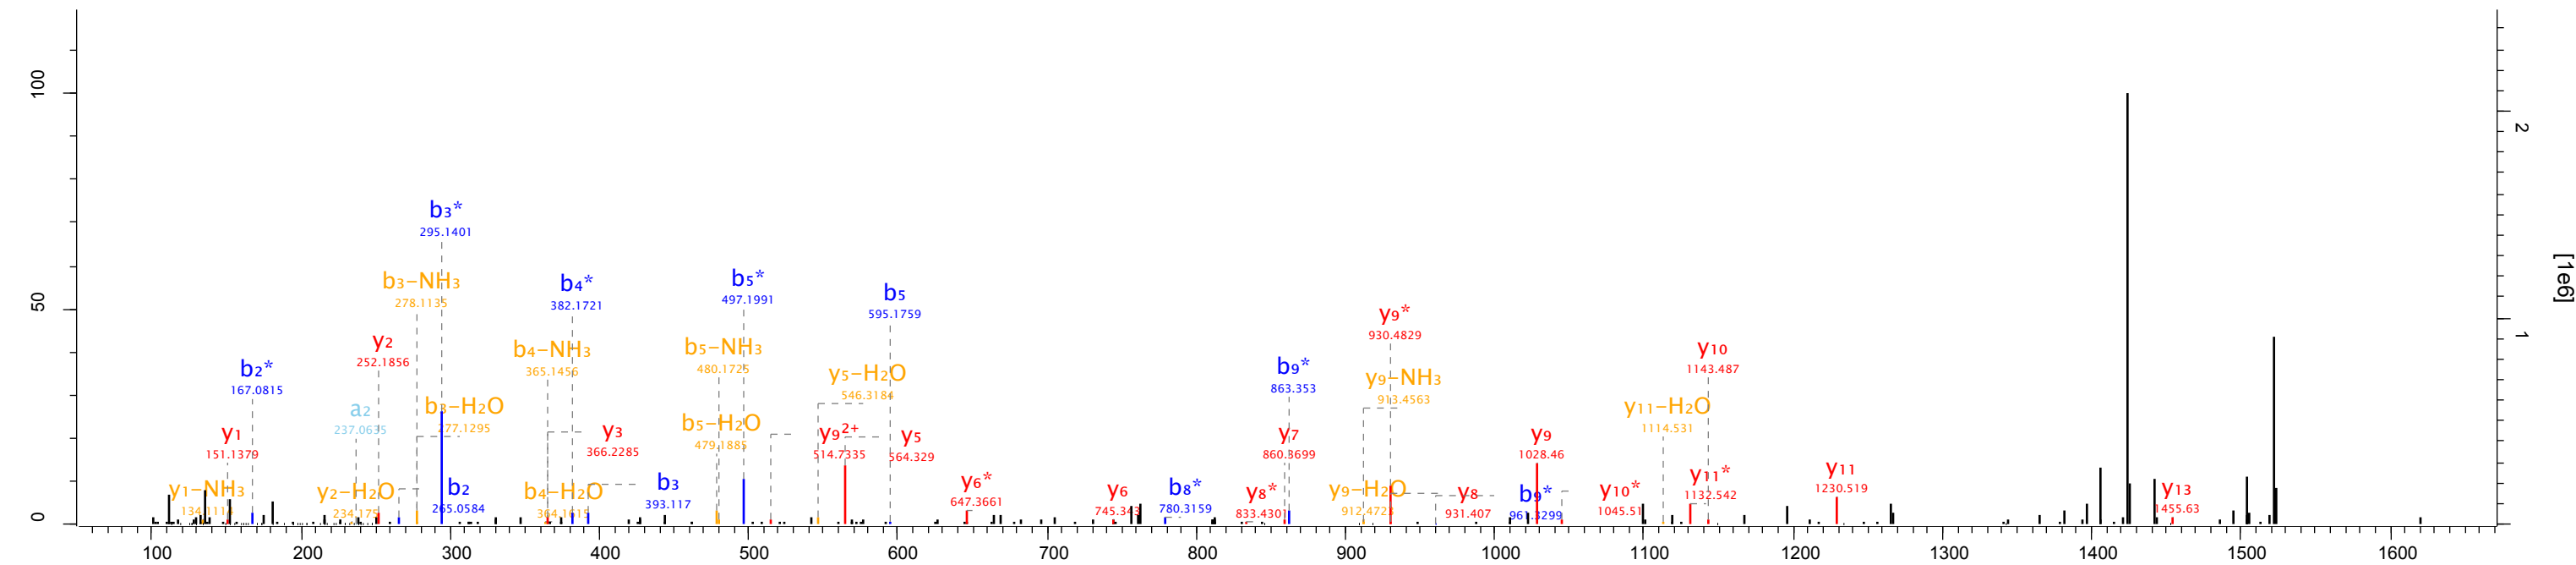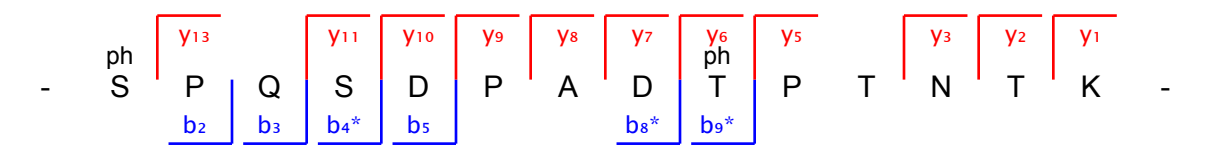



Raw file: 20150812\_A375SR\_Phospho\_BR1\_03  
 Scan: 5224 Method: FTMS; HCD Score: 217.66 m/z: 862.36 Gene names: THRAP3

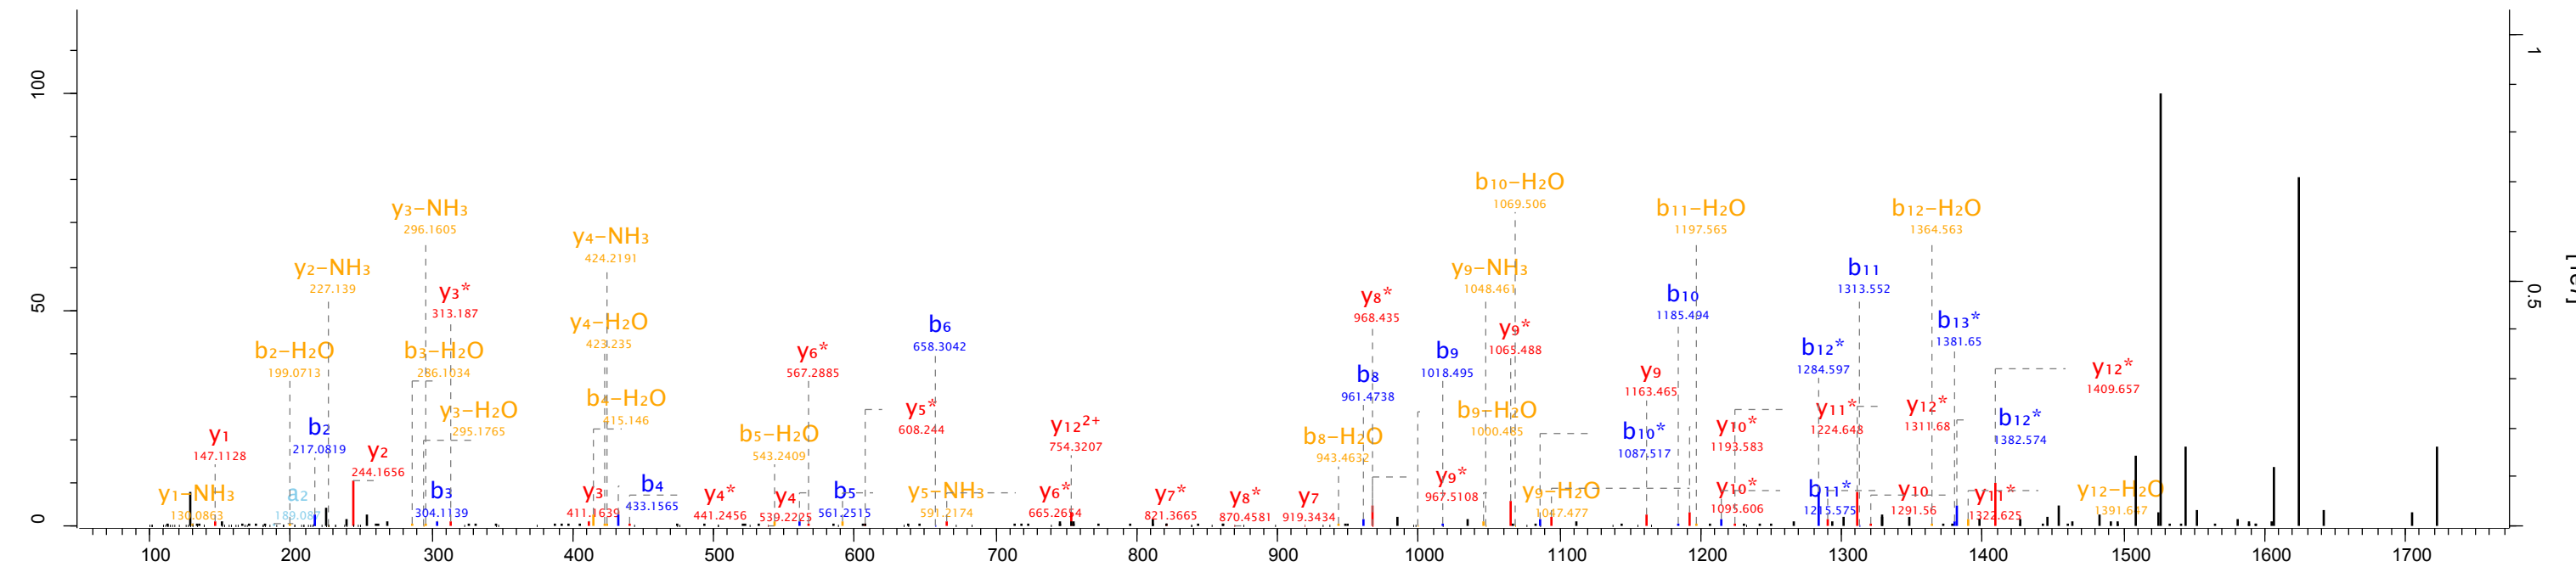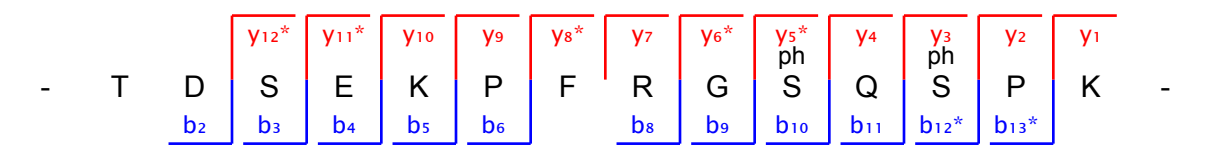

Raw file 20150812\_A375SR\_Phospho\_BR1\_03 Scan 5454 Method FTMS; HCD Score 155.88 m/z 774.37 Gene names RSRC2

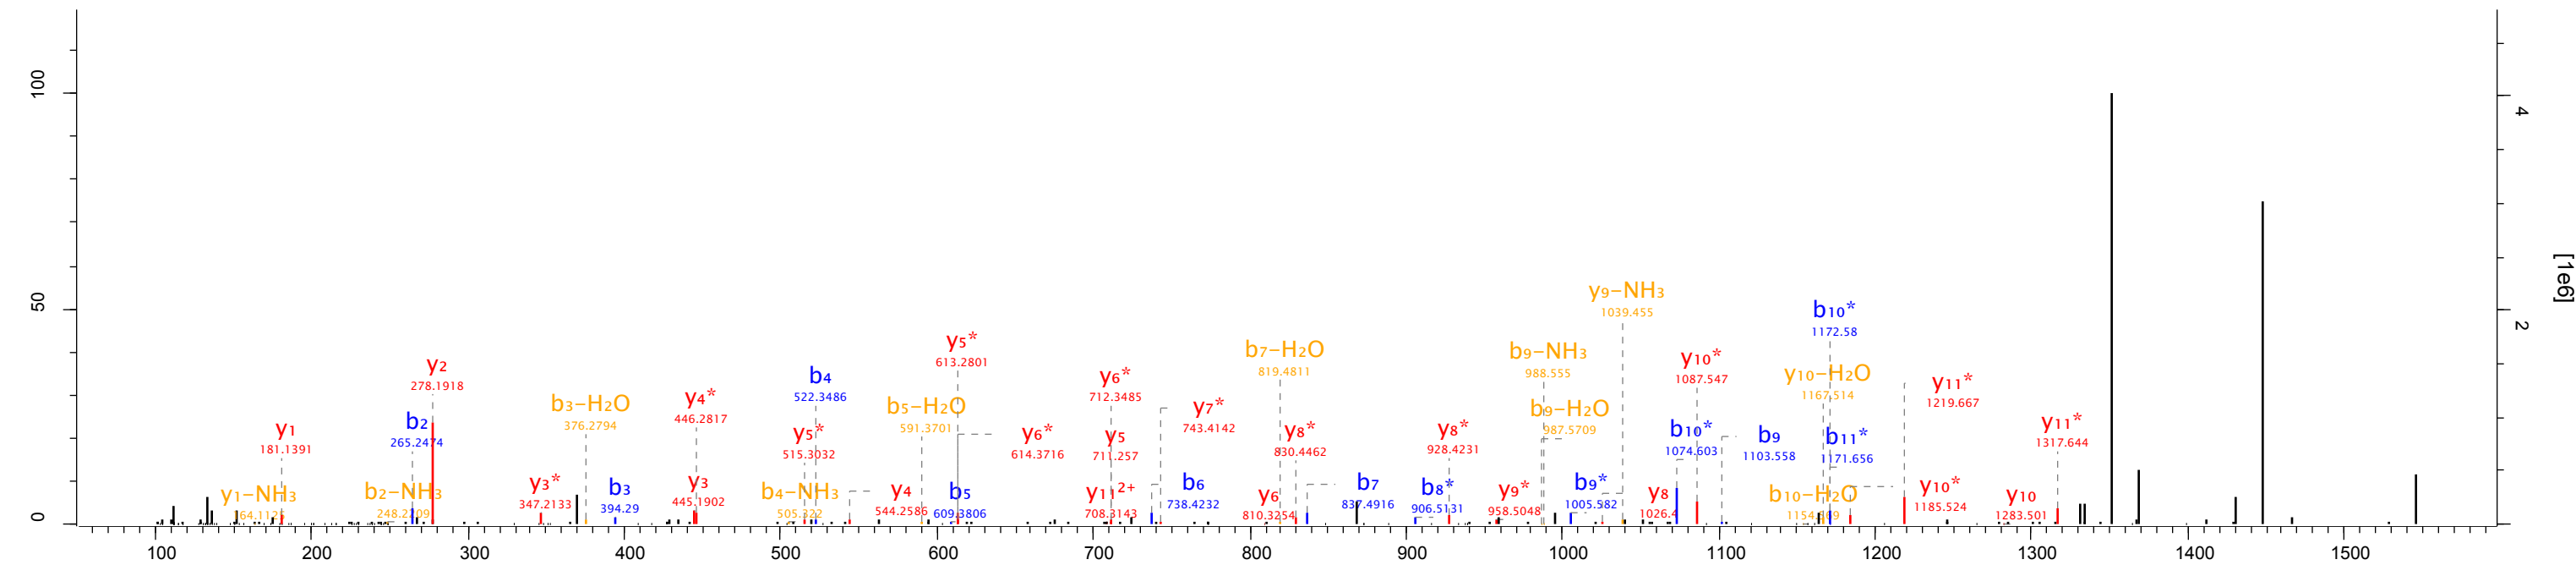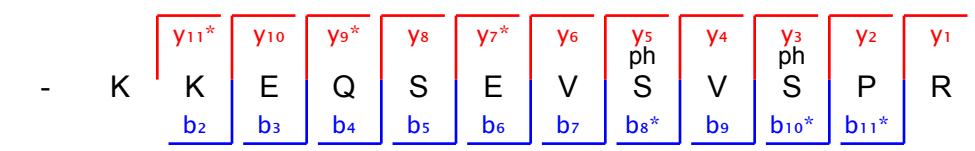

Raw file: 20150812\_A375SR\_Phospho\_BR1\_03  
 Scan: 5574 Method: FTMS; HCD Score: 79.12 m/z: 738.24 Gene names: SSH3

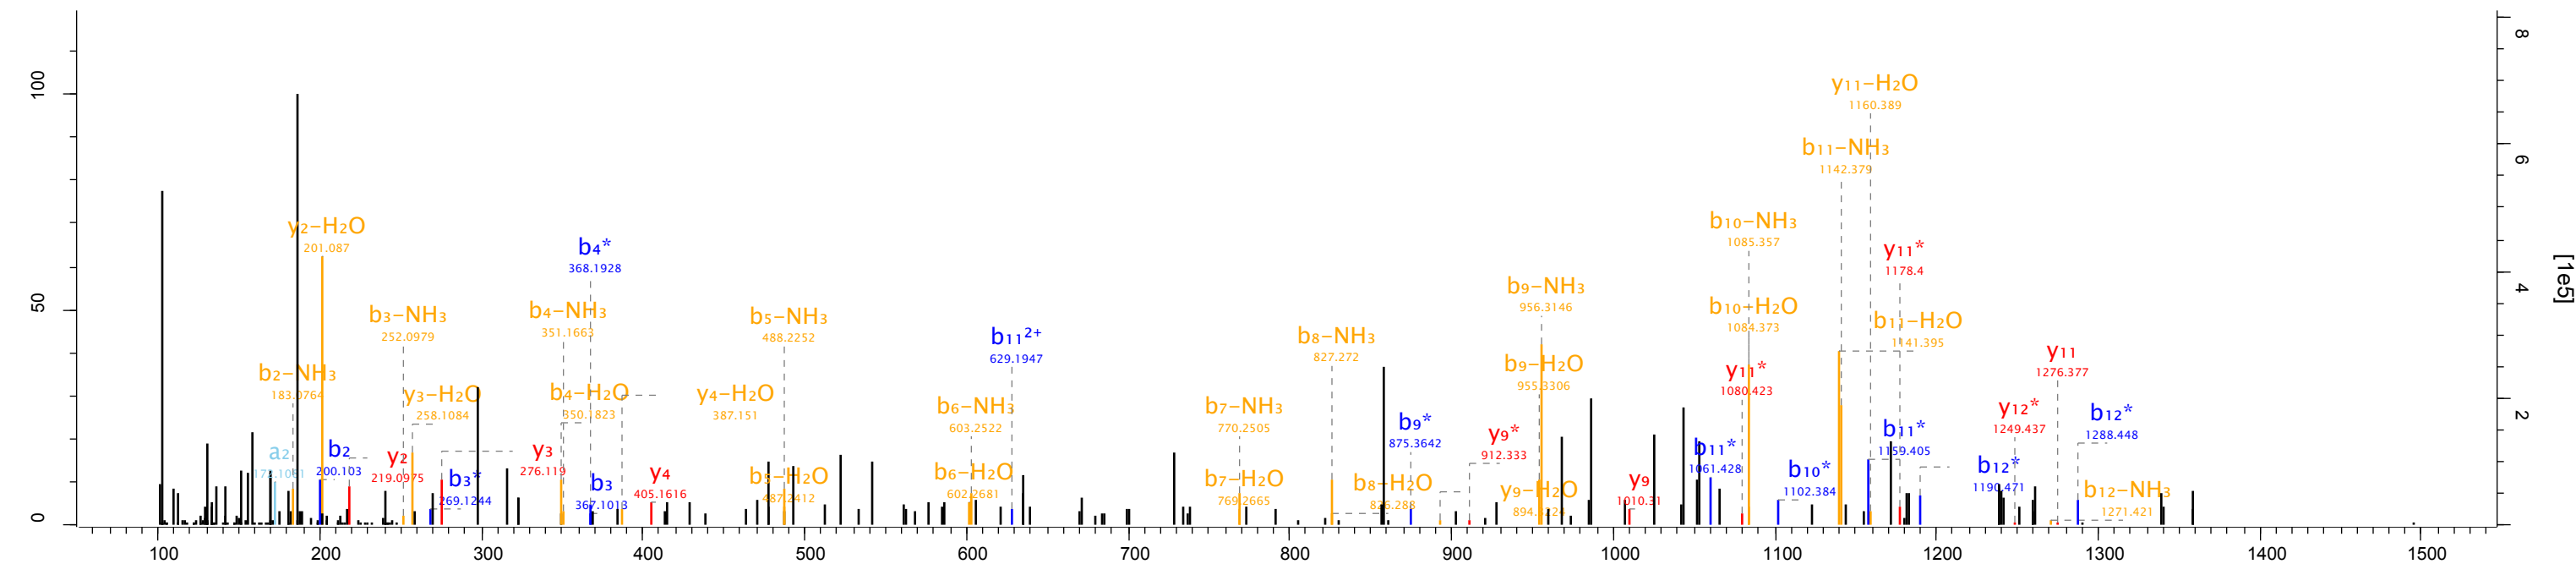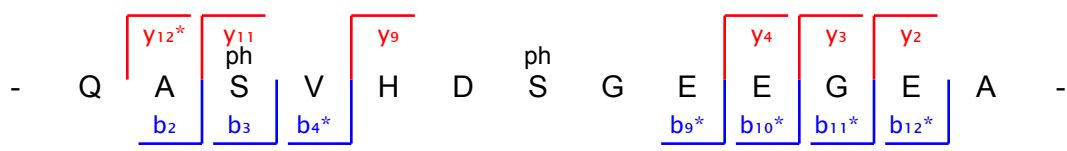

Raw file  
20150812\_A375SR\_Phospho\_BR1\_03

Scan 5754 Method FTMS; HCD Score 105.92 m/z 842.75 Gene names BZW1

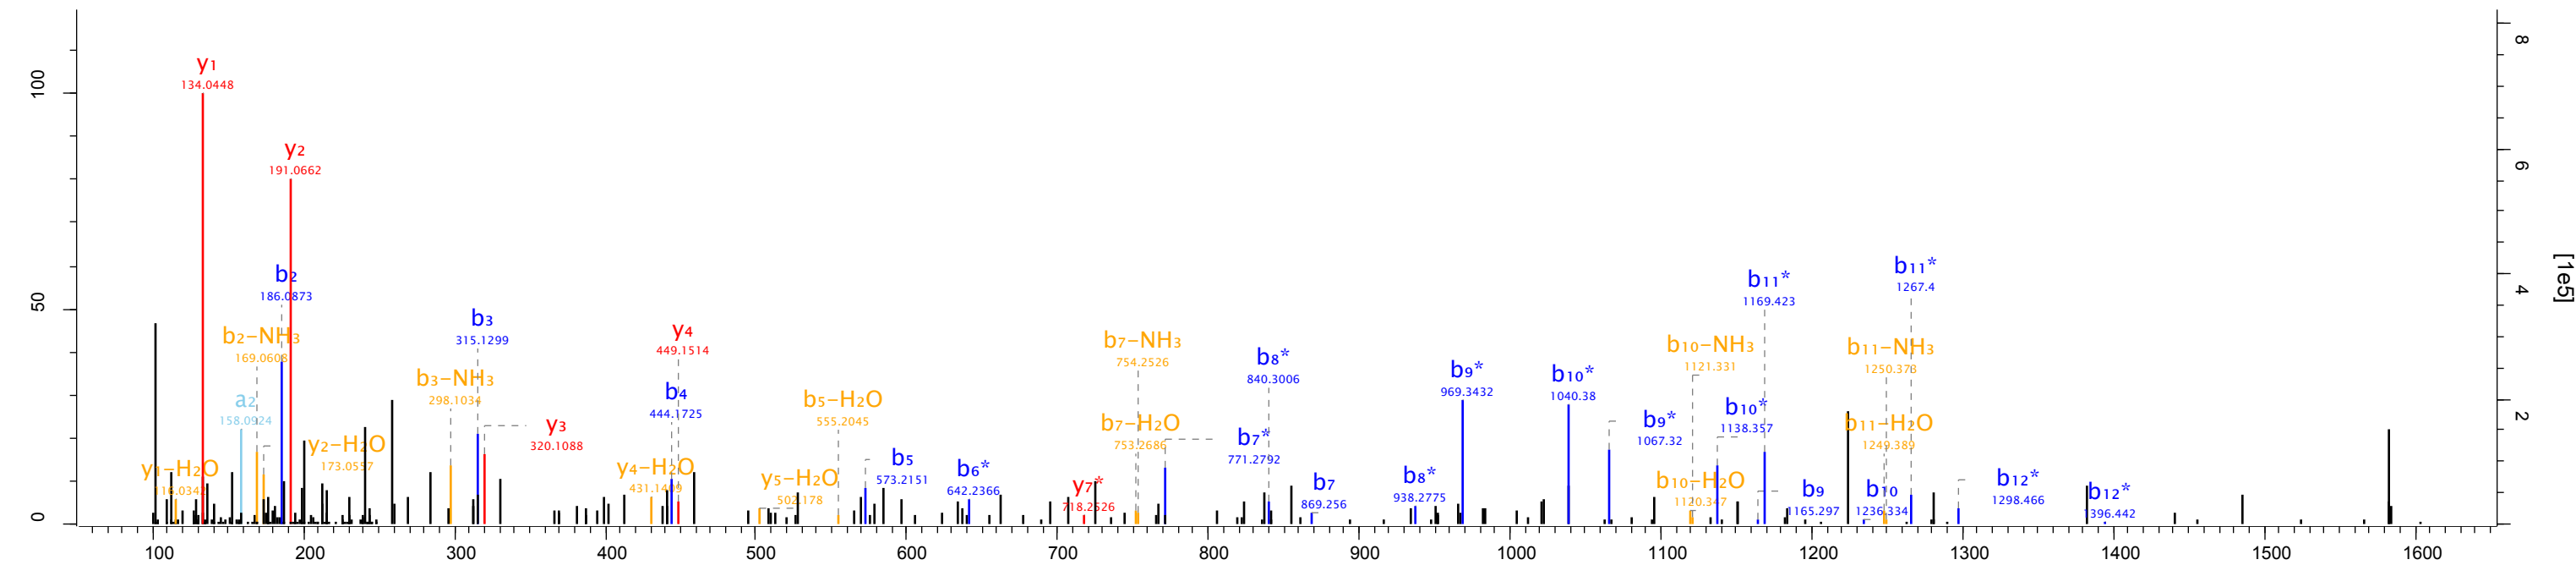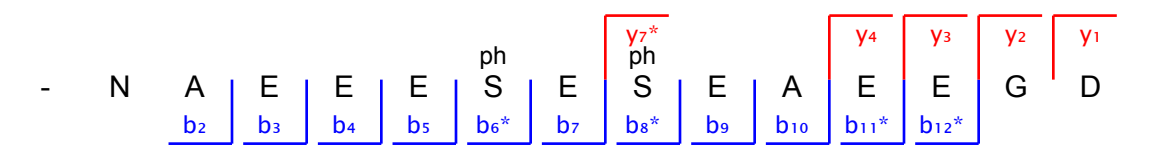

Raw file: 20150812\_A375SR\_Phospho\_BR1\_03  
 Scan: 5764 Method: FTMS; HCD Score: 192.46 m/z: 799.31 Gene names: EPN2

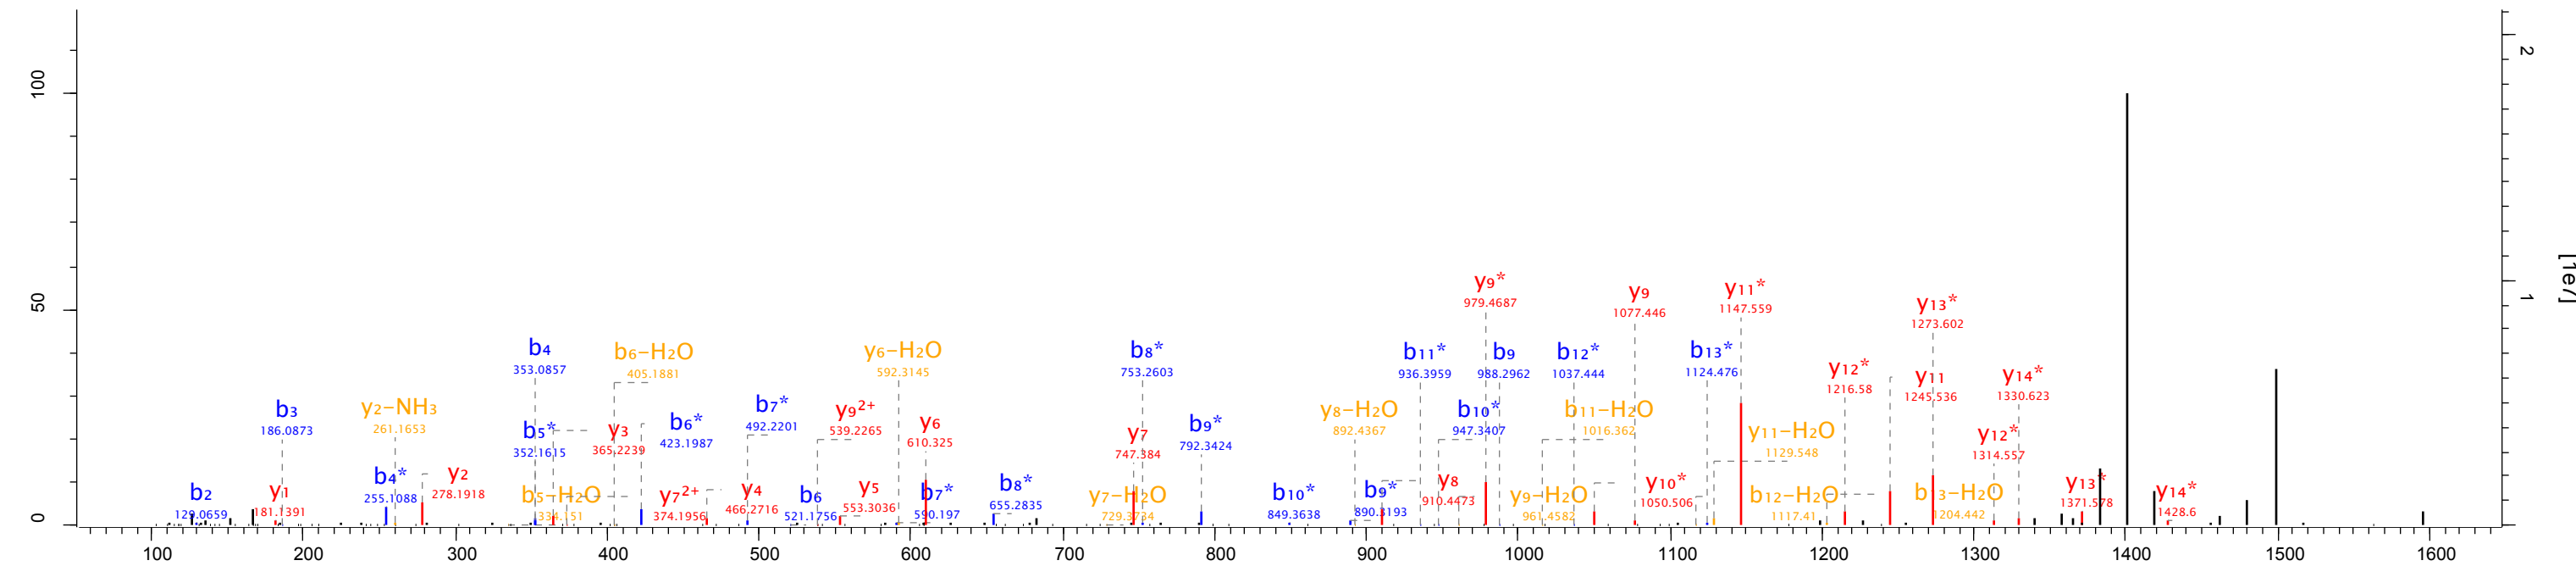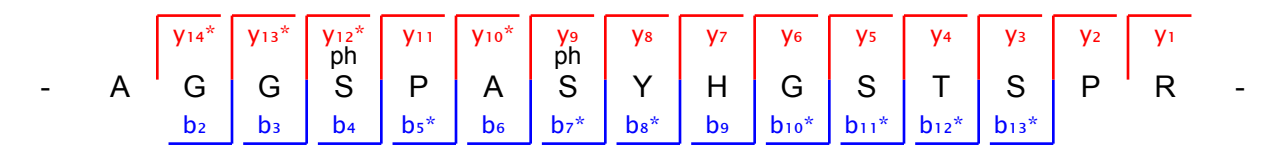

Raw file: 20150812\_A375SR\_Phospho\_BR1\_03  
 Scan: 5974 Method: FTMS; HCD Score: 222.13 m/z: 768.8 Gene names: LEO1

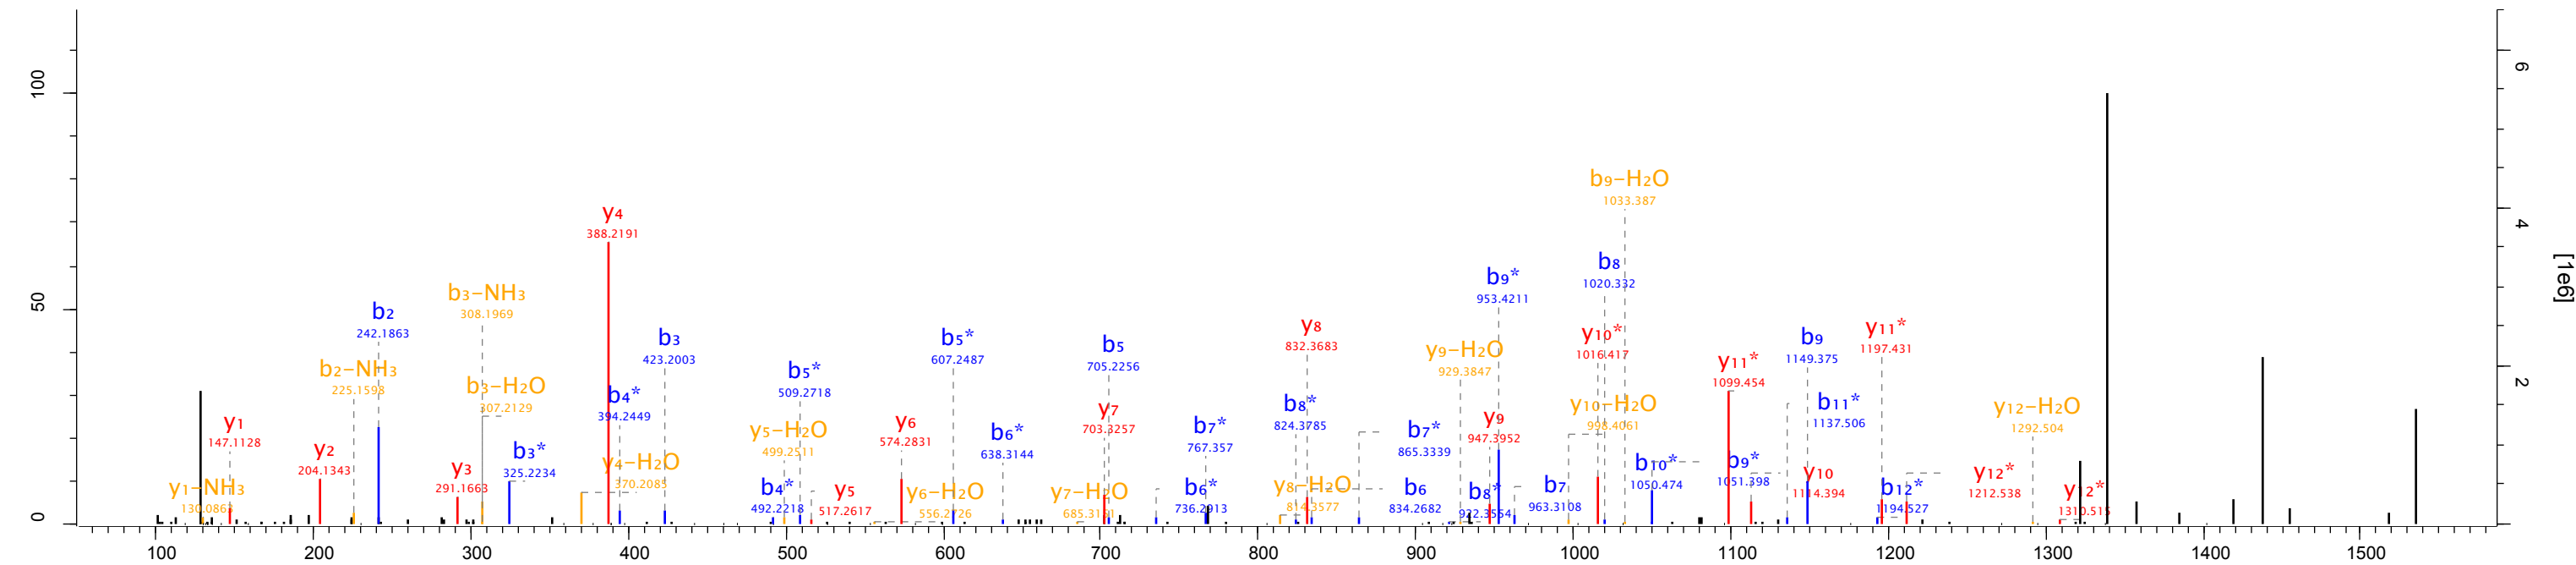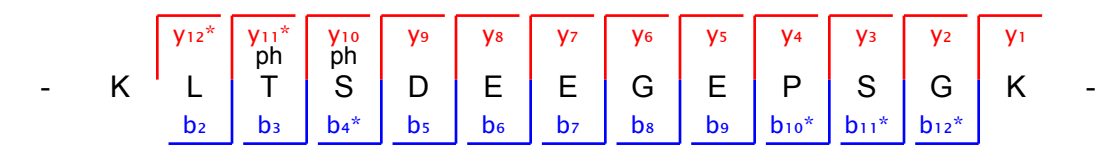

Raw file: 20150812\_A375SR\_Phospho\_BR1\_03  
 Scan: 6064 Method: FTMS; HCD Score: 79.87 m/z: 477.16 Gene names: TRA2B

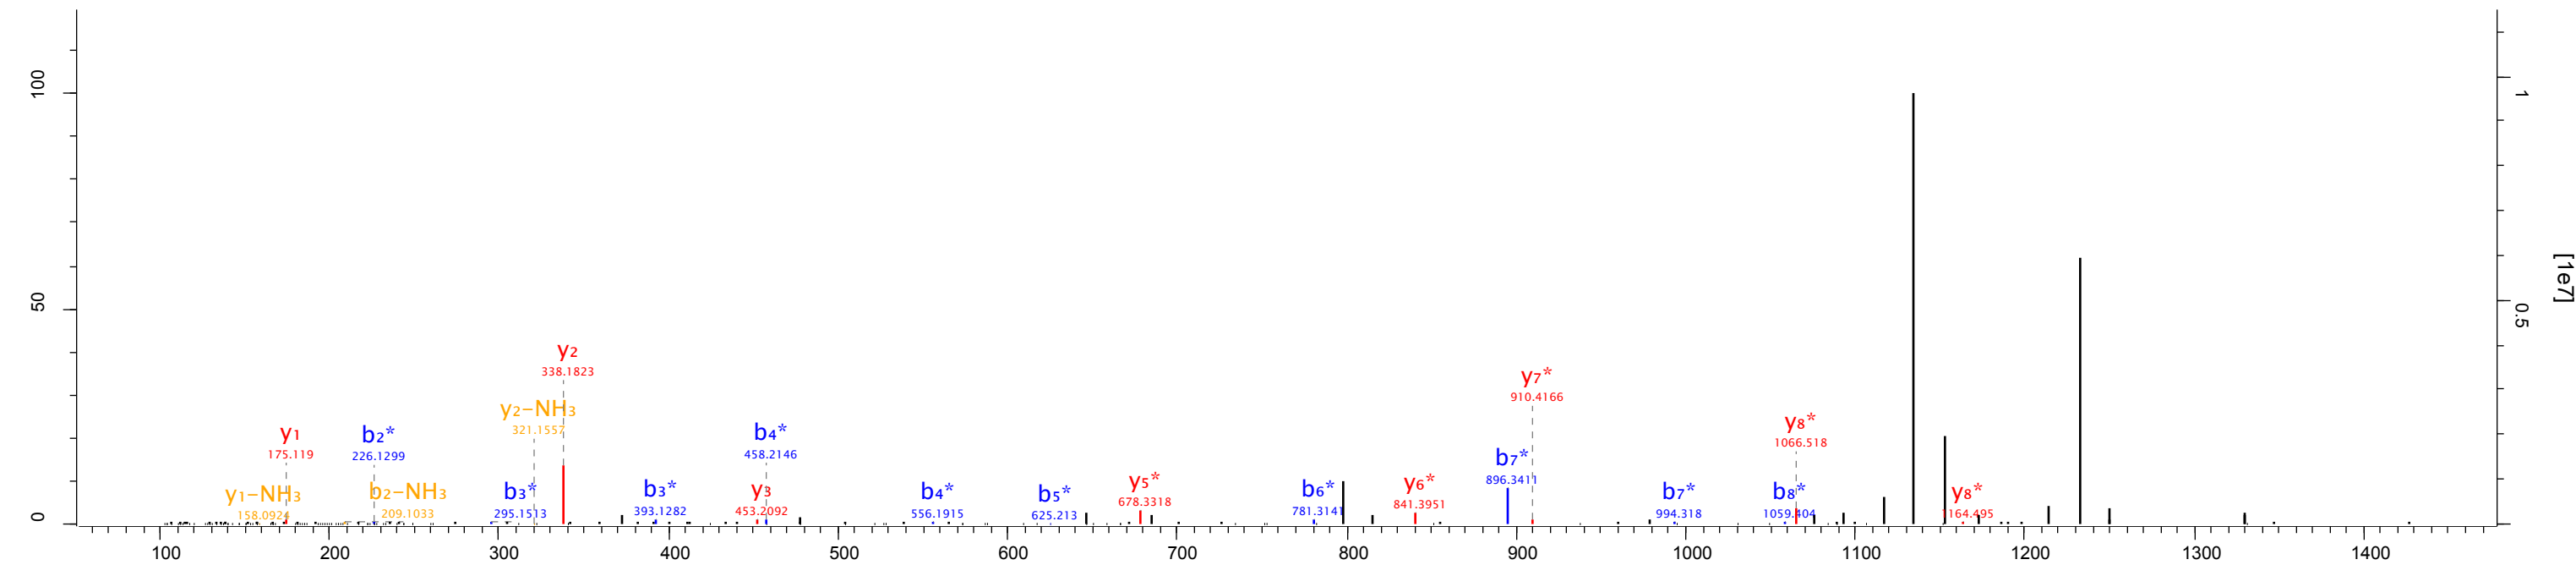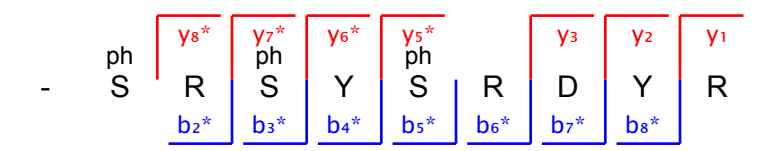

Raw file: 20150812\_A375SR\_Phospho\_BR1\_03  
 Scan: 6164 Method: FTMS; HCD Score: 64.45 m/z: 577.89 Gene names: RBBP6

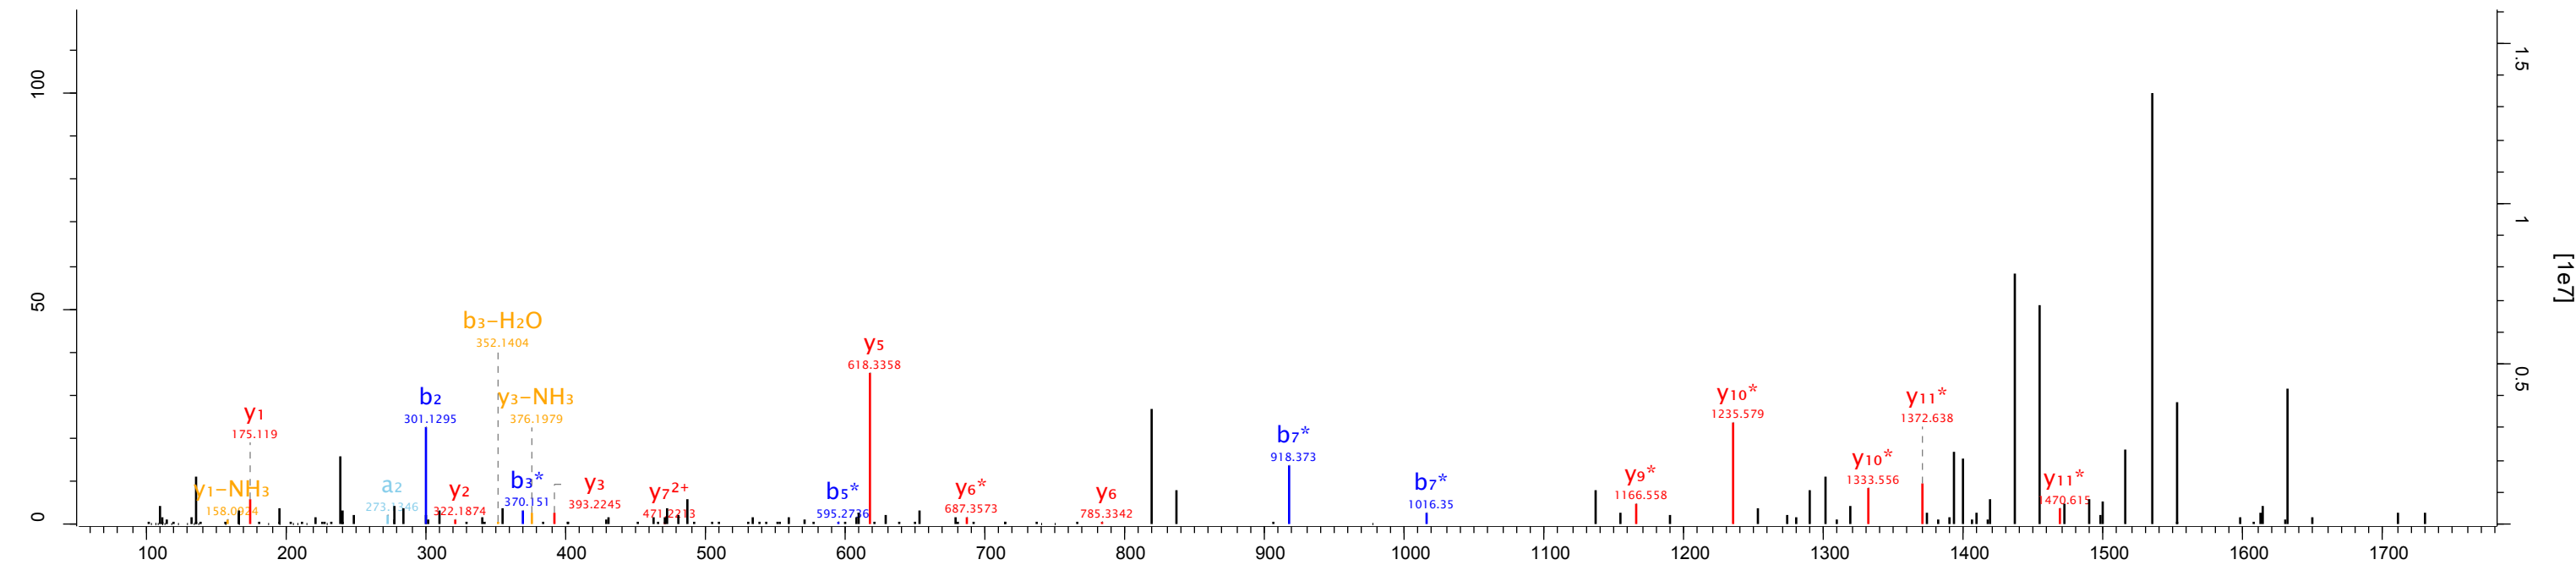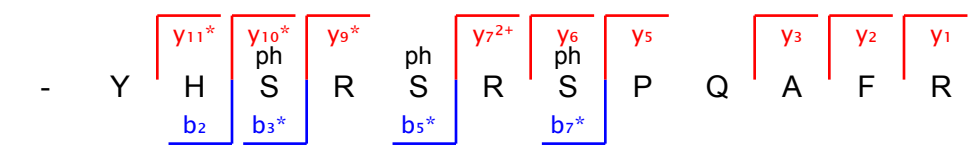



Raw file: 20150812\_A375SR\_Phospho\_BR1\_03  
 Scan: 6224 Method: FTMS; HCD Score: 69.07 m/z: 803.34 Gene names: ZMYND8

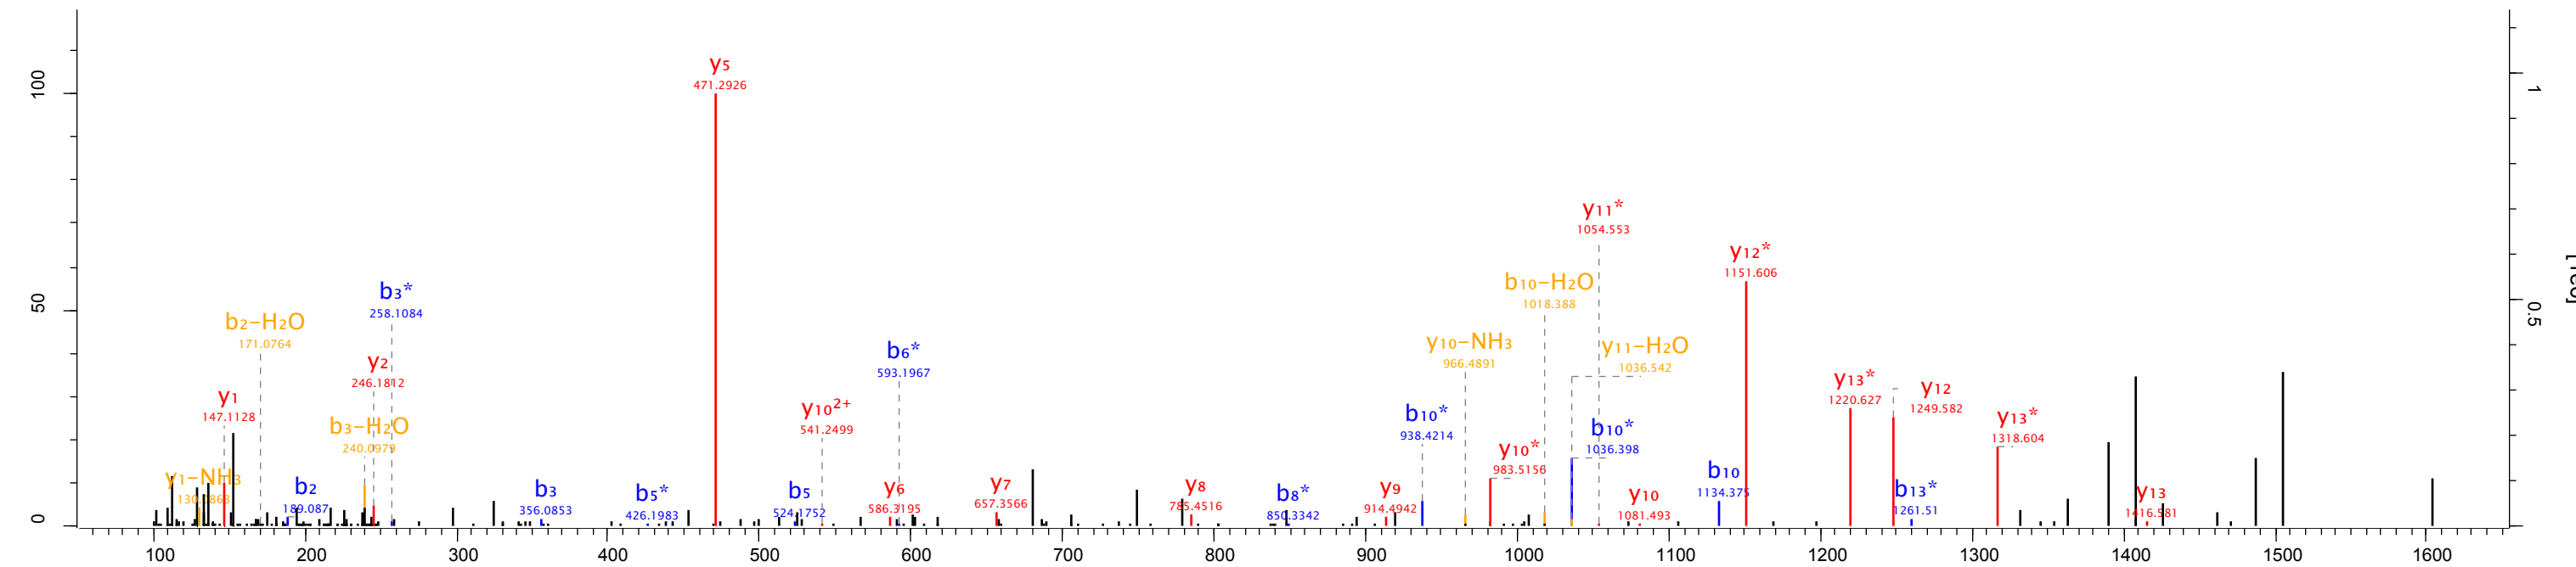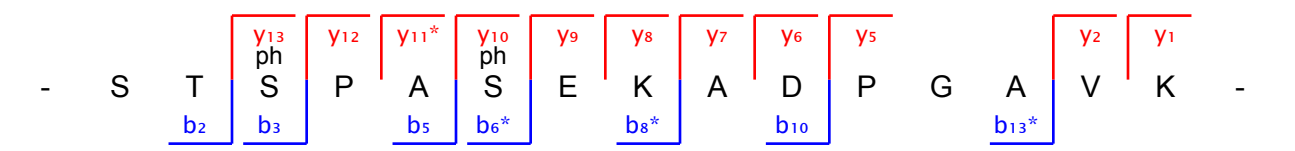

Raw file: 20150812\_A375SR\_Phospho\_BR1\_03  
 Scan: 6284 Method: FTMS; HCD Score: 161.8 m/z: 664.31 Gene names: CDK12

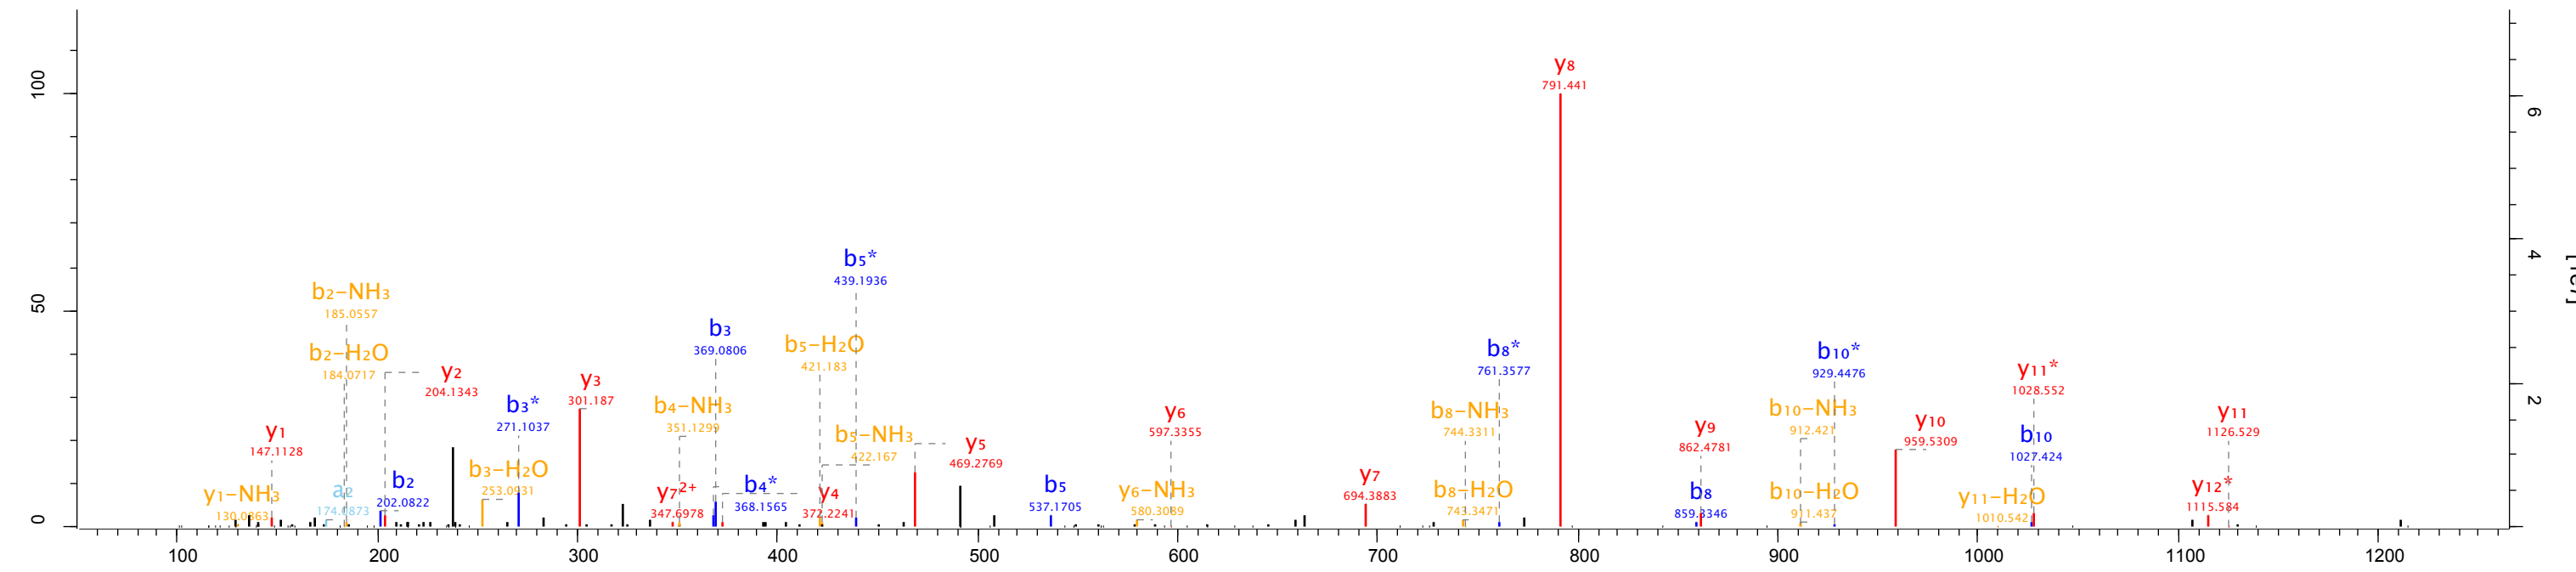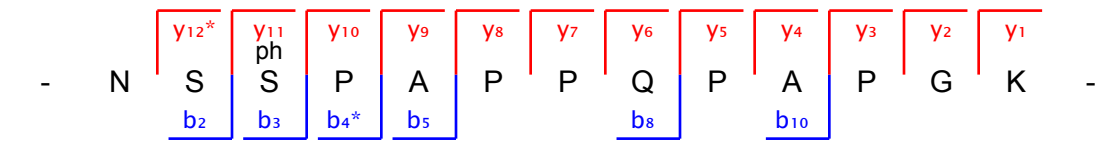

Raw file Scan Method Score m/z Gene names  
 20150812\_A375SR\_Phospho\_BR1\_03 6934 FTMS; HCD 309.55 1057.42 ARRB1

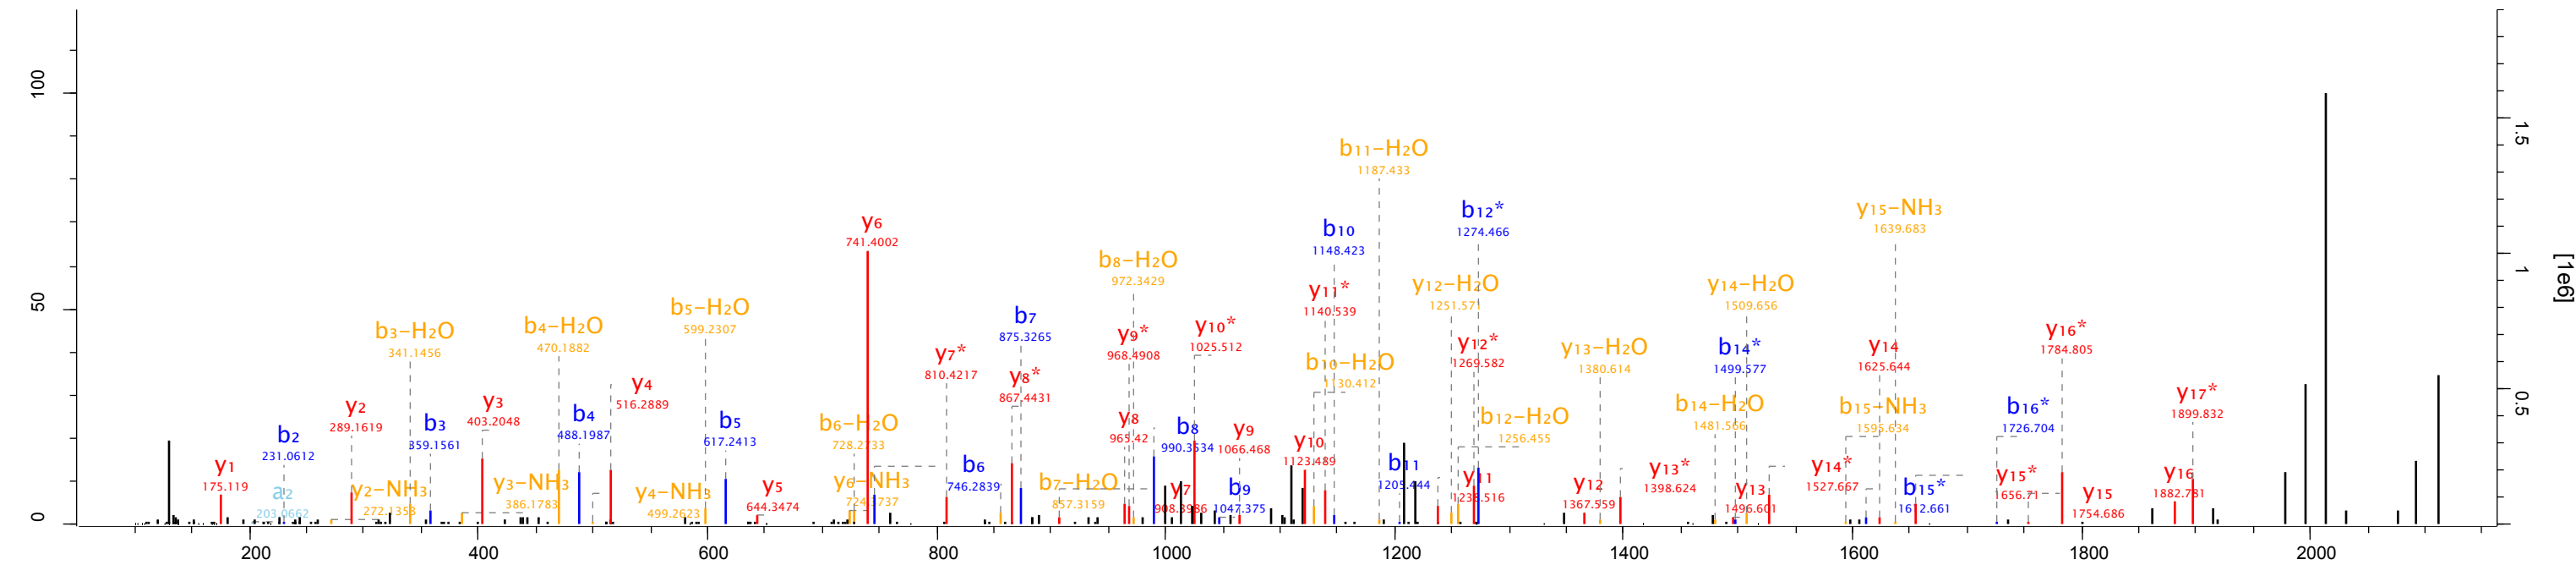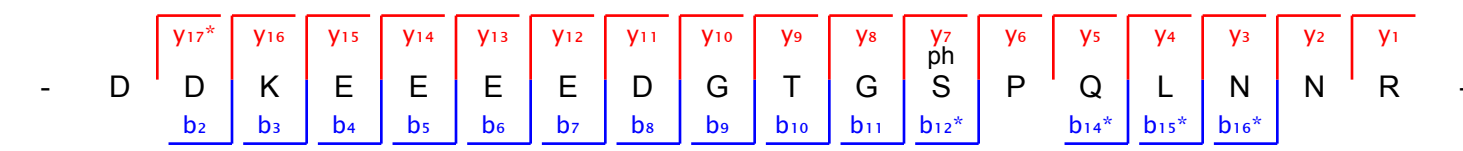

Raw file: 20150812\_A375SR\_Phospho\_BR1\_03  
 Scan: 7464 Method: FTMS; HCD Score: 88.78 m/z: 752.83 Gene names: TBC1D5

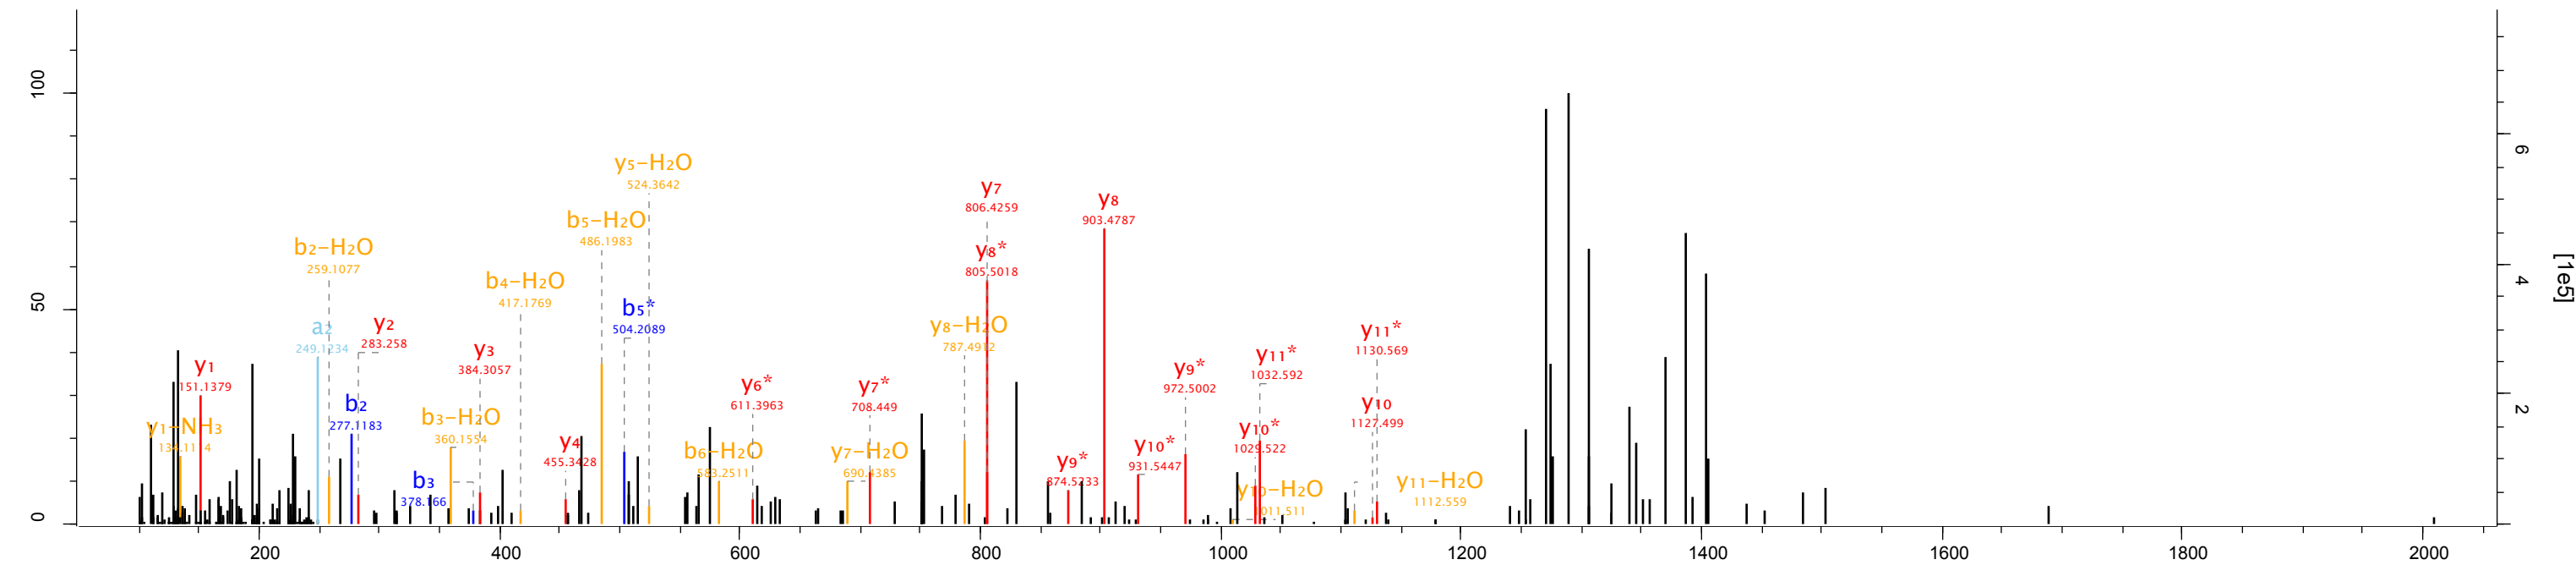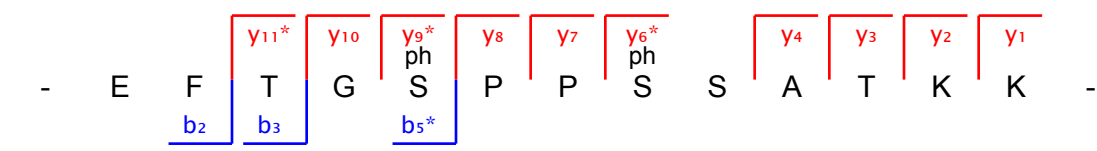

Raw file: 20150812\_A375SR\_Phospho\_BR1\_03  
 Scan: 7534 Method: FTMS; HCD Score: 152.34 m/z: 450.2 Gene names: PRPF38B

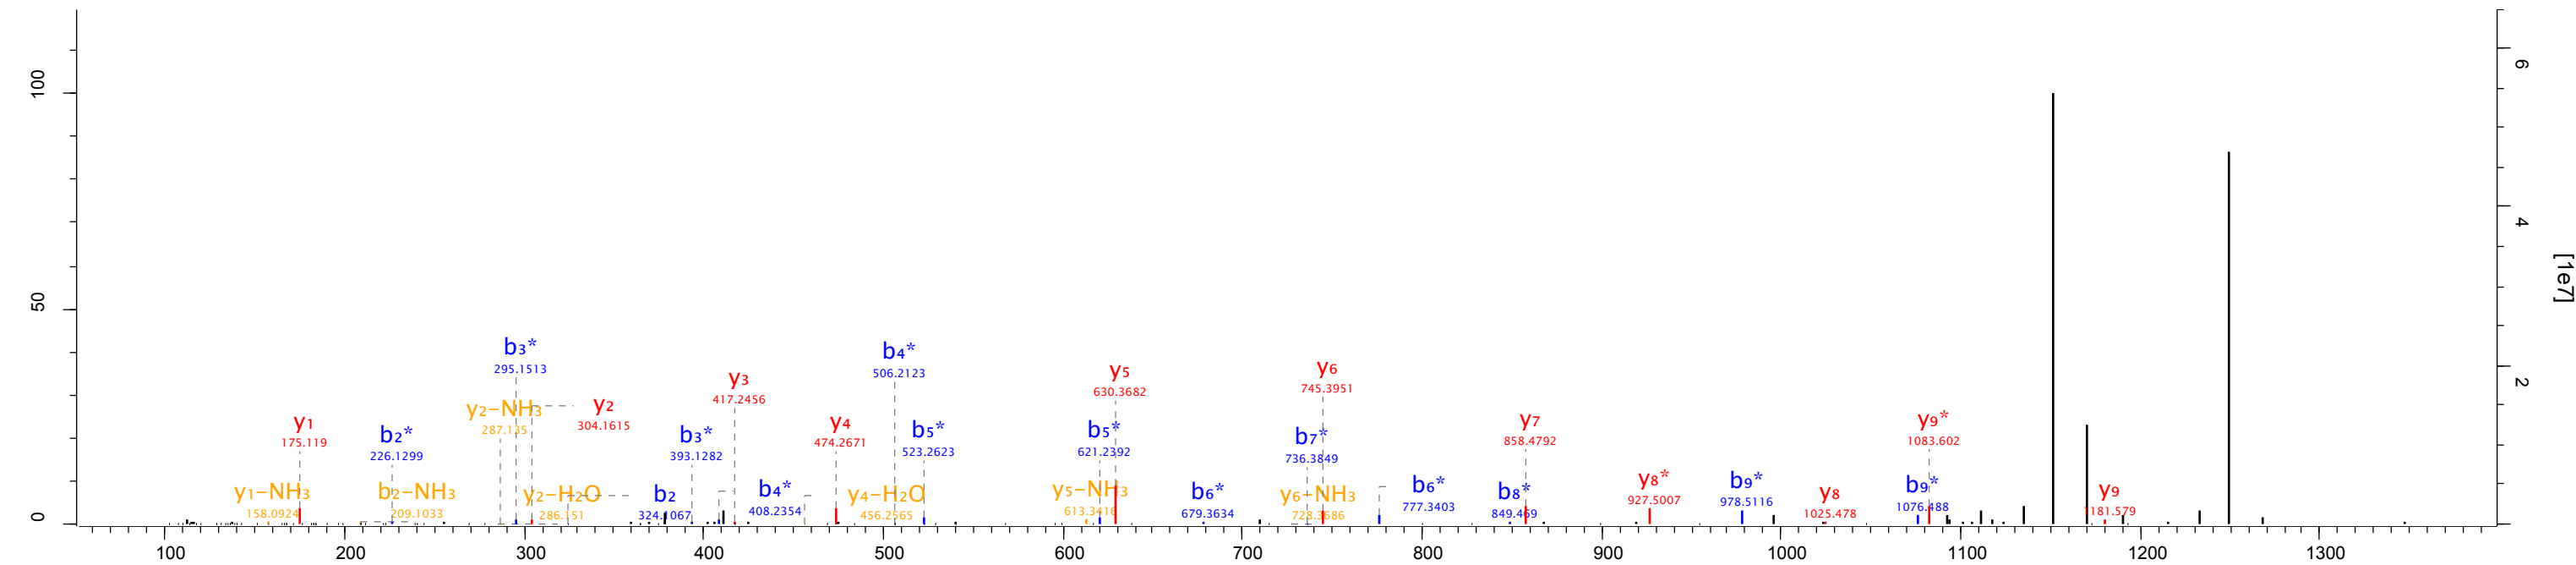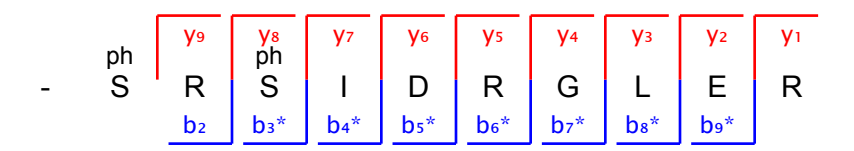

Raw file: 20150812\_A375SR\_Phospho\_BR1\_03  
 Scan: 7554 Method: FTMS; HCD Score: 183.28 m/z: 597.25 Gene names: SLC38A1

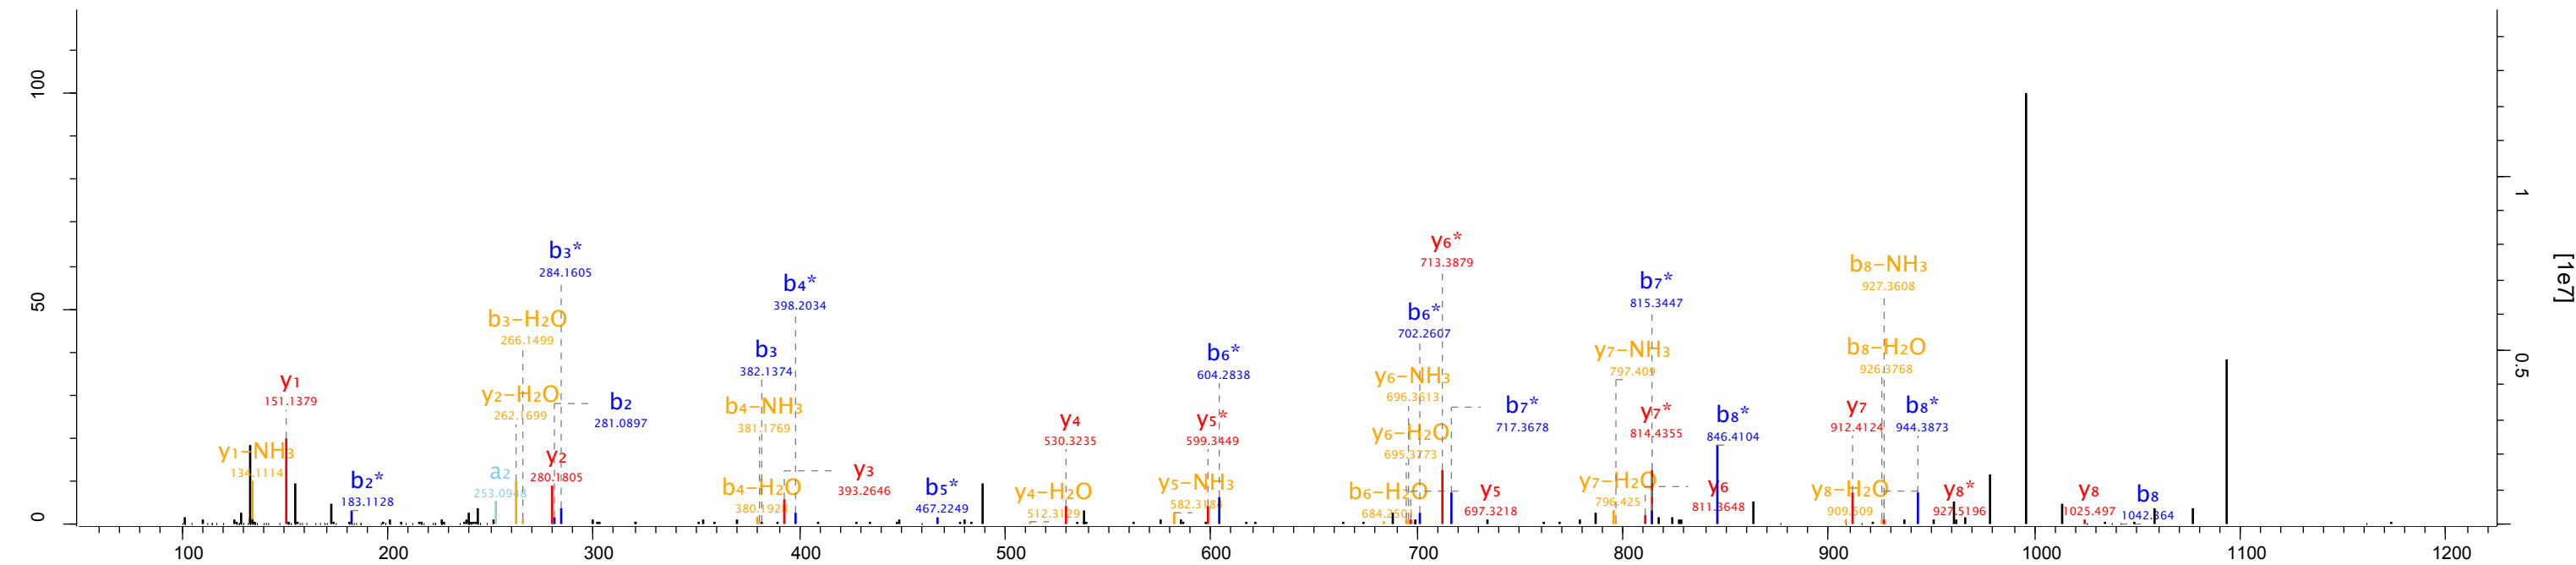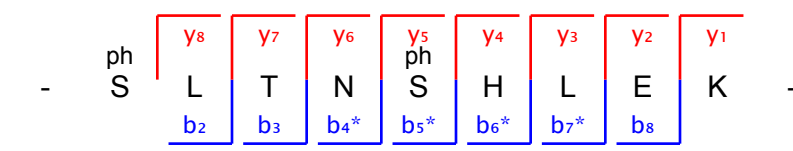

Raw file: 20150812\_A375SR\_Phospho\_BR1\_03  
 Scan: 7844 Method: FTMS; HCD Score: 241.66 m/z: 839.8 Gene names: HIRIP3

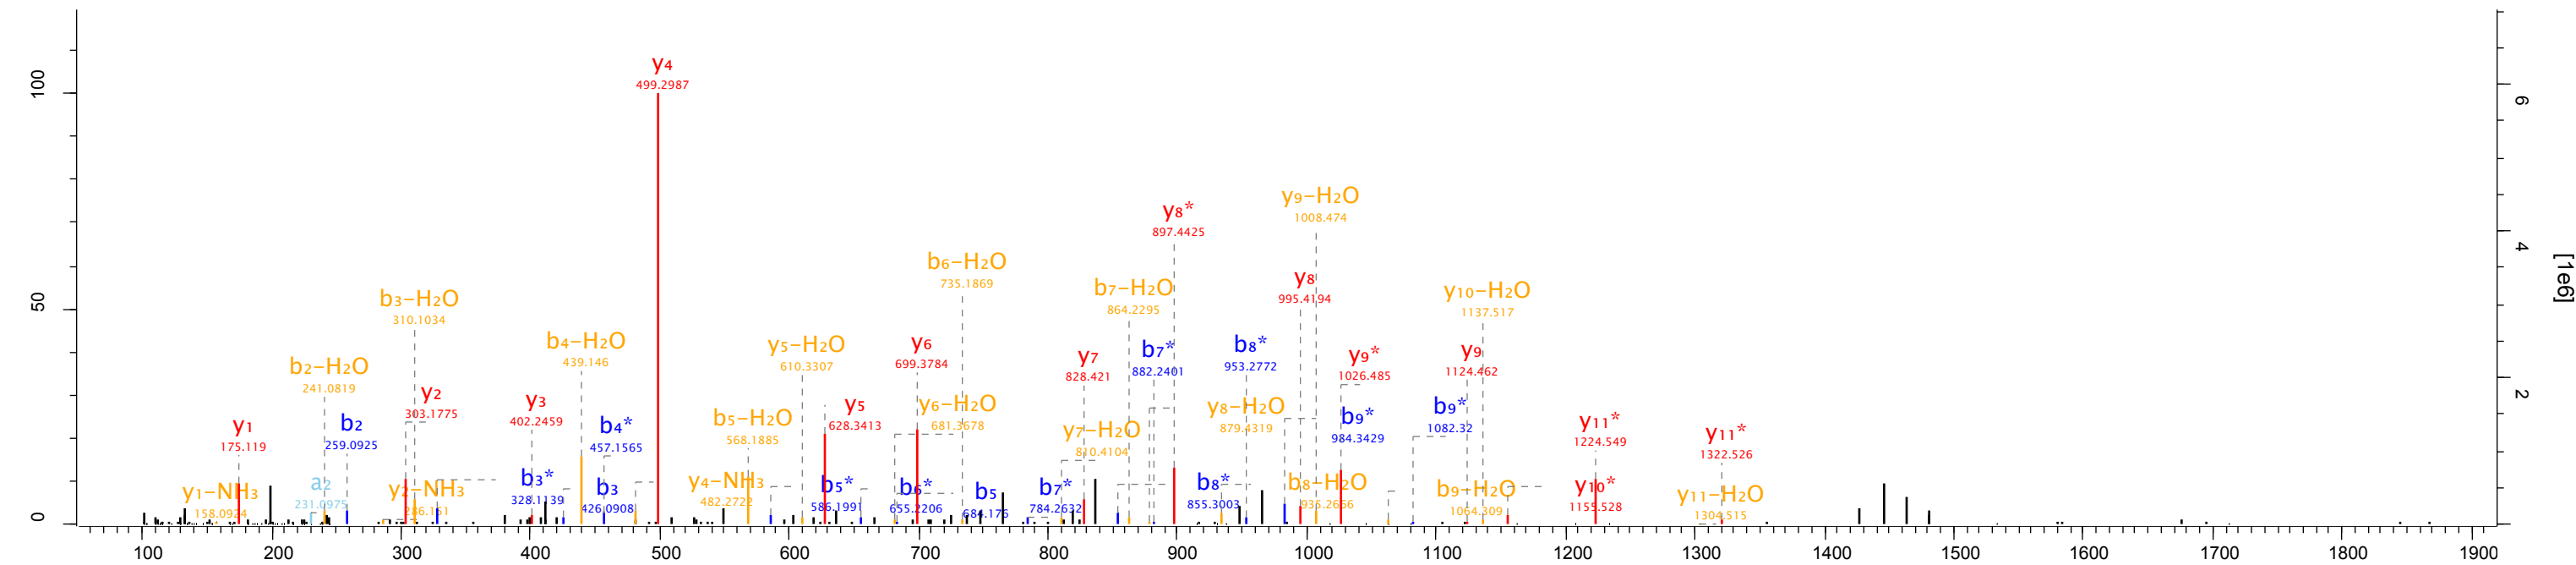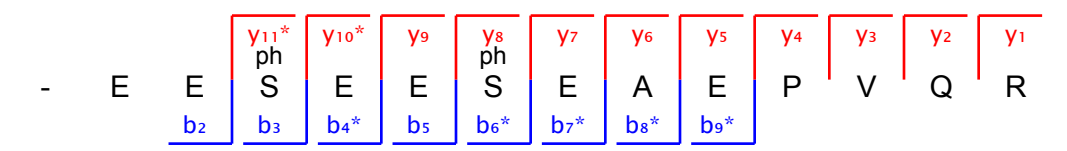

Raw file: 20150812\_A375SR\_Phospho\_BR1\_03  
 Scan: 8394 Method: FTMS; HCD Score: 41.79 m/z: 850.86 Gene names: SRRM1

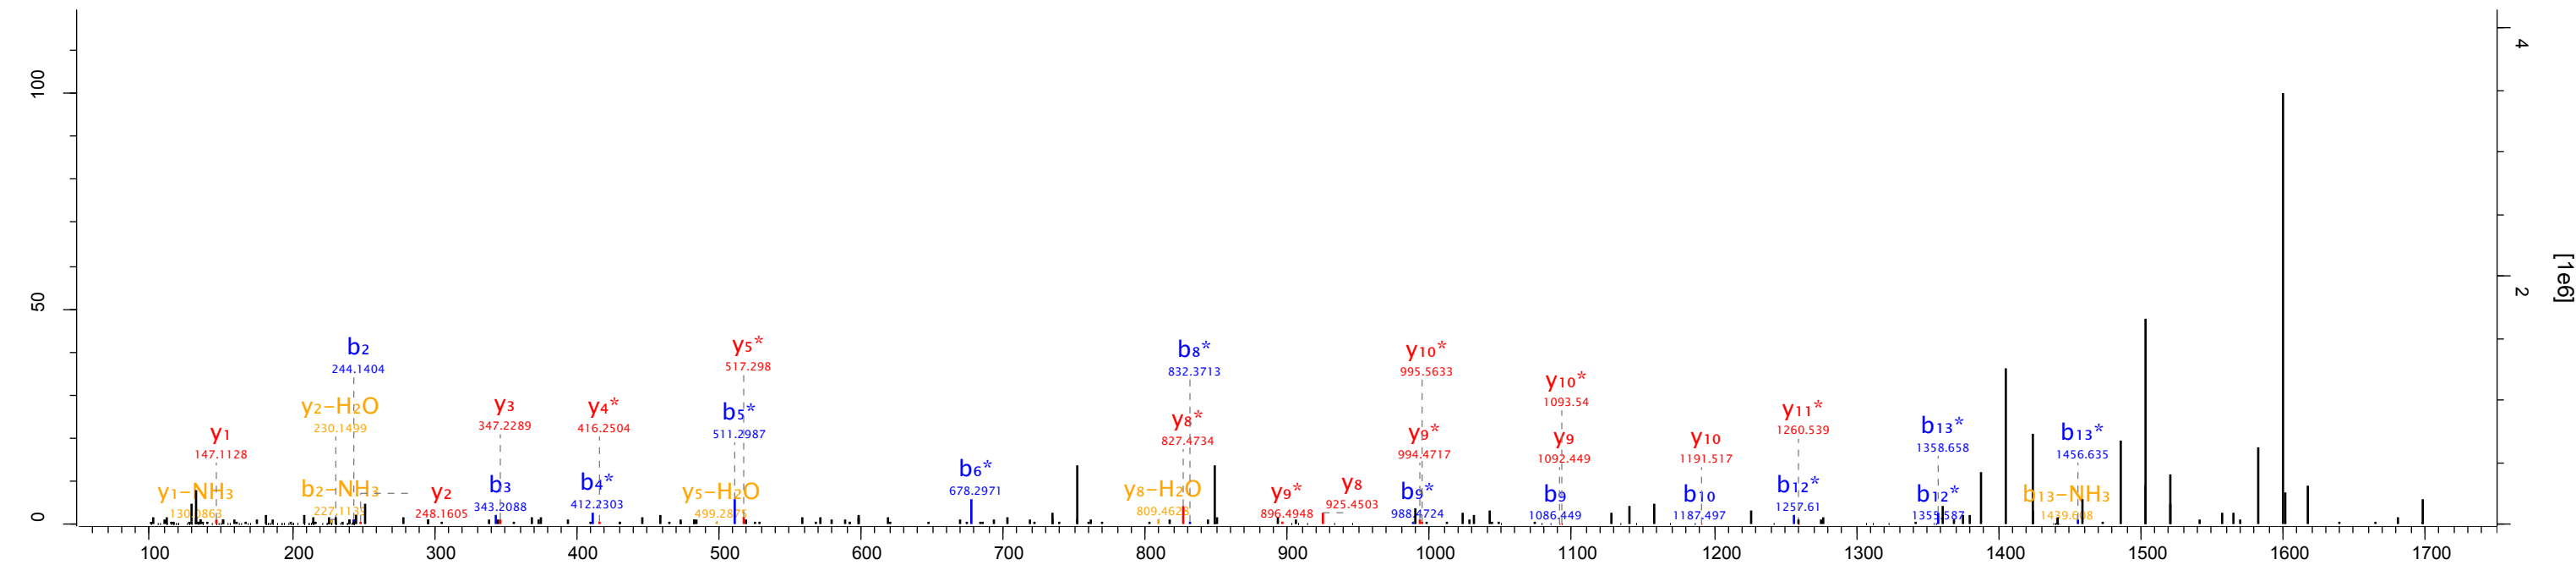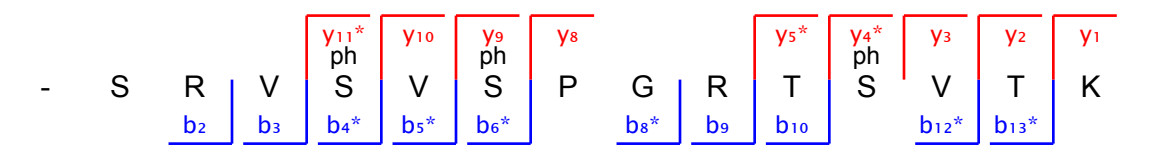



Raw file  
20150812\_A375SR\_Phospho\_BR1\_03

Scan 8624 Method FTMS; HCD Score 99.33 m/z 687.65 Gene names MKI67

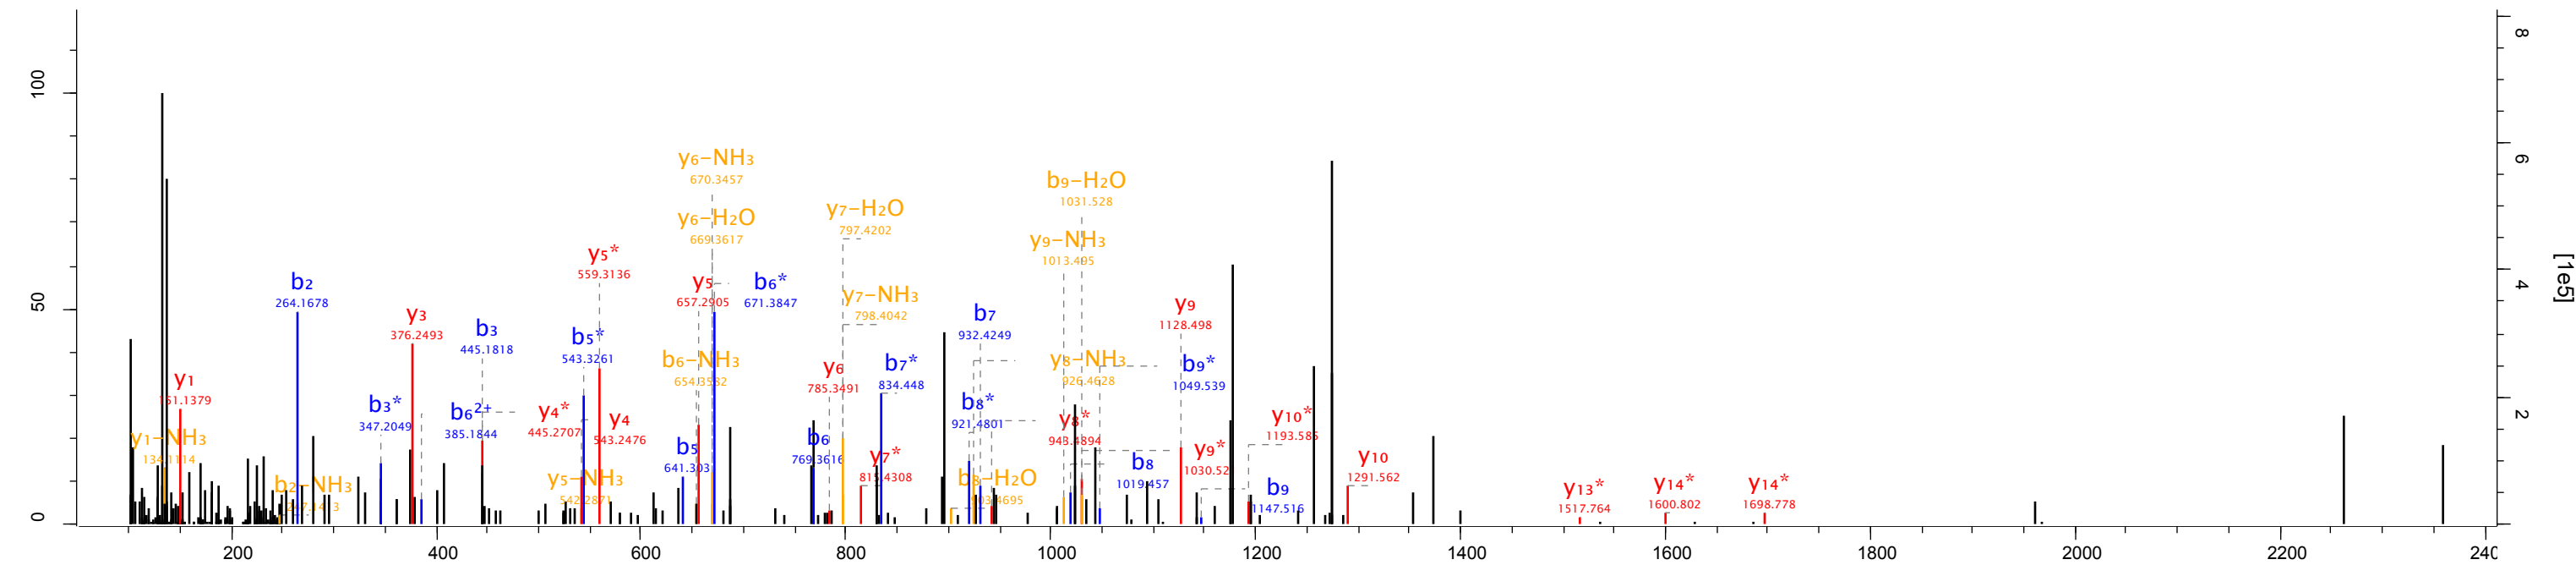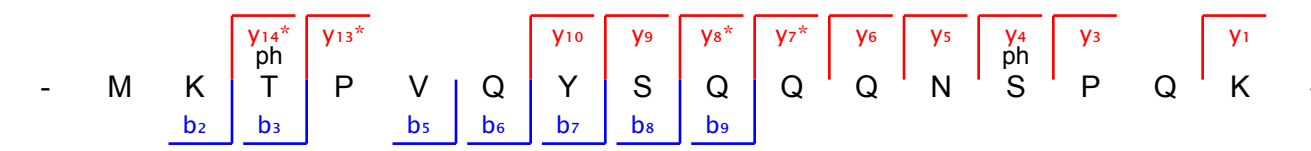

Raw file 20150812\_A375SR\_Phospho\_BR1\_03 Scan 8904 Method FTMS; HCD Score 206.46 m/z 1059.94 Gene names CIC

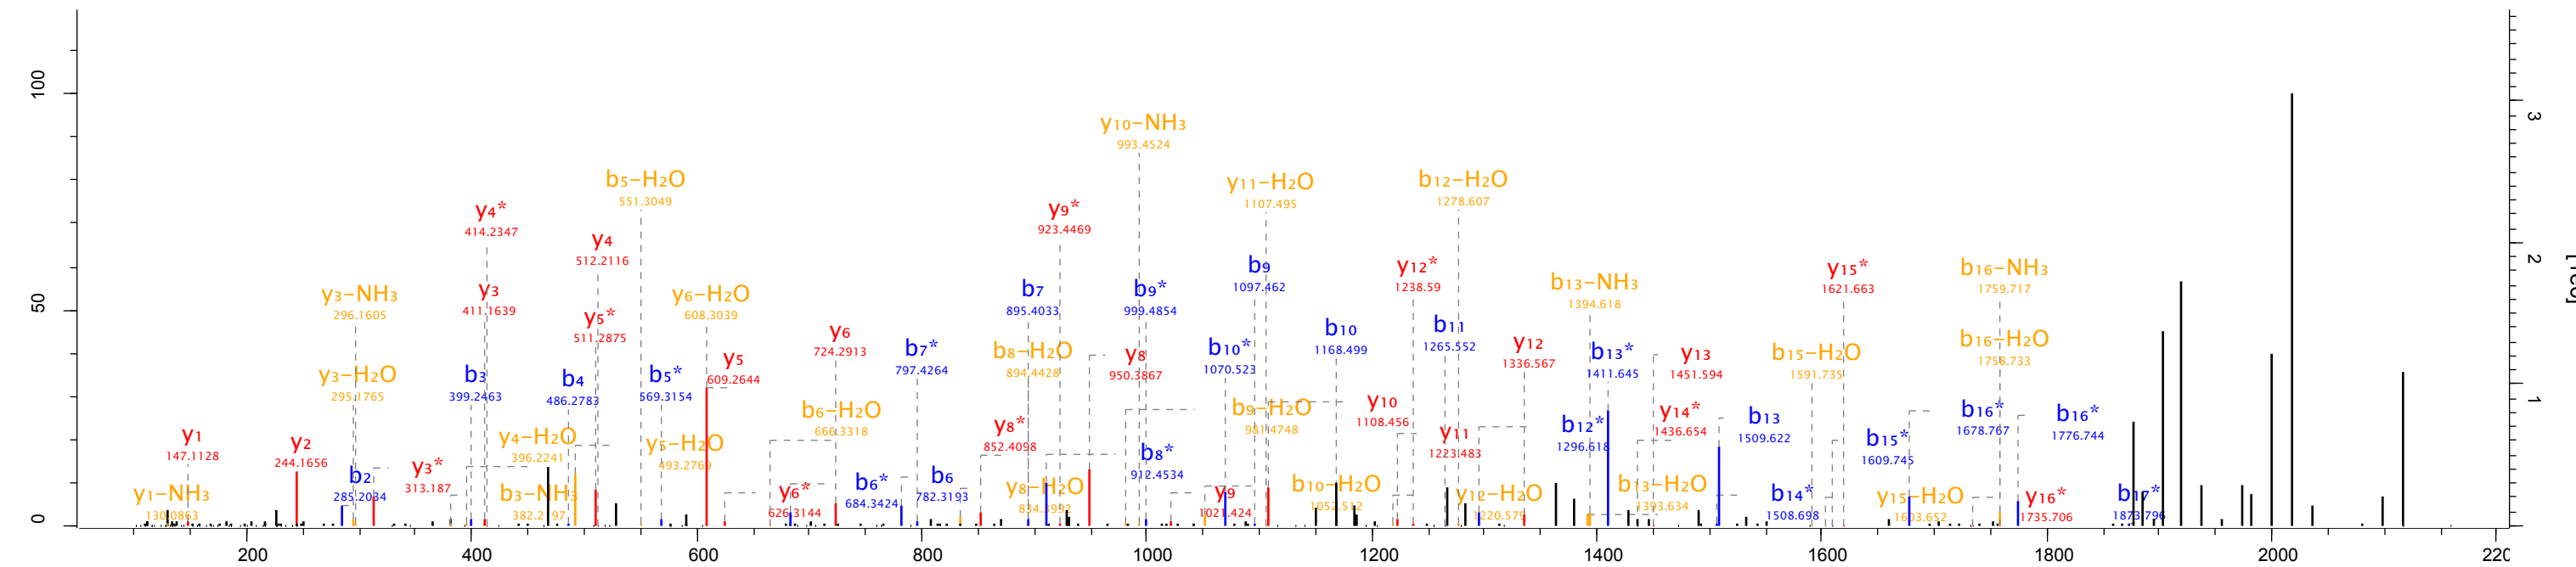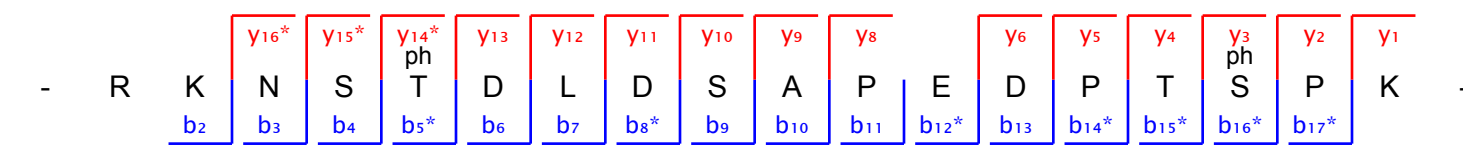

Raw file: 20150812\_A375SR\_Phospho\_BR1\_03  
 Scan: 9084 Method: FTMS; HCD Score: 212.47 m/z: 763.35 Gene names: TP53BP1

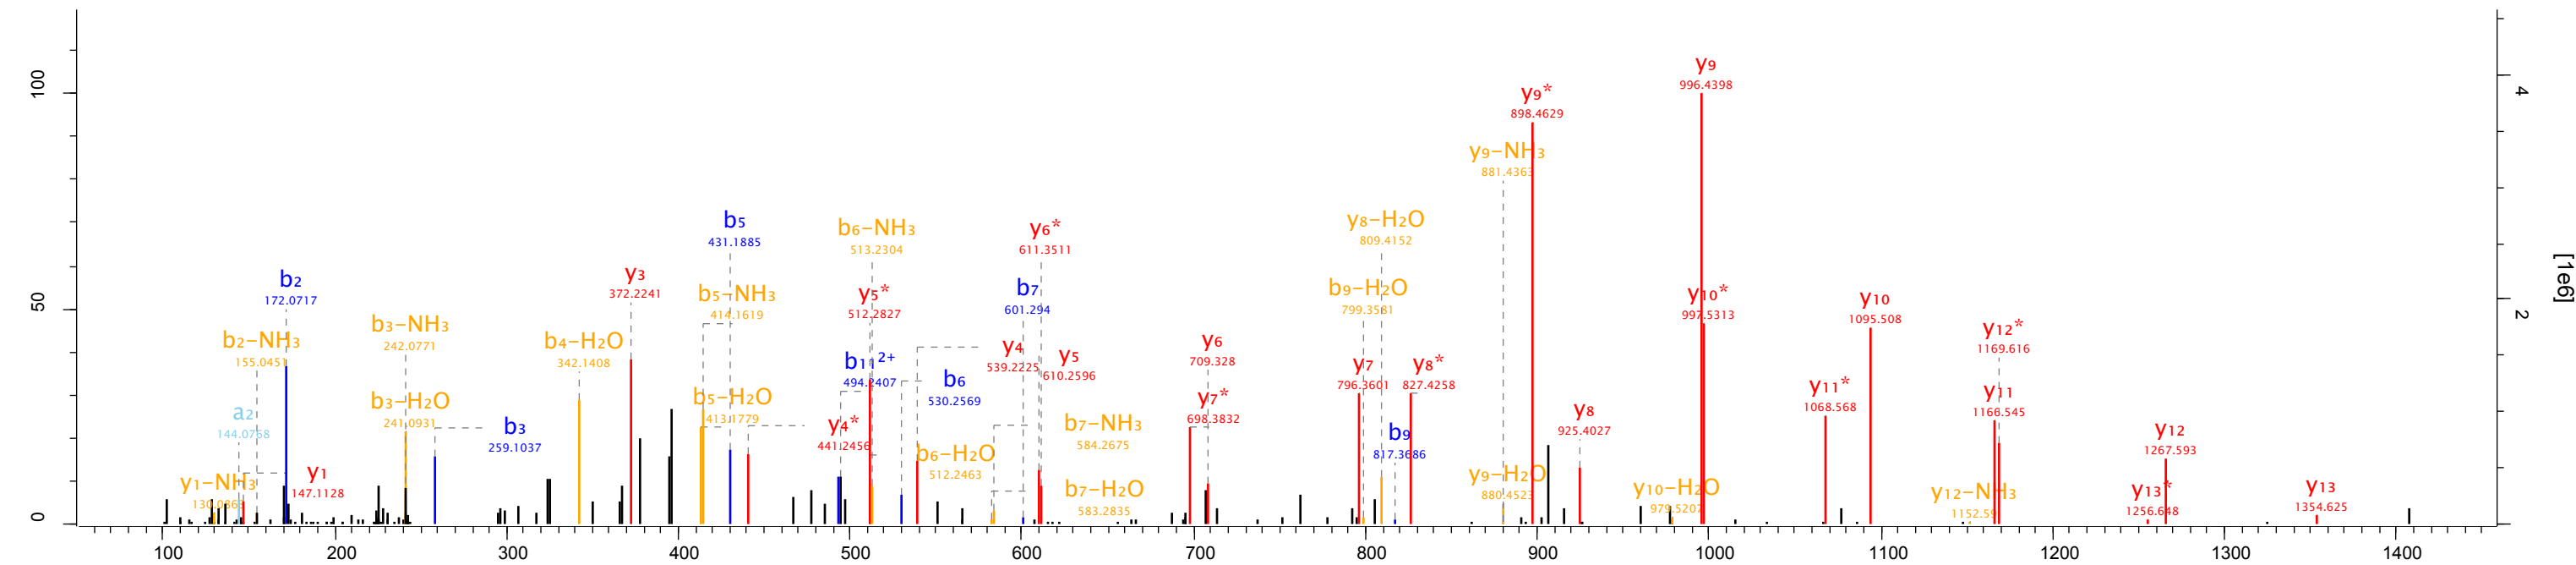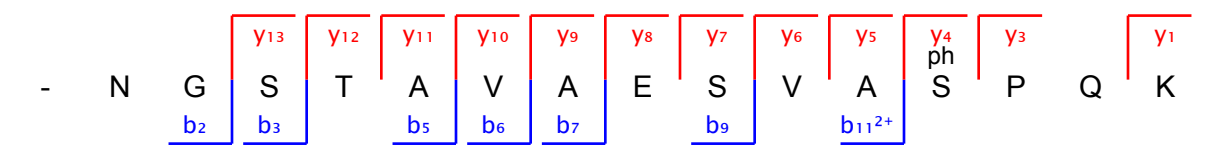

Raw file

20150812\_A375SR\_Phospho\_BR1\_03

Scan 9134 Method FTMS; HCD Score 100.43 m/z 489.89 Gene names VCIPI1

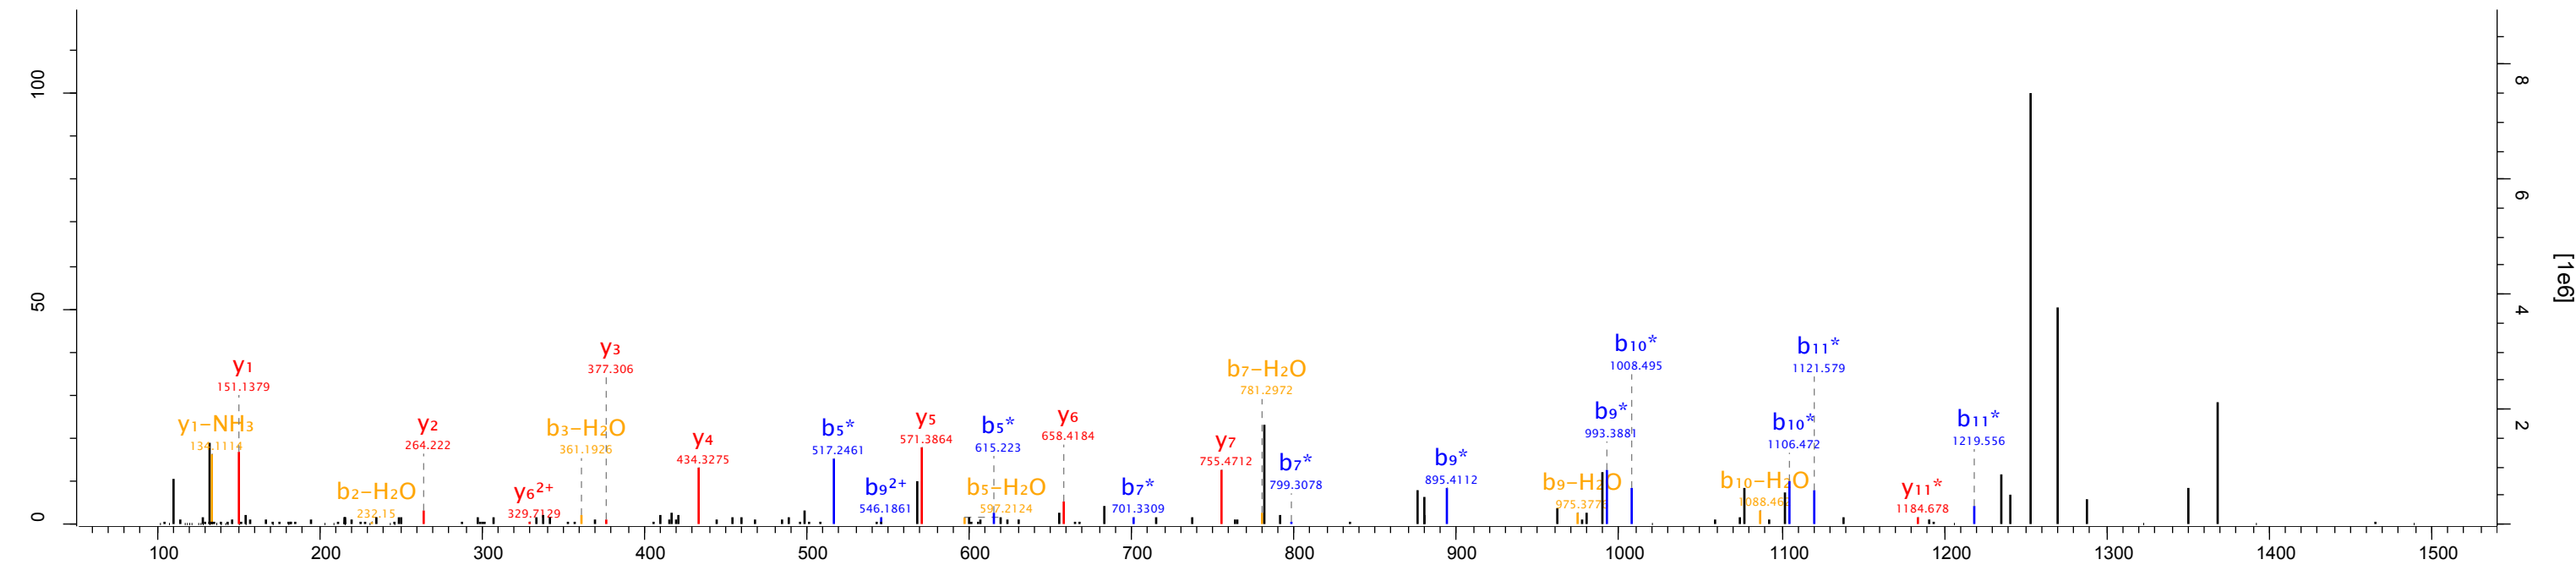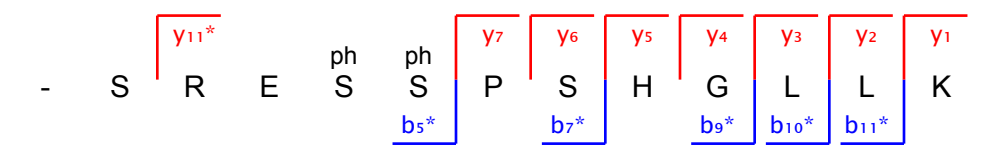

Raw file: 20150812\_A375SR\_Phospho\_BR1\_03  
 Scan: 9164 Method: FTMS; HCD Score: 209.74 m/z: 886.81 Gene names: PRRC2A

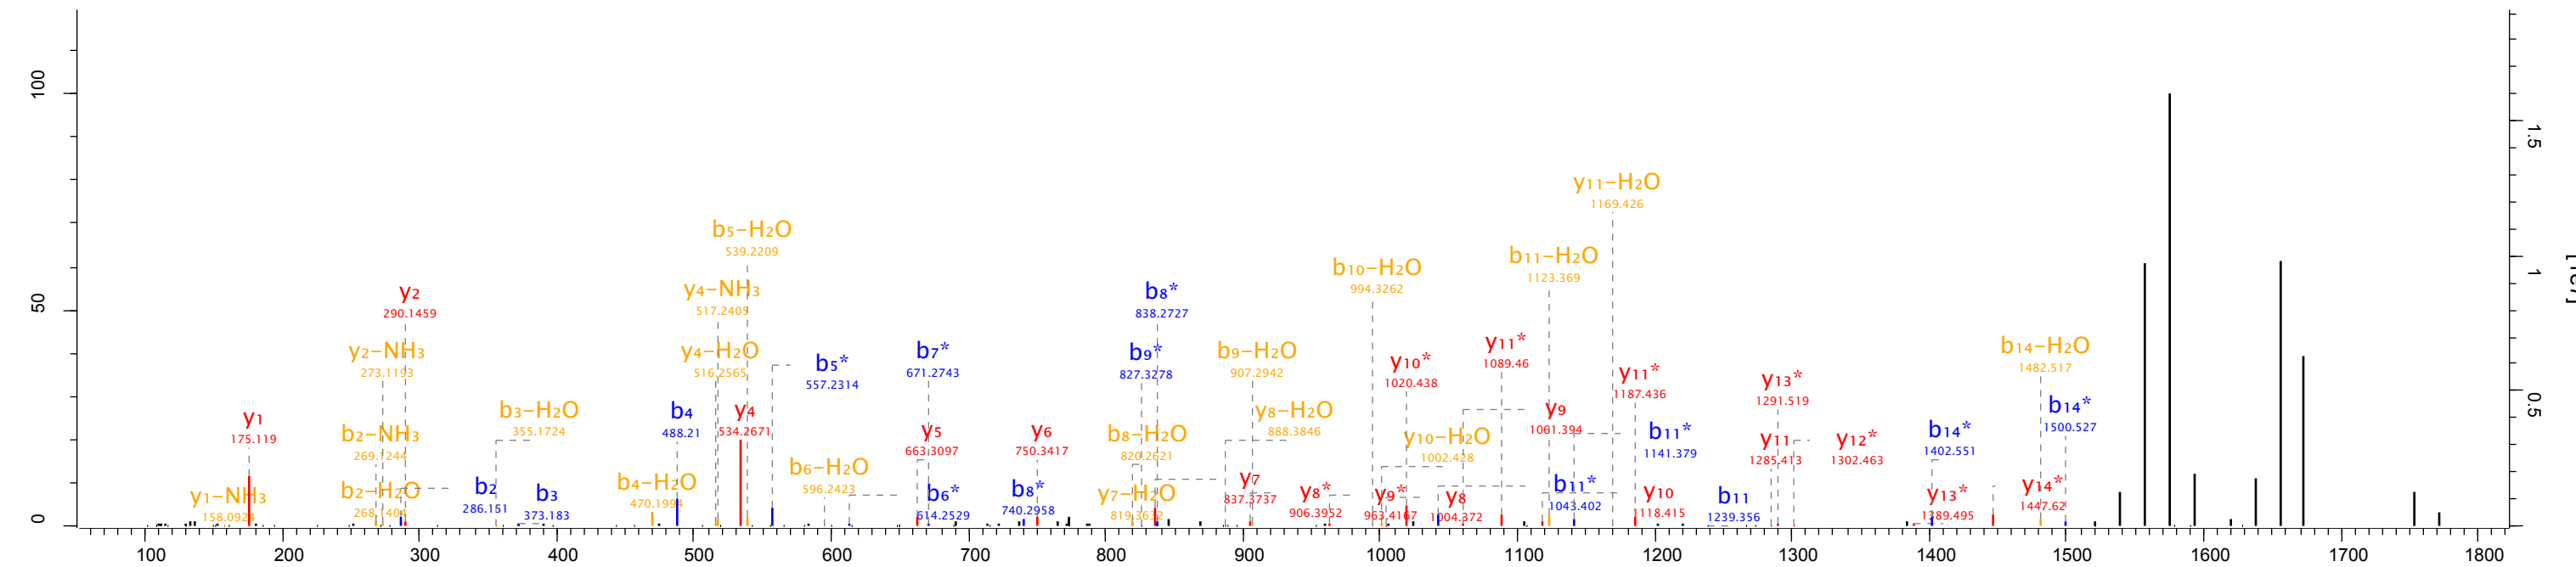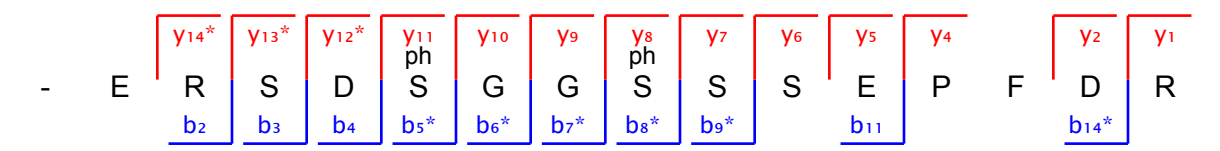

Raw file 20150812\_A375SR\_Phospho\_BR1\_03 Scan 9514 Method FTMS; HCD Score 178.02 m/z 719.3 Gene names EME1

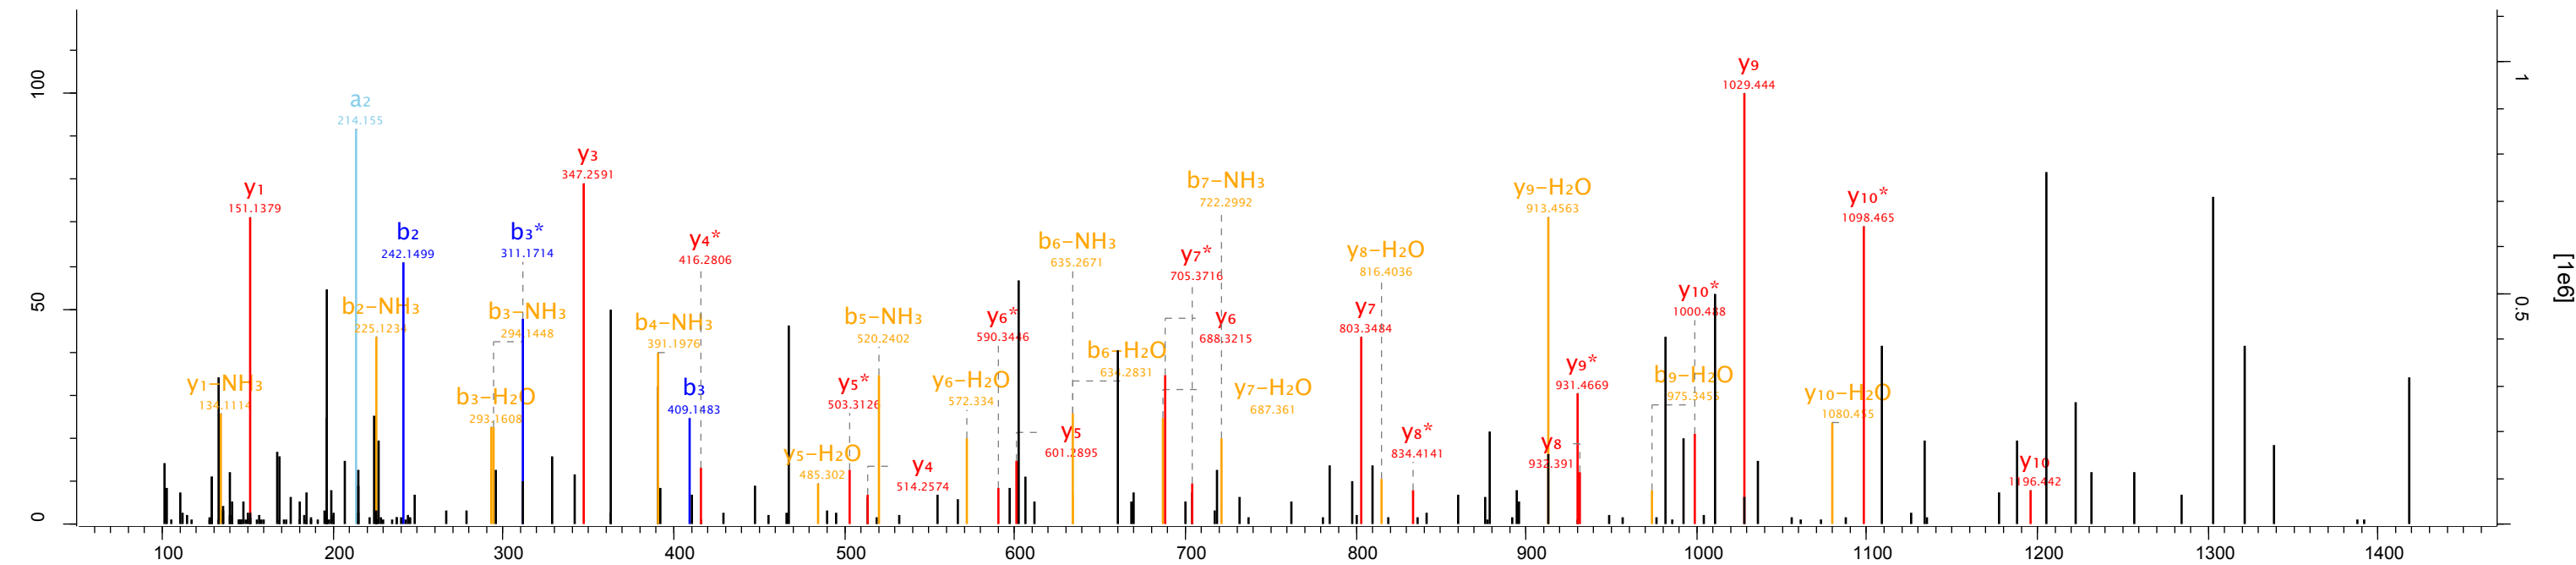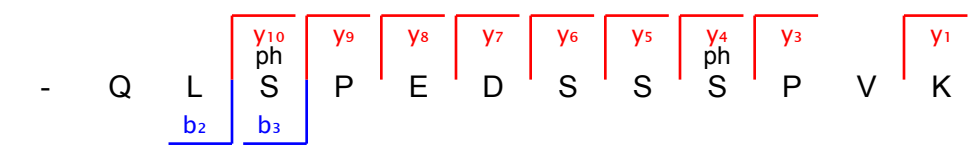

Raw file: 20150812\_A375SR\_Phospho\_BR1\_03  
 Scan: 9644 Method: FTMS; HCD Score: 161.96 m/z: 1056.43 Gene names: PRRC2C

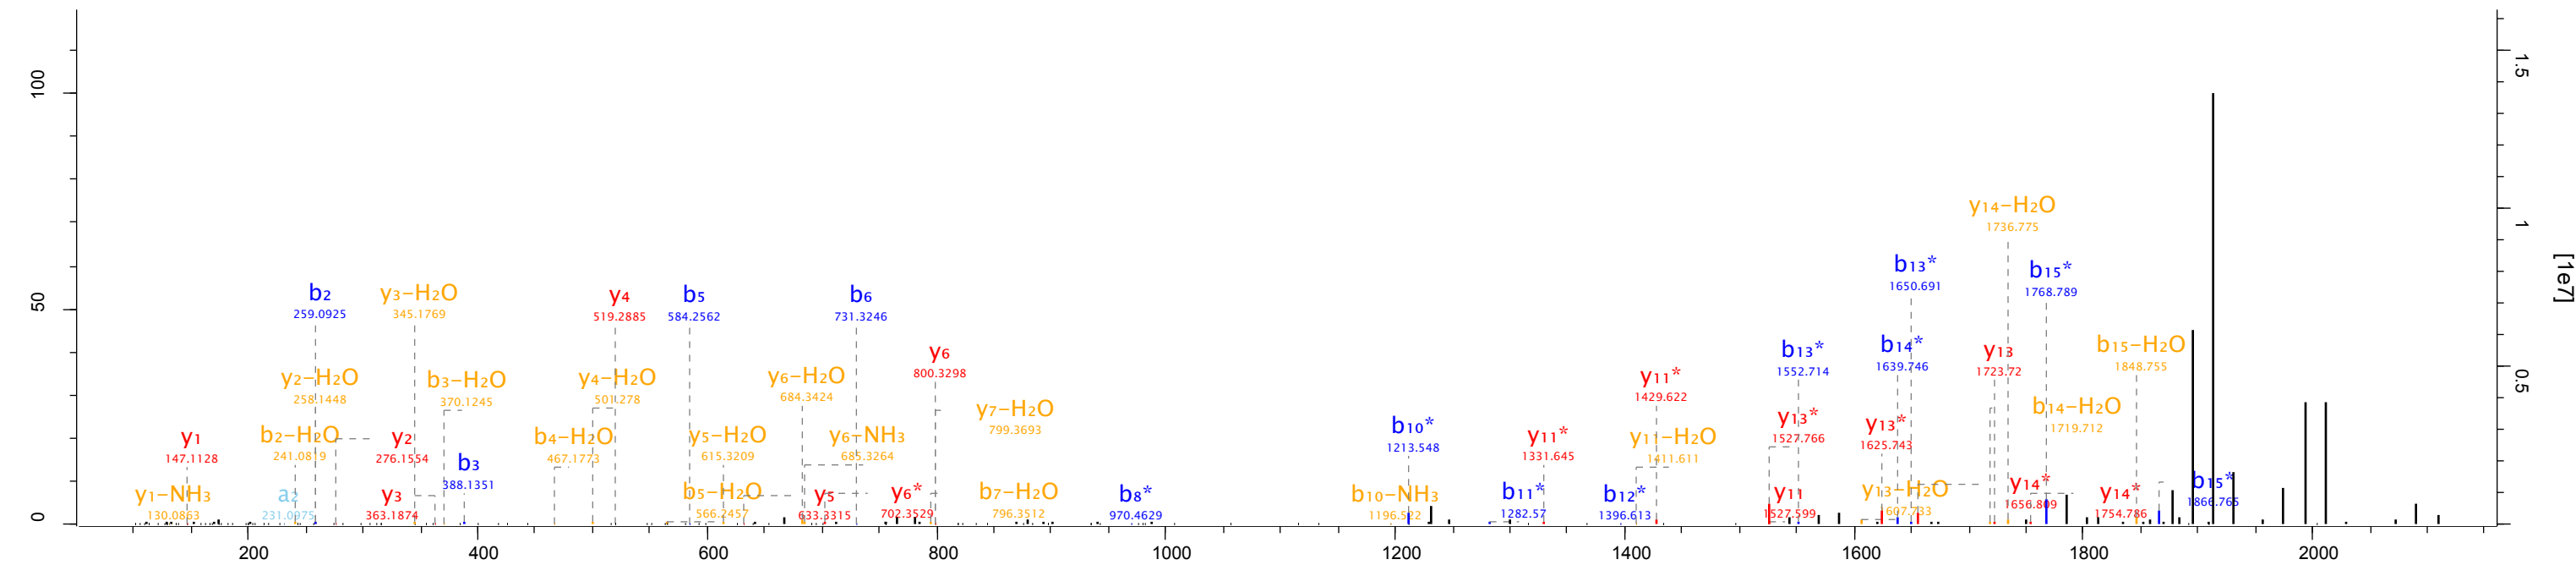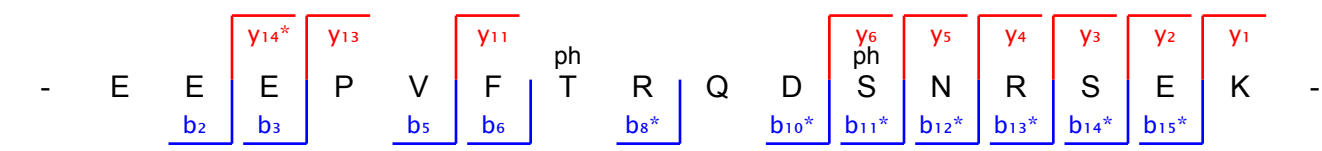

Raw file: 20150812\_A375SR\_Phospho\_BR1\_03  
 Scan: 9734 Method: FTMS; HCD Score: 115.38 m/z: 695.27 Gene names: PPP1R15B

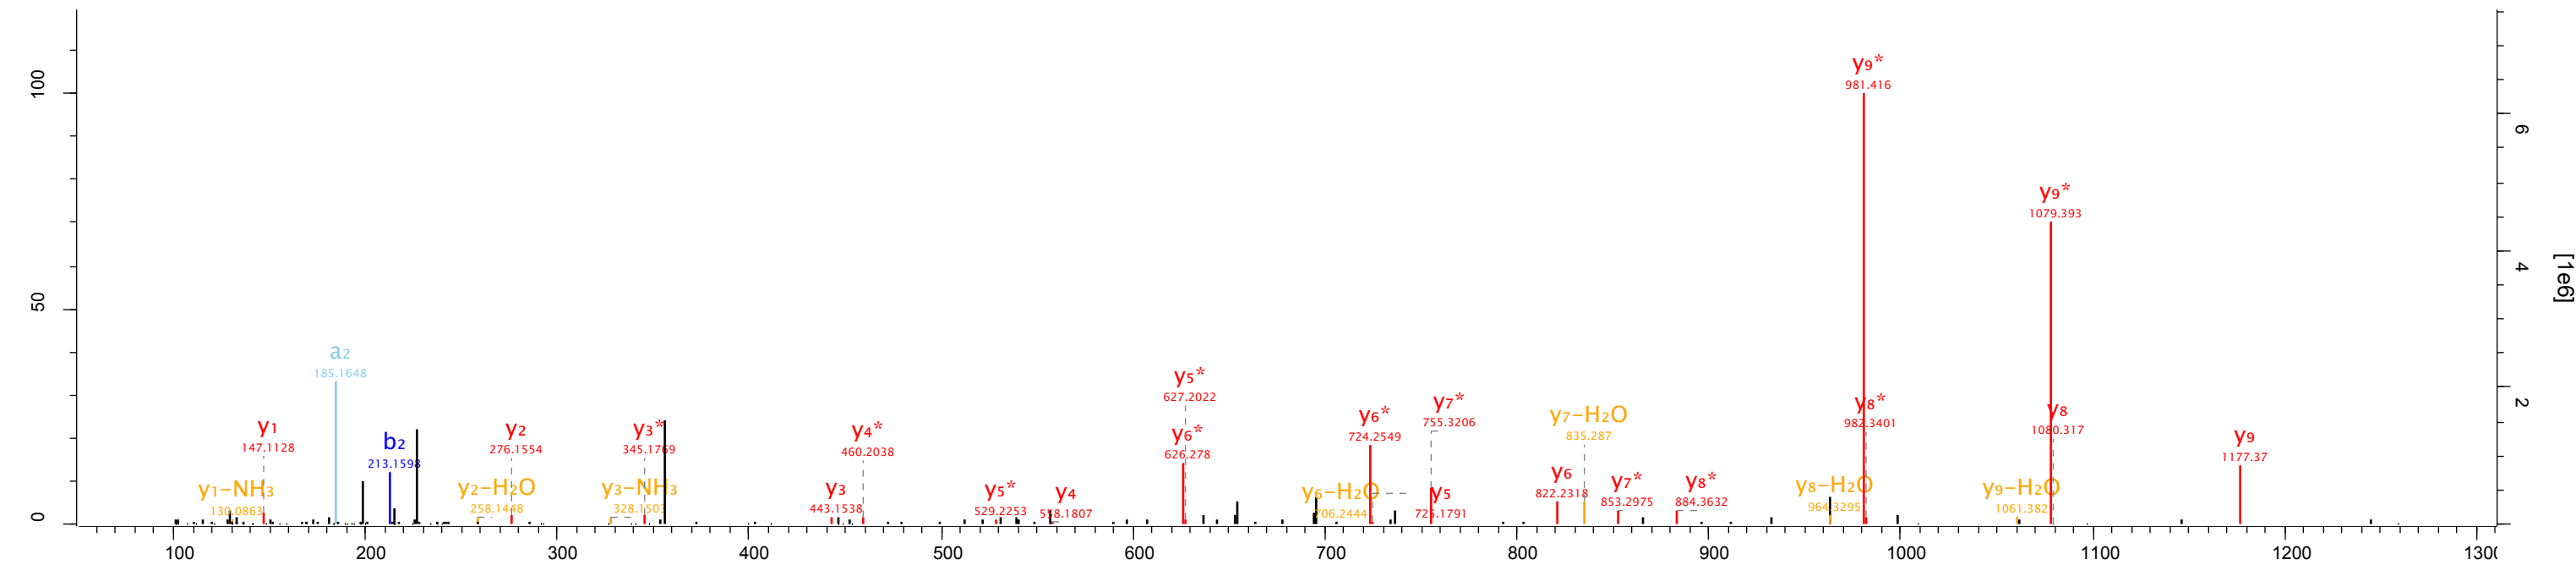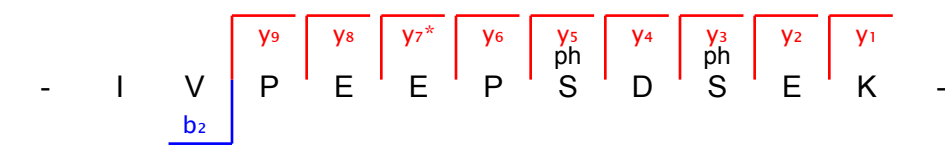



Raw file 20150812\_A375SR\_Phospho\_BR1\_04 Scan 10074 Method FTMS; HCD Score 181.34 m/z 588.31 Gene names TWISTNB

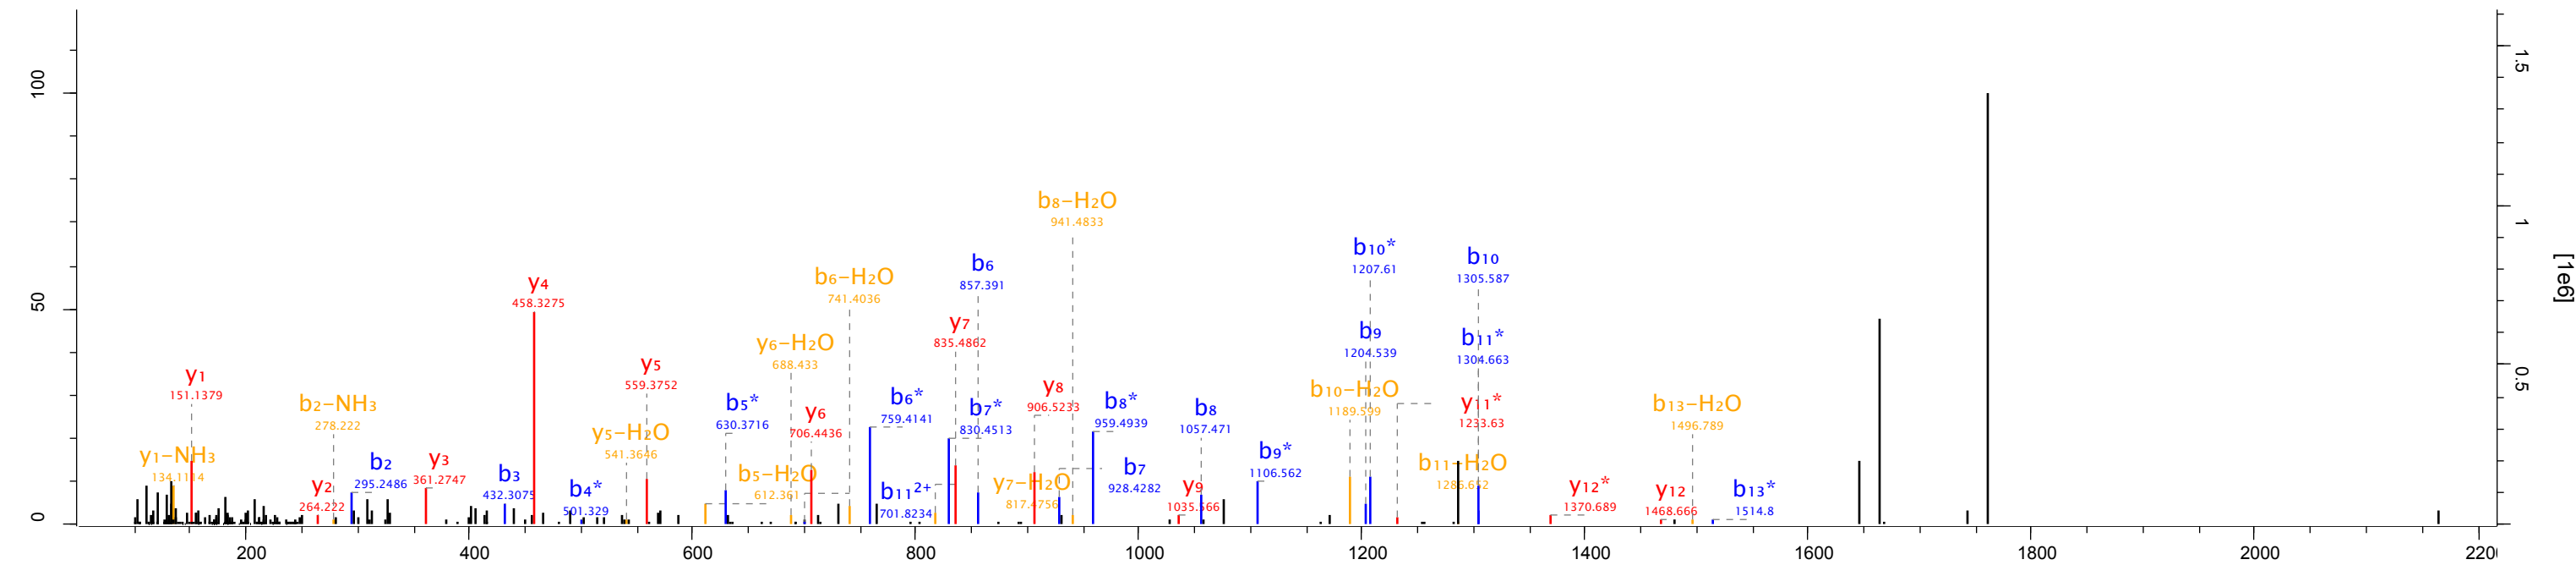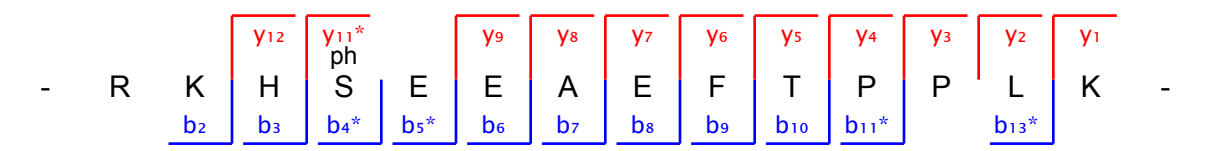

Raw file 20150812\_A375SR\_Phospho\_BR1\_04 Scan 10104 Method FTMS; HCD Score 119.41 m/z 954.41 Gene names FTSJ3

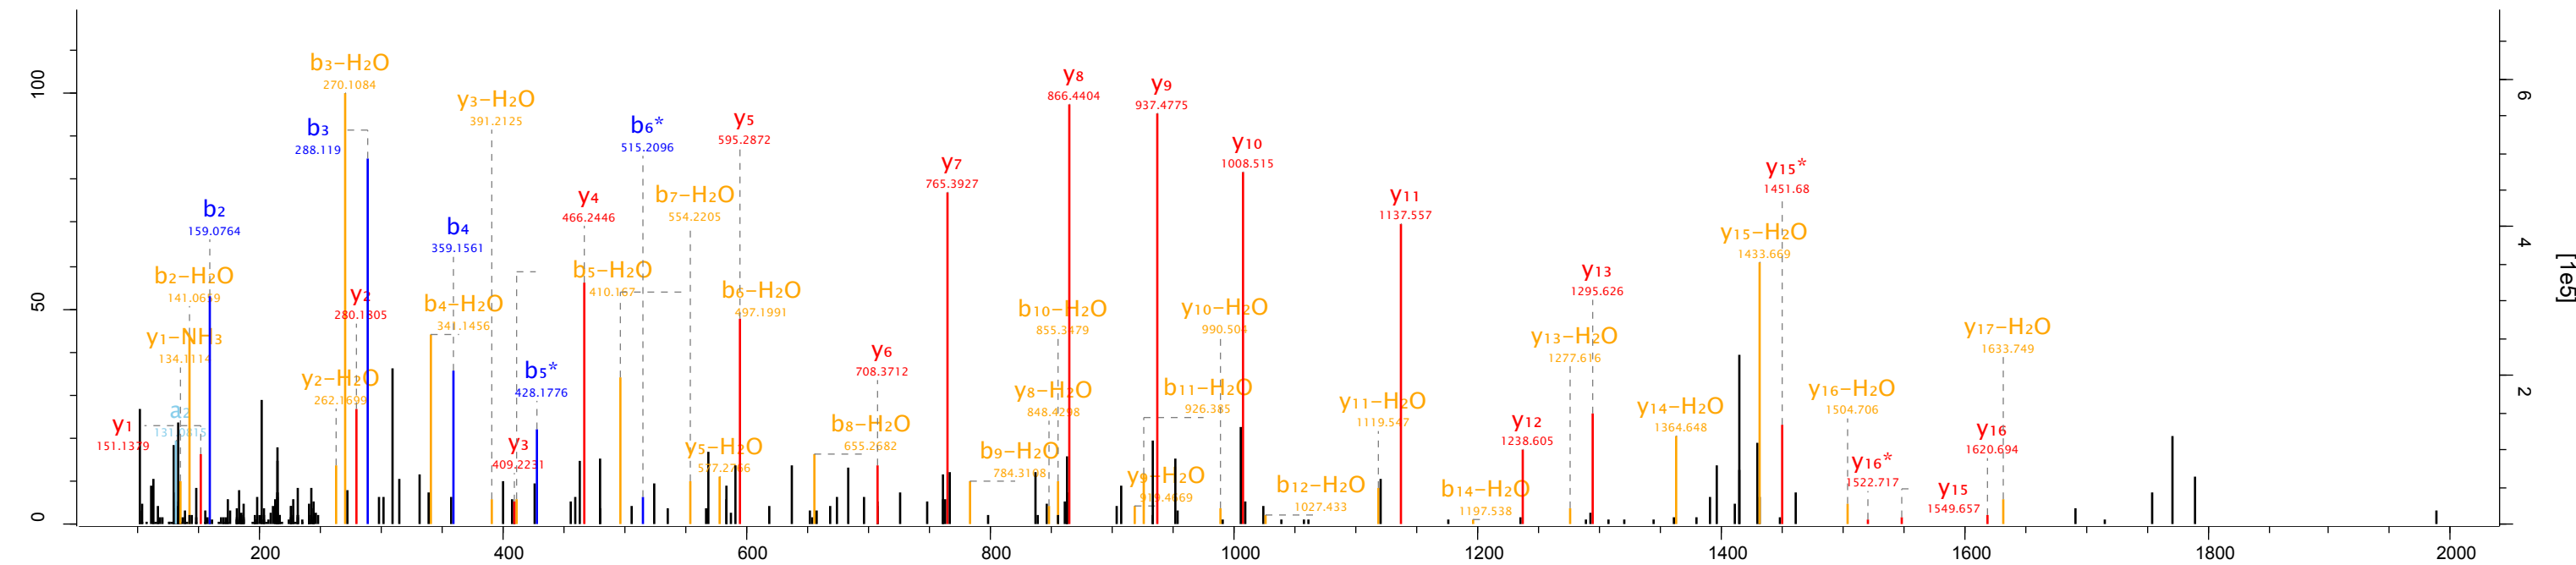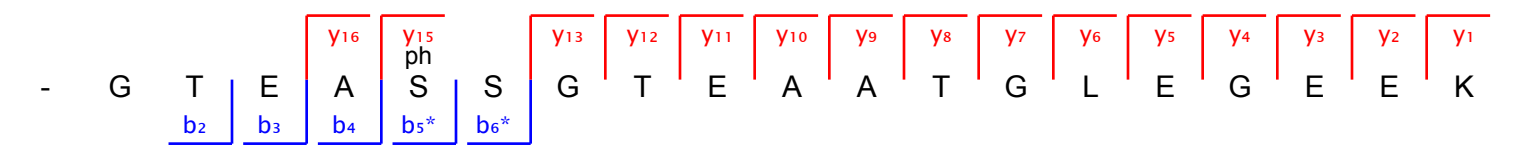

Raw file  
20150812\_A375SR\_Phospho\_BR1\_04

Scan 10154 Method FTMS; HCD Score 178.88 m/z 912.74 Gene names MPLKIP

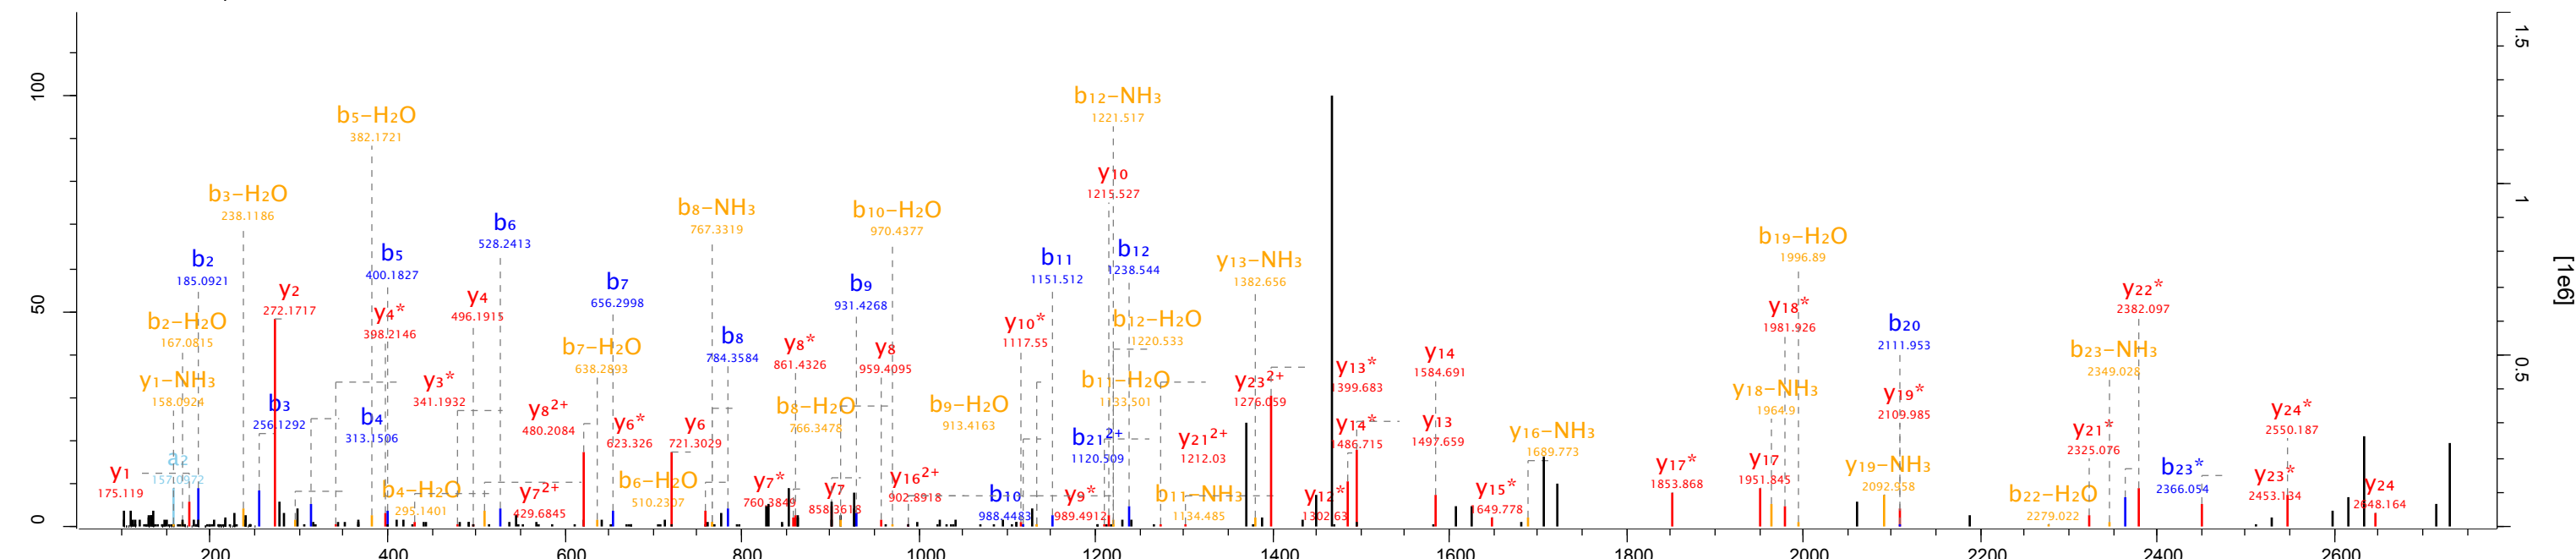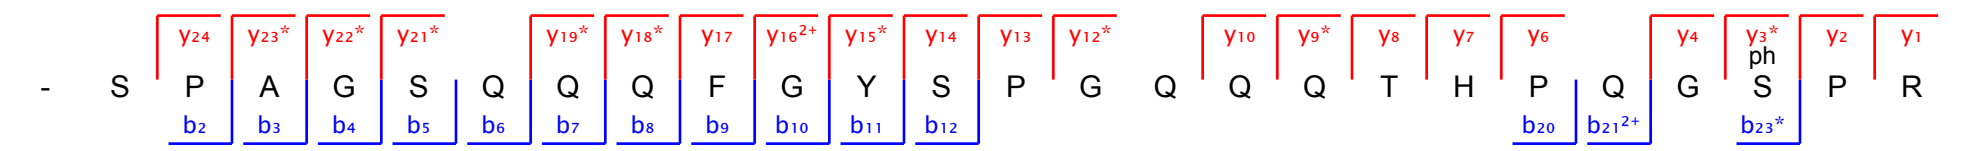

Raw file: 20150812\_A375SR\_Phospho\_BR1\_04  
 Scan: 10554 Method: FTMS; HCD Score: 277.49 m/z: 822.8 Gene names: ARHGAP17

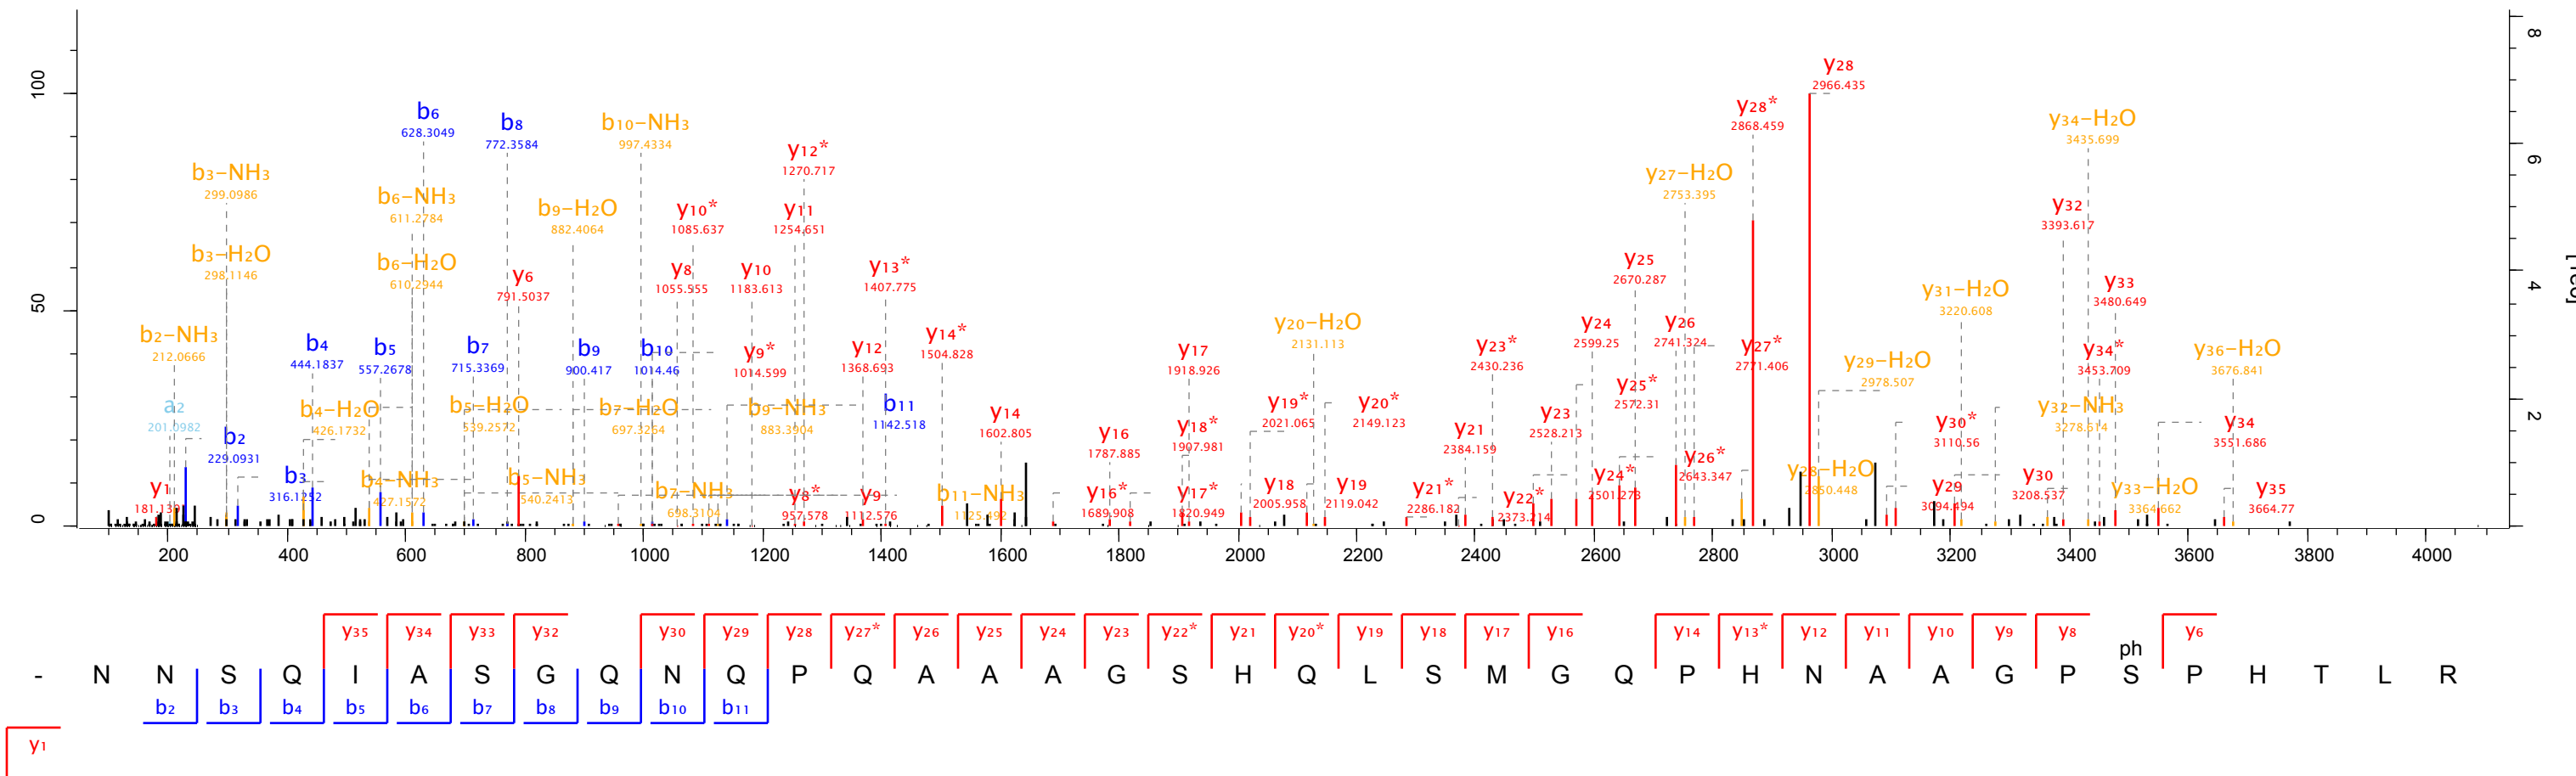

Raw file: 20150812\_A375SR\_Phospho\_BR1\_04  
 Scan: 10874 Method: FTMS; HCD Score: 124.34 m/z: 554.23 Gene names: DOCK7

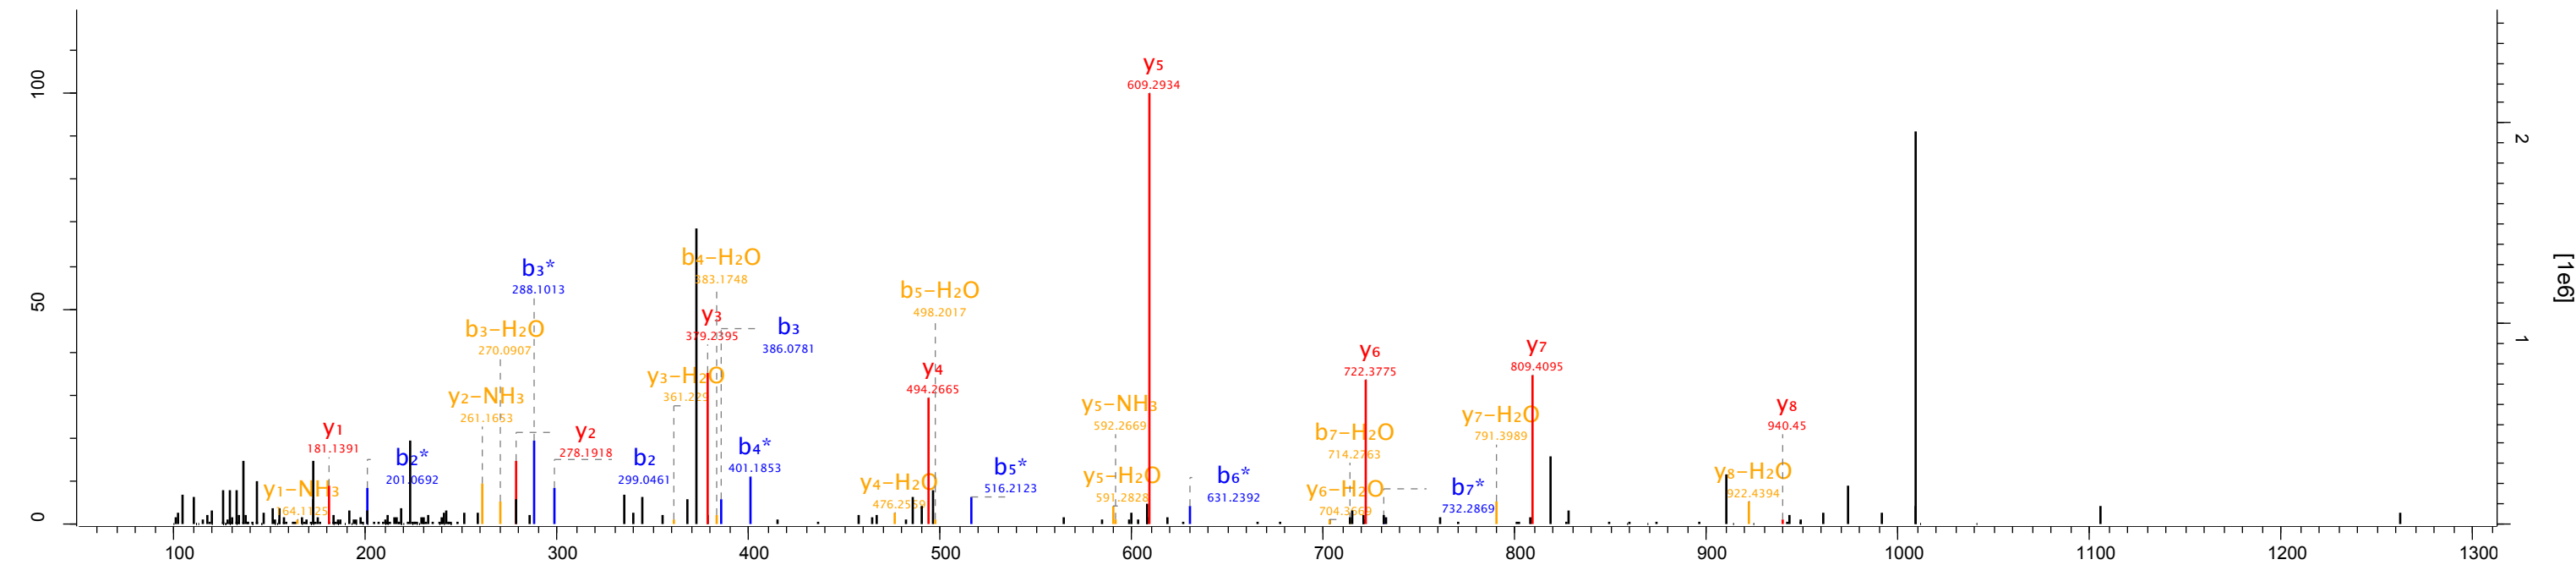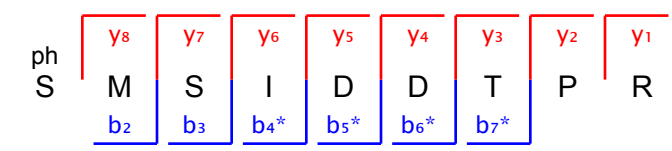

Raw file Scan Method Score m/z Gene names  
 20150812\_A375SR\_Phospho\_BR1\_04 10964 FTMS; HCD 185.71 772.84 ITCH

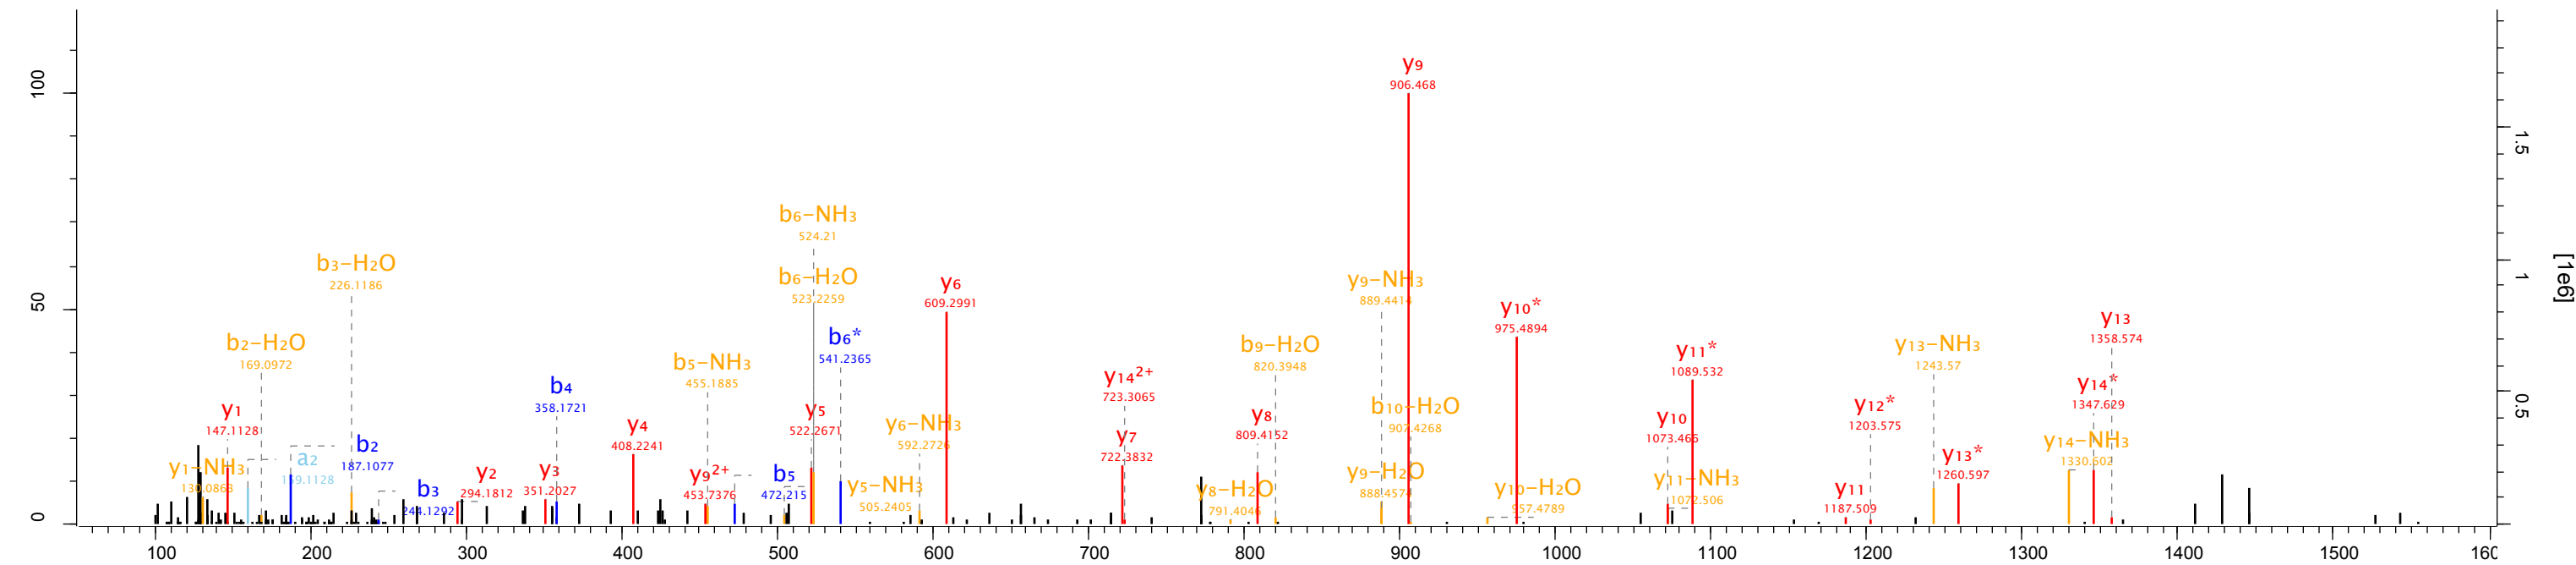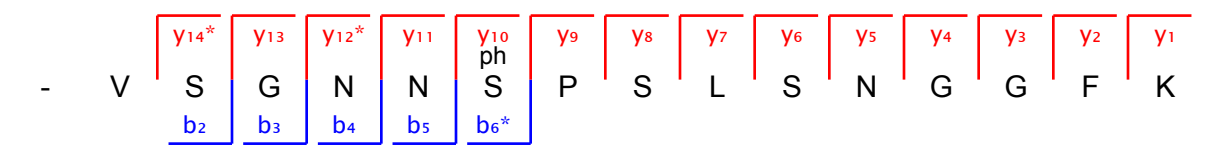

Raw file 20150812\_A375SR\_Phospho\_BR1\_04 Scan 11194 Method FTMS; HCD Score 141.1 m/z 687.33 Gene names RFX7

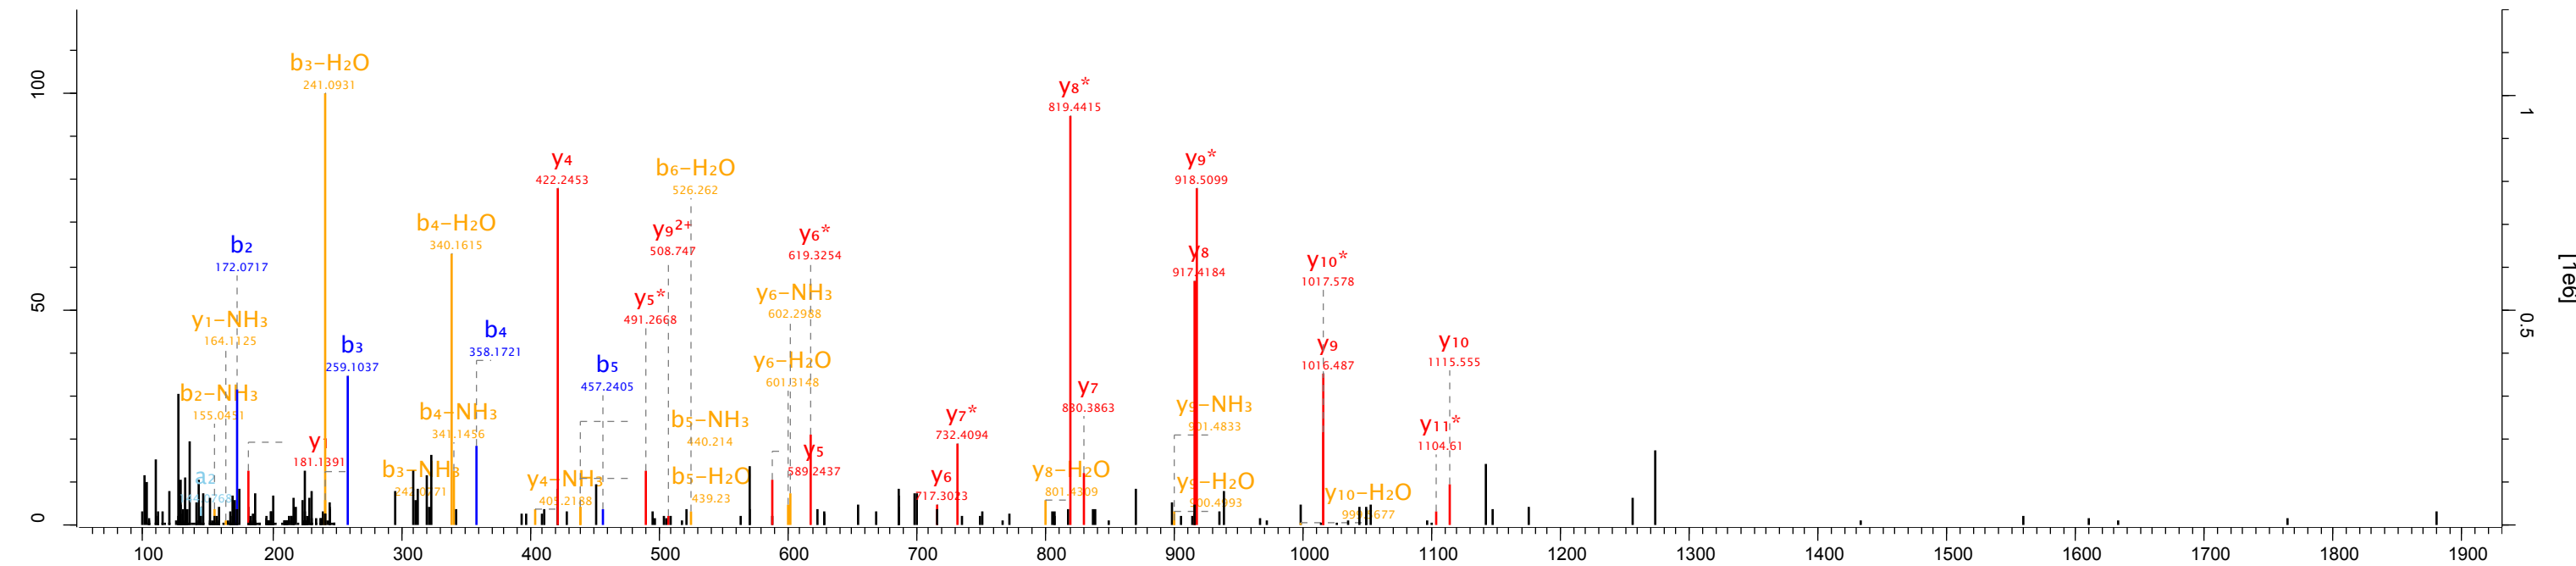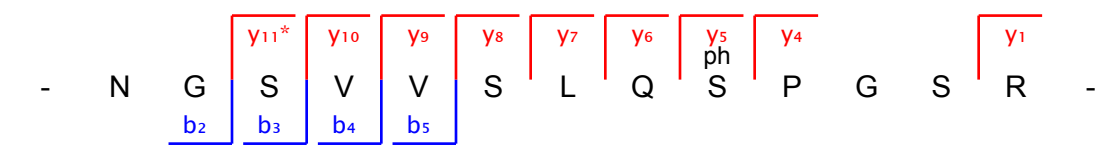

Raw file Scan Method Score m/z Gene names  
 20150812\_A375SR\_Phospho\_BR1\_04 11544 FTMS; HCD 361.49 1133.5 HIRIP3

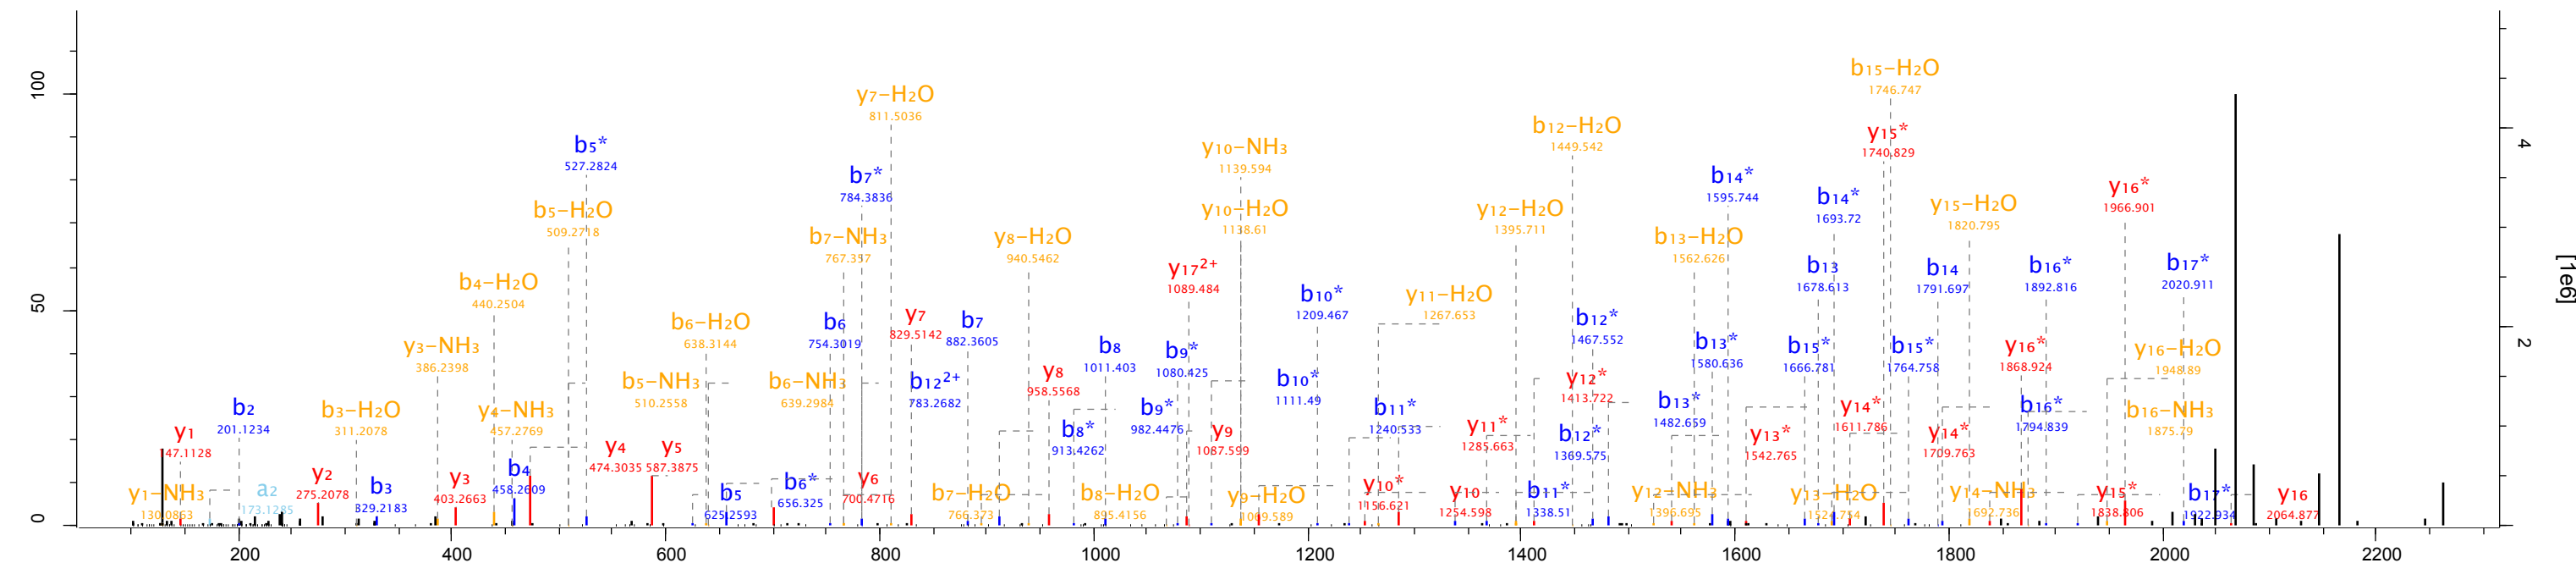

- S L K E E Q E S E E E I L A Q K K -

y17<sup>2+</sup>
y16
y15<sup>\*</sup>
y14<sup>\*</sup>
y13<sup>\*</sup>
y12<sup>\*</sup>
y11<sup>\*</sup>
y10
y9
y8
y7
y6
y5
y4
y3
y2
y1

b2
b3
b4
b5
b6
b7
b8
b9<sup>\*</sup>
b10<sup>\*</sup>
b11<sup>\*</sup>
b12<sup>\*</sup>
b13
b14
b15<sup>\*</sup>
b16<sup>\*</sup>
b17<sup>\*</sup>



Raw file: 20150812\_A375SR\_Phospho\_BR1\_04  
 Scan: 11984 Method: FTMS; HCD Score: 223.81 m/z: 1078.47 Gene names: CSNK1G3

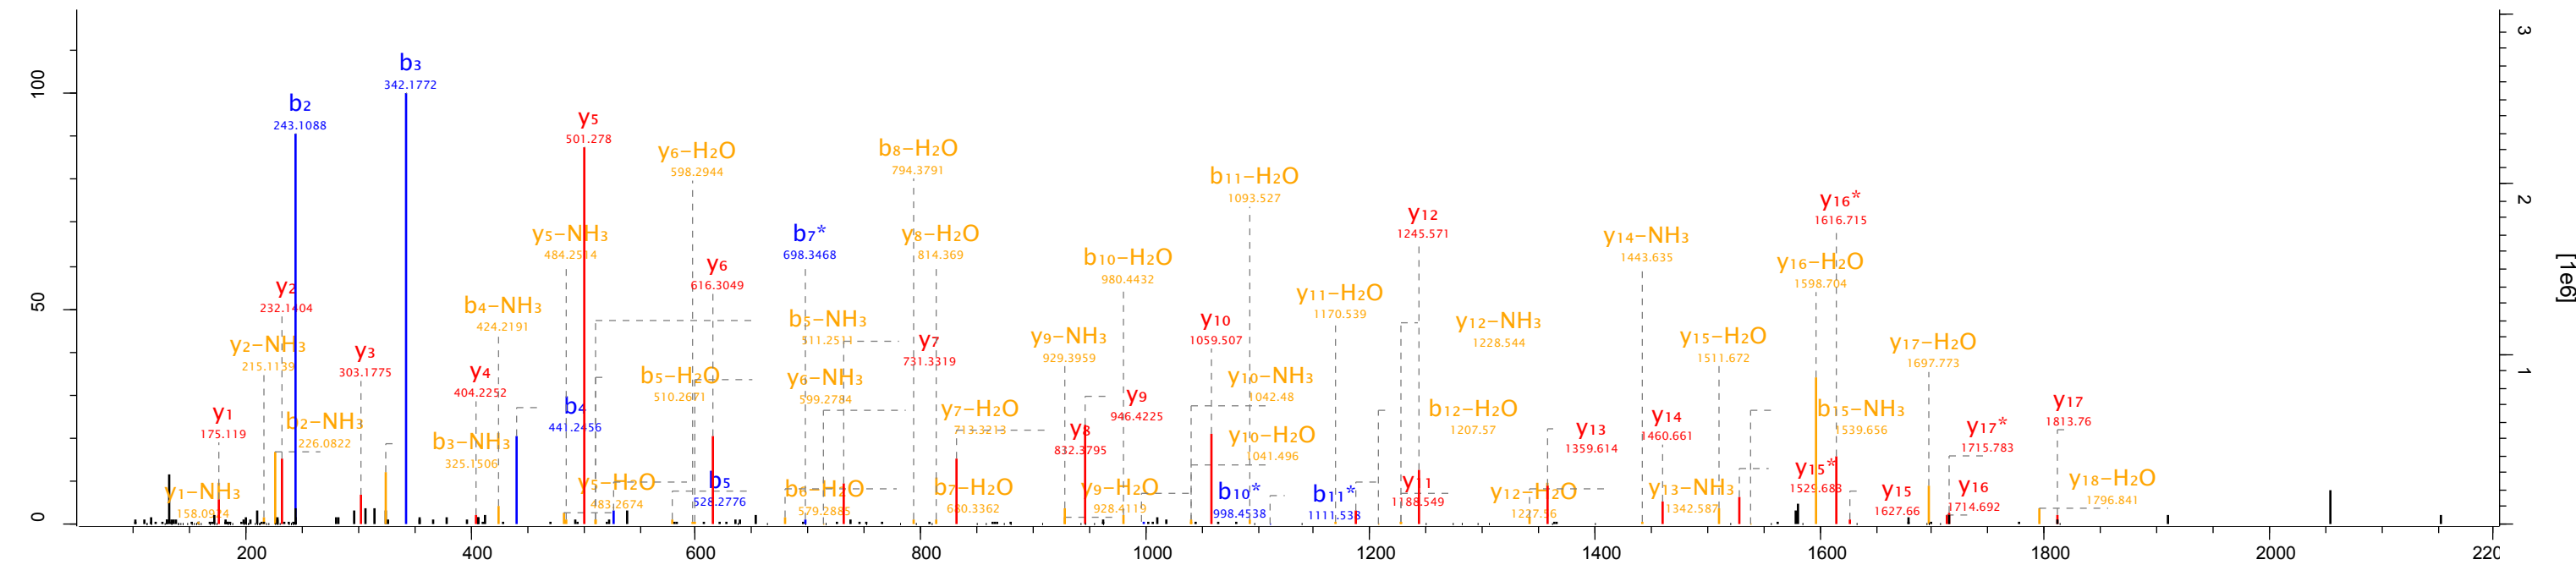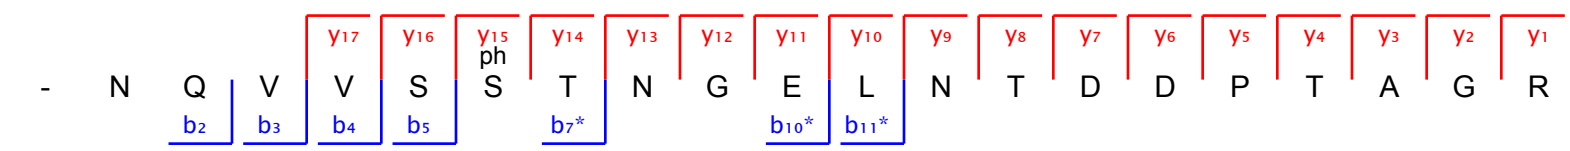

Raw file 20150812\_A375SR\_Phospho\_BR1\_04 Scan 12234 Method FTMS; HCD Score 139.31 m/z 955.77 Gene names TMPO

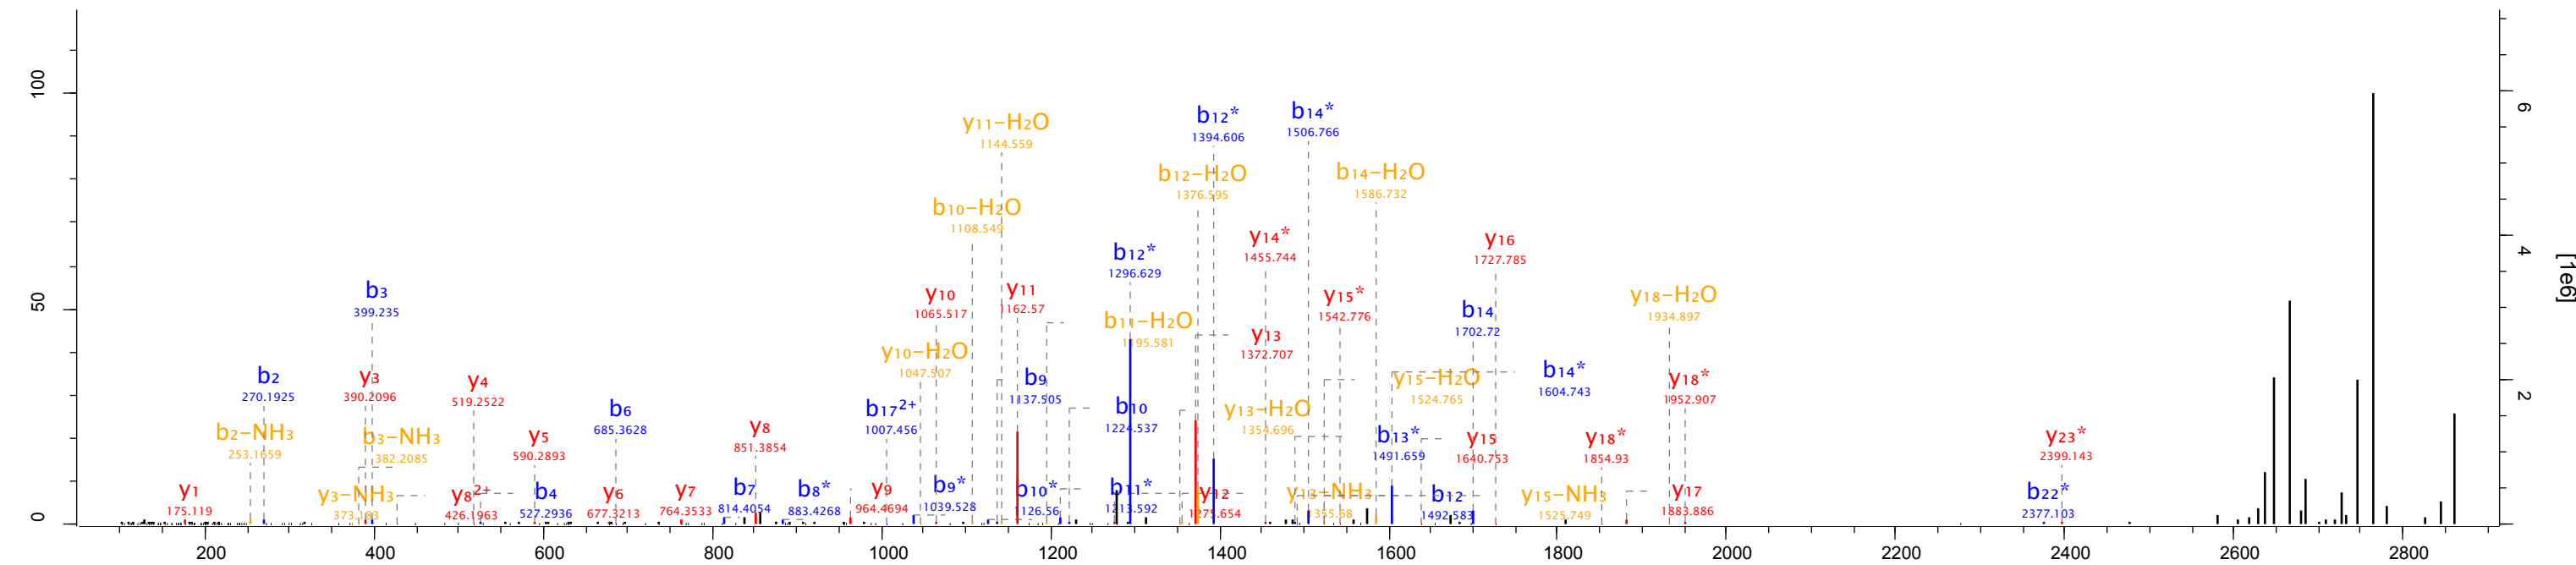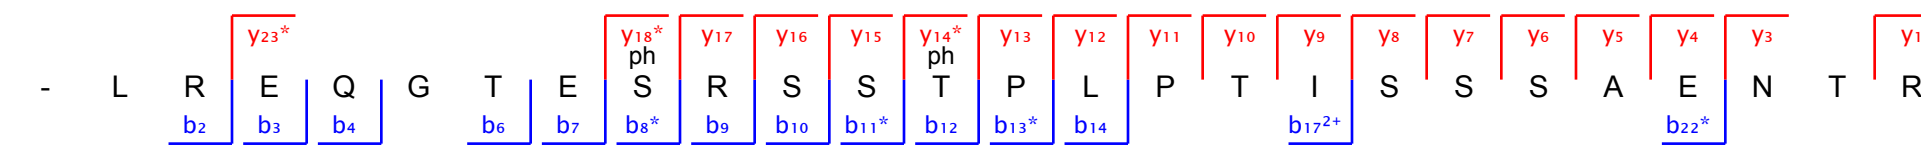

Raw file  
20150812\_A375SR\_Phospho\_BR1\_04

Scan 12254 Method FTMS; HCD Score 312.01 m/z 990.91 Gene names NUP98

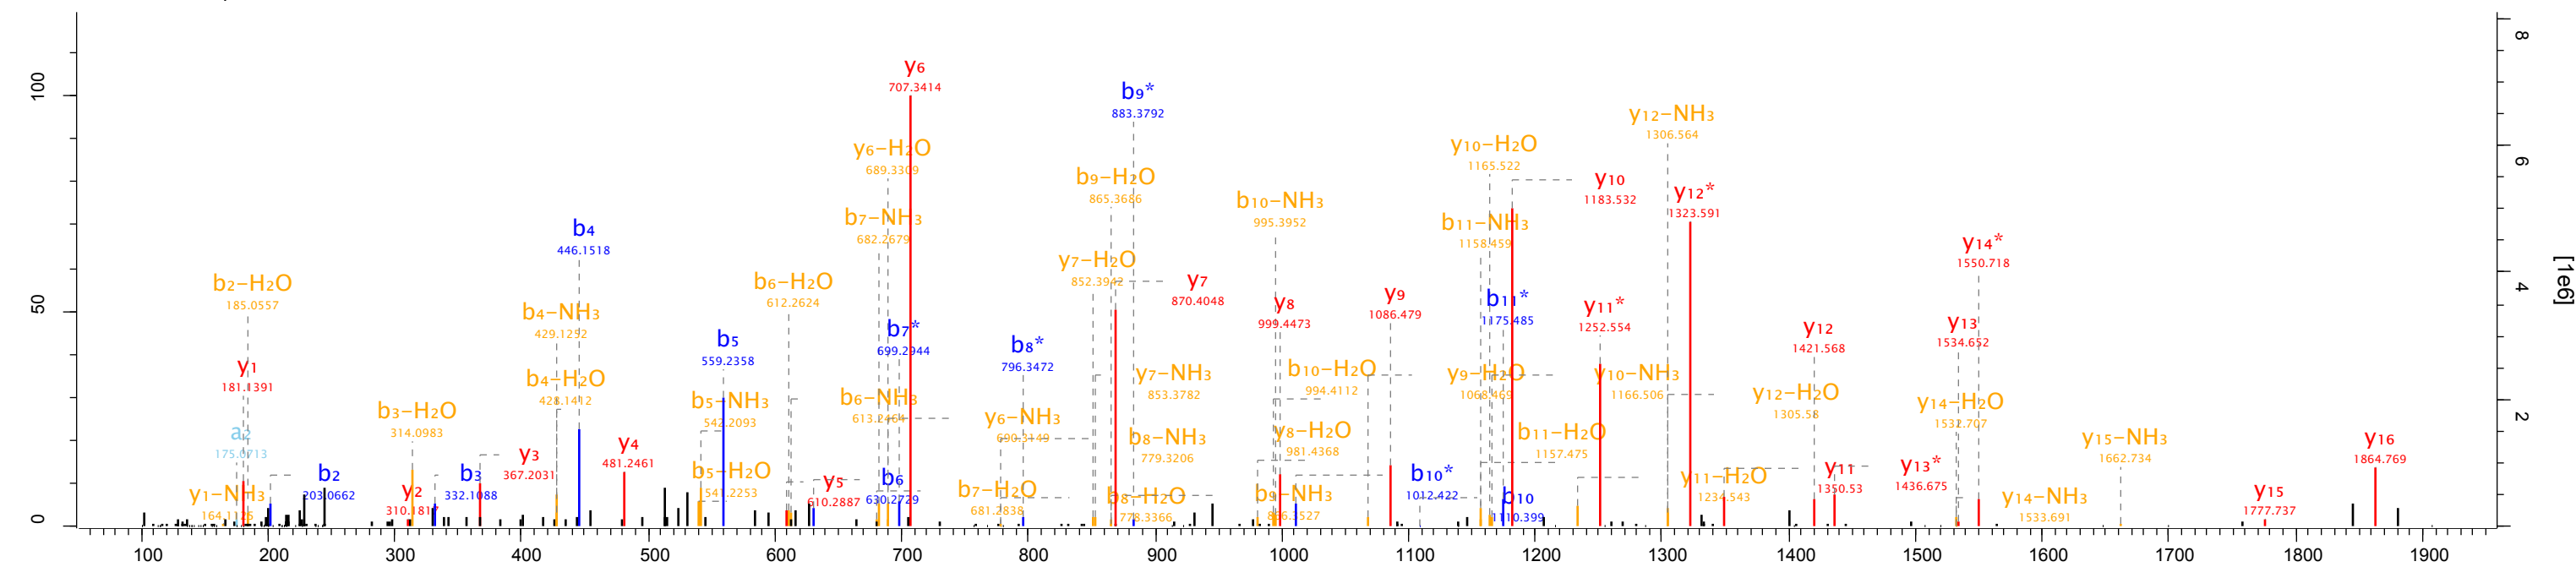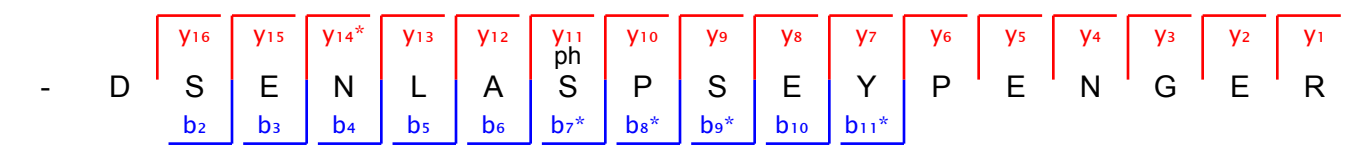

Raw file: 20150812\_A375SR\_Phospho\_BR1\_04  
 Scan: 12334 Method: FTMS; HCD Score: 182.4 m/z: 796.04 Gene names: SETD2

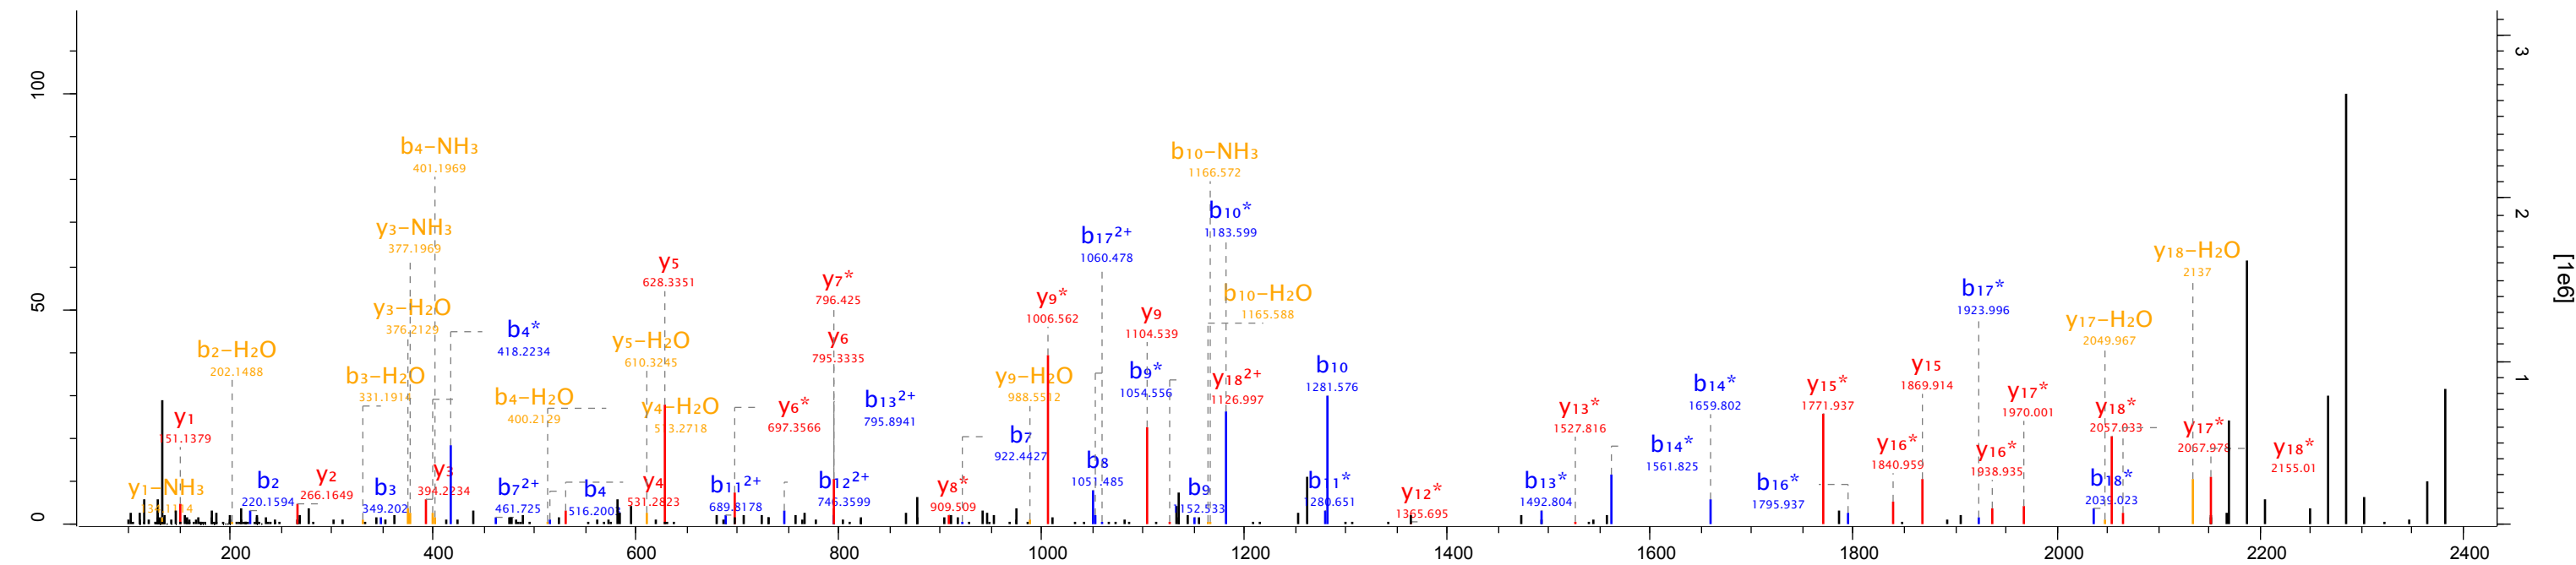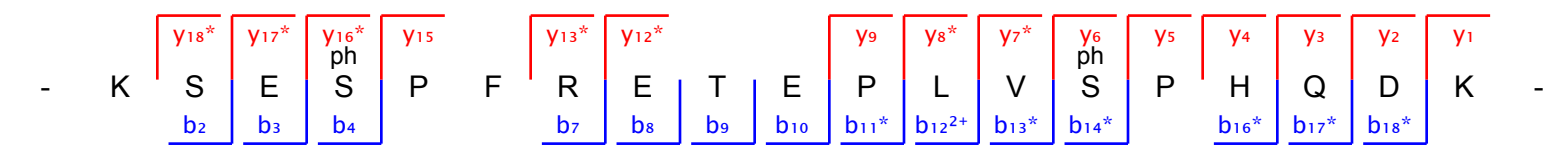

Raw file 20150812\_A375SR\_Phospho\_BR1\_04 Scan 12414 Method FTMS; HCD Score 173.04 m/z 512.76 Gene names CIC

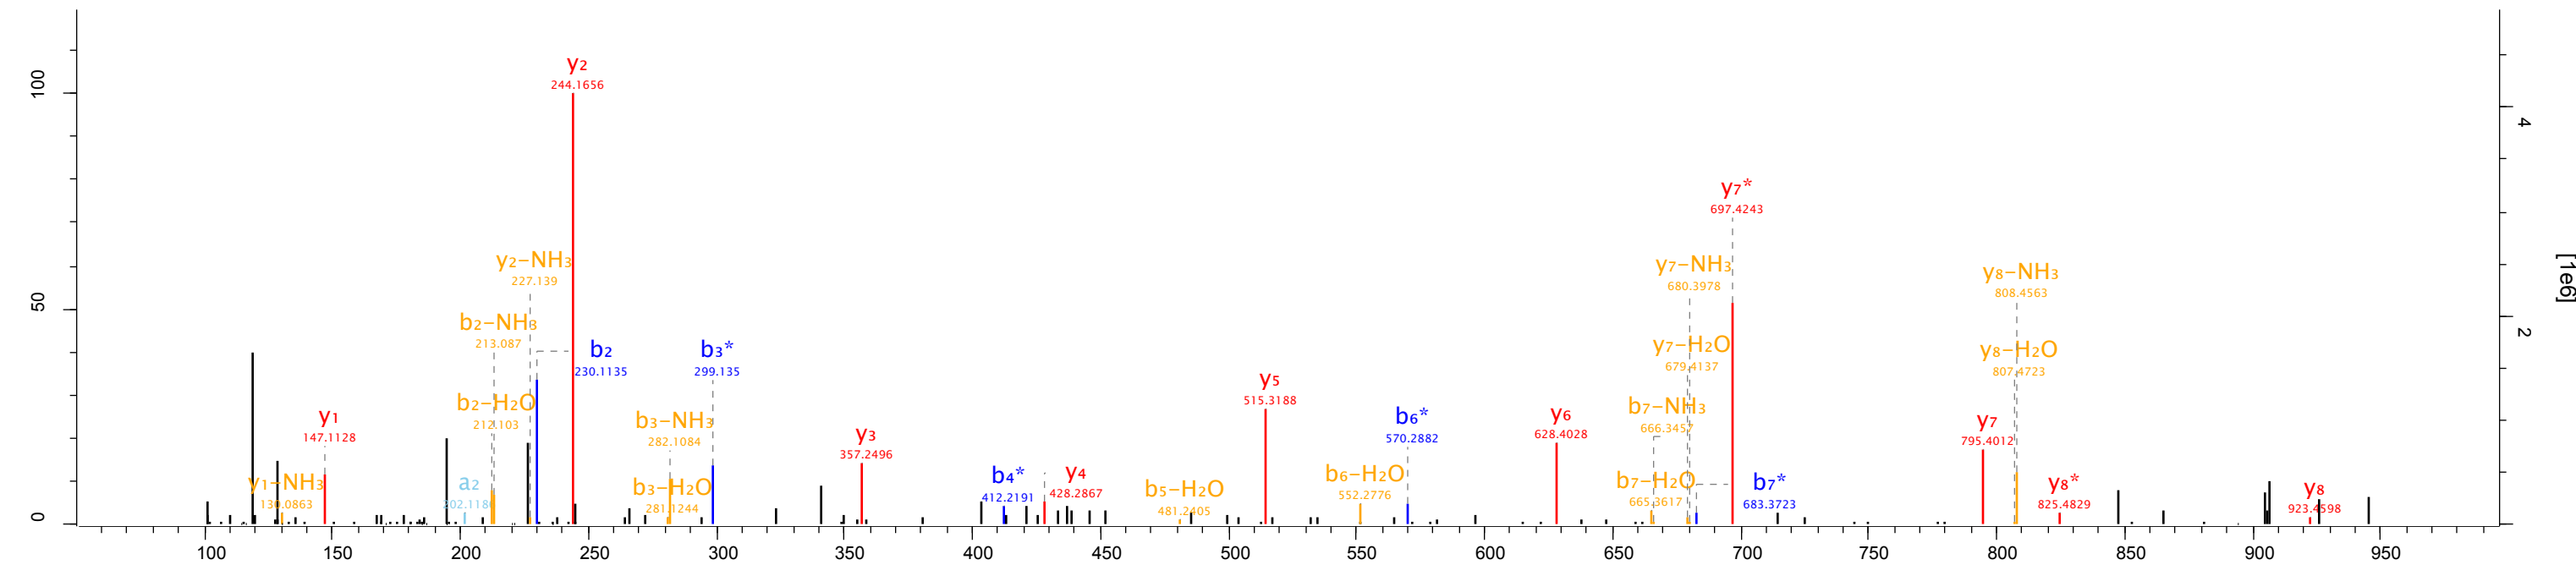

- T Q S L S A L P K -

y8 y7  
ph y6 y5 y4 y3 y2 y1  
b2 b3\* b4\* b6\* b7\*

Raw file: 20150812\_A375SR\_Phospho\_BR1\_04  
 Scan: 12524 Method: FTMS; HCD Score: 67.37 m/z: 798.36 Gene names: TRA2B

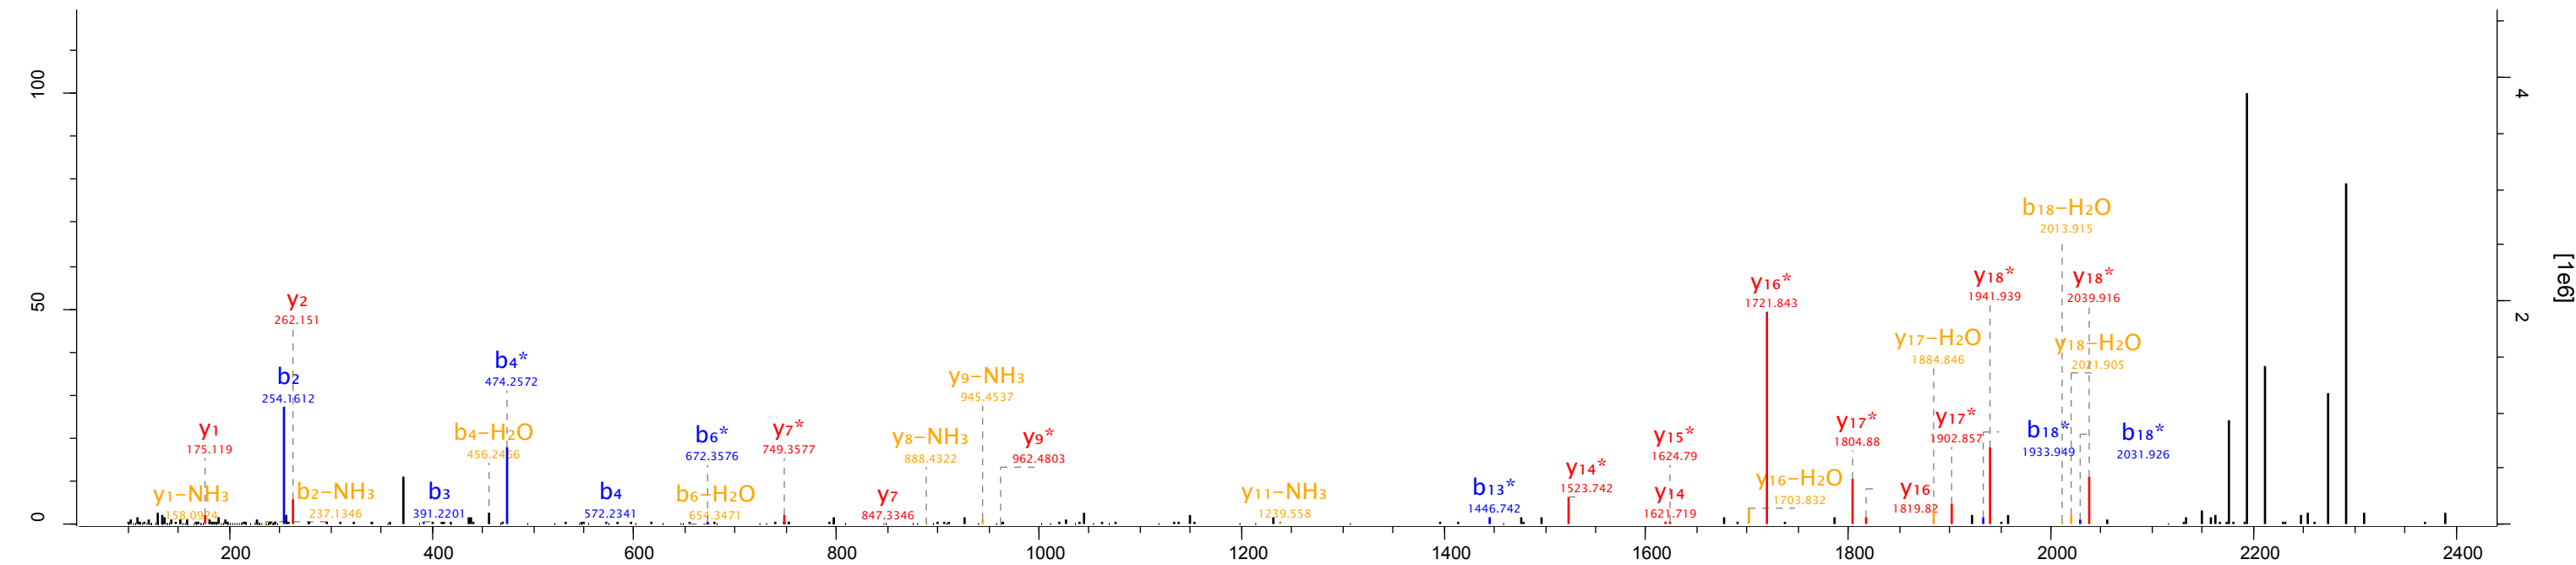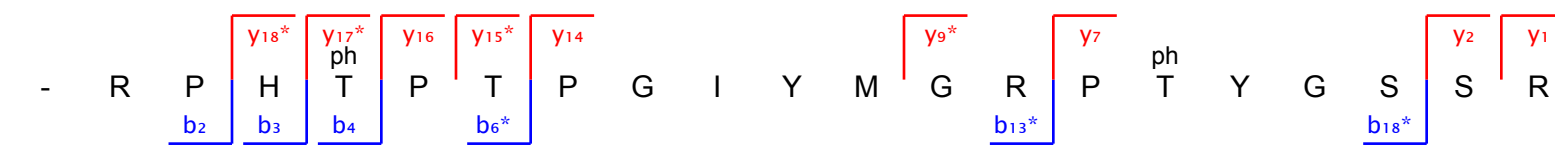

Raw file Scan Method Score m/z Gene names  
 20150812\_A375SR\_Phospho\_BR1\_04 12734 FTMS; HCD 140.06 894.9 FNBP1L

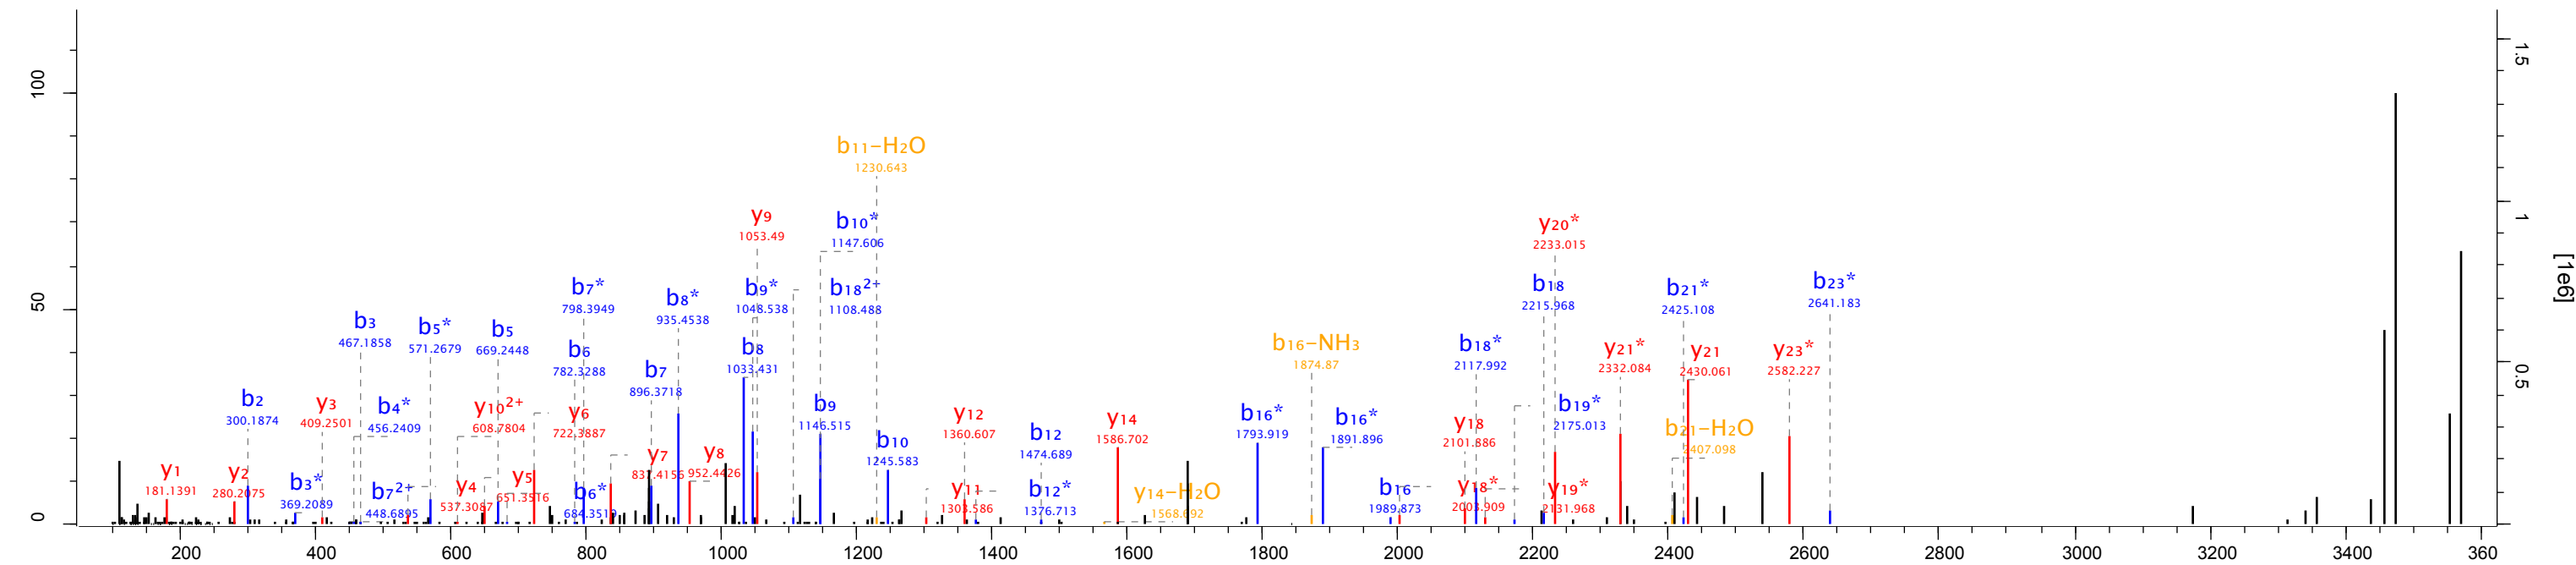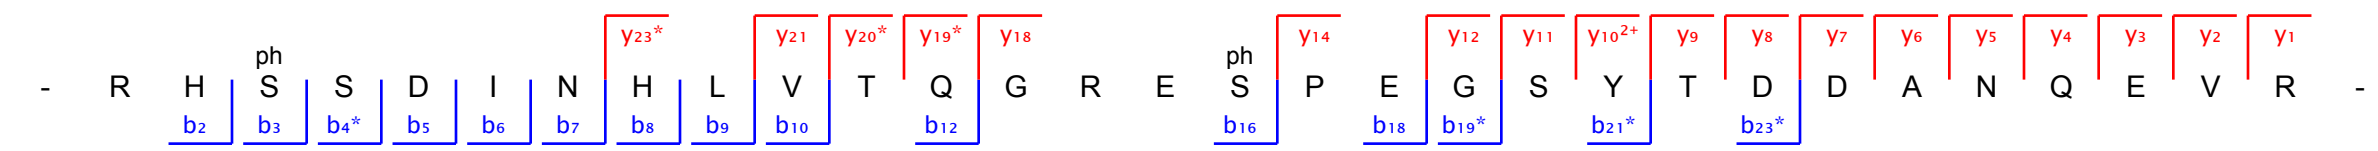

Raw file: 20150812\_A375SR\_Phospho\_BR1\_04  
 Scan: 13454 Method: FTMS; HCD Score: 203.88 m/z: 633.31 Gene names: NHSL1

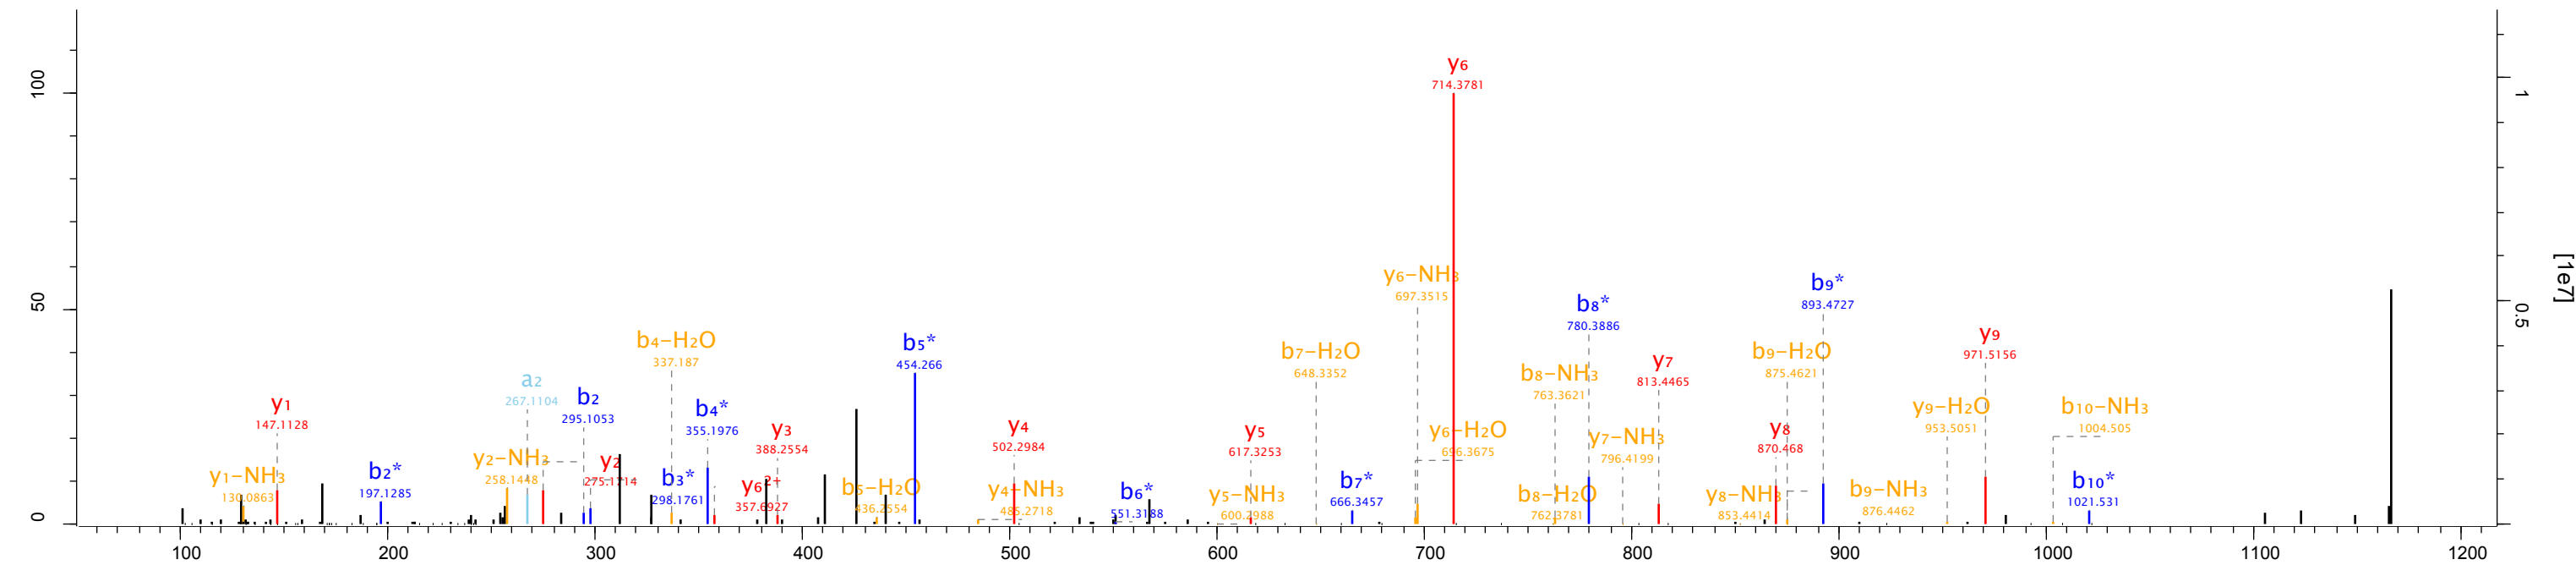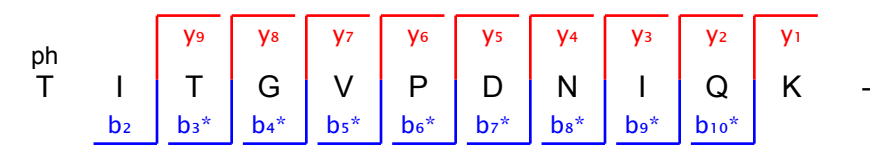



Raw file: 20150812\_A375SR\_Phospho\_BR1\_04  
 Scan: 13724 Method: FTMS; HCD Score: 134.49 m/z: 730.32 Gene names: HNRNPA1;HNRNPA1L2

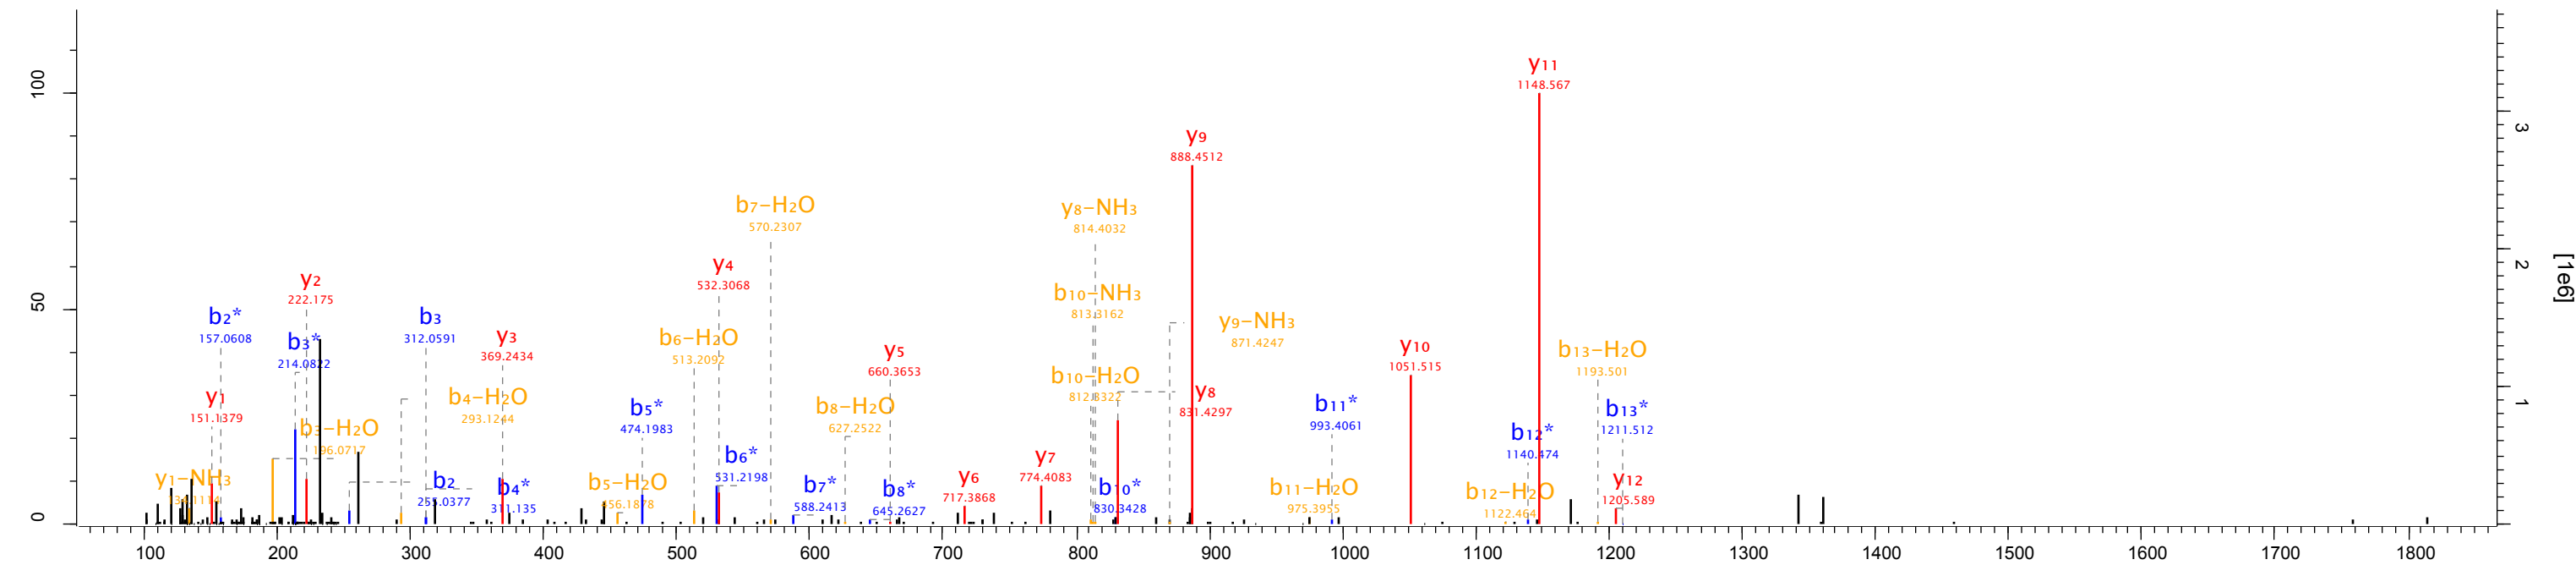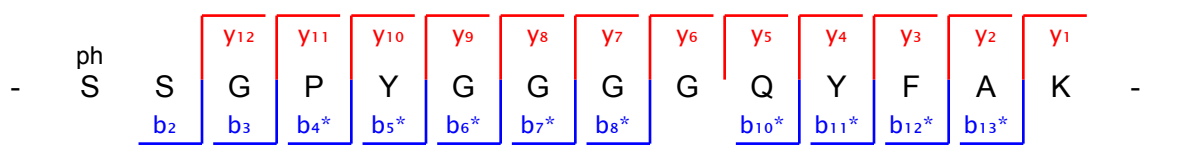

Raw file: 20150812\_A375SR\_Phospho\_BR1\_04  
 Scan: 1374 Method: FTMS; HCD Score: 77.36 m/z: 368.17 Gene names: SRRM2

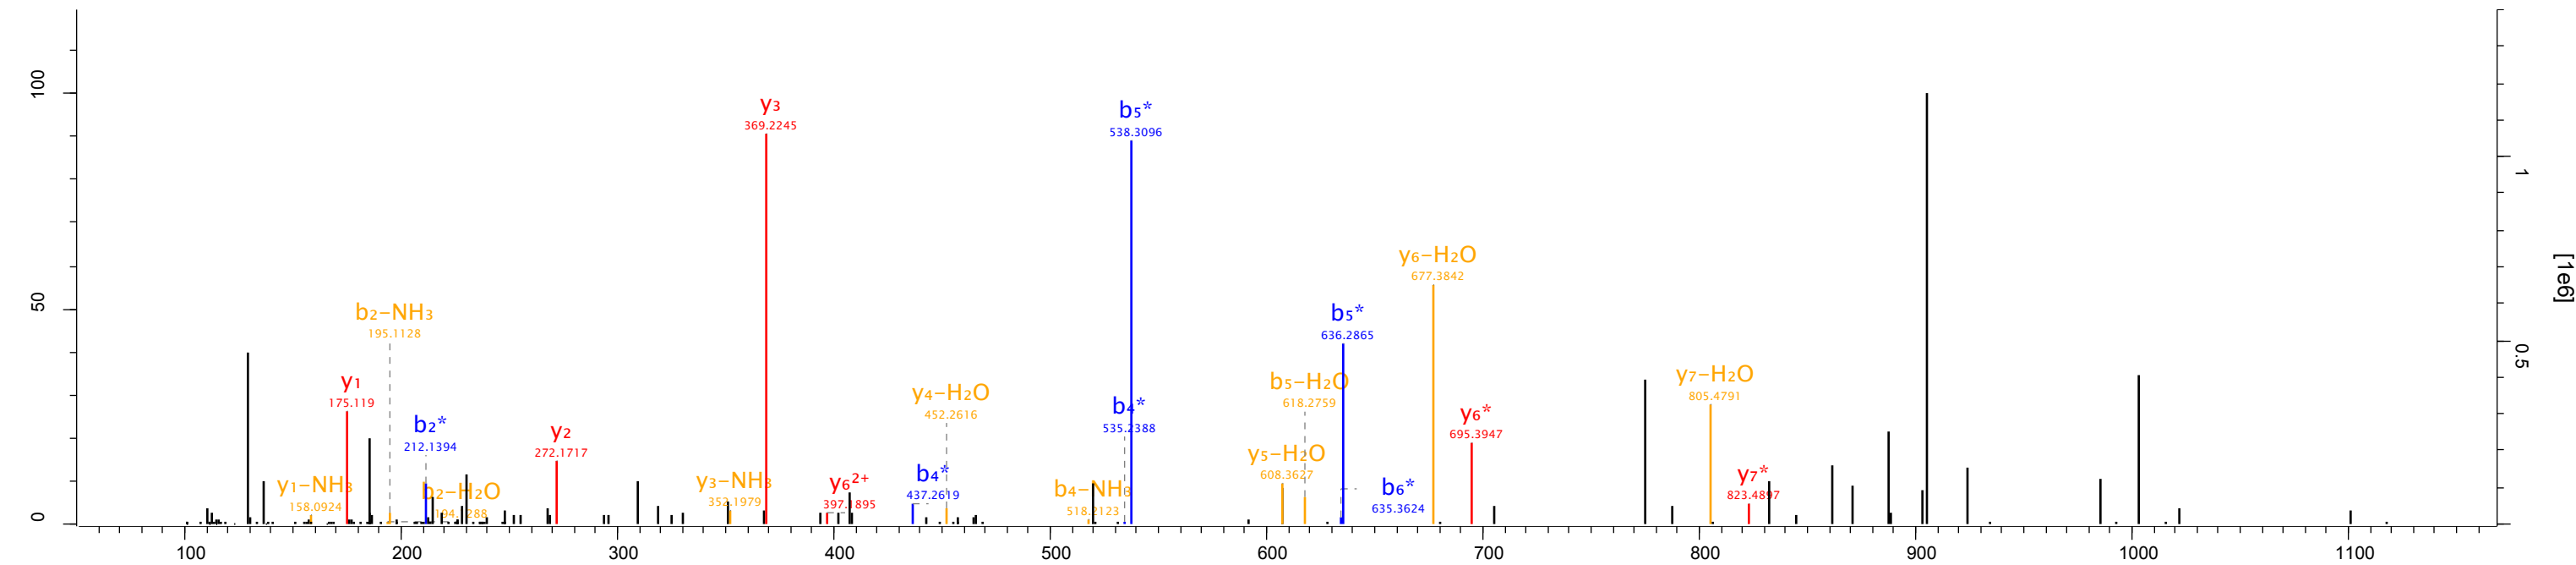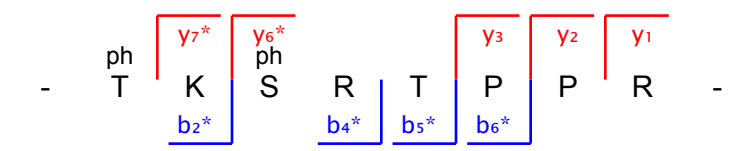

Raw file: 20150812\_A375SR\_Phospho\_BR1\_04  
 Scan: 13834 Method: FTMS; HCD Score: 56.72 m/z: 887.39 Gene names: RANBP3;ZNF8

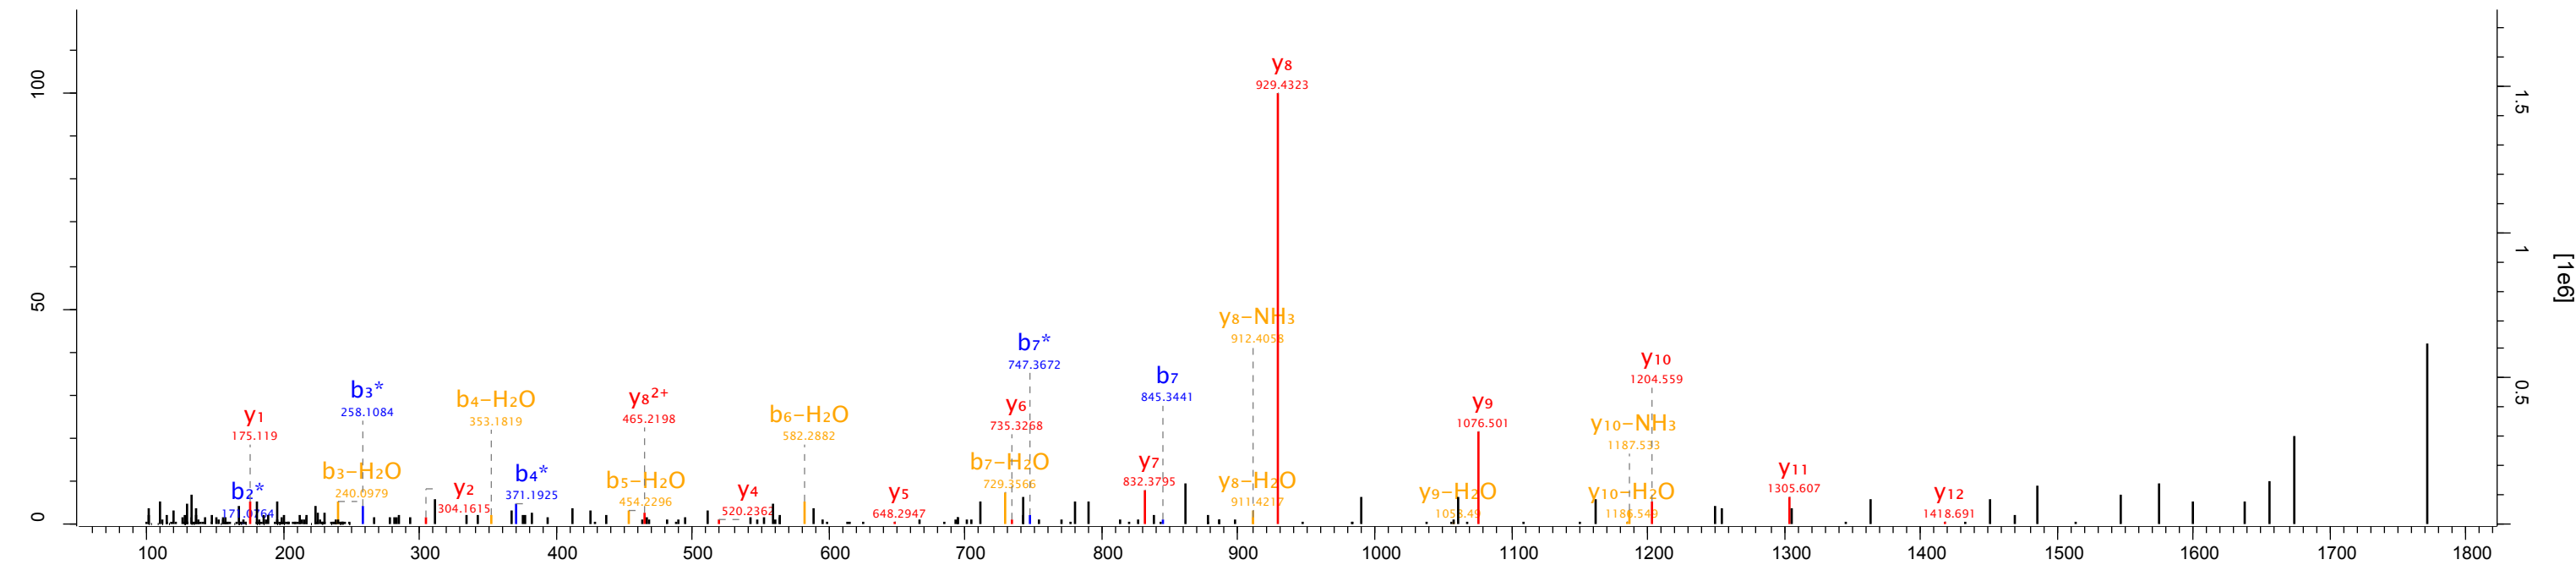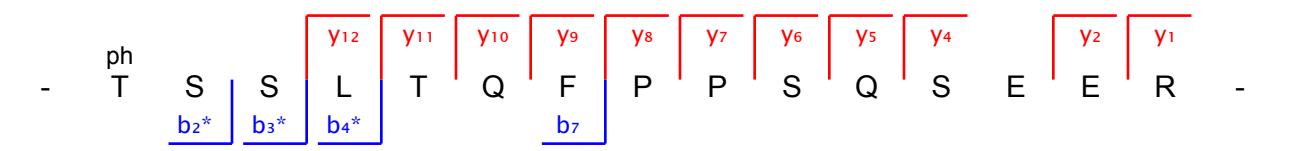

Raw file: 20150812\_A375SR\_Phospho\_BR1\_04  
 Scan: 1394 Method: FTMS; HCD Score: 114.88 m/z: 416.53 Gene names: CCNL1

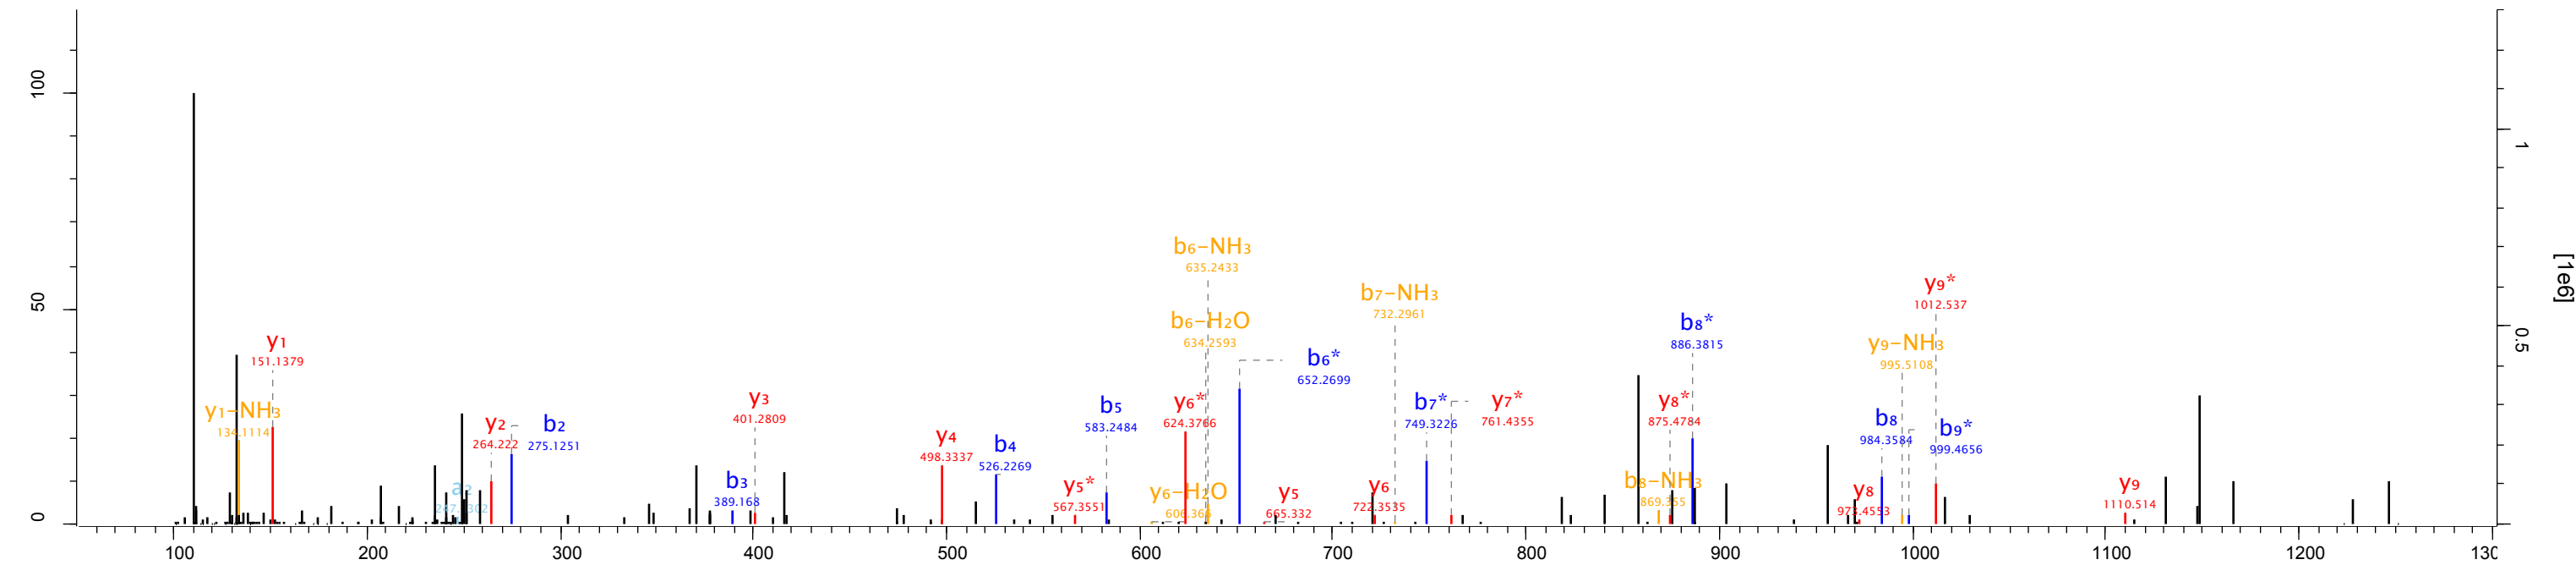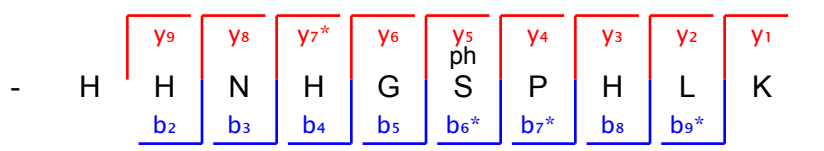

Raw file: 20150812\_A375SR\_Phospho\_BR1\_04  
 Scan: 14104 Method: FTMS; HCD Score: 133.06 m/z: 1290.87 Gene names: POLR3E

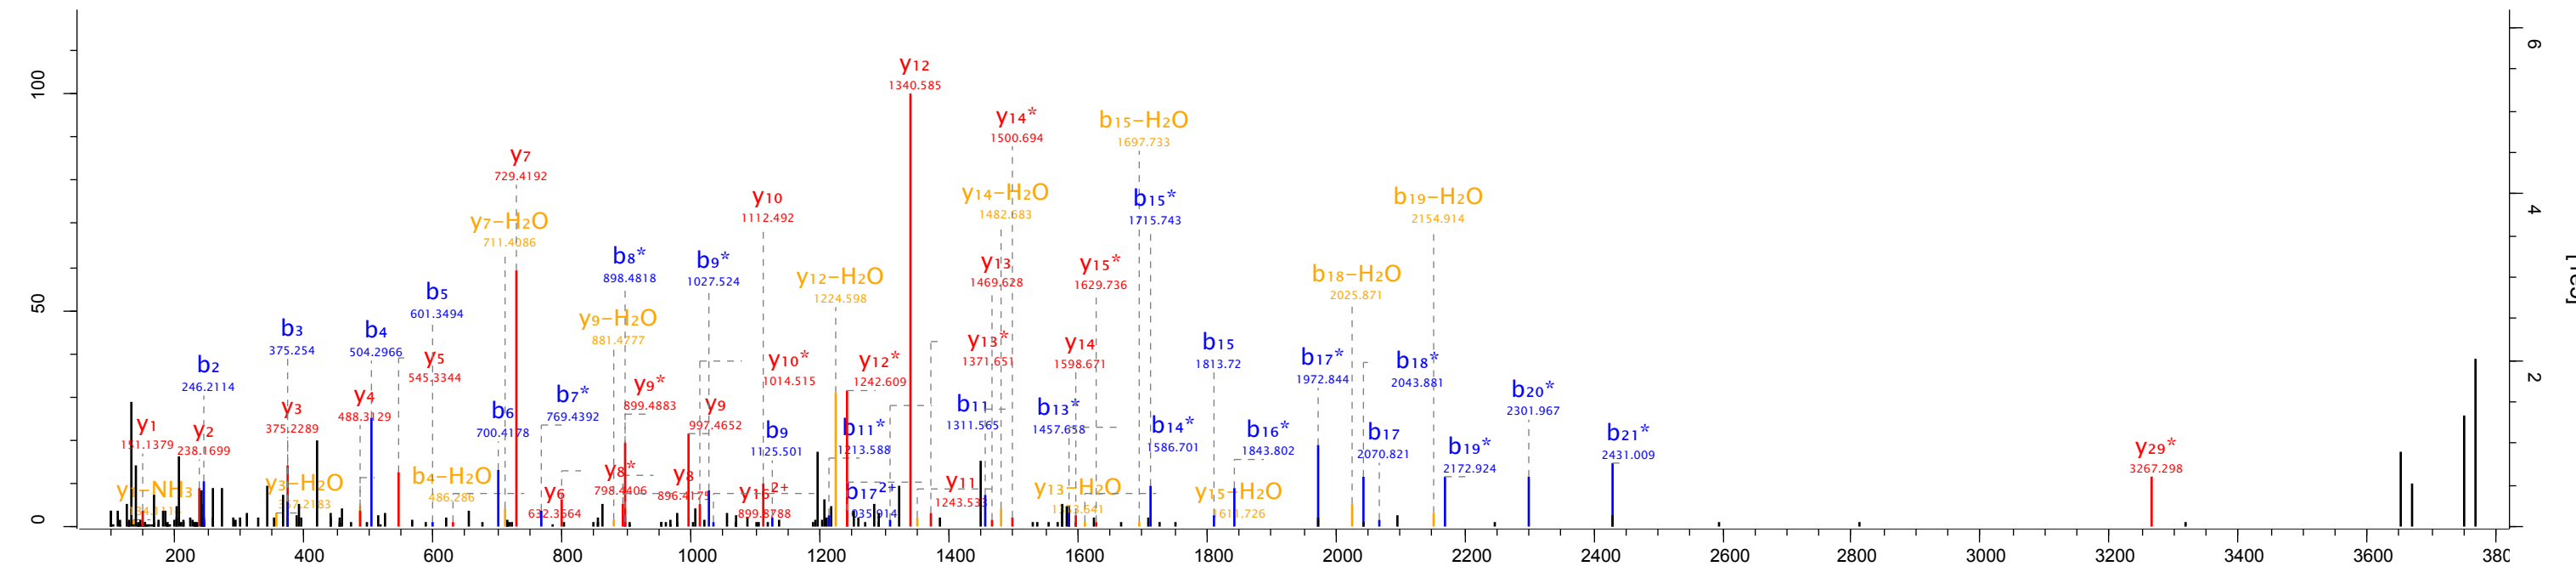

Protein sequence: I K E E P V S E E G E D E E Q E A E E E P M D T S P S G L H S K

Fragmentation sites (b and y ions) are indicated by boxes below the sequence:

- b2: K
- b3: E
- b4: E
- b5: P
- b6: V
- b7\*: S
- b8\*: E
- b9: E
- b11: G
- b13\*: D
- b14\*: E
- b15: E
- b16\*: Q
- b17: E
- b18\*: A
- b19\*: E
- b20\*: E
- b21\*: E

Phosphorylation site (y29\*) is indicated by a box above the sequence: P (residue 5).

Raw file: 20150812\_A375SR\_Phospho\_BR1\_04  
 Scan: 14184 Method: FTMS; HCD Score: 366.57 m/z: 1161.02 Gene names: UBR4

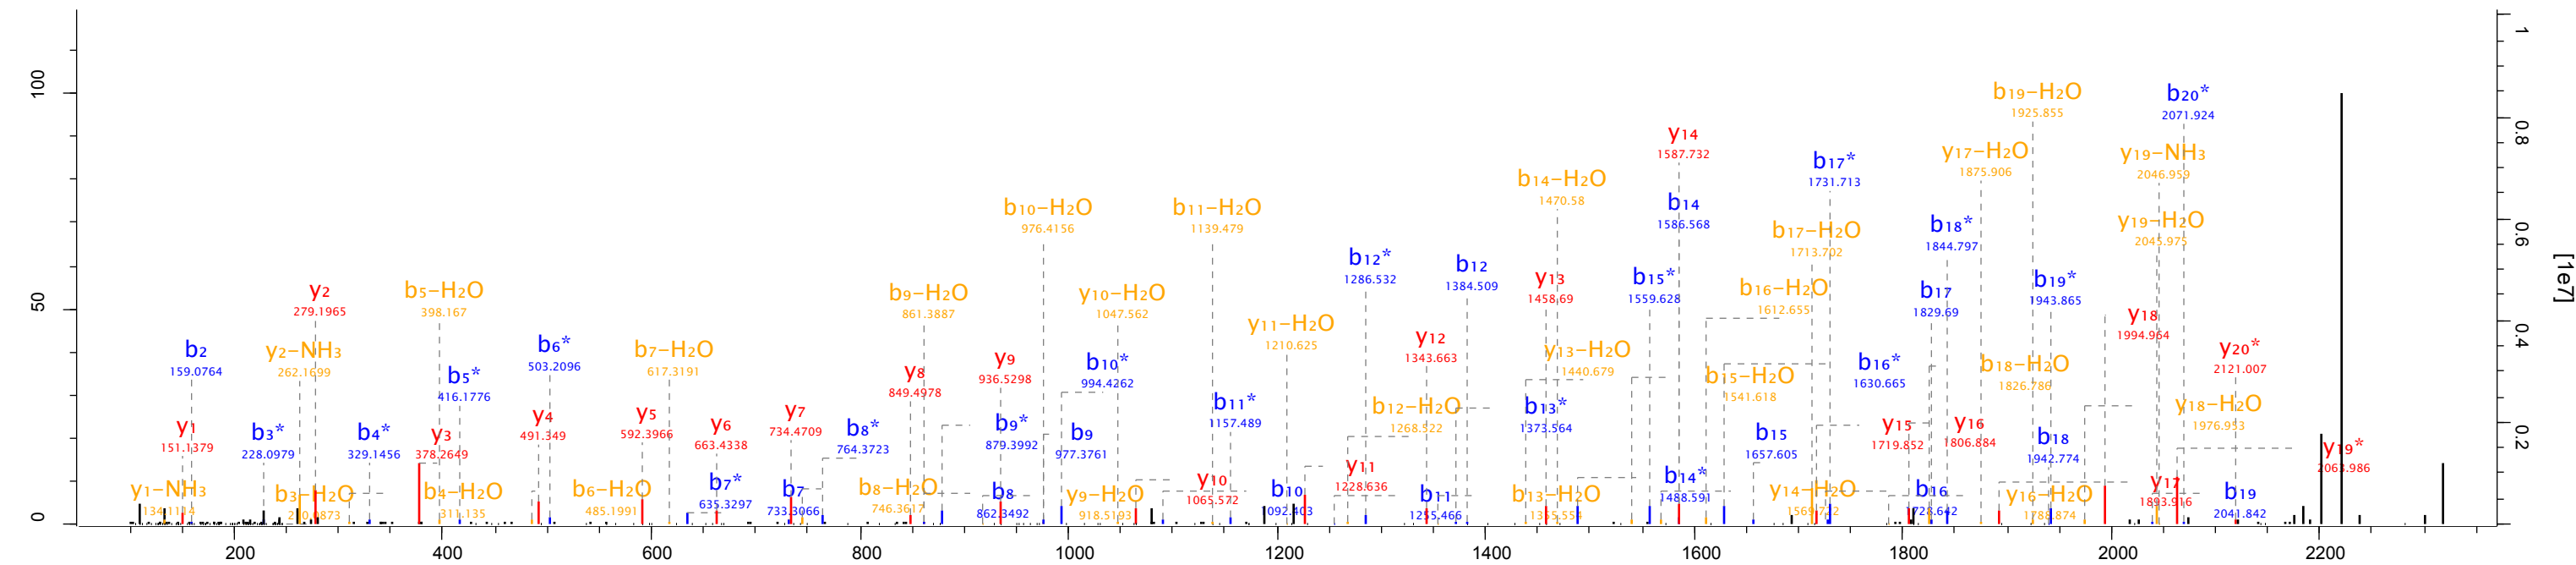

- T -  
 G S T S S K E D D Y E S D A A T I V Q K -  
 b<sub>2</sub> b<sub>3</sub><sup>\*</sup> b<sub>4</sub><sup>\*</sup> b<sub>5</sub><sup>\*</sup> b<sub>6</sub><sup>\*</sup> b<sub>7</sub> b<sub>8</sub> b<sub>9</sub> b<sub>10</sub> b<sub>11</sub> b<sub>12</sub> b<sub>13</sub><sup>\*</sup> b<sub>14</sub> b<sub>15</sub> b<sub>16</sub> b<sub>17</sub> b<sub>18</sub> b<sub>19</sub> b<sub>20</sub><sup>\*</sup> y<sub>1</sub> y<sub>2</sub> y<sub>3</sub> y<sub>4</sub> y<sub>5</sub> y<sub>6</sub> y<sub>7</sub> y<sub>8</sub> y<sub>9</sub> y<sub>10</sub> y<sub>11</sub> y<sub>12</sub> y<sub>13</sub> y<sub>14</sub> y<sub>15</sub> y<sub>16</sub> y<sub>17</sub> y<sub>18</sub> y<sub>19</sub><sup>\*</sup> y<sub>20</sub><sup>\*</sup> ph

Raw file  
20150812\_A375SR\_Phospho\_BR1\_04

Scan 14924 Method FTMS; HCD Score 160.35 m/z 869.42 Gene names *SNTB2*

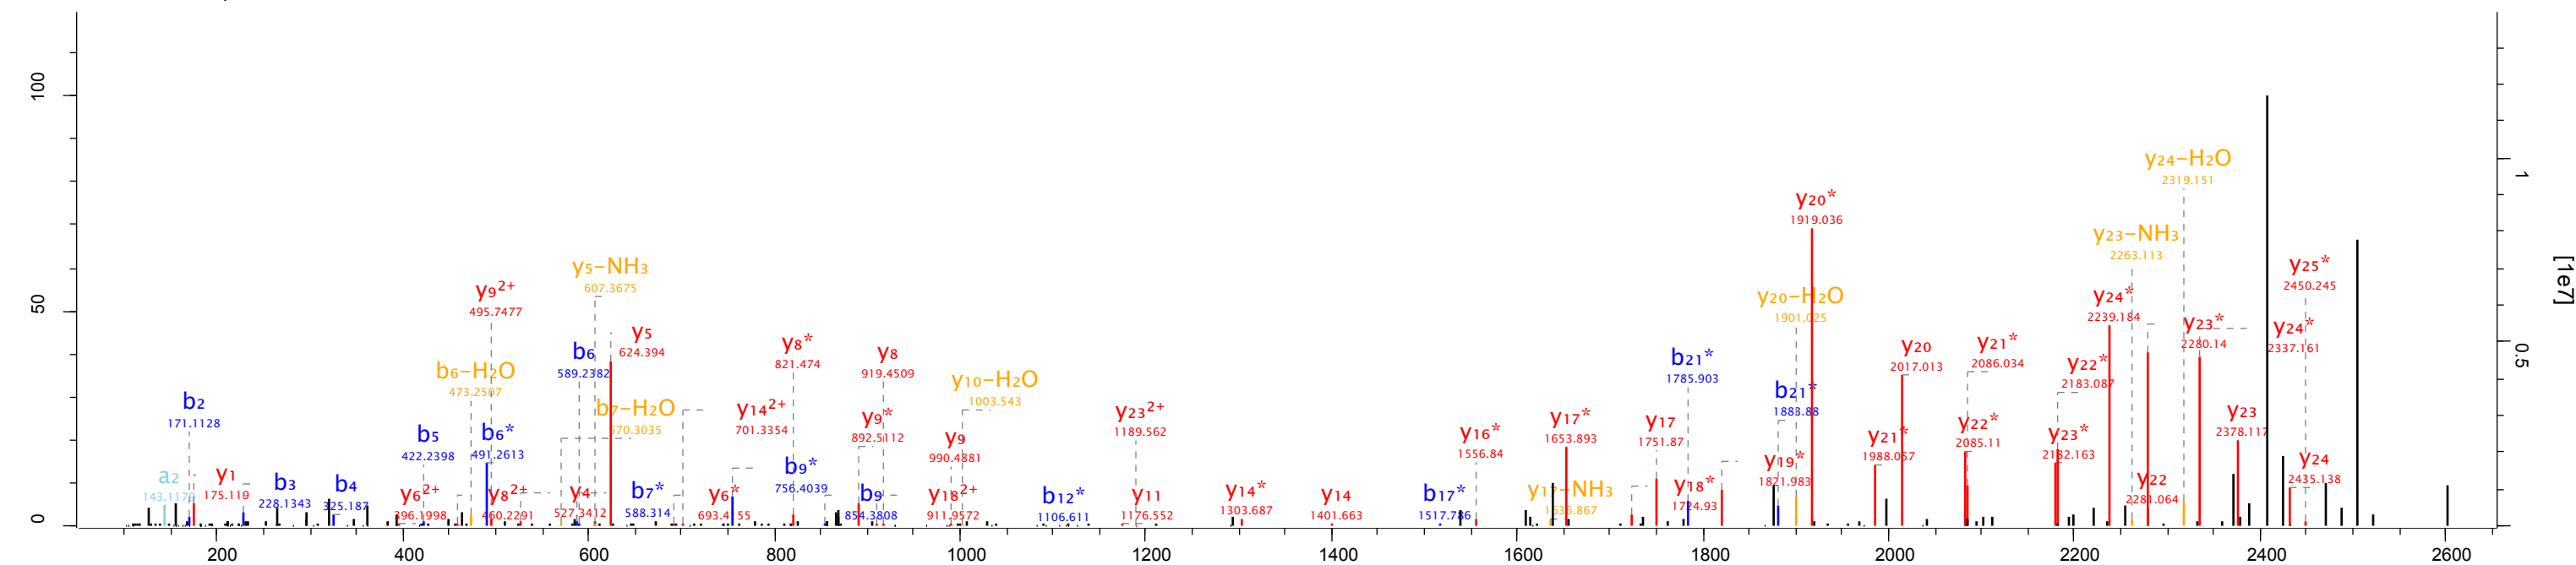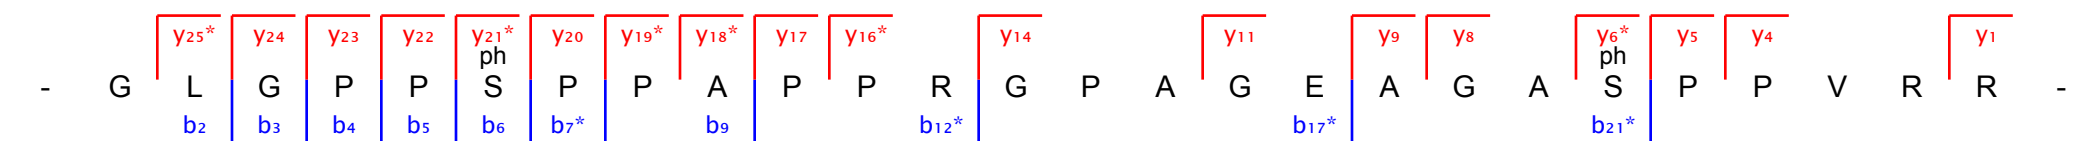

Raw file: 20150812\_A375SR\_Phospho\_BR1\_04  
 Scan: 15144 Method: FTMS; HCD Score: 221.81 m/z: 1028.48 Gene names: CPSF4

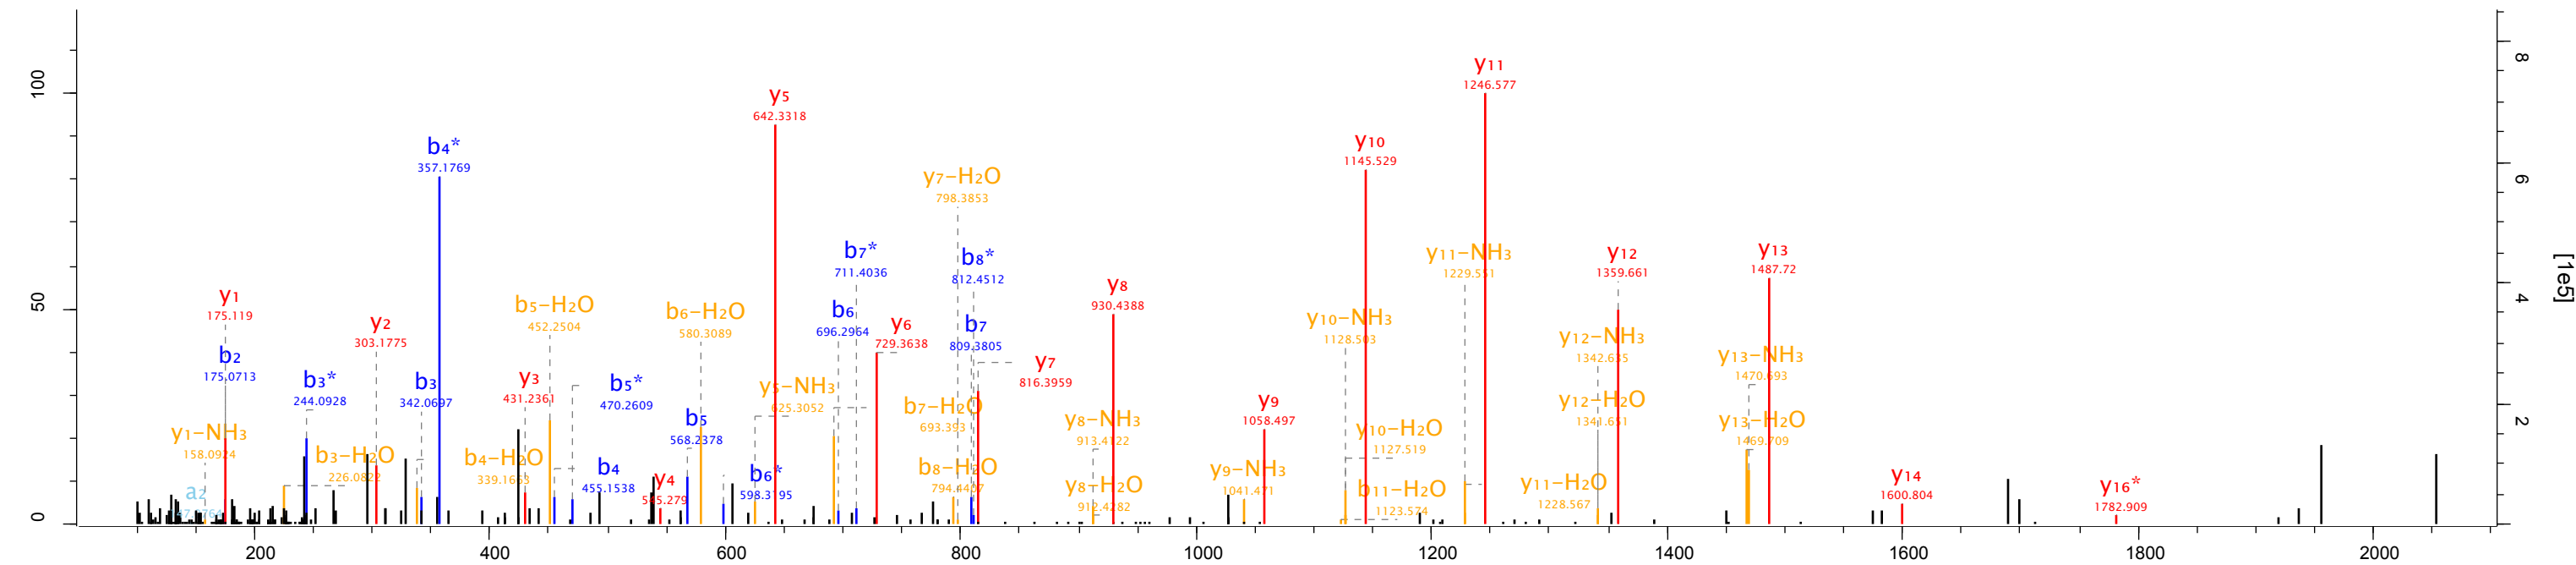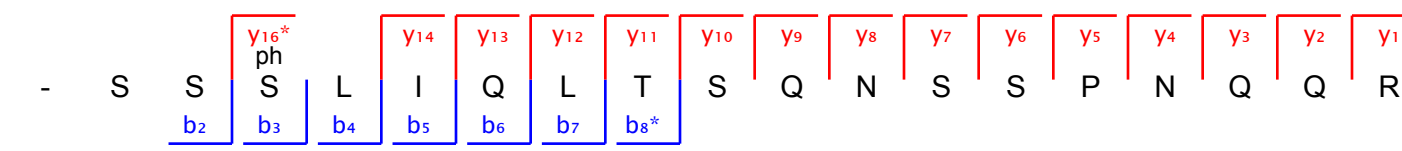



Raw file 20150812\_A375SR\_Phospho\_BR1\_04 Scan 15504 Method FTMS; HCD Score 134.56 m/z 662.27 Gene names RBM14

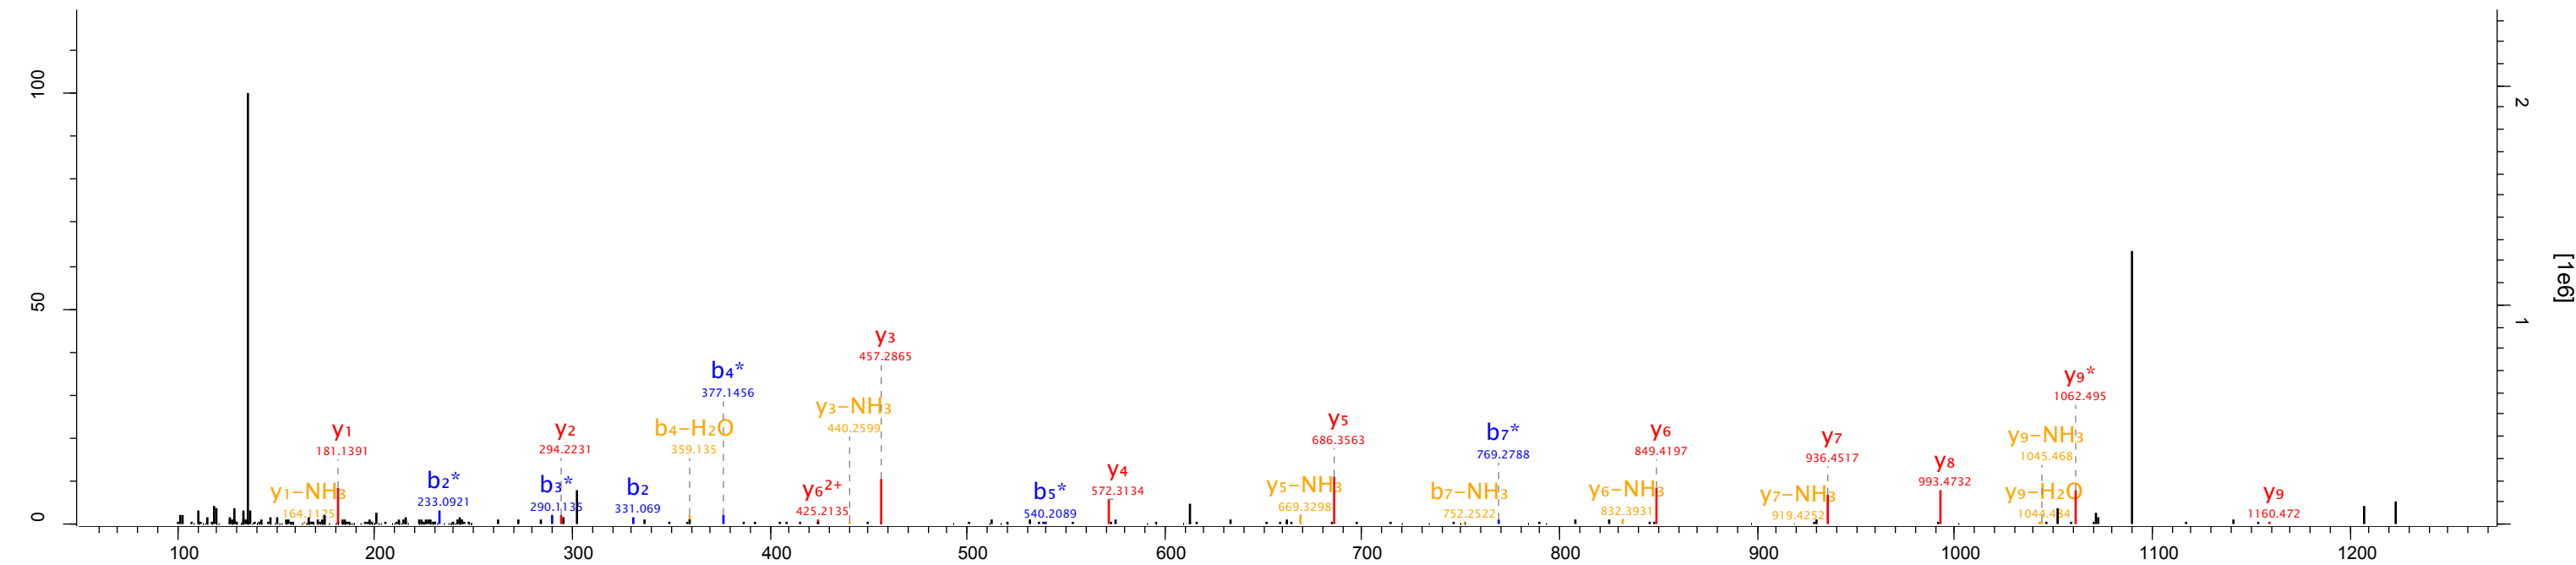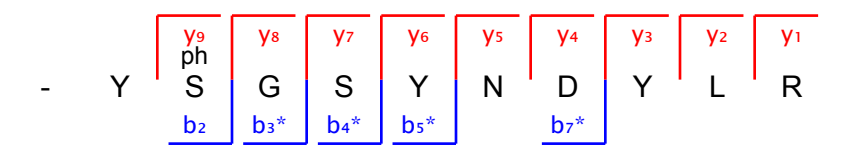



Raw file: 20150812\_A375SR\_Phospho\_BR1\_04  
 Scan: 16434 Method: FTMS; HCD Score: 94.36 m/z: 1202.83 Gene names: FXR1

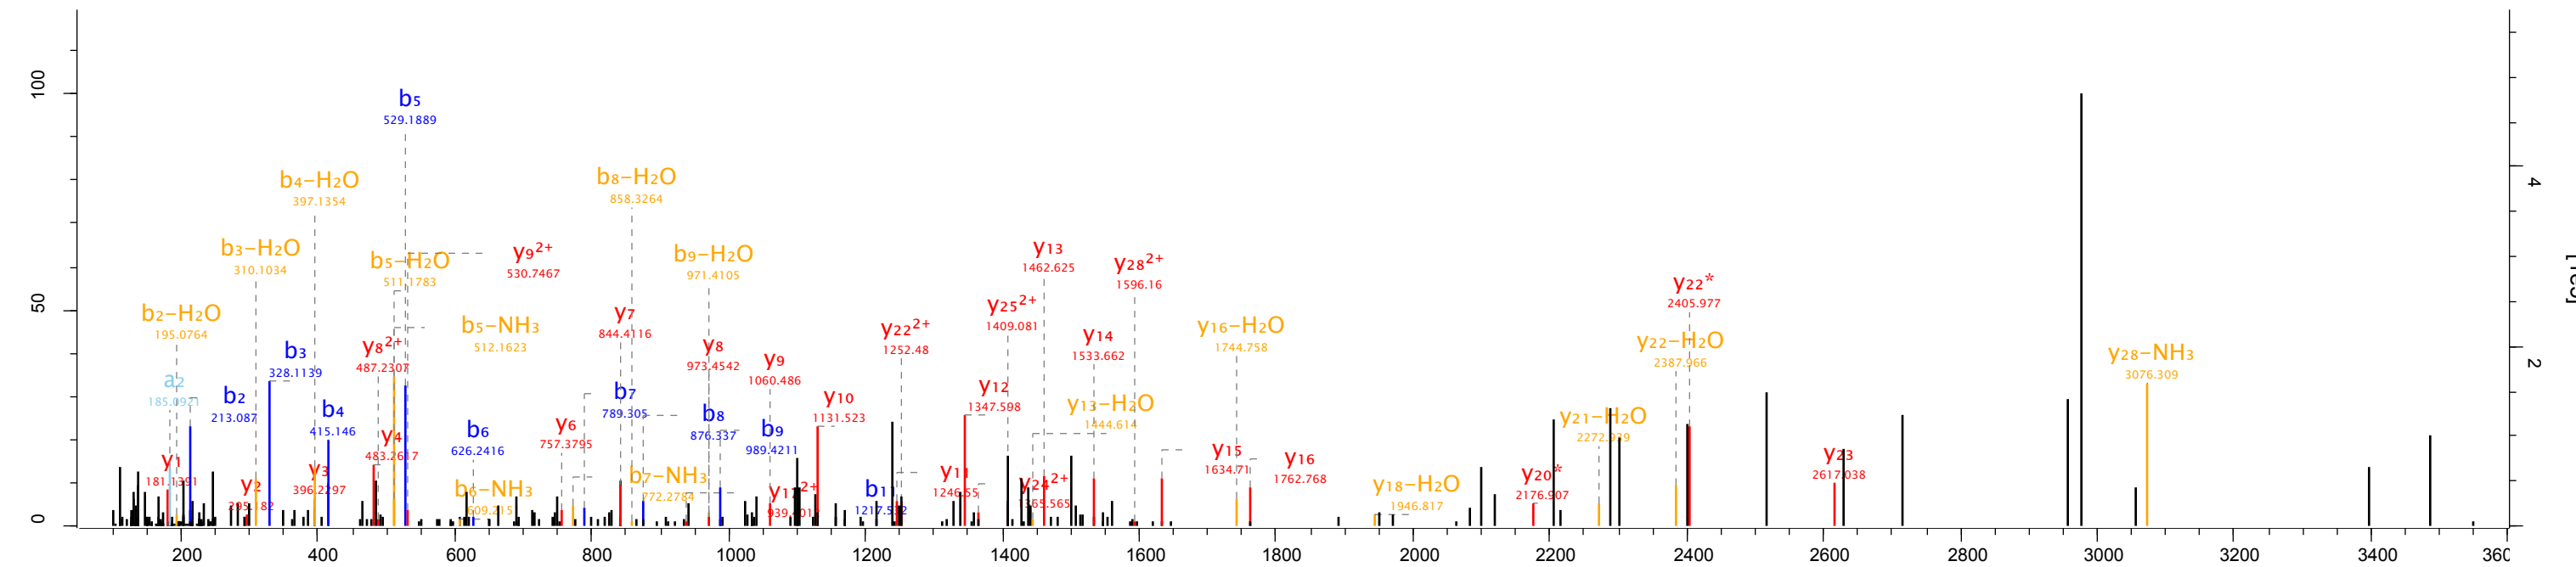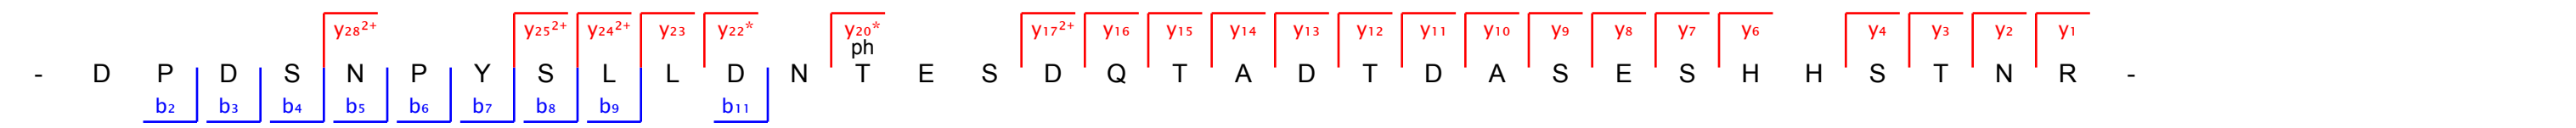

Raw file Scan Method Score m/z Gene names  
 20150812\_A375SR\_Phospho\_BR1\_04 16564 FTMS; HCD 50.14 745.02 NEDD4

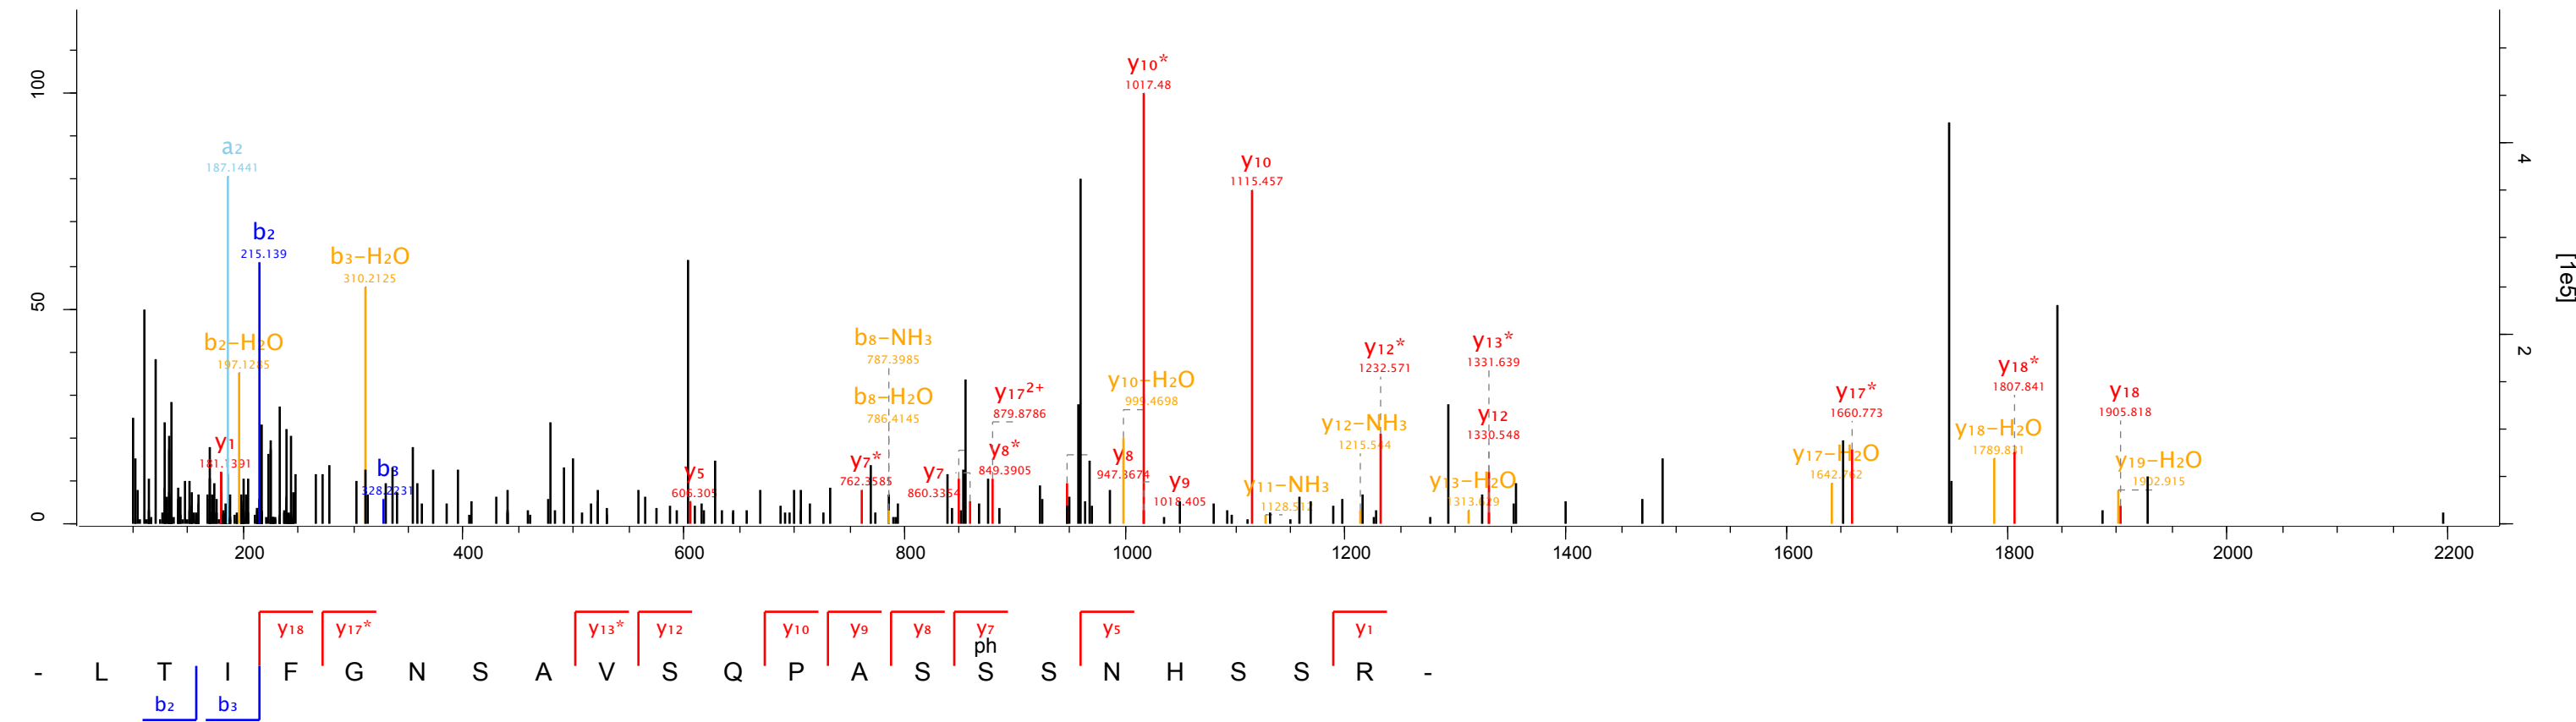

Raw file Scan Method Score m/z Gene names  
 20150812\_A375SR\_Phospho\_BR1\_04 16594 FTMS; HCD 115.45 788.39 HDAC4

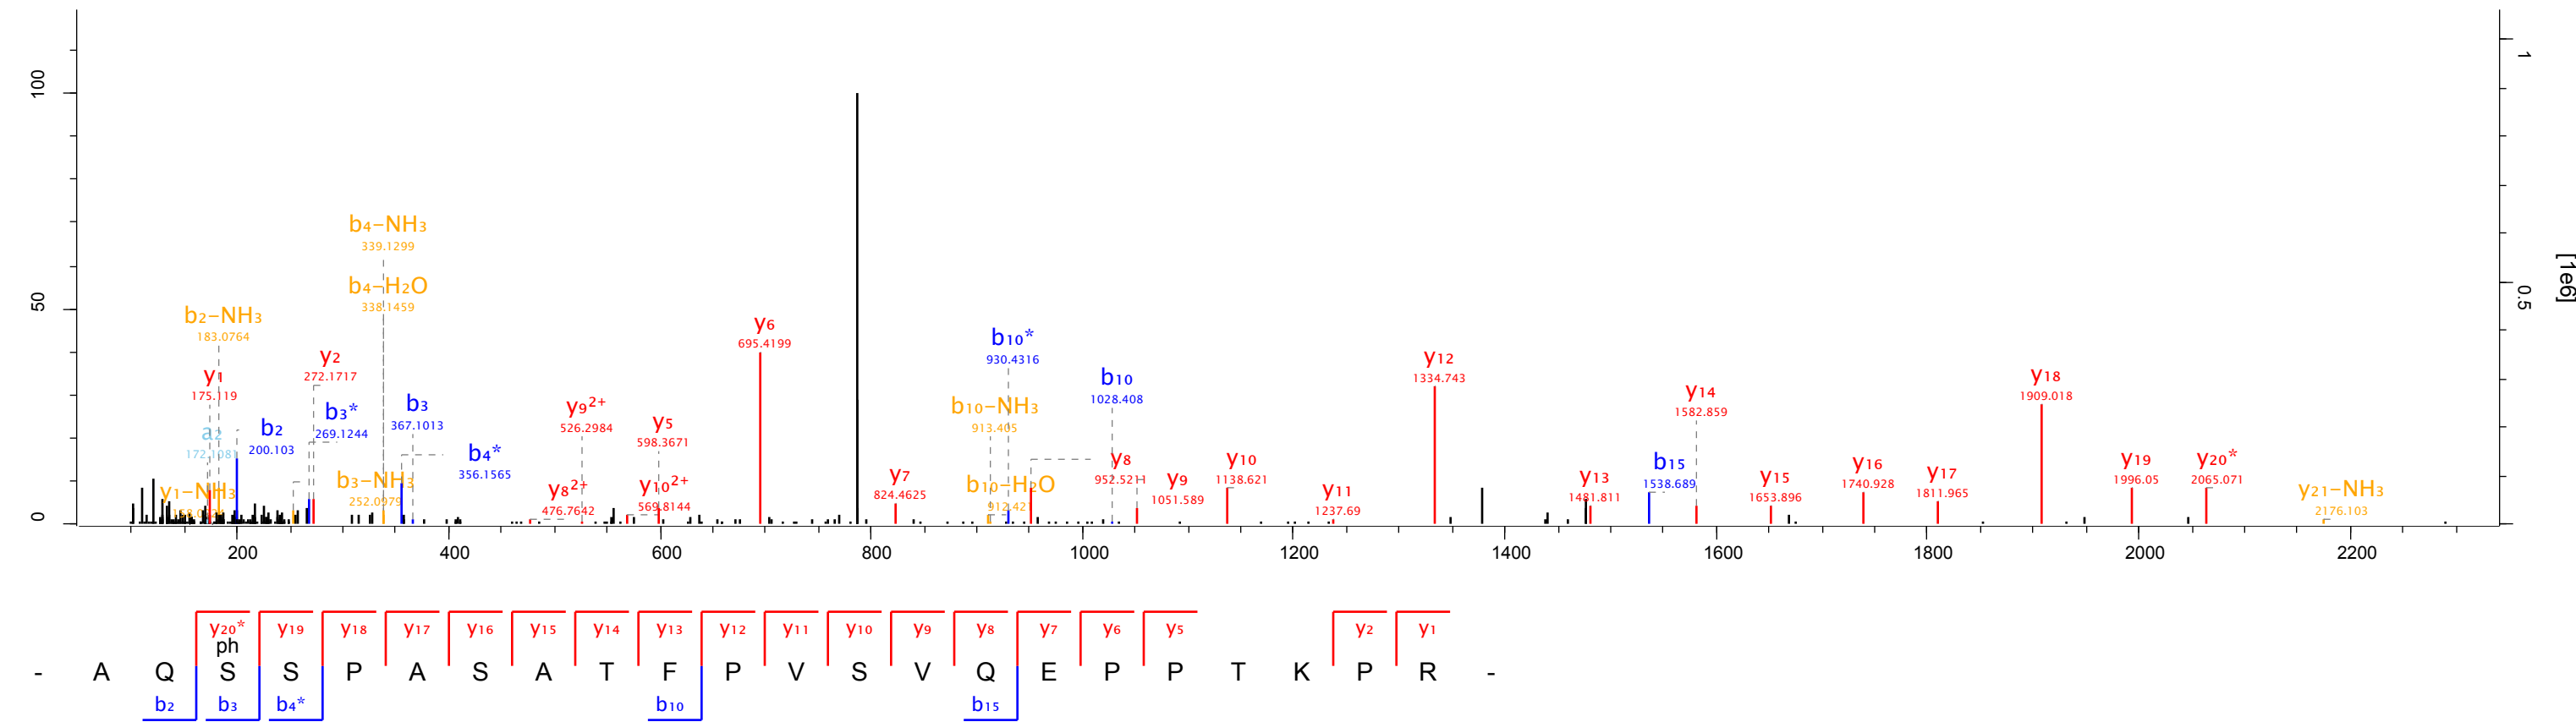

Raw file 20150812\_A375SR\_Phospho\_BR1\_04 Scan 16724 Method FTMS; HCD Score 112.01 m/z 978.4 Gene names PHF6

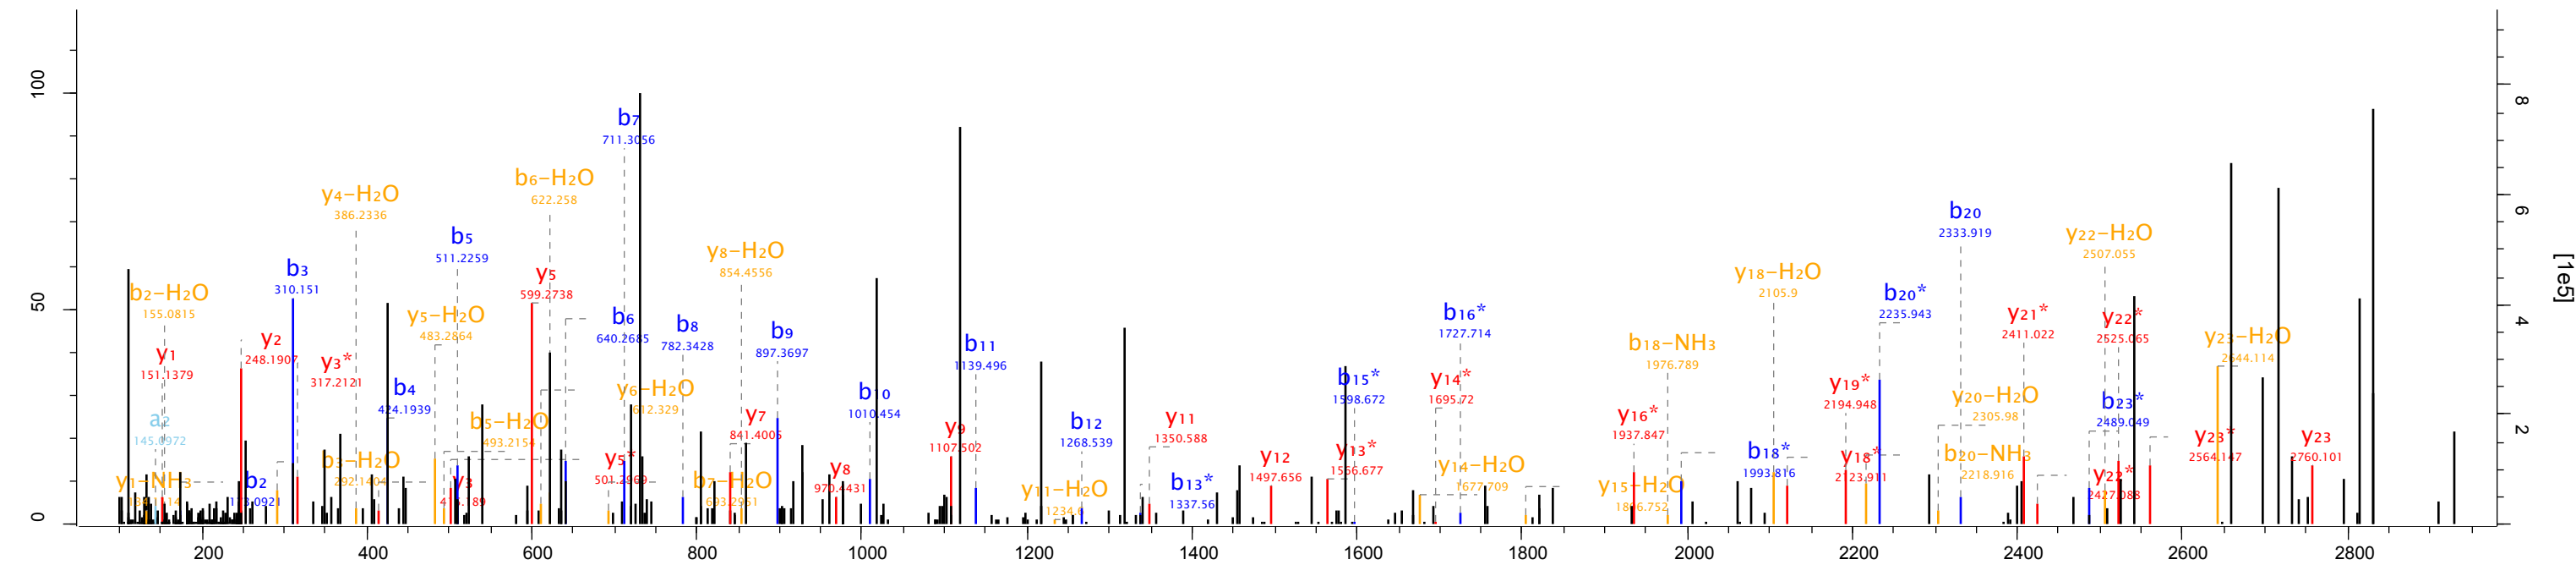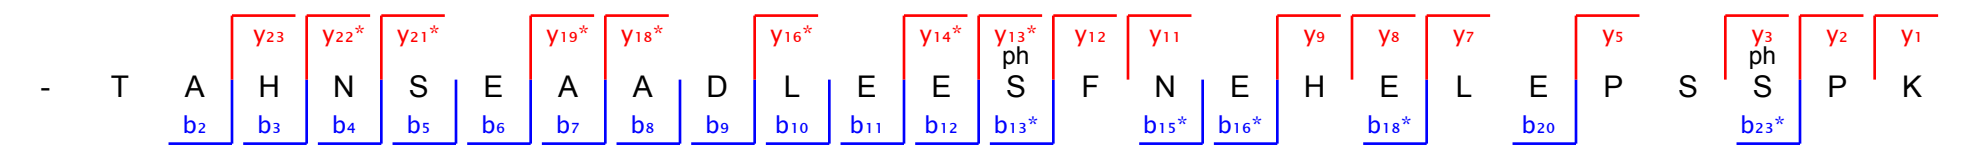

Raw file 20150812\_A375SR\_Phospho\_BR1\_04 Scan 16744 Method FTMS; HCD Score 148.52 m/z 774.41 Gene names PHLDB2

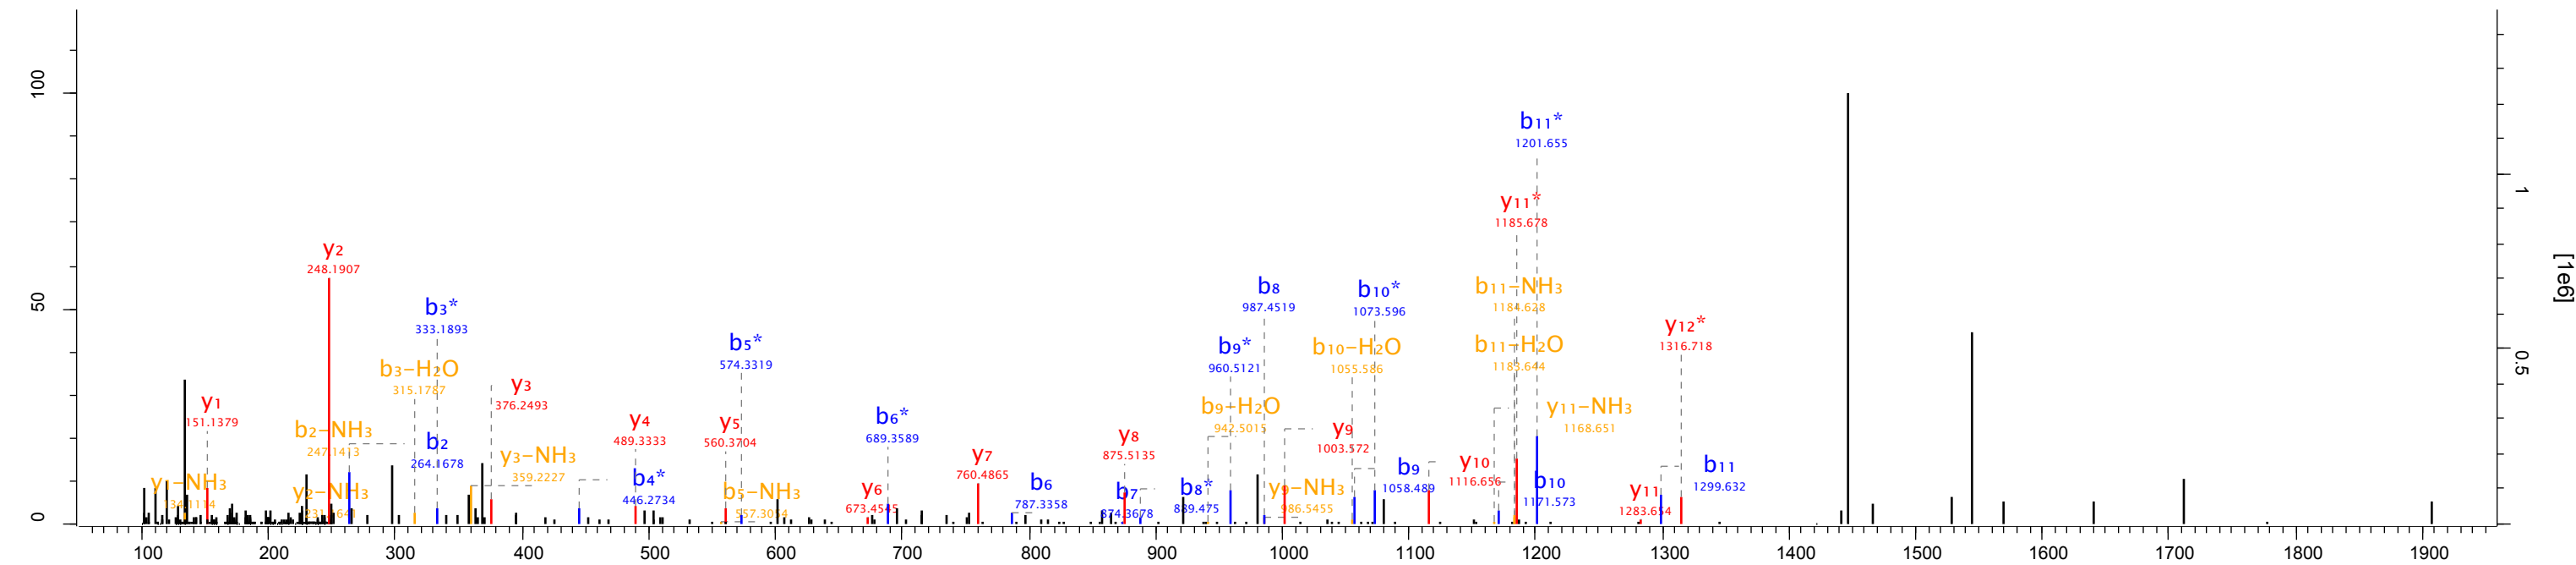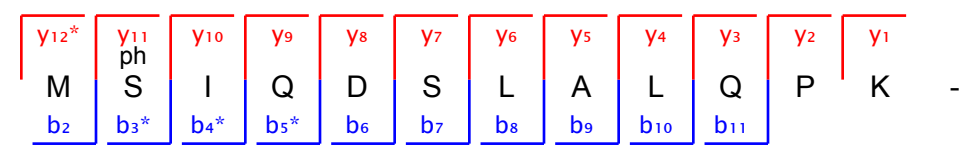





Raw file  
20150812\_A375SR\_Phospho\_BR1\_04

Scan 17574 Method FTMS; HCD Score 203.71 m/z 978.92 Gene names TLK1

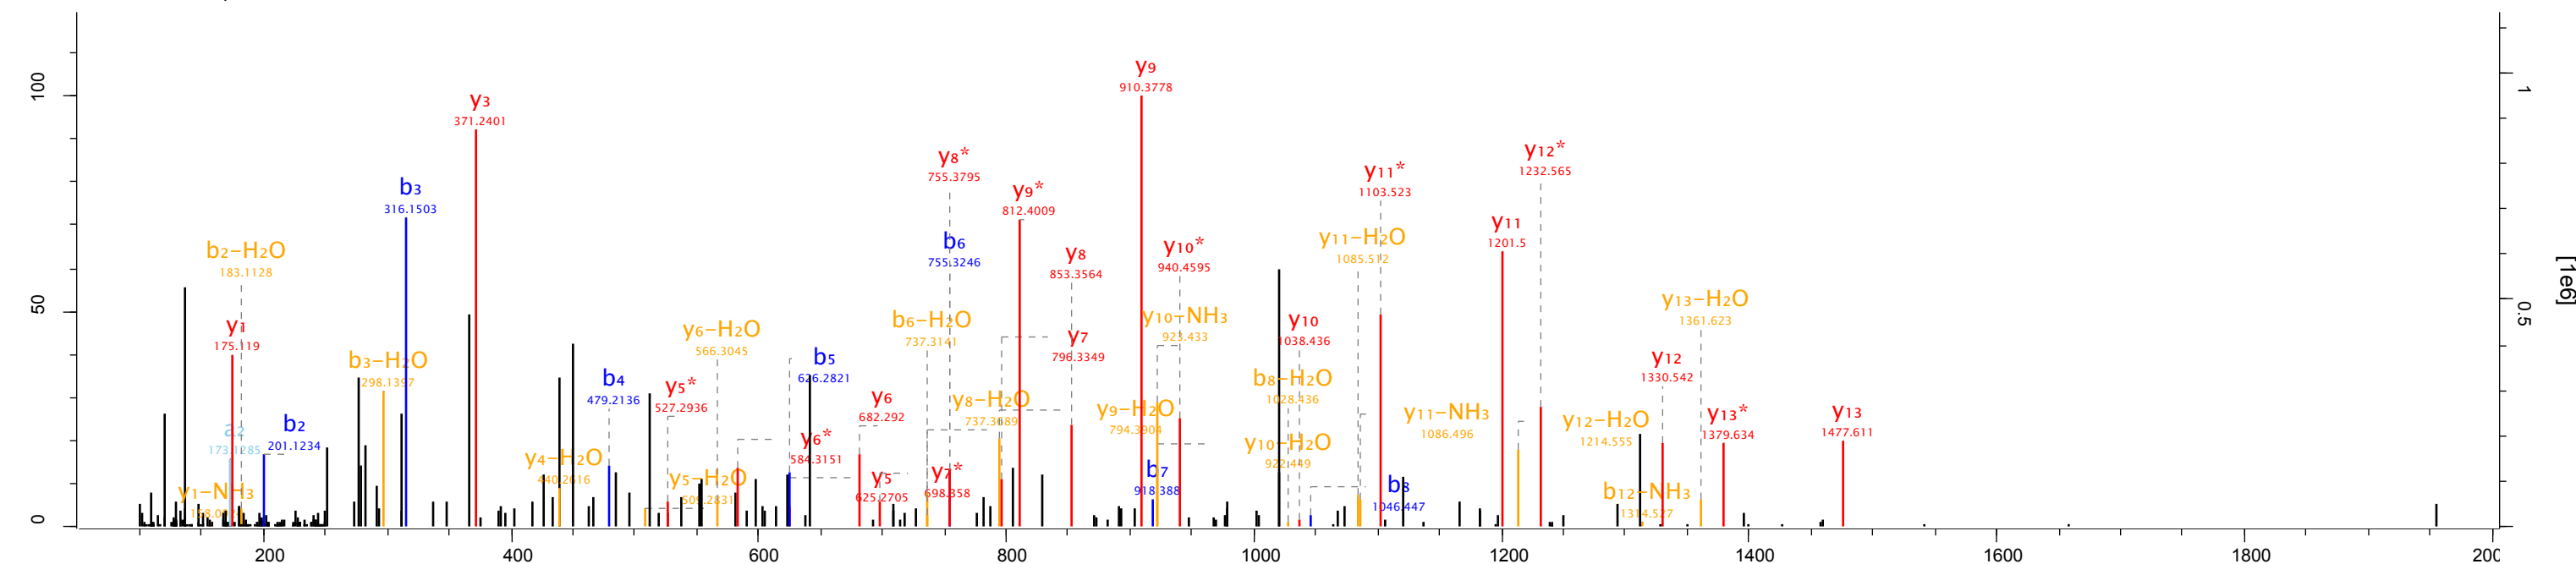

- I S D Y F E Y Q G G N G S S P V R -  
b2 b3 b4 b5 b6 b7 b8

Raw file 20150812\_A375SR\_Phospho\_BR1\_04 Scan 17614 Method FTMS; HCD Score 159.1 m/z 627.32 Gene names OSBPL11

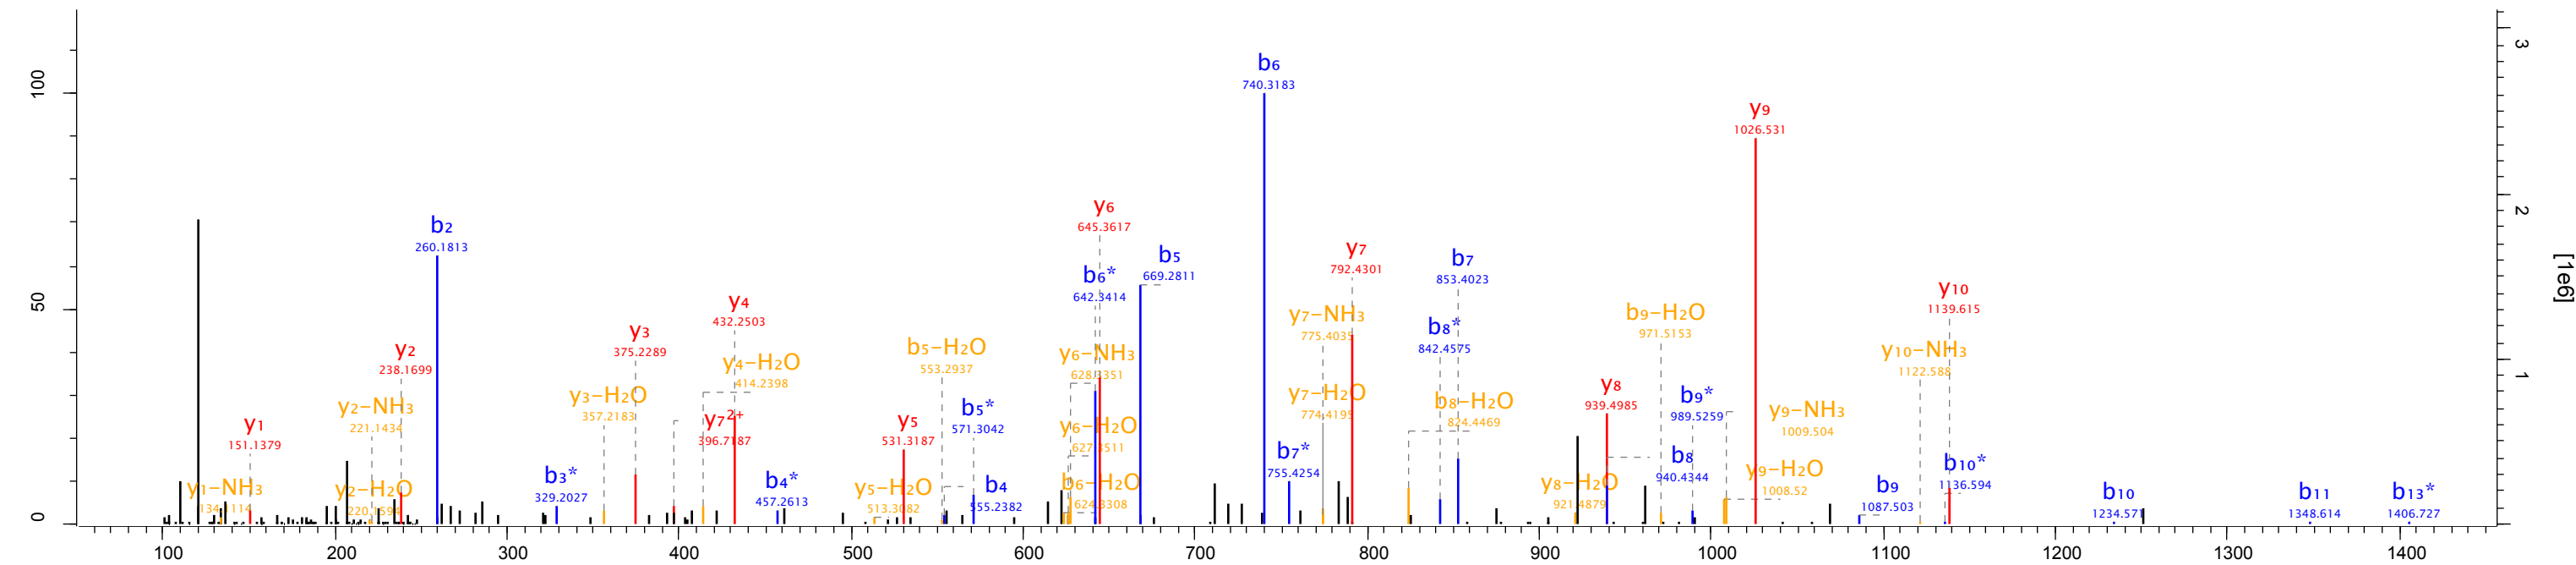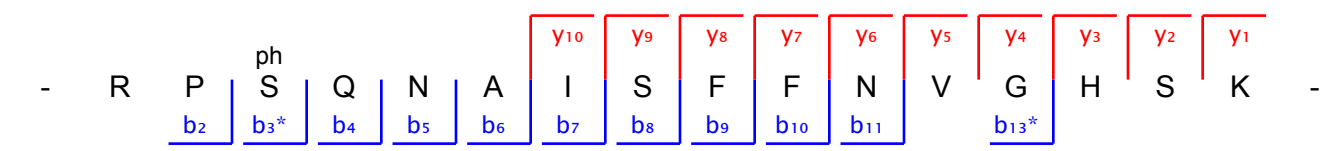

Raw file

Scan Method Score m/z Gene names

20150812\_A375SR\_Phospho\_BR1\_04

17674 FTMS; HCD 147.09 785.83 DR1

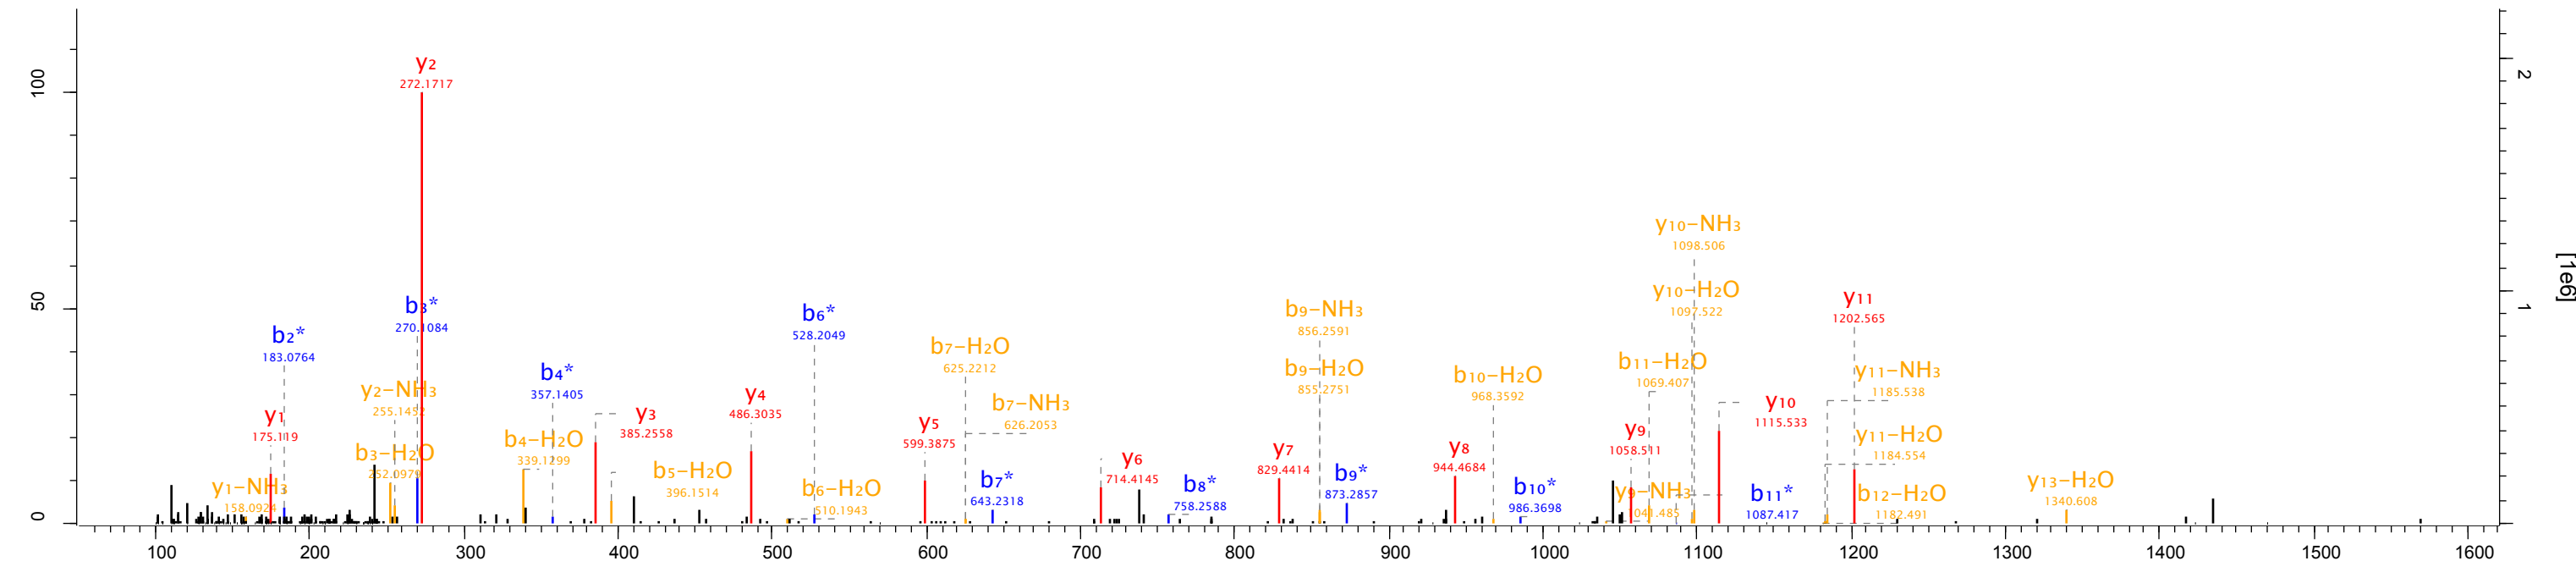

ac  
- A ph S S Y11 Y10 Y9 Y8 Y7 Y6 Y5 Y4 Y3 Y2 Y1  
- S S G N D D D L T I P R -  
b2\* b3\* b4\* b6\* b7\* b8\* b9\* b10\* b11\*

Raw file: 20150812\_A375SR\_Phospho\_BR1\_04  
 Scan: 17844 Method: FTMS; HCD Score: 111.43 m/z: 966.13 Gene names: SRP72

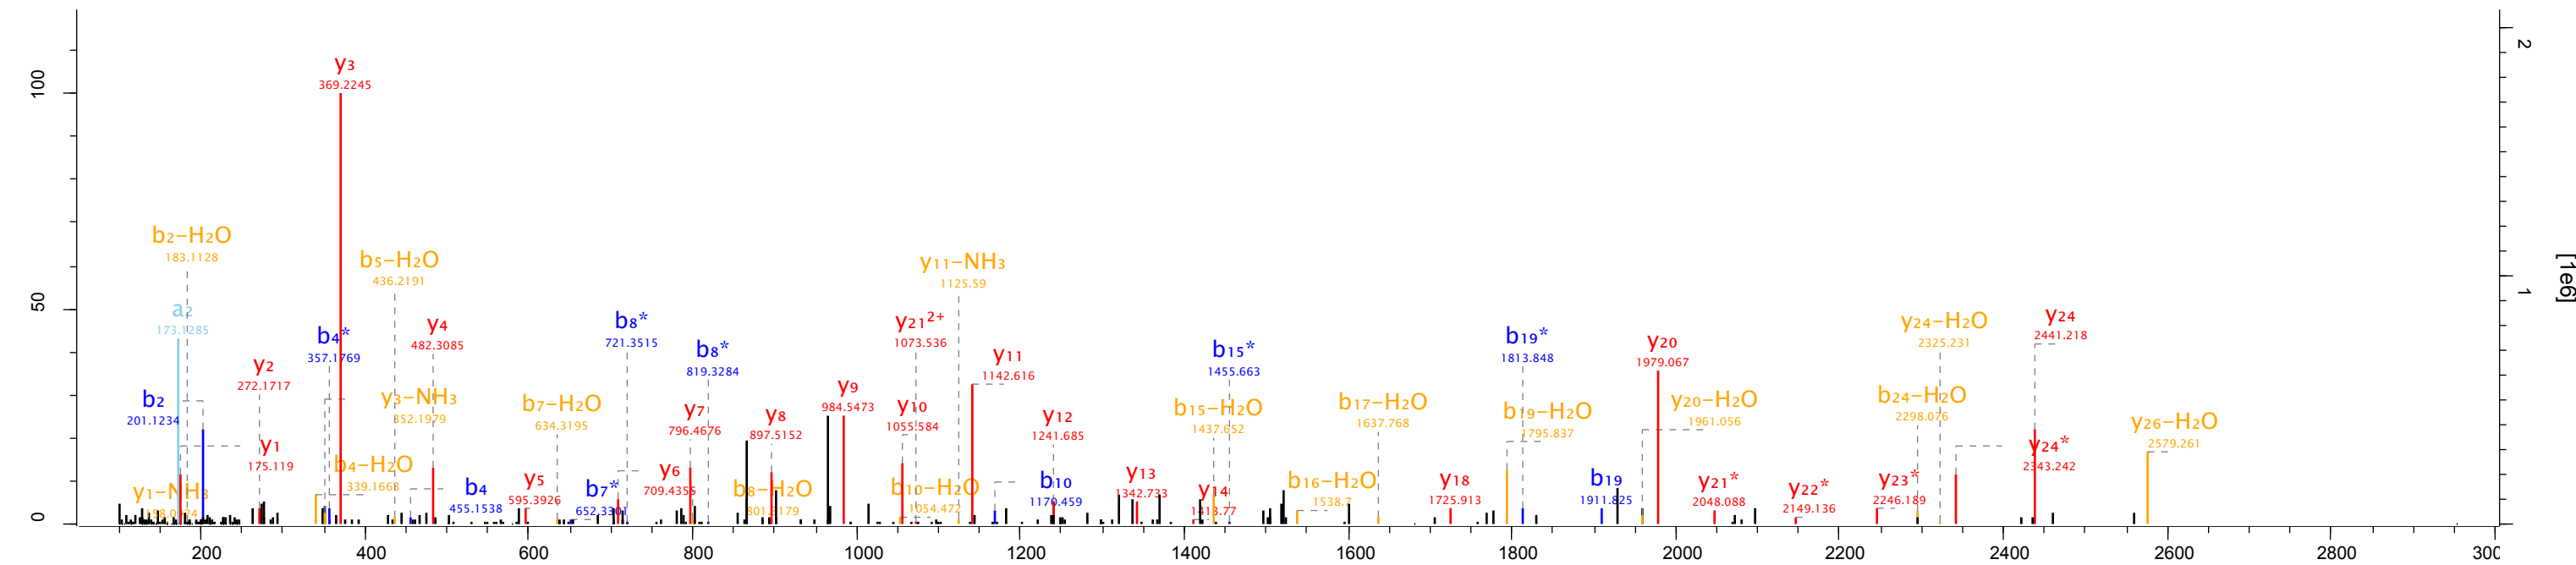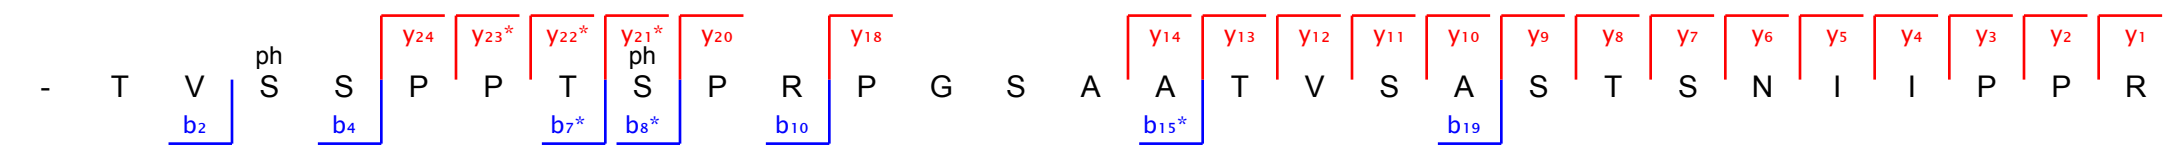

Raw file 20150812\_A375SR\_Phospho\_BR1\_04 Scan 18324 Method FTMS; HCD Score 92.01 m/z 956.91 Gene names VPS13D

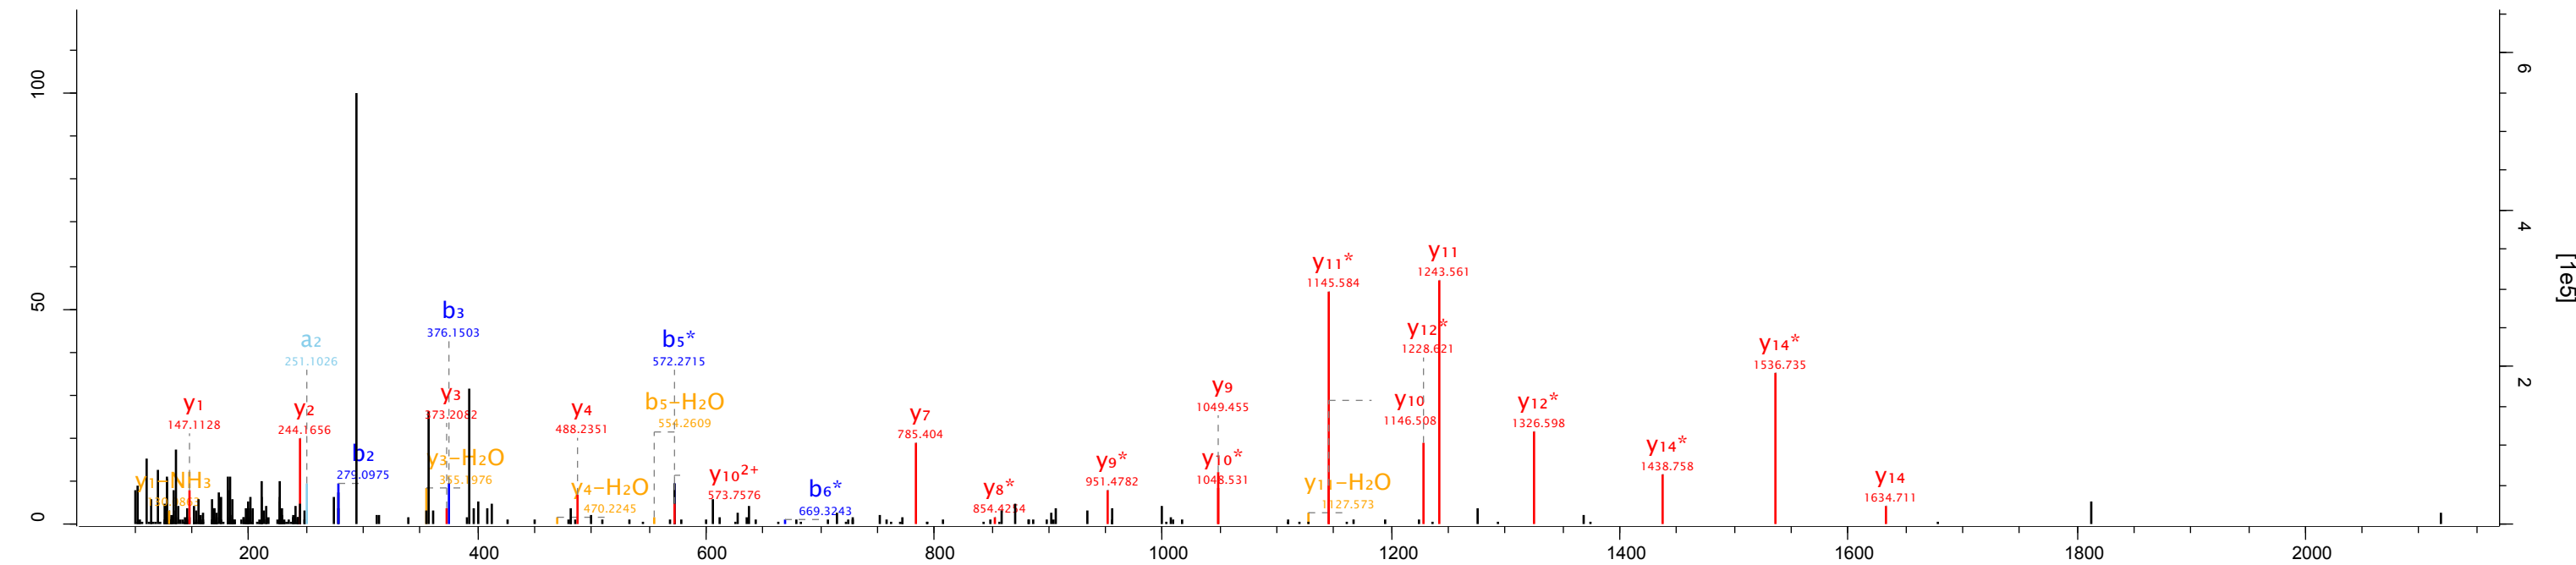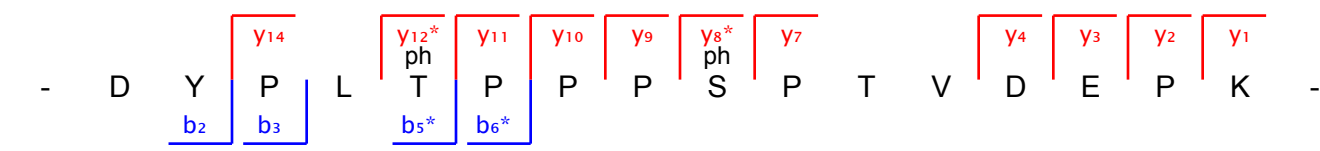

Raw file Scan Method Score m/z Gene names  
 20150812\_A375SR\_Phospho\_BR1\_04 18524 FTMS; HCD 147.87 723.65 SLC26A2

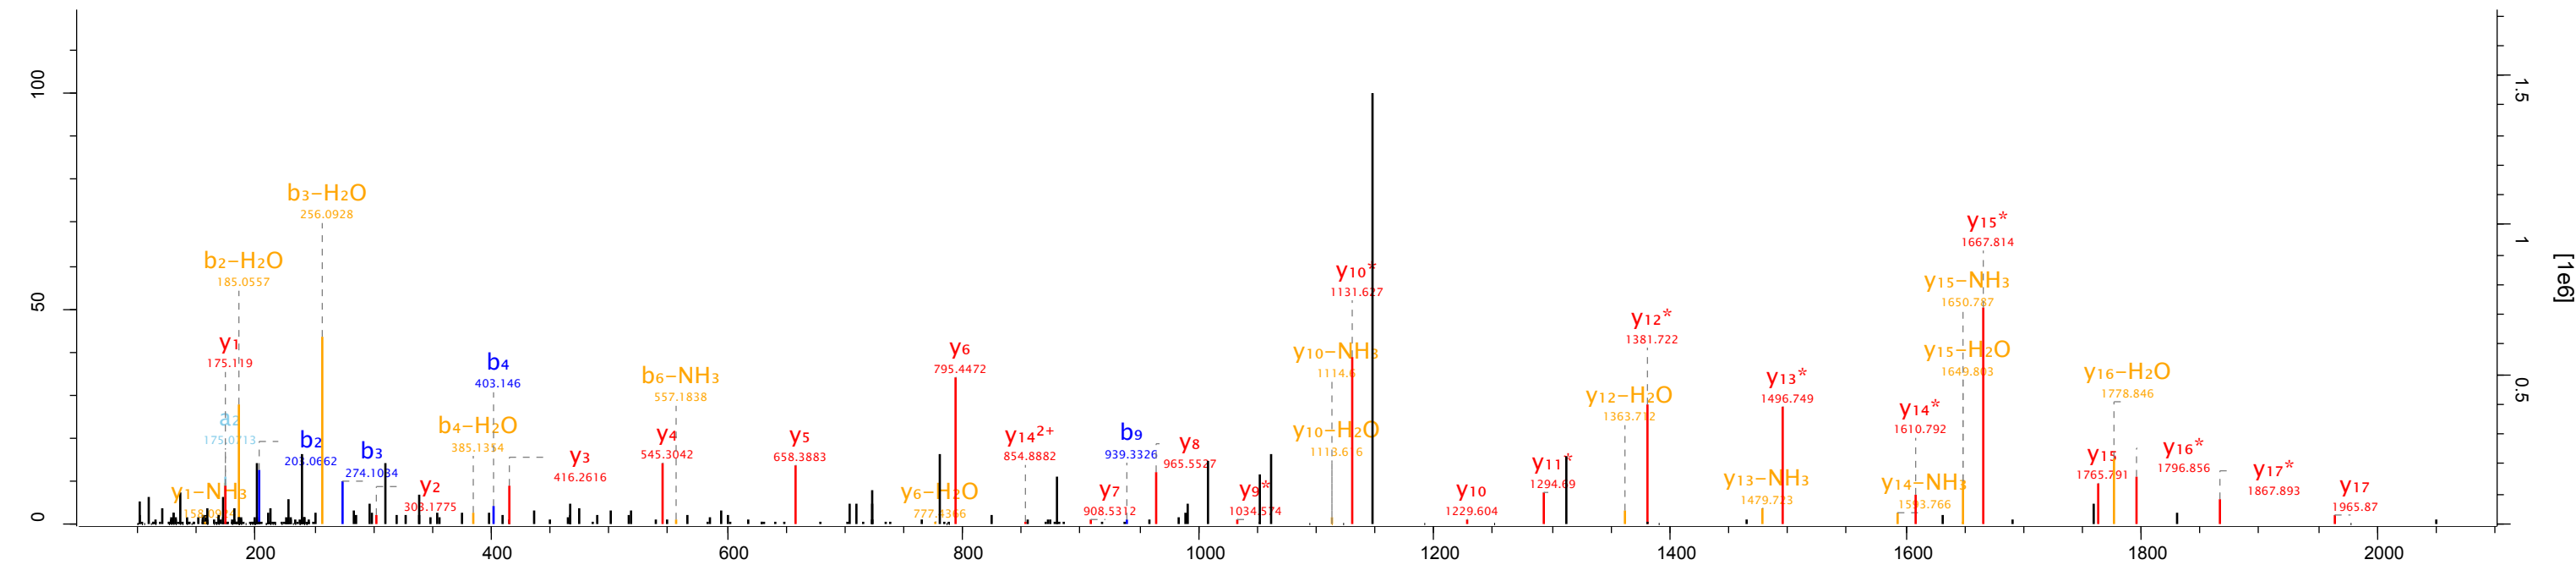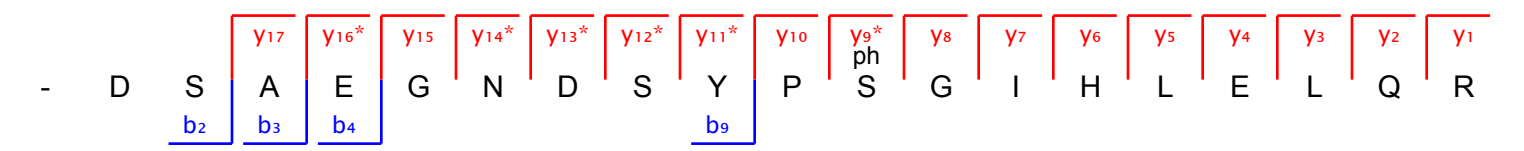

Raw file: 20150812\_A375SR\_Phospho\_BR1\_04  
 Scan: 18574 Method: FTMS; HCD Score: 152.35 m/z: 1198.24 Gene names: CTTNBP2NL

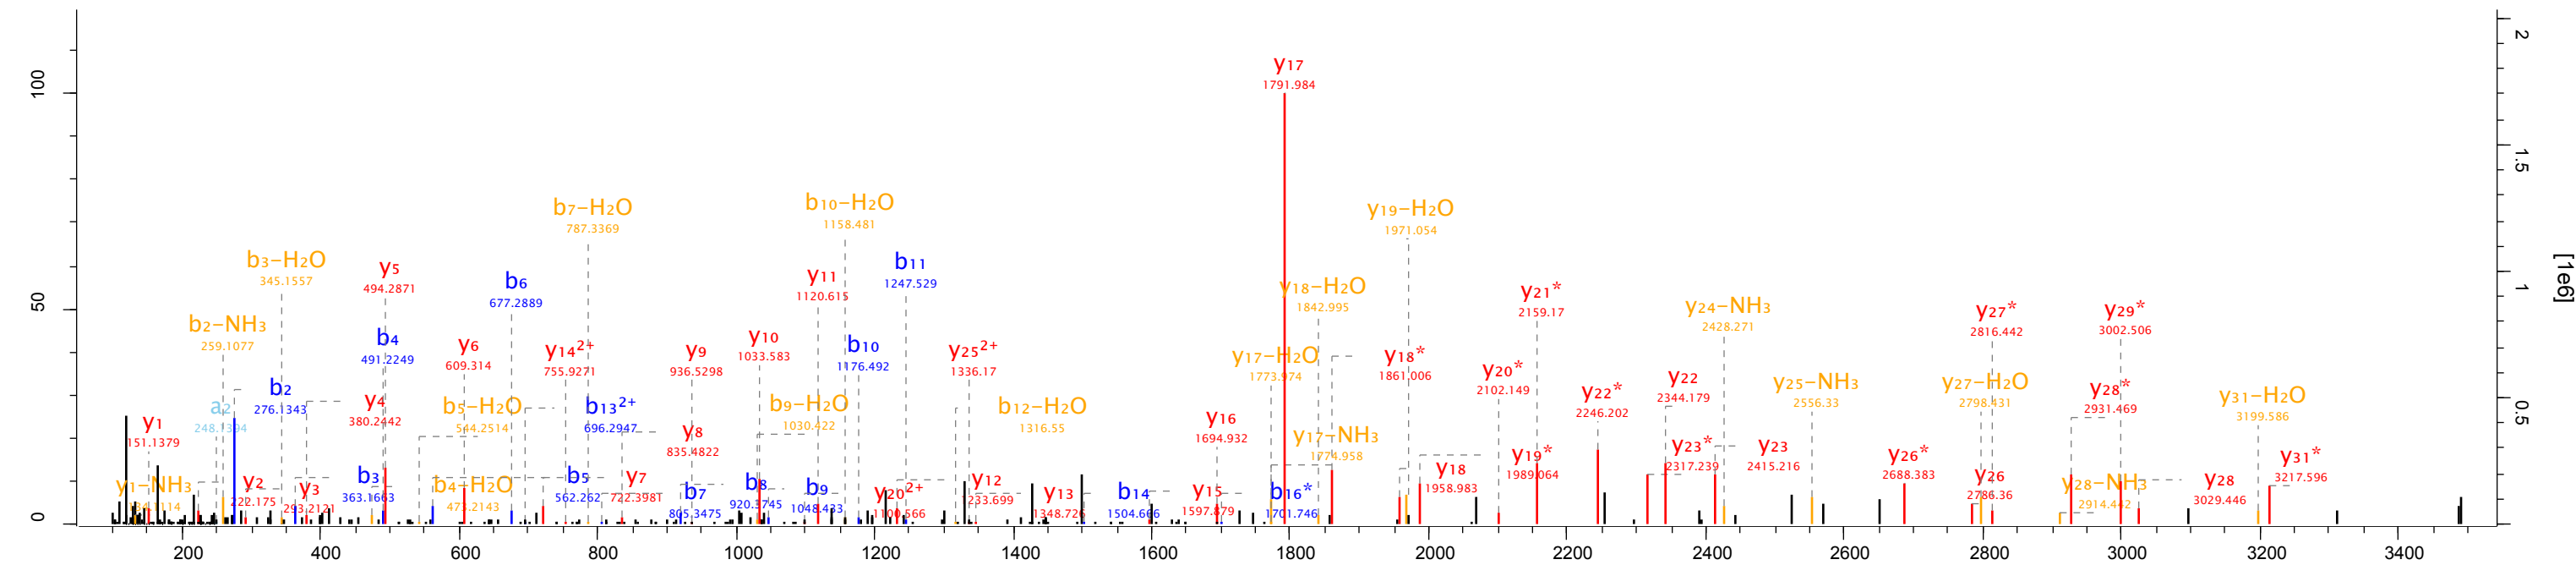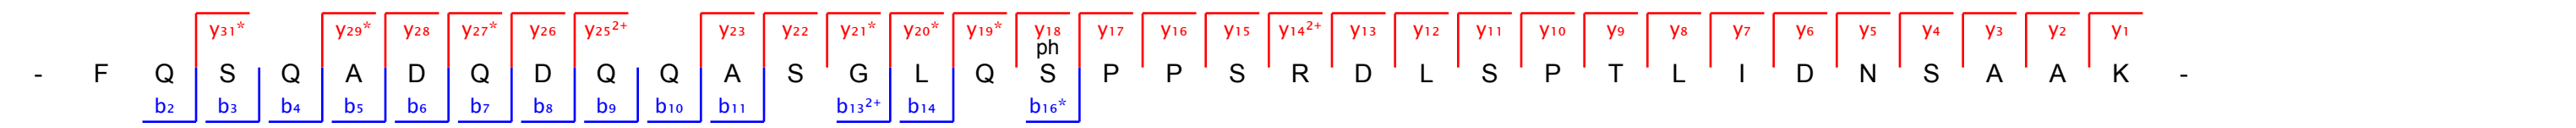

Raw file: 20150812\_A375SR\_Phospho\_BR1\_04  
 Scan: 18584 Method: FTMS; HCD Score: 95.62 m/z: 944.43 Gene names: MACF1

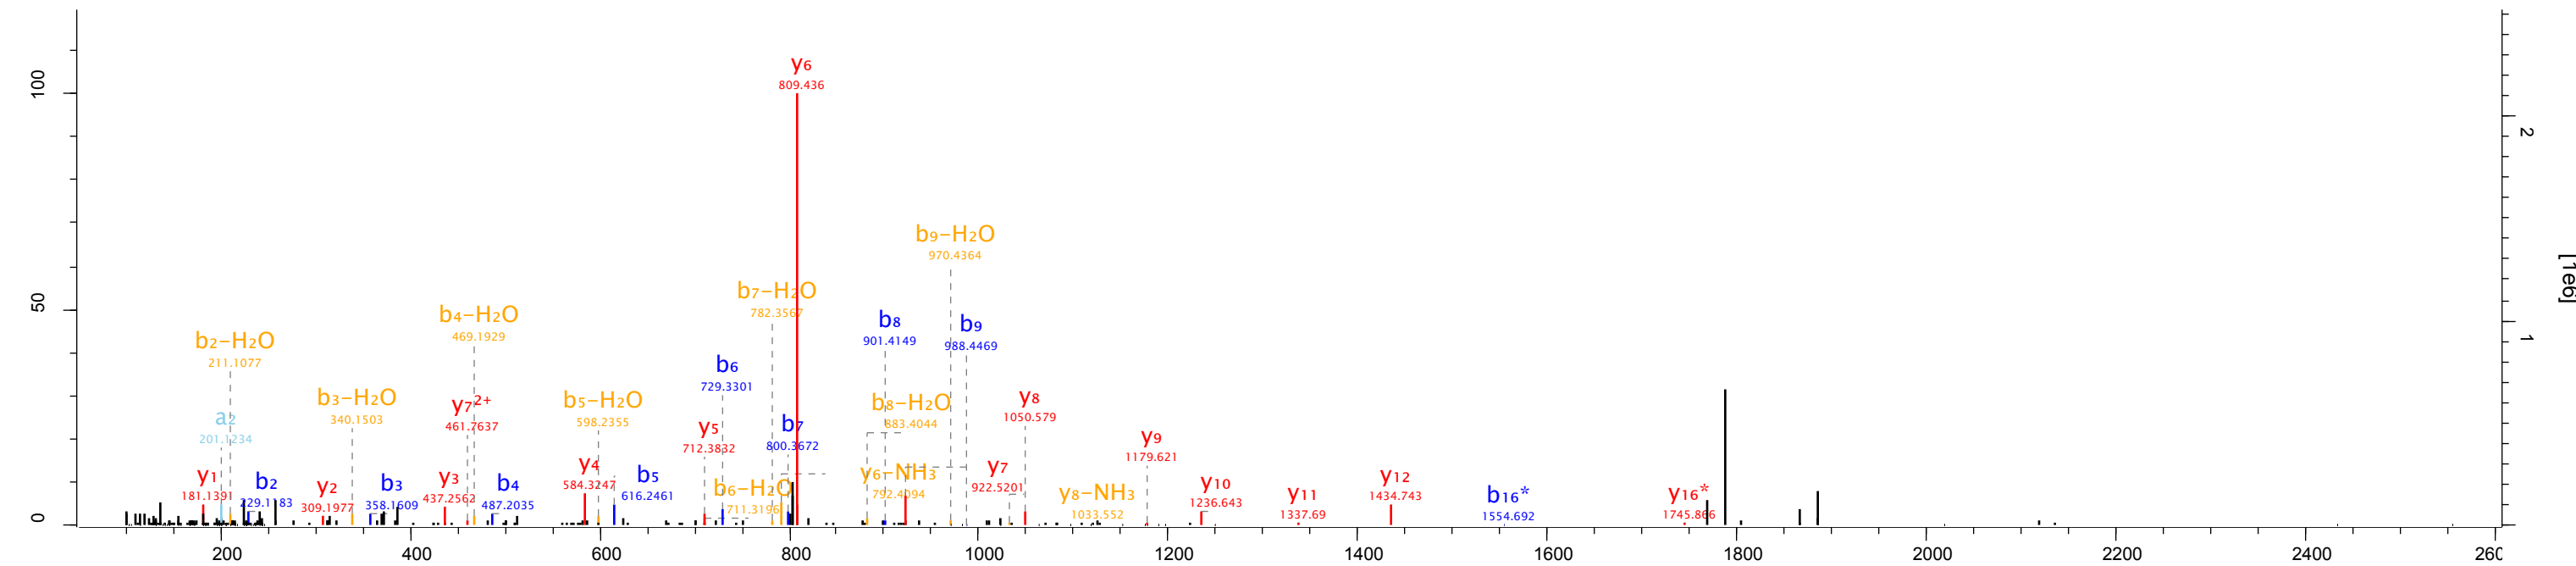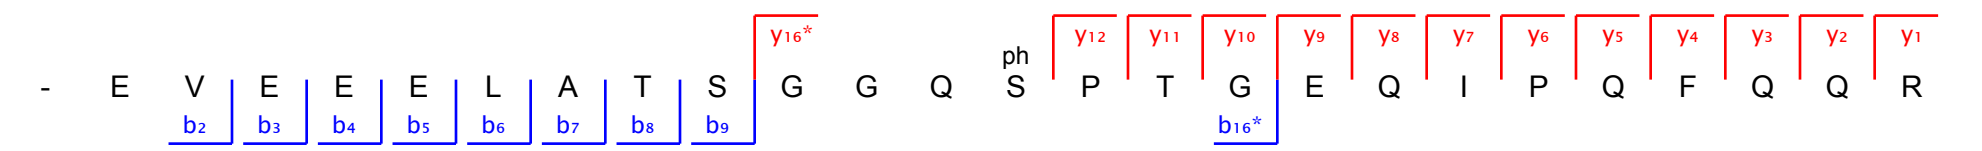



Raw file 20150812\_A375SR\_Phospho\_BR1\_04 Scan 18724 Method FTMS; HCD Score 110.38 m/z 960.43 Gene names CAMSAP2

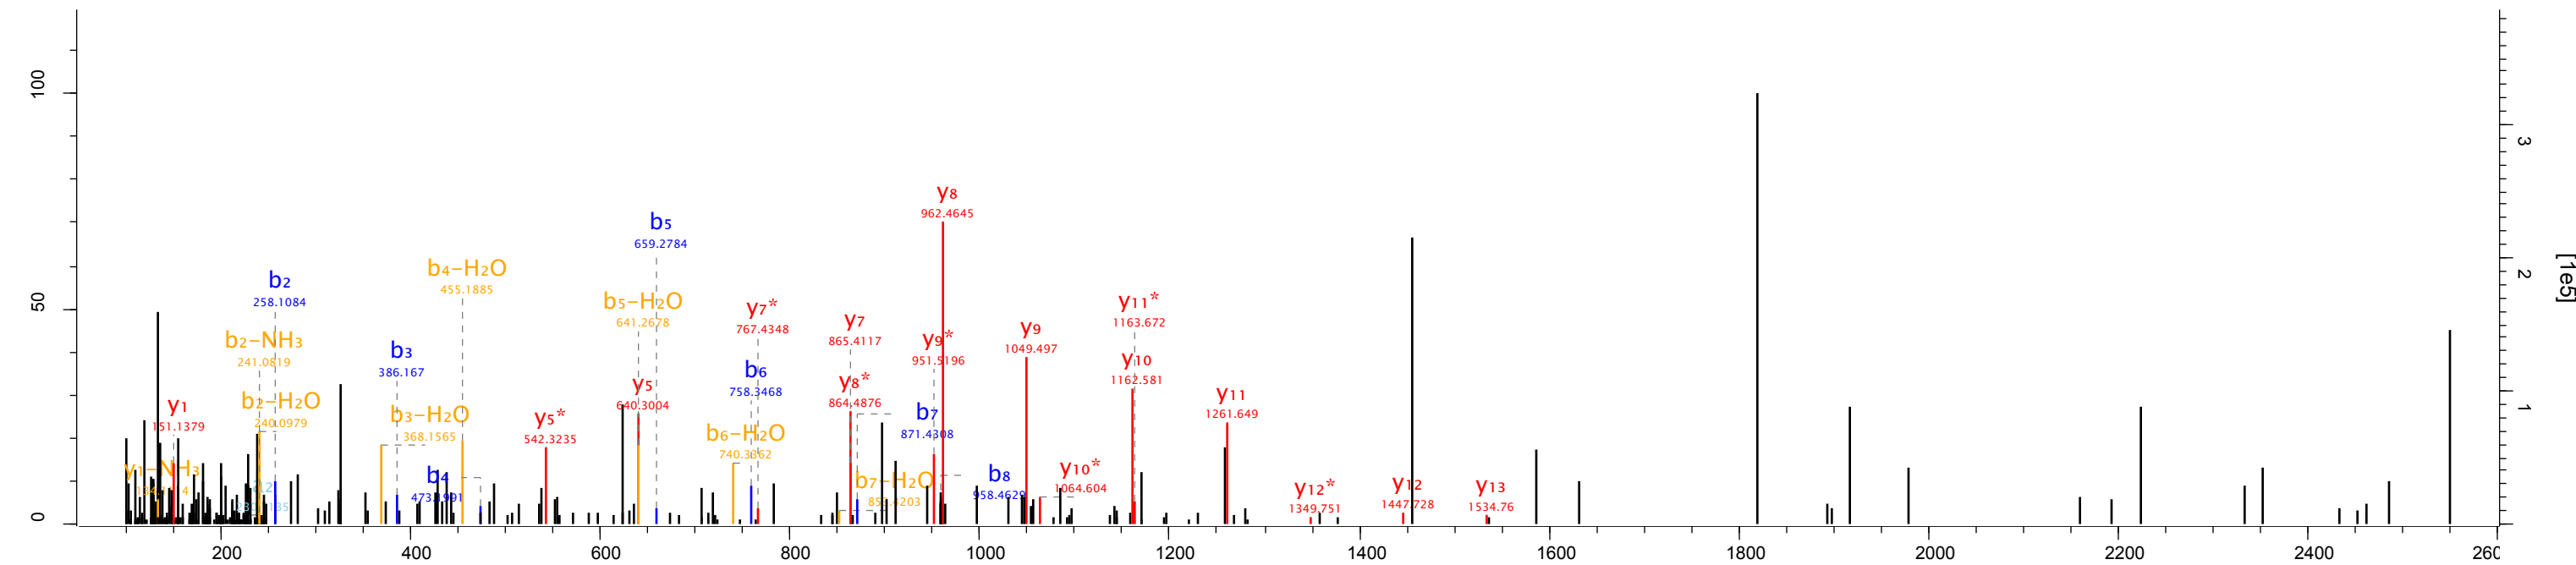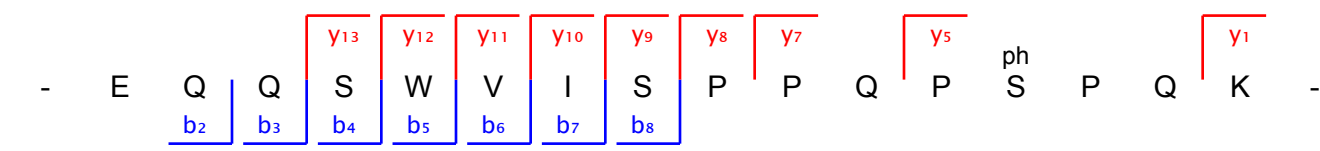

Raw file: 20150812\_A375SR\_Phospho\_BR1\_04  
 Scan: 18764 Method: FTMS; HCD Score: 106.21 m/z: 1149.79 Gene names: YBX1

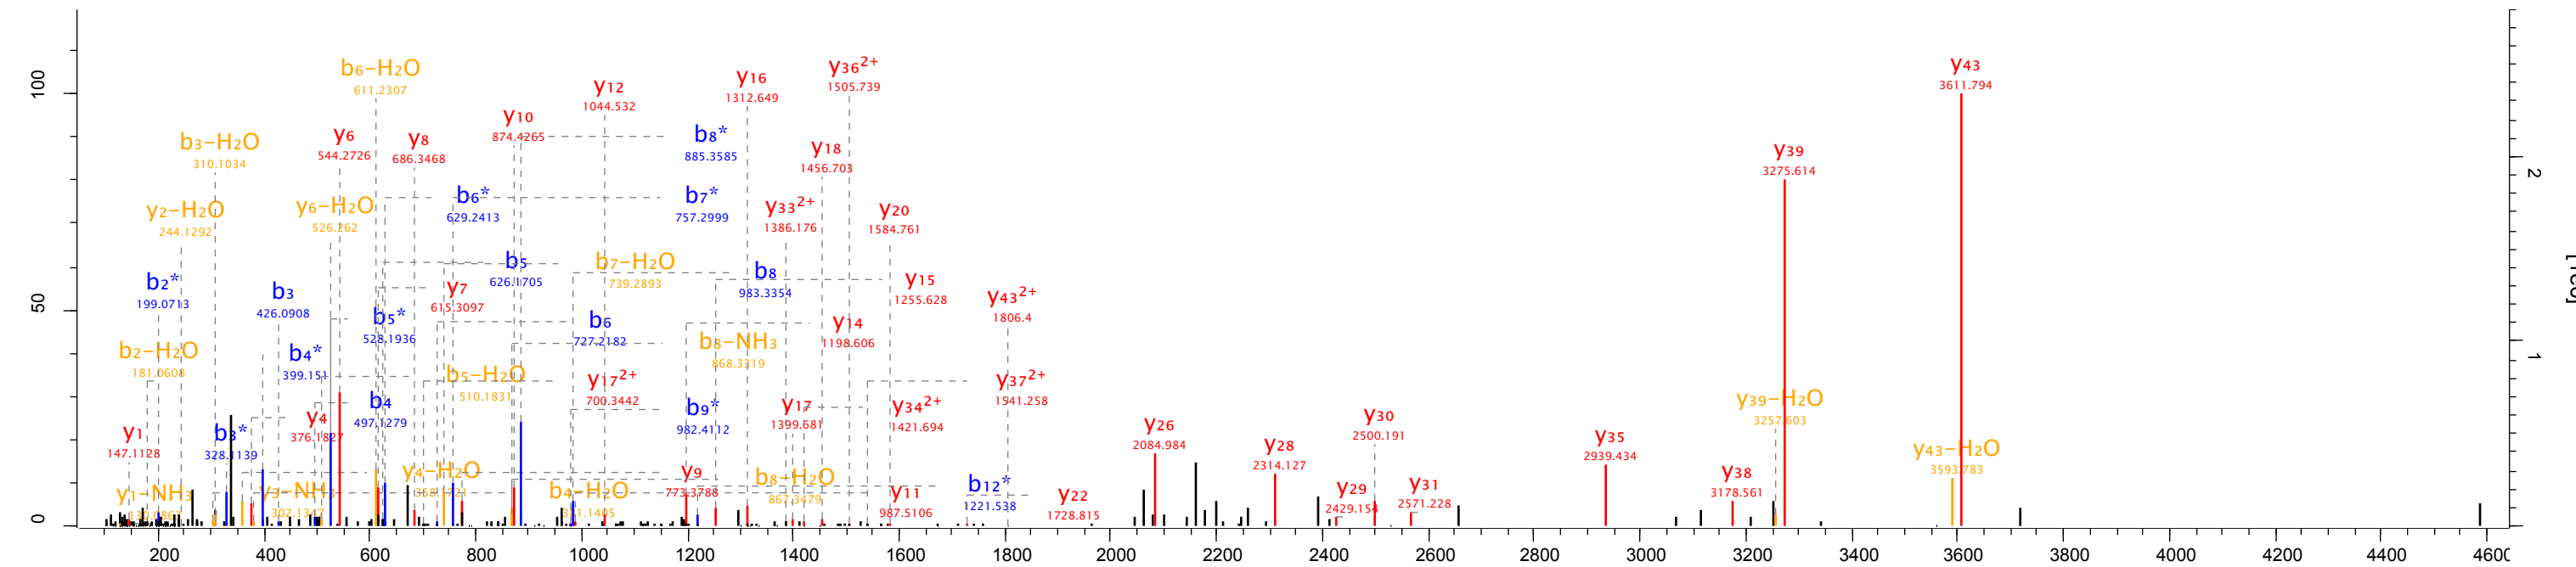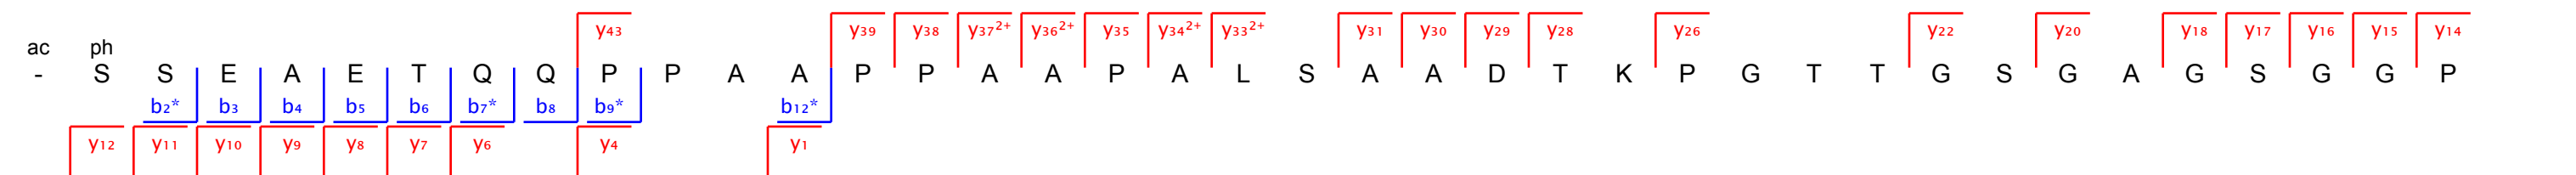

Raw file: 20150812\_A375SR\_Phospho\_BR1\_04  
 Scan: 19304 Method: FTMS; HCD Score: 105.94 m/z: 1041.09 Gene names: RPRD2

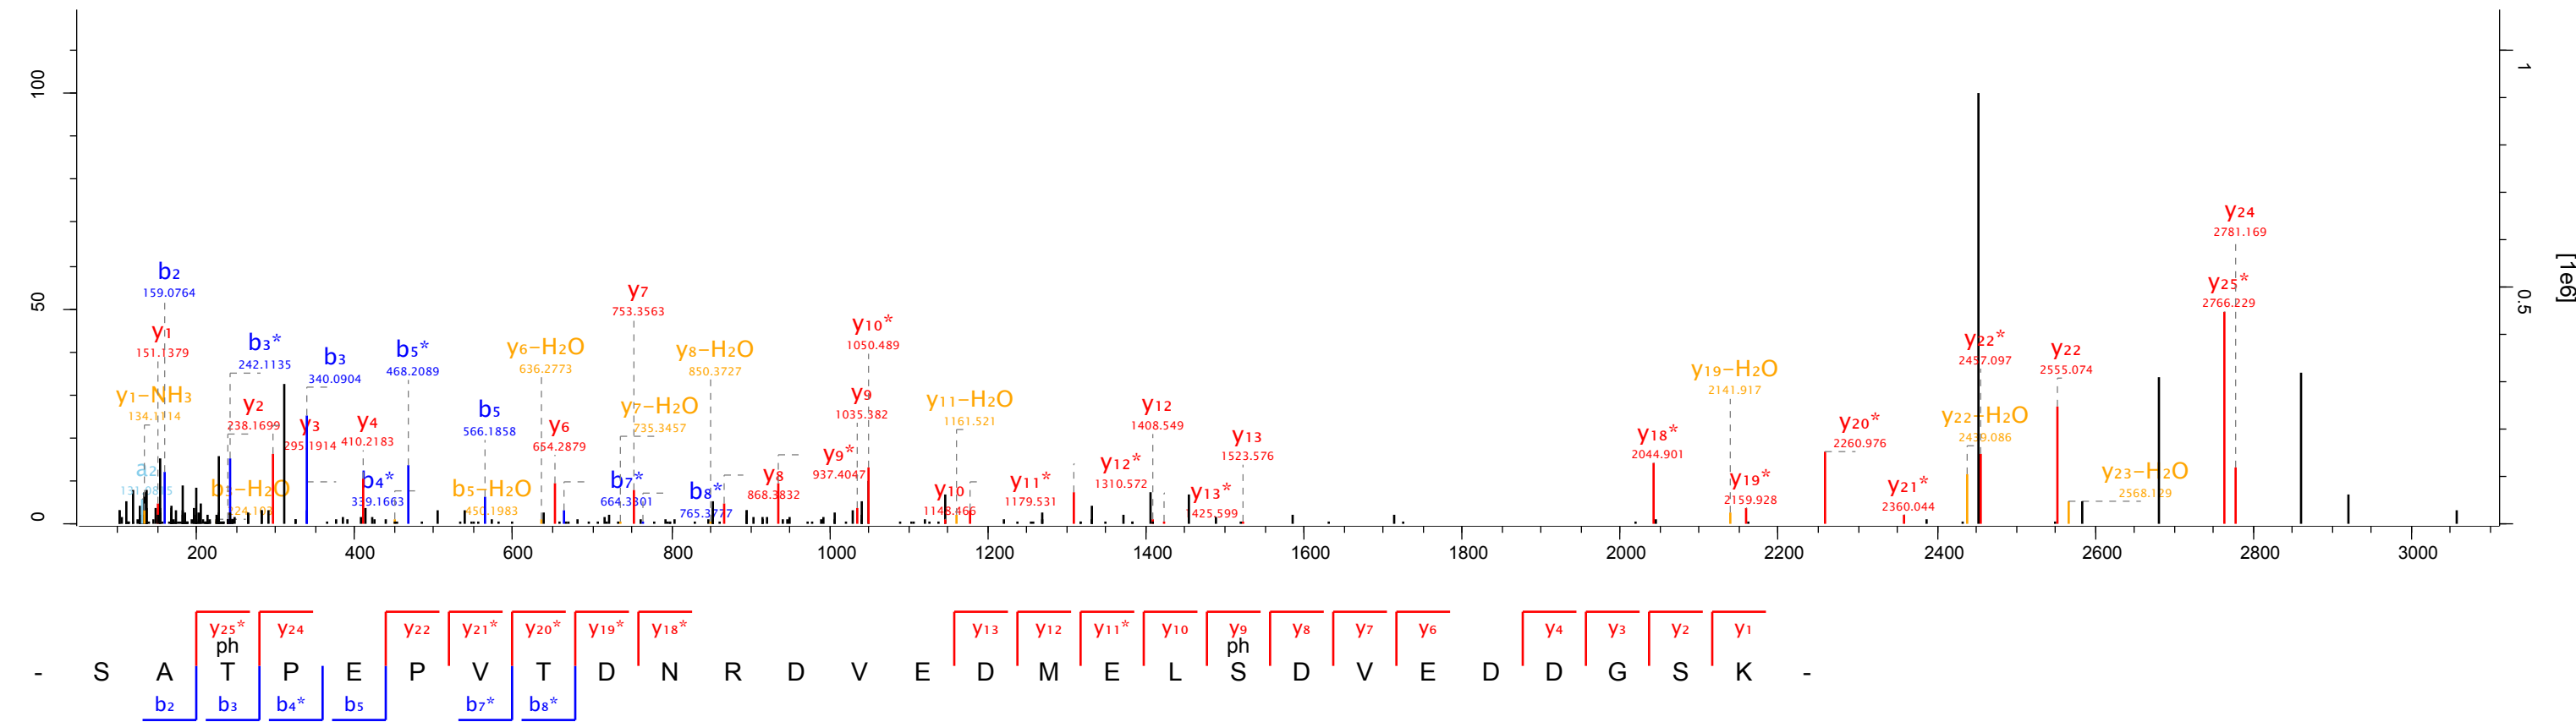

Raw file Scan Method Score m/z Gene names  
 20150812\_A375SR\_Phospho\_BR1\_04 19364 FTMS; HCD 442.63 1266.55 GIT1

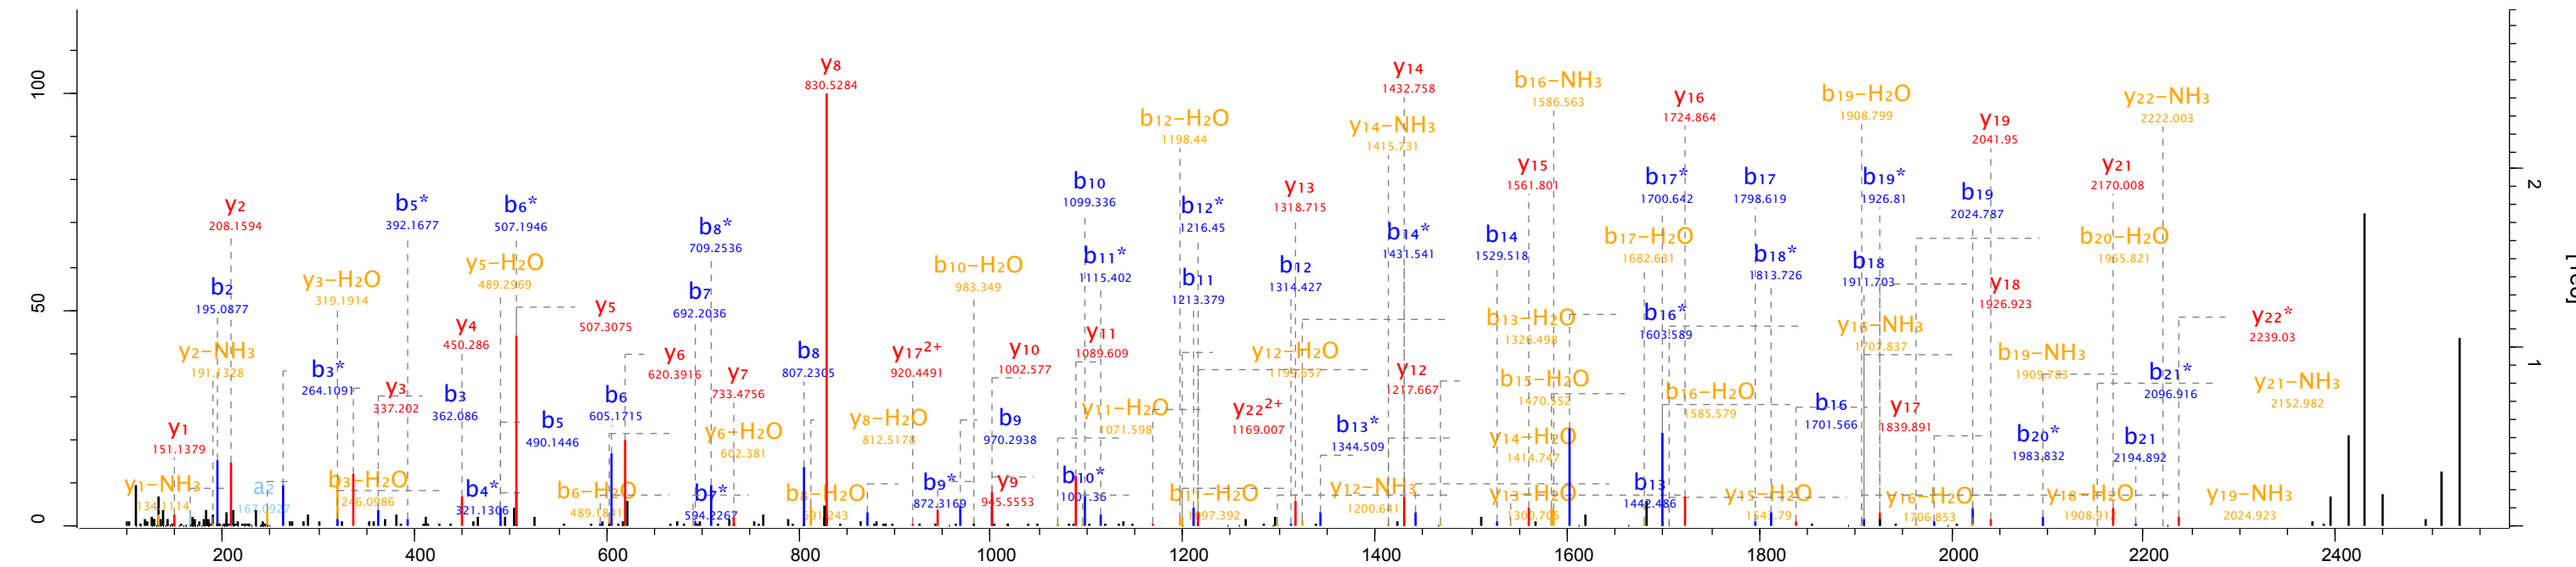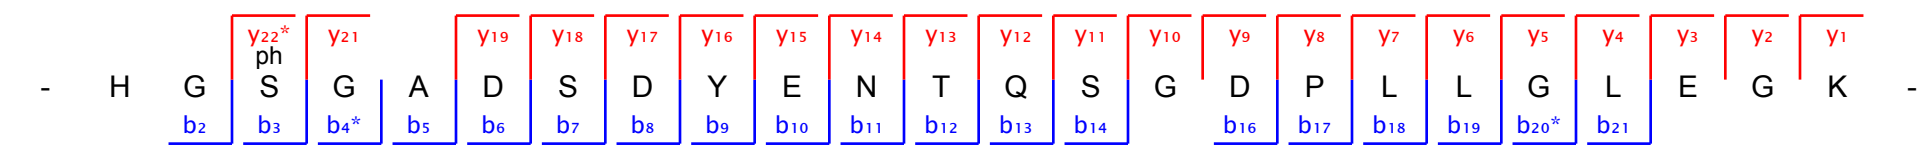

Raw file 20150812\_A375SR\_Phospho\_BR1\_04 Scan 19654 FTMS; HCD Score 233.38 m/z 910.45 Gene names ELAVL2

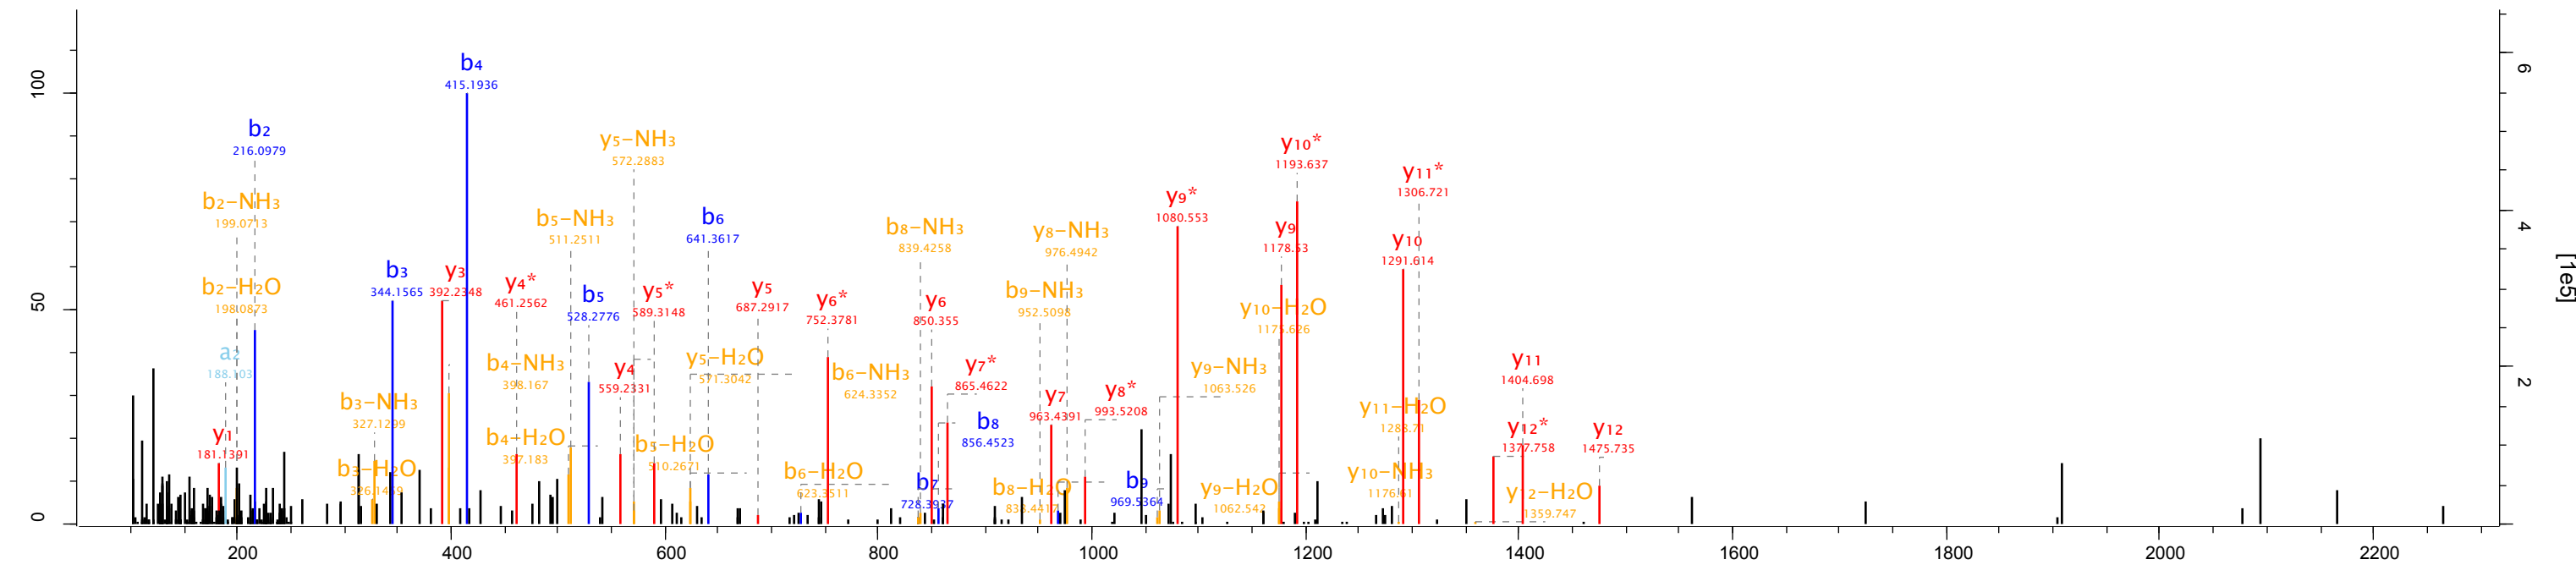

- T N Q A I L S Q L Y Q S P N R -

Fragmentation mapping (b and y ions):

- b2: N
- b3: Q
- b4: A
- b5: I
- b6: L
- b7: S
- b8: Q
- b9: L
- y1: R
- y3: P
- y4: S
- y5: Q
- y6: Y
- y7: L
- y8\*: Q
- y9: S
- y10: L
- y11: I
- y12: A

20150812\_A375SR\_Phospho\_BR1\_04 19844 FTMS; HCD 61.09 879.4 PKP3

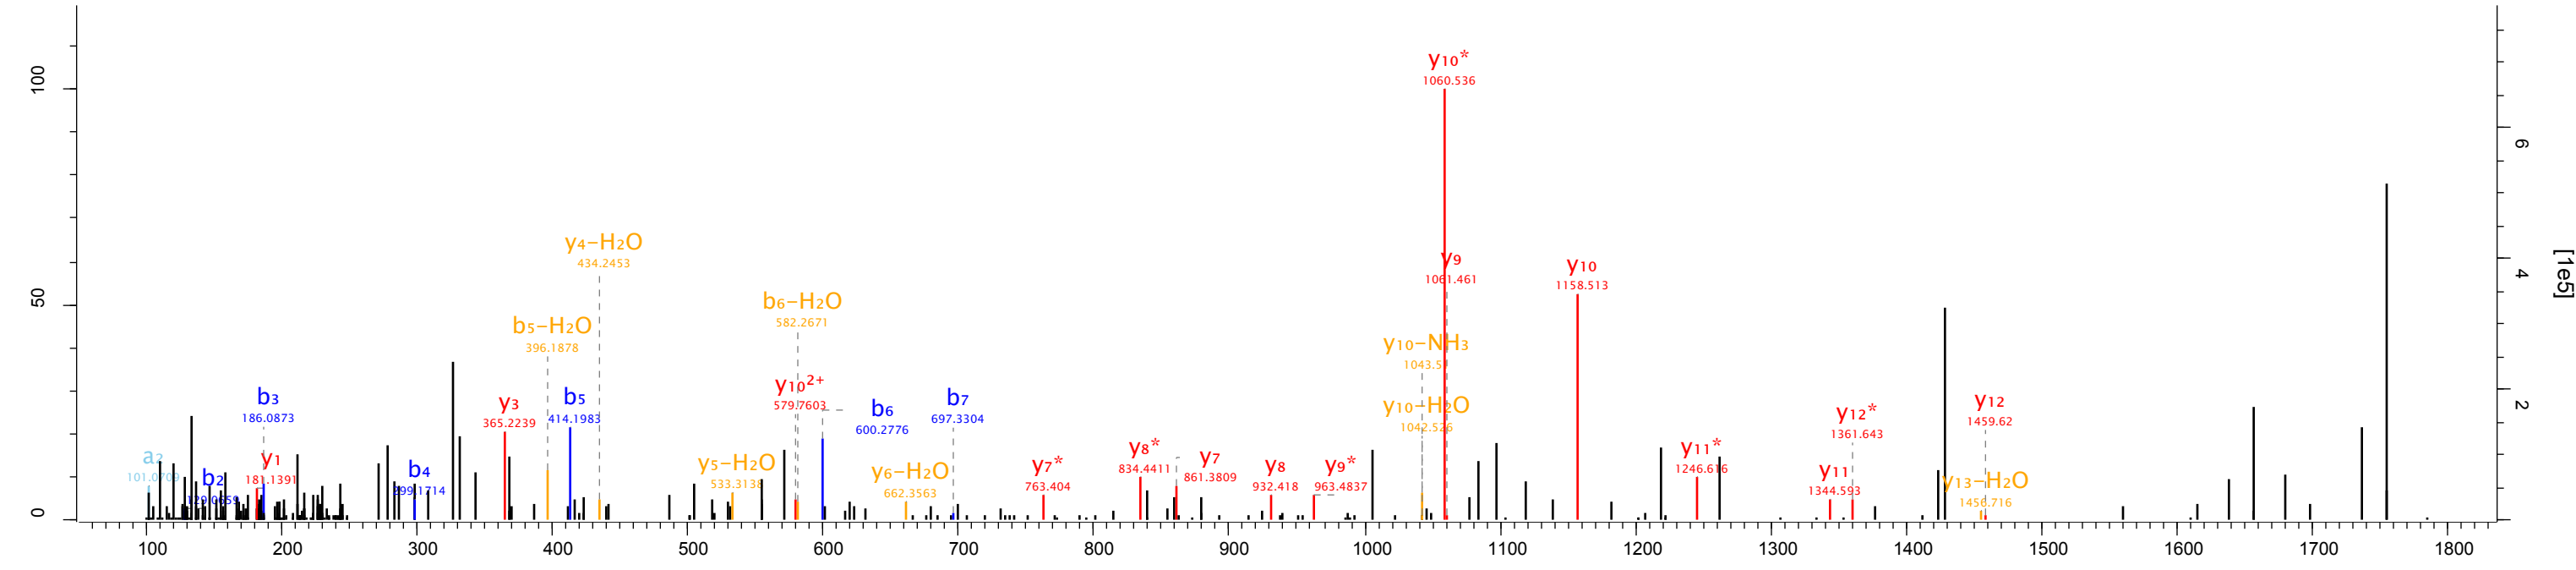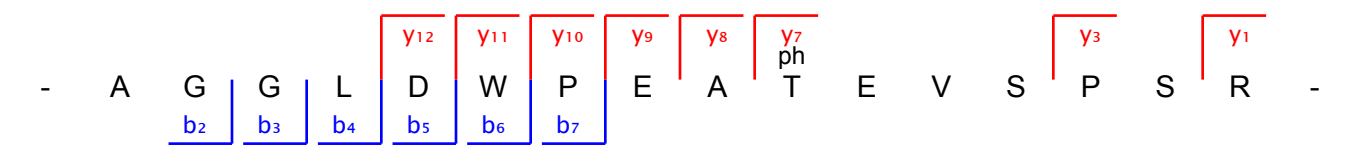

Raw file  
20150812\_A375SR\_Phospho\_BR1\_04

Scan 19904 Method FTMS; HCD Score 213.47 m/z 874.76 Gene names CHAMP1

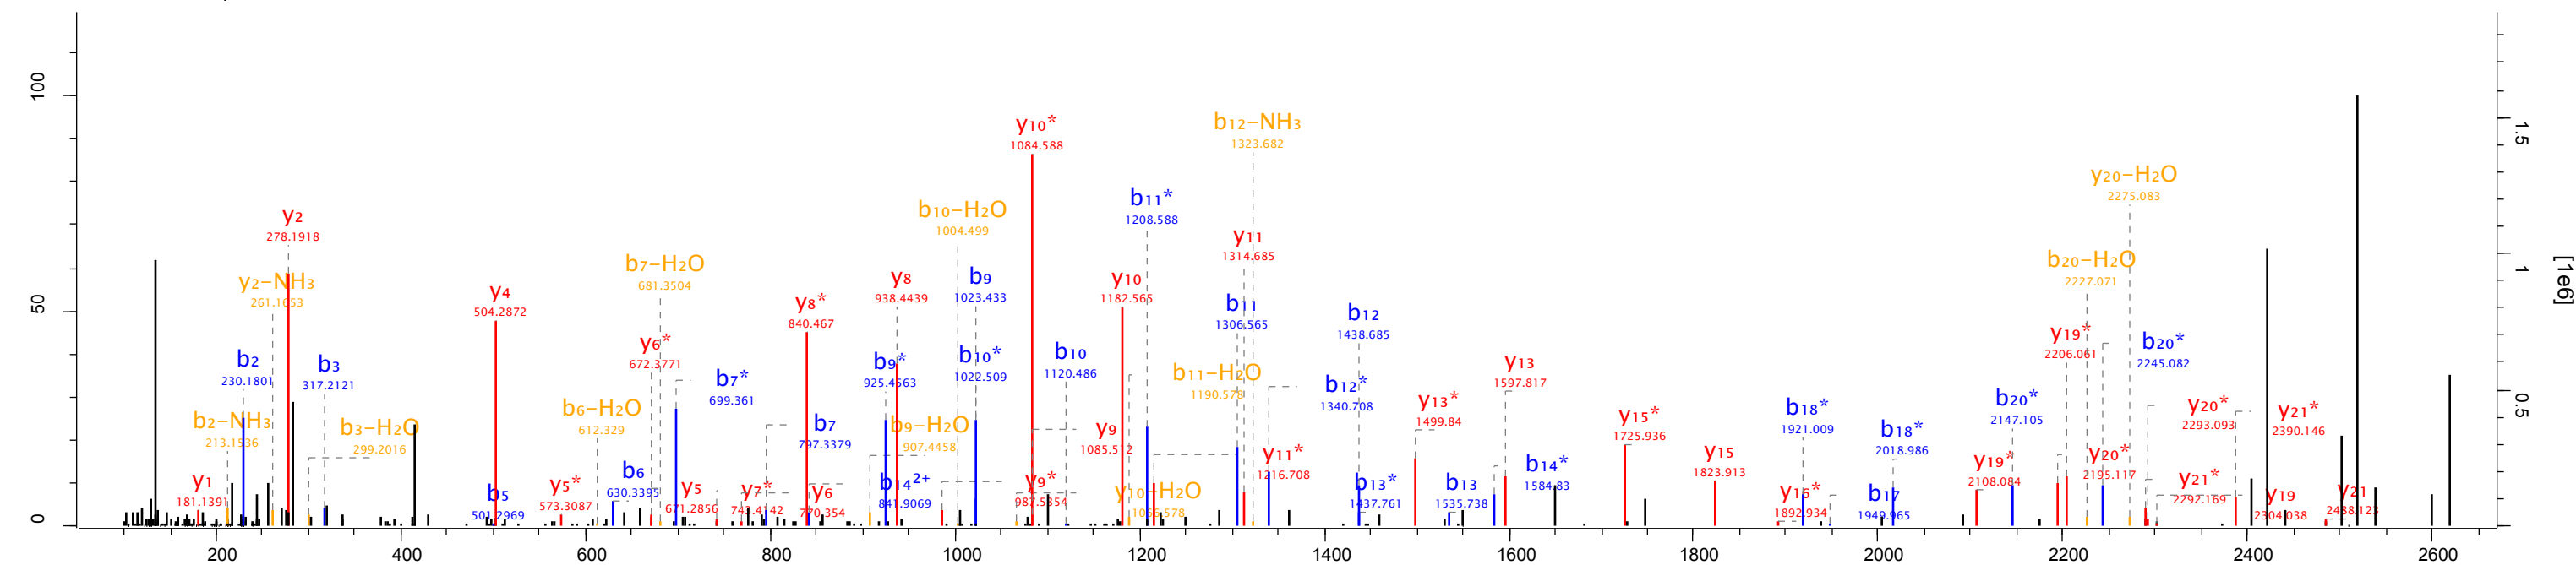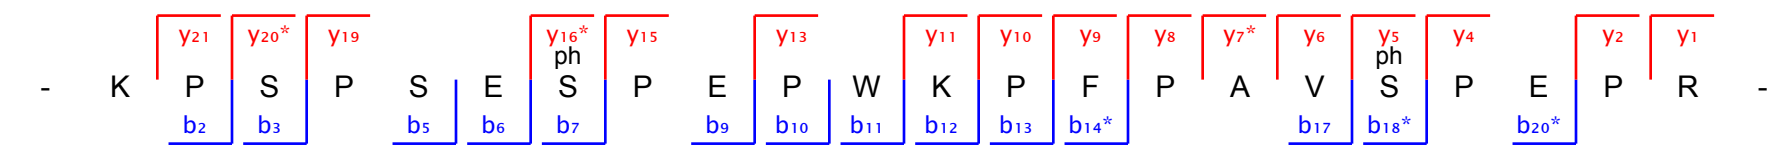

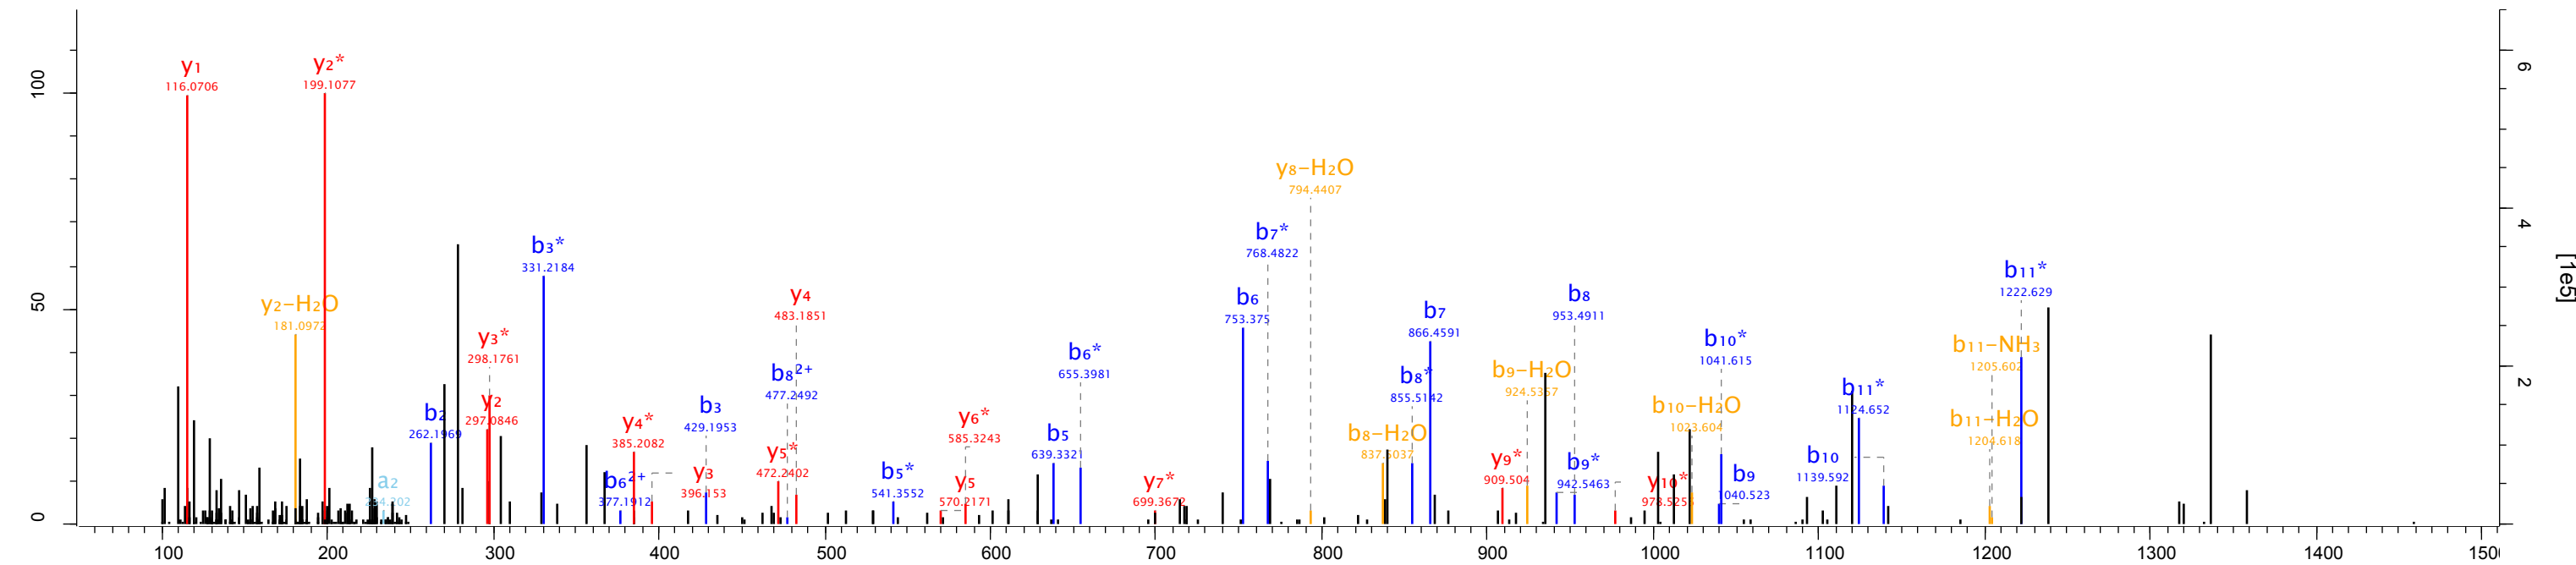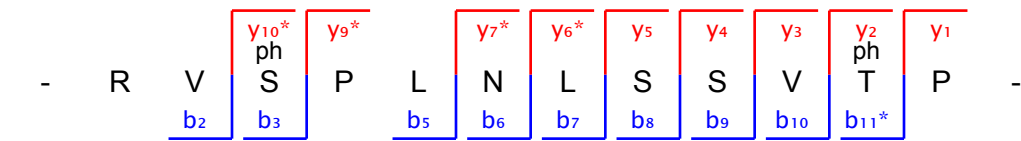



Raw file Scan Method Score m/z Gene names  
 20150812\_A375SR\_Phospho\_BR1\_04 20984 FTMS; HCD 118.36 782.36 RBM12B

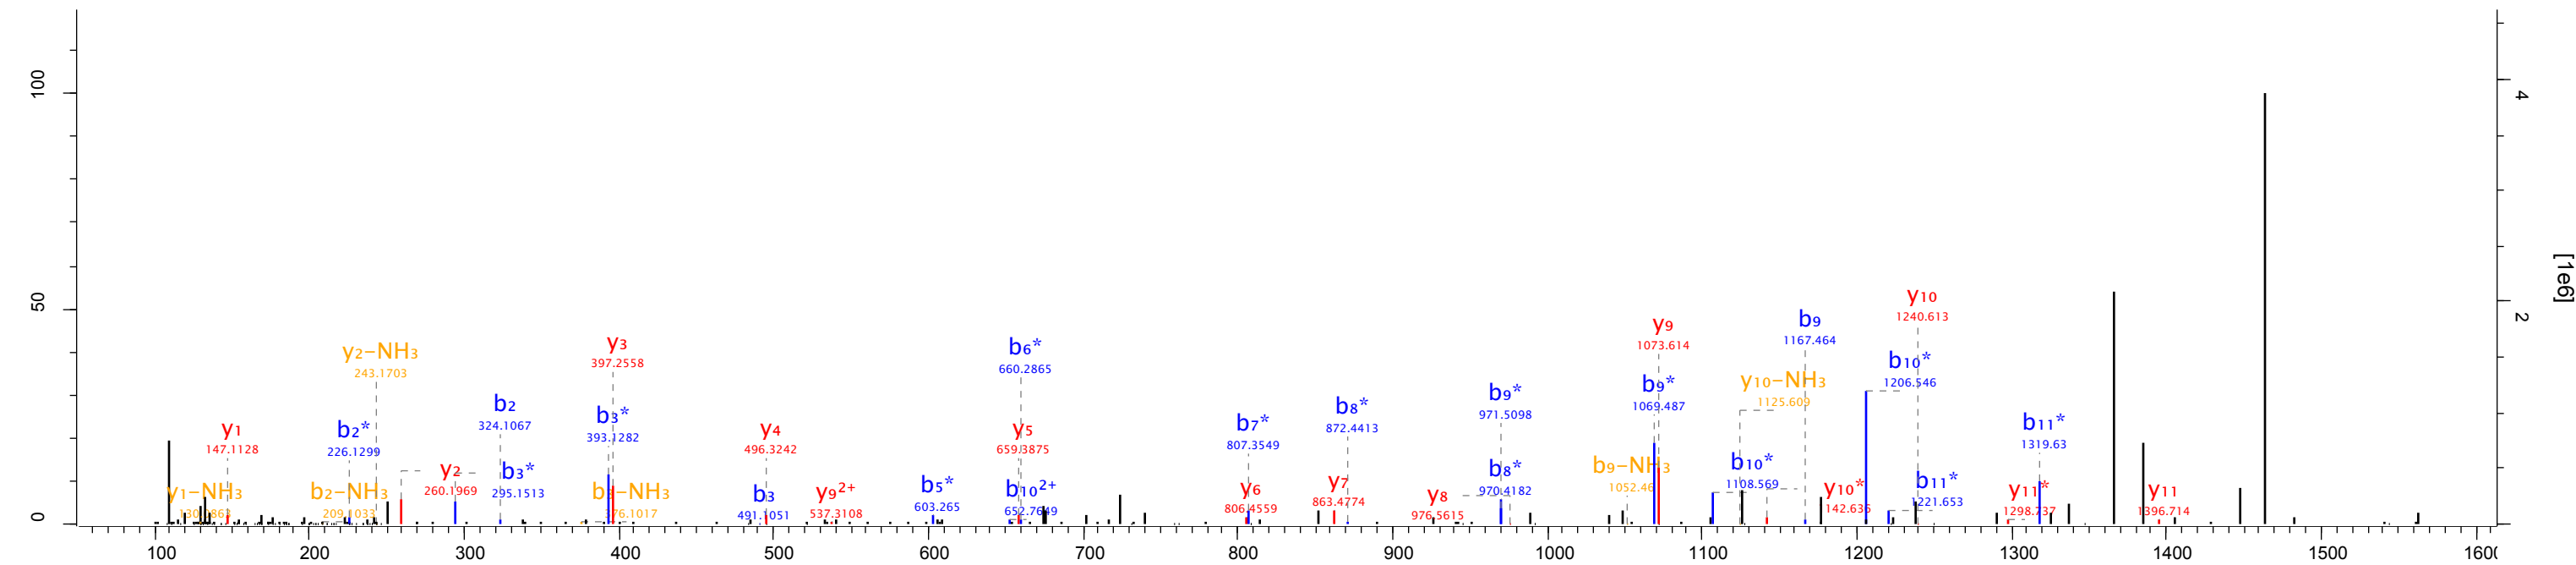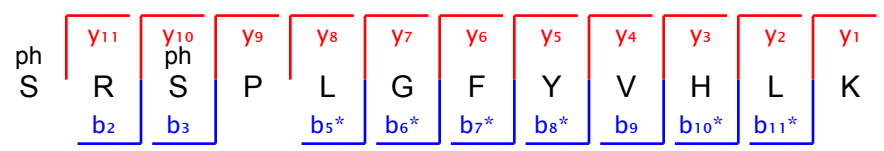

Raw file: 20150812\_A375SR\_Phospho\_BR1\_04  
 Scan: 2144 Method: FTMS; HCD Score: 132.06 m/z: 665.29 Gene names: CDK9

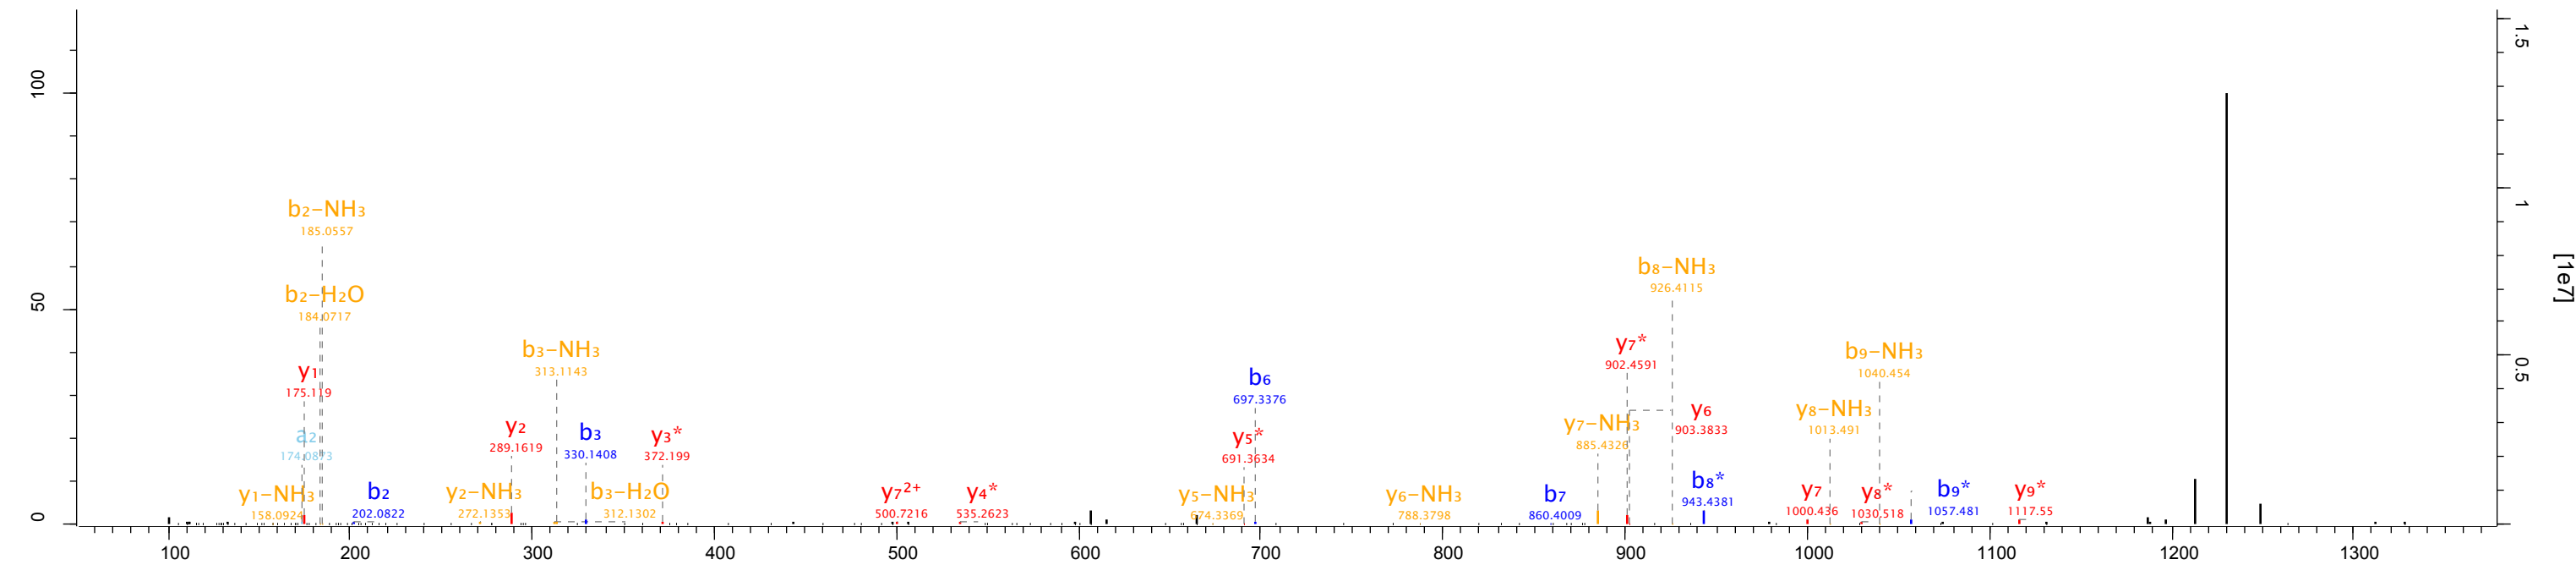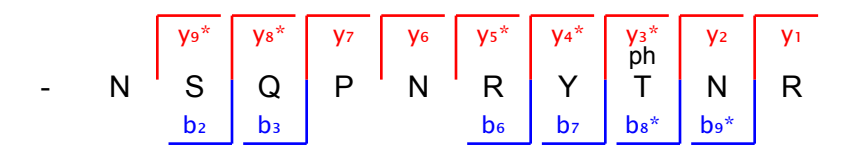

Raw file: 20150812\_A375SR\_Phospho\_BR1\_04  
 Scan: 2194 Method: FTMS; HCD Score: 289.75 m/z: 631.32 Gene names: BCLAF1

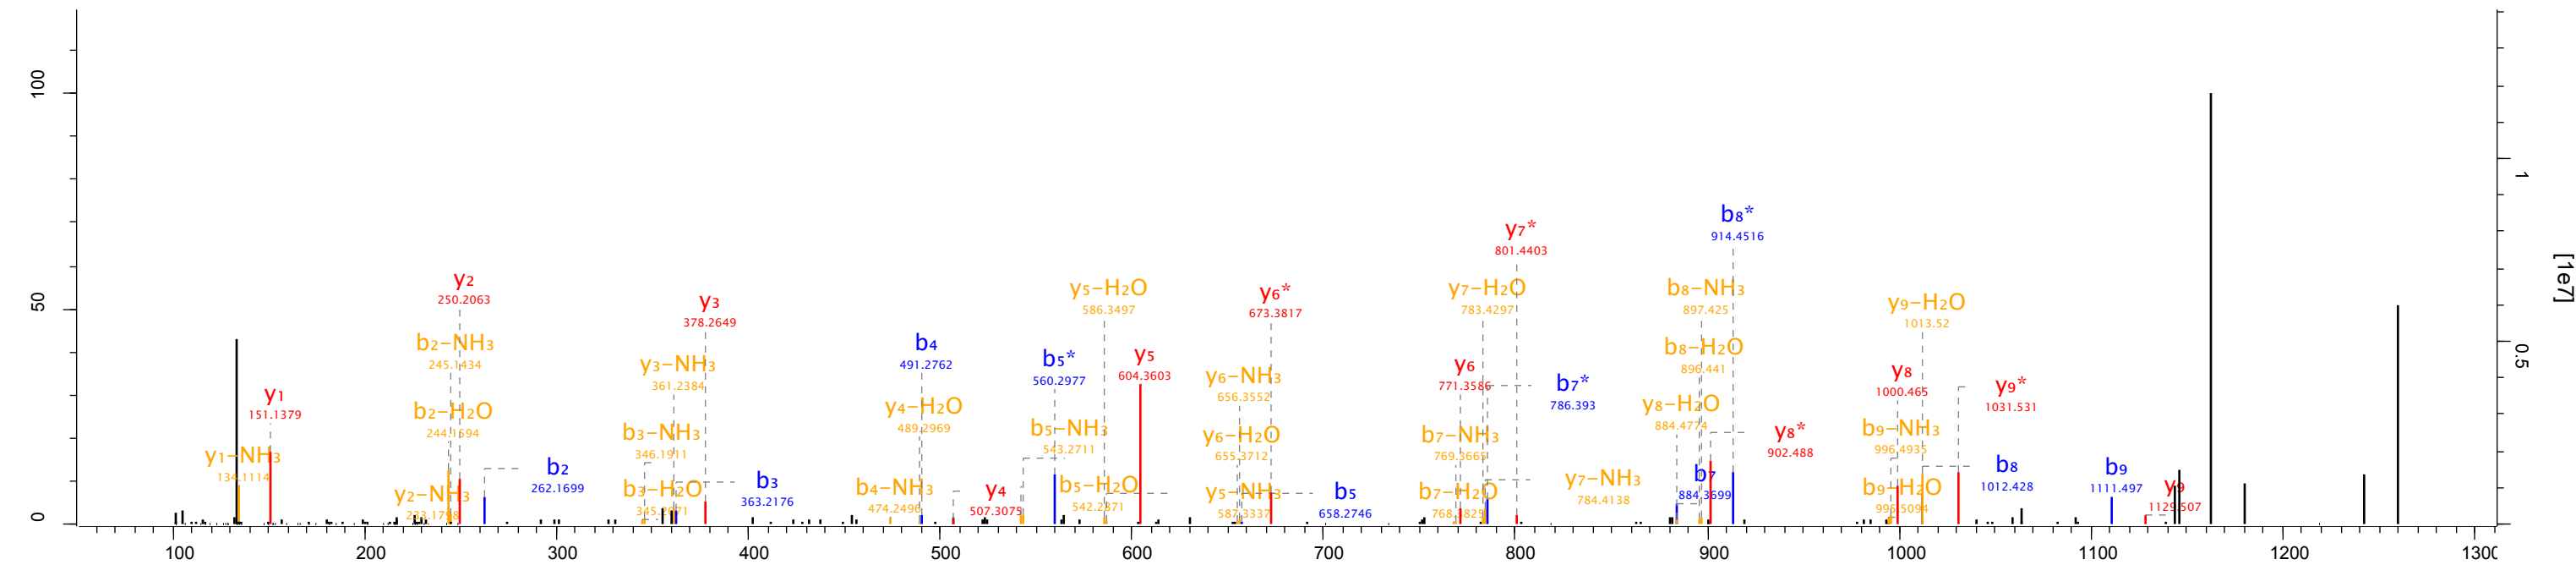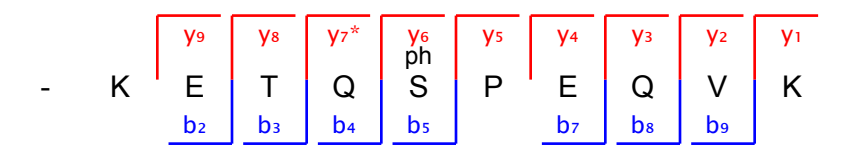

Raw file  
20150812\_A375SR\_Phospho\_BR1\_04

Scan 2344 Method FTMS; HCD Score 277.48 m/z 883.85 Gene names VPS4B

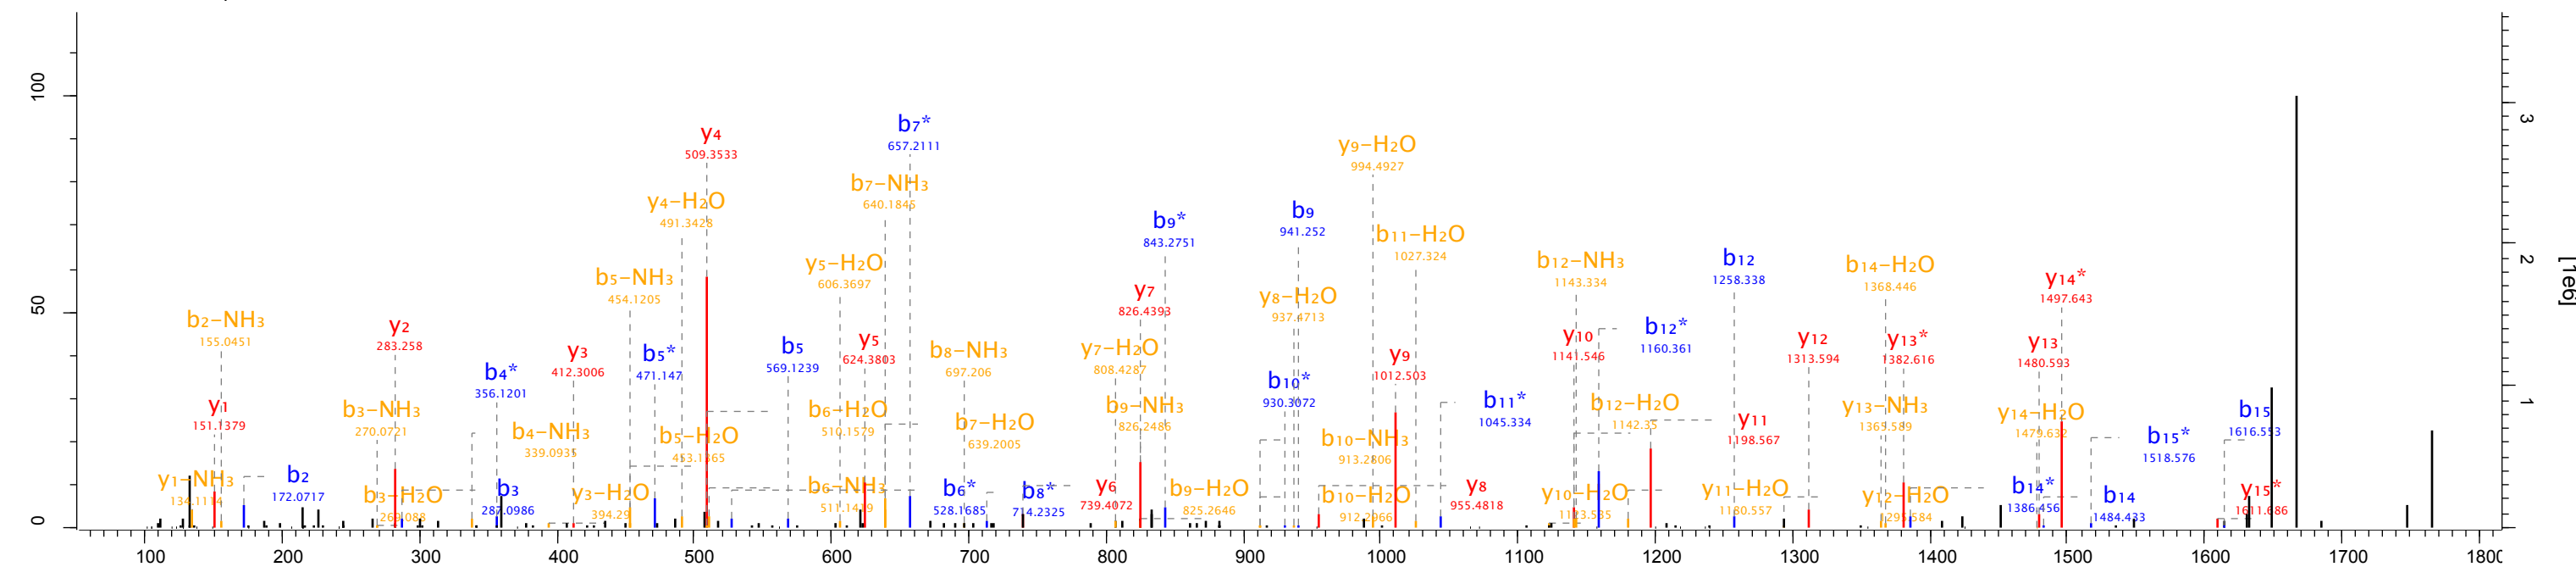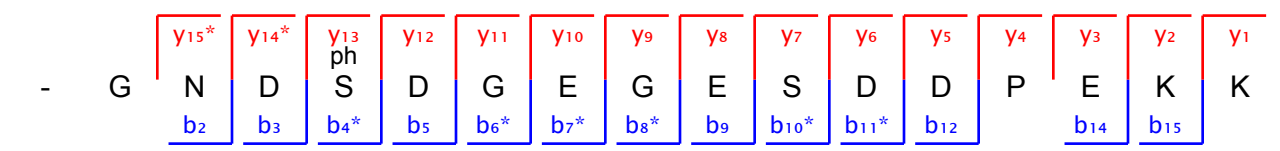

Raw file: 20150812\_A375SR\_Phospho\_BR1\_04  
 Scan: 23674 Method: FTMS; HCD Score: 191.51 m/z: 802.83 Gene names: ANKS1A

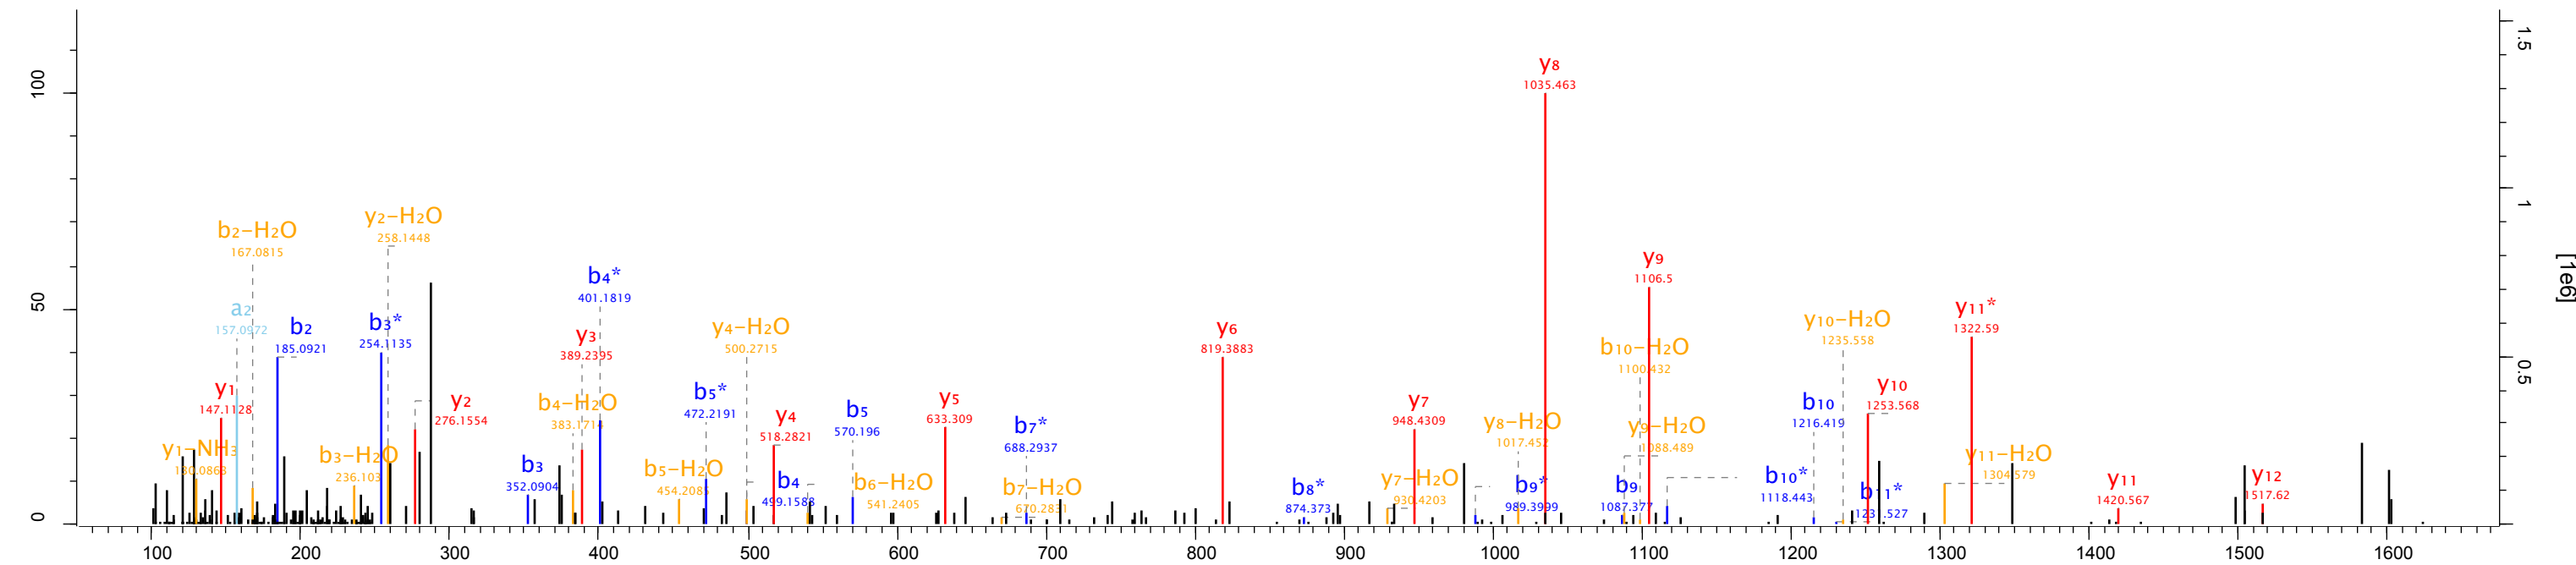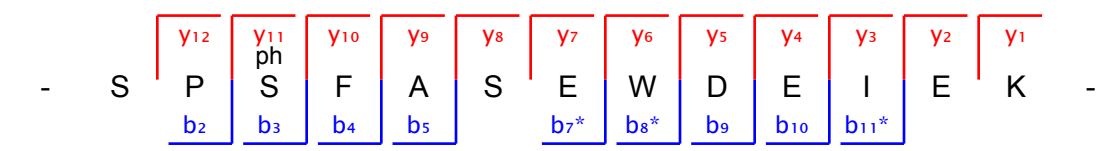

Raw file 20150812\_A375SR\_Phospho\_BR1\_04 Scan 23934 Method FTMS; HCD Score 79.14 m/z 921.76 Gene names SCAF11

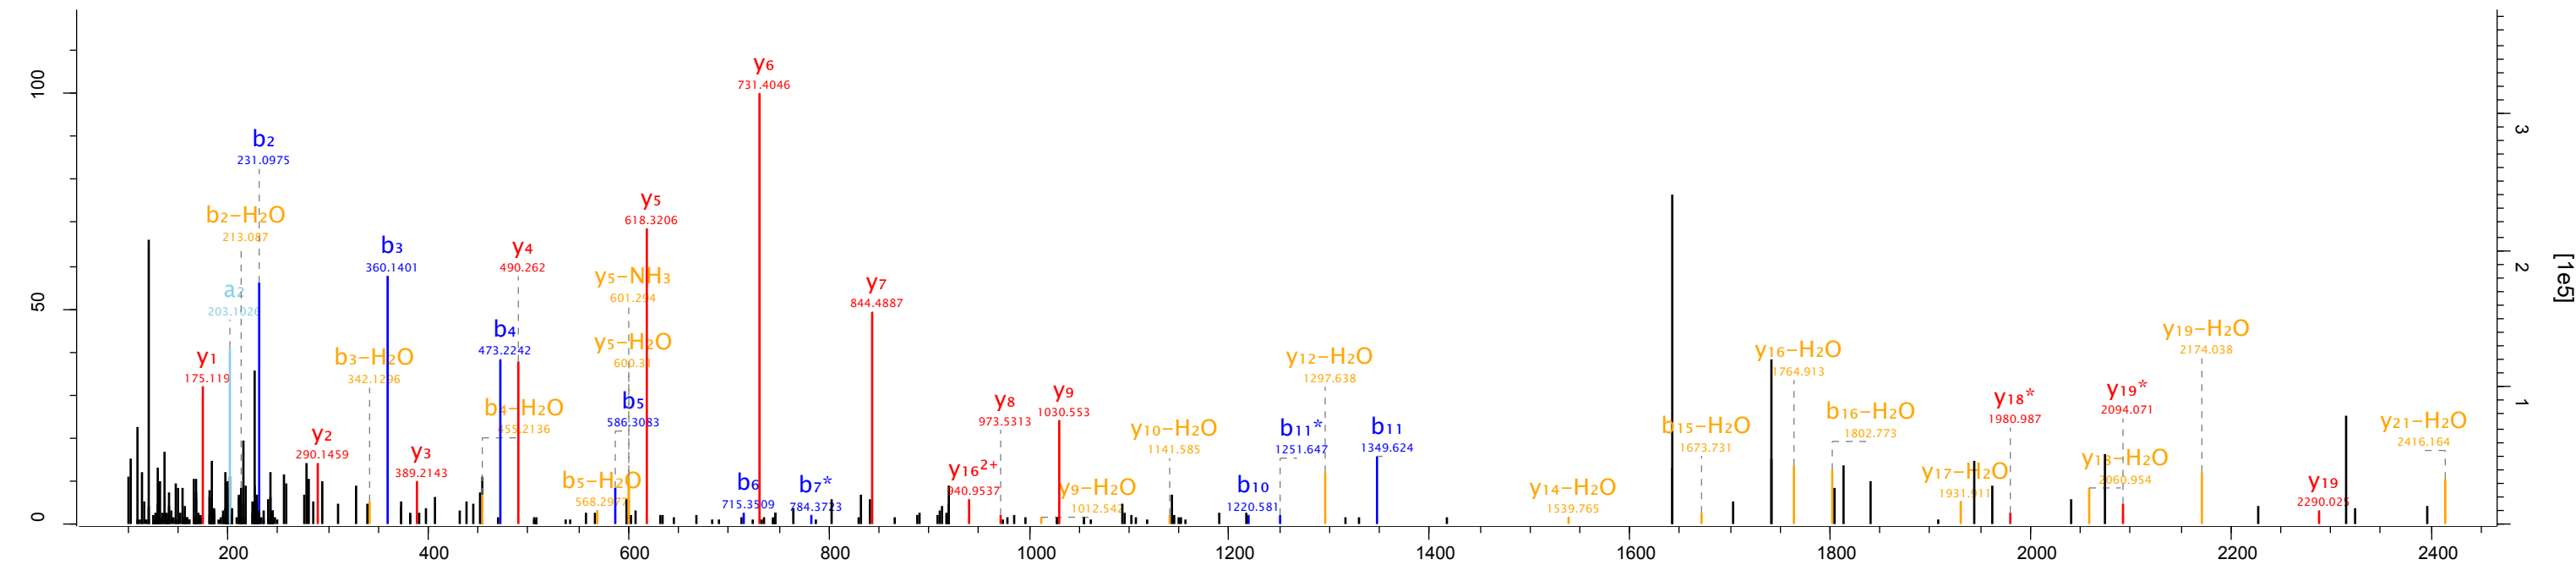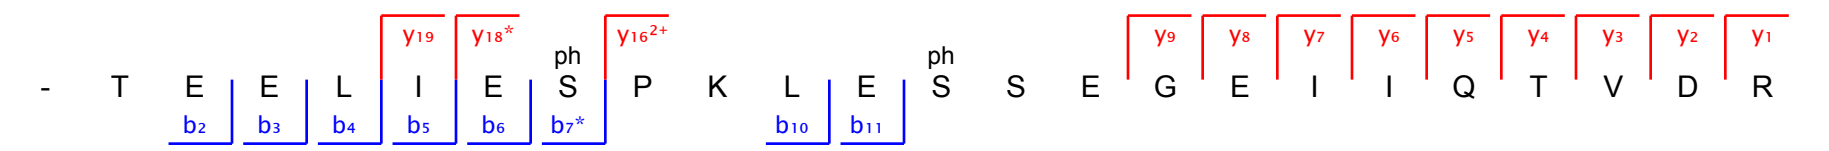

Raw file: 20150812\_A375SR\_Phospho\_BR1\_04  
 Scan: 23944 Method: FTMS; HCD Score: 218.62 m/z: 893.94 Gene names: LSM14A

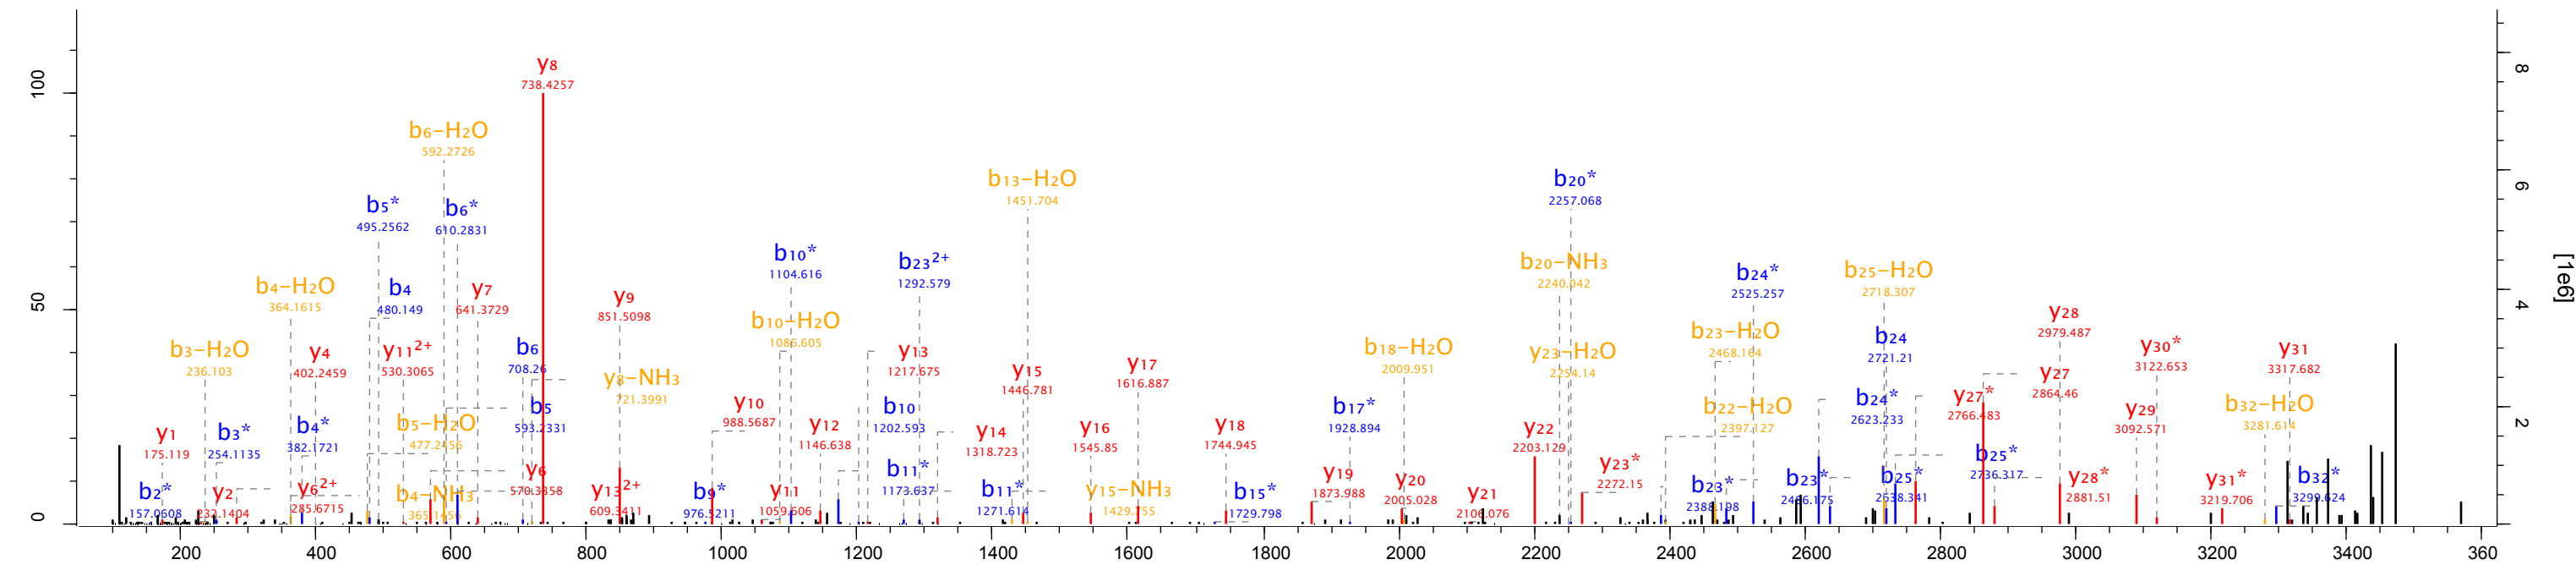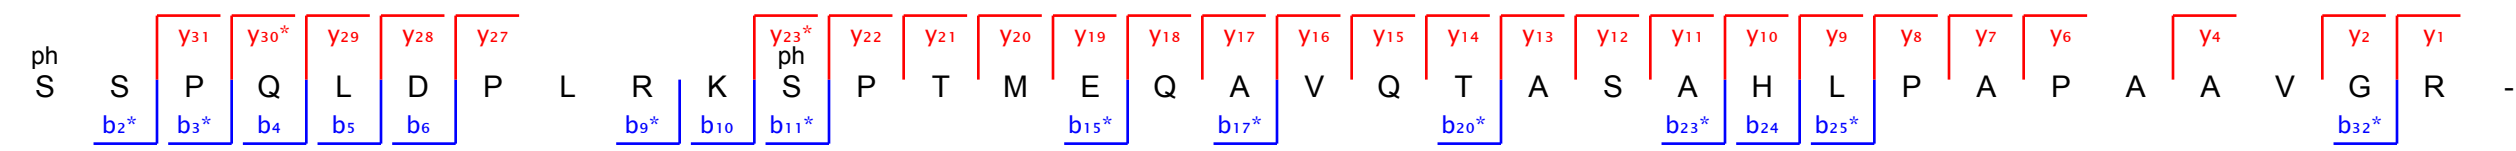

Raw file  
20150812\_A375SR\_Phospho\_BR1\_04

Scan 24124 Method FTMS; HCD Score 180.8 m/z 936.44 Gene names ACTG1;POTEE;ACTC1;ACTA1;ACTA2;ACTG2;ACTBL2;ACTB;POTEF;POTEKP

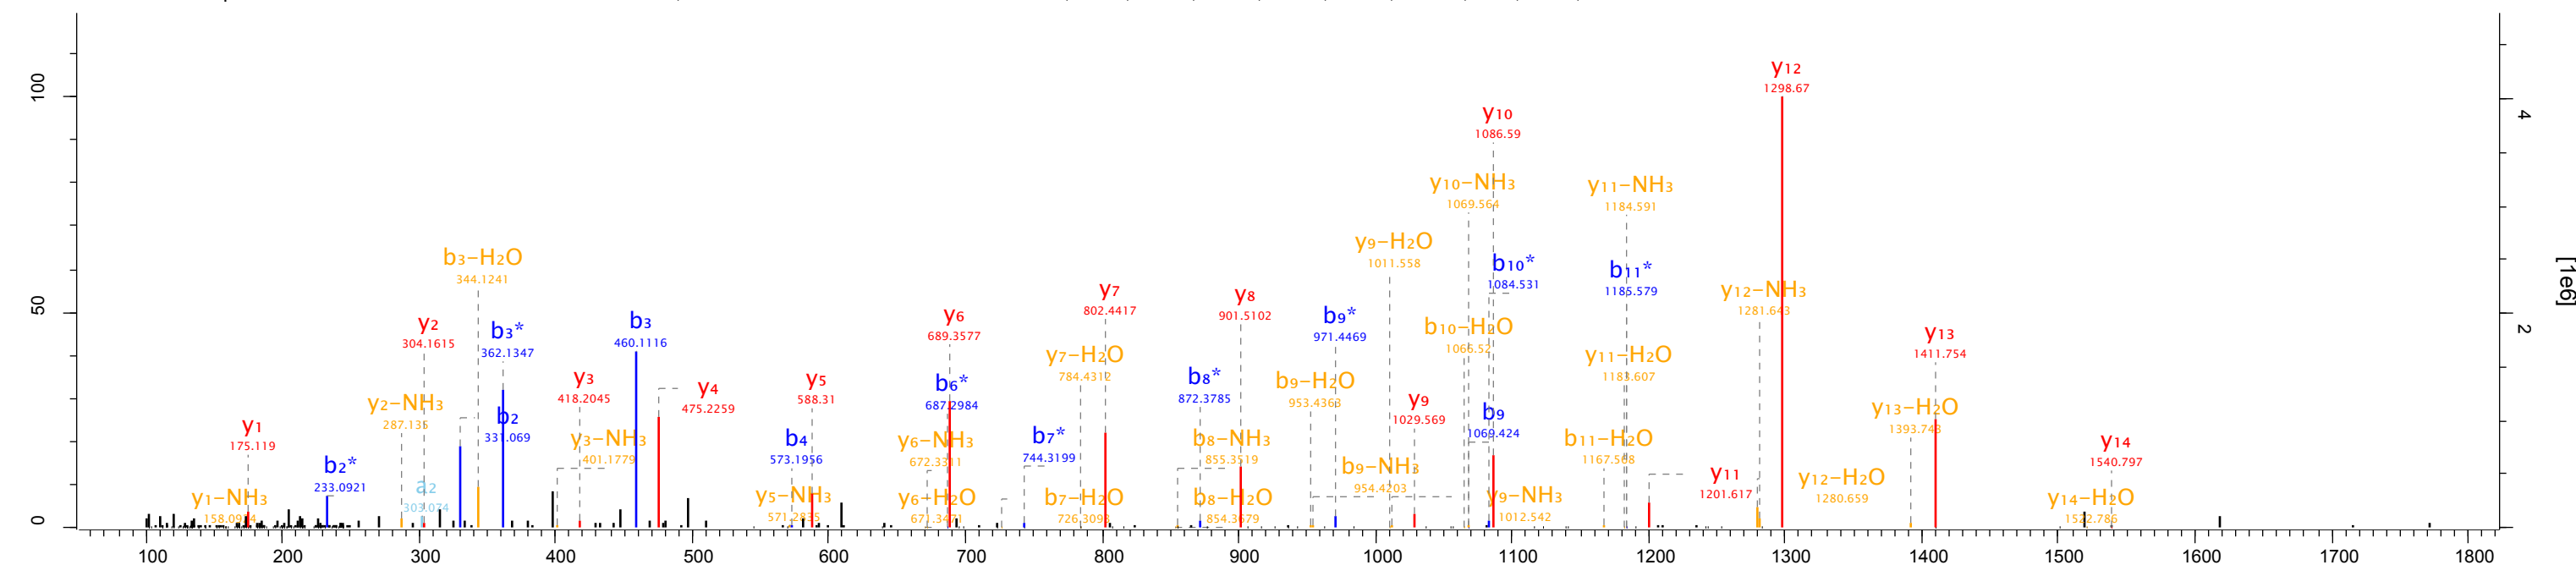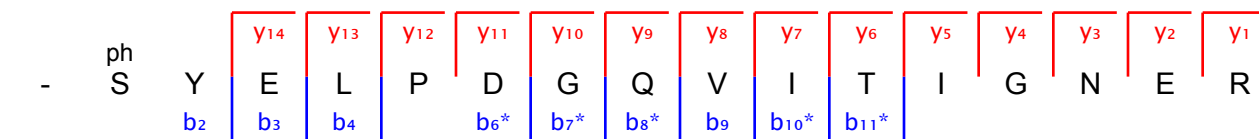



Raw file 20150812\_A375SR\_Phospho\_BR1\_04 Scan 24434 Method FTMS; HCD Score 173.96 m/z 947.11 Gene names ETV6

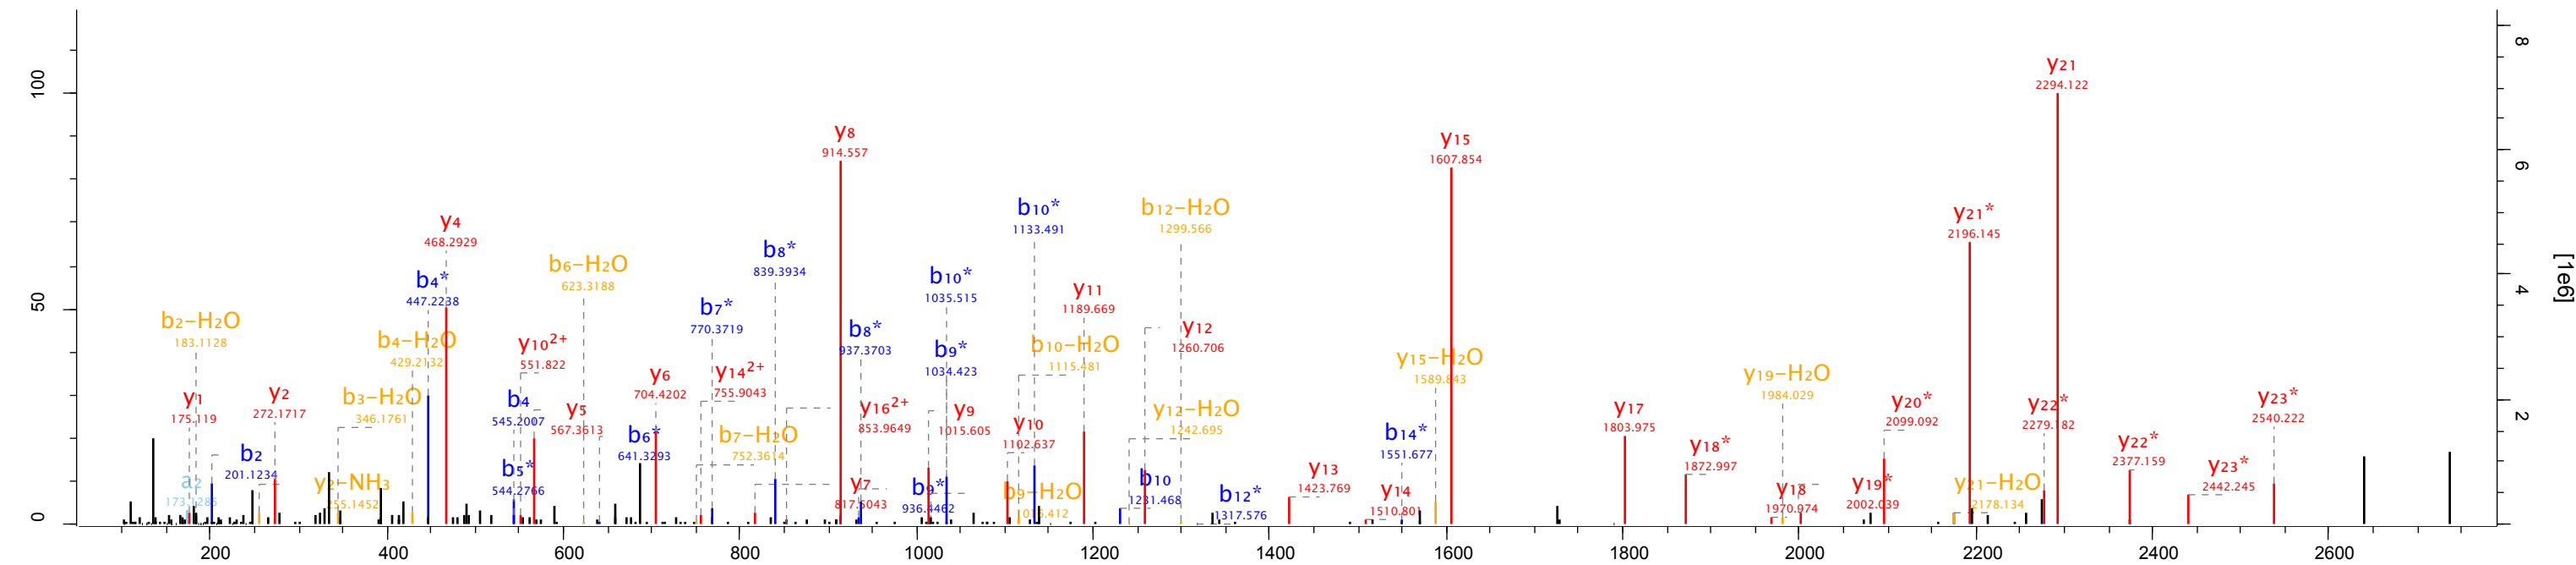

- I S Y T P P E S P V P S Y A S S T P L H V P V P R -

Fragmentation mapping below the sequence:

- Y23\* (S)
- Y22\* ph (T)
- Y21 (P)
- Y20\* (P)
- Y19\* (E)
- Y18 ph (S)
- Y17 (P)
- Y162+ (V)
- Y15 (P)
- Y14 (S)
- Y13 (Y)
- Y12 (A)
- Y11 (S)
- Y10 (S)
- Y9 (T)
- Y8 (P)
- Y7 (L)
- Y6 (H)
- Y5 (V)
- Y4 (P)
- Y2 (P)
- Y1 (R)

Fragmentation mapping below the sequence (b ions):

- b2 (S)
- b4 (T)
- b5\* (P)
- b6\* (P)
- b7\* (E)
- b8\* (S)
- b9\* (P)
- b10 (V)
- b12\* (S)
- b14\* (A)

Raw file: 20150812\_A375SR\_Phospho\_BR1\_04  
 Scan: 24624 Method: FTMS; HCD Score: 214.28 m/z: 778.4 Gene names: JUN

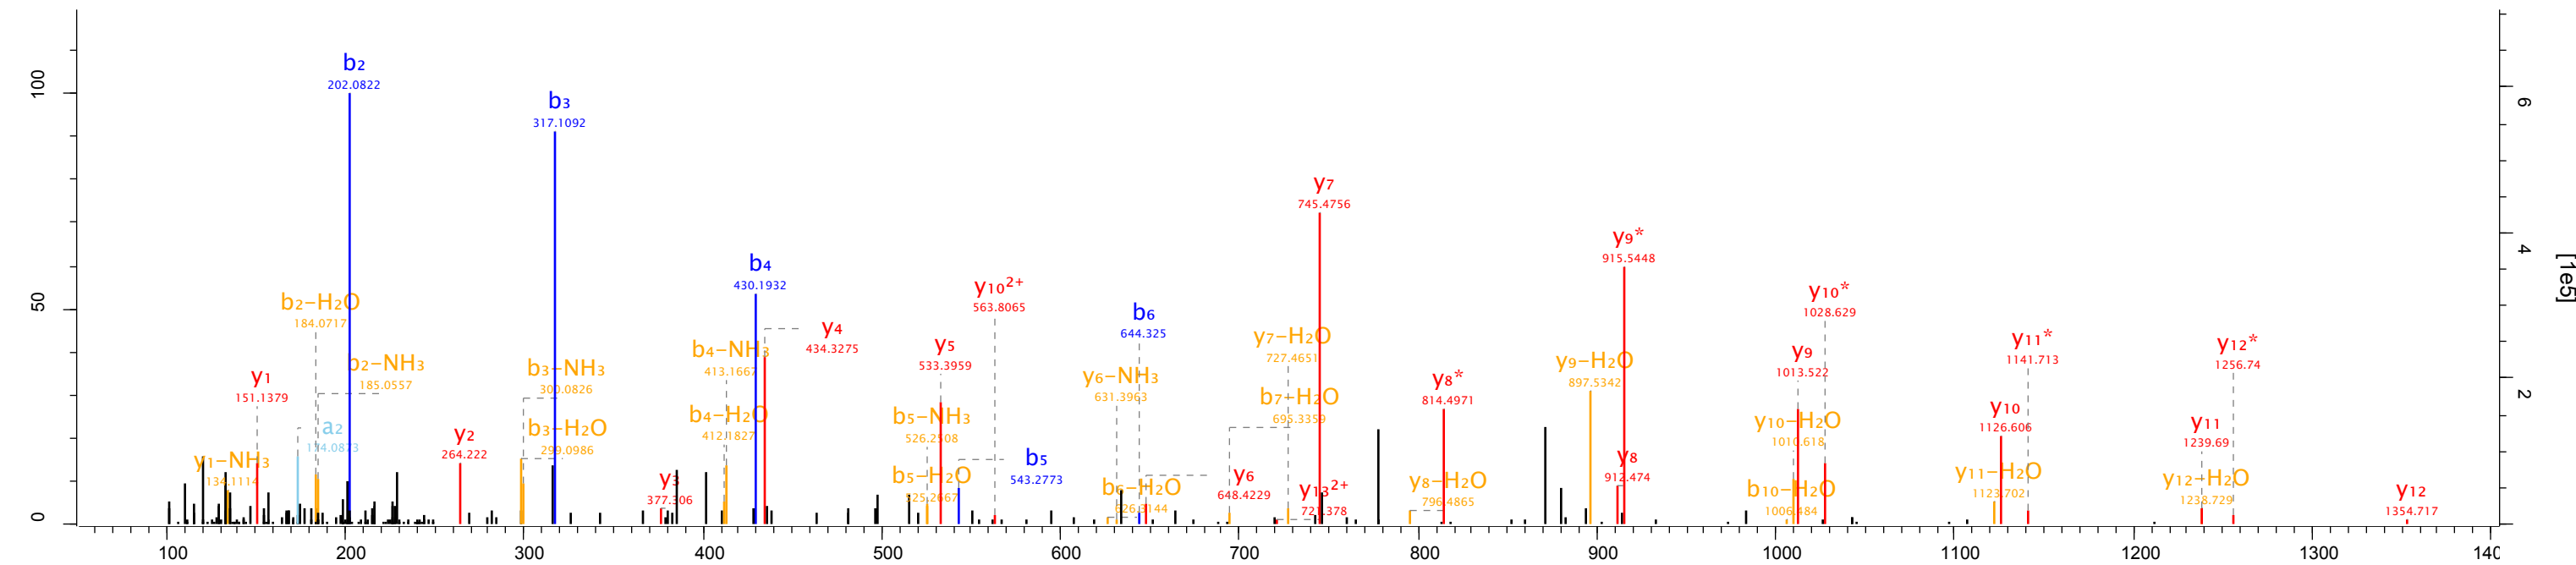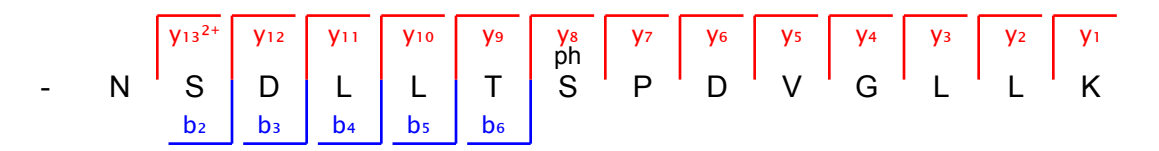

Raw file 20150812\_A375SR\_Phospho\_BR1\_04 Scan 25384 Method FTMS; HCD Score 273.87 m/z 1121.5 Gene names PA2G4

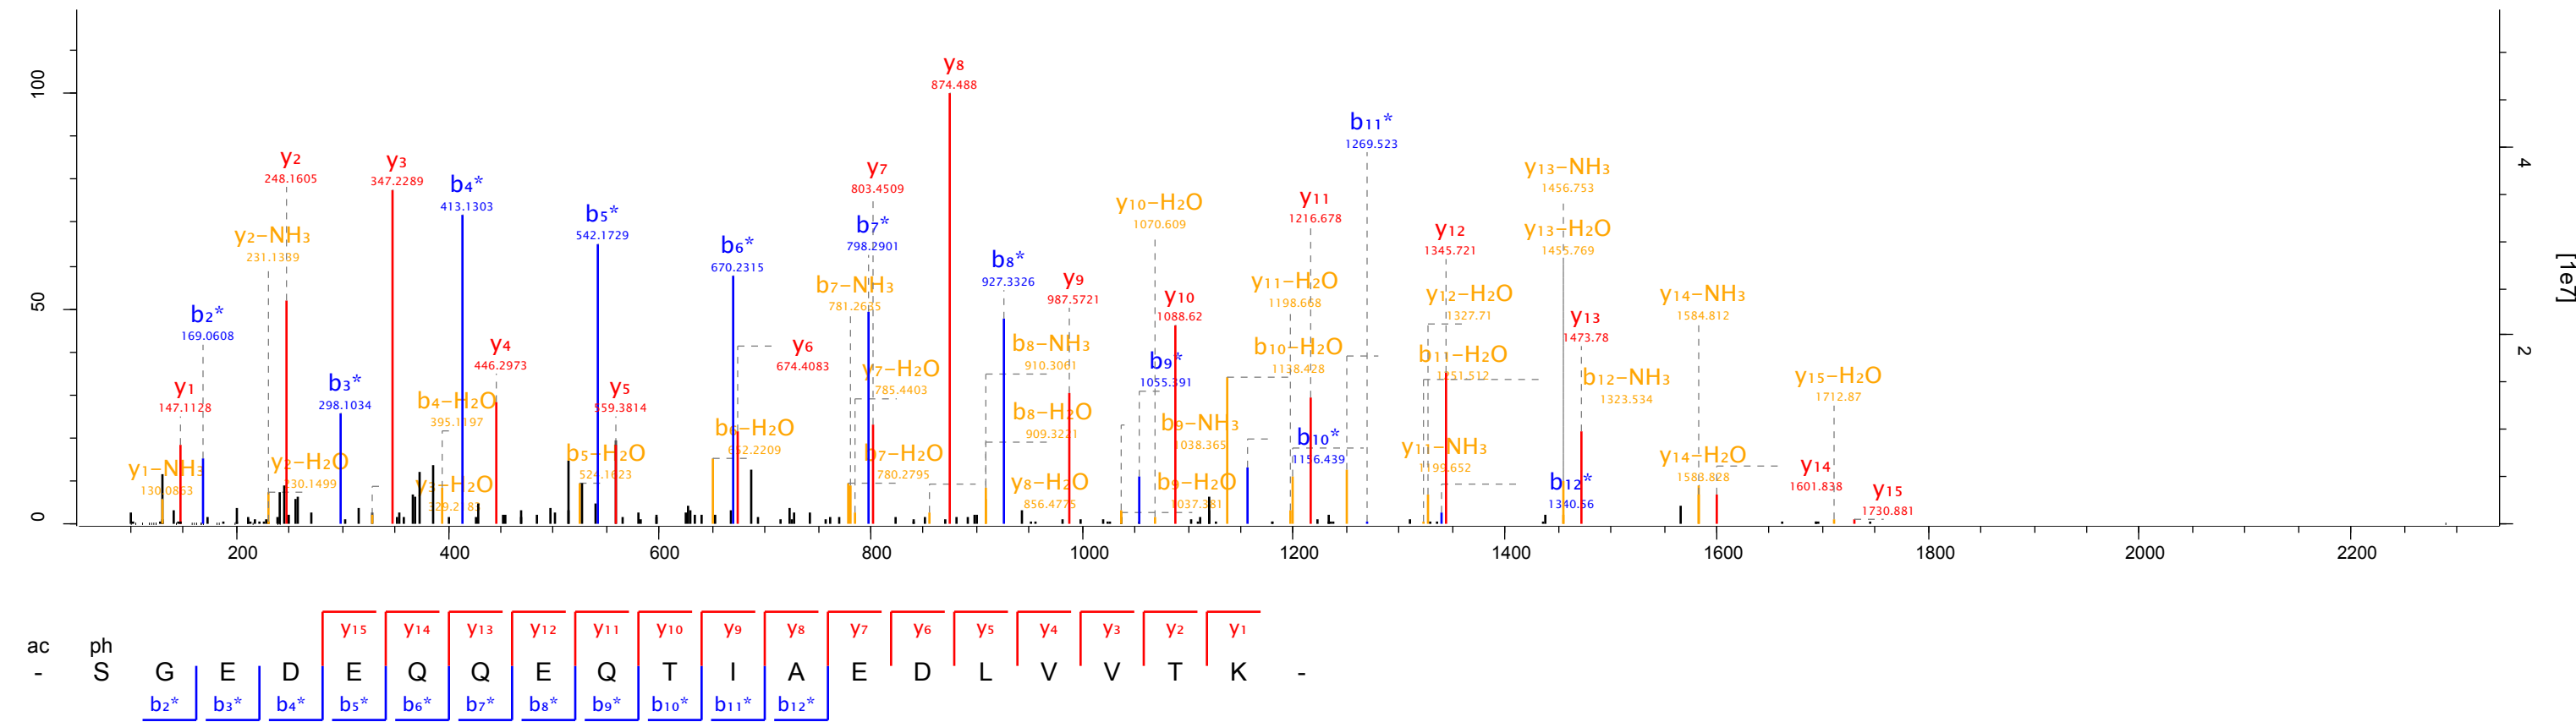

Raw file: 20150812\_A375SR\_Phospho\_BR1\_04  
 Scan: 2594 Method: FTMS; HCD Score: 92.54 m/z: 440.2 Gene names: ZFP91

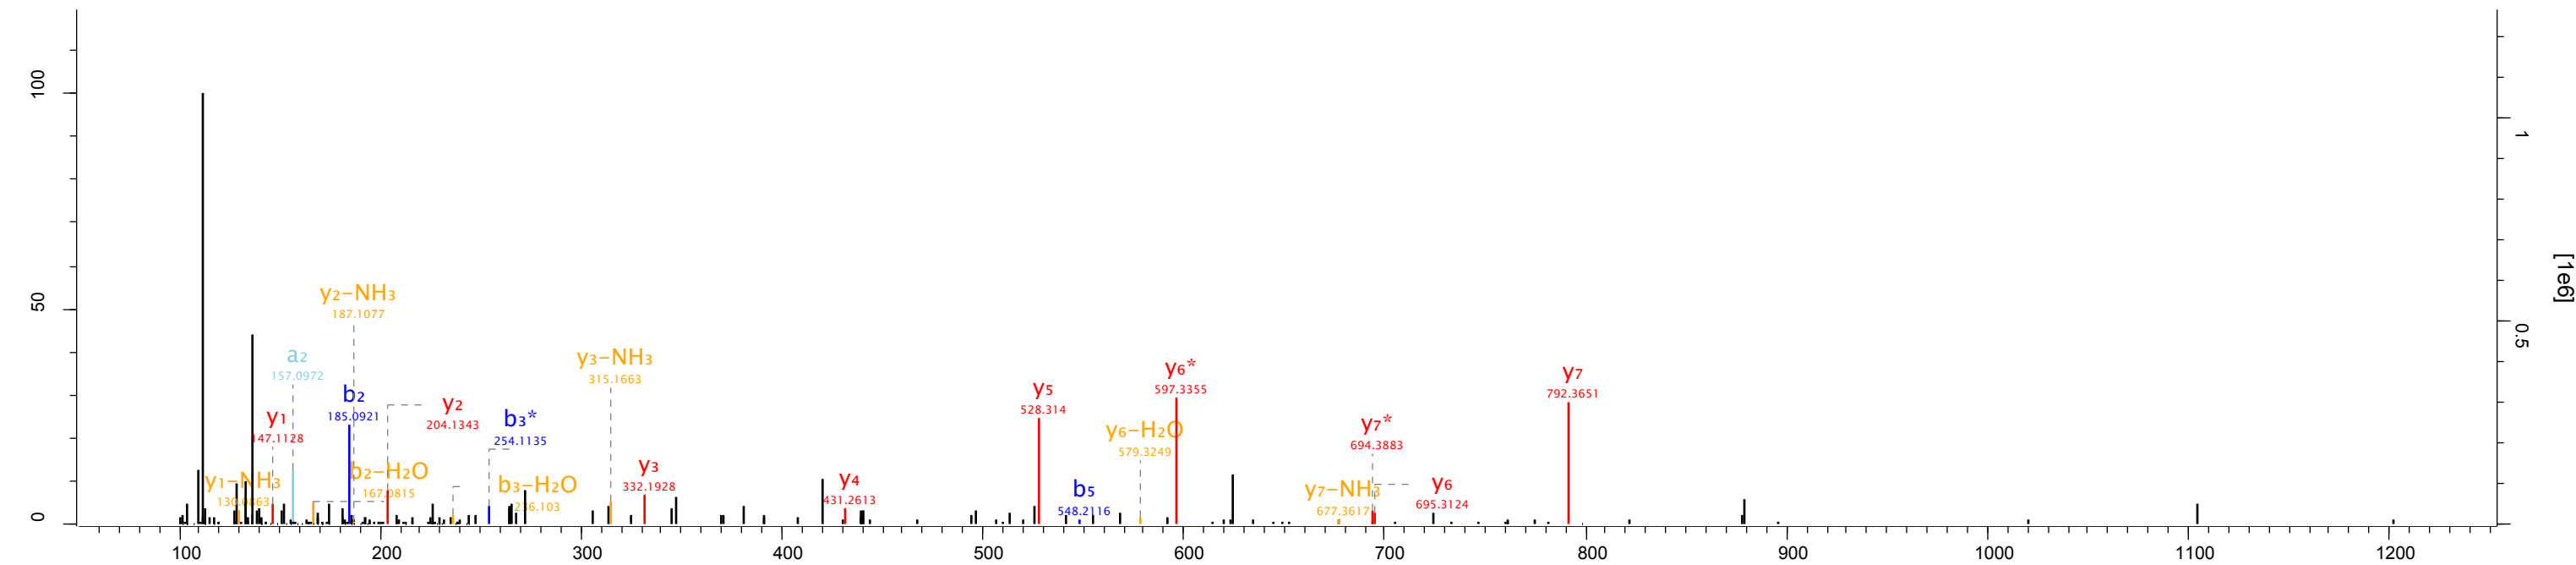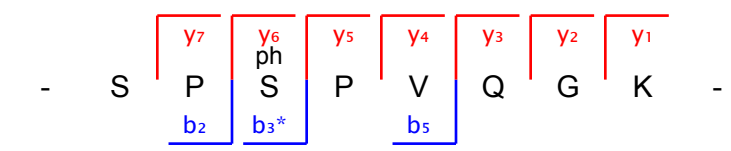

Raw file: 20150812\_A375SR\_Phospho\_BR1\_04  
 Scan: 26304 Method: FTMS; HCD Score: 77.55 m/z: 924.99 Gene names: GPN1

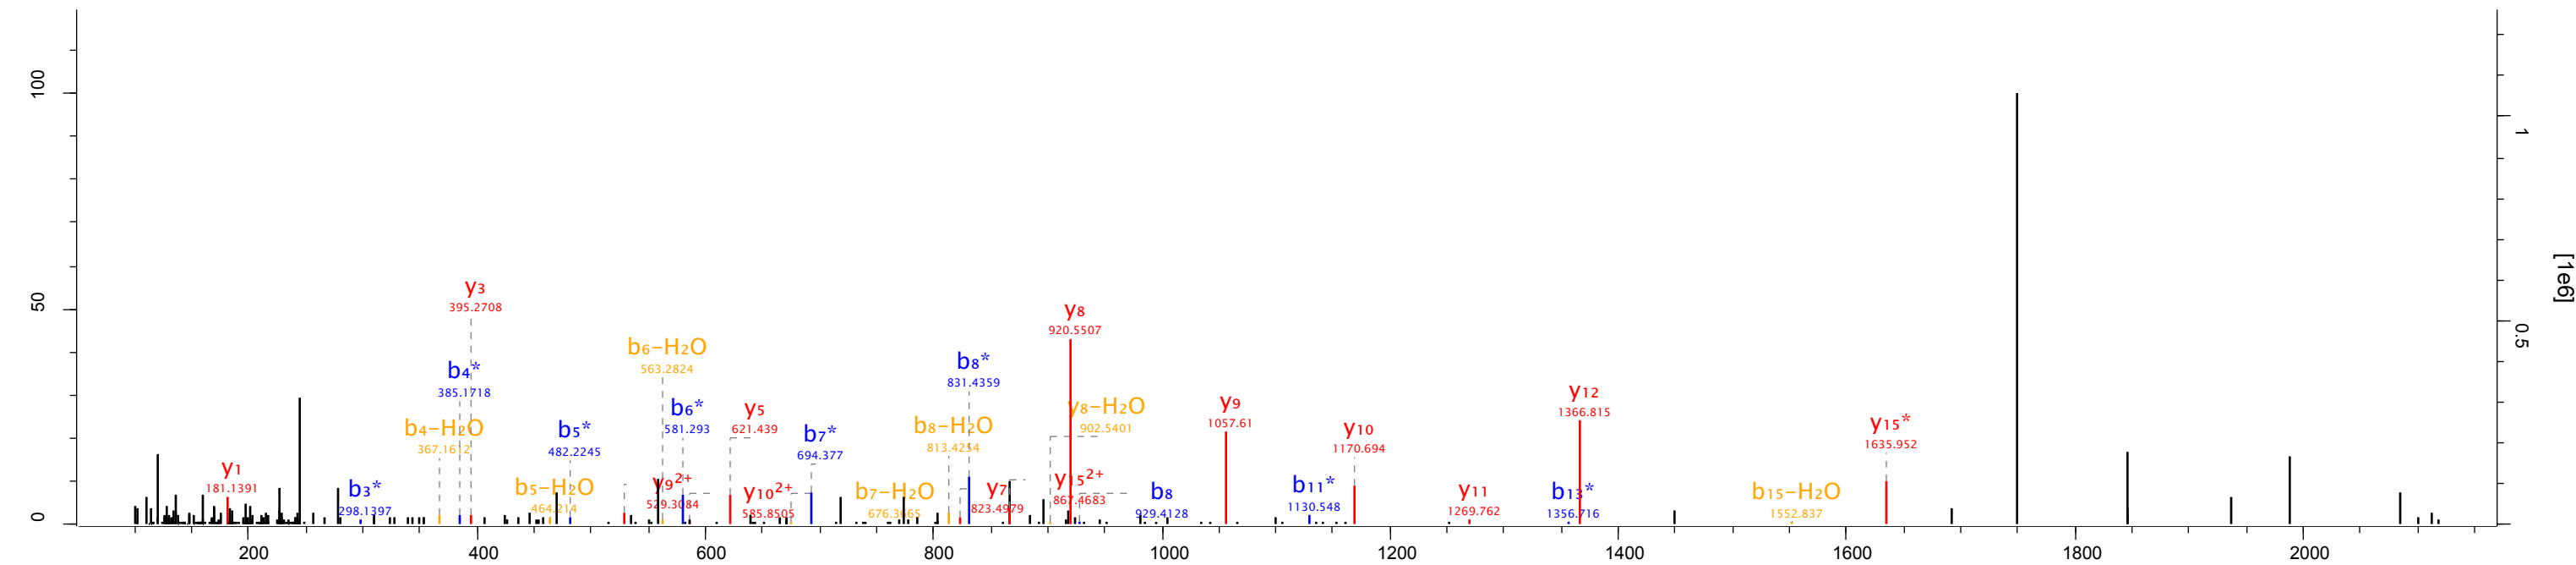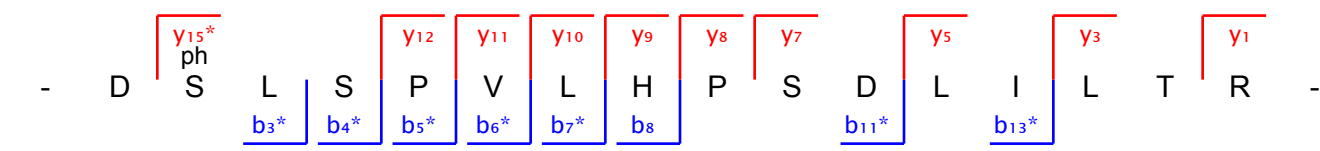

Raw file  
20150812\_A375SR\_Phospho\_BR1\_04

Scan 26344 Method FTMS; HCD Score 87.59 m/z 1196.89 Gene names KMT2D

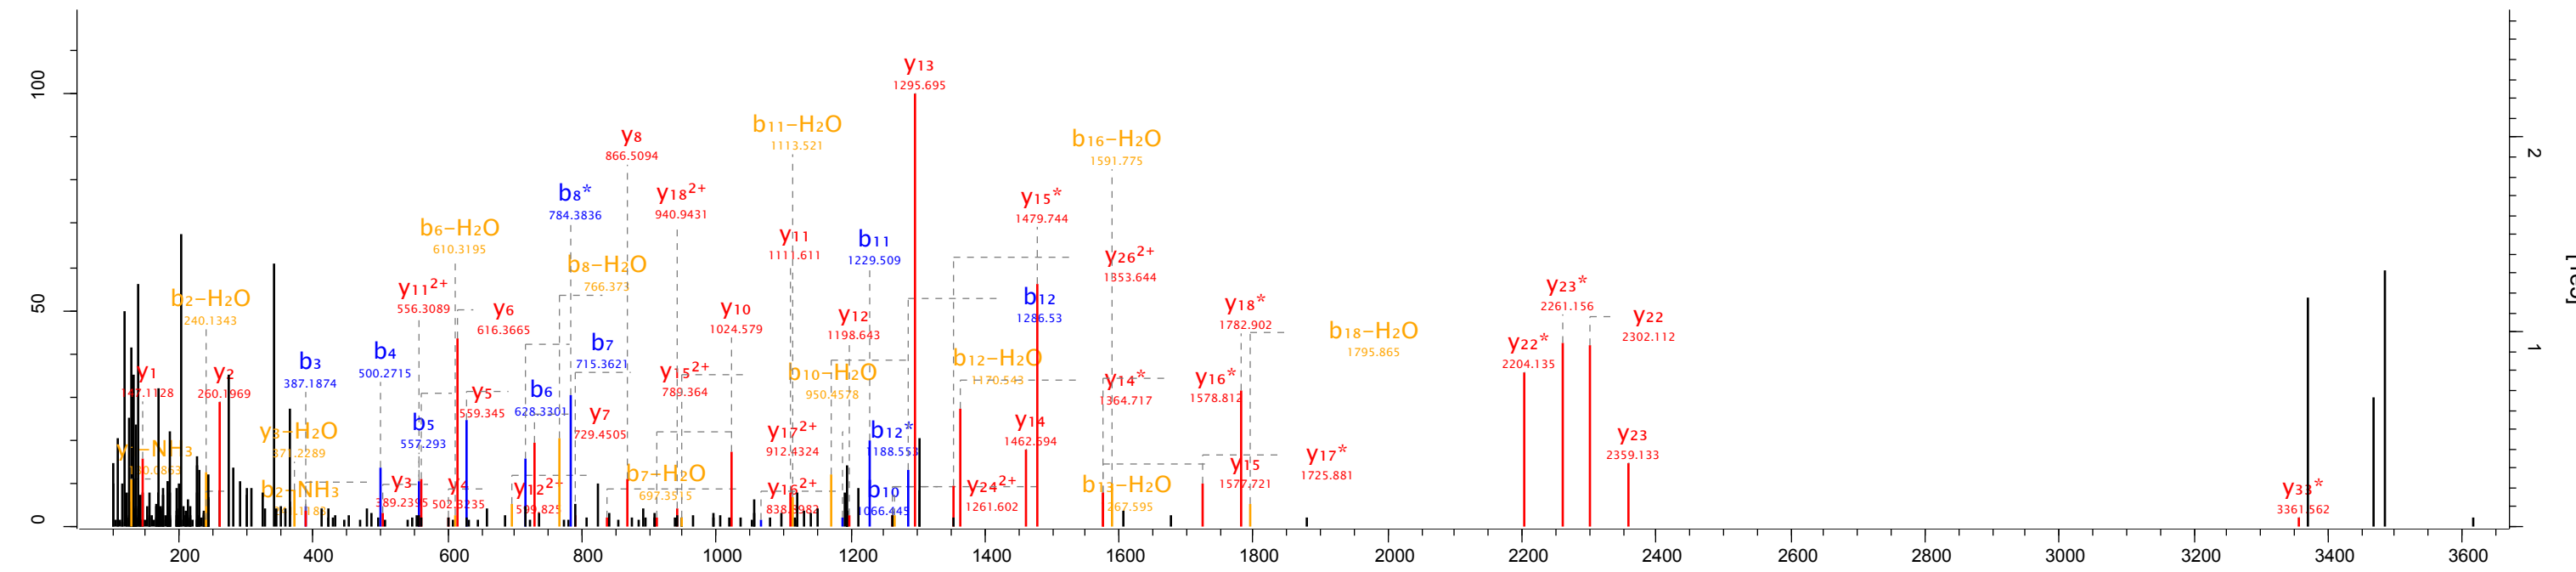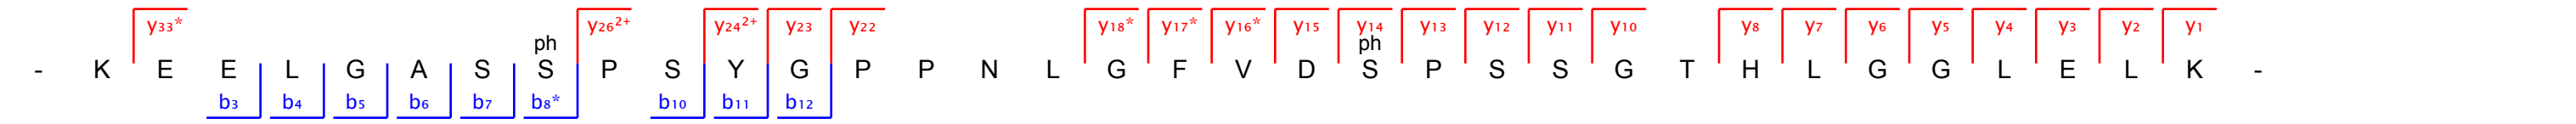



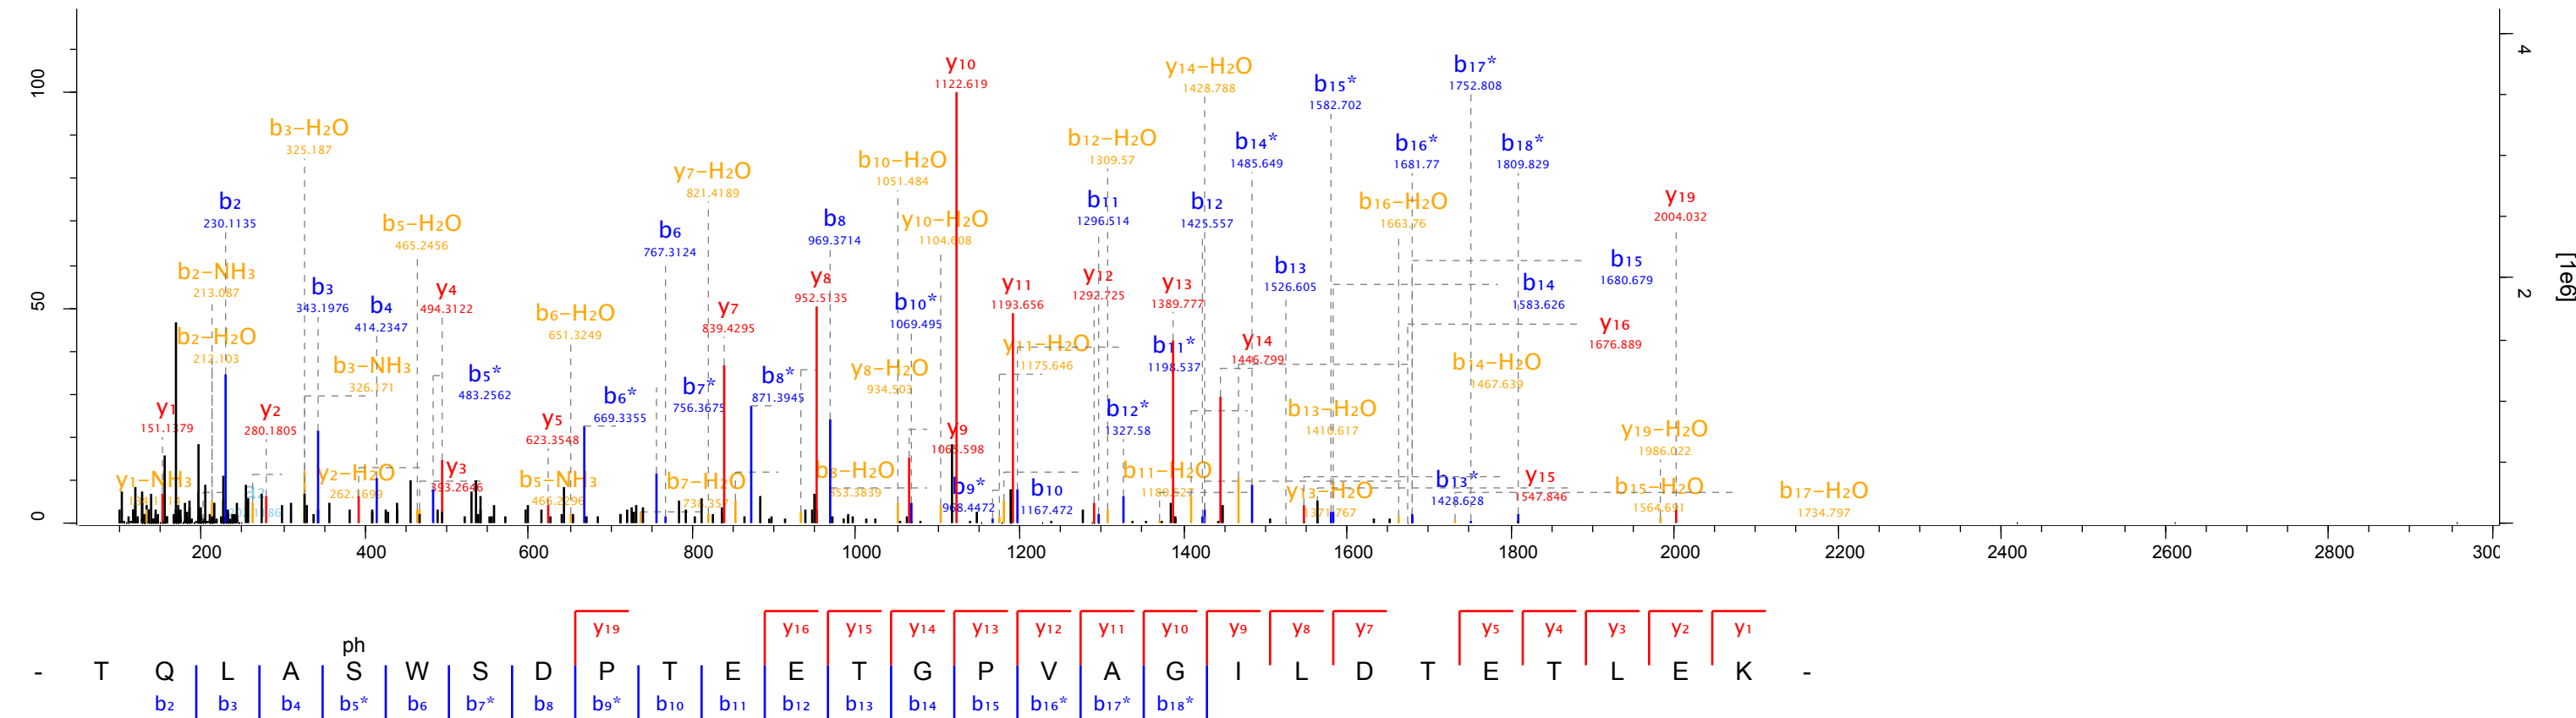



Raw file Scan Method Score m/z Gene names  
 20150812\_A375SR\_Phospho\_BR1\_04 2914 FTMS; HCD 229.38 804.87 LRRFIP1

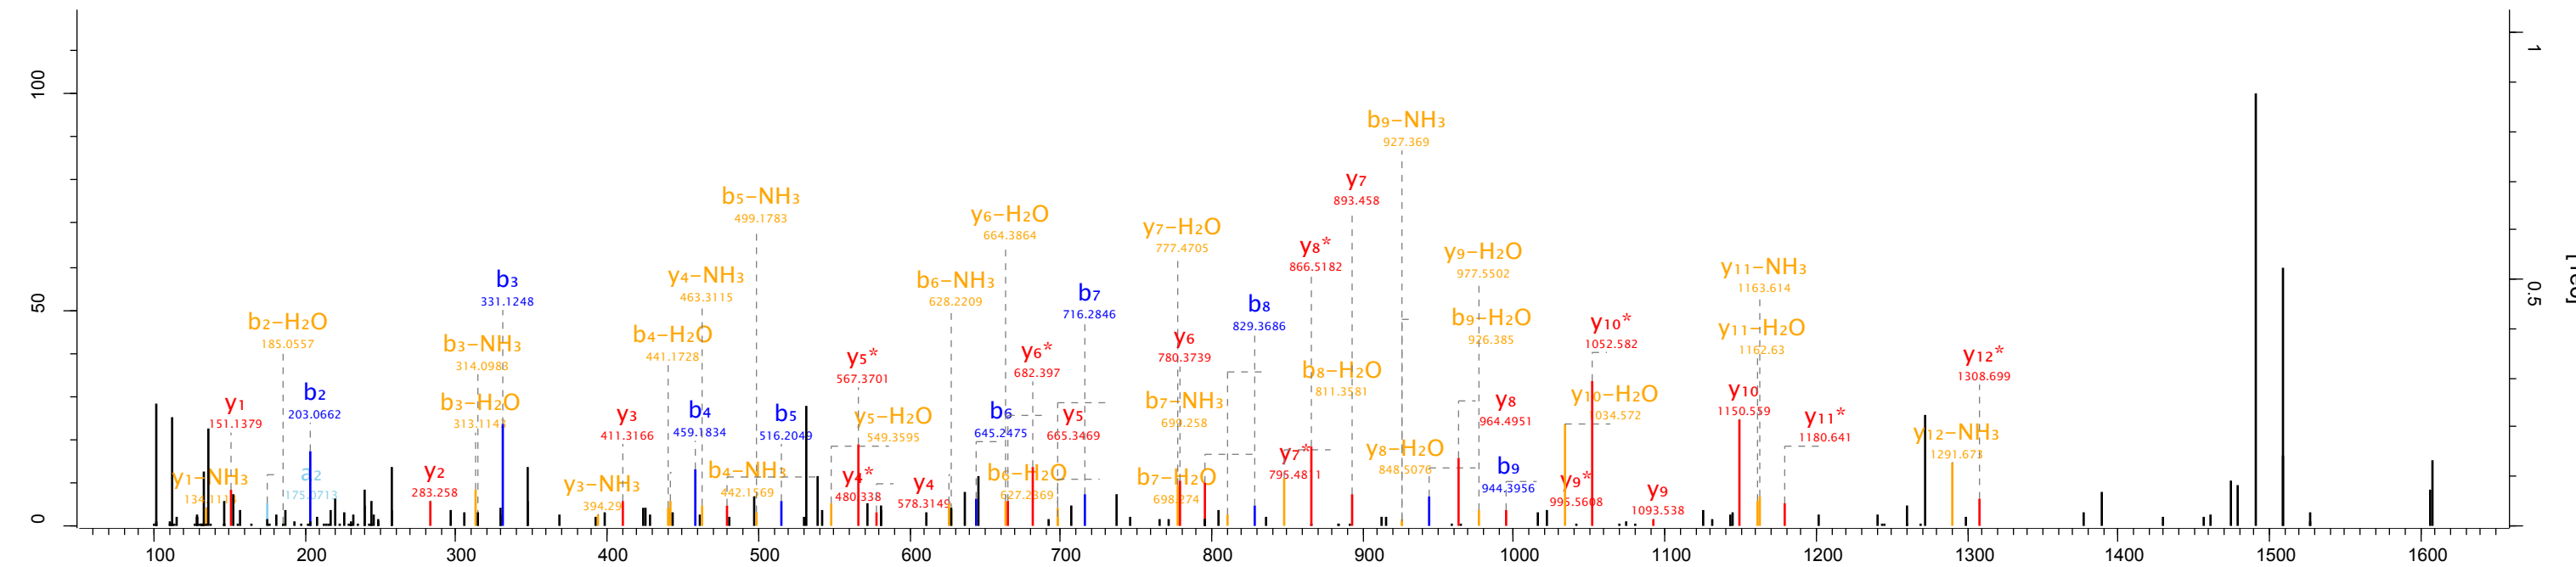

- S D Q Q G E A L D S S Q K K -  
 b<sub>2</sub> b<sub>3</sub> b<sub>4</sub> b<sub>5</sub> b<sub>6</sub> b<sub>7</sub> b<sub>8</sub> b<sub>9</sub>  
 y<sub>12</sub>\* y<sub>11</sub>\* y<sub>10</sub> y<sub>9</sub> y<sub>8</sub> y<sub>7</sub> y<sub>6</sub> y<sub>5</sub> y<sub>4</sub> y<sub>3</sub> y<sub>2</sub> y<sub>1</sub>  
 ph

Raw file: 20150812\_A375SR\_Phospho\_BR1\_04  
 Scan: 2994 Method: FTMS; HCD Score: 84.95 m/z: 621.31 Gene names: SRRM1

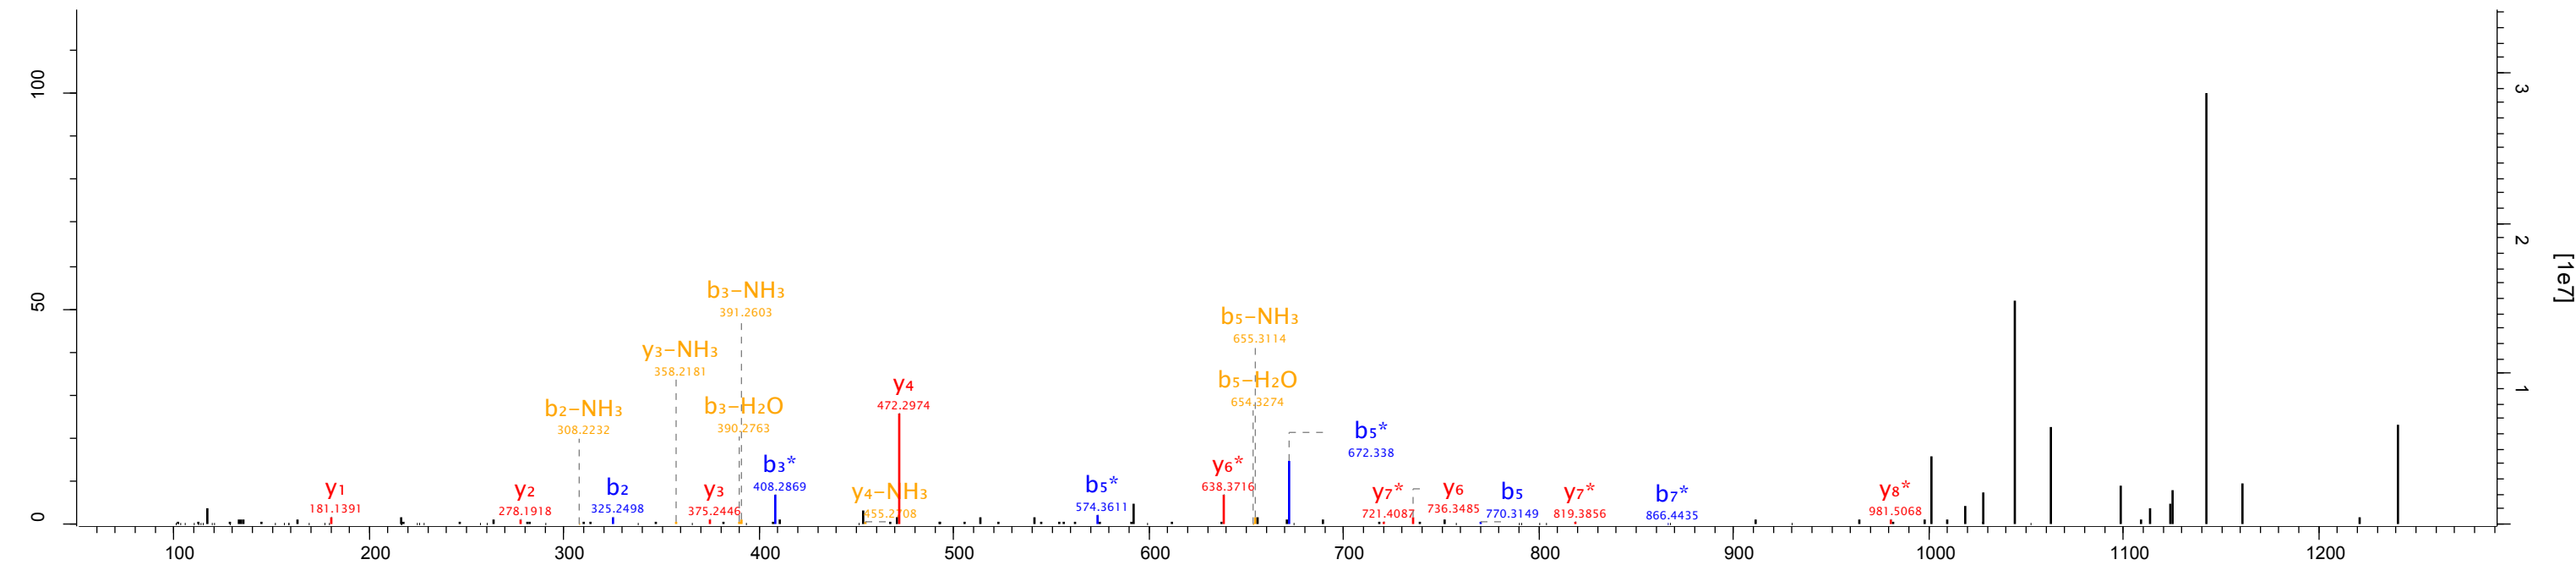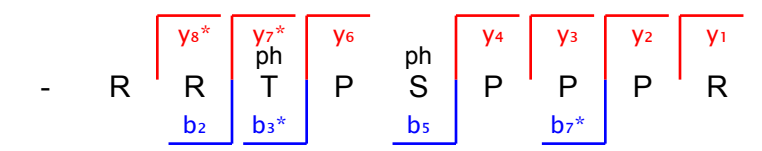

Raw file: 20150812\_A375SR\_Phospho\_BR1\_04  
 Scan: 3114 Method: FTMS; HCD Score: 47.23 m/z: 582.3 Gene names: TANC2

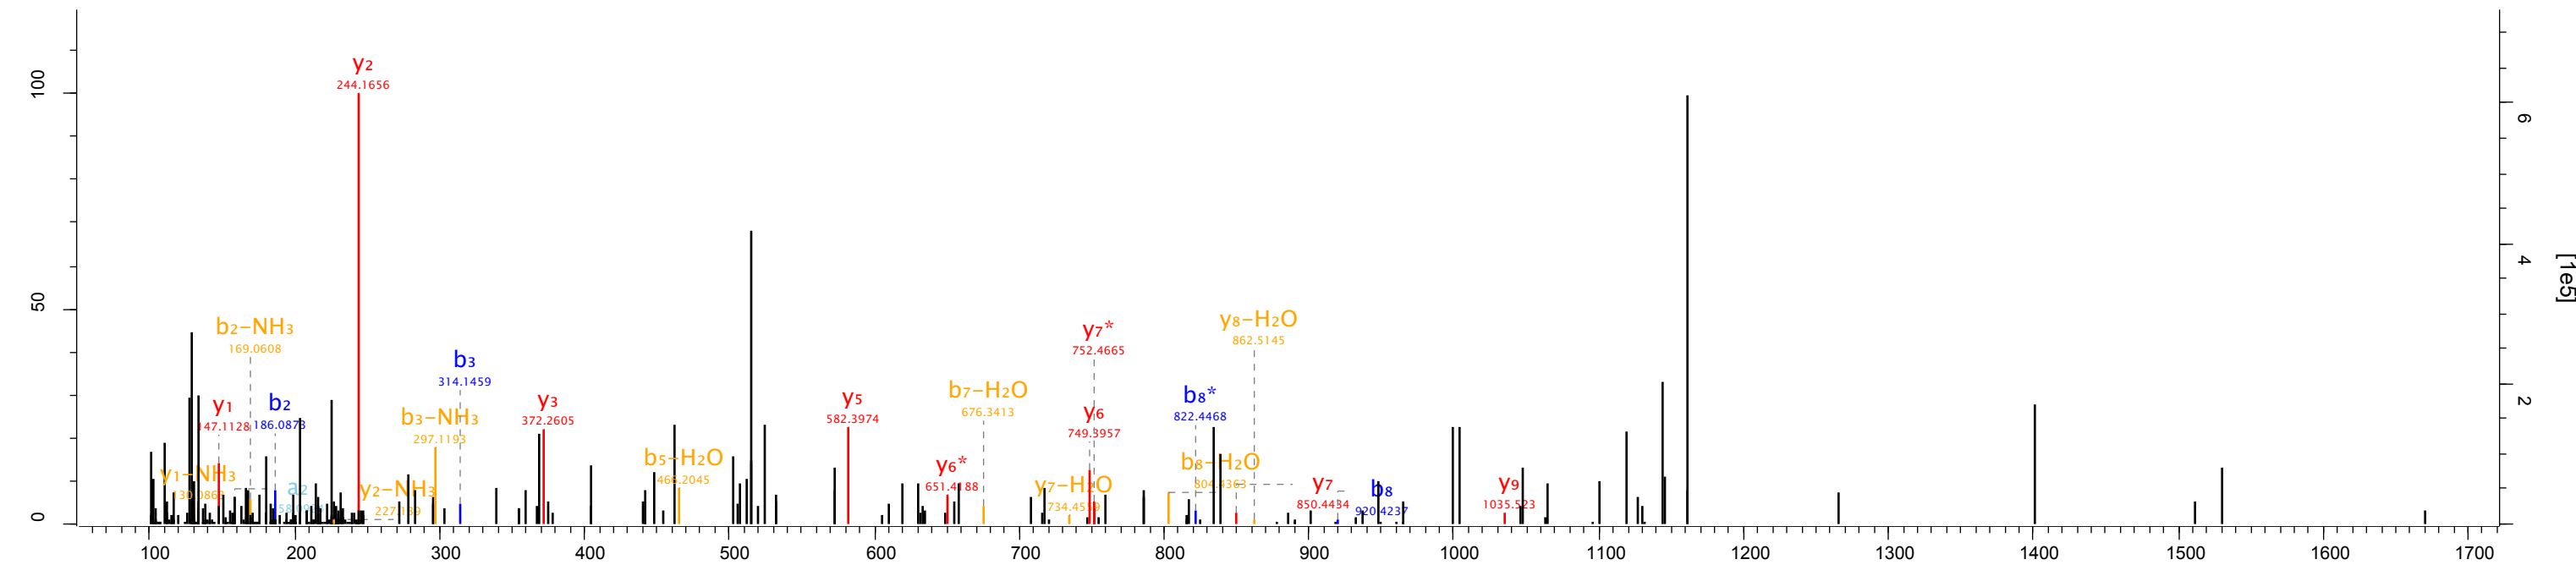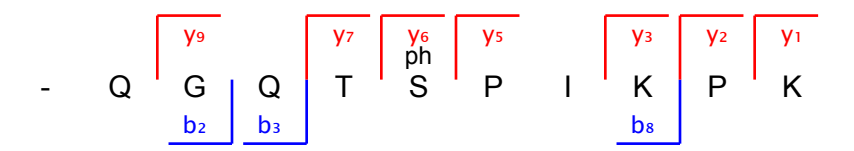

Raw file: 20150812\_A375SR\_Phospho\_BR1\_04  
 Scan: 3164 Method: FTMS; HCD Score: 46.1 m/z: 609.95 Gene names: AASDHPPT

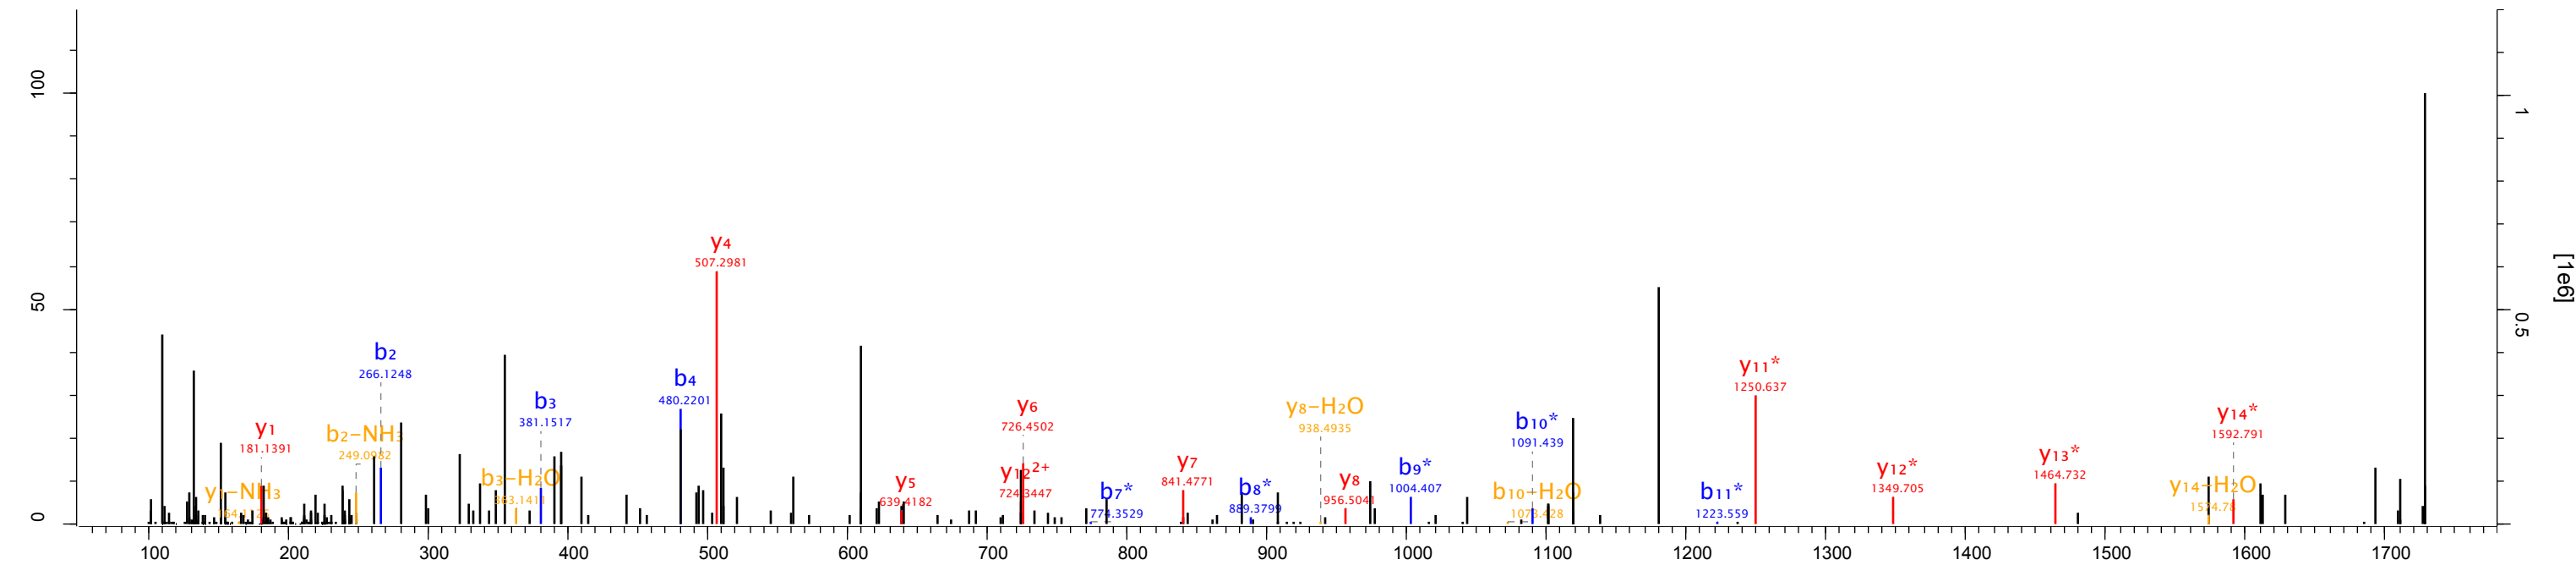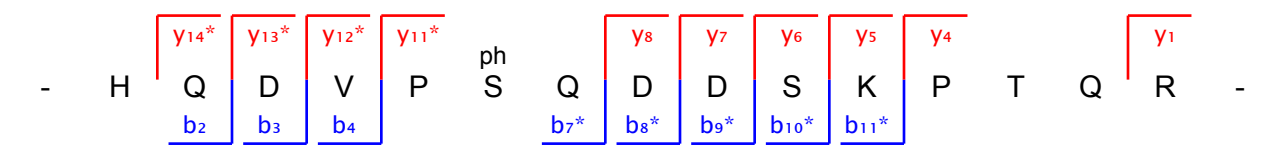

Raw file  
20150812\_A375SR\_Phospho\_BR1\_04

Scan 3194 Method FTMS; HCD Score 410.51 m/z 1124.44 Gene names SMC3

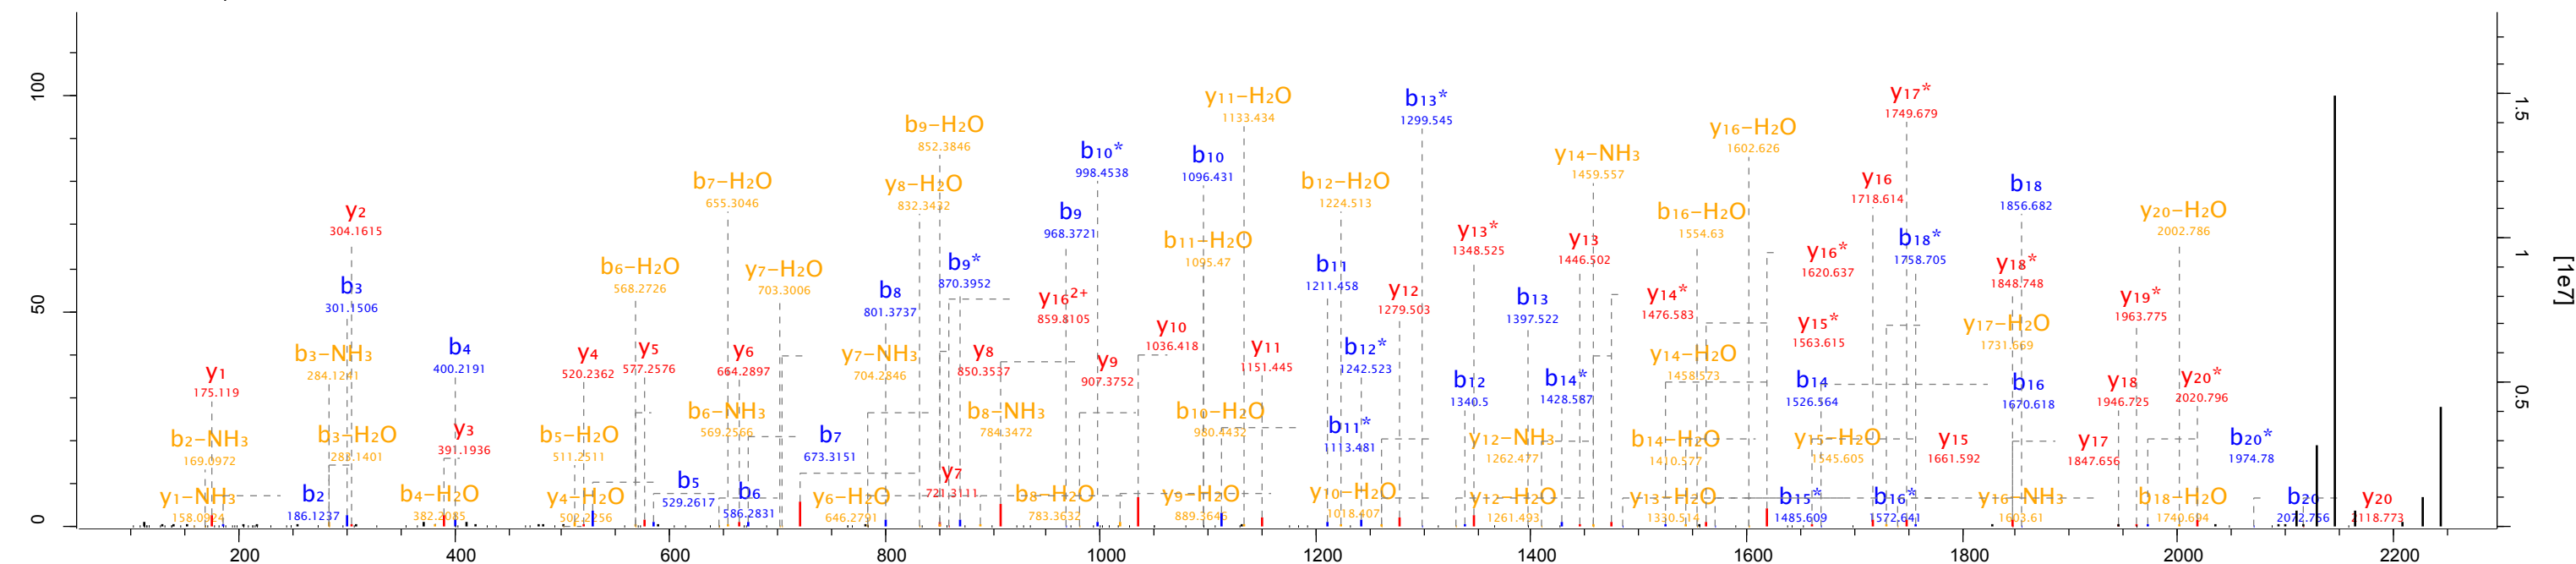

- K G D V E G S Q ph S Q D E G E G S G E S E R -  
b<sub>2</sub> b<sub>3</sub> b<sub>4</sub> b<sub>5</sub> b<sub>6</sub> b<sub>7</sub> b<sub>8</sub> b<sub>9</sub> b<sub>10</sub> b<sub>11</sub> b<sub>12</sub> b<sub>13</sub> b<sub>14</sub> b<sub>15</sub>\* b<sub>16</sub> b<sub>18</sub> b<sub>20</sub>

Raw file: 20150812\_A375SR\_Phospho\_BR1\_04  
 Scan: 3304 Method: FTMS; HCD Score: 109.4 m/z: 762 Gene names: TJP1

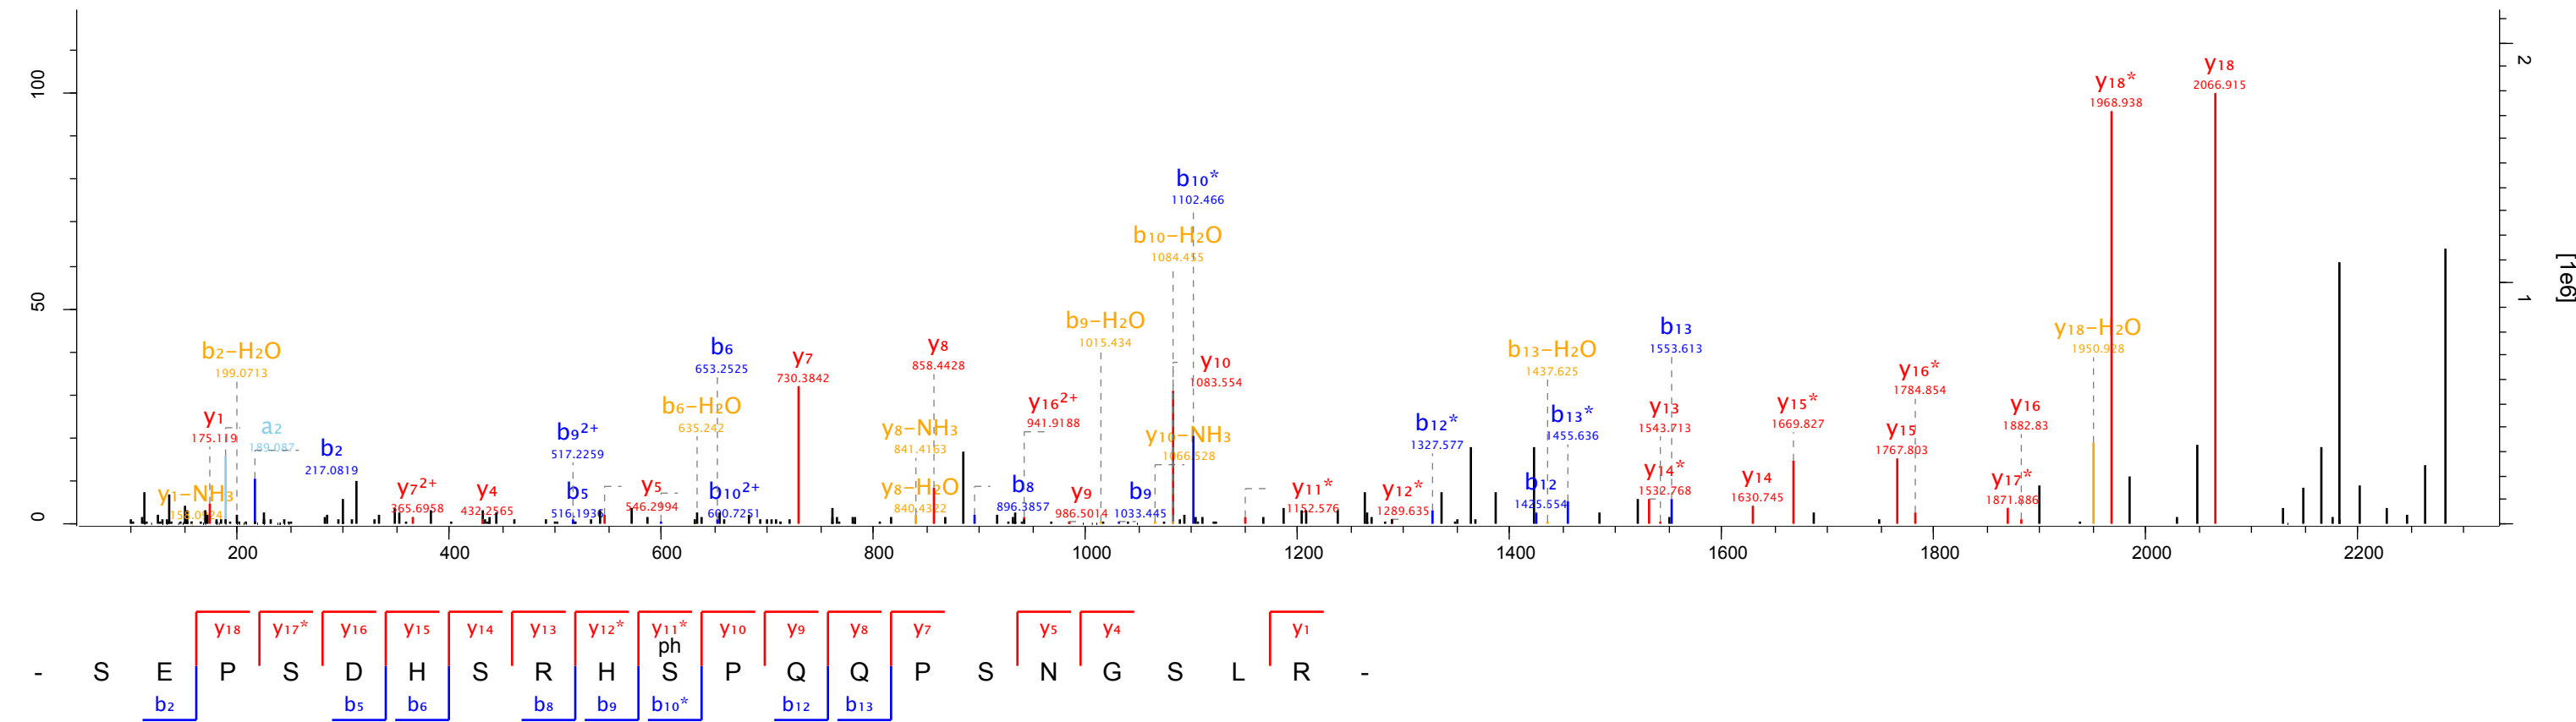



Raw file: 20150812\_A375SR\_Phospho\_BR1\_04  
 Scan: 4164 Method: FTMS; HCD Score: 189.32 m/z: 644.77 Gene names: SORBS2

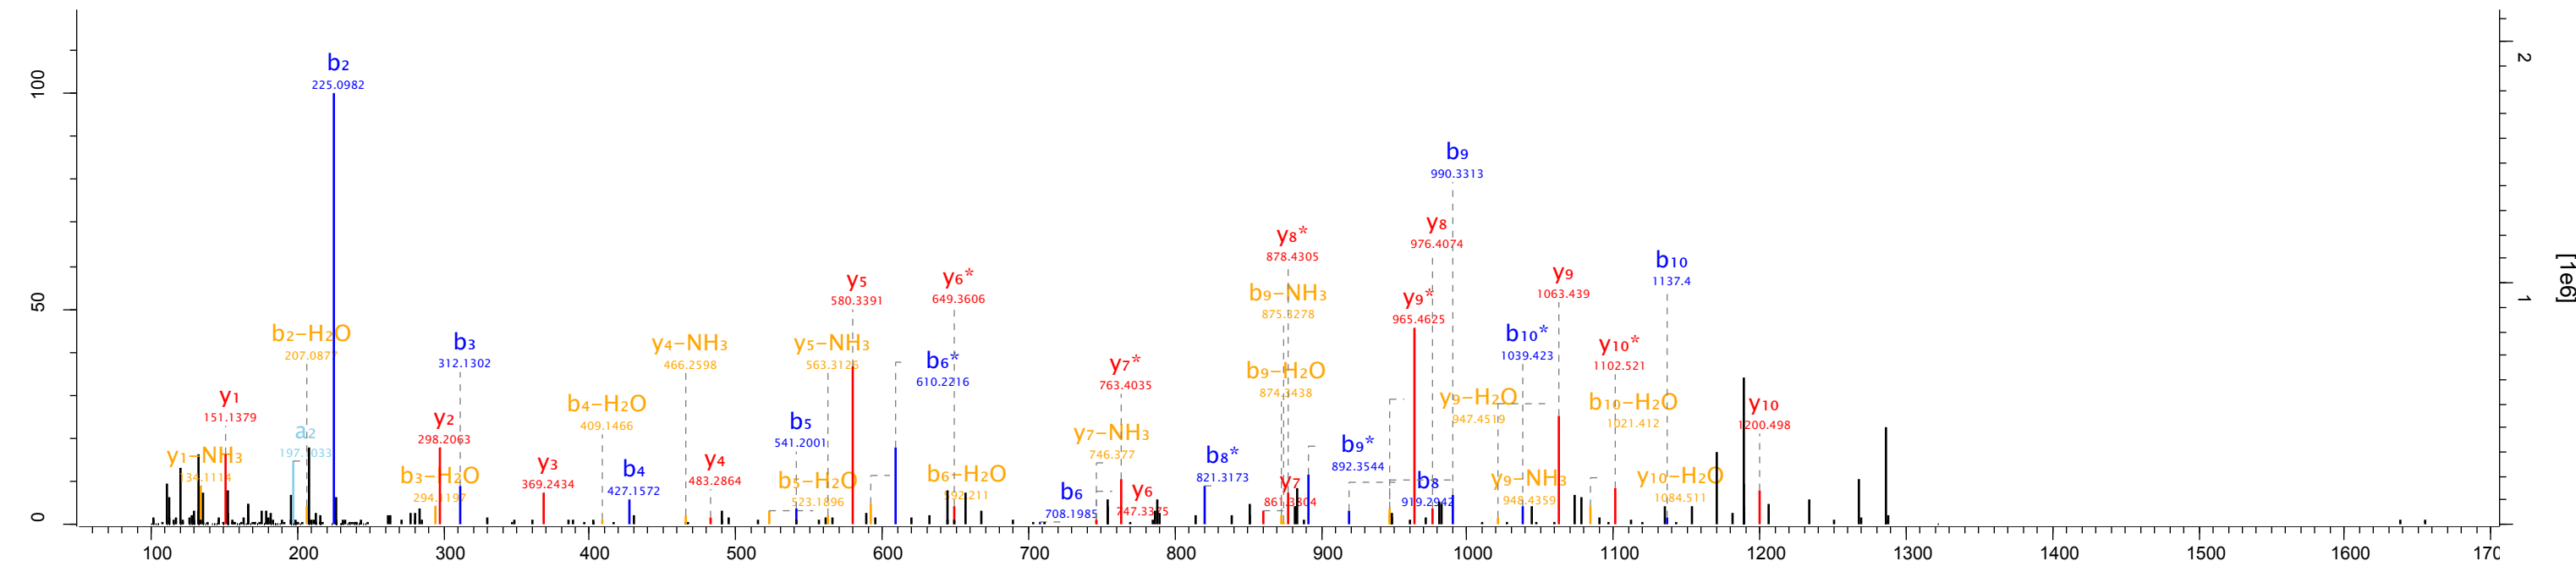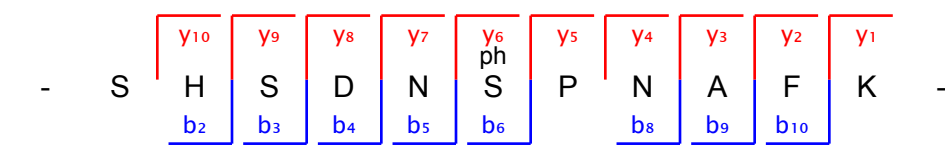



Raw file: 20150812\_A375SR\_Phospho\_BR1\_04  
 Scan: 5314 Method: FTMS; HCD Score: 254.53 m/z: 852.35 Gene names: NASP

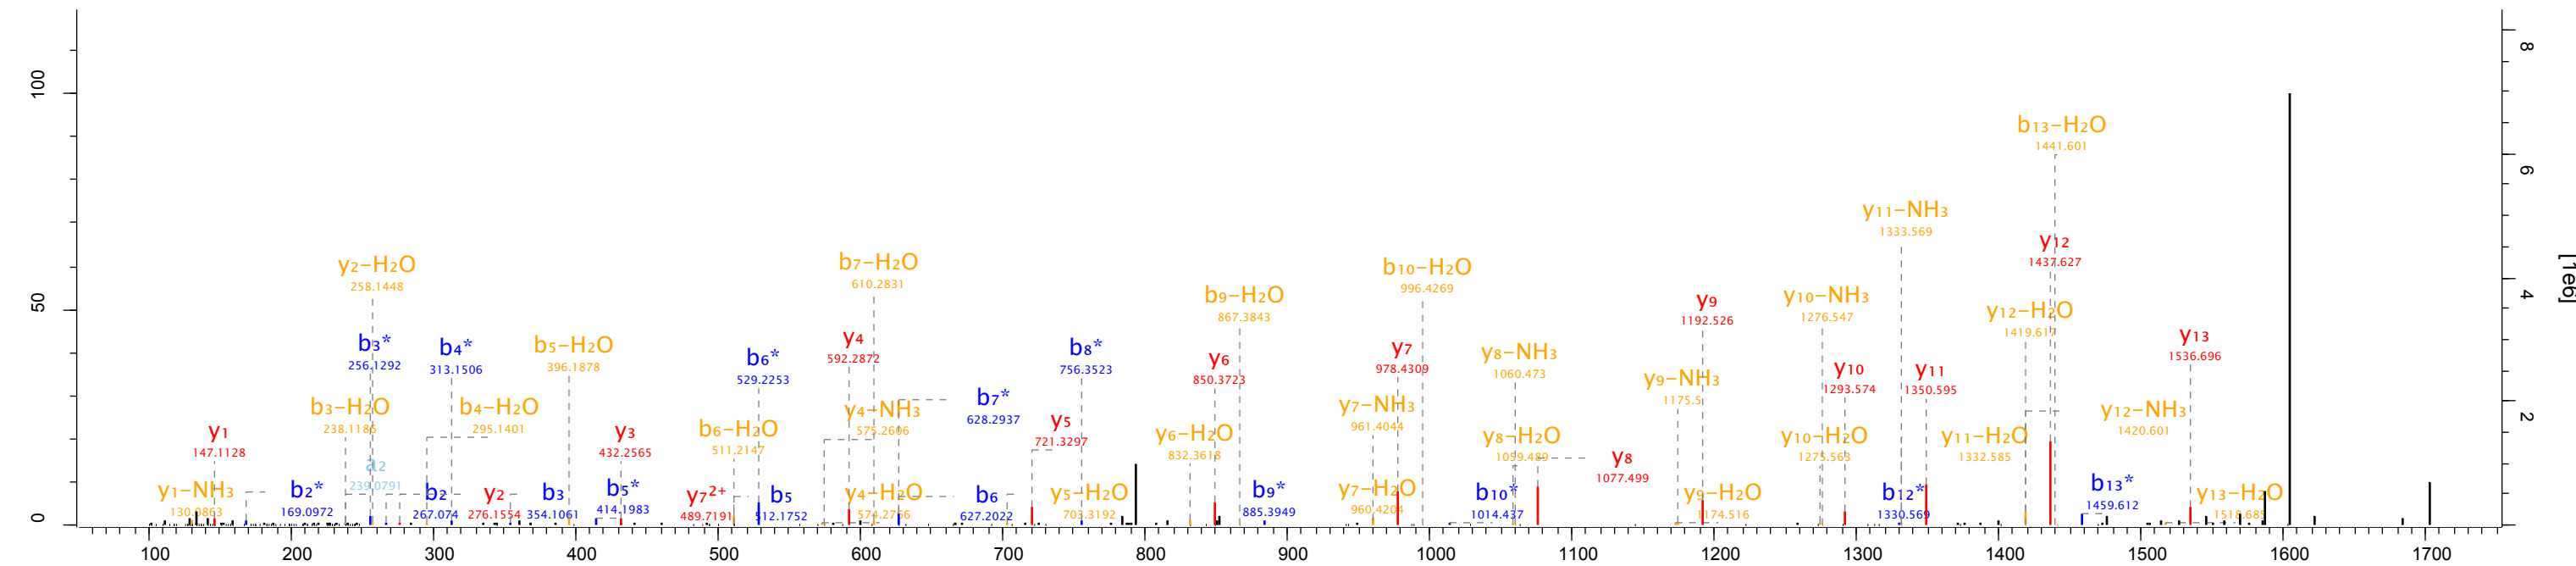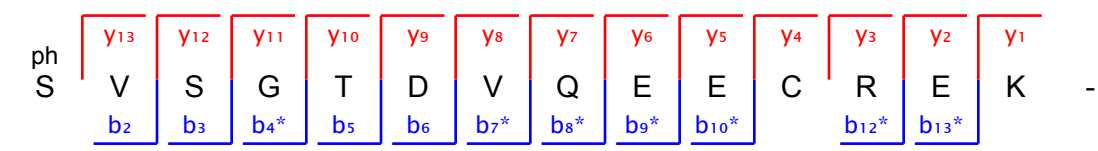

Raw file: 20150812\_A375SR\_Phospho\_BR1\_04  
 Scan: 5594 Method: FTMS; HCD Score: 326.94 m/z: 887.9 Gene names: EDC3

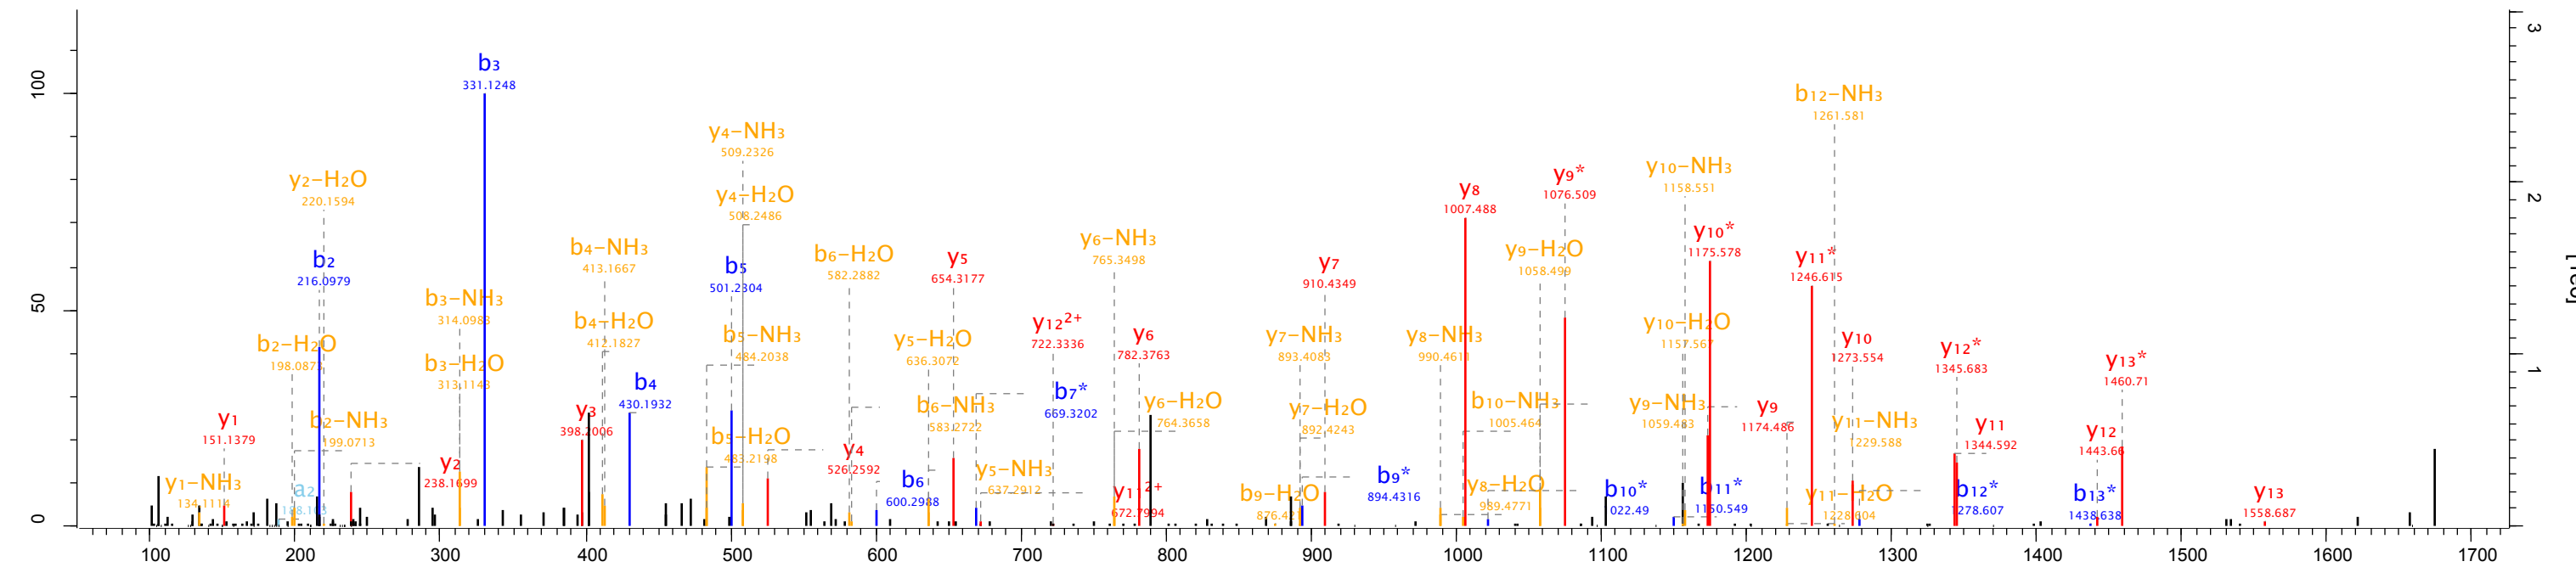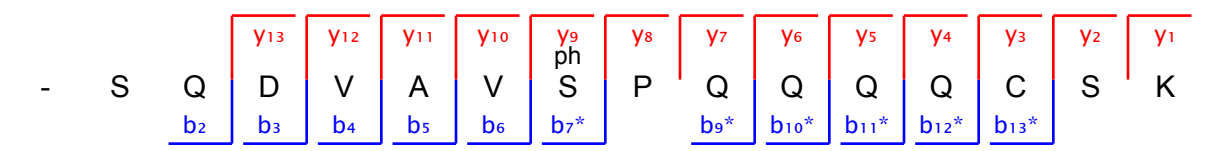

Raw file: 20150812\_A375SR\_Phospho\_BR1\_04  
 Scan: 6544 Method: FTMS; HCD Score: 111.11 m/z: 680.33 Gene names: ZC3H13

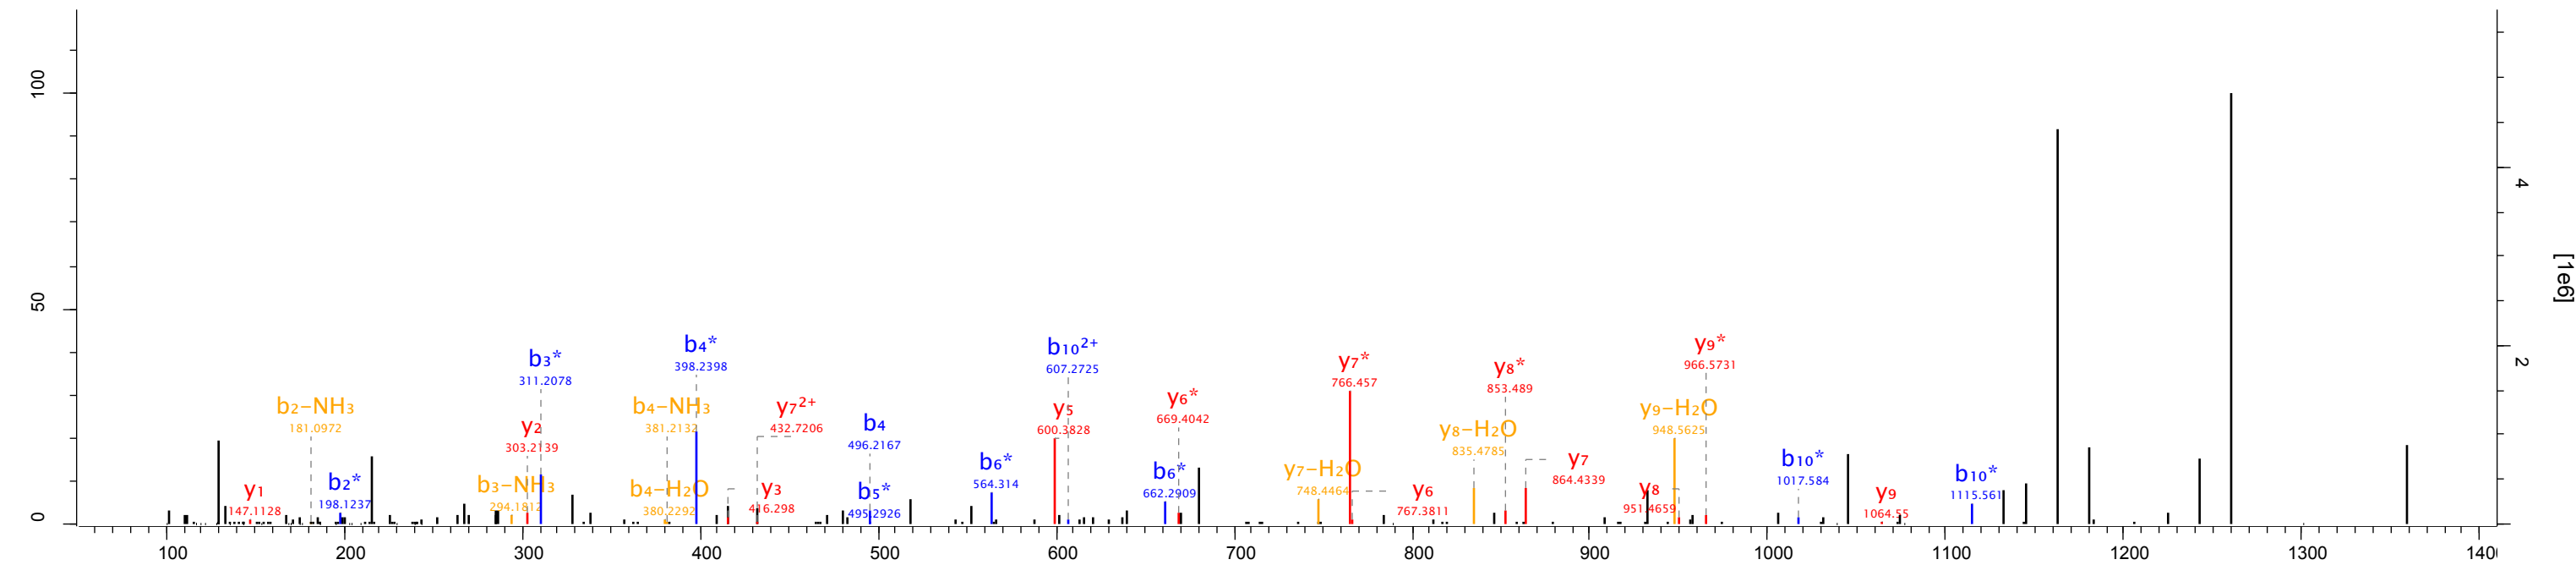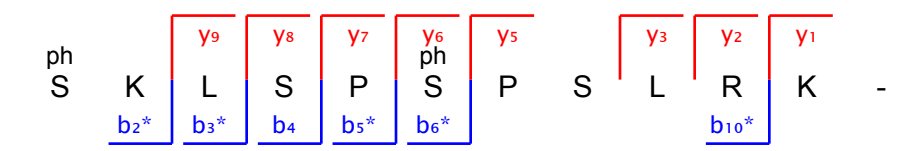

Raw file: 20150812\_A375SR\_Phospho\_BR1\_04  
 Scan: 6964 Method: FTMS; HCD Score: 153.06 m/z: 567.92 Gene names: STAMBPL1

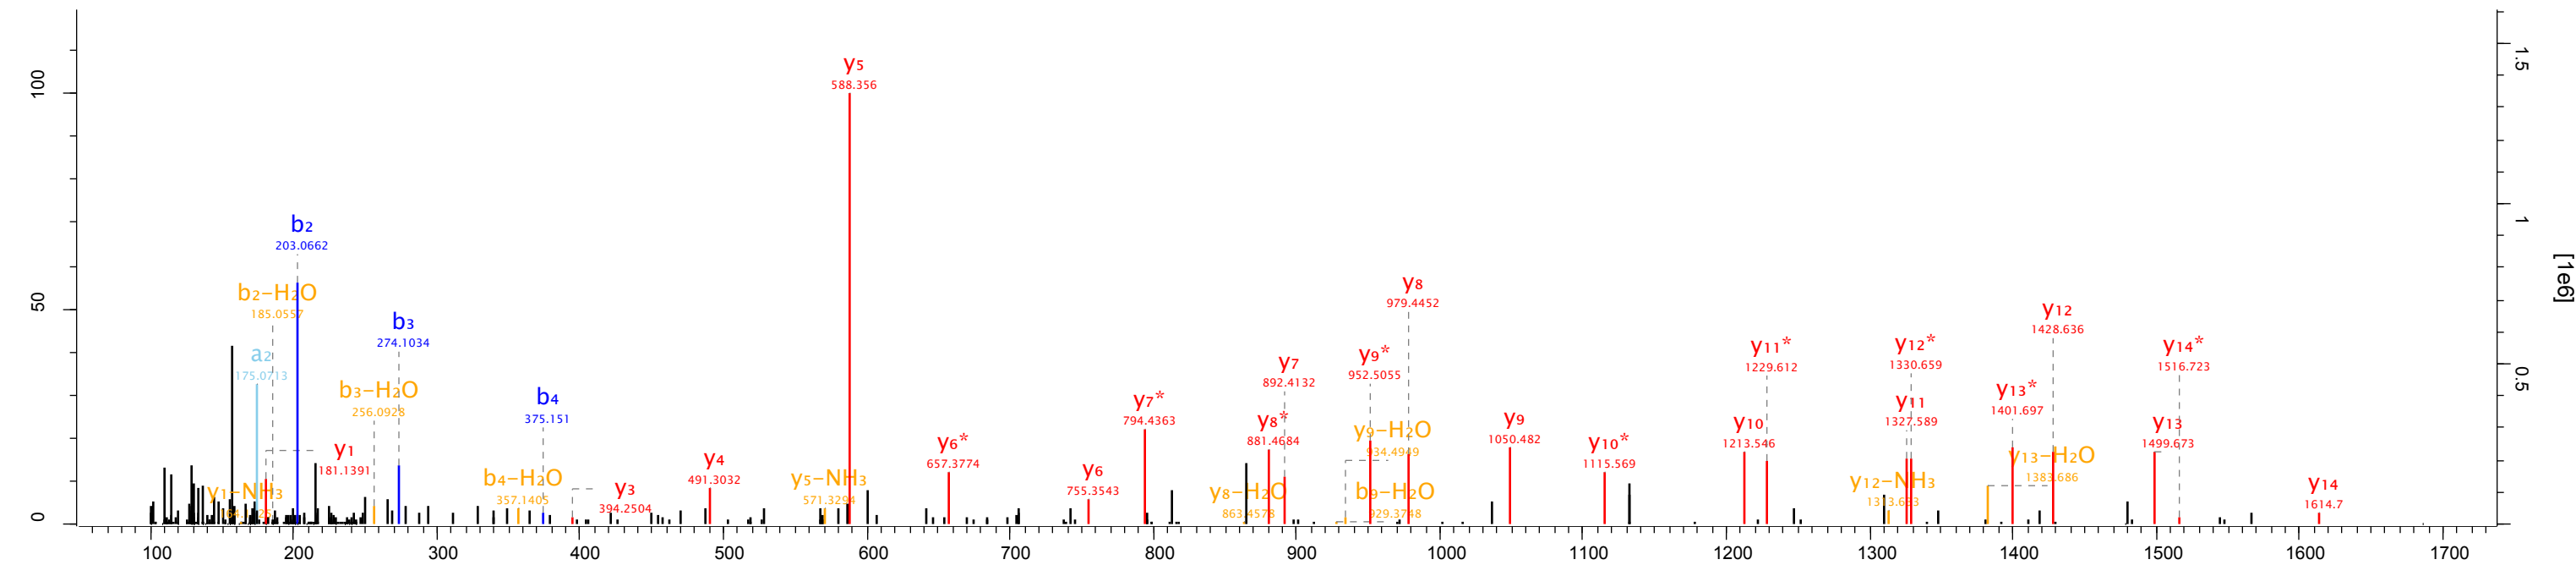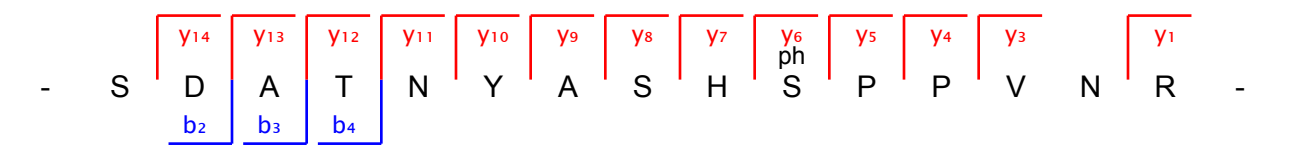

Raw file: 20150812\_A375SR\_Phospho\_BR1\_04  
 Scan: 7124 Method: FTMS; HCD Score: 113.76 m/z: 556.77 Gene names: RASAL2;DAB2IP

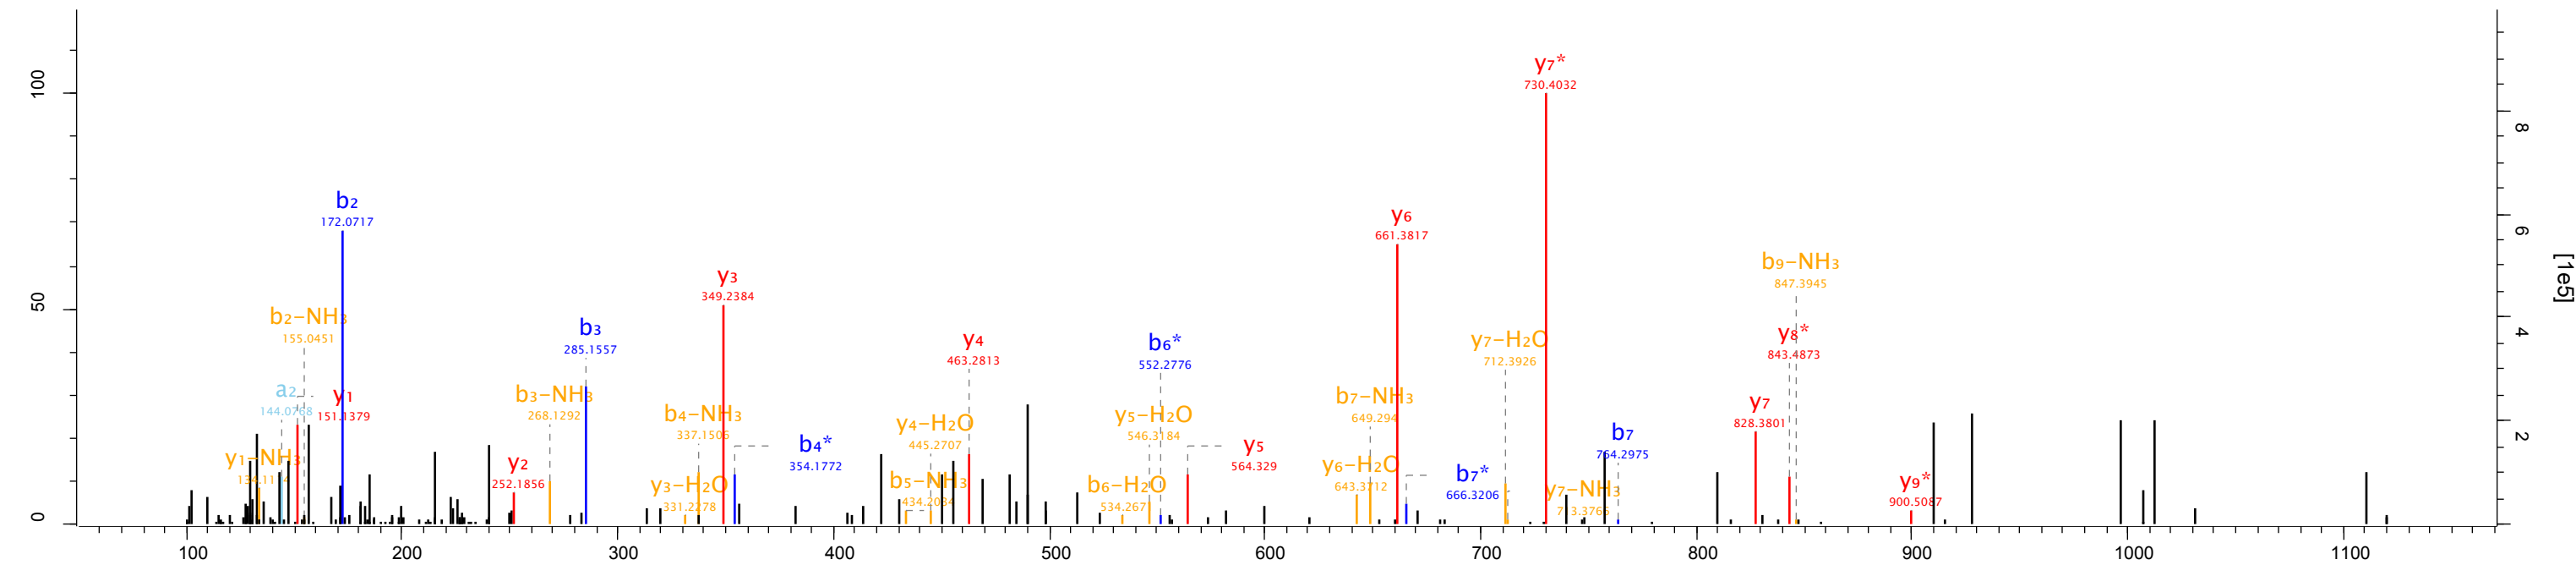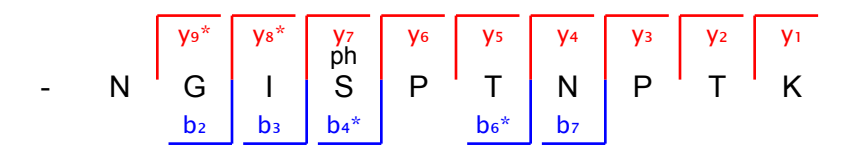

Raw file: 20150812\_A375SR\_Phospho\_BR1\_04  
 Scan: 7524 Method: FTMS; HCD Score: 99.81 m/z: 793.38 Gene names: BRD1

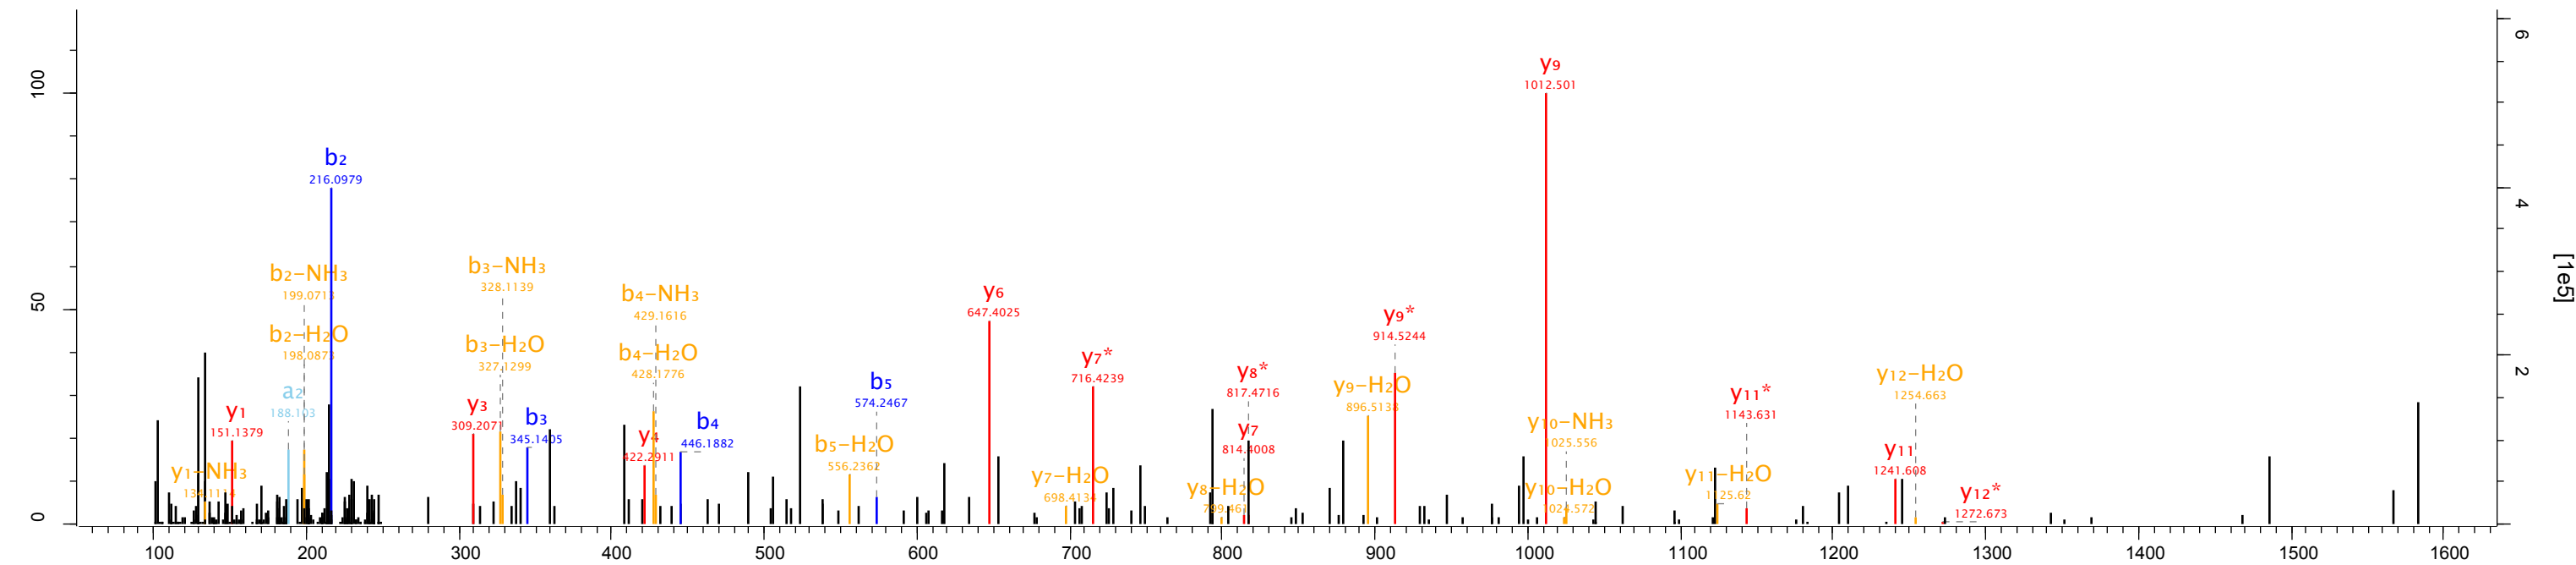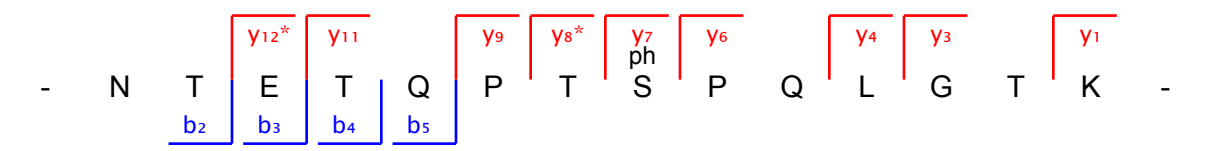

Raw file: 20150812\_A375SR\_Phospho\_BR1\_04  
 Scan: 7774 Method: FTMS; HCD Score: 262.23 m/z: 994.4 Gene names: CDC42EP4

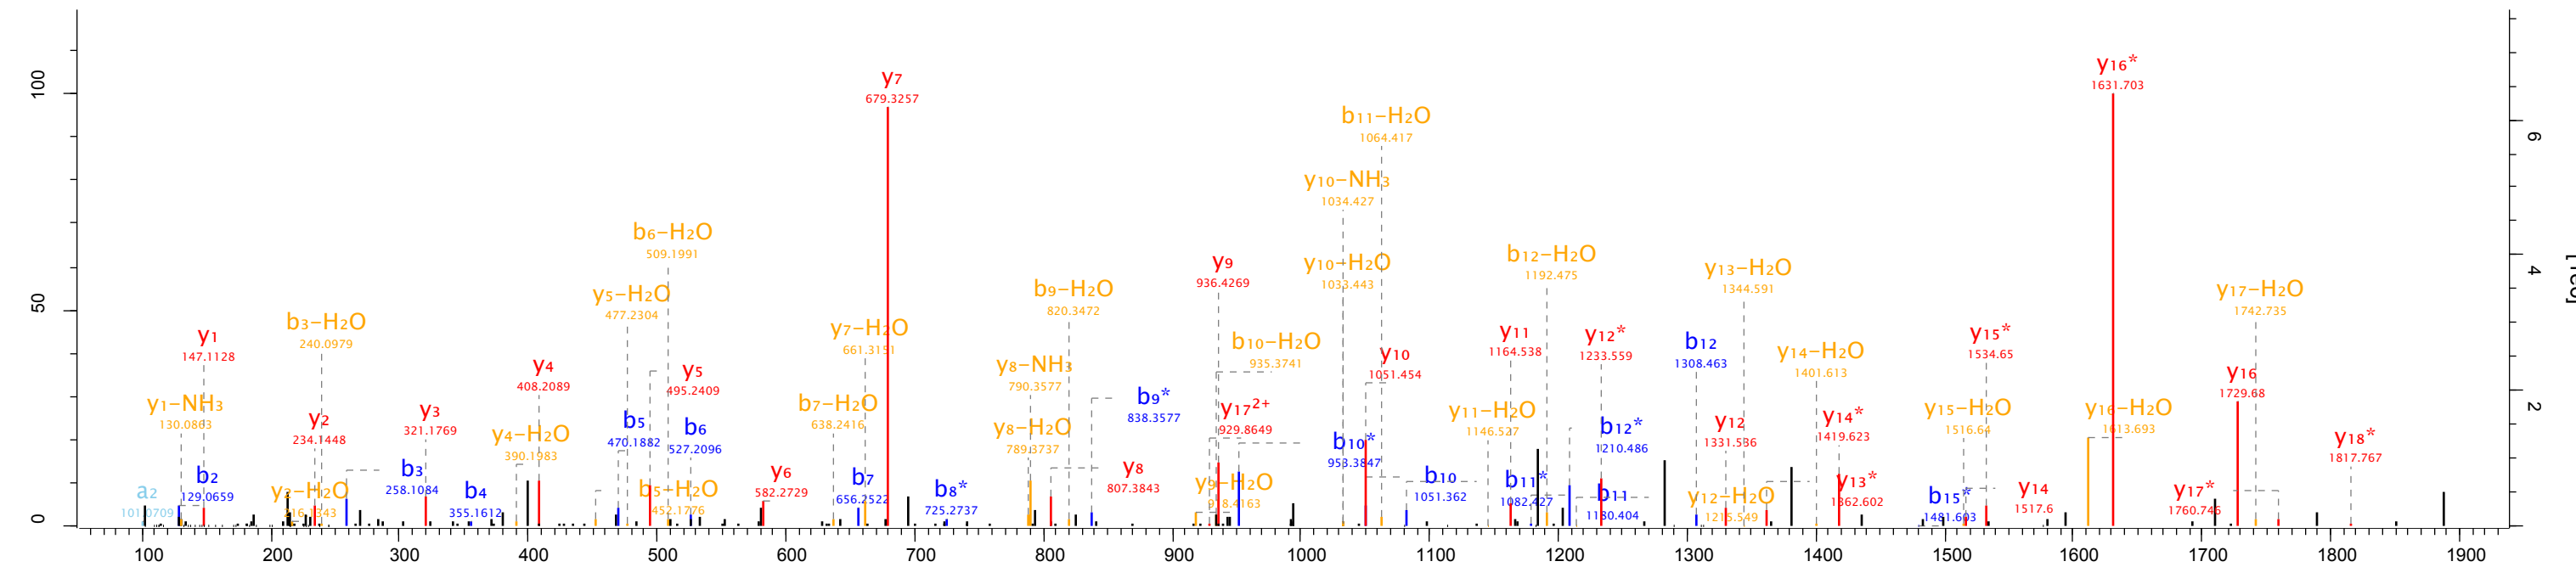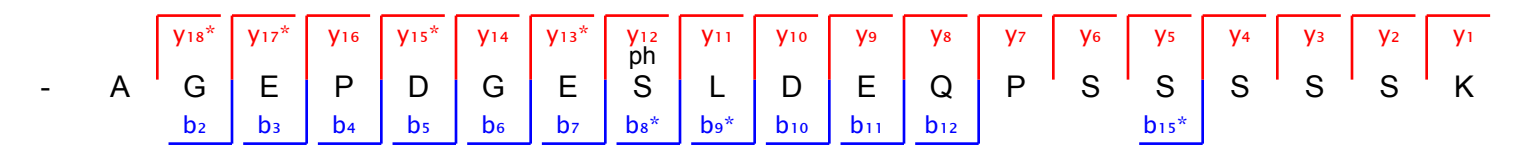

Raw file: 20150812\_A375SR\_Phospho\_BR1\_04  
 Scan: 7874 Method: FTMS; HCD Score: 401.03 m/z: 1123.97 Gene names: SLC4A1AP

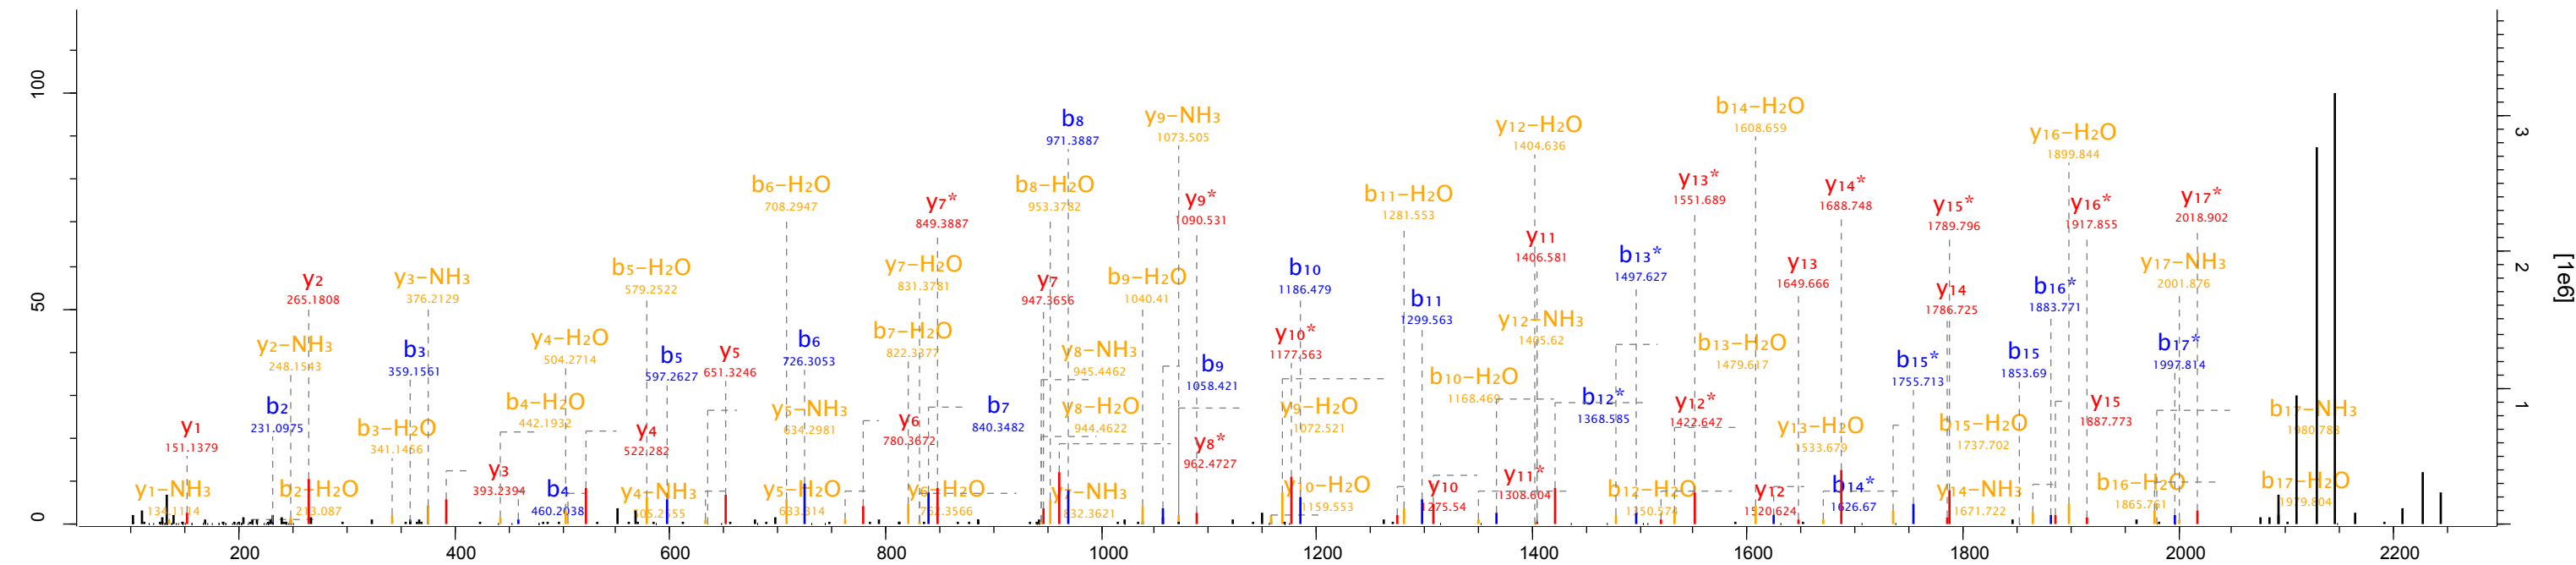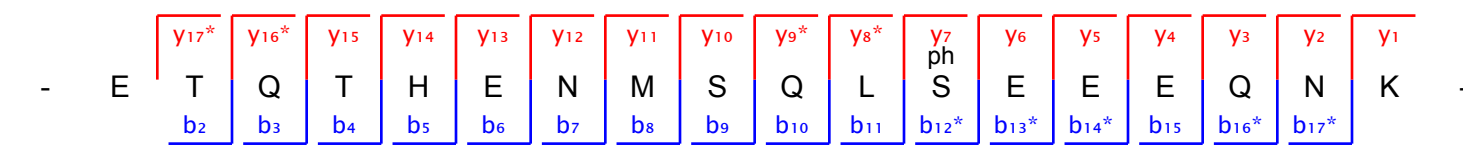



Raw file: 20150812\_A375SR\_Phospho\_BR1\_04  
 Scan: 8004 Method: FTMS; HCD Score: 66.4 m/z: 858.86 Gene names: HNRNPF

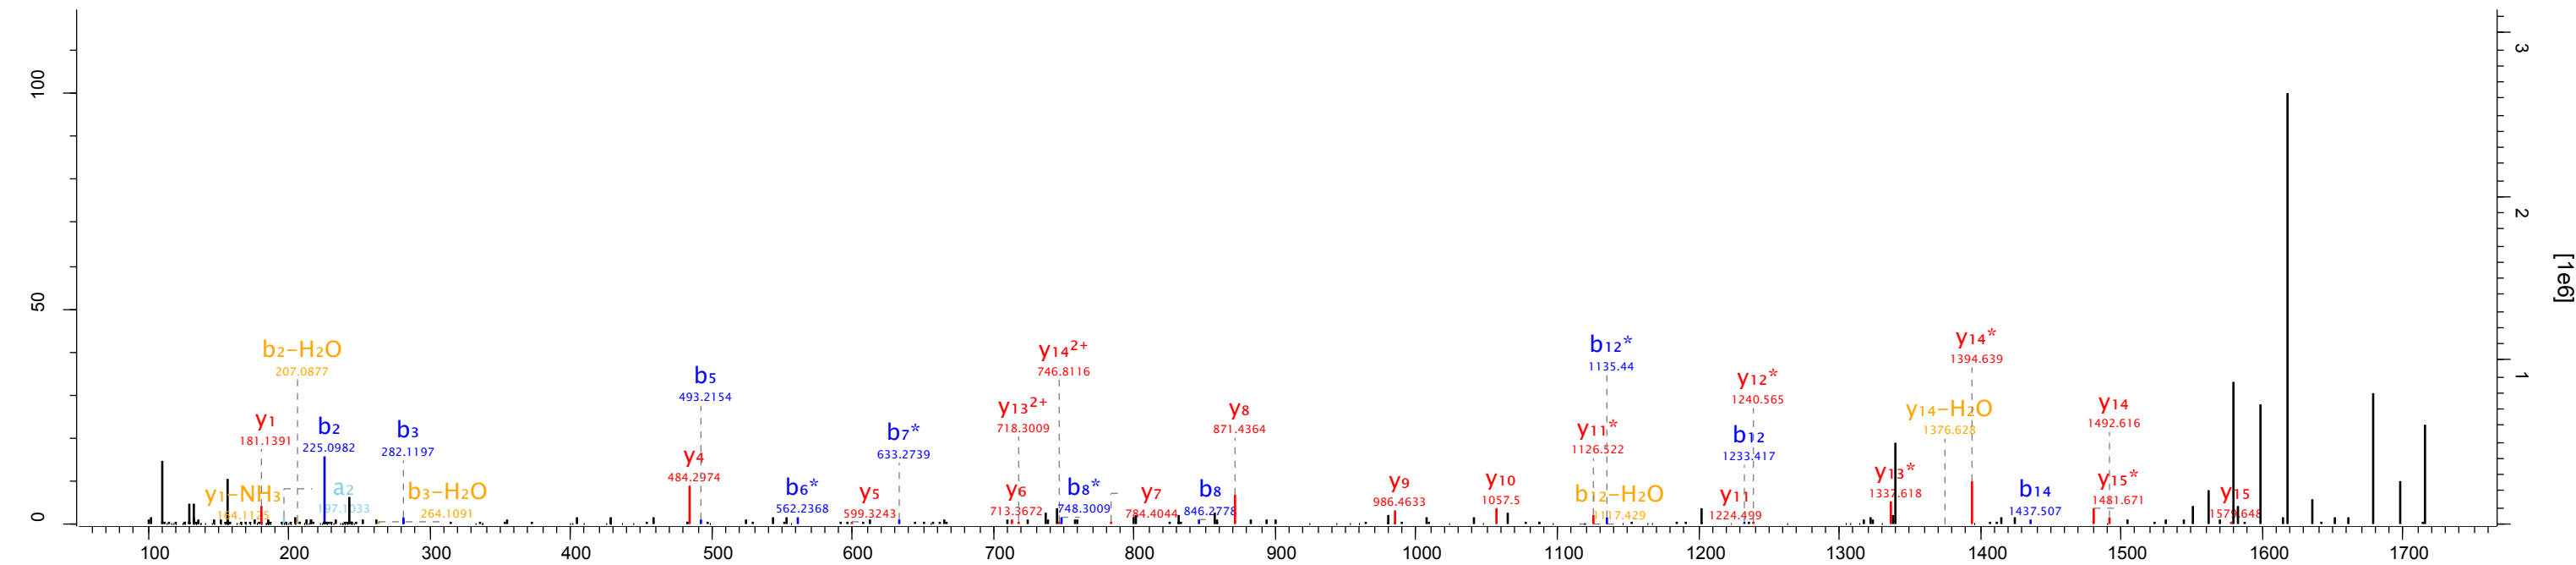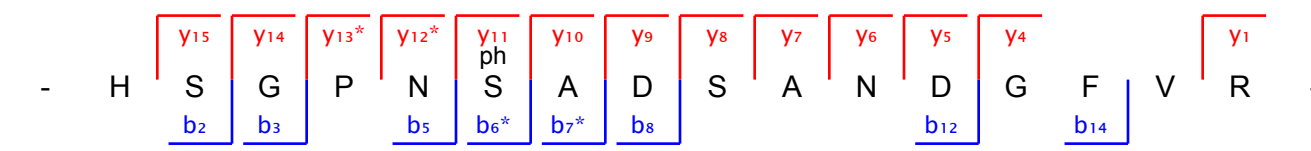

Raw file 20150812\_A375SR\_Phospho\_BR1\_04 Scan 8294 Method FTMS; HCD Score 125.51 m/z 557.26 Gene names HN1

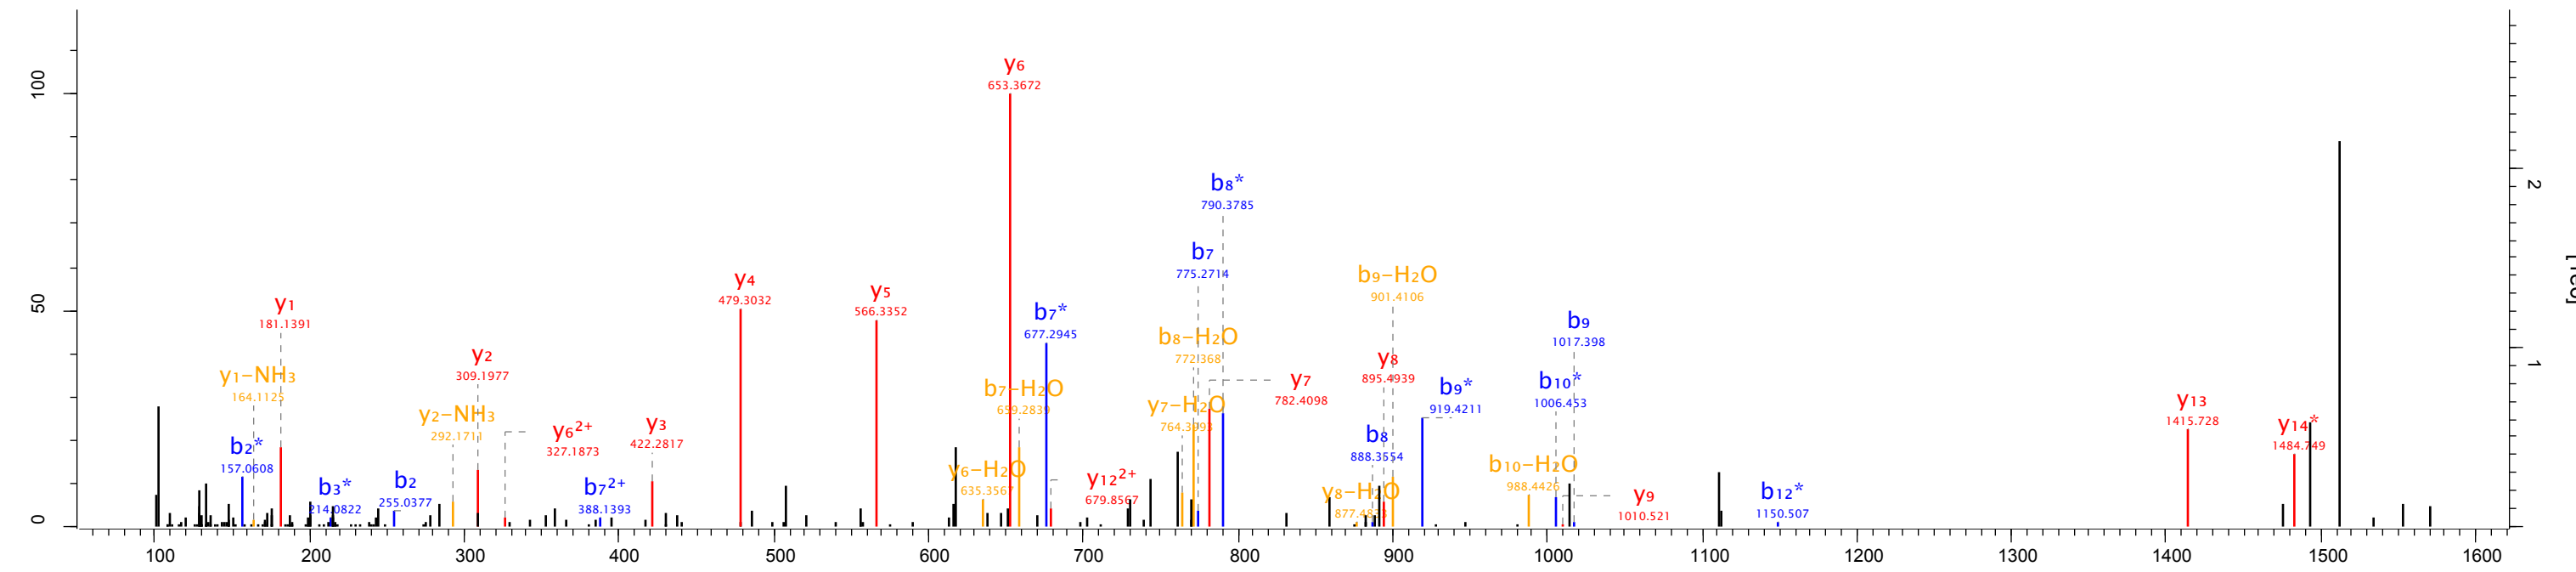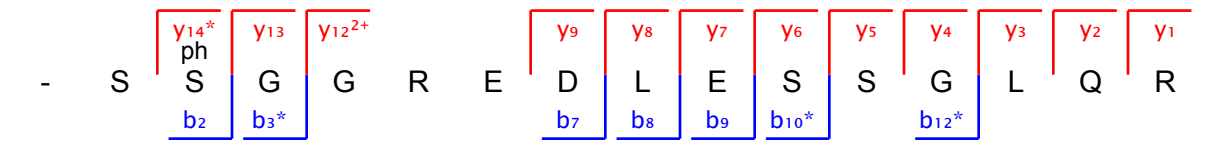

Raw file: 20150812\_A375SR\_Phospho\_BR1\_04  
 Scan: 8444 Method: FTMS; HCD Score: 76.15 m/z: 609.8 Gene names: BCLAF1

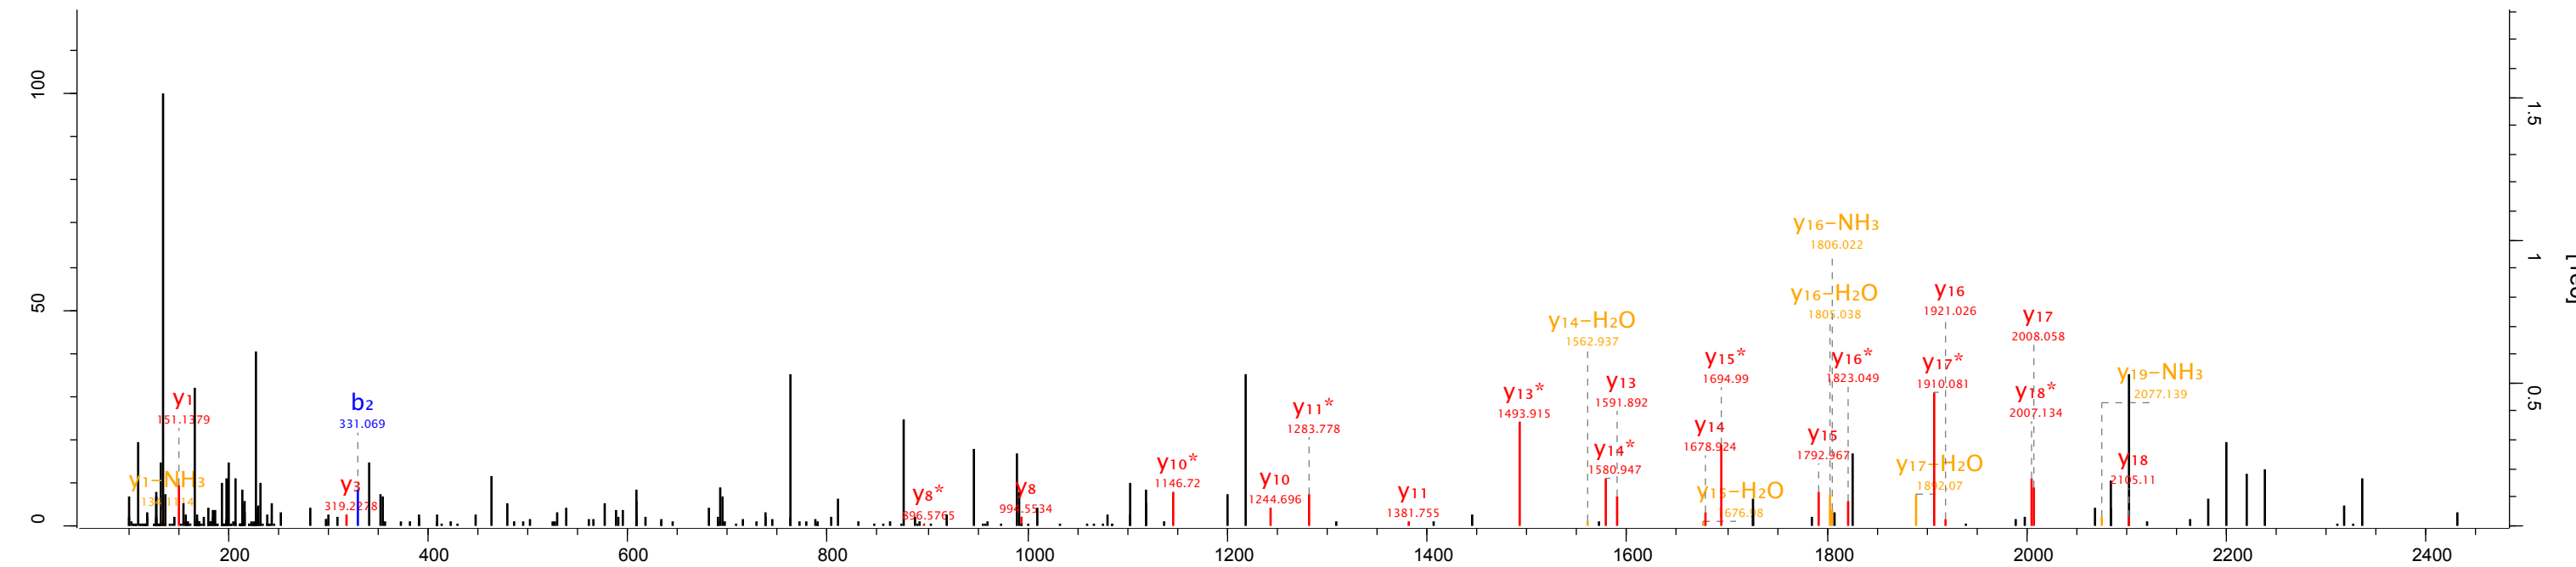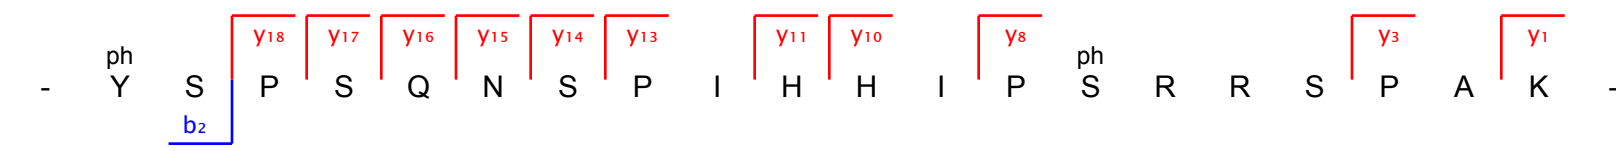

Raw file  
20150812\_A375SR\_Phospho\_BR1\_04

Scan 8604 Method FTMS; HCD Score 322.74 m/z 1059.45 Gene names LARP1B

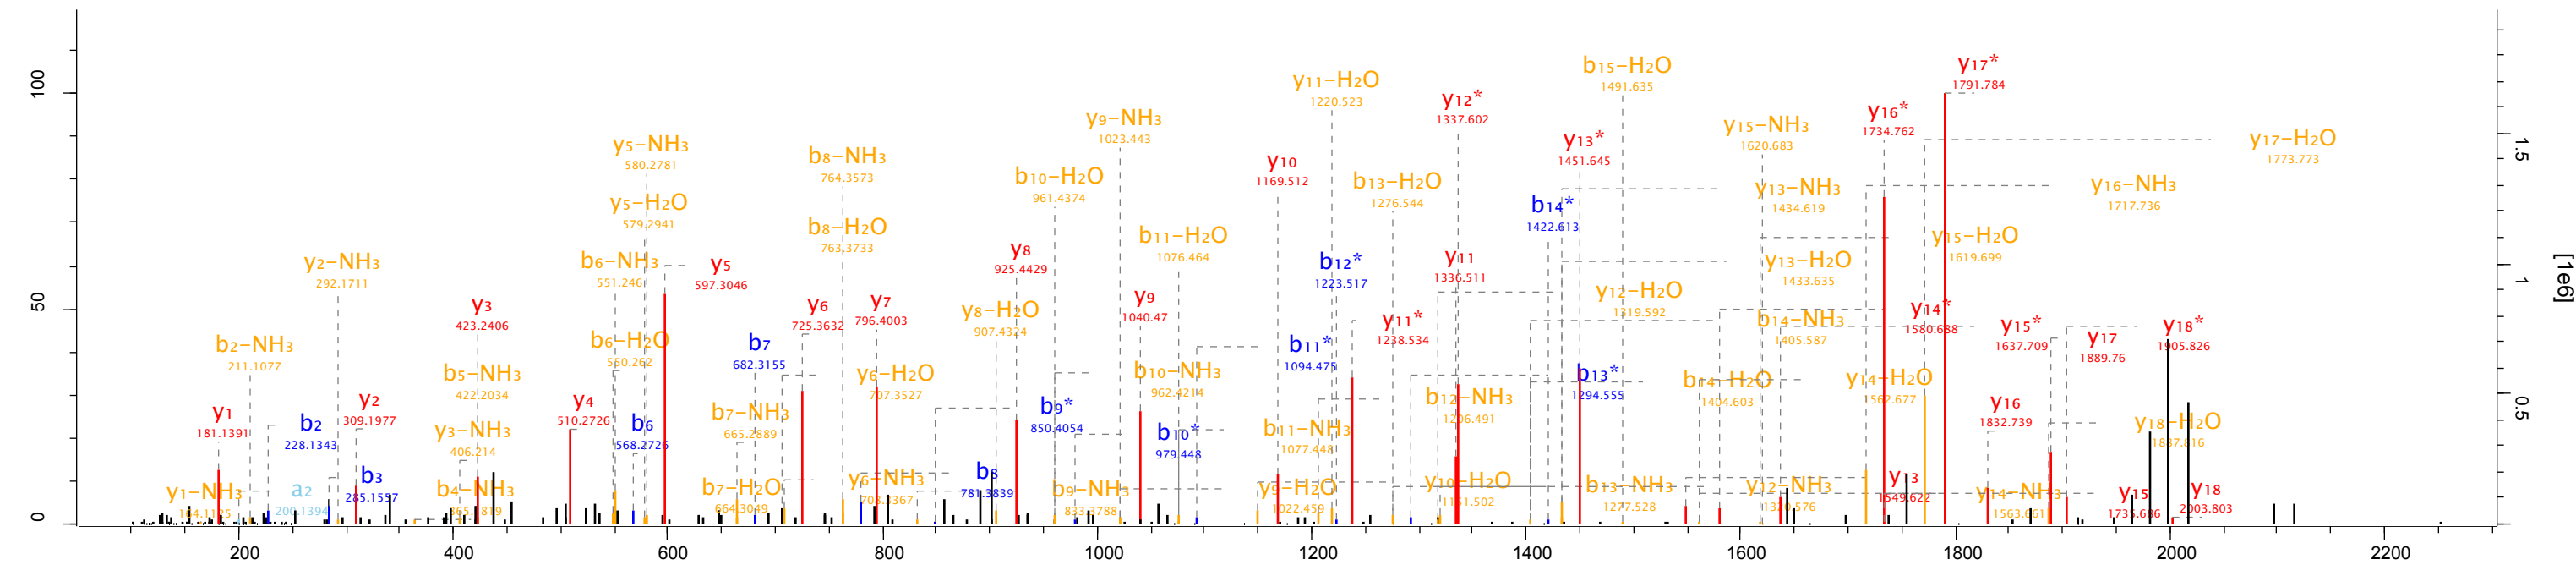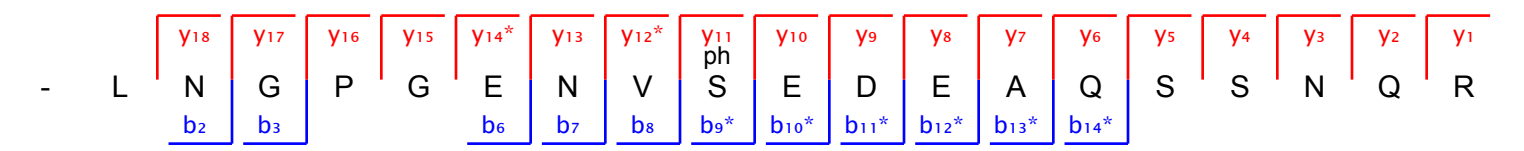

Raw file 20150812\_A375SR\_Phospho\_BR1\_04 Scan 8624 Method FTMS; HCD Score 156 m/z 833.91 Gene names ATXN2

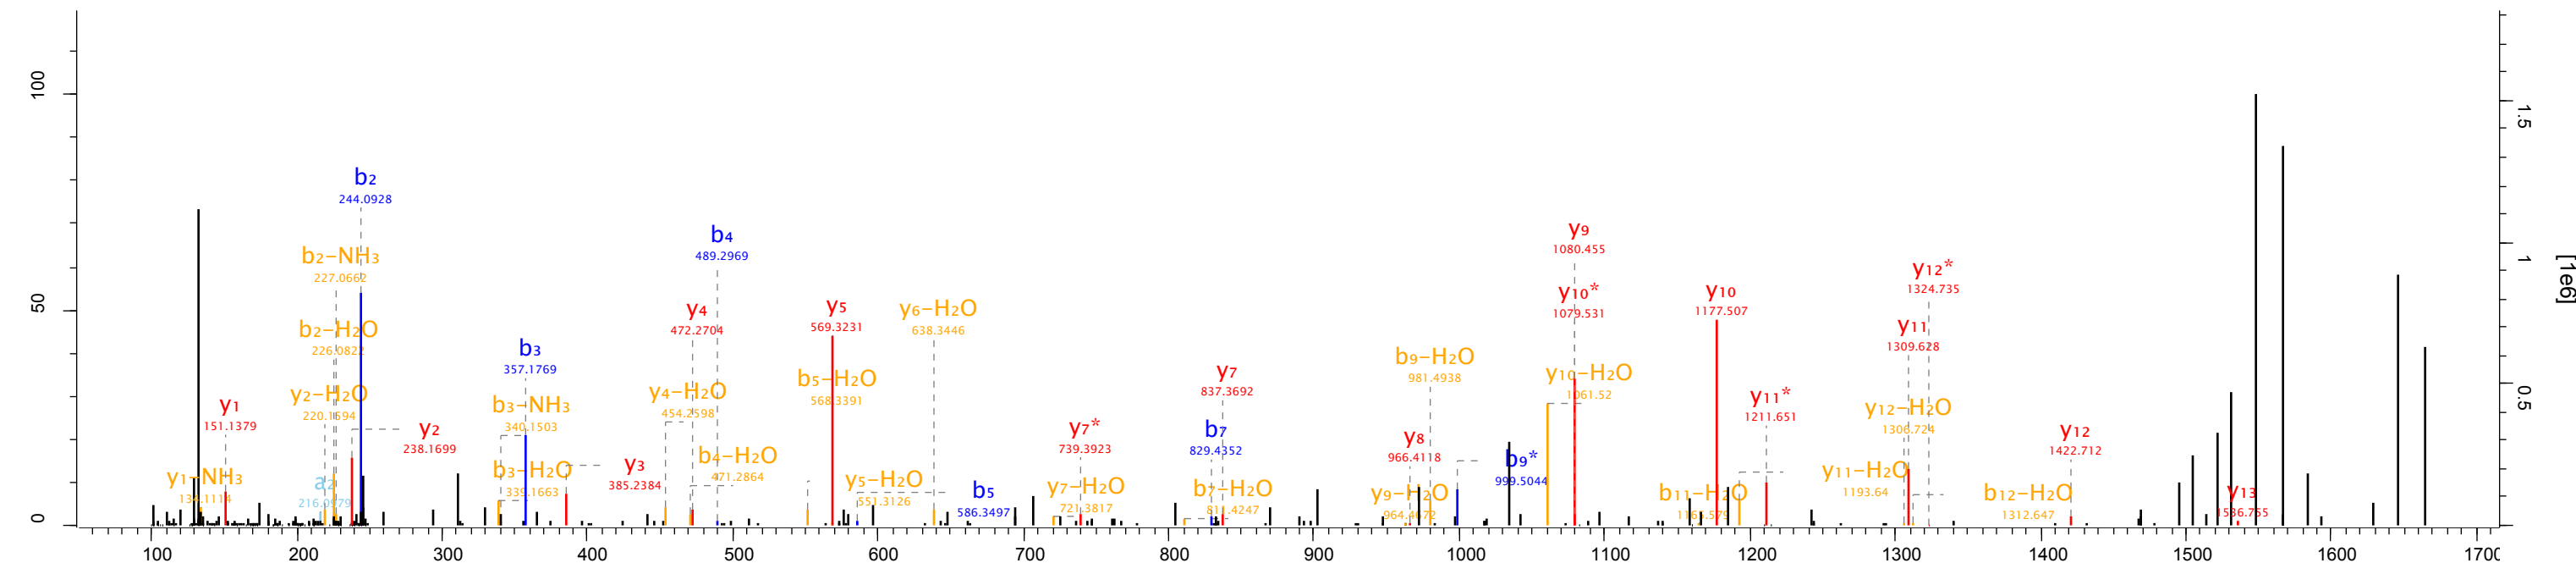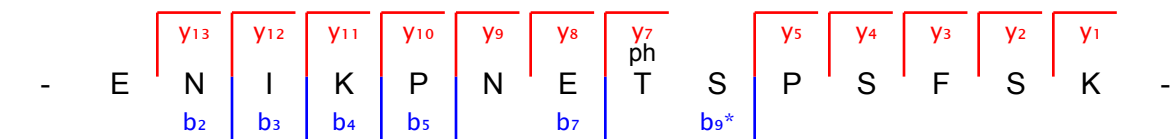

Raw file: 20150812\_A375SR\_Phospho\_BR1\_04  
 Scan: 9384 Method: FTMS; HCD Score: 119.55 m/z: 522.25 Gene names: CASP8AP2

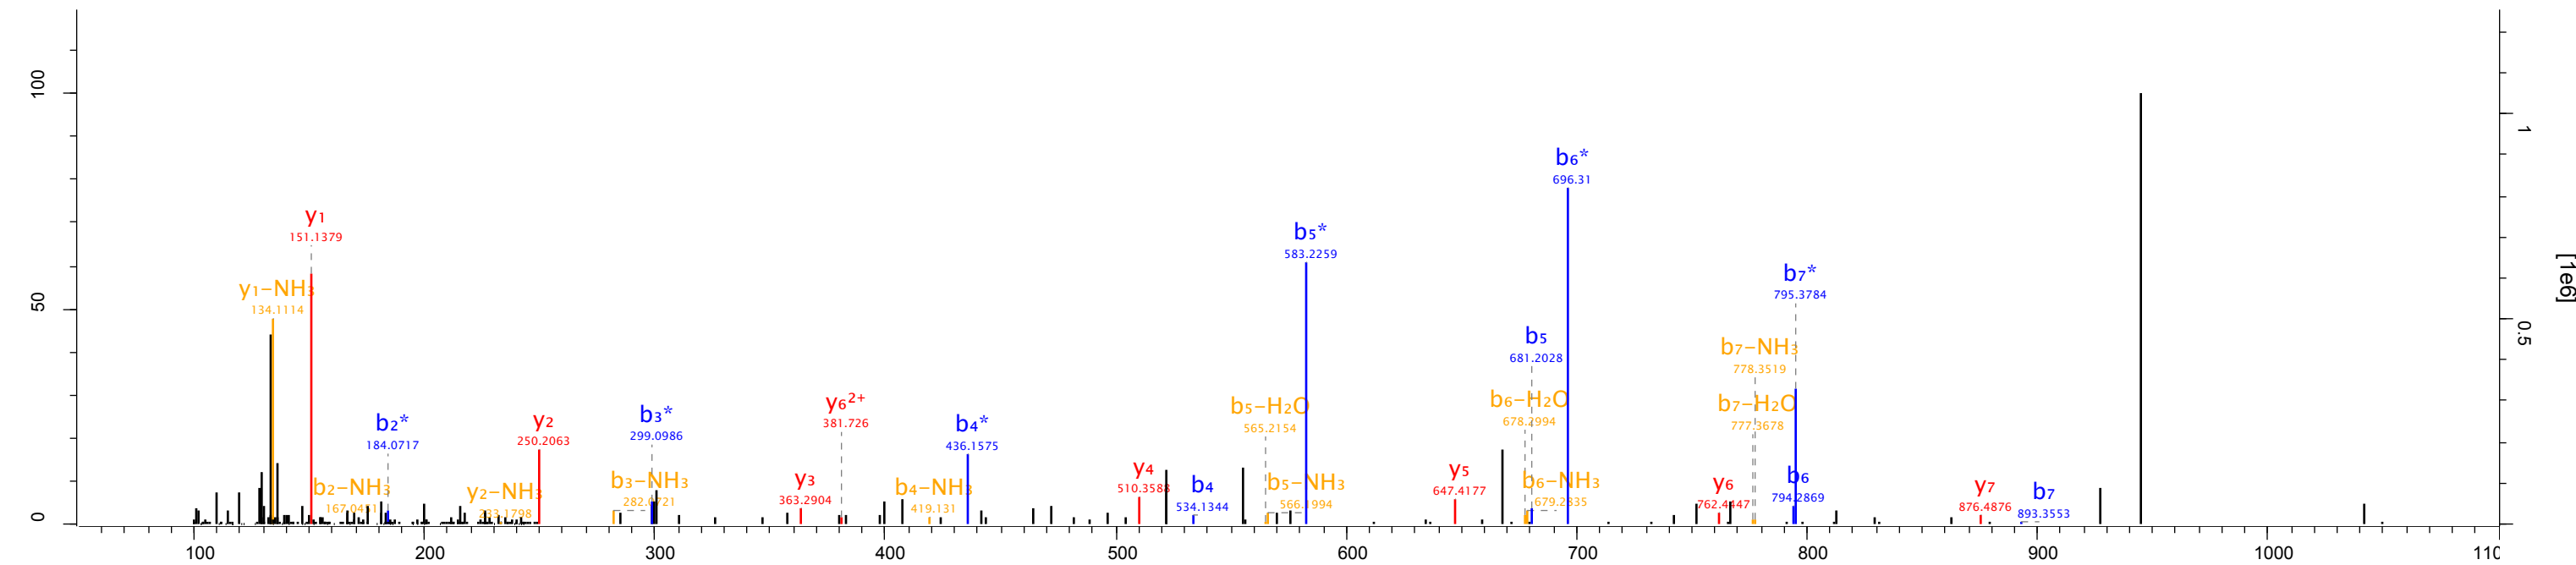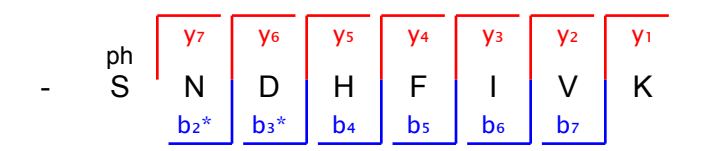

Raw file: 20150812\_A375SR\_Phospho\_BR1\_04  
 Scan: 9534 Method: FTMS; HCD Score: 94.76 m/z: 630.26 Gene names: SCAMP2

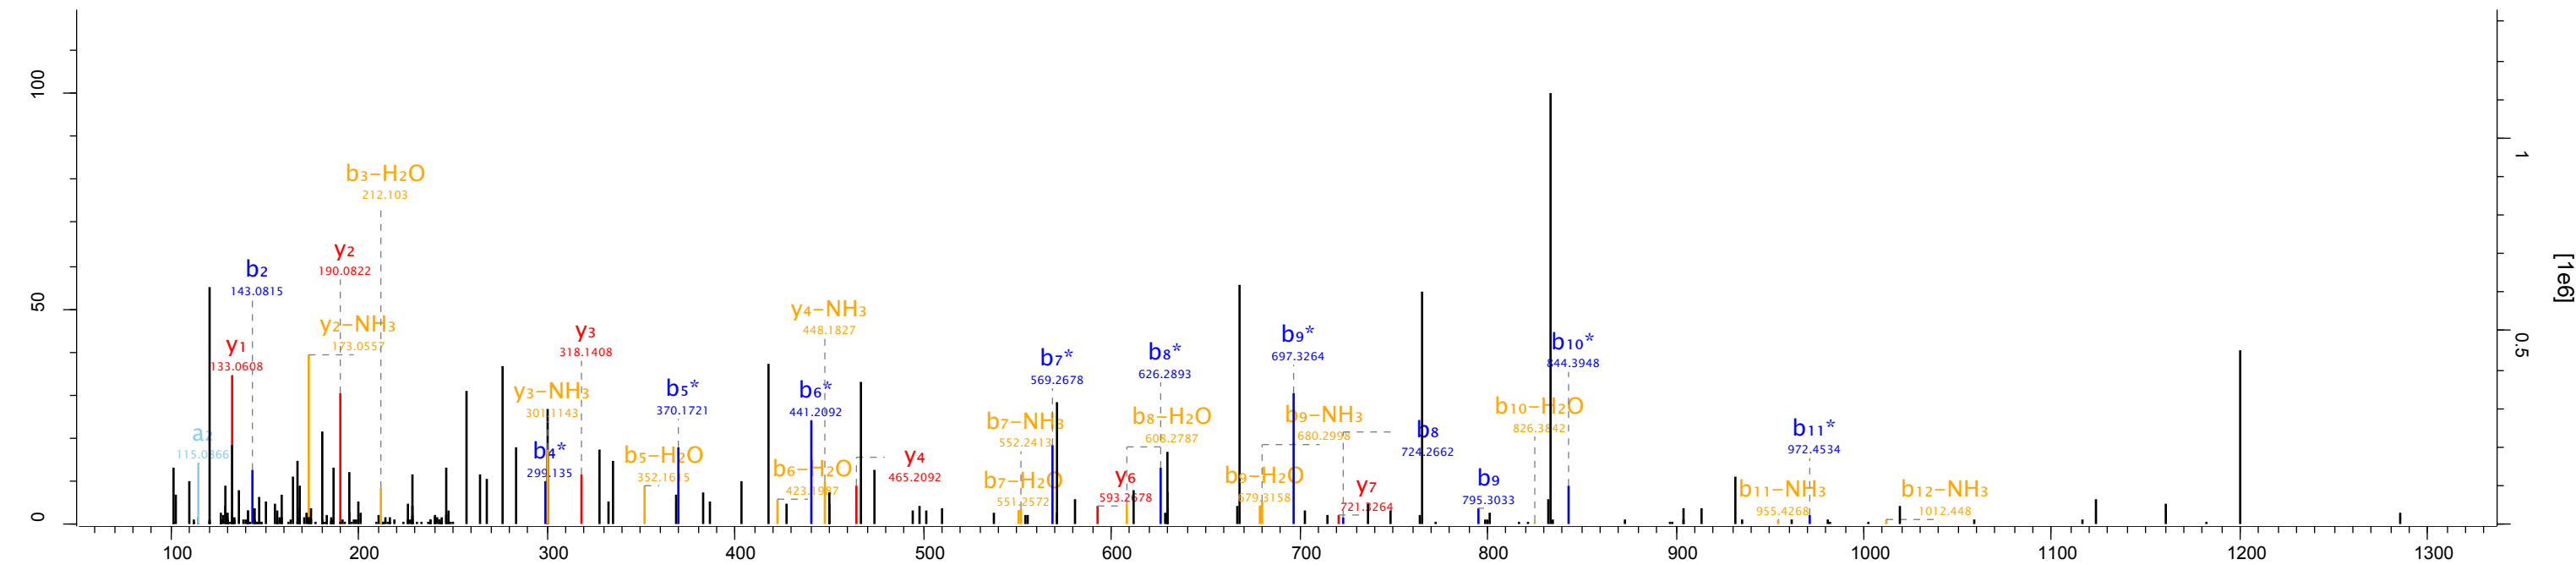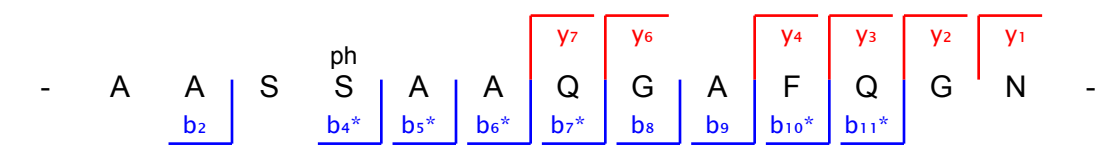

Raw file: 20150812\_A375SR\_Phospho\_BR1\_04  
 Scan: 9634 Method: FTMS; HCD Score: 147.87 m/z: 972.94 Gene names: KIF13B

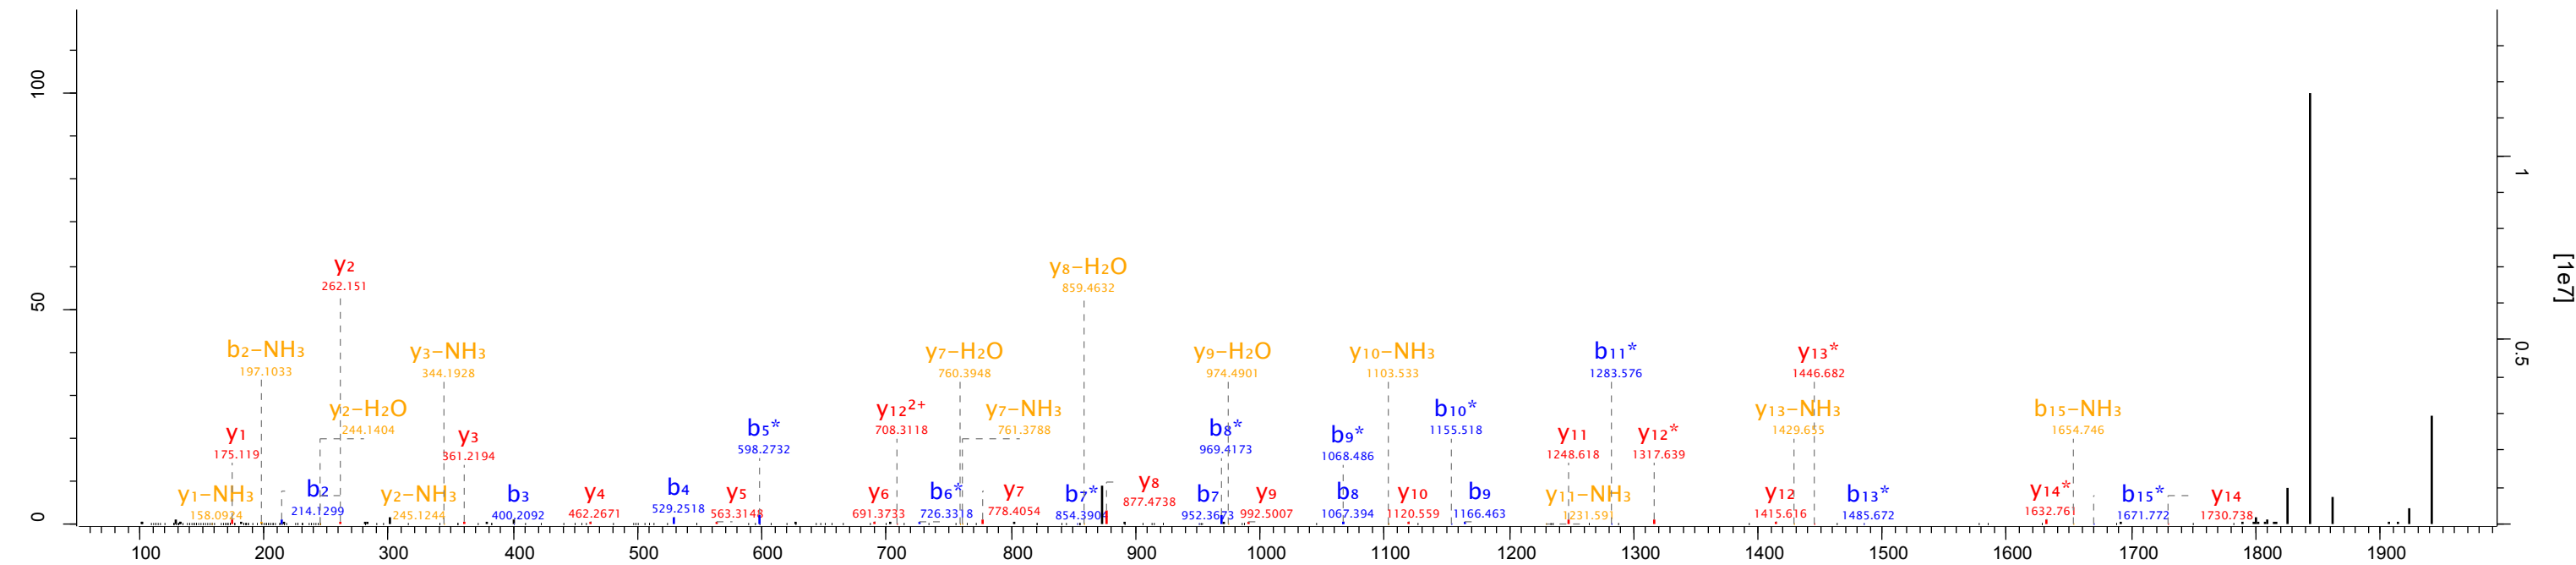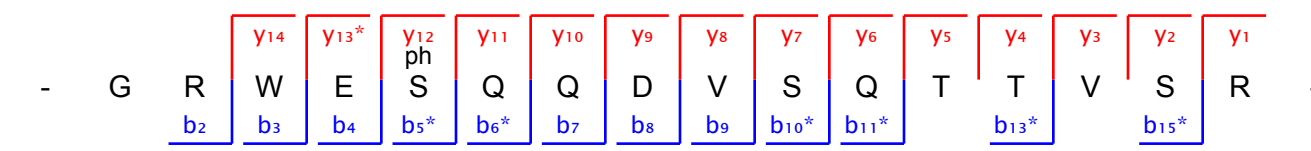



Raw file: 20150812\_A375SR\_Phospho\_BR1\_04  
 Scan: 9954 Method: FTMS; HCD Score: 295.53 m/z: 895.86 Gene names: SYNPO

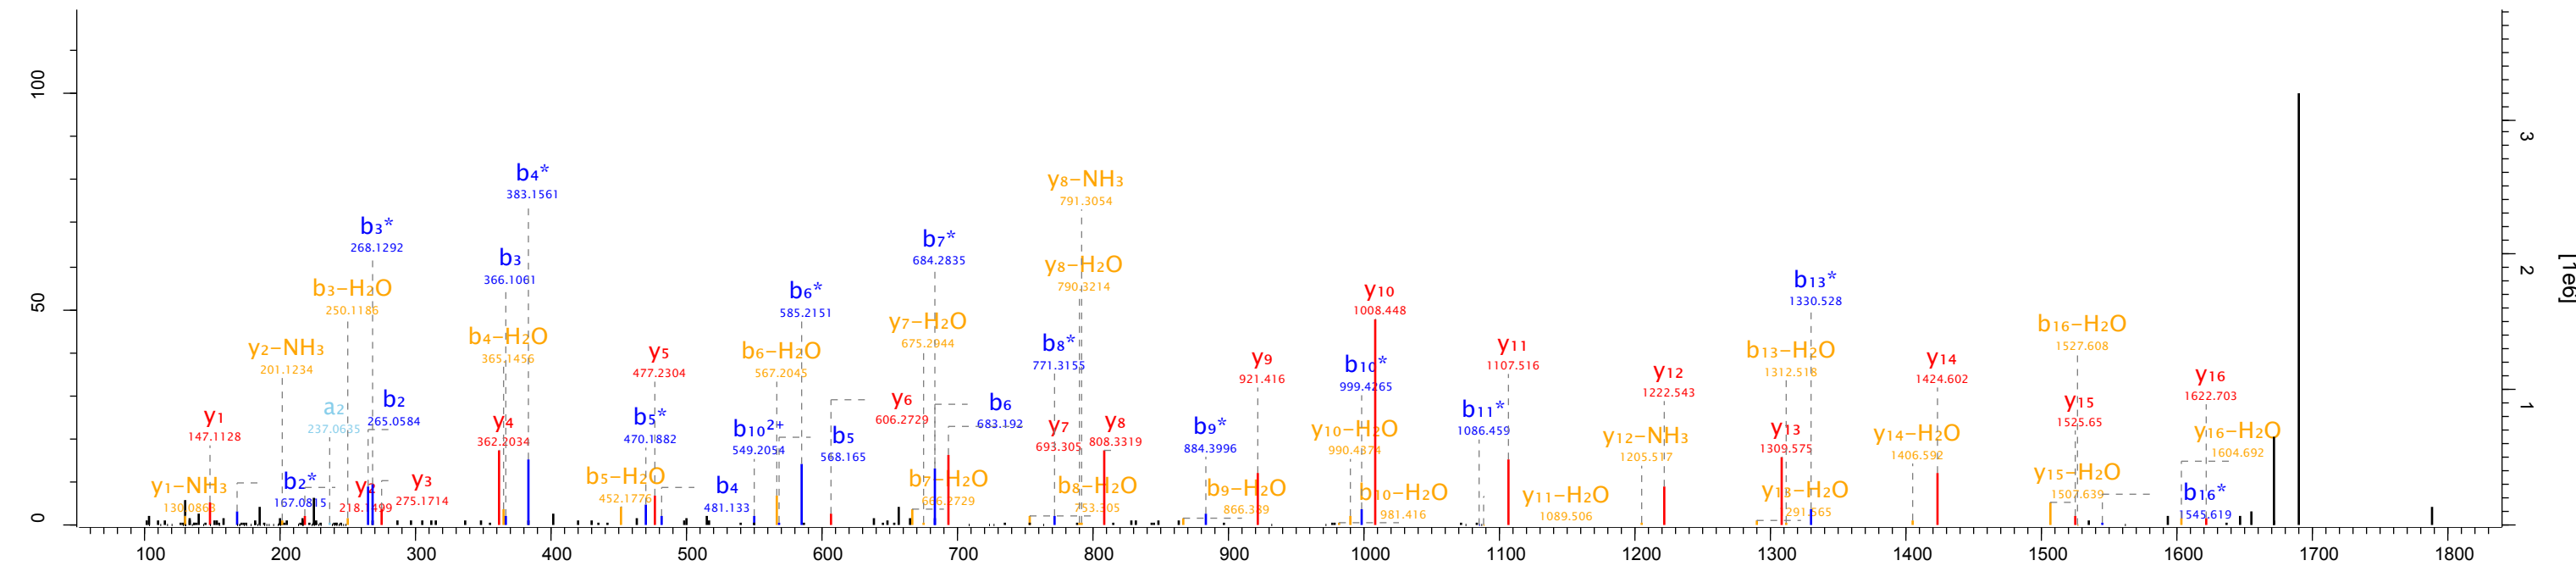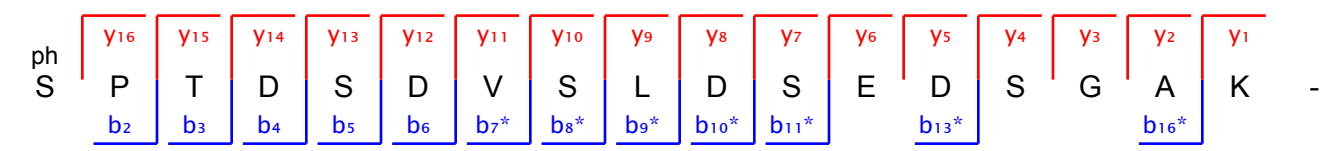

Raw file 20150812\_A375SR\_Phospho\_BR1\_05 Scan 10624 Method FTMS; HCD Score 143.57 m/z 908.95 Gene names EML4

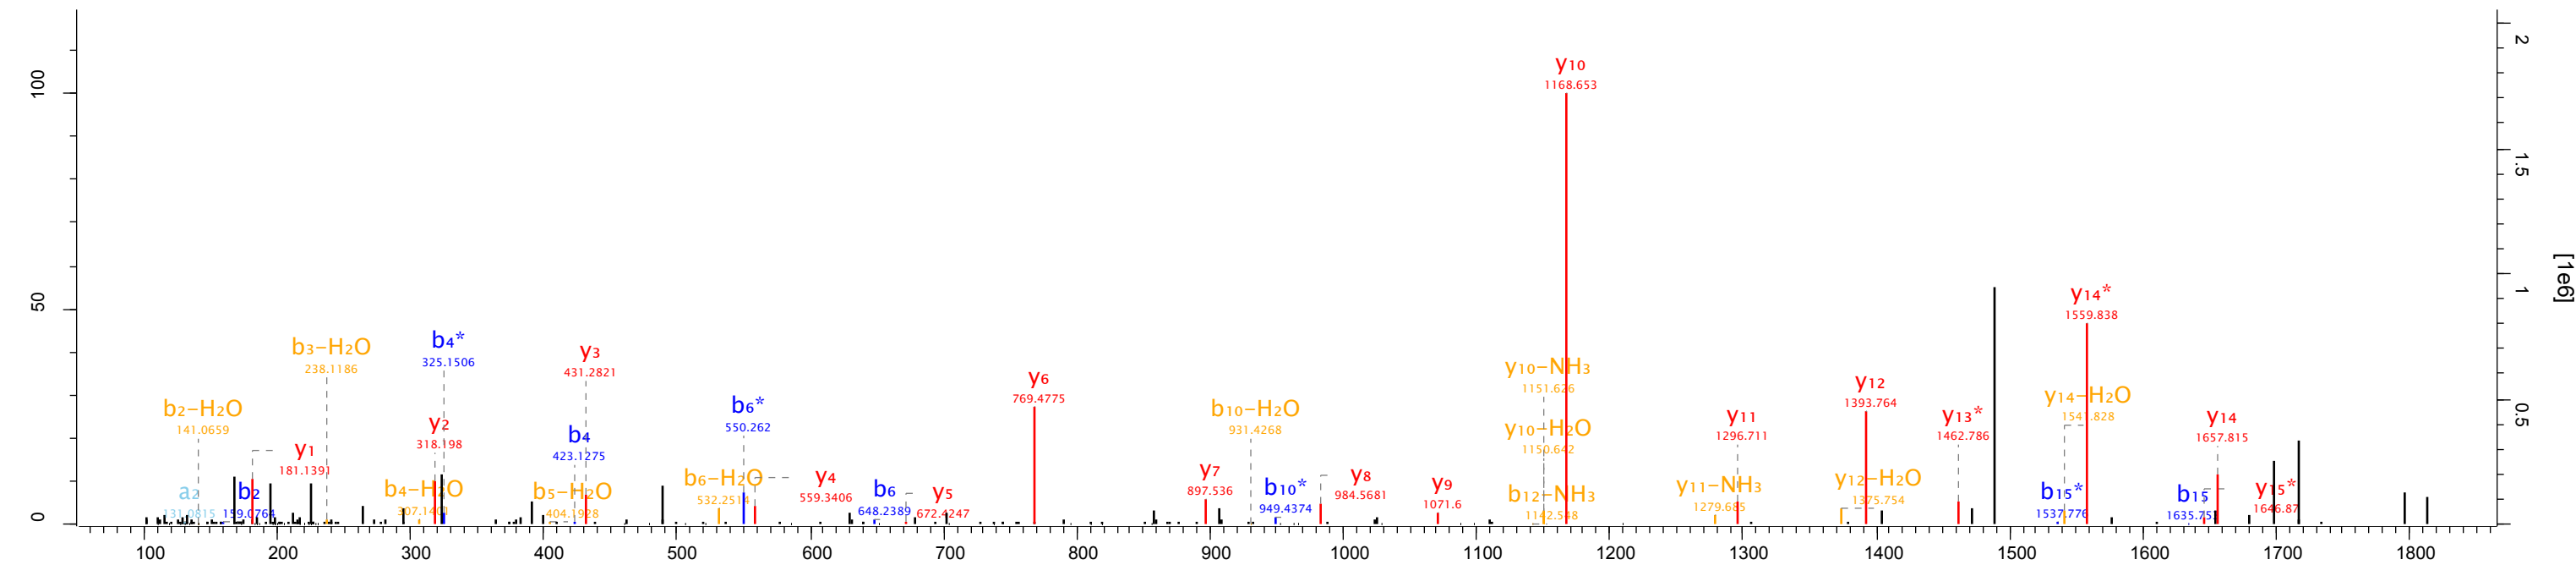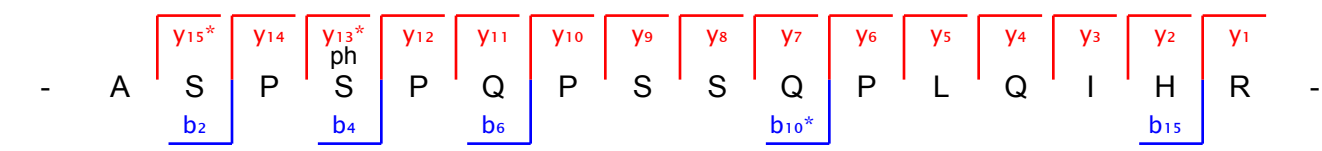

Raw file 20150812\_A375SR\_Phospho\_BR1\_05 Scan 10714 Method FTMS; HCD Score 40.4 m/z 711.04 Gene names GTPBP1

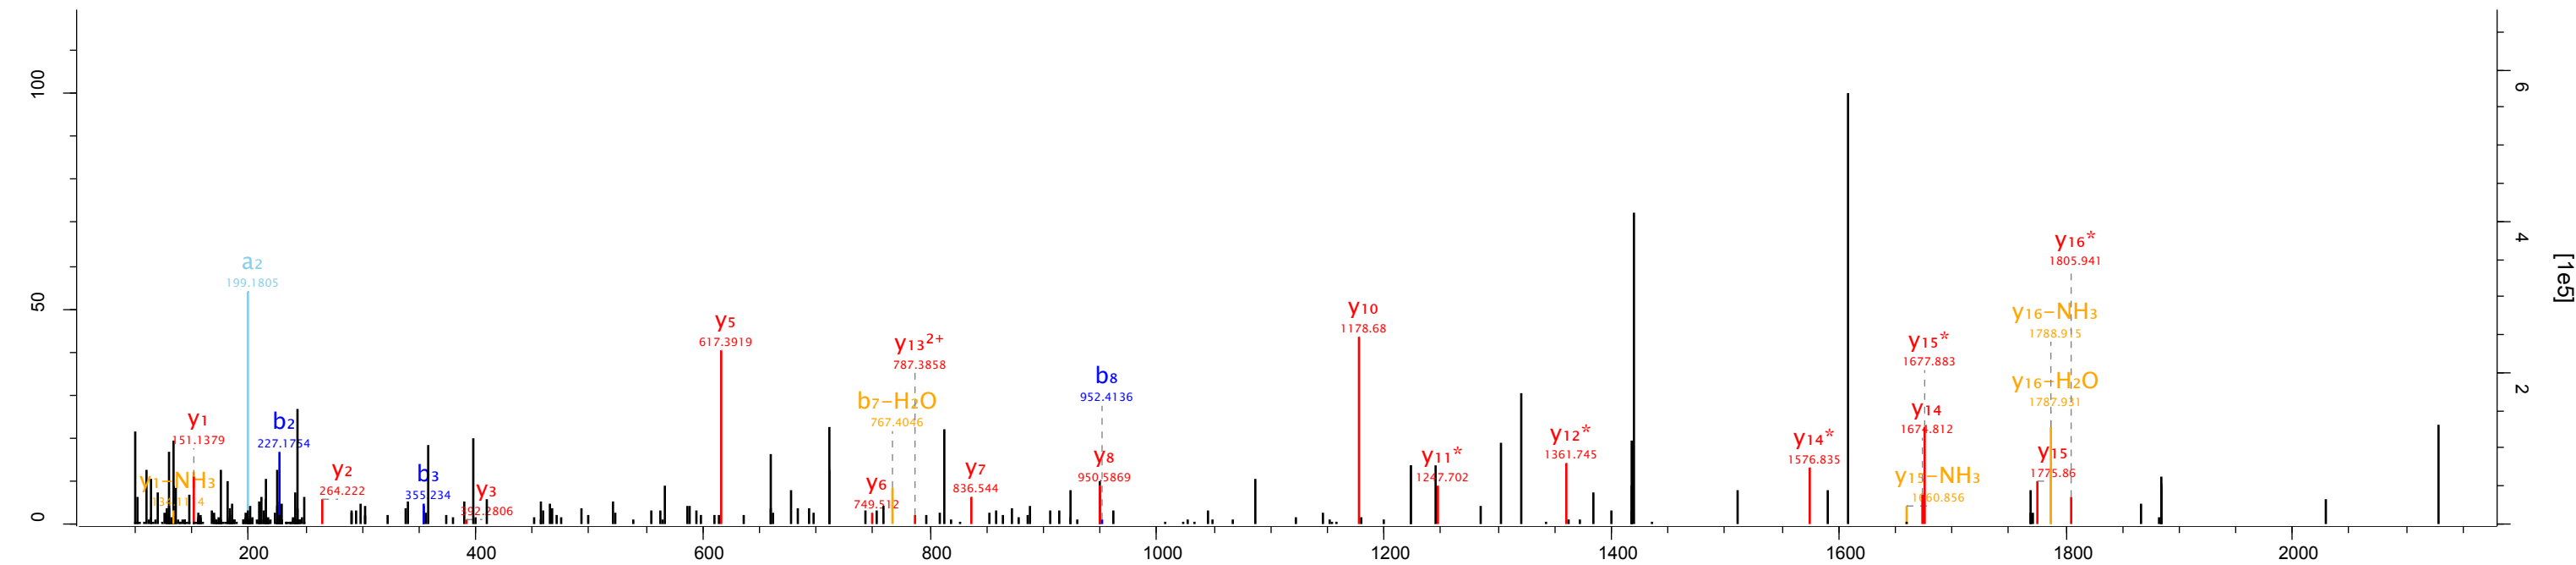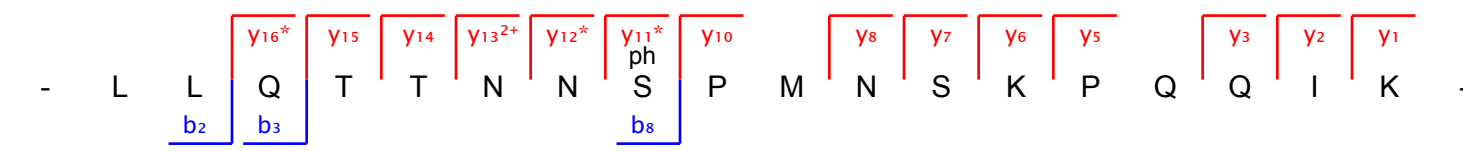

Raw file Scan Method Score m/z Gene names  
 20150812\_A375SR\_Phospho\_BR1\_05 10934 FTMS; HCD 89.34 752.36 KANSL1

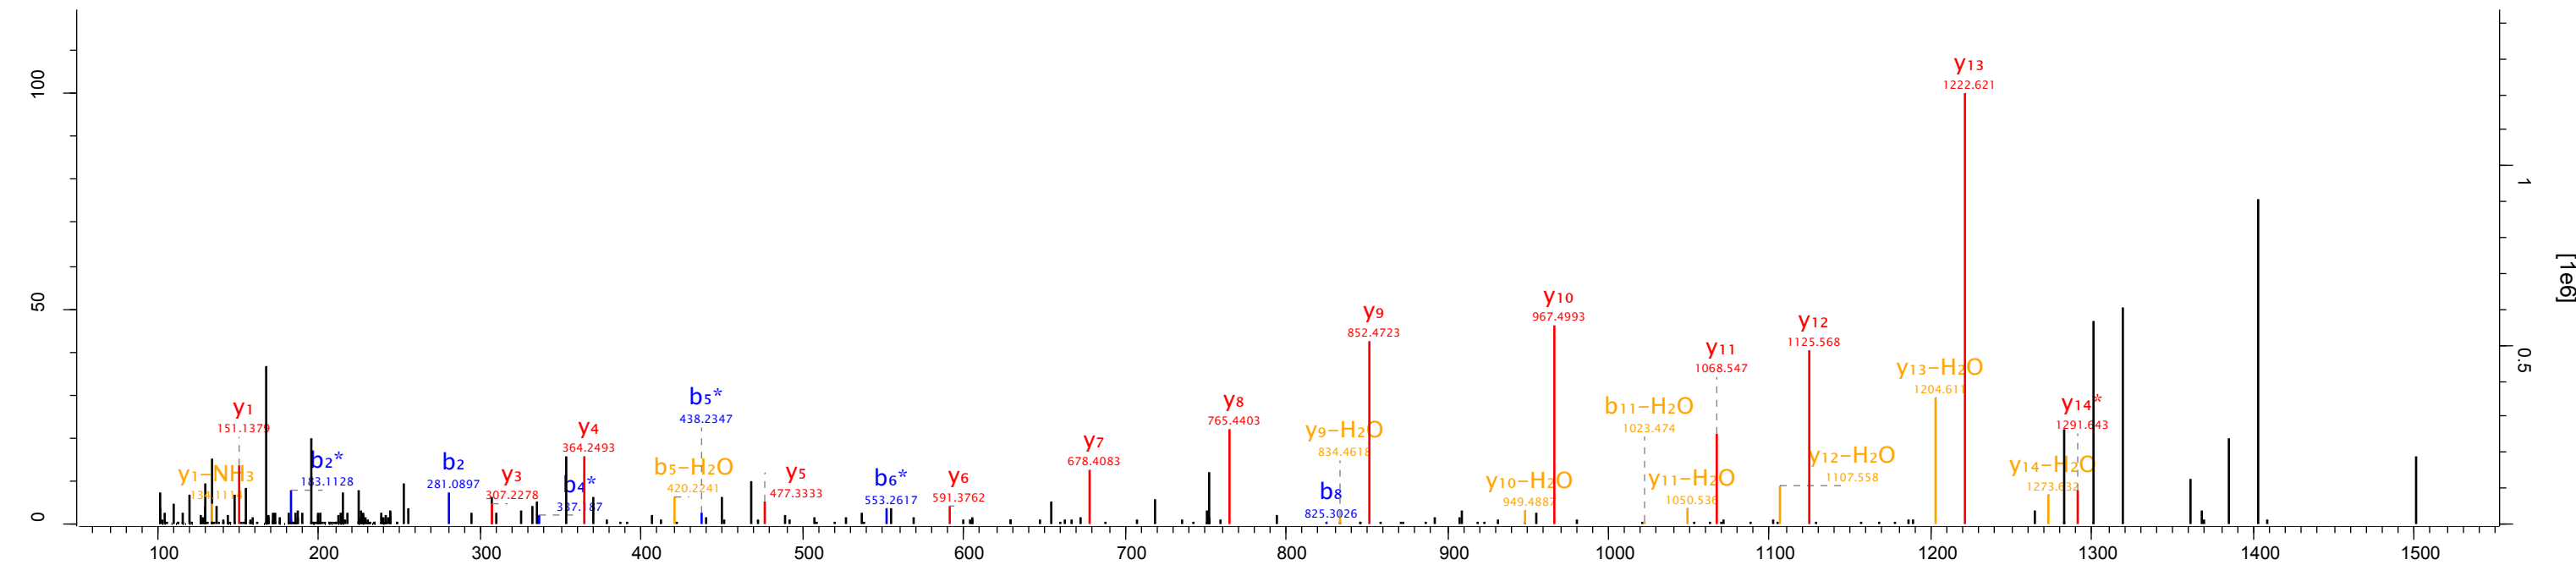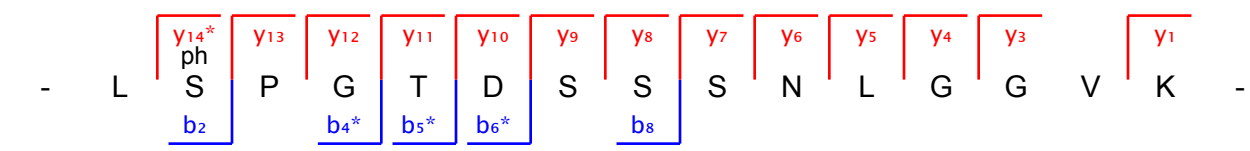

Raw file 20150812\_A375SR\_Phospho\_BR1\_05 Scan 11034 Method FTMS; HCD Score 59.04 m/z 519.23 Gene names LUZP1

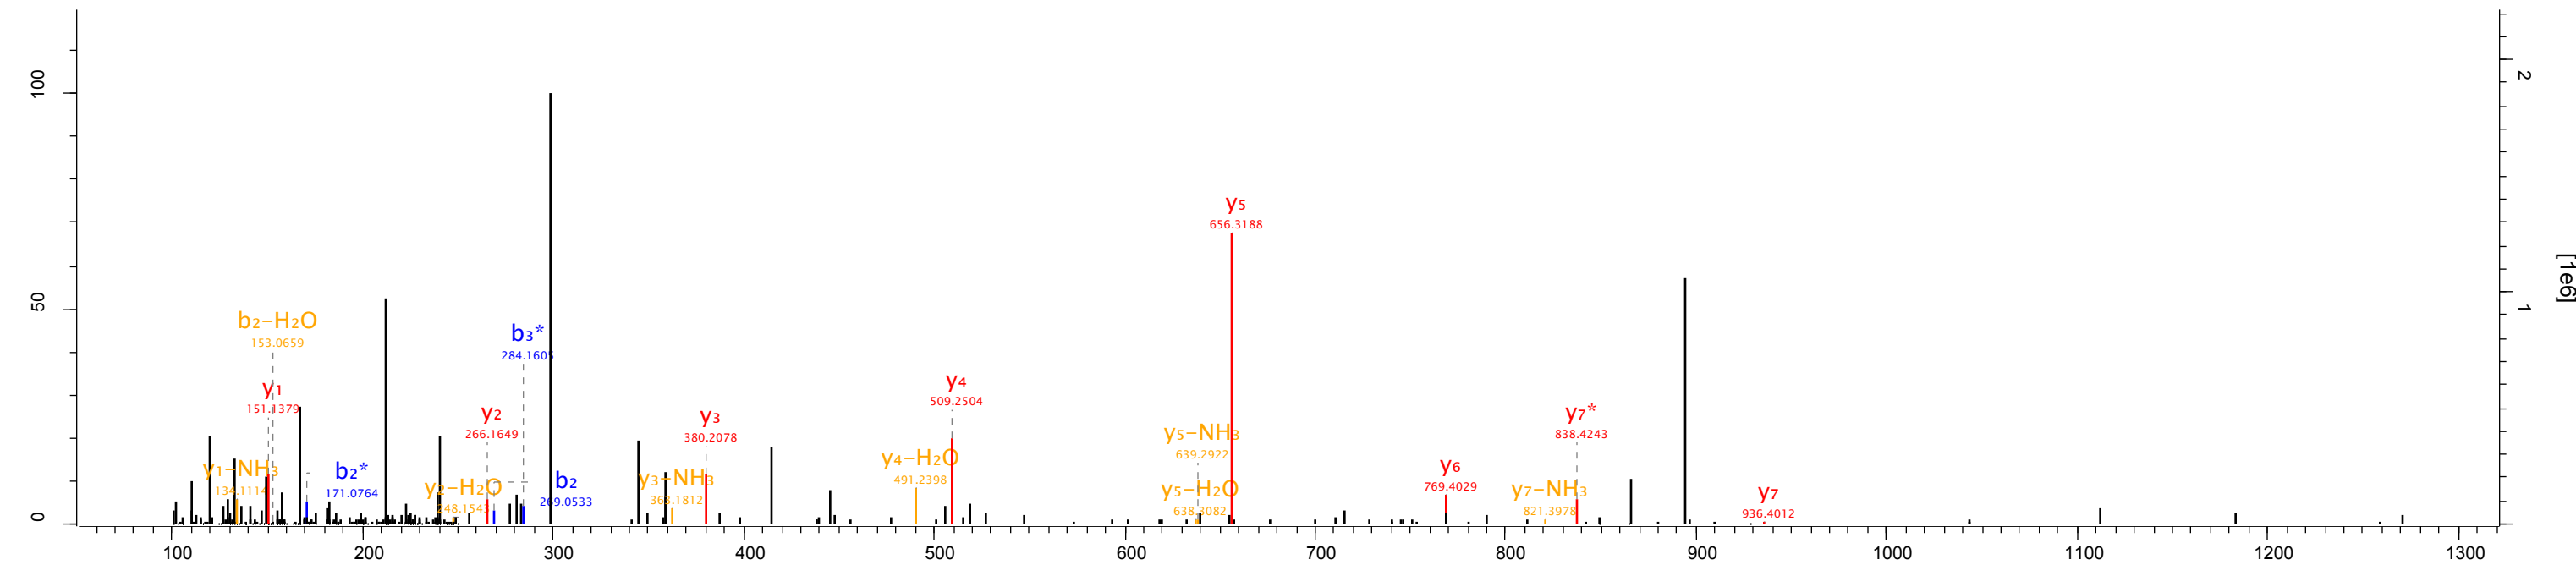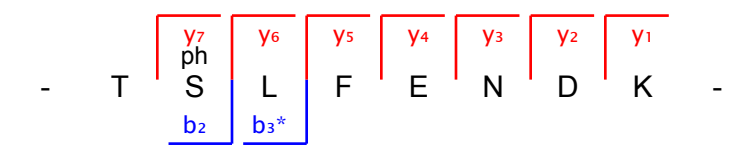

Raw file Scan Method Score m/z Gene names  
 20150812\_A375SR\_Phospho\_BR1\_05 11174 FTMS; HCD 287.14 963.47 ZC3H13

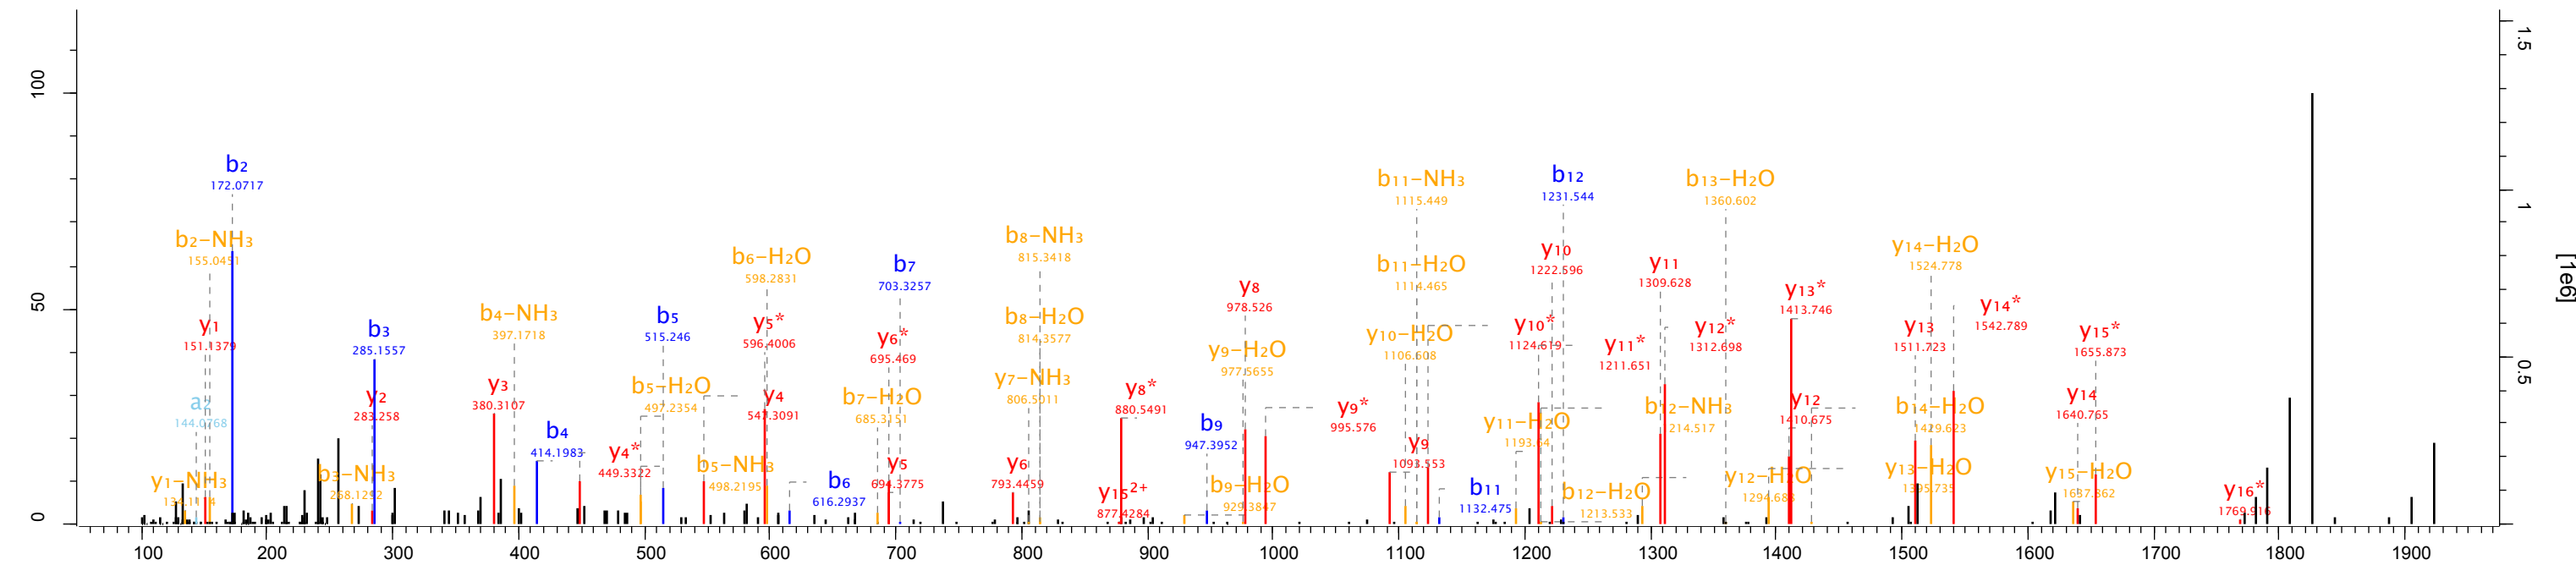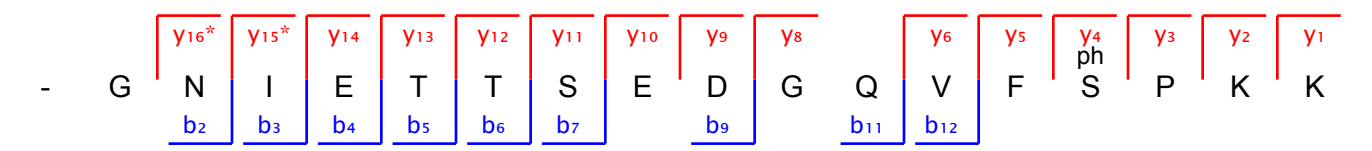

Raw file 20150812\_A375SR\_Phospho\_BR1\_05 Scan 11514 Method FTMS; HCD Score 182.28 m/z 704.33 Gene names PFKP

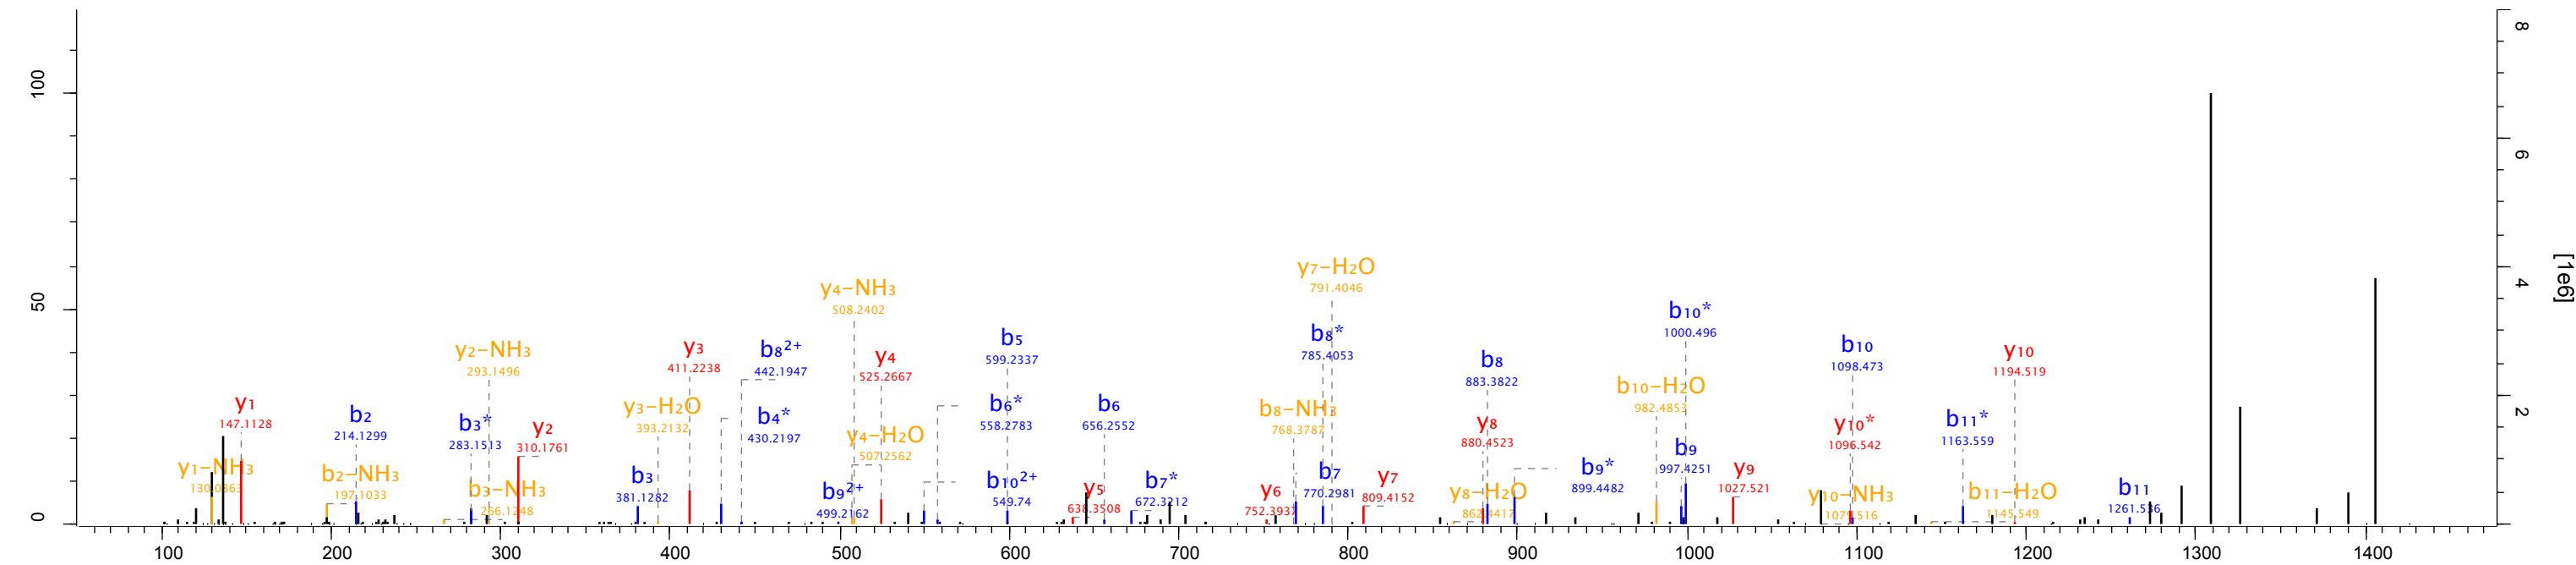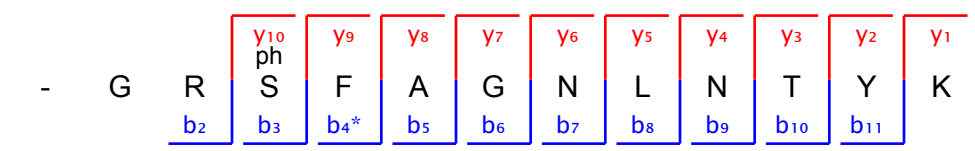

Raw file 20150812\_A375SR\_Phospho\_BR1\_05 Scan 12724 Method FTMS; HCD Score 159.26 m/z 930.89 Gene names NMD3

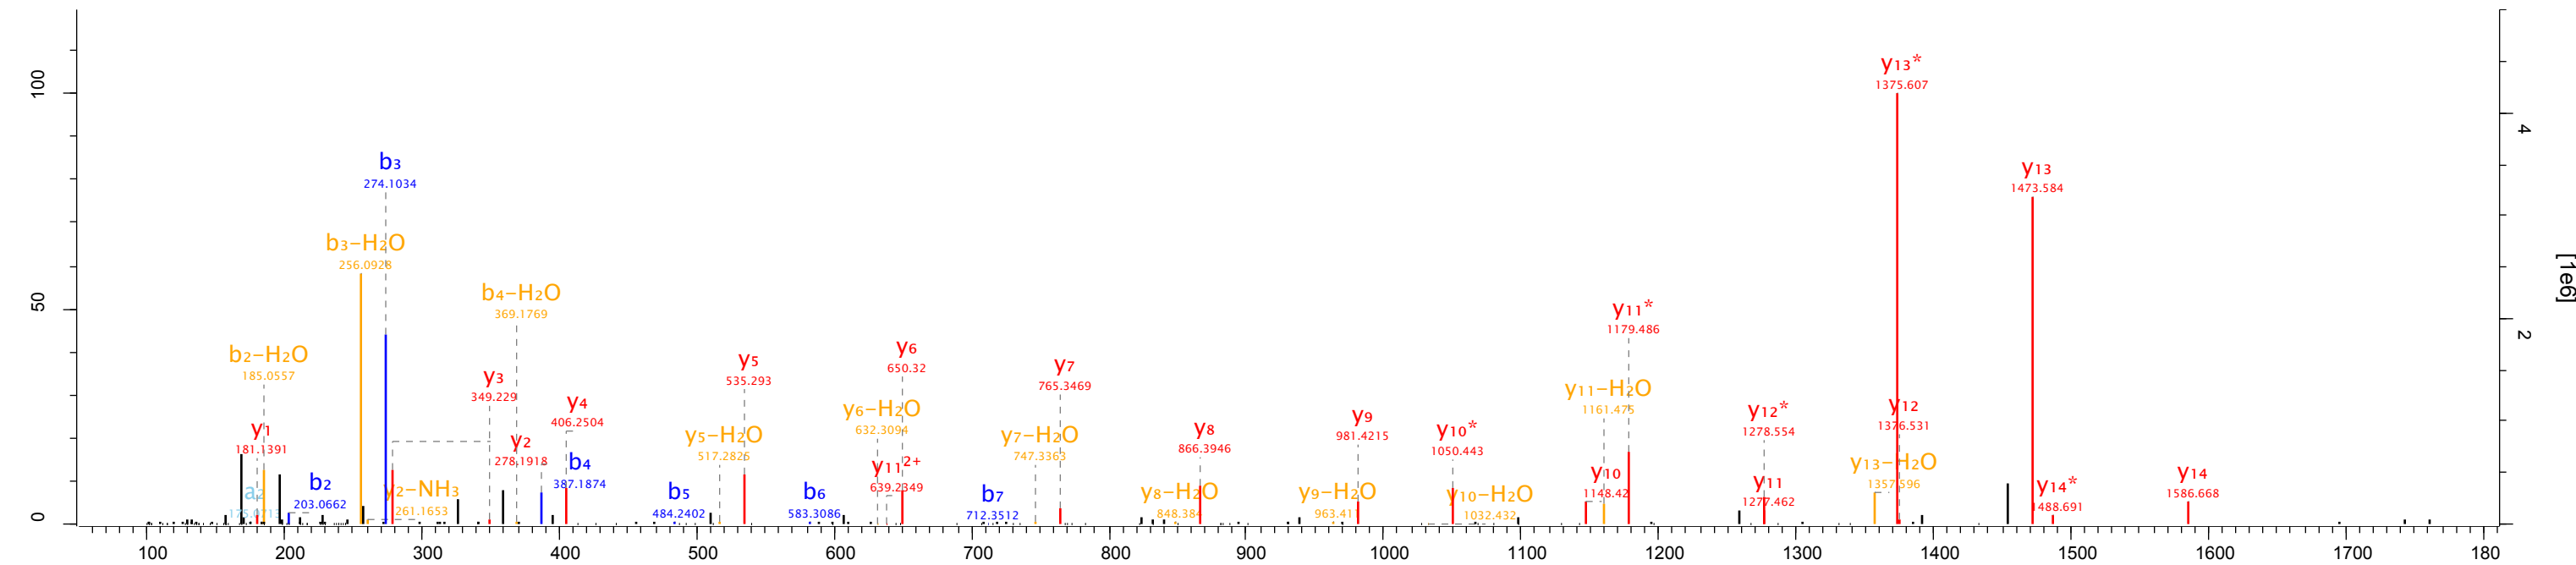

- D S A I P V E S D T D D E G A P R -

Fragmentation sites are indicated by boxes below the sequence:

- Blue boxes: b<sub>2</sub> (S), b<sub>3</sub> (A), b<sub>4</sub> (I), b<sub>5</sub> (P), b<sub>6</sub> (V), b<sub>7</sub> (E)
- Red boxes: y<sub>14</sub> (I), y<sub>13</sub> (P), y<sub>12</sub> (V), y<sub>11</sub> (E), y<sub>10</sub> (S), y<sub>9</sub> (D), y<sub>8</sub> (T), y<sub>7</sub> (D), y<sub>6</sub> (D), y<sub>5</sub> (E), y<sub>4</sub> (G), y<sub>3</sub> (A), y<sub>2</sub> (P), y<sub>1</sub> (R)



Raw file Scan Method Score m/z Gene names  
 20150812\_A375SR\_Phospho\_BR1\_05 12854 FTMS; HCD 133.86 693.33 CBY1

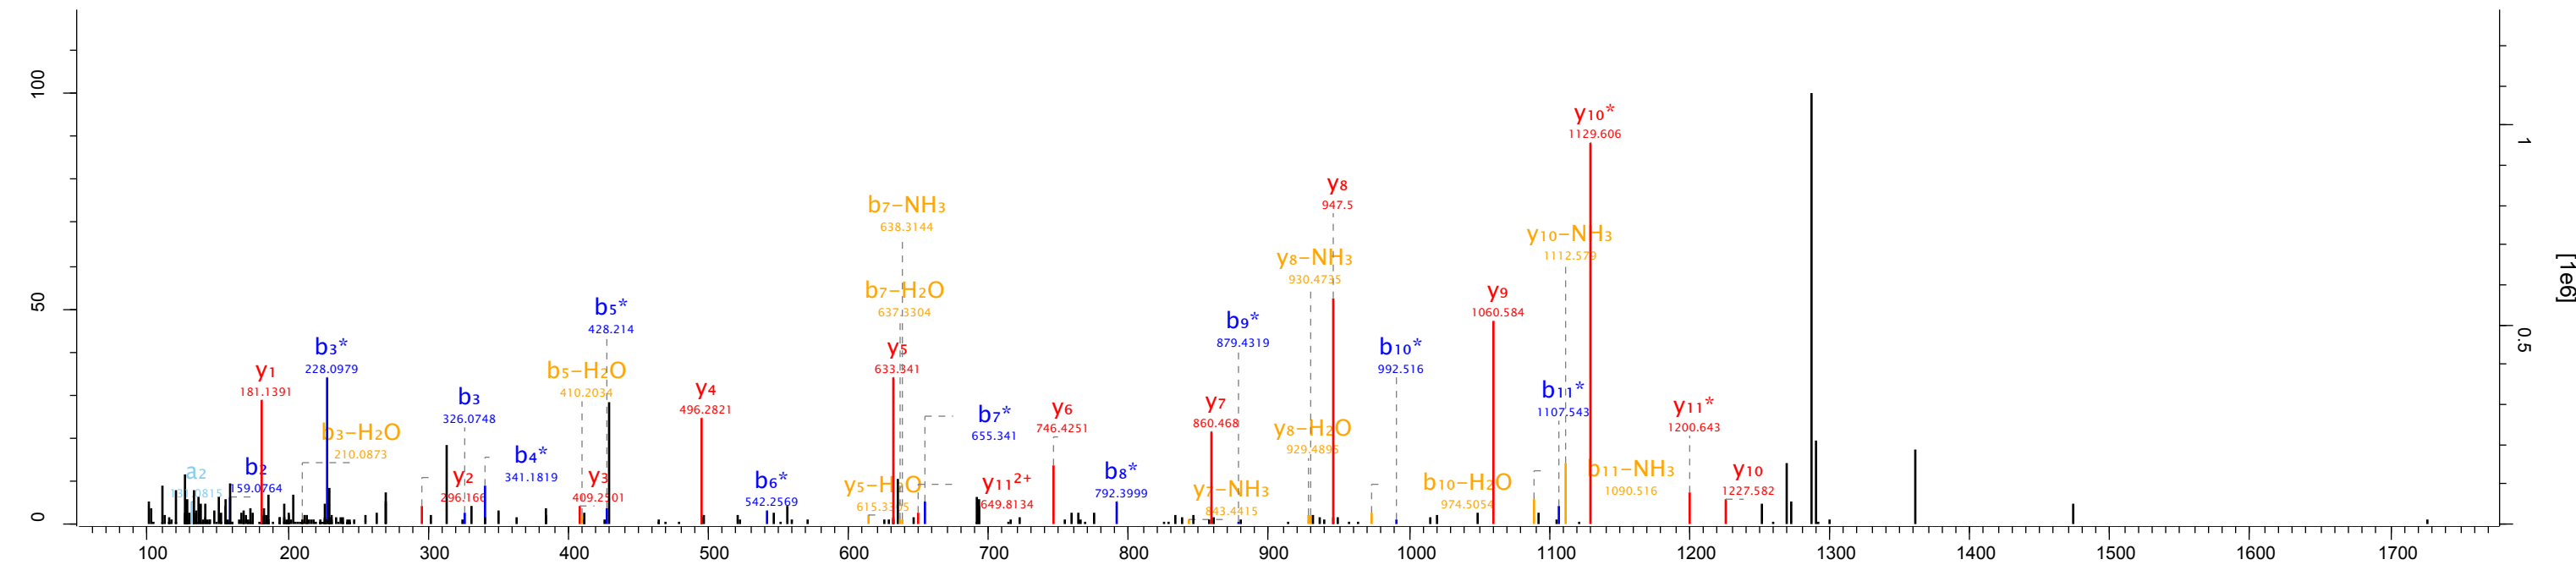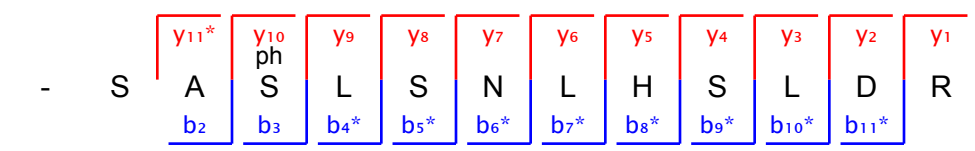

Raw file: 20150812\_A375SR\_Phospho\_BR1\_05  
 Scan: 13214 Method: FTMS; HCD Score: 108.08 m/z: 735.36 Gene names: RB1

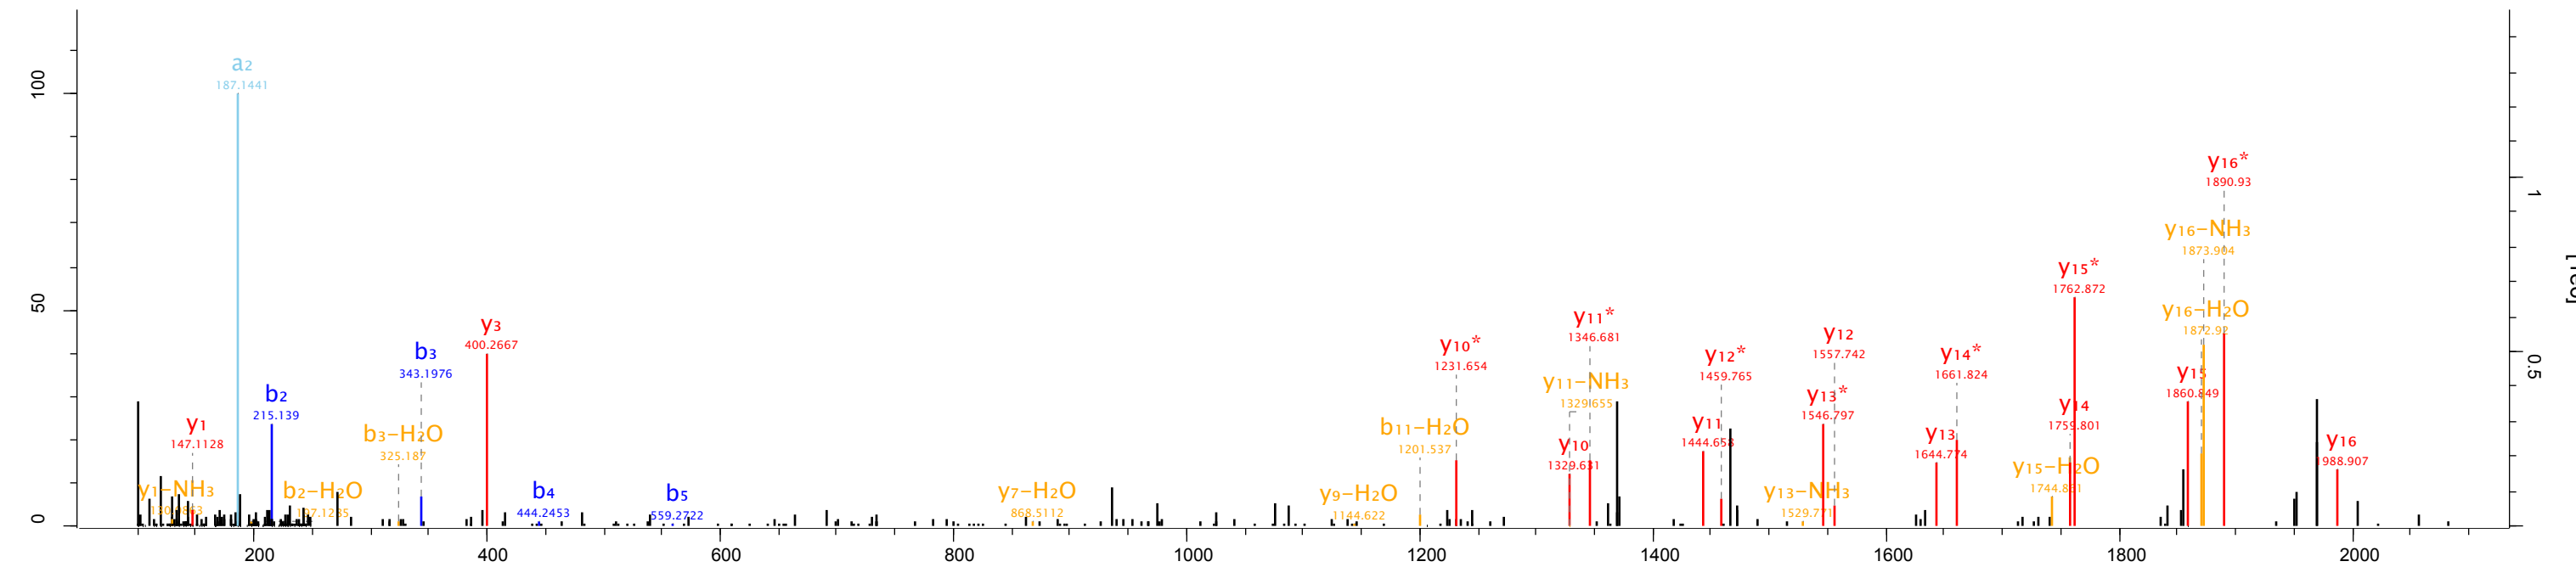

- T L Q T D S I D S F E T Q R T P R K -

b<sub>2</sub>
b<sub>3</sub>
b<sub>4</sub>
b<sub>5</sub>
y<sub>16</sub>
y<sub>15</sub>
y<sub>14</sub>
y<sub>13</sub>
y<sub>12</sub>
y<sub>11</sub>
y<sub>10</sub>  
ph
y<sub>3</sub>
y<sub>1</sub>

Raw file: 20150812\_A375SR\_Phospho\_BR1\_05  
 Scan: 13324 Method: FTMS; HCD Score: 203.53 m/z: 686.83 Gene names: TRAFD1

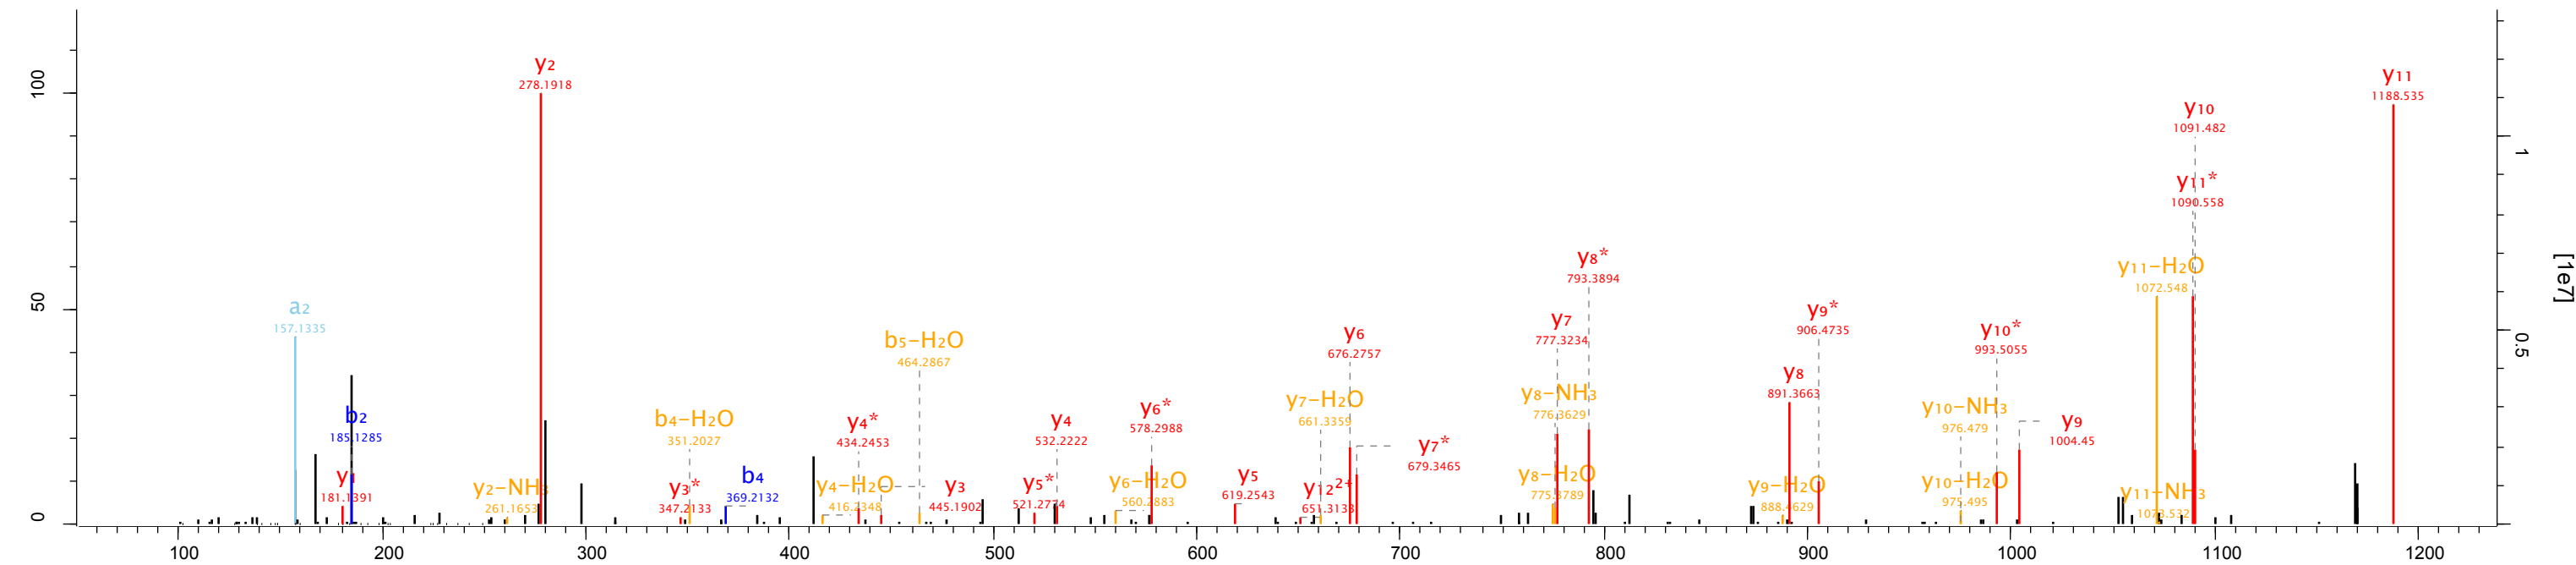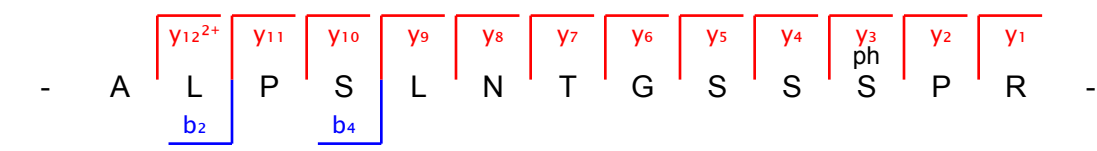

Raw file: 20150812\_A375SR\_Phospho\_BR1\_05  
 Scan: 13344 Method: FTMS; HCD Score: 136.26 m/z: 853.89 Gene names: ABLIM1

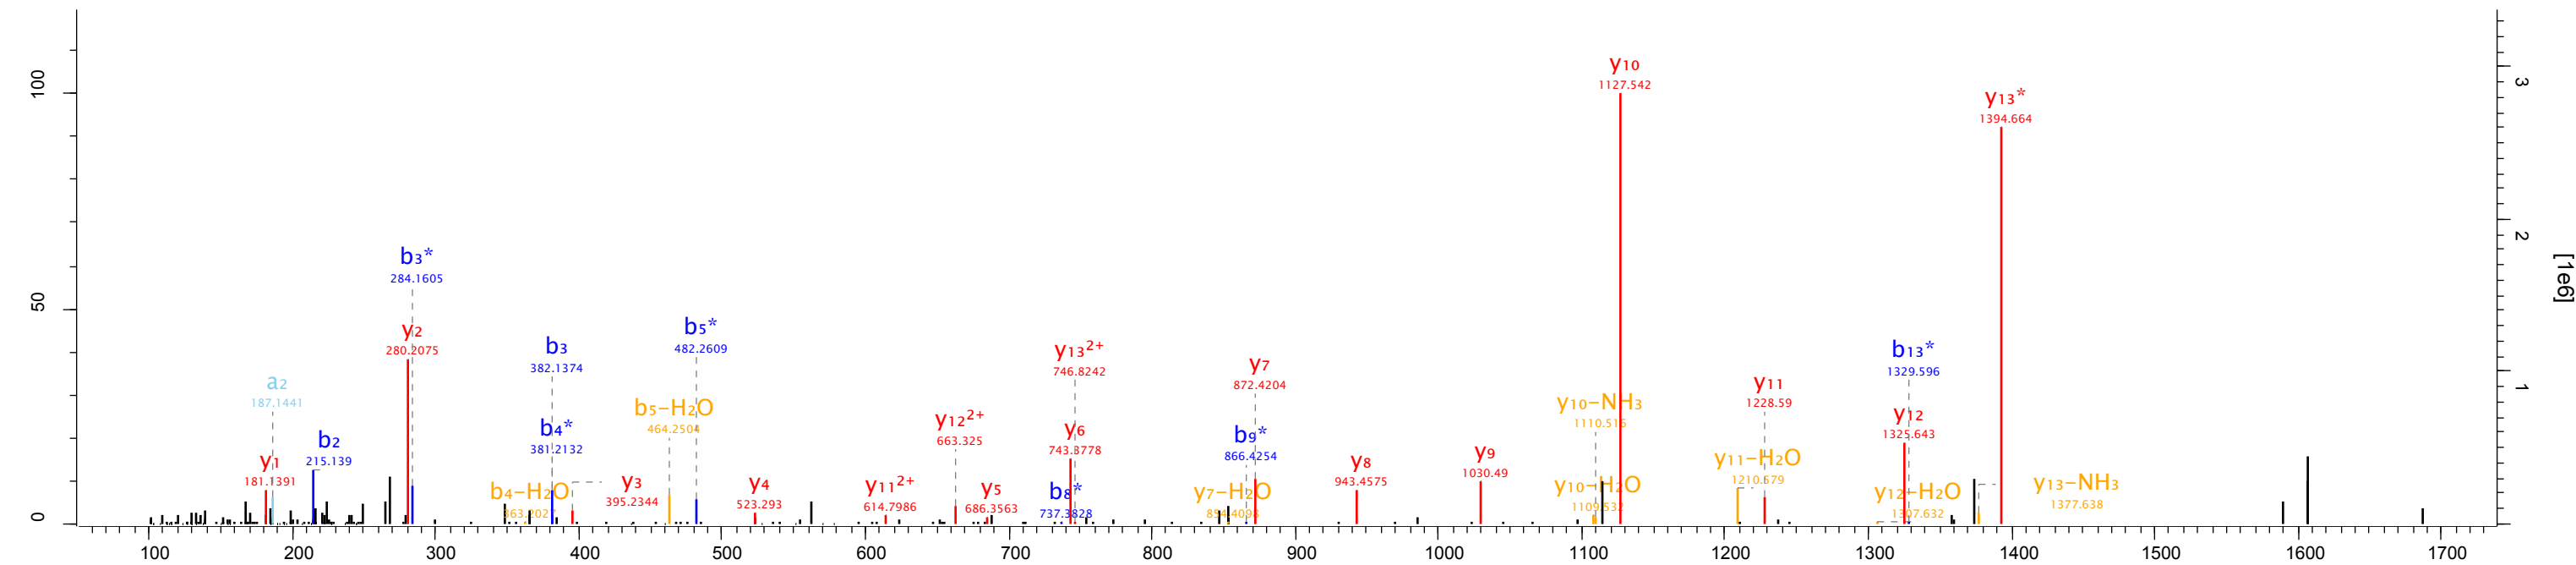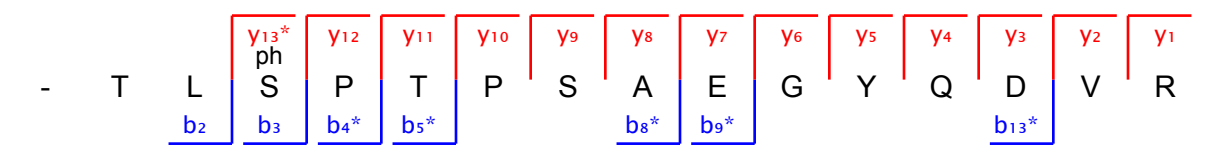

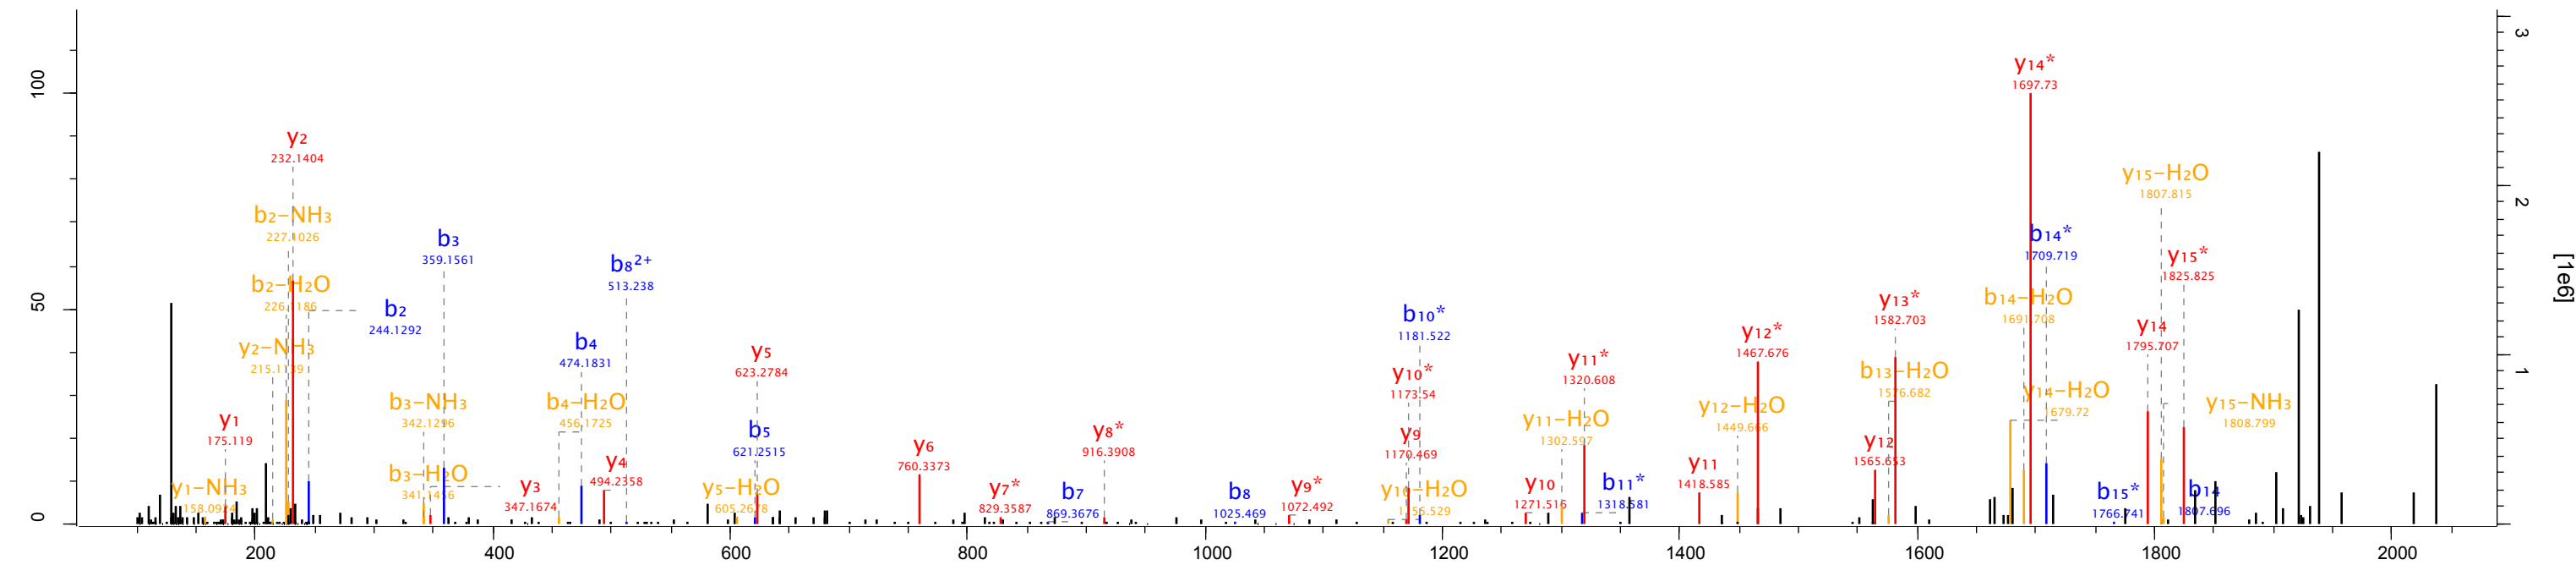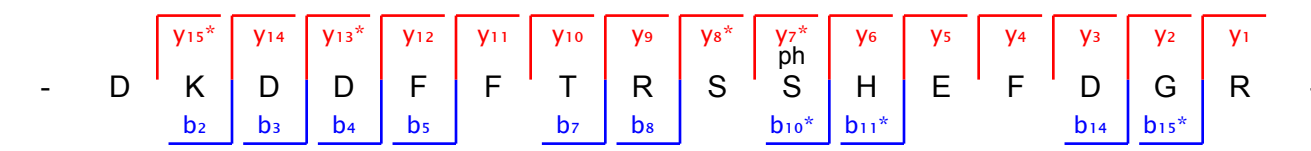

Raw file: 20150812\_A375SR\_Phospho\_BR1\_05  
 Scan: 1474 Method: FTMS; HCD Score: 49.04 m/z: 538.57 Gene names: EML3

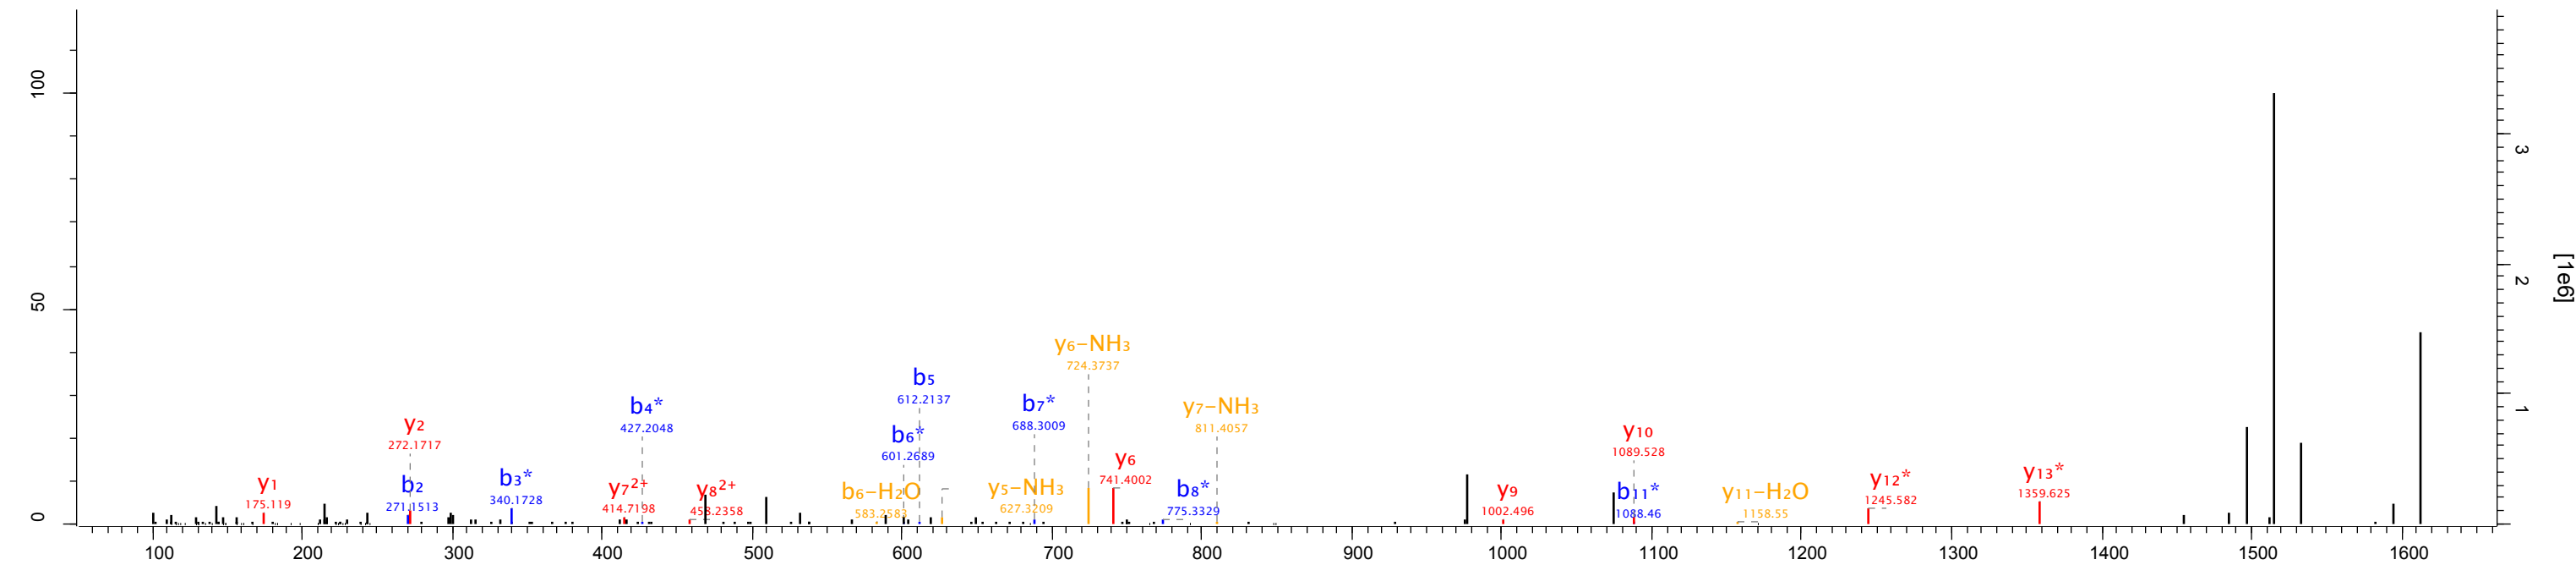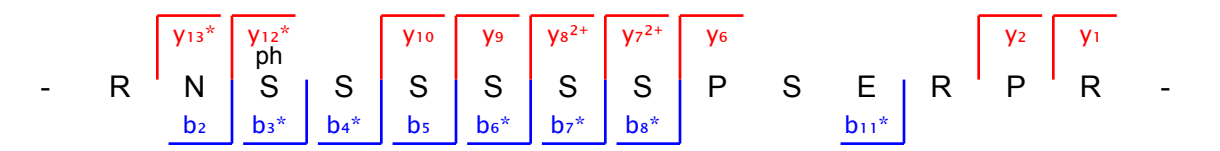

Raw file: 20150812\_A375SR\_Phospho\_BR1\_05  
 Scan: 14854 Method: FTMS; HCD Score: 189.66 m/z: 1049.45 Gene names: BABAM1

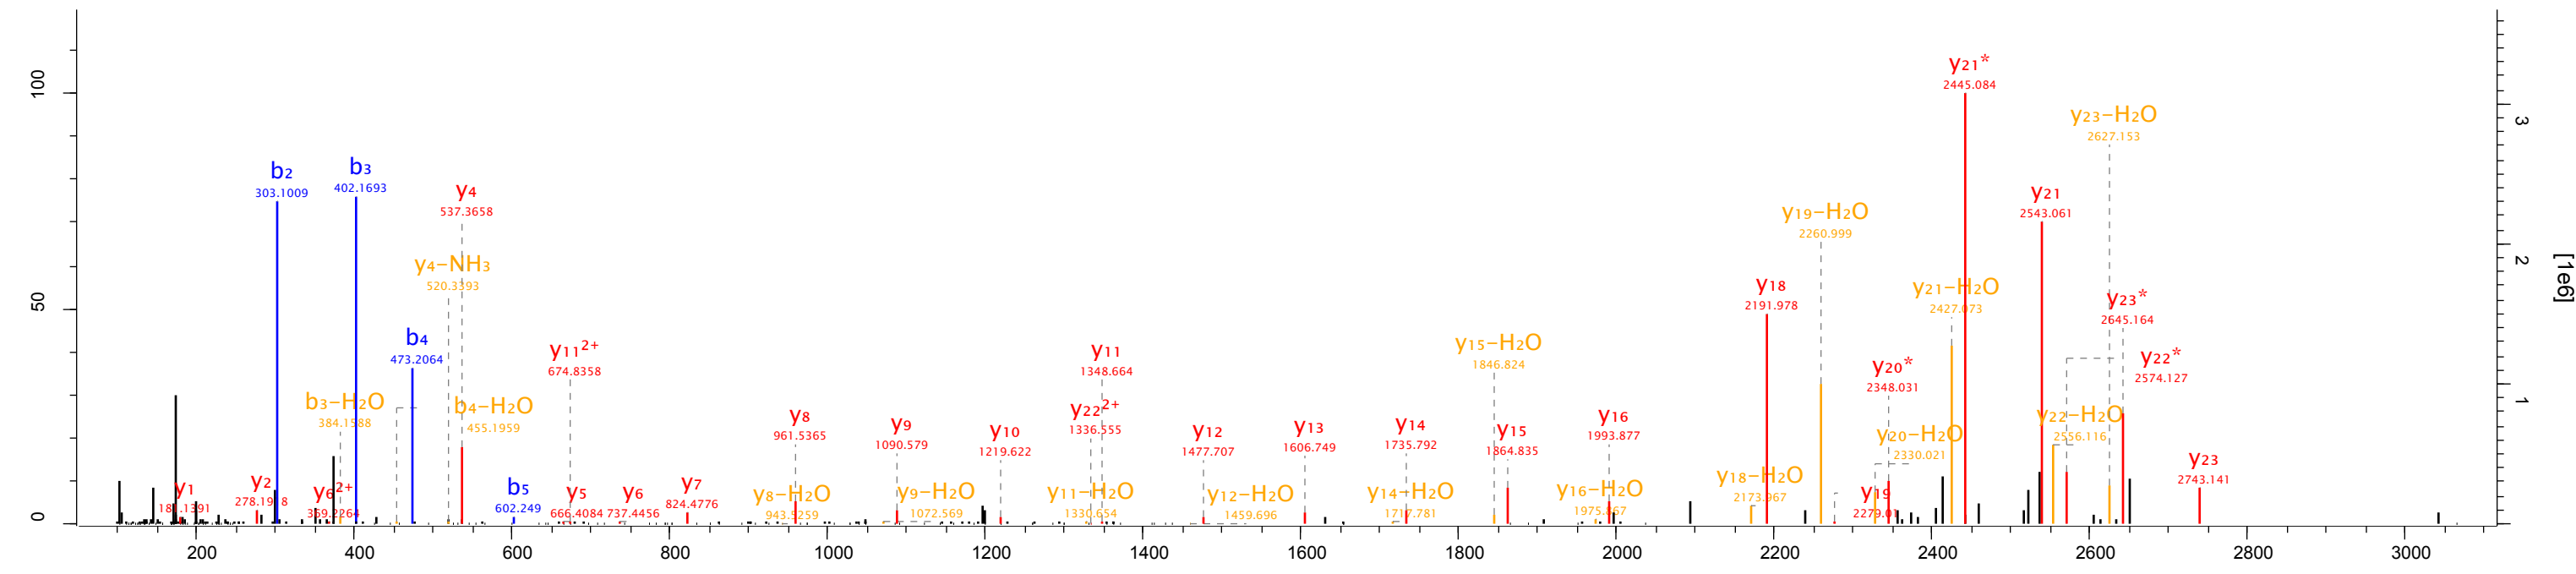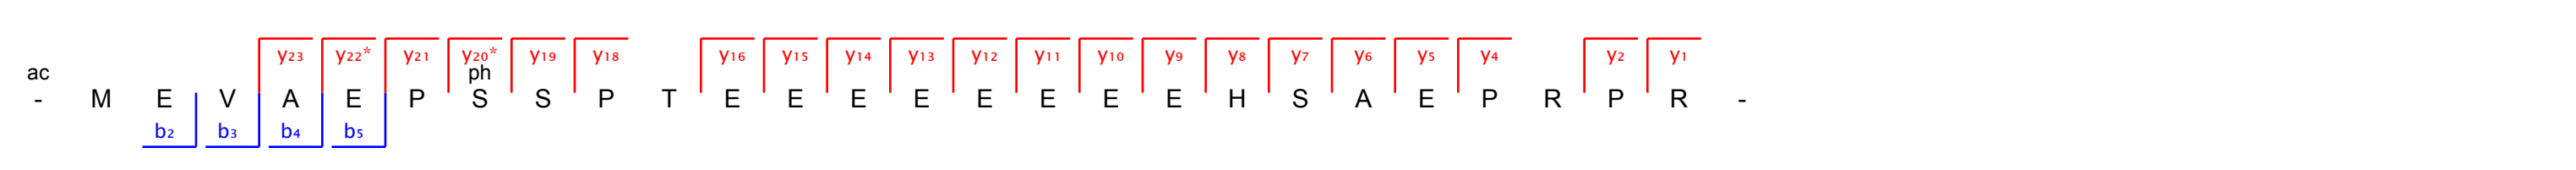

Raw file 20150812\_A375SR\_Phospho\_BR1\_05 Scan 16174 Method FTMS; HCD Score 178.68 m/z 829.36 Gene names CRIM1

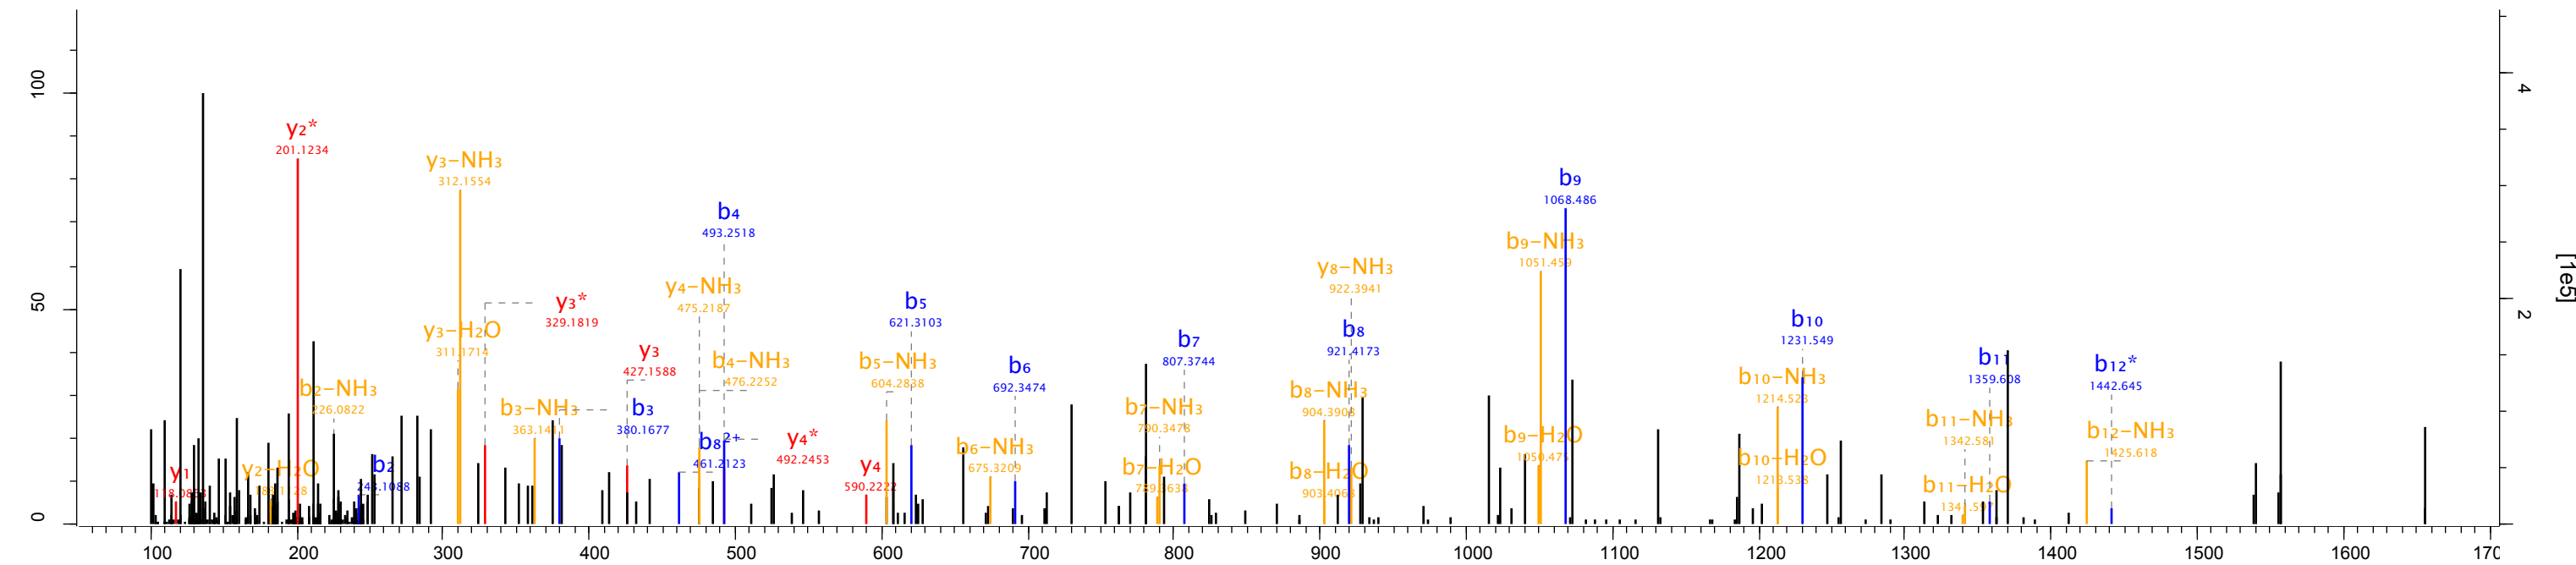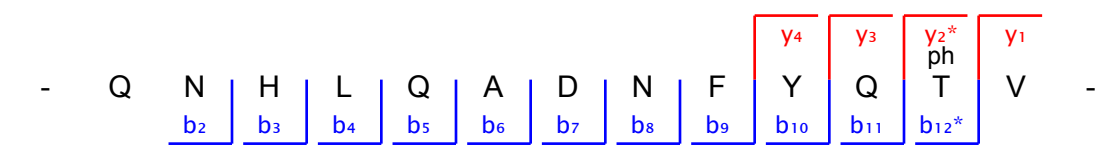



Raw file 20150812\_A375SR\_Phospho\_BR1\_05 Scan 16334 Method FTMS; HCD Score 94.71 m/z 813.35 Gene names PLEKHA3

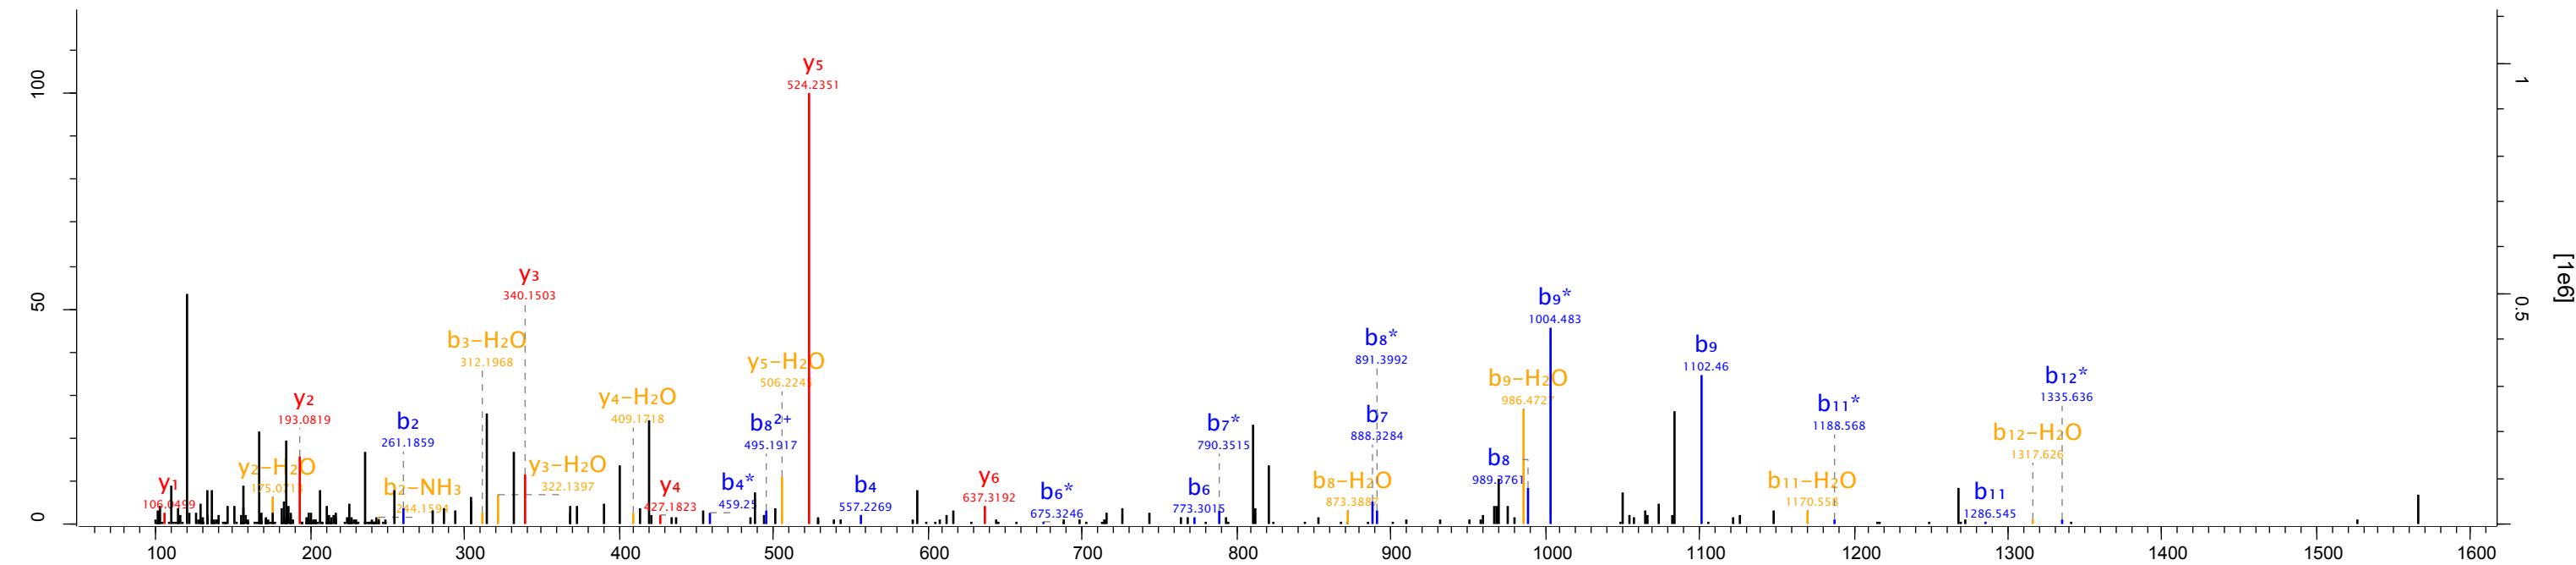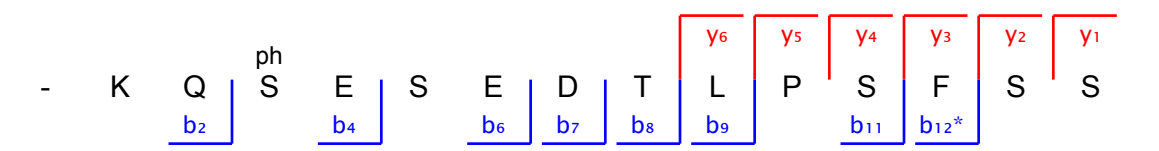

Raw file: 20150812\_A375SR\_Phospho\_BR1\_05  
 Scan: 16864 Method: FTMS; HCD Score: 92.86 m/z: 572.77 Gene names: LYSMD2

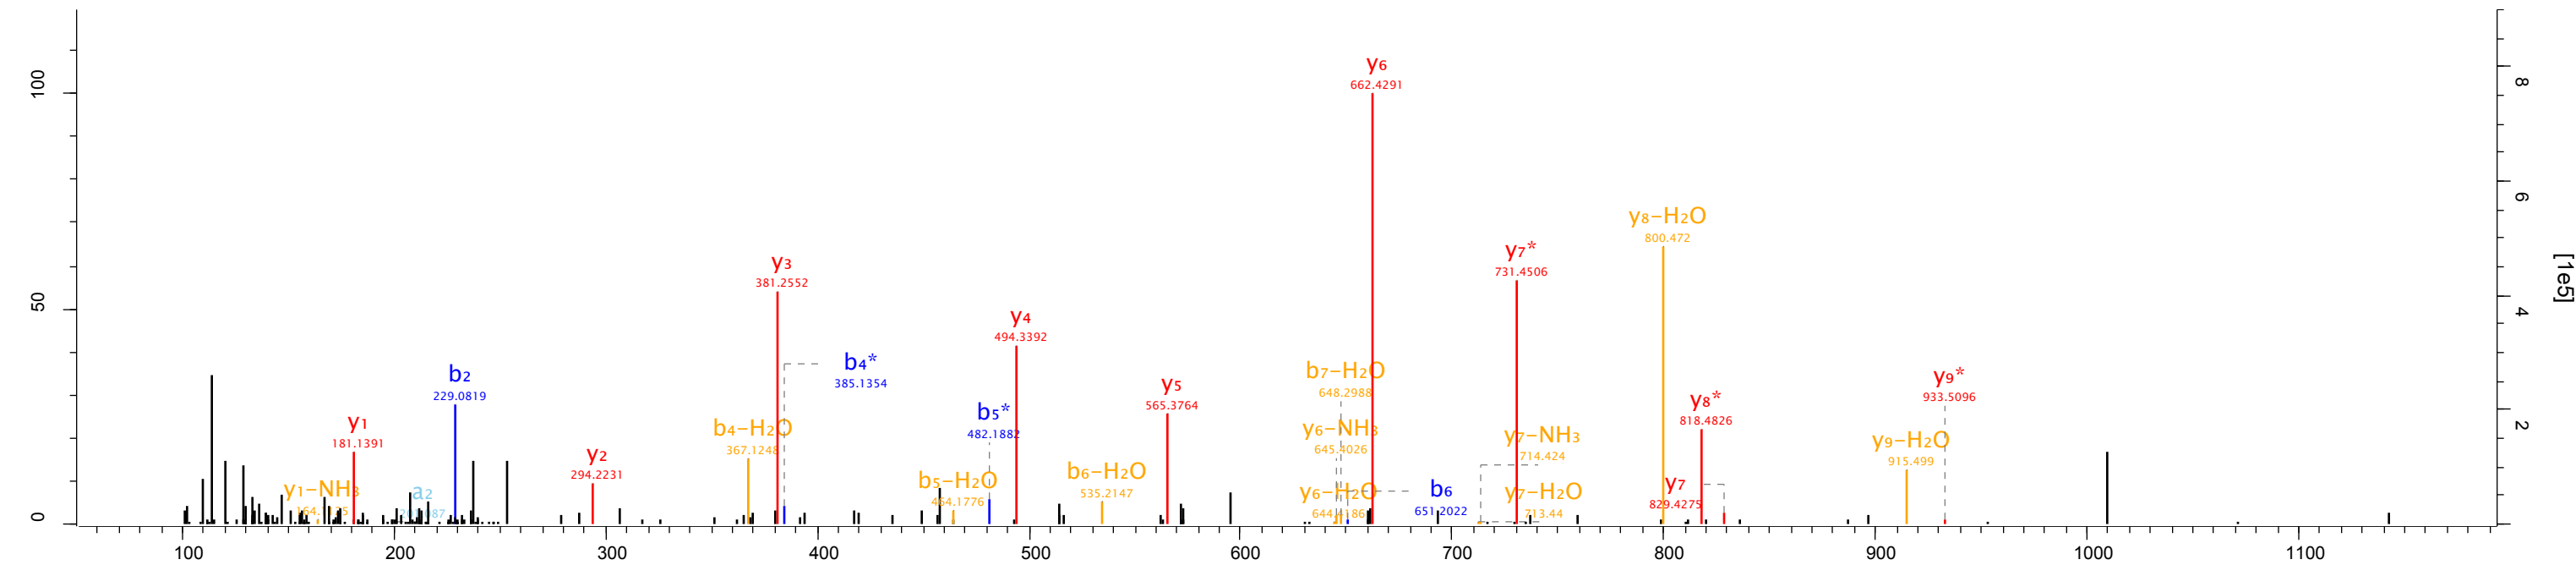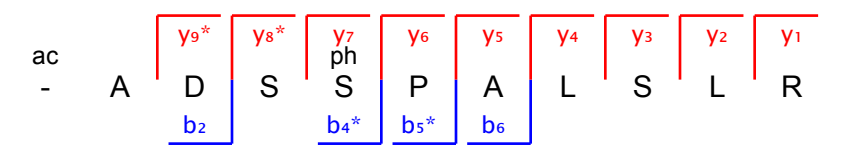

Raw file: 20150812\_A375SR\_Phospho\_BR1\_05  
 Scan: 17454 Method: FTMS; HCD Score: 207.37 m/z: 811.92 Gene names: ELMSAN1

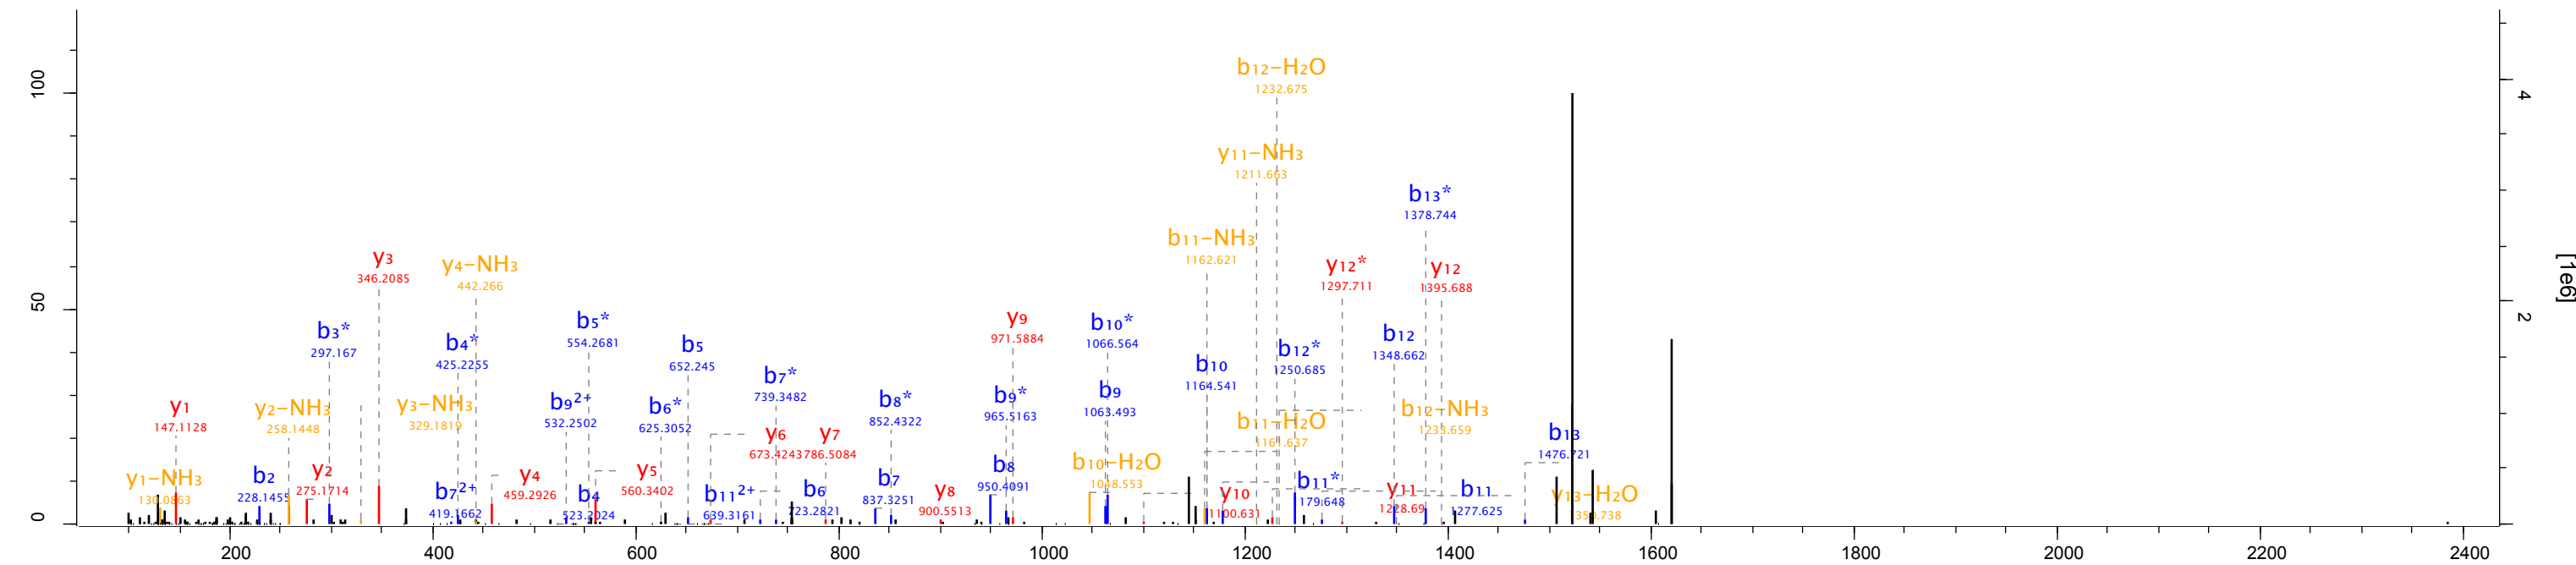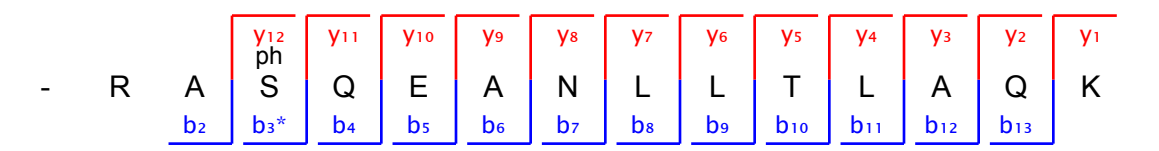

Raw file 20150812\_A375SR\_Phospho\_BR1\_05 Scan 17834 Method FTMS; HCD Score 81.44 m/z 589.62 Gene names NUP107

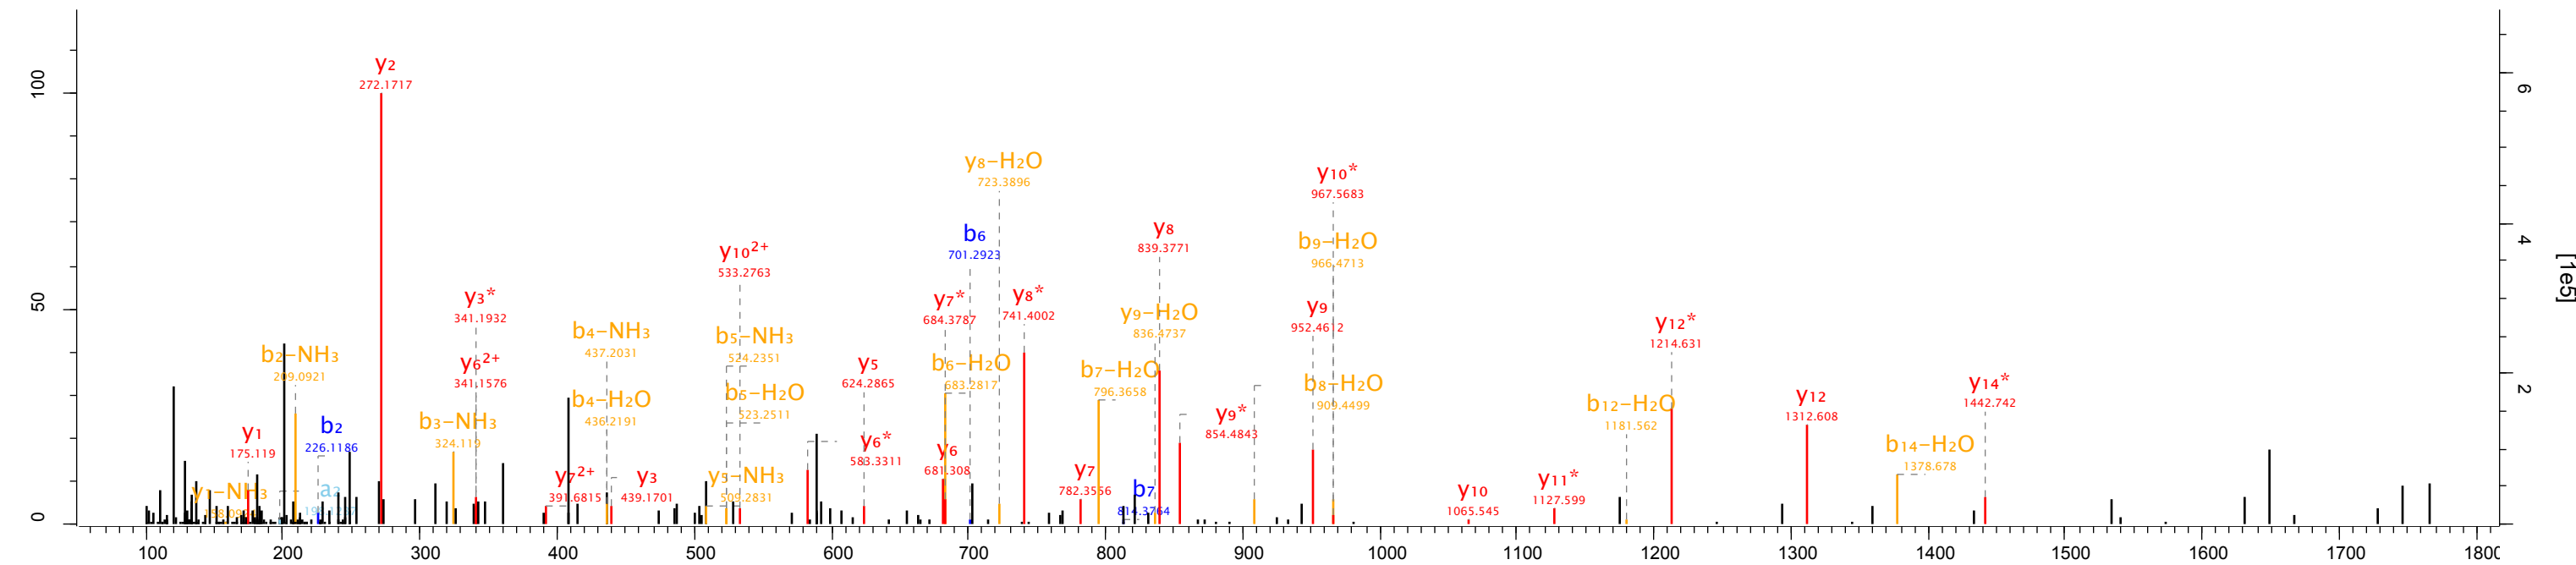

- Q P D I S C I L G T G G K S P R -

Fragmentation sites are indicated by brackets above the sequence:

- Red brackets above: y14\* (D-I), y12 (S-C), y11\* (C-I), y10 (I-L), y9 (L-G), y8 (G-T), y7 (T-G), y6 (G-G), y5 (G-K), y3 (S-ph), y2 (P-S), y1 (S-R)
- Blue brackets below: b2 (P-D), b6 (C-I), b7 (I-L)

Raw file 20150812\_A375SR\_Phospho\_BR1\_05 Scan 18114 Method FTMS; HCD Score 320.41 m/z 1033.11 Gene names RCOR1

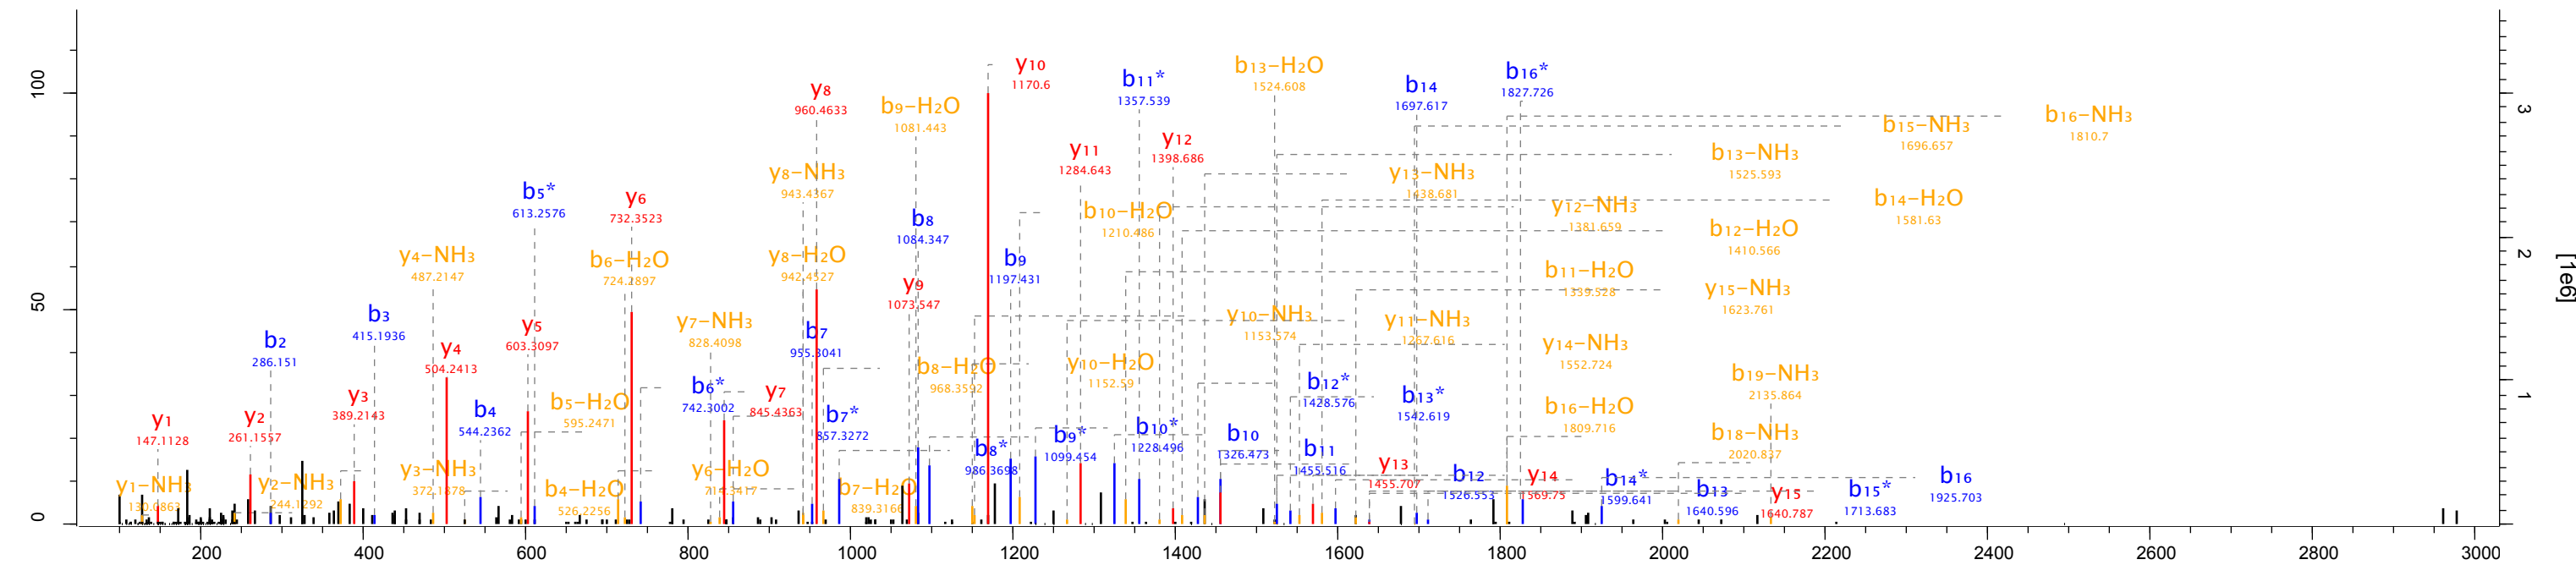

- E R E E S E D E L E E A N G N N P I D I E V D Q N K -

Fragmentation mapping below the sequence:

- Red boxes (y-ions): y15 (A), y14 (N), y13 (G), y12 (N), y11 (N), y10 (P), y9 (I), y8 (D), y7 (I), y6 (E), y5 (V), y4 (D), y3 (Q), y2 (N), y1 (K)
- Blue boxes (b-ions): b2 (R), b3 (E), b4 (E), b5\* (S), b6\* (E), b7 (D), b8 (E), b9 (L), b10 (E), b11 (E), b12 (A), b13 (N), b14 (G), b15\* (N), b16 (N)

Raw file Scan Method Score m/z Gene names  
 20150812\_A375SR\_Phospho\_BR1\_05 18454 FTMS; HCD 166.27 723.65 SLC26A2

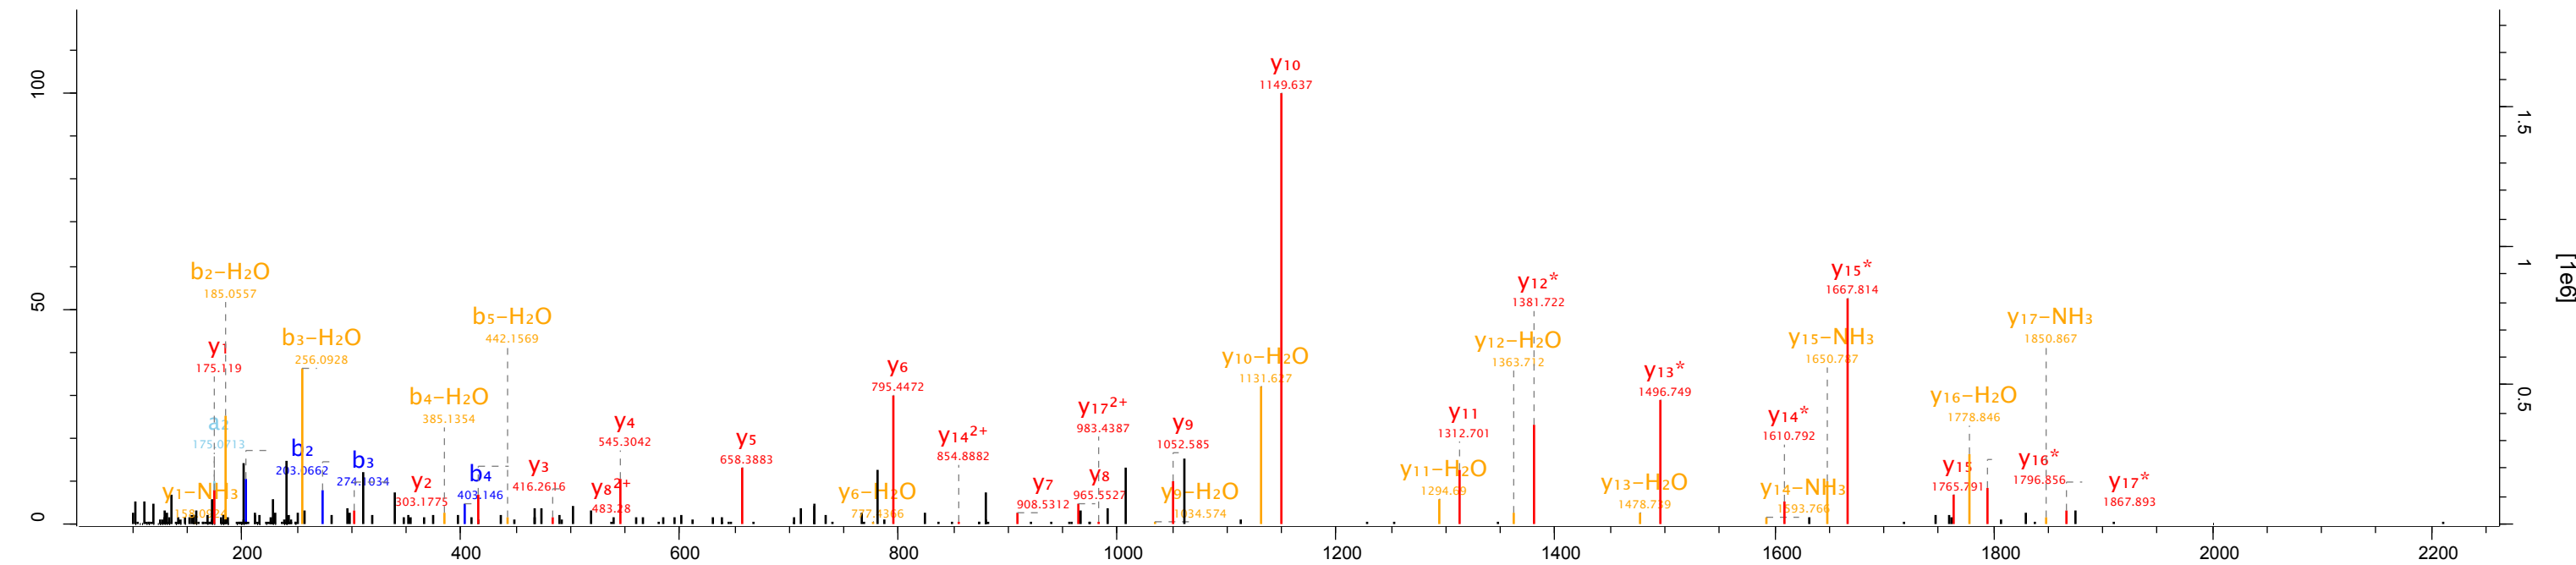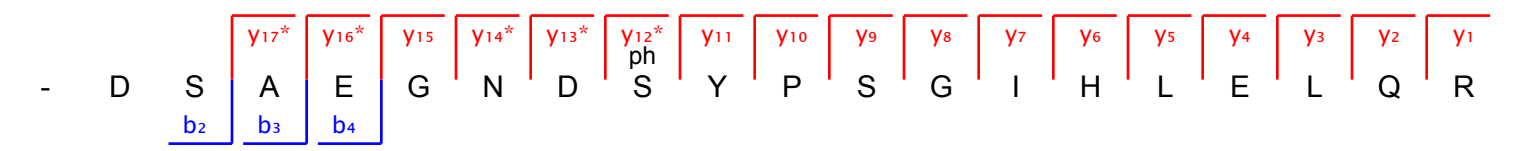

Raw file 20150812\_A375SR\_Phospho\_BR1\_05 Scan 18684 Method FTMS; HCD Score 215.28 m/z 1118 Gene names KHSRP

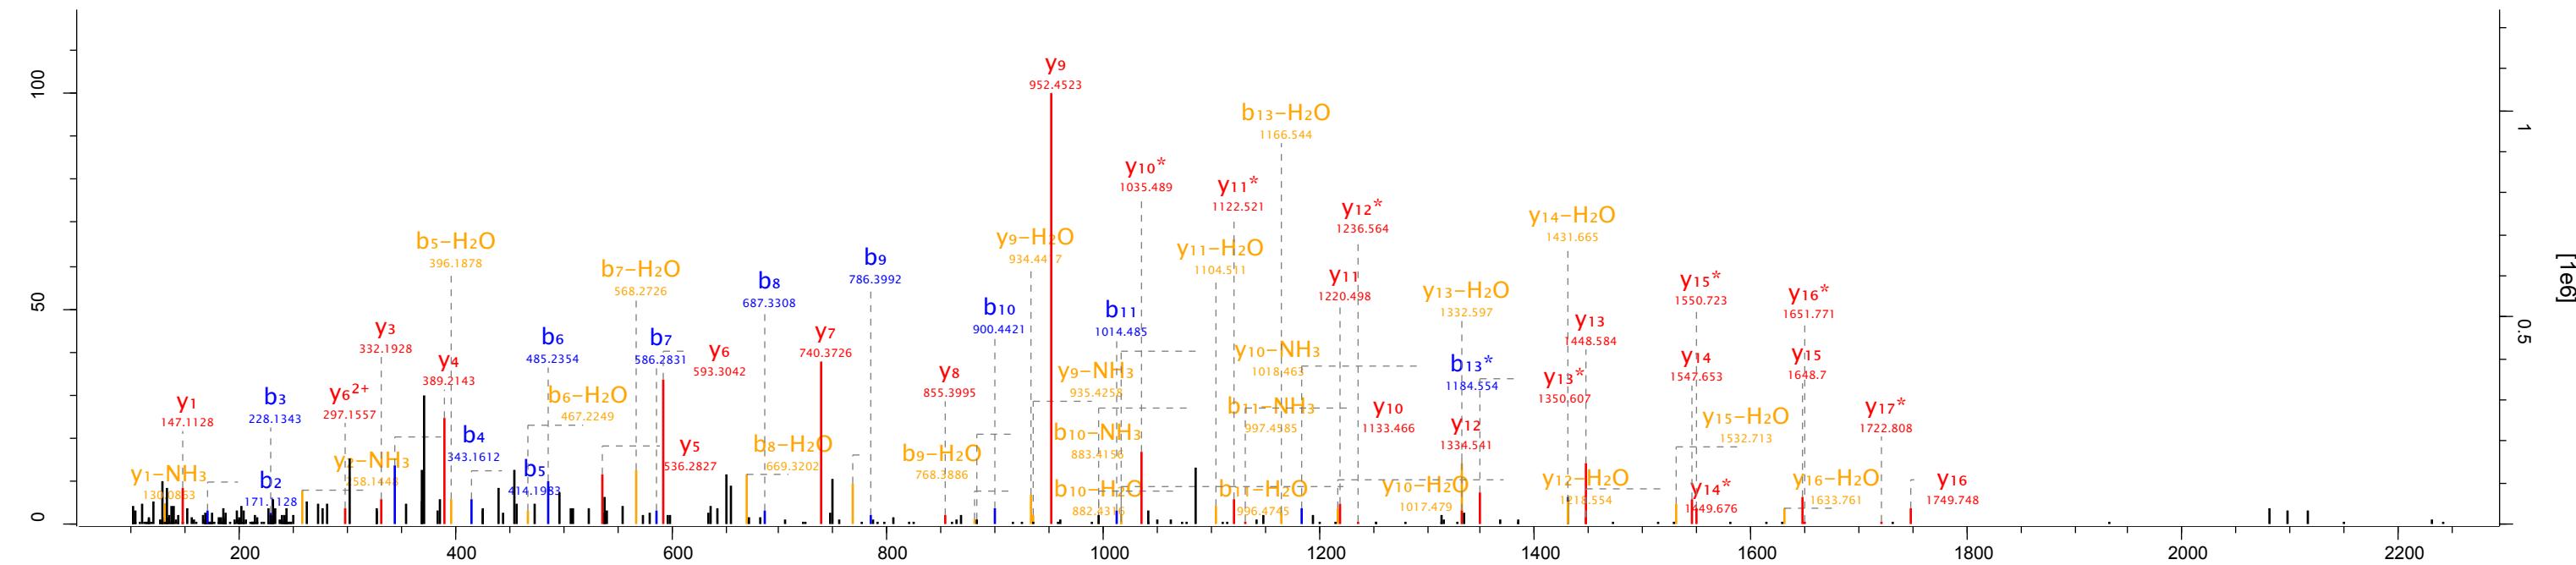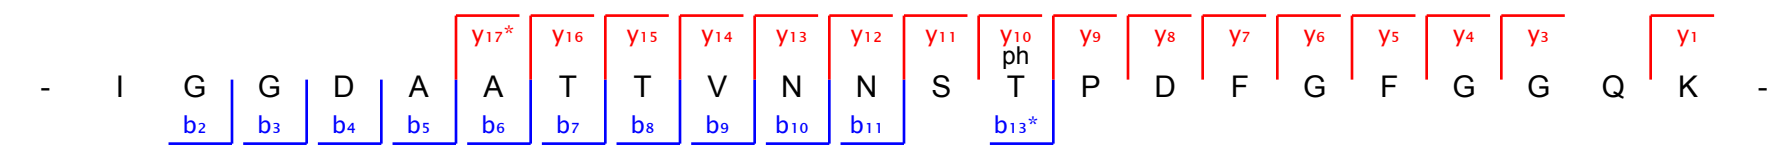

Raw file 20150812\_A375SR\_Phospho\_BR1\_05 Scan 19334 Method FTMS; HCD Score 433.87 m/z 1288.49 Gene names EHD2

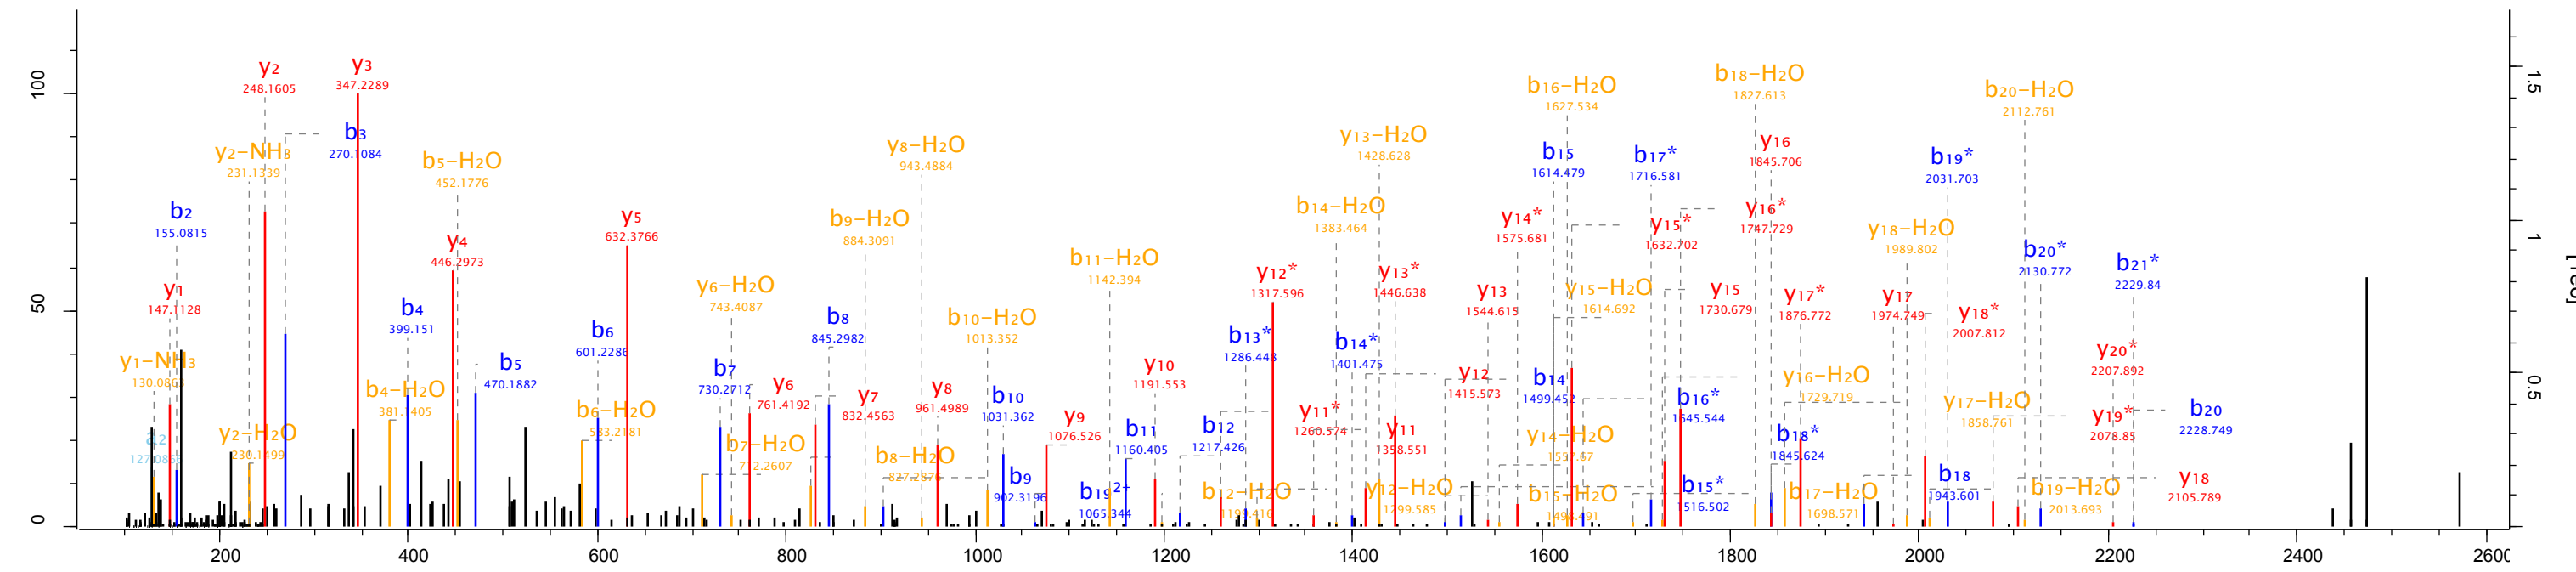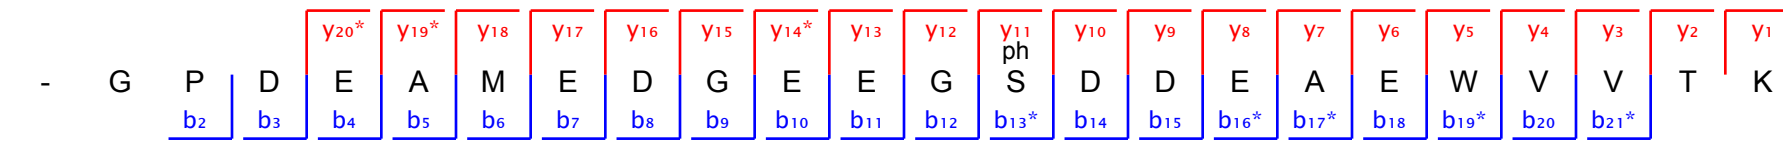



Raw file 20150812\_A375SR\_Phospho\_BR1\_05 Scan 21594 Method FTMS; HCD Score 176.34 m/z 1152.57 Gene names MSANTD2

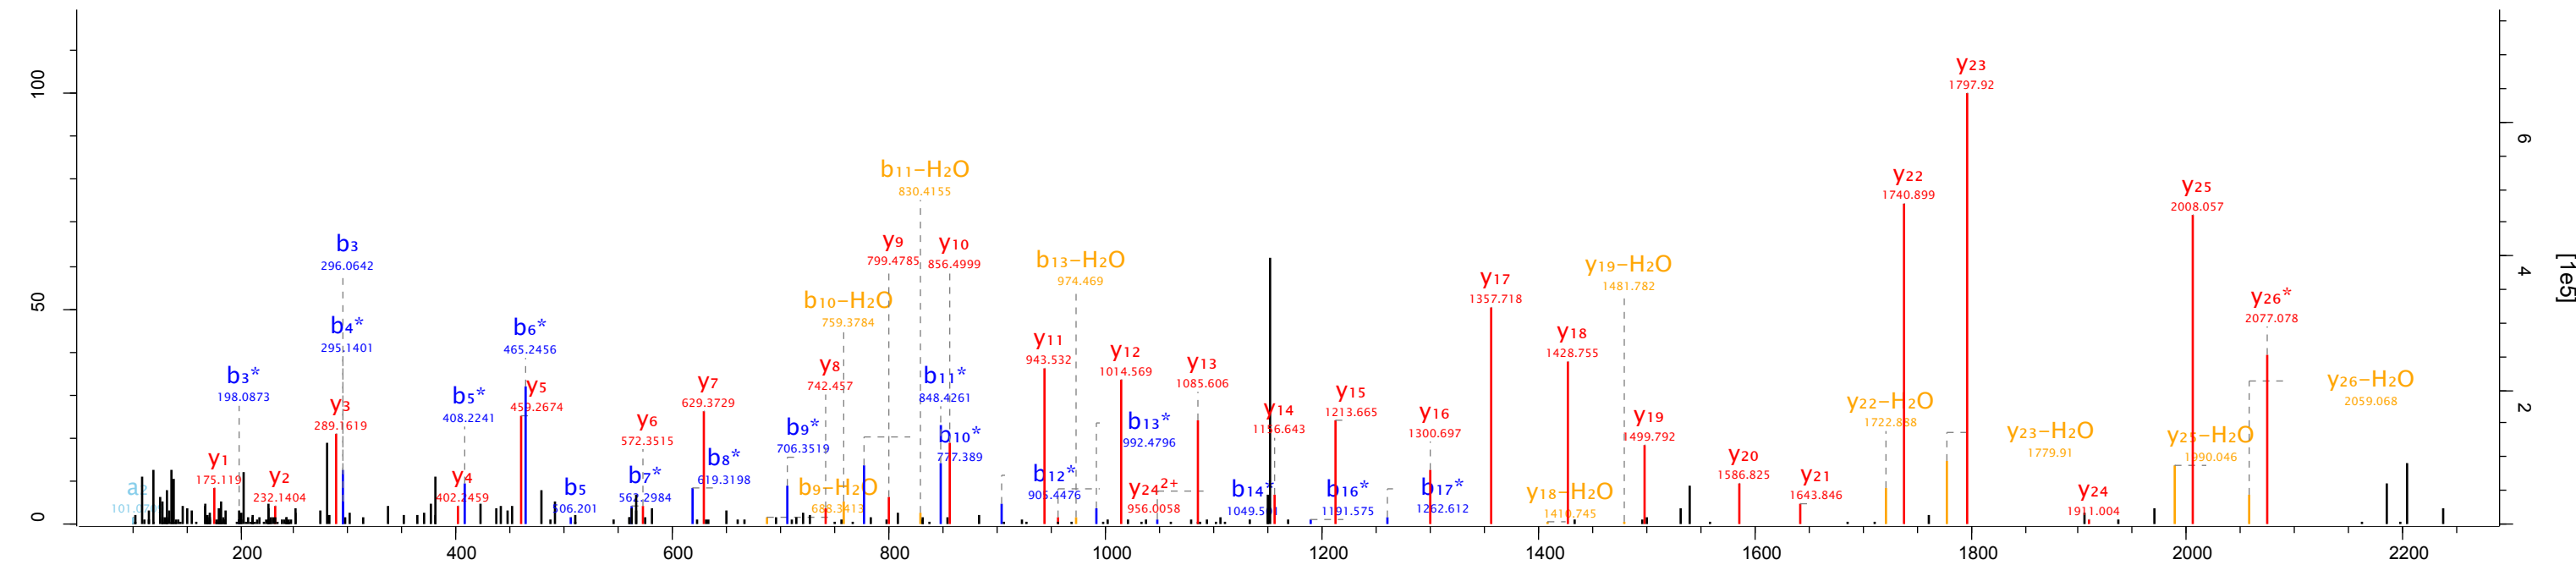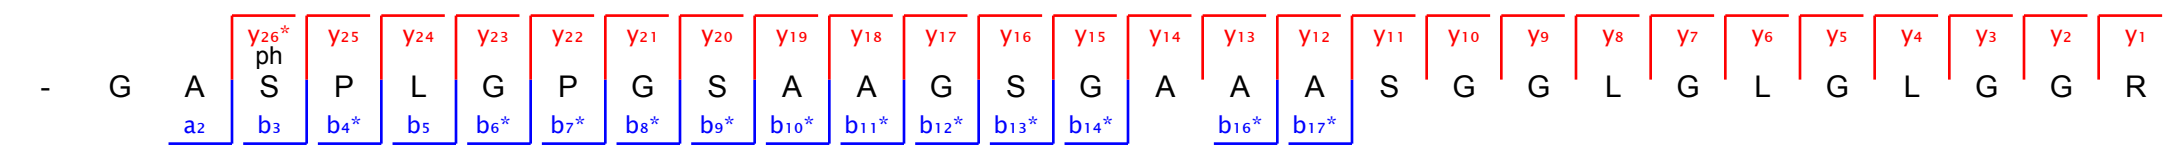

Raw file: 20150812\_A375SR\_Phospho\_BR1\_05  
 Scan: 21734 Method: FTMS; HCD Score: 188.98 m/z: 943.41 Gene names: EIF6

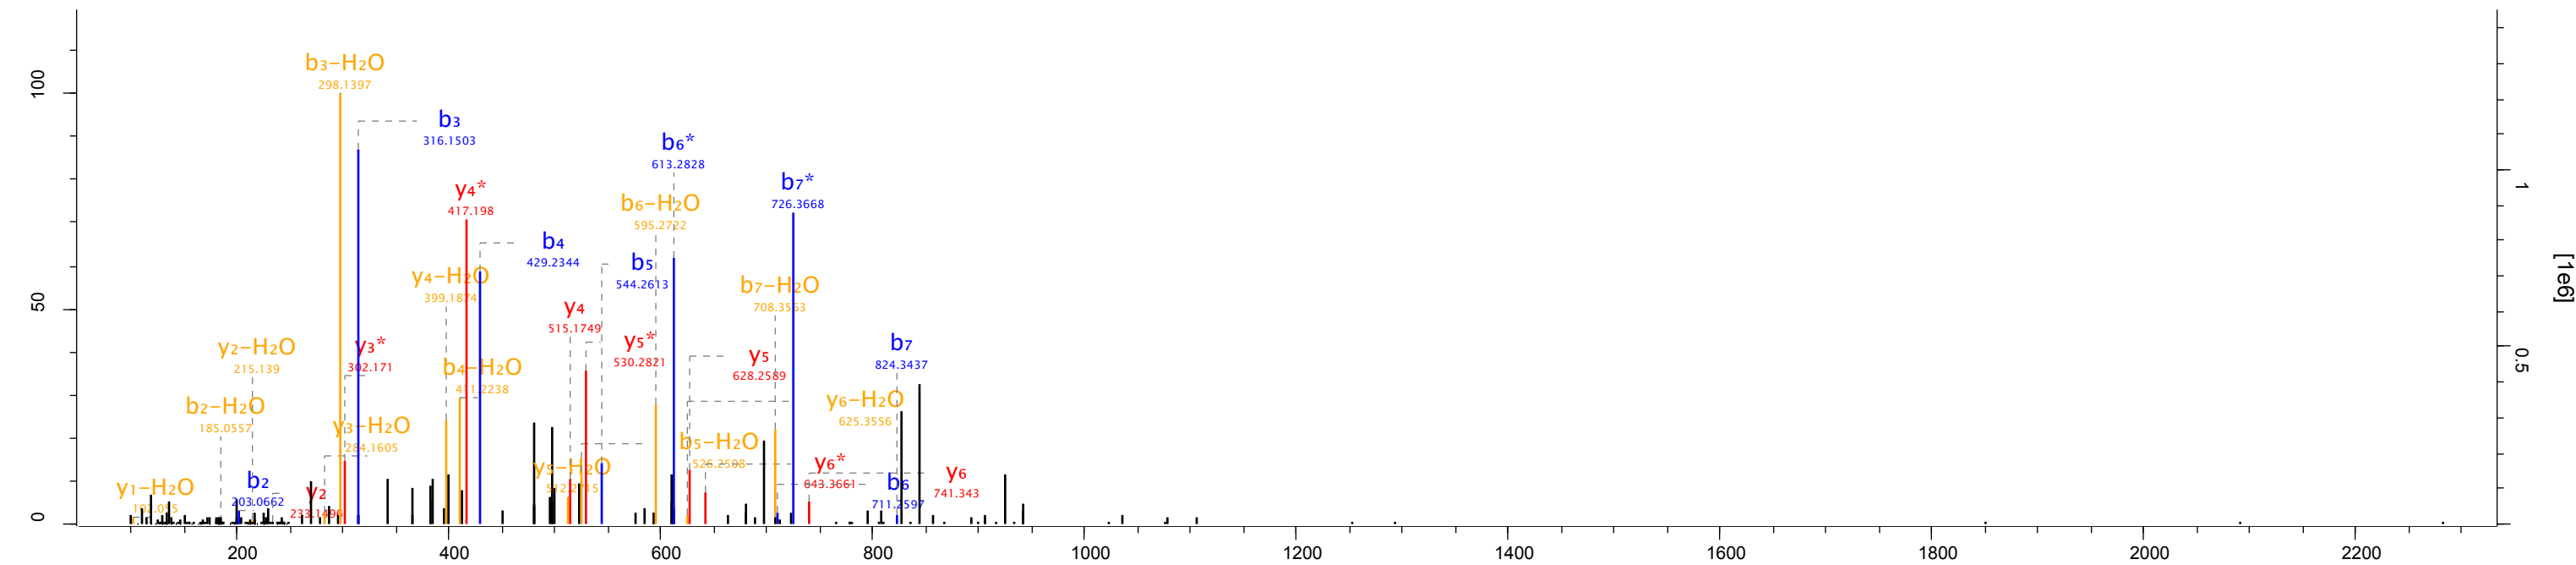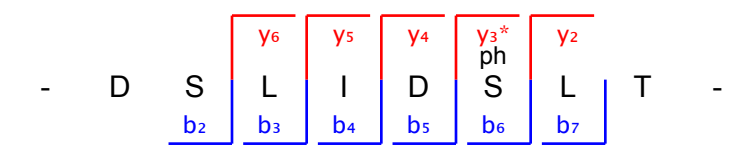

Raw file 20150812\_A375SR\_Phospho\_BR1\_05 Scan 22354 Method FTMS; HCD Score 250.2 m/z 859.36 Gene names PPFIBP1

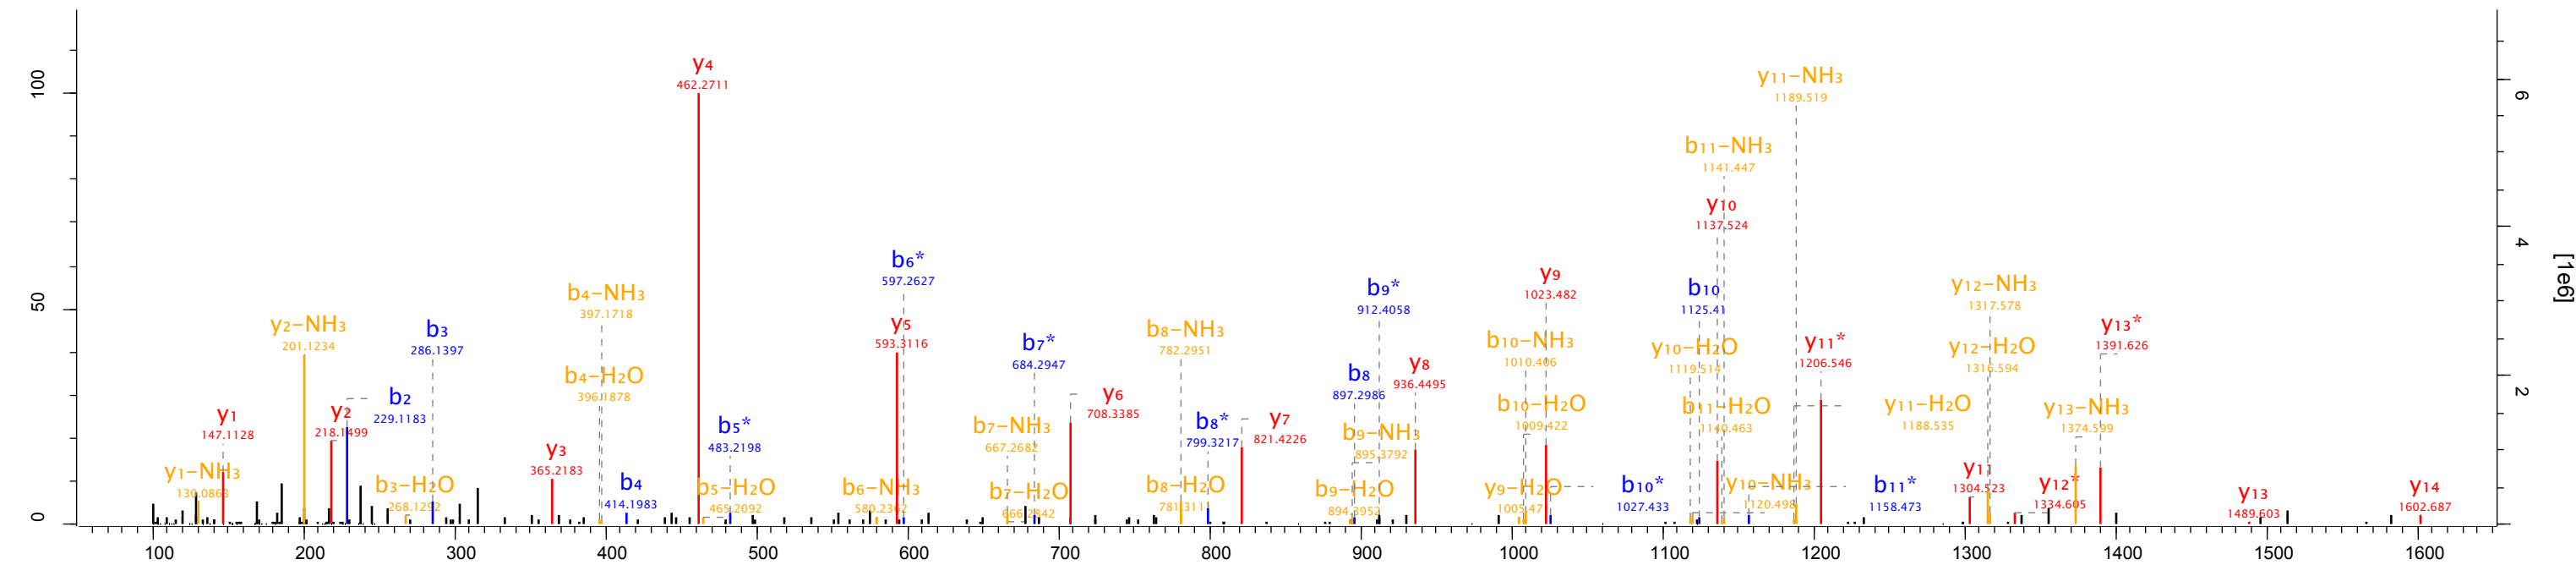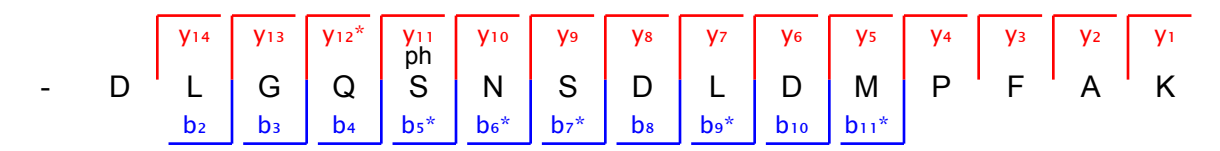

Raw file: 20150812\_A375SR\_Phospho\_BR1\_05  
 Scan: 2674 Method: FTMS; HCD Score: 129.29 m/z: 517.24 Gene names: SIN3A

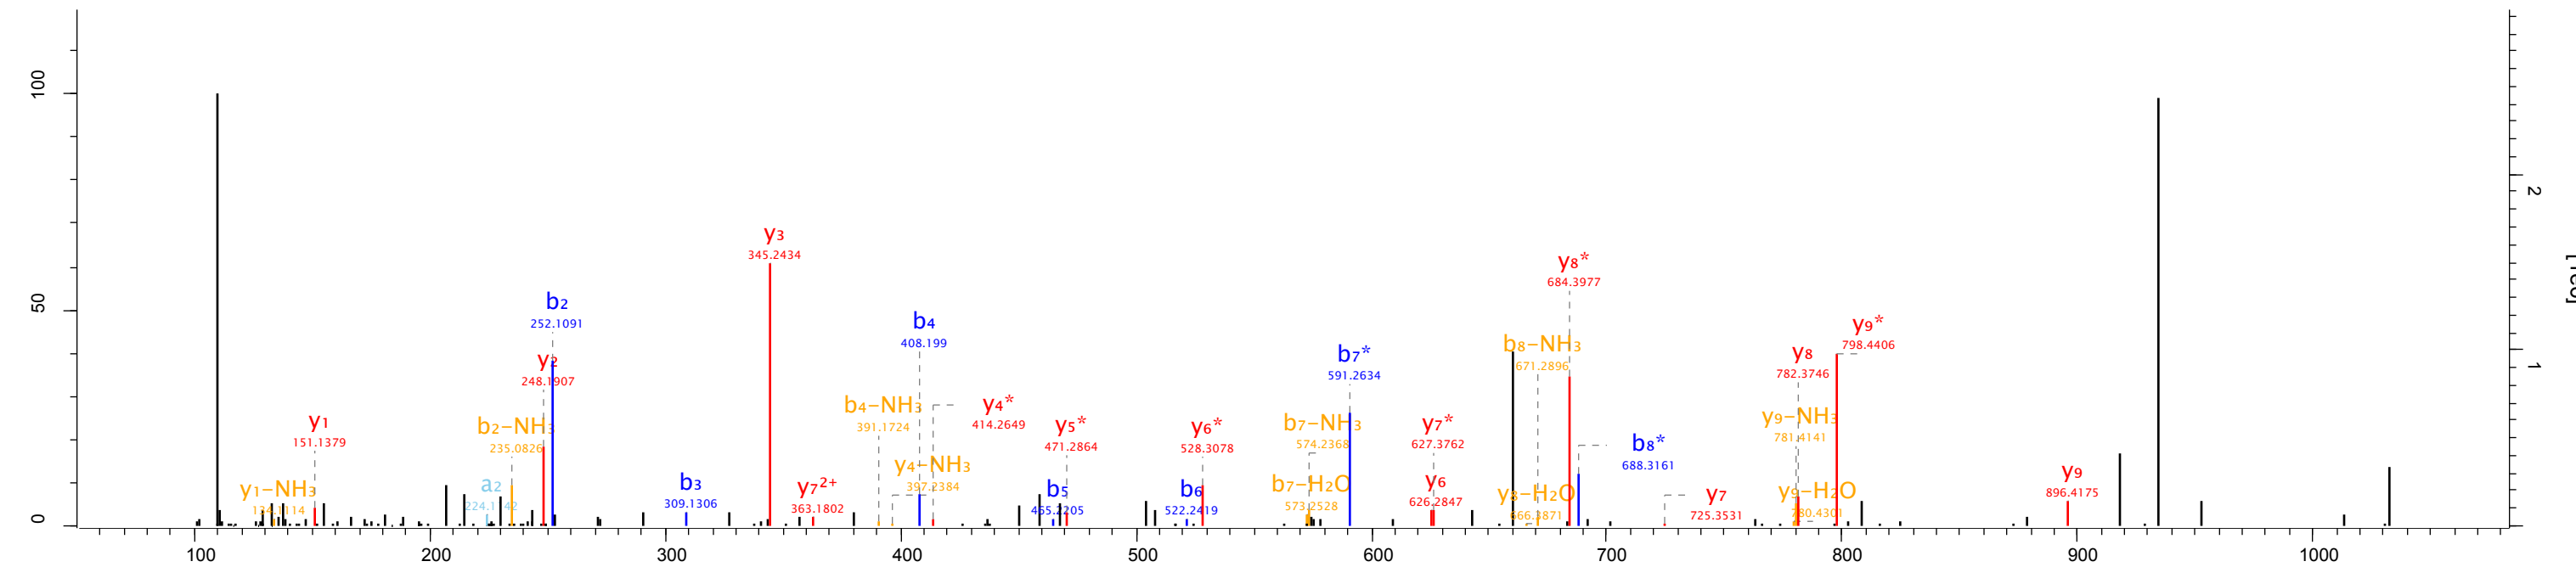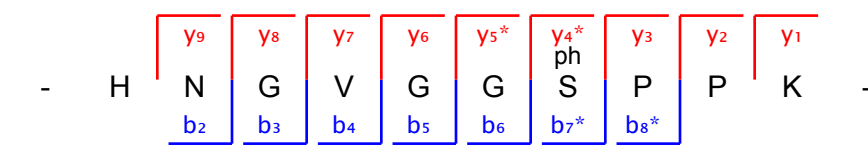

Raw file 20150812\_A375SR\_Phospho\_BR1\_05 Scan 27884 Method FTMS; HCD Score 120.63 m/z 1091.54 Gene names WDR44

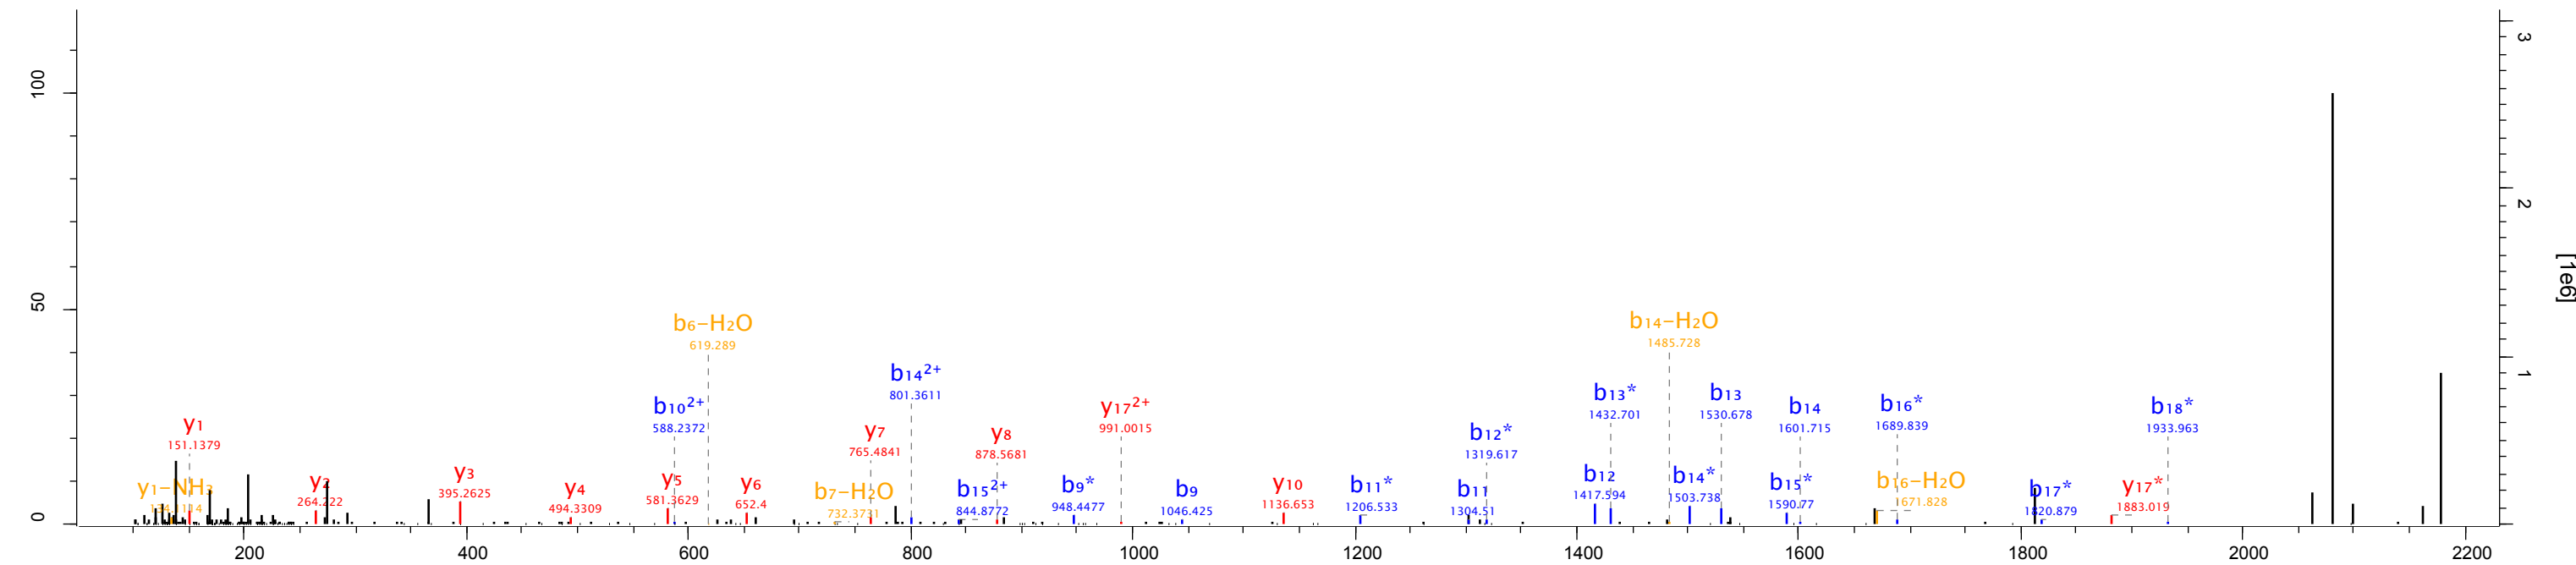

- S N S G R E L ph T D E E I L A S V M I K -

Fragmentation mapping (b and y ions) is shown below the sequence:

- b<sub>9</sub> (under D)
- b<sub>10</sub><sup>2+</sup> (under E)
- b<sub>11</sub> (under E)
- b<sub>12</sub> (under I)
- b<sub>13</sub> (under L)
- b<sub>14</sub> (under A)
- b<sub>15</sub>\* (under S)
- b<sub>16</sub>\* (under V)
- b<sub>17</sub>\* (under M)
- b<sub>18</sub>\* (under I)
- y<sub>10</sub> (over E)
- y<sub>8</sub> (over I)
- y<sub>7</sub> (over L)
- y<sub>6</sub> (over A)
- y<sub>5</sub> (over S)
- y<sub>4</sub> (over V)
- y<sub>3</sub> (over M)
- y<sub>2</sub> (over I)
- y<sub>1</sub> (over K)
- y<sub>17</sub>\* (over S)

Raw file: 20150812\_A375SR\_Phospho\_BR1\_05  
 Scan: 27924 Method: FTMS; HCD Score: 63.97 m/z: 1174.26 Gene names: ZEB1

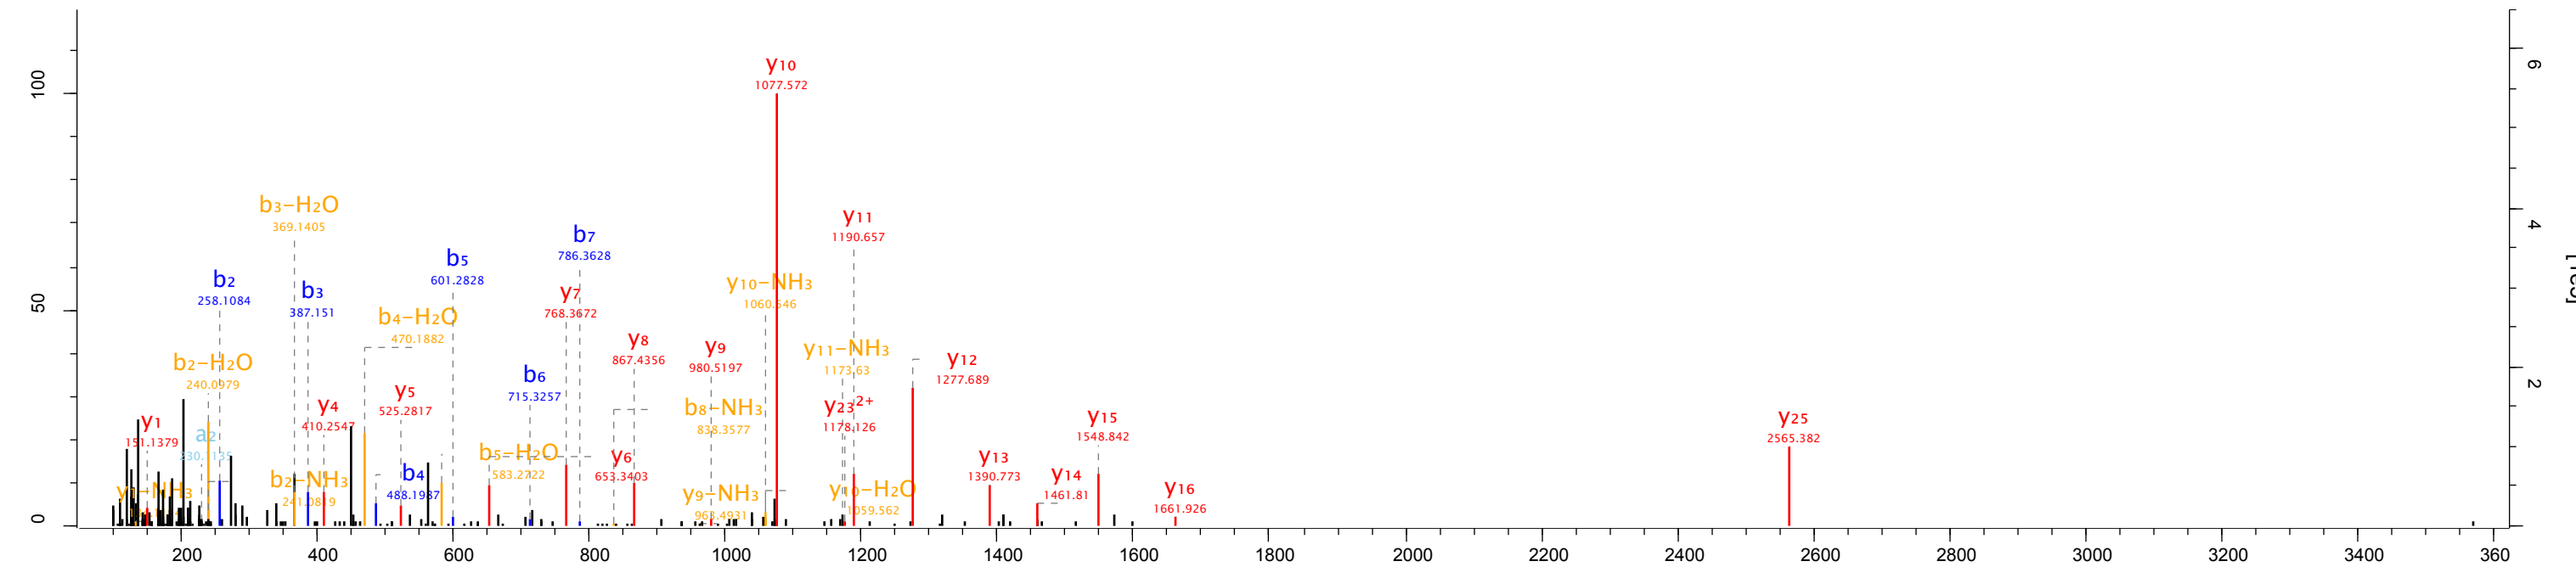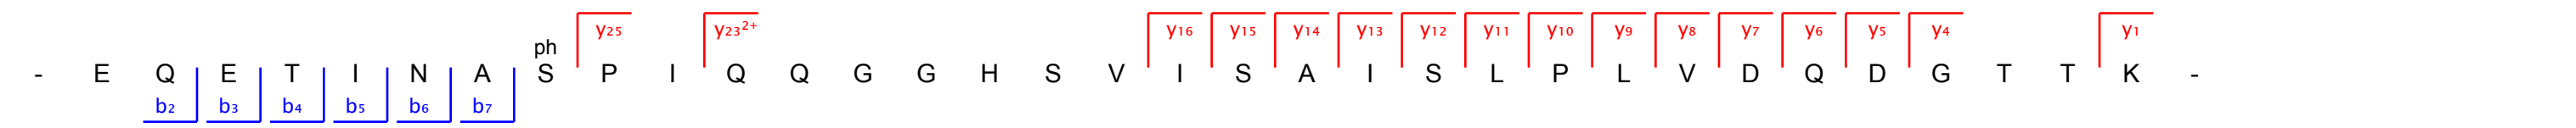



Raw file  
 20150812\_A375SR\_Phospho\_BR1\_05  
 Scan 3644 Method FTMS; HCD Score 143.64 m/z 595.75 Gene names NAA10

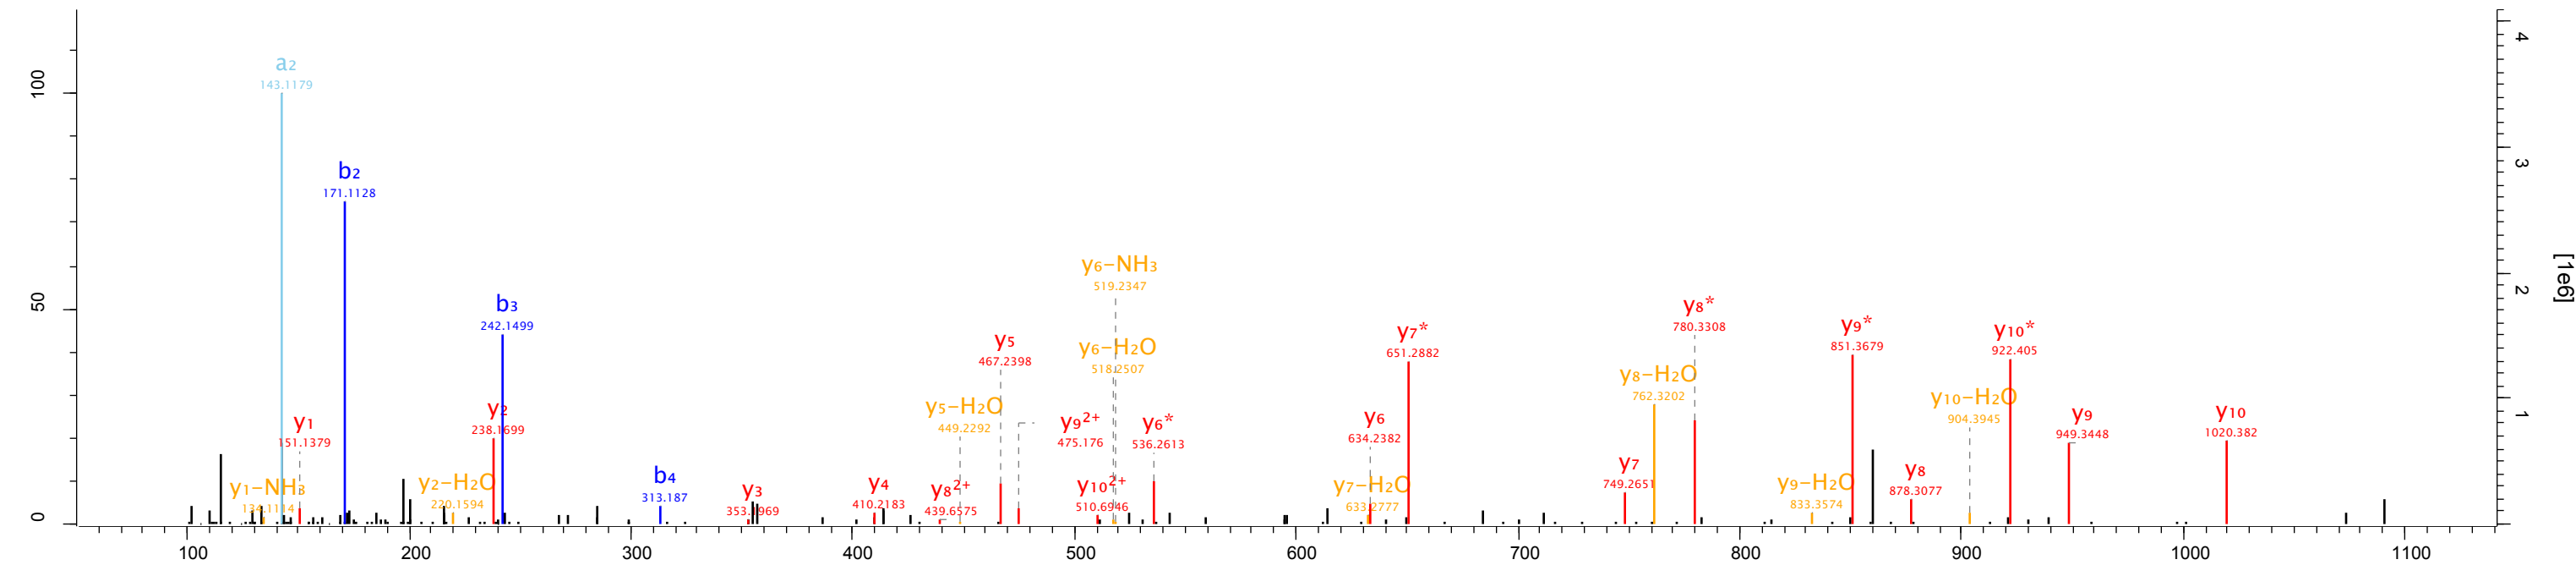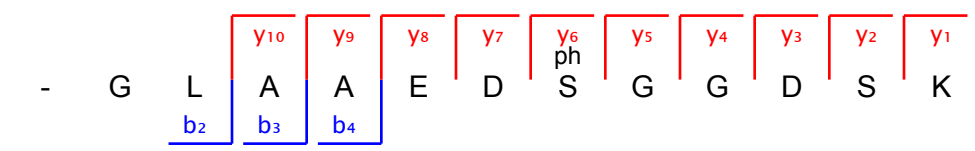



Raw file 20150812\_A375SR\_Phospho\_BR1\_05 Scan 3824 Method FTMS; HCD Score 65.51 m/z 605.27 Gene names TSC22D4

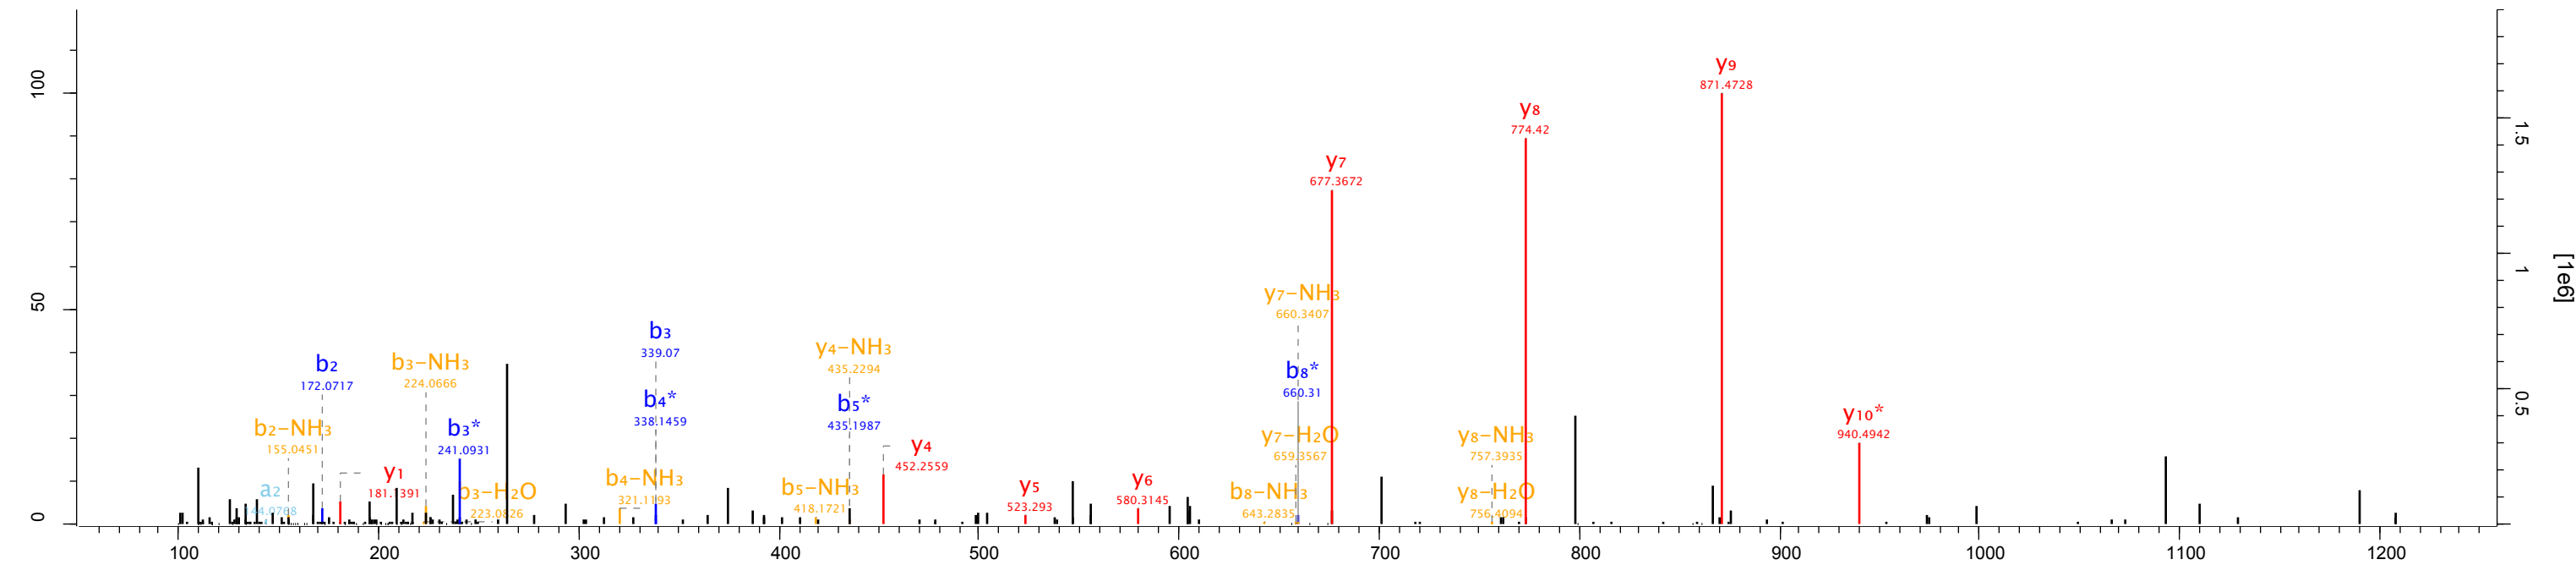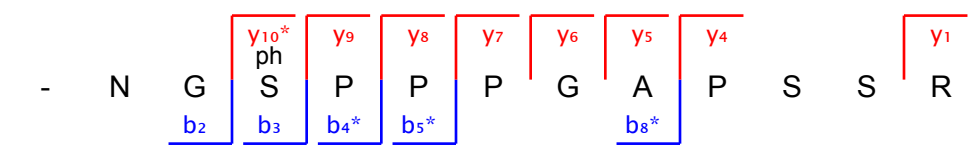

Raw file: 20150812\_A375SR\_Phospho\_BR1\_05  
 Scan: 3904 Method: FTMS; HCD Score: 111.46 m/z: 384.18 Gene names: ZNF609

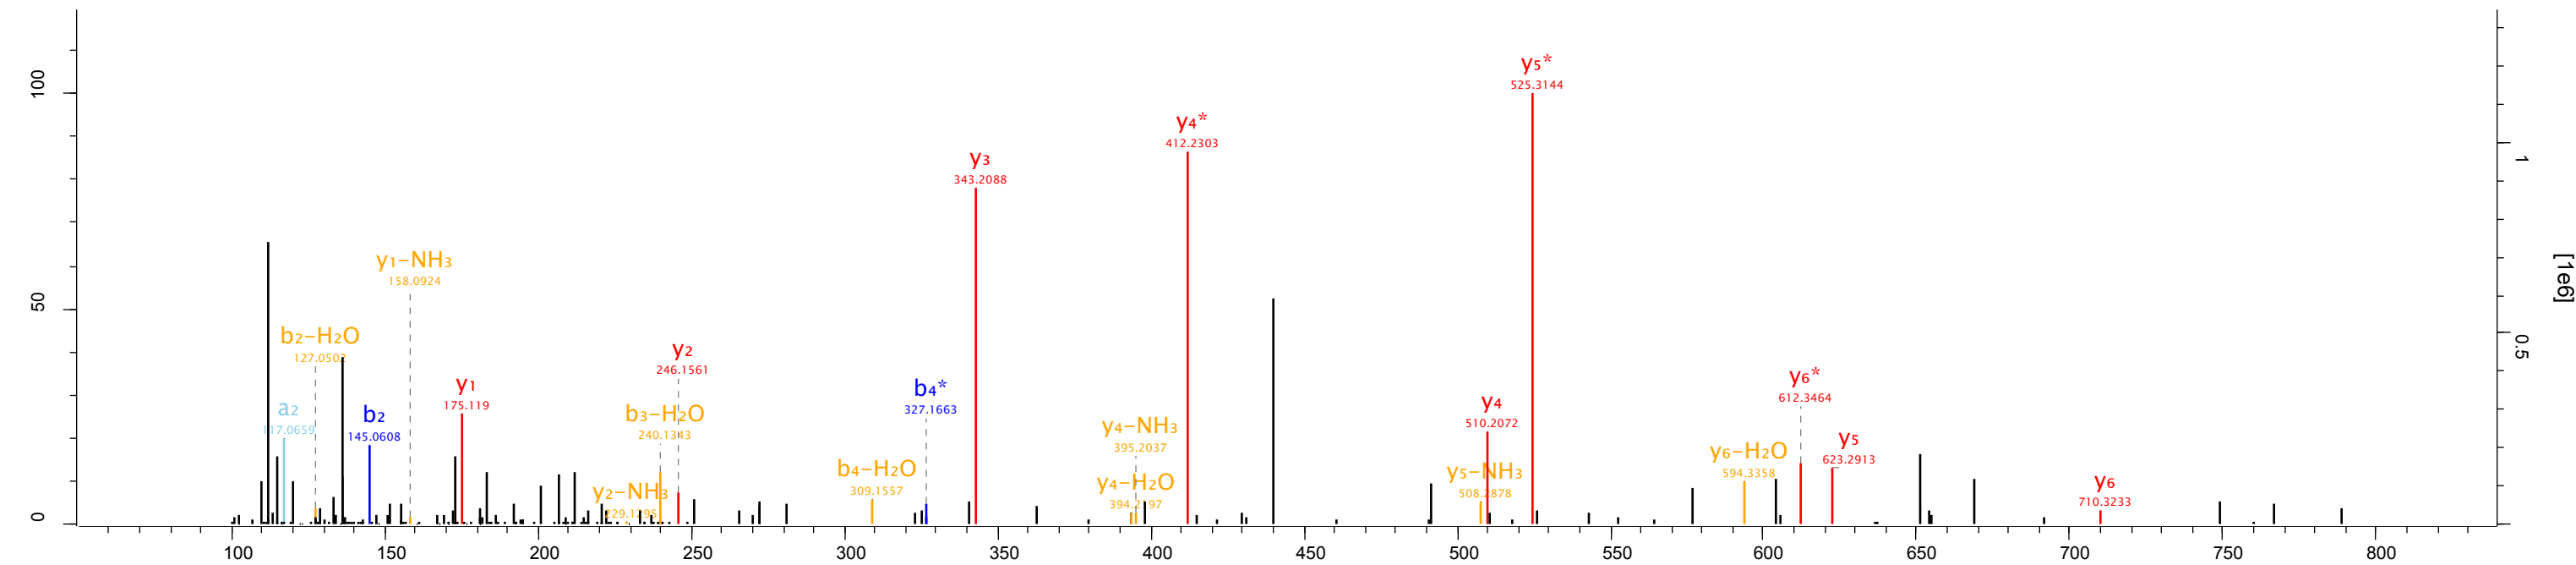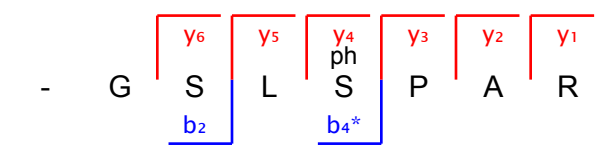

Raw file: 20150812\_A375SR\_Phospho\_BR1\_05  
 Scan: 4354 Method: FTMS; HCD Score: 108.08 m/z: 1104.94 Gene names: HMGA2

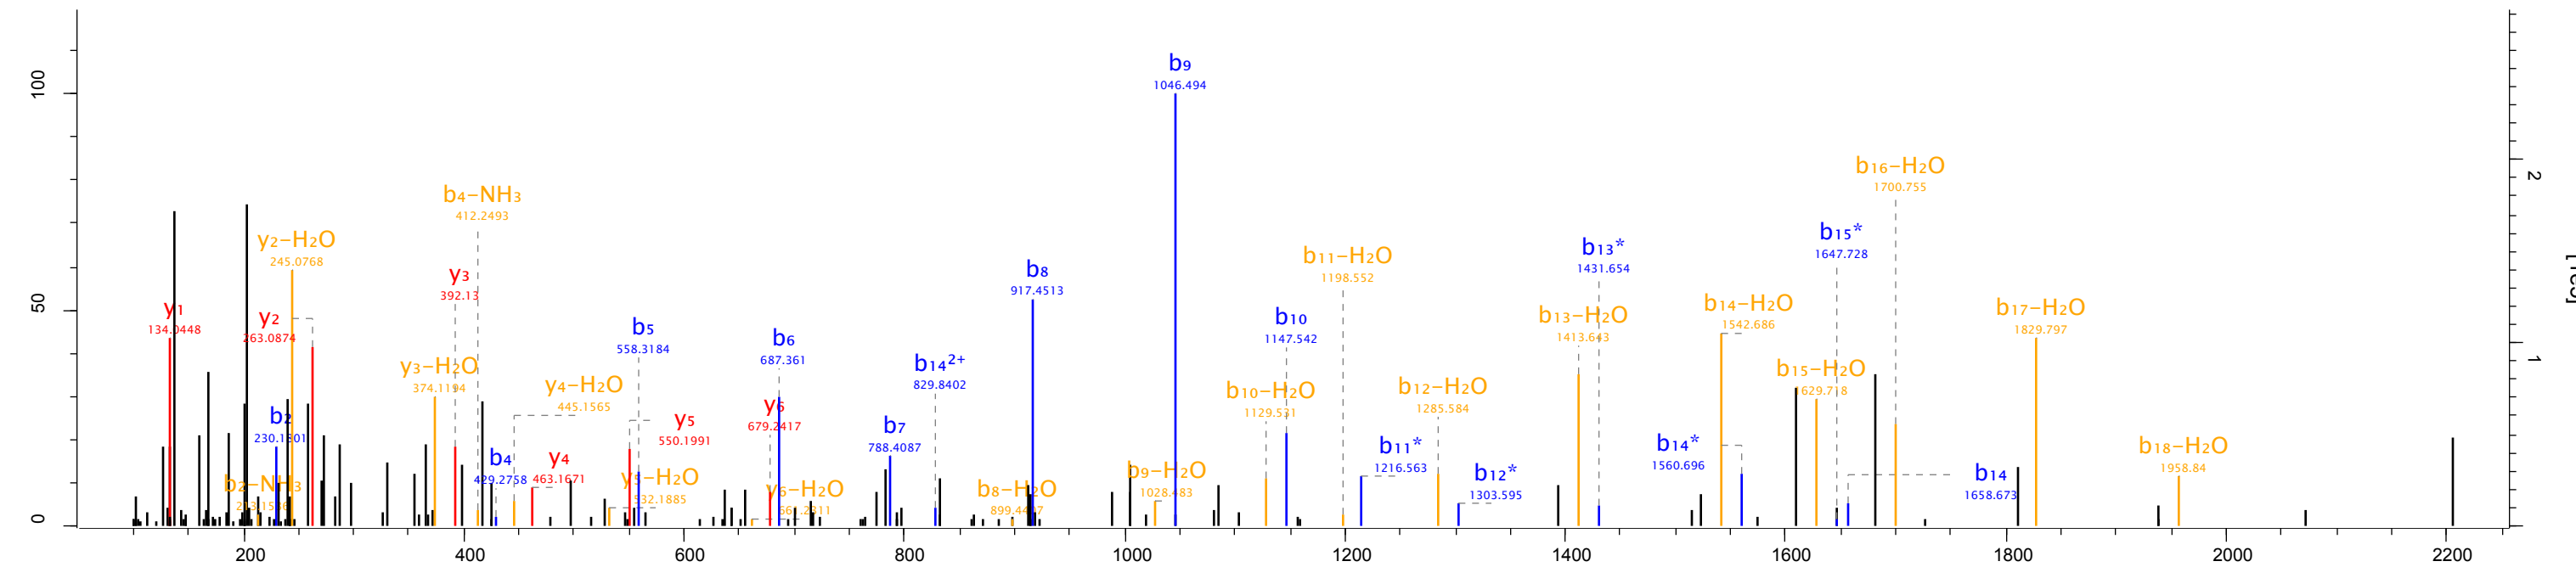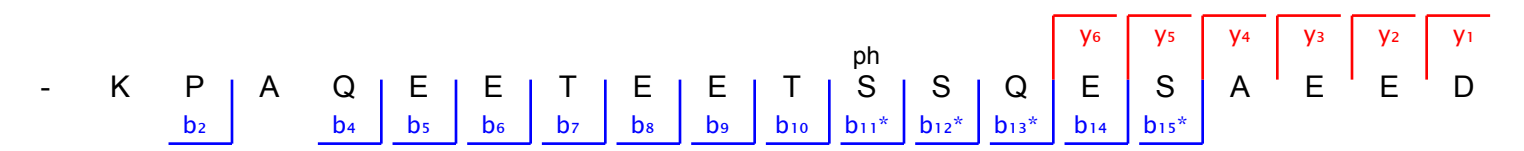

Raw file: 20150812\_A375SR\_Phospho\_BR1\_05  
 Scan: 4824 Method: FTMS; HCD Score: 103.23 m/z: 664.28 Gene names: GIGYF1

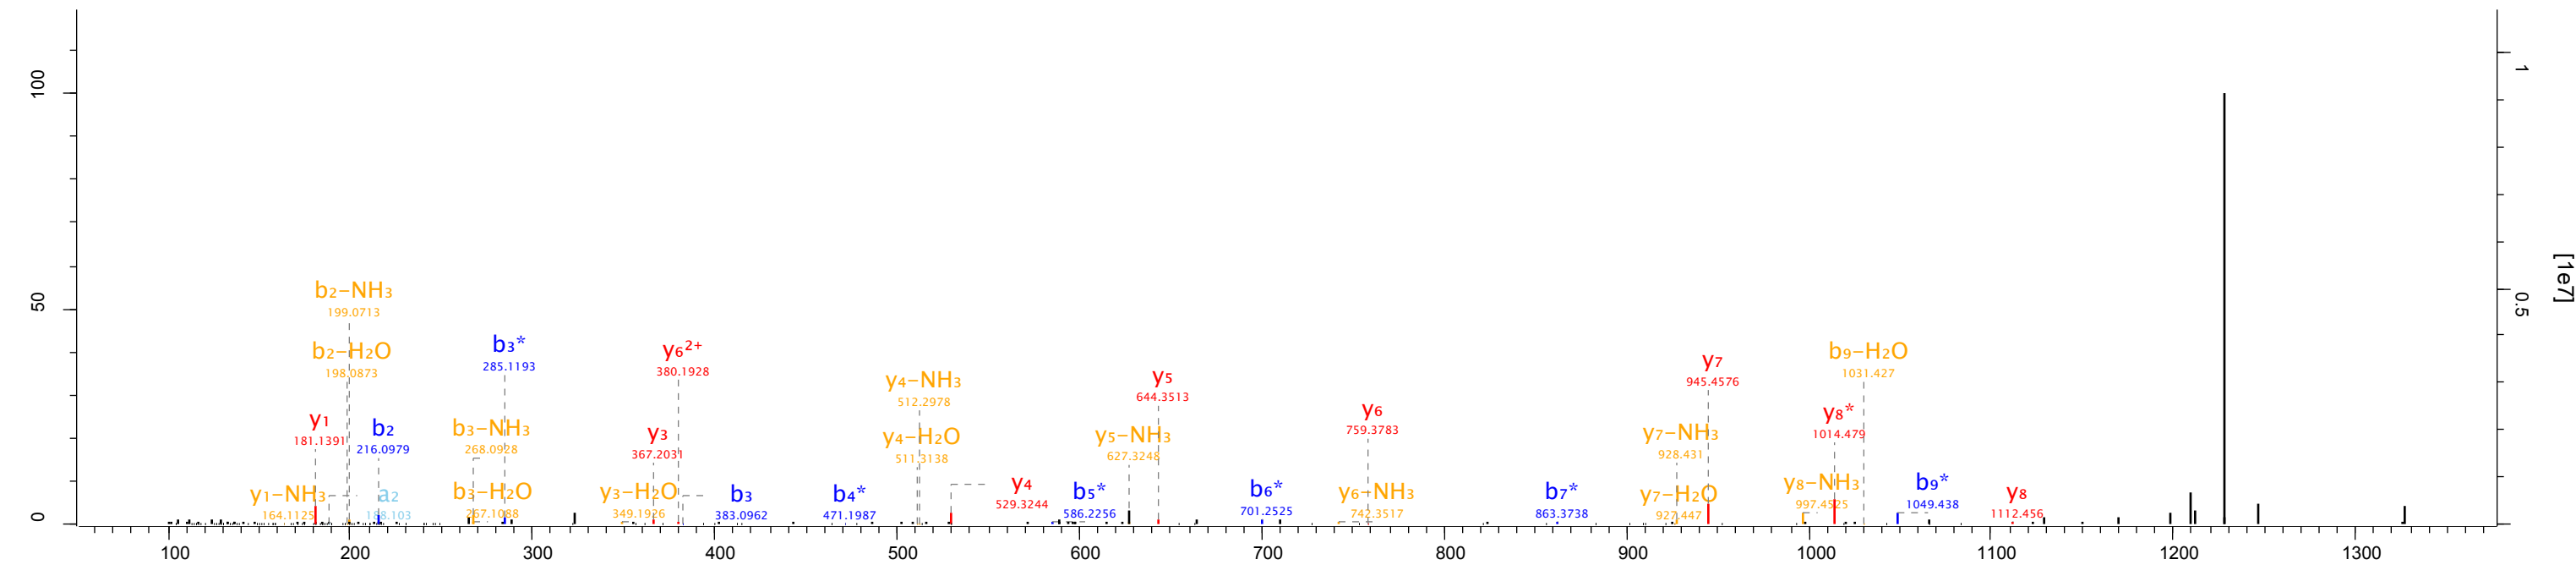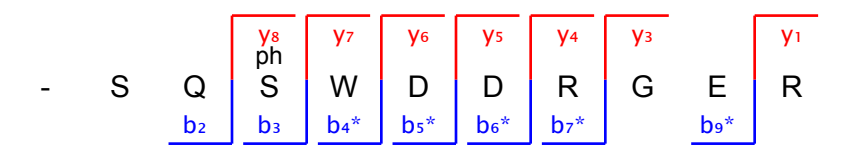

Raw file: 20150812\_A375SR\_Phospho\_BR1\_05  
 Scan: 5074 Method: FTMS; HCD Score: 103.01 m/z: 623.96 Gene names: MATR3;DKFZp686L22104

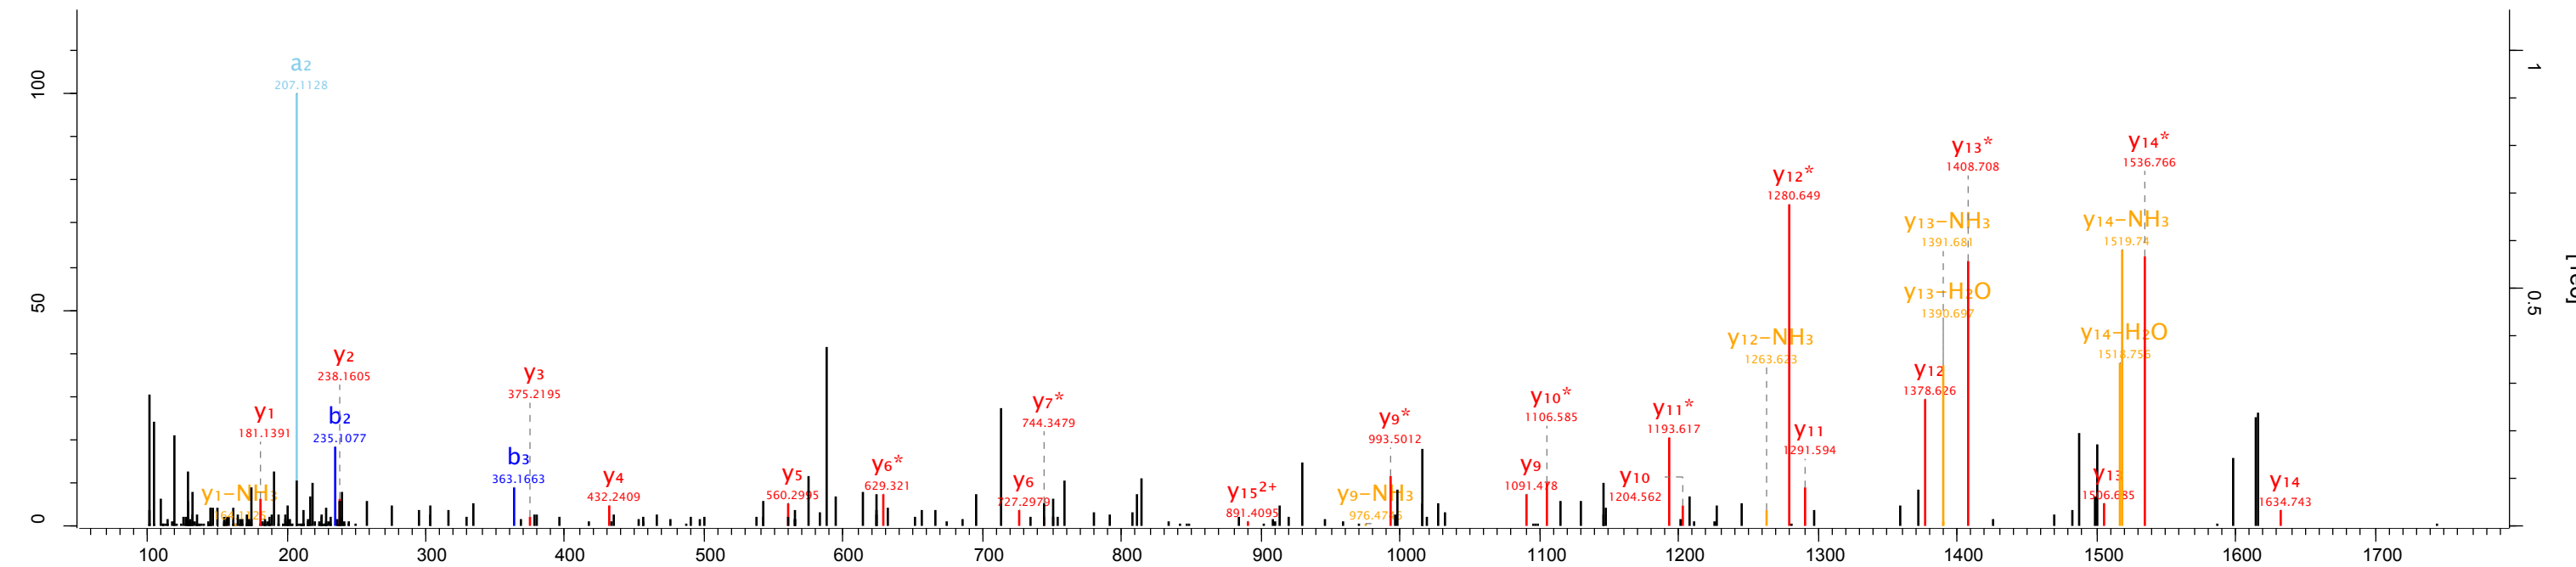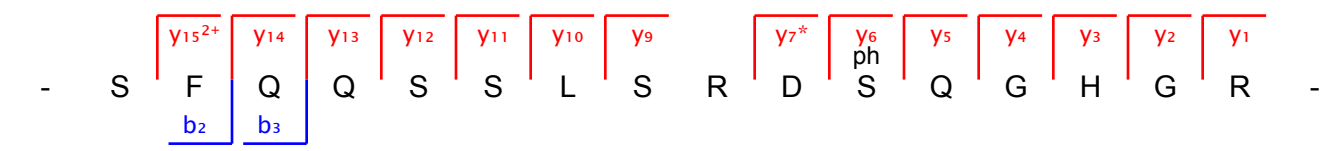

Raw file: 20150812\_A375SR\_Phospho\_BR1\_05  
 Scan: 5374 Method: FTMS; HCD Score: 106.32 m/z: 662.31 Gene names: PLA2G4E

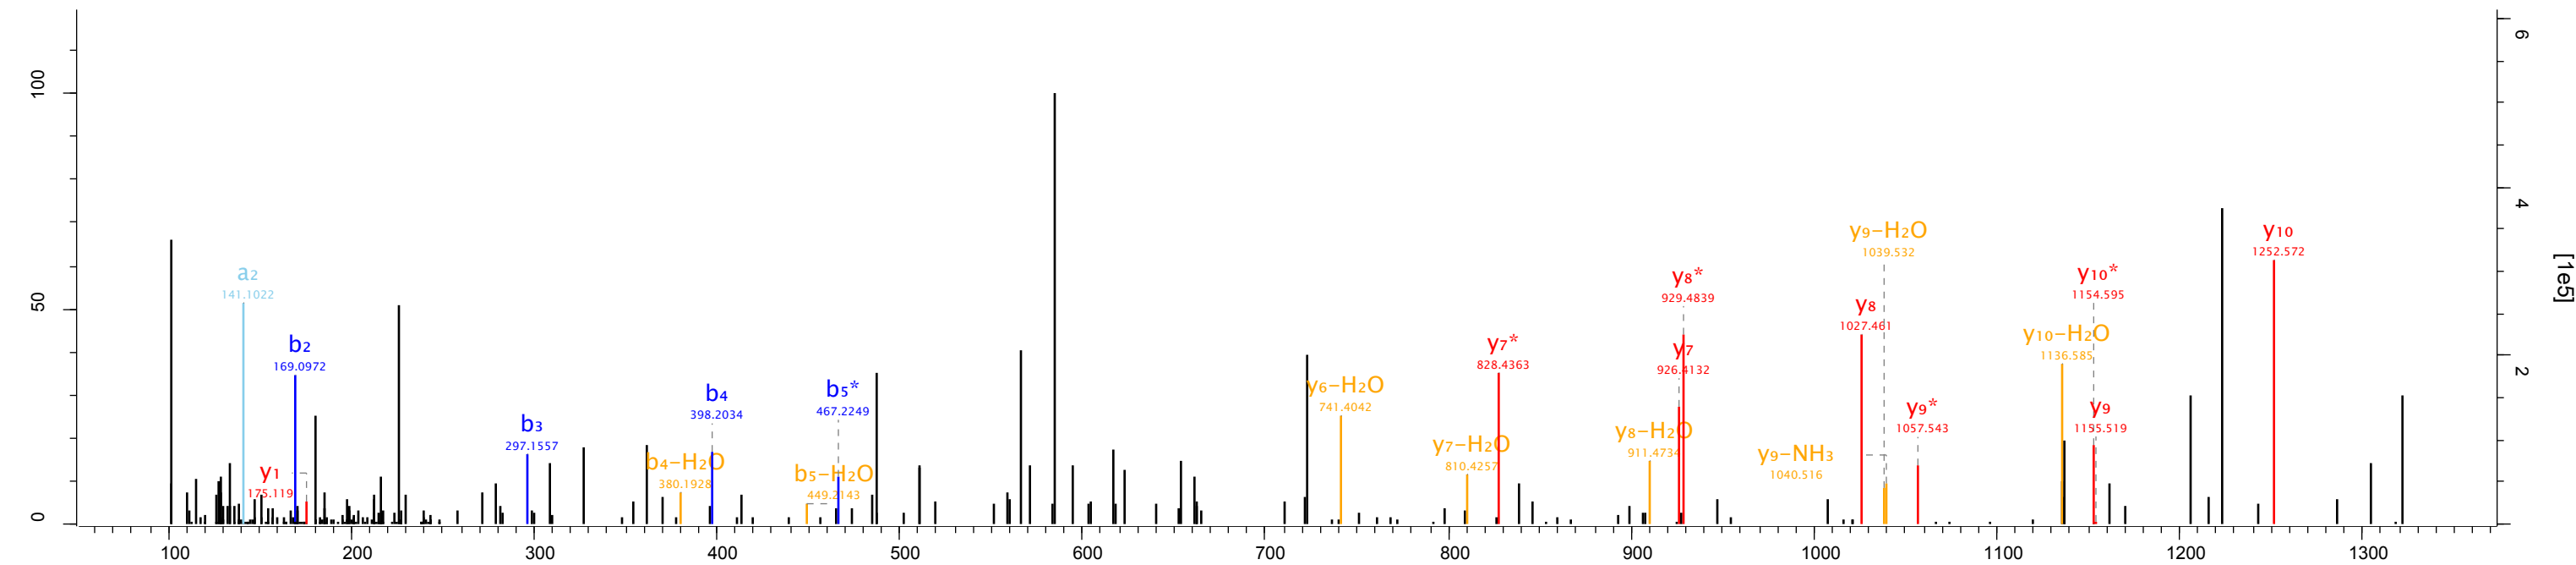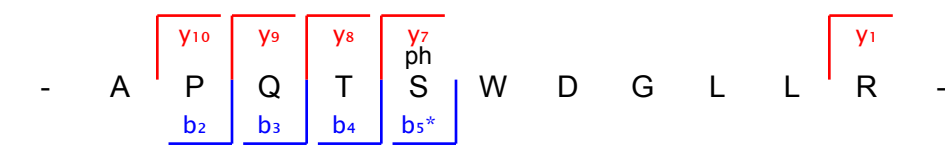

Raw file: 20150812\_A375SR\_Phospho\_BR1\_05  
 Scan: 6044 Method: FTMS; HCD Score: 113.18 m/z: 403.2 Gene names: RTKN

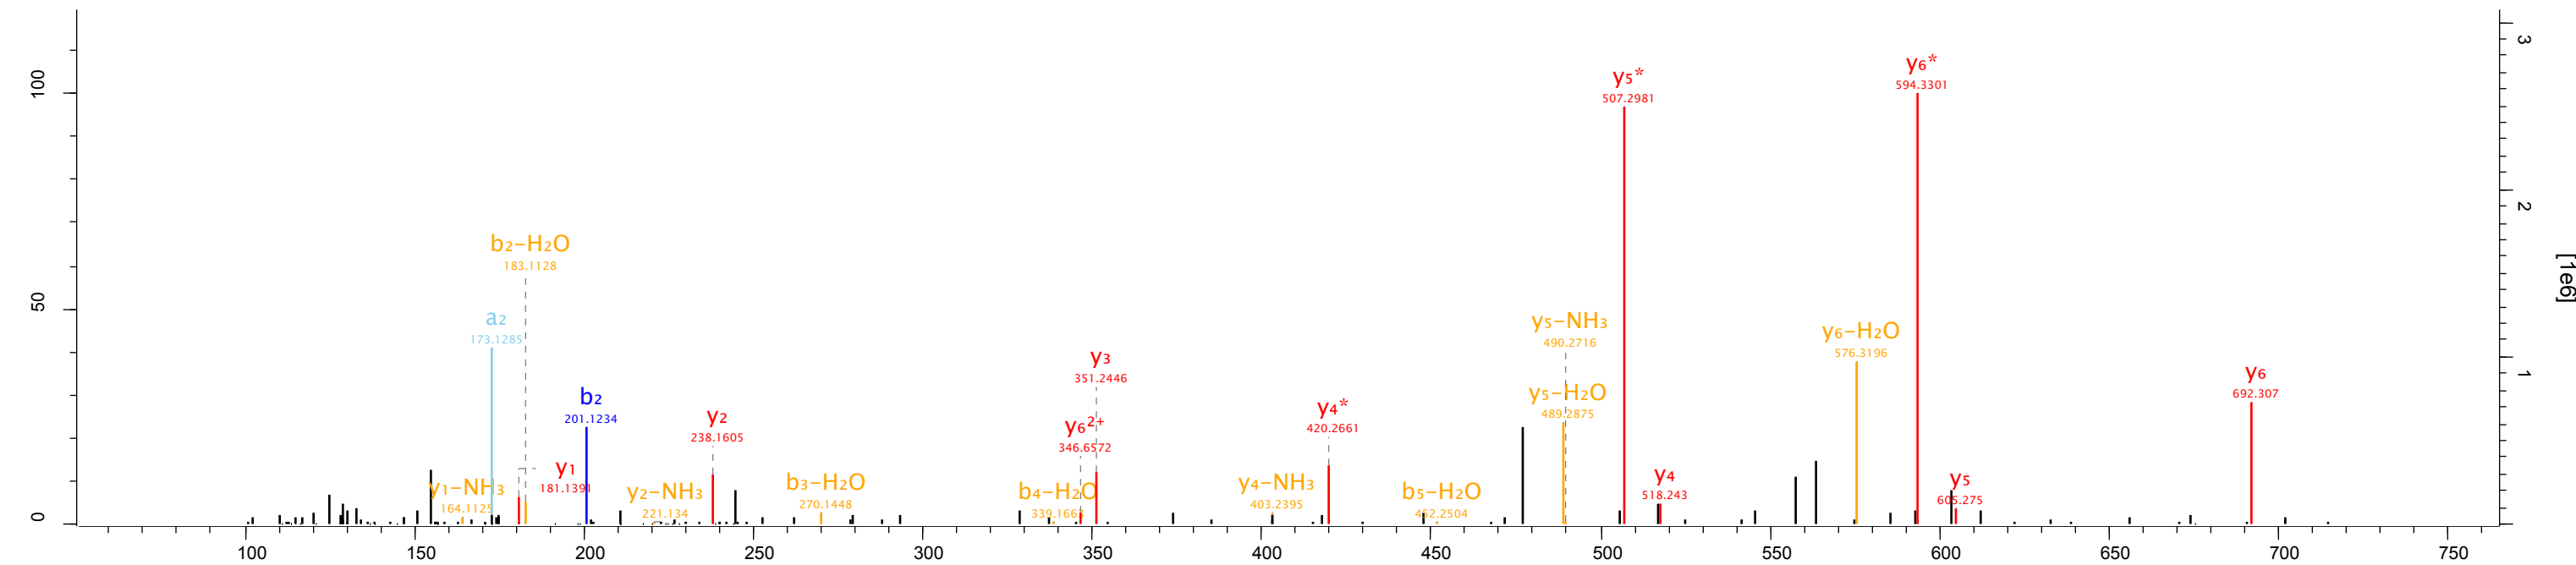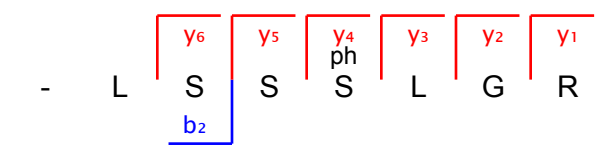

Raw file: 20150812\_A375SR\_Phospho\_BR1\_05  
 Scan: 6284 Method: FTMS; HCD Score: 136.81 m/z: 503.91 Gene names: EEF1D

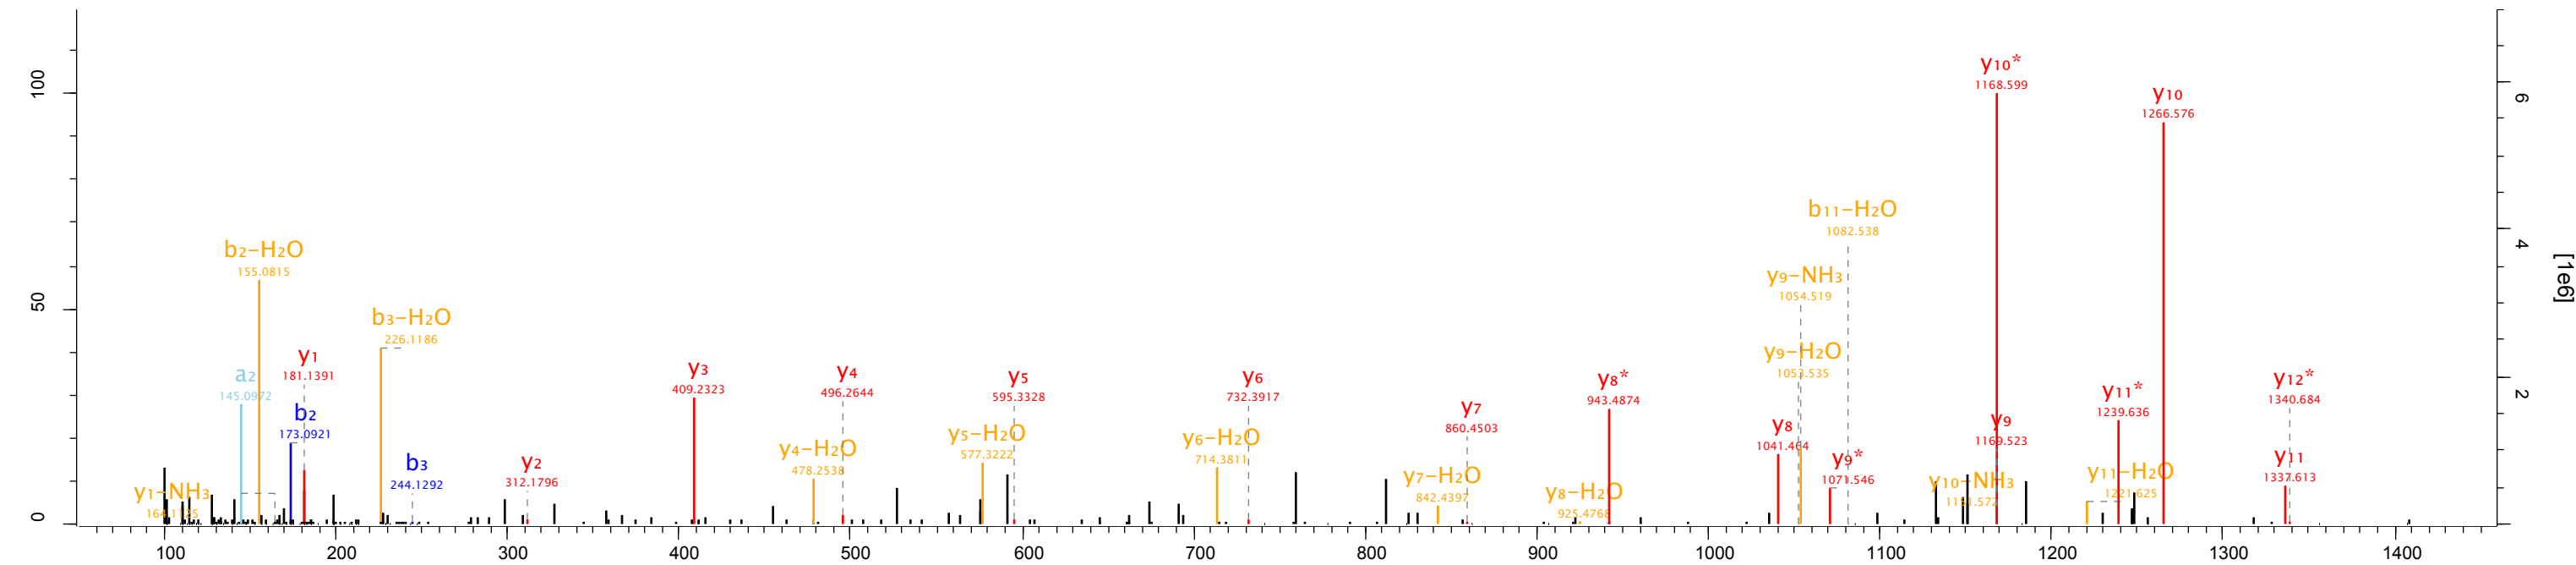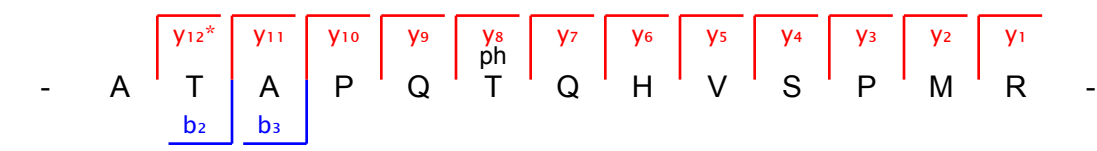



Raw file: 20150812\_A375SR\_Phospho\_BR1\_05  
 Scan: 6484 Method: FTMS; HCD Score: 90.43 m/z: 483.26 Gene names: SYNRC

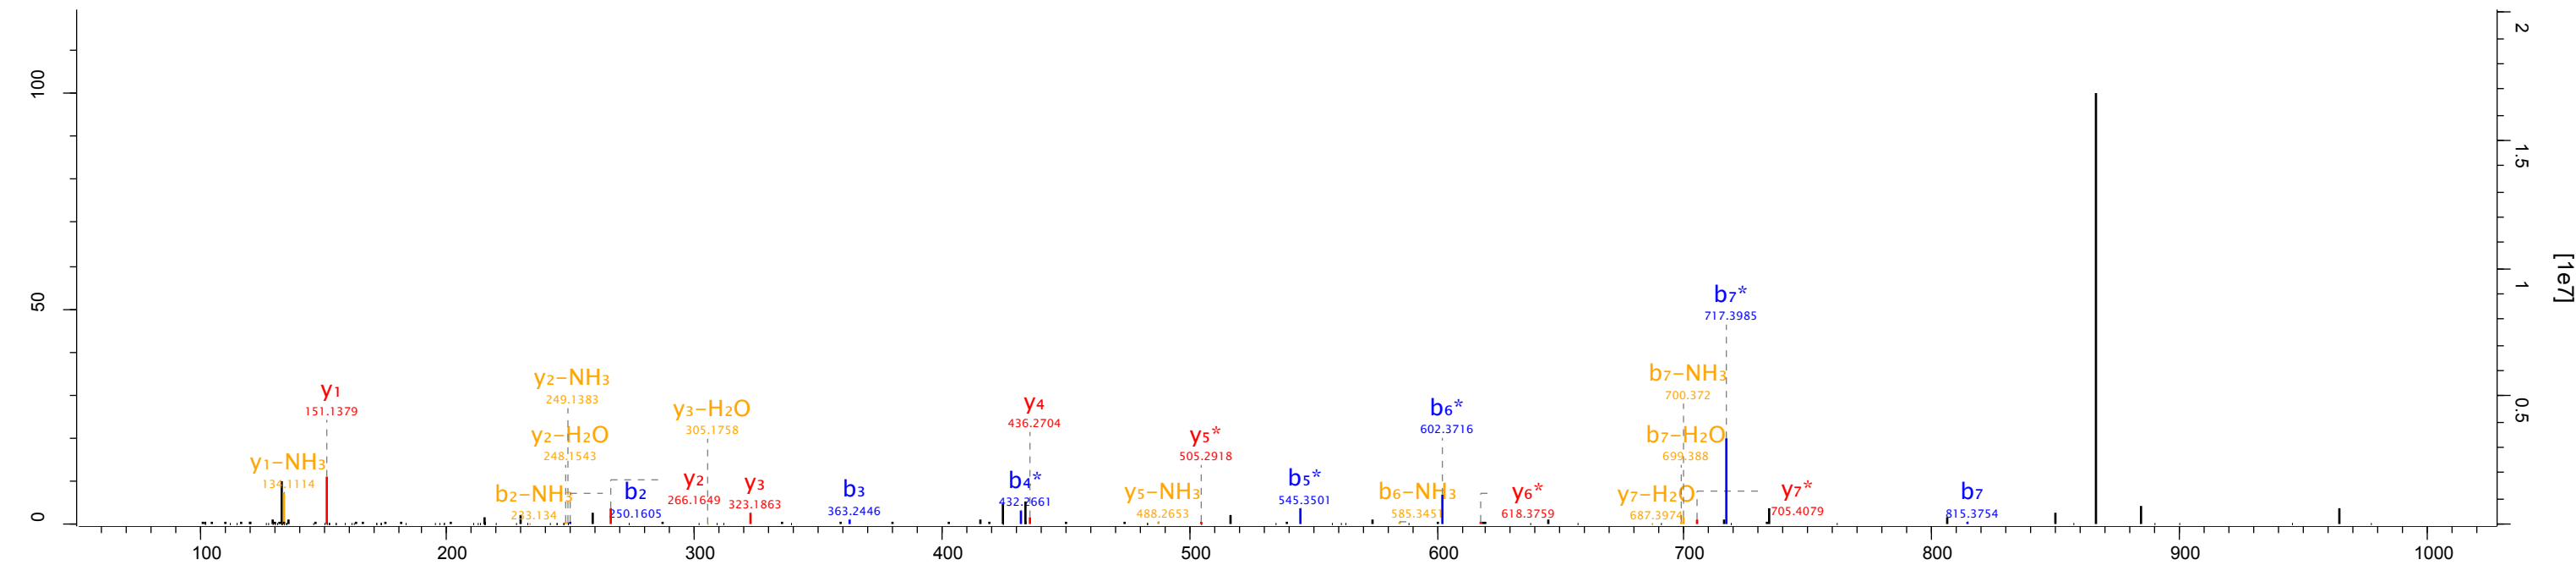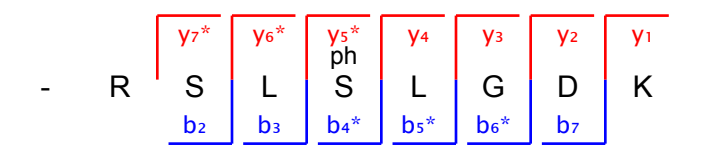

Raw file: 20150812\_A375SR\_Phospho\_BR1\_05  
 Scan: 6714 Method: FTMS; HCD Score: 89.3 m/z: 500.75 Gene names: SMTN

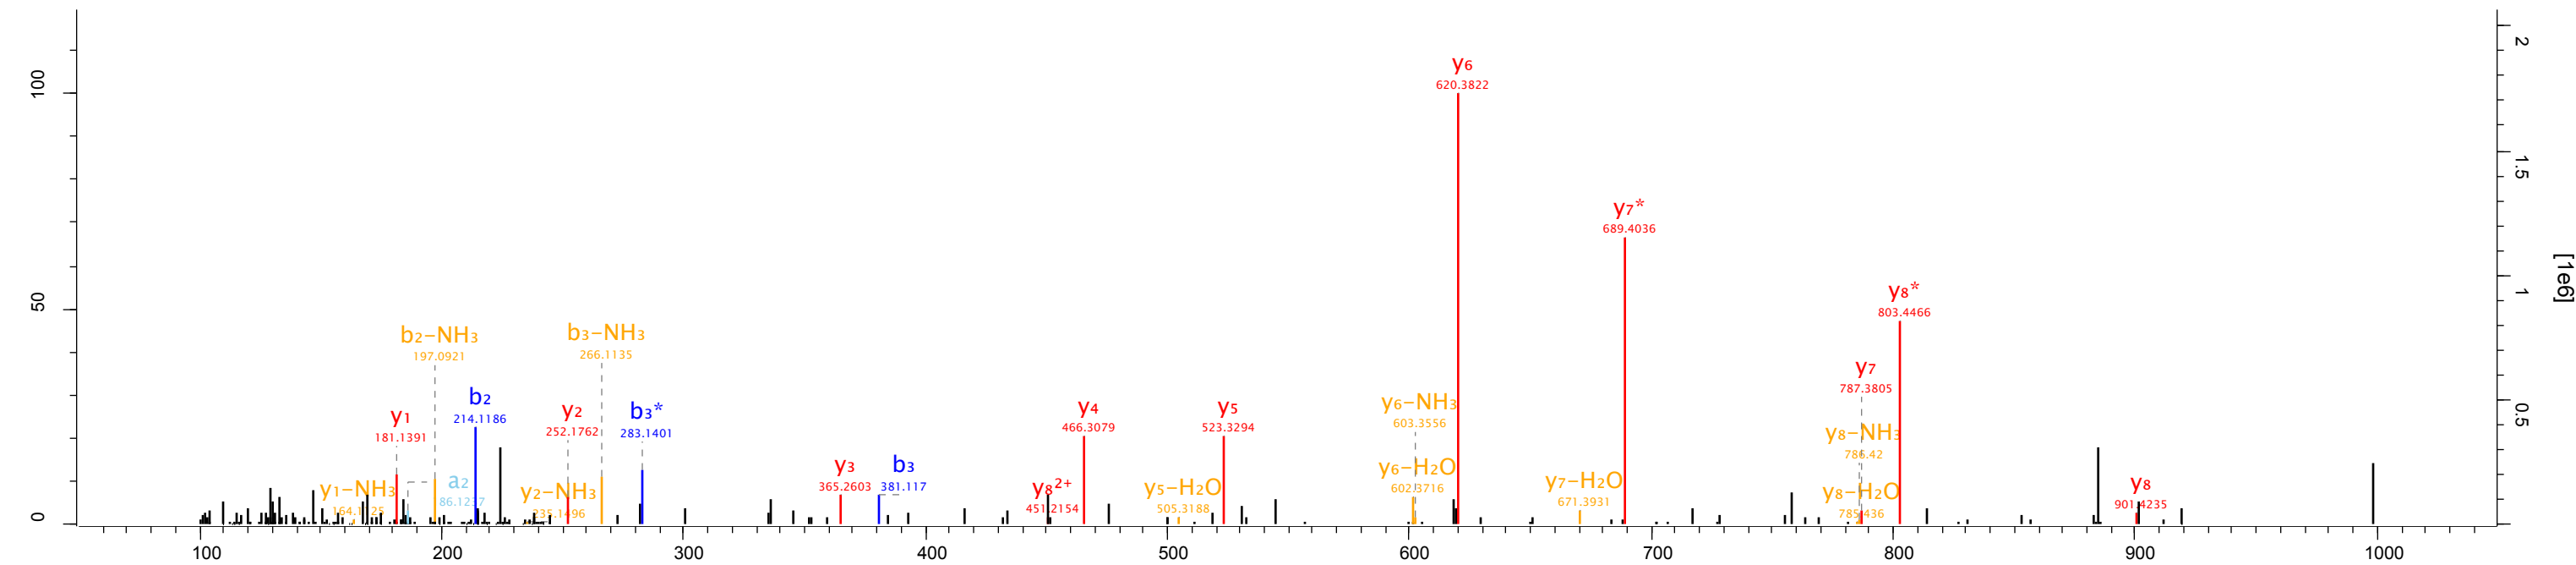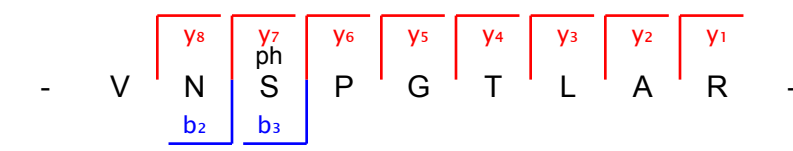

Raw file 20150812\_A375SR\_Phospho\_BR1\_05 Scan 7194 Method FTMS; HCD Score 255.69 m/z 801.41 Gene names GPATCH8

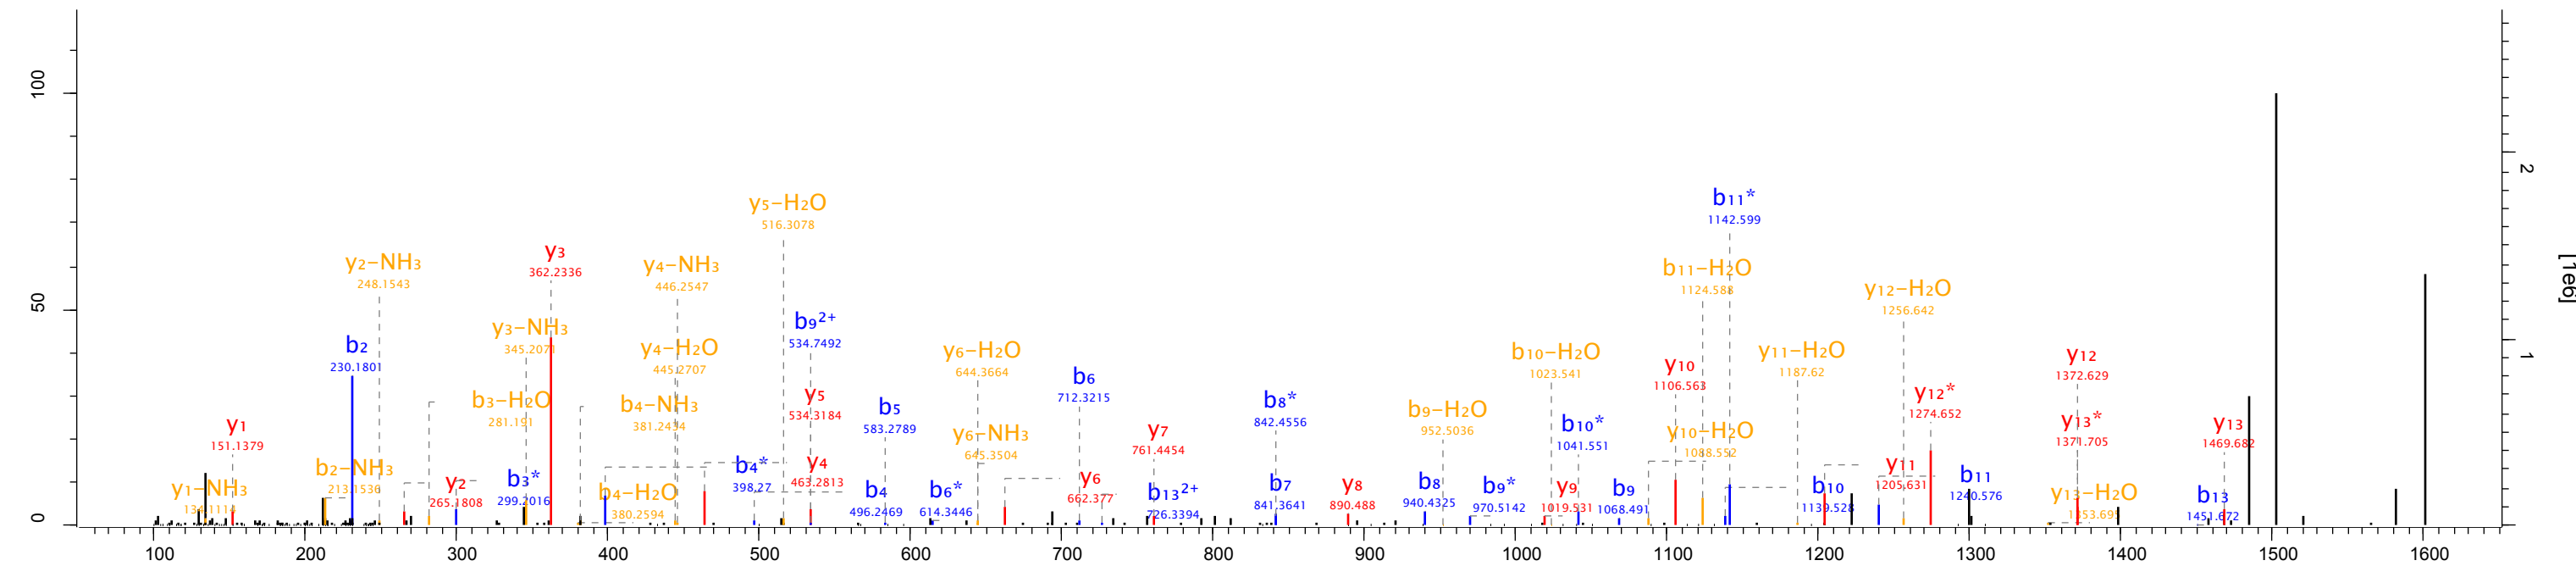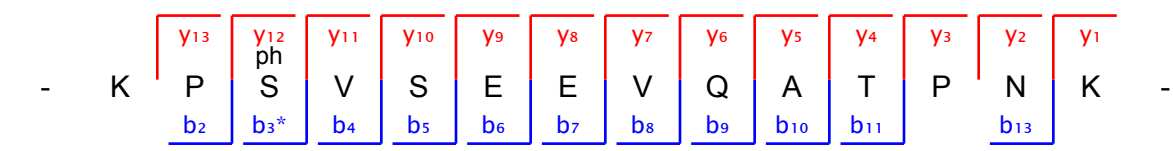

Raw file: 20150812\_A375SR\_Phospho\_BR1\_05  
 Scan: 7494 Method: FTMS; HCD Score: 106.75 m/z: 658.31 Gene names: SLAIN2

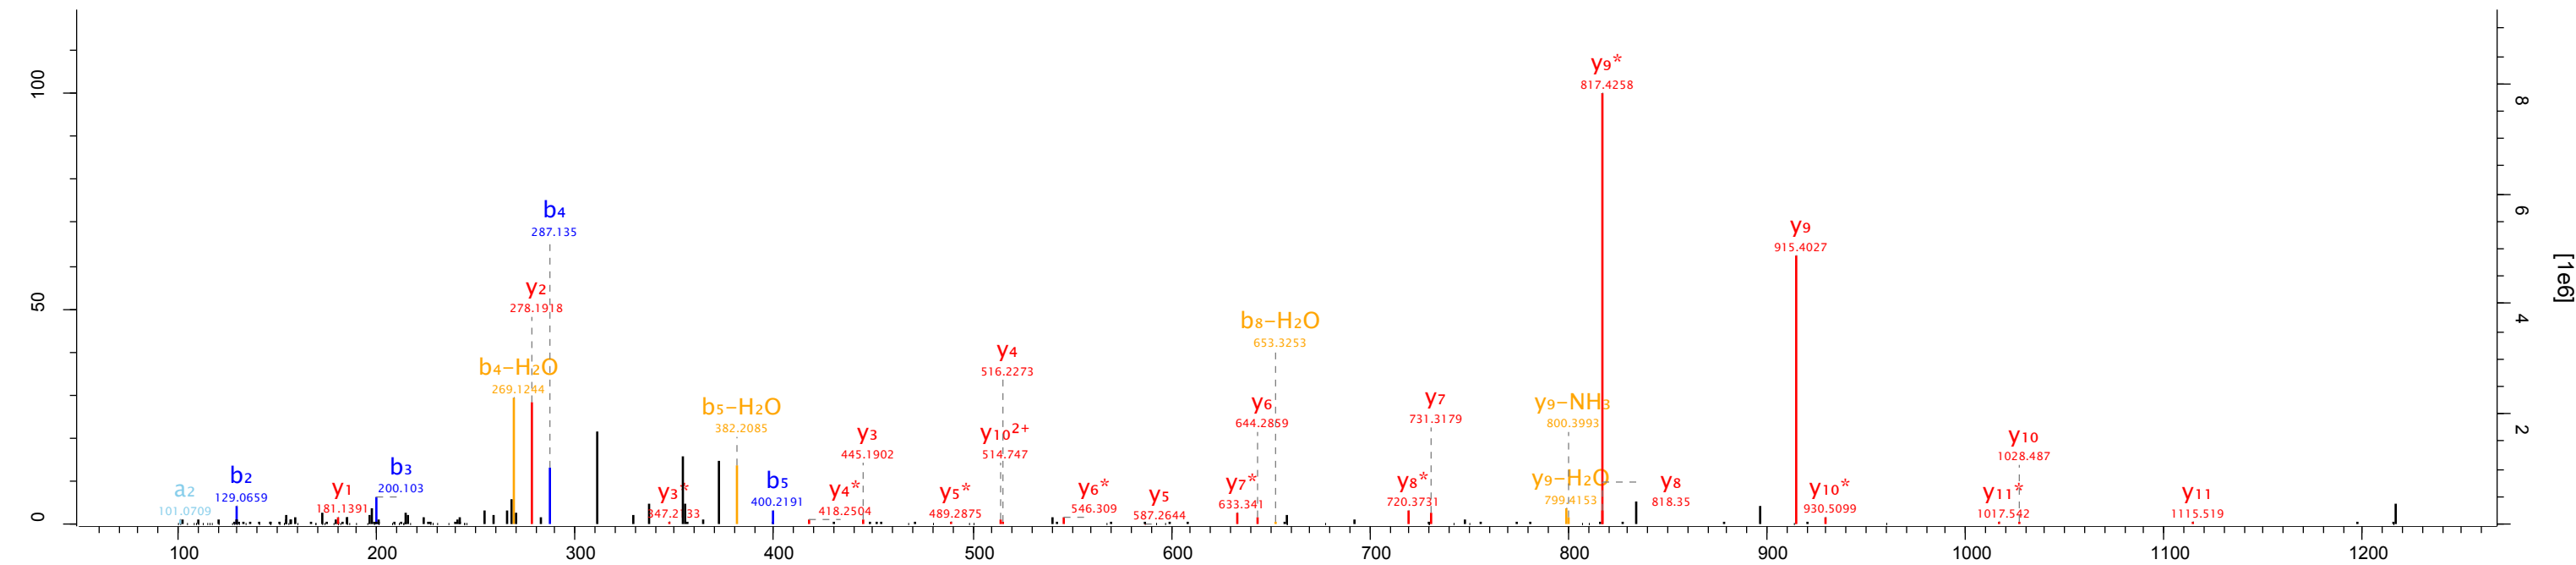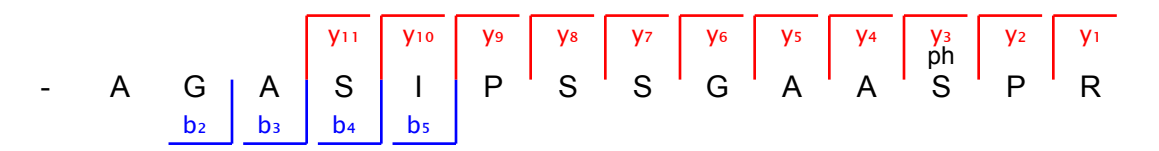

Raw file: 20150812\_A375SR\_Phospho\_BR1\_05  
 Scan: 8024 Method: FTMS; HCD Score: 89.13 m/z: 501.25 Gene names: KMT2D

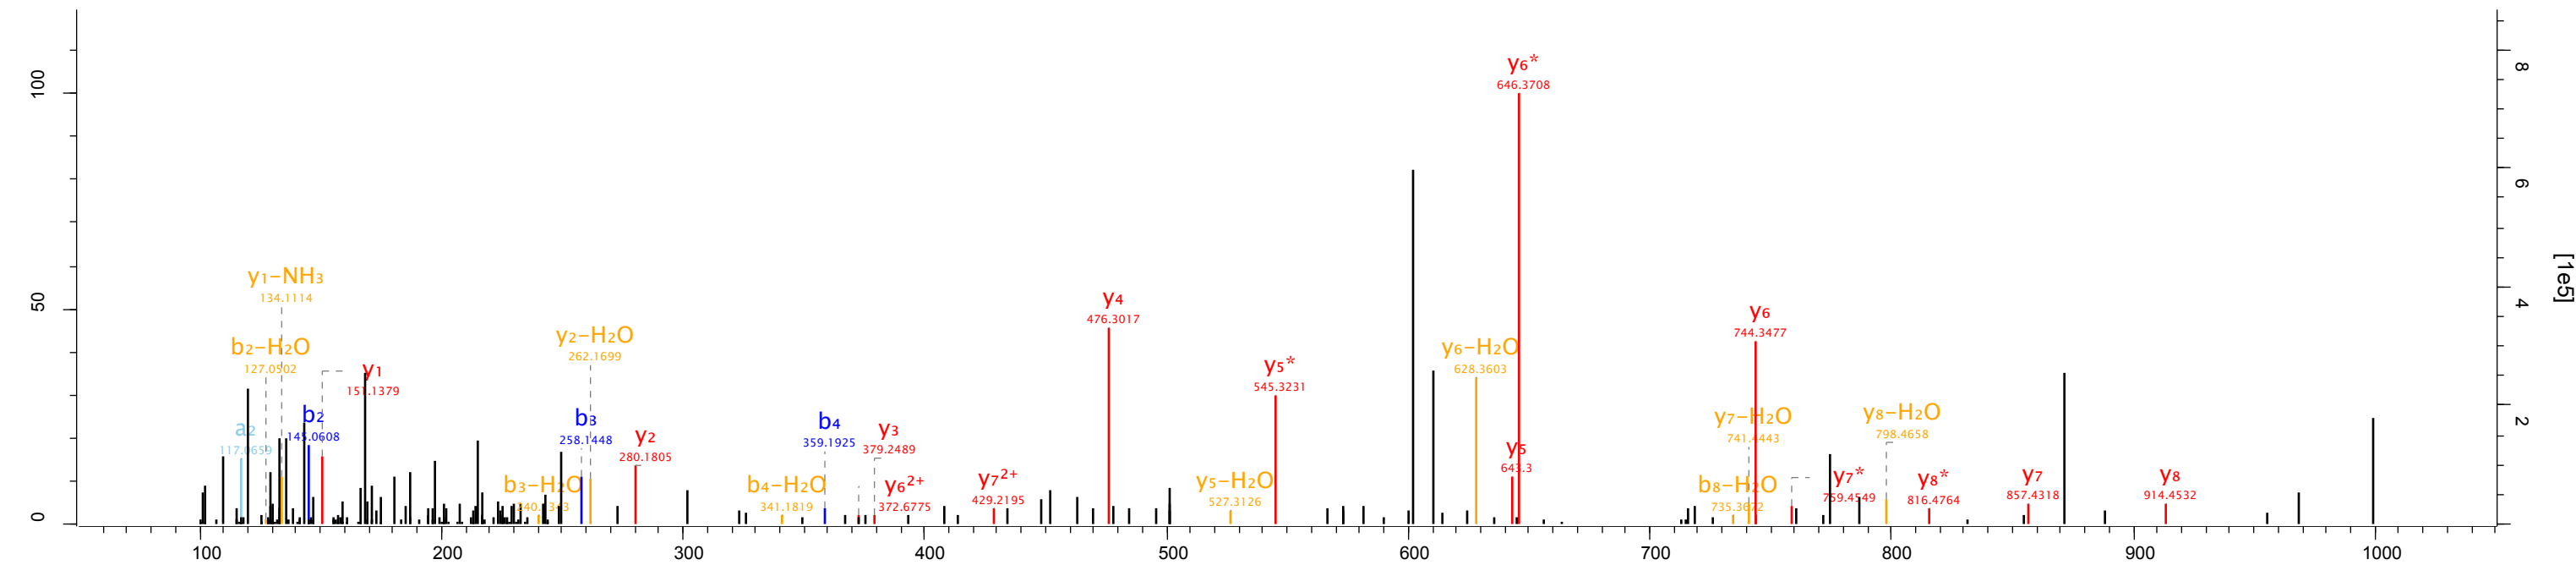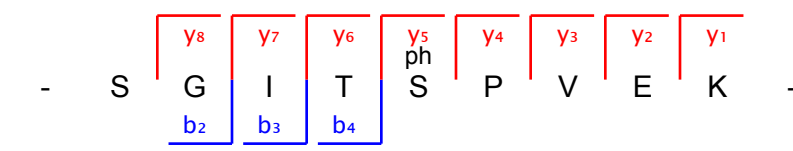

Raw file: 20150812\_A375SR\_Phospho\_BR1\_05  
 Scan: 8134 Method: FTMS; HCD Score: 203.05 m/z: 708.82 Gene names: RPS3A

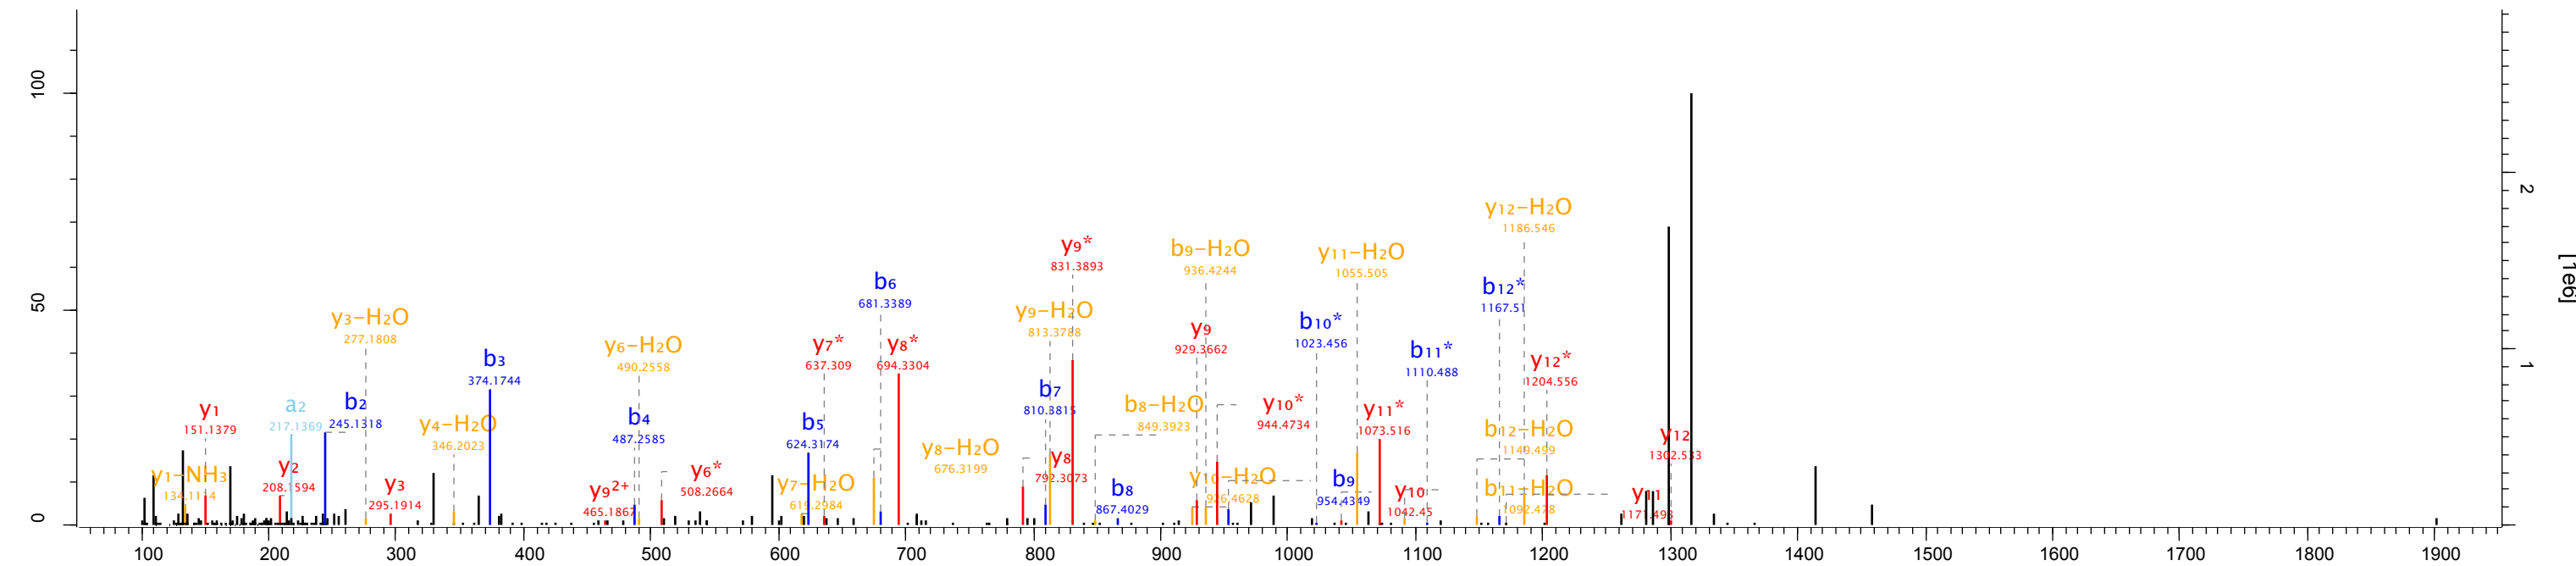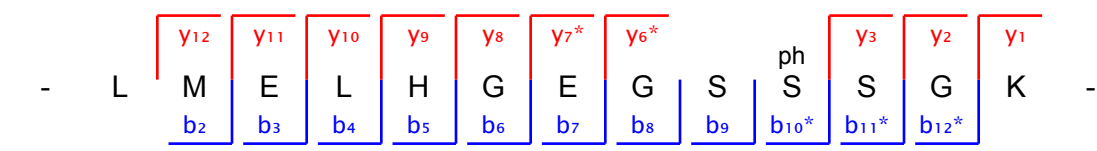

Raw file: 20150812\_A375SR\_Phospho\_BR1\_05  
 Scan: 8474 Method: FTMS; HCD Score: 77.54 m/z: 634.64 Gene names: ARHGAP4

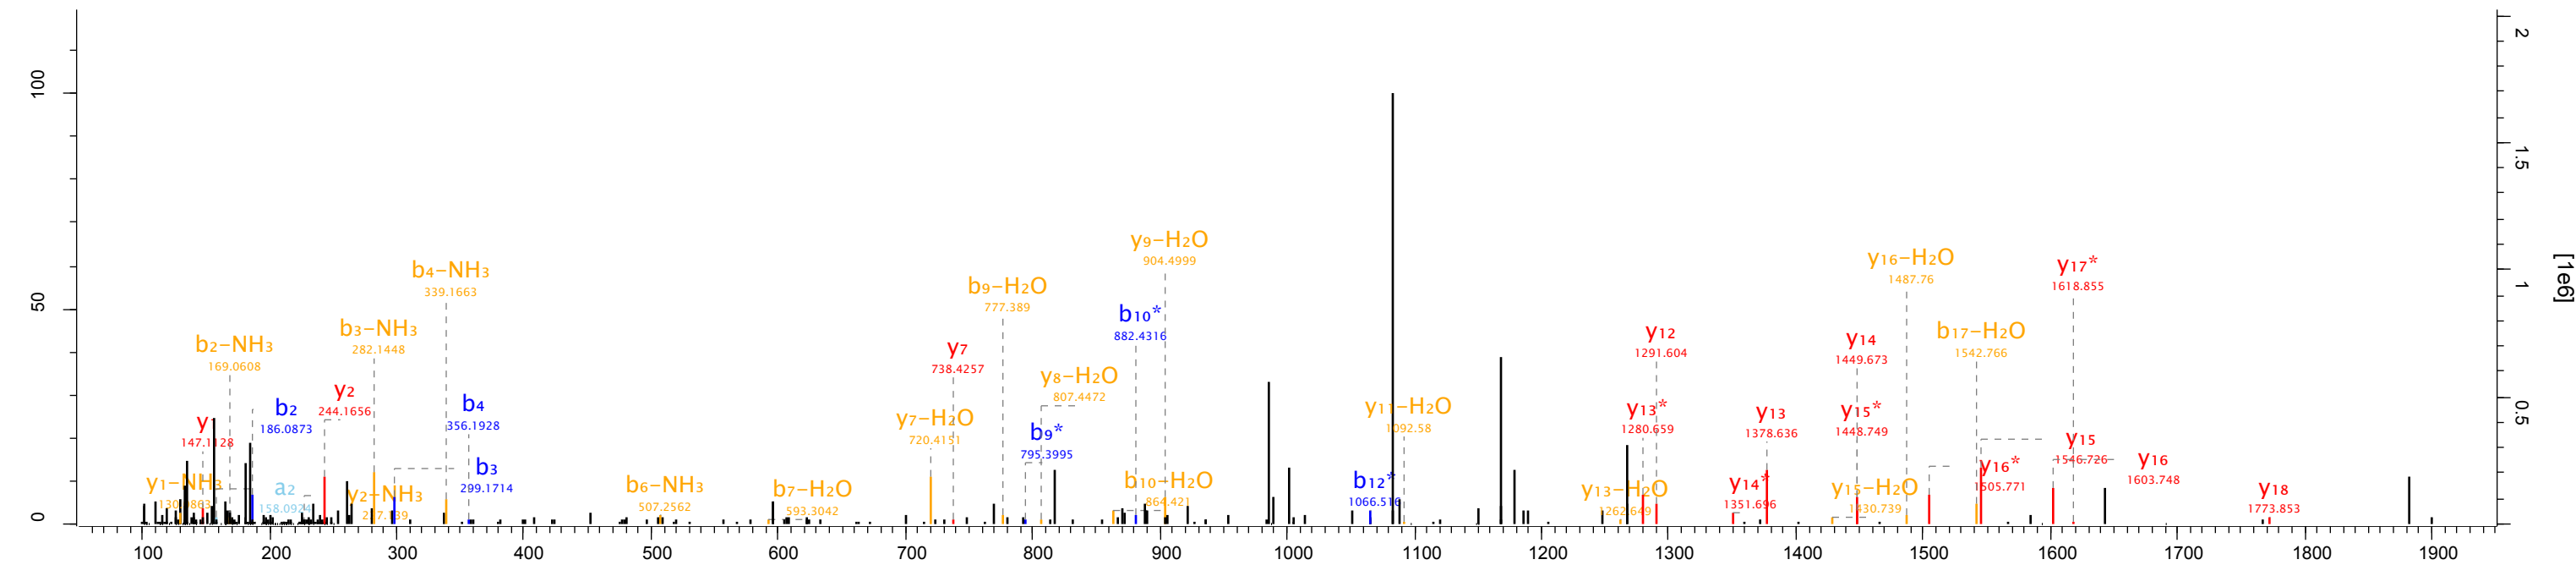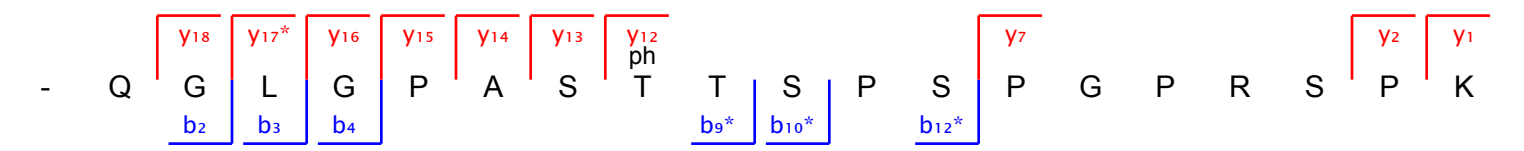

Raw file: 20150812\_A375SR\_Phospho\_BR1\_05  
 Scan: 9594 Method: FTMS; HCD Score: 222.62 m/z: 857.4 Gene names: MEPCE

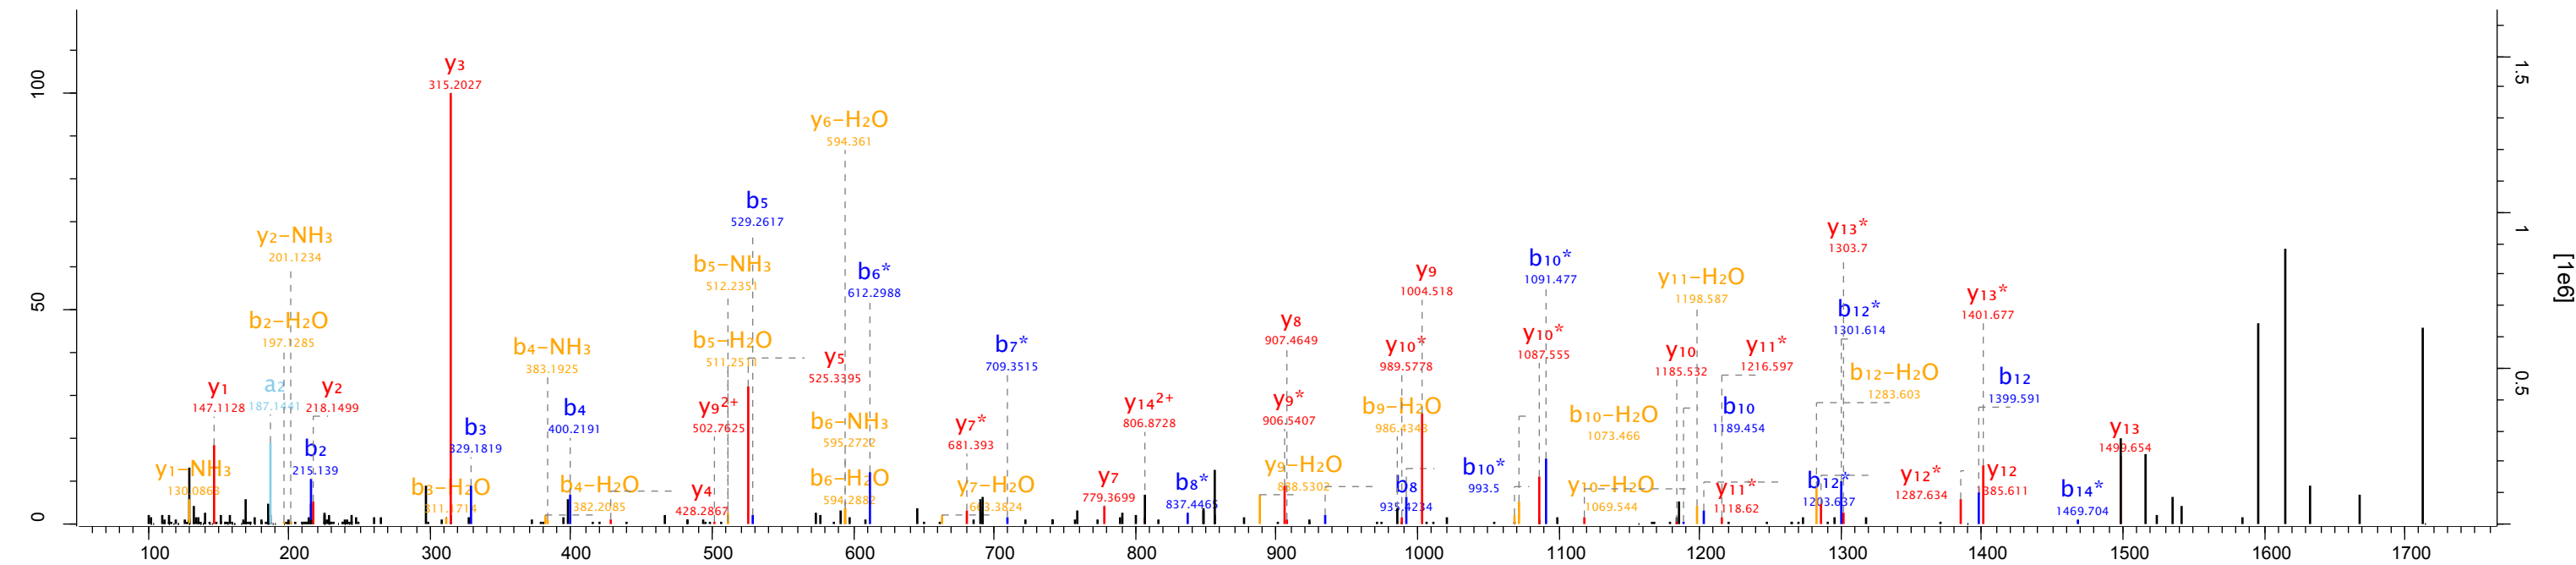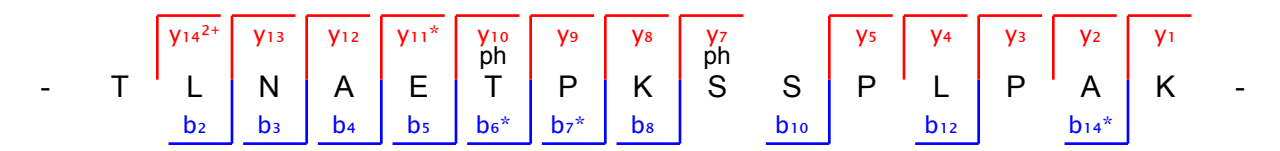



Raw file: 20150812\_A375SR\_Phospho\_BR1\_05  
 Scan: 9864 Method: FTMS; HCD Score: 113.24 m/z: 553.26 Gene names: BAIAP2;CCDC43

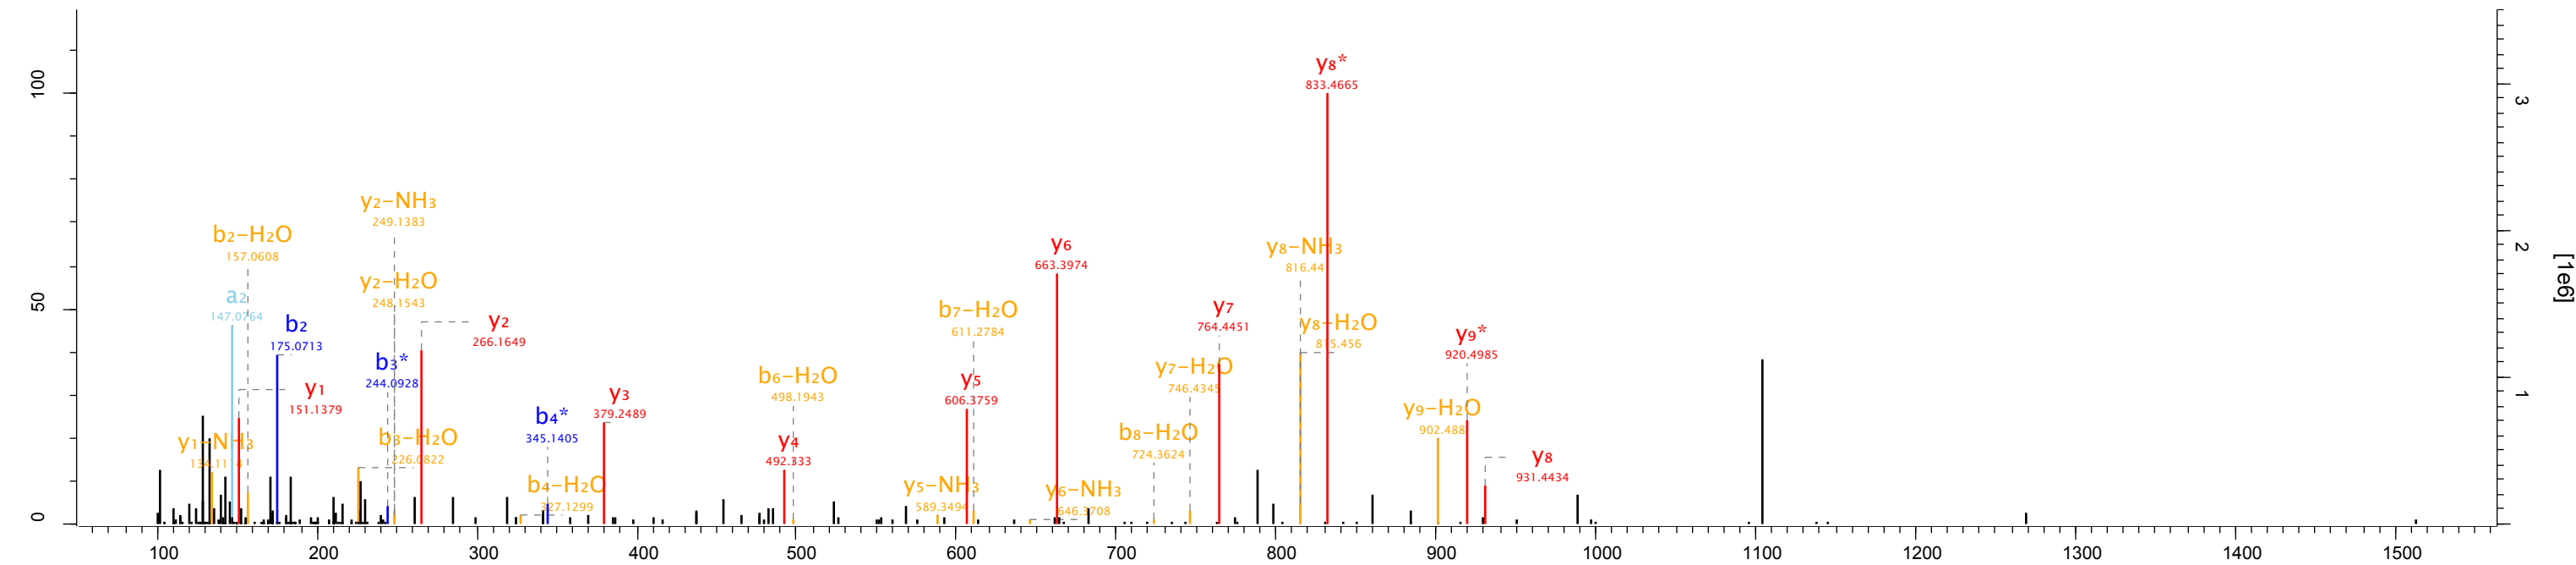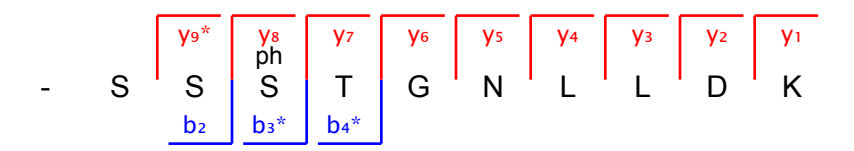

Raw file: 20150812\_A375SR\_Phospho\_BR1\_05  
 Scan: 9914 Method: FTMS; HCD Score: 62.09 m/z: 584.78 Gene names: SCAF1

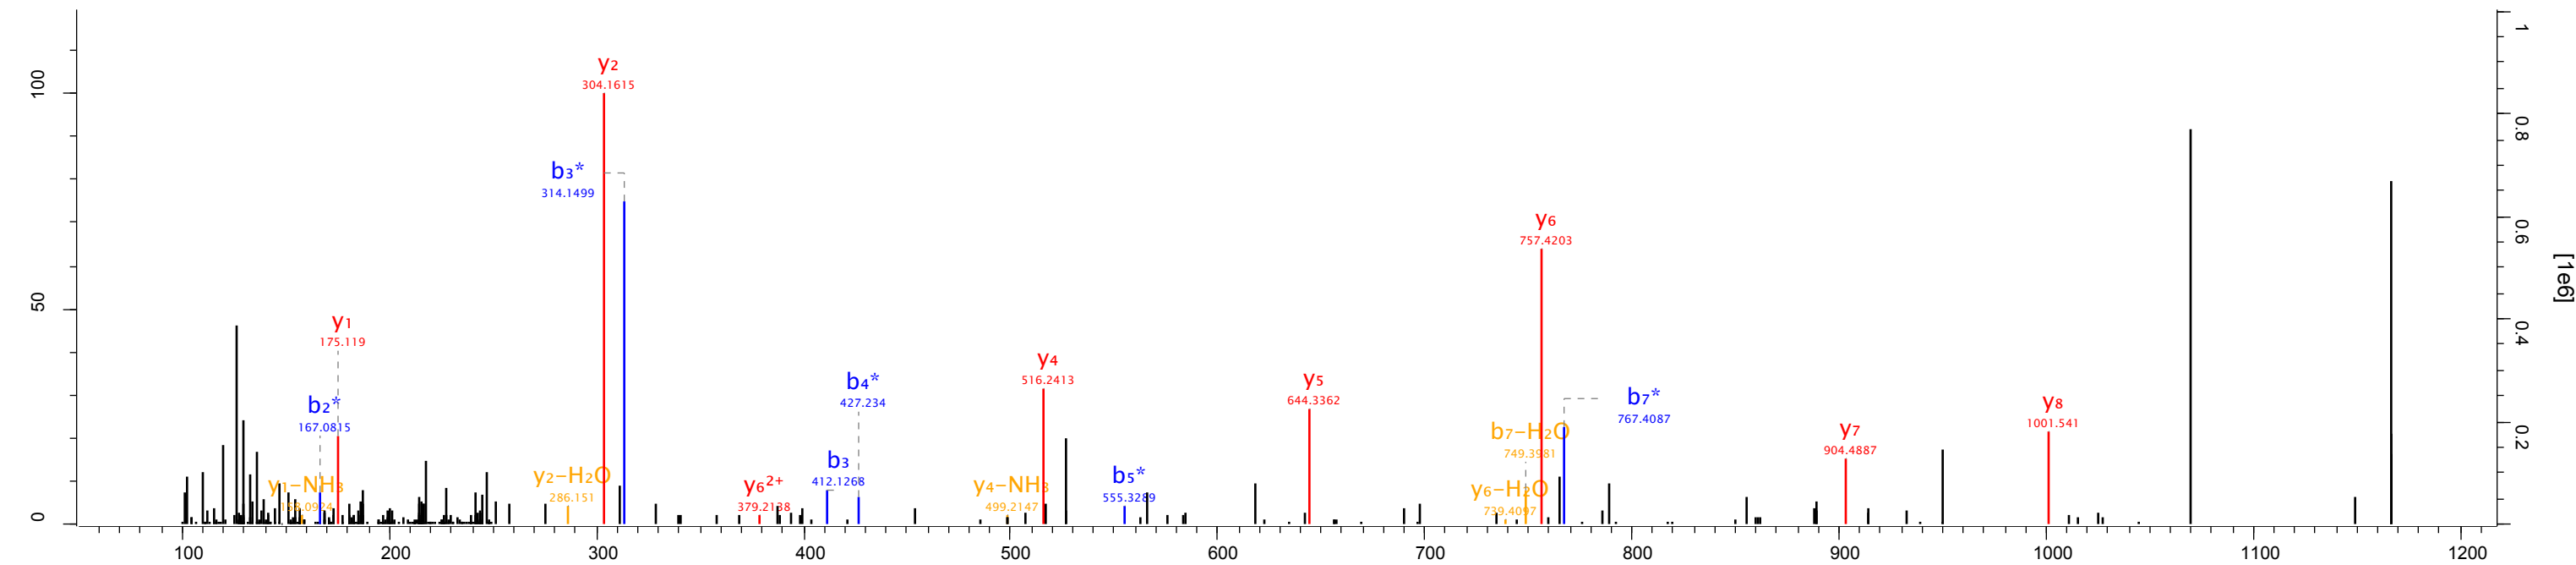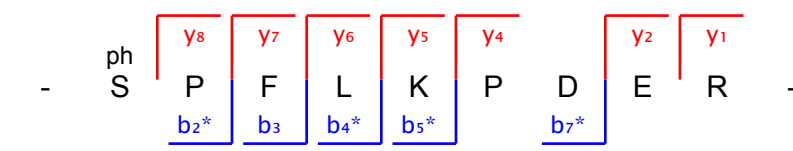

Raw file: 20150812\_A375SR\_Phospho\_BR1\_06  
 Scan: 10044 Method: FTMS; HCD Score: 100.18 m/z: 605.29 Gene names: SRCIN1

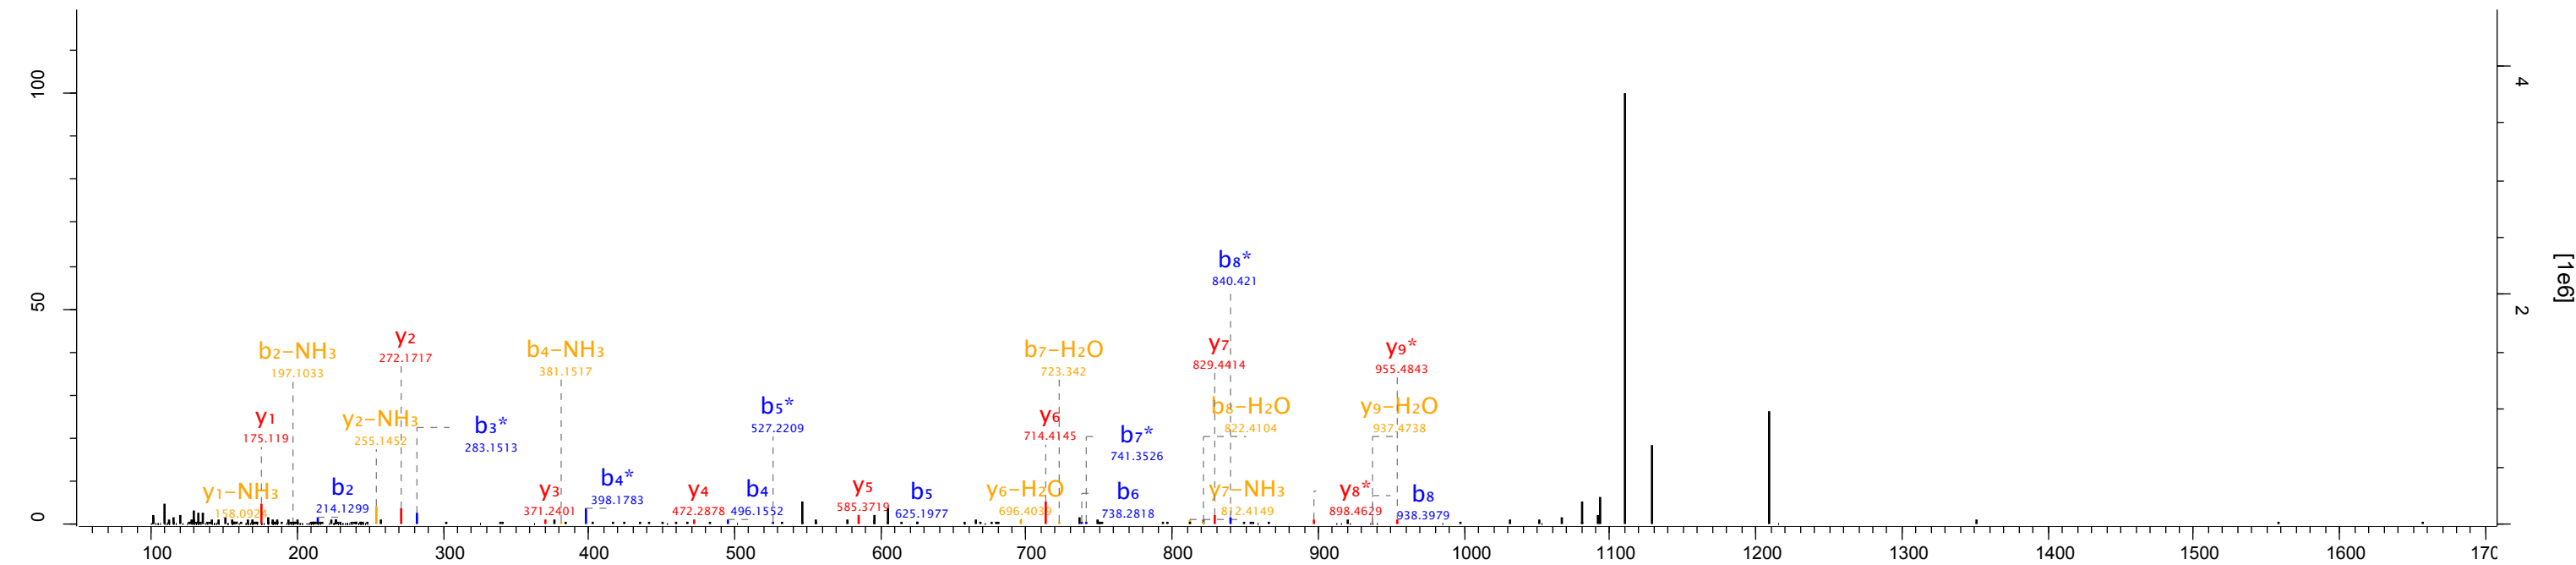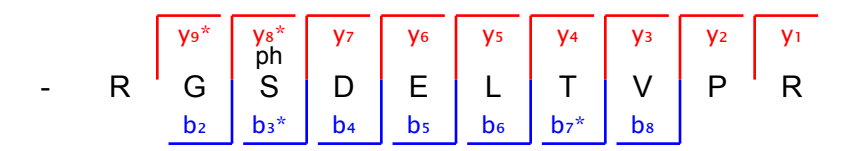

Raw file: 20150812\_A375SR\_Phospho\_BR1\_06  
 Scan: 10224 Method: FTMS; HCD Score: 230.62 m/z: 820.39 Gene names: PDS5A

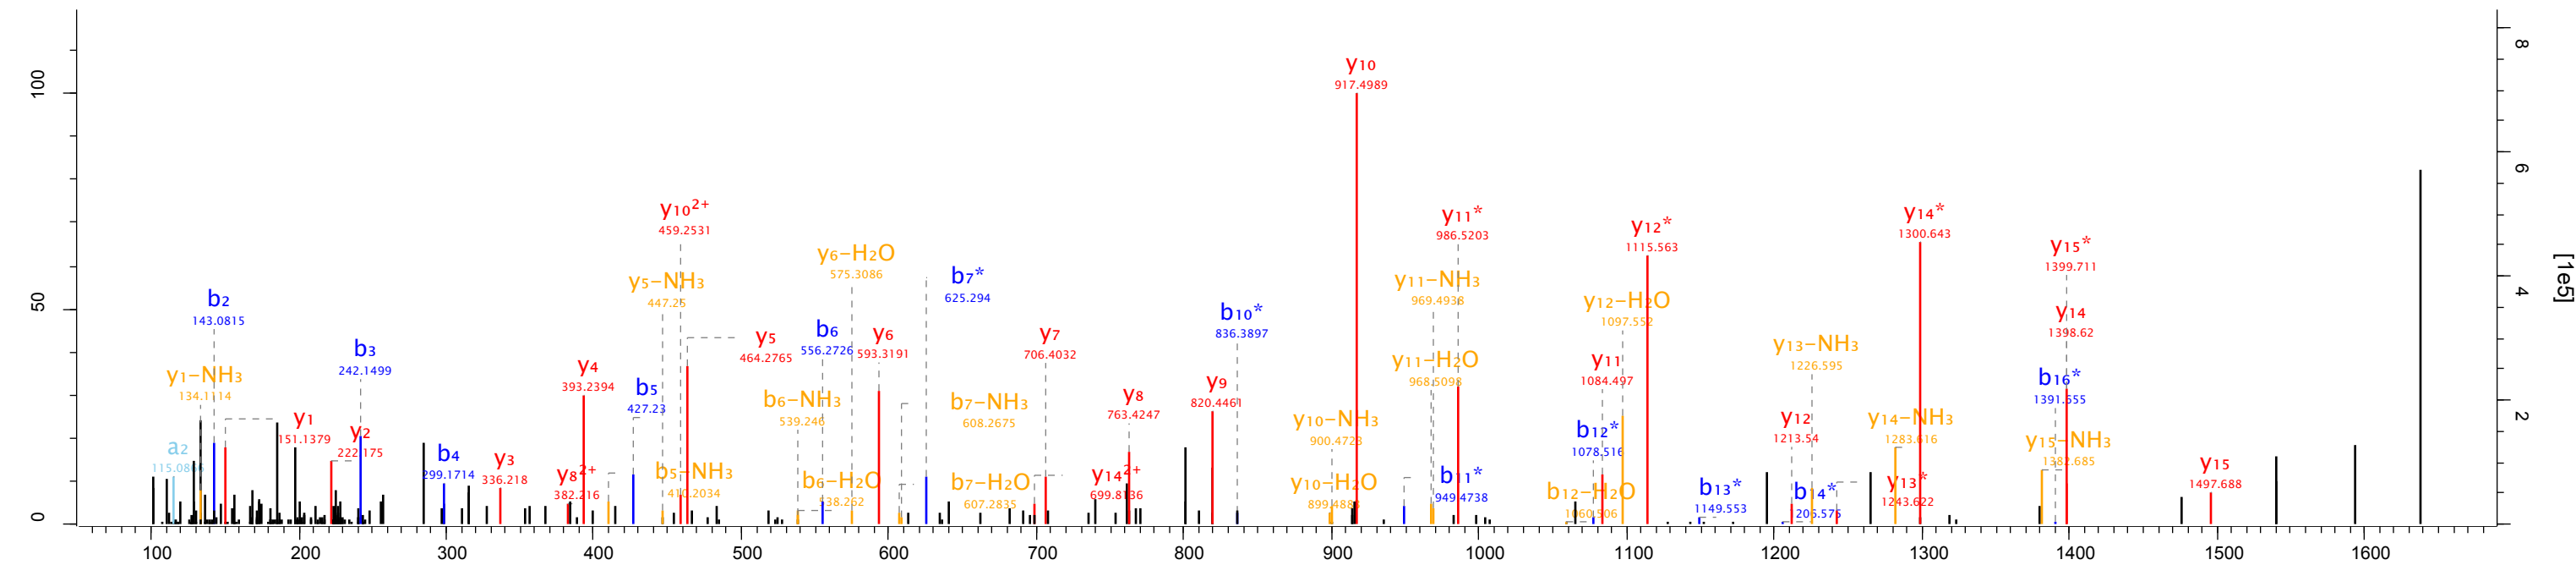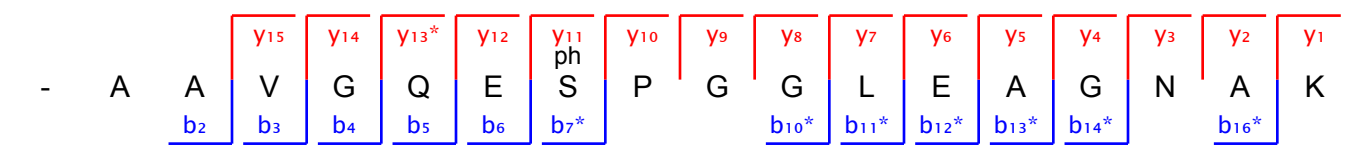

20150812\_A375SR\_Phospho\_BR1\_06 10344 FTMS; HCD 124.2 651 RRP15

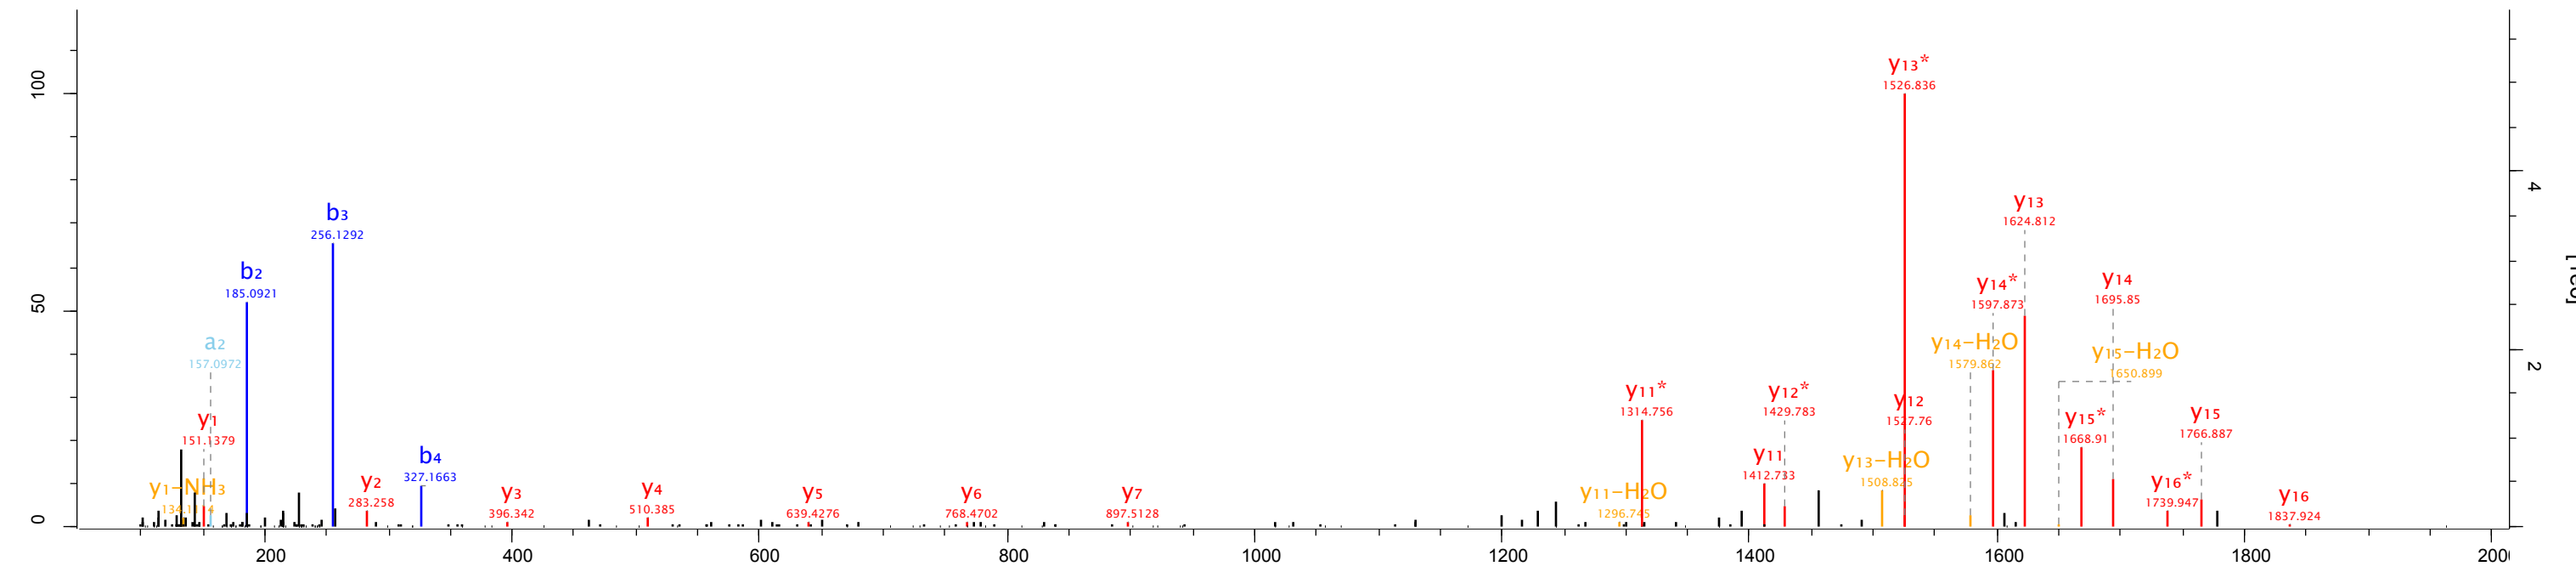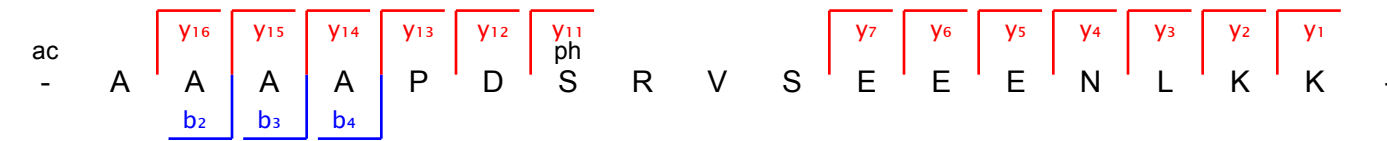

Raw file 20150812\_A375SR\_Phospho\_BR1\_06 Scan 10624 Method FTMS; HCD Score 158.78 m/z 954.91 Gene names FTSJ3

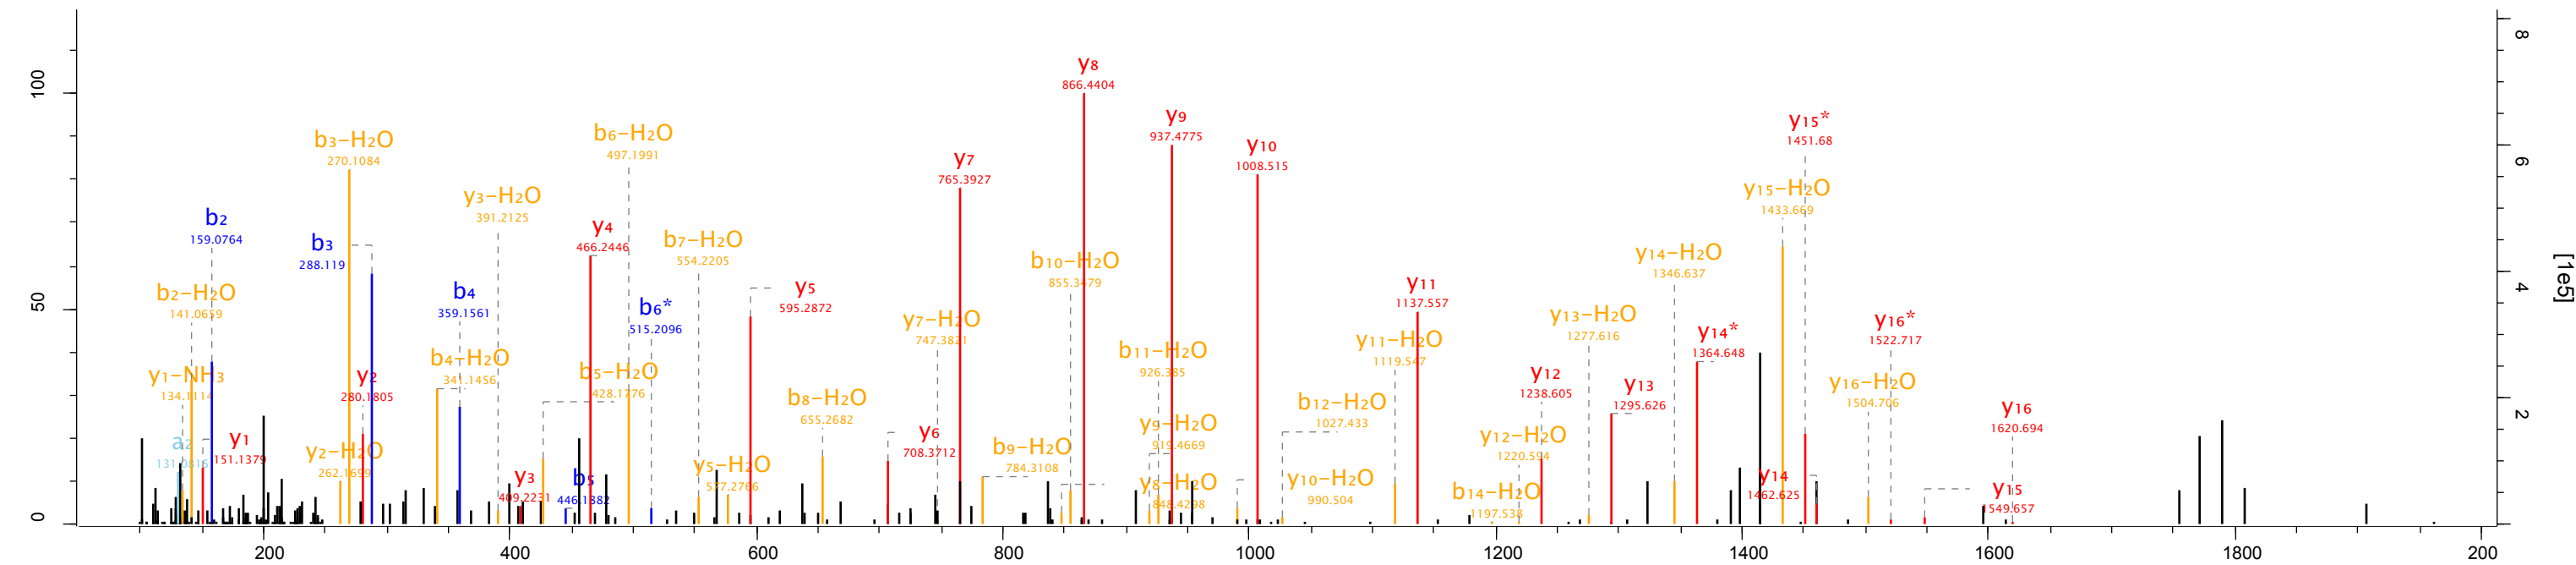

- G T E A S S G T E A A T G L E G E E K -

Fragmentation mapping (b and y ions) is shown below the sequence:

- b2: T
- b3: E
- b4: A
- b5: S
- b6\*: S
- y1: E
- y2: E
- y3: G
- y4: E
- y5: L
- y6: T
- y7: A
- y8: A
- y9: A
- y10: E
- y11: T
- y12: S
- y13: S
- y14: S
- y15: S
- y16: S

Raw file 20150812\_A375SR\_Phospho\_BR1\_06 Scan 11344 Method FTMS; HCD Score 101.53 m/z 638.78 Gene names LARP7

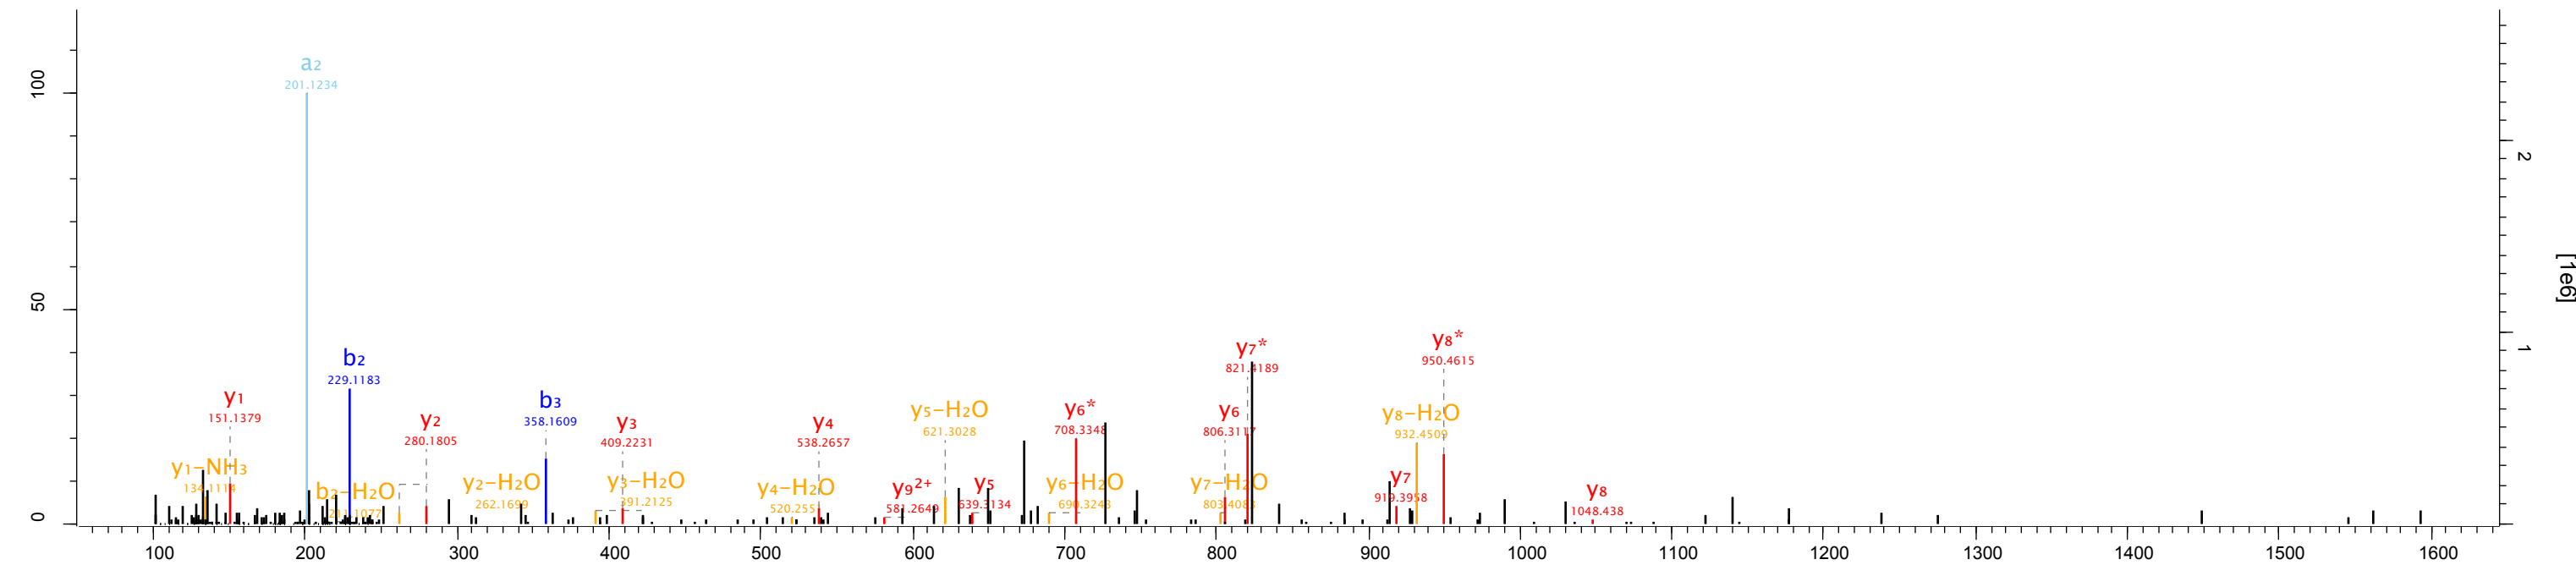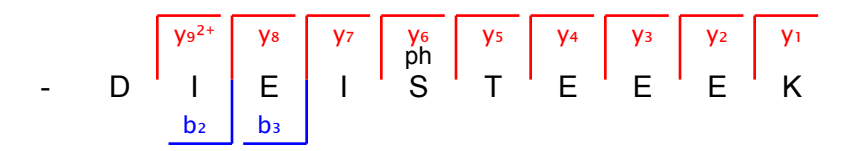

Raw file 20150812\_A375SR\_Phospho\_BR1\_06 Scan 11424 Method FTMS; HCD Score 129.6 m/z 835.37 Gene names KIF21A

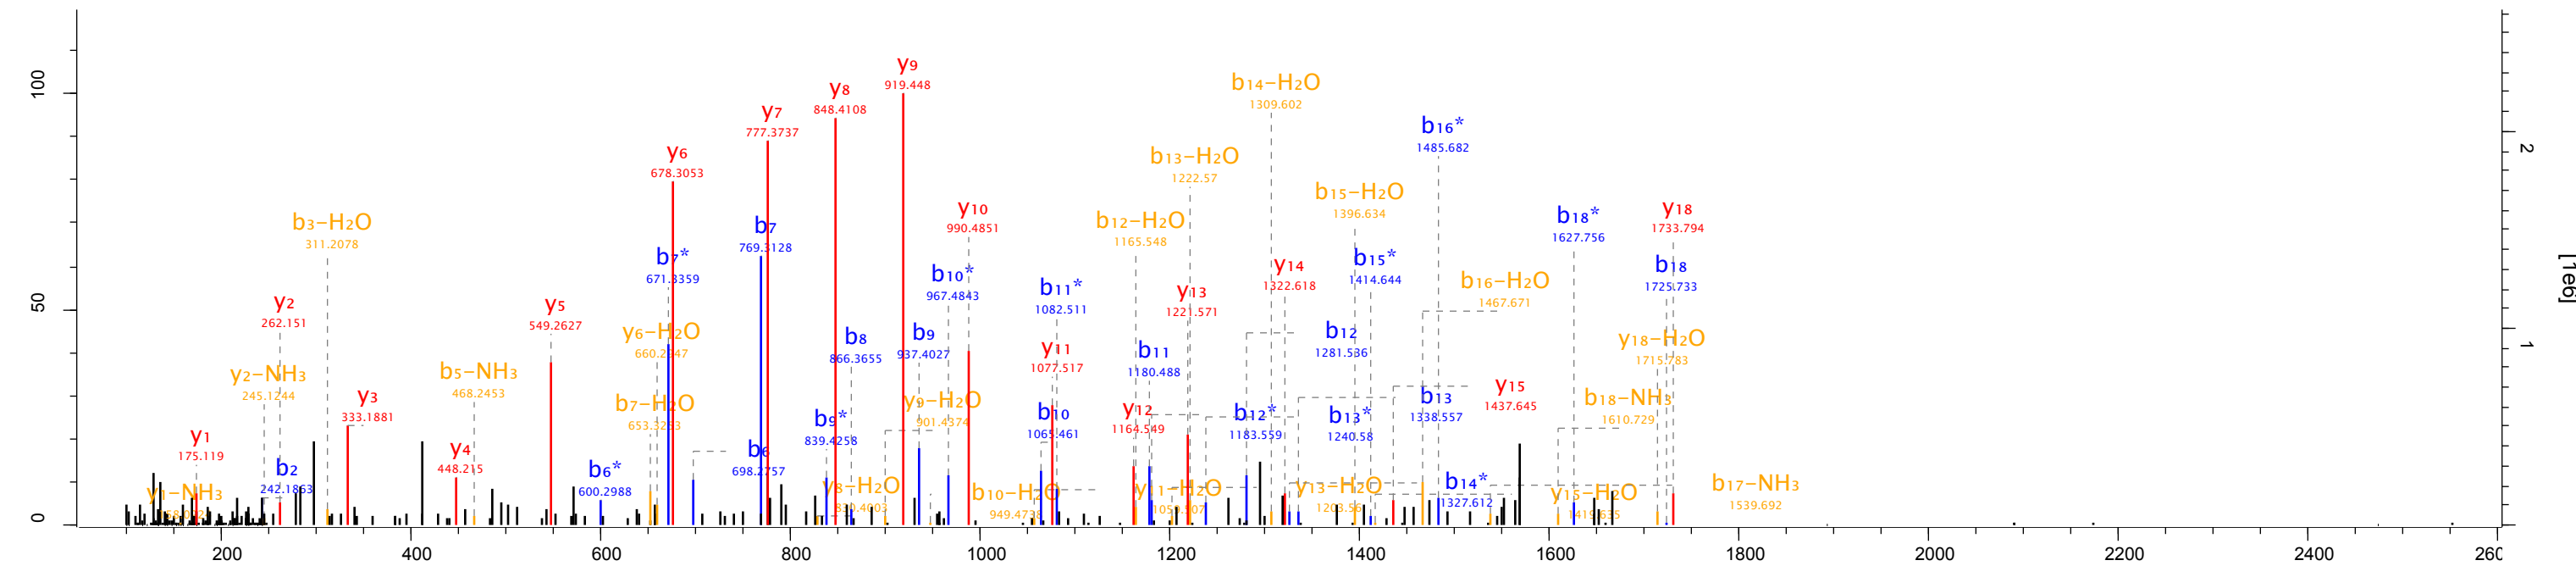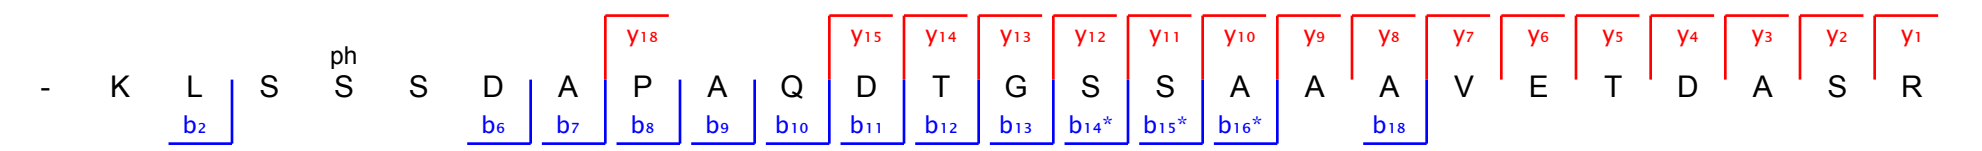



Raw file  
20150812\_A375SR\_Phospho\_BR1\_06

Scan 11534 Method FTMS; HCD Score 147.83 m/z 764.86 Gene names PHACTR4

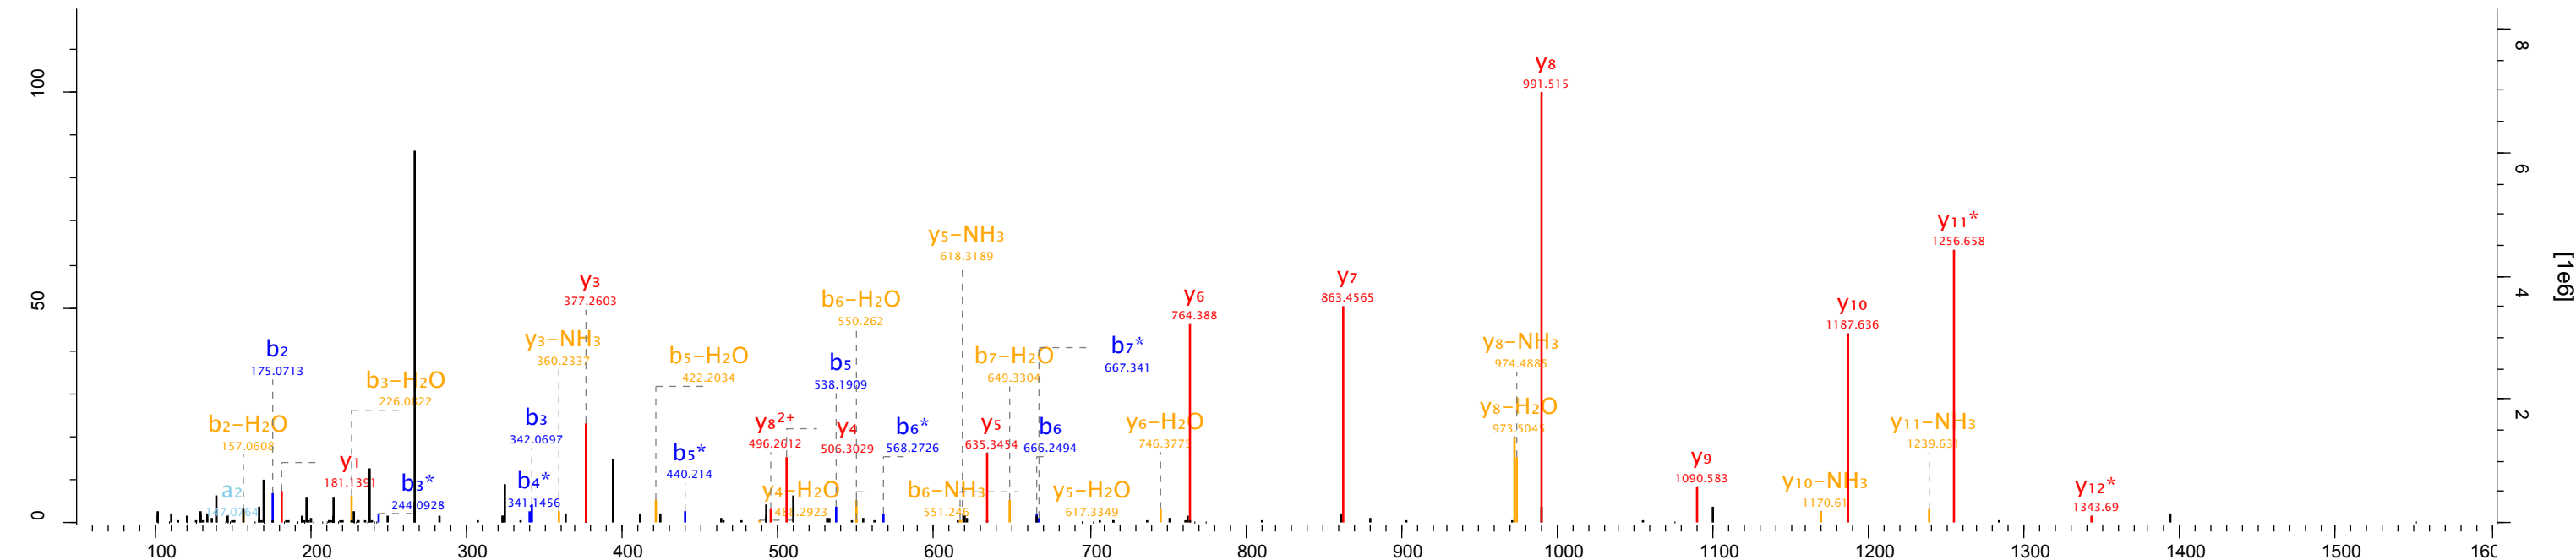

- S S S P V Q V E E E P V R -  
b<sub>2</sub> b<sub>3</sub> b<sub>4</sub>\* b<sub>5</sub> b<sub>6</sub> b<sub>7</sub>\*

Raw file 20150812\_A375SR\_Phospho\_BR1\_06 Scan 12124 Method FTMS; HCD Score 46.07 m/z 662.82 Gene names MYO5C

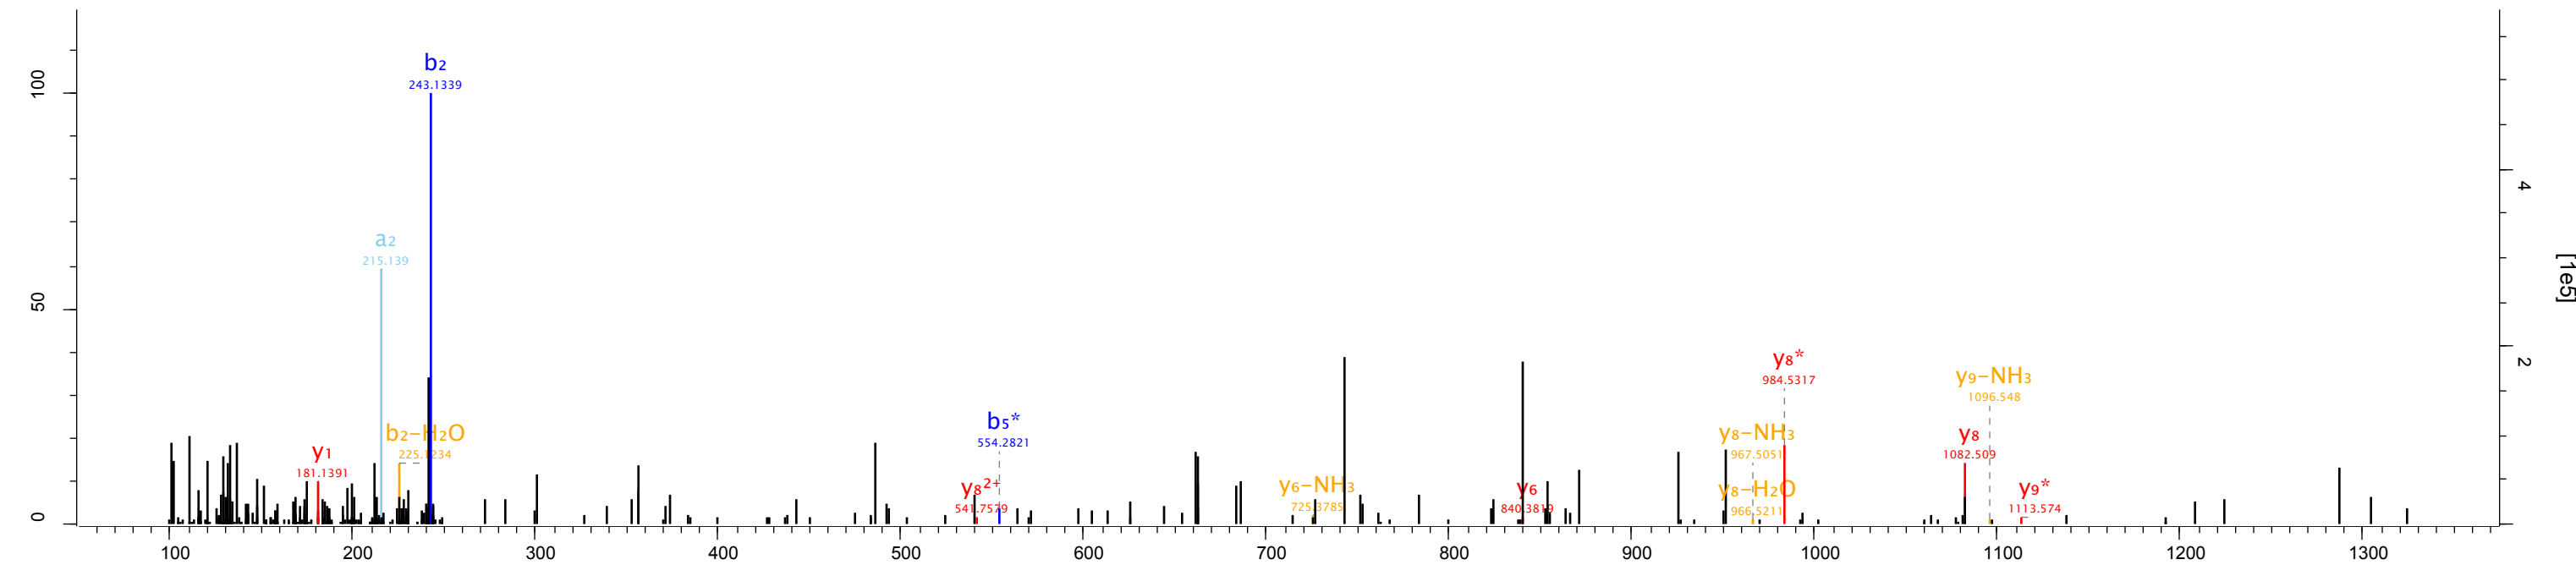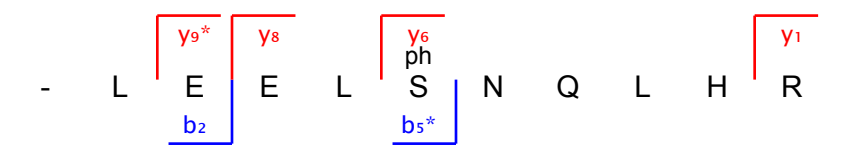

Raw file: 20150812\_A375SR\_Phospho\_BR1\_06  
 Scan: 1234 Method: FTMS; HCD Score: 217.35 m/z: 572.58 Gene names: POLR3G

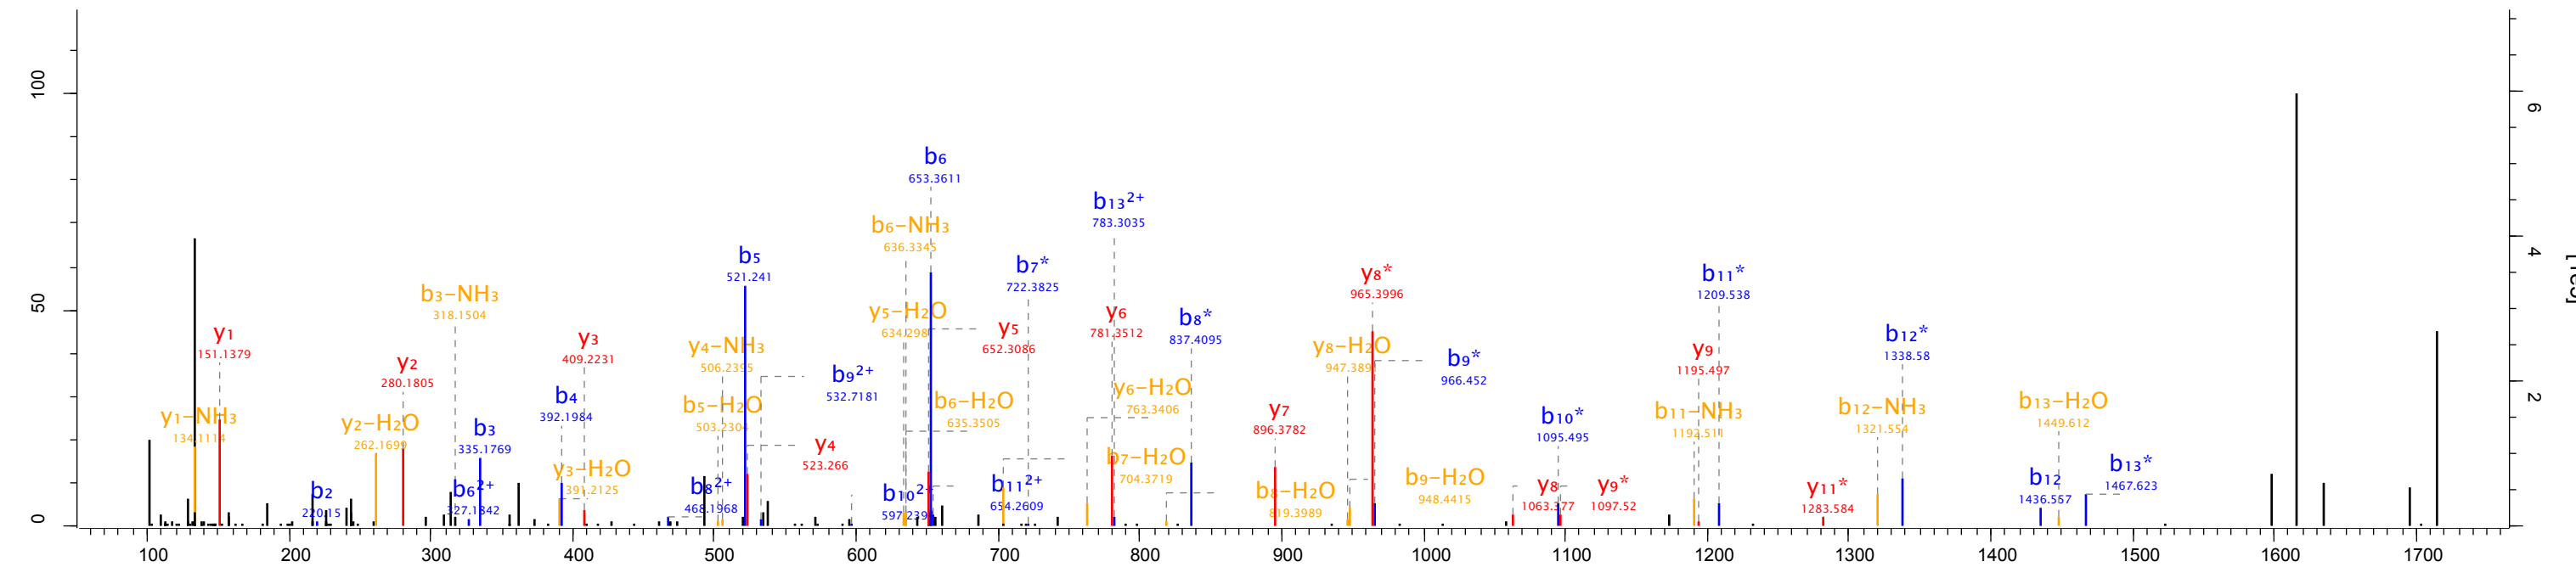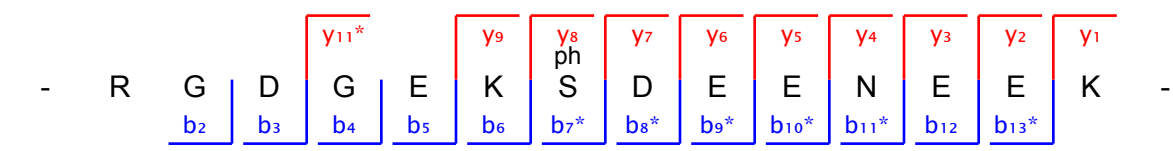

Raw file: 20150812\_A375SR\_Phospho\_BR1\_06  
 Scan: 12524 Method: FTMS; HCD Score: 148.15 m/z: 893.91 Gene names: SH3BP4

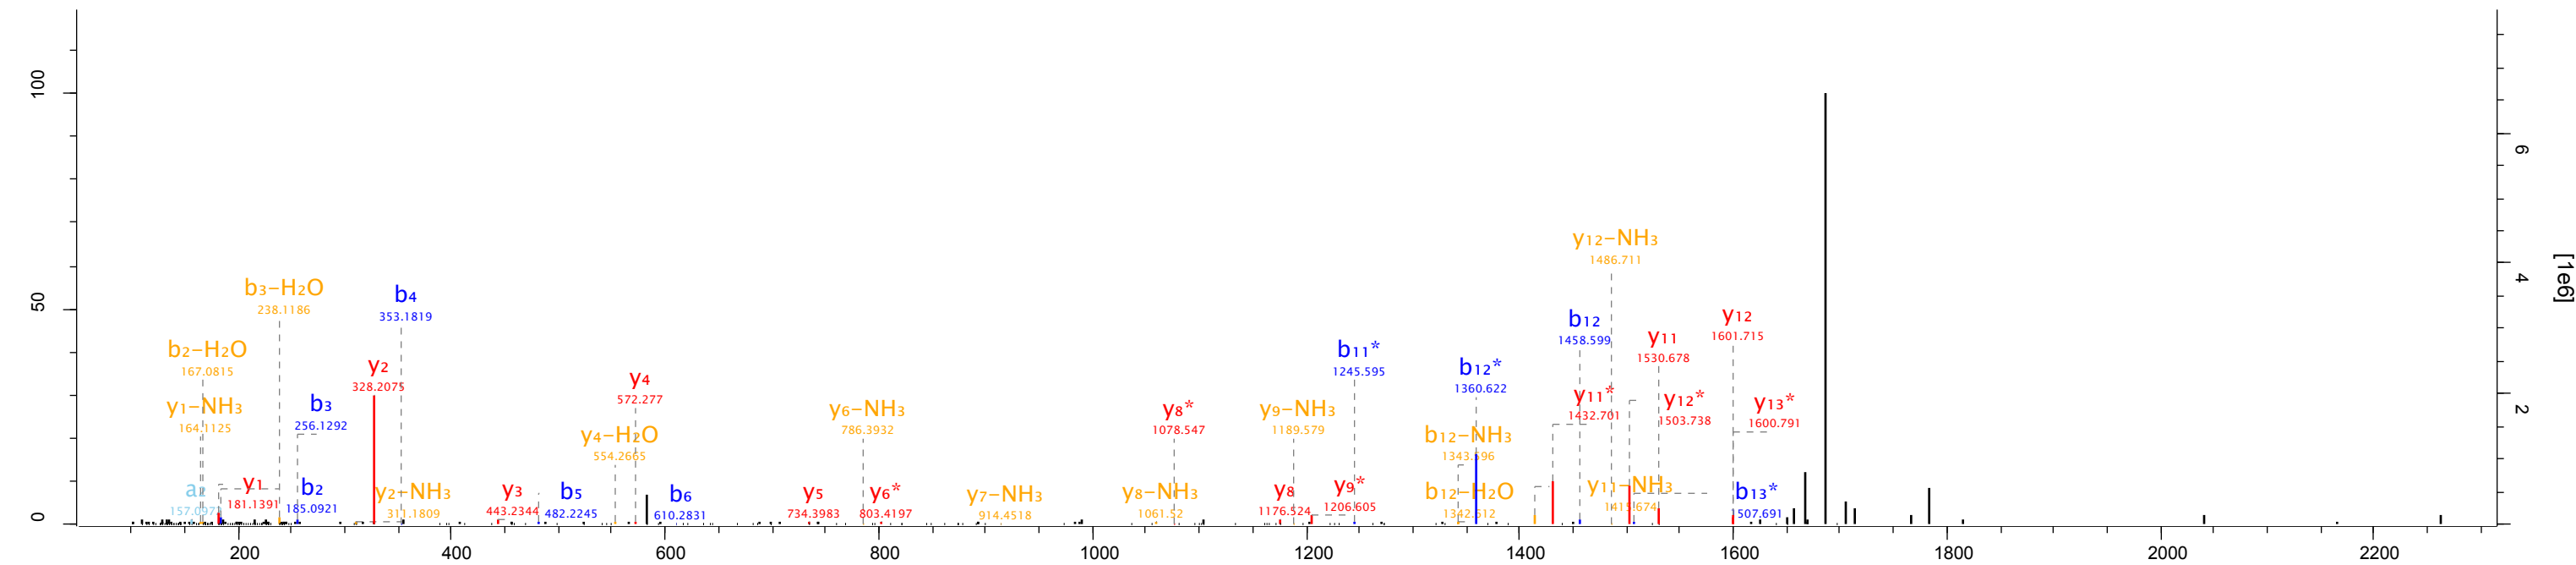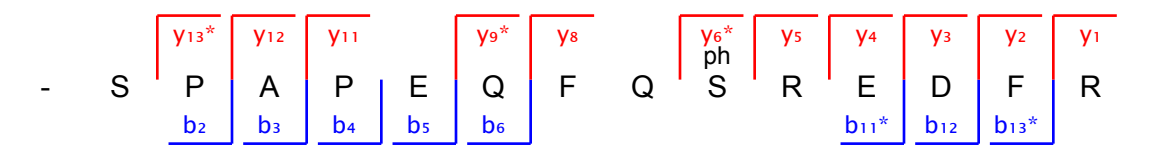

Raw file: 20150812\_A375SR\_Phospho\_BR1\_06  
 Scan: 12544 Method: FTMS; HCD Score: 244.77 m/z: 1008.94 Gene names: SYNLM

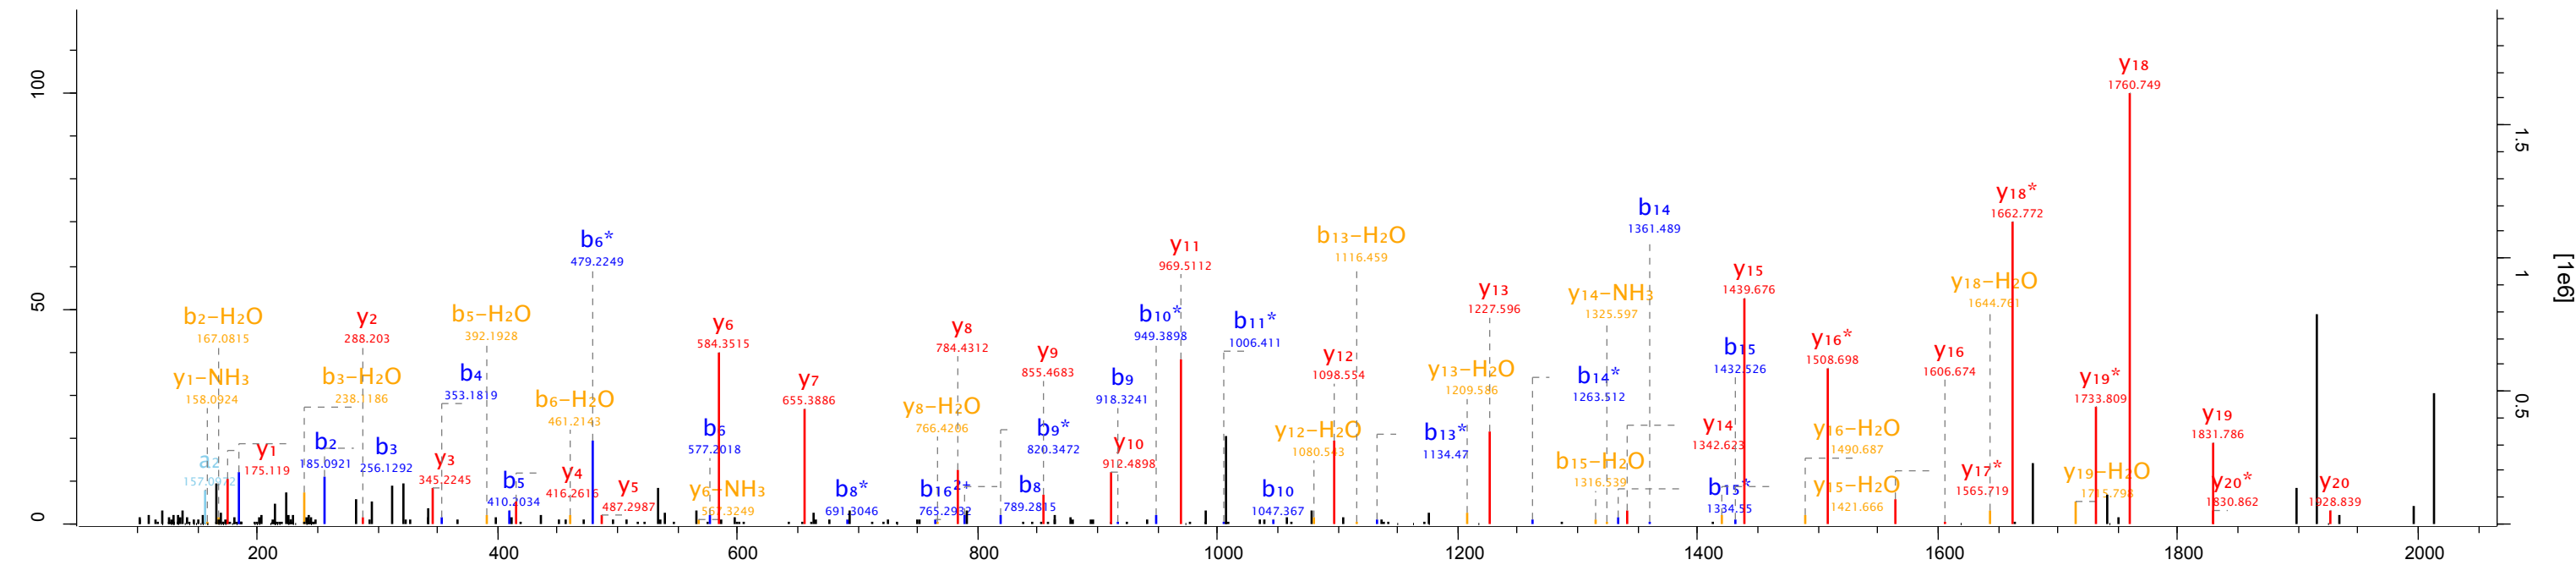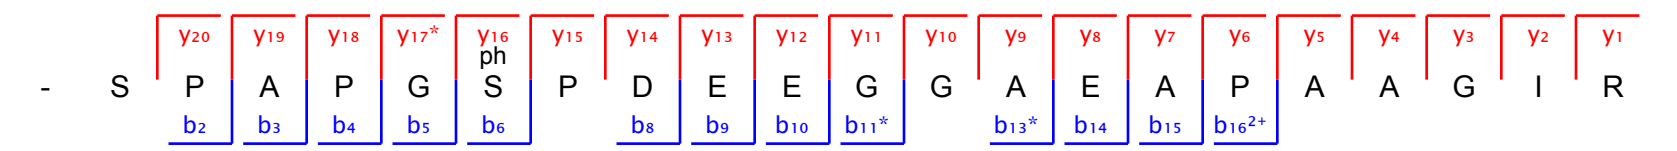

Raw file 20150812\_A375SR\_Phospho\_BR1\_06 Scan 12654 Method FTMS; HCD Score 176.23 m/z 689.32 Gene names RPS27

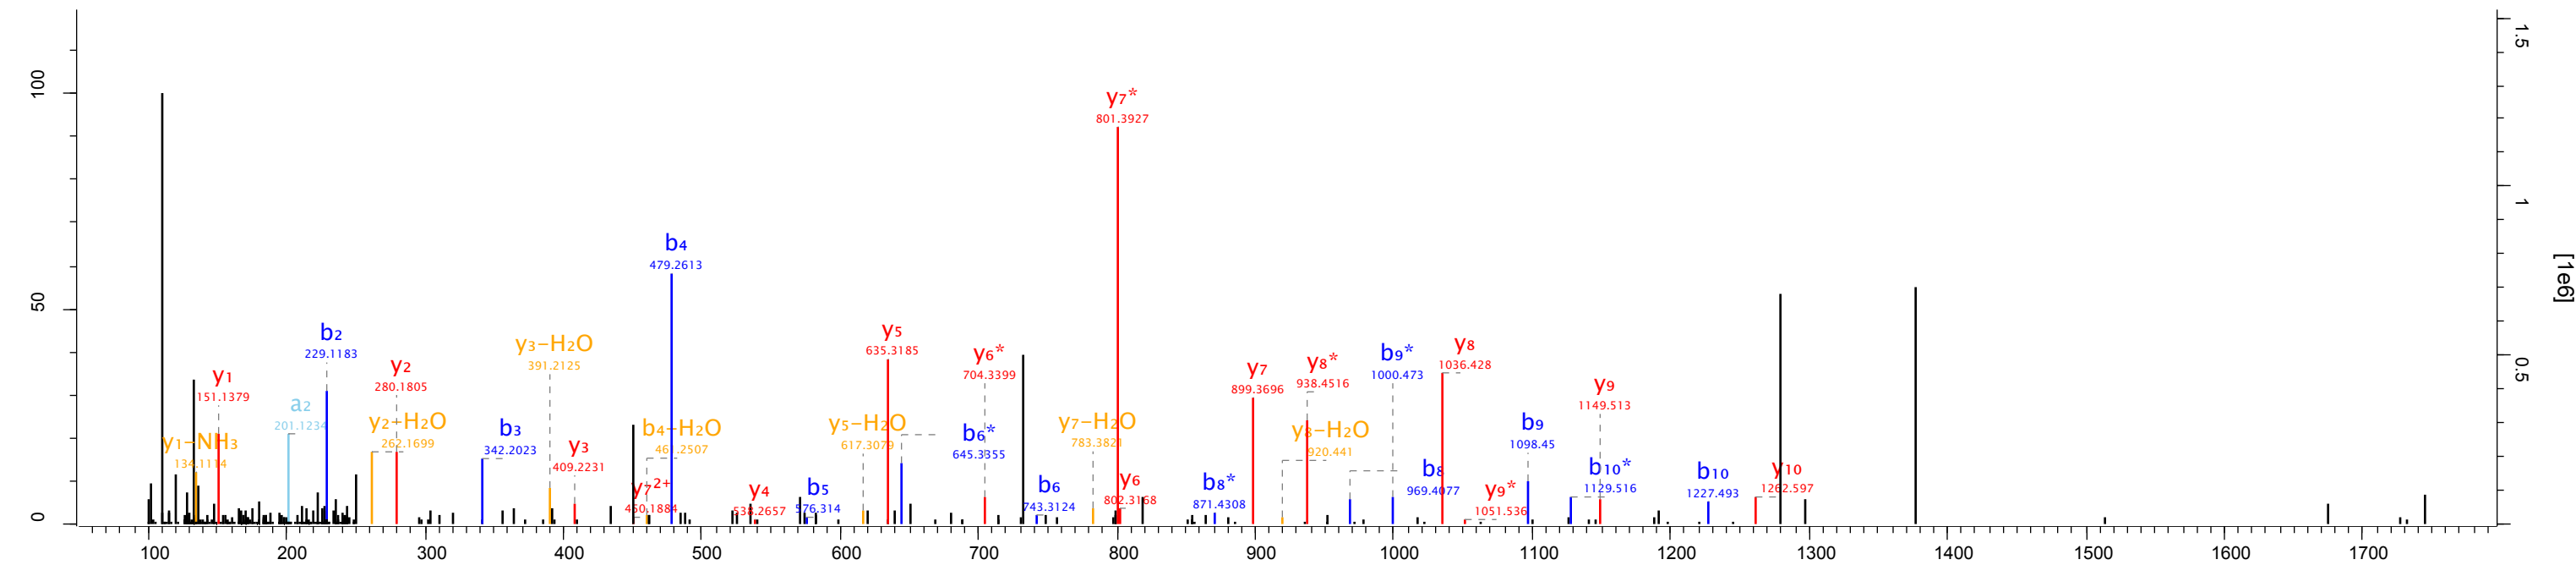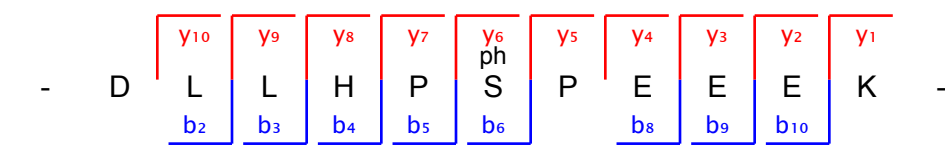

Raw file: 20150812\_A375SR\_Phospho\_BR1\_06  
 Scan: 12694 Method: FTMS; HCD Score: 348.34 m/z: 1055.98 Gene names: RPRD2

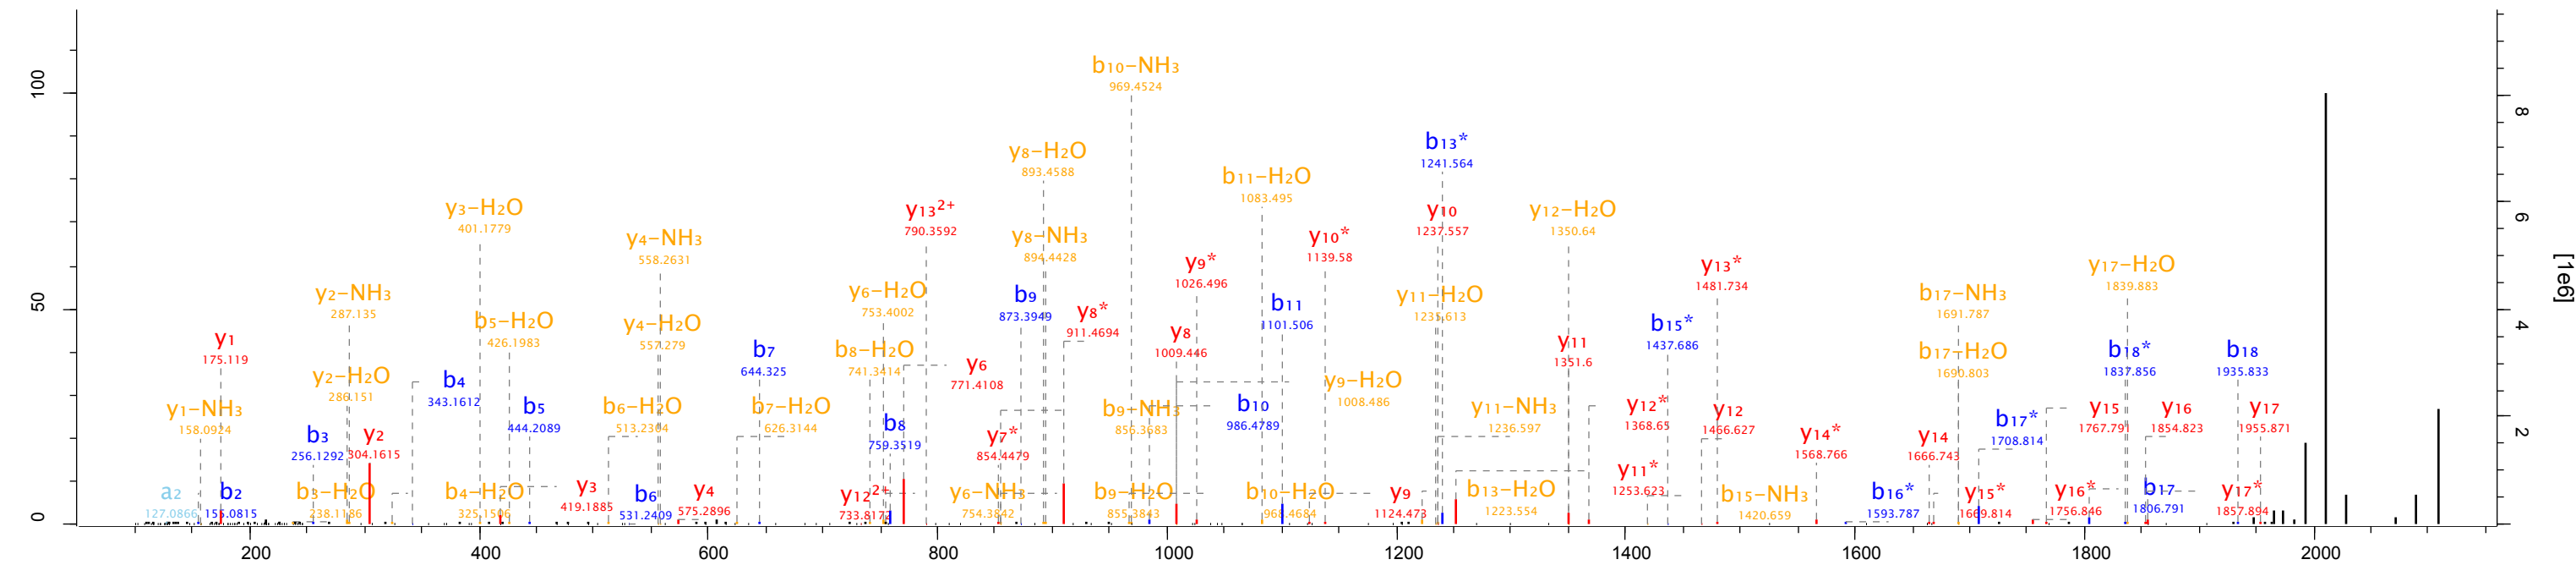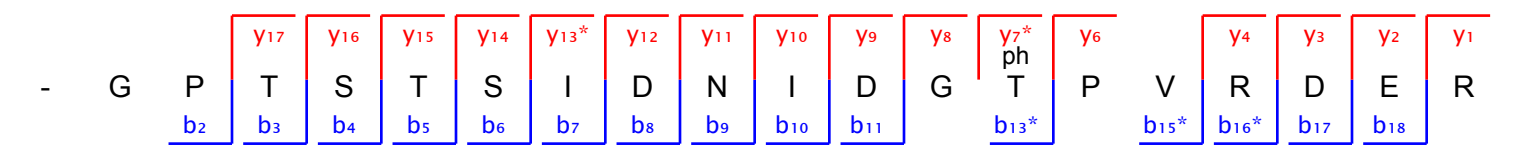

Raw file  
 20150812\_A375SR\_Phospho\_BR1\_06  
 Scan 13804 Method FTMS; HCD Score 140.45 m/z 674.67 Gene names VIM

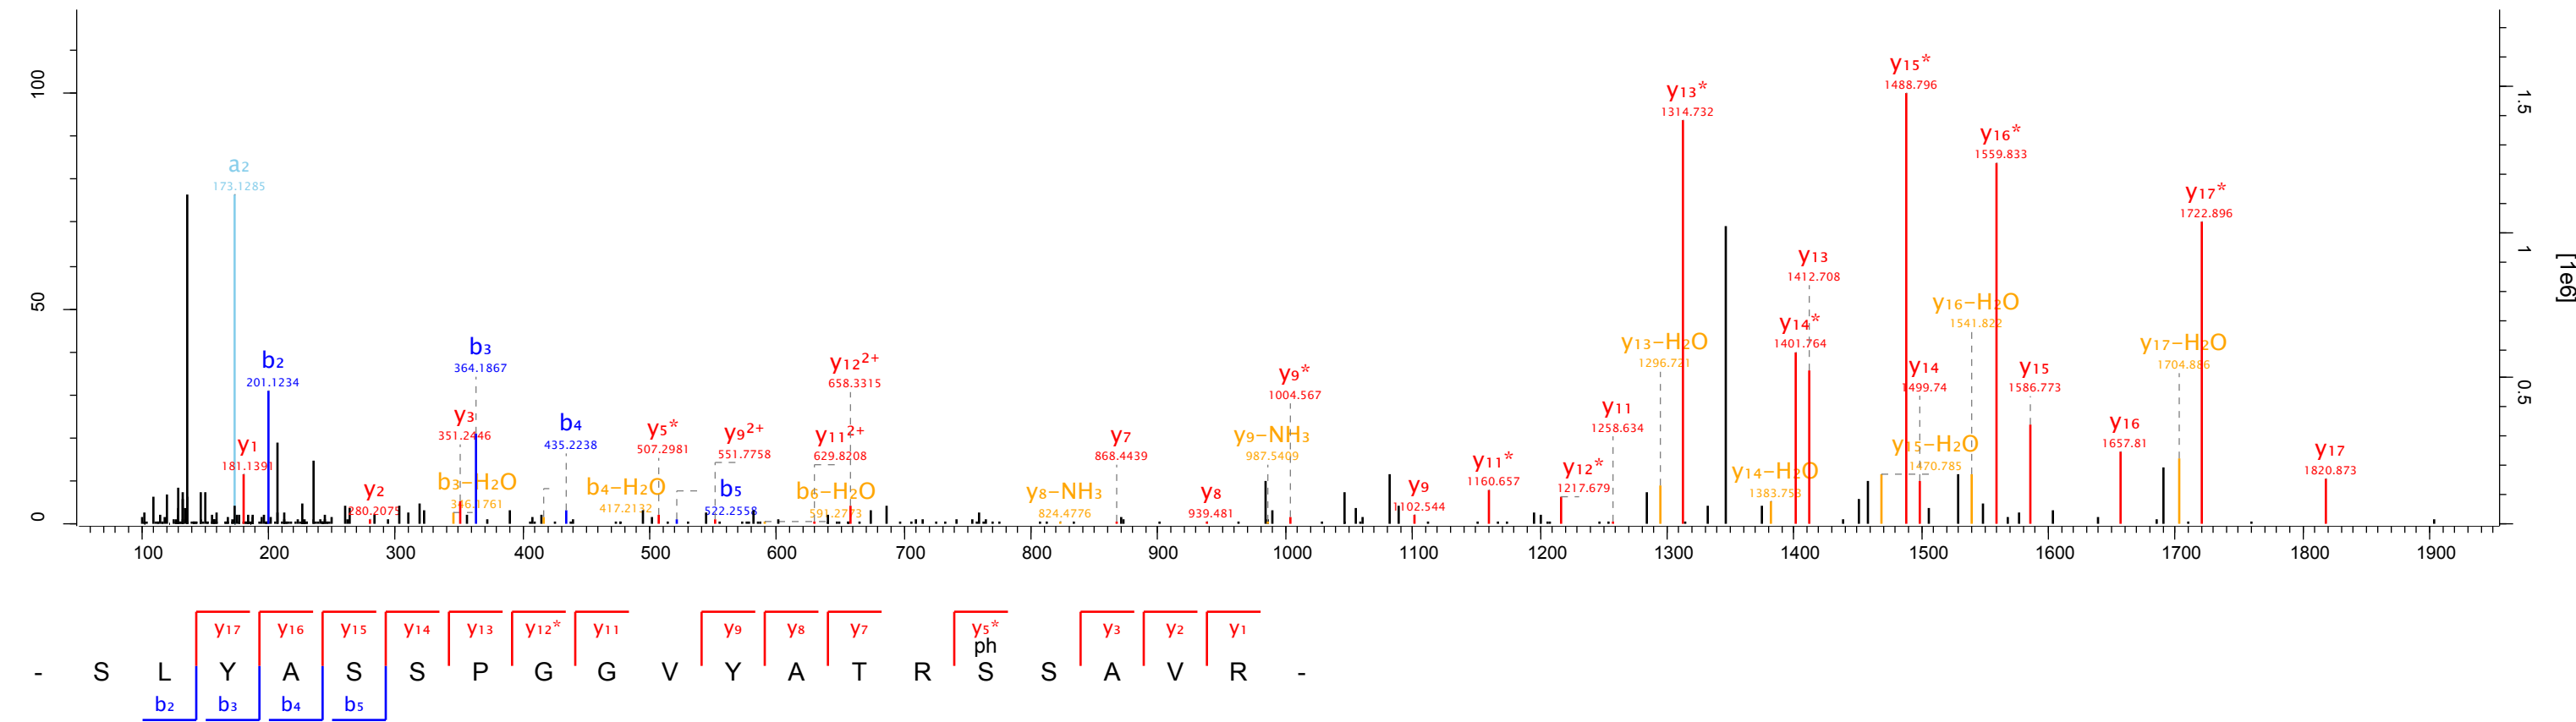



Raw file: 20150812\_A375SR\_Phospho\_BR1\_06  
 Scan: 13874 Method: FTMS; HCD Score: 133.89 m/z: 561.73 Gene names: MYO18A

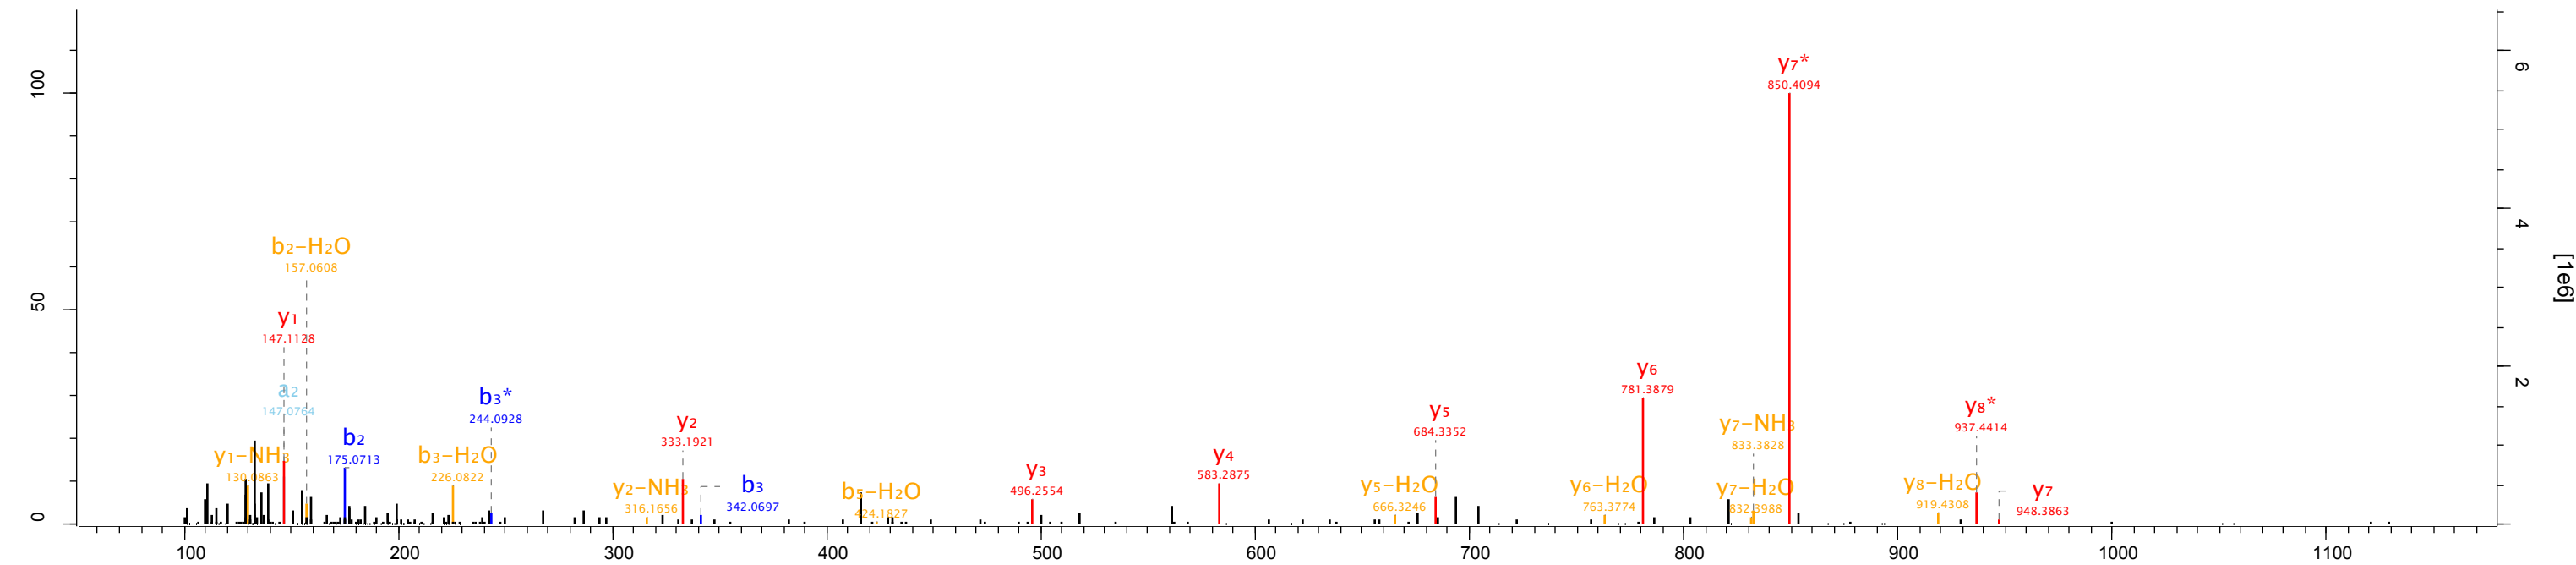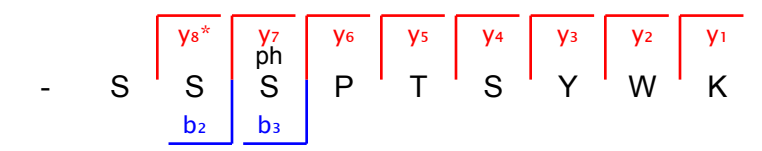

Raw file: 20150812\_A375SR\_Phospho\_BR1\_06  
 Scan: 13884 Method: FTMS; HCD Score: 157.96 m/z: 705.63 Gene names: ZYX

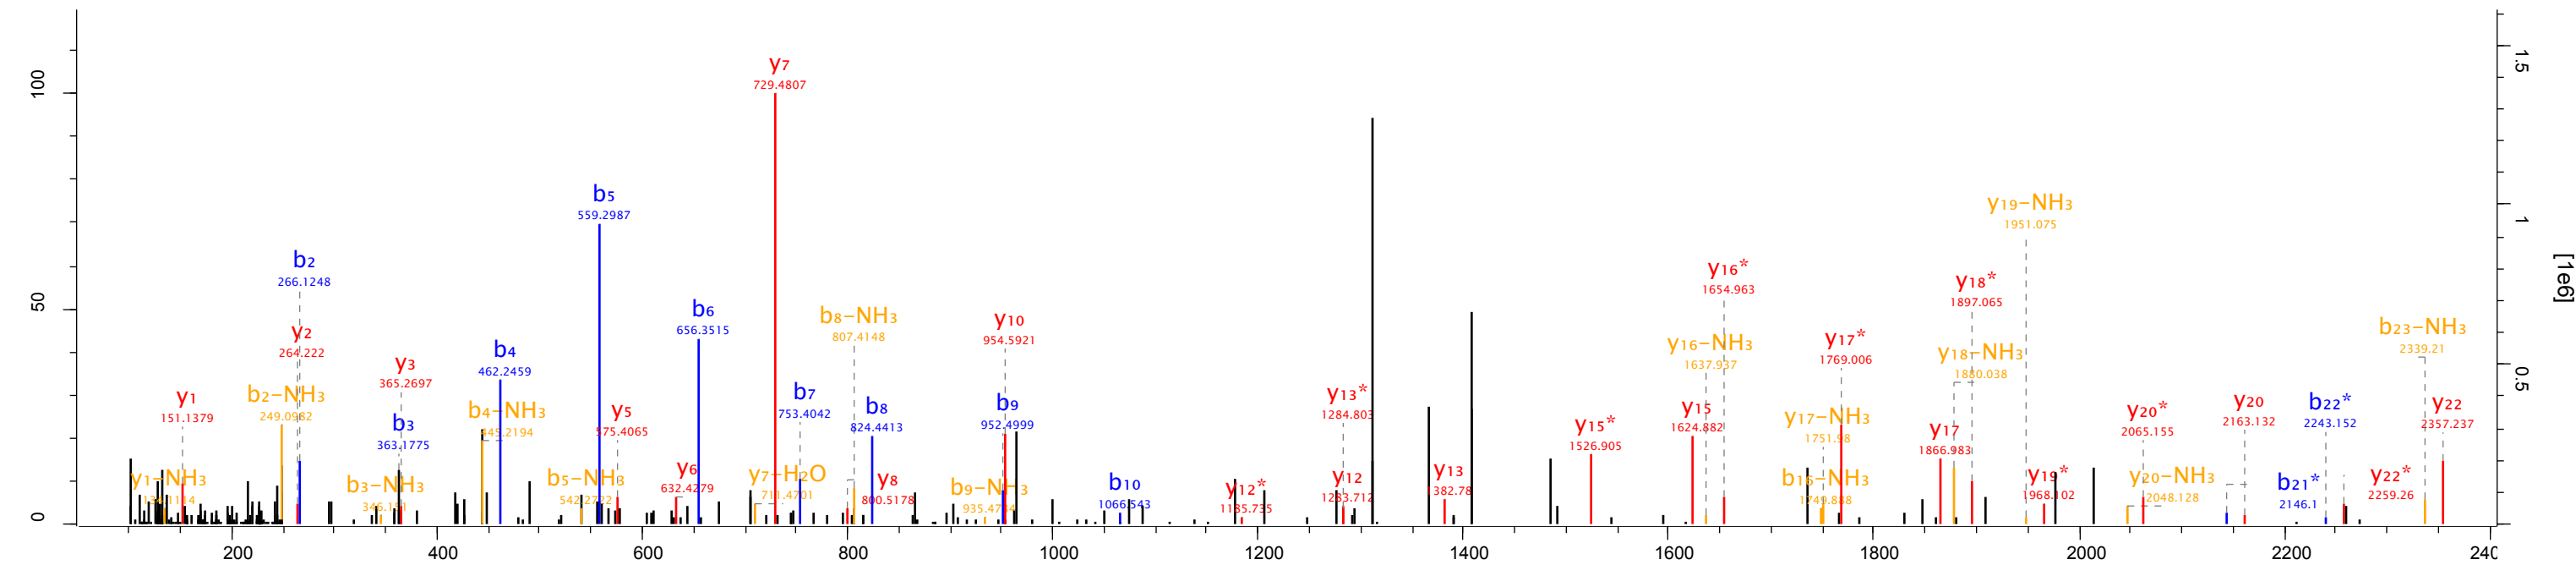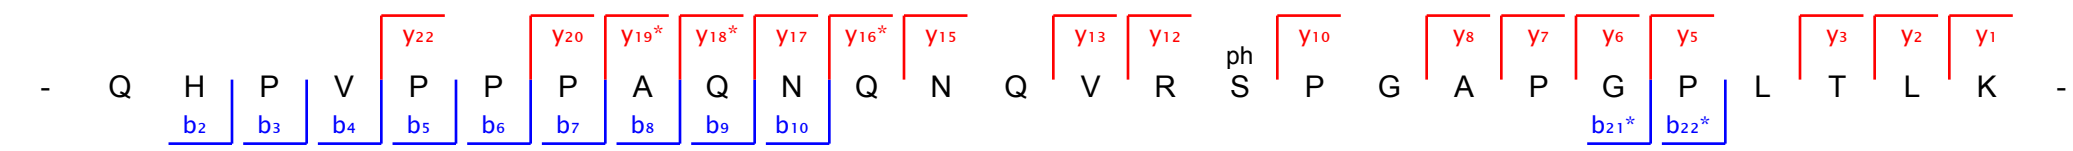

Raw file: 20150812\_A375SR\_Phospho\_BR1\_06  
 Scan: 14574 Method: FTMS; HCD Score: 145 m/z: 646.29 Gene names: MAP7D1

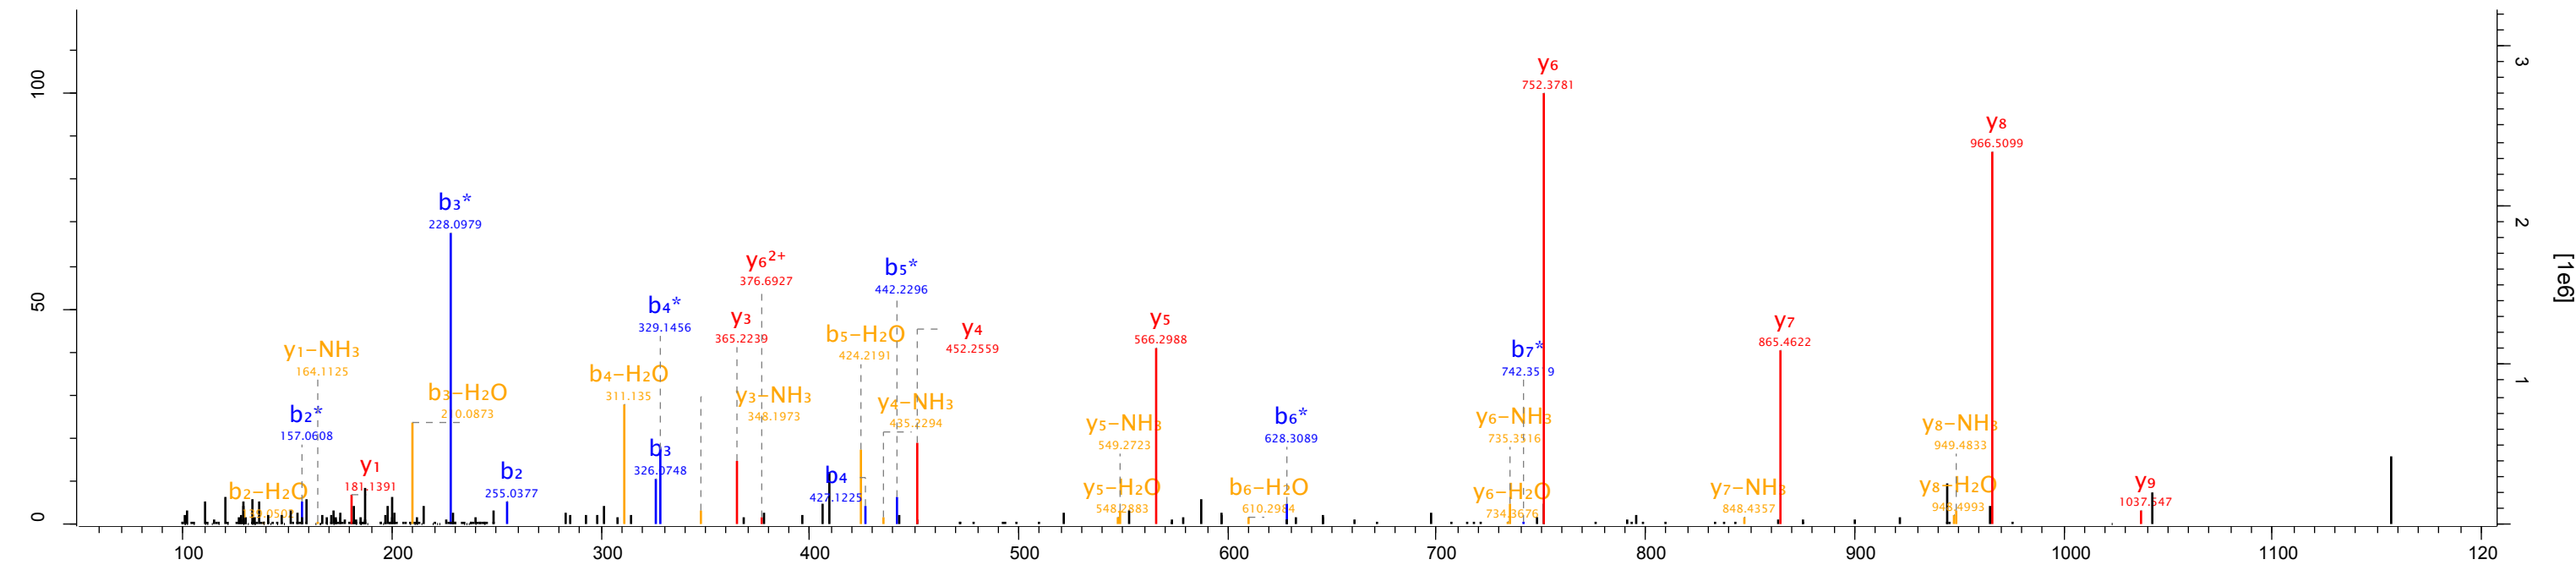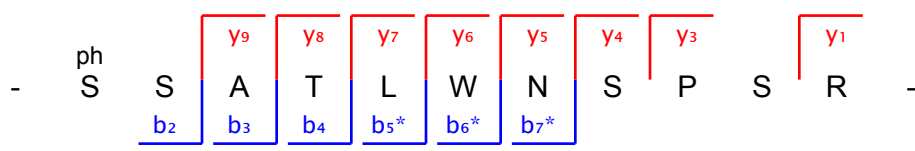

Raw file: 20150812\_A375SR\_Phospho\_BR1\_06  
 Scan: 15794 Method: FTMS; HCD Score: 97.08 m/z: 845.44 Gene names: ATRX

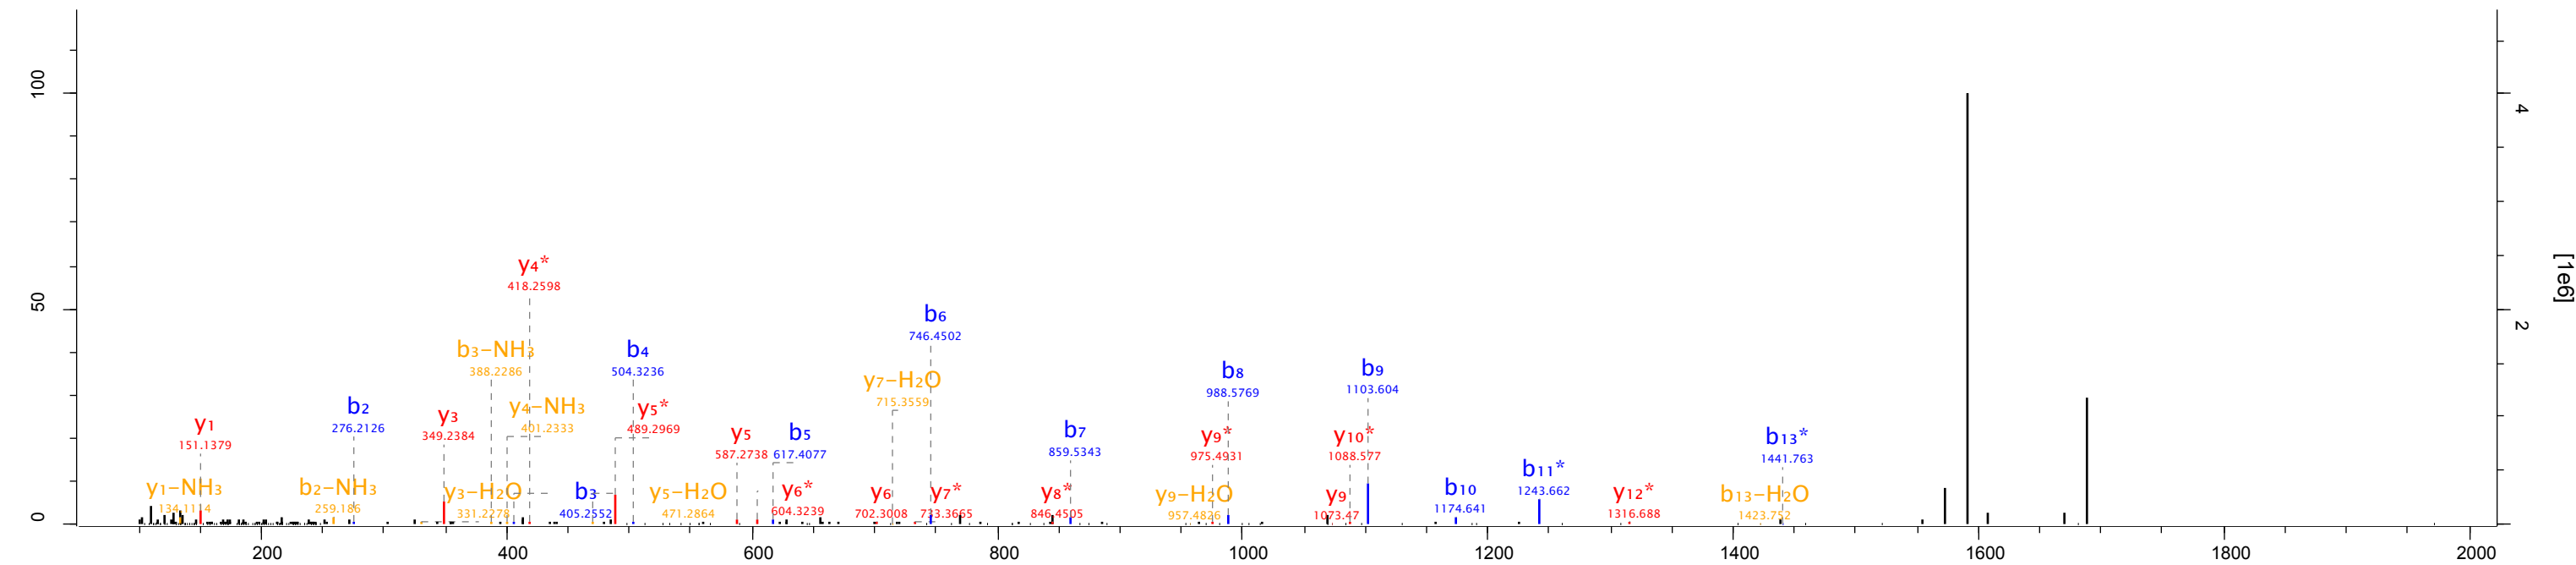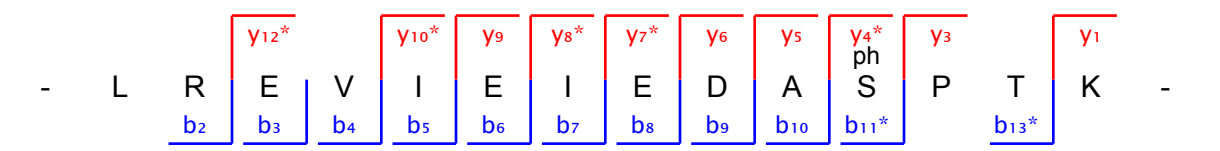

Raw file 20150812\_A375SR\_Phospho\_BR1\_06 Scan 16384 Method FTMS; HCD Score 77.66 m/z 862.9 Gene names RASAL2

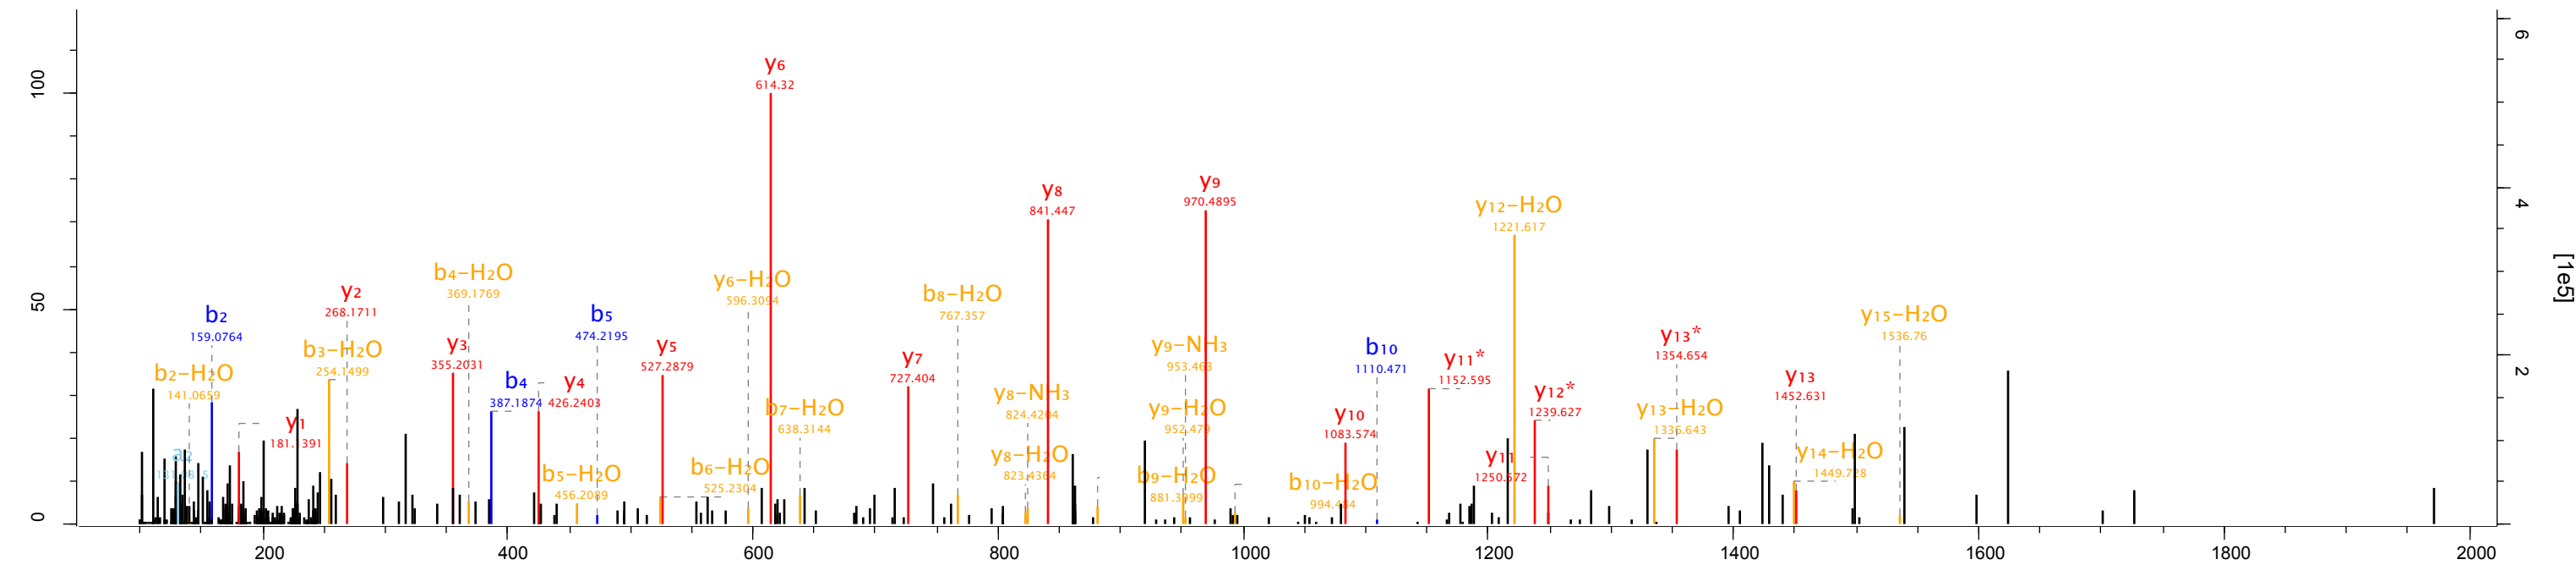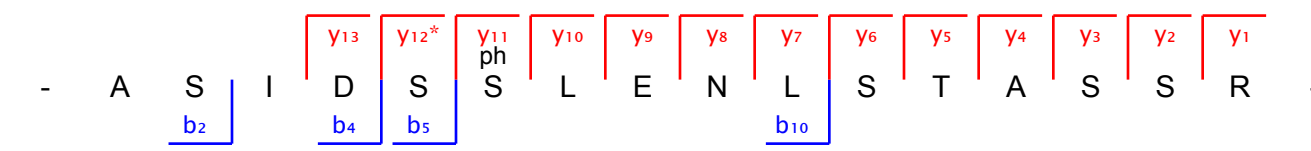

Raw file Scan Method Score m/z Gene names  
 20150812\_A375SR\_Phospho\_BR1\_06 1654 FTMS; HCD 285.97 740.82 NOLC1

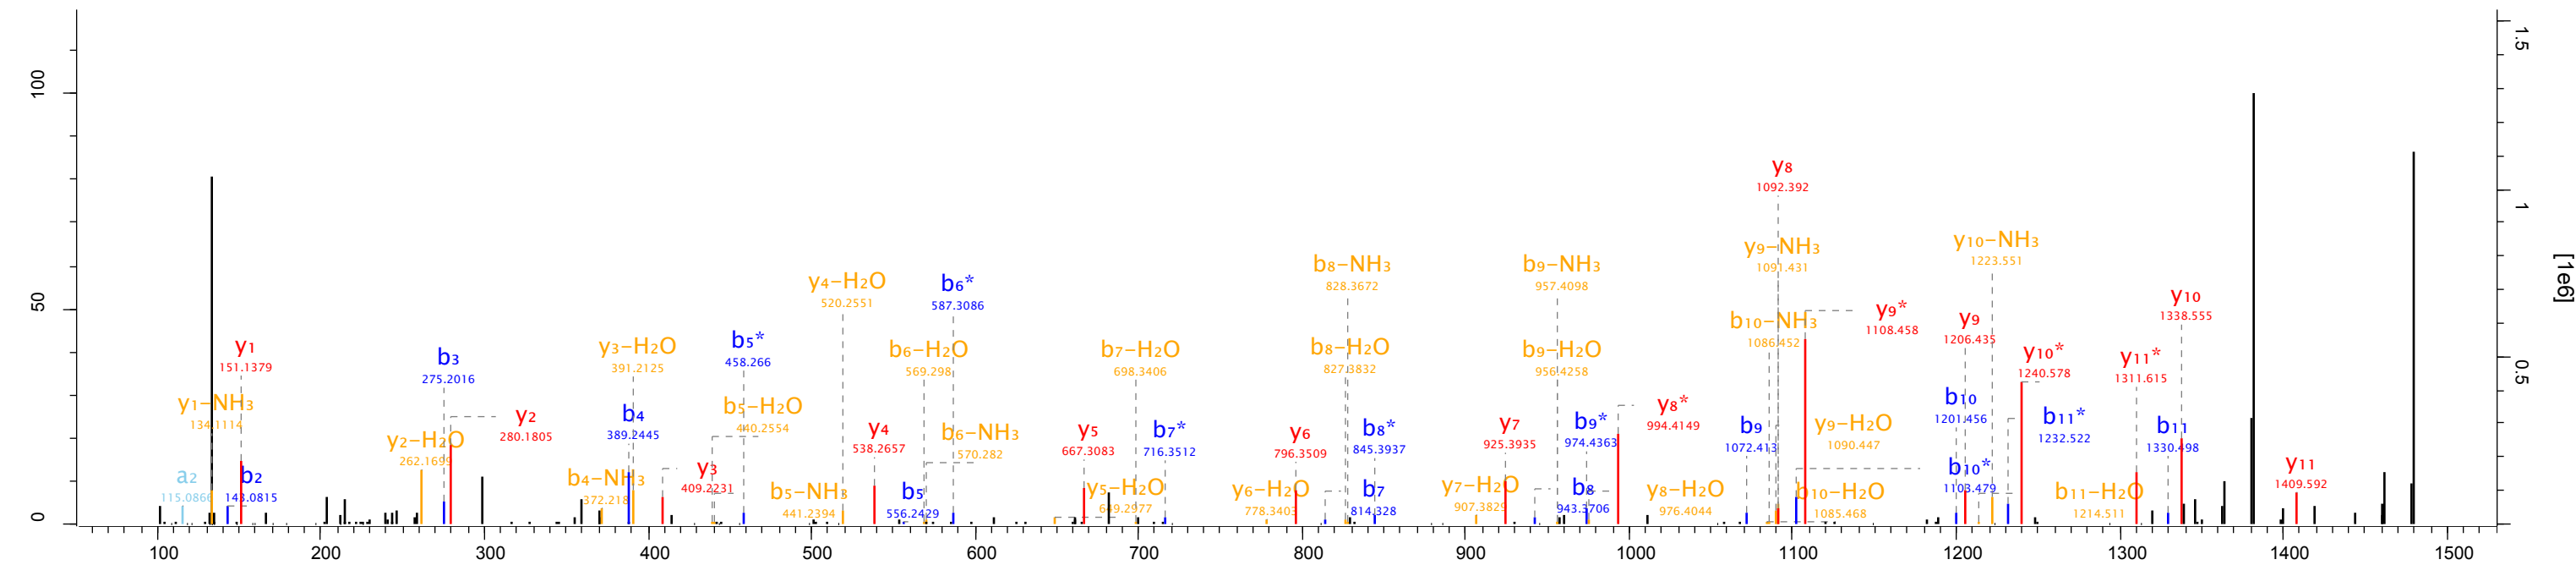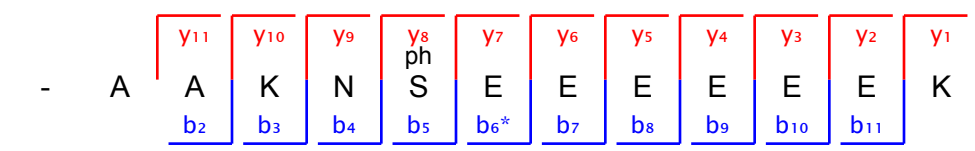

Raw file 20150812\_A375SR\_Phospho\_BR1\_06 Scan 16724 Method FTMS; HCD Score 174.39 m/z 707.33 Gene names EPHA2

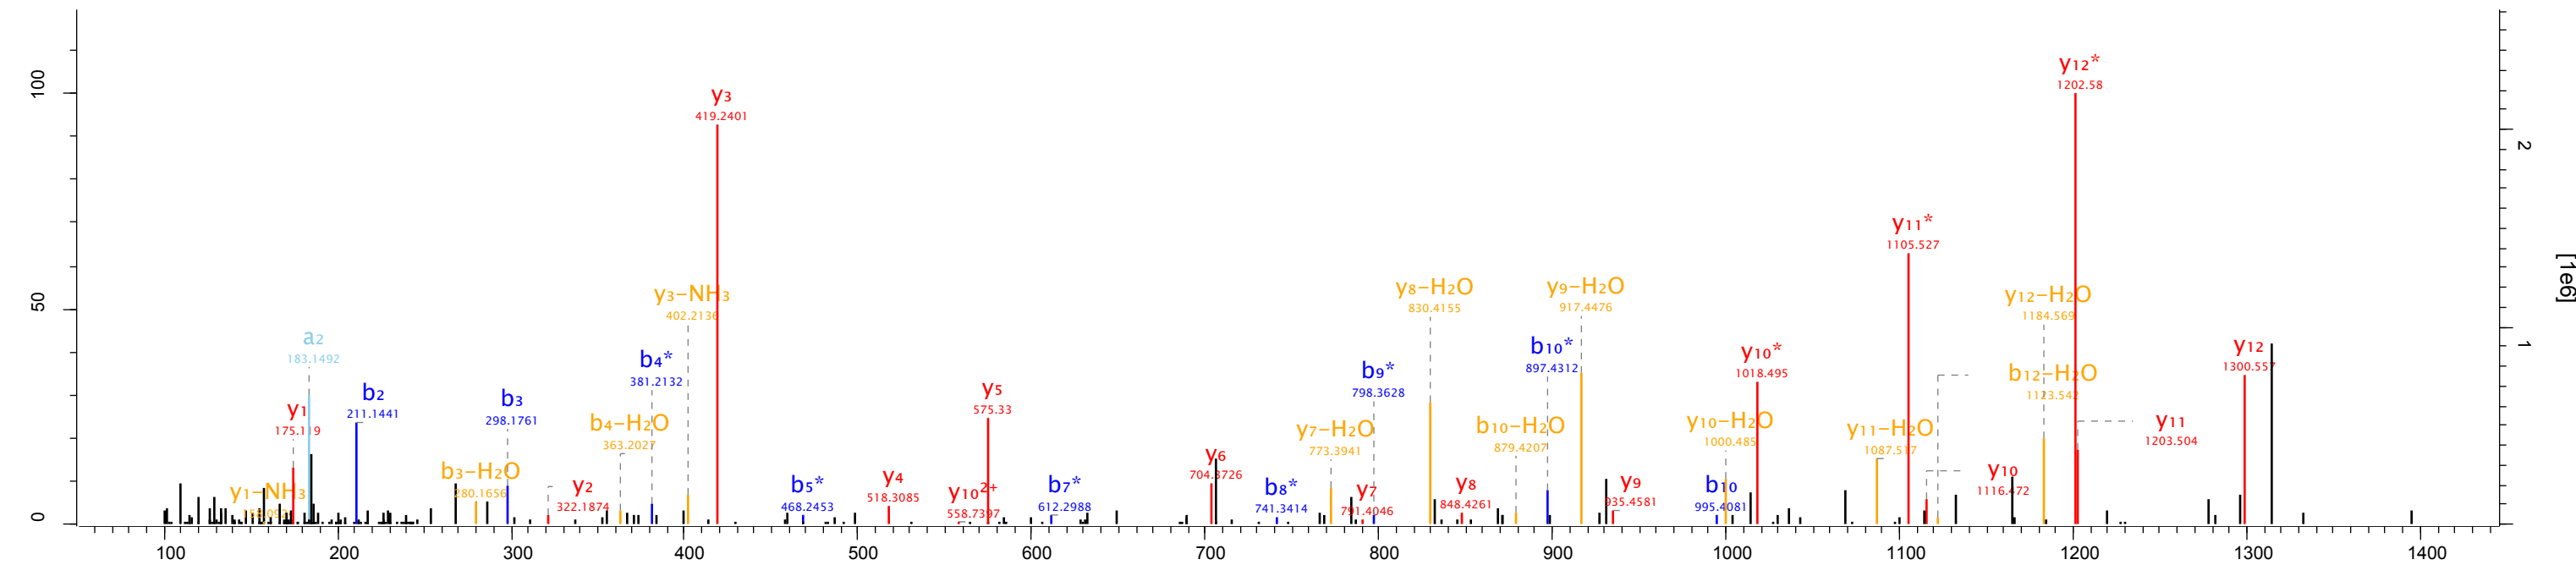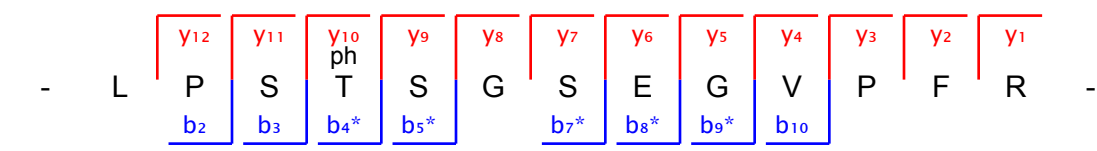

Raw file 20150812\_A375SR\_Phospho\_BR1\_06 Scan 16934 Method FTMS; HCD Score 80.41 m/z 731.33 Gene names NEDD4L;ZNF227

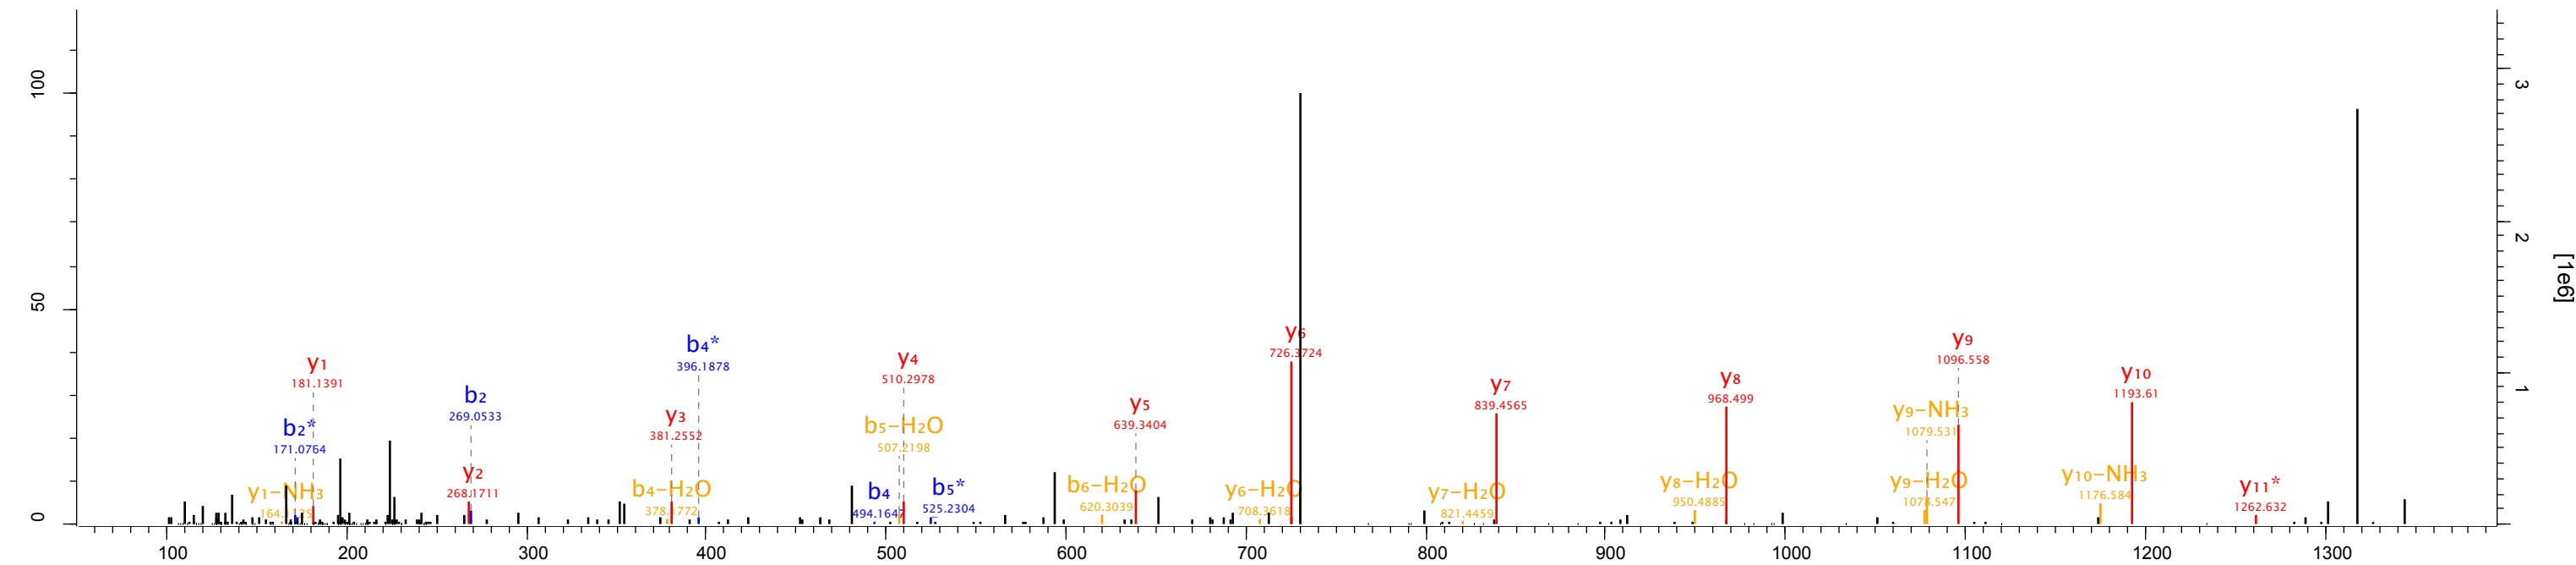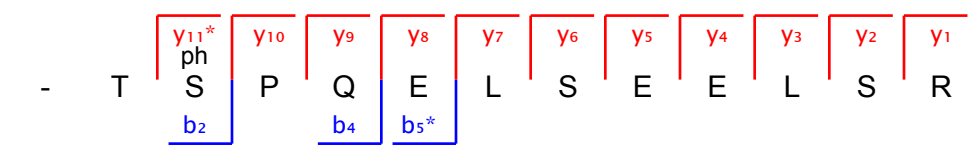



Raw file 20150812\_A375SR\_Phospho\_BR1\_06 Scan 17194 Method FTMS; HCD Score 117 m/z 702.34 Gene names MKI67

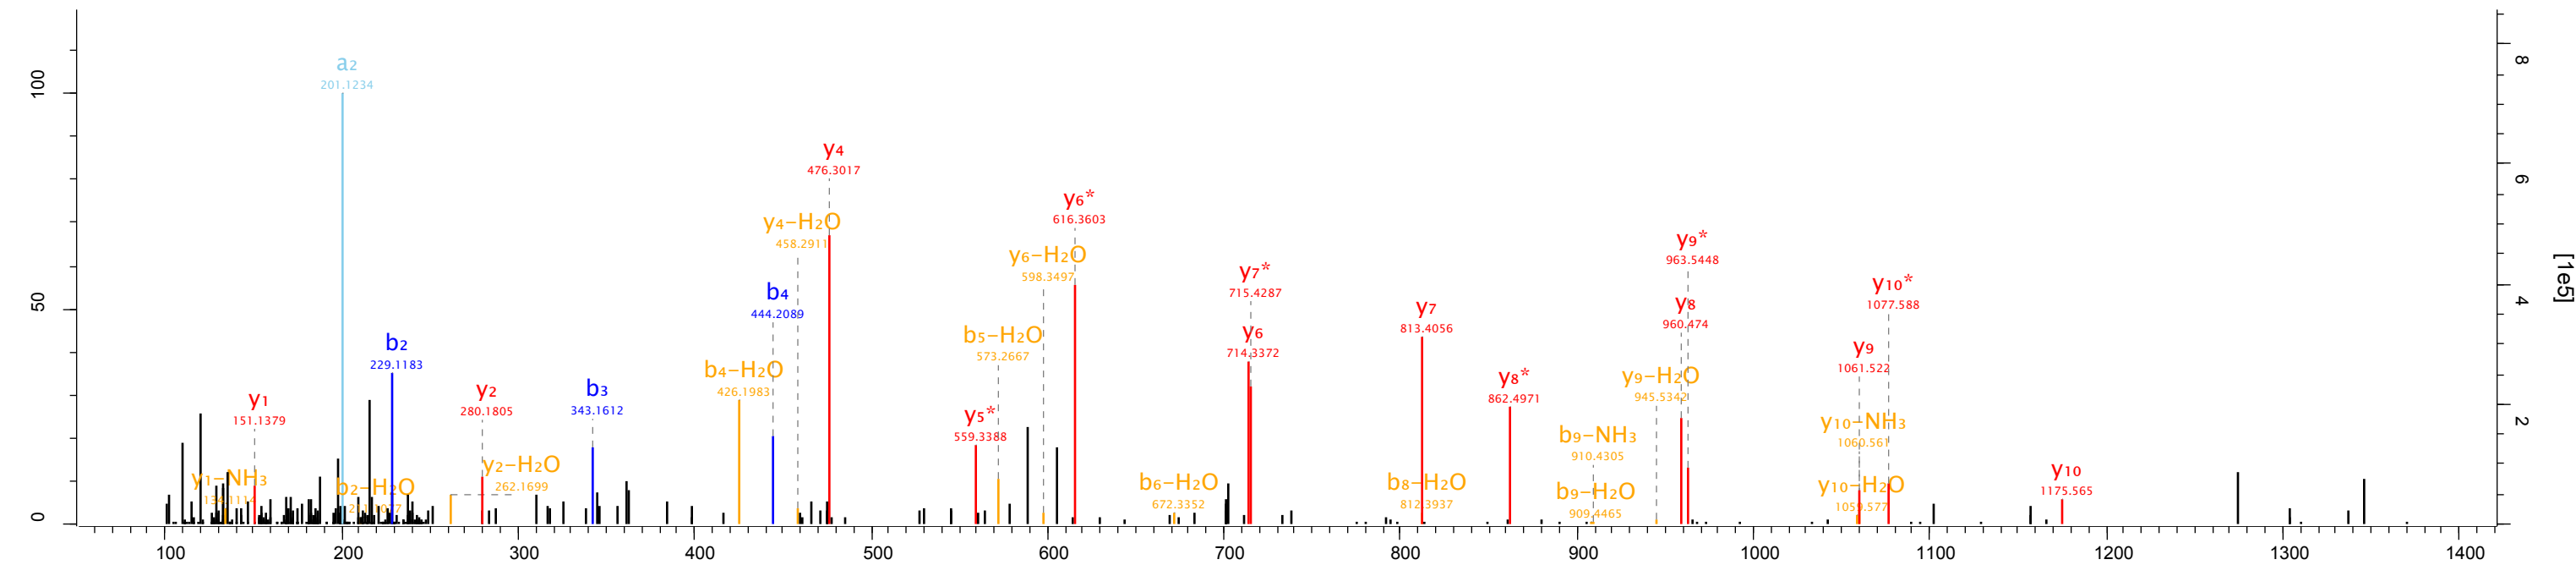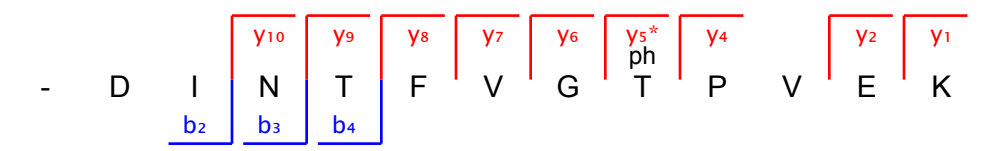

Raw file: 20150812\_A375SR\_Phospho\_BR1\_06  
 Scan: 17784 Method: FTMS; HCD Score: 159.1 m/z: 947.81 Gene names: TNKS1BP1

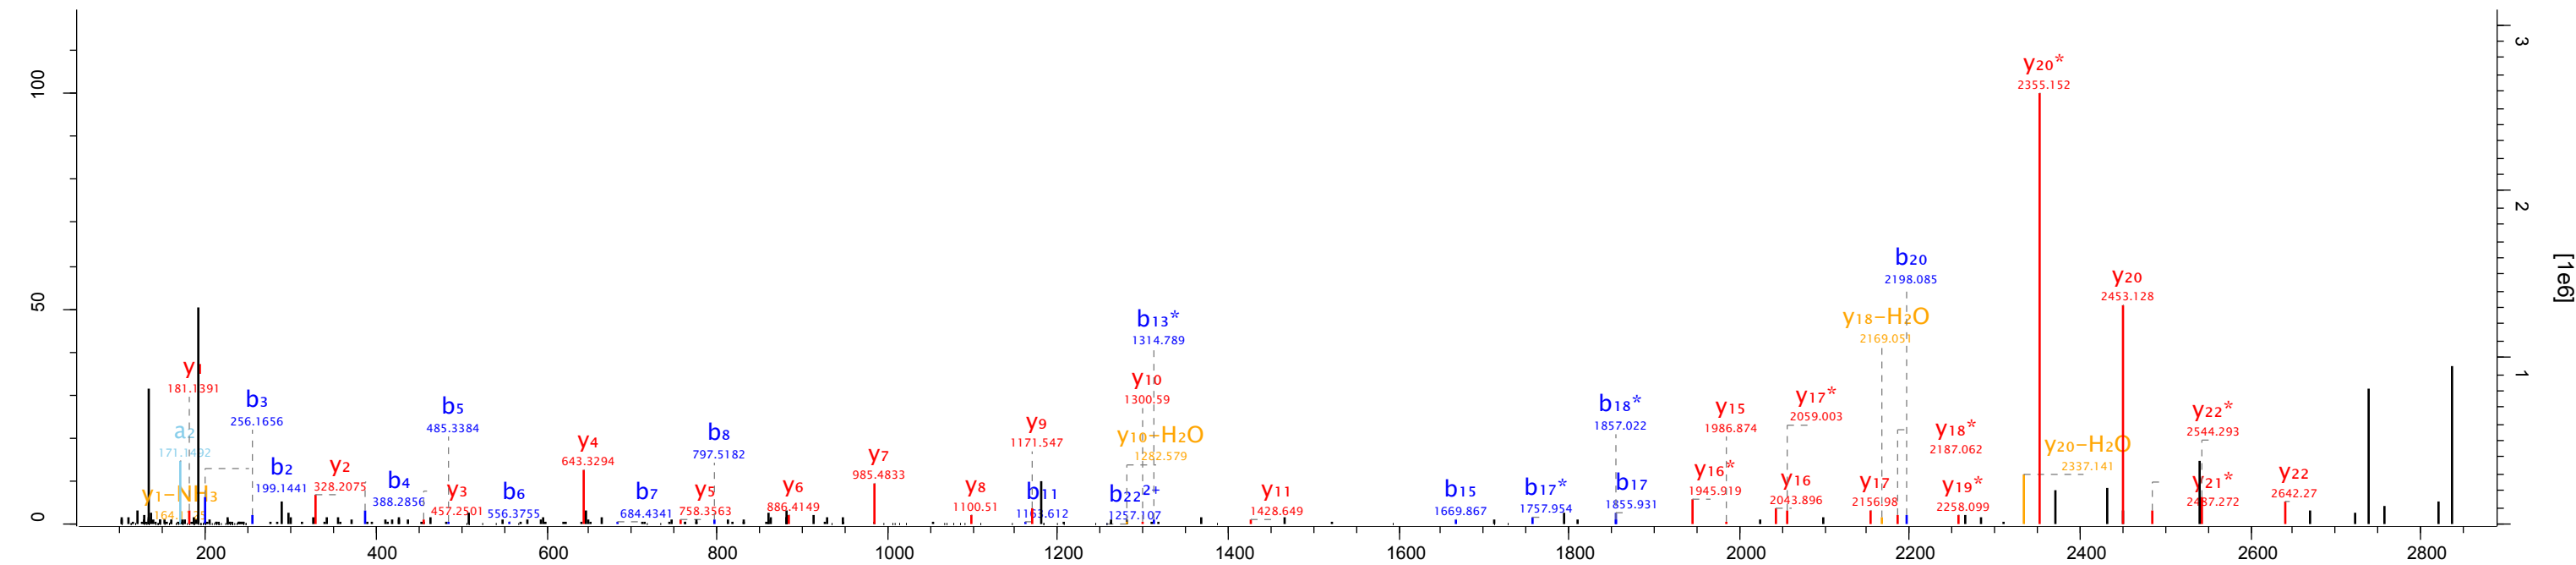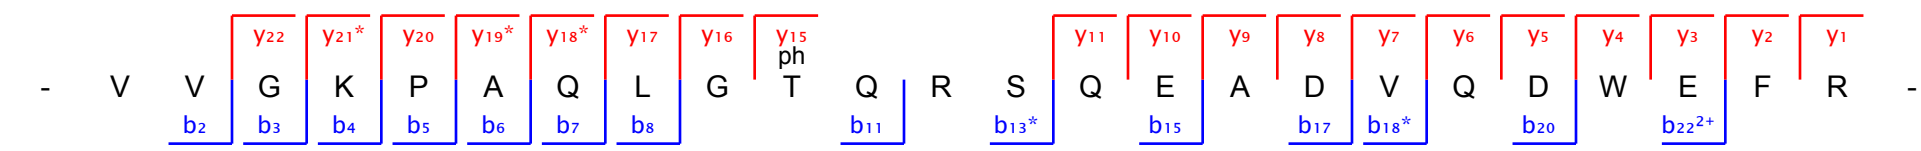

Raw file 20150812\_A375SR\_Phospho\_BR1\_06 Scan 17874 Method FTMS; HCD Score 175.52 m/z 821.86 Gene names NAGK

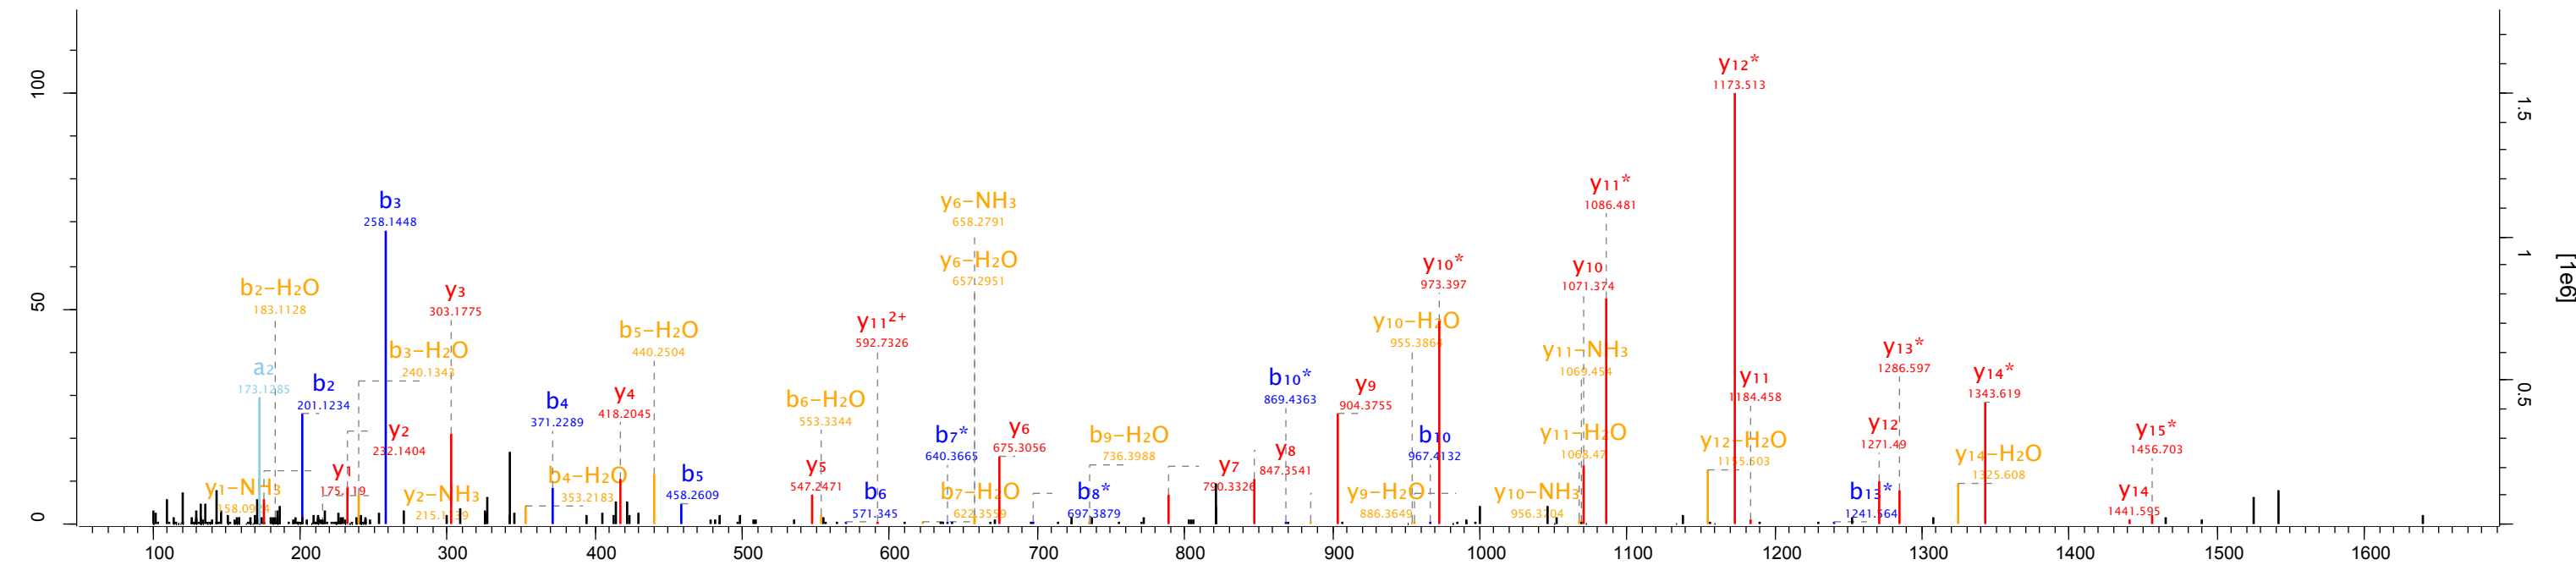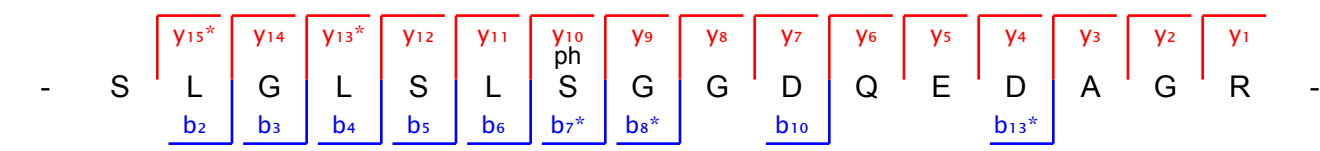

20150812\_A375SR\_Phospho\_BR1\_06

18174 FTMS; HCD 145.49 662.8 CDC42EP4

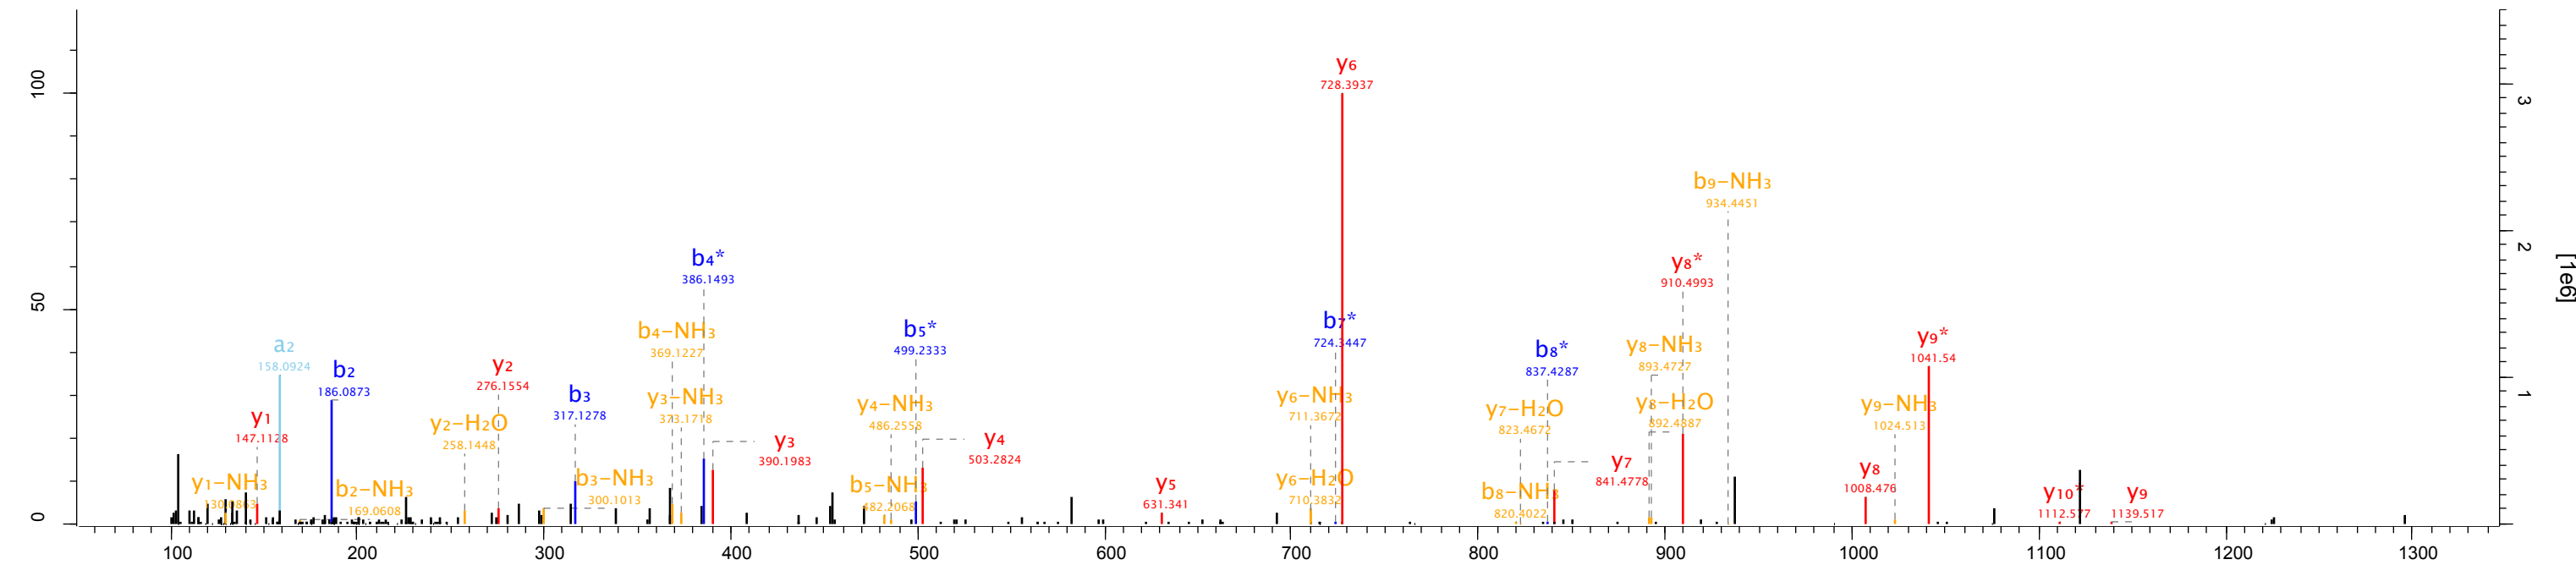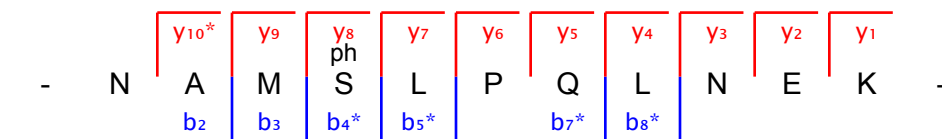

Raw file 20150812\_A375SR\_Phospho\_BR1\_06 Scan 20414 Method FTMS; HCD Score 60.42 m/z 901.71 Gene names PCNP

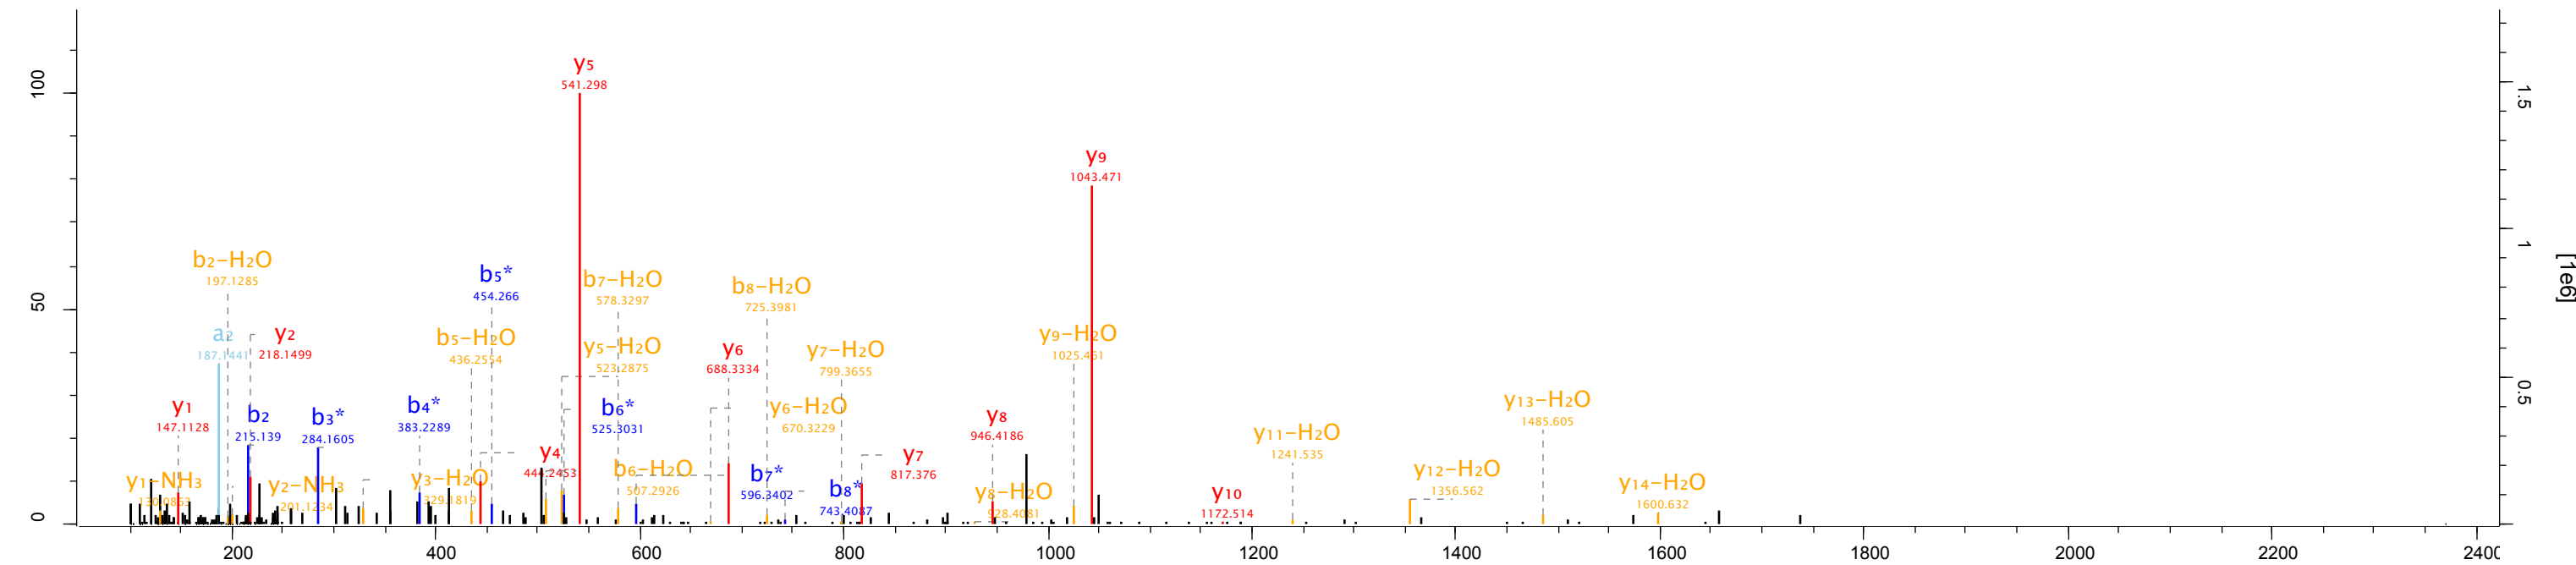

- T L S V A A A F N E D E D S E P E E M P P E A K -

ph  
 b2 b3\* b4\* b5\* b6\* b7\* b8\*

y10 y9 y8 y7 y6 OX y5 y4 y2 y1

Raw file 20150812\_A375SR\_Phospho\_BR1\_06 Scan 20564 Method FTMS; HCD Score 60.73 m/z 990.42 Gene names CRK

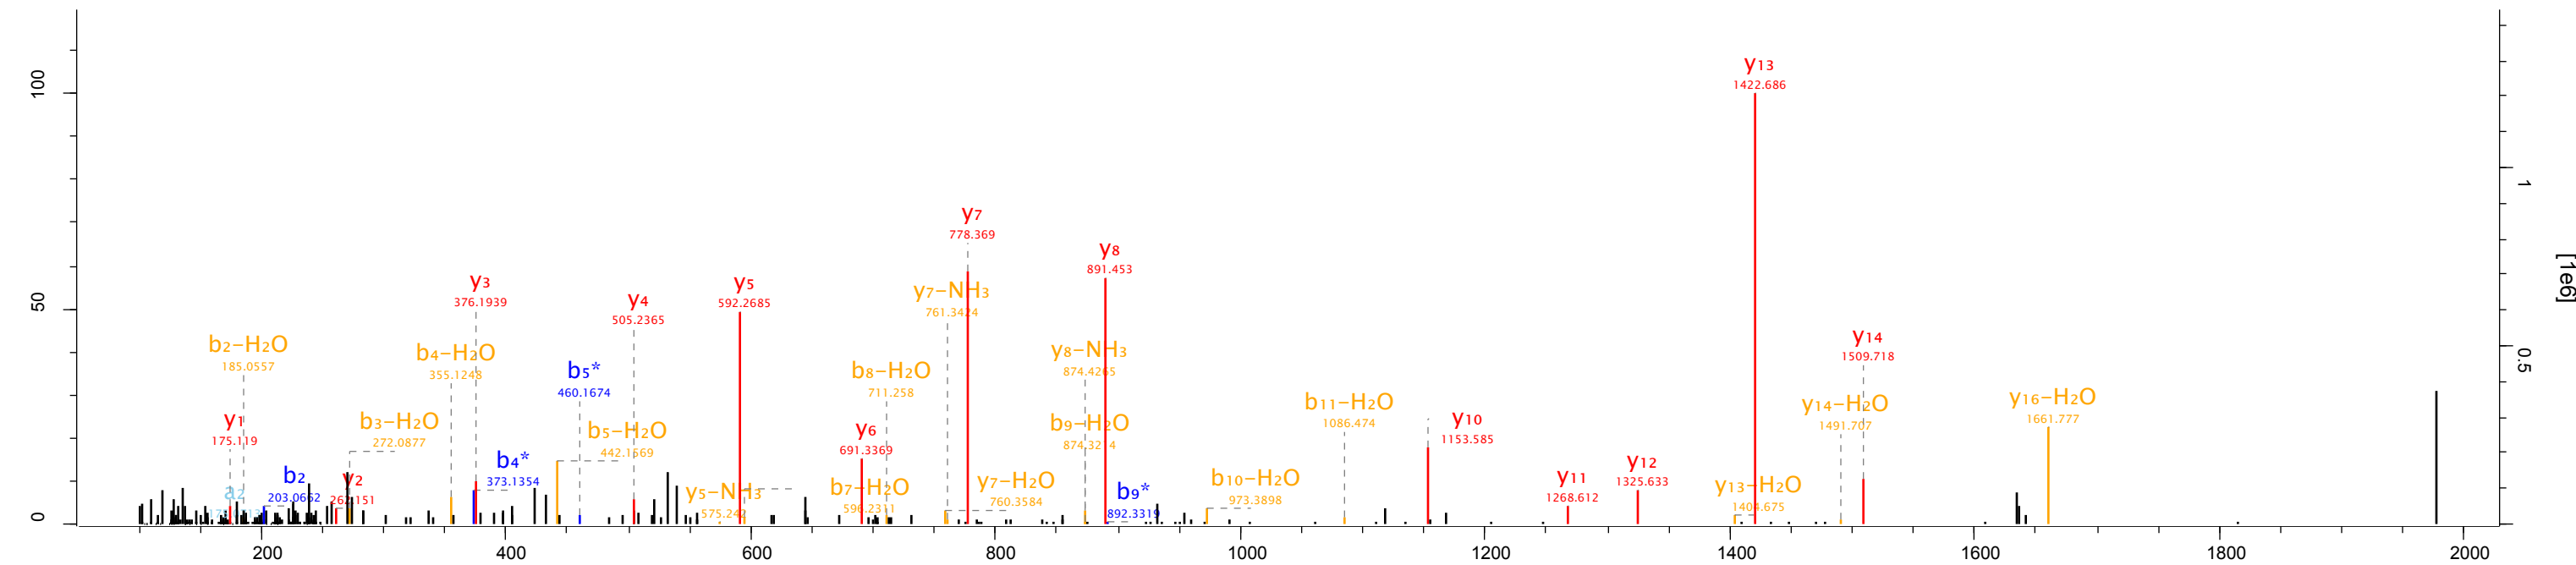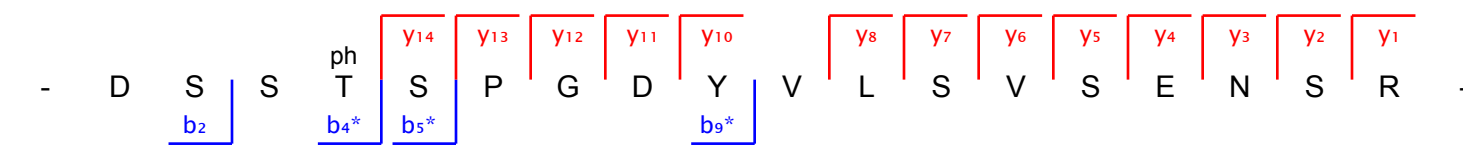

Raw file 20150812\_A375SR\_Phospho\_BR1\_06 Scan 21574 Method FTMS; HCD Score 126.4 m/z 596.96 Gene names KIF20B

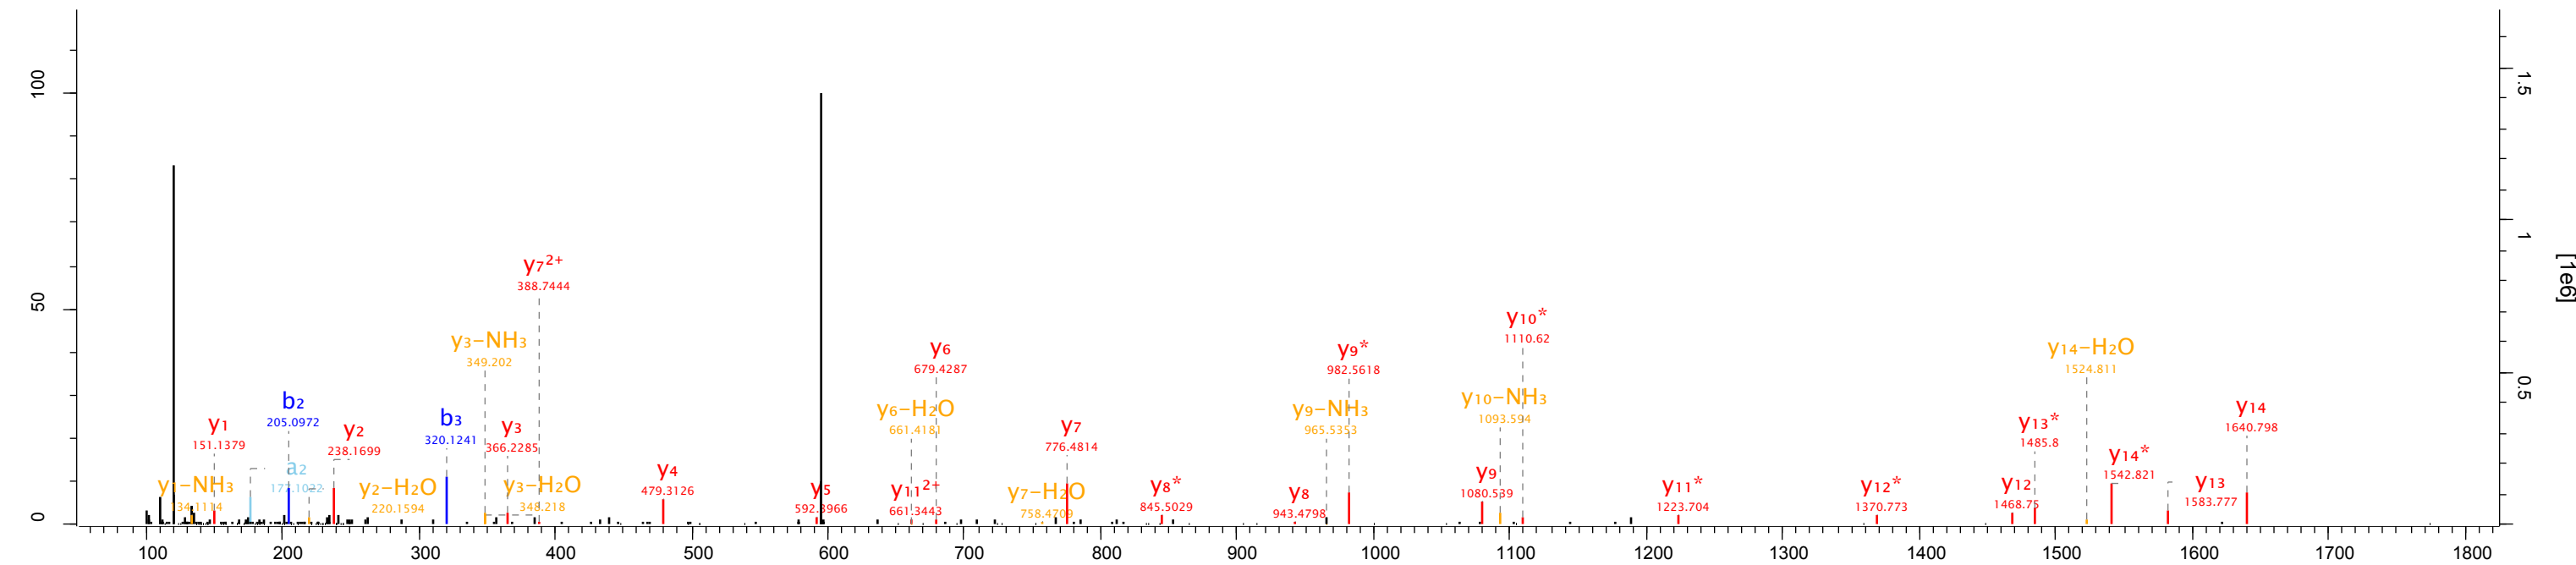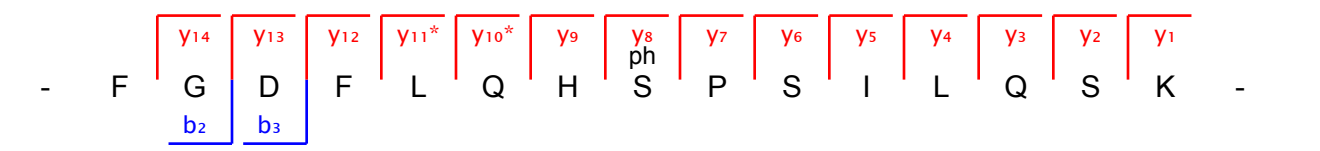

Raw file 20150812\_A375SR\_Phospho\_BR1\_06 Scan 22244 Method FTMS; HCD Score 135.99 m/z 1215.9 Gene names TRIM28

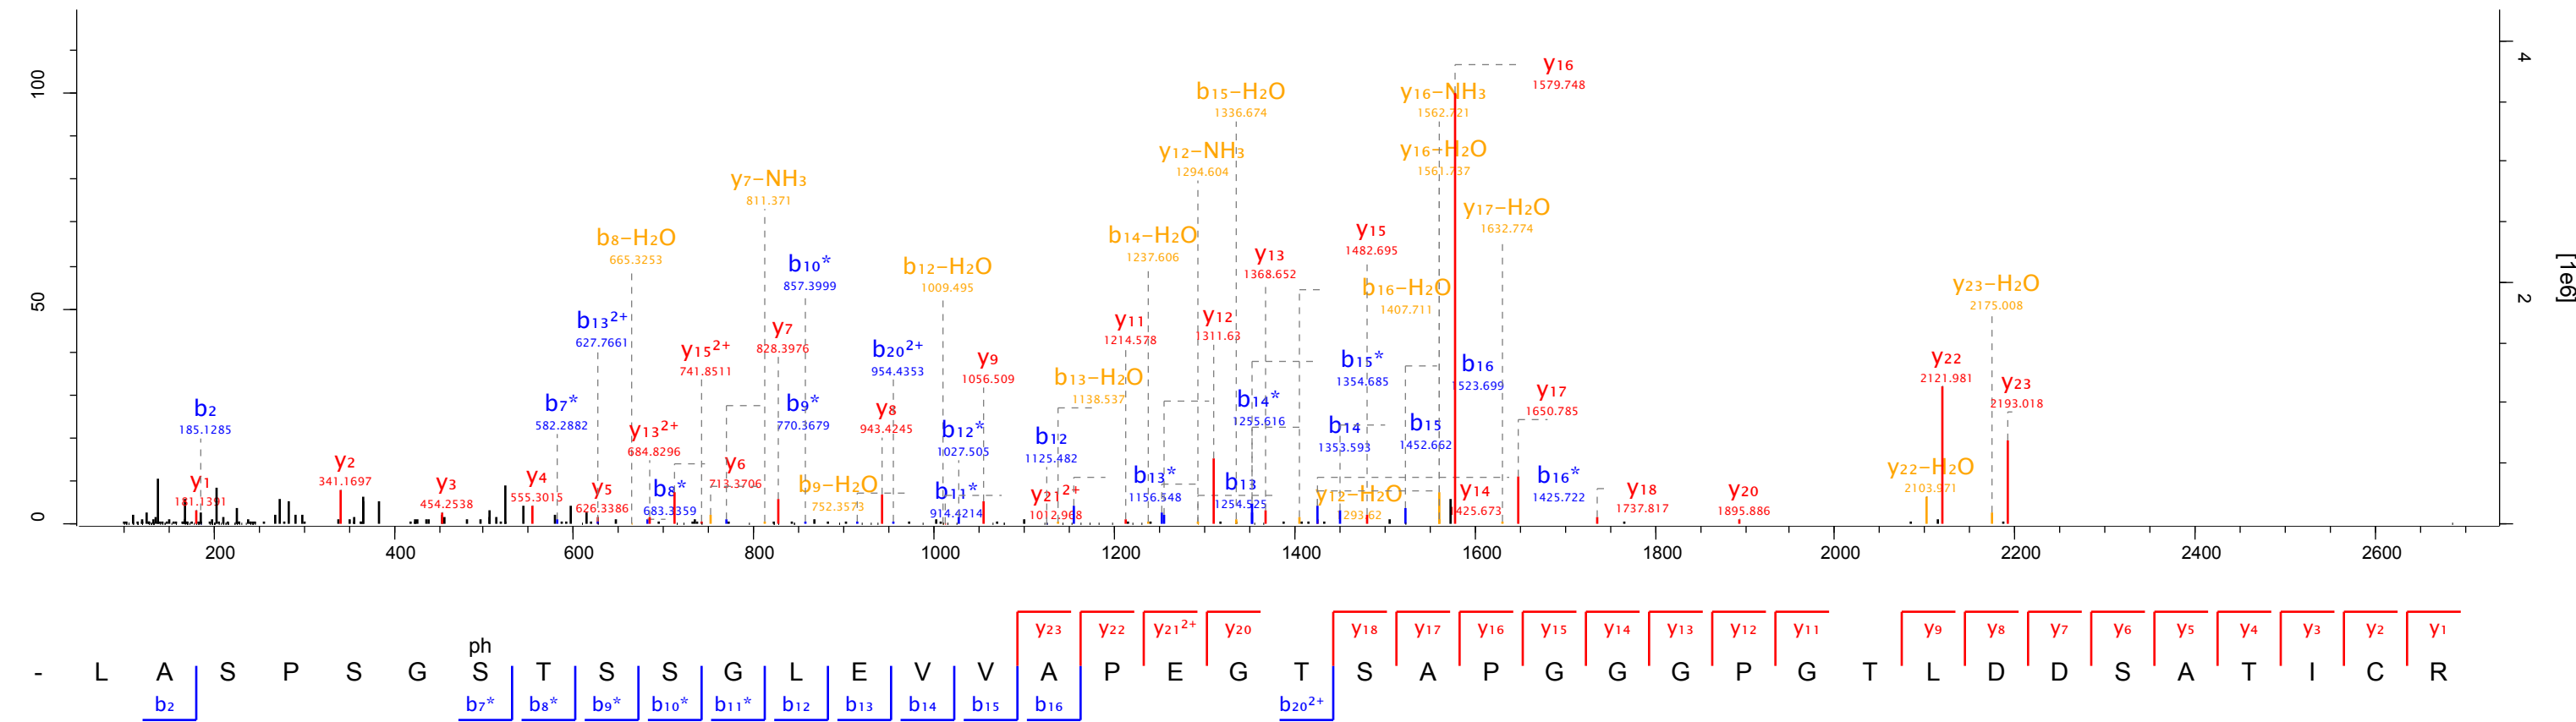



Raw file

20150812\_A375SR\_Phospho\_BR1\_06

Scan 2234 Method FTMS; HCD Score 101.08 m/z 675.81 Gene names LBR

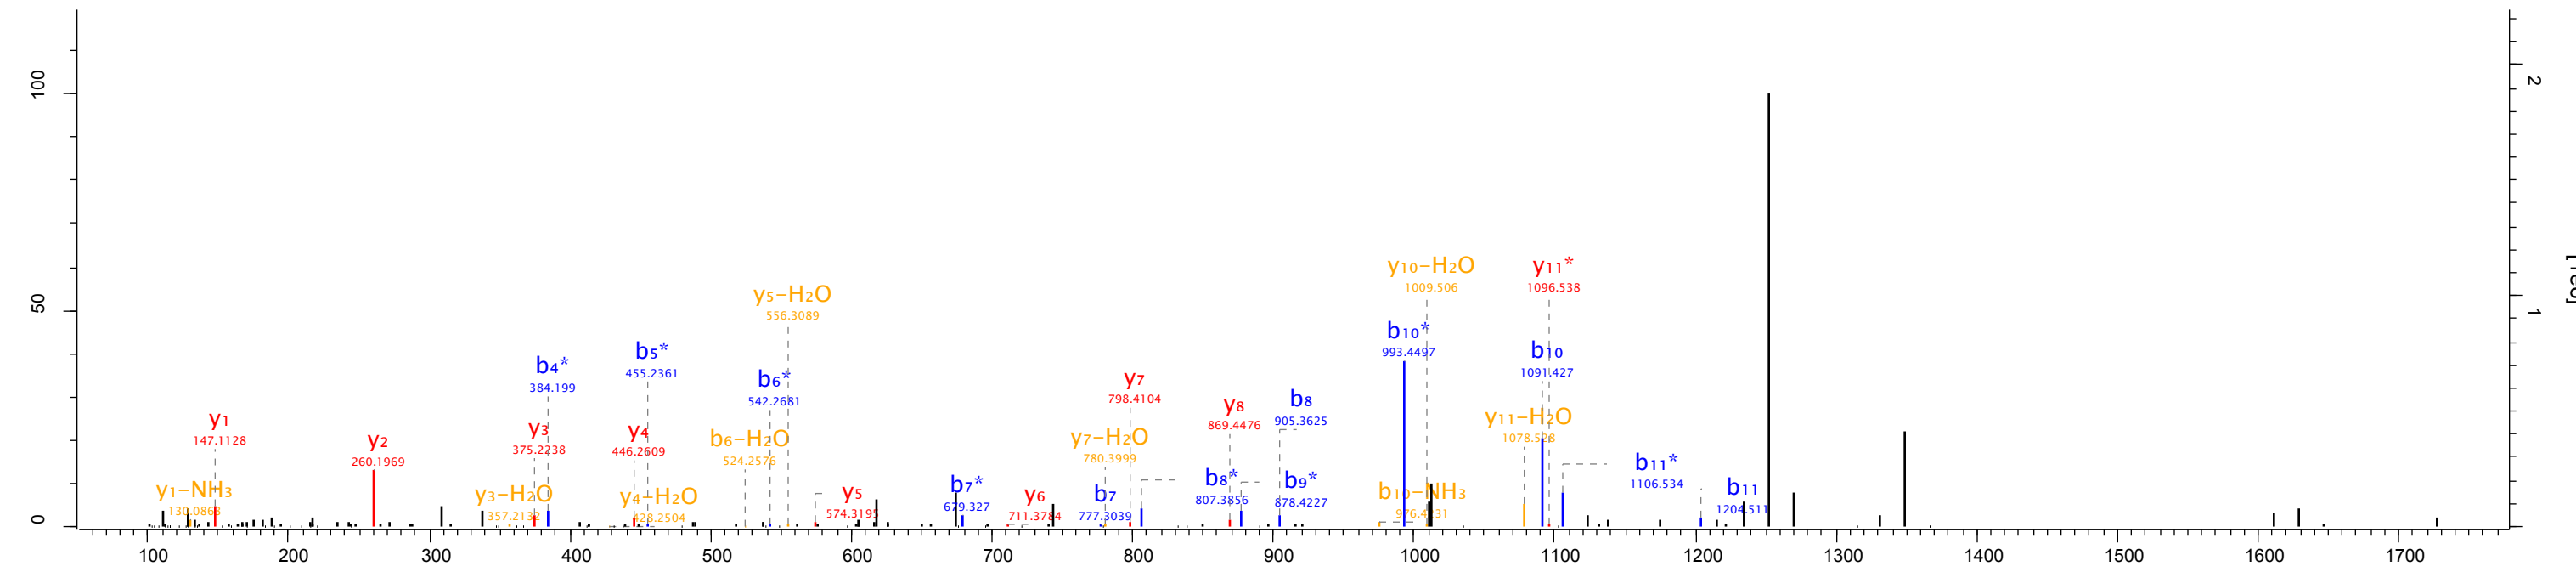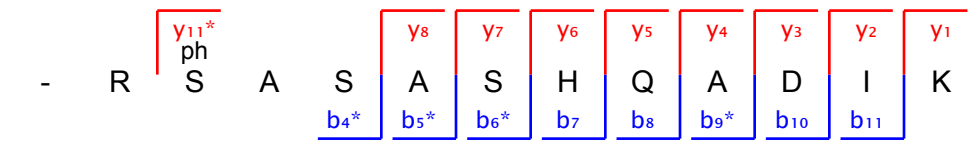

Raw file: 20150812\_A375SR\_Phospho\_BR1\_06  
 Scan: 2644 Method: FTMS; HCD Score: 241.11 m/z: 739.85 Gene names: GLYAT;BICD1

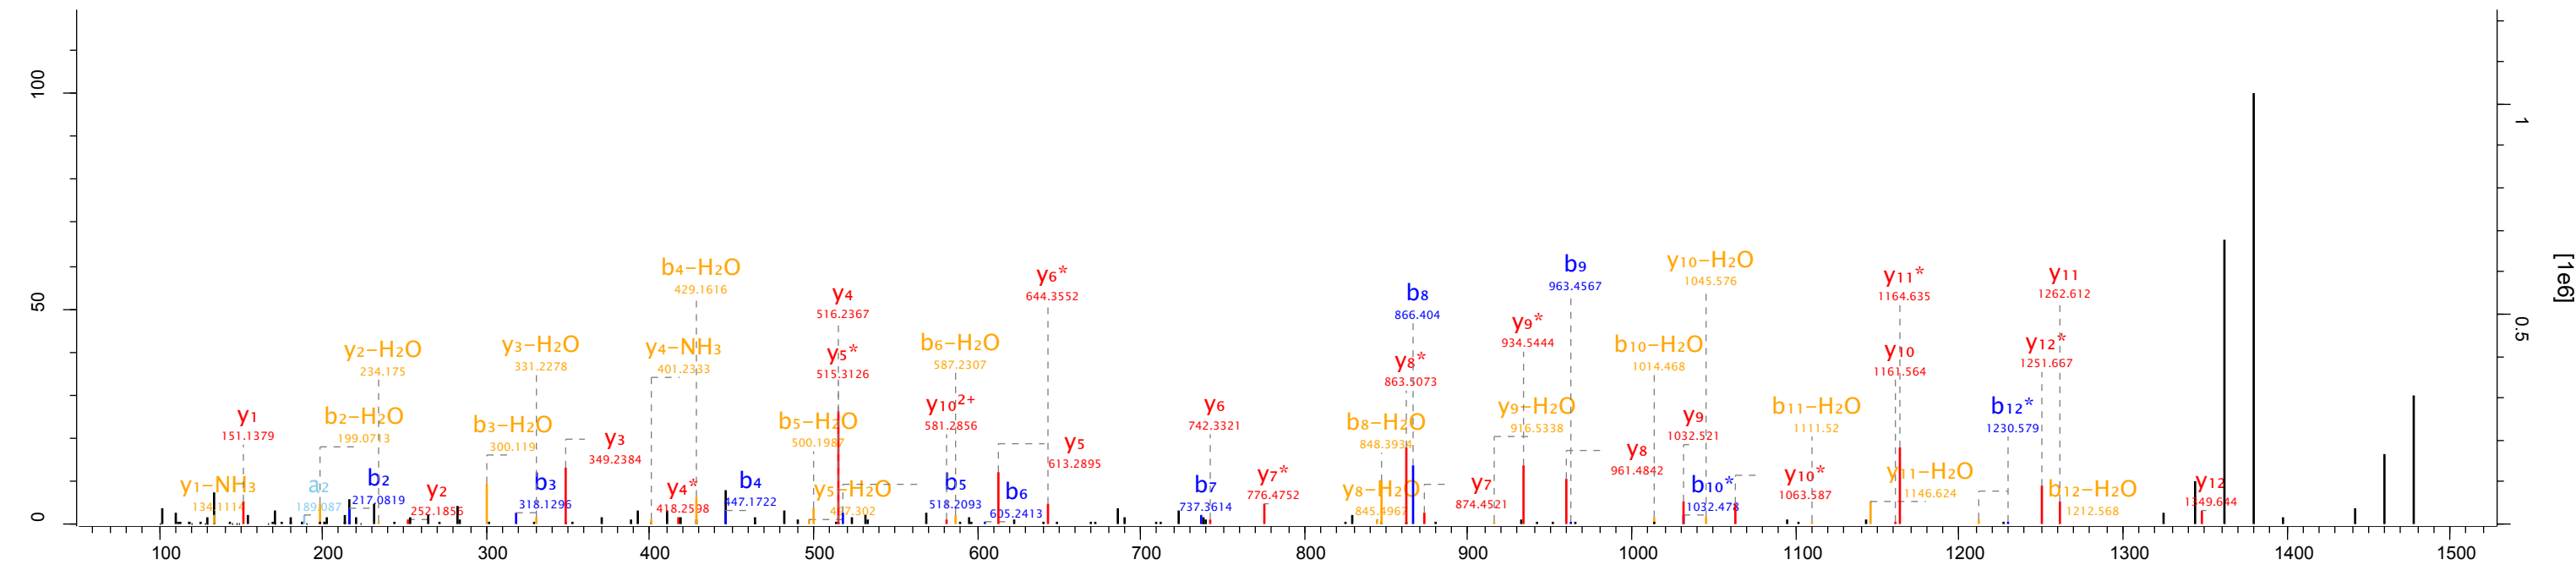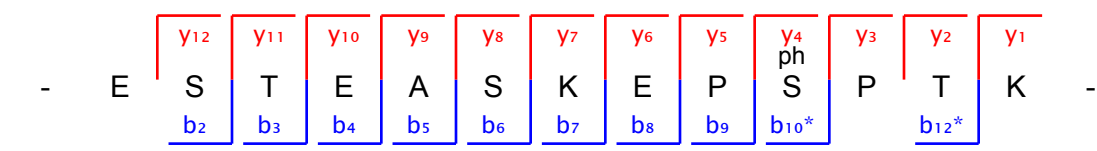

Raw file: 20150812\_A375SR\_Phospho\_BR1\_06  
 Scan: 27594 Method: FTMS; HCD Score: 46.17 m/z: 1105.54 Gene names: CLUH

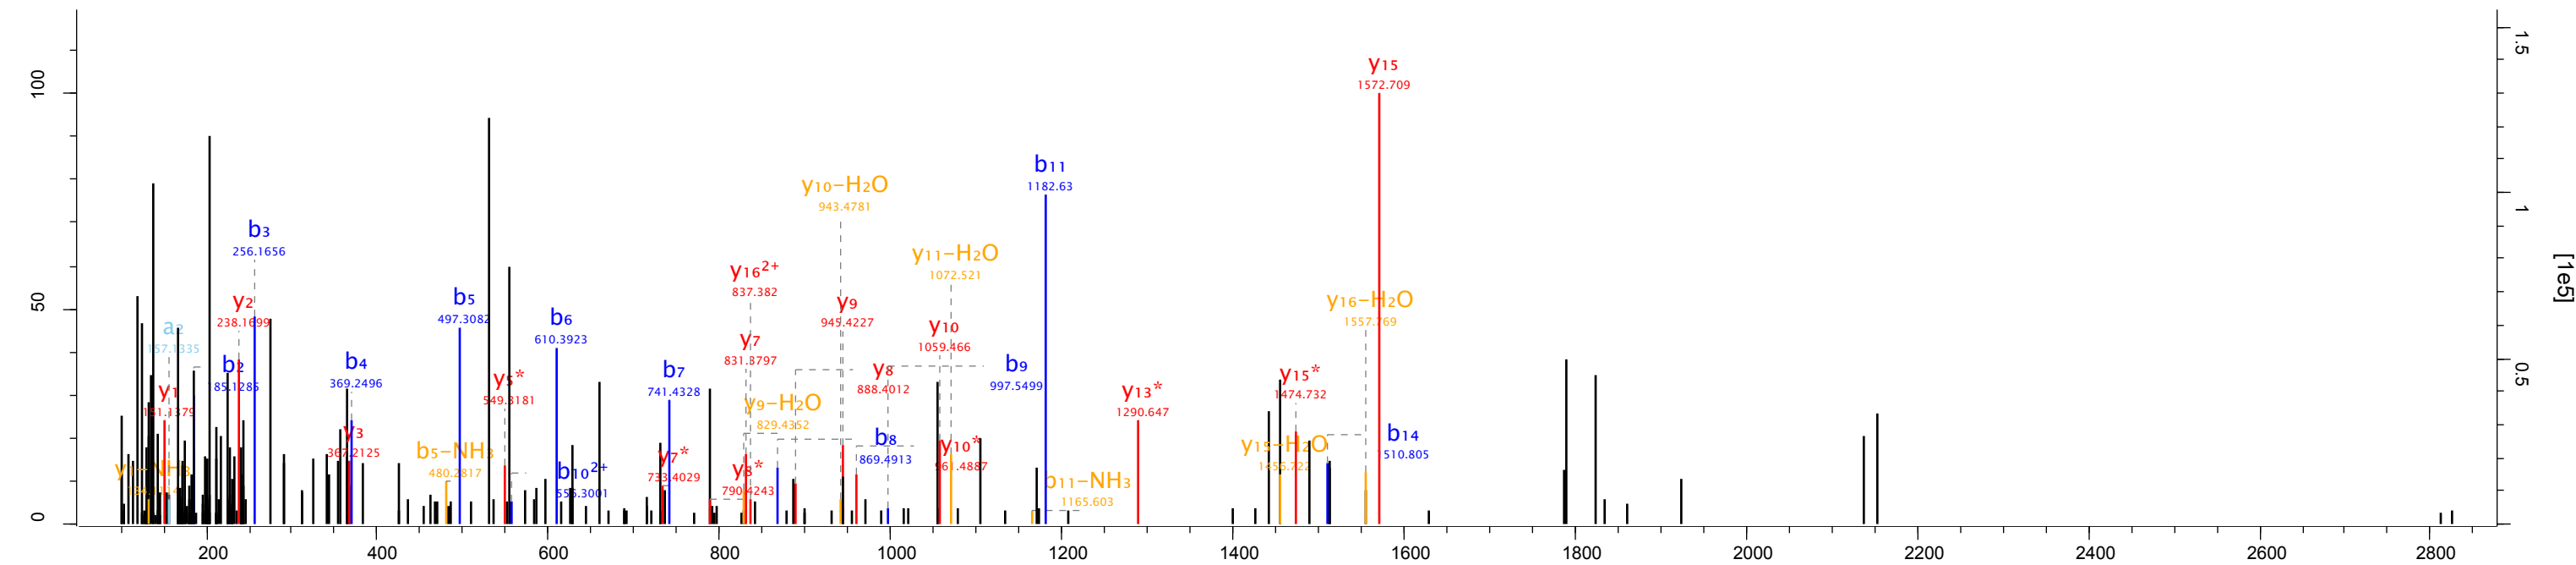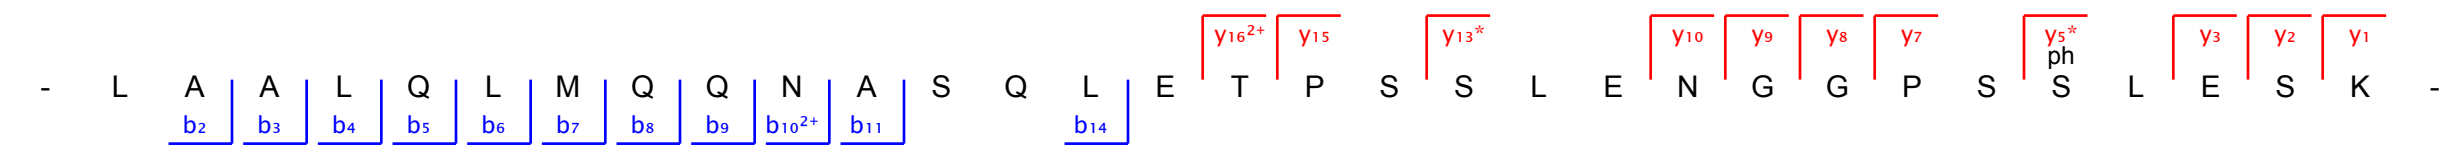

Raw file 20150812\_A375SR\_Phospho\_BR1\_06 Scan 28184 Method FTMS; HCD Score 133.75 m/z 850.76 Gene names SEC23IP

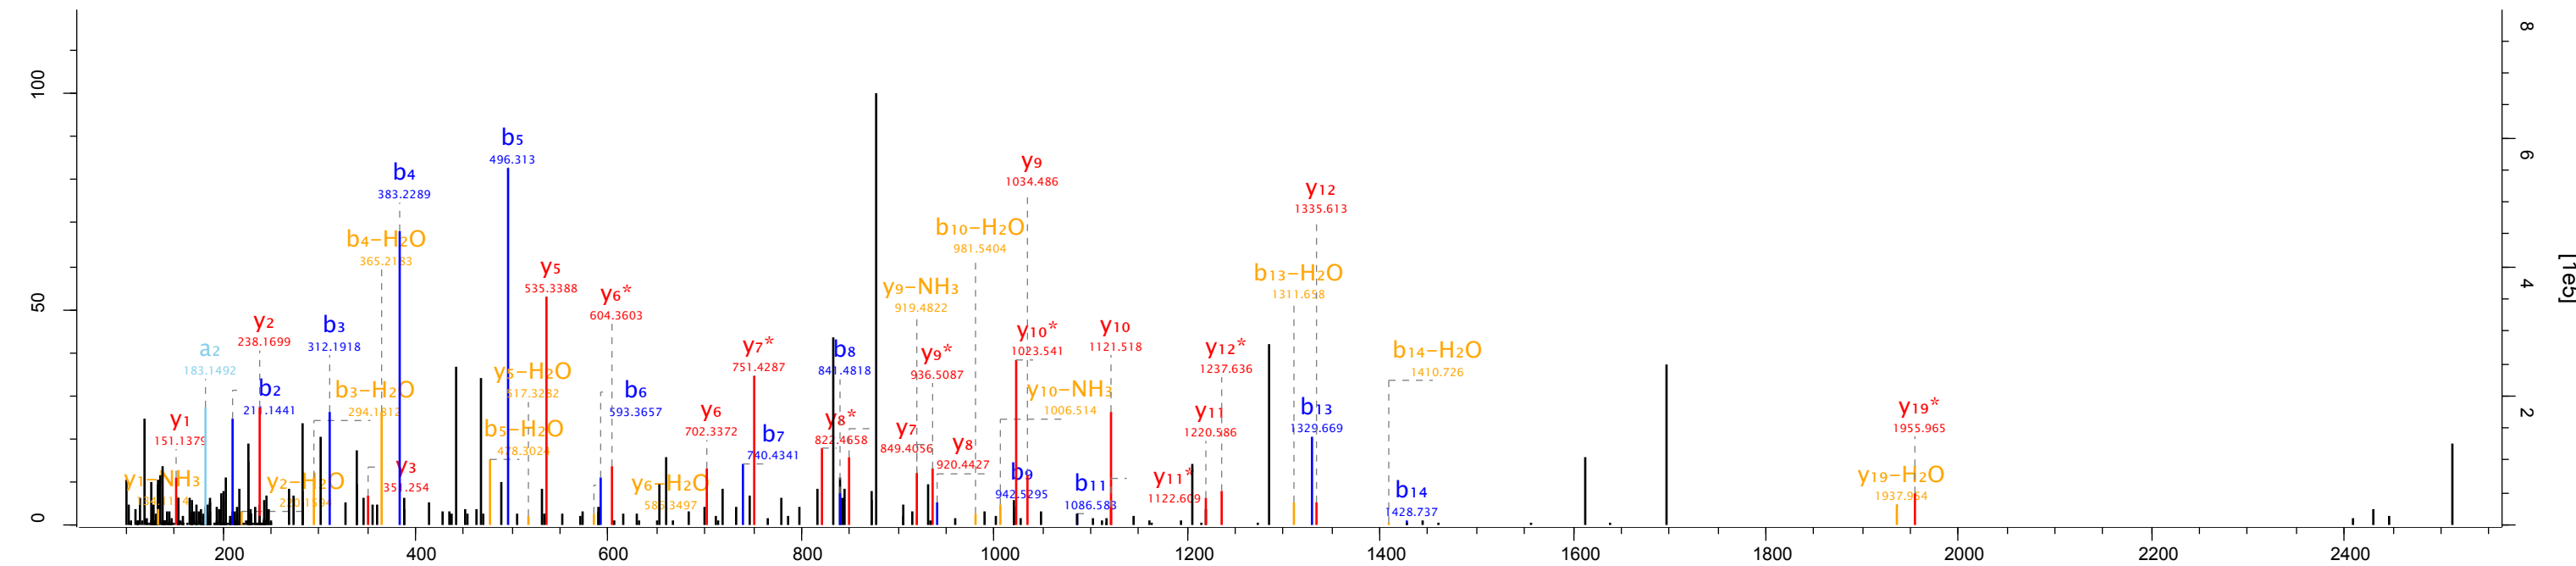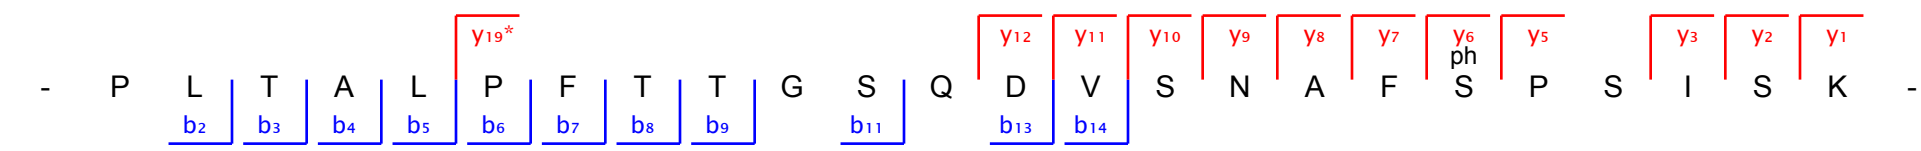

Raw file: 20150812\_A375SR\_Phospho\_BR1\_06  
 Scan: 3584 Method: FTMS; HCD Score: 127.03 m/z: 633.36 Gene names: PRPF4B

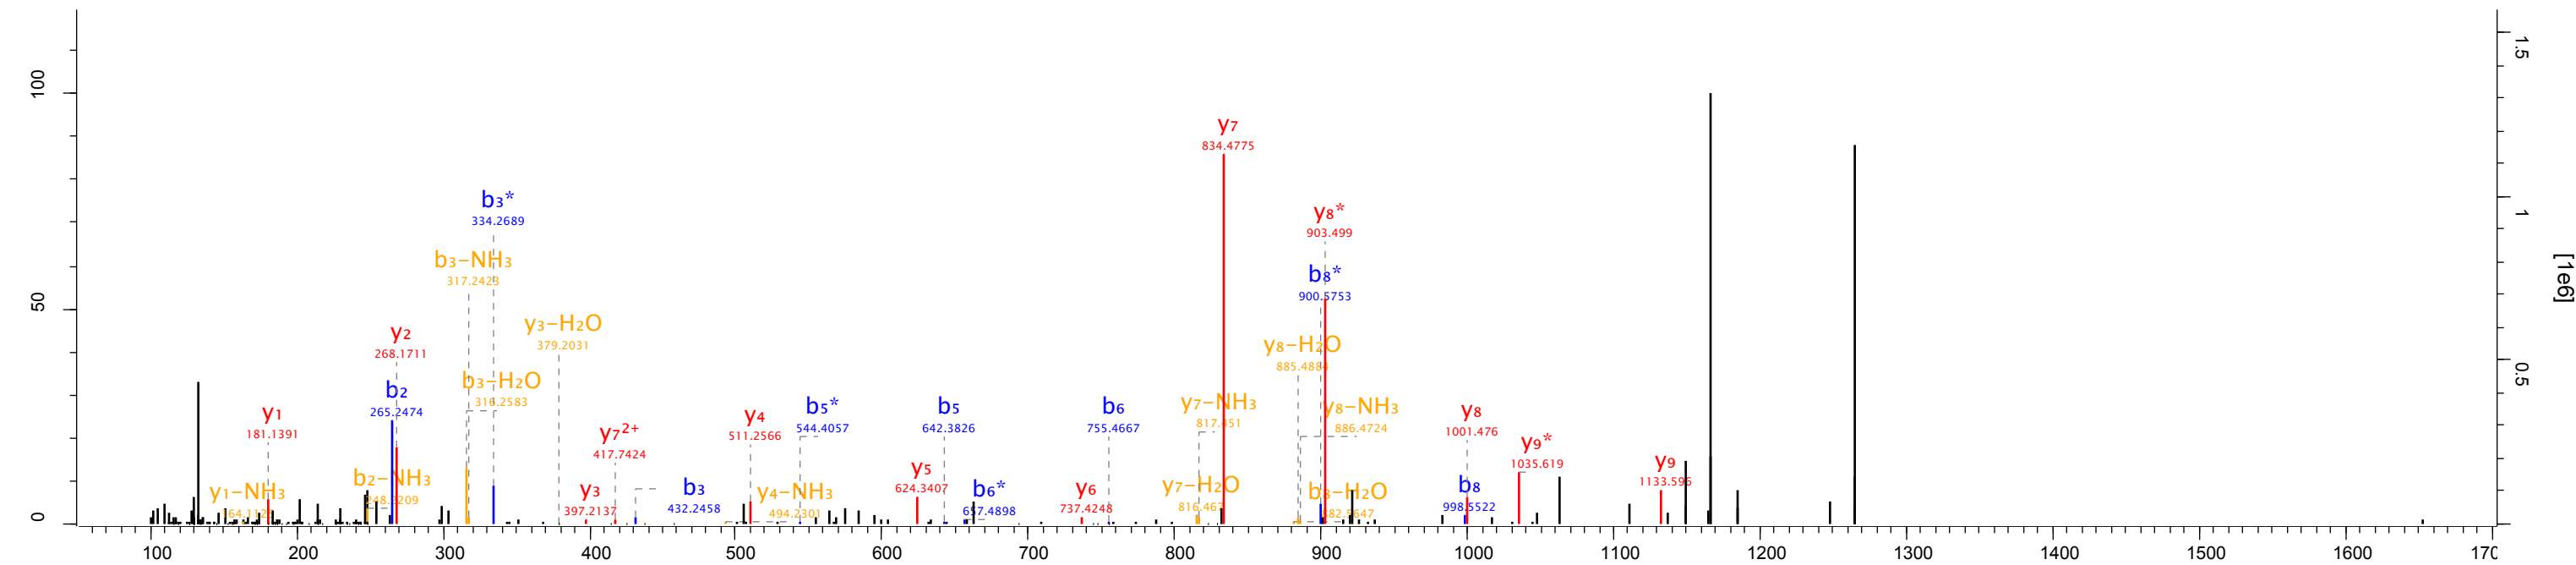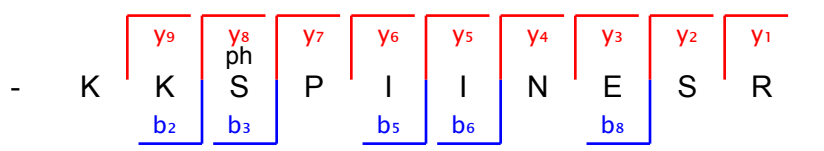

Raw file 20150812\_A375SR\_Phospho\_BR1\_06 Scan 3914 Method FTMS; HCD Score 128.59 m/z 722.32

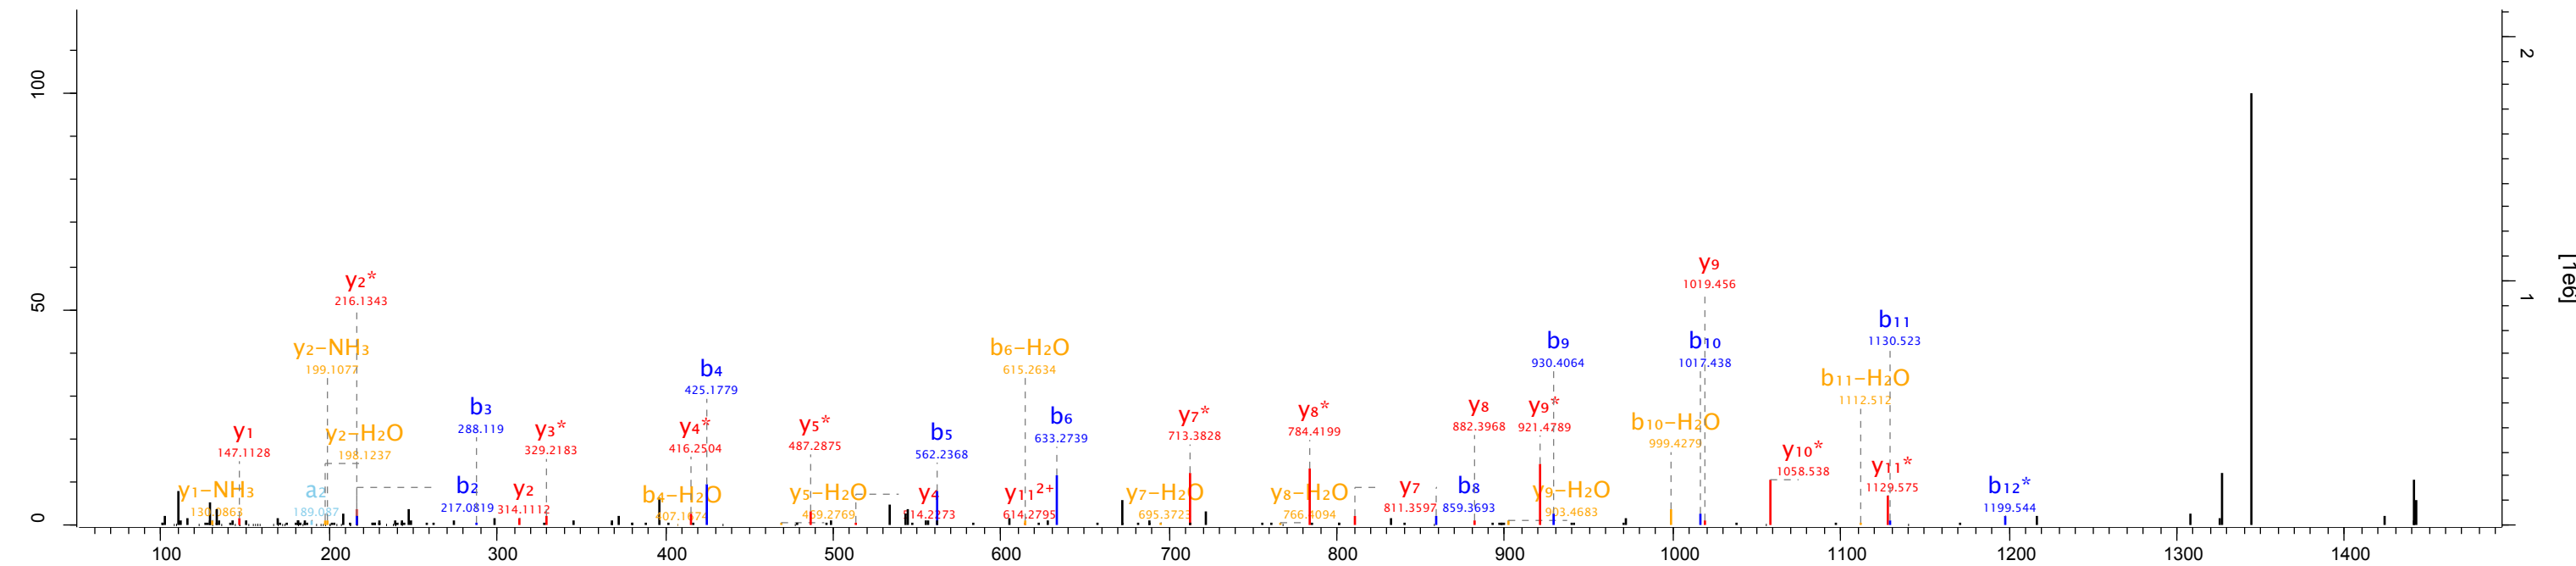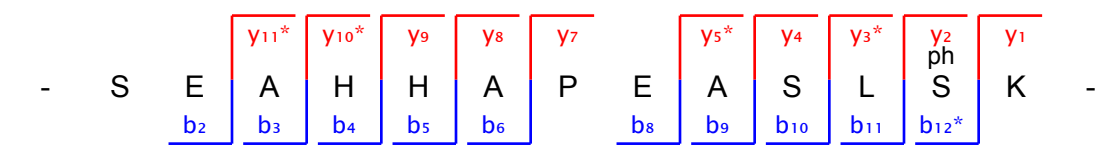

Raw file: 20150812\_A375SR\_Phospho\_BR1\_06  
 Scan: 4114 Method: FTMS; HCD Score: 89.91 m/z: 444.71 Gene names: PPFIBP1

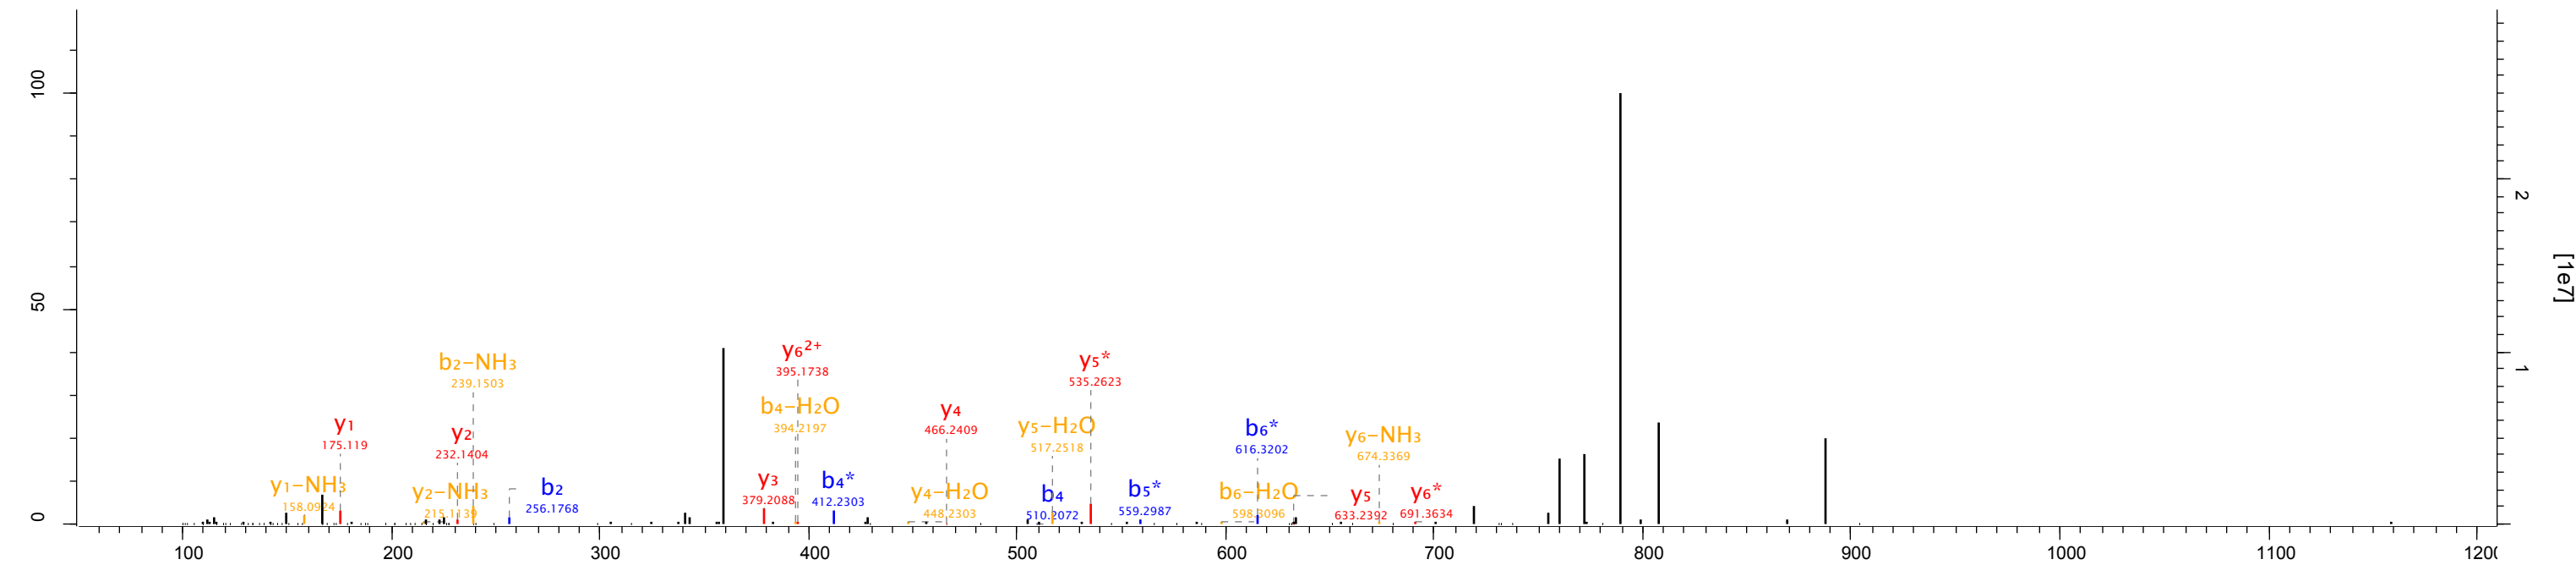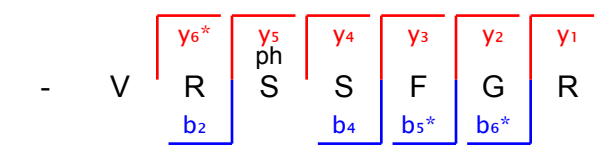

Raw file: 20150812\_A375SR\_Phospho\_BR1\_06  
 Scan: 4444 Method: FTMS; HCD Score: 127.87 m/z: 553.25 Gene names: S100A11

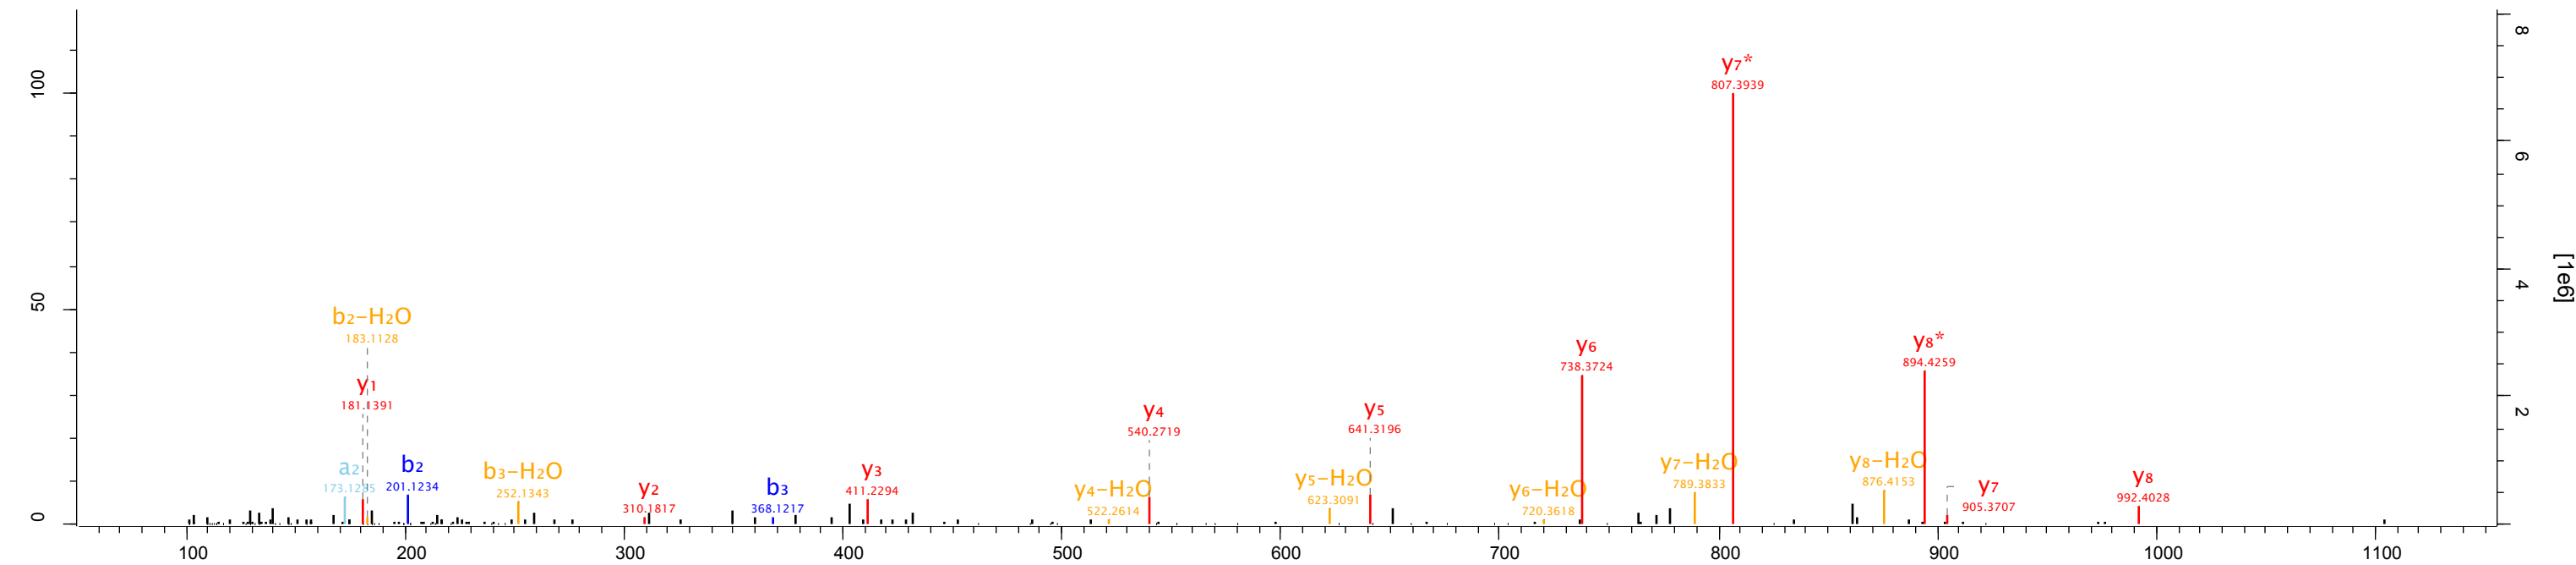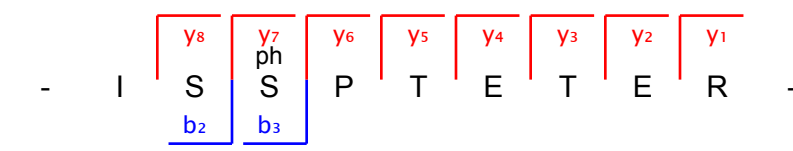



Raw file: 20150812\_A375SR\_Phospho\_BR1\_06  
 Scan: 4504 Method: FTMS; HCD Score: 226.08 m/z: 912.4 Gene names: RBMX2

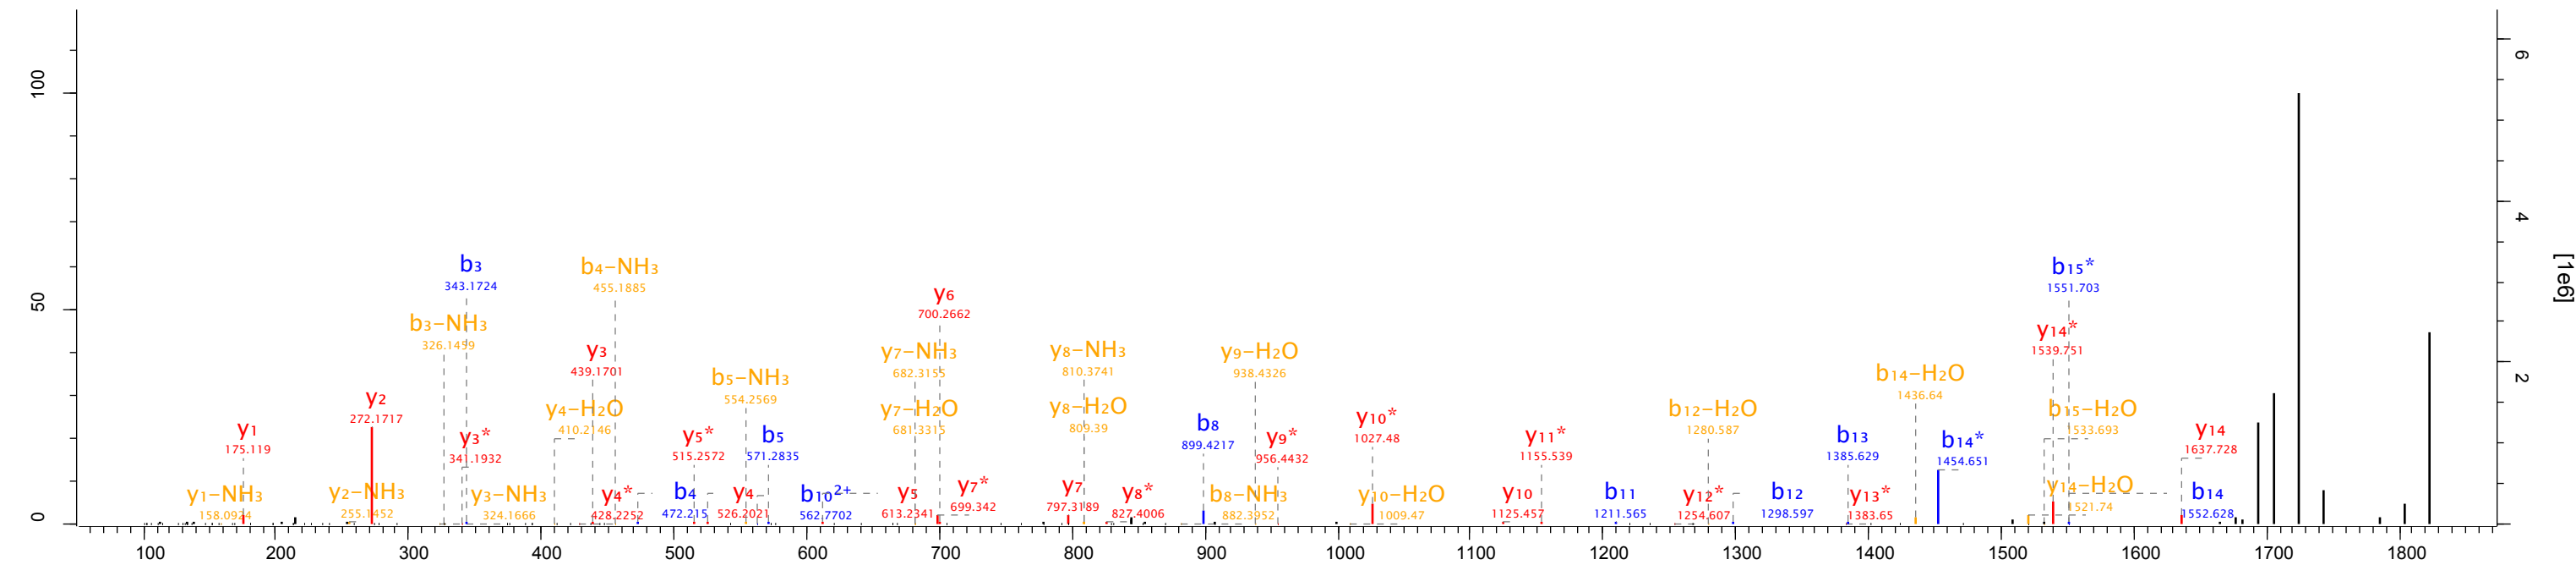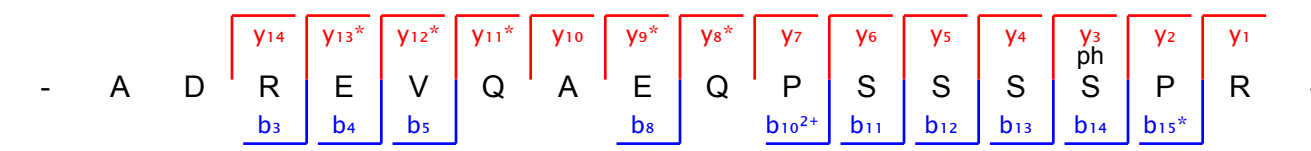

Raw file: 20150812\_A375SR\_Phospho\_BR1\_06  
 Scan: 5044 Method: FTMS; HCD Score: 80.31 m/z: 600.78 Gene names: SCAF11

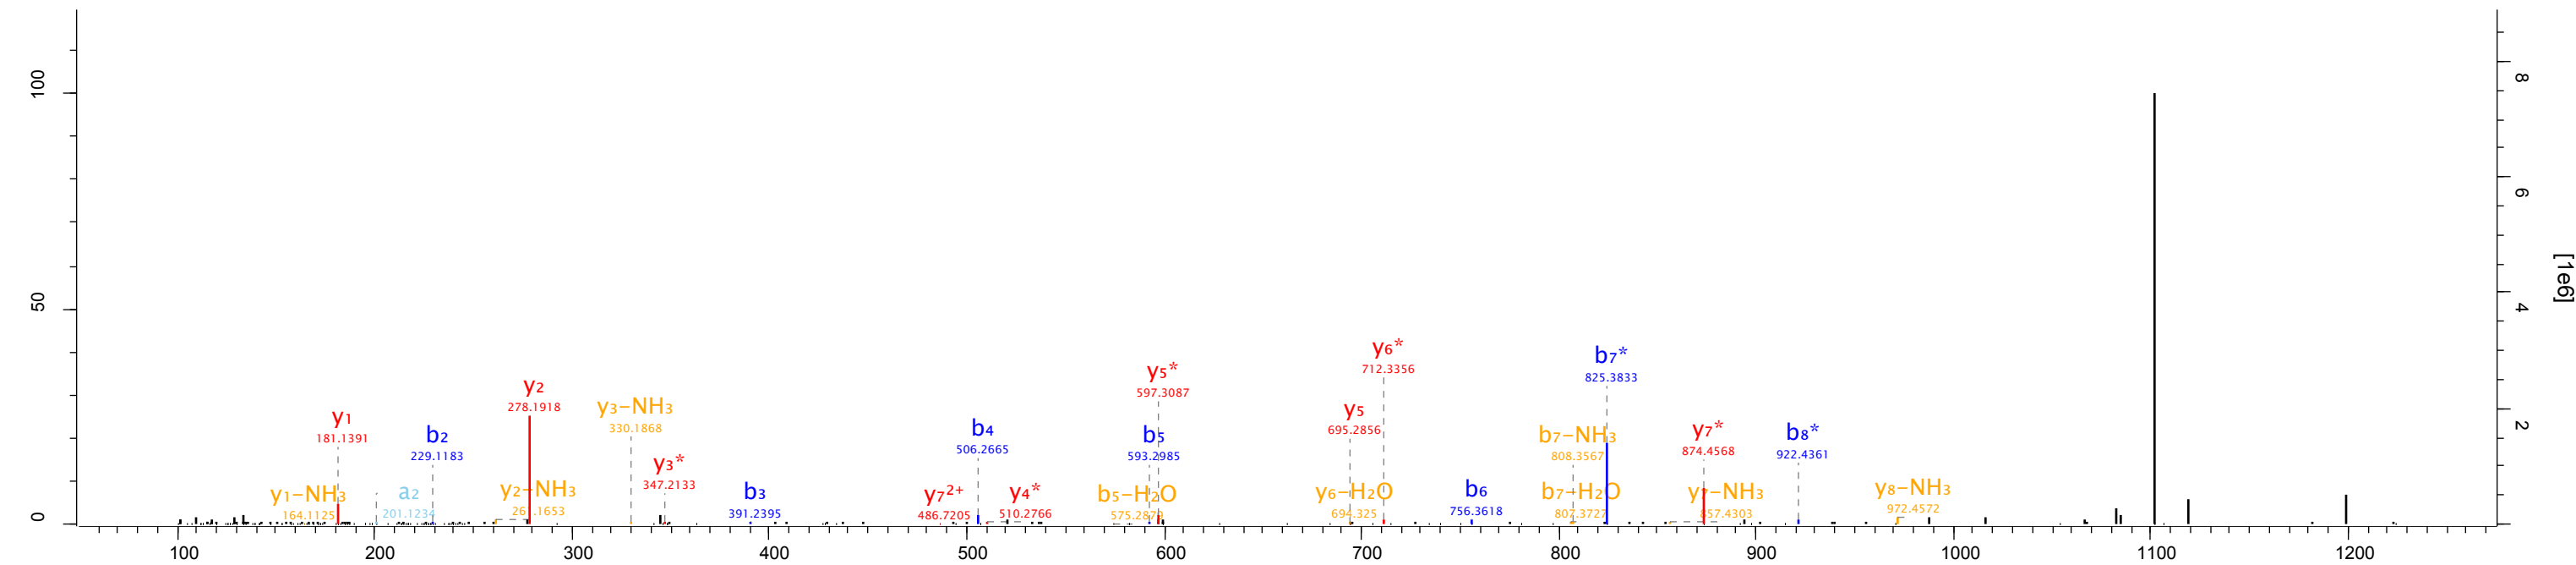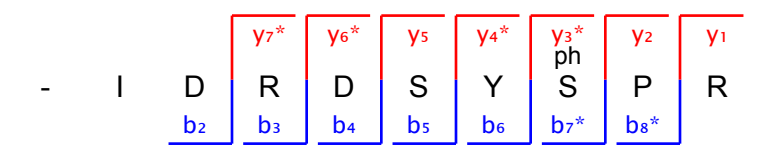

Raw file: 20150812\_A375SR\_Phospho\_BR1\_06  
 Scan: 5234 Method: FTMS; HCD Score: 189.84 m/z: 685.99 Gene names: BRD7

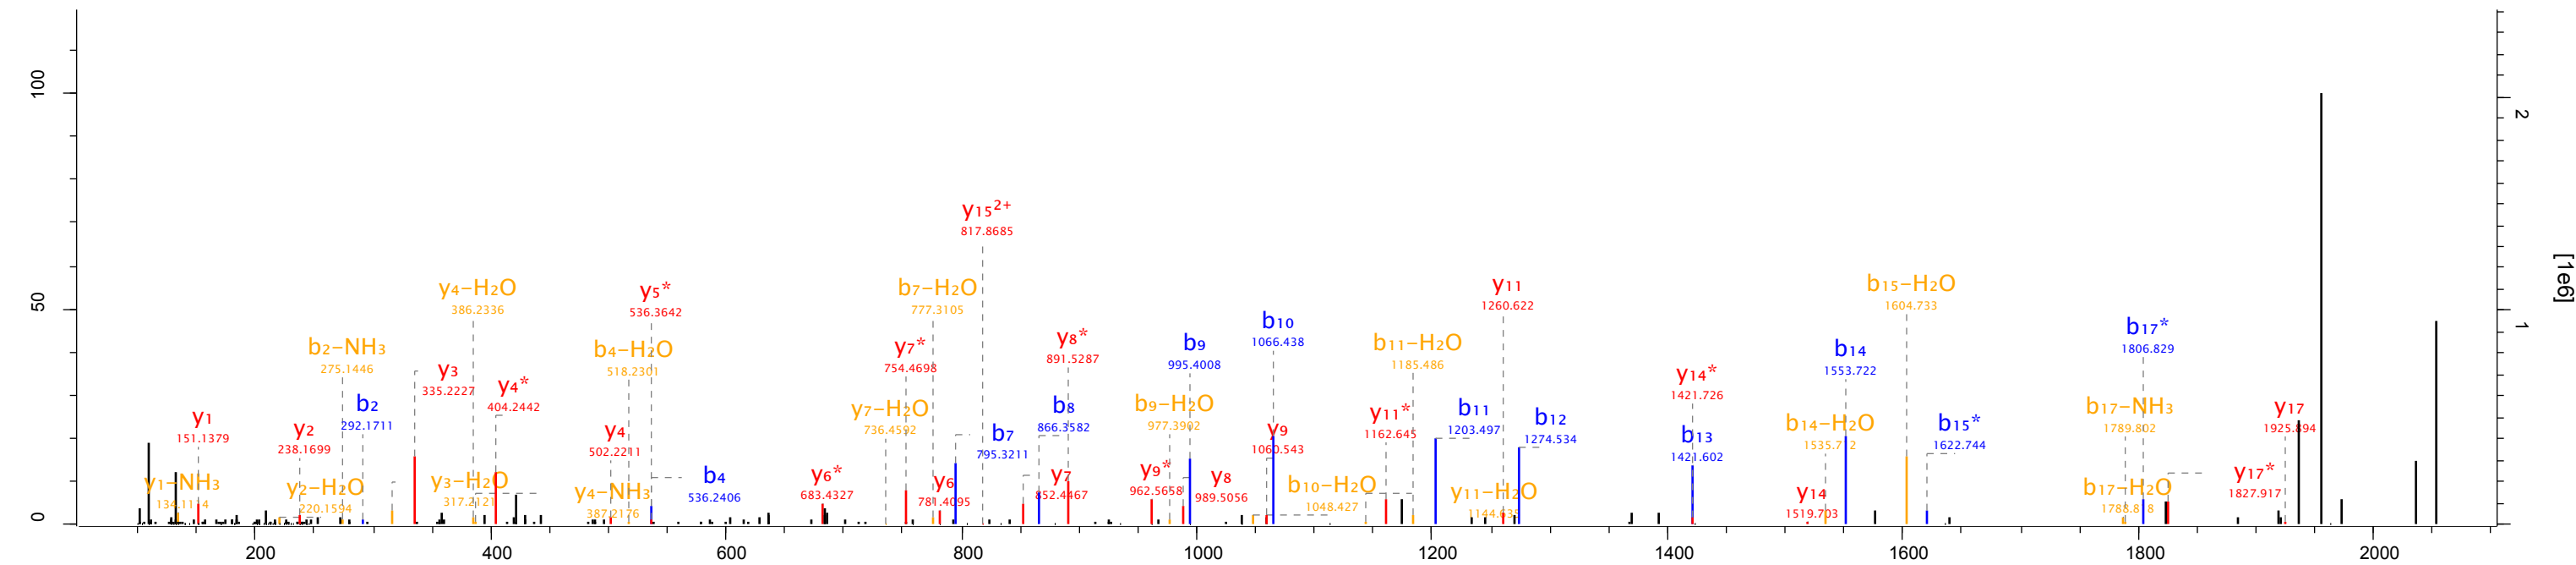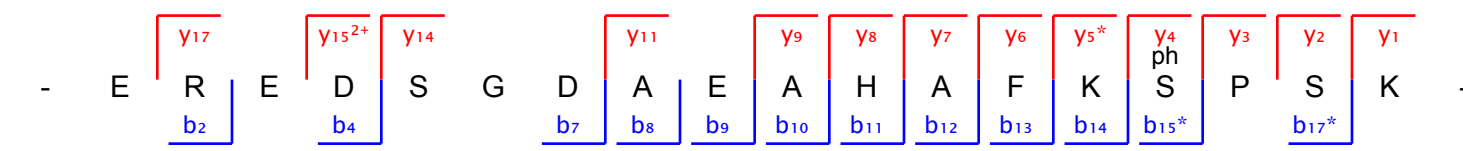

Raw file: 20150812\_A375SR\_Phospho\_BR1\_06  
 Scan: 5804 Method: FTMS; HCD Score: 128.27 m/z: 457.24 Gene names: YAP1

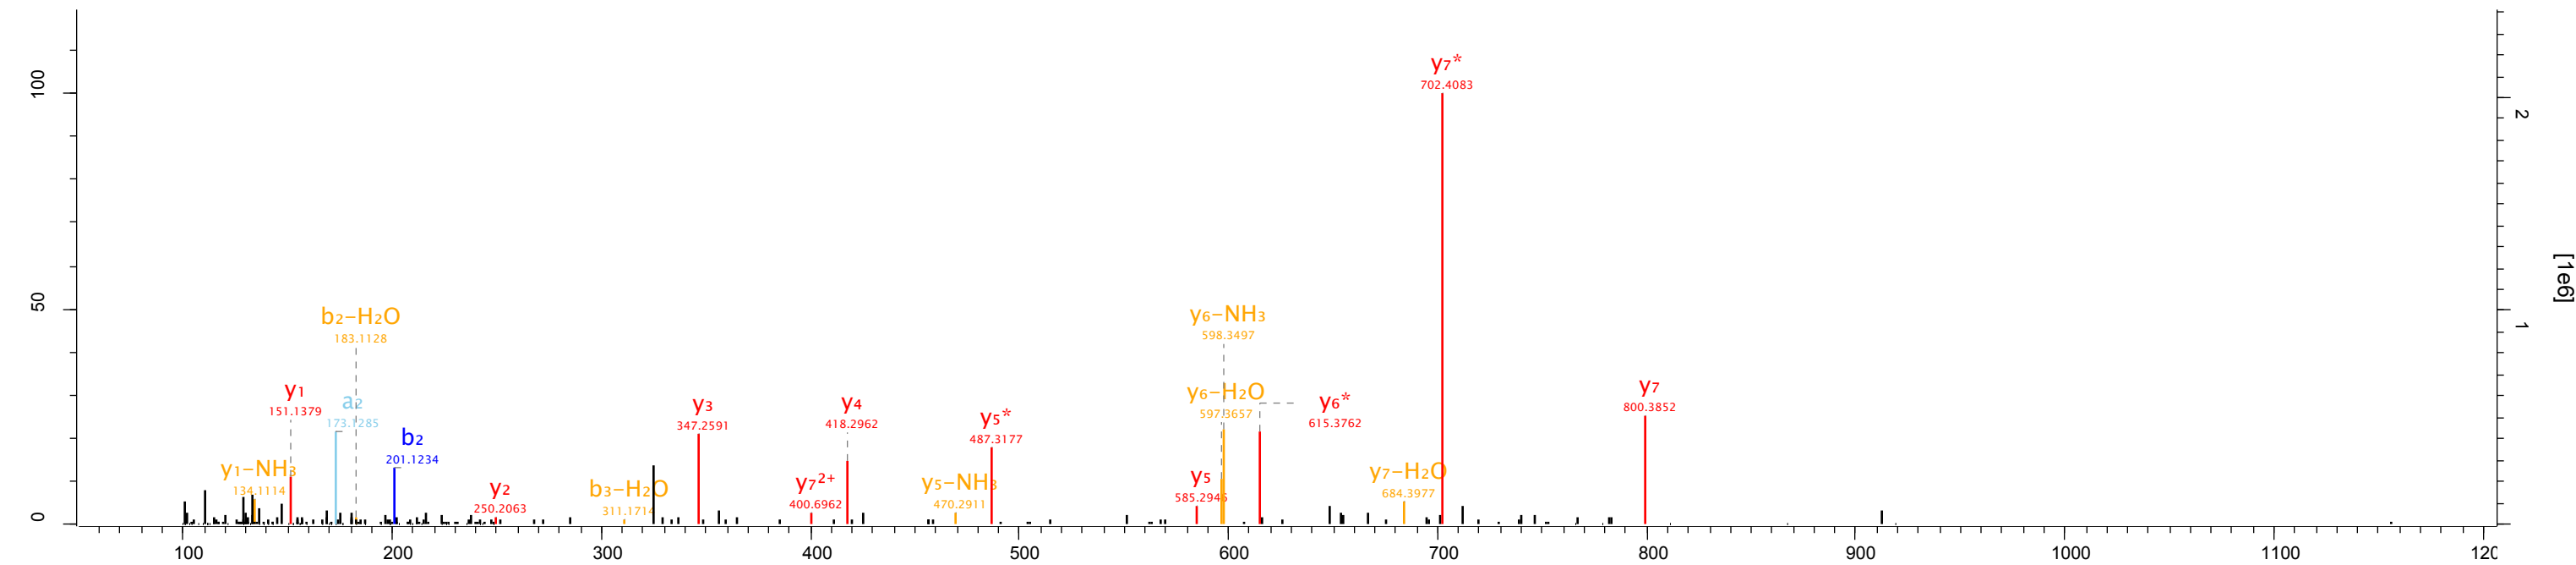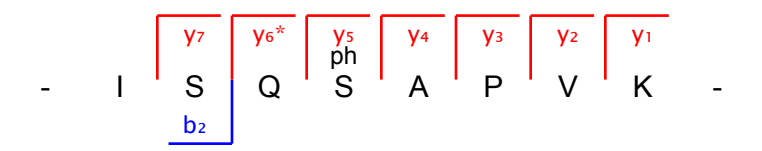

Raw file: 20150812\_A375SR\_Phospho\_BR1\_06  
 Scan: 6074 Method: FTMS; HCD Score: 77.66 m/z: 622.94 Gene names: RPP30

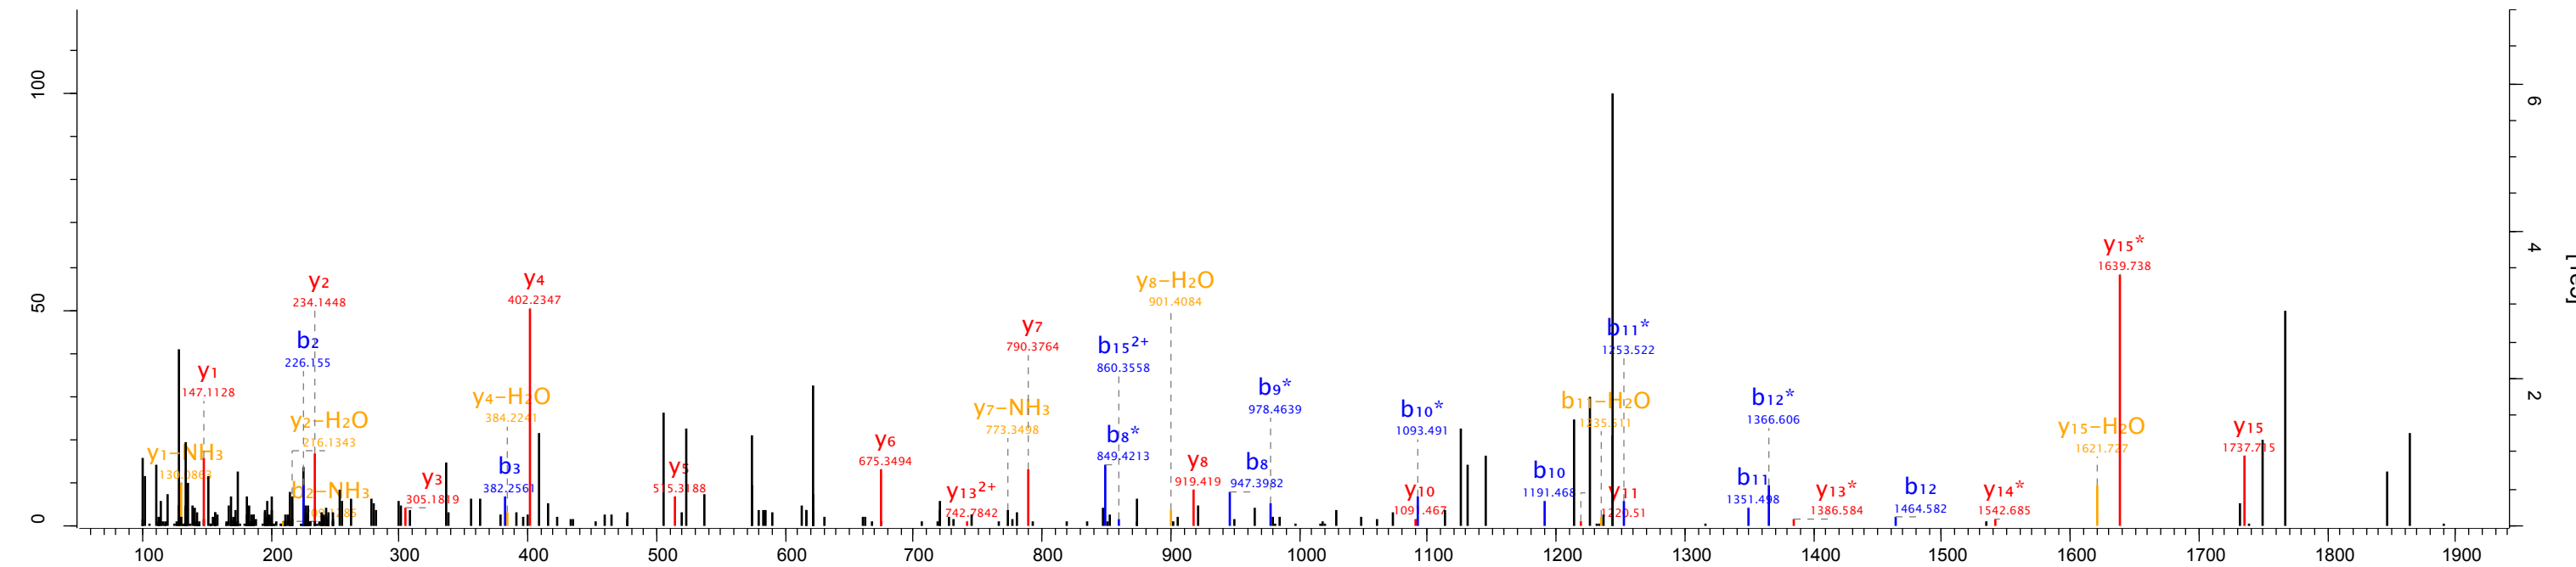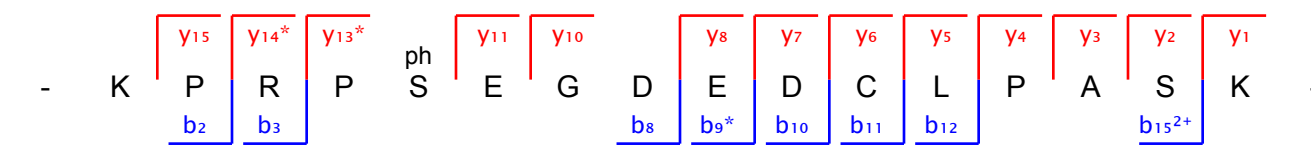

Raw file: 20150812\_A375SR\_Phospho\_BR1\_06  
 Scan: 6104 Method: FTMS; HCD Score: 75.38 m/z: 620.26 Gene names: SATB2

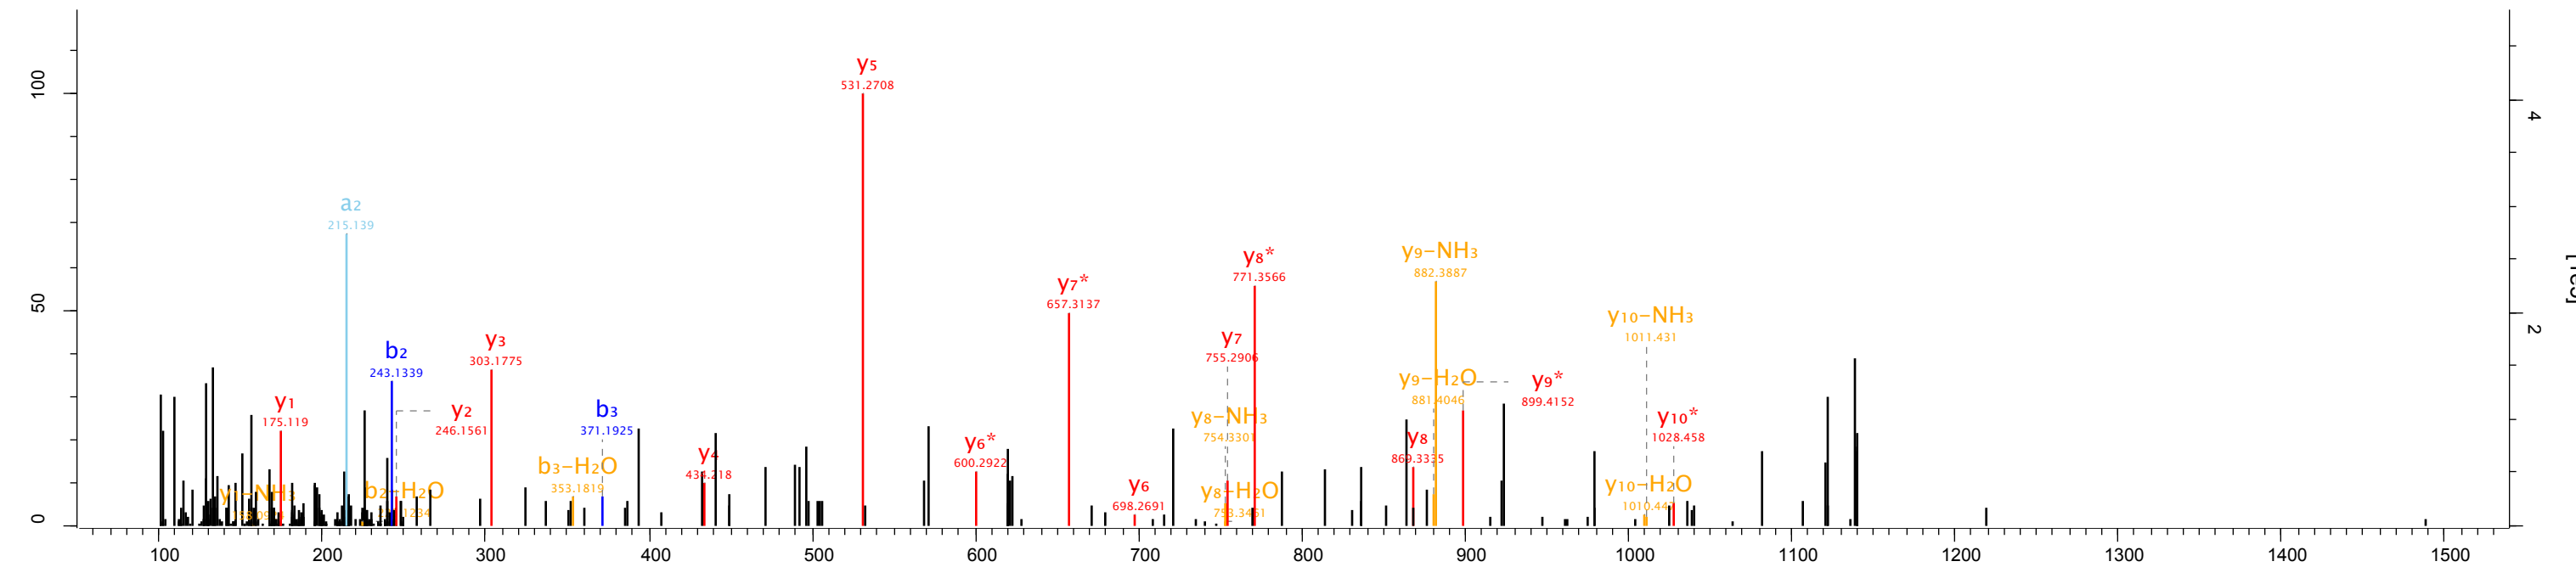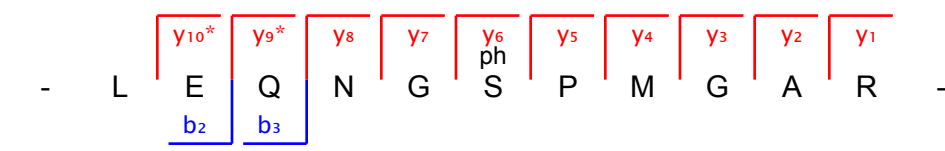

Raw file: 20150812\_A375SR\_Phospho\_BR1\_06  
 Scan: 6284 Method: FTMS; HCD Score: 46.35 m/z: 609.27 Gene names: RPRD2

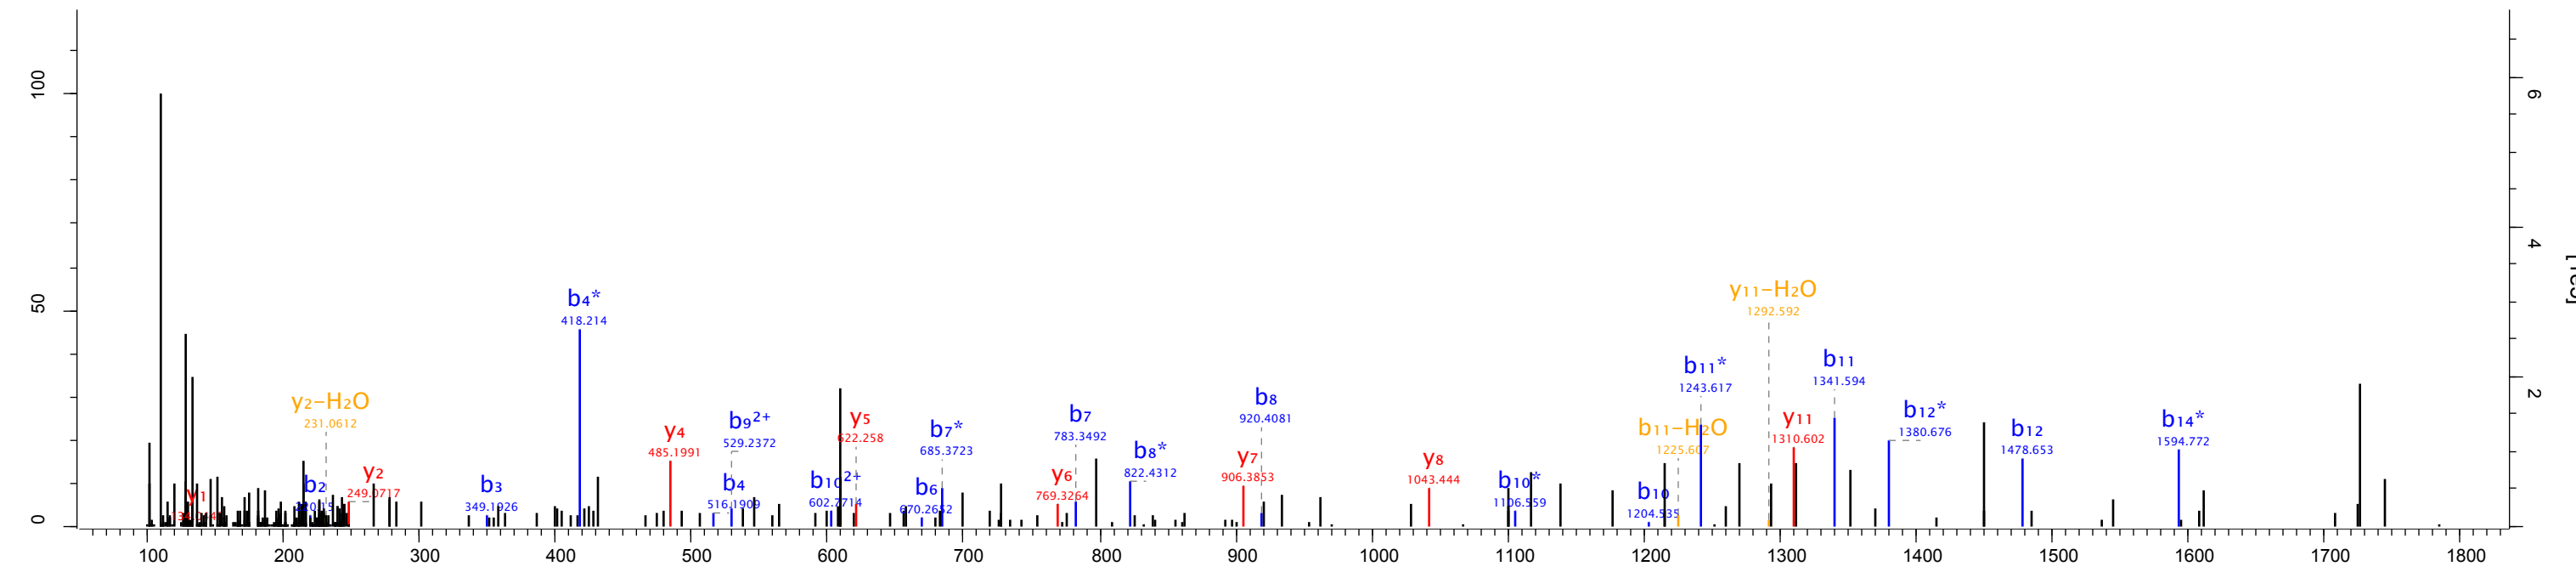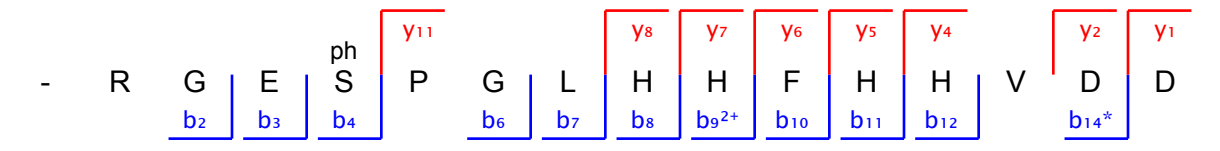

Raw file Scan Method Score m/z Gene names

20150812\_A375SR\_Phospho\_BR1\_06 6414 FTMS; HCD 145.23 541.26 SRRM1

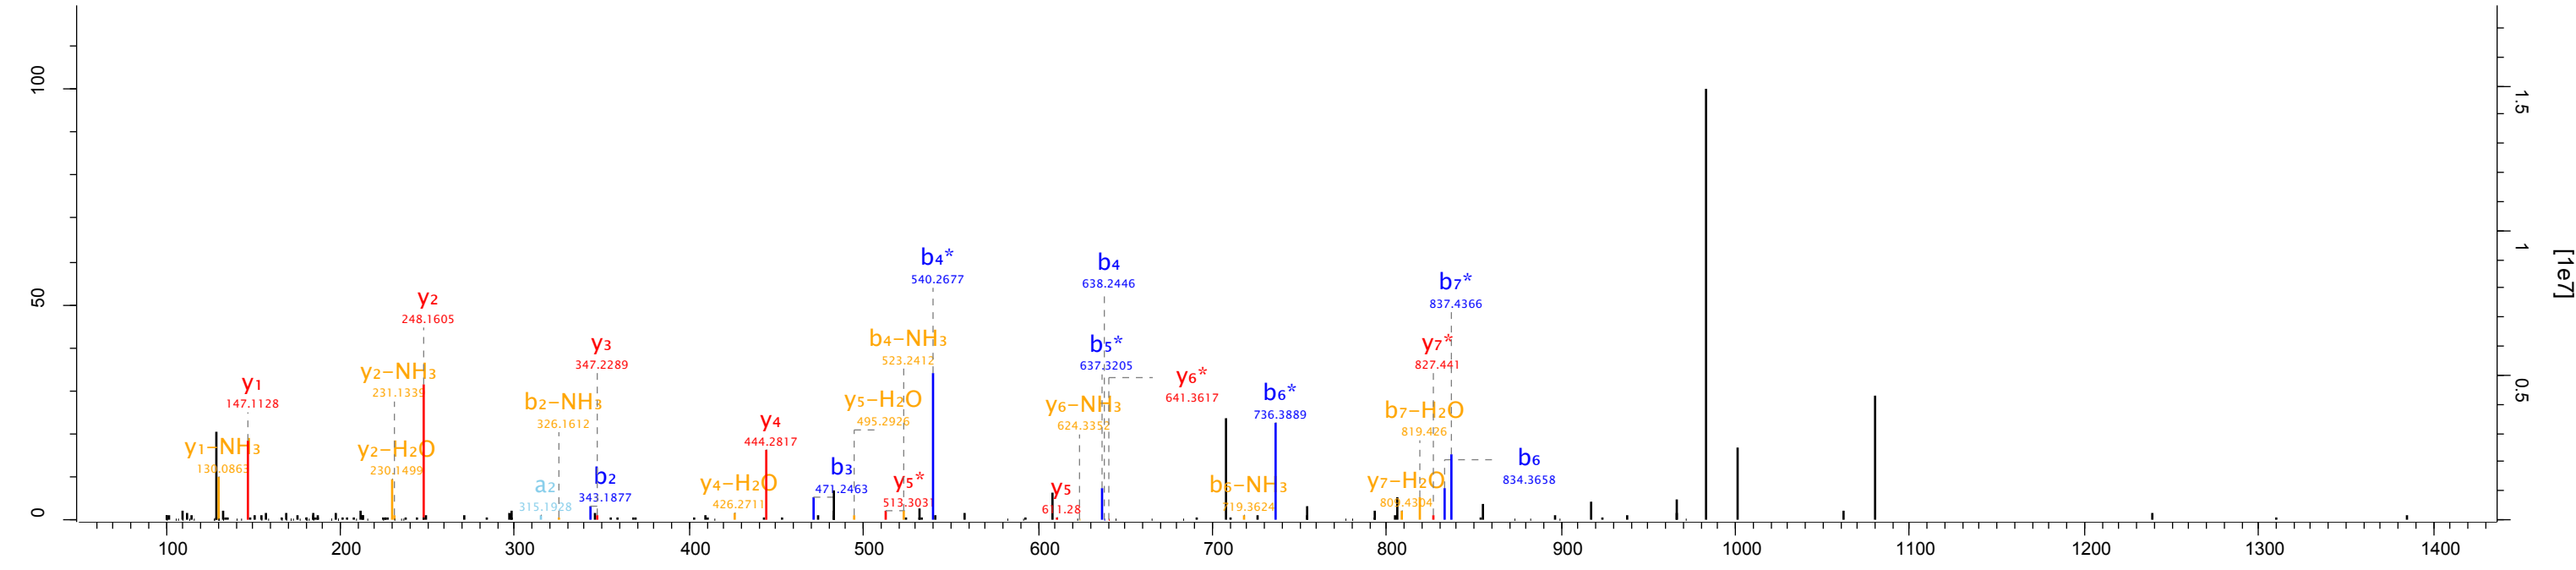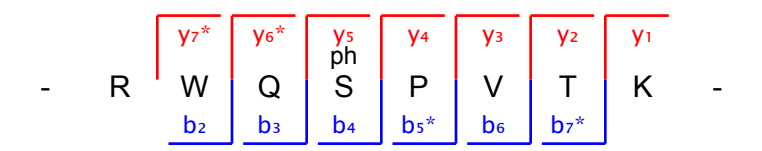



Raw file: 20150812\_A375SR\_Phospho\_BR1\_06  
 Scan: 6524 Method: FTMS; HCD Score: 104.82 m/z: 500.73 Gene names: VIM

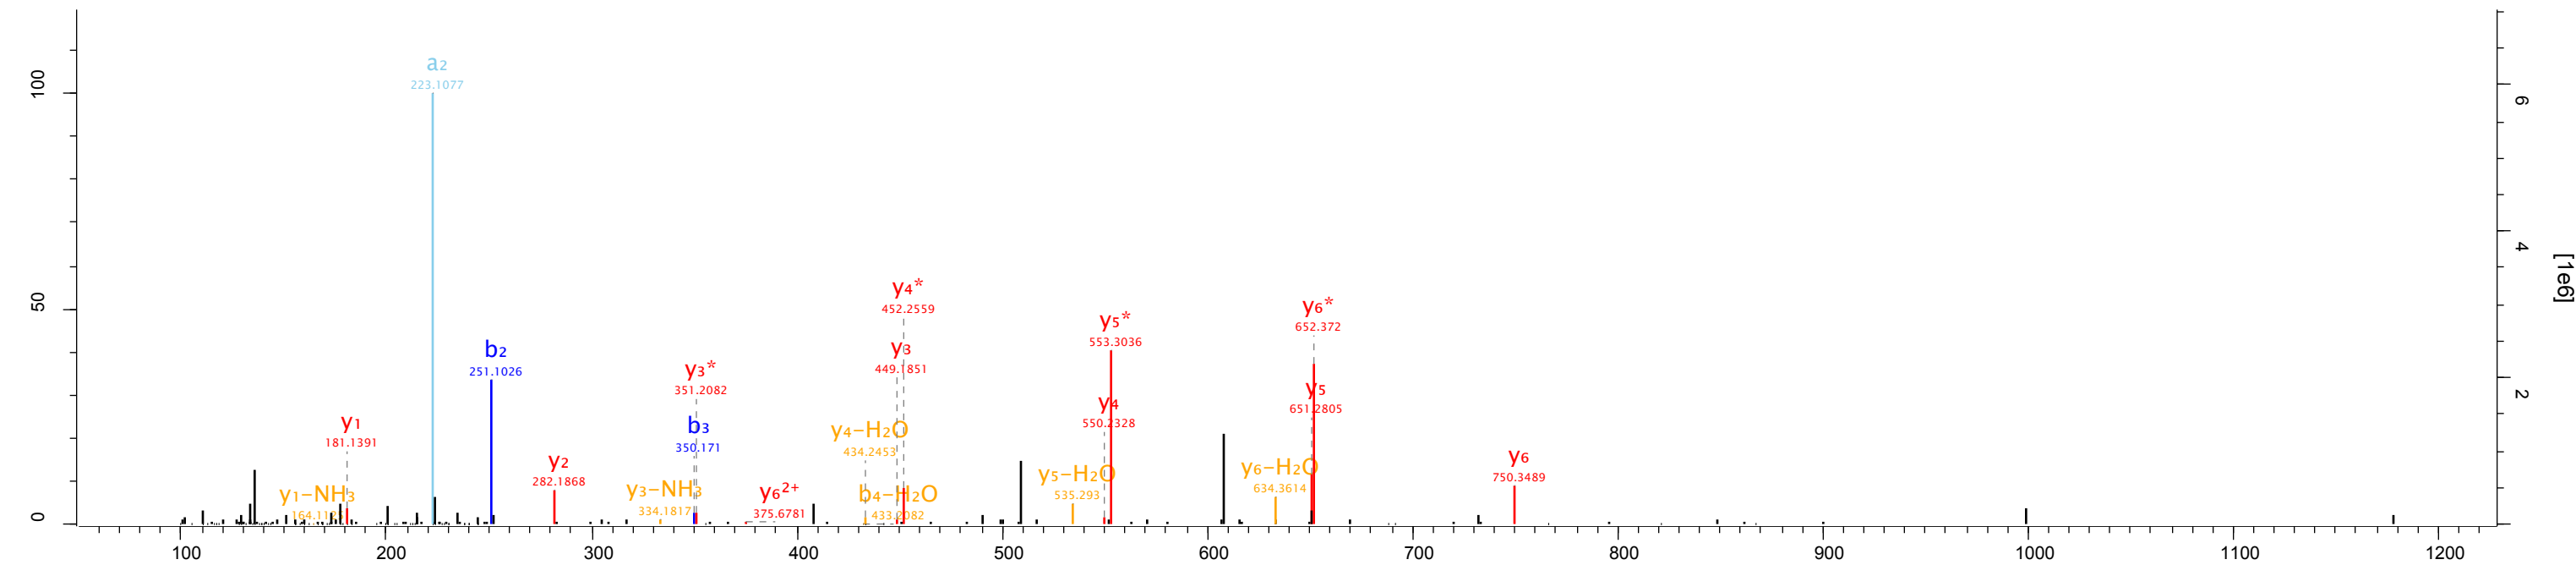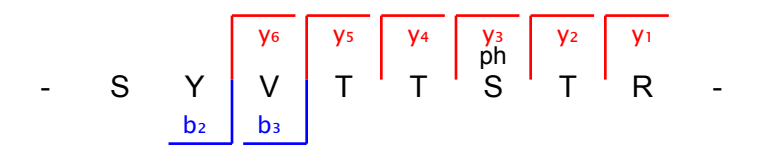

Raw file: 20150812\_A375SR\_Phospho\_BR1\_06  
 Scan: 6734 Method: FTMS; HCD Score: 177.04 m/z: 753.32 Gene names: PSIP1

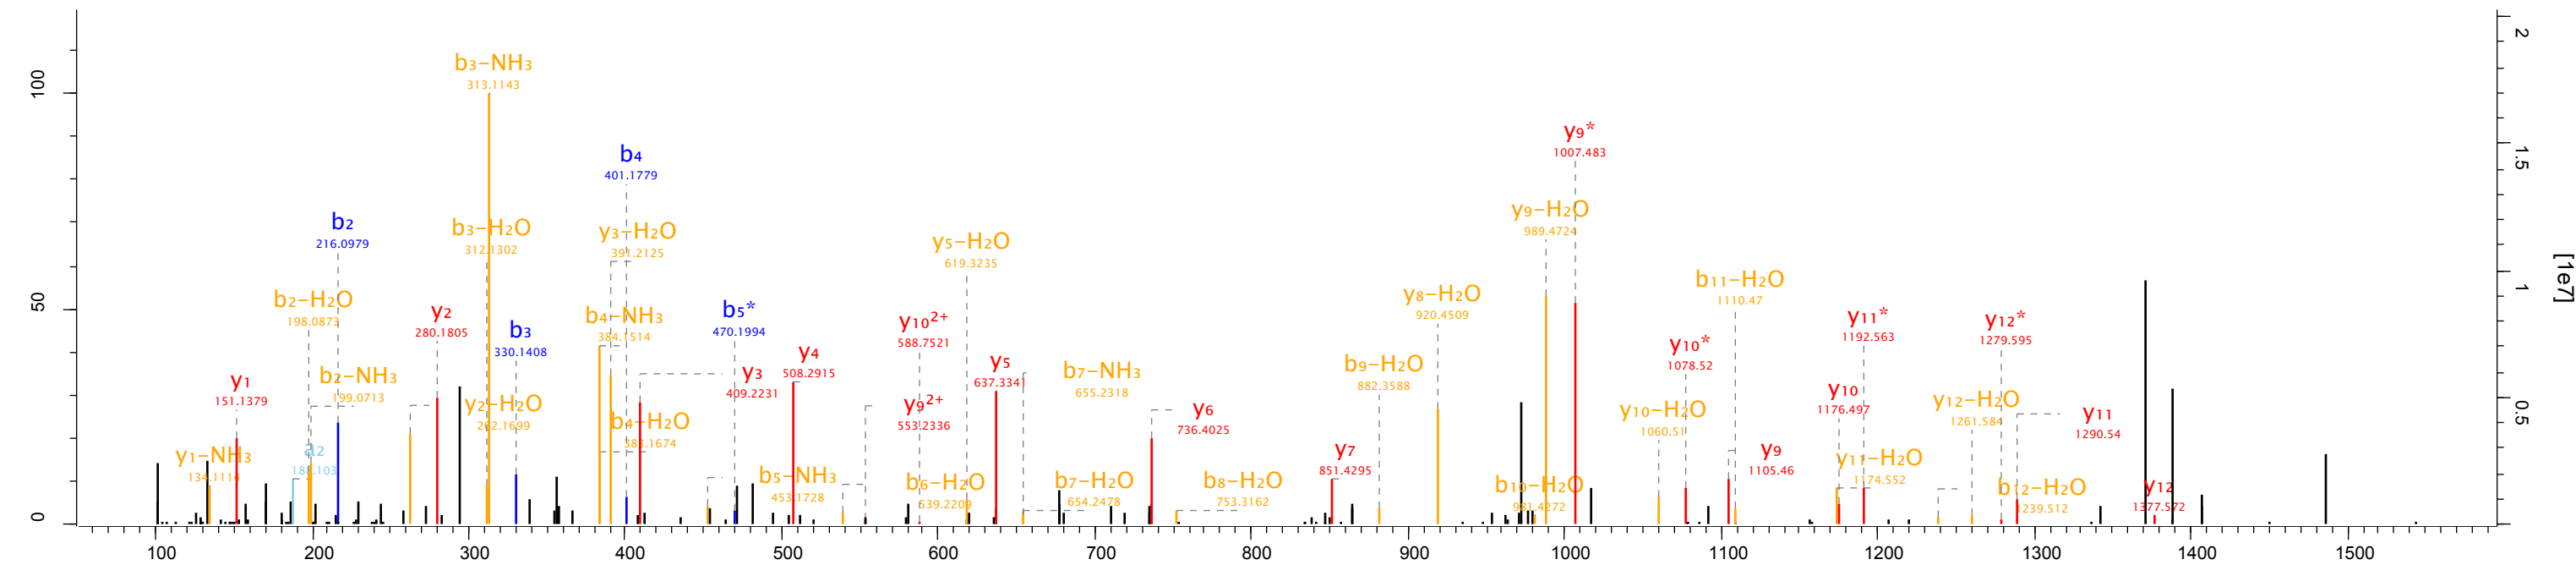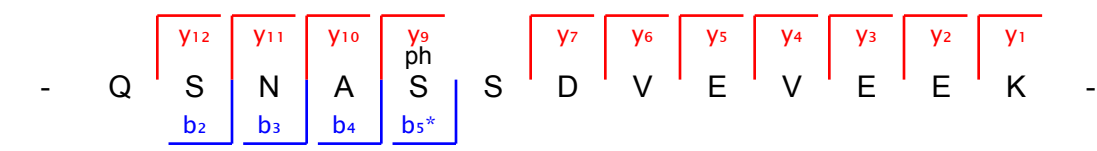

Raw file: 20150812\_A375SR\_Phospho\_BR1\_06  
 Scan: 6754 Method: FTMS; HCD Score: 179.9 m/z: 709.36 Gene names: ATRX

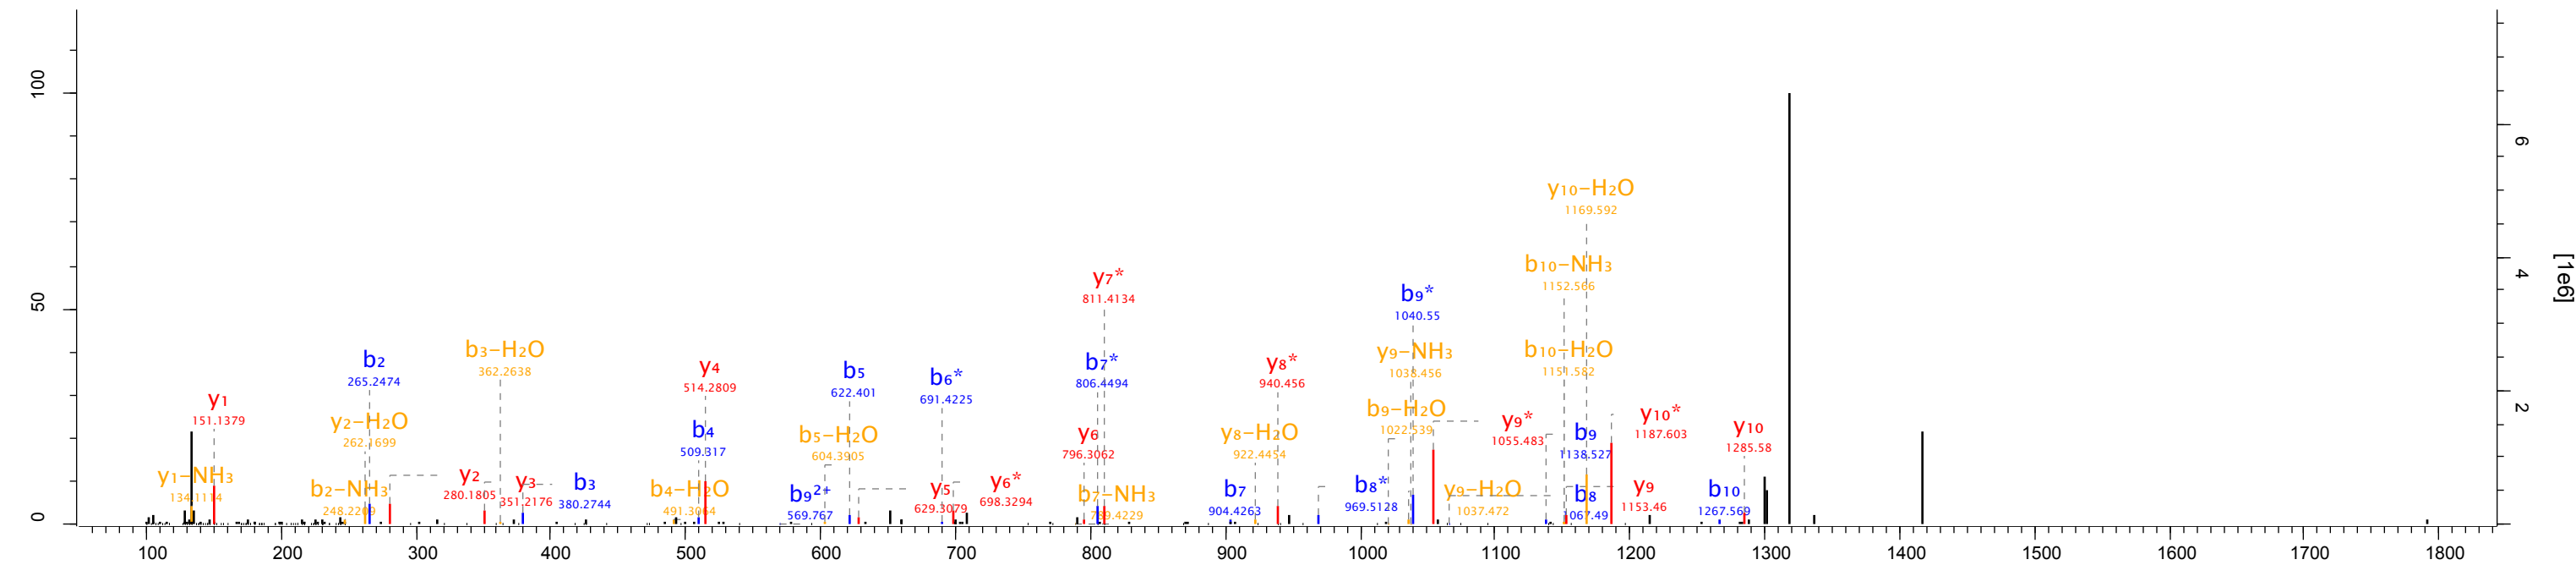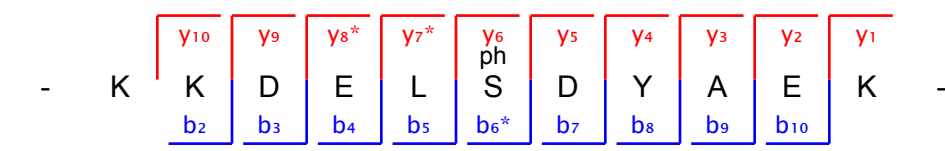

Raw file: 20150812\_A375SR\_Phospho\_BR1\_06  
 Scan: 7004 Method: FTMS; HCD Score: 164.72 m/z: 998.96 Gene names: C12orf45

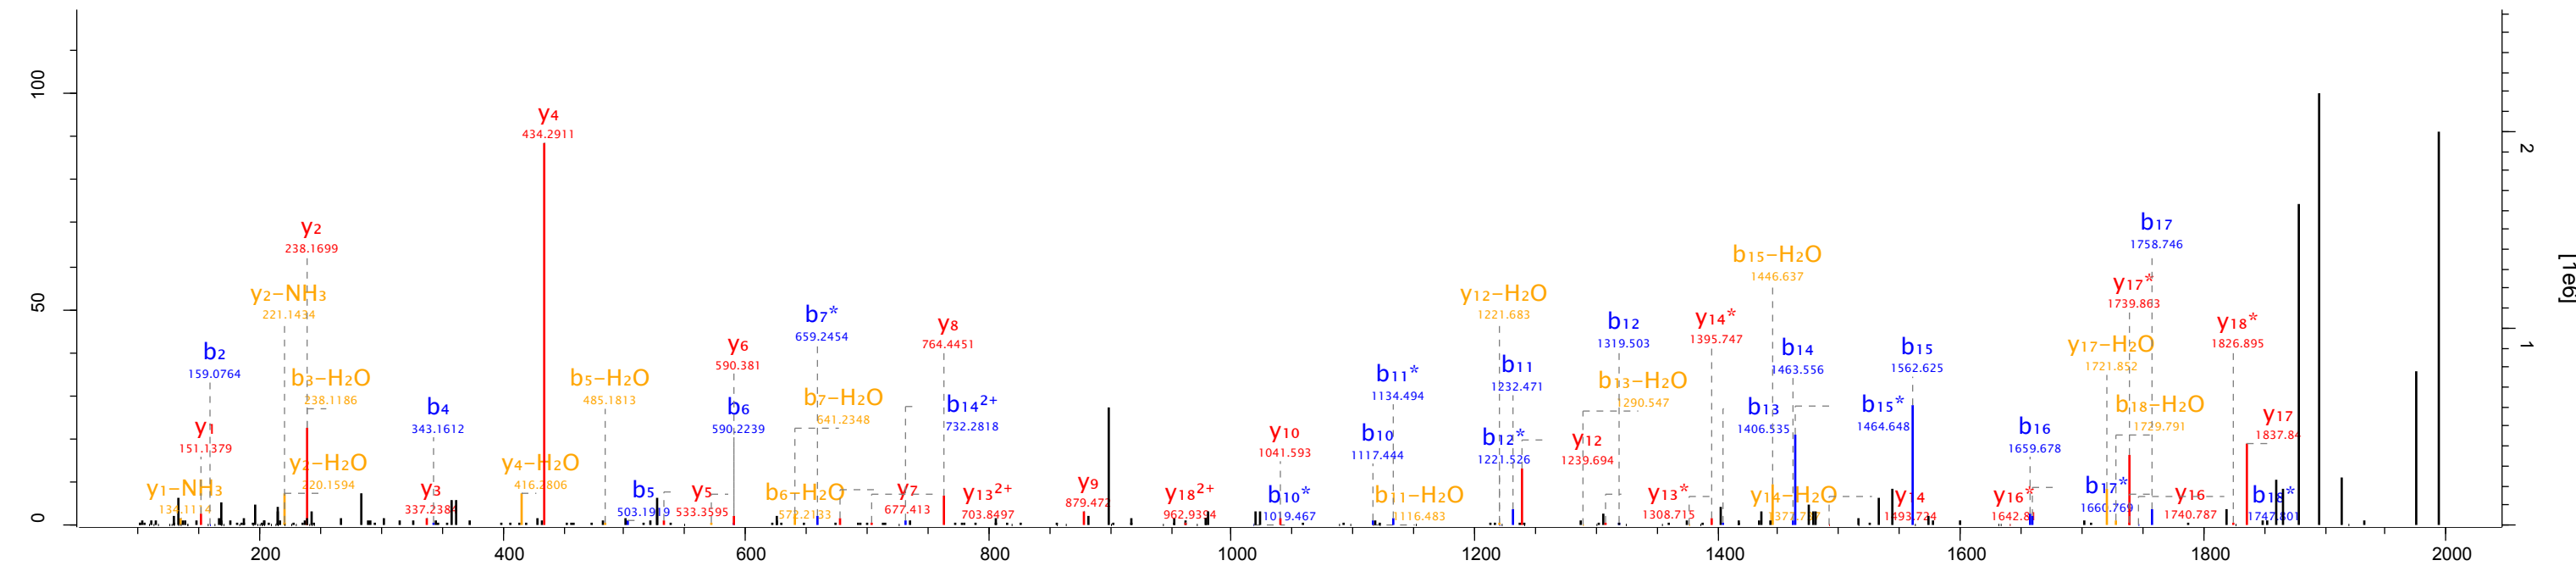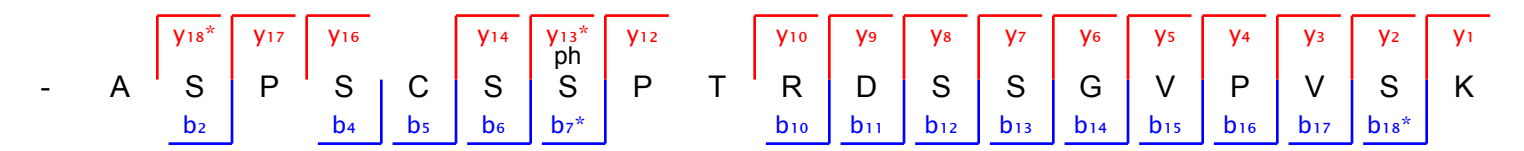

Raw file: 20150812\_A375SR\_Phospho\_BR1\_06  
 Scan: 7184 Method: FTMS; HCD Score: 126.19 m/z: 544.76 Gene names: PLEKHA5

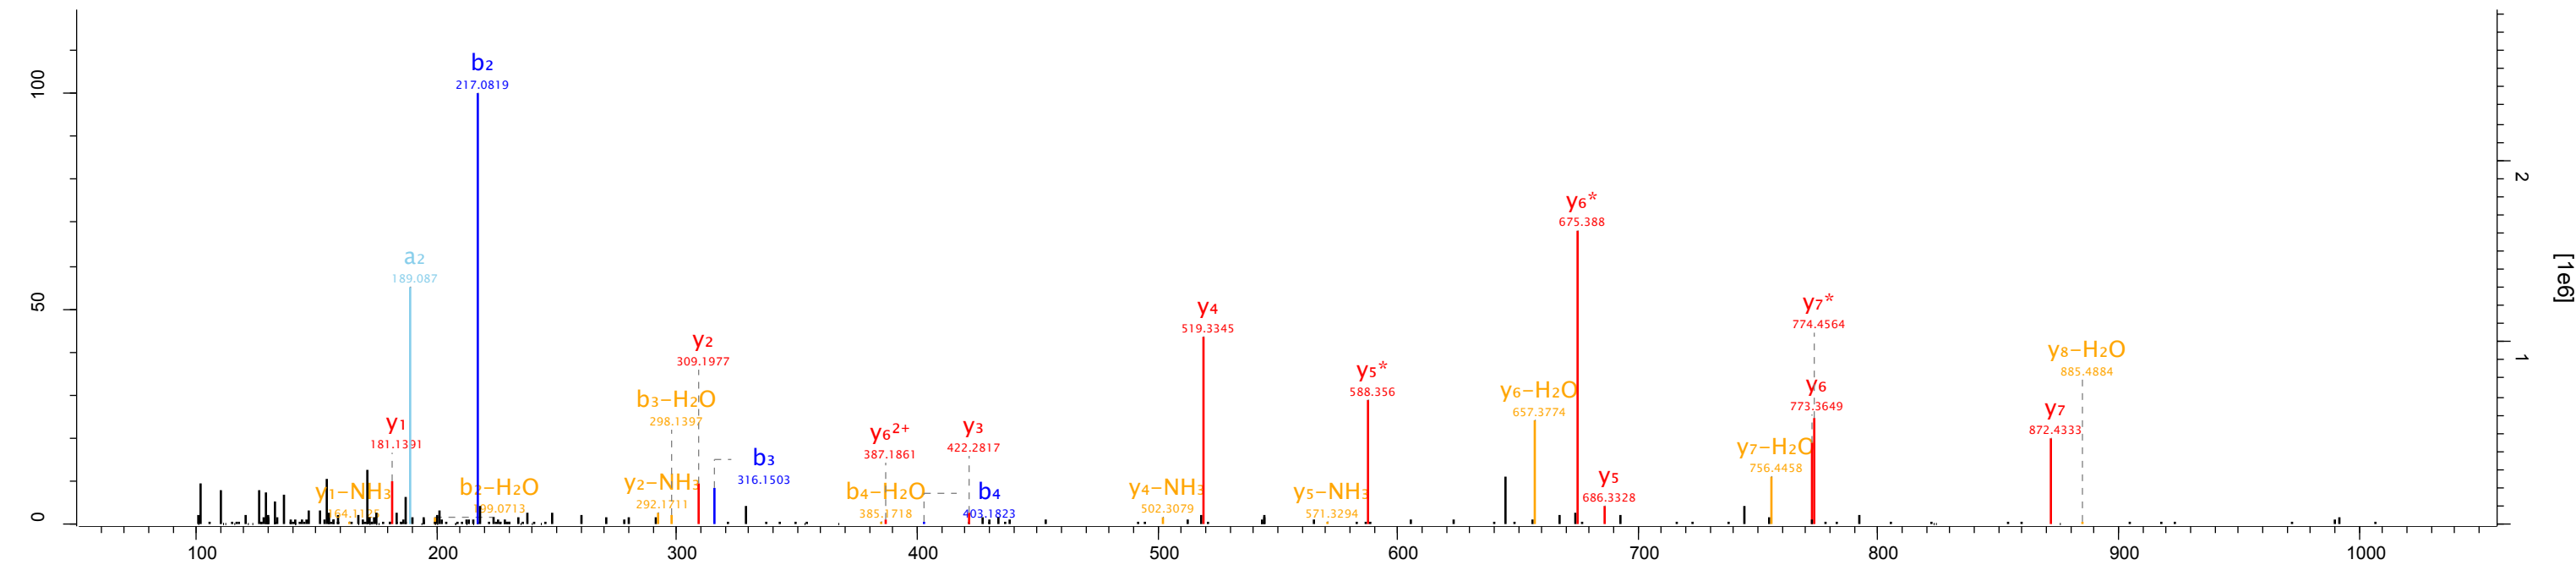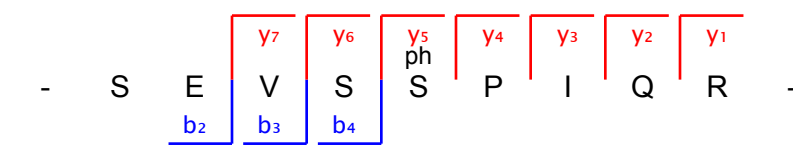

Raw file 20150812\_A375SR\_Phospho\_BR1\_06 Scan 7944 Method FTMS; HCD Score 69.98 m/z 662.32 Gene names NDE1

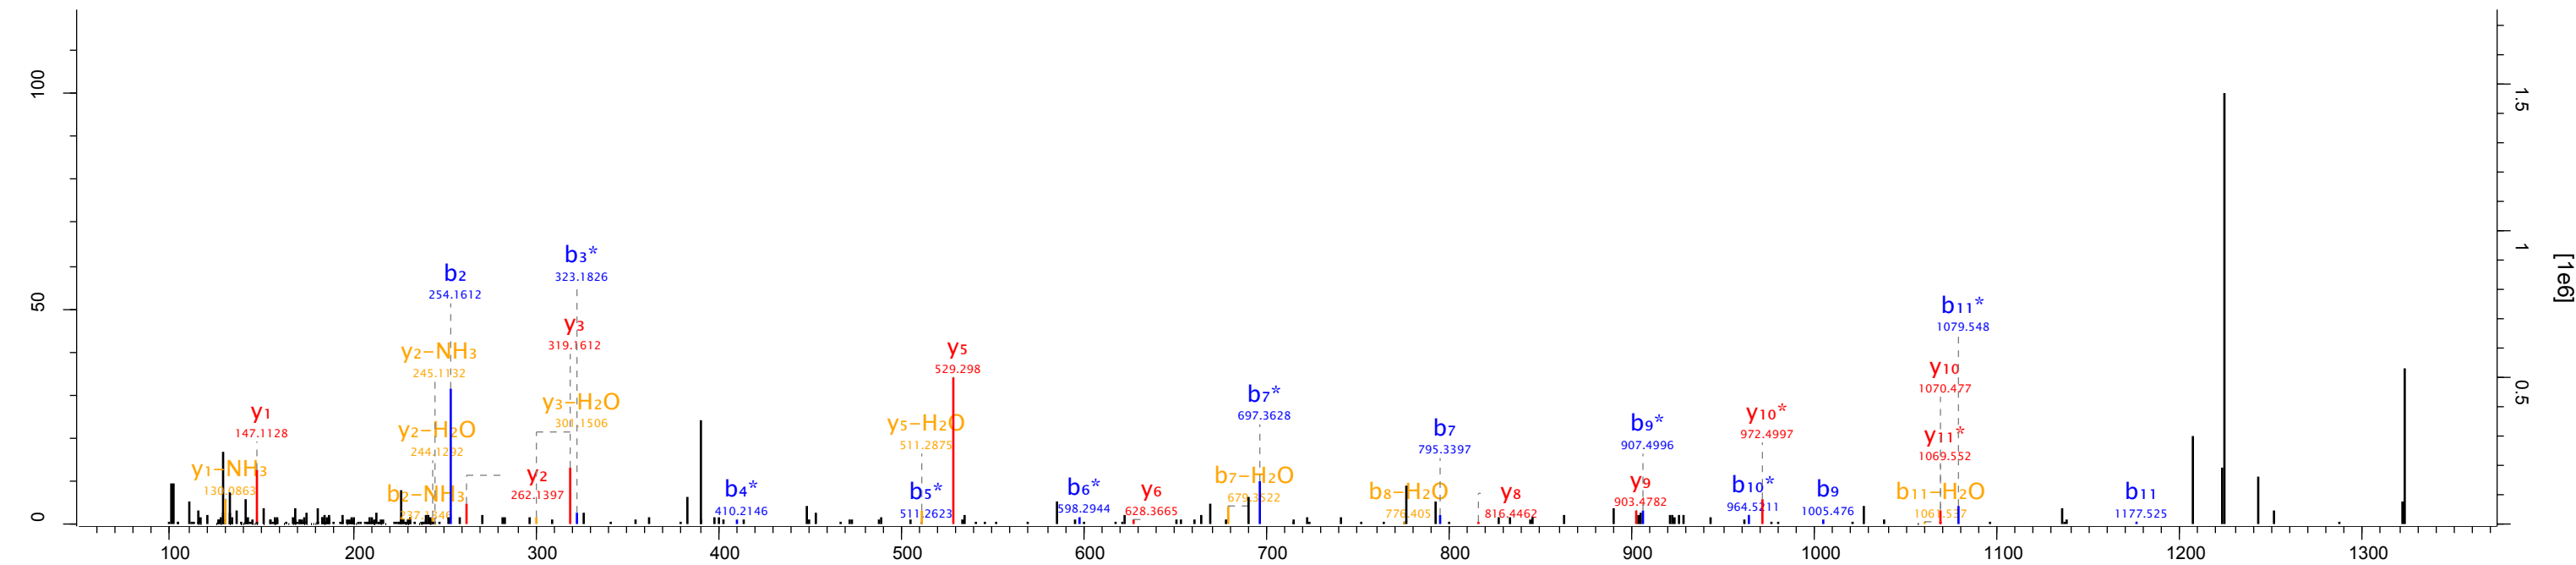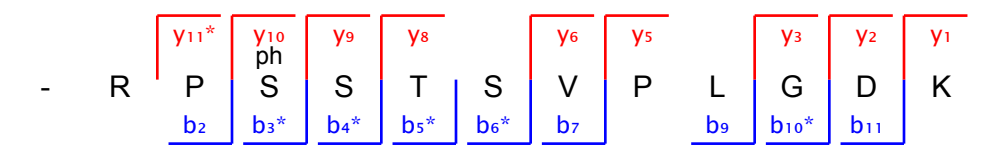

Raw file: 20150812\_A375SR\_Phospho\_BR1\_06  
 Scan: 8464 Method: FTMS; HCD Score: 88.02 m/z: 584.29 Gene names: BAG3

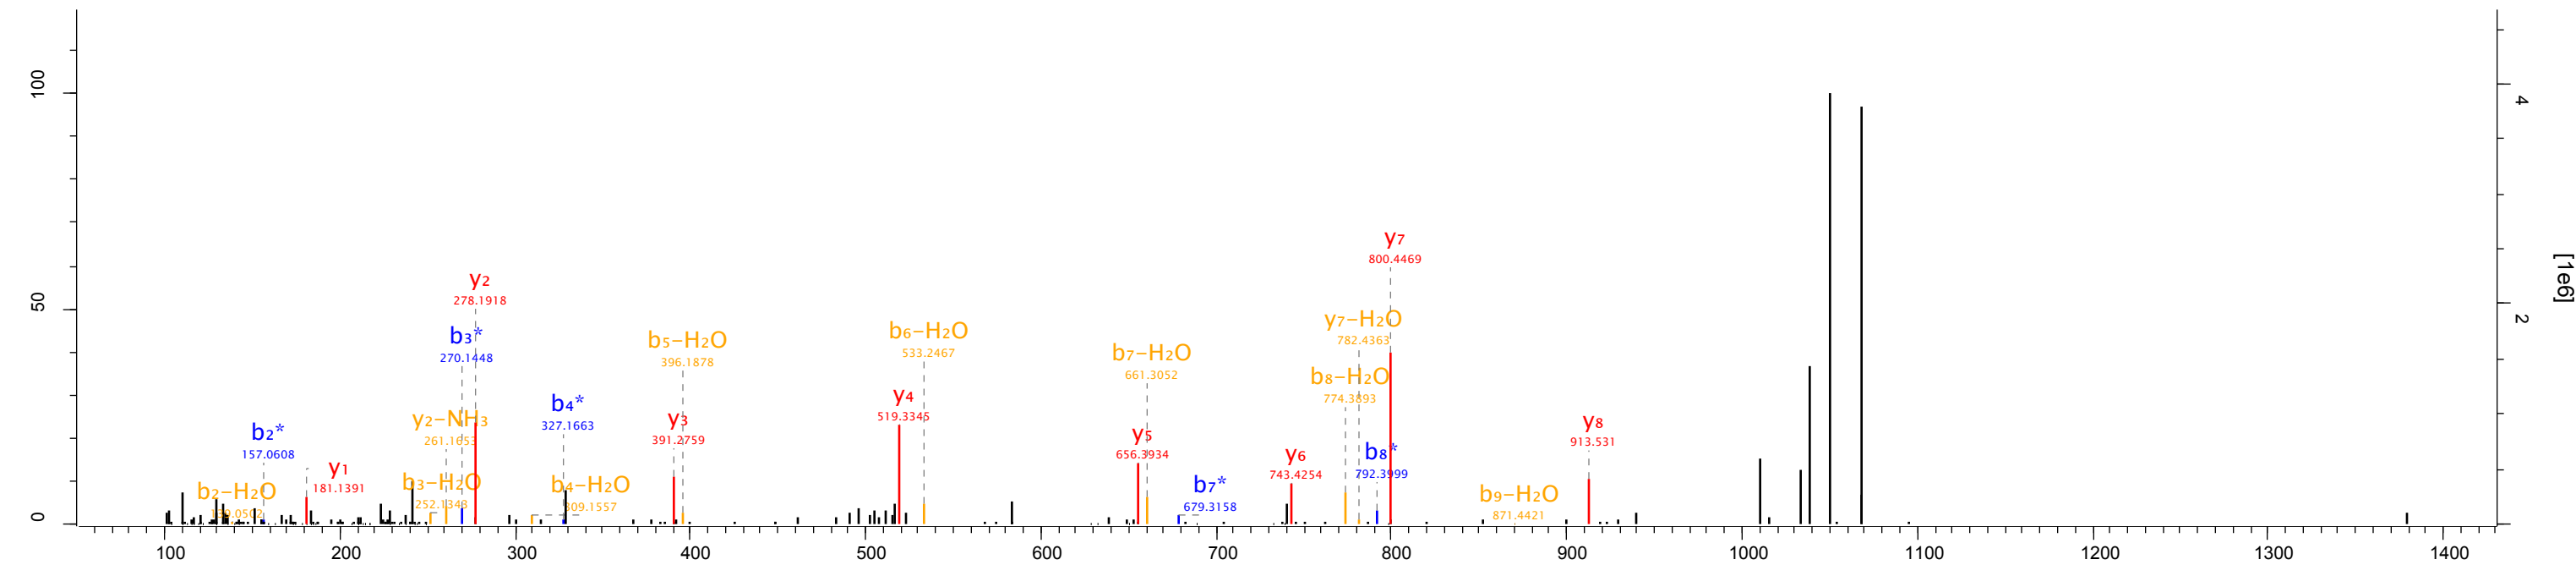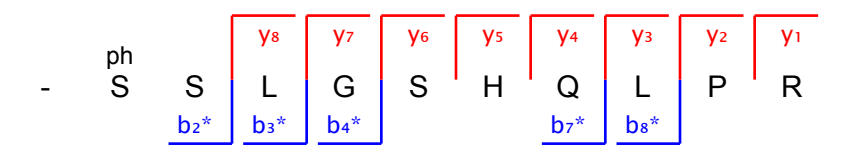

Raw file  
20150812\_A375SR\_Phospho\_BR1\_06

Scan 8874 Method FTMS; HCD Score 340.26 m/z 1234.99 Gene names HNRNPUL2;HNRNPUL2-BSCL2

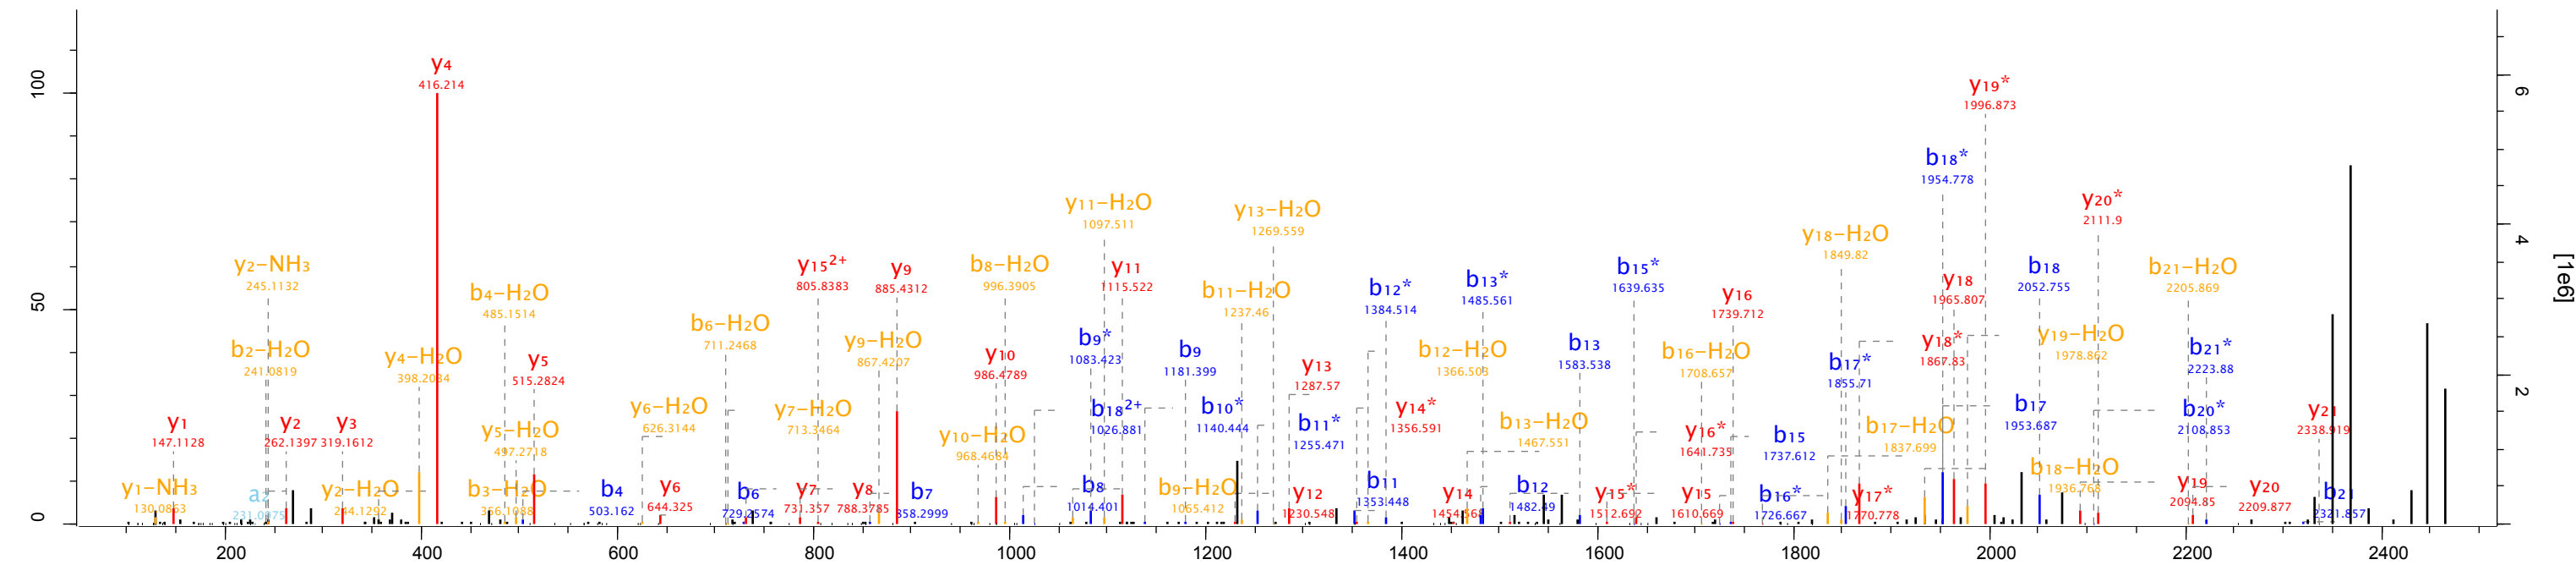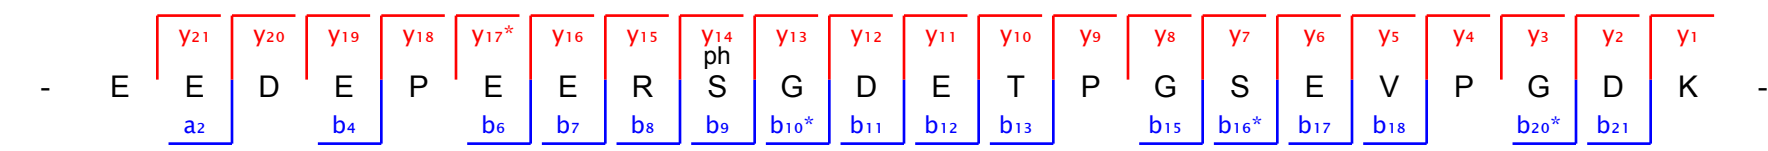



Raw file: 20150812\_A375SR\_Phospho\_BR1\_06  
 Scan: 9124 Method: FTMS; HCD Score: 188.56 m/z: 873.85 Gene names: RBMX

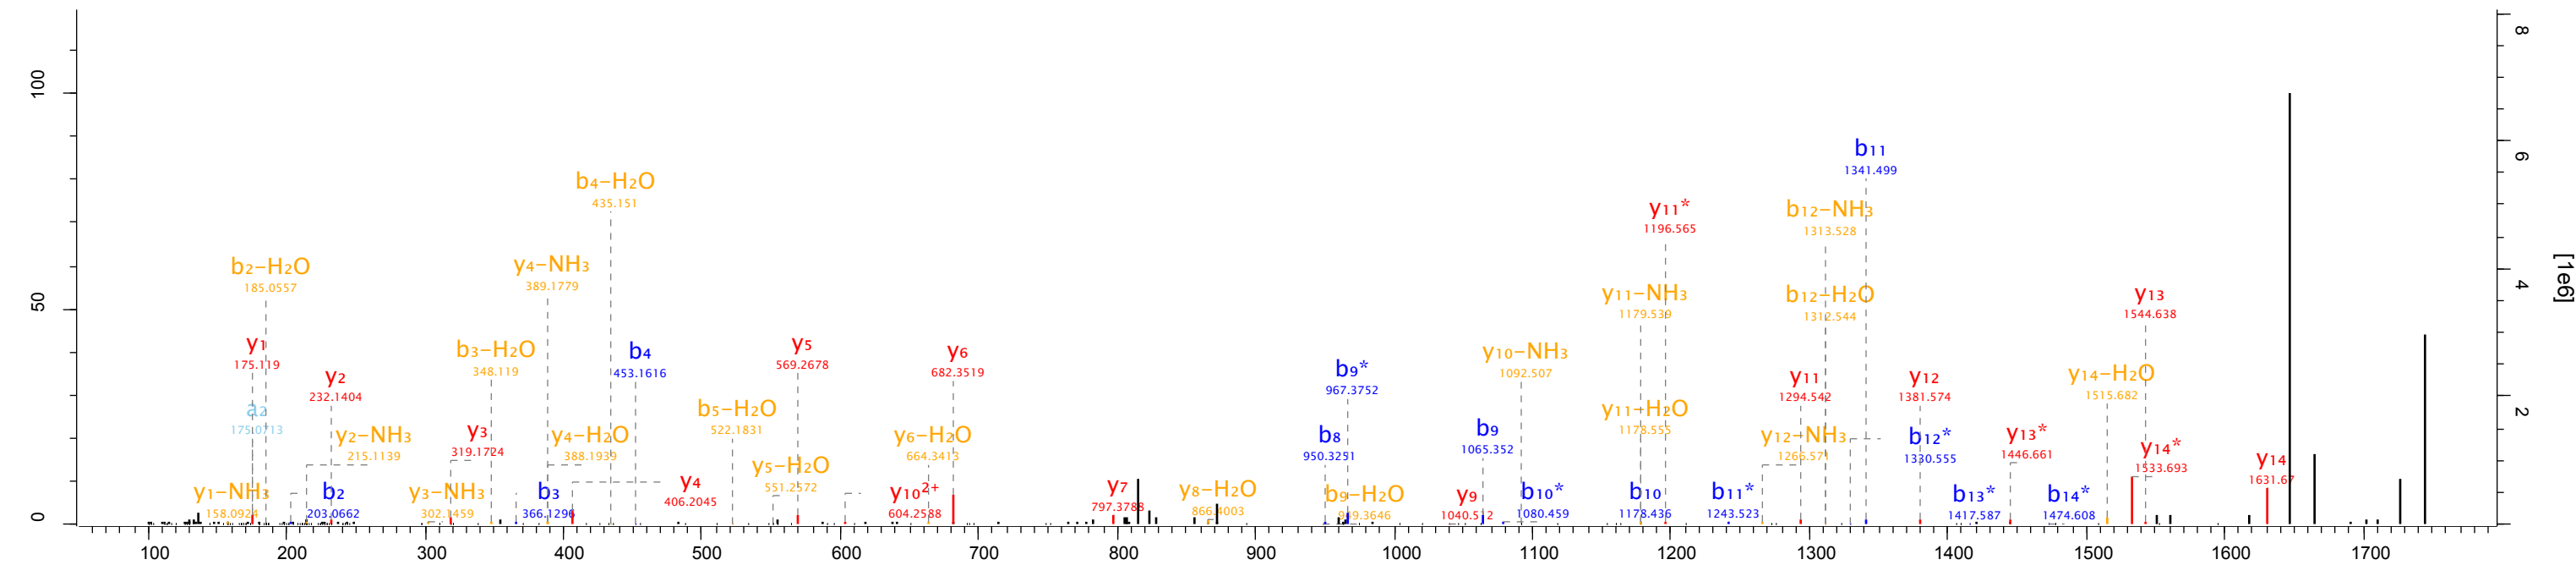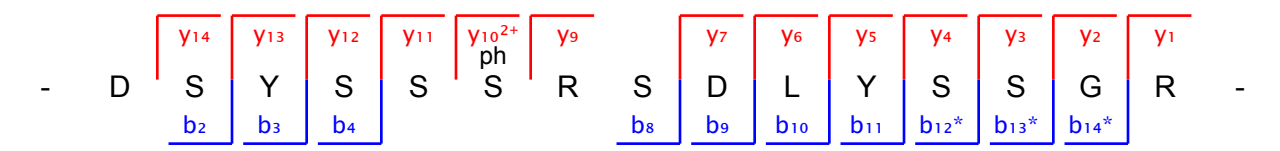

Raw file 20150812\_A375SR\_Phospho\_BR1\_06 Scan 9194 Method FTMS; HCD Score 44.93 m/z 496.9

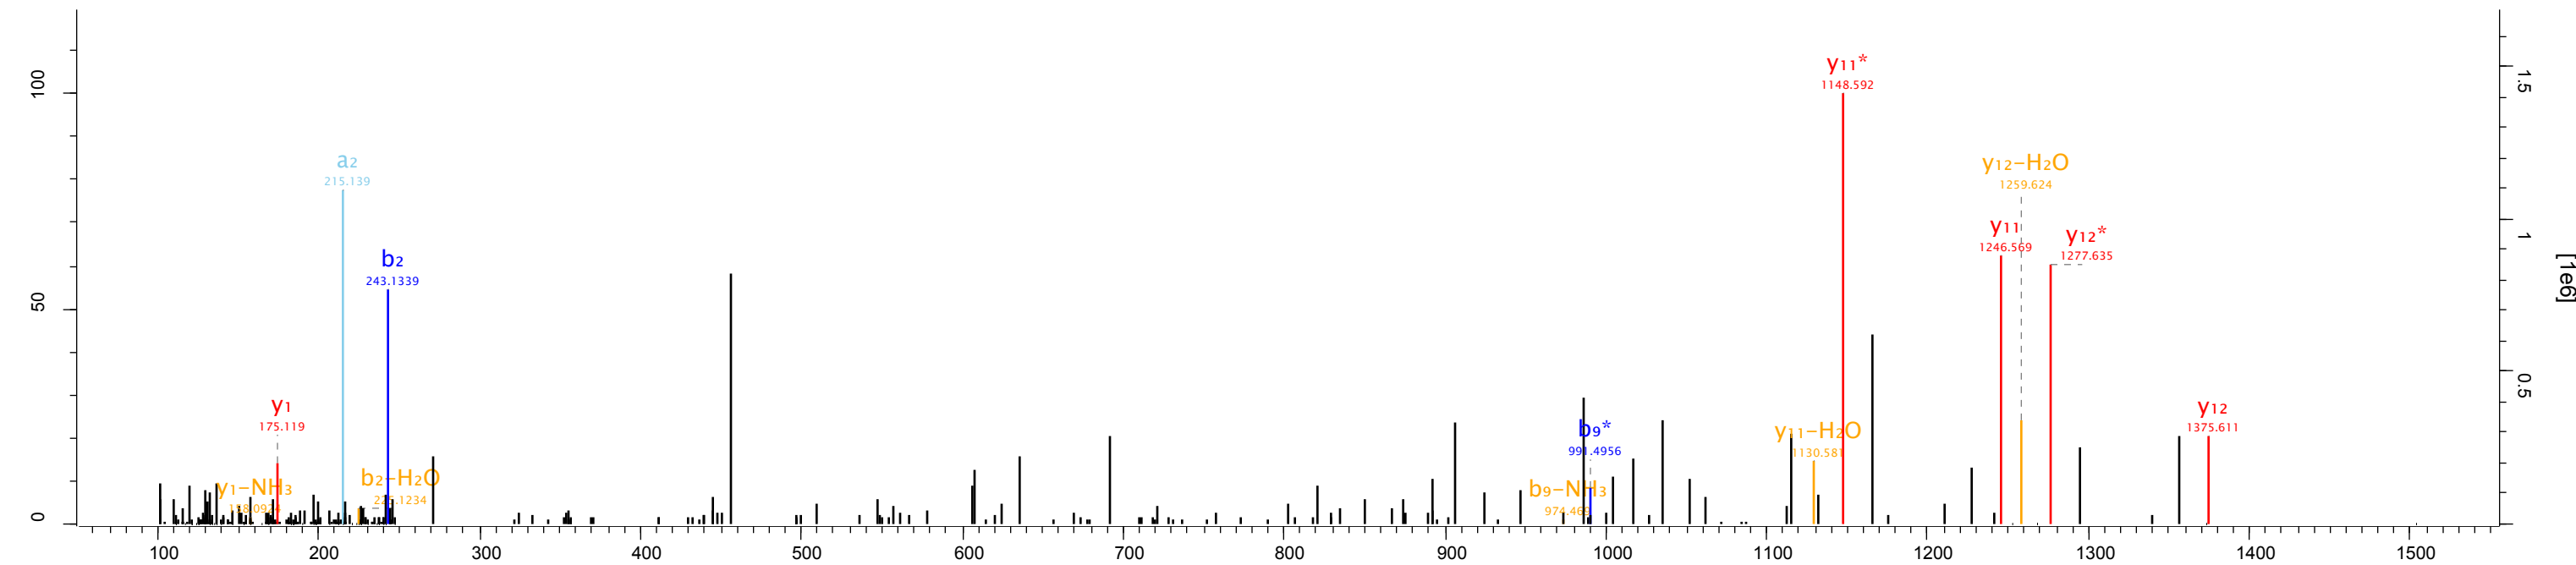

- L E S T P H S R T A G P R -

Fragmentation mapping:

- Red brackets above the sequence: y12 (E-S), y11-ph (S), y1 (R)
- Blue brackets below the sequence: b2 (E-S), b9\* (T)

Raw file: 20150812\_A375SR\_Phospho\_BR1\_06  
 Scan: 9414 Method: FTMS; HCD Score: 324.29 m/z: 757.87 Gene names: BNIP2

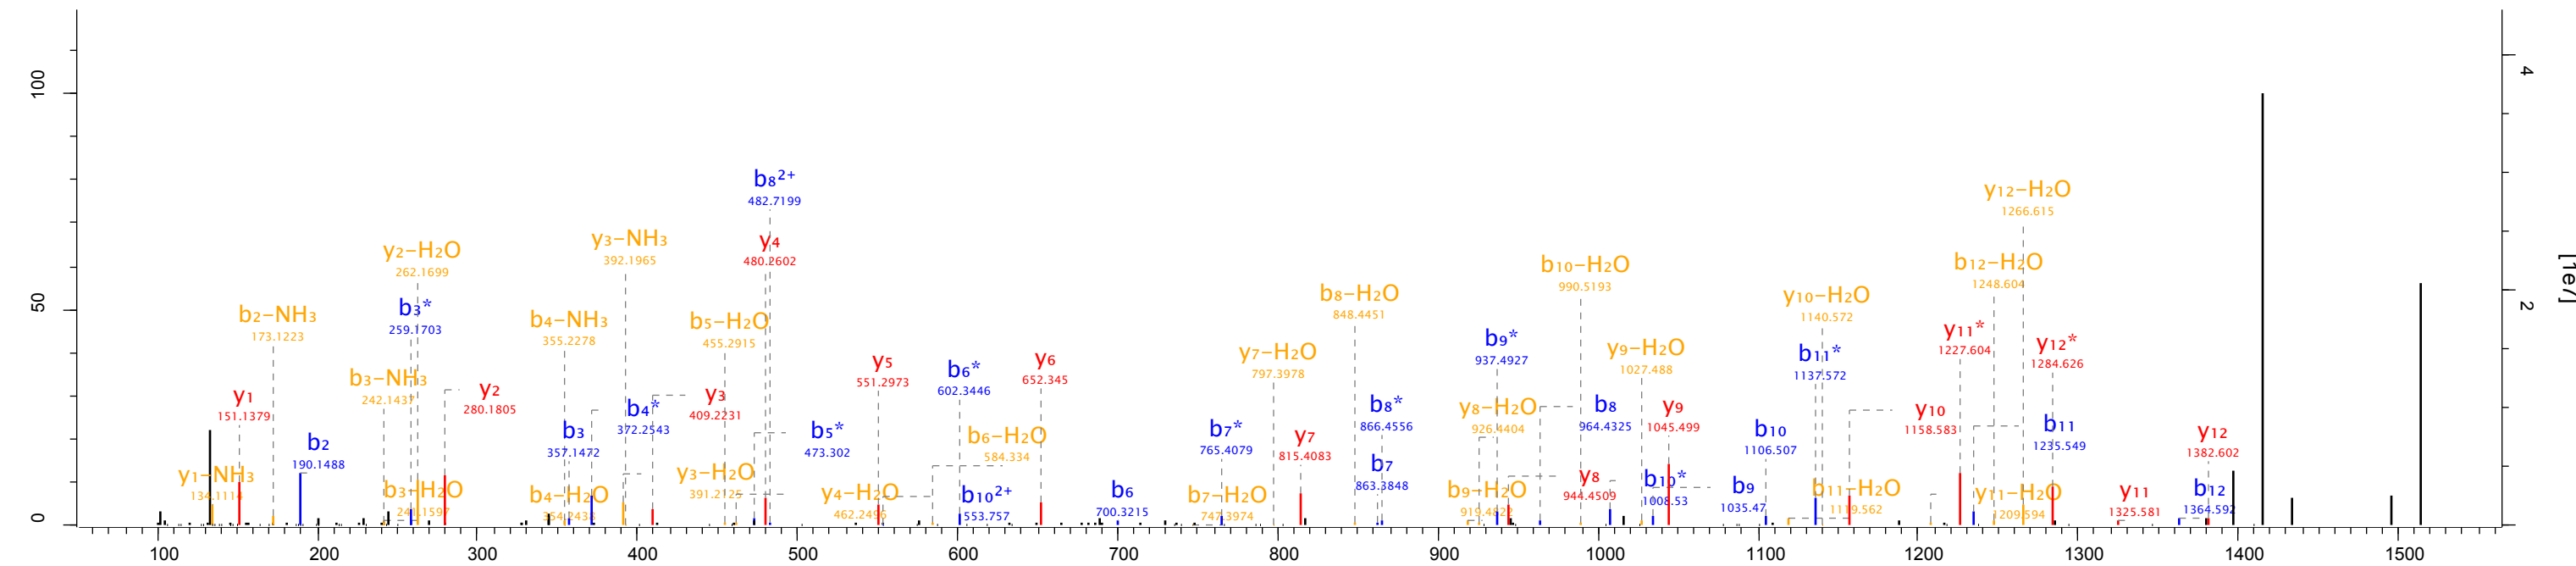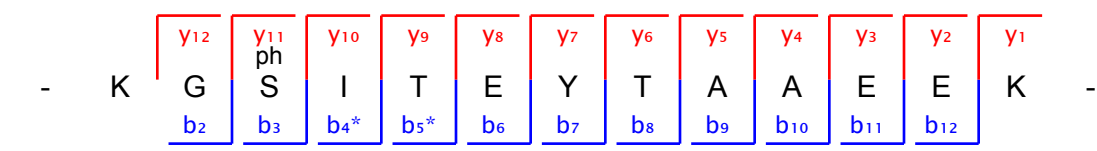

Raw file 20150812\_A375SR\_Phospho\_BR1\_07 Scan 12864 Method FTMS; HCD Score 129.9 m/z 641.65 Gene names STK10

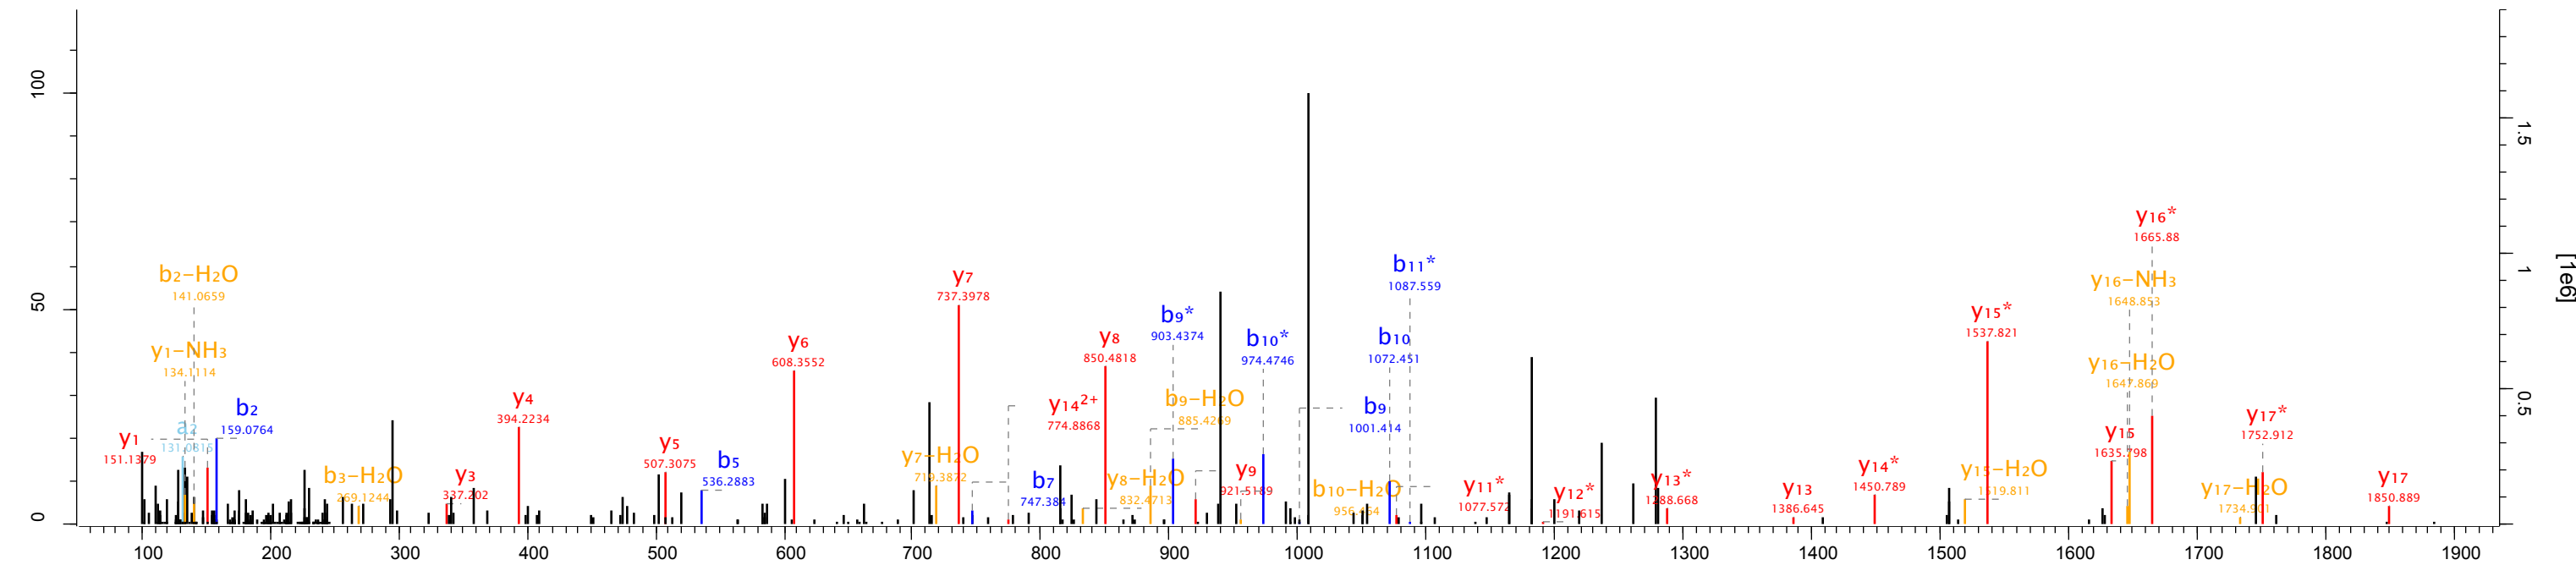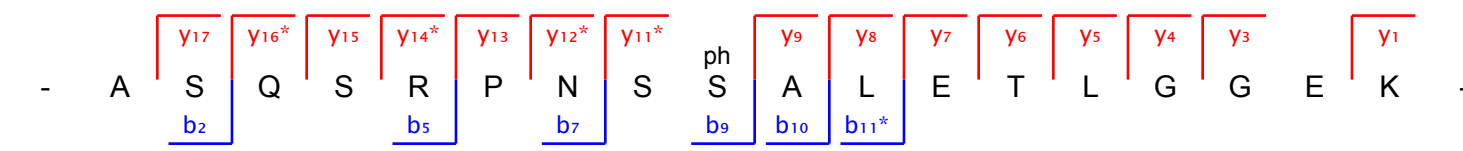

Raw file 20150812\_A375SR\_Phospho\_BR1\_07 Scan 1714 Method FTMS; HCD Score 41.09 m/z 554.61 Gene names BTBD10

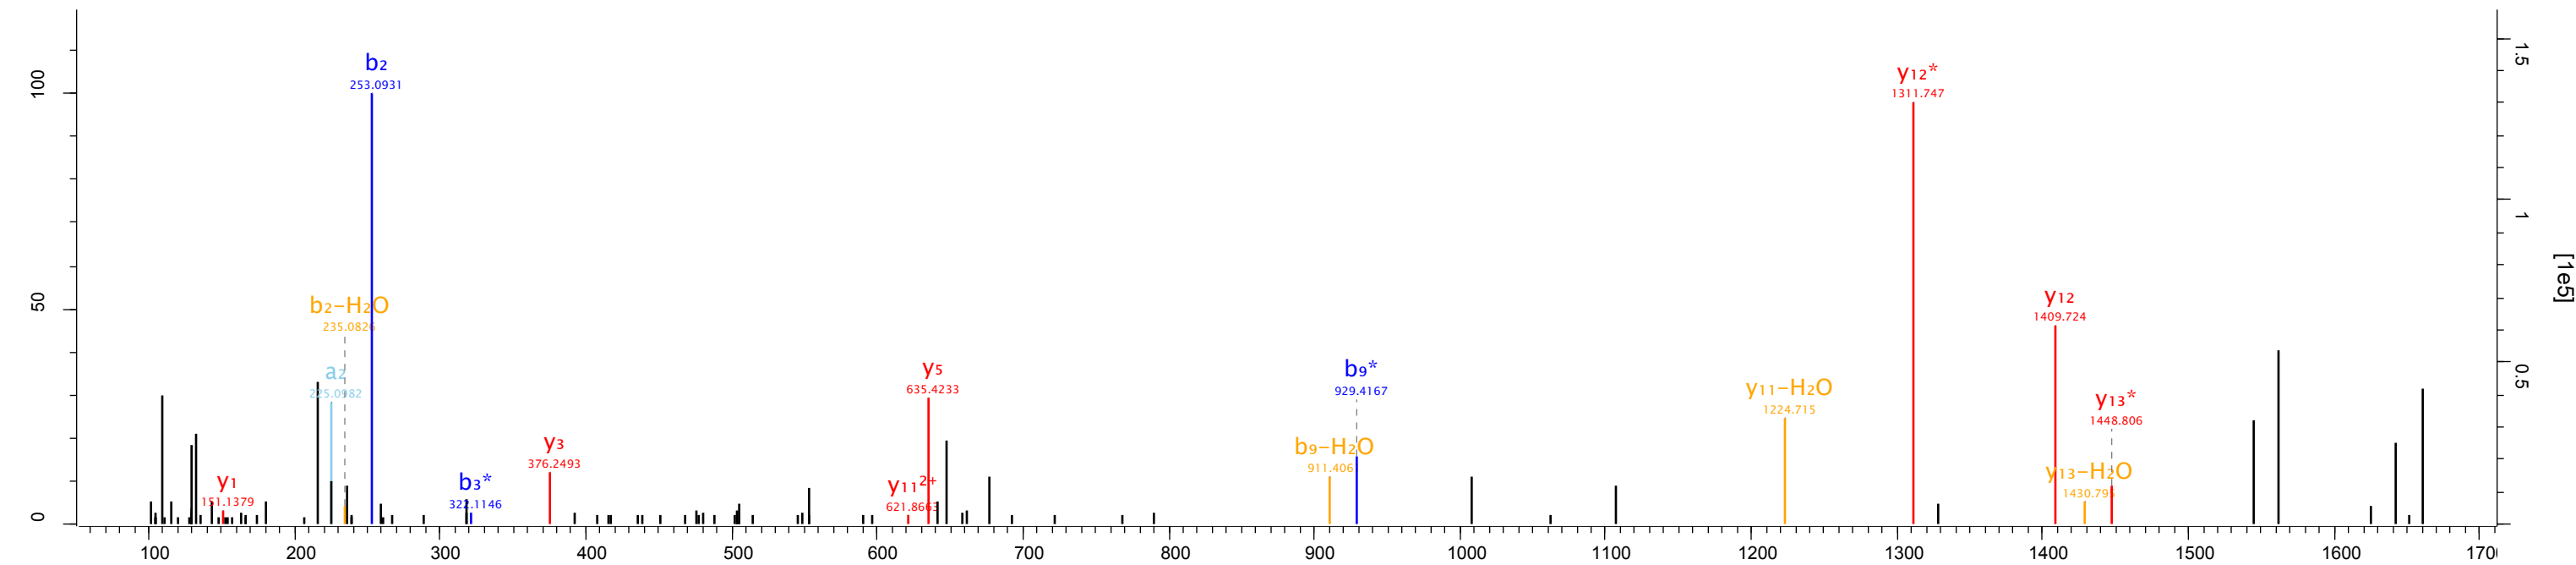

- D y<sub>13</sub><sup>\*</sup> y<sub>12</sub>  
ph y<sub>11</sub><sup>2+</sup> S S R P S b<sub>9</sub><sup>\*</sup> y<sub>5</sub> R y<sub>3</sub> P Q y<sub>1</sub> K -

b<sub>2</sub> b<sub>3</sub><sup>\*</sup>

Raw file Scan Method Score m/z Gene names  
 20150812\_A375SR\_Phospho\_BR1\_07 17364 FTMS; HCD 75.22 817.37 MSANTD2

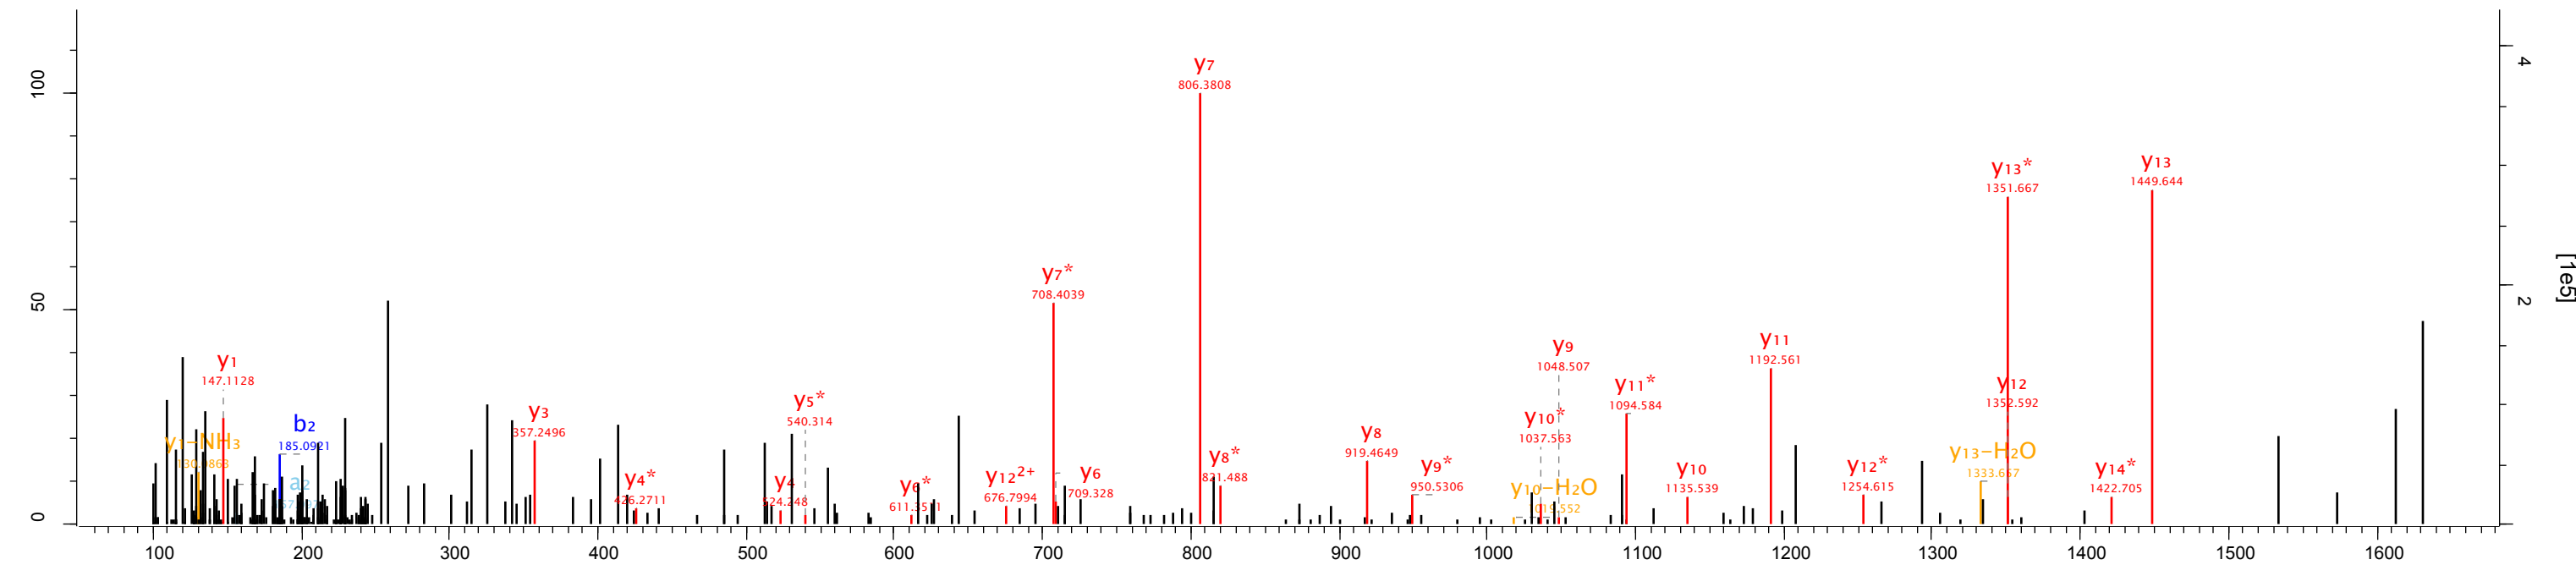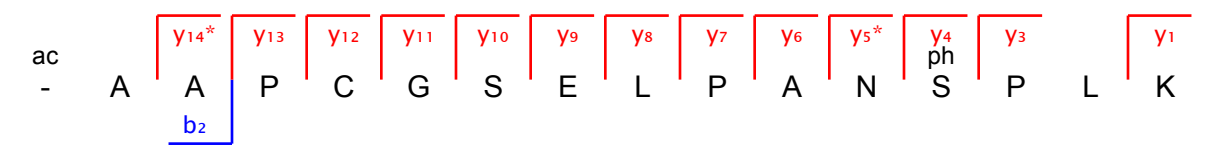

Raw file: 20150812\_A375SR\_Phospho\_BR1\_07  
 Scan: 1864 Method: FTMS; HCD Score: 204.26 m/z: 721.38 Gene names: TCOF1

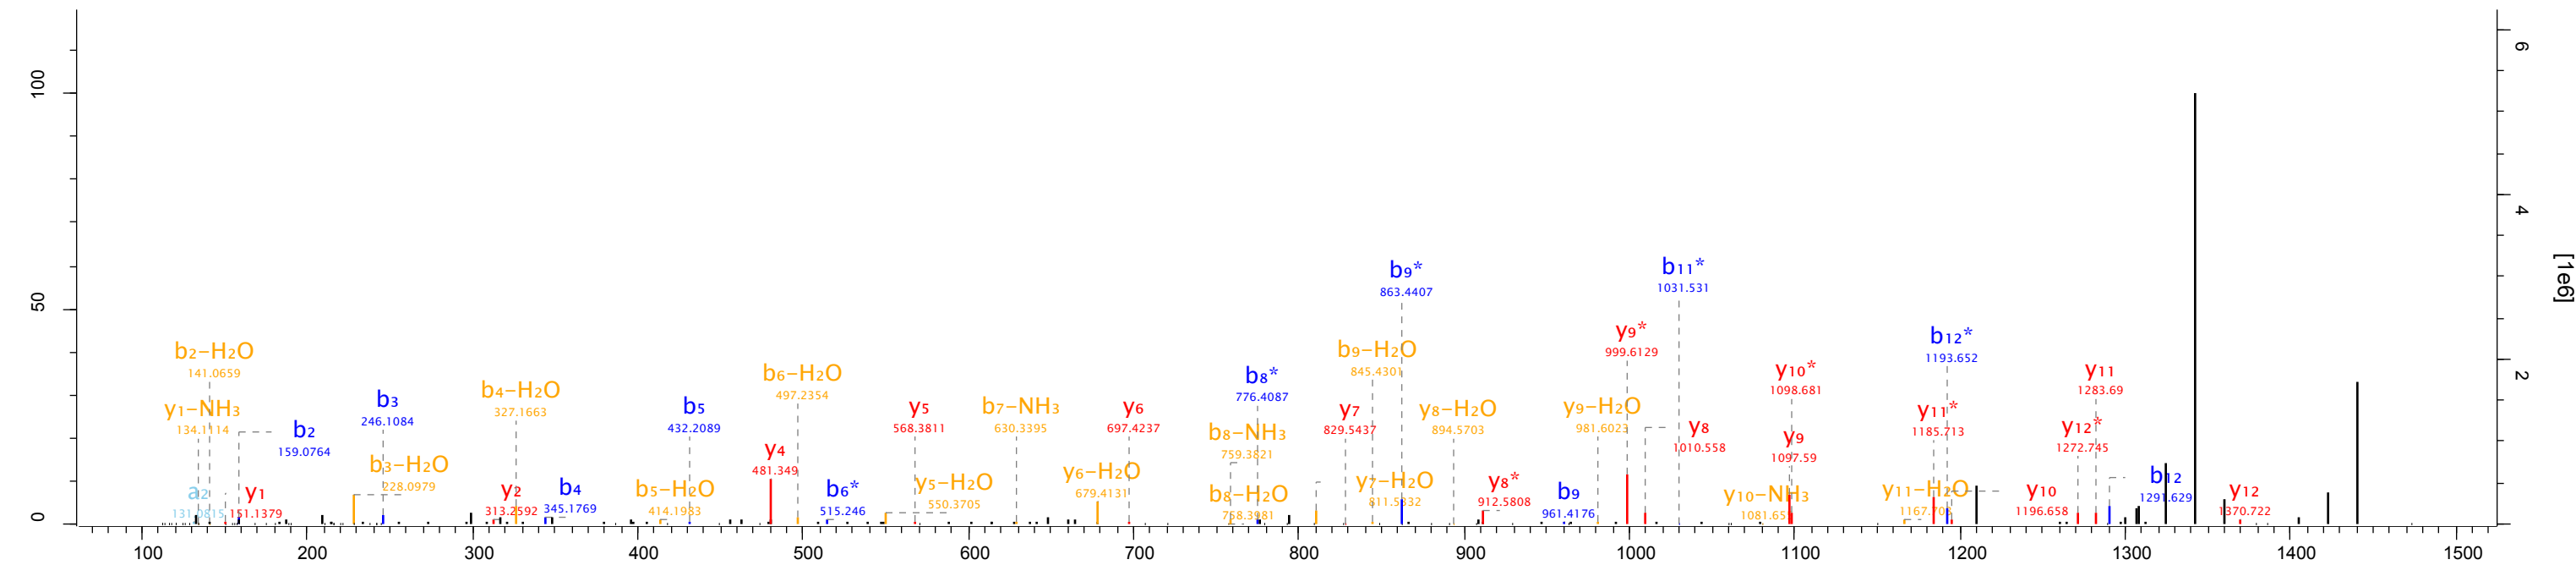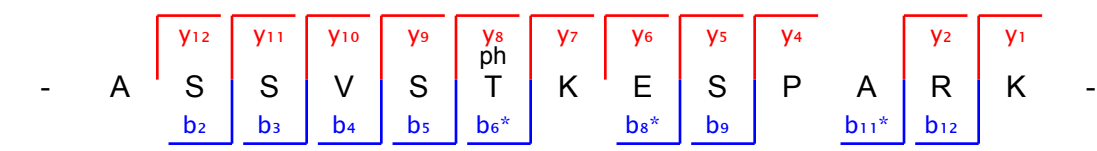

Raw file: 20150812\_A375SR\_Phospho\_BR1\_07  
 Scan: 19774 Method: FTMS; HCD Score: 103.88 m/z: 694.32 Gene names: TUT1;MIR3654

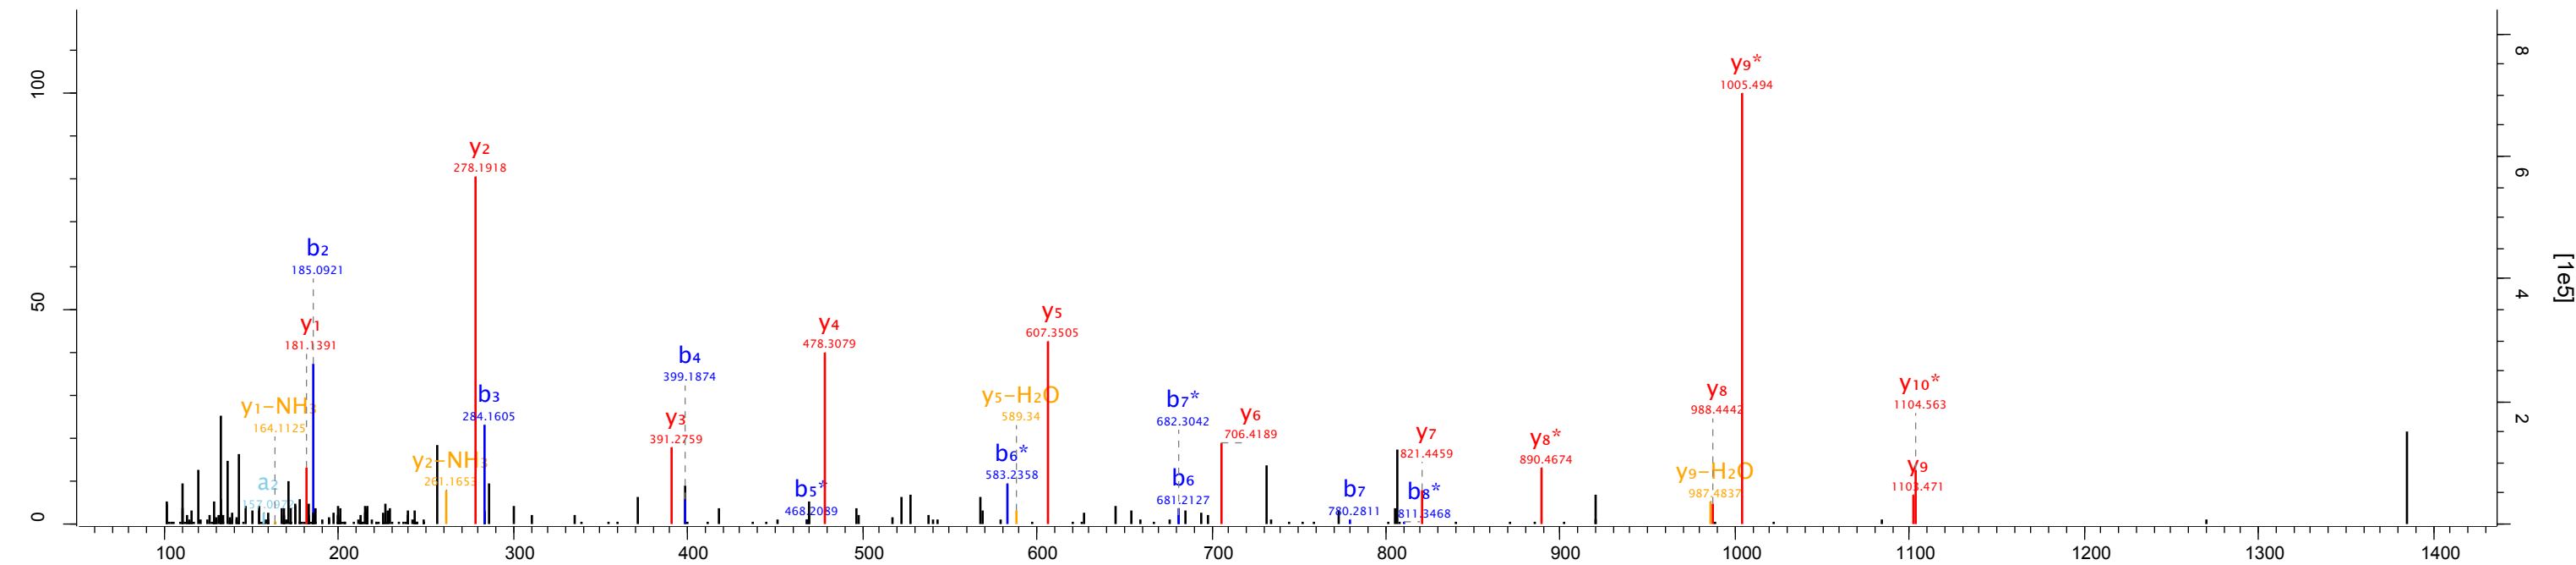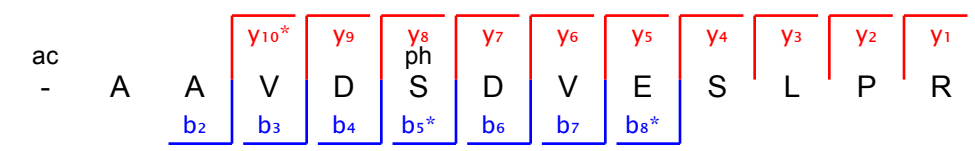



Raw file 20150812\_A375SR\_Phospho\_BR1\_07 Scan 19944 Method FTMS; HCD Score 98.39 m/z 812.38 Gene names MTMR2

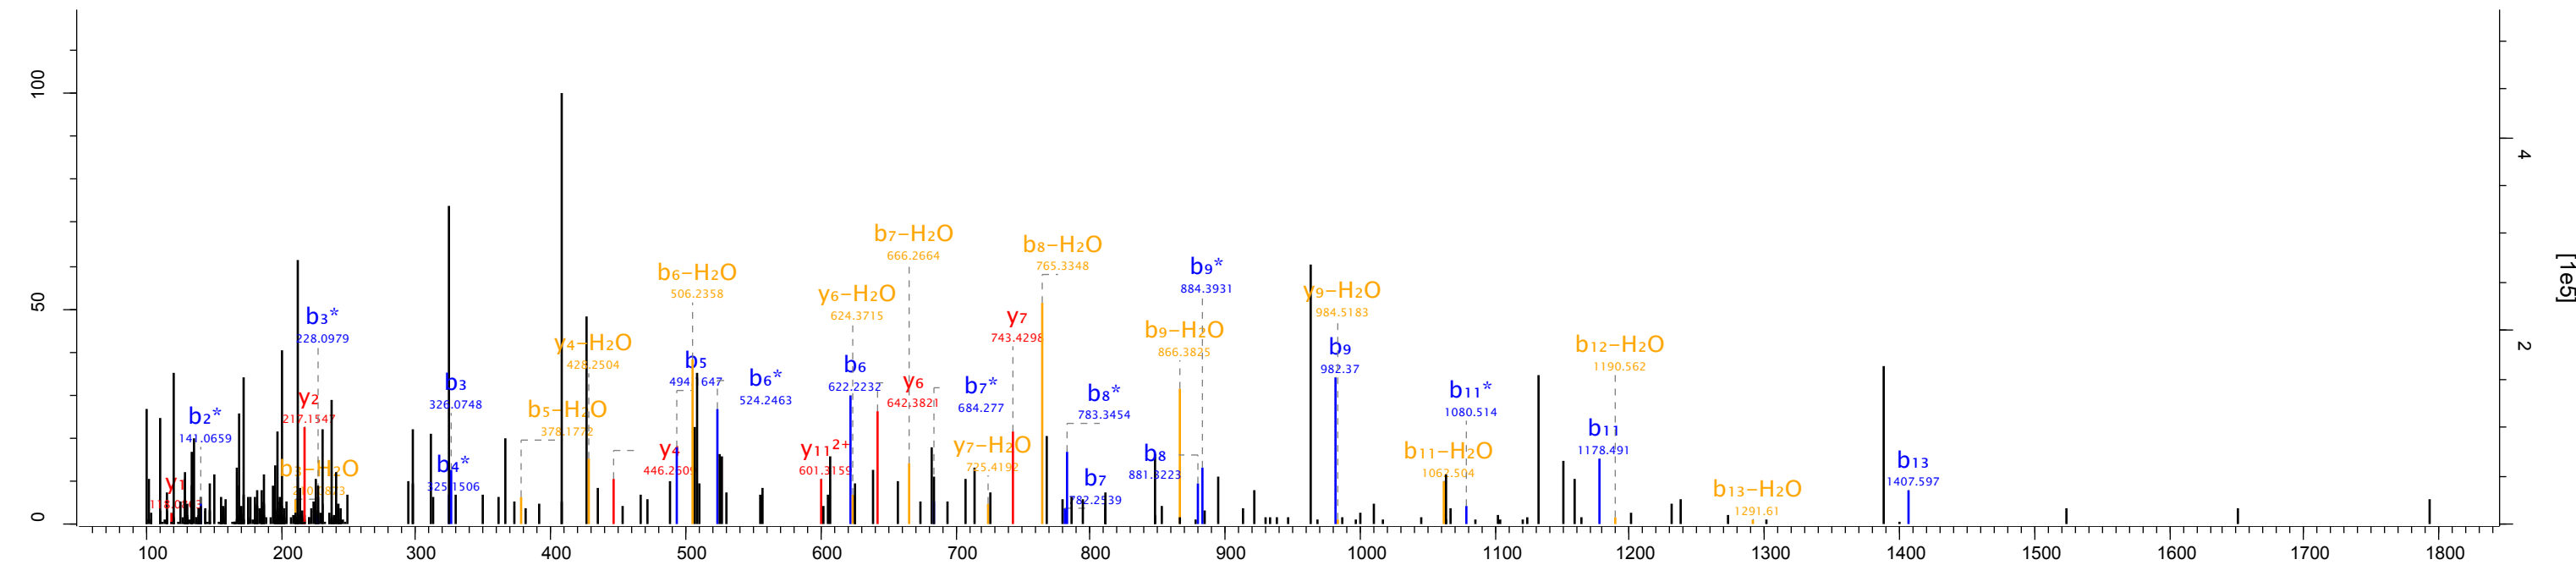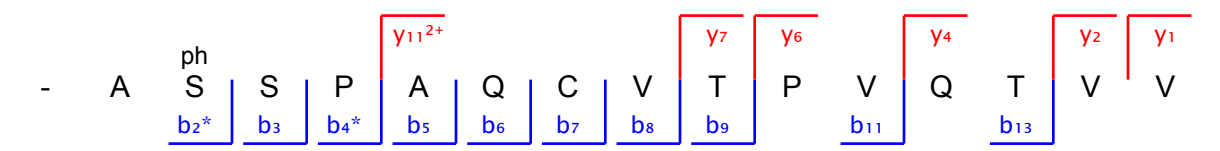

Raw file 20150812\_A375SR\_Phospho\_BR1\_07 Scan 20744 Method FTMS; HCD Score 77.58 m/z 990.92 Gene names CRK

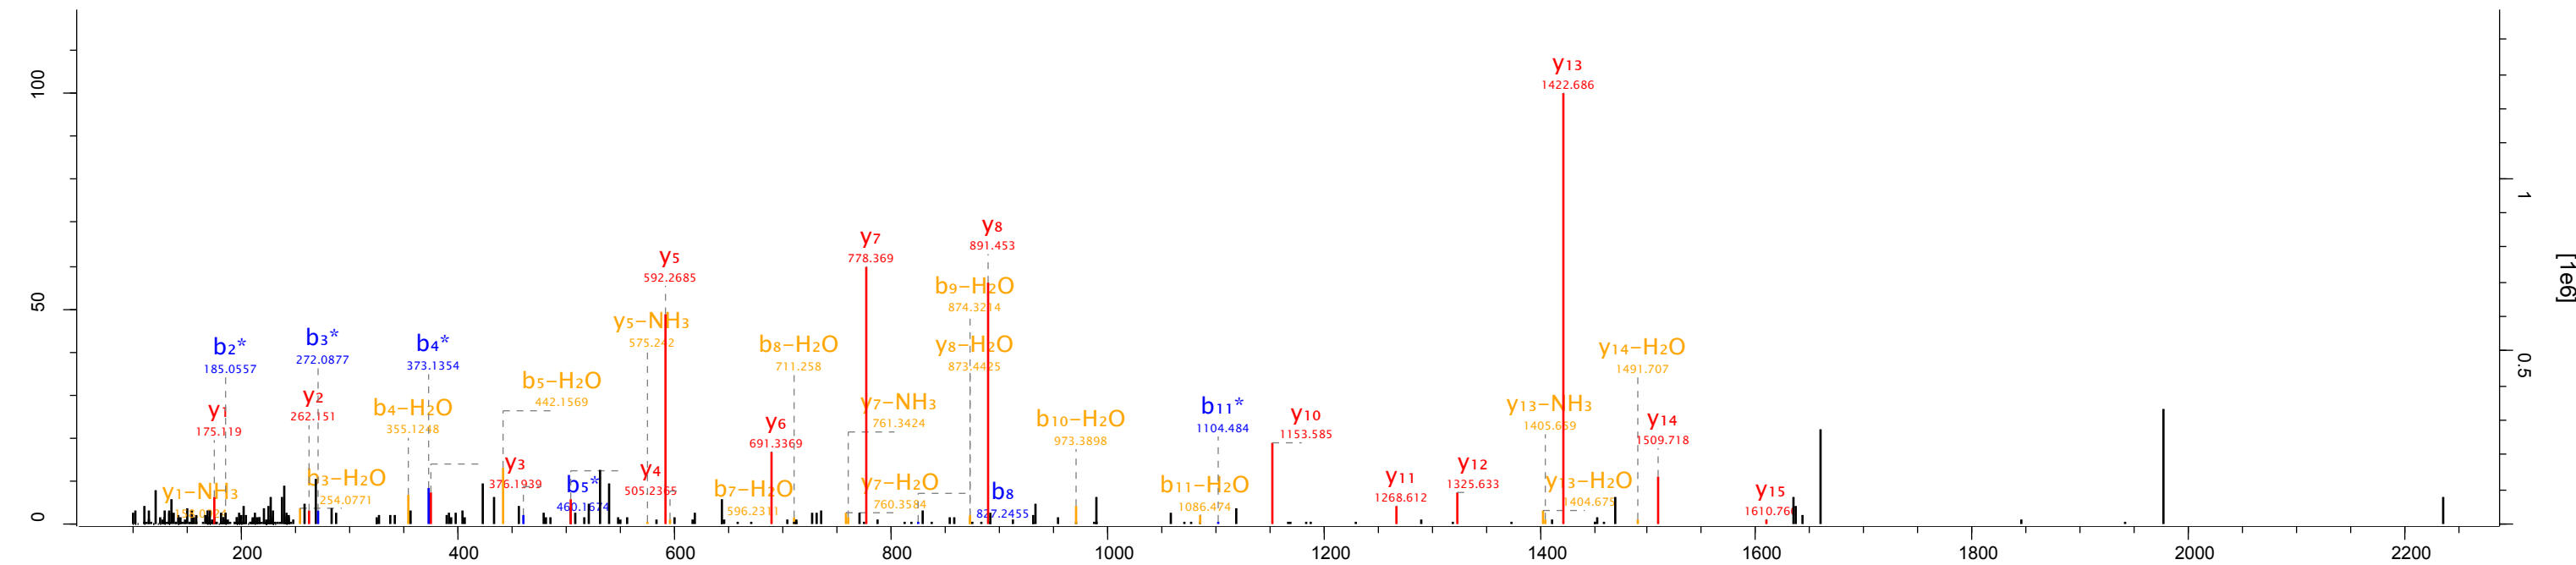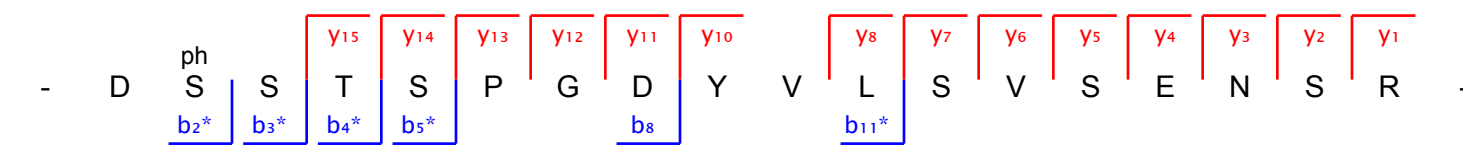

Raw file 20150812\_A375SR\_Phospho\_BR1\_07 Scan 25614 Method FTMS; HCD Score 154.1 m/z 1001.52 Gene names HNRNPBK

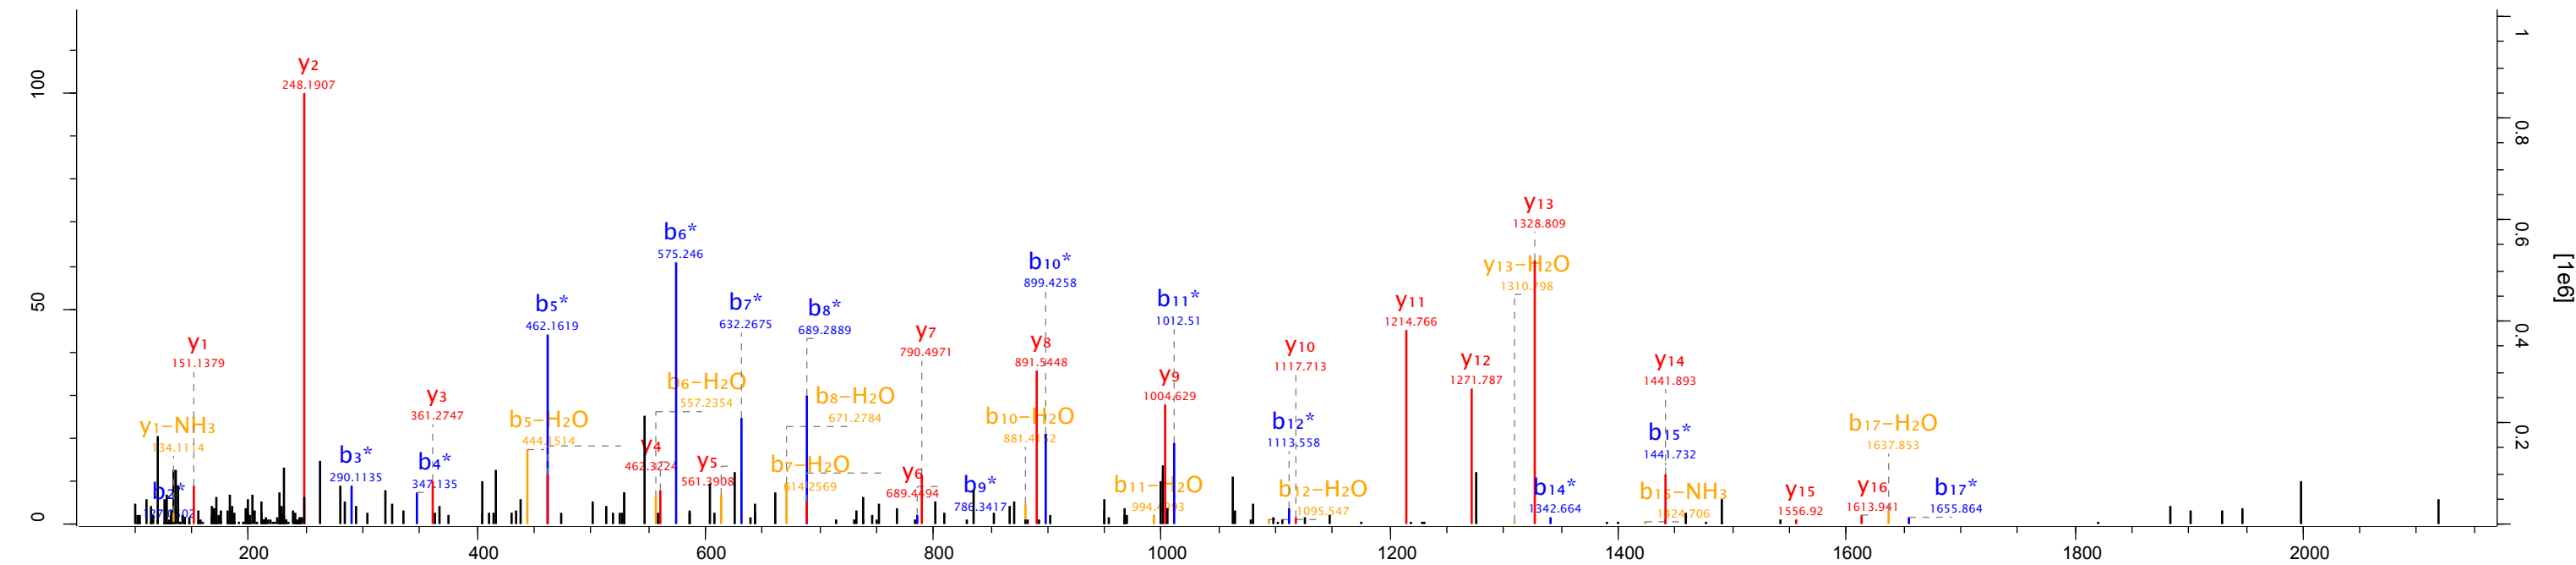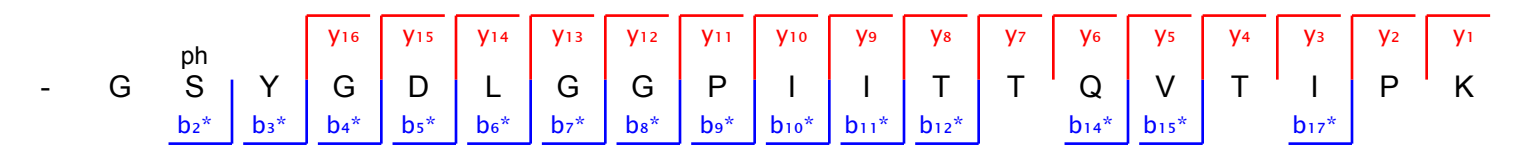

Raw file 20150812\_A375SR\_Phospho\_BR1\_07 Scan 27714 Method FTMS; HCD Score 113.73 m/z 963.95 Gene names UBAP1

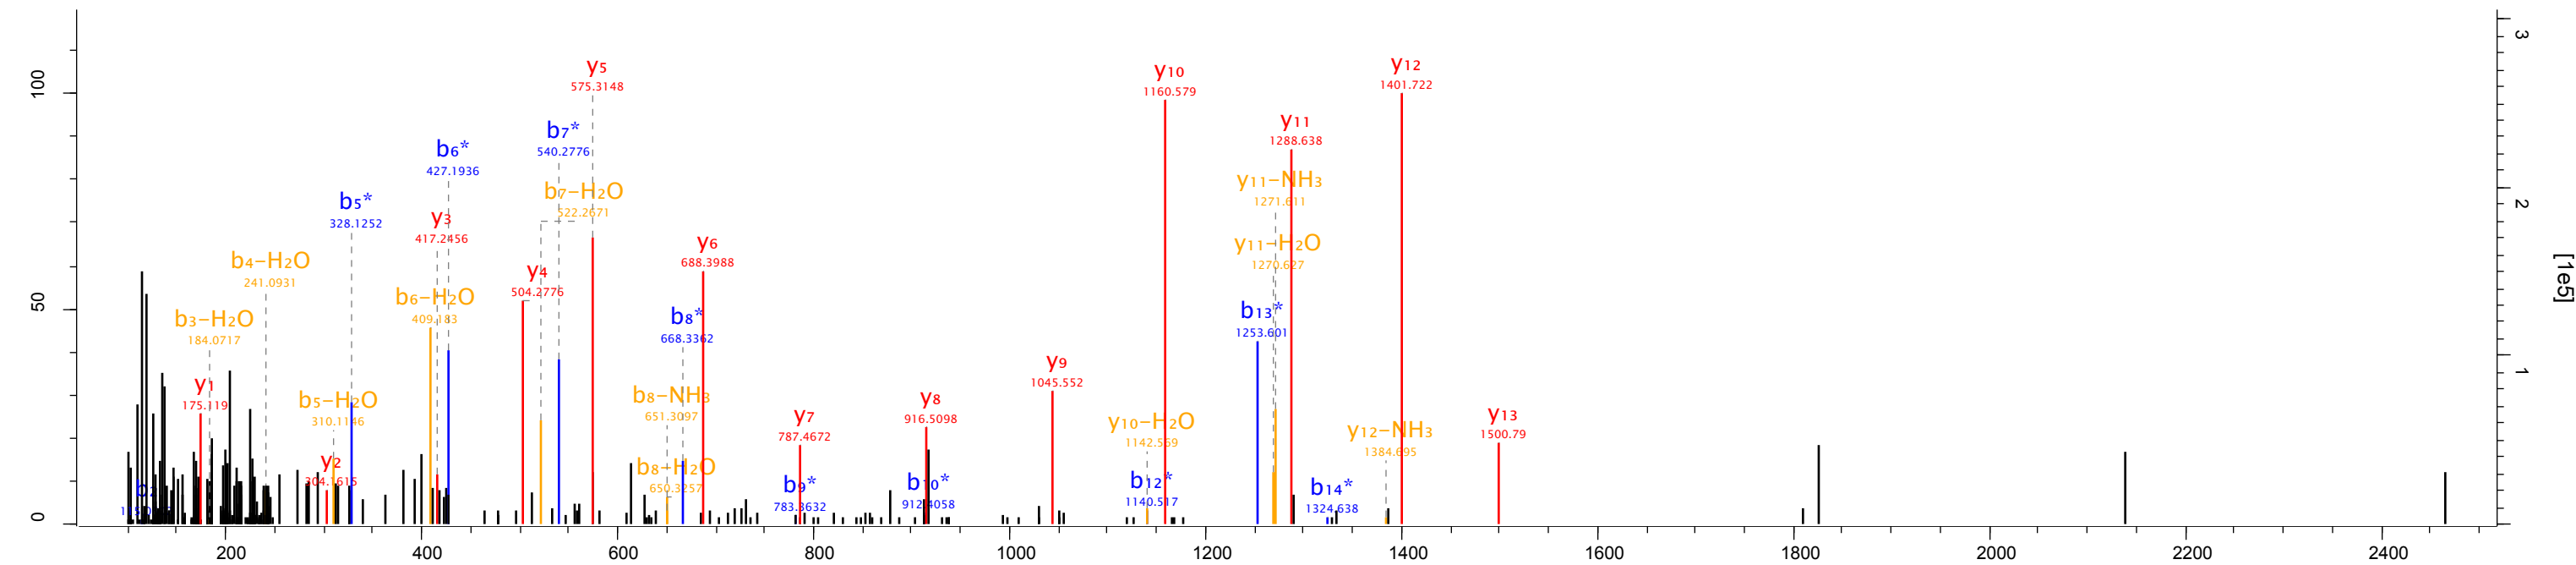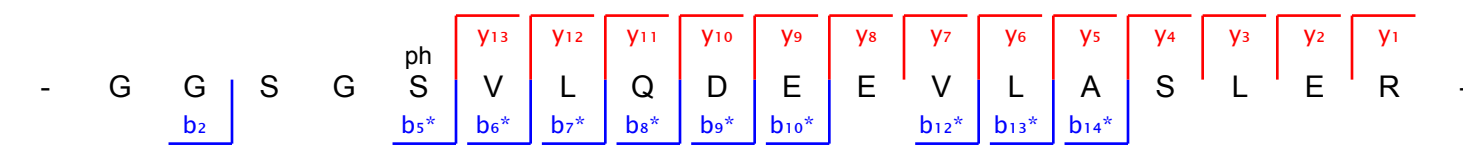

Raw file: 20150812\_A375SR\_Phospho\_BR1\_07  
 Scan: 6424 Method: FTMS; HCD Score: 102.65 m/z: 647.29 Gene names: EIF4H

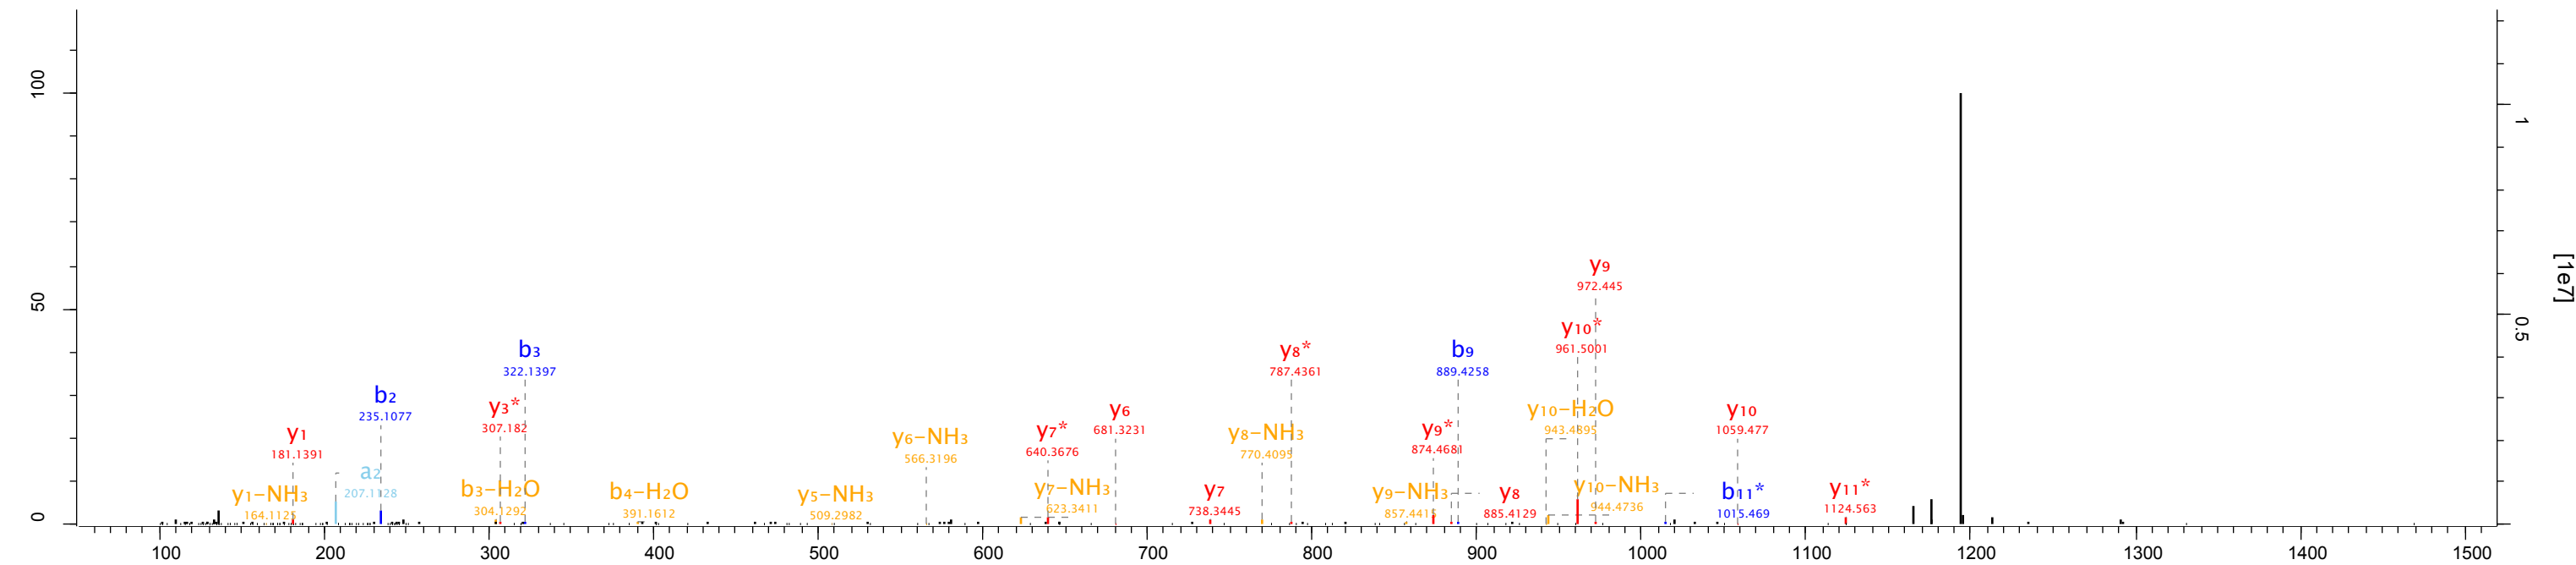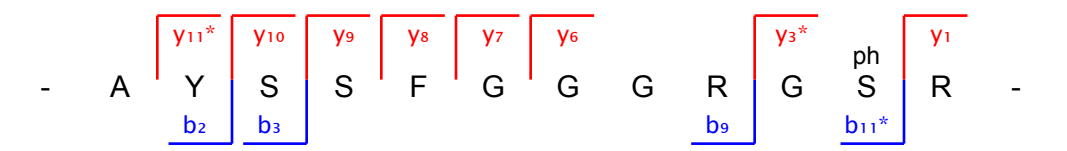

Raw file 20150812\_A375SR\_Phospho\_BR1\_07 Scan 8974 Method FTMS; HCD Score 111.31 m/z 575.77 Gene names WIPI2

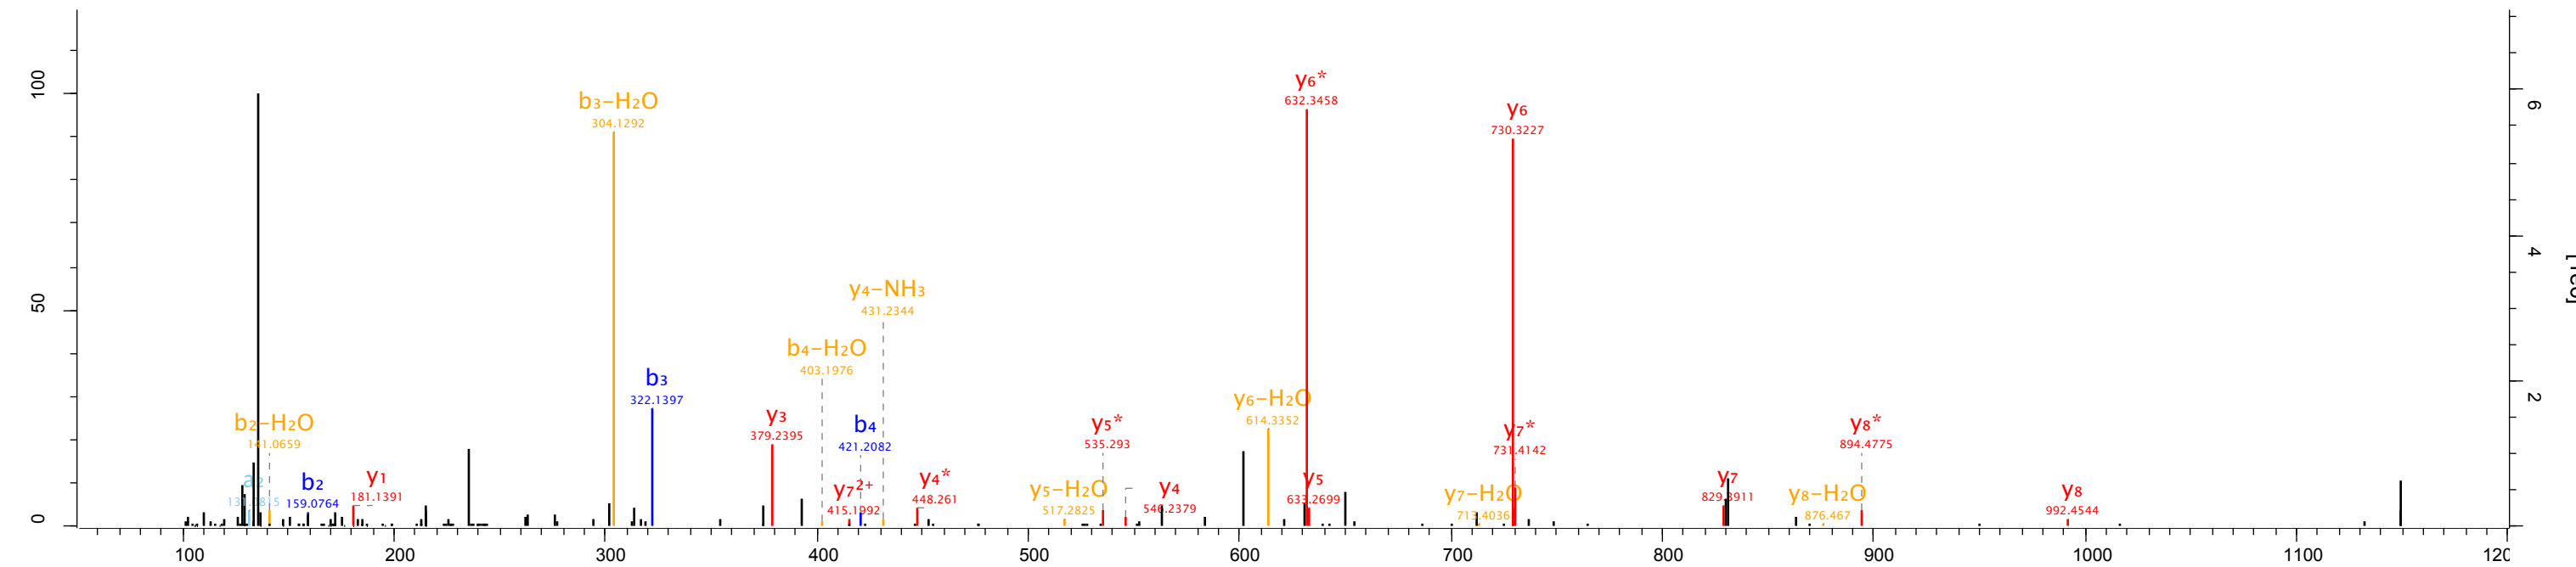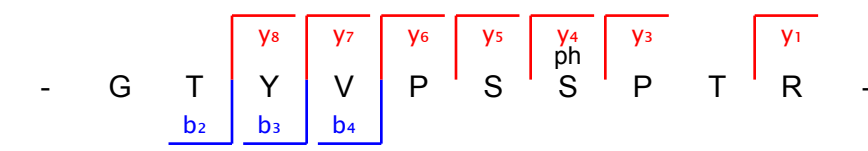

Raw file Scan Method Score m/z Gene names

20150812\_A375SR\_Phospho\_BR1\_07 9534 FTMS; HCD 132.06 460.56 DPM1

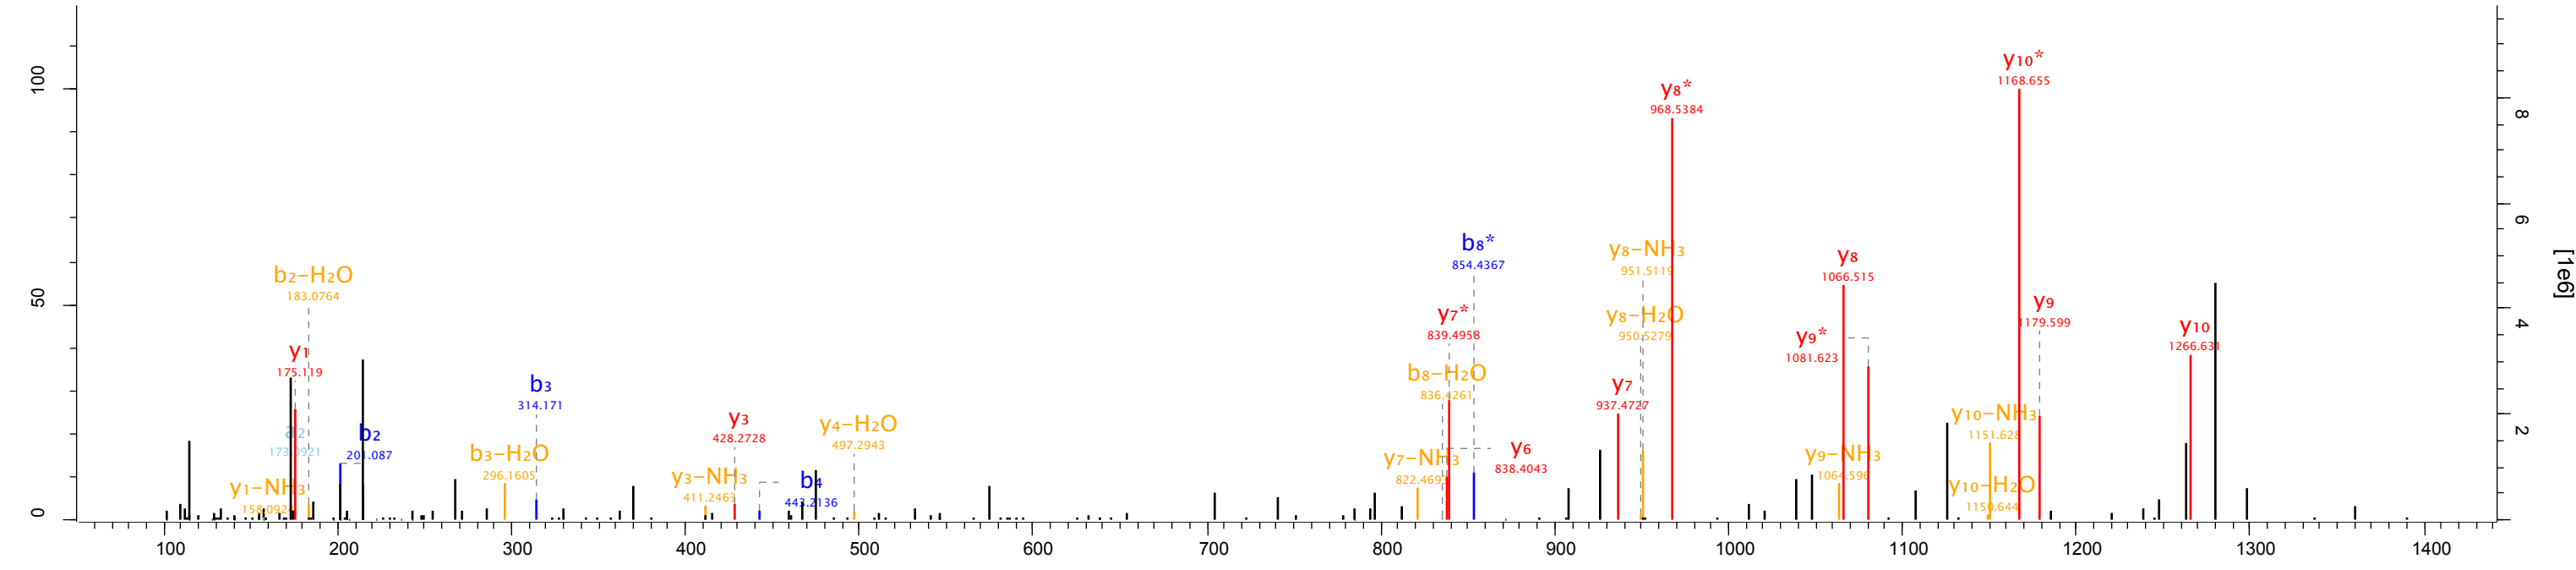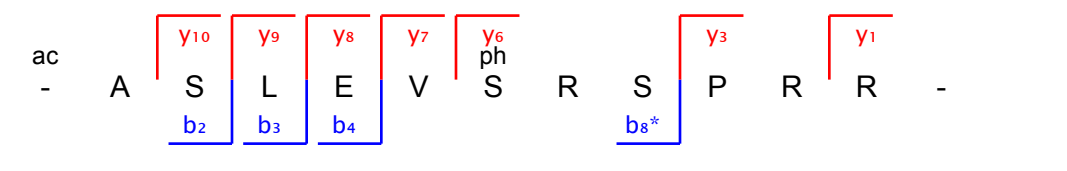

Raw file 20150812\_A375SR\_Phospho\_BR1\_08 Scan 10414 Method FTMS; HCD Score 52.17 m/z 577.98 Gene names RBM14

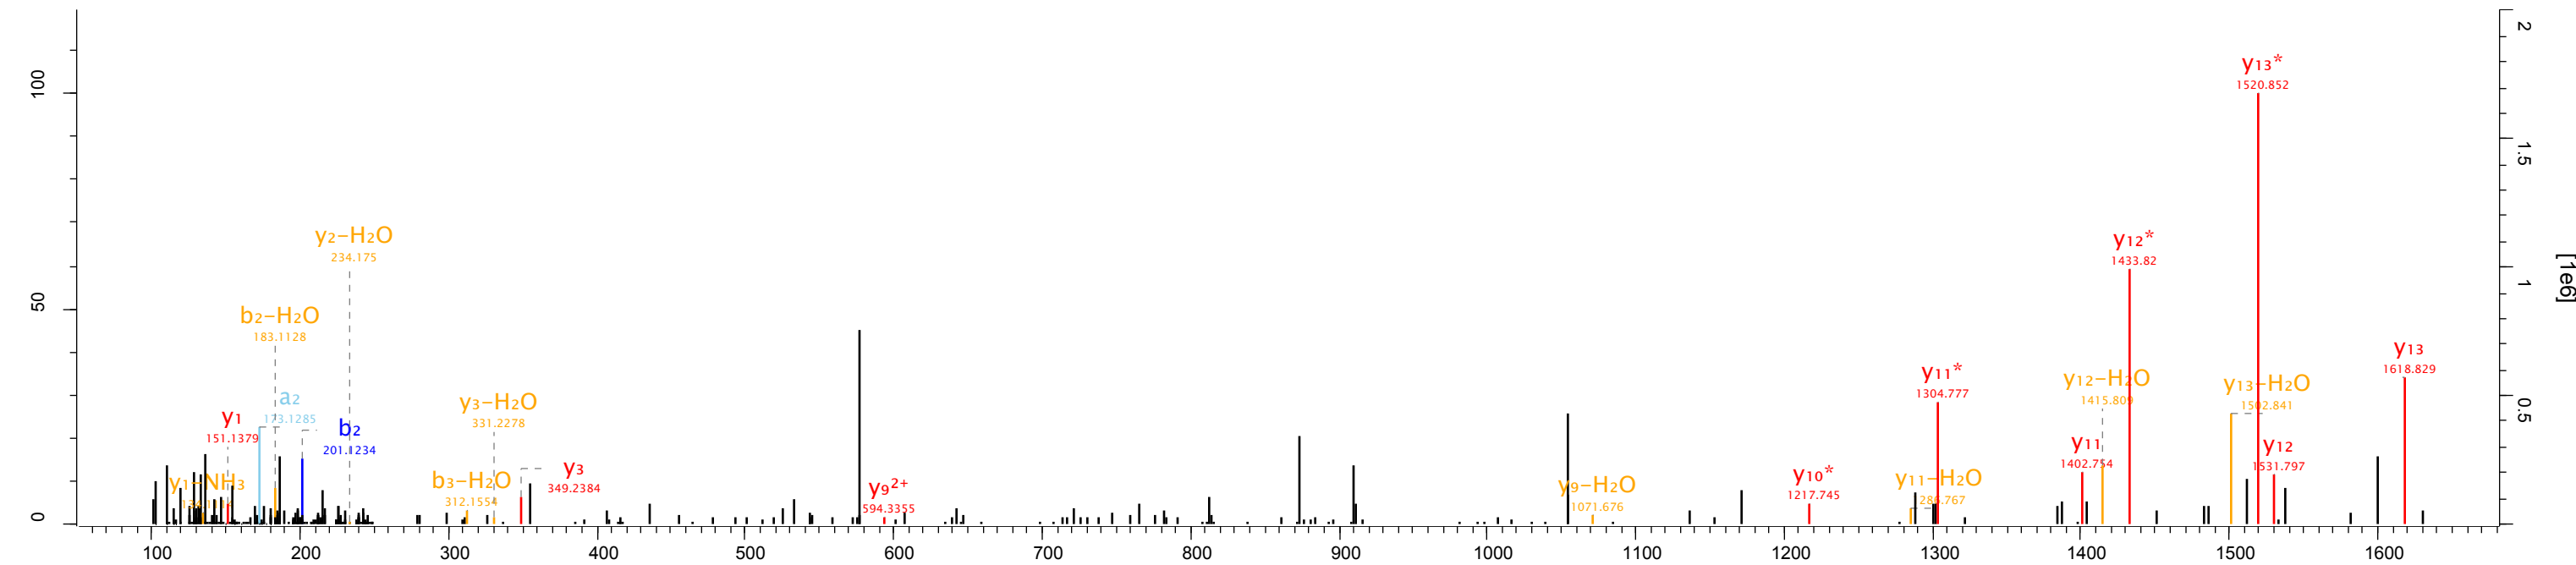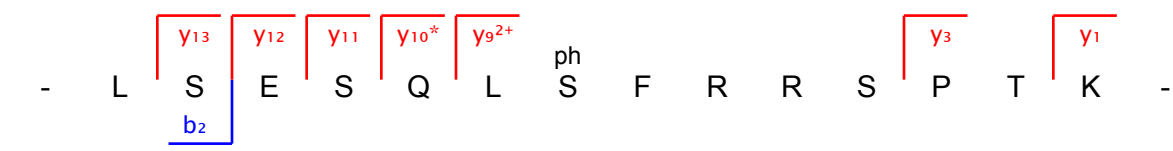



Raw file 20150812\_A375SR\_Phospho\_BR1\_08 Scan 10494 Method FTMS; HCD Score 74.79 m/z 604.29 Gene names EML4

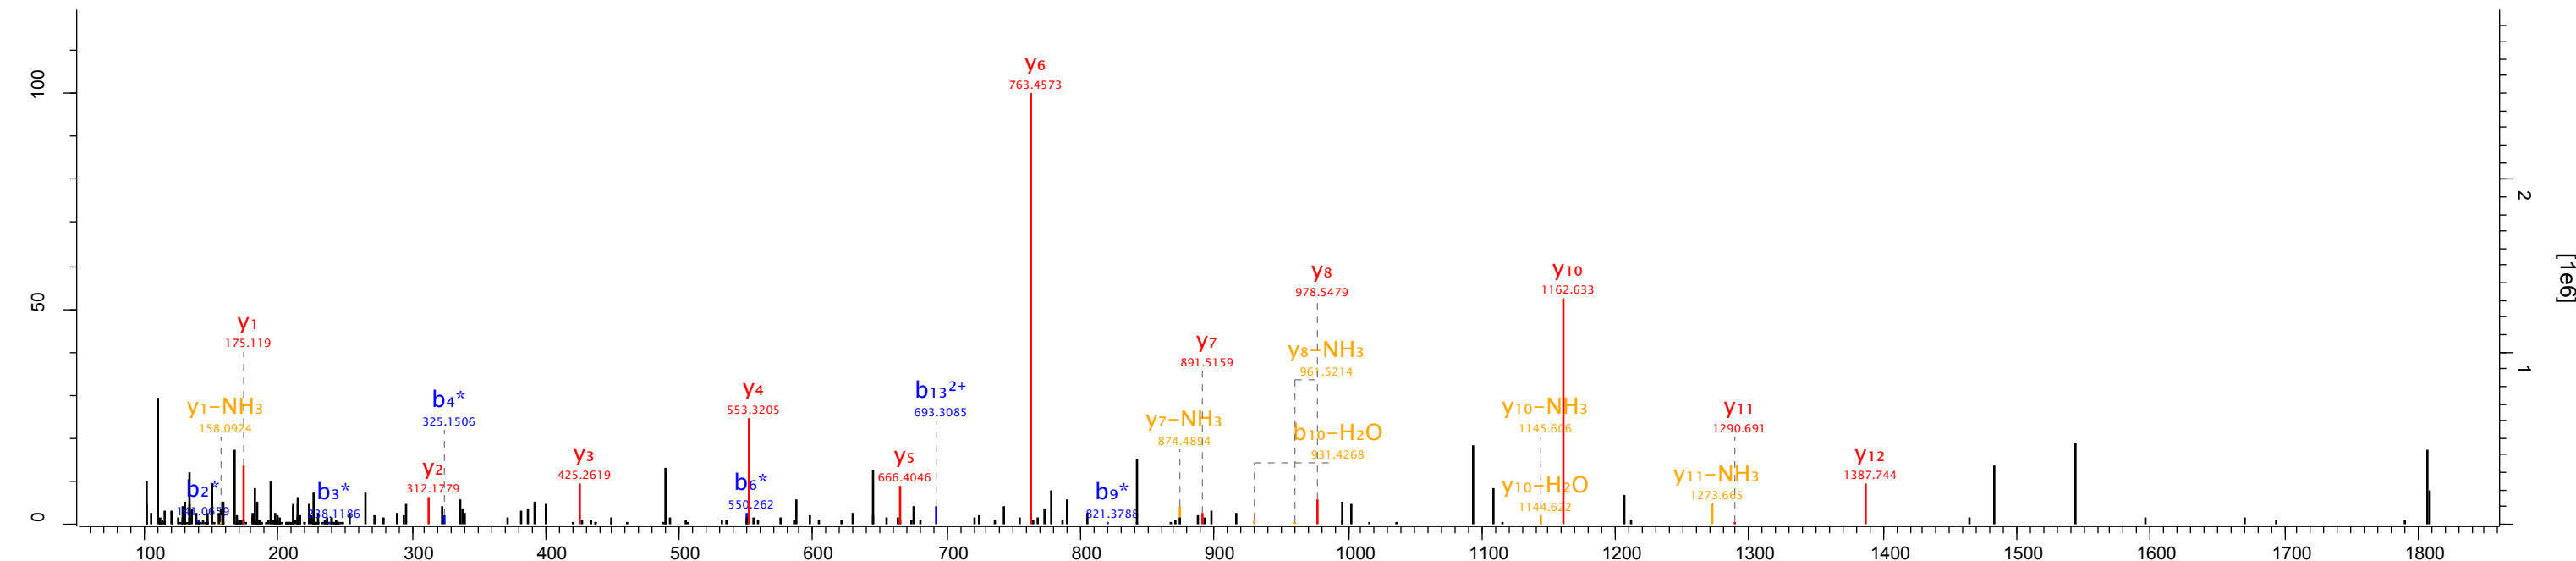

- A ph S P S P Q P S S Q P L Q I H R -  
 b2\* b3\* b4\* b6\* b9\* b13<sup>2+</sup> y12 y11 y10 y8 y7 y6 y5 y4 y3 y2 y1

Raw file: 20150812\_A375SR\_Phospho\_BR1\_08  
 Scan: 12004 Method: FTMS; HCD Score: 294.07 m/z: 1260.53 Gene names: TJP2

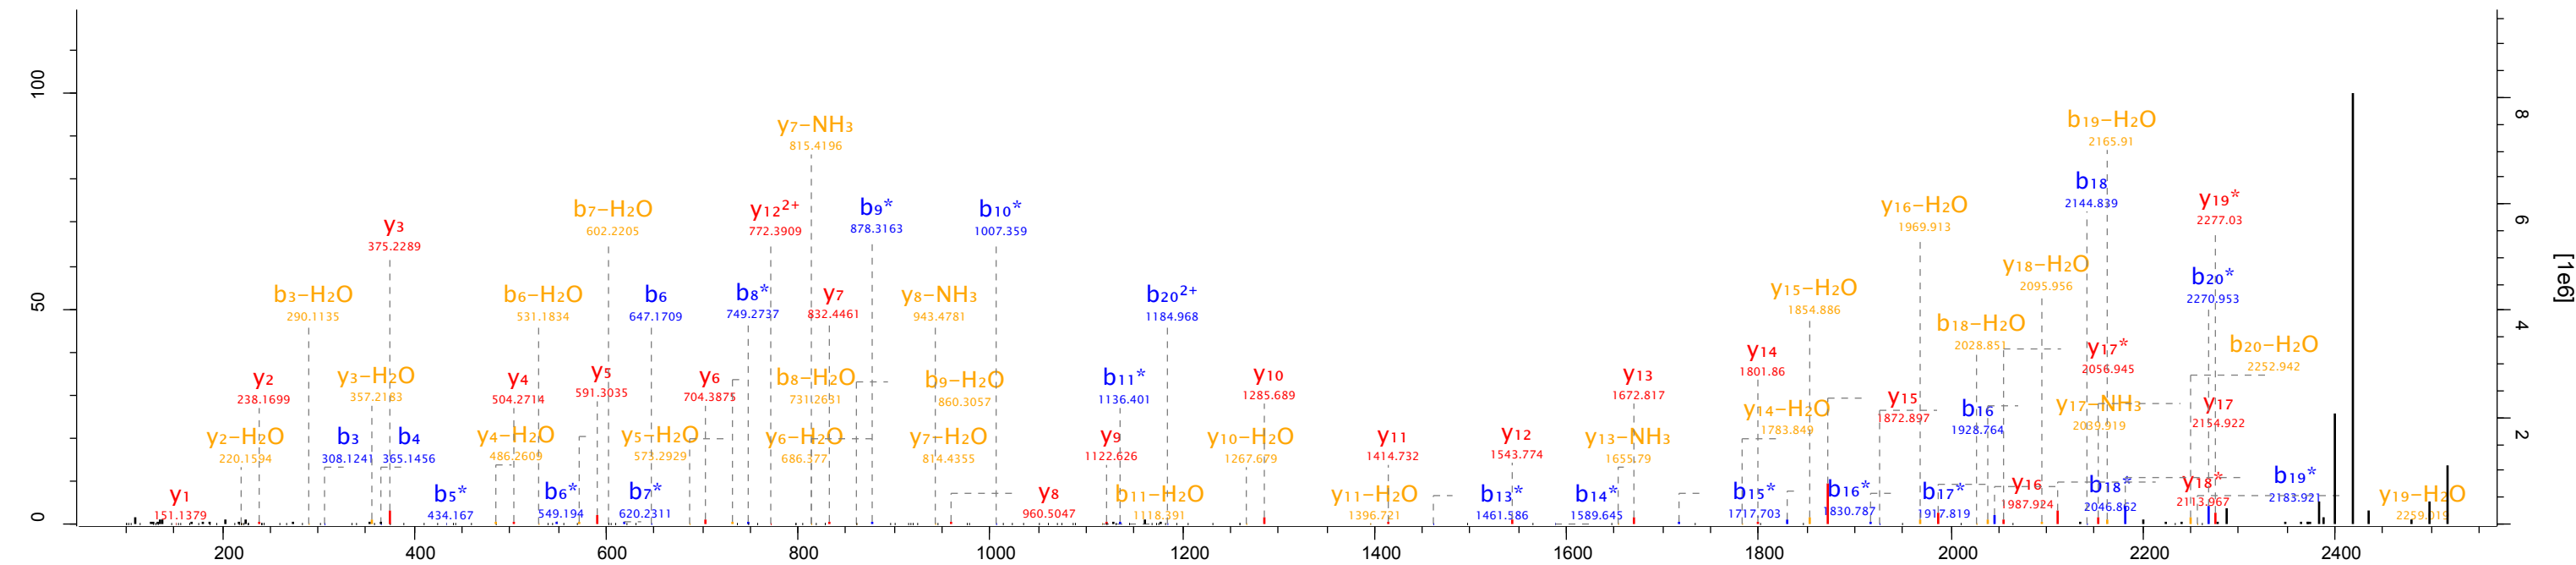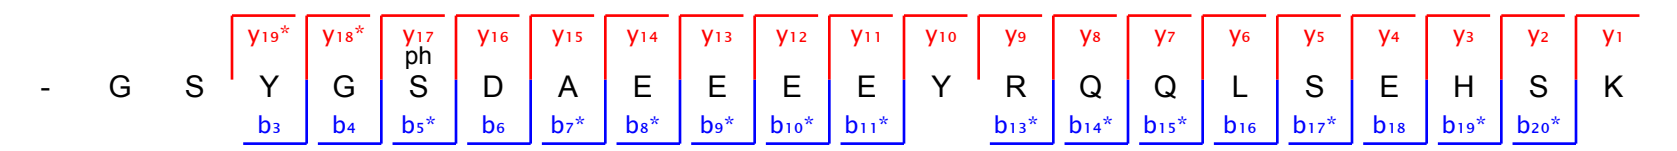

Raw file  
20150812\_A375SR\_Phospho\_BR1\_08

Scan 12484 Method FTMS; HCD Score 323.63 m/z 958.44 Gene names TNKS1BP1

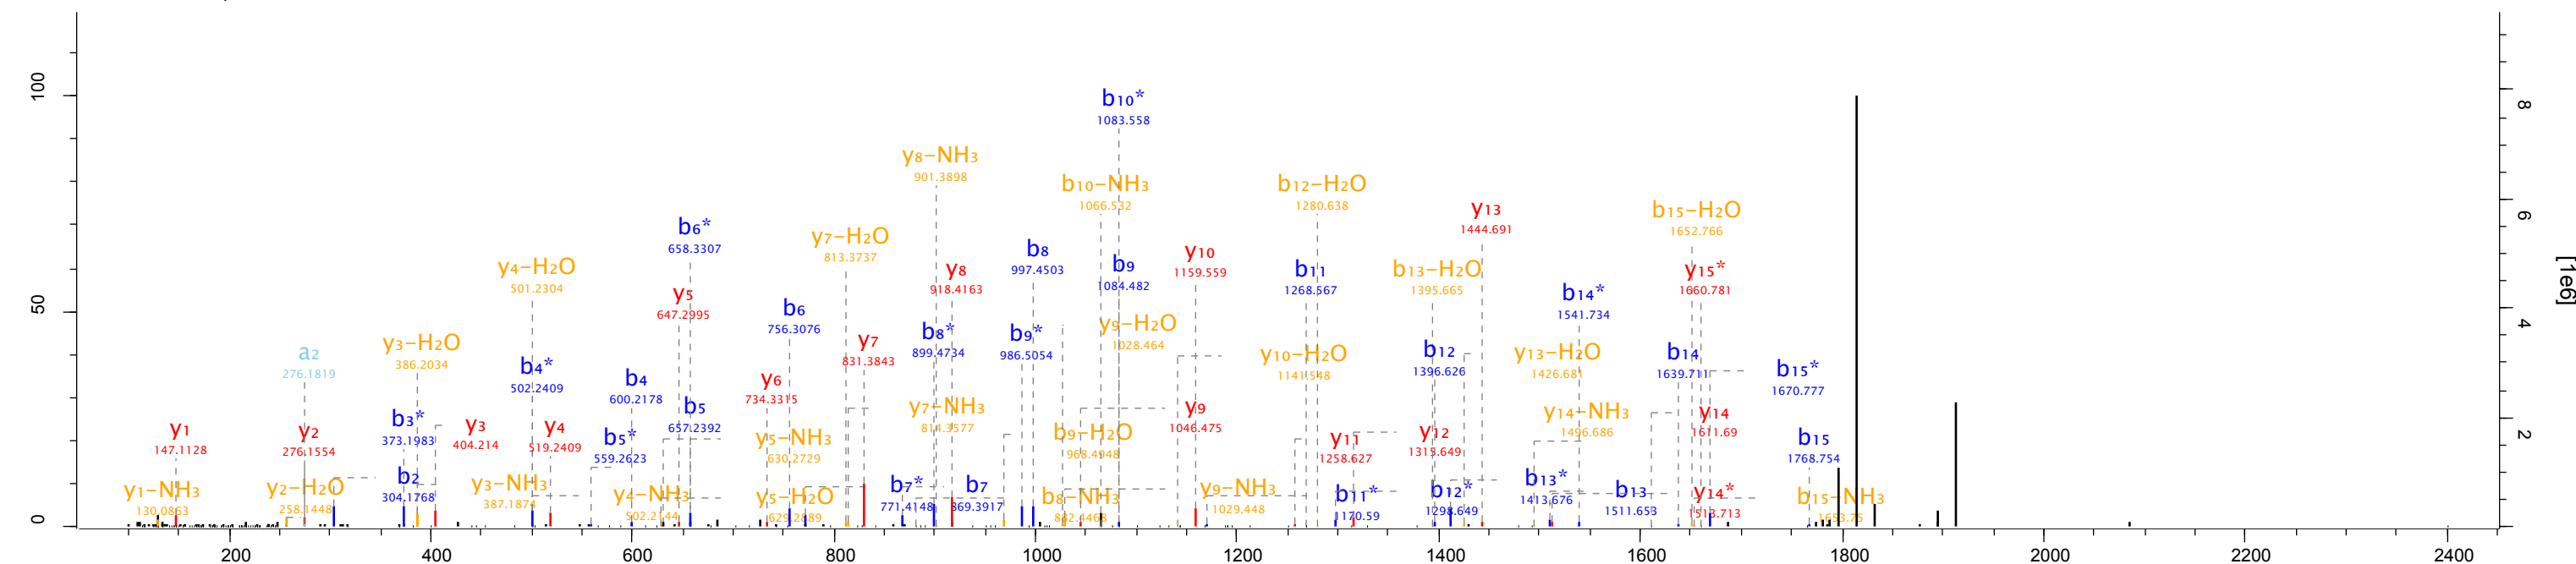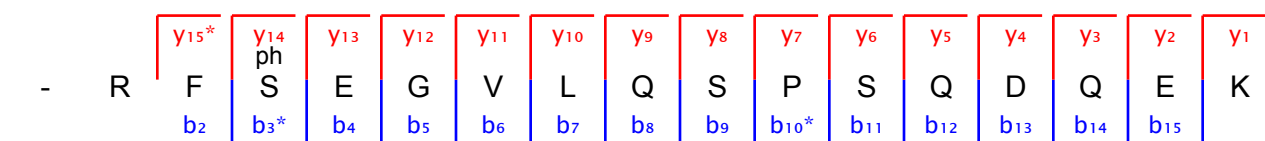

Raw file 20150812\_A375SR\_Phospho\_BR1\_08 Scan 13324 Method FTMS; HCD Score 180.7 m/z 721.35 Gene names KHSRP

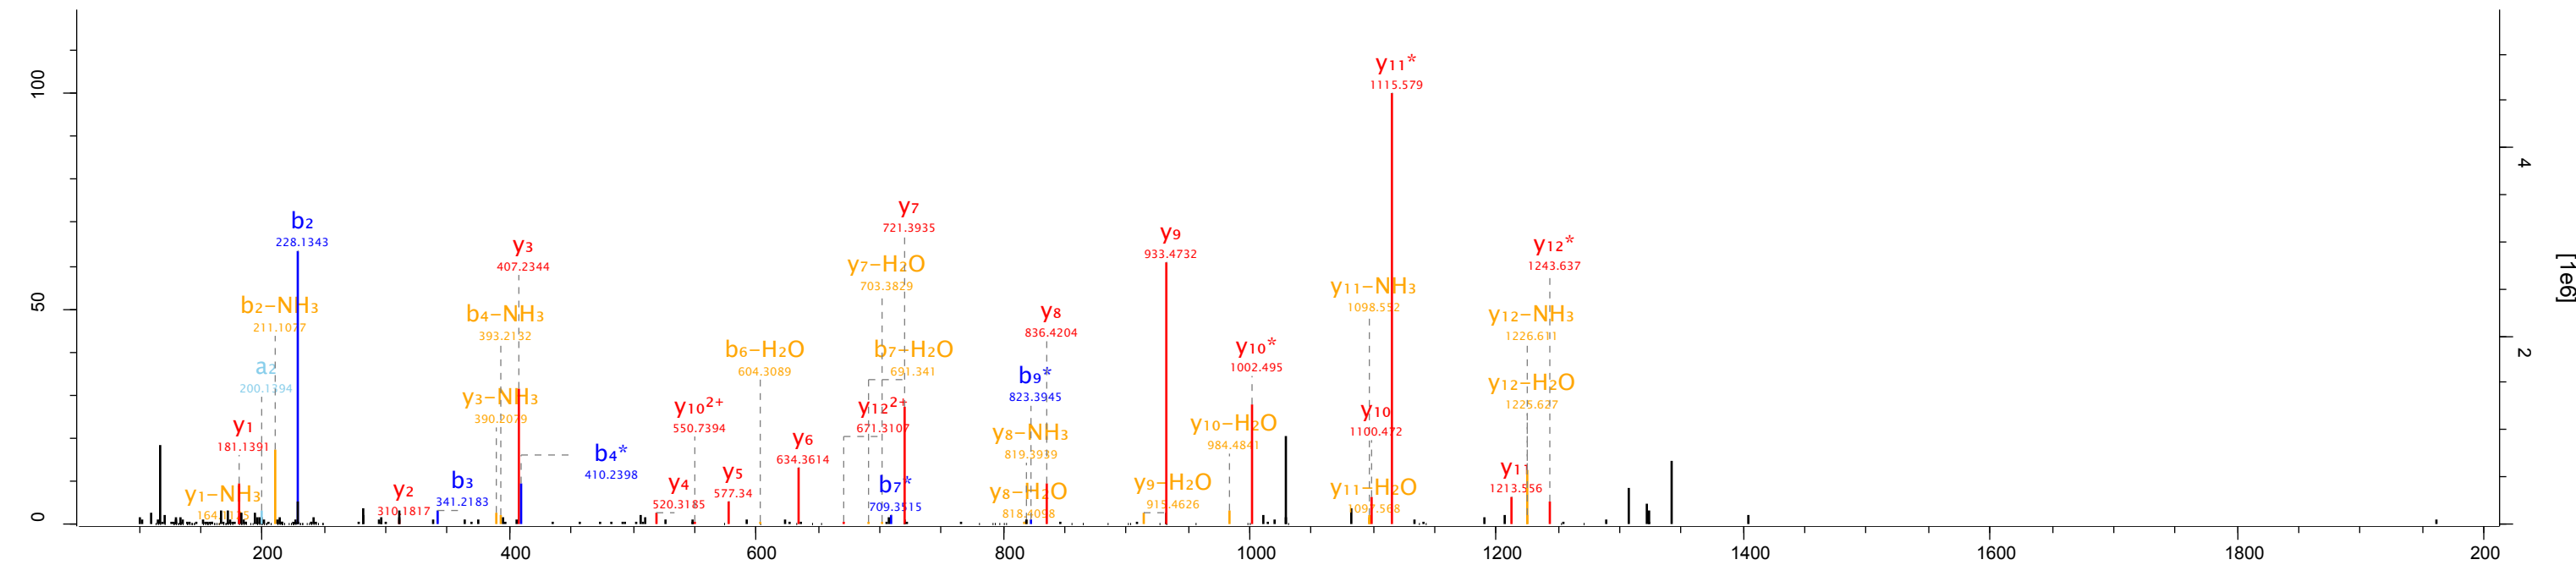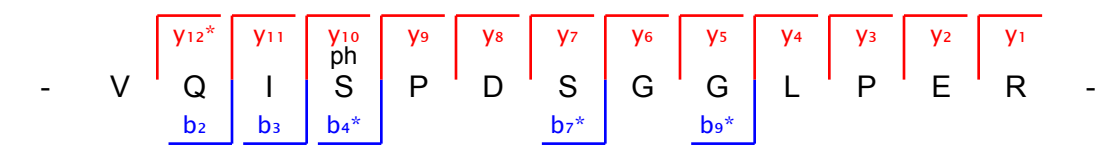

Raw file 20150812\_A375SR\_Phospho\_BR1\_08 Scan 14294 Method FTMS; HCD Score 138.24 m/z 763.33 Gene names FLG

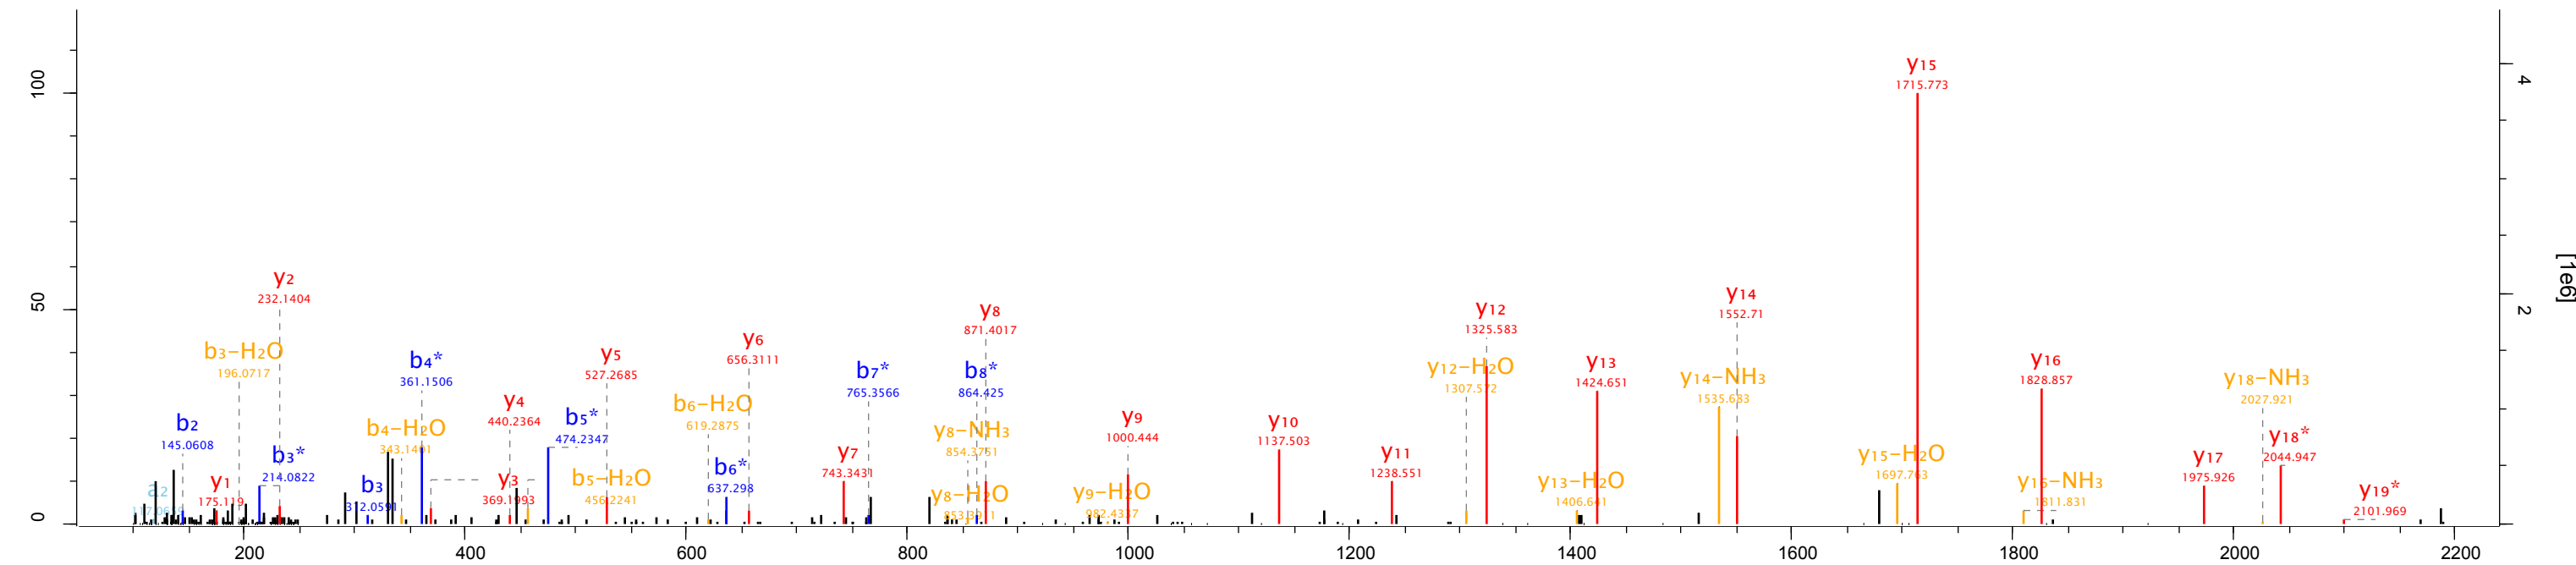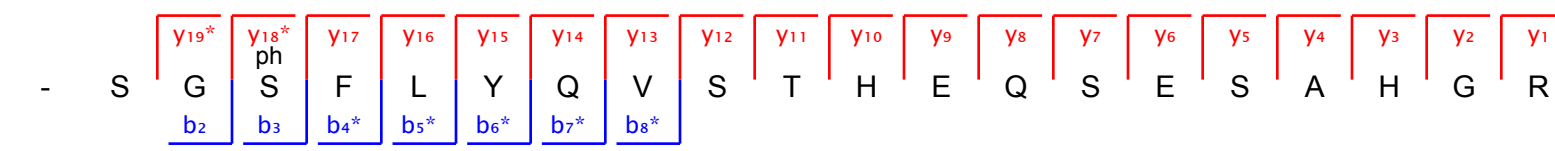

Raw file: 20150812\_A375SR\_Phospho\_BR1\_08  
 Scan: 14974 Method: FTMS; HCD Score: 156.9 m/z: 914.74 Gene names: ZC3H4

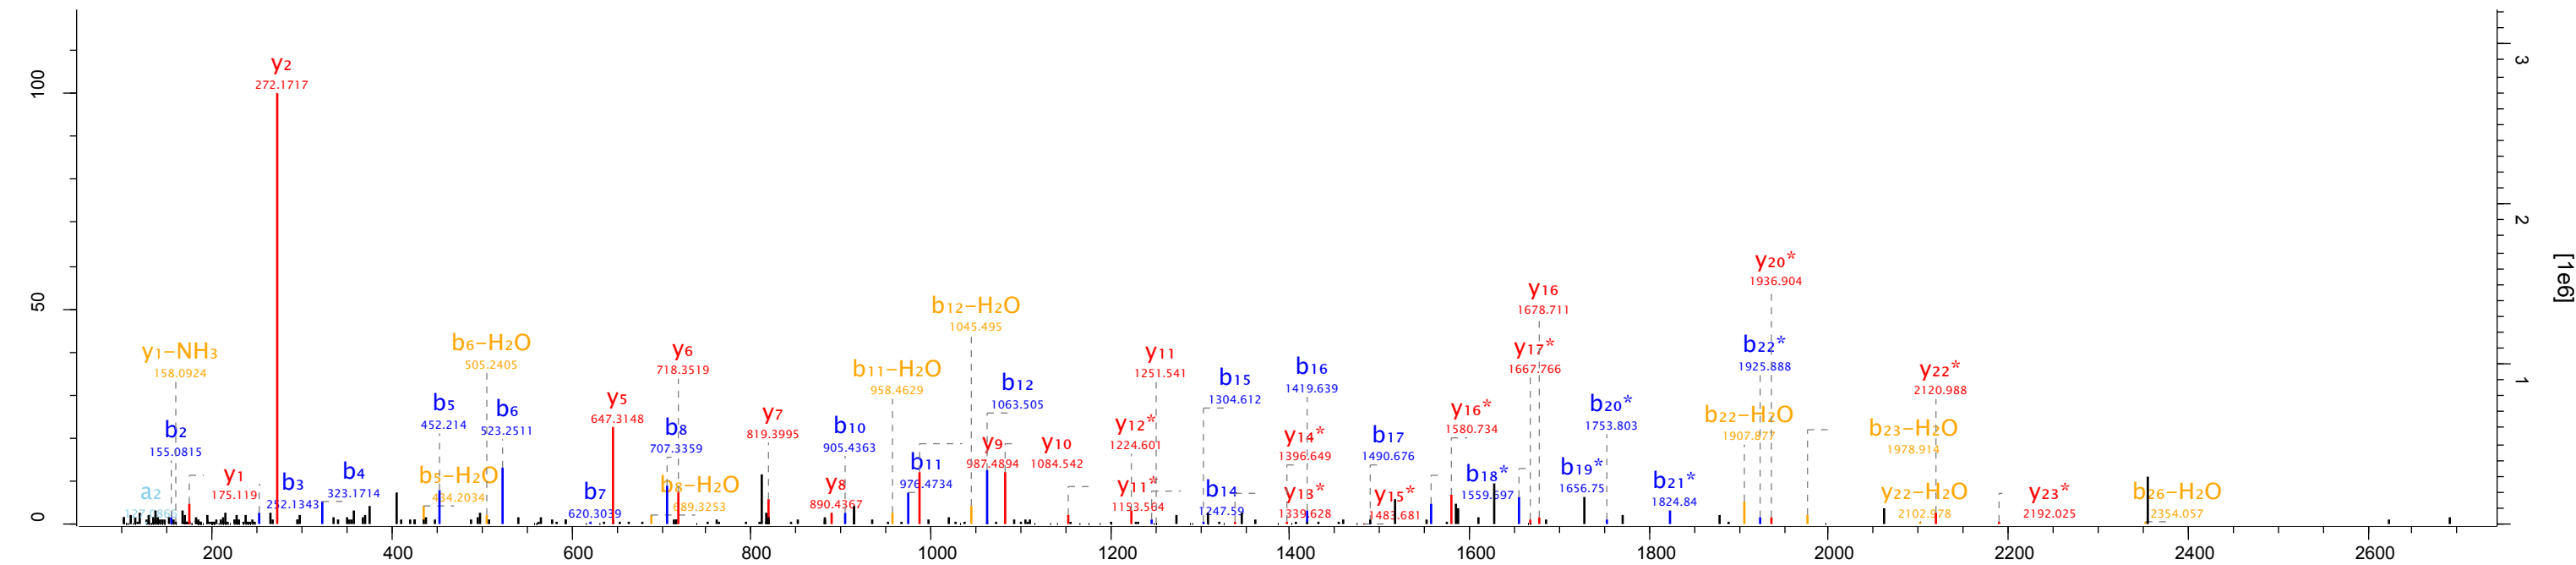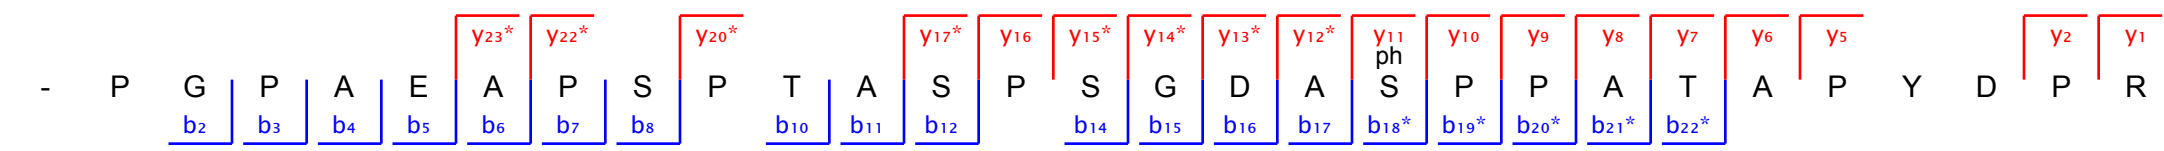

Raw file: 20150812\_A375SR\_Phospho\_BR1\_08  
 Scan: 15314 Method: FTMS; HCD Score: 103.52 m/z: 1006.46 Gene names: LRRFIP1

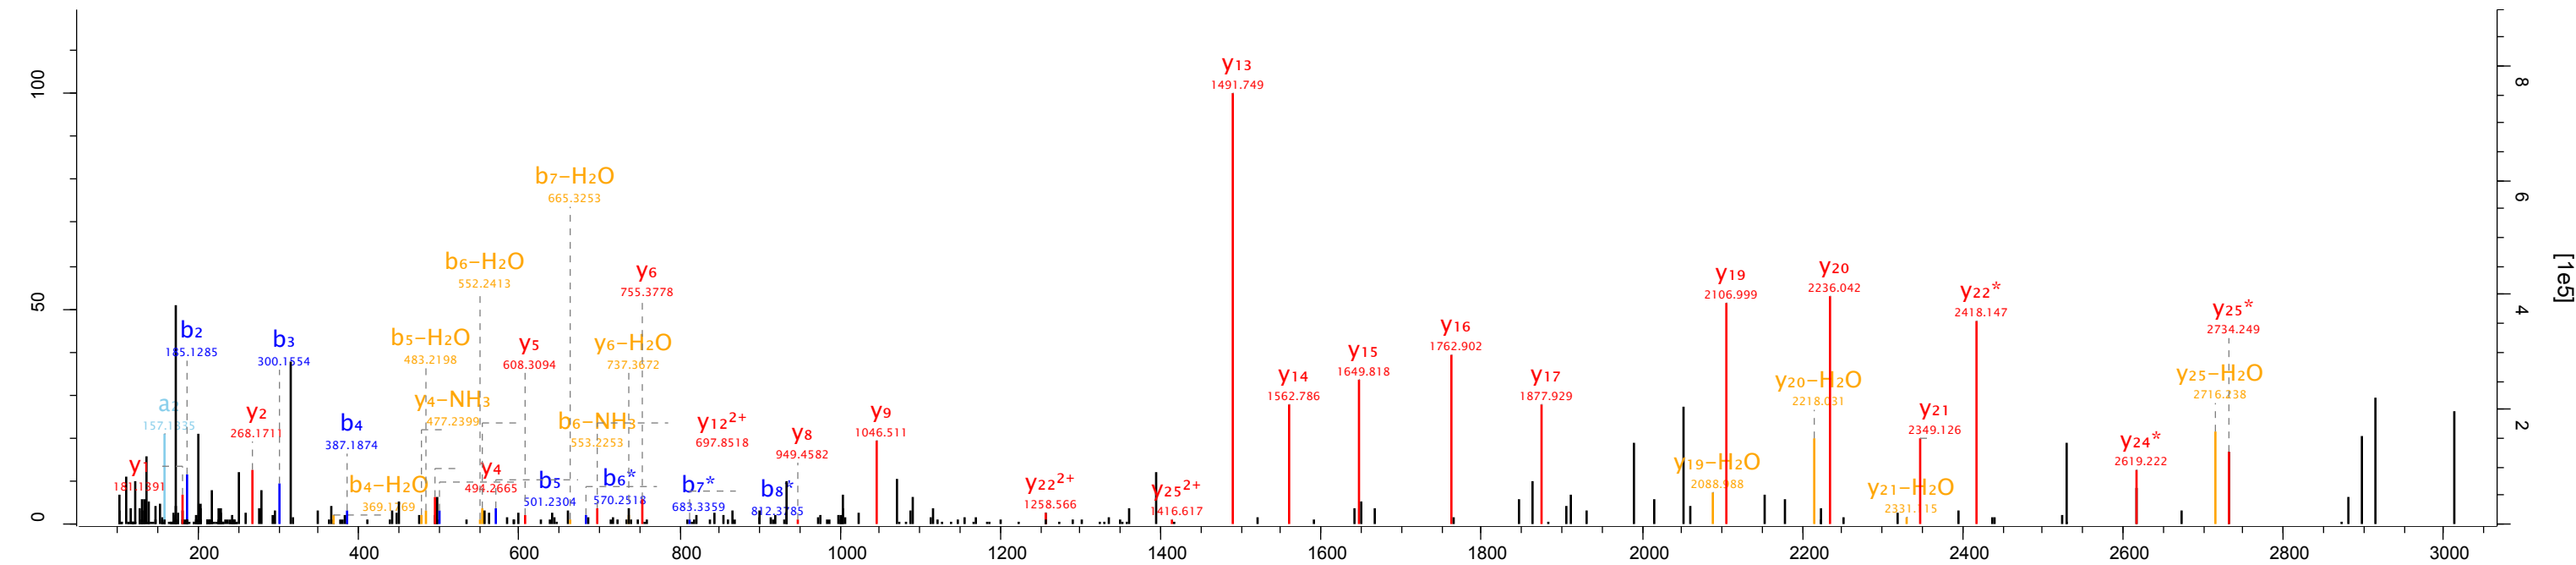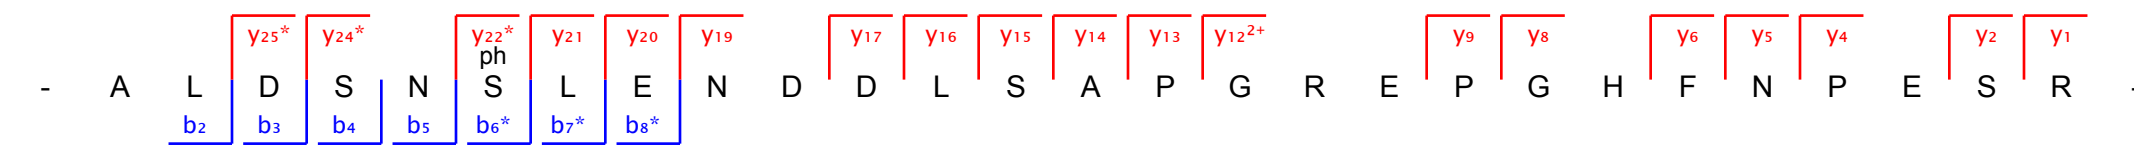

Raw file: 20150812\_A375SR\_Phospho\_BR1\_08  
 Scan: 15504 Method: FTMS; HCD Score: 164.05 m/z: 937.44 Gene names: TLE4

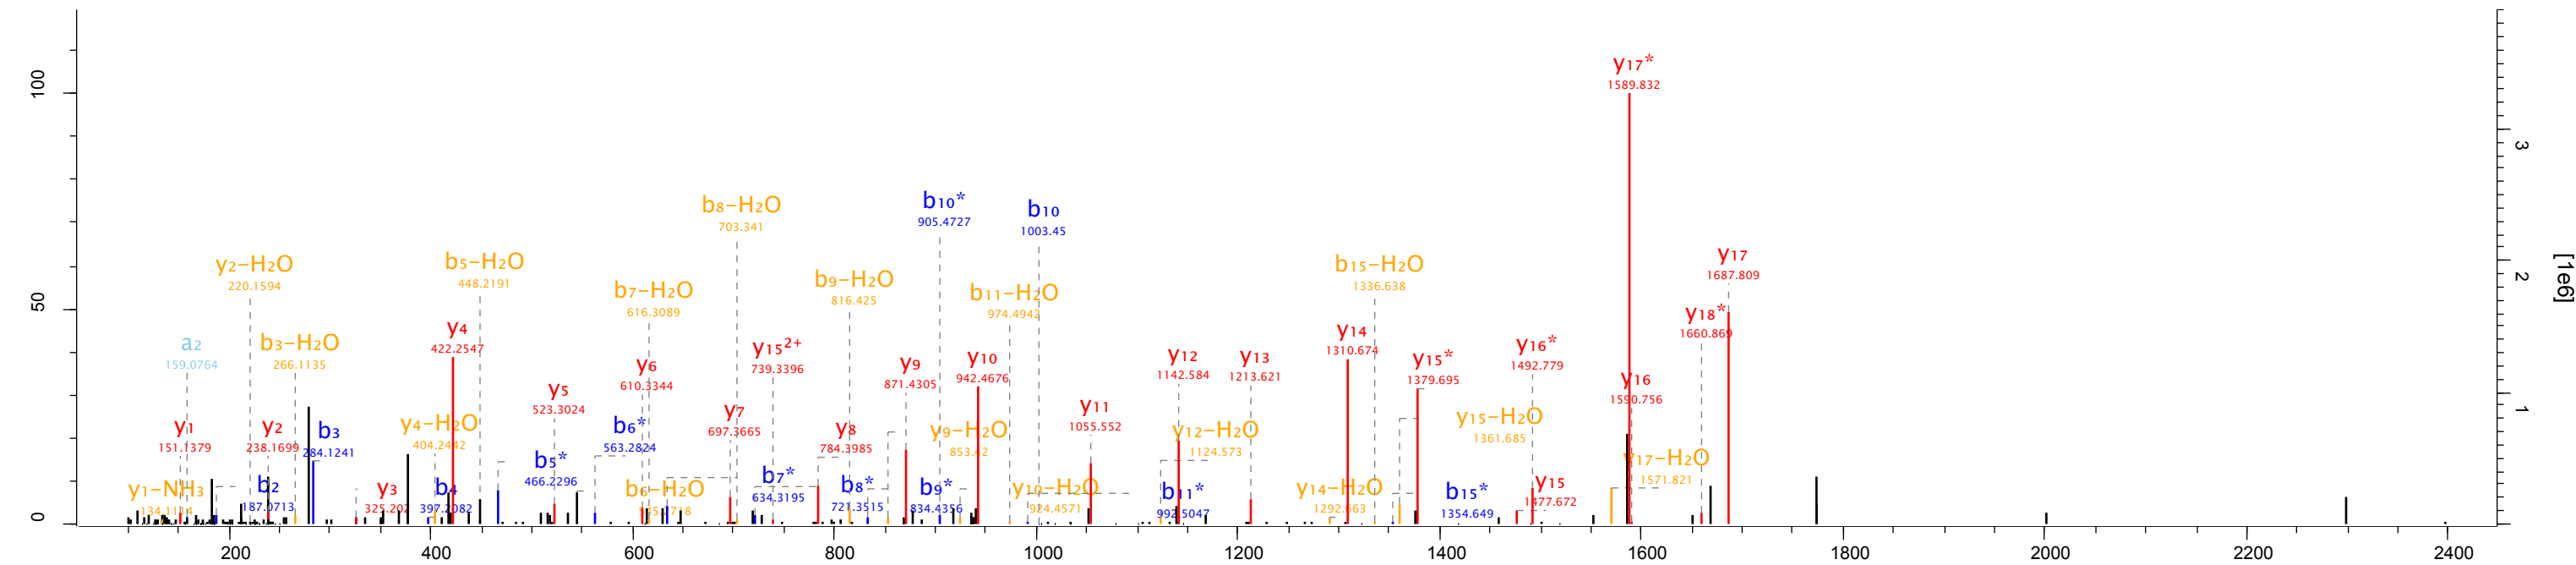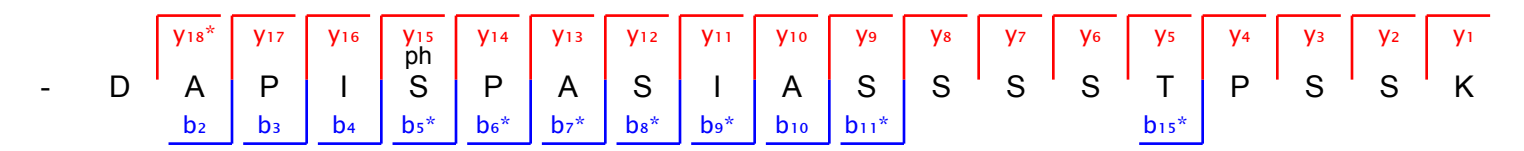



Raw file 20150812\_A375SR\_Phospho\_BR1\_08 Scan 15704 Method FTMS; HCD Score 163.92 m/z 826.87 Gene names LMNA

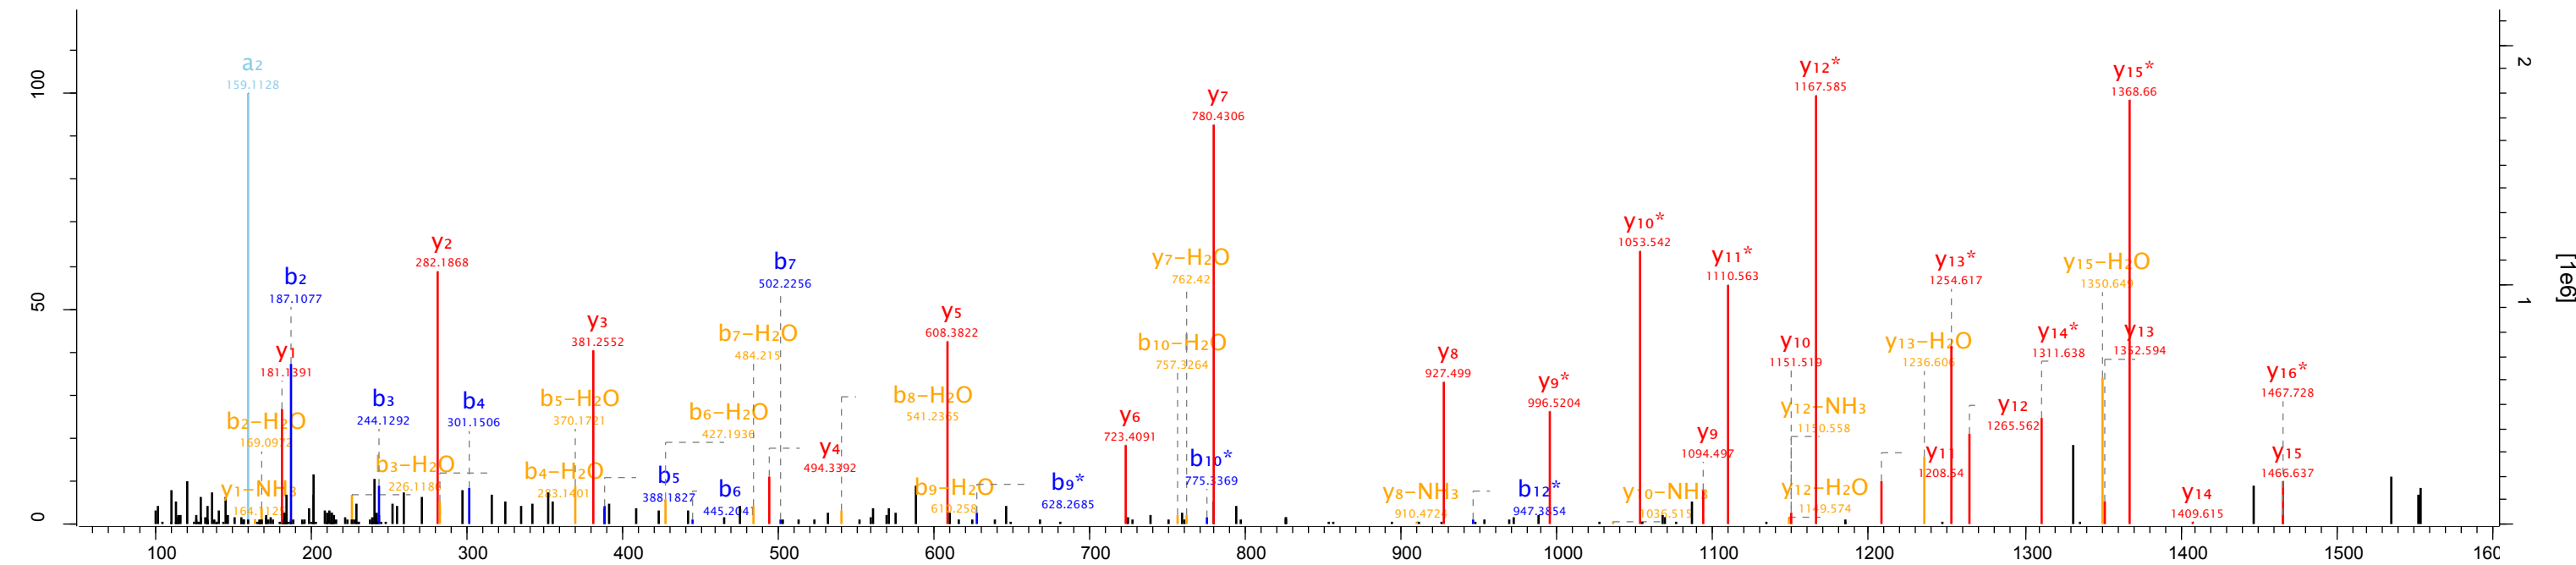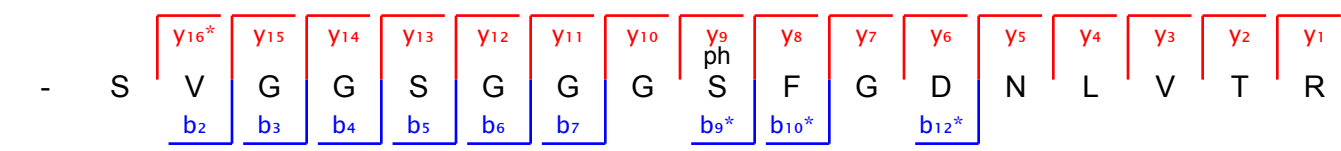

Raw file: 20150812\_A375SR\_Phospho\_BR1\_08  
 Scan: 16504 Method: FTMS; HCD Score: 149.84 m/z: 984.02 Gene names: POU2F1

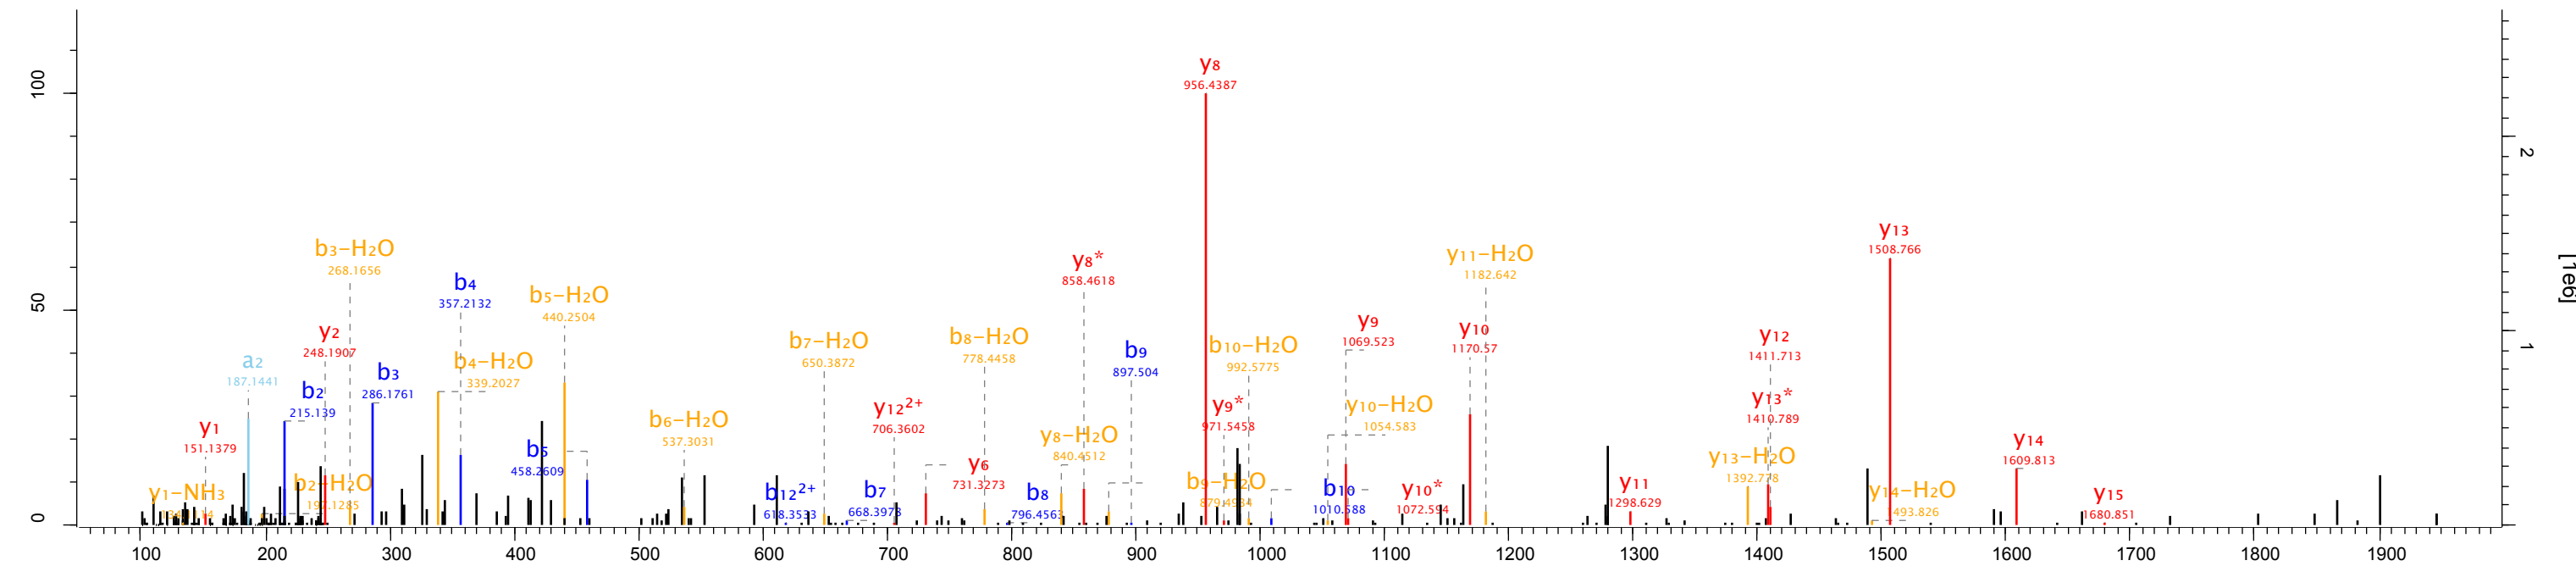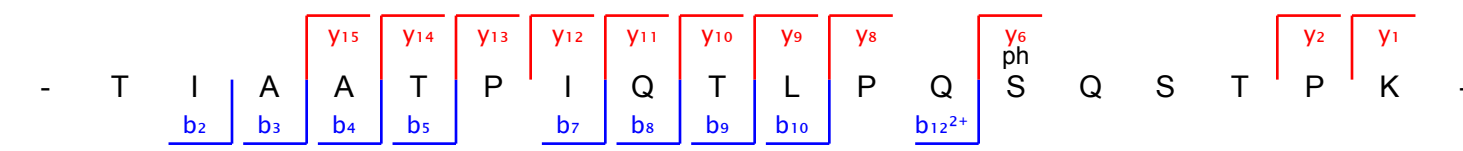

Raw file 20150812\_A375SR\_Phospho\_BR1\_08 Scan 19314 Method FTMS; HCD Score 155.91 m/z 704.33 Gene names SLC9A3R2

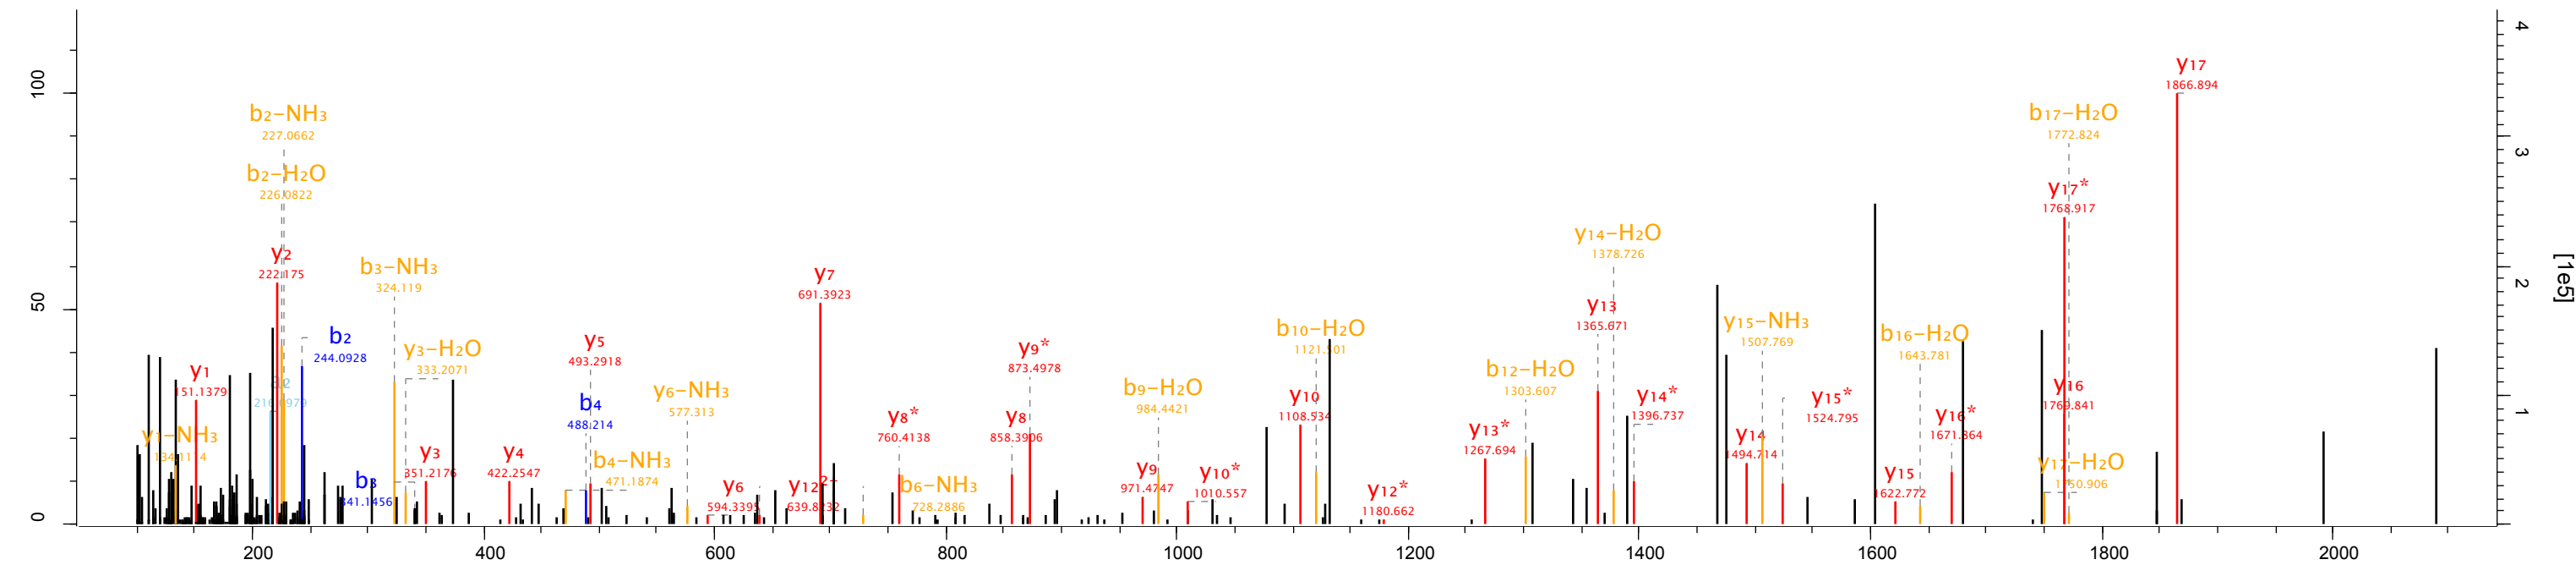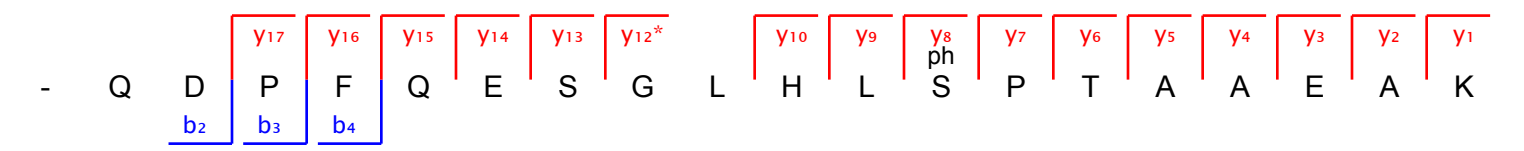

Raw file: 20150812\_A375SR\_Phospho\_BR1\_08  
 Scan: 2124 Method: FTMS; HCD Score: 91.59 m/z: 731.86 Gene names: MAP4

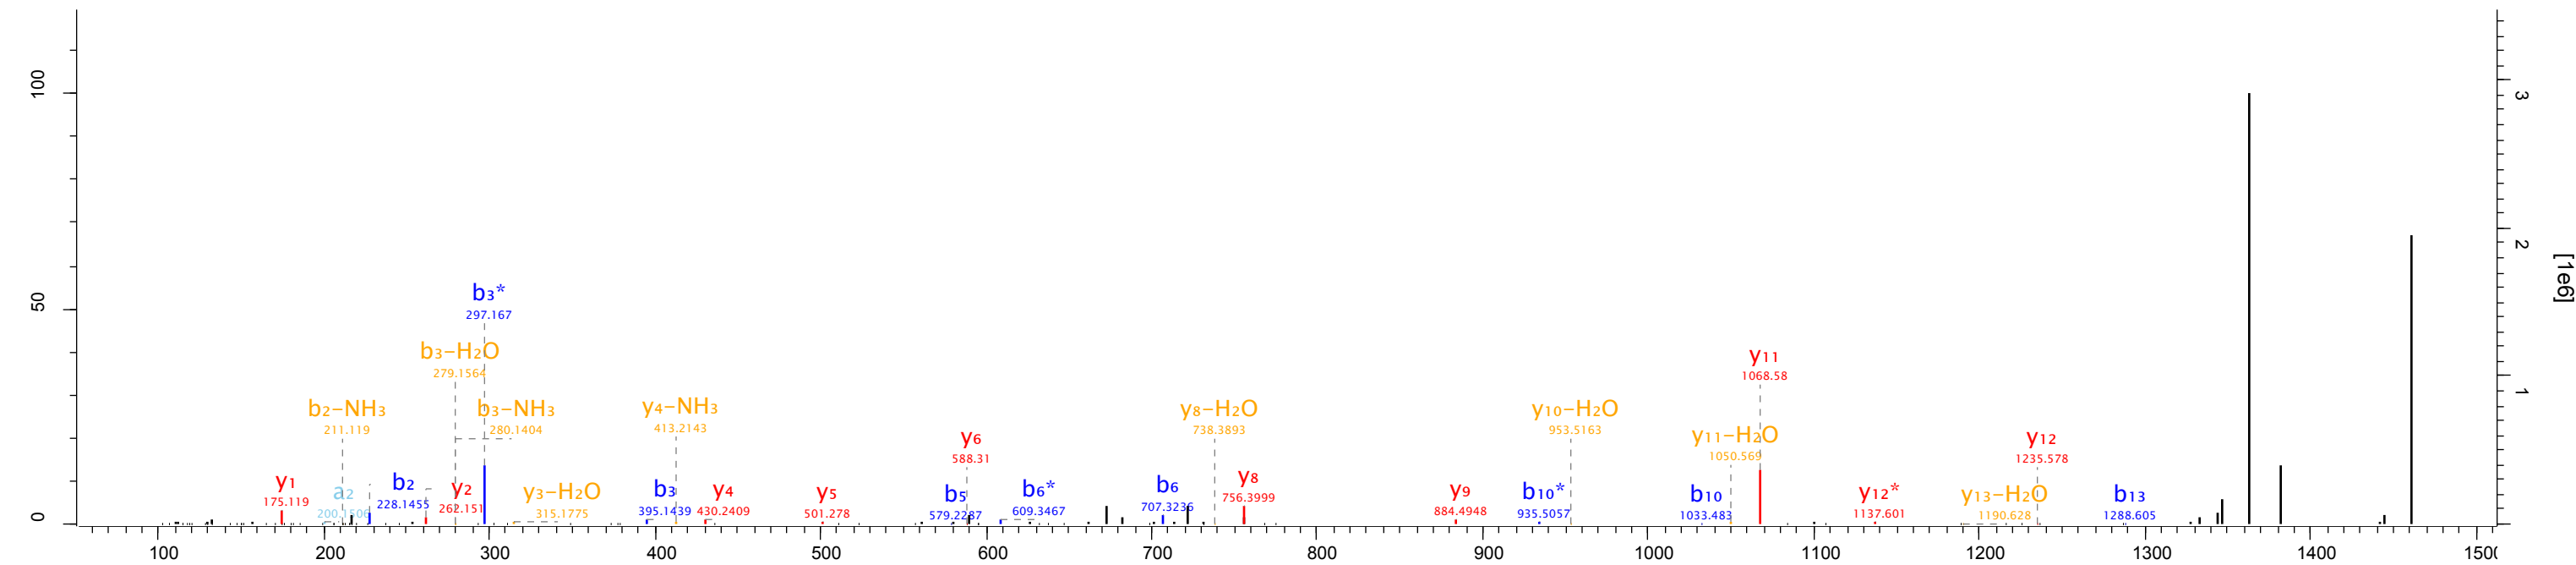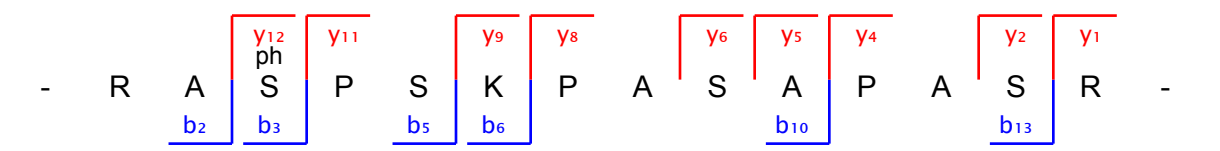

Raw file: 20150812\_A375SR\_Phospho\_BR1\_08  
 Scan: 2644 Method: FTMS; HCD Score: 63.3 m/z: 536.61 Gene names: BBX

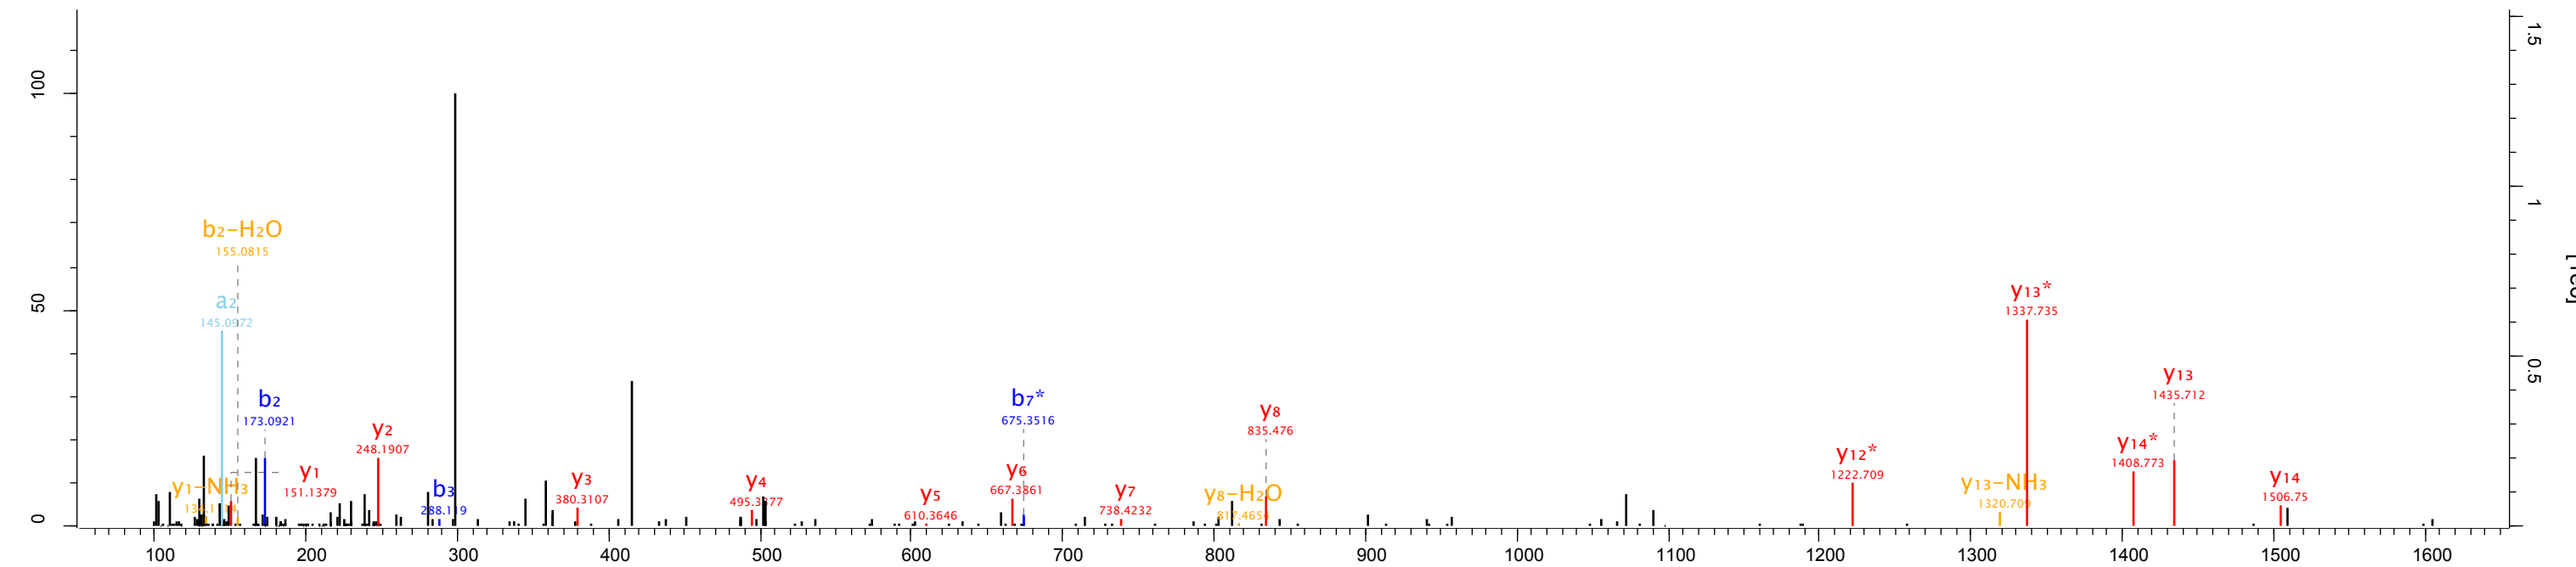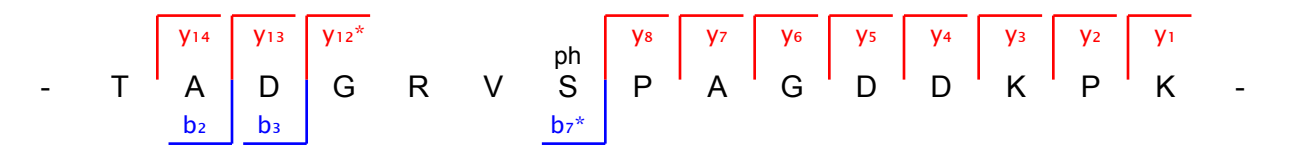

Raw file  
20150812\_A375SR\_Phospho\_BR1\_08

Scan 28704 Method FTMS; HCD Score 260.66 m/z 977.49 Gene names RPLP2

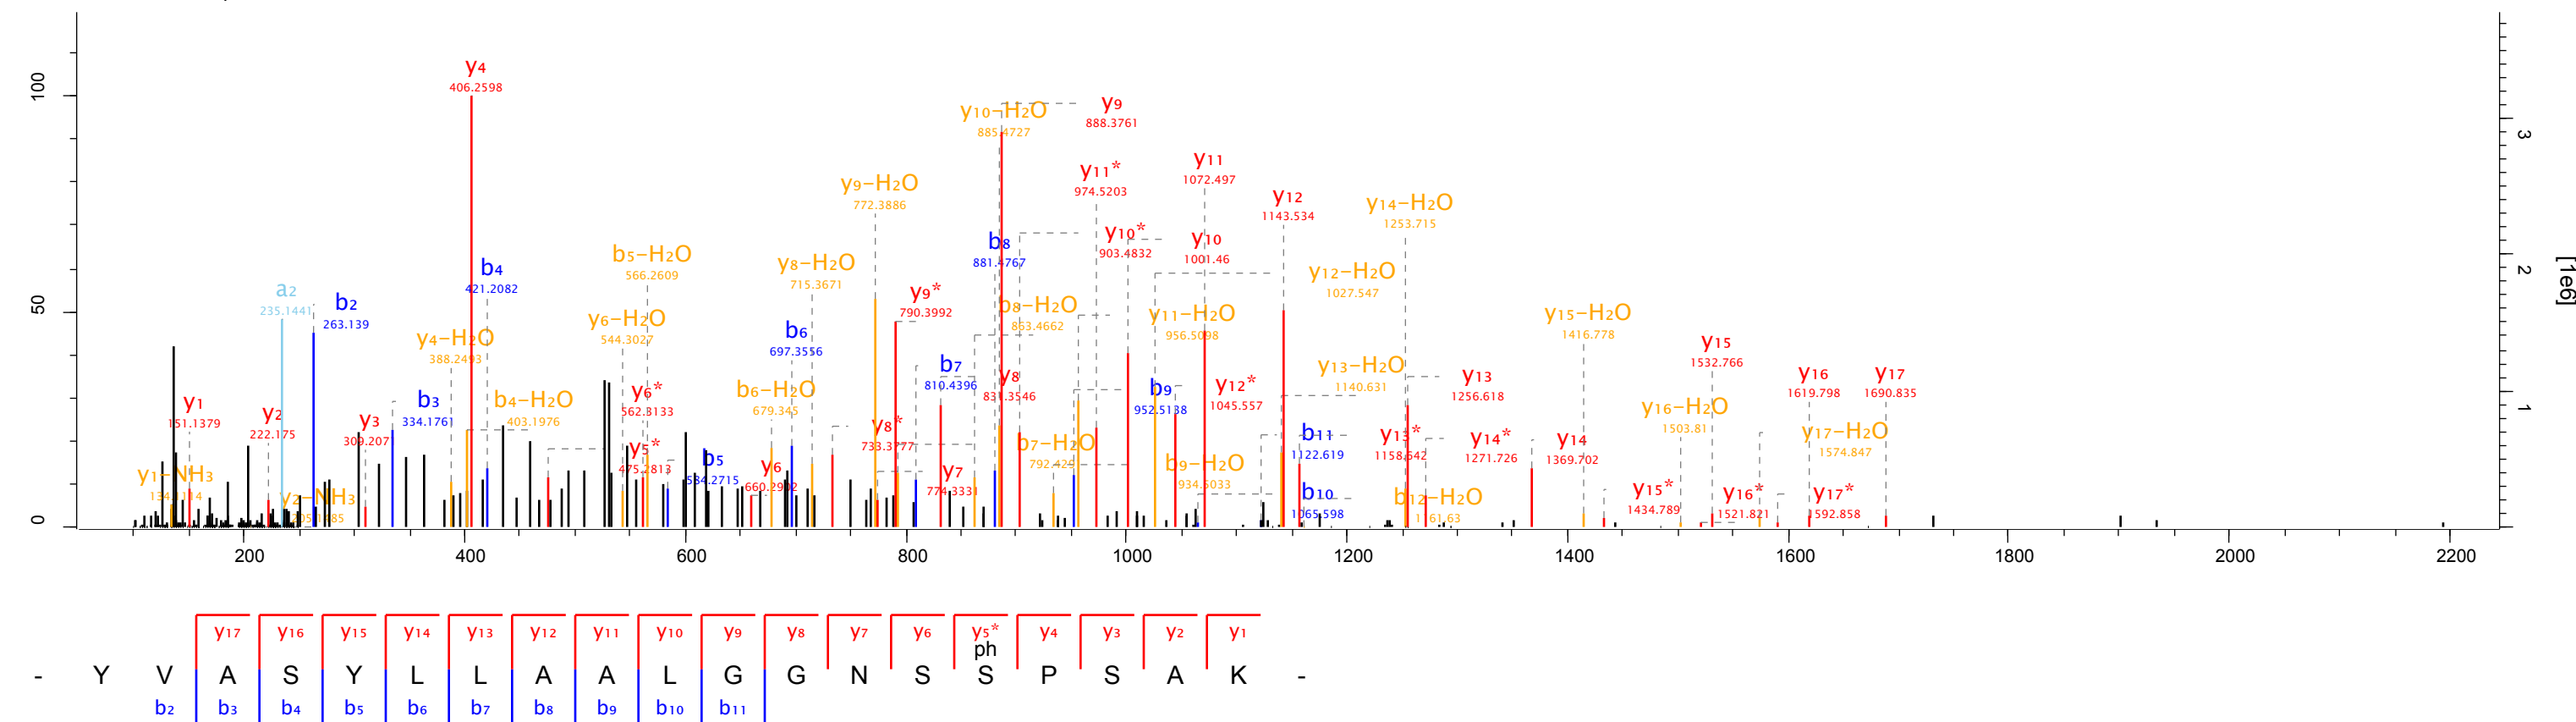

Raw file 20150812\_A375SR\_Phospho\_BR1\_08 Scan 2984 Method FTMS; HCD Score 65.04 m/z 544.28 Gene names CDCA5

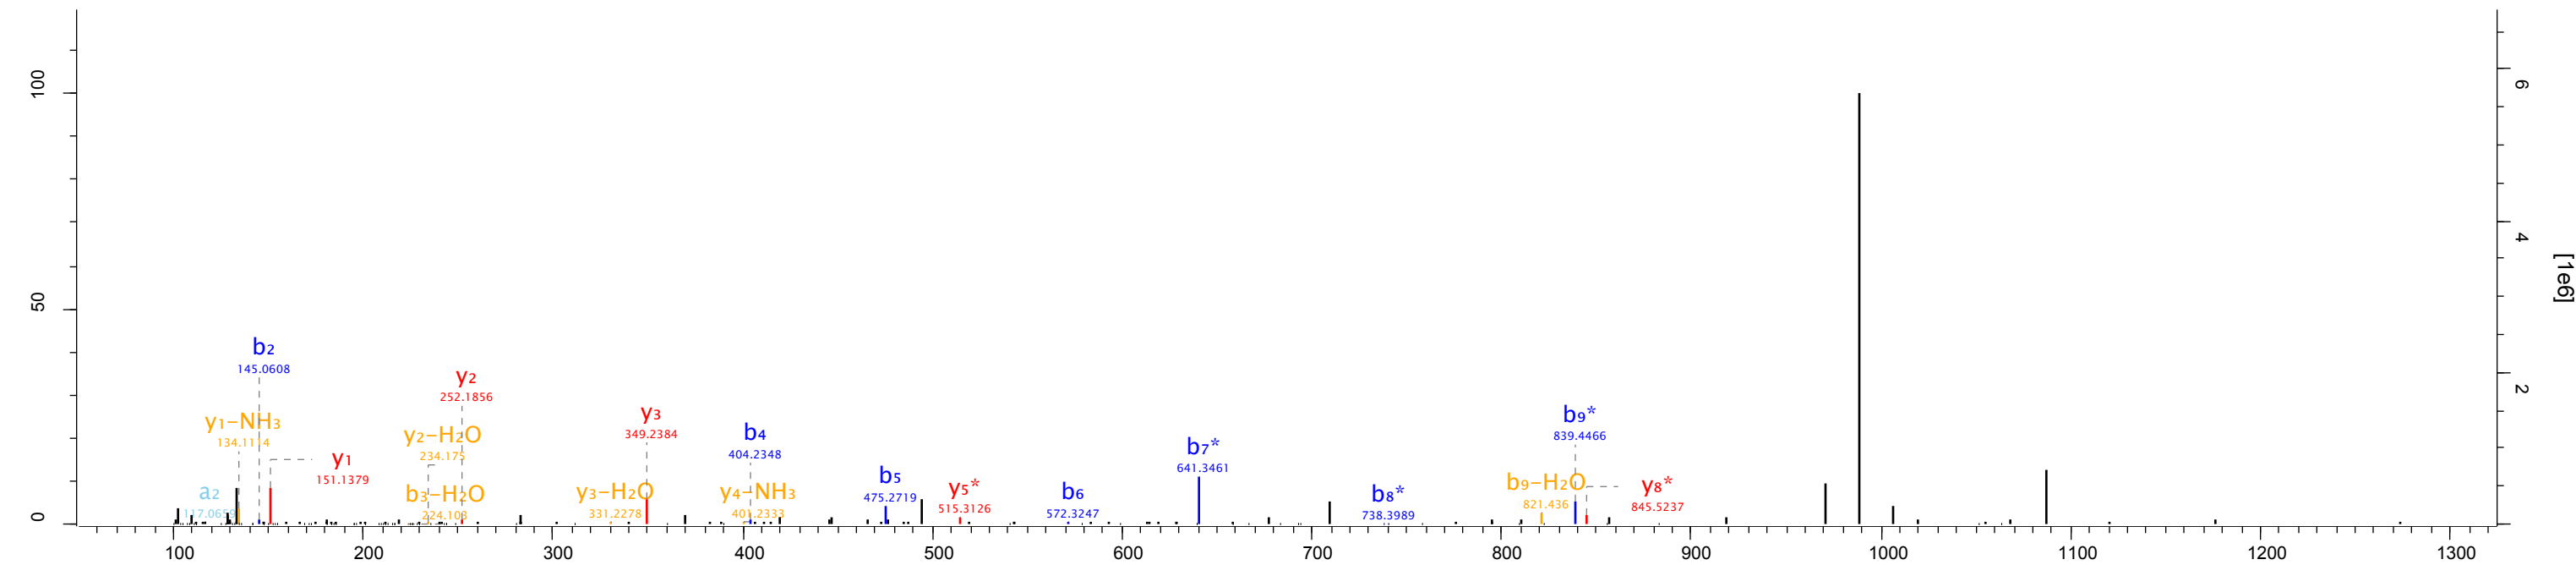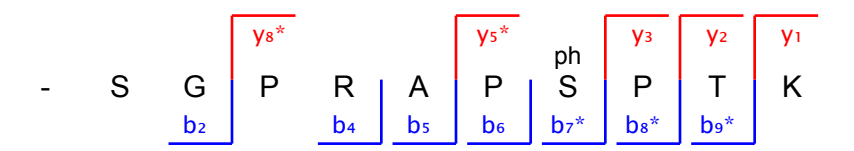

Raw file: 20150812\_A375SR\_Phospho\_BR1\_08  
 Scan: 3234 Method: FTMS; HCD Score: 145.48 m/z: 486.94 Gene names: NOP2

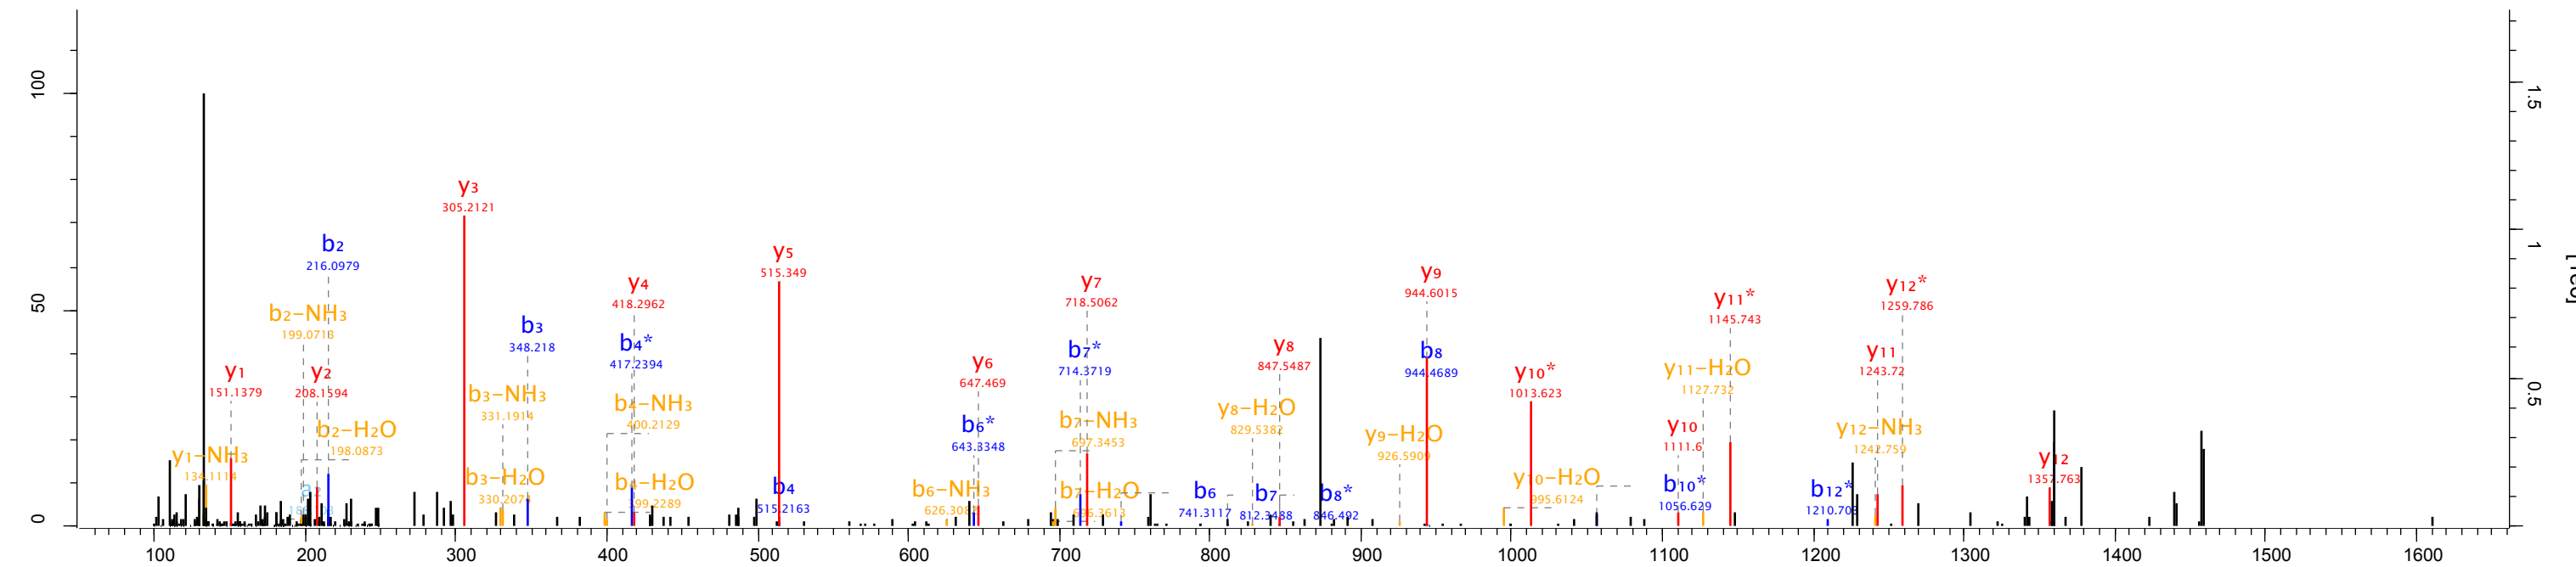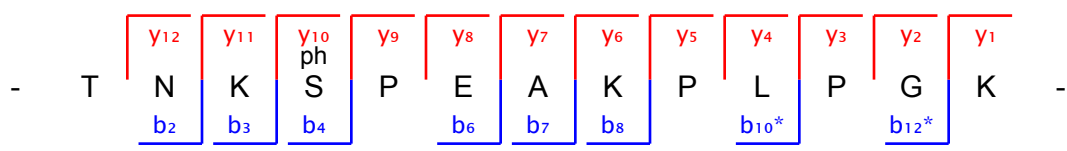



Raw file: 20150812\_A375SR\_Phospho\_BR1\_08  
 Scan: 3424 Method: FTMS; HCD Score: 88.02 m/z: 385.88 Gene names: RAB11FIP5

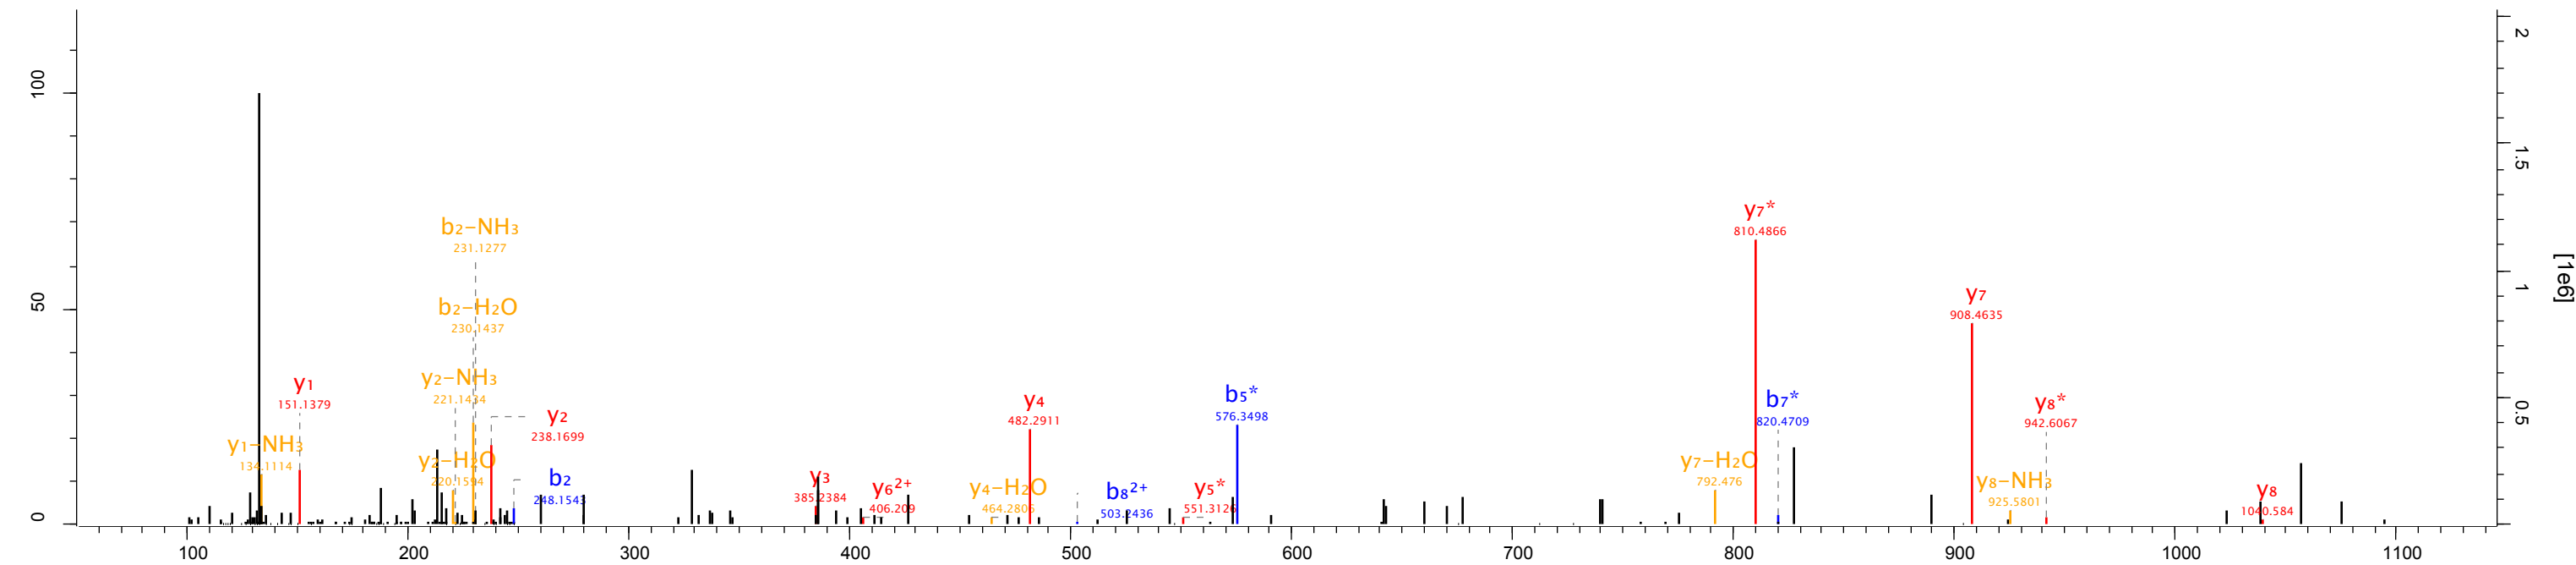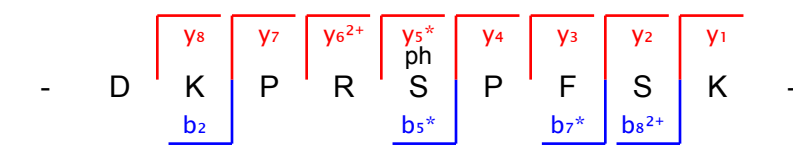

Raw file Scan Method Score m/z Gene names  
 20150812\_A375SR\_Phospho\_BR1\_08 4724 FTMS; HCD 158.02 657.82 YTHDC1

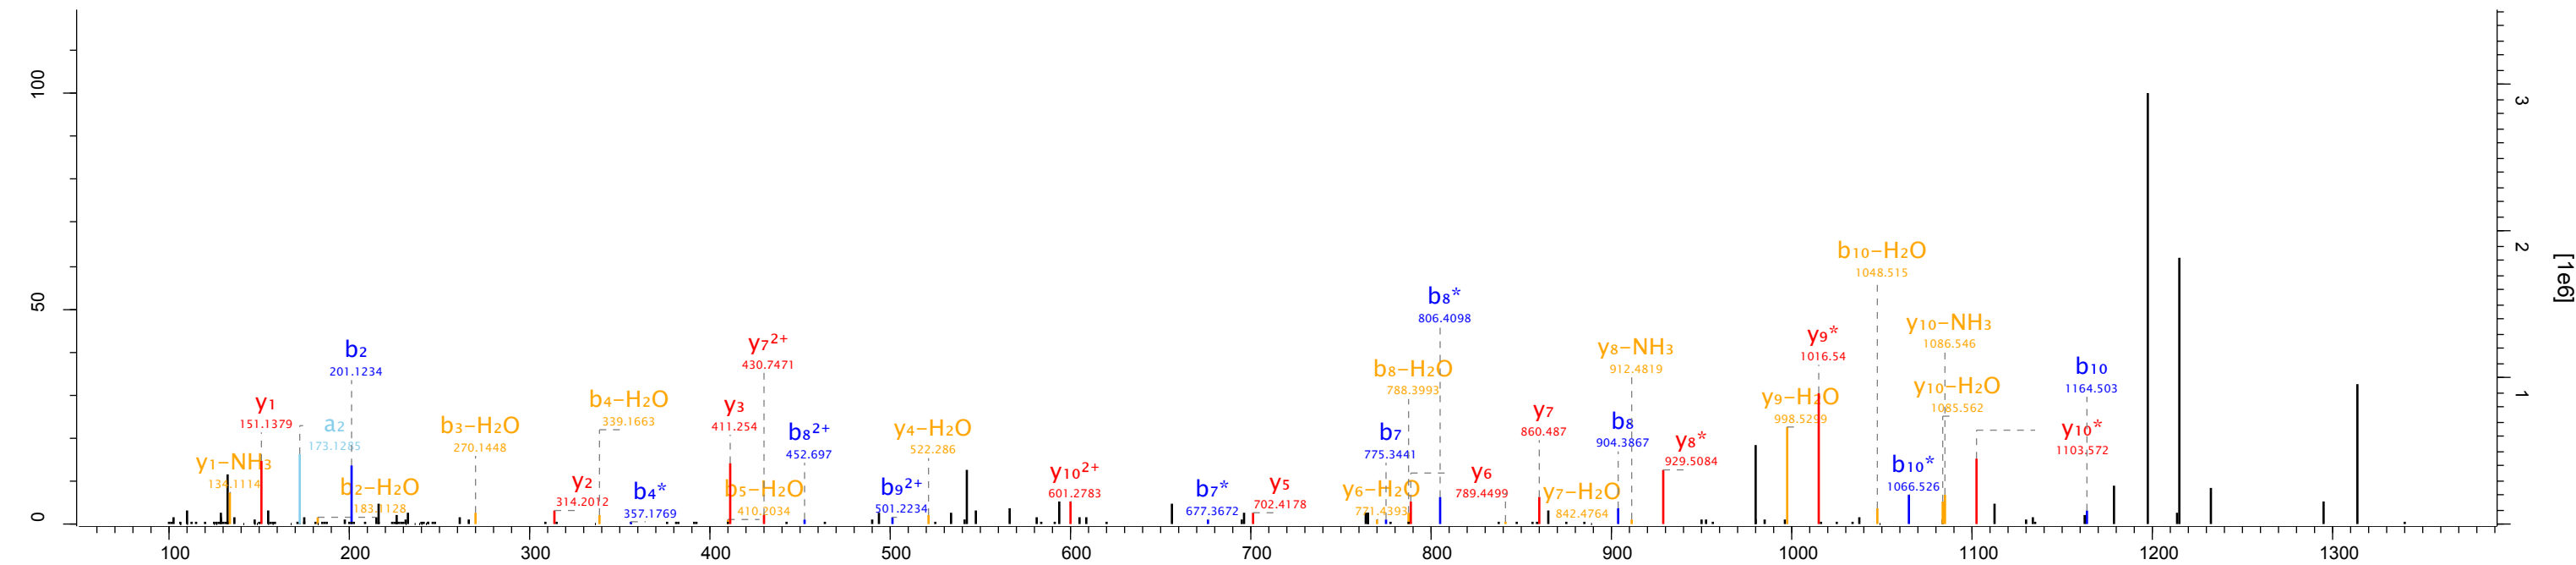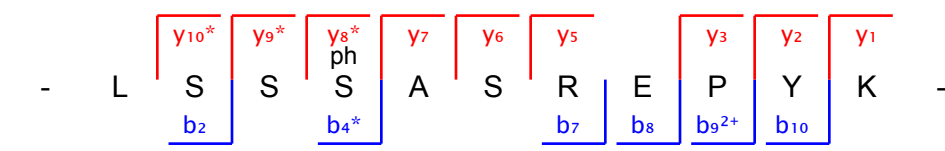

Raw file: 20150812\_A375SR\_Phospho\_BR1\_08  
 Scan: 5674 Method: FTMS; HCD Score: 273.84 m/z: 933.43 Gene names: MARCKS

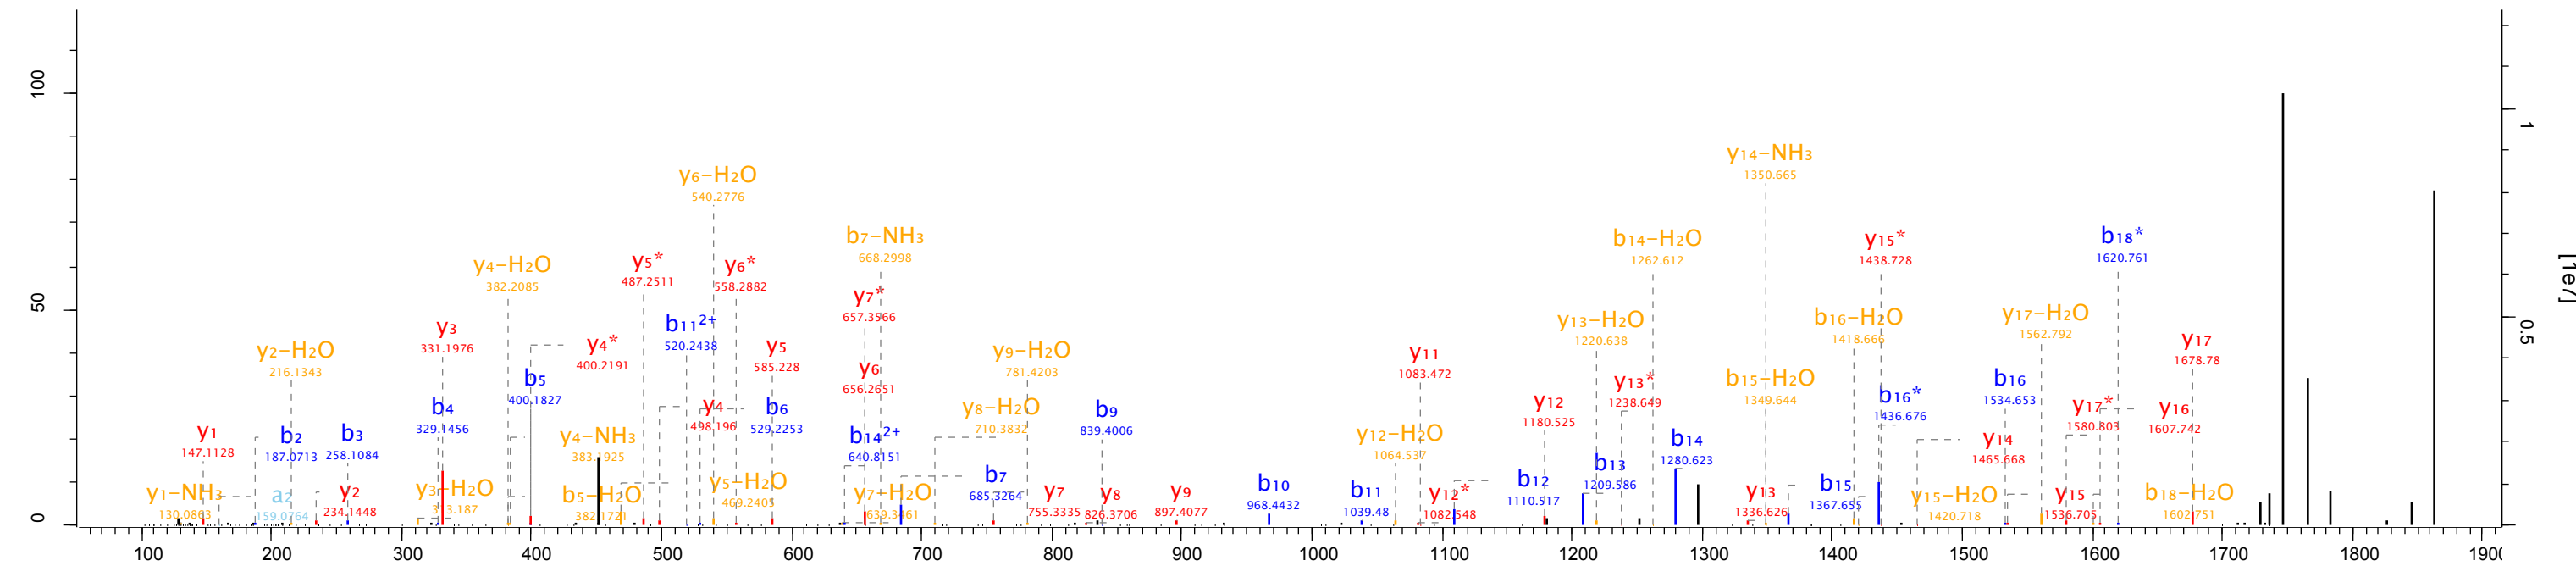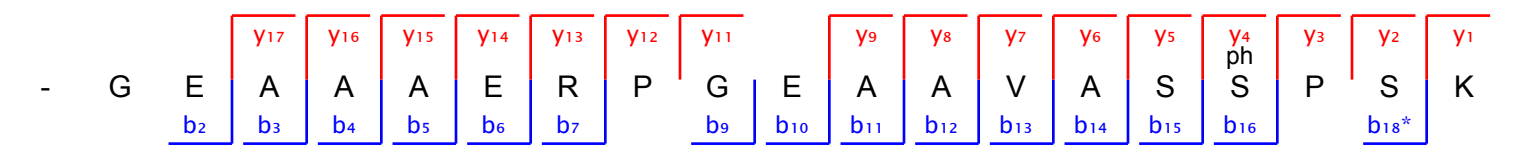

Raw file: 20150812\_A375SR\_Phospho\_BR1\_08  
 Scan: 5794 Method: FTMS; HCD Score: 129.67 m/z: 478.23 Gene names: PHLDB1

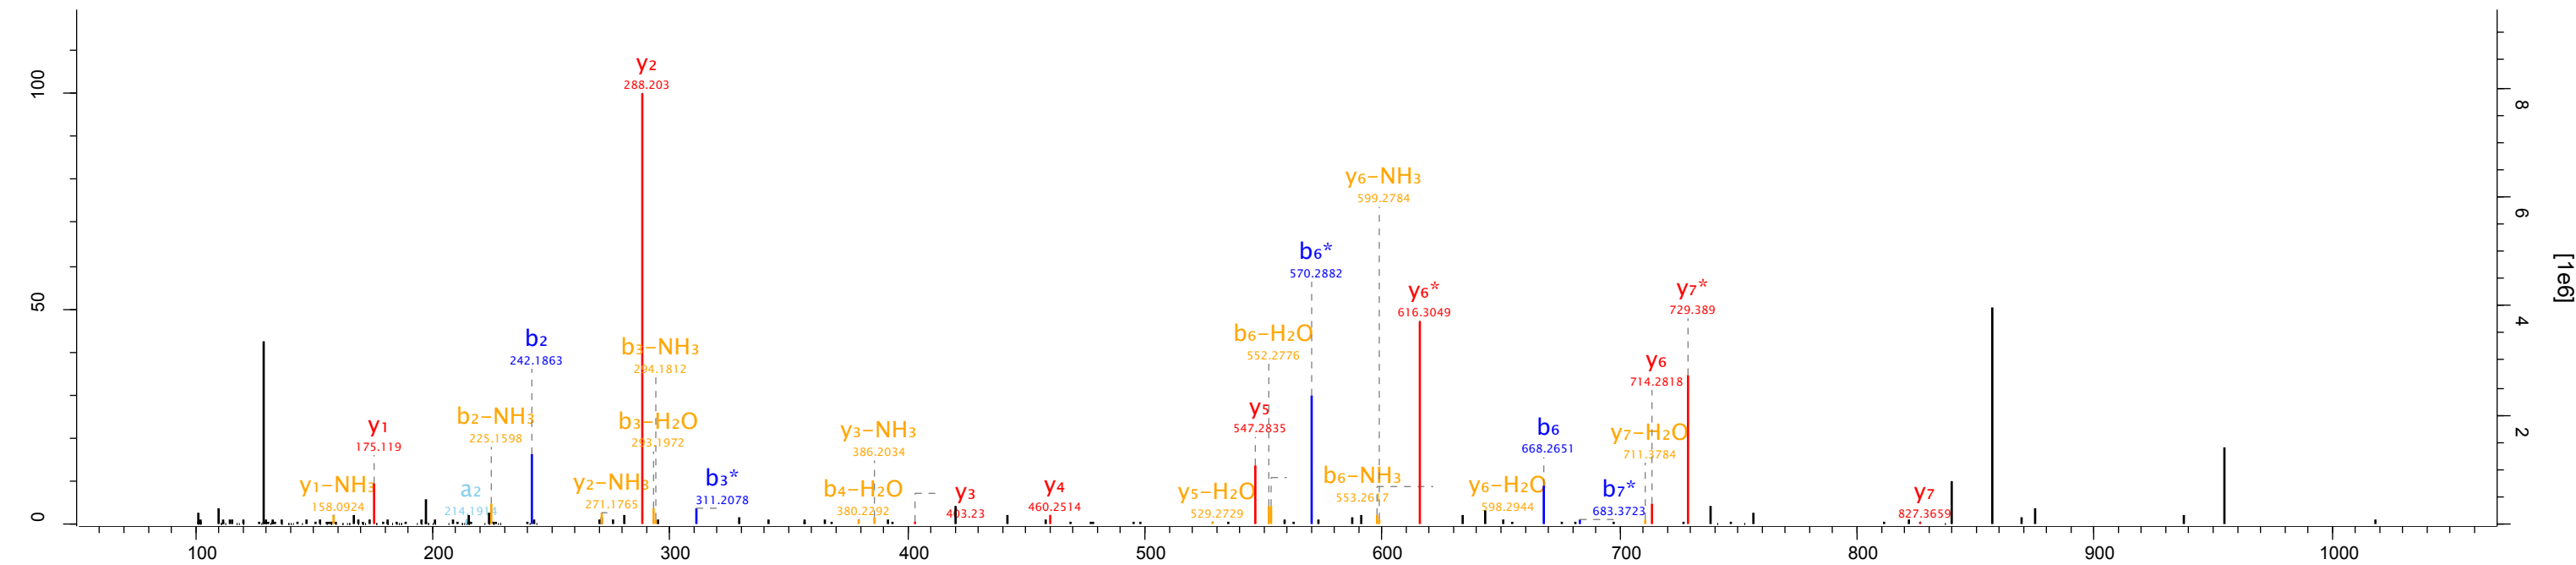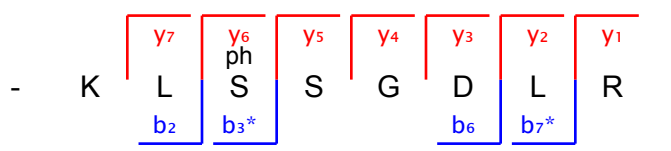



Raw file: 20150812\_A375SR\_Phospho\_BR1\_08  
 Scan: 7094 Method: FTMS; HCD Score: 85.2 m/z: 667.34 Gene names: NDE1

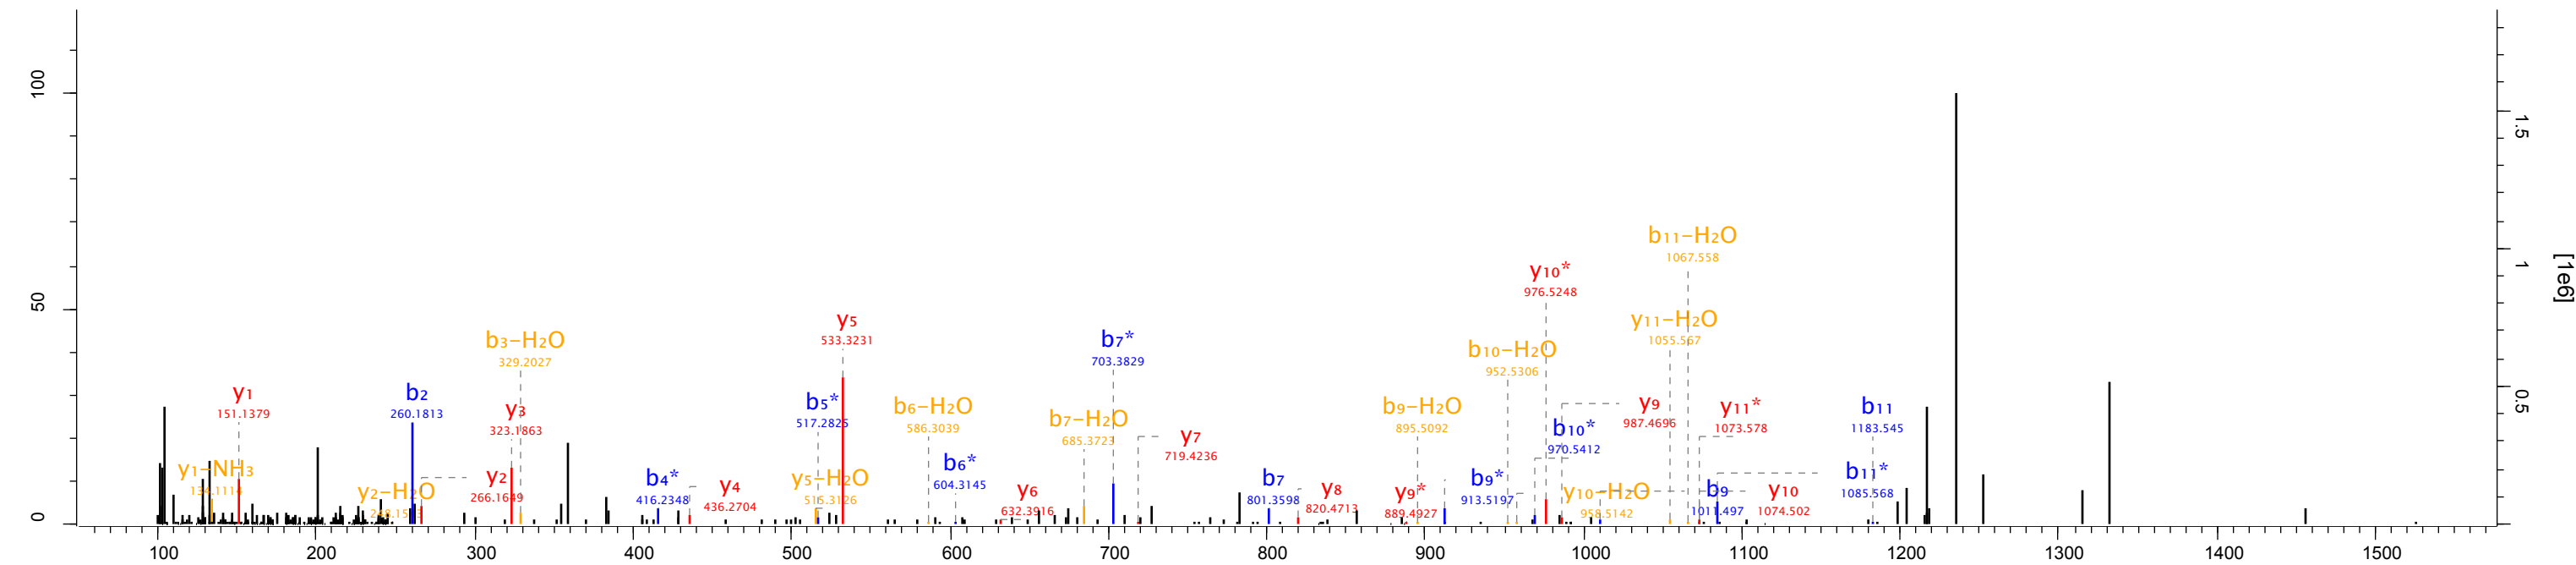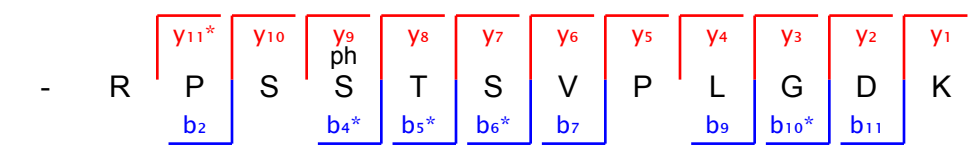

Raw file 20150812\_A375SR\_Phospho\_BR1\_08 Scan 8274 Method FTMS; HCD Score 280.64 m/z 980.43 Gene names GBF1

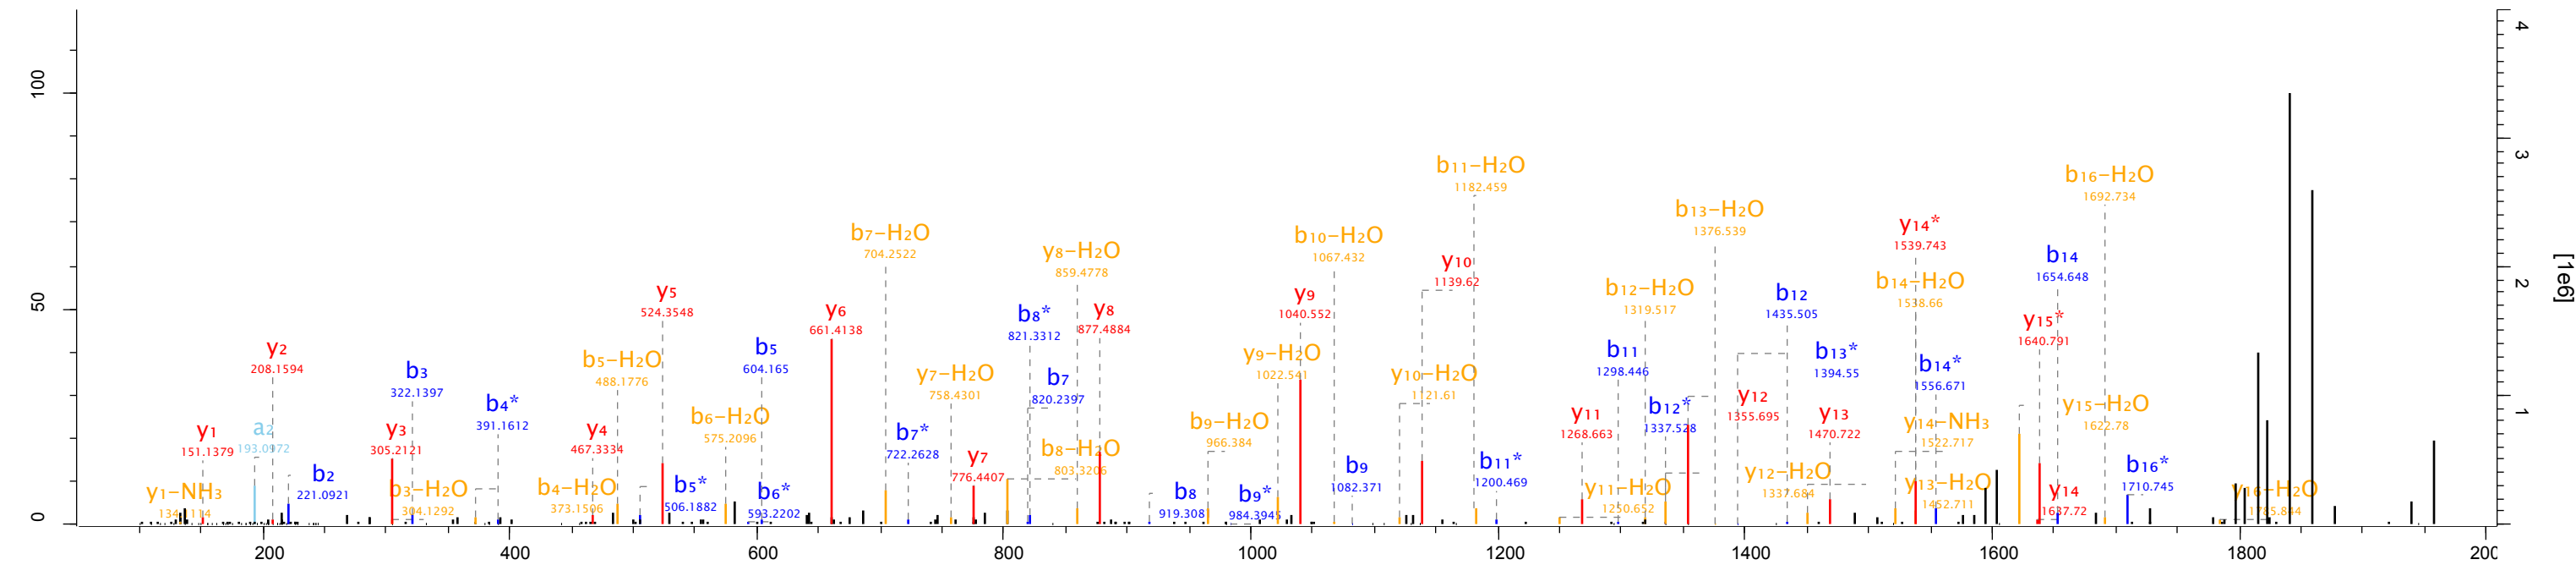

- G Y T S D S E V Y T D H G R P G K -

Fragmentation mapping (b-ions in blue, y-ions in red):

- Y1: G
- Y2: G
- Y3: P
- Y4: R
- Y5: G
- Y6: H
- Y7: D
- Y8: T
- Y9: Y
- Y10: V
- Y11: E
- Y12: S
- Y13: D
- Y14: S
- Y15\*: T

Fragmentation mapping (b-ions in blue):

- b2: Y
- b3: T
- b4\*: S
- b5: D
- b6\*: S
- b7: E
- b8: V
- b9: Y
- b11: D
- b12: H
- b13\*: G
- b14: R
- b16\*: G

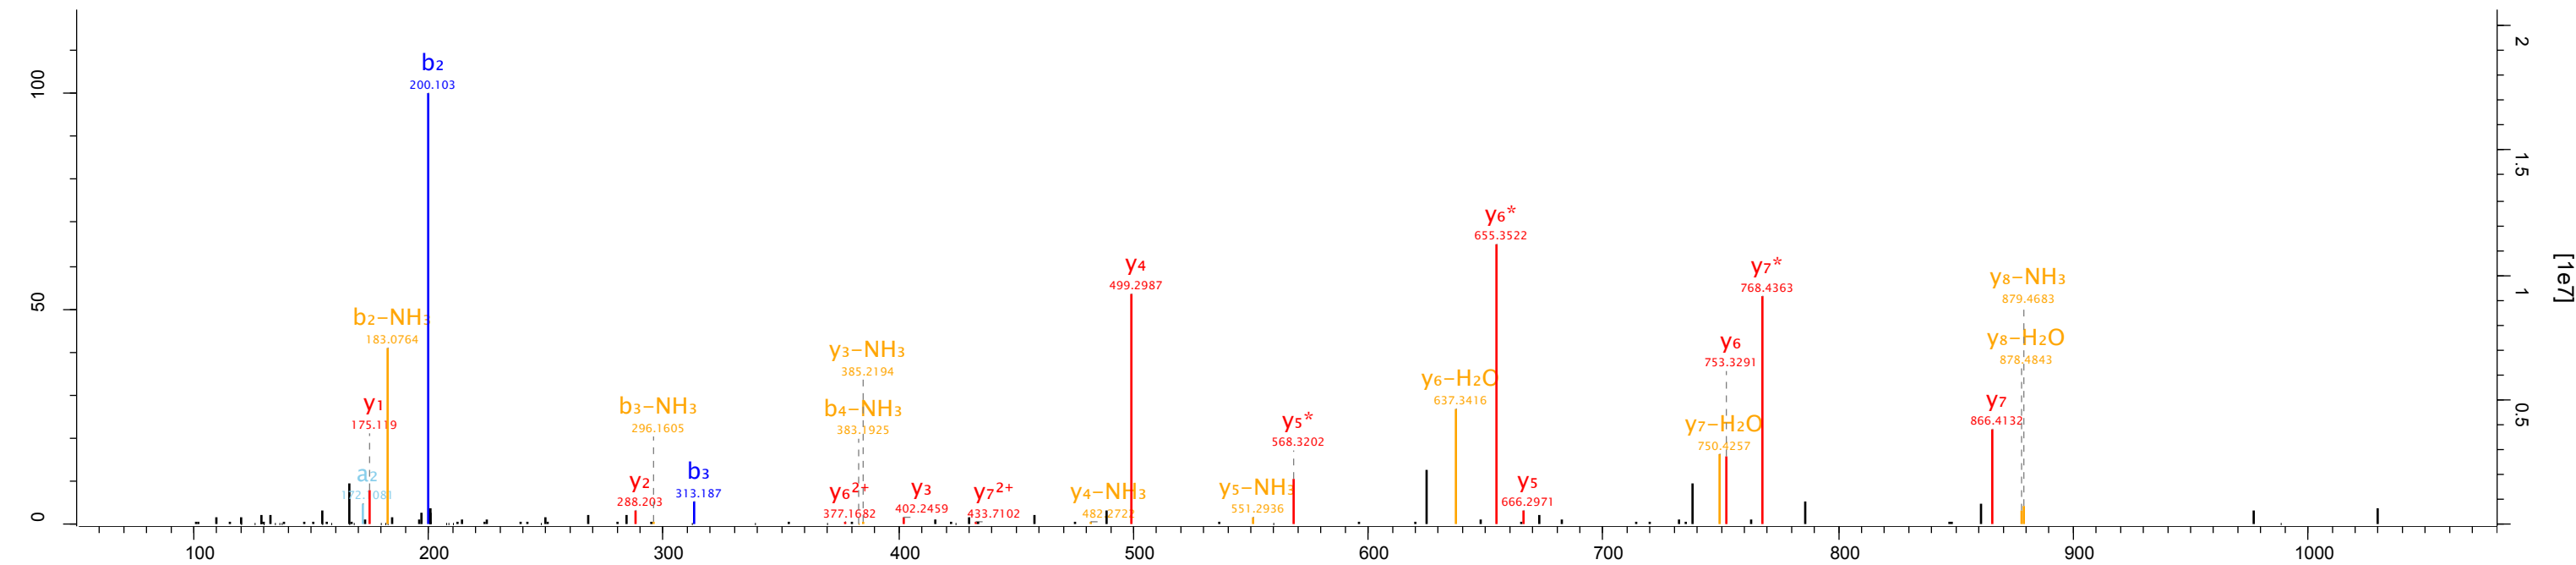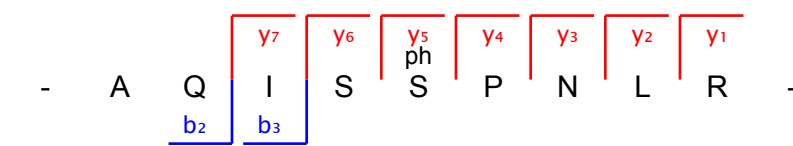



Raw file 20150812\_A375SR\_Phospho\_BR1\_09 Scan 11134 Method FTMS; HCD Score 112.82 m/z 729.9 Gene names PATL1

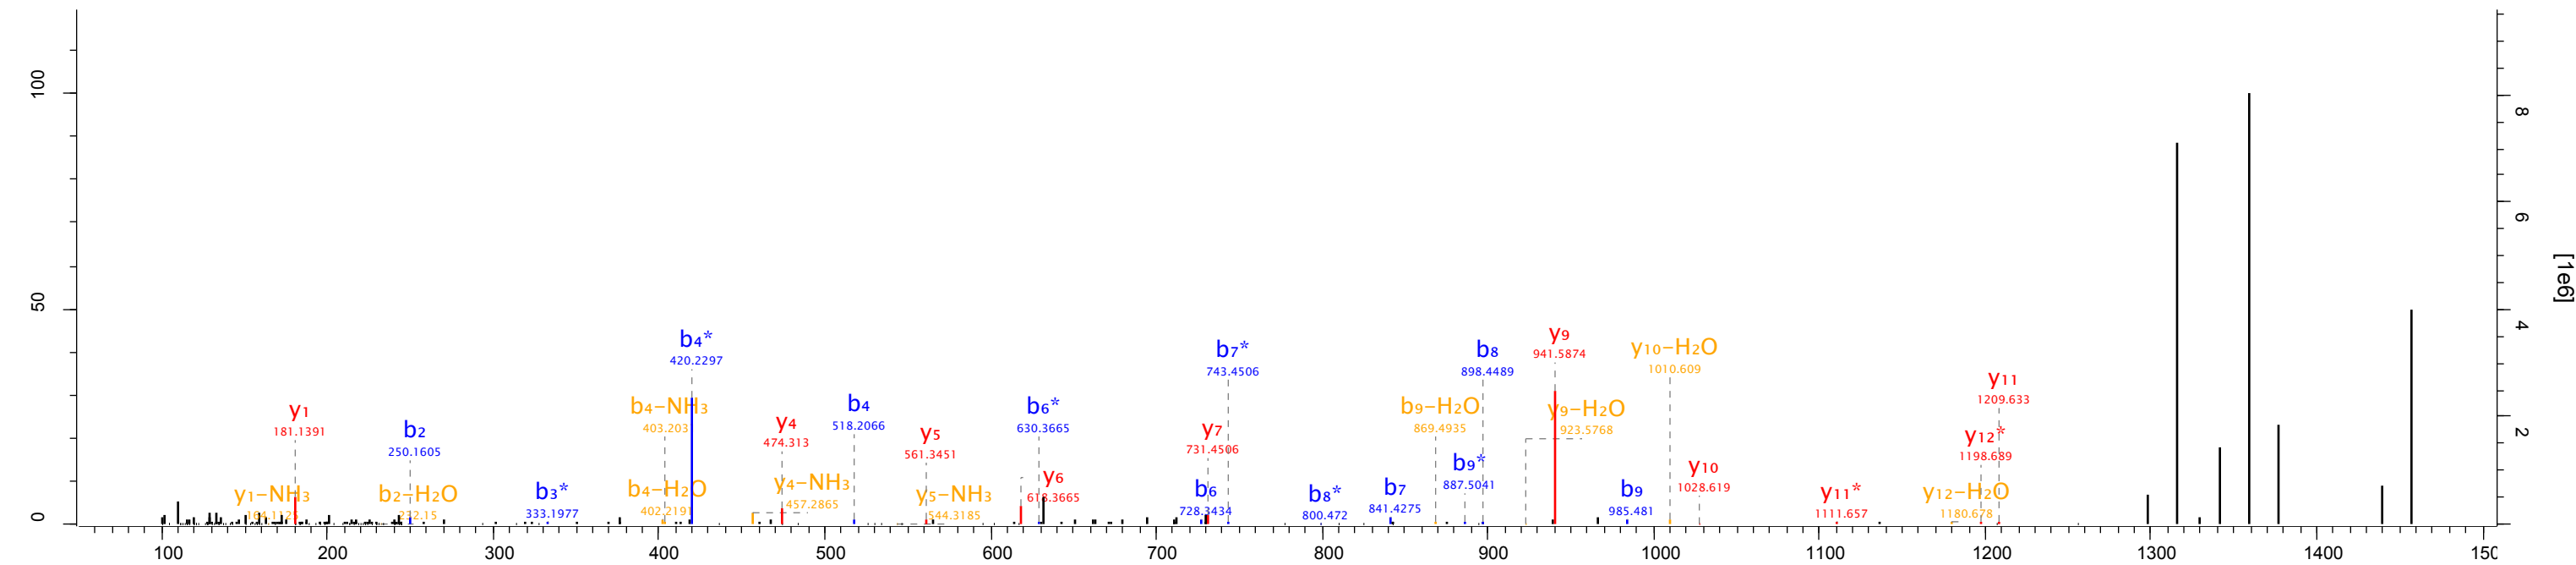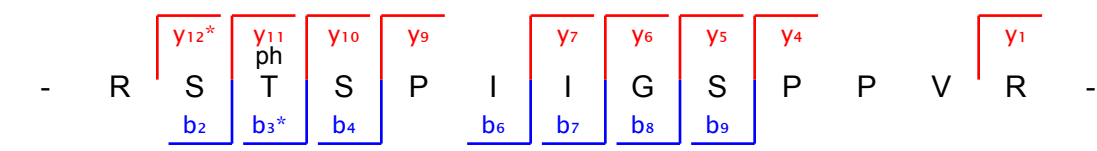

Raw file 20150812\_A375SR\_Phospho\_BR1\_09 Scan 12174 Method FTMS; HCD Score 92.35 m/z 747.32 Gene names LMNA

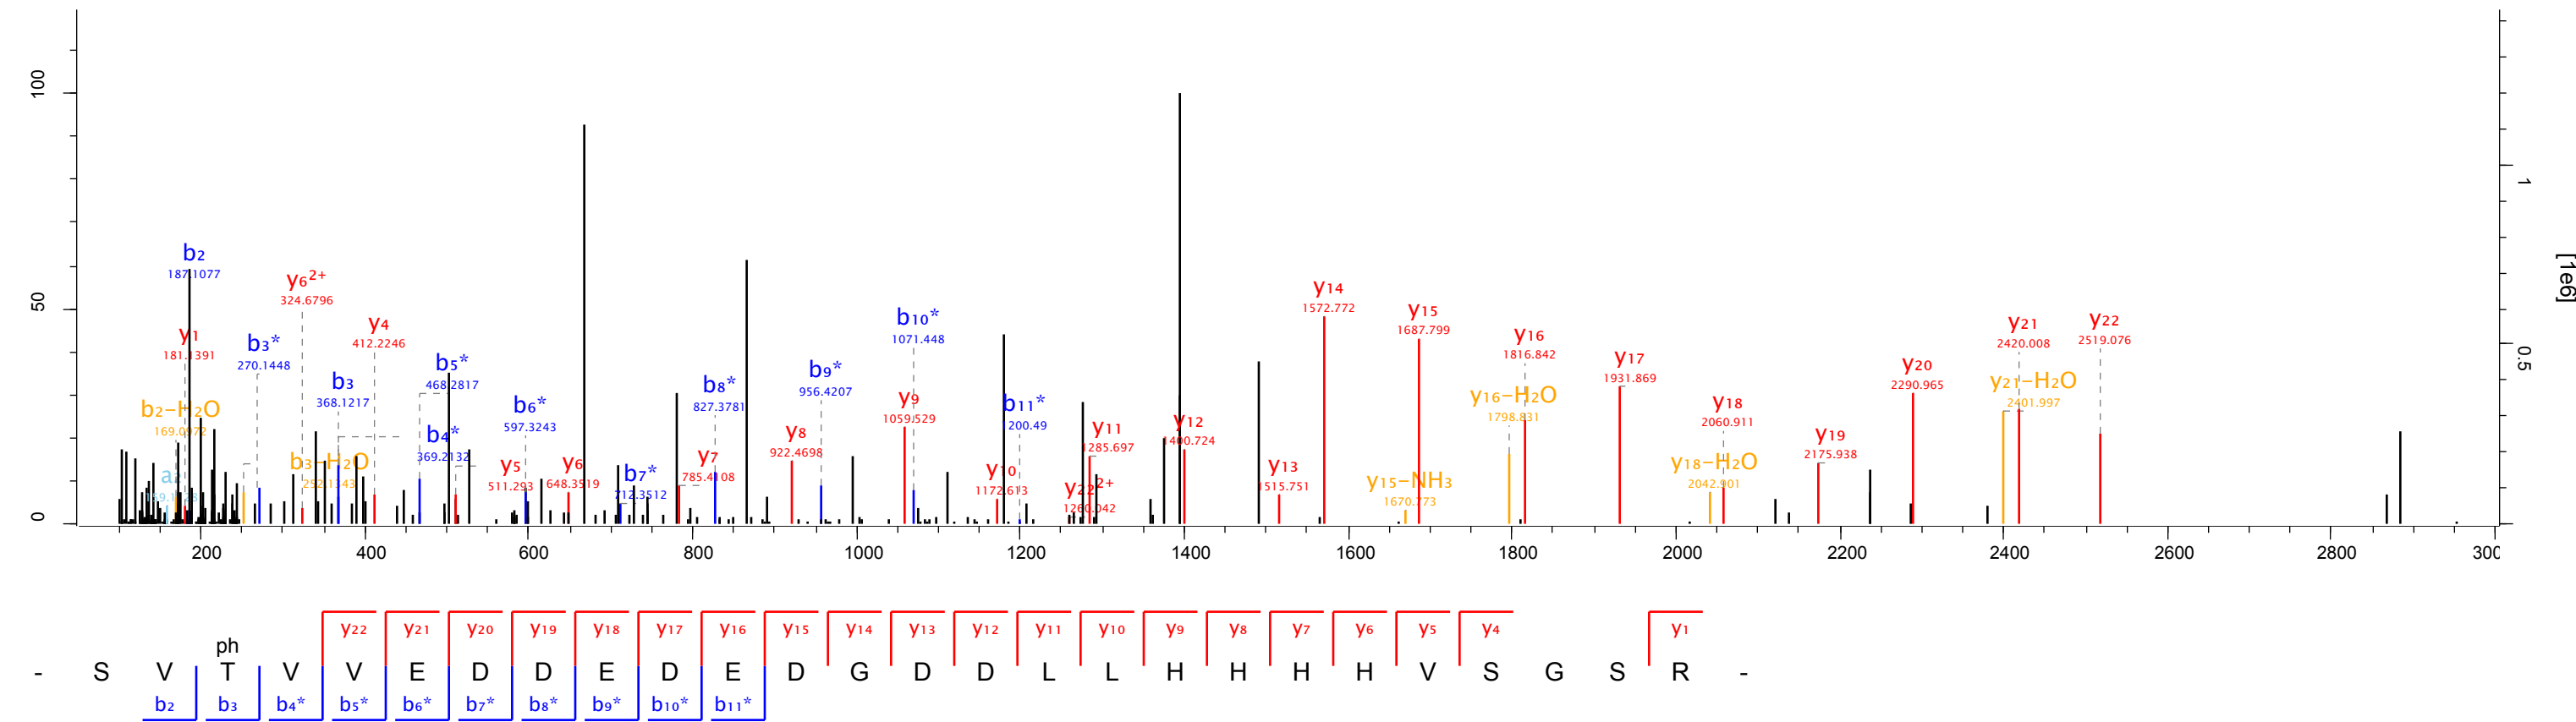

Raw file 20150812\_A375SR\_Phospho\_BR1\_09 Scan 12384 Method FTMS; HCD Score 229.03 m/z 599.85 Gene names PNISR

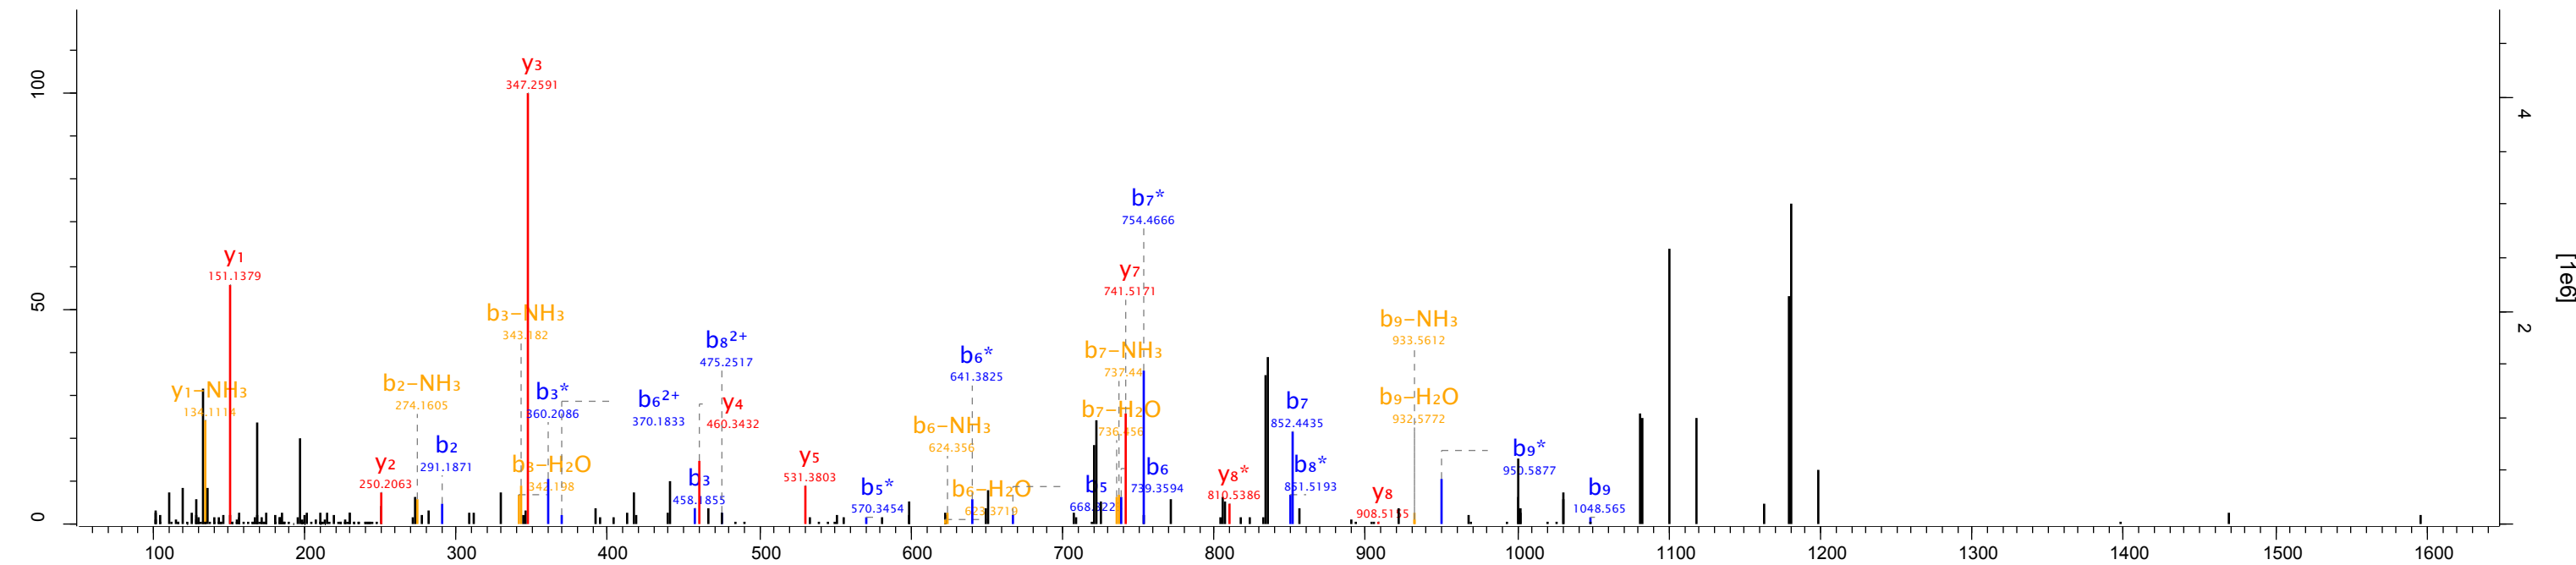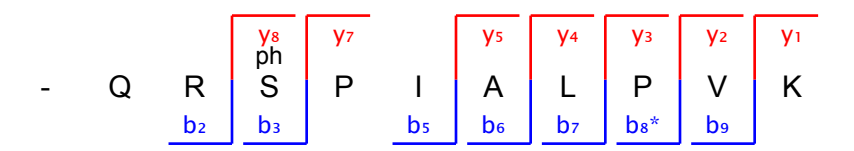

Raw file 20150812\_A375SR\_Phospho\_BR1\_09 Scan 14074 Method FTMS; HCD Score 206.03 m/z 818.77 Gene names TPR

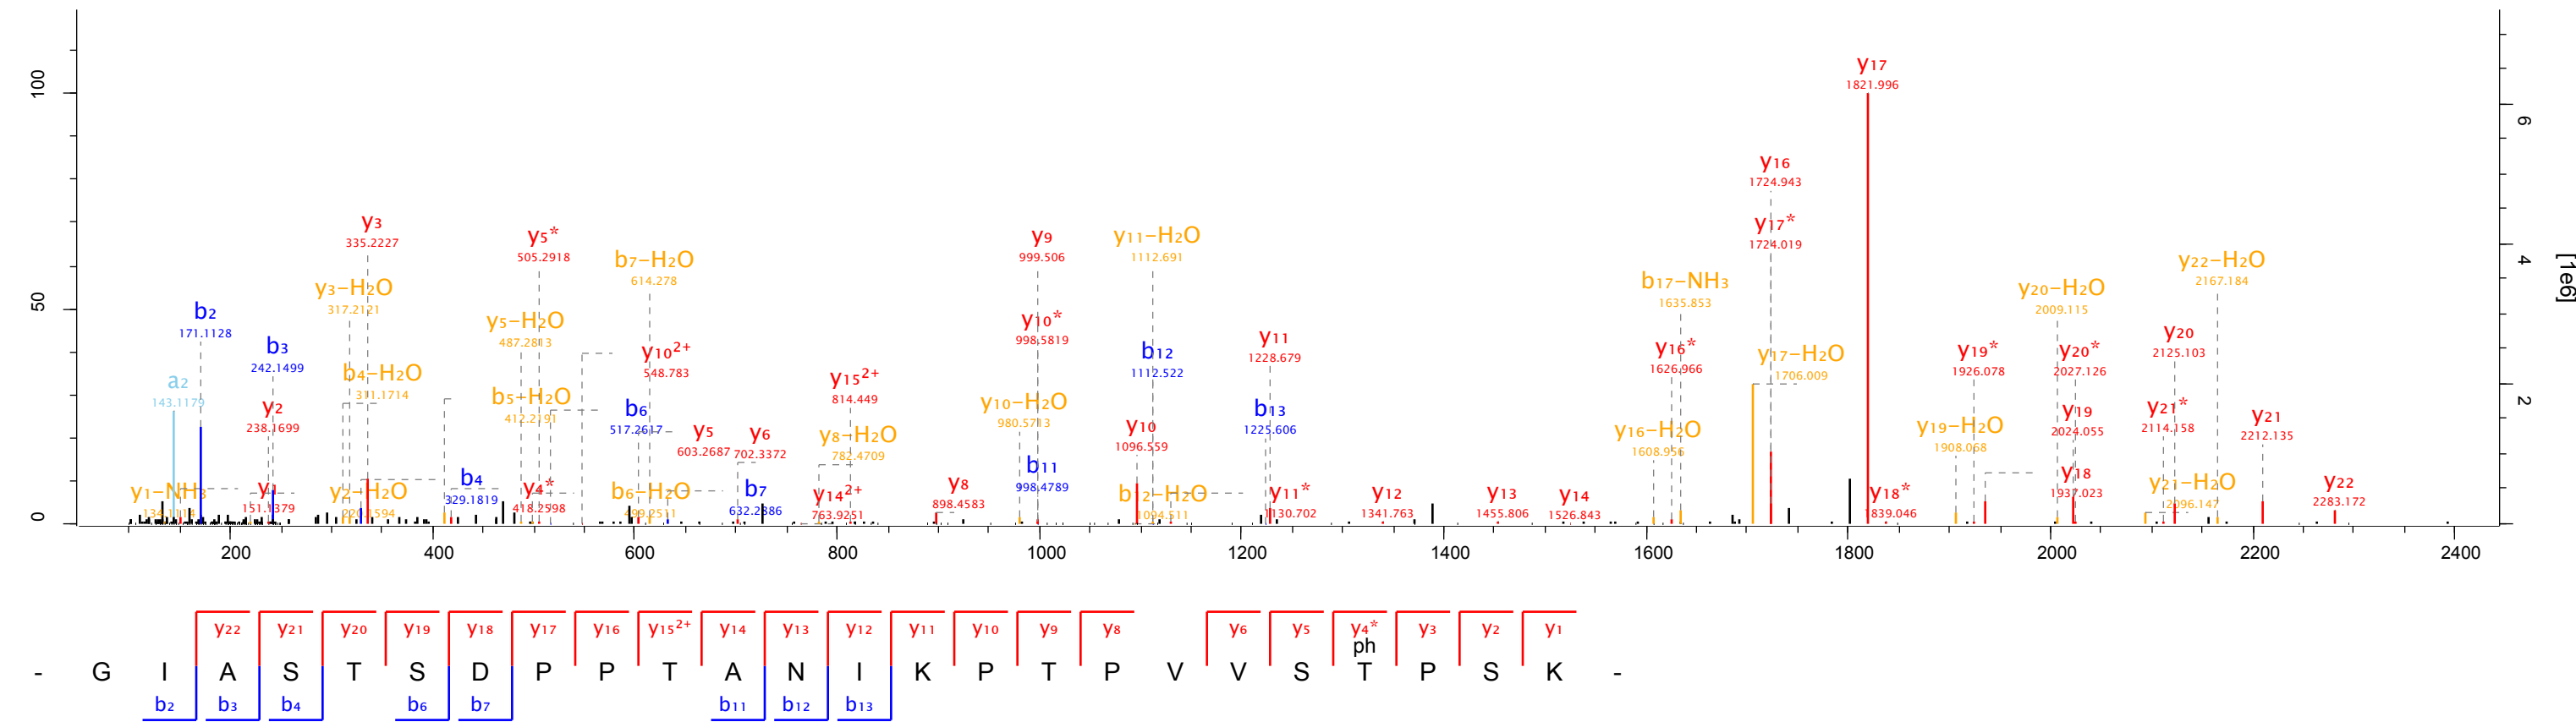

Raw file 20150812\_A375SR\_Phospho\_BR1\_09 Scan 14154 Method FTMS; HCD Score 79.49 m/z 616.37 Gene names PFDN6

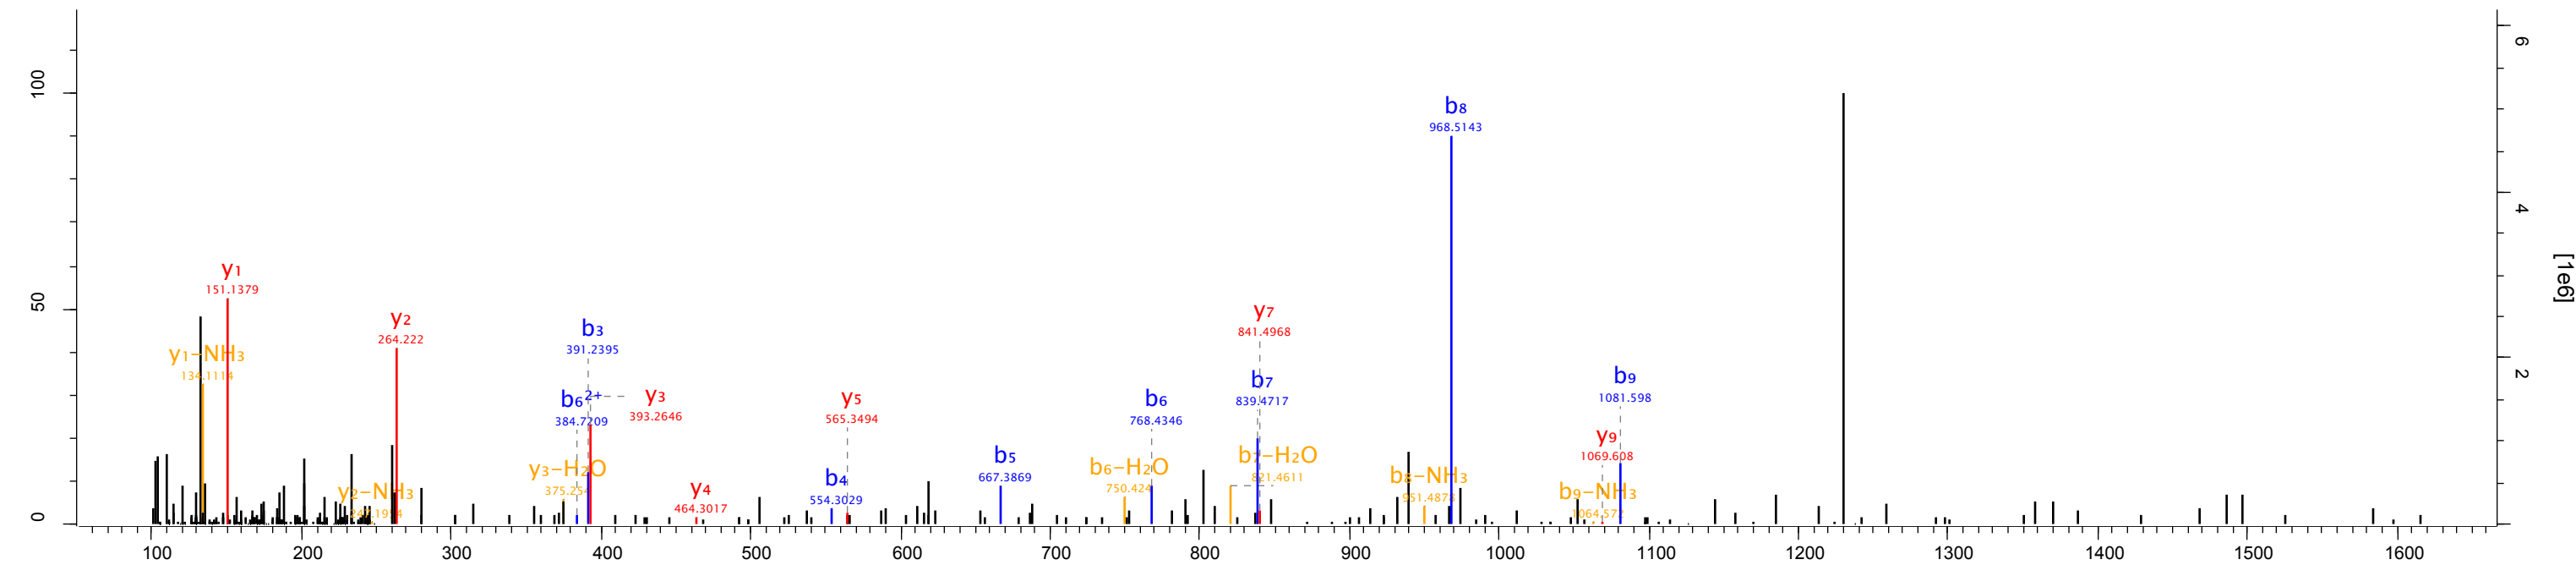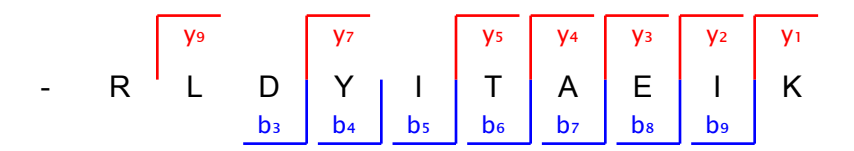

Raw file 20150812\_A375SR\_Phospho\_BR1\_09 Scan 14234 Method FTMS; HCD Score 251.28 m/z 789.31 Gene names HUWE1

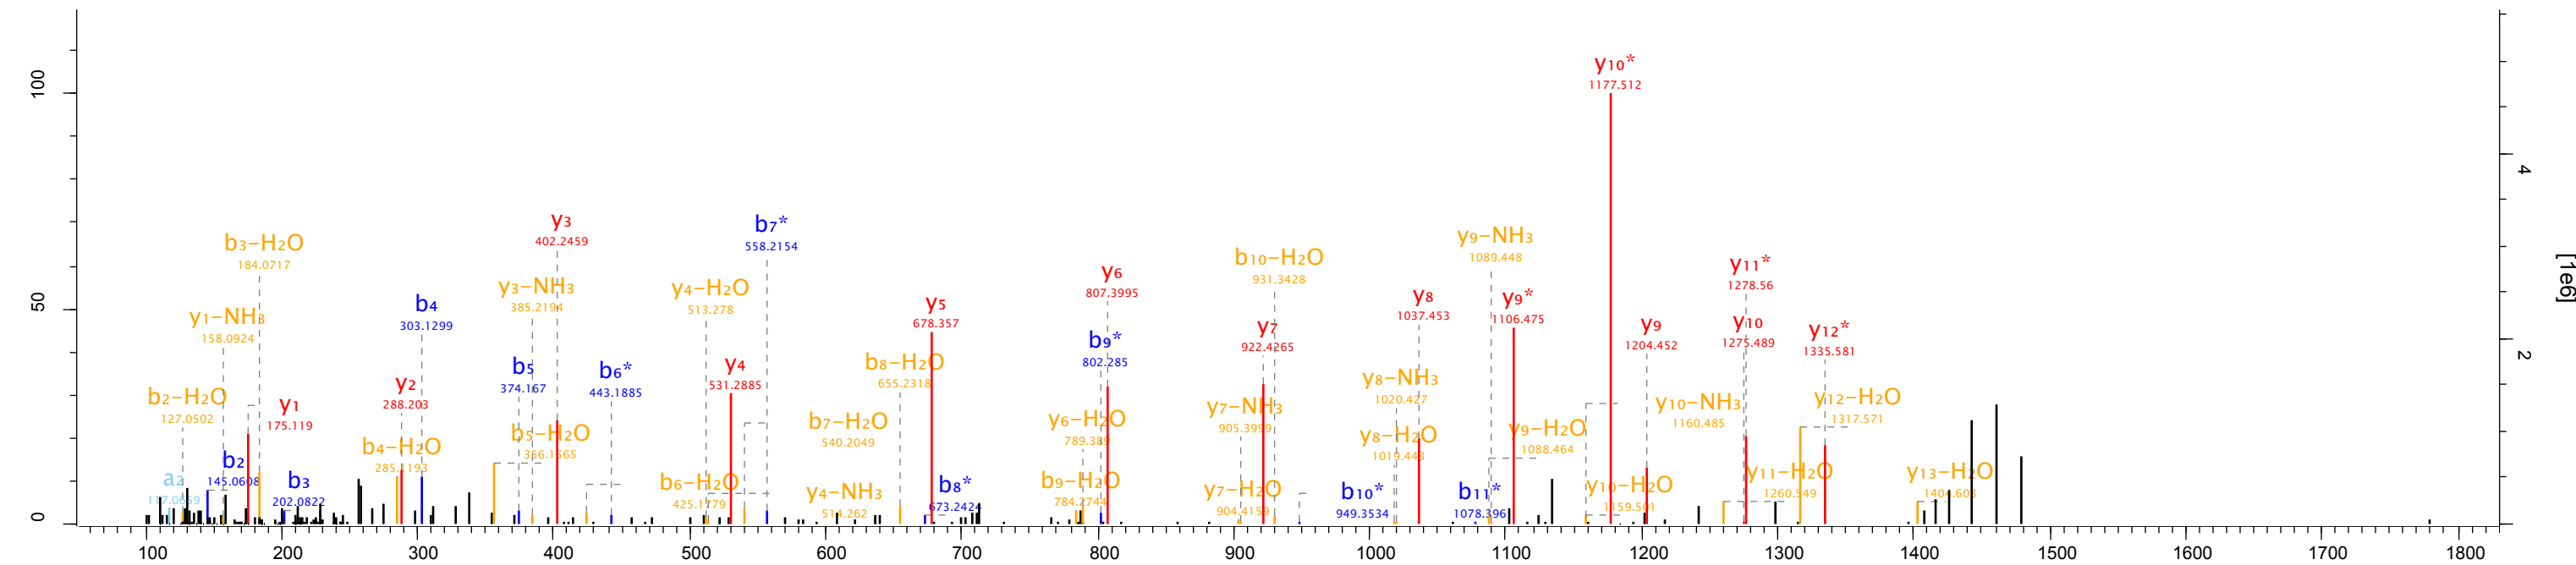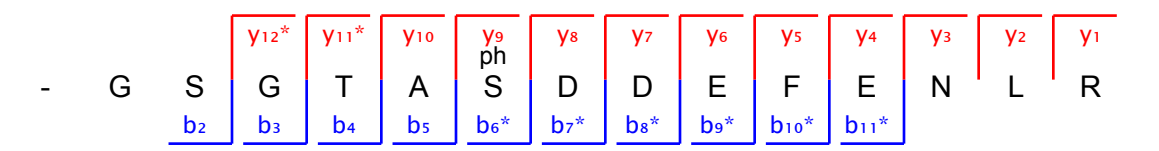

Raw file  
 20150812\_A375SR\_Phospho\_BR1\_09  
 Scan 14464 Method FTMS; HCD Score 157.96 m/z 648.34 Gene names ANLN

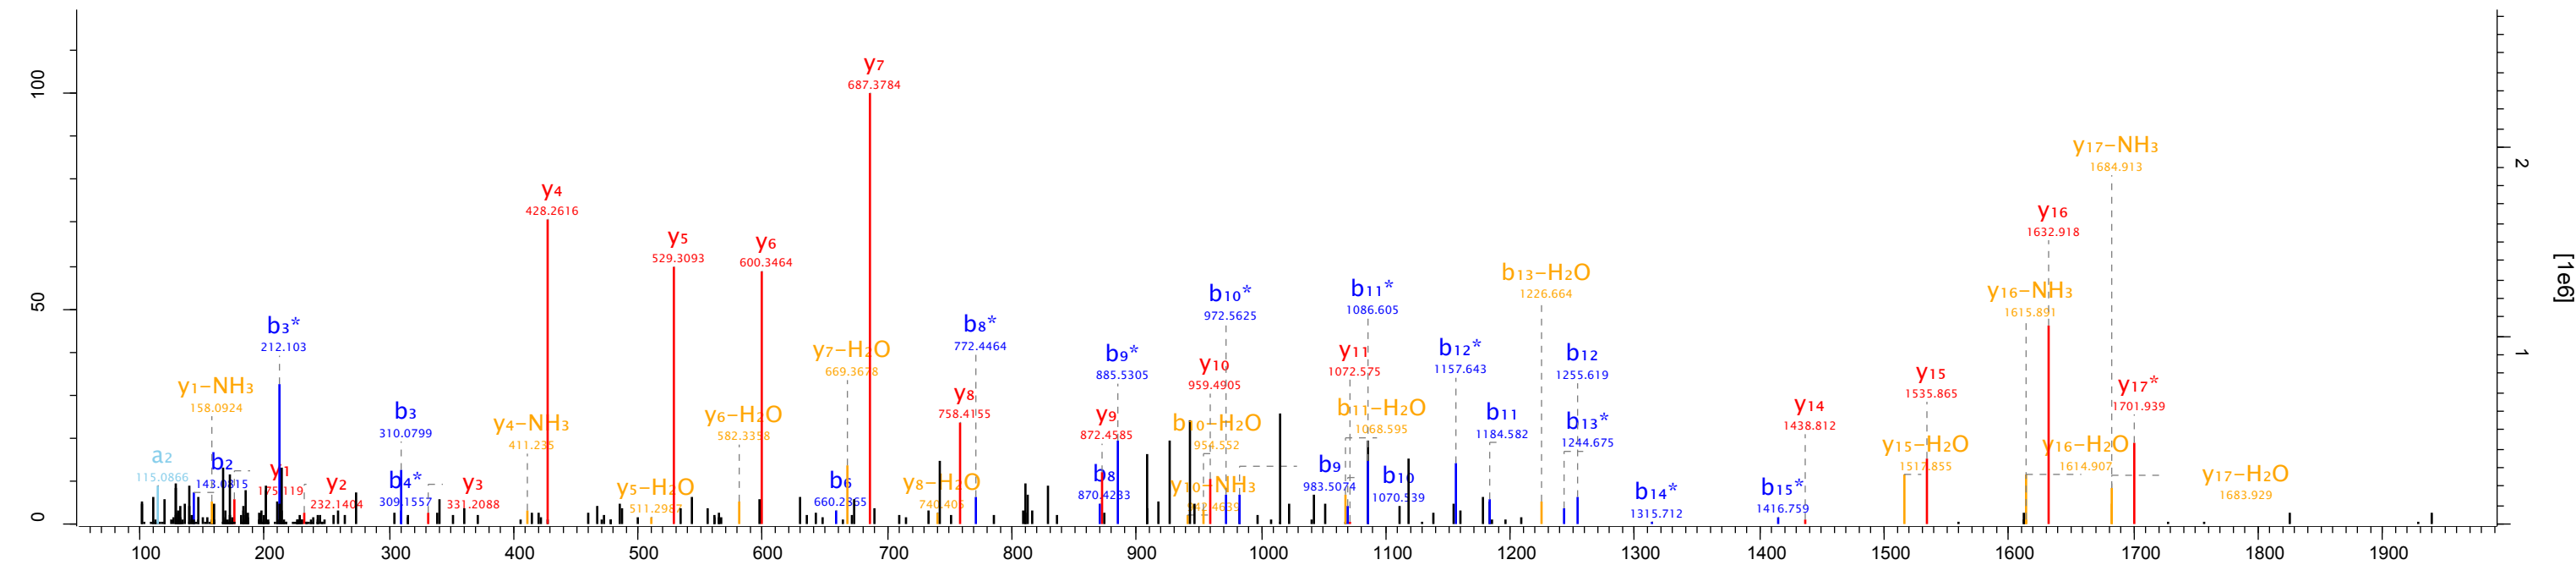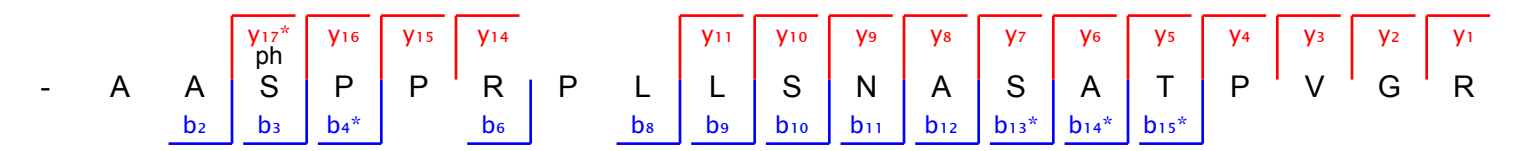

Raw file 20150812\_A375SR\_Phospho\_BR1\_09 Scan 14674 Method FTMS; HCD Score 220.48 m/z 812.42 Gene names TRIM33

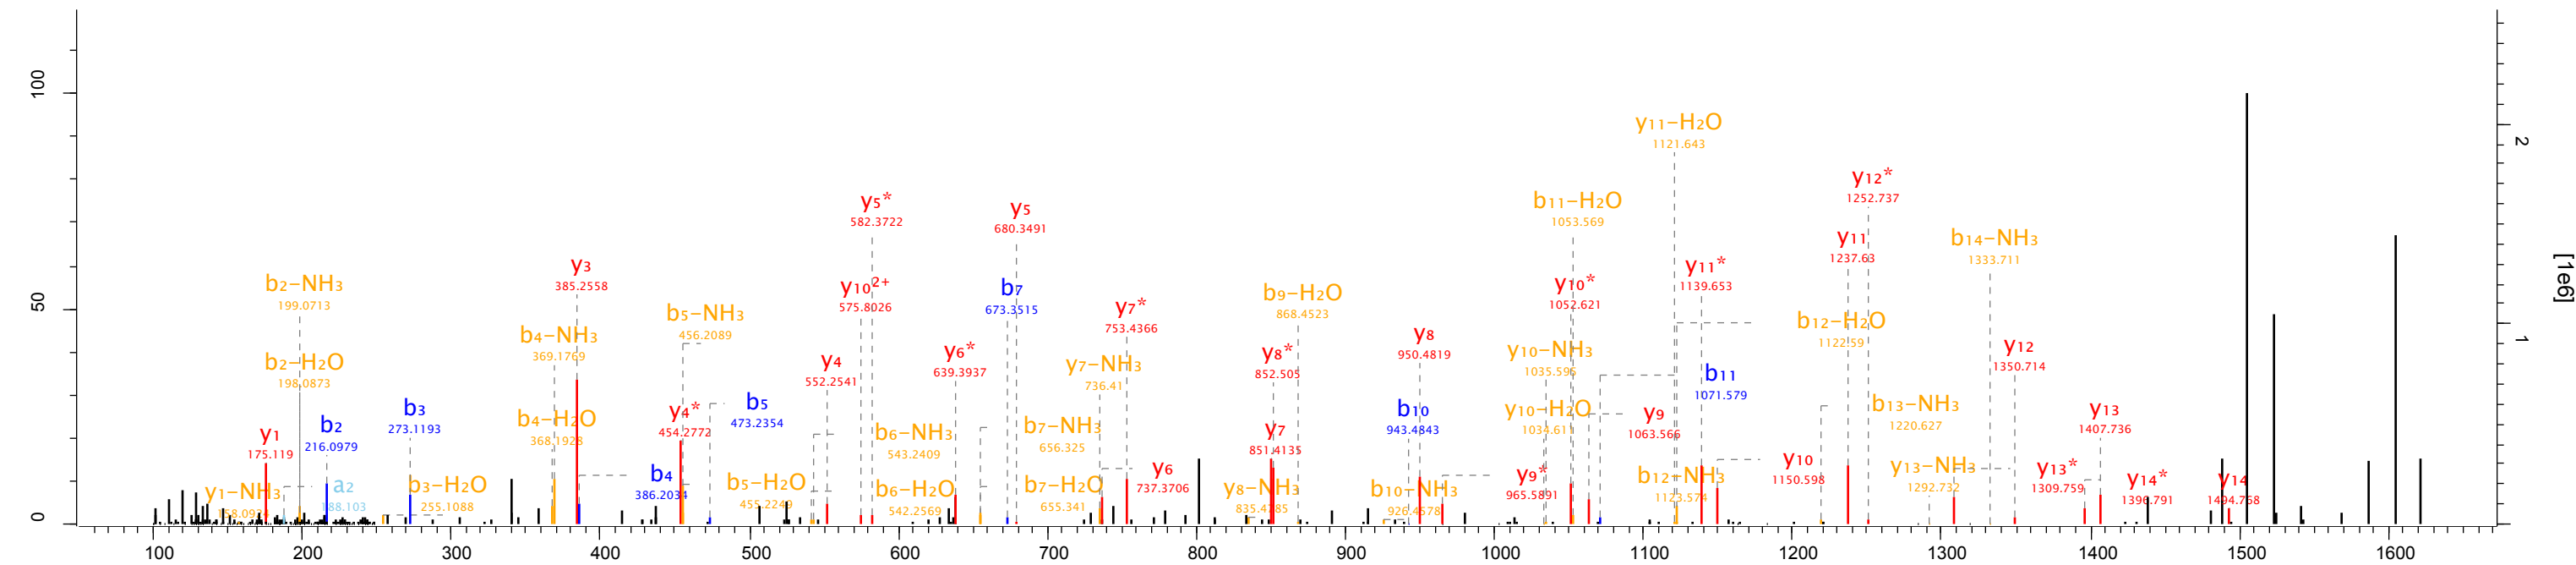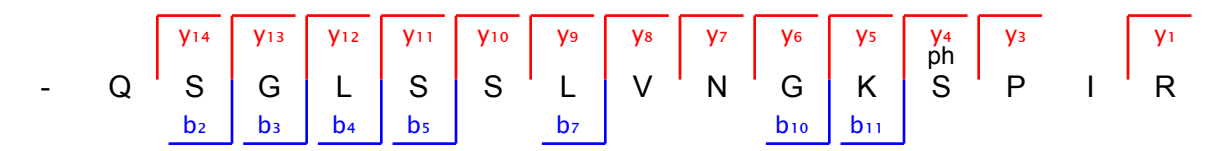



Raw file: 20150812\_A375SR\_Phospho\_BR1\_09  
 Scan: 15714 Method: FTMS; HCD Score: 240.21 m/z: 882.4 Gene names: SH3BP5L

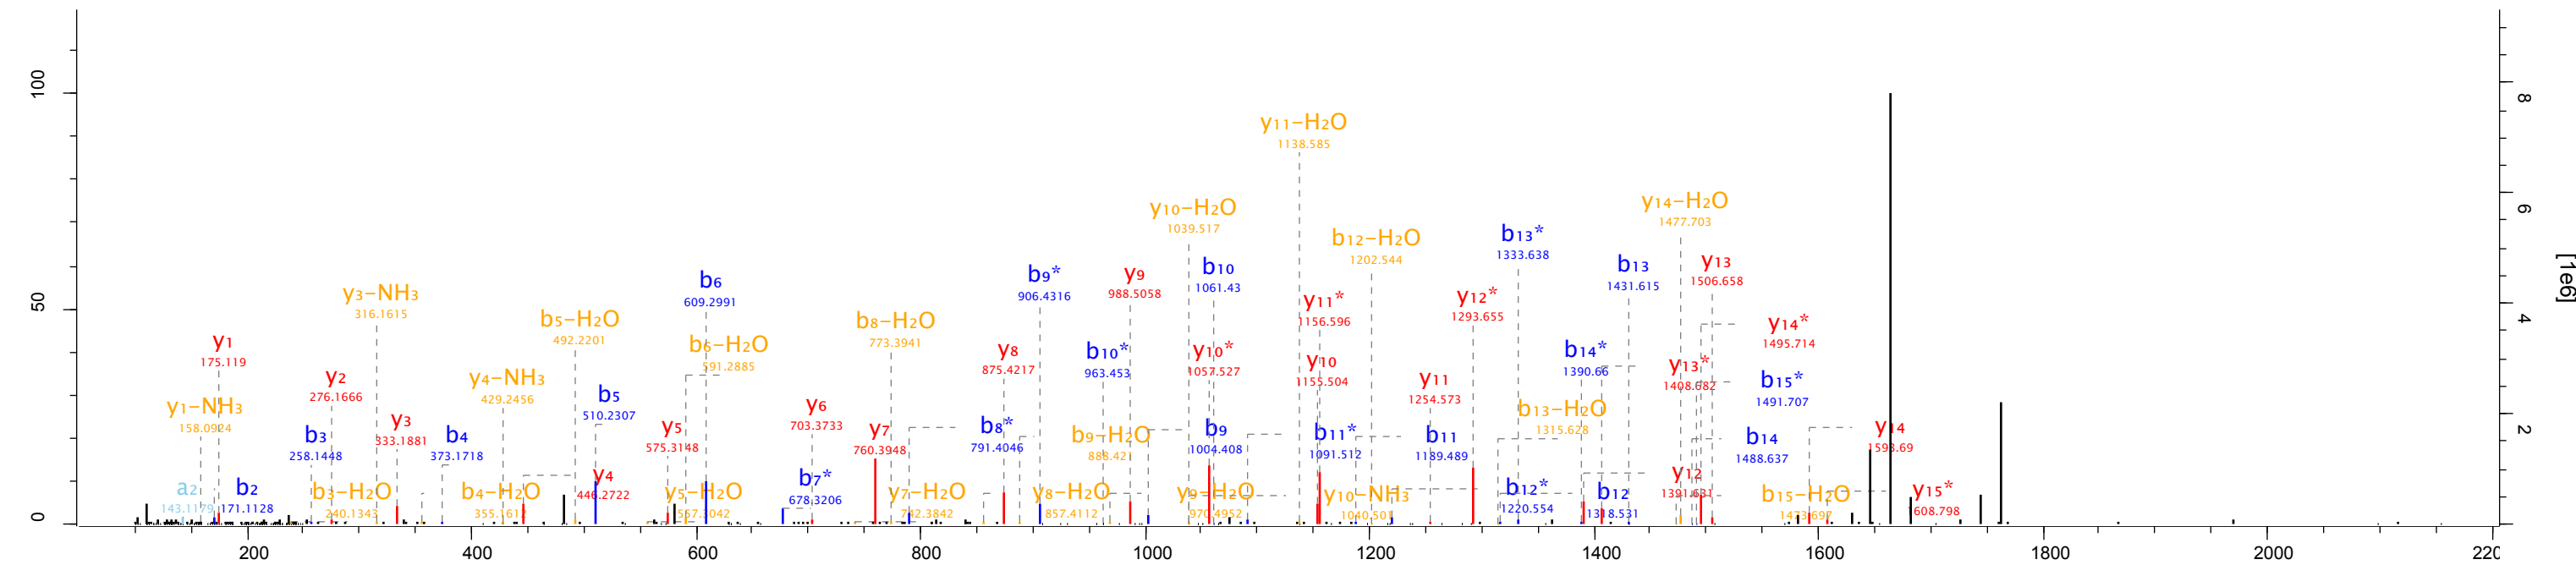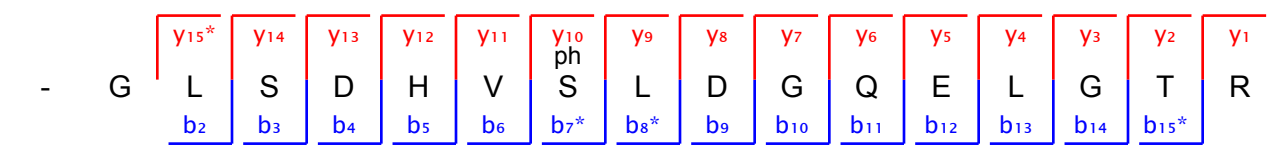

Raw file 20150812\_A375SR\_Phospho\_BR1\_09 Scan 16794 Method FTMS; HCD Score 173.21 m/z 785.88 Gene names RPRD2

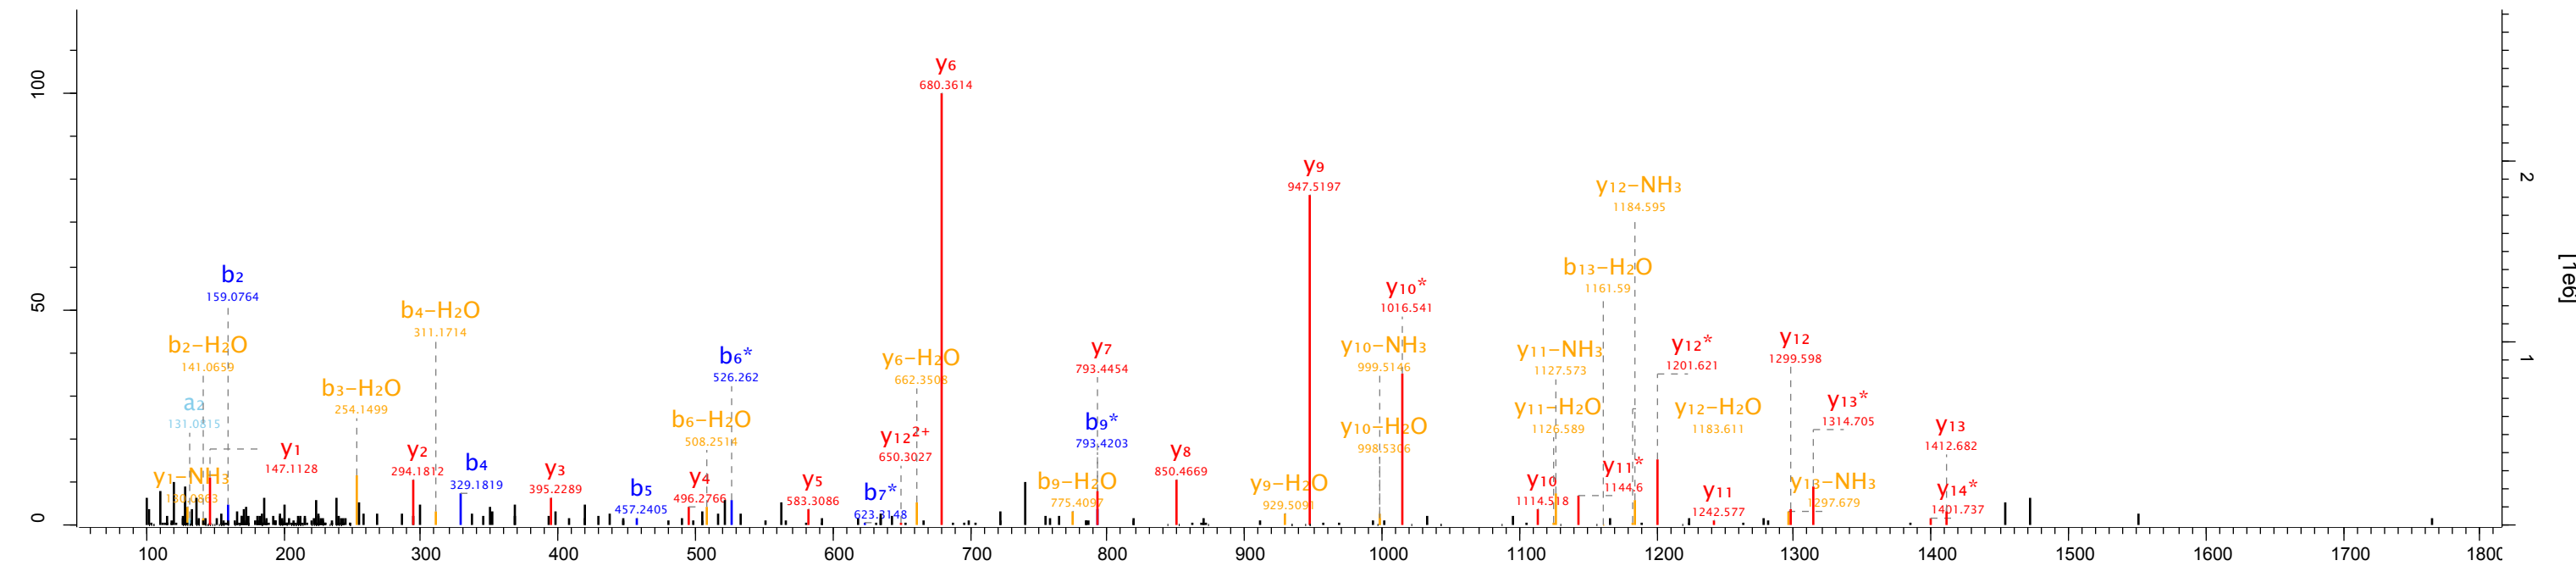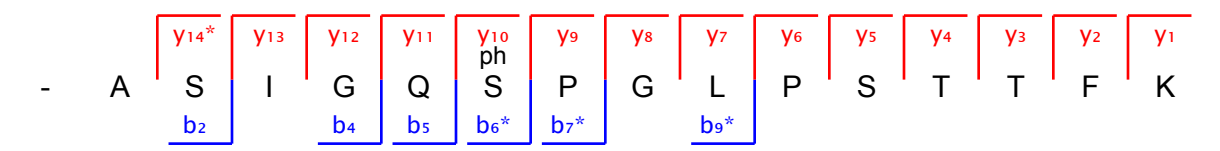

Raw file: 20150812\_A375SR\_Phospho\_BR1\_09  
 Scan: 2144 Method: FTMS; HCD Score: 91.66 m/z: 522.95 Gene names: SIRT6

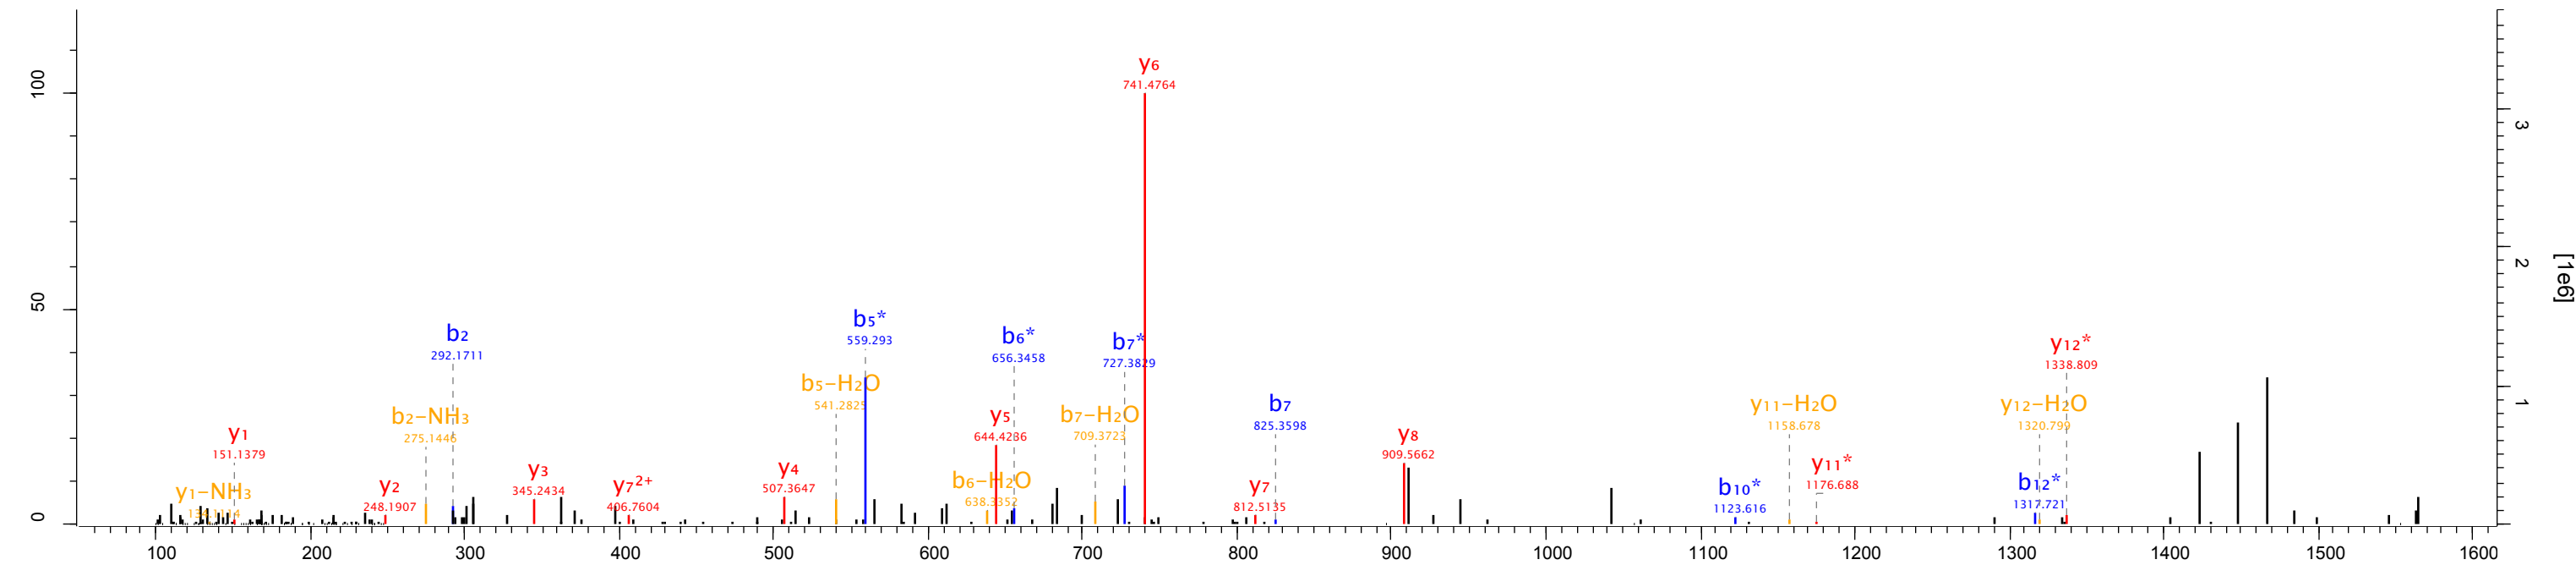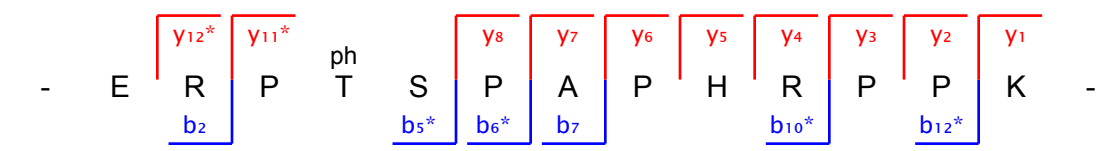

Raw file  
20150812\_A375SR\_Phospho\_BR1\_09

Scan 21764 Method FTMS; HCD Score 126.74 m/z 1215.9 Gene names TRIM28

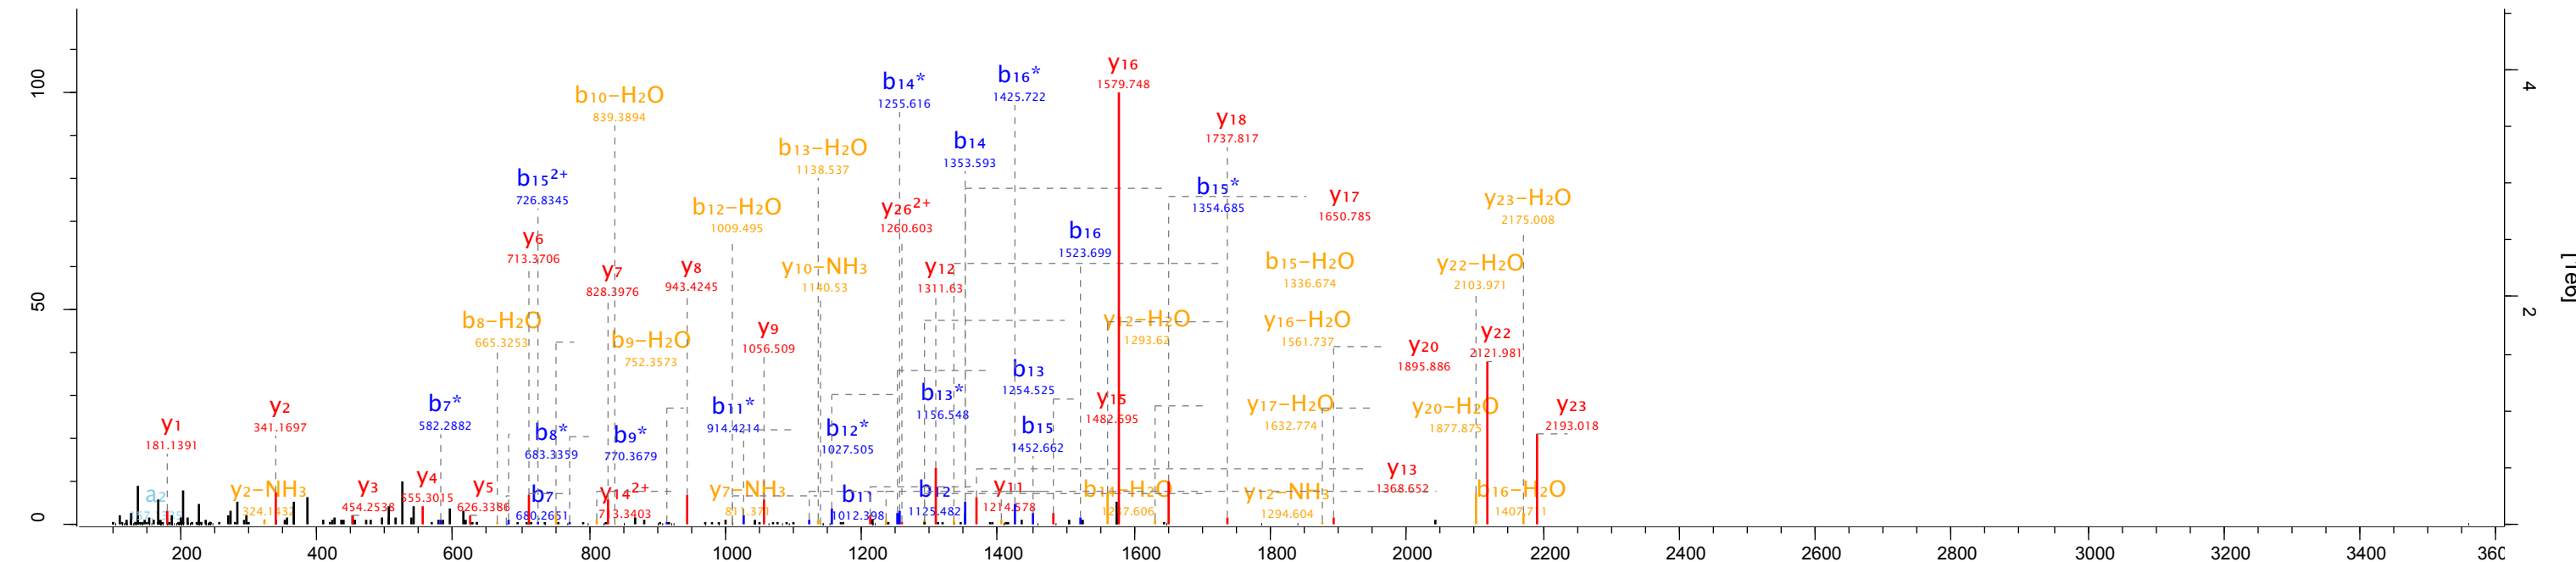

- L A S P S G S T S S G L E V V A P E G T S A P G G G P G T L D D S A T I C R

a2
b7
b8\*
b9\*
b11
b12
b13
b14
b15
b16
y26<sup>2+</sup>
y23
y22
y20
y18
y17
y16
y15
y14<sup>2+</sup>
y13
y12
y11
y9
y8
y7
y6
y5
y4
y3
y2
y1

Raw file 20150812\_A375SR\_Phospho\_BR1\_09 Scan 2274 Method FTMS; HCD Score 77.81 m/z 542.77 Gene names PAK4;NRBP2

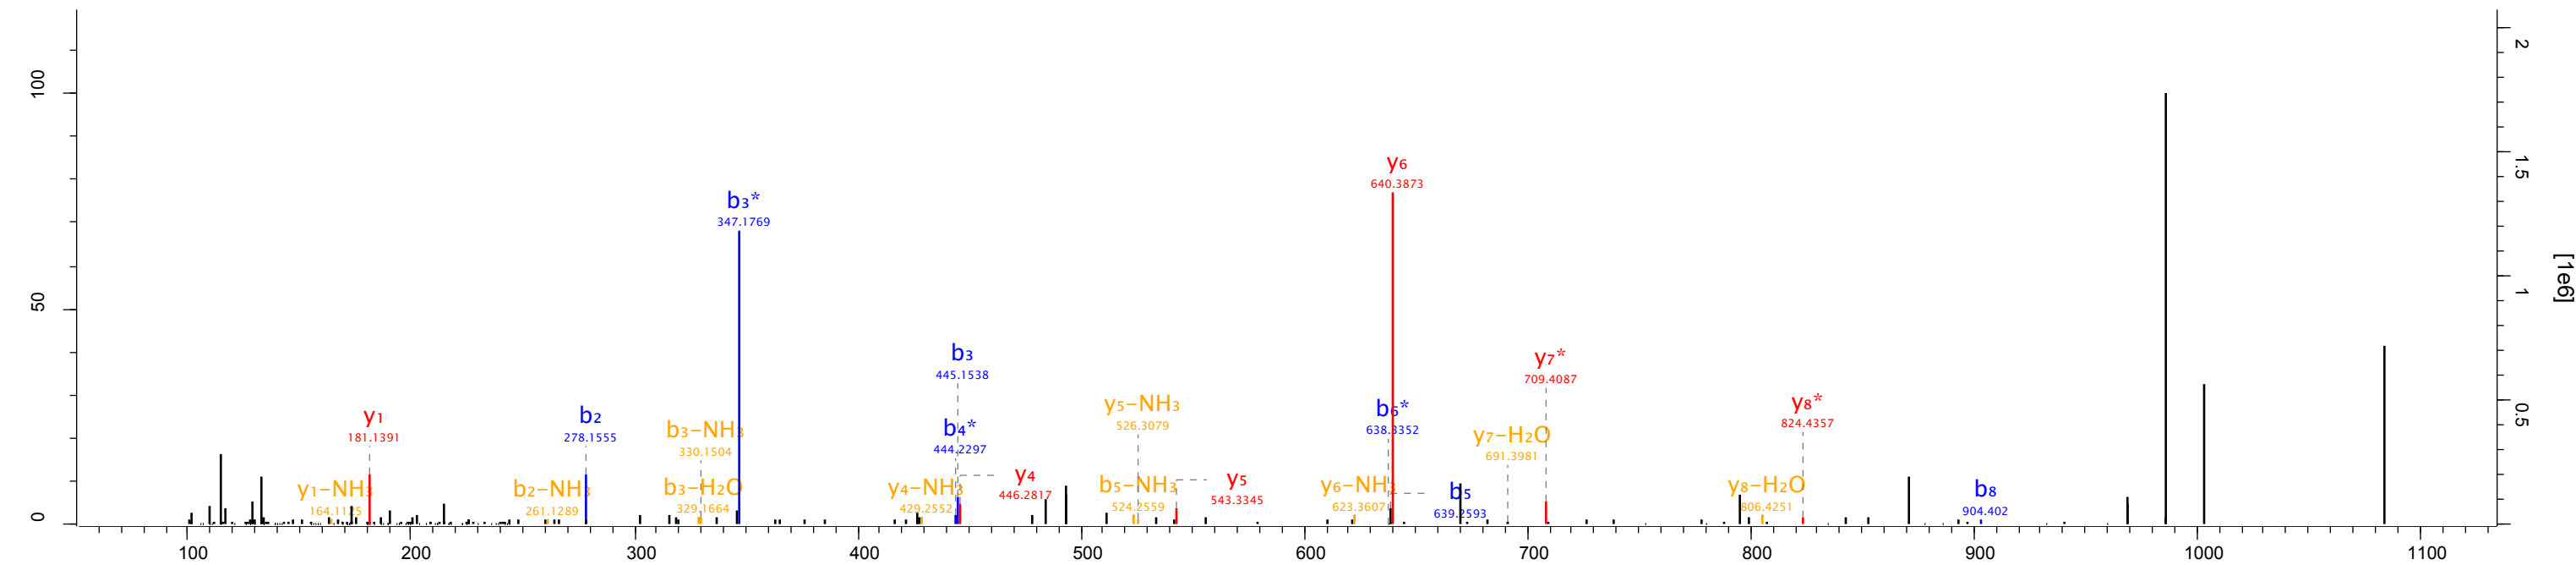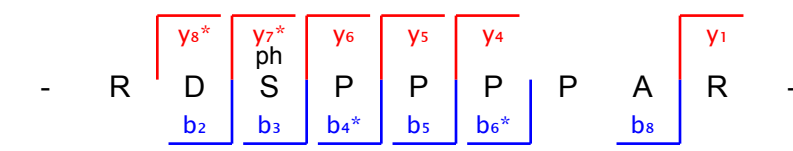

Raw file: 20150812\_A375SR\_Phospho\_BR1\_09  
 Scan: 2334 Method: FTMS; HCD Score: 76.07 m/z: 466.89 Gene names: CAP1

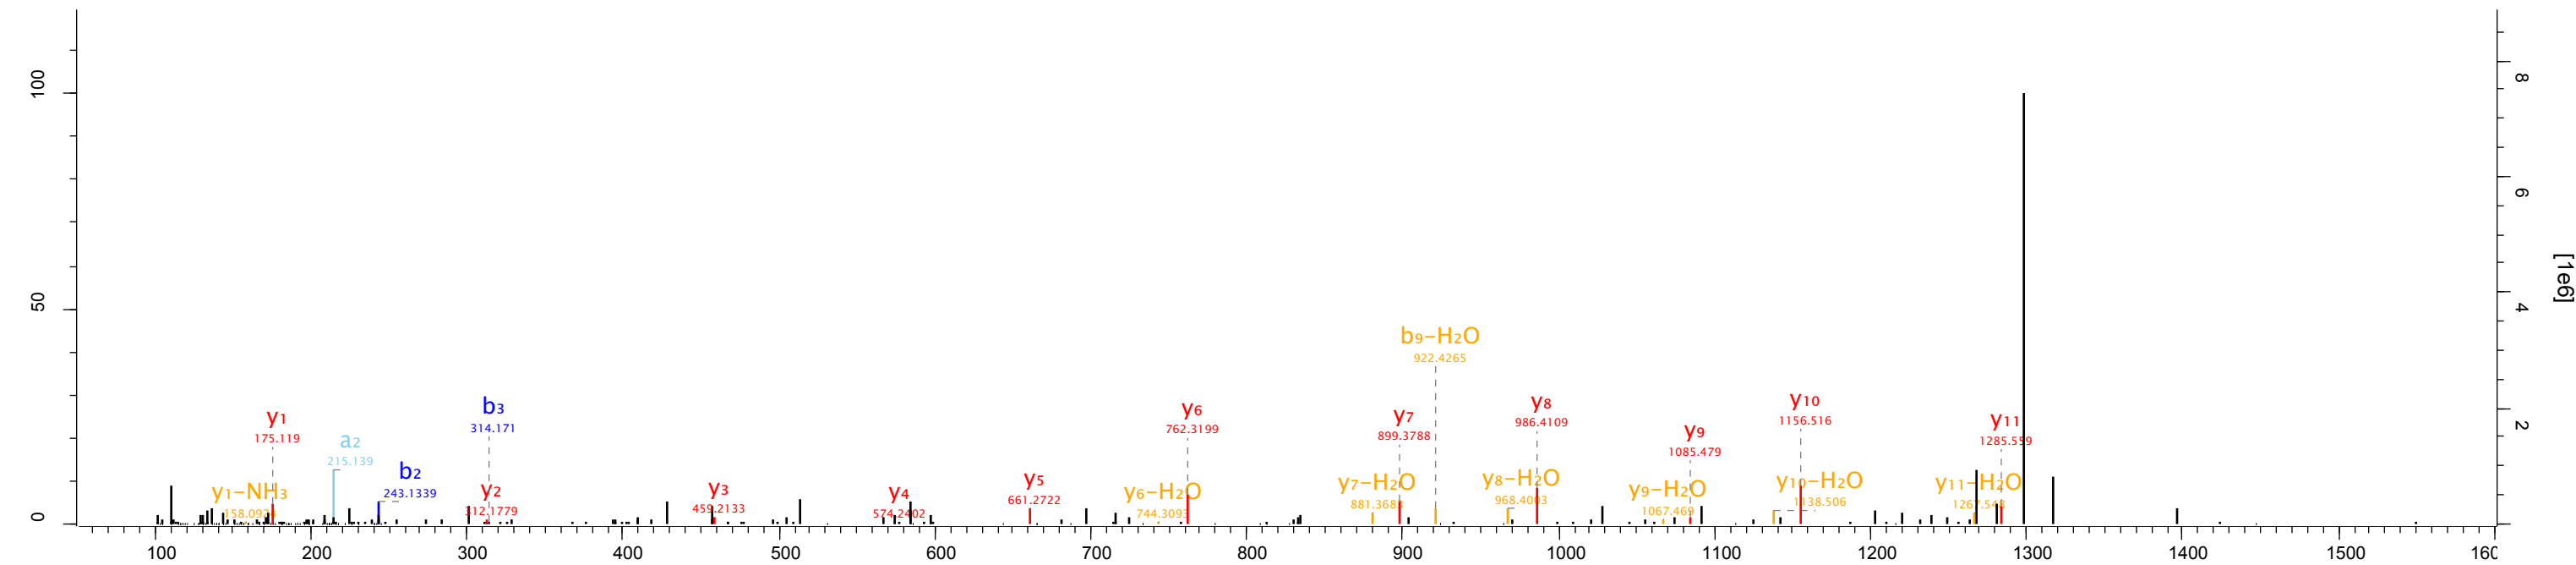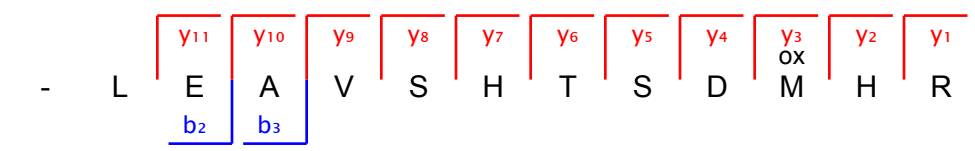

Raw file: 20150812\_A375SR\_Phospho\_BR1\_09  
 Scan: 23604 Method: FTMS; HCD Score: 251.67 m/z: 1194.26 Gene names: QRICH1

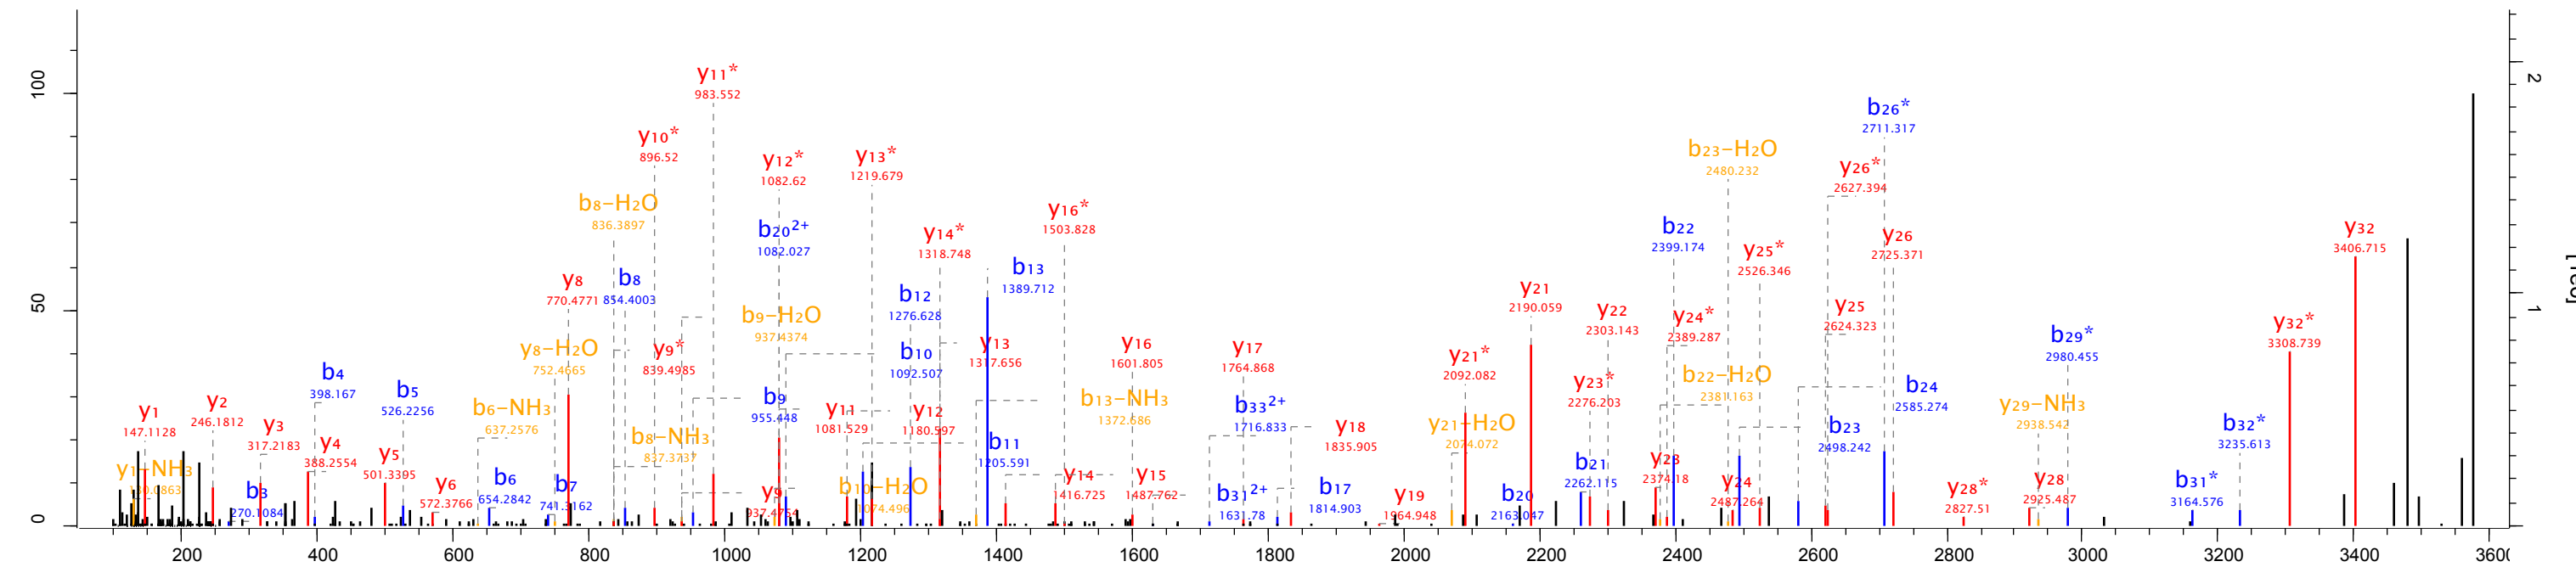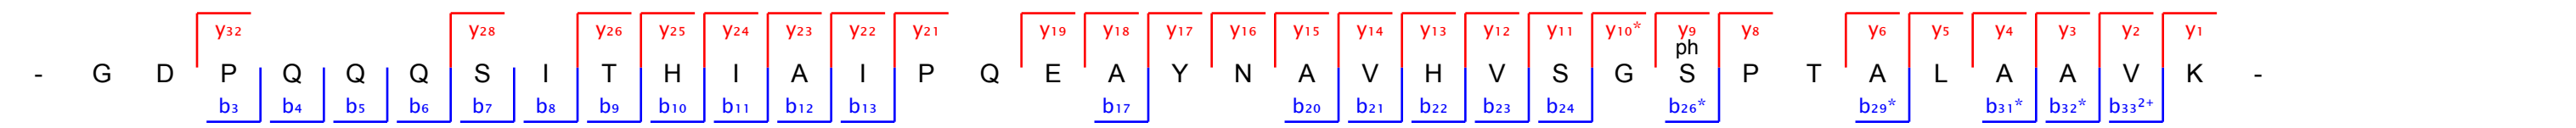

Raw file  
20150812\_A375SR\_Phospho\_BR1\_09

Scan 26194 Method FTMS; HCD Score 126.18 m/z 887.82 Gene names CEP170

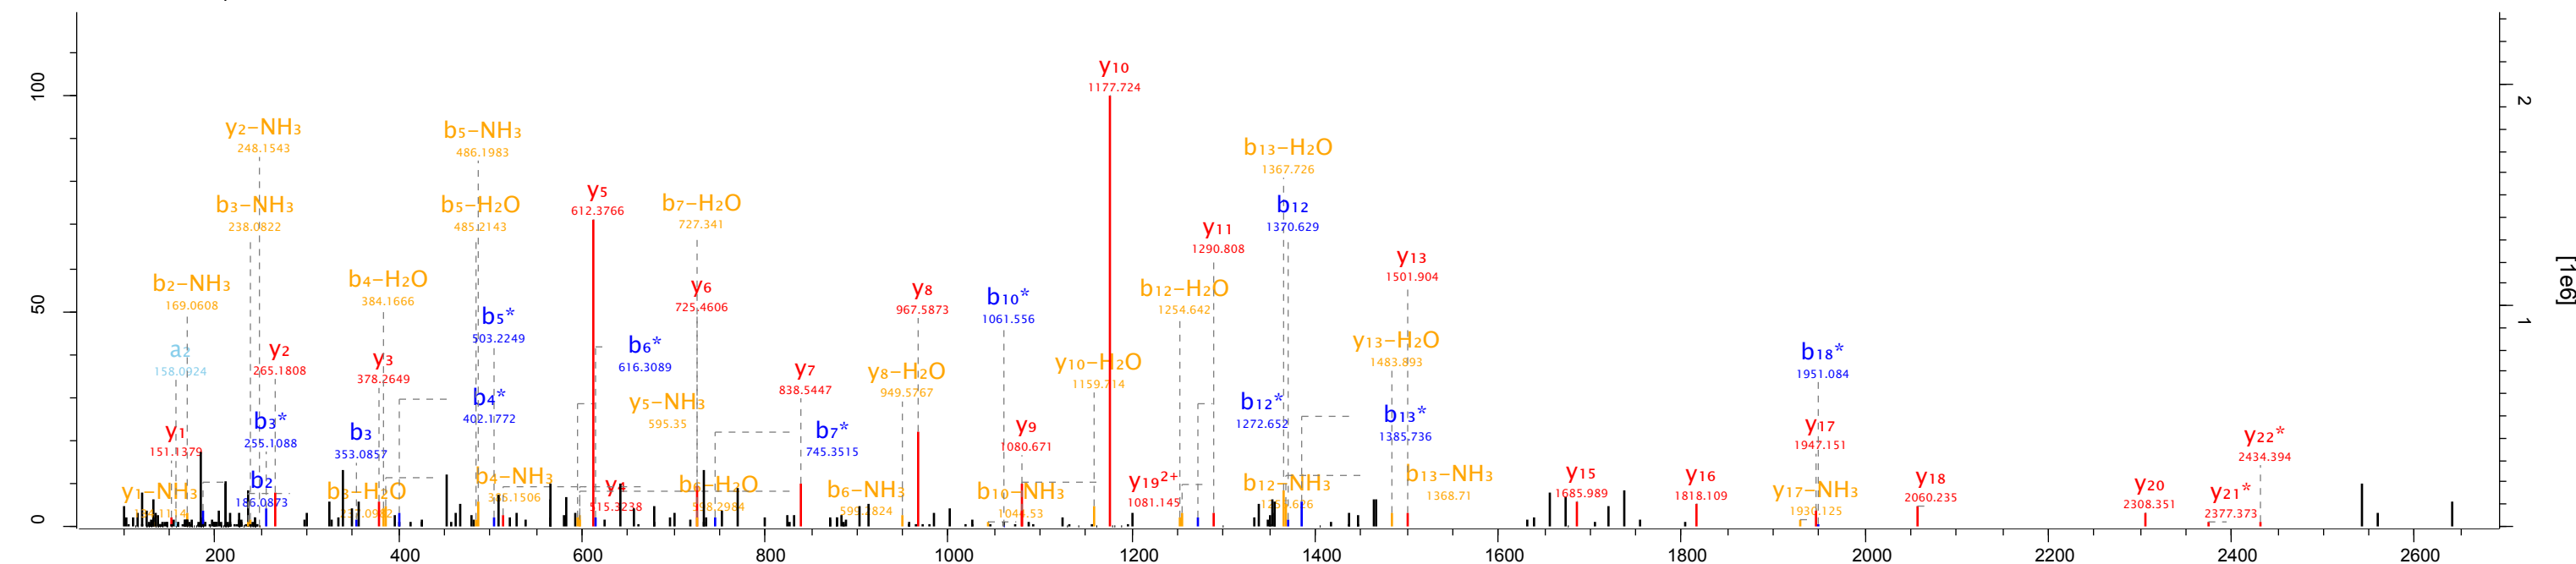

- Q -  
G S F T I E K P S P N I P I E L I P H I N K -  
b2 b3 b4\* b5\* b6\* b7\* b10\* b12 b13\* b18\*



Raw file  
20150812\_A375SR\_Phospho\_BR1\_09

Scan 5374 Method FTMS; HCD Score 359.9 m/z 947.35 Gene names SUPT6H

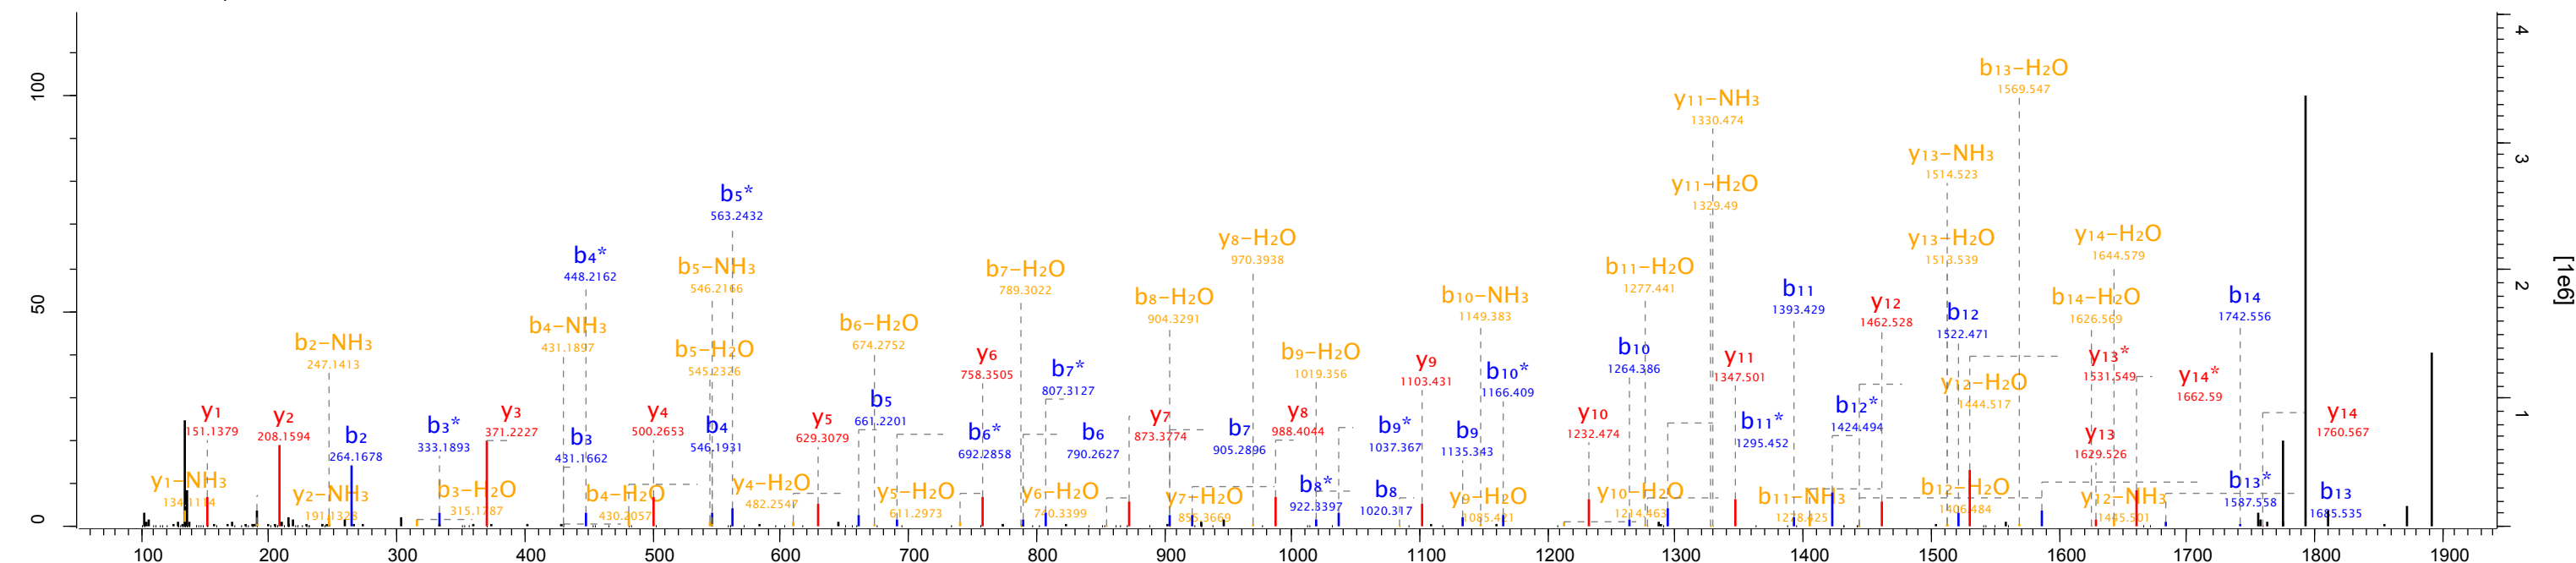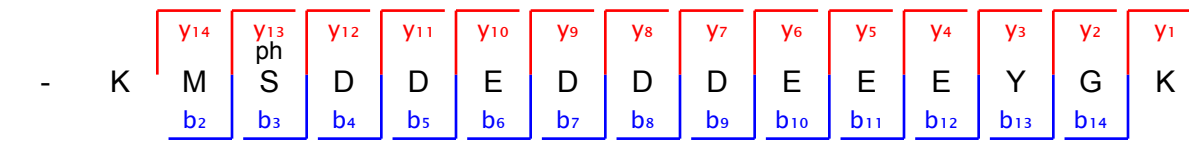

Raw file: 20150812\_A375SR\_Phospho\_BR1\_09  
 Scan: 7434 Method: FTMS; HCD Score: 234.28 m/z: 716.69 Gene names: REPS1

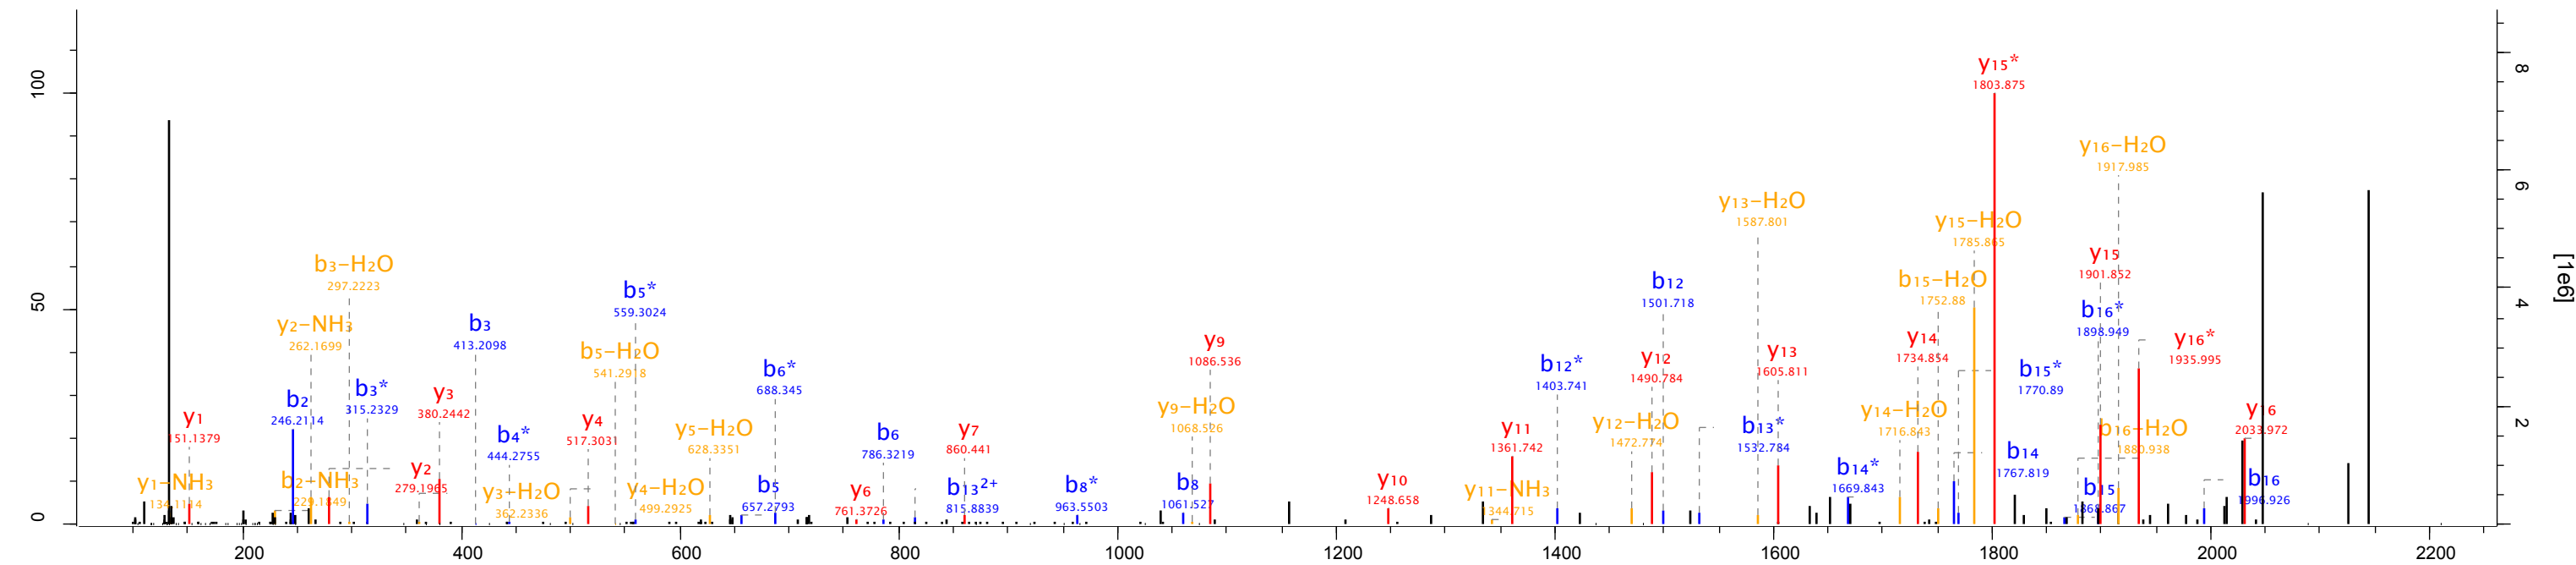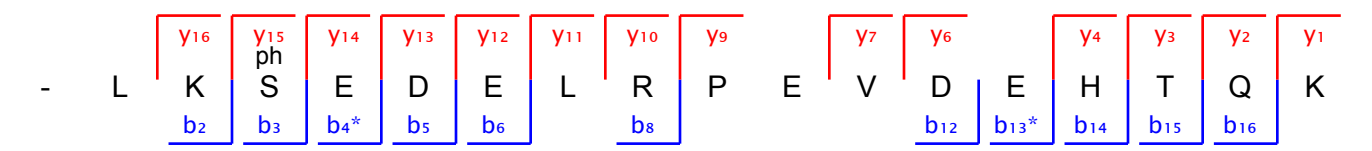

Raw file  
20150812\_A375SR\_Phospho\_BR1\_10

Scan 12784 Method FTMS; HCD Score 327.84 m/z 872.44 Gene names DIDO1

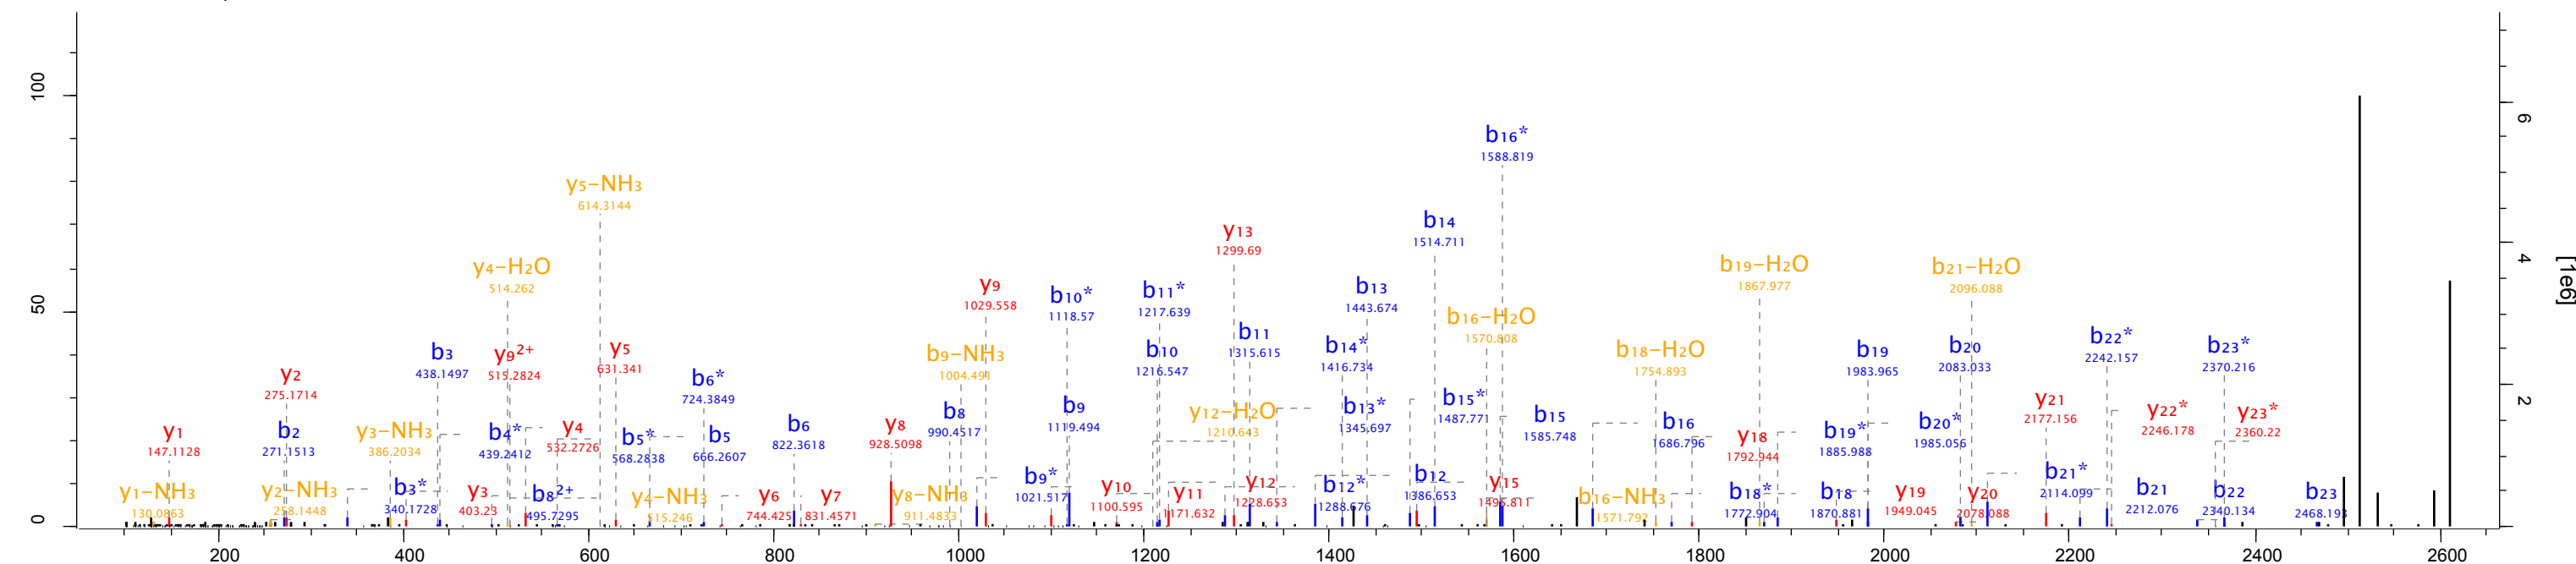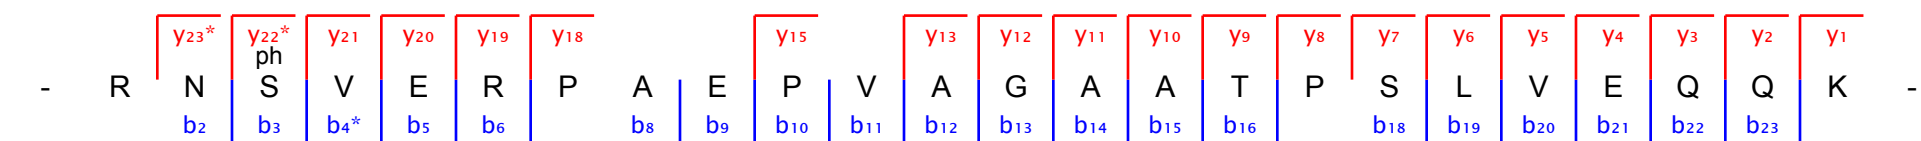

Raw file 20150812\_A375SR\_Phospho\_BR1\_10 Scan 13404 Method FTMS; HCD Score 112.53 m/z 878.43 Gene names TCF3

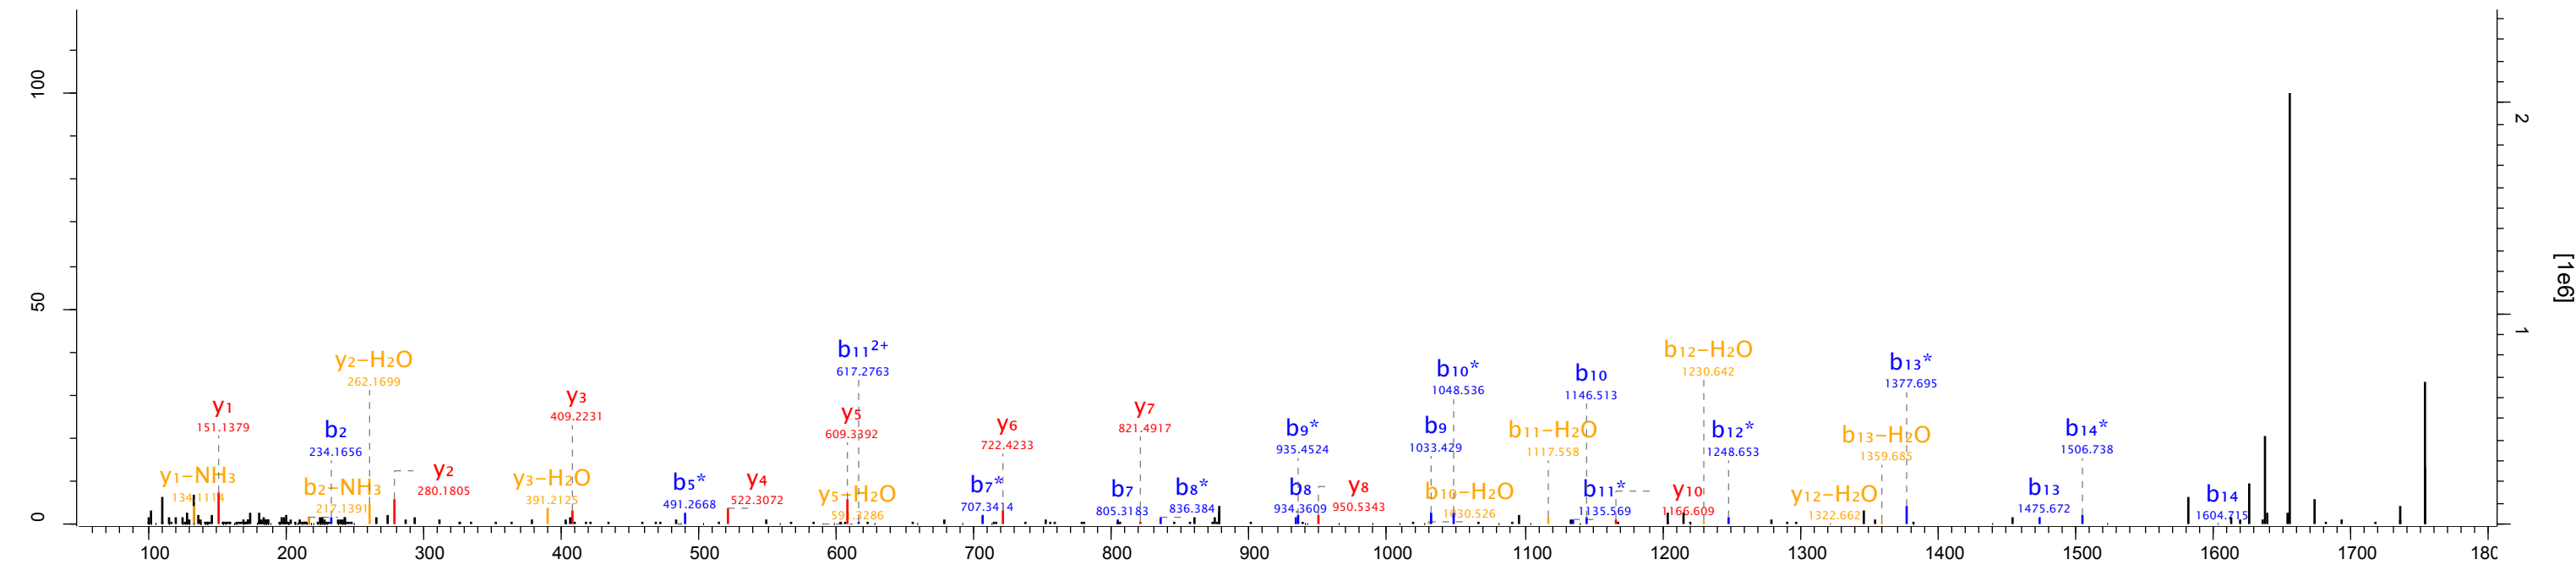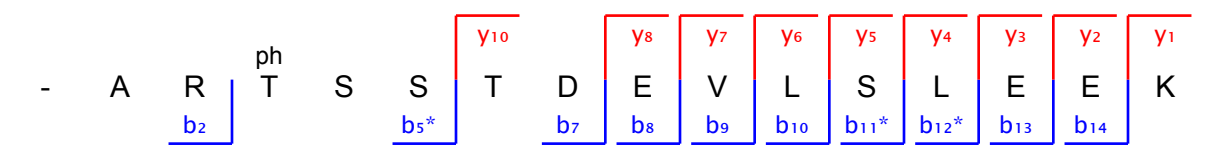

Raw file: 20150812\_A375SR\_Phospho\_BR1\_10  
 Scan: 1794 Method: FTMS; HCD Score: 119.72 m/z: 601.81 Gene names: NOLC1

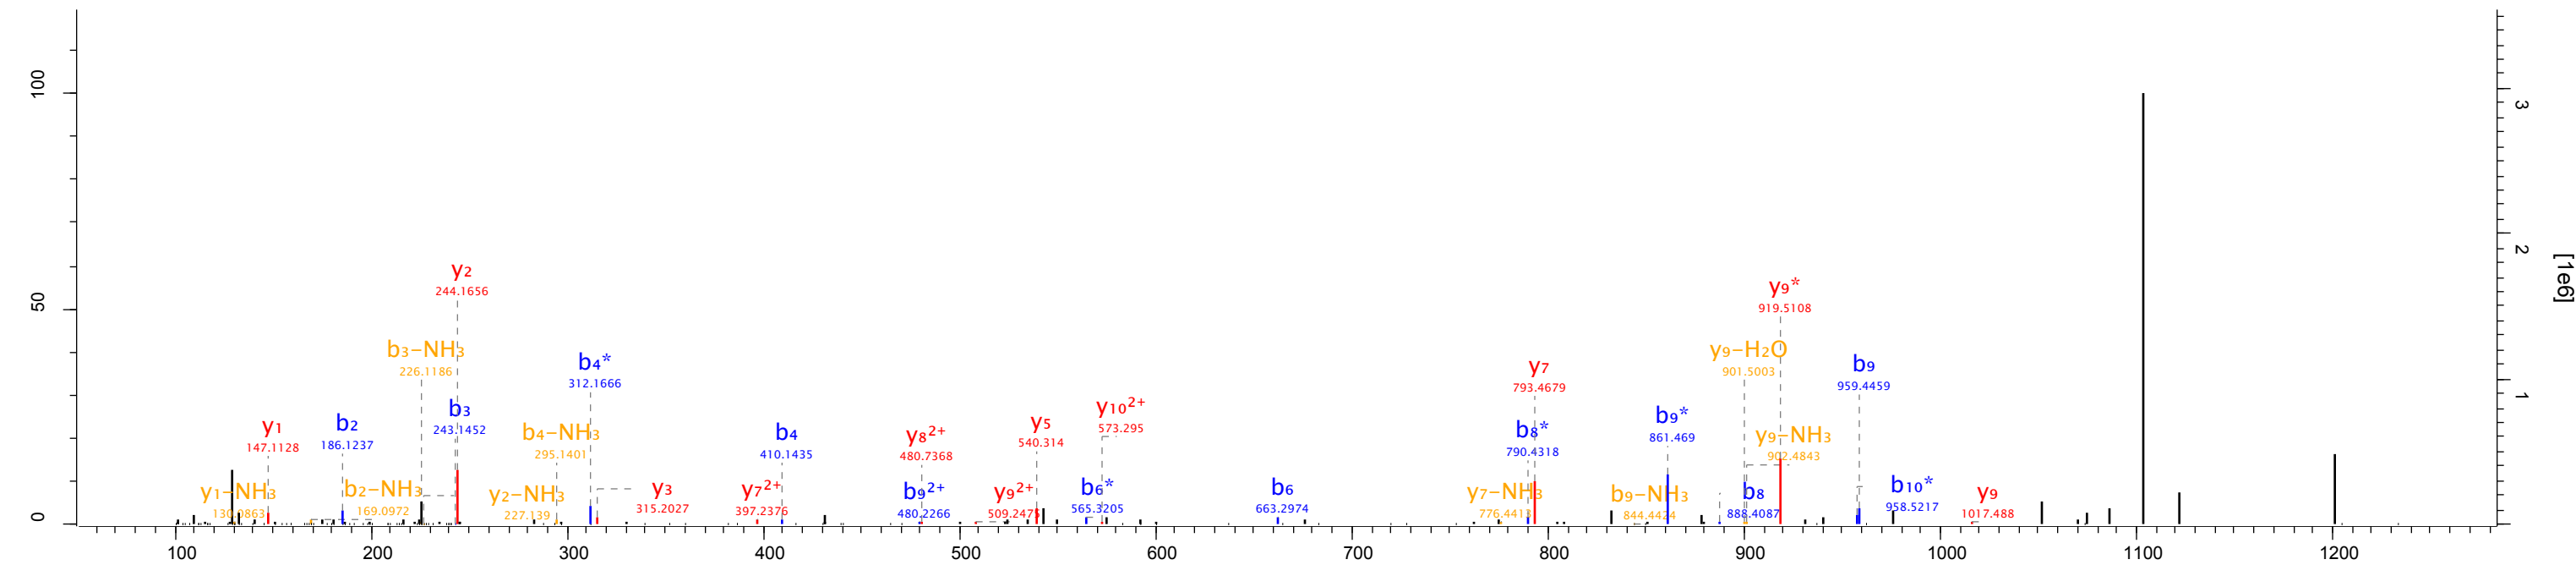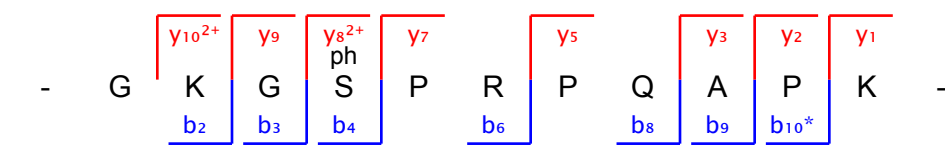

Raw file: 20150812\_A375SR\_Phospho\_BR1\_10  
 Scan: 1854 Method: FTMS; HCD Score: 143.31 m/z: 549.28 Gene names: SRRM1

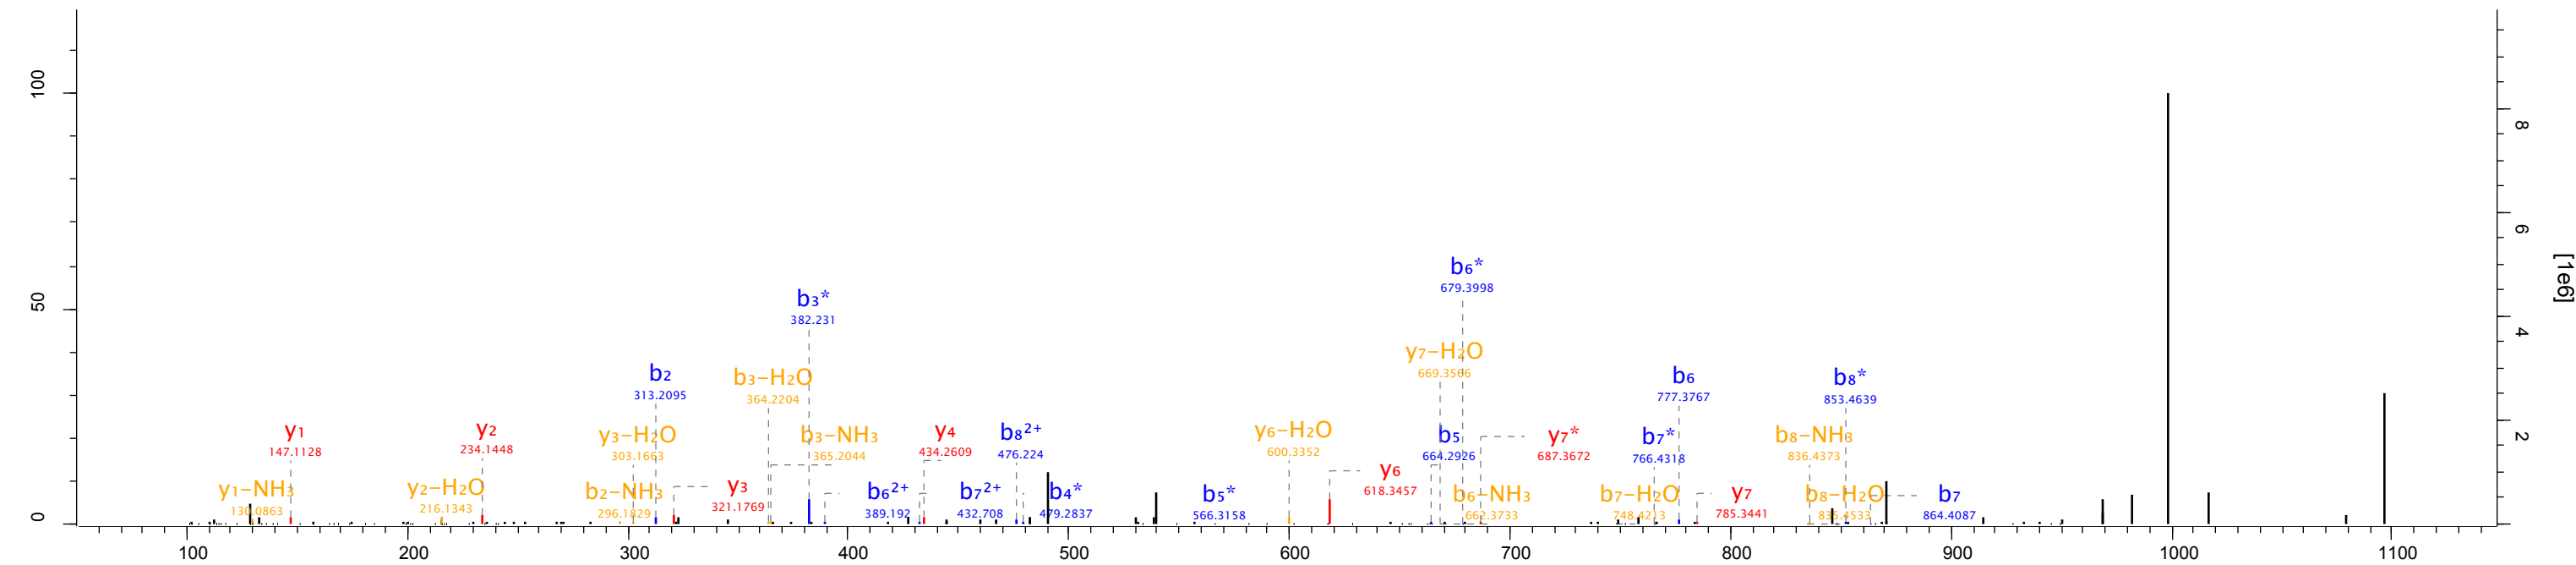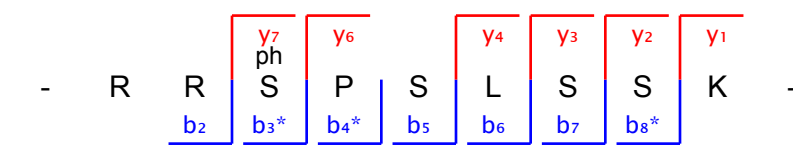

Raw file 20150812\_A375SR\_Phospho\_BR1\_10 Scan 18794 Method FTMS; HCD Score 155.16 m/z 931 Gene names PLEC

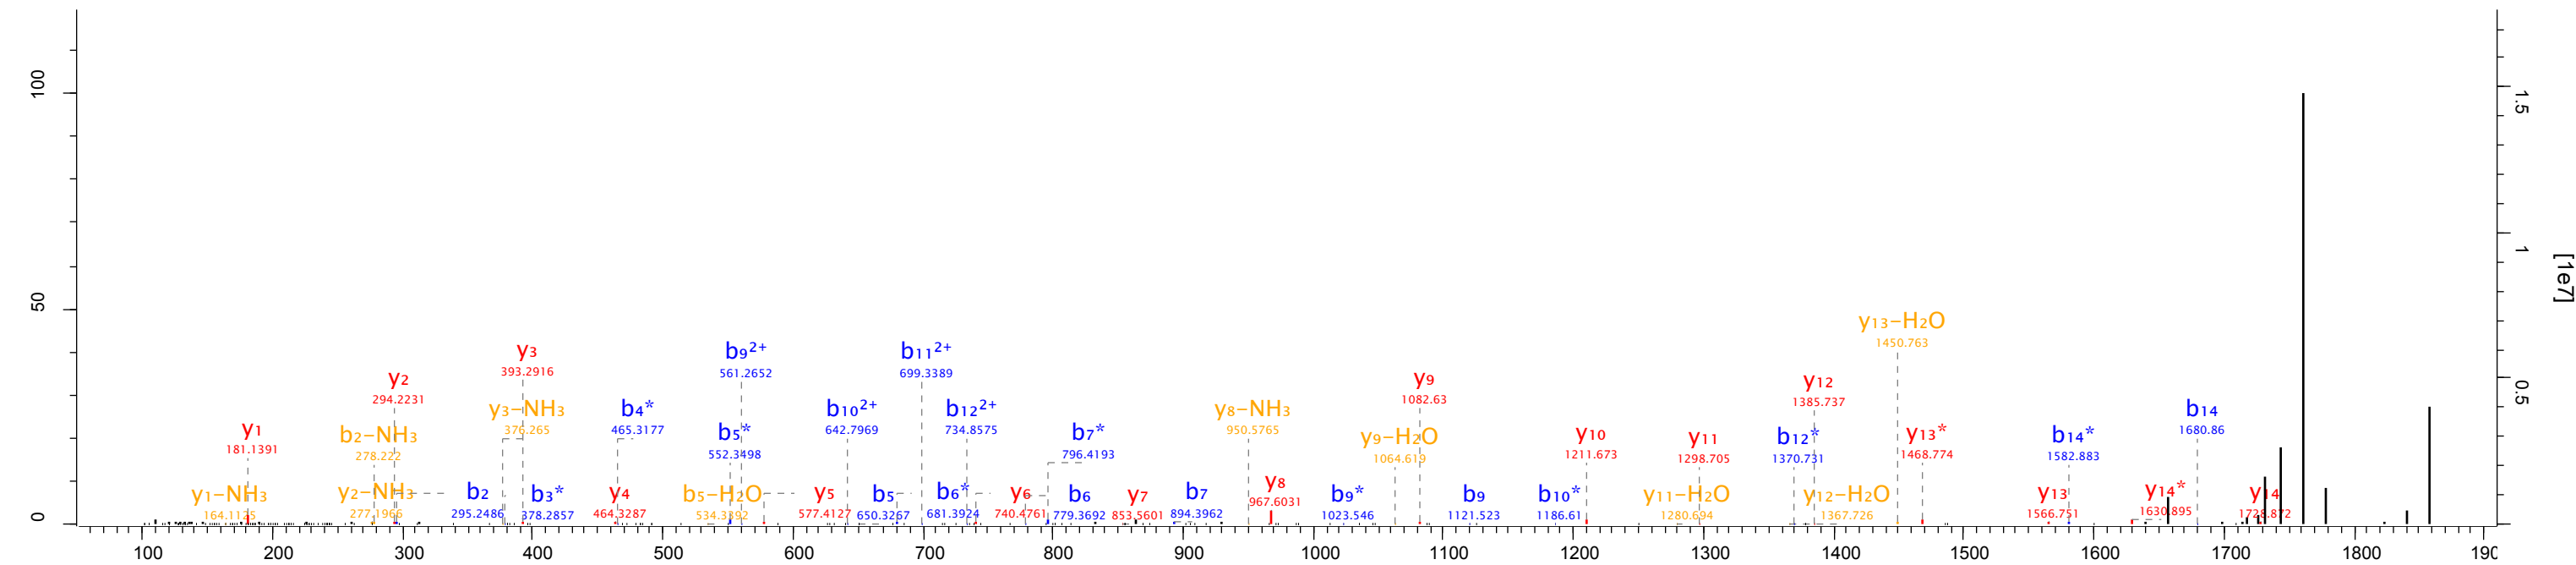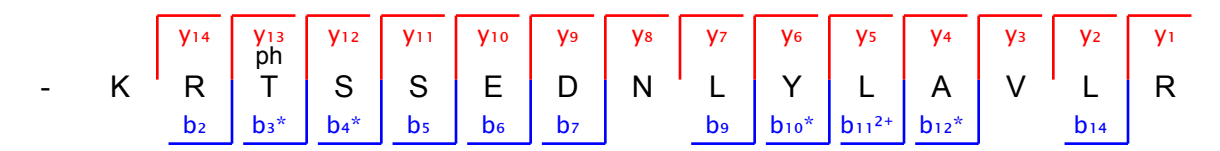

Raw file: 20150812\_A375SR\_Phospho\_BR1\_10  
 Scan: 24954 Method: FTMS; HCD Score: 178.95 m/z: 1067.04 Gene names: FLNB

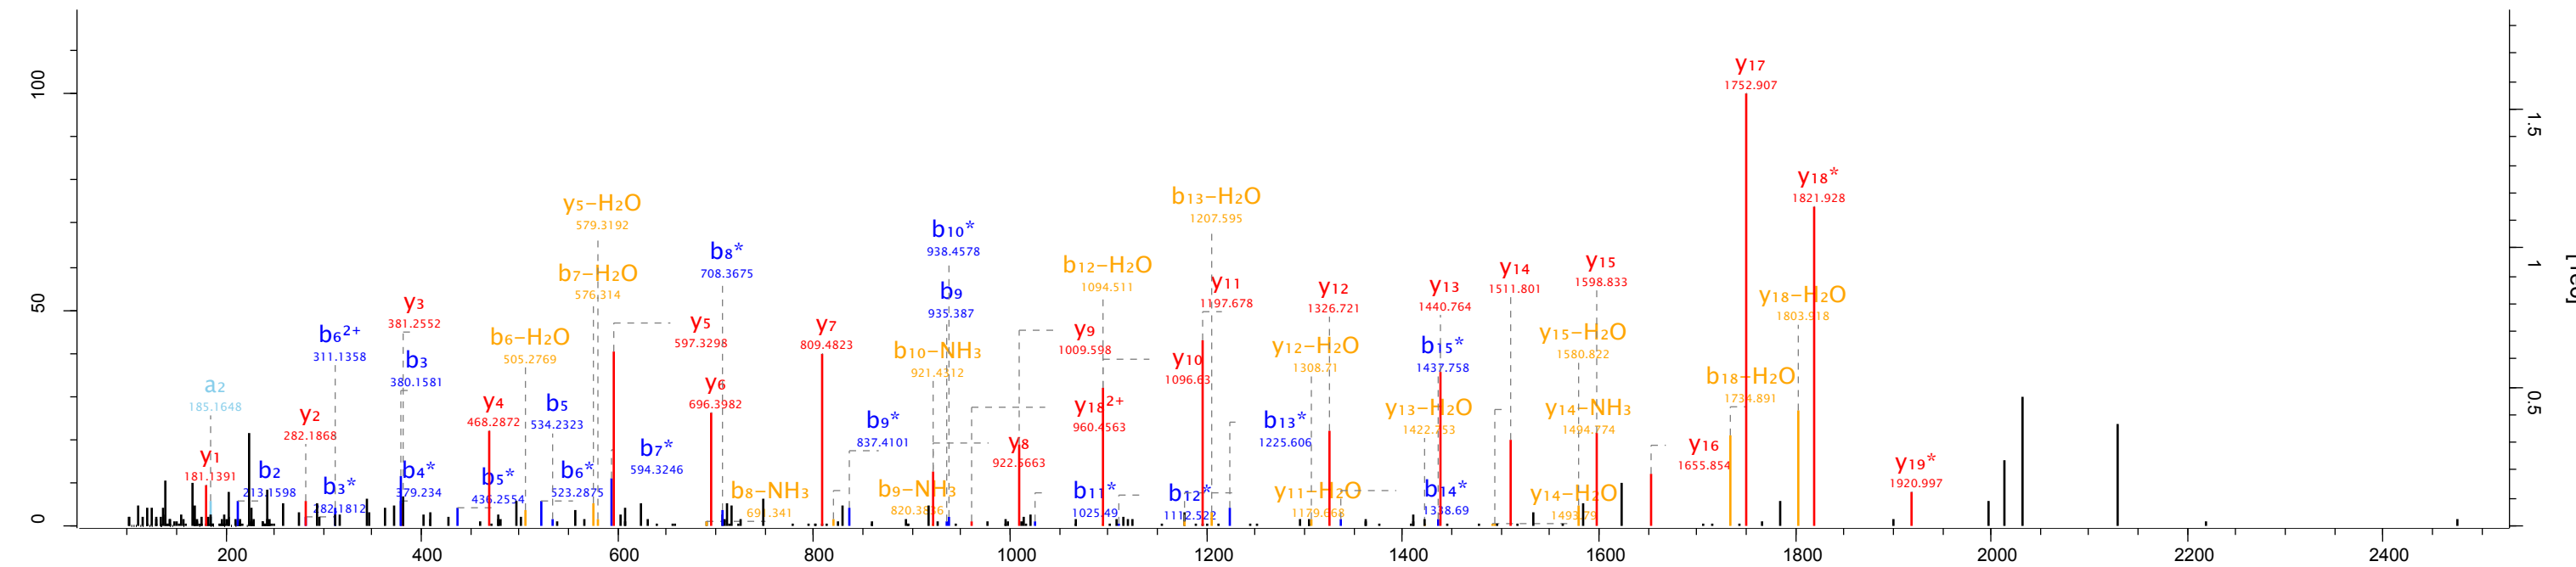

Sequence: L - V S P G S A N E T S S I L V E S V T R -

Fragmentation sites (boxed):

- V (b<sub>2</sub>)
- S (b<sub>3</sub>)
- P (b<sub>4</sub><sup>\*</sup>)
- G (b<sub>5</sub>)
- S (b<sub>6</sub><sup>\*</sup>)
- A (b<sub>7</sub><sup>\*</sup>)
- N (b<sub>8</sub><sup>\*</sup>)
- E (b<sub>9</sub>)
- T (b<sub>10</sub><sup>\*</sup>)
- S (b<sub>11</sub><sup>\*</sup>)
- S (b<sub>12</sub><sup>\*</sup>)
- I (b<sub>13</sub><sup>\*</sup>)
- L (b<sub>14</sub><sup>\*</sup>)
- V (b<sub>15</sub><sup>\*</sup>)



Raw file: 20150812\_A375SR\_Phospho\_BR1\_10  
 Scan: 3504 Method: FTMS; HCD Score: 71.78 m/z: 488.92 Gene names: LARP4B

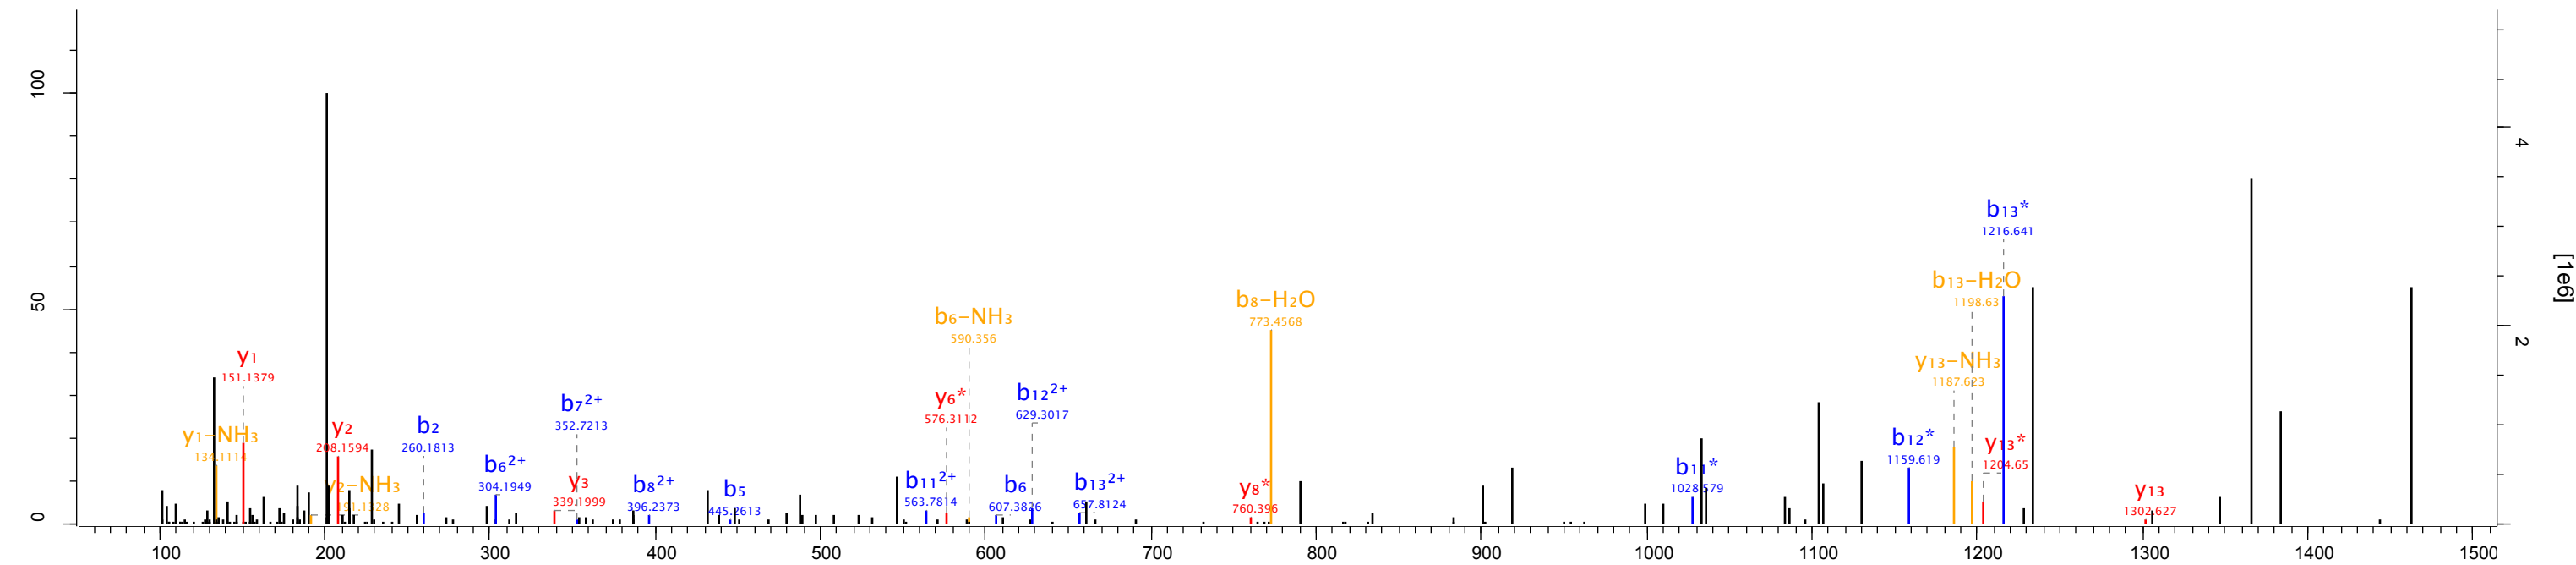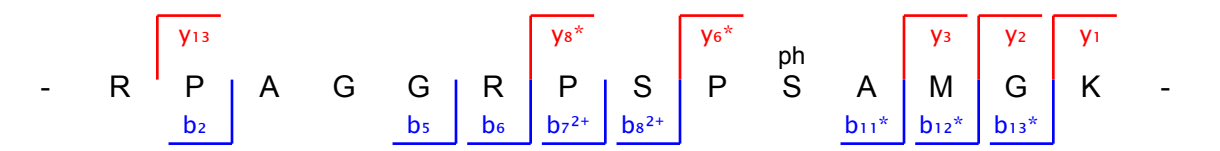

Raw file  
 20150812\_A375SR\_Phospho\_BR1\_10  
 Scan 4704 Method FTMS; HCD Score 105.06 m/z 451.23 Gene names PHLDB1

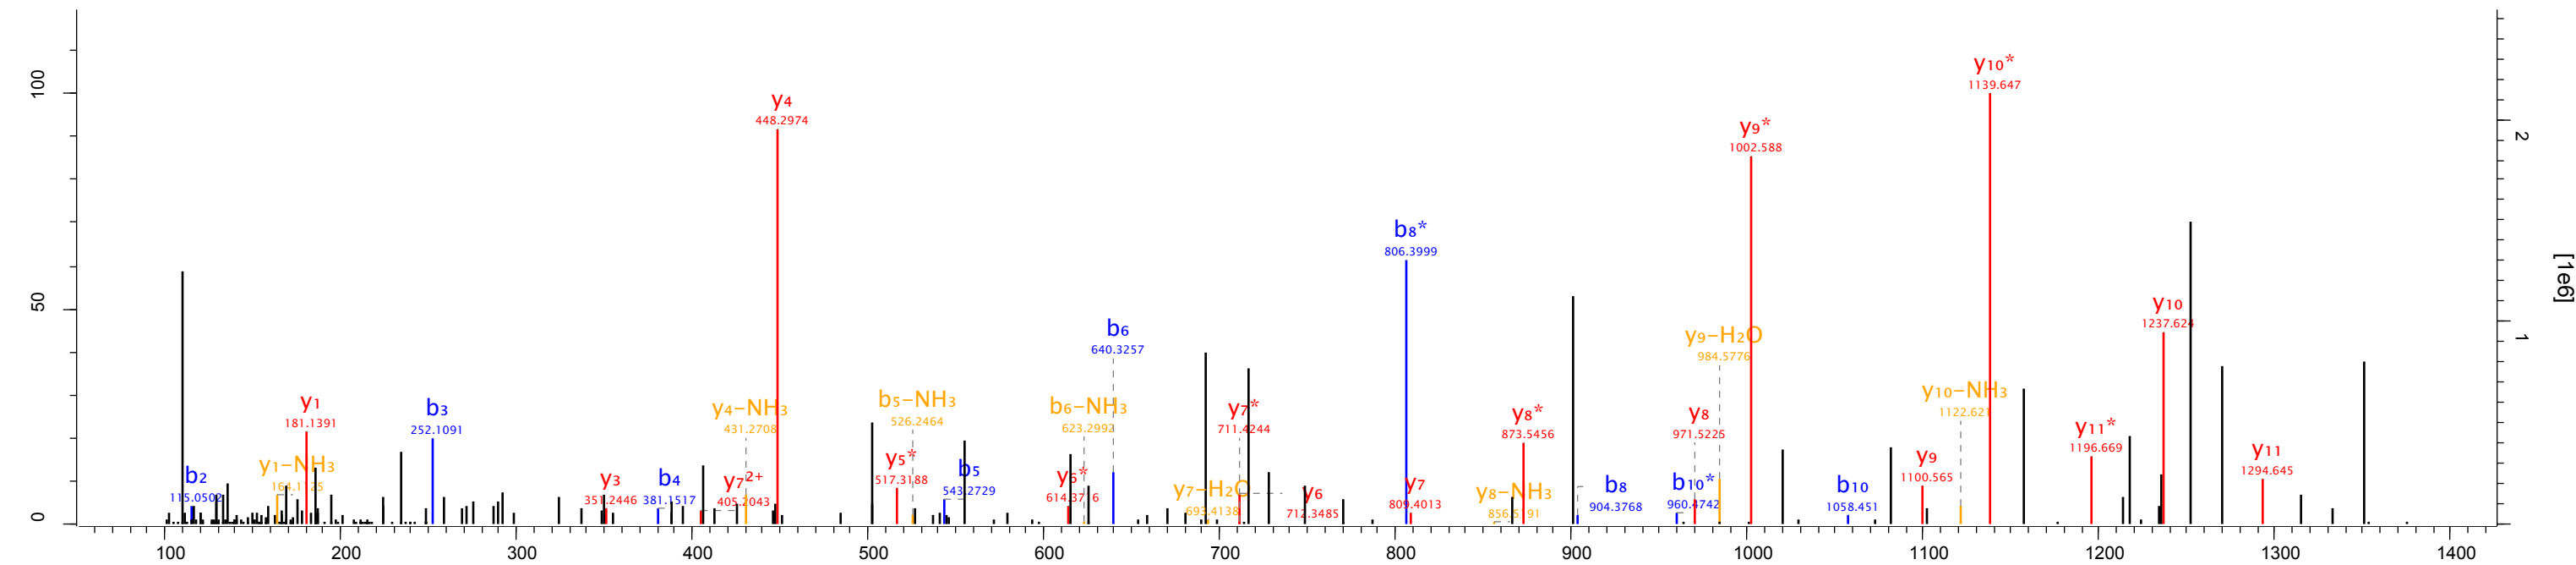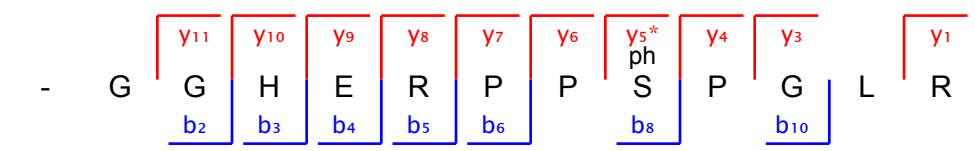

Raw file: 20150812\_A375SR\_Phospho\_BR1\_10  
 Scan: 6684 Method: FTMS; HCD Score: 105.13 m/z: 482.71 Gene names: TTC4

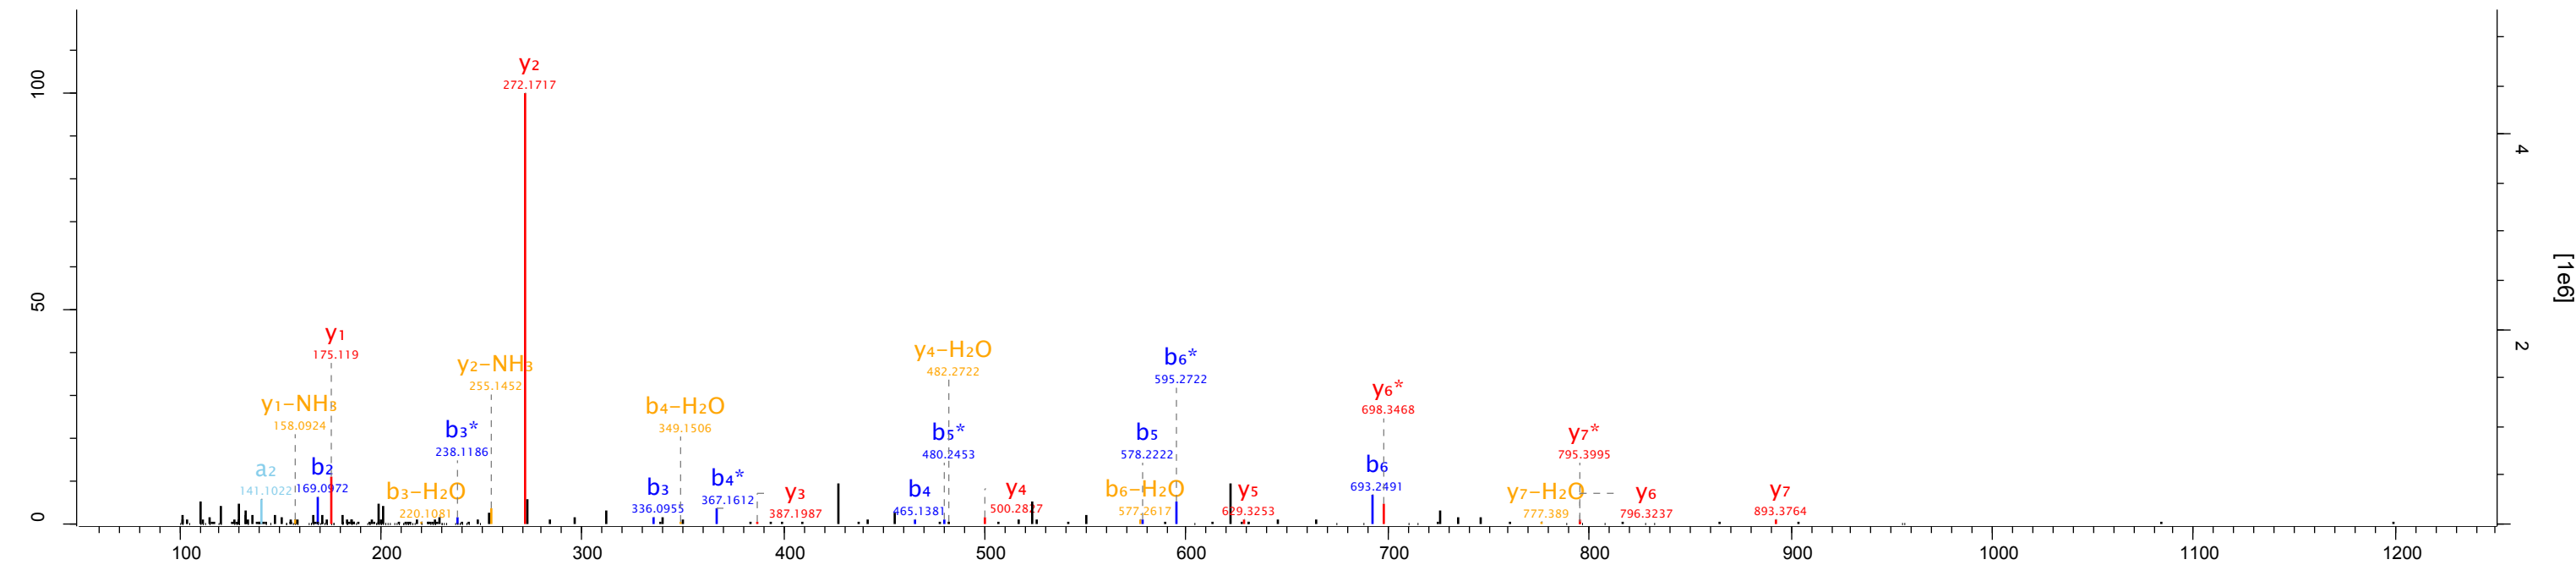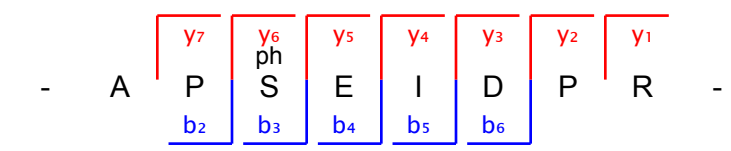

Raw file 20150812\_A375SR\_Phospho\_BR1\_10 Scan 7174 Method FTMS; HCD Score 104.94 m/z 531.8 Gene names VIM

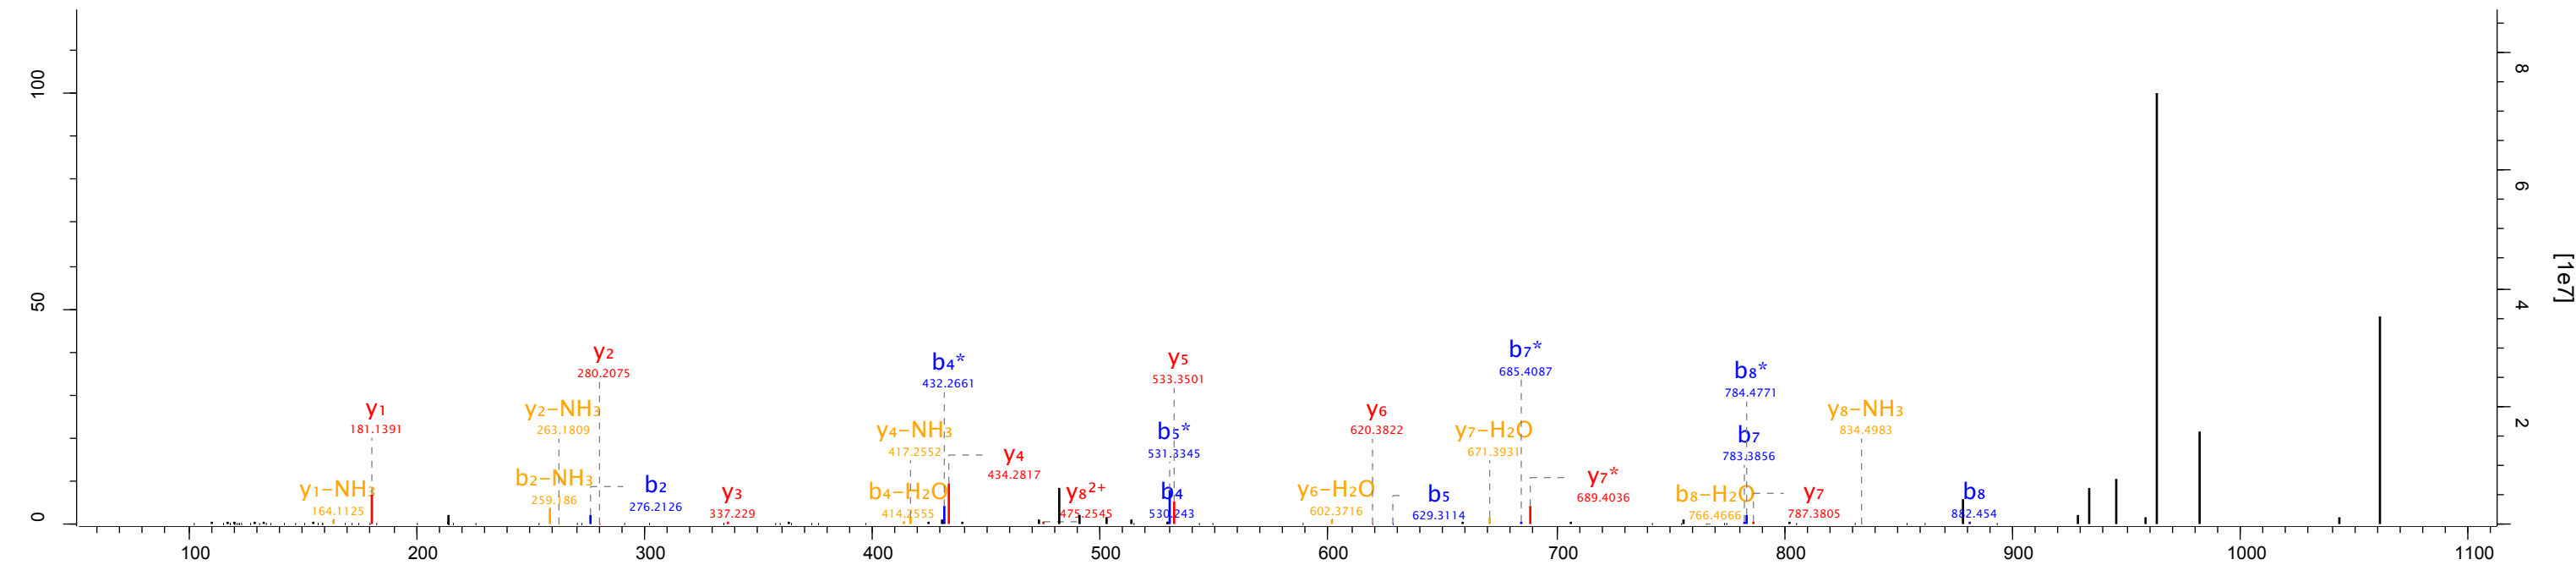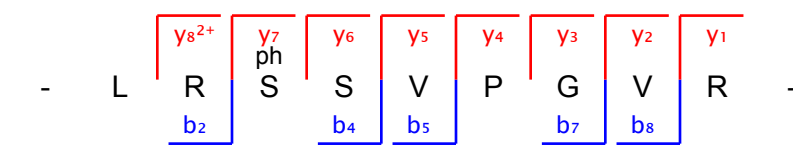

Raw file: 20150812\_A375SR\_Phospho\_BR1\_10  
 Scan: 8864 Method: FTMS; HCD Score: 130.29 m/z: 740.39 Gene names: MEF2D

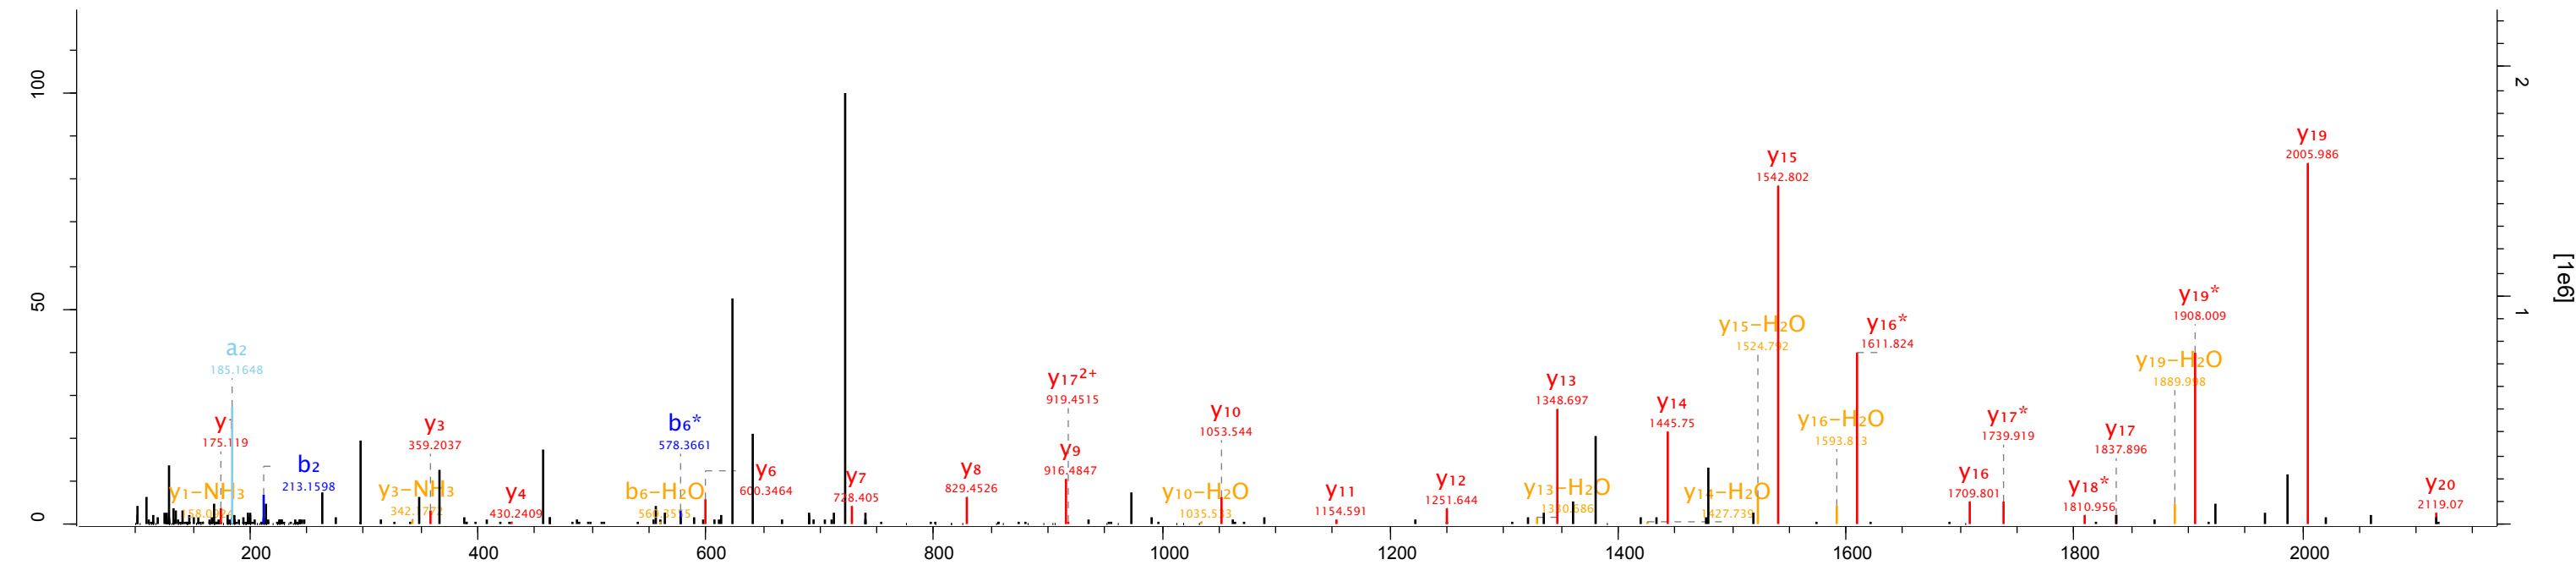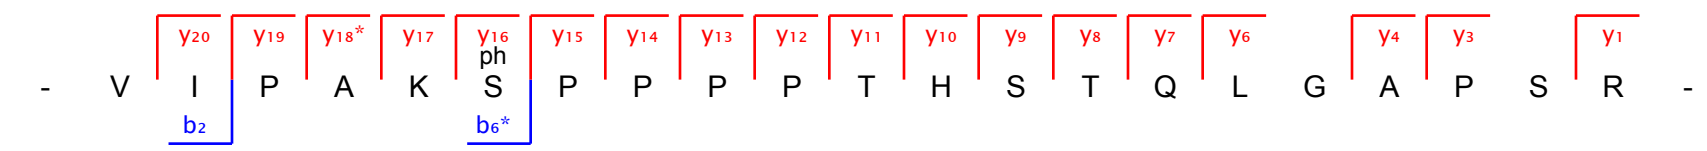

Raw file Scan Method Score m/z Gene names  
 20150812\_A375SR\_Phospho\_BR1\_10 9164 FTMS; HCD 117.33 757.03 DENND4C

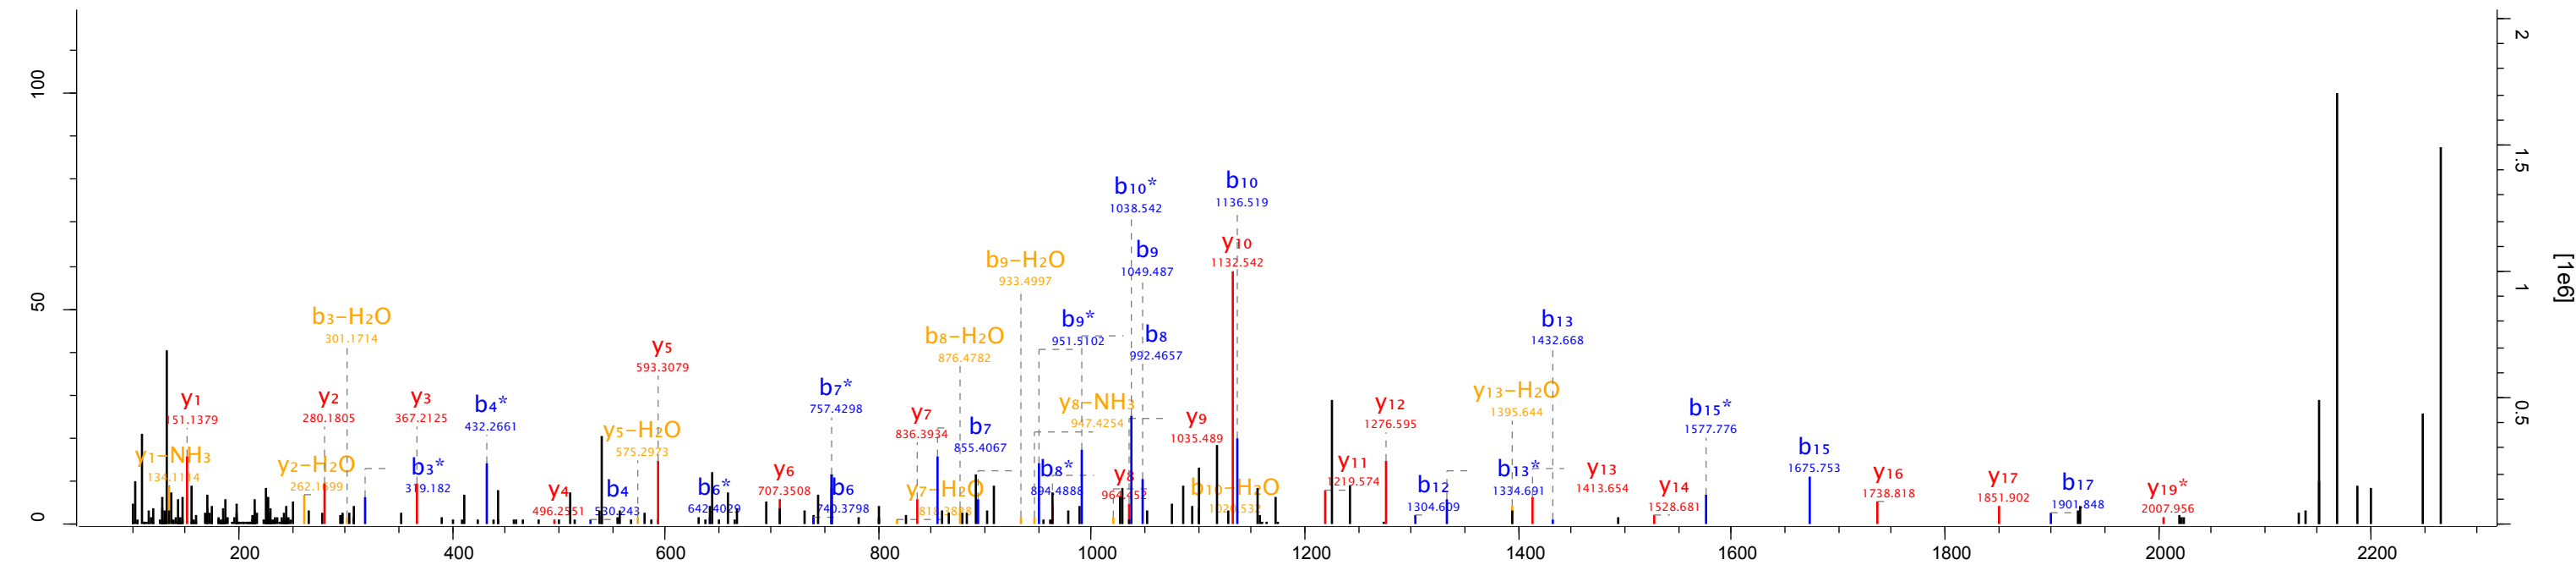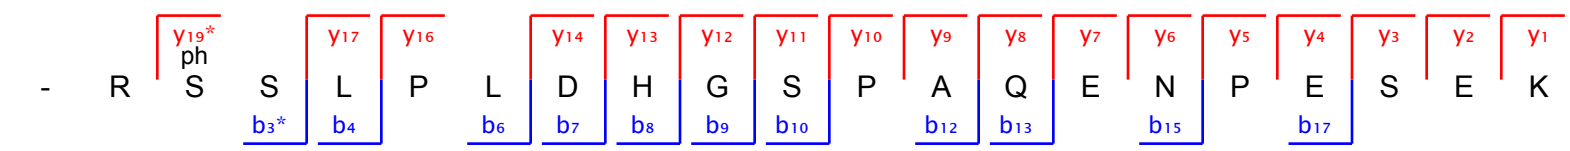

Raw file: 20150812\_A375SR\_Phospho\_BR1\_10  
 Scan: 9484 Method: FTMS; HCD Score: 97.07 m/z: 598.84 Gene names: SLC4A1AP

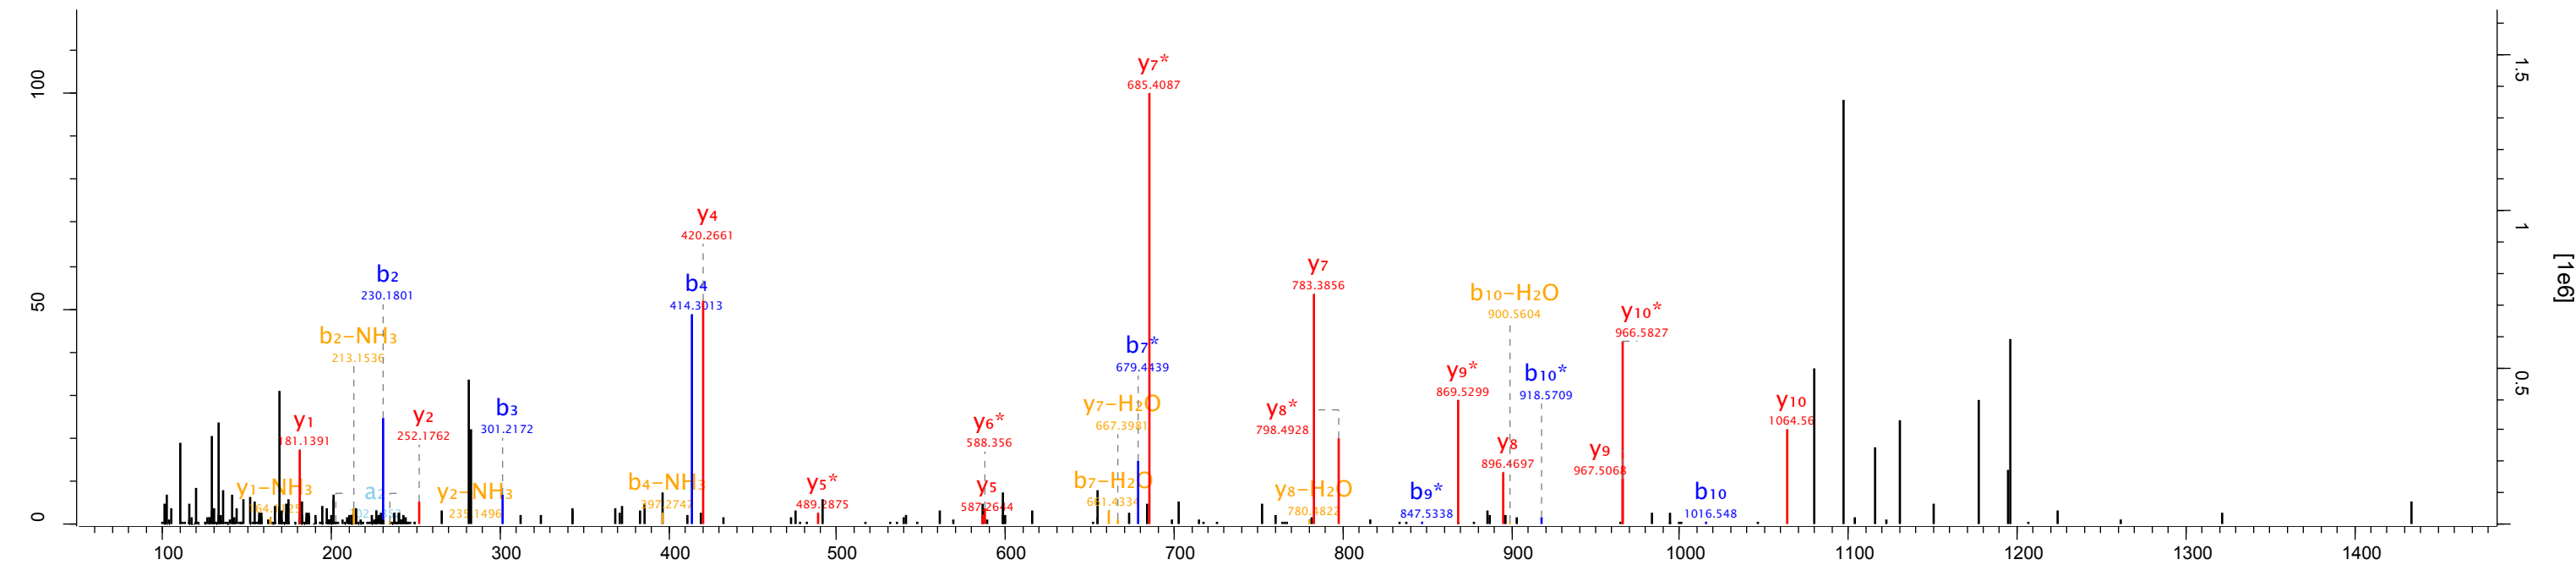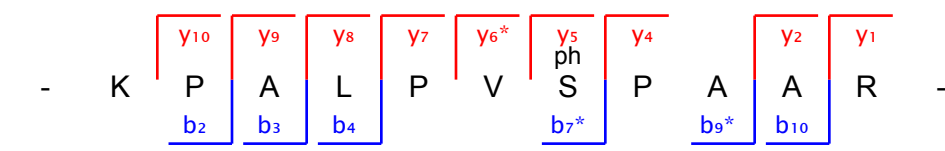

Raw file 20150812\_A375SR\_Phospho\_BR1\_10 Scan 9724 Method FTMS; HCD Score 75.87 m/z 804.02 Gene names FAM84B

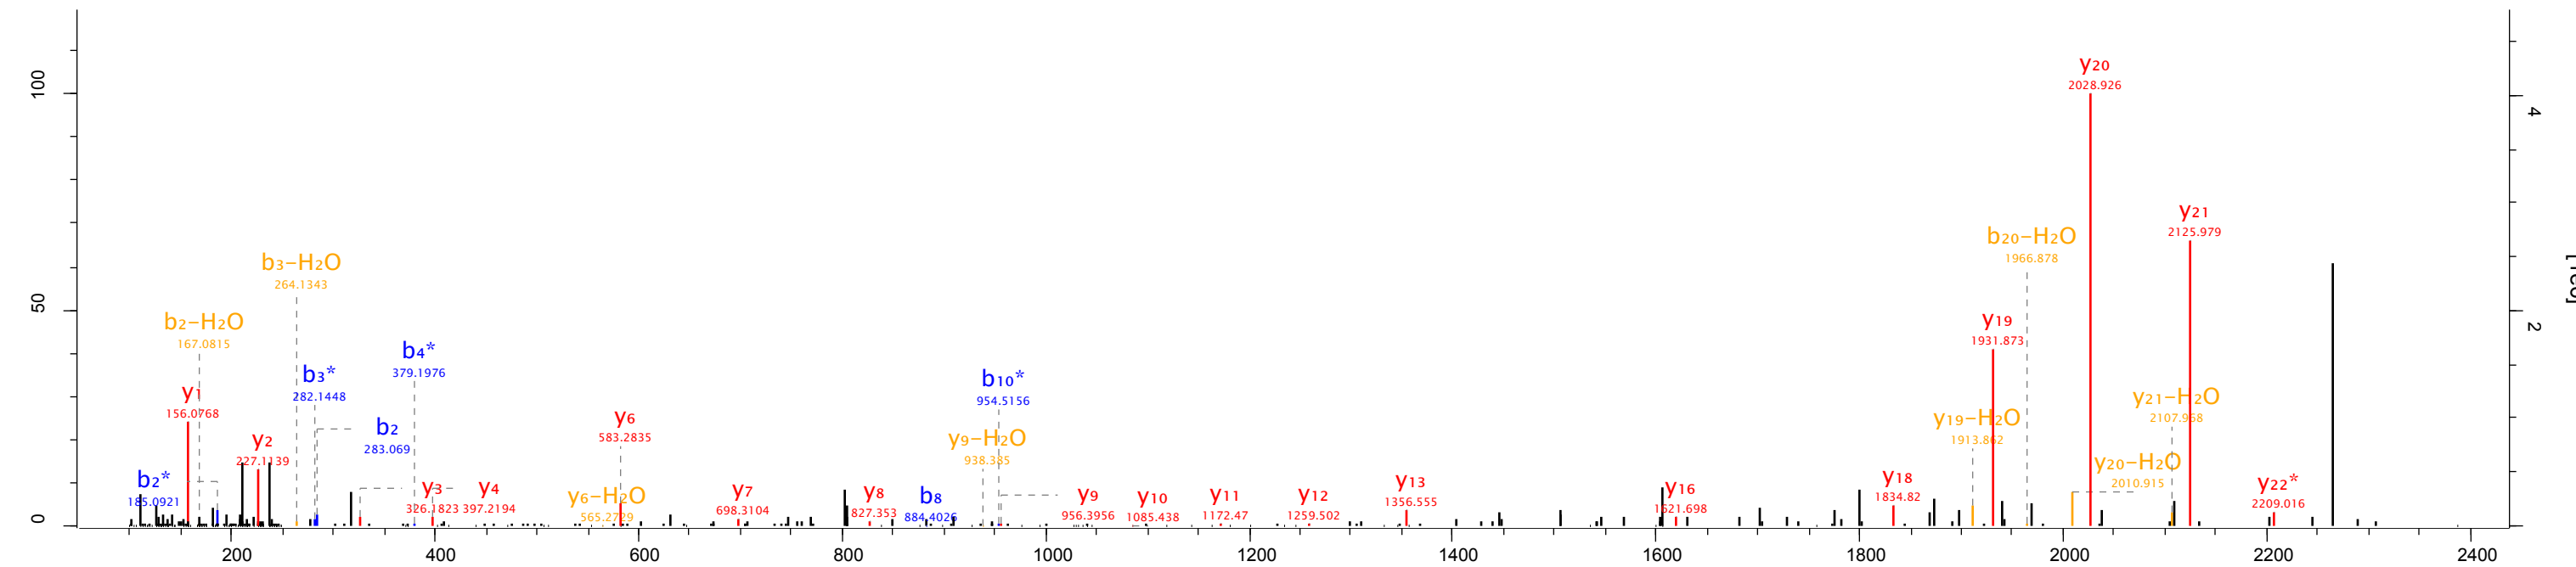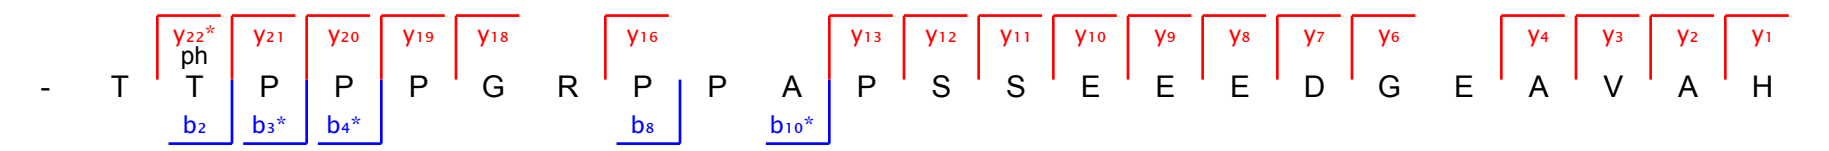



Raw file 20150812\_A375SR\_Phospho\_BR1\_01 Scan 11135 Method FTMS; HCD Score 319.13 m/z 1108.9 Gene names OSBP

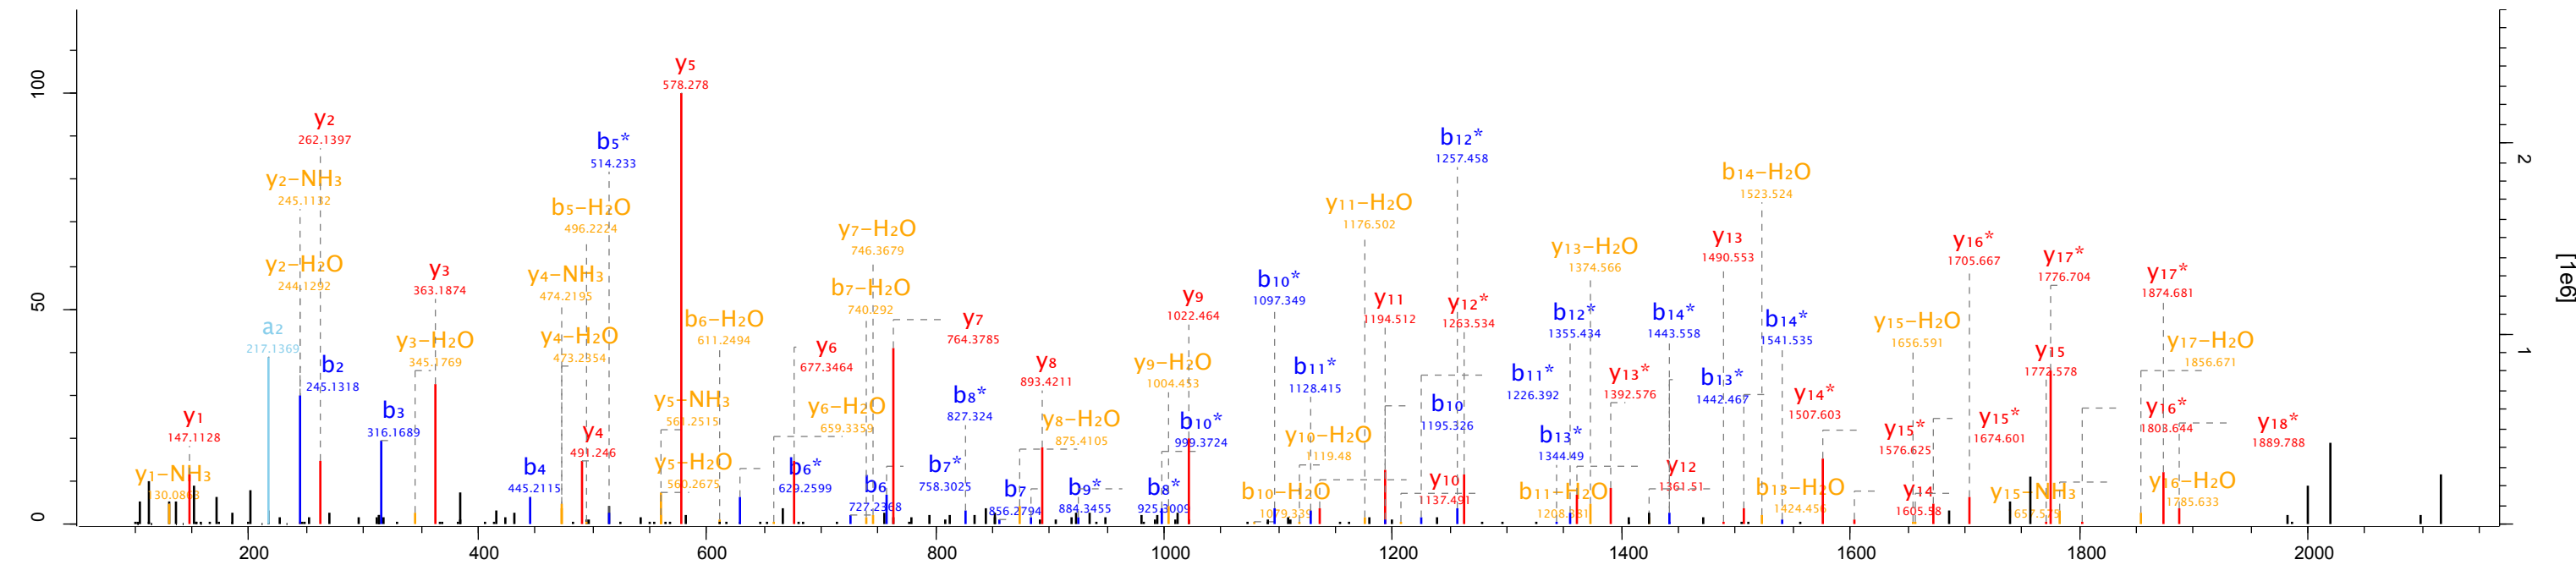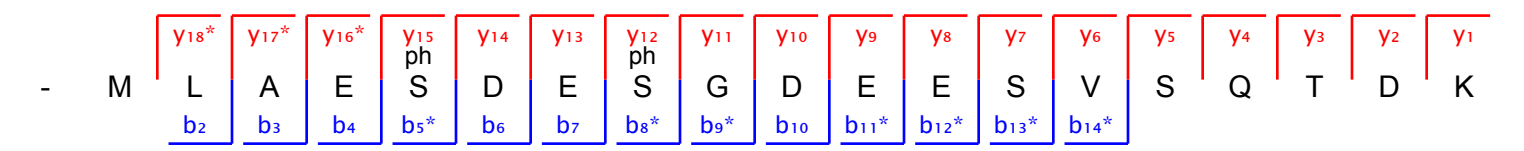

Raw file 20150812\_A375SR\_Phospho\_BR1\_01 Scan 16245 Method FTMS; HCD Score 52.47 m/z 1104.46 Gene names EPRS

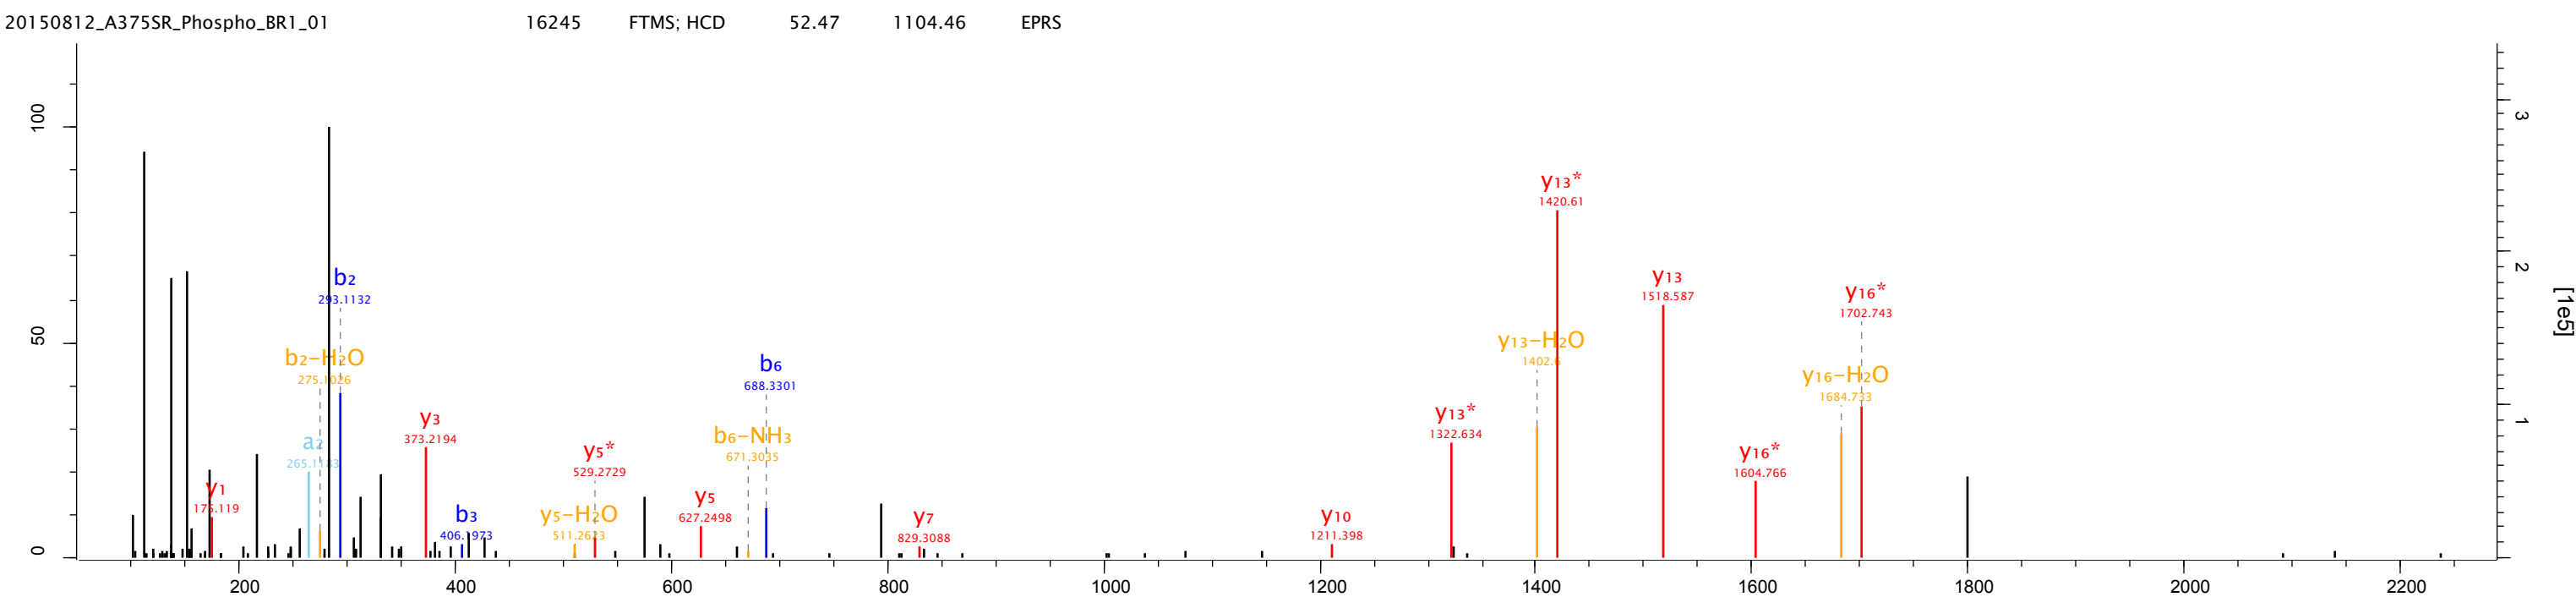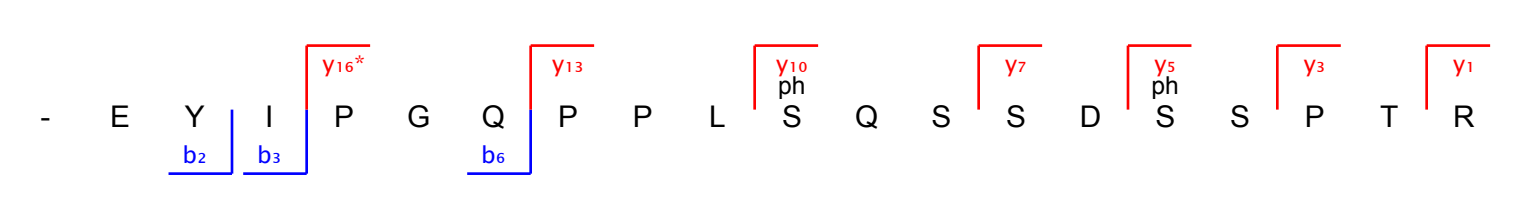

Raw file: 20150812\_A375SR\_Phospho\_BR1\_01  
 Scan: 16815 Method: FTMS; HCD Score: 84.81 m/z: 1431.52 Gene names: EIF5

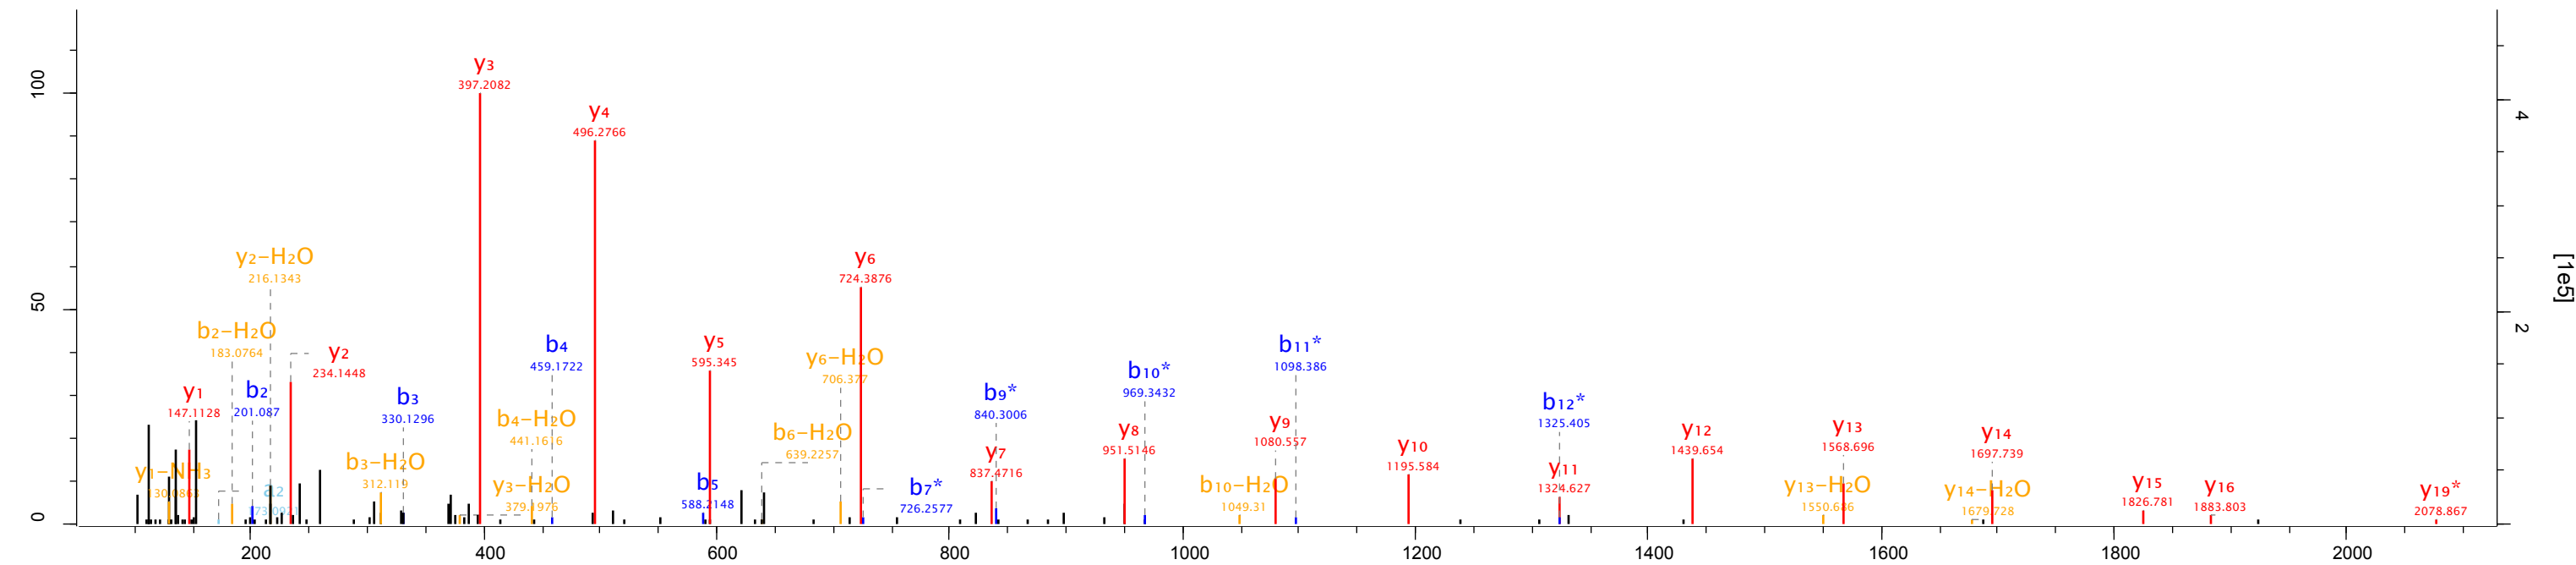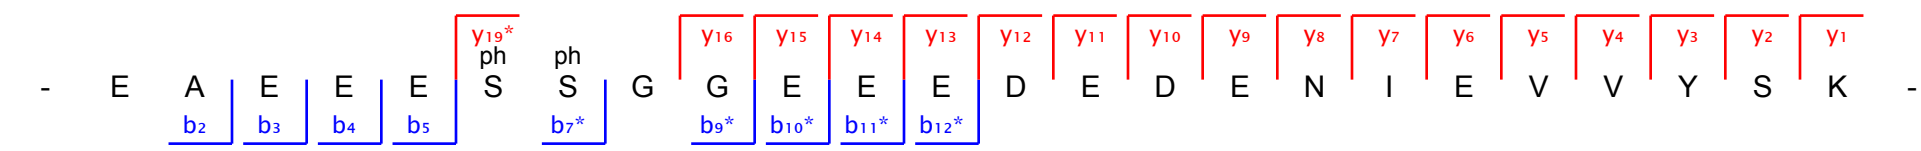

Raw file 20150812\_A375SR\_Phospho\_BR1\_01 Scan 5425 Method FTMS; HCD Score 49.77 m/z 849.35 Gene names GBF1

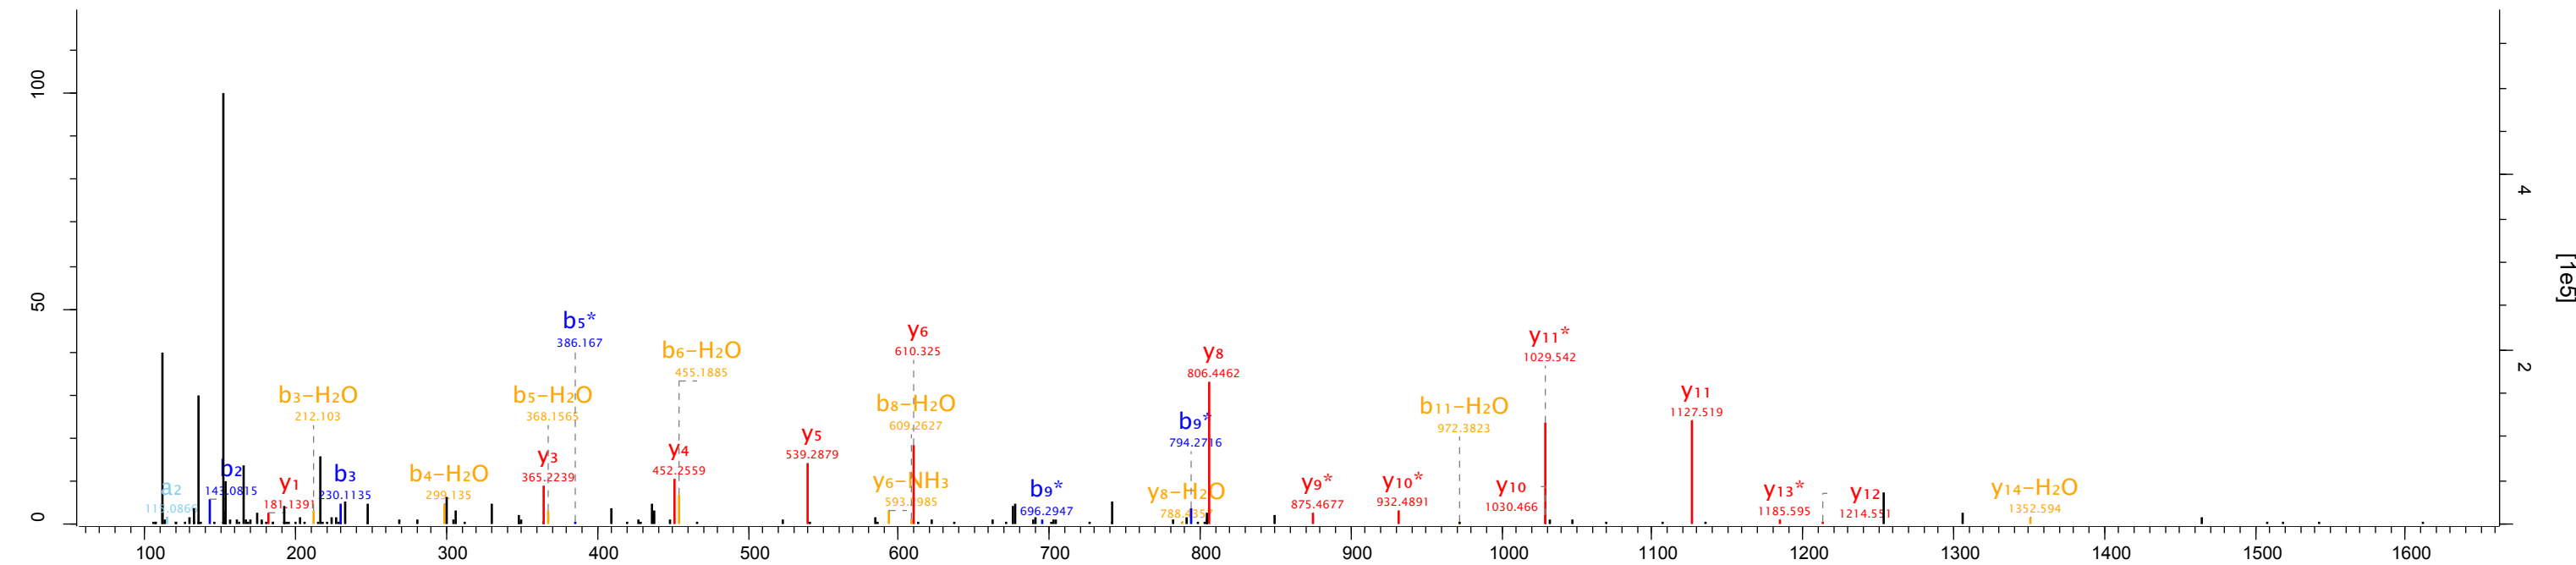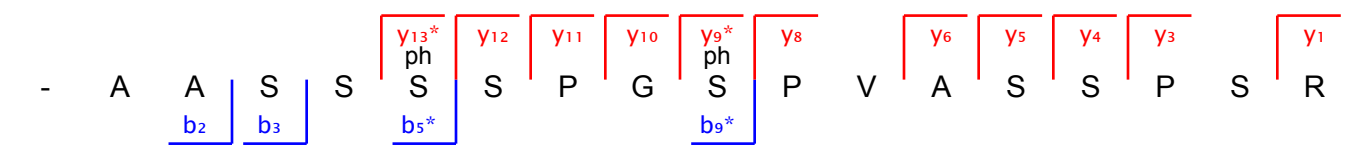

Raw file Scan Method Score m/z Gene names  
 20150812\_A375SR\_Phospho\_BR1\_01 9535 FTMS; HCD 58.81 1007.85 CENPT

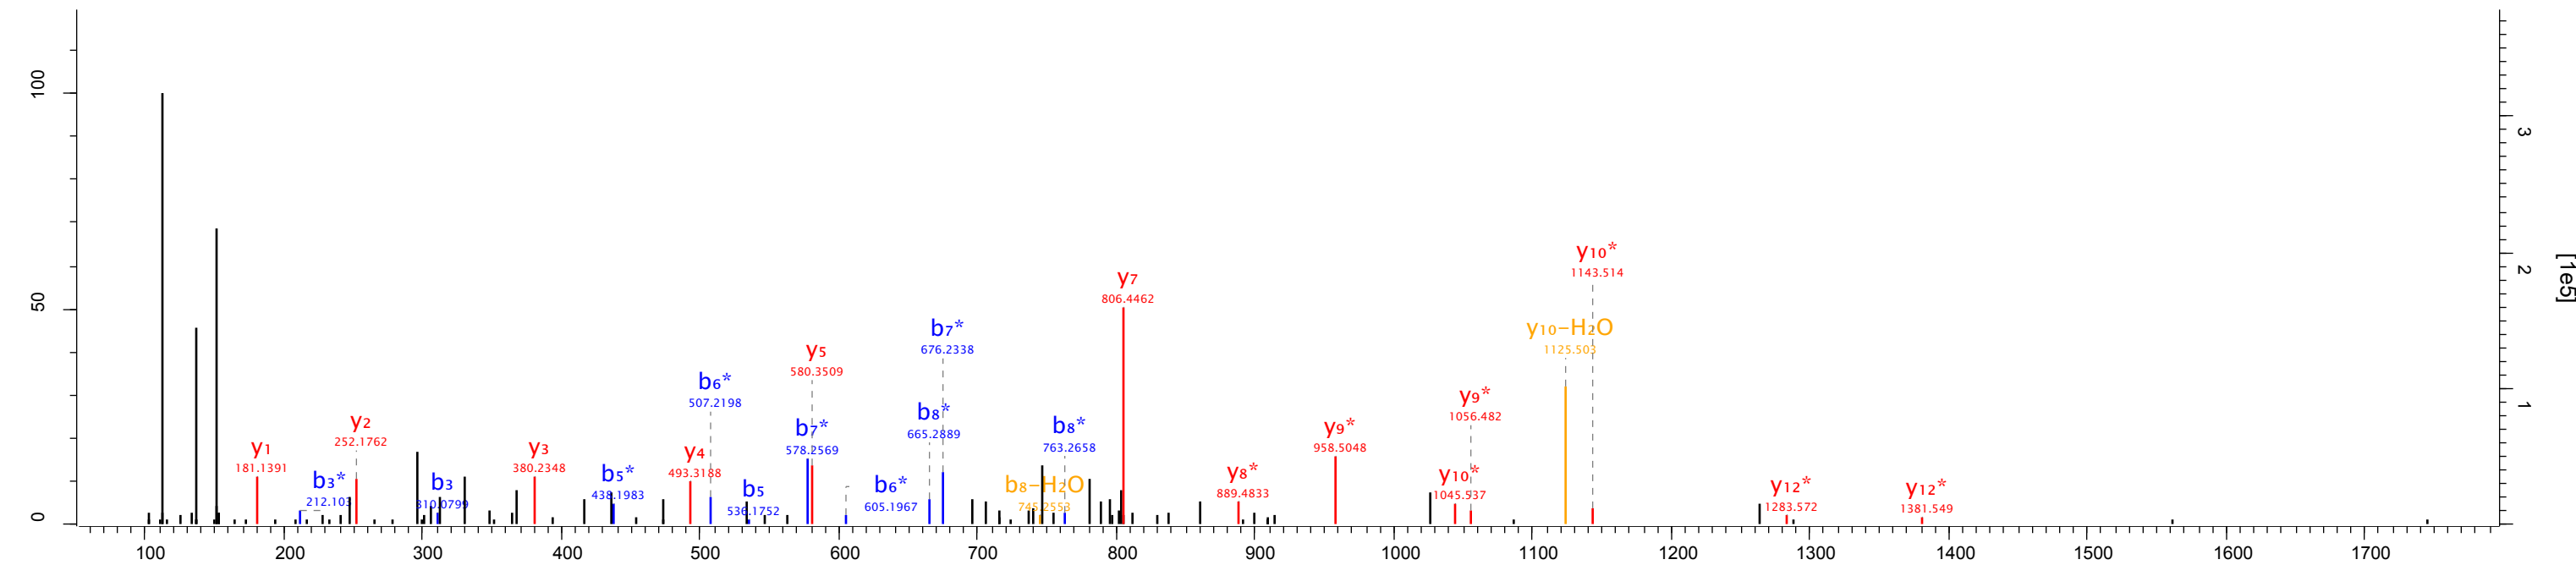

- A A ph S P E S A S S T P E S L Q A R -

Annotations below the sequence:

- ph (above S)
- b<sub>3</sub>\* (below S)
- b<sub>5</sub>\* (below E)
- b<sub>6</sub>\* (below S)
- b<sub>7</sub>\* (below A)
- b<sub>8</sub>\* (below S)
- y<sub>12</sub>\* (above S)
- y<sub>10</sub>\* (above S)
- y<sub>9</sub>\* (above S)
- y<sub>8</sub>\* (above T)
- y<sub>7</sub> (above P)
- y<sub>5</sub> (above S)
- y<sub>4</sub> (above L)
- y<sub>3</sub> (above Q)
- y<sub>2</sub> (above A)
- y<sub>1</sub> (above R)

Raw file: 20150812\_A375SR\_Phospho\_BR1\_01  
 Scan: 9555 Method: FTMS; HCD Score: 43.23 m/z: 922.71 Gene names: RCOR3

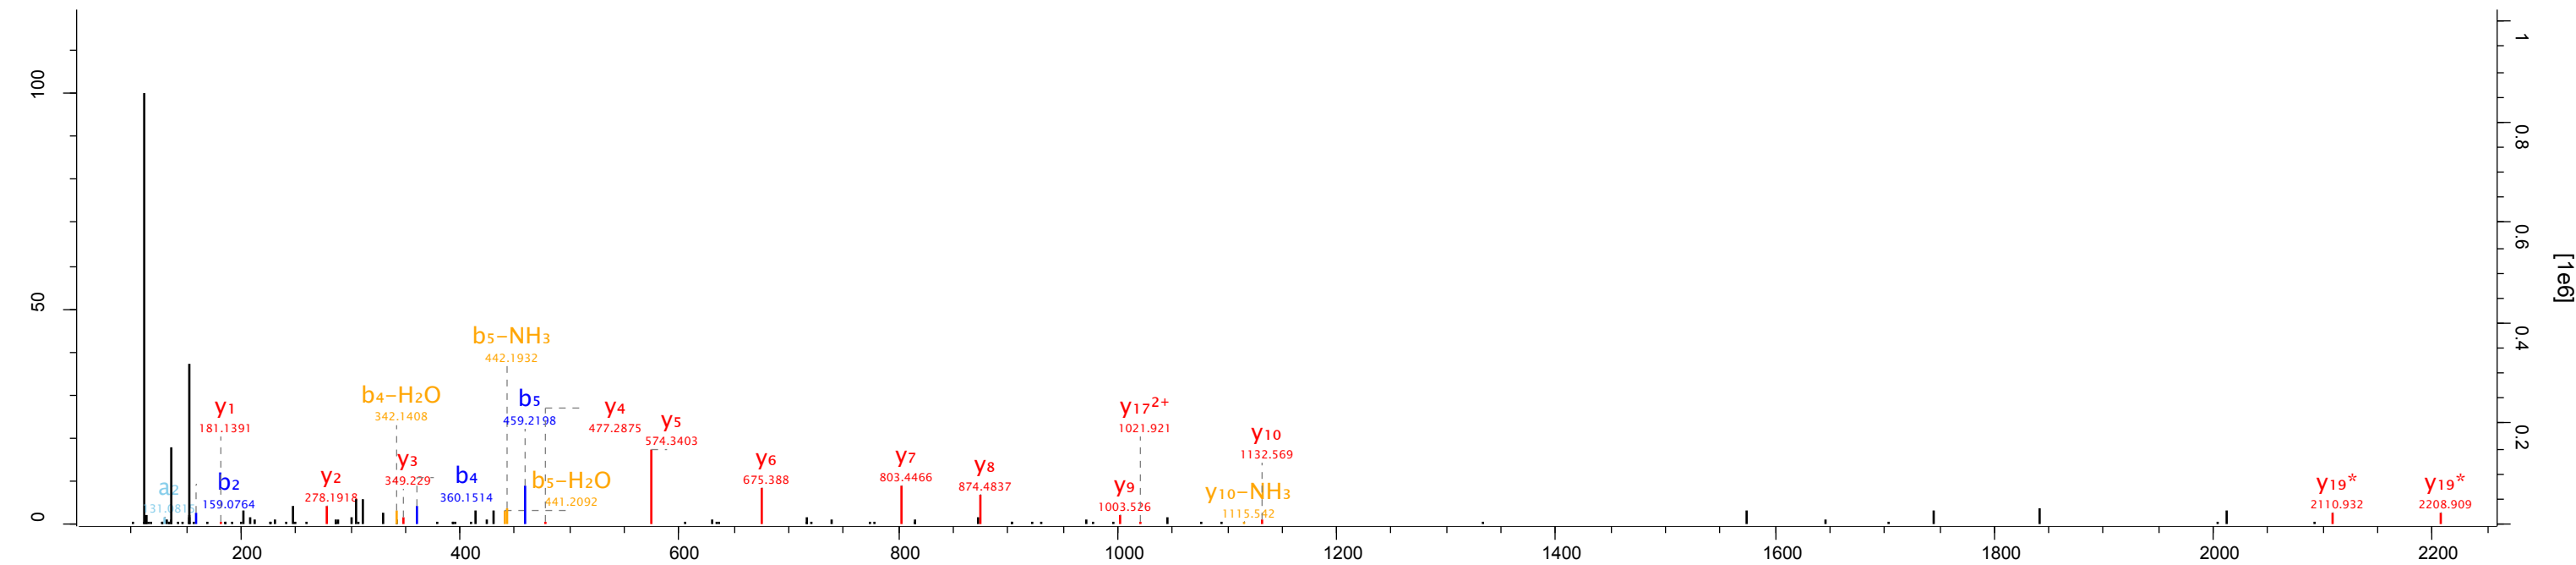

- S A S N V P S G K S T D E E E E A Q T P Q A P R -

Fragmentation mapping (b and y ions) is shown below the sequence:

- Residue A: b2
- Residue N: b4
- Residue V: b5
- Residue P: y19\*
- Residue S: y17<sup>2+</sup>
- Residue G: y10
- Residue K: y9
- Residue S: y8
- Residue T: y7
- Residue D: y6
- Residue E: y5
- Residue E: y4
- Residue E: y3
- Residue A: y2
- Residue Q: y1

Raw file: 20150812\_A375SR\_Phospho\_BR1\_02  
 Scan: 10005 Method: FTMS; HCD Score: 182.32 m/z: 1199.51 Gene names: MAP7D1

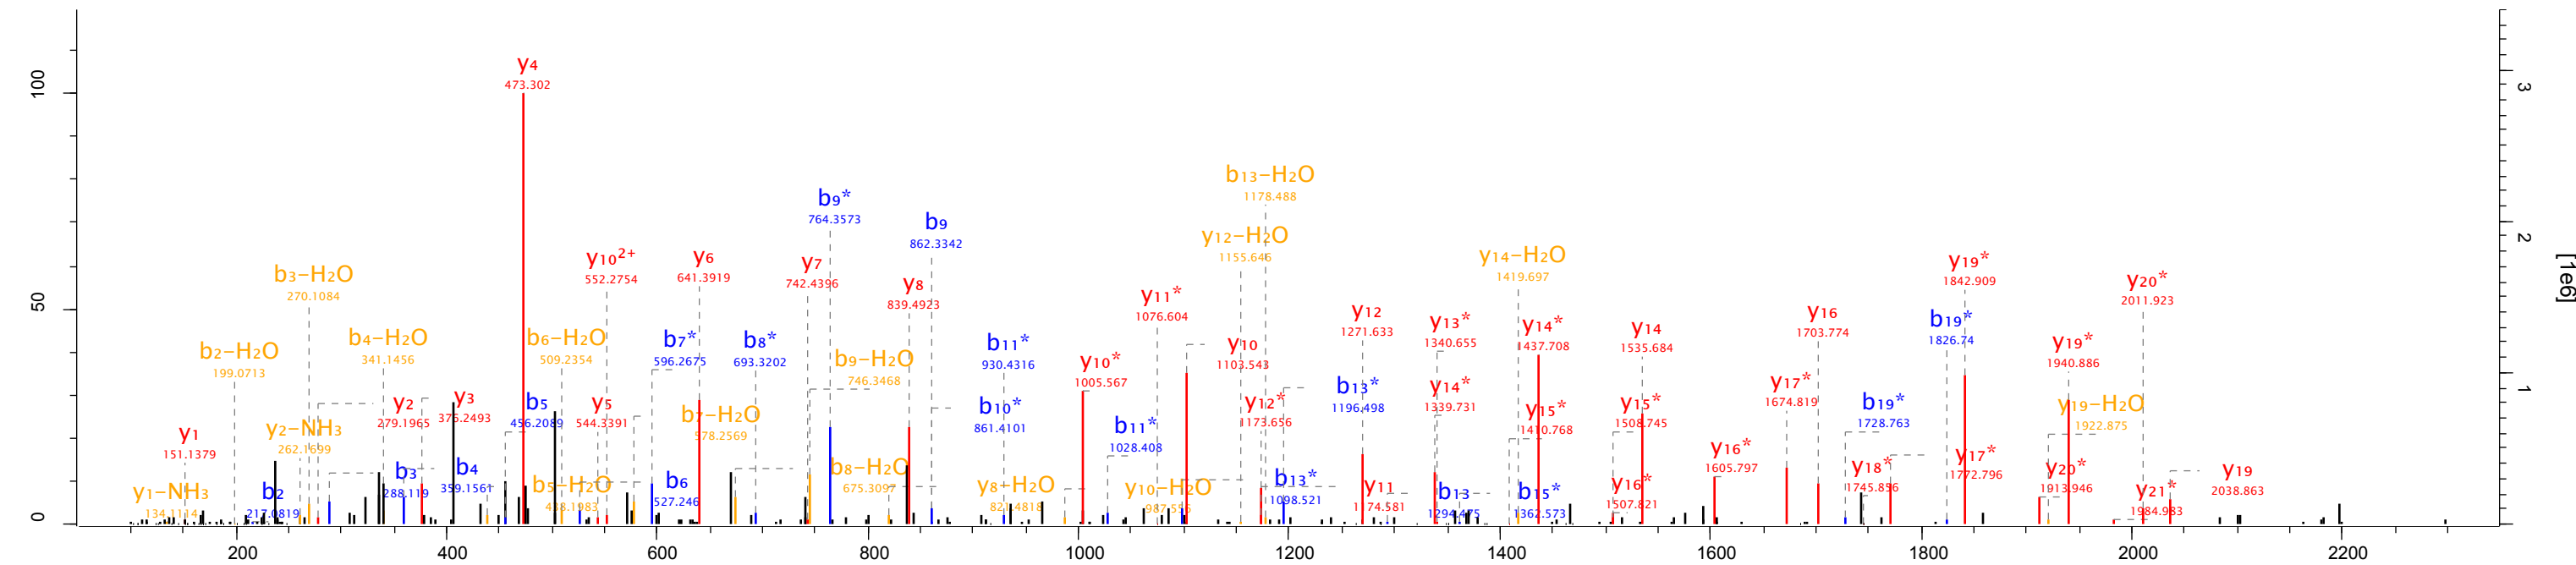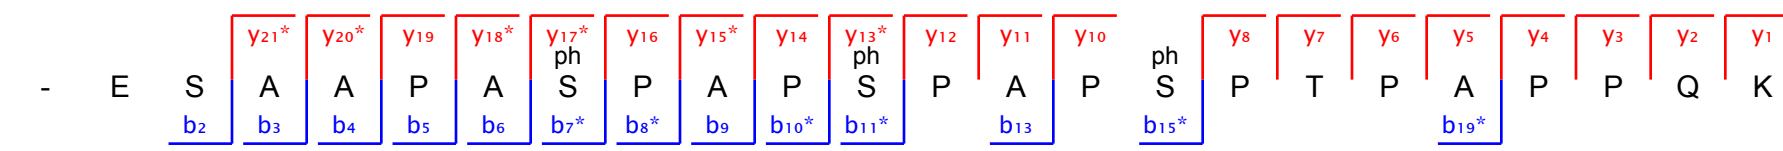

Raw file 20150812\_A375SR\_Phospho\_BR1\_02 Scan 10115 Method FTMS; HCD Score 321.26 m/z 1096.36 Gene names PDAP1

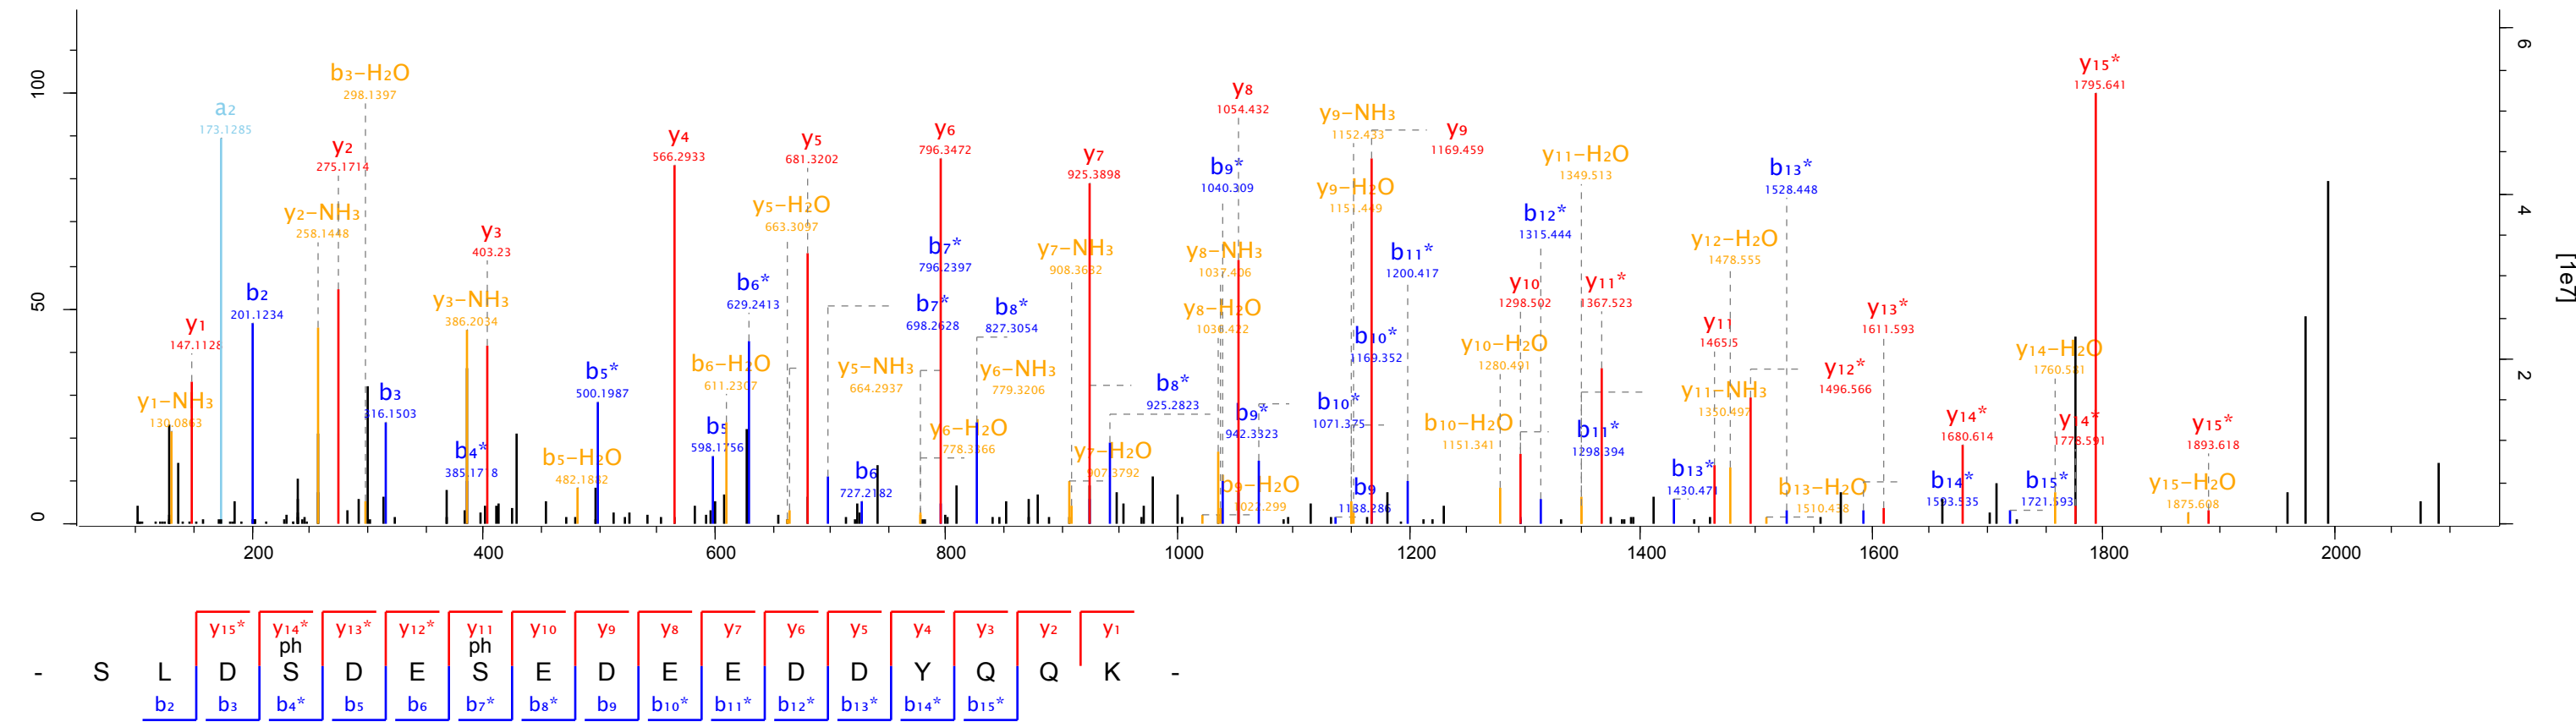



Raw file Scan Method Score m/z Gene names  
 20150812\_A375SR\_Phospho\_BR1\_02 10255 FTMS; HCD 153.23 1018.42 MCRS1

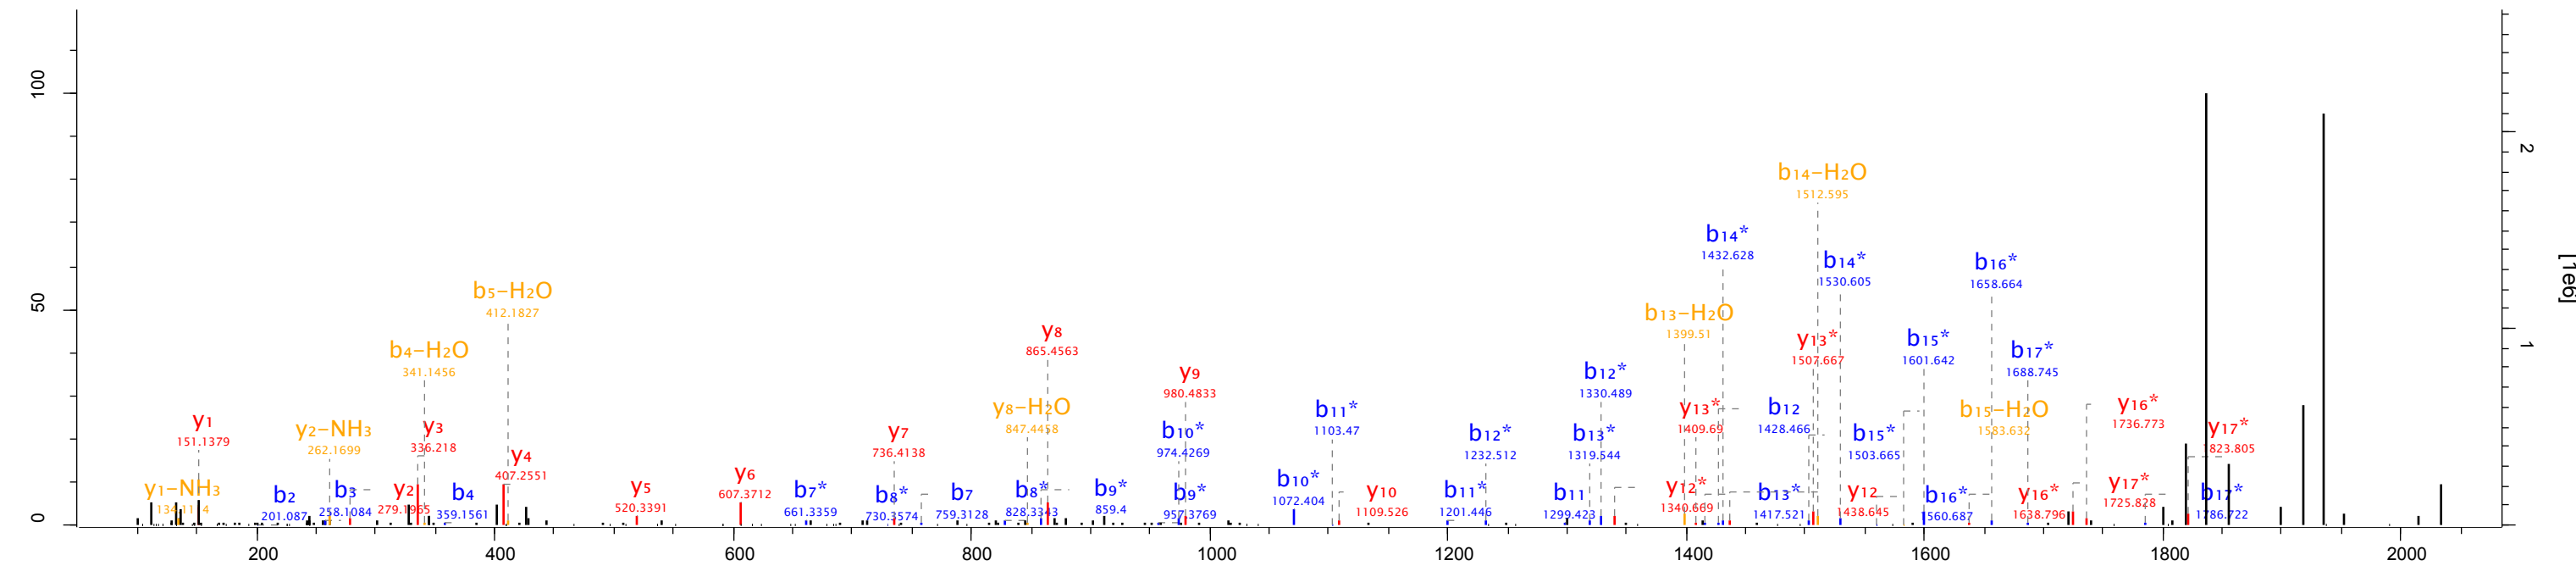



Raw file: 20150812\_A375SR\_Phospho\_BR1\_02  
 Scan: 10565 Method: FTMS; HCD Score: 135.08 m/z: 661.77 Gene names: SRPK2

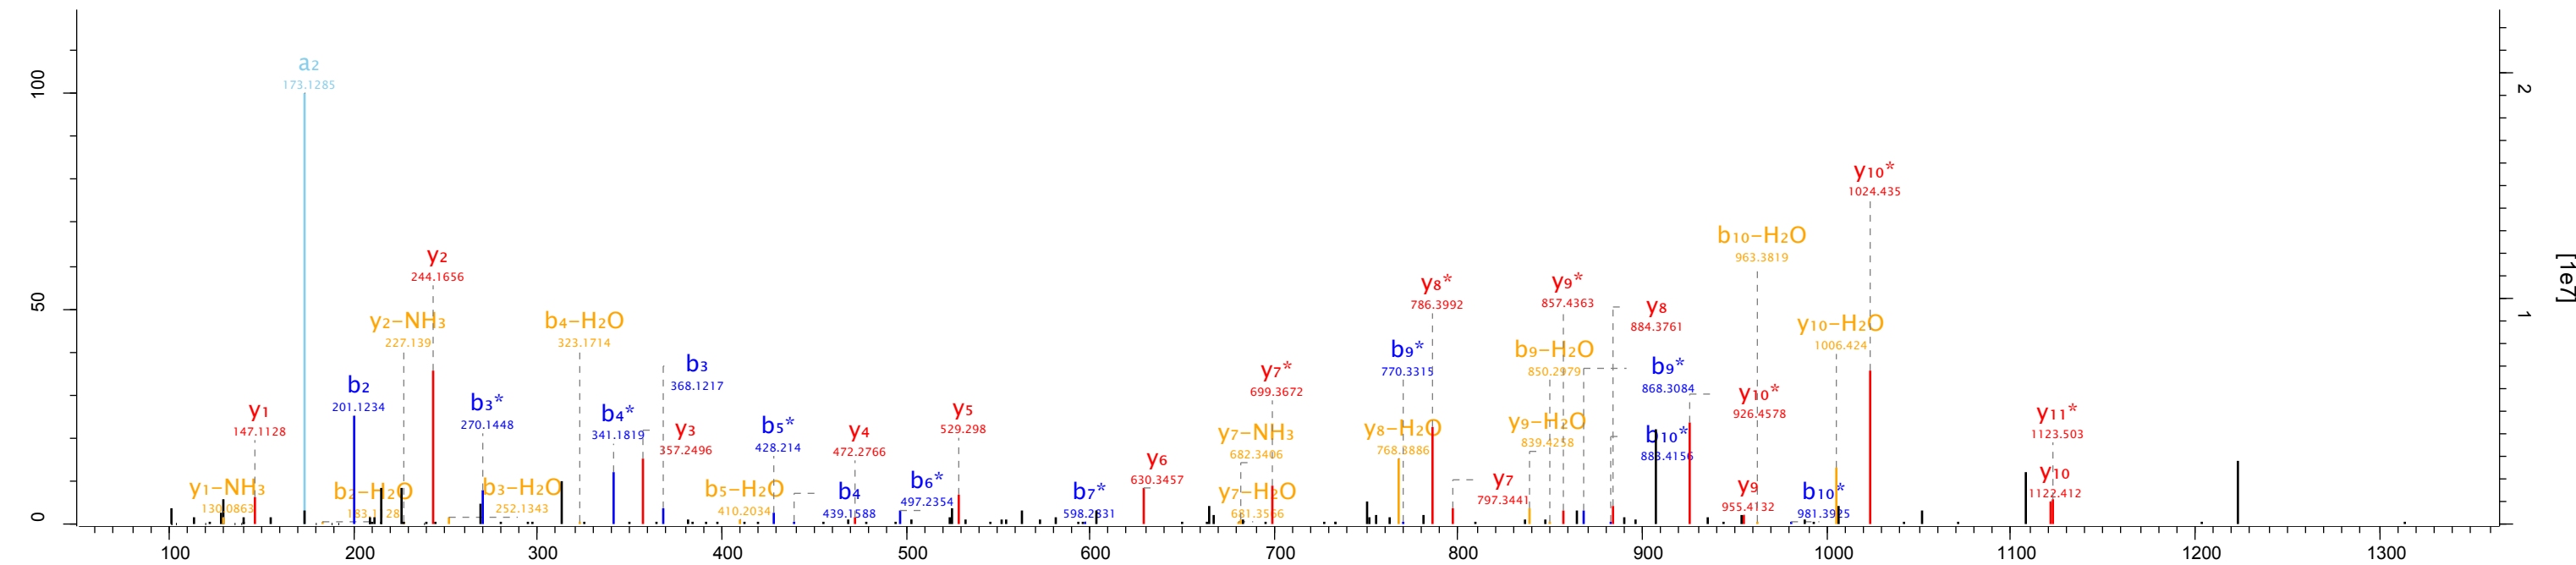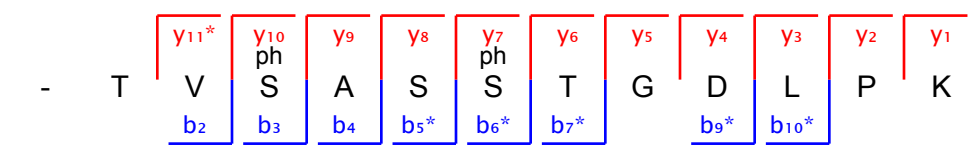

Raw file: 20150812\_A375SR\_Phospho\_BR1\_02  
 Scan: 10745 Method: FTMS; HCD Score: 88.55 m/z: 604.62 Gene names: IRS2

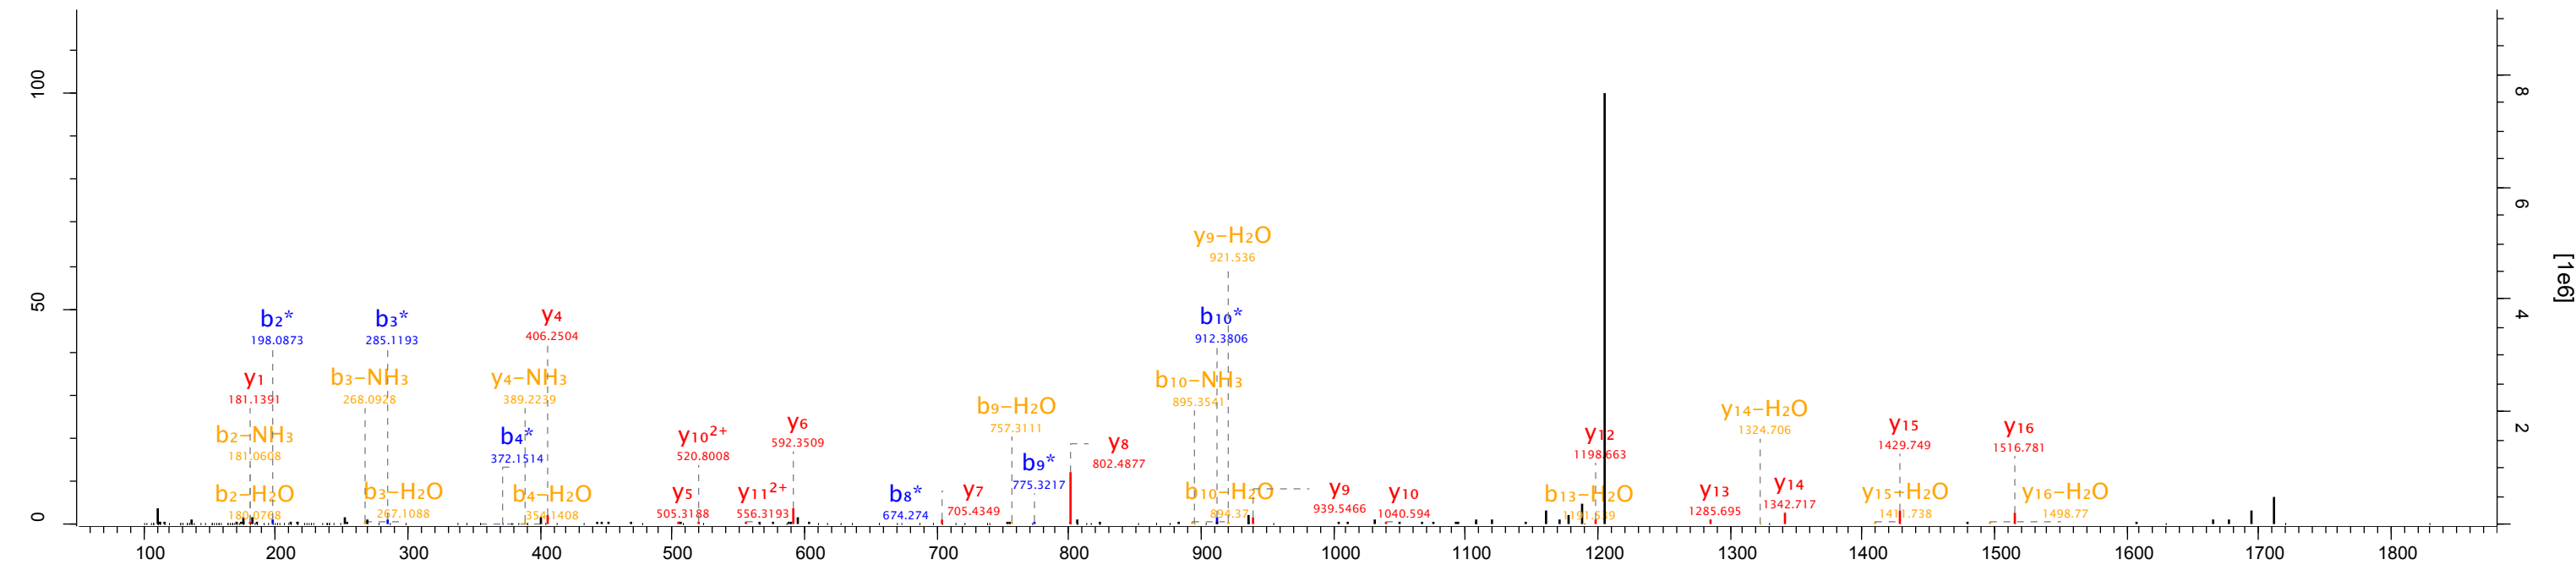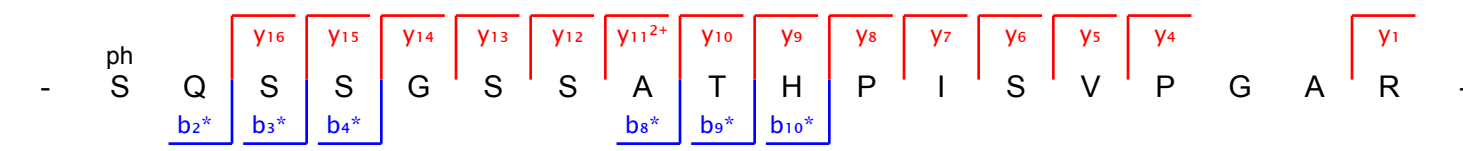

Raw file: 20150812\_A375SR\_Phospho\_BR1\_02  
 Scan: 10895 Method: FTMS; HCD Score: 73.76 m/z: 833 Gene names: PRRC2C

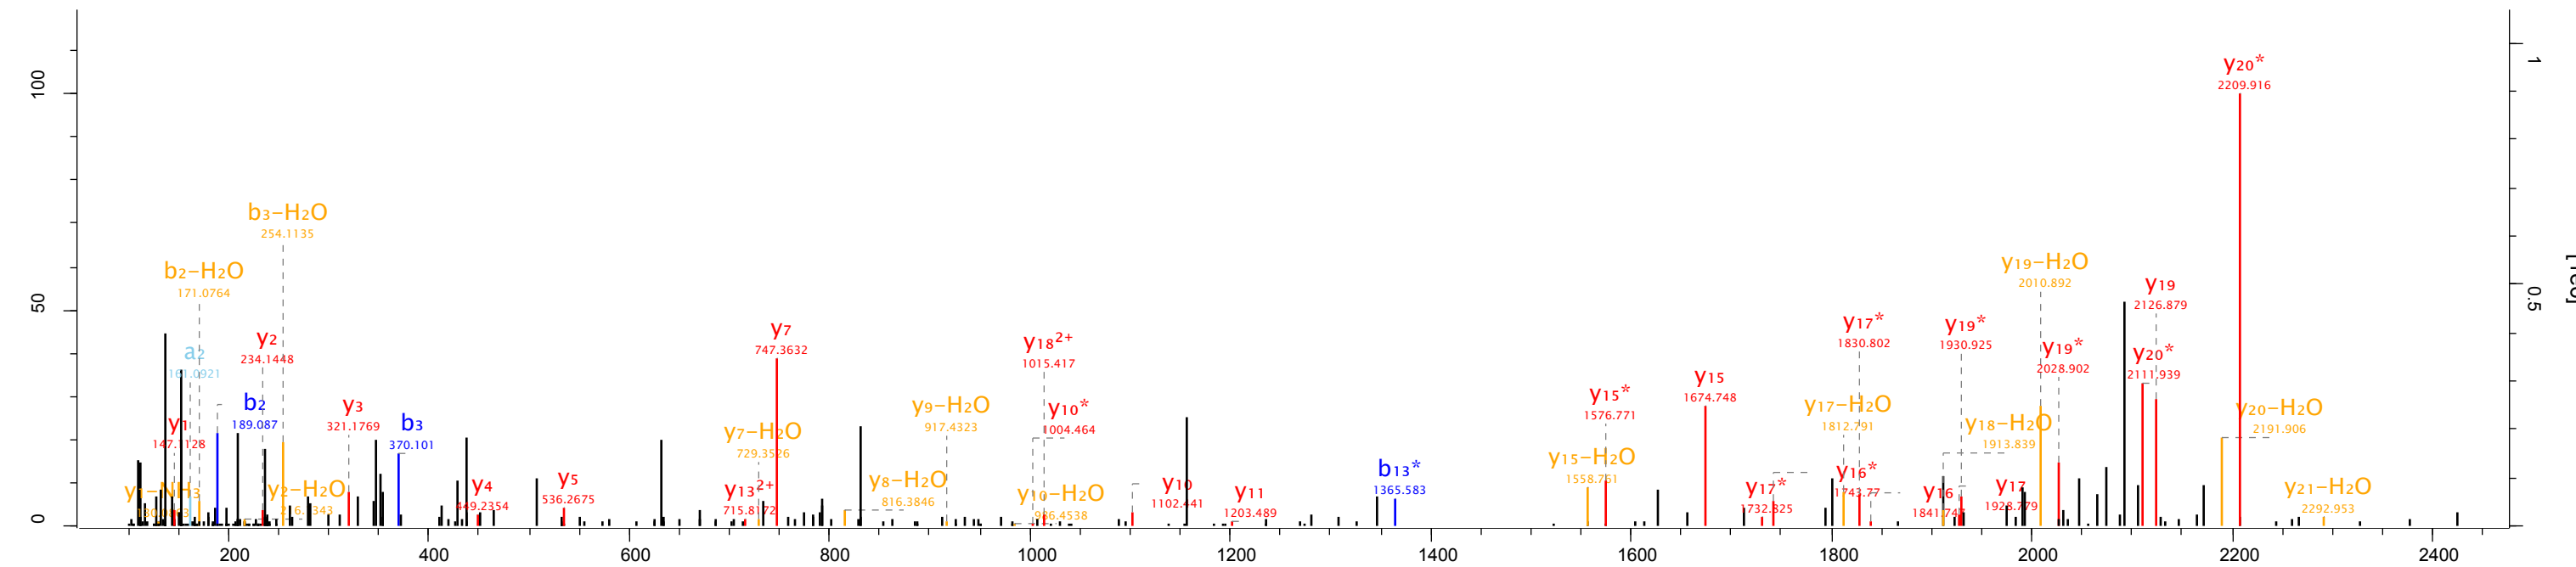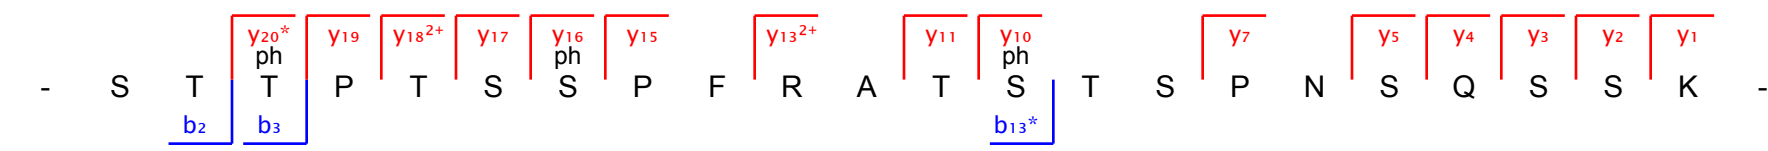

Raw file 20150812\_A375SR\_Phospho\_BR1\_02 Scan 10935 Method FTMS; HCD Score 111.11 m/z 683.29 Gene names C11orf30;EMSY

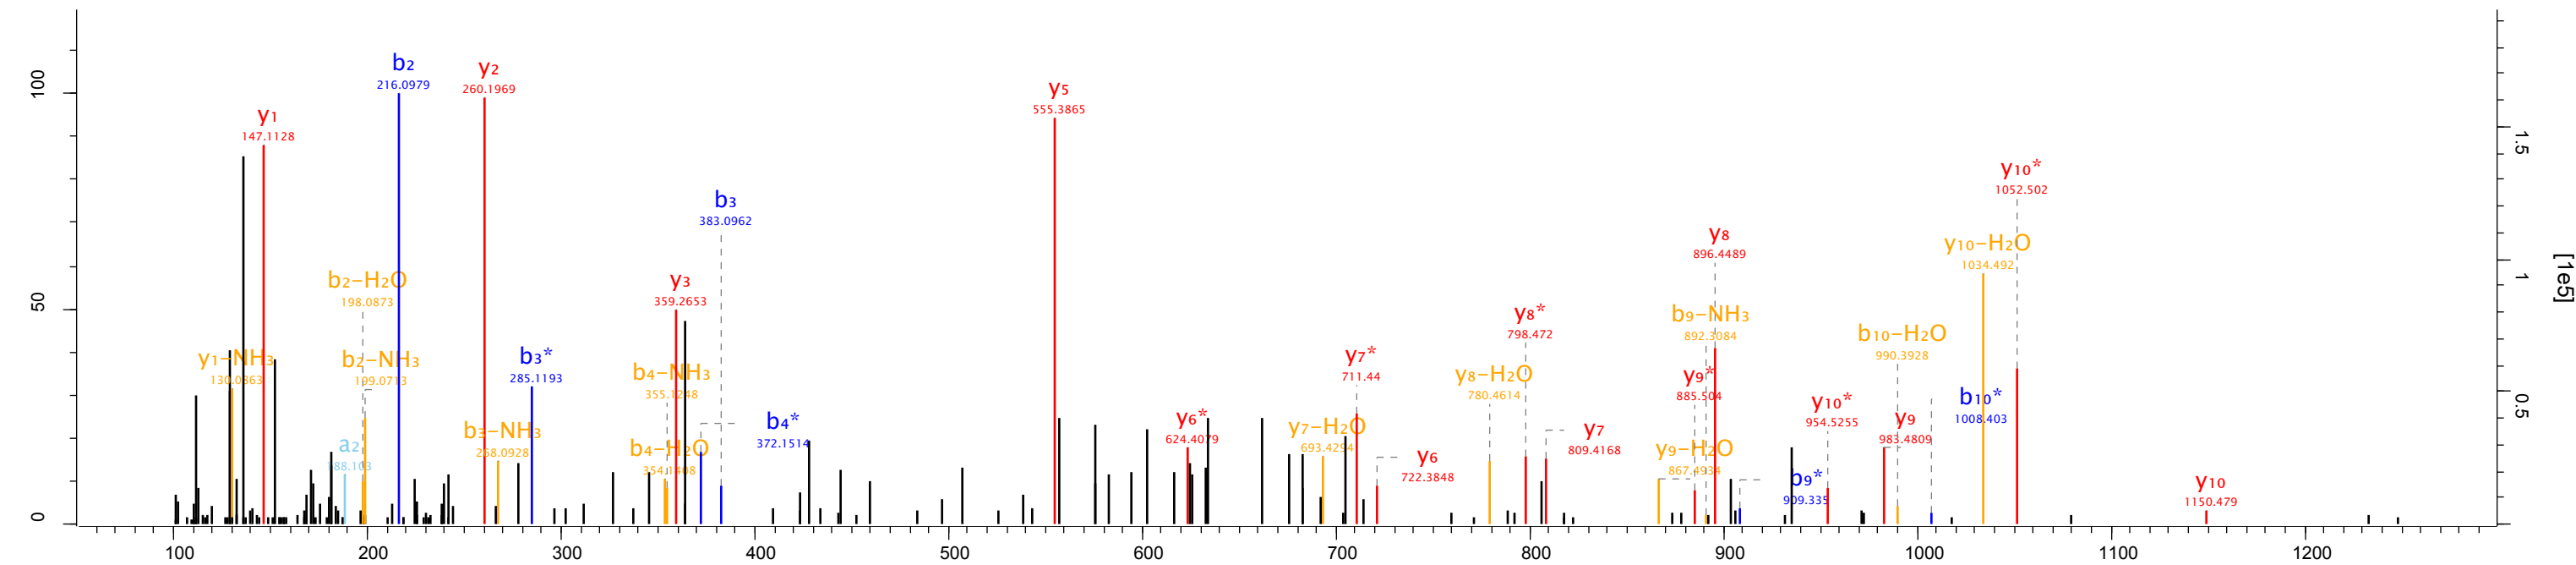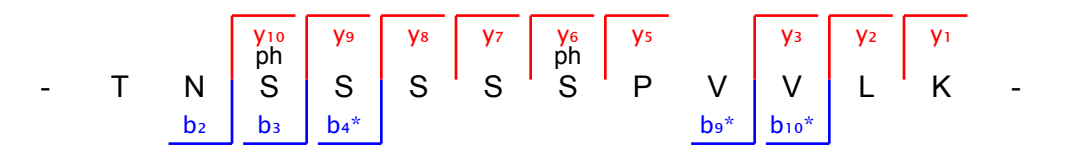

Raw file: 20150812\_A375SR\_Phospho\_BR1\_02  
 Scan: 11095 Method: FTMS; HCD Score: 49.66 m/z: 658.92 Gene names: RANBP2

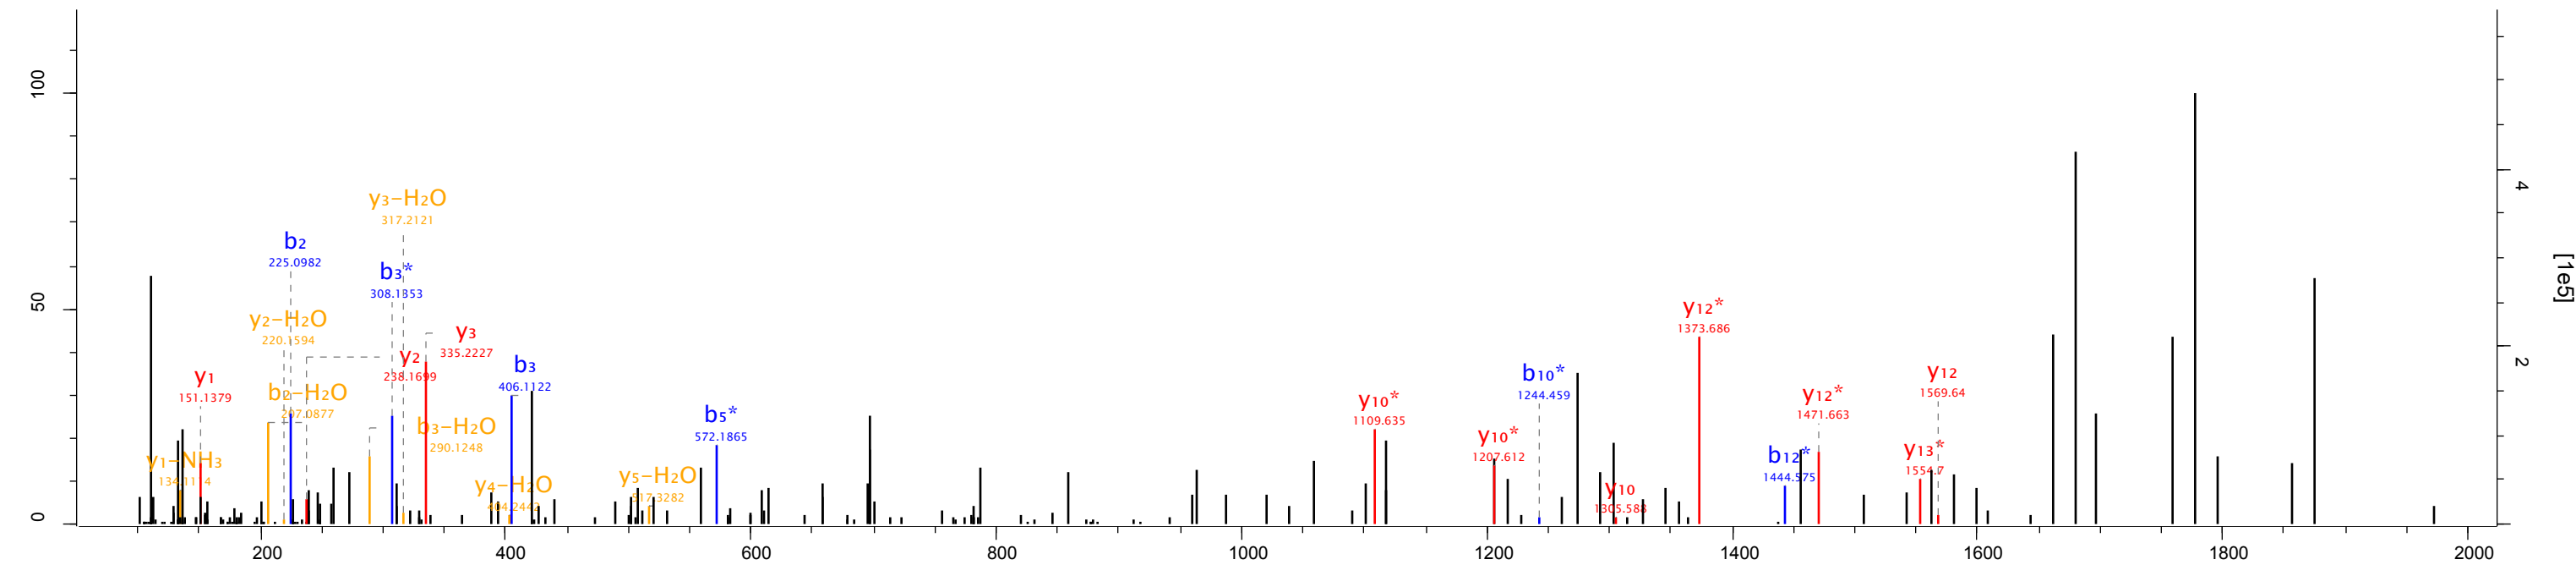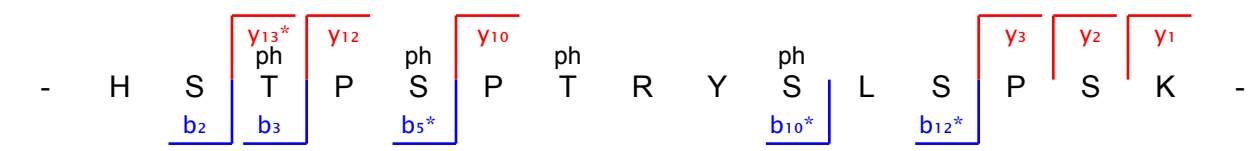

Raw file 20150812\_A375SR\_Phospho\_BR1\_02 Scan 11295 Method FTMS; HCD Score 66.54 m/z 1005.82 Gene names CCDC6

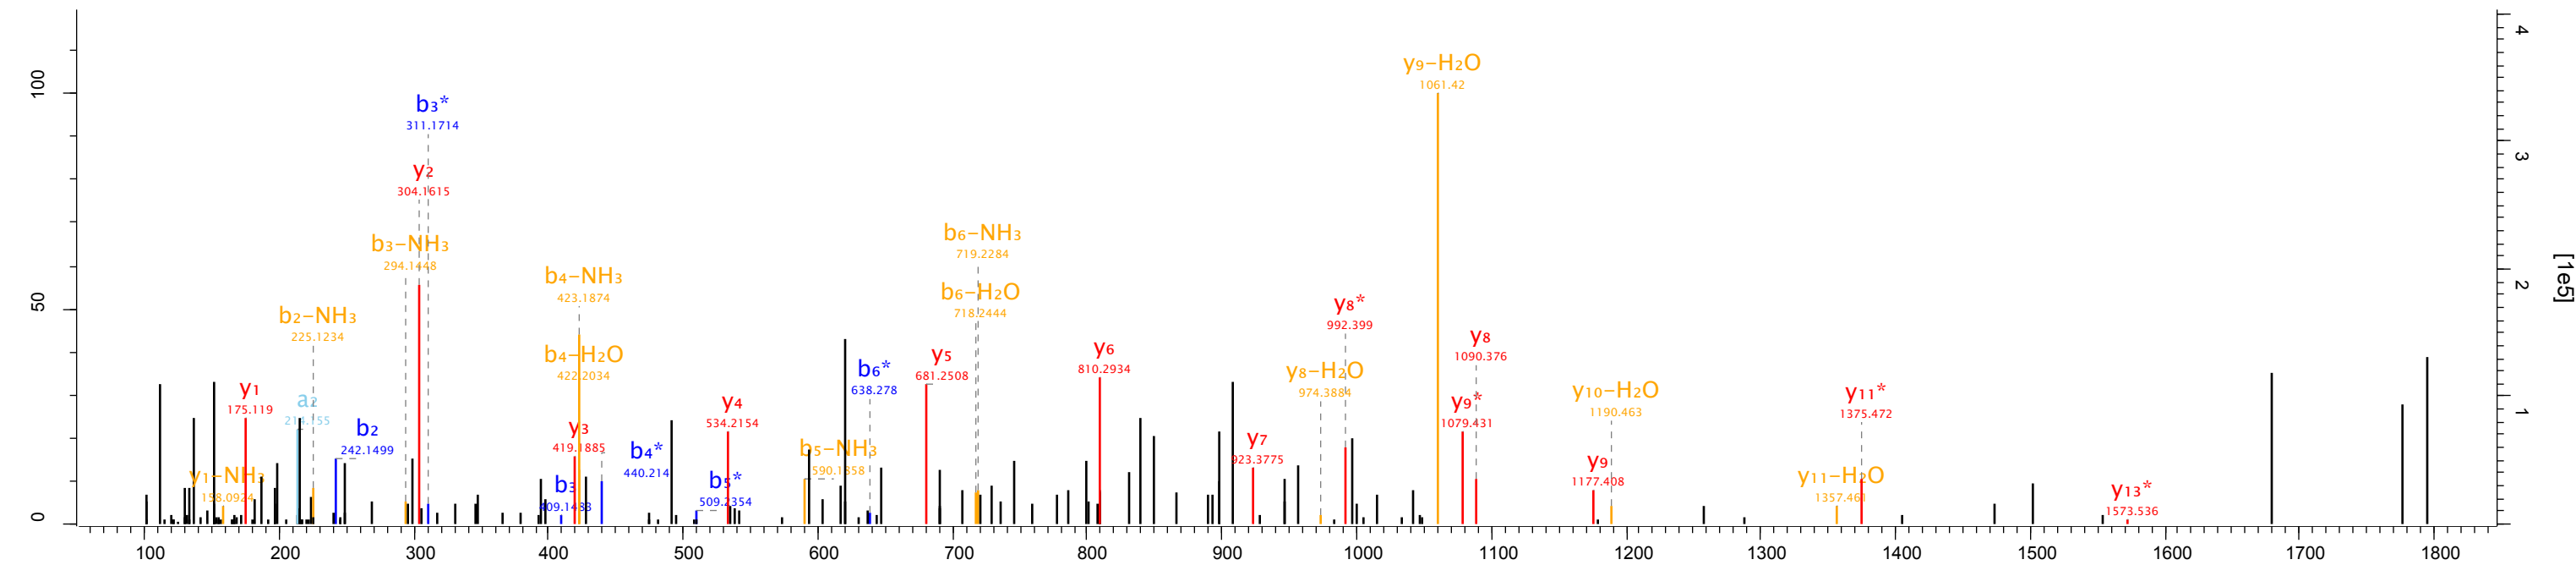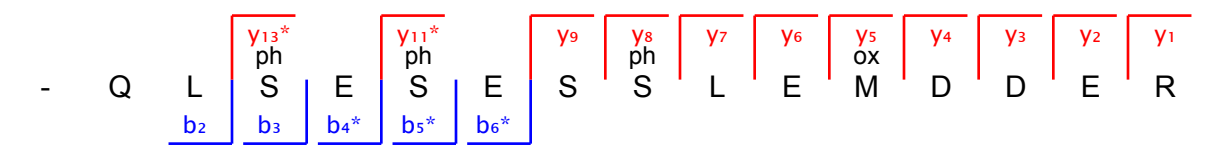



Raw file 20150812\_A375SR\_Phospho\_BR1\_02 Scan 11645 Method FTMS; HCD Score 141.57 m/z 704.76 Gene names LARP7

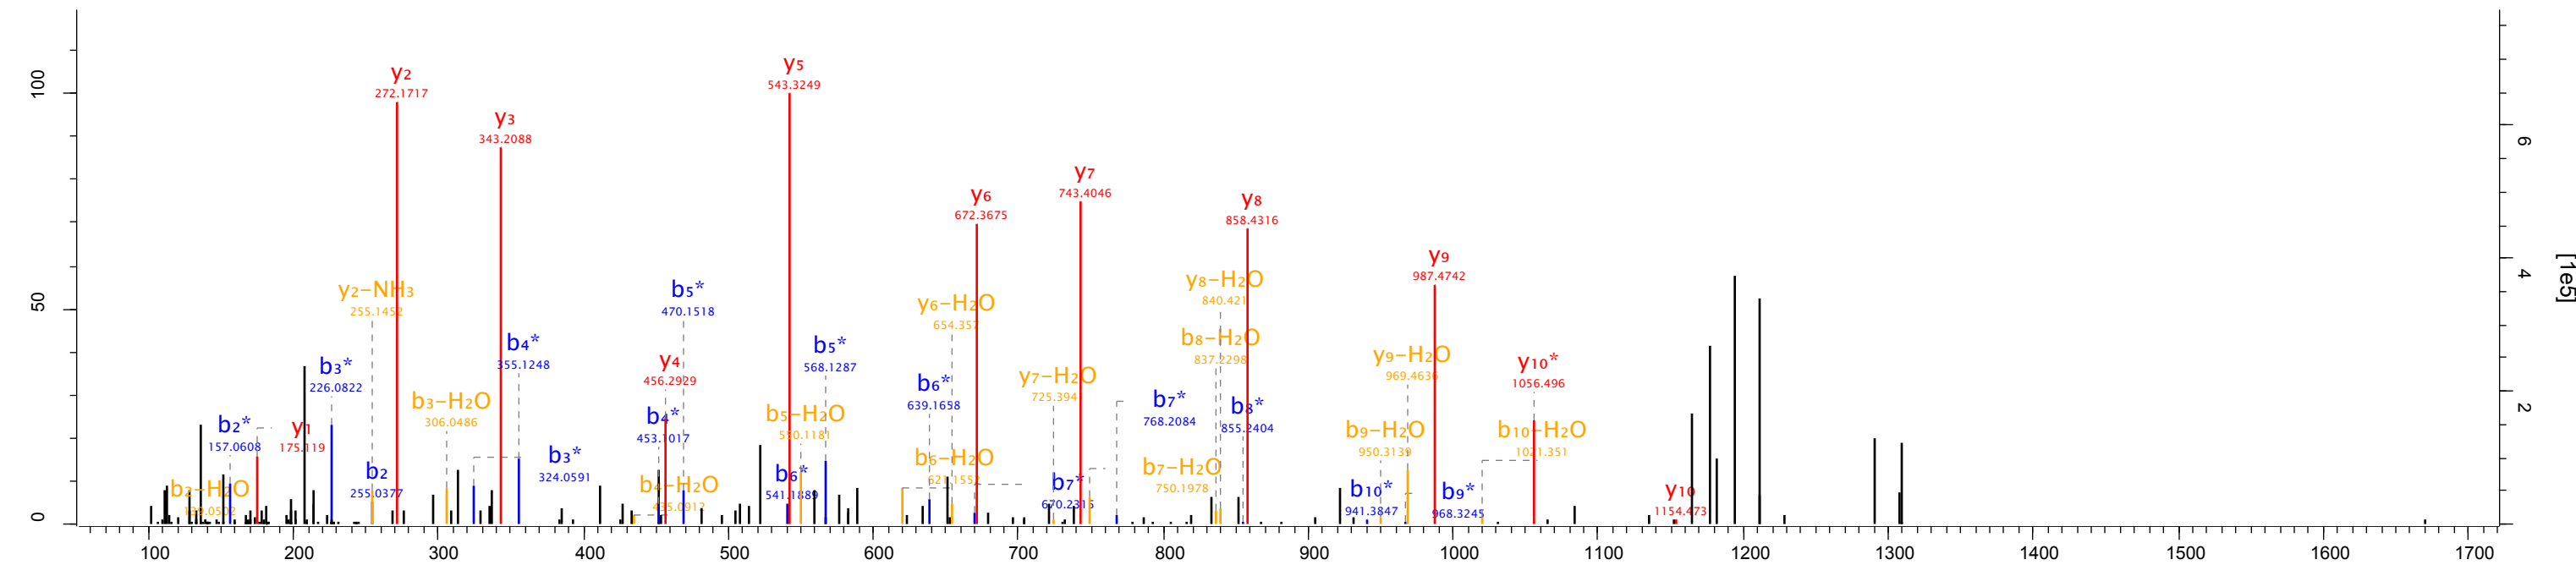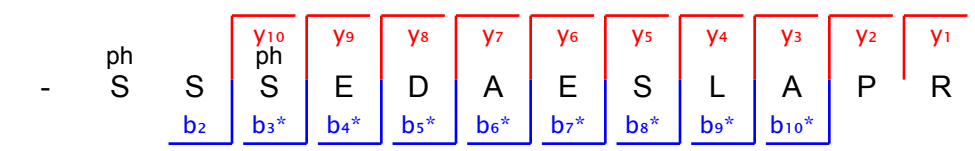

Raw file 20150812\_A375SR\_Phospho\_BR1\_02 Scan 11805 Method FTMS; HCD Score 222.44 m/z 833.8 Gene names ZC3H18

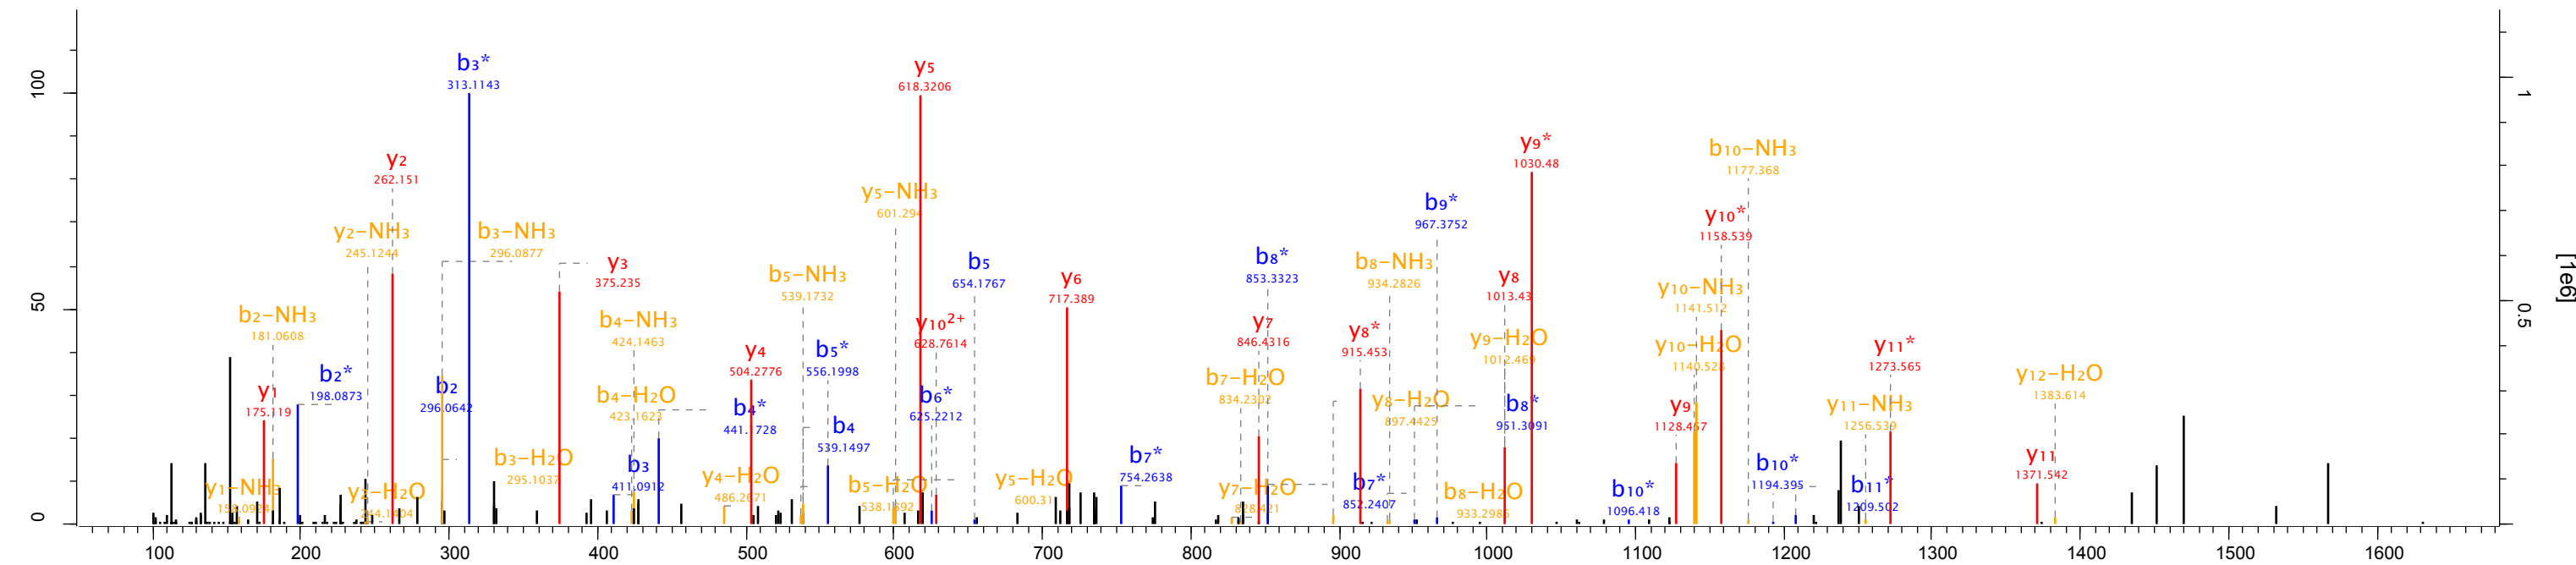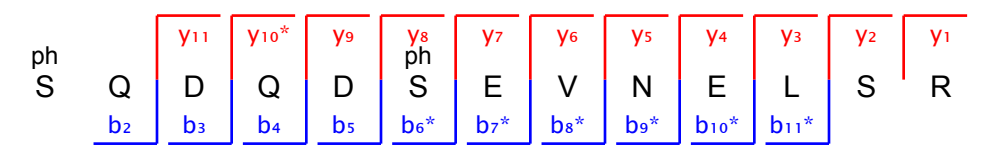

Raw file 20150812\_A375SR\_Phospho\_BR1\_02 Scan 12075 Method FTMS; HCD Score 115.26 m/z 705.28 Gene names AFAP1

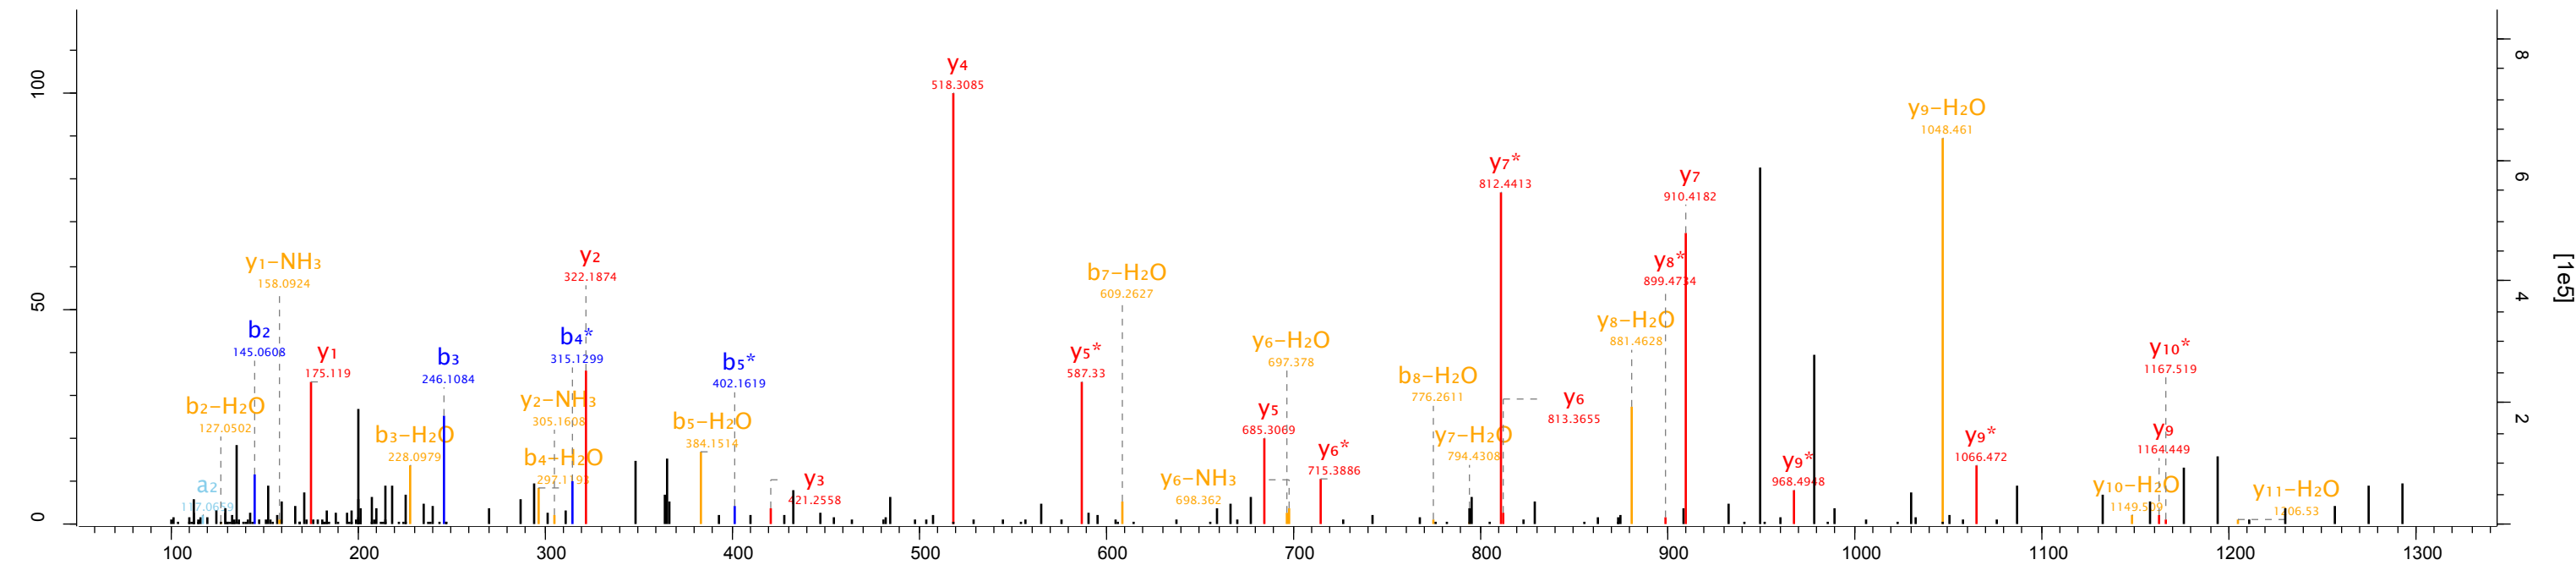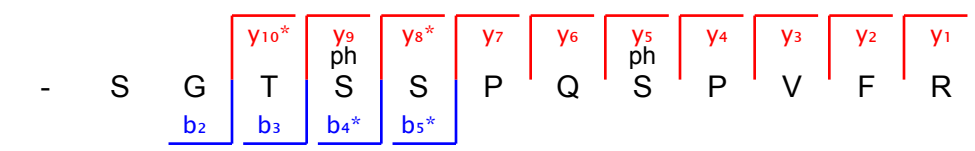

Raw file 20150812\_A375SR\_Phospho\_BR1\_02 Scan 12495 Method FTMS; HCD Score 103.75 m/z 911.38 Gene names SRSF6

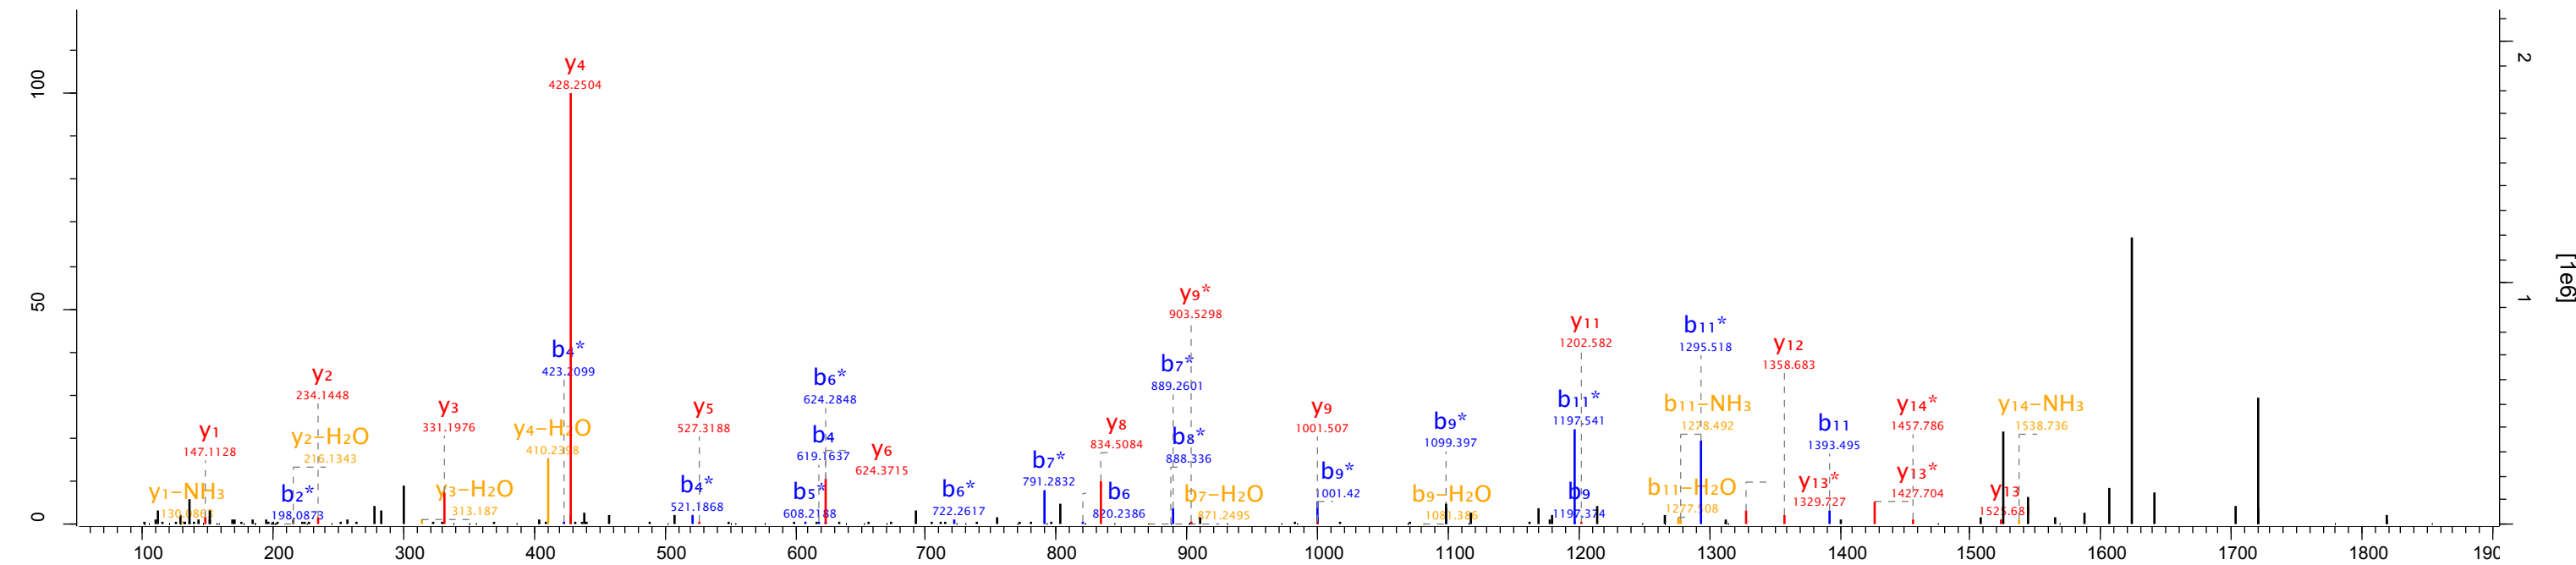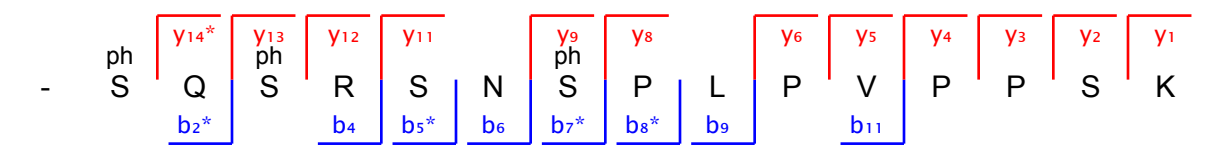

Raw file 20150812\_A375SR\_Phospho\_BR1\_02 Scan 12575 Method FTMS; HCD Score 98.2 m/z 757.81 Gene names TRAF7

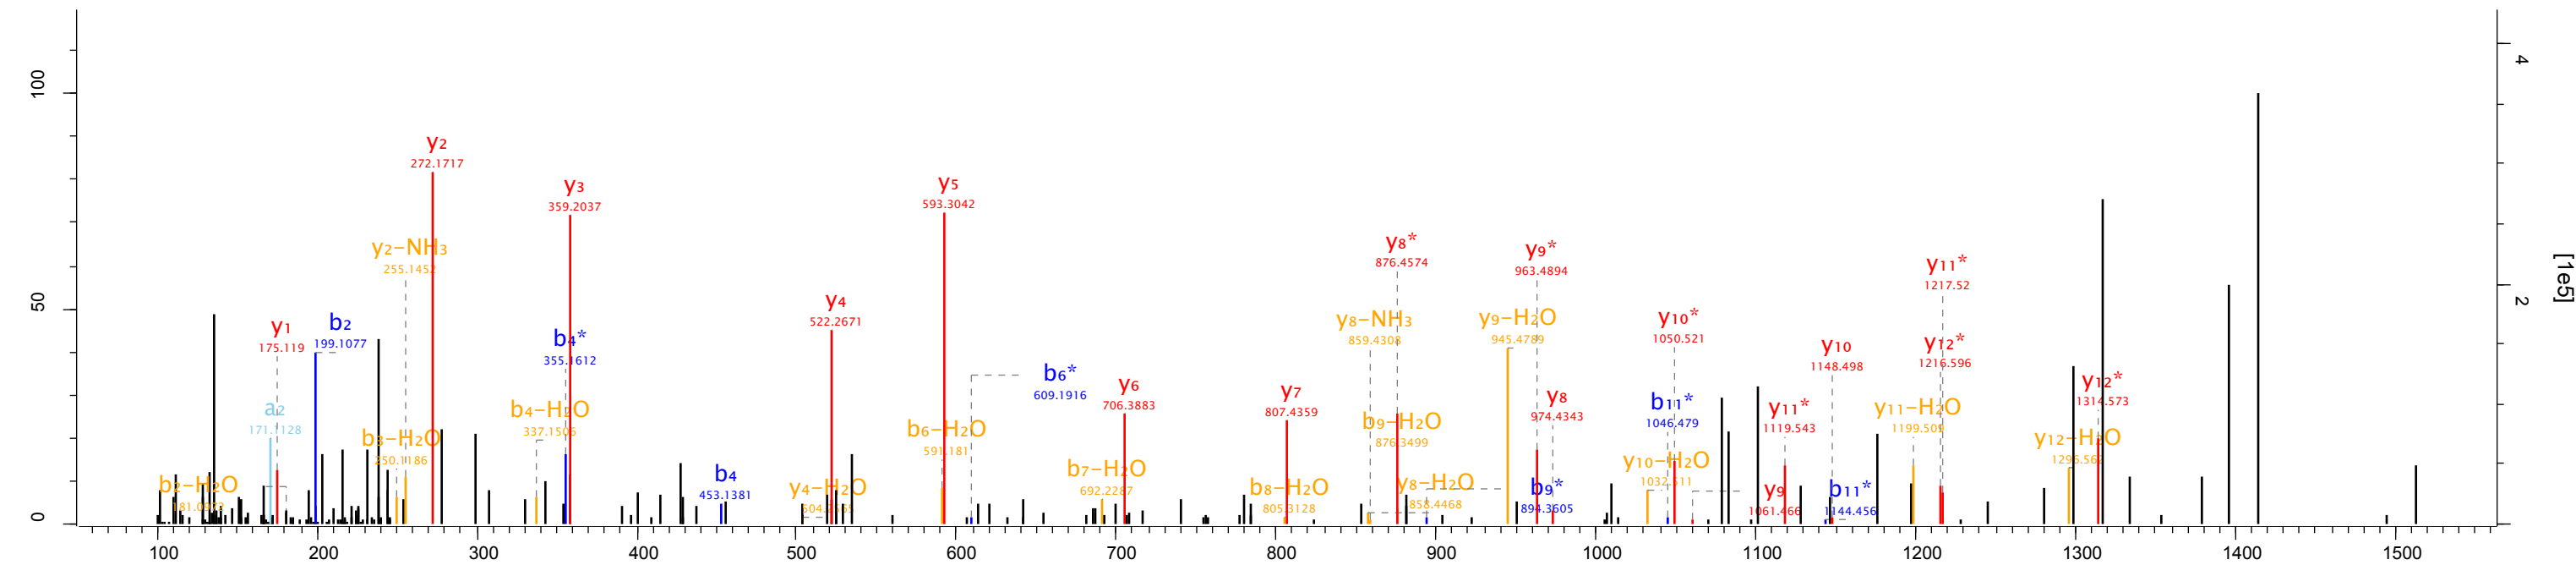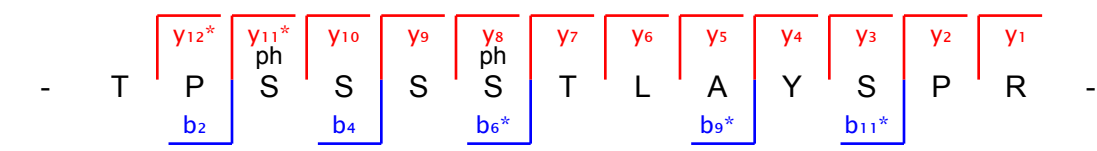

Raw file: 20150812\_A375SR\_Phospho\_BR1\_02  
 Scan: 12585 Method: FTMS; HCD Score: 126.04 m/z: 846.35 Gene names: POLR2A

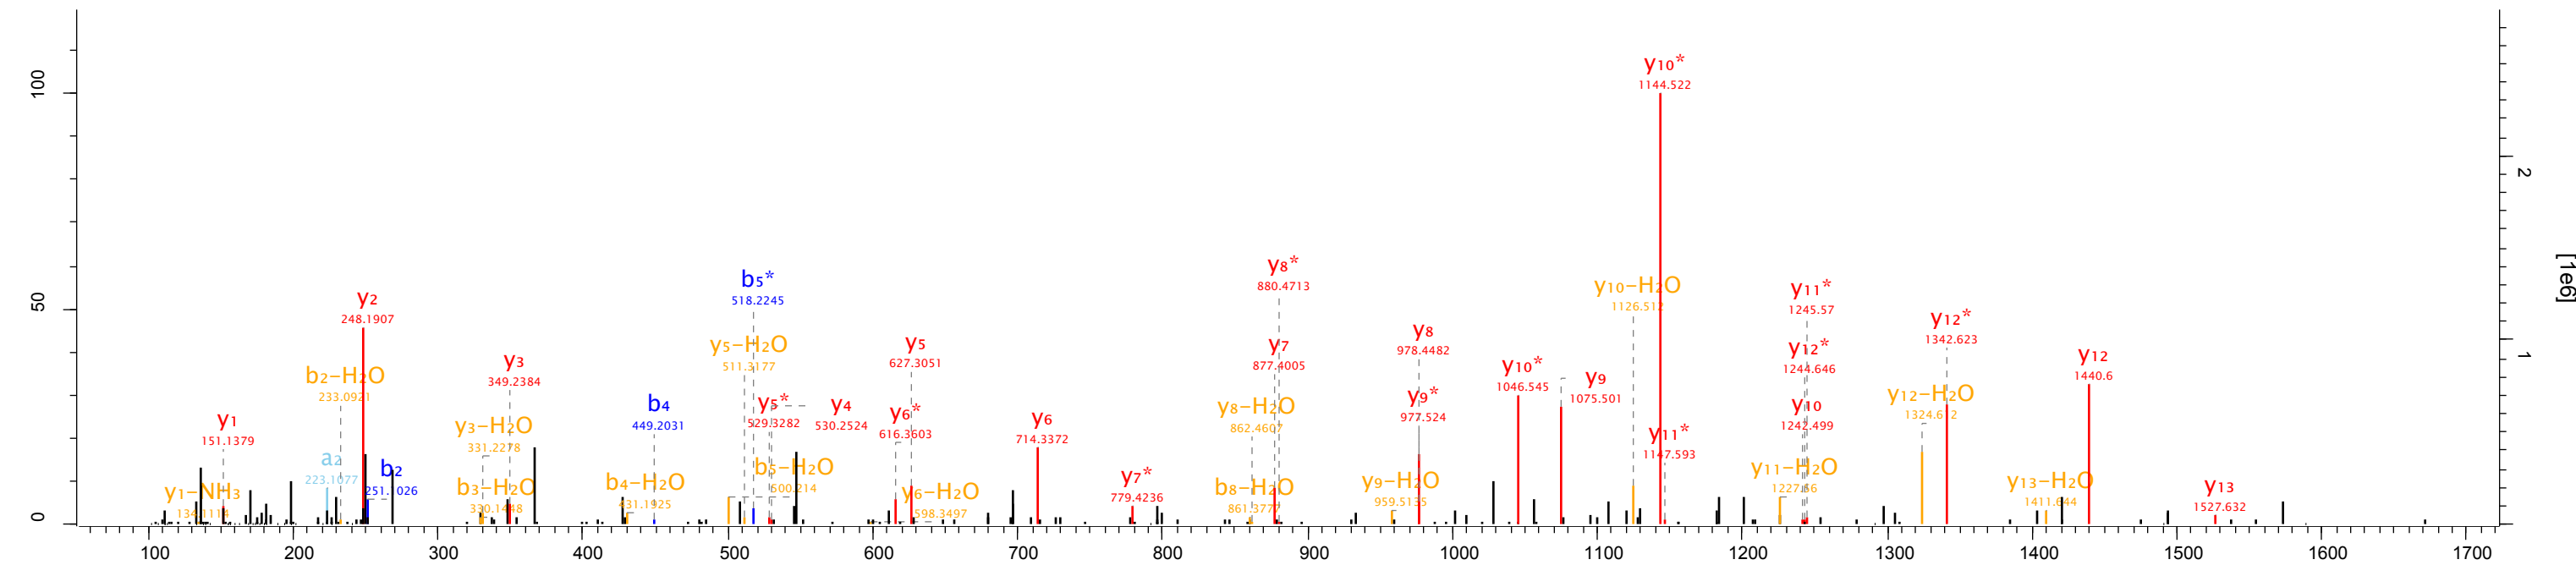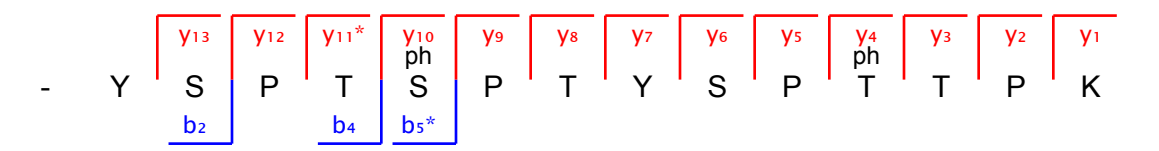

Raw file: 20150812\_A375SR\_Phospho\_BR1\_02  
 Scan: 12615 Method: FTMS; HCD Score: 41.42 m/z: 791.62 Gene names: MKI67

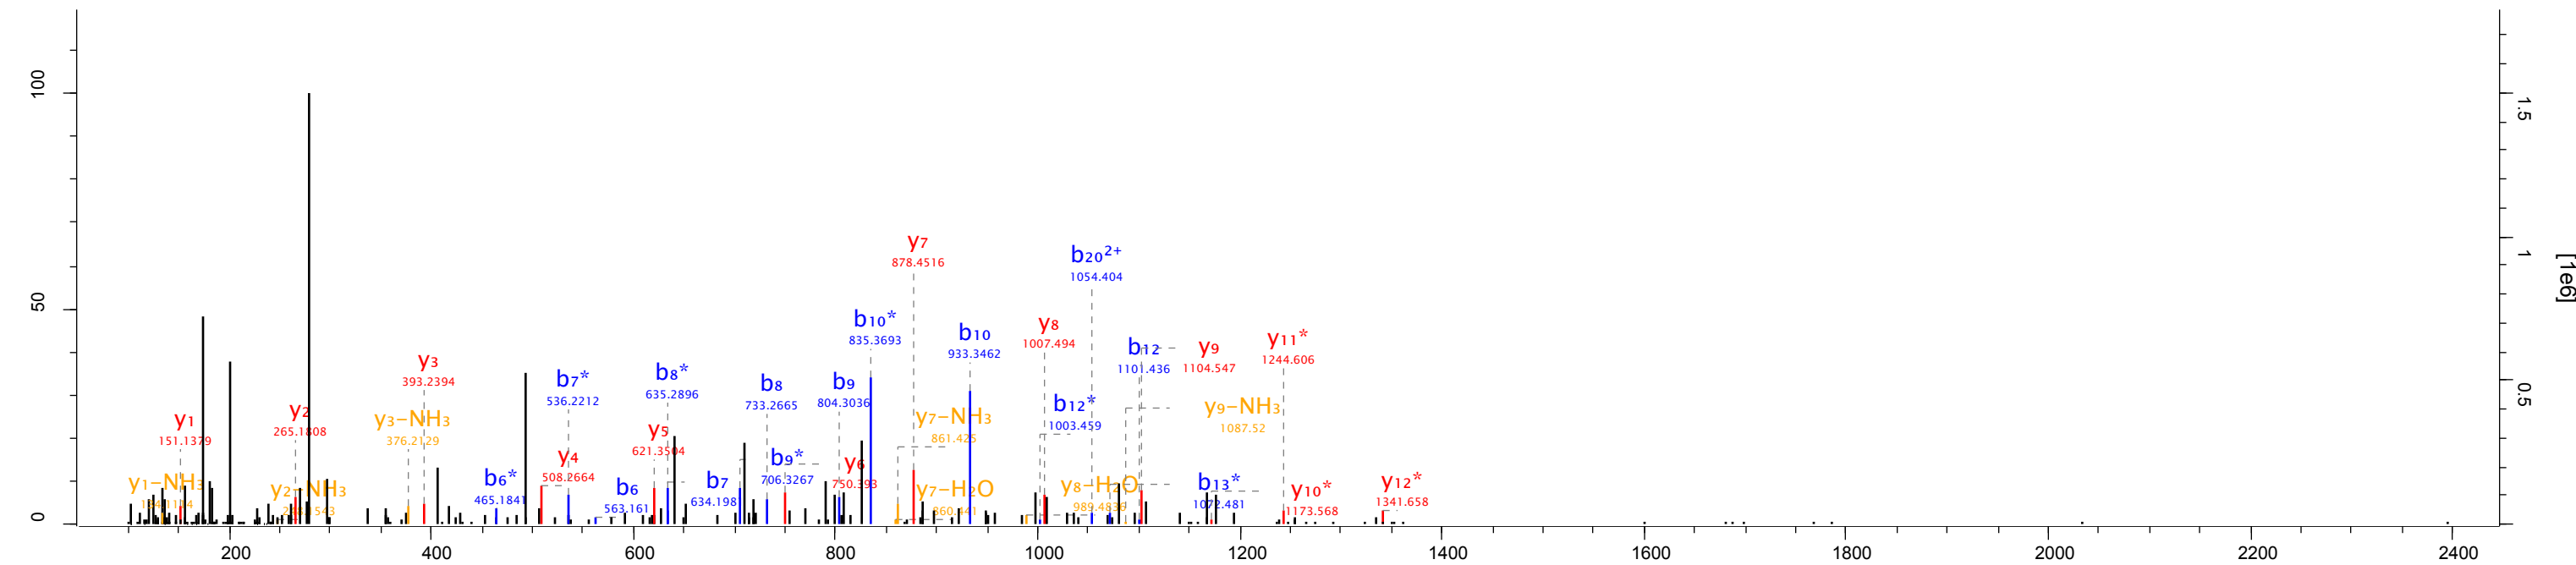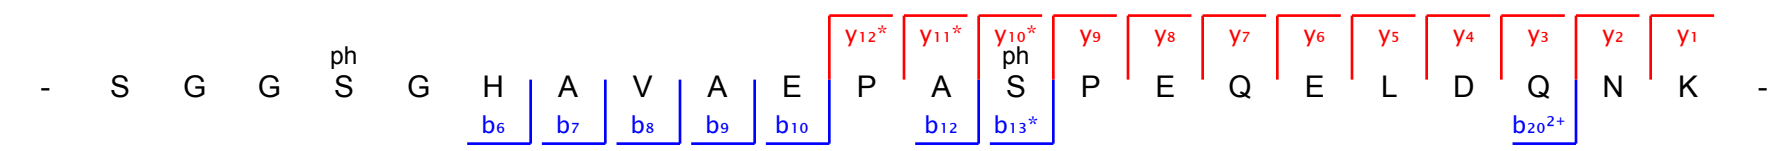

Raw file 20150812\_A375SR\_Phospho\_BR1\_02 Scan 12645 Method FTMS; HCD Score 237.32 m/z 874.38 Gene names ARID1A

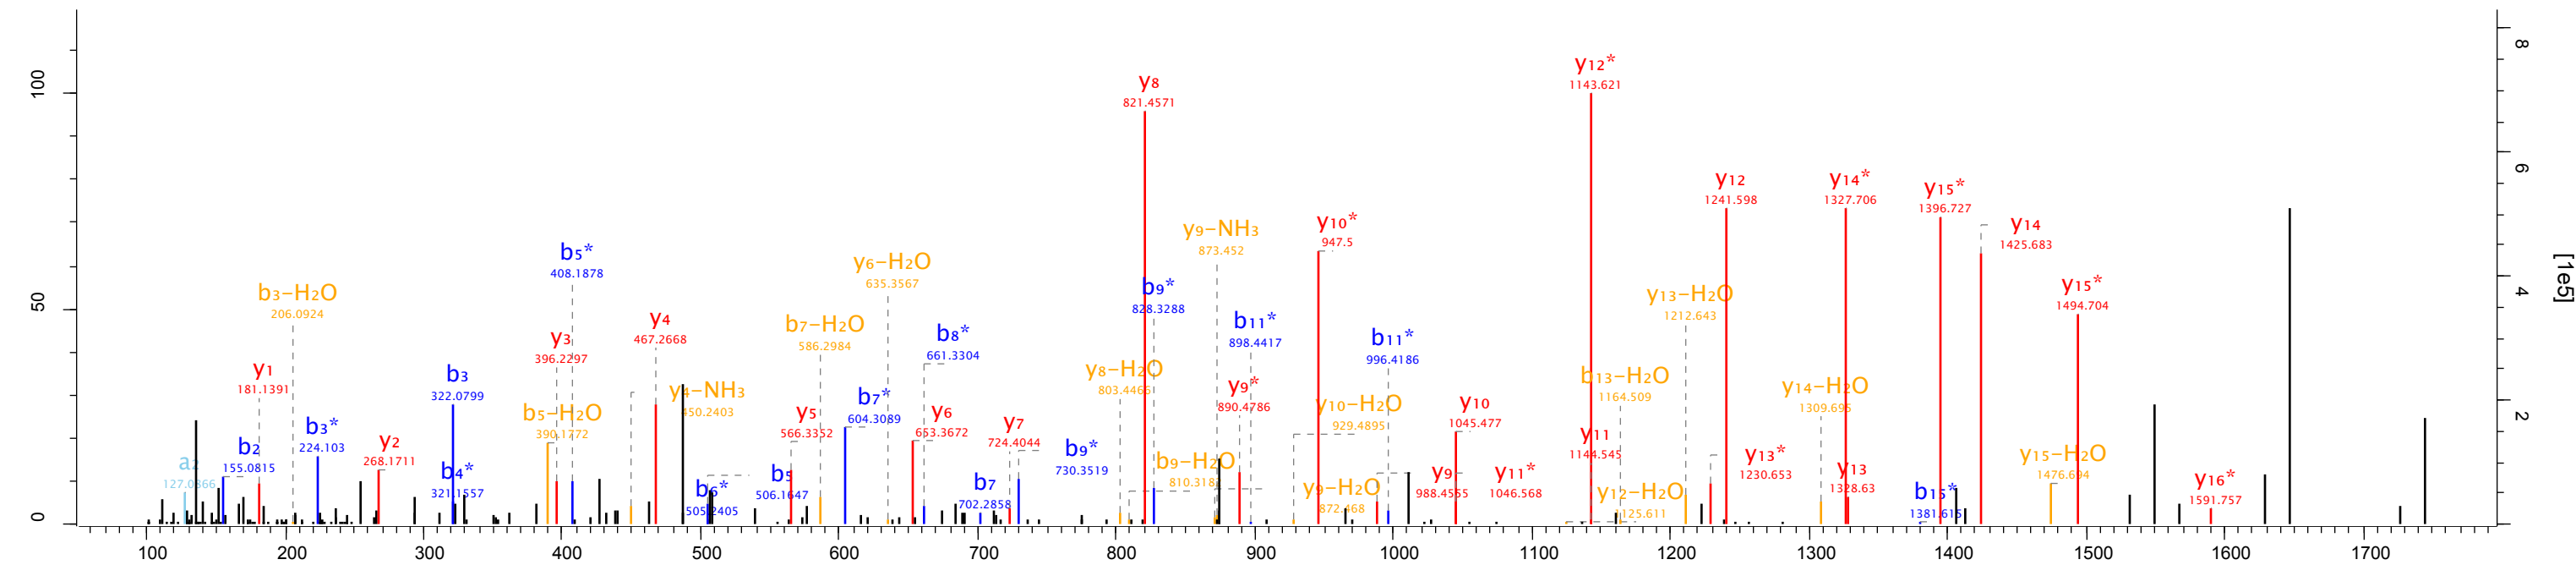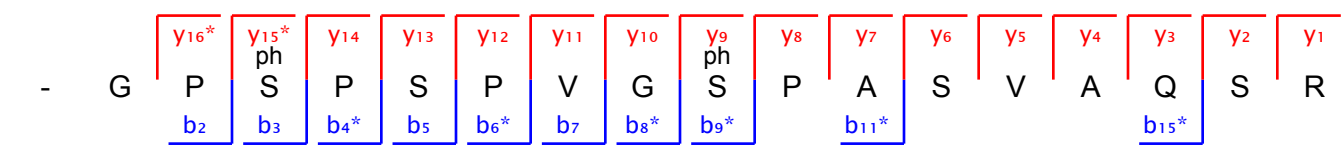



Raw file: 20150812\_A375SR\_Phospho\_BR1\_02  
 Scan: 13155 Method: FTMS; HCD Score: 146.17 m/z: 1007.8 Gene names: KRI1

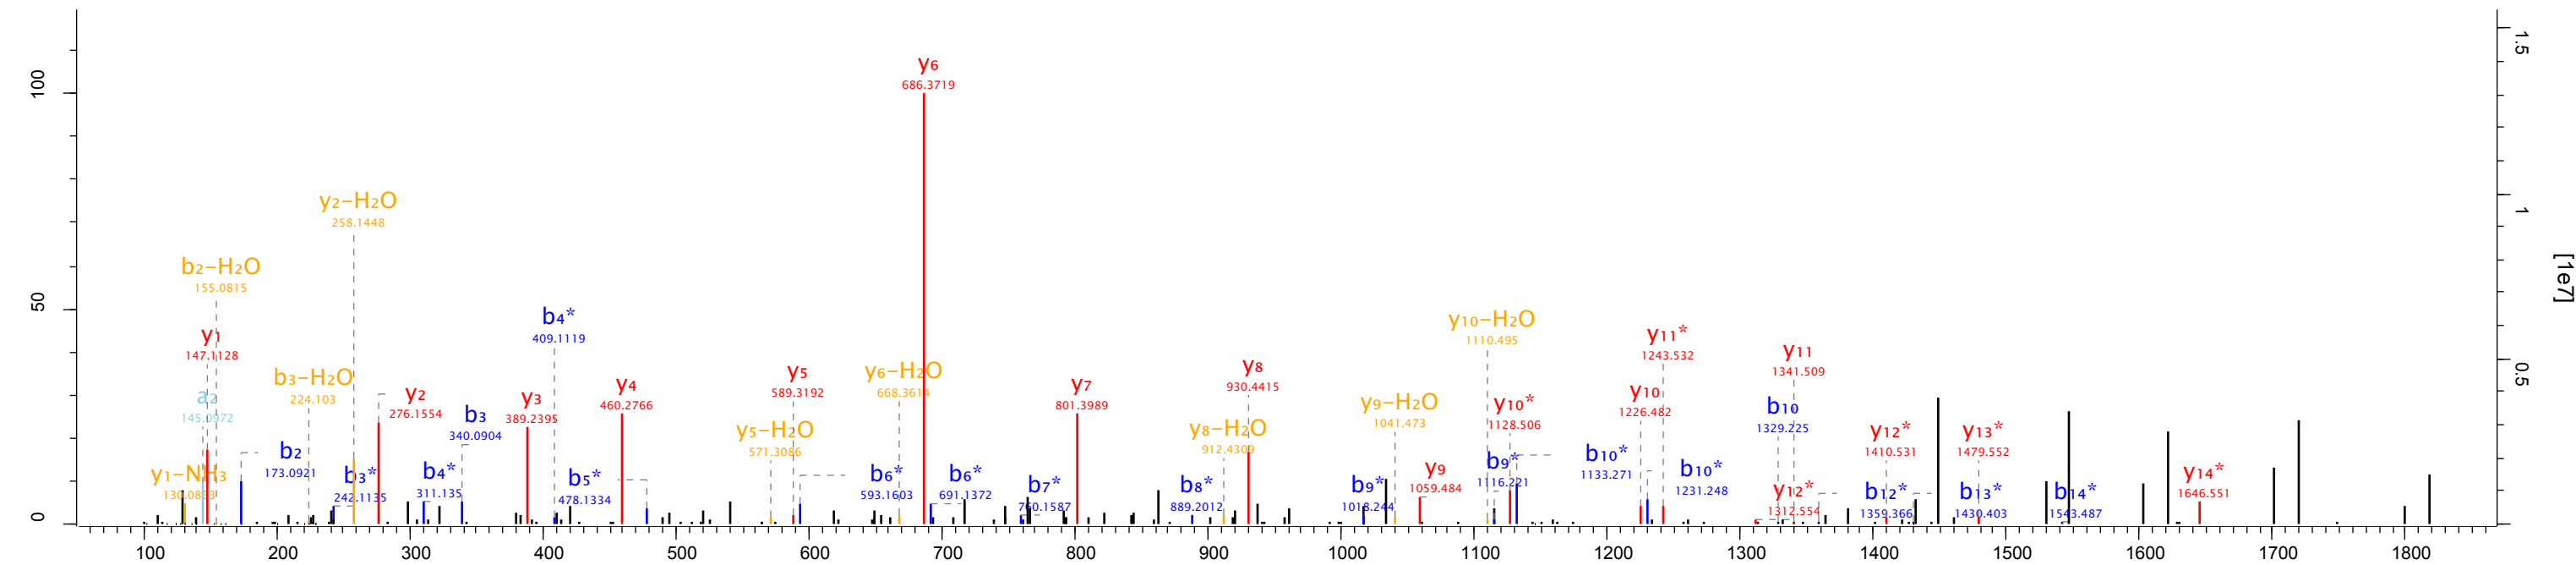

Sequence: - T A S S S D S E E D P E A L E K -  
 Fragmentation sites: b2, b3, b4\*, b5\*, b6\*, b7\*, b8\*, b9\*, b10, b12\*, b13\*, b14\* (blue boxes); y1, y2, y3, y4, y5, y6, y7, y8, y9, y11, y12\*, y13\*, y14\* (red boxes).

Raw file 20150812\_A375SR\_Phospho\_BR1\_02 Scan 13395 Method FTMS; HCD Score 115.58 m/z 891.69 Gene names DOCK7

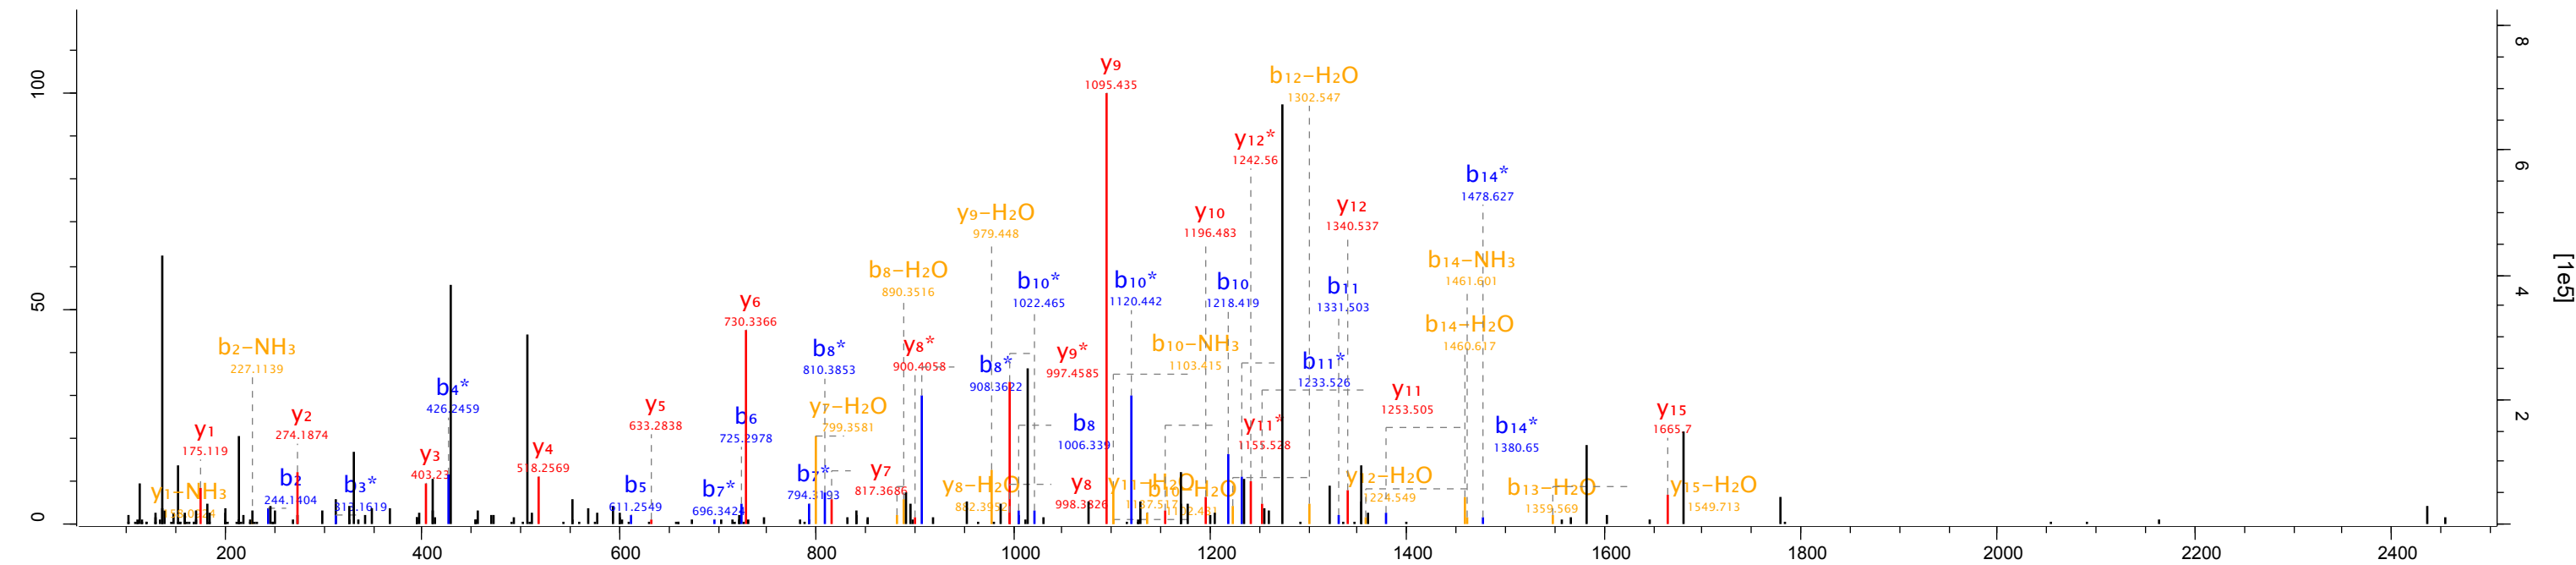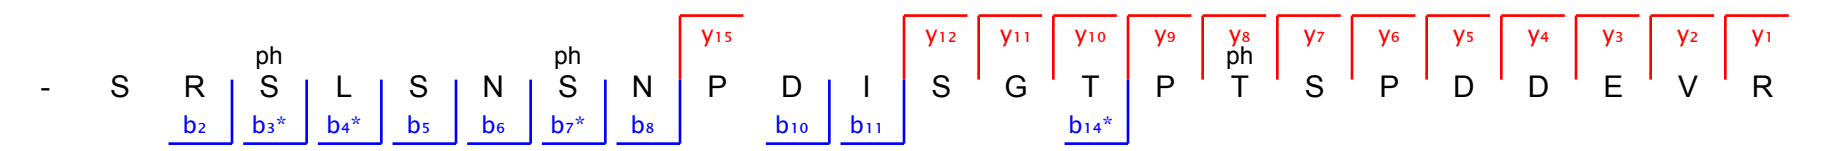

Raw file: 20150812\_A375SR\_Phospho\_BR1\_02  
 Scan: 13415 Method: FTMS; HCD Score: 41.23 m/z: 835.3 Gene names: PACS1

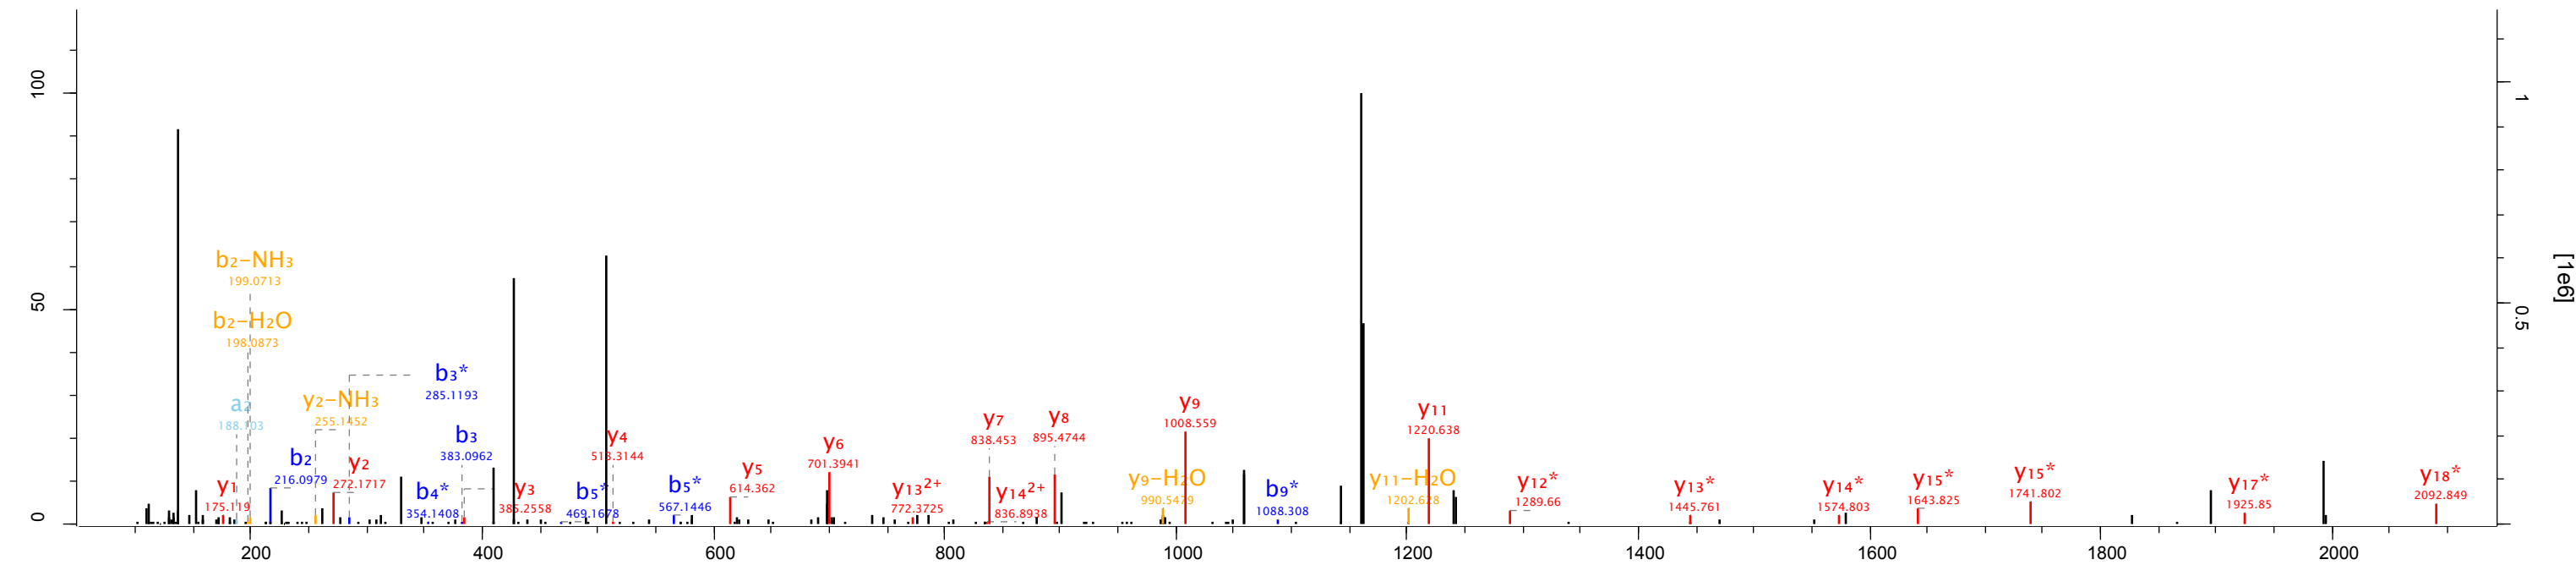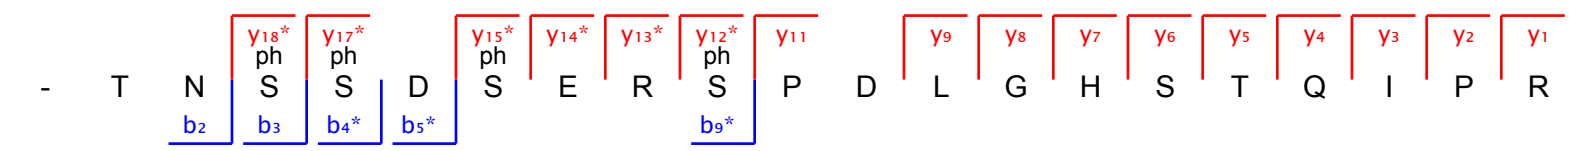

Raw file: 20150812\_A375SR\_Phospho\_BR1\_02  
 Scan: 13695 Method: FTMS; HCD Score: 173.11 m/z: 1257.93 Gene names: USP47

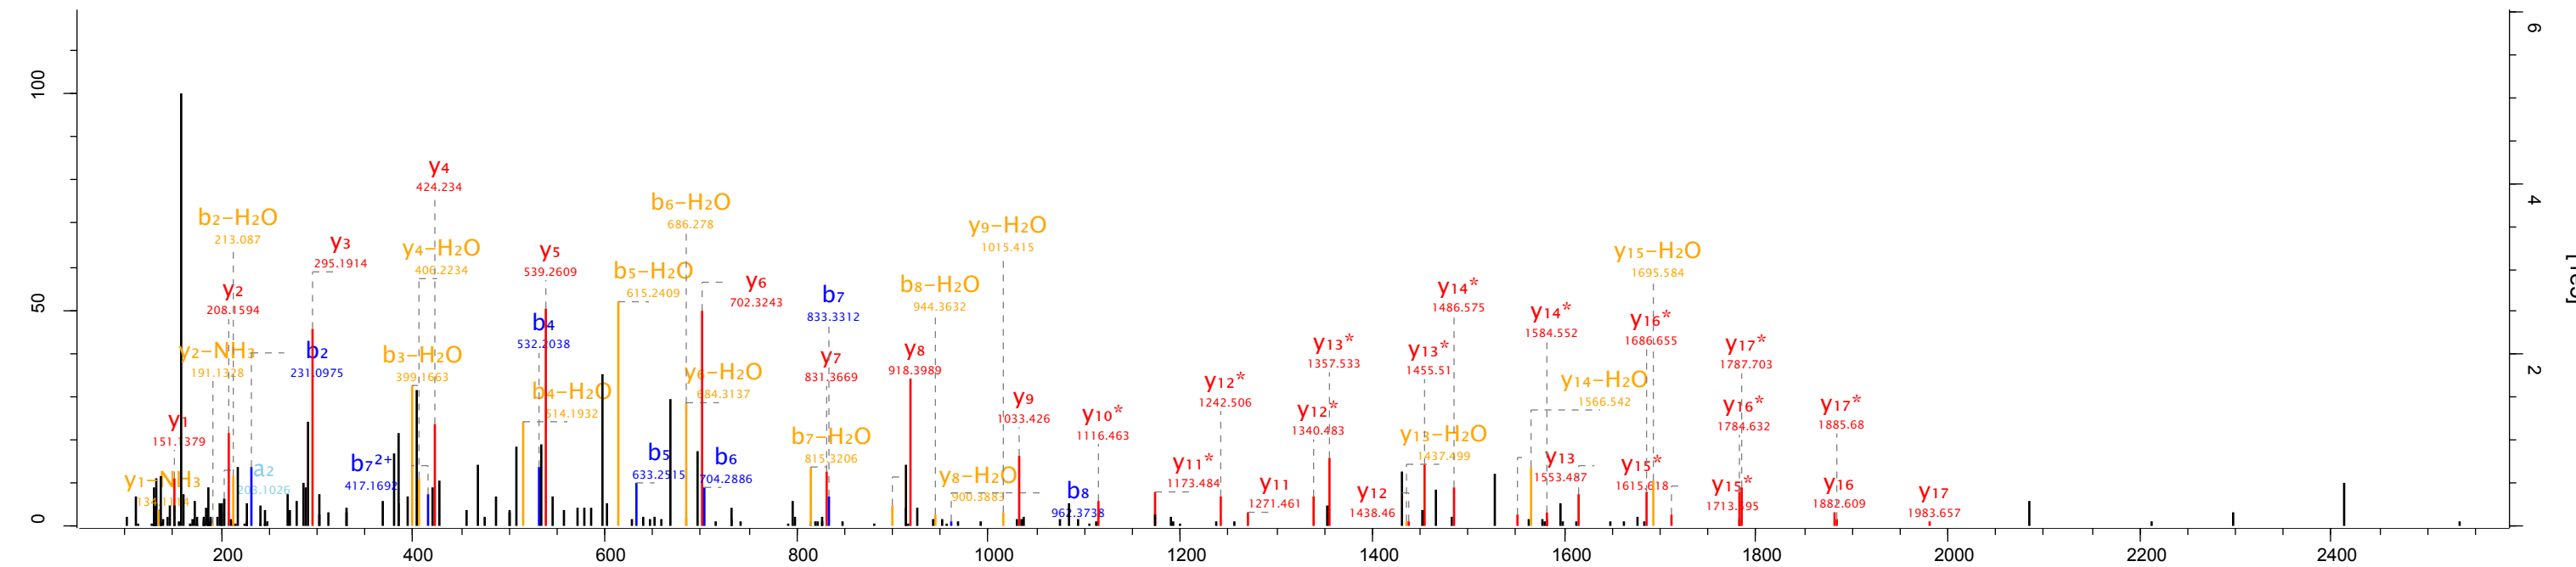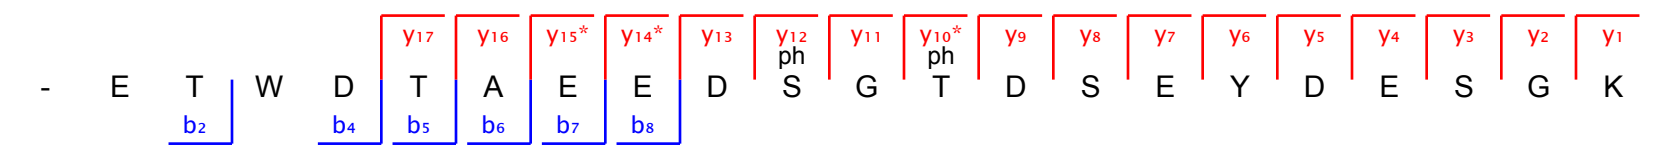



Raw file  
 20150812\_A375SR\_Phospho\_BR1\_02  
 Scan 13905 Method FTMS; HCD Score 120.42 m/z 844.71 Gene names LMNA

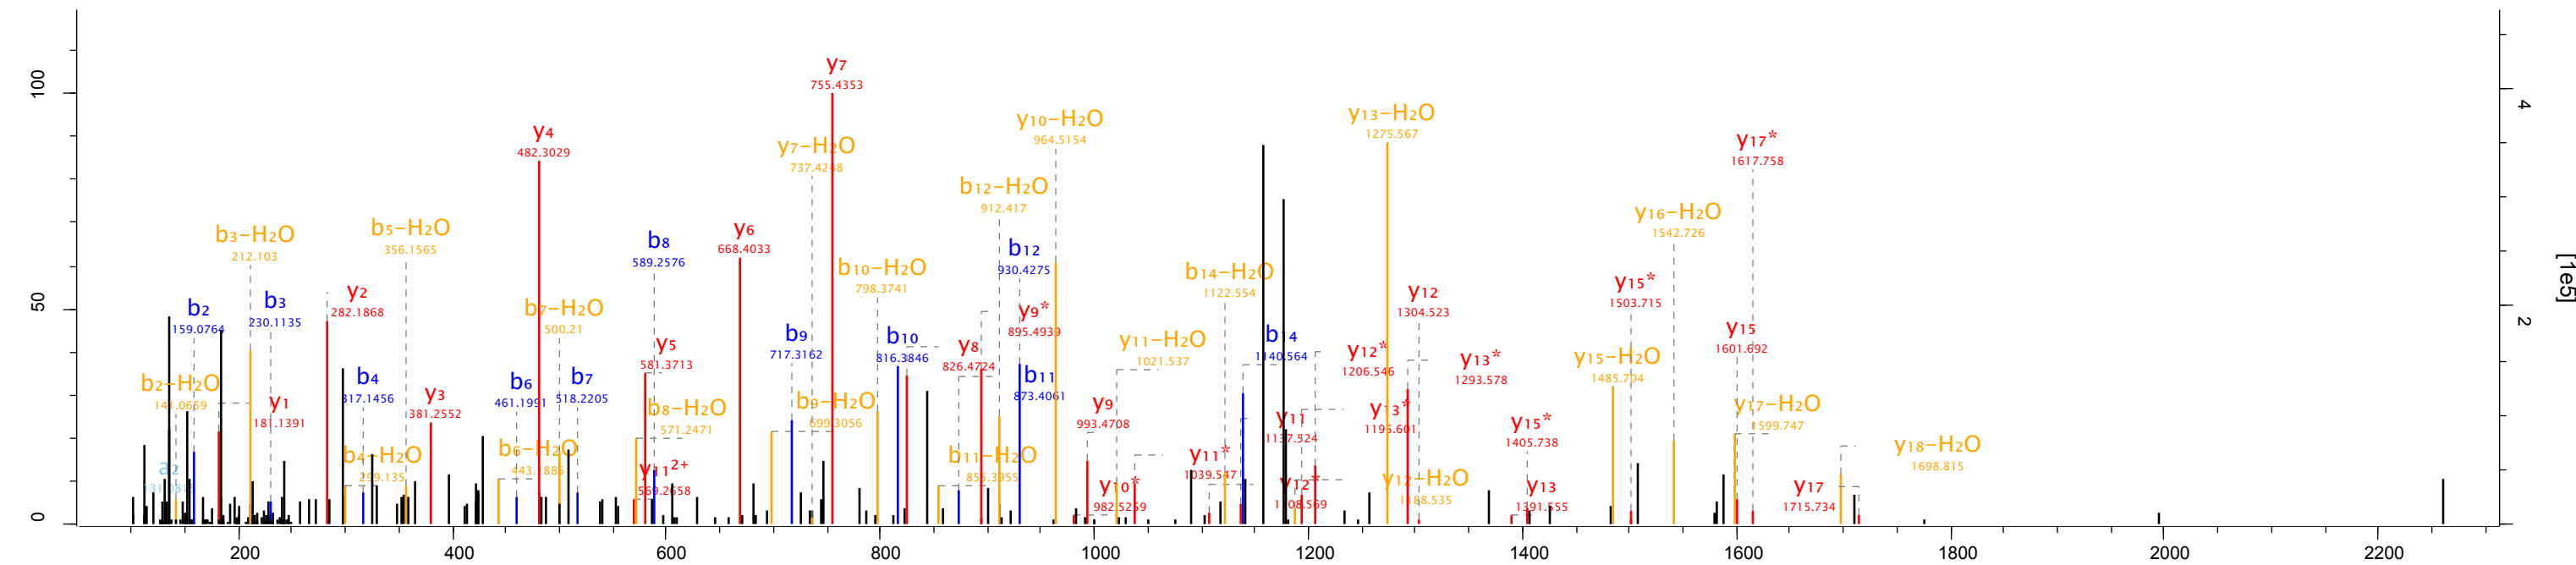

- A S A S G S G A Q V G G P I S S G S S A S S V T V T R -

Fragmentation mapping (b and y ions) is shown below the sequence:

- b2: S
- b3: SA
- b4: SAS
- b6: SG
- b7: SGA
- b8: SGAQ
- b9: SGAQV
- b10: SGAQV
- b11: SGAQV
- b12: SGAQVGG
- b14: SGAQVGGPI
- y1: V
- y2: VT
- y3: VTV
- y4: VTV
- y5: VTVS
- y6: VTVSS
- y7: VTVSSA
- y8: VTVSSA
- y9: VTVSSA
- y10: VTVSSA
- y11: VTVSSA
- y12: VTVSSA
- y13: VTVSSA
- y15: VTVSSA
- y17: VTVSSA

Raw file: 20150812\_A375SR\_Phospho\_BR1\_02  
 Scan: 13945 Method: FTMS; HCD Score: 144.08 m/z: 1000.83 Gene names: CCDC6

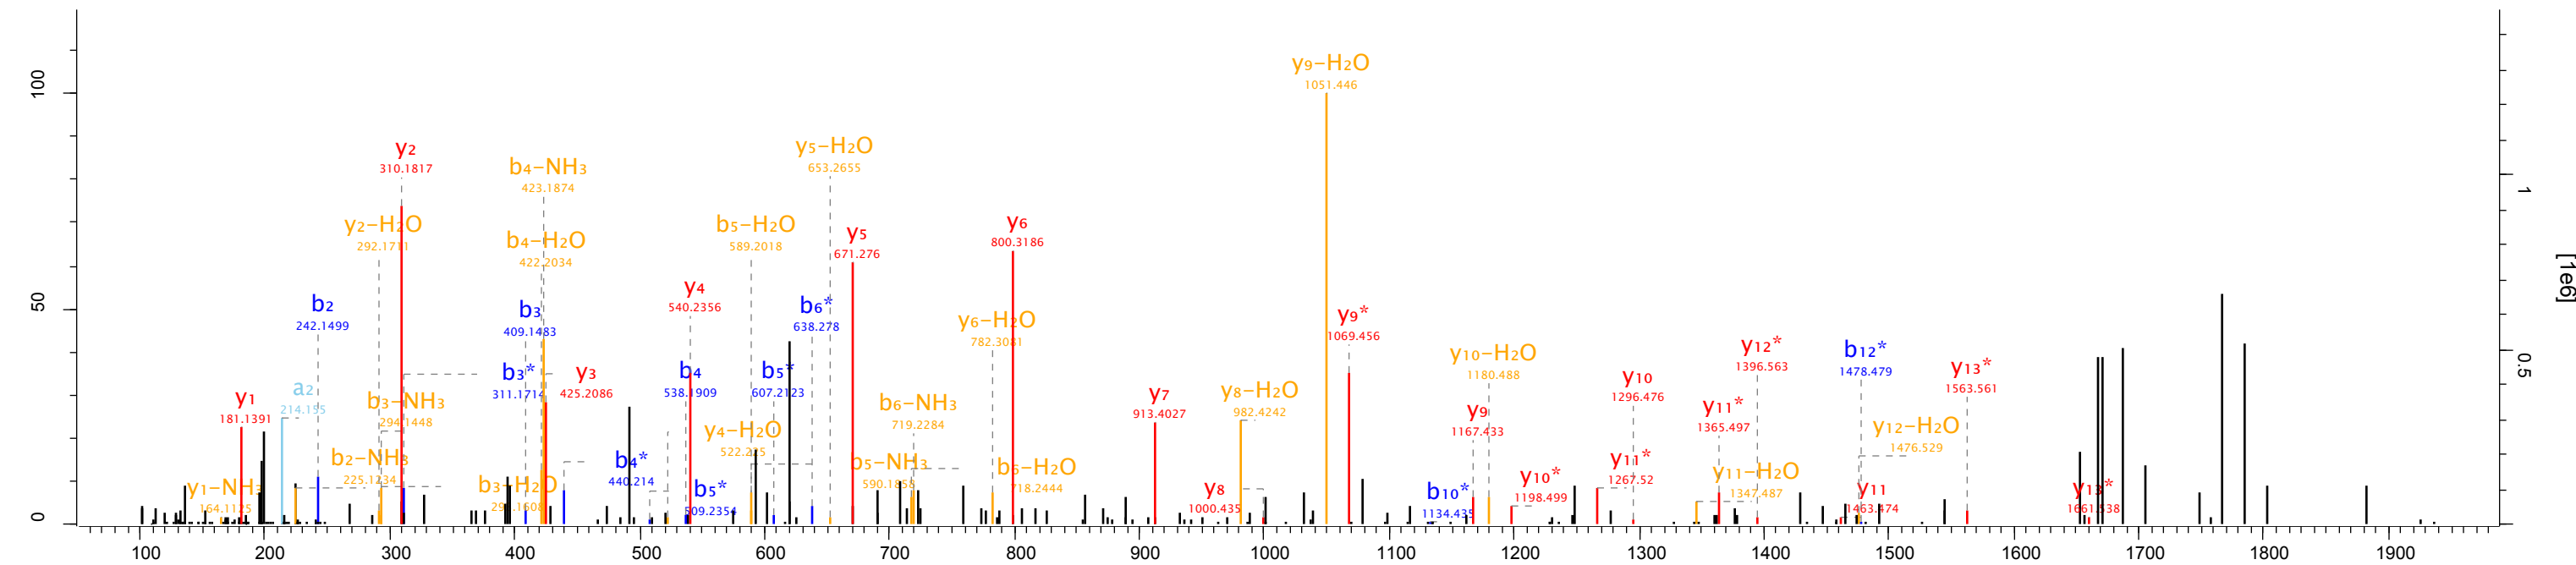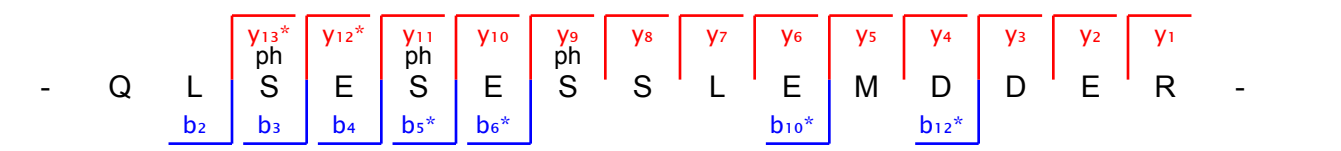

Raw file Scan Method Score m/z Gene names  
 20150812\_A375SR\_Phospho\_BR1\_02 14195 FTMS; HCD 90.06 1080.31 DEK

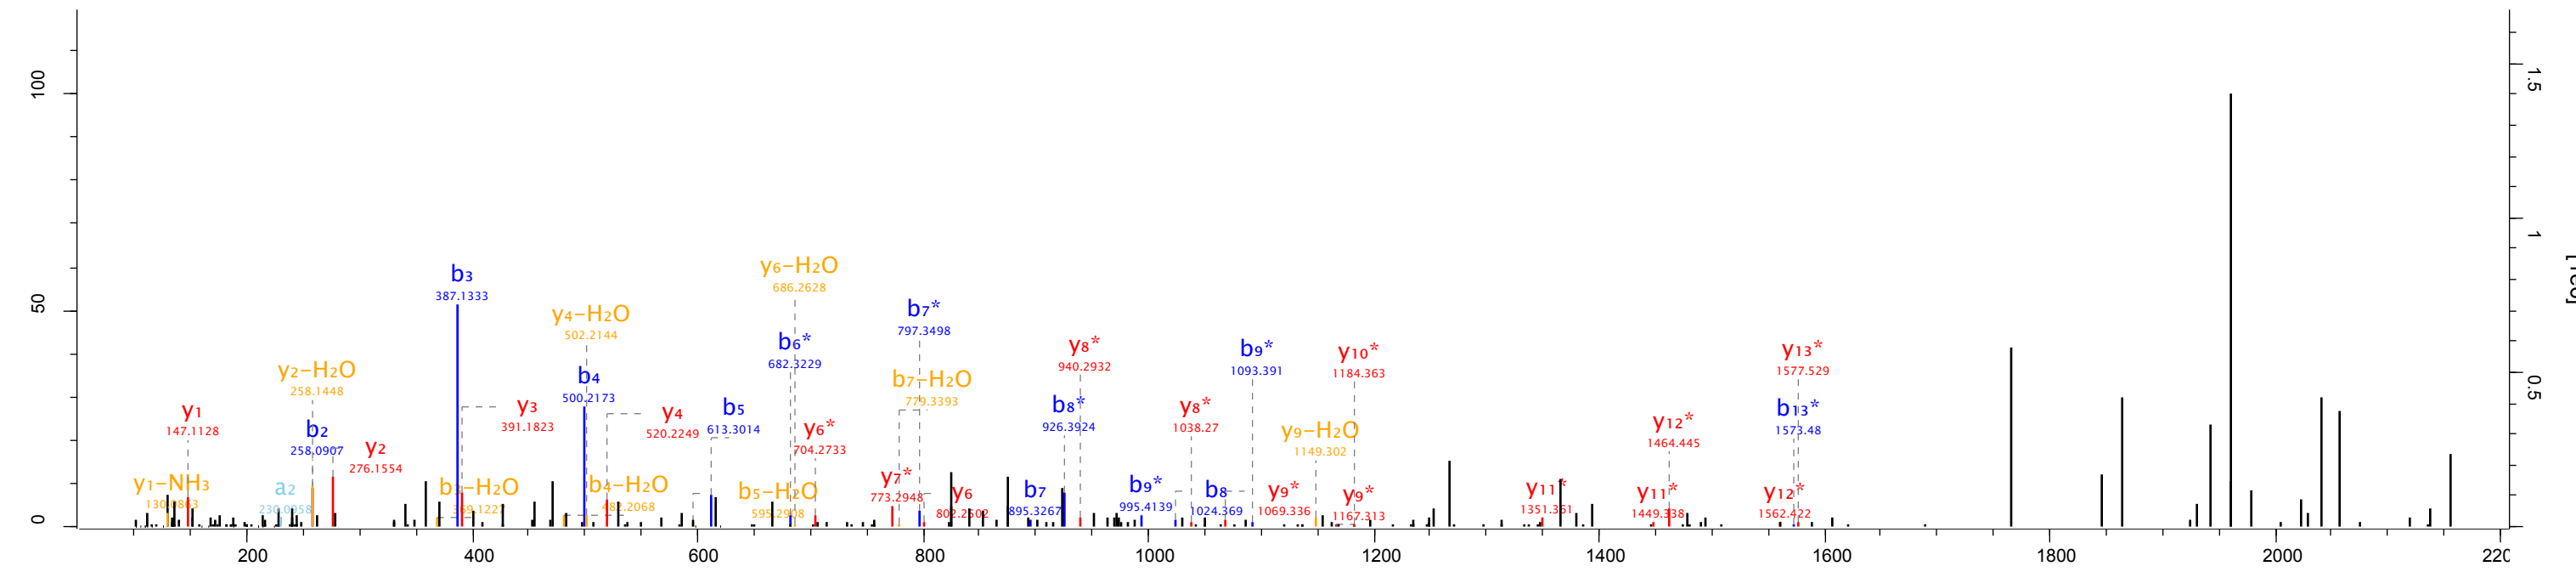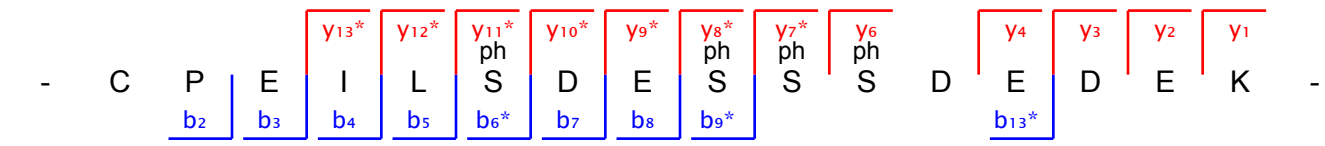





Raw file: 20150812\_A375SR\_Phospho\_BR1\_02  
 Scan: 15115 Method: FTMS; HCD Score: 157.7 m/z: 849.32 Gene names: SGK223

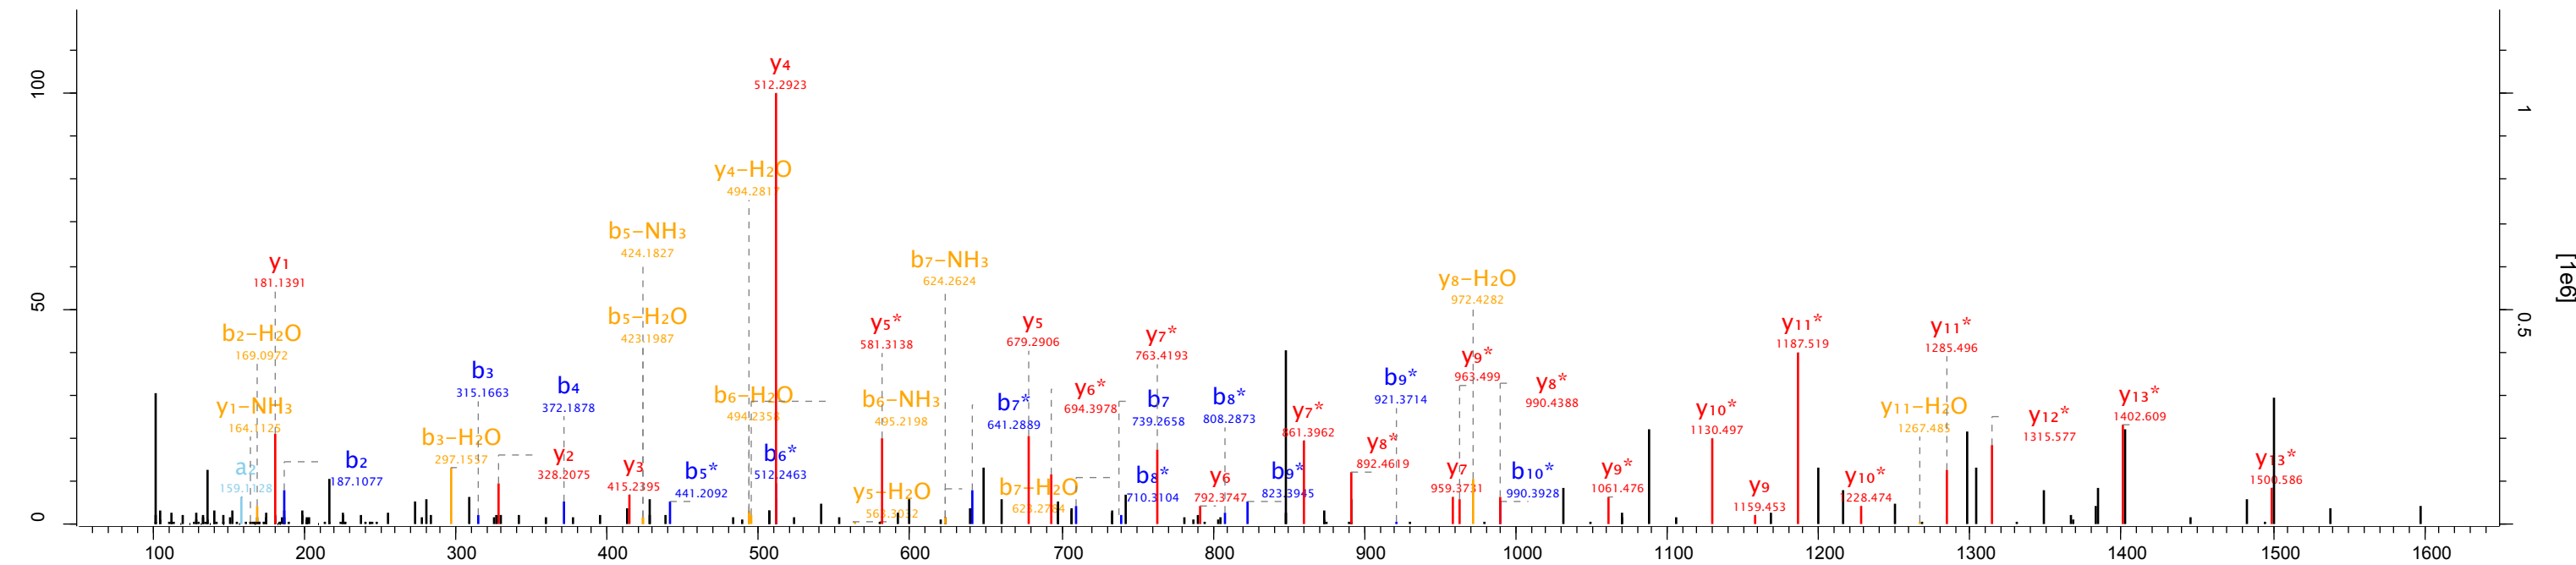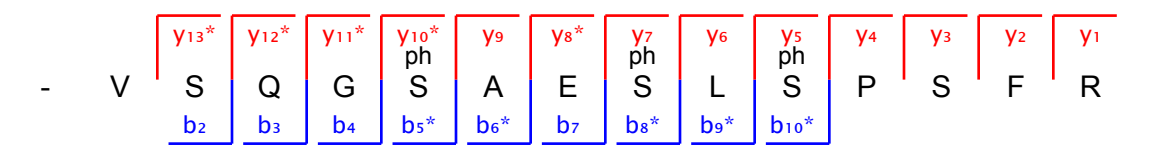

Raw file 20150812\_A375SR\_Phospho\_BR1\_02 Scan 15745 Method FTMS; HCD Score 172.91 m/z 1181.82 Gene names SERBP1

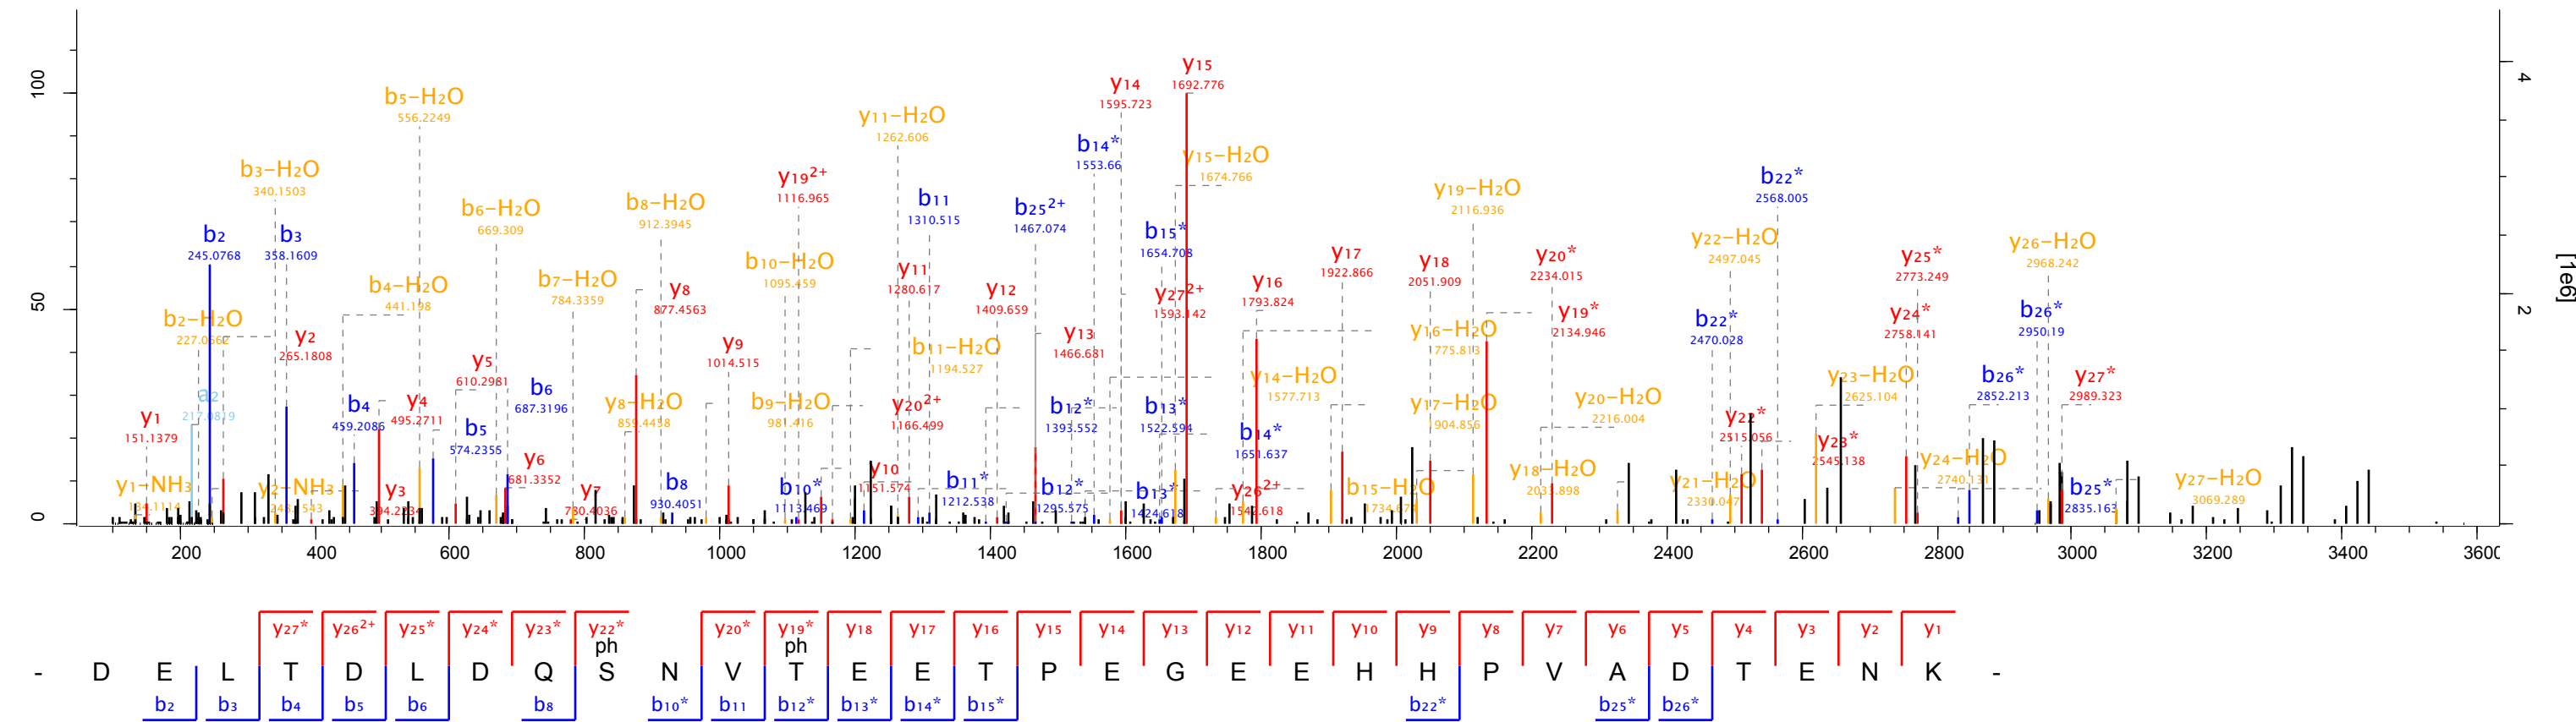

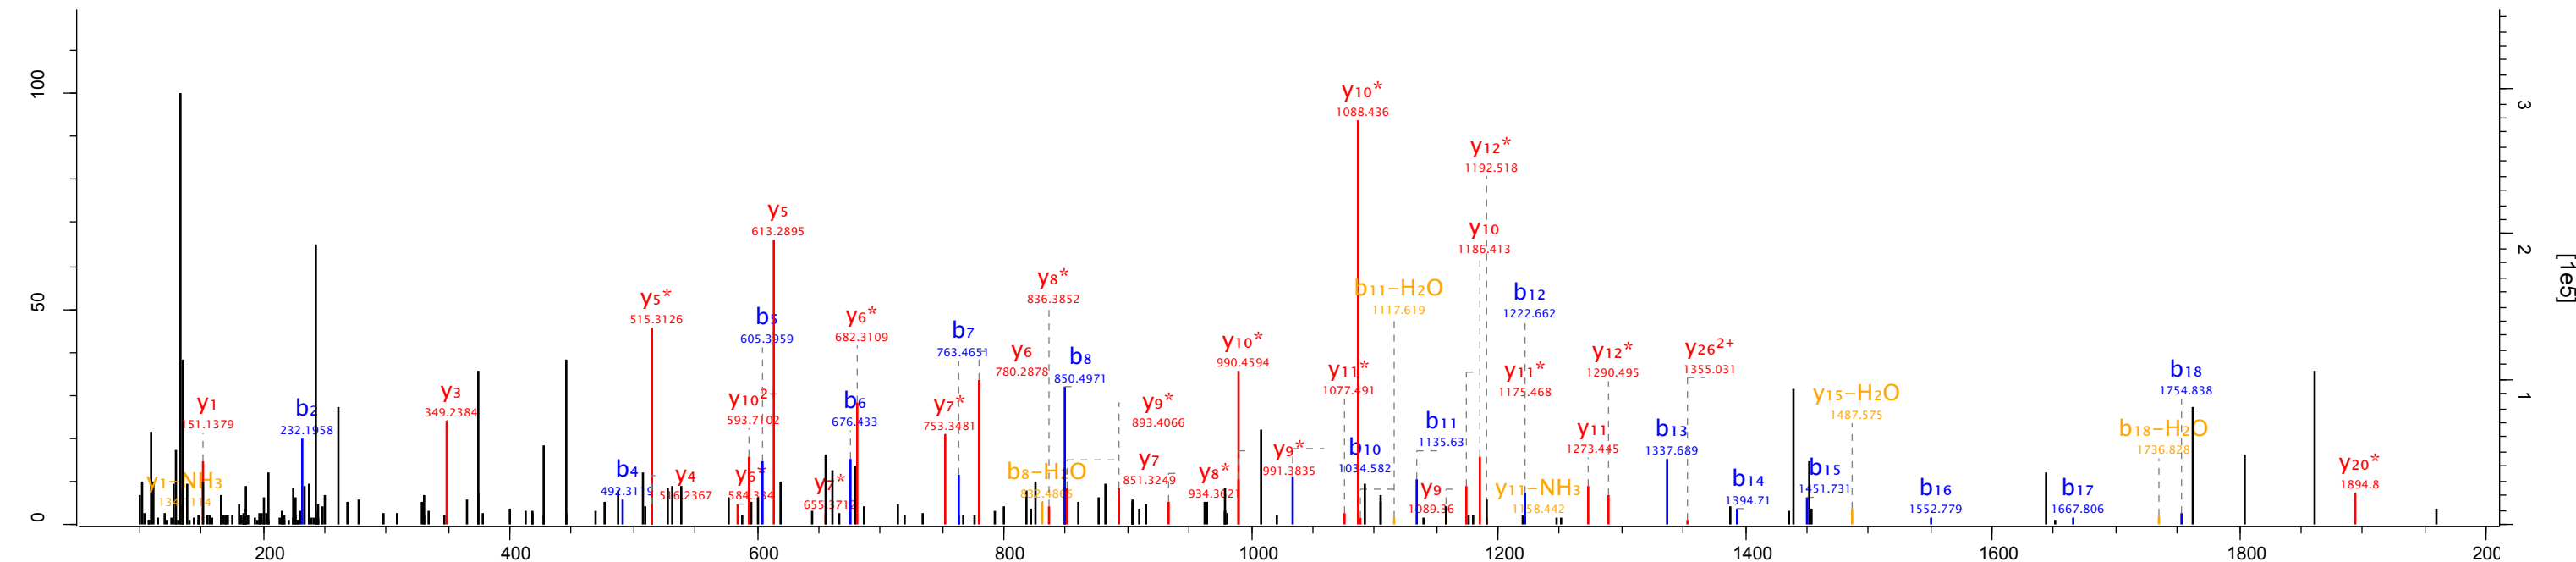

- K V P Y L A S S P S T S D G G T D S P G T A S P S P T K -  
 b<sub>2</sub> b<sub>4</sub> b<sub>5</sub> b<sub>6</sub> b<sub>7</sub> b<sub>8</sub> b<sub>10</sub> b<sub>11</sub> b<sub>12</sub> b<sub>13</sub> b<sub>14</sub> b<sub>15</sub> b<sub>16</sub> b<sub>17</sub> b<sub>18</sub> y<sub>12</sub>\* y<sub>11</sub> y<sub>10</sub> y<sub>9</sub> y<sub>8</sub>\* y<sub>7</sub> y<sub>6</sub> y<sub>5</sub> y<sub>4</sub> y<sub>3</sub> y<sub>26</sub><sup>2+</sup> y<sub>20</sub>\*



Raw file 20150812\_A375SR\_Phospho\_BR1\_02 Scan 16335 Method FTMS; HCD Score 101.72 m/z 921.71 Gene names PHF14

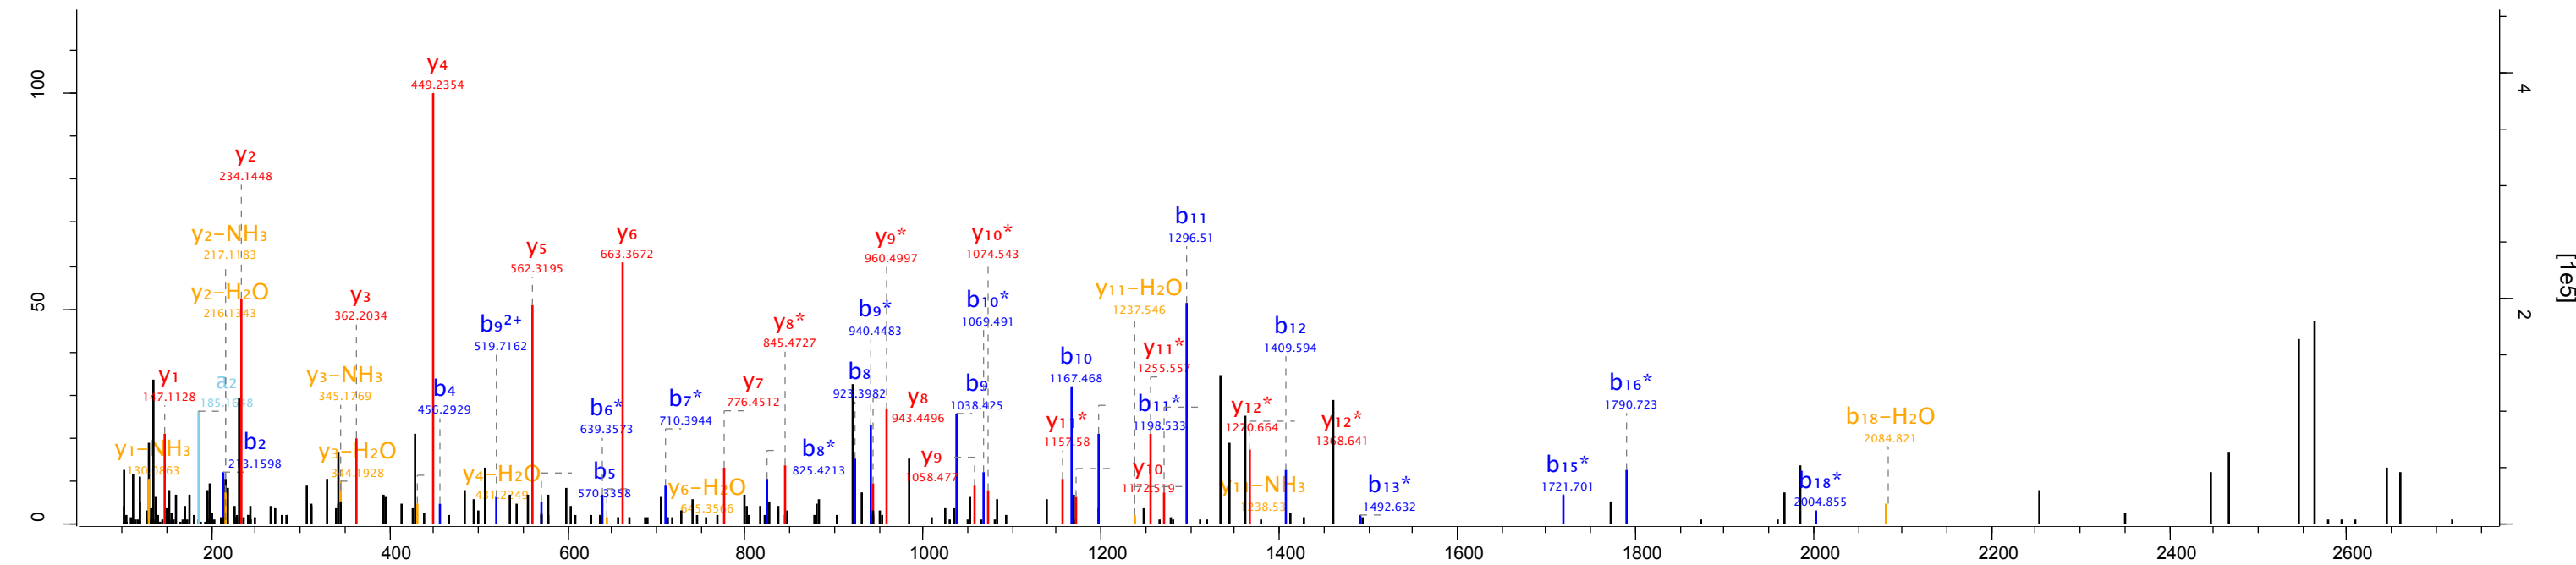

- V L S R N S A D D E E L T N D S L T L S Q S K -

Fragmentation mapping below the sequence:

- b<sub>2</sub> (under L)
- b<sub>4</sub> (under R)
- b<sub>5</sub> (under N)
- b<sub>6</sub><sup>\*</sup> (under S)
- b<sub>7</sub><sup>\*</sup> (under A)
- b<sub>8</sub> (under D)
- b<sub>9</sub> (under D)
- b<sub>10</sub> (under E)
- b<sub>11</sub> (under E)
- b<sub>12</sub> (under L)
- b<sub>13</sub><sup>\*</sup> (under T)
- b<sub>15</sub><sup>\*</sup> (under N)
- b<sub>16</sub><sup>\*</sup> (under S)
- b<sub>18</sub><sup>\*</sup> (under L)

Fragmentation mapping above the sequence:

- y<sub>12</sub><sup>\*</sup> (above L)
- y<sub>11</sub><sup>\*</sup> (above T)
- y<sub>10</sub> (above N)
- y<sub>9</sub> (above D)
- y<sub>8</sub> (above S)
- y<sub>7</sub> (above L)
- y<sub>6</sub> (above T)
- y<sub>5</sub> (above L)
- y<sub>4</sub> (above S)
- y<sub>3</sub> (above Q)
- y<sub>2</sub> (above S)
- y<sub>1</sub> (above K)

Raw file 20150812\_A375SR\_Phospho\_BR1\_02 Scan 16485 Method FTMS; HCD Score 152.17 m/z 1247.89 Gene names MAP1B

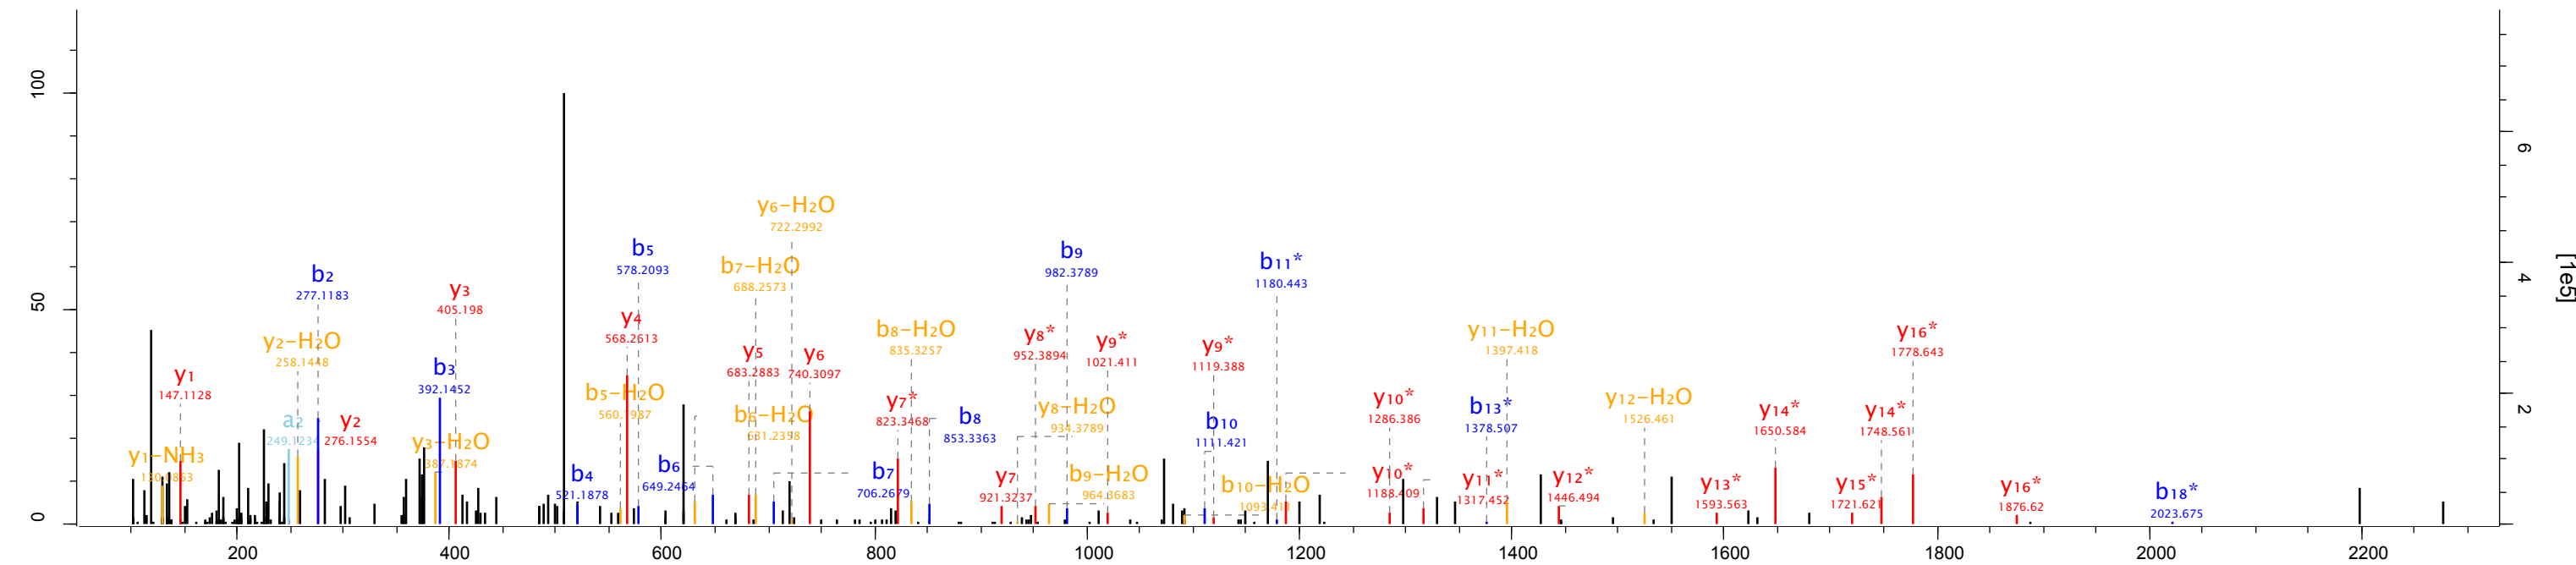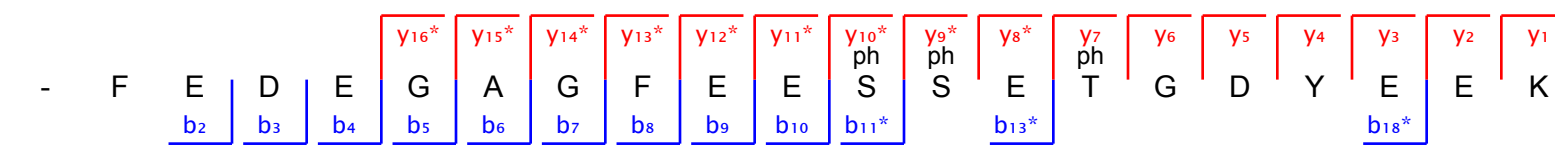

Raw file: 20150812\_A375SR\_Phospho\_BR1\_02  
 Scan: 16515 Method: FTMS; HCD Score: 79.43 m/z: 1000.89 Gene names: PLEC

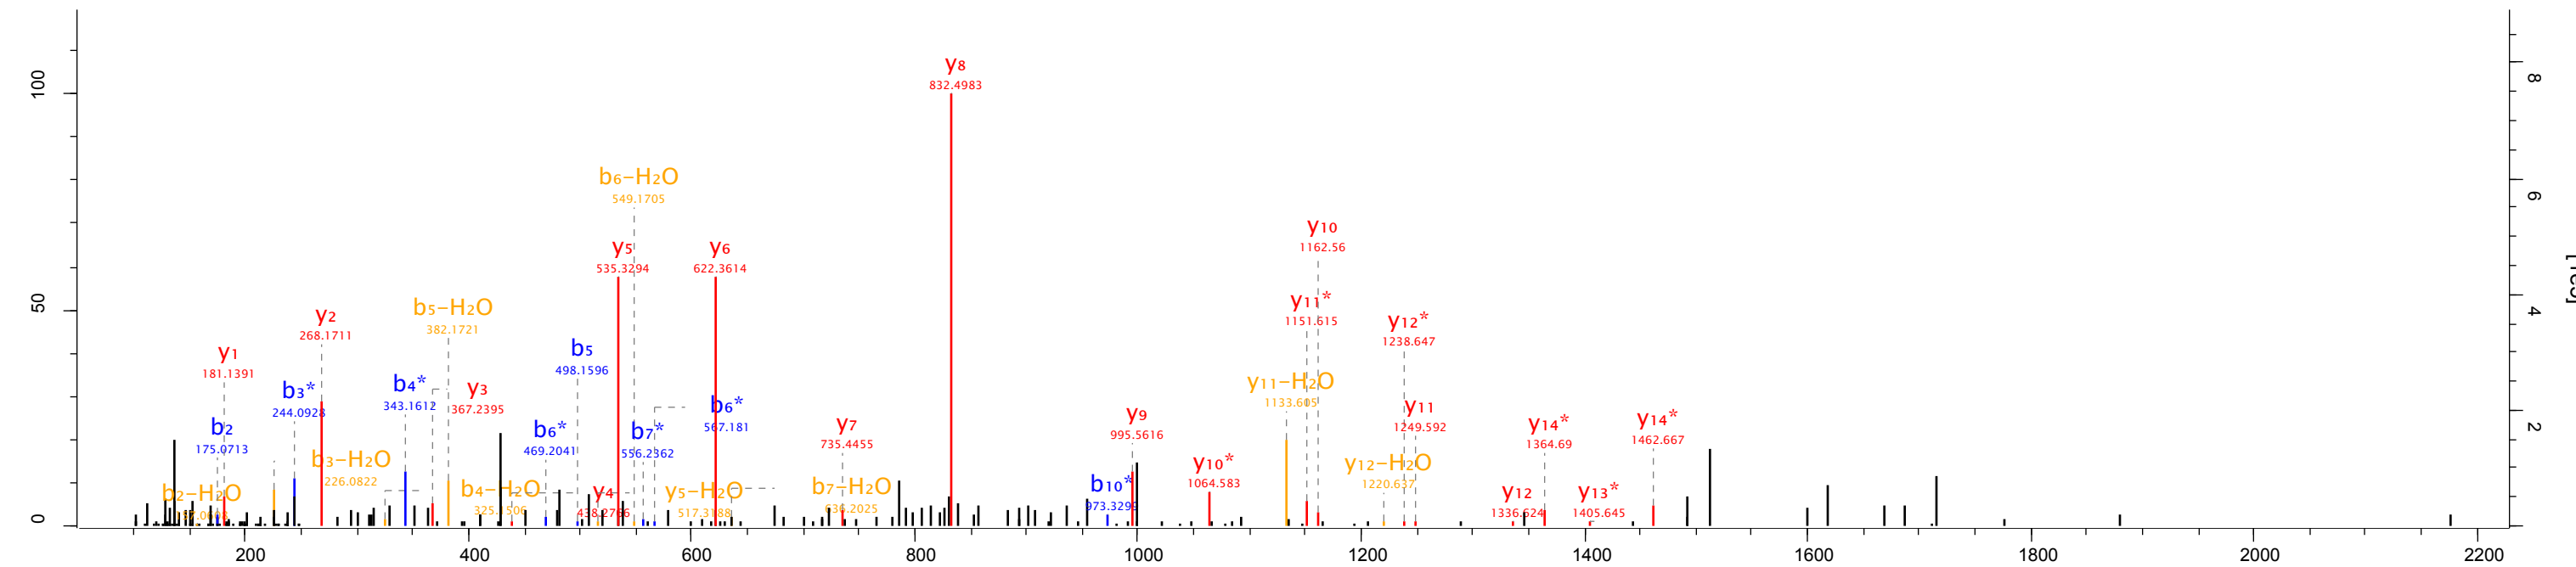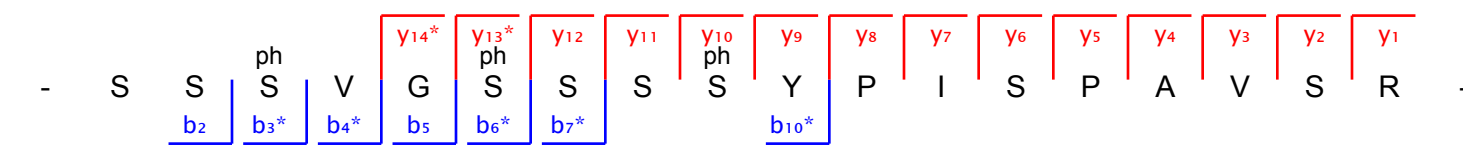



Raw file 20150812\_A375SR\_Phospho\_BR1\_02 Scan 16655 Method FTMS; HCD Score 128.79 m/z 1002.41 Gene names NAV3

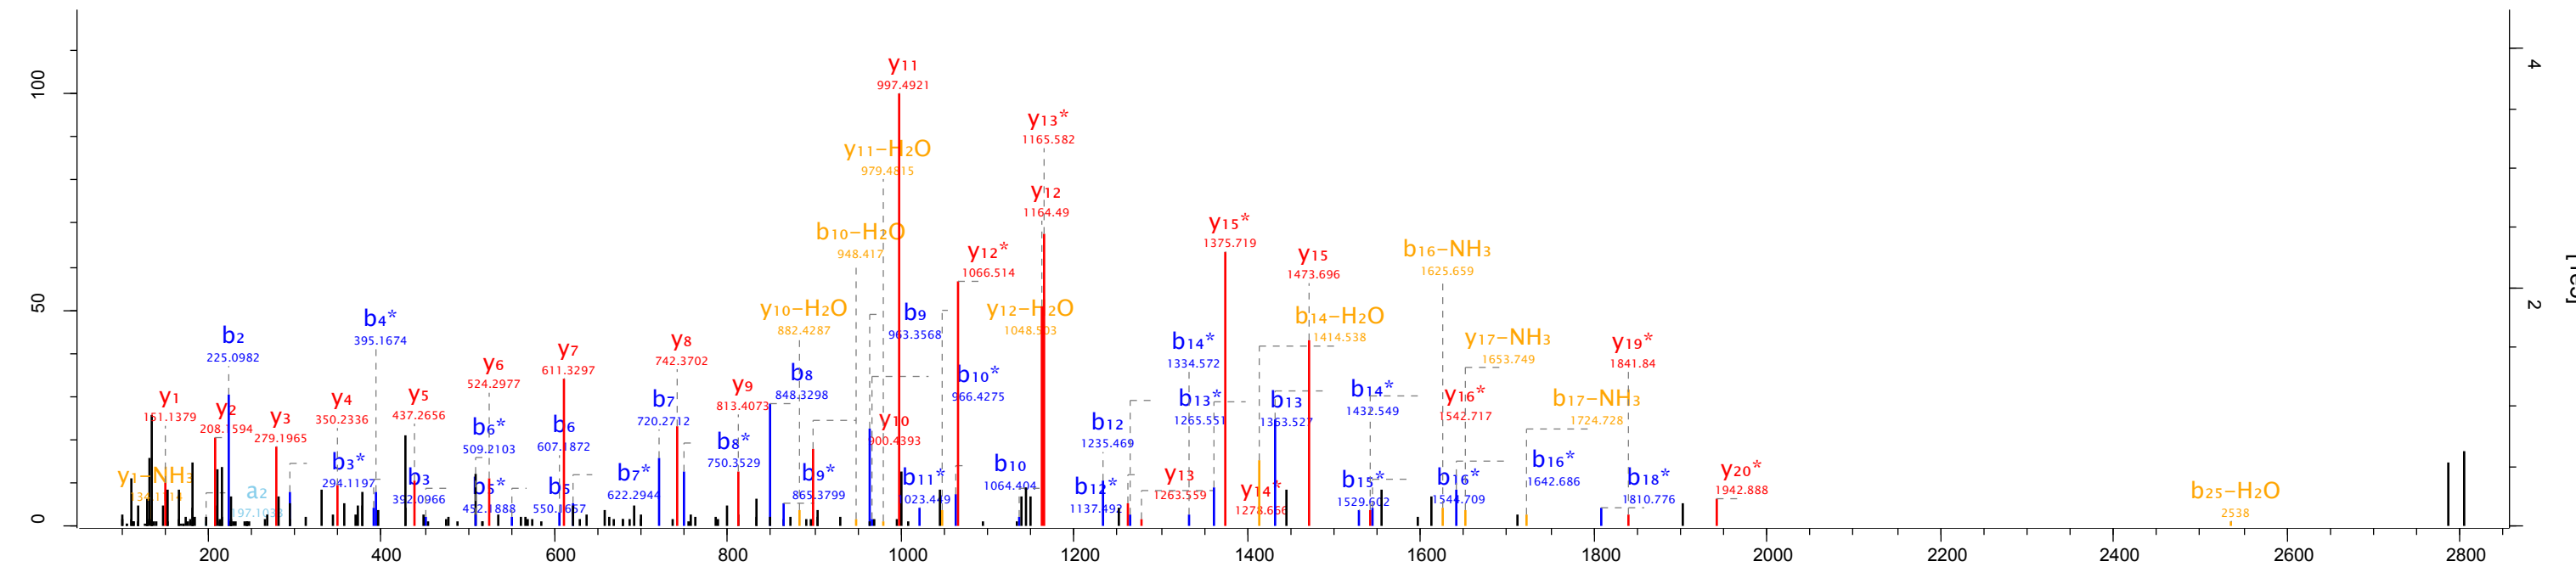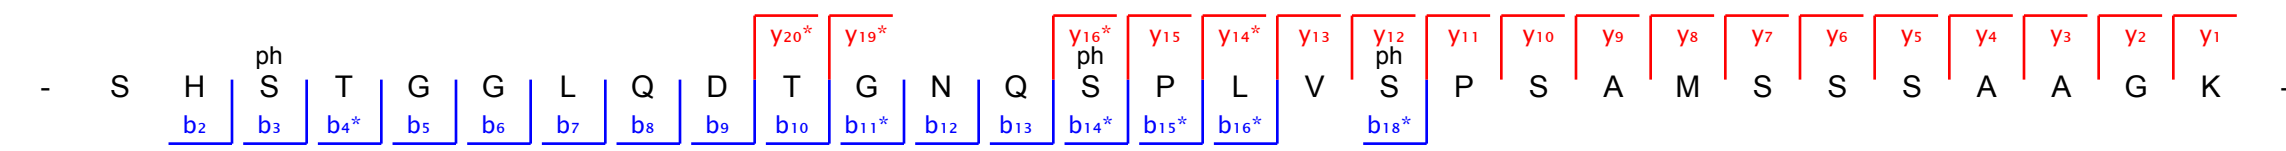

Raw file  
 20150812\_A375SR\_Phospho\_BR1\_02  
 Scan 17005 Method FTMS; HCD Score 89.91 m/z 670.36 Gene names ATRX

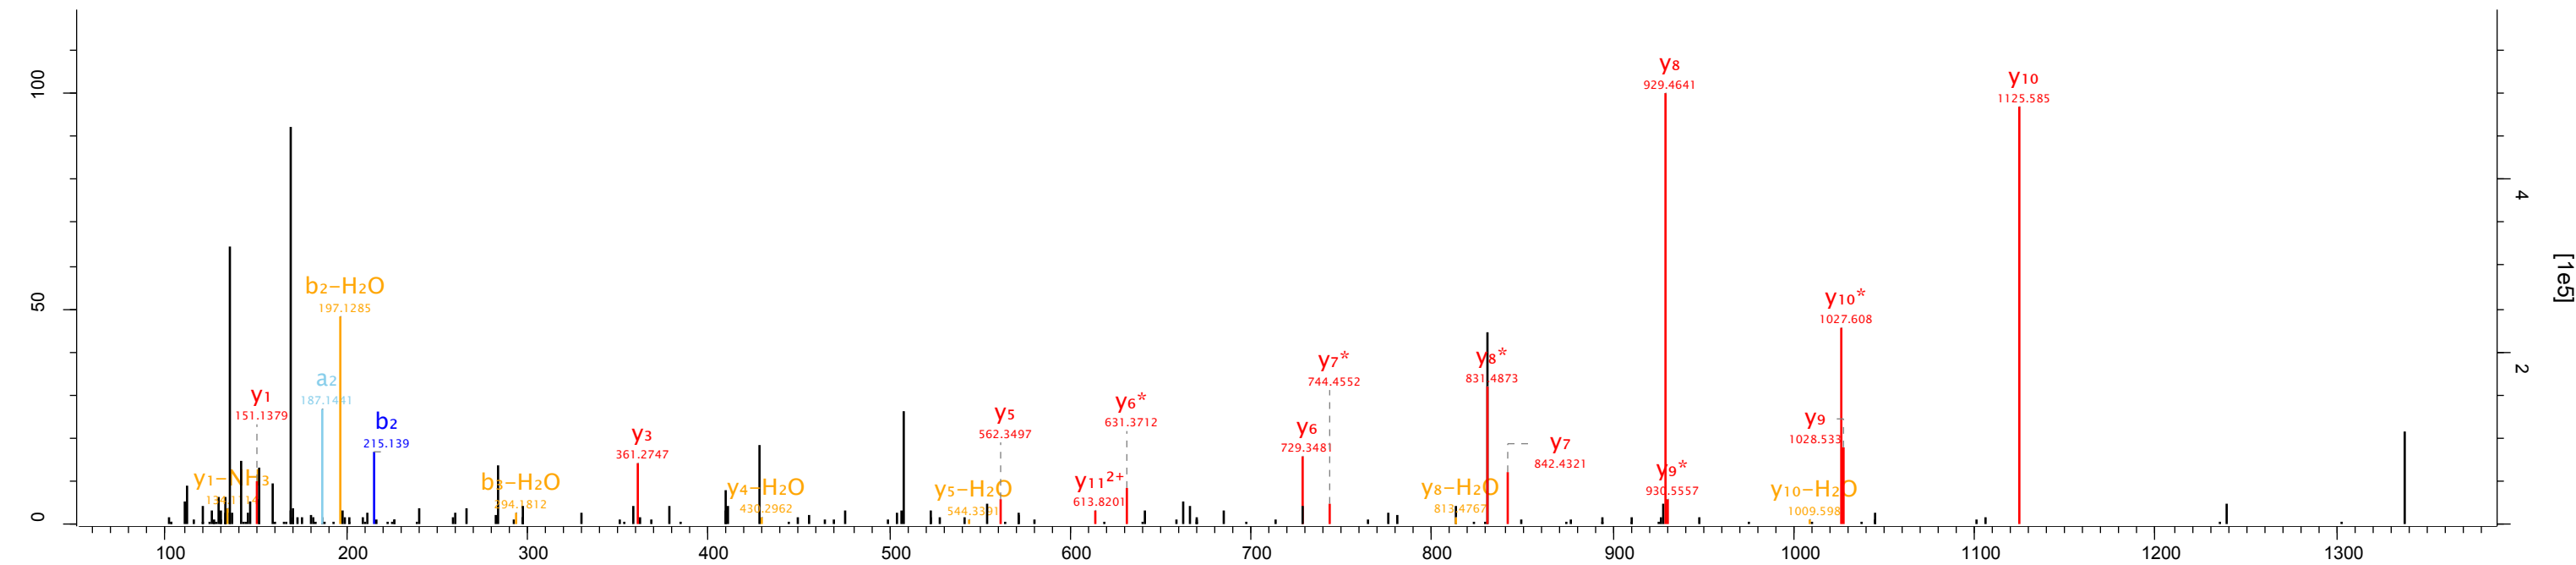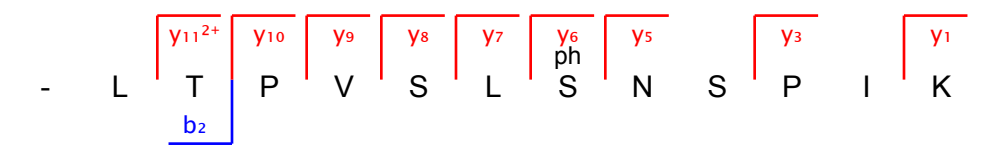

Raw file: 20150812\_A375SR\_Phospho\_BR1\_02  
 Scan: 17105 Method: FTMS; HCD Score: 150.22 m/z: 1051.88 Gene names: SLC23A2

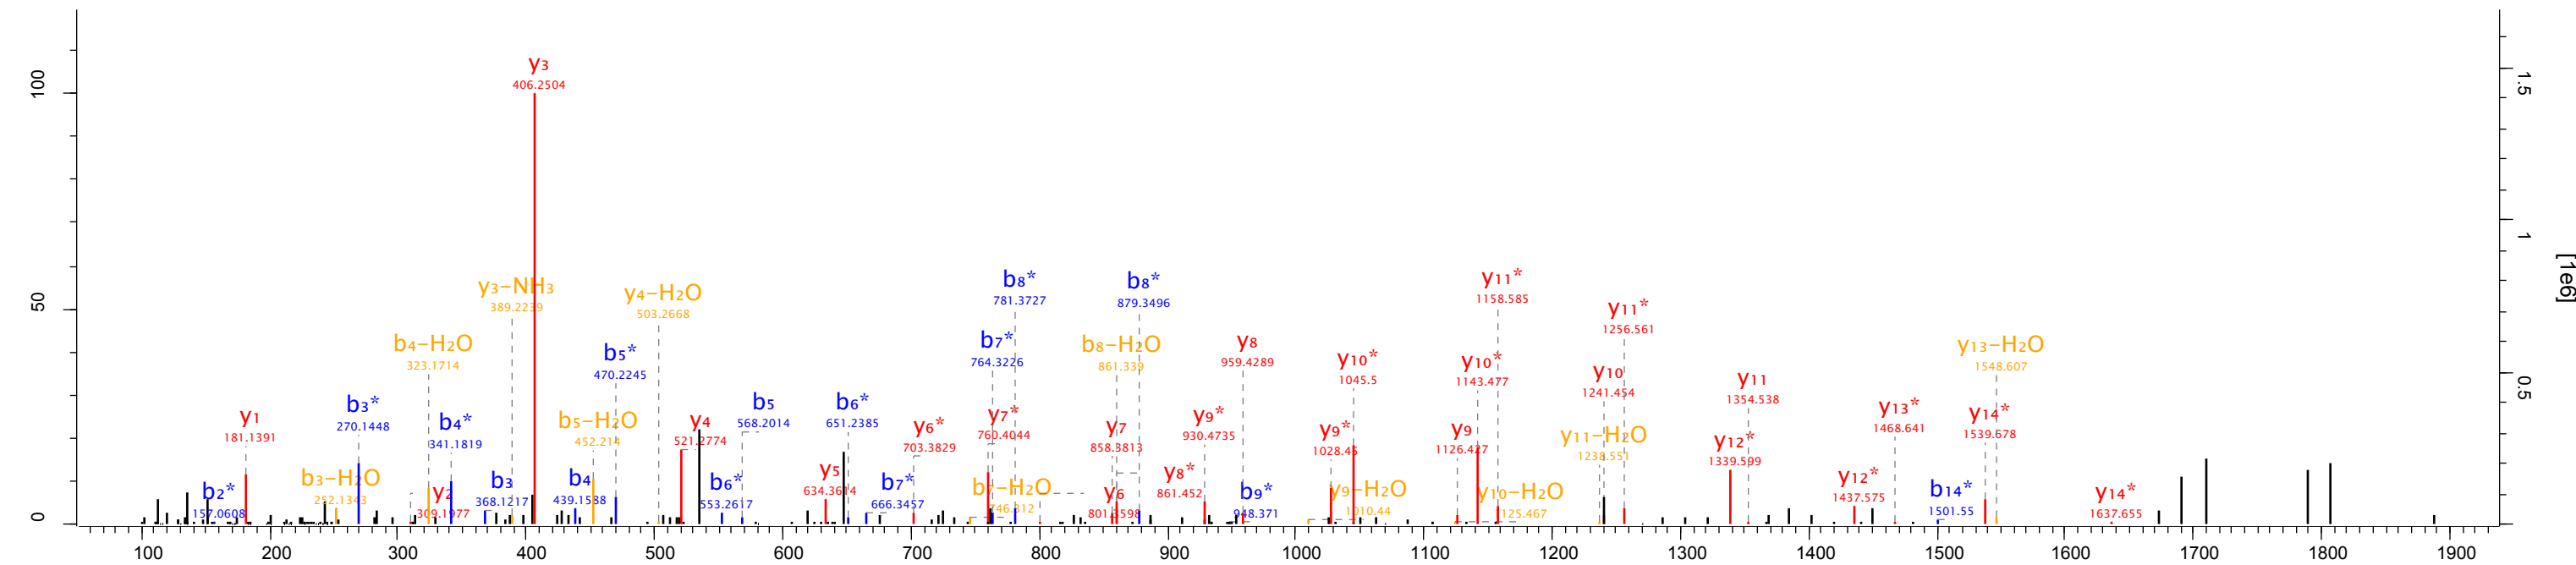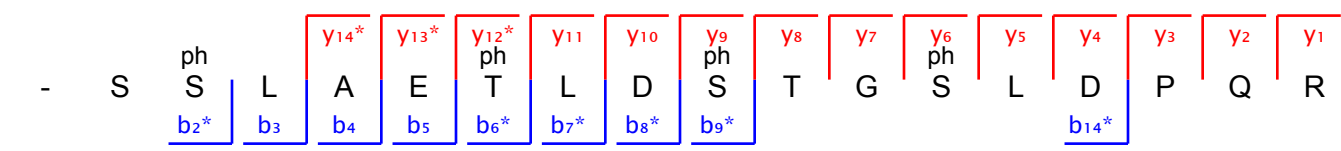

Raw file: 20150812\_A375SR\_Phospho\_BR1\_02  
 Scan: 17275 Method: FTMS; HCD Score: 88.57 m/z: 838.79 Gene names: CTPS1

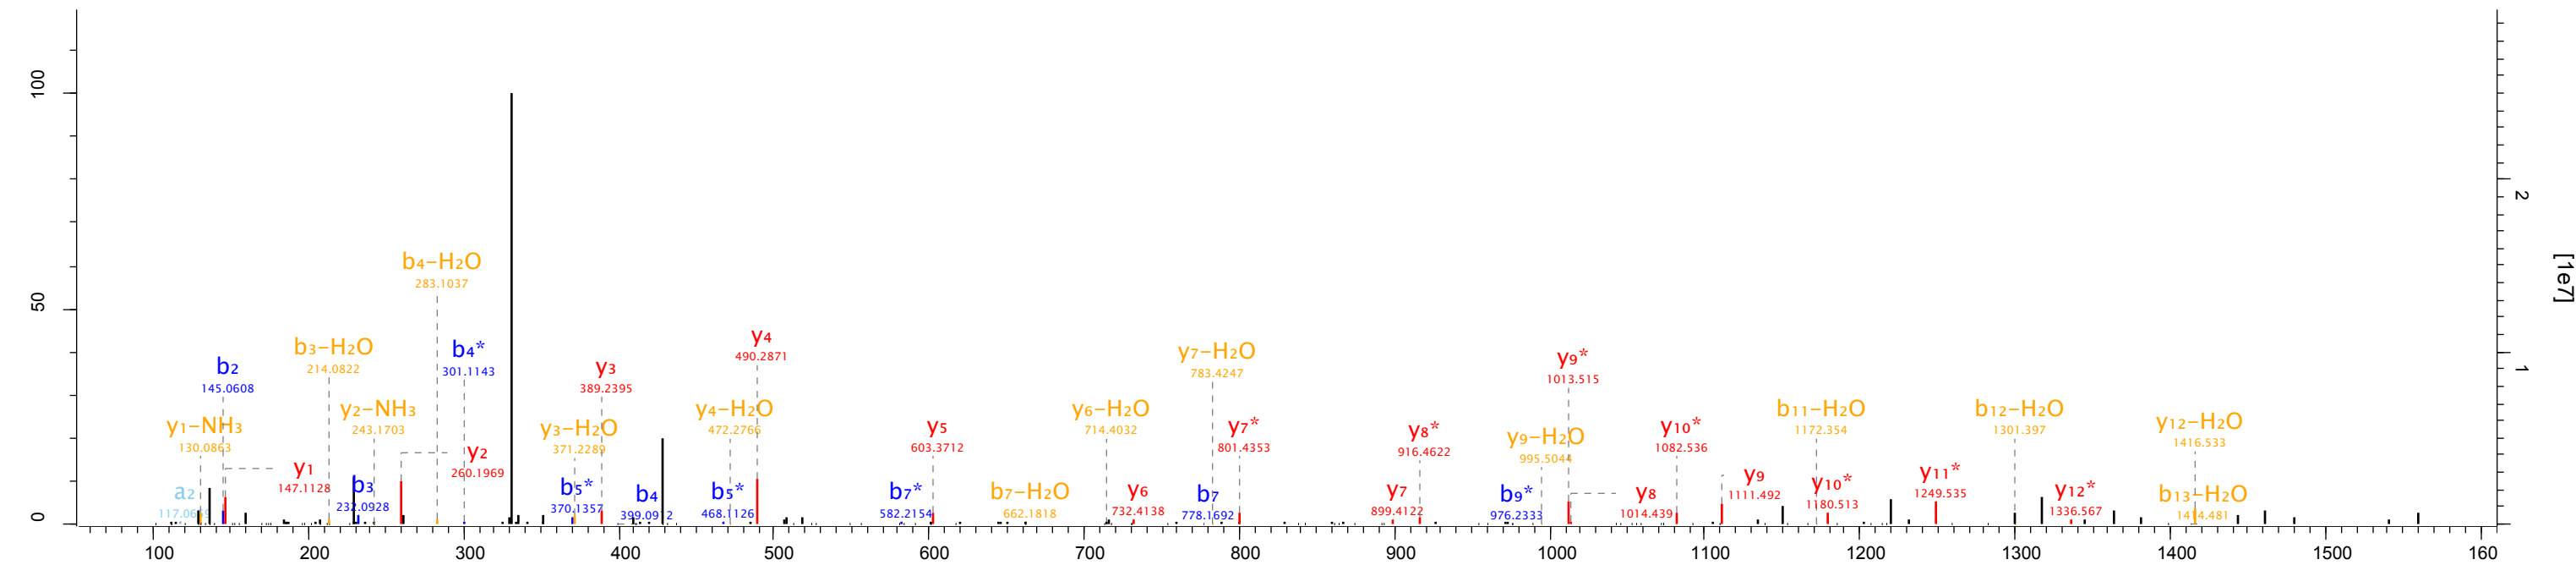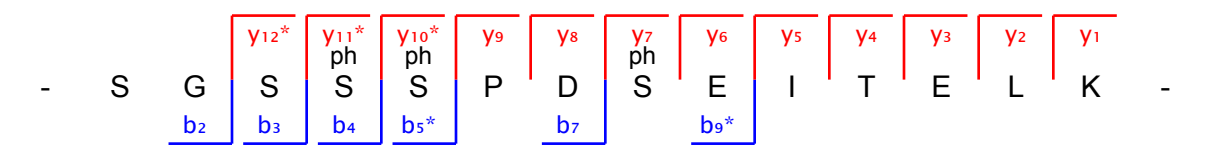

Raw file: 20150812\_A375SR\_Phospho\_BR1\_02  
 Scan: 17315 Method: FTMS; HCD Score: 179.41 m/z: 952.84 Gene names: INPP5F

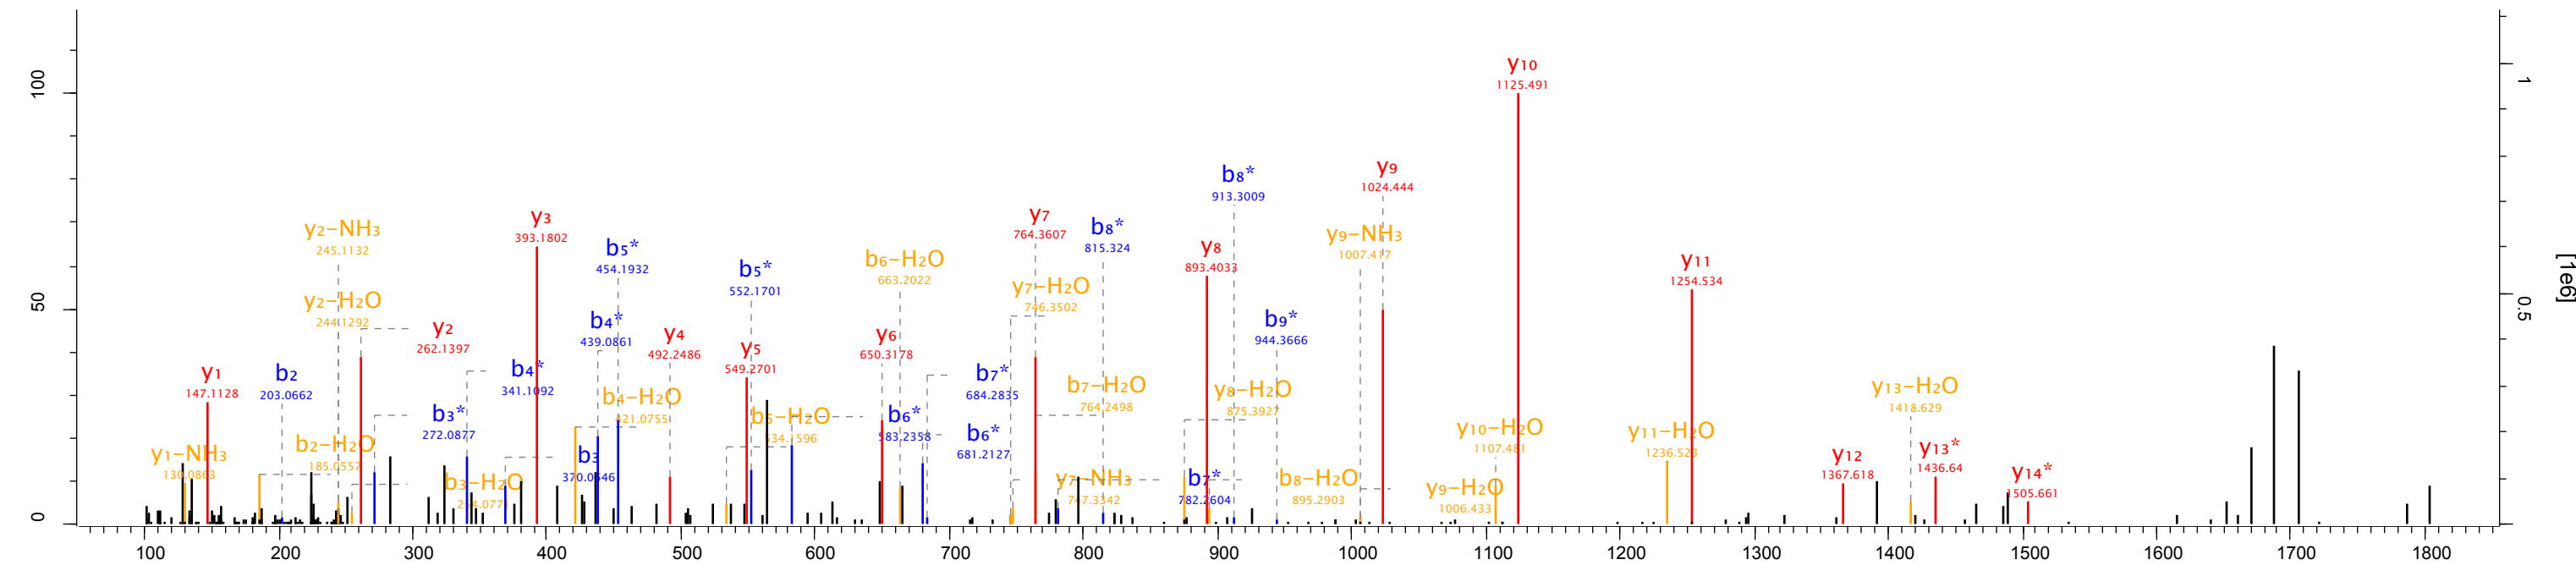

Peptide sequence: - S D S ph S L E T M E N T G V M D K -

Fragmentation sites (b and y ions):

- b<sub>2</sub> (S)
- b<sub>3</sub> (S)
- b<sub>4</sub><sup>\*</sup> (S)
- b<sub>5</sub><sup>\*</sup> (L)
- b<sub>6</sub><sup>\*</sup> (E)
- b<sub>7</sub><sup>\*</sup> (T)
- b<sub>8</sub><sup>\*</sup> (M)
- b<sub>9</sub><sup>\*</sup> (E)

Fragmentation sites (b and y ions):

- y<sub>1</sub> (K)
- y<sub>2</sub> (D)
- y<sub>3</sub> (M)
- y<sub>4</sub> (V)
- y<sub>5</sub> (G)
- y<sub>6</sub> (T)
- y<sub>7</sub> (N)
- y<sub>8</sub> (E)
- y<sub>9</sub> (M)
- y<sub>10</sub> (T)
- y<sub>11</sub> (E)
- y<sub>12</sub> (L)
- y<sub>13</sub><sup>\*</sup> (S)
- y<sub>14</sub><sup>\*</sup> (S)

Raw file 20150812\_A375SR\_Phospho\_BR1\_02 Scan 17405 Method FTMS; HCD Score 109.42 m/z 1014.74 Gene names NES

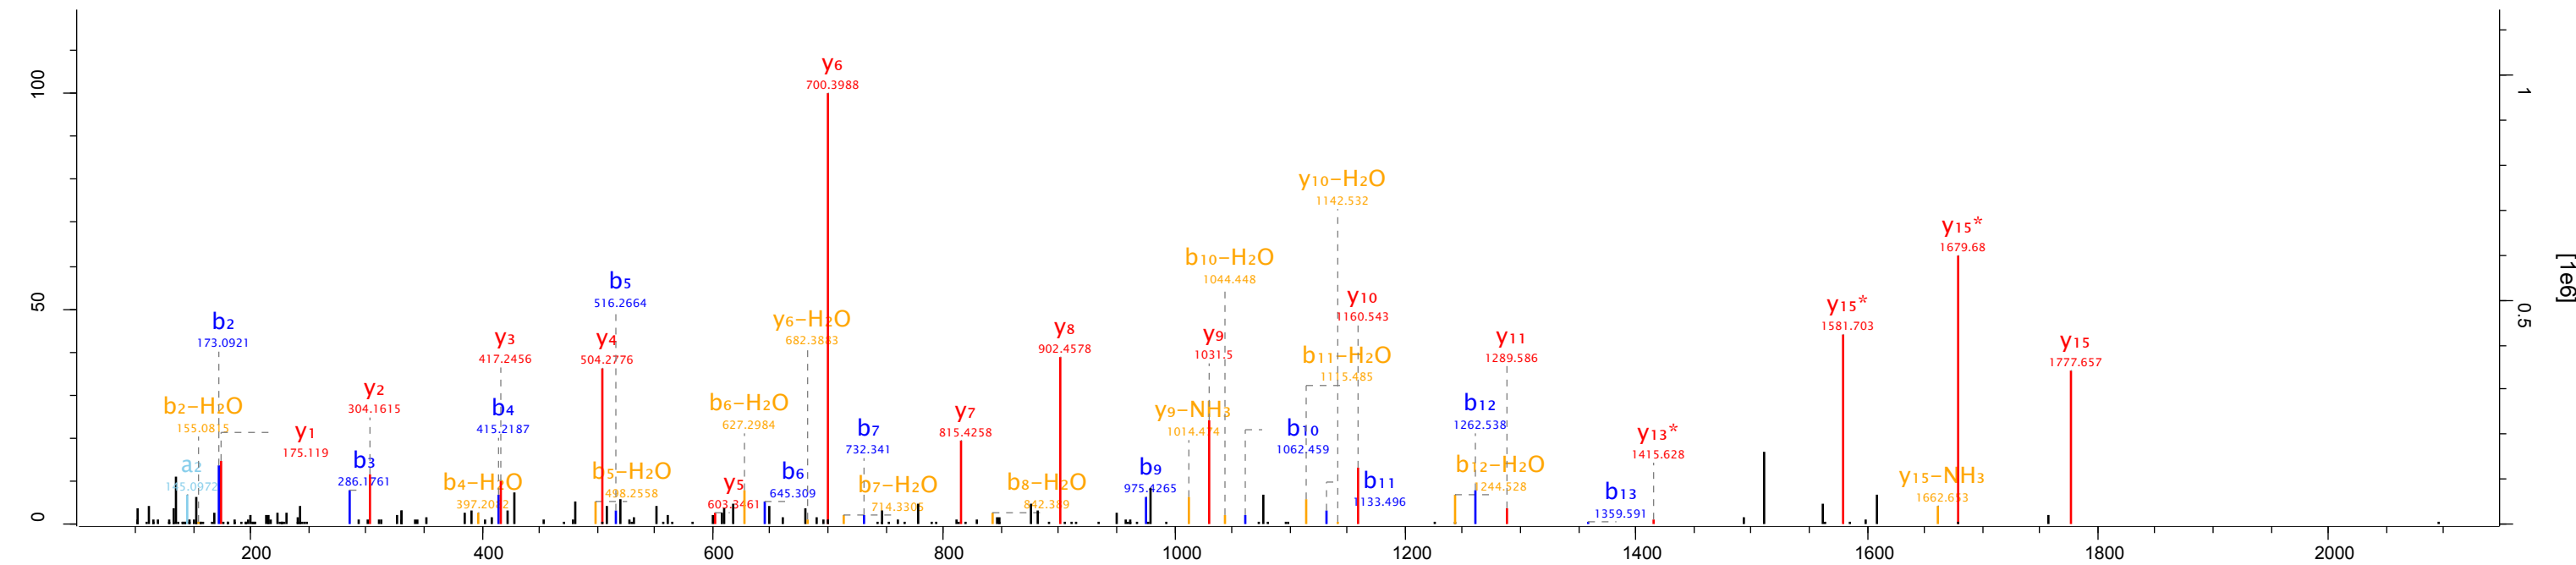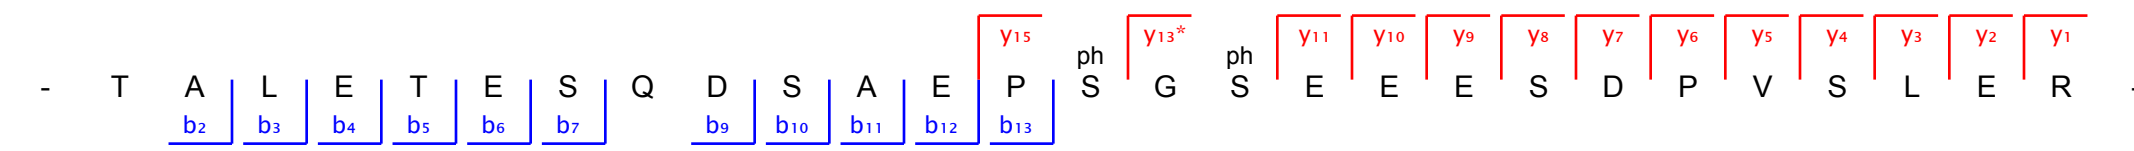

Raw file 20150812\_A375SR\_Phospho\_BR1\_02 Scan 17655 Method FTMS; HCD Score 129.82 m/z 1326.92 Gene names NOL8

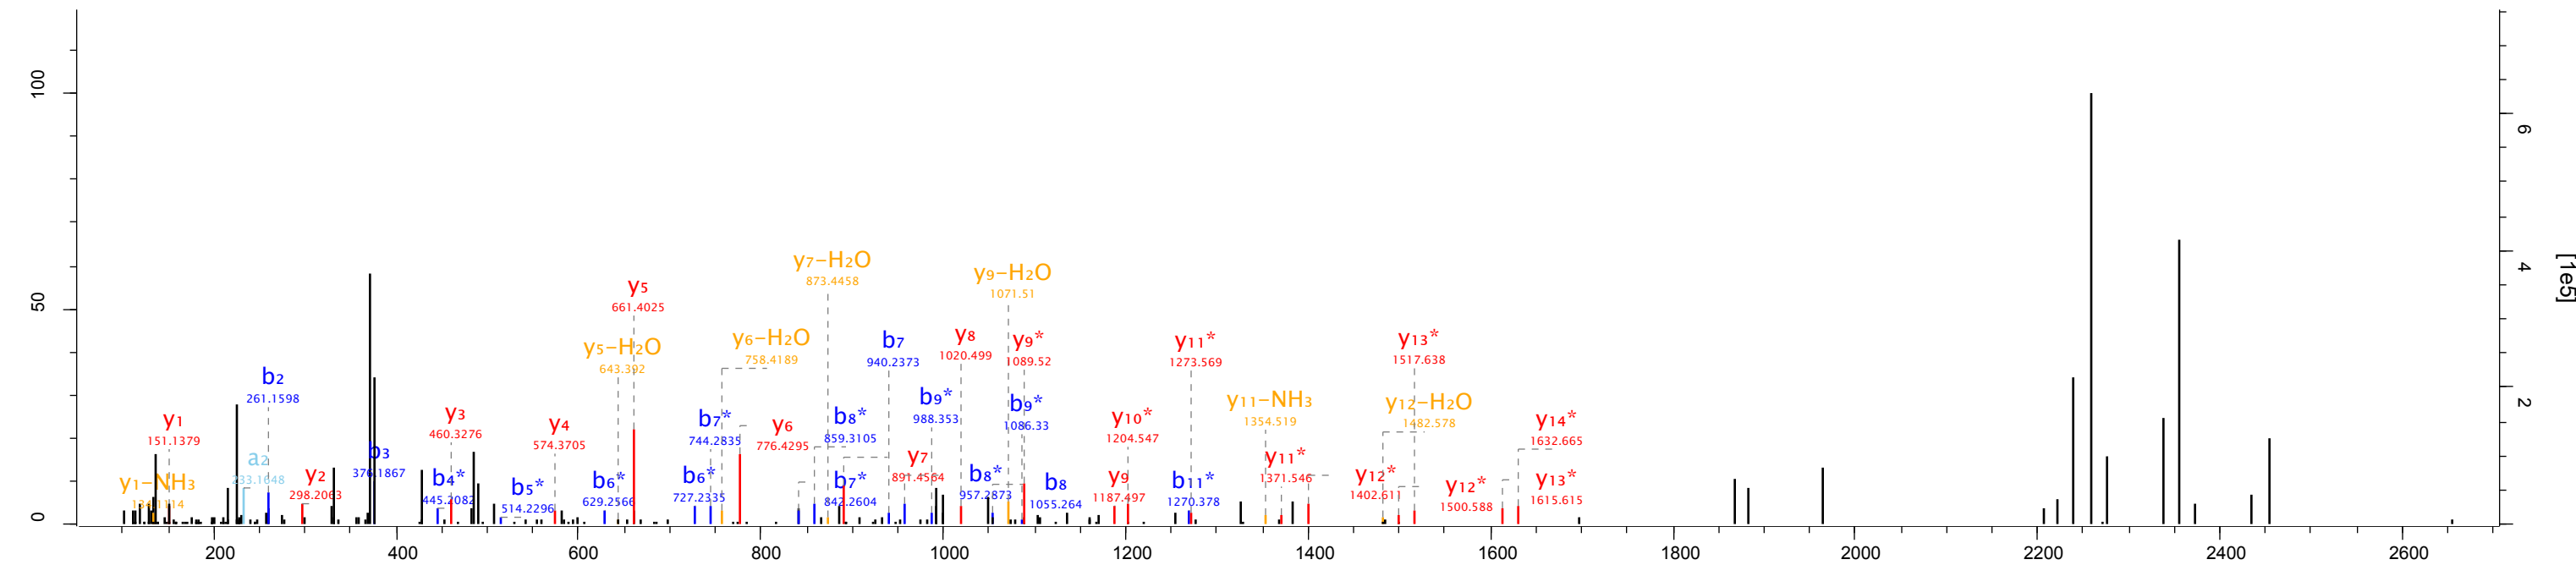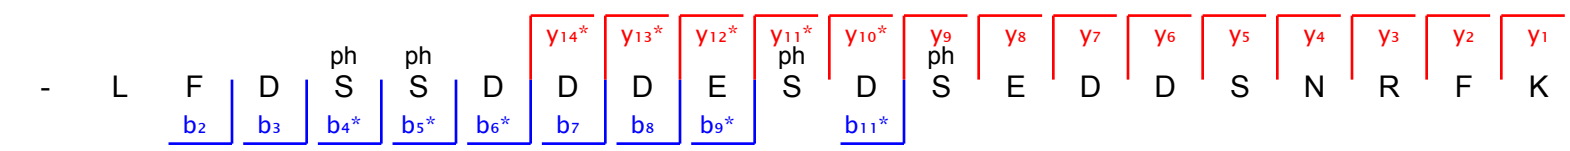

Raw file 20150812\_A375SR\_Phospho\_BR1\_02 Scan 18175 Method FTMS; HCD Score 89.99 m/z 1085.44 Gene names CEP170

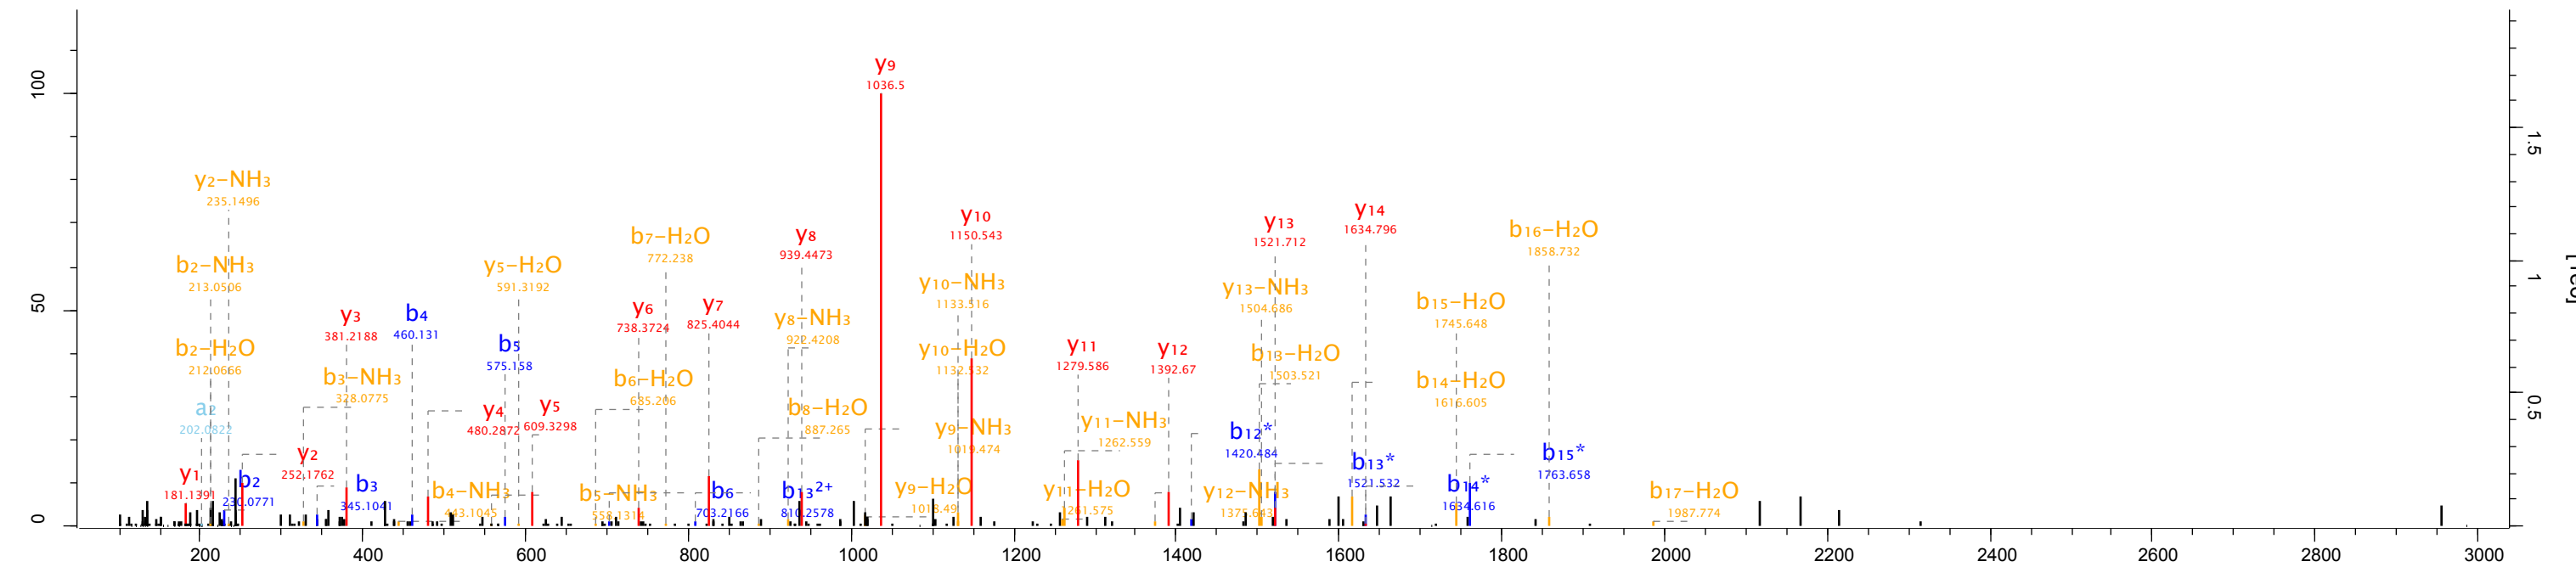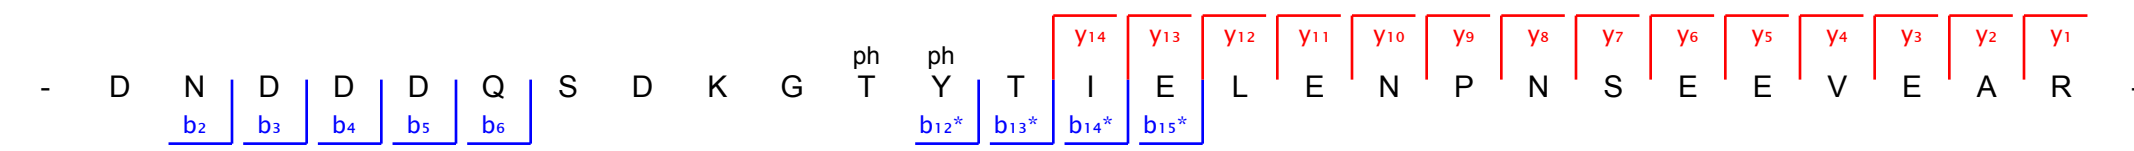





Raw file  
20150812\_A375SR\_Phospho\_BR1\_02

Scan 19335 Method FTMS; HCD Score 230.29 m/z 1547.61 Gene names AATF

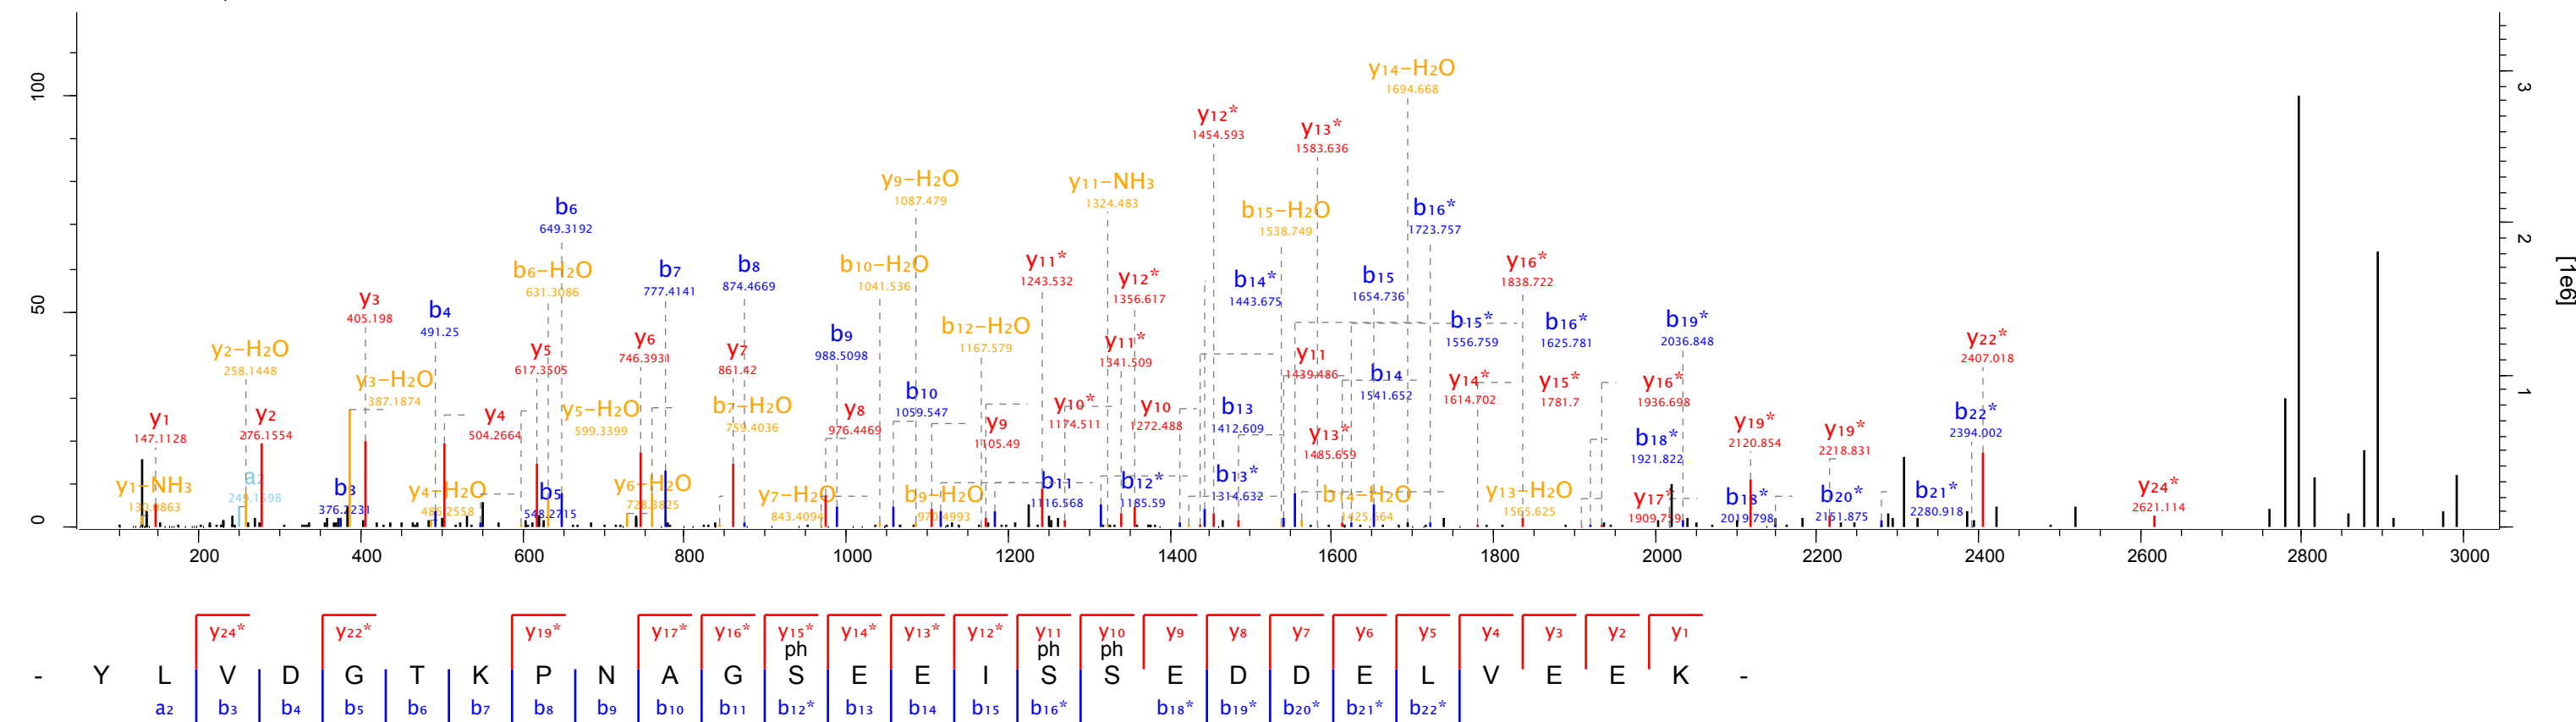

Raw file 20150812\_A375SR\_Phospho\_BR1\_02 Scan 19845 Method FTMS; HCD Score 107.98 m/z 768.3 Gene names TOMM20

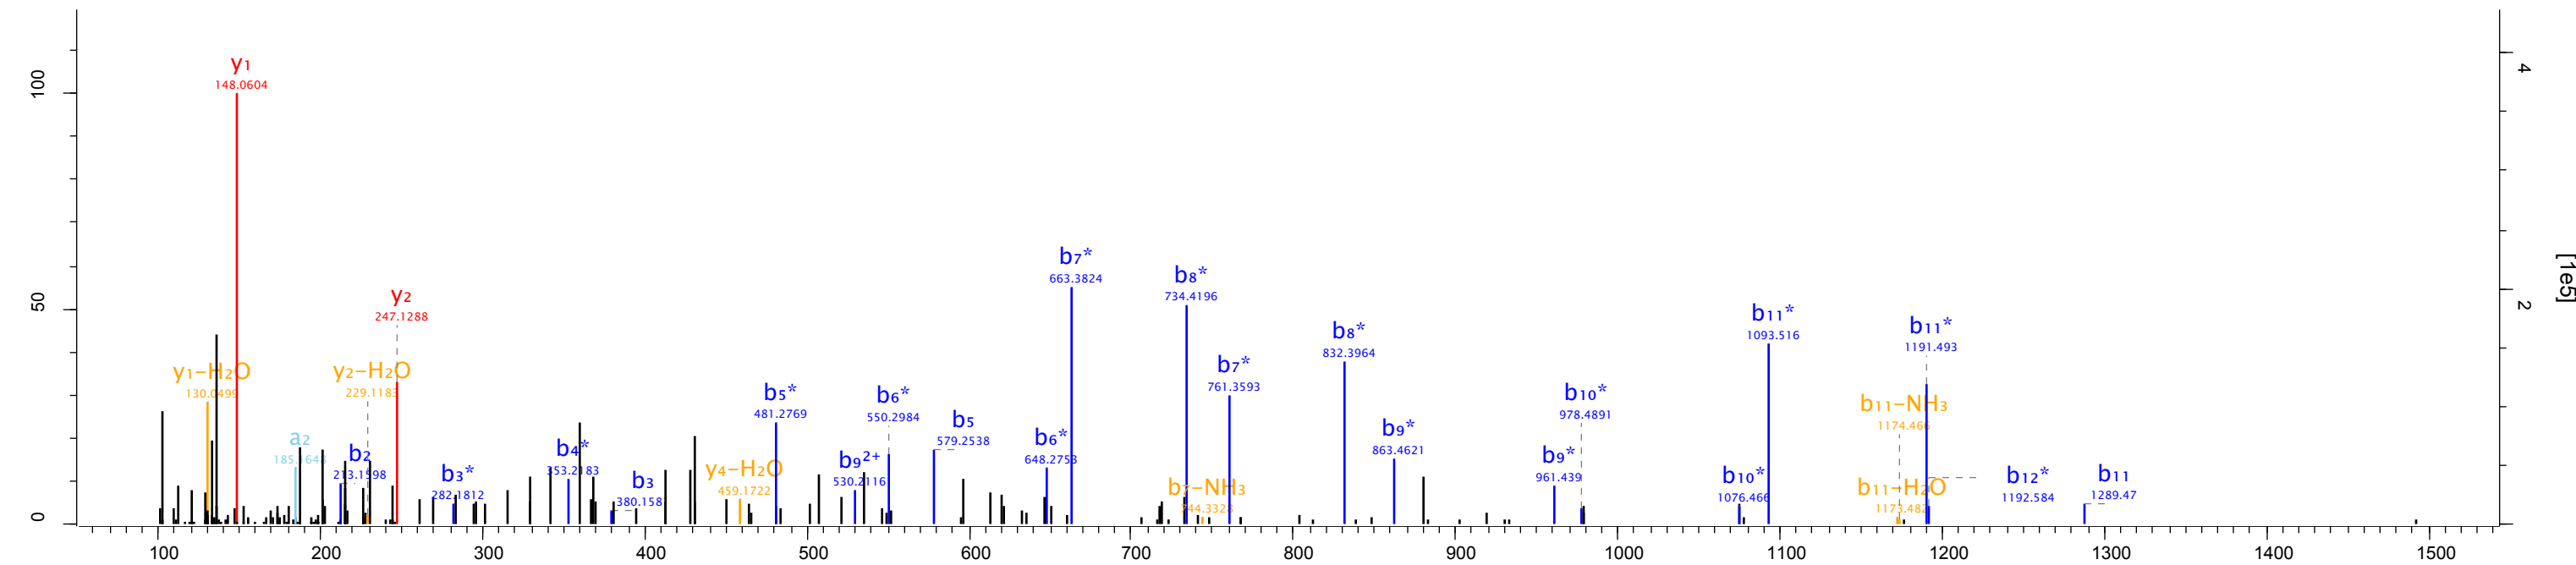

- I V S A Q S L A E D D V E -  
 b2 b3 b4\* b5 b6\* b7\* b8\* b9\* b10\* b11 b12\* y2 y1

Raw file 20150812\_A375SR\_Phospho\_BR1\_02 Scan 20575 Method FTMS; HCD Score 57.54 m/z 962.16 Gene names ATXN2

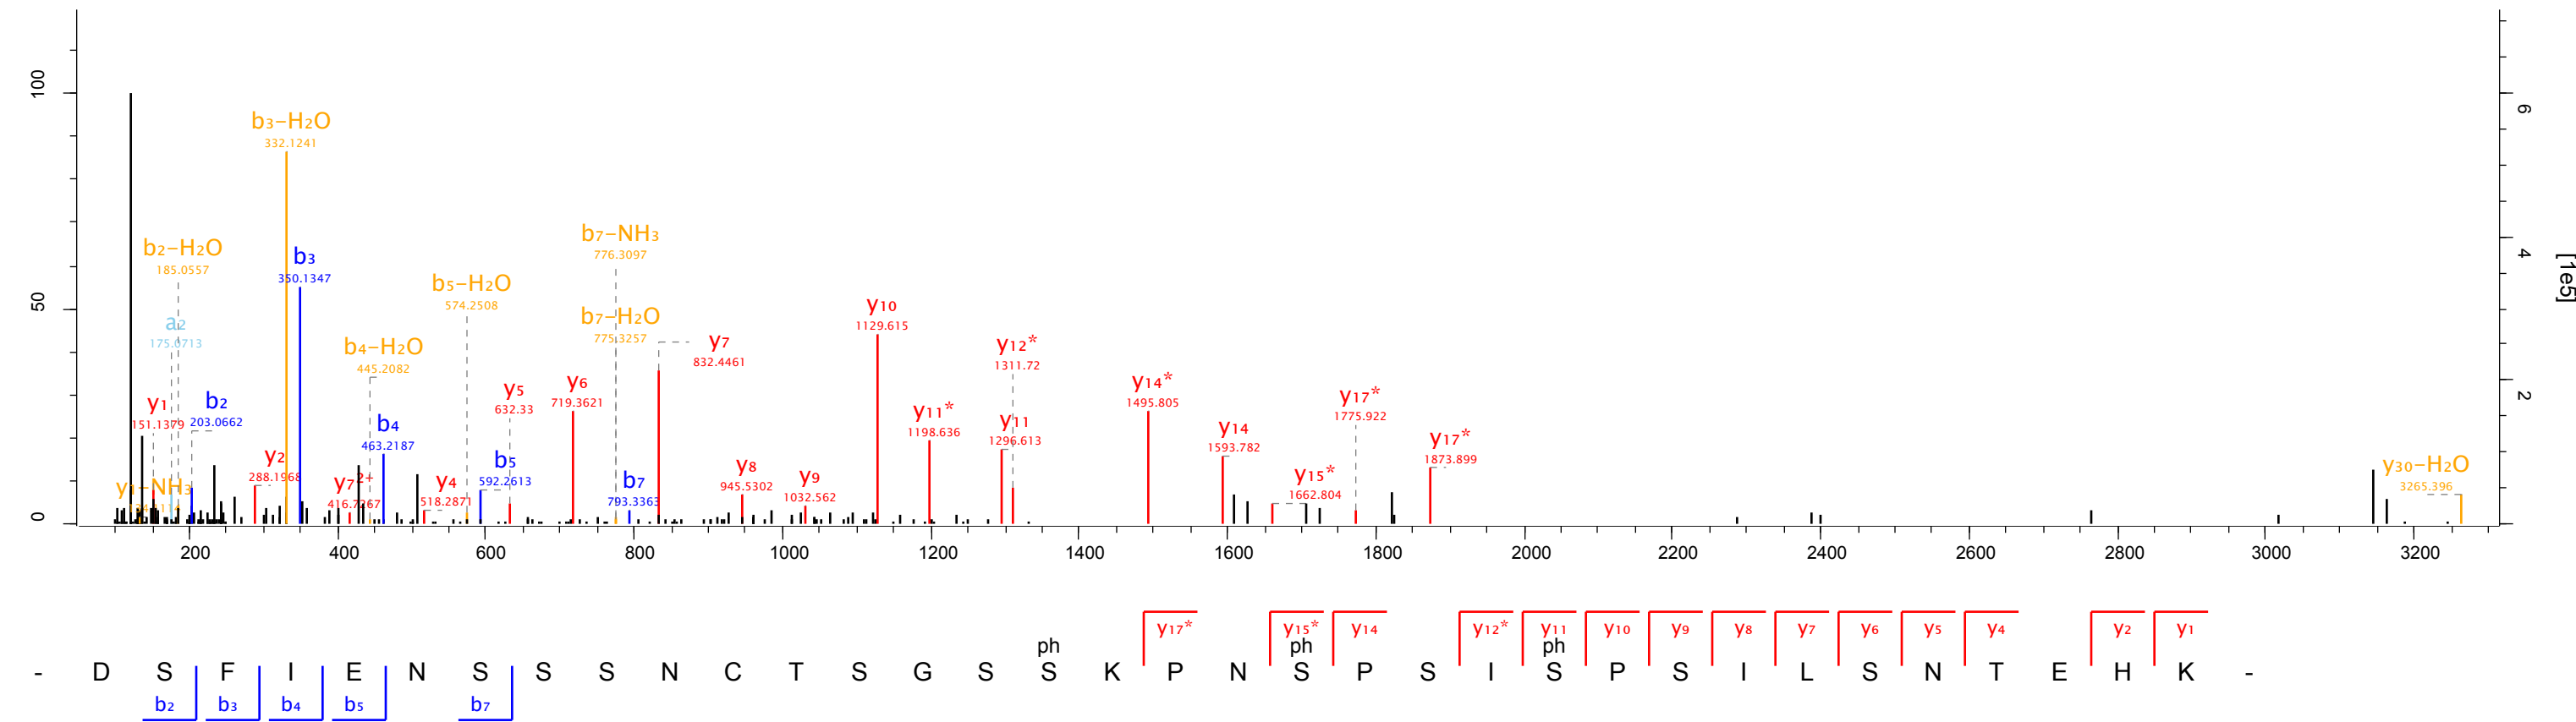

Raw file: 20150812\_A375SR\_Phospho\_BR1\_02  
 Scan: 20645 Method: FTMS; HCD Score: 116.2 m/z: 1026.88 Gene names: BAZ1A

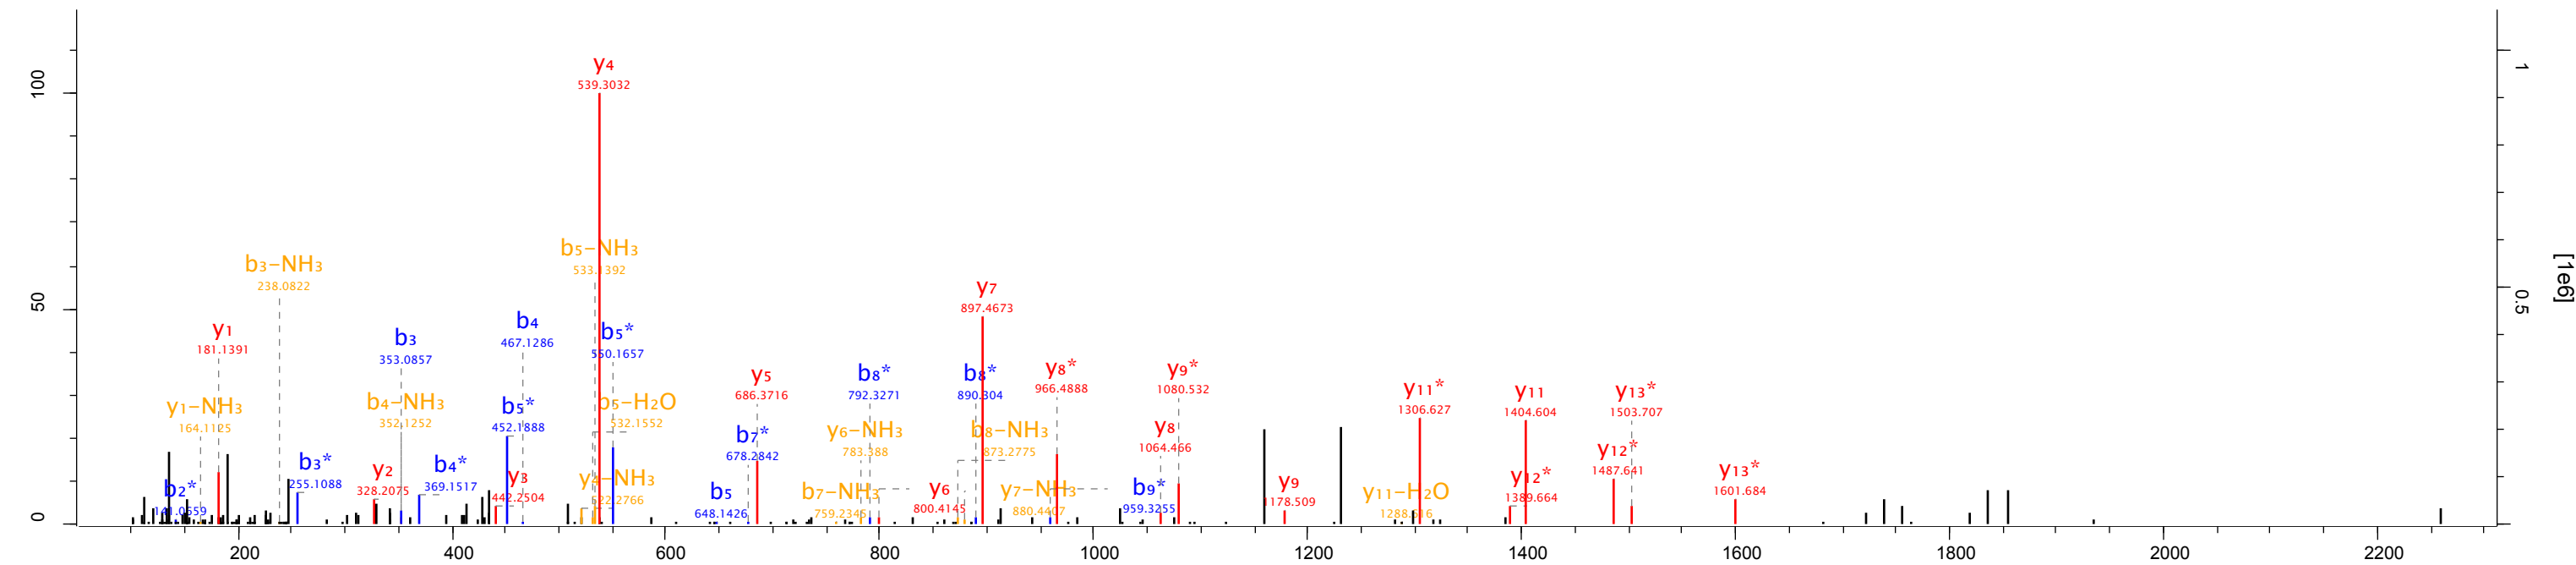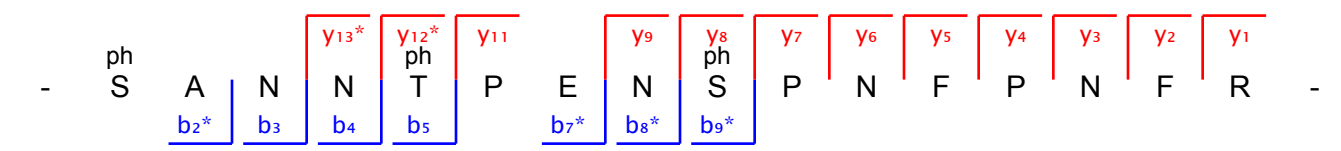

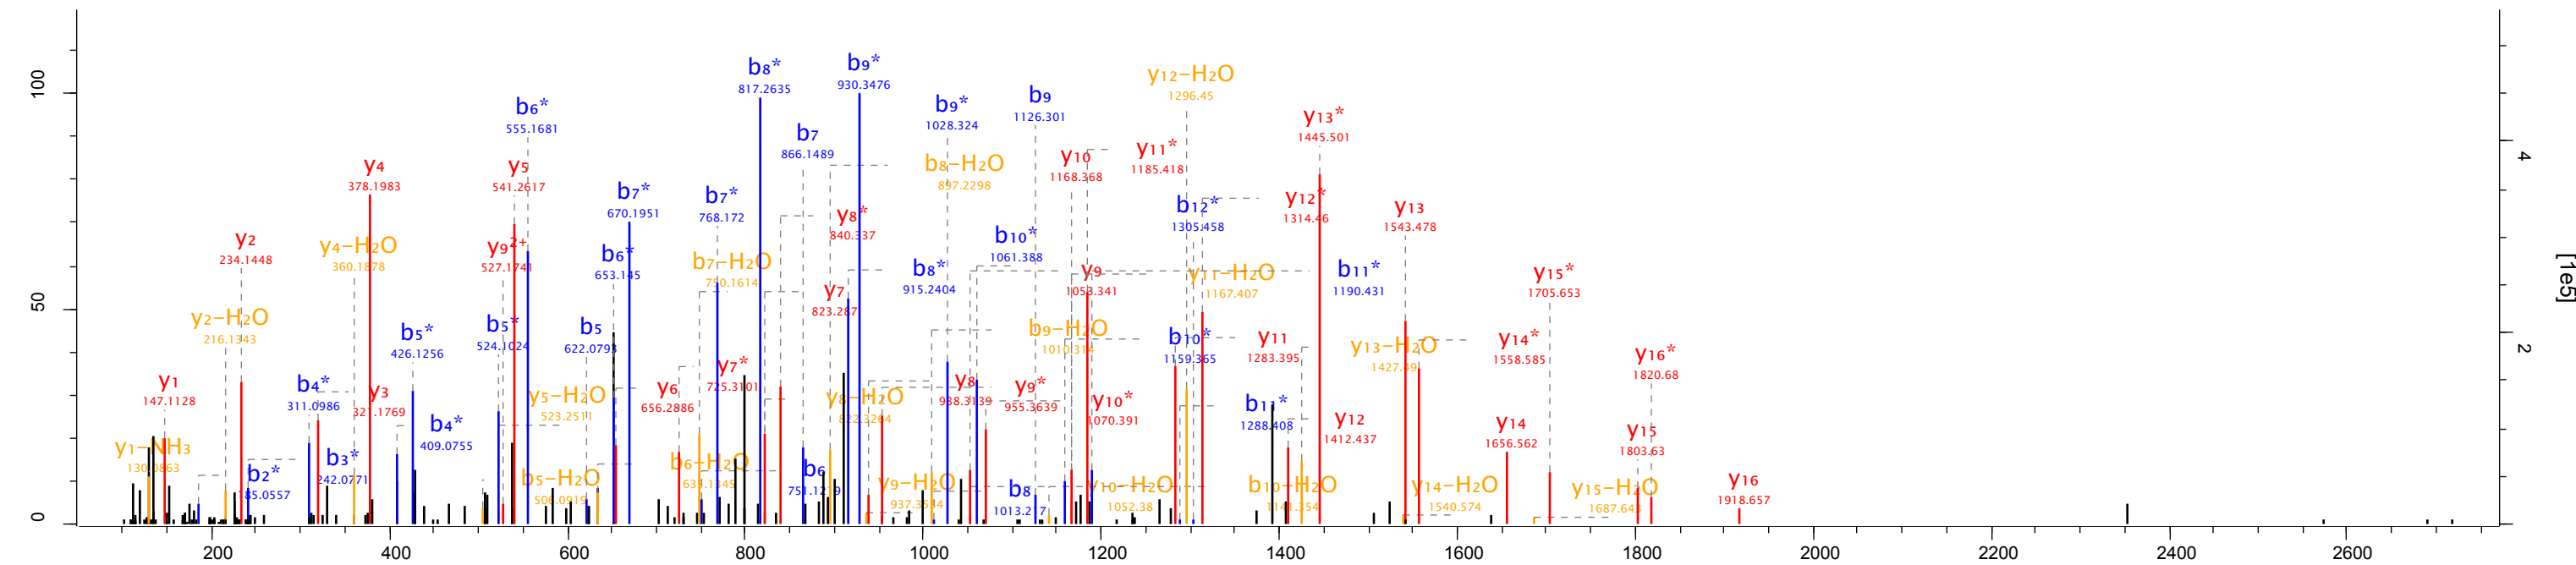

- D ph S G ph S D E y16 y15 y14 y13 y12 y11 y10 y9 y8 y7 ph y6 y5 y4 y3 y2 y1 -  
 b2\* b3\* b4\* b5 b6 b7 b8 b9 b10\* b11\* b12\* D D D D S D Y G S S K -

Raw file: 20150812\_A375SR\_Phospho\_BR1\_02  
 Scan: 22325 Method: FTMS; HCD Score: 135.47 m/z: 1063.9 Gene names: RREB1

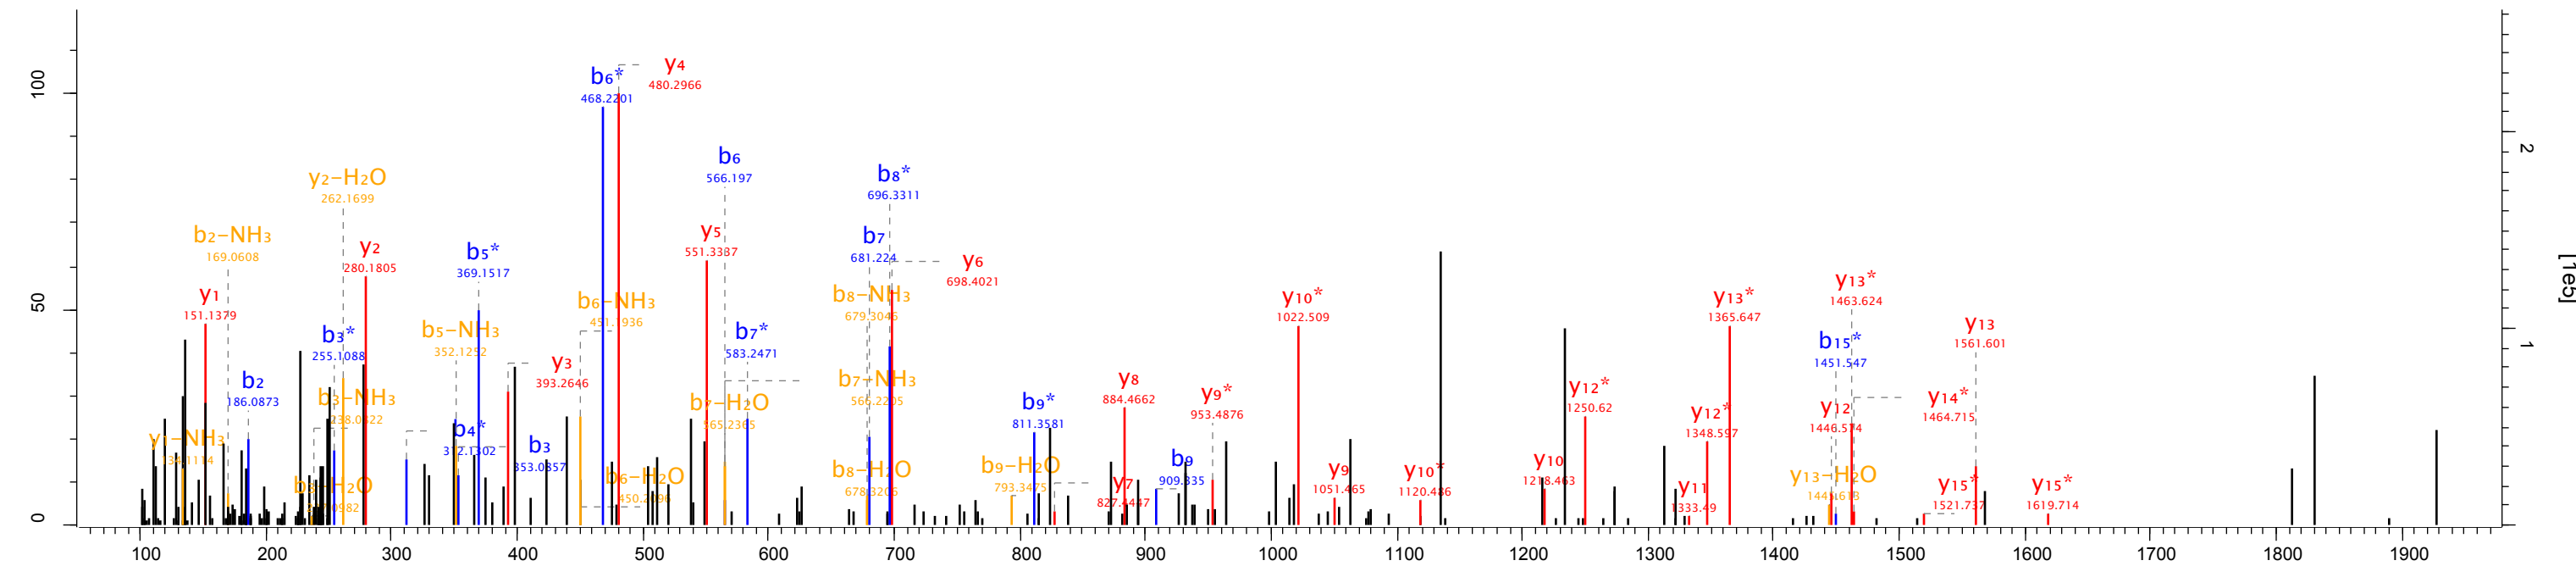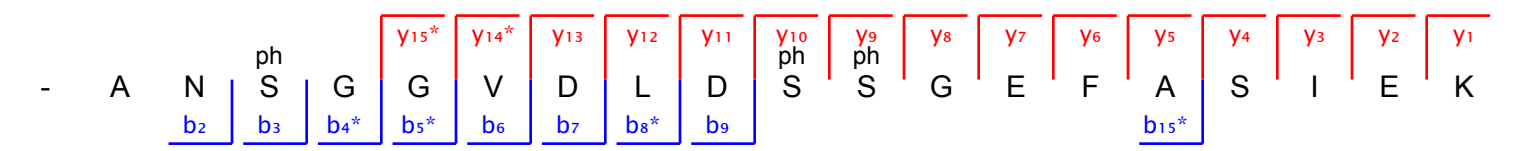

Raw file 20150812\_A375SR\_Phospho\_BR1\_02 Scan 22675 Method FTMS; HCD Score 167.61 m/z 990.09 Gene names XRN2

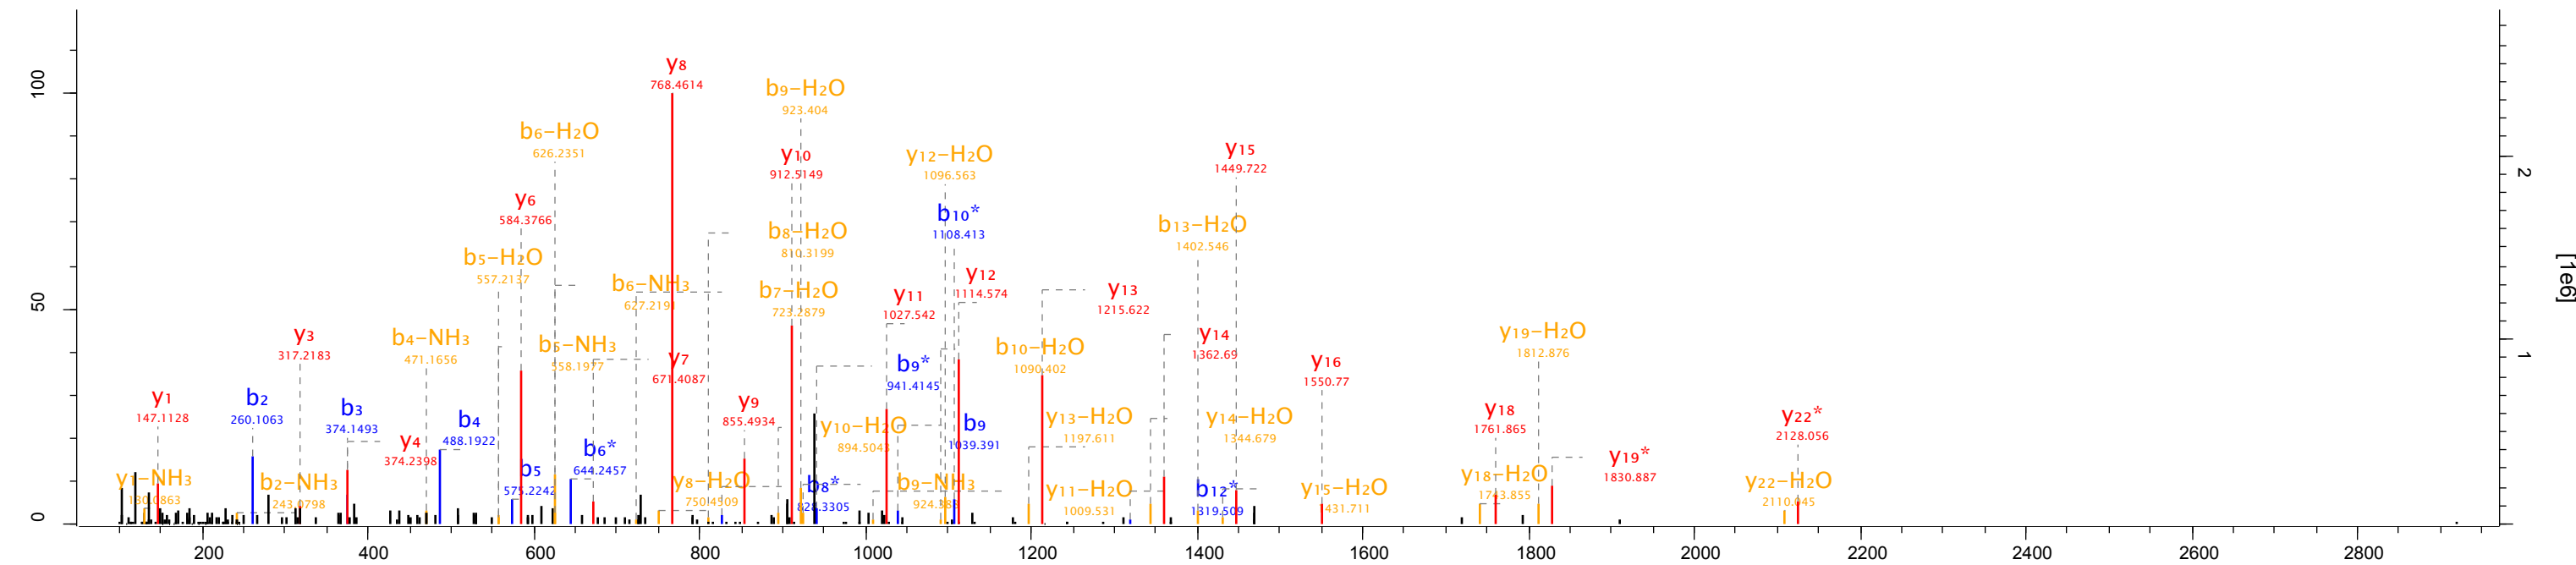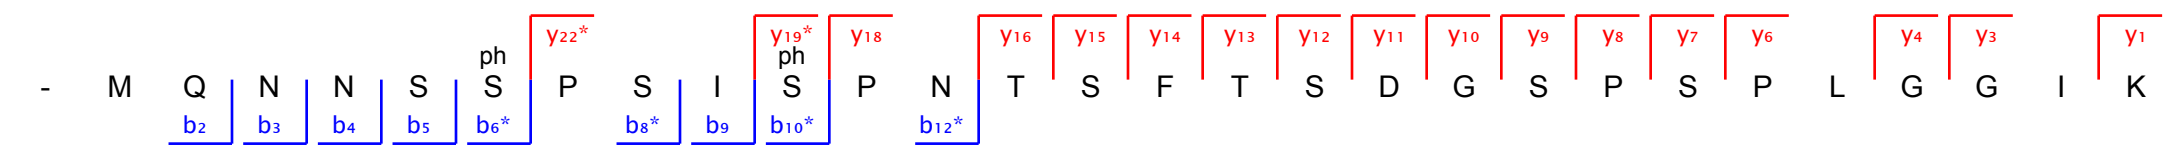



Raw file: 20150812\_A375SR\_Phospho\_BR1\_02  
 Scan: 22785 Method: FTMS; HCD Score: 185 m/z: 1395.05 Gene names: SART1

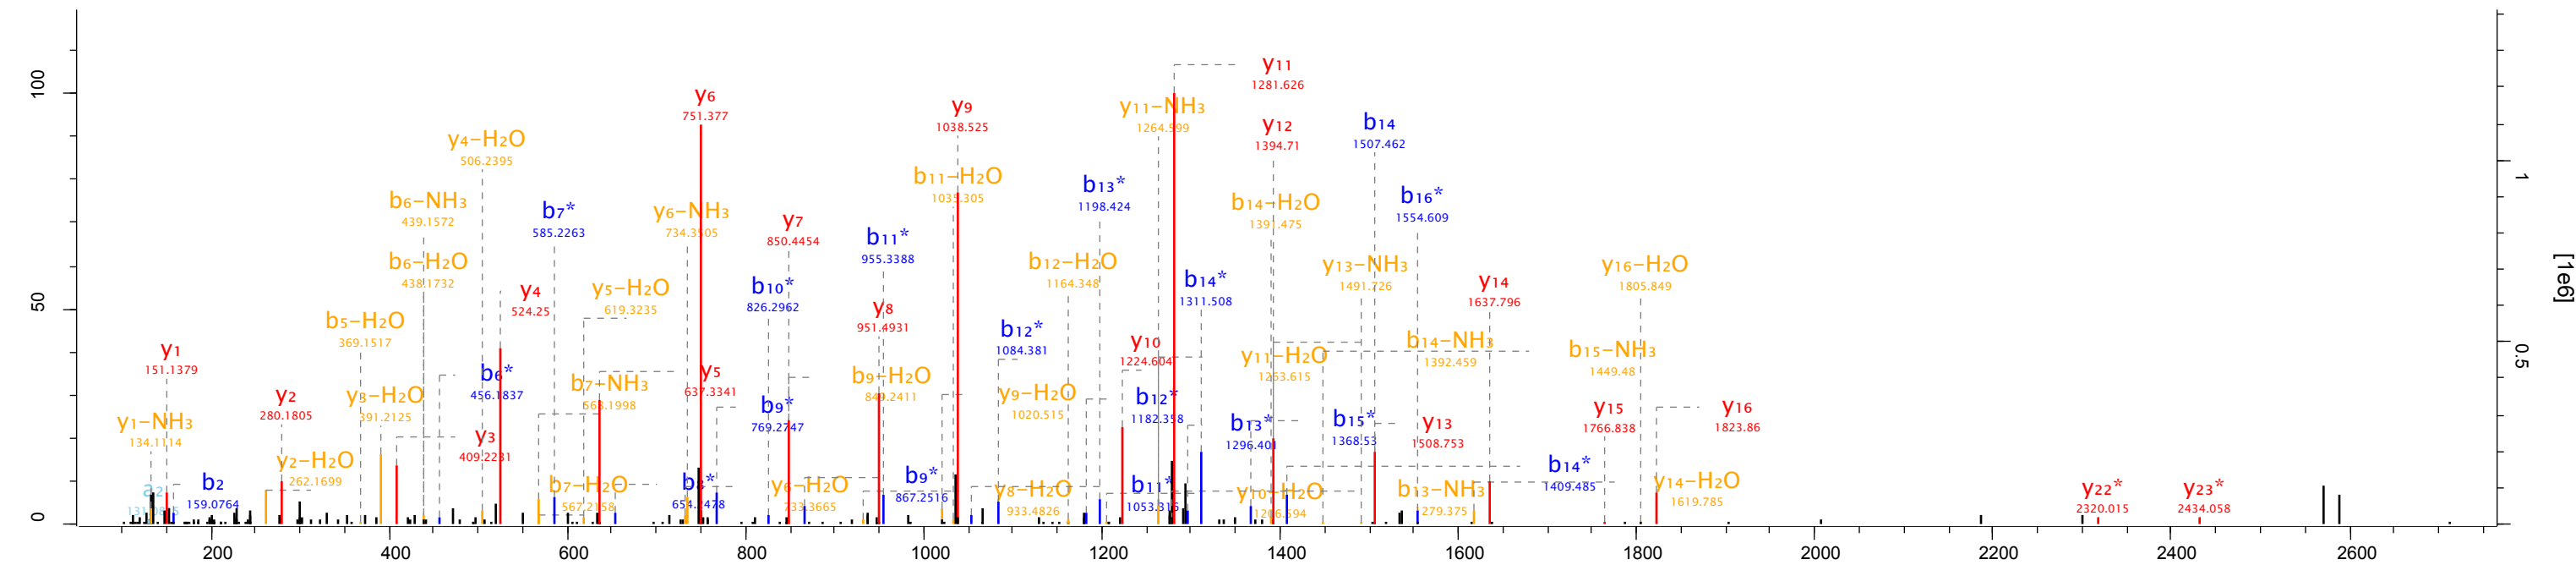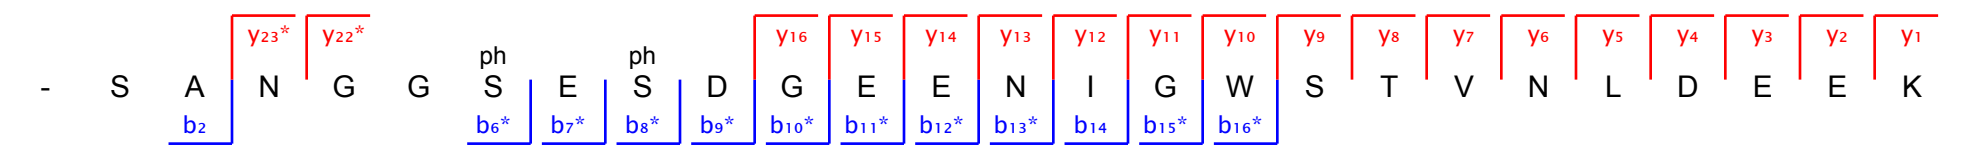

Raw file: 20150812\_A375SR\_Phospho\_BR1\_02  
 Scan: 23195 Method: FTMS; HCD Score: 144.78 m/z: 1188.47 Gene names: DCAF6

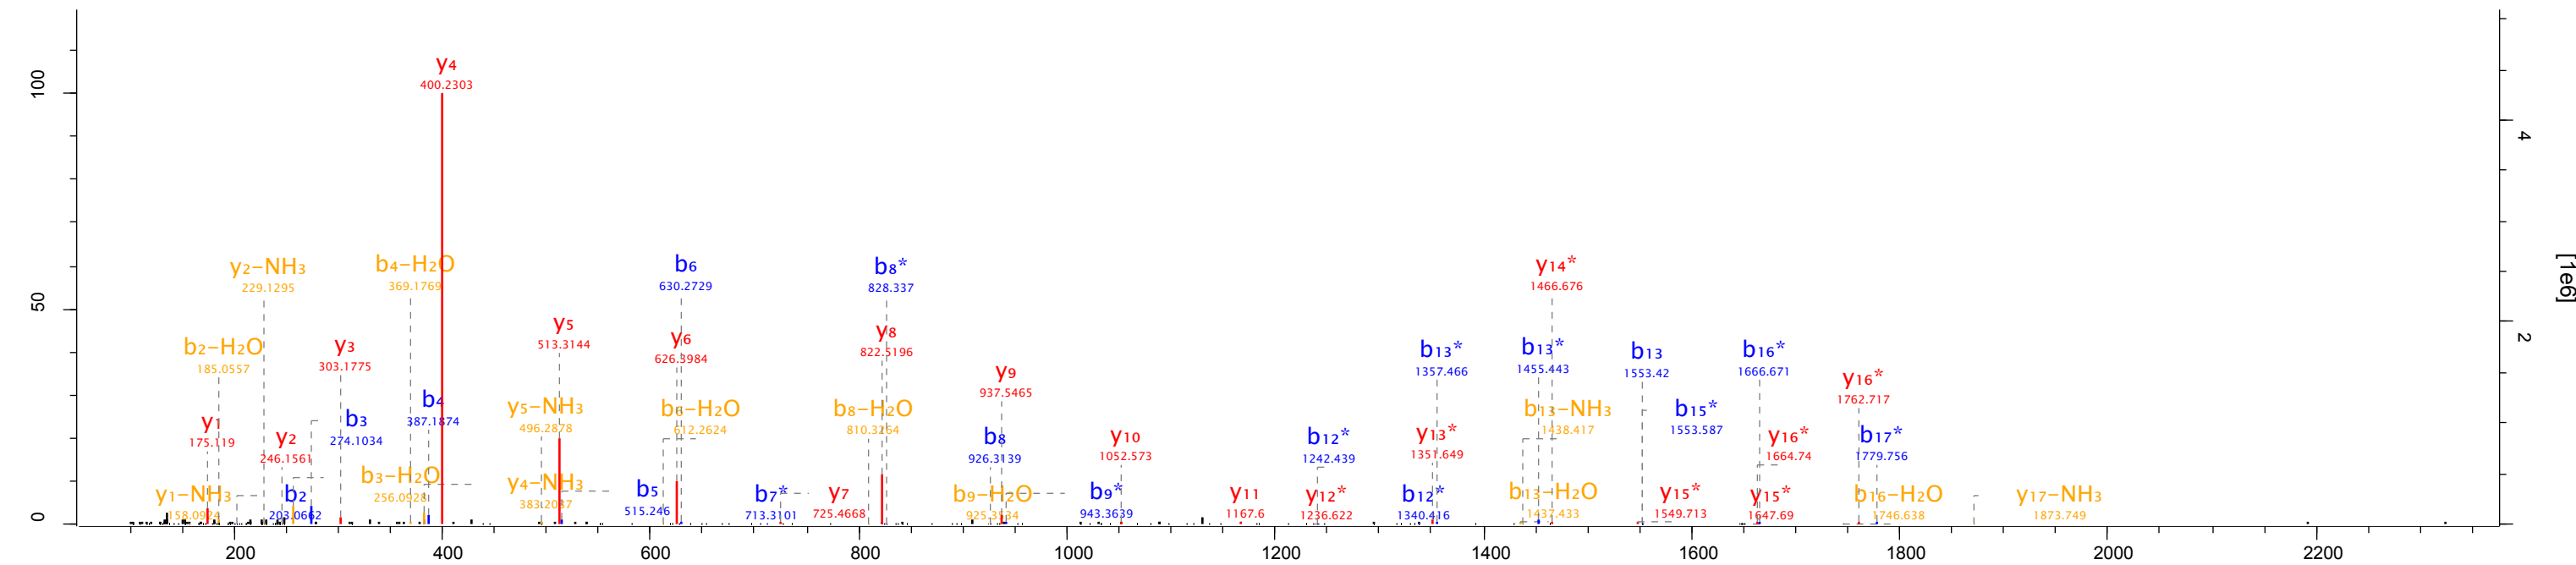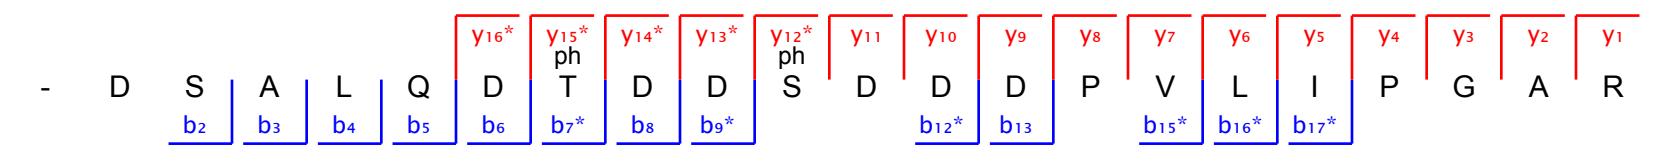

Raw file 20150812\_A375SR\_Phospho\_BR1\_02 Scan 24085 Method FTMS; HCD Score 67.71 m/z 931.41 Gene names FRYL

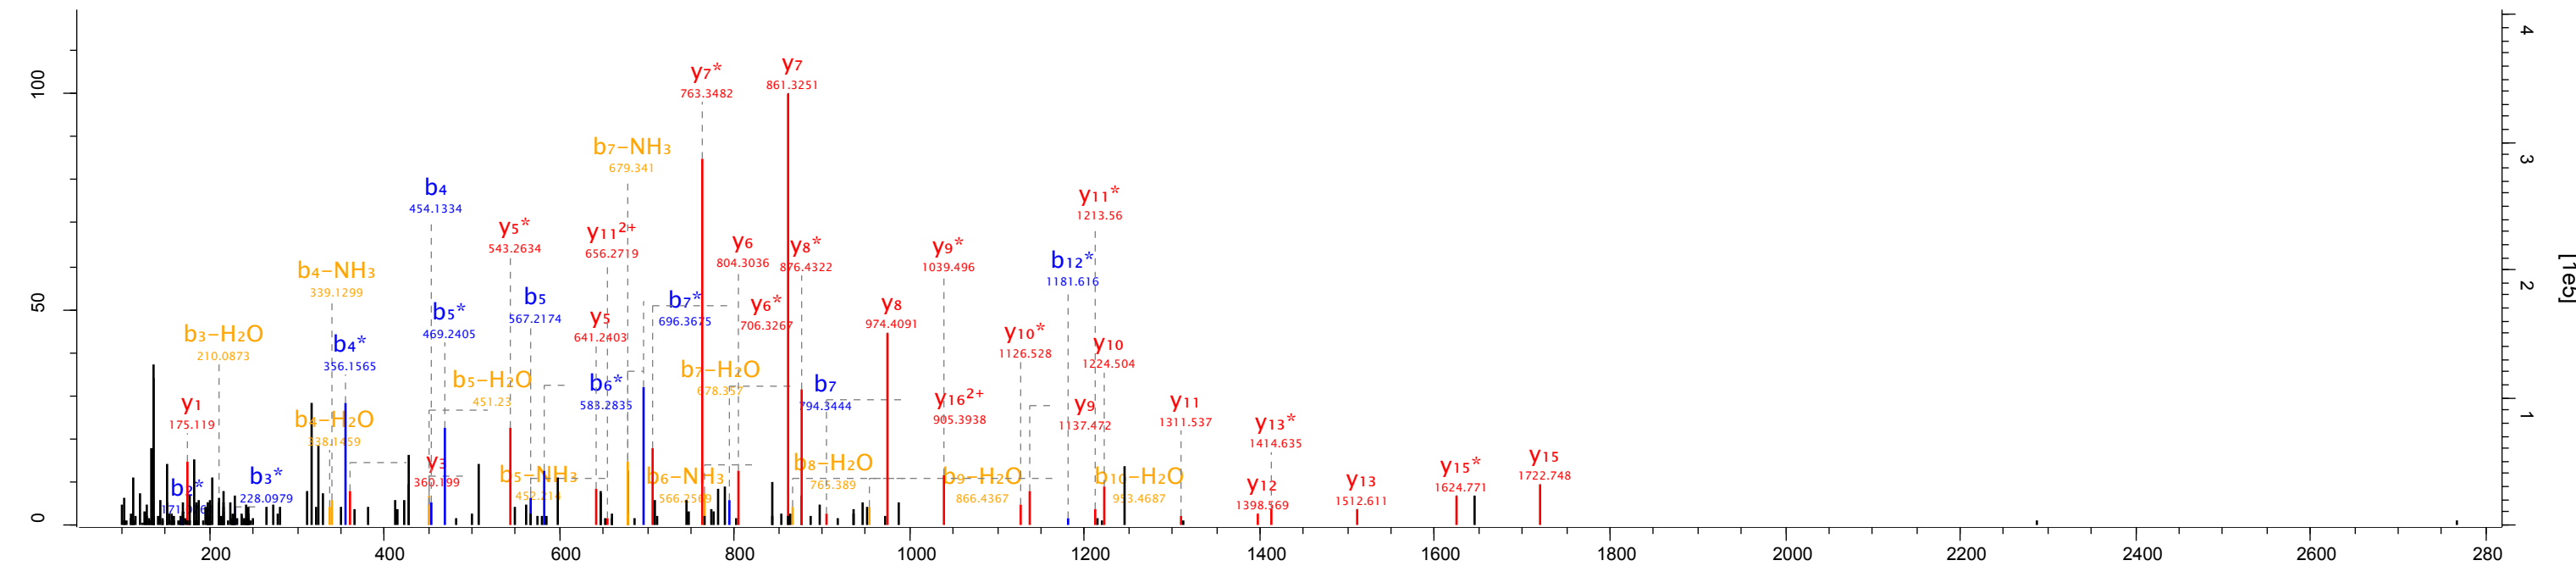

Sequence: - S T G Q L N L S T S P I N S S S Y L G Y N S N A R -

Fragmentation mapping:

- ph (peptide backbone)
- b2\* (under T)
- b3\* (under G)
- b4 (under Q)
- b5 (under L)
- b6\* (under N)
- b7 (under L)
- b12\* (under I)
- y16<sup>2+</sup> (above S)
- y15 (above P)
- y13 (above N)
- y12 (above S)
- y11 (above S)
- y10 (above S)
- y9 (above Y)
- y8 (above L)
- y7 (above G)
- y6 (above Y)
- y5 (above N)
- y3 (above N)
- y1 (above R)

Raw file 20150812\_A375SR\_Phospho\_BR1\_02 Scan 24905 Method FTMS; HCD Score 190.93 m/z 1207.97 Gene names VRK3

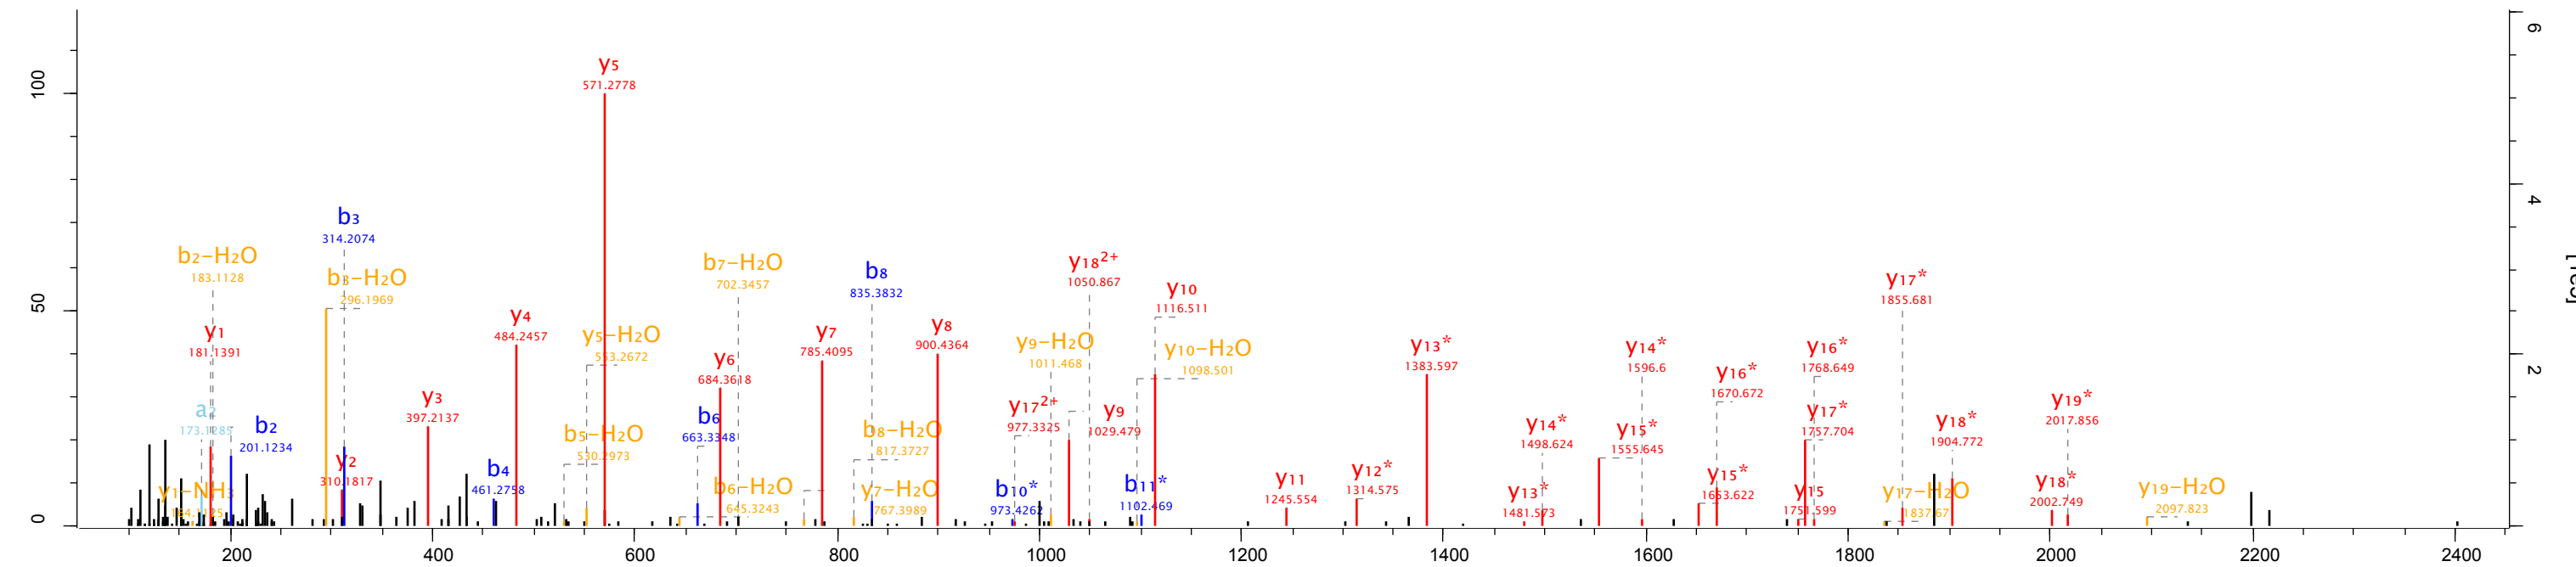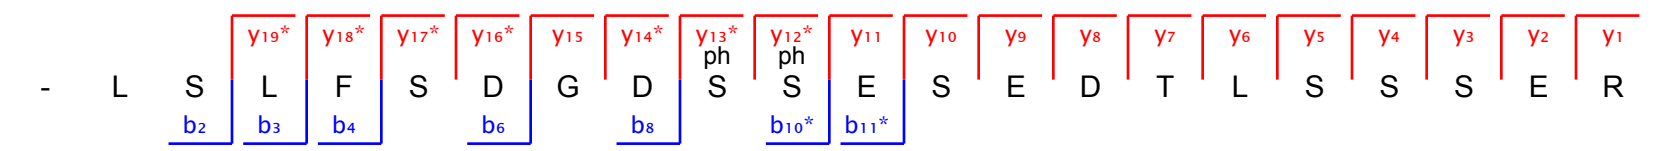

Raw file: 20150812\_A375SR\_Phospho\_BR1\_02  
 Scan: 2545 Method: FTMS; HCD Score: 113.19 m/z: 648.73 Gene names: SRRM1

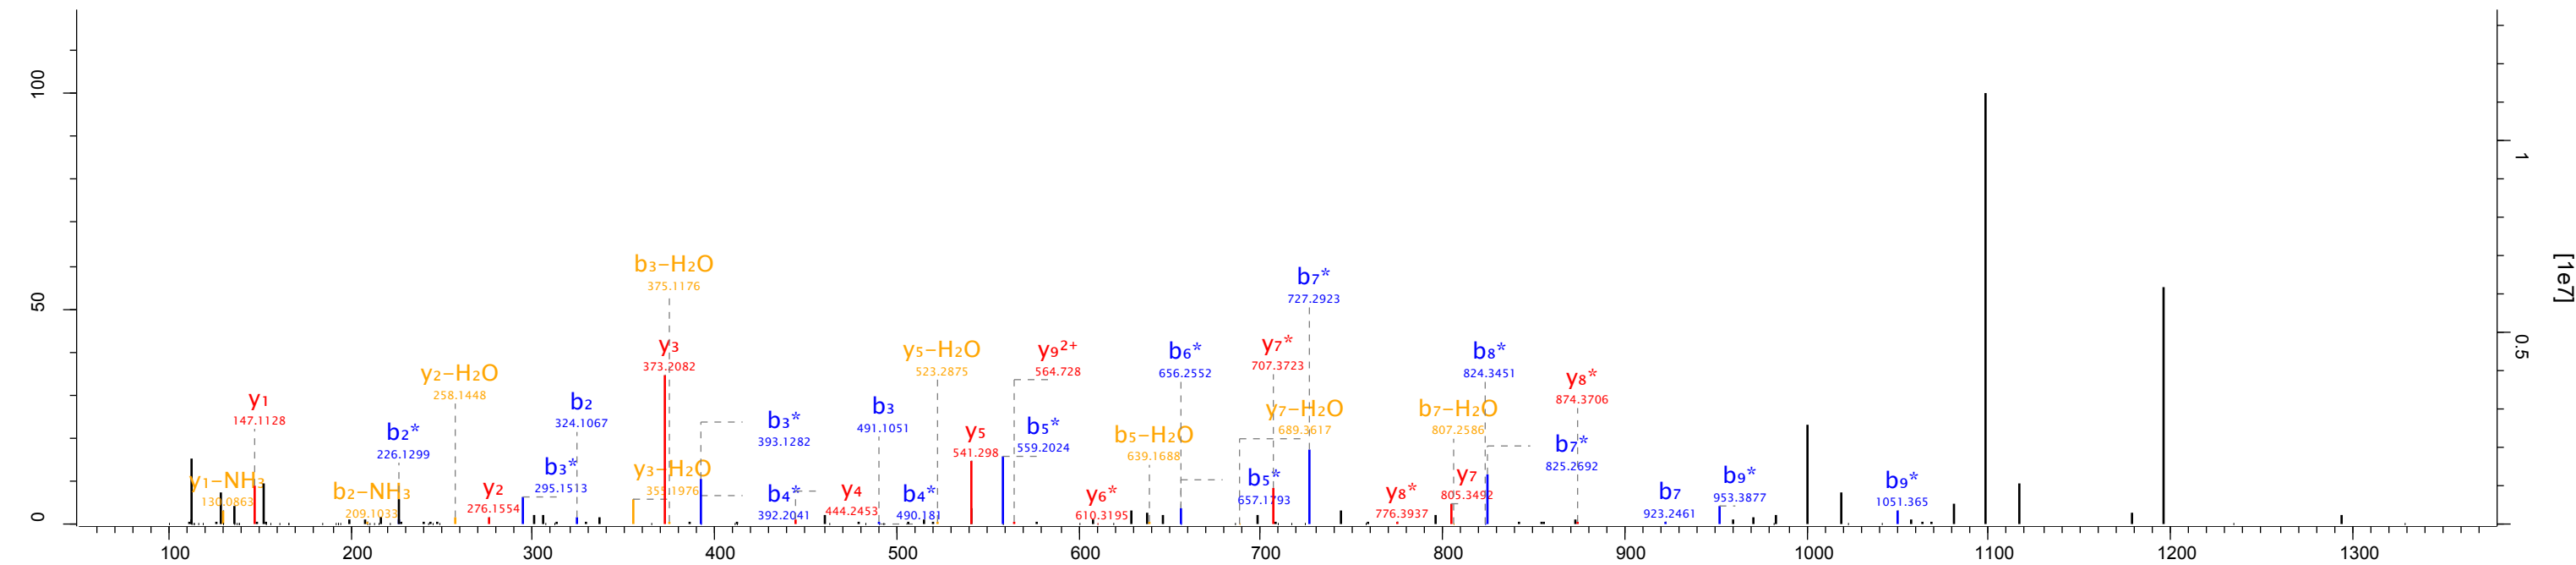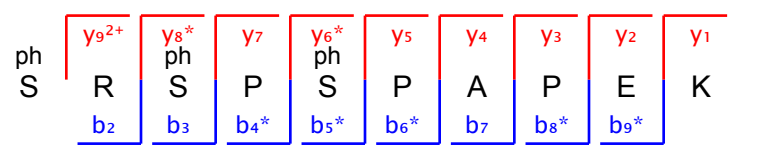

Raw file 20150812\_A375SR\_Phospho\_BR1\_02 Scan 25485 Method FTMS; HCD Score 103.06 m/z 1069.13 Gene names SNTB2

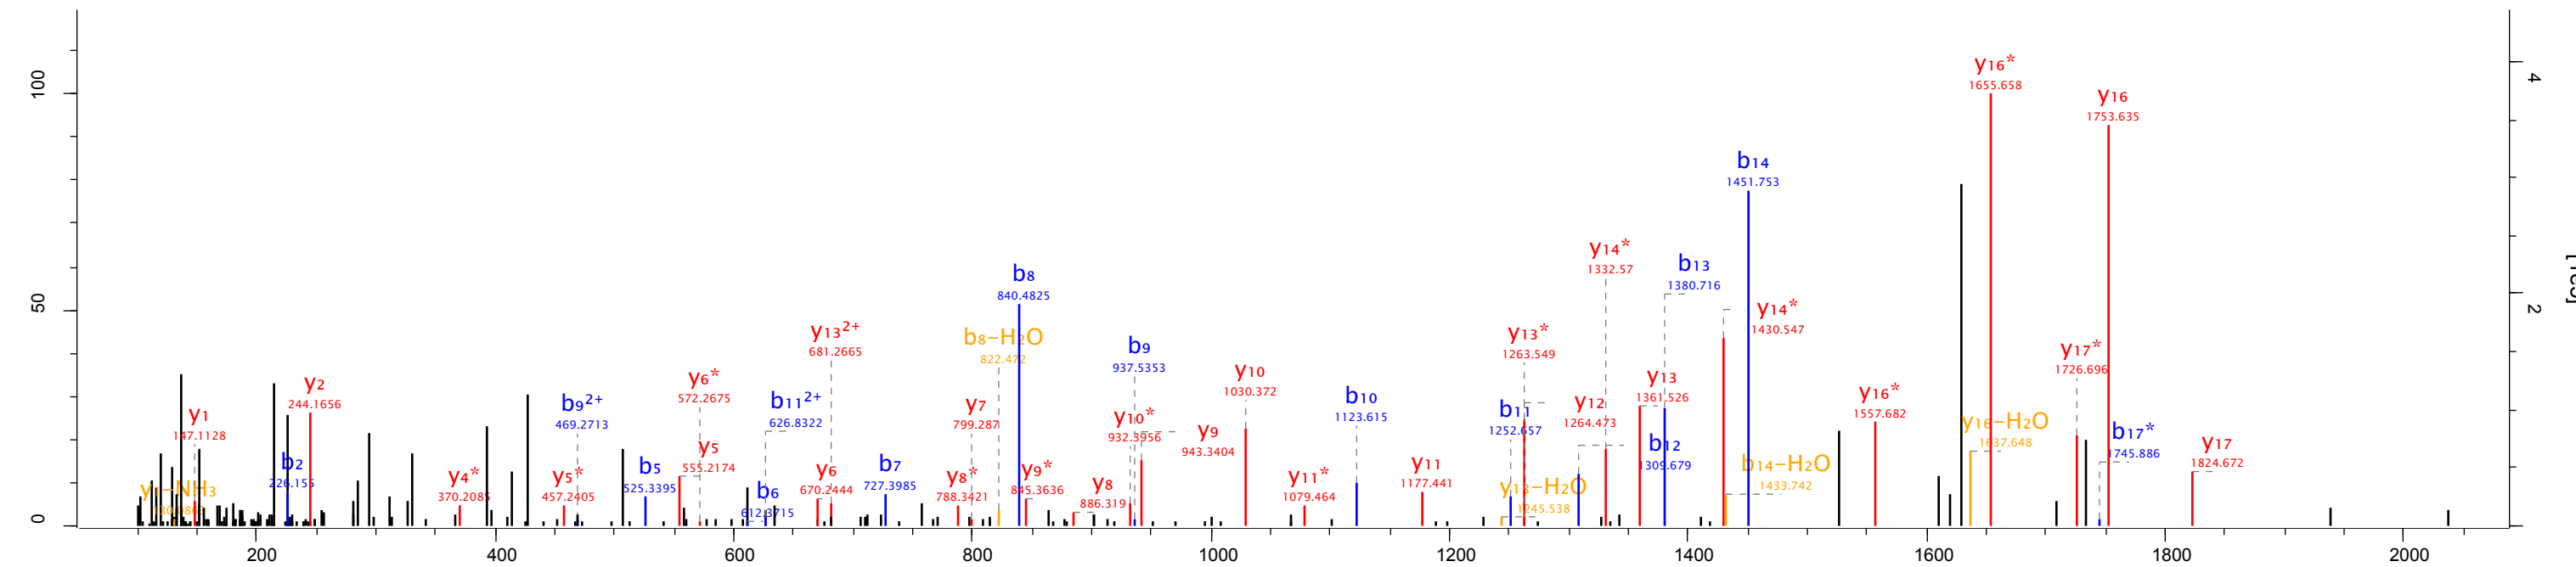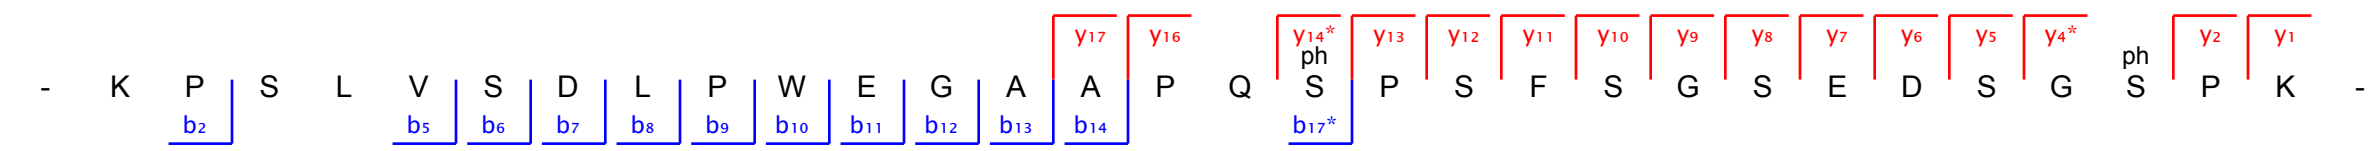

Raw file: 20150812\_A375SR\_Phospho\_BR1\_02  
 Scan: 26595 Method: FTMS; HCD Score: 53.18 m/z: 1136.89 Gene names: CDCA3

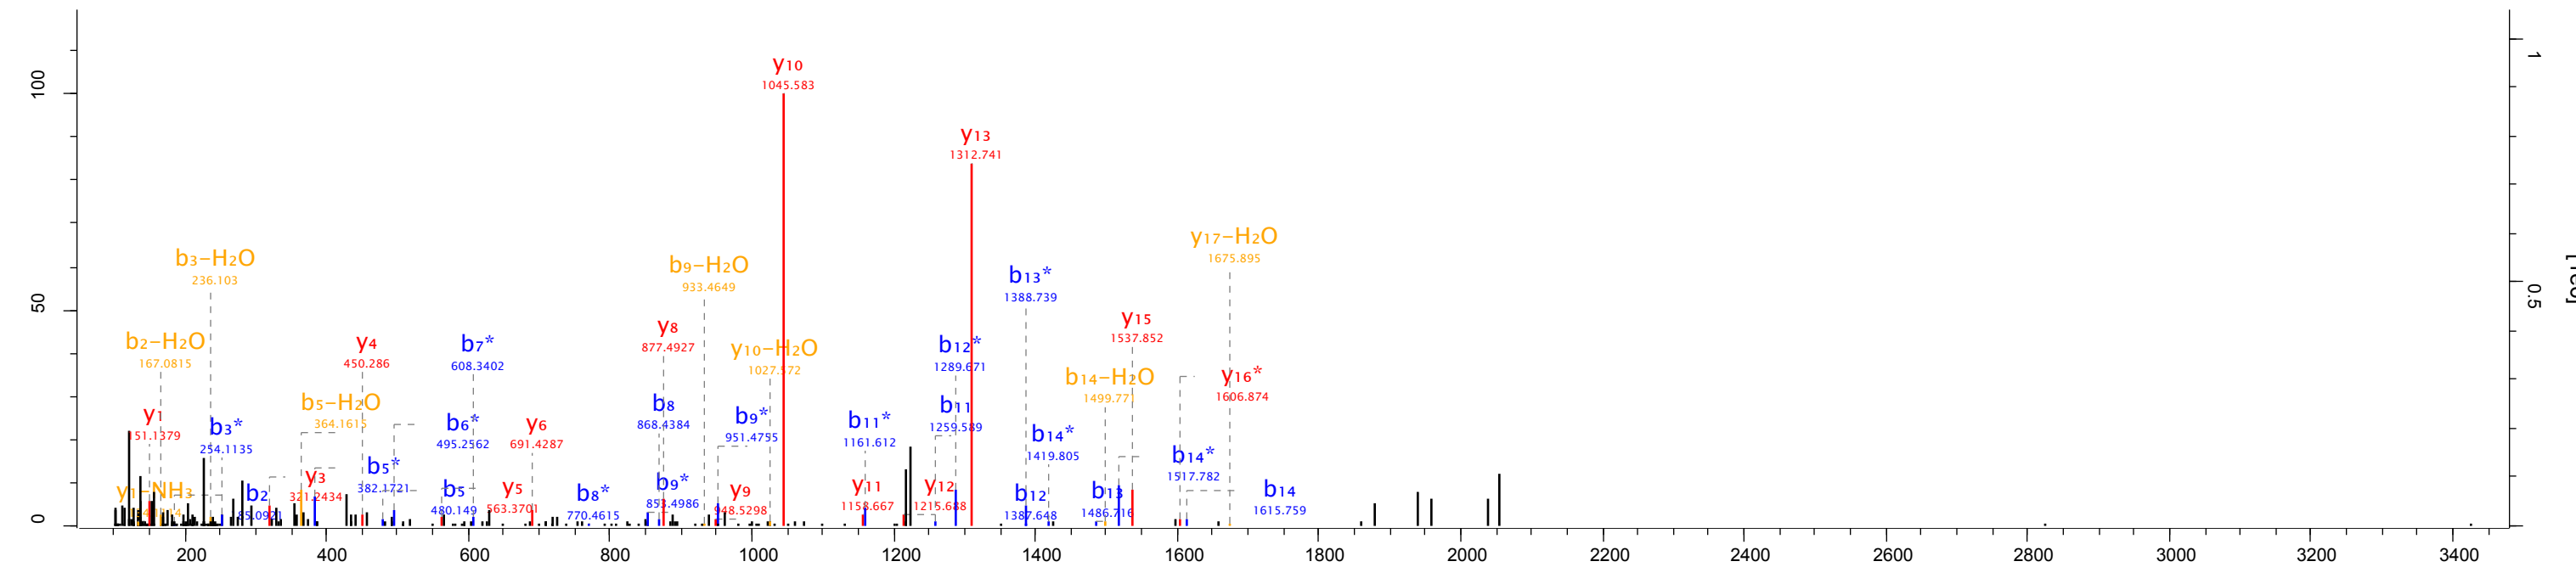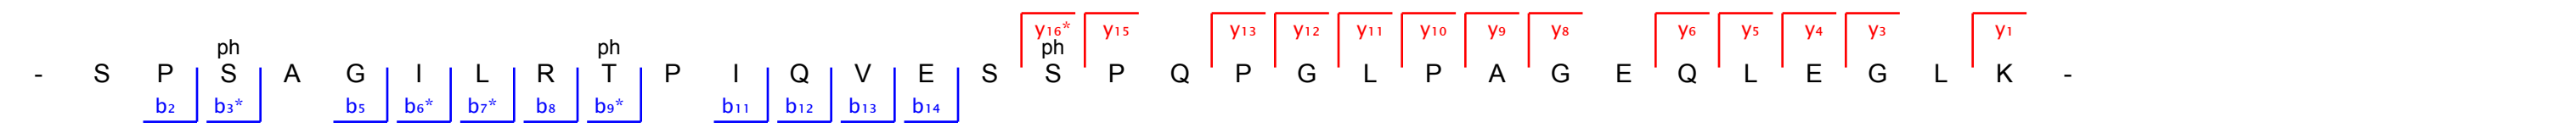

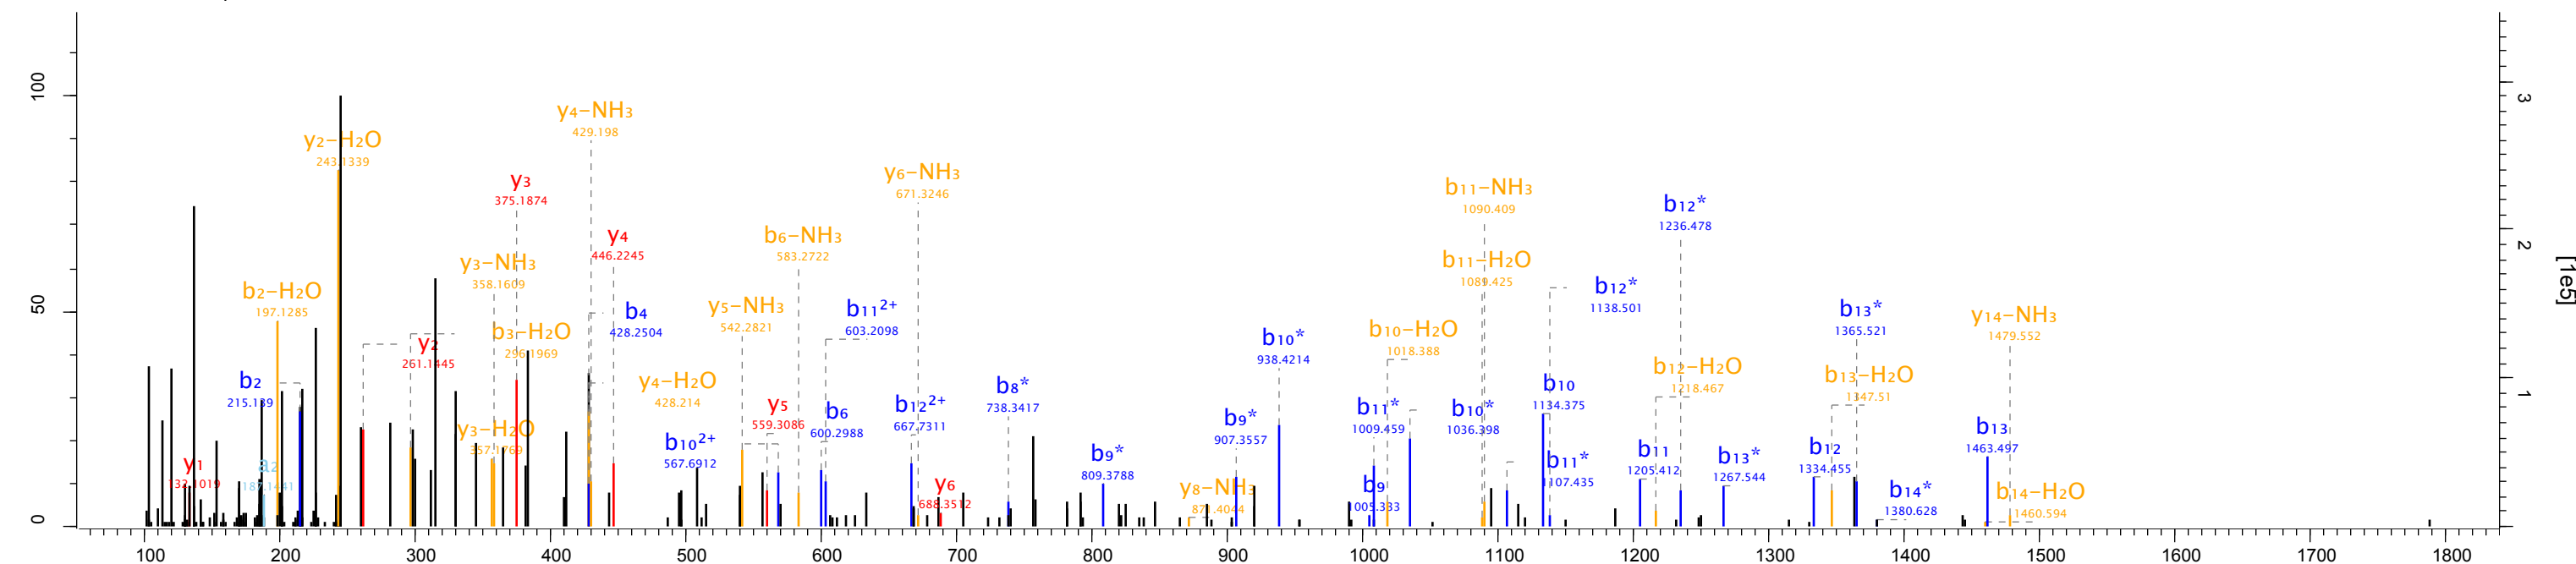

- I T V N G D S ph S A E A E E L A N E I -  
 b<sub>2</sub> b<sub>4</sub> b<sub>6</sub> b<sub>8</sub><sup>\*</sup> b<sub>9</sub> b<sub>10</sub> b<sub>11</sub> b<sub>12</sub> b<sub>13</sub> b<sub>14</sub><sup>\*</sup> y<sub>6</sub> y<sub>5</sub> y<sub>4</sub> y<sub>3</sub> y<sub>2</sub> y<sub>1</sub>



Raw file 20150812\_A375SR\_Phospho\_BR1\_02 Scan 26935 Method FTMS; HCD Score 140.45 m/z 813.35 Gene names PXN

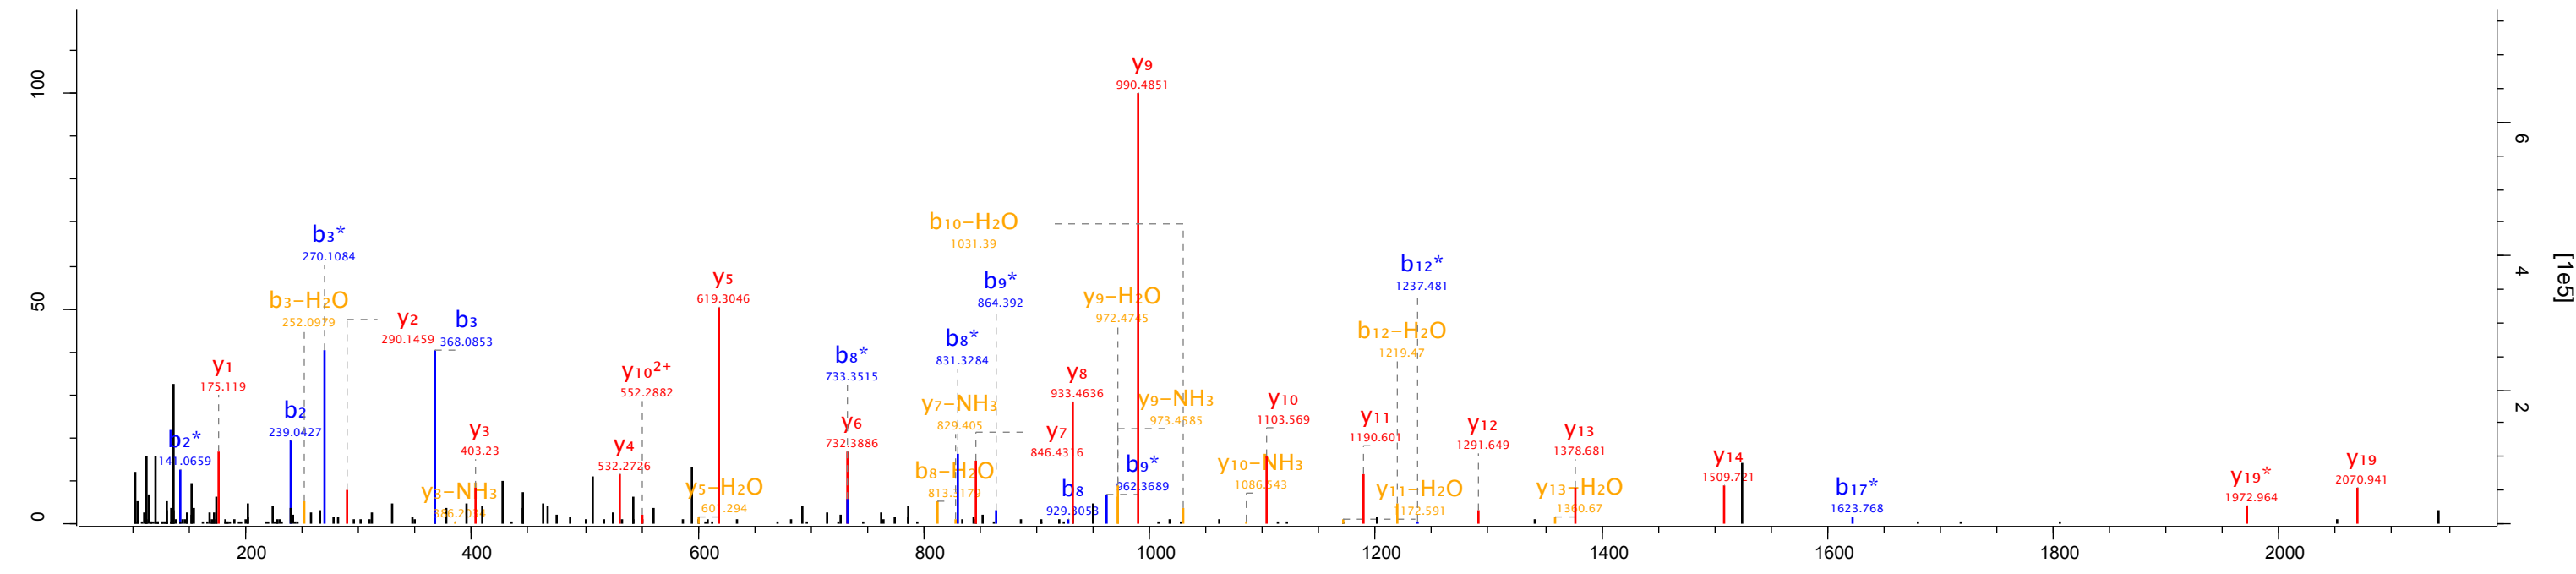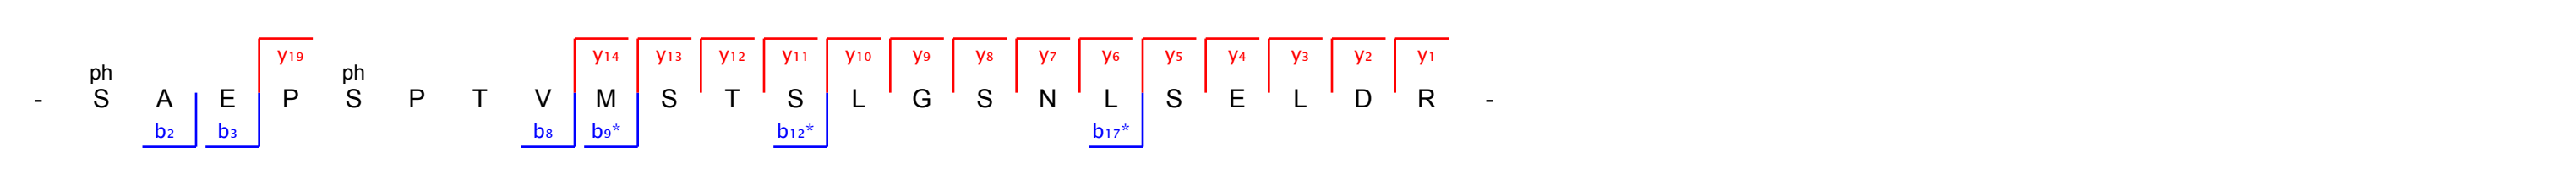

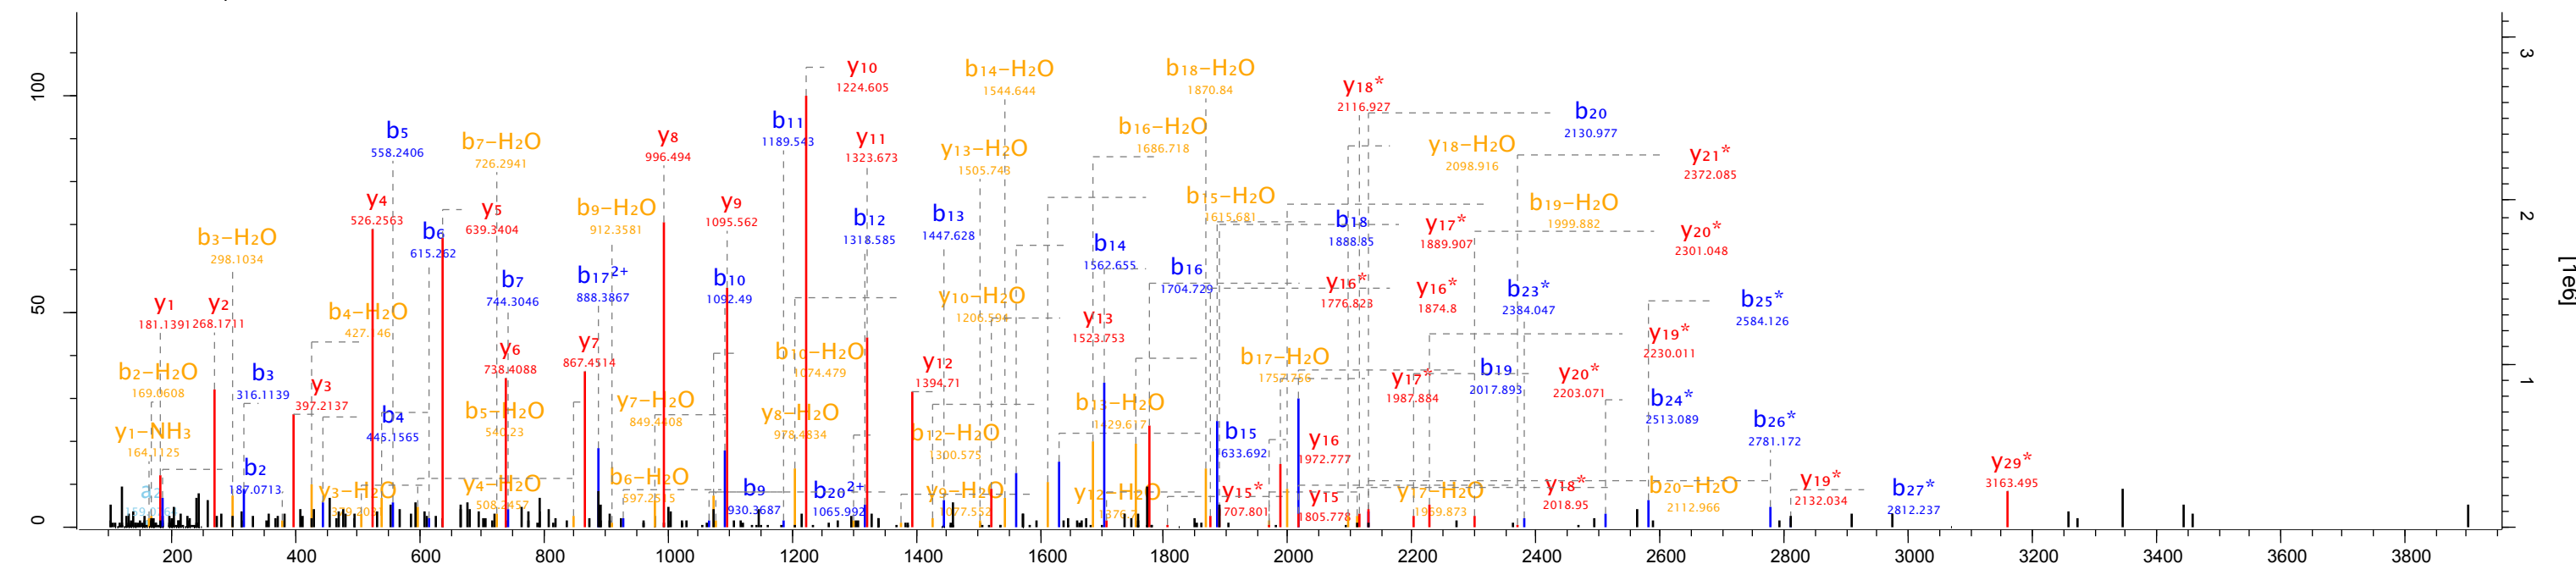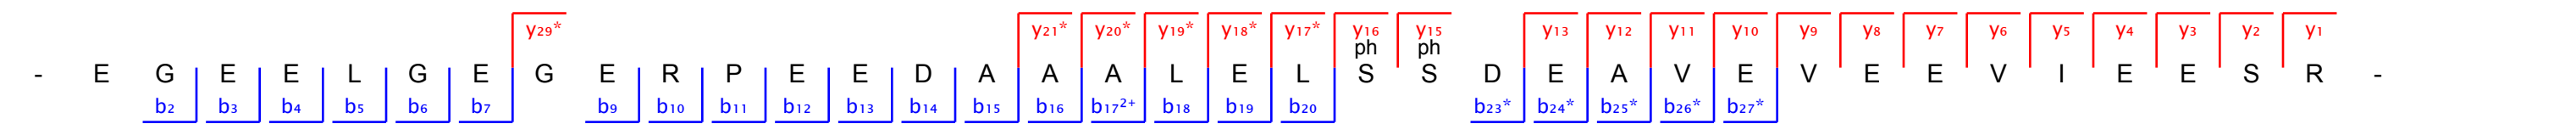

Raw file 20150812\_A375SR\_Phospho\_BR1\_02 Scan 28485 Method FTMS; HCD Score 203.11 m/z 1134.51 Gene names FOSL1

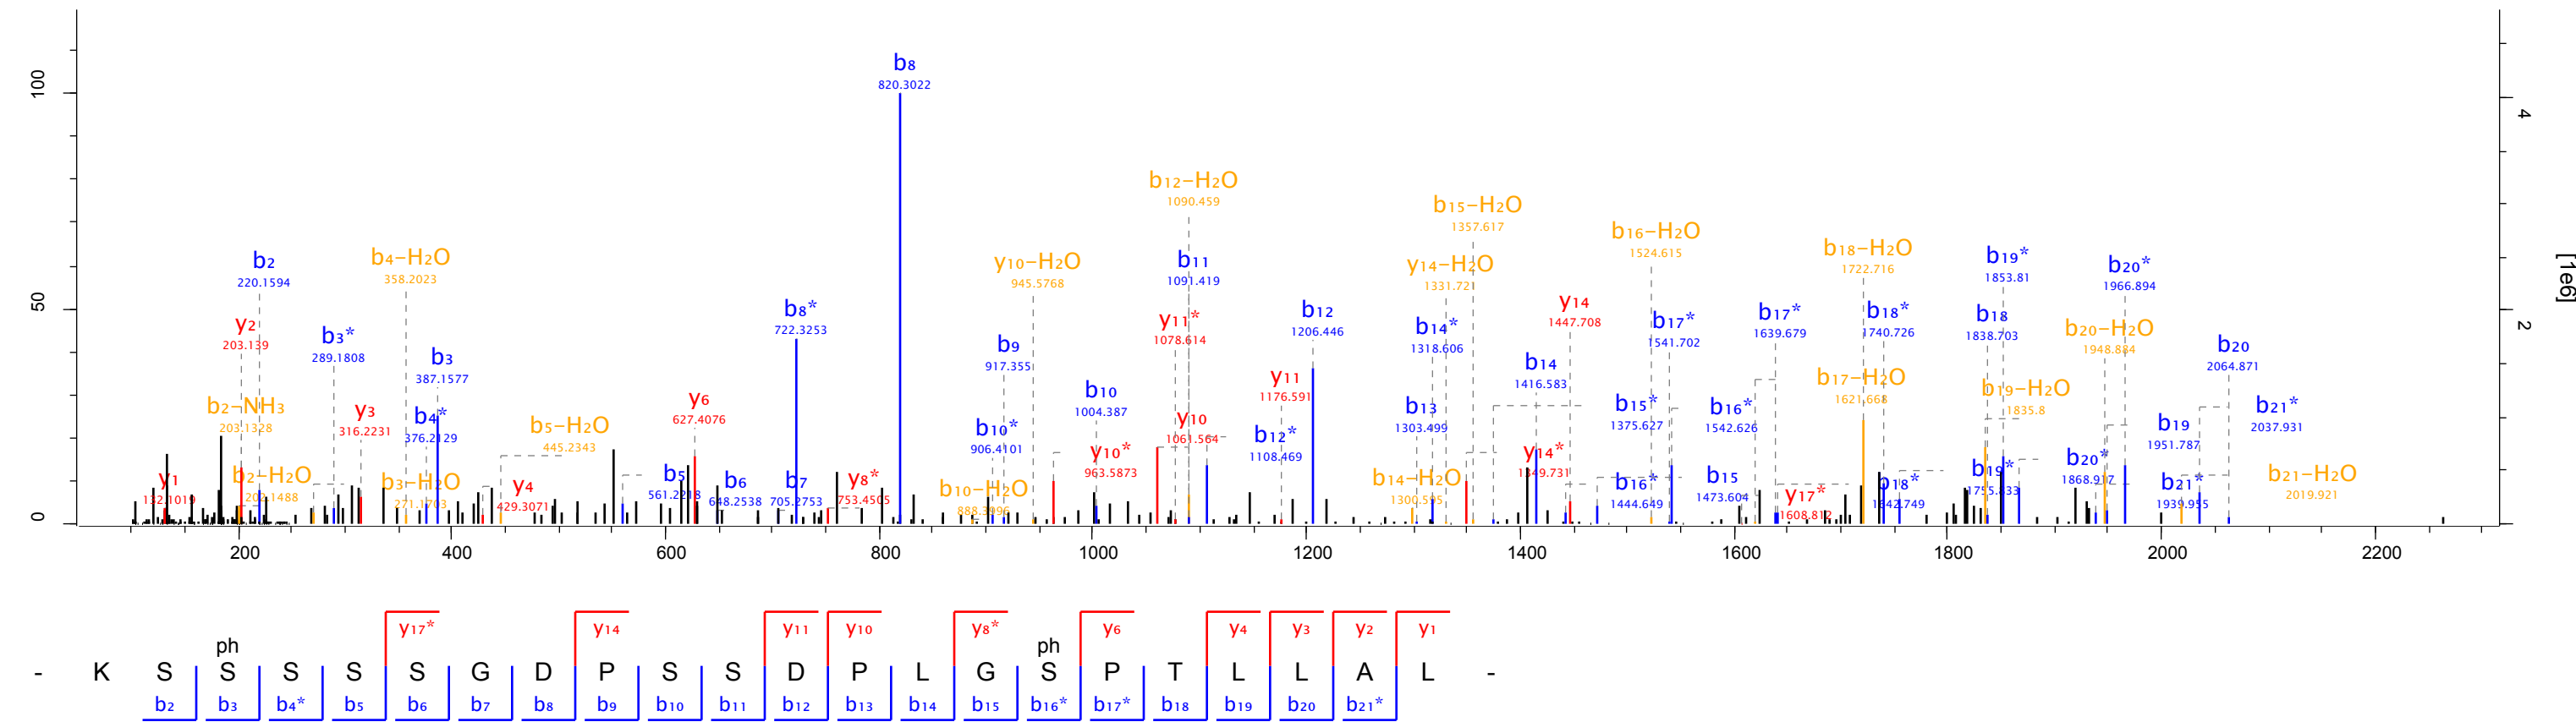

Raw file: 20150812\_A375SR\_Phospho\_BR1\_02  
 Scan: 3075 Method: FTMS; HCD Score: 84.27 m/z: 702.8 Gene names: SRRM2

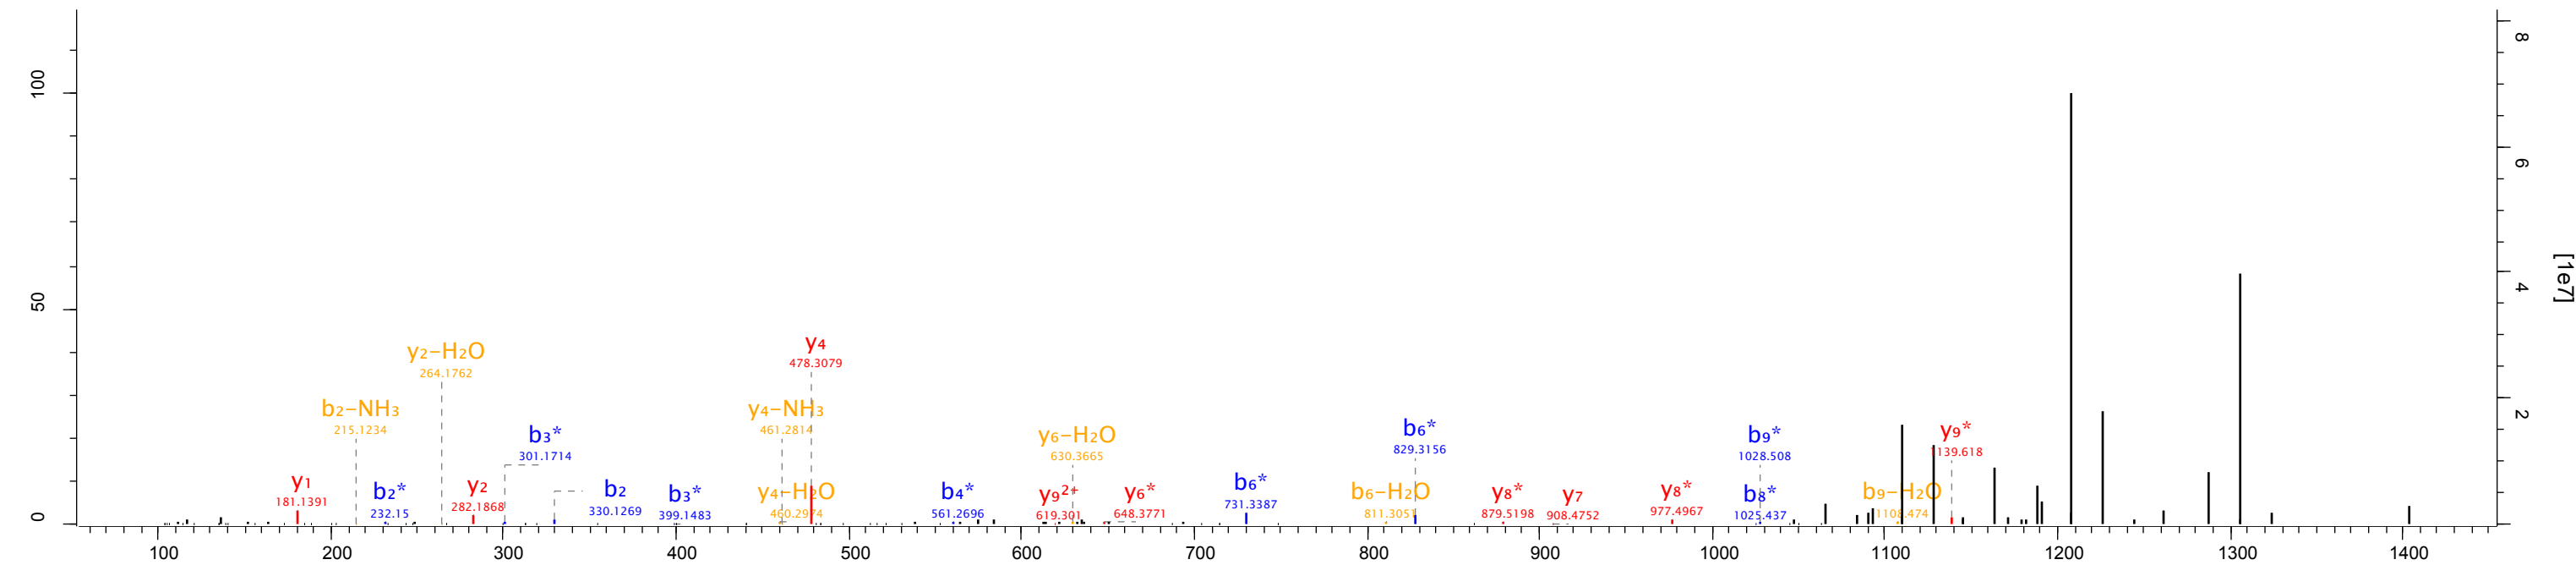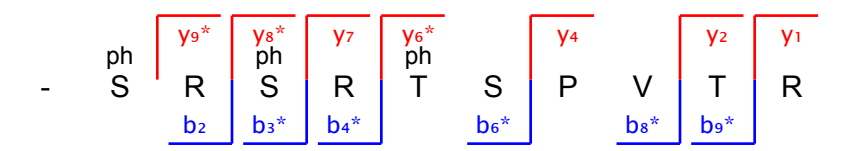

Raw file 20150812\_A375SR\_Phospho\_BR1\_02 Scan 3565 Method FTMS; HCD Score 51.43 m/z 812.79 Gene names NUP133

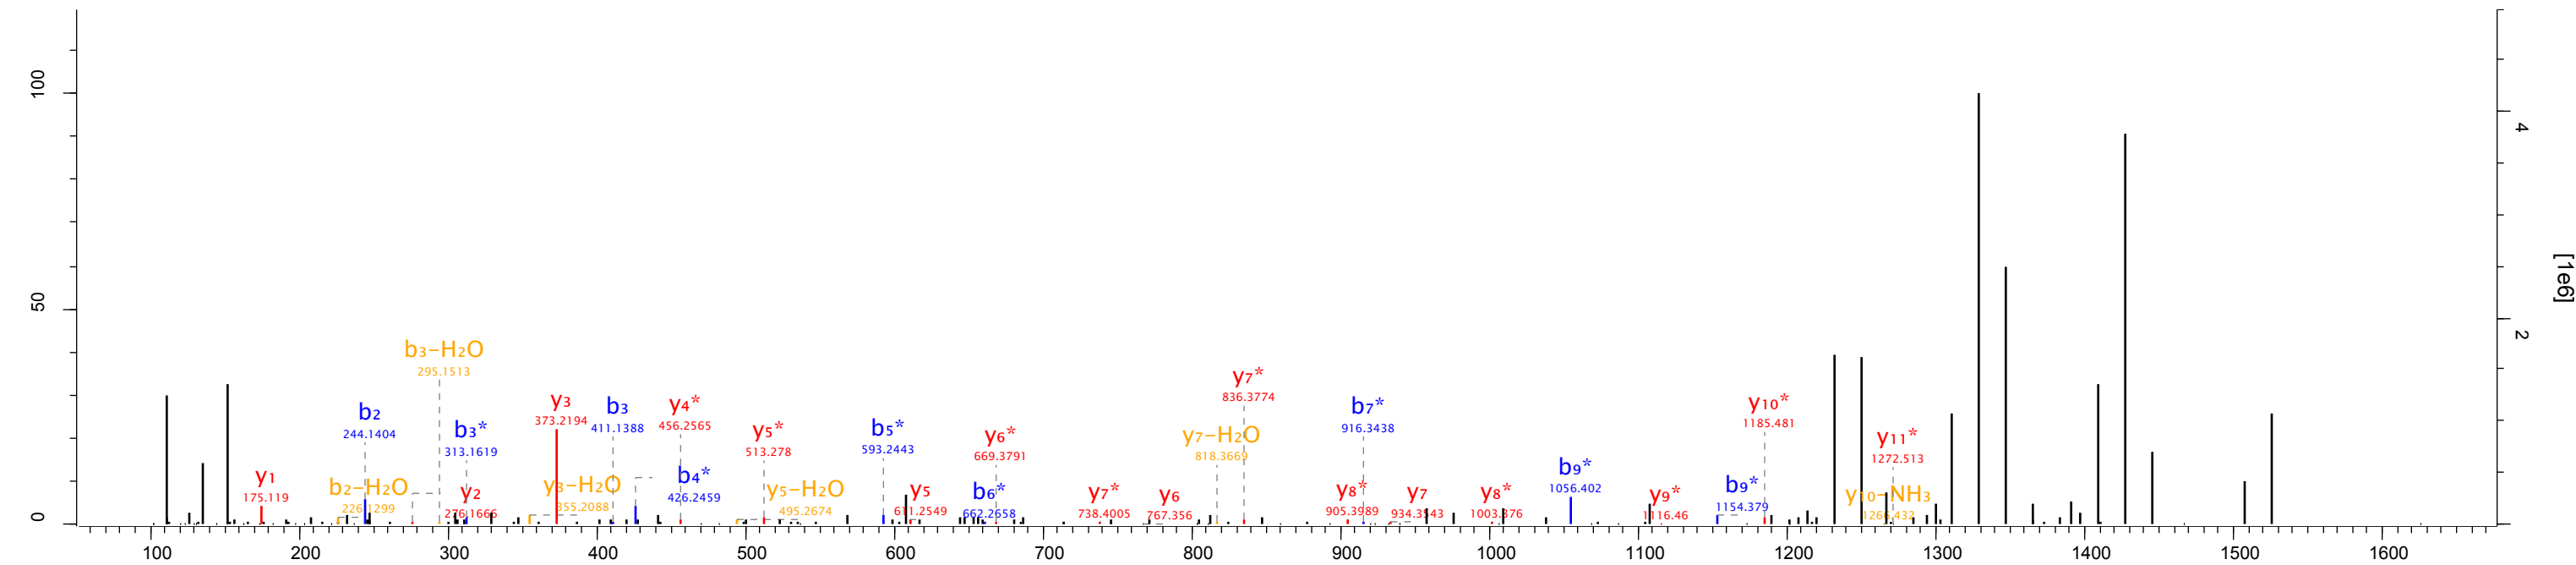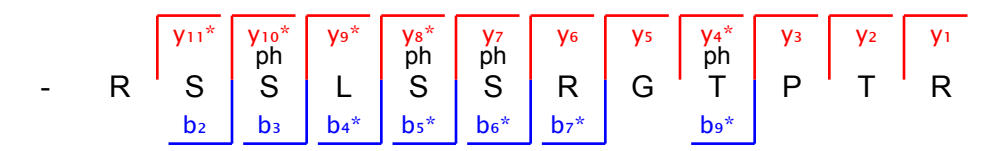

Raw file: 20150812\_A375SR\_Phospho\_BR1\_02  
 Scan: 3575 Method: FTMS; HCD Score: 100.15 m/z: 1116.42 Gene names: SRRM2

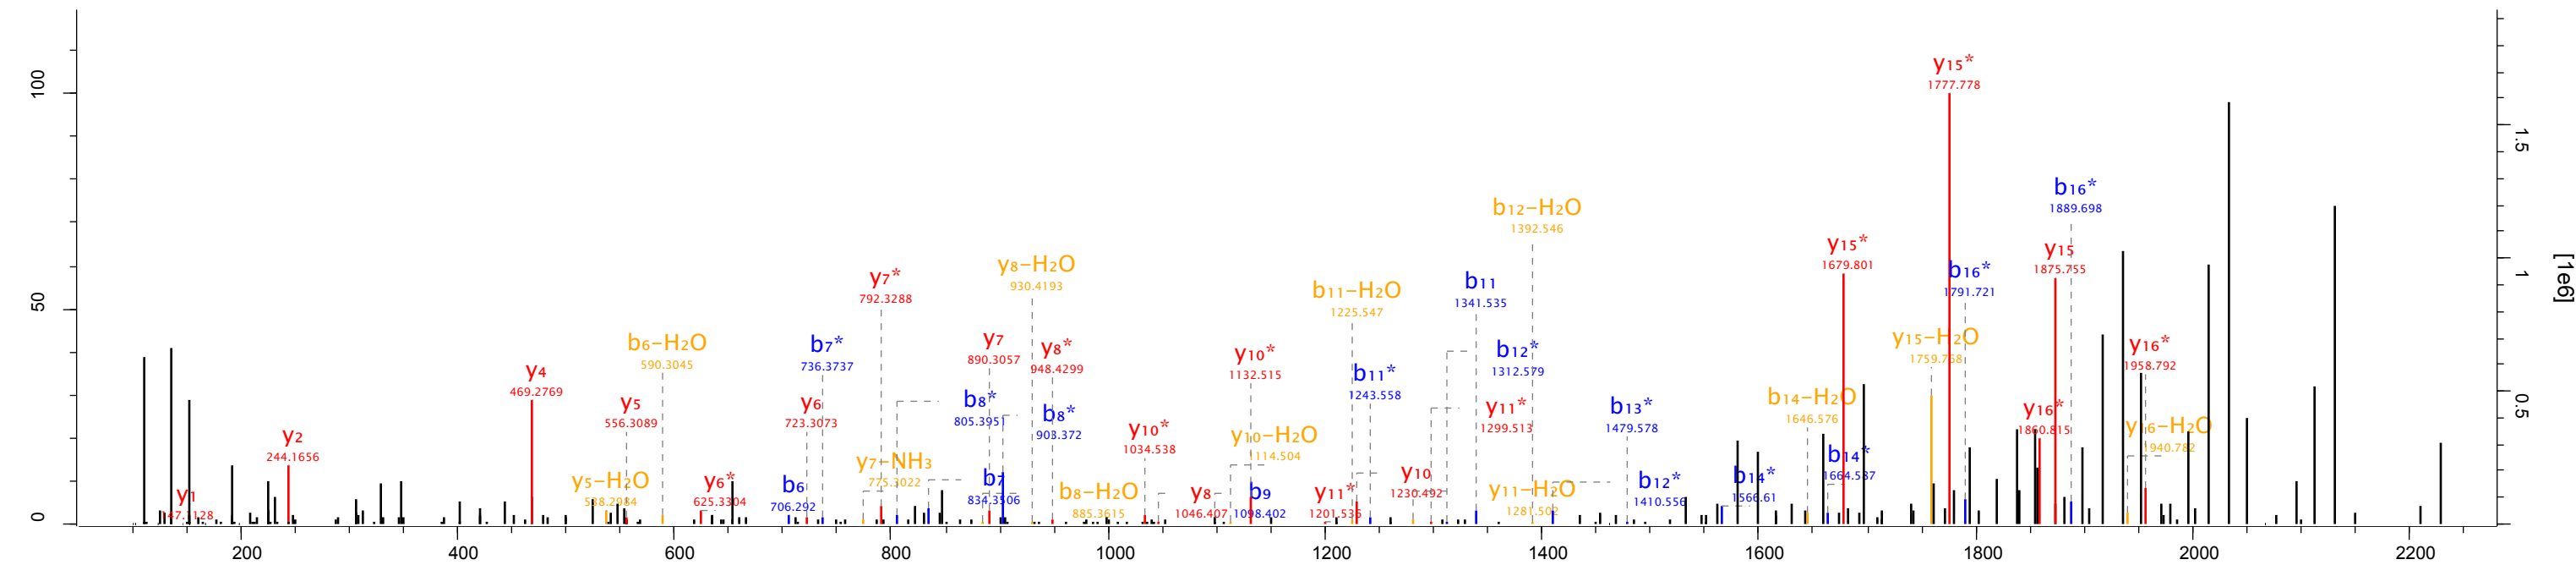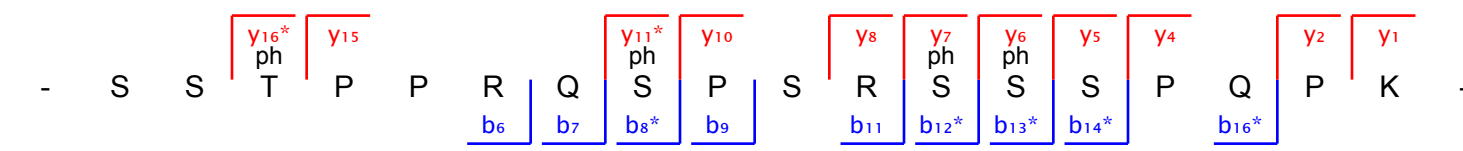

Raw file: 20150812\_A375SR\_Phospho\_BR1\_02  
 Scan: 3935 Method: FTMS; HCD Score: 88.28 m/z: 712.76 Gene names: SRRM2

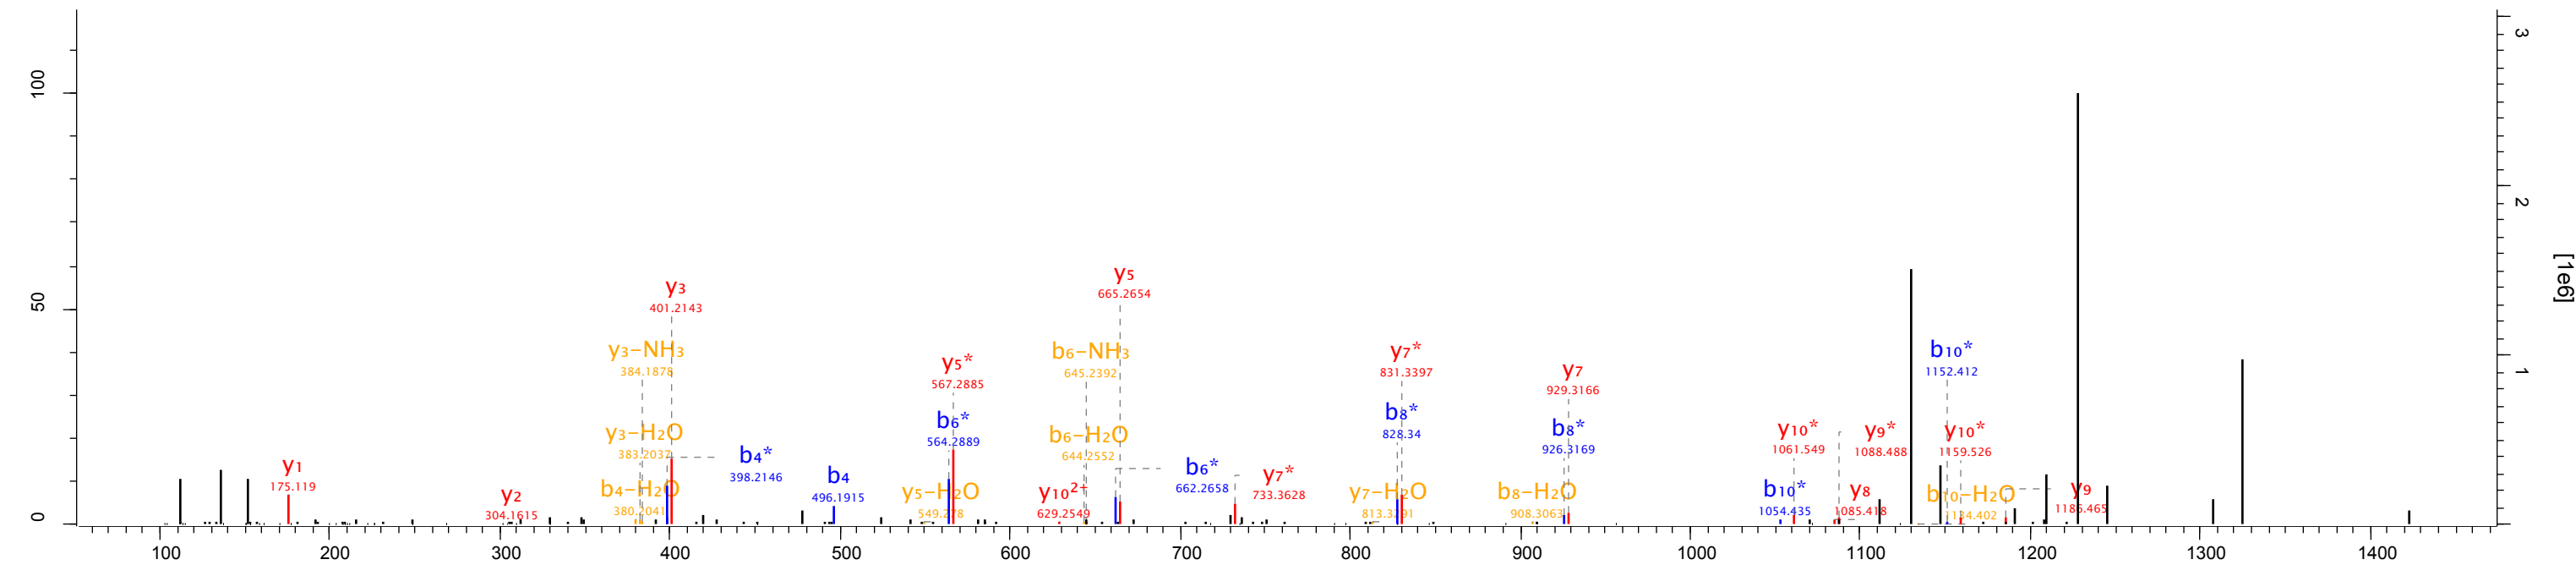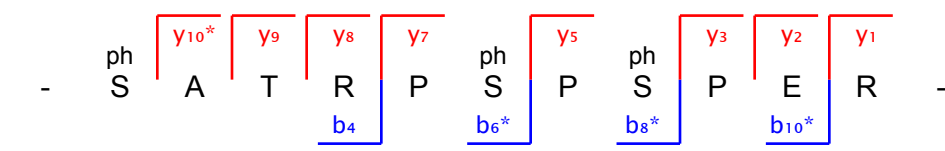

Raw file 20150812\_A375SR\_Phospho\_BR1\_02 Scan 3995 Method FTMS; HCD Score 122.68 m/z 879.01 Gene names RBBP6

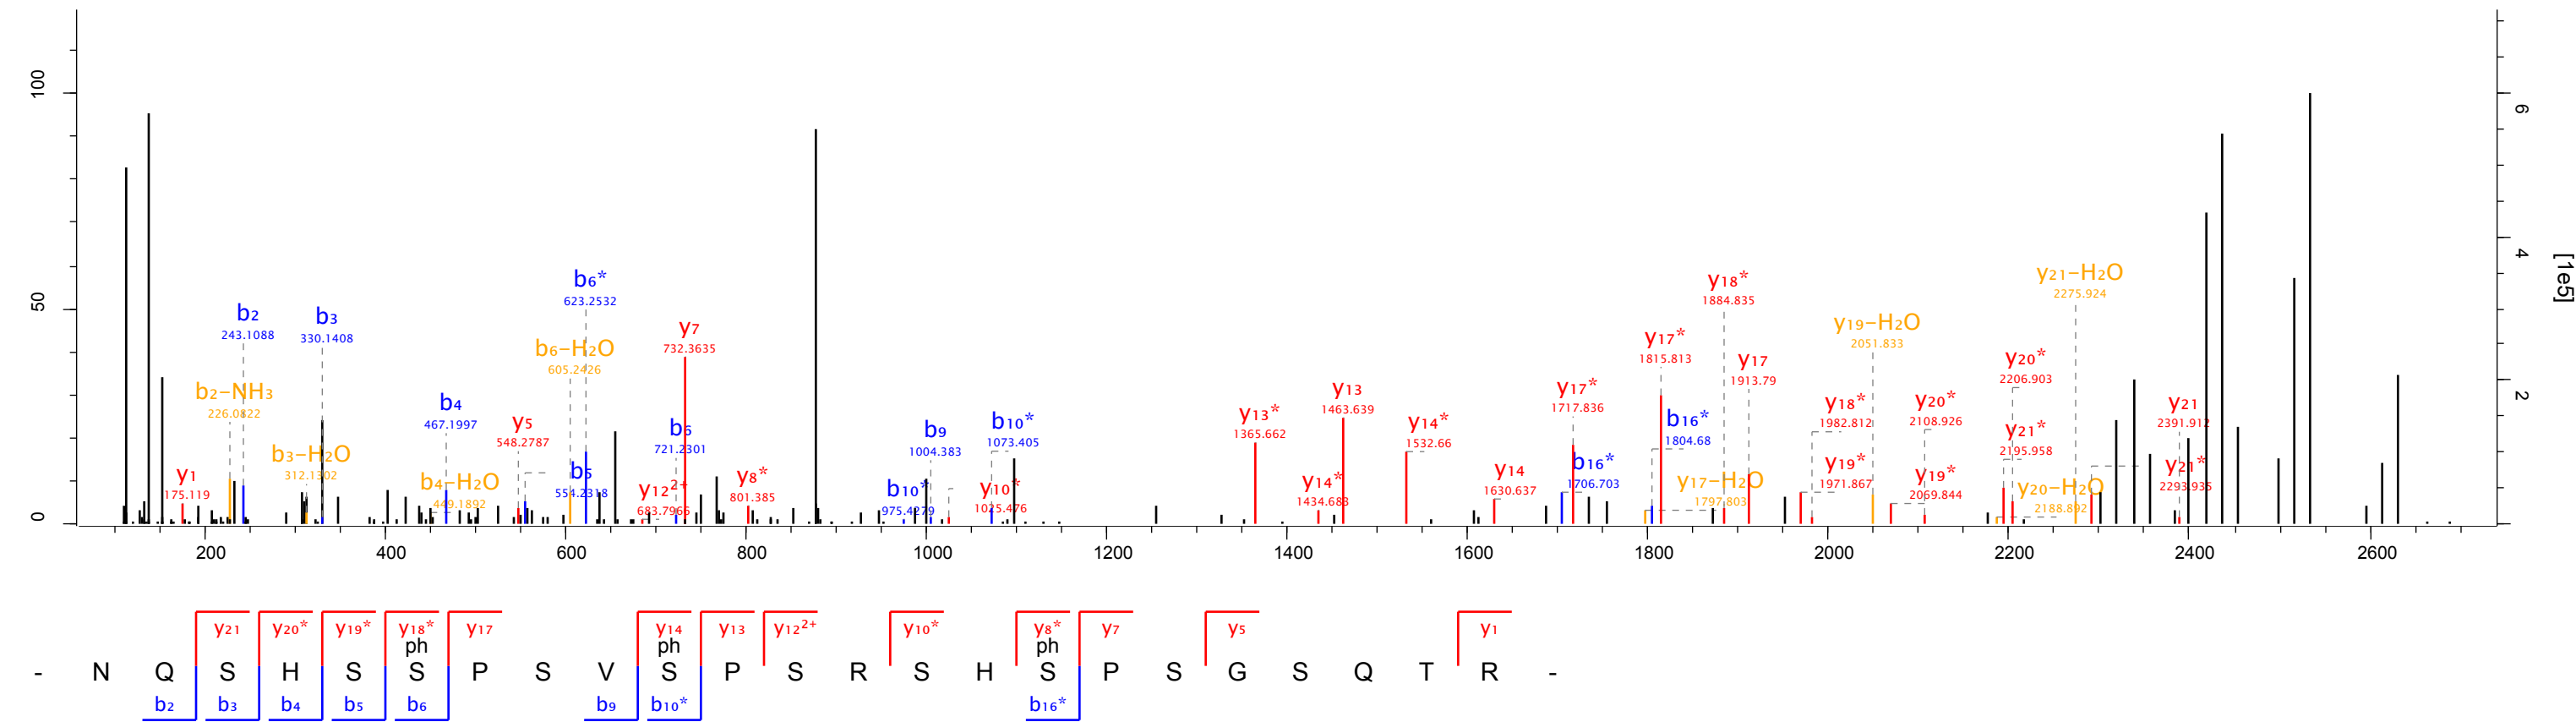



Raw file: 20150812\_A375SR\_Phospho\_BR1\_02  
 Scan: 4085 Method: FTMS; HCD Score: 202.34 m/z: 927.82 Gene names: PRPF40A

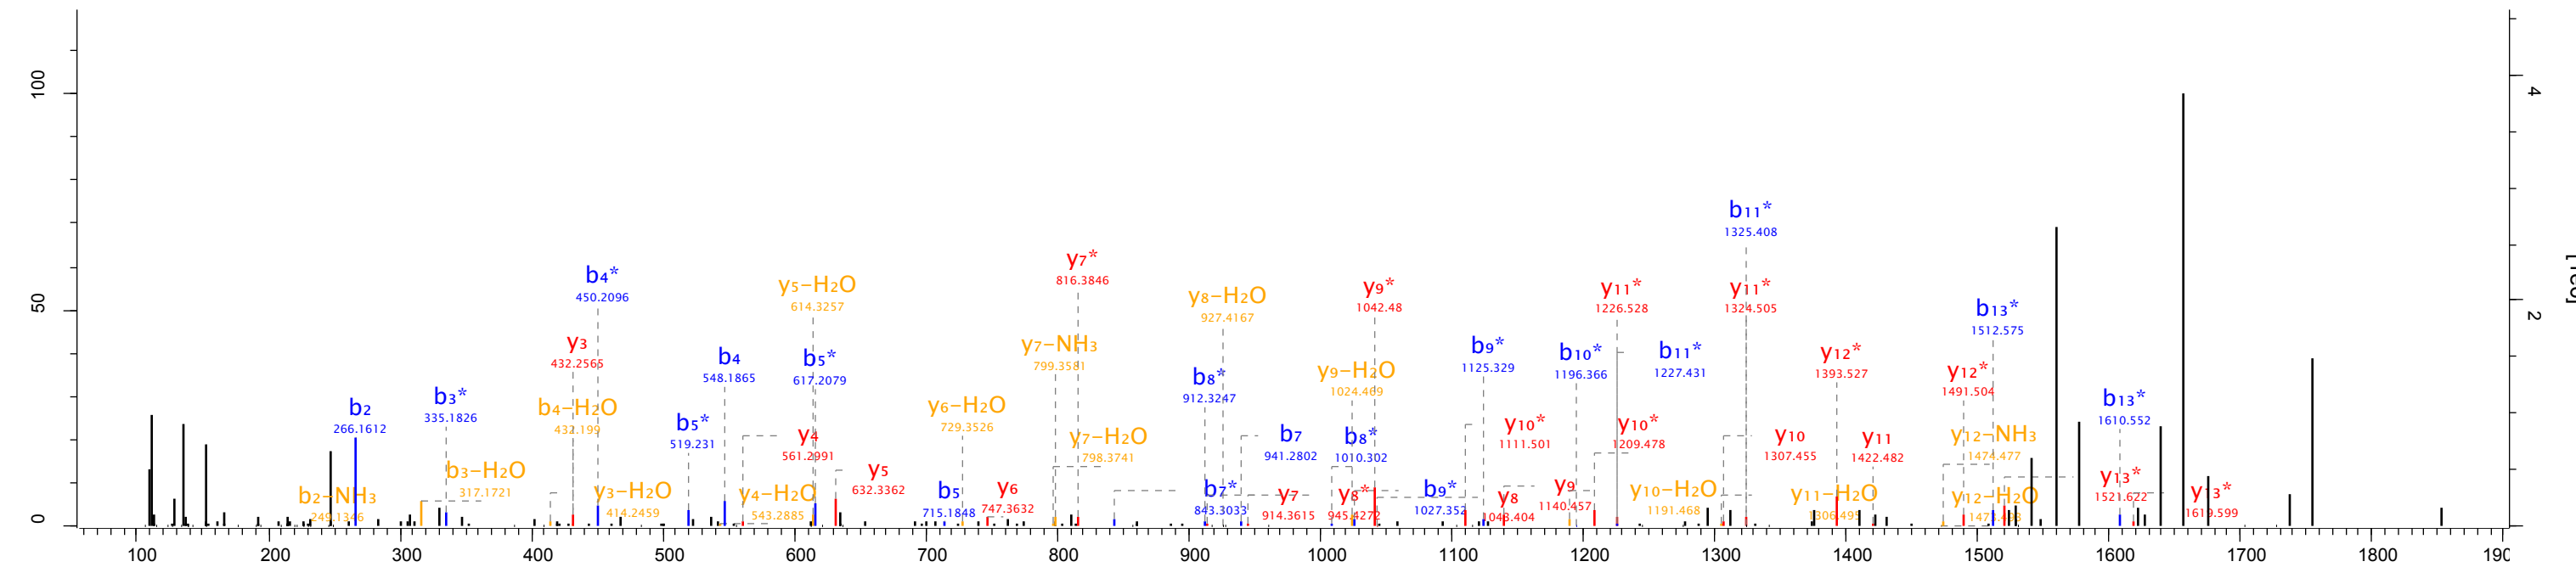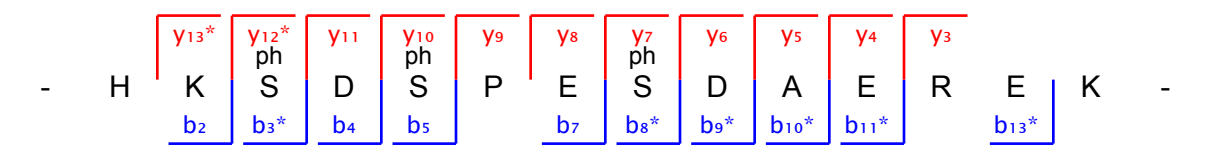

Raw file 20150812\_A375SR\_Phospho\_BR1\_02 Scan 4705 Method FTMS; HCD Score 171.94 m/z 1080.4 Gene names SGTA

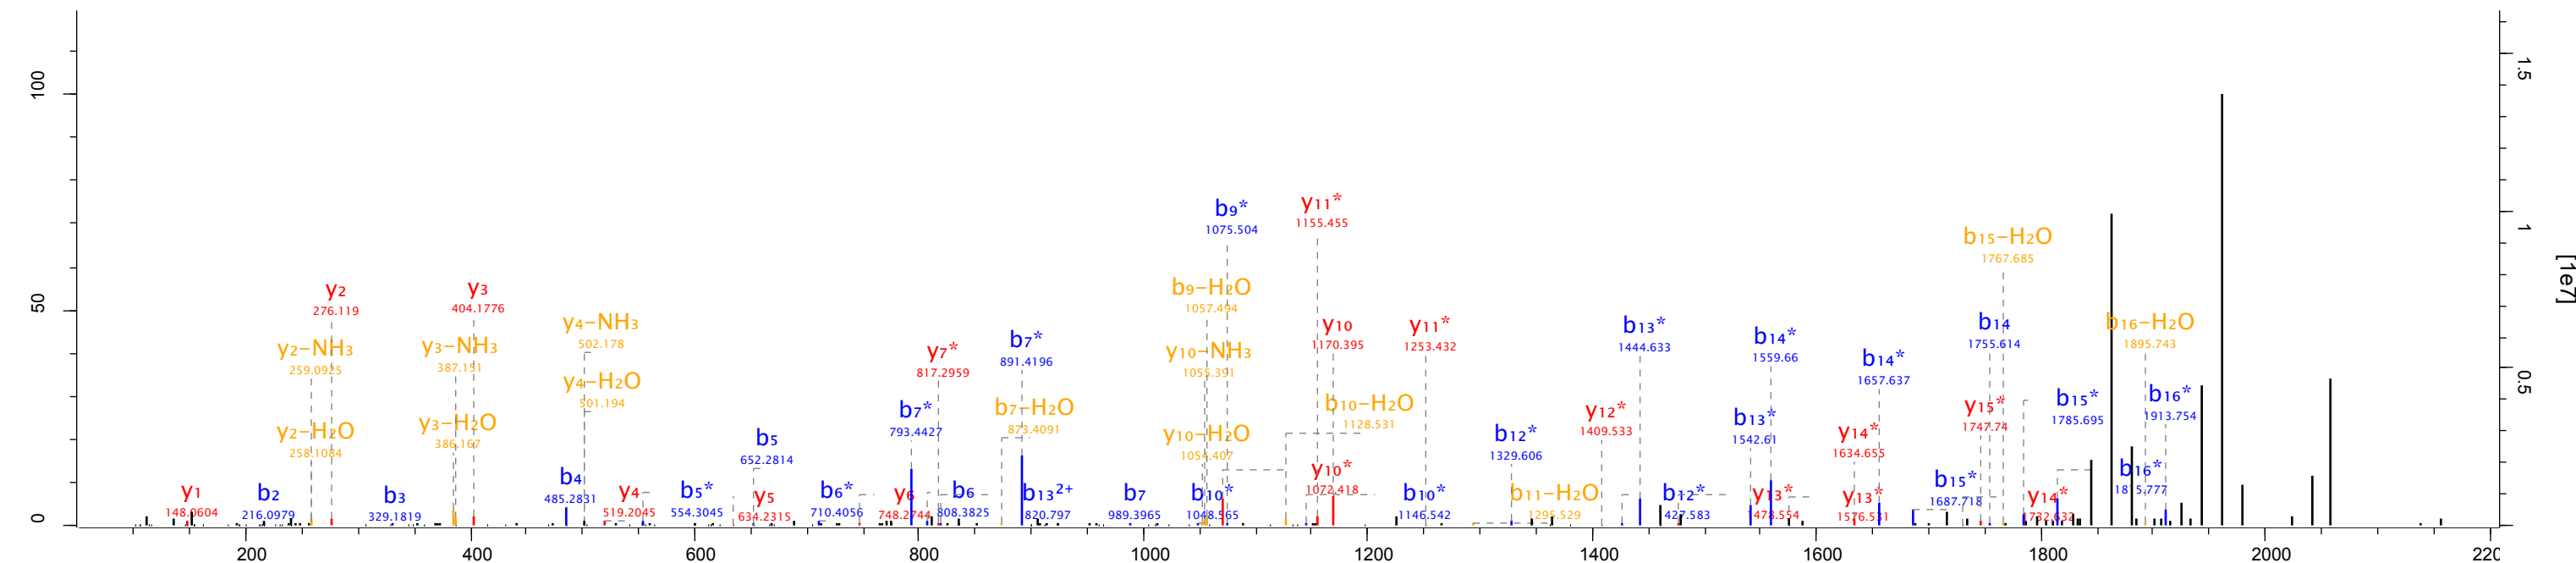

- S Q I R I R P S A S N D D Q Q E -

Fragmentation mapping (b and y ions):

- b<sub>2</sub> (under Q)
- b<sub>3</sub> (under I)
- b<sub>4</sub> (under R)
- b<sub>5</sub> (under I)
- b<sub>6</sub> (under R)
- b<sub>7</sub> (under T)
- b<sub>9</sub>\* (under S)
- b<sub>10</sub>\* (under A)
- b<sub>12</sub>\* (under N)
- b<sub>13</sub>\* (under D)
- b<sub>14</sub> (under D)
- b<sub>15</sub>\* (under Q)
- b<sub>16</sub>\* (under Q)

Fragmentation mapping (y ions):

- y<sub>1</sub> (under E)
- y<sub>2</sub> (under Q)
- y<sub>3</sub> (under Q)
- y<sub>4</sub> (under D)
- y<sub>5</sub> (under D)
- y<sub>6</sub> (under N)
- y<sub>7</sub>\* (under S)
- y<sub>10</sub> (under N)
- y<sub>10</sub>\* (under N)
- y<sub>11</sub>\* (under D)
- y<sub>11</sub>\* (under D)
- y<sub>12</sub>\* (under Q)
- y<sub>13</sub>\* (under Q)
- y<sub>14</sub>\* (under Q)
- y<sub>14</sub>\* (under E)
- y<sub>15</sub>\* (under E)

Raw file: 20150812\_A375SR\_Phospho\_BR1\_02  
 Scan: 4845 Method: FTMS; HCD Score: 47.62 m/z: 620.25 Gene names: CDK12

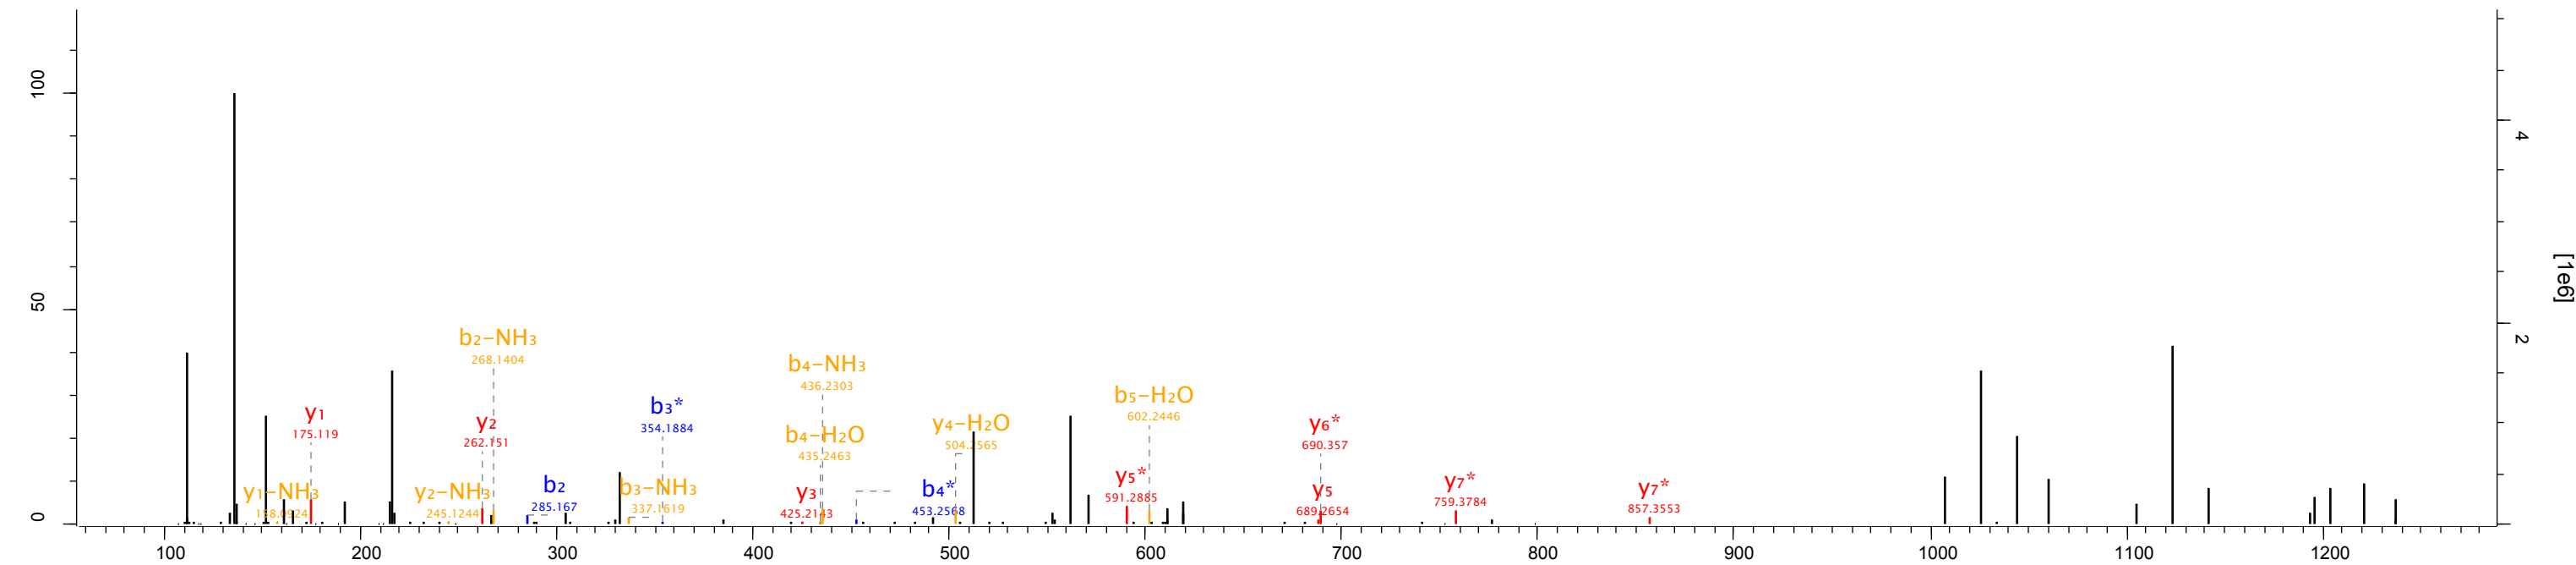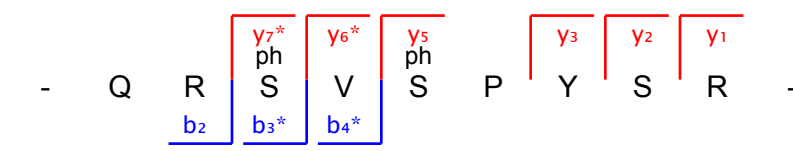

Raw file: 20150812\_A375SR\_Phospho\_BR1\_02  
 Scan: 5195 Method: FTMS; HCD Score: 130.46 m/z: 832.83 Gene names: SRSF5

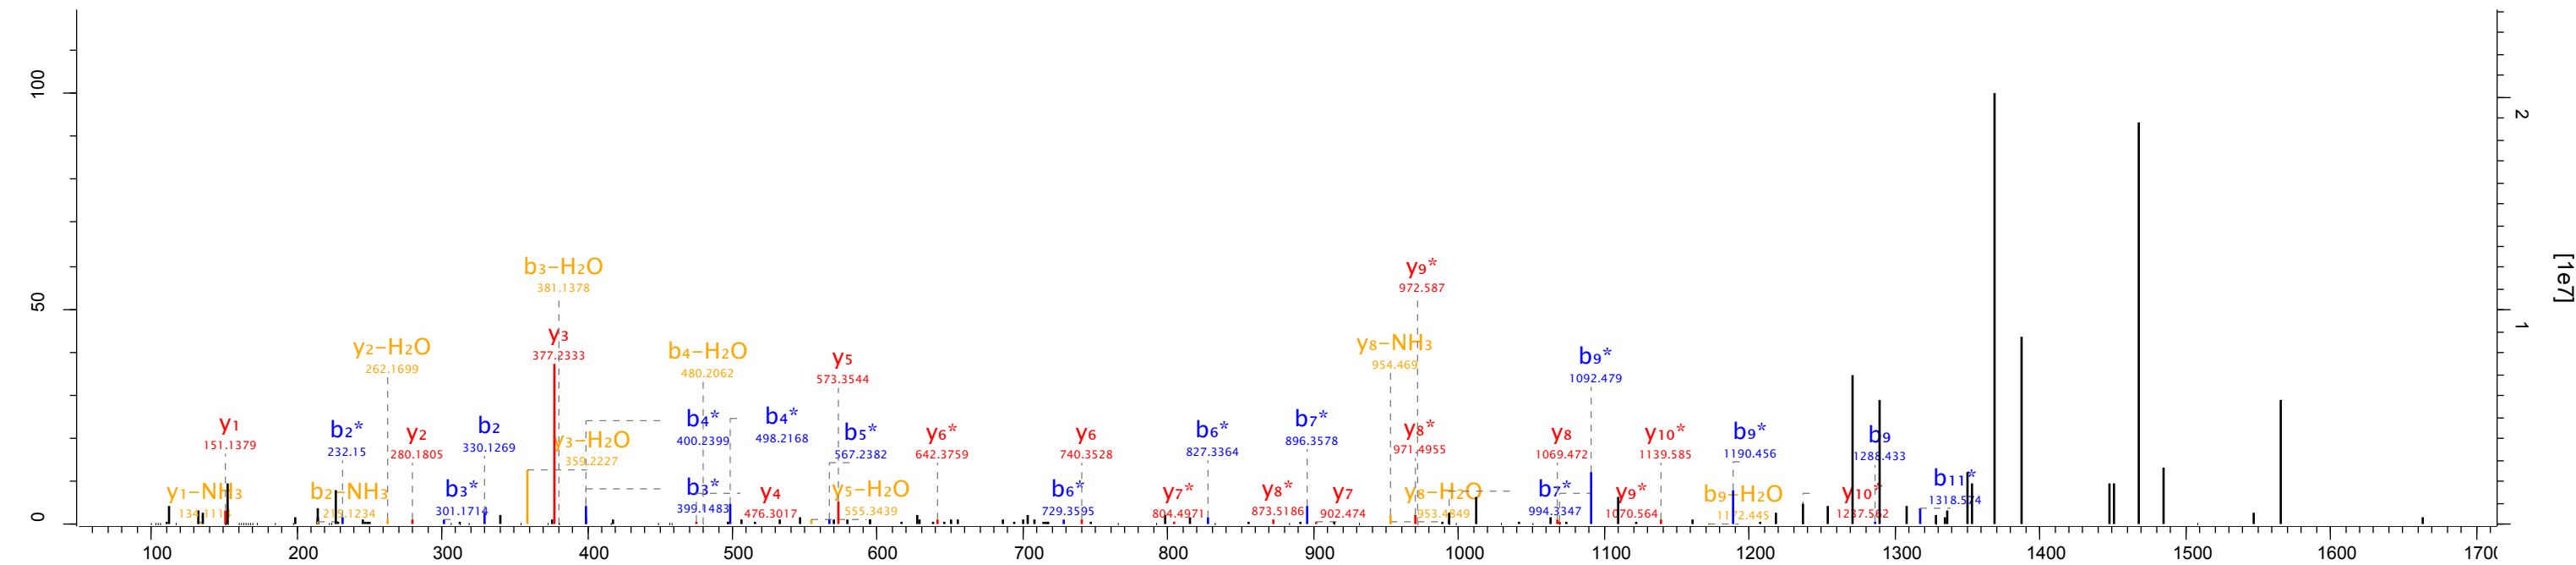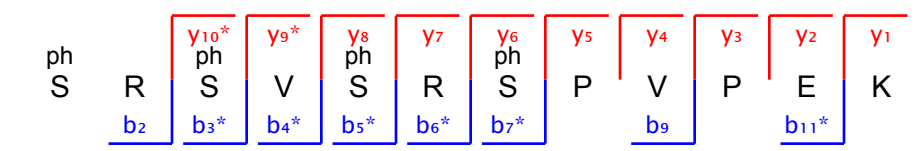

Raw file: 20150812\_A375SR\_Phospho\_BR1\_02  
 Scan: 5275 Method: FTMS; HCD Score: 74.14 m/z: 514.57 Gene names: SRRM1

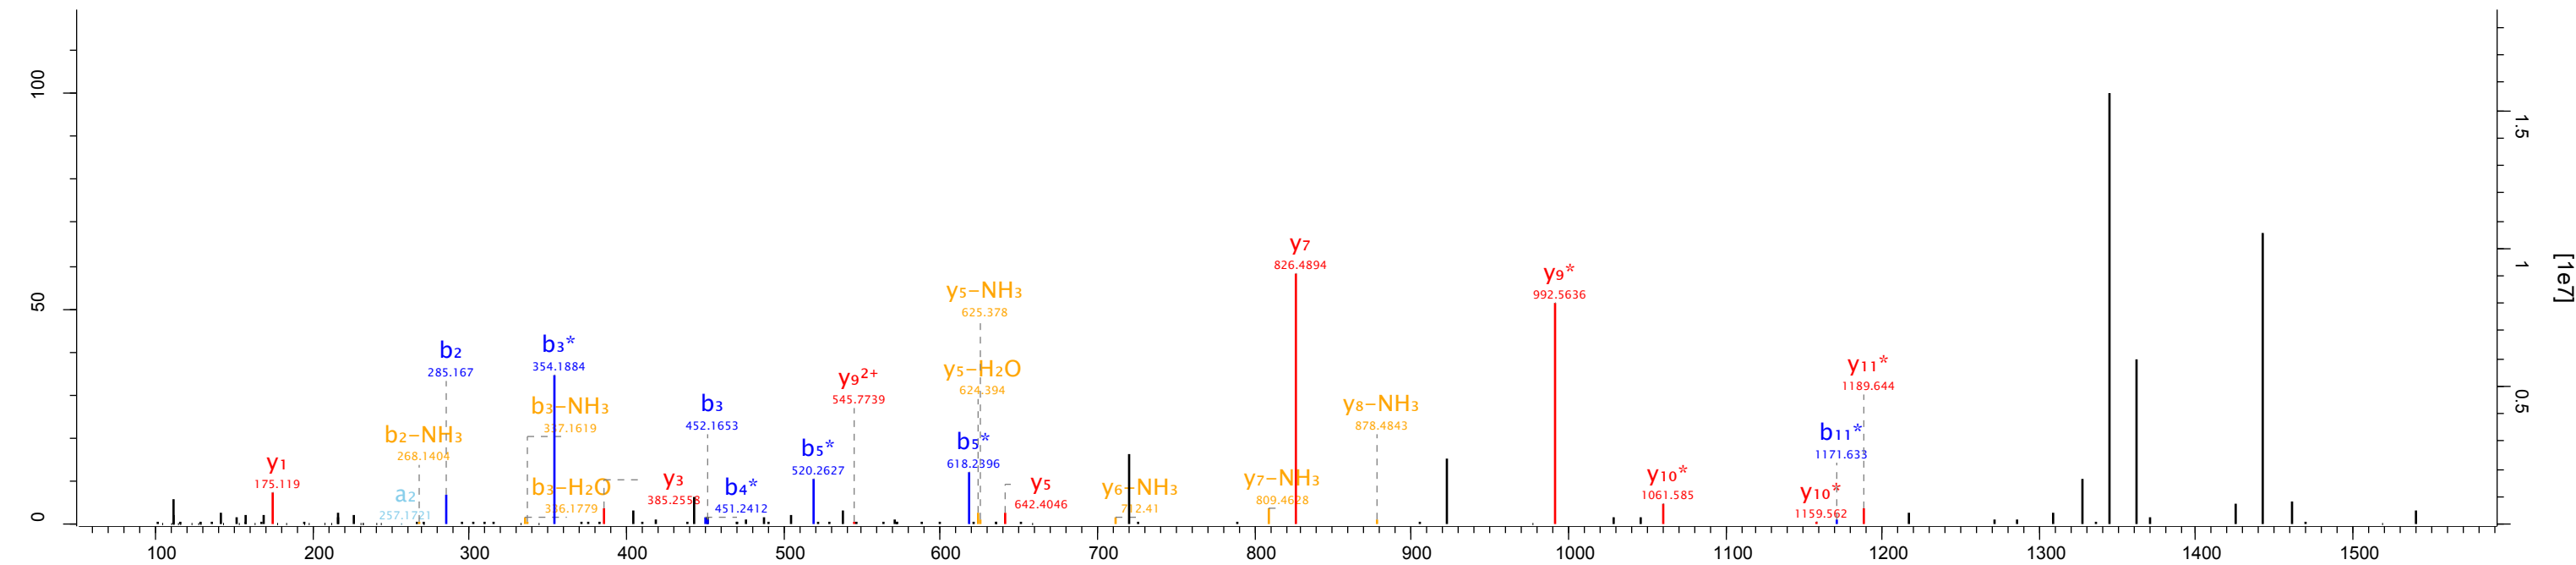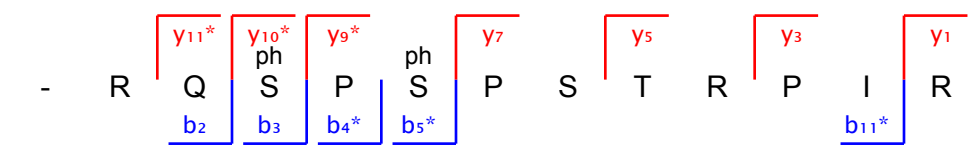

Raw file: 20150812\_A375SR\_Phospho\_BR1\_02  
 Scan: 5625 Method: FTMS; HCD Score: 108.73 m/z: 786.29 Gene names: MAGED2

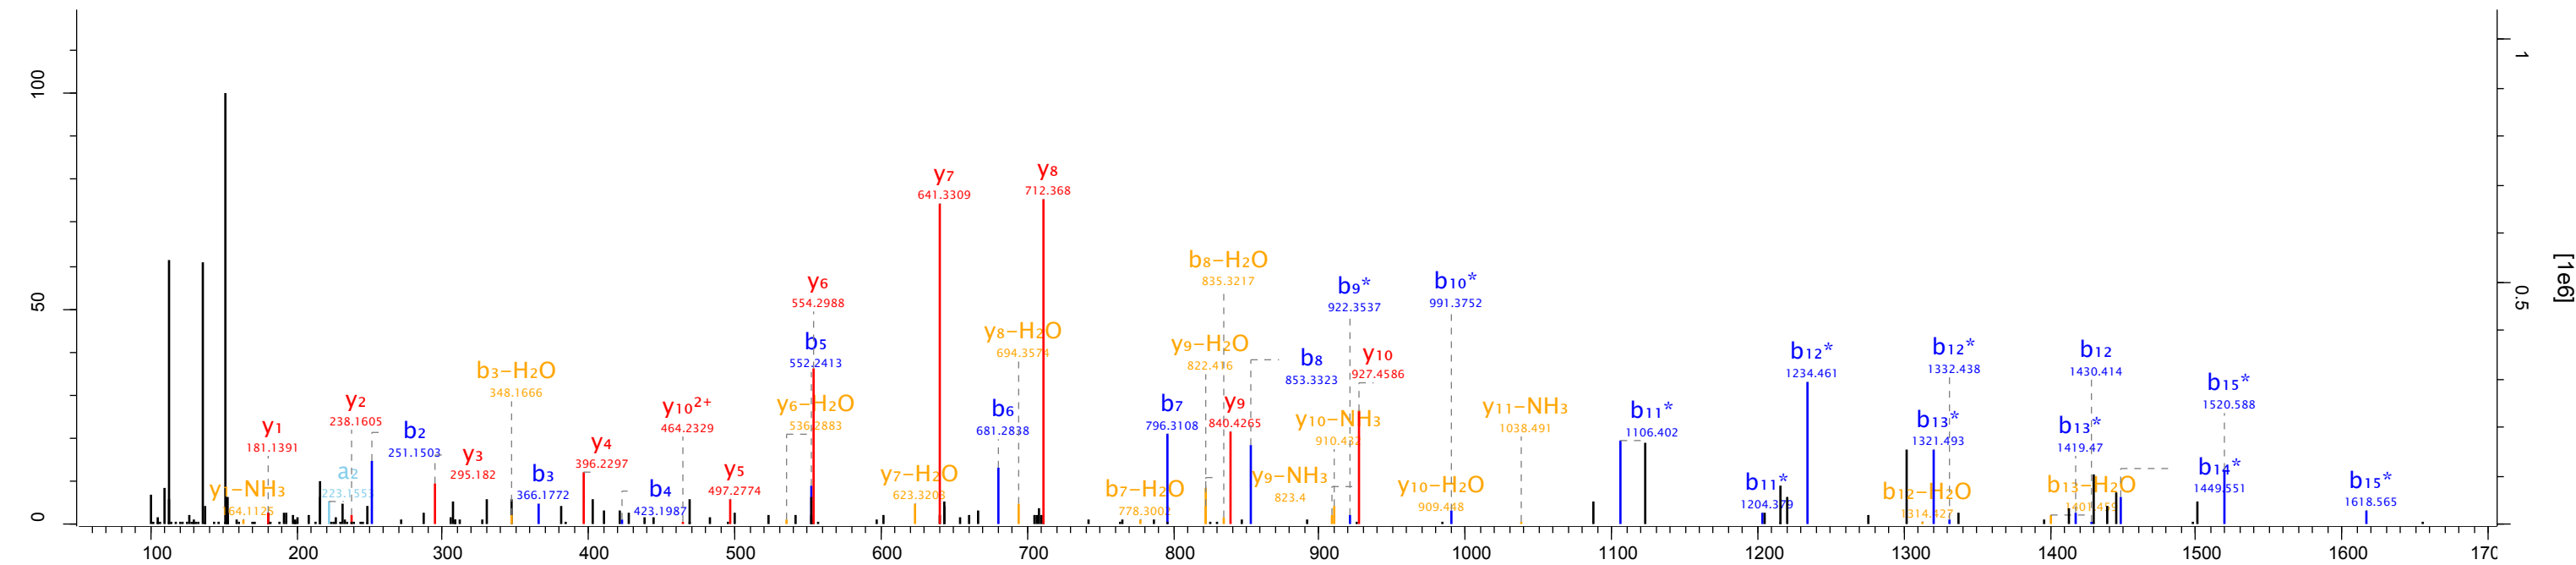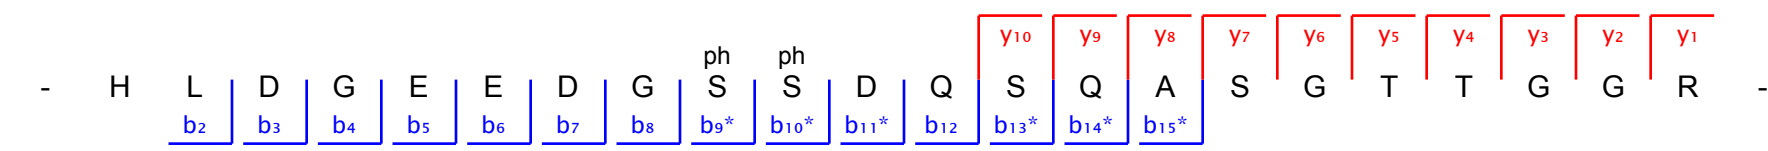

Raw file Scan Method Score m/z Gene names

20150812\_A375SR\_Phospho\_BR1\_02 5785 FTMS; HCD 103.9 822.85 HMBS

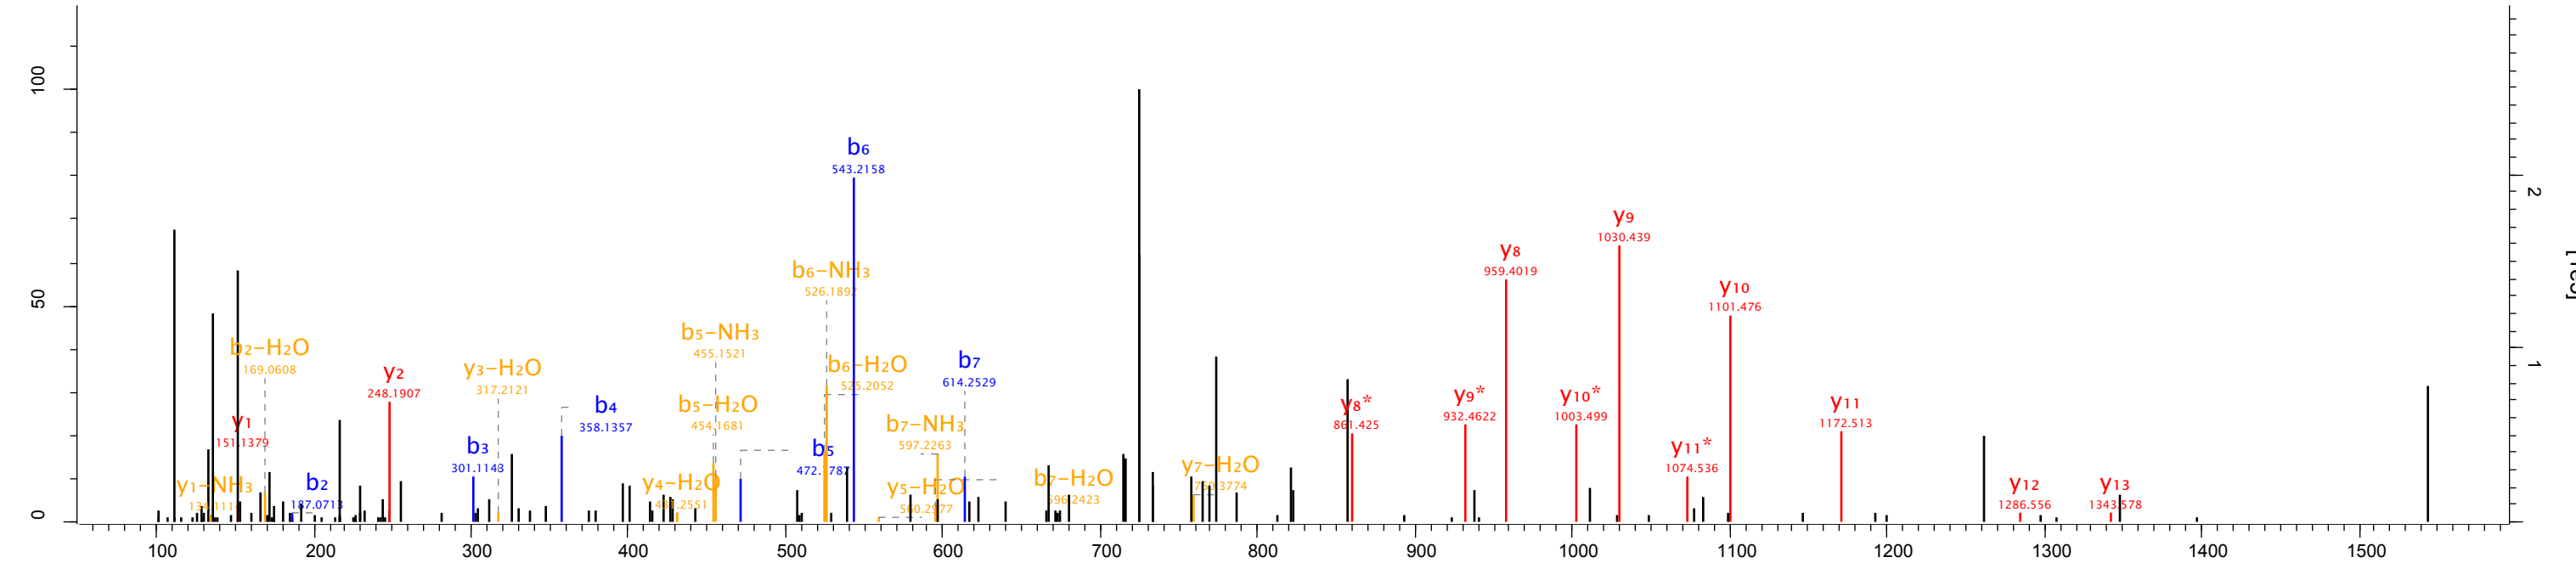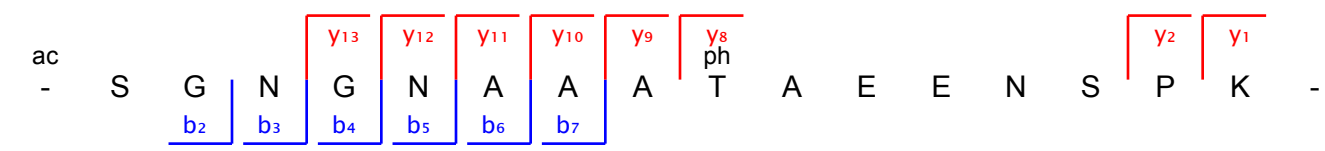

Raw file: 20150812\_A375SR\_Phospho\_BR1\_02  
 Scan: 5925 Method: FTMS; HCD Score: 95.54 m/z: 680.24 Gene names: SRRM2

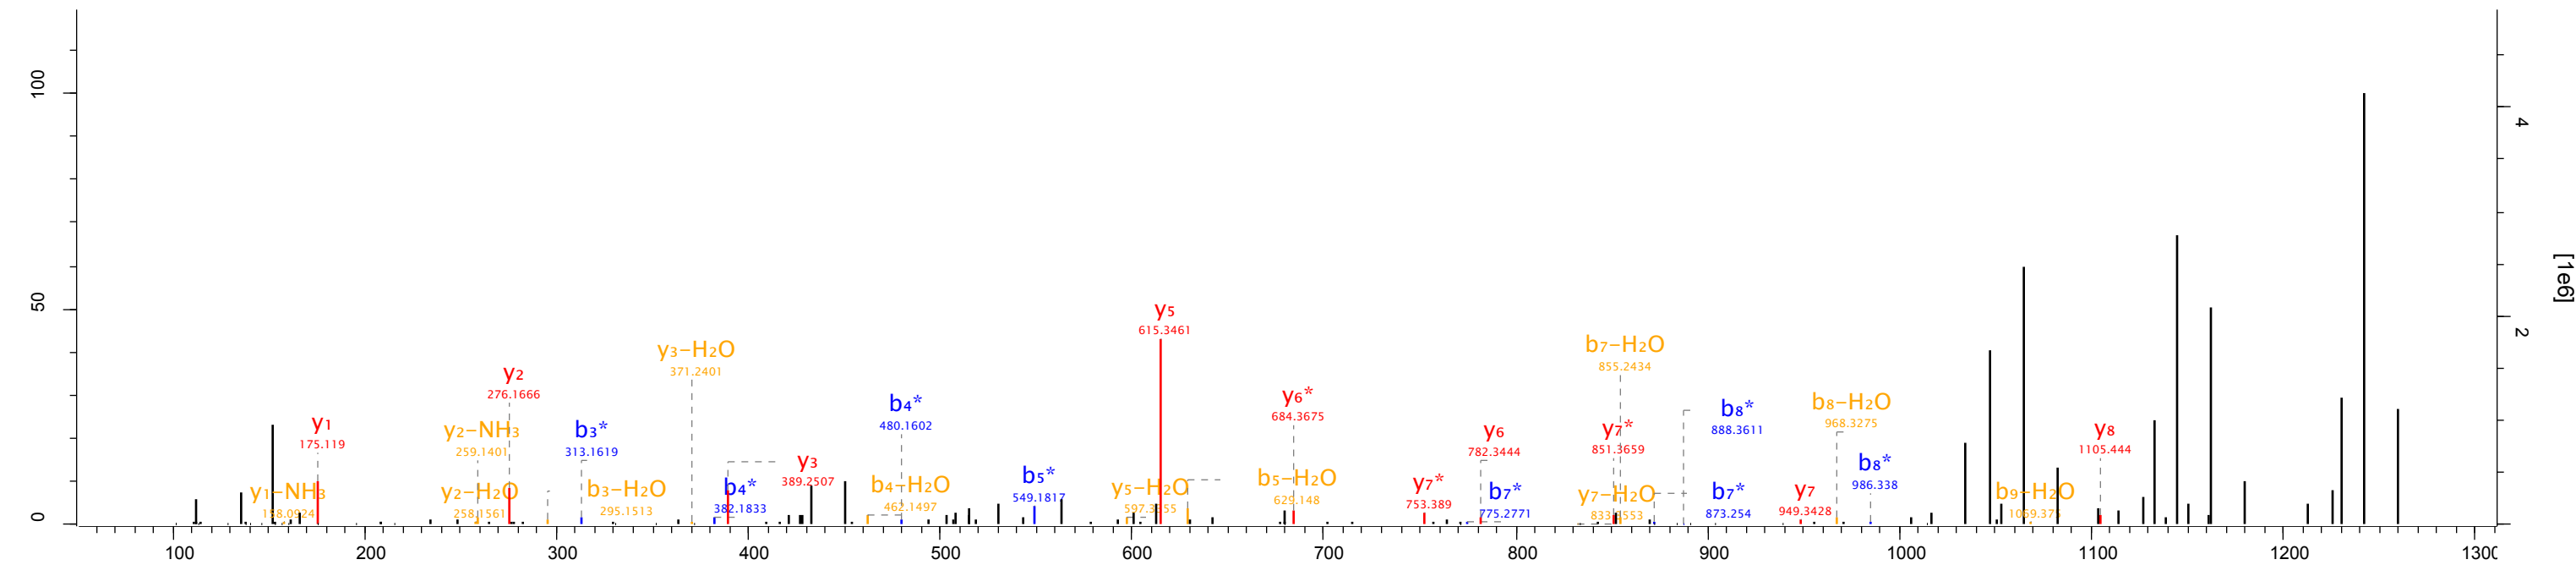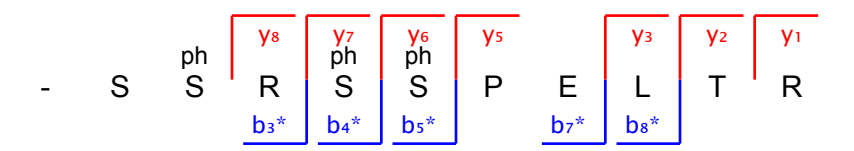



Raw file: 20150812\_A375SR\_Phospho\_BR1\_02  
 Scan: 6105 Method: FTMS; HCD Score: 142.53 m/z: 832.82 Gene names: MARCKS

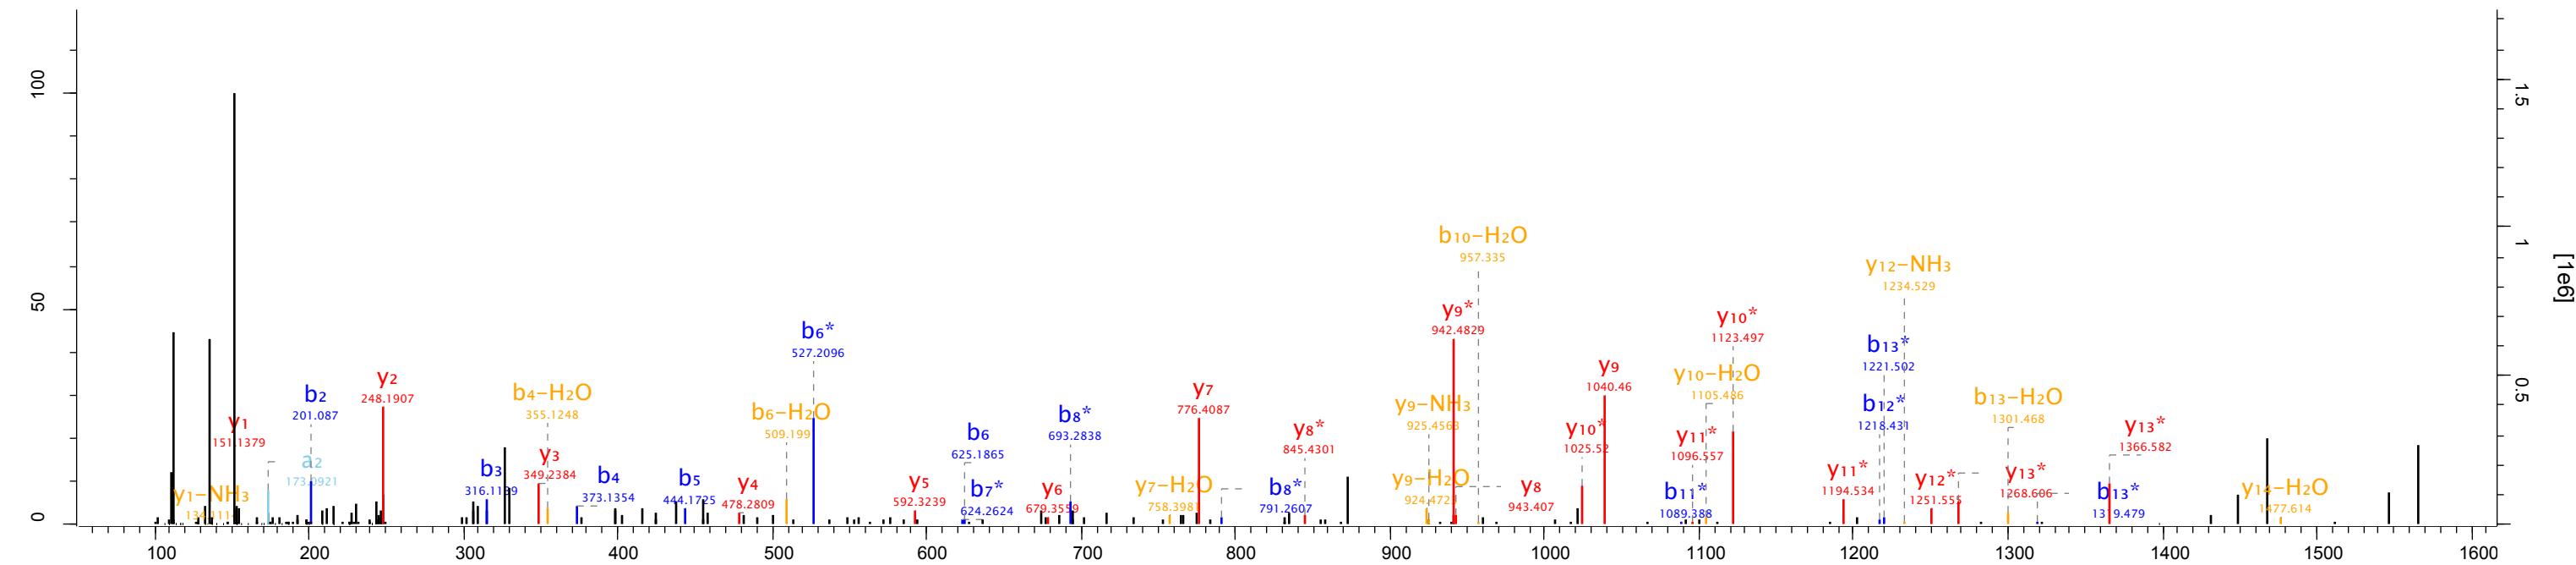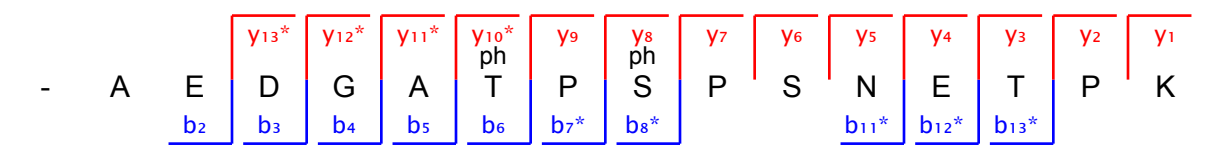

Raw file Scan Method Score m/z Gene names  
 20150812\_A375SR\_Phospho\_BR1\_02 6125 FTMS; HCD 121.48 879.32 SRRM2

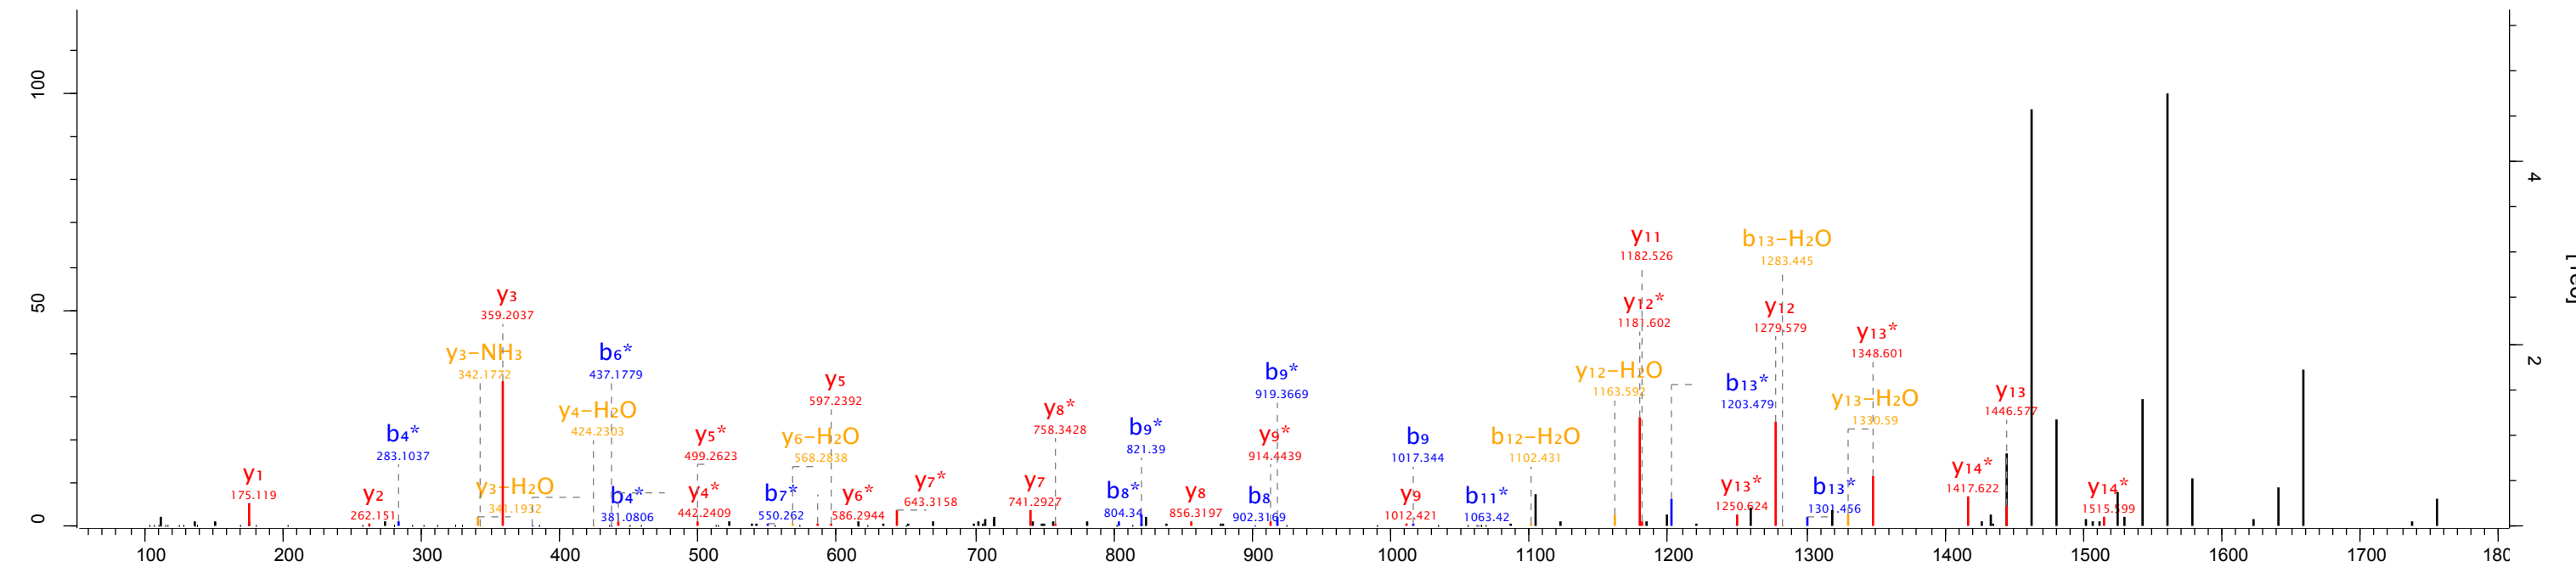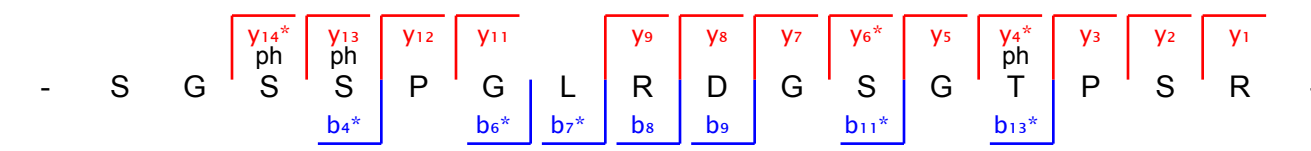

Raw file  
 20150812\_A375SR\_Phospho\_BR1\_02  
 Scan 6285 Method FTMS; HCD Score 117.77 m/z 789.31 Gene names ZNF687

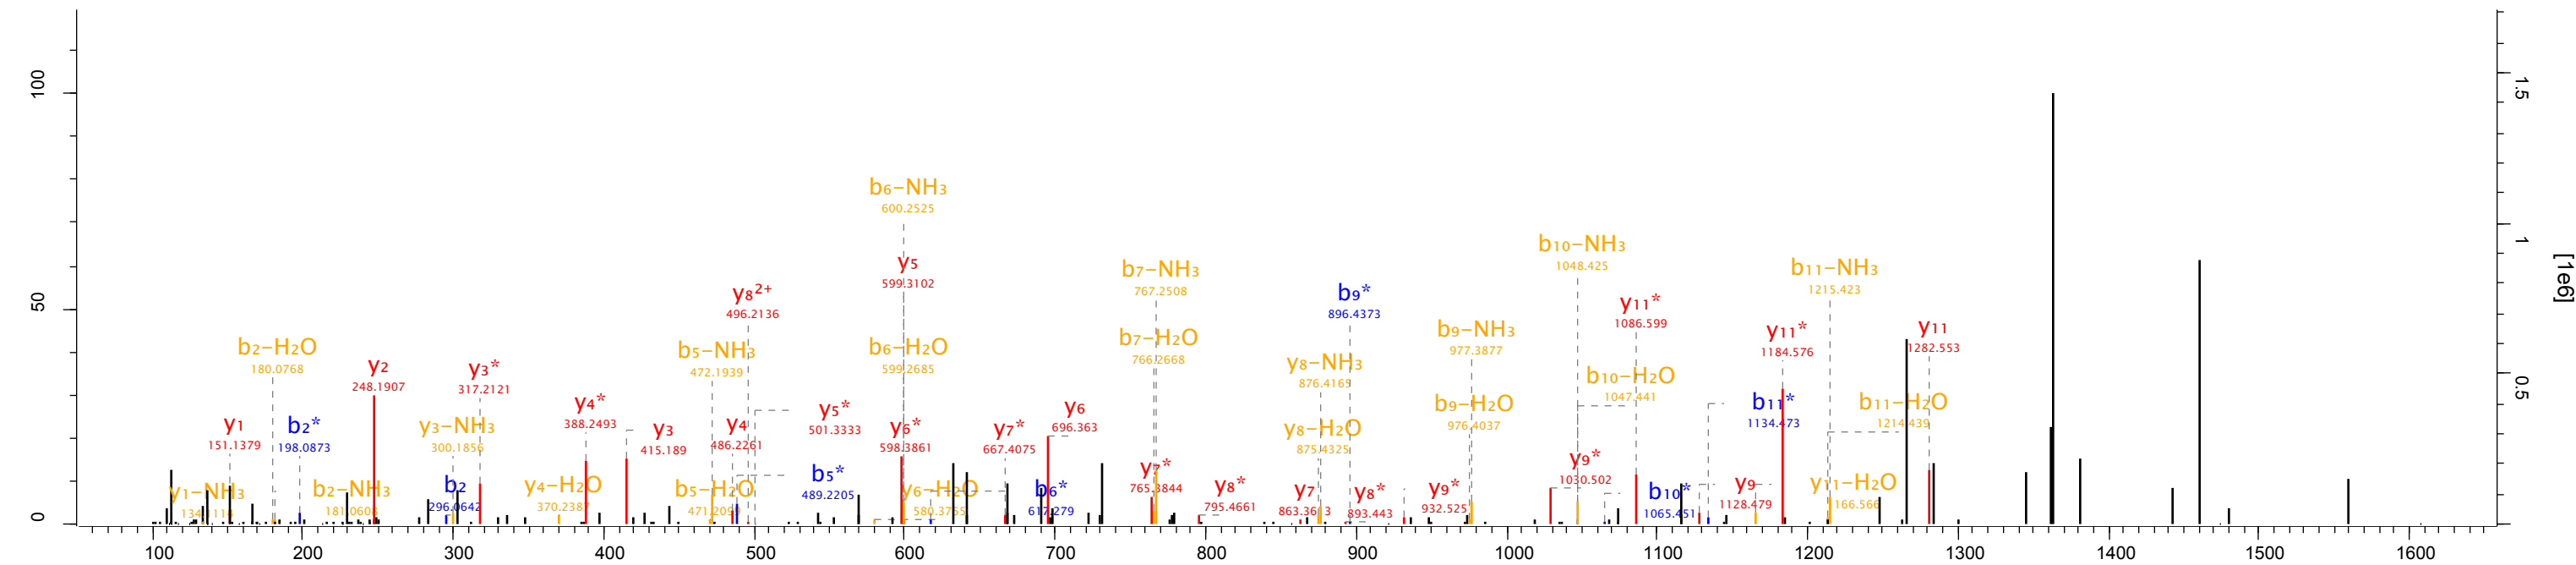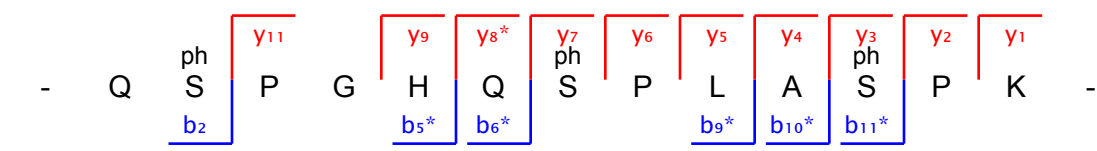

Raw file 20150812\_A375SR\_Phospho\_BR1\_02 Scan 6295 Method FTMS; HCD Score 122.13 m/z 869.31 Gene names CHD1

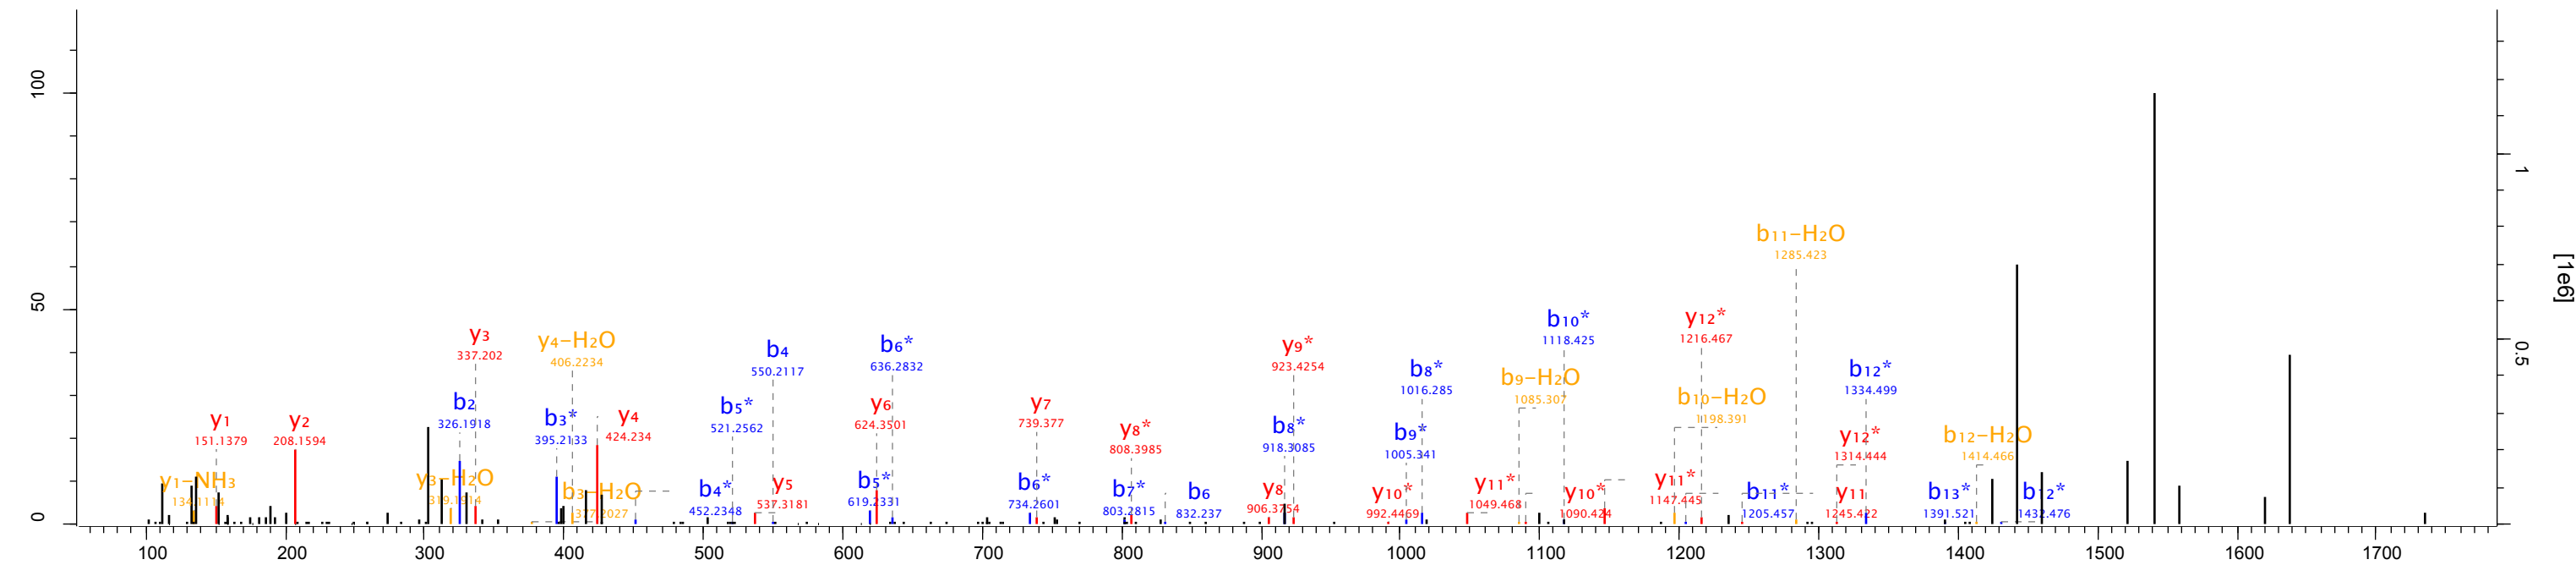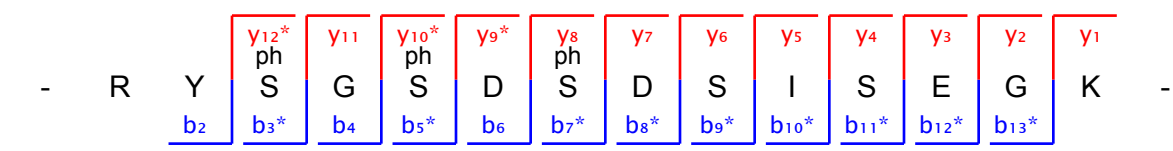

Raw file: 20150812\_A375SR\_Phospho\_BR1\_02  
 Scan: 6455 Method: FTMS; HCD Score: 184.6 m/z: 850.34 Gene names: CHAF1B

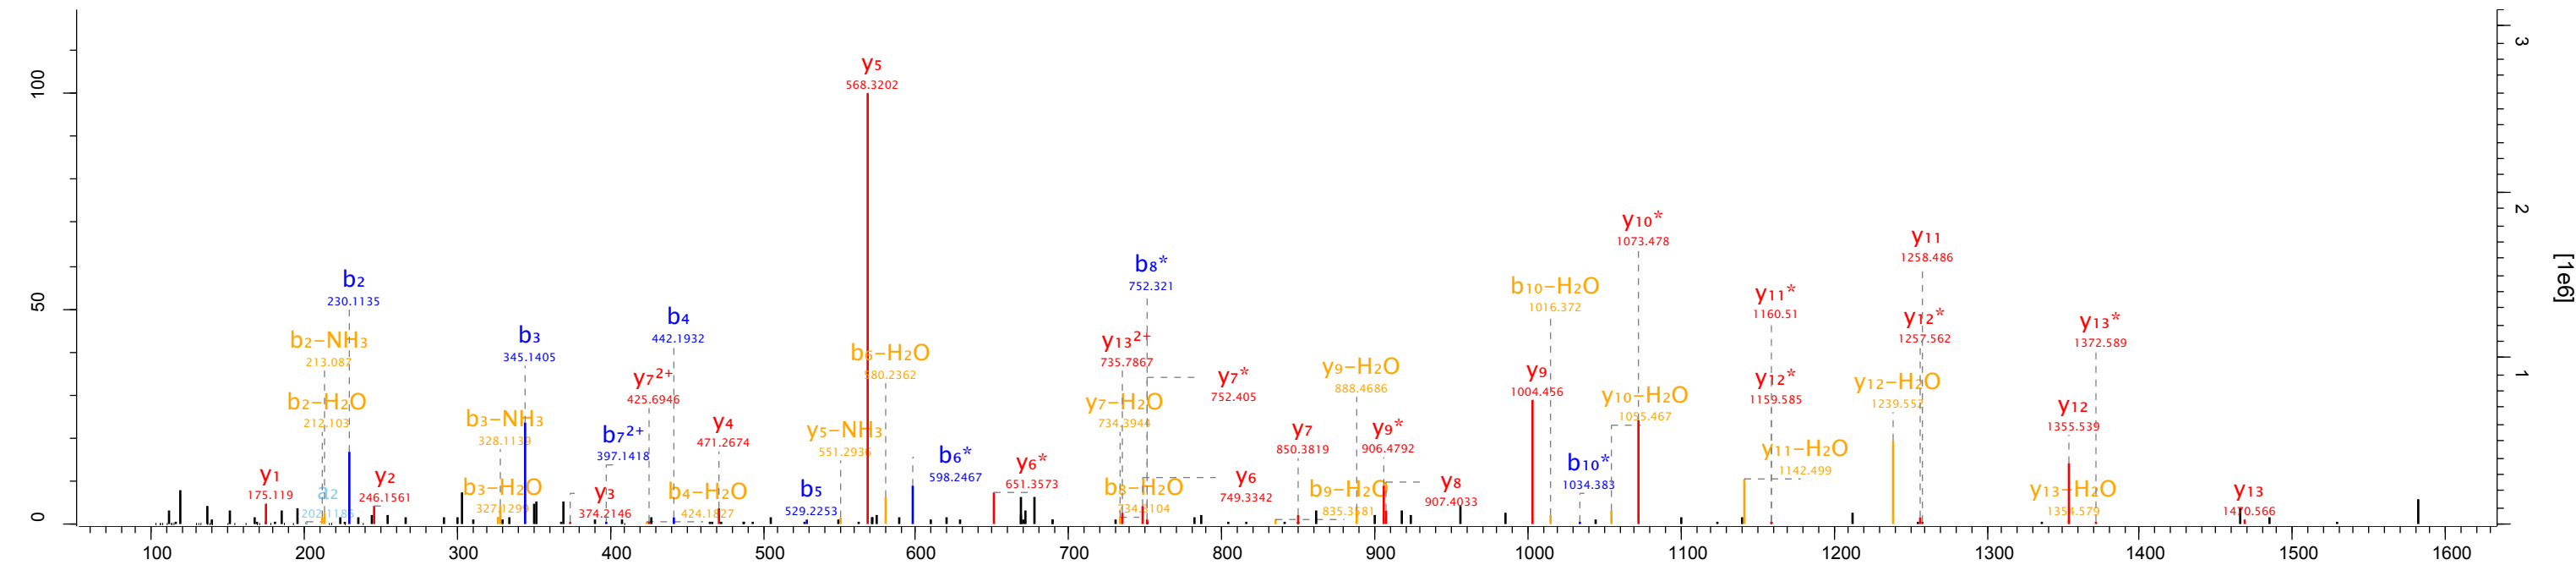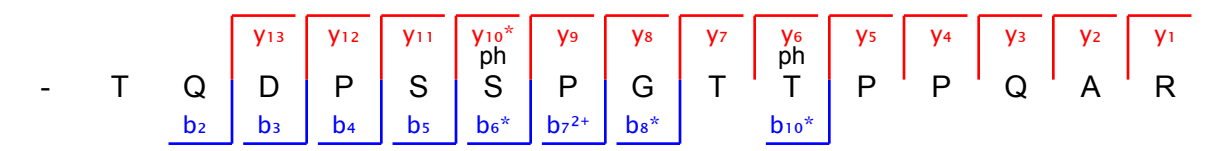

Raw file: 20150812\_A375SR\_Phospho\_BR1\_02  
 Scan: 6635 Method: FTMS; HCD Score: 83.89 m/z: 660.77 Gene names: GPSM3

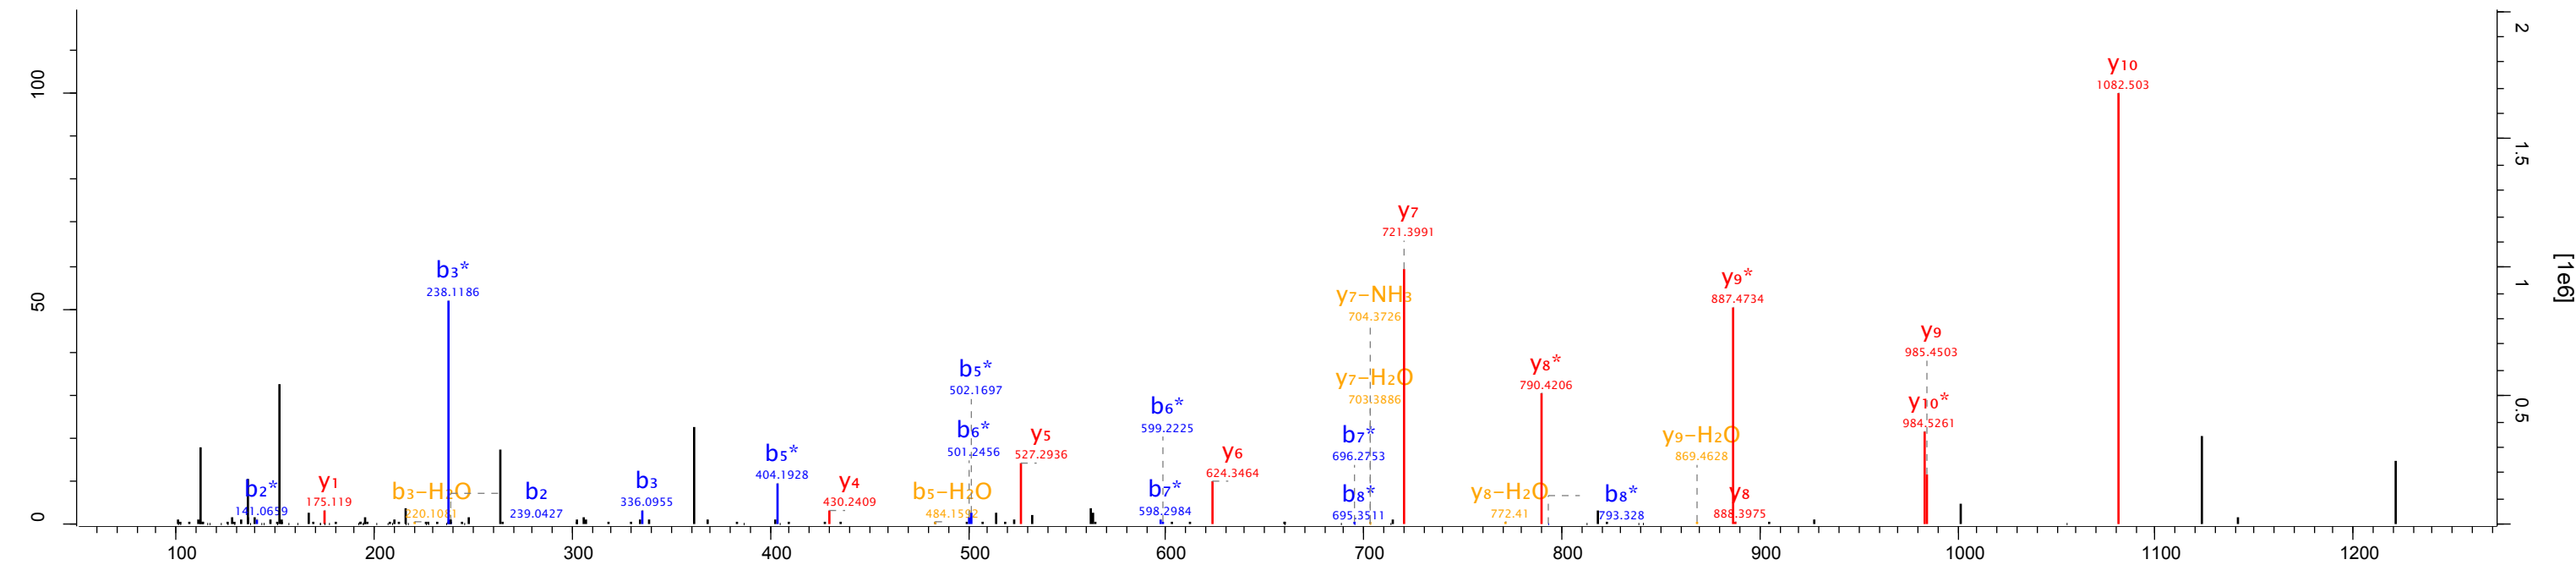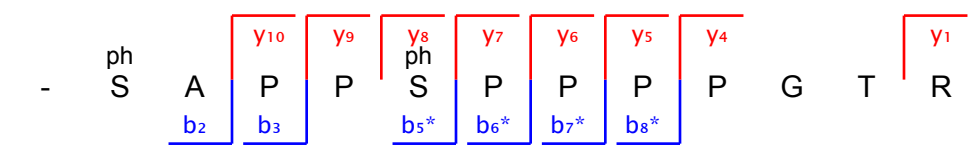

Raw file: 20150812\_A375SR\_Phospho\_BR1\_02  
 Scan: 6705 Method: FTMS; HCD Score: 138.23 m/z: 902.87 Gene names: SYTL5

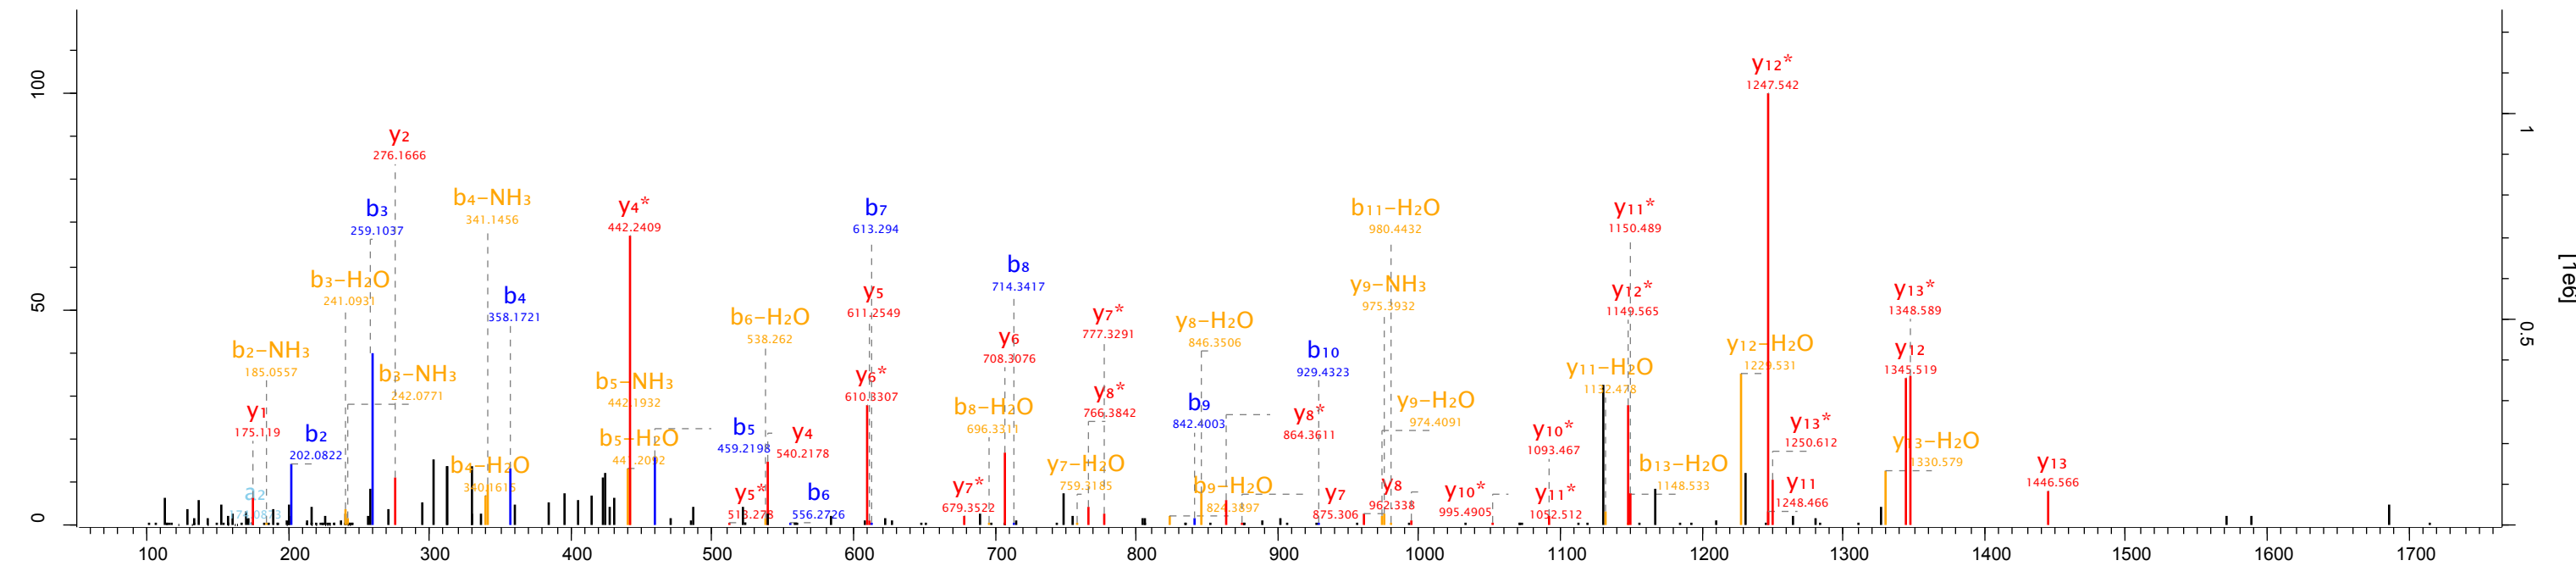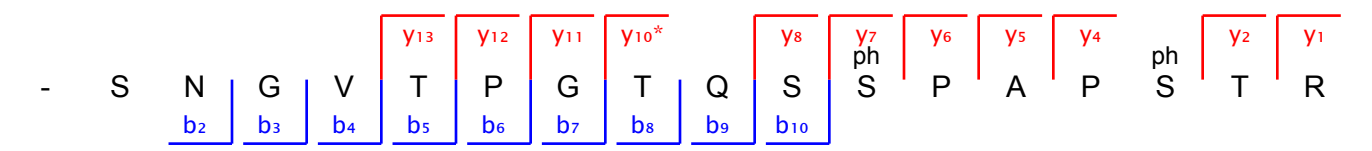

Raw file: 20150812\_A375SR\_Phospho\_BR1\_02  
 Scan: 6755 Method: FTMS; HCD Score: 106.4 m/z: 764.28 Gene names: SRSF10

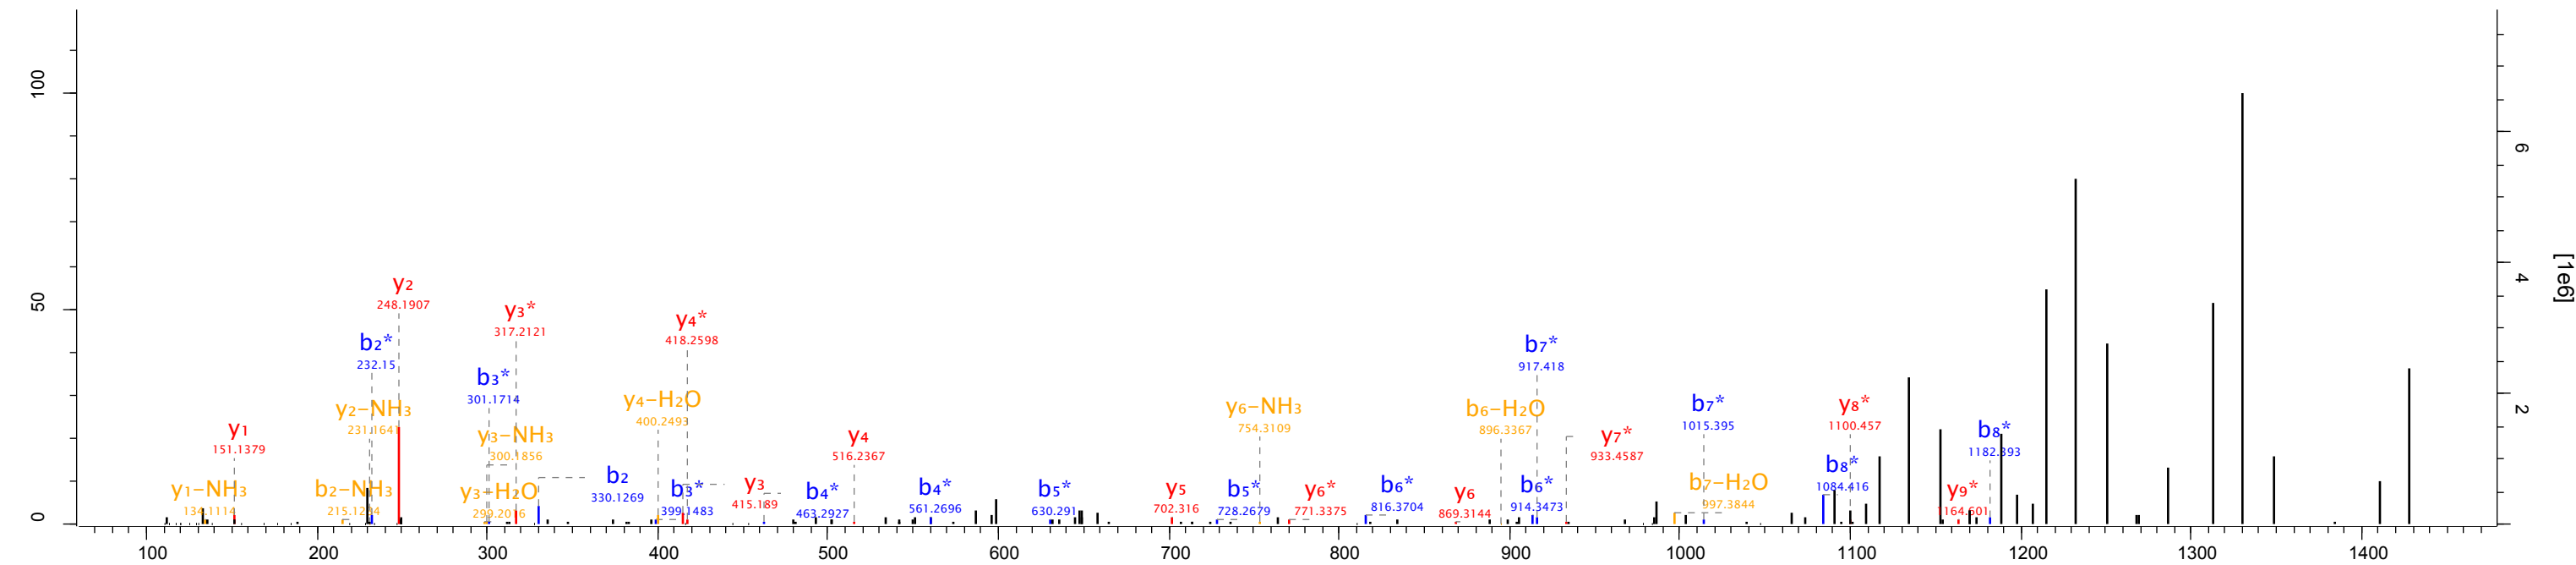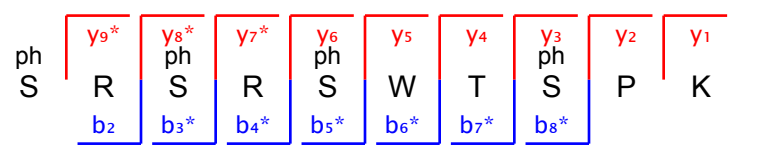



Raw file: 20150812\_A375SR\_Phospho\_BR1\_02  
 Scan: 6885 Method: FTMS; HCD Score: 136.62 m/z: 902.35 Gene names: PALLD

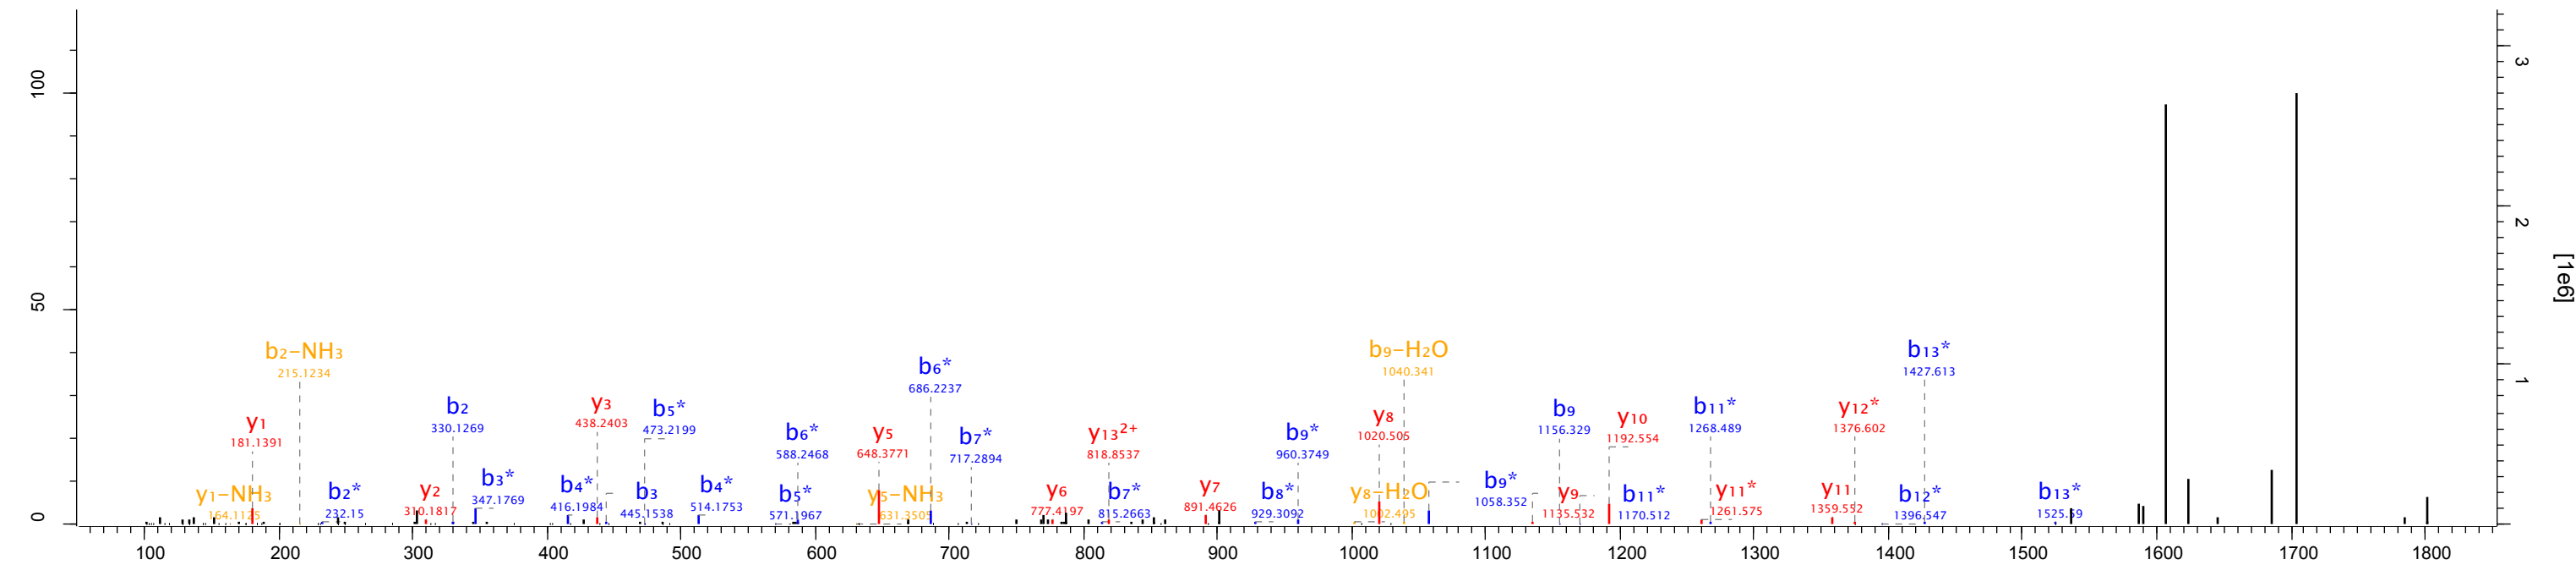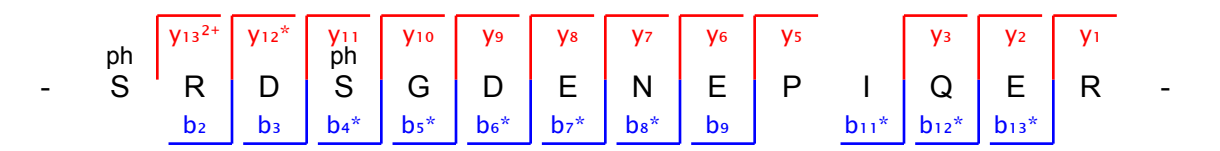

Raw file: 20150812\_A375SR\_Phospho\_BR1\_02  
 Scan: 6955 Method: FTMS; HCD Score: 76.91 m/z: 647.58 Gene names: ACIN1

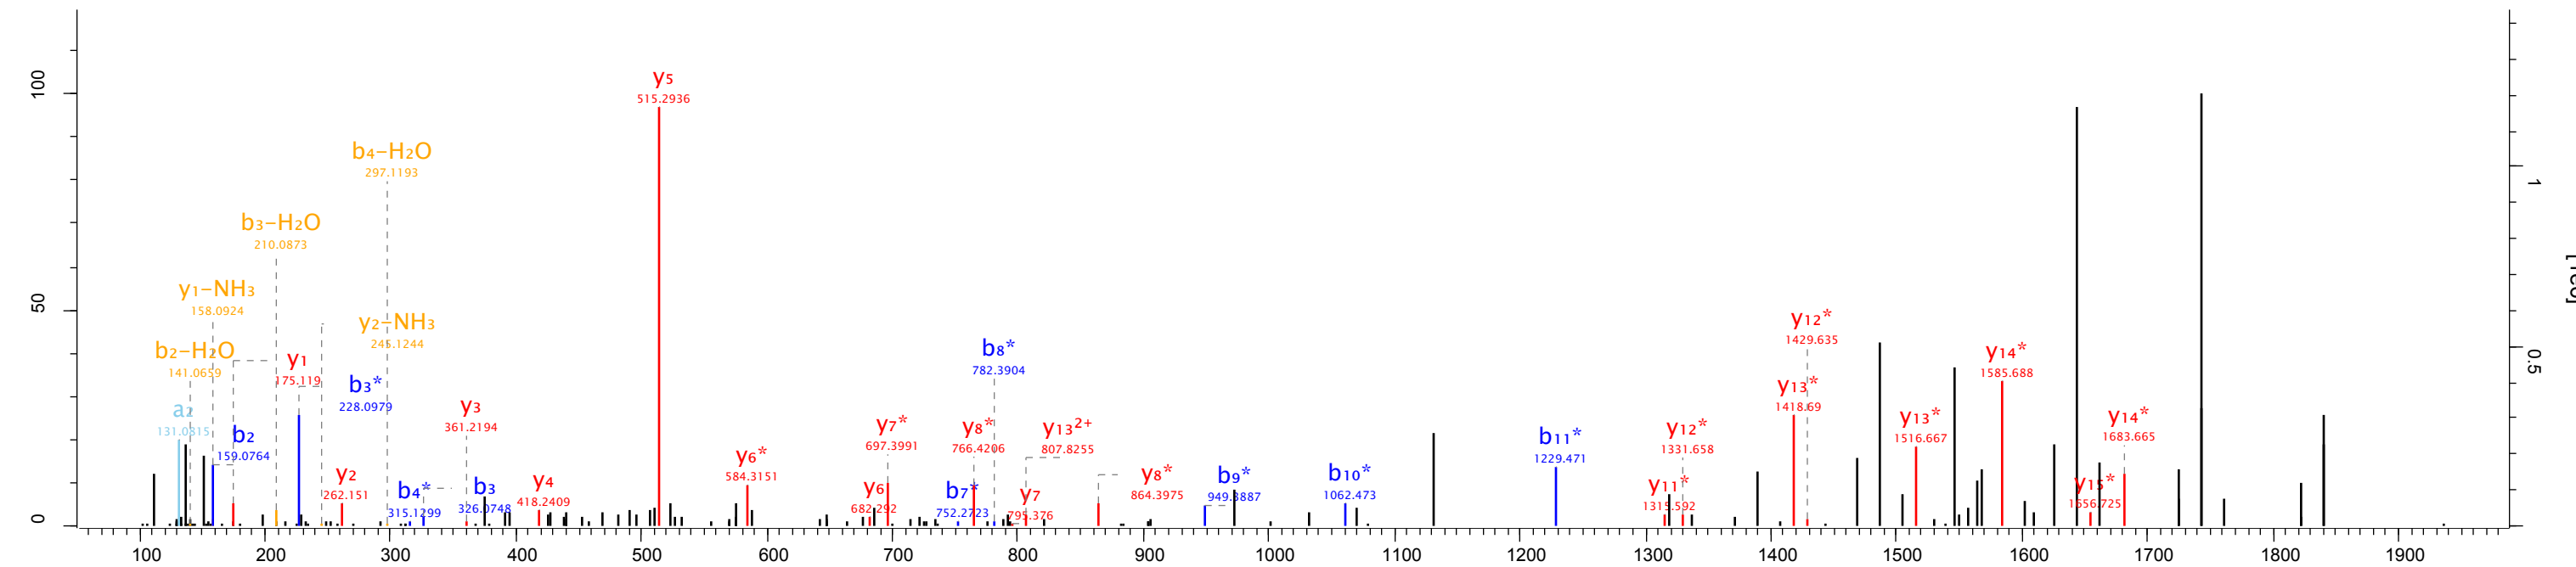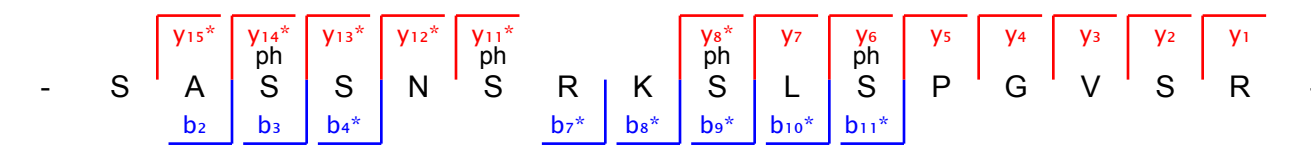

Raw file  
20150812\_A375SR\_Phospho\_BR1\_02

Scan 7185 Method FTMS; HCD Score 229.42 m/z 1191.45 Gene names PRRC2A

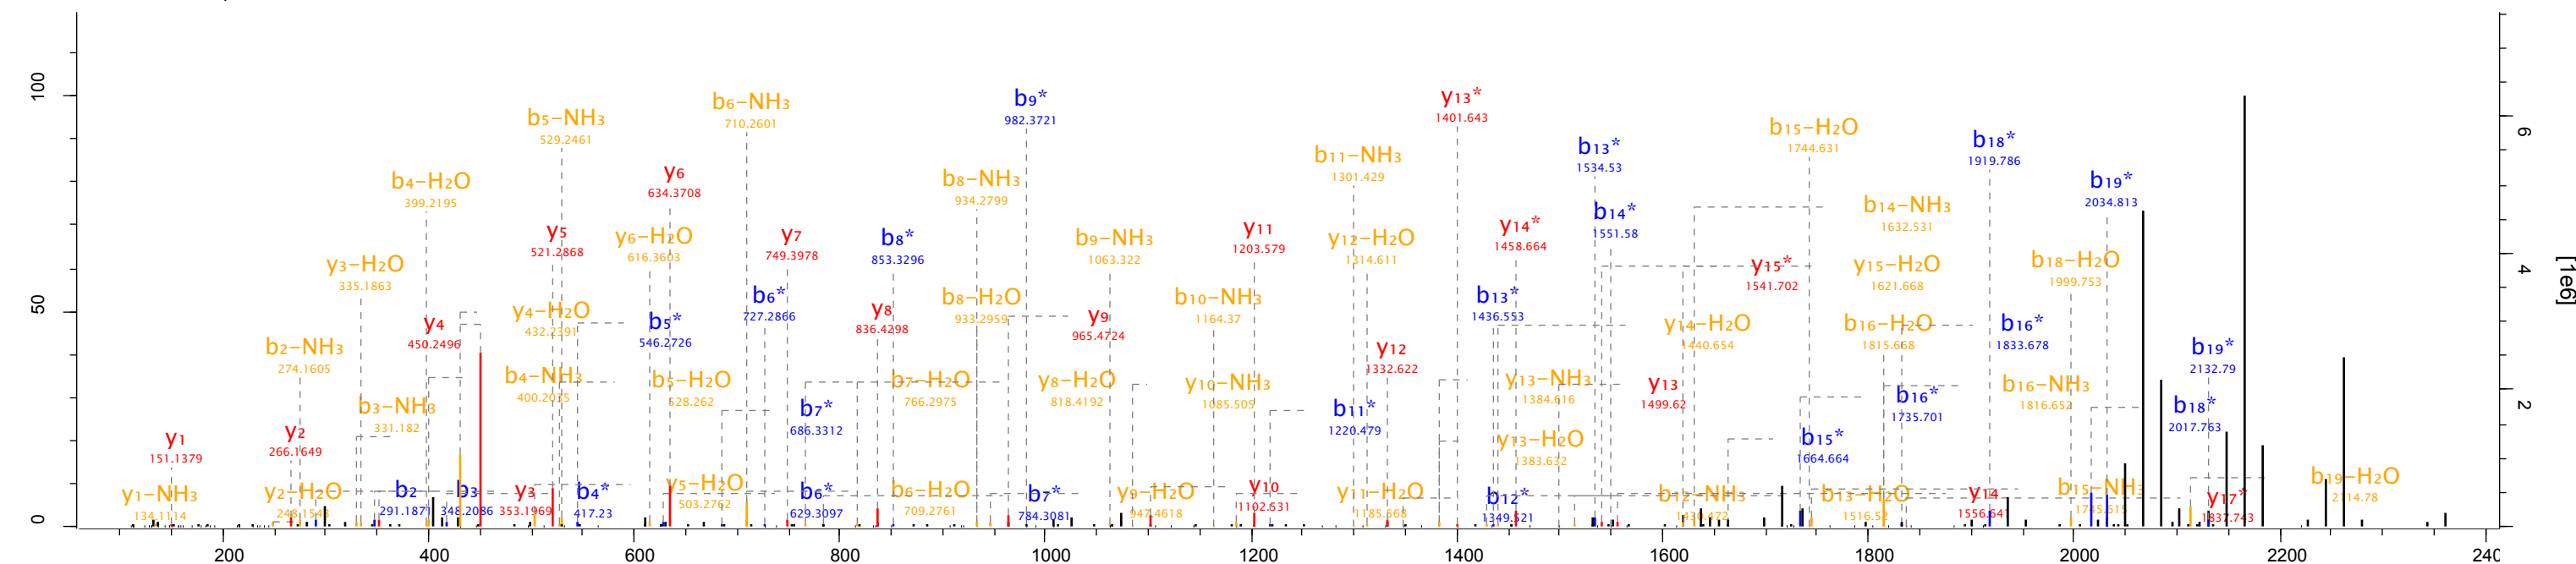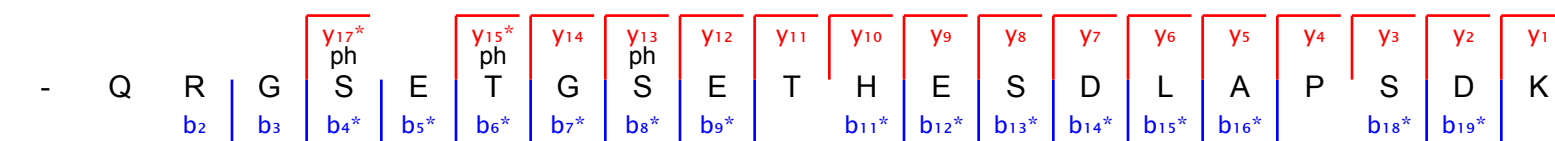

Raw file: 20150812\_A375SR\_Phospho\_BR1\_02  
 Scan: 7495 Method: FTMS; HCD Score: 65.95 m/z: 715.8 Gene names: ANKRD17

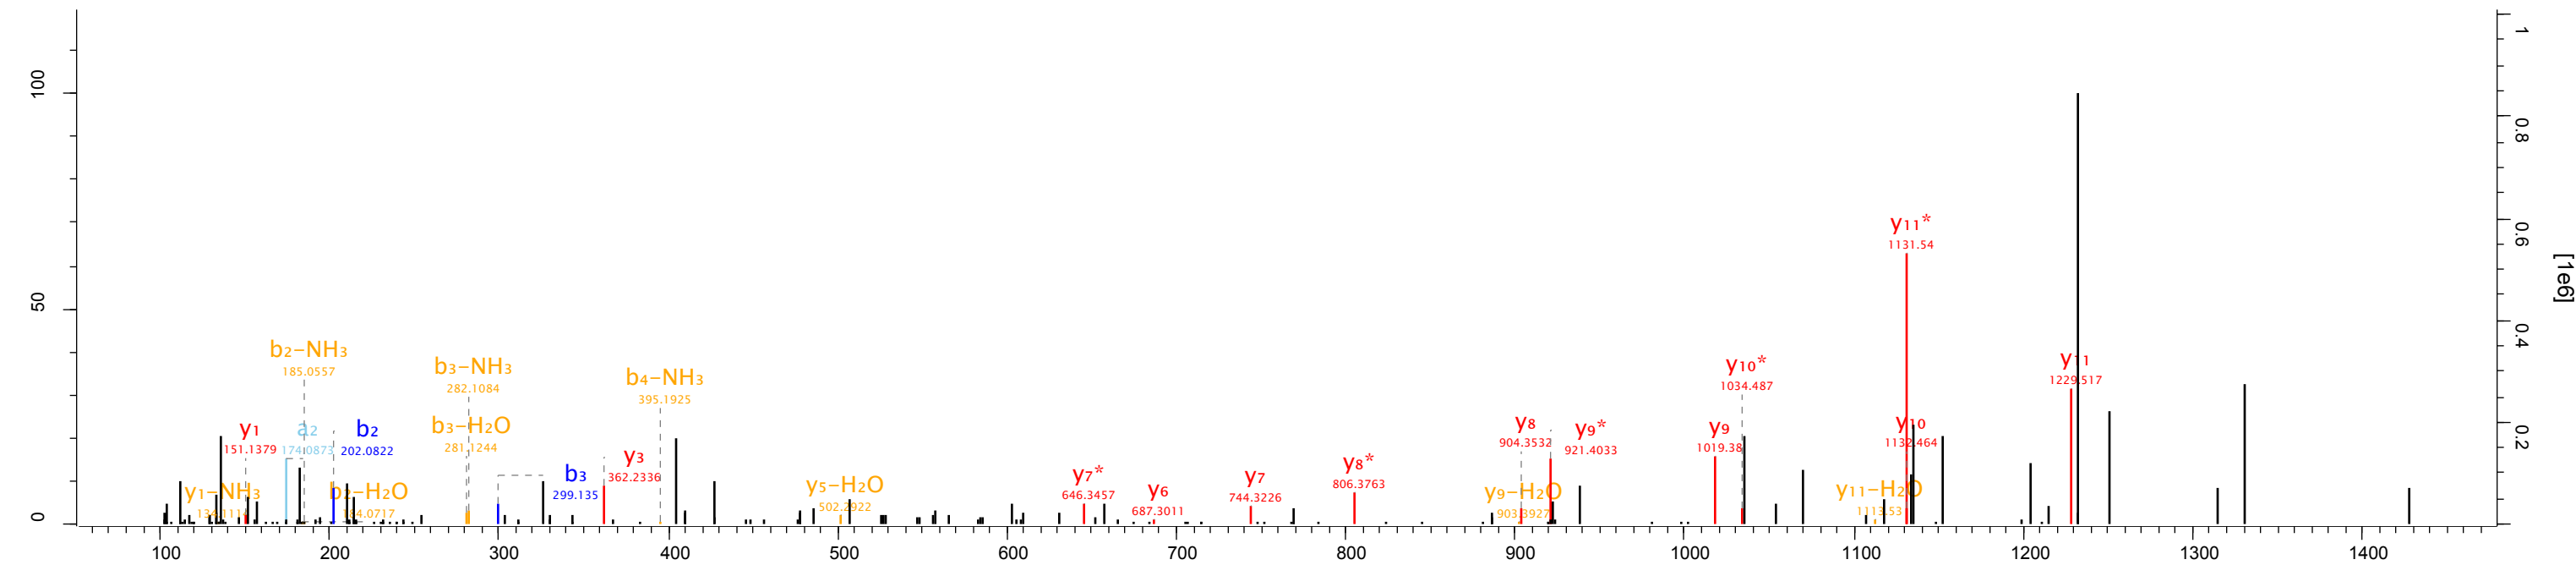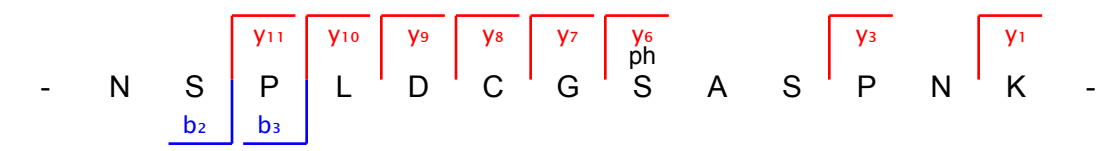

Raw file: 20150812\_A375SR\_Phospho\_BR1\_02  
 Scan: 7545 Method: FTMS; HCD Score: 113.3 m/z: 1018.82 Gene names: SSRP1

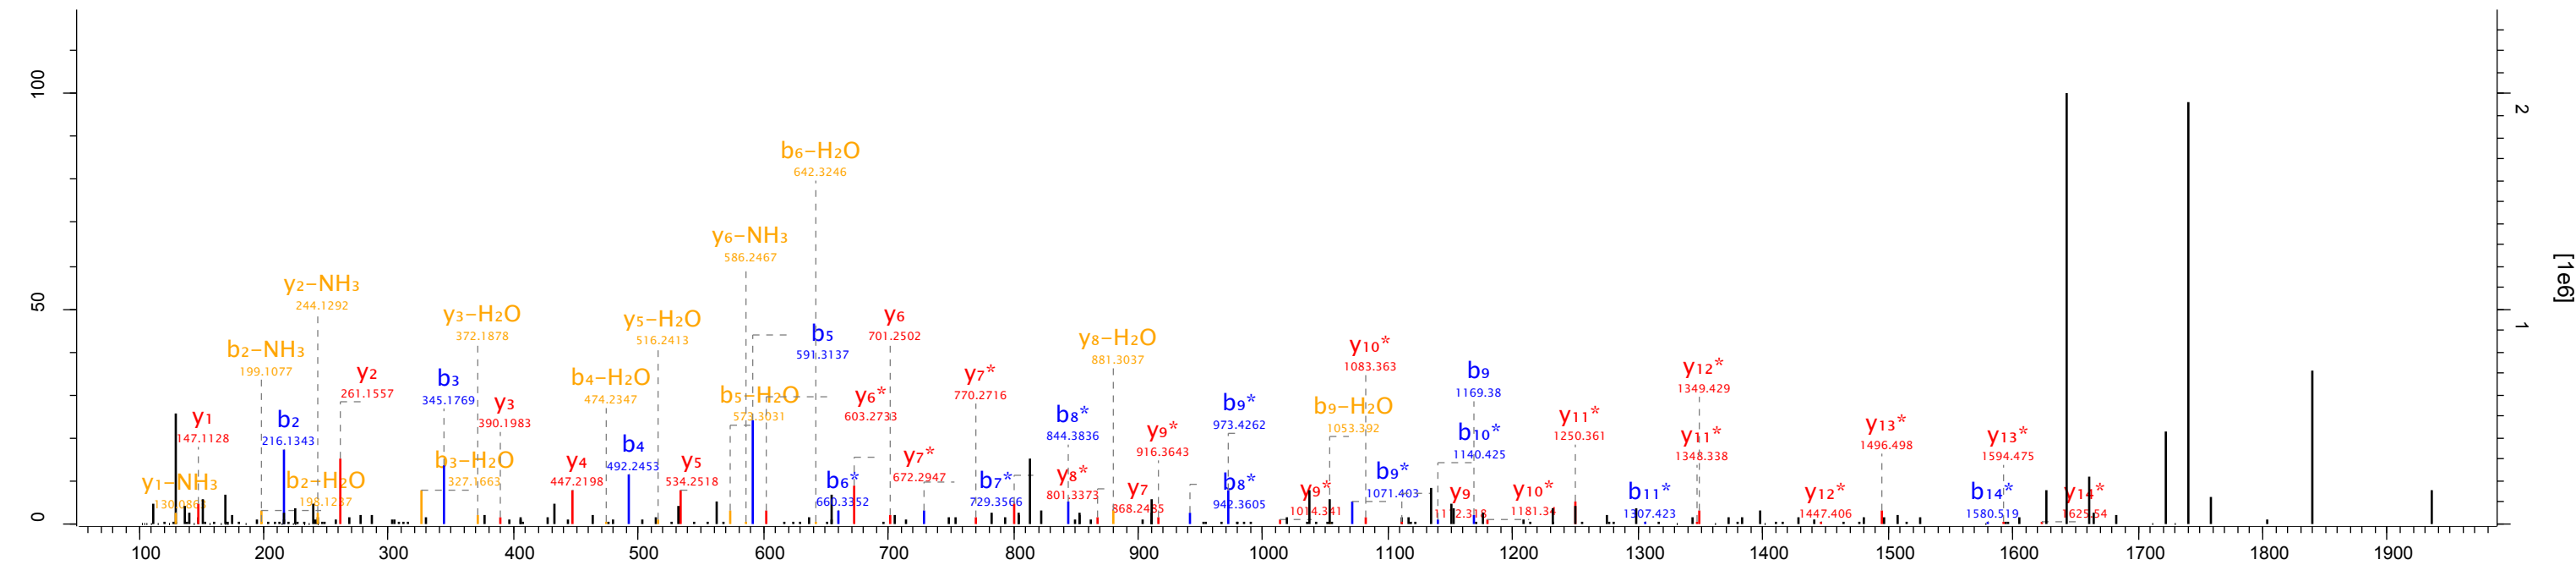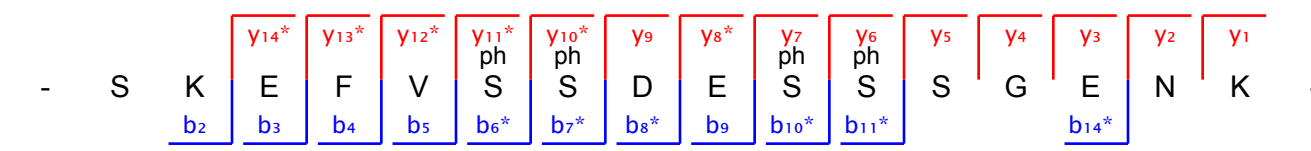

Raw file 20150812\_A375SR\_Phospho\_BR1\_02 Scan 7745 Method FTMS; HCD Score 57.35 m/z 952.07 Gene names REPS1

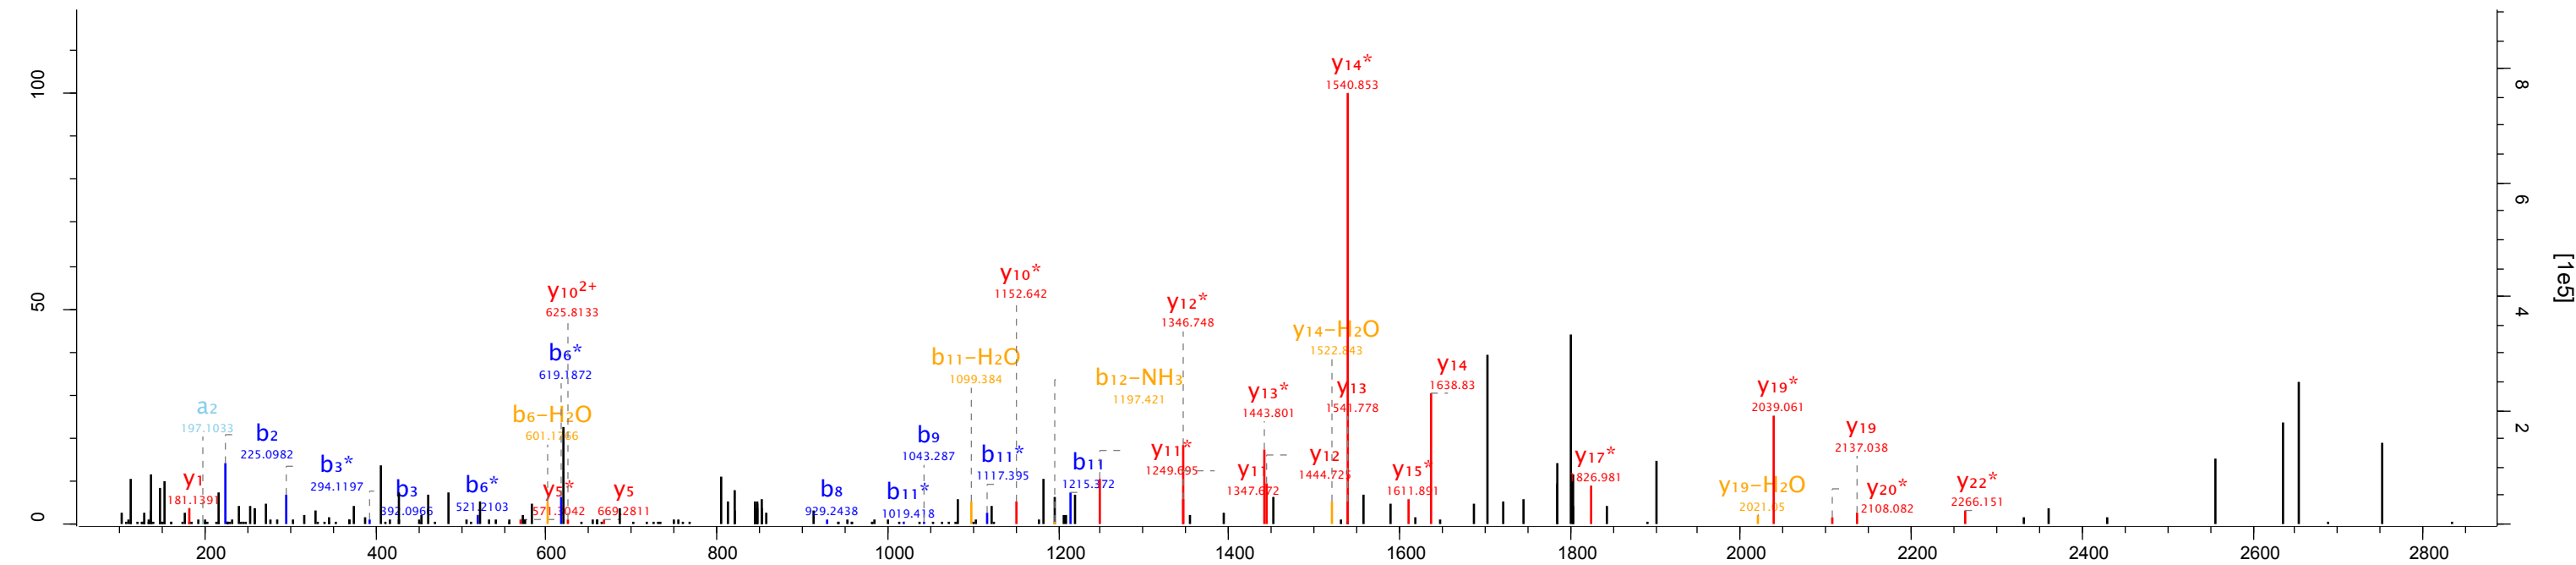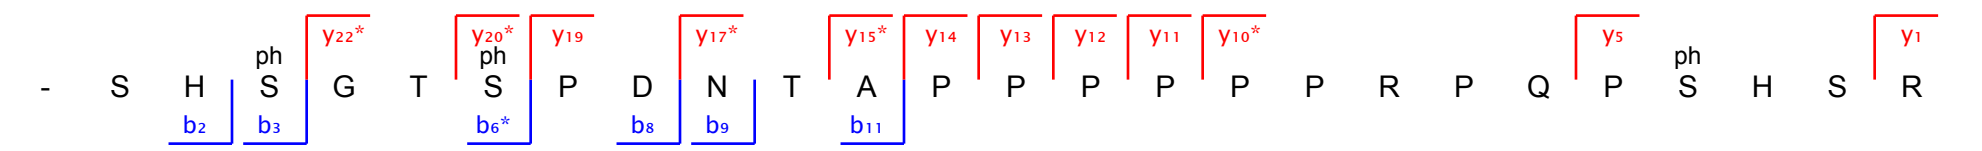

Raw file 20150812\_A375SR\_Phospho\_BR1\_02 Scan 7785 Method FTMS; HCD Score 149.99 m/z 1022.38 Gene names CEP41

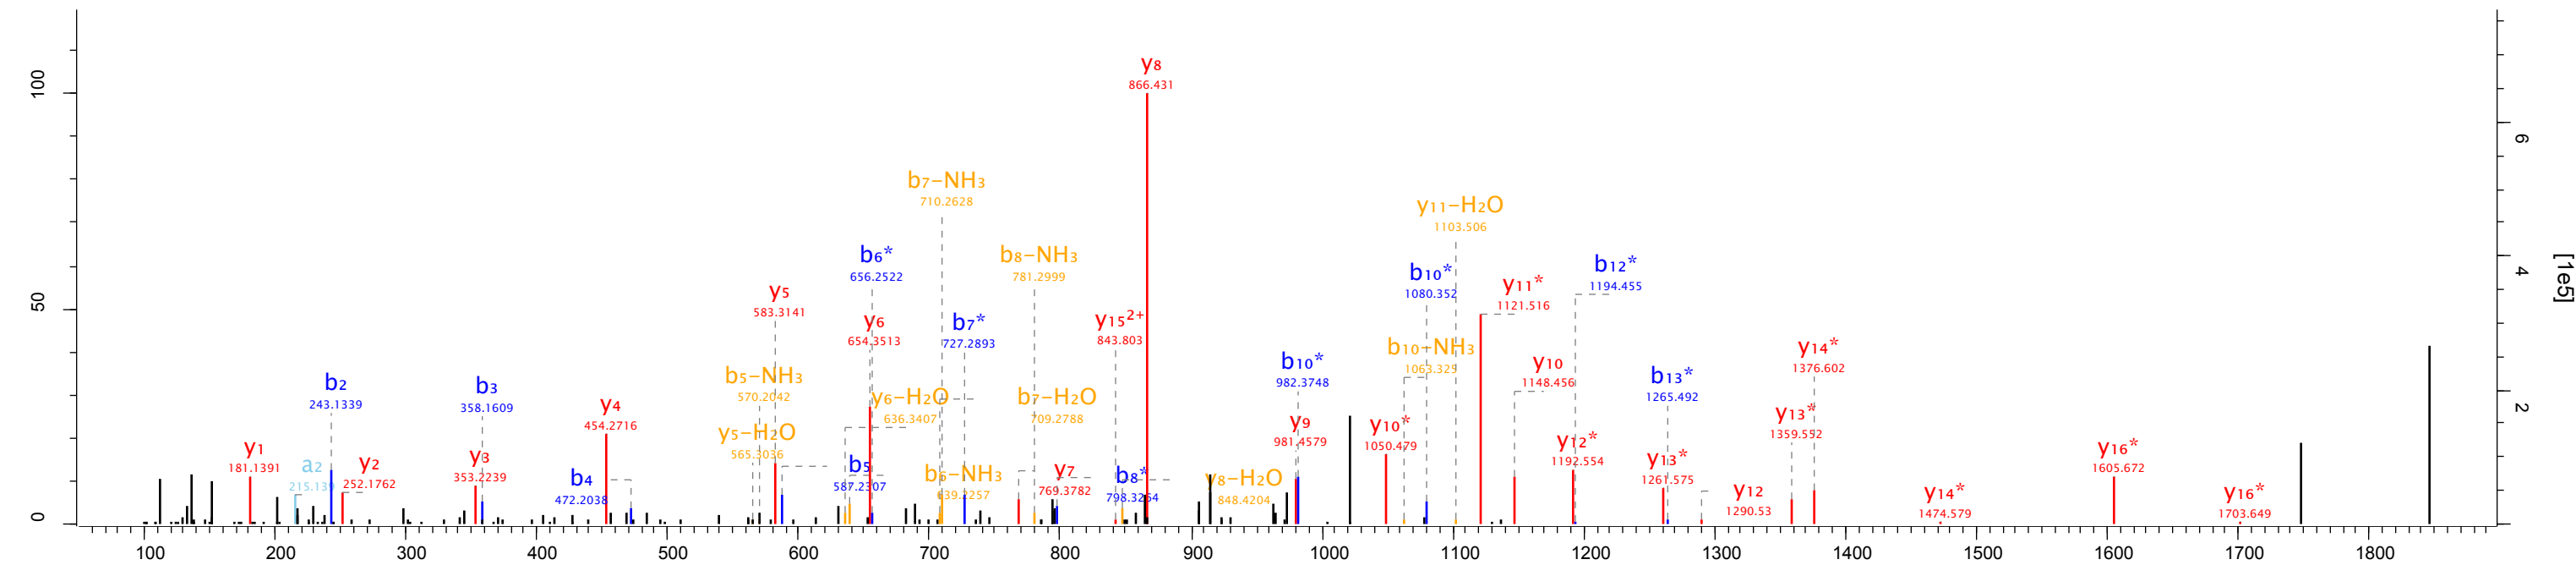

- L E D N D S A A S D P D A E T T A R -

Fragmentation mapping (b and y ions) is shown below the sequence:

- b2: E
- b3: D
- b4: N
- b5: D
- b6\*: S
- b7\*: A
- b8\*: A
- b10\*: S
- b12\*: D
- b13\*: A





Raw file: 20150812\_A375SR\_Phospho\_BR1\_02  
 Scan: 7915 Method: FTMS; HCD Score: 91.81 m/z: 1172.91 Gene names: GNL2

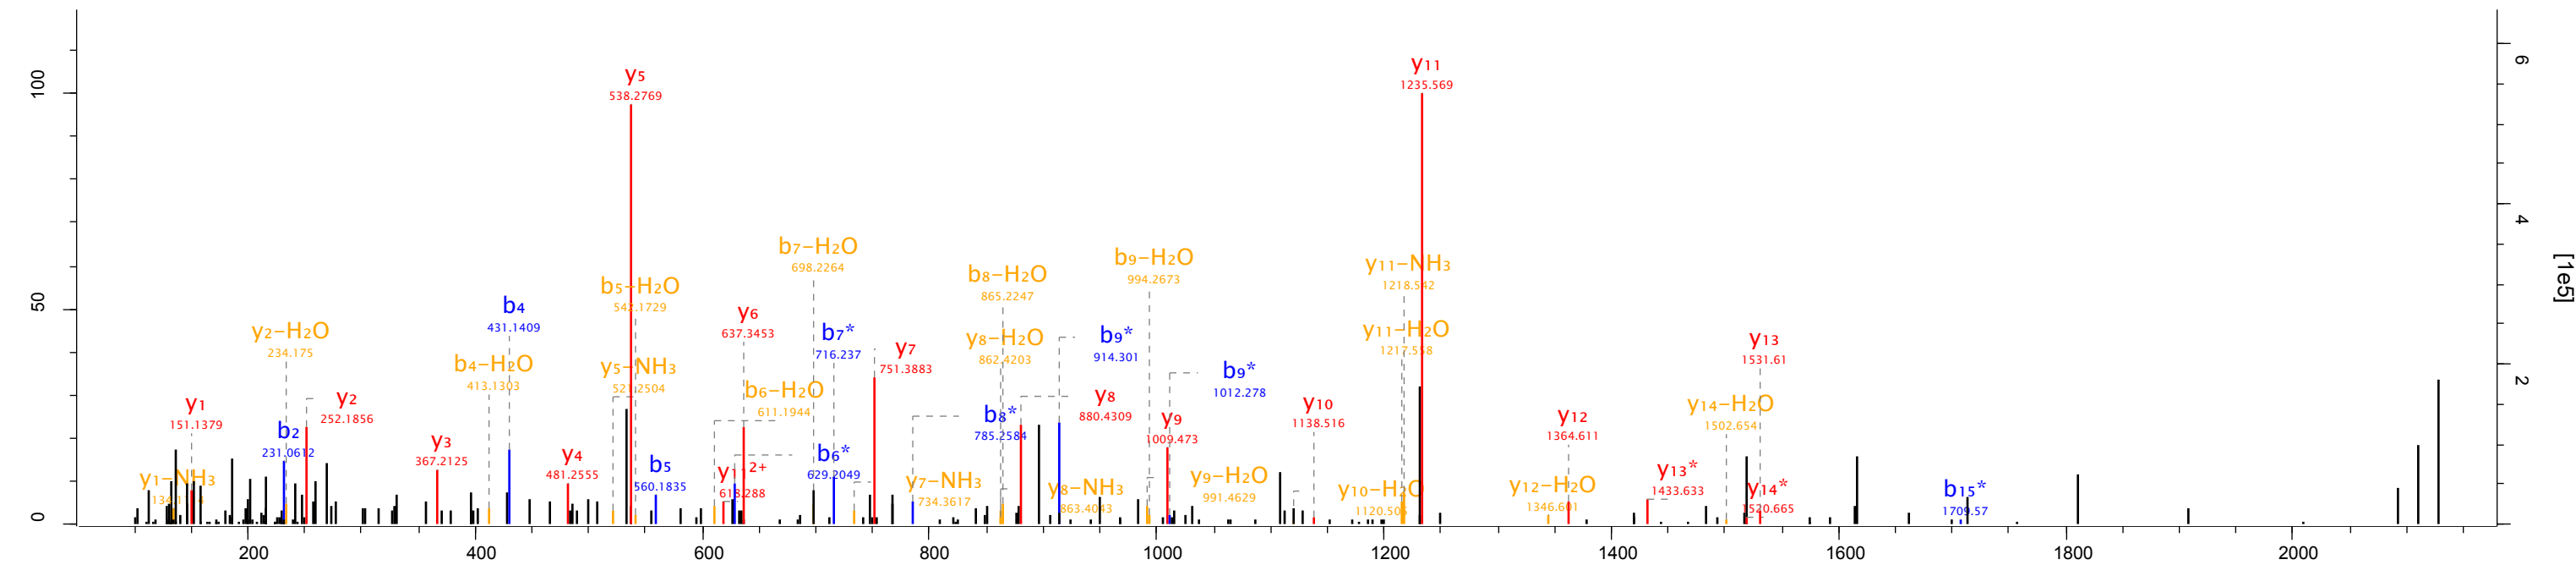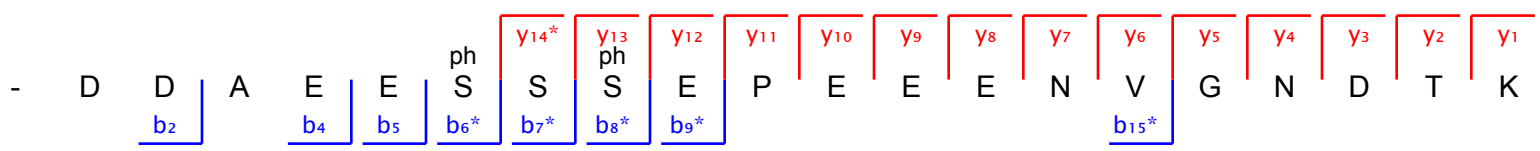

Raw file: 20150812\_A375SR\_Phospho\_BR1\_02  
 Scan: 7935 Method: FTMS; HCD Score: 144.17 m/z: 749.8 Gene names: GMIP

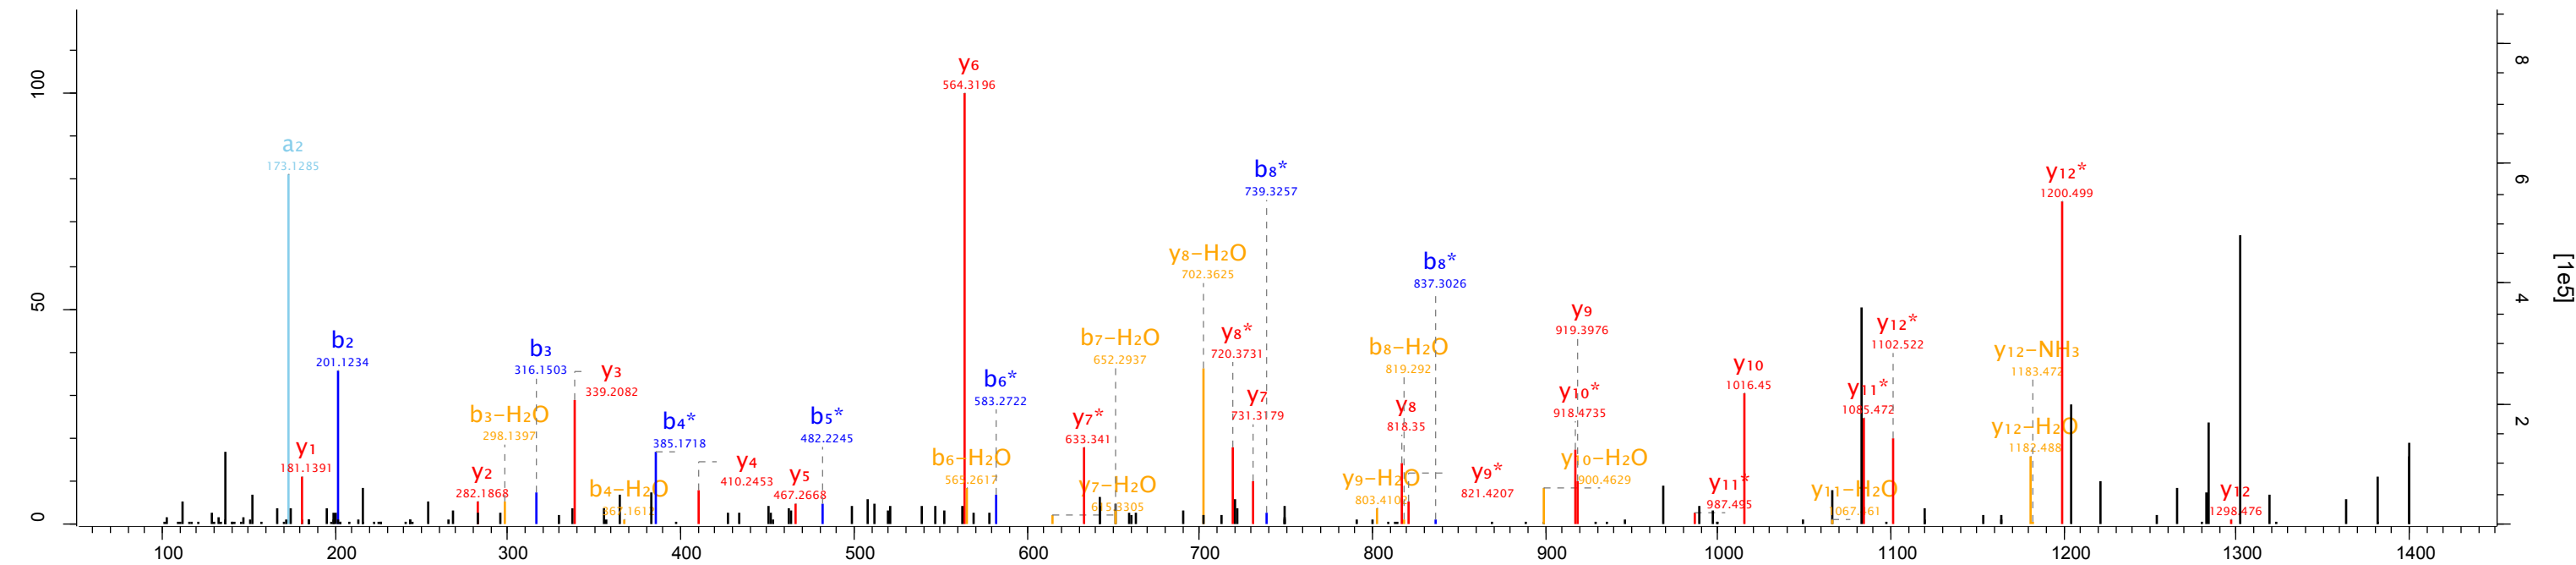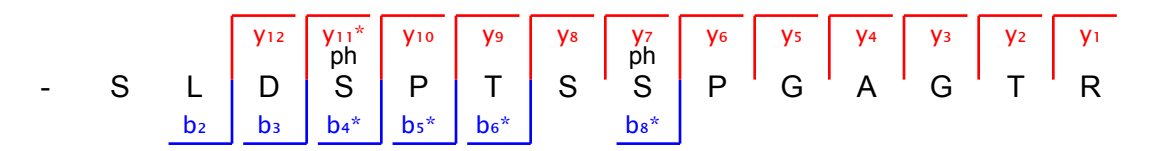

Raw file: 20150812\_A375SR\_Phospho\_BR1\_02  
 Scan: 8015 Method: FTMS; HCD Score: 179.19 m/z: 877.31 Gene names: NOP14

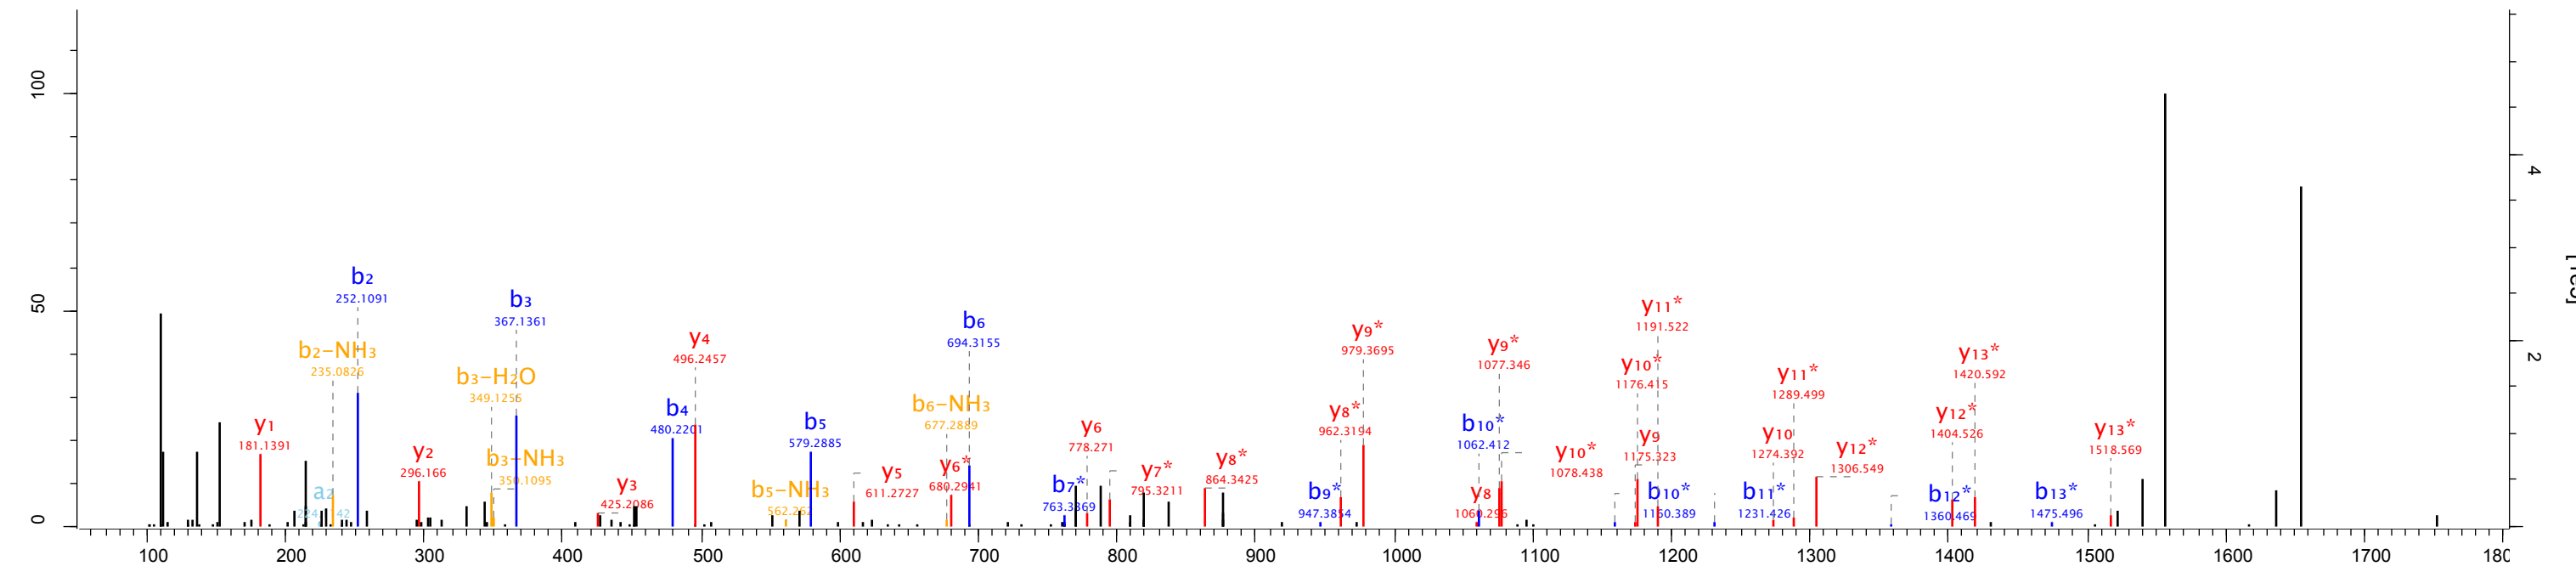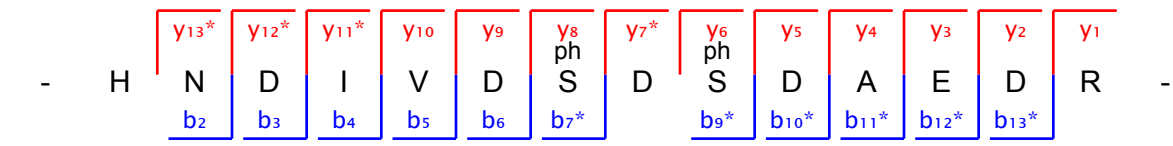

Raw file  
20150812\_A375SR\_Phospho\_BR1\_02

Scan 8155 Method FTMS; HCD Score 95.54 m/z 826 Gene names AKT1S1

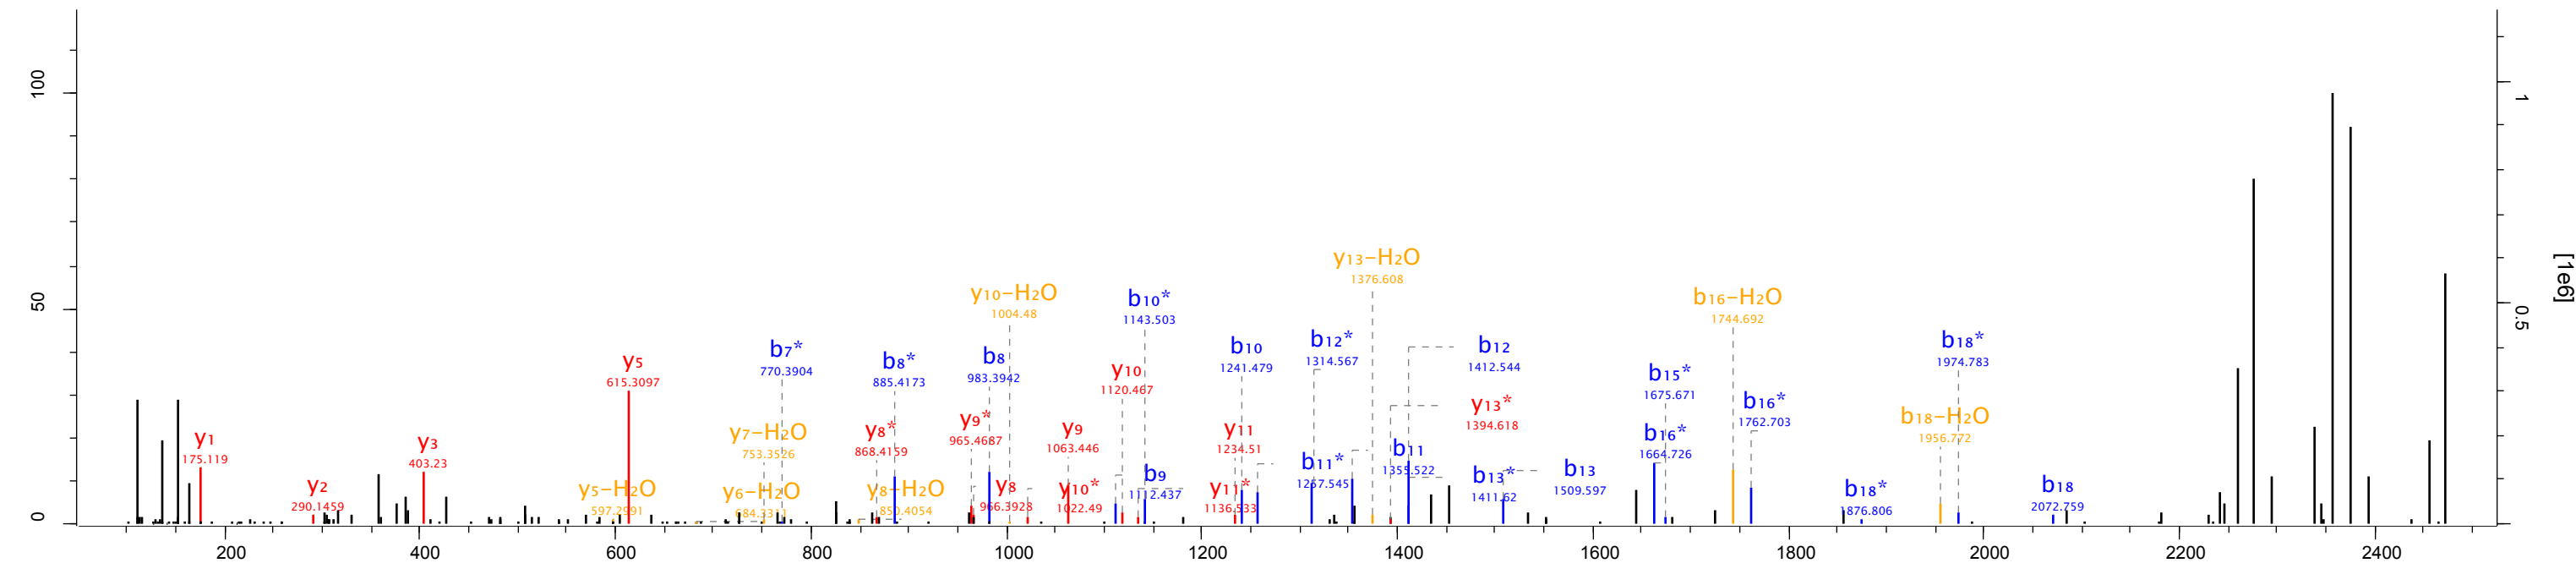

- R T E A R S S D E E N G P P S S P D L D R -

Fragmentation mapping:  
- b7\* | b8 | b9 | b10 | b11 | b12 | b13 | b15\* | b16\* | b18 | y13\* | y11 | y10 | y9 | y8 | y5 | y3 | y2 | y1 -

Raw file  
 20150812\_A375SR\_Phospho\_BR1\_02  
 Scan 8465 Method FTMS; HCD Score 61.76 m/z 715.8 Gene names DNNTIP2

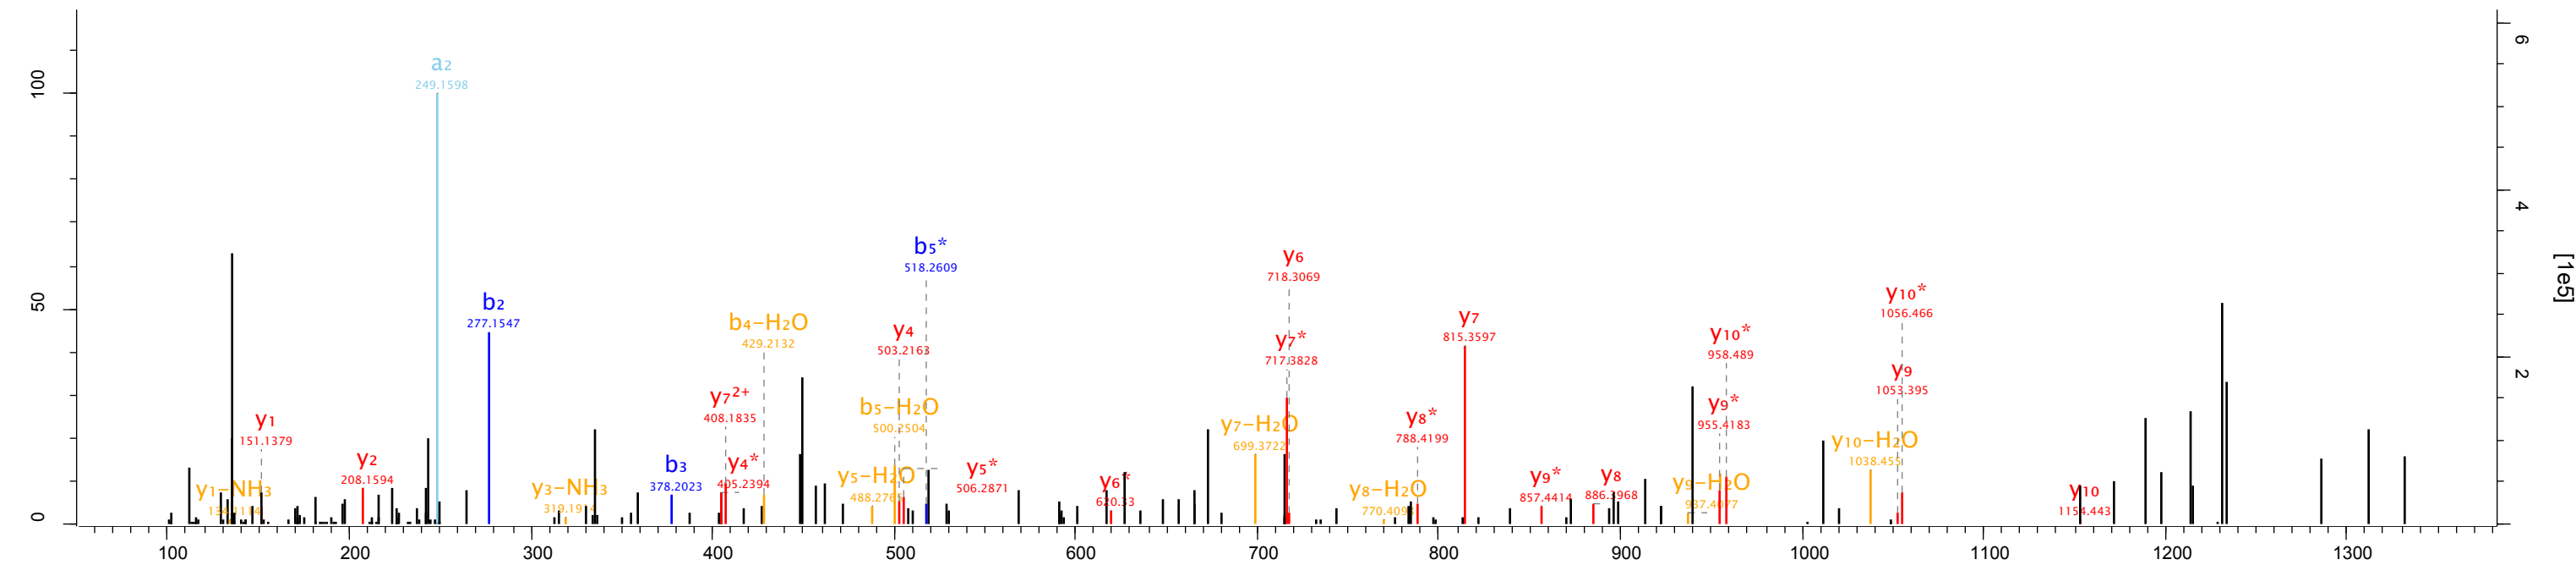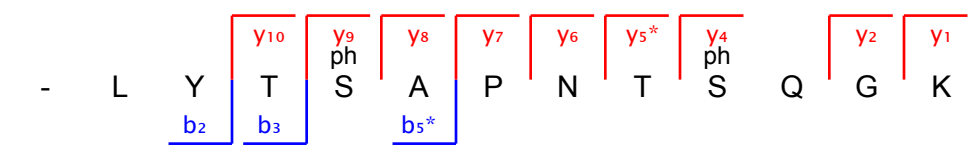

Raw file: 20150812\_A375SR\_Phospho\_BR1\_02  
 Scan: 8675 Method: FTMS; HCD Score: 154.95 m/z: 799.29 Gene names: CEP170

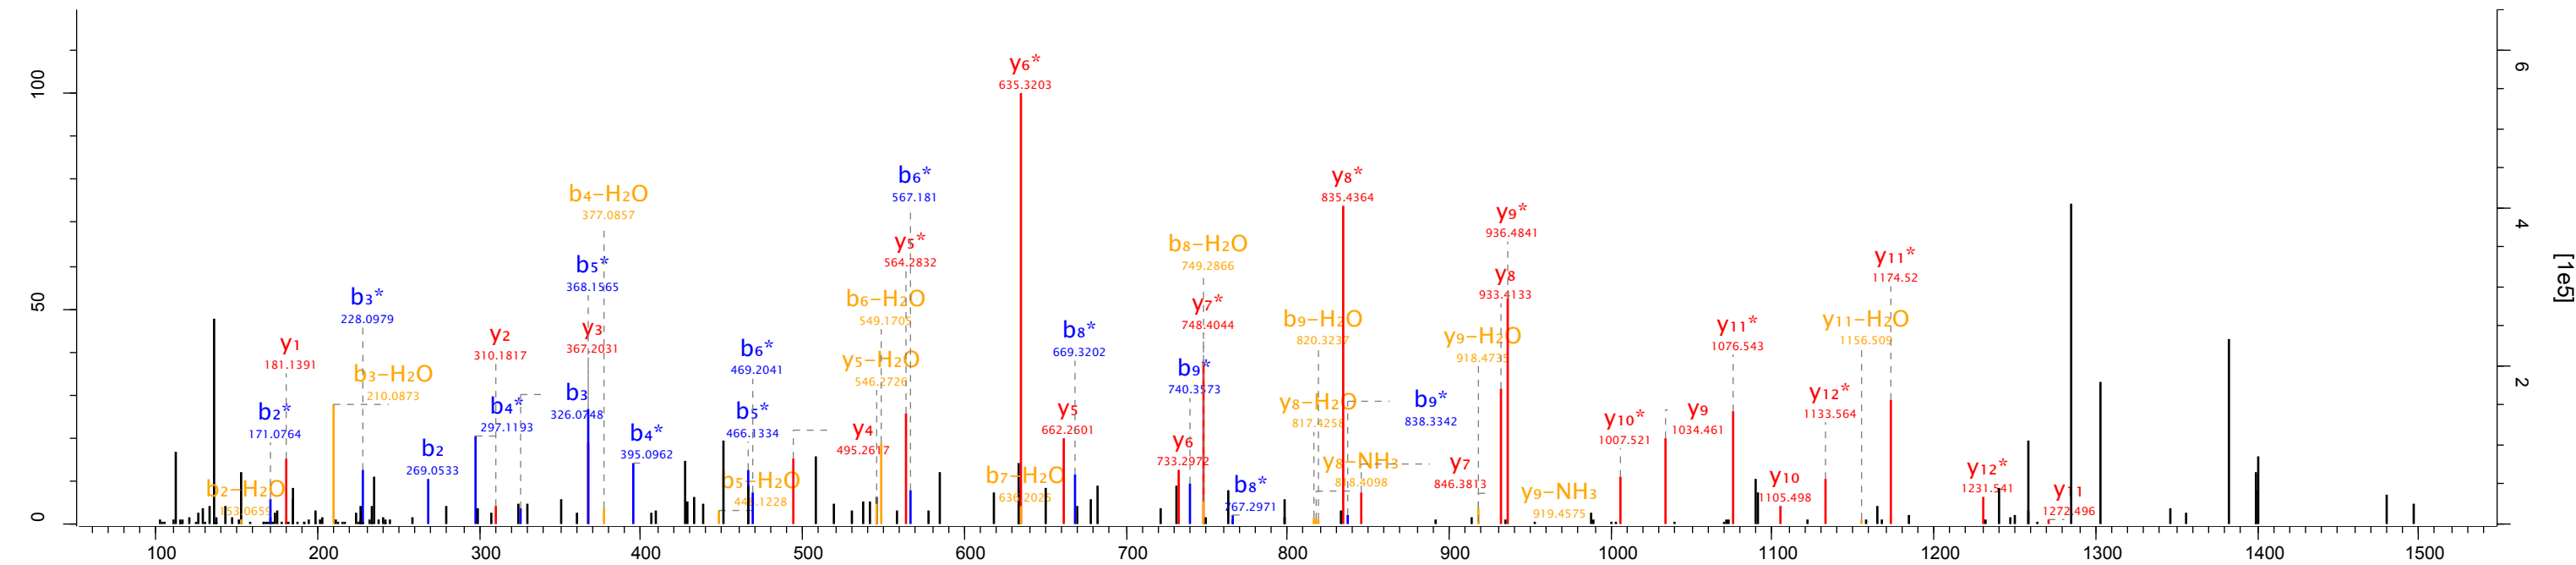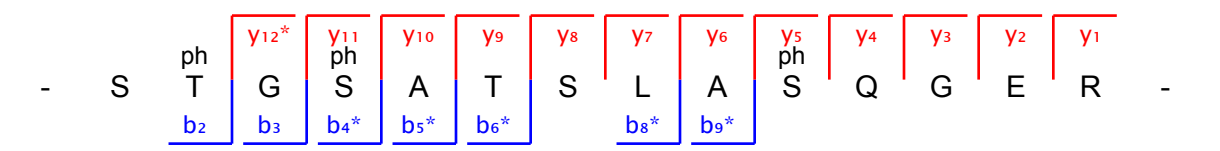

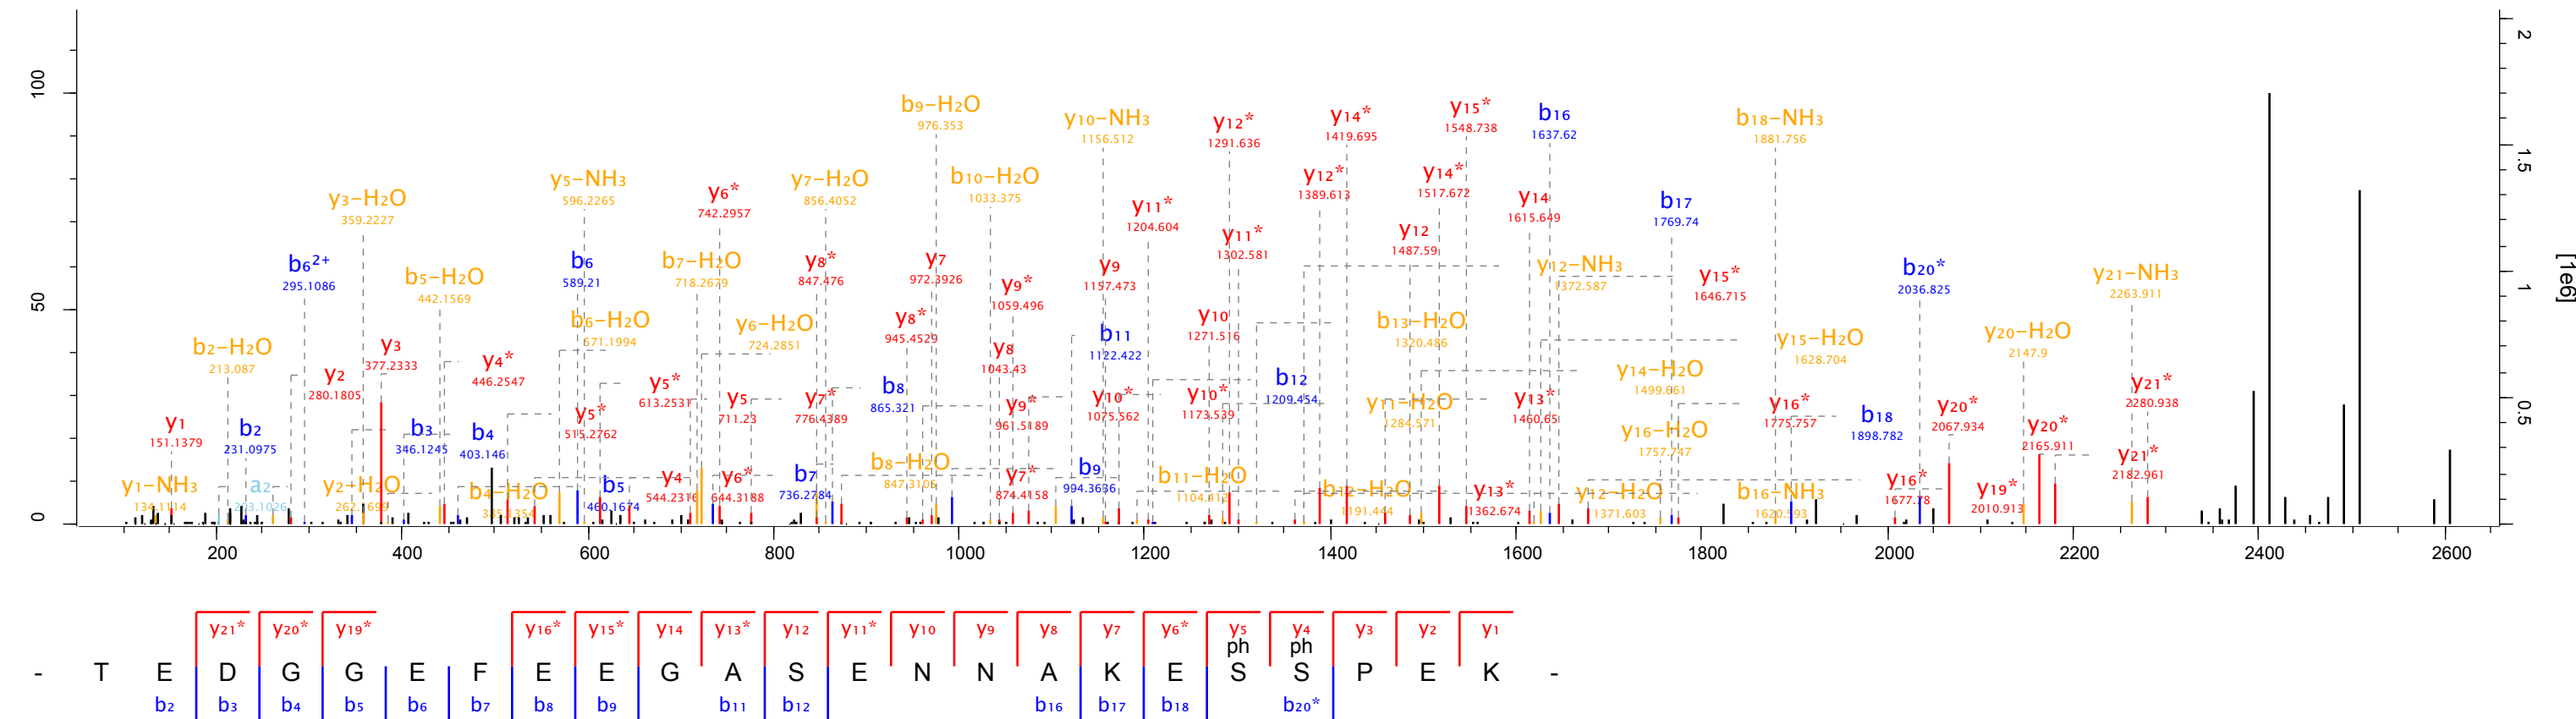

Raw file: 20150812\_A375SR\_Phospho\_BR1\_02  
 Scan: 9335 Method: FTMS; HCD Score: 64.07 m/z: 903.71 Gene names: CUL4B

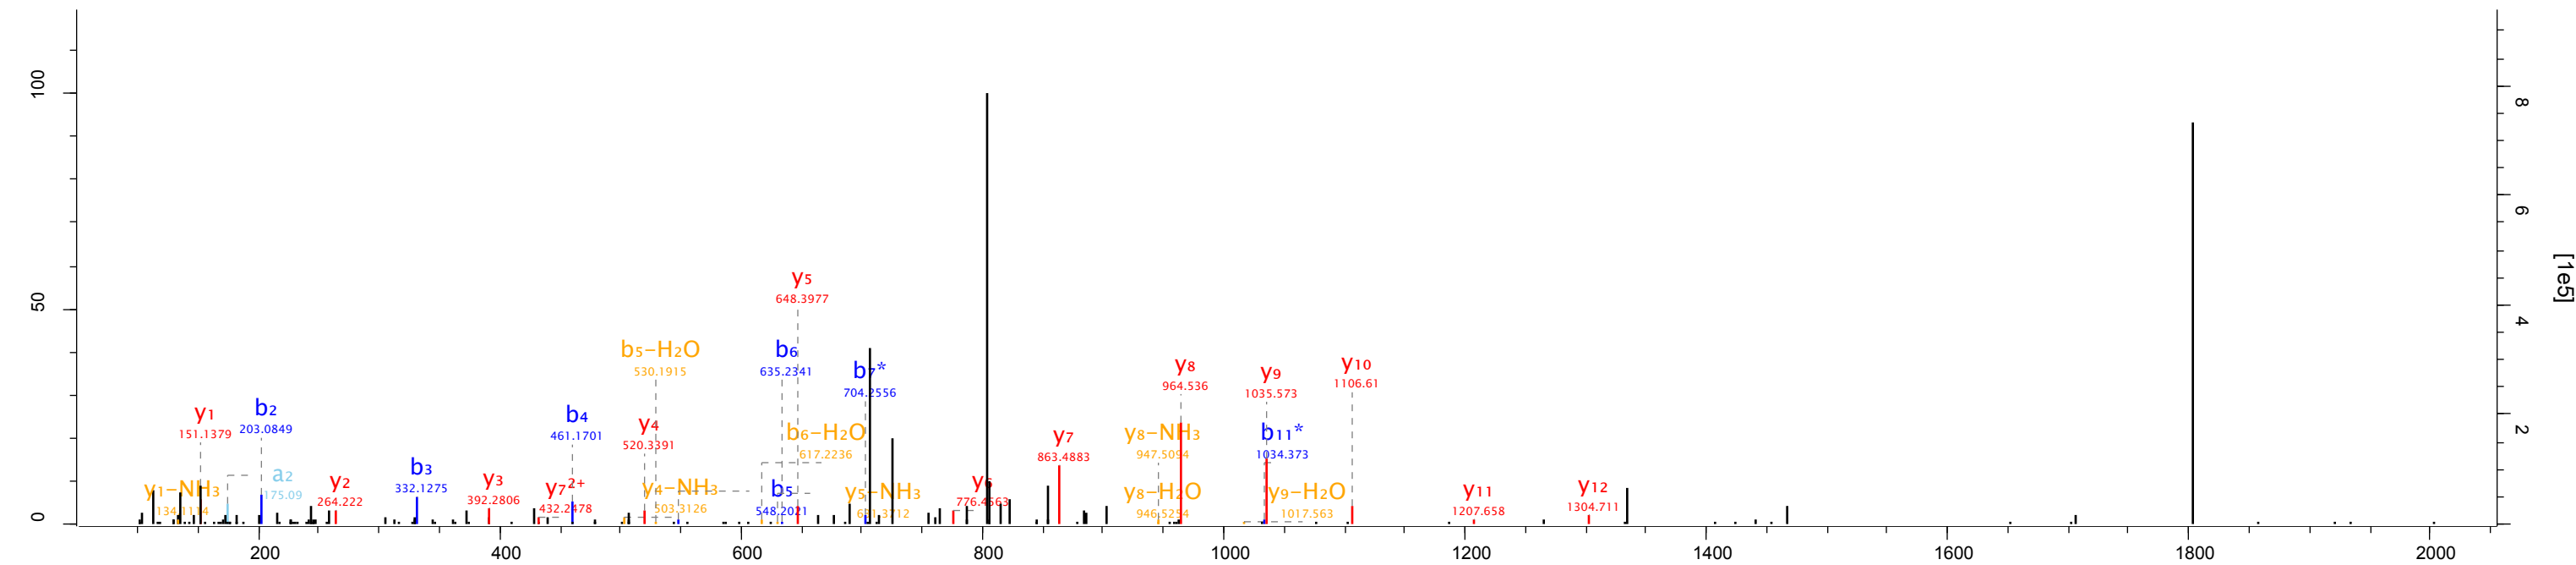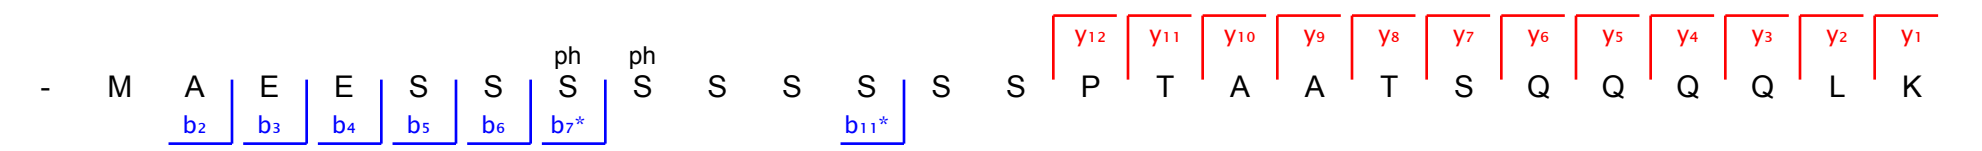



Raw file: 20150812\_A375SR\_Phospho\_BR1\_02  
 Scan: 9585 Method: FTMS; HCD Score: 61.1 m/z: 764.83 Gene names: SRRM2

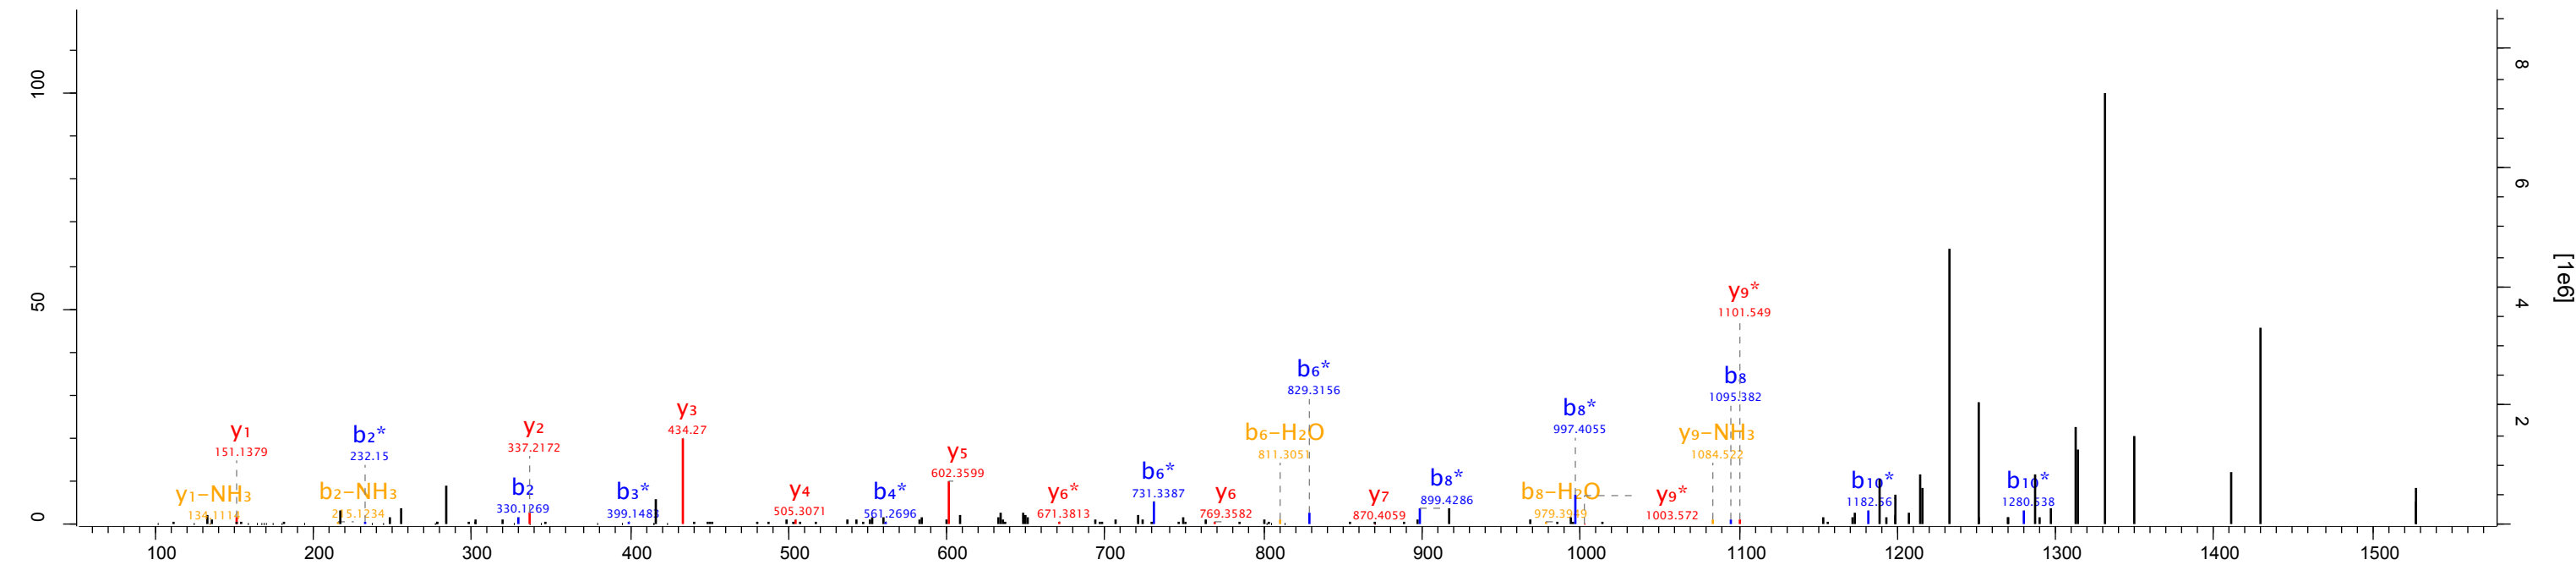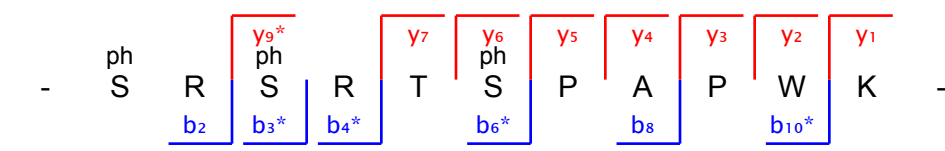

Raw file: 20150812\_A375SR\_Phospho\_BR1\_02  
 Scan: 9625 Method: FTMS; HCD Score: 147.07 m/z: 630.74 Gene names: MCM2

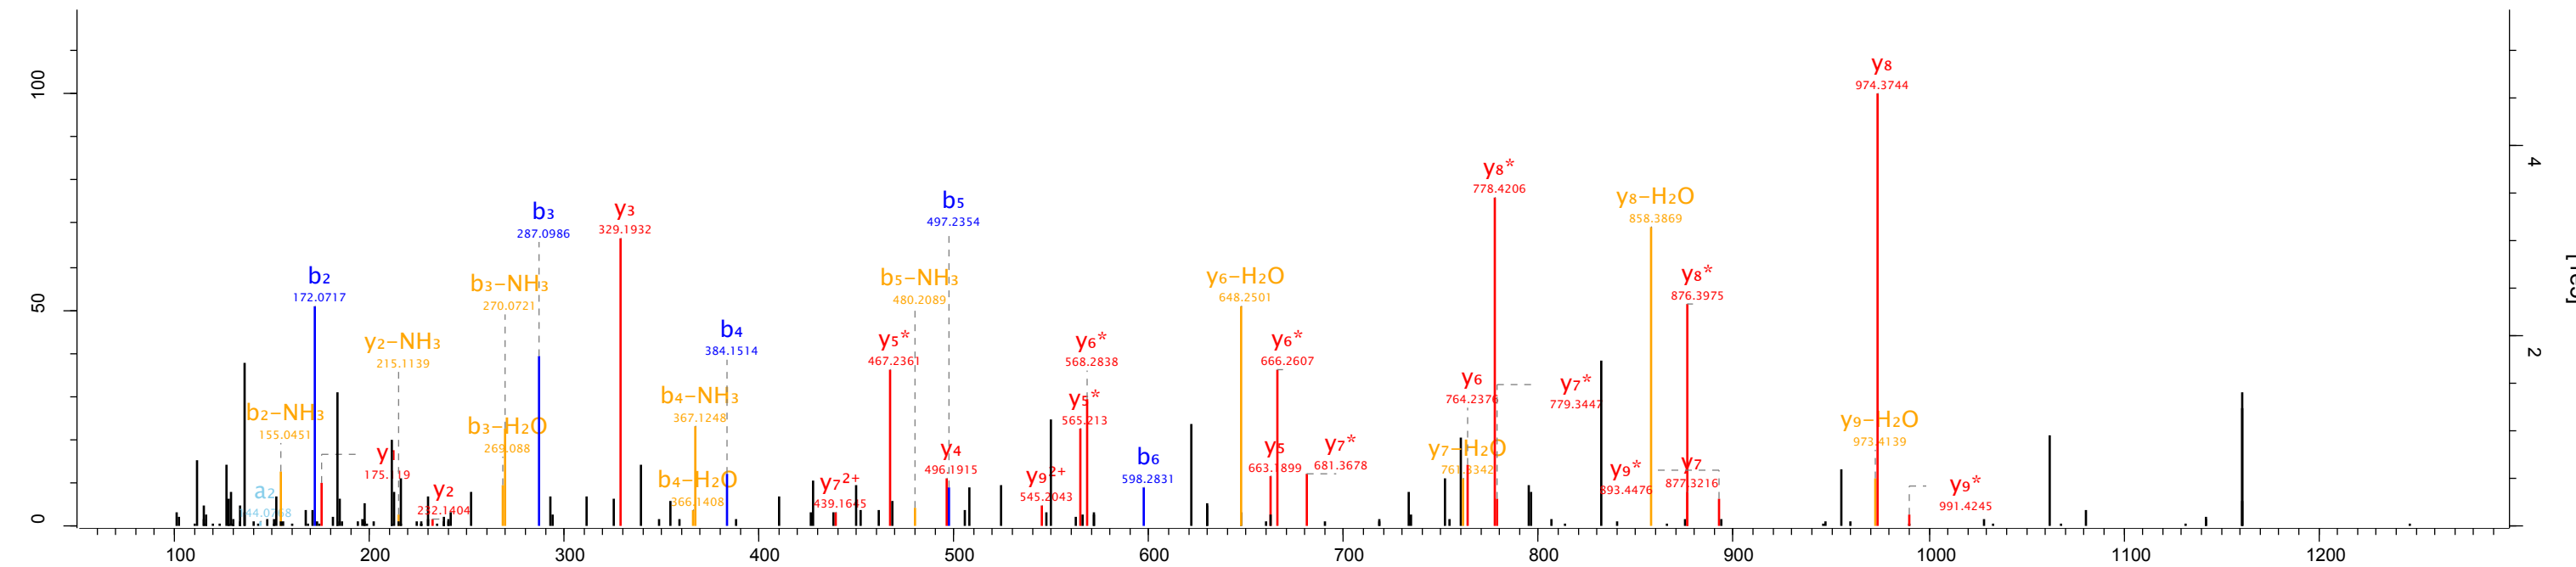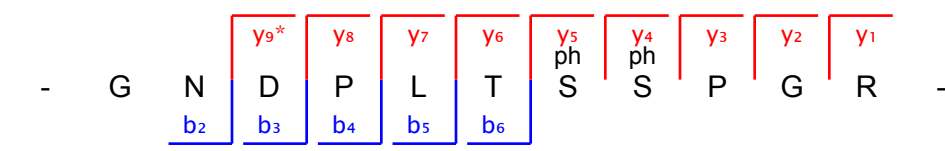

Raw file: 20150812\_A375SR\_Phospho\_BR1\_02  
 Scan: 9705 Method: FTMS; HCD Score: 143.84 m/z: 1043.41 Gene names: APBB2

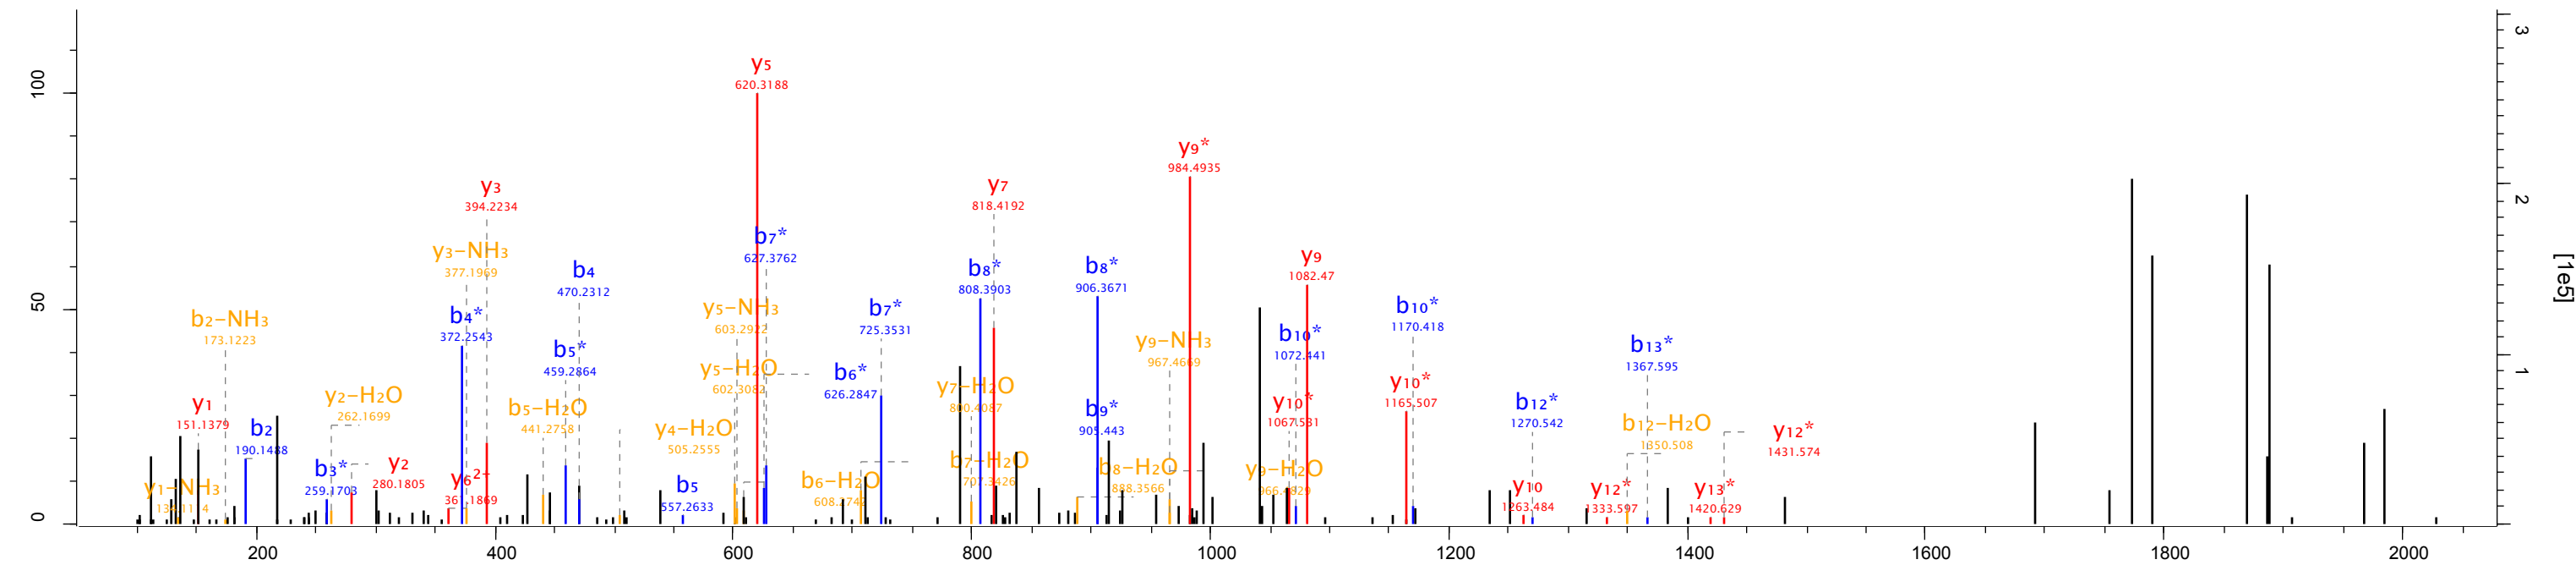

- K G S L S S V T P S P T P E N E K -

b<sub>2</sub> b<sub>3</sub>\* b<sub>4</sub> b<sub>5</sub> b<sub>6</sub>\* b<sub>7</sub>\* b<sub>8</sub>\* b<sub>9</sub>\* b<sub>10</sub>\* b<sub>12</sub>\* b<sub>13</sub>\*  
 y<sub>13</sub>\* y<sub>12</sub>\* y<sub>10</sub> y<sub>9</sub> y<sub>7</sub> y<sub>6</sub><sup>2+</sup> y<sub>5</sub> y<sub>3</sub> y<sub>2</sub> y<sub>1</sub>

Raw file 20150812\_A375SR\_Phospho\_BR1\_02 Scan 9865 Method FTMS; HCD Score 65.49 m/z 652.98 Gene names NUP214

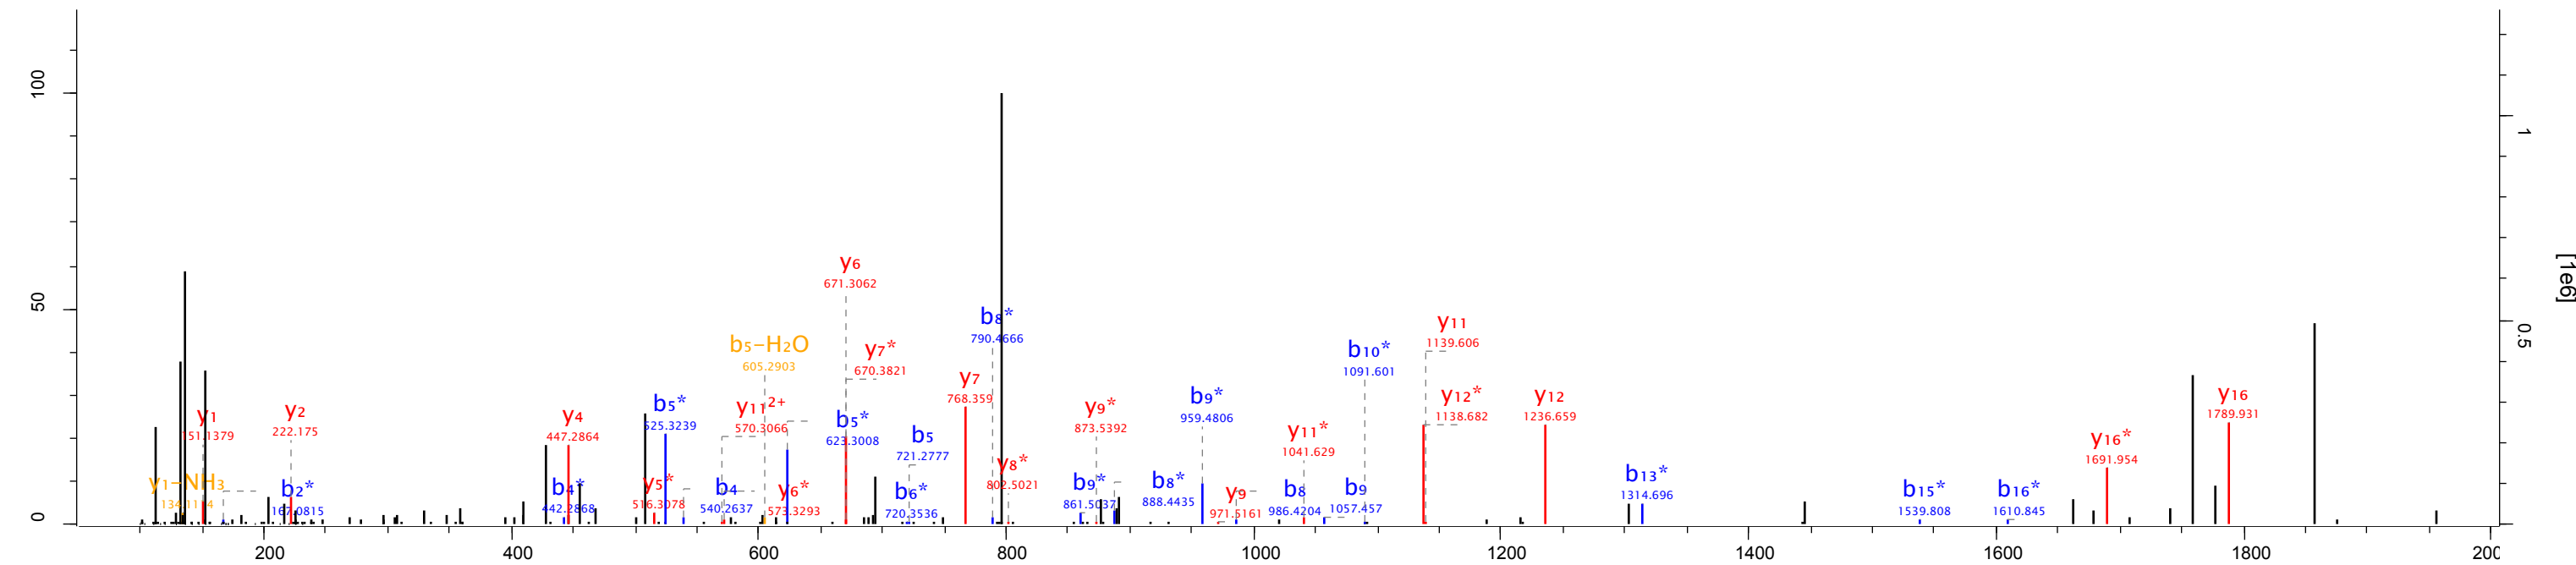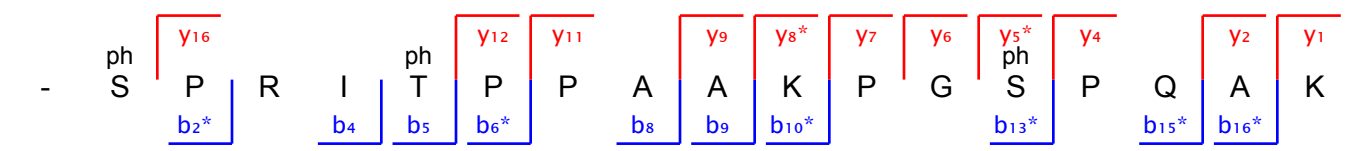

Raw file 20150812\_A375SR\_Phospho\_BR1\_02 Scan 9875 Method FTMS; HCD Score 112.6 m/z 886.68 Gene names ATRX

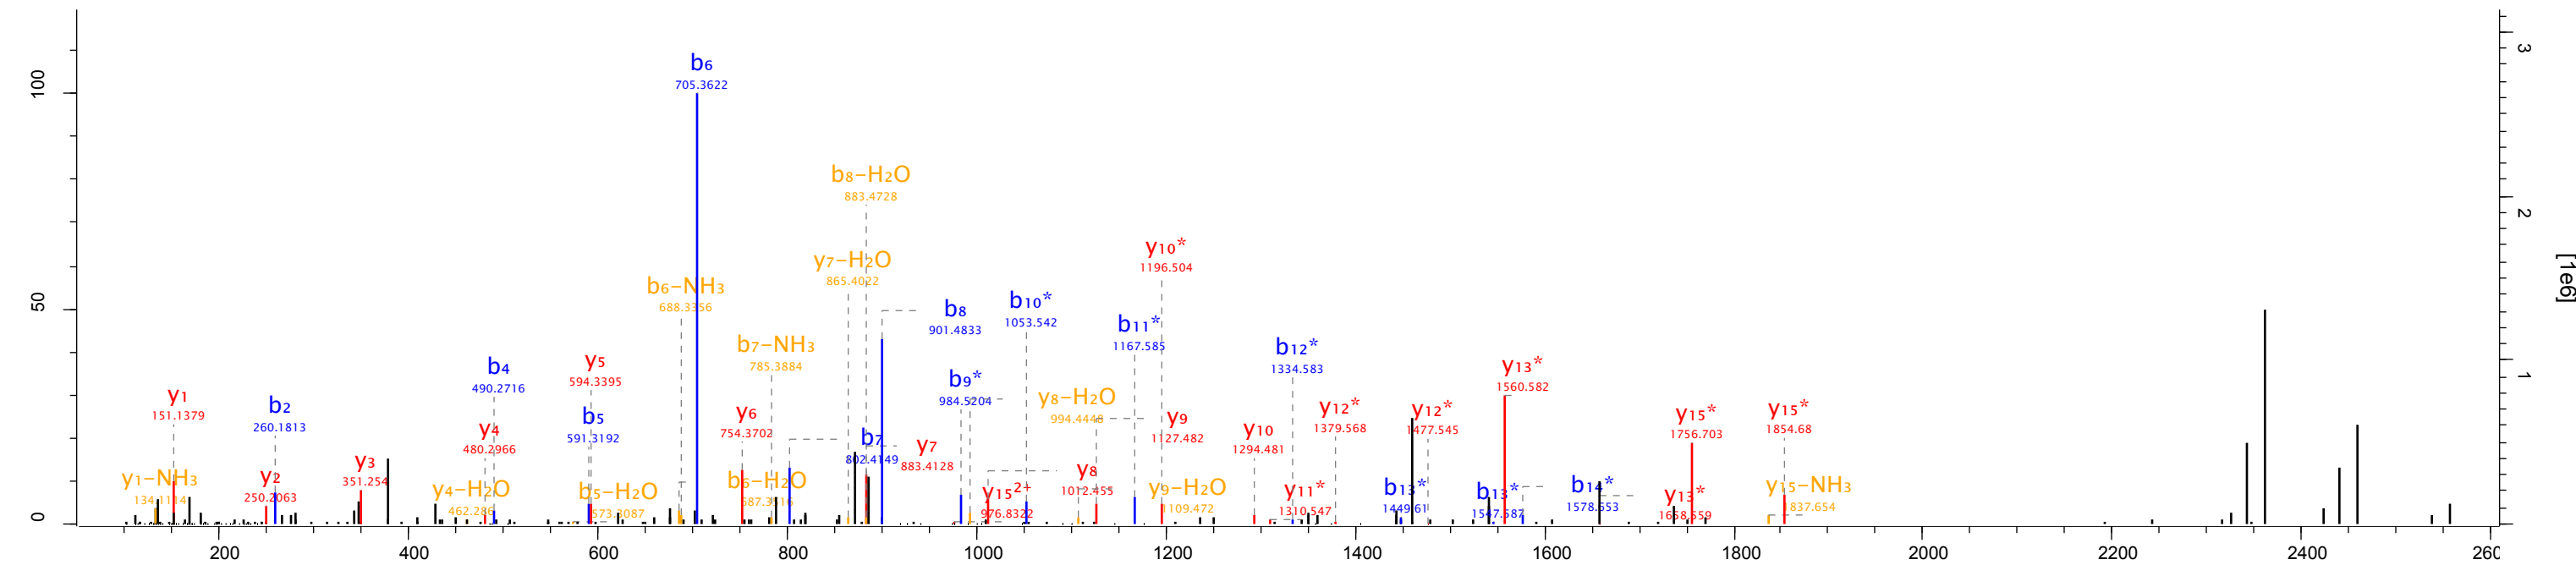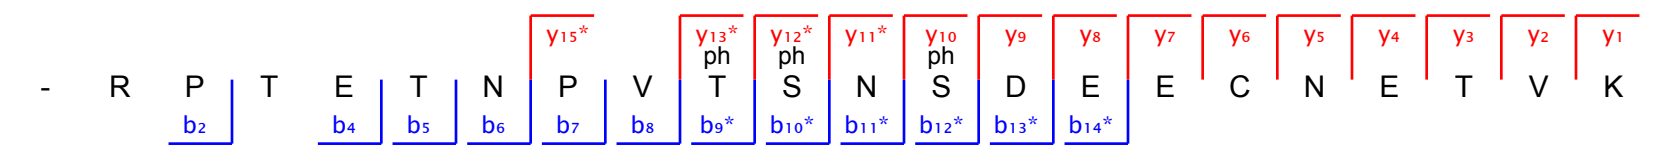

Raw file 20150812\_A375SR\_Phospho\_BR1\_03 Scan 10335 Method FTMS; HCD Score 143.88 m/z 674.27 Gene names POC5

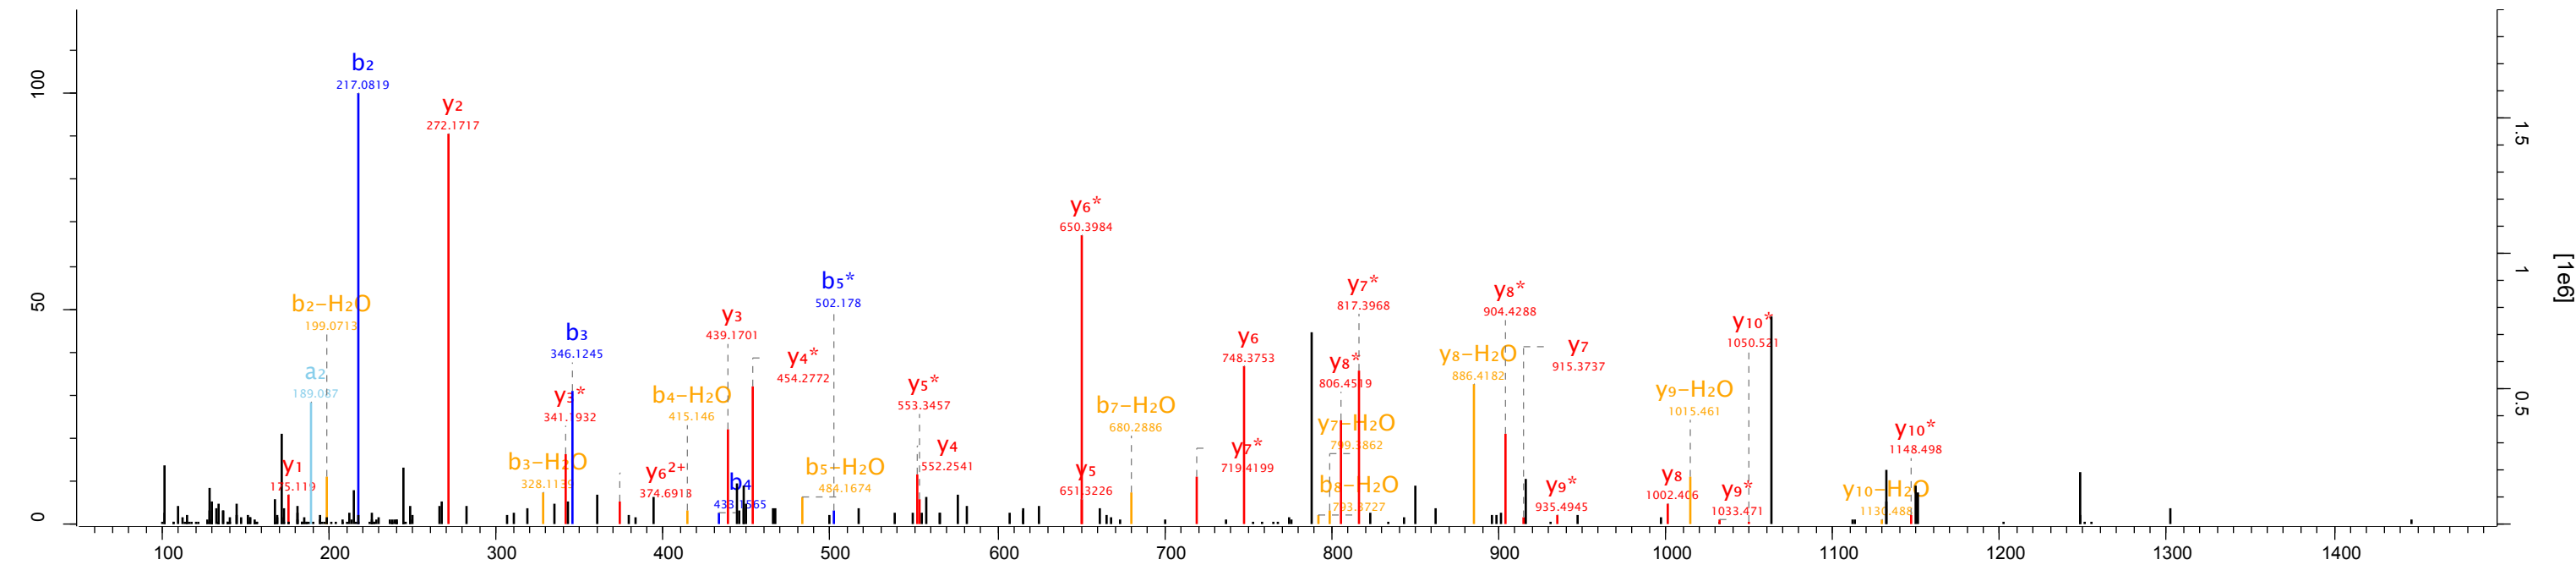

- T y10\* y9\* y8 y7  
ph y6 y5 y4 y3  
ph y2 y1 -

b2 b3 b4 b5\* P V L S P R -

Raw file 20150812\_A375SR\_Phospho\_BR1\_03 Scan 10605 Method FTMS; HCD Score 109.42 m/z 646.3 Gene names LUZP1

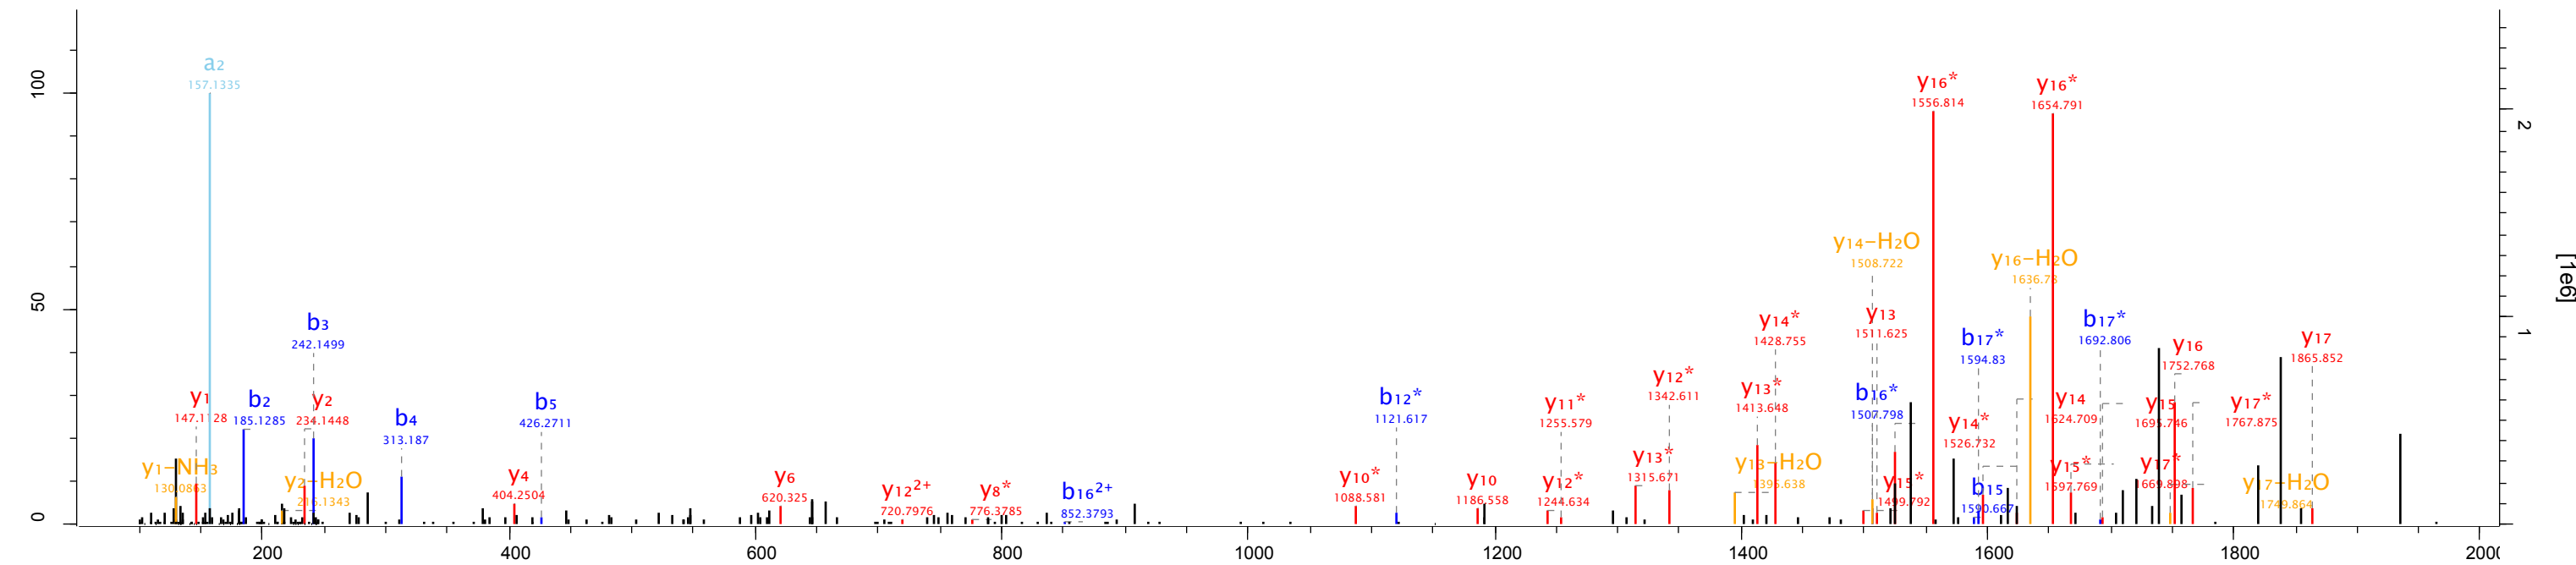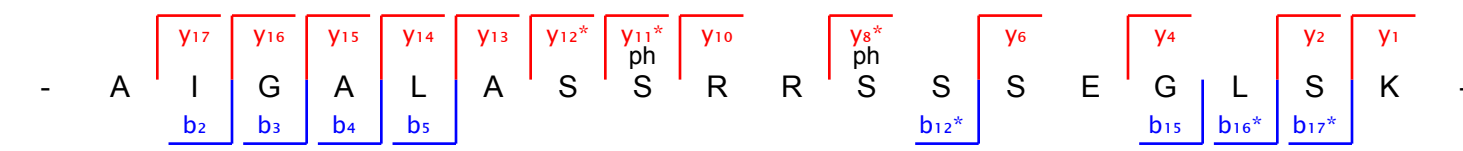

Raw file: 20150812\_A375SR\_Phospho\_BR1\_03  
 Scan: 10725 Method: FTMS; HCD Score: 325.6 m/z: 888.84 Gene names: SRRM2

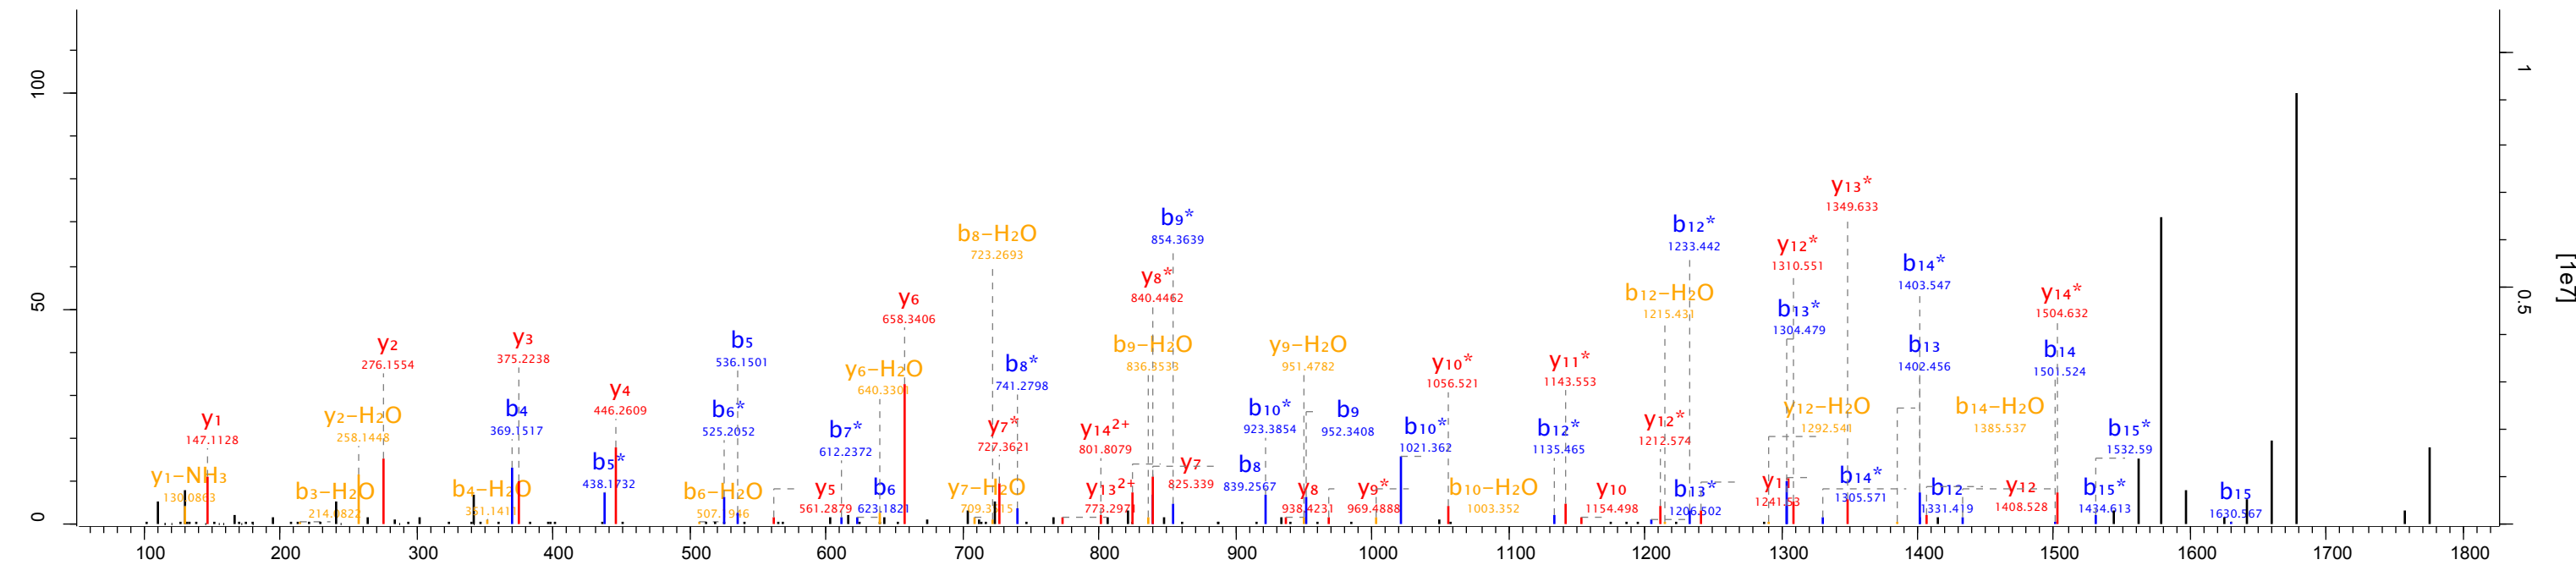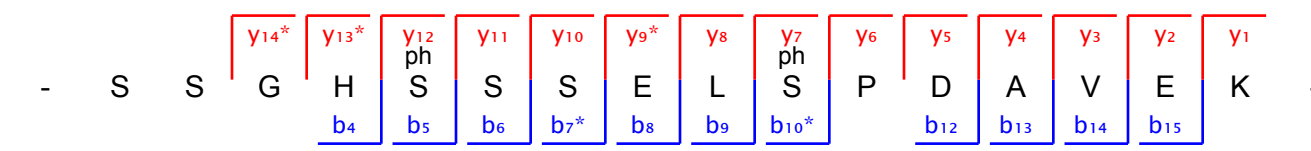



Raw file: 20150812\_A375SR\_Phospho\_BR1\_03  
 Scan: 10875 Method: FTMS; HCD Score: 288.58 m/z: 1014.96 Gene names: SCAF11

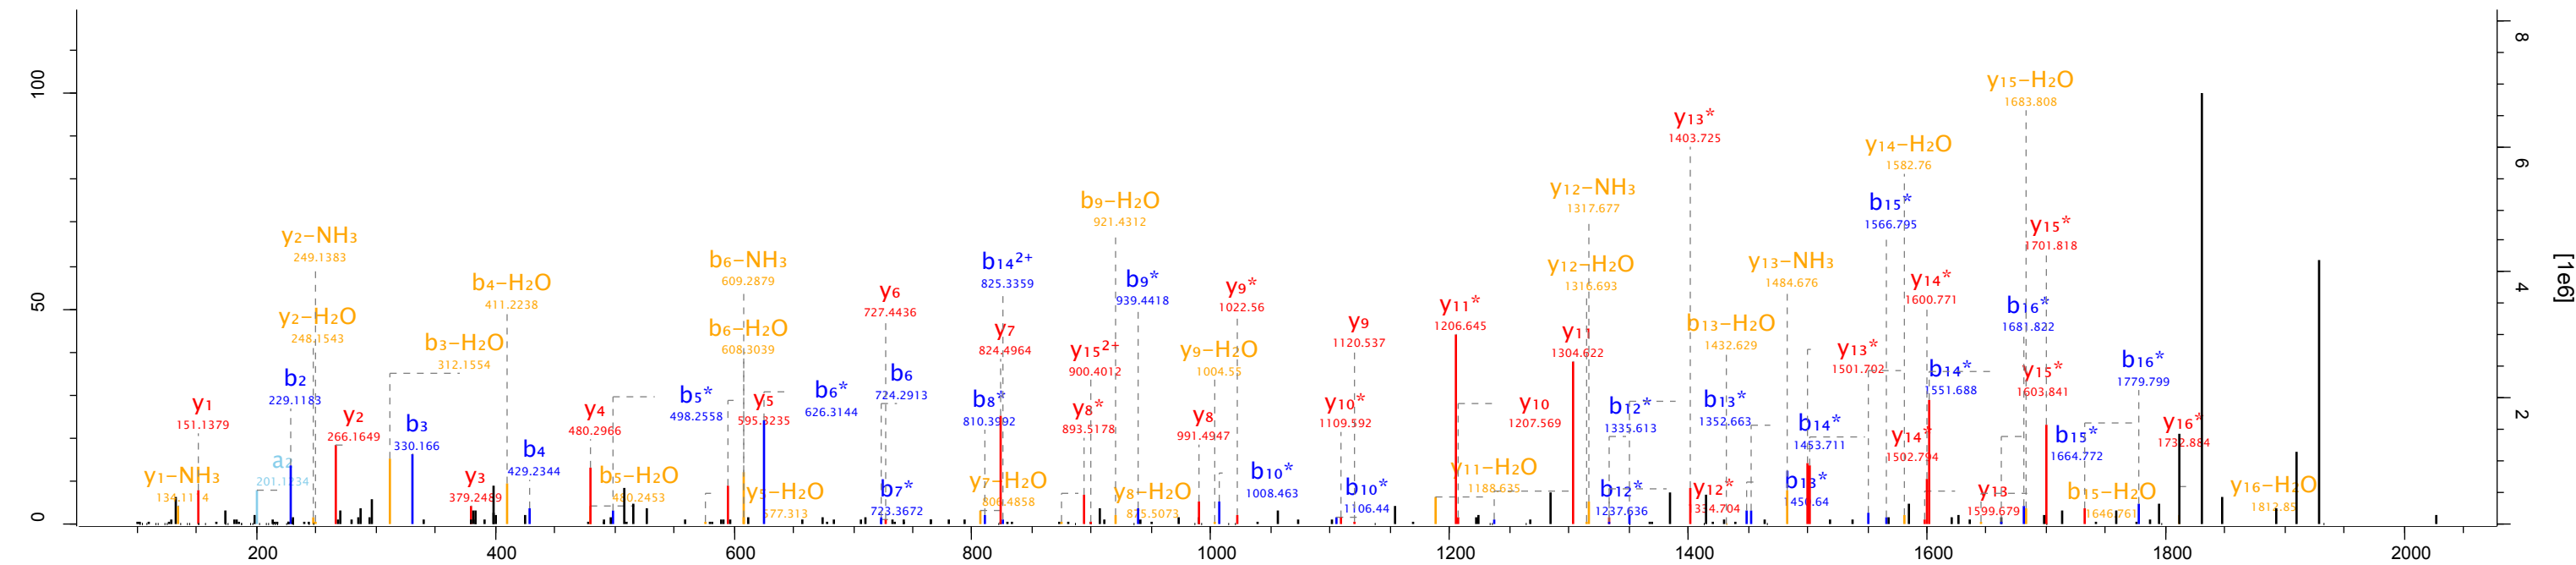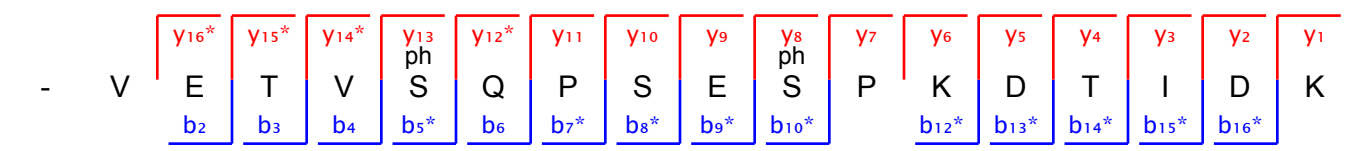

Raw file 20150812\_A375SR\_Phospho\_BR1\_03 Scan 11555 Method FTMS; HCD Score 97.26 m/z 804.85 Gene names SETD2

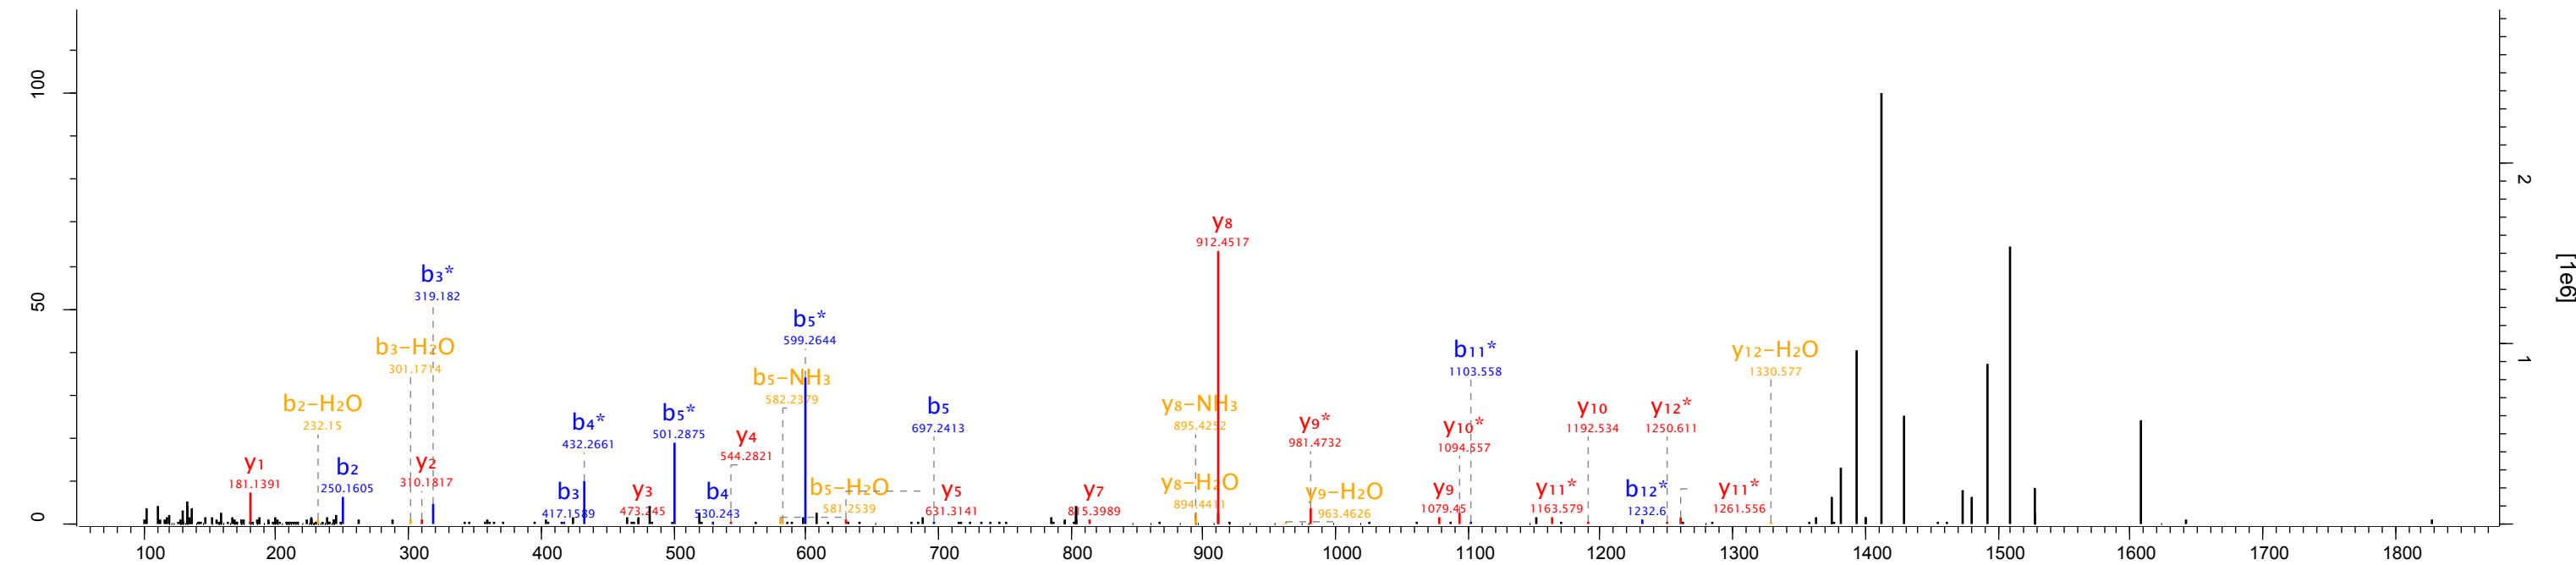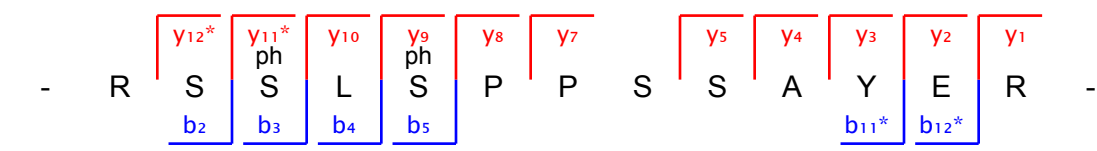

Raw file 20150812\_A375SR\_Phospho\_BR1\_03 Scan 11825 Method FTMS; HCD Score 147.49 m/z 884.33 Gene names MYO18A

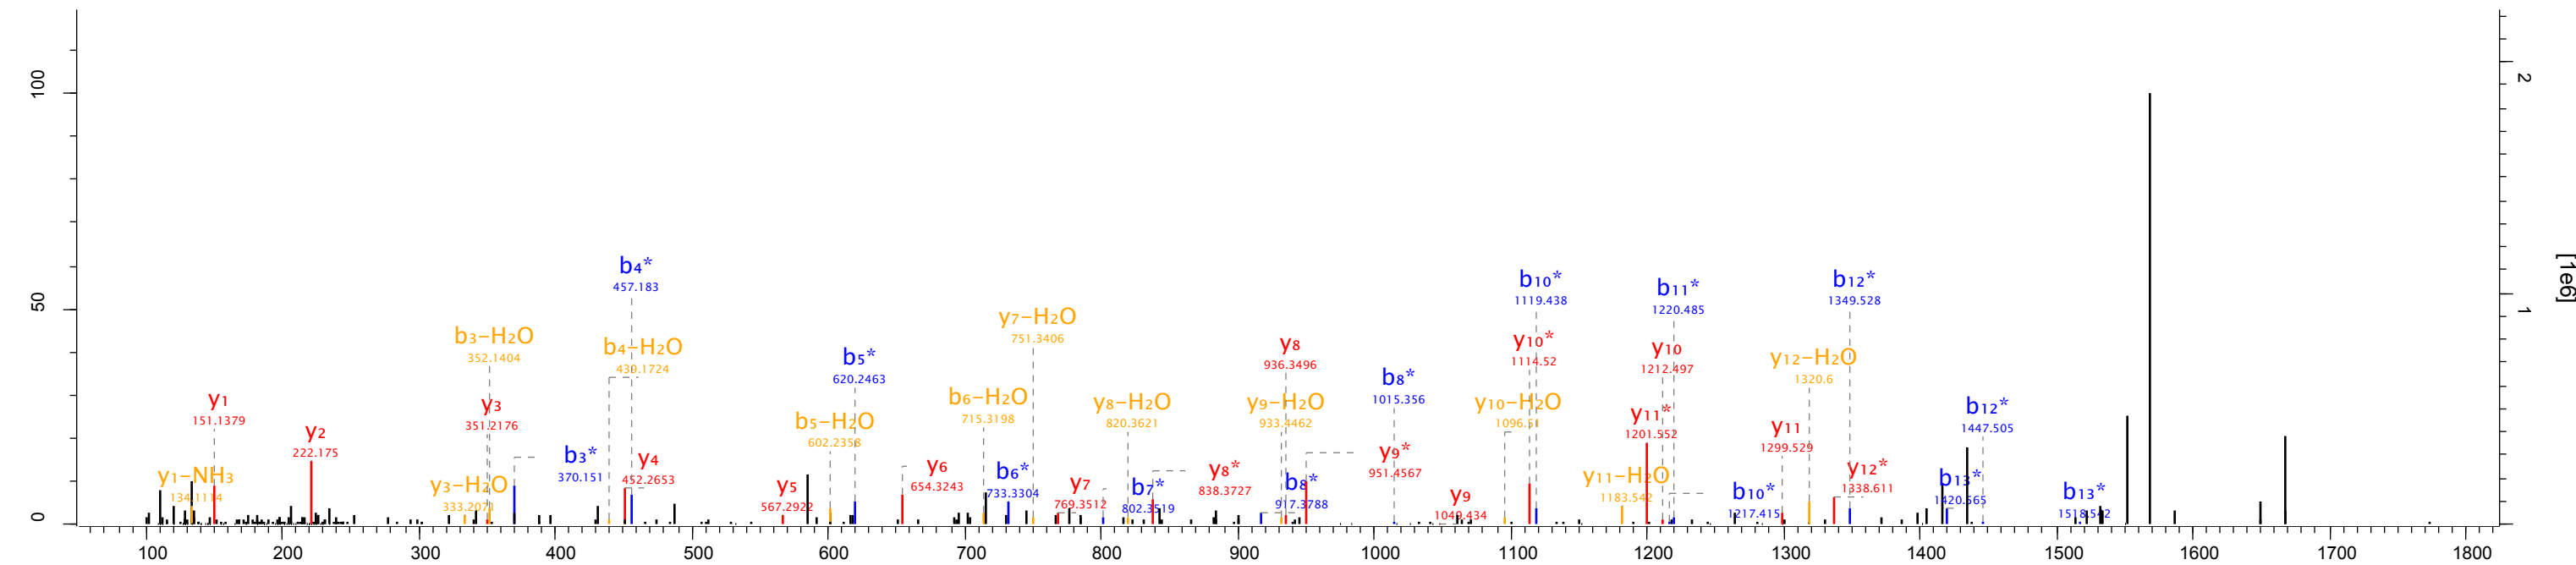

Raw file Scan Method Score m/z Gene names

20150812\_A375SR\_Phospho\_BR1\_03 11955 FTMS; HCD 374.3 1279.51 ALKBH5

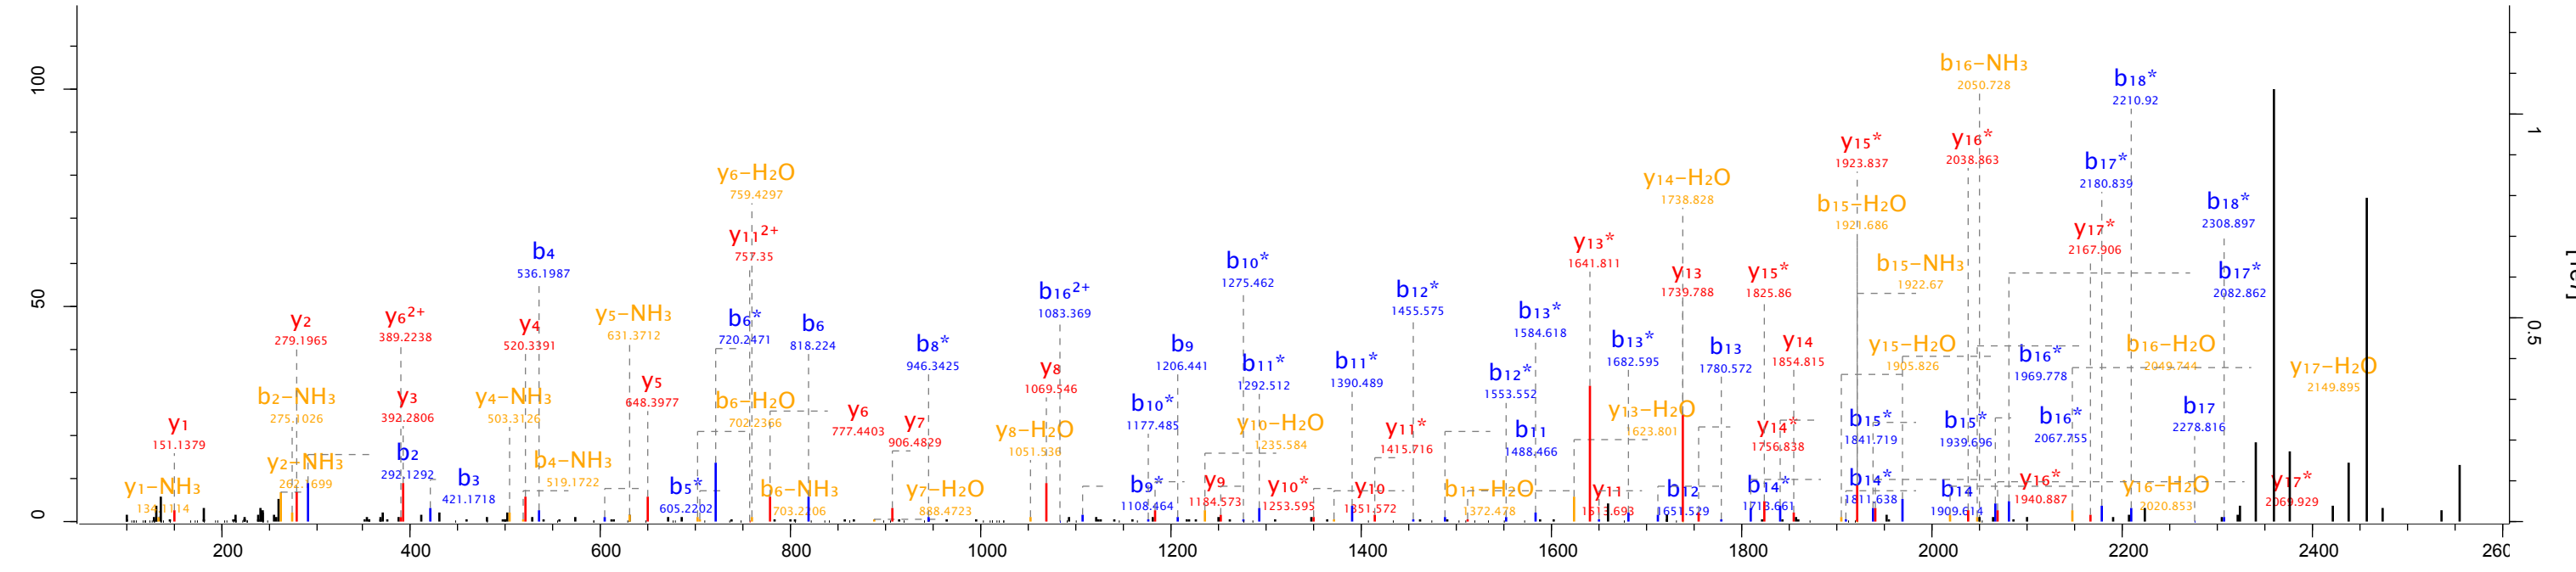

- Y Q E D P E R S D Y E E Q Q L Q K -

b<sub>2</sub>
b<sub>3</sub>
b<sub>4</sub>
b<sub>5</sub>\*
b<sub>6</sub>
b<sub>8</sub>\*
b<sub>9</sub>
b<sub>10</sub>\*
b<sub>11</sub>
b<sub>12</sub>
b<sub>13</sub>
b<sub>14</sub>
b<sub>15</sub>\*
b<sub>16</sub>\*
b<sub>17</sub>
b<sub>18</sub>\*

y<sub>17</sub>\*
y<sub>16</sub>\*
y<sub>15</sub>\*
y<sub>14</sub>
y<sub>13</sub>
y<sub>11</sub>
y<sub>10</sub>
y<sub>9</sub>
y<sub>8</sub>
y<sub>7</sub>
y<sub>6</sub>
y<sub>5</sub>
y<sub>4</sub>
y<sub>3</sub>
y<sub>2</sub>
y<sub>1</sub>

b<sub>2</sub>-NH<sub>3</sub>
b<sub>3</sub>-NH<sub>3</sub>
b<sub>4</sub>-NH<sub>3</sub>
b<sub>5</sub>-NH<sub>3</sub>
b<sub>6</sub>-NH<sub>3</sub>
b<sub>8</sub>-NH<sub>3</sub>
b<sub>9</sub>-NH<sub>3</sub>
b<sub>10</sub>-NH<sub>3</sub>
b<sub>11</sub>-NH<sub>3</sub>
b<sub>12</sub>-NH<sub>3</sub>
b<sub>13</sub>-NH<sub>3</sub>
b<sub>14</sub>-NH<sub>3</sub>
b<sub>15</sub>-NH<sub>3</sub>
b<sub>16</sub>-NH<sub>3</sub>
b<sub>17</sub>-NH<sub>3</sub>
b<sub>18</sub>-NH<sub>3</sub>

y<sub>1</sub>-H<sub>2</sub>O
y<sub>2</sub>-H<sub>2</sub>O
y<sub>3</sub>-H<sub>2</sub>O
y<sub>4</sub>-H<sub>2</sub>O
y<sub>5</sub>-H<sub>2</sub>O
y<sub>6</sub>-H<sub>2</sub>O
y<sub>7</sub>-H<sub>2</sub>O
y<sub>8</sub>-H<sub>2</sub>O
y<sub>9</sub>-H<sub>2</sub>O
y<sub>10</sub>-H<sub>2</sub>O
y<sub>11</sub>-H<sub>2</sub>O
y<sub>12</sub>-H<sub>2</sub>O
y<sub>13</sub>-H<sub>2</sub>O
y<sub>14</sub>-H<sub>2</sub>O
y<sub>15</sub>-H<sub>2</sub>O
y<sub>16</sub>-H<sub>2</sub>O
y<sub>17</sub>-H<sub>2</sub>O

Raw file: 20150812\_A375SR\_Phospho\_BR1\_03  
 Scan: 11965 Method: FTMS; HCD Score: 115.38 m/z: 768.33 Gene names: DDX17

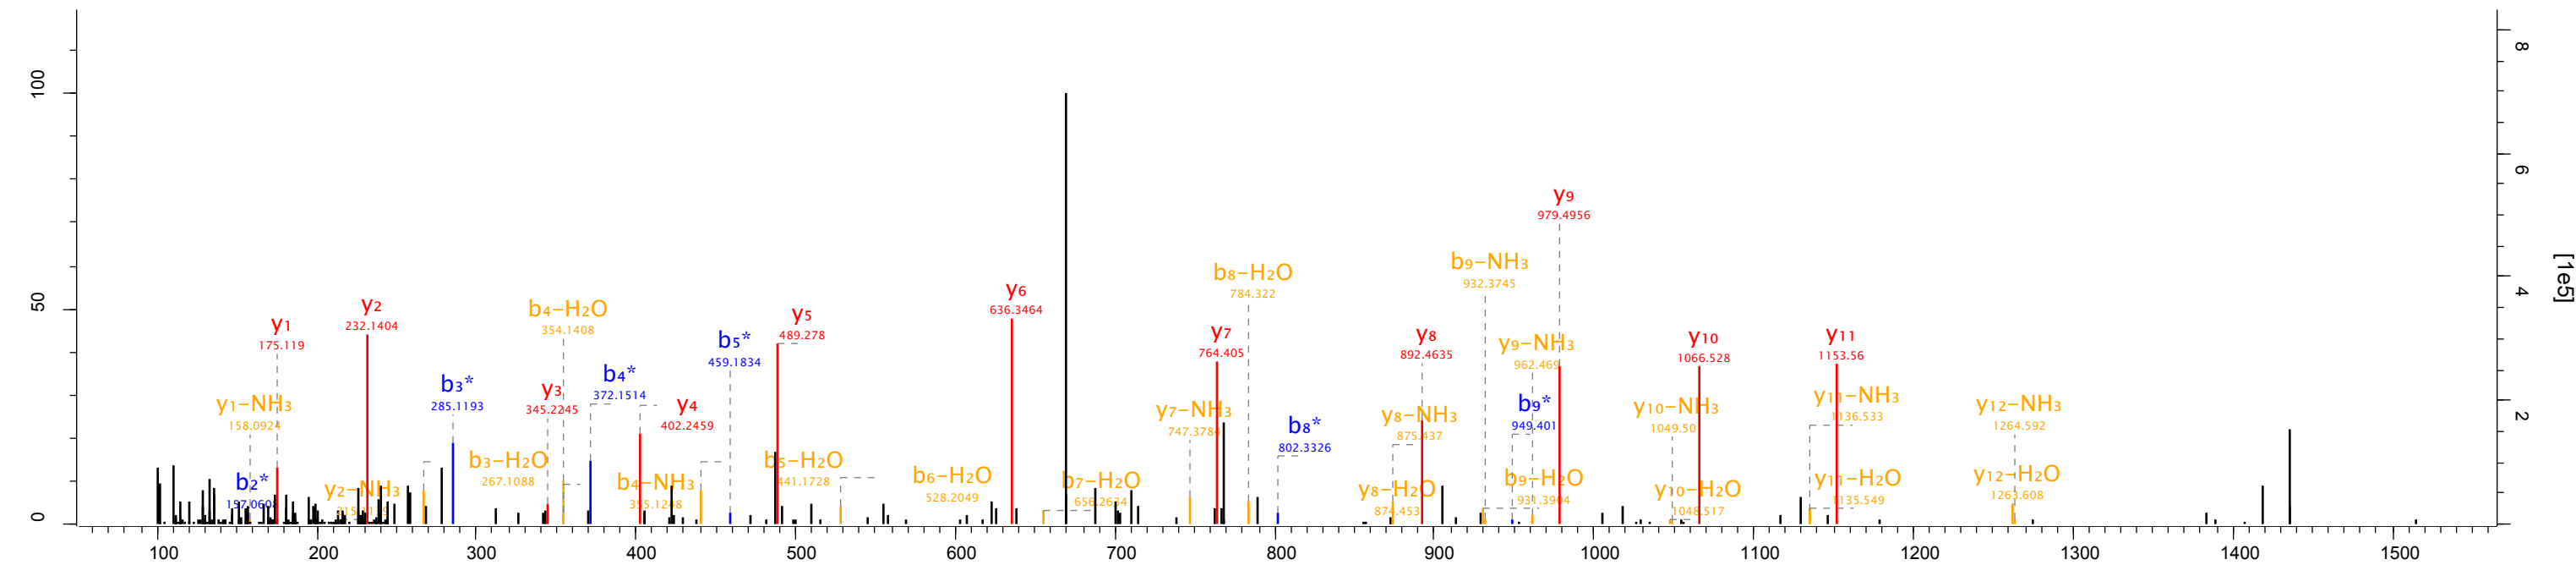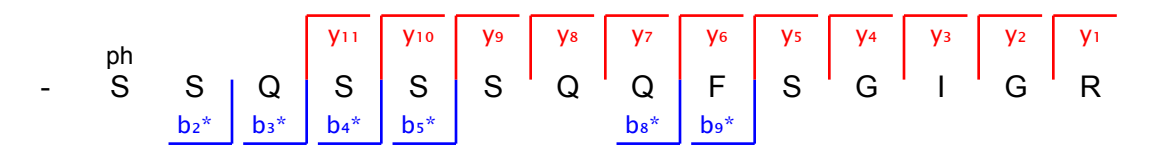

Raw file 20150812\_A375SR\_Phospho\_BR1\_03 Scan 12235 Method FTMS; HCD Score 175.02 m/z 1223.05 Gene names SUDS3

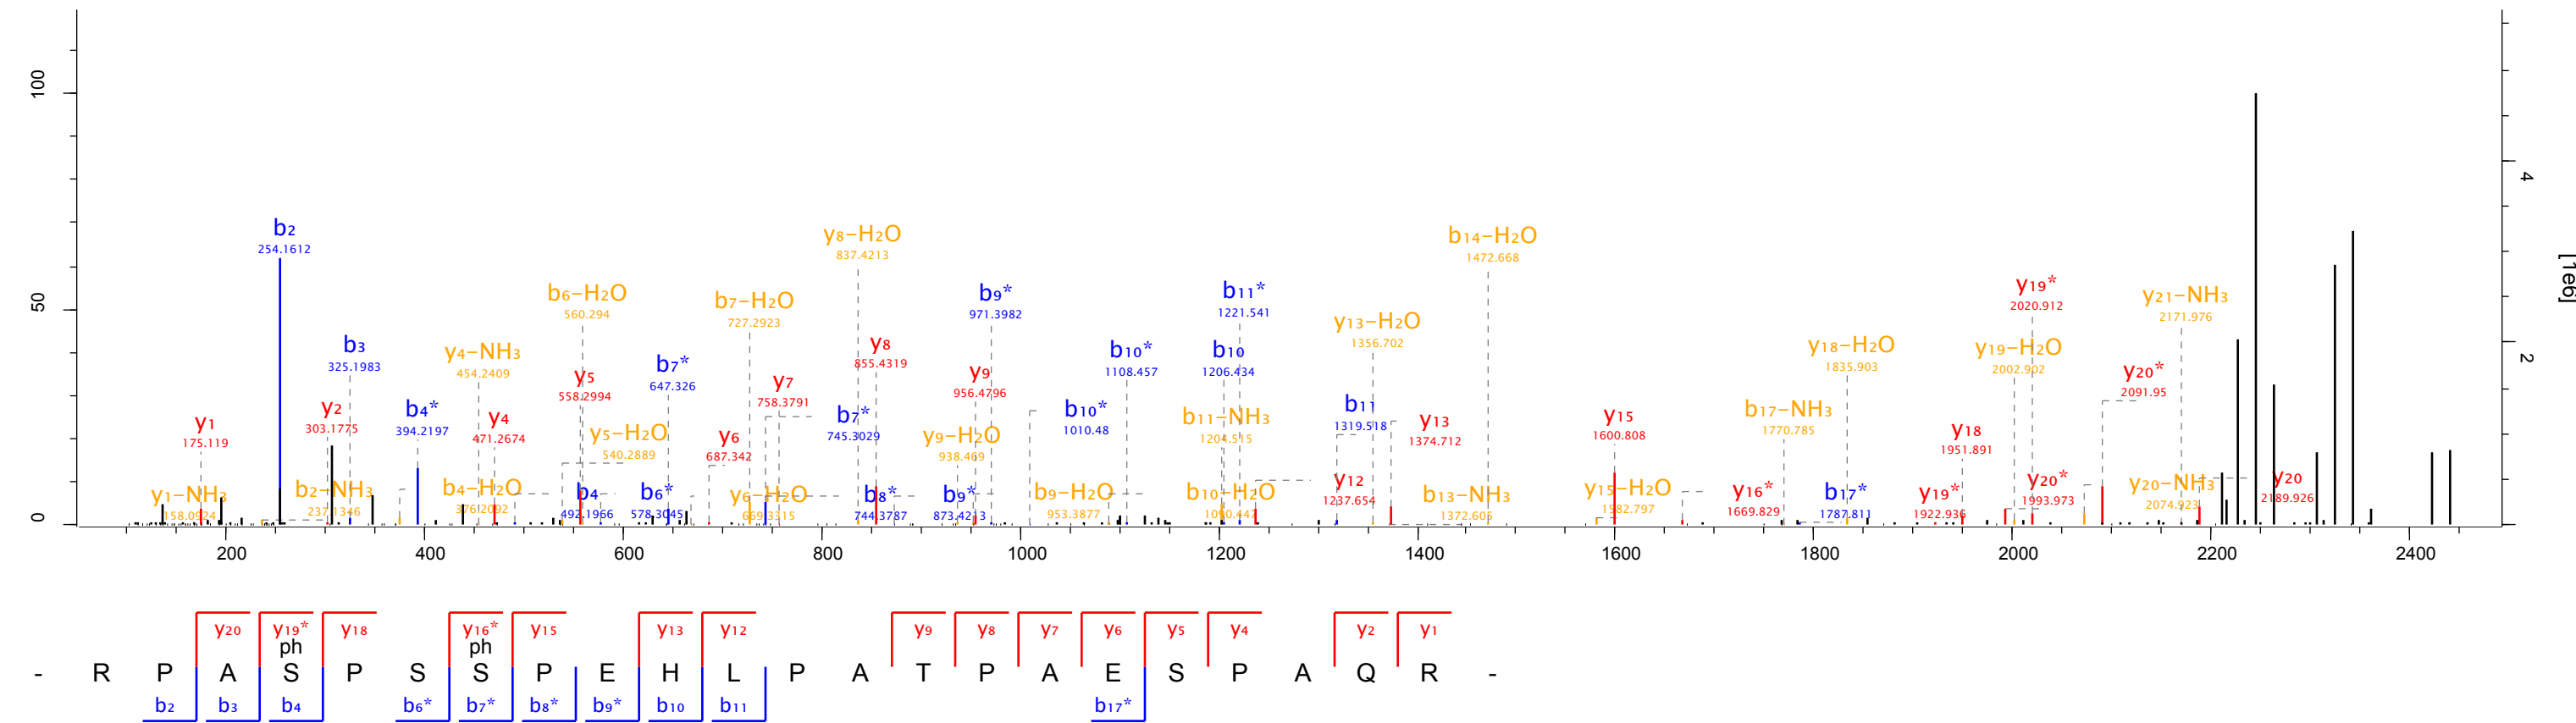

Raw file 20150812\_A375SR\_Phospho\_BR1\_03 Scan 12415 Method FTMS; HCD Score 85.89 m/z 519.71 Gene names SNX29

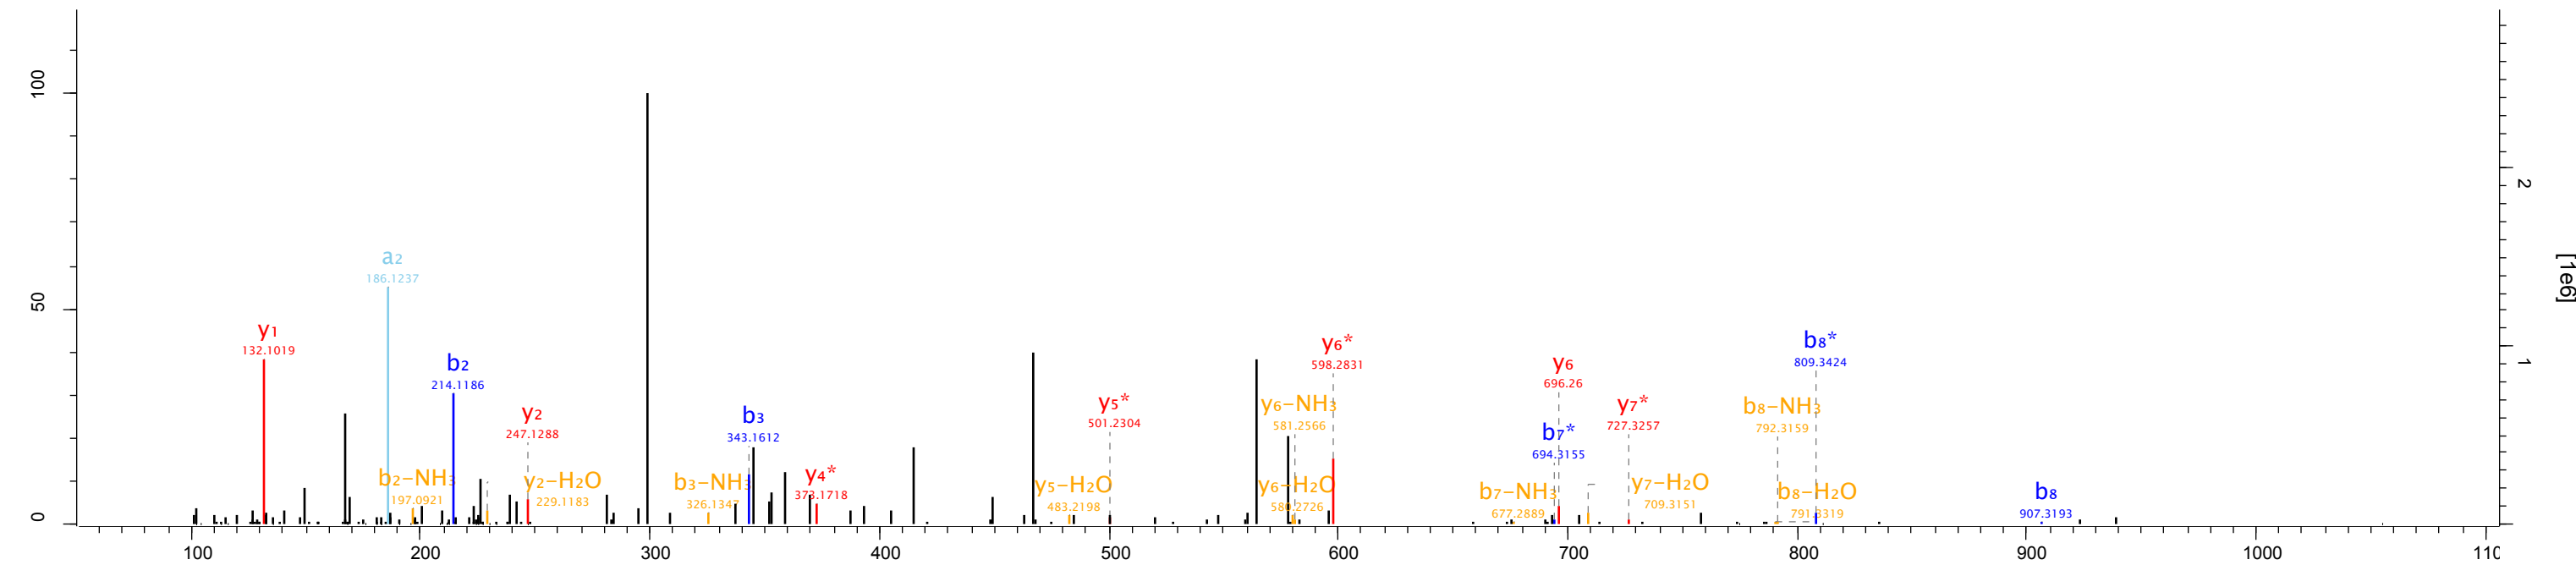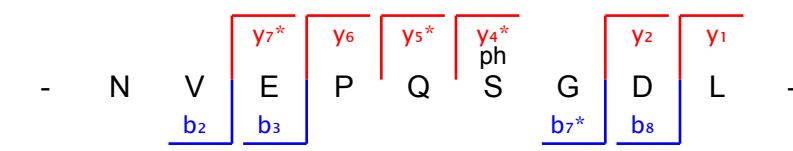

Raw file 20150812\_A375SR\_Phospho\_BR1\_03 Scan 12555 Method FTMS; HCD Score 129.88 m/z 823.69 Gene names MON1B

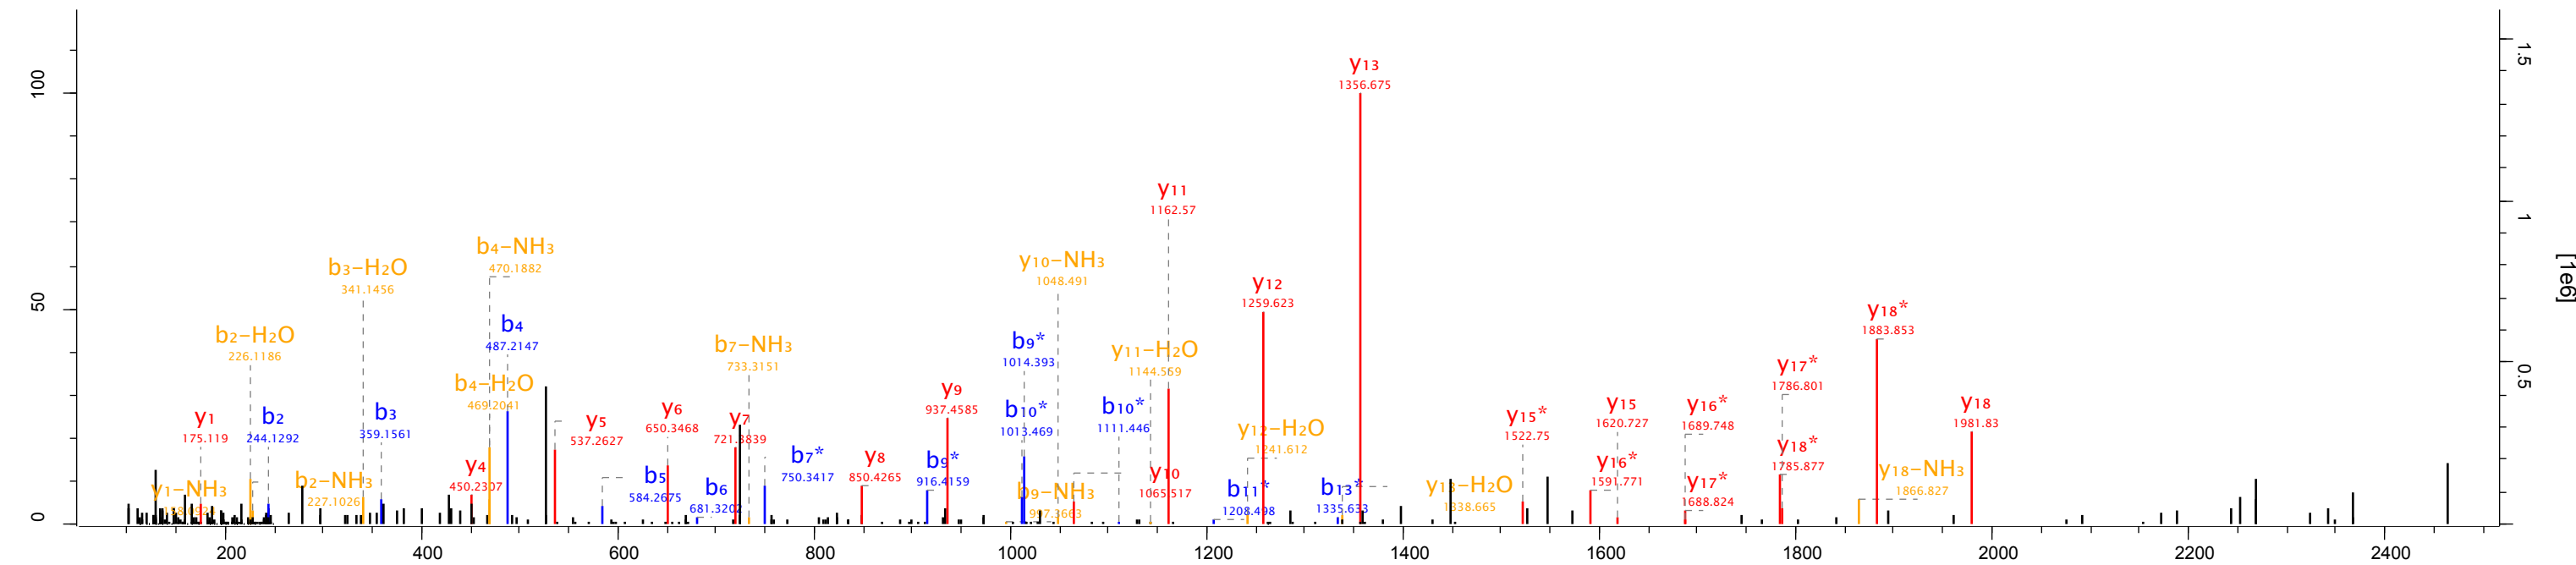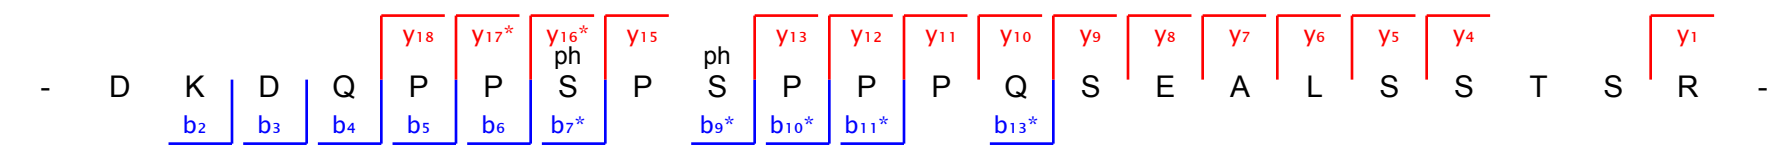



Raw file  
20150812\_A375SR\_Phospho\_BR1\_03

Scan 12785 Method FTMS; HCD Score 240.61 m/z 758.83 Gene names DOCK7

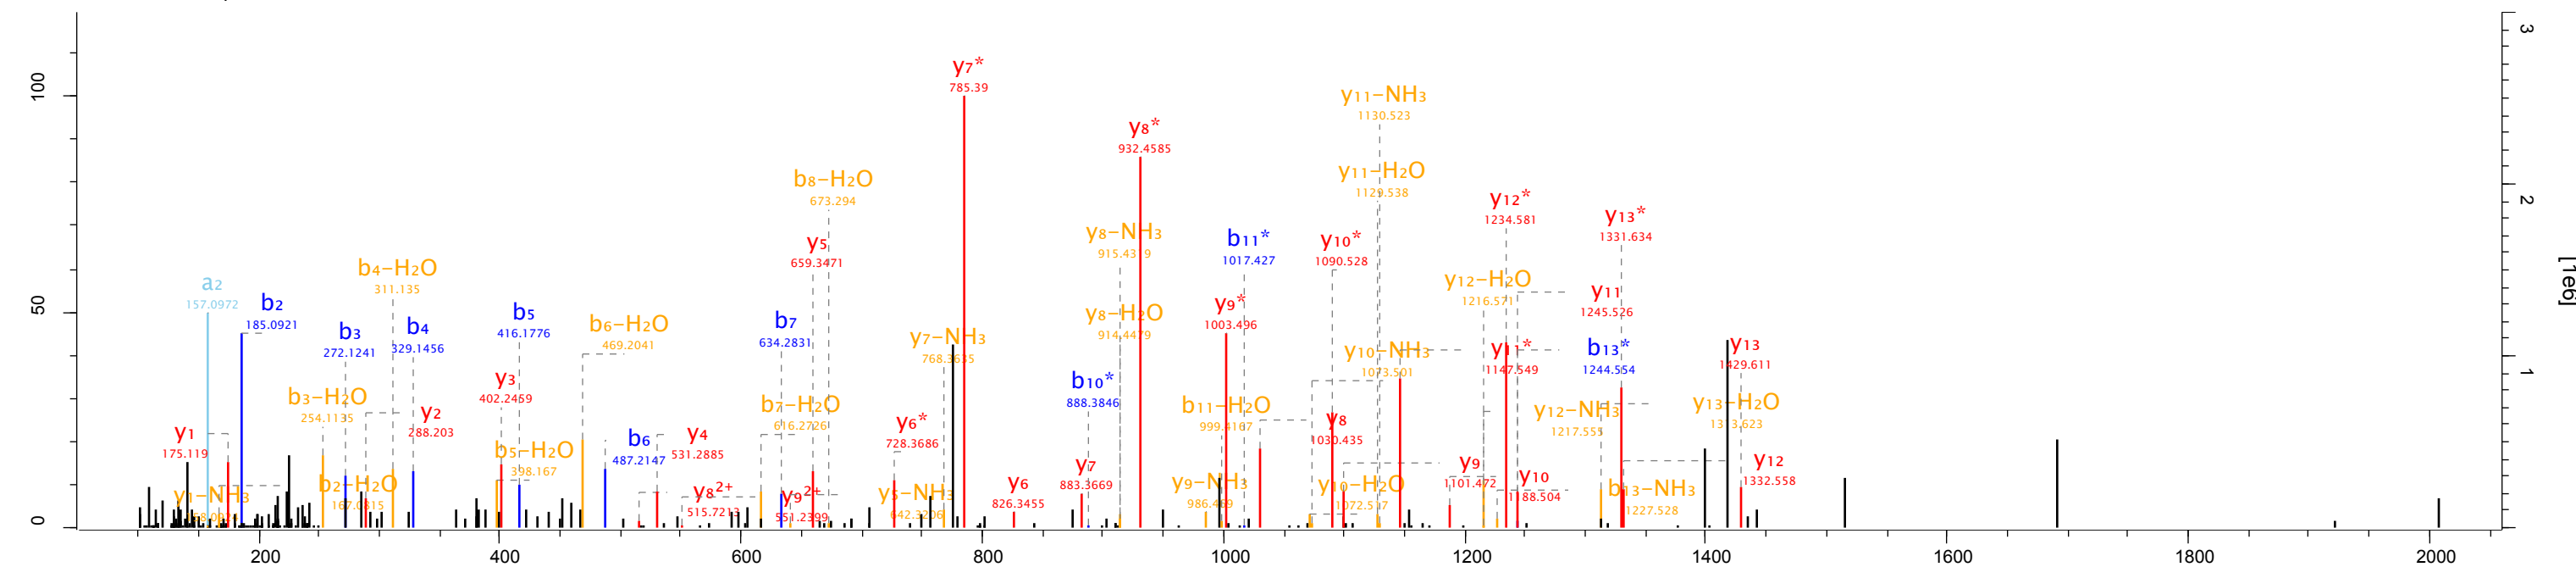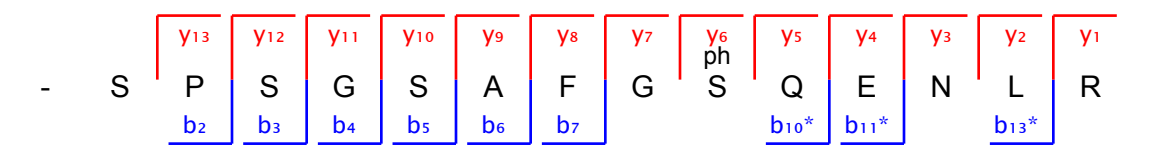

Raw file 20150812\_A375SR\_Phospho\_BR1\_03 Scan 12865 Method FTMS; HCD Score 169.62 m/z 838.85 Gene names POLR2A

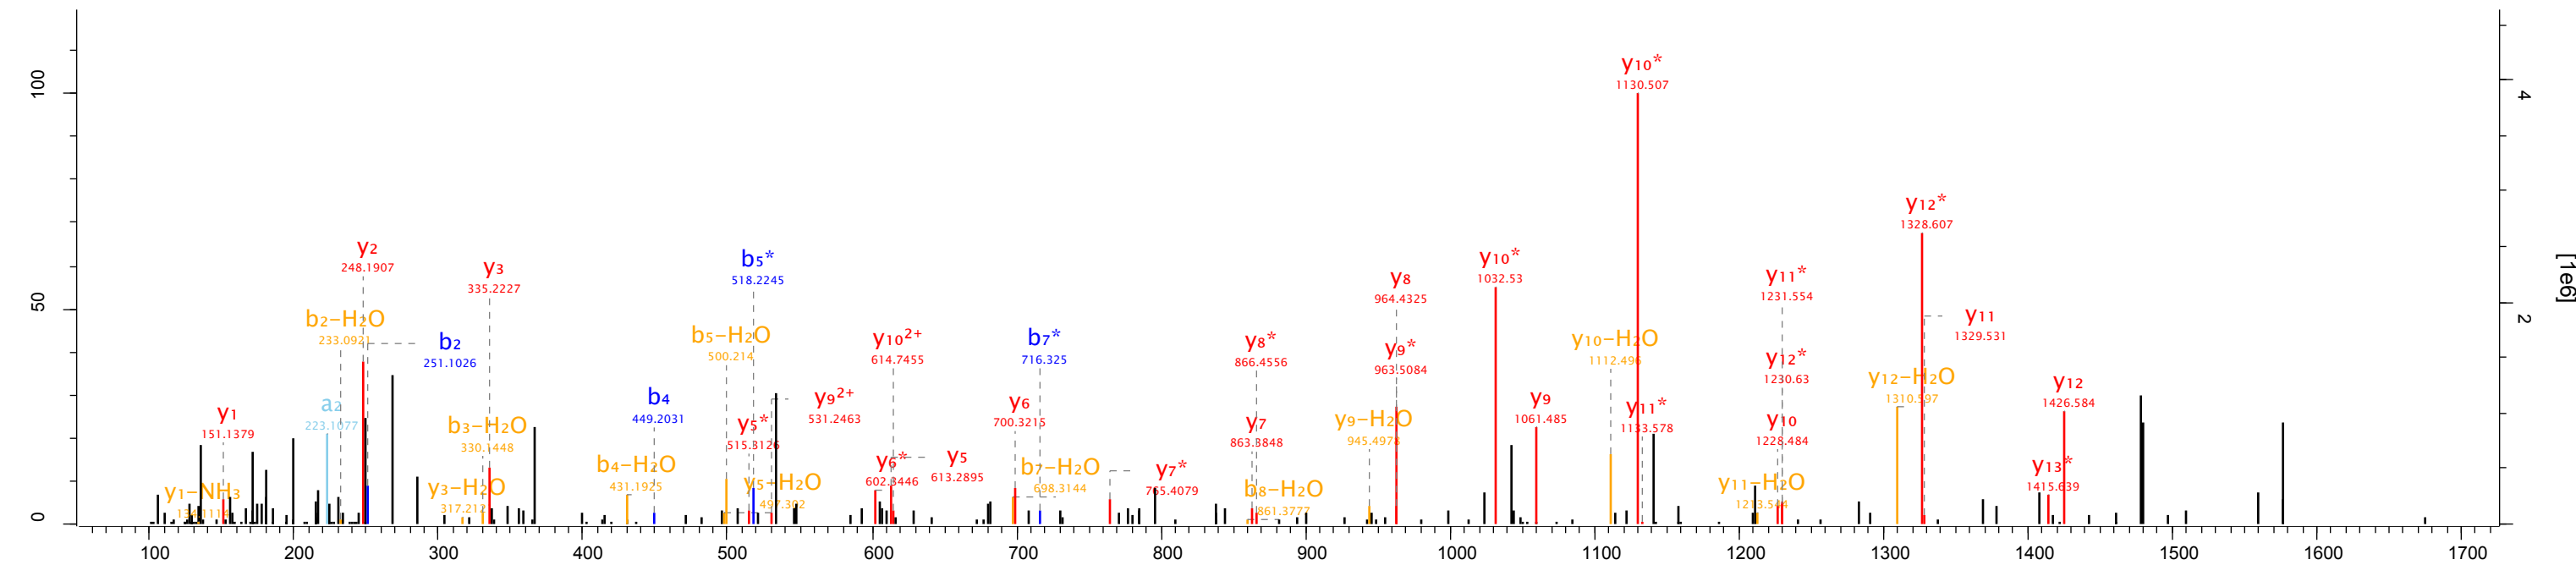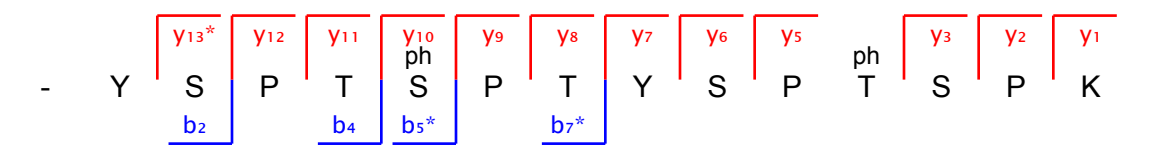

Raw file: 20150812\_A375SR\_Phospho\_BR1\_03  
 Scan: 13025 Method: FTMS; HCD Score: 202.85 m/z: 1059.46 Gene names: GLCCI1

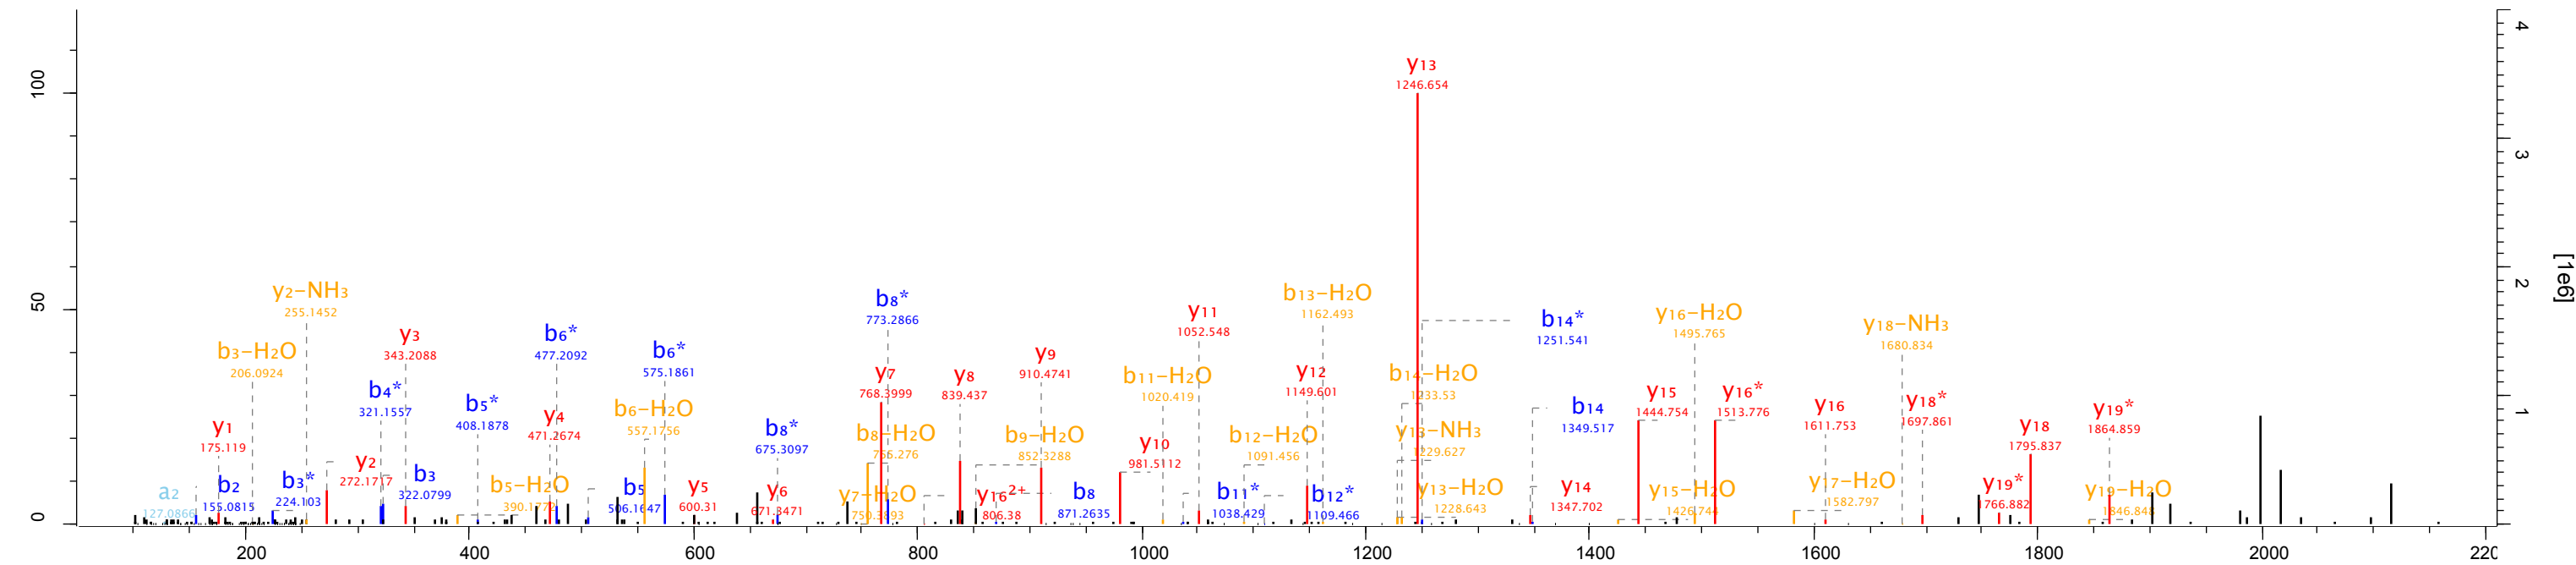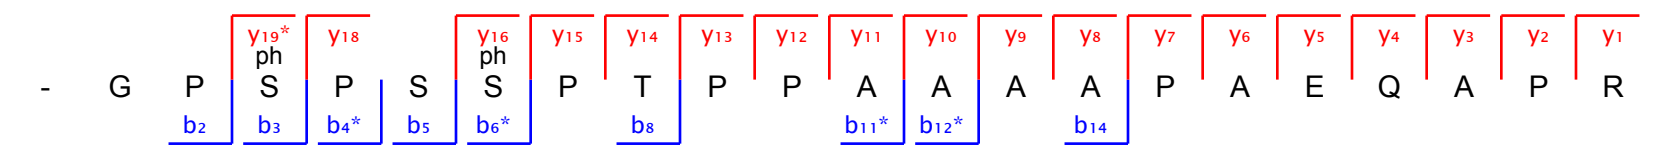

Raw file: 20150812\_A375SR\_Phospho\_BR1\_03  
 Scan: 13175 Method: FTMS; HCD Score: 89.28 m/z: 935.39 Gene names: MKL1; mkl1

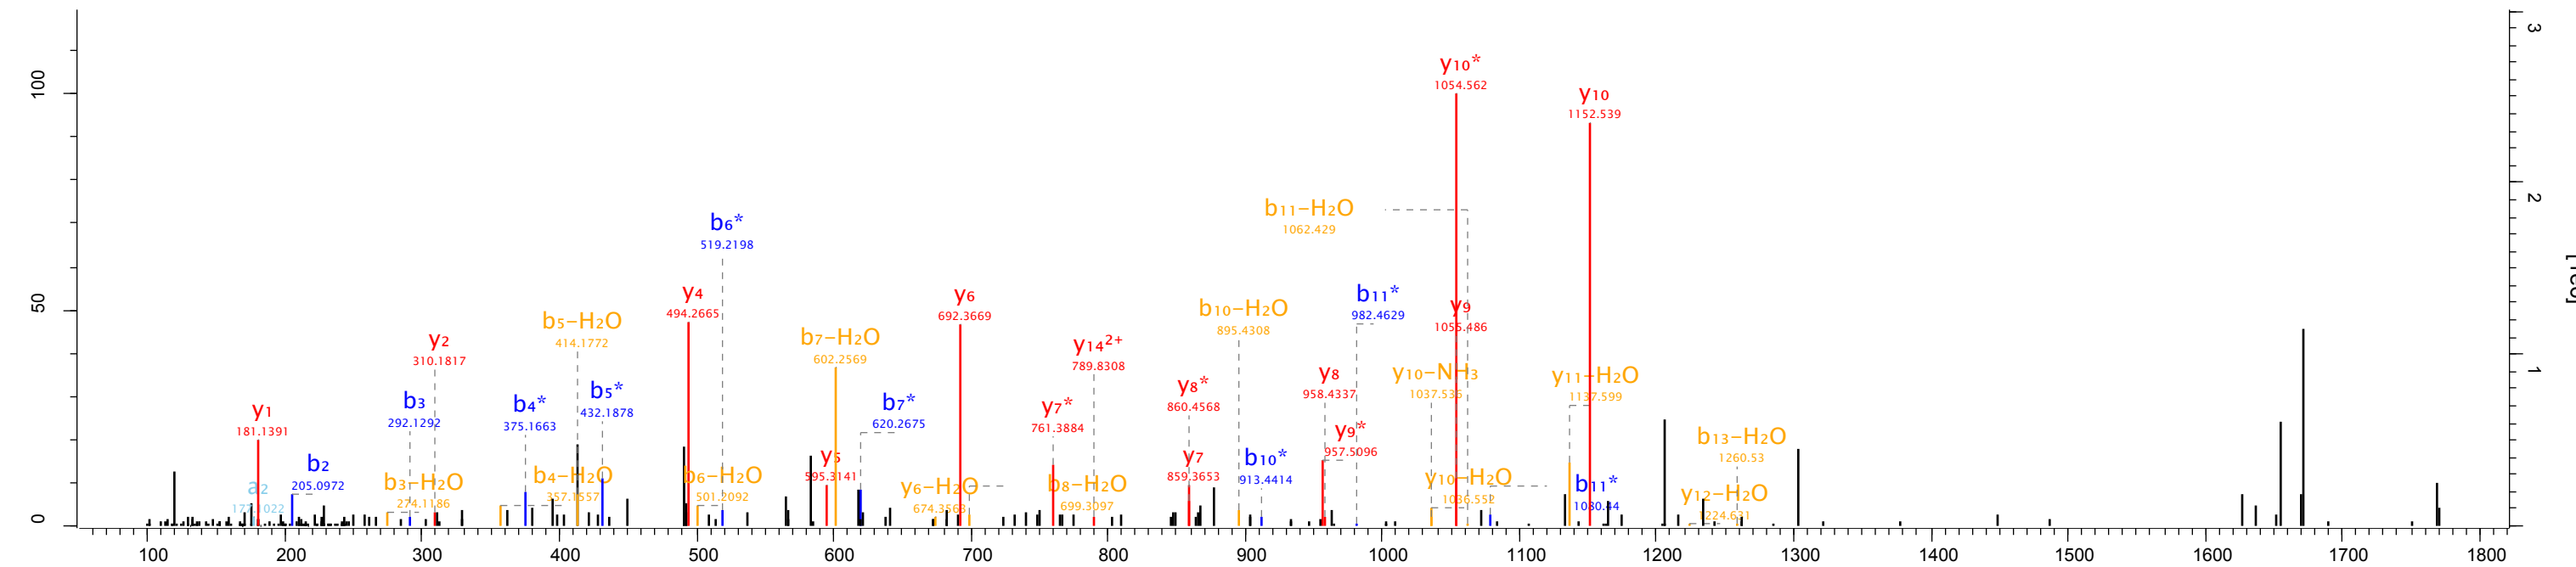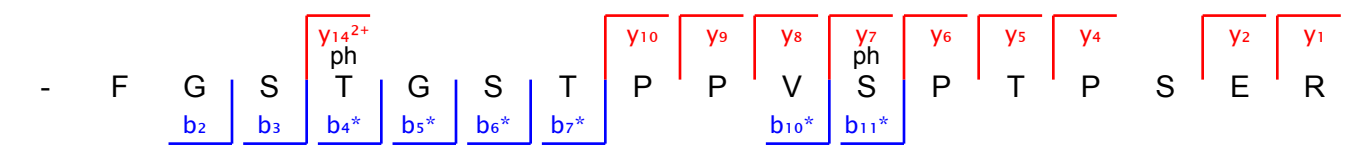

Raw file: 20150812\_A375SR\_Phospho\_BR1\_03  
 Scan: 1335 Method: FTMS; HCD Score: 111.73 m/z: 745.35 Gene names: CWC25

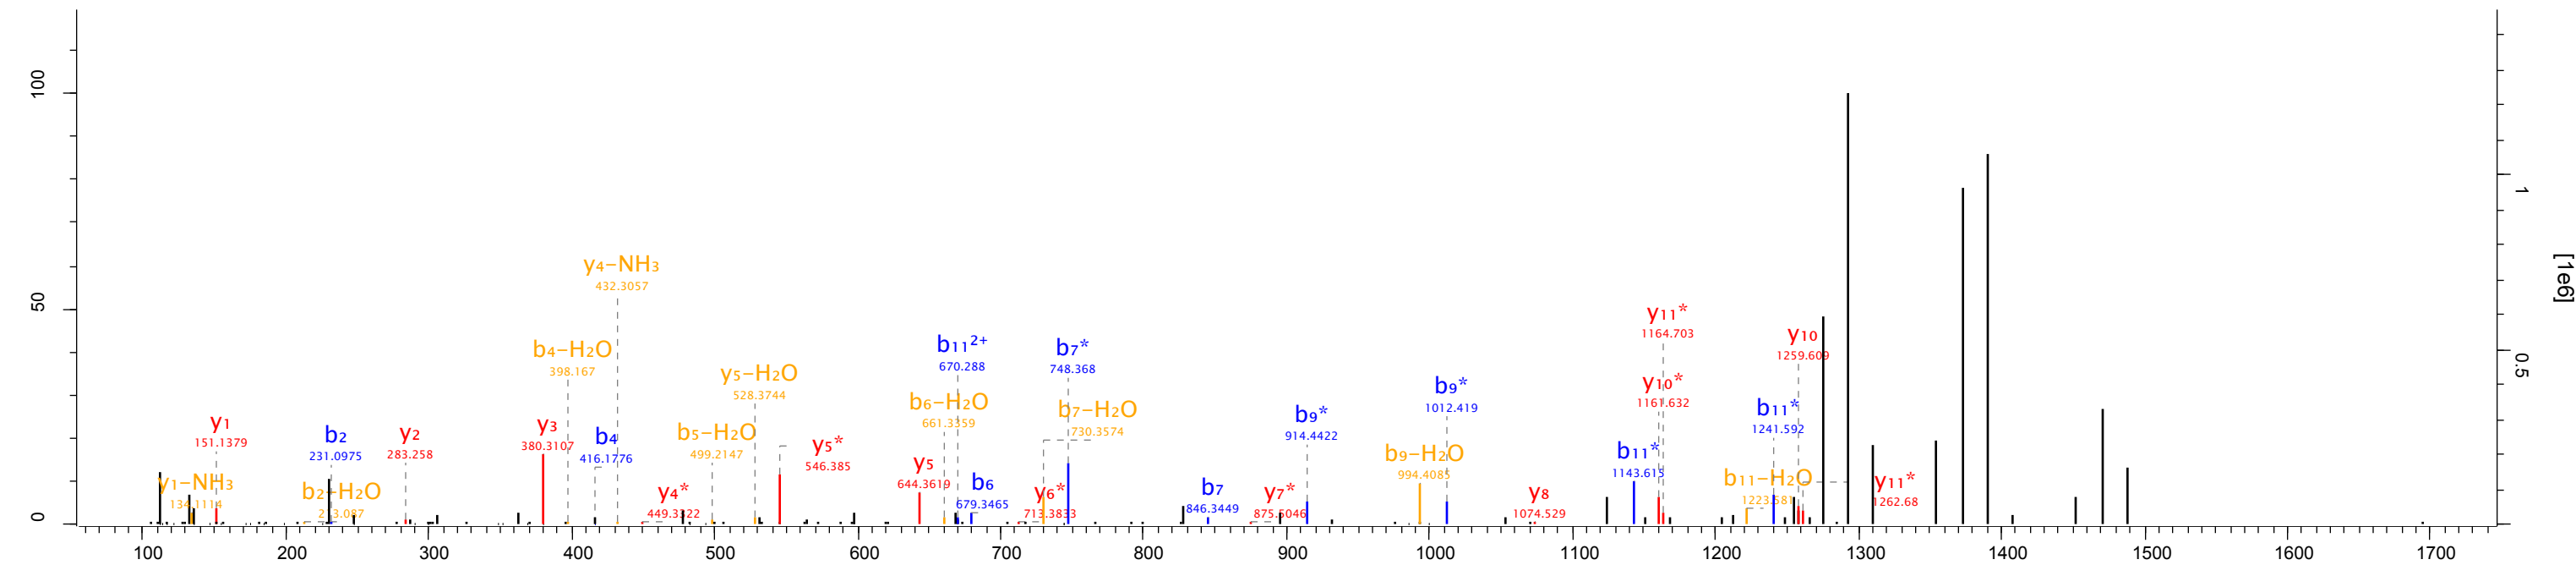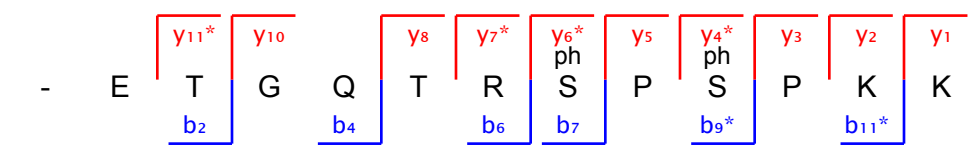

Raw file: 20150812\_A375SR\_Phospho\_BR1\_03  
 Scan: 13385 Method: FTMS; HCD Score: 235.68 m/z: 1016.83 Gene names: FRA10AC1

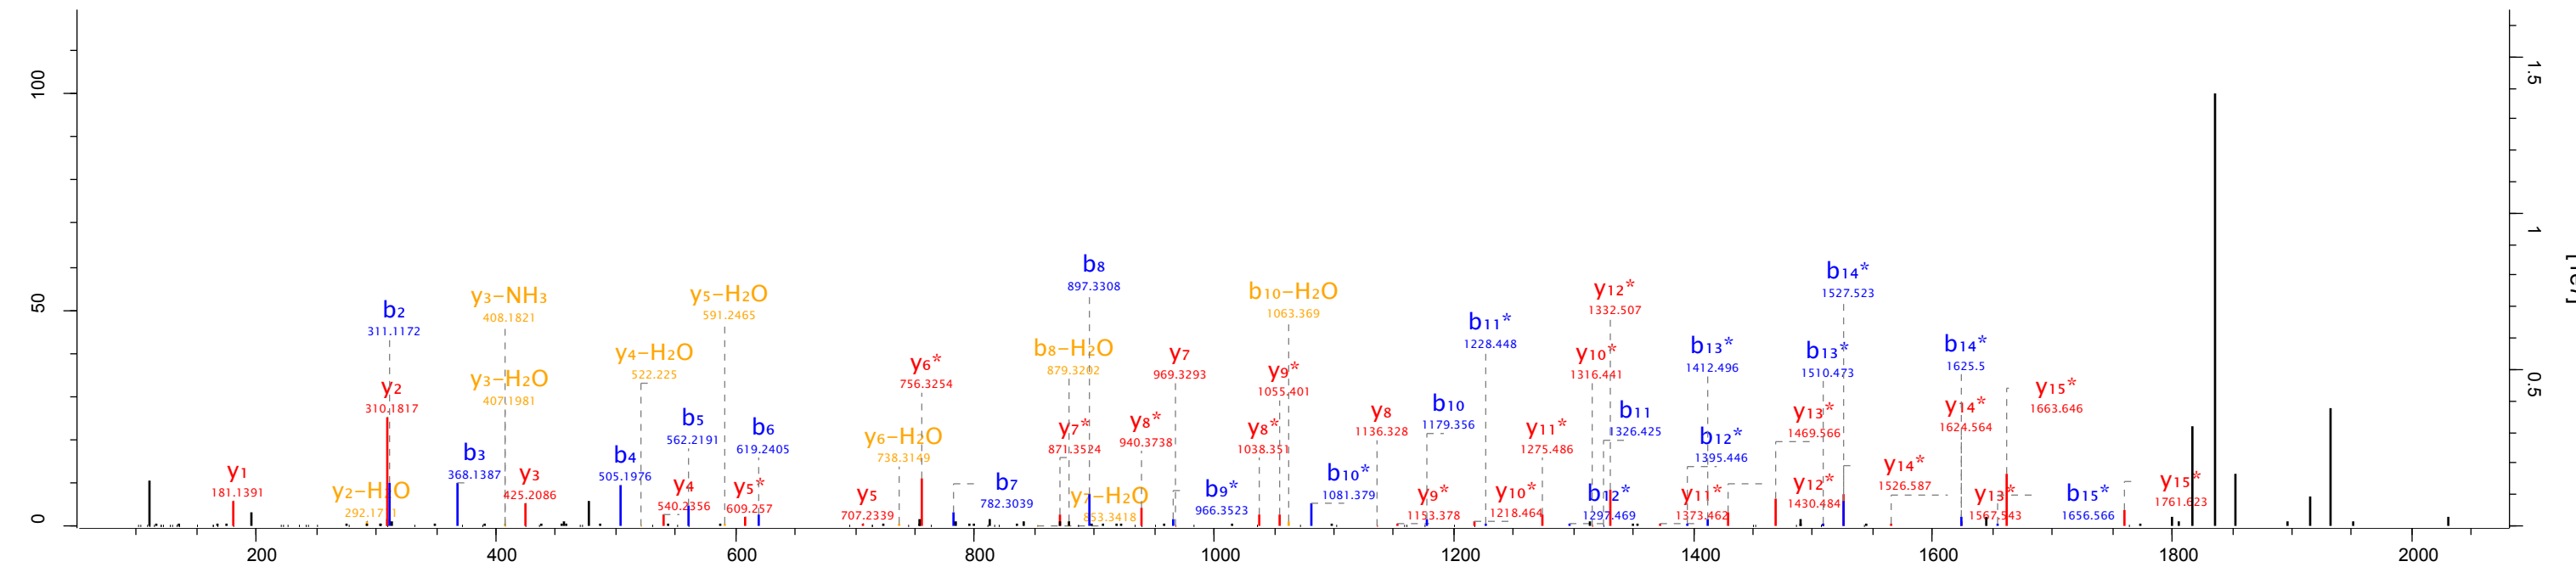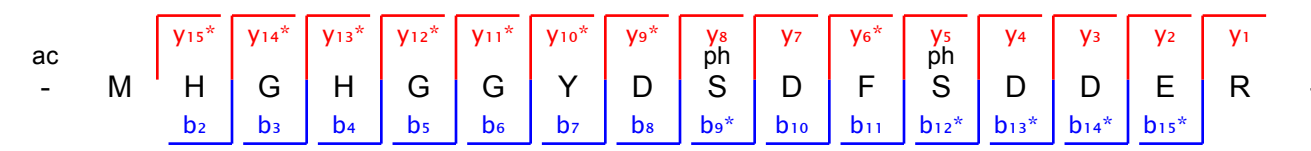

Raw file 20150812\_A375SR\_Phospho\_BR1\_03 Scan 13485 Method FTMS; HCD Score 88.31 m/z 735.29 Gene names UBE2V1

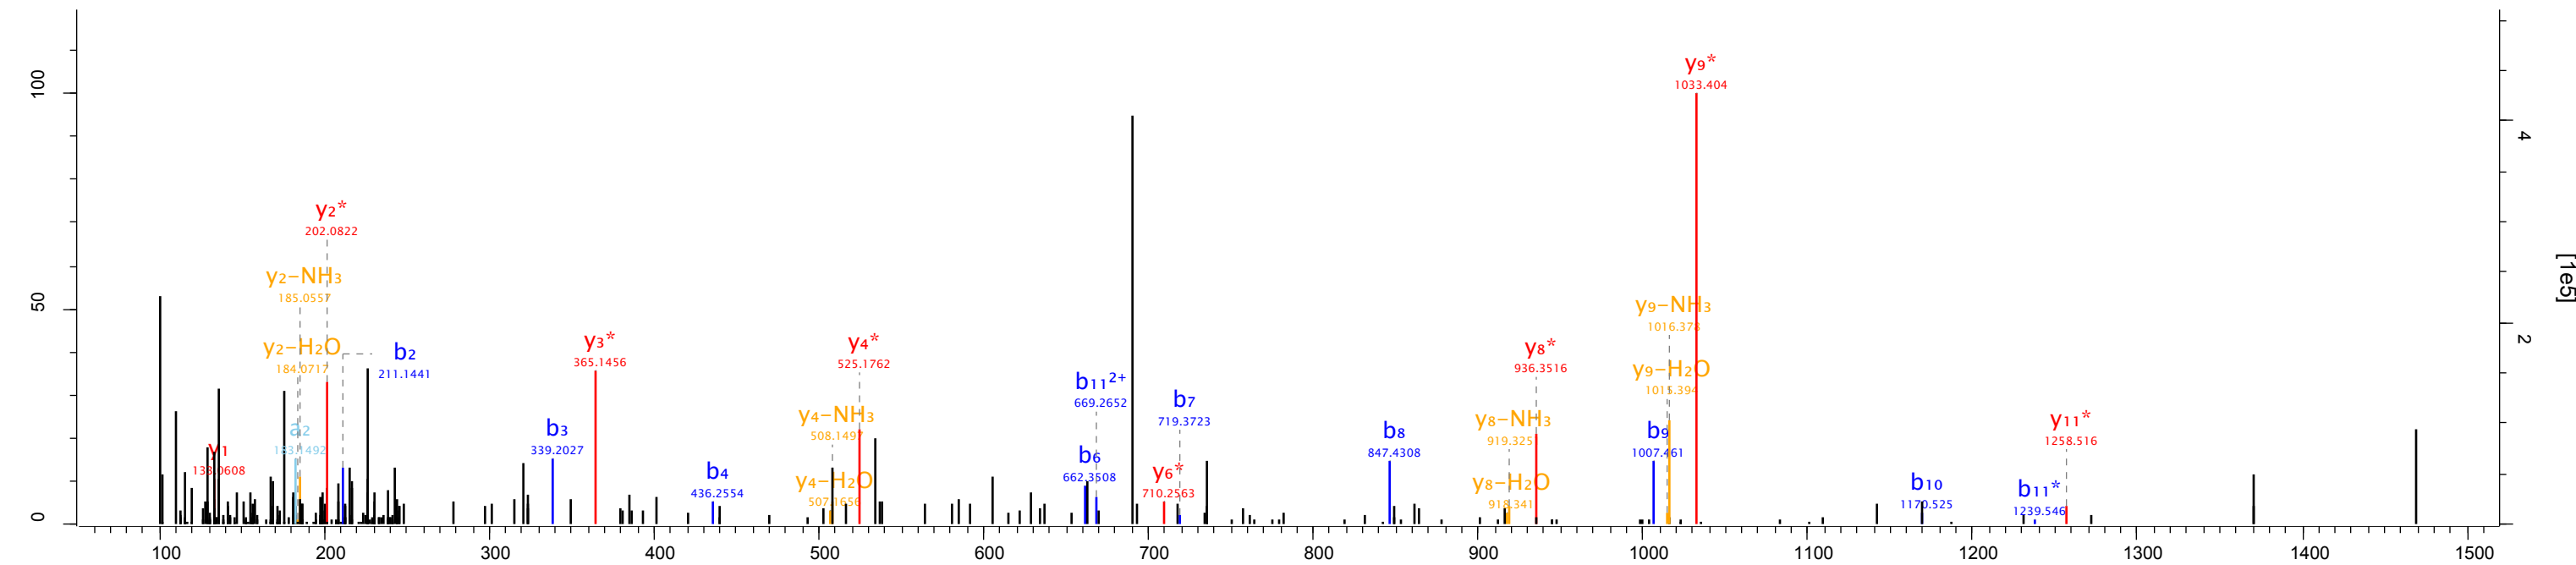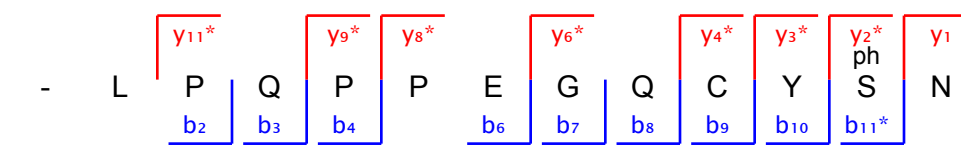

Raw file: 20150812\_A375SR\_Phospho\_BR1\_03  
 Scan: 1365 Method: FTMS; HCD Score: 93.23 m/z: 523.55 Gene names: SRRM1

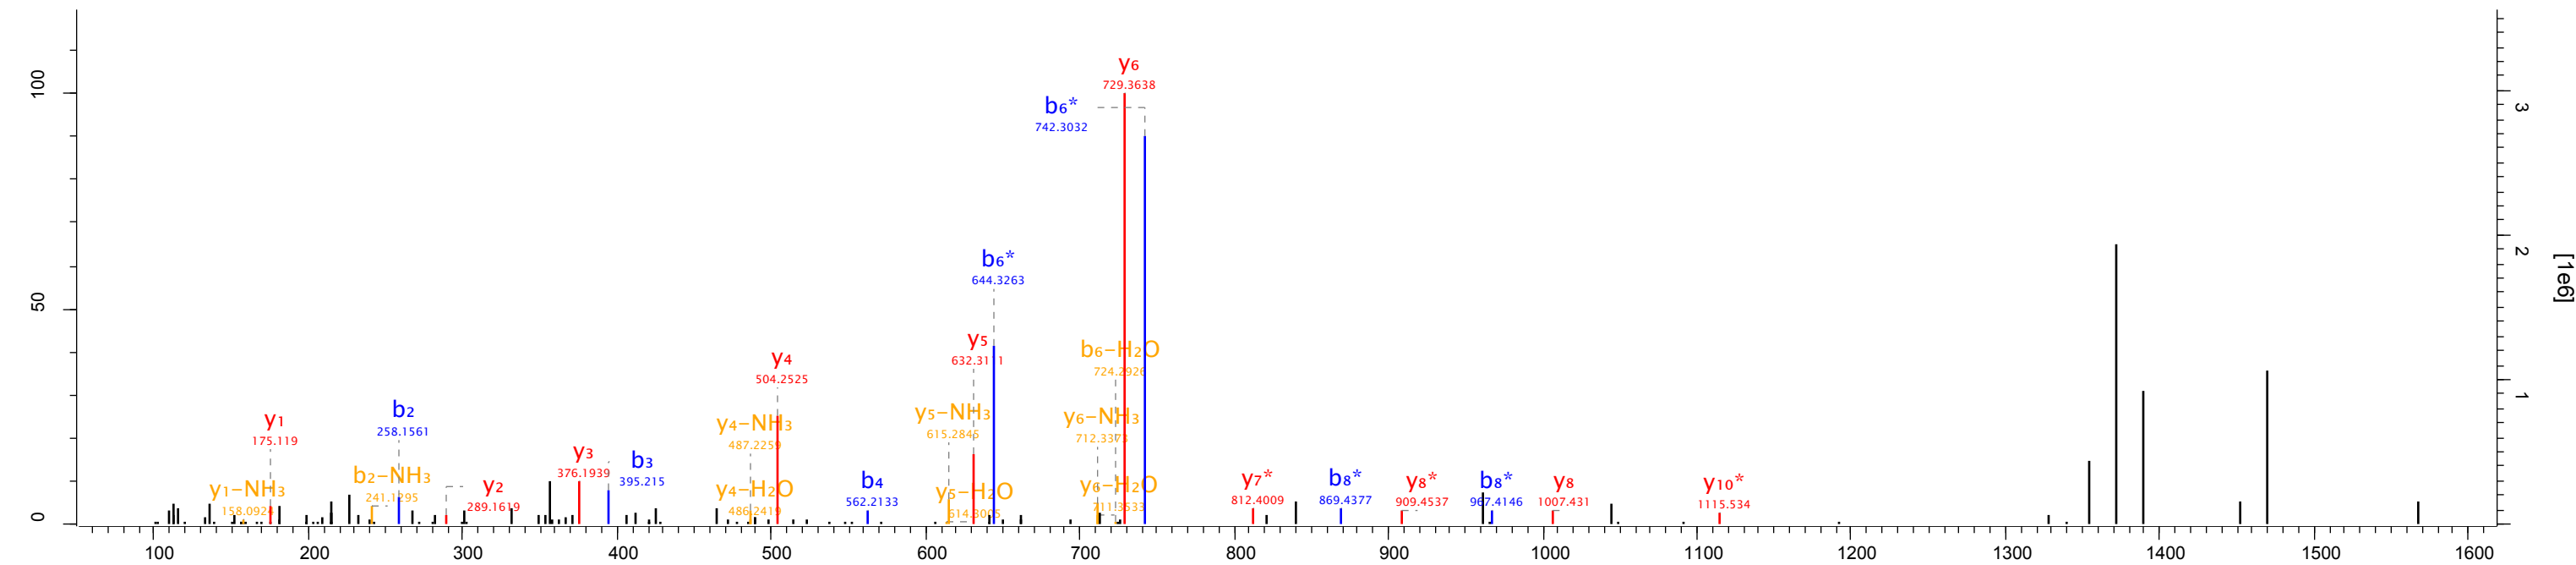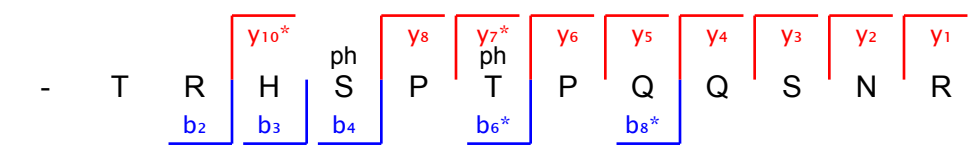



Raw file Scan Method Score m/z Gene names  
 20150812\_A375SR\_Phospho\_BR1\_03 13765 FTMS; HCD 124.51 599.23 SRRM2

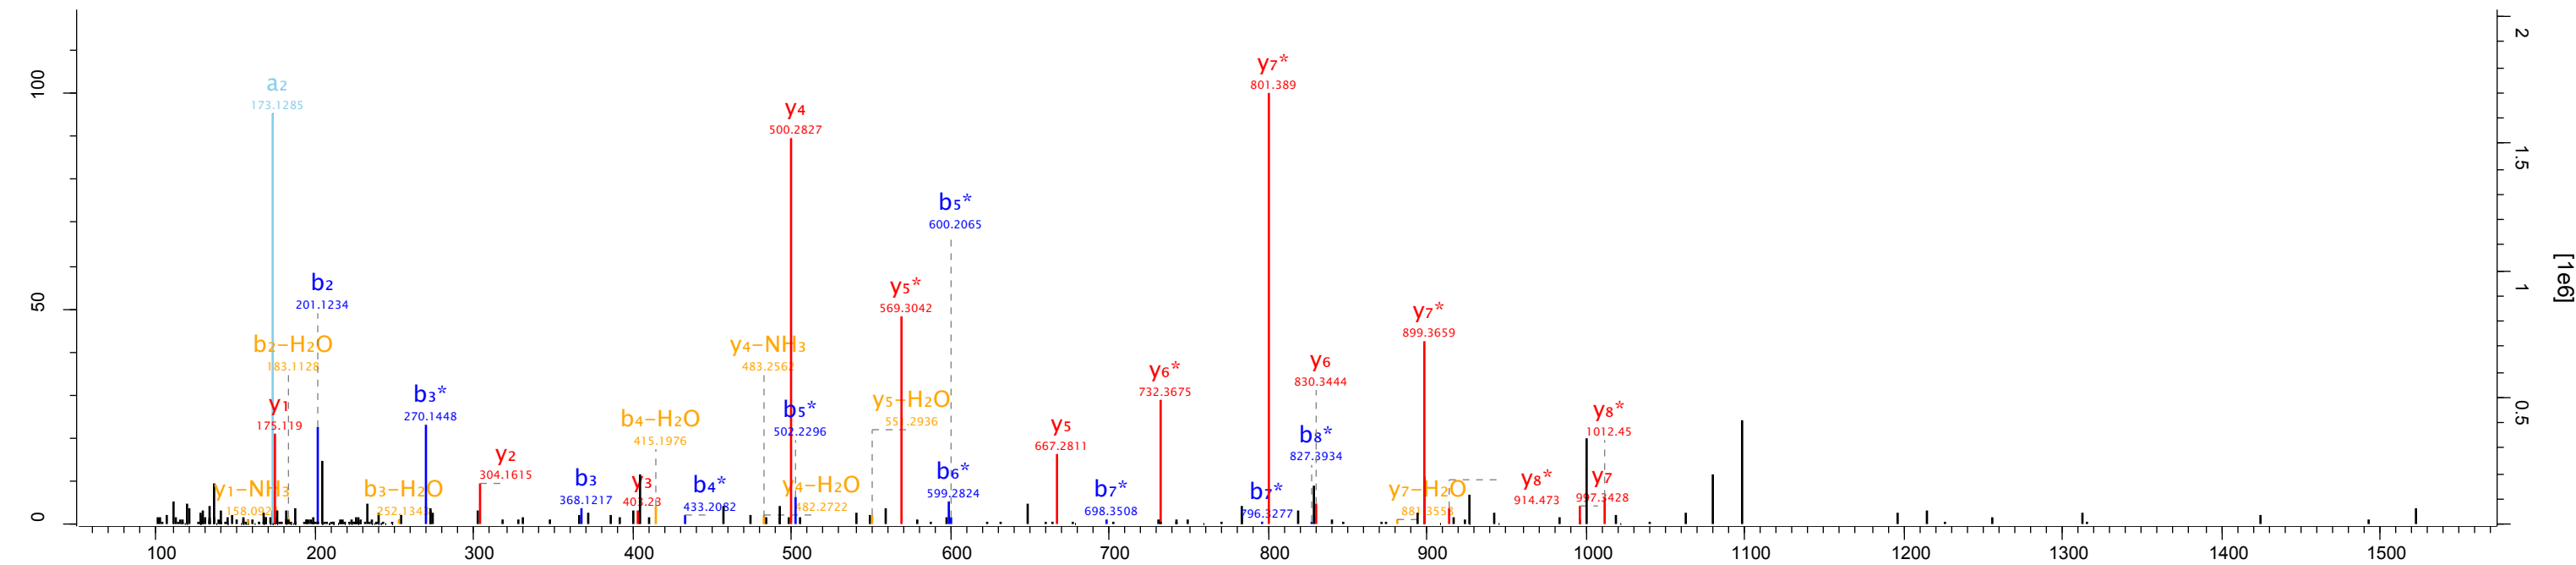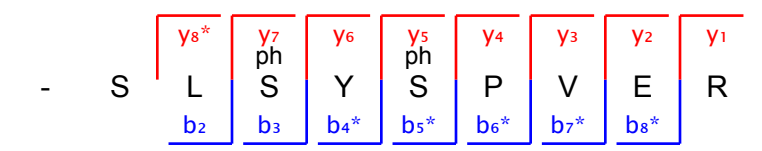

Raw file 20150812\_A375SR\_Phospho\_BR1\_03 Scan 14075 Method FTMS; HCD Score 50.77 m/z 833.4 Gene names LIMCH1

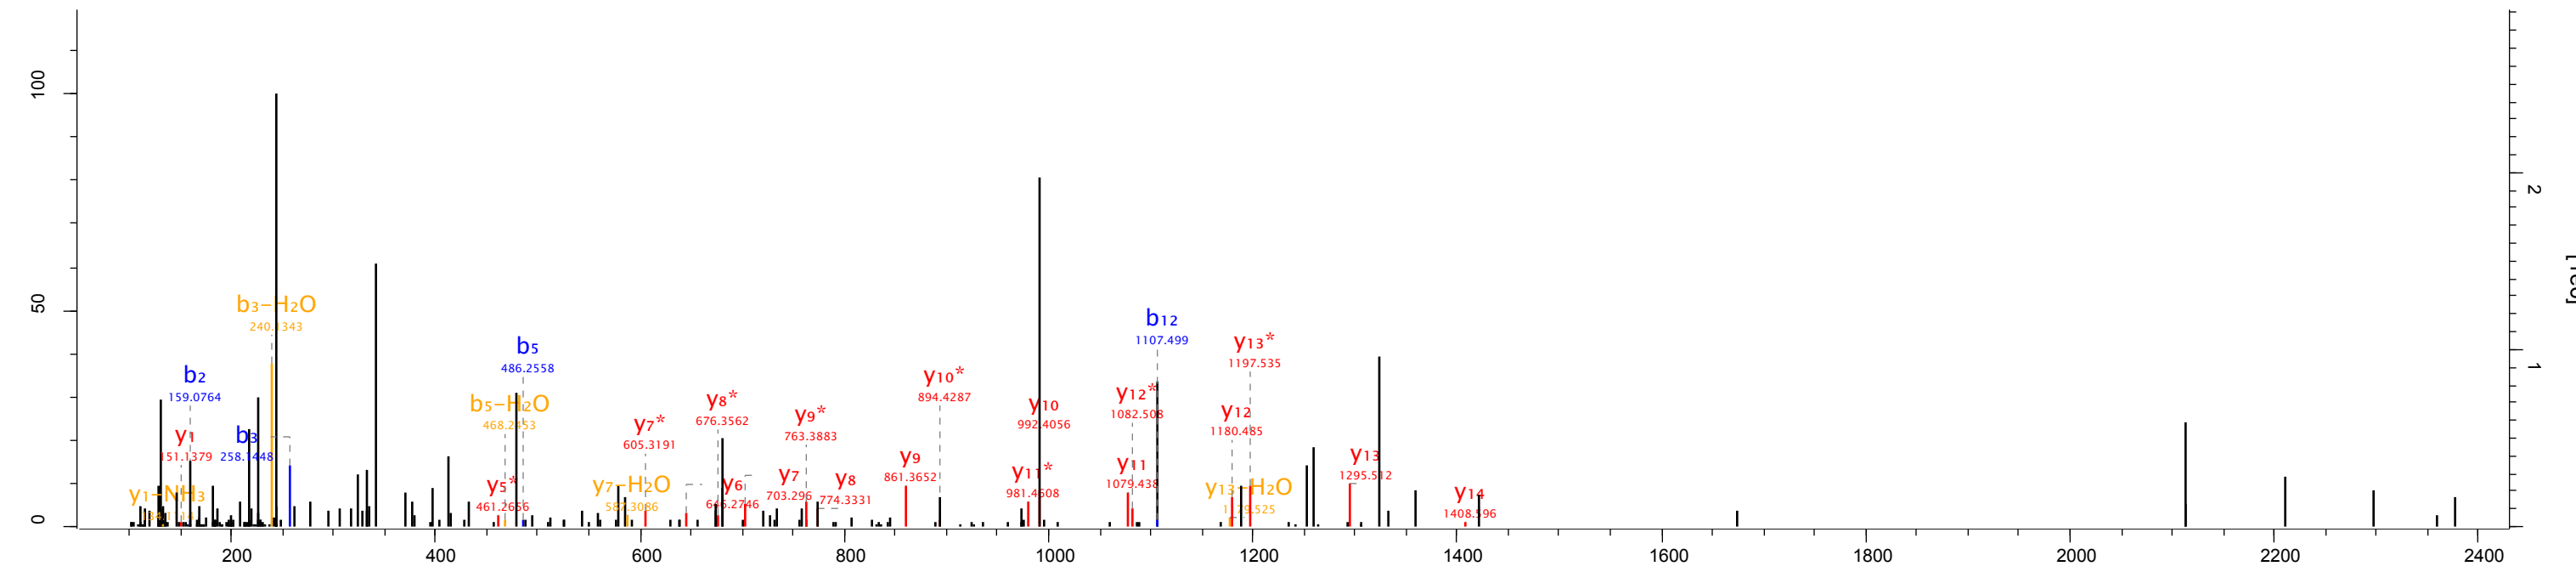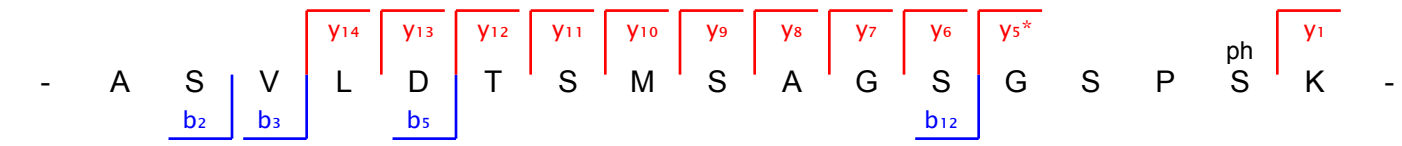

Raw file 20150812\_A375SR\_Phospho\_BR1\_03 Scan 14235 Method FTMS; HCD Score 245.25 m/z 1058.05 Gene names ARFGEF2

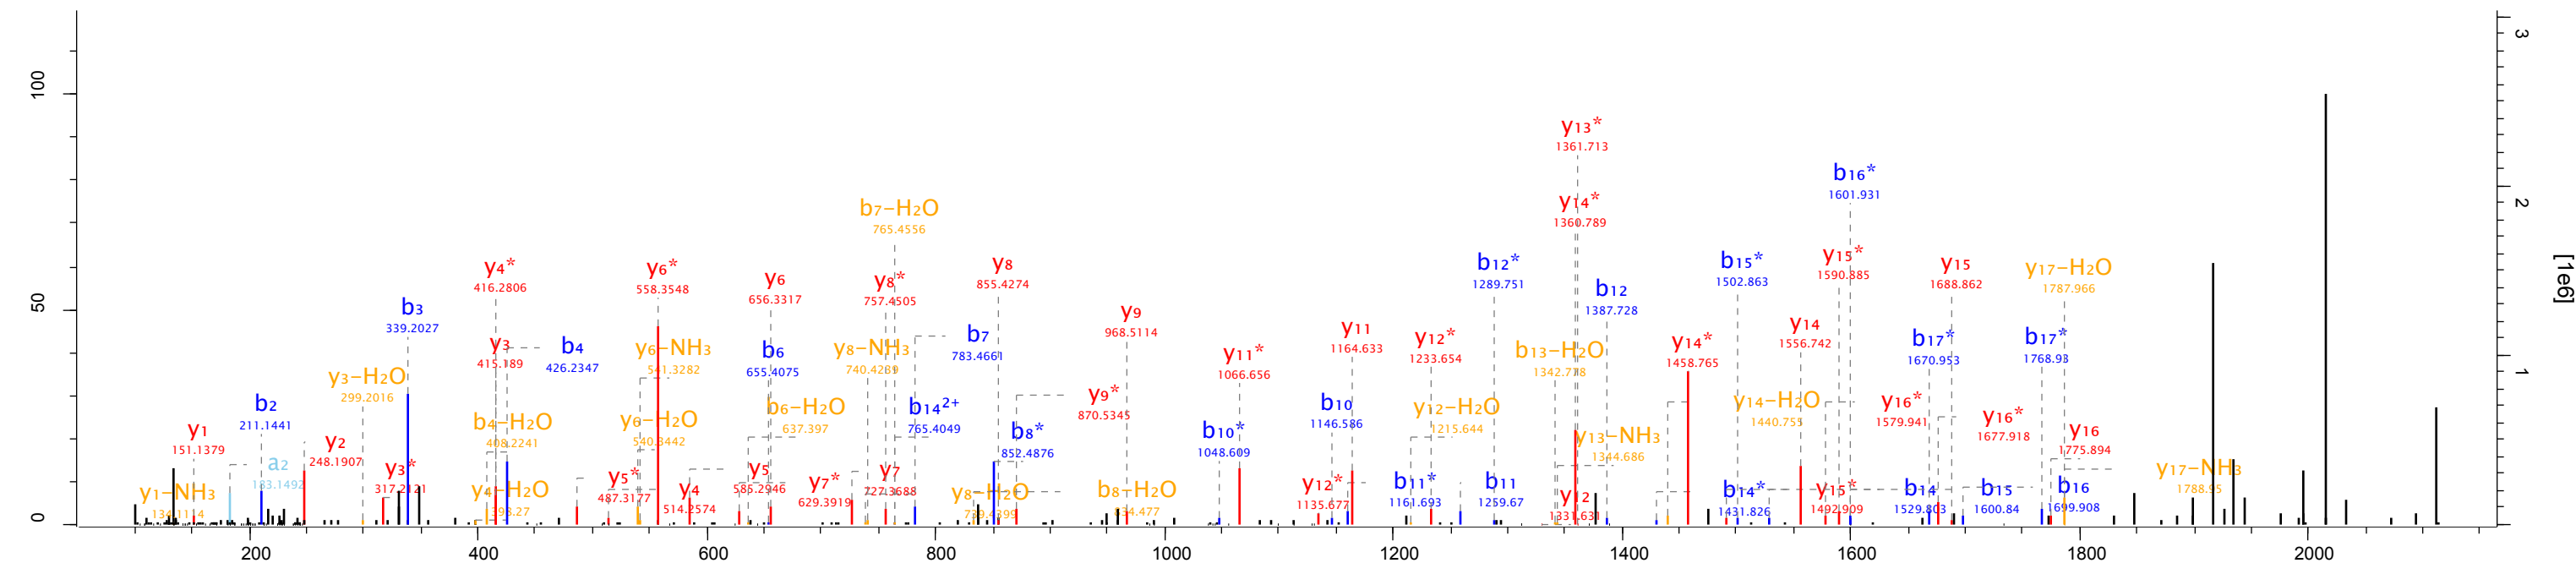

- P I Q S K P Q S P V I Q A A A V S P K -

b<sub>2</sub>
b<sub>3</sub>
b<sub>4</sub>
b<sub>6</sub>
b<sub>7</sub>
b<sub>8</sub><sup>\*</sup>
b<sub>10</sub>
b<sub>11</sub>
b<sub>12</sub>
b<sub>14</sub>
b<sub>15</sub>
b<sub>16</sub>
b<sub>17</sub><sup>\*</sup>
y<sub>16</sub>
y<sub>15</sub>
y<sub>14</sub>
y<sub>13</sub><sup>\*</sup>
y<sub>12</sub><sup>ph</sup>
y<sub>11</sub>
y<sub>9</sub>
y<sub>8</sub>
y<sub>7</sub>
y<sub>6</sub>
y<sub>5</sub>
y<sub>4</sub>
y<sub>3</sub><sup>ph</sup>
y<sub>2</sub>
y<sub>1</sub>

Raw file: 20150812\_A375SR\_Phospho\_BR1\_03  
 Scan: 14255 Method: FTMS; HCD Score: 122.99 m/z: 789.05 Gene names: MAP3K7;DKFZp586F0420

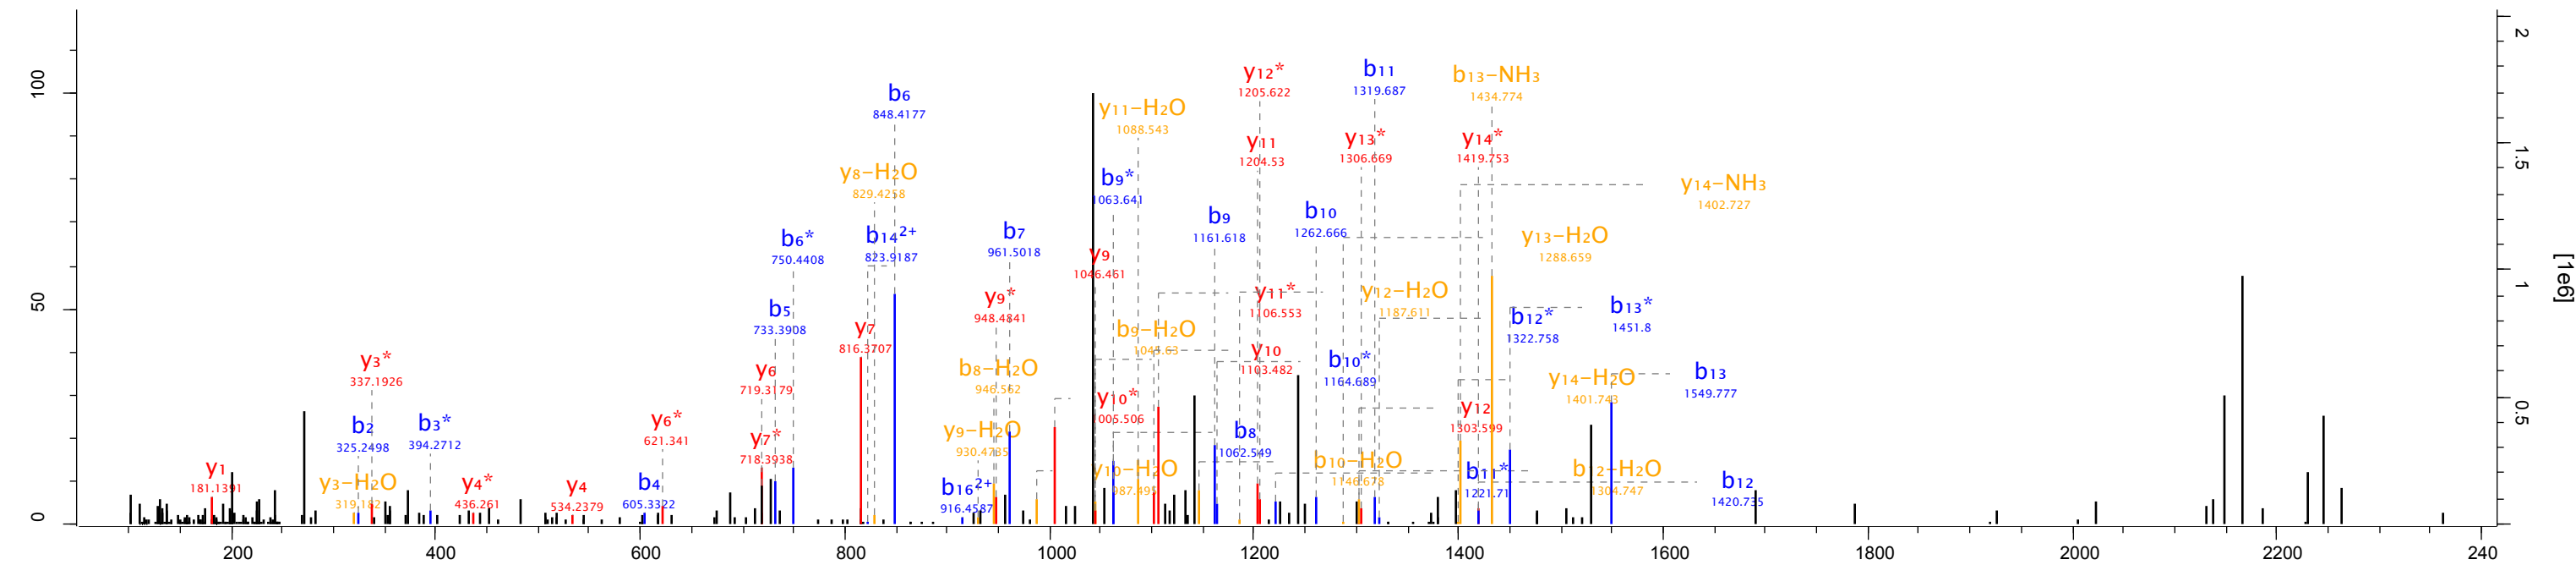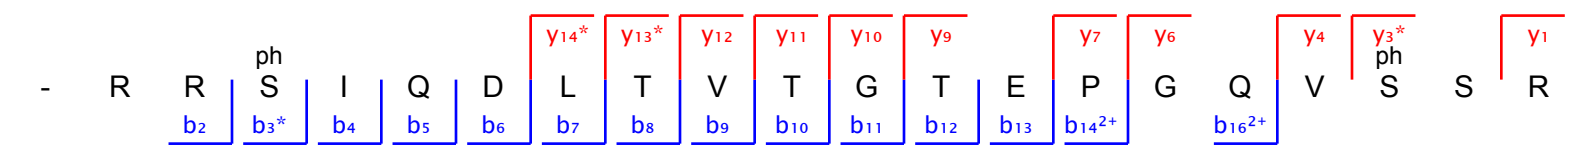

Raw file 20150812\_A375SR\_Phospho\_BR1\_03 Scan 14275 Method FTMS; HCD Score 193.93 m/z 942.37 Gene names NDRG3

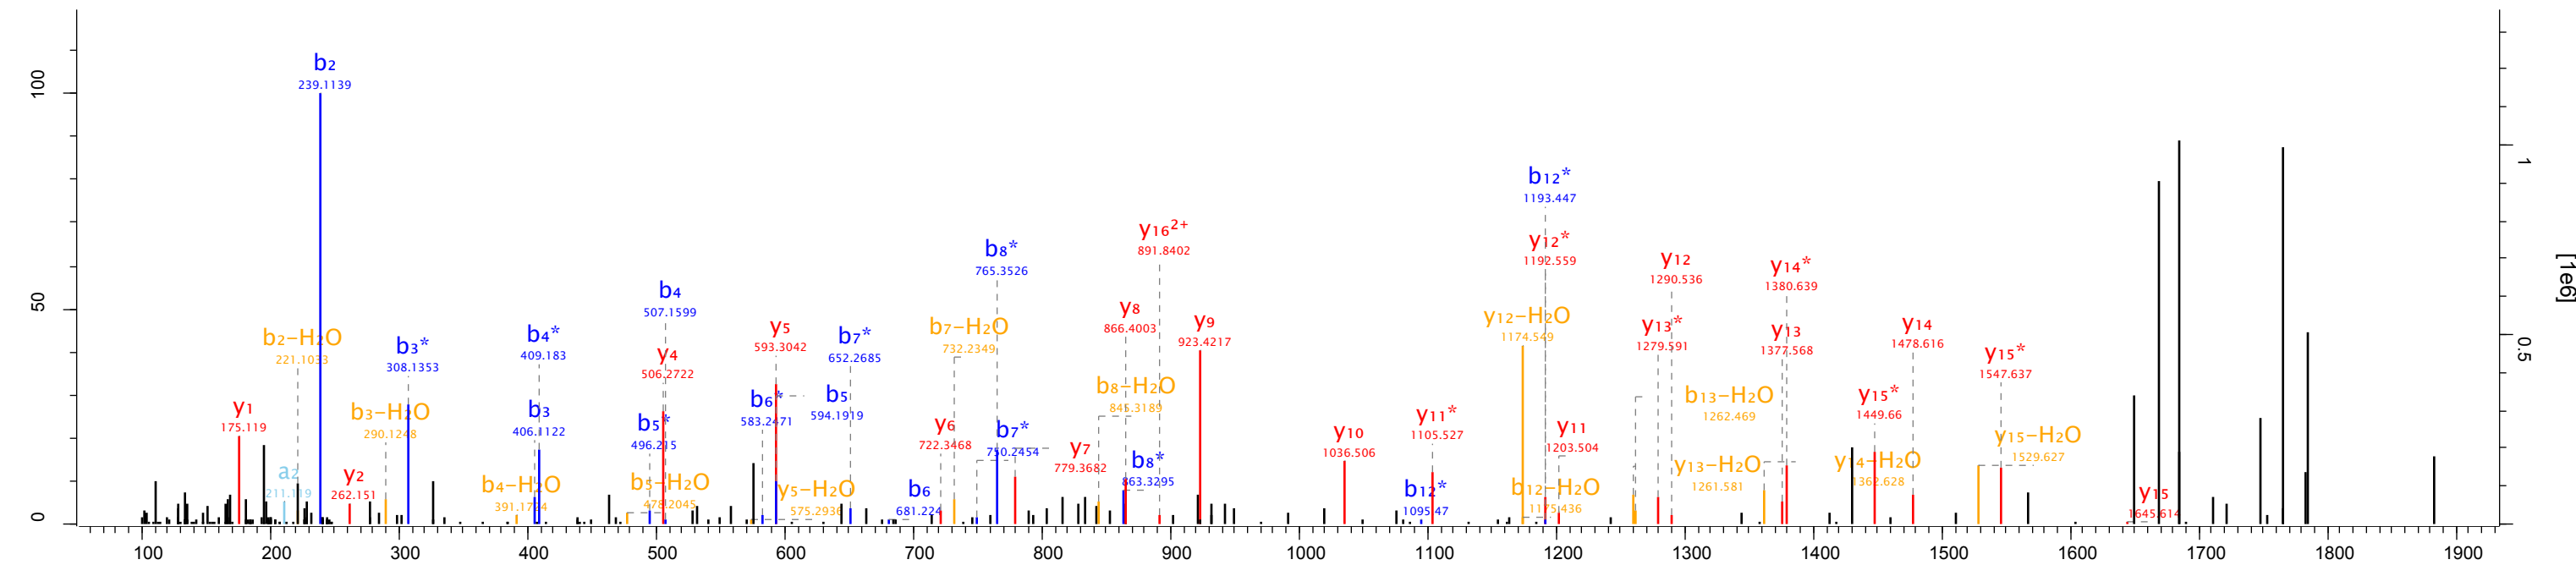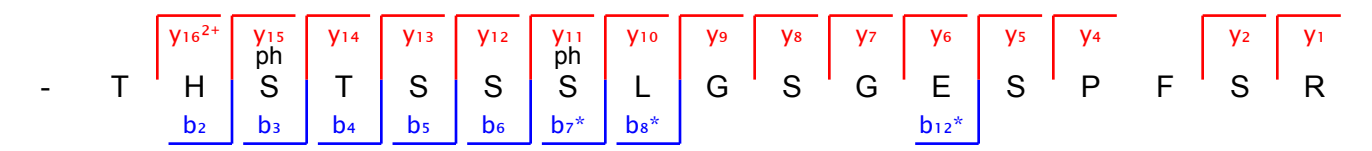

Raw file  
20150812\_A375SR\_Phospho\_BR1\_03

Scan 14485 Method FTMS; HCD Score 118.42 m/z 986.41 Gene names ATN1

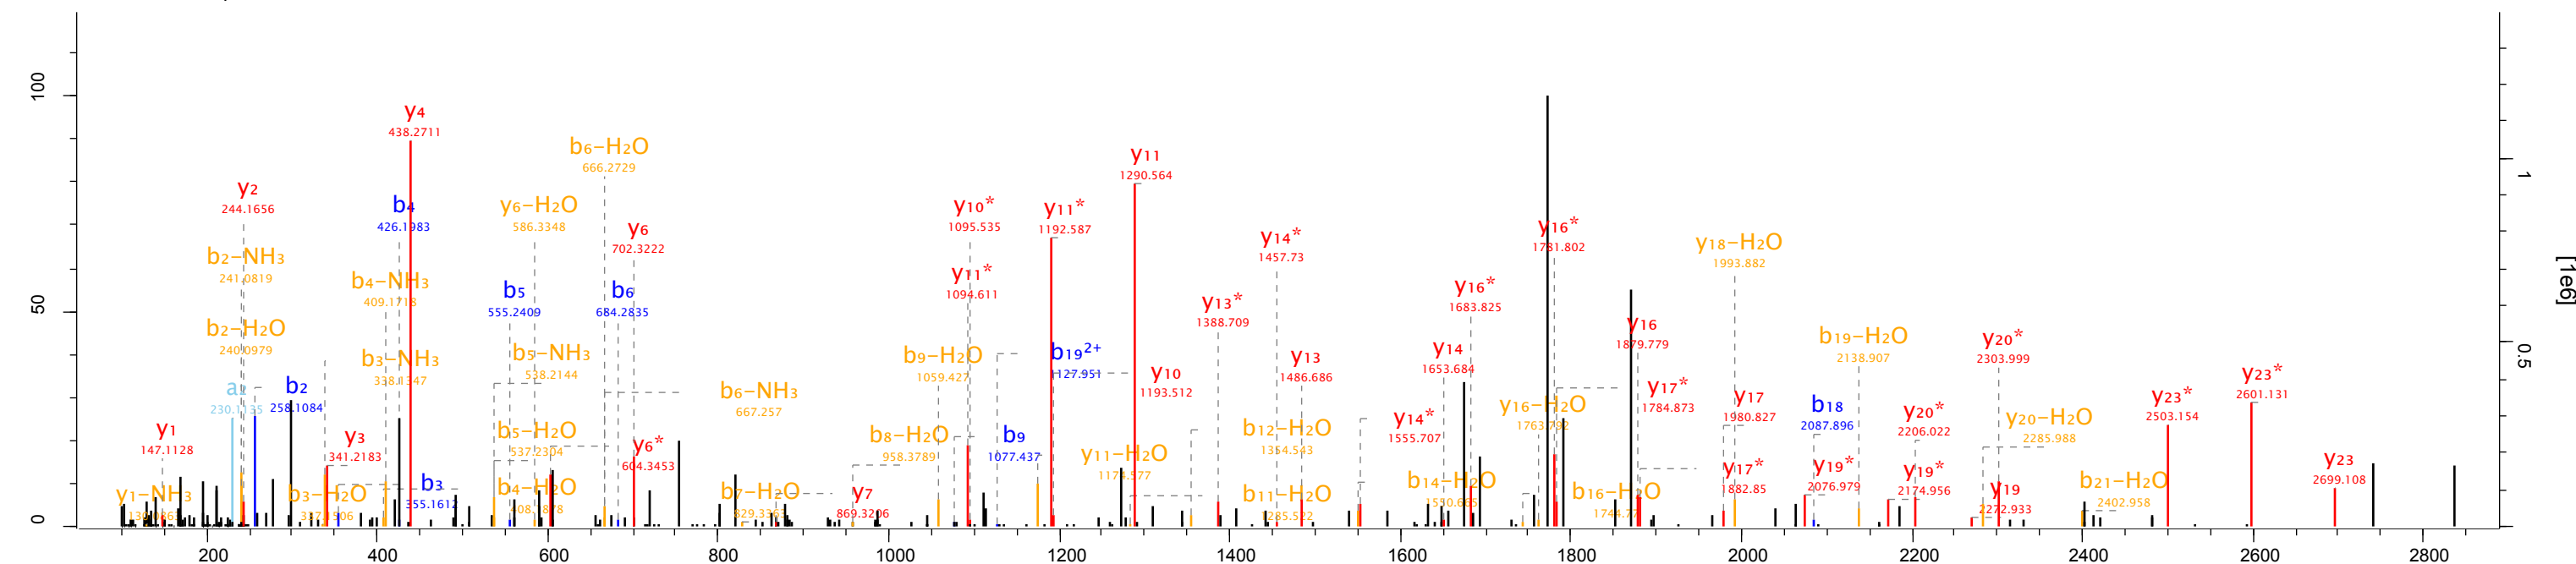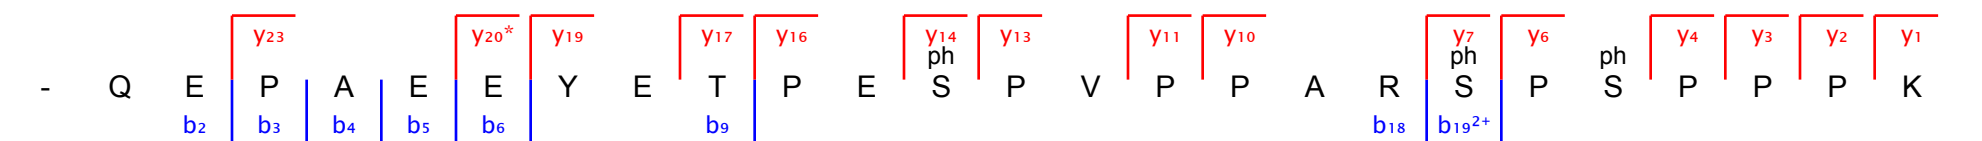

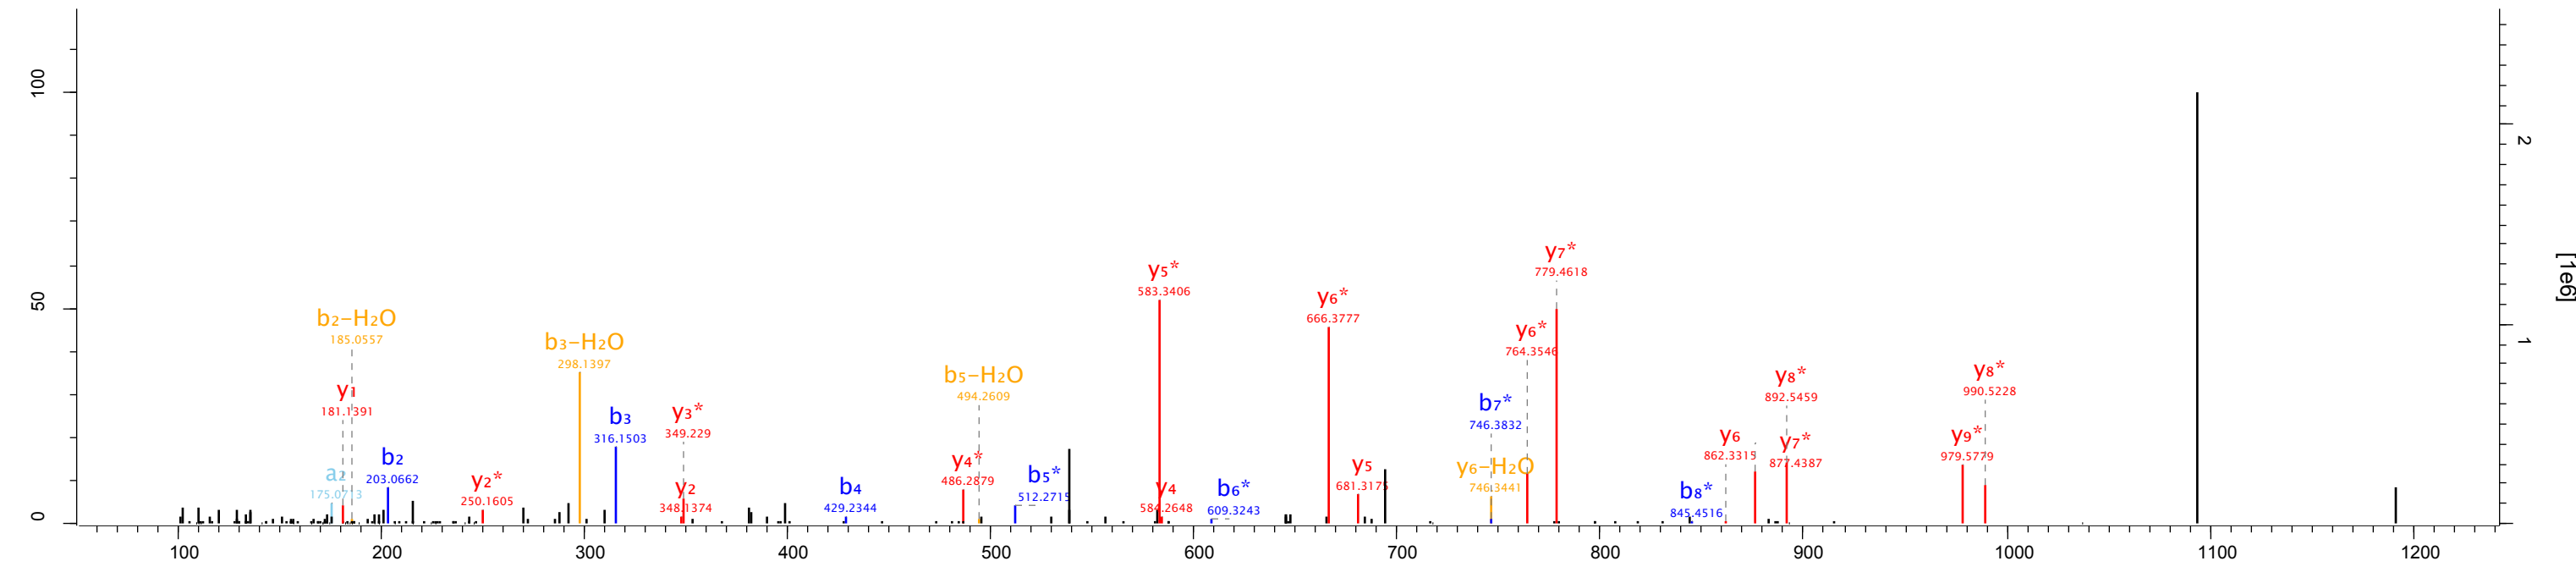

- D S L I P H V S R -

b<sub>2</sub> b<sub>3</sub> b<sub>4</sub> b<sub>5</sub><sup>\*</sup> b<sub>6</sub><sup>\*</sup> b<sub>7</sub><sup>\*</sup> b<sub>8</sub><sup>\*</sup>

y<sub>9</sub><sup>\*</sup> y<sub>8</sub><sup>\*</sup> y<sub>7</sub><sup>\*</sup> y<sub>6</sub><sup>ph</sup> y<sub>5</sub> y<sub>4</sub> y<sub>3</sub><sup>\*</sup> y<sub>2</sub><sup>ph</sup> y<sub>1</sub>

Raw file: 20150812\_A375SR\_Phospho\_BR1\_03  
 Scan: 14825 Method: FTMS; HCD Score: 99.11 m/z: 679.66 Gene names: KANK2

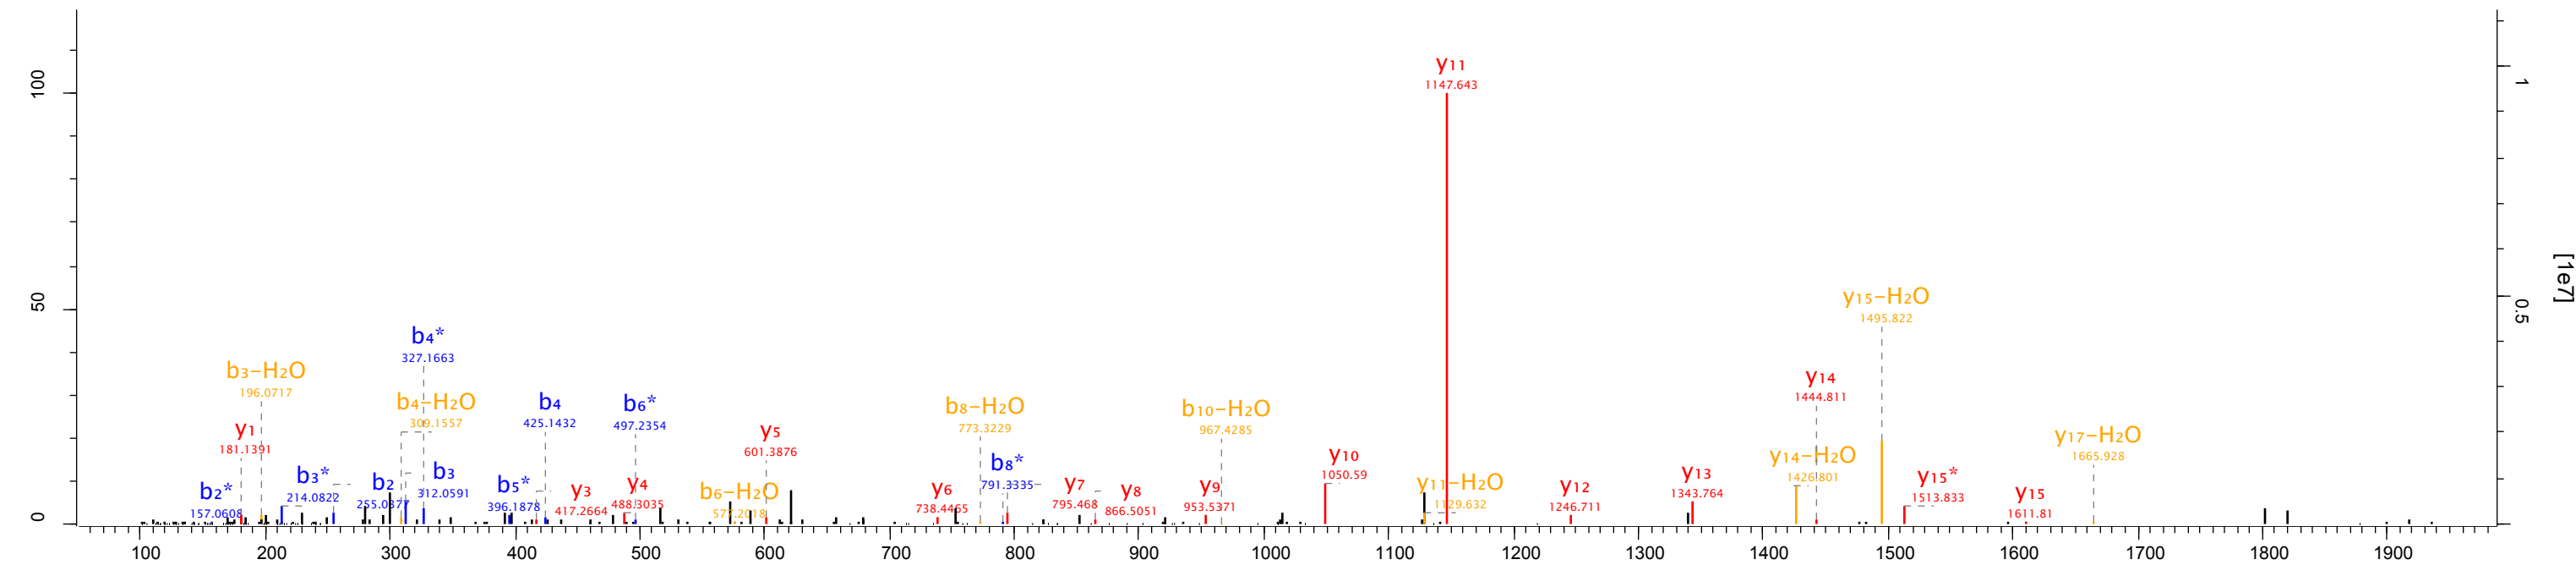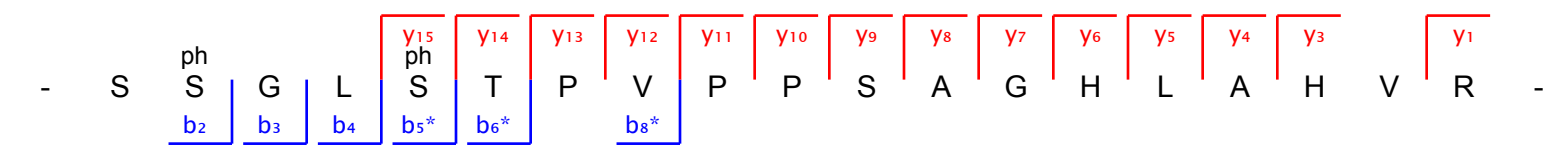



Raw file 20150812\_A375SR\_Phospho\_BR1\_03 Scan 14845 Method FTMS; HCD Score 159.86 m/z 1177.97 Gene names RIOK1

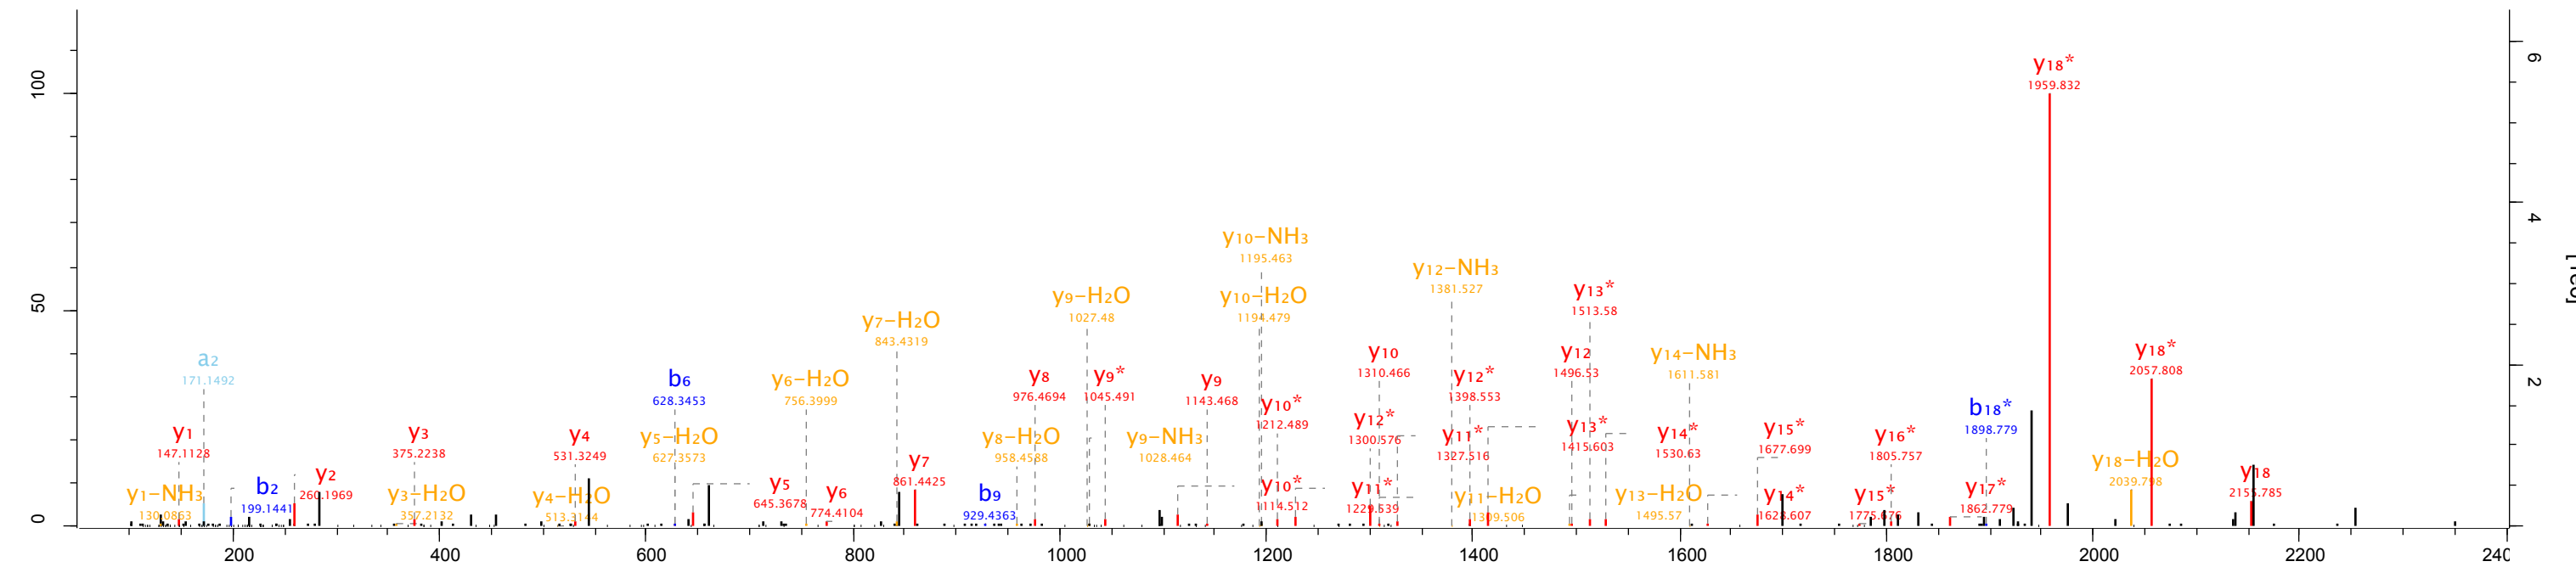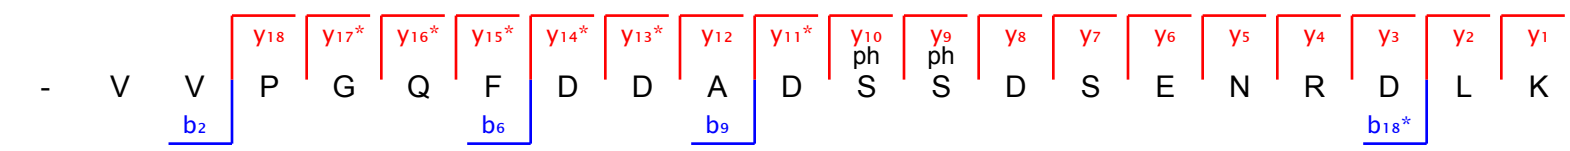

Raw file 20150812\_A375SR\_Phospho\_BR1\_03 Scan 15075 Method FTMS; HCD Score 356.89 m/z 1163.98 Gene names ZFC3H1

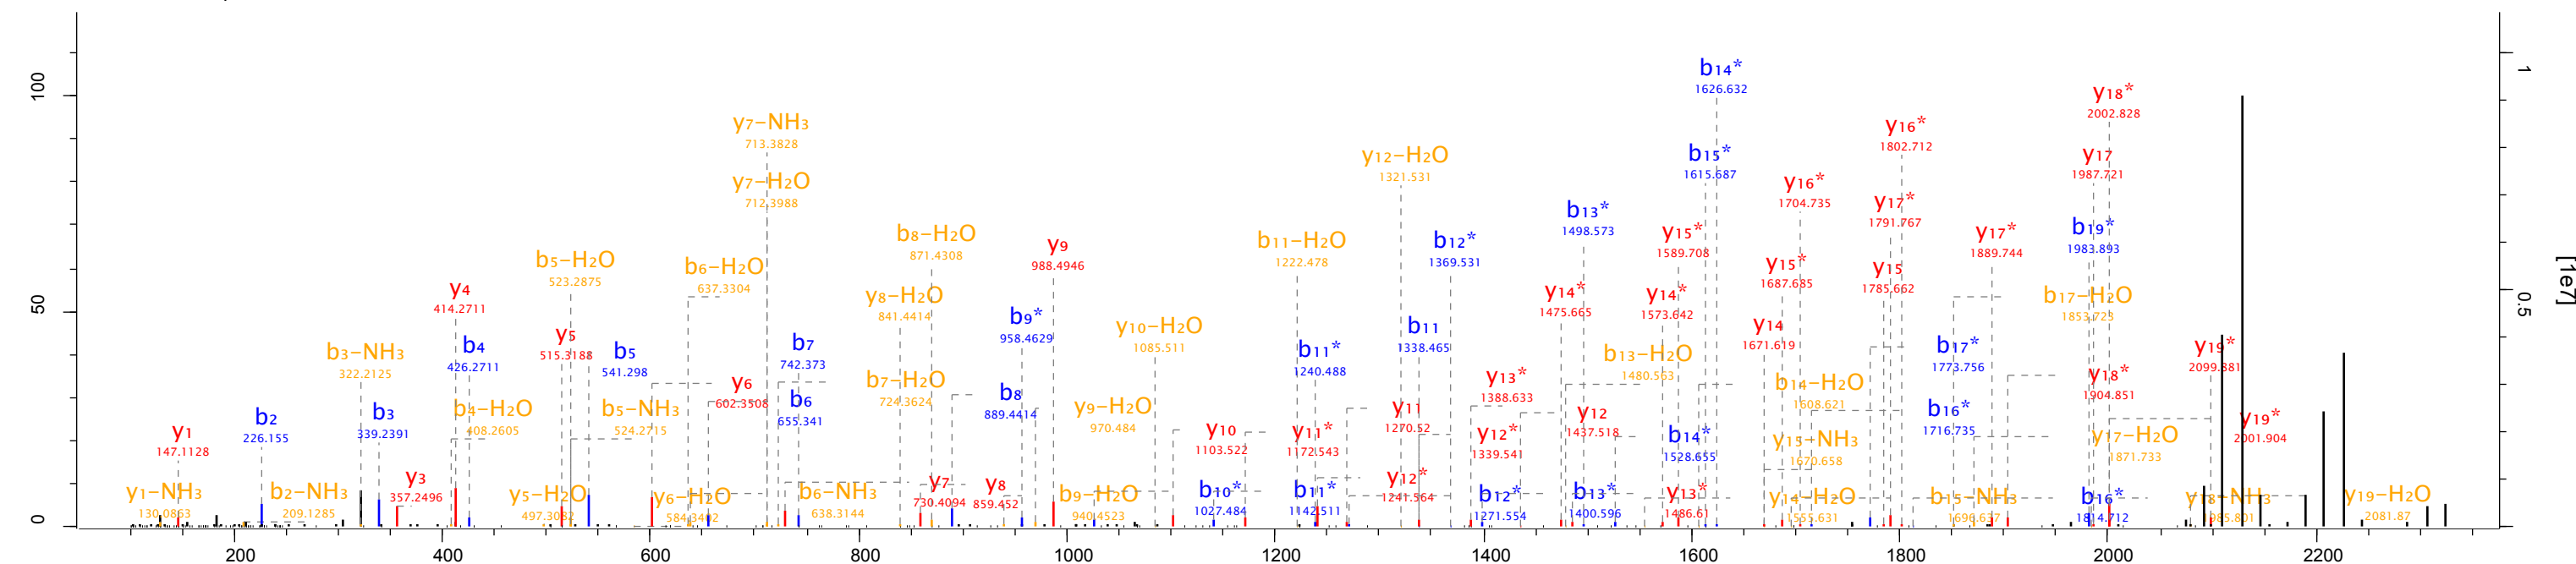

- K P I S D N S F S ph S ph S D E E Q S T G P I K -

b<sub>2</sub> b<sub>3</sub> b<sub>4</sub> b<sub>5</sub> b<sub>6</sub> b<sub>7</sub> b<sub>8</sub> b<sub>9</sub><sup>\*</sup> b<sub>10</sub><sup>\*</sup> b<sub>11</sub> b<sub>12</sub><sup>\*</sup> b<sub>13</sub><sup>\*</sup> b<sub>14</sub><sup>\*</sup> b<sub>15</sub><sup>\*</sup> b<sub>16</sub><sup>\*</sup> b<sub>17</sub><sup>\*</sup> b<sub>19</sub><sup>\*</sup>

y<sub>19</sub><sup>\*</sup> y<sub>18</sub><sup>\*</sup> y<sub>17</sub> y<sub>16</sub><sup>\*</sup> y<sub>15</sub> y<sub>14</sub> y<sub>13</sub><sup>\*</sup> y<sub>12</sub> ph y<sub>11</sub> ph y<sub>10</sub> y<sub>9</sub> y<sub>8</sub> y<sub>7</sub> y<sub>6</sub> y<sub>5</sub> y<sub>4</sub> y<sub>3</sub> y<sub>1</sub>

Raw file 20150812\_A375SR\_Phospho\_BR1\_03 Scan 15195 Method FTMS; HCD Score 179.5 m/z 943.89 Gene names KCNJ2

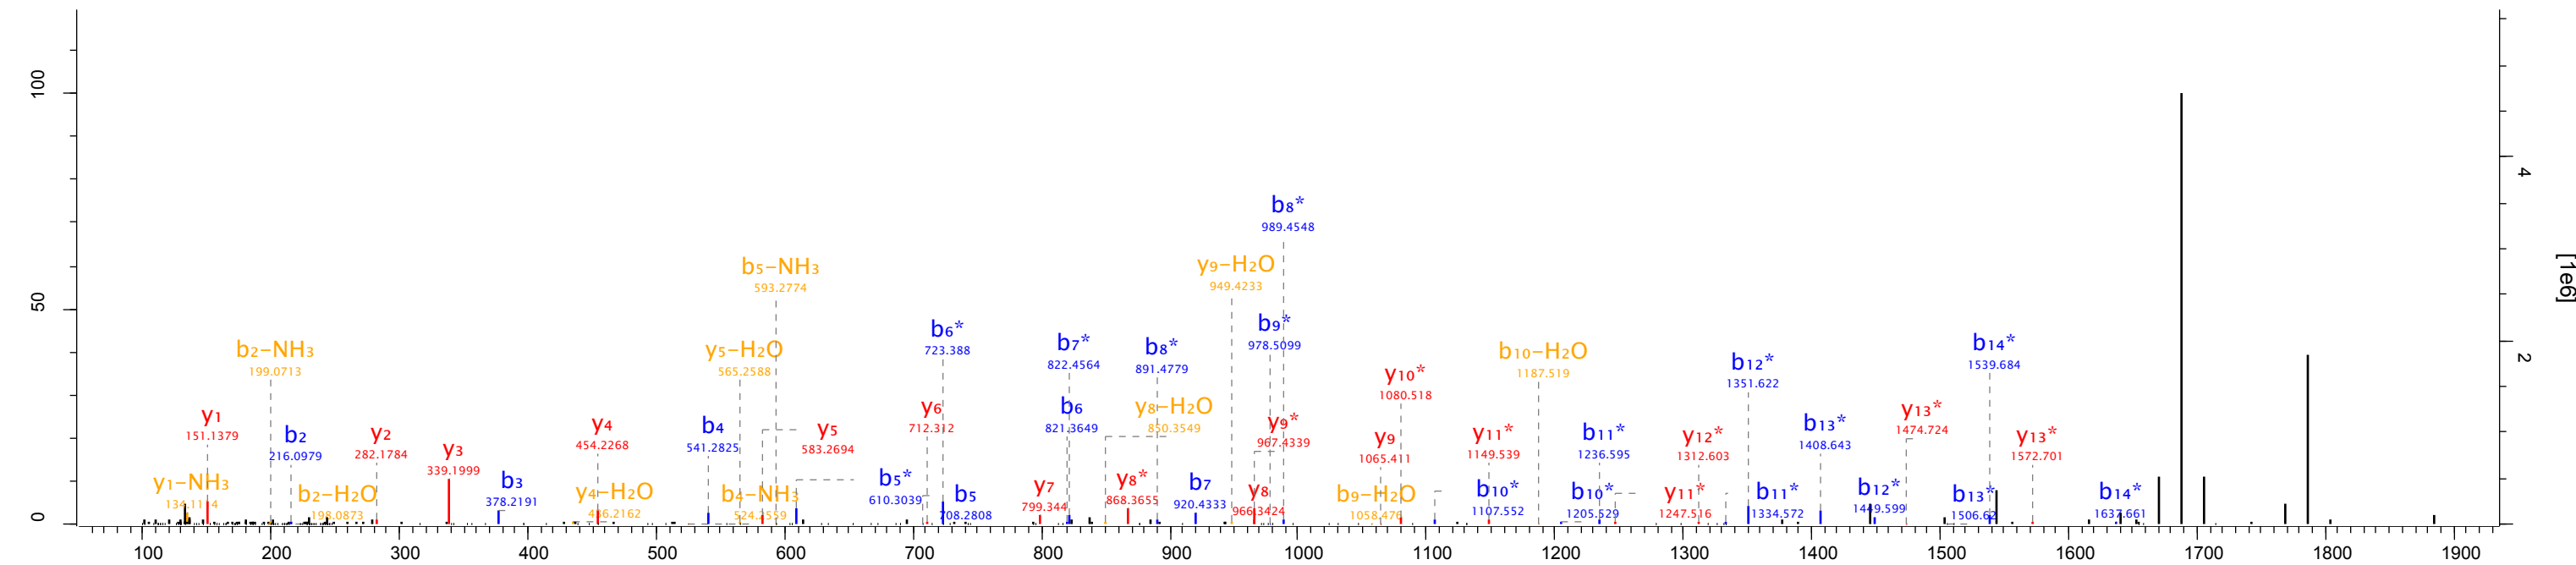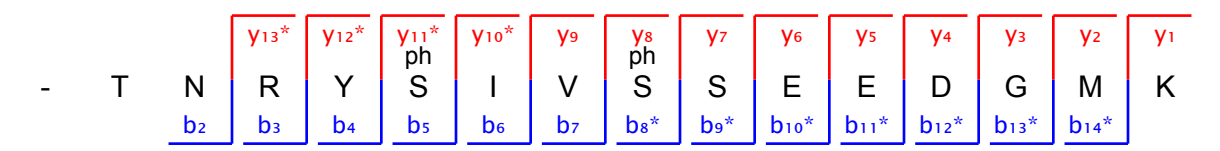



Raw file: 20150812\_A375SR\_Phospho\_BR1\_03  
 Scan: 15925 Method: FTMS; HCD Score: 223.91 m/z: 1012.43 Gene names: SIPA1L2

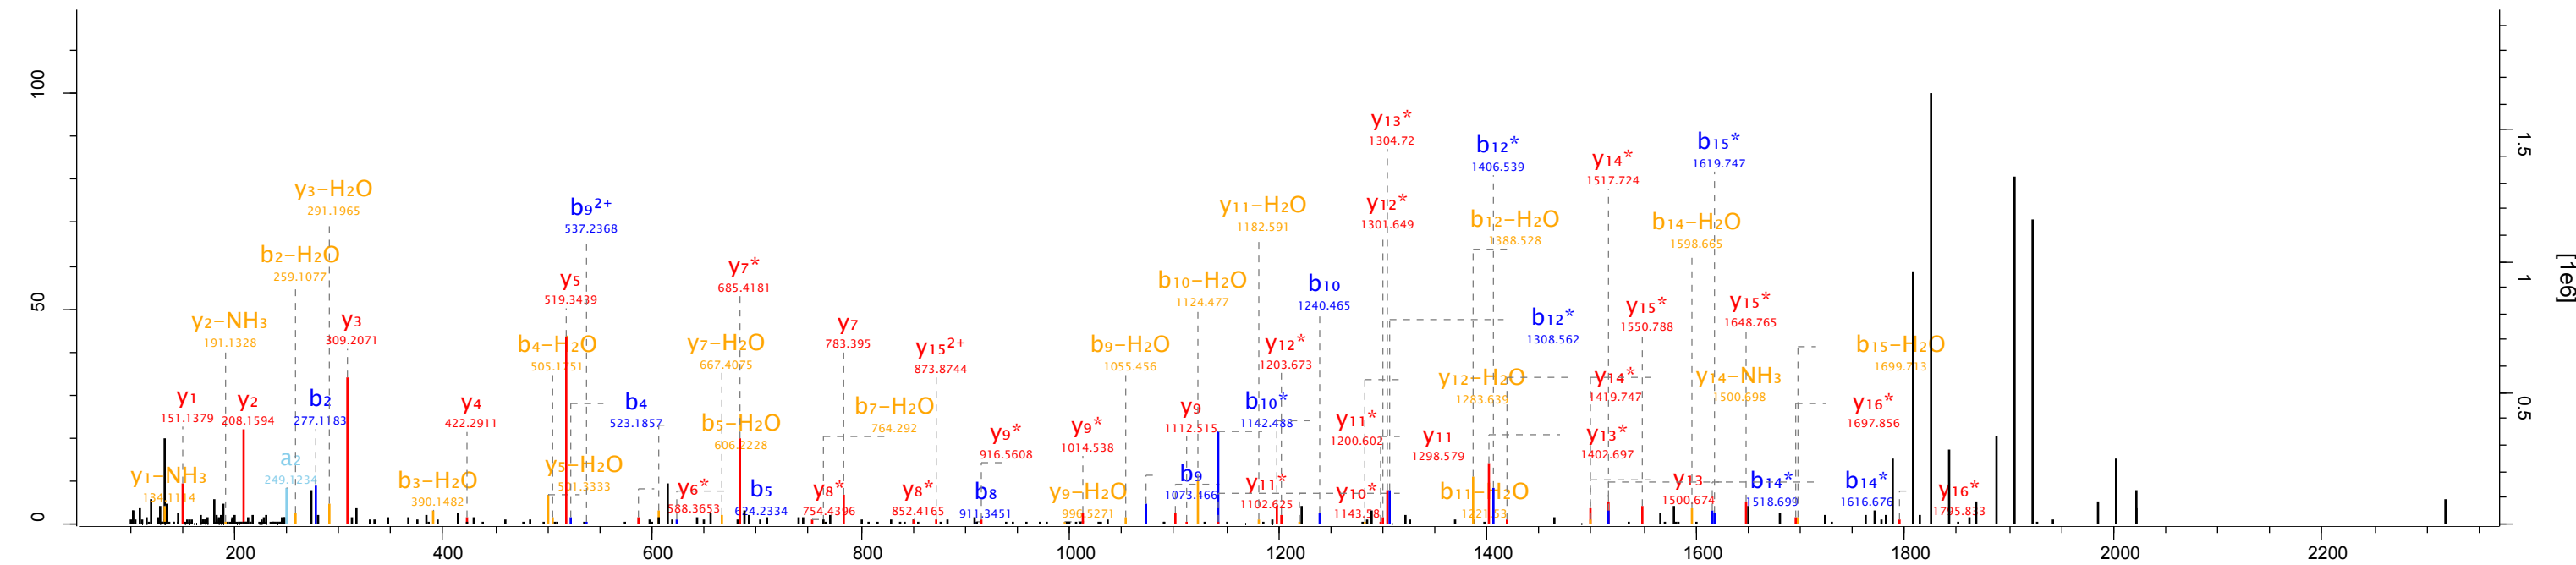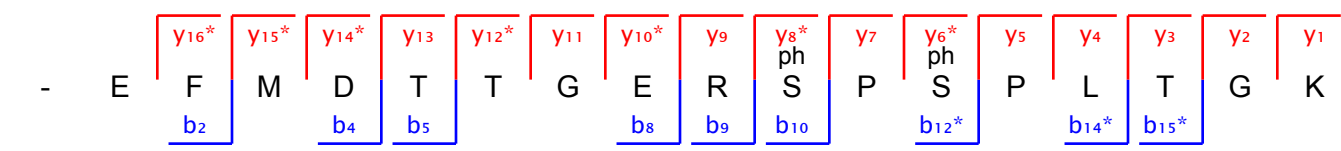

Raw file 20150812\_A375SR\_Phospho\_BR1\_03 Scan 15985 Method FTMS; HCD Score 50.54 m/z 956.93 Gene names SVIL

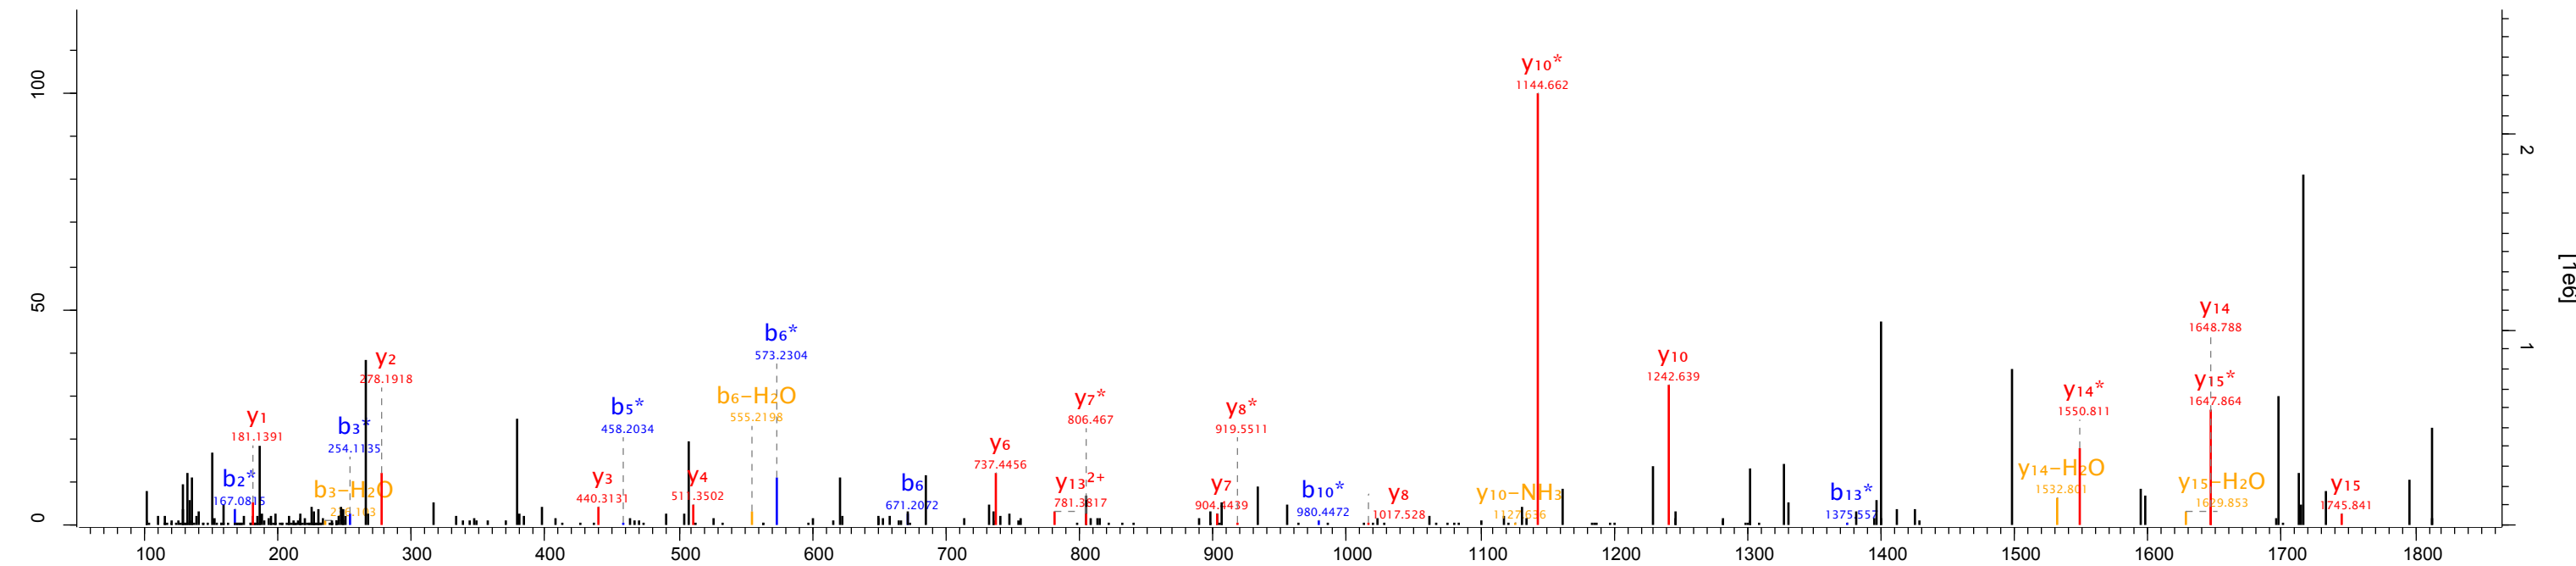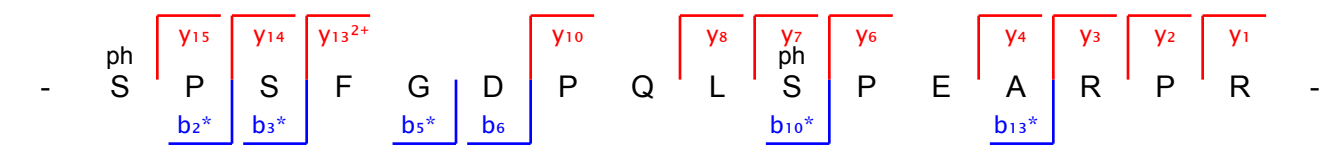

Raw file: 20150812\_A375SR\_Phospho\_BR1\_03  
 Scan: 16325 Method: FTMS; HCD Score: 363.93 m/z: 1016.91 Gene names: SRRM1

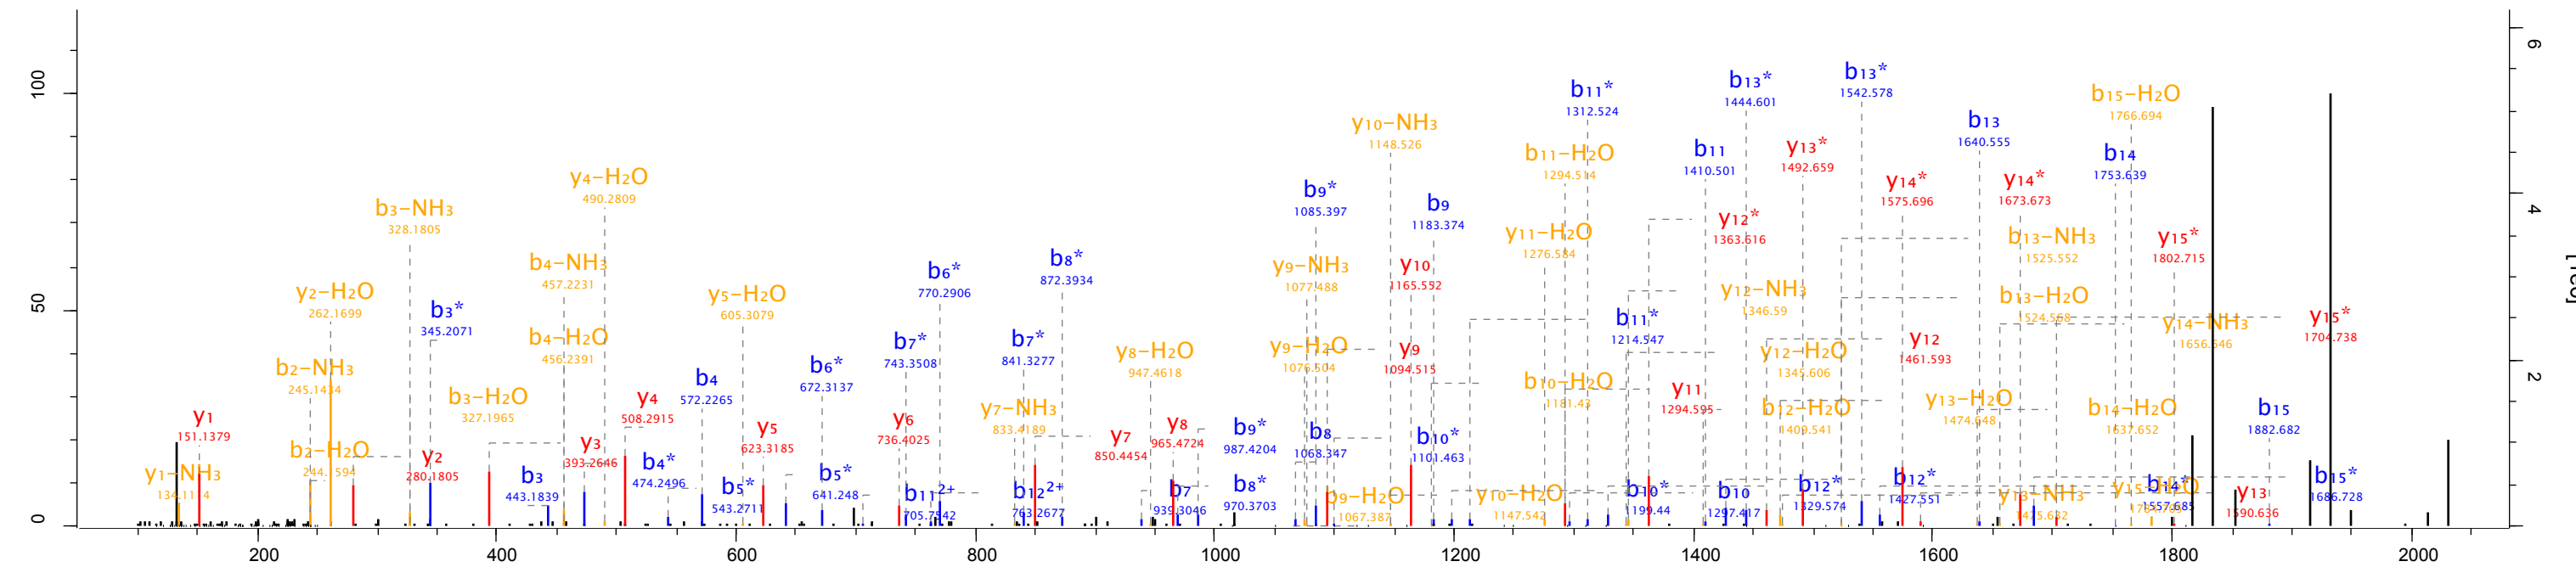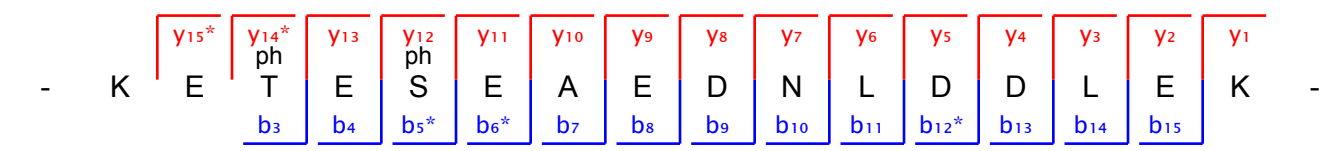

Raw file 20150812\_A375SR\_Phospho\_BR1\_03 Scan 16385 Method FTMS; HCD Score 127.49 m/z 547.92 Gene names NEURL4

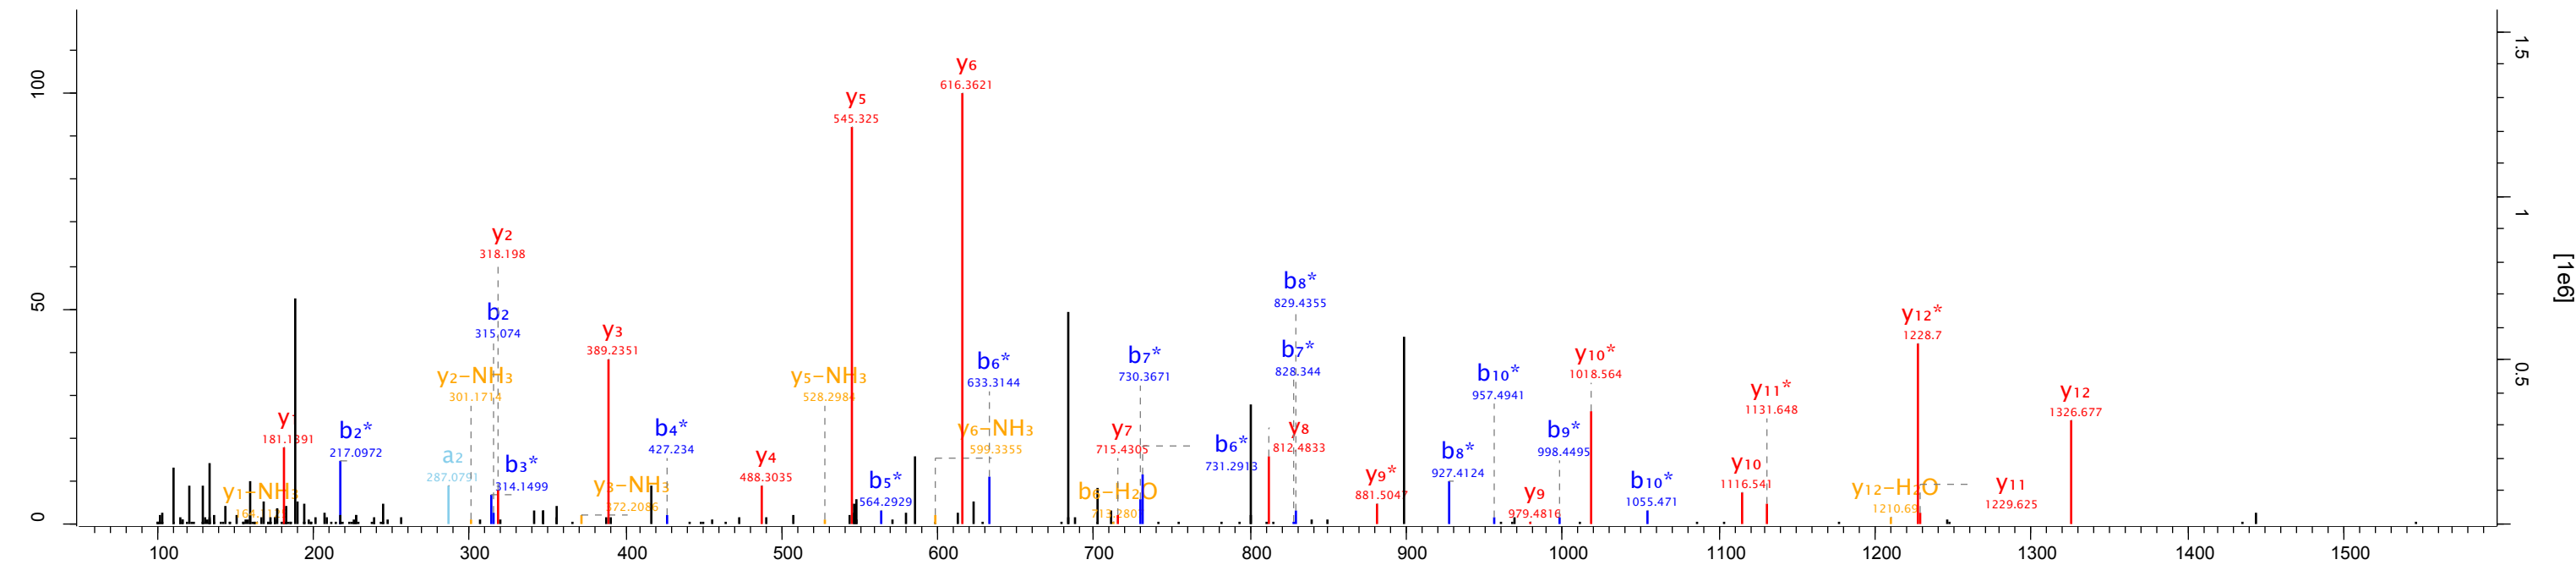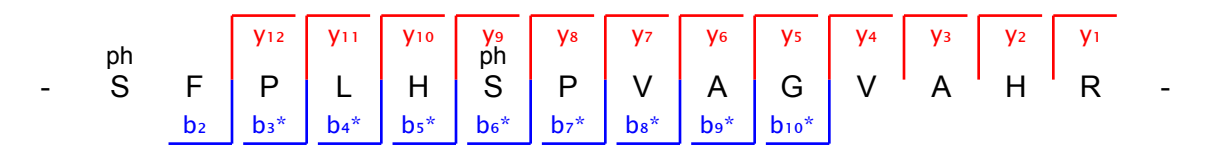



Raw file 20150812\_A375SR\_Phospho\_BR1\_03 Scan 16405 Method FTMS; HCD Score 127.54 m/z 1031.08 Gene names NUCKS1

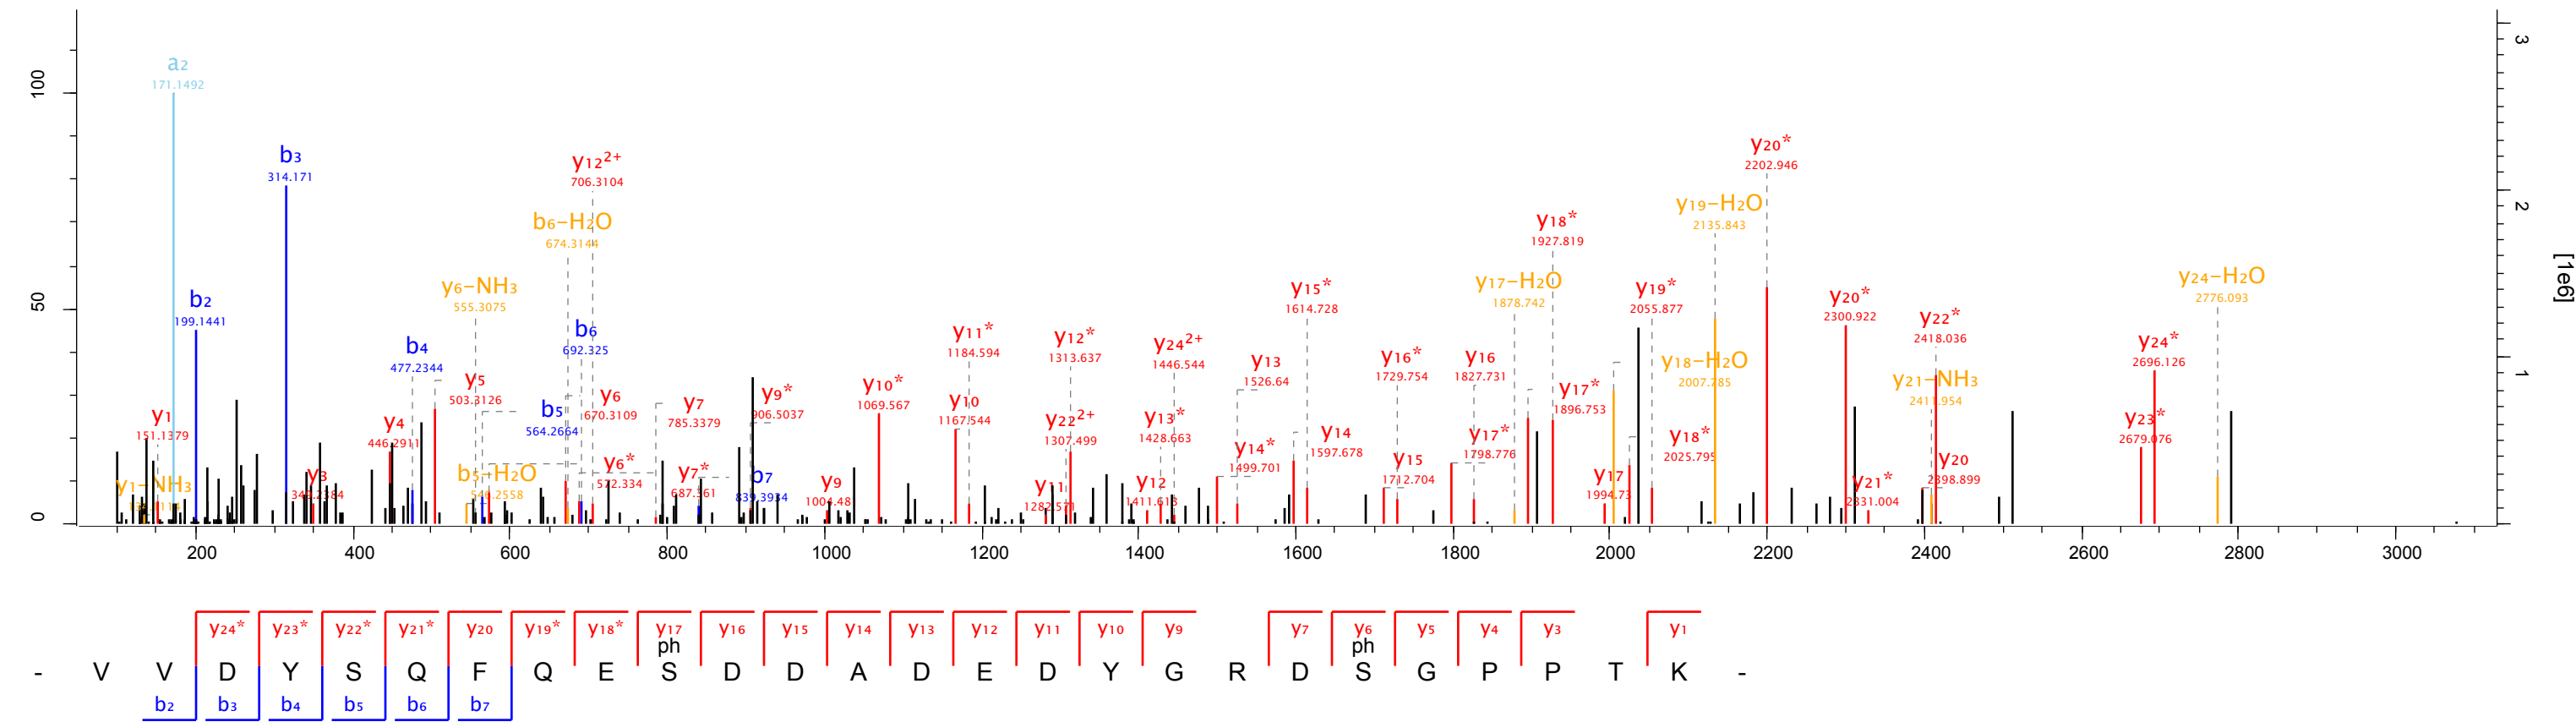

Raw file: 20150812\_A375SR\_Phospho\_BR1\_03  
 Scan: 16745 Method: FTMS; HCD Score: 206.32 m/z: 1167.84 Gene names: BCL7C

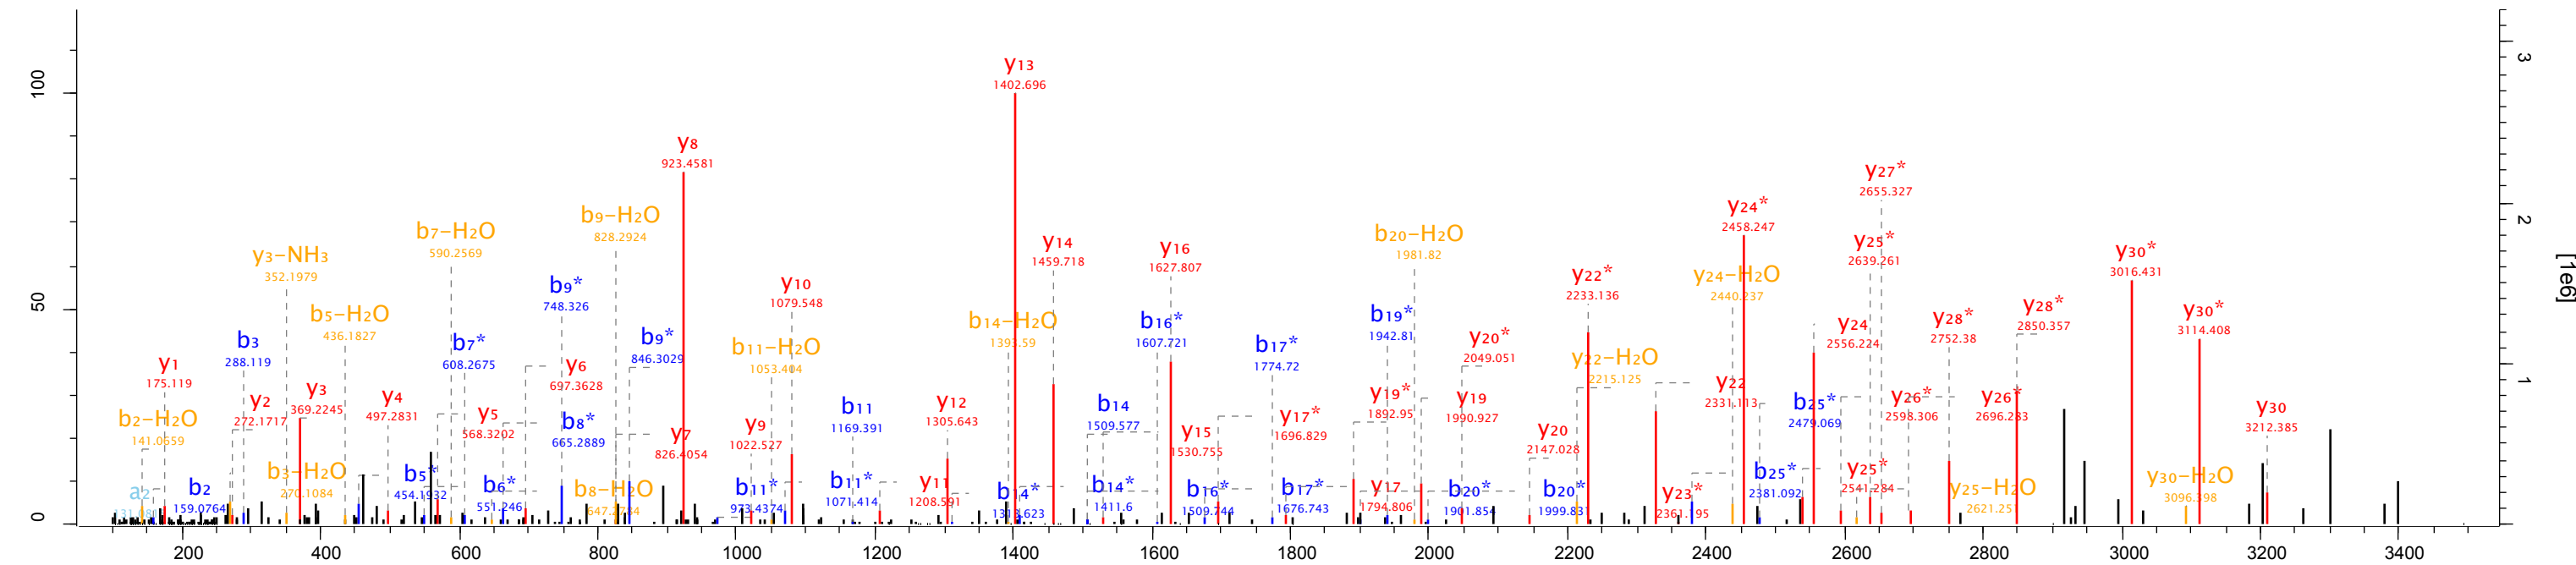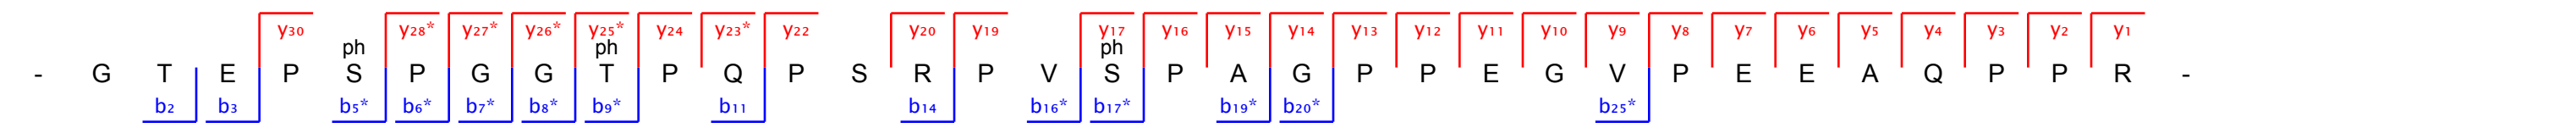

Raw file: 20150812\_A375SR\_Phospho\_BR1\_03  
 Scan: 16765 Method: FTMS; HCD Score: 200.94 m/z: 806.42 Gene names: BCL9L

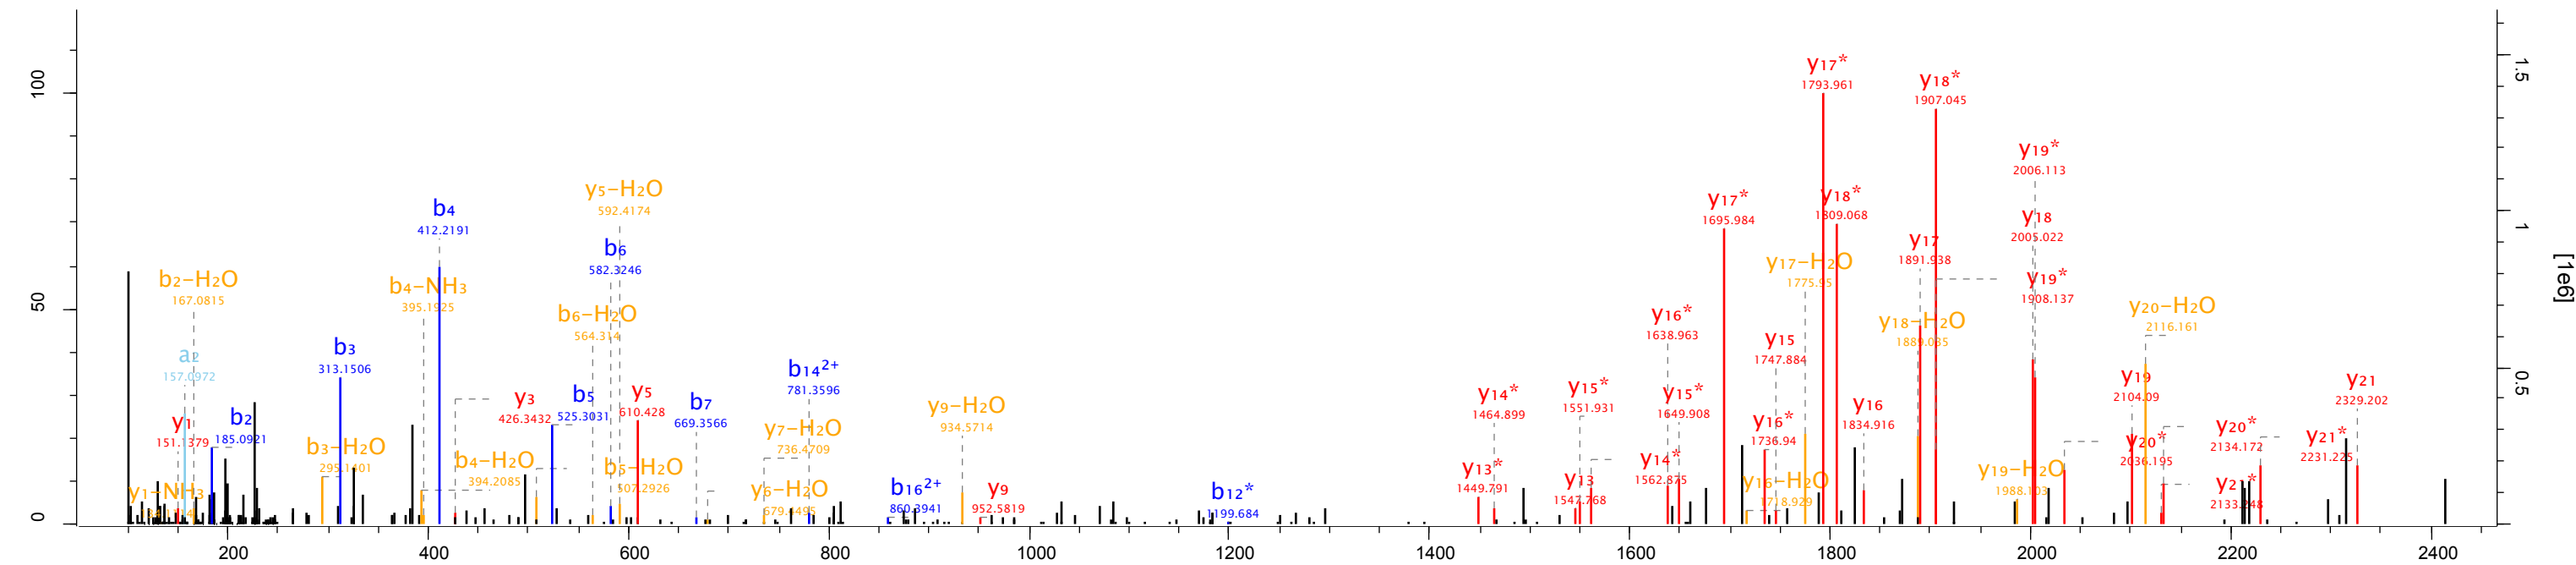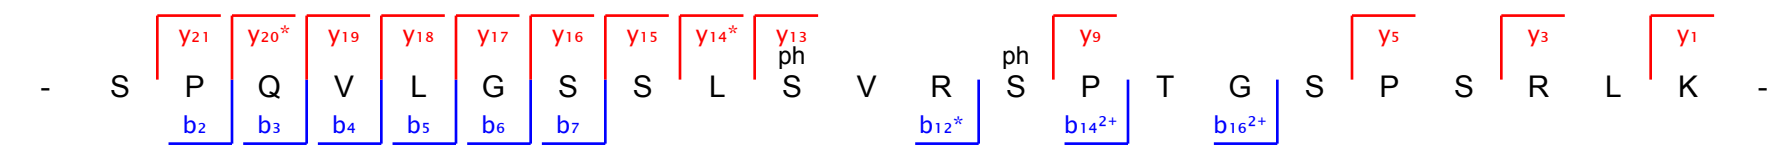

Raw file 20150812\_A375SR\_Phospho\_BR1\_03 Scan 16815 Method FTMS; HCD Score 111.4 m/z 798.32 Gene names UBR4

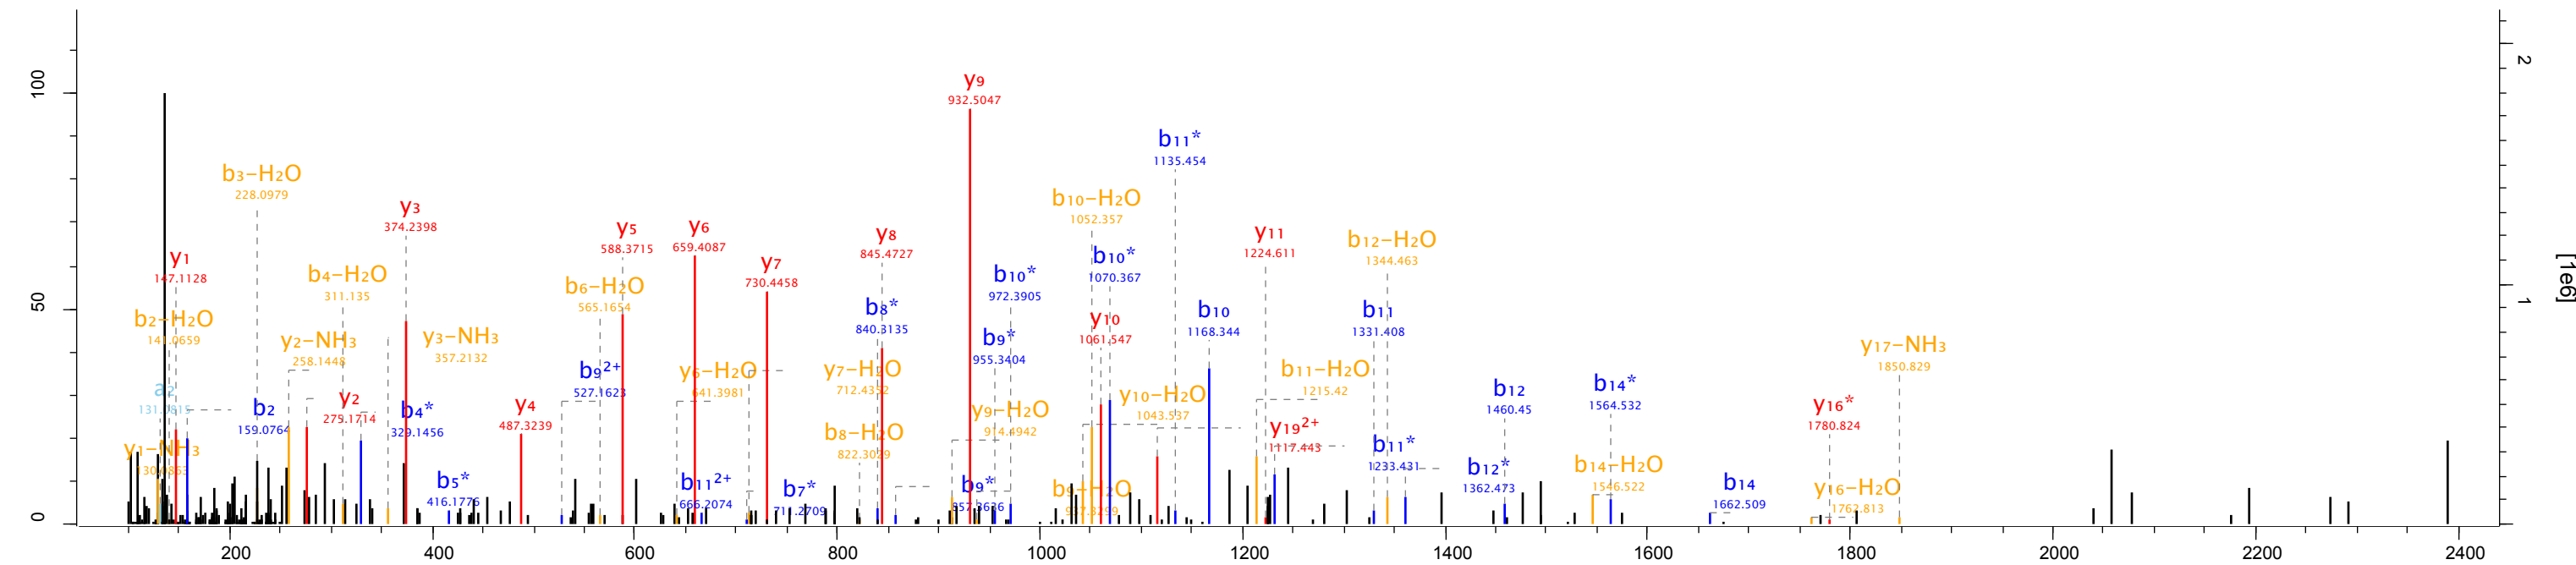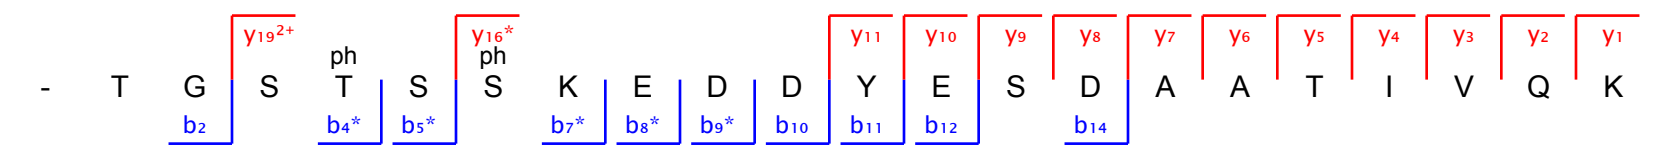

Raw file  
 20150812\_A375SR\_Phospho\_BR1\_03  
 Scan 16855 Method FTMS; HCD Score 73.51 m/z 785.1 Gene names LARP4B

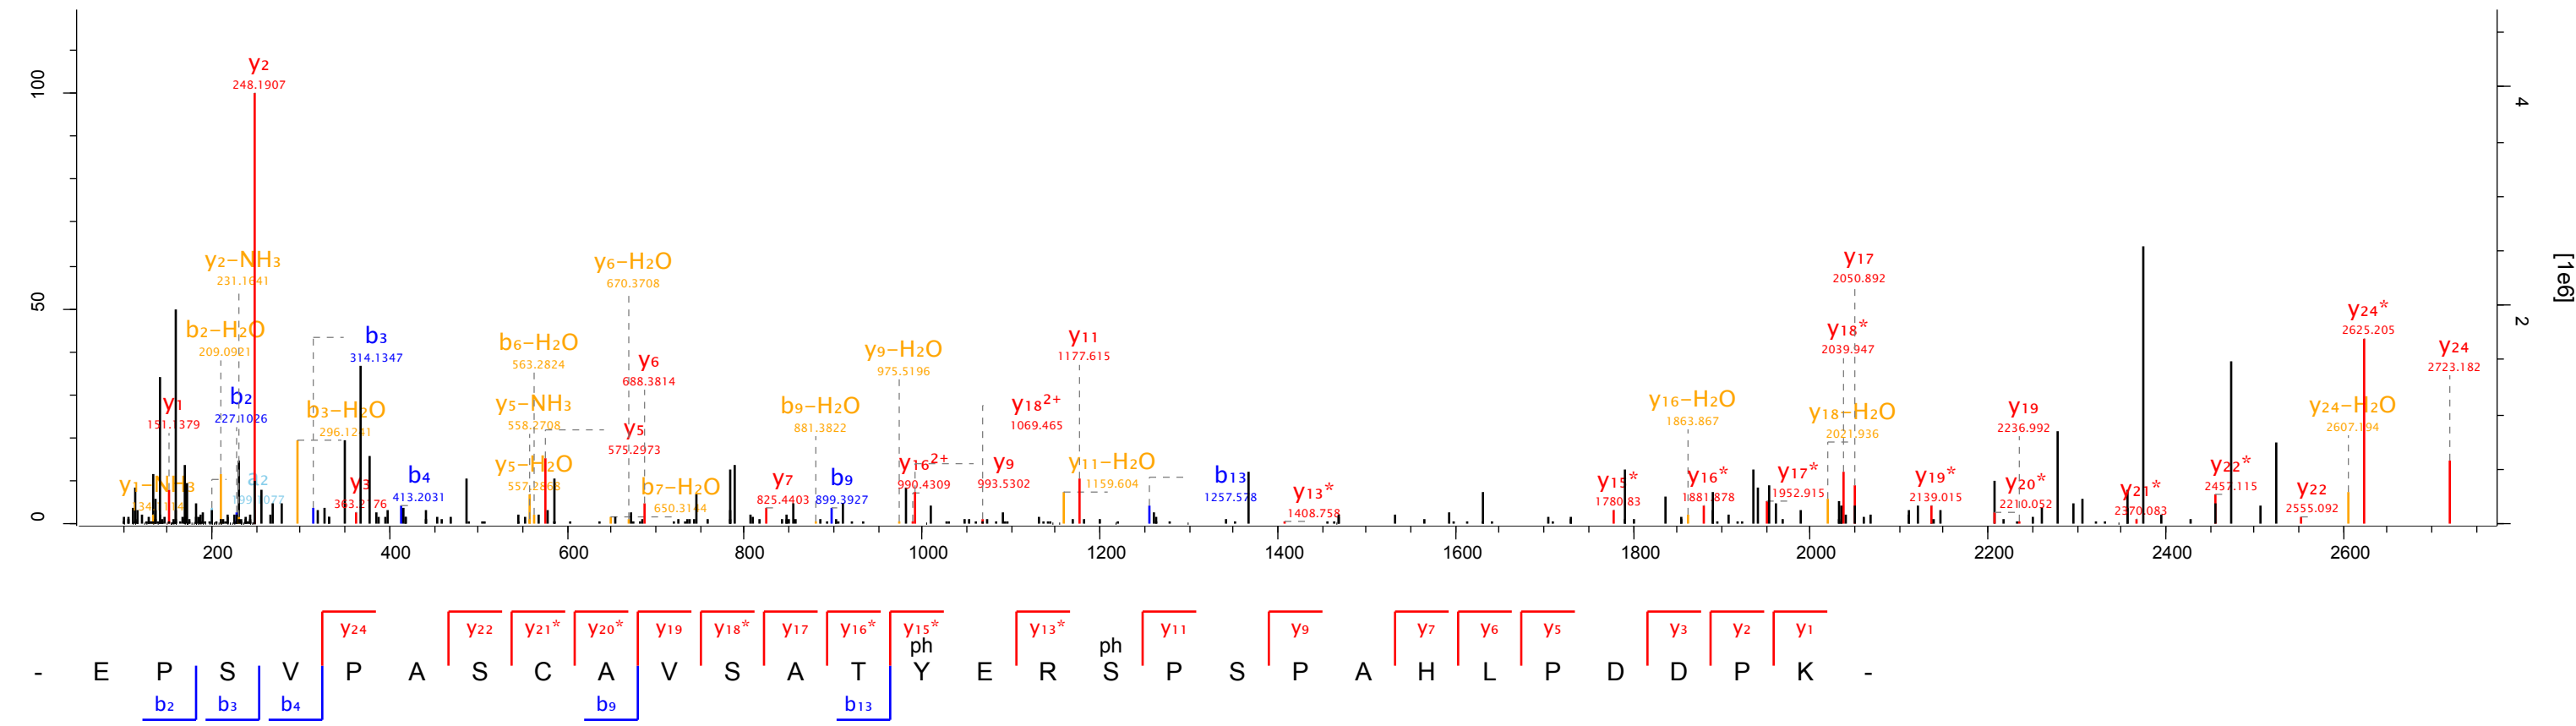

Raw file 20150812\_A375SR\_Phospho\_BR1\_03 Scan 17295 Method FTMS; HCD Score 58.43 m/z 977.79 Gene names NOL12

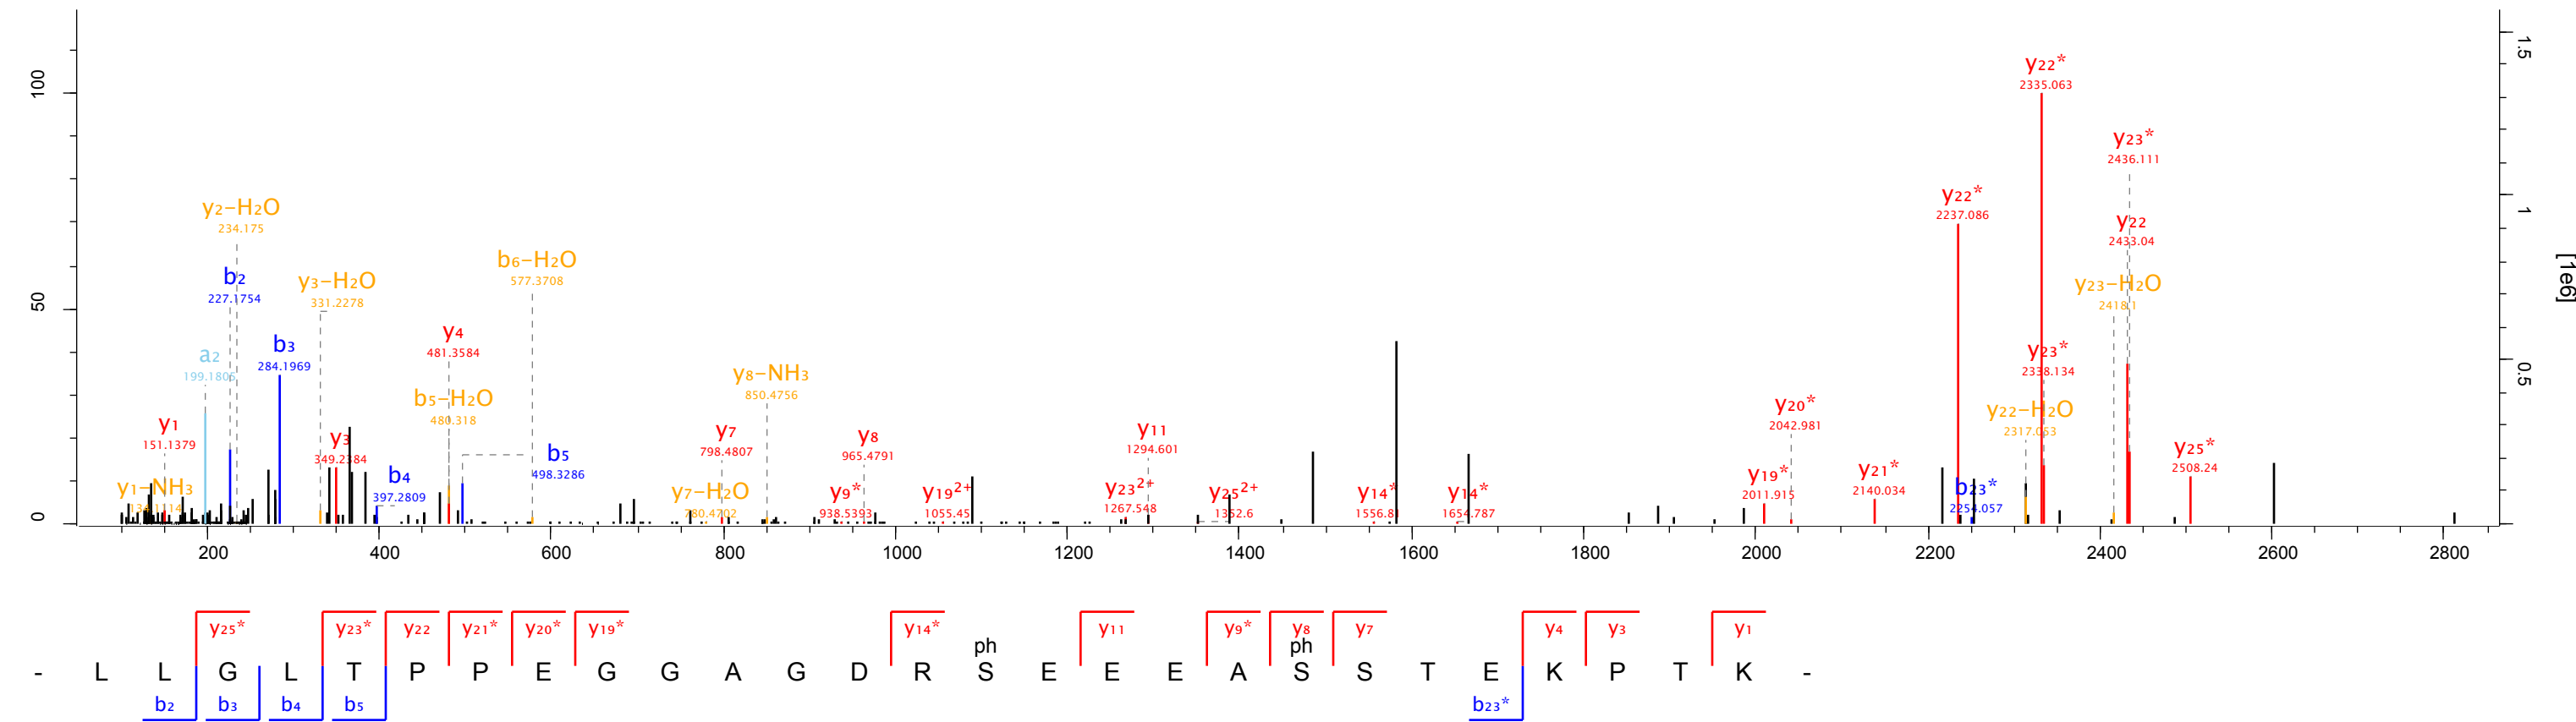

Raw file  
 20150812\_A375SR\_Phospho\_BR1\_03  
 Scan 17855 Method FTMS; HCD Score 75.19 m/z 947.46 Gene names TCOF1

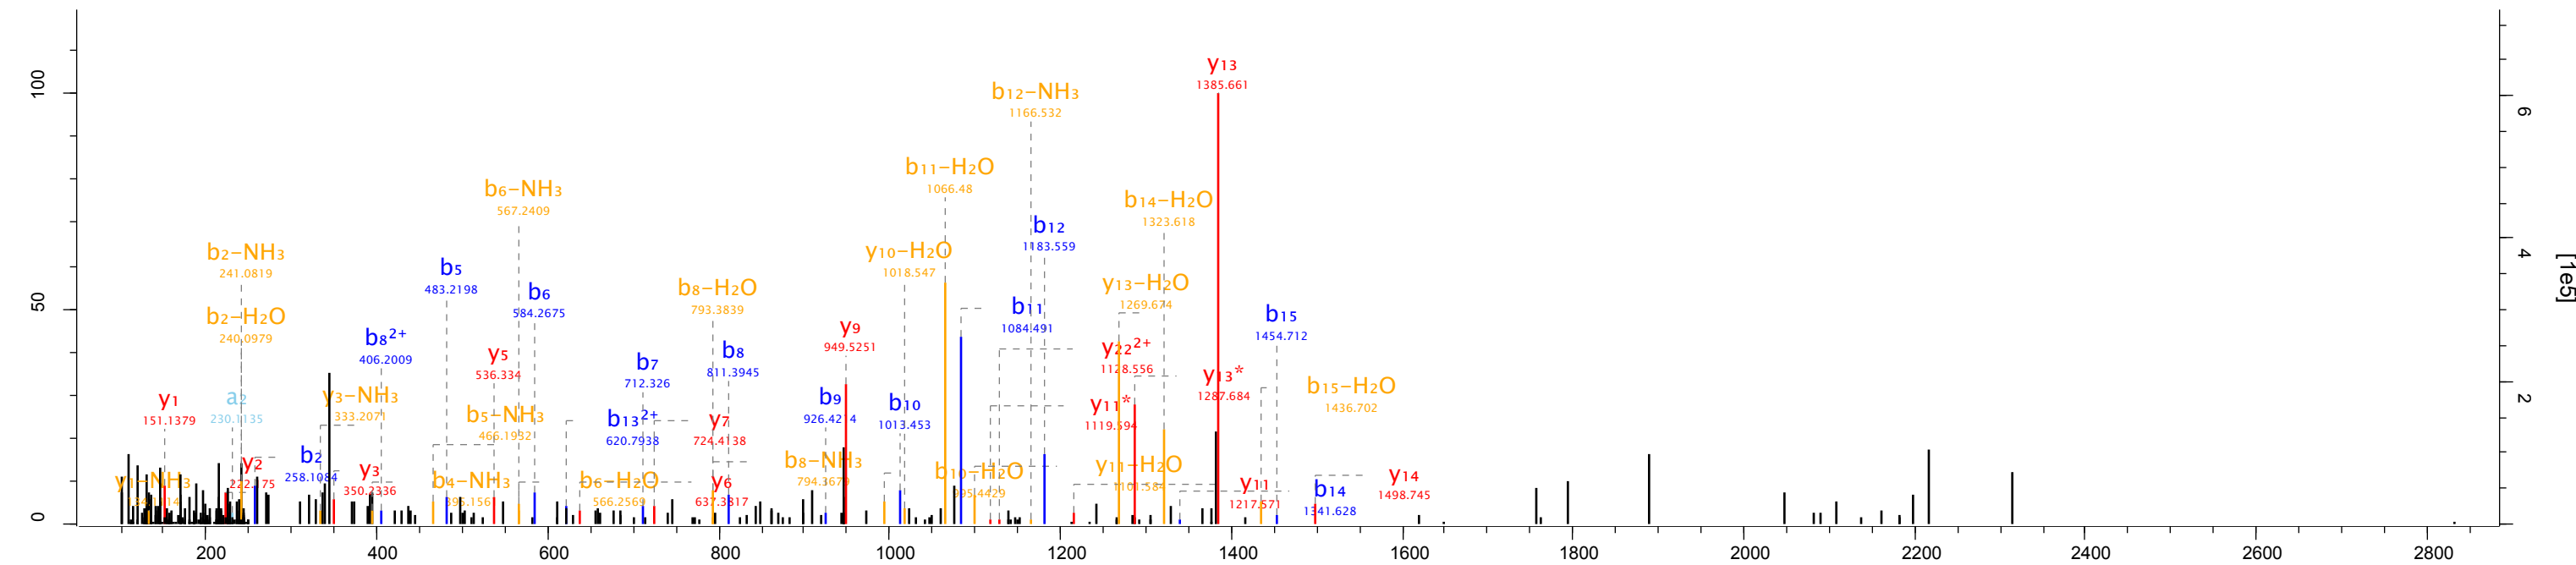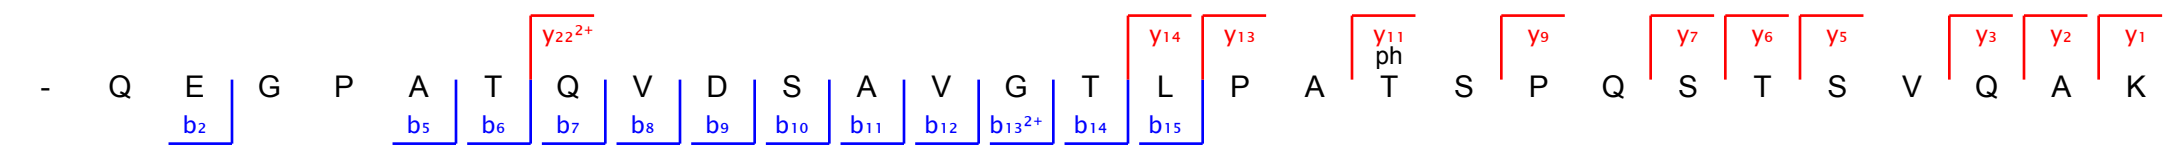

Raw file: 20150812\_A375SR\_Phospho\_BR1\_03  
 Scan: 18485 Method: FTMS; HCD Score: 113.63 m/z: 888.9 Gene names: MAP4K4

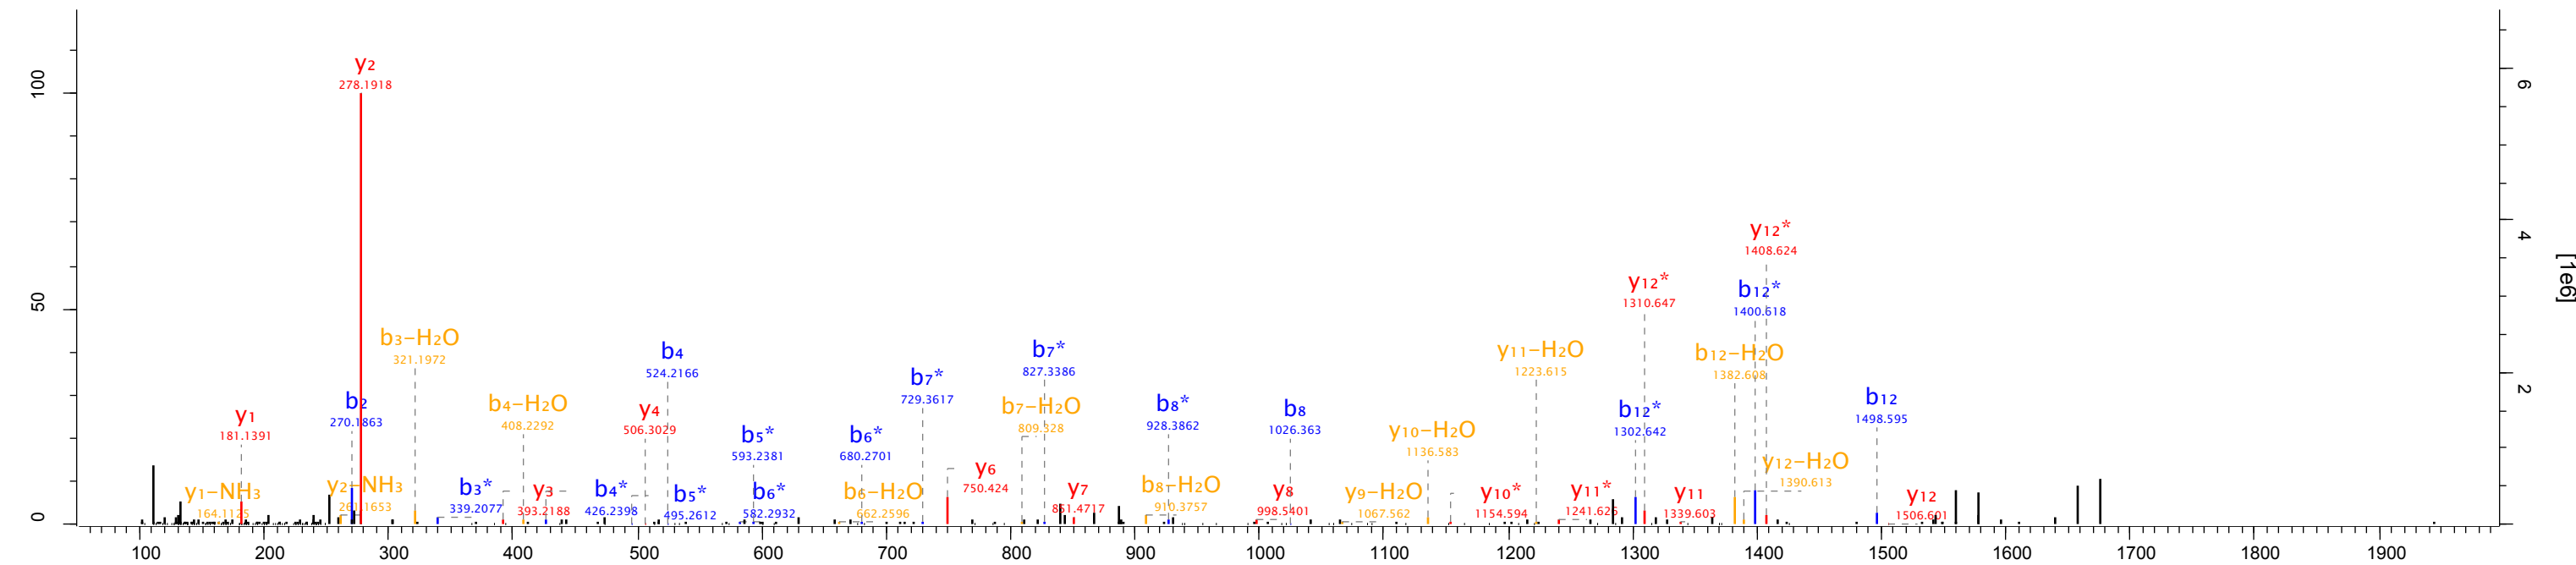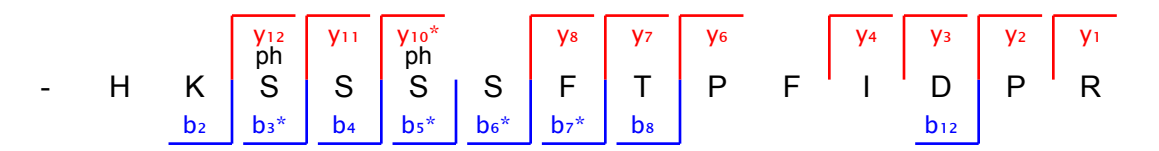



Raw file: 20150812\_A375SR\_Phospho\_BR1\_03  
 Scan: 18695 Method: FTMS; HCD Score: 132.55 m/z: 1196.53 Gene names: SNX33

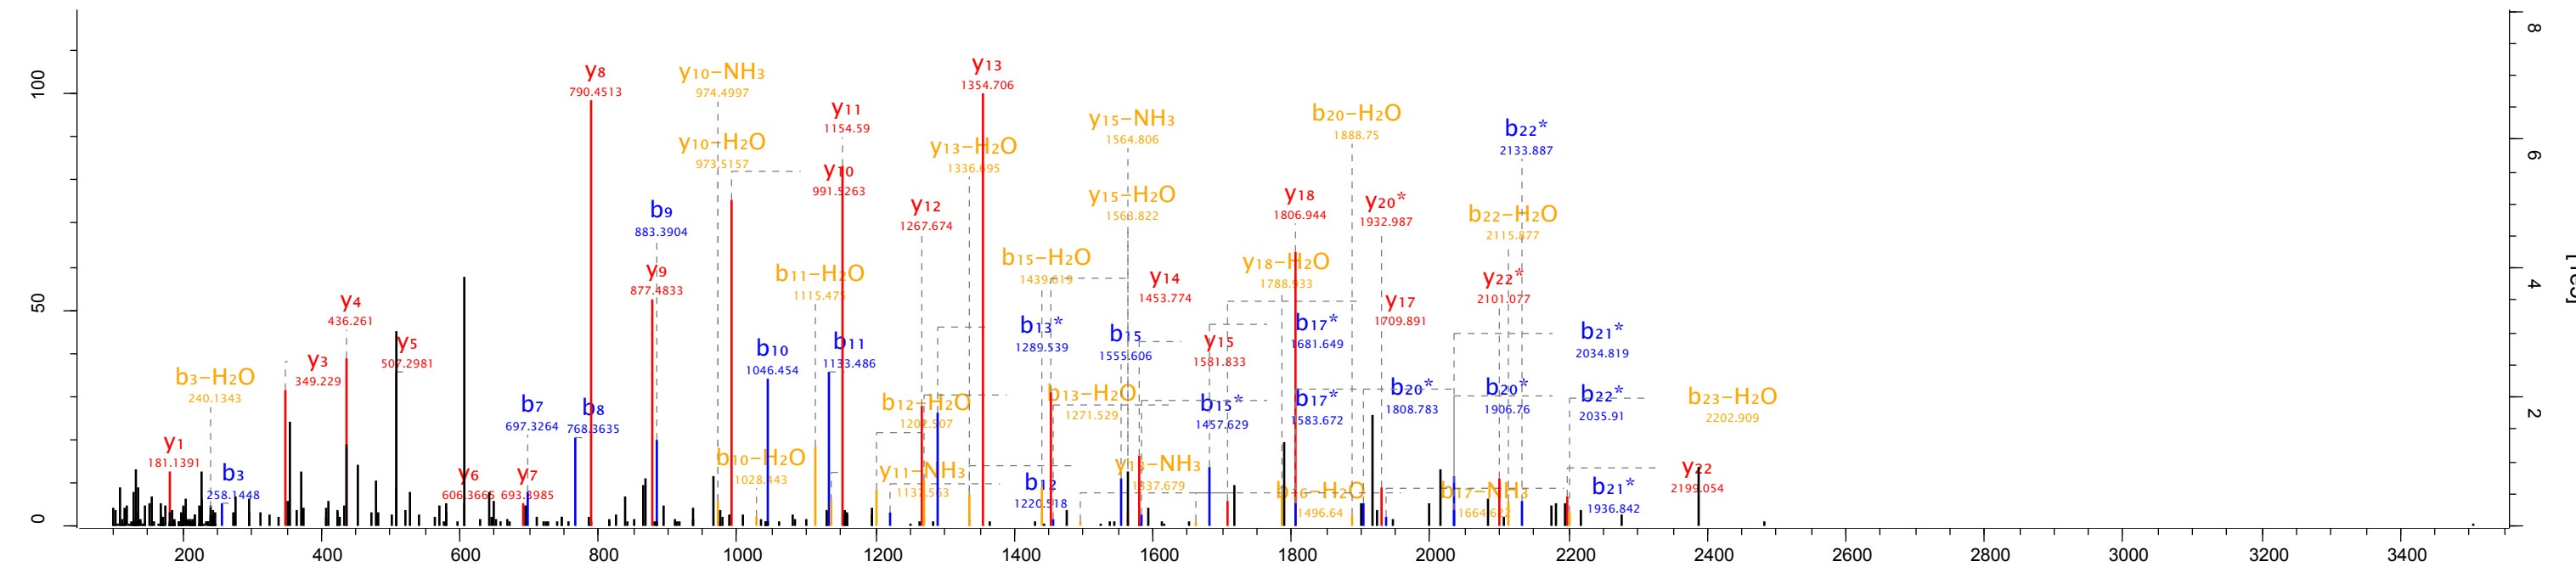

- S G I S T N H A D Y S S ph P A G S P G A Q V S L Y N S P S V A S P A R -

b<sub>3</sub> b<sub>7</sub> b<sub>8</sub> b<sub>9</sub> b<sub>10</sub> b<sub>11</sub> b<sub>12</sub> b<sub>13</sub>\* b<sub>15</sub> b<sub>17</sub>\* b<sub>20</sub>\* b<sub>21</sub>\* b<sub>22</sub>\* y<sub>22</sub> y<sub>20</sub>\* y<sub>18</sub> y<sub>17</sub> y<sub>15</sub> y<sub>14</sub> y<sub>13</sub> y<sub>12</sub> y<sub>11</sub> y<sub>10</sub> y<sub>9</sub> y<sub>8</sub> y<sub>7</sub> y<sub>6</sub> y<sub>5</sub> y<sub>4</sub> y<sub>3</sub> y<sub>1</sub>

Raw file 20150812\_A375SR\_Phospho\_BR1\_03 Scan 18735 Method FTMS; HCD Score 162.28 m/z 1128 Gene names PKN1

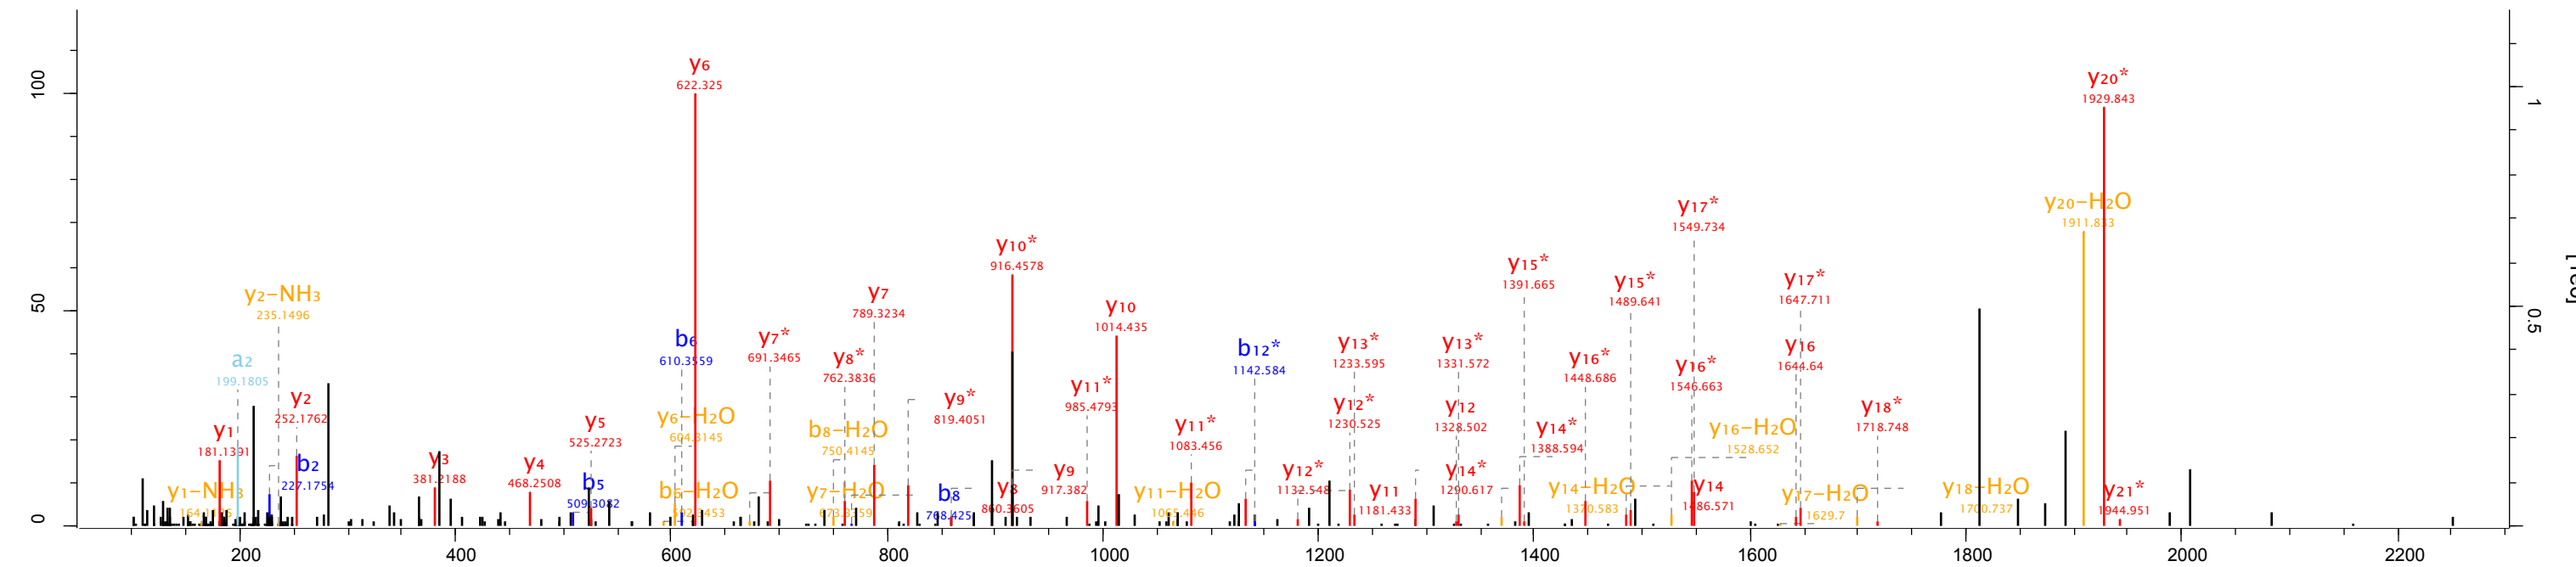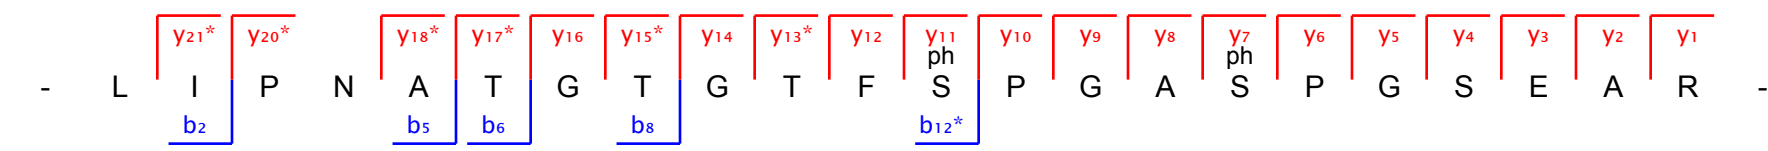

Raw file 20150812\_A375SR\_Phospho\_BR1\_03 Scan 18745 Method FTMS; HCD Score 222.86 m/z 1137.5 Gene names PHLDB2

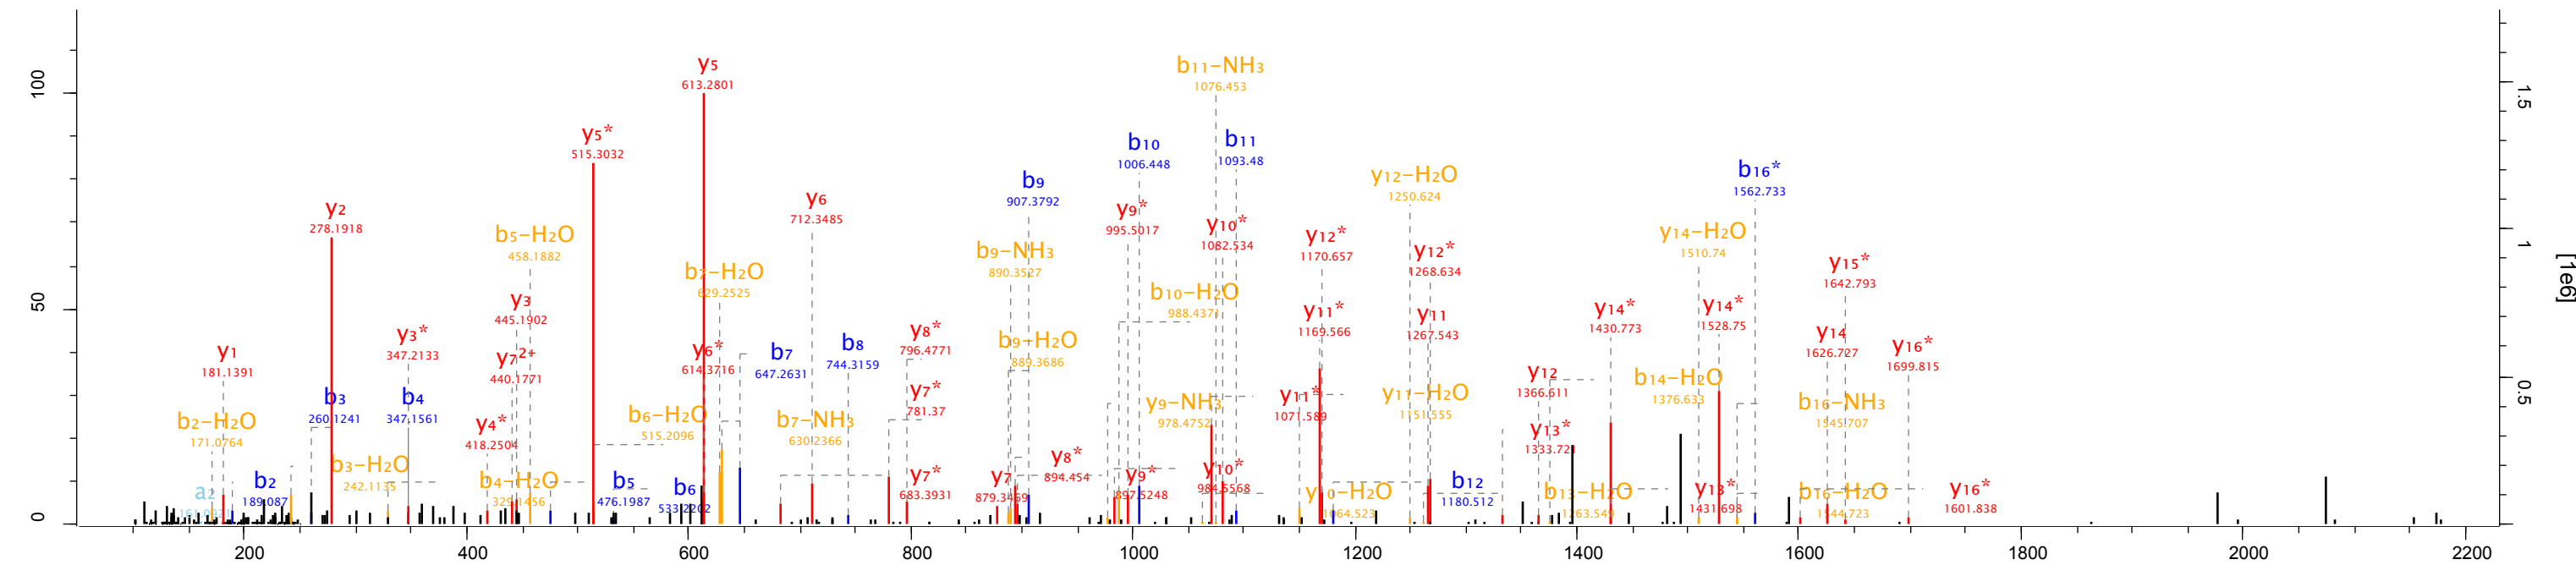

- T S A S E G N P Y V S S T L S V P A S P R -

Fragmentation mapping: b2 (S), b3 (A), b4 (S), b5 (E), b6 (G), b7 (N), b8 (P), b9 (Y), b10 (V), b11 (S), b12 (S), b16\* (V)

Fragmentation mapping: y16\* (R), y15\* (P), y14 (S), y13\* (A), y12 (V), y11 (S), y10\* (S), y9\* (T), y8\* (L), y7 (S), y6 (V), y5 (P), y4\* (A), y3 (S), y2 (P), y1 (R)



Raw file 20150812\_A375SR\_Phospho\_BR1\_03 Scan 20175 Method FTMS; HCD Score 176.08 m/z 1028.78 Gene names NCOA7

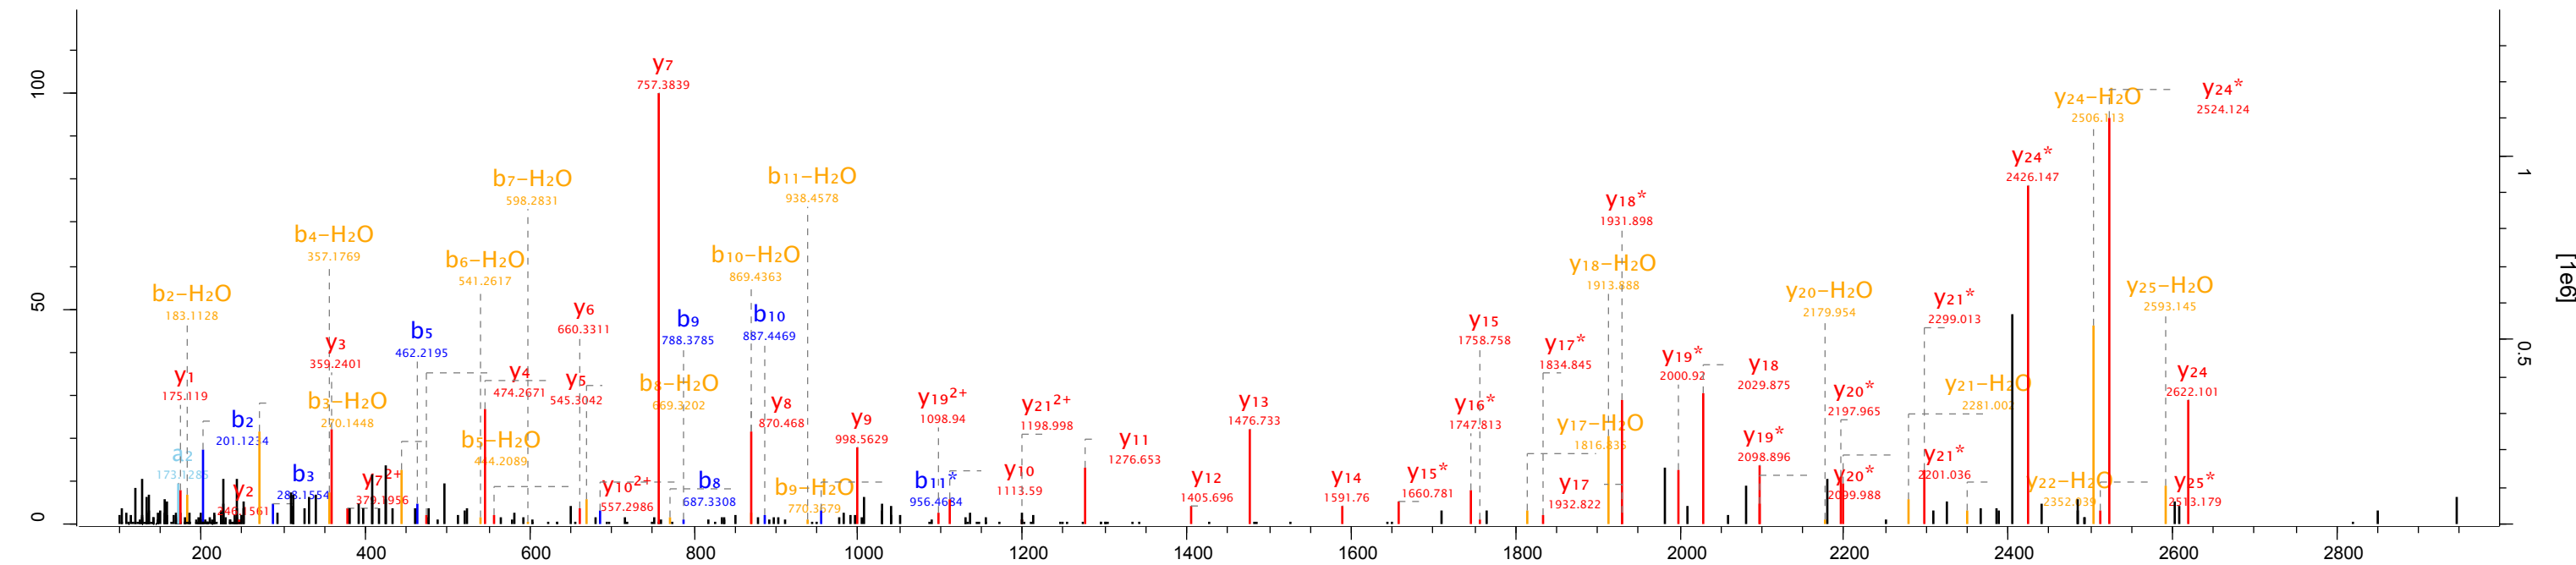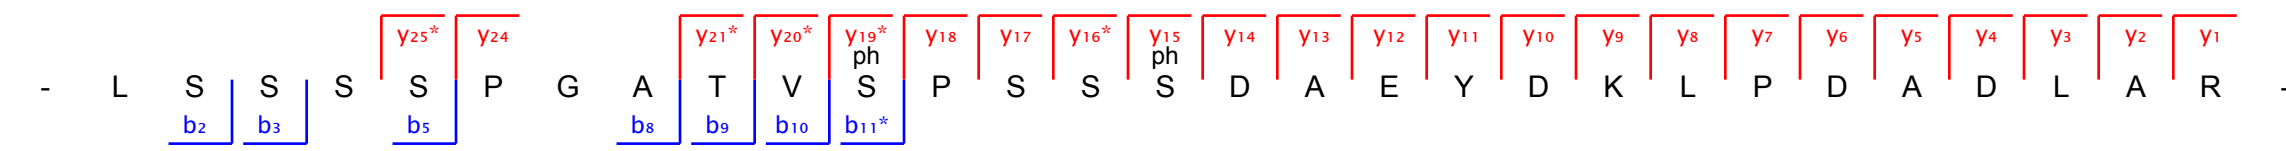

Raw file Scan Method Score m/z Gene names  
 20150812\_A375SR\_Phospho\_BR1\_03 20245 FTMS; HCD 124.76 670.63 ZDHHC5

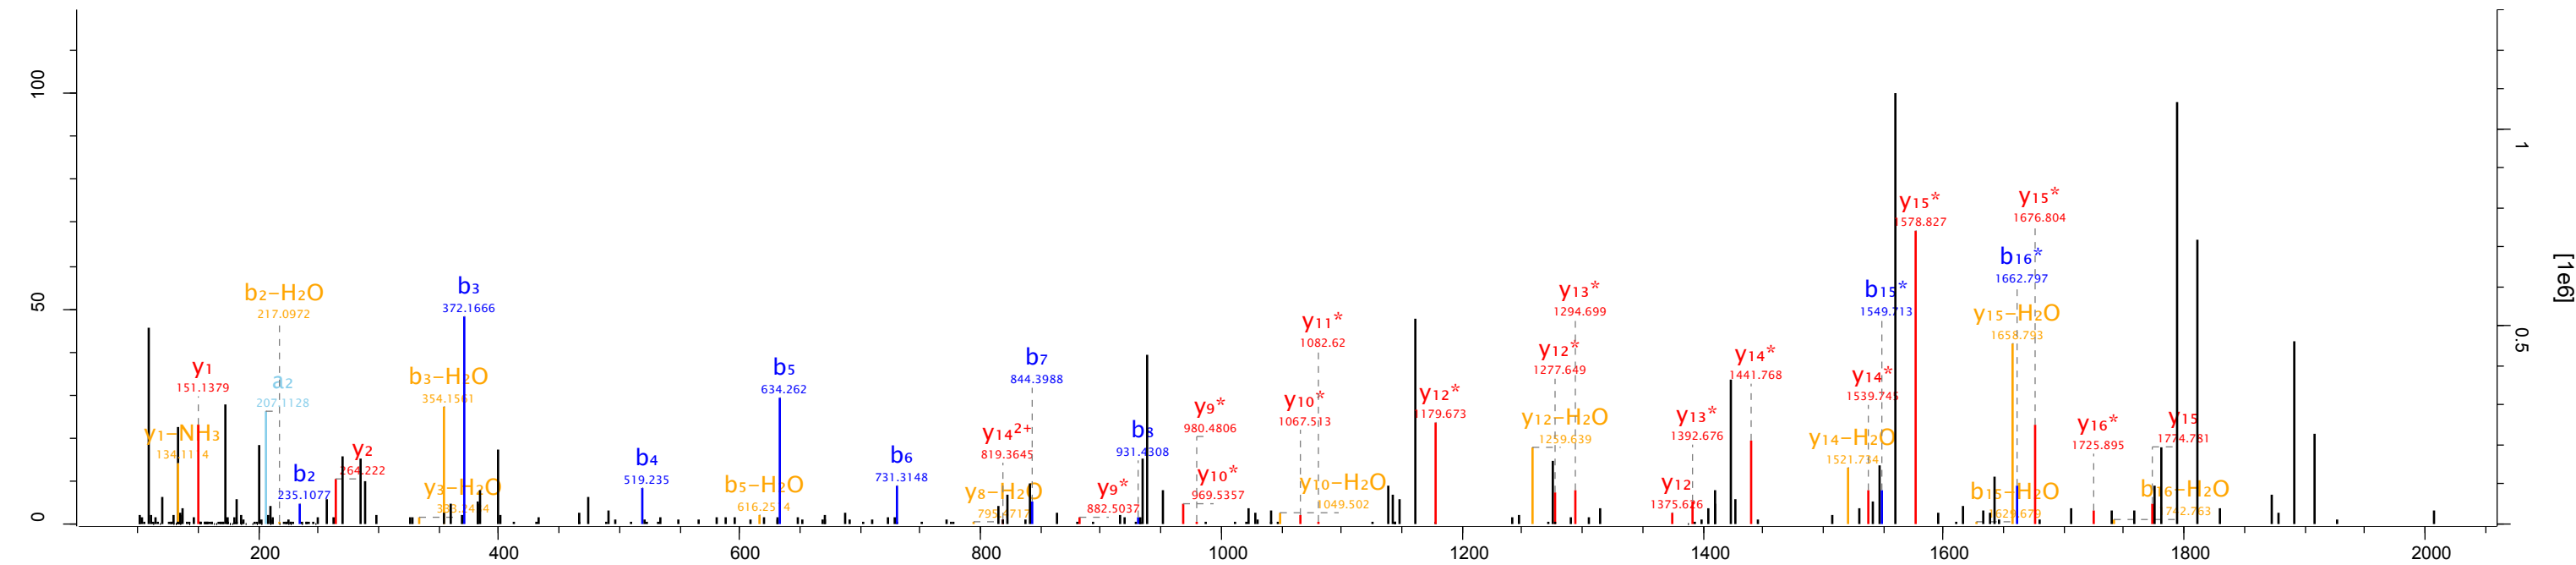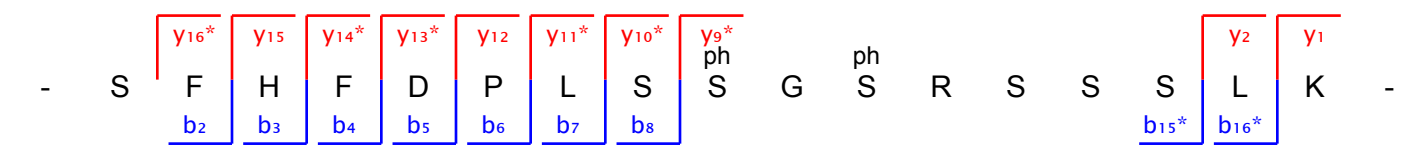

Raw file: 20150812\_A375SR\_Phospho\_BR1\_03  
 Scan: 20285 Method: FTMS; HCD Score: 90.36 m/z: 807.07 Gene names: RAPH1

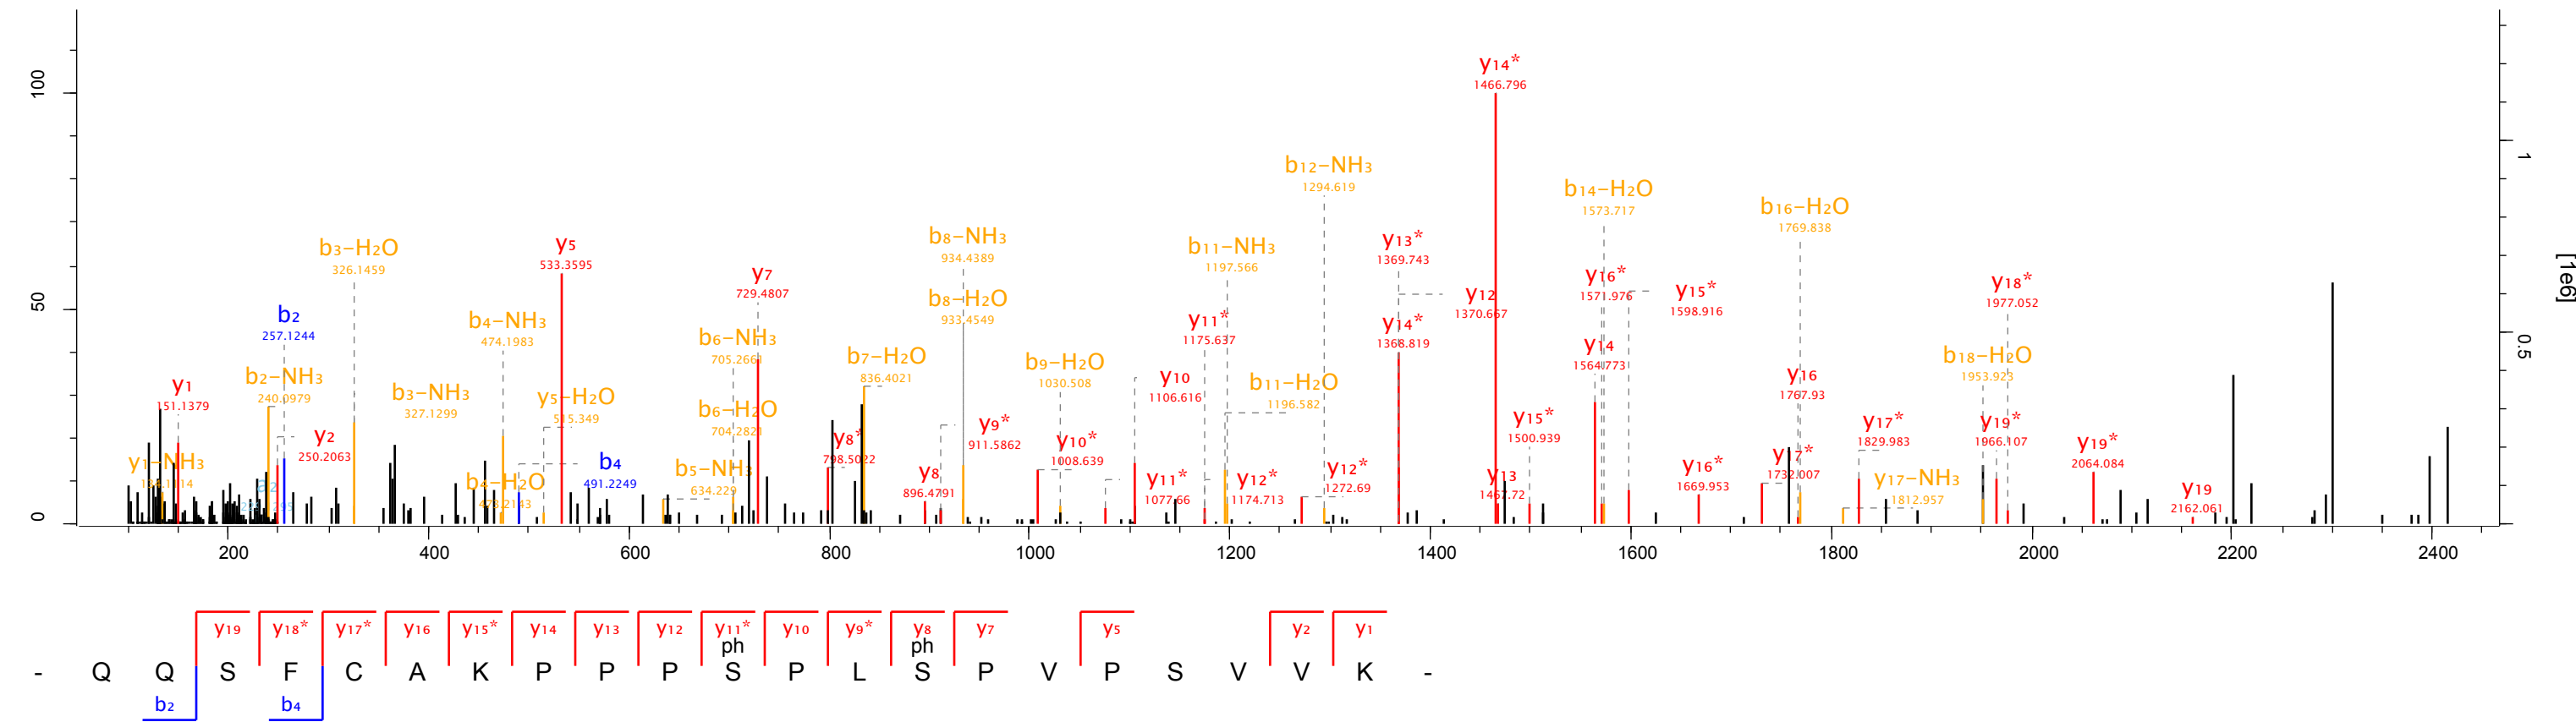

Raw file  
 20150812\_A375SR\_Phospho\_BR1\_03  
 Scan 20435 Method FTMS; HCD Score 85.61 m/z 916.76 Gene names LMO7

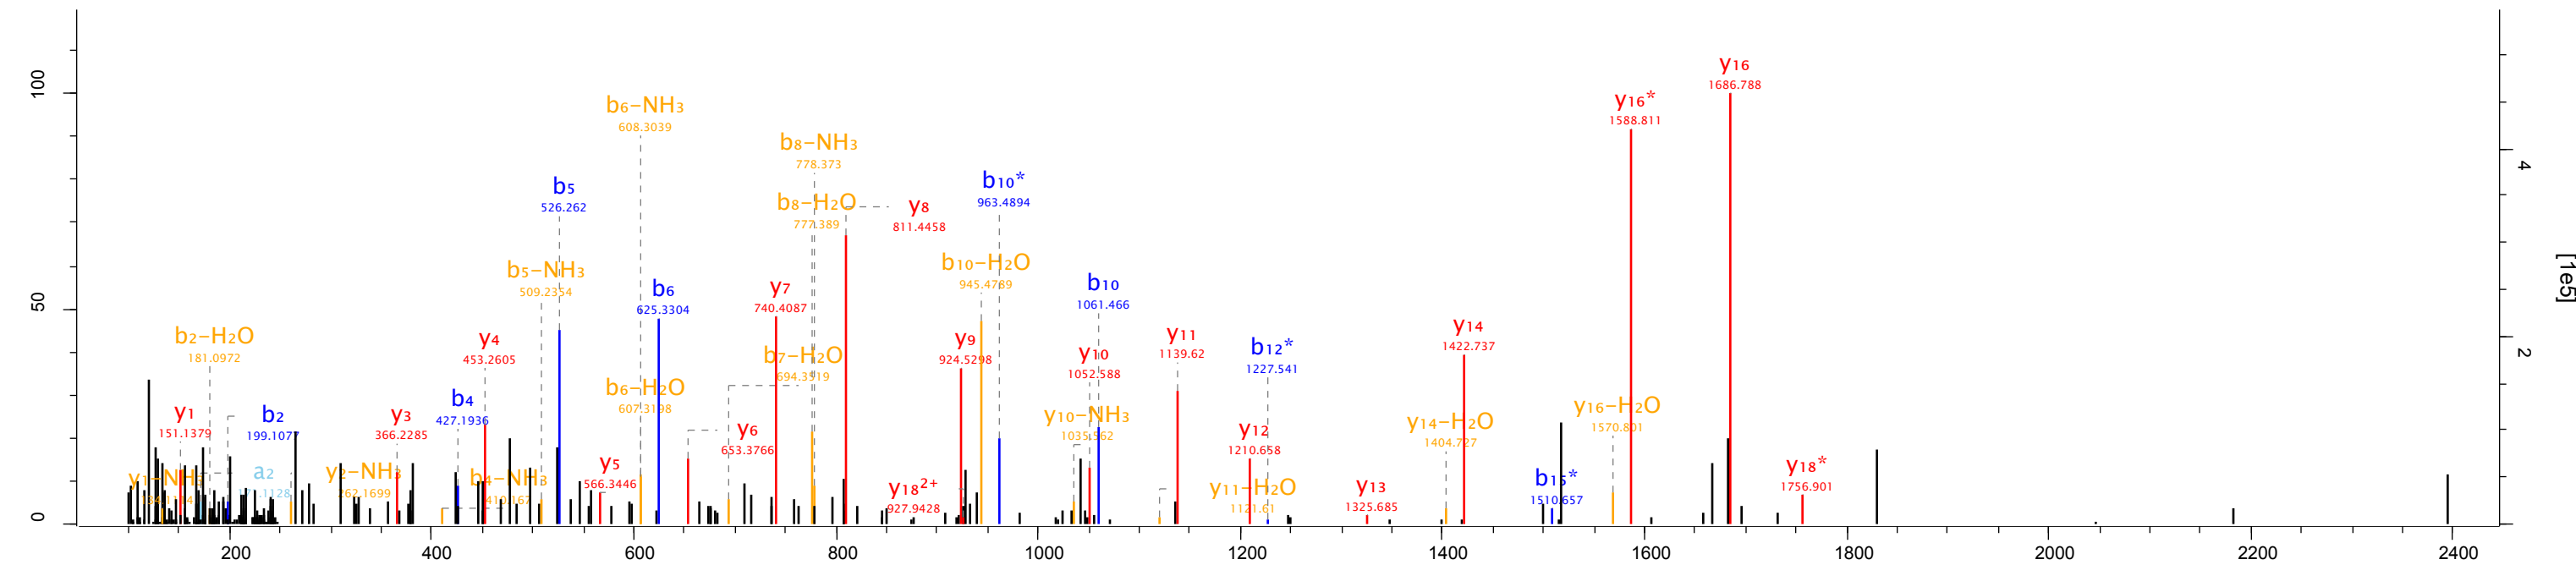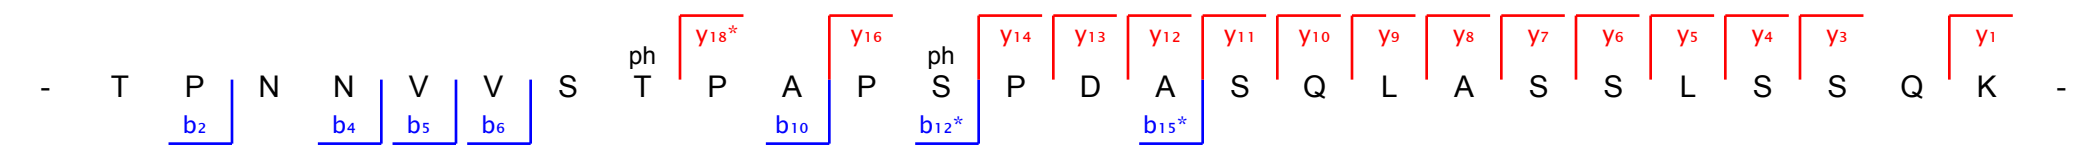



Raw file: 20150812\_A375SR\_Phospho\_BR1\_03  
 Scan: 2055 Method: FTMS; HCD Score: 148.06 m/z: 836.31 Gene names: TRA2B

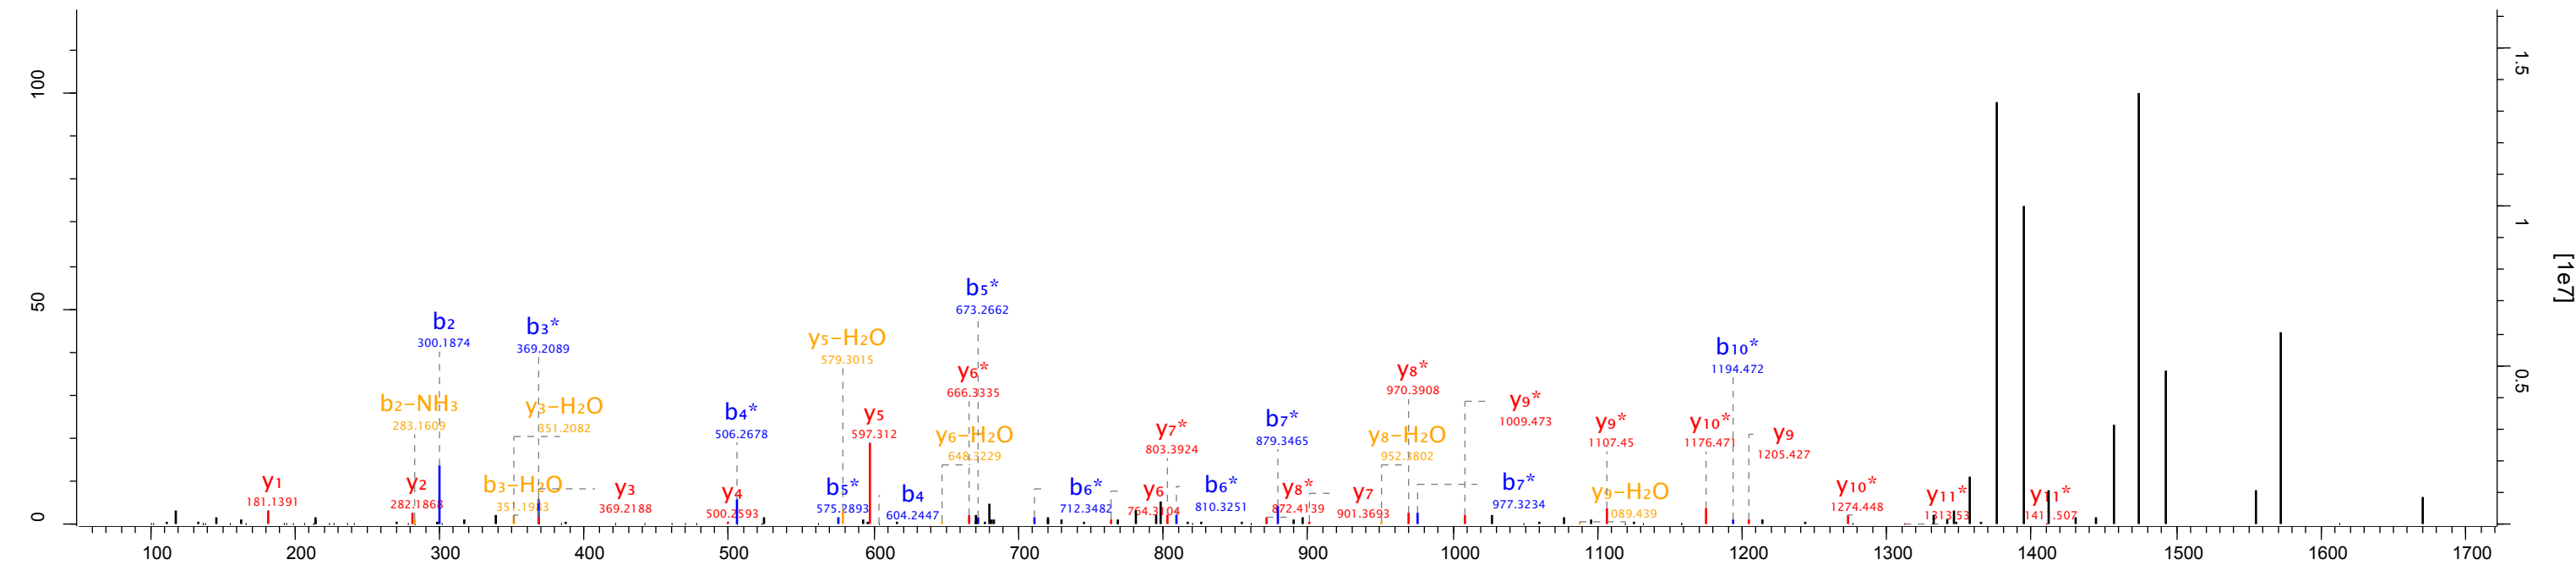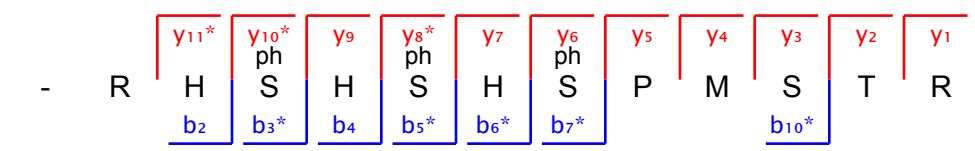

Raw file: 20150812\_A375SR\_Phospho\_BR1\_03  
 Scan: 20785 Method: FTMS; HCD Score: 162.44 m/z: 982.47 Gene names: GINS2

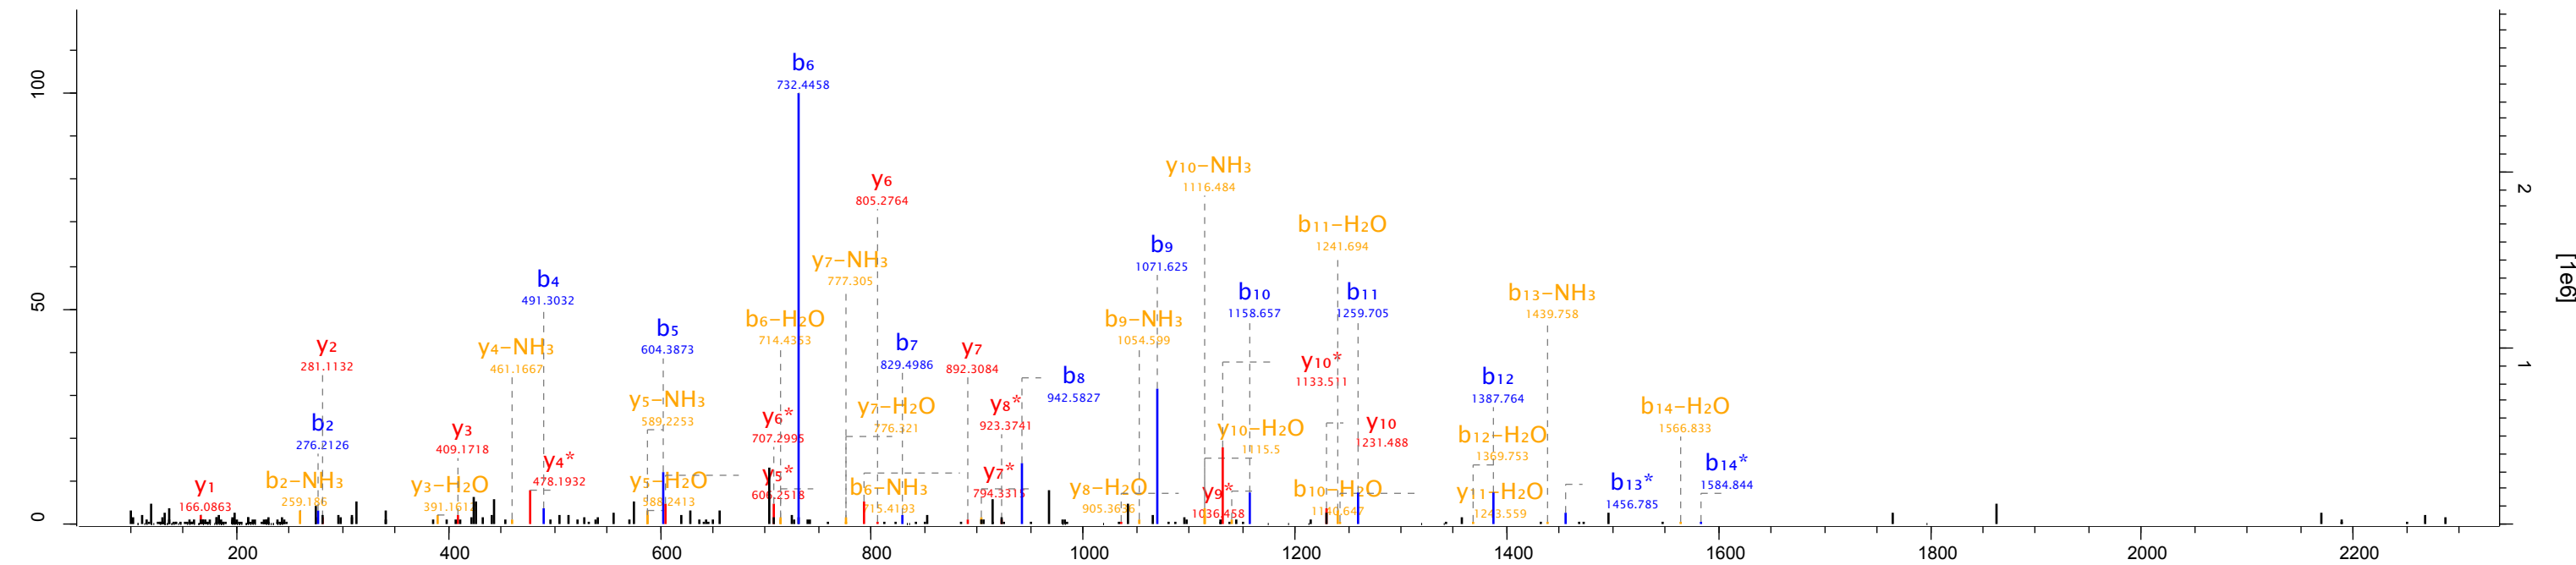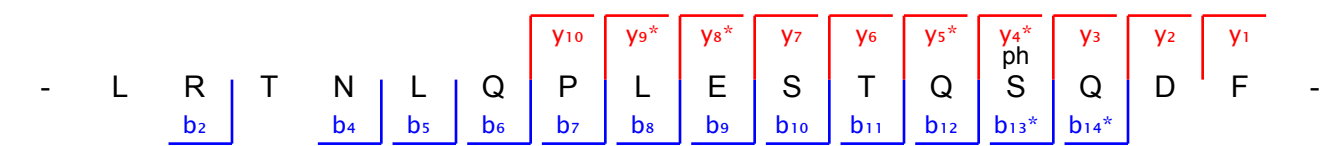

Raw file  
20150812\_A375SR\_Phospho\_BR1\_03

Scan 20805 Method FTMS; HCD Score 155.25 m/z 1038.5 Gene names FOXP4

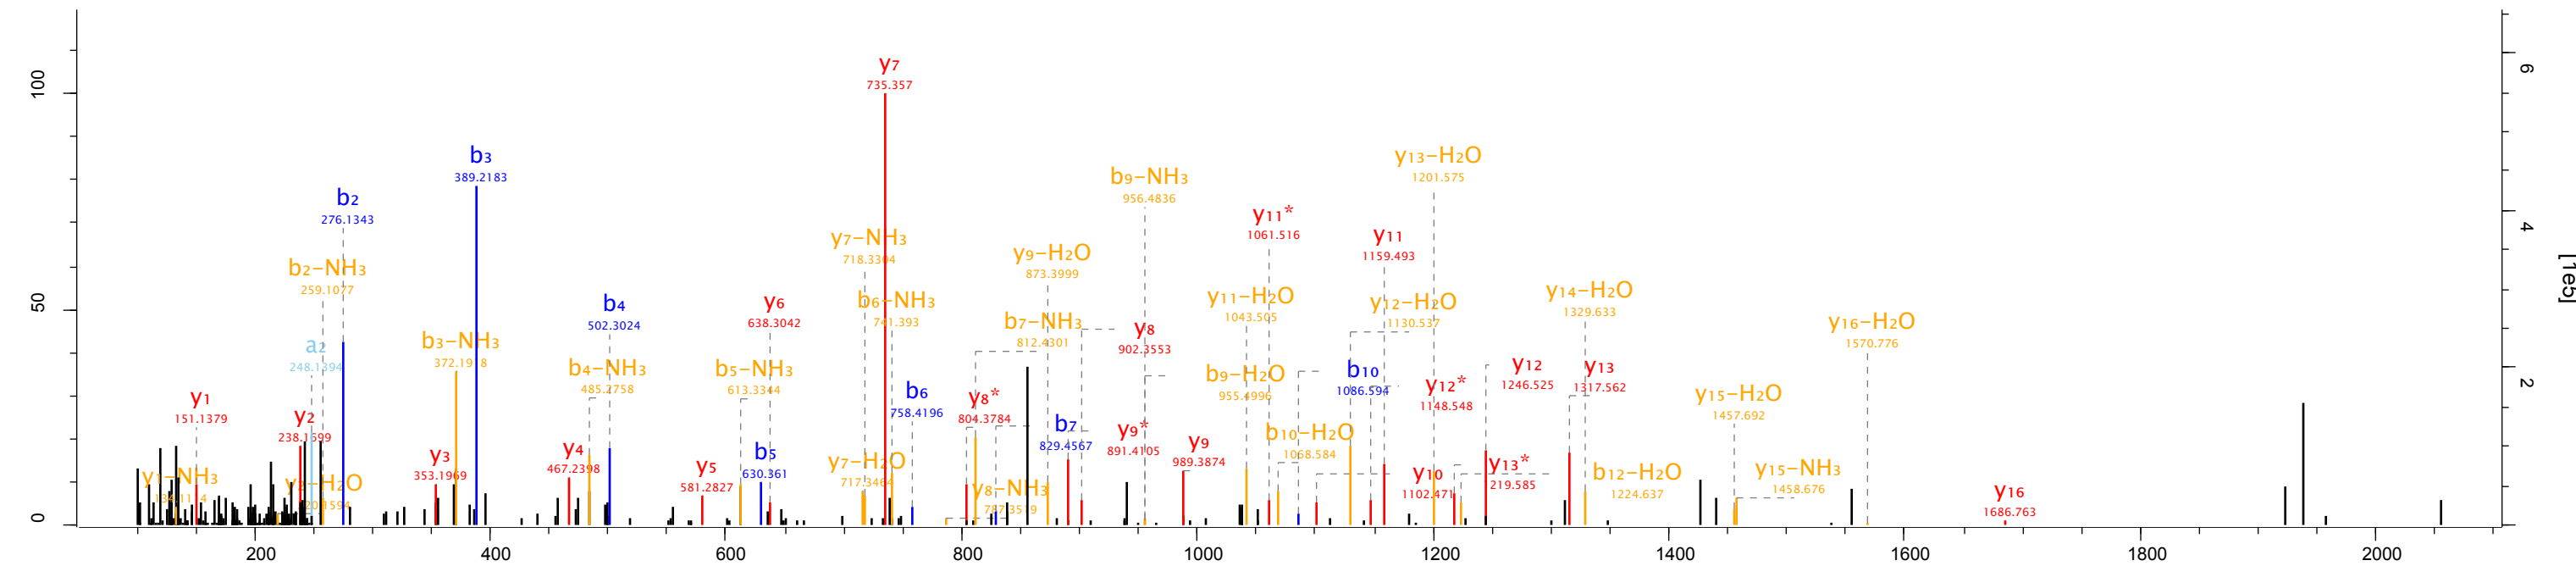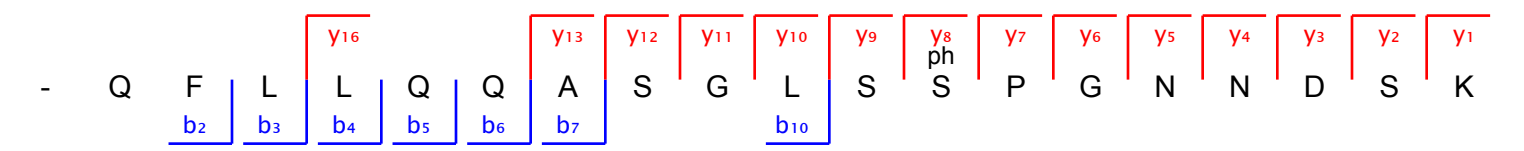

Raw file: 20150812\_A375SR\_Phospho\_BR1\_03  
 Scan: 20835  
 Method: FTMS; HCD  
 Score: 284.81  
 m/z: 1133.79  
 Gene names: PTPN12

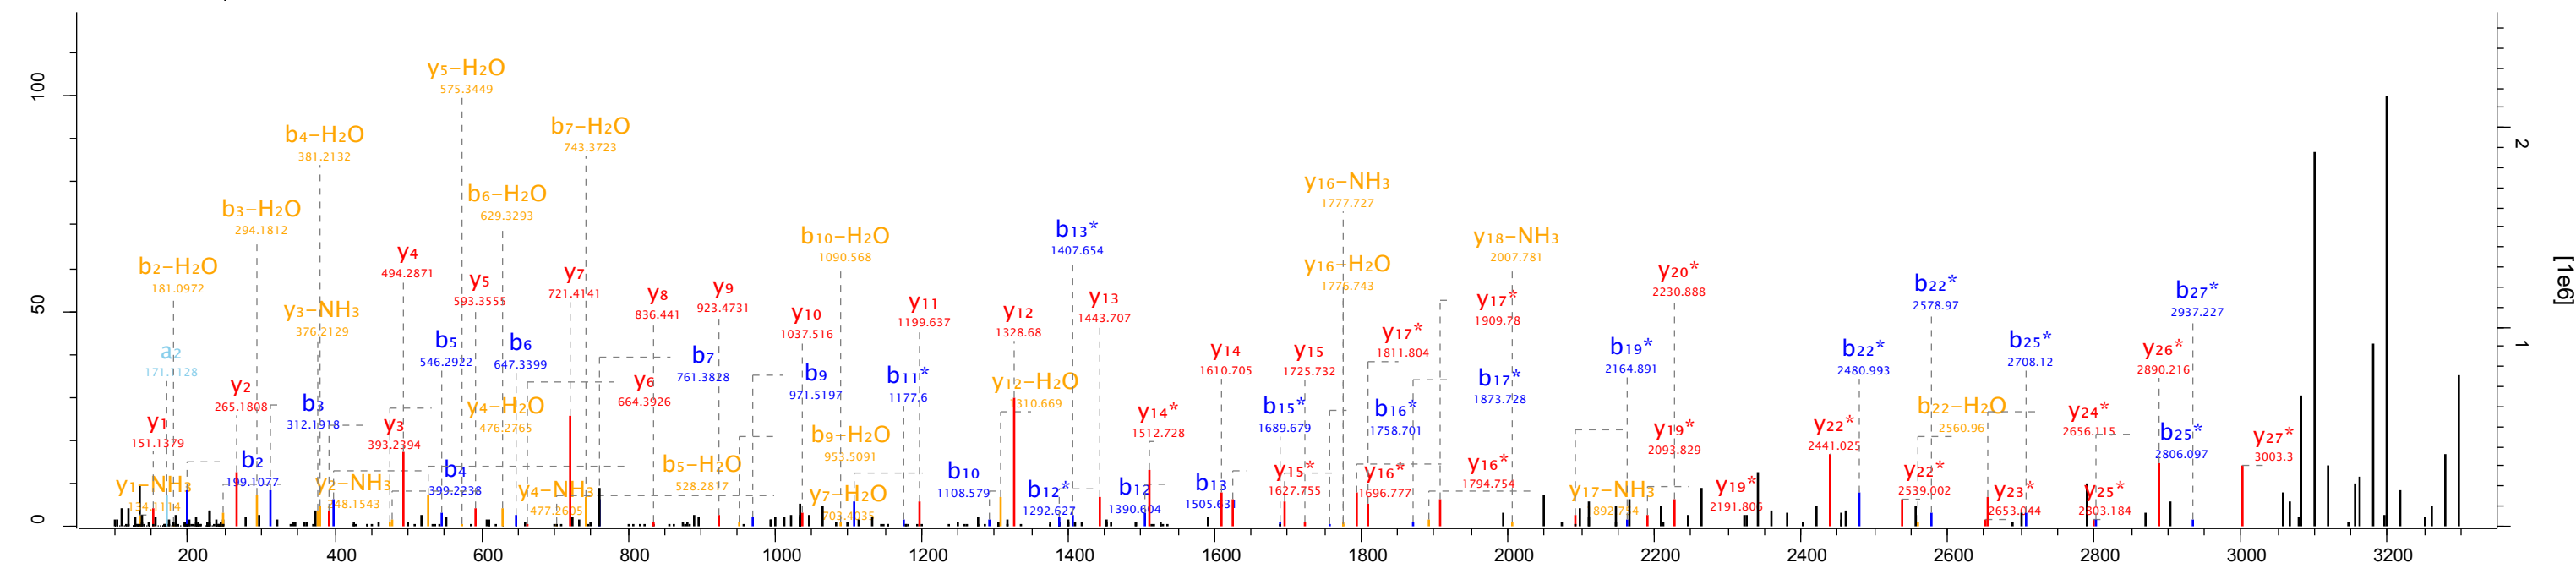

- T P L S F T N P L H S D D S D E R N S D G A V T Q N K -

b<sub>2</sub>
b<sub>3</sub>
b<sub>4</sub>
b<sub>5</sub>
b<sub>6</sub>
b<sub>7</sub>
b<sub>9</sub>
b<sub>10</sub>
b<sub>11</sub><sup>\*</sup>
b<sub>12</sub>
b<sub>13</sub>
b<sub>15</sub><sup>\*</sup>
b<sub>16</sub><sup>\*</sup>
b<sub>17</sub><sup>\*</sup>
b<sub>19</sub><sup>\*</sup>
b<sub>22</sub><sup>\*</sup>
b<sub>25</sub><sup>\*</sup>
b<sub>27</sub><sup>\*</sup>
y<sub>22</sub><sup>\*</sup>
y<sub>23</sub><sup>\*</sup>
y<sub>24</sub><sup>\*</sup>
y<sub>25</sub><sup>\*</sup>
y<sub>26</sub><sup>\*</sup>
y<sub>27</sub><sup>\*</sup>
y<sub>19</sub><sup>\*</sup>
y<sub>20</sub><sup>\*</sup>
y<sub>17</sub><sup>\*</sup>
y<sub>16</sub><sup>\*</sup>
y<sub>15</sub><sup>\*</sup>
y<sub>14</sub>
y<sub>13</sub>
y<sub>12</sub>
y<sub>11</sub>
y<sub>10</sub>
y<sub>9</sub>
y<sub>8</sub>
y<sub>7</sub>
y<sub>6</sub>
y<sub>5</sub>
y<sub>4</sub>
y<sub>3</sub>
y<sub>2</sub>
y<sub>1</sub>

Raw file  
20150812\_A375SR\_Phospho\_BR1\_03

Scan 21325 Method FTMS; HCD Score 52.27 m/z 927.02 Gene names INCENP

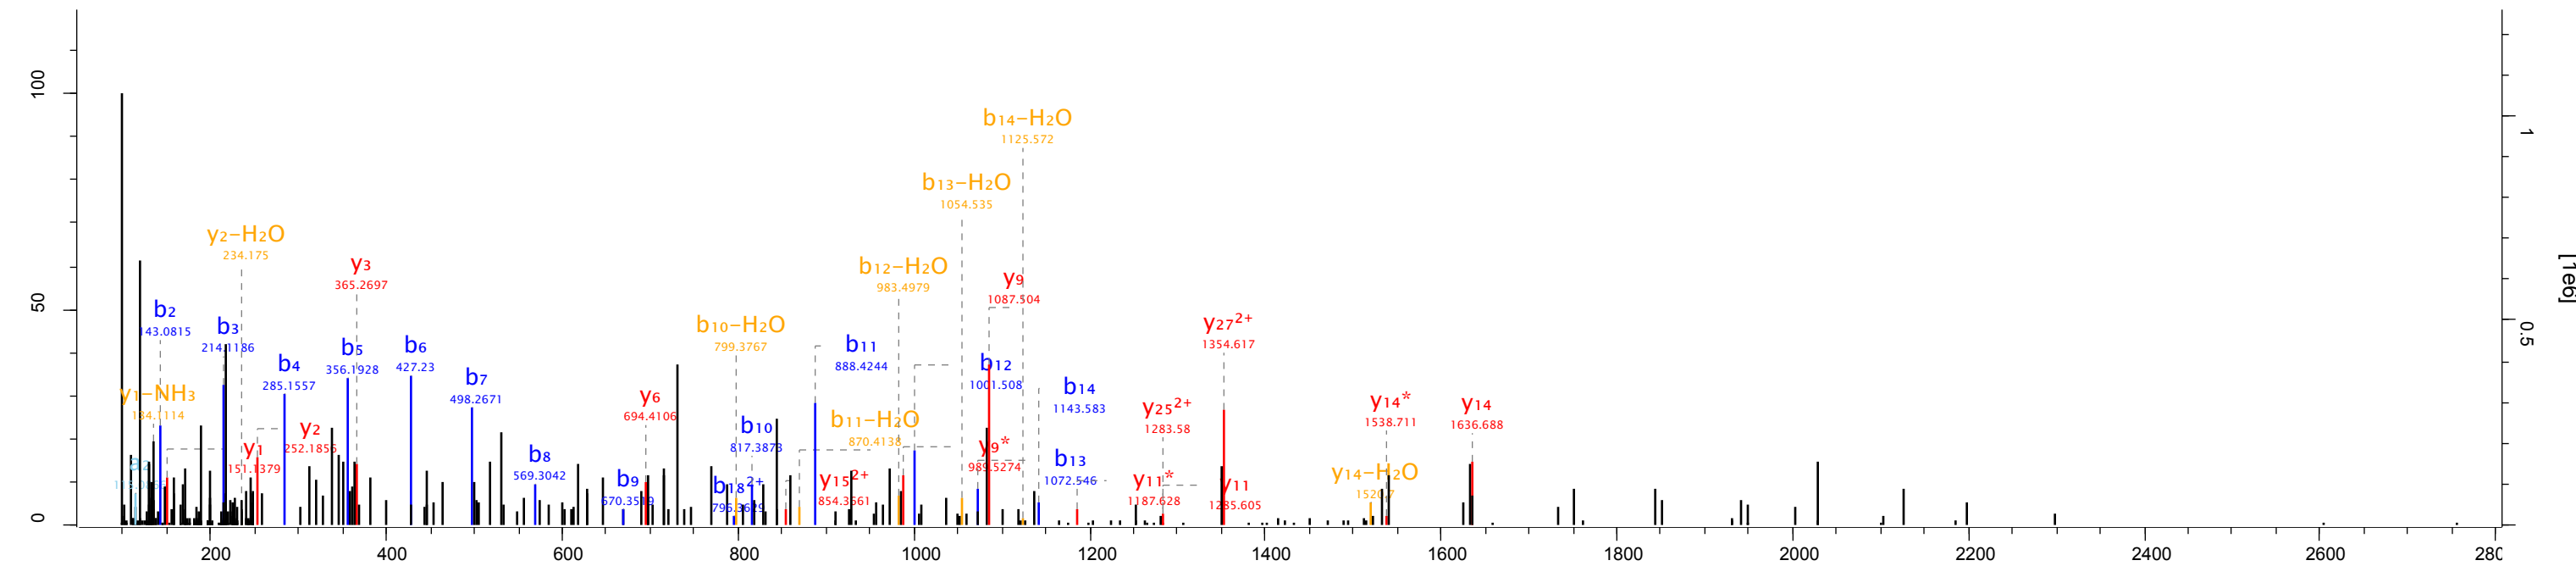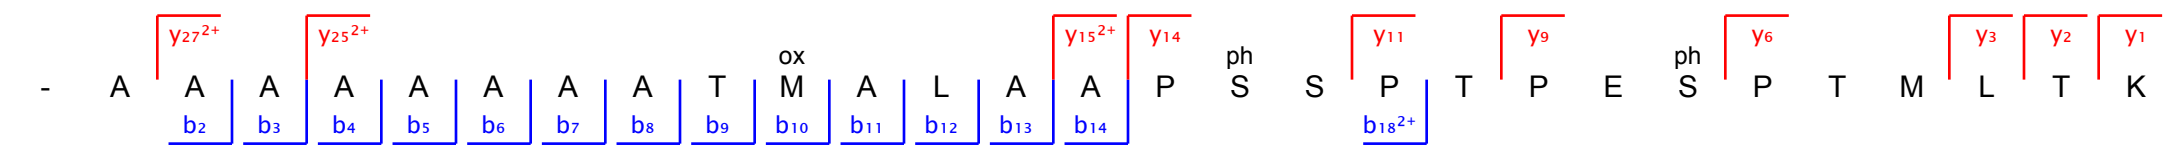

Raw file 20150812\_A375SR\_Phospho\_BR1\_03 Scan 21445 Method FTMS; HCD Score 259.36 m/z 1228.19 Gene names METAP2

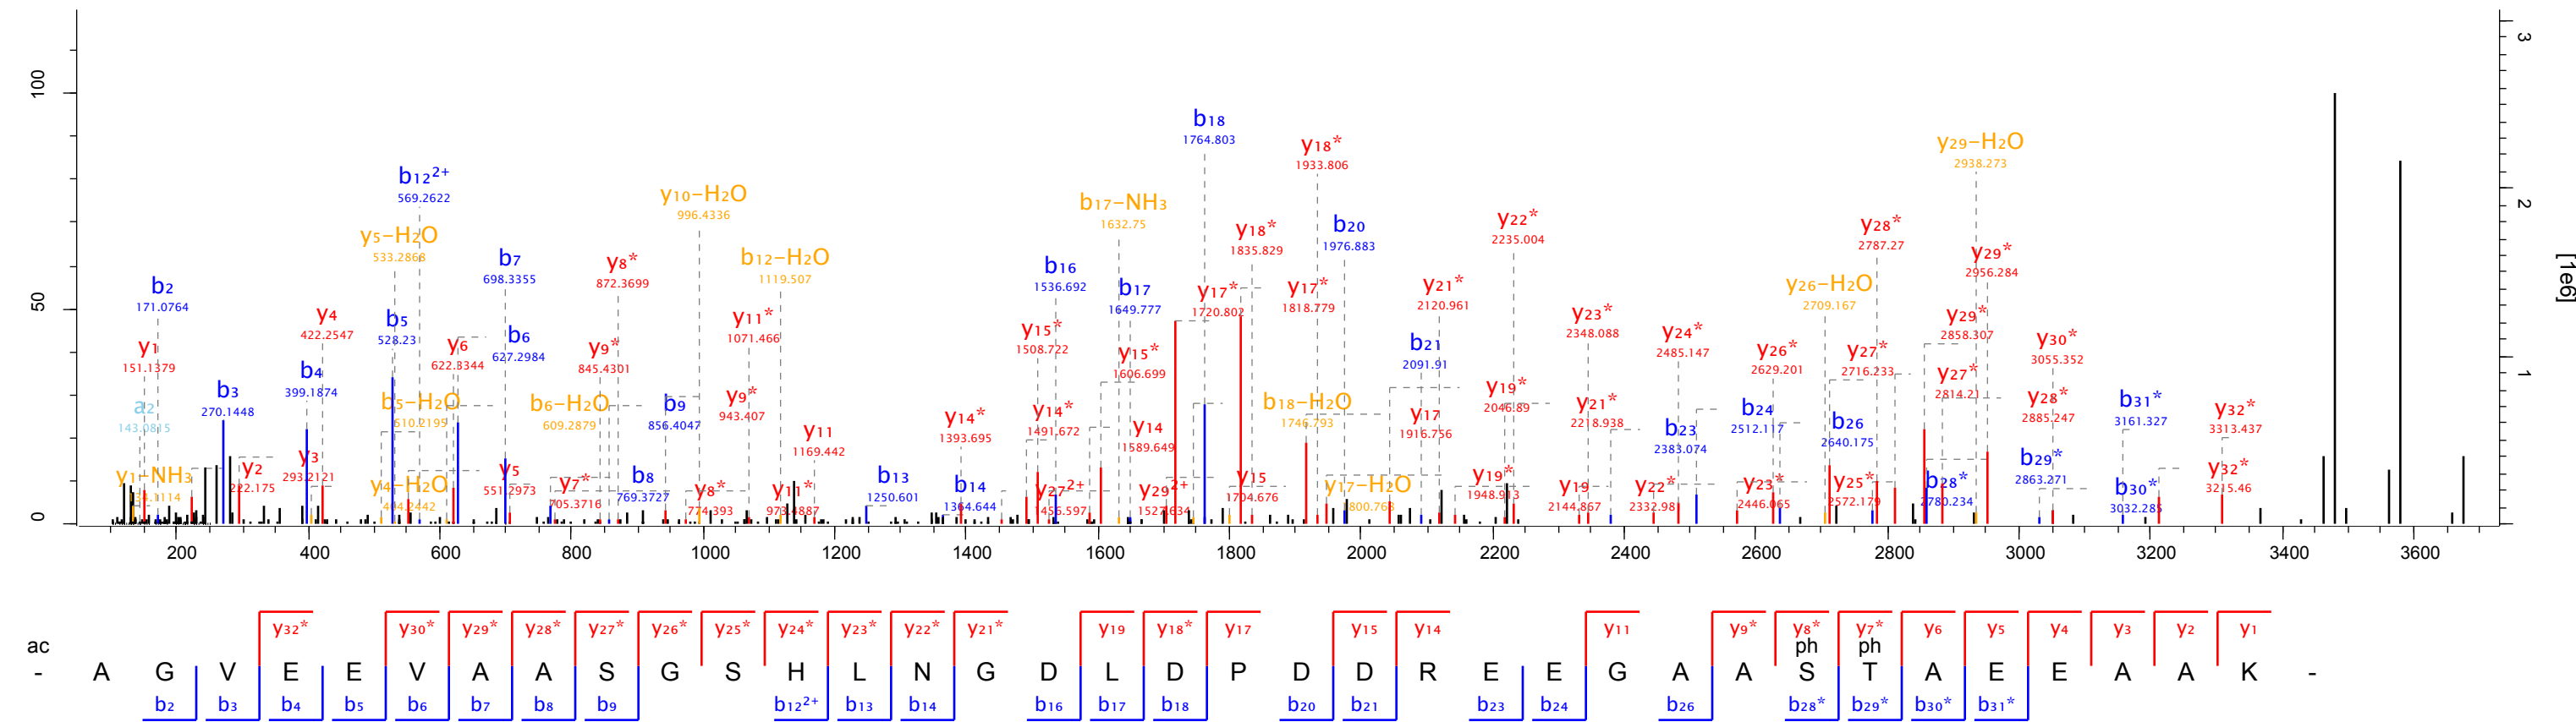

Raw file 20150812\_A375SR\_Phospho\_BR1\_03 Scan 21615 Method FTMS; HCD Score 234.89 m/z 965.41 Gene names ZFYVE20

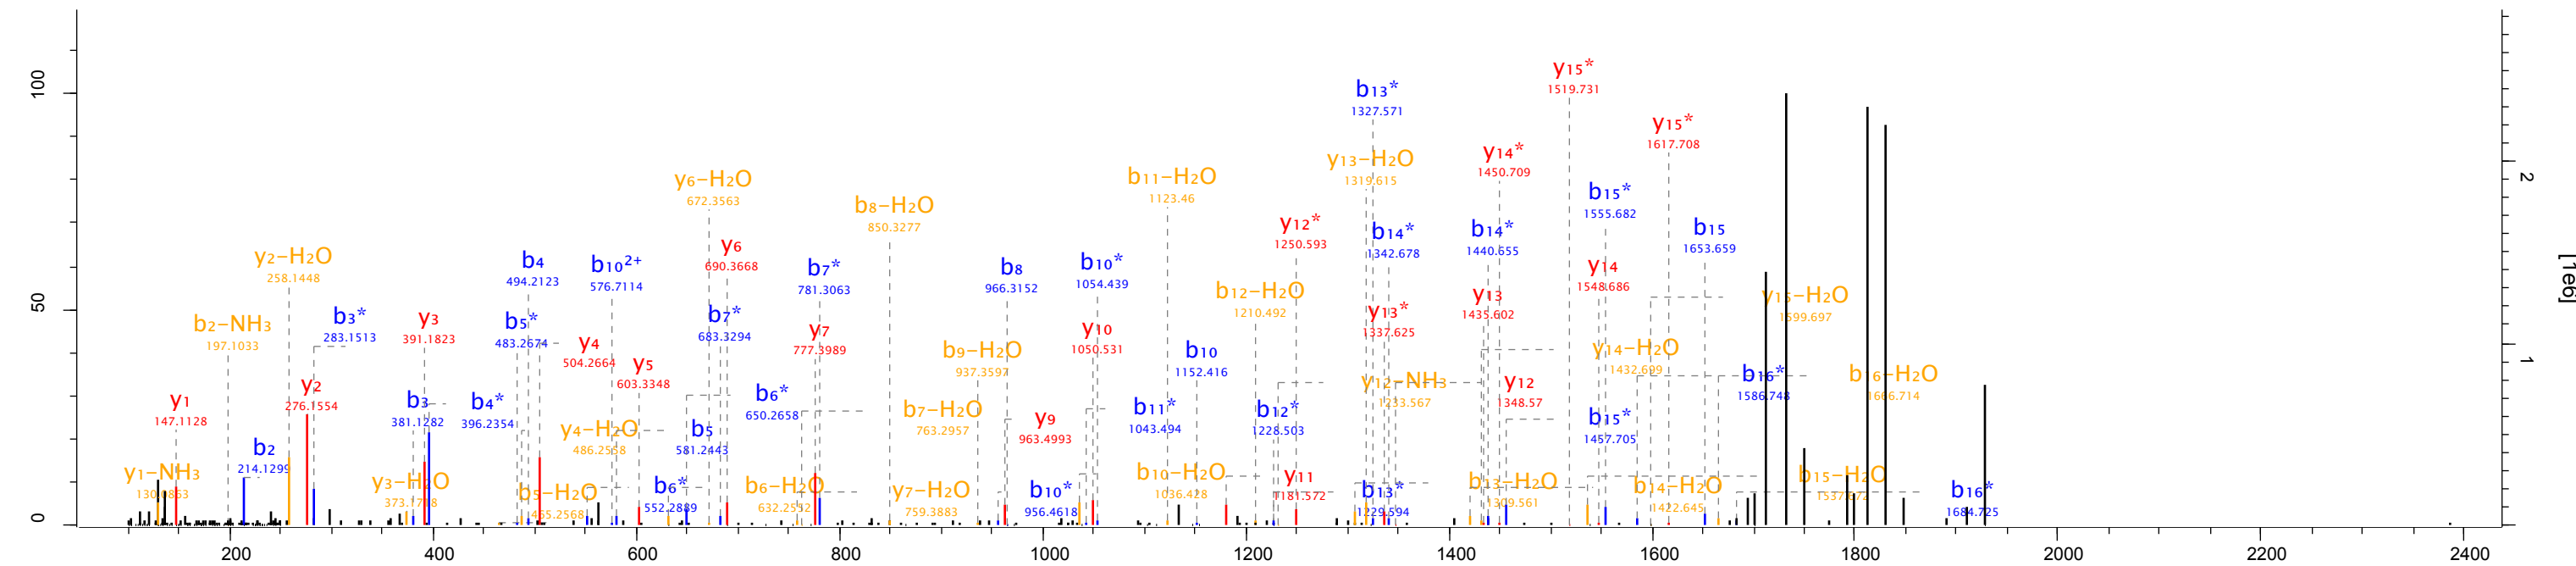

- R G Y15\*  
ph  
S Y14  
I Y13  
S Y12  
ph  
S Y11  
M Y10  
S Y9  
S V Y7  
S Y6  
S Y5  
V Y4  
L Y3  
D Y2  
E Y1  
K -

b2 b3 b4 b5 b6\* b7\* b8 b10 b11\* b12\* b13\* b14\* b15 b16\*

Raw file  
 20150812\_A375SR\_Phospho\_BR1\_03  
 Scan 23005 Method FTMS; HCD Score 68.35 m/z 978.79 Gene names KIAA0930

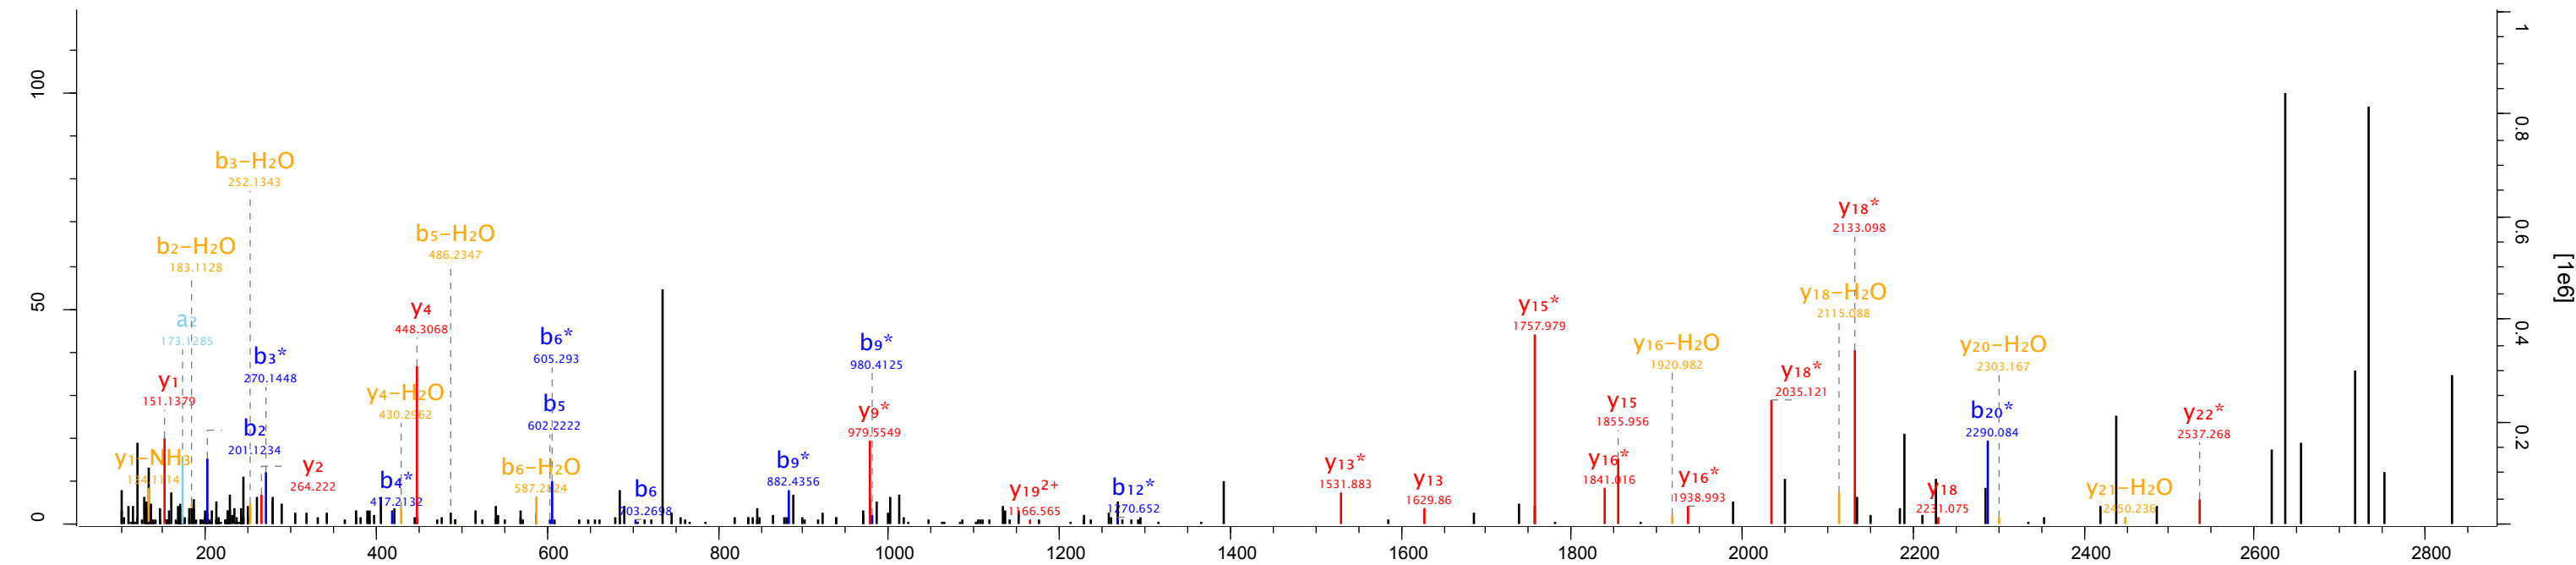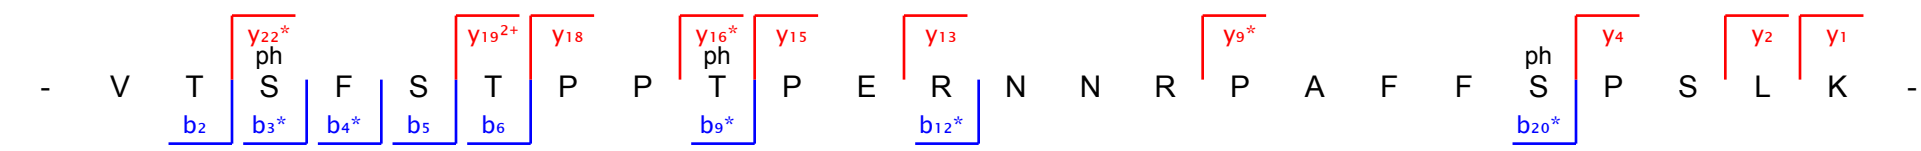



Raw file: 20150812\_A375SR\_Phospho\_BR1\_03  
 Scan: 23035 Method: FTMS; HCD Score: 105.05 m/z: 819.4 Gene names: CHD3

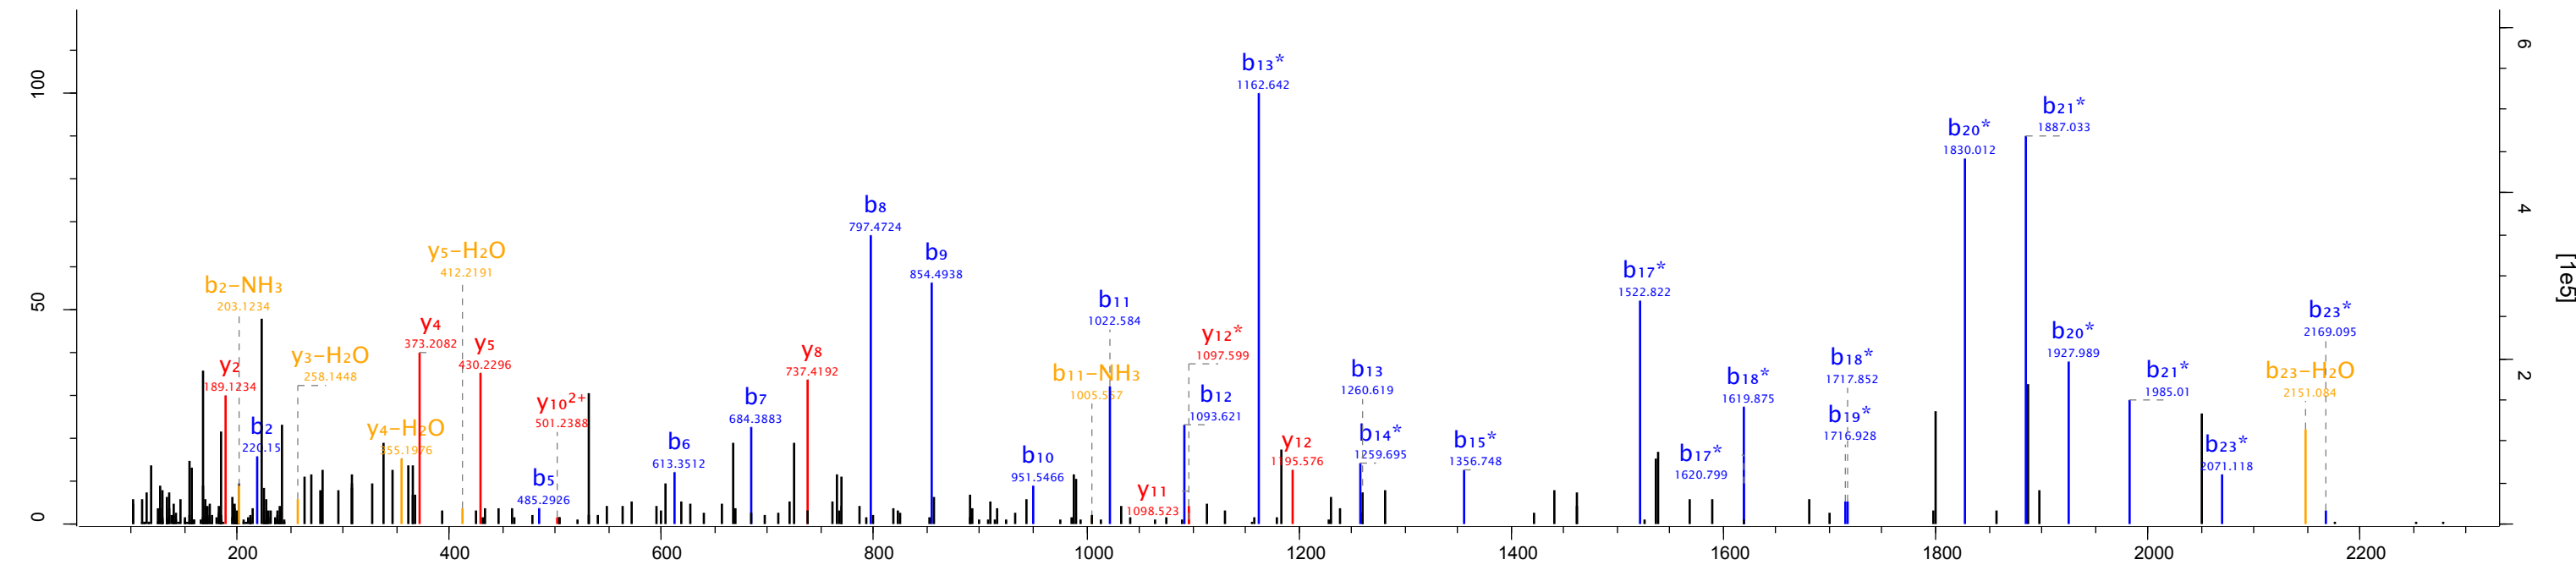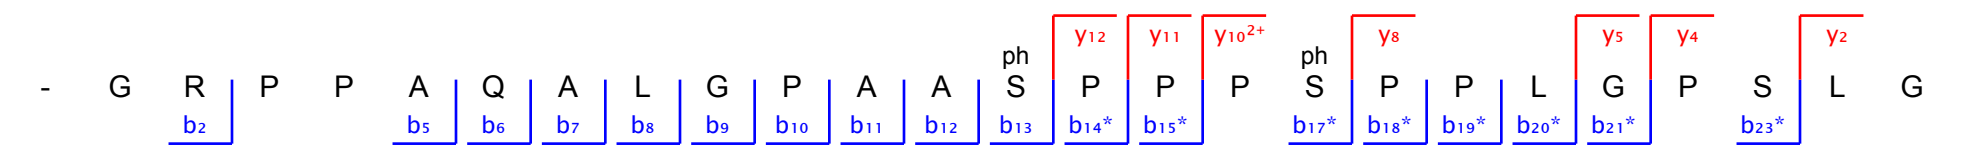

Raw file 20150812\_A375SR\_Phospho\_BR1\_03 Scan 23055 Method FTMS; HCD Score 121.35 m/z 881.89 Gene names BCL9L

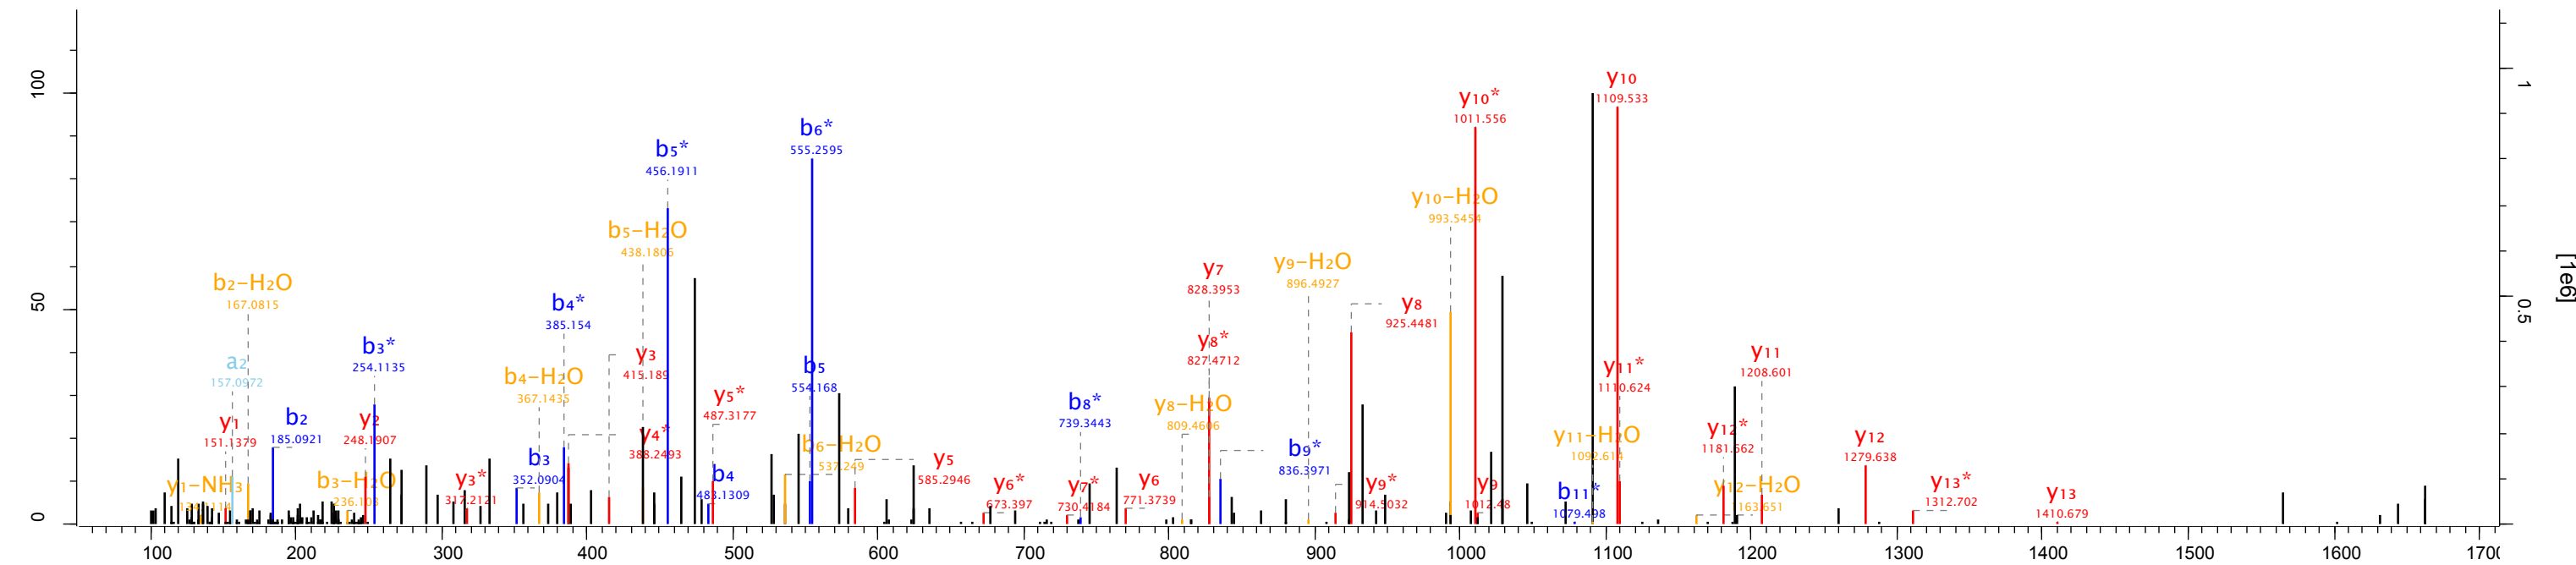

- S P S ph M A V P S P G W V A S P K -  
 b<sub>2</sub> b<sub>3</sub> b<sub>4</sub> b<sub>5</sub> b<sub>6</sub>\* b<sub>8</sub>\* b<sub>9</sub>\* b<sub>11</sub>\* y<sub>13</sub> y<sub>12</sub> y<sub>11</sub> y<sub>10</sub> y<sub>9</sub> y<sub>8</sub> y<sub>7</sub> y<sub>6</sub> y<sub>5</sub> y<sub>4</sub>\* y<sub>3</sub> y<sub>2</sub> y<sub>1</sub>  
 ph y<sub>13</sub> y<sub>12</sub> y<sub>11</sub> y<sub>10</sub> y<sub>9</sub> y<sub>8</sub> y<sub>7</sub> y<sub>6</sub> y<sub>5</sub> y<sub>4</sub>\* y<sub>3</sub> y<sub>2</sub> y<sub>1</sub>  
 b<sub>2</sub> b<sub>3</sub> b<sub>4</sub> b<sub>5</sub> b<sub>6</sub>\* b<sub>8</sub>\* b<sub>9</sub>\* b<sub>11</sub>\* y<sub>13</sub> y<sub>12</sub> y<sub>11</sub> y<sub>10</sub> y<sub>9</sub> y<sub>8</sub> y<sub>7</sub> y<sub>6</sub> y<sub>5</sub> y<sub>4</sub>\* y<sub>3</sub> y<sub>2</sub> y<sub>1</sub>

Raw file 20150812\_A375SR\_Phospho\_BR1\_03 Scan 23405 Method FTMS; HCD Score 184.76 m/z 1158.01 Gene names TP53BP1

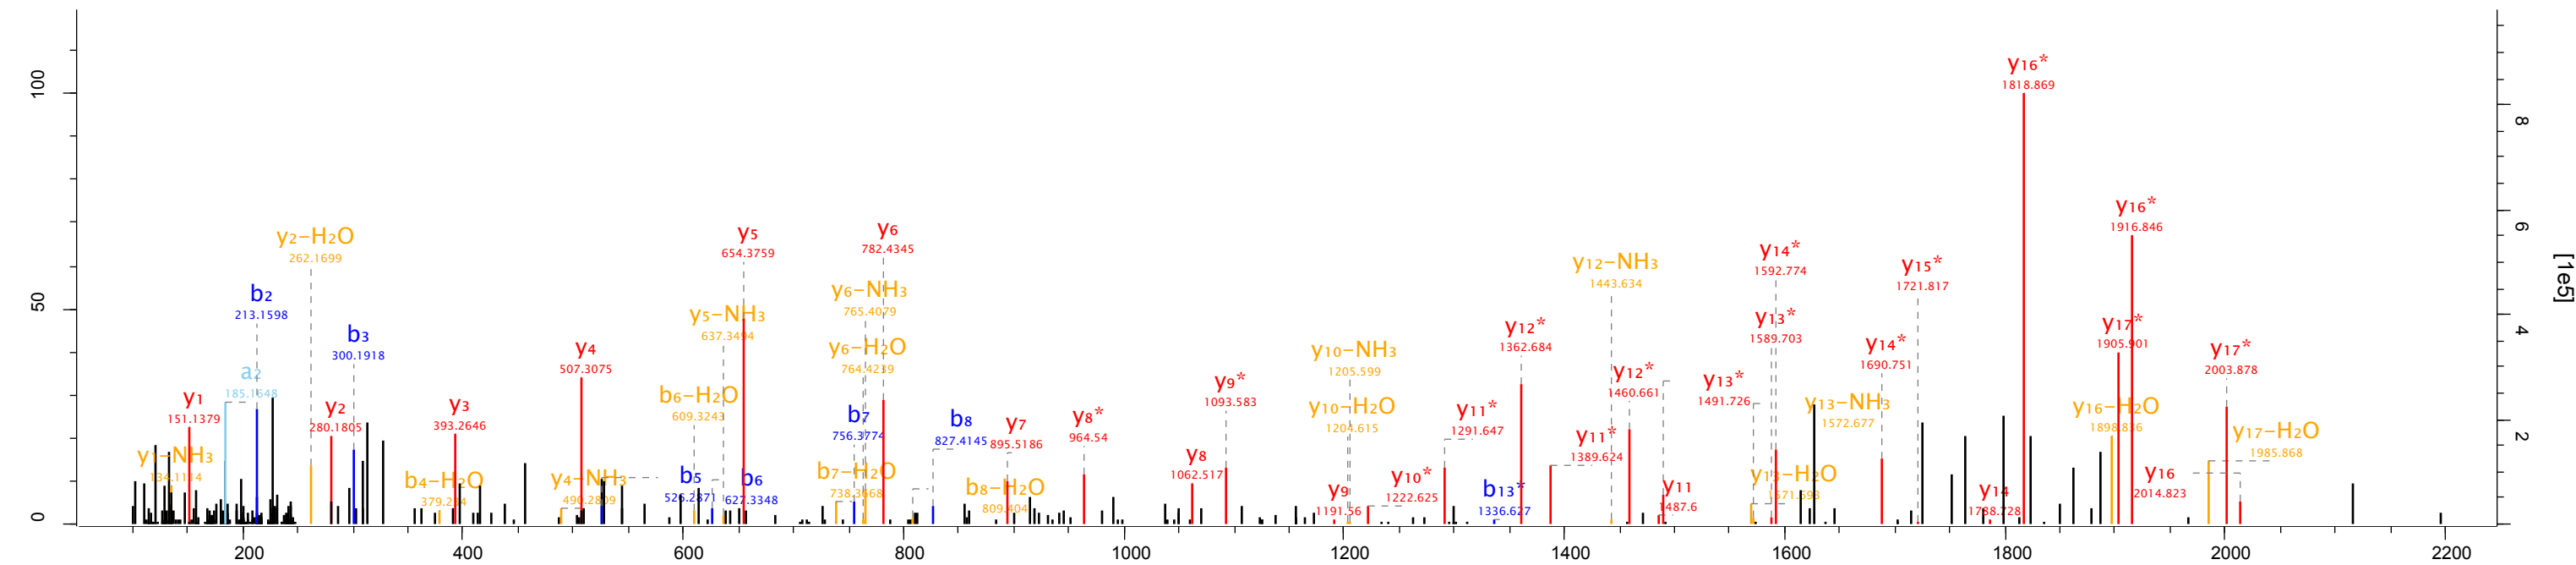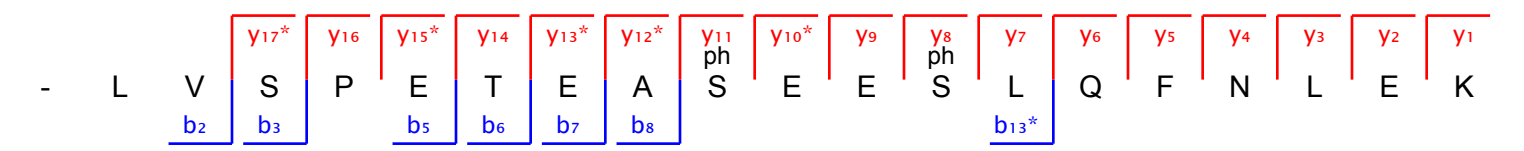

Raw file: 20150812\_A375SR\_Phospho\_BR1\_03  
 Scan: 23545 Method: FTMS; HCD Score: 121.56 m/z: 614 Gene names: MYBBP1A

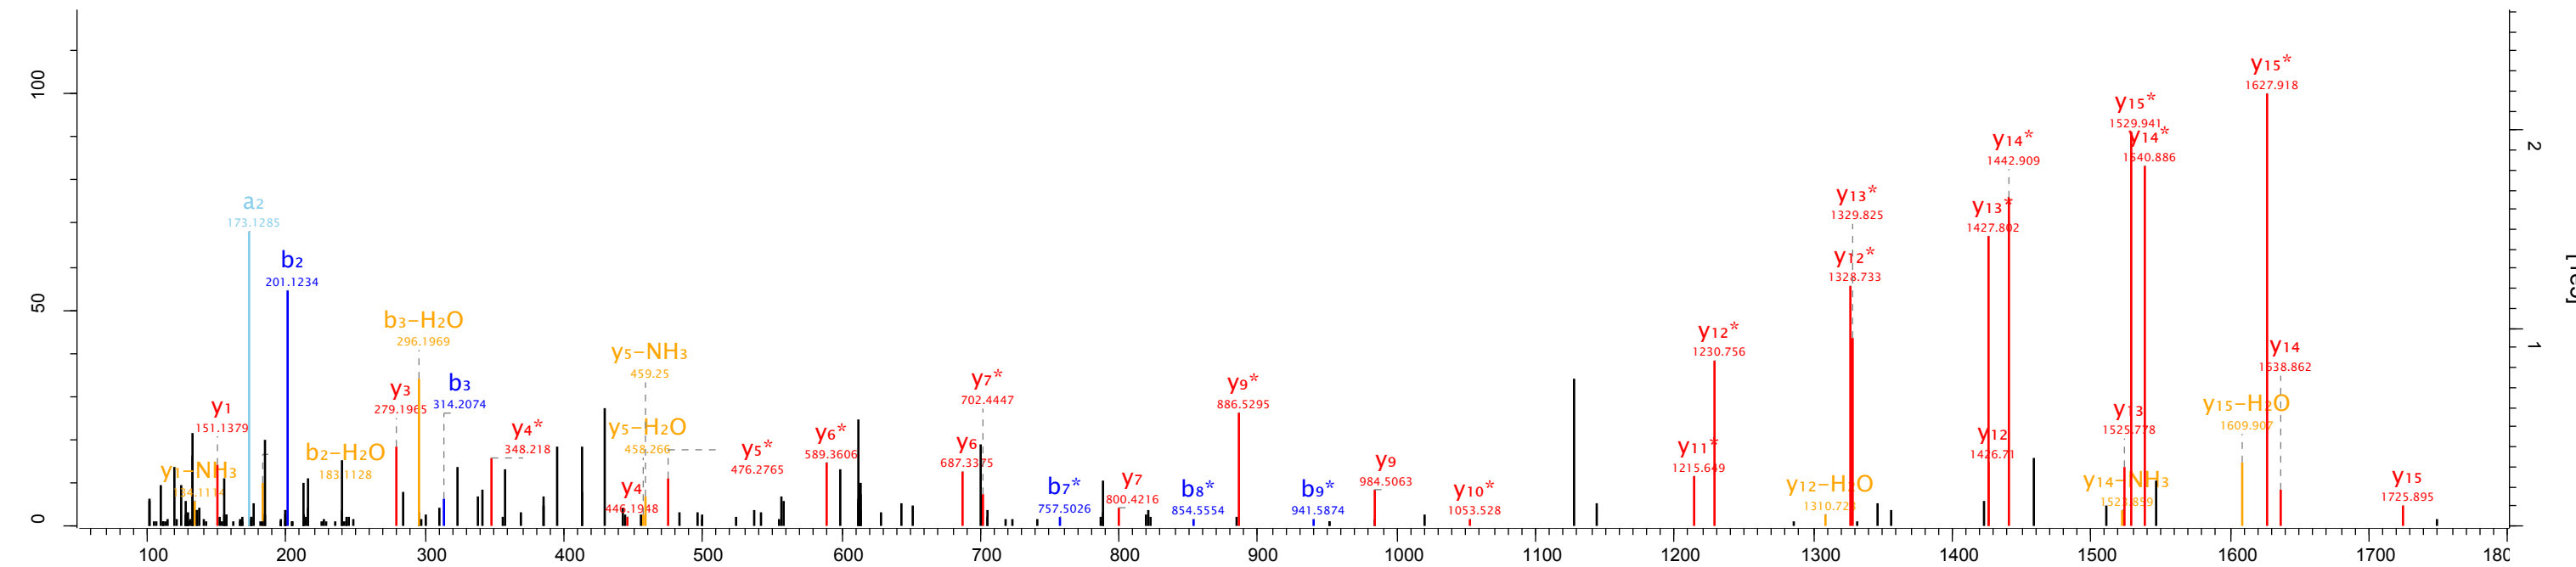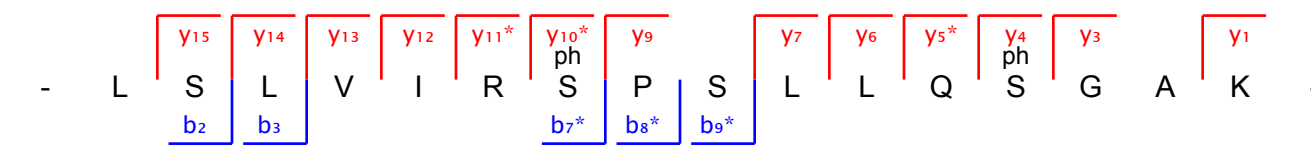

Raw file  
 20150812\_A375SR\_Phospho\_BR1\_03  
 Scan 23625 Method FTMS; HCD Score 120.93 m/z 772.72 Gene names NFATC2IP

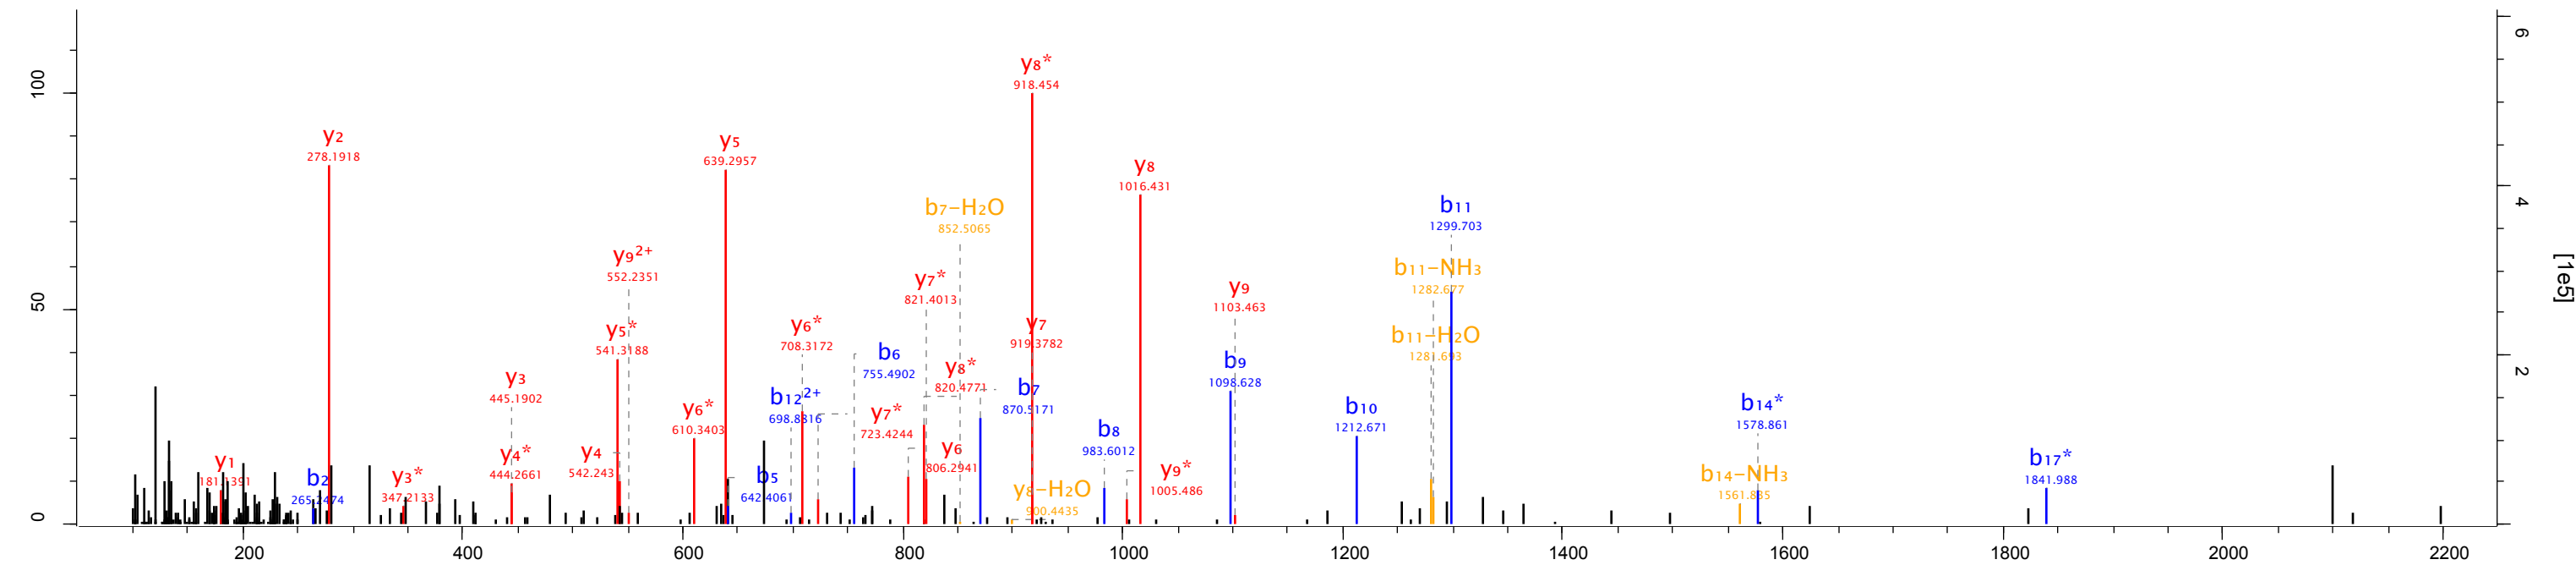

- K K T E F L D L D N S P L S P P S P R -

Fragmentation mapping (b ions in blue, y ions in red):

- b<sub>2</sub> (K-K)
- b<sub>5</sub> (F)
- b<sub>6</sub> (L)
- b<sub>7</sub> (D)
- b<sub>8</sub> (L)
- b<sub>9</sub> (D)
- b<sub>10</sub> (N)
- b<sub>11</sub> (S)
- b<sub>12<sup>2+</sup></sub> (P)
- b<sub>14\*</sub> (S)
- b<sub>17\*</sub> (S)
- y<sub>1</sub> (R)
- y<sub>2</sub> (P)
- y<sub>3</sub> (S)
- y<sub>4</sub> (P)
- y<sub>5</sub> (P)
- y<sub>6</sub> (S)
- y<sub>7</sub> (L)
- y<sub>8</sub> (P)
- y<sub>9</sub> (S)

Raw file 20150812\_A375SR\_Phospho\_BR1\_03 Scan 23905 Method FTMS; HCD Score 230.93 m/z 1279.04 Gene names GATAD2B

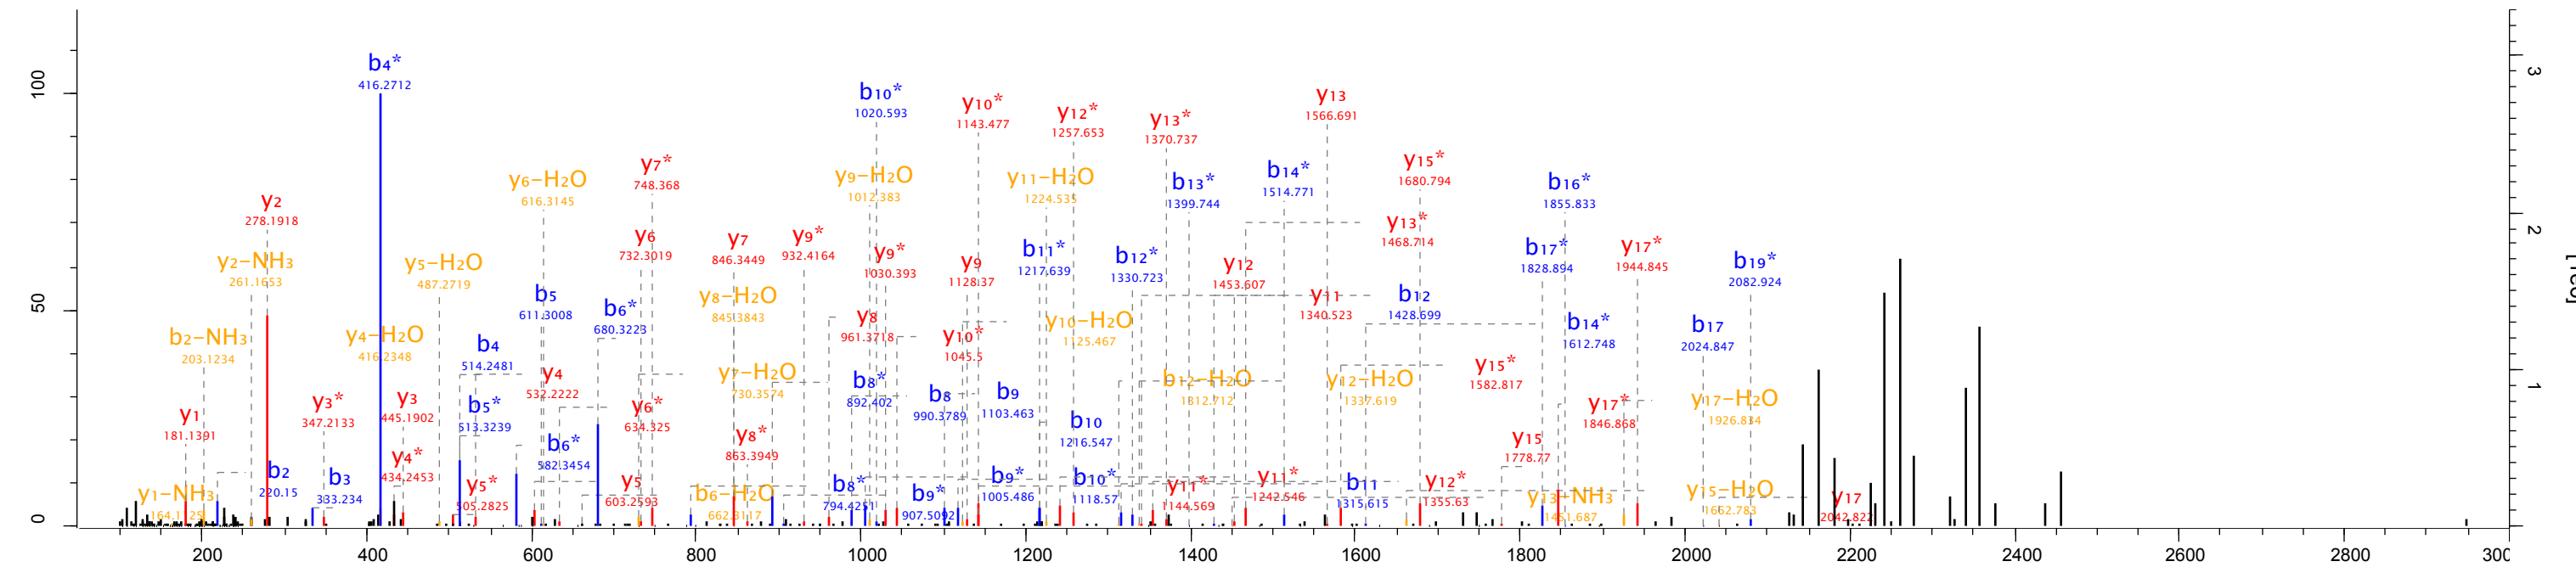

- G R L ph T P ph S P D I I V L S P D N E A S ph S P R -

b<sub>2</sub> b<sub>3</sub> b<sub>4</sub> b<sub>5</sub> b<sub>6</sub>\* b<sub>8</sub> b<sub>9</sub> b<sub>10</sub> b<sub>11</sub> b<sub>12</sub> b<sub>13</sub>\* b<sub>14</sub>\* b<sub>16</sub>\* b<sub>17</sub> b<sub>19</sub>\*

y<sub>17</sub> y<sub>15</sub> y<sub>13</sub> y<sub>12</sub> y<sub>11</sub> y<sub>10</sub>\* y<sub>9</sub> ph y<sub>8</sub> y<sub>7</sub> y<sub>6</sub> y<sub>5</sub> y<sub>4</sub> y<sub>3</sub> ph y<sub>2</sub> y<sub>1</sub>

Raw file: 20150812\_A375SR\_Phospho\_BR1\_03  
 Scan: 24125 Method: FTMS; HCD Score: 280.92 m/z: 1283.03 Gene names: SLC3A2

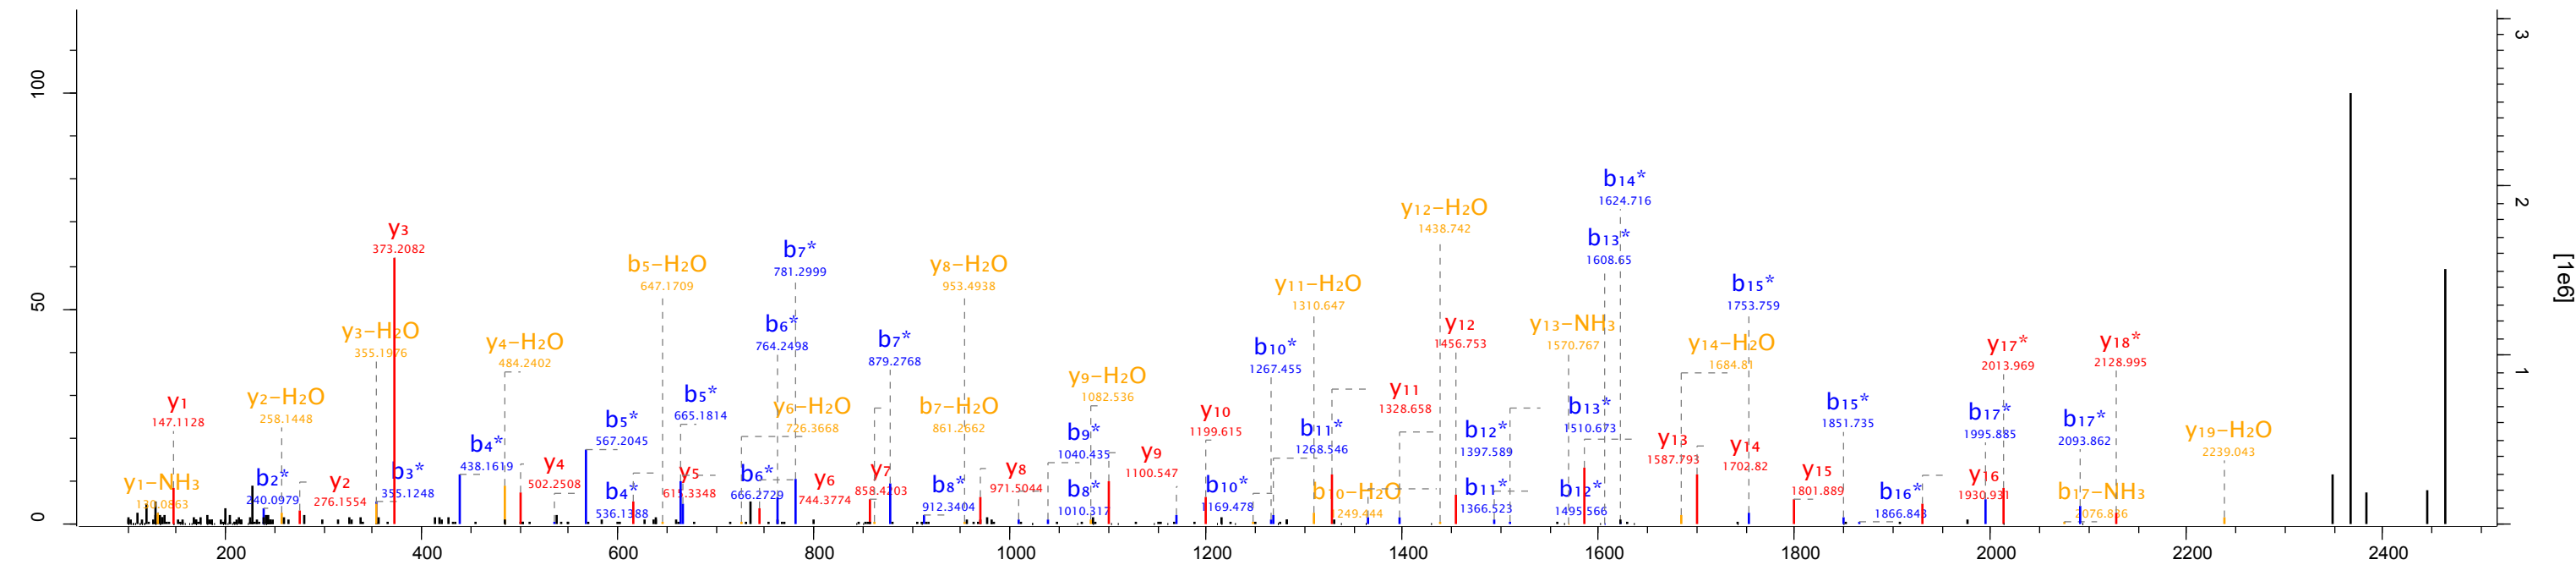

ac - pH S Q D T E V D M K E V E L N E L E P E K -

Y18\*
Y17\*
Y16
Y15
Y14
Y13
Y12
Y11
Y10
Y9
Y8
Y7
Y6
Y5
Y4
Y3
Y2
Y1

b2\*
b3\*
b4\*
b5\*
b6\*
b7\*
b8\*
b9\*
b10\*
b11\*
b12\*
b13\*
b14\*
b15\*
b16\*
b17\*

Raw file Scan Method Score m/z Gene names  
 20150812\_A375SR\_Phospho\_BR1\_03 24455 FTMS; HCD 283.22 1170.51 SRRM2

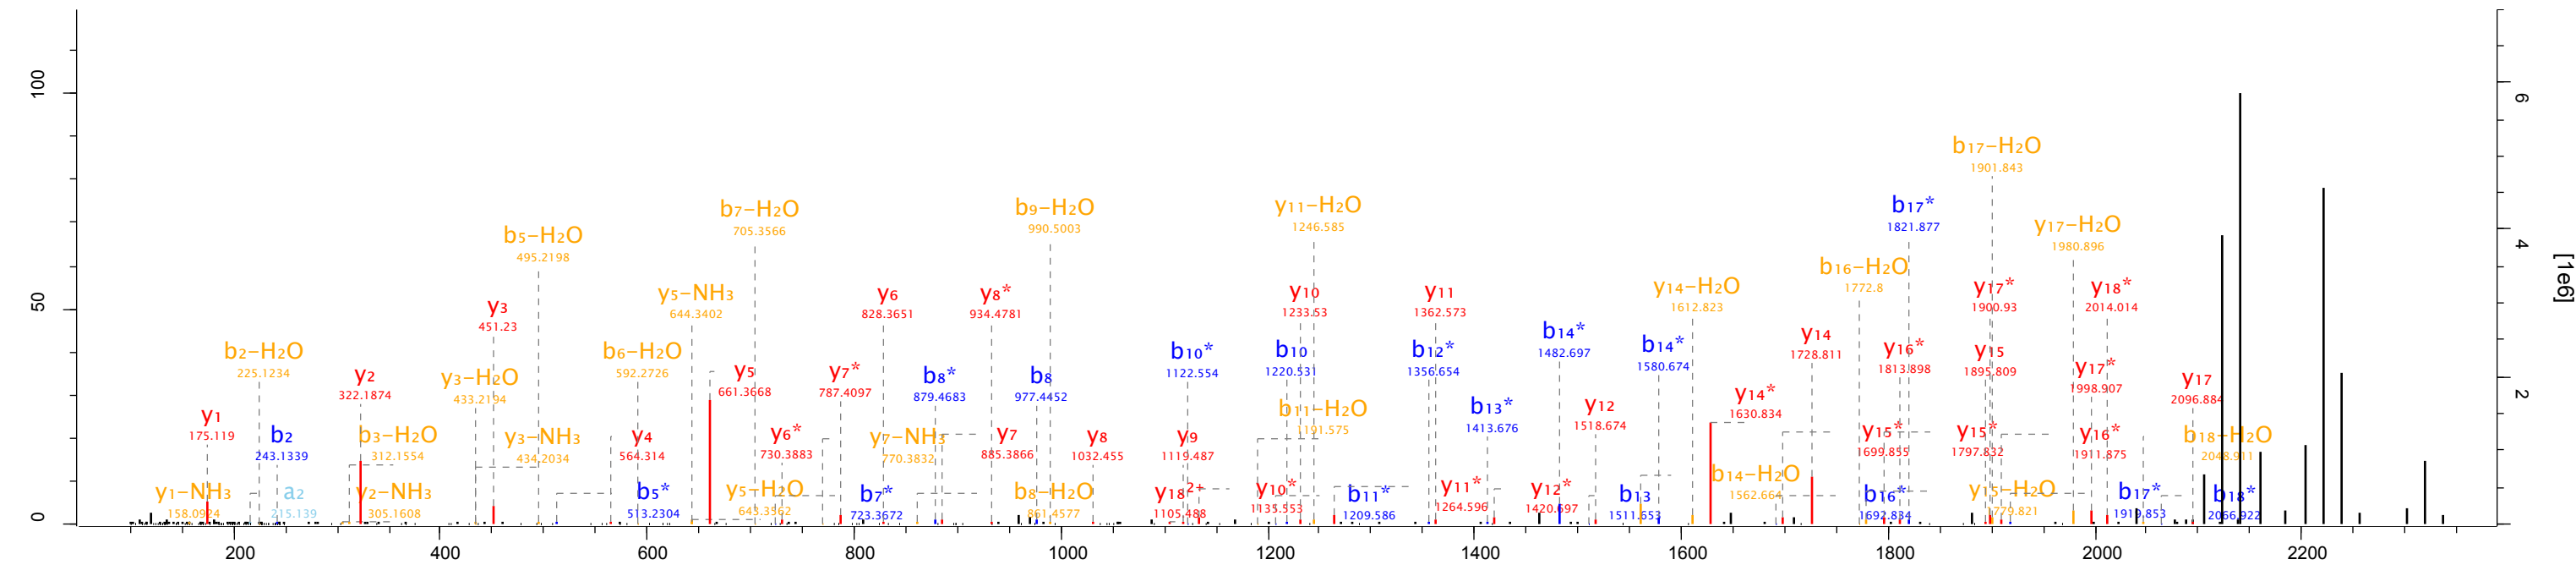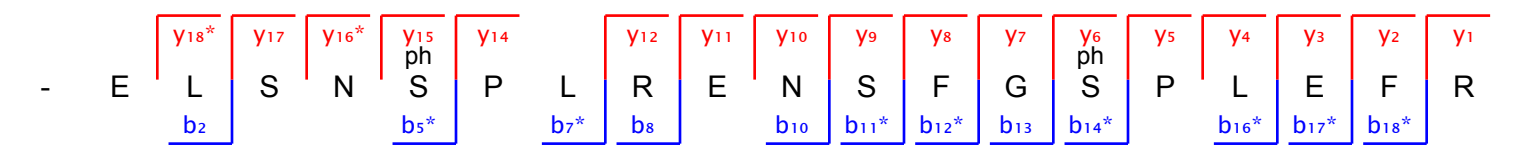



Raw file 20150812\_A375SR\_Phospho\_BR1\_03 Scan 24765 Method FTMS; HCD Score 152.93 m/z 1026.09 Gene names PAXBP1

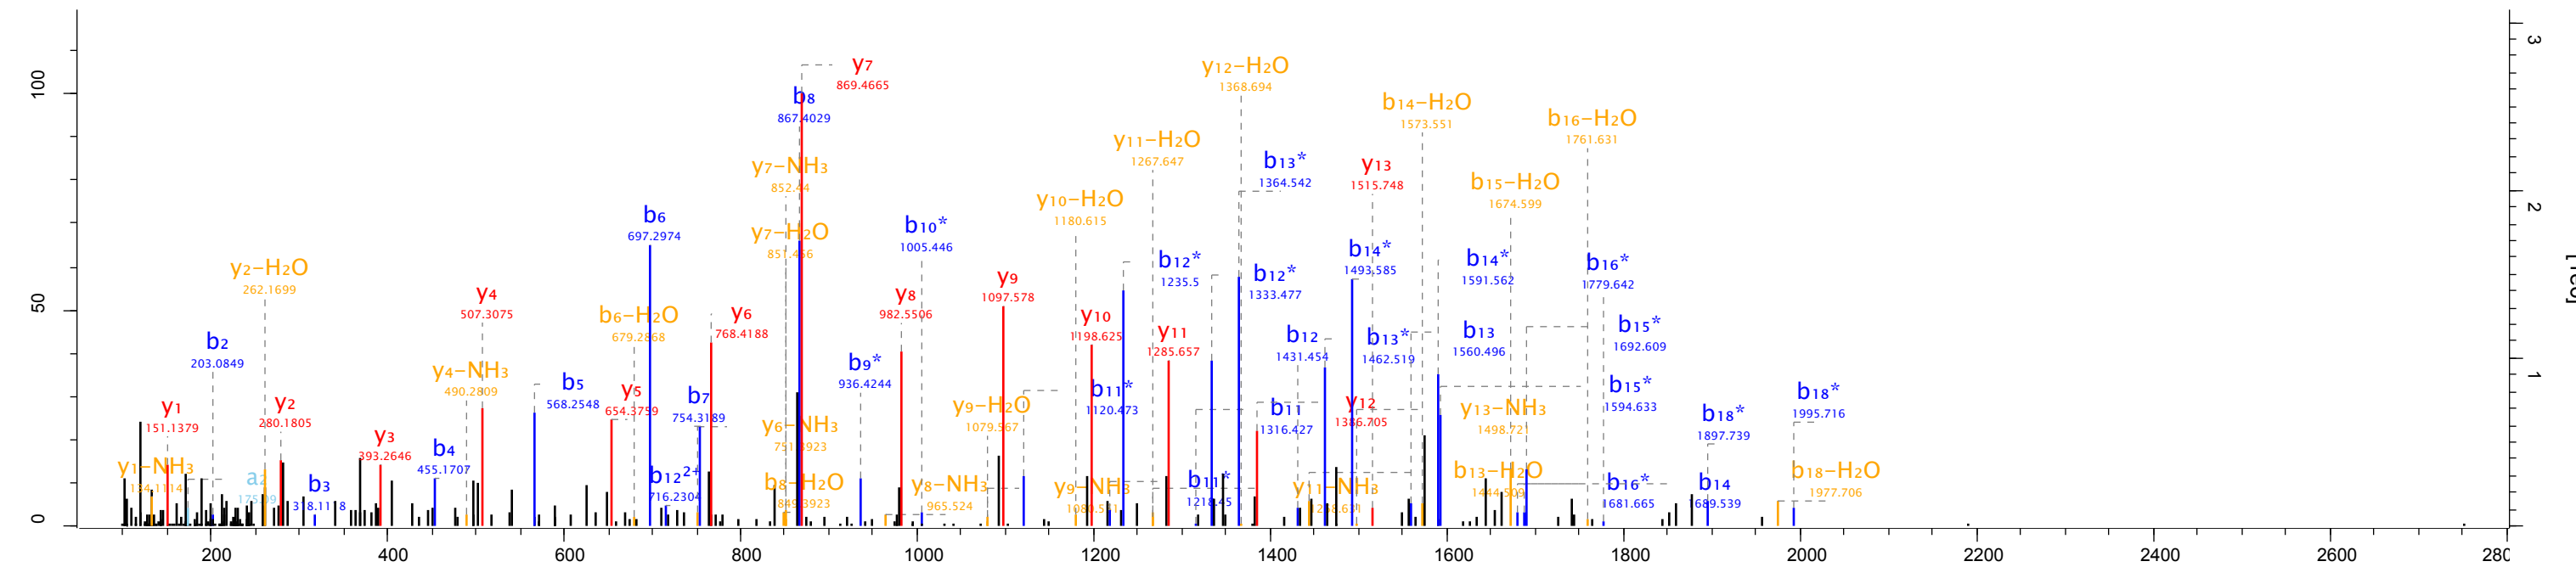

- M A D H L E G L S S D D E E T S T D I T N F N L E K -

Fragmentation mapping below the sequence:

- b<sub>2</sub> (A), b<sub>3</sub> (D), b<sub>4</sub> (H), b<sub>5</sub> (L), b<sub>6</sub> (E), b<sub>7</sub> (G), b<sub>8</sub> (L), b<sub>9</sub><sup>\*</sup> (S), b<sub>10</sub><sup>\*</sup> (S), b<sub>11</sub> (D), b<sub>12</sub> (D), b<sub>13</sub> (E), b<sub>14</sub> (E), b<sub>15</sub><sup>\*</sup> (T), b<sub>16</sub><sup>\*</sup> (S), b<sub>18</sub><sup>\*</sup> (D)
- y<sub>1</sub> (K), y<sub>2</sub> (E), y<sub>3</sub> (L), y<sub>4</sub> (N), y<sub>5</sub> (F), y<sub>6</sub> (N), y<sub>7</sub> (T), y<sub>8</sub> (I), y<sub>9</sub> (D), y<sub>10</sub> (T), y<sub>11</sub> (S), y<sub>12</sub> (T), y<sub>13</sub> (E)

Raw file: 20150812\_A375SR\_Phospho\_BR1\_03  
 Scan: 24935 Method: FTMS; HCD Score: 250.43 m/z: 901.42 Gene names: CDK13

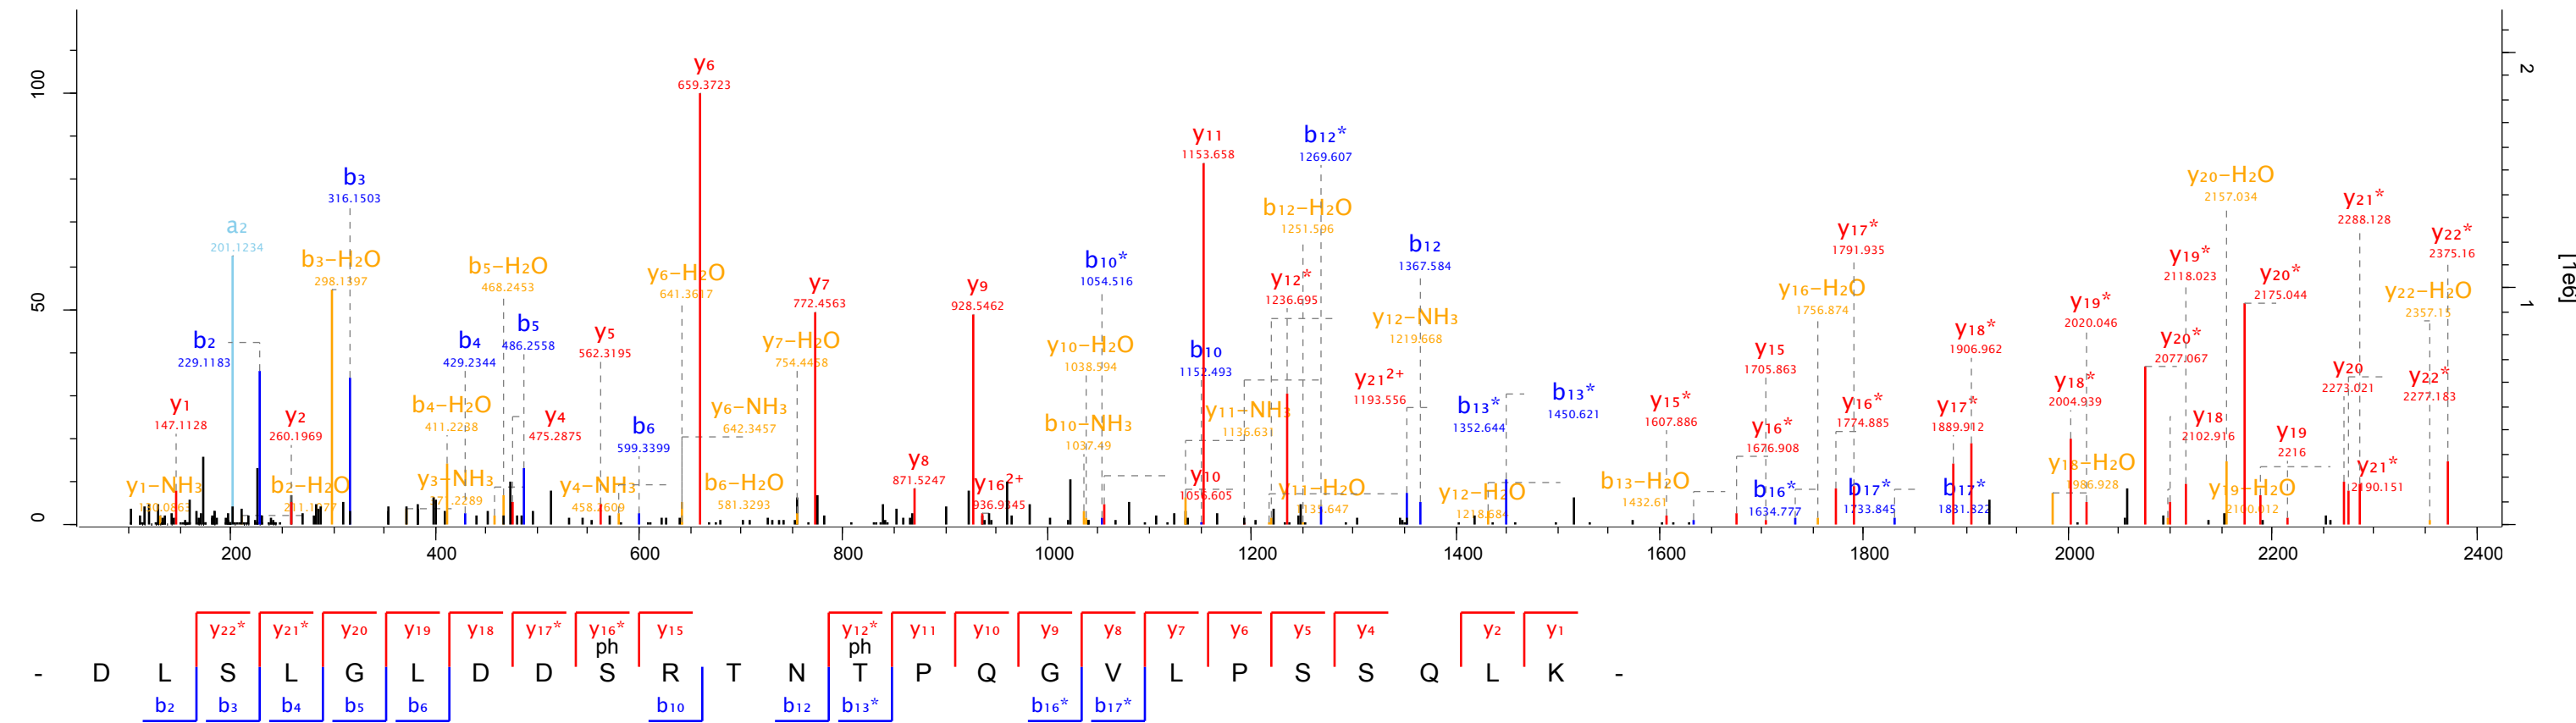

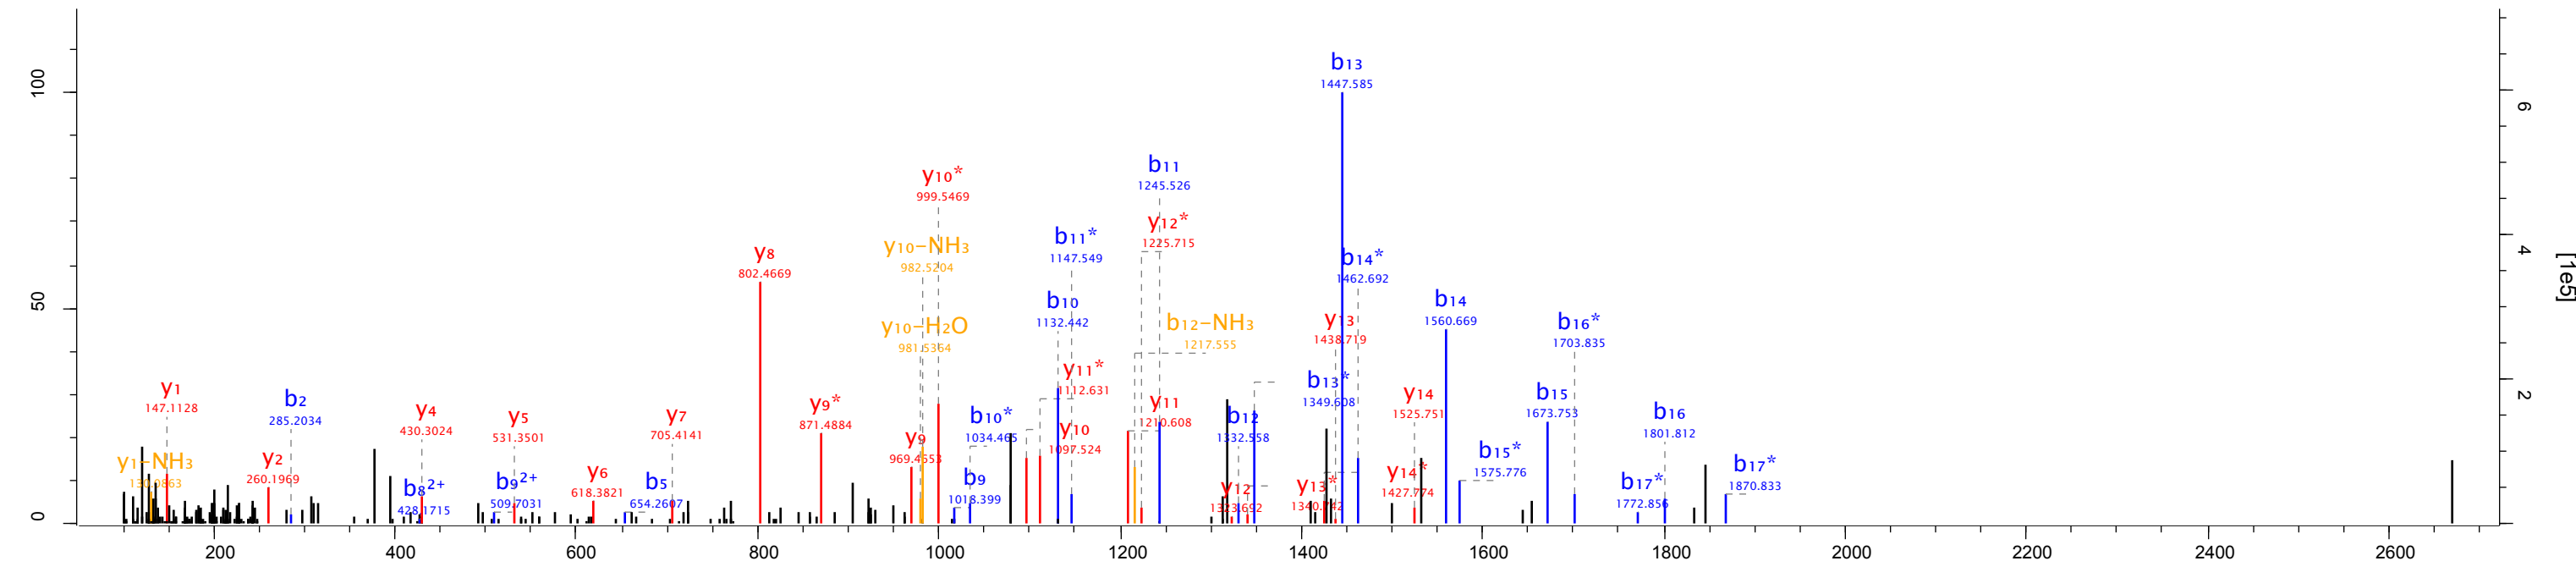

- K R S D S G G Y N L S D I I Q S P S S T G L L K -

b<sub>2</sub>
b<sub>5</sub>
b<sub>8</sub><sup>2+</sup>
b<sub>9</sub>
b<sub>10</sub>
b<sub>11</sub>
b<sub>12</sub>
b<sub>13</sub>
b<sub>14</sub>
b<sub>15</sub>
b<sub>16</sub>
b<sub>17</sub><sup>\*</sup>
y<sub>14</sub>
y<sub>13</sub>
y<sub>12</sub>
y<sub>11</sub>
y<sub>10</sub>
y<sub>9</sub>
y<sub>8</sub>
y<sub>7</sub>
y<sub>6</sub>
y<sub>5</sub>
y<sub>4</sub>
y<sub>2</sub>
y<sub>1</sub>

Raw file 20150812\_A375SR\_Phospho\_BR1\_03 Scan 25575 Method FTMS; HCD Score 165.01 m/z 971.42 Gene names NAA15

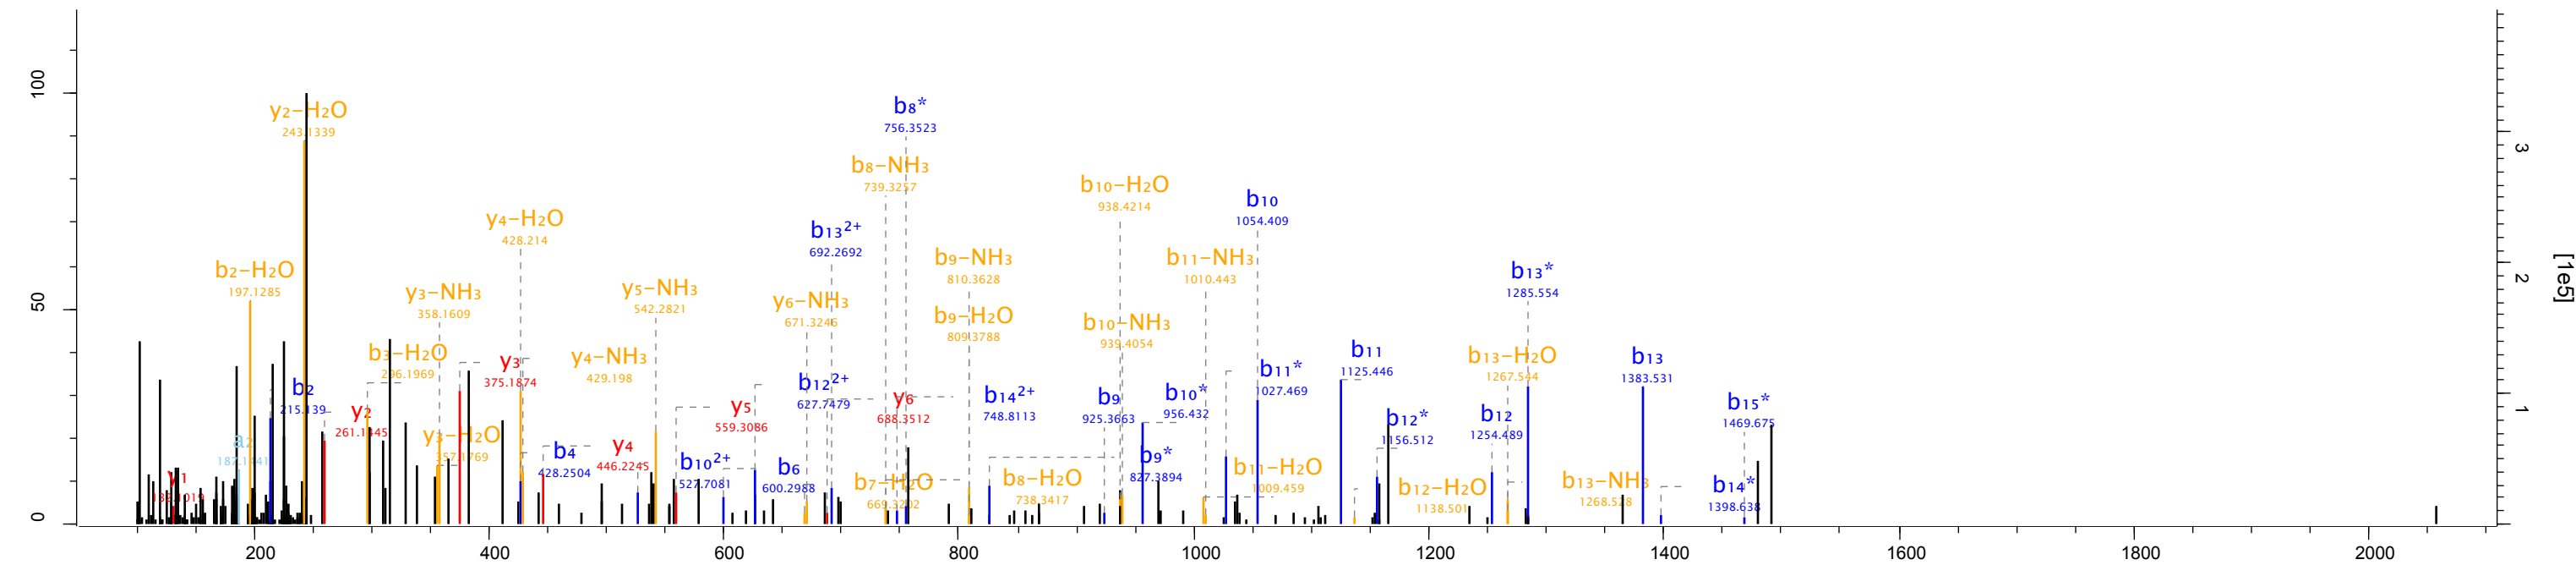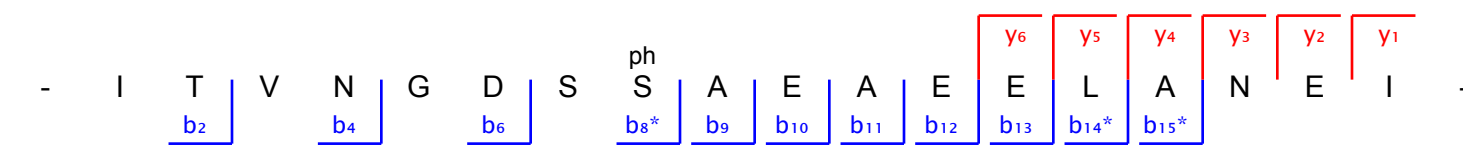

Raw file  
20150812\_A375SR\_Phospho\_BR1\_03

Scan 25955 Method FTMS; HCD Score 174.1 m/z 1326.08 Gene names PBRM1

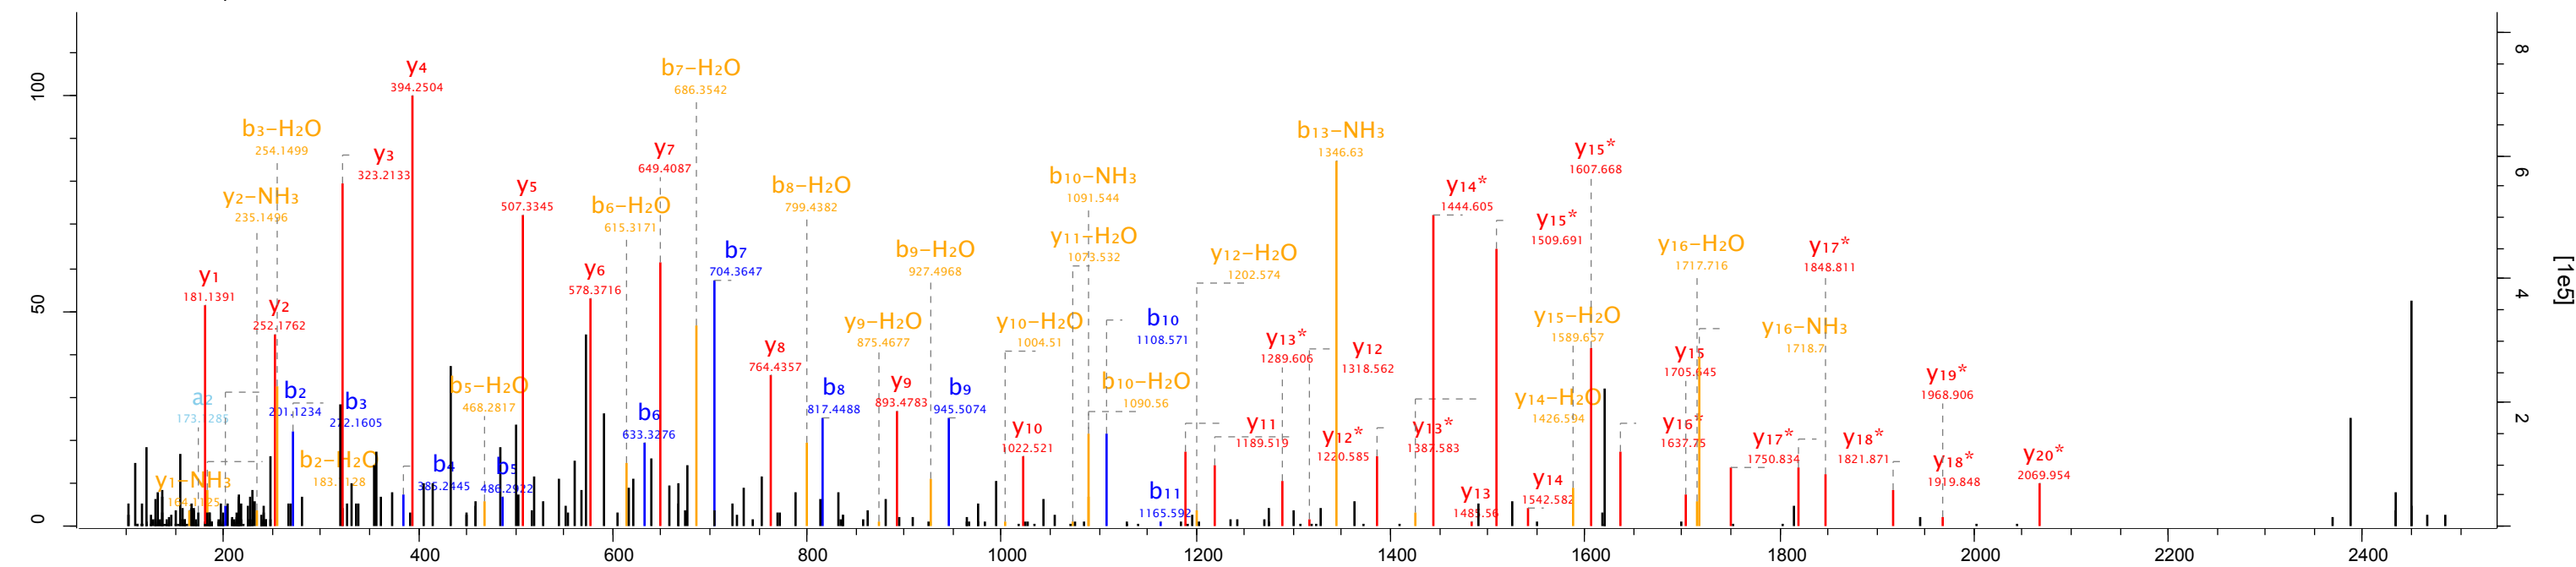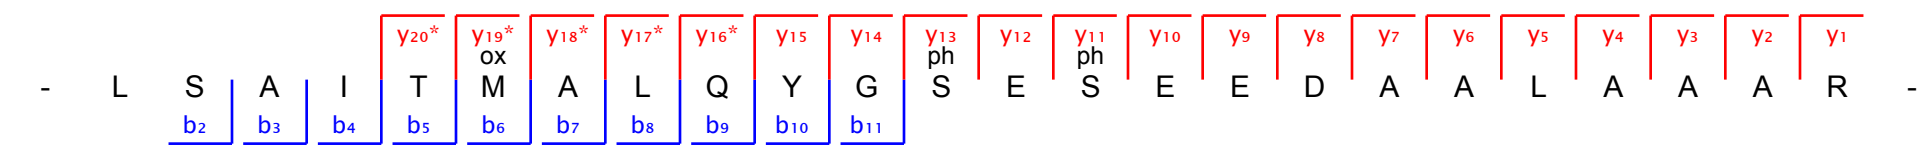

Raw file: 20150812\_A375SR\_Phospho\_BR1\_03  
 Scan: 27255 Method: FTMS; HCD Score: 56.86 m/z: 1068.5 Gene names: CCDC6

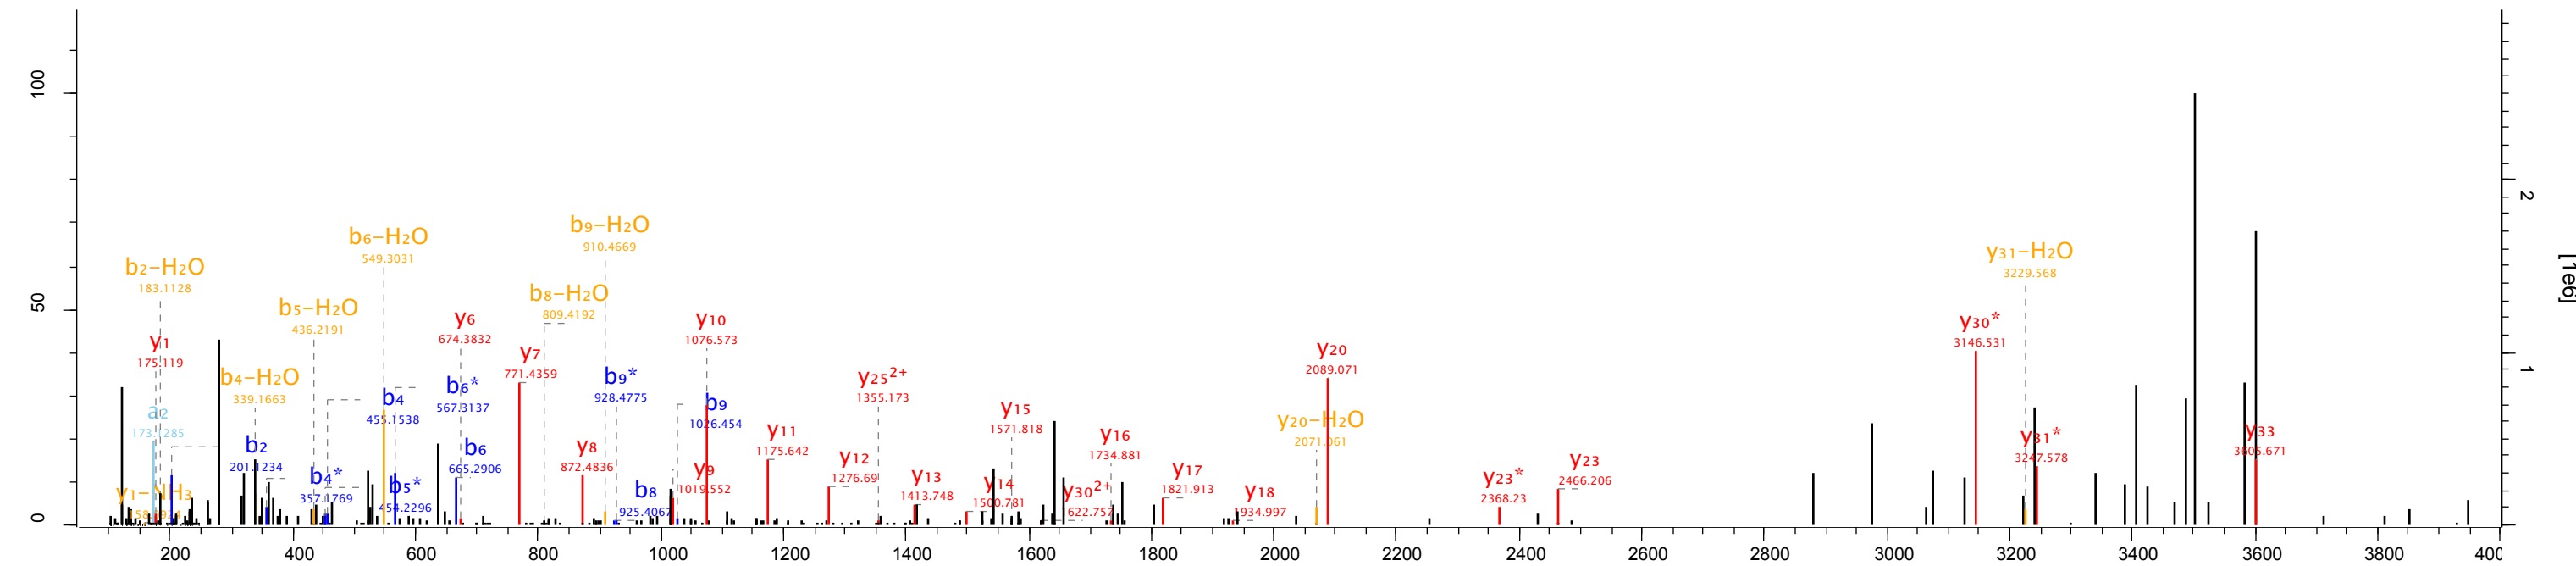

Sequence: - T V S P h S P I P Y T P S P S S S R P I S P G L S Y A S H T V G F T P P T S L T

Fragmentation mapping (b and y ions):

- b ions (blue boxes):** b<sub>2</sub> (V), b<sub>4</sub> (S), b<sub>5</sub>\* (P), b<sub>6</sub> (I), b<sub>8</sub> (Y), b<sub>9</sub> (T).
- y ions (red boxes):** y<sub>1</sub> (T), y<sub>6</sub> (P), y<sub>7</sub> (P), y<sub>8</sub> (F), y<sub>9</sub> (G), y<sub>10</sub> (V), y<sub>11</sub> (T), y<sub>12</sub> (H), y<sub>13</sub> (S), y<sub>14</sub> (A), y<sub>15</sub> (Y), y<sub>16</sub> (S), y<sub>17</sub> (L), y<sub>18</sub> (G), y<sub>20</sub> (P), y<sub>23</sub> (R), y<sub>25</sub><sup>2+</sup> (S), y<sub>30</sub>\* (P), y<sub>31</sub>\* (T), y<sub>33</sub> (P).

Raw file: 20150812\_A375SR\_Phospho\_BR1\_03  
 Scan: 27415 Method: FTMS; HCD Score: 179.2 m/z: 987.46 Gene names: DAP

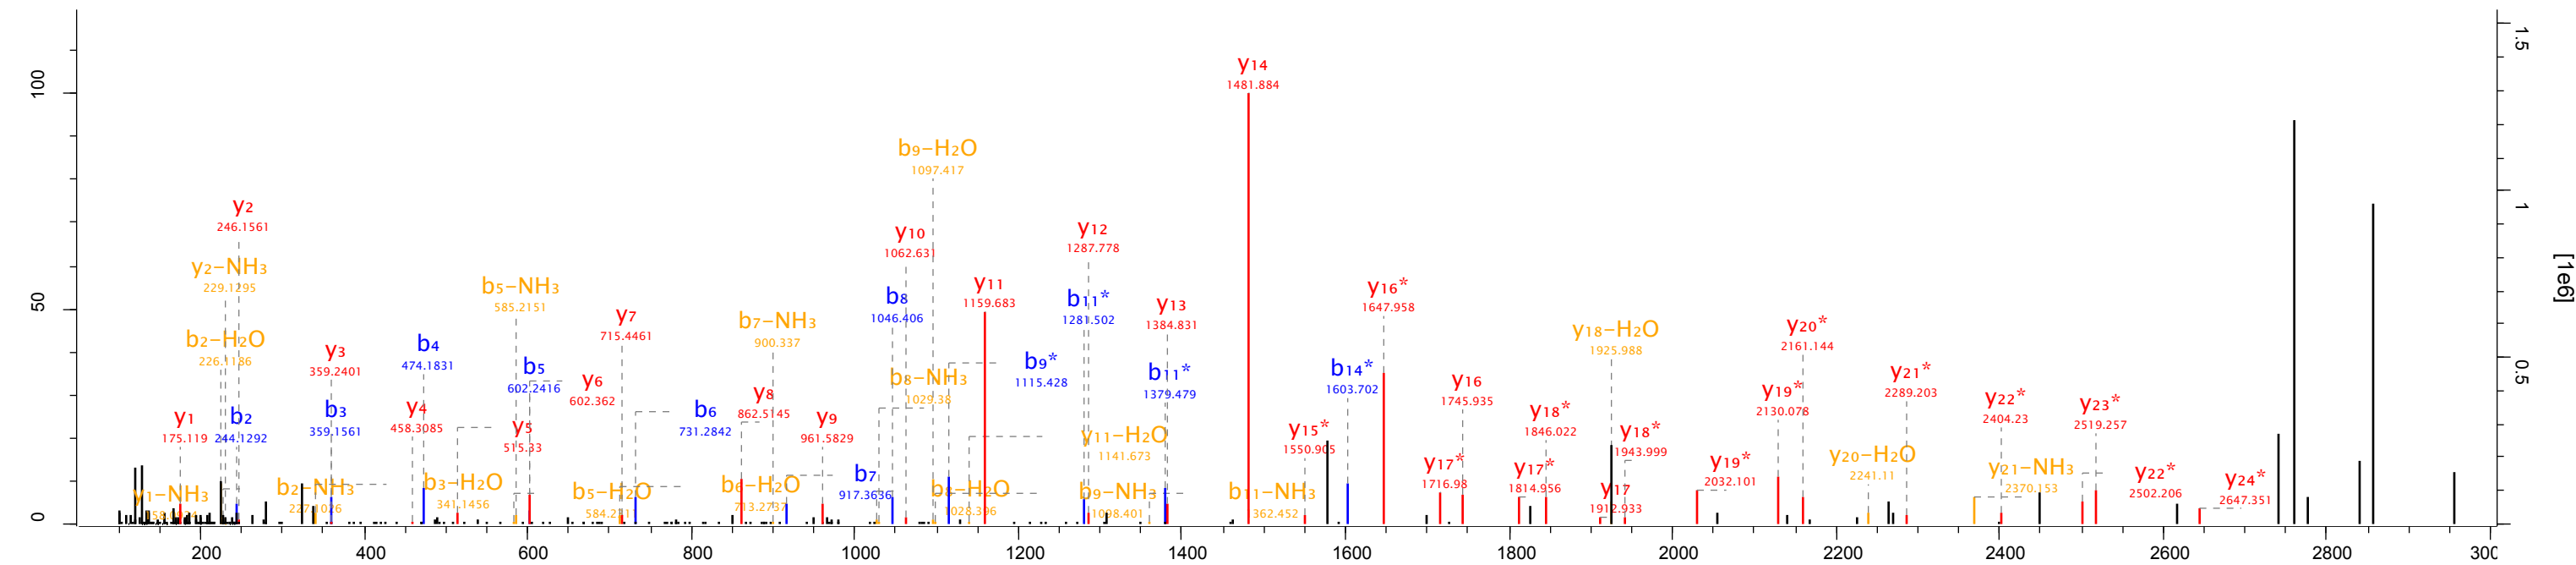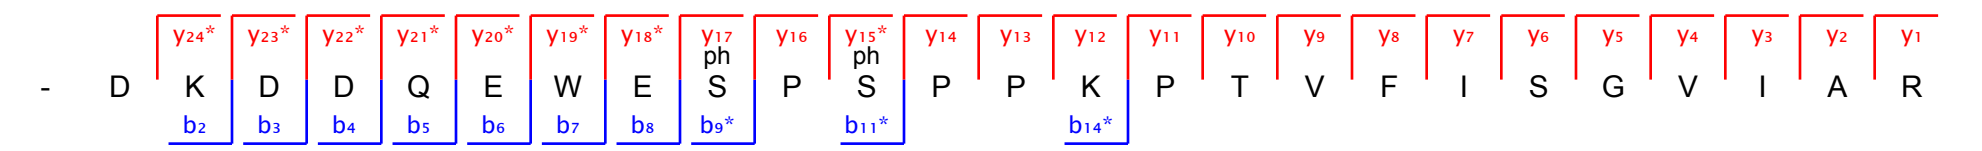

Raw file Scan Method Score m/z Gene names  
 20150812\_A375SR\_Phospho\_BR1\_03 27805 FTMS; HCD 336.92 1196.53 RSF1

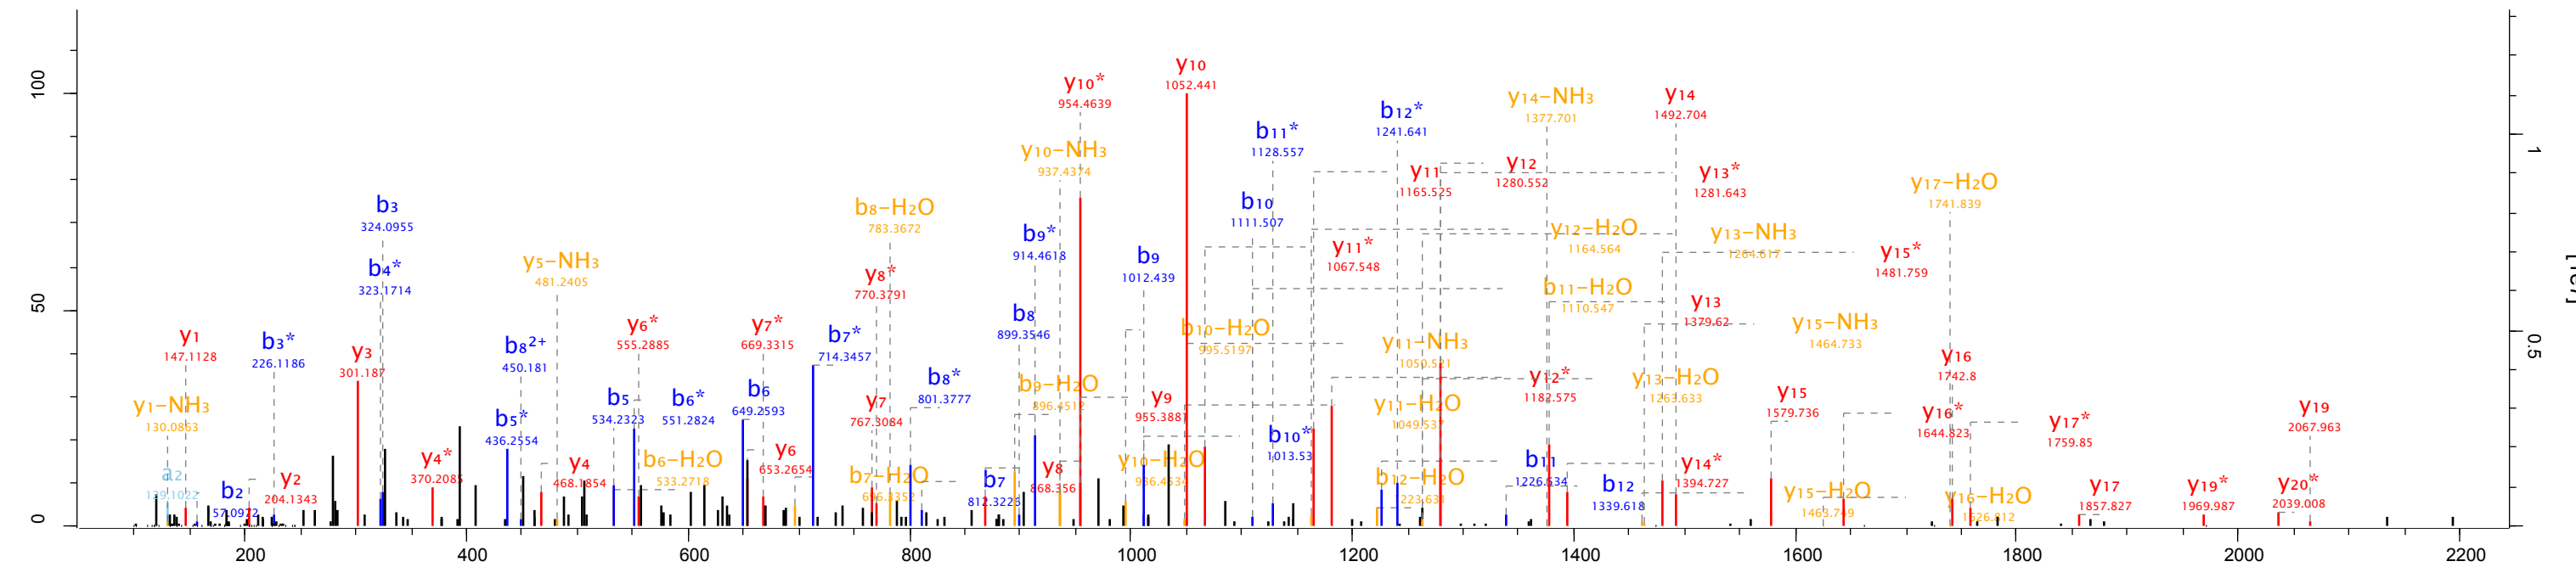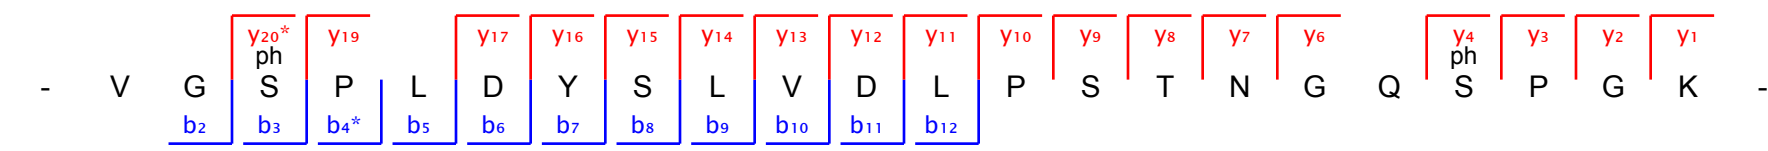



Raw file 20150812\_A375SR\_Phospho\_BR1\_03 Scan 28445 Method FTMS; HCD Score 59.3 m/z 828.15 Gene names DIDO1

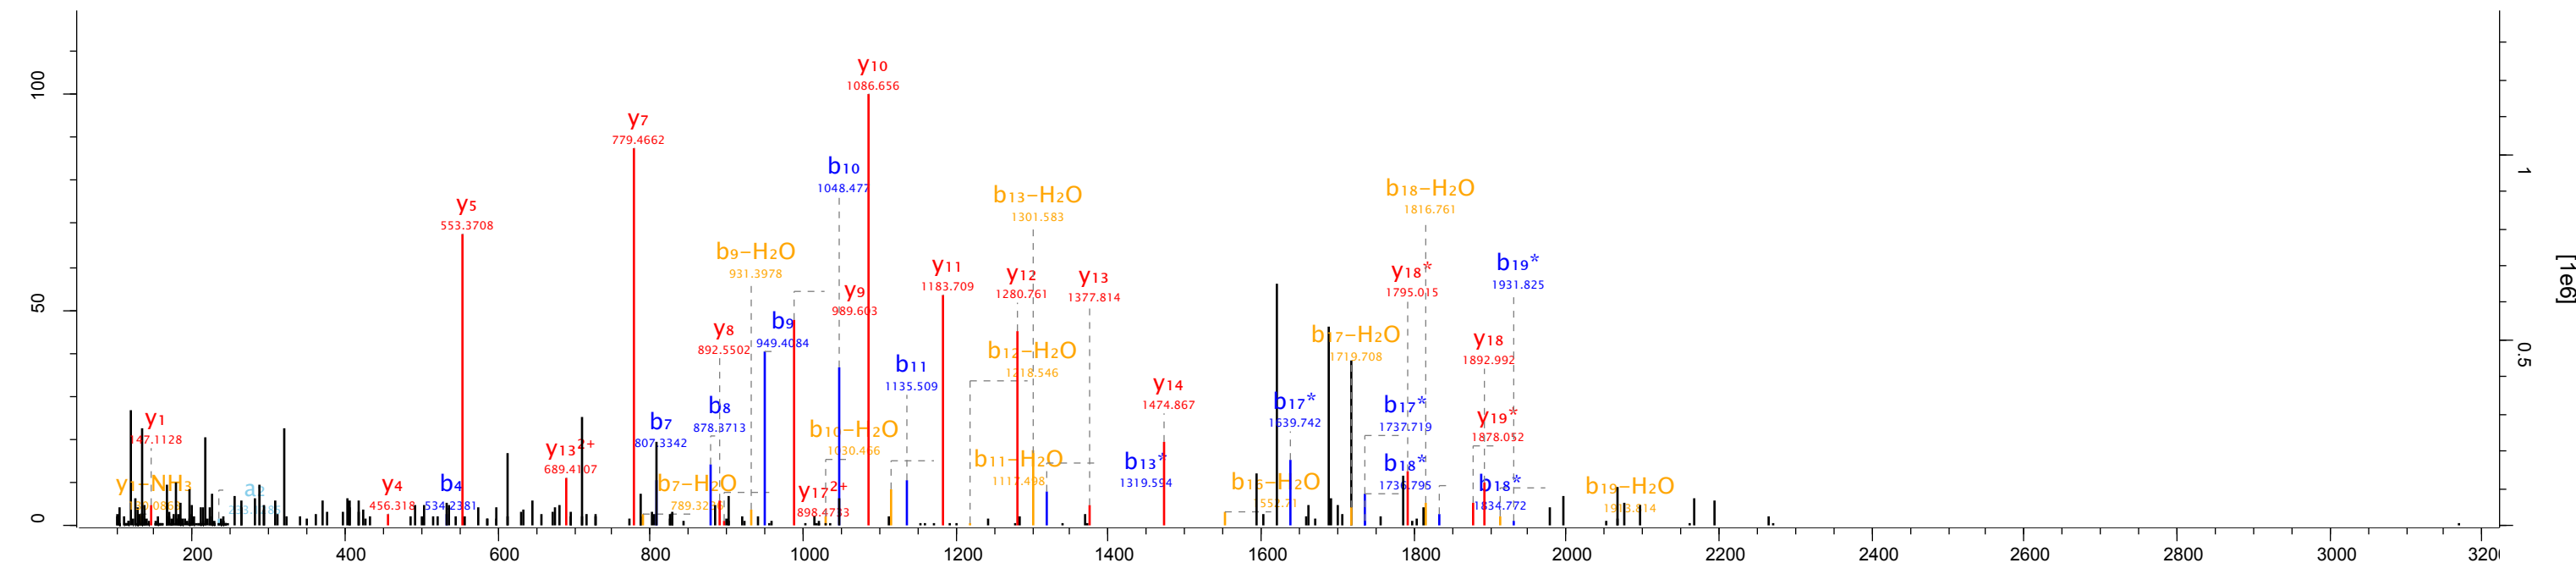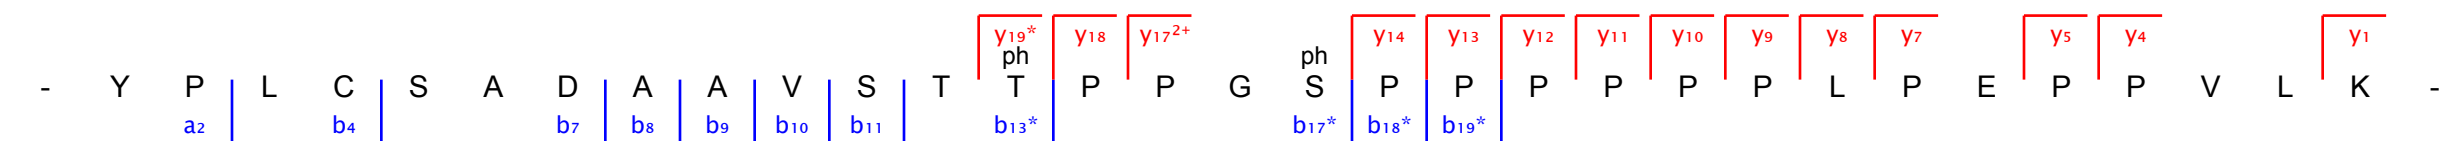

Raw file 20150812\_A375SR\_Phospho\_BR1\_03 Scan 3435 Method FTMS; HCD Score 81.37 m/z 754.84 Gene names WAC

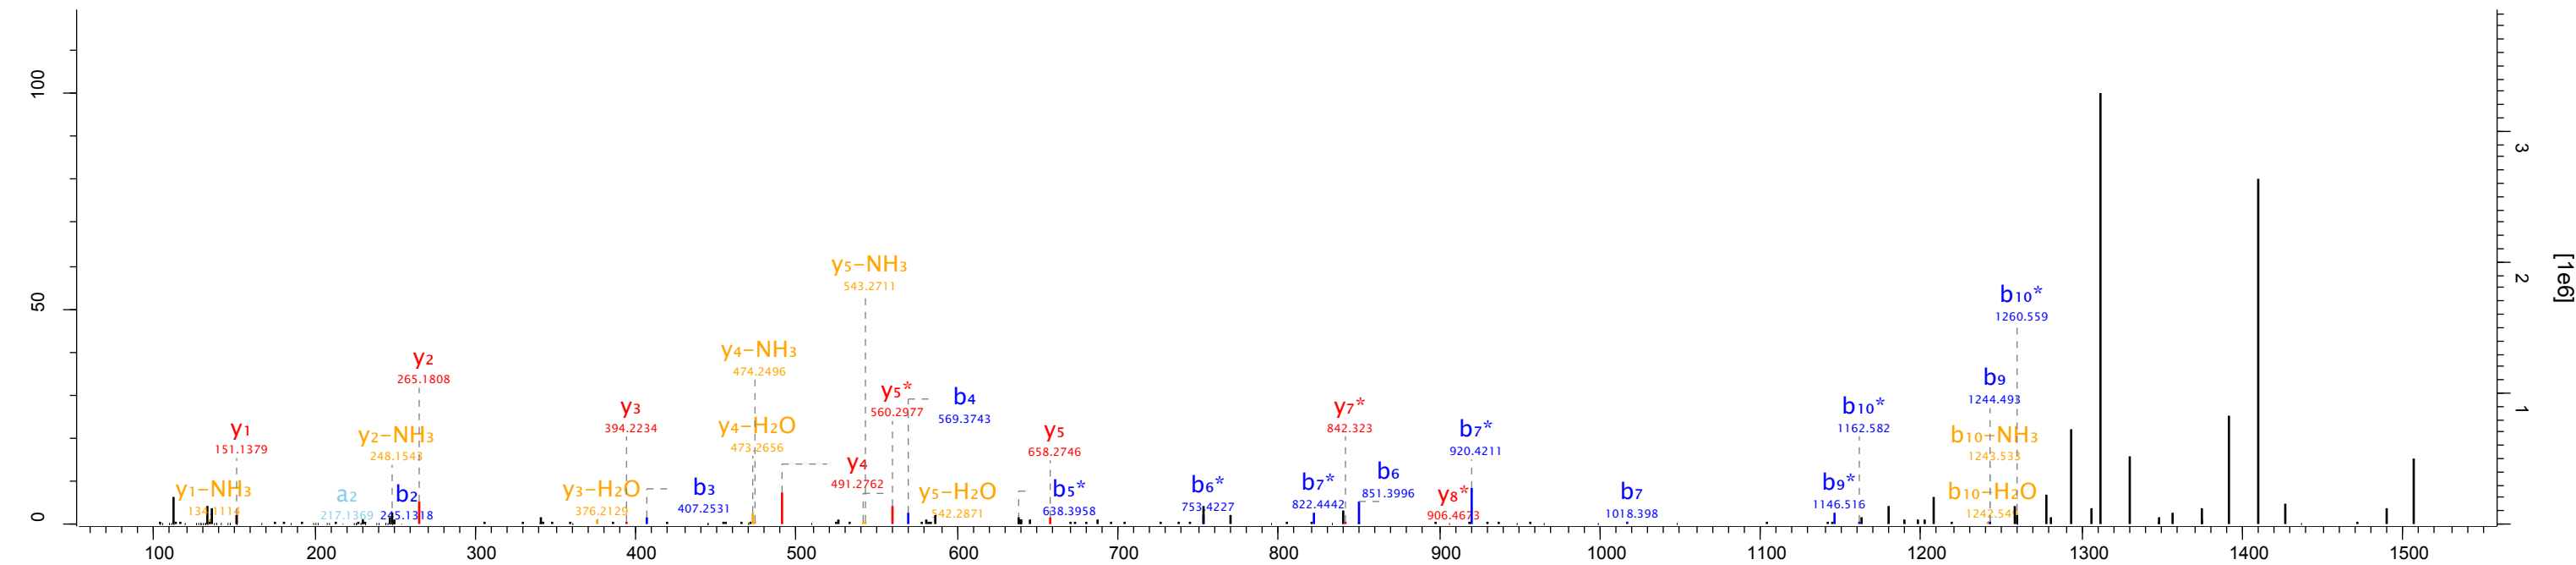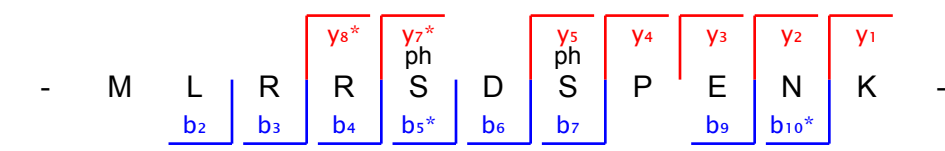

Raw file: 20150812\_A375SR\_Phospho\_BR1\_03  
 Scan: 3535 Method: FTMS; HCD Score: 252.58 m/z: 942.83 Gene names: NUCKS1

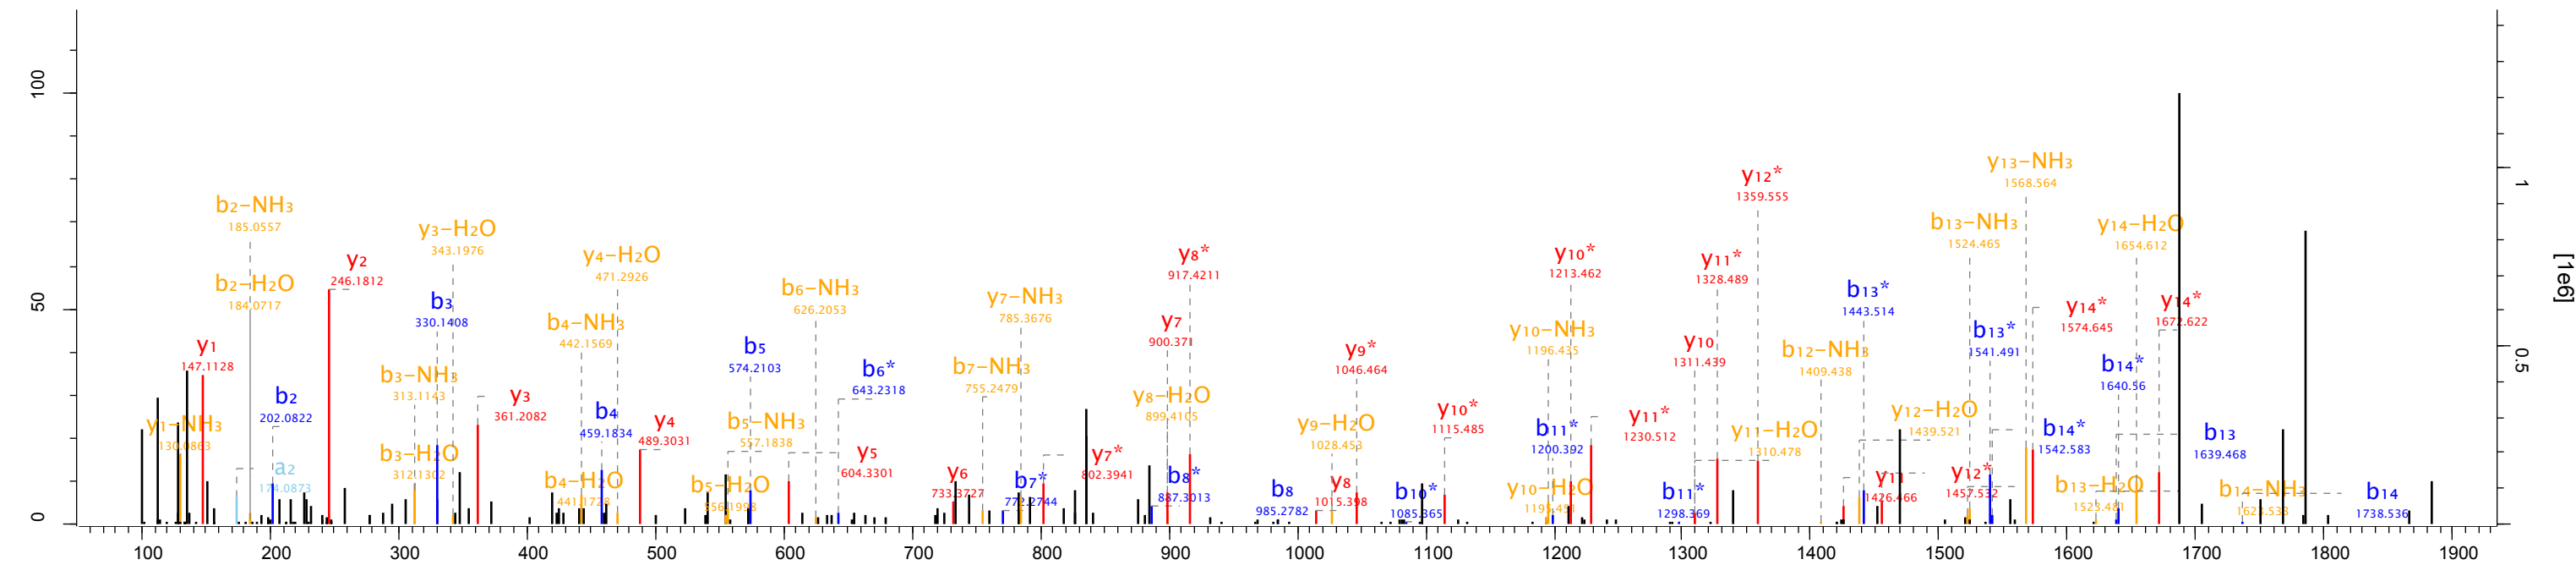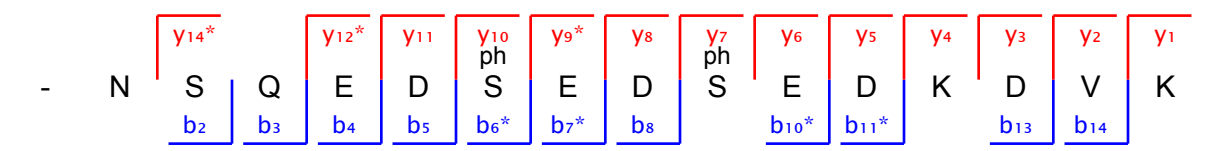

Raw file 20150812\_A375SR\_Phospho\_BR1\_03 Scan 3615 Method FTMS; HCD Score 57.62 m/z 631.75 Gene names LARP4B

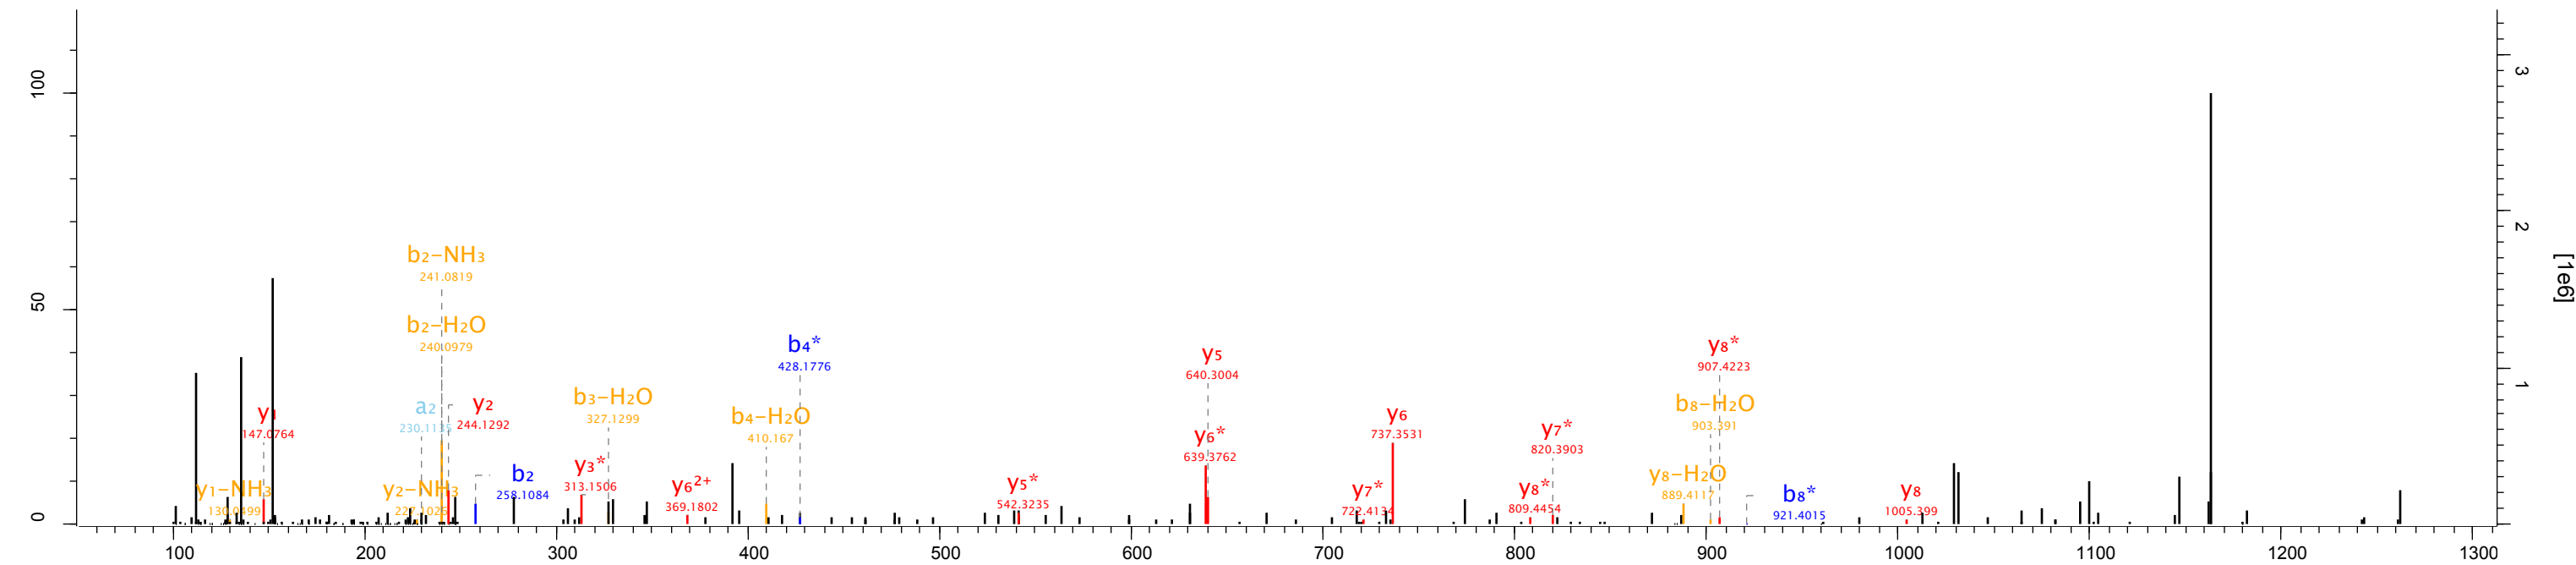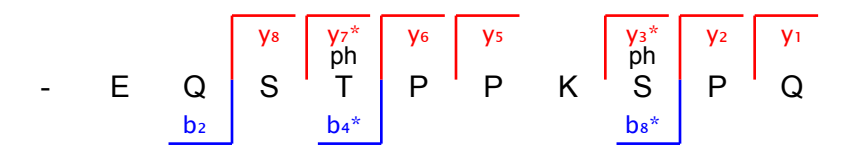

Raw file: 20150812\_A375SR\_Phospho\_BR1\_03  
 Scan: 3955 Method: FTMS; HCD Score: 44.61 m/z: 393.5 Gene names: RBBP6

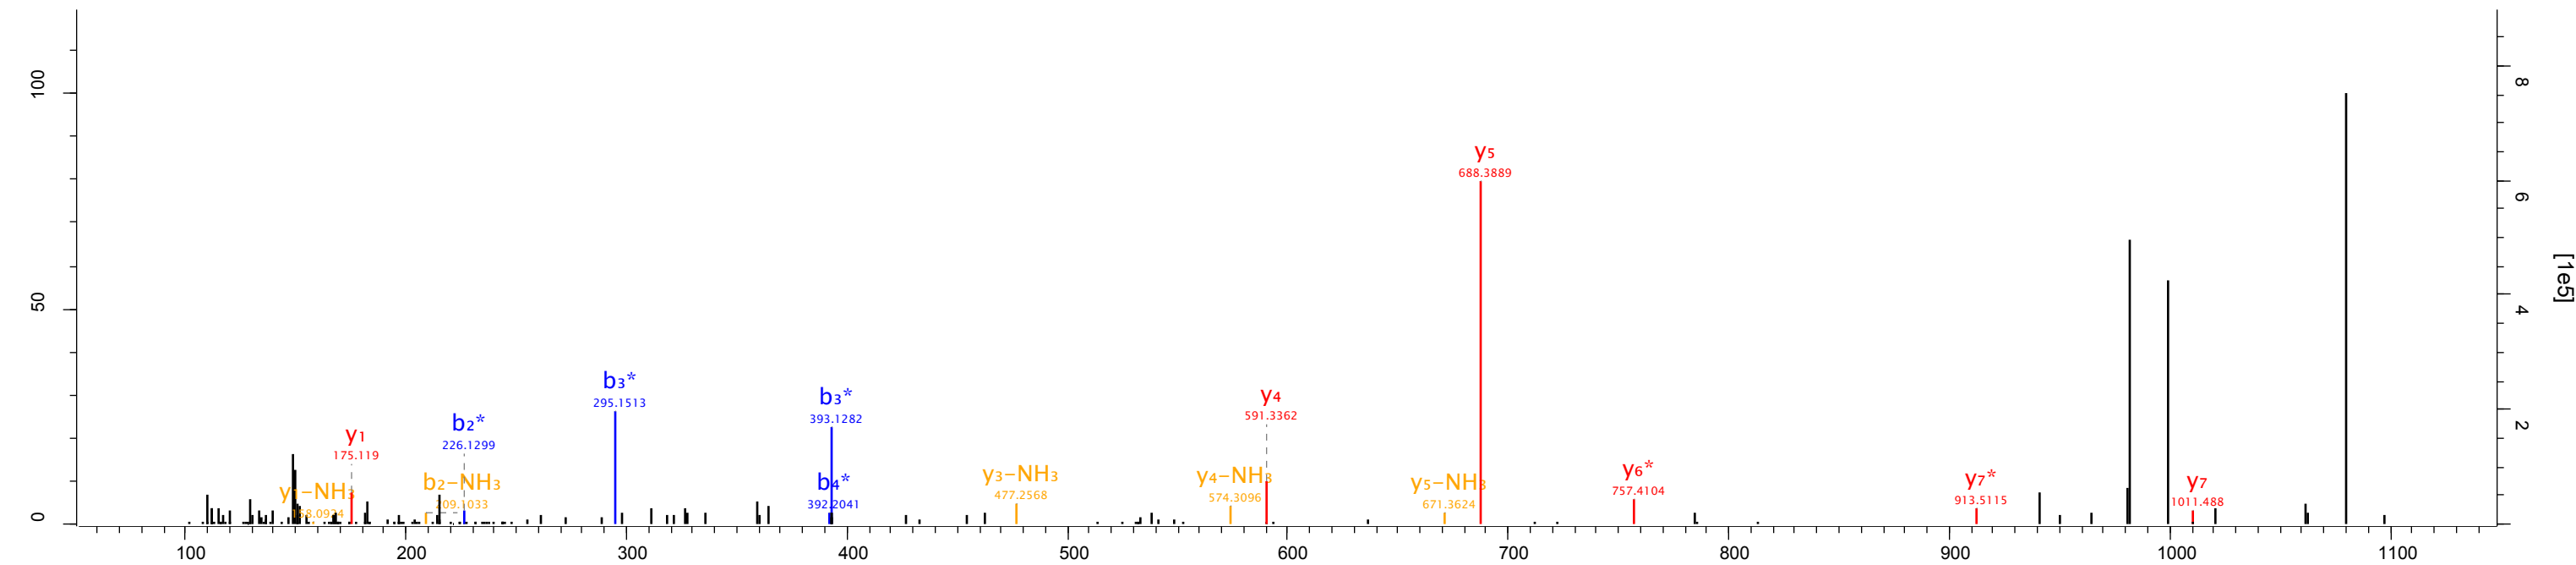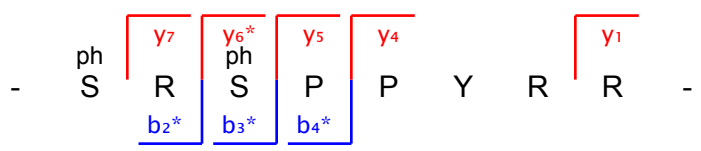

Raw file: 20150812\_A375SR\_Phospho\_BR1\_03  
 Scan: 4255 Method: FTMS; HCD Score: 52.6 m/z: 588.26 Gene names: SRRM2

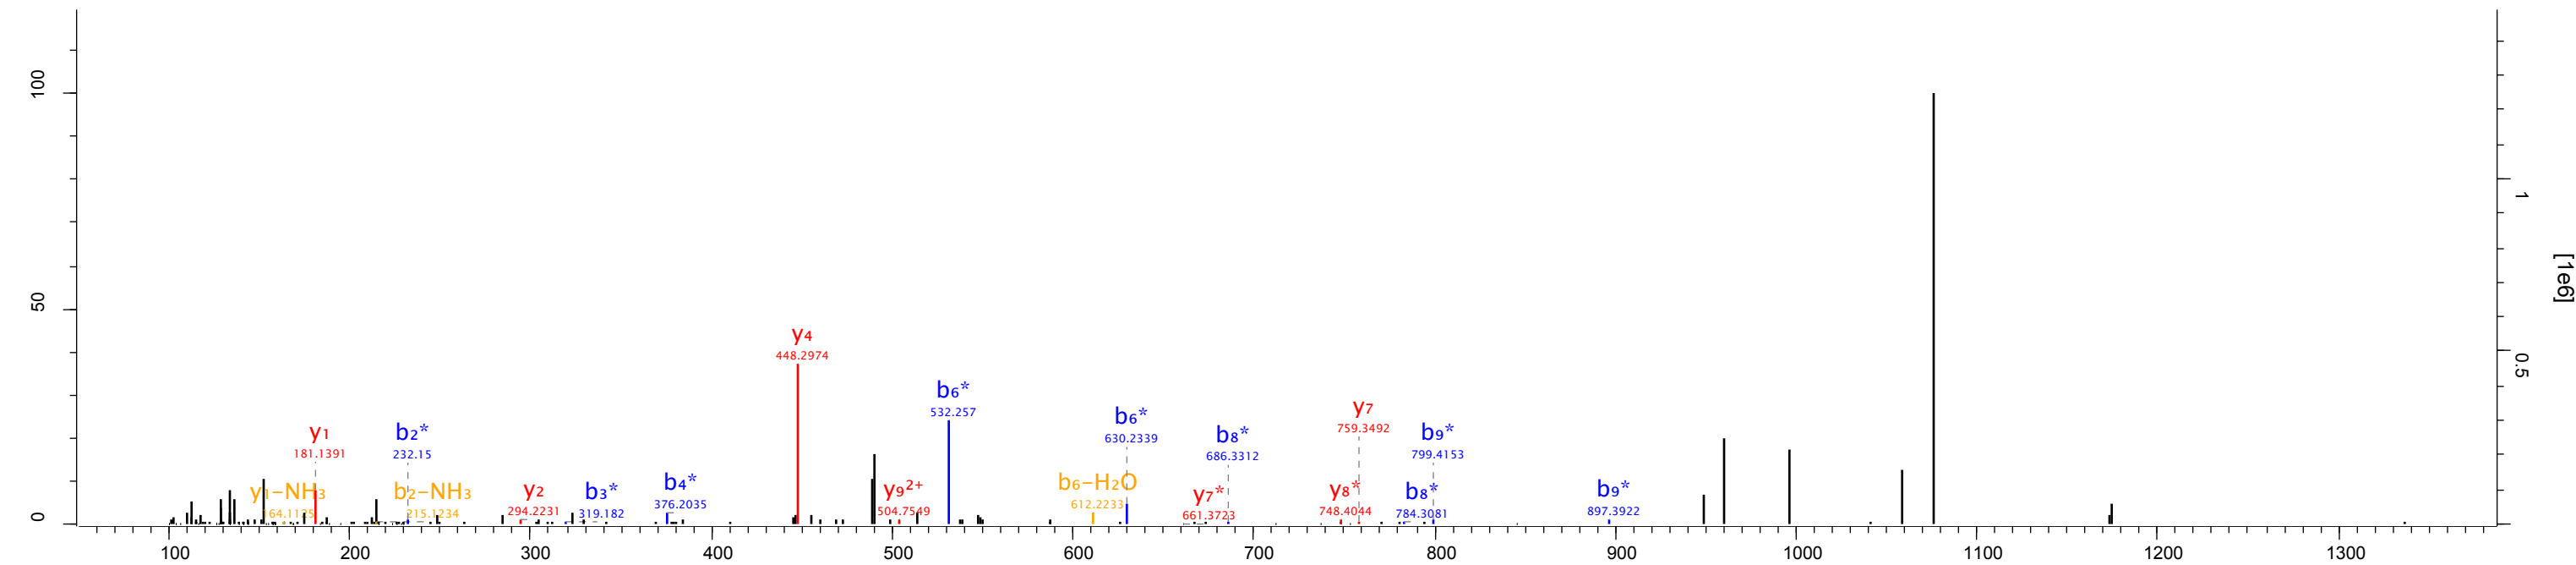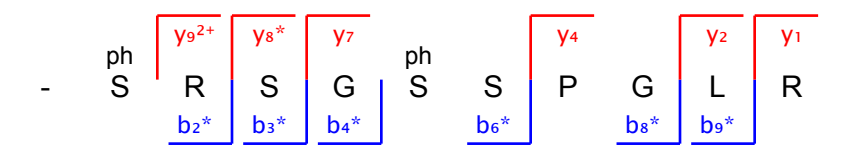

Raw file 20150812\_A375SR\_Phospho\_BR1\_03 Scan 4445 Method FTMS; HCD Score 112.5 m/z 539.23 Gene names SRRM2

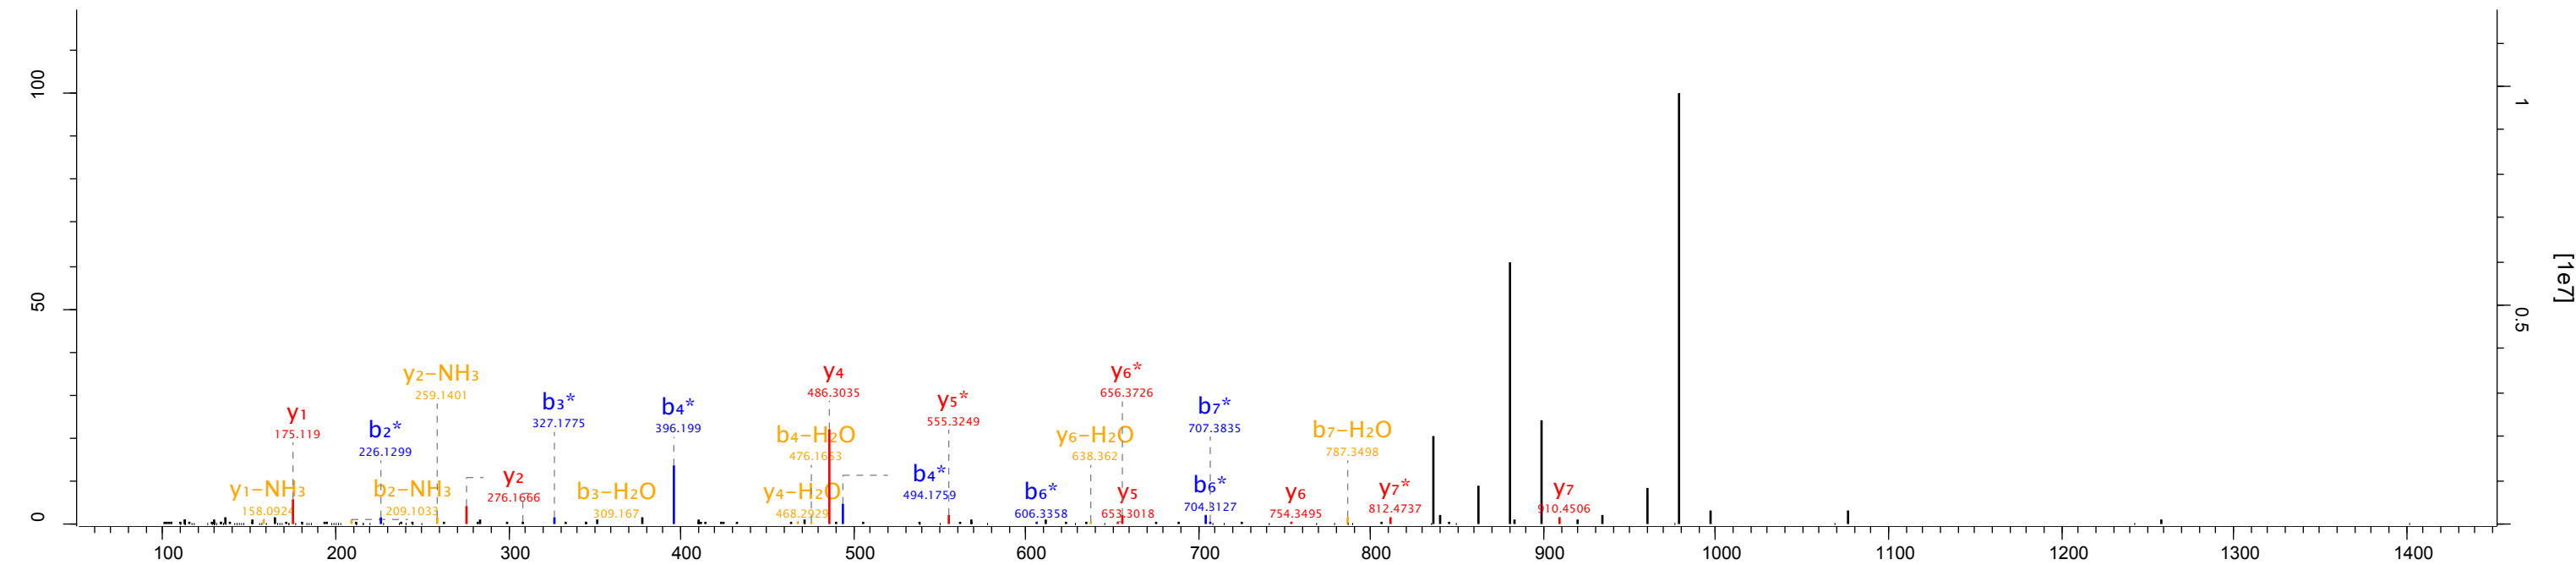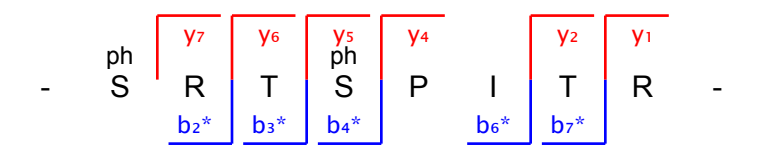

Raw file: 20150812\_A375SR\_Phospho\_BR1\_03  
 Scan: 4855 Method: FTMS; HCD Score: 134.15 m/z: 950.42 Gene names: MMTAG2

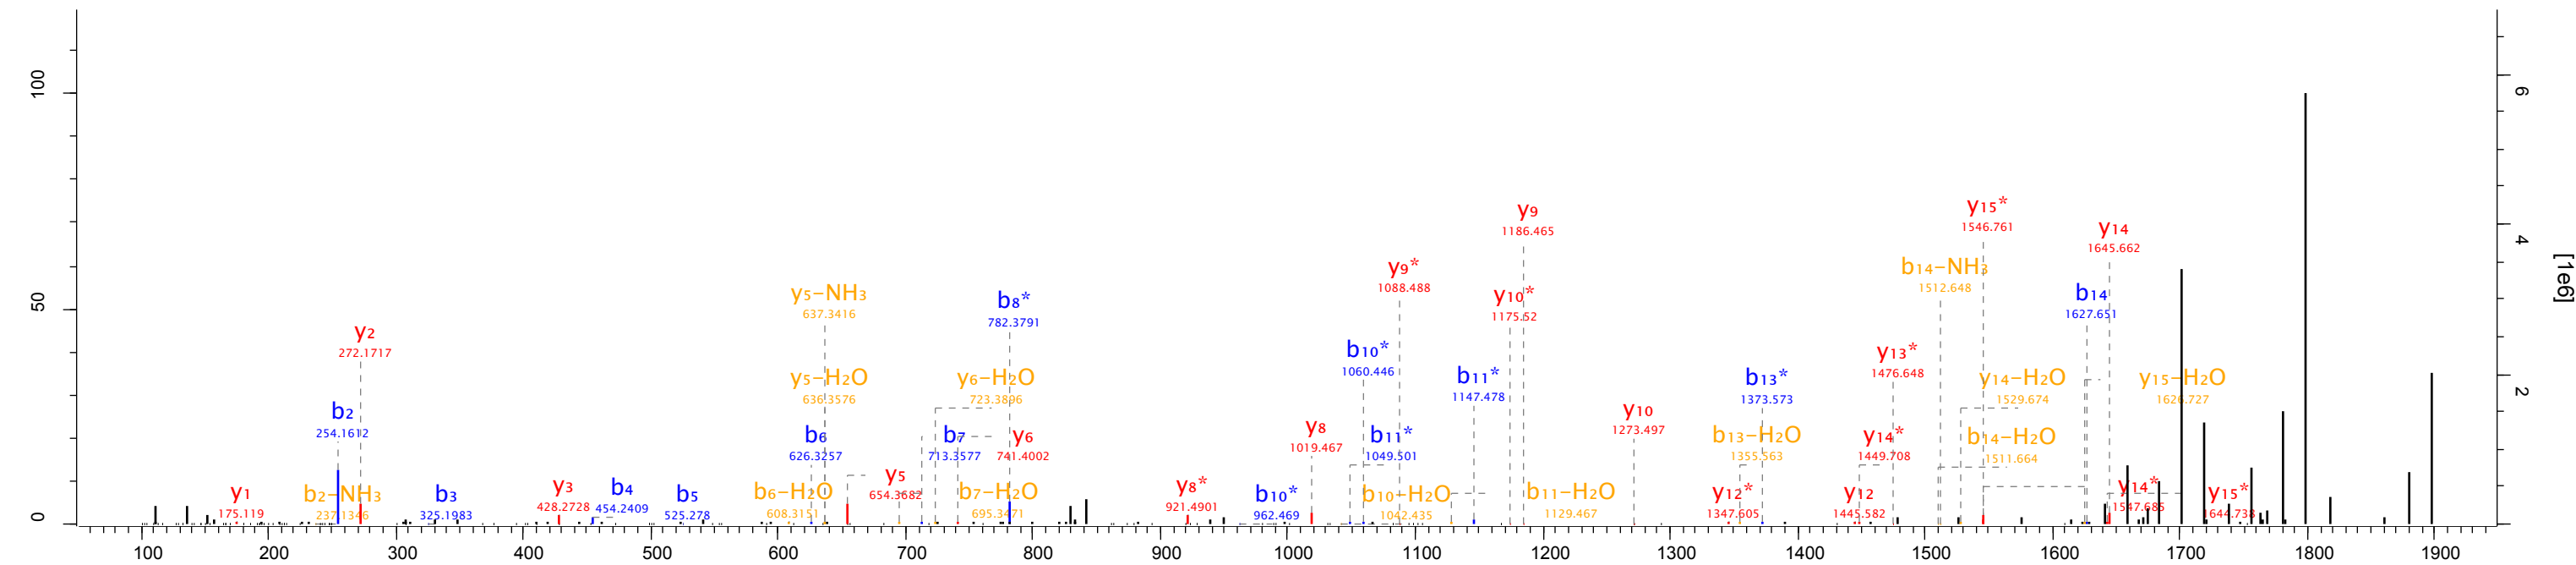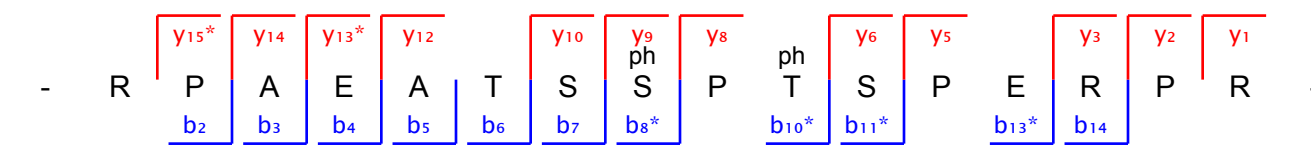



Raw file: 20150812\_A375SR\_Phospho\_BR1\_03  
 Scan: 5455 Method: FTMS; HCD Score: 156.92 m/z: 677.62 Gene names: SCML2

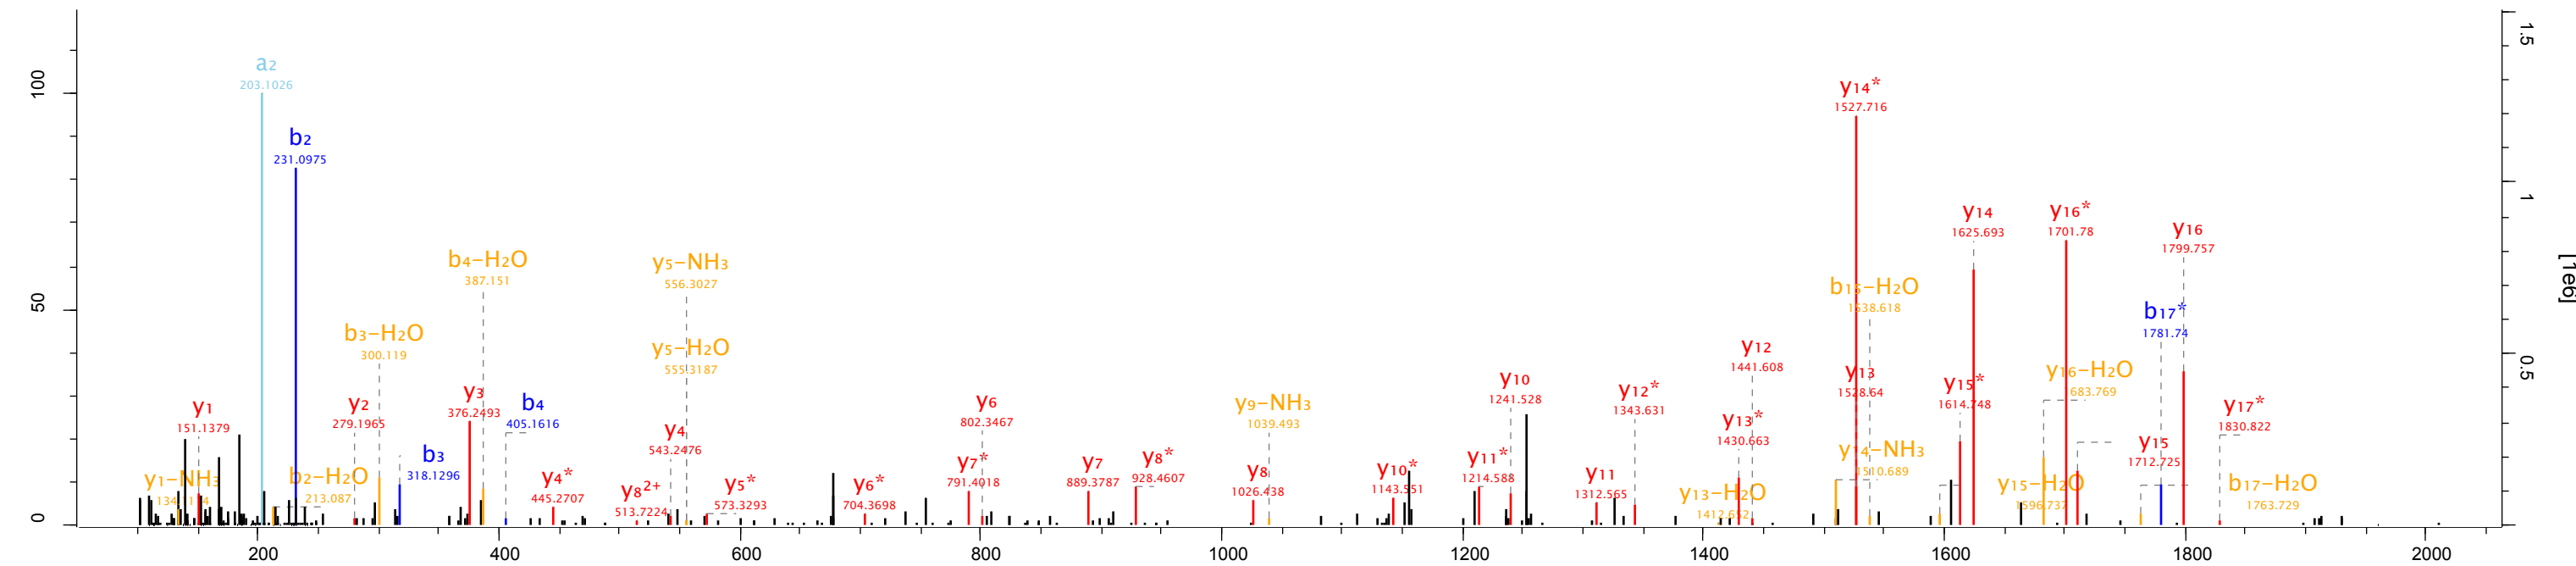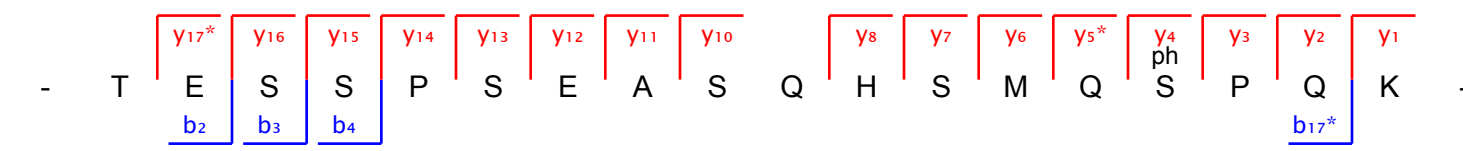

Raw file: 20150812\_A375SR\_Phospho\_BR1\_03  
 Scan: 5615 Method: FTMS; HCD Score: 354.64 m/z: 1031.39 Gene names: LEO1

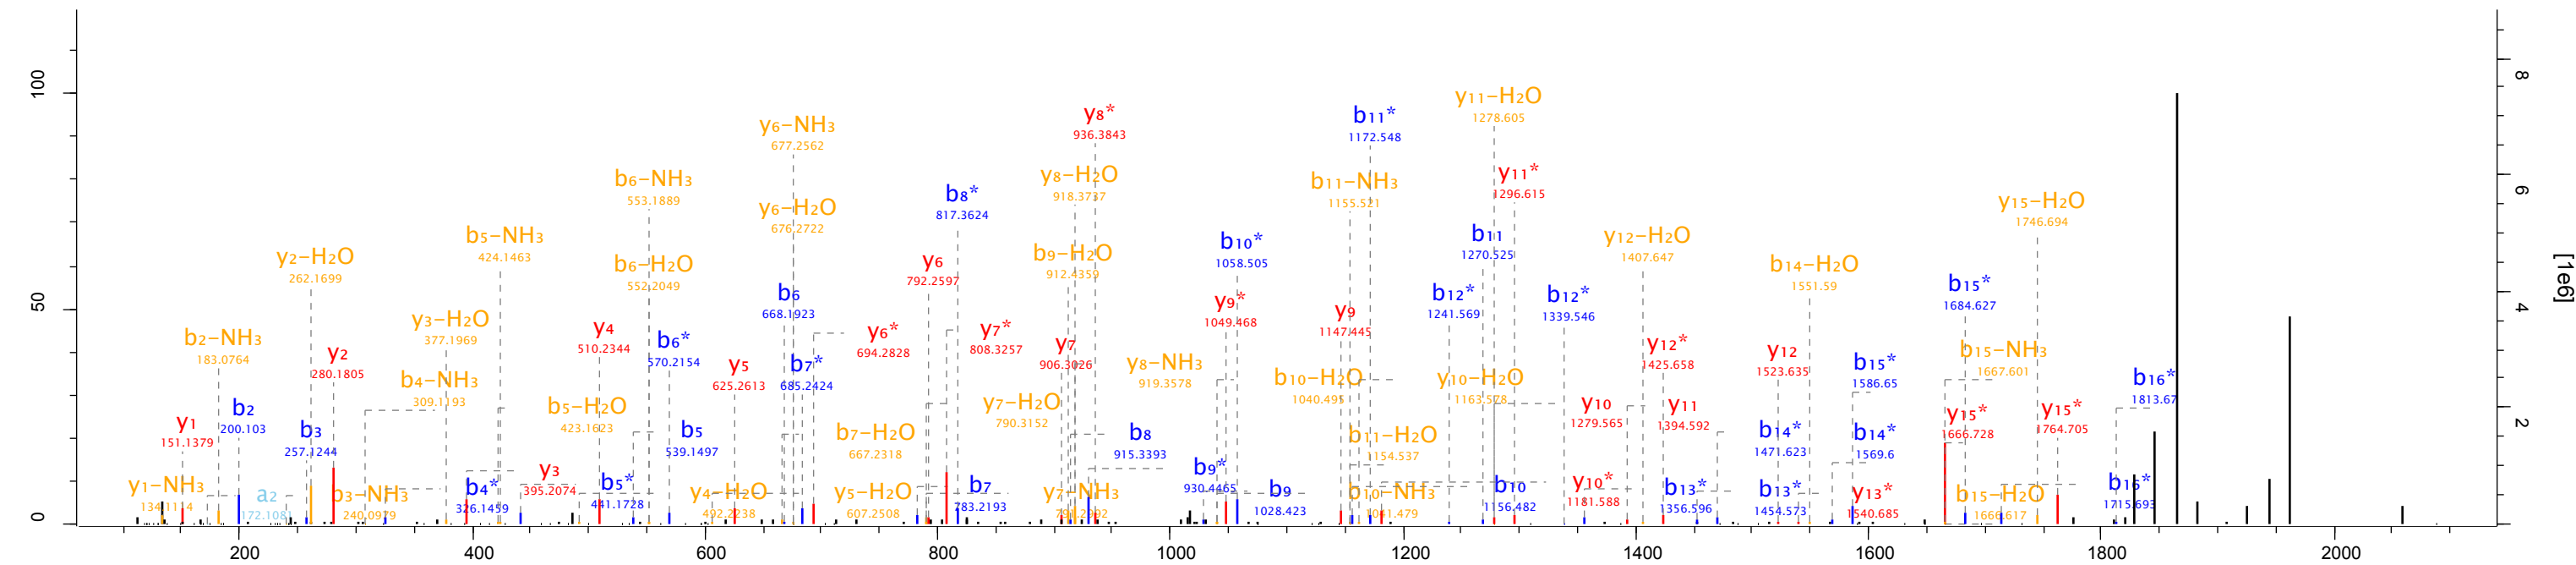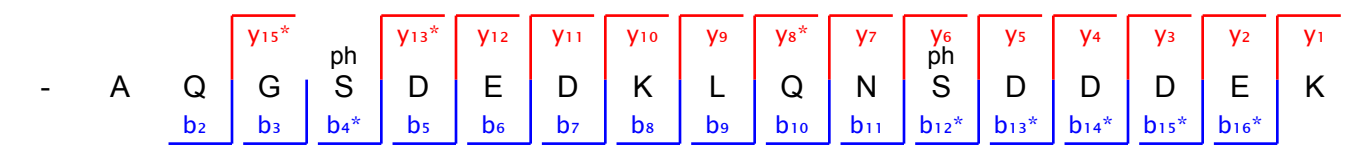

Raw file 20150812\_A375SR\_Phospho\_BR1\_03 Scan 6075 Method FTMS; HCD Score 103.16 m/z 666.79 Gene names MCM2

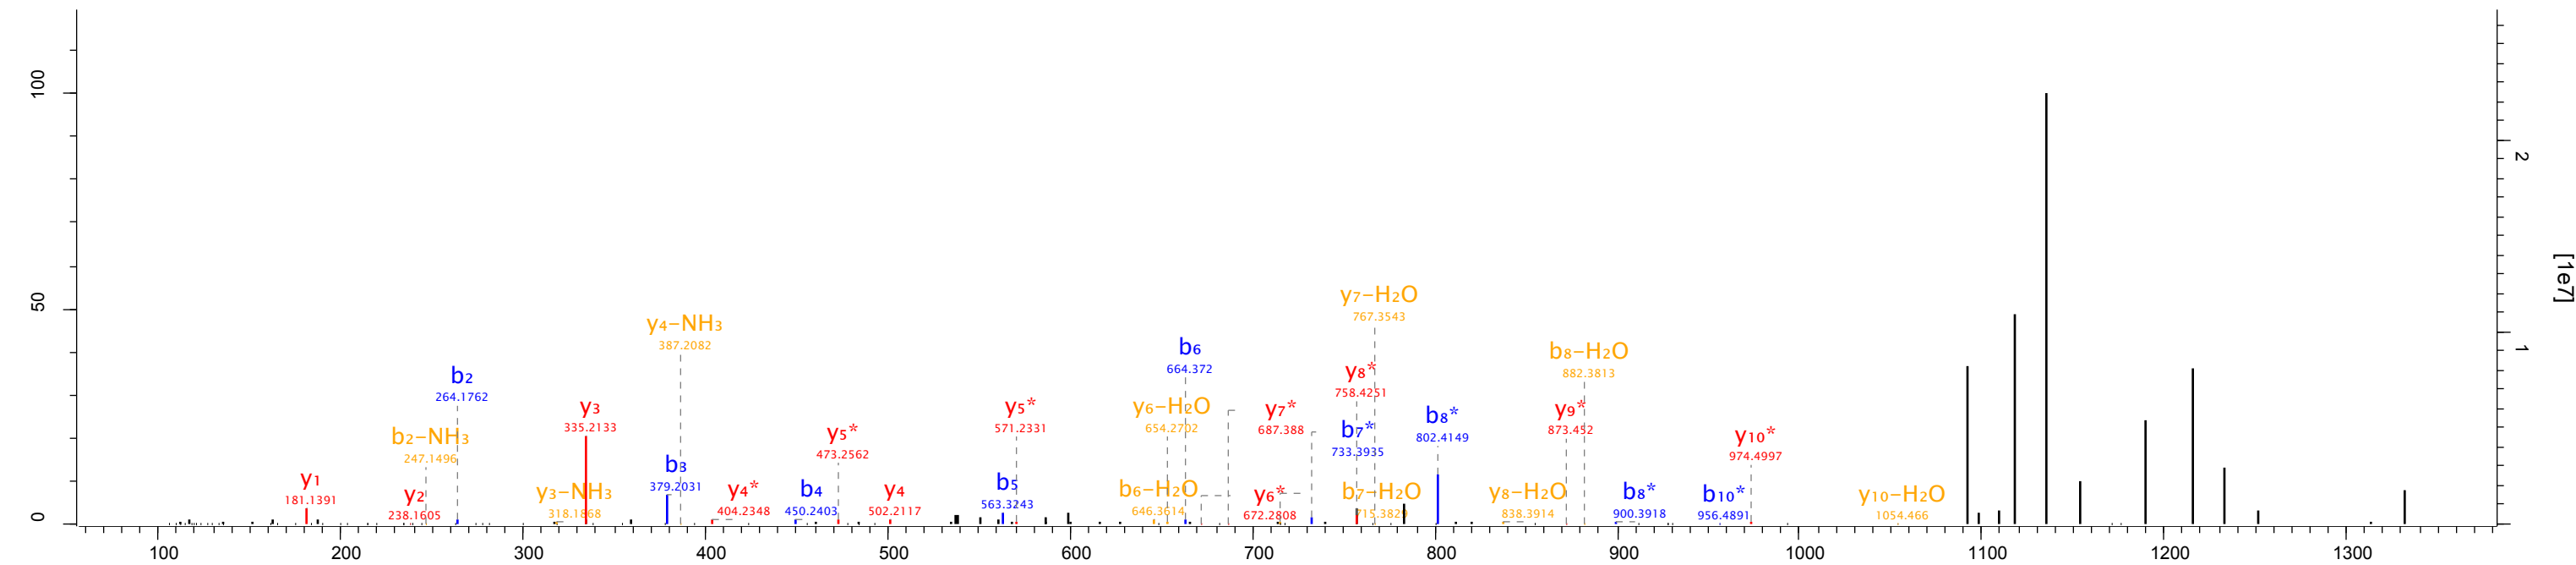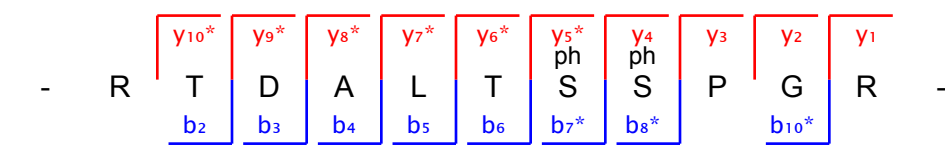

Raw file  
20150812\_A375SR\_Phospho\_BR1\_03

Scan Method Score m/z Gene names  
6125 FTMS; HCD 235.74 914.4 SRRM2

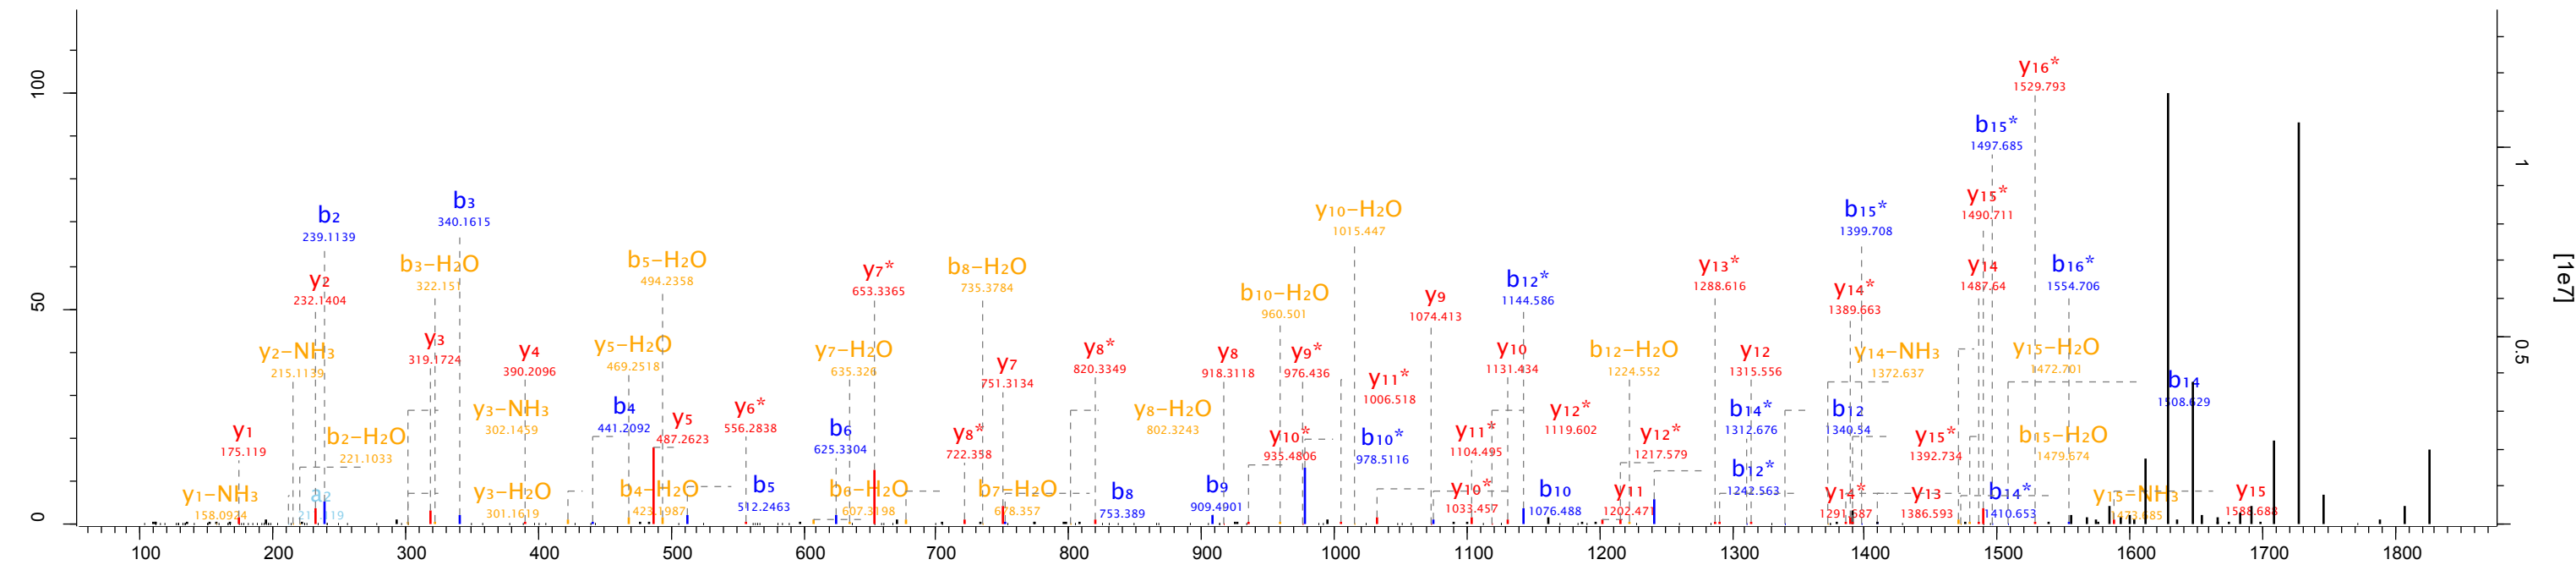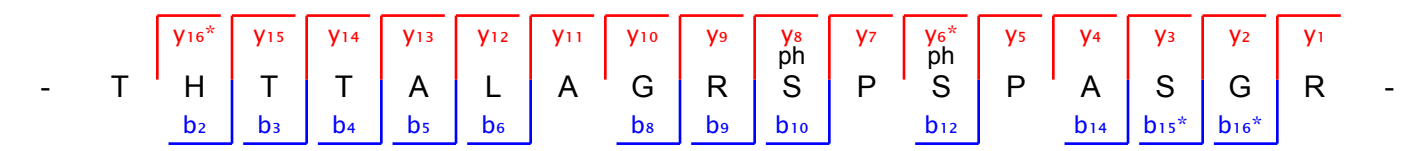

Raw file: 20150812\_A375SR\_Phospho\_BR1\_03  
 Scan: 6565 Method: FTMS; HCD Score: 259.81 m/z: 820.33 Gene names: HMBS

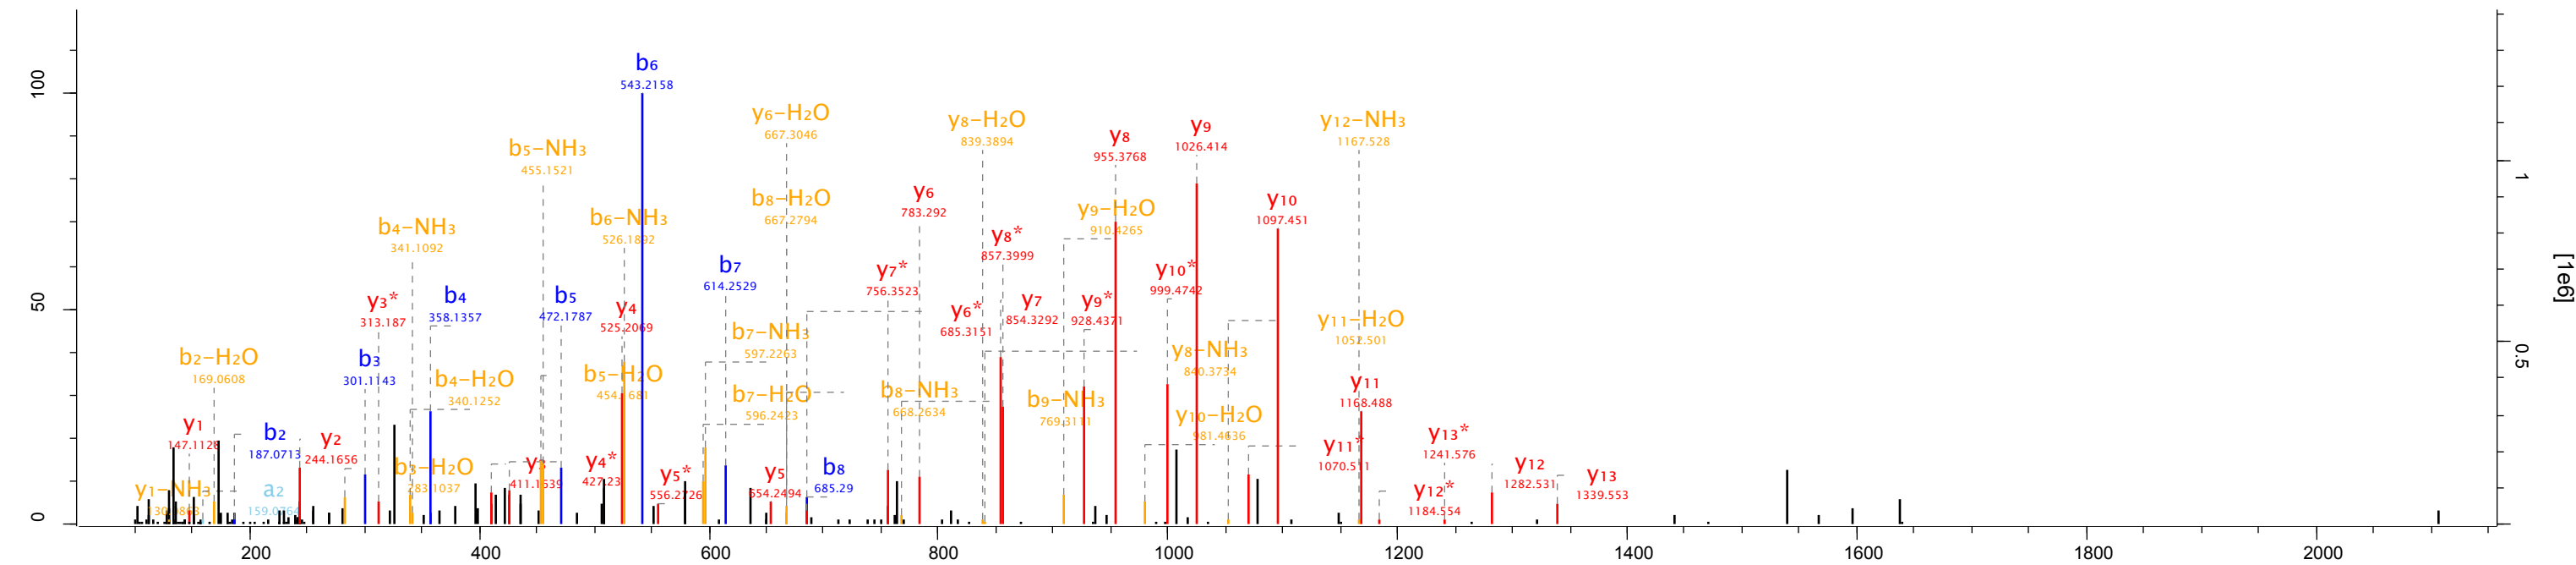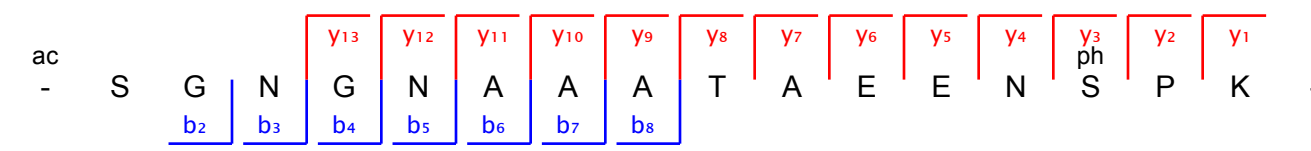

Raw file 20150812\_A375SR\_Phospho\_BR1\_03 Scan 6765 Method FTMS; HCD Score 44.66 m/z 646.25 Gene names TENC1

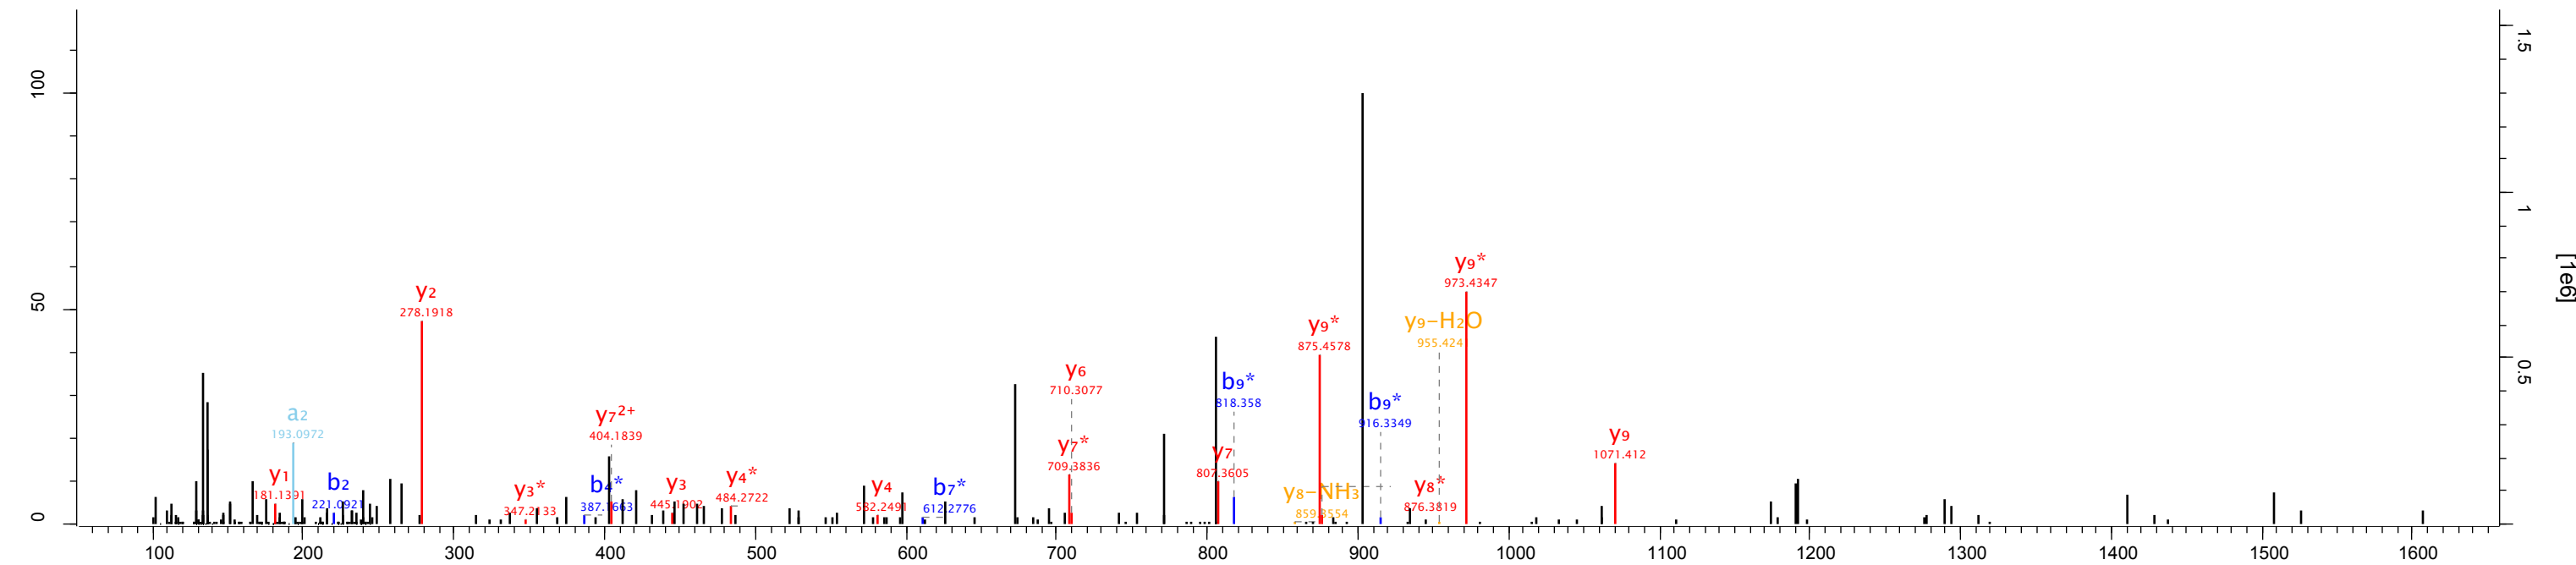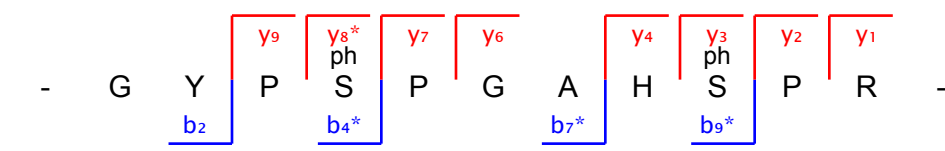



Raw file: 20150812\_A375SR\_Phospho\_BR1\_03  
 Scan: 7605 Method: FTMS; HCD Score: 121.62 m/z: 680.33 Gene names: ZC3H13

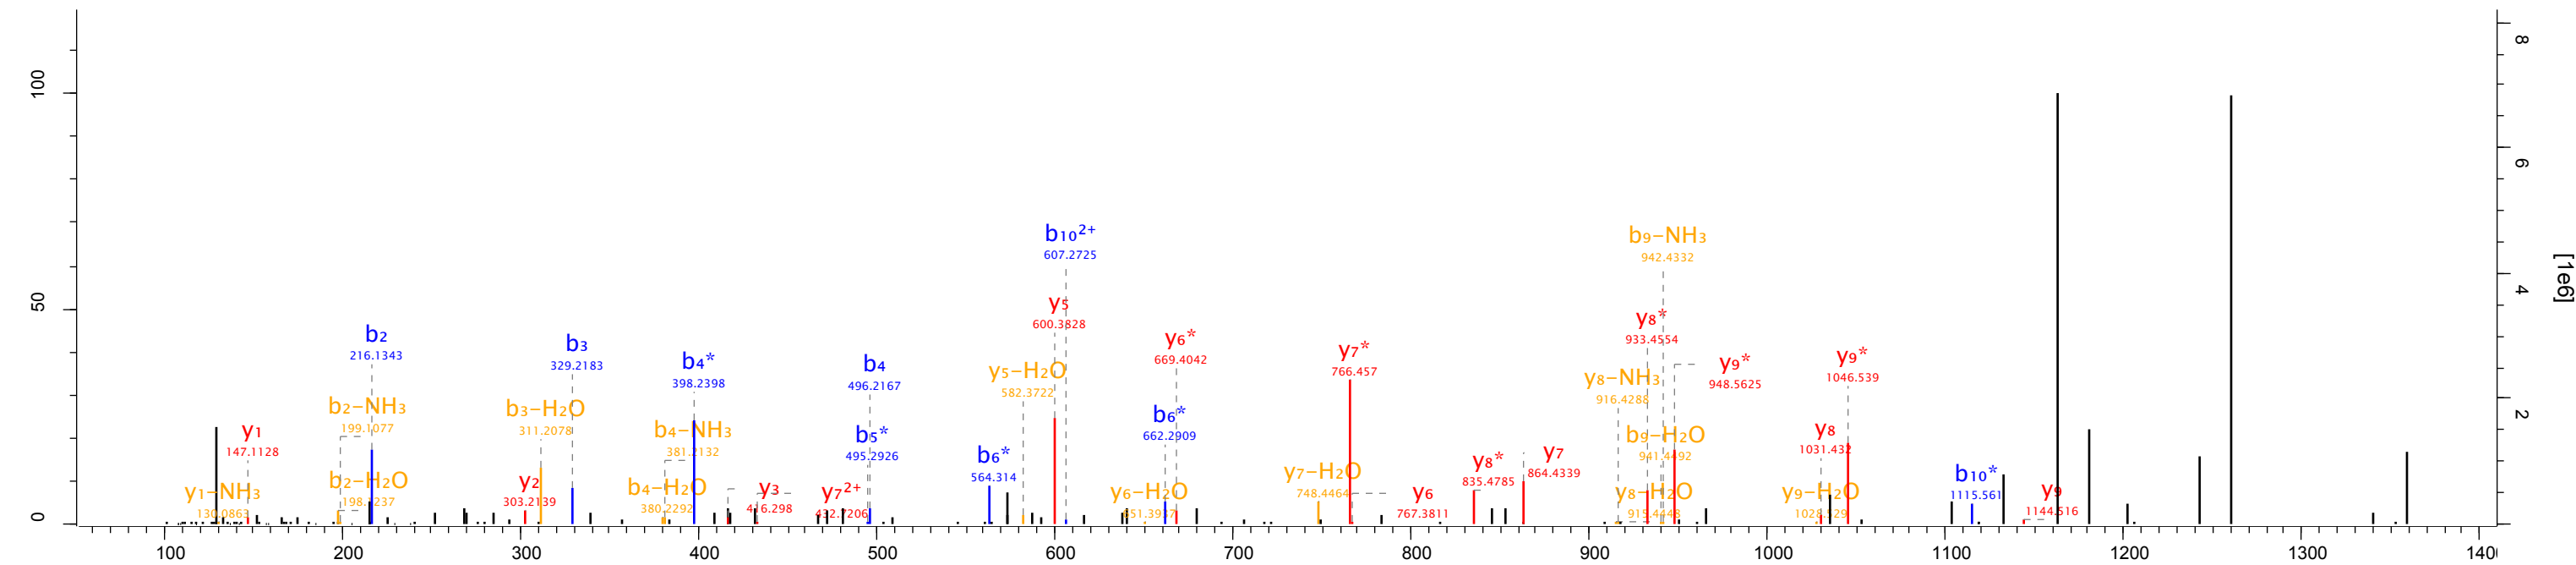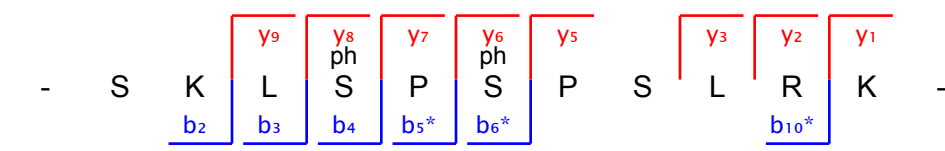



Raw file: 20150812\_A375SR\_Phospho\_BR1\_03  
 Scan: 8435 Method: FTMS; HCD Score: 142.03 m/z: 620.29 Gene names: SRRM1

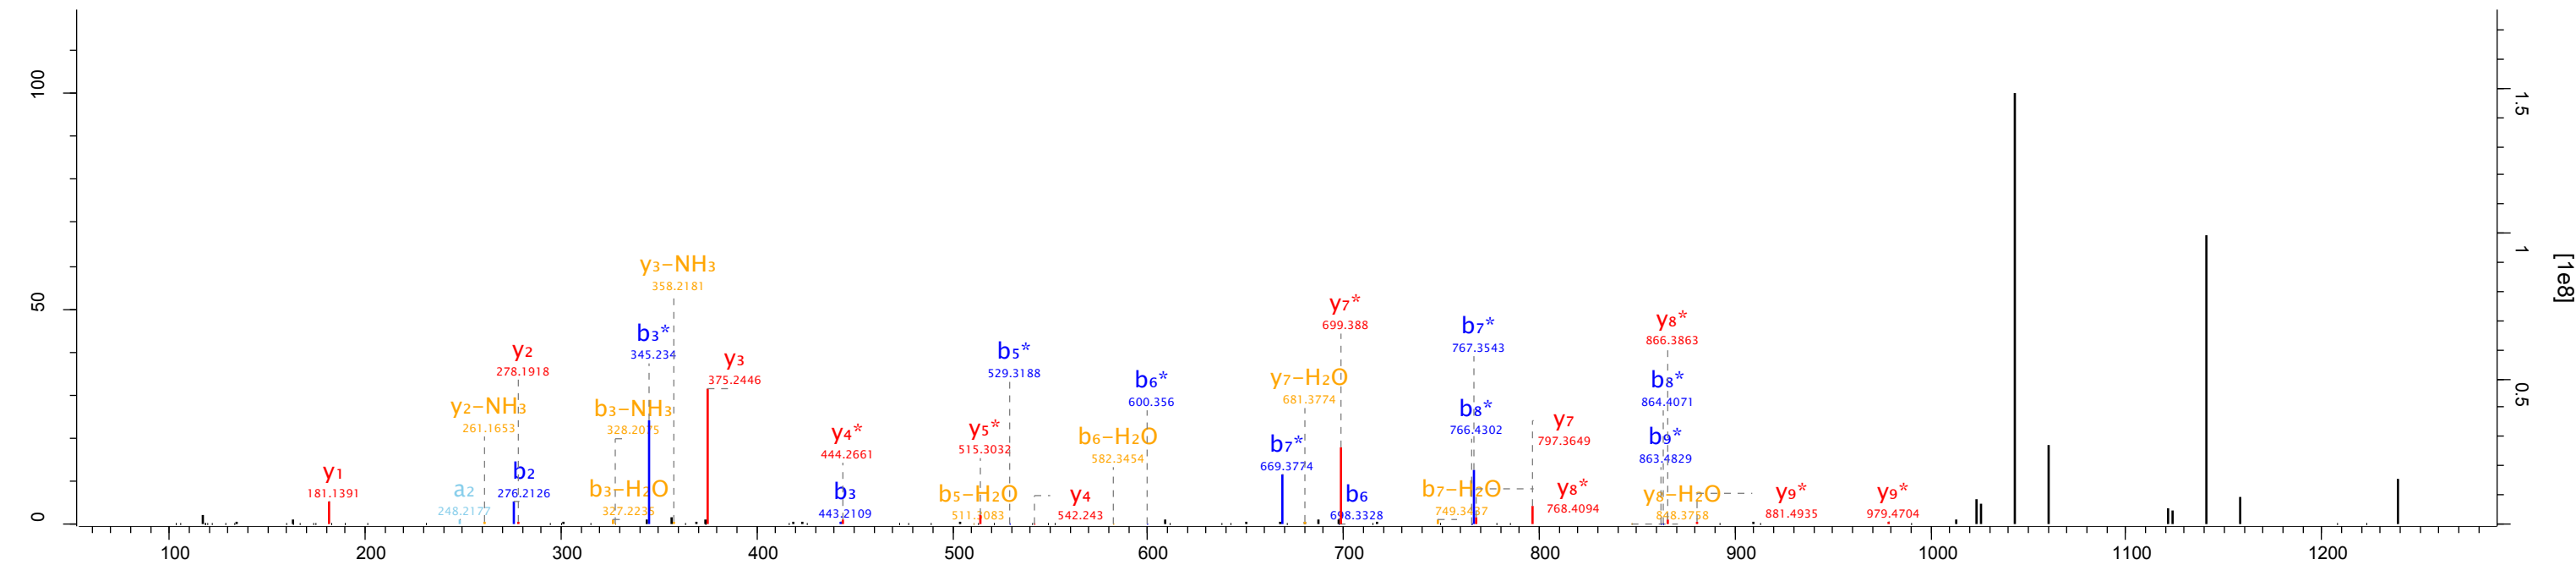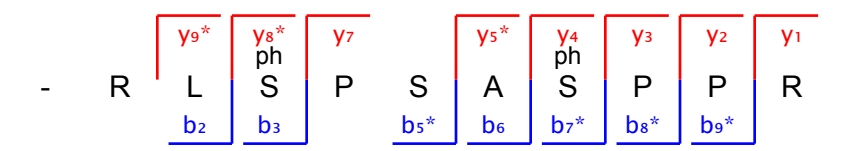

Raw file  
 20150812\_A375SR\_Phospho\_BR1\_03  
 Scan 8685 Method FTMS; HCD Score 314.35 m/z 1307.05 Gene names UBAP2L

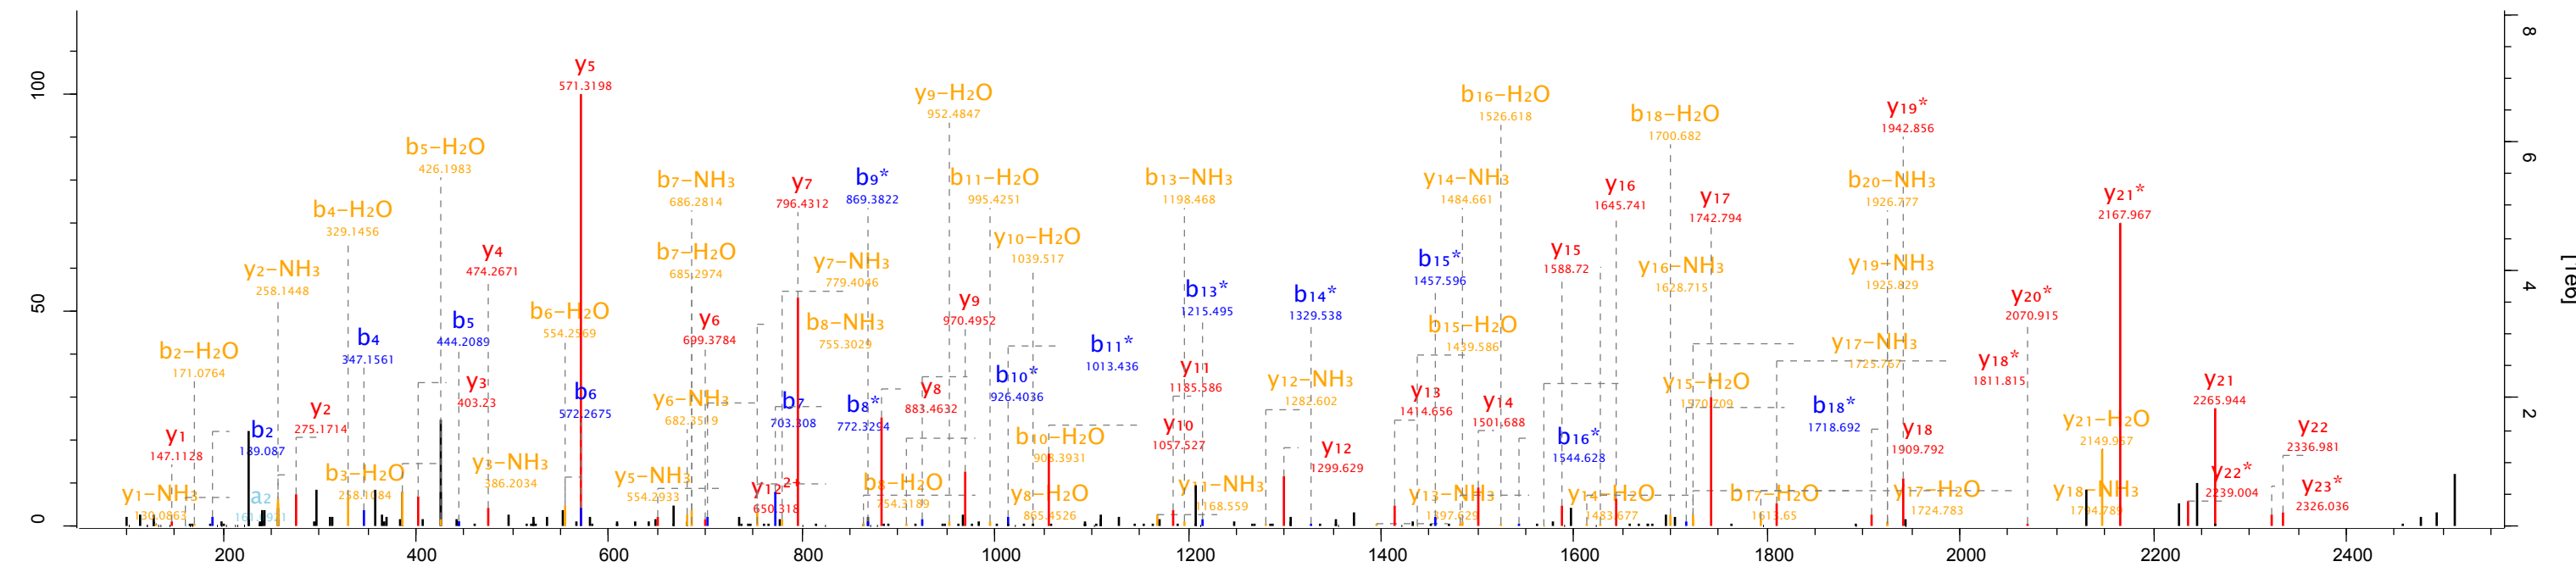

- S T S A P Q M S ph S P G S S D N Q S S S P Q P A Q Q K -

Fragmentation mapping (b and y ions) is shown below the sequence:

- b ions (blue boxes):** b<sub>2</sub> (T), b<sub>4</sub> (A), b<sub>5</sub> (P), b<sub>6</sub> (Q), b<sub>7</sub> (M), b<sub>8</sub><sup>\*</sup> (S), b<sub>9</sub><sup>\*</sup> (P), b<sub>10</sub><sup>\*</sup> (G), b<sub>11</sub><sup>\*</sup> (S), b<sub>13</sub><sup>\*</sup> (D), b<sub>14</sub><sup>\*</sup> (N), b<sub>15</sub><sup>\*</sup> (Q), b<sub>16</sub><sup>\*</sup> (S), b<sub>18</sub><sup>\*</sup> (S).
- y ions (red boxes):** y<sub>1</sub> (K), y<sub>2</sub> (Q), y<sub>3</sub> (Q), y<sub>4</sub> (A), y<sub>5</sub> (P), y<sub>6</sub> (Q), y<sub>7</sub> (P), y<sub>8</sub> (S), y<sub>9</sub> (S), y<sub>10</sub> (S), y<sub>11</sub> (Q), y<sub>12</sub> (N), y<sub>13</sub> (D), y<sub>14</sub> (S), y<sub>15</sub> (S), y<sub>16</sub> (G), y<sub>17</sub> (P), y<sub>18</sub> (S), y<sub>19</sub><sup>\*</sup> (M), y<sub>20</sub><sup>\*</sup> (Q), y<sub>21</sub> (P), y<sub>22</sub><sup>\*</sup> (A), y<sub>23</sub><sup>\*</sup> (S).

Raw file: 20150812\_A375SR\_Phospho\_BR1\_03  
 Scan: 8715 Method: FTMS; HCD Score: 81.89 m/z: 673.31 Gene names: PLEKHA7

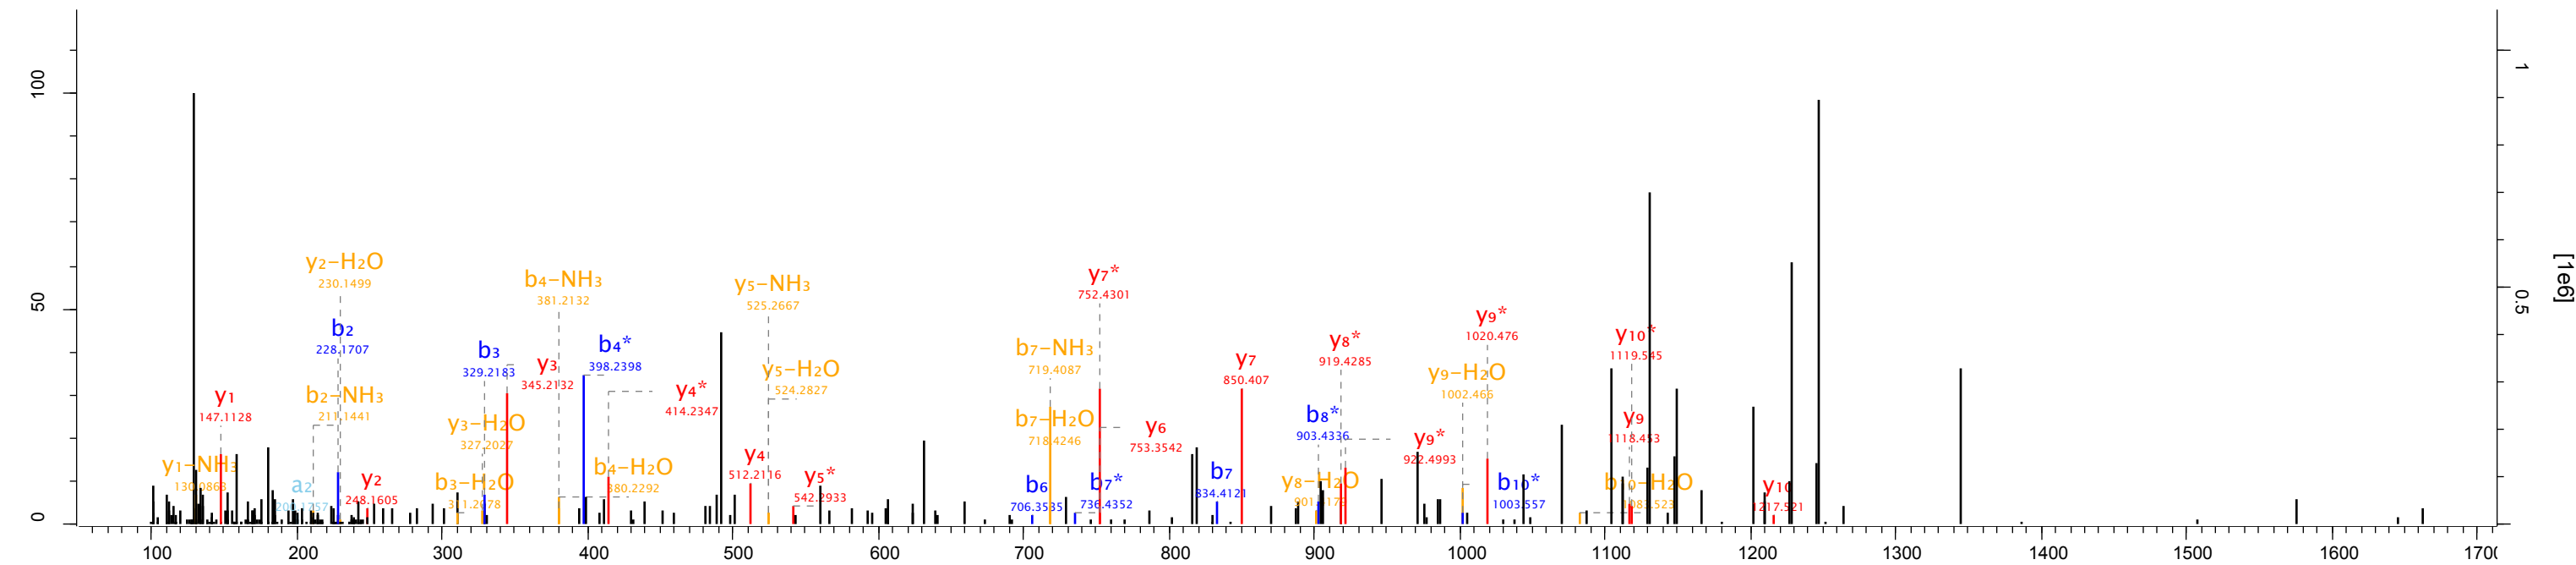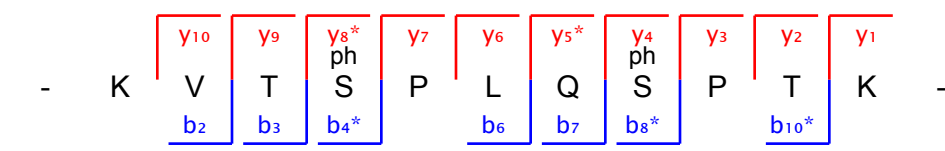

Raw file: 20150812\_A375SR\_Phospho\_BR1\_03  
 Scan: 8995 Method: FTMS; HCD Score: 257.2 m/z: 1004.4 Gene names: LARP7

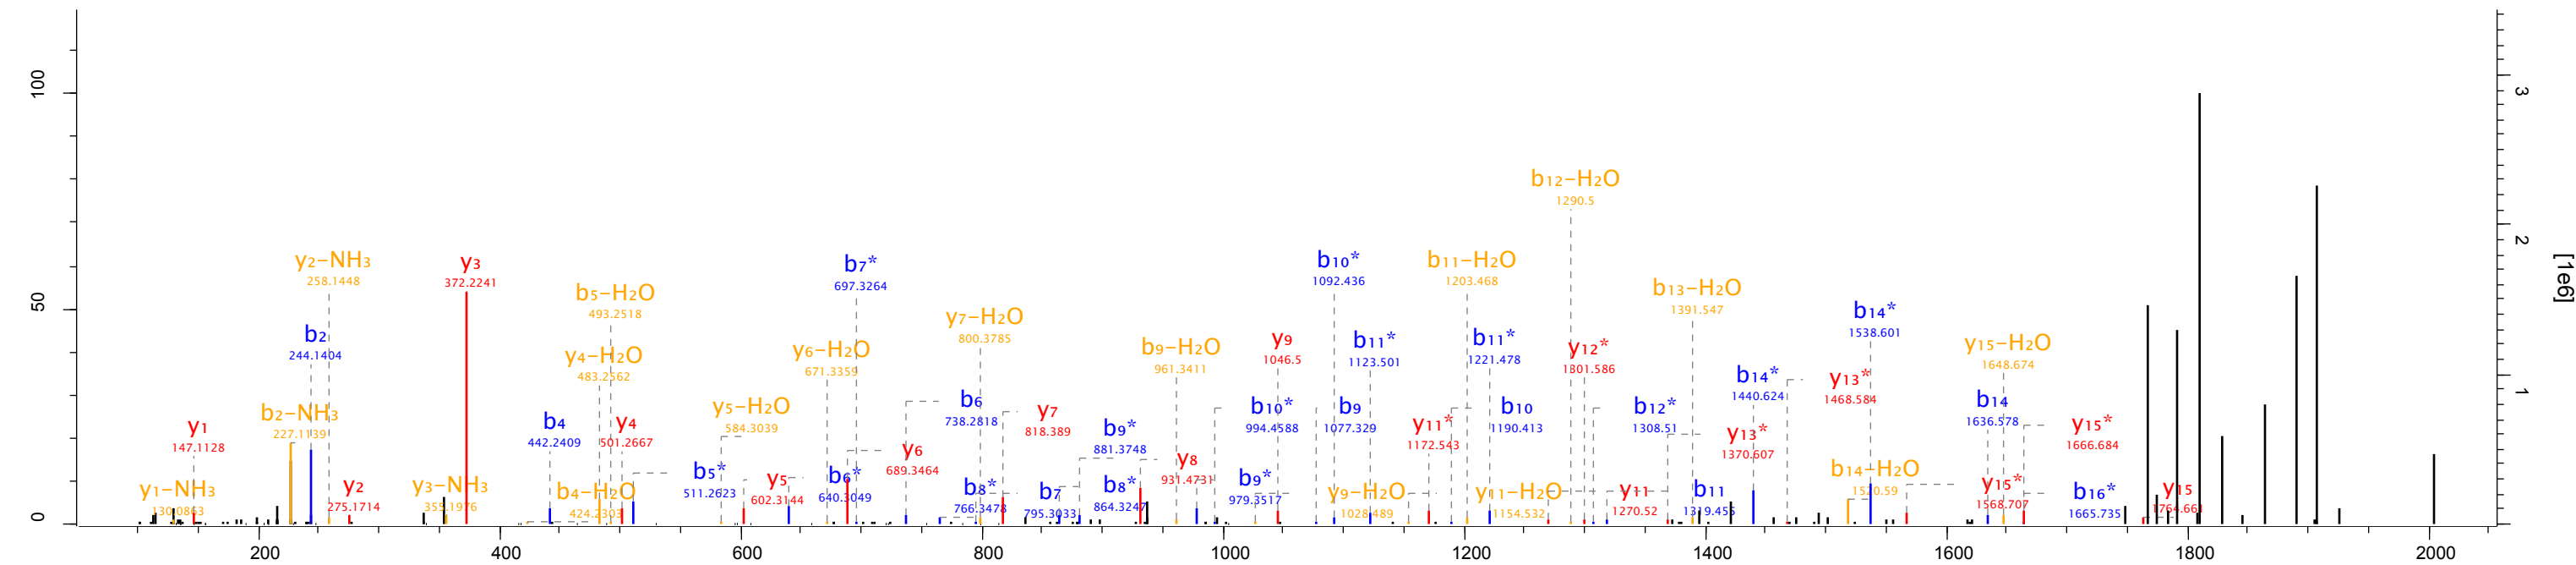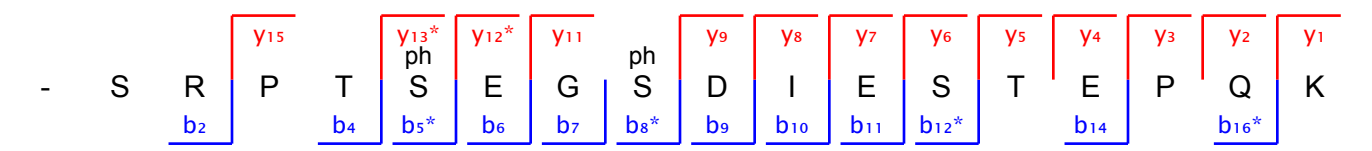

Raw file: 20150812\_A375SR\_Phospho\_BR1\_03  
 Scan: 9805 Method: FTMS; HCD Score: 189.09 m/z: 662.99 Gene names: MICALL1

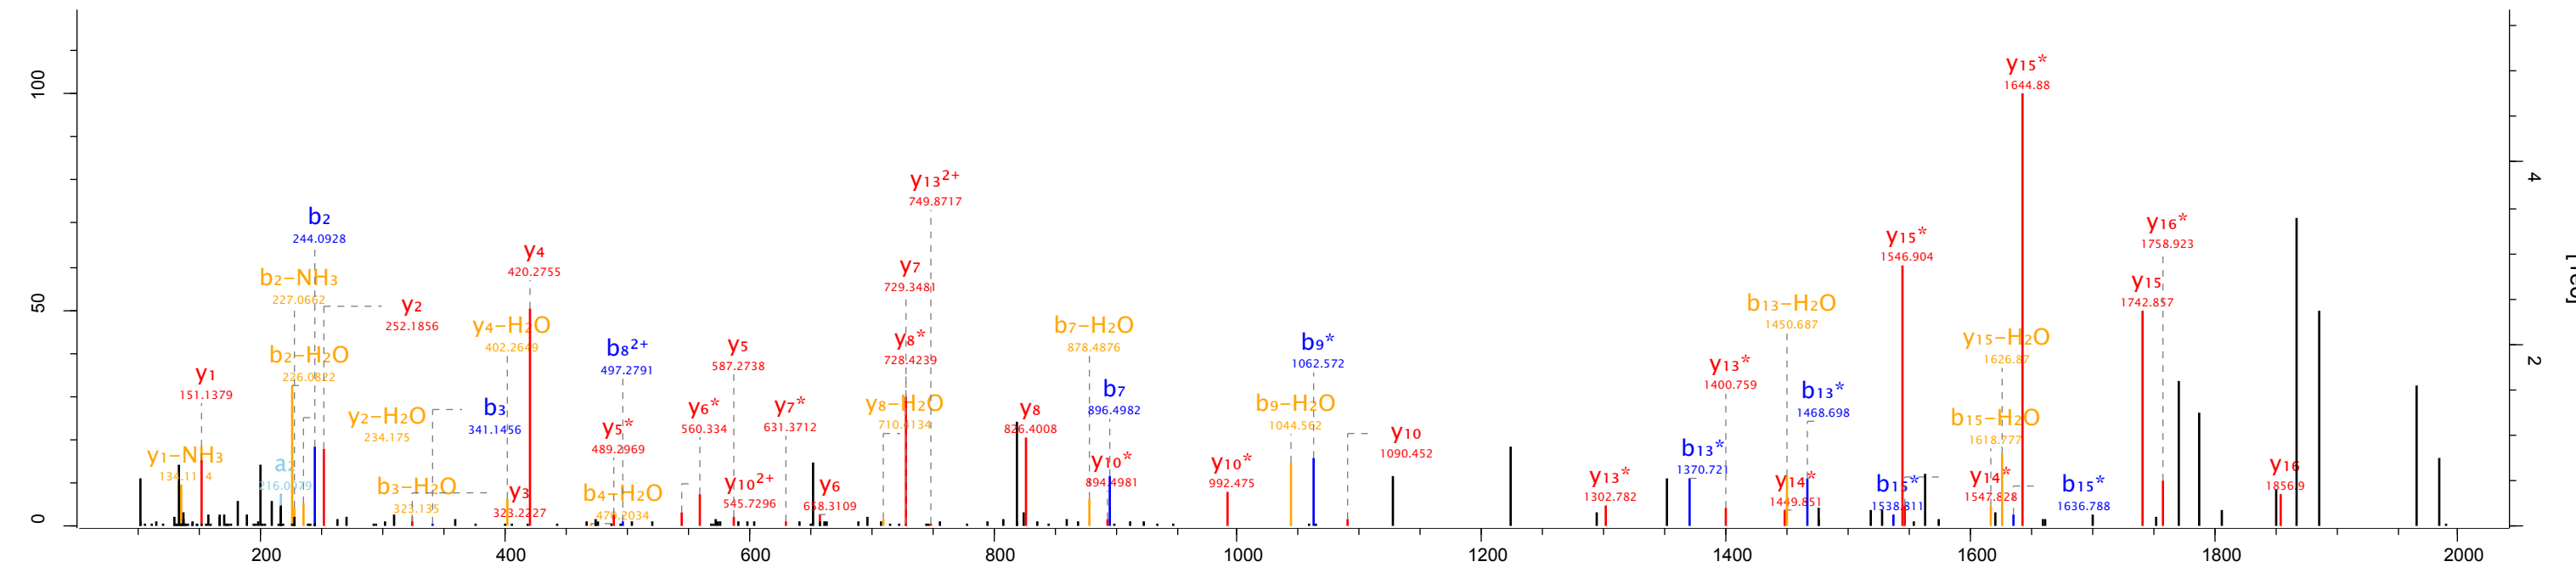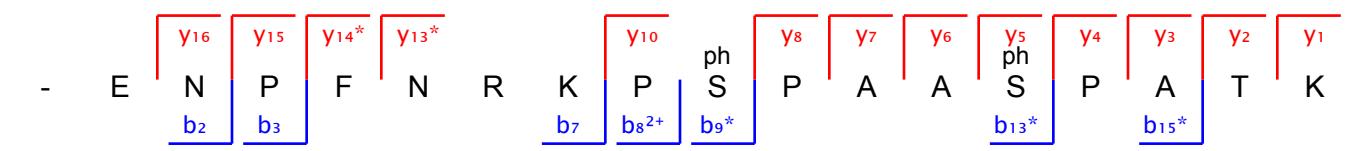

Raw file: 20150812\_A375SR\_Phospho\_BR1\_03  
 Scan: 9845 Method: FTMS; HCD Score: 132.55 m/z: 471.22 Gene names: SH3BP5L

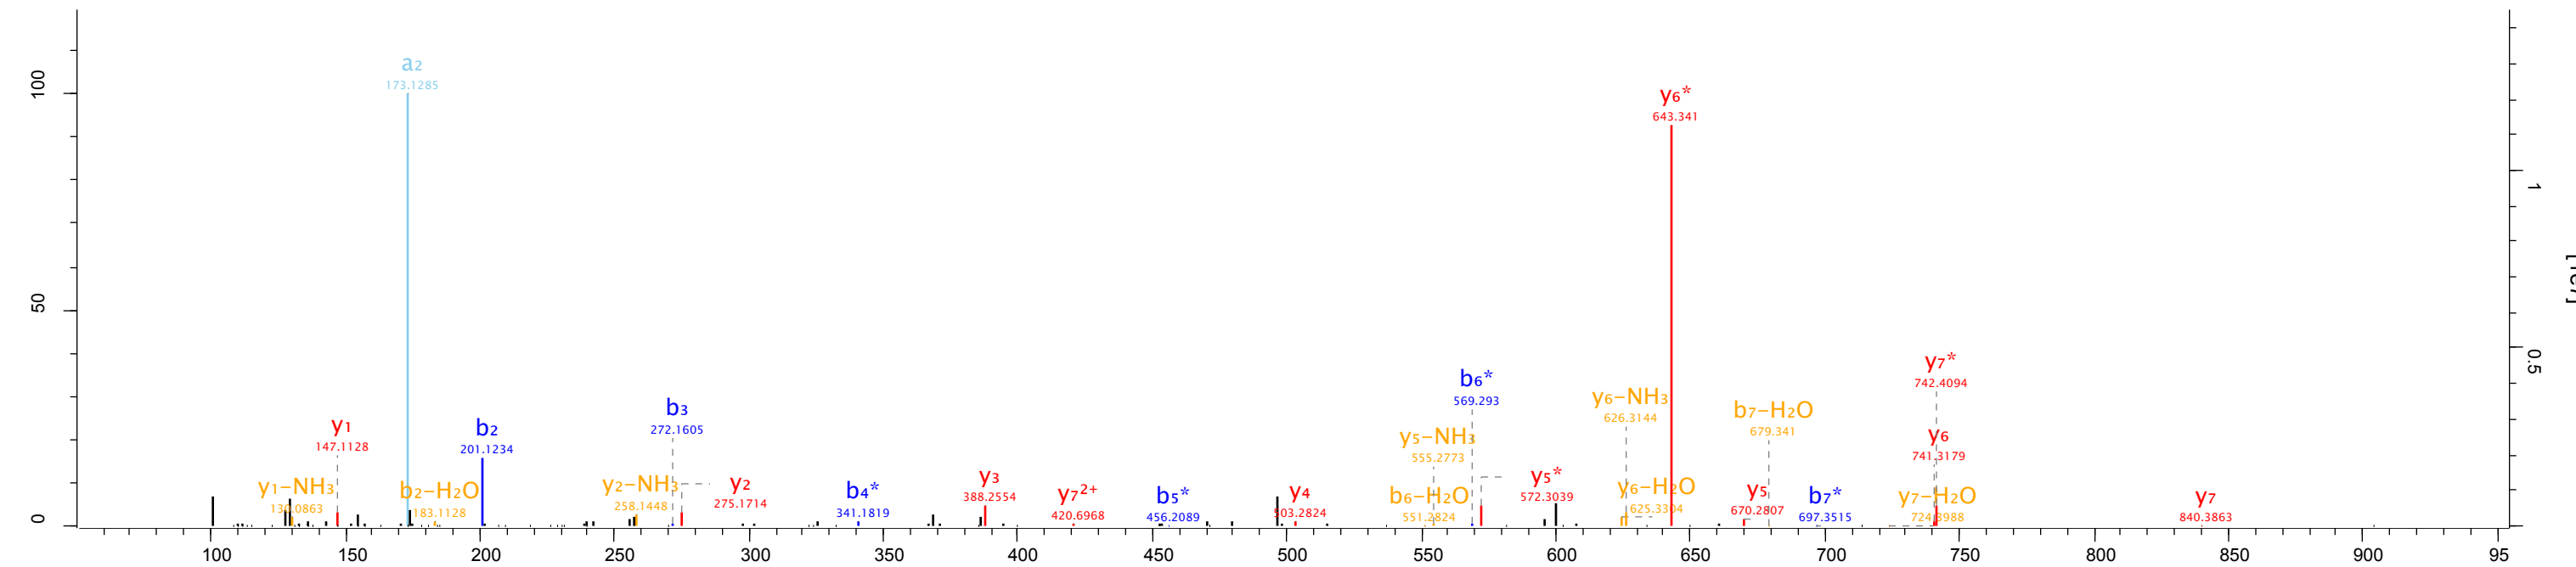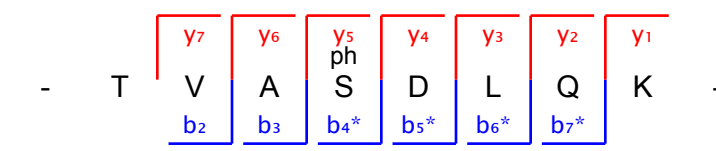

Raw file: 20150812\_A375SR\_Phospho\_BR1\_03  
 Scan: 9895 Method: FTMS; HCD Score: 128.1 m/z: 545.25 Gene names: SRRM2

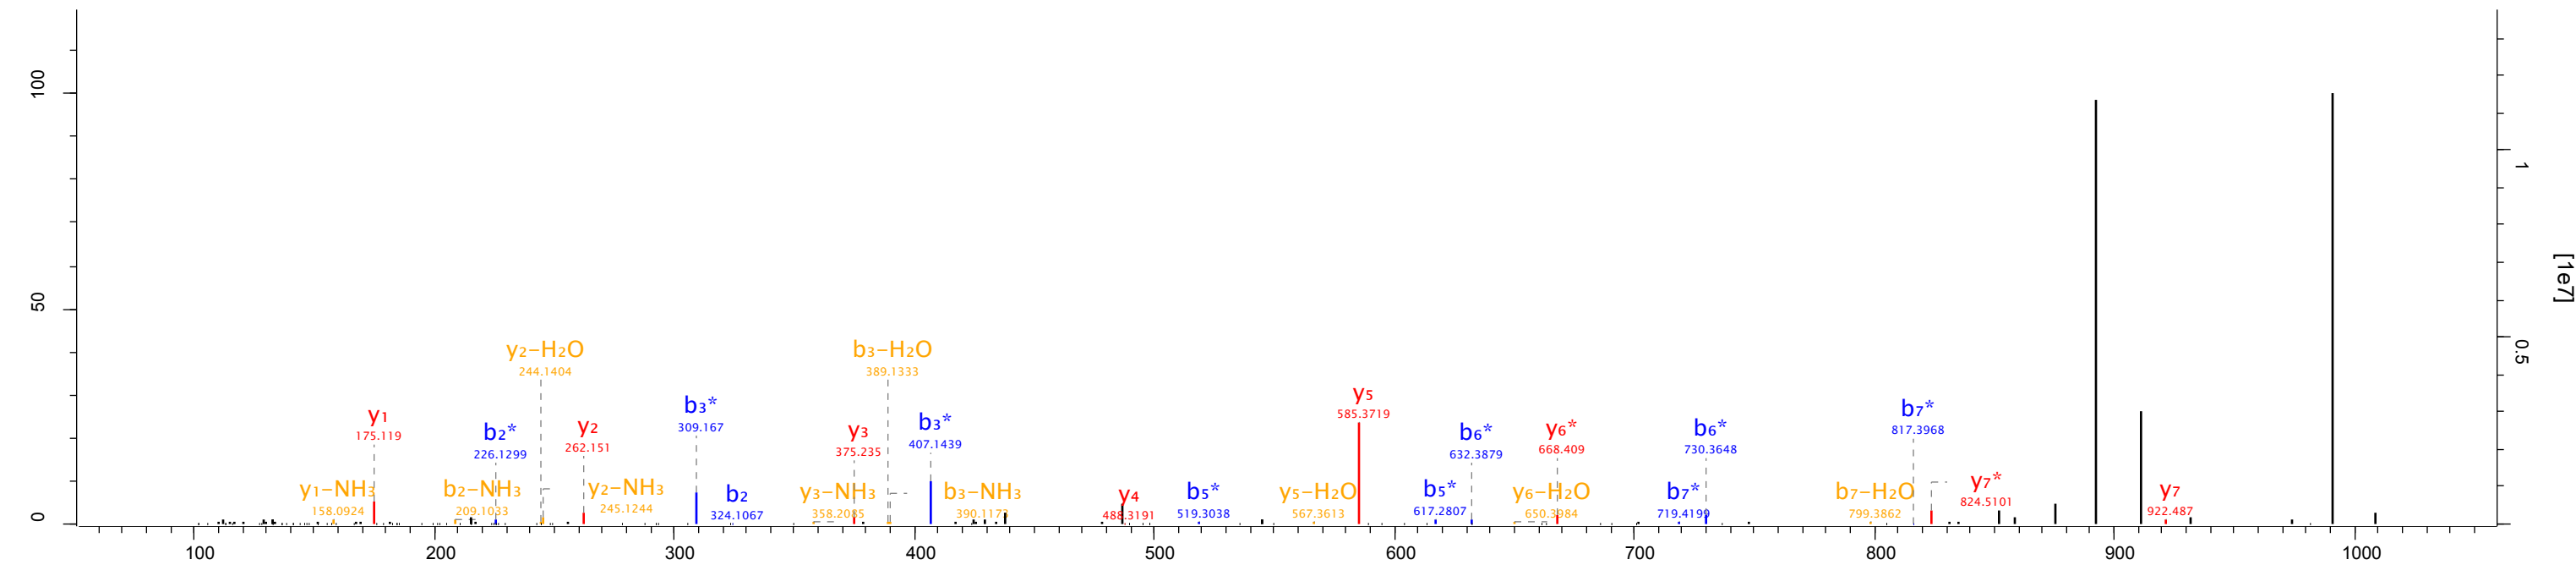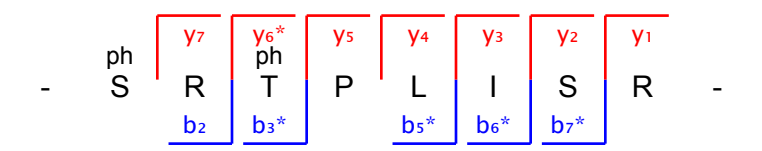

Raw file 20150812\_A375SR\_Phospho\_BR1\_04 Scan 10655 Method FTMS; HCD Score 54.95 m/z 1005.12 Gene names RAD23A

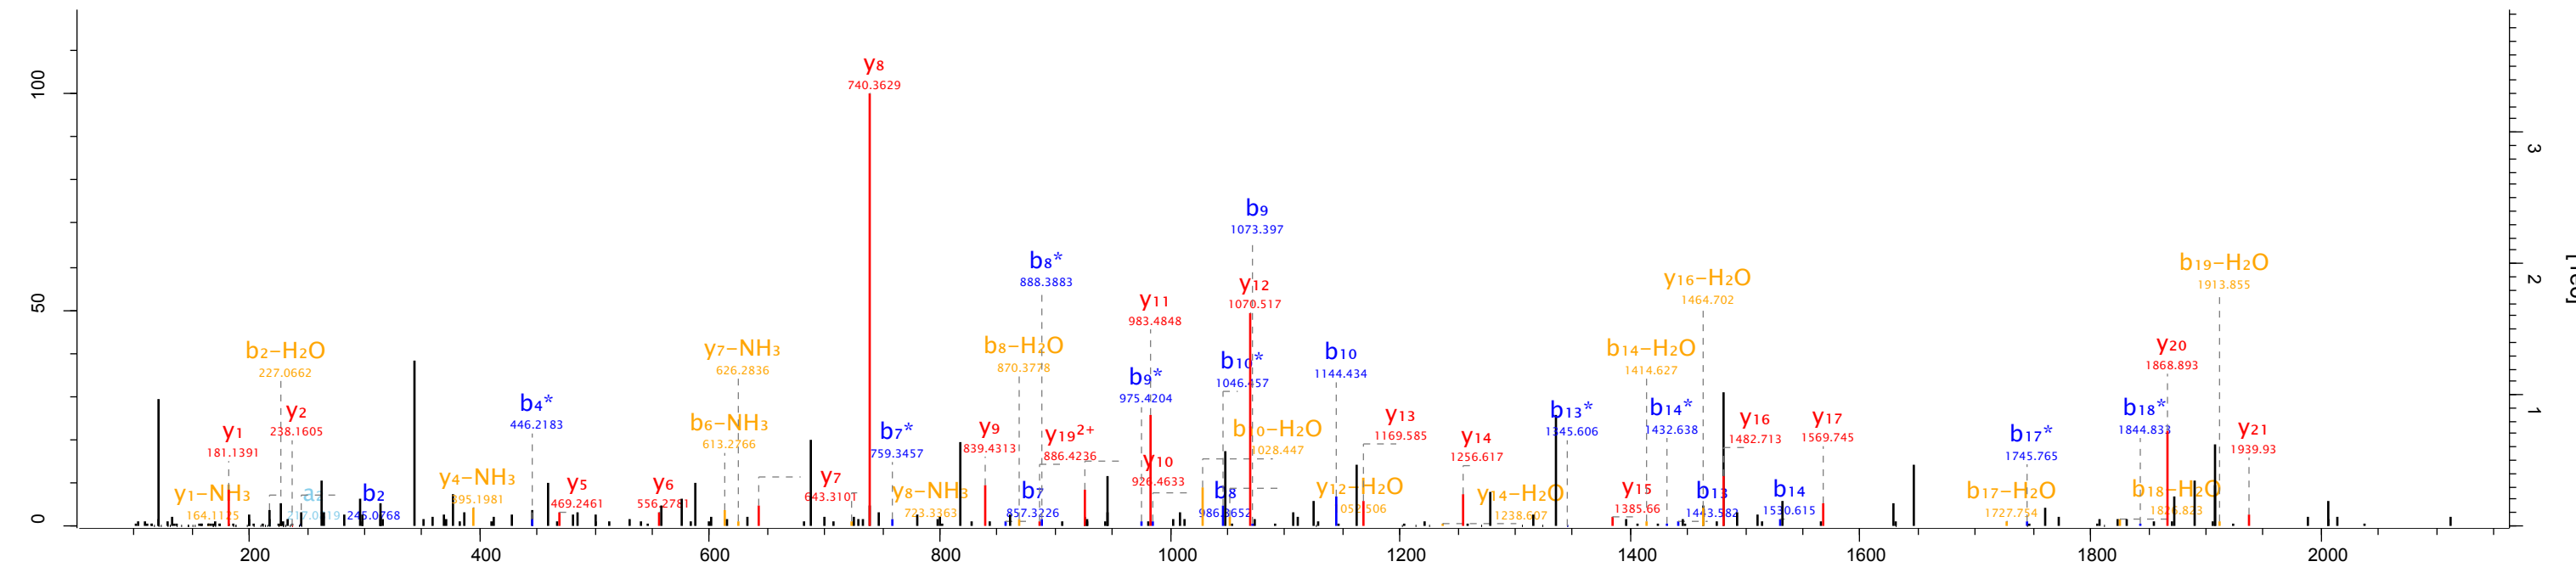

- E D K ph S P S E E S A P T T S P E S V S G S V P S S G S S G R -

b<sub>2</sub>
b<sub>4</sub><sup>\*</sup>
b<sub>7</sub>
b<sub>8</sub>
b<sub>9</sub>
b<sub>10</sub>
b<sub>13</sub>
b<sub>14</sub>
b<sub>17</sub><sup>\*</sup>
b<sub>18</sub><sup>\*</sup>
y<sub>1</sub>
y<sub>2</sub>
y<sub>5</sub>
y<sub>6</sub>
y<sub>7</sub>
y<sub>8</sub>
y<sub>9</sub>
y<sub>10</sub>
y<sub>11</sub>
y<sub>12</sub>
y<sub>13</sub>
y<sub>14</sub>
y<sub>15</sub>
y<sub>16</sub>
y<sub>17</sub>
y<sub>19</sub><sup>2+</sup>
y<sub>20</sub>
y<sub>21</sub>



Raw file 20150812\_A375SR\_Phospho\_BR1\_04 Scan 11175 Method FTMS; HCD Score 258.31 m/z 870.36 Gene names SNRNP70

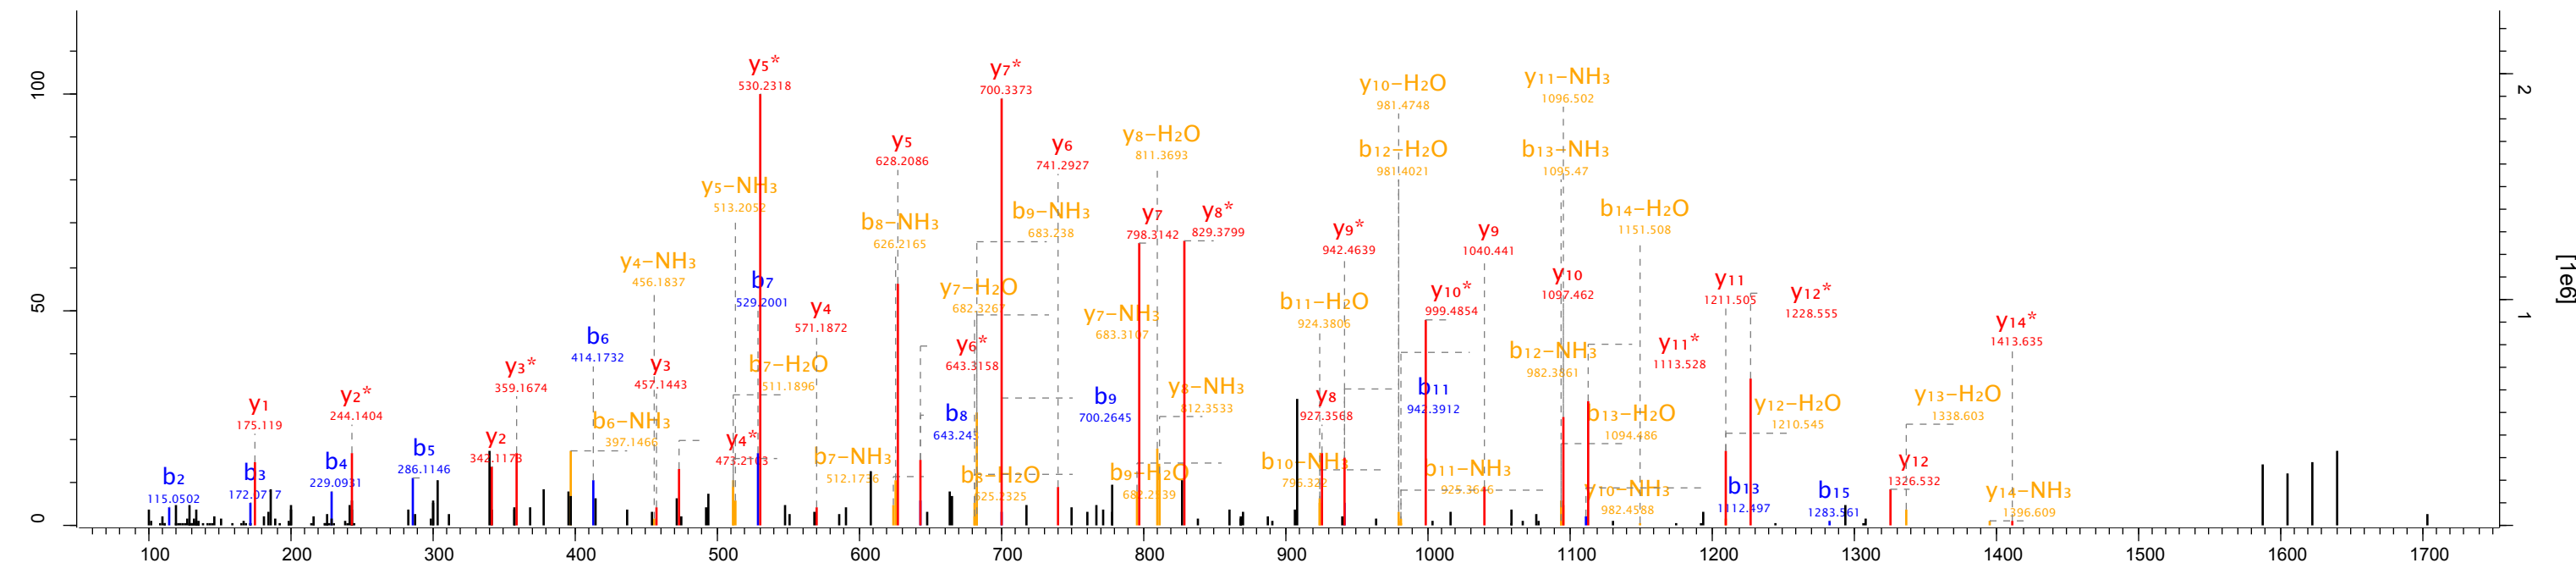

- G G G G G Q D N G L E G L G N D S R -

Fragmentation mapping (b and y ions):

- b<sub>2</sub> (G), b<sub>3</sub> (G), b<sub>4</sub> (G), b<sub>5</sub> (G), b<sub>6</sub> (Q), b<sub>7</sub> (D), b<sub>8</sub> (N), b<sub>9</sub> (G), b<sub>11</sub> (L), b<sub>13</sub> (L), b<sub>15</sub> (N)
- y<sub>1</sub> (R), y<sub>2</sub> (S), y<sub>3</sub> (D), y<sub>4</sub> (N), y<sub>5</sub> (G), y<sub>6</sub> (L), y<sub>7</sub> (G), y<sub>8</sub> (E), y<sub>9</sub> (L), y<sub>10</sub> (G), y<sub>11</sub> (N), y<sub>12</sub> (D), y<sub>14</sub> (G)



Raw file 20150812\_A375SR\_Phospho\_BR1\_04 Scan 11845 Method FTMS; HCD Score 224.49 m/z 904.77 Gene names NRD1

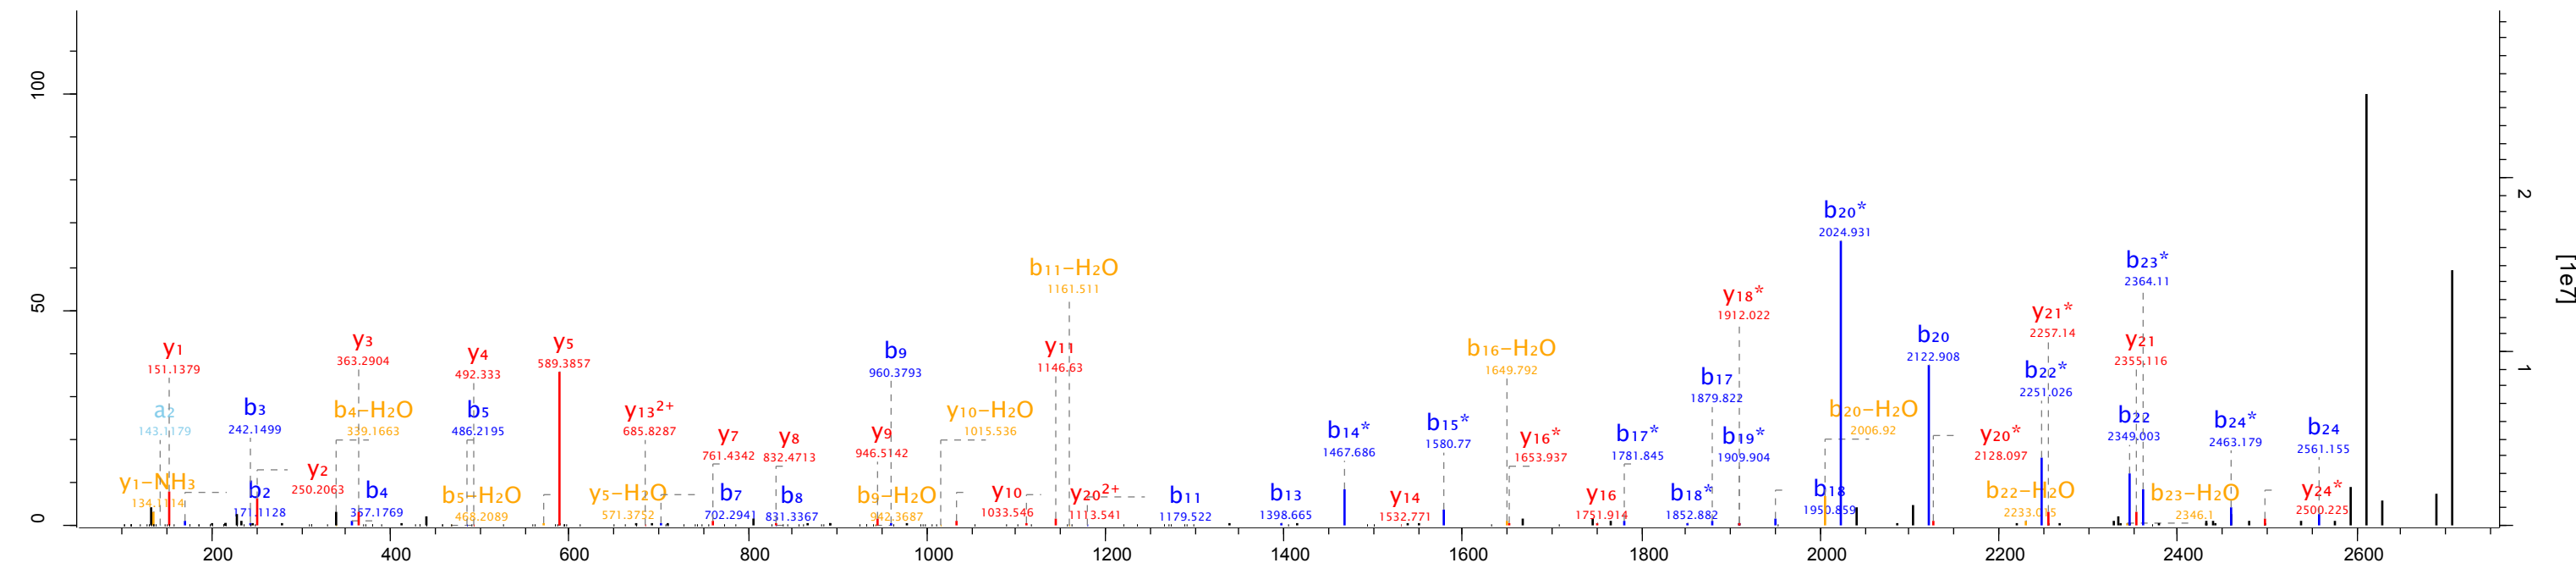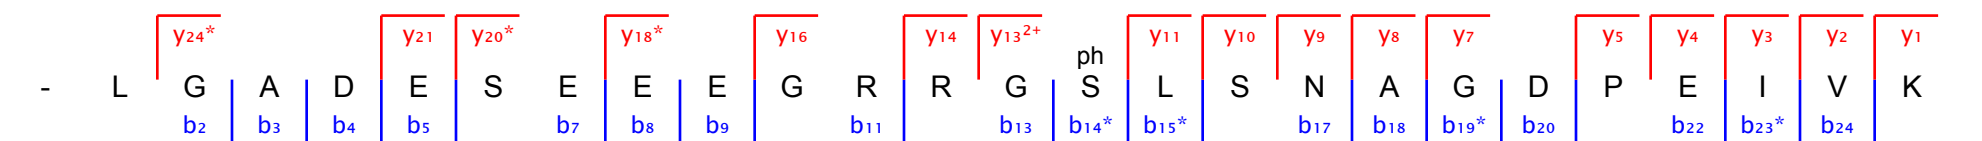

Raw file: 20150812\_A375SR\_Phospho\_BR1\_04  
 Scan: 12165 Method: FTMS; HCD Score: 88.3 m/z: 932.89 Gene names: MKL1;mk11

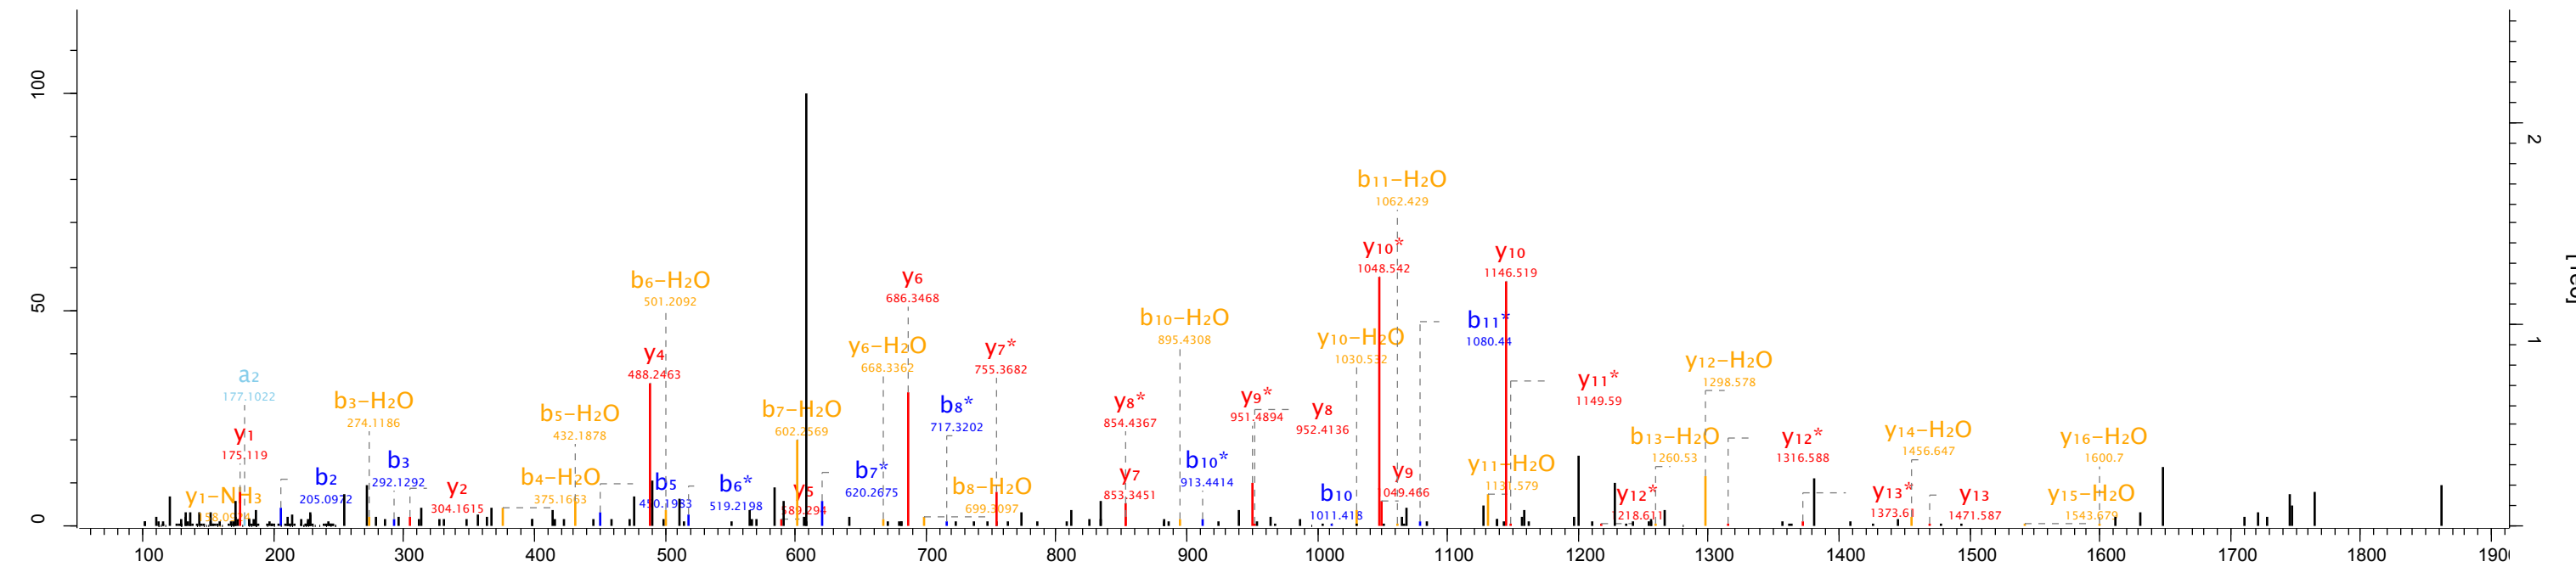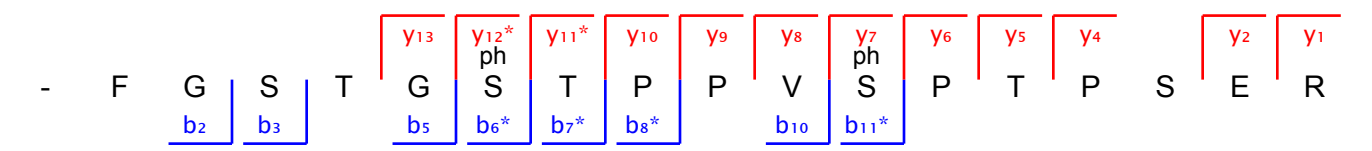

Raw file: 20150812\_A375SR\_Phospho\_BR1\_04  
 Scan: 1255 Method: FTMS; HCD Score: 104.3 m/z: 378.19 Gene names: SCAF11

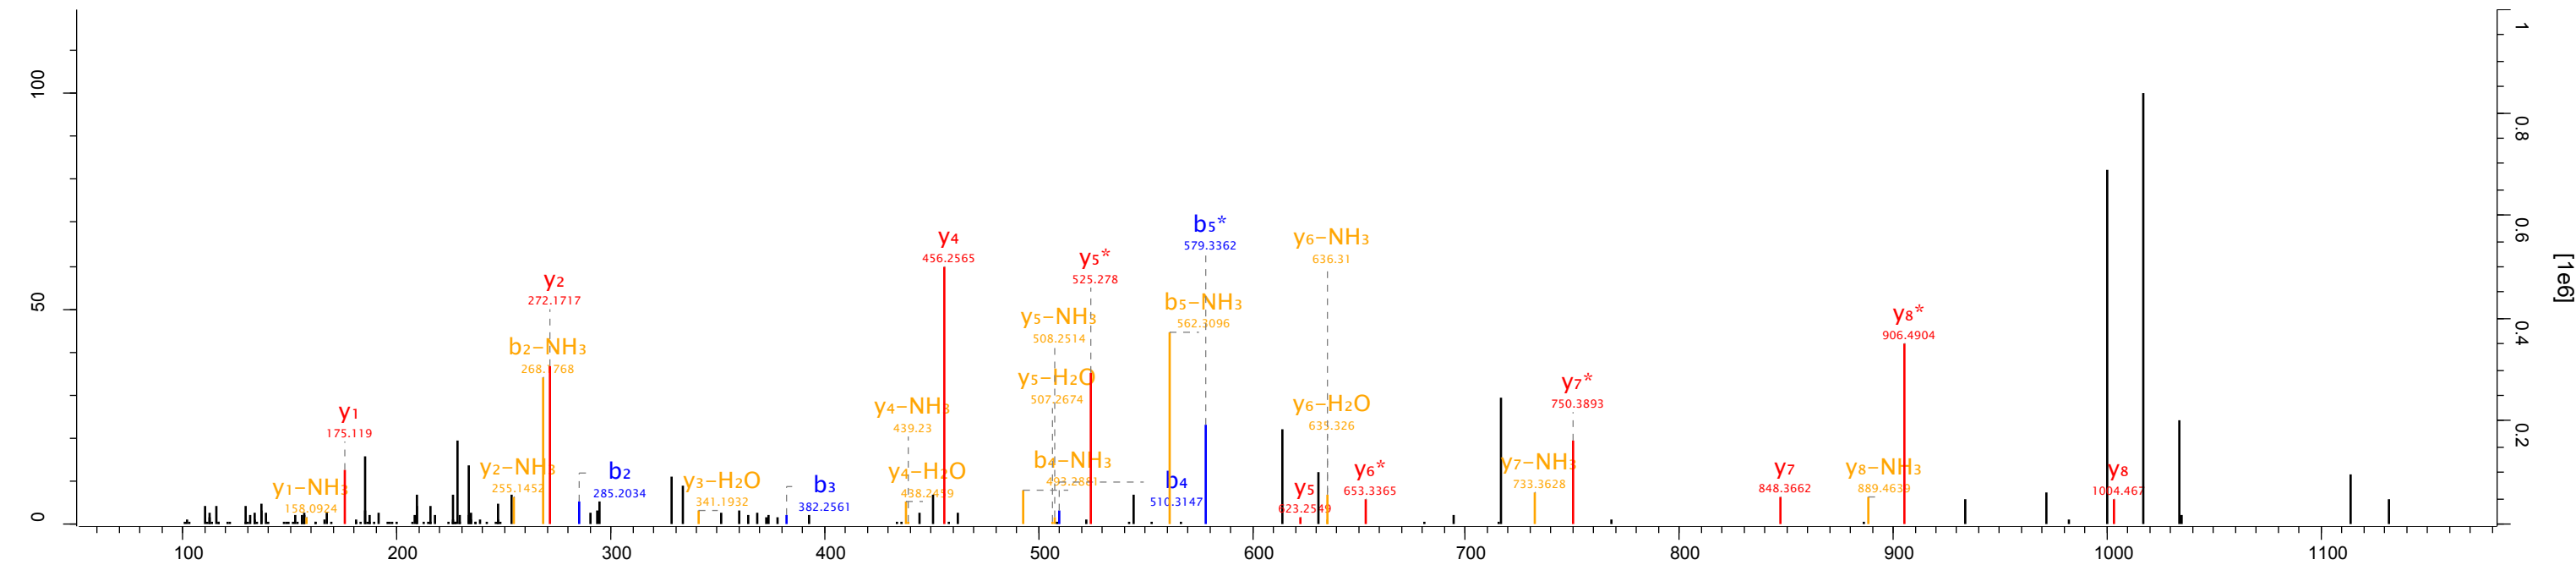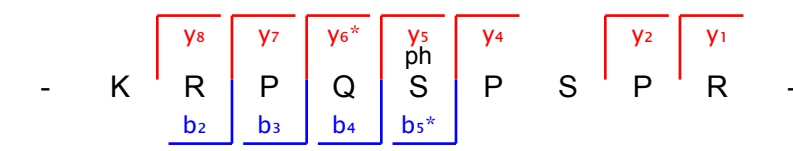

Raw file: 20150812\_A375SR\_Phospho\_BR1\_04  
 Scan: 12615 Method: FTMS; HCD Score: 124.1 m/z: 1164.02 Gene names: DLGAP5

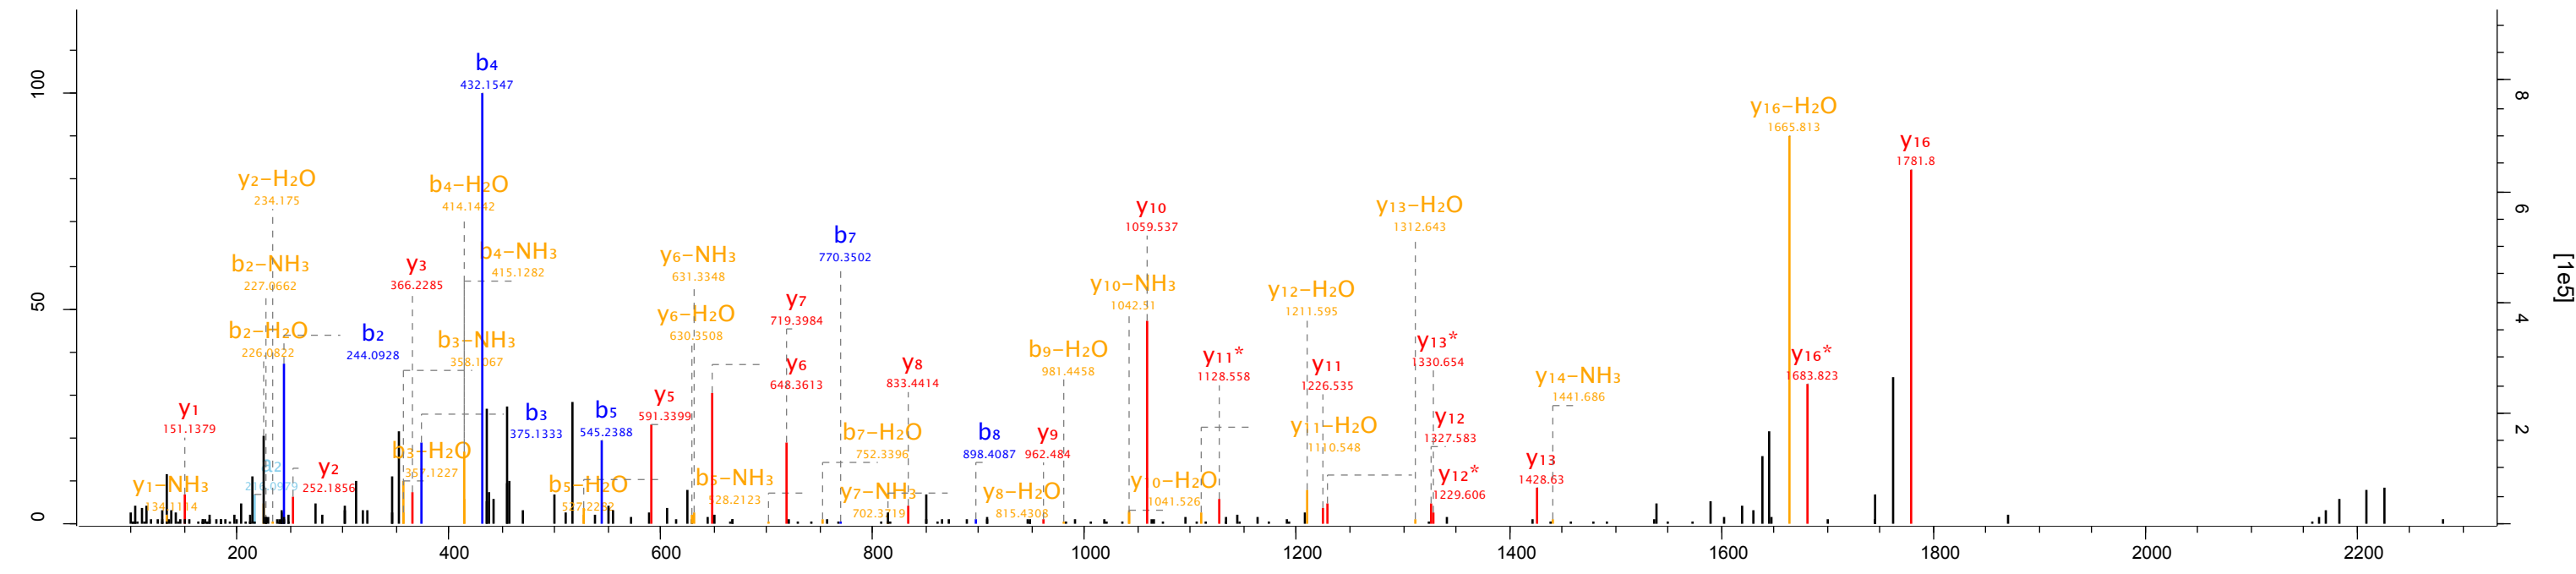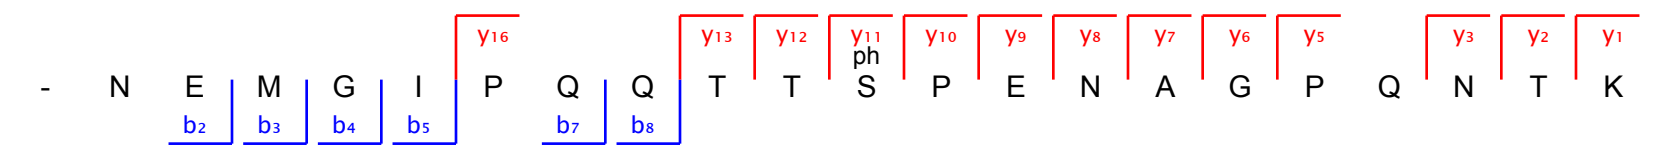

Raw file: 20150812\_A375SR\_Phospho\_BR1\_04  
 Scan: 12655 Method: FTMS; HCD Score: 274.58 m/z: 811.9 Gene names: CHAMP1

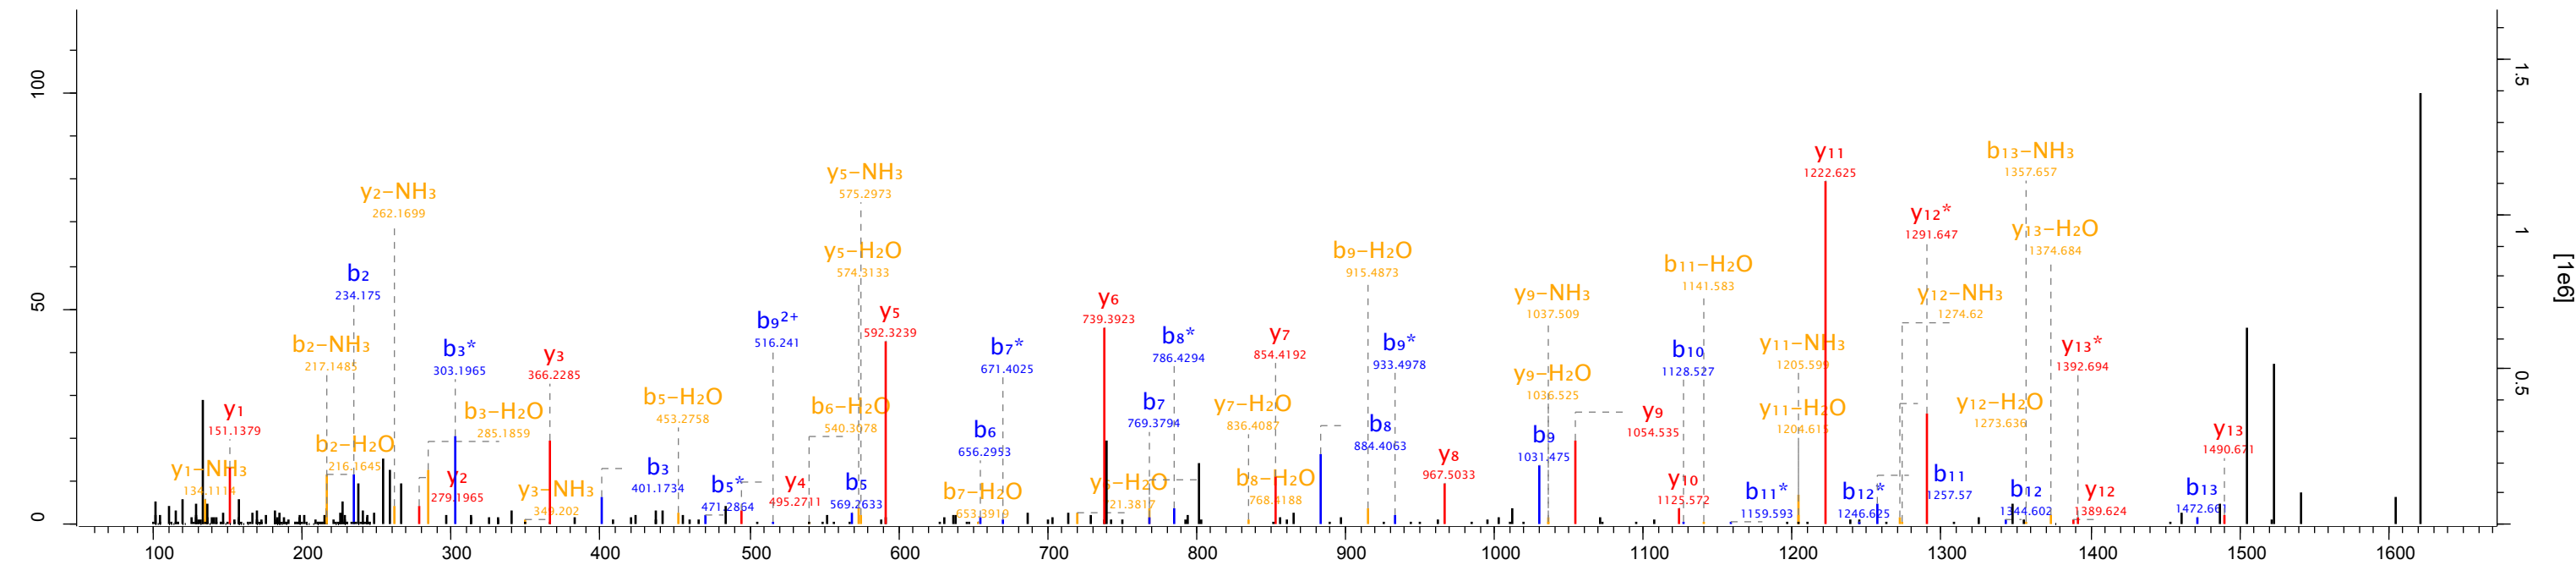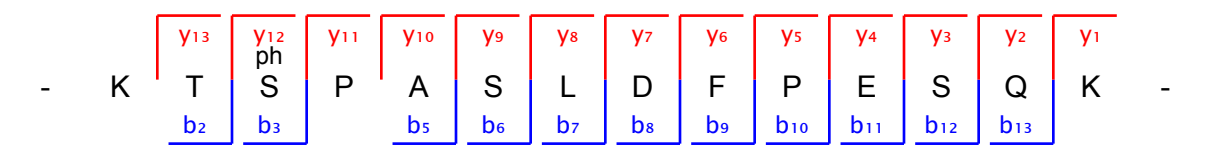

Raw file: 20150812\_A375SR\_Phospho\_BR1\_04  
 Scan: 12975 Method: FTMS; HCD Score: 147 m/z: 675.02 Gene names: FLYWCH2

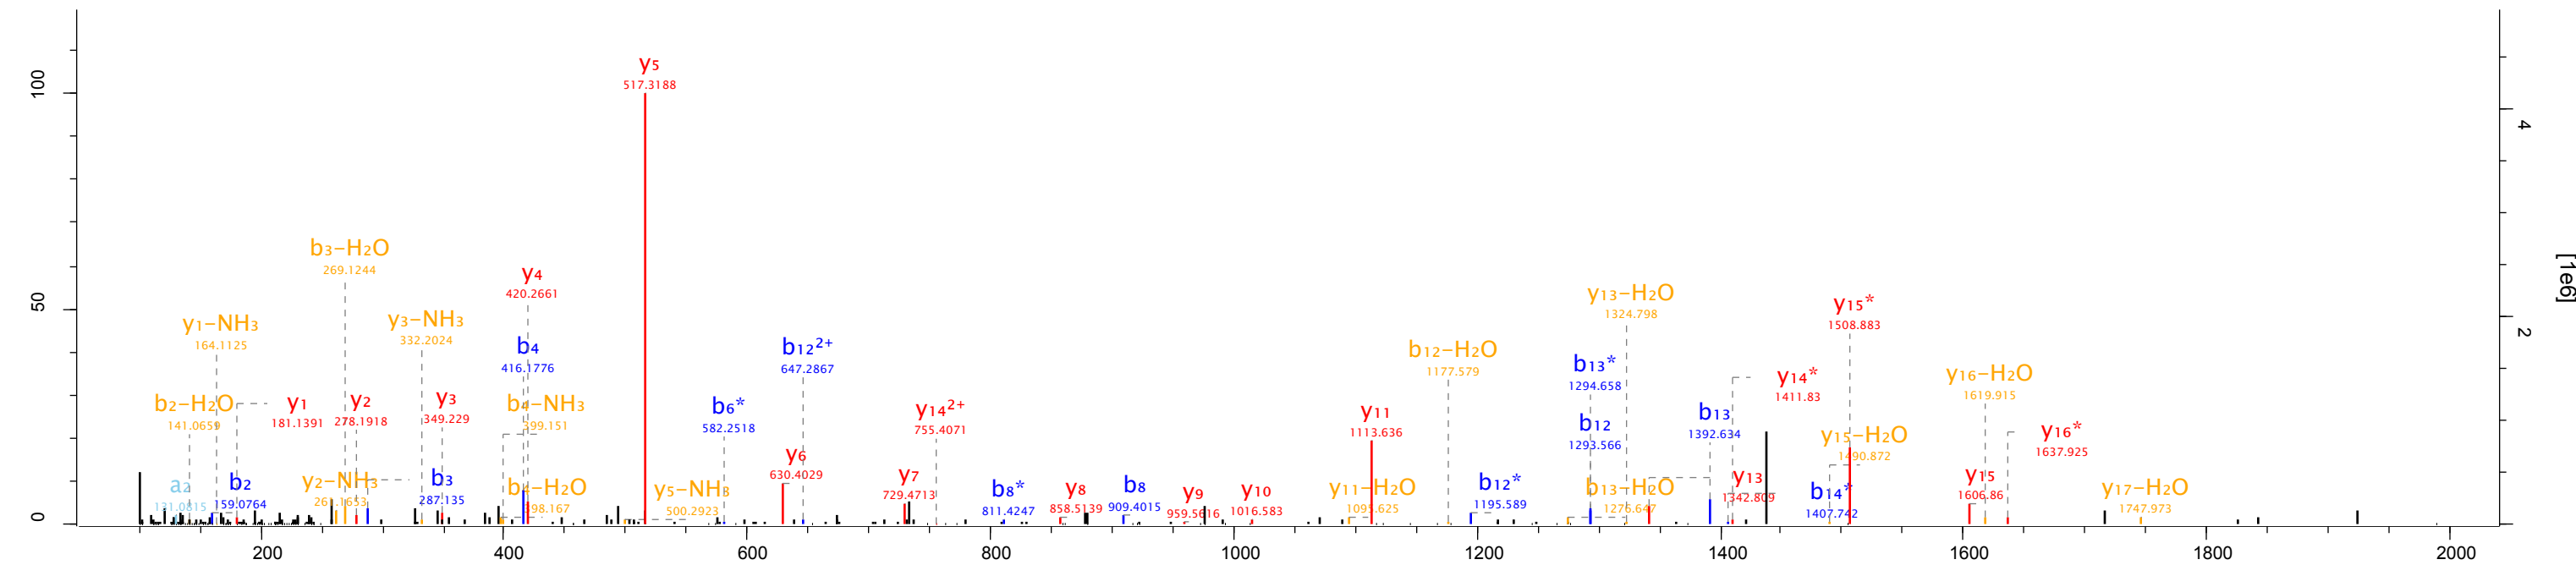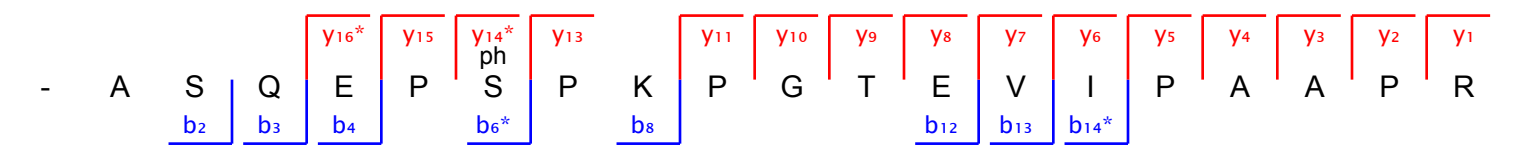



Raw file: 20150812\_A375SR\_Phospho\_BR1\_04  
 Scan: 13025 Method: FTMS; HCD Score: 133.57 m/z: 945.14 Gene names: XRN1

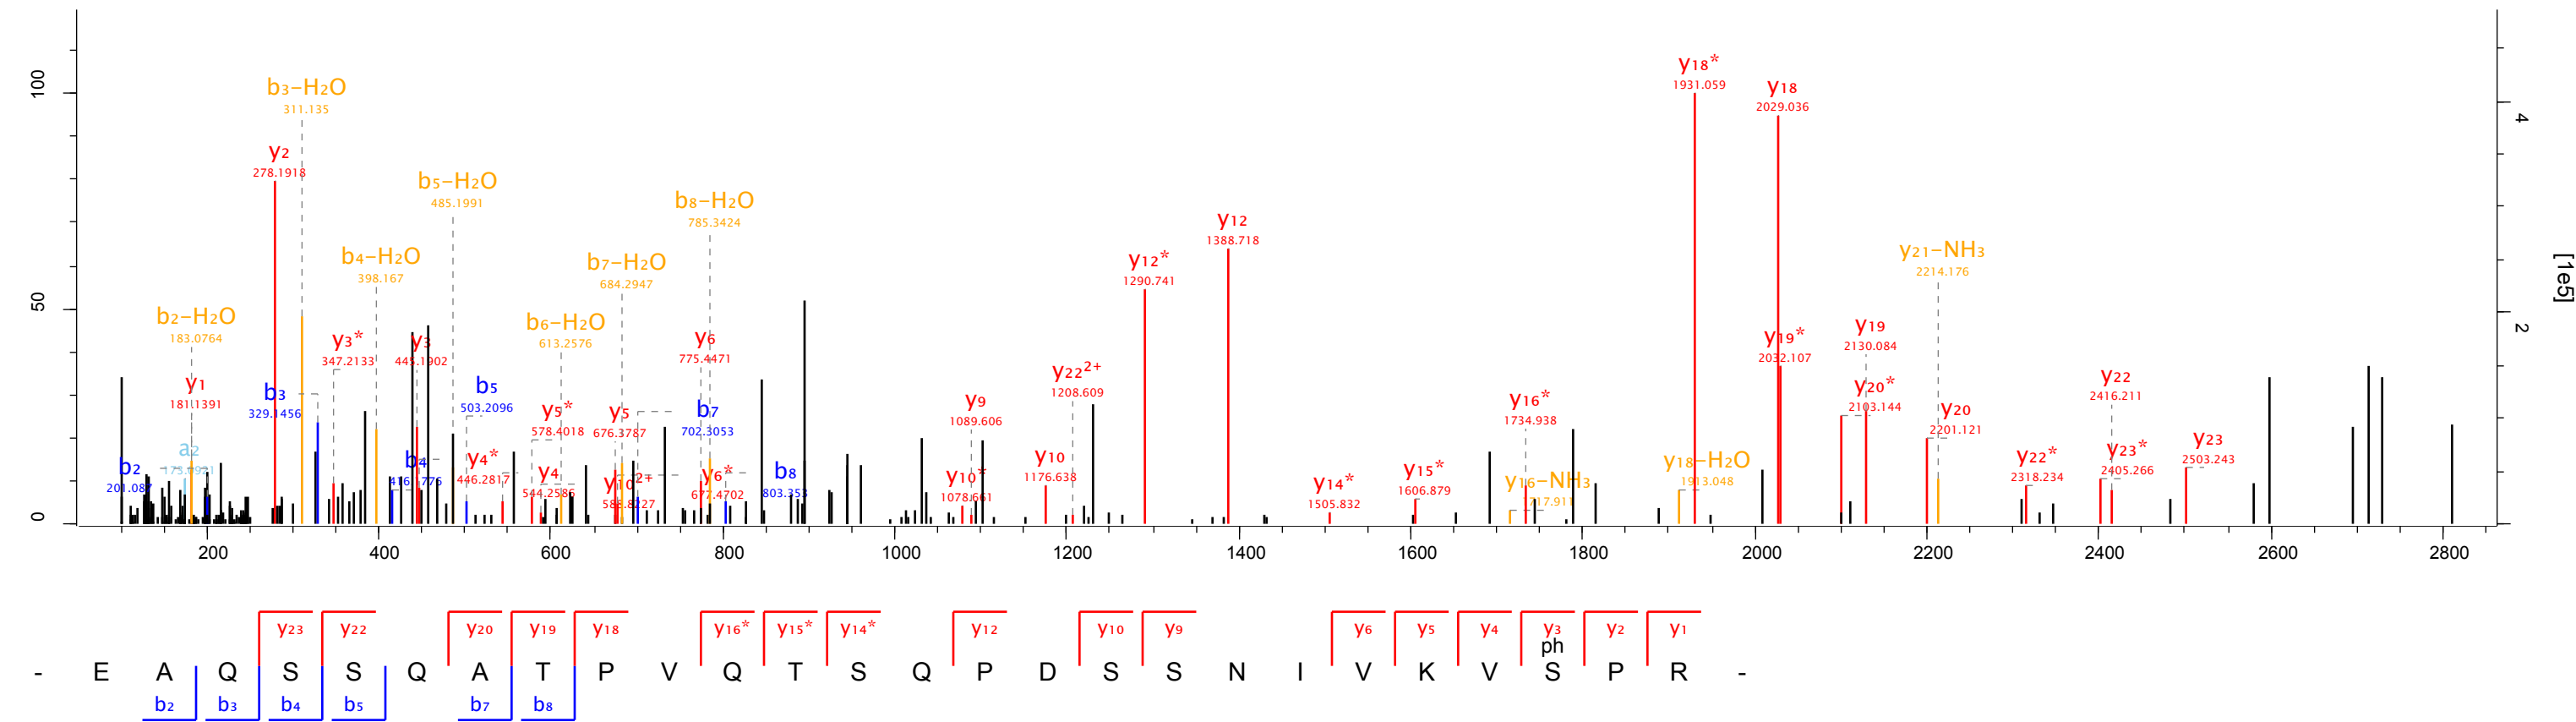

Raw file: 20150812\_A375SR\_Phospho\_BR1\_04  
 Scan: 13095 Method: FTMS; HCD Score: 80.72 m/z: 641.34 Gene names: ZNF687

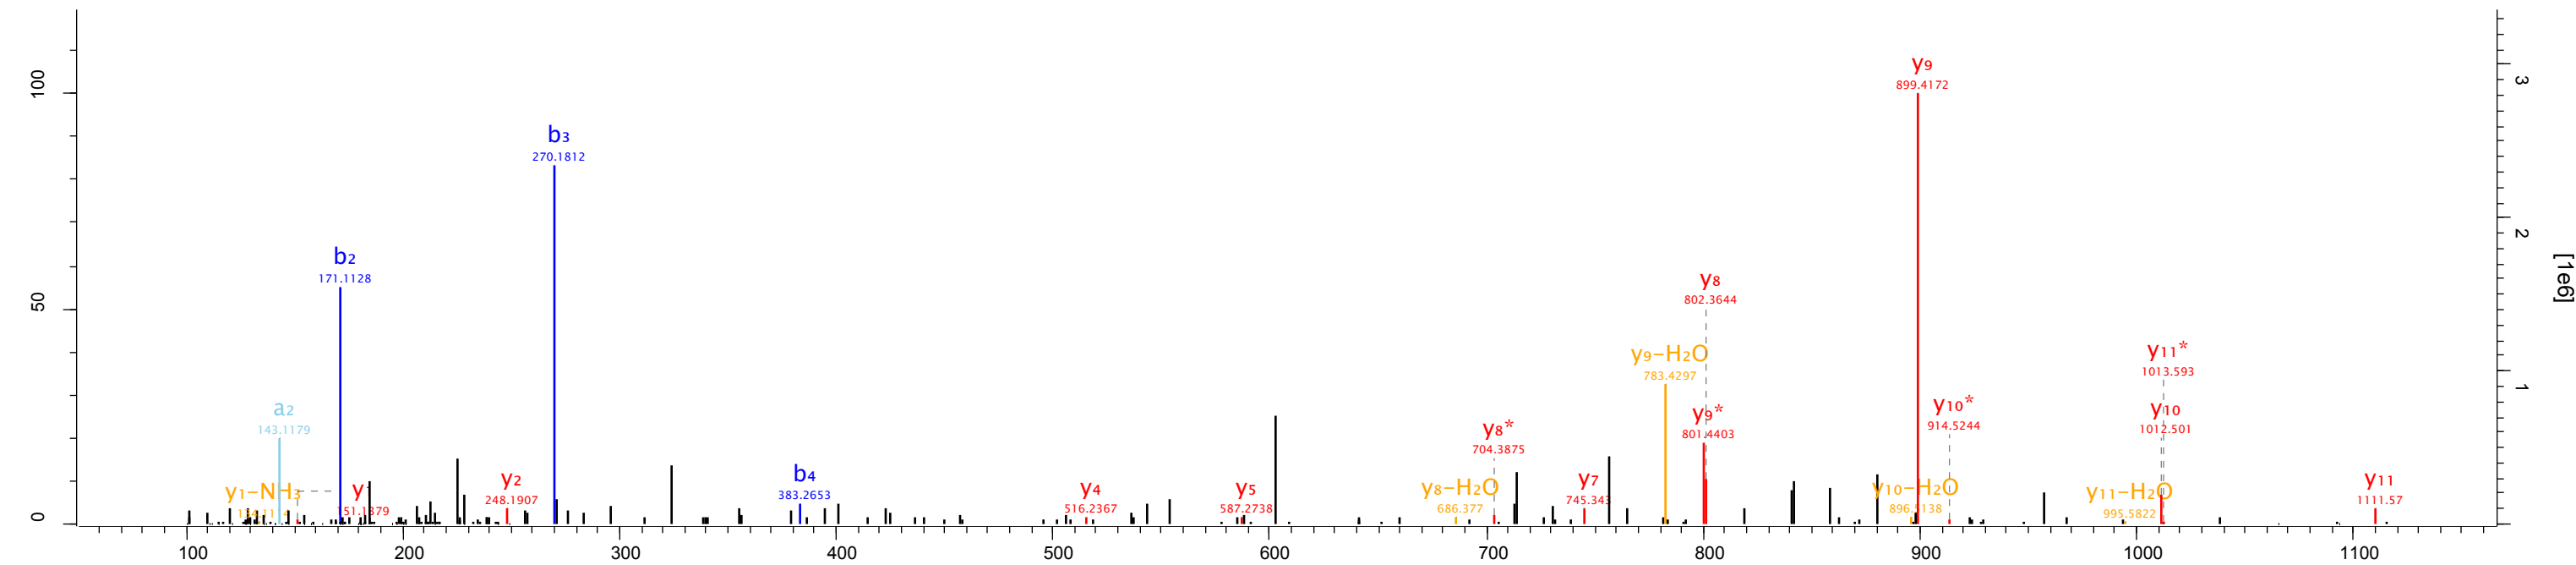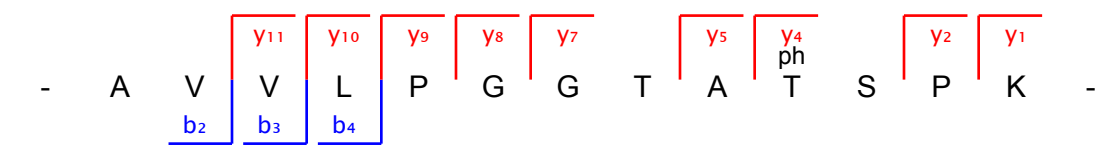

Raw file: 20150812\_A375SR\_Phospho\_BR1\_04  
 Scan: 13145 Method: FTMS; HCD Score: 131.94 m/z: 777.02 Gene names: FKBP5

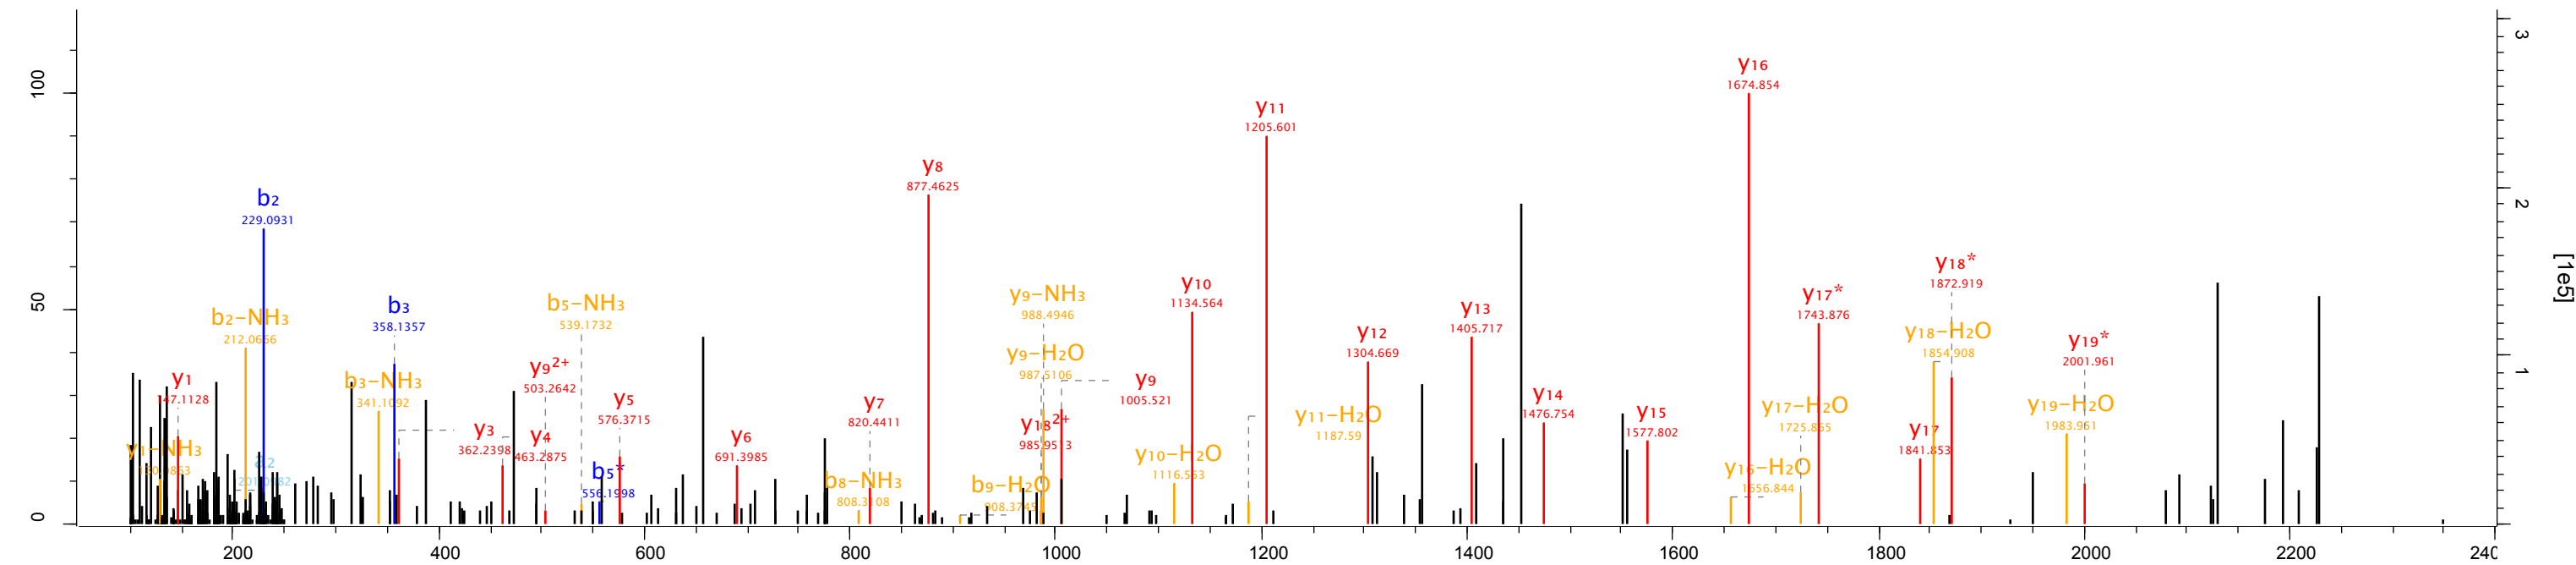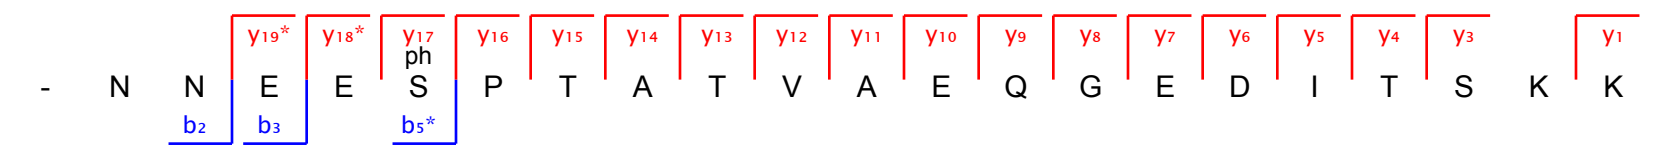

Raw file  
20150812\_A375SR\_Phospho\_BR1\_04

Scan Method Score m/z Gene names  
14245 FTMS; HCD 96.7 1110.79 HNRNPUL1

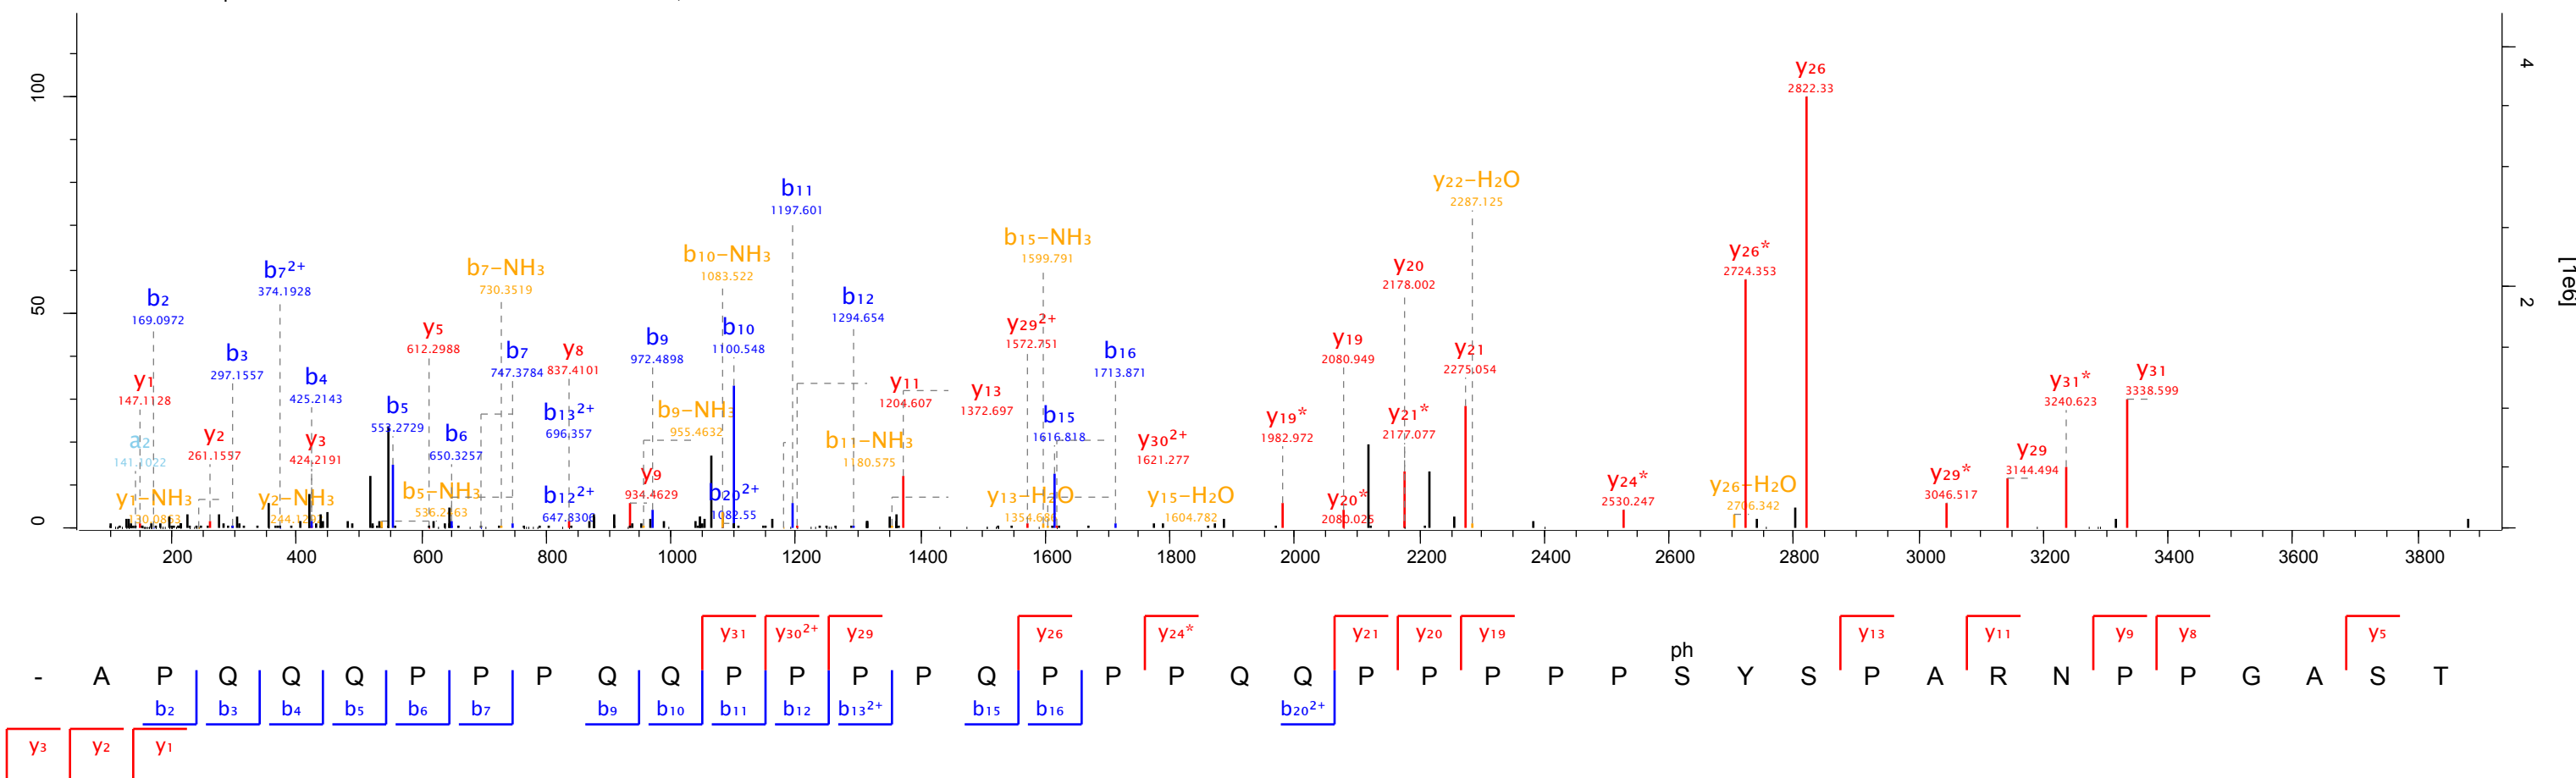

Raw file 20150812\_A375SR\_Phospho\_BR1\_04 Scan 14655 Method FTMS; HCD Score 64.48 m/z 637.64 Gene names SLAIN2

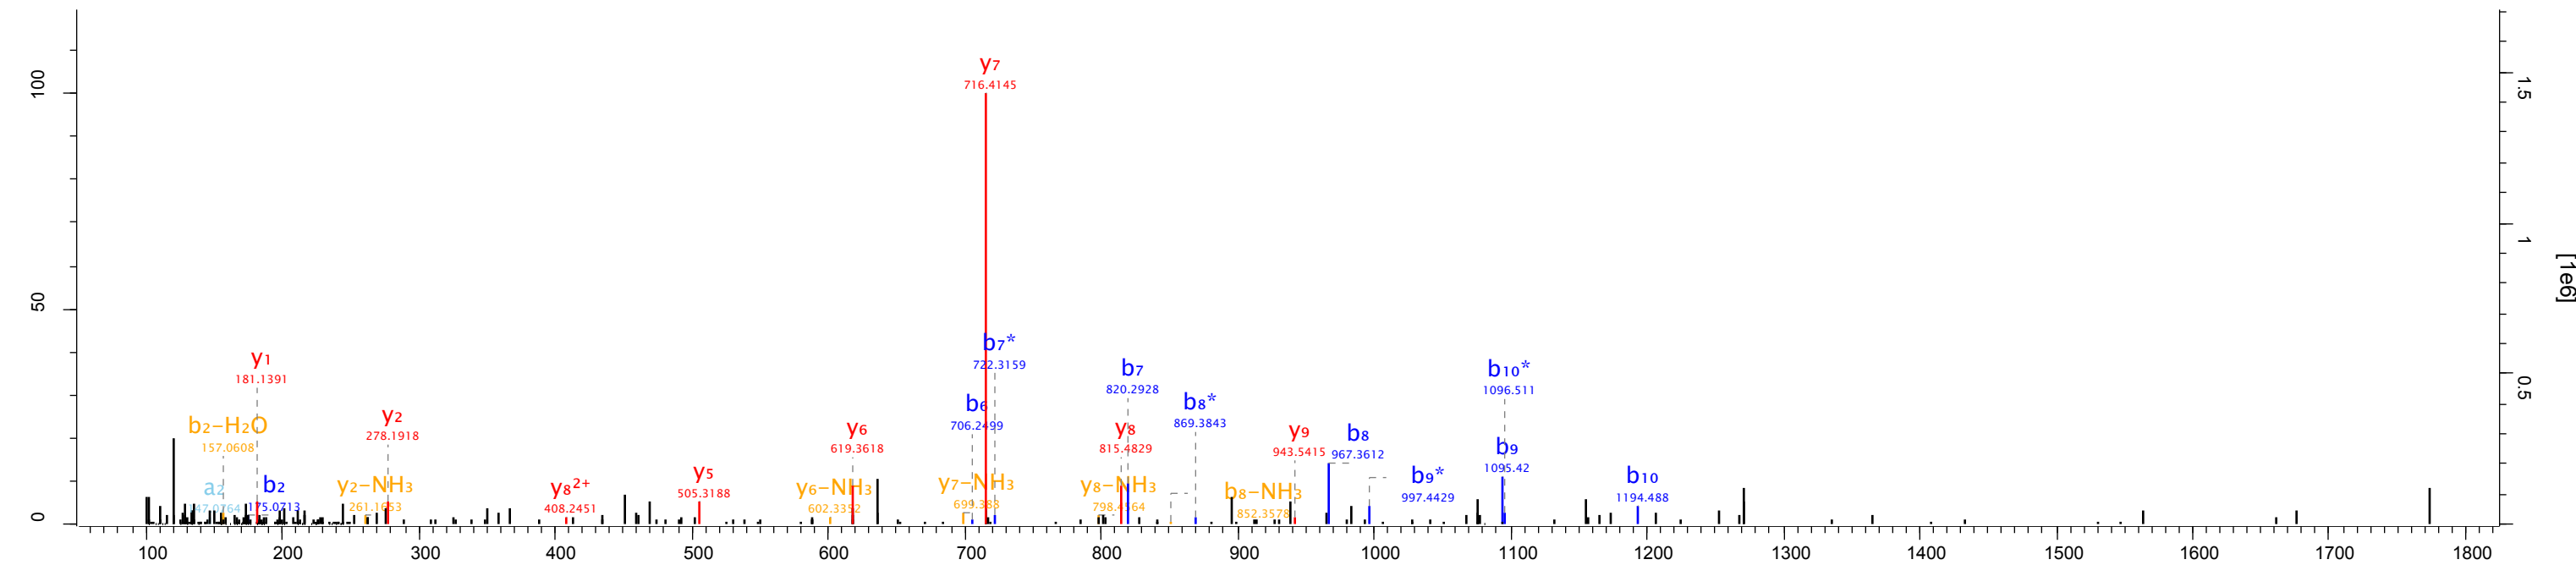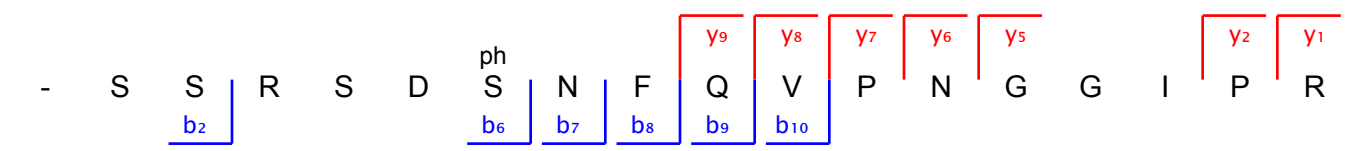

Raw file 20150812\_A375SR\_Phospho\_BR1\_04 Scan 14665 Method FTMS; HCD Score 116.39 m/z 993.42 Gene names CHAMP1

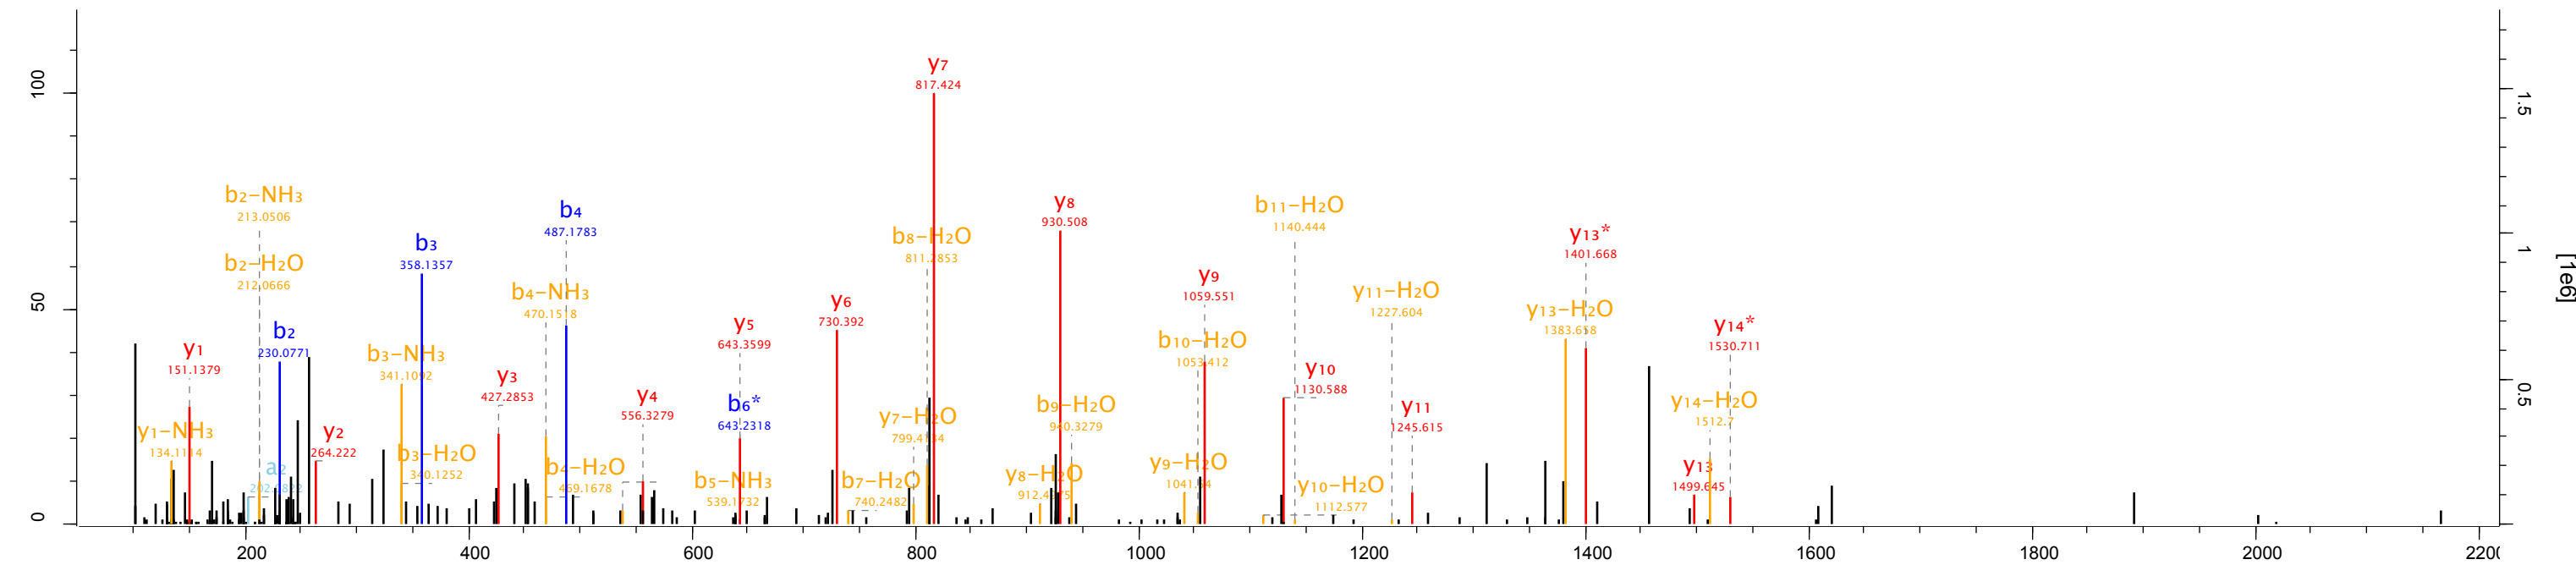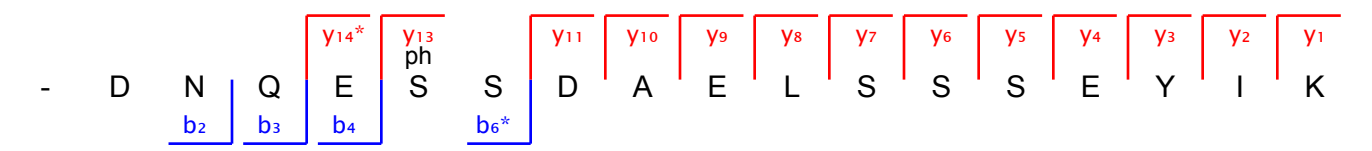

Raw file: 20150812\_A375SR\_Phospho\_BR1\_04  
 Scan: 14805  
 Method: FTMS; HCD  
 Score: 411.9  
 m/z: 1434.58  
 Gene names: MATR3;DKFZp686L22104

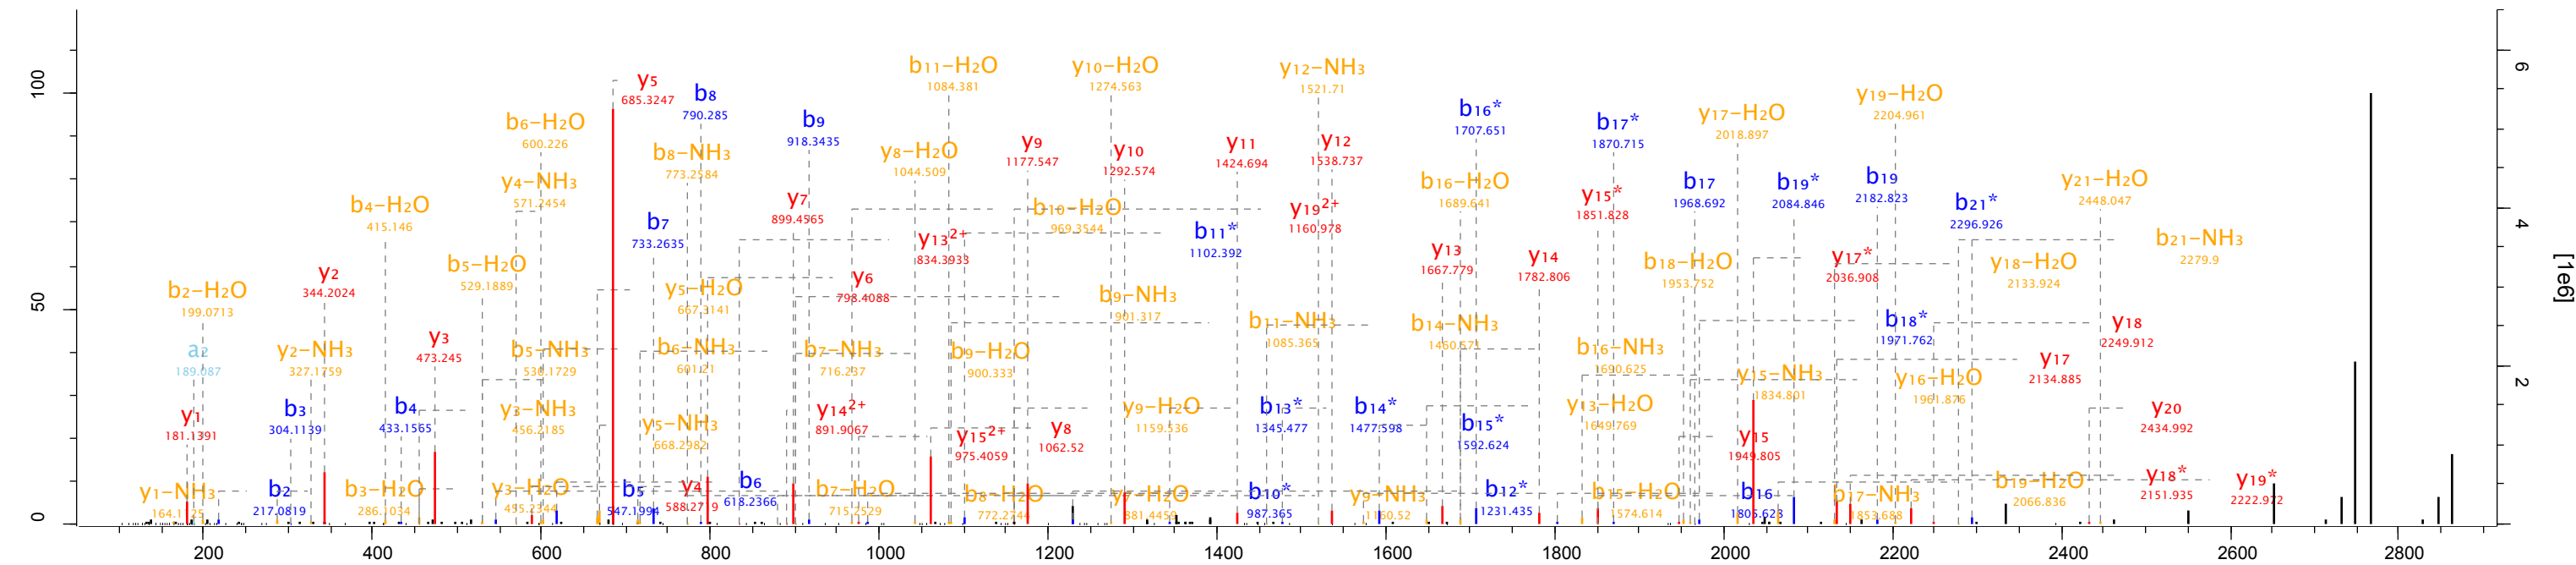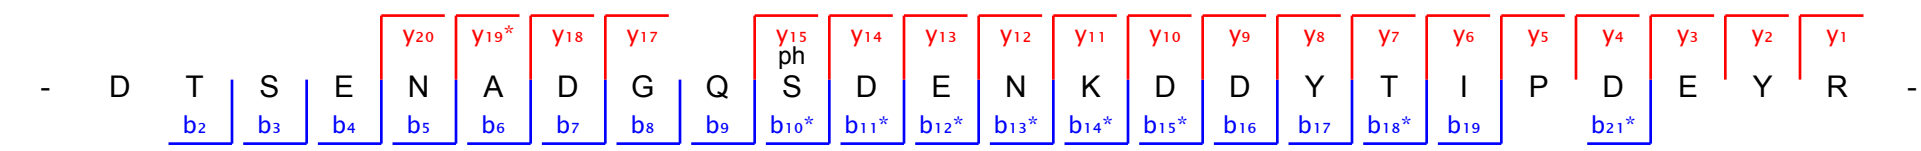

Raw file: 20150812\_A375SR\_Phospho\_BR1\_04  
 Scan: 15095 Method: FTMS; HCD Score: 186.56 m/z: 891.36 Gene names: ANLN

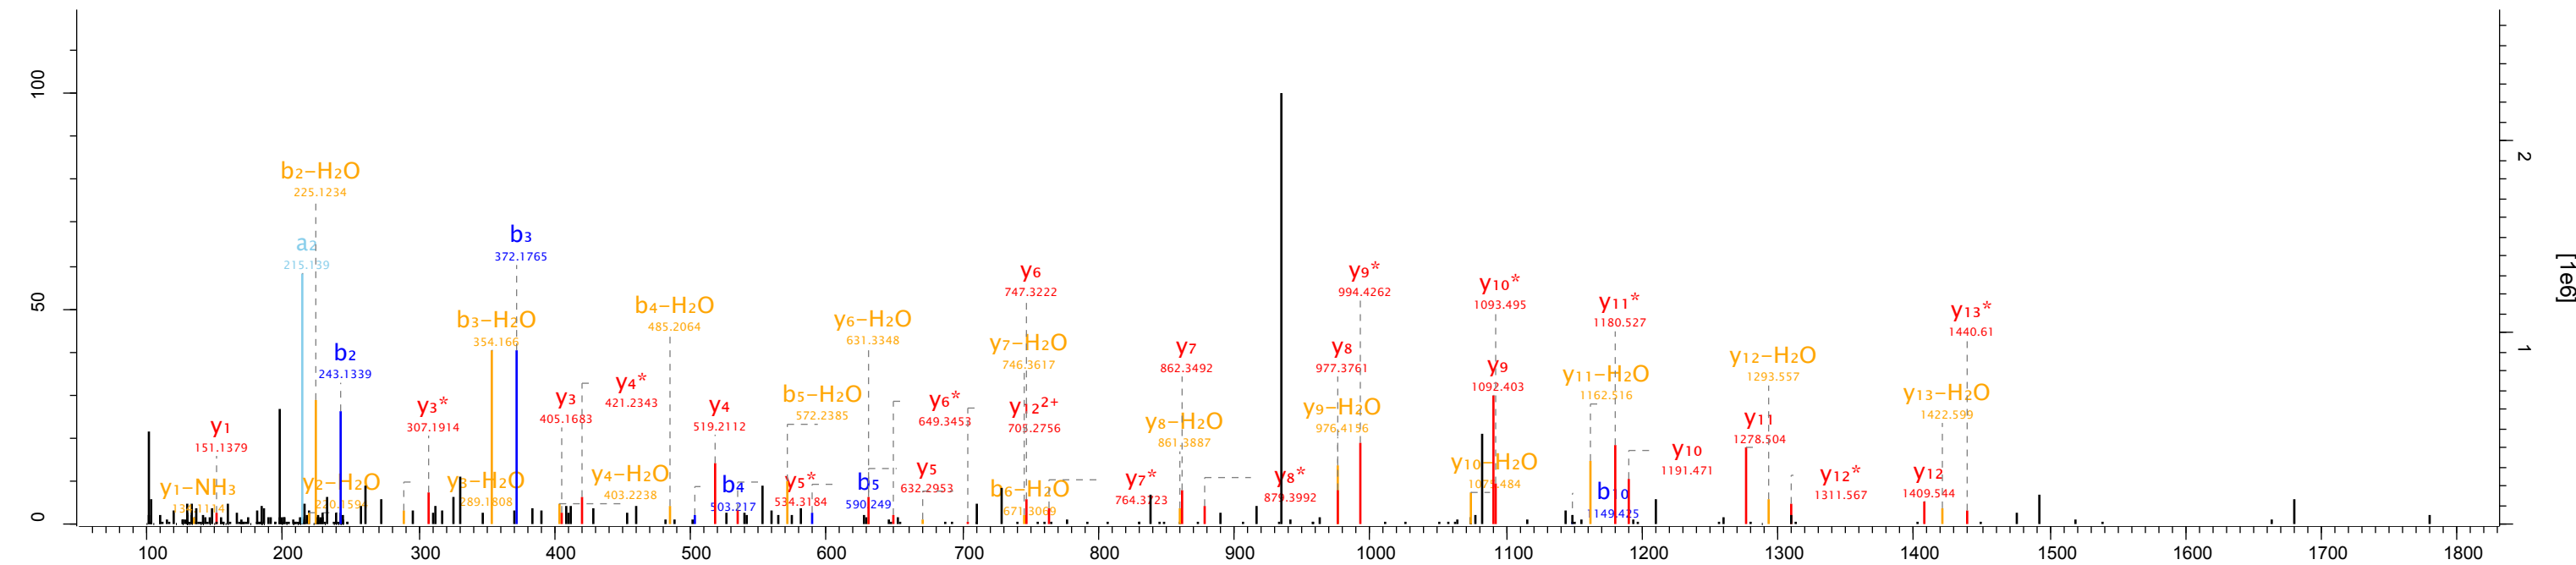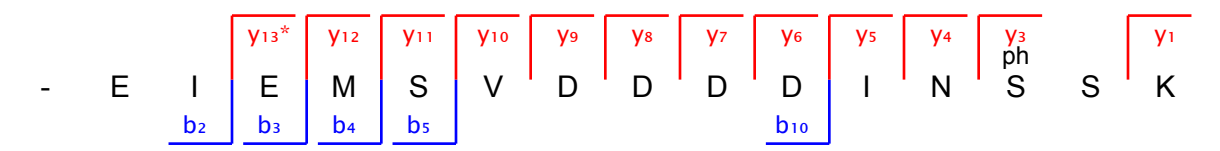



Raw file Scan Method Score m/z Gene names  
 20150812\_A375SR\_Phospho\_BR1\_04 15125 FTMS; HCD 233.17 1260.52 AVEN

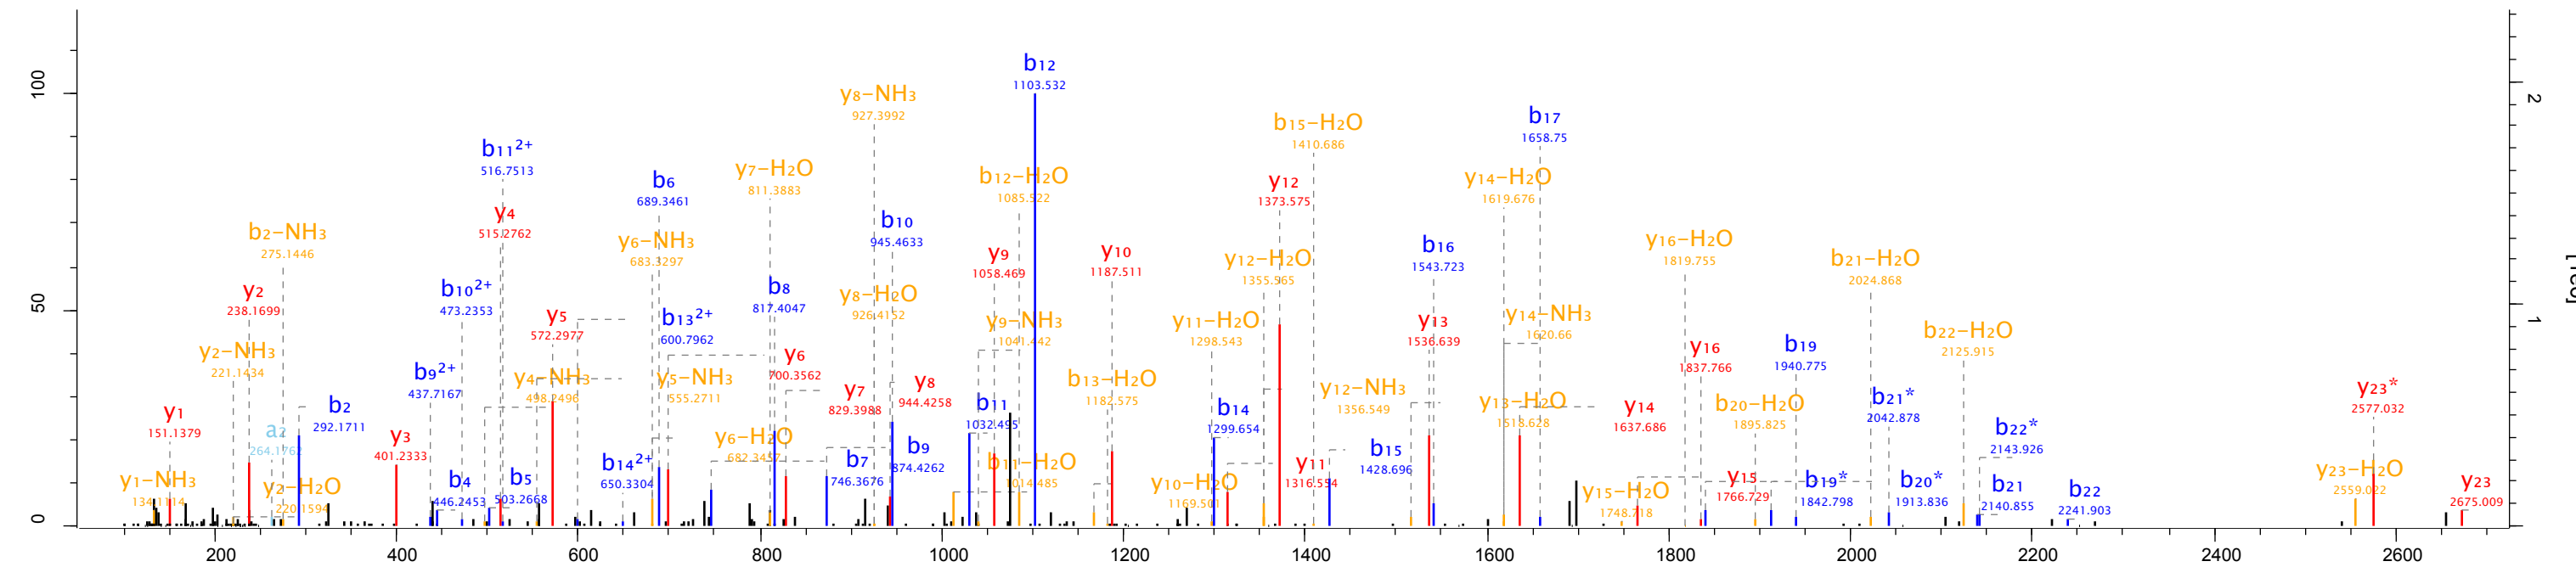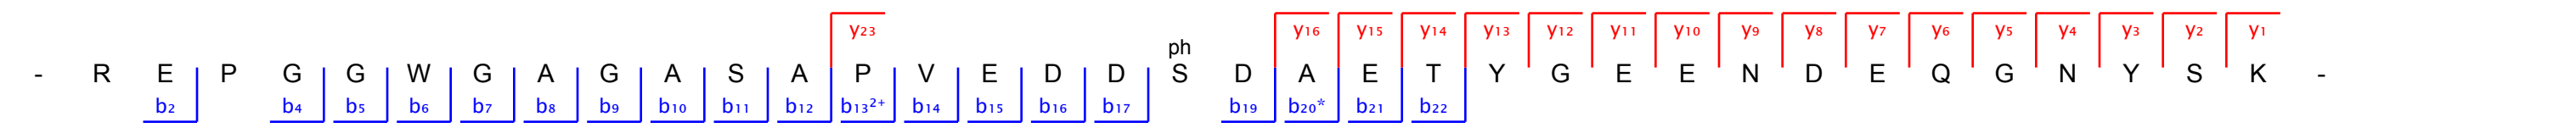

Raw file: 20150812\_A375SR\_Phospho\_BR1\_04  
 Scan: 15145 Method: FTMS; HCD Score: 137.29 m/z: 861.72 Gene names: SETD1A

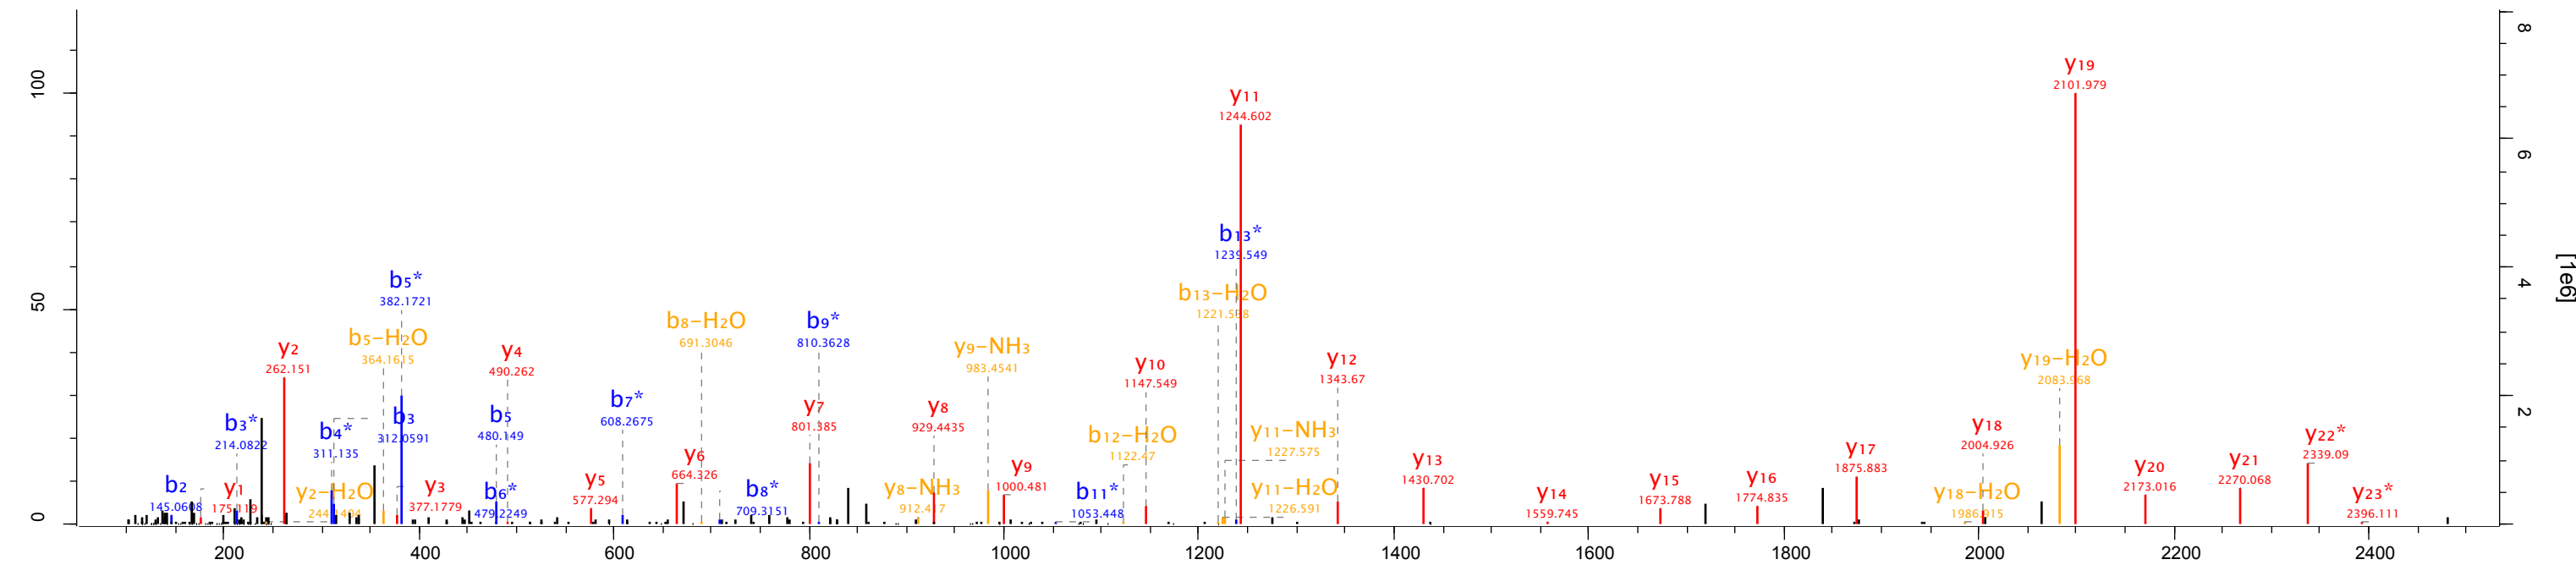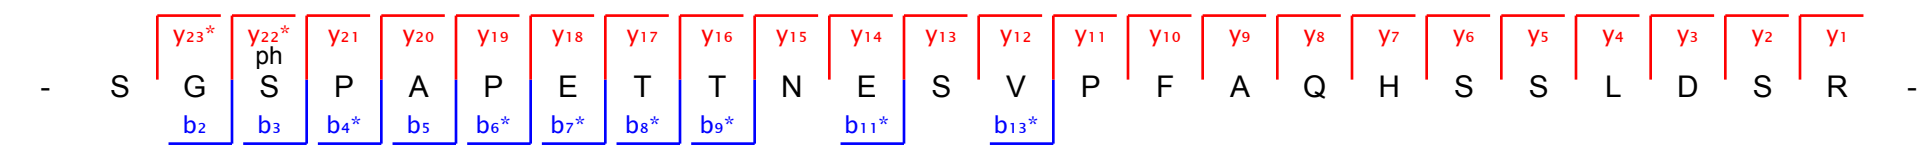

Raw file 20150812\_A375SR\_Phospho\_BR1\_04 Scan 15215 Method FTMS; HCD Score 315.36 m/z 1171.44 Gene names CAAP1

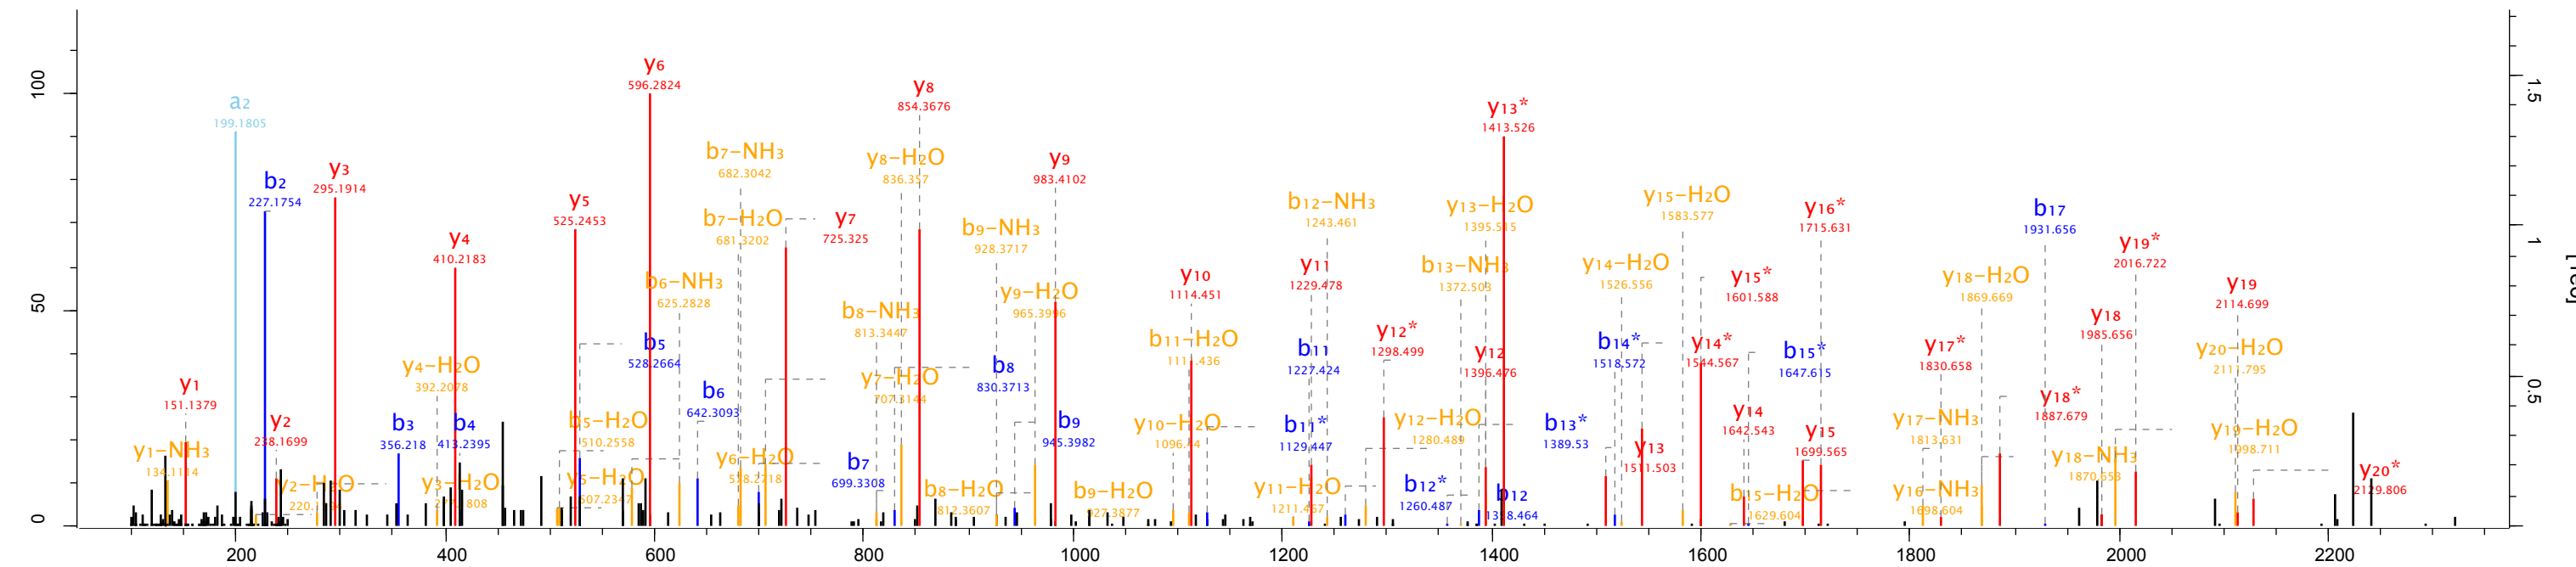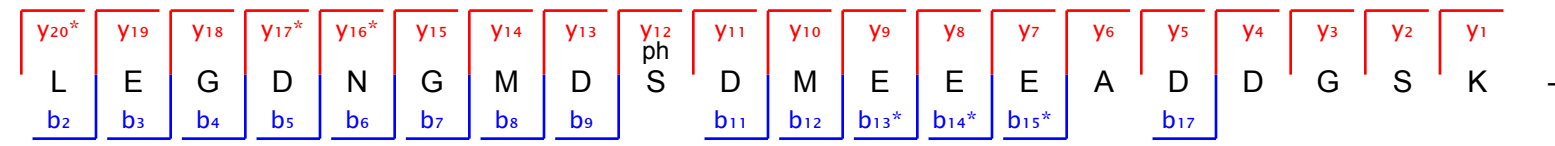

Raw file  
 20150812\_A375SR\_Phospho\_BR1\_04  
 Scan 16005 Method FTMS; HCD Score 81.43 m/z 871.65 Gene names PCBP2

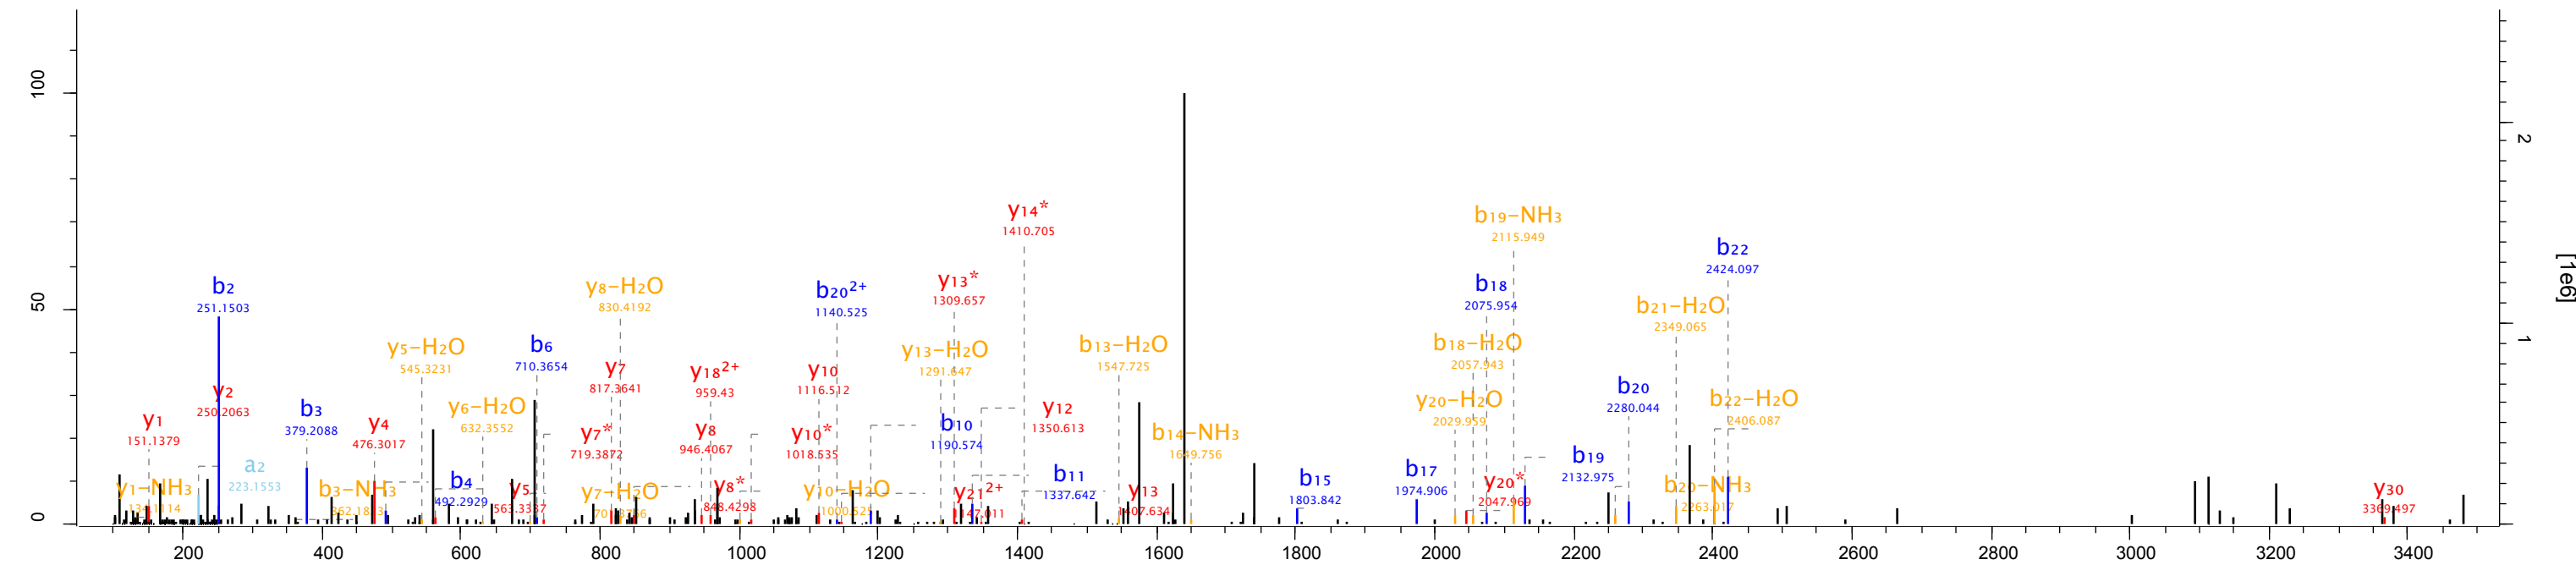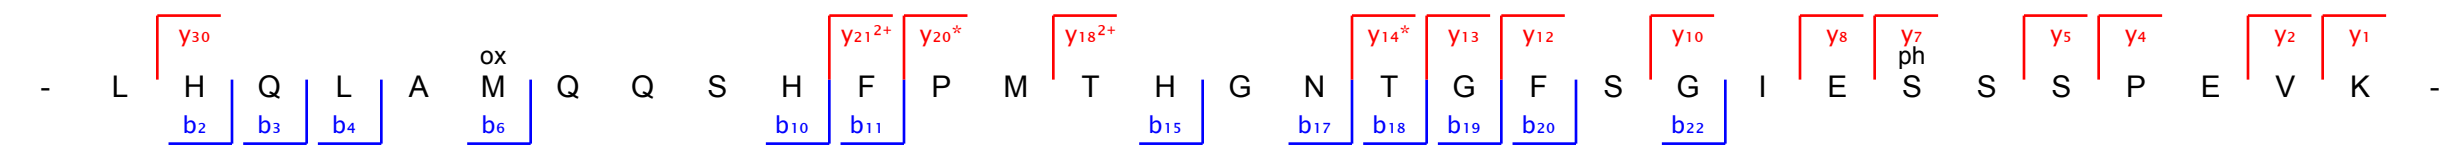

Raw file  
 20150812\_A375SR\_Phospho\_BR1\_04  
 Scan 16145 Method FTMS; HCD Score 278.08 m/z 907.38 Gene names MCM2

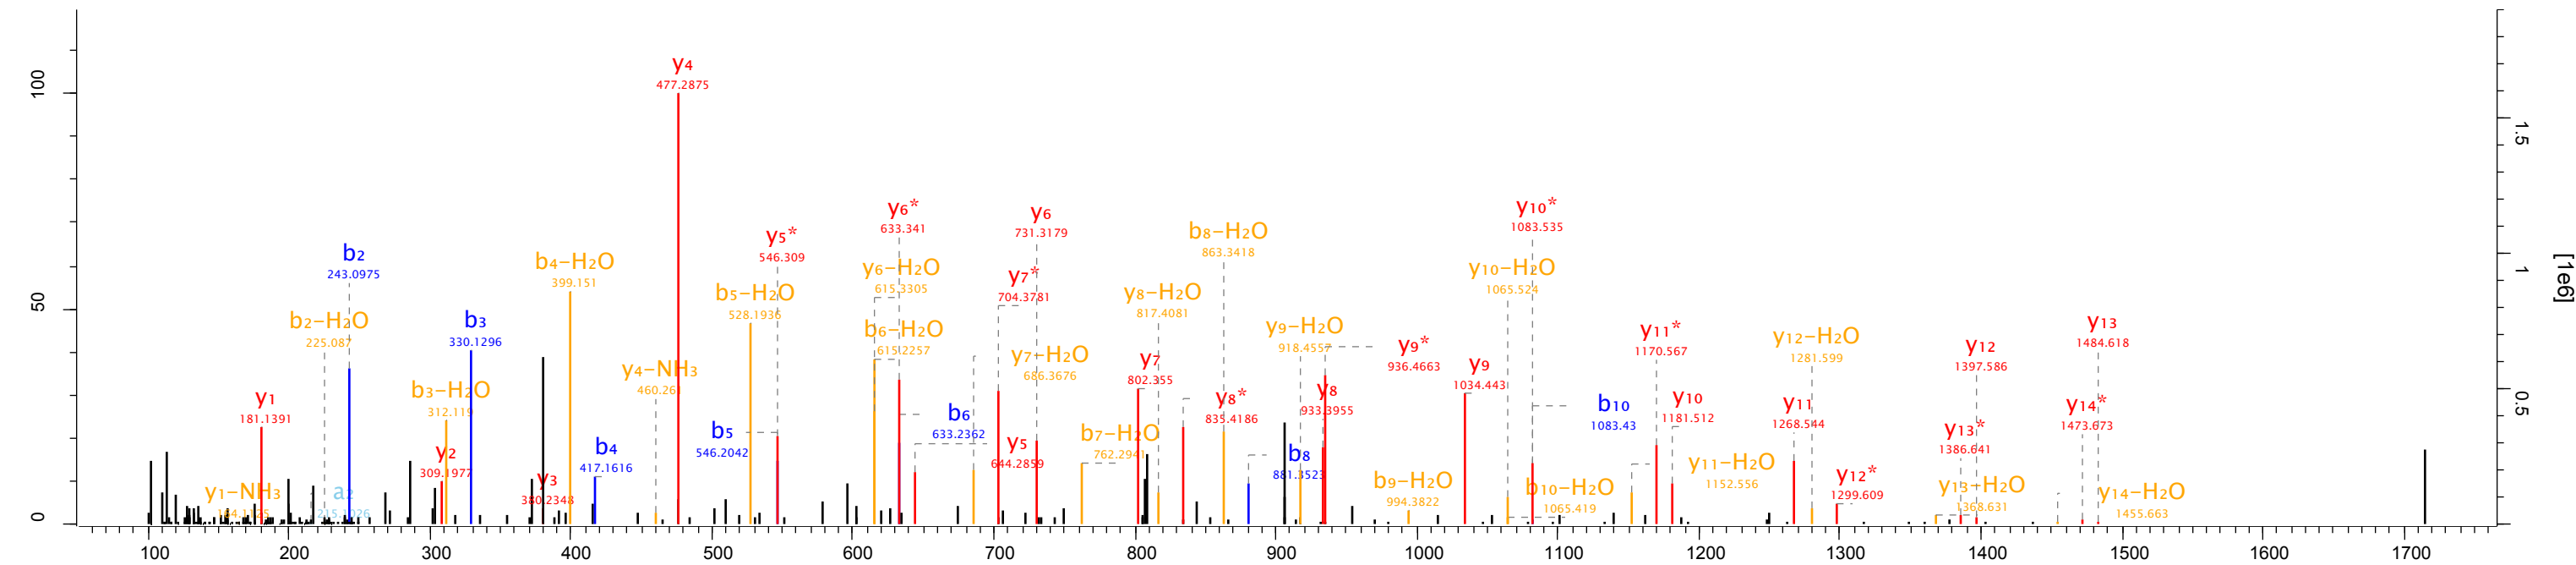

ac  
 - A E S S E S F T M A S S P A Q R -  
 b2 b3 b4 b5 b6 b8 b10

Raw file: 20150812\_A375SR\_Phospho\_BR1\_04  
 Scan: 16205 Method: FTMS; HCD Score: 185.19 m/z: 775.09 Gene names: KIAA0930

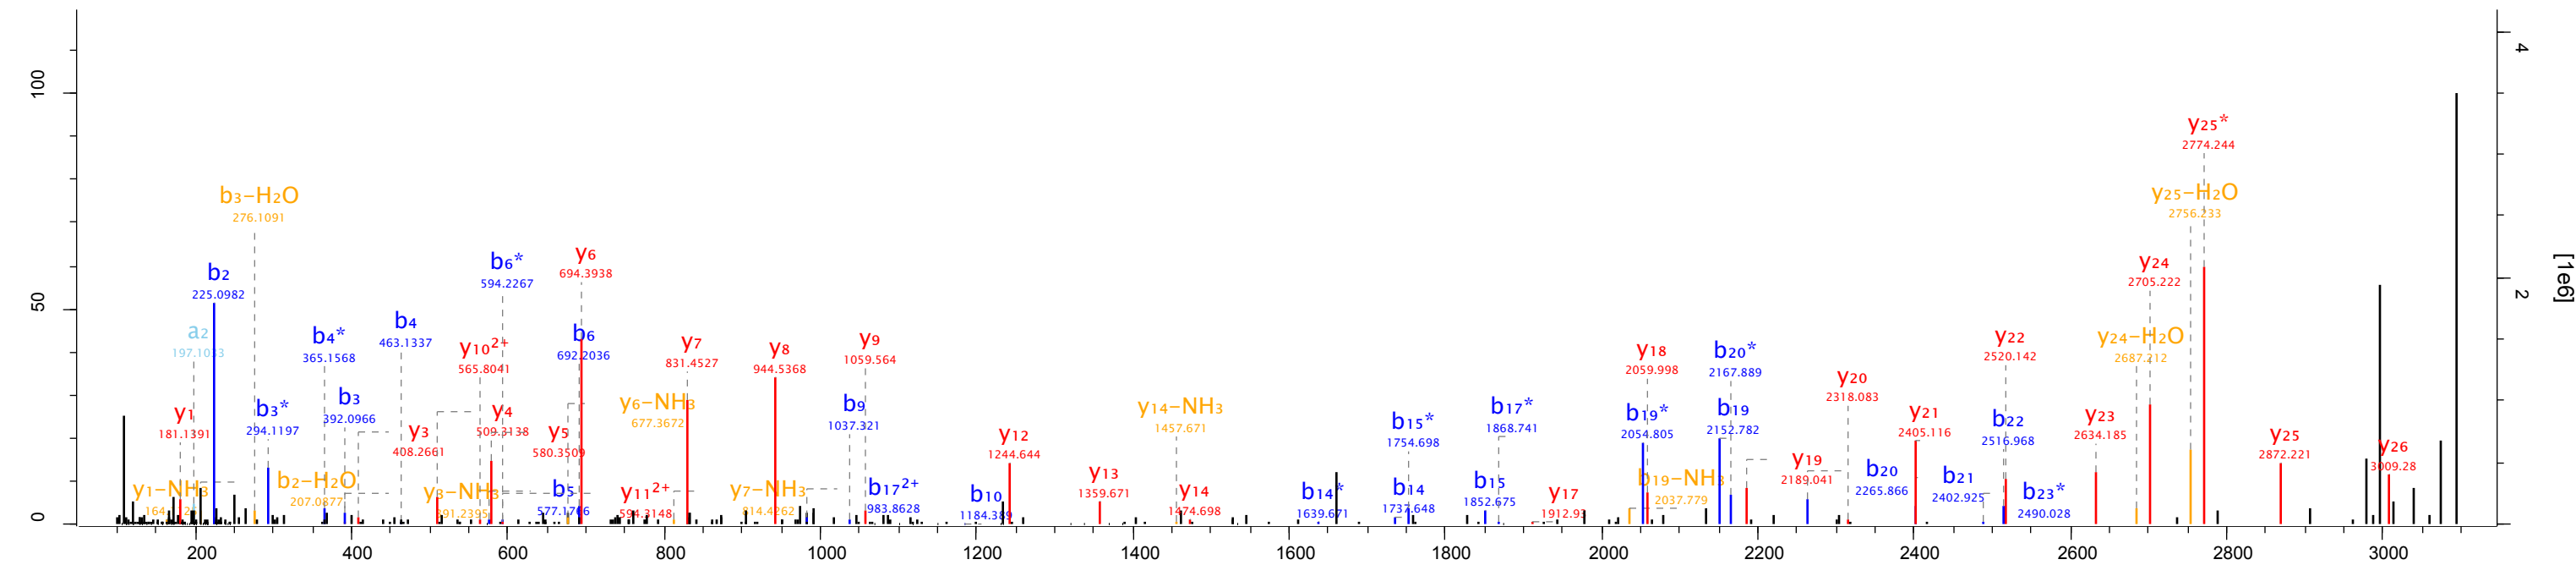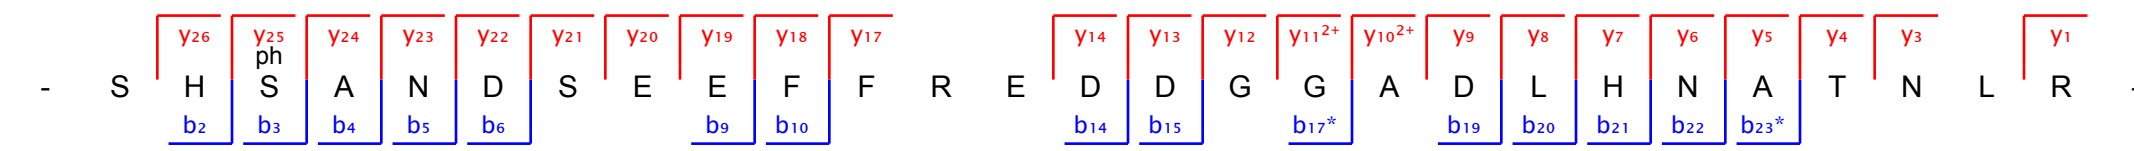

Raw file 20150812\_A375SR\_Phospho\_BR1\_04 Scan 1645 Method FTMS; HCD Score 153.19 m/z 473.73 Gene names USP42

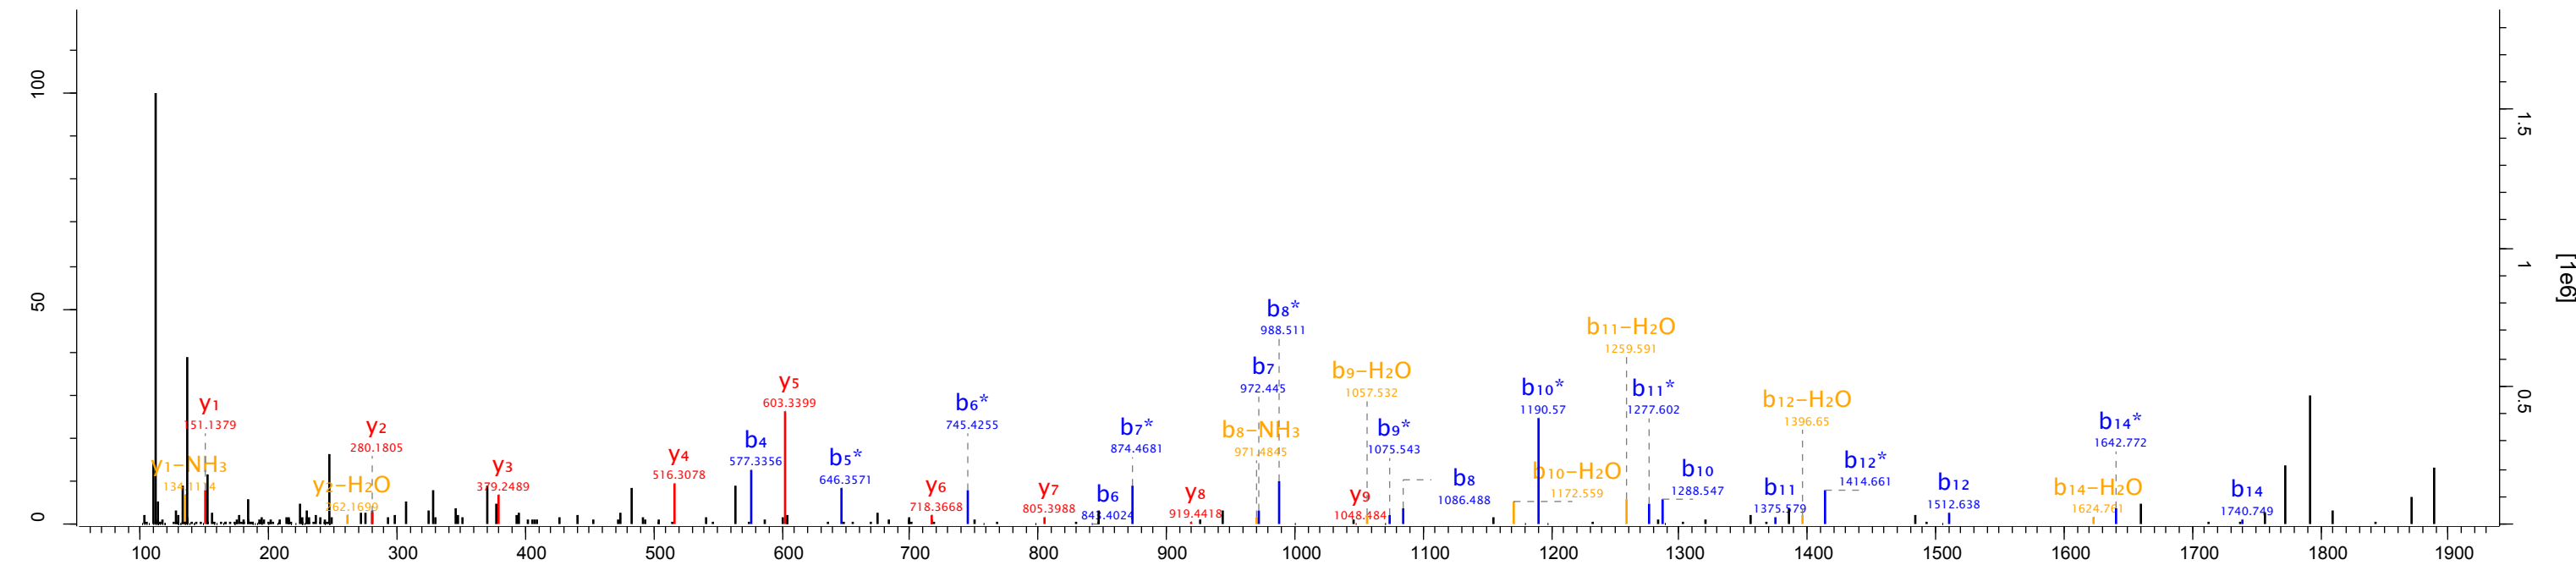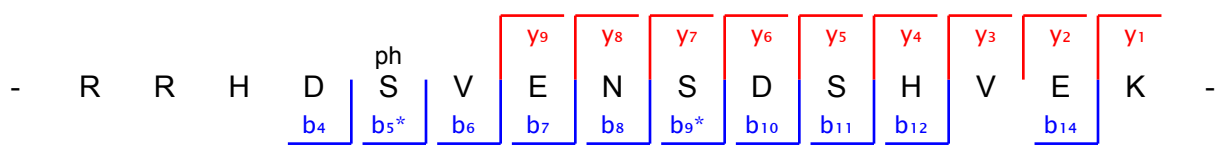

Raw file Scan Method Score m/z Gene names  
 20150812\_A375SR\_Phospho\_BR1\_04 16975 FTMS; HCD 120.72 1269.9 FAM91A1

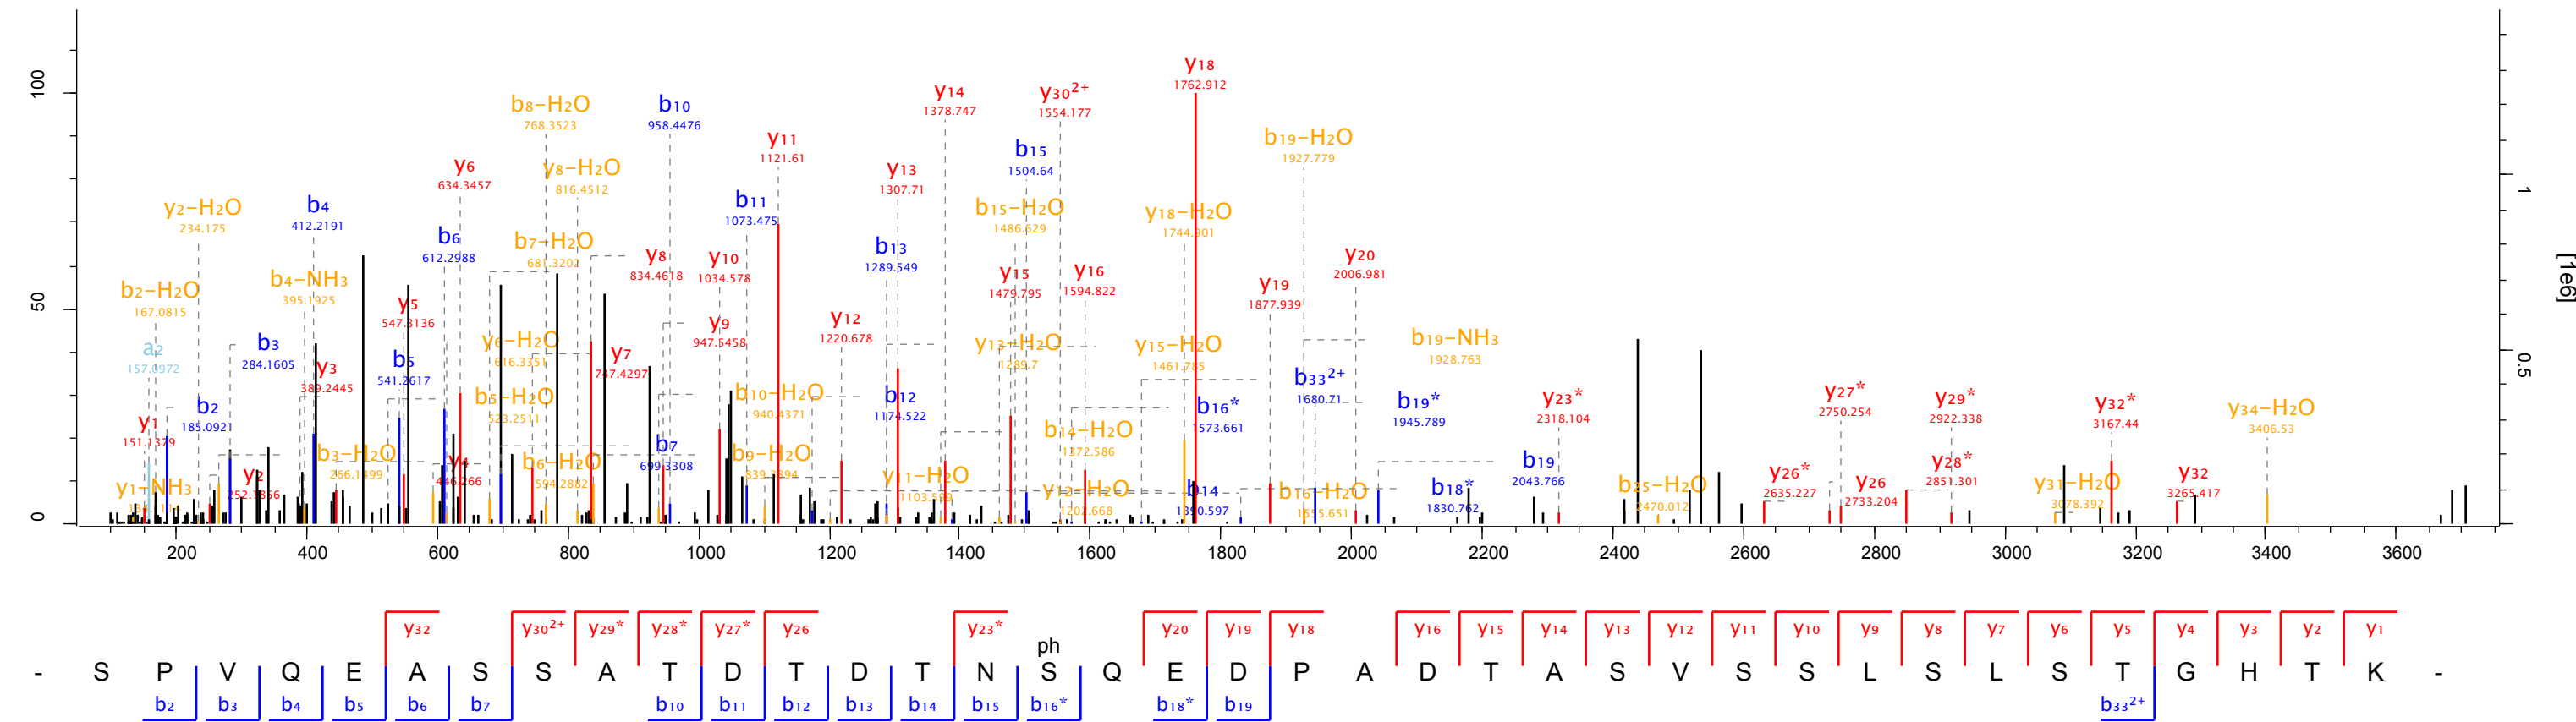



Raw file 20150812\_A375SR\_Phospho\_BR1\_04 Scan 17285 Method FTMS; HCD Score 214.1 m/z 1054.46 Gene names NCOR2

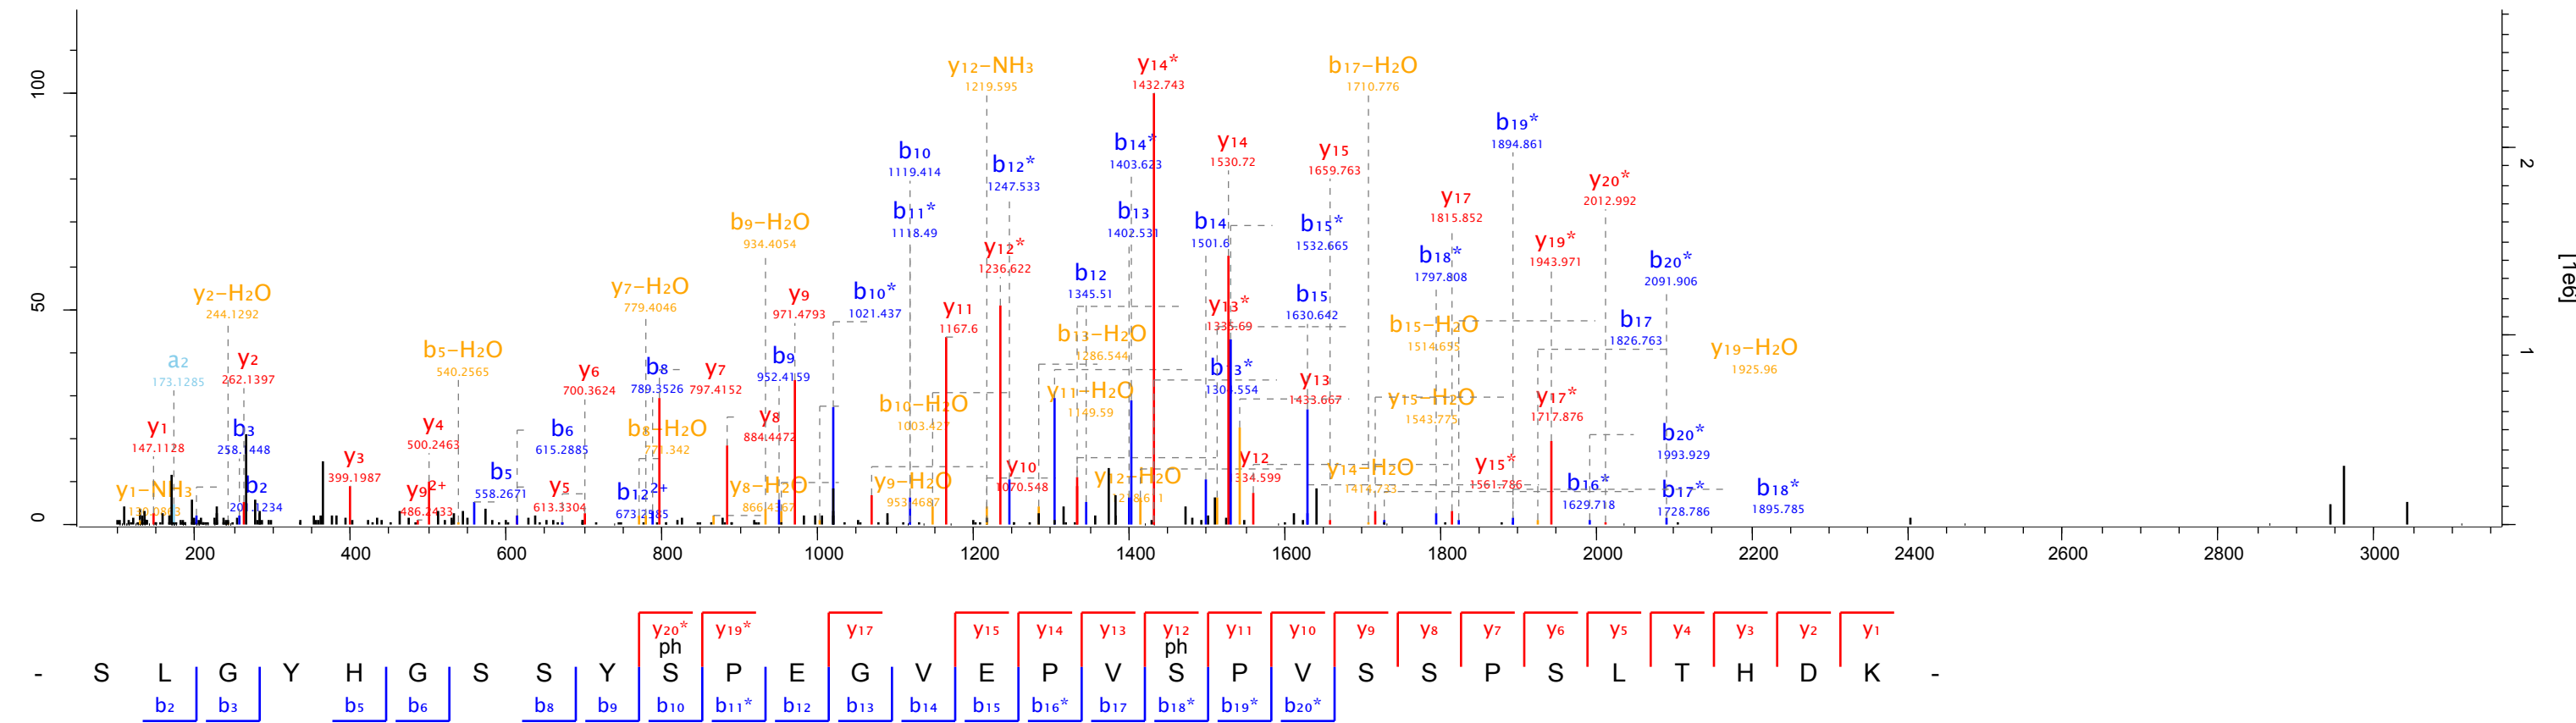

Raw file 20150812\_A375SR\_Phospho\_BR1\_04  
 Scan 18005 Method FTMS; HCD Score 55.49 m/z 951.49 Gene names DLG5

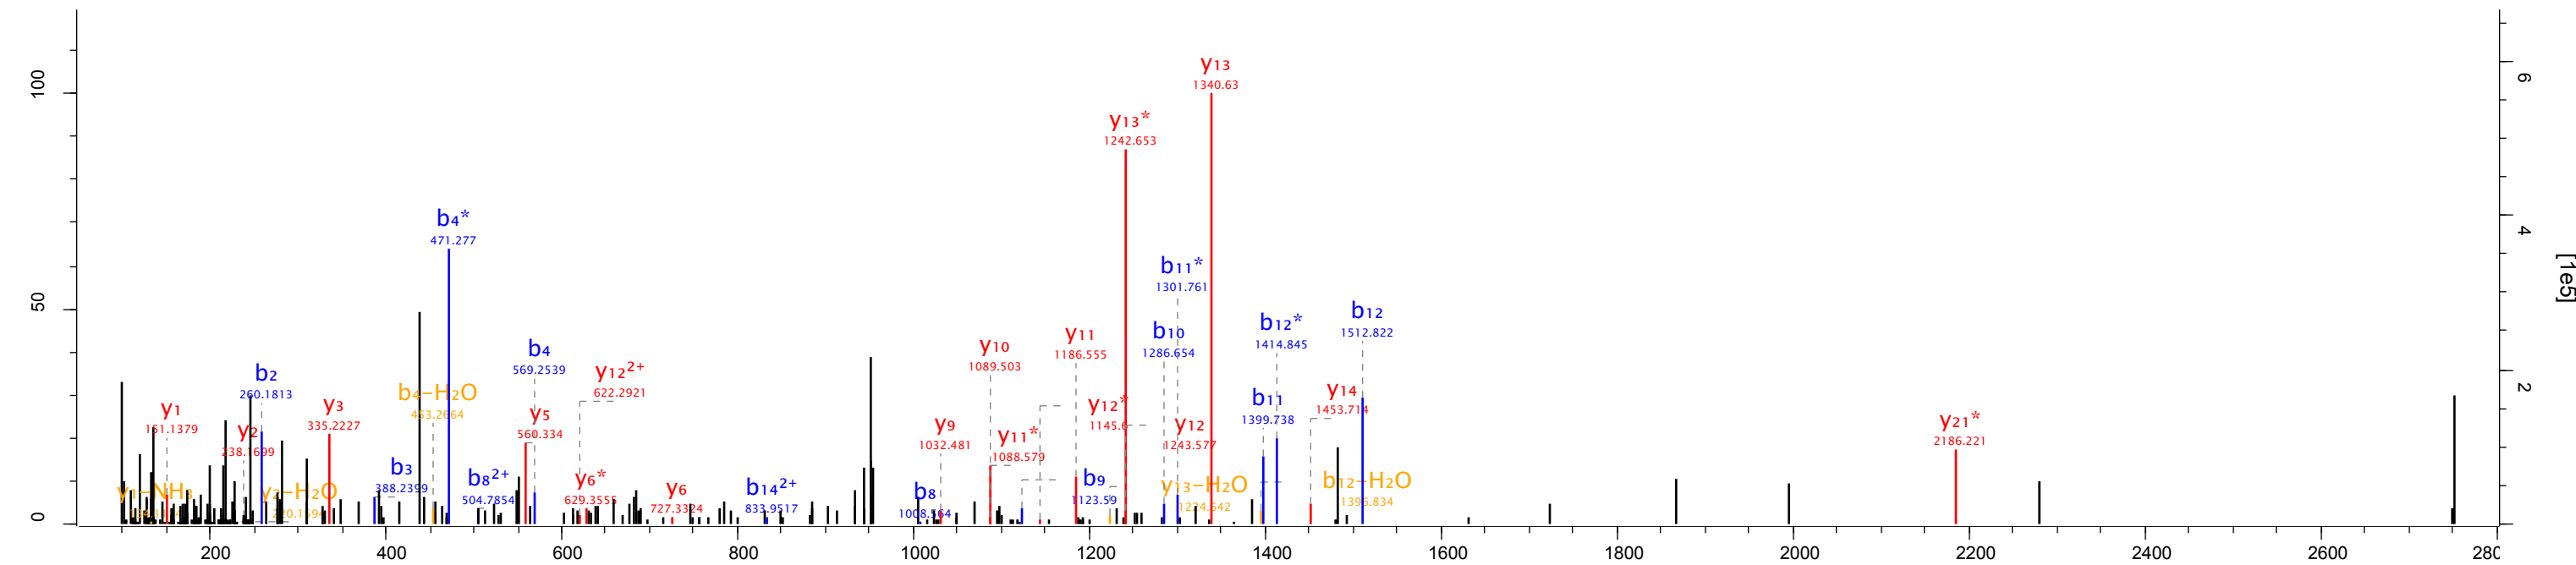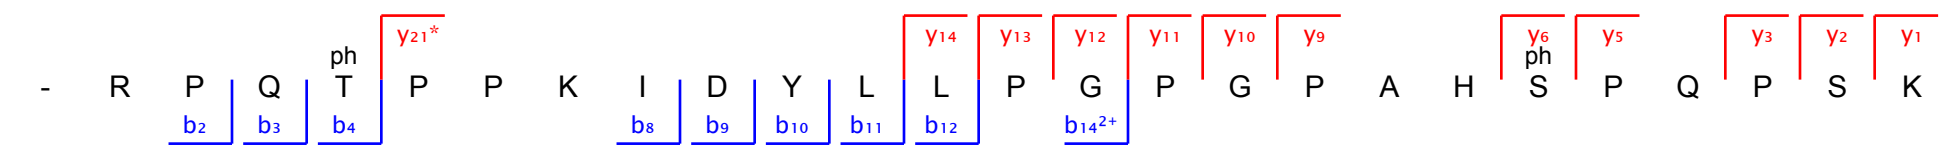

Raw file: 20150812\_A375SR\_Phospho\_BR1\_04  
 Scan: 18705 Method: FTMS; HCD Score: 160.04 m/z: 685.82 Gene names: LPHN2

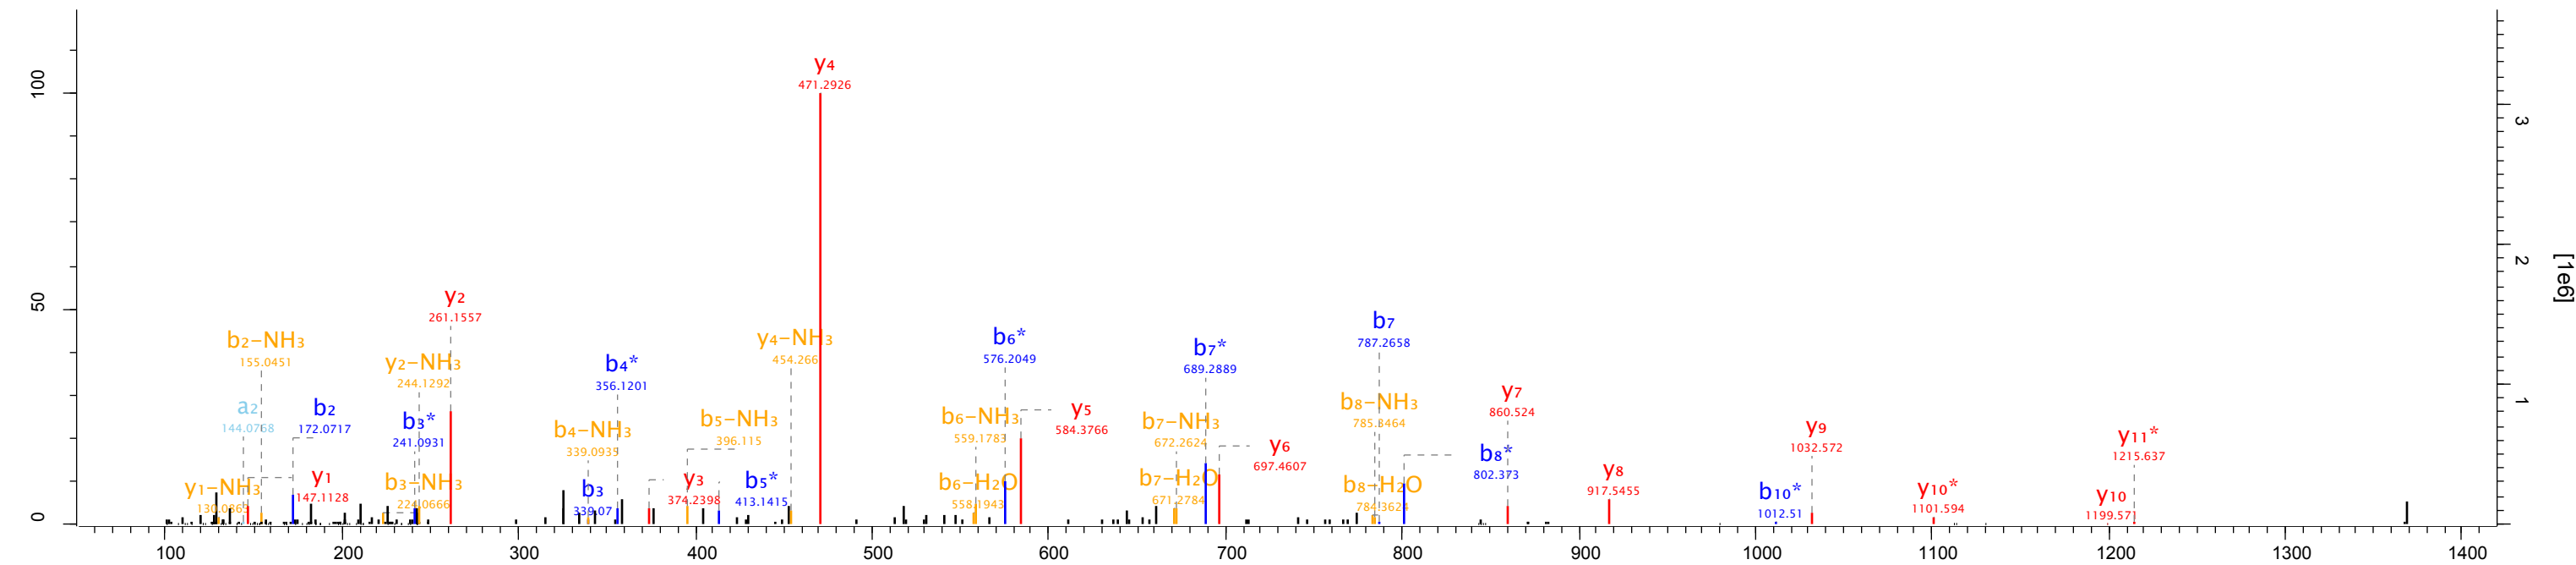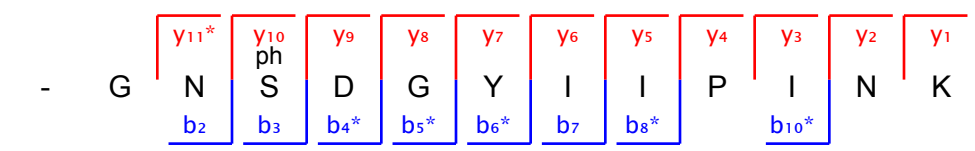

Raw file 20150812\_A375SR\_Phospho\_BR1\_04 Scan 18805 Method FTMS; HCD Score 160.04 m/z 1008.47 Gene names ZBTB21

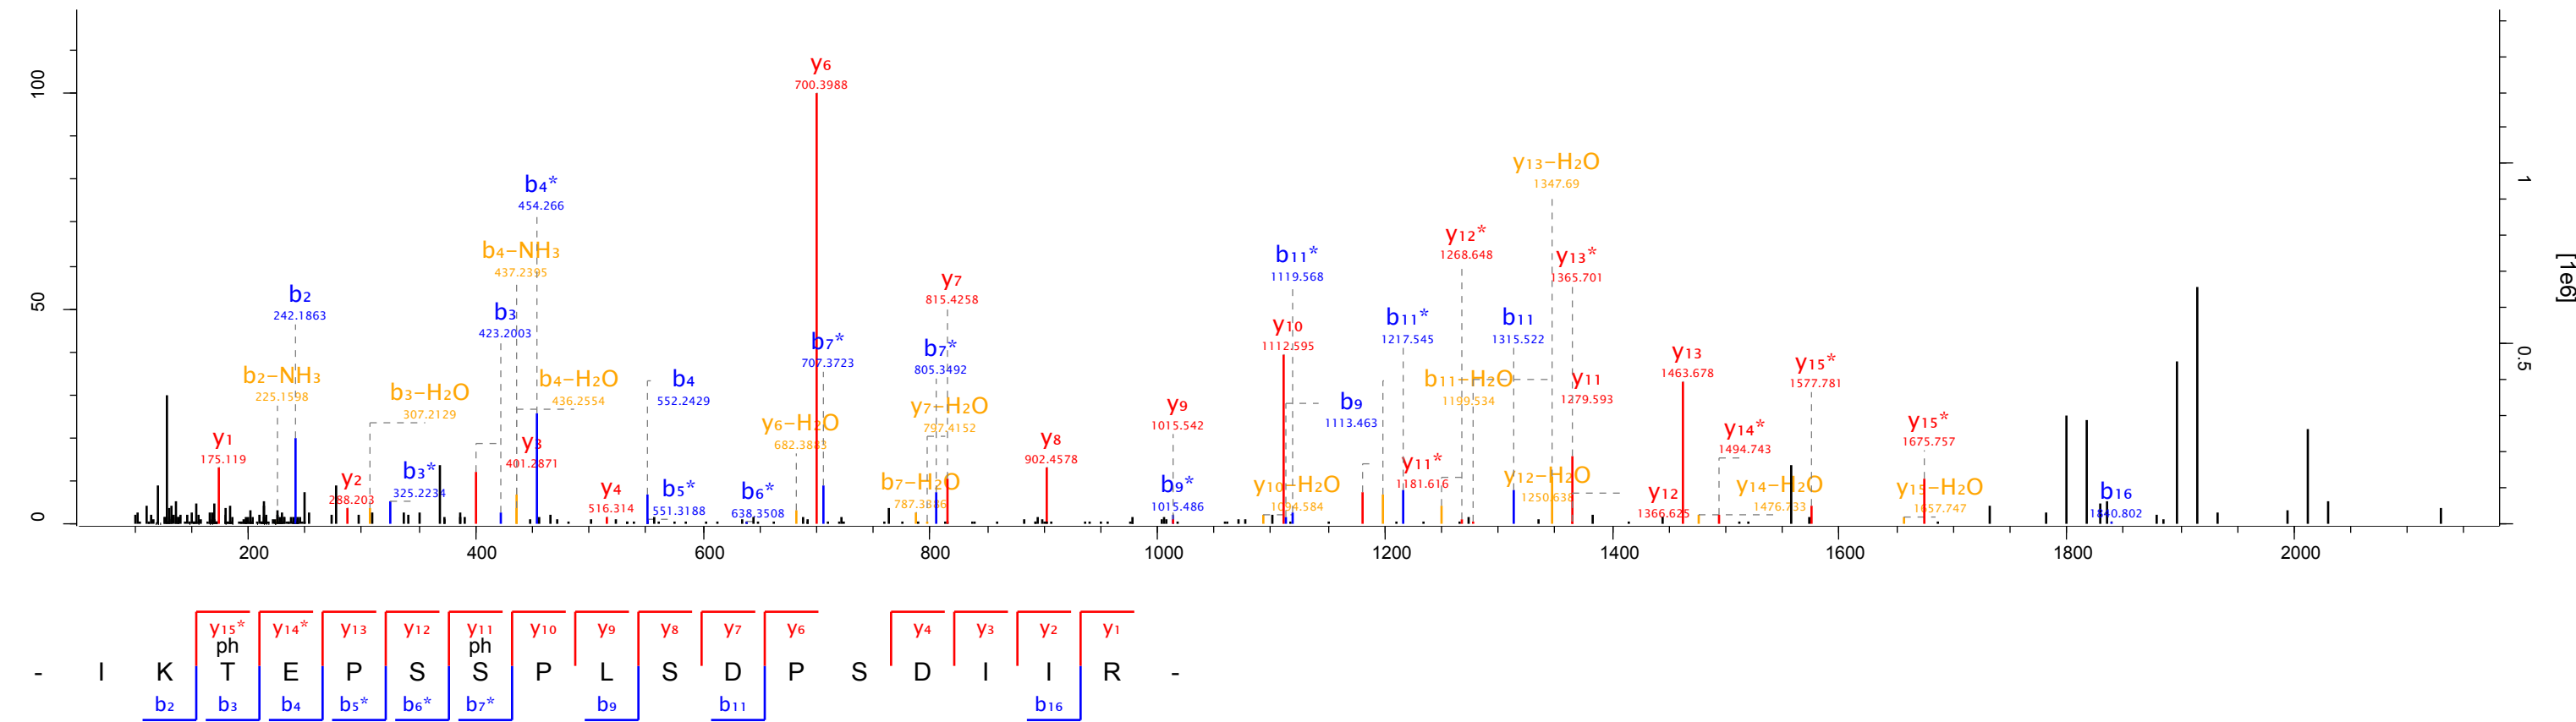

Raw file: 20150812\_A375SR\_Phospho\_BR1\_04  
 Scan: 1935 Method: FTMS; HCD Score: 333.75 m/z: 883.37 Gene names: EIF4B

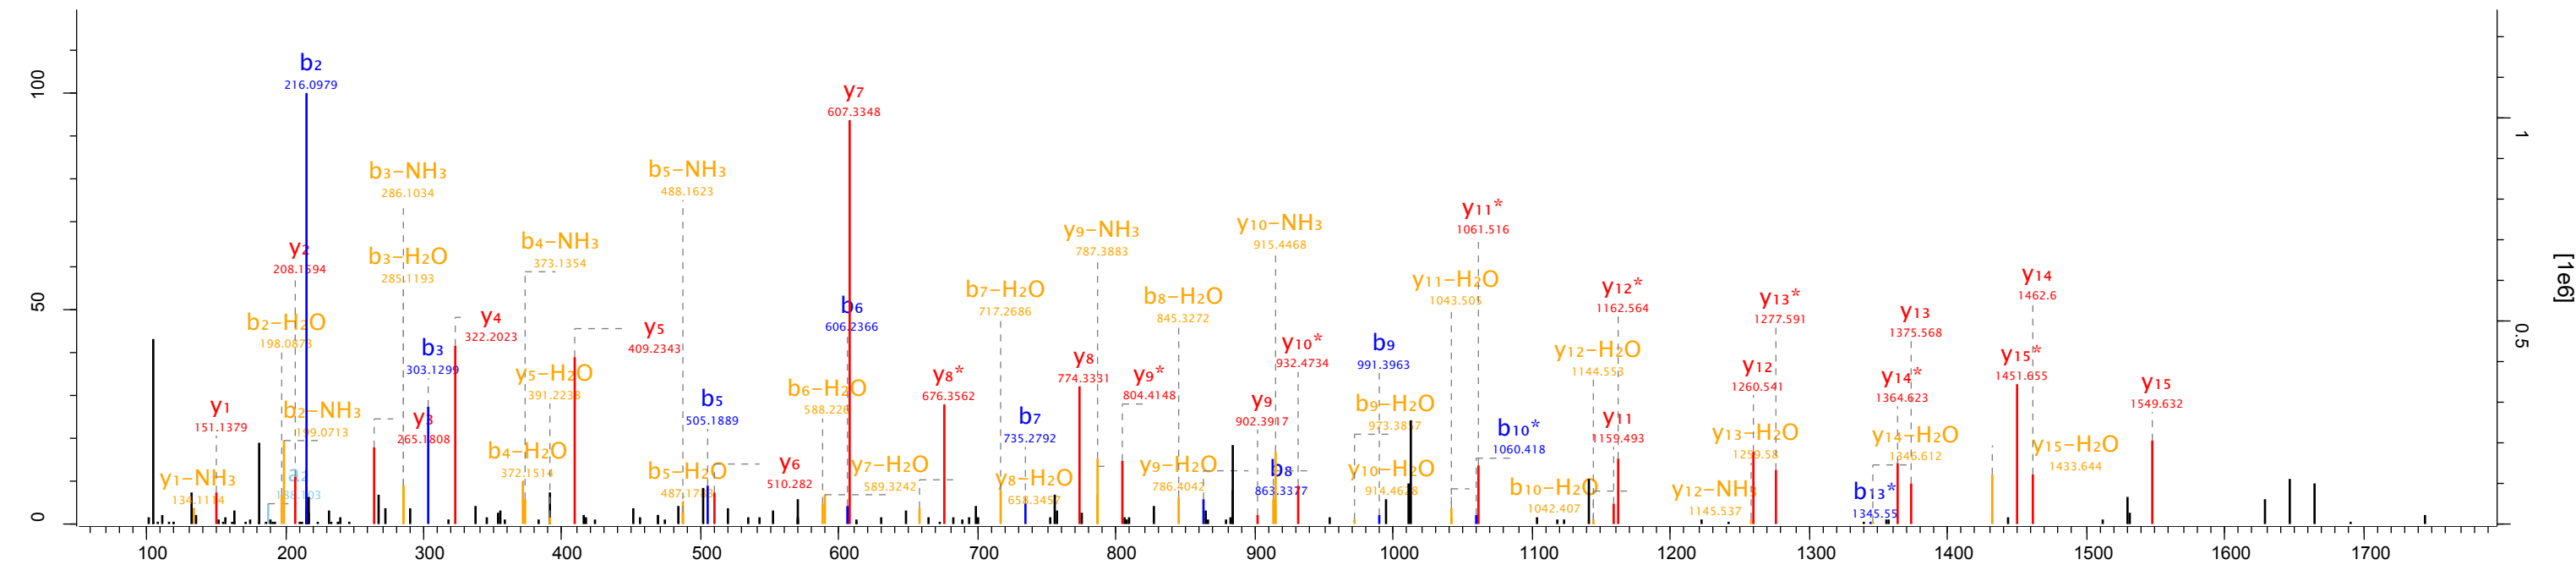

- S Q S S D T E Q Q S P T S G G G K -

Fragmentation sites (b and y ions) are indicated by boxes below the sequence:

- b<sub>2</sub> (S-Q)
- b<sub>3</sub> (Q-S)
- b<sub>5</sub> (D-S)
- b<sub>6</sub> (S-T)
- b<sub>7</sub> (T-E)
- b<sub>8</sub> (E-Q)
- b<sub>9</sub> (Q-Q)
- b<sub>10</sub>\*
- b<sub>13</sub>\*

Corresponding y ions are labeled above the sequence:

- y<sub>15</sub> (S-Q)
- y<sub>14</sub> (Q-S)
- y<sub>13</sub> (S-D)
- y<sub>12</sub> (D-T)
- y<sub>11</sub> (T-E)
- y<sub>10</sub>\*
- y<sub>9</sub> (E-Q)
- y<sub>8</sub> (Q-Q)
- y<sub>7</sub> (Q-S)
- y<sub>6</sub> (S-P)
- y<sub>5</sub> (P-T)
- y<sub>4</sub> (T-S)
- y<sub>3</sub> (S-G)
- y<sub>2</sub> (G-G)
- y<sub>1</sub> (G-K)

Raw file: 20150812\_A375SR\_Phospho\_BR1\_04  
 Scan: 20075 Method: FTMS; HCD Score: 73.23 m/z: 828.37 Gene names: SIPA1L3

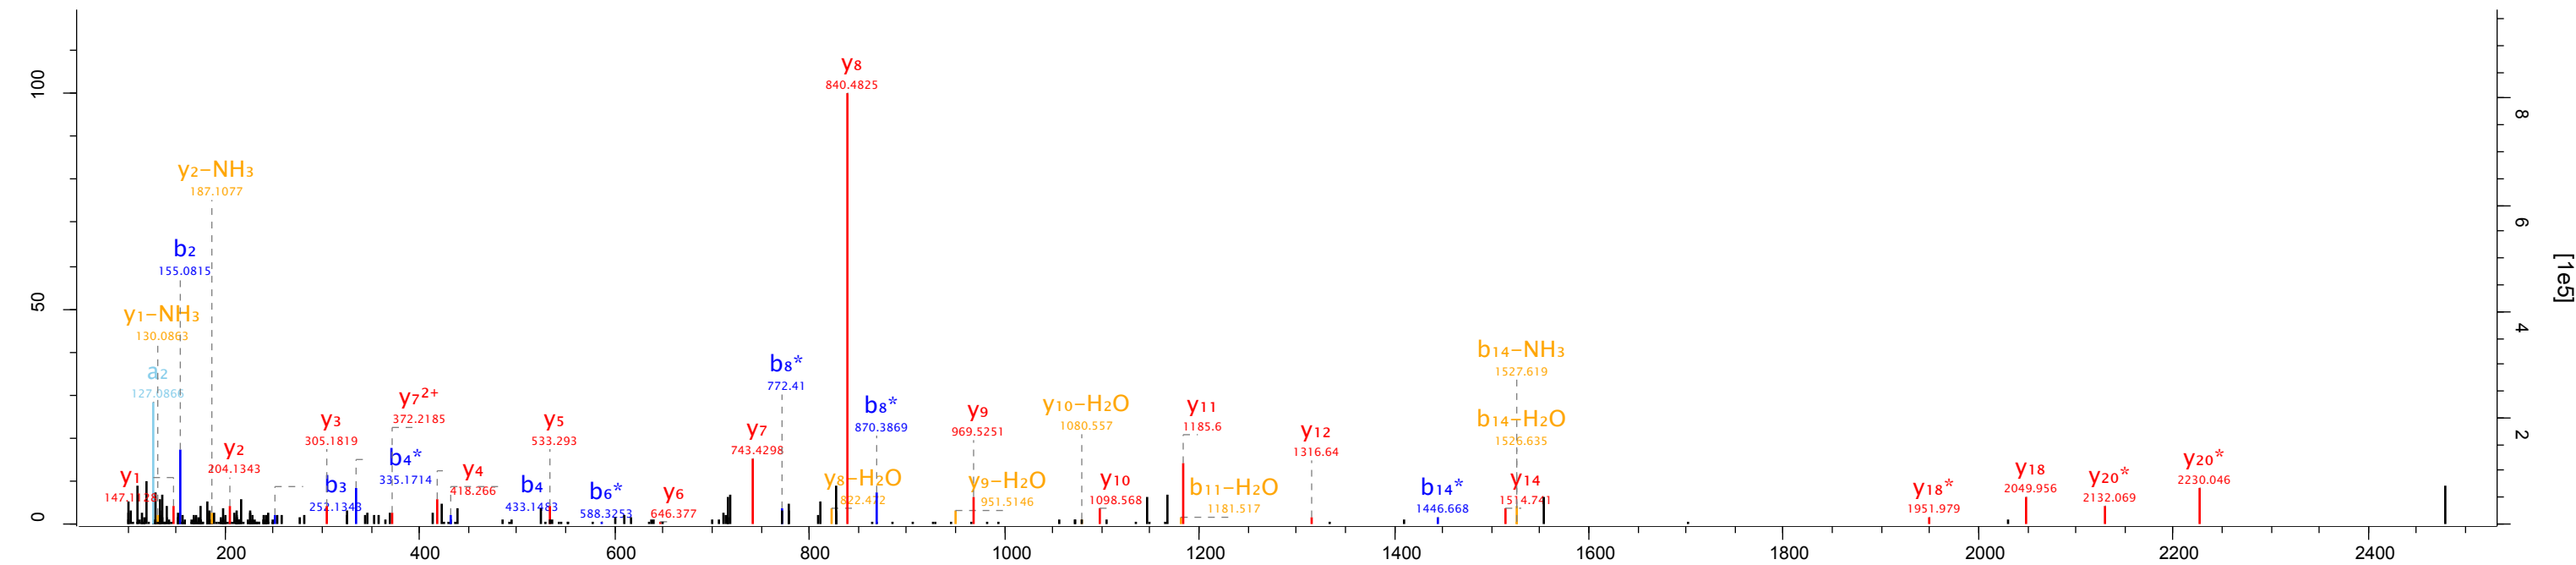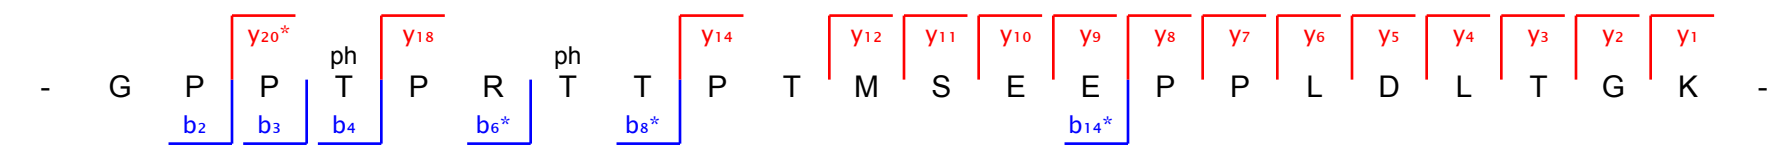

Raw file: 20150812\_A375SR\_Phospho\_BR1\_04  
 Scan: 2025 Method: FTMS; HCD Score: 91.08 m/z: 437.85 Gene names: BABAM1

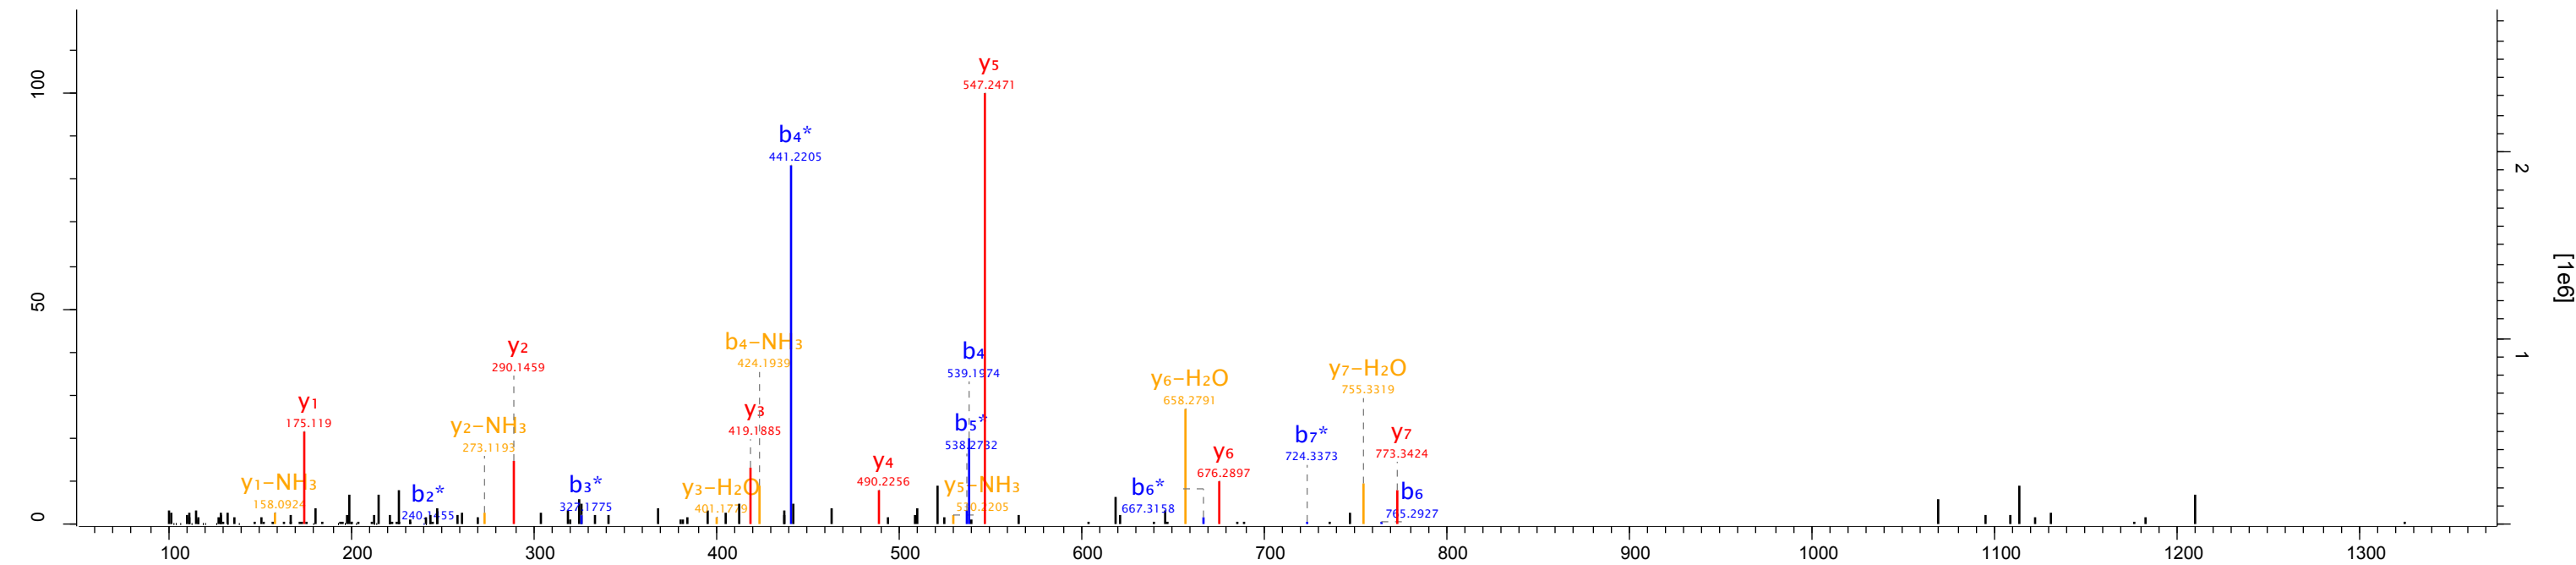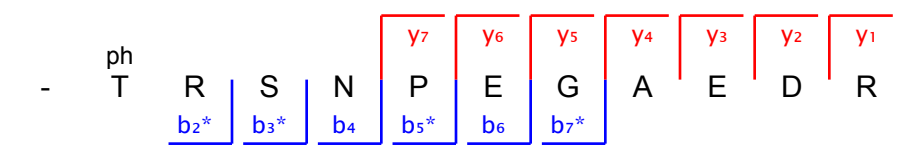

Raw file: 20150812\_A375SR\_Phospho\_BR1\_04  
 Scan: 20645 Method: FTMS; HCD Score: 93.41 m/z: 928.94 Gene names: AKAP11

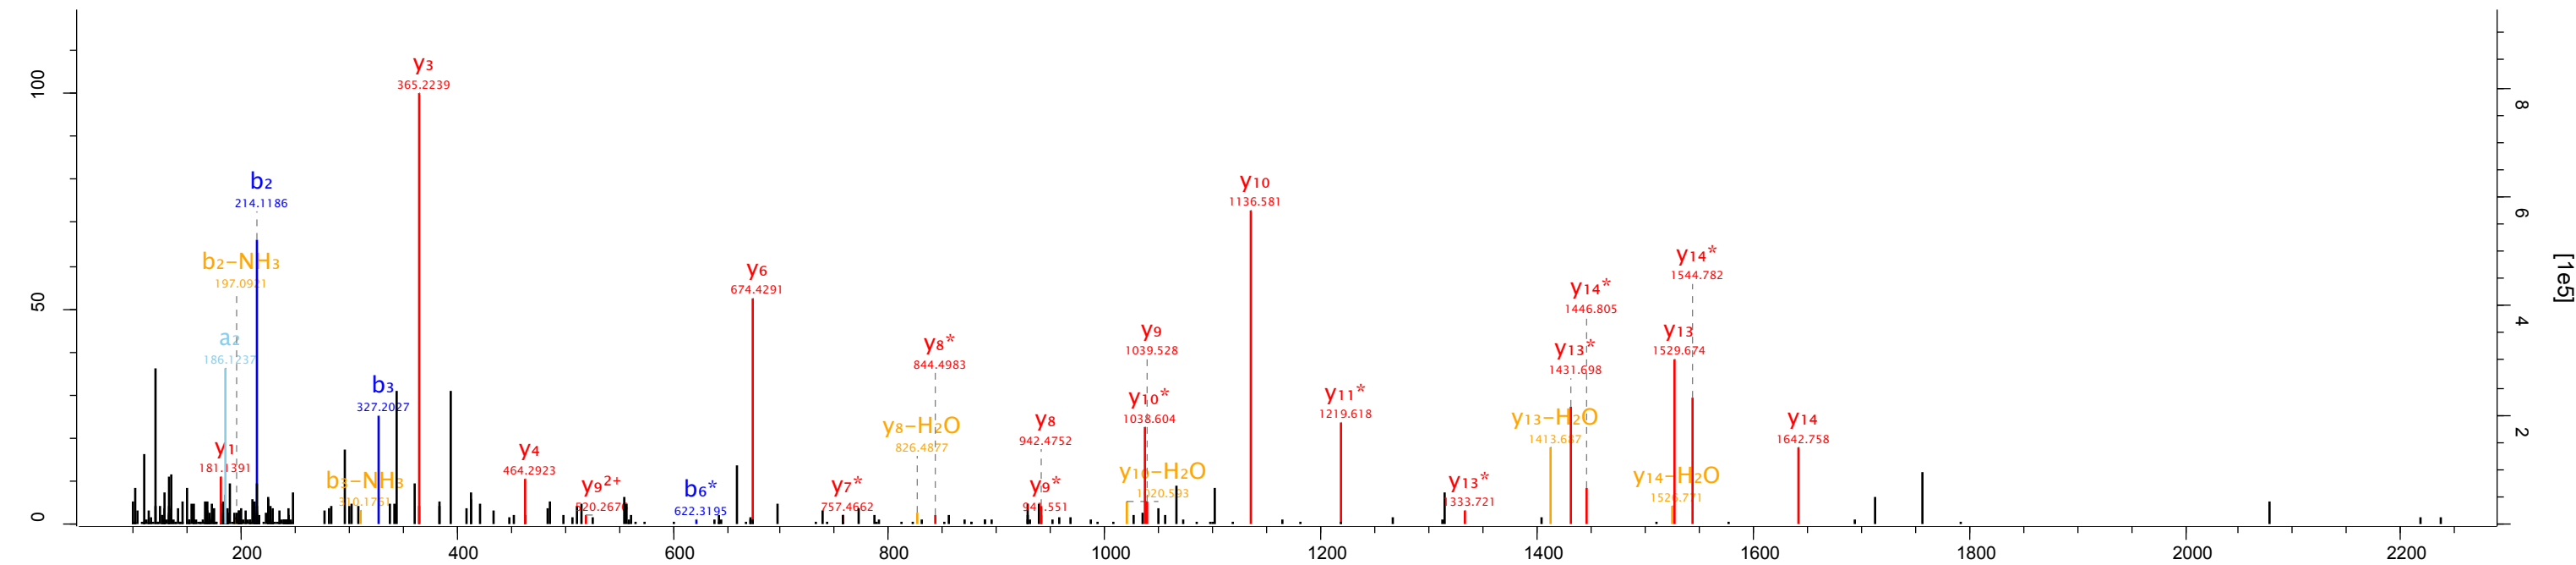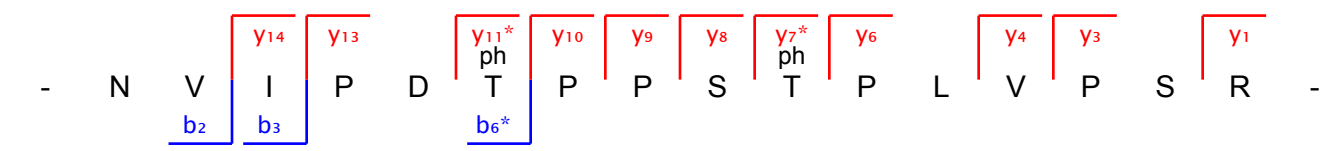



Raw file: 20150812\_A375SR\_Phospho\_BR1\_04  
 Scan: 20725 Method: FTMS; HCD Score: 231.39 m/z: 873.9 Gene names: NOLC1

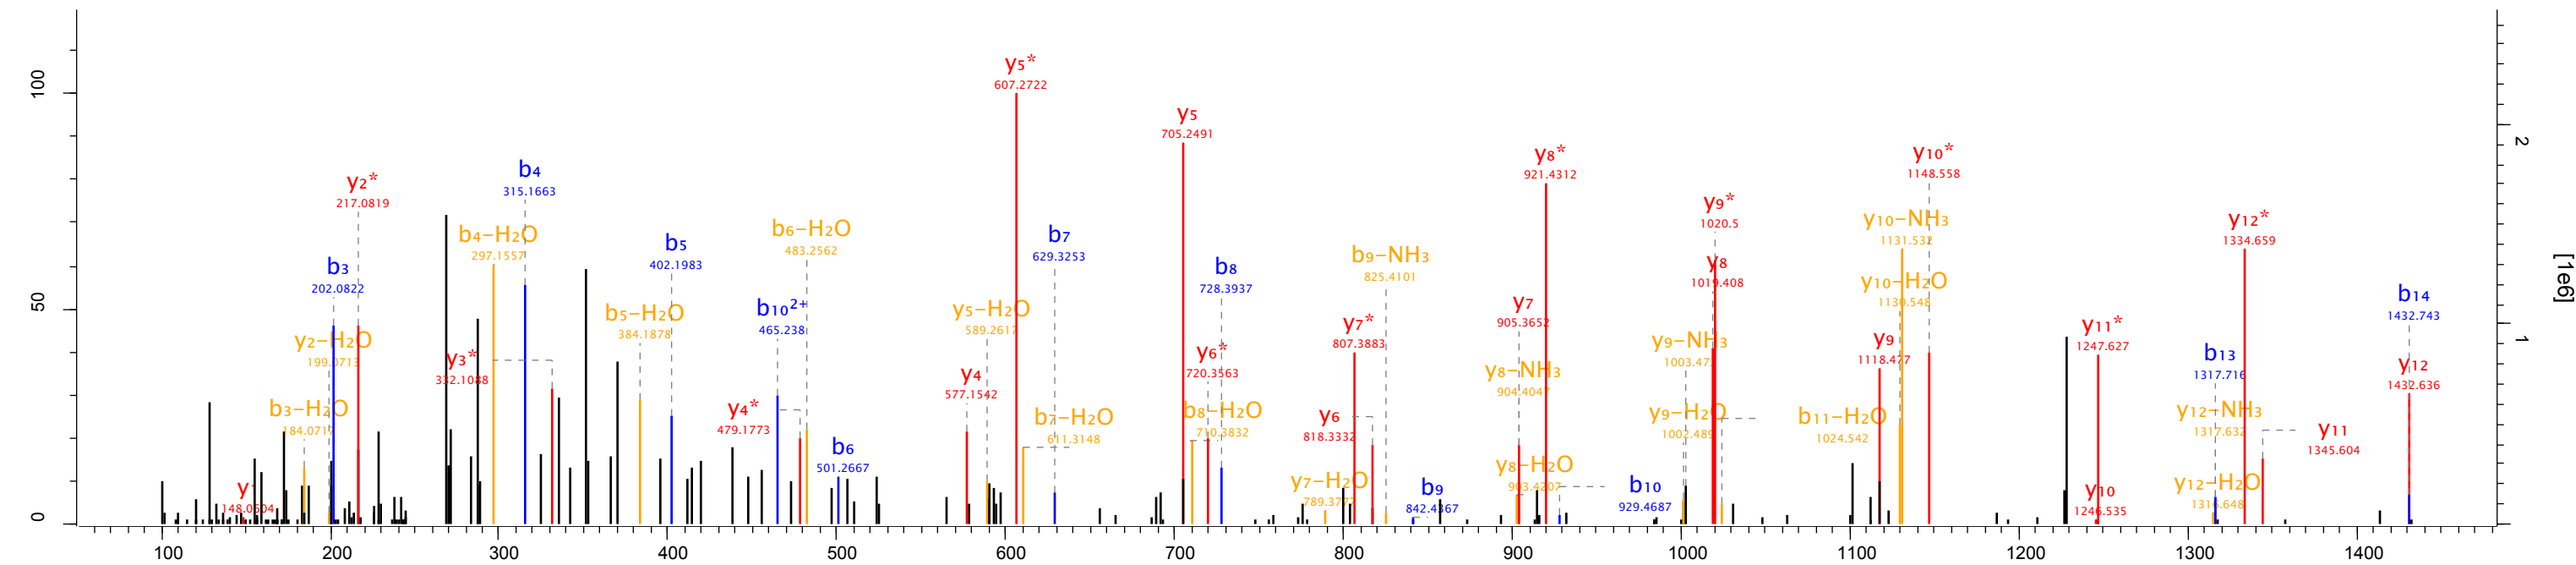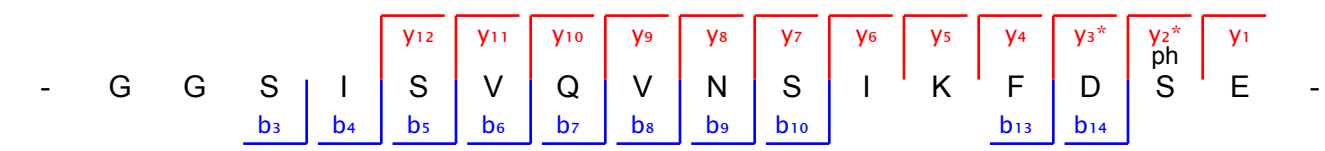

Raw file: 20150812\_A375SR\_Phospho\_BR1\_04  
 Scan: 21045 Method: FTMS; HCD Score: 180.46 m/z: 794.35 Gene names: UGP2

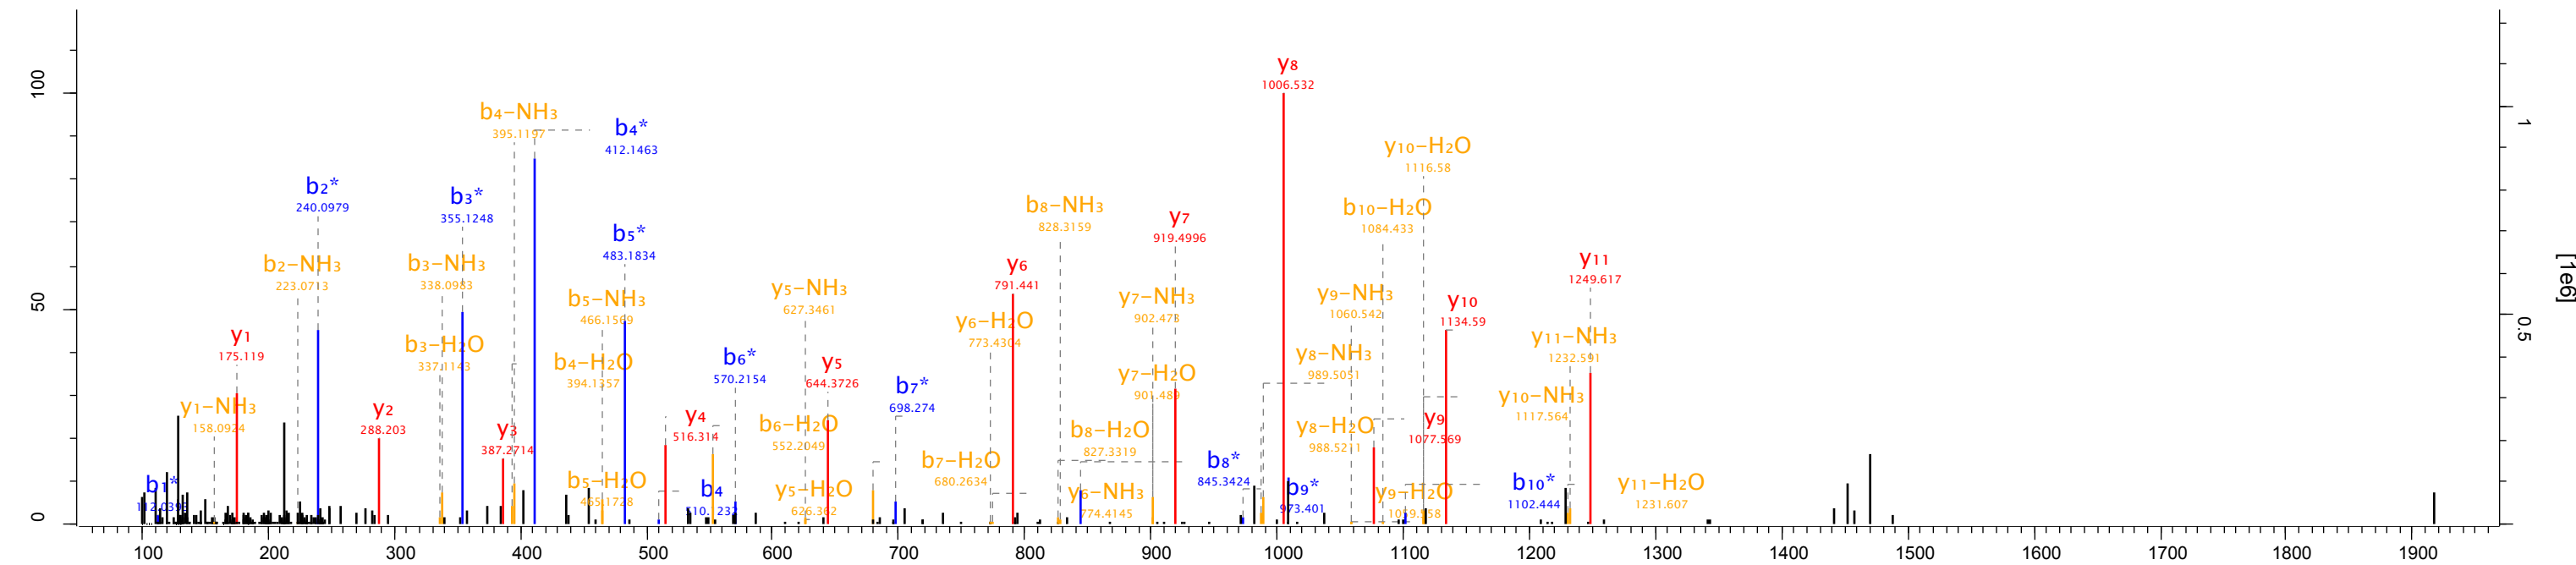

ac - ph S Q D G A S Q F Q E V I R -  
 b1\* b2\* b3\* b4 b5\* b6\* b7\* b8\* b9\* b10\*

Raw file: 20150812\_A375SR\_Phospho\_BR1\_04  
 Scan: 21505 Method: FTMS; HCD Score: 101.21 m/z: 1128.81 Gene names: IPO5

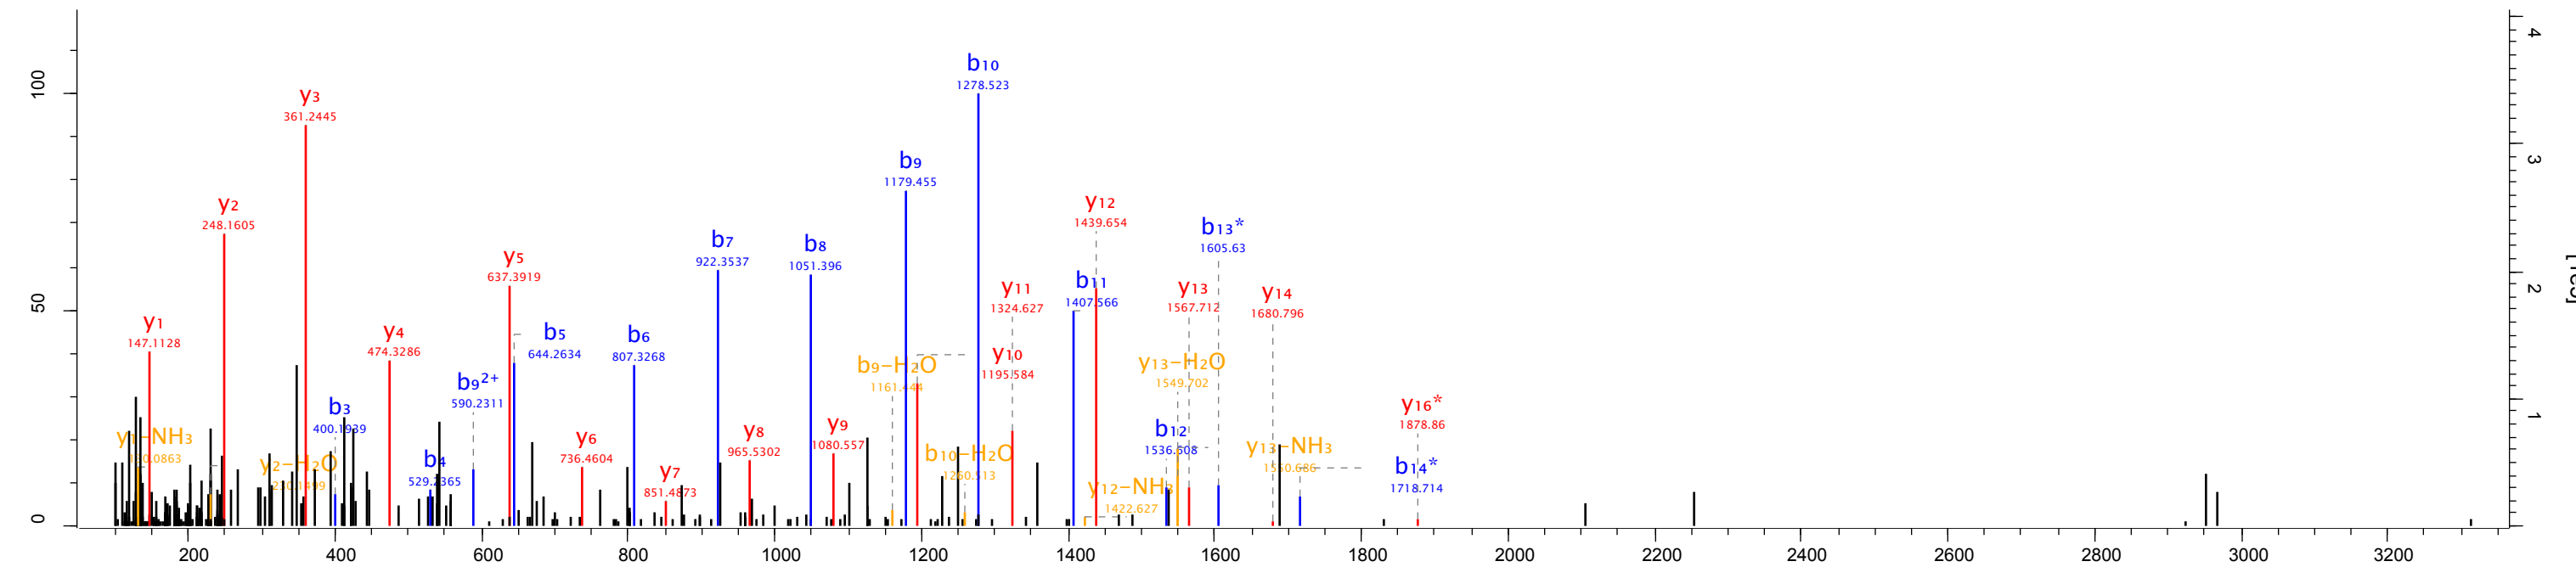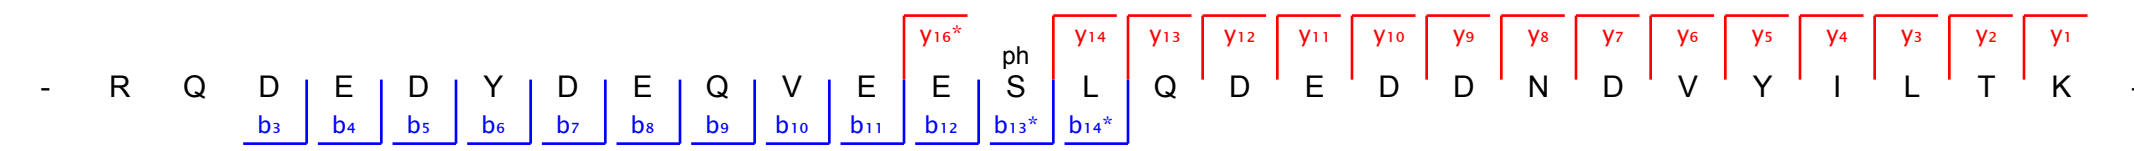

Raw file  
20150812\_A375SR\_Phospho\_BR1\_04

Scan 22885 Method FTMS; HCD Score 139.75 m/z 1014.5 Gene names CDC5L

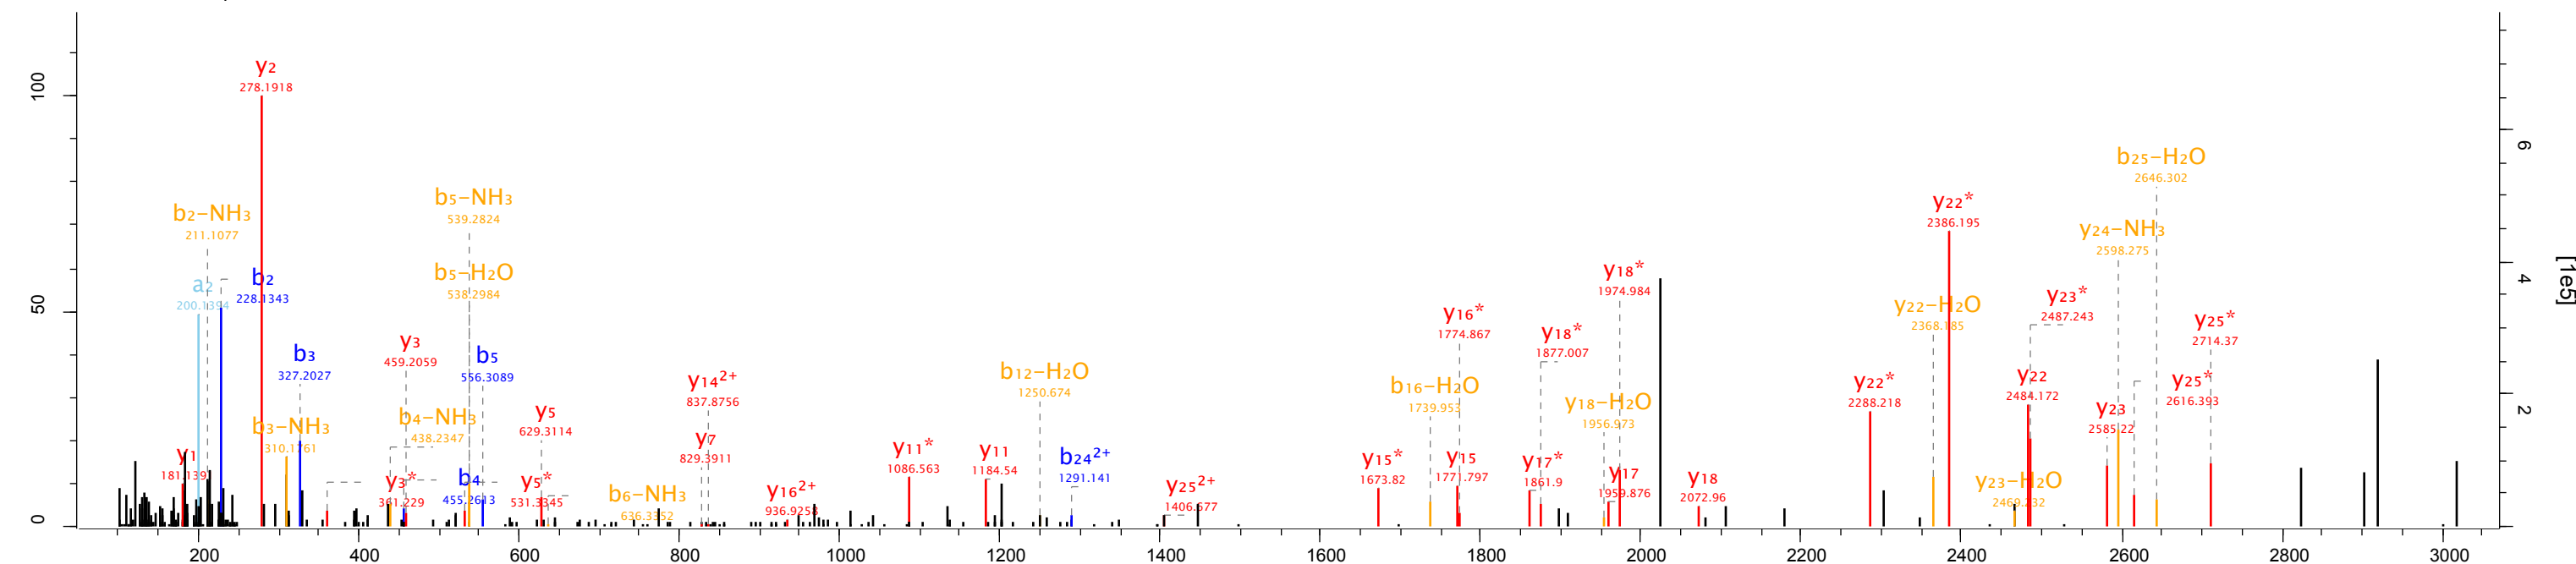

- Q V V Q T P N T V L S T P F R T P S N G A E G L T P R -  
b<sub>2</sub> b<sub>3</sub> b<sub>4</sub> b<sub>5</sub> b<sub>24<sup>2+</sup> y<sub>18</sub> y<sub>17</sub> y<sub>16\*</sub> y<sub>15</sub> y<sub>14<sup>2+</sup> y<sub>11</sub> y<sub>7</sub> y<sub>5</sub> y<sub>3</sub> y<sub>2</sub> y<sub>1</sub></sub></sub>

Raw file 20150812\_A375SR\_Phospho\_BR1\_04 Scan 23255 Method FTMS; HCD Score 107.57 m/z 1245.49 Gene names YWHAZ

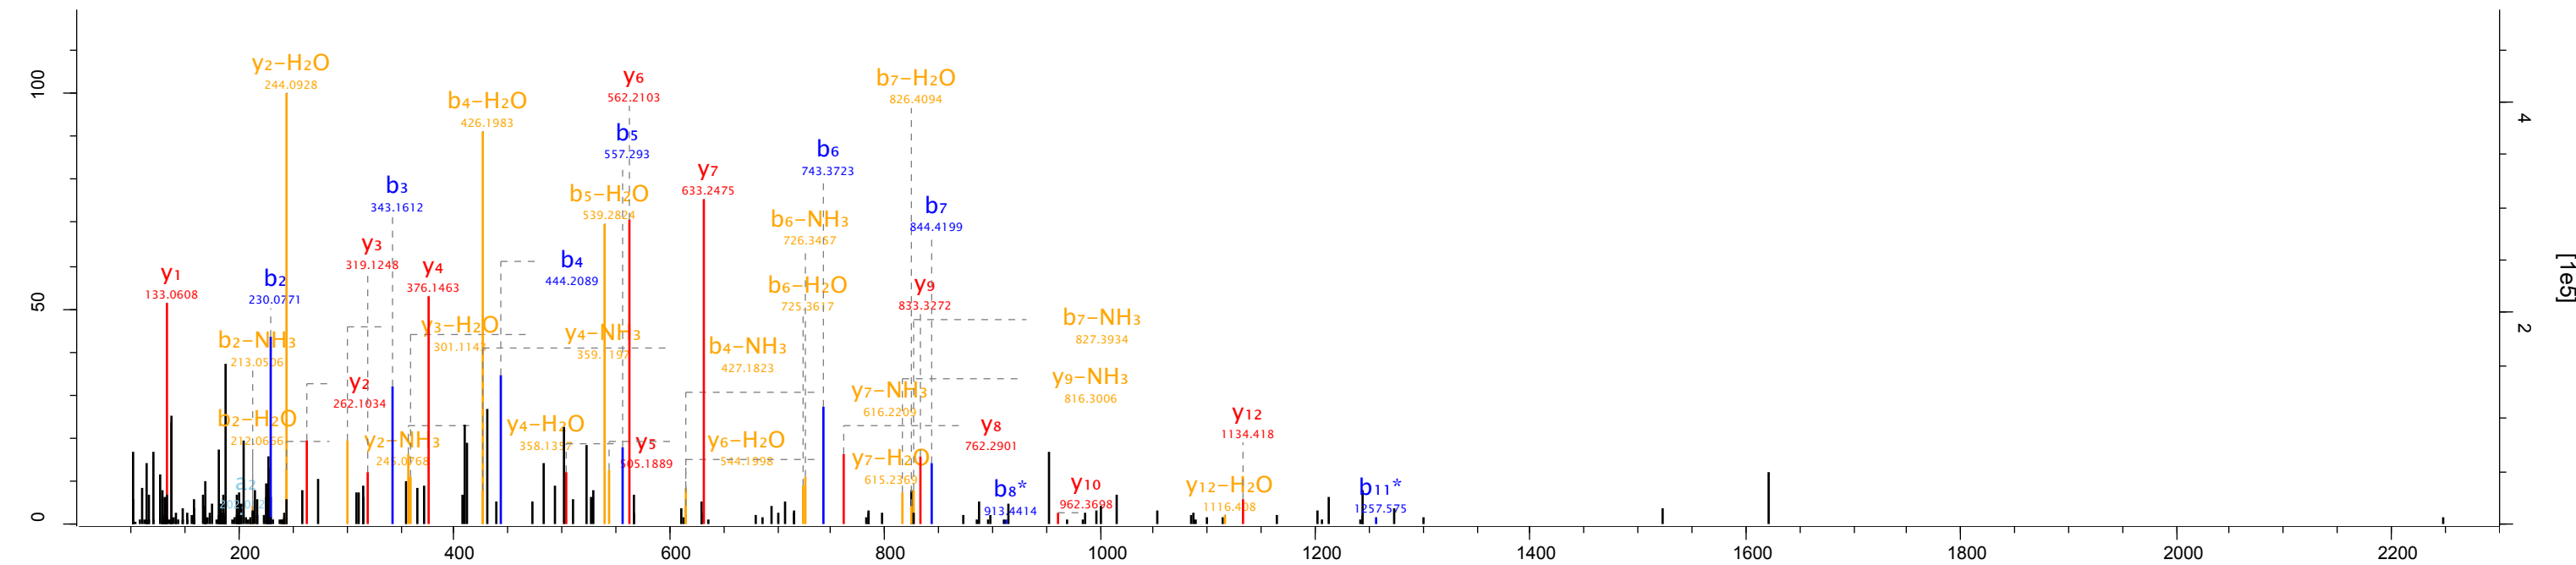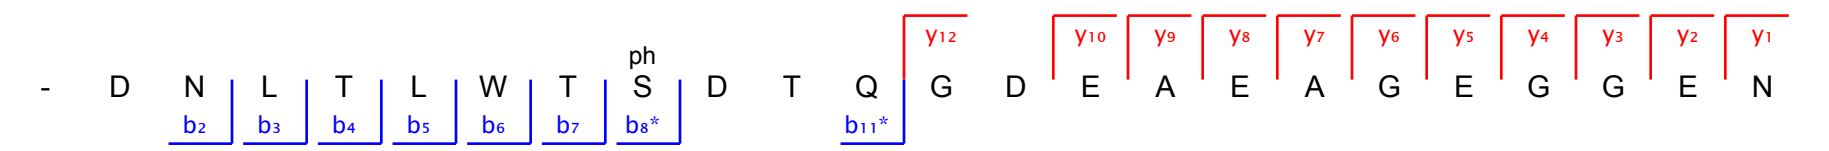

Raw file 20150812\_A375SR\_Phospho\_BR1\_04 Scan 25035 Method FTMS; HCD Score 132.28 m/z 961.5 Gene names B4GALT1

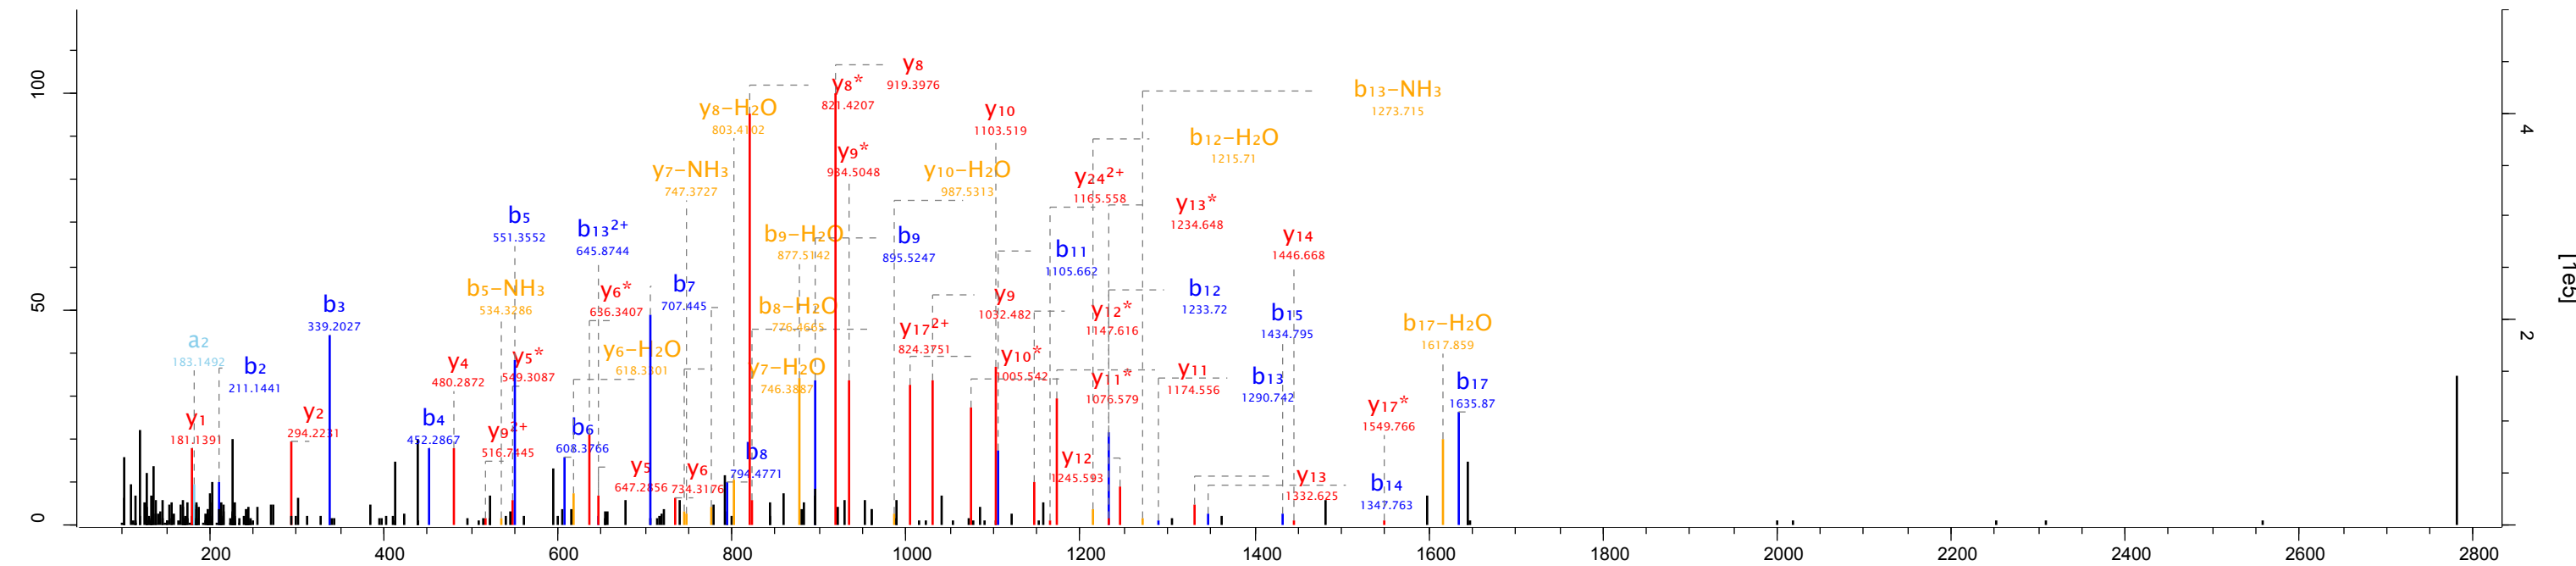

- L P Q L V G V S T P L Q G G S N S A A A I G Q S S G E L R -

b<sub>2</sub>
b<sub>3</sub>
b<sub>4</sub>
b<sub>5</sub>
b<sub>6</sub>
b<sub>7</sub>
b<sub>8</sub>
b<sub>9</sub>
b<sub>11</sub>
b<sub>12</sub>
b<sub>13</sub>
b<sub>14</sub>
b<sub>15</sub>
b<sub>17</sub>
y<sub>14</sub>
y<sub>13</sub>
y<sub>12</sub>
y<sub>11</sub>
y<sub>10</sub>
y<sub>9</sub>
y<sub>8</sub>
y<sub>6</sub>
y<sub>5</sub><sup>ph</sup>
y<sub>4</sub>
y<sub>2</sub>
y<sub>1</sub>
y<sub>24</sub><sup>2+</sup>
y<sub>17</sub><sup>\*</sup>

Raw file: 20150812\_A375SR\_Phospho\_BR1\_04  
 Scan: 26095 Method: FTMS; HCD Score: 97.63 m/z: 1495.97 Gene names: GNLI

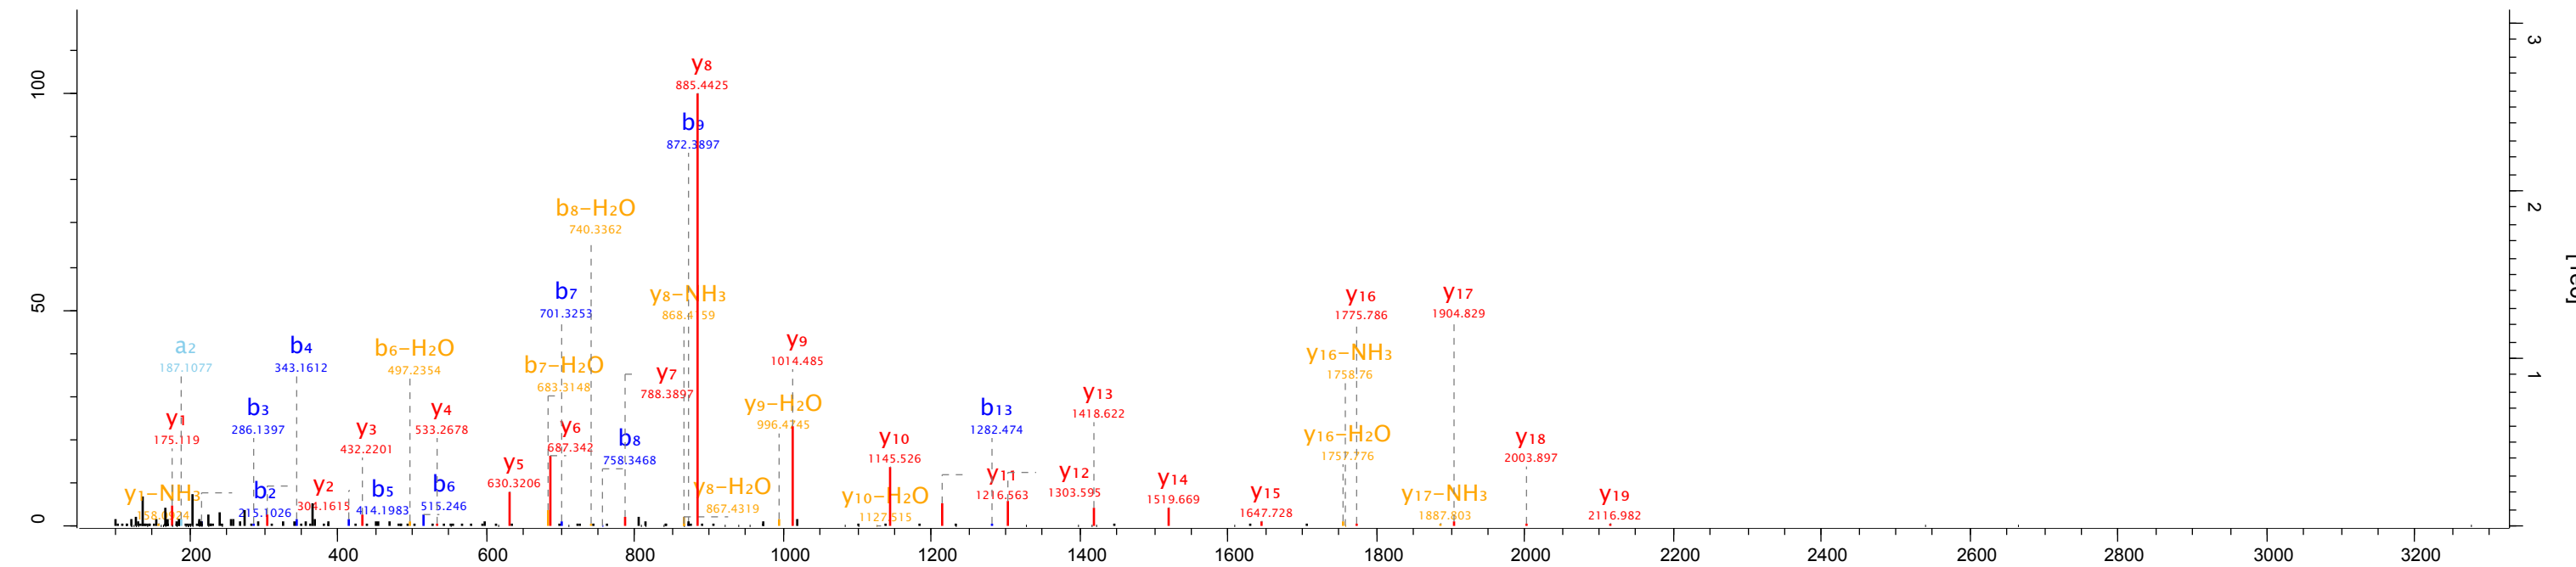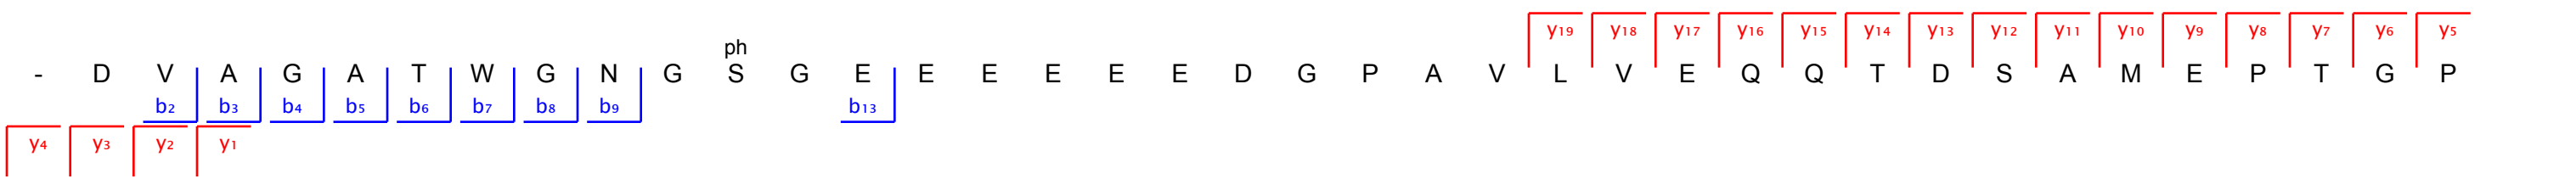

Raw file: 20150812\_A375SR\_Phospho\_BR1\_04  
 Scan: 3065 Method: FTMS; HCD Score: 174.99 m/z: 850.35 Gene names: POGZ

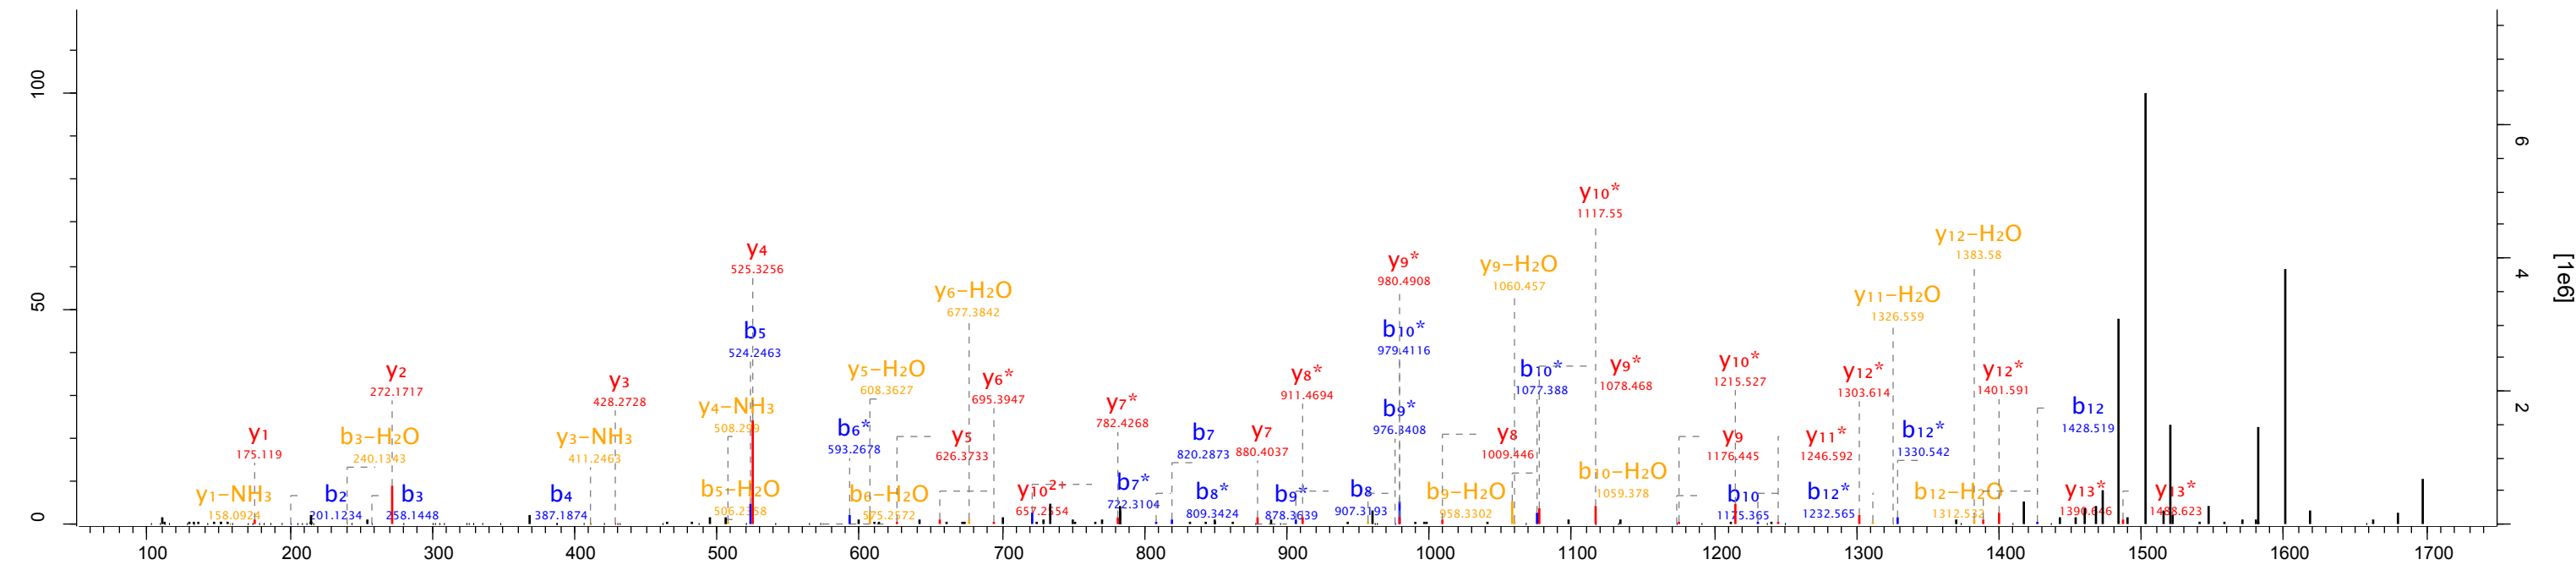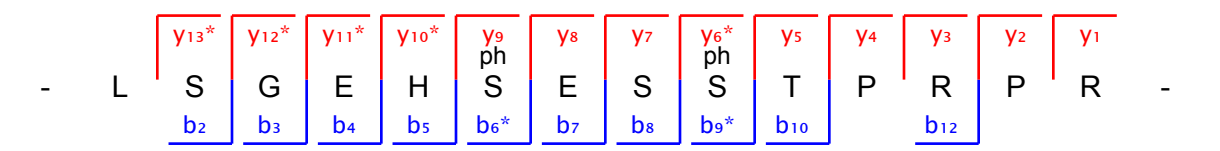



Raw file 20150812\_A375SR\_Phospho\_BR1\_04 Scan 3105 Method FTMS; HCD Score 72.66 m/z 584.79 Gene names BUB1B

20150812\_A375SR\_Phospho\_BR1\_04

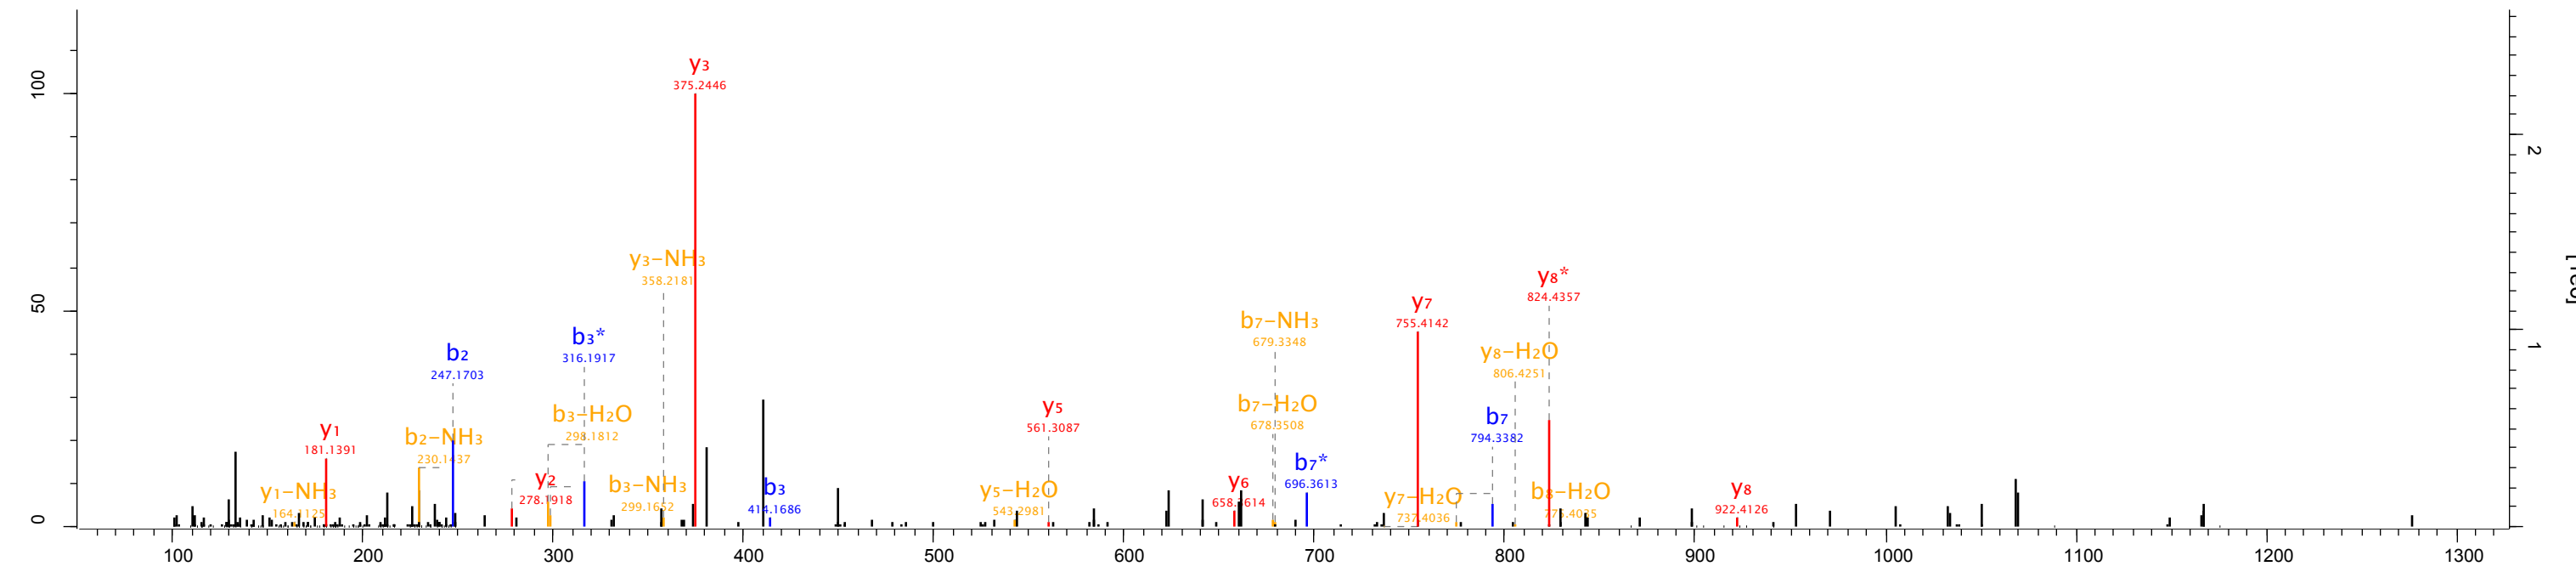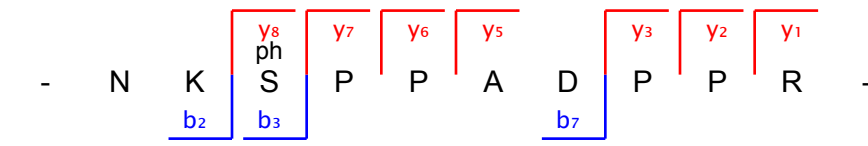

Raw file: 20150812\_A375SR\_Phospho\_BR1\_04  
 Scan: 3605 Method: FTMS; HCD Score: 106.14 m/z: 440.21 Gene names: BCLAF1

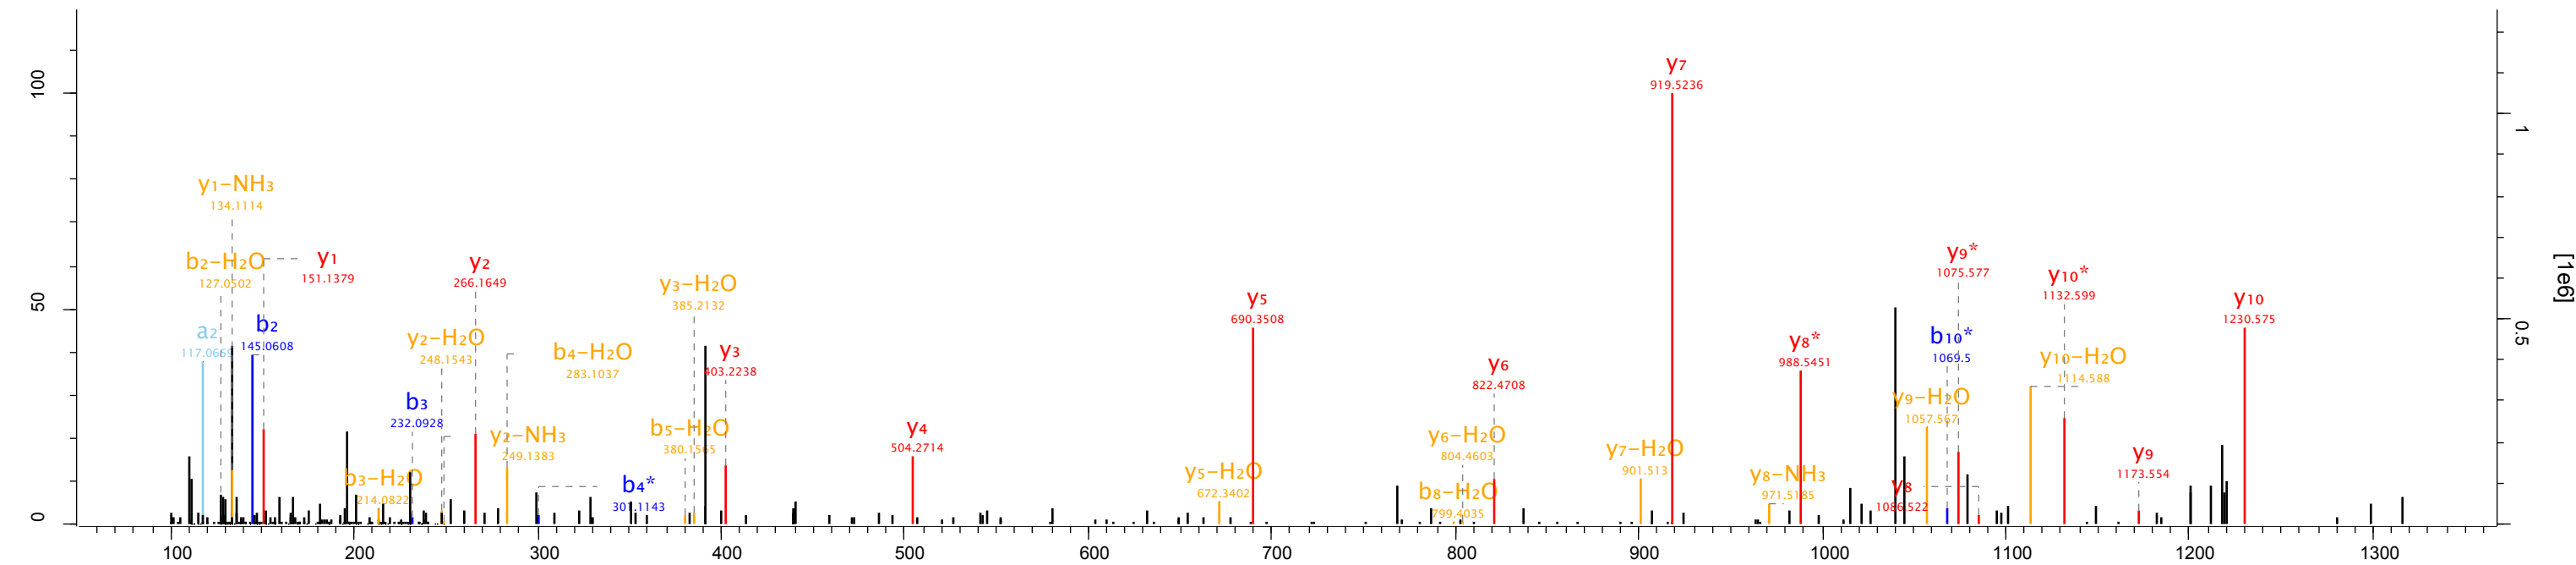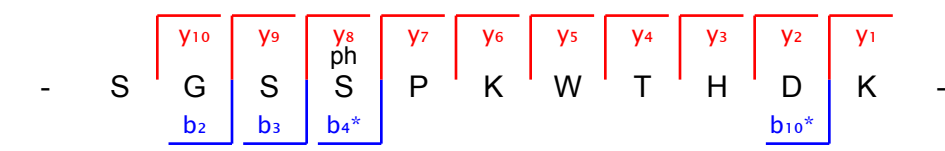

Raw file 20150812\_A375SR\_Phospho\_BR1\_04 Scan 4945 Method FTMS; HCD Score 130.27 m/z 605.28 Gene names LMNA

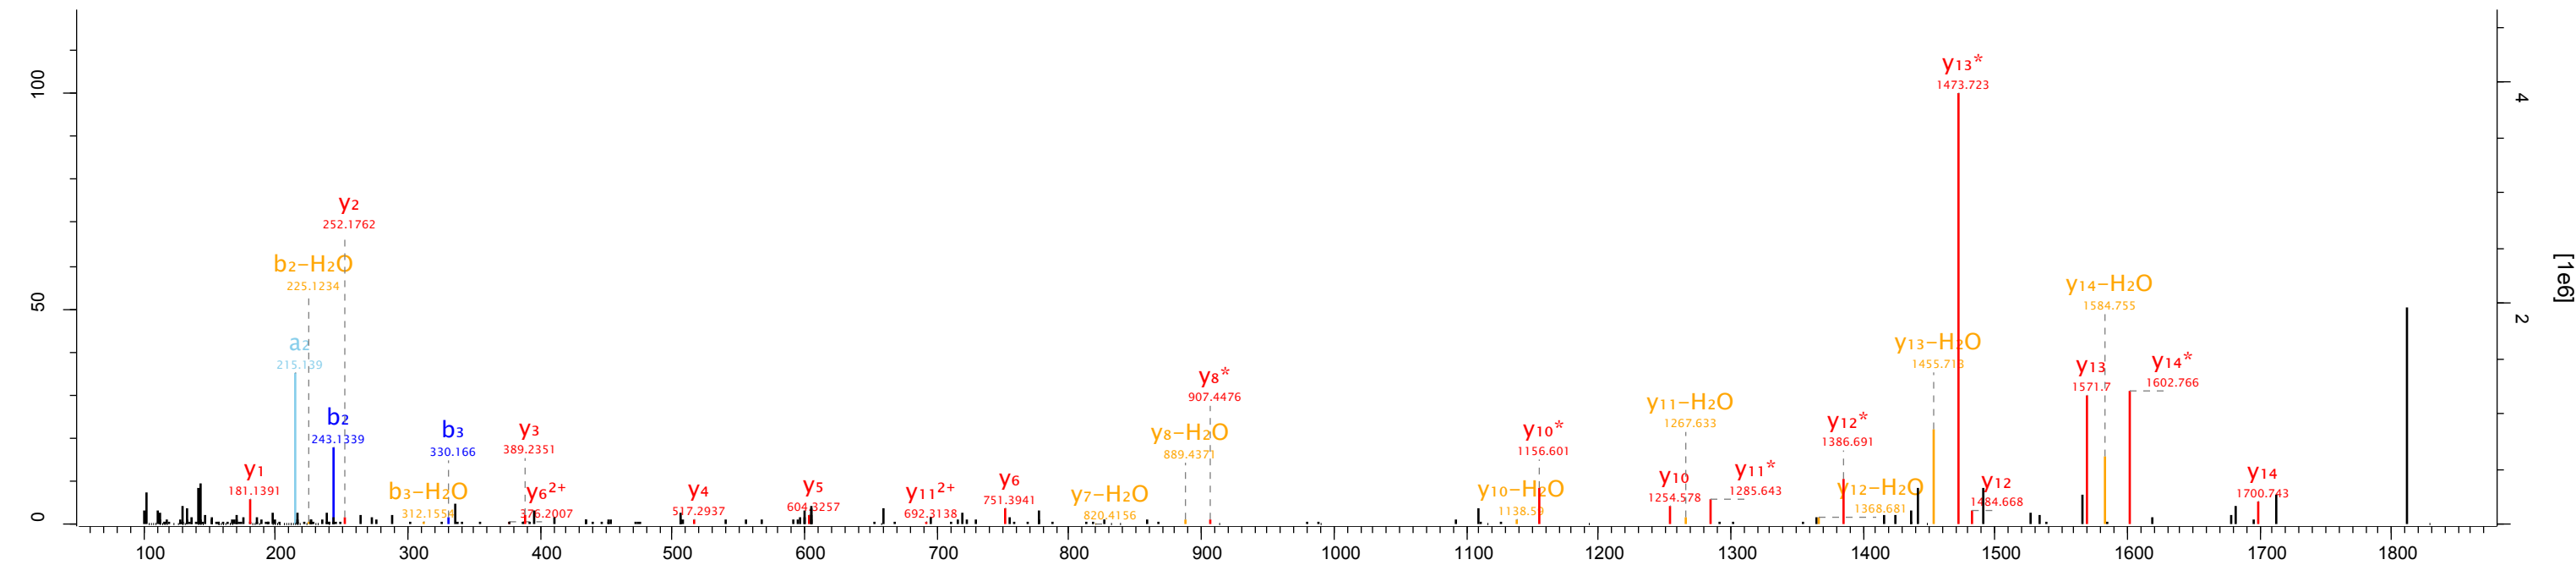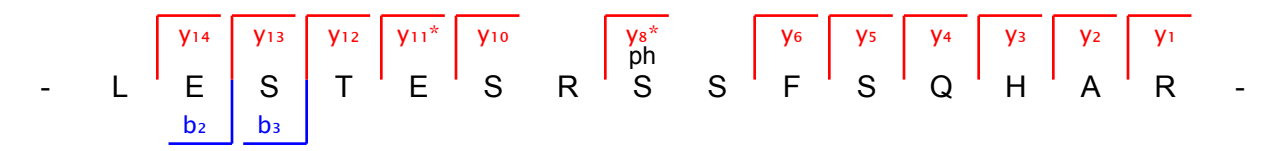

Raw file: 20150812\_A375SR\_Phospho\_BR1\_04  
 Scan: 5225 Method: FTMS; HCD Score: 84.86 m/z: 479.9 Gene names: PCM1

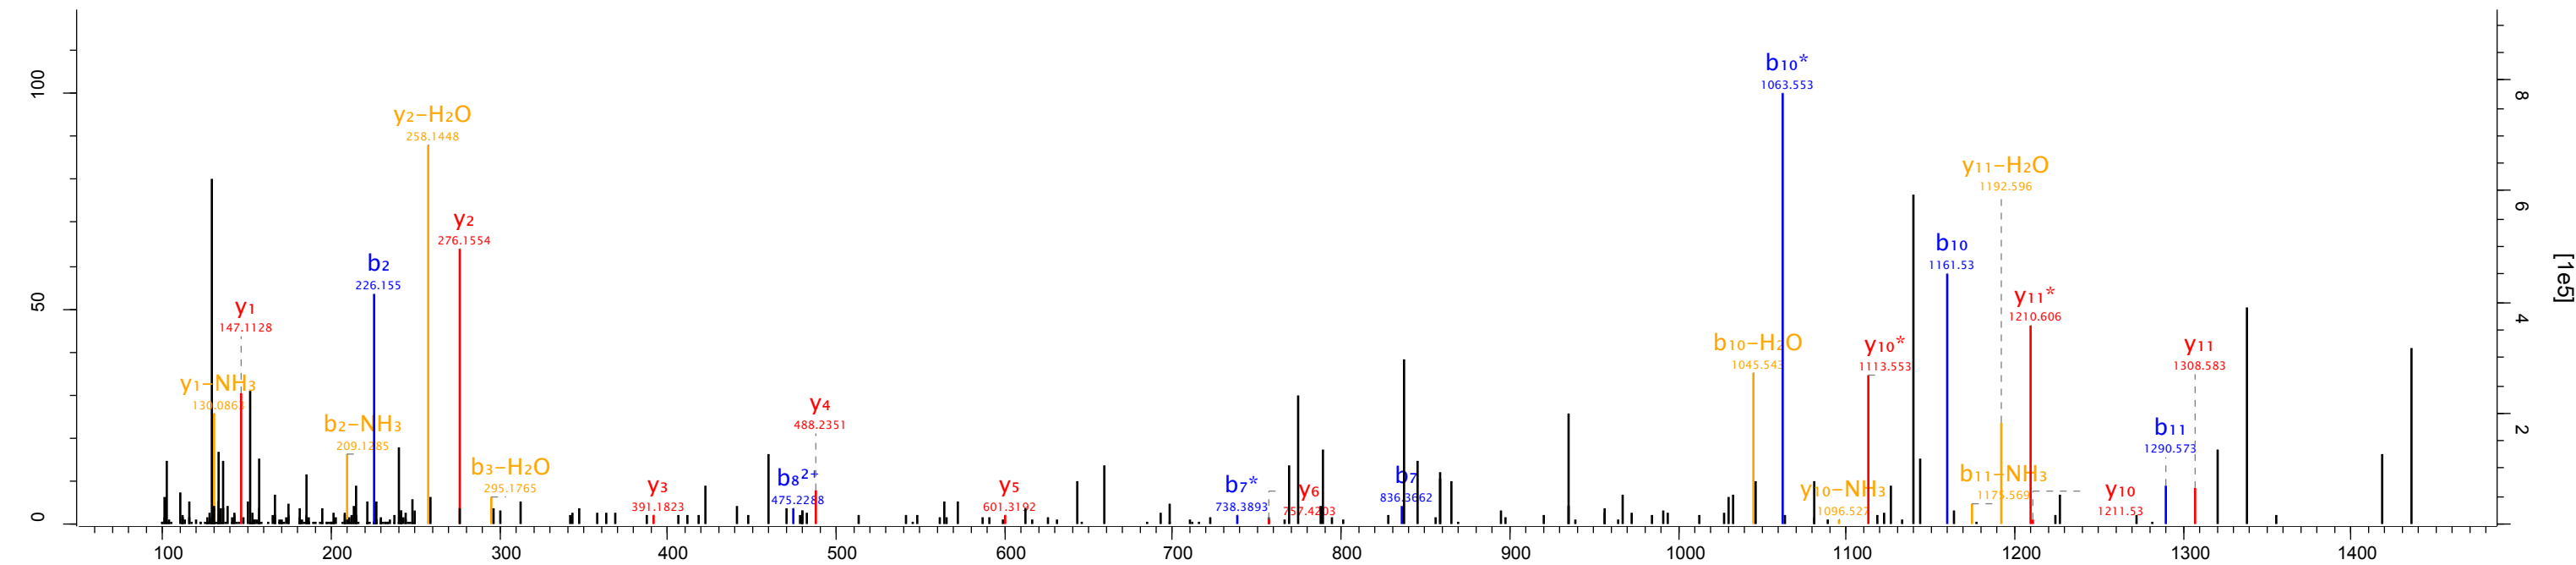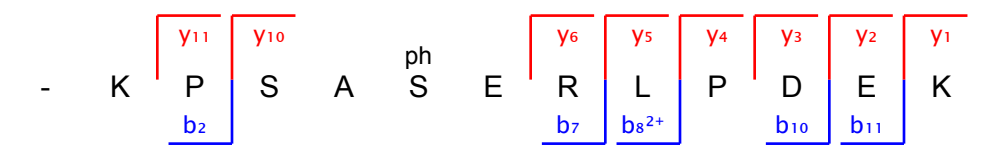

Raw file: 20150812\_A375SR\_Phospho\_BR1\_04  
 Scan: 5985 Method: FTMS; HCD Score: 129.06 m/z: 878.91 Gene names: NUP214

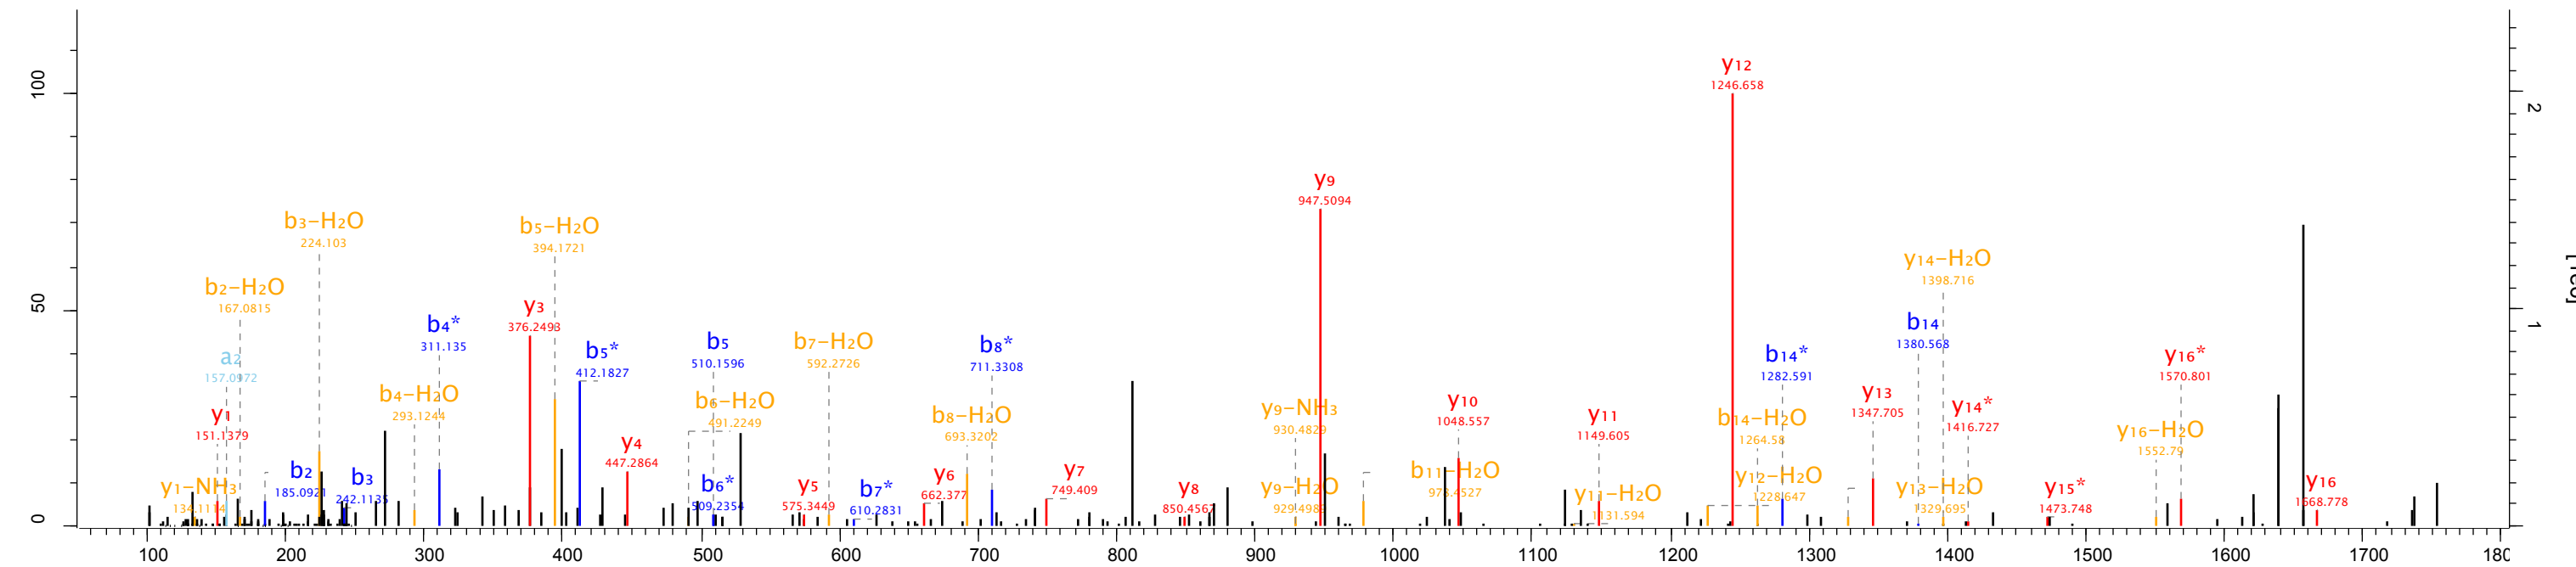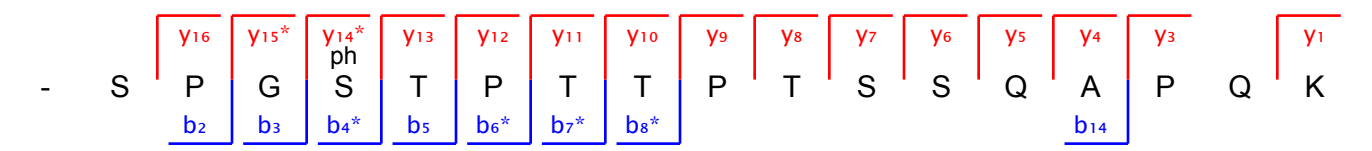

Raw file 20150812\_A375SR\_Phospho\_BR1\_04 Scan 6265 Method FTMS; HCD Score 66.27 m/z 449.22 Gene names AKAP10

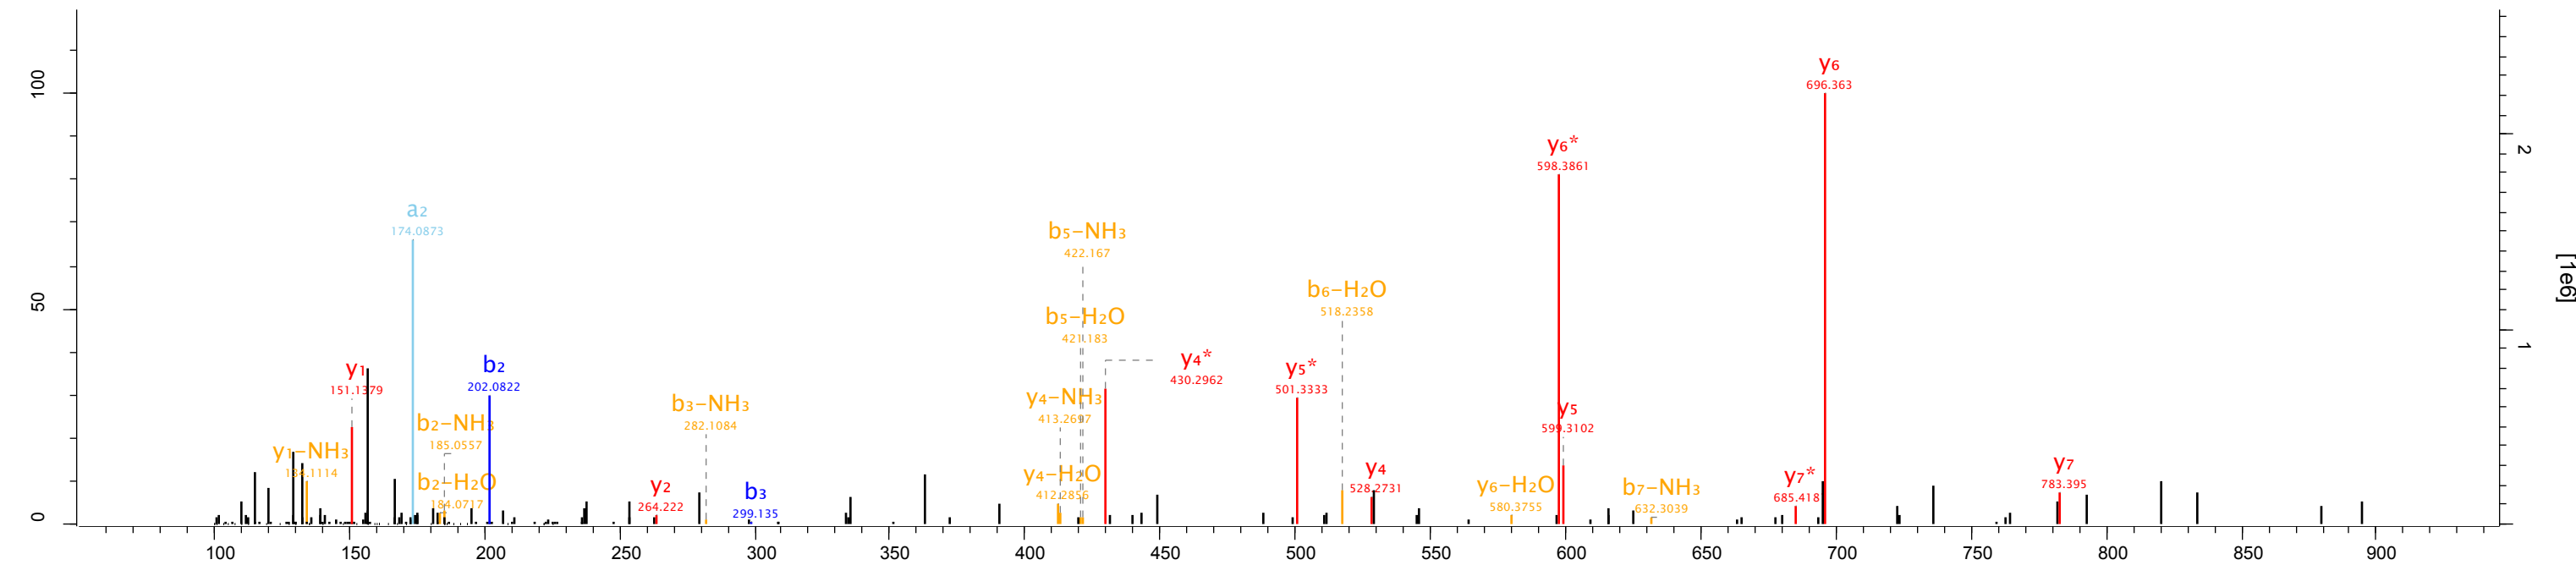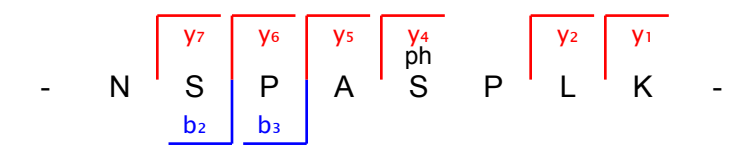

Raw file: 20150812\_A375SR\_Phospho\_BR1\_04  
 Scan: 6425 Method: FTMS; HCD Score: 114.99 m/z: 553.89 Gene names: RBMX2

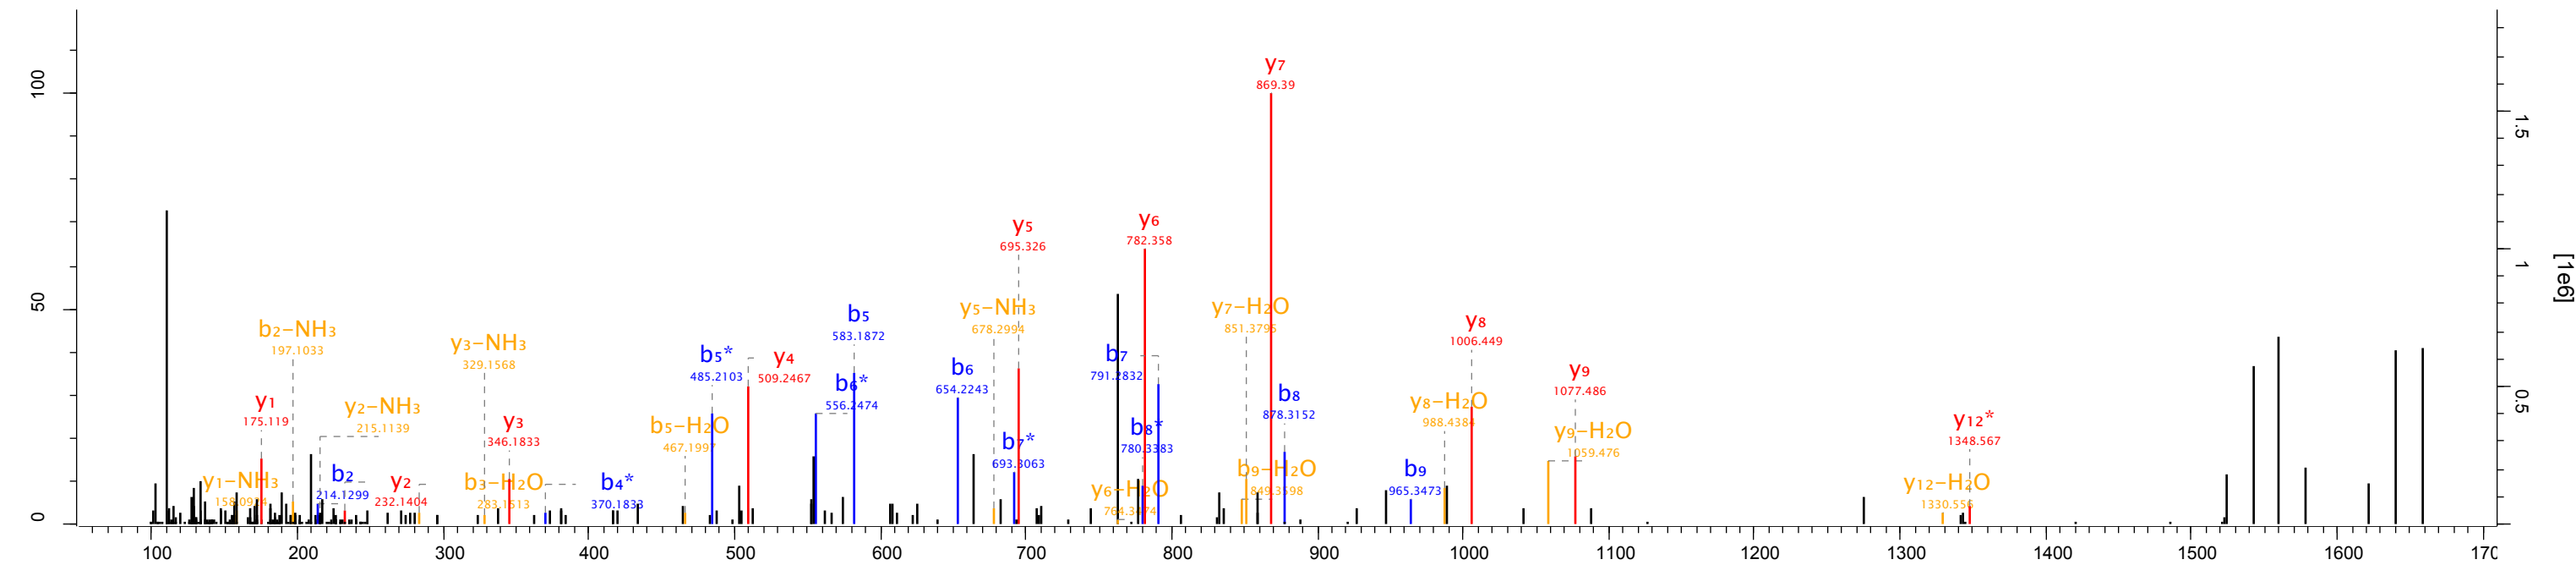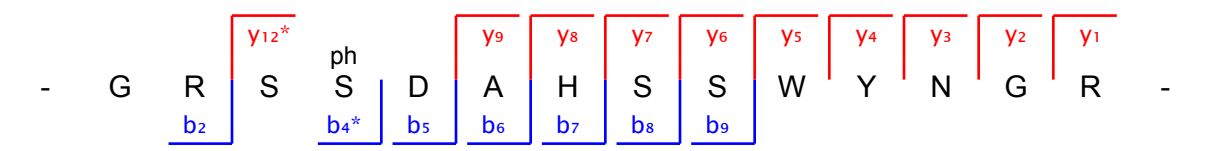

Raw file: 20150812\_A375SR\_Phospho\_BR1\_04  
 Scan: 6695 Method: FTMS; HCD Score: 109.23 m/z: 943.92 Gene names: CHTF18

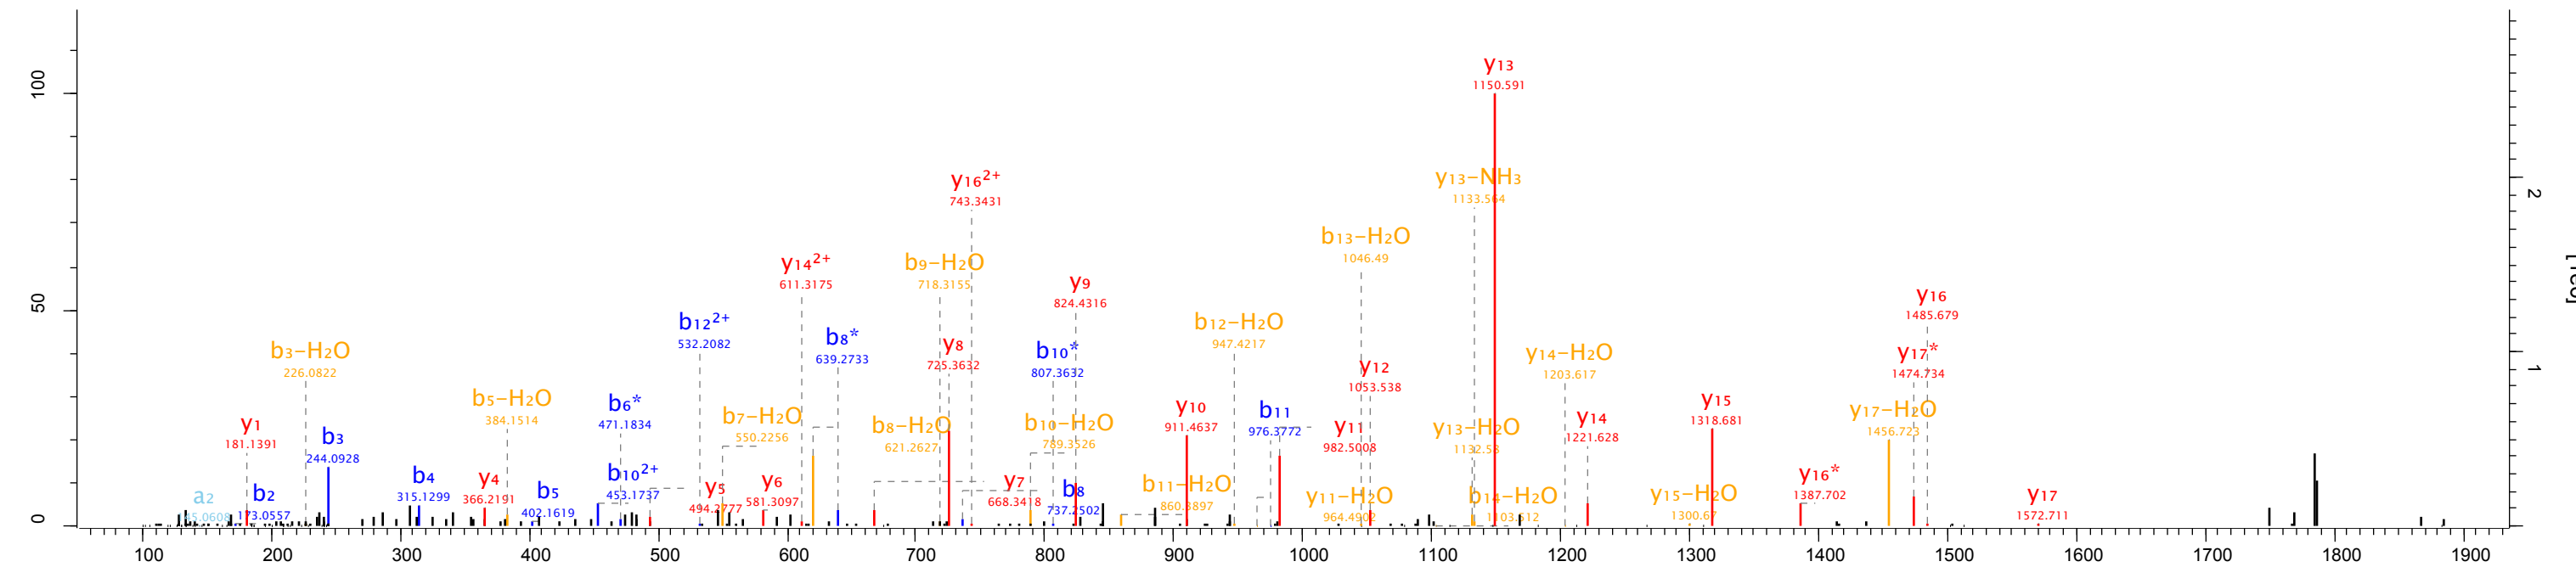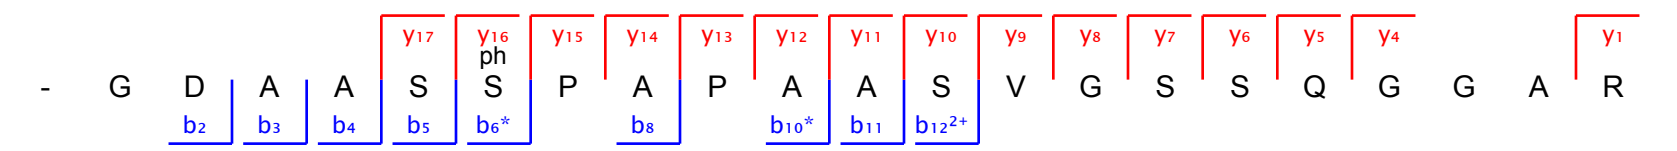



Raw file 20150812\_A375SR\_Phospho\_BR1\_04 Scan 6725 Method FTMS; HCD Score 184.32 m/z 877.81 Gene names HAUS7

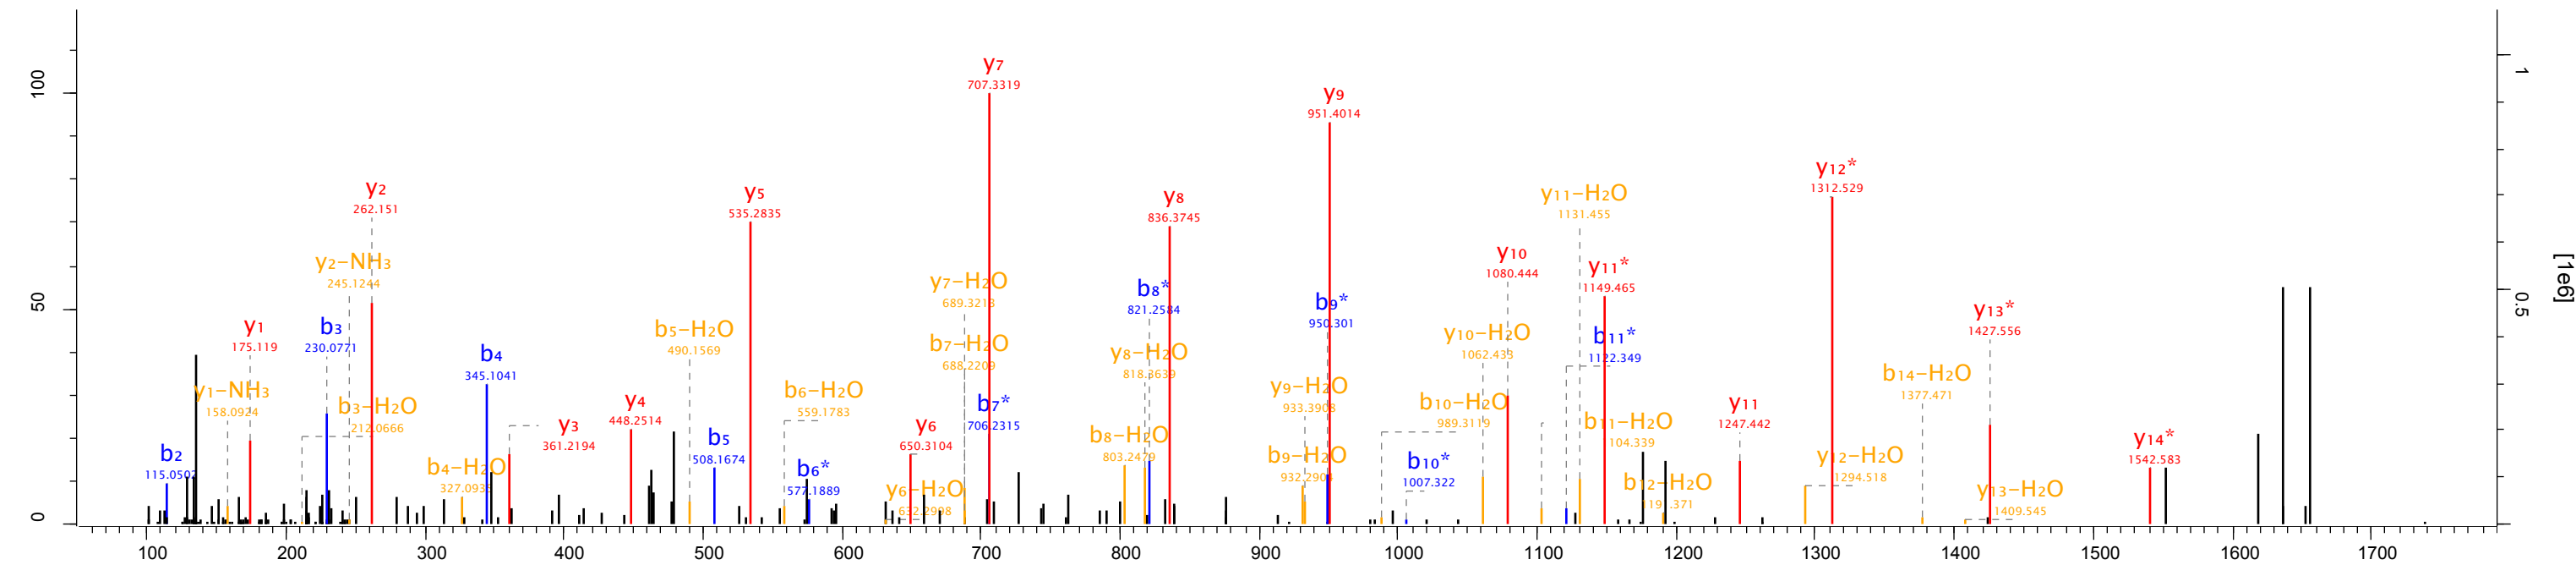

- G G D D Y S E D E G D S S V S R -

b<sub>2</sub>
b<sub>3</sub>
b<sub>4</sub>
b<sub>5</sub>
b<sub>6</sub>\*
b<sub>7</sub>\*
b<sub>8</sub>\*
b<sub>9</sub>\*
b<sub>10</sub>\*
b<sub>11</sub>\*
y<sub>14</sub>\*
y<sub>13</sub>\*
y<sub>12</sub>\*
y<sub>11</sub>ph
y<sub>10</sub>
y<sub>9</sub>
y<sub>8</sub>
y<sub>7</sub>
y<sub>6</sub>
y<sub>5</sub>
y<sub>4</sub>
y<sub>3</sub>
y<sub>2</sub>
y<sub>1</sub>

Raw file 20150812\_A375SR\_Phospho\_BR1\_04 Scan 6865 Method FTMS; HCD Score 159.56 m/z 1094.43 Gene names TRAF3IP1

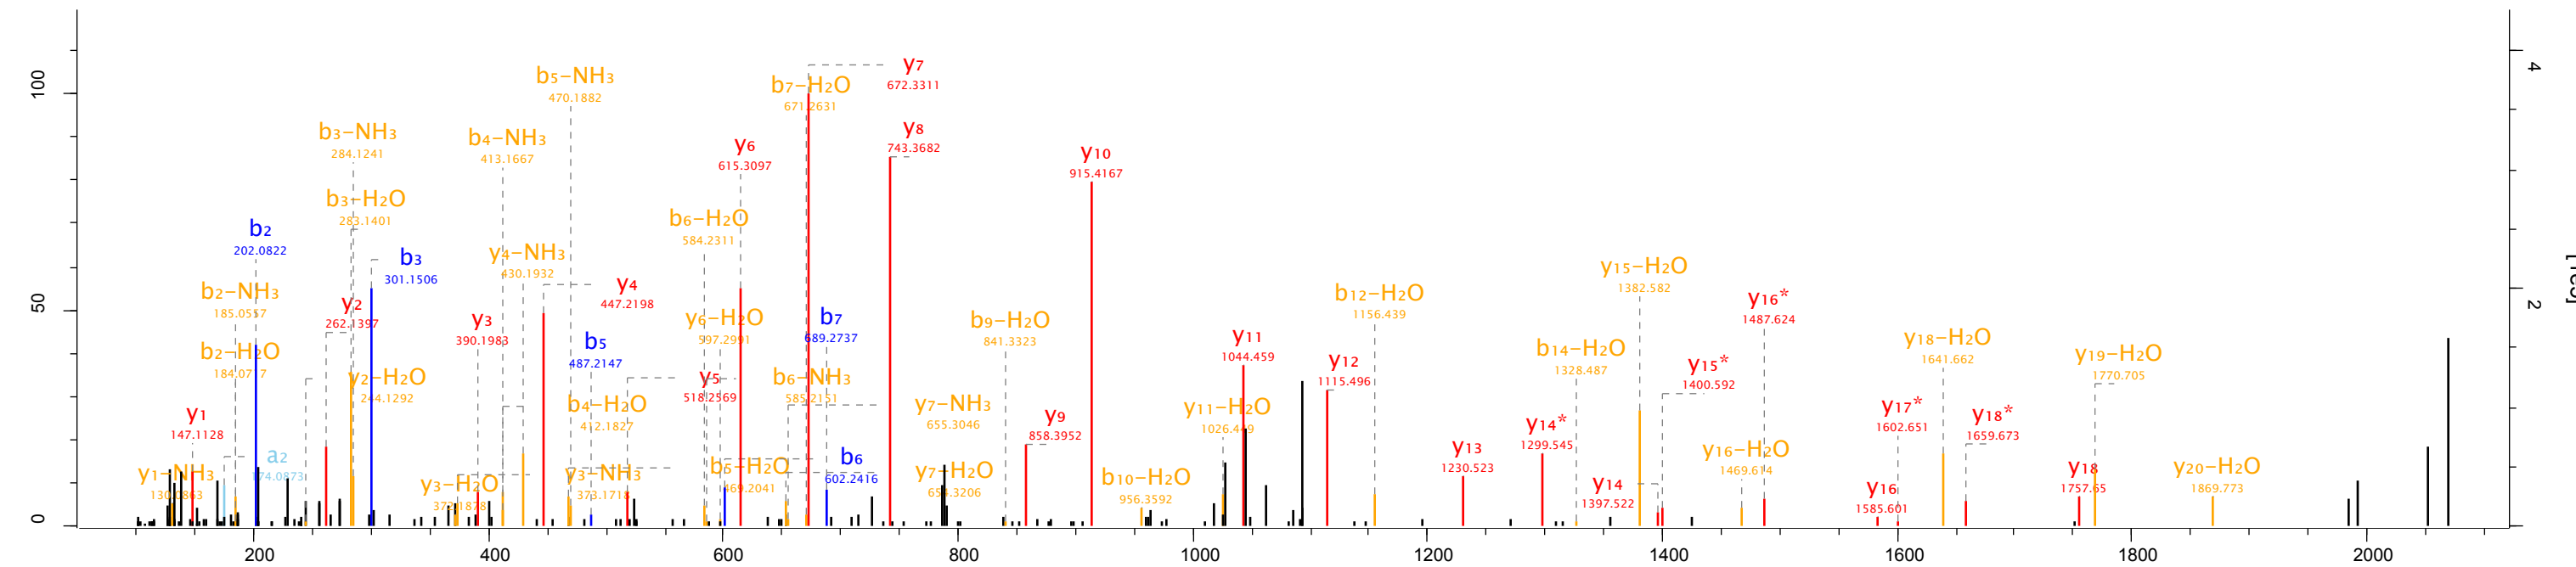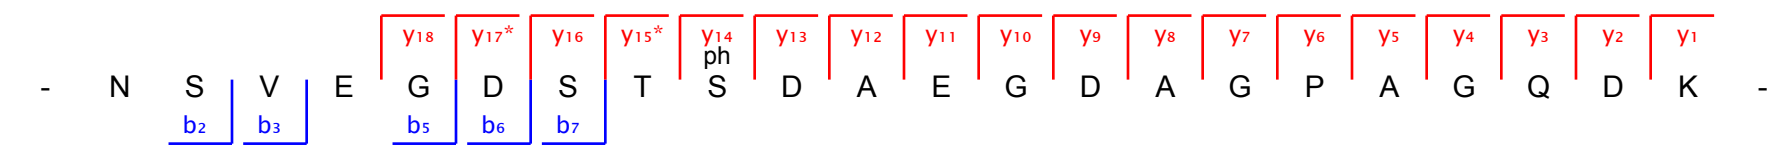

Raw file 20150812\_A375SR\_Phospho\_BR1\_04 Scan 7005 Method FTMS; HCD Score 79.51 m/z 952.08 Gene names PHF3

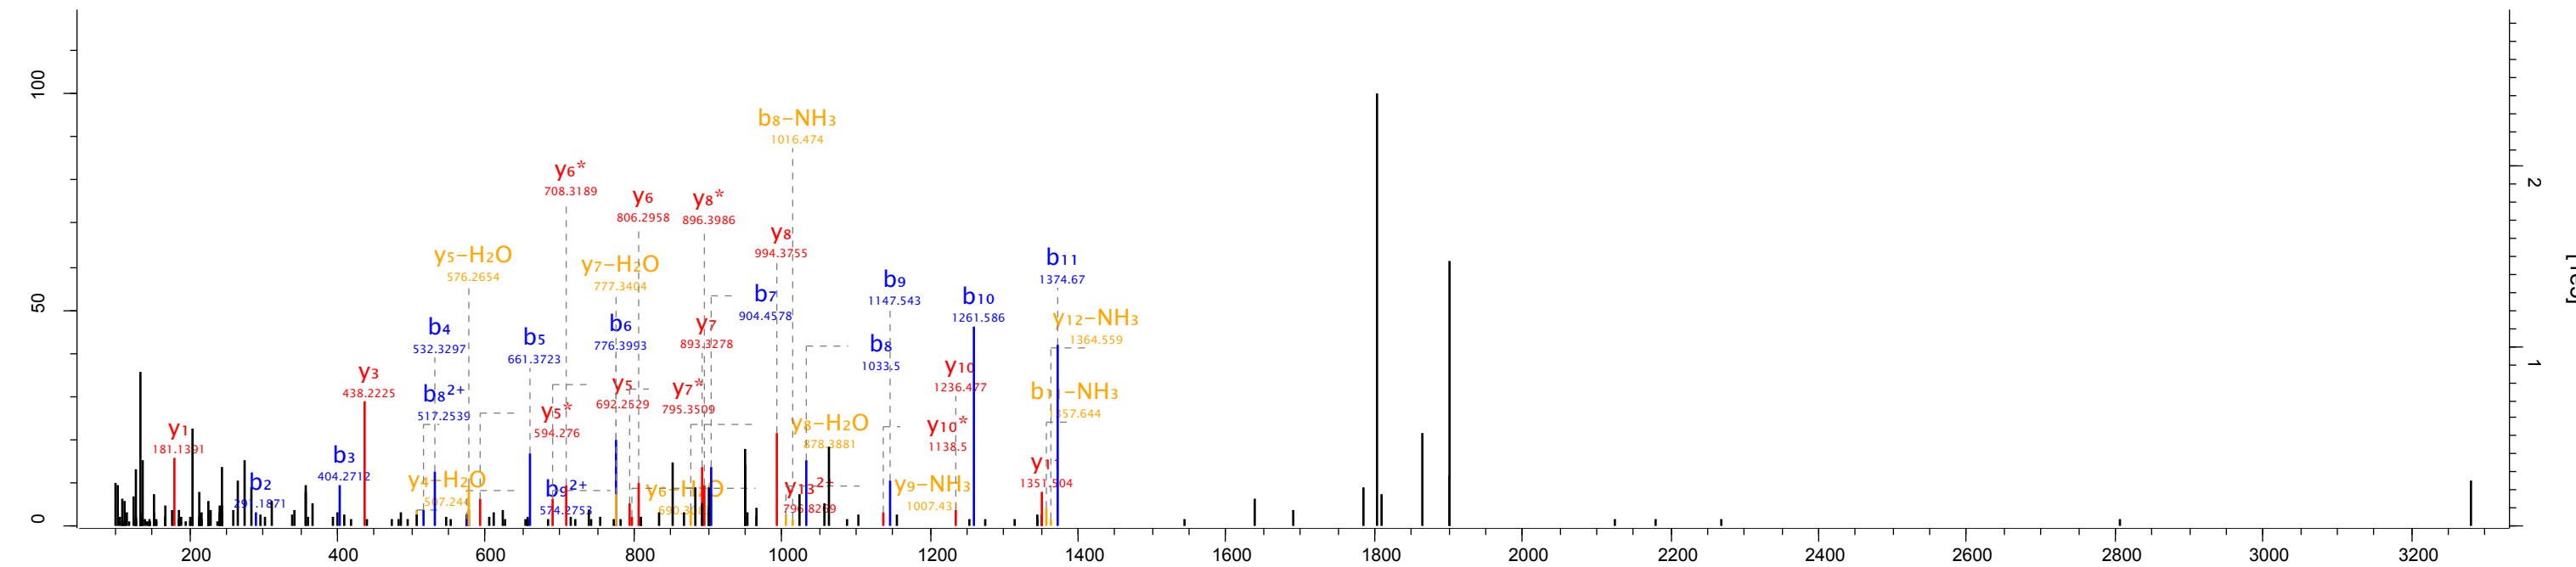

- R Q L Q E D Q E N N L Q D N Q T S N S P C R -

b<sub>2</sub>
b<sub>3</sub>
b<sub>4</sub>
b<sub>5</sub>
b<sub>6</sub>
b<sub>7</sub>
b<sub>8</sub>
b<sub>9</sub>
b<sub>10</sub>
b<sub>11</sub>
y<sub>13</sub><sup>2+</sup>
y<sub>11</sub>
y<sub>10</sub>
y<sub>8</sub>
y<sub>7</sub>
y<sub>6</sub>
y<sub>5</sub>  
ph
y<sub>3</sub>
y<sub>1</sub>

Raw file: 20150812\_A375SR\_Phospho\_BR1\_04  
 Scan: 7165 Method: FTMS; HCD Score: 88.94 m/z: 562.28 Gene names: MAPT

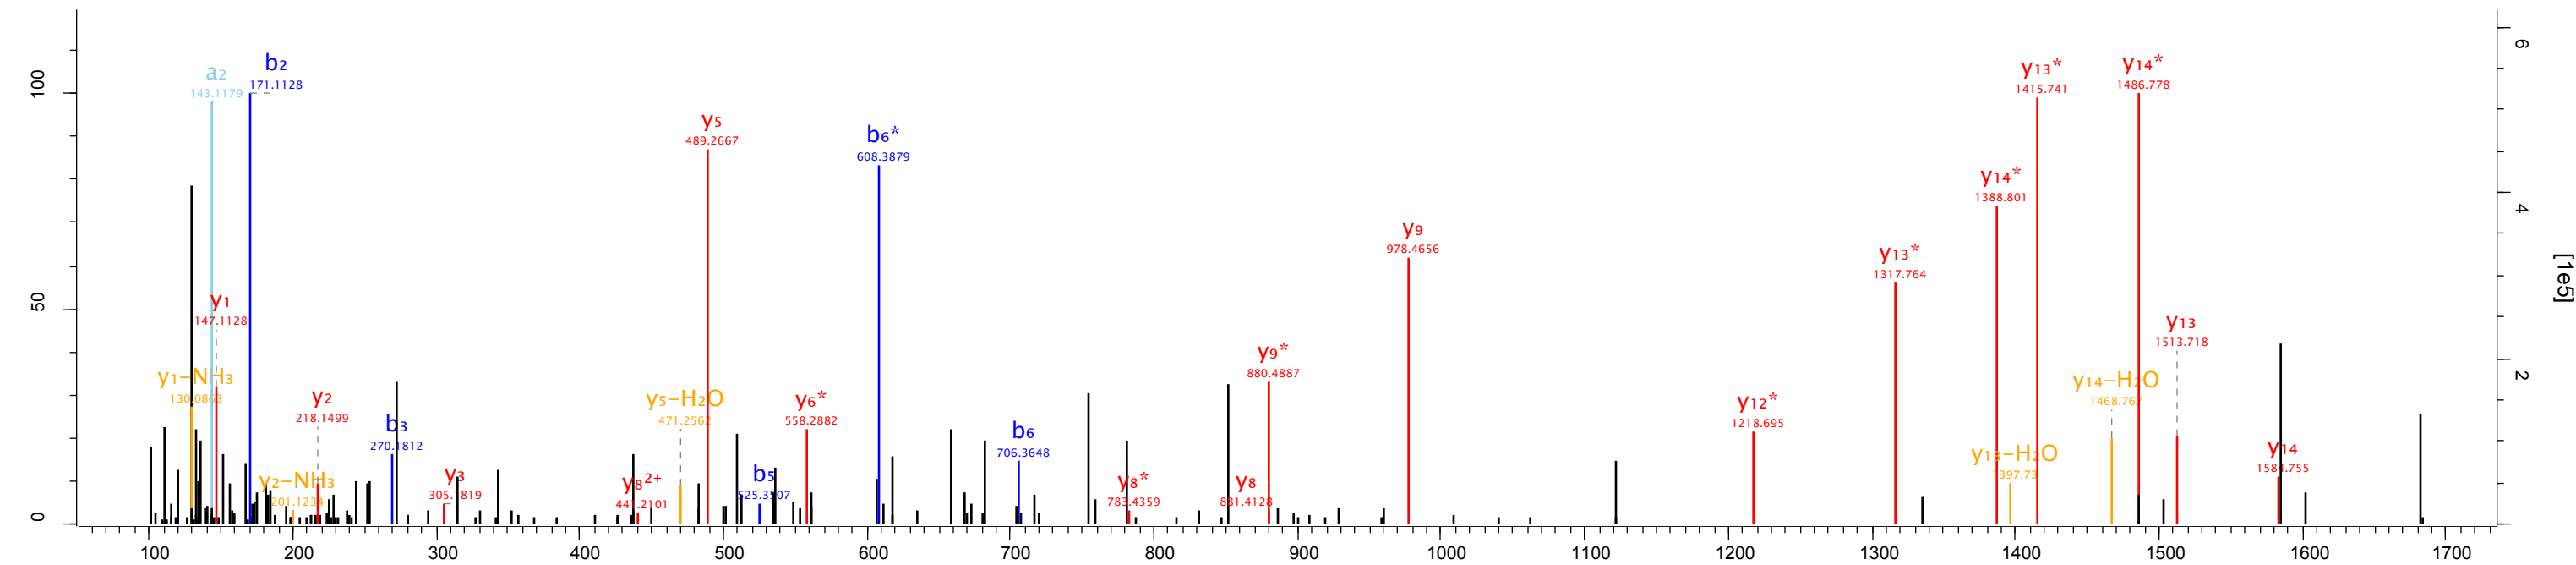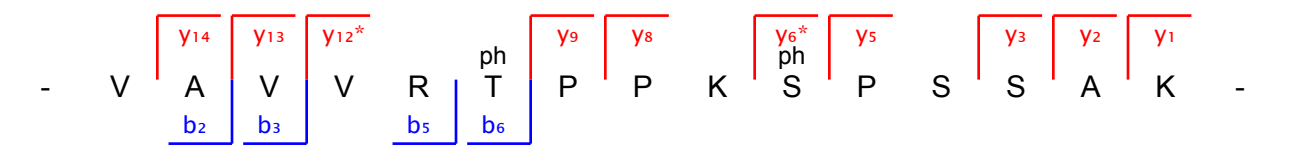

Raw file: 20150812\_A375SR\_Phospho\_BR1\_04  
 Scan: 7845 Method: FTMS; HCD Score: 74.78 m/z: 635.98 Gene names: ATRX

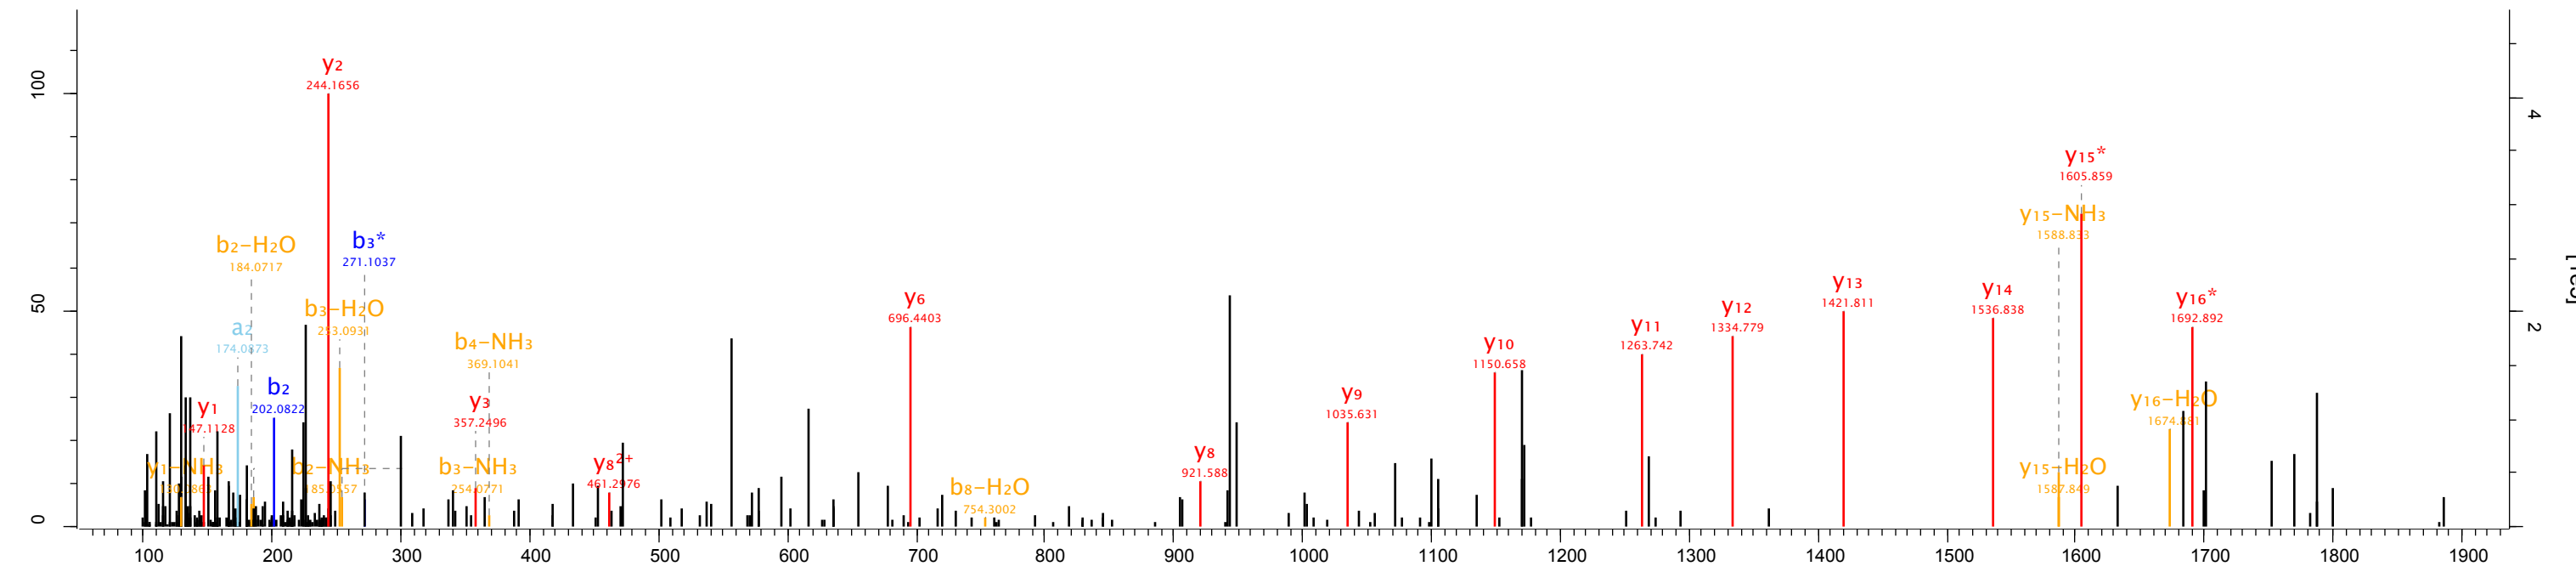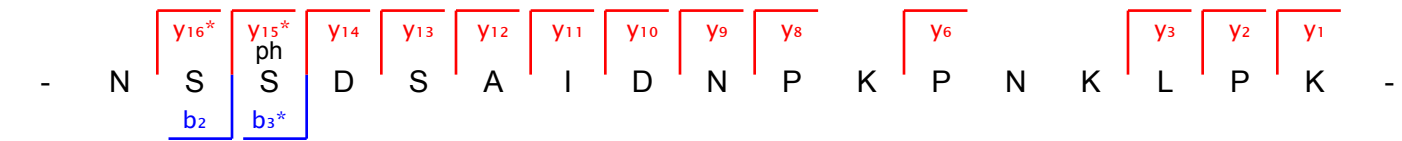

Raw file 20150812\_A375SR\_Phospho\_BR1\_04 Scan 8165 Method FTMS; HCD Score 85.47 m/z 726.79 Gene names RBMX2

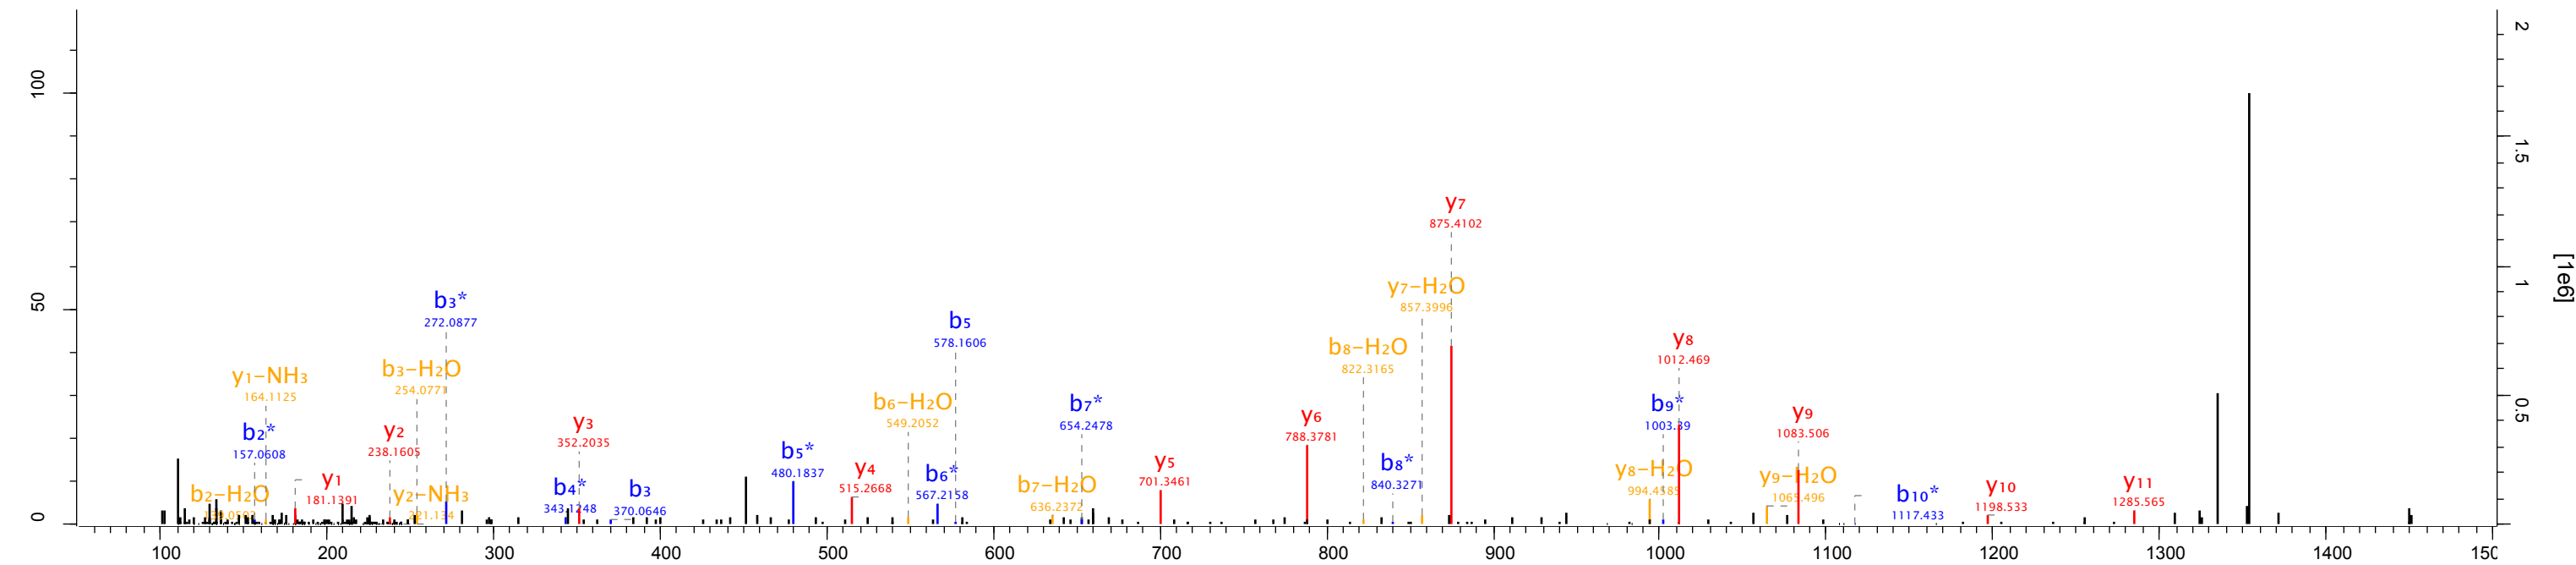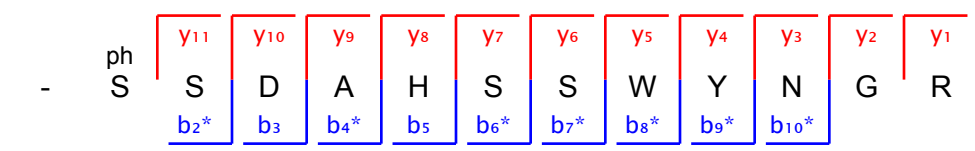

Raw file: 20150812\_A375SR\_Phospho\_BR1\_04  
 Scan: 8445 Method: FTMS; HCD Score: 128.21 m/z: 574.25 Gene names: PRRC2B

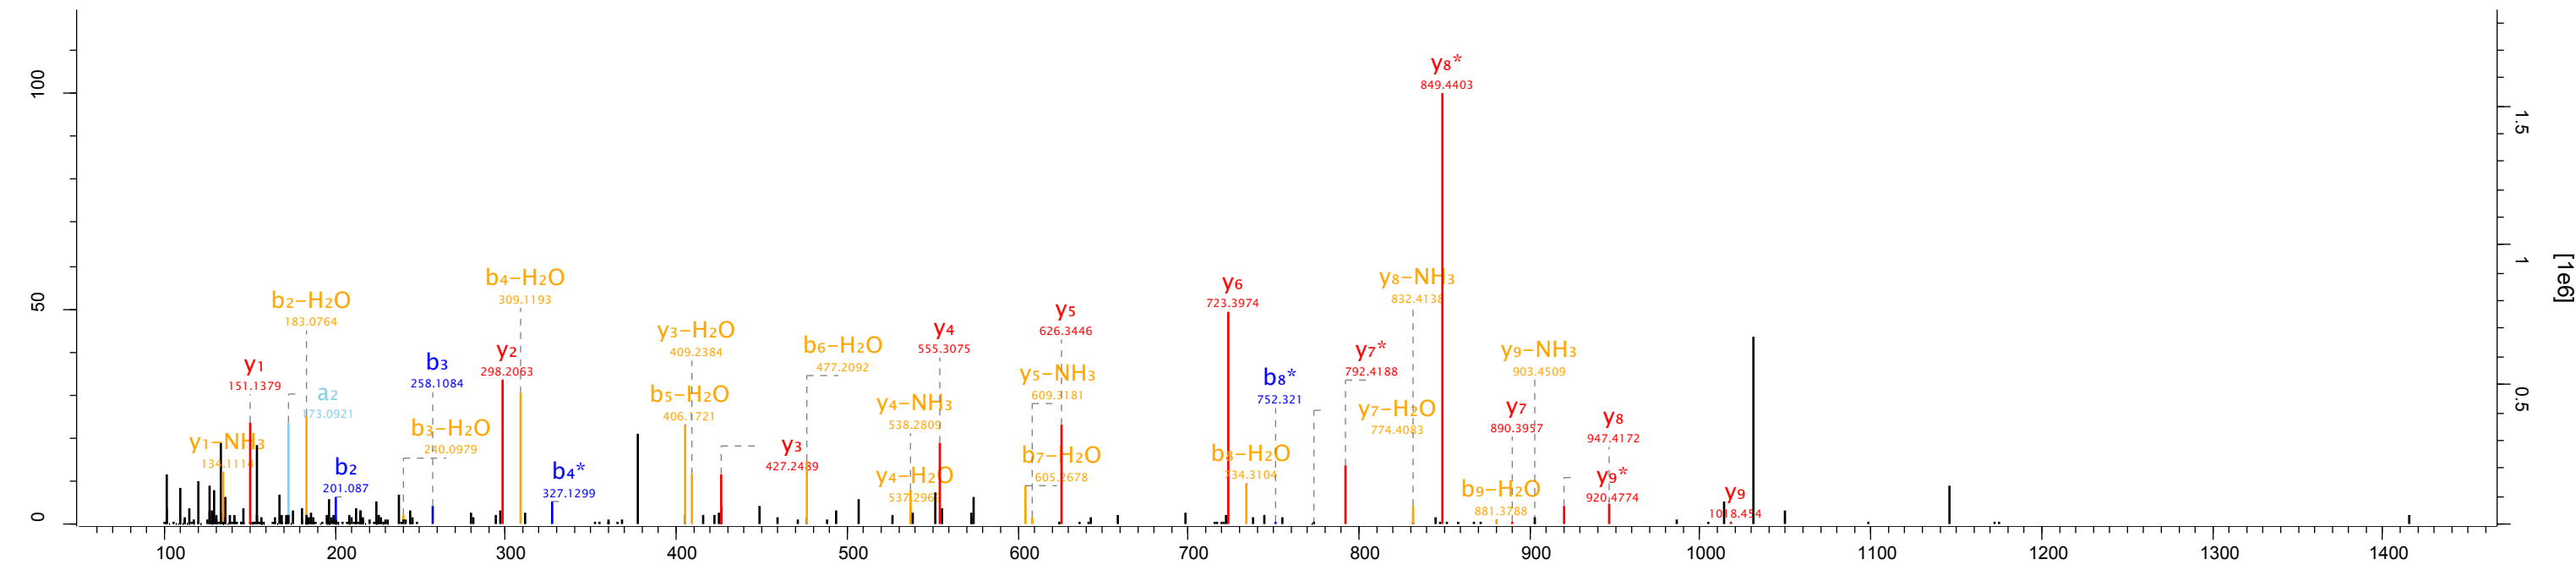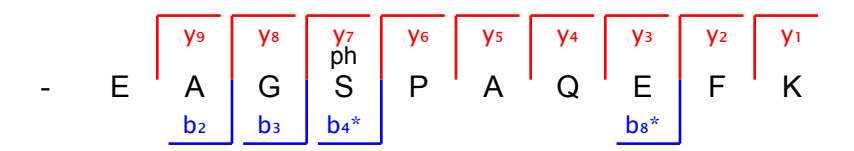

Raw file 20150812\_A375SR\_Phospho\_BR1\_04 Scan 8605 Method FTMS; HCD Score 142.3 m/z 830.02 Gene names NFIL3

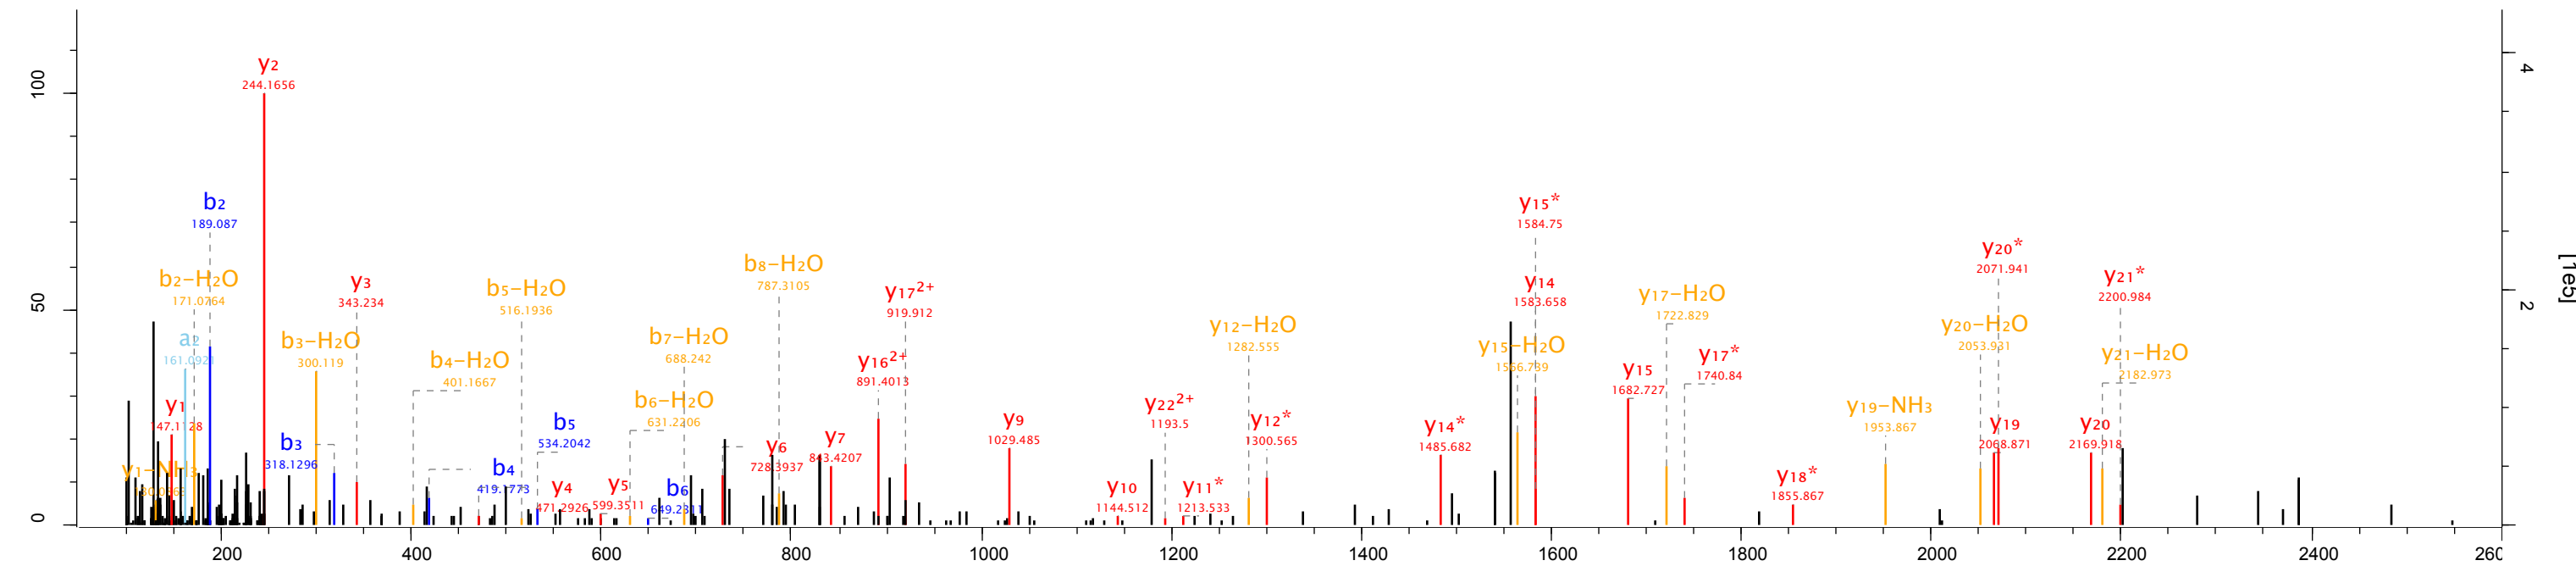

- T S E T D D G V V G K S S D G E D E Q Q V P K -

Fragmentation labels below the sequence:

- Red boxes: y<sub>22</sub><sup>2+</sup>, y<sub>21</sub><sup>\*</sup>, y<sub>20</sub>, y<sub>19</sub>, y<sub>18</sub><sup>\*</sup>, y<sub>17</sub><sup>\*</sup>, y<sub>16</sub><sup>2+</sup>, y<sub>15</sub>, y<sub>14</sub>, y<sub>12</sub><sup>\*</sup>, y<sub>11</sub><sup>\*</sup>, y<sub>10</sub>, y<sub>9</sub>, y<sub>7</sub>, y<sub>6</sub>, y<sub>5</sub>, y<sub>4</sub>, y<sub>3</sub>, y<sub>2</sub>, y<sub>1</sub>
- Blue boxes: b<sub>2</sub>, b<sub>3</sub>, b<sub>4</sub>, b<sub>5</sub>, b<sub>6</sub>



Raw file 20150812\_A375SR\_Phospho\_BR1\_04 Scan 8735 Method FTMS; HCD Score 44.51 m/z 500.92

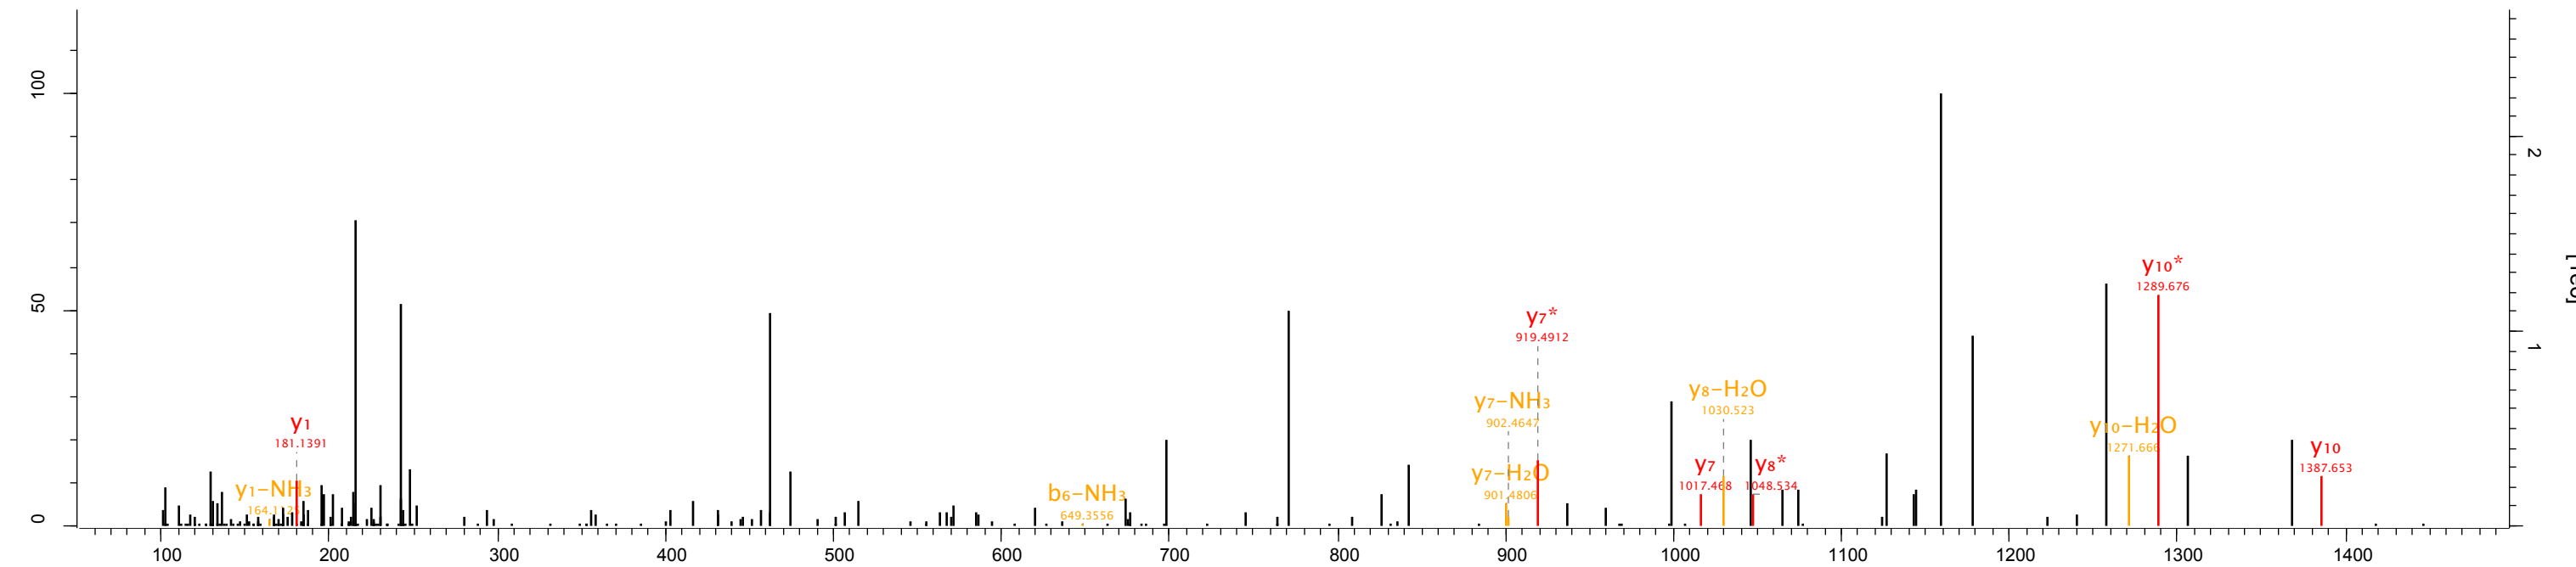

- L L Q E I S S N R I R -

Fragmentation mapping (red boxes):

- y10: L L Q E I S S N R I R
- y8\*: L L Q E I S S N R I R
- y7: L L Q E I S S N R I R
- y1: L L Q E I S S N R I R

Raw file: 20150812\_A375SR\_Phospho\_BR1\_04  
 Scan: 8785 Method: FTMS; HCD Score: 112.11 m/z: 732.82 Gene names: TWISTNB

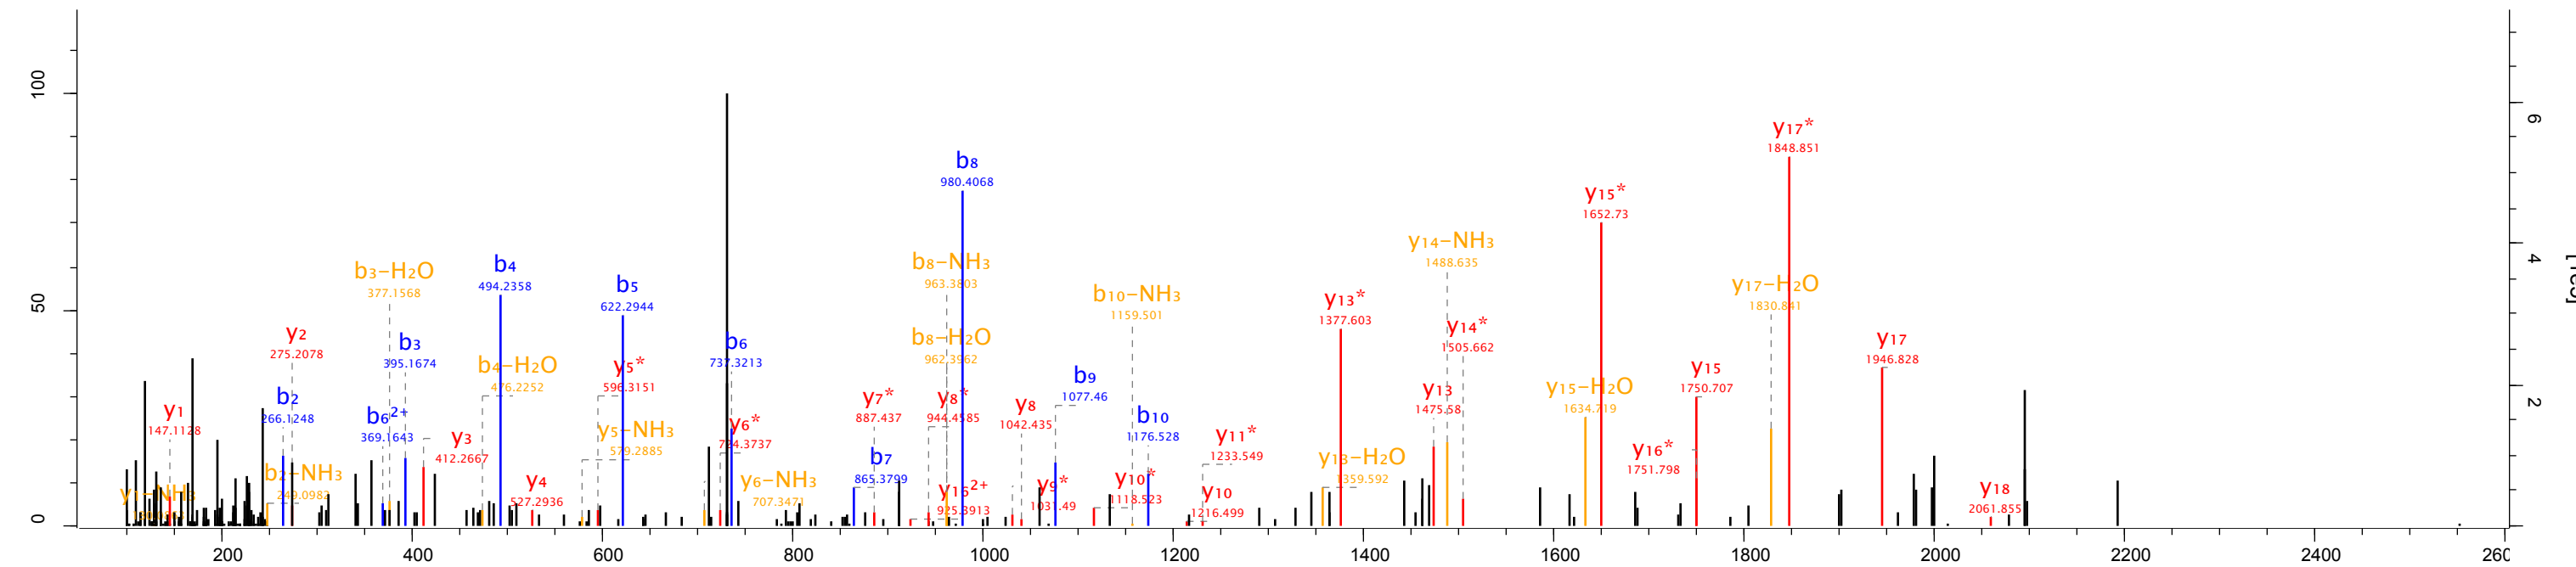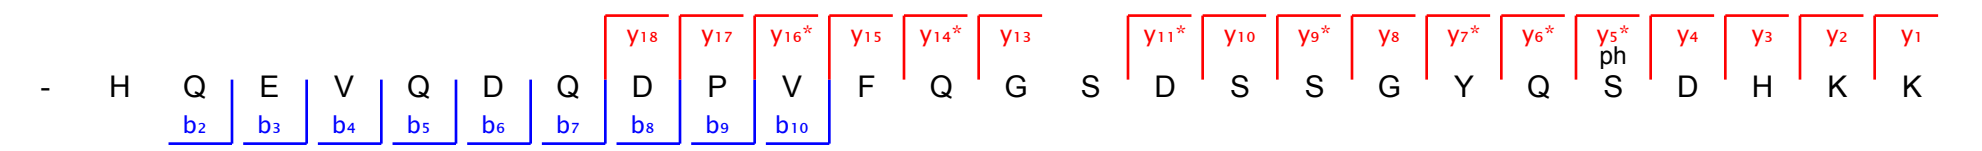

Raw file: 20150812\_A375SR\_Phospho\_BR1\_04  
 Scan: 8815 Method: FTMS; HCD Score: 216 m/z: 659.3 Gene names: TNKS1BP1

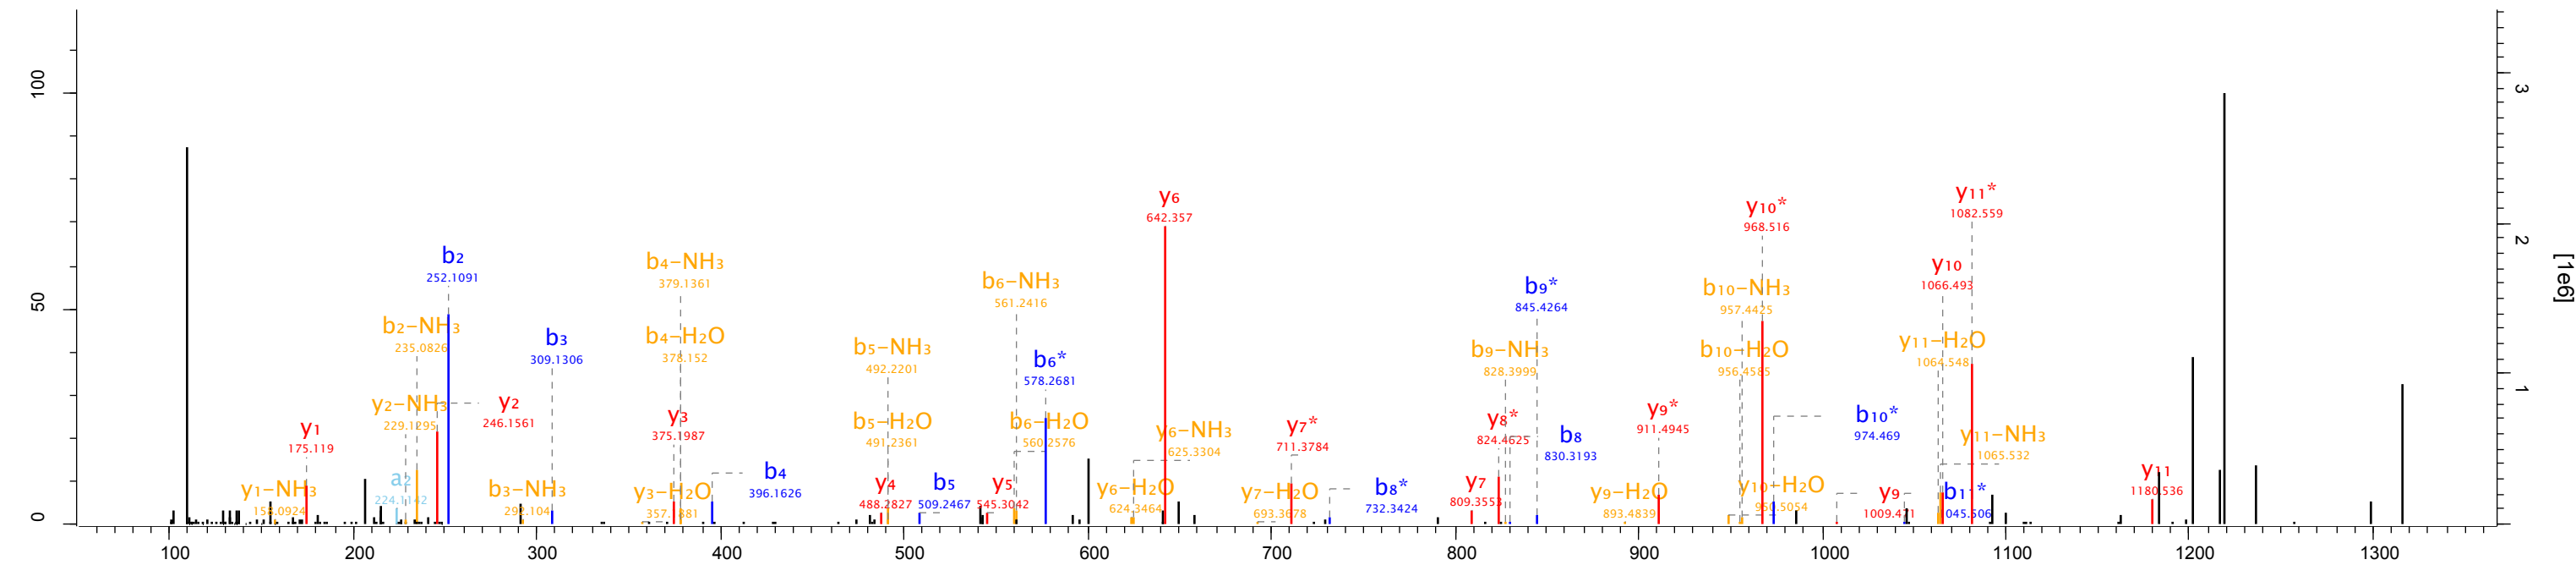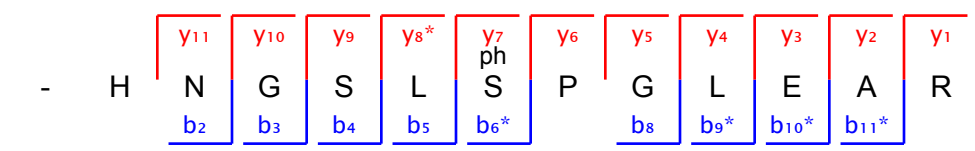

Raw file: 20150812\_A375SR\_Phospho\_BR1\_04  
 Scan: 8945 Method: FTMS; HCD Score: 126.32 m/z: 690.24 Gene names: HERC1

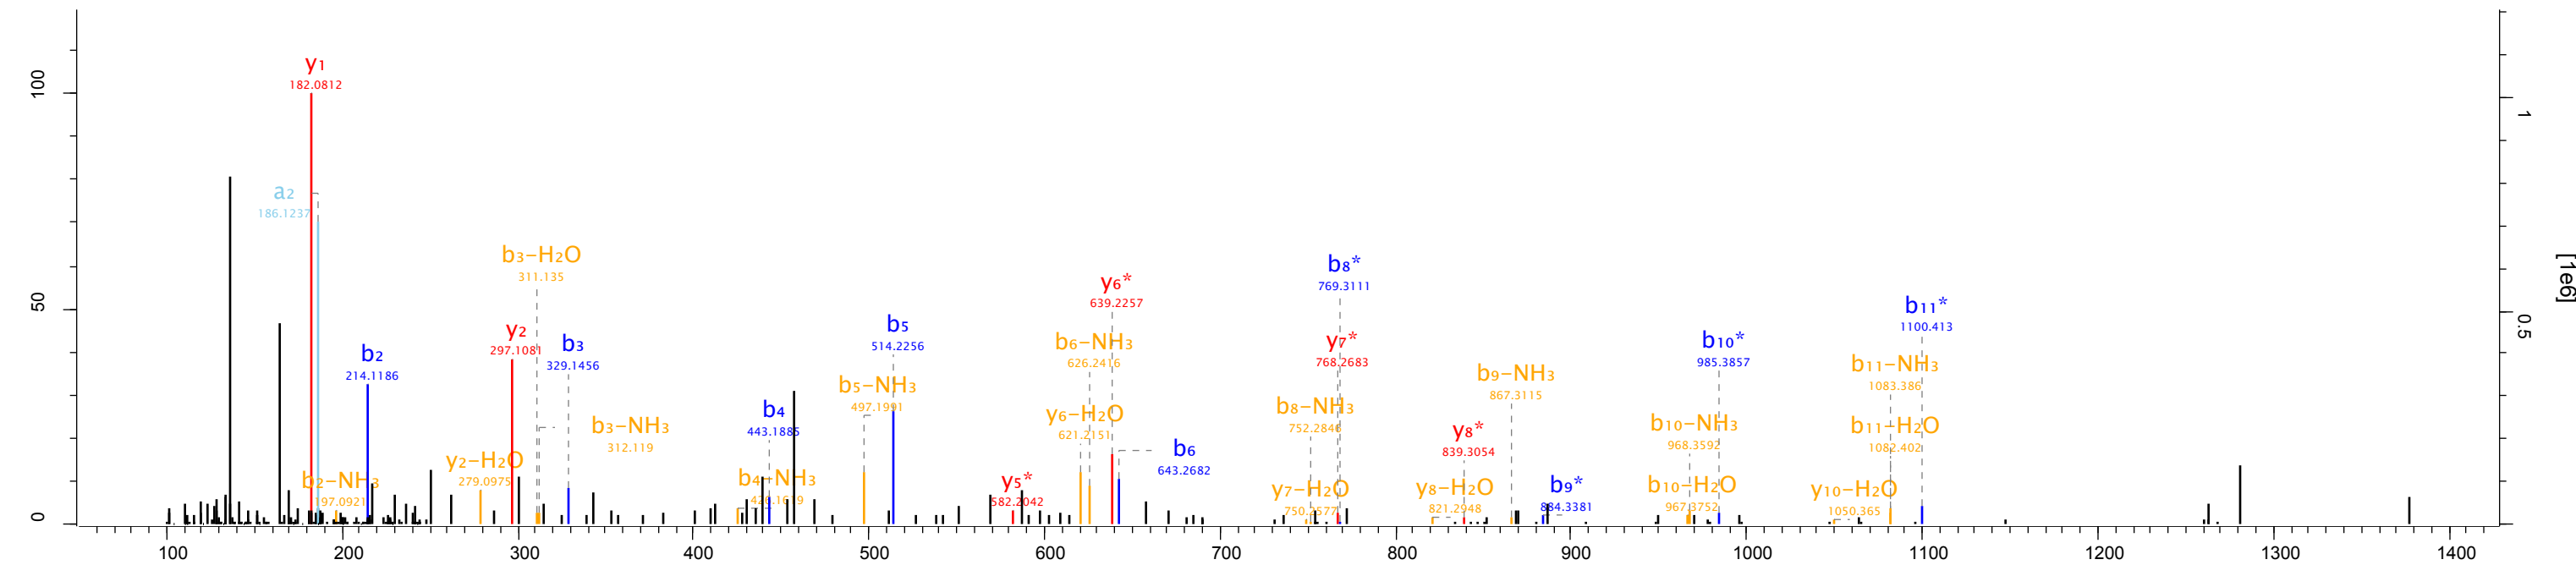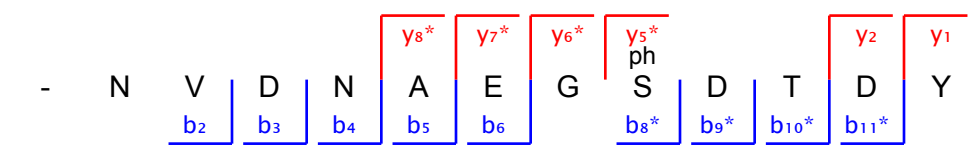

Raw file: 20150812\_A375SR\_Phospho\_BR1\_04  
 Scan: 8985 Method: FTMS; HCD Score: 181.24 m/z: 747.05 Gene names: ZC3H4

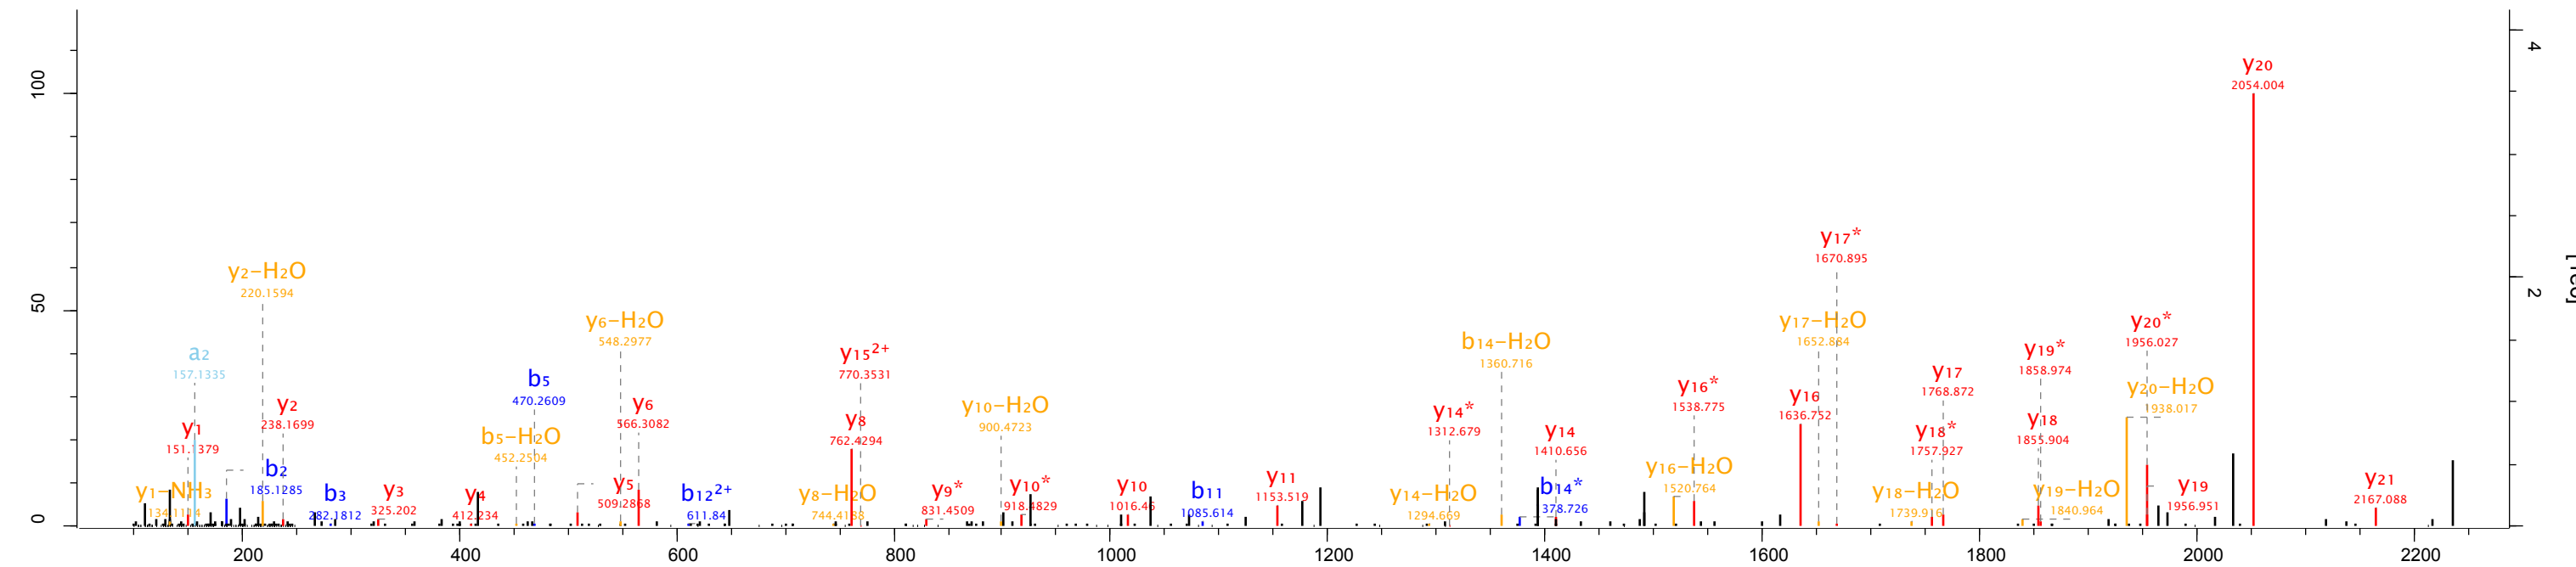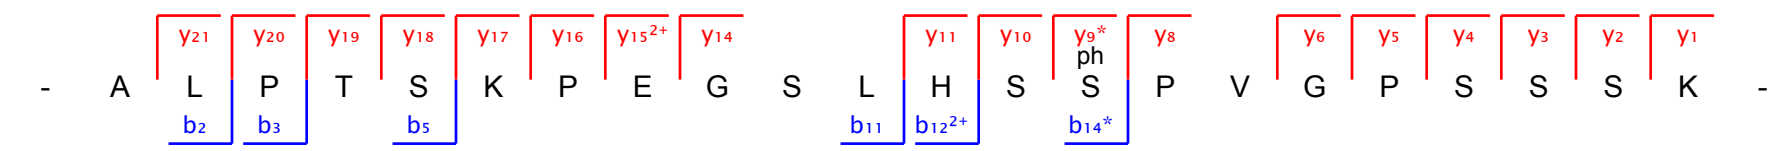

Raw file: 20150812\_A375SR\_Phospho\_BR1\_04  
 Scan: 9365 Method: FTMS; HCD Score: 120.98 m/z: 1259.54 Gene names: GSK3A

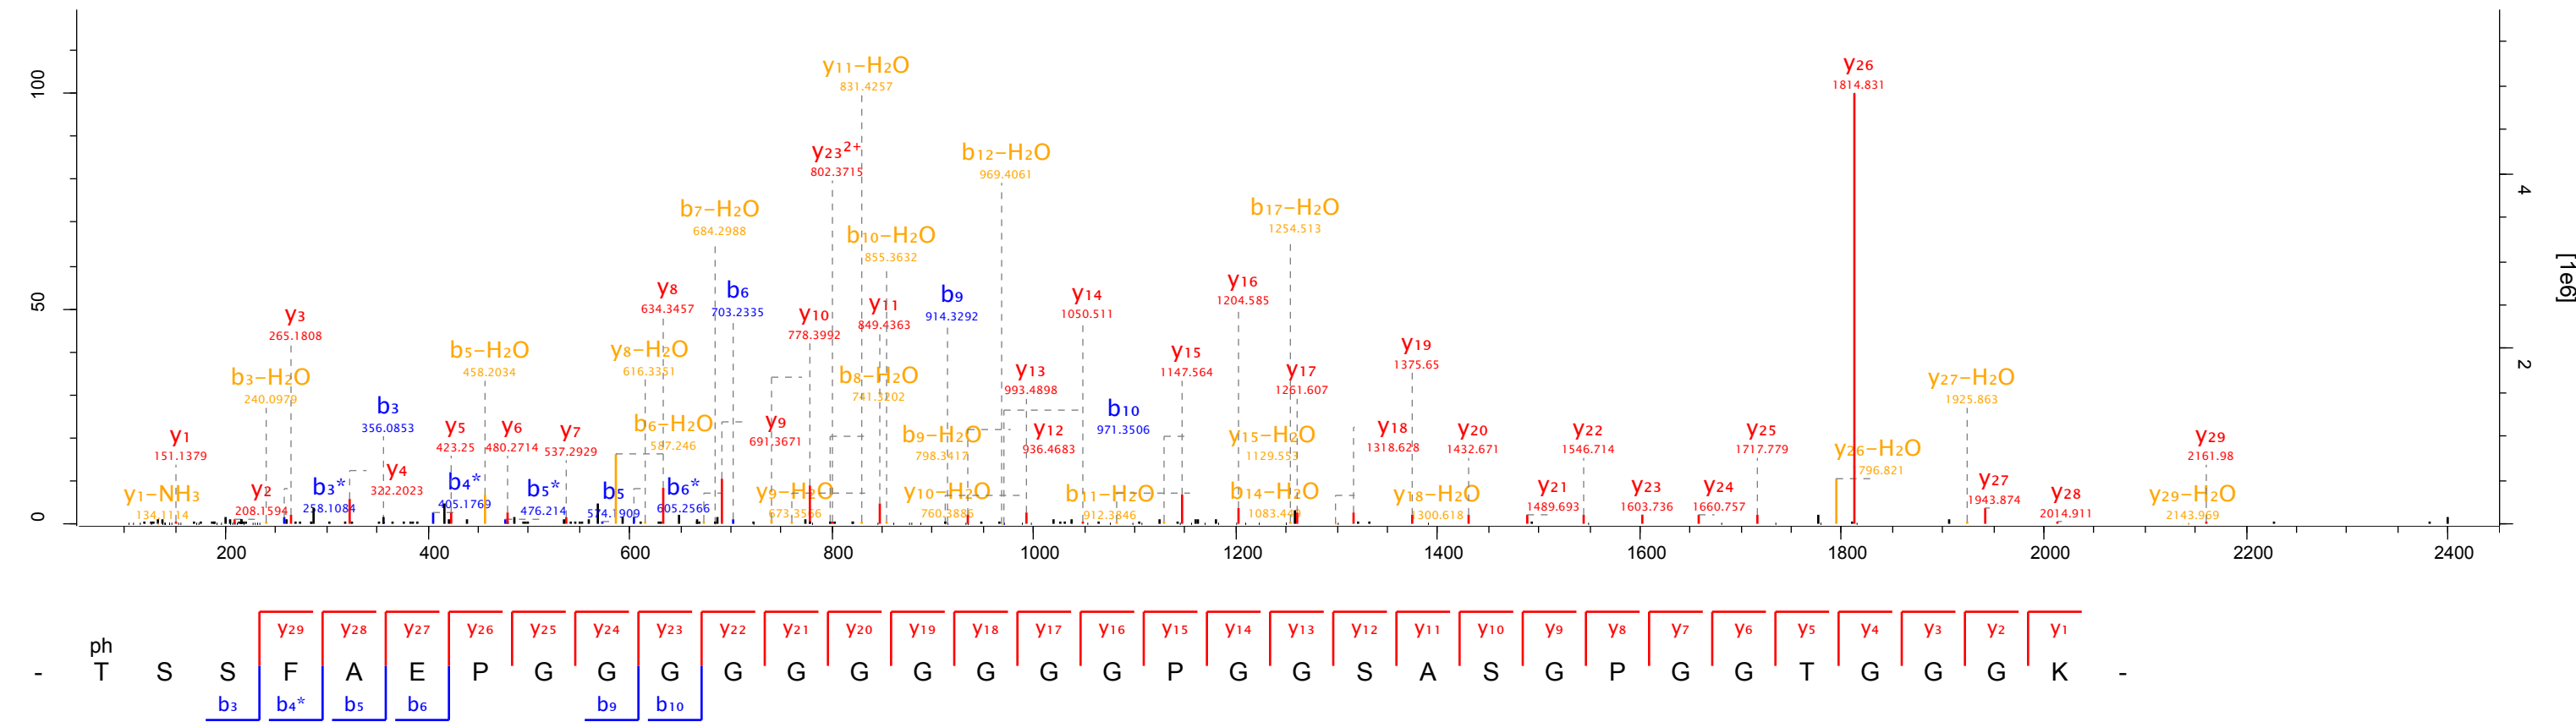



Raw file: 20150812\_A375SR\_Phospho\_BR1\_04  
 Scan: 9855 Method: FTMS; HCD Score: 189.23 m/z: 667.78 Gene names: LARP7

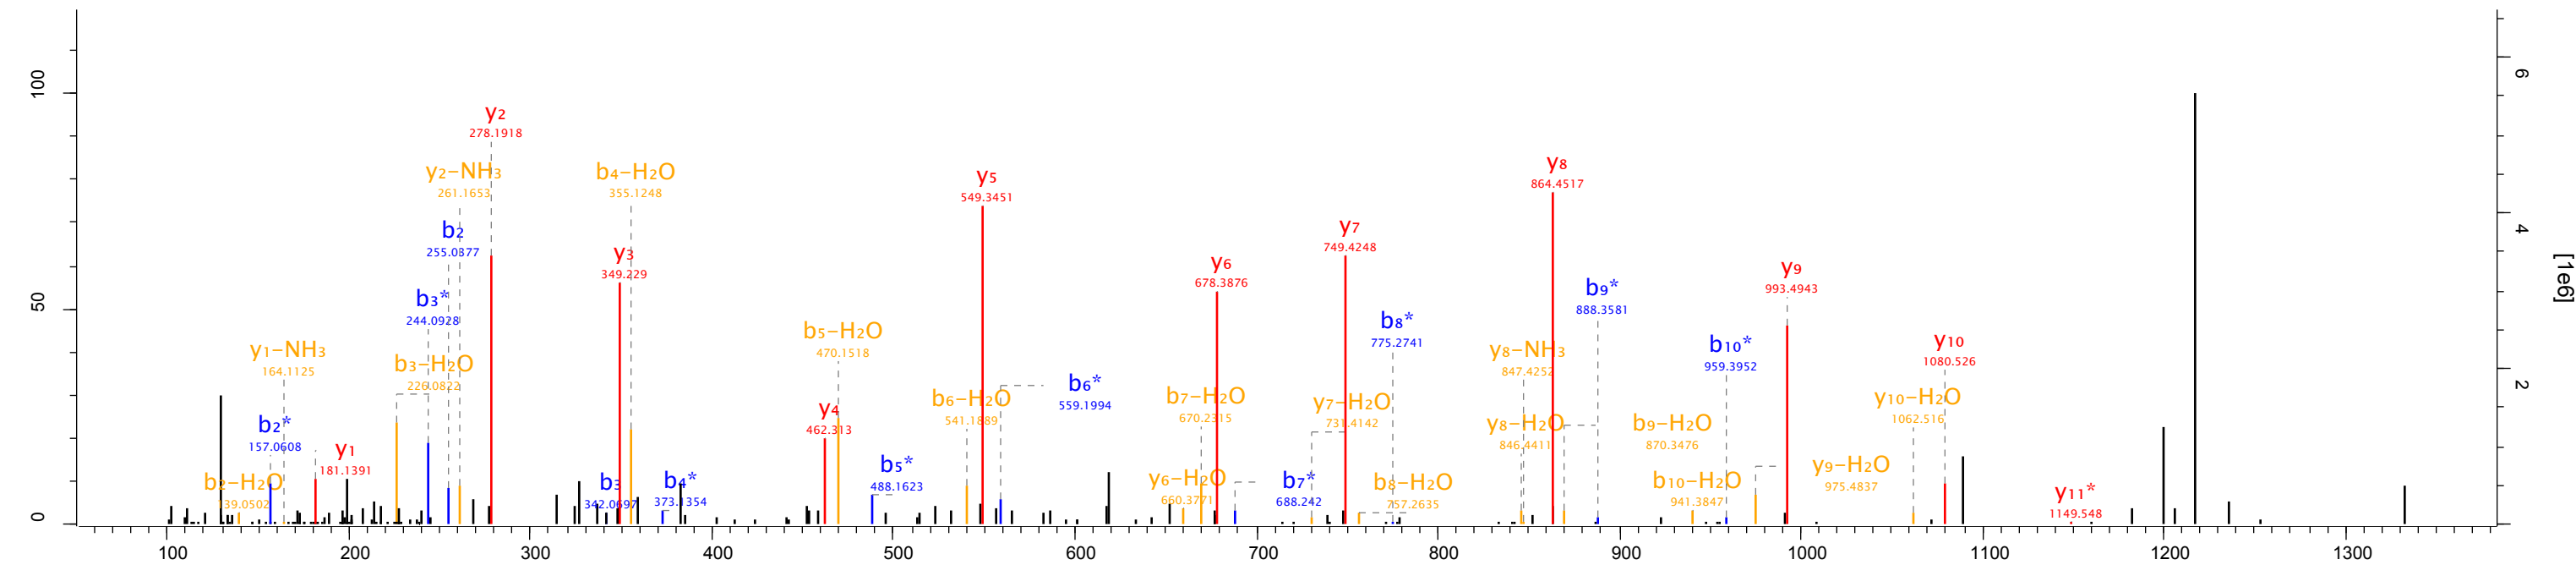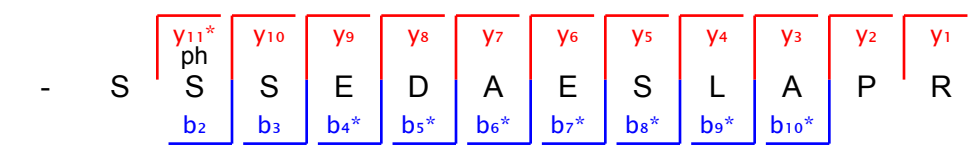



Raw file 20150812\_A375SR\_Phospho\_BR1\_05 Scan 10085 Method FTMS; HCD Score 203.96 m/z 832.38 Gene names RAB12

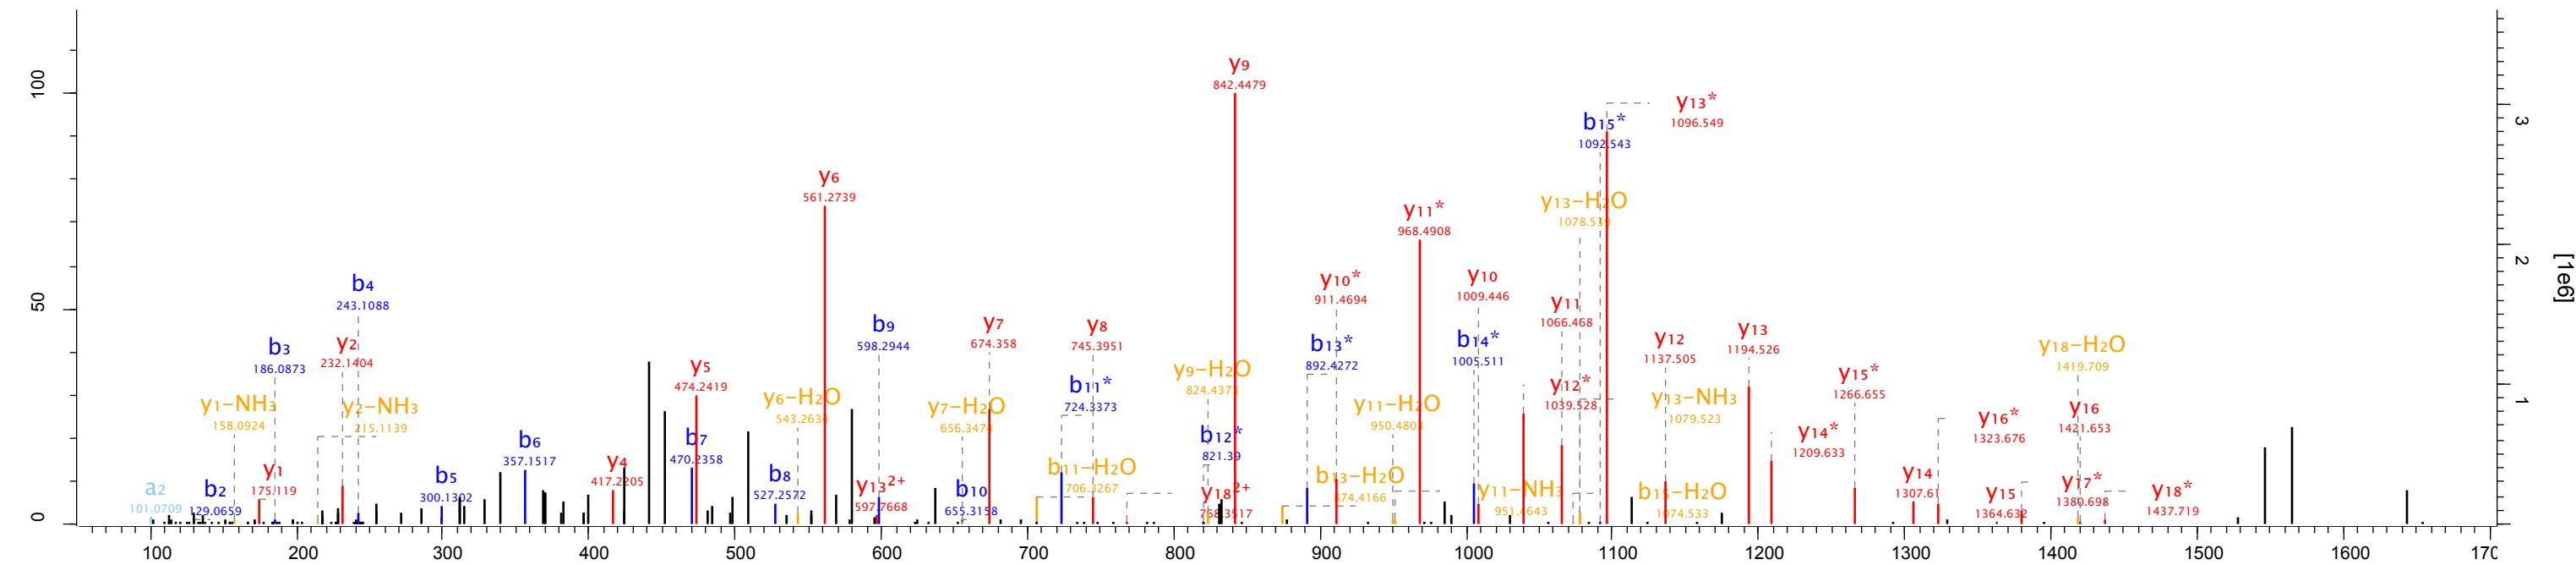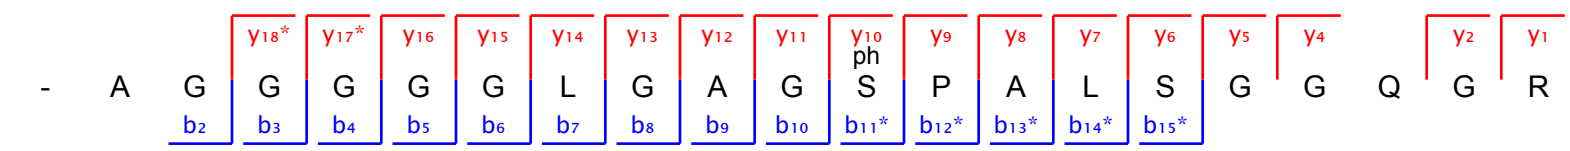

Raw file 20150812\_A375SR\_Phospho\_BR1\_05 Scan 10205 Method FTMS; HCD Score 241.25 m/z 682.66 Gene names TBC1D5

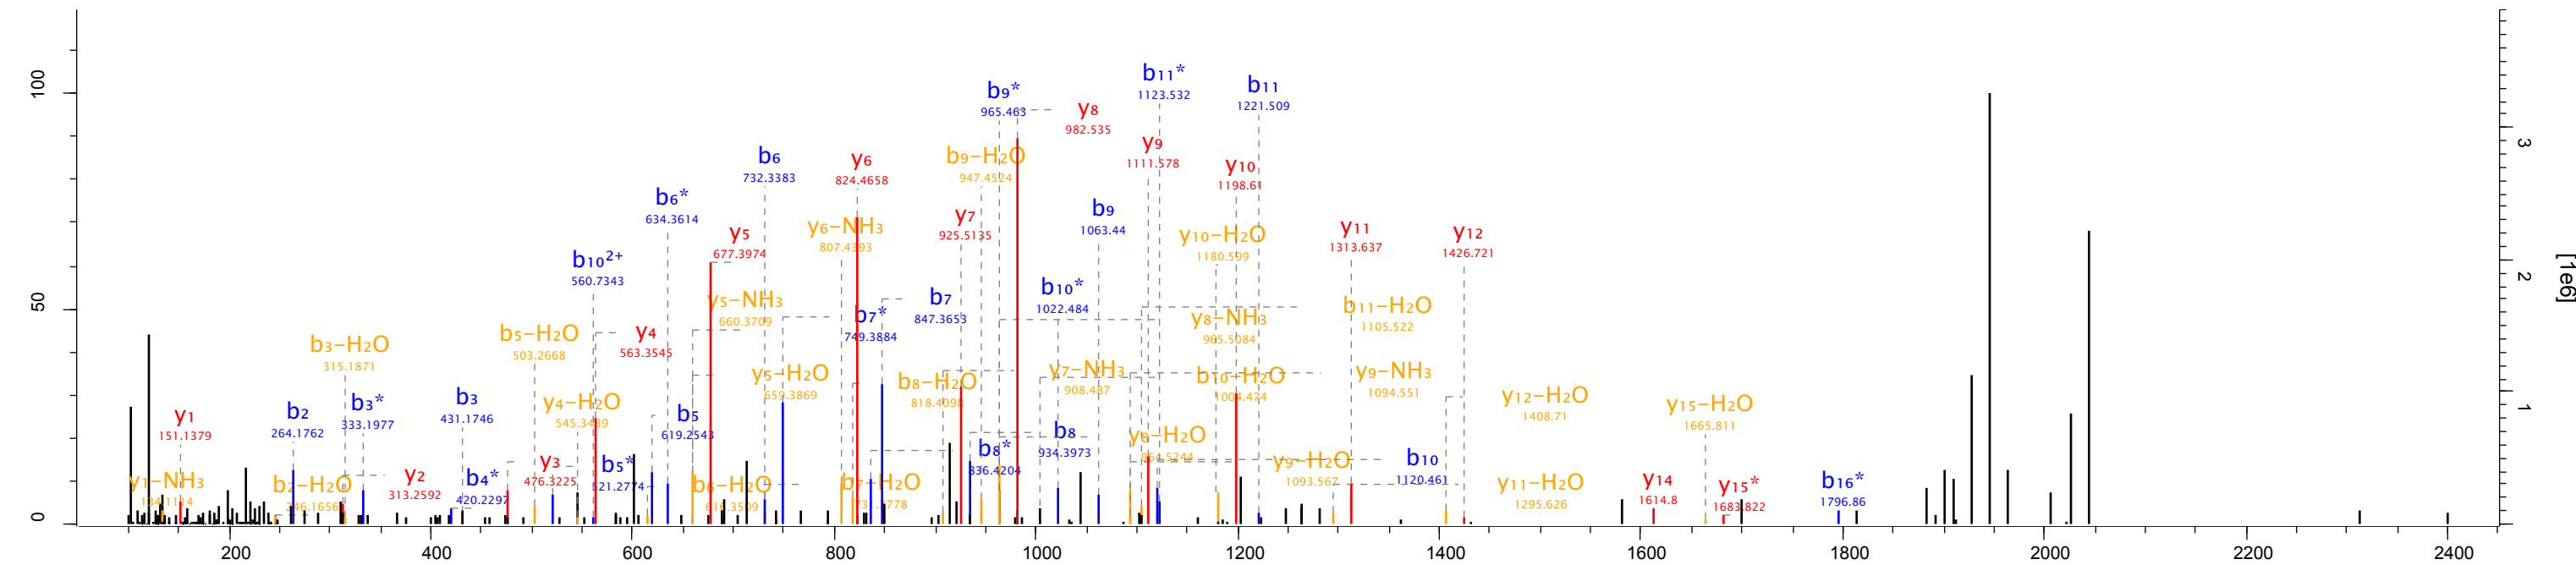

- R T S ph S T L D S E G T F N S Y R K -

b2 b3 b4\* b5 b6 b7 b8 b9 b10 b11 b16\*

y15\* y14 y12 y11 y10 y9 y8 y7 y6 y5 y4 y3 y2 y1

Raw file 20150812\_A375SR\_Phospho\_BR1\_05 Scan 10325 Method FTMS; HCD Score 187.5 m/z 738.86 Gene names PUM2

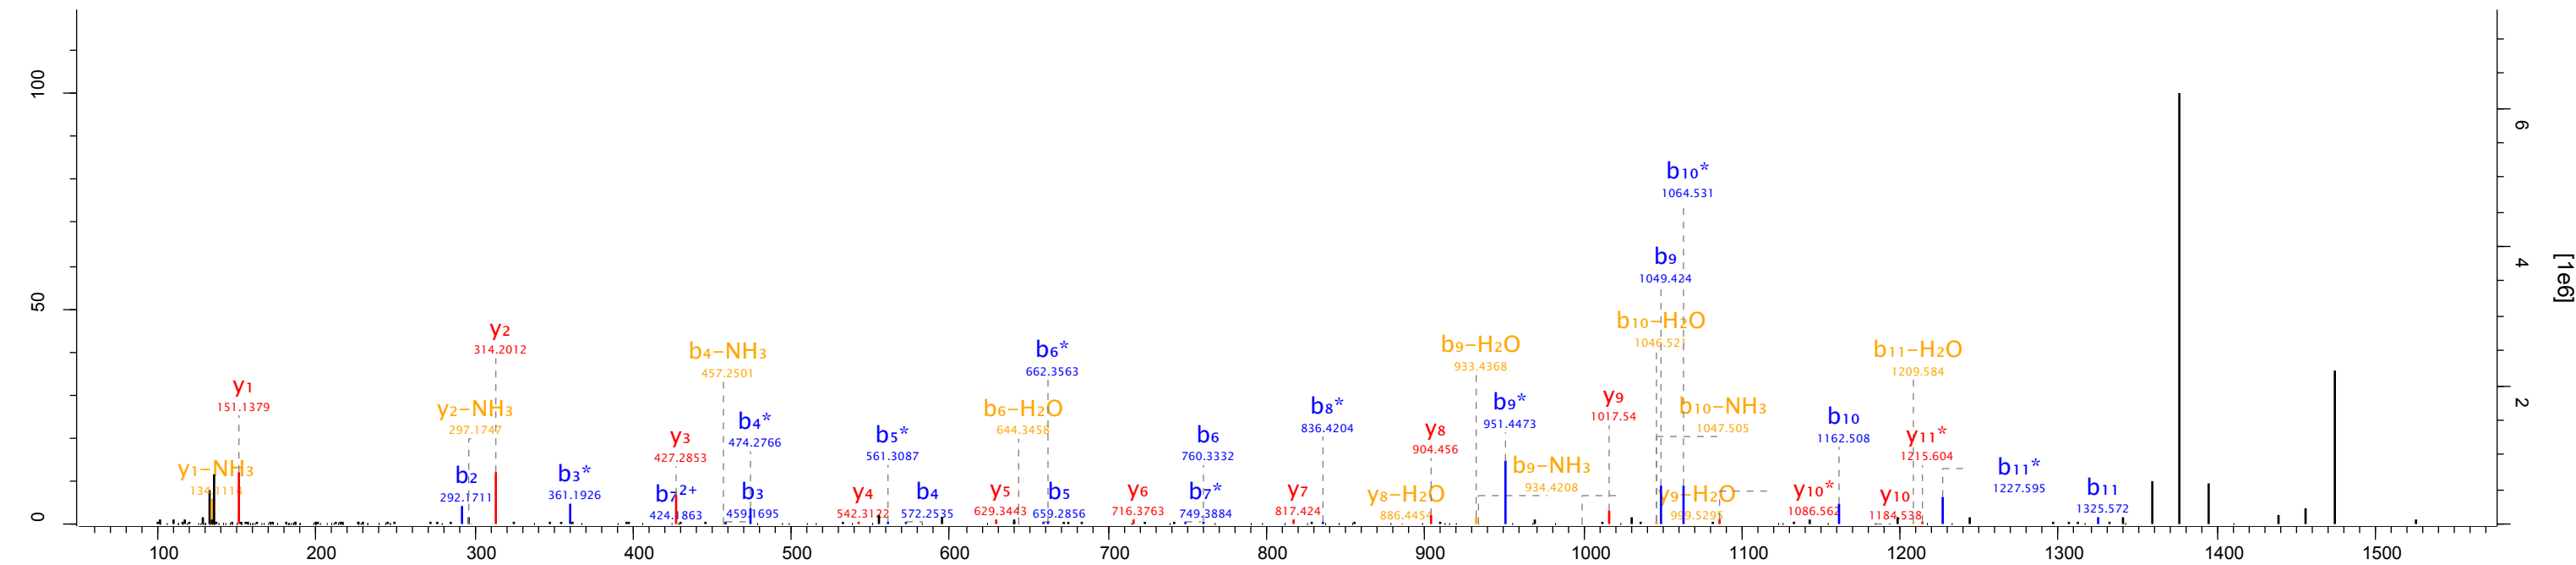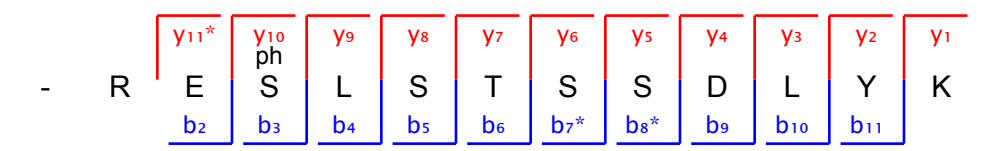

Raw file 20150812\_A375SR\_Phospho\_BR1\_05 Scan 11495 Method FTMS; HCD Score 145.52 m/z 513.57 Gene names GTF2I

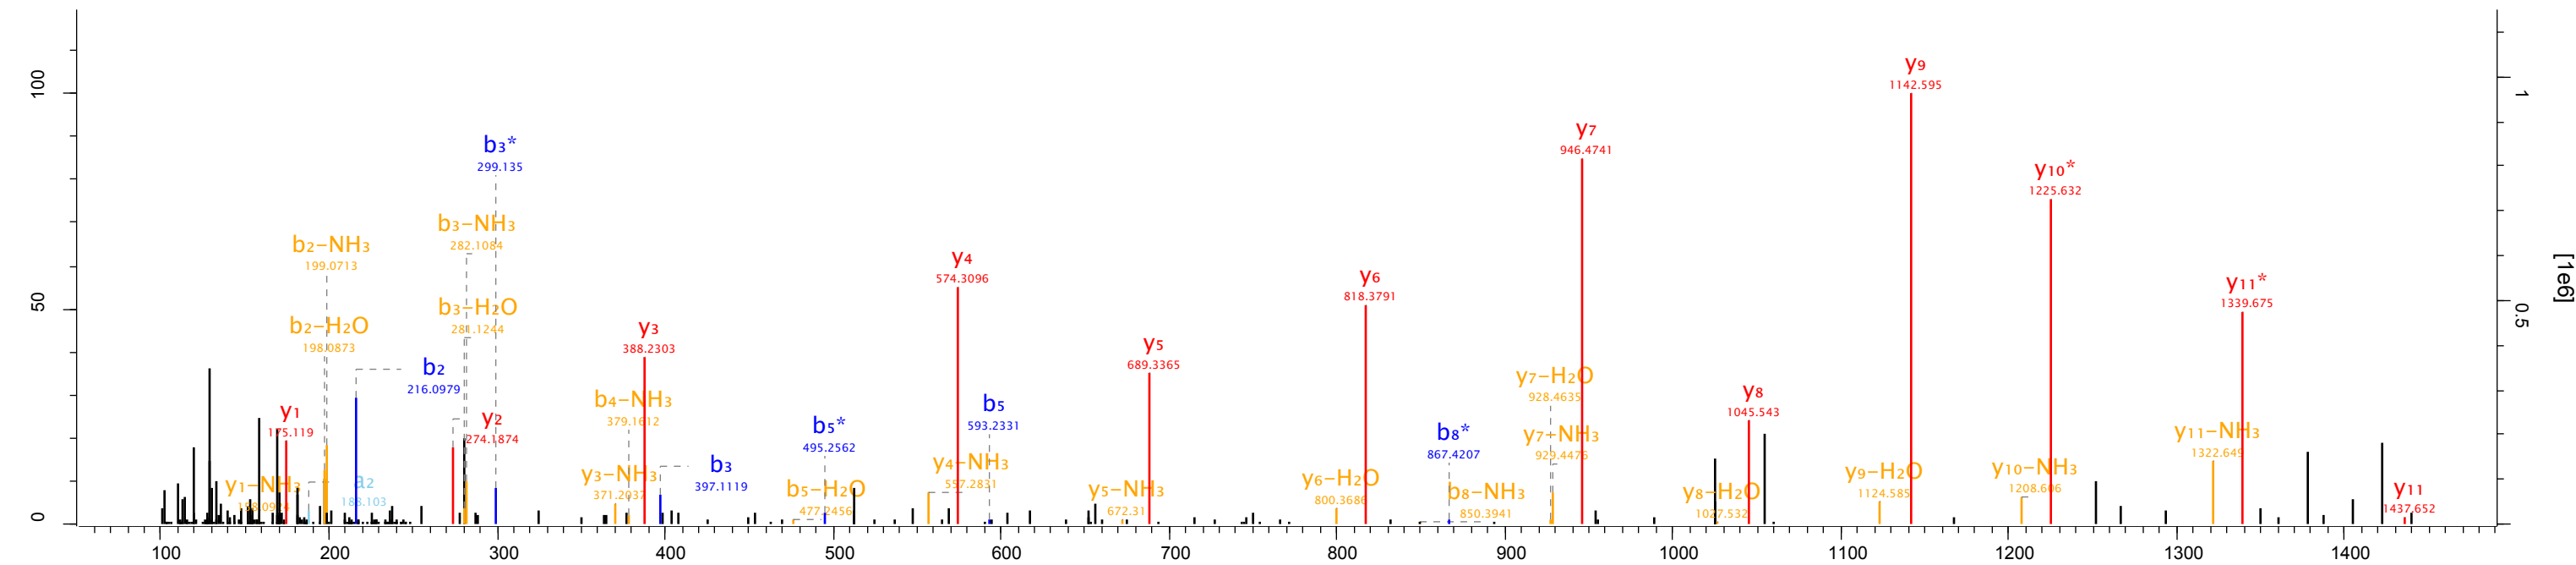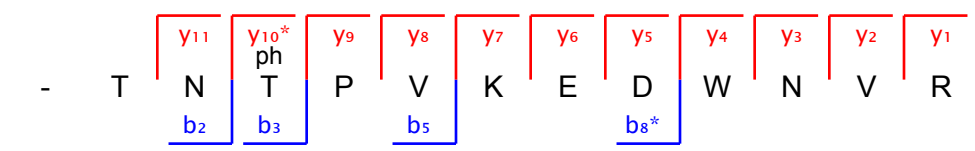

Raw file: 20150812\_A375SR\_Phospho\_BR1\_05  
 Scan: 11575 Method: FTMS; HCD Score: 141.7 m/z: 865.9 Gene names: DGCR8

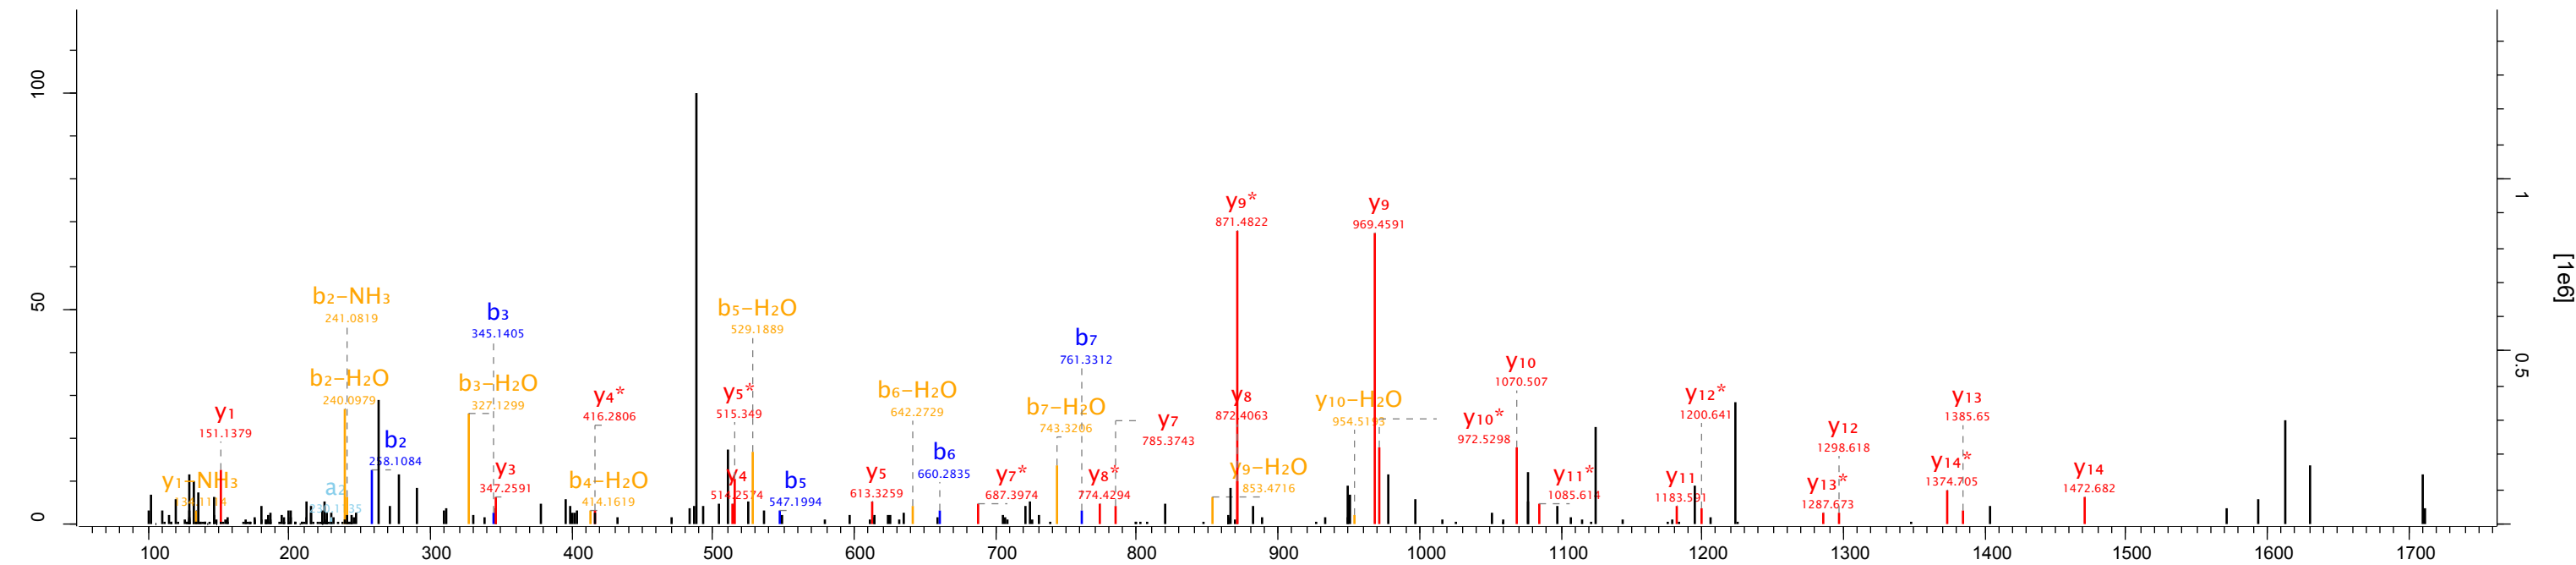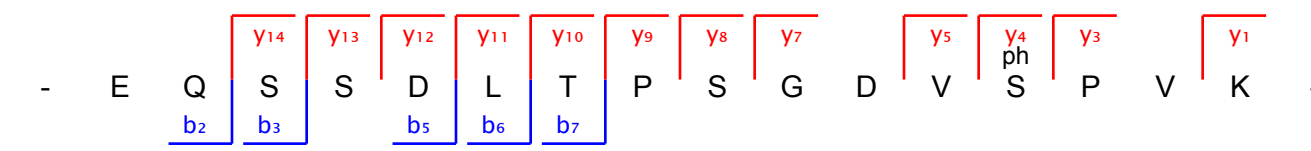

Raw file 20150812\_A375SR\_Phospho\_BR1\_05 Scan 12695 Method FTMS; HCD Score 233.79 m/z 866.41 Gene names SRSF2

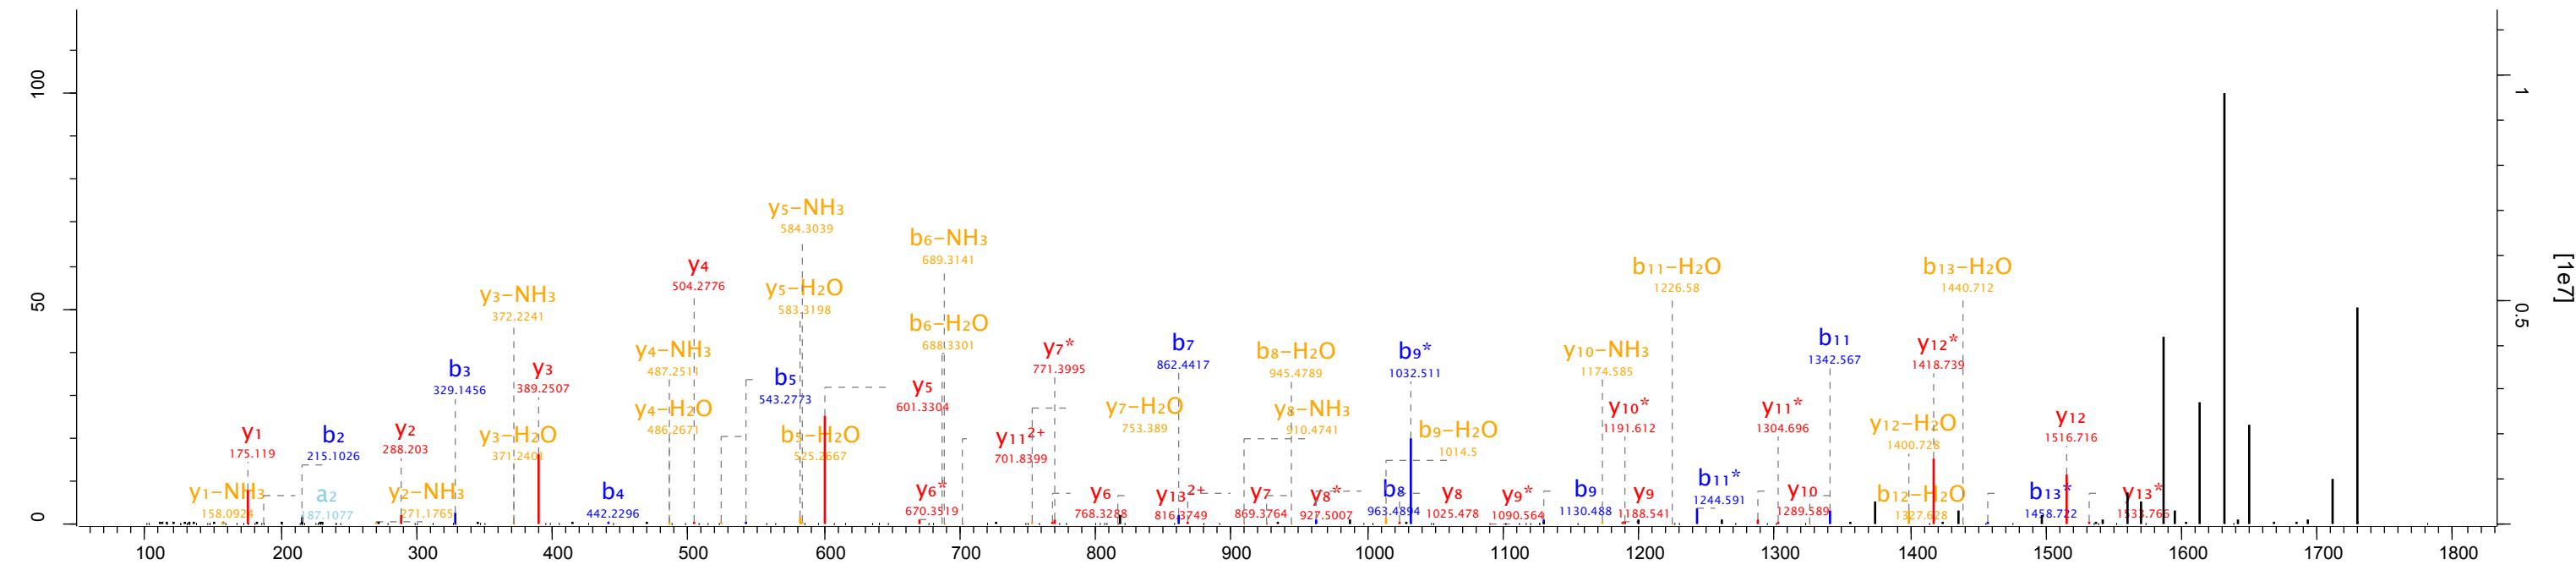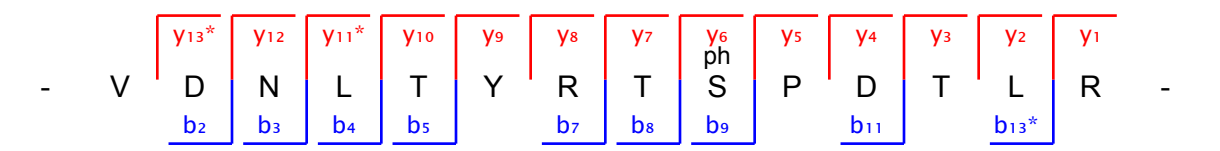

Raw file: 20150812\_A375SR\_Phospho\_BR1\_05  
 Scan: 1335 Method: FTMS; HCD Score: 157.54 m/z: 571.93 Gene names: CBX1

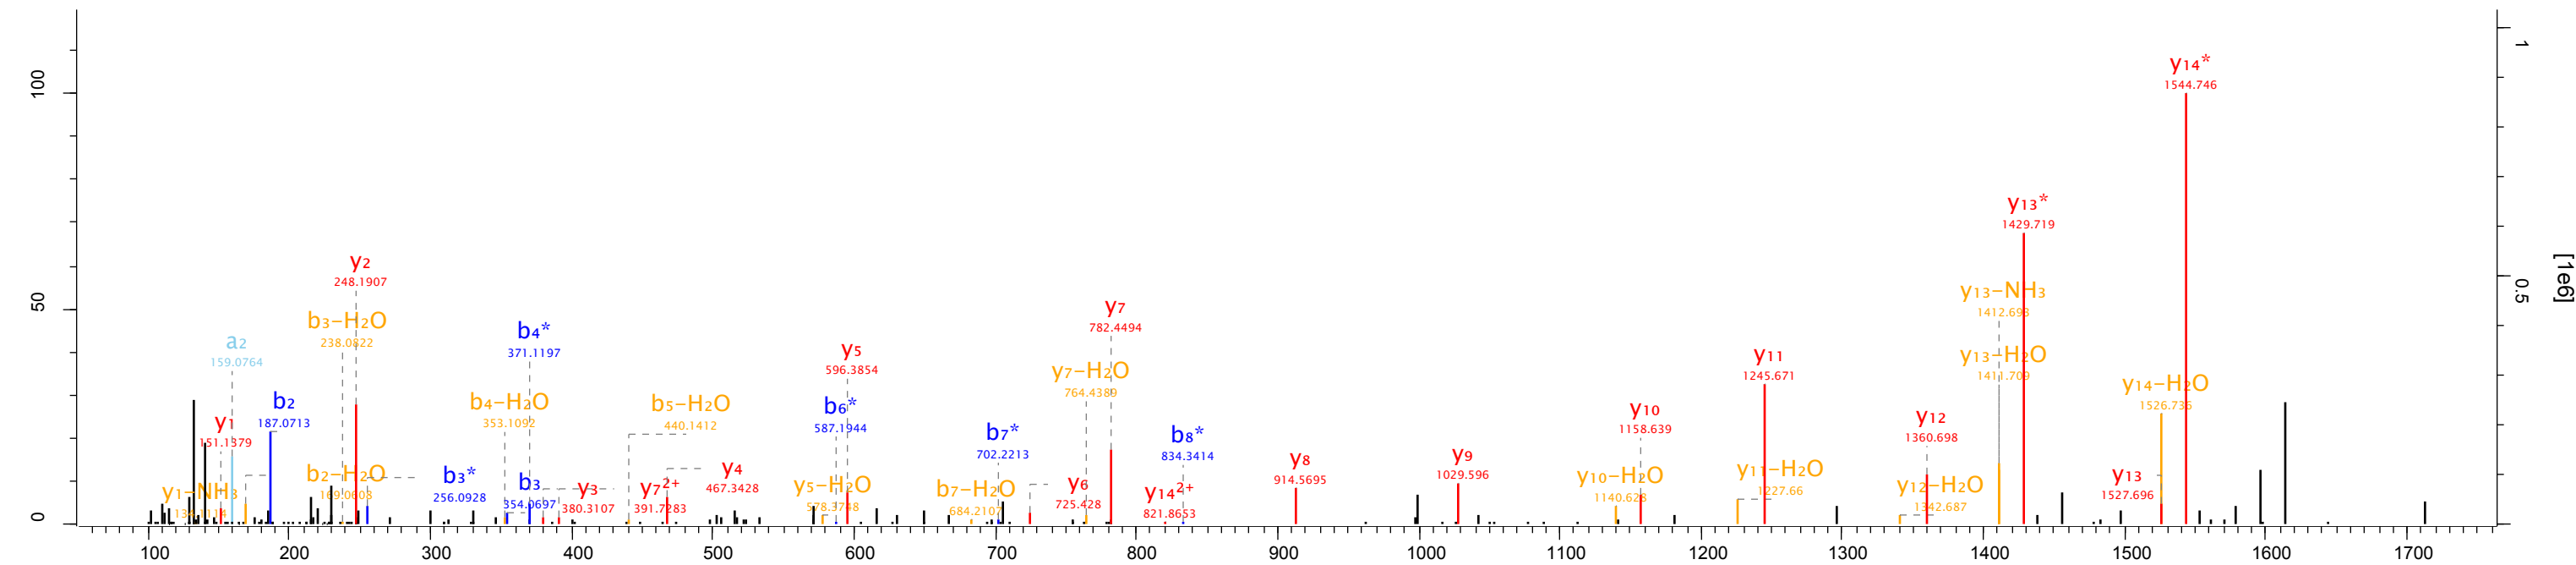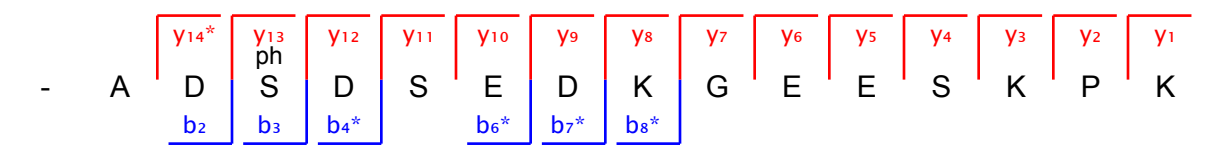

Raw file 20150812\_A375SR\_Phospho\_BR1\_05 Scan 13555 Method FTMS; HCD Score 113.38 m/z 527.24 Gene names FAM53B

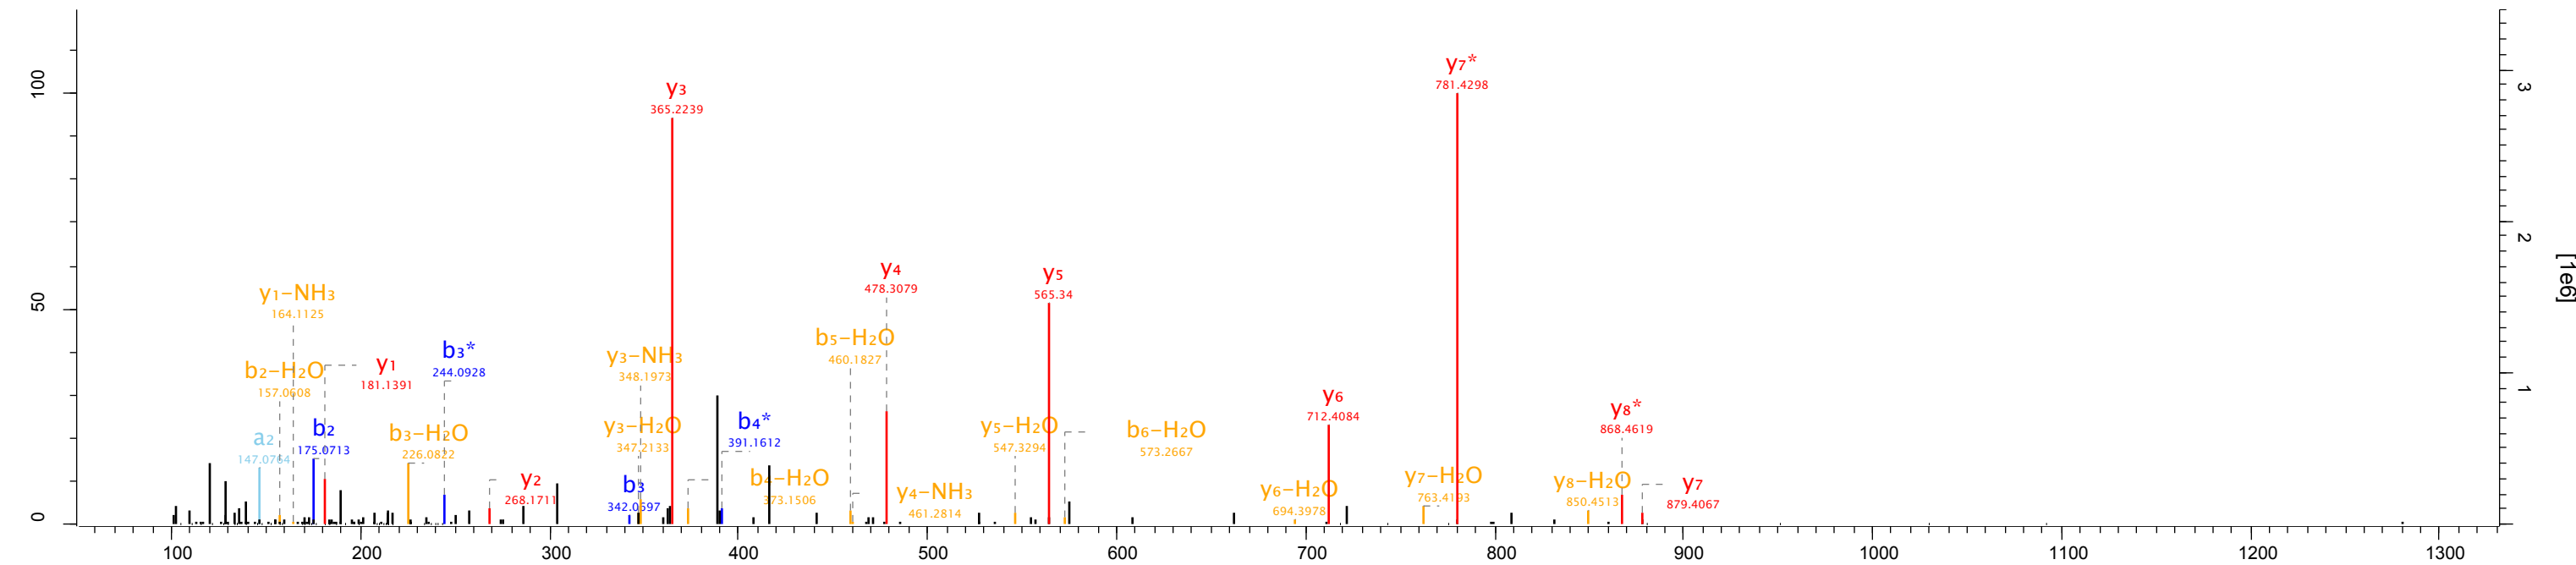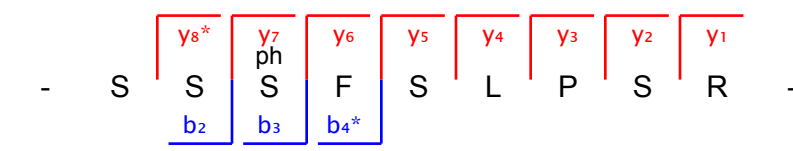



Raw file: 20150812\_A375SR\_Phospho\_BR1\_05  
 Scan: 13565 Method: FTMS; HCD Score: 117.27 m/z: 554.72 Gene names: IMPDH2

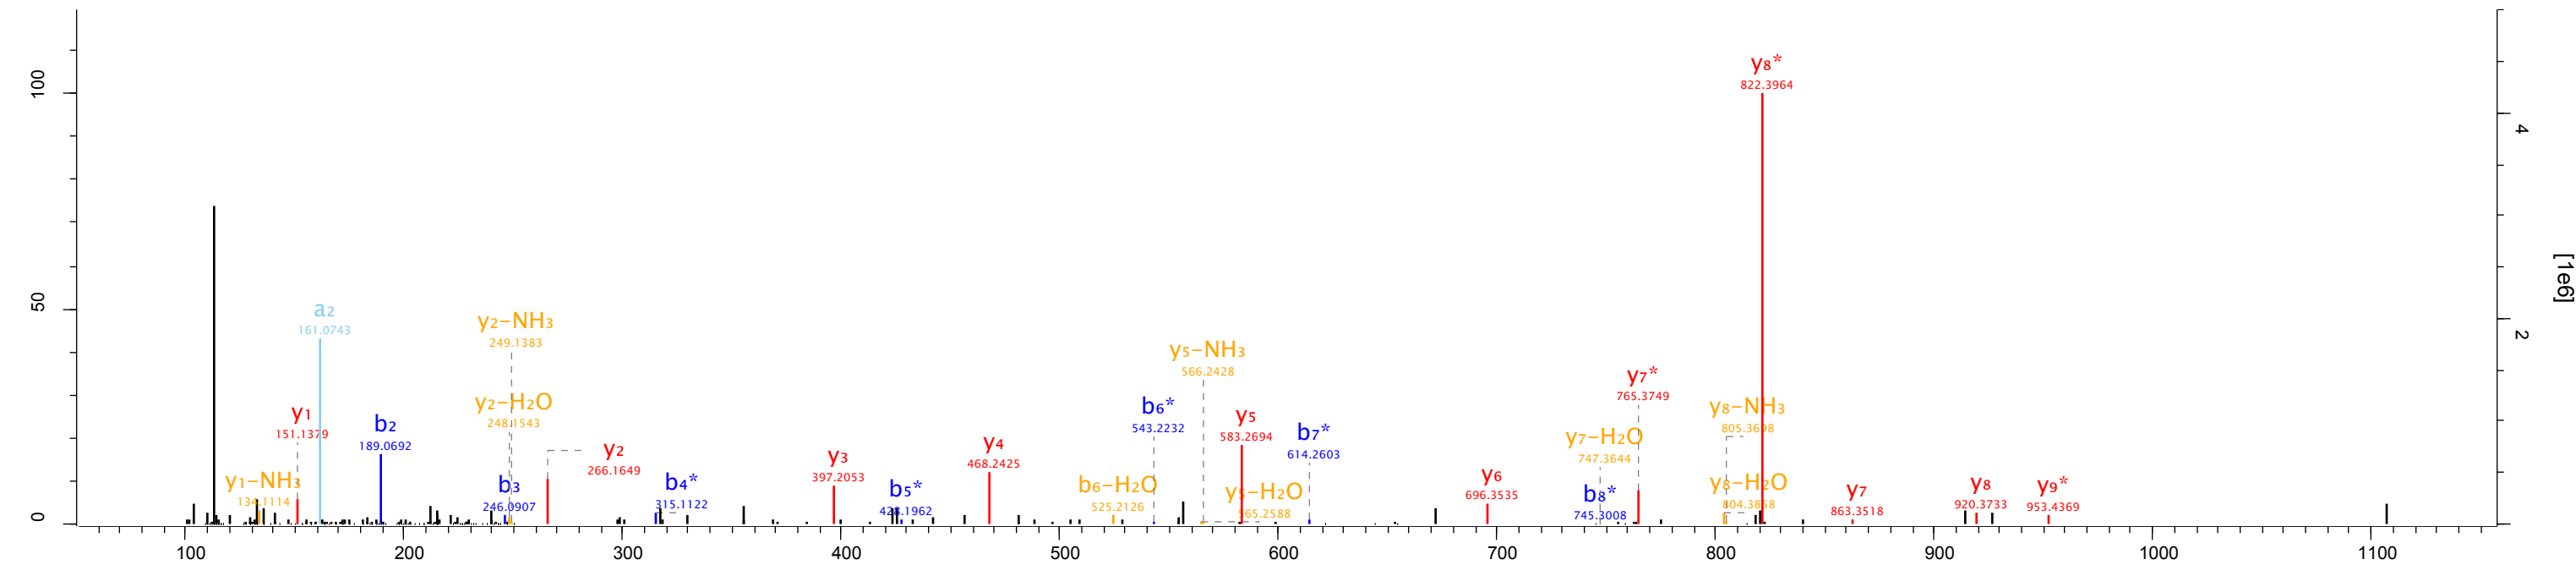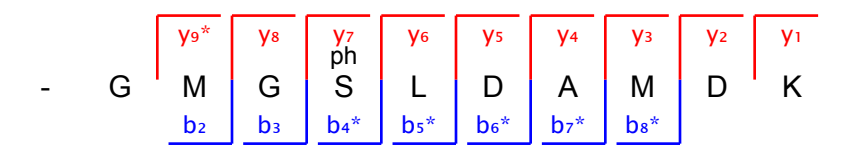

Raw file 20150812\_A375SR\_Phospho\_BR1\_05 Scan 13655 Method FTMS; HCD Score 154.84 m/z 911.46 Gene names SLAIN2

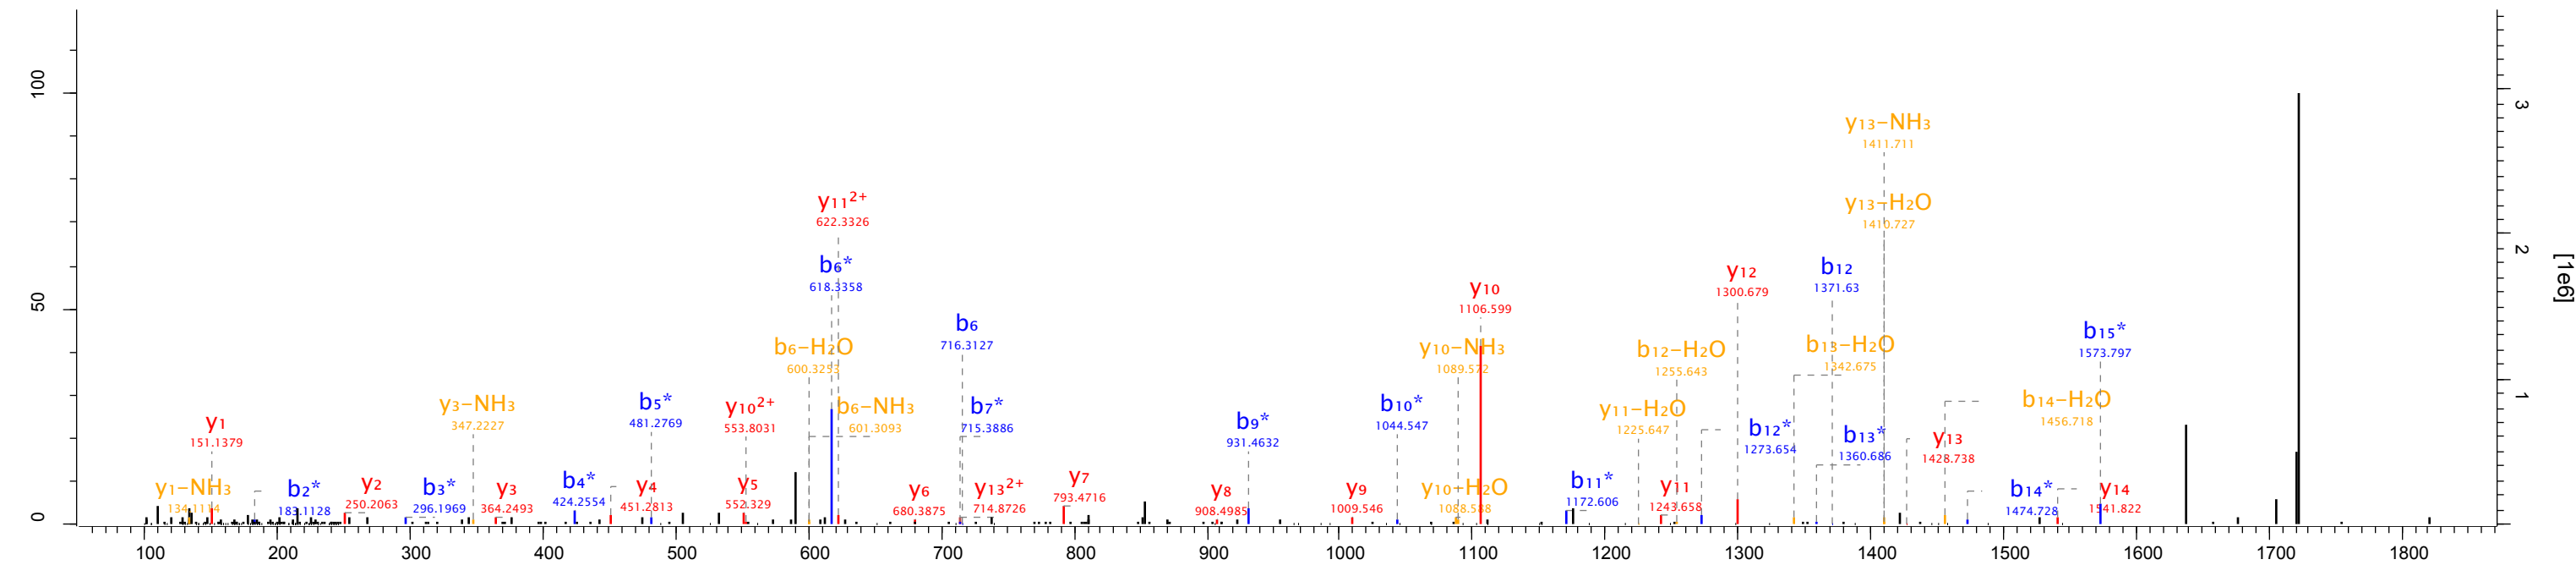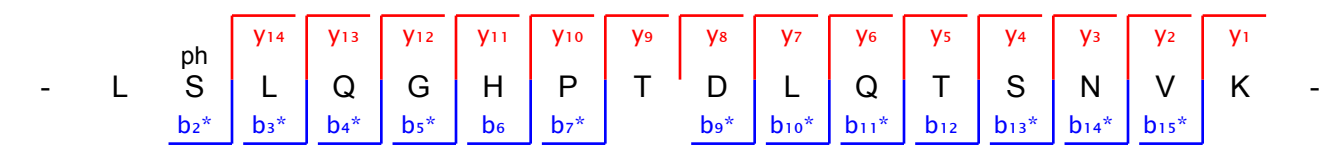

Raw file: 20150812\_A375SR\_Phospho\_BR1\_05  
 Scan: 13715 Method: FTMS; HCD Score: 144.27 m/z: 510.46

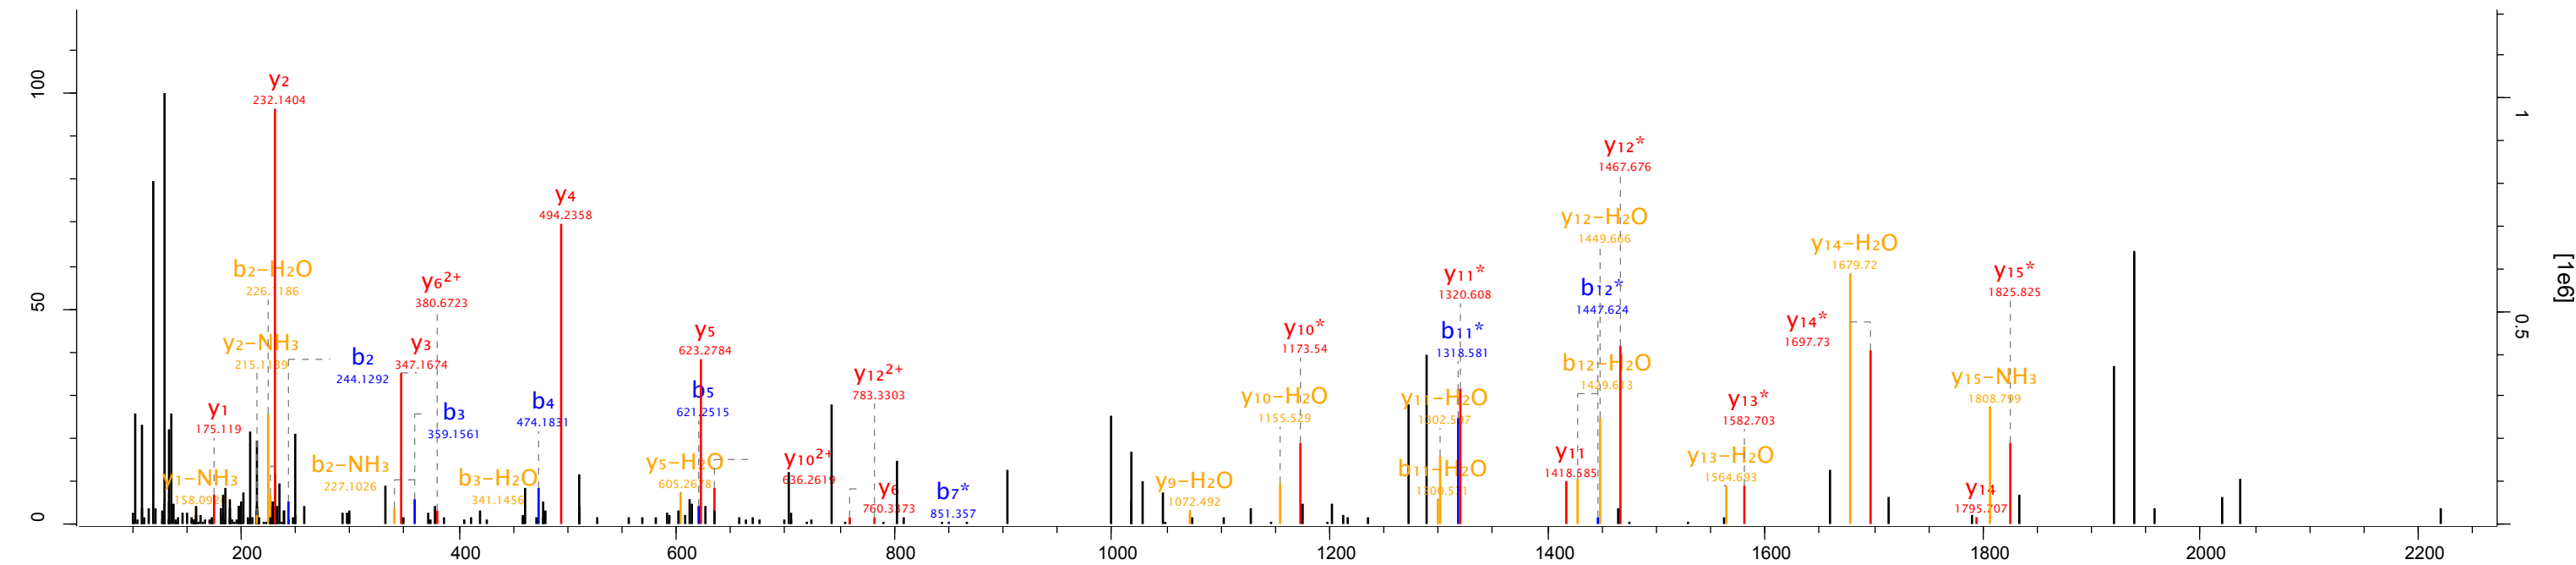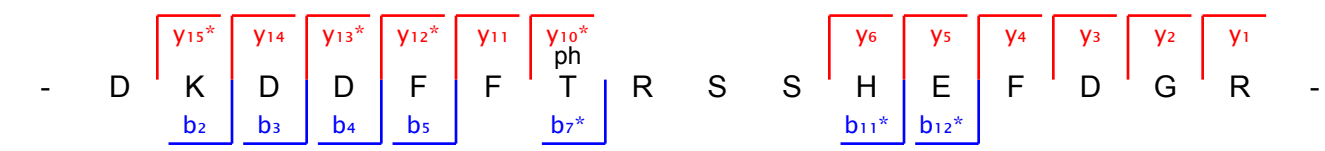

Raw file 20150812\_A375SR\_Phospho\_BR1\_05 Scan 13835 Method FTMS; HCD Score 290.44 m/z 908.9 Gene names DAXX

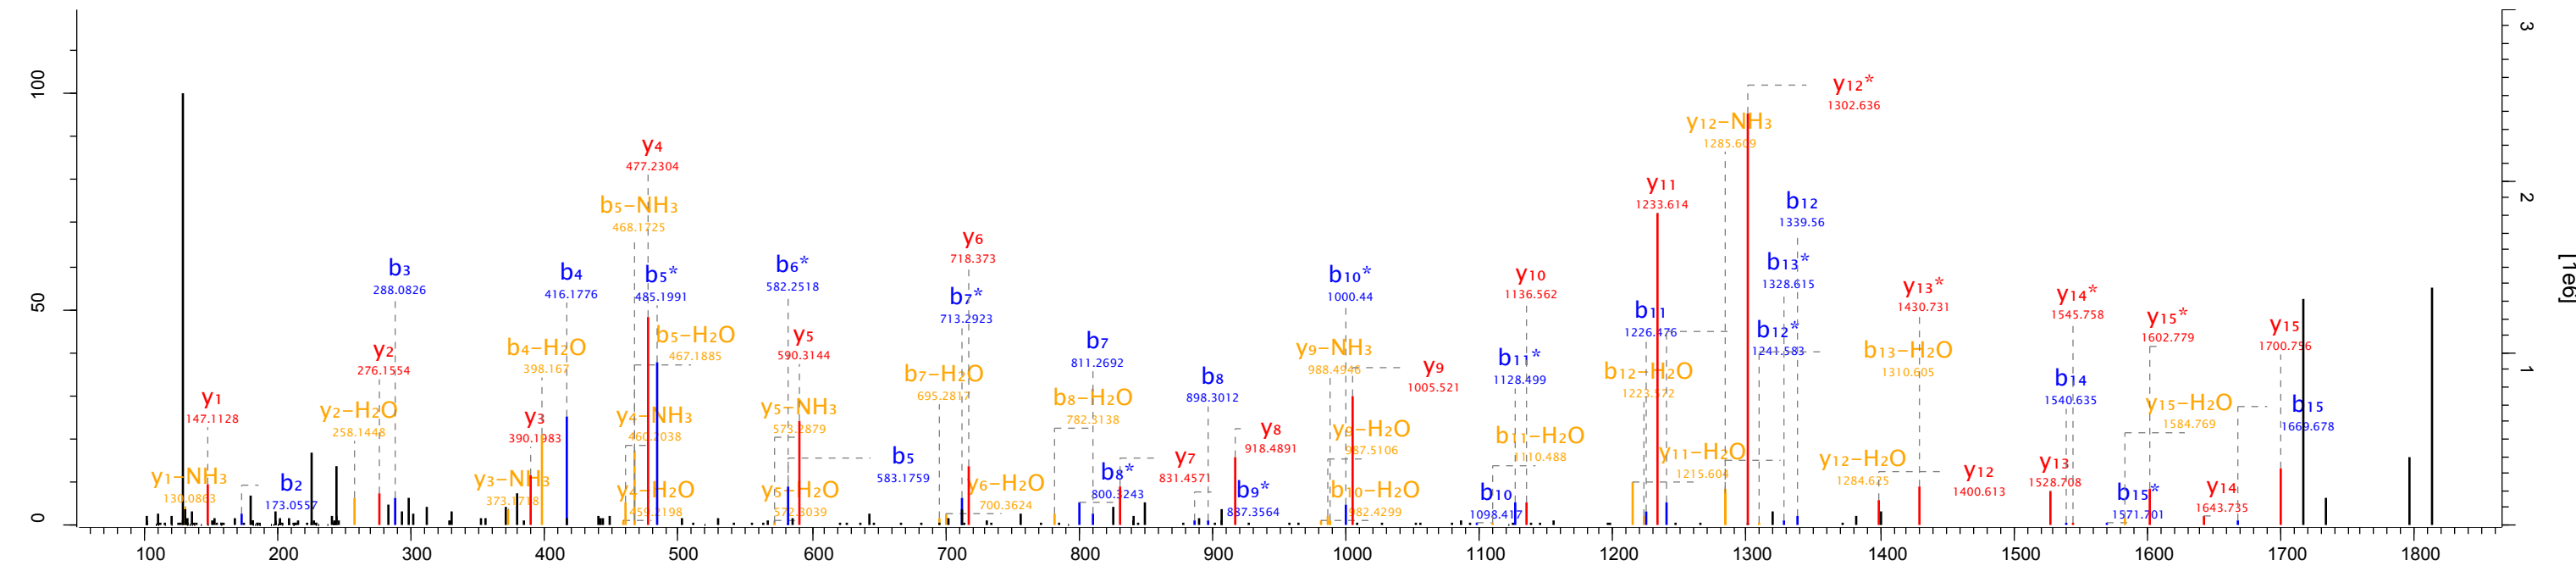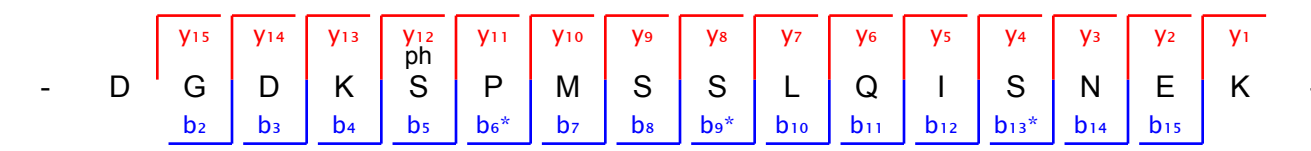

Raw file 20150812\_A375SR\_Phospho\_BR1\_05 Scan 14115 Method FTMS; HCD Score 109.16 m/z 605.8 Gene names RBM15

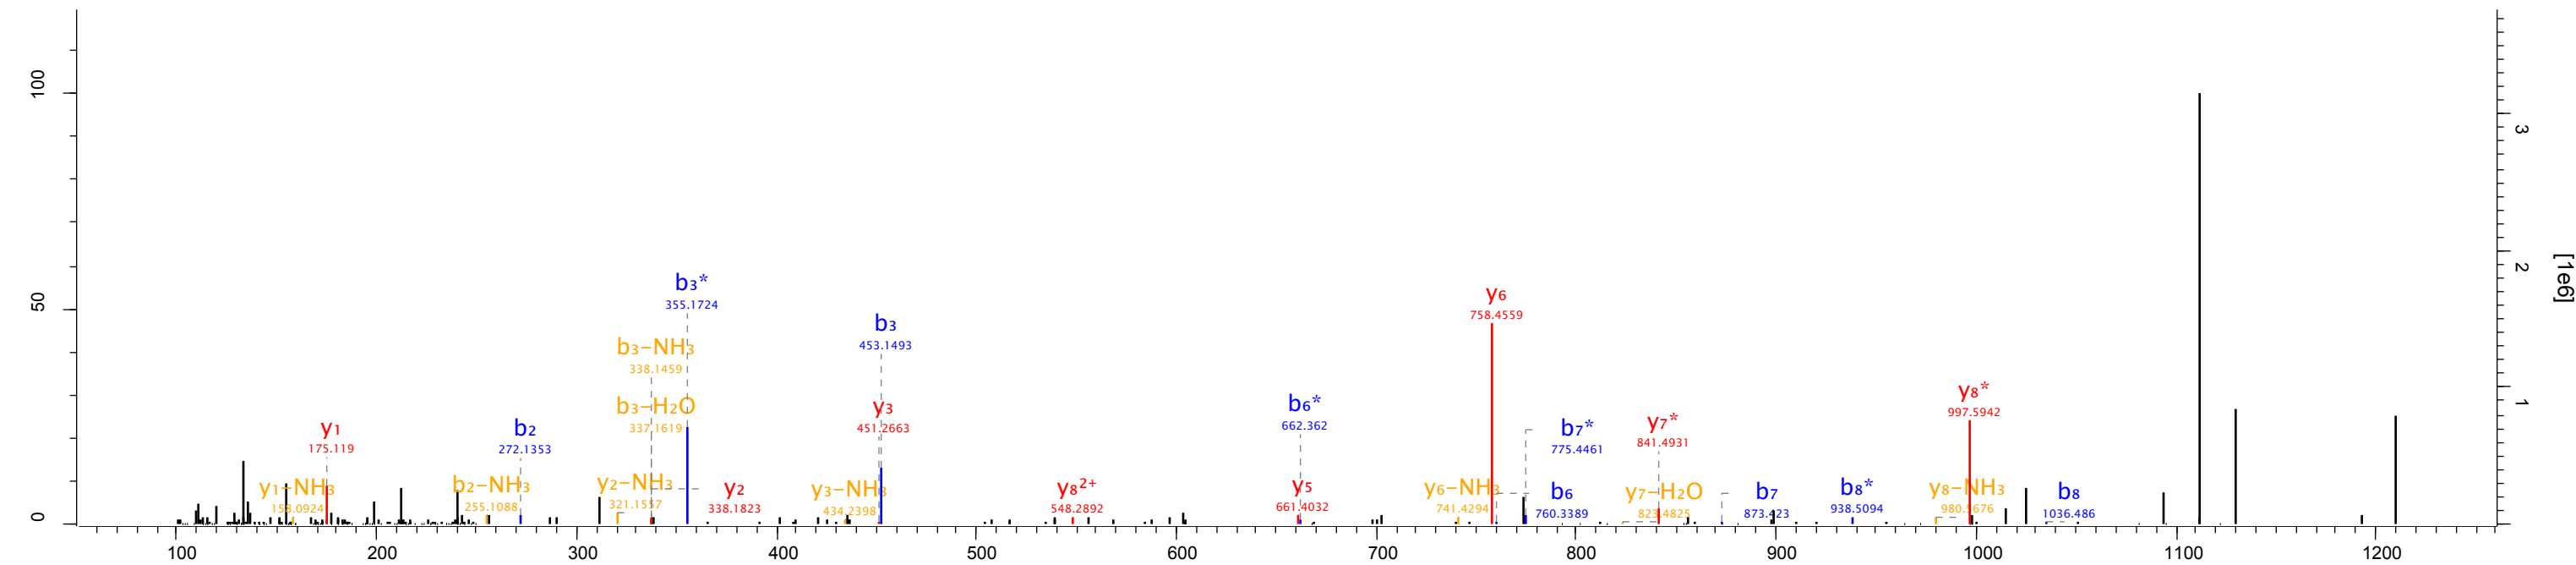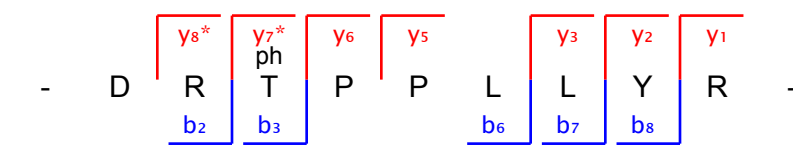

Raw file: 20150812\_A375SR\_Phospho\_BR1\_05  
 Scan: 14355  
 Method: FTMS; HCD  
 Score: 206.48  
 m/z: 971.96  
 Gene names: SPECC1L;SPECC1L-ADORA2A

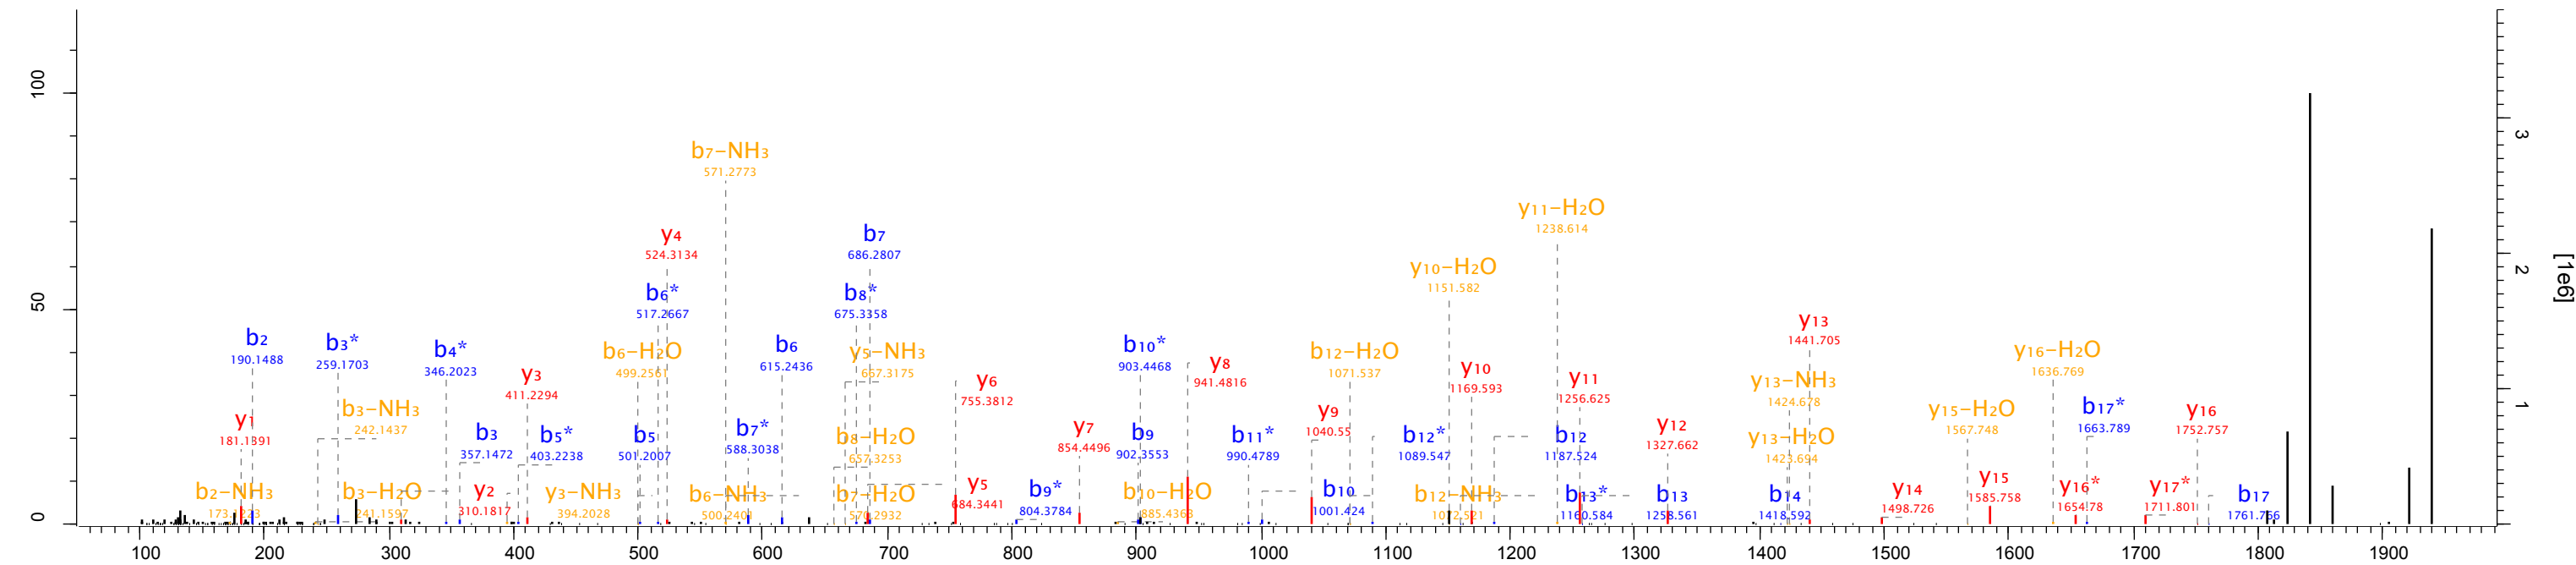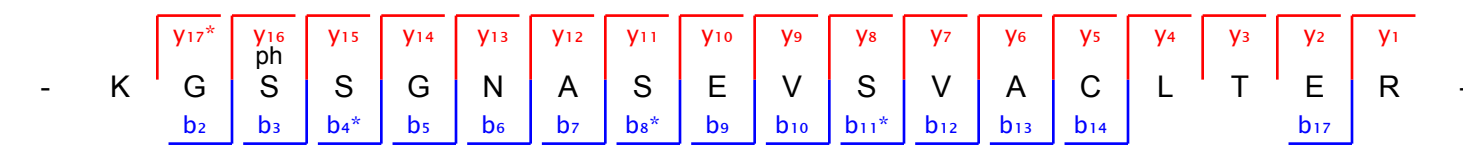

Raw file 20150812\_A375SR\_Phospho\_BR1\_05 Scan 14885 Method FTMS; HCD Score 169.37 m/z 800.34 Gene names PIAS2

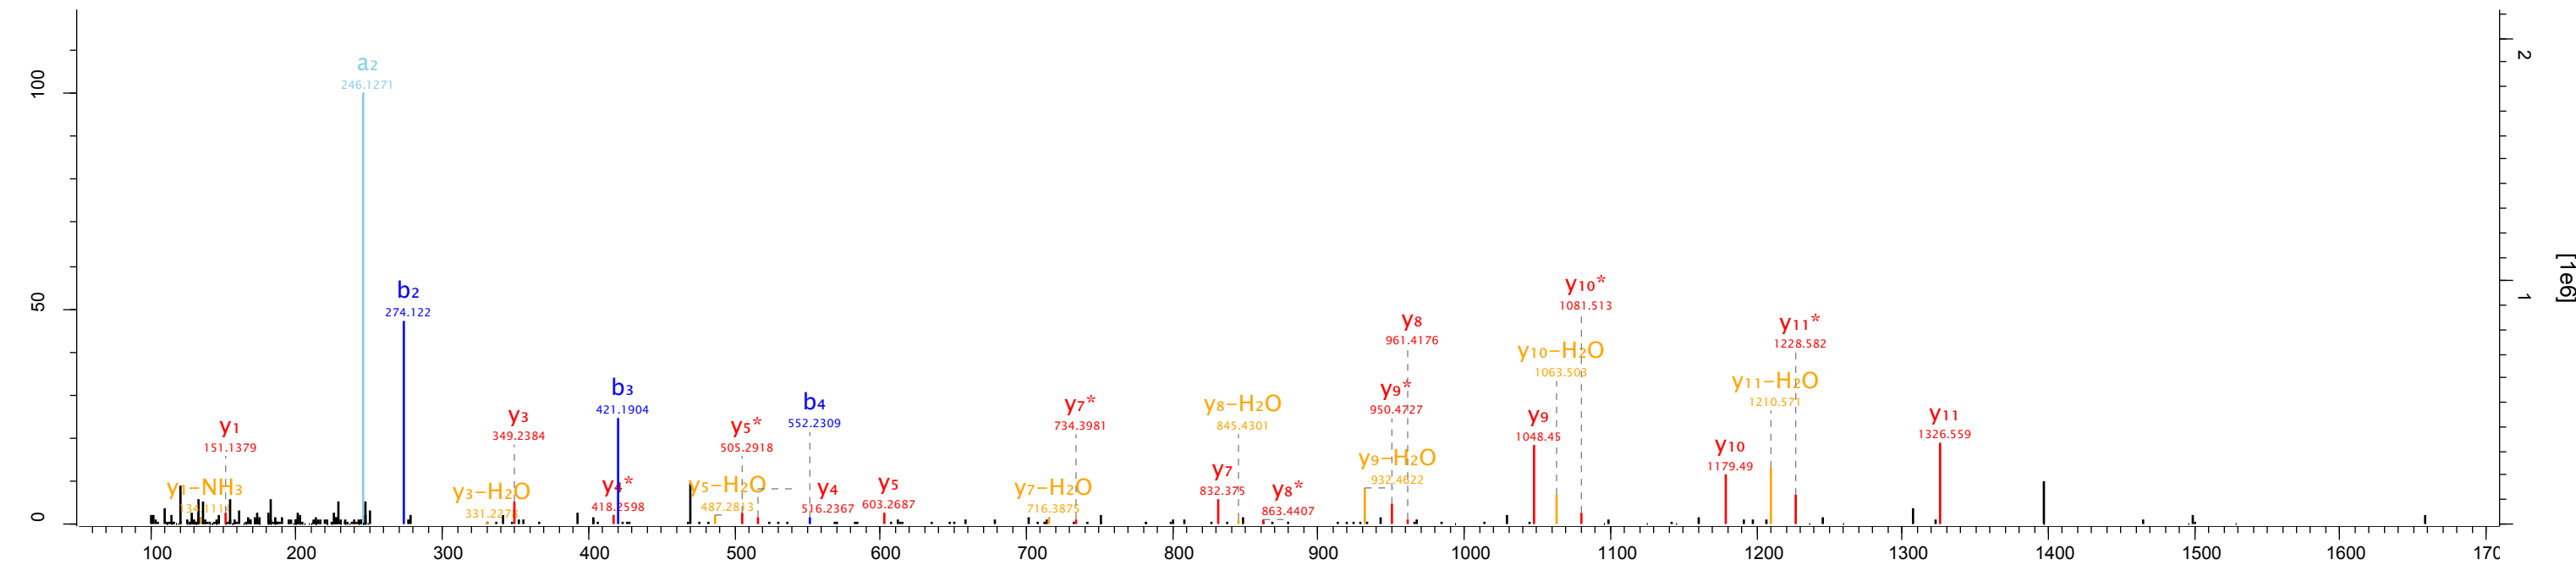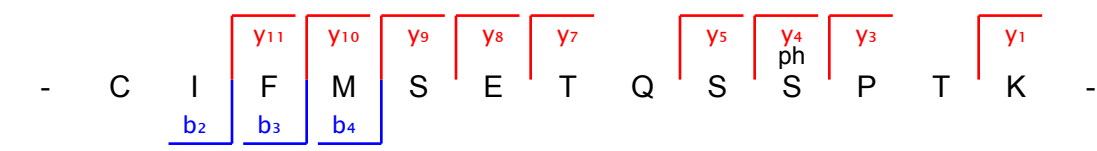

Raw file: 20150812\_A375SR\_Phospho\_BR1\_05  
 Scan: 1525 Method: FTMS; HCD Score: 85.81 m/z: 396.53 Gene names: MAP1B

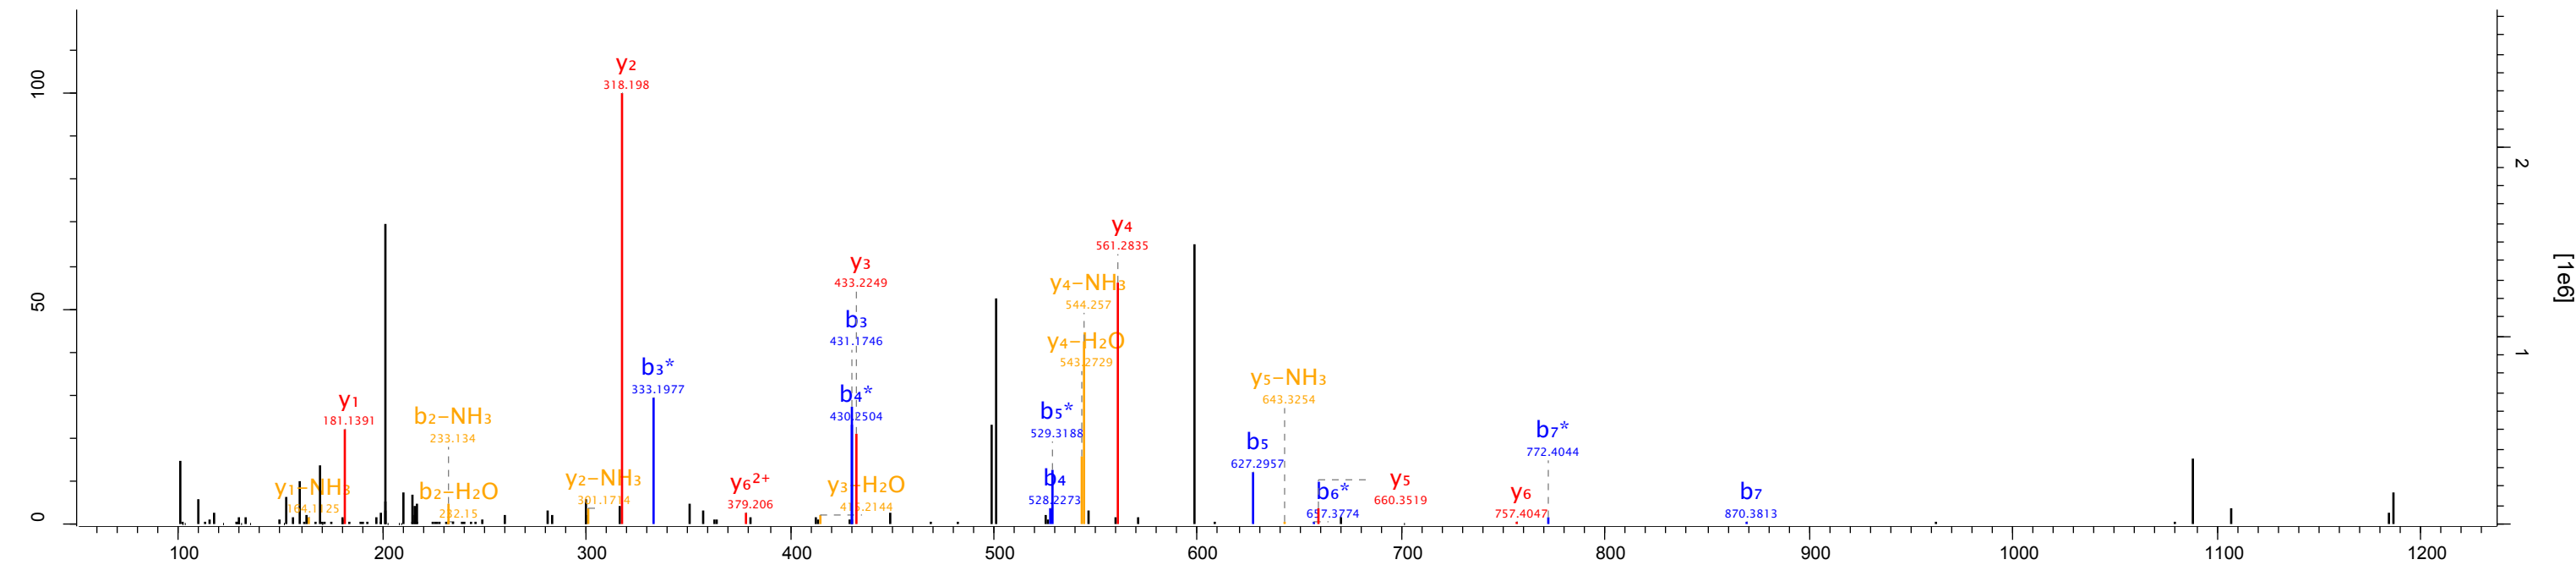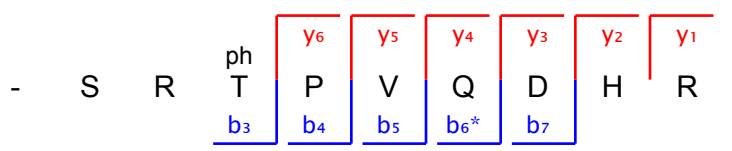



Raw file: 20150812\_A375SR\_Phospho\_BR1\_05  
 Scan: 15955 Method: FTMS; HCD Score: 44.44 m/z: 960.12 Gene names: STAT5B

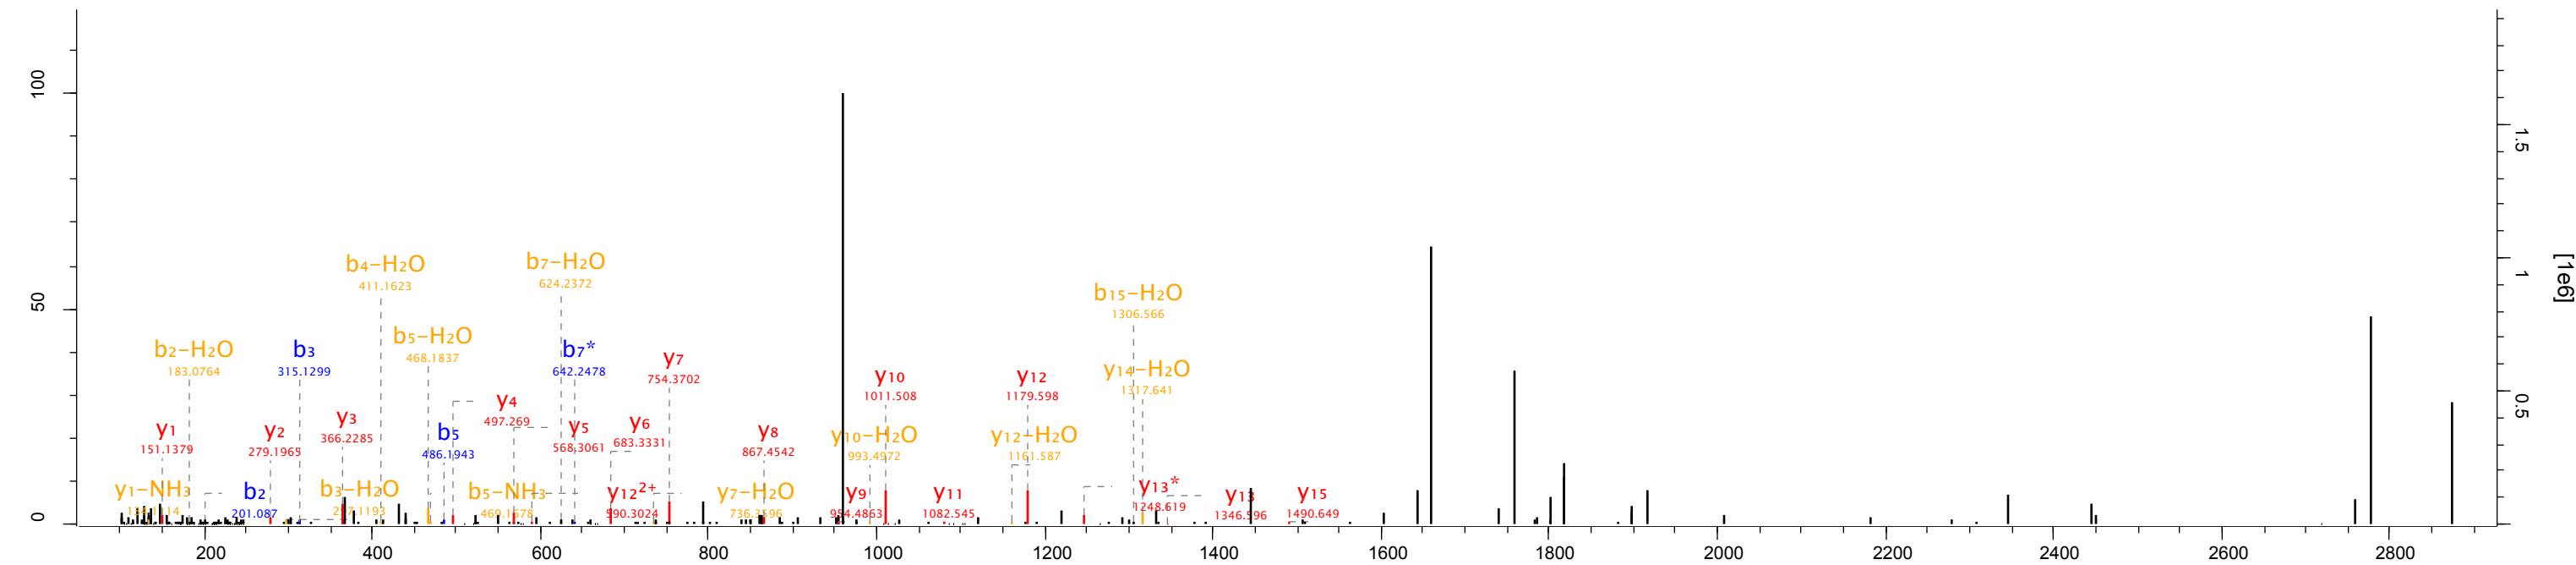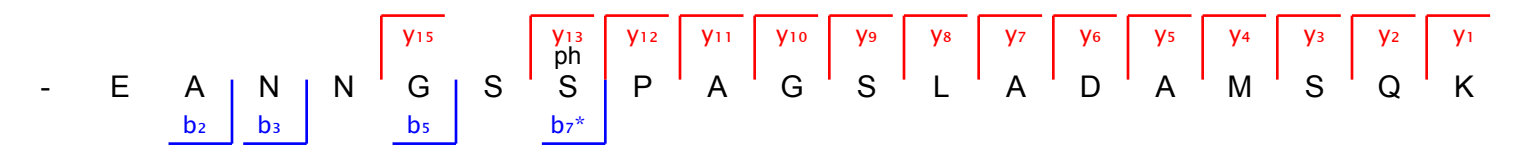

Raw file Scan Method Score m/z Gene names  
 20150812\_A375SR\_Phospho\_BR1\_05 16775 FTMS; HCD 103.83 637.81 TMF1

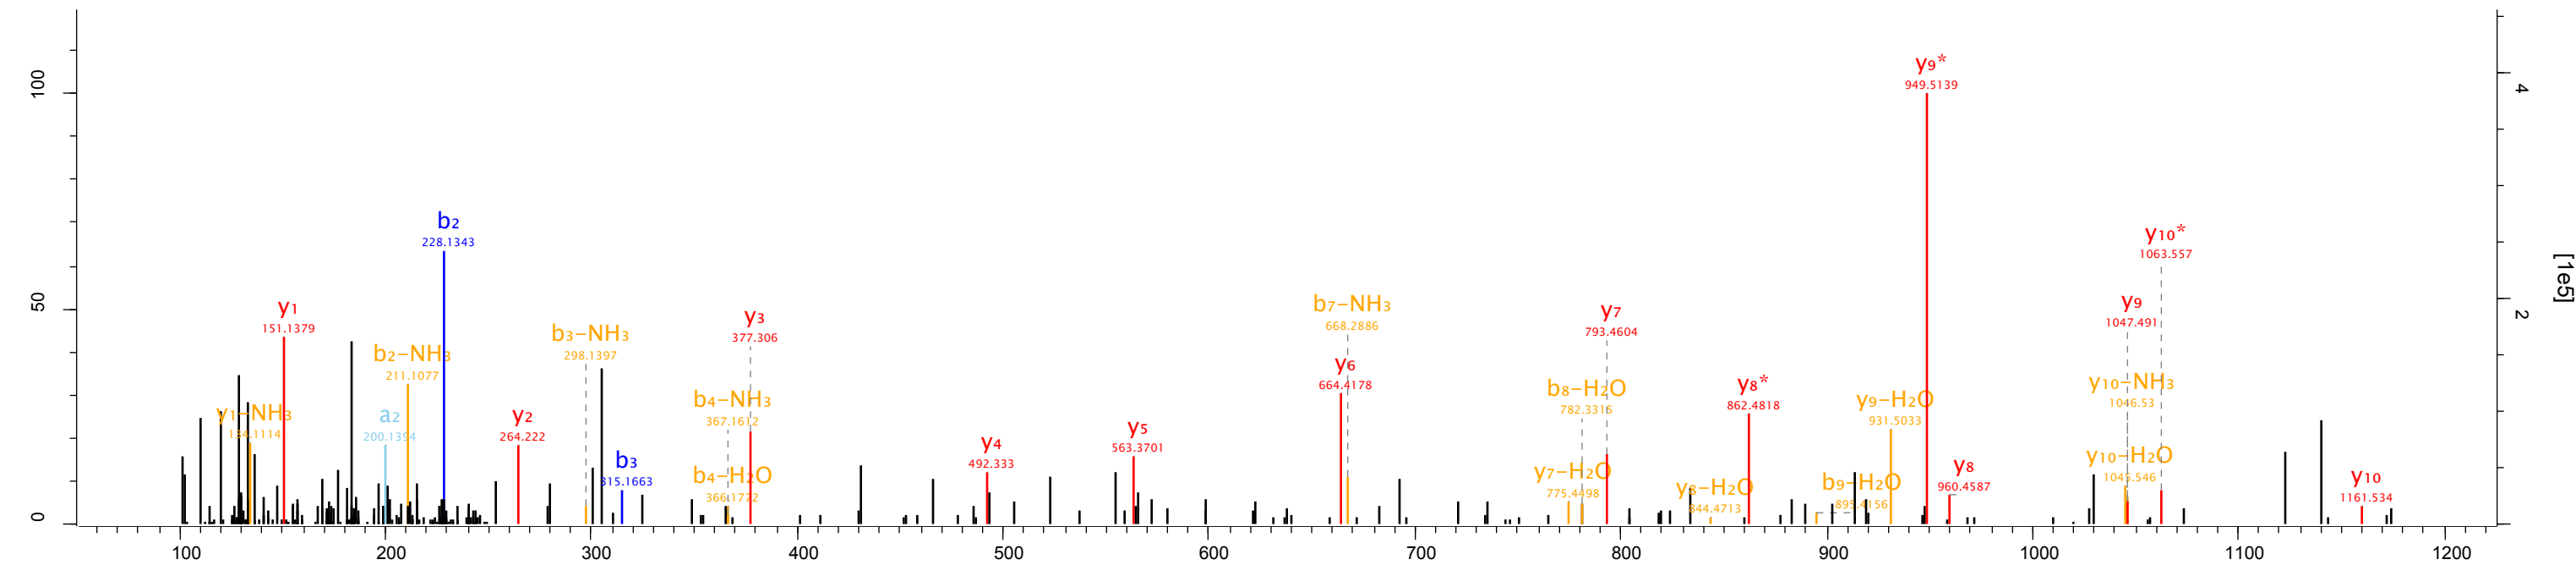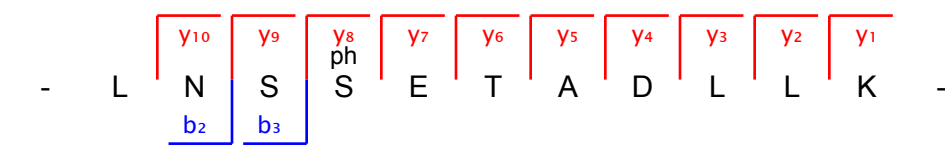

Raw file 20150812\_A375SR\_Phospho\_BR1\_05 Scan 17475 Method FTMS; HCD Score 156.07 m/z 1058.79 Gene names CEP170

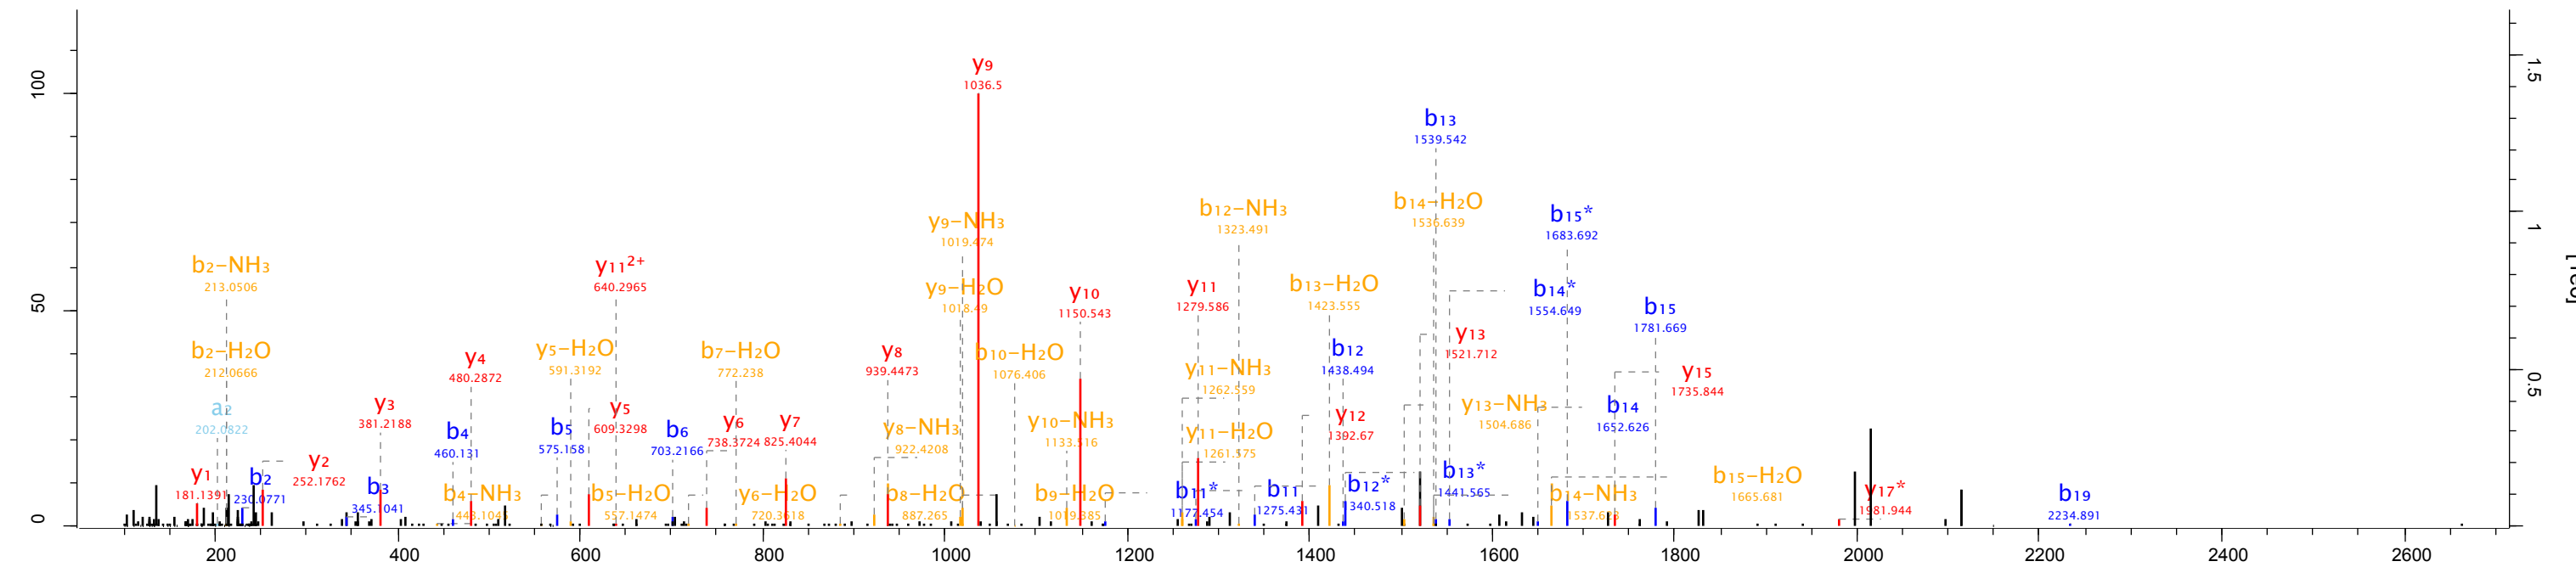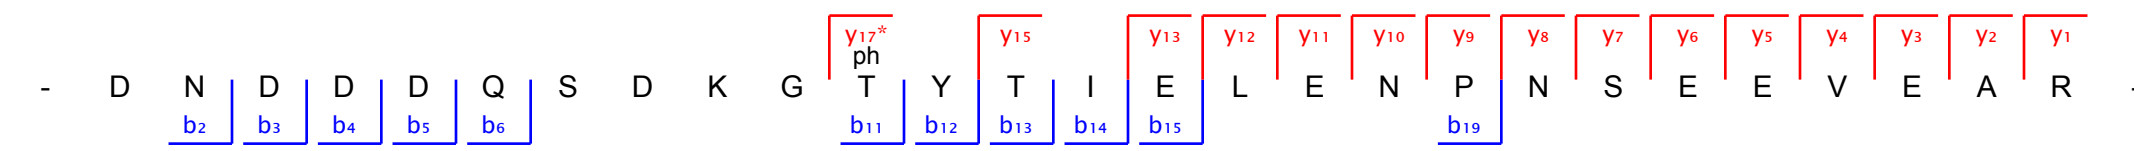

Raw file  
20150812\_A375SR\_Phospho\_BR1\_05

Scan 17685 Method FTMS; HCD Score 309.66 m/z 788.58 Gene names RANBP2

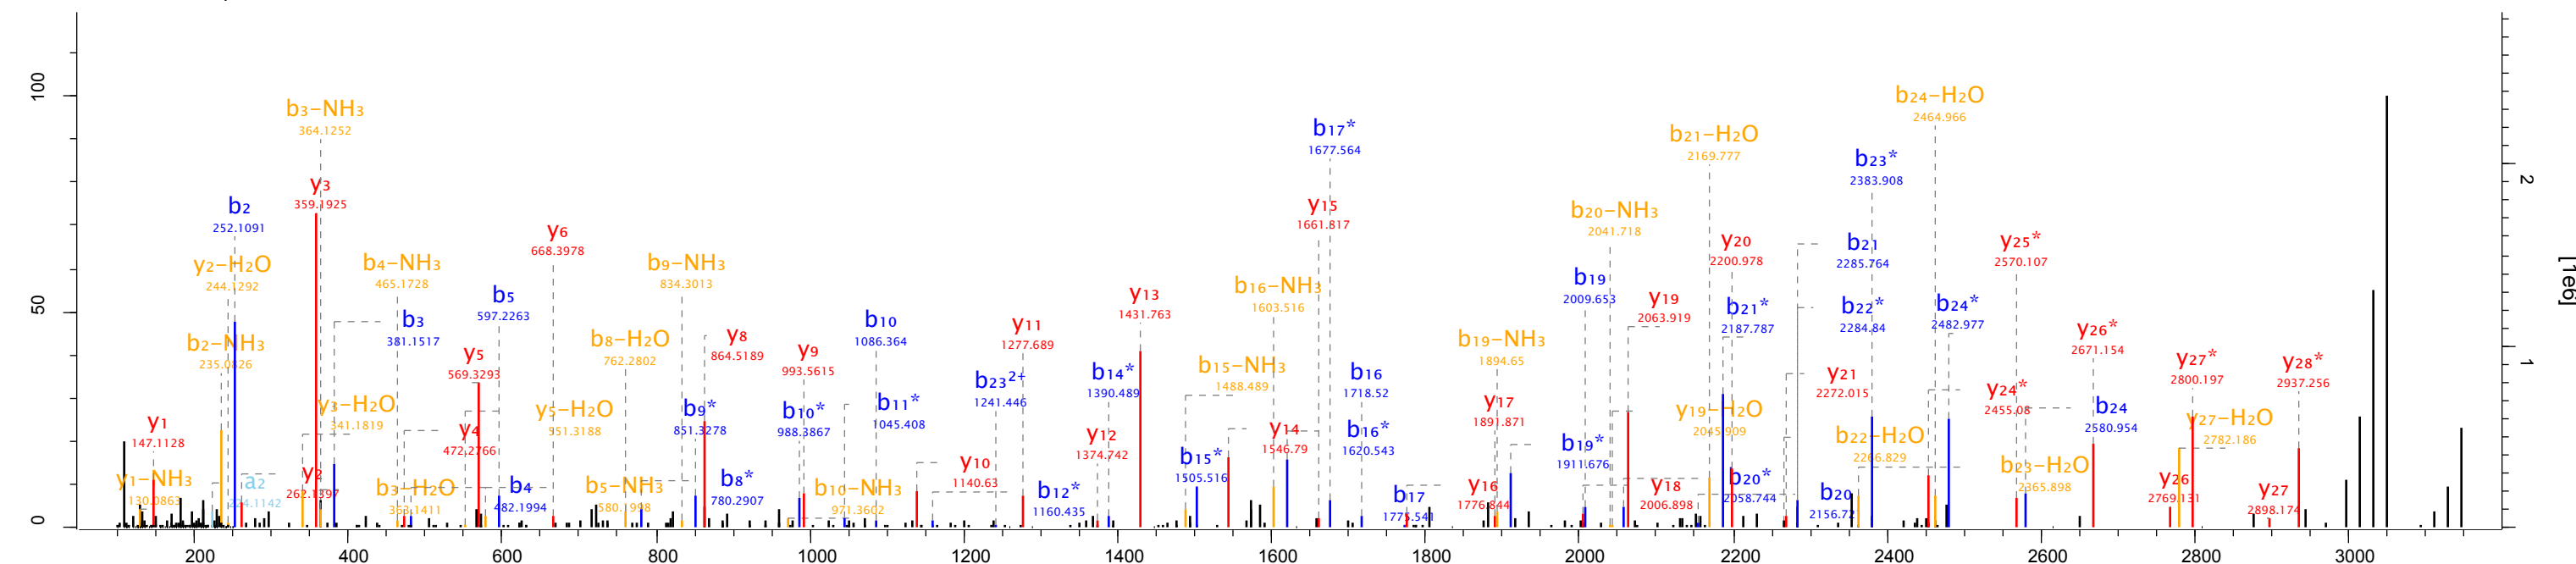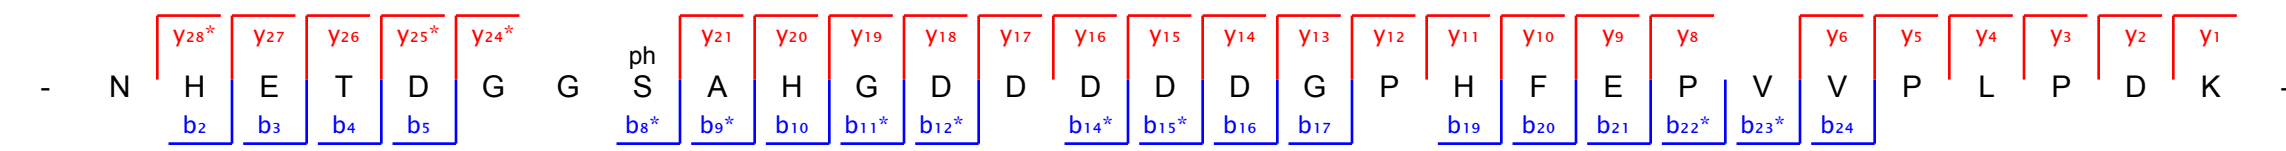

Raw file: 20150812\_A375SR\_Phospho\_BR1\_05  
 Scan: 1775 Method: FTMS; HCD Score: 134.13 m/z: 617.3 Gene names: RNF219

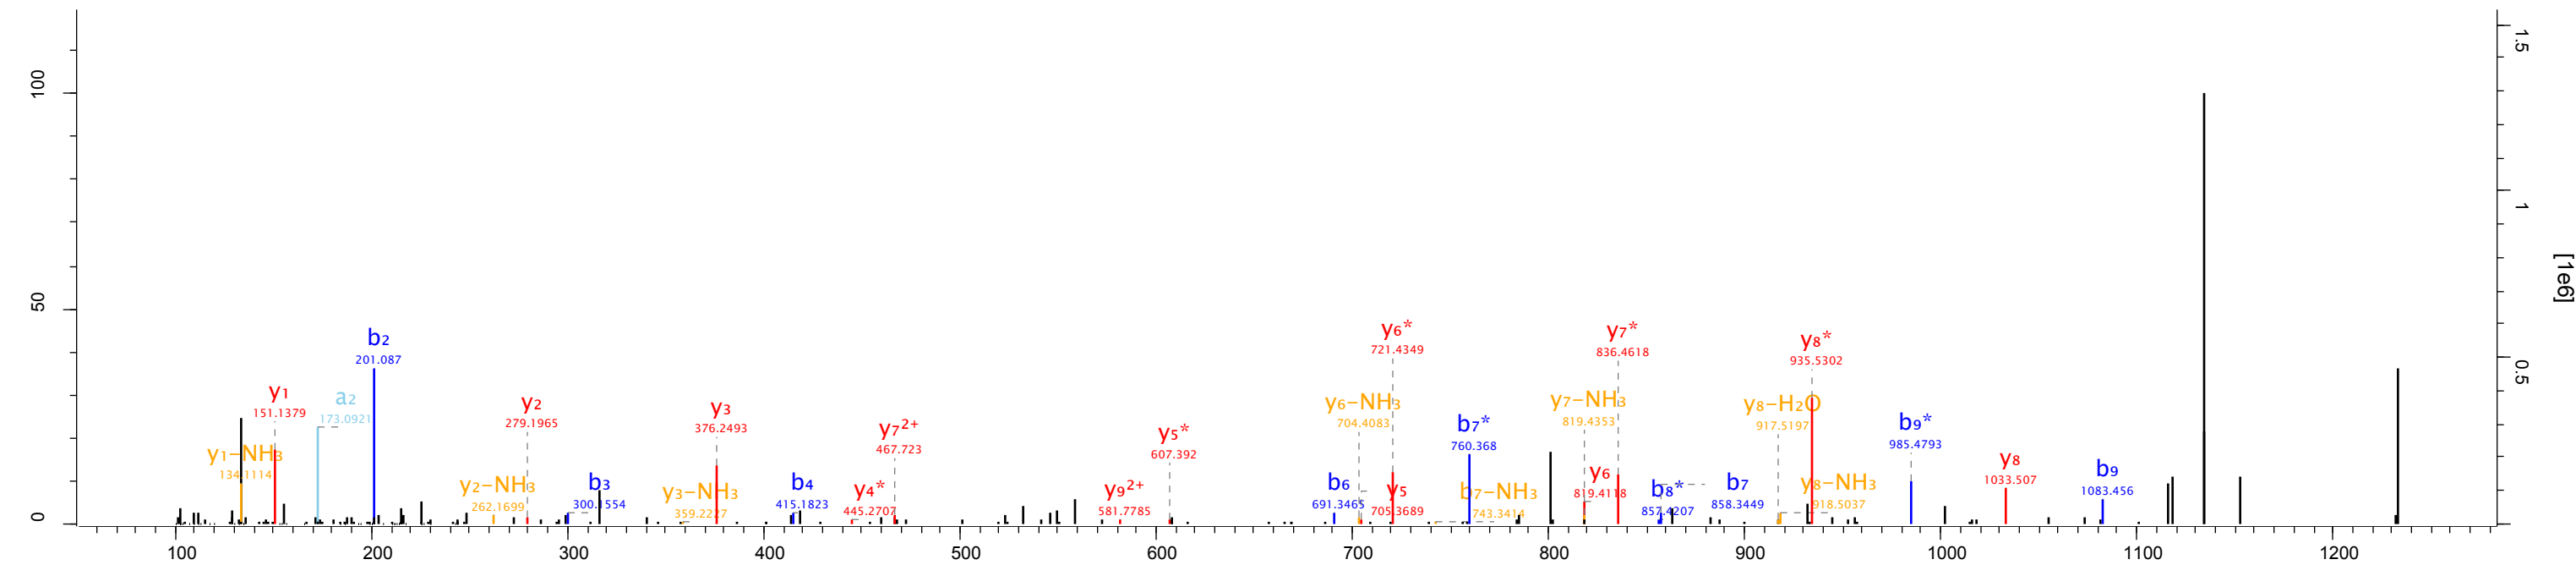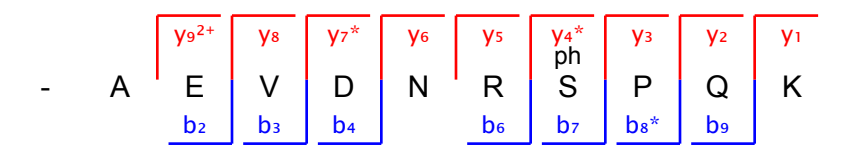

Raw file: 20150812\_A375SR\_Phospho\_BR1\_05  
 Scan: 18565 Method: FTMS; HCD Score: 190.37 m/z: 1011.46 Gene names: USP16

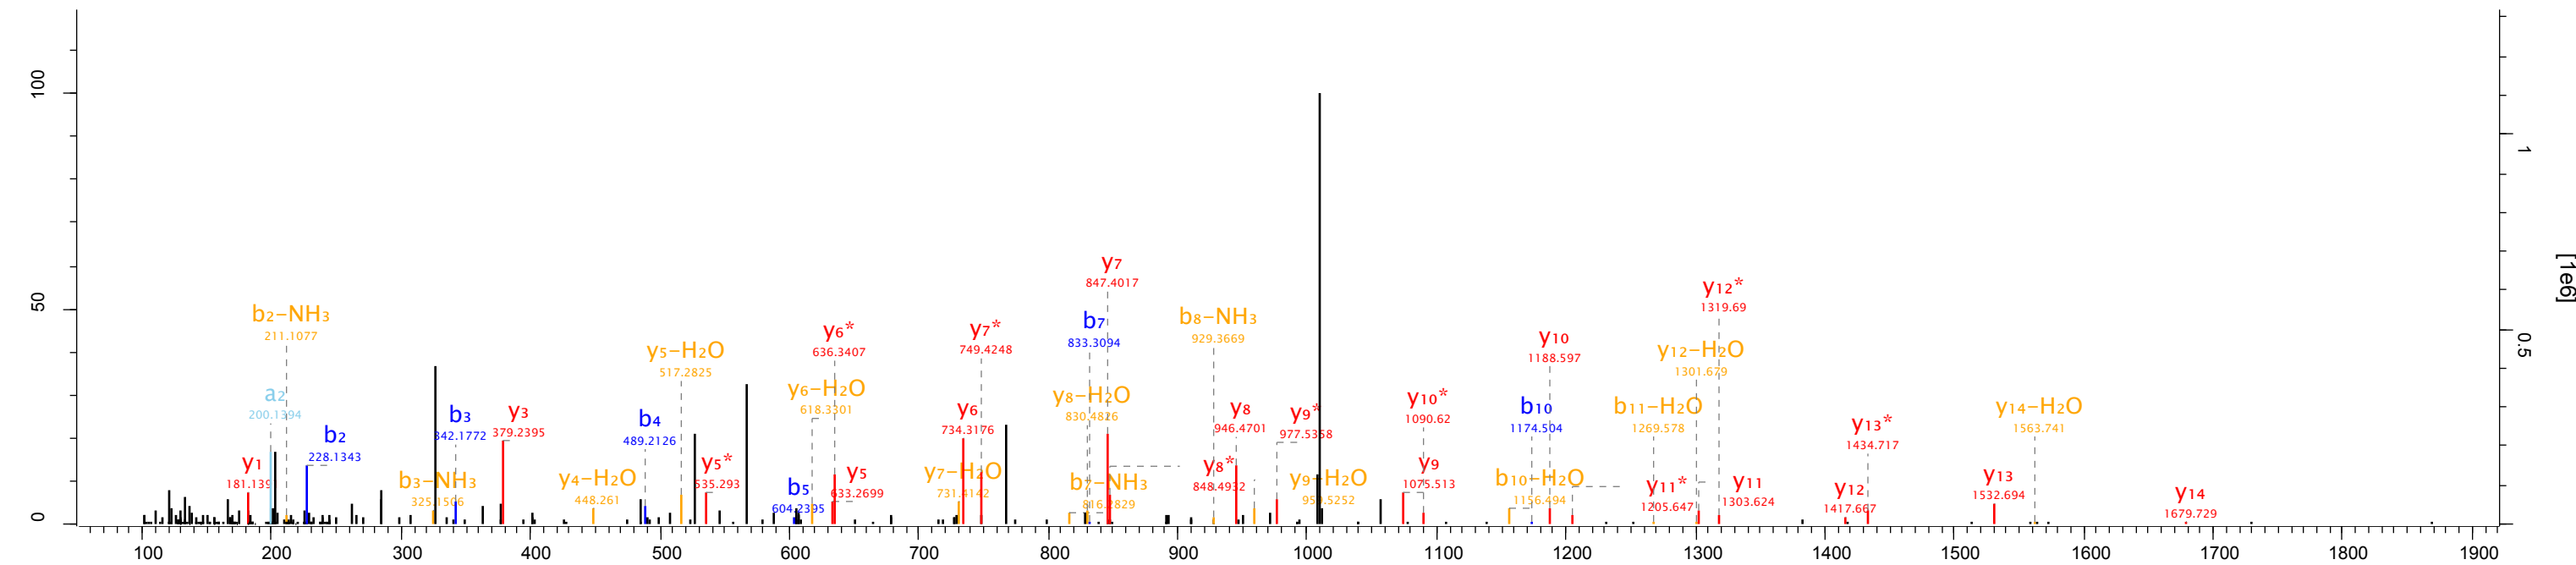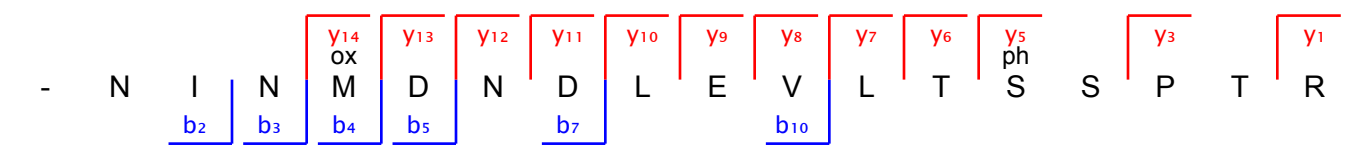

Raw file 20150812\_A375SR\_Phospho\_BR1\_05 Scan 18715 Method FTMS; HCD Score 75.19 m/z 710.05 Gene names CDC40

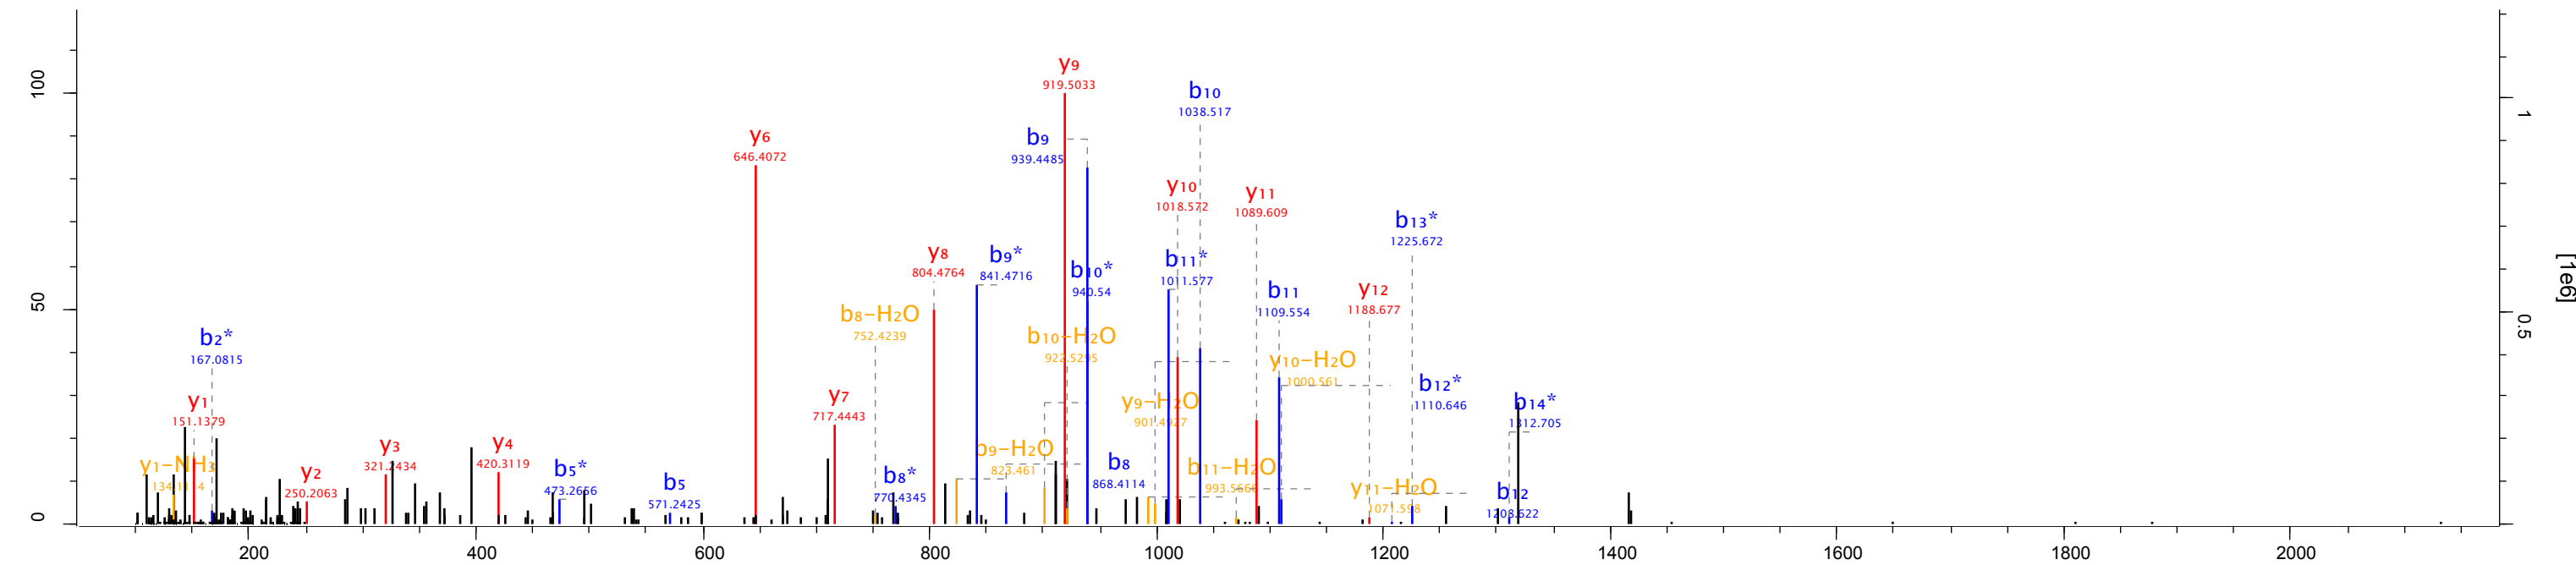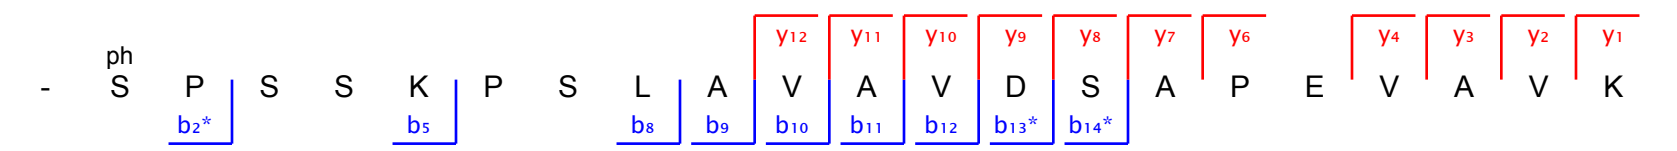

Raw file 20150812\_A375SR\_Phospho\_BR1\_05 Scan 1915 Method FTMS; HCD Score 130.03 m/z 585.8 Gene names CCNK

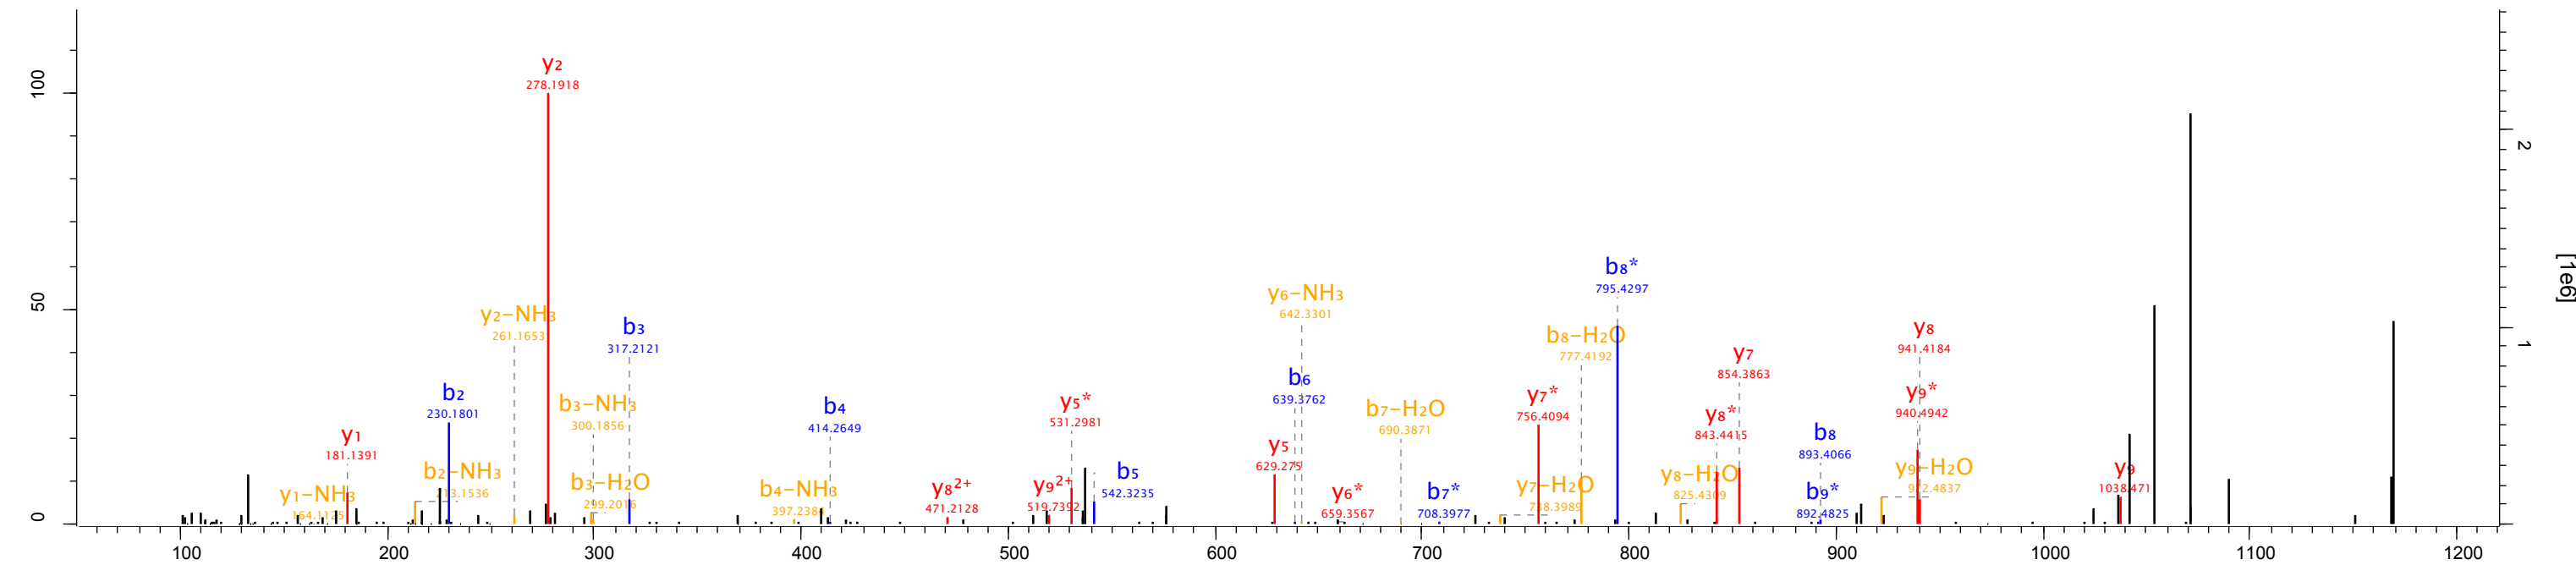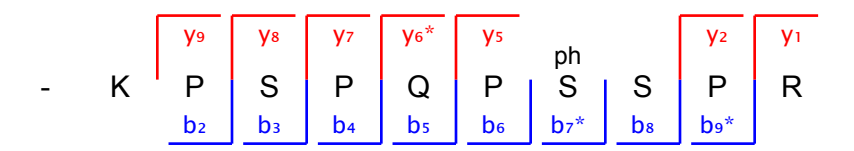



Raw file  
 20150812\_A375SR\_Phospho\_BR1\_05  
 Scan 20565 Method FTMS; HCD Score 163.95 m/z 760.67 Gene names TAB3

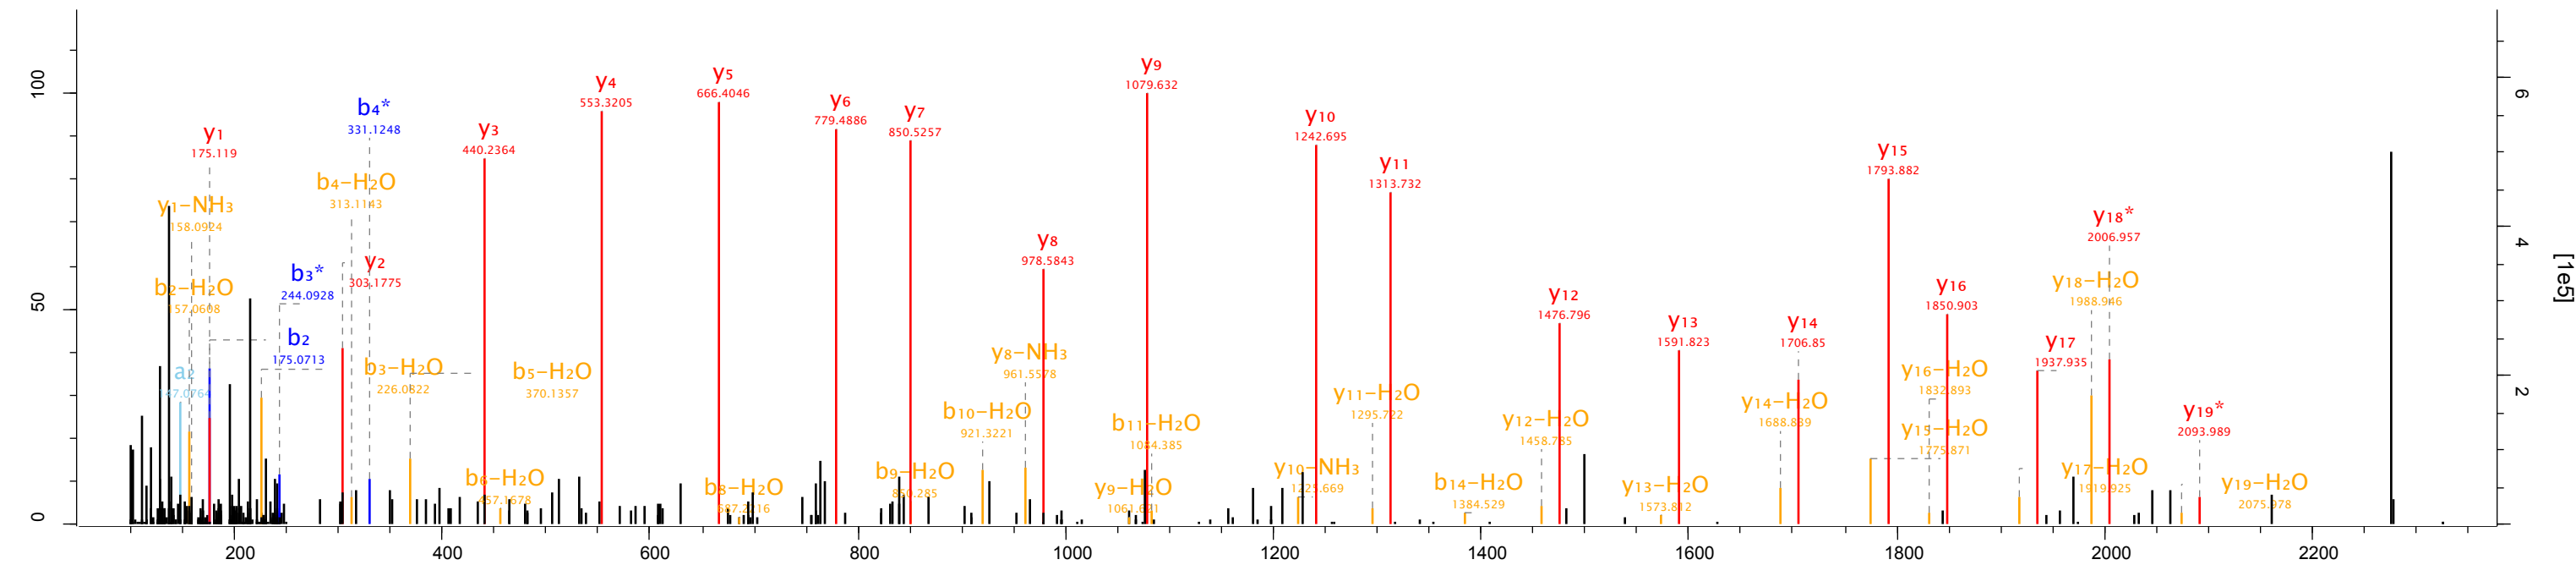

Raw file 20150812\_A375SR\_Phospho\_BR1\_05 Scan 21145 Method FTMS; HCD Score 90.06 m/z 782.76 Gene names ZNF579

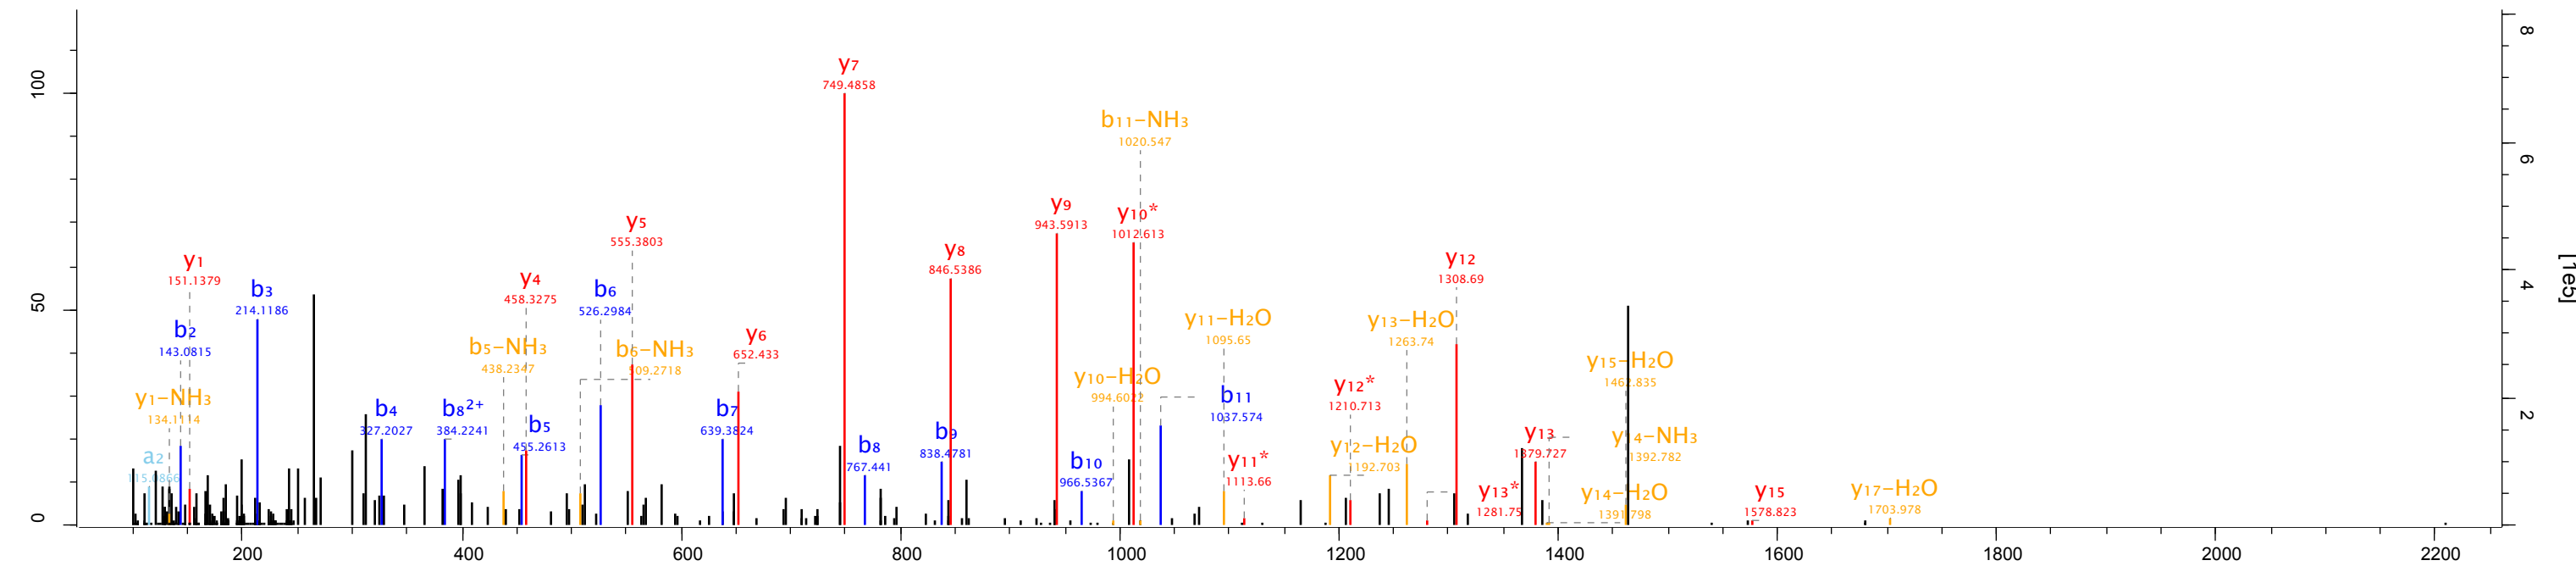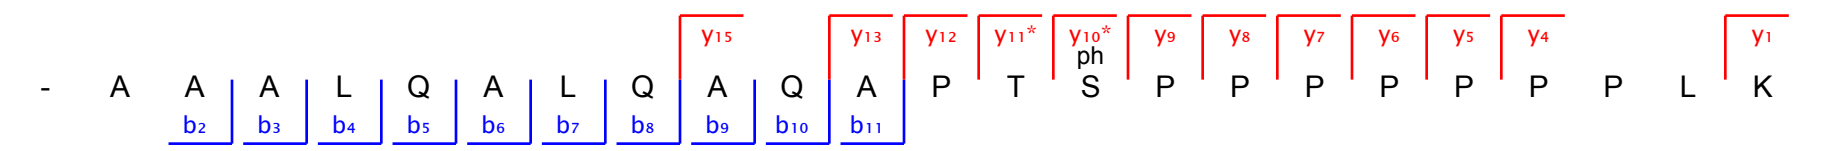

Raw file 20150812\_A375SR\_Phospho\_BR1\_05 Scan 21385 Method FTMS; HCD Score 74.43 m/z 784.85 Gene names CDC26

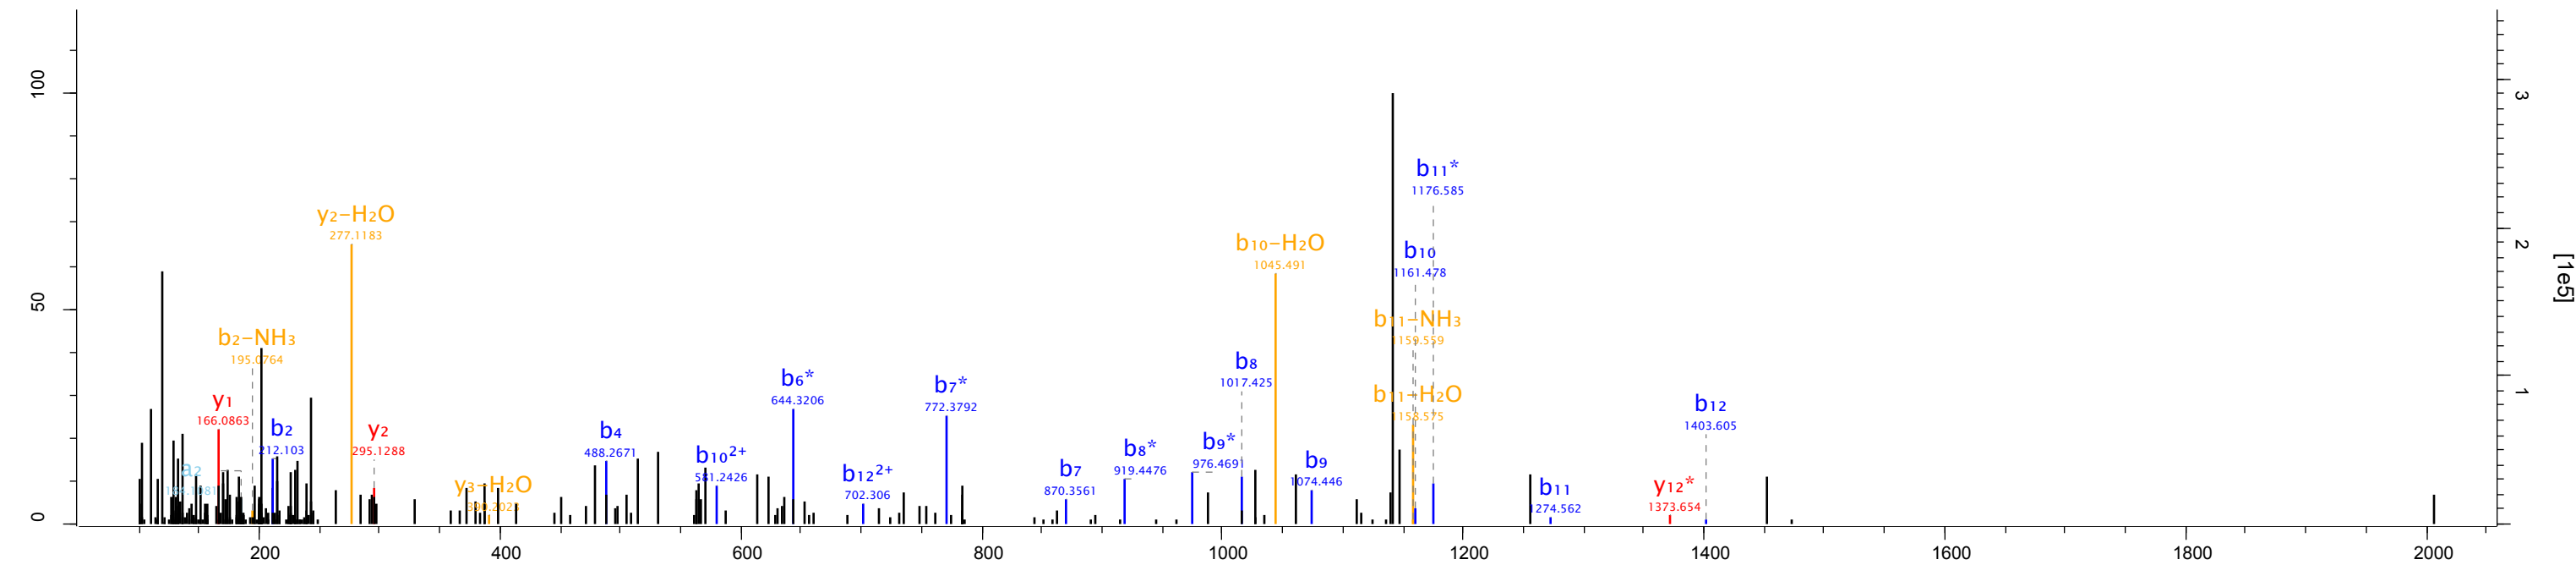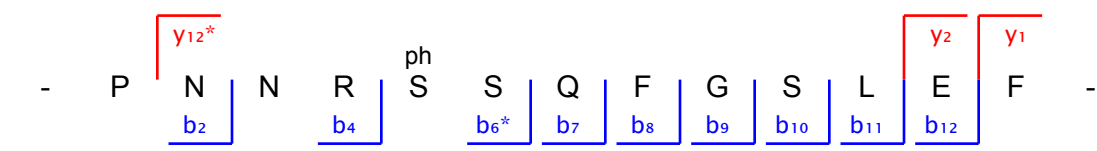

Raw file: 20150812\_A375SR\_Phospho\_BR1\_05  
 Scan: 21465 Method: FTMS; HCD Score: 124.4 m/z: 1046.97 Gene names: SMARCC2

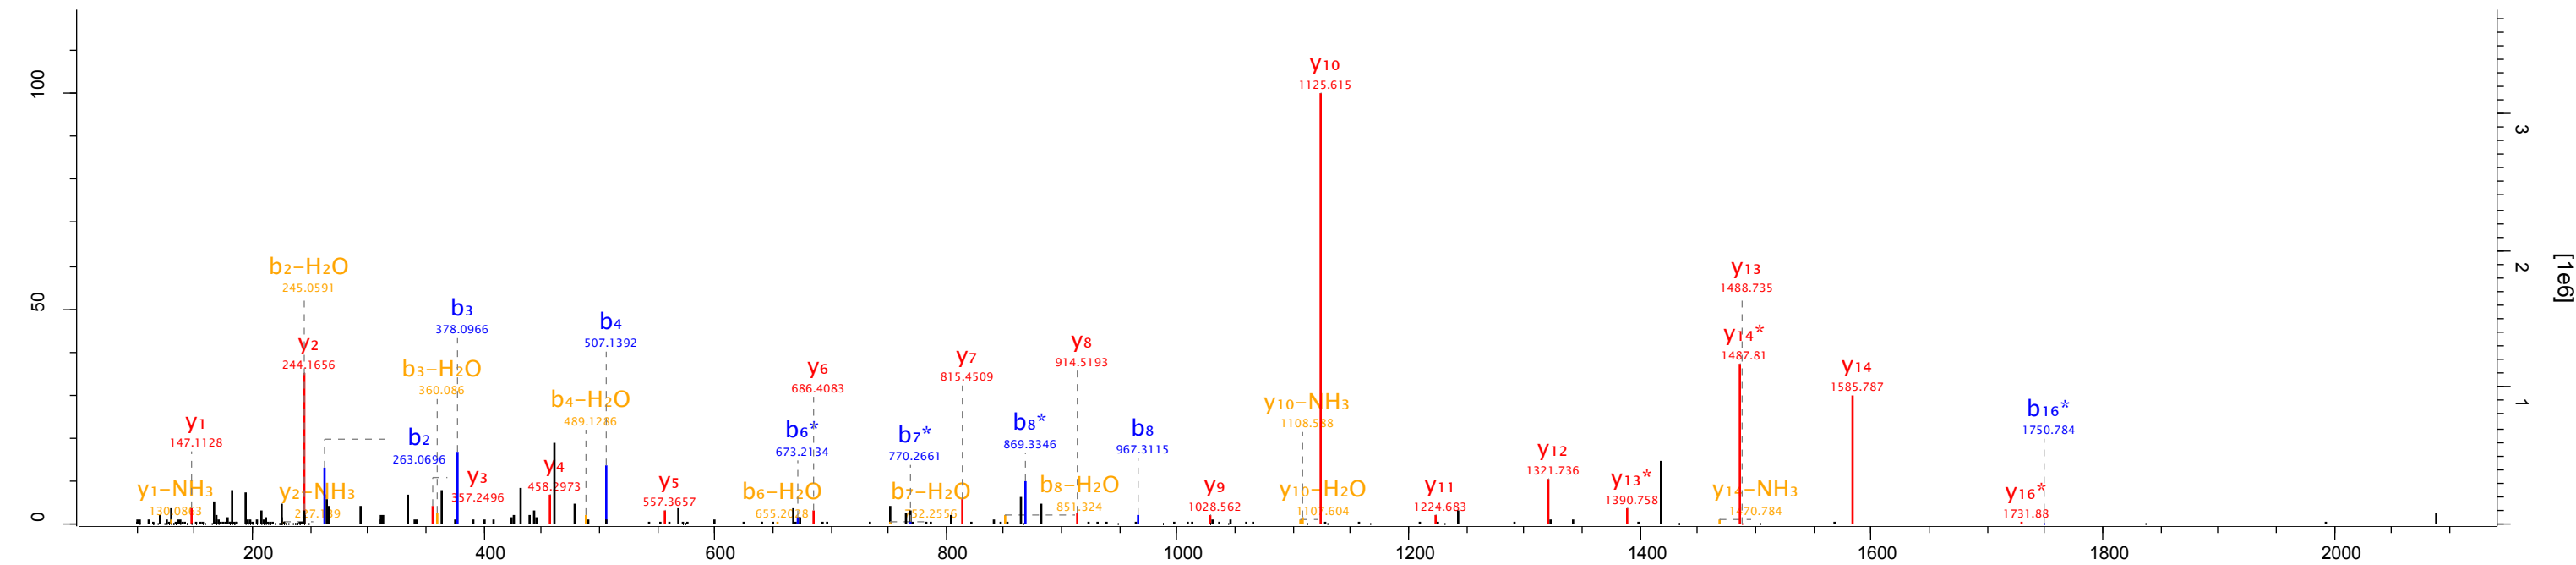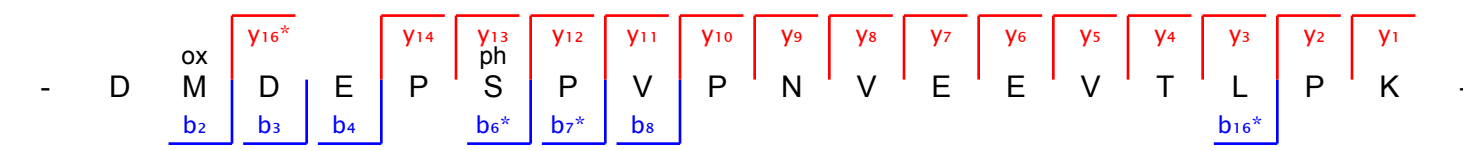

Raw file  
 20150812\_A375SR\_Phospho\_BR1\_05  
 Scan 21755 Method FTMS; HCD Score 284.56 m/z 1221.51 Gene names SAC3D1

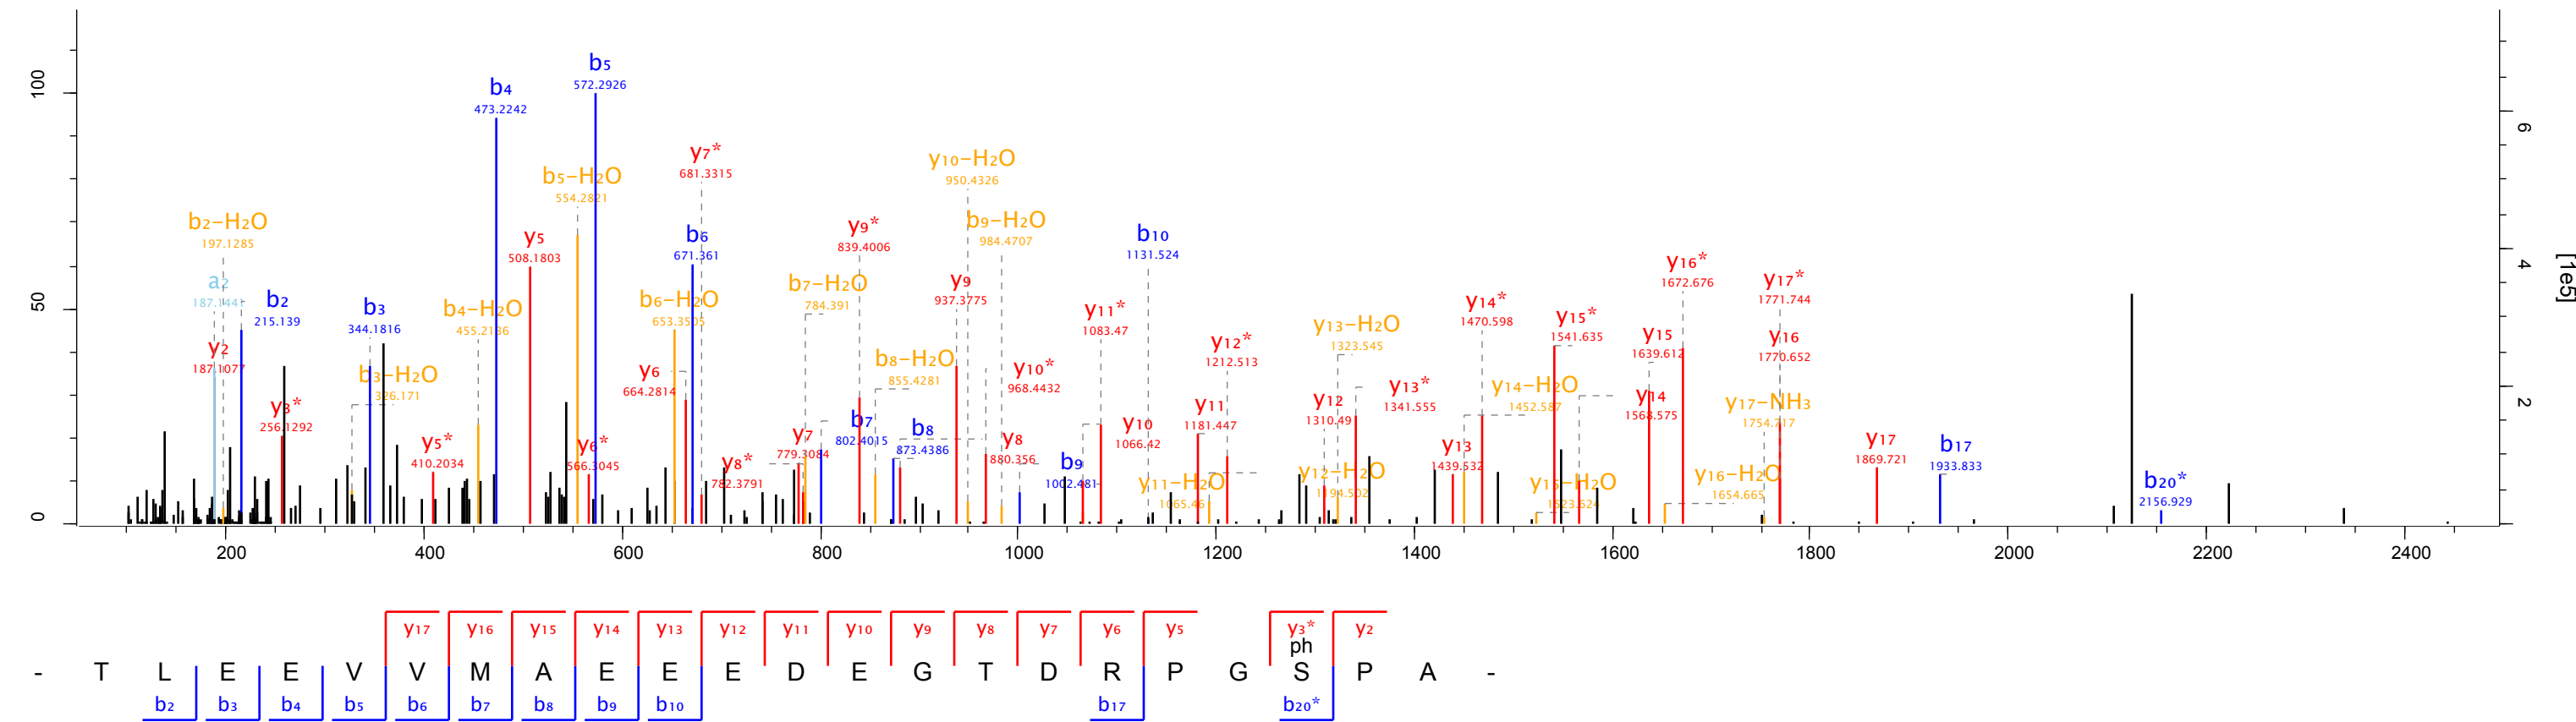

Raw file: 20150812\_A375SR\_Phospho\_BR1\_05  
 Scan: 22955 Method: FTMS; HCD Score: 196.62 m/z: 1069.48 Gene names: MADD

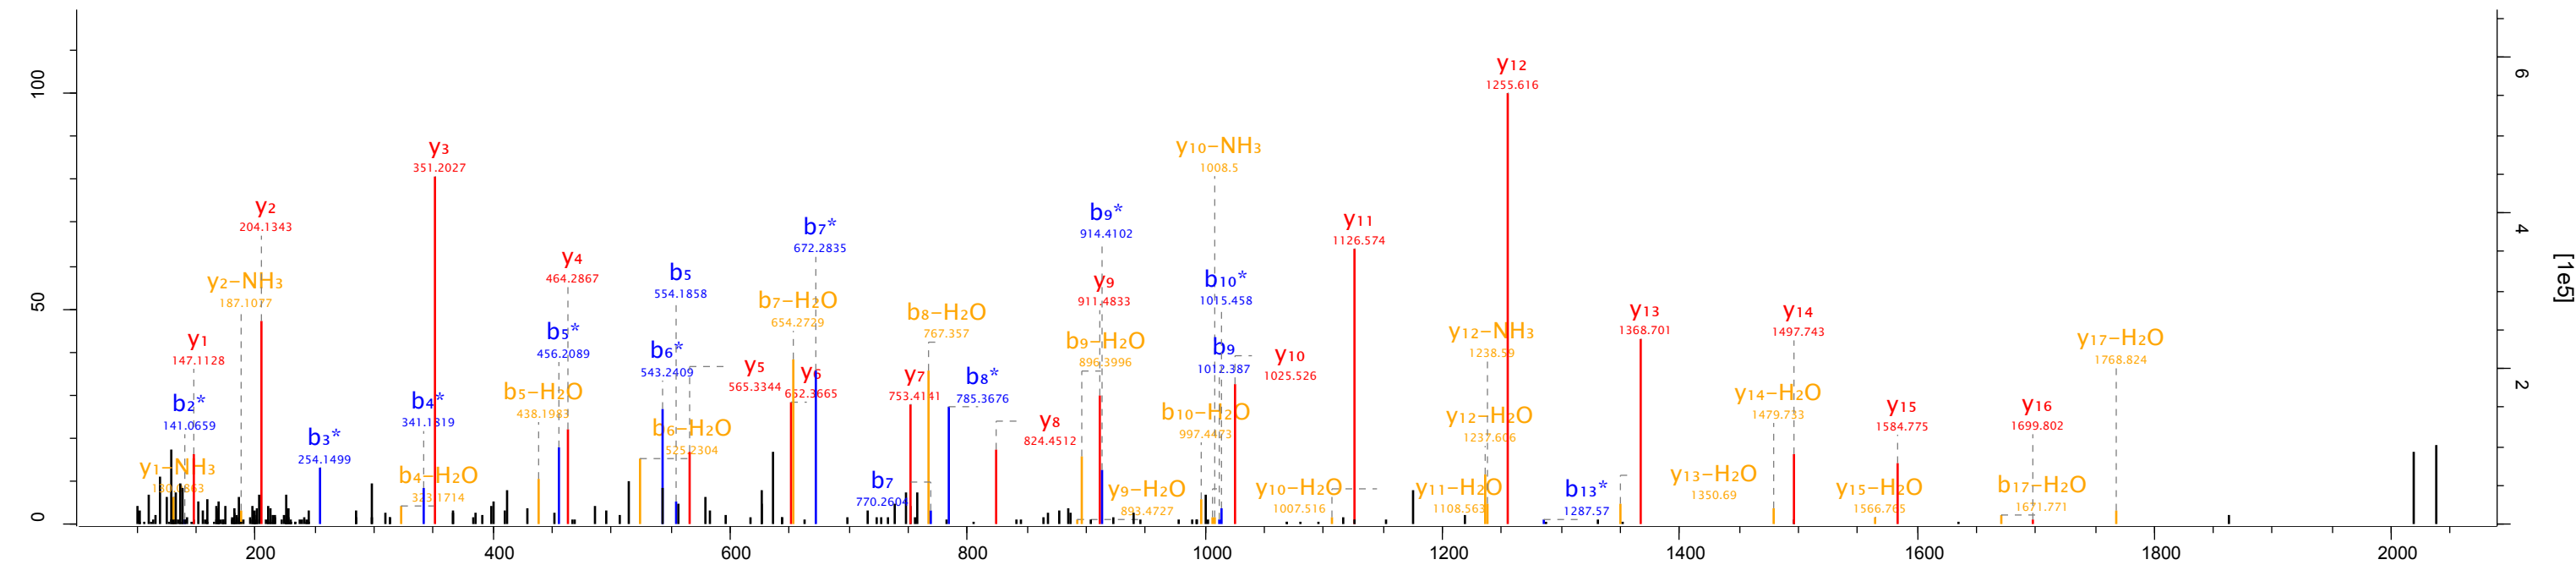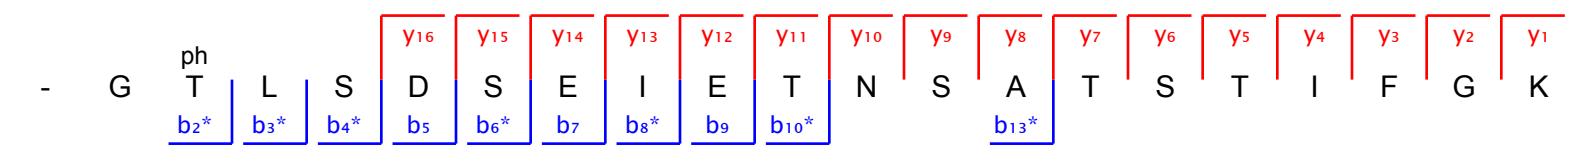

Raw file 20150812\_A375SR\_Phospho\_BR1\_05 Scan 22995 Method FTMS; HCD Score 82.2 m/z 895.79 Gene names CENPF

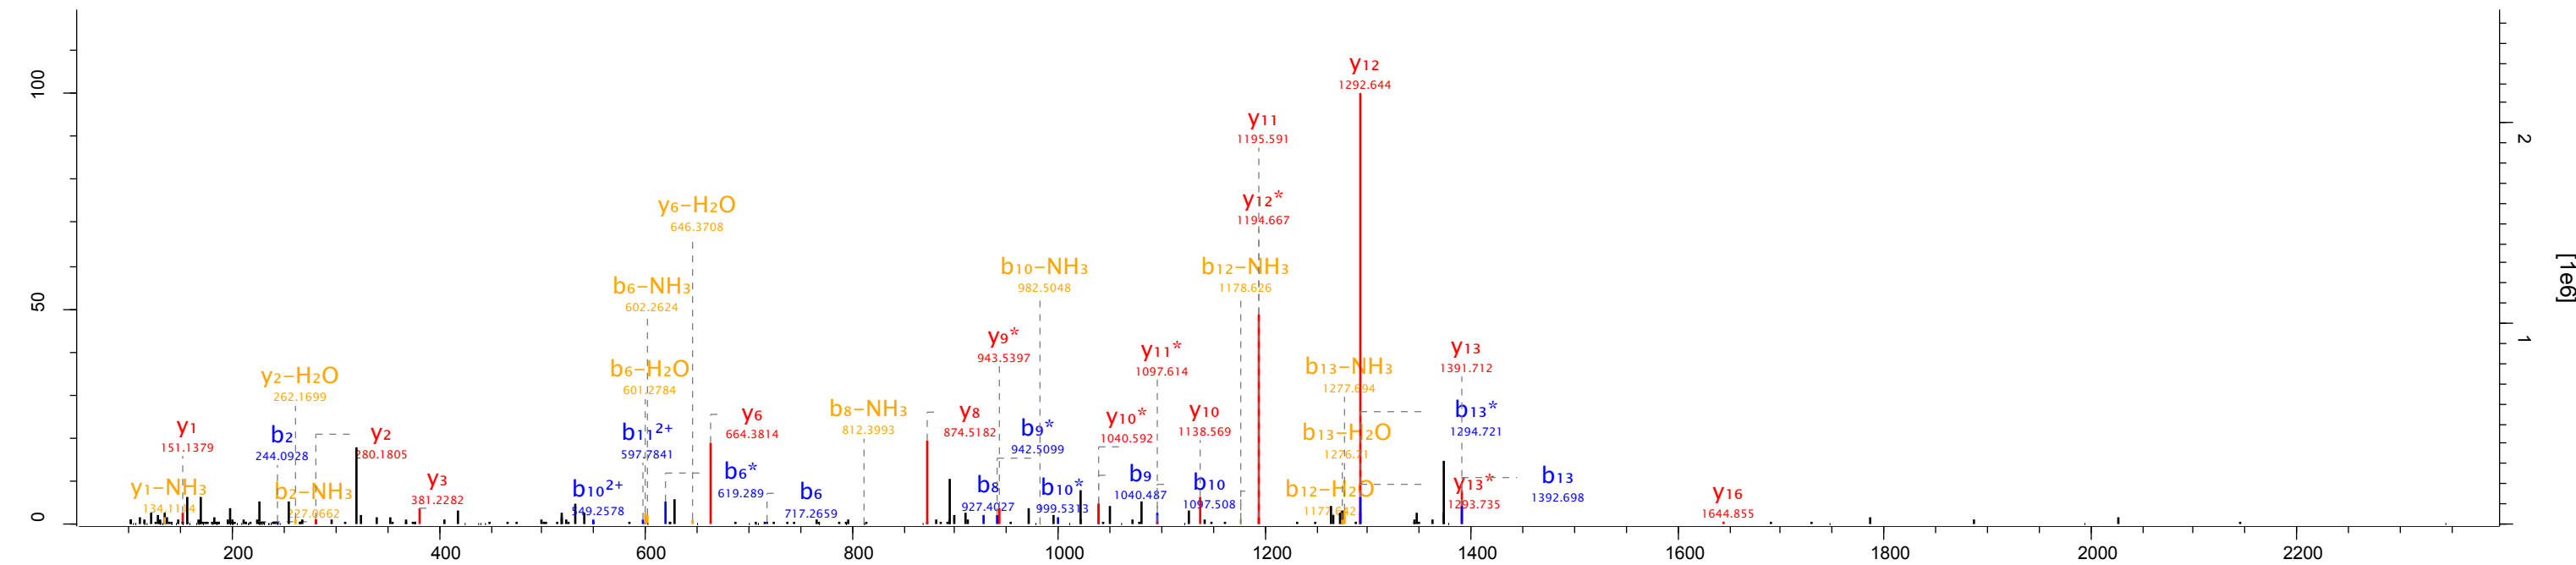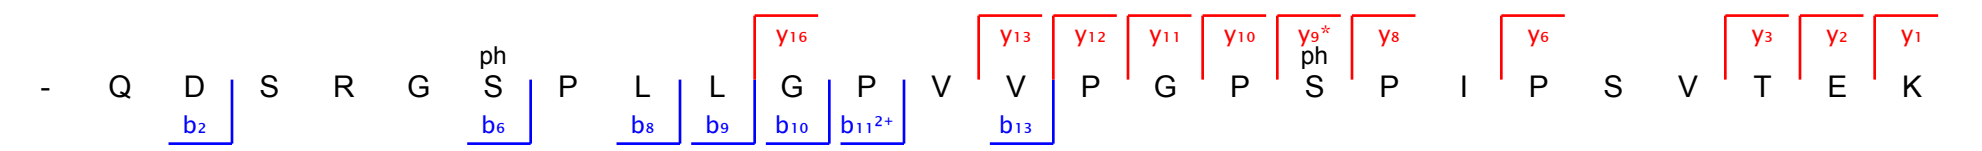

Raw file 20150812\_A375SR\_Phospho\_BR1\_05 Scan 23695 Method FTMS; HCD Score 153.28 m/z 785.06 Gene names BAIAP2;CCDC43

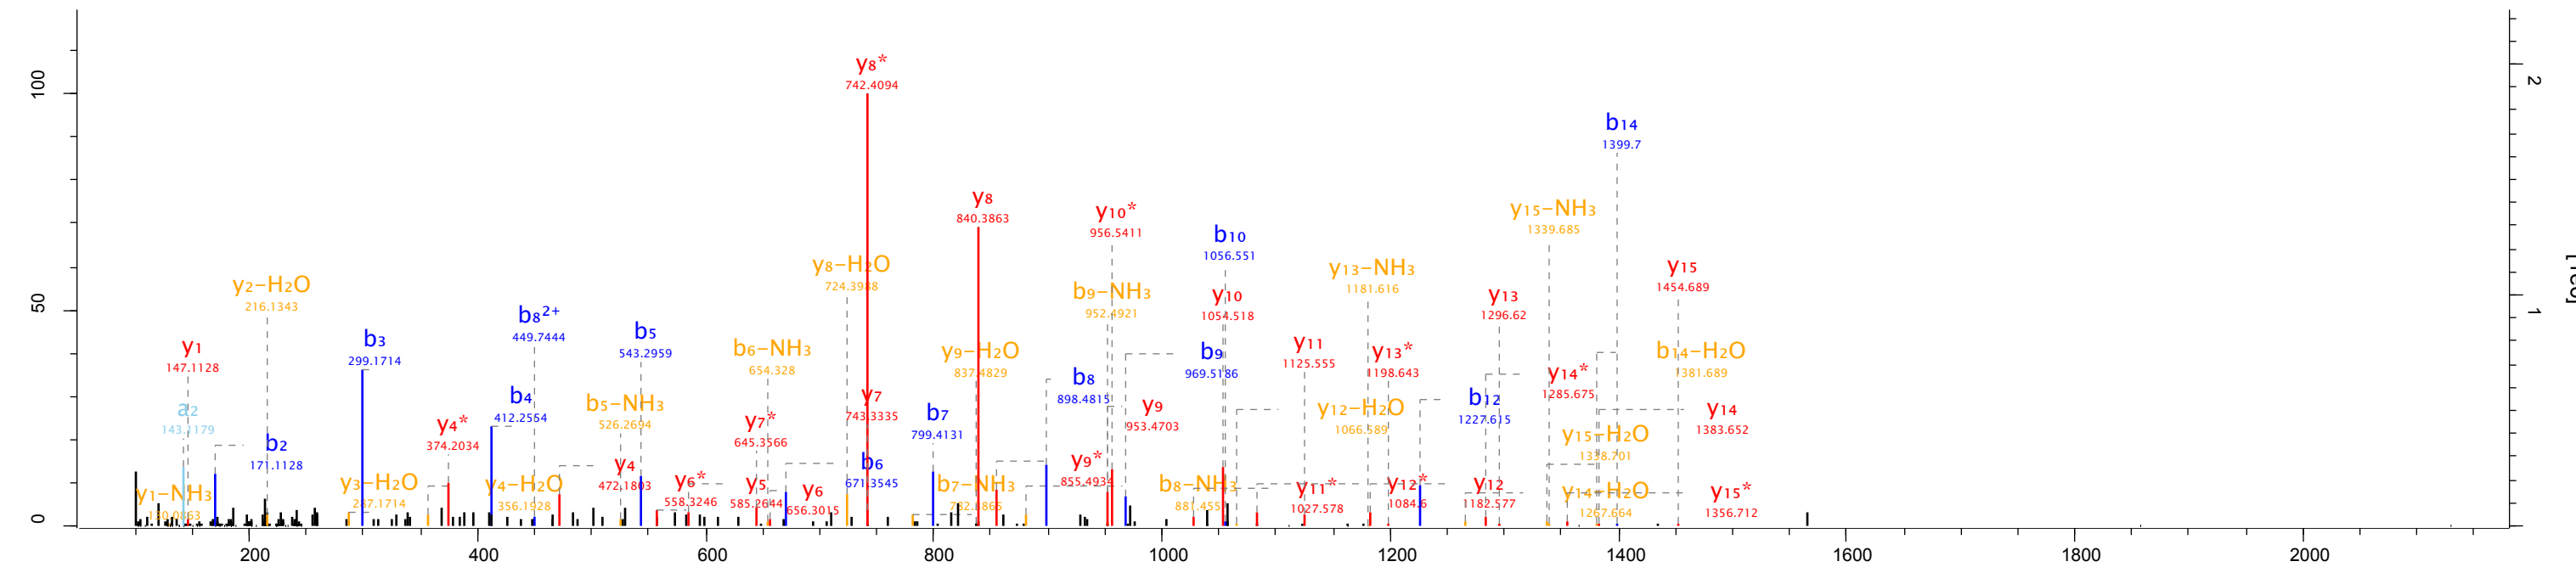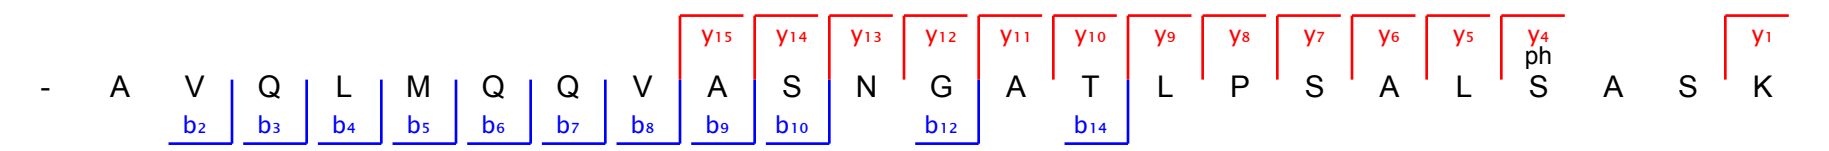



Raw file: 20150812\_A375SR\_Phospho\_BR1\_05  
 Scan: 23705 Method: FTMS; HCD Score: 78.22 m/z: 756.05 Gene names: KIAA1217

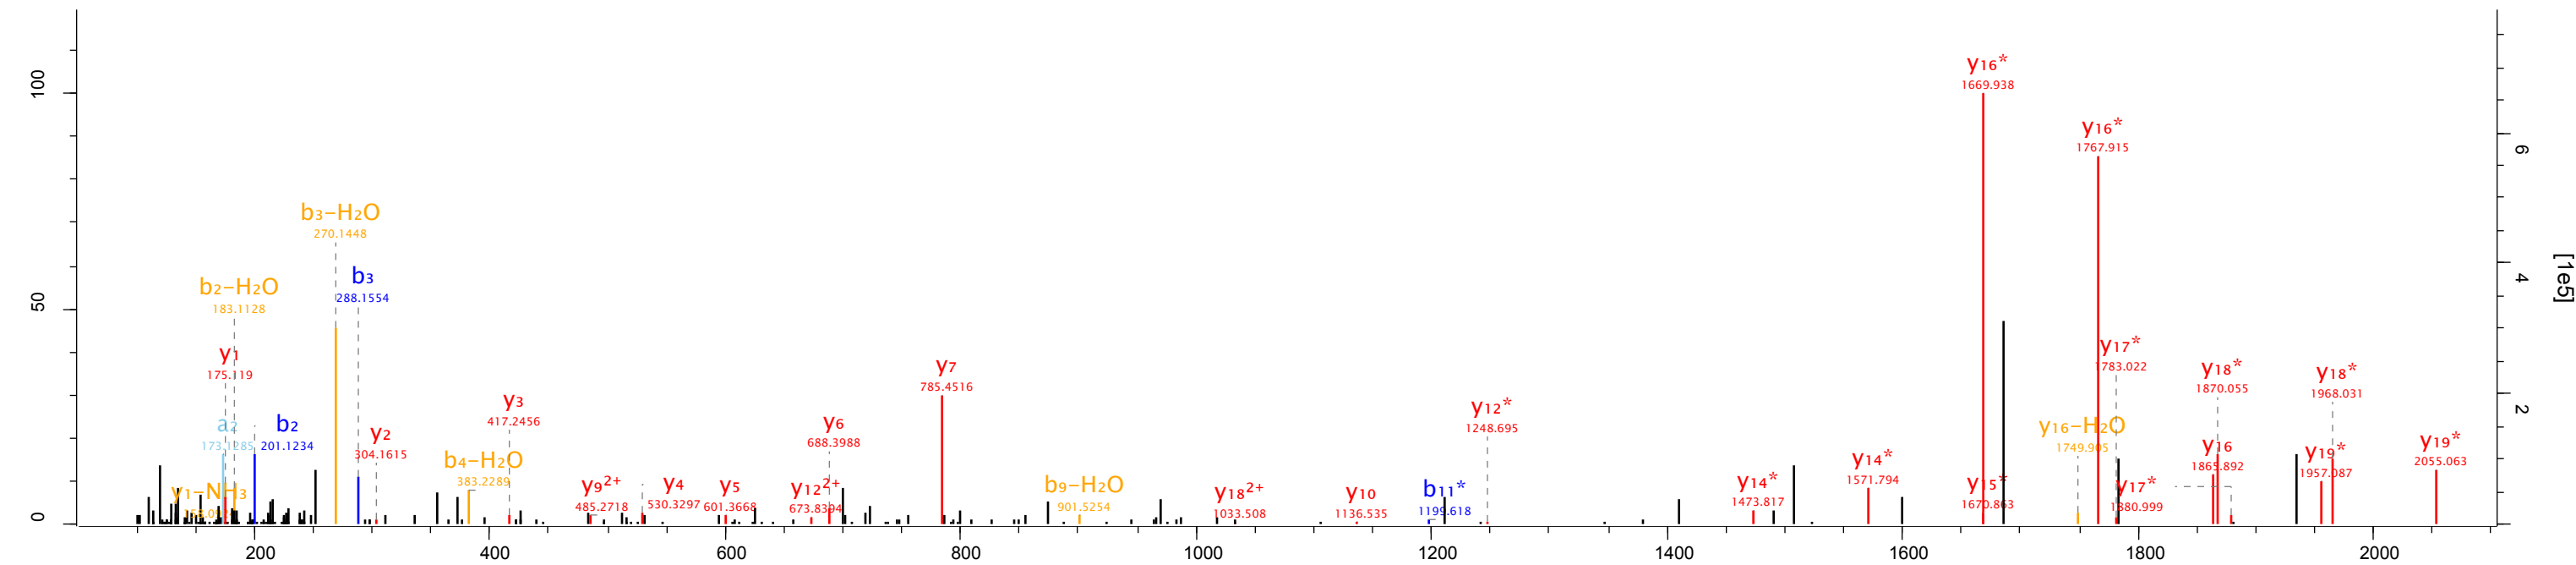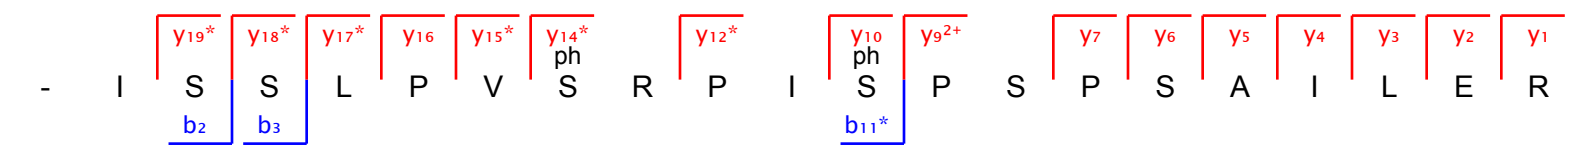

Raw file: 20150812\_A375SR\_Phospho\_BR1\_05  
 Scan: 23775 Method: FTMS; HCD Score: 76.97 m/z: 1148.84 Gene names: FXR2

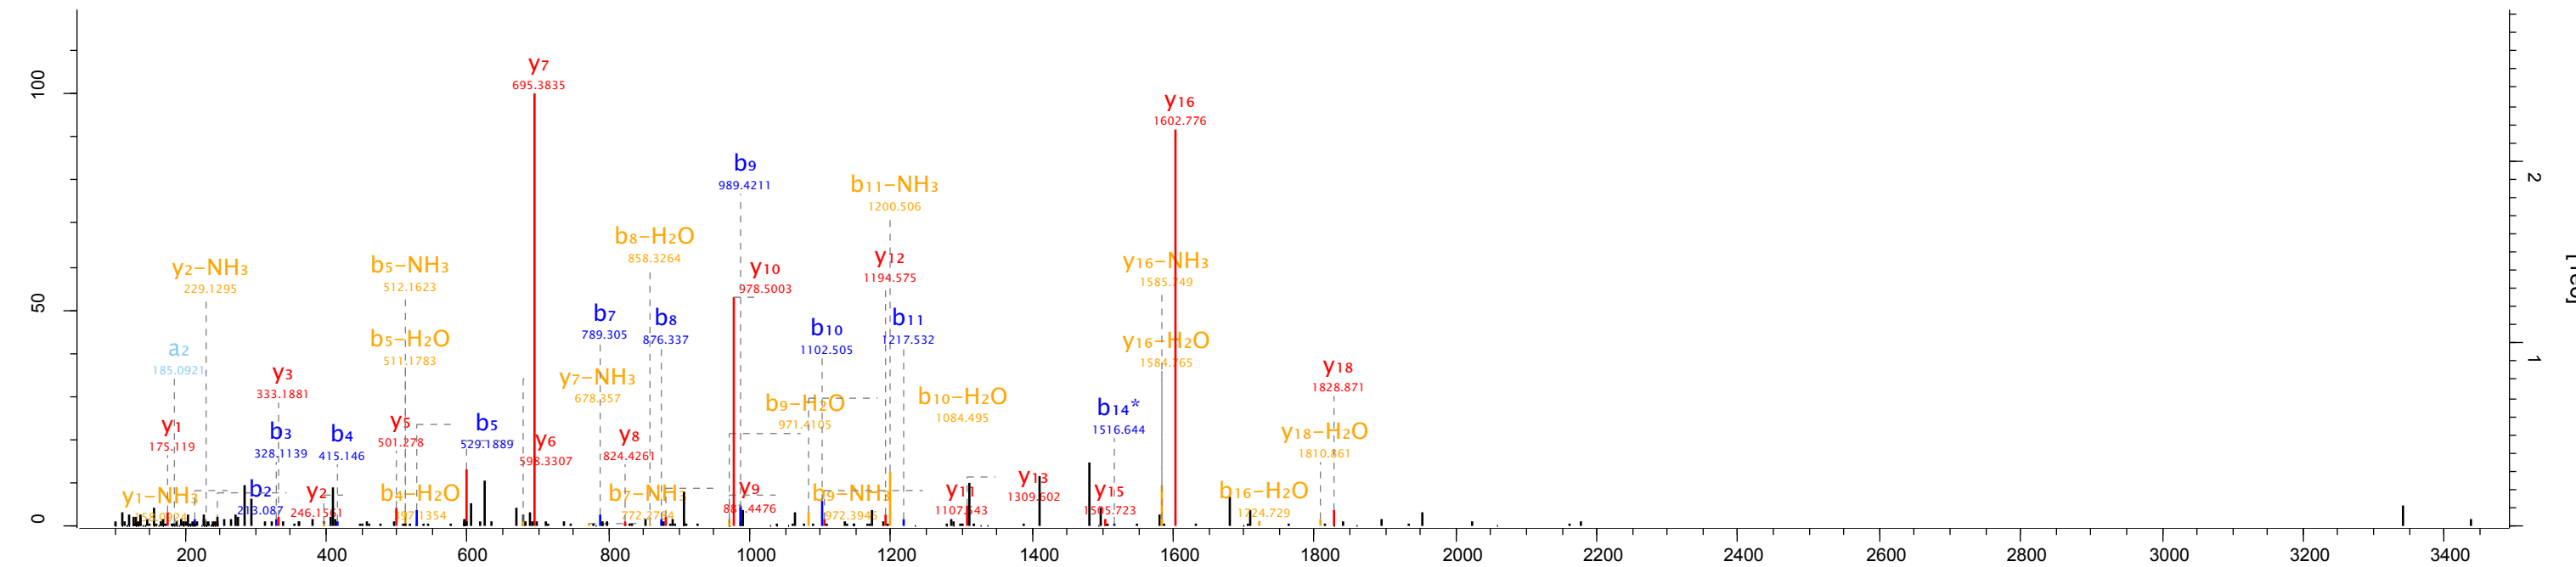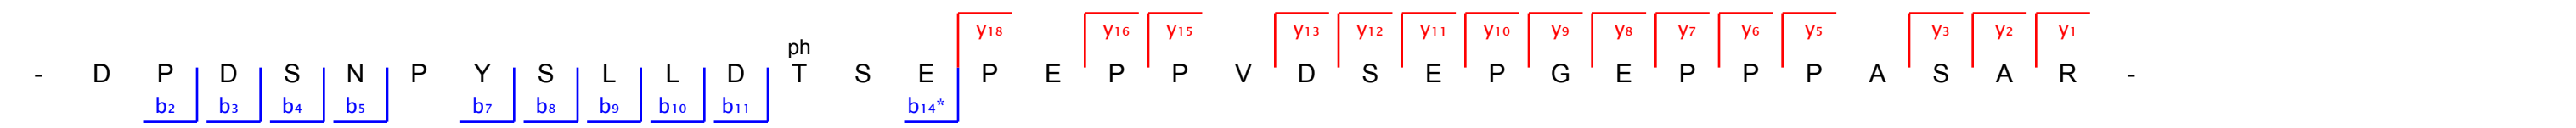

Raw file: 20150812\_A375SR\_Phospho\_BR1\_05  
 Scan: 25925 Method: FTMS; HCD Score: 138.82 m/z: 816.91 Gene names: NKAP

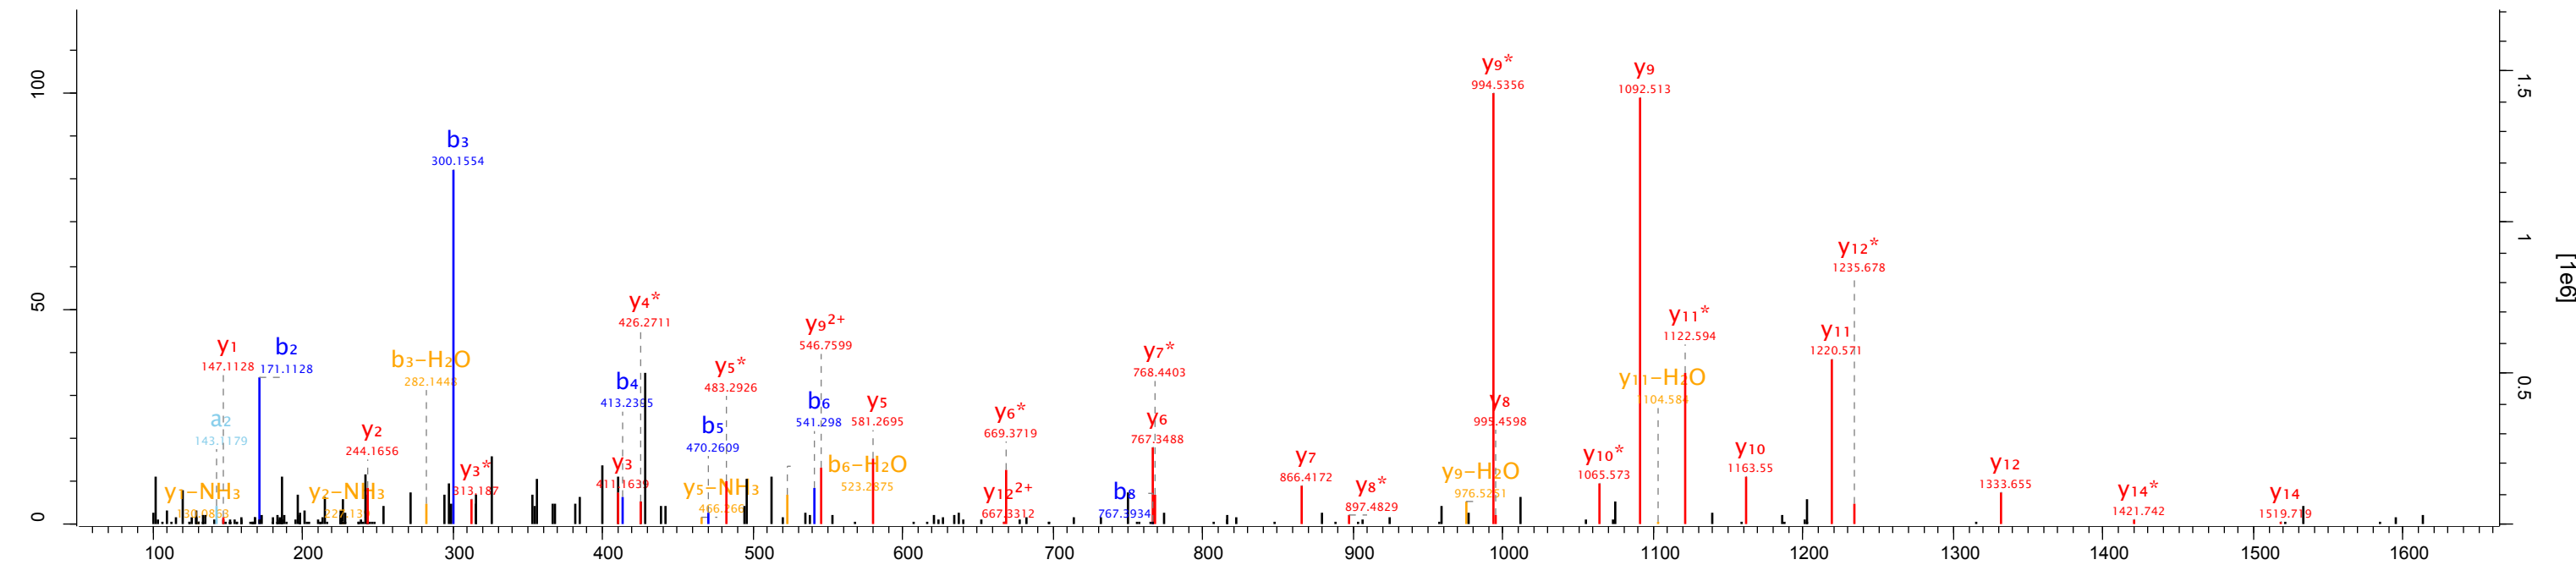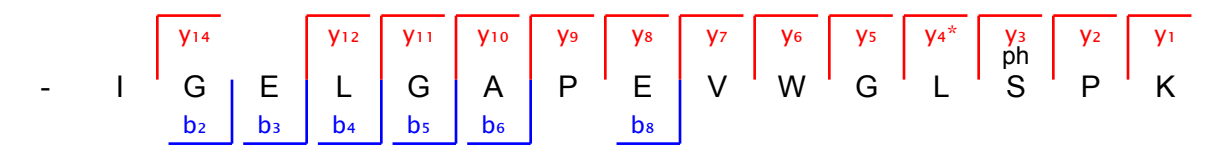

Raw file 20150812\_A375SR\_Phospho\_BR1\_05 Scan 2605 Method FTMS; HCD Score 128.1 m/z 421.18 Gene names N4BP1

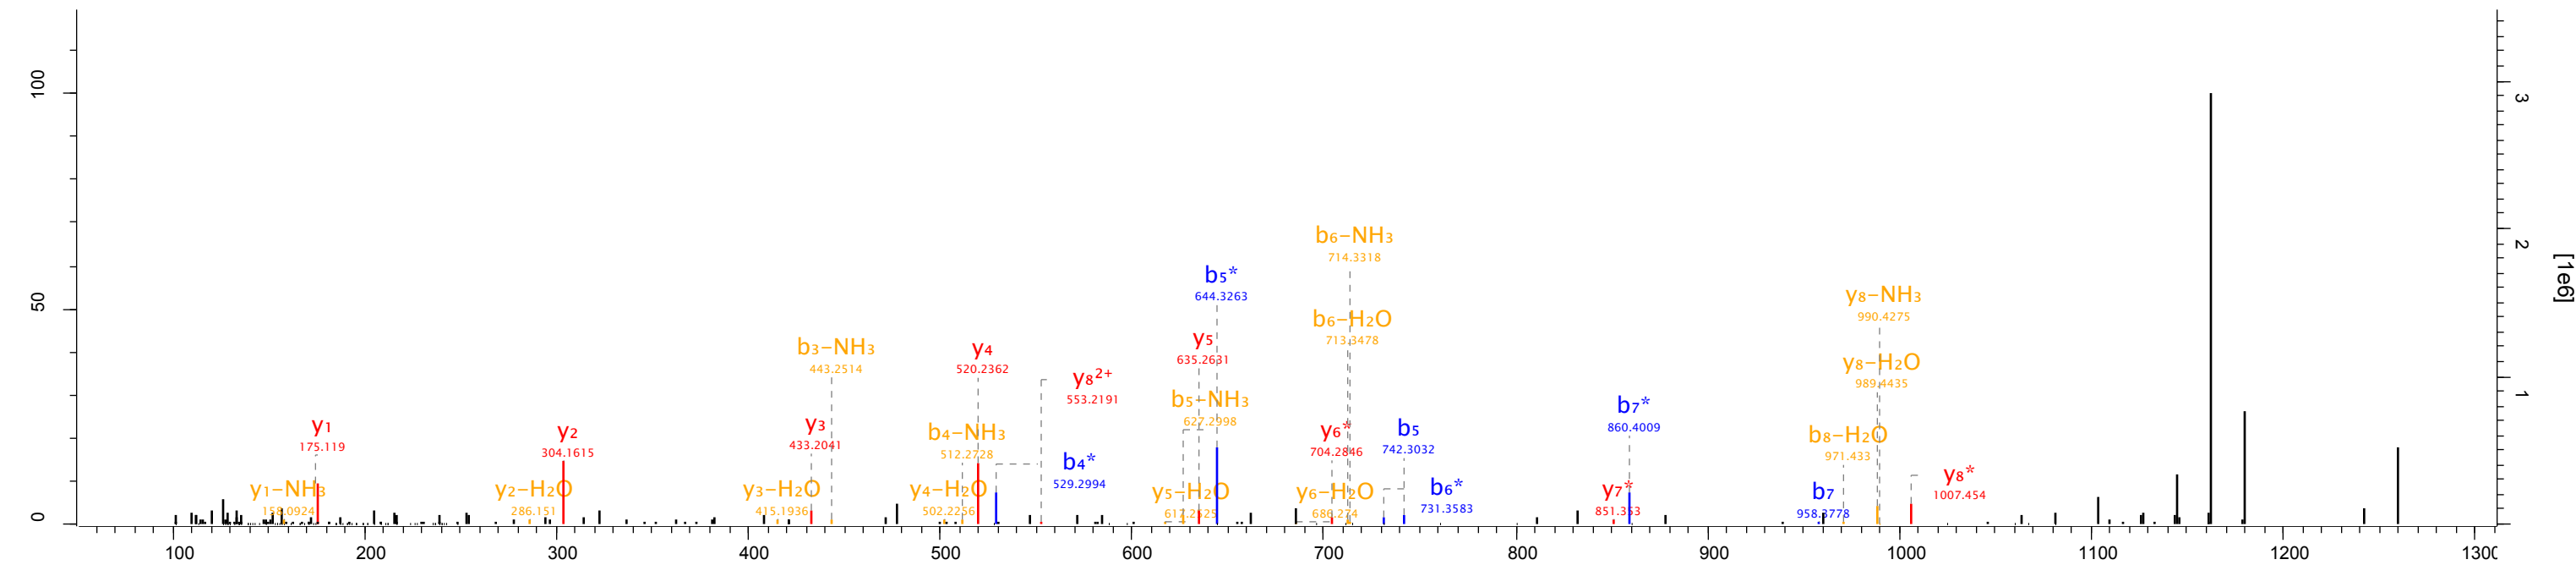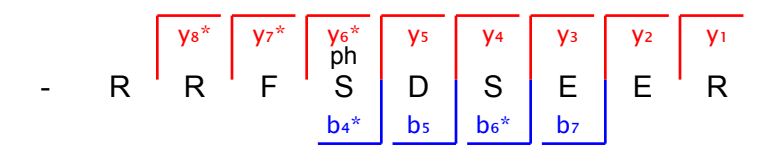

Raw file: 20150812\_A375SR\_Phospho\_BR1\_05  
 Scan: 2685 Method: FTMS; HCD Score: 118.37 m/z: 603.94 Gene names: ITFG3

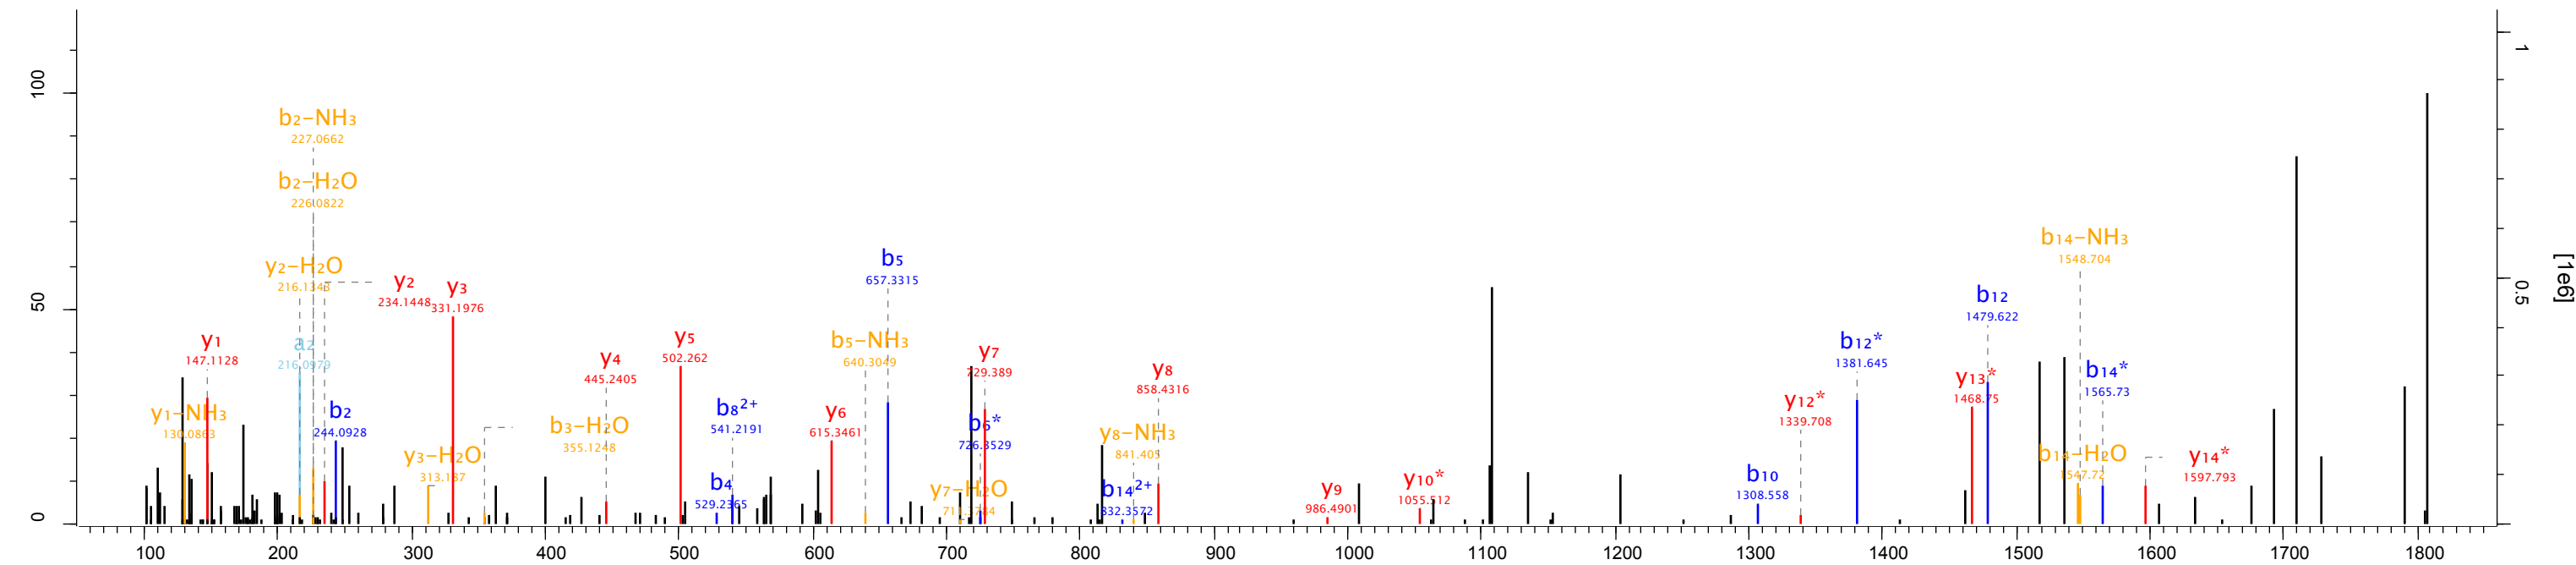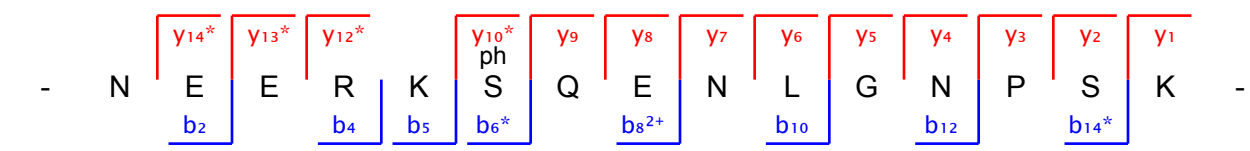

Raw file: 20150812\_A375SR\_Phospho\_BR1\_05  
 Scan: 3075 Method: FTMS; HCD Score: 145.7 m/z: 744.31 Gene names: EIF2B2

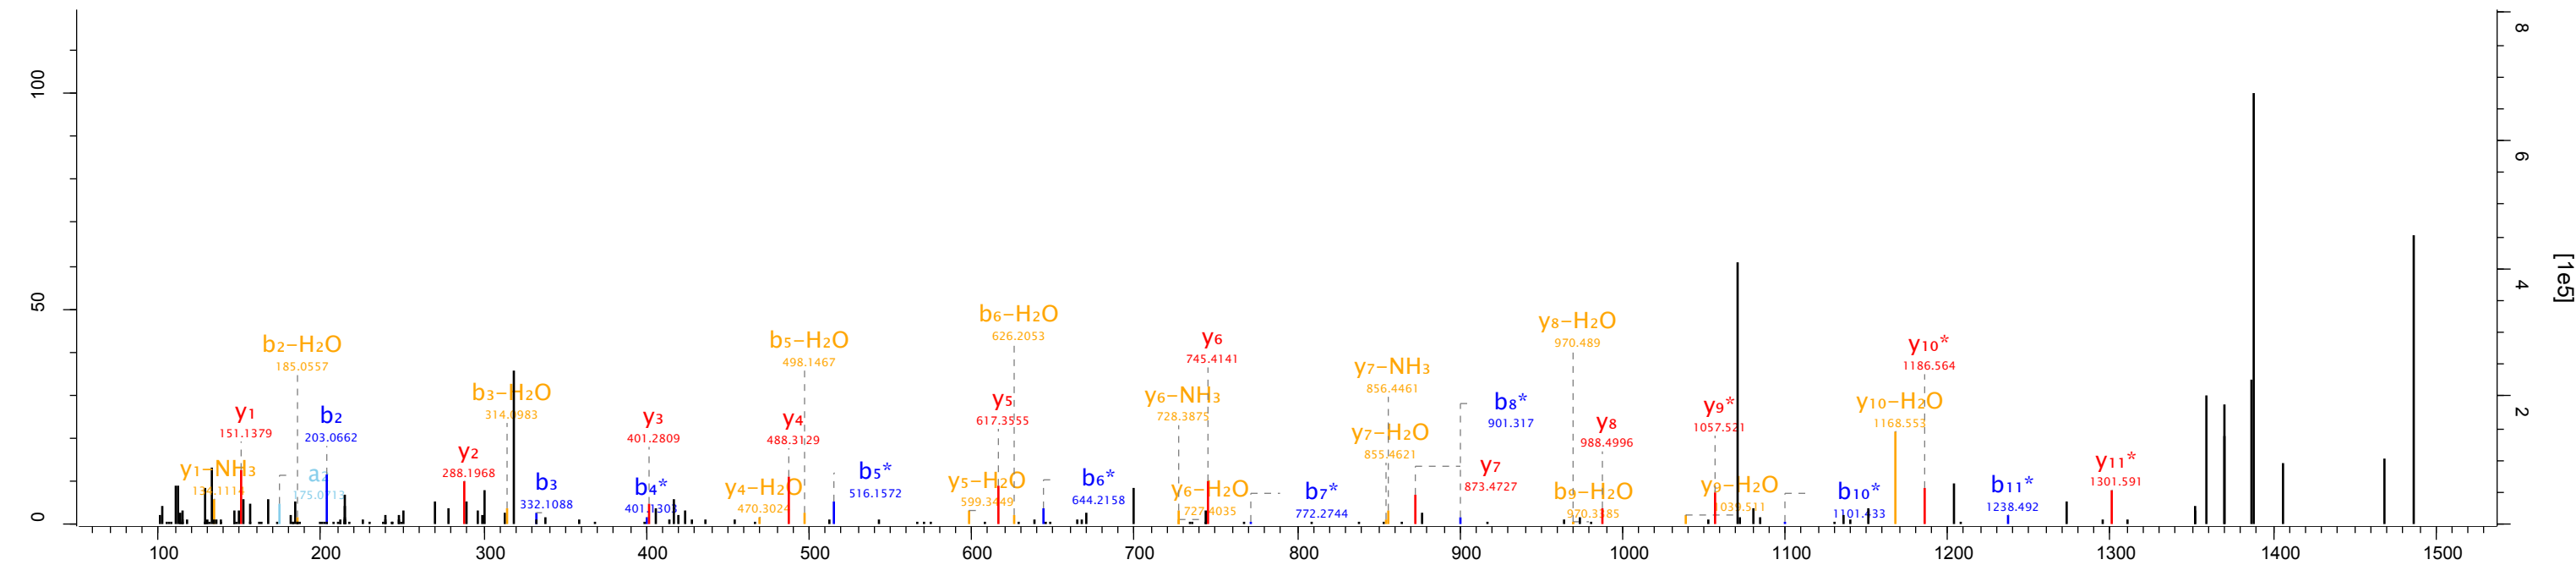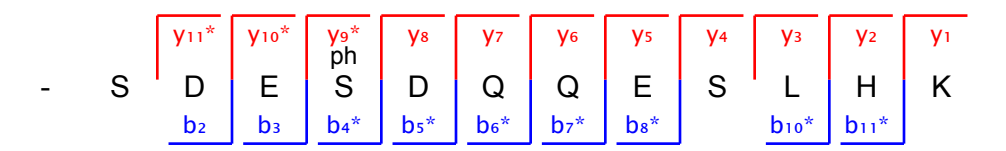

Raw file: 20150812\_A375SR\_Phospho\_BR1\_05  
 Scan: 3135 Method: FTMS; HCD Score: 185.96 m/z: 786.74 Gene names: DTL

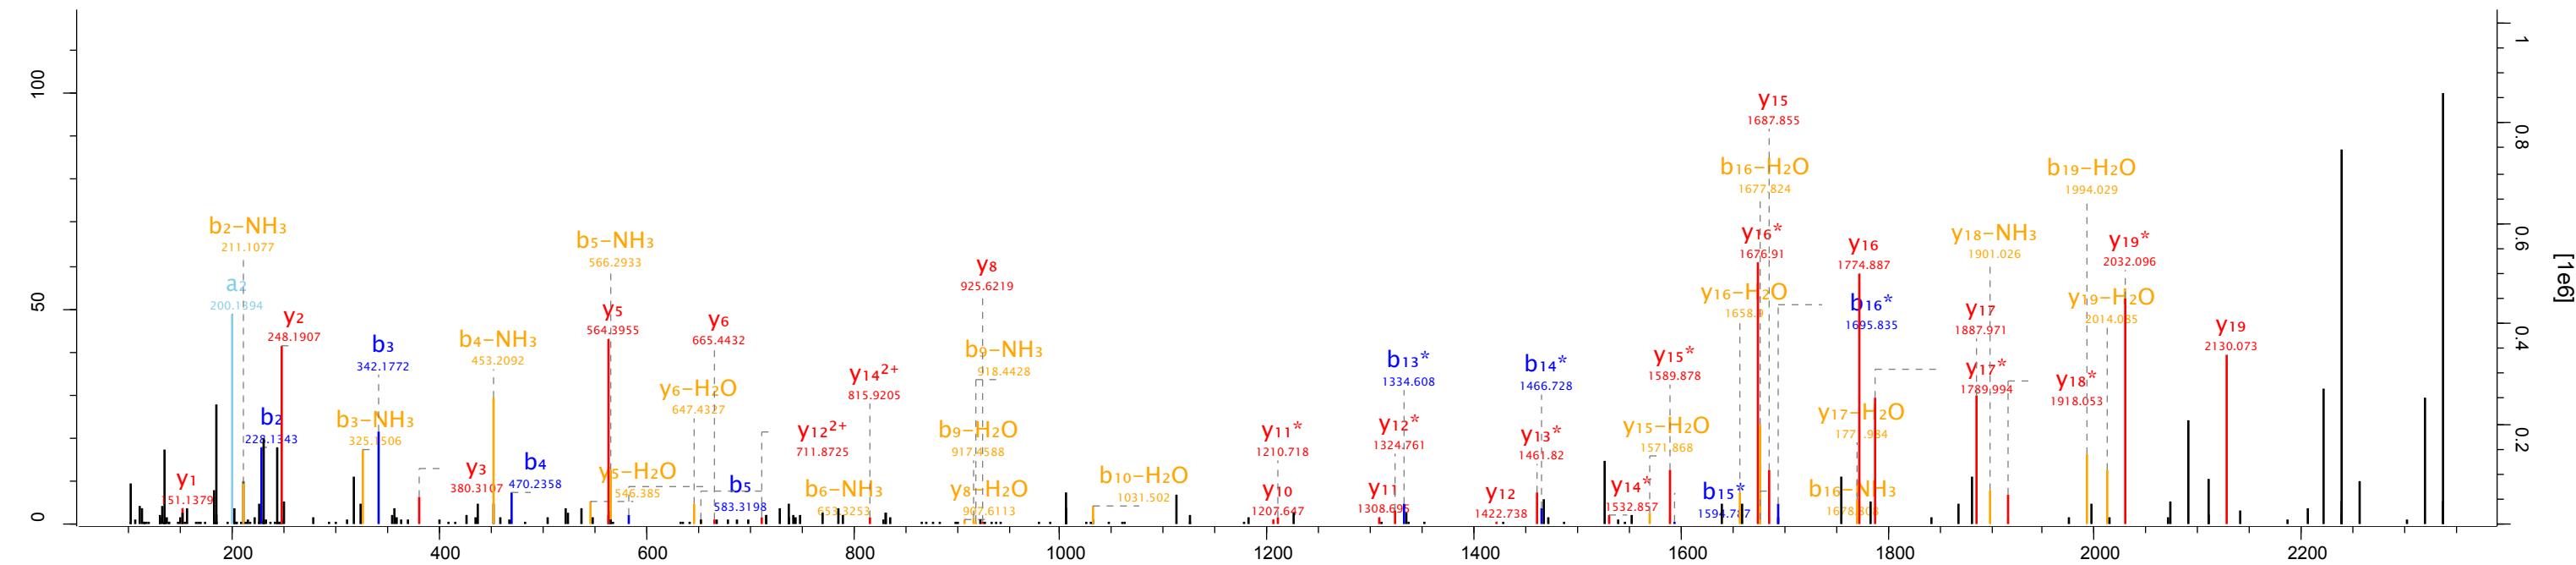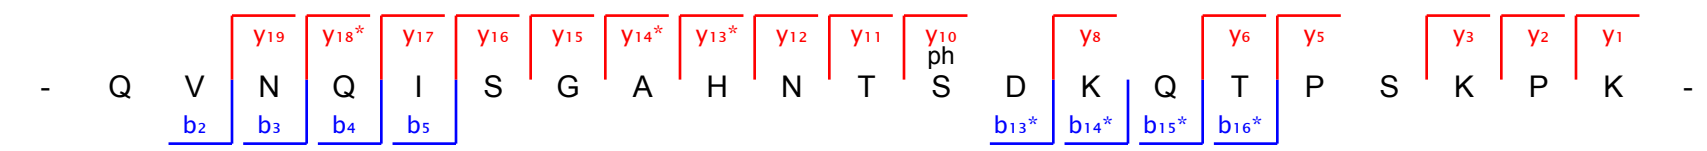

Raw file: 20150812\_A375SR\_Phospho\_BR1\_05  
 Scan: 3365 Method: FTMS; HCD Score: 386.96 m/z: 1046.46 Gene names: HNRNPC

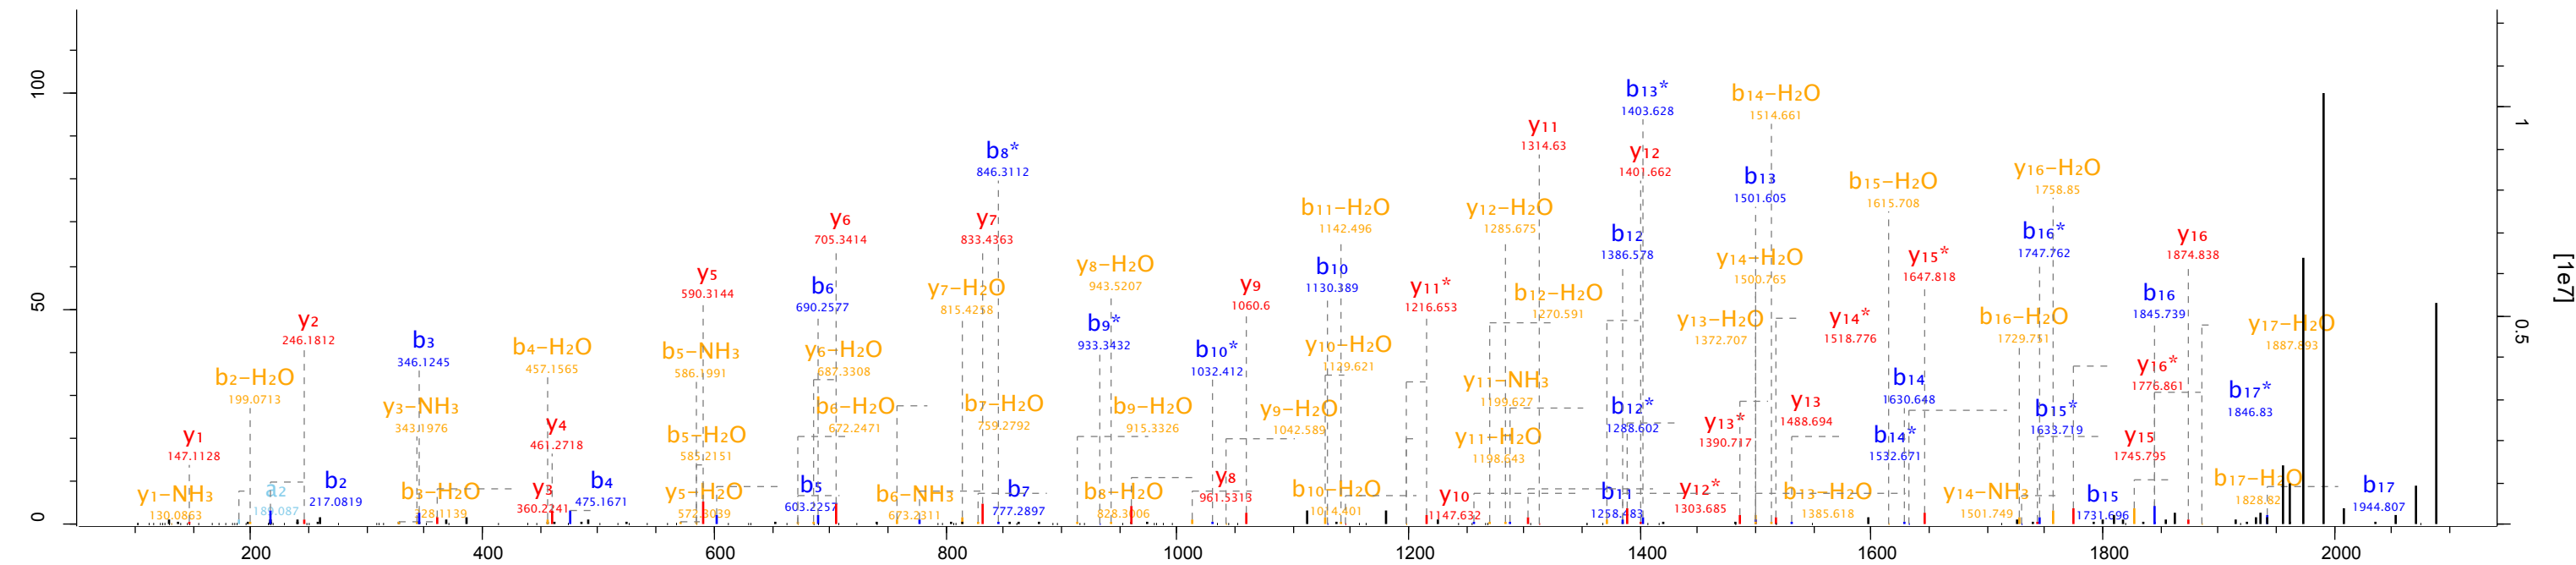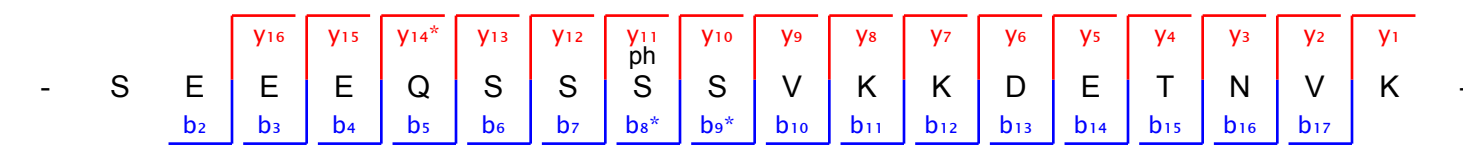



Raw file: 20150812\_A375SR\_Phospho\_BR1\_05  
 Scan: 3795 Method: FTMS; HCD Score: 213.02 m/z: 825.84 Gene names: DSG2

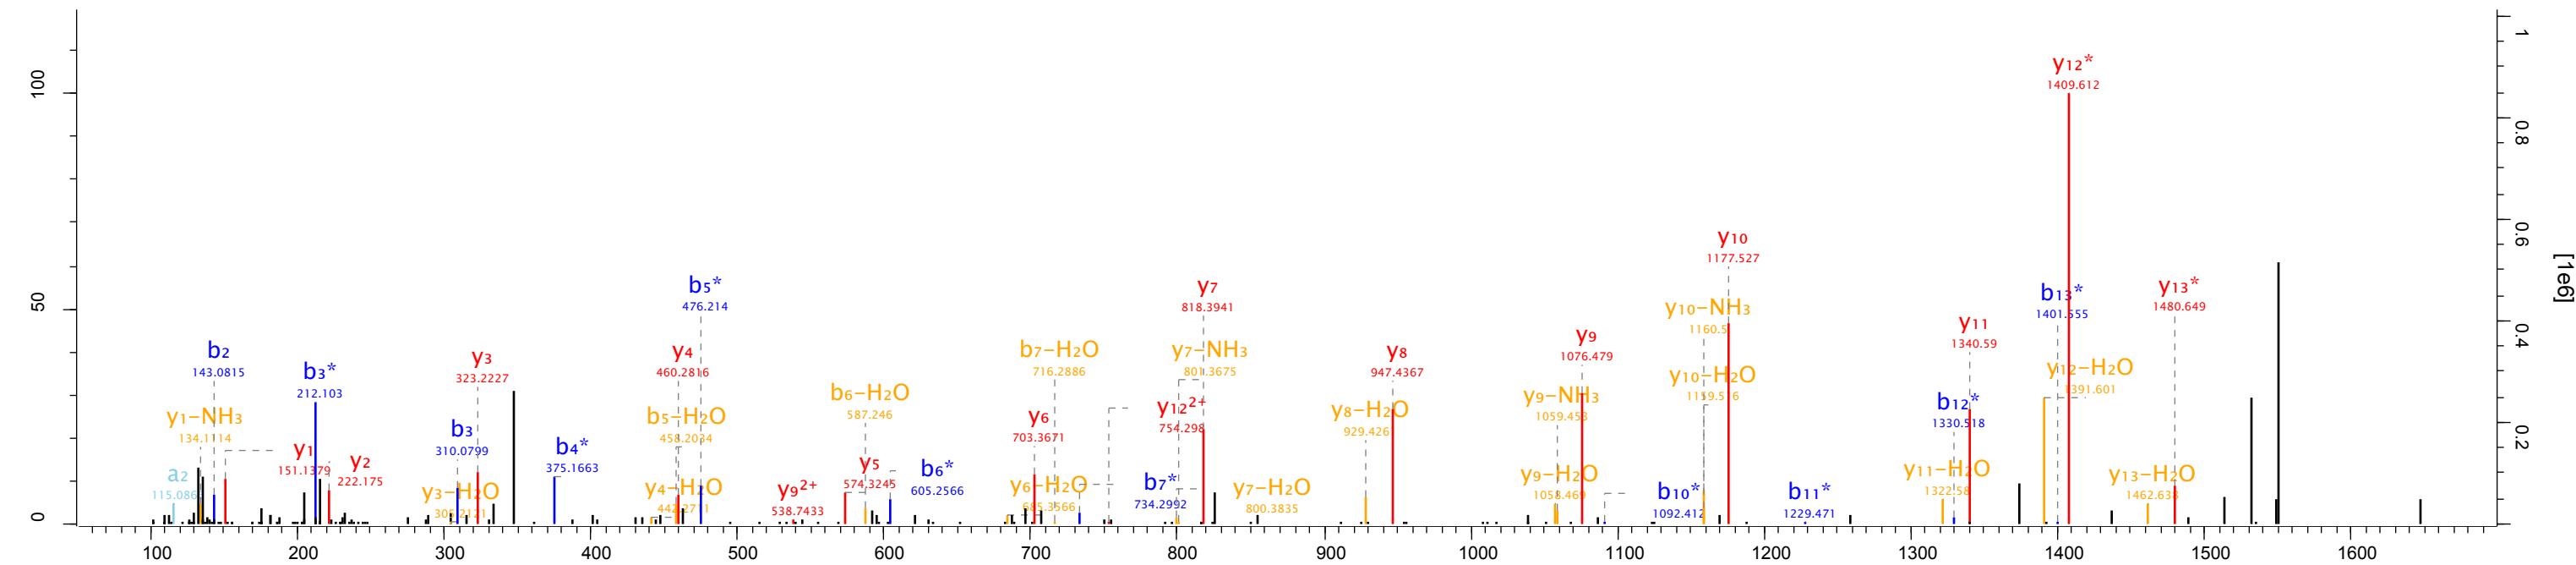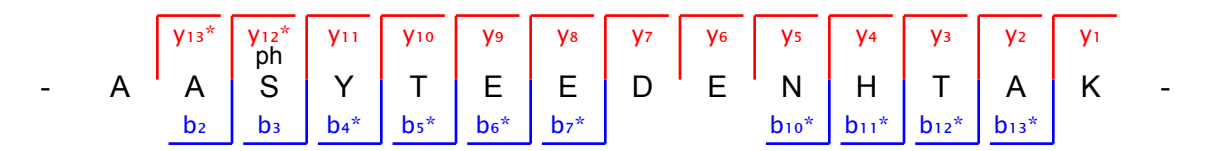

Raw file 20150812\_A375SR\_Phospho\_BR1\_05 Scan 4355 Method FTMS; HCD Score 143.38 m/z 901.39 Gene names SMARCD2

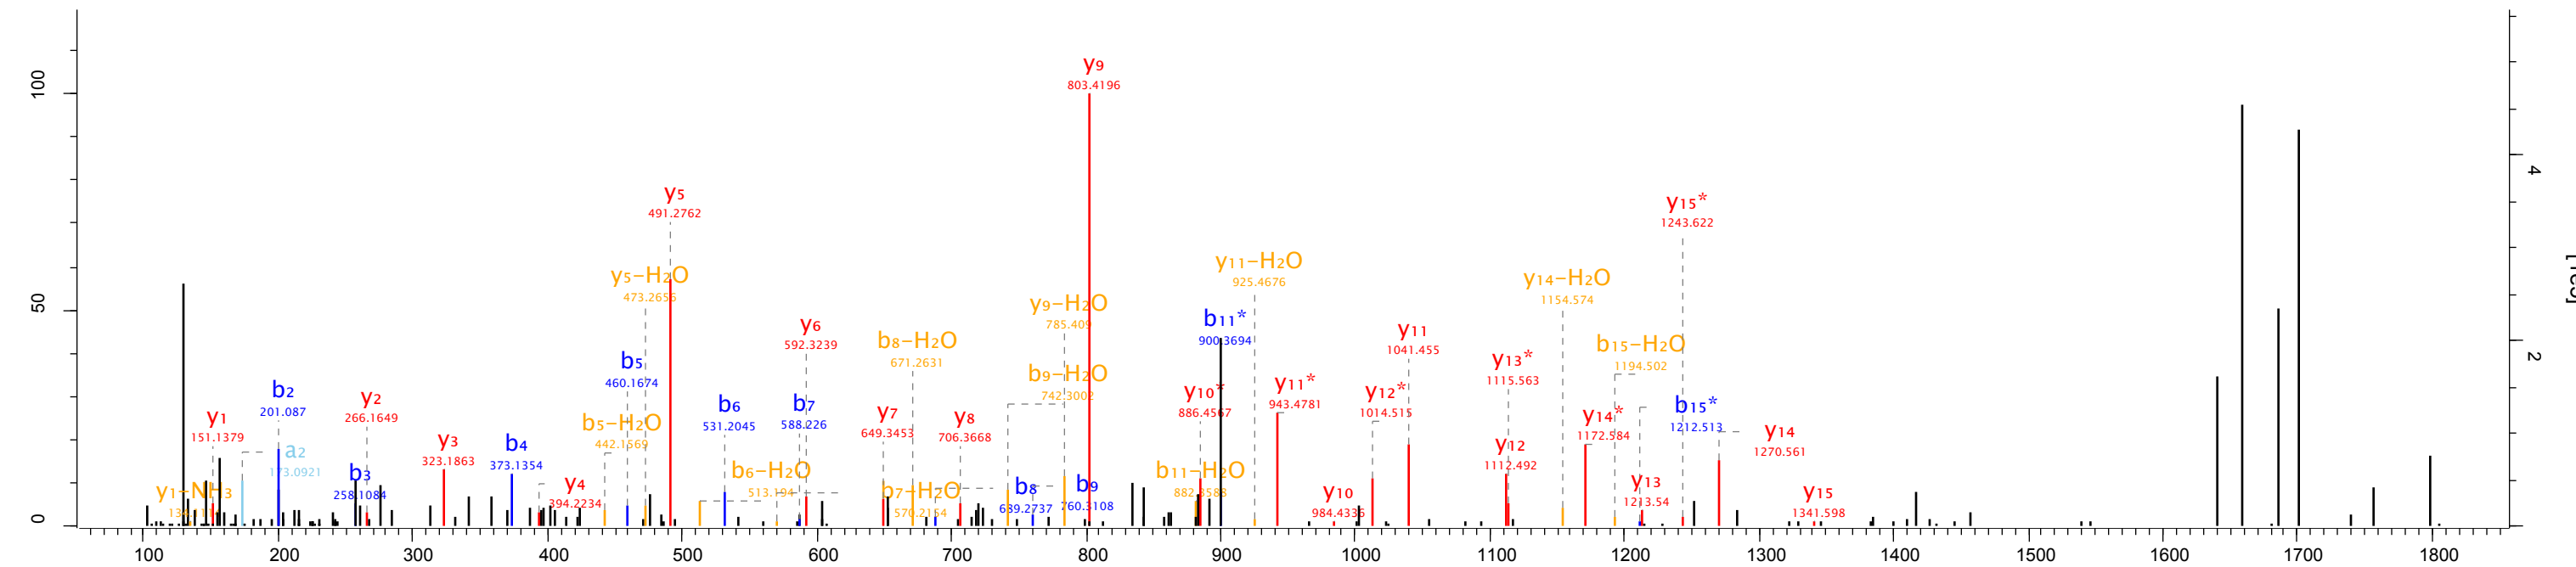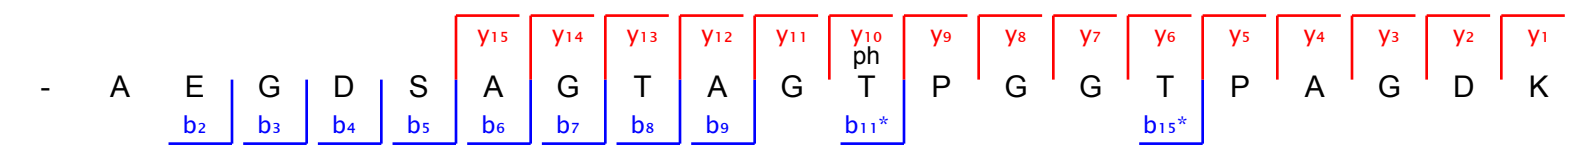

Raw file 20150812\_A375SR\_Phospho\_BR1\_05 Scan 5715 Method FTMS; HCD Score 176.27 m/z 842.87 Gene names MARCKS

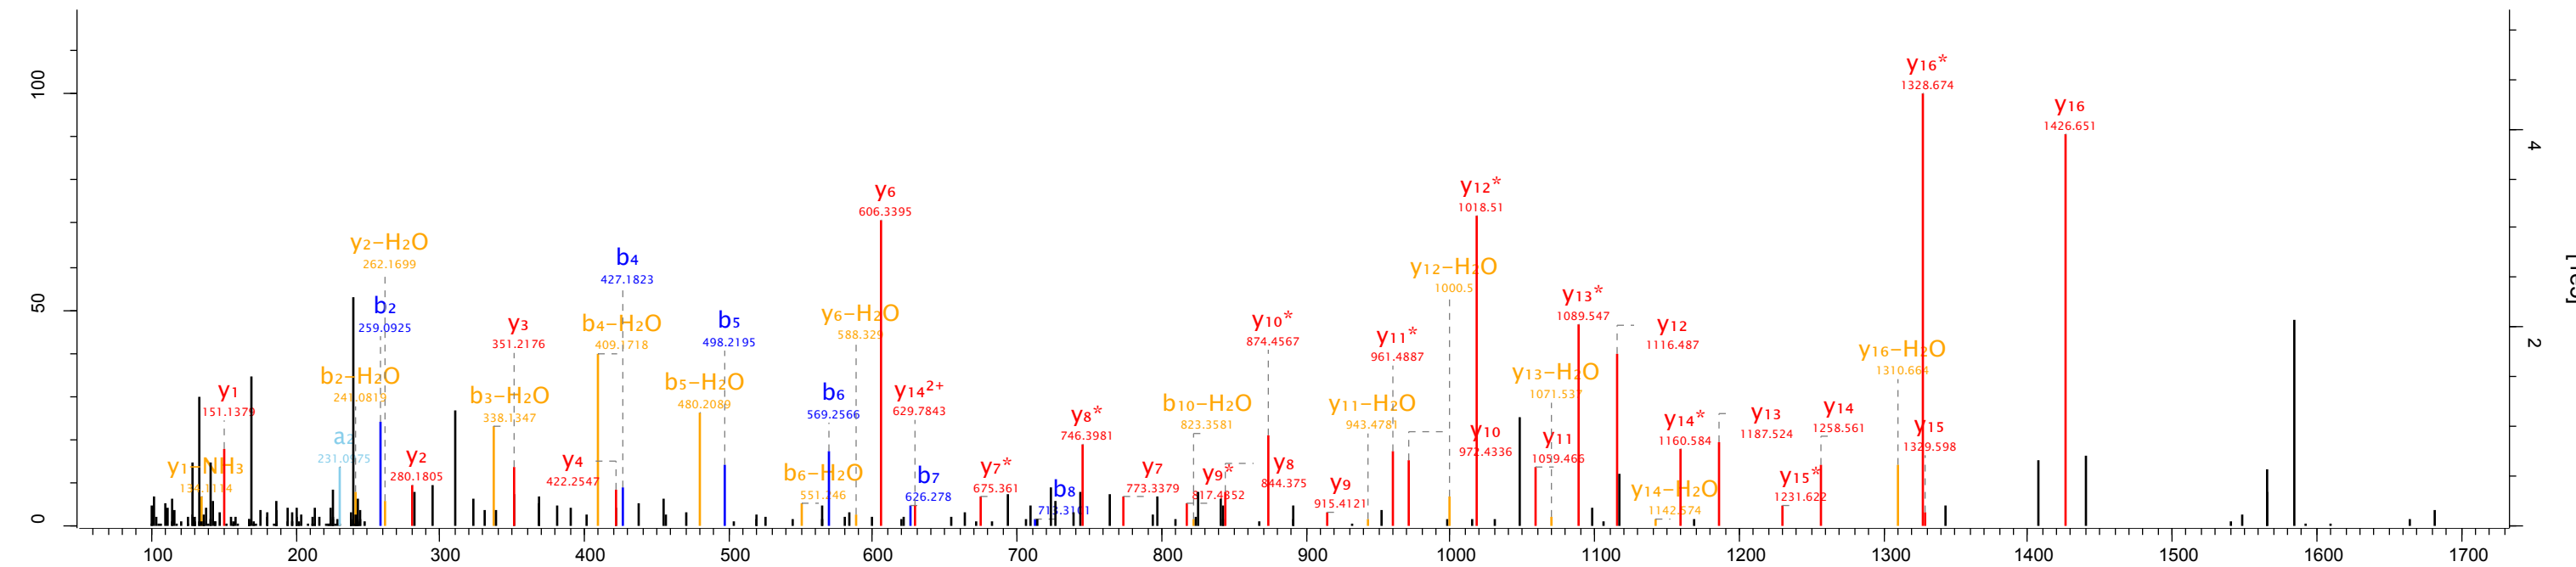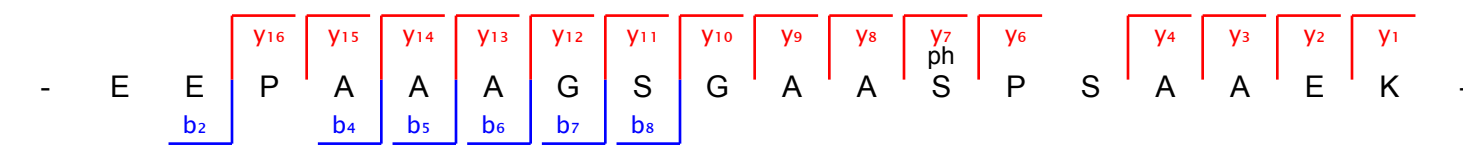

Raw file: 20150812\_A375SR\_Phospho\_BR1\_05  
 Scan: 5965 Method: FTMS; HCD Score: 153.18 m/z: 613.79 Gene names: RAI14

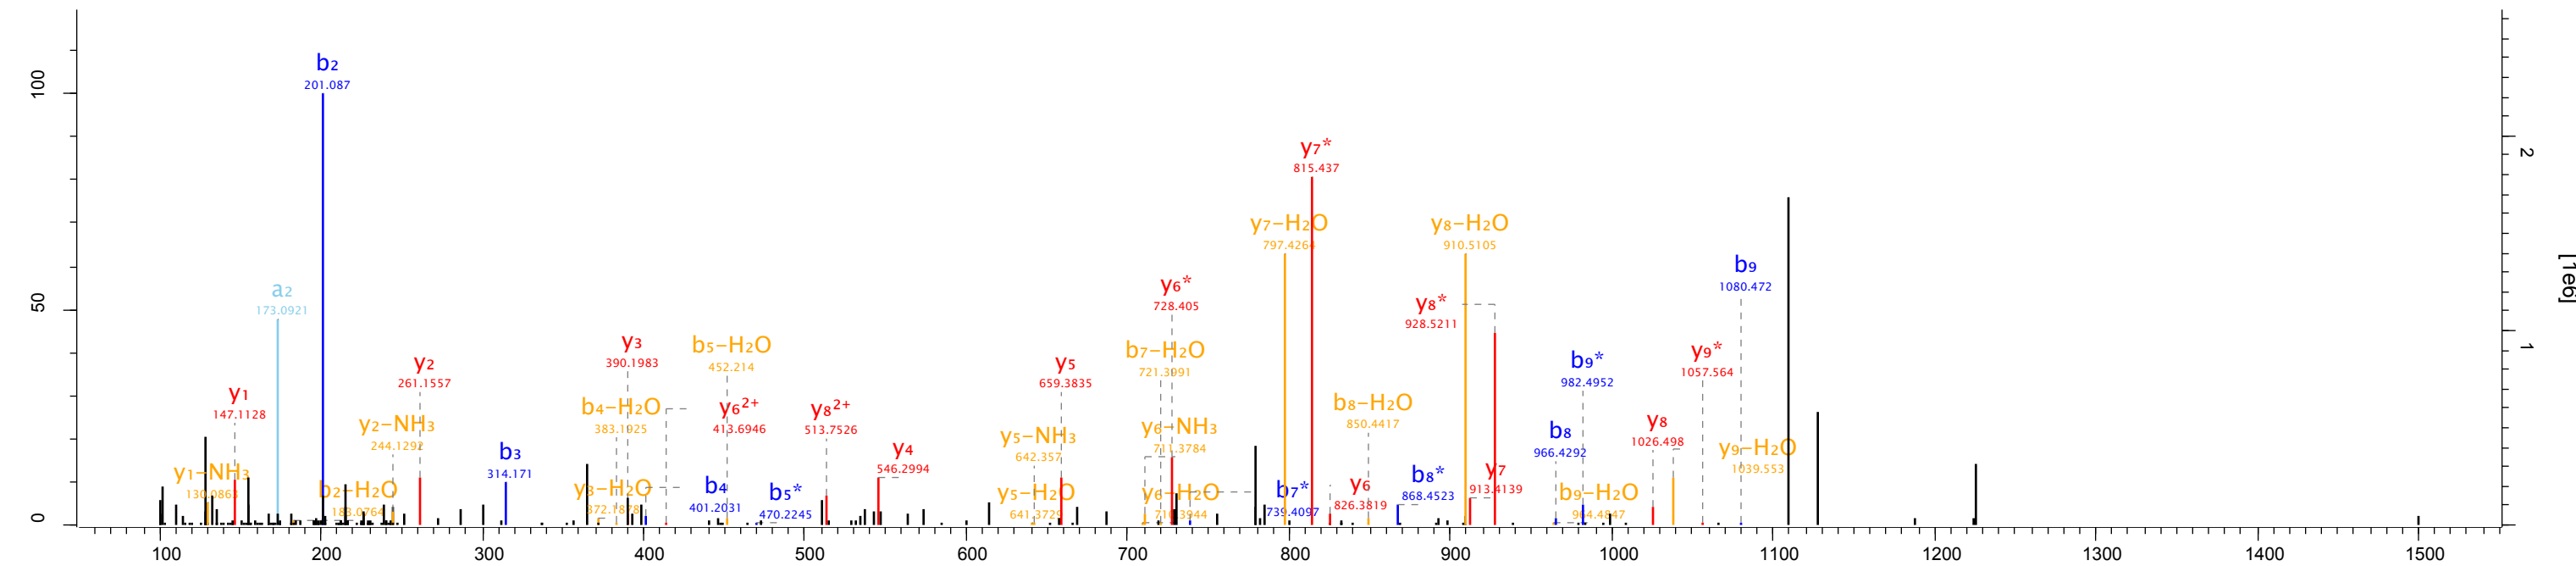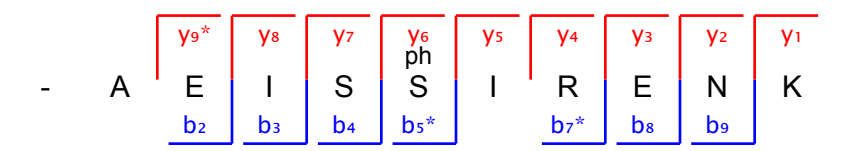

Raw file 20150812\_A375SR\_Phospho\_BR1\_05 Scan 6035 Method FTMS; HCD Score 207.8 m/z 588.8 Gene names PYGO2

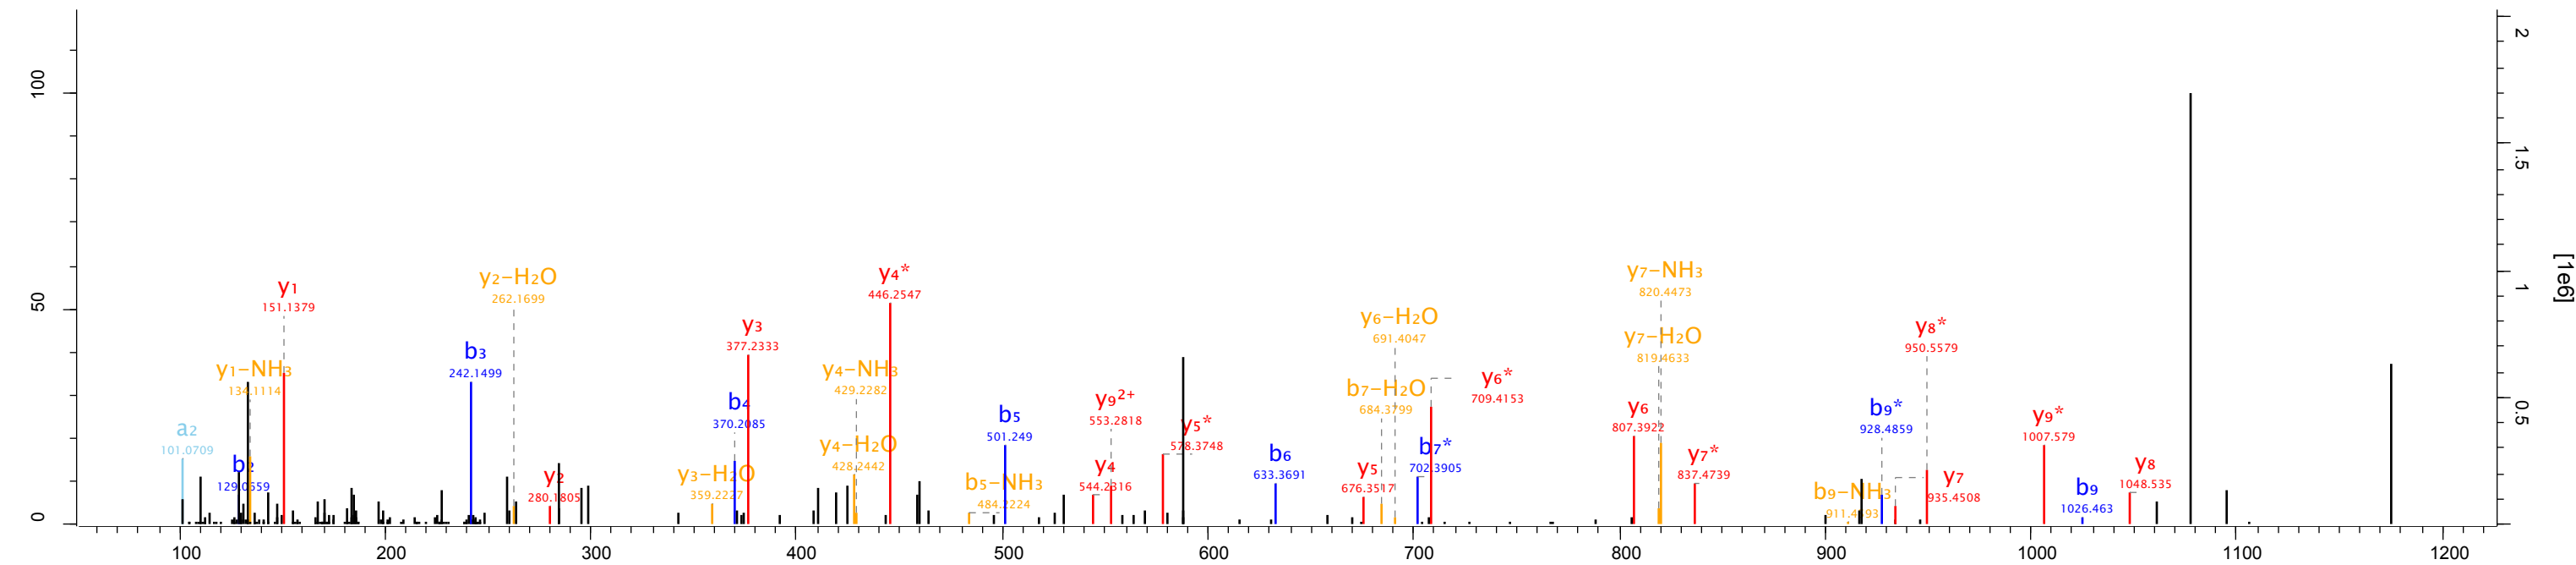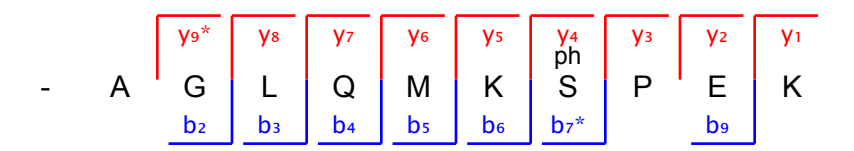

Raw file: 20150812\_A375SR\_Phospho\_BR1\_05  
 Scan: 6255 Method: FTMS; HCD Score: 111.63 m/z: 740.32 Gene names: MAPT

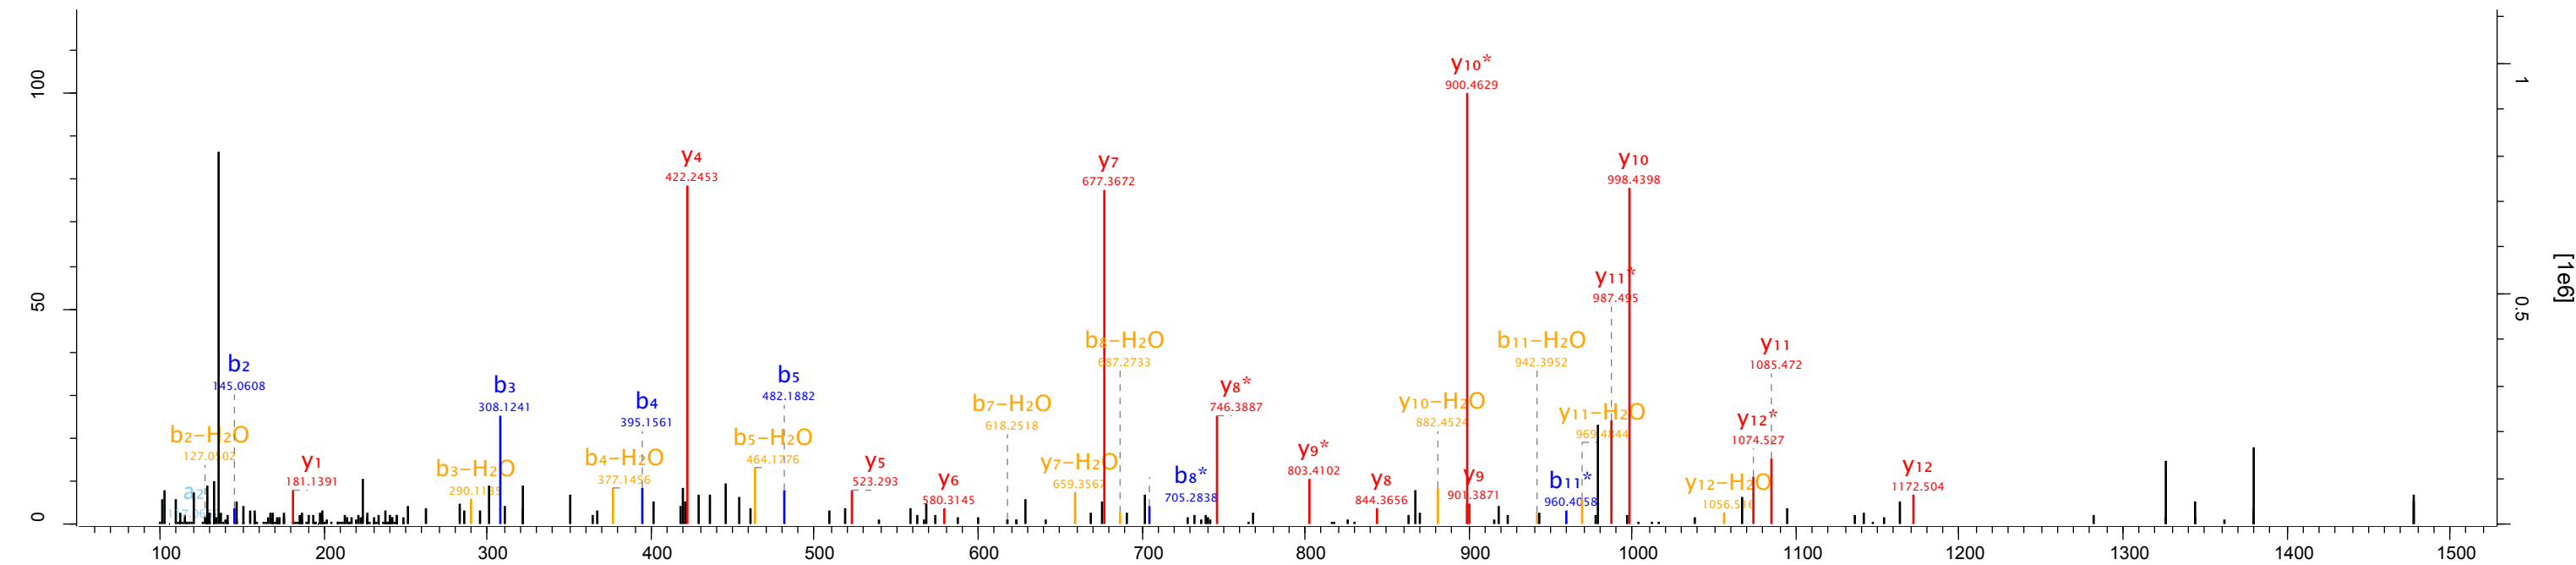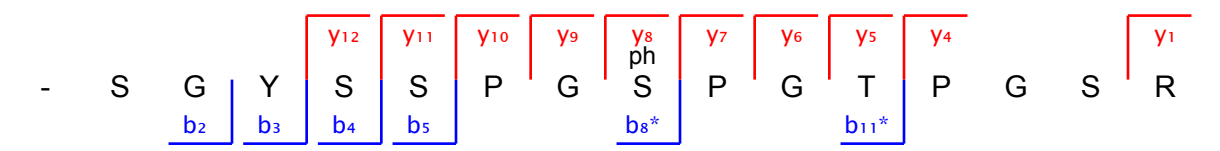

Raw file: 20150812\_A375SR\_Phospho\_BR1\_05  
 Scan: 6285 Method: FTMS; HCD Score: 127.89 m/z: 902.9 Gene names: SOX5

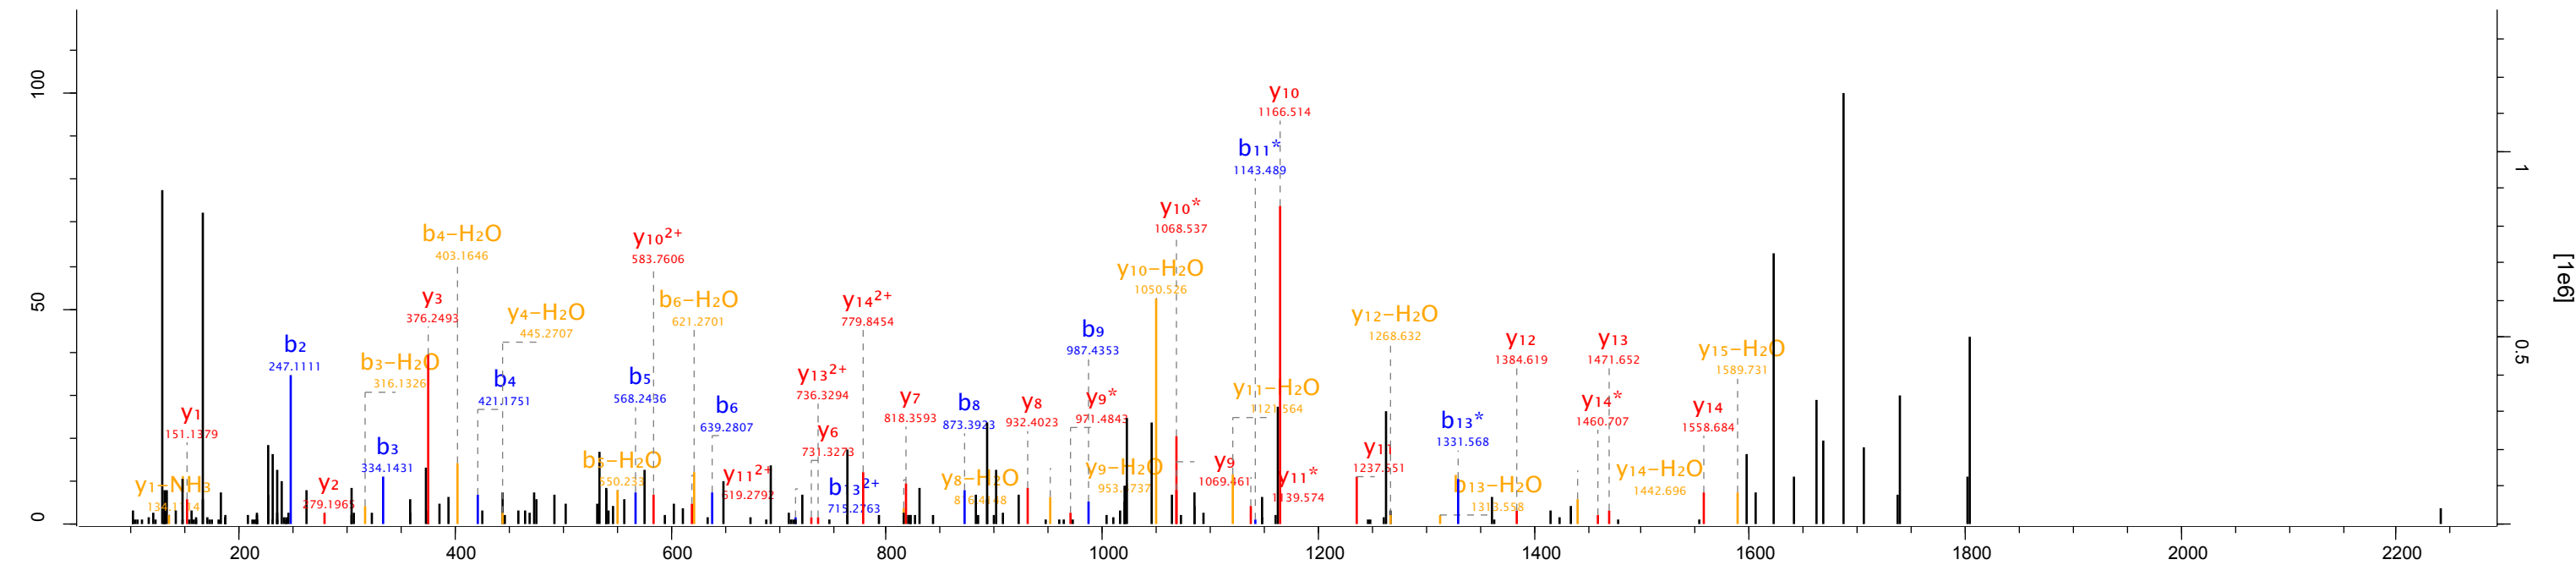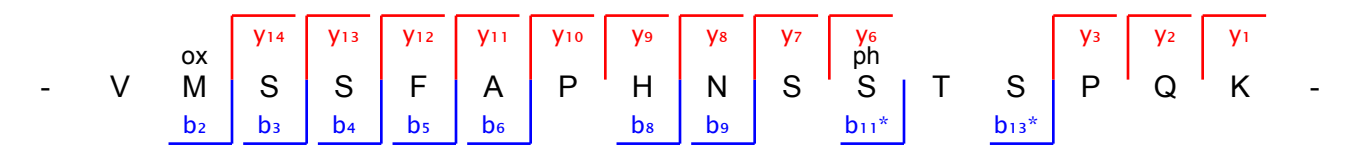

Raw file: 20150812\_A375SR\_Phospho\_BR1\_05  
 Scan: 6295 Method: FTMS; HCD Score: 62.86 m/z: 507.89 Gene names: TAF7

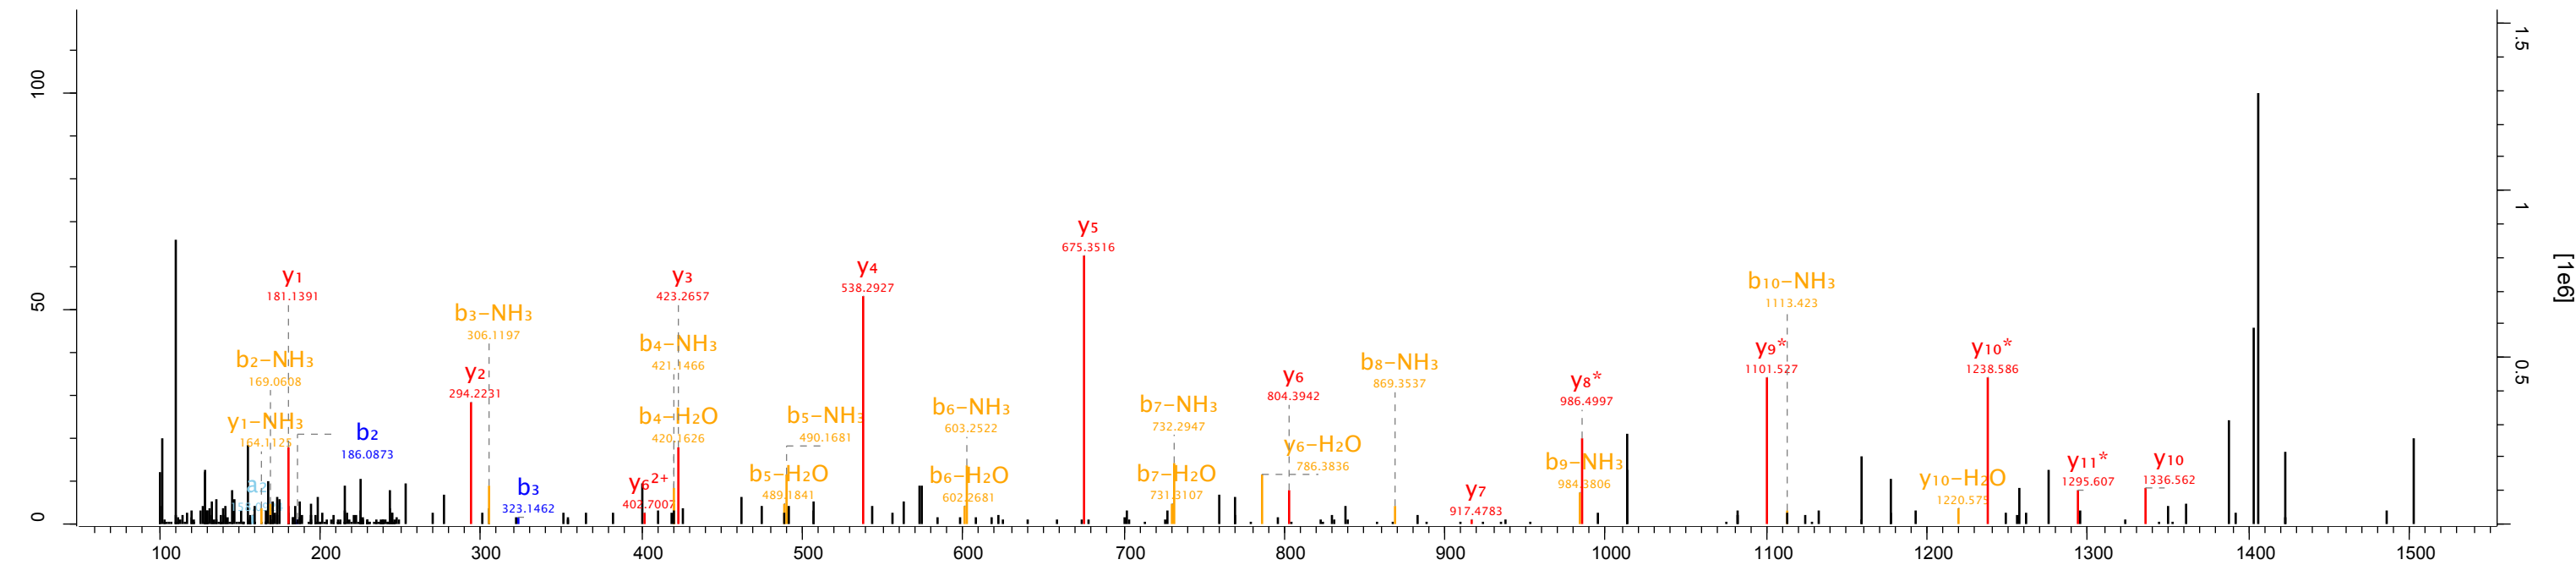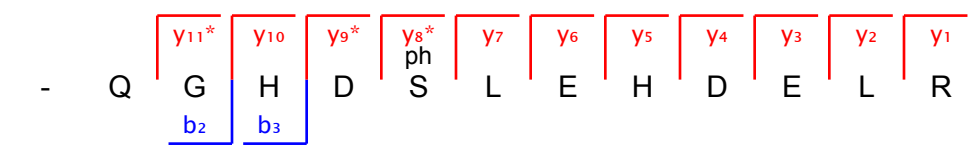



Raw file 20150812\_A375SR\_Phospho\_BR1\_05 Scan 6675 Method FTMS; HCD Score 52.97 m/z 609.78 Gene names RECQL

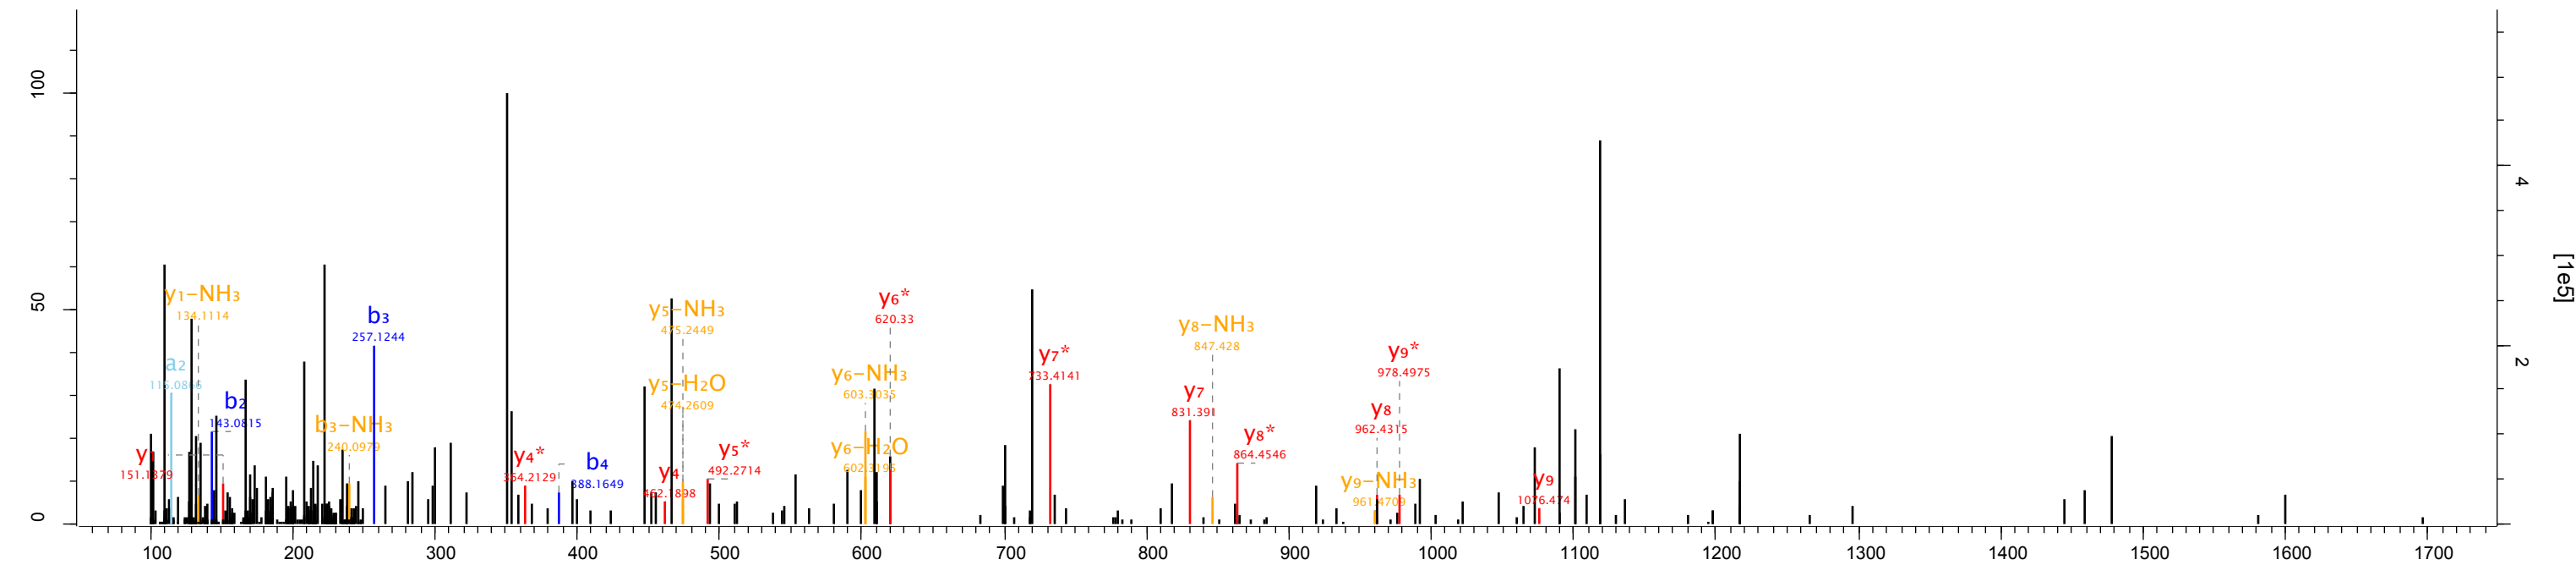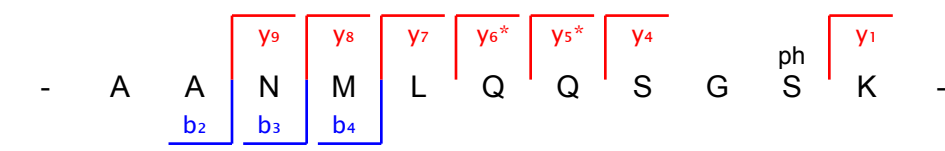

Raw file: 20150812\_A375SR\_Phospho\_BR1\_05  
 Scan: 7245 Method: FTMS; HCD Score: 134.04 m/z: 516.25 Gene names: KIAA1522

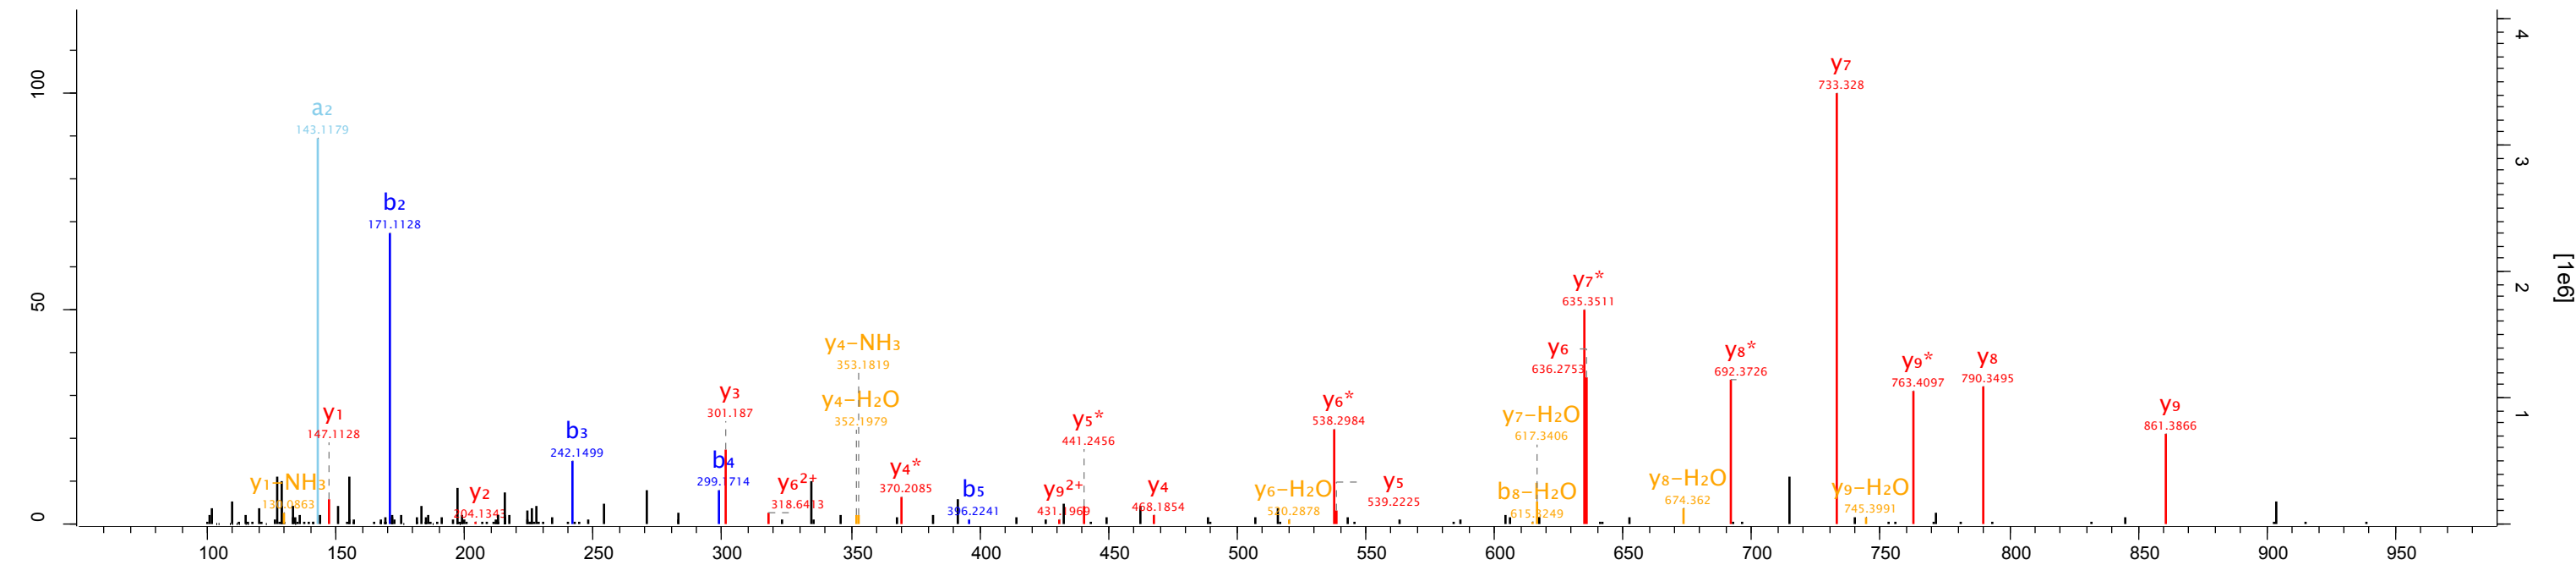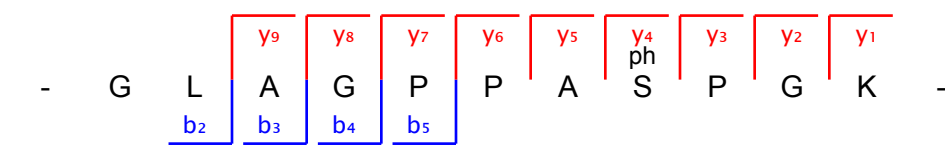

Raw file 20150812\_A375SR\_Phospho\_BR1\_05 Scan 7975 Method FTMS; HCD Score 175.93 m/z 682.69 Gene names TP53BP2

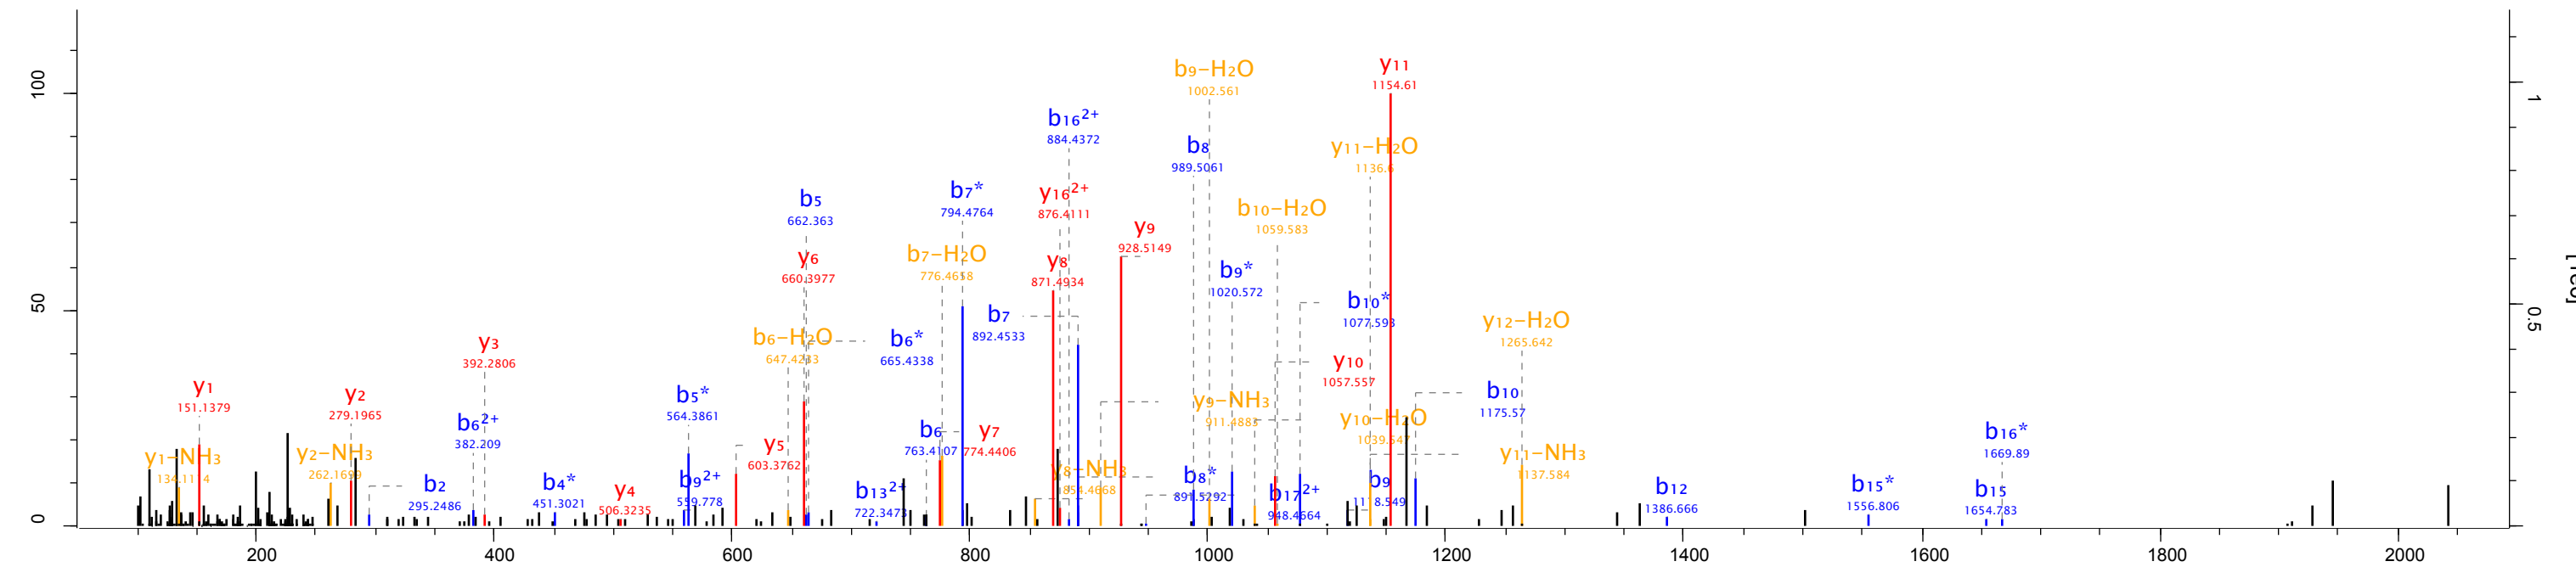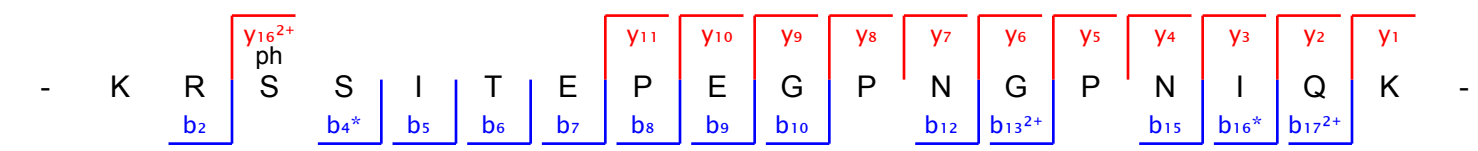

Raw file 20150812\_A375SR\_Phospho\_BR1\_05 Scan 8095 Method FTMS; HCD Score 105.98 m/z 466.22 Gene names DDX39A

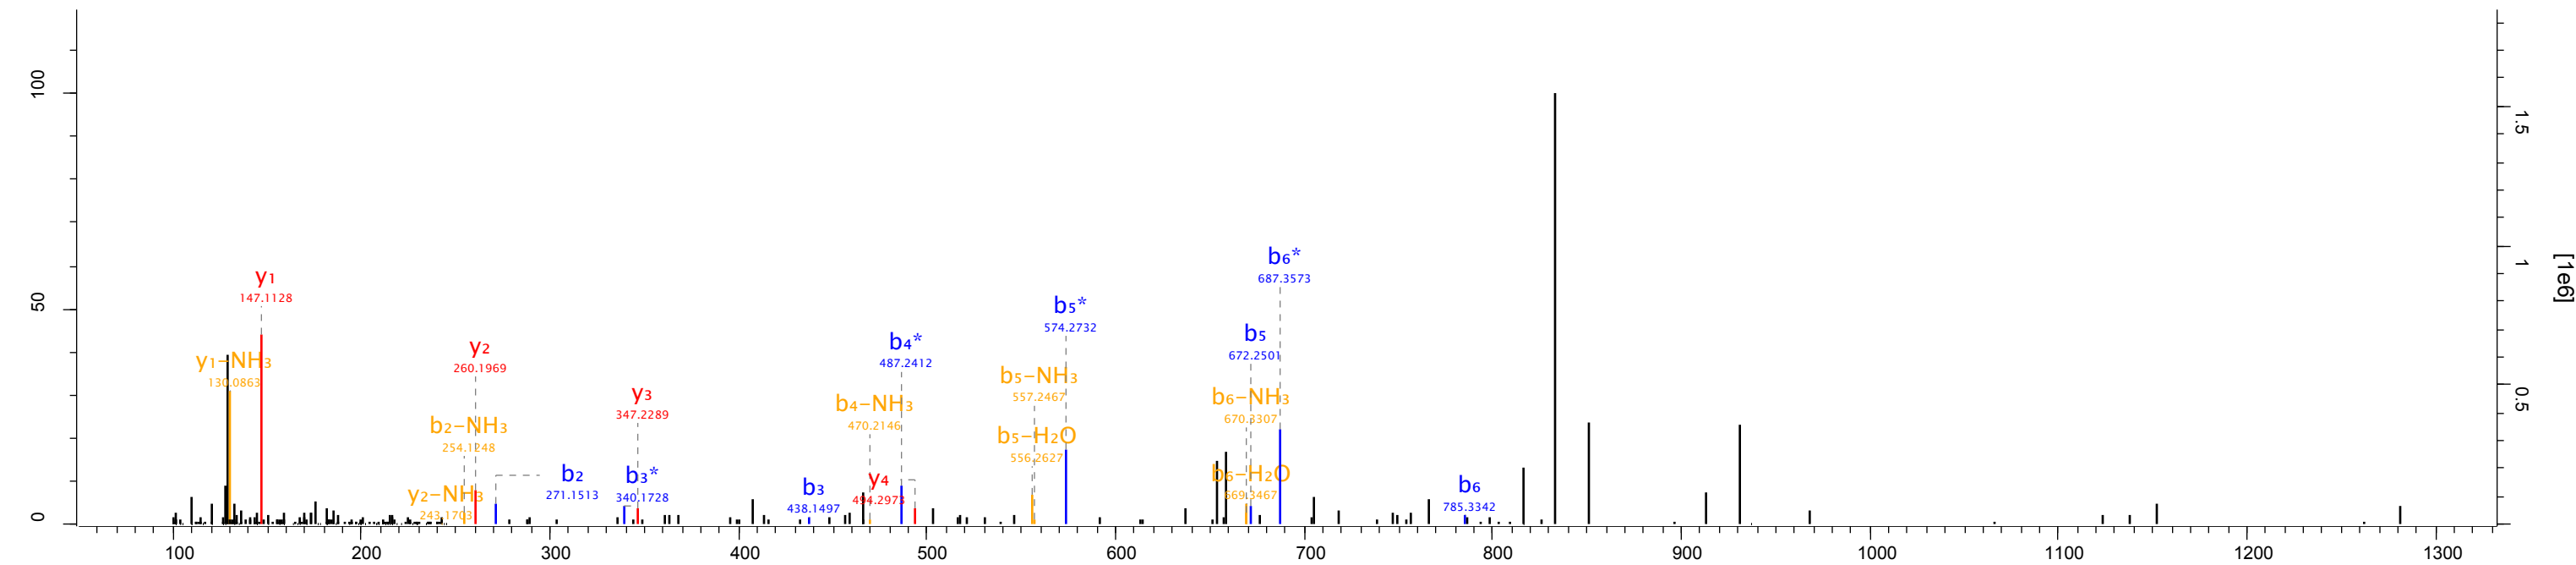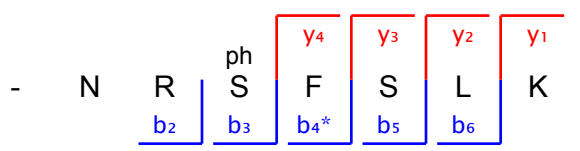

Raw file: 20150812\_A375SR\_Phospho\_BR1\_05  
 Scan: 8755 Method: FTMS; HCD Score: 221.46 m/z: 822.35 Gene names: LITAF;TLE3

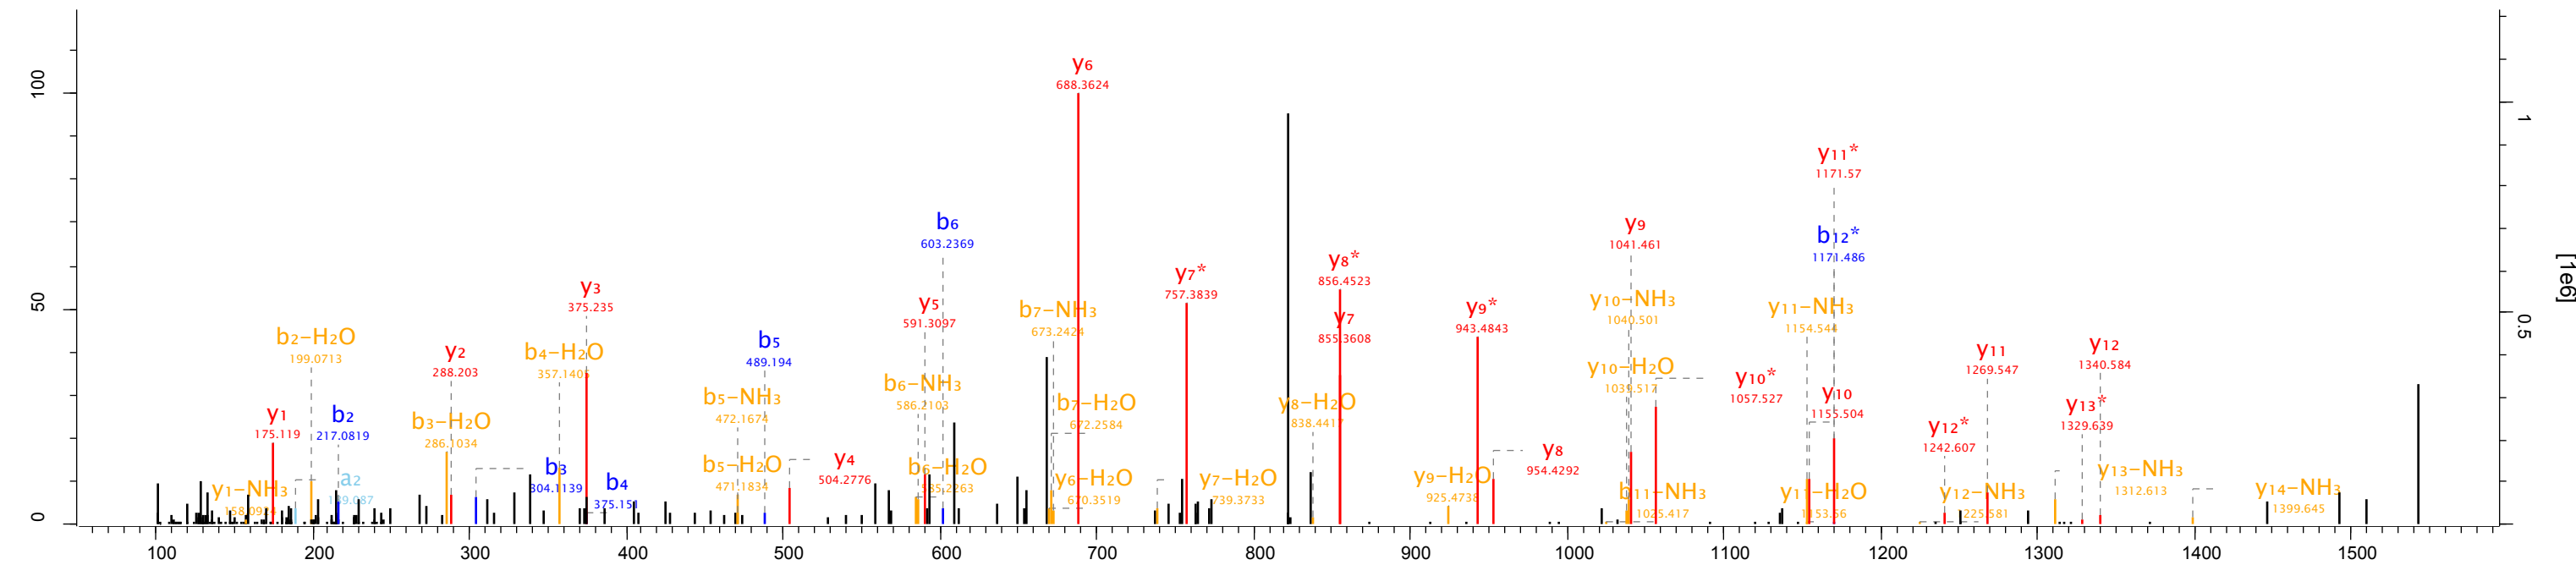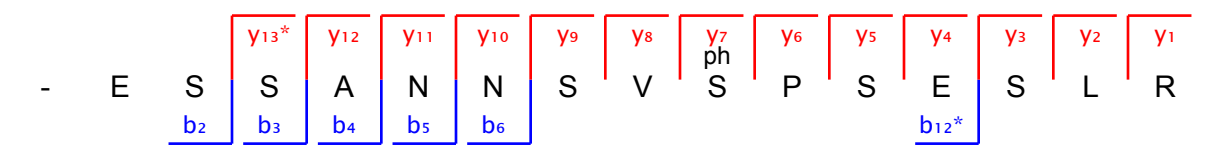

Raw file 20150812\_A375SR\_Phospho\_BR1\_05 Scan 8965 Method FTMS; HCD Score 355.16 m/z 946.93 Gene names SLTM

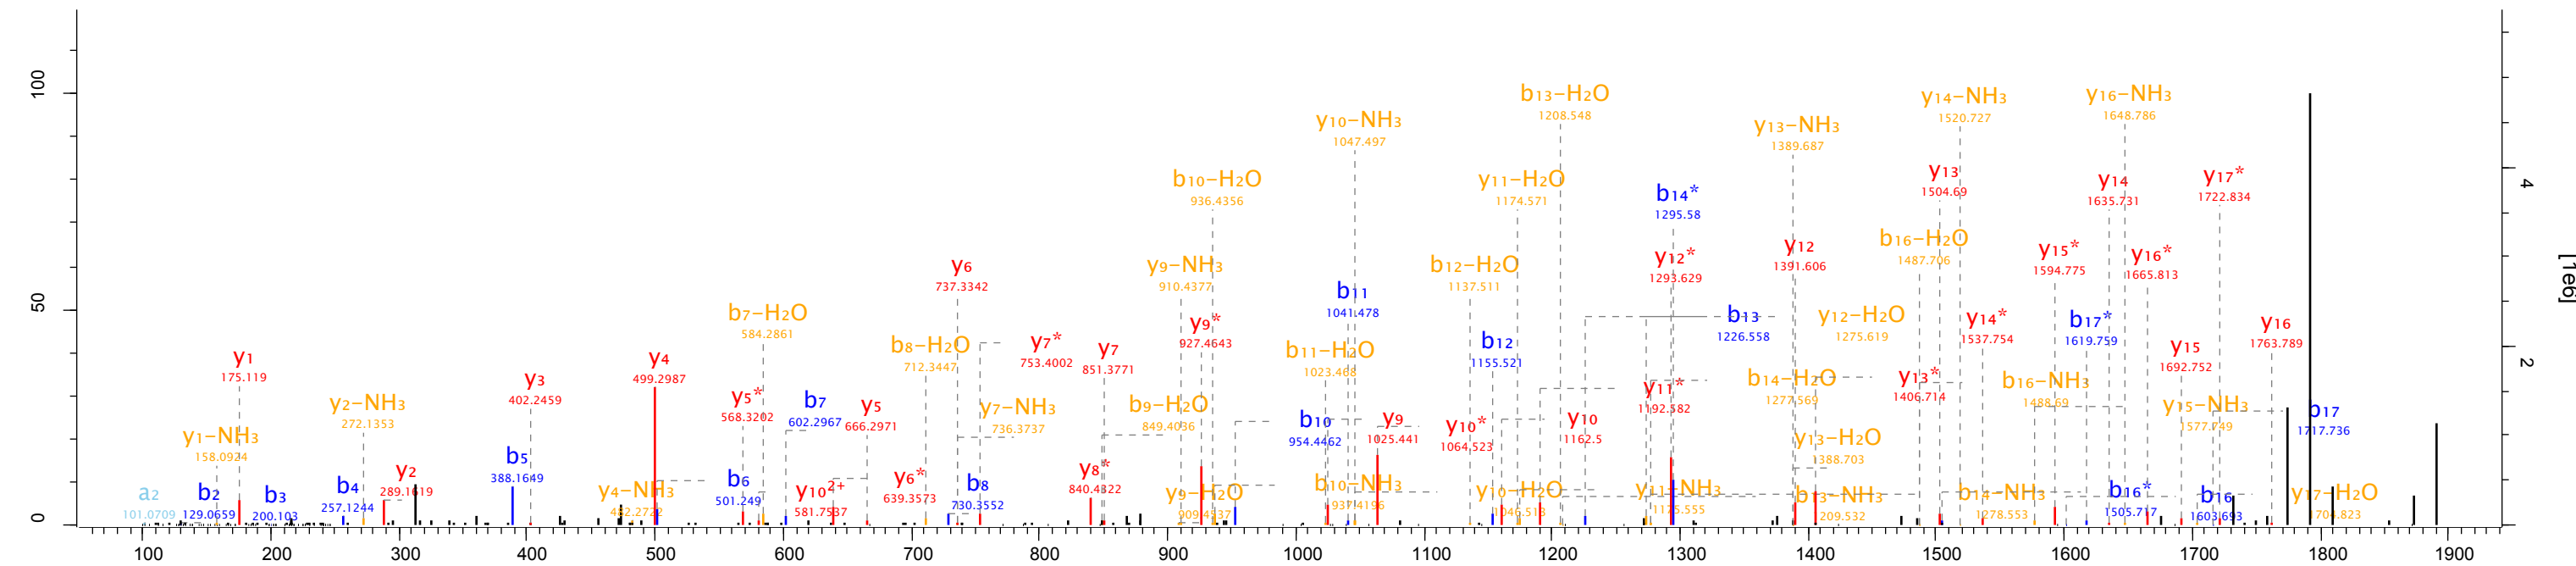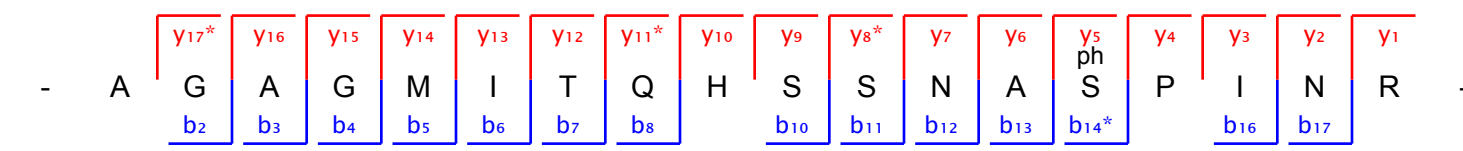

Raw file: 20150812\_A375SR\_Phospho\_BR1\_05  
 Scan: 9135 Method: FTMS; HCD Score: 292.68 m/z: 975.89 Gene names: WTAP

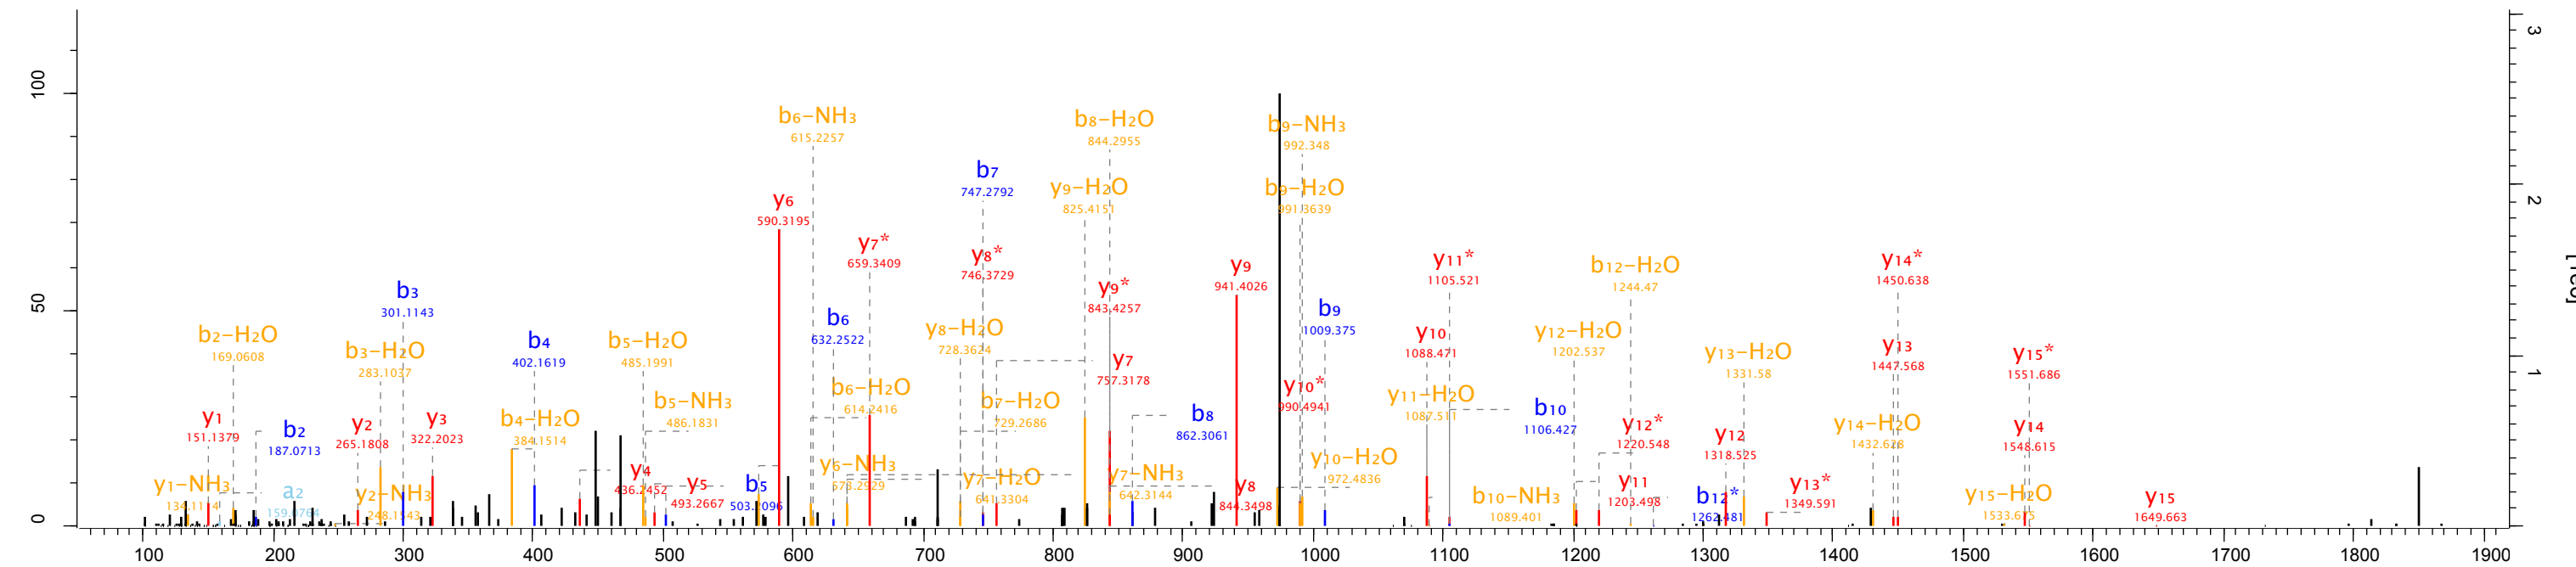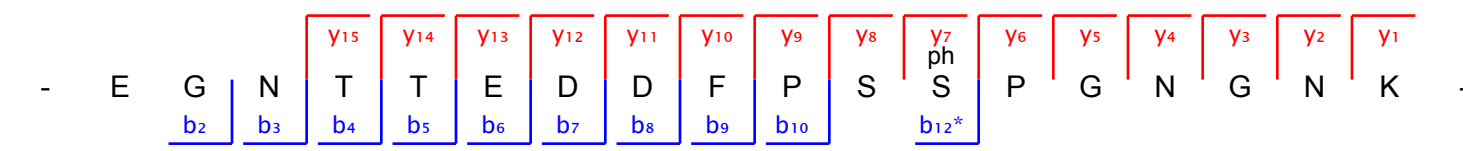

Raw file: 20150812\_A375SR\_Phospho\_BR1\_05  
 Scan: 9755 Method: FTMS; HCD Score: 203.79 m/z: 952.95 Gene names: TP53BP2

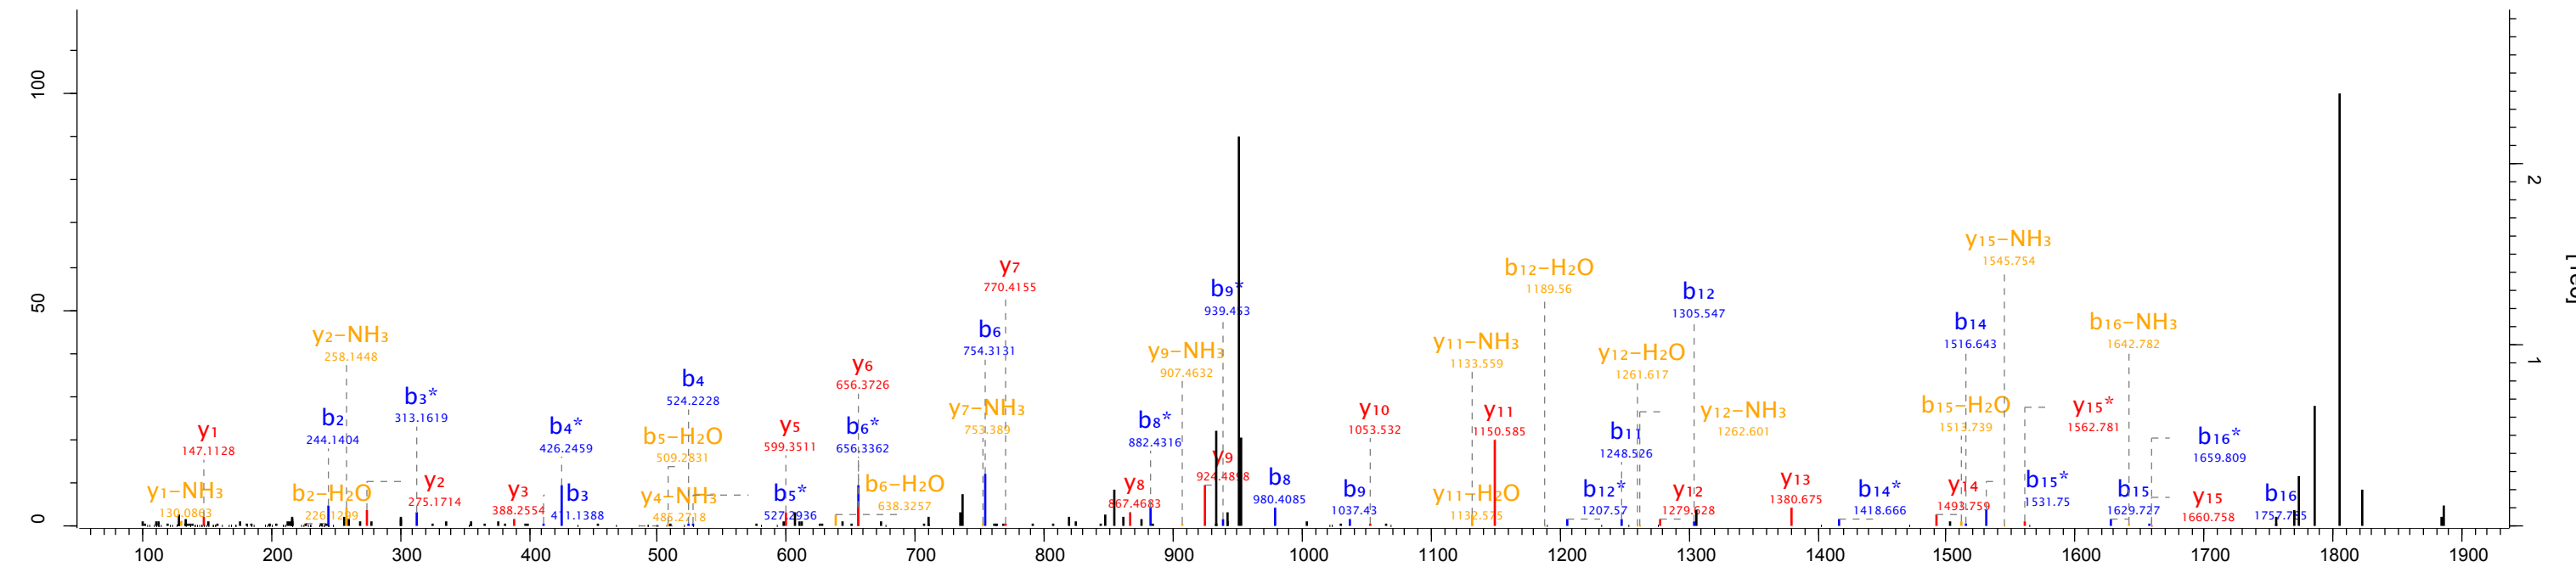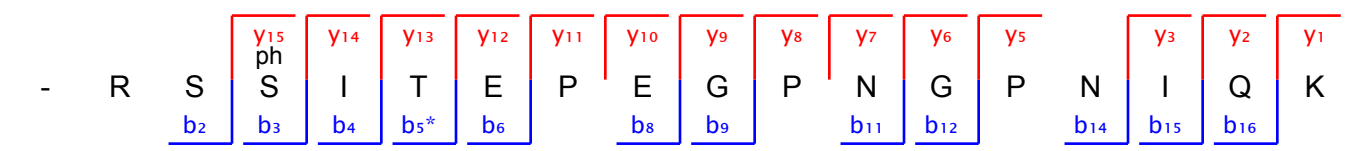



Raw file: 20150812\_A375SR\_Phospho\_BR1\_05  
 Scan: 9935 Method: FTMS; HCD Score: 477.23 m/z: 1031.46 Gene names: PPP4R2

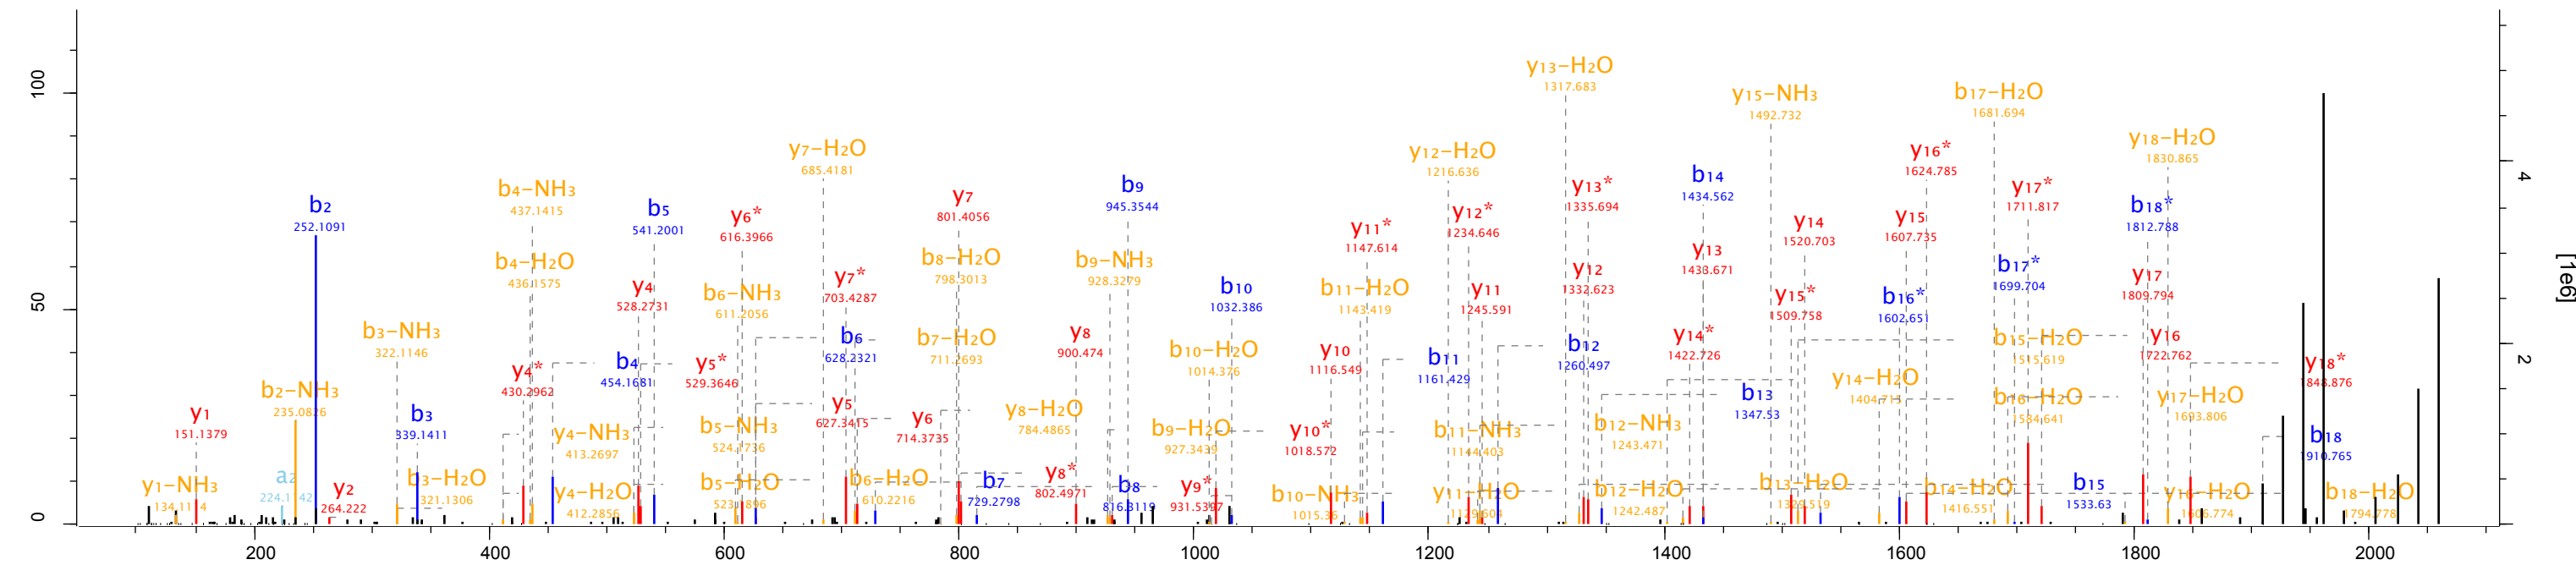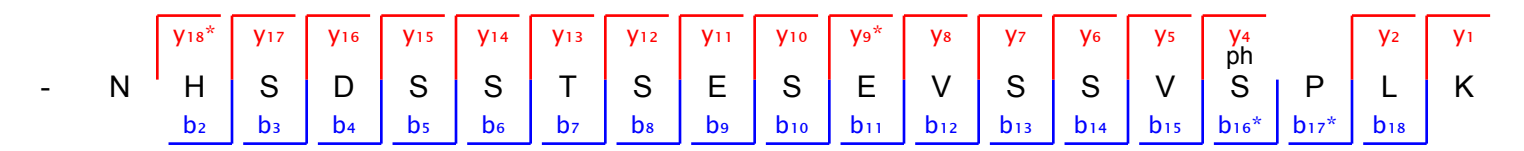

Raw file: 20150812\_A375SR\_Phospho\_BR1\_06  
 Scan: 10245 Method: FTMS; HCD Score: 223.68 m/z: 1082.5 Gene names: CCDC9

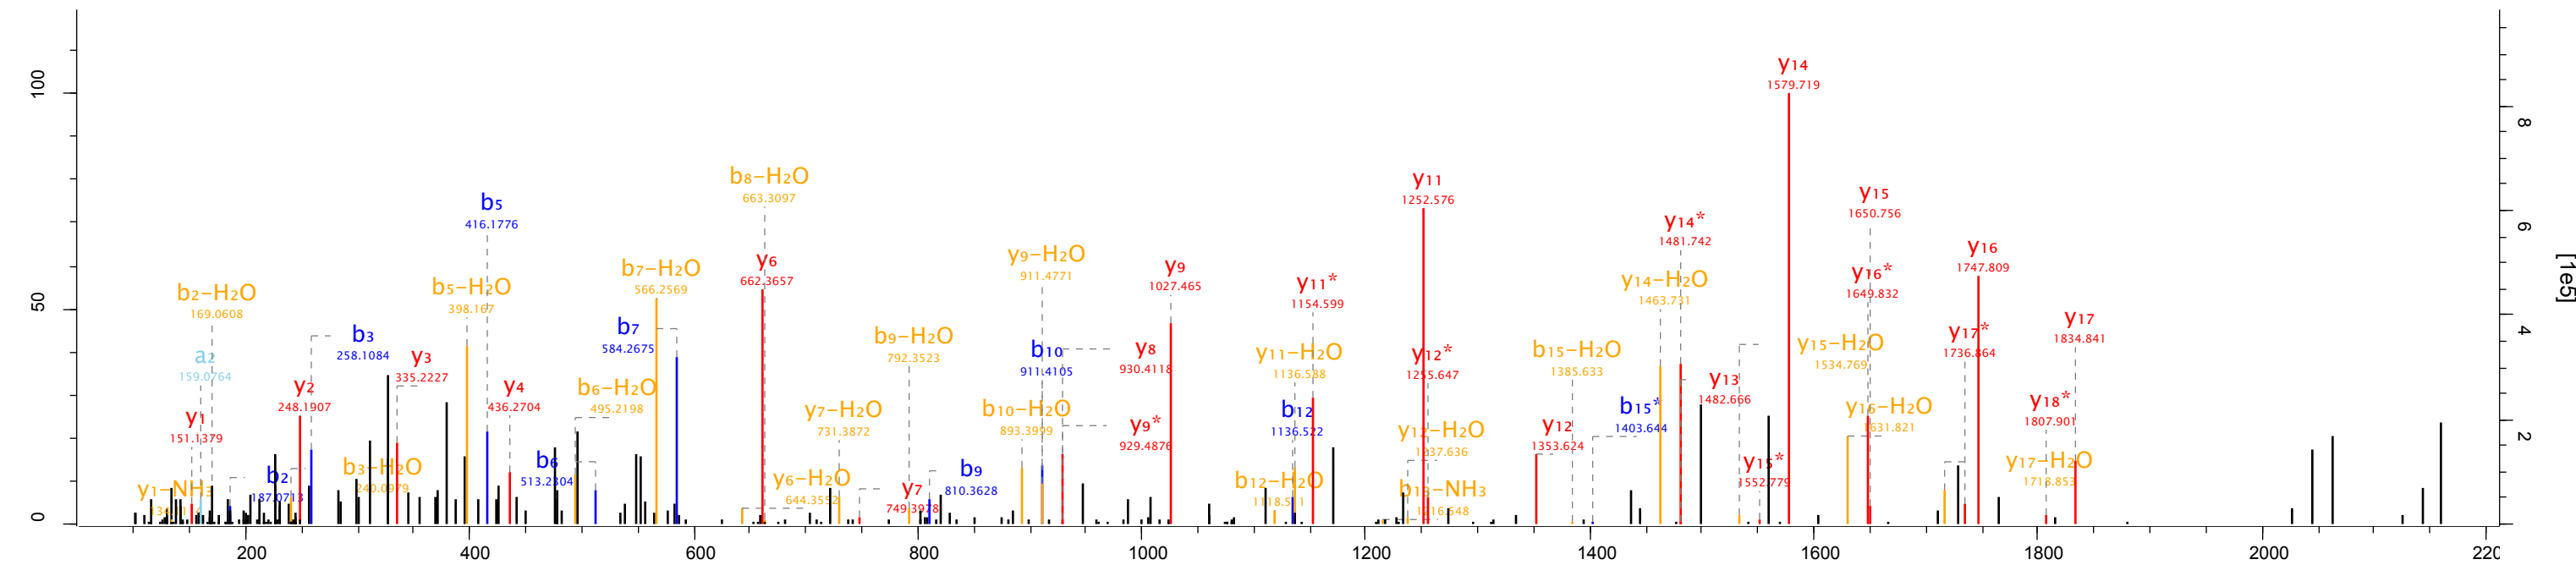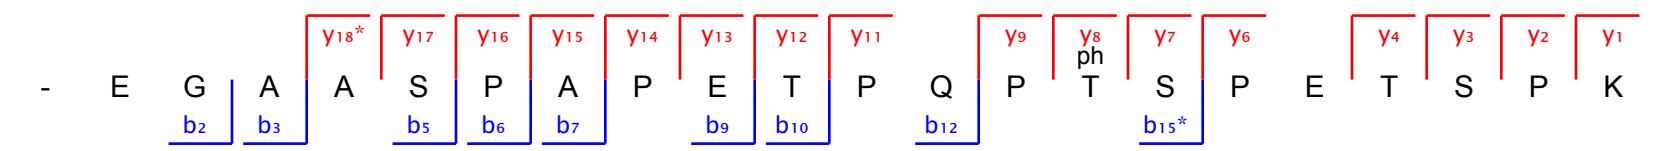

Raw file 20150812\_A375SR\_Phospho\_BR1\_06 Scan 10565 Method FTMS; HCD Score 103.41 m/z 761.33 Gene names TNS3

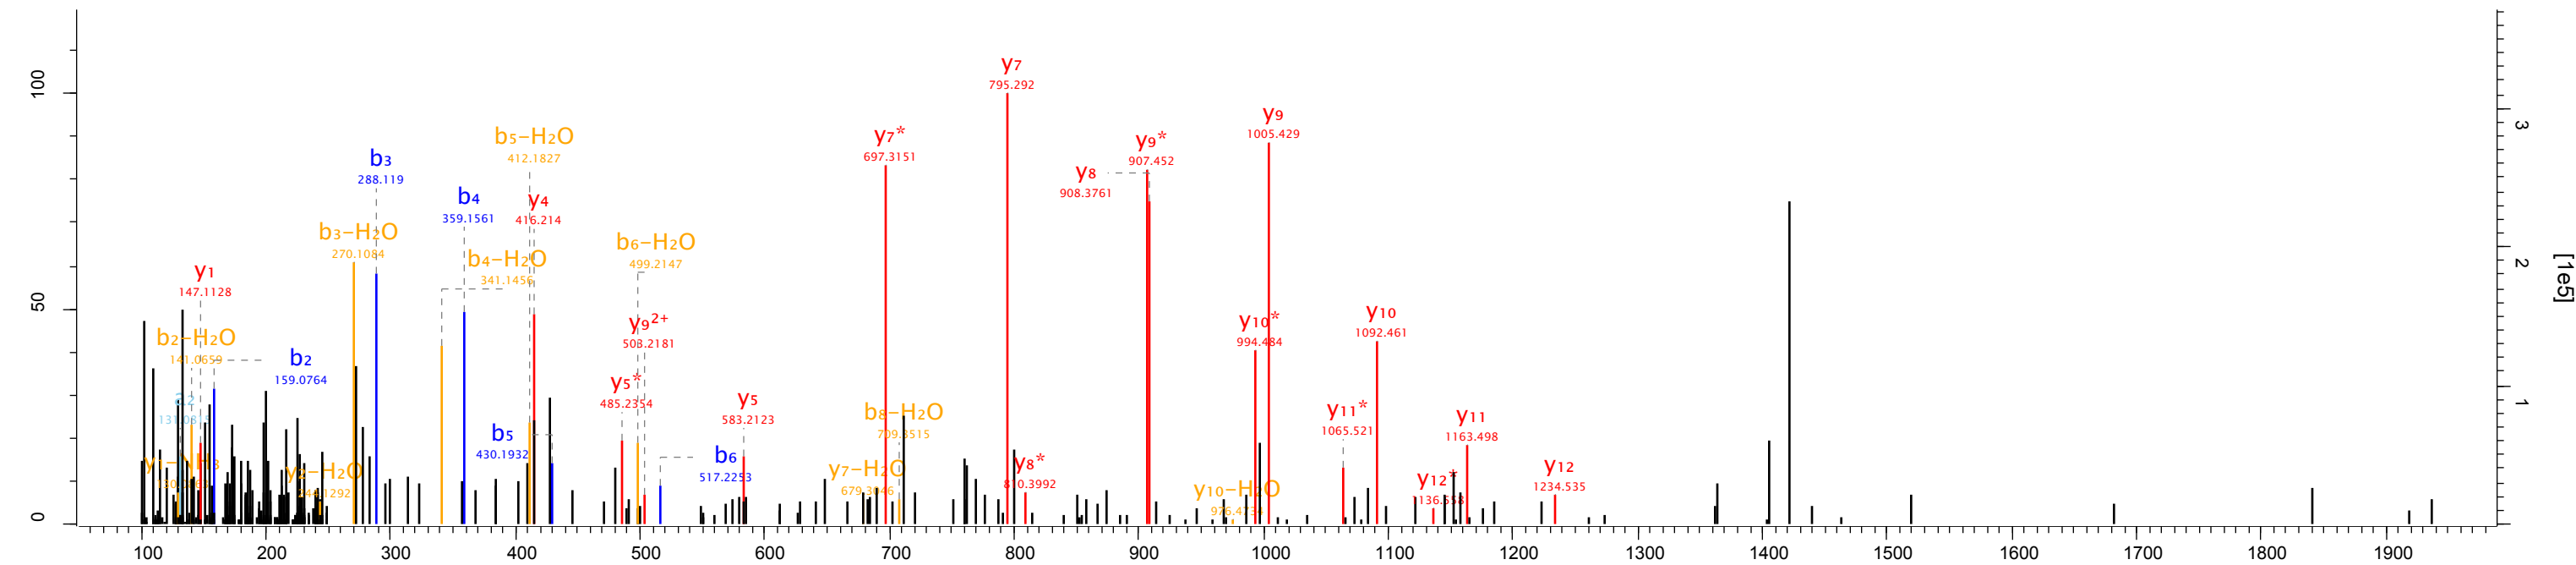

- A S E A A S P L P D S P G D K -  
 b<sub>2</sub> b<sub>3</sub> b<sub>4</sub> b<sub>5</sub> b<sub>6</sub> y<sub>12</sub> y<sub>11</sub> y<sub>10</sub> y<sub>9</sub> y<sub>8</sub> y<sub>7</sub> y<sub>5</sub> y<sub>4</sub> y<sub>1</sub>

Raw file: 20150812\_A375SR\_Phospho\_BR1\_06  
 Scan: 10585 Method: FTMS; HCD Score: 94.67 m/z: 549.28 Gene names: CEP192

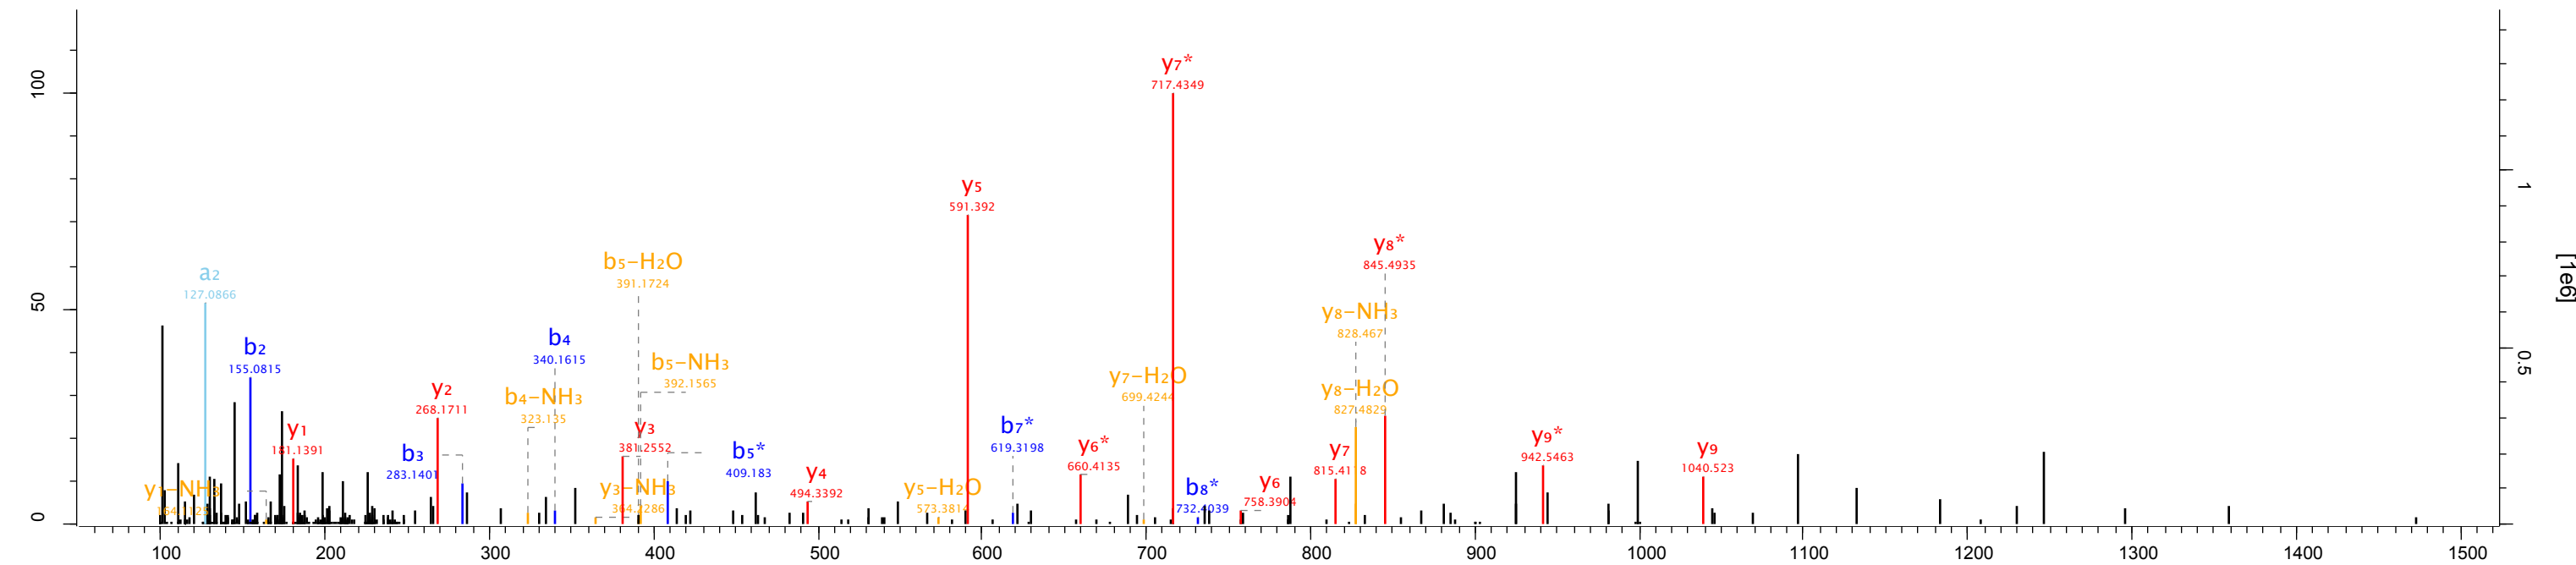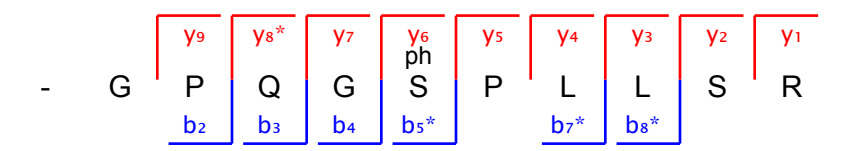

Raw file 20150812\_A375SR\_Phospho\_BR1\_06 Scan 11265 Method FTMS; HCD Score 139.63 m/z 988.93 Gene names IRS2

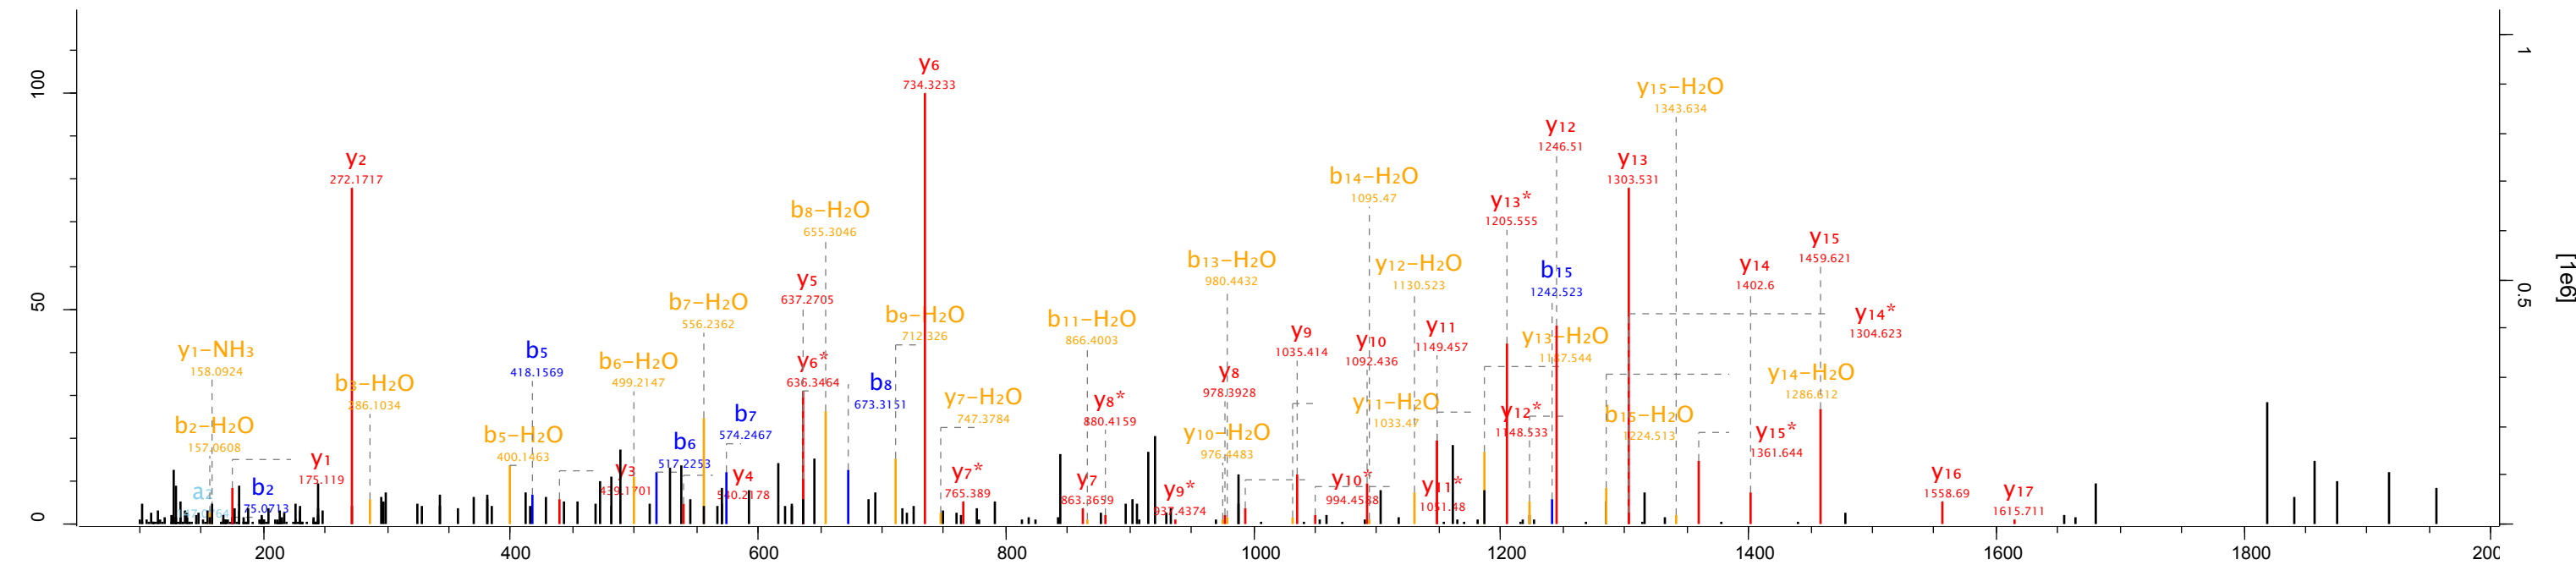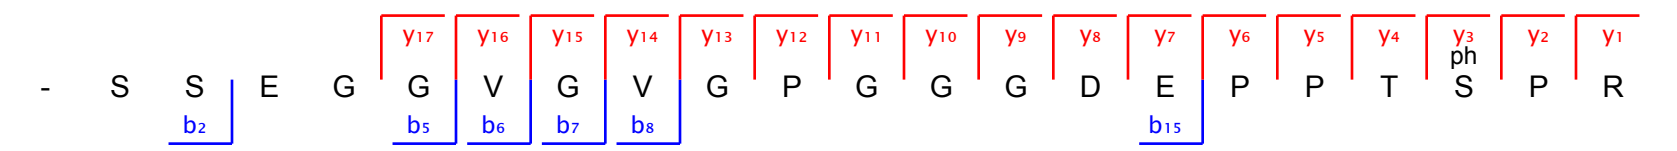

Raw file  
20150812\_A375SR\_Phospho\_BR1\_06

Scan Method Score m/z Gene names  
11505 FTMS; HCD 104.55 573.32 BRD8

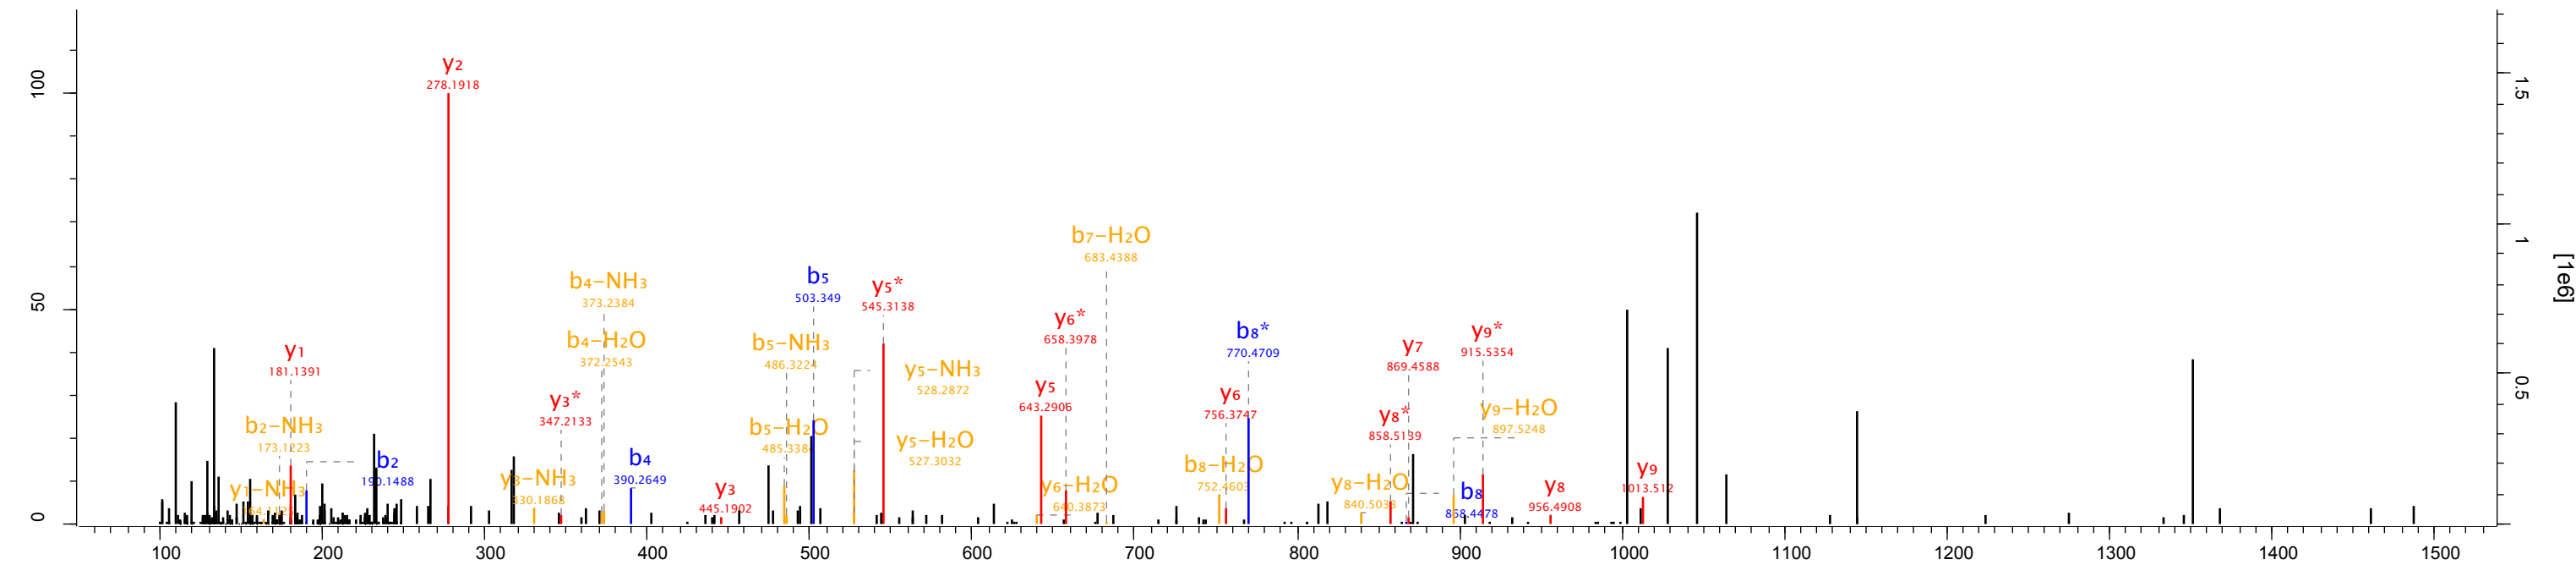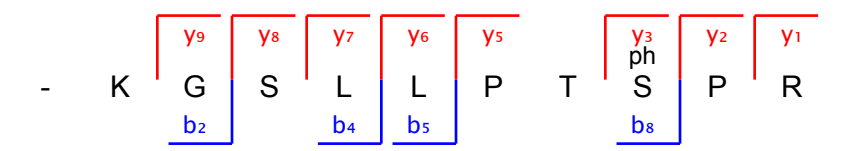

Raw file: 20150812\_A375SR\_Phospho\_BR1\_06  
 Scan: 1185 Method: FTMS; HCD Score: 78.96 m/z: 540.26 Gene names: PPIG

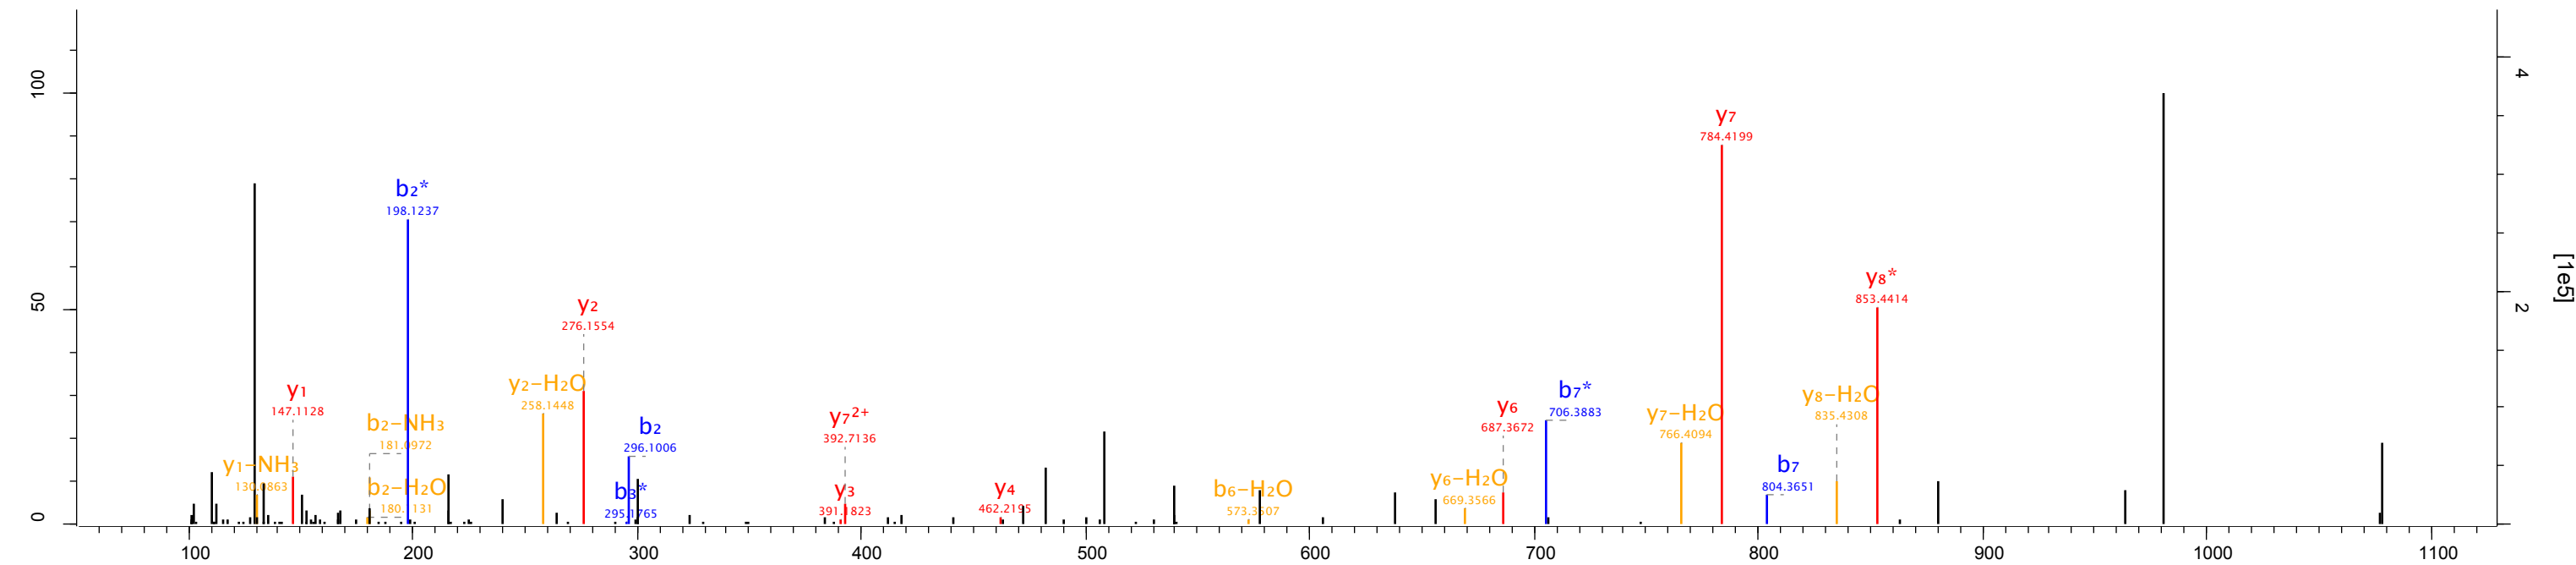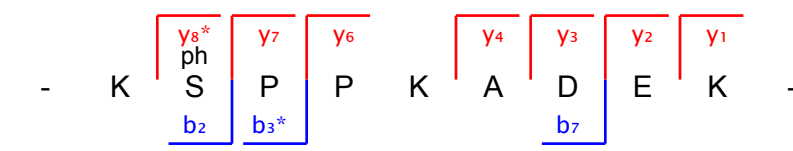

Raw file 20150812\_A375SR\_Phospho\_BR1\_06 Scan 11885 Method FTMS; HCD Score 133.32 m/z 645.77 Gene names DTX3L

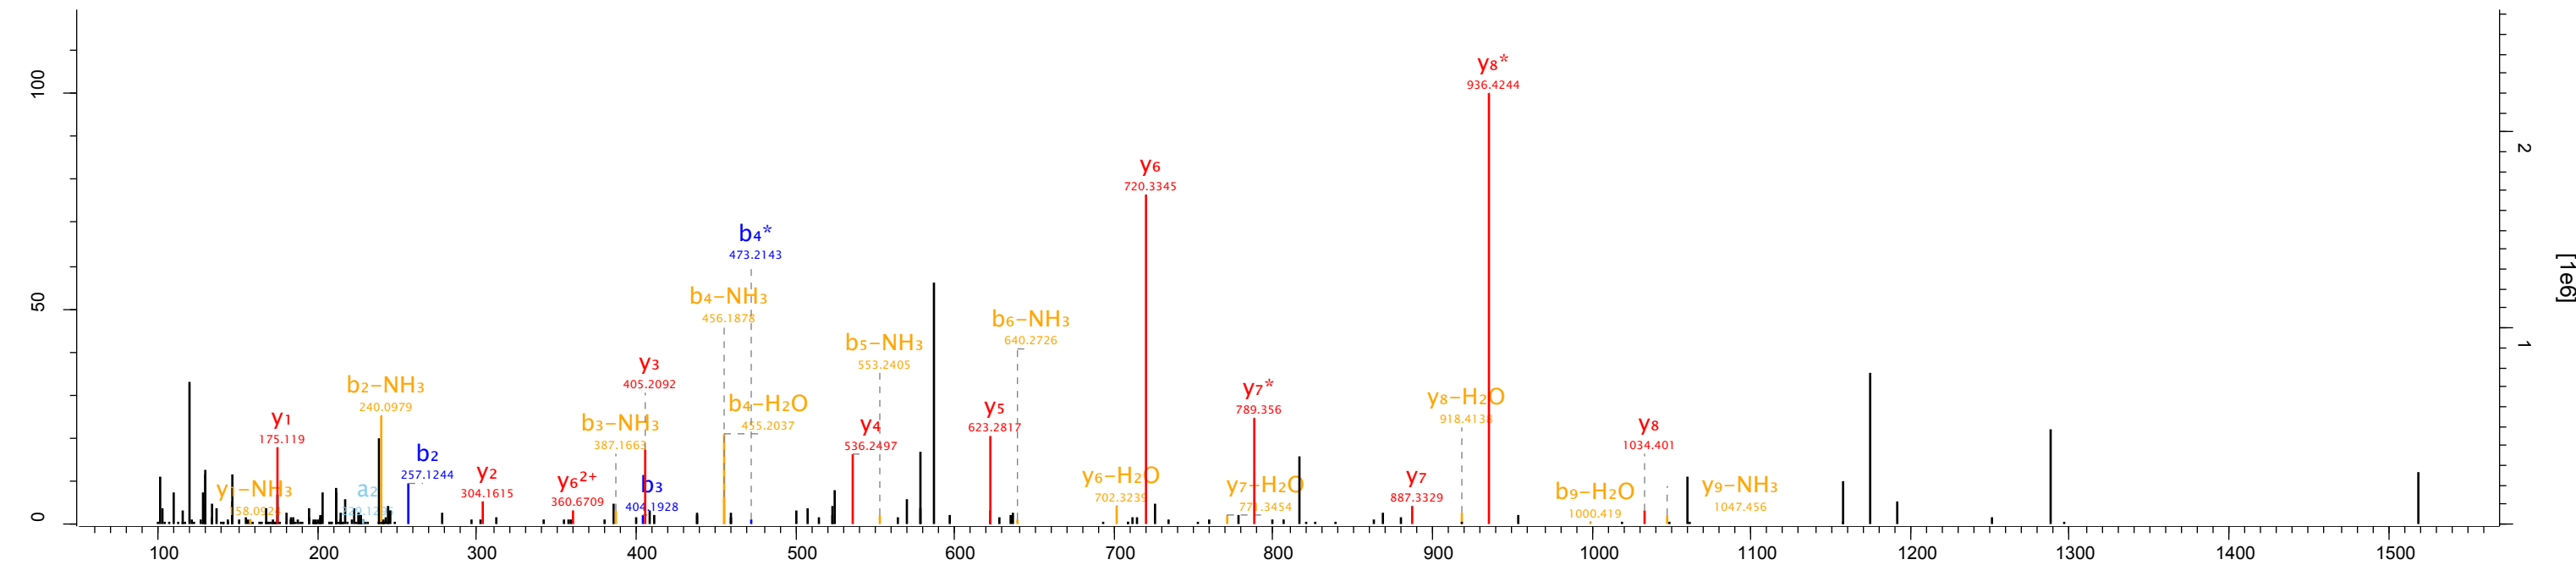

- Q Q F S P S M T E R -  
 b2 b3 b4\* y8 y7 ph y6 y5 y4 y3 y2 y1



Raw file 20150812\_A375SR\_Phospho\_BR1\_06 Scan 11935 Method FTMS; HCD Score 176.39 m/z 975.89 Gene names TBC1D2B

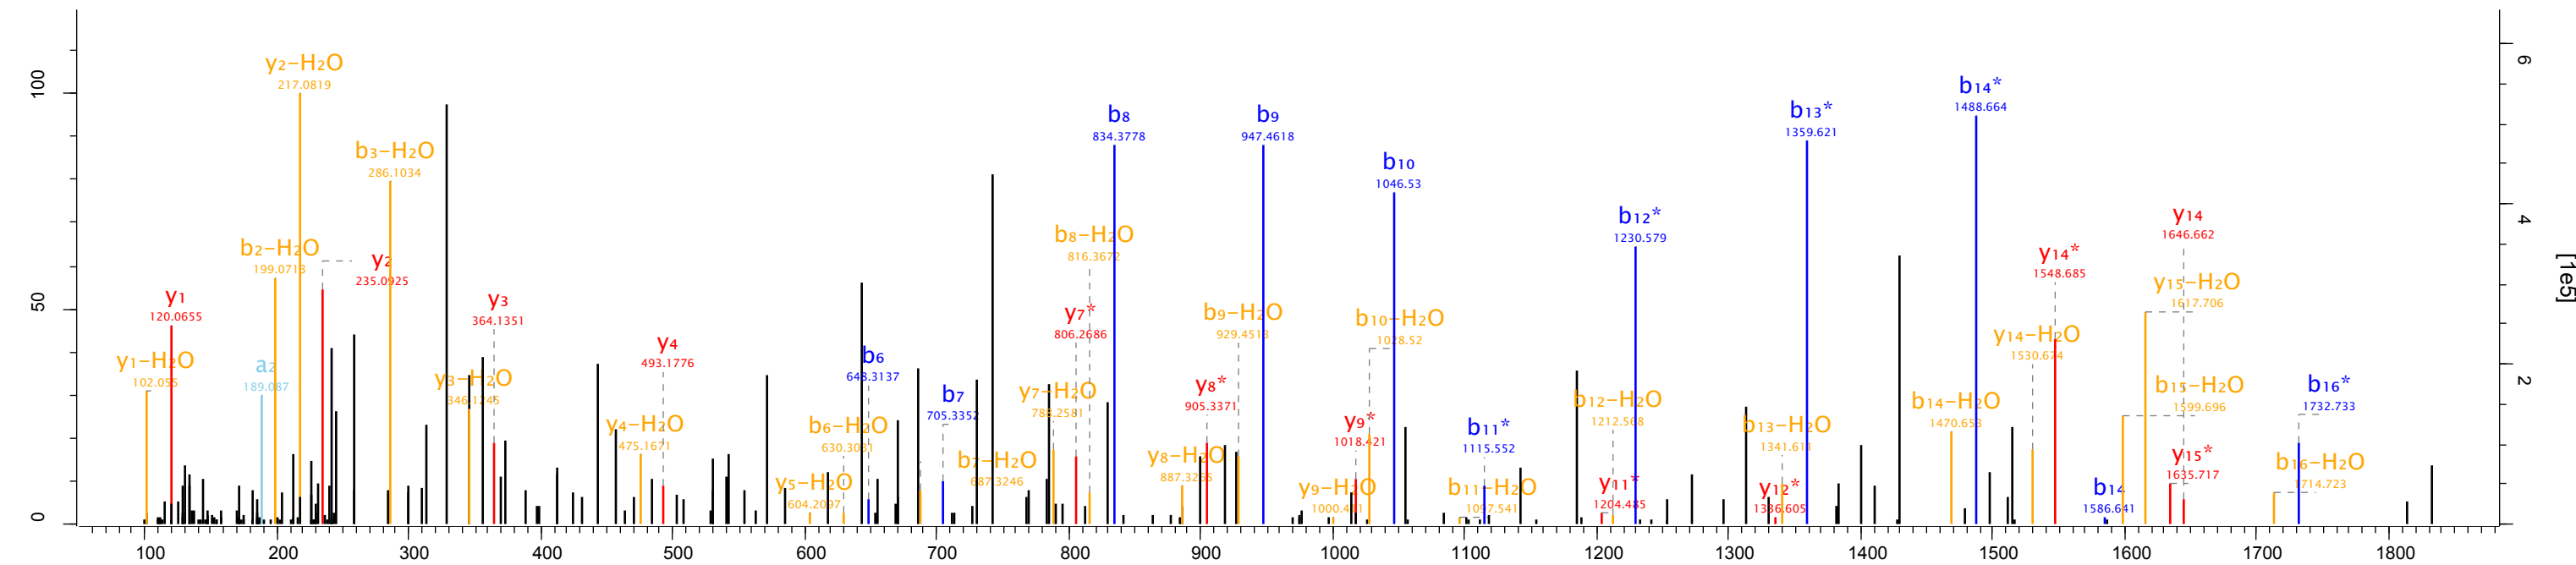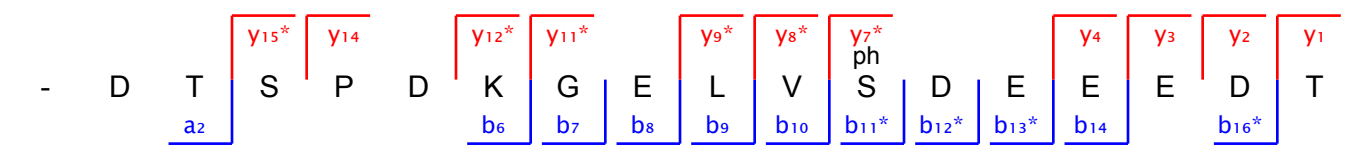

Raw file: 20150812\_A375SR\_Phospho\_BR1\_06  
 Scan: 11975 Method: FTMS; HCD Score: 164.53 m/z: 514.93 Gene names: BCLAF1

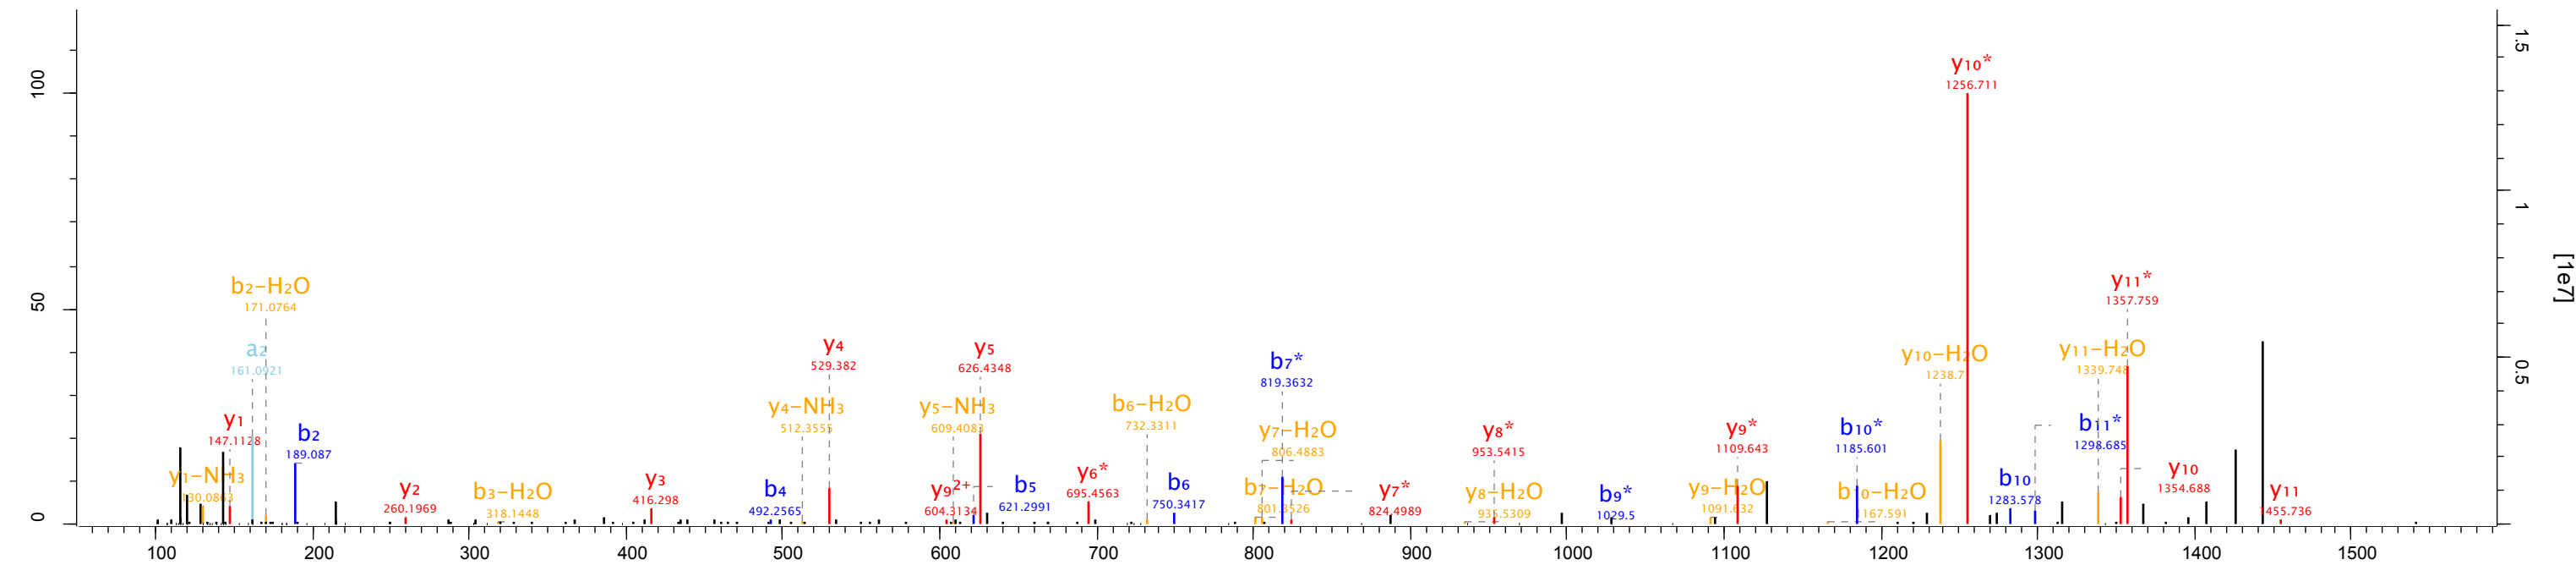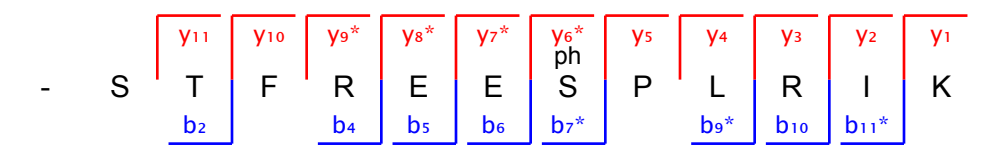

Raw file 20150812\_A375SR\_Phospho\_BR1\_06 Scan 12425 Method FTMS; HCD Score 202.44 m/z 1154.48 Gene names ZNF639

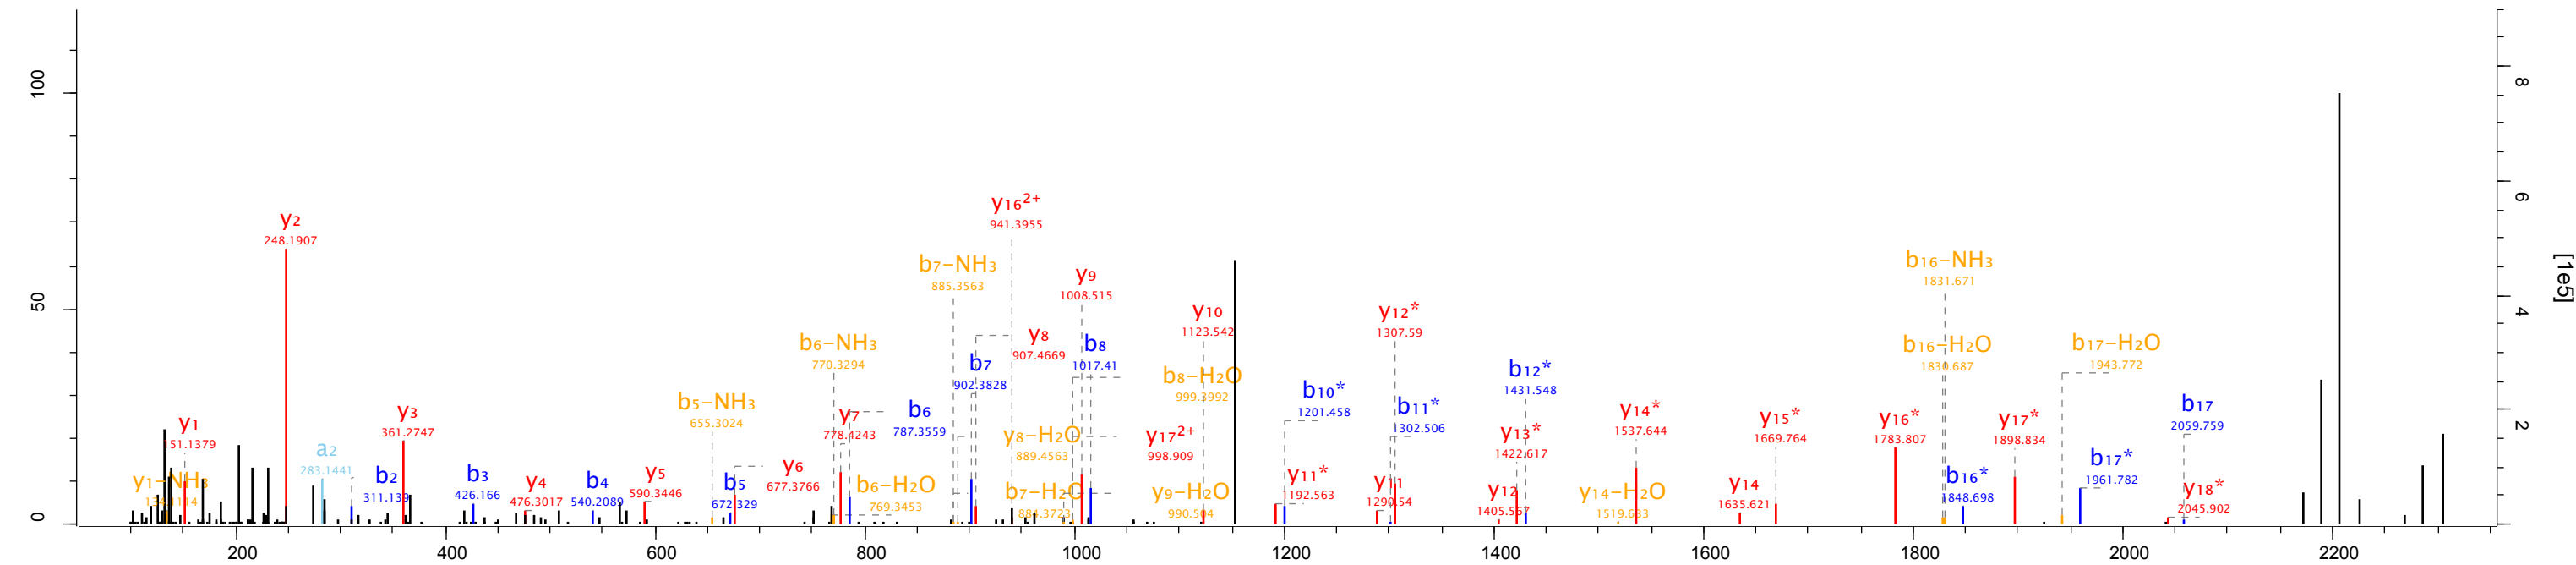

- Y F D N K D D D S D T E T S N D L P K -

Fragmentation mapping:

- Red boxes: y18\*, y17\*, y16\*, y15\*, y14, y13\*, y12, y11 ph, y10, y9, y8, y7, y6, y5, y4, y3, y2, y1
- Blue boxes: b2, b3, b4, b5, b6, b7, b8, b10\*, b11\*, b12\*, b16\*, b17

Raw file: 20150812\_A375SR\_Phospho\_BR1\_06  
 Scan: 12485 Method: FTMS; HCD Score: 119.27 m/z: 877.9 Gene names: FOXK2

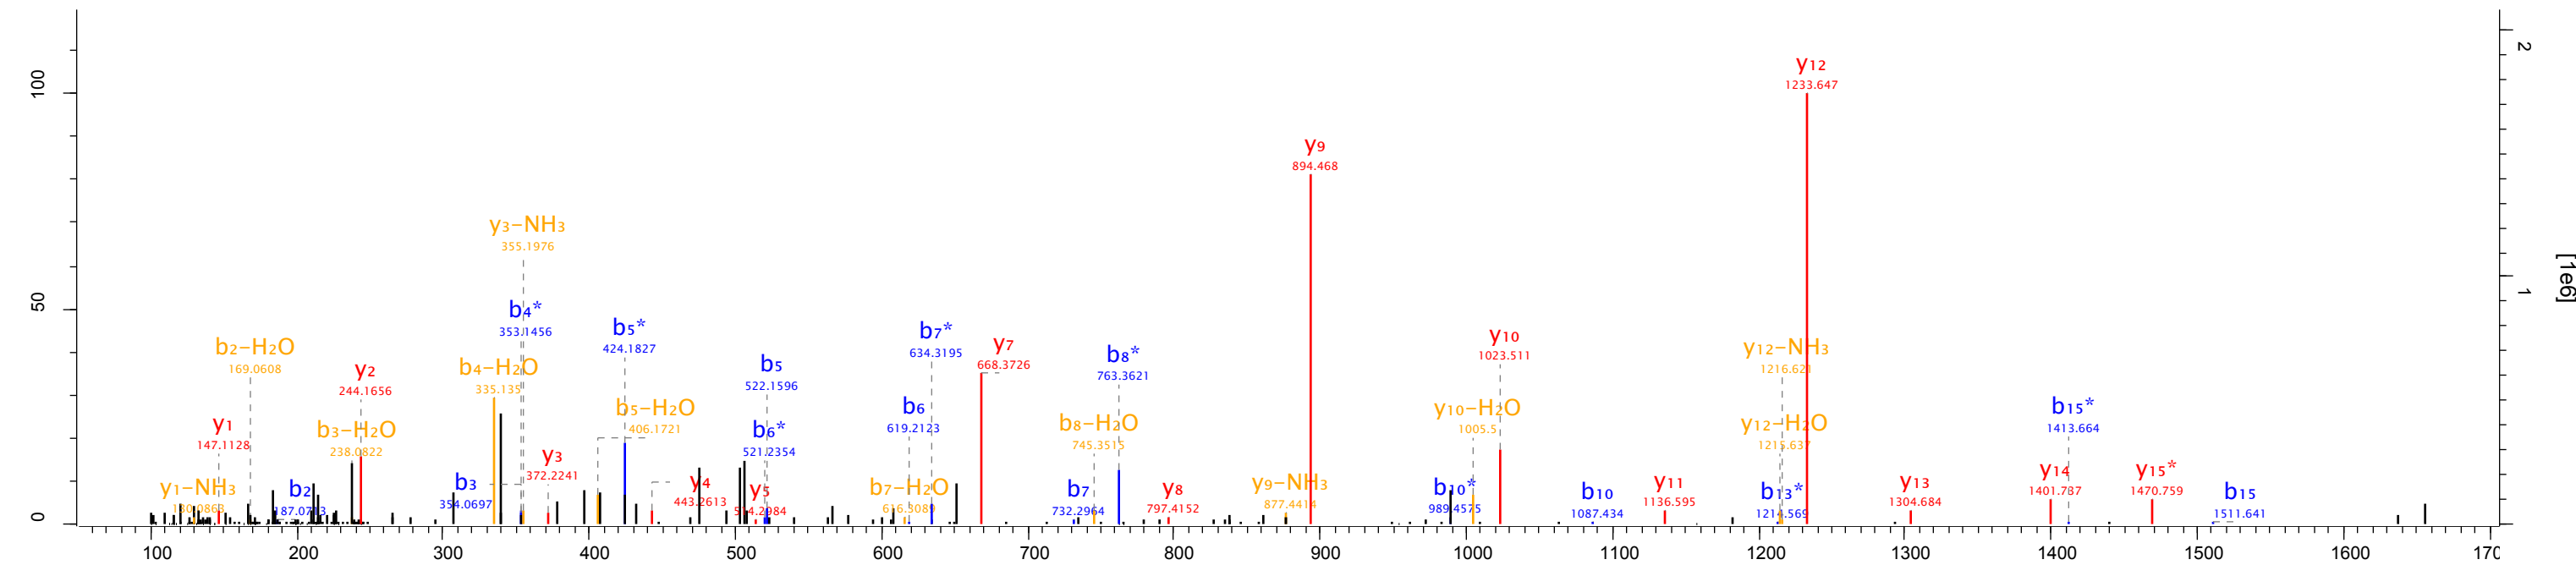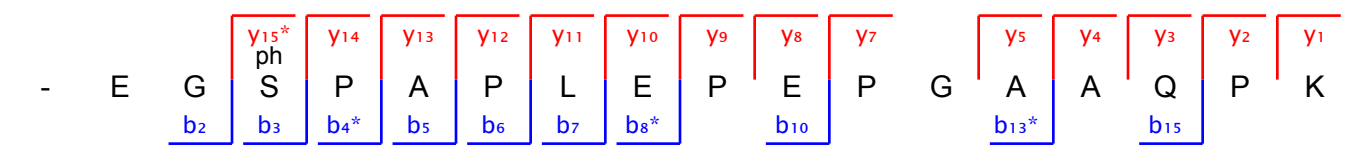

Raw file Scan Method Score m/z Gene names  
 20150812\_A375SR\_Phospho\_BR1\_06 12655 FTMS; HCD 109.77 883.4 ZNF446

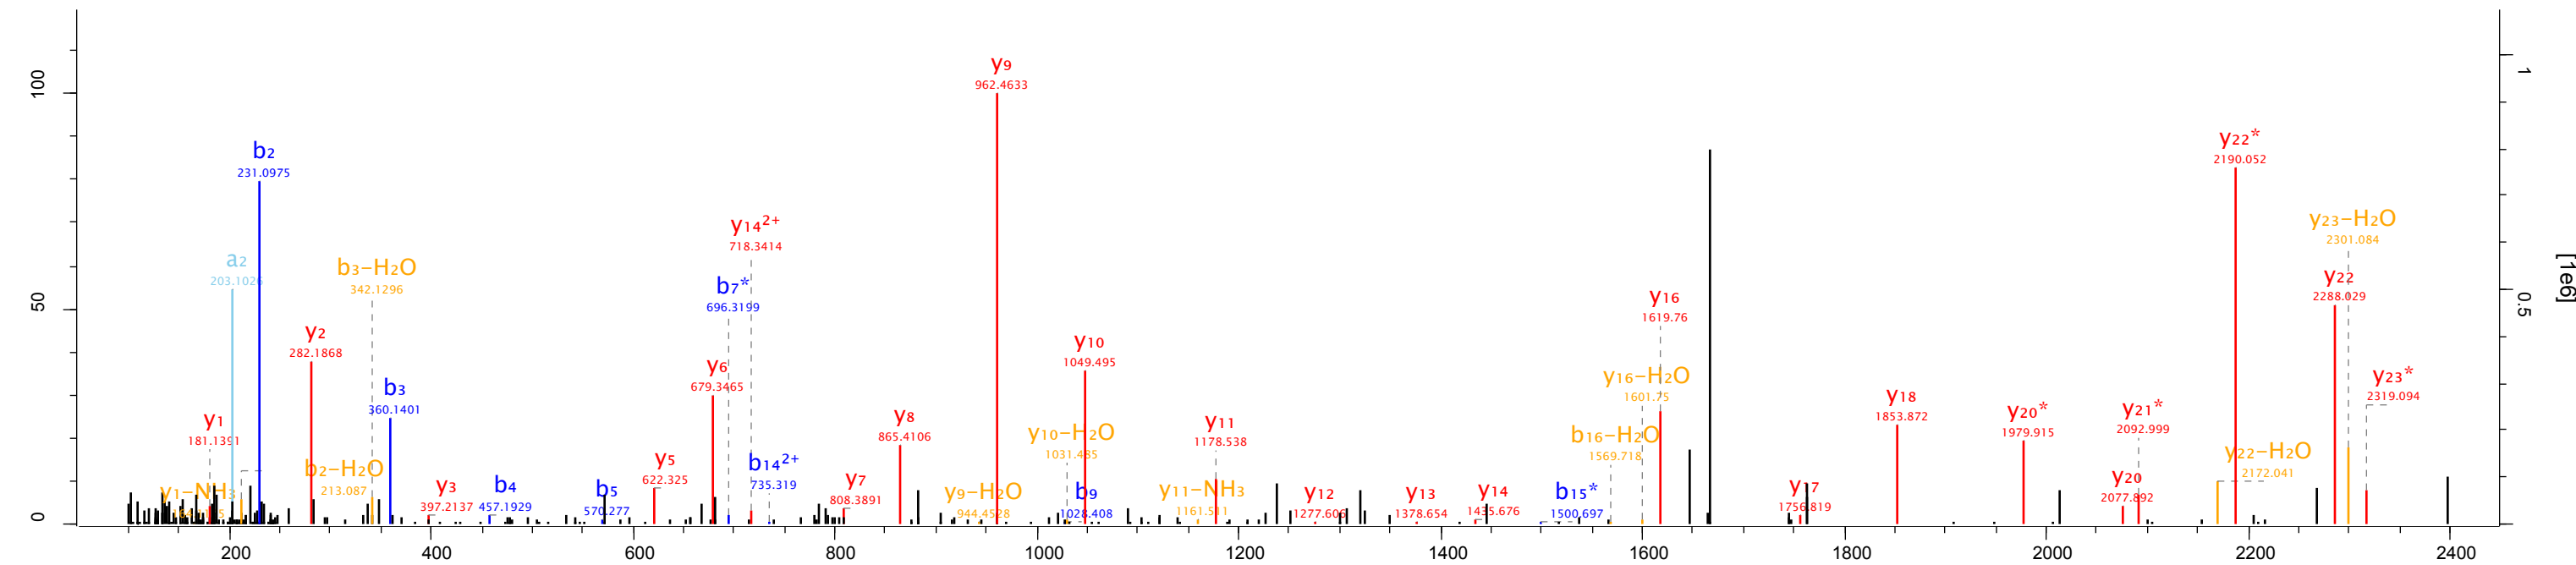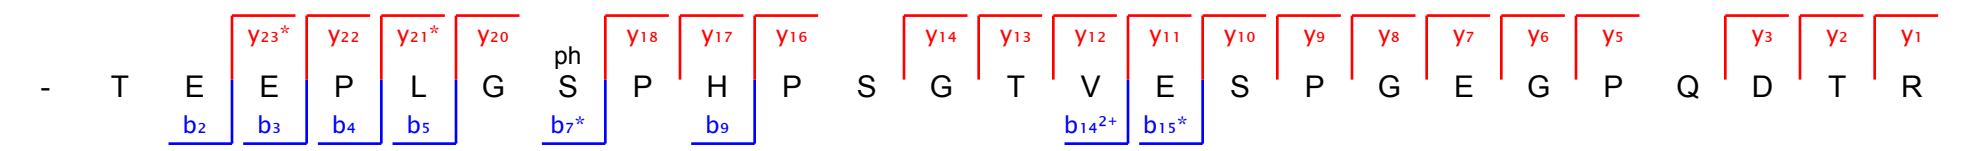

Raw file: 20150812\_A375SR\_Phospho\_BR1\_06  
 Scan: 13775 Method: FTMS; HCD Score: 230.24 m/z: 971.93 Gene names: DBN1

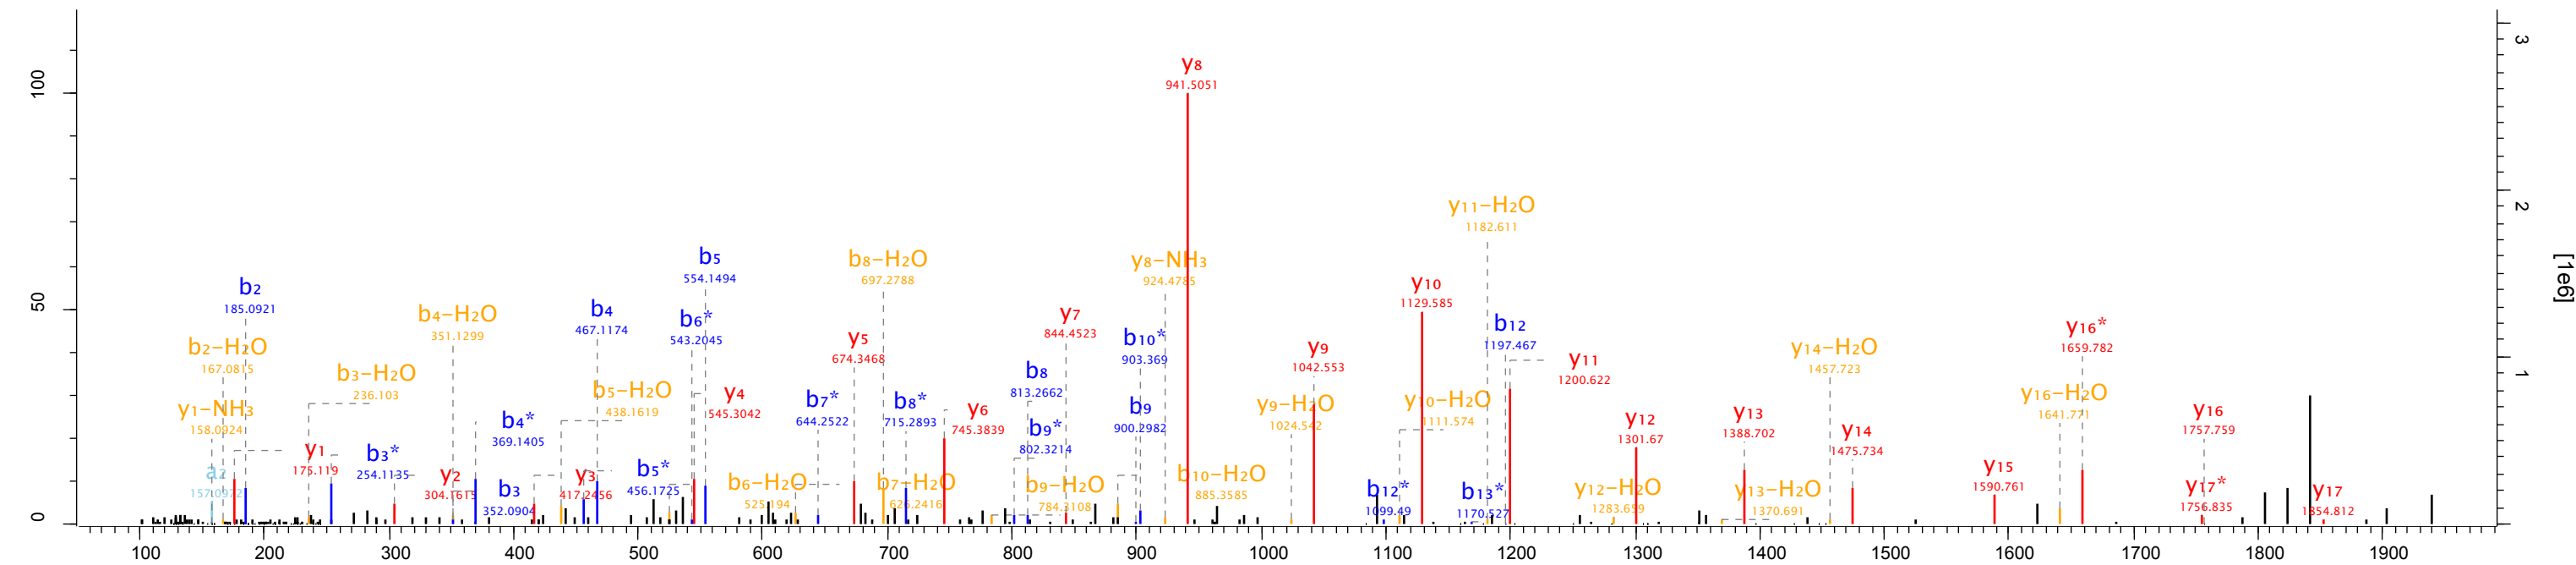

Sequence: S P S D S T A S T P V A E Q I E R -

Fragmentation sites (b and y ions) are indicated by boxes below the sequence:

- b2 (P)
- b3 (S)
- b4 (D)
- b5 (S)
- b6\* (T)
- b7\* (A)
- b8 (S)
- b9 (T)
- b10\* (P)
- b12 (V)
- b13\* (A)

Raw file: 20150812\_A375SR\_Phospho\_BR1\_06  
 Scan: 16255 Method: FTMS; HCD Score: 166.66 m/z: 974 Gene names: FAM208A

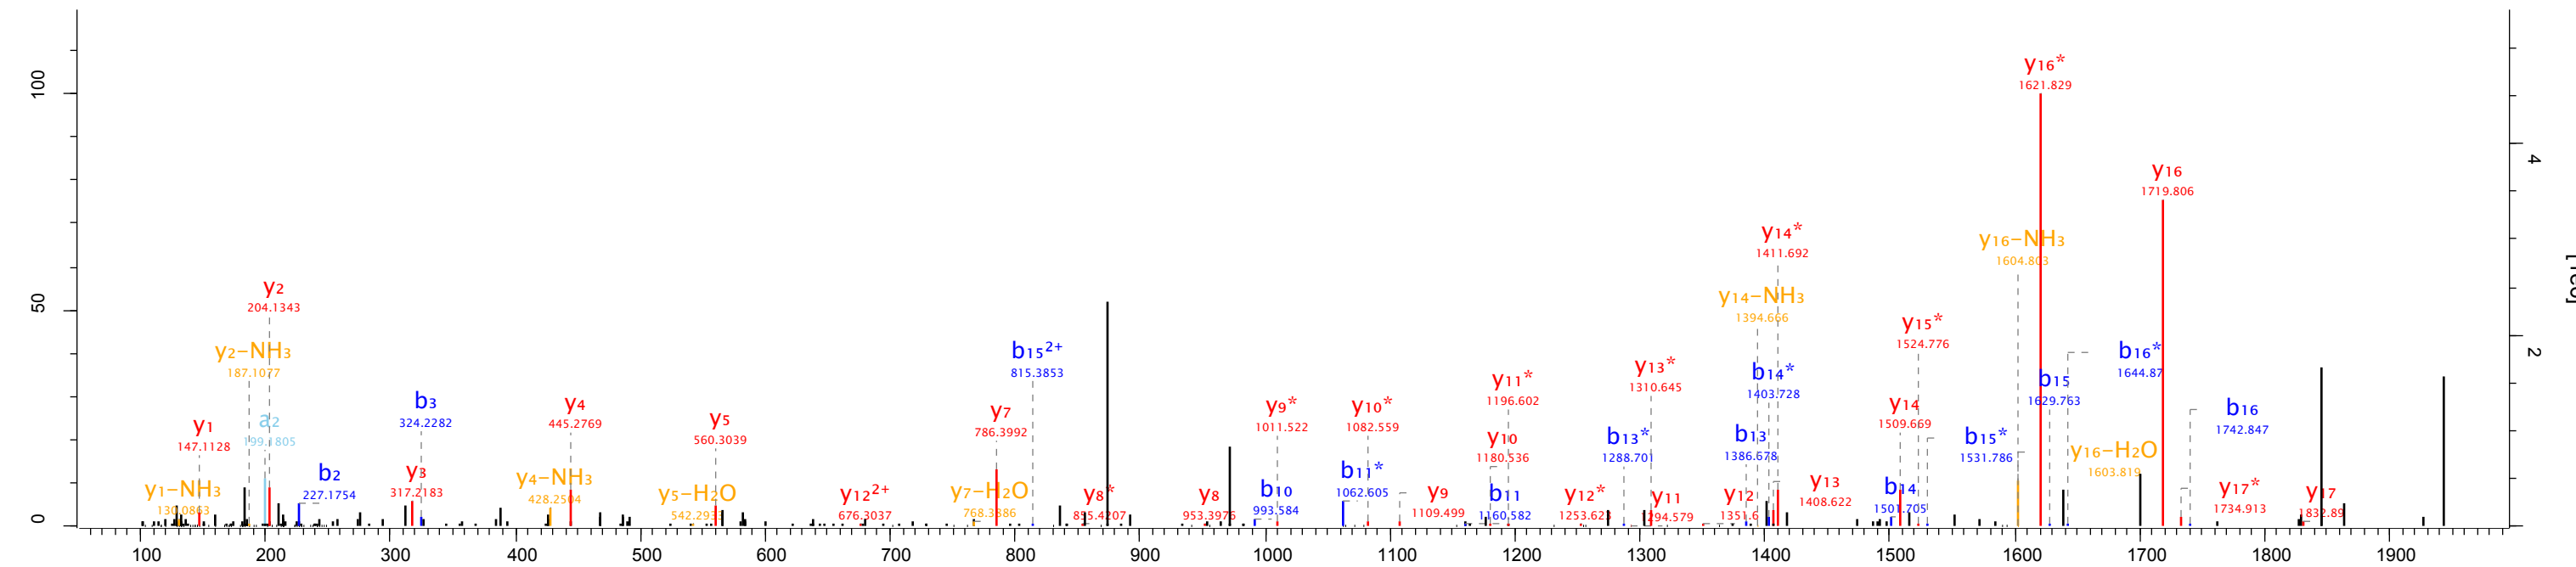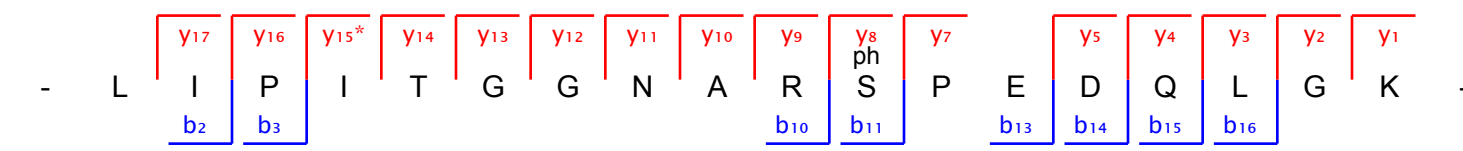

Raw file 20150812\_A375SR\_Phospho\_BR1\_06 Scan 16485 Method FTMS; HCD Score 262.11 m/z 1039.14 Gene names CT45A3;CT45A1

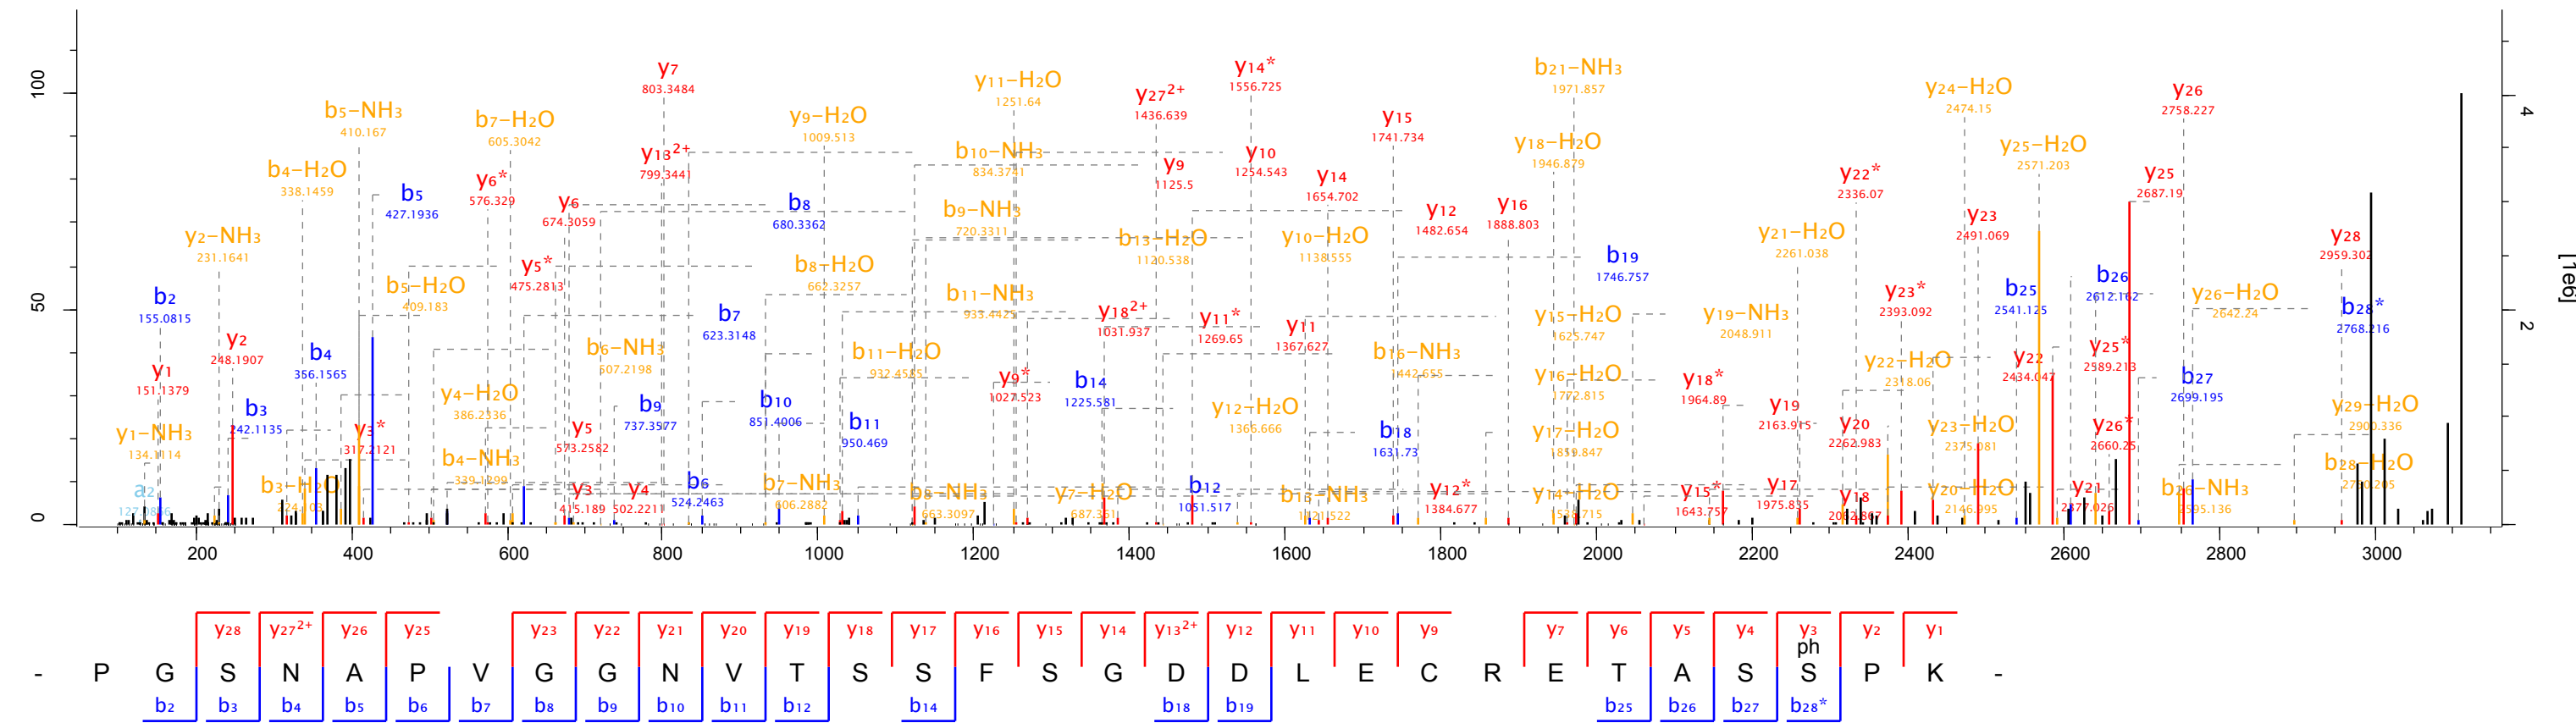



Raw file: 20150812\_A375SR\_Phospho\_BR1\_06  
 Scan: 17585 Method: FTMS; HCD Score: 166.52 m/z: 729.86 Gene names: KIAA0930

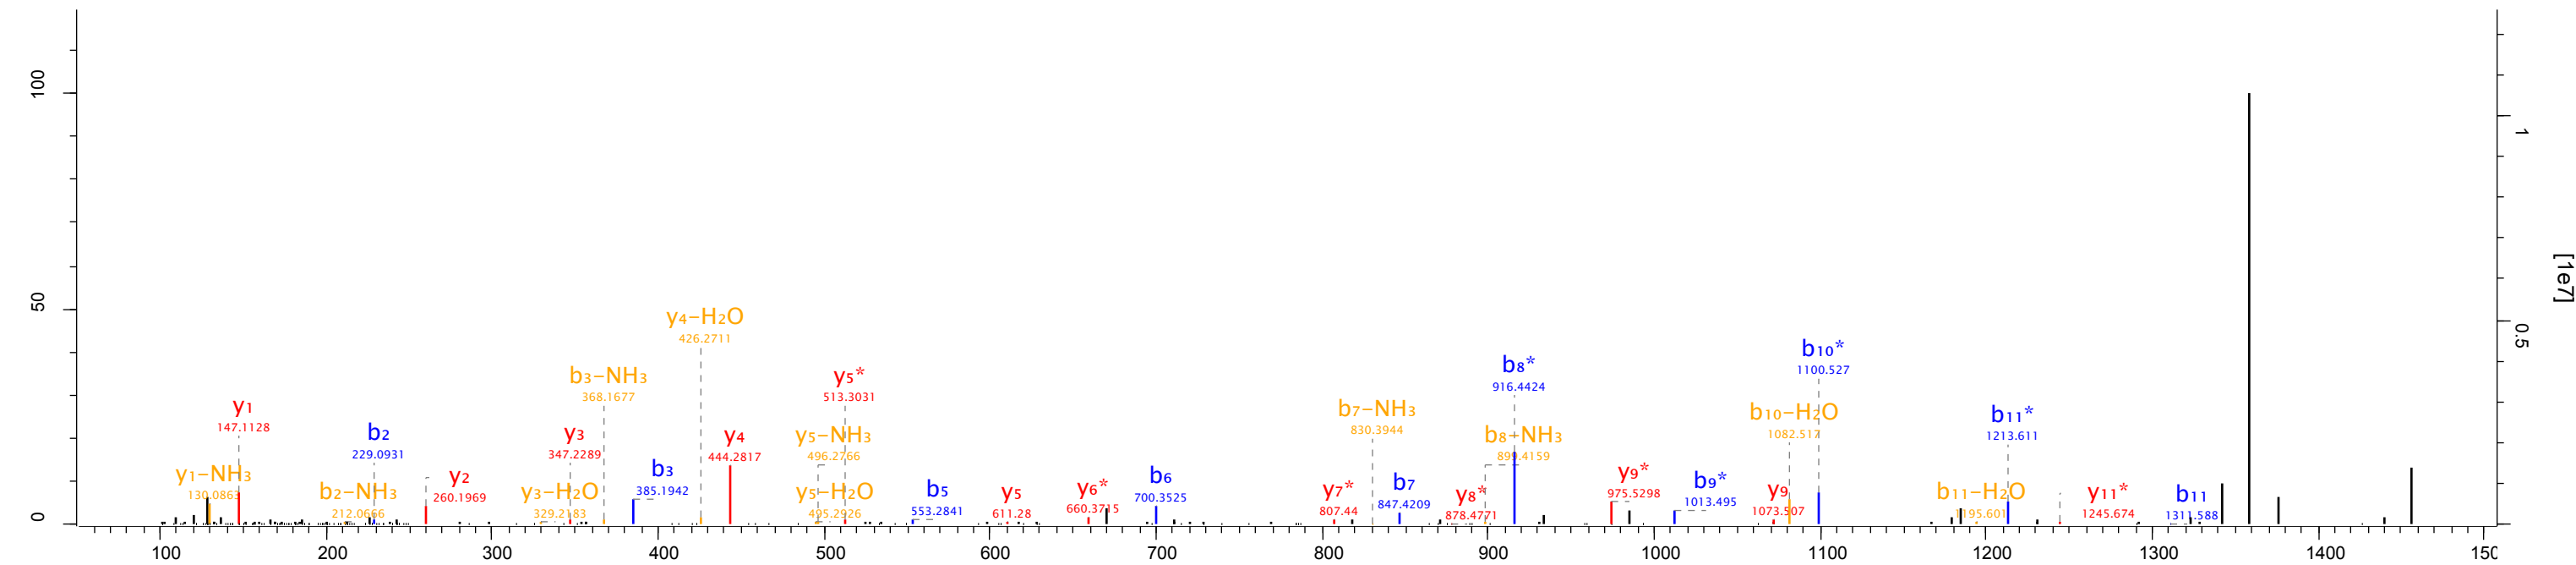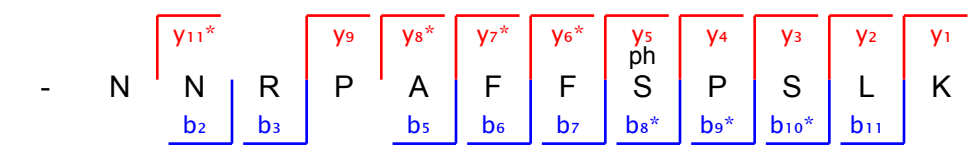

Raw file 20150812\_A375SR\_Phospho\_BR1\_06 Scan 17625 Method FTMS; HCD Score 128.29 m/z 976.46 Gene names CRTC2

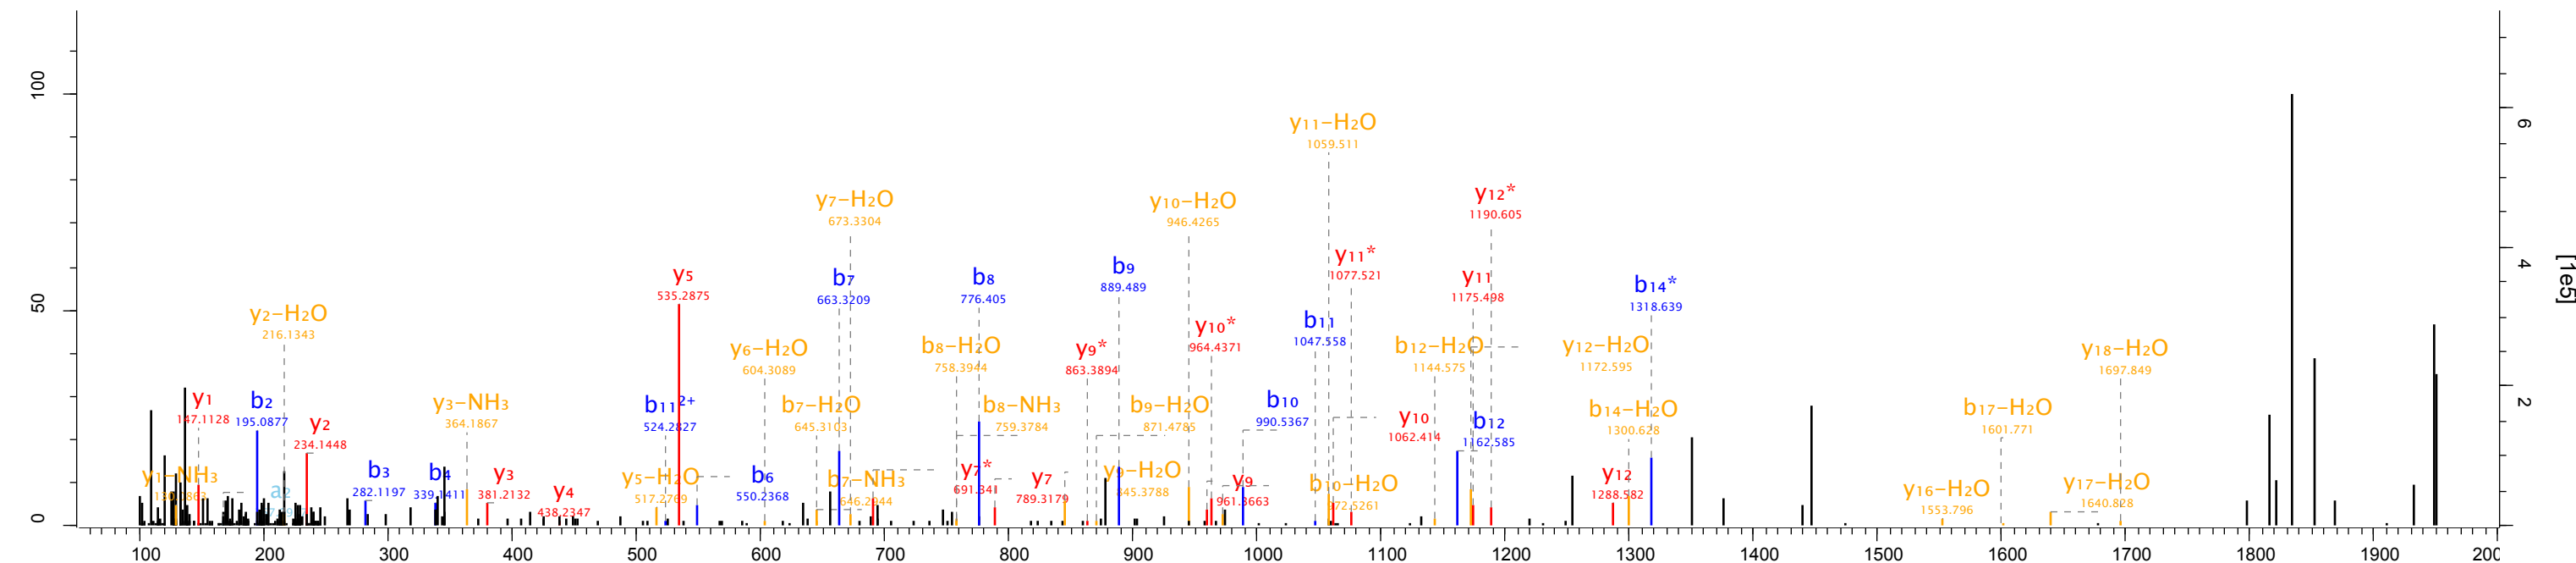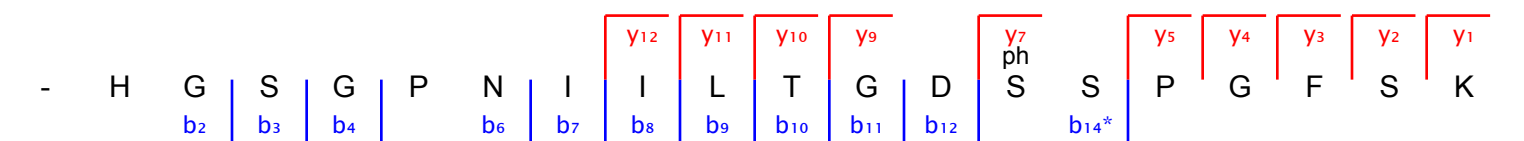

Raw file 20150812\_A375SR\_Phospho\_BR1\_06 Scan 1785 Method FTMS; HCD Score 121.82 m/z 719.36 Gene names MAP4

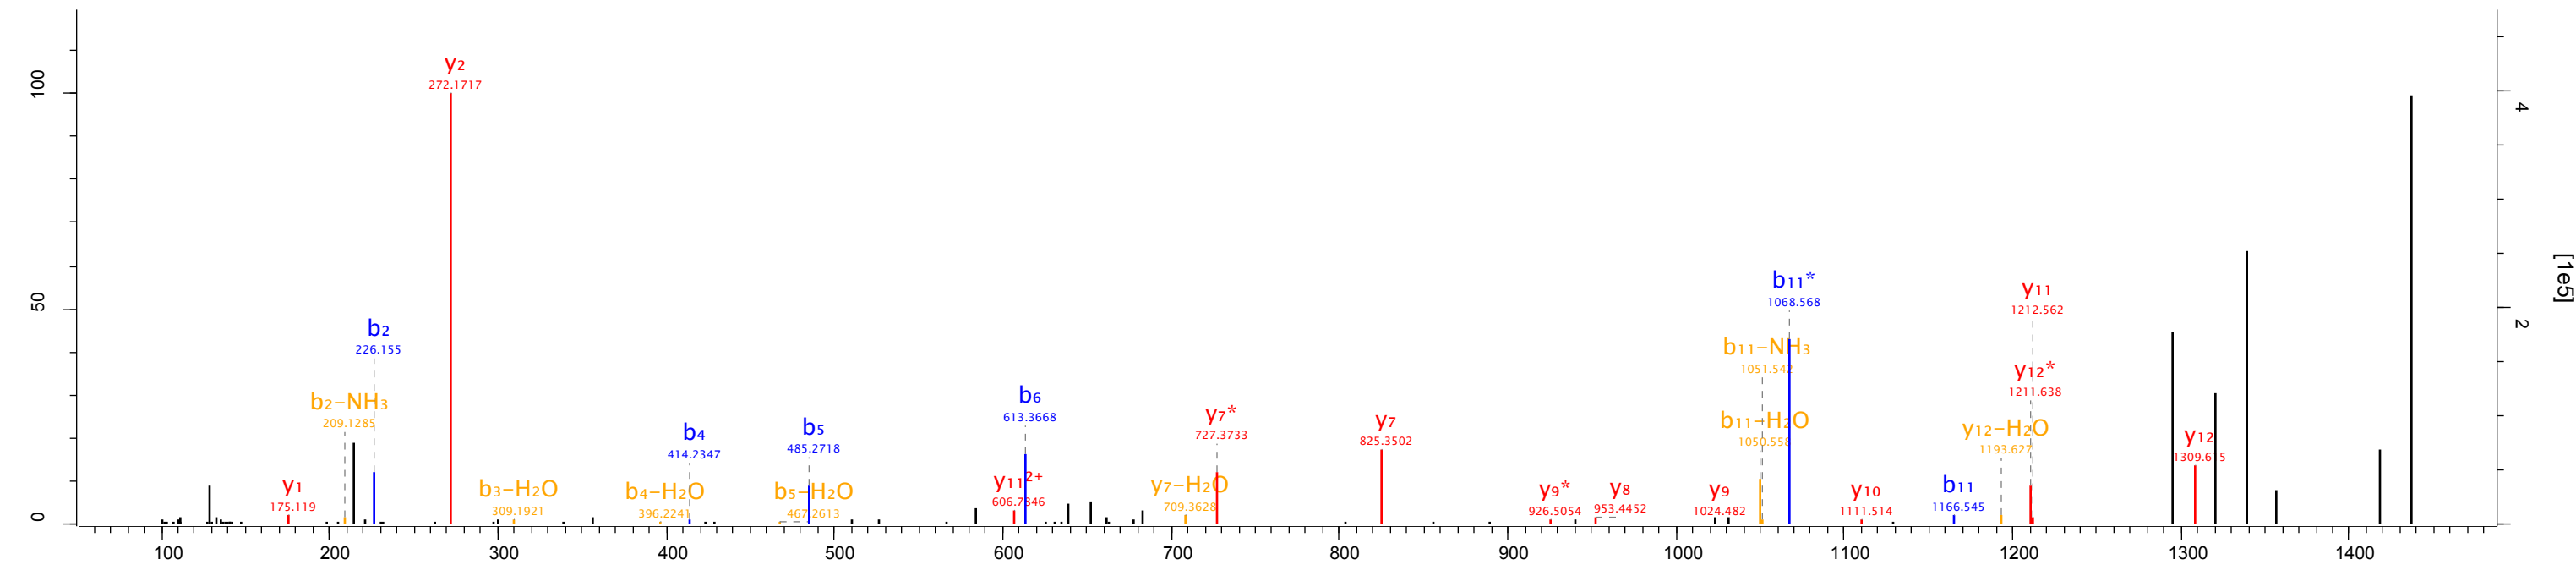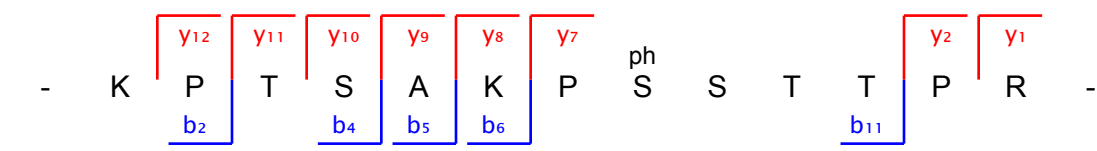



Raw file: 20150812\_A375SR\_Phospho\_BR1\_06  
 Scan: 1975 Method: FTMS; HCD Score: 179.68 m/z: 509.73 Gene names: ABI1

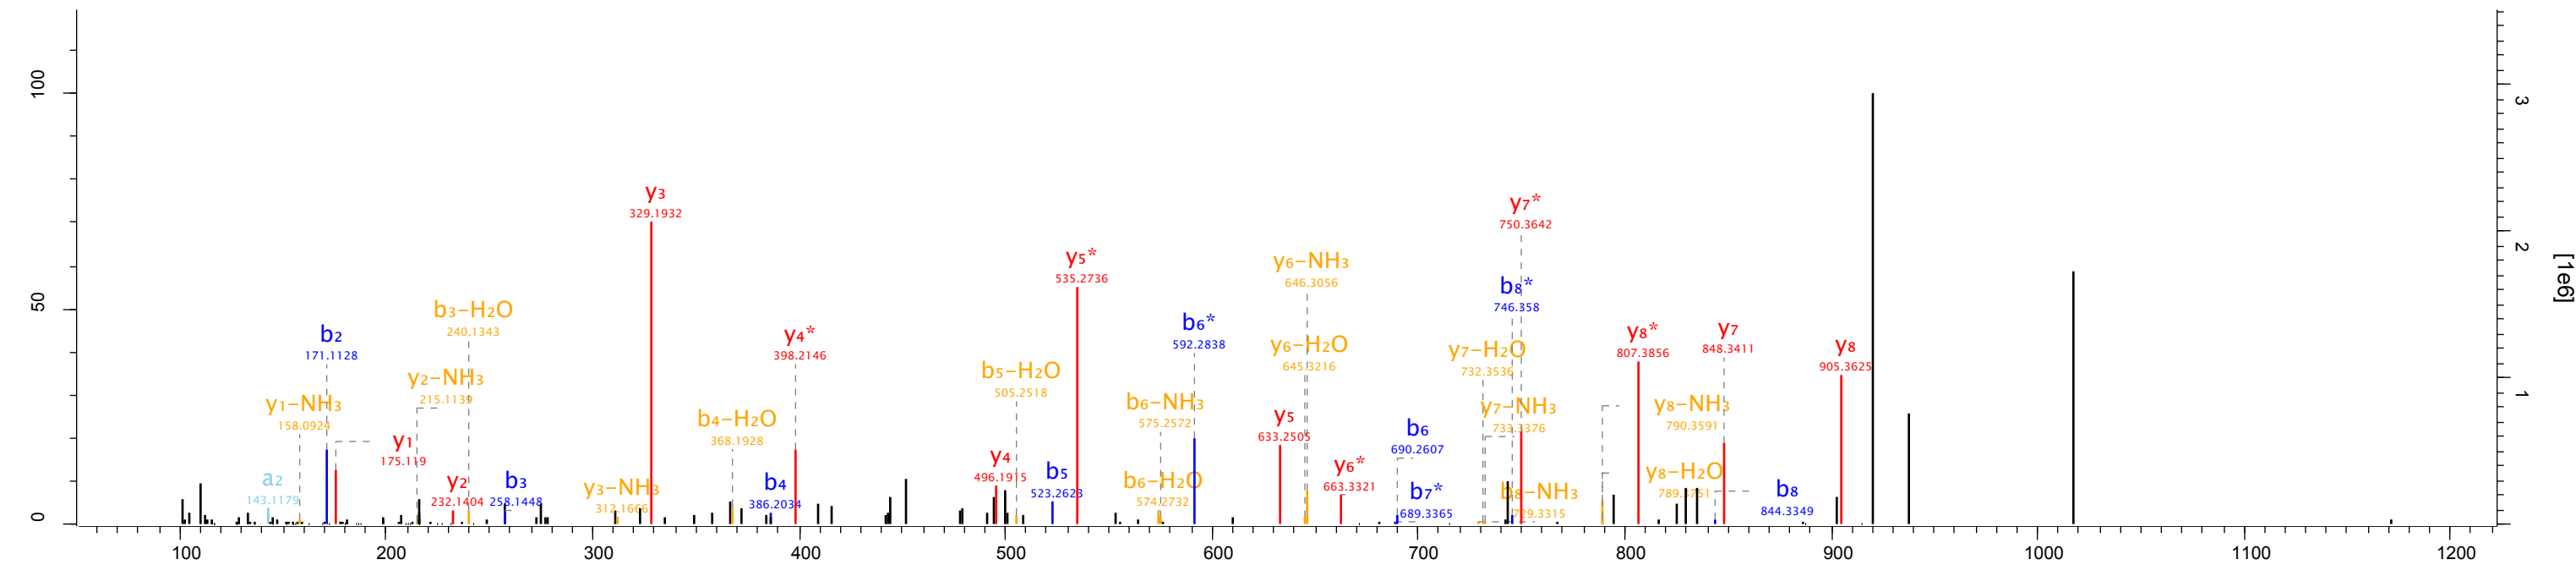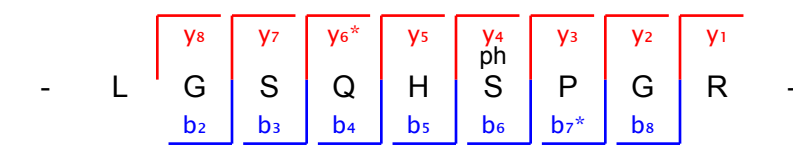

Raw file 20150812\_A375SR\_Phospho\_BR1\_06 Scan 19795 Method FTMS; HCD Score 203.21 m/z 1179.91 Gene names EIF4G1

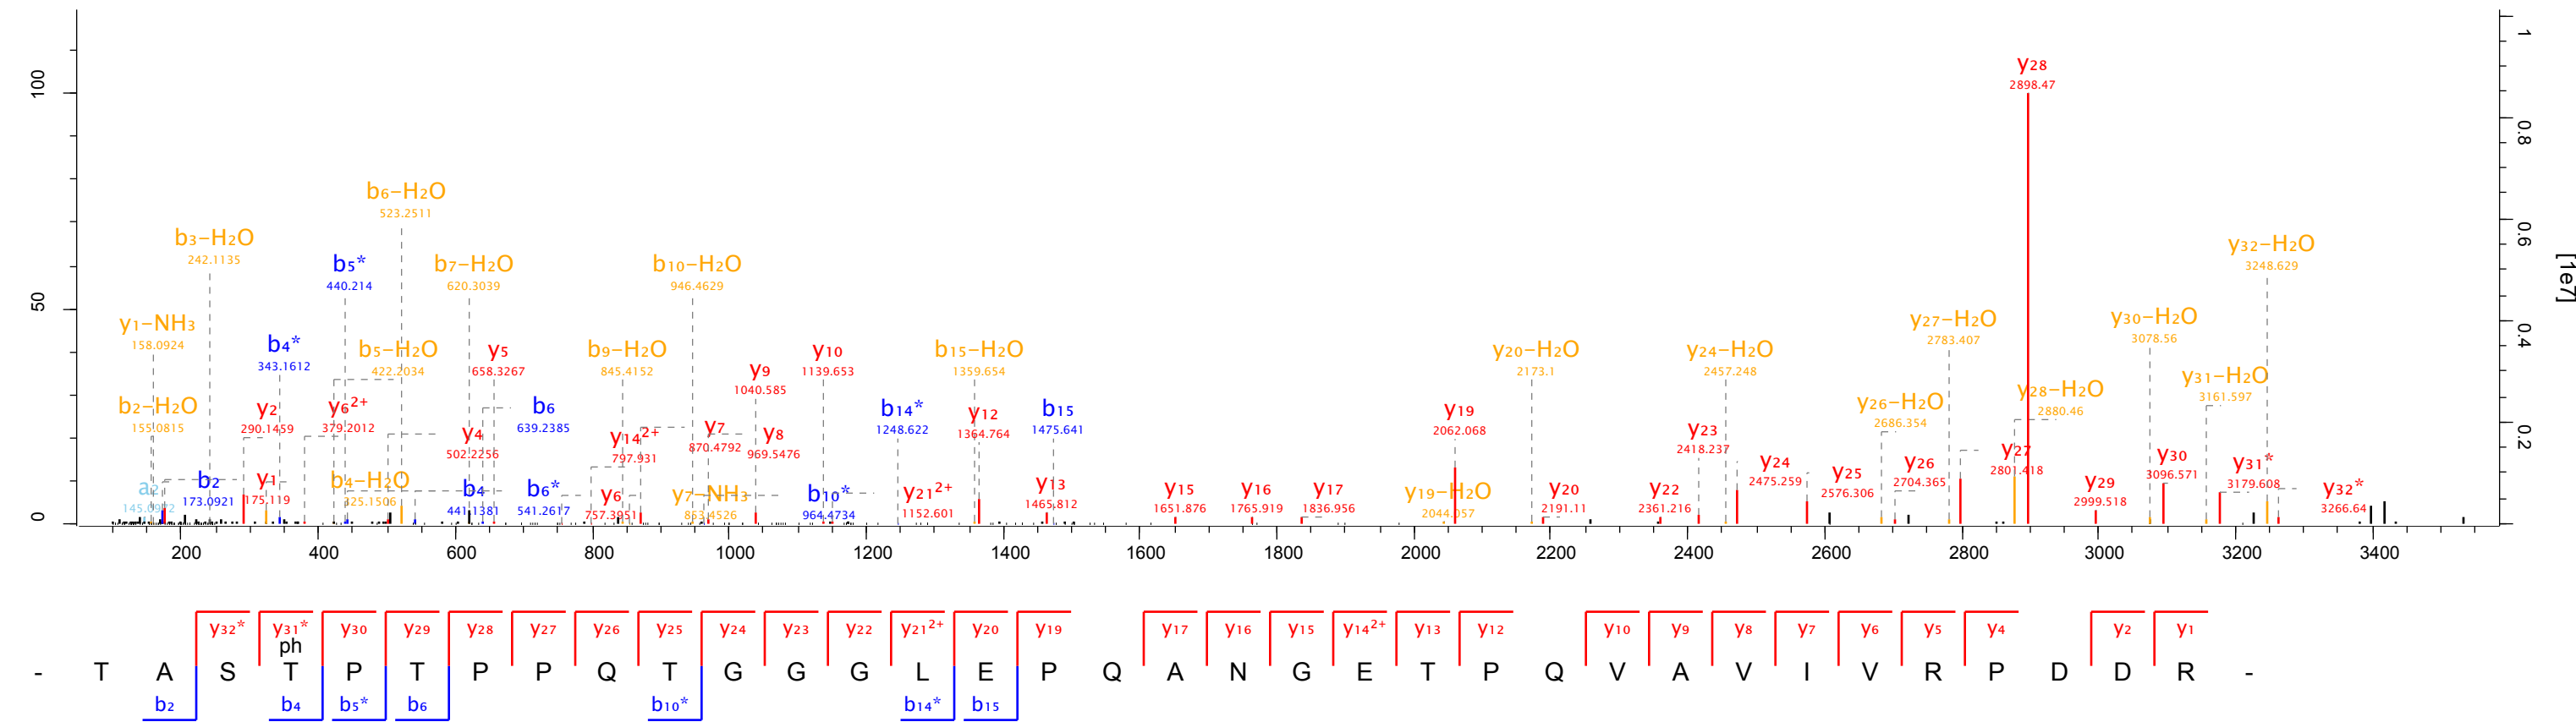

Raw file 20150812\_A375SR\_Phospho\_BR1\_06 Scan 21765 Method FTMS; HCD Score 57.48 m/z 827.39 Gene names GIGYF1

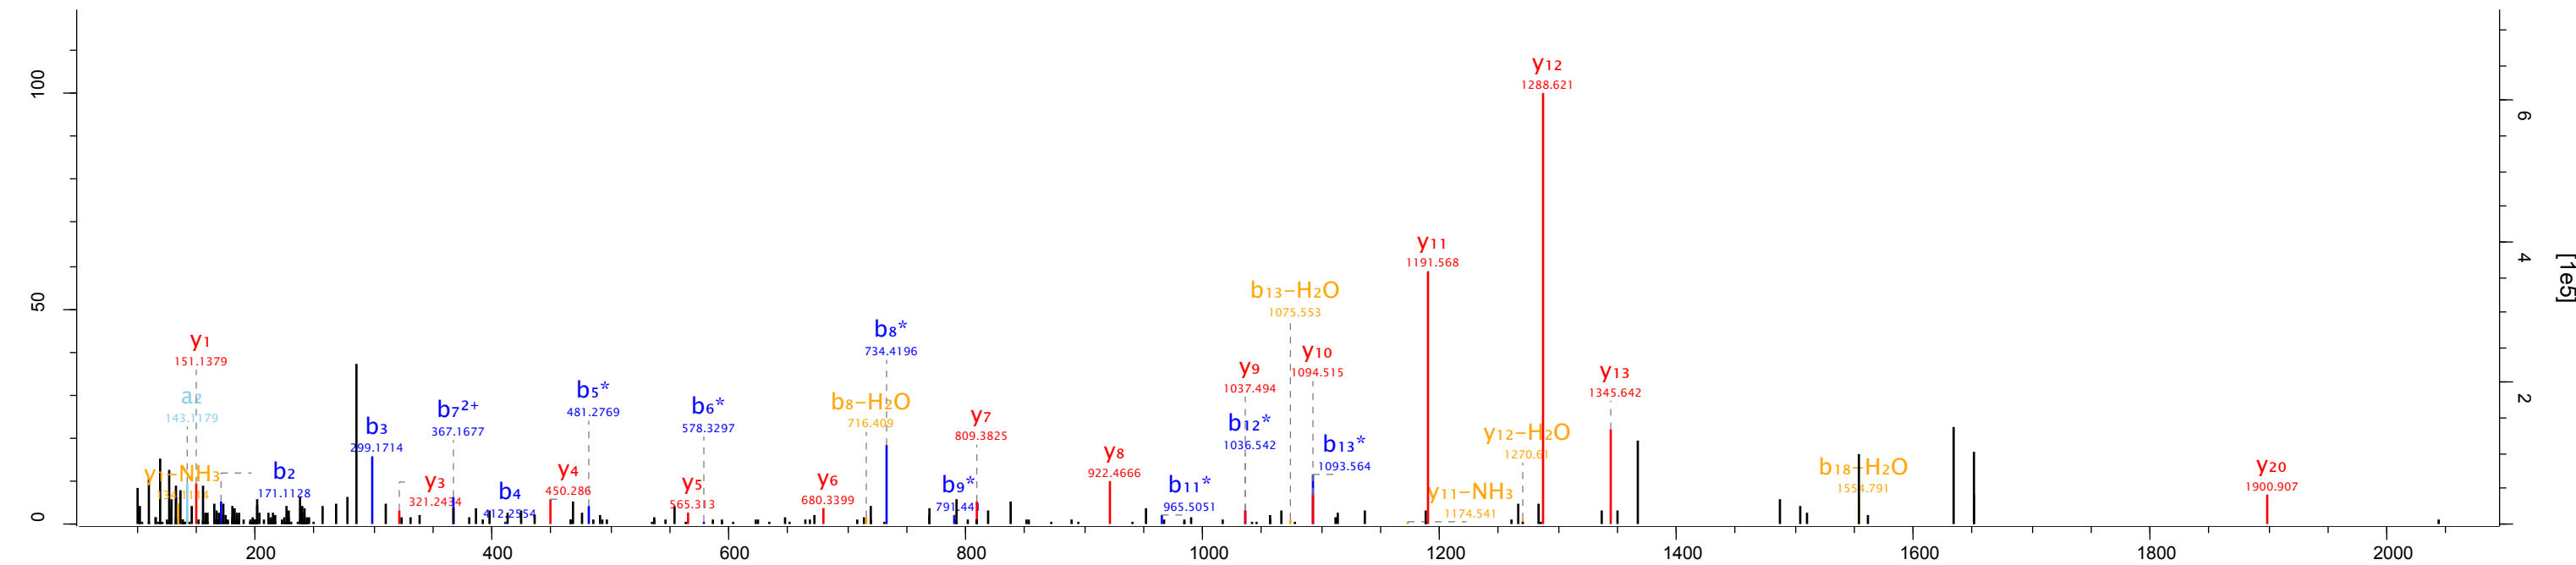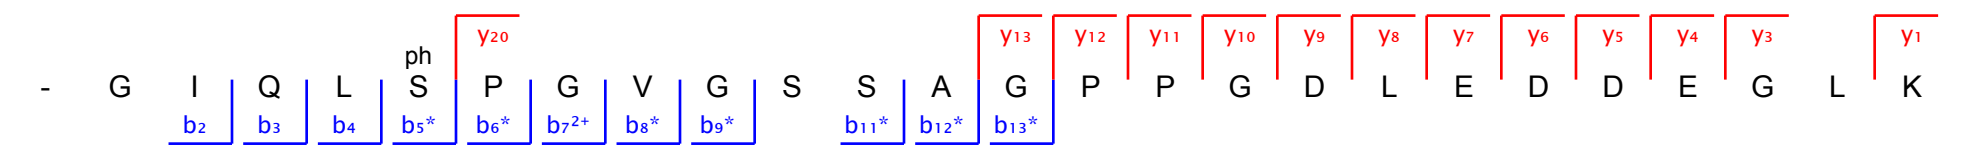

Raw file Scan Method Score m/z Gene names  
 20150812\_A375SR\_Phospho\_BR1\_06 23085 FTMS; HCD 102.13 964.48 ERCC6L

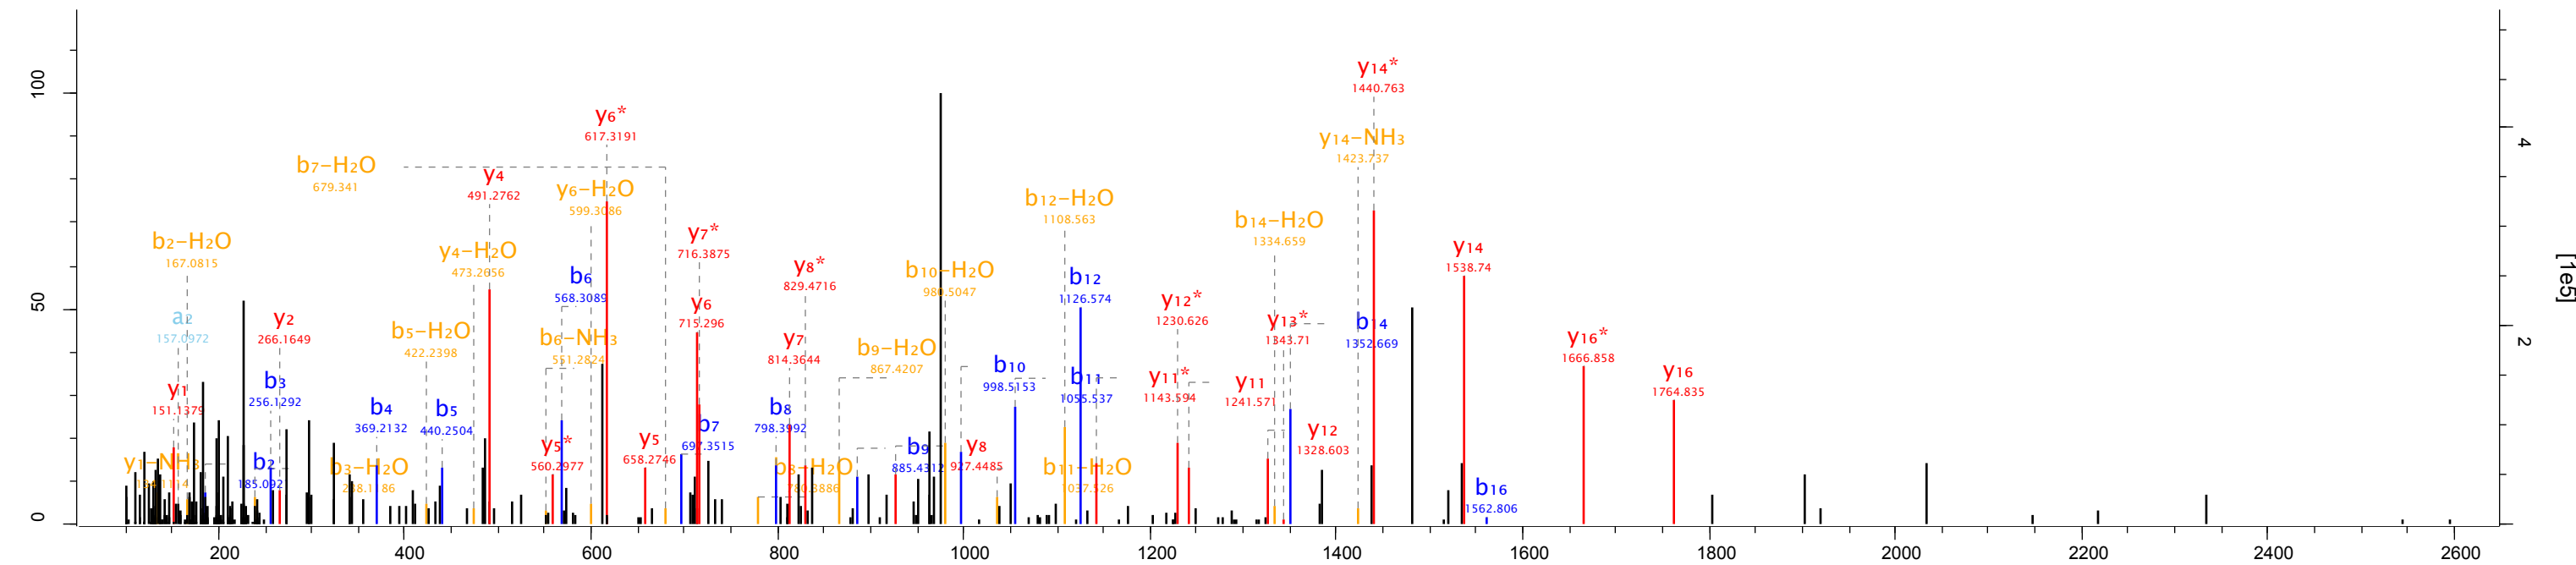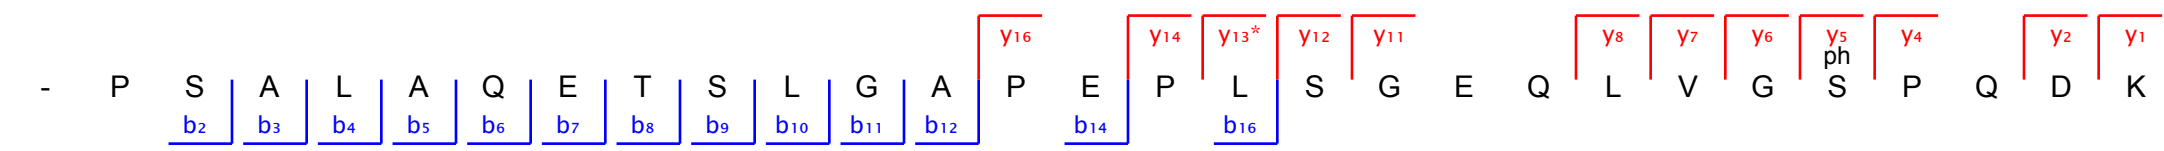



Raw file: 20150812\_A375SR\_Phospho\_BR1\_06  
 Scan: 2465 Method: FTMS; HCD Score: 63.19 m/z: 386.52 Gene names: RSNB1

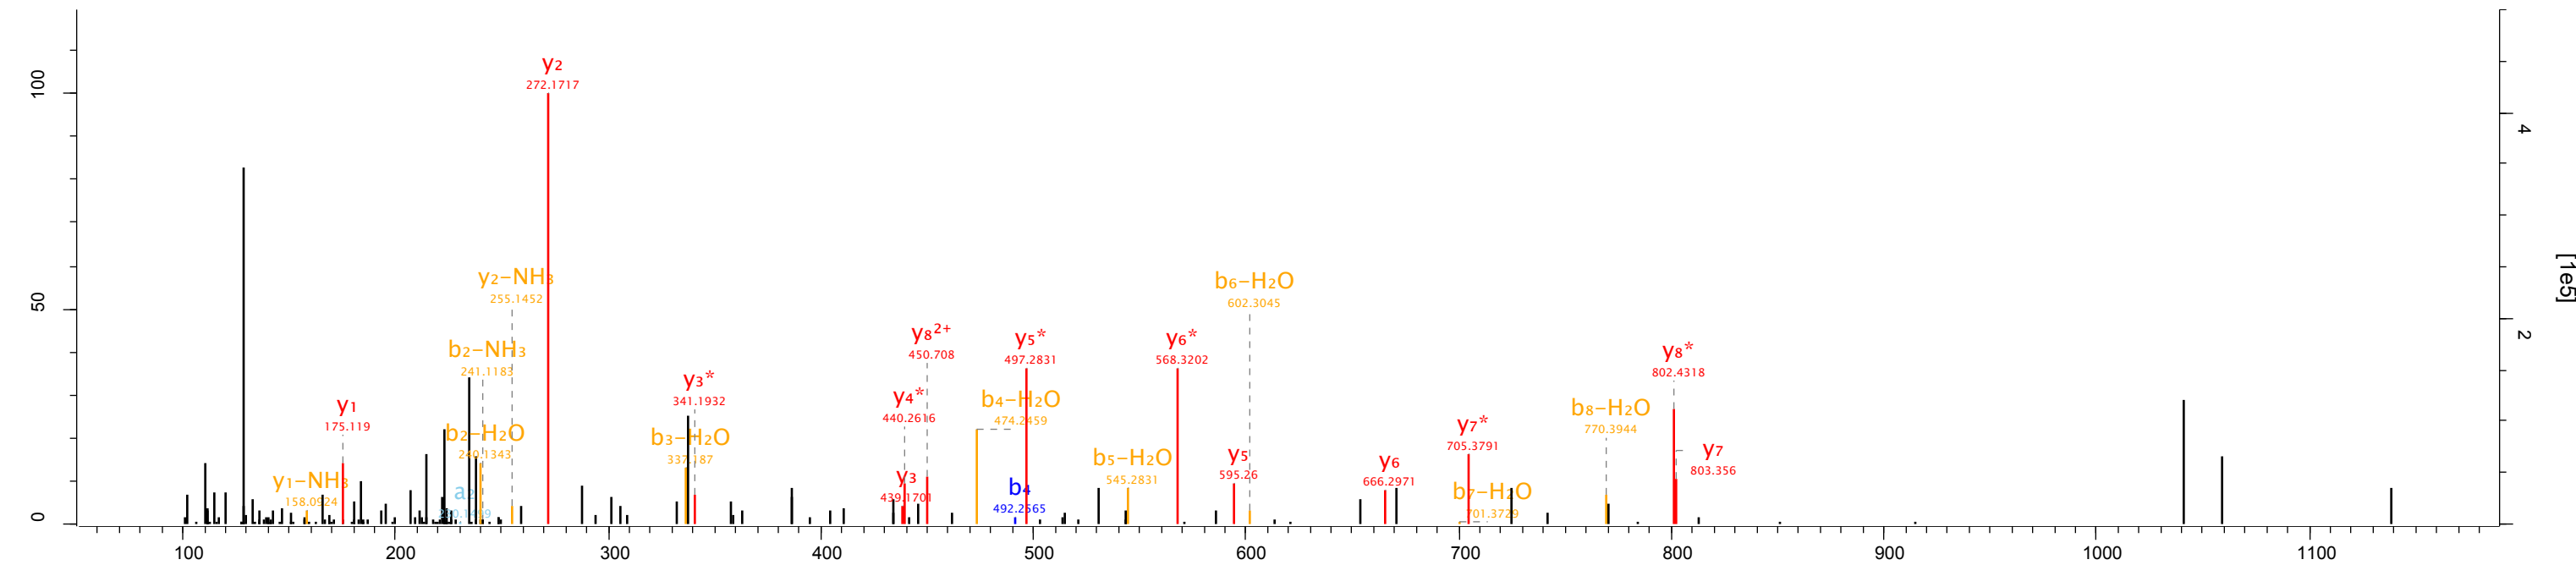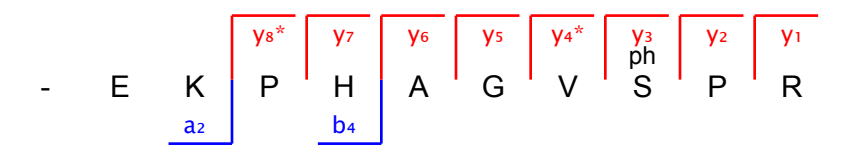

Raw file  
 20150812\_A375SR\_Phospho\_BR1\_06  
 Scan 25225 Method FTMS; HCD Score 185.7 m/z 1044.01 Gene names FLNA

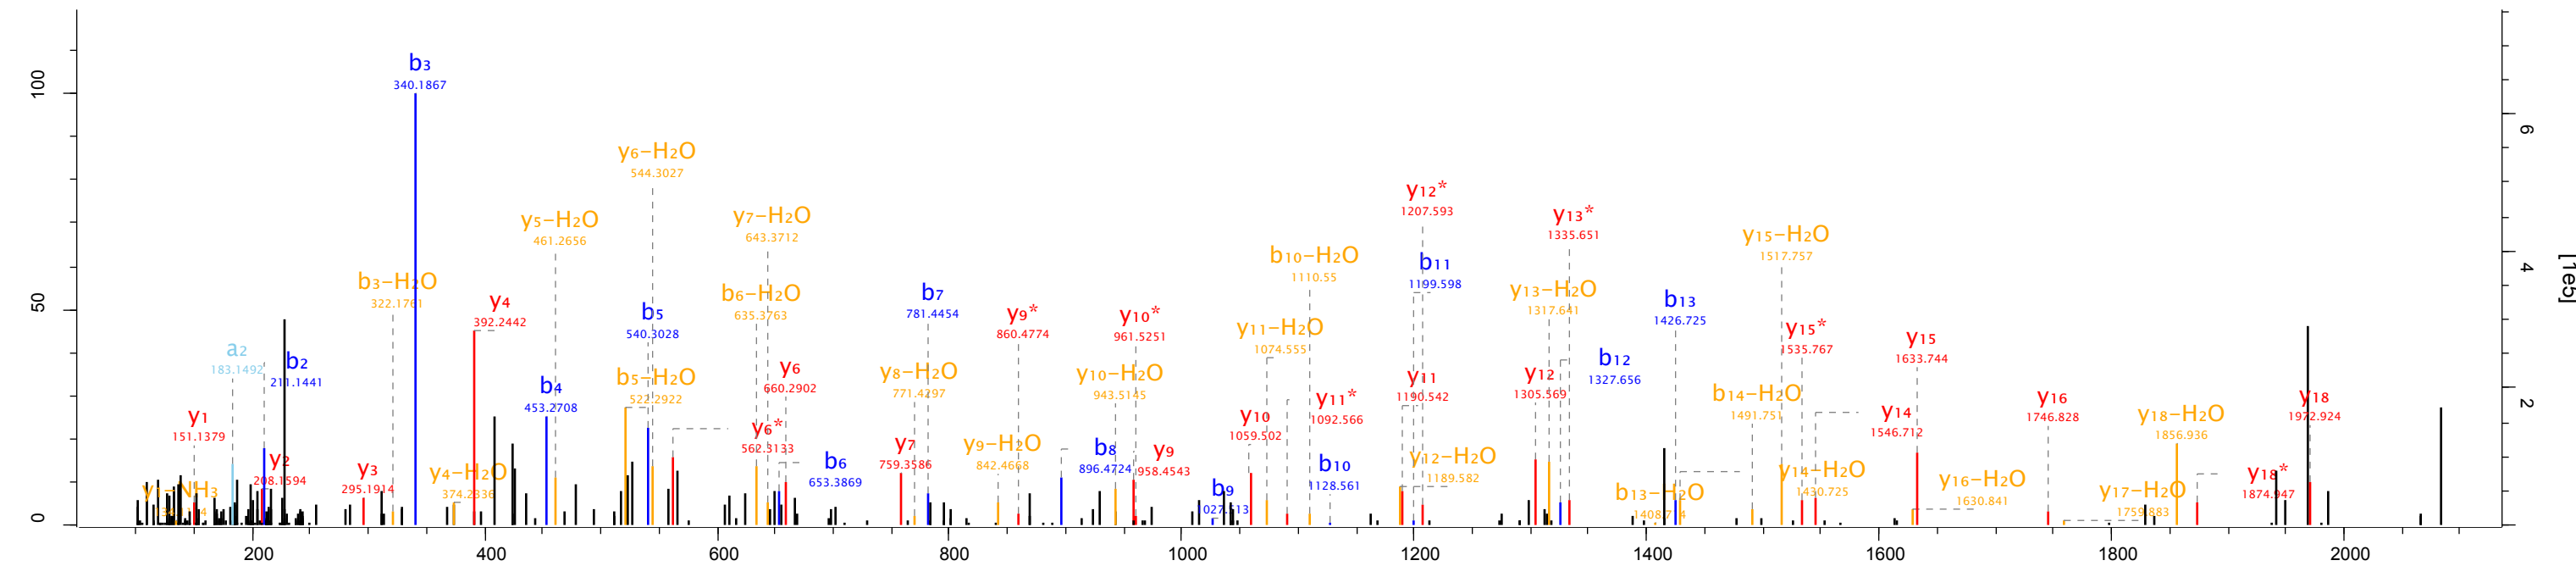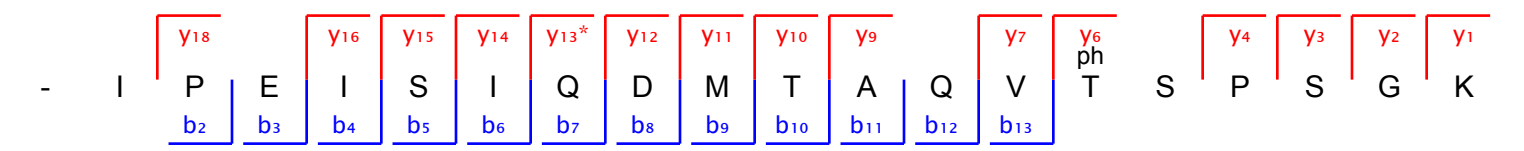

Raw file 20150812\_A375SR\_Phospho\_BR1\_06 Scan 3365 Method FTMS; HCD Score 80.84 m/z 713.99 Gene names SPEN

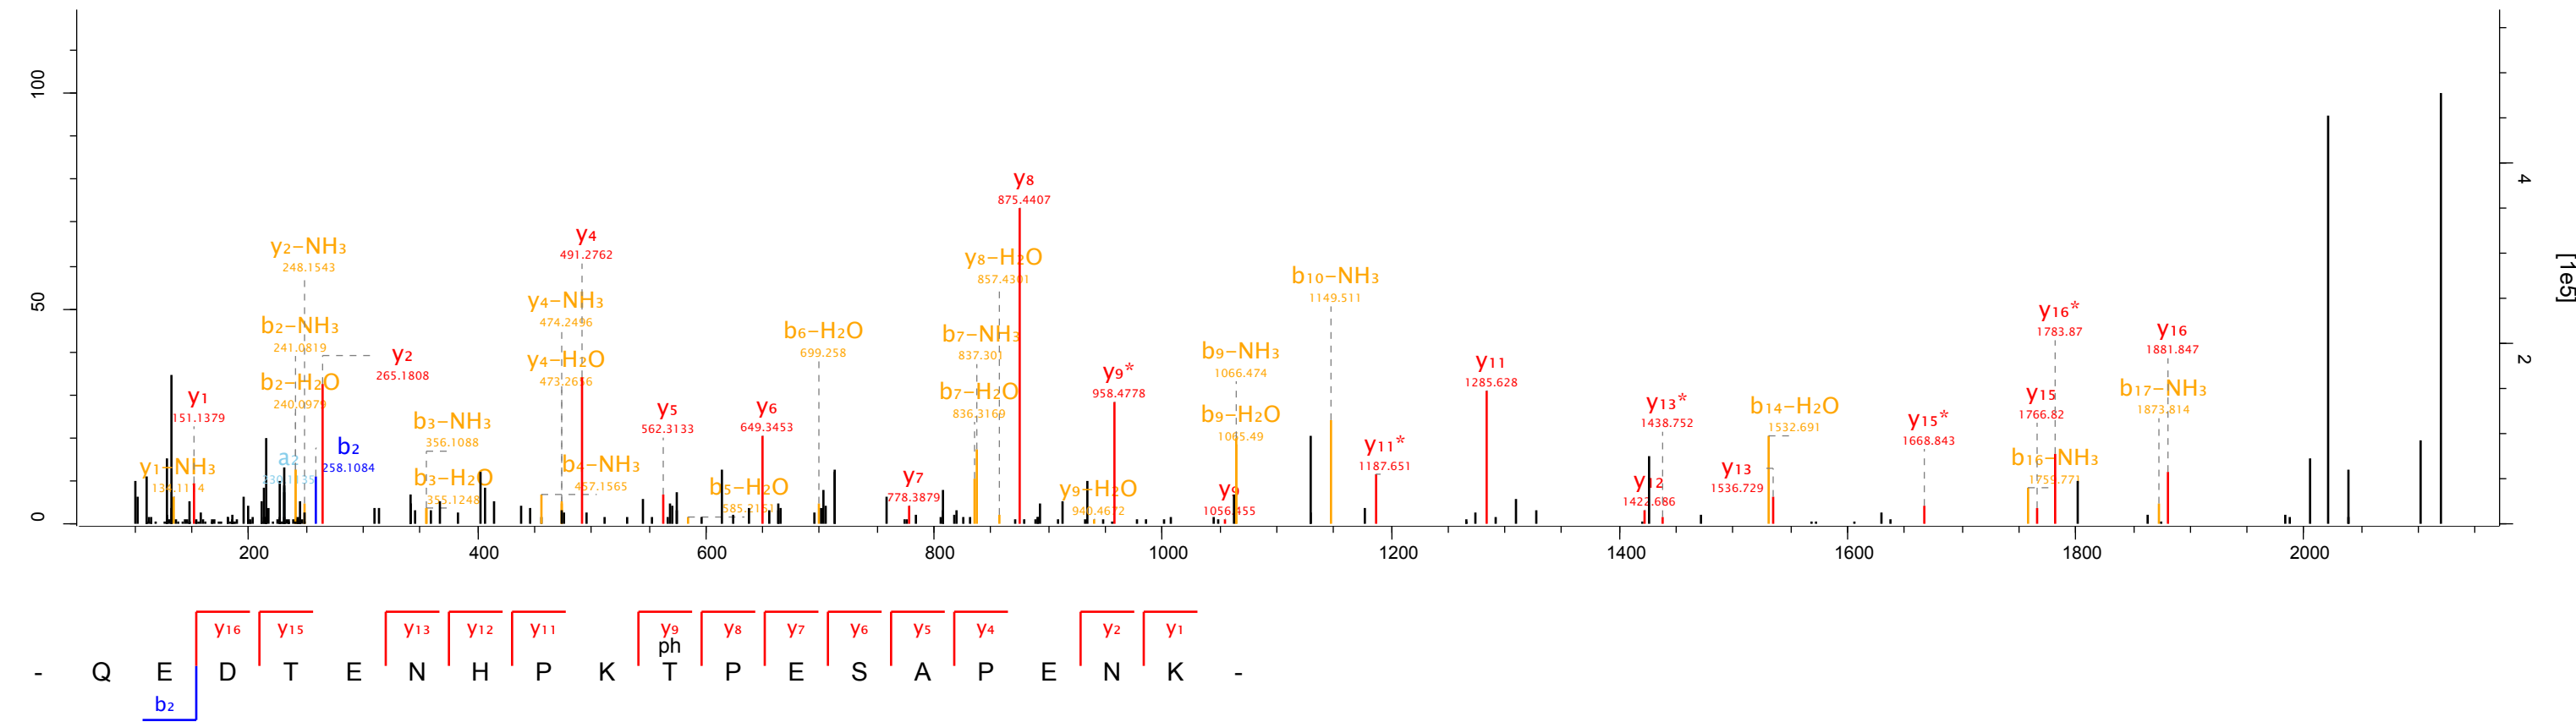

Raw file  
20150812\_A375SR\_Phospho\_BR1\_06

Scan 3585 Method FTMS; HCD Score 184.34 m/z 607.92 Gene names ARNT

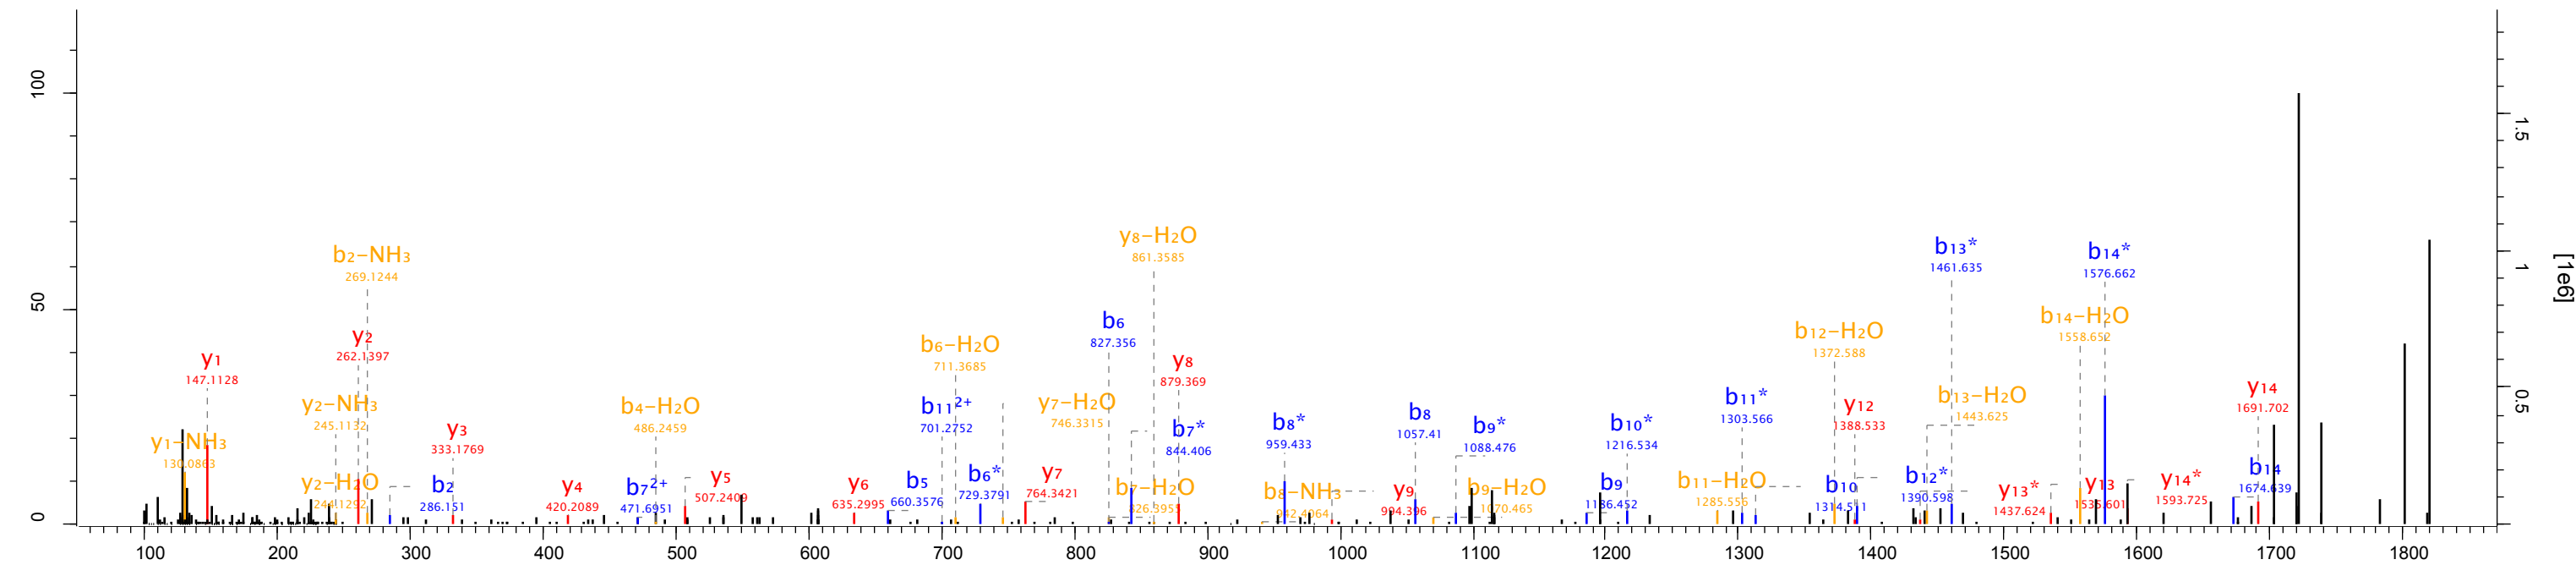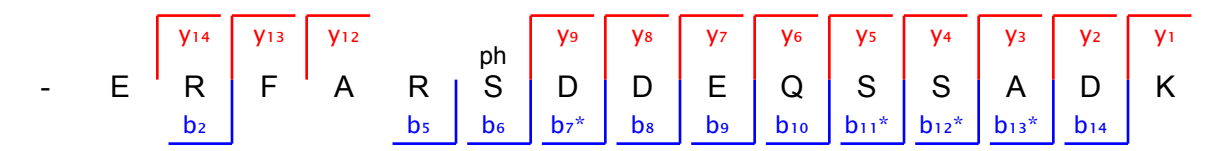

Raw file 20150812\_A375SR\_Phospho\_BR1\_06 Scan 3665 Method FTMS; HCD Score 248.99 m/z 635.29 Gene names FAM64A

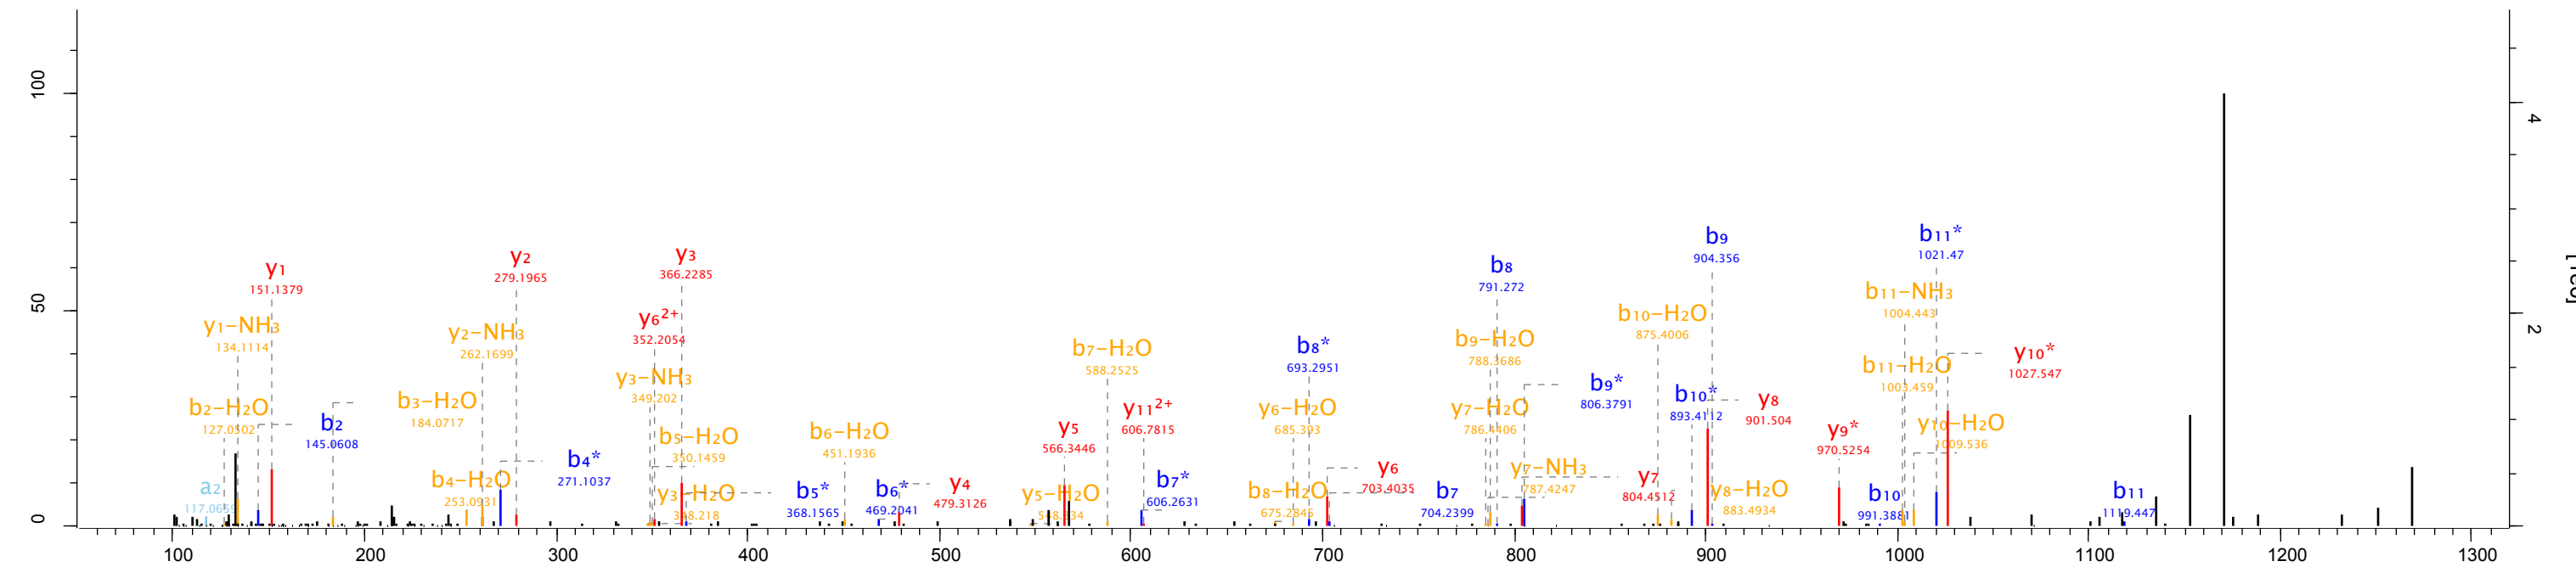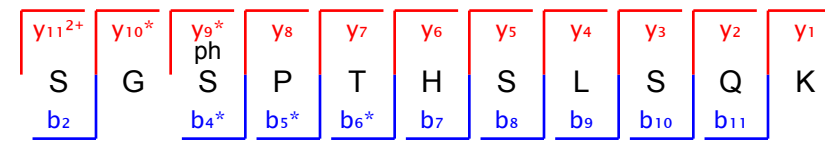

Raw file 20150812\_A375SR\_Phospho\_BR1\_06 Scan 3815 Method FTMS; HCD Score 167.66 m/z 608.97 Gene names SMN1

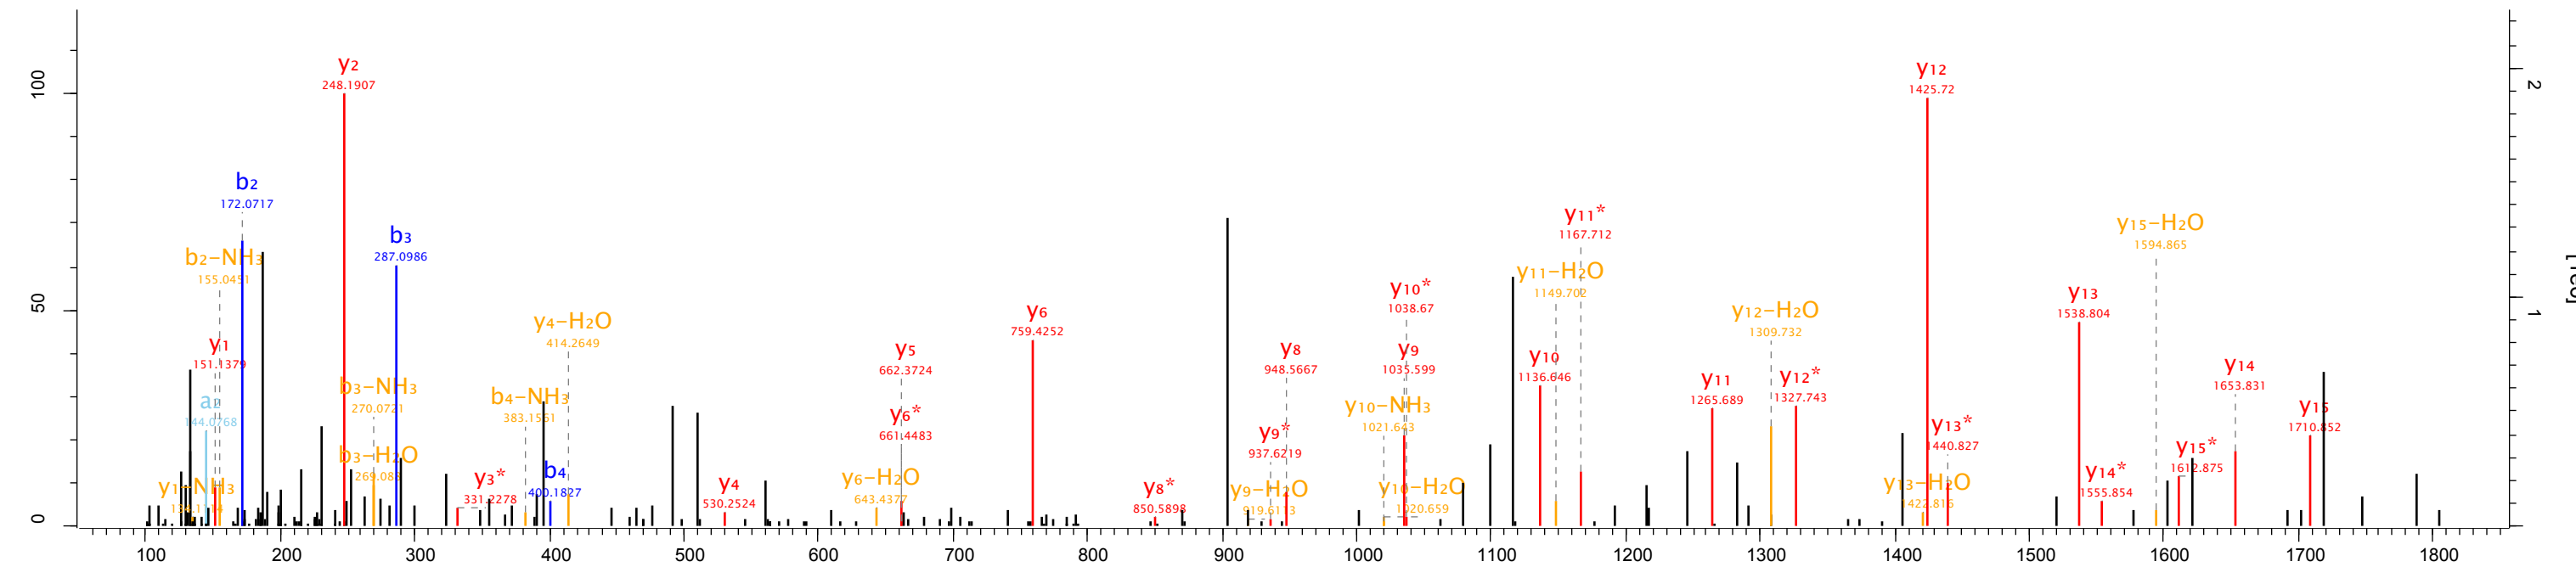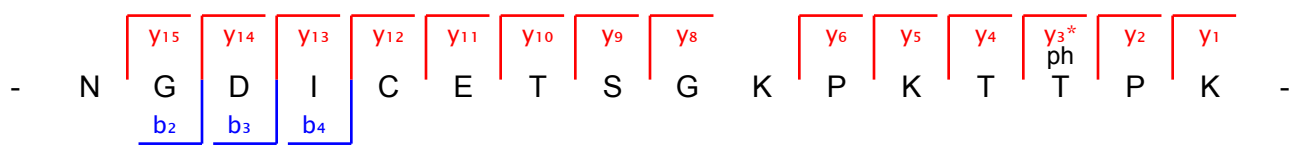

20150812\_A375SR\_Phospho\_BR1\_06 3935 FTMS; HCD 140.78 523.77 DSN1

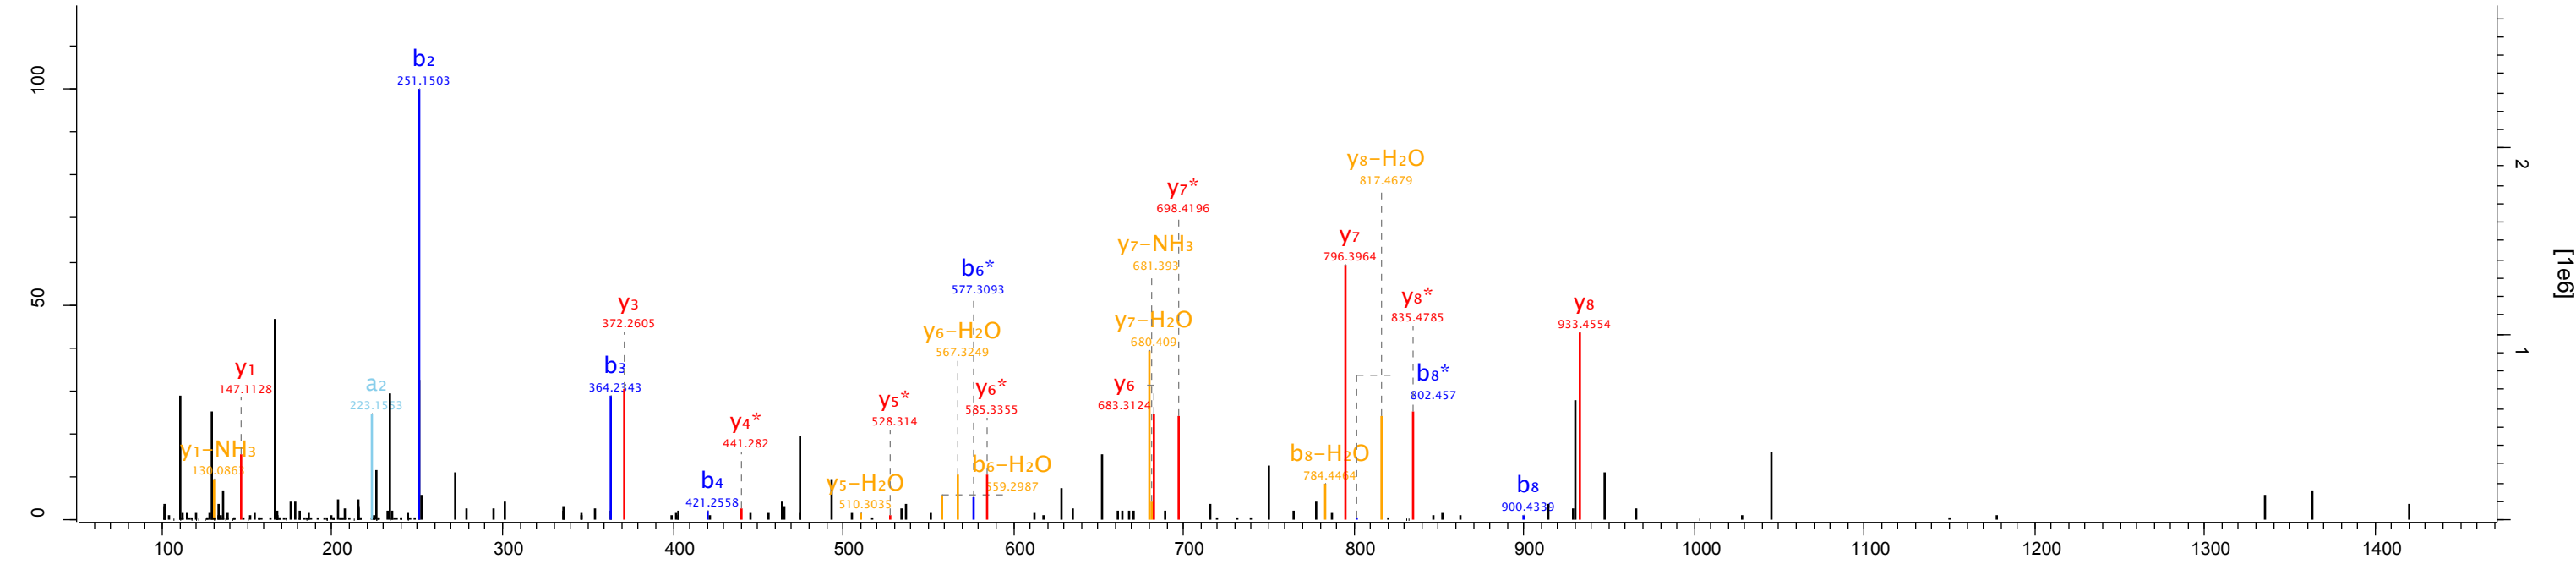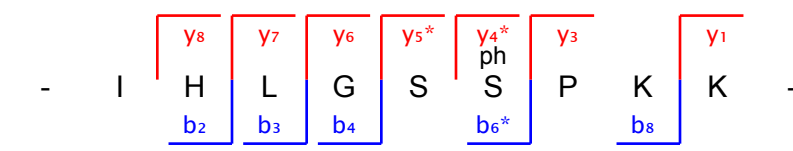

Raw file: 20150812\_A375SR\_Phospho\_BR1\_06  
 Scan: 4725 Method: FTMS; HCD Score: 61.56 m/z: 528.59 Gene names: AMOTL2

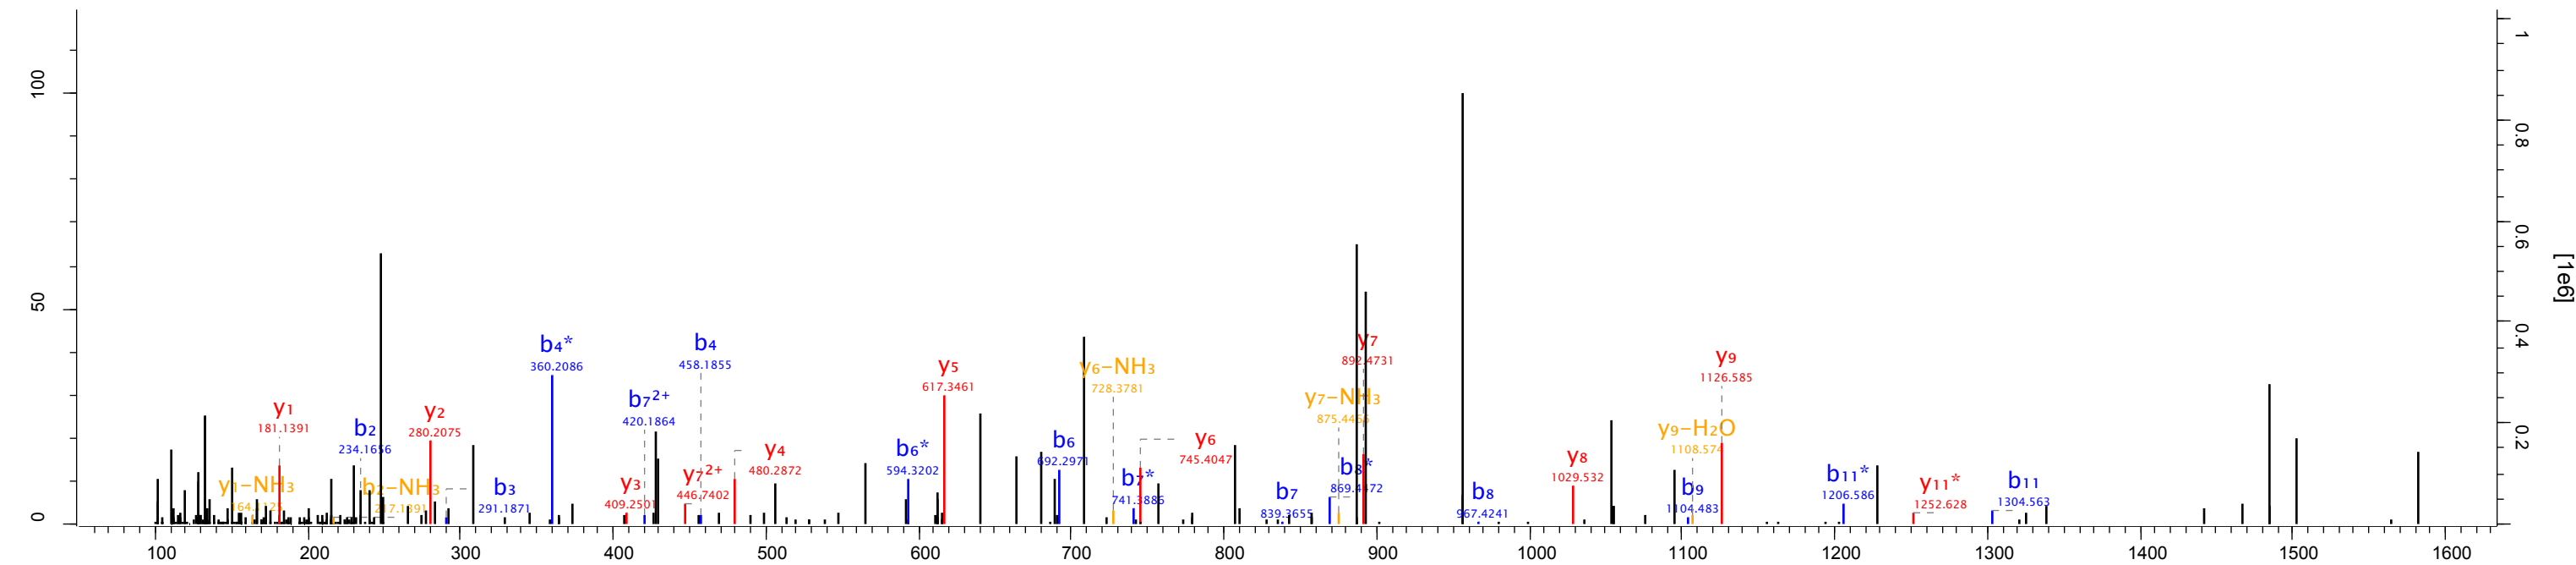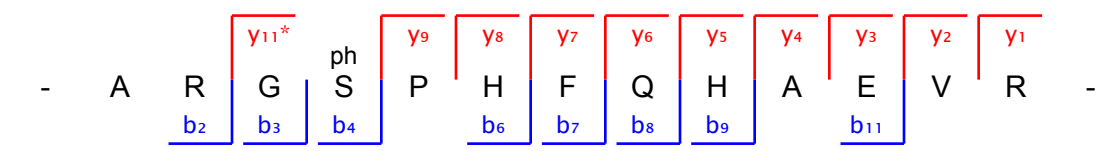



Raw file: 20150812\_A375SR\_Phospho\_BR1\_06  
 Scan: 5605 Method: FTMS; HCD Score: 59.58 m/z: 559.29 Gene names: ZNF592

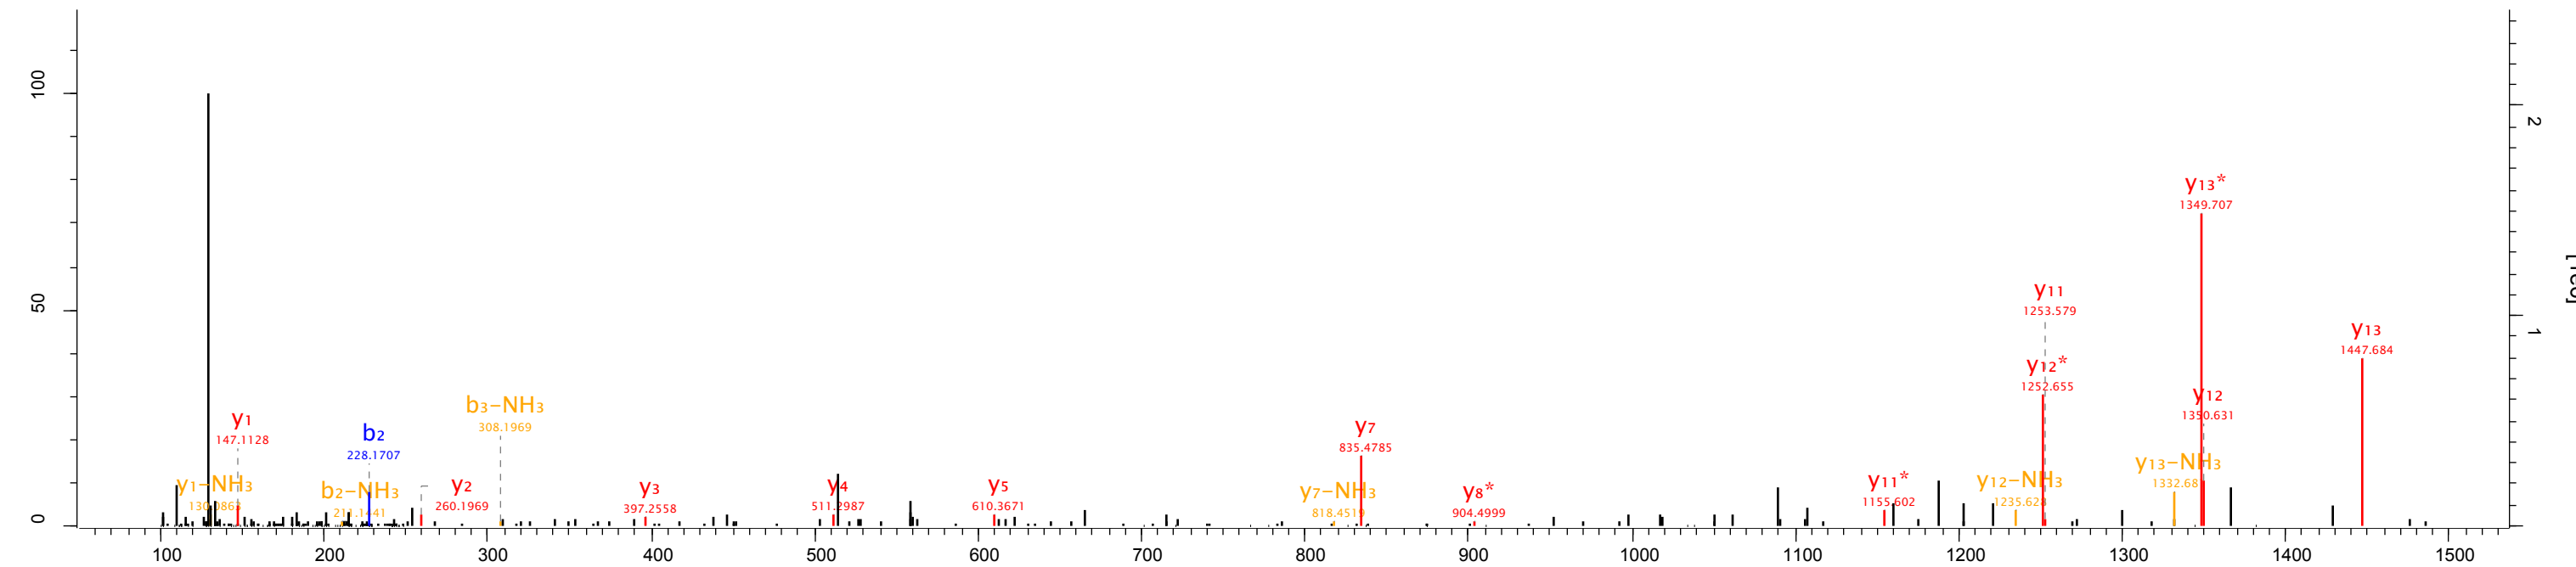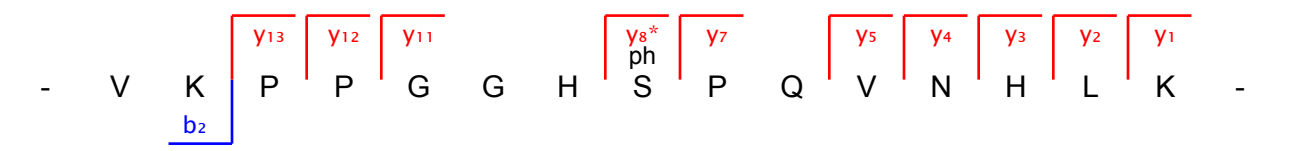

Raw file: 20150812\_A375SR\_Phospho\_BR1\_06  
 Scan: 5785 Method: FTMS; HCD Score: 67.87 m/z: 568.57 Gene names: NASP

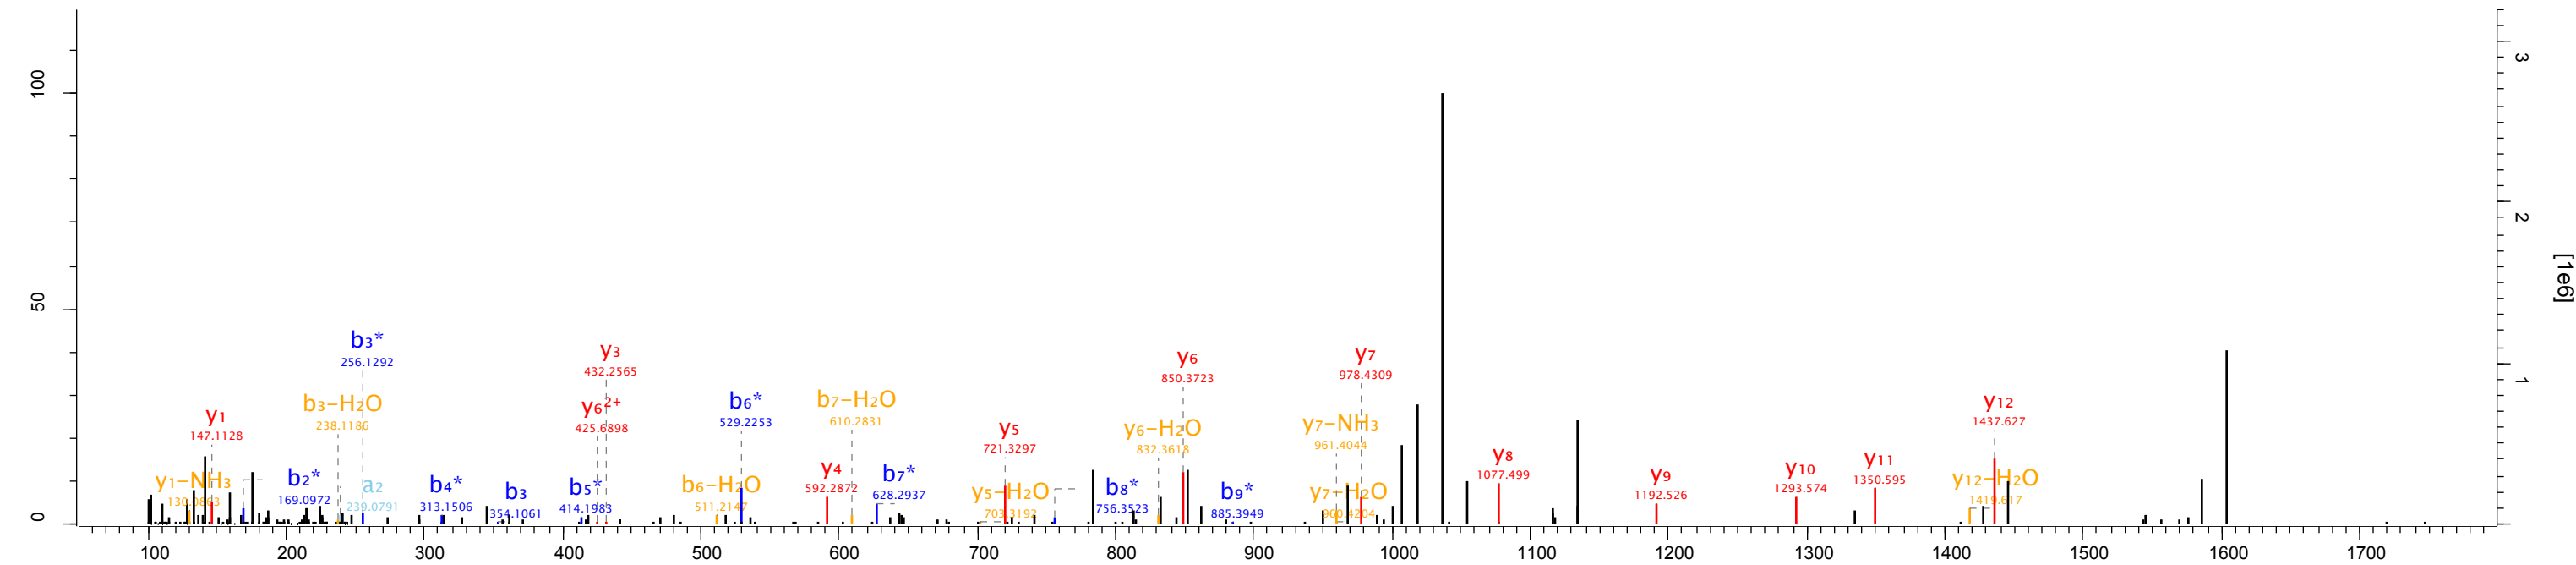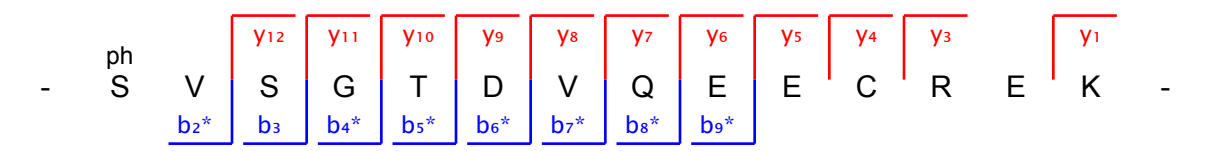

Raw file: 20150812\_A375SR\_Phospho\_BR1\_06  
 Scan: 6485 Method: FTMS; HCD Score: 147.55 m/z: 504.73 Gene names: SPEN

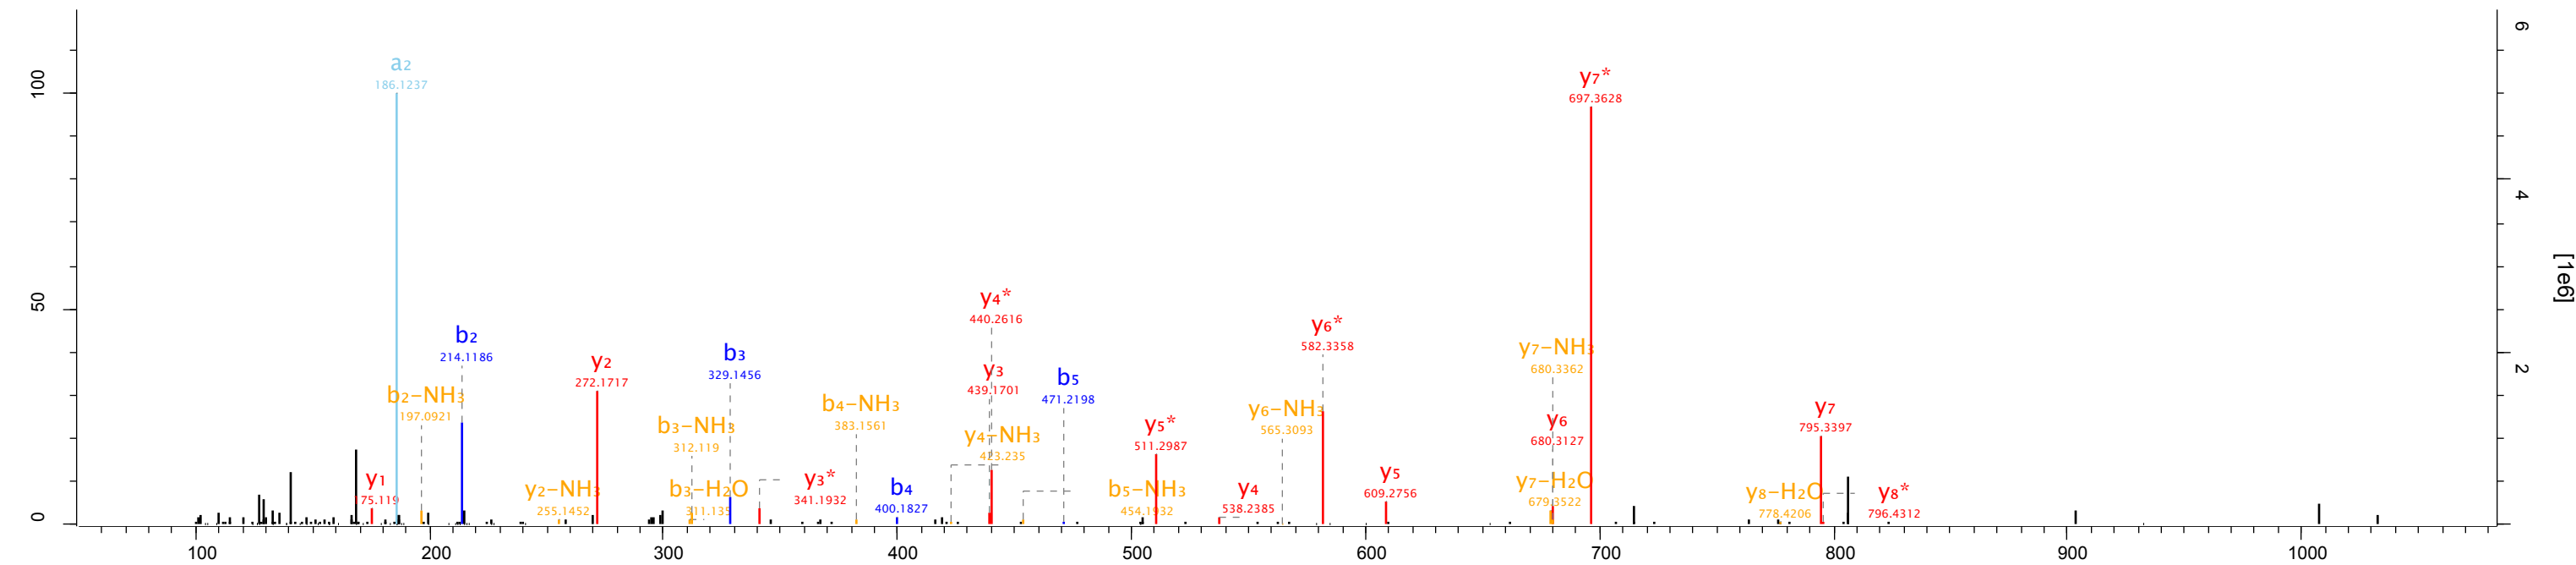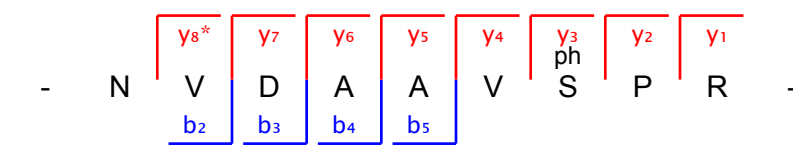

Raw file 20150812\_A375SR\_Phospho\_BR1\_06 Scan 6615 Method FTMS; HCD Score 193.34 m/z 565.93 Gene names AHNAK

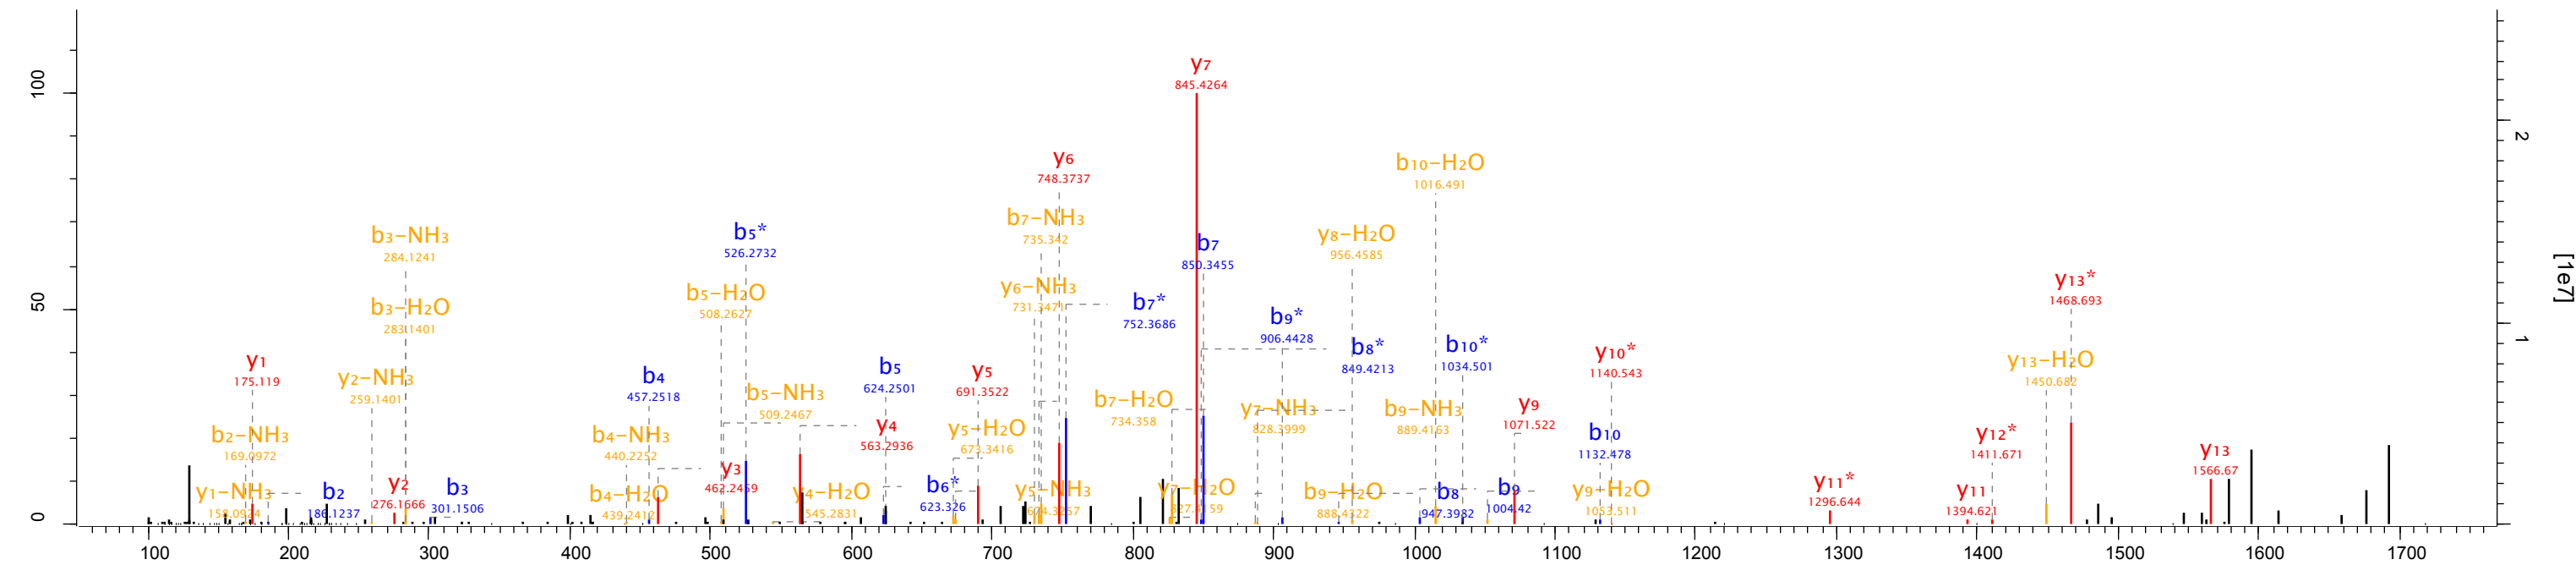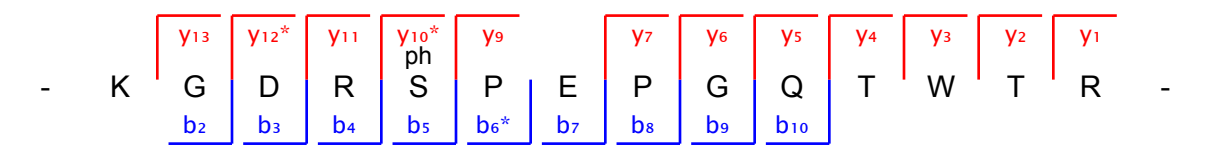

Raw file 20150812\_A375SR\_Phospho\_BR1\_06 Scan 6775 Method FTMS; HCD Score 93.62 m/z 546.3 Gene names BAZ1B

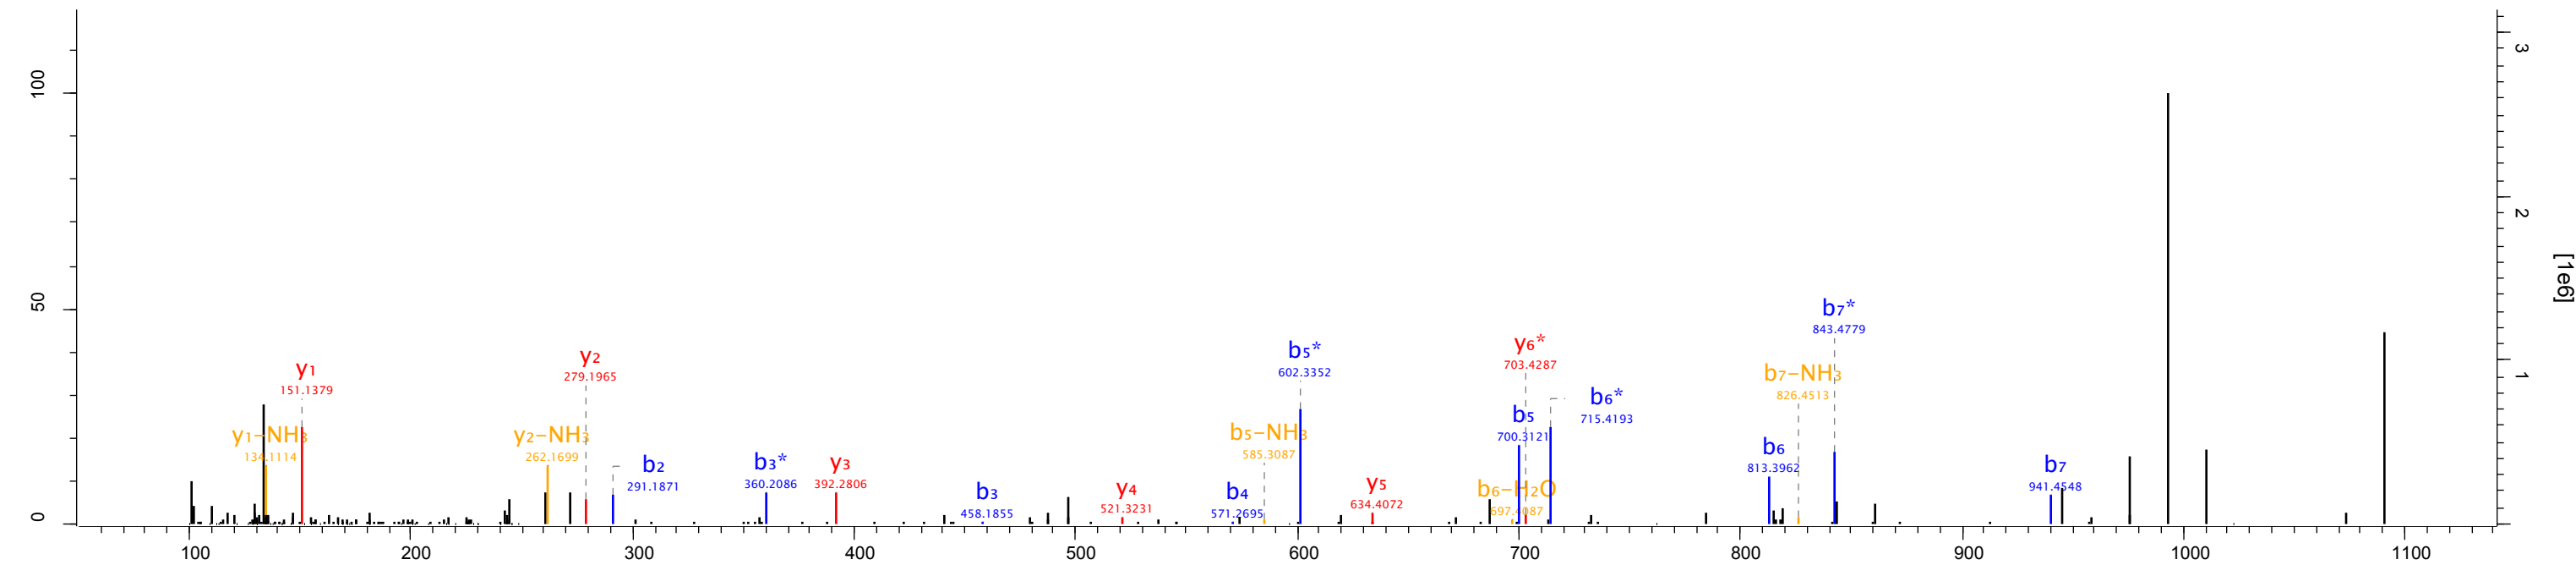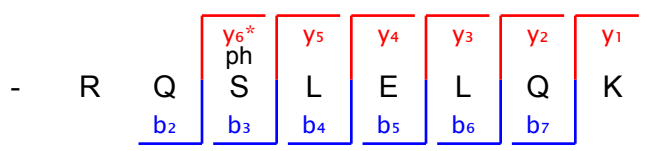

Raw file: 20150812\_A375SR\_Phospho\_BR1\_06  
 Scan: 7265 Method: FTMS; HCD Score: 170.89 m/z: 691.81 Gene names: IRS2

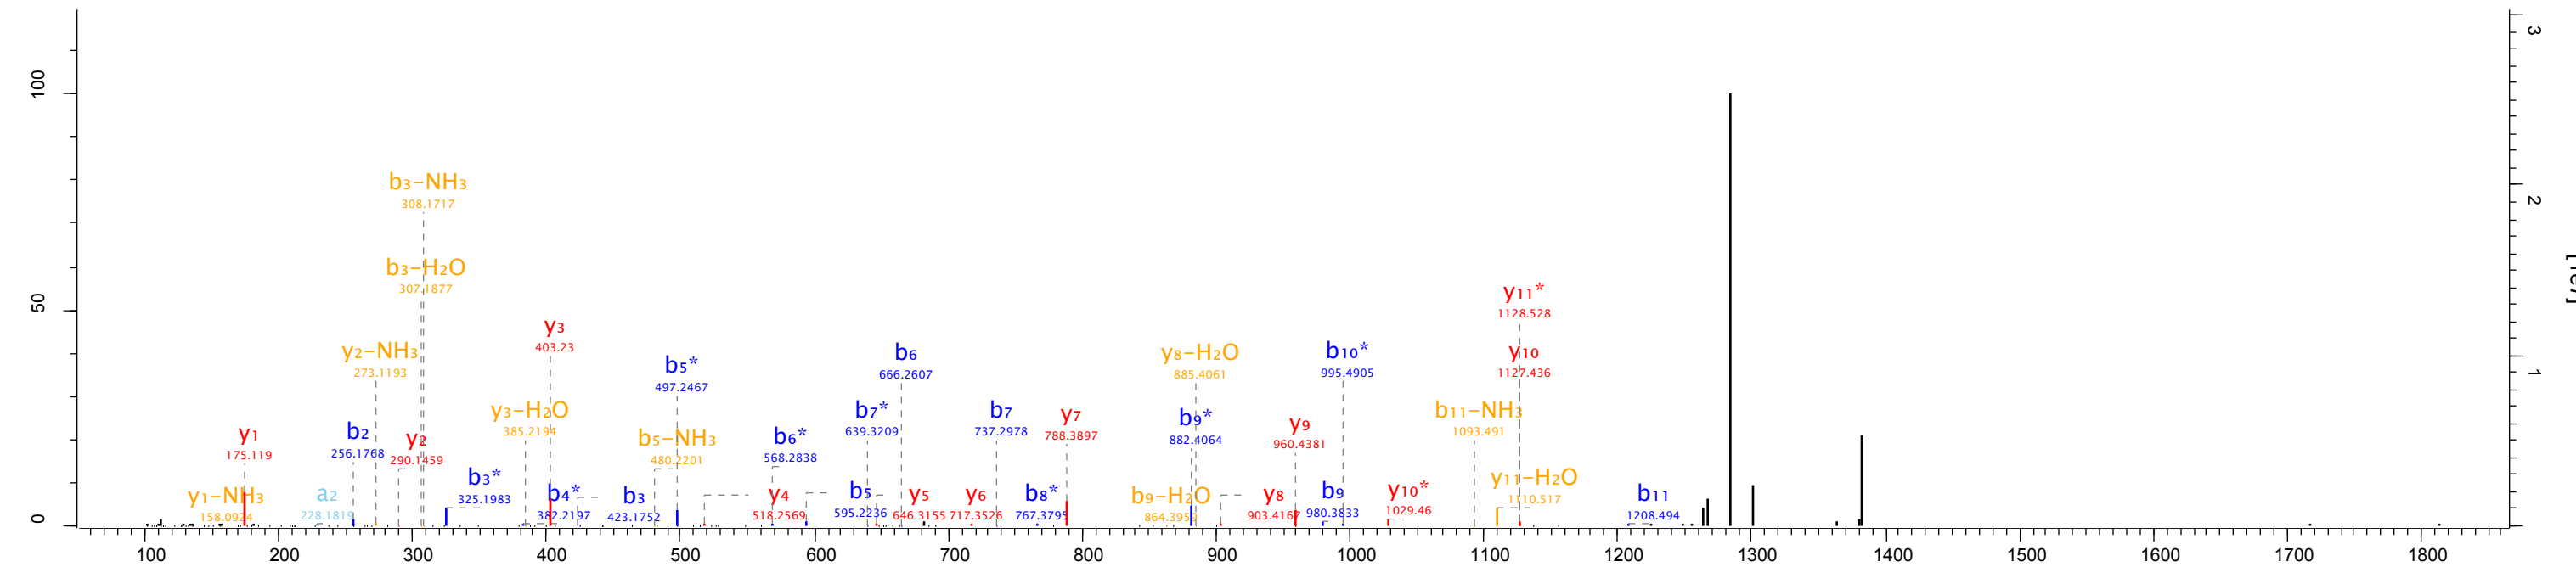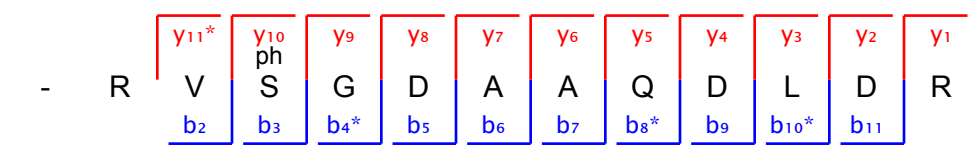

Raw file 20150812\_A375SR\_Phospho\_BR1\_06 Scan 7745 Method FTMS; HCD Score 156.29 m/z 515.59 Gene names NRBP1

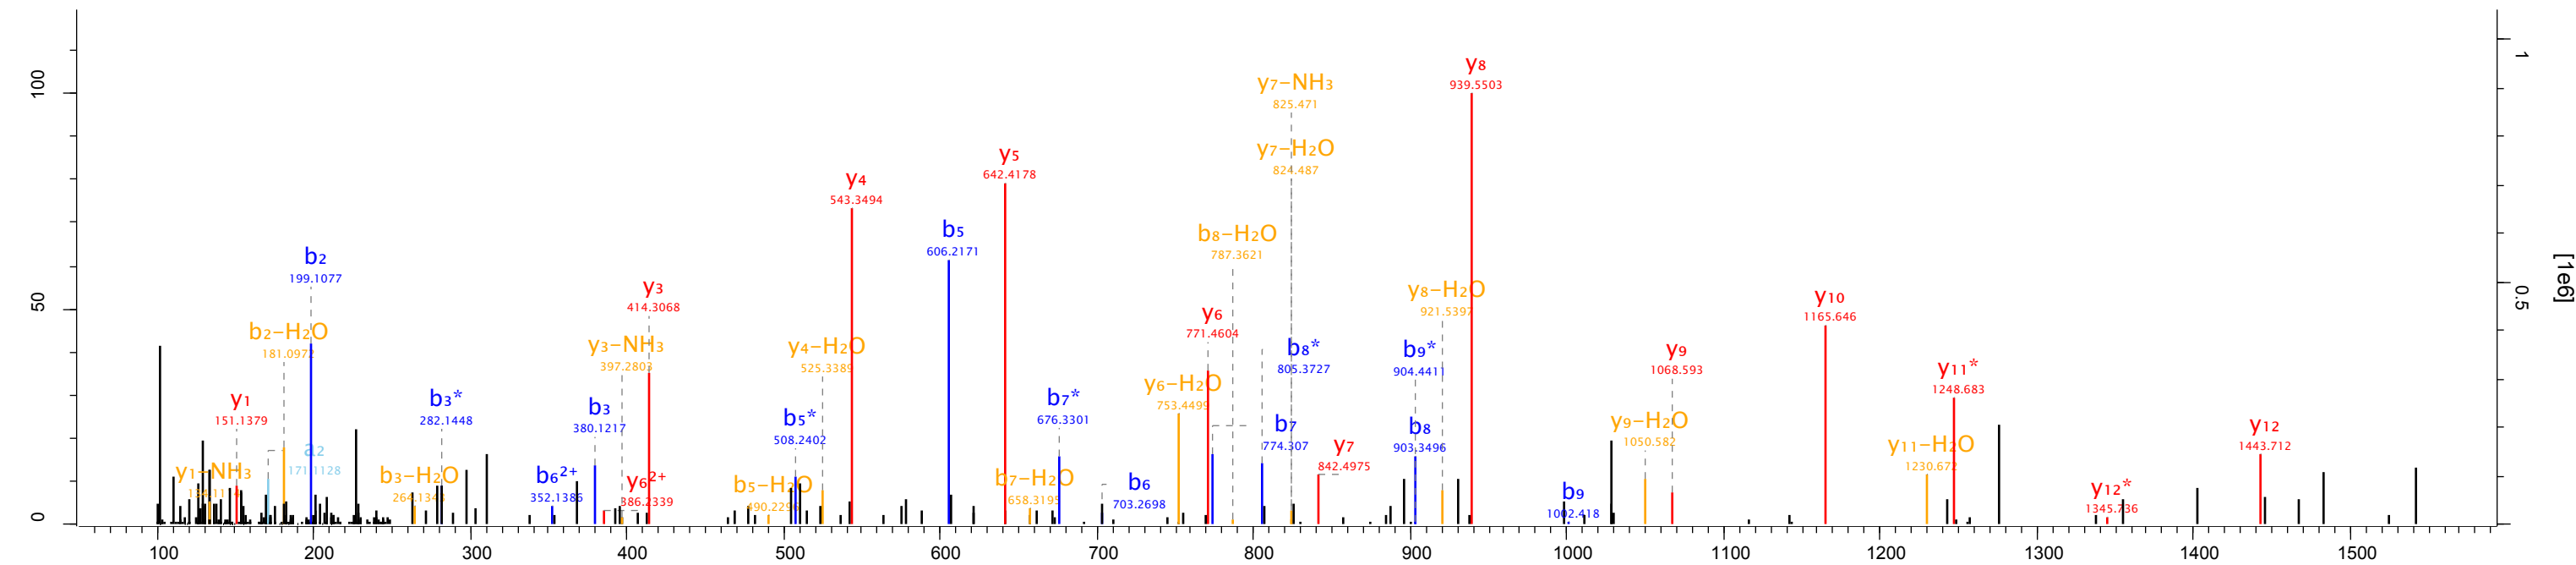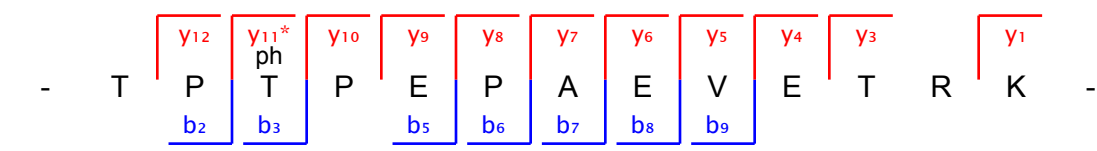

Raw file  
 20150812\_A375SR\_Phospho\_BR1\_06  
 Scan 8095 Method FTMS; HCD Score 155.33 m/z 537.26 Gene names UBR4

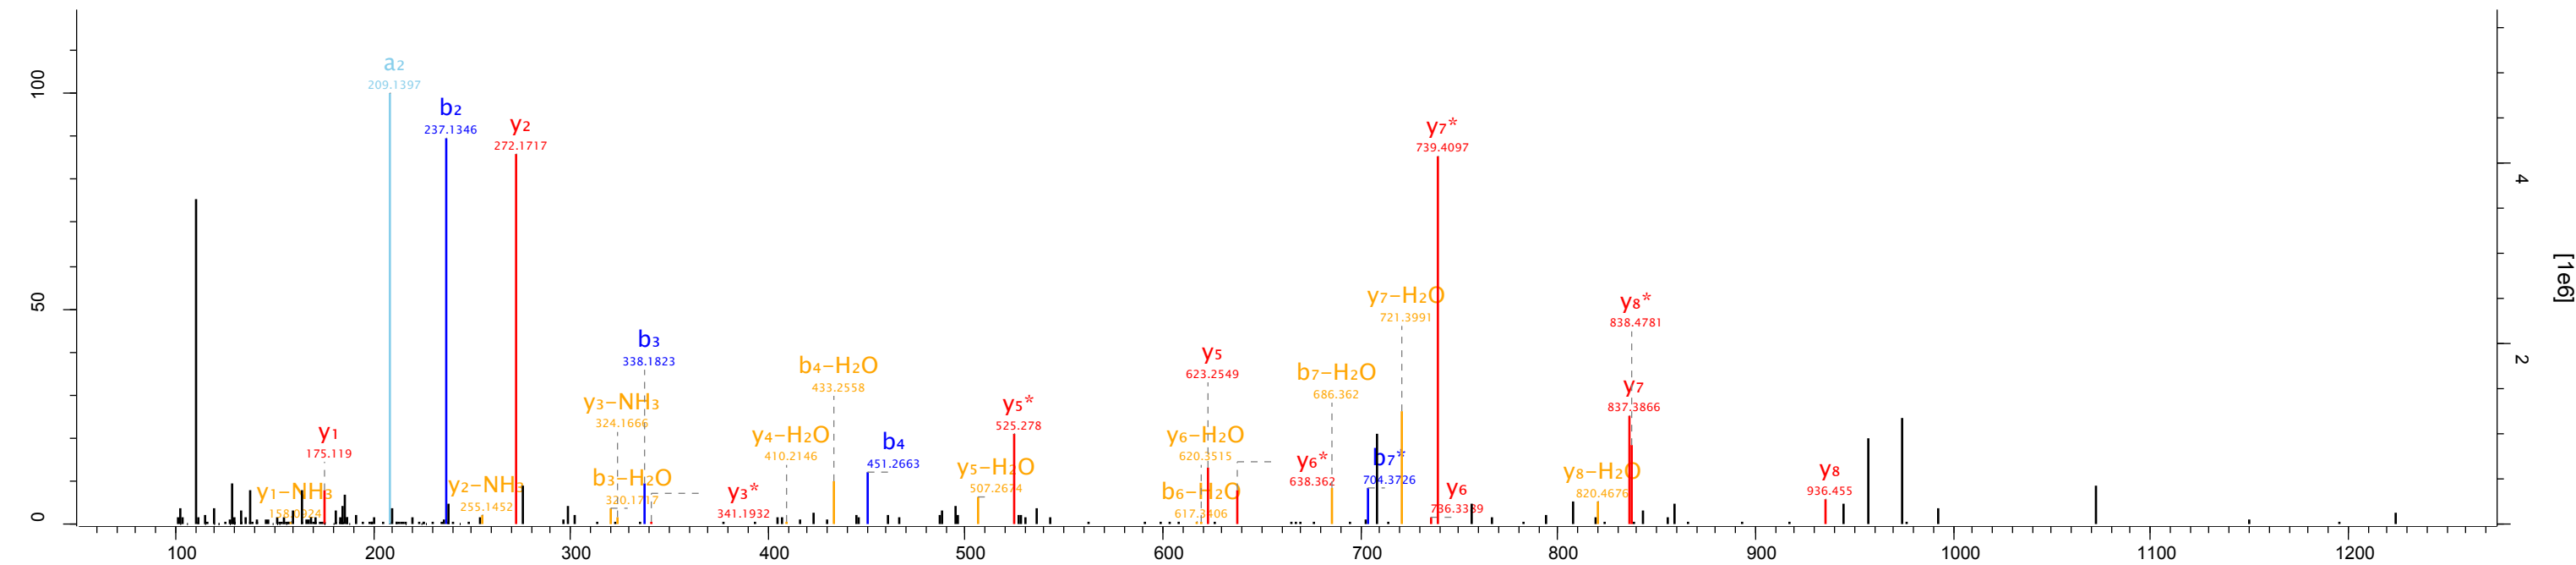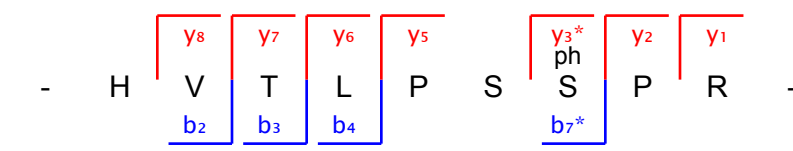



Raw file: 20150812\_A375SR\_Phospho\_BR1\_06  
 Scan: 8205 Method: FTMS; HCD Score: 229.38 m/z: 767.89 Gene names: LSM14A

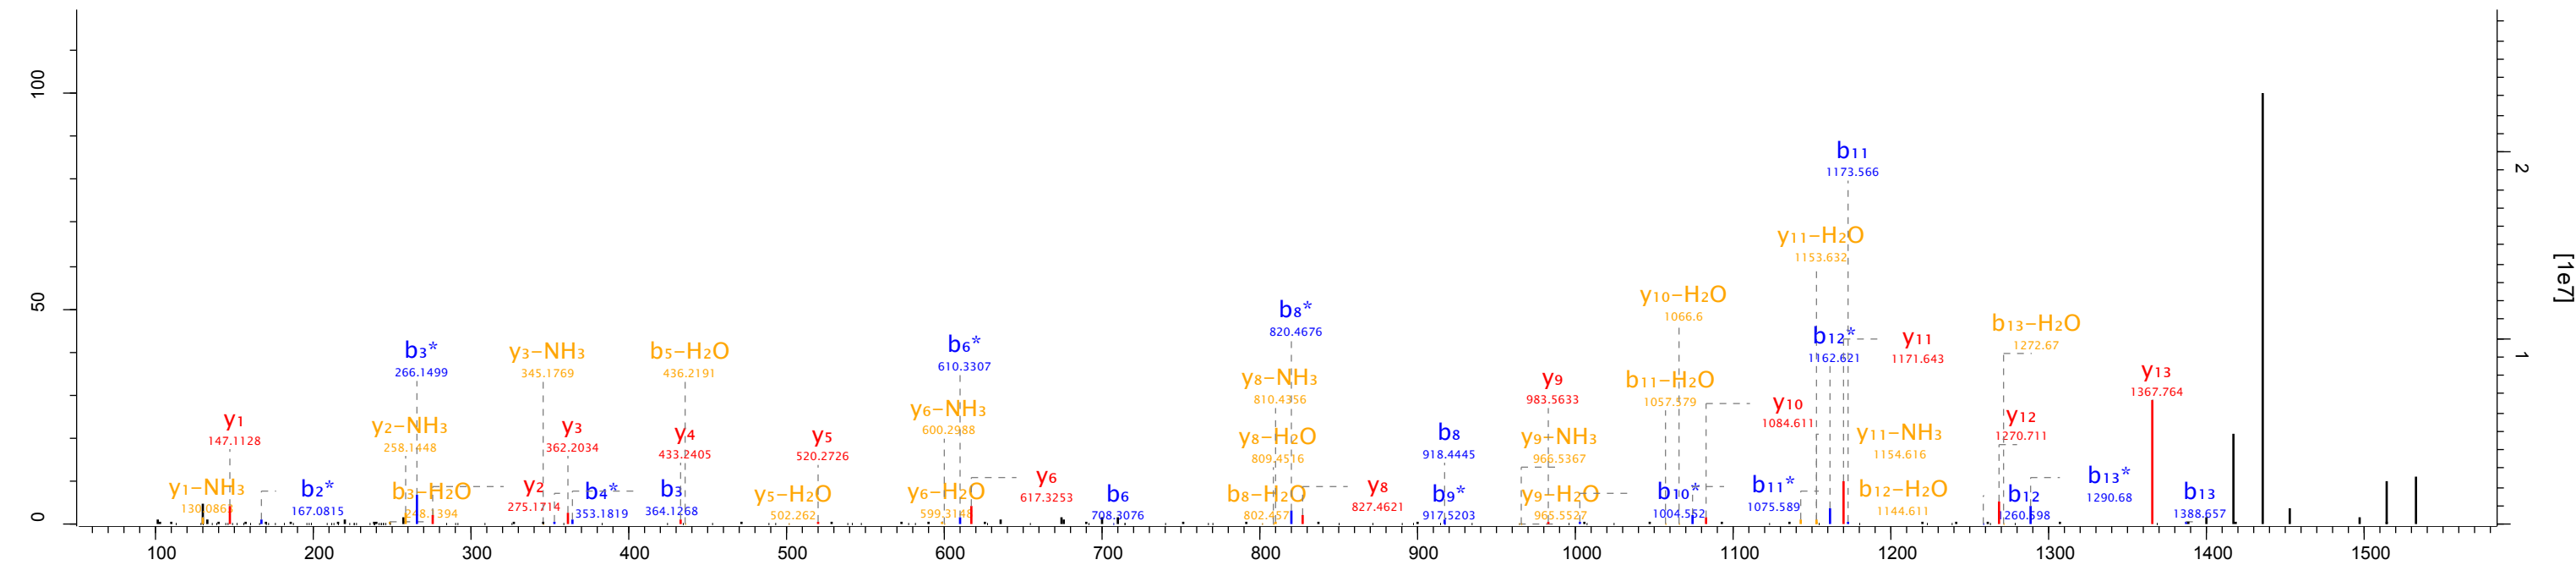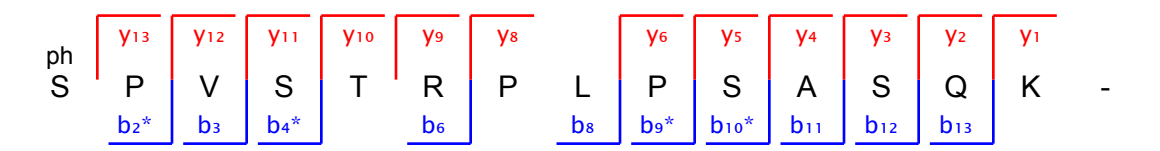

Raw file: 20150812\_A375SR\_Phospho\_BR1\_06  
 Scan: 8245 Method: FTMS; HCD Score: 176.26 m/z: 705.32 Gene names: ZKSCAN1

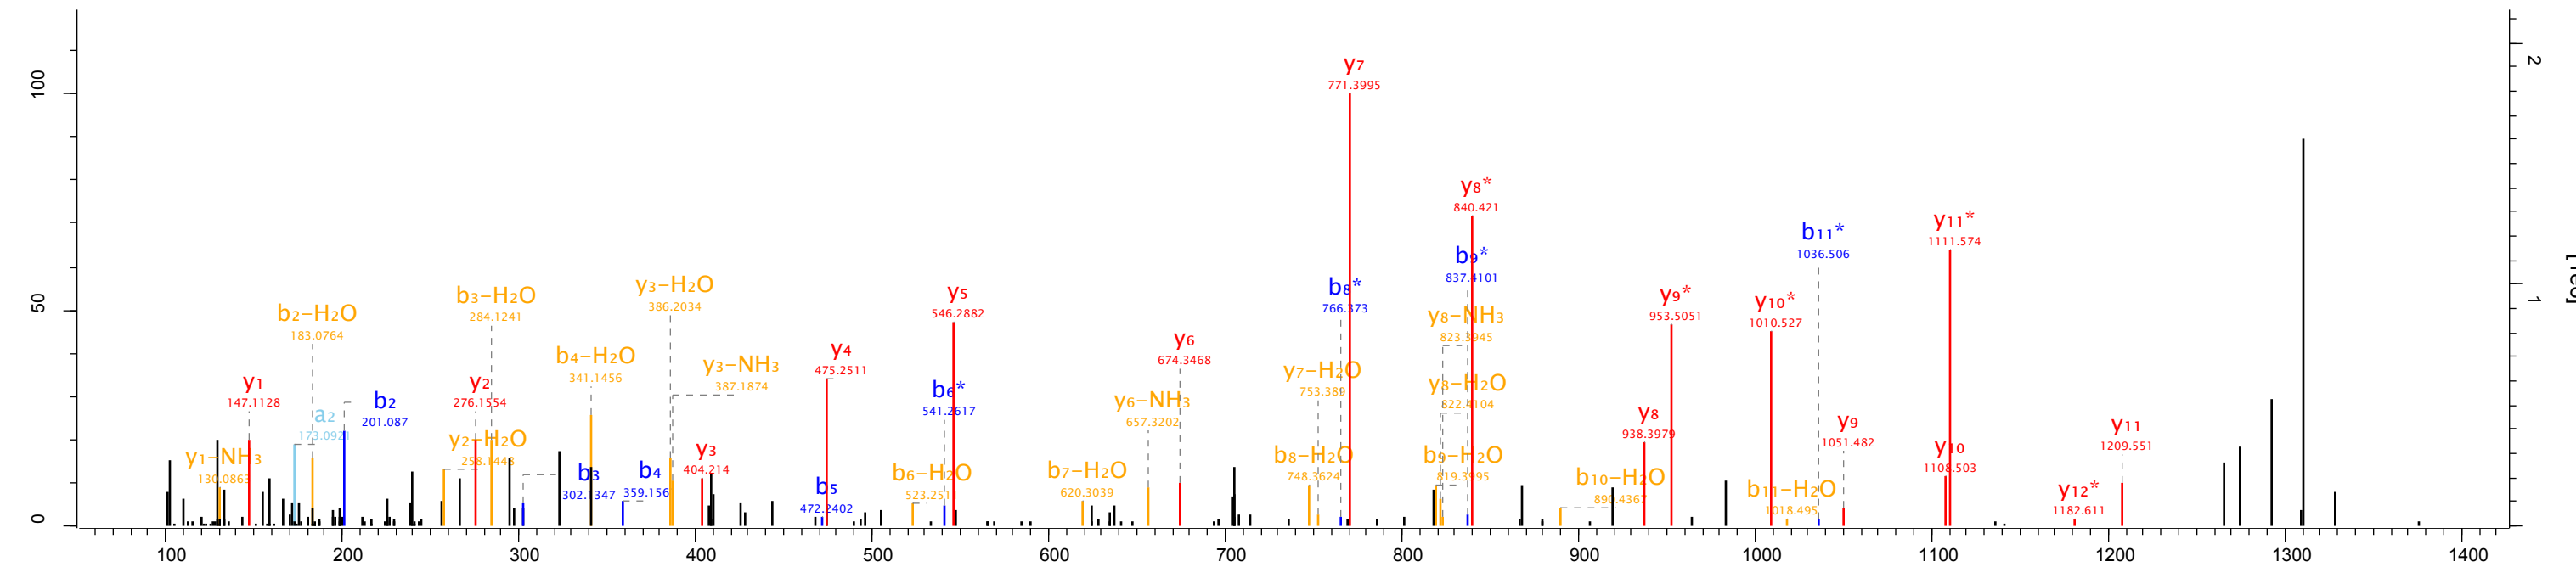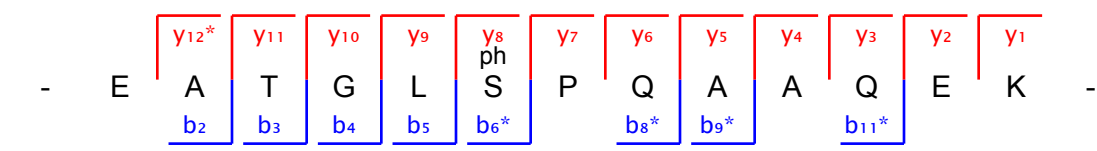

Raw file: 20150812\_A375SR\_Phospho\_BR1\_06  
 Scan: 8985 Method: FTMS; HCD Score: 159.44 m/z: 853.32 Gene names: SNUPN

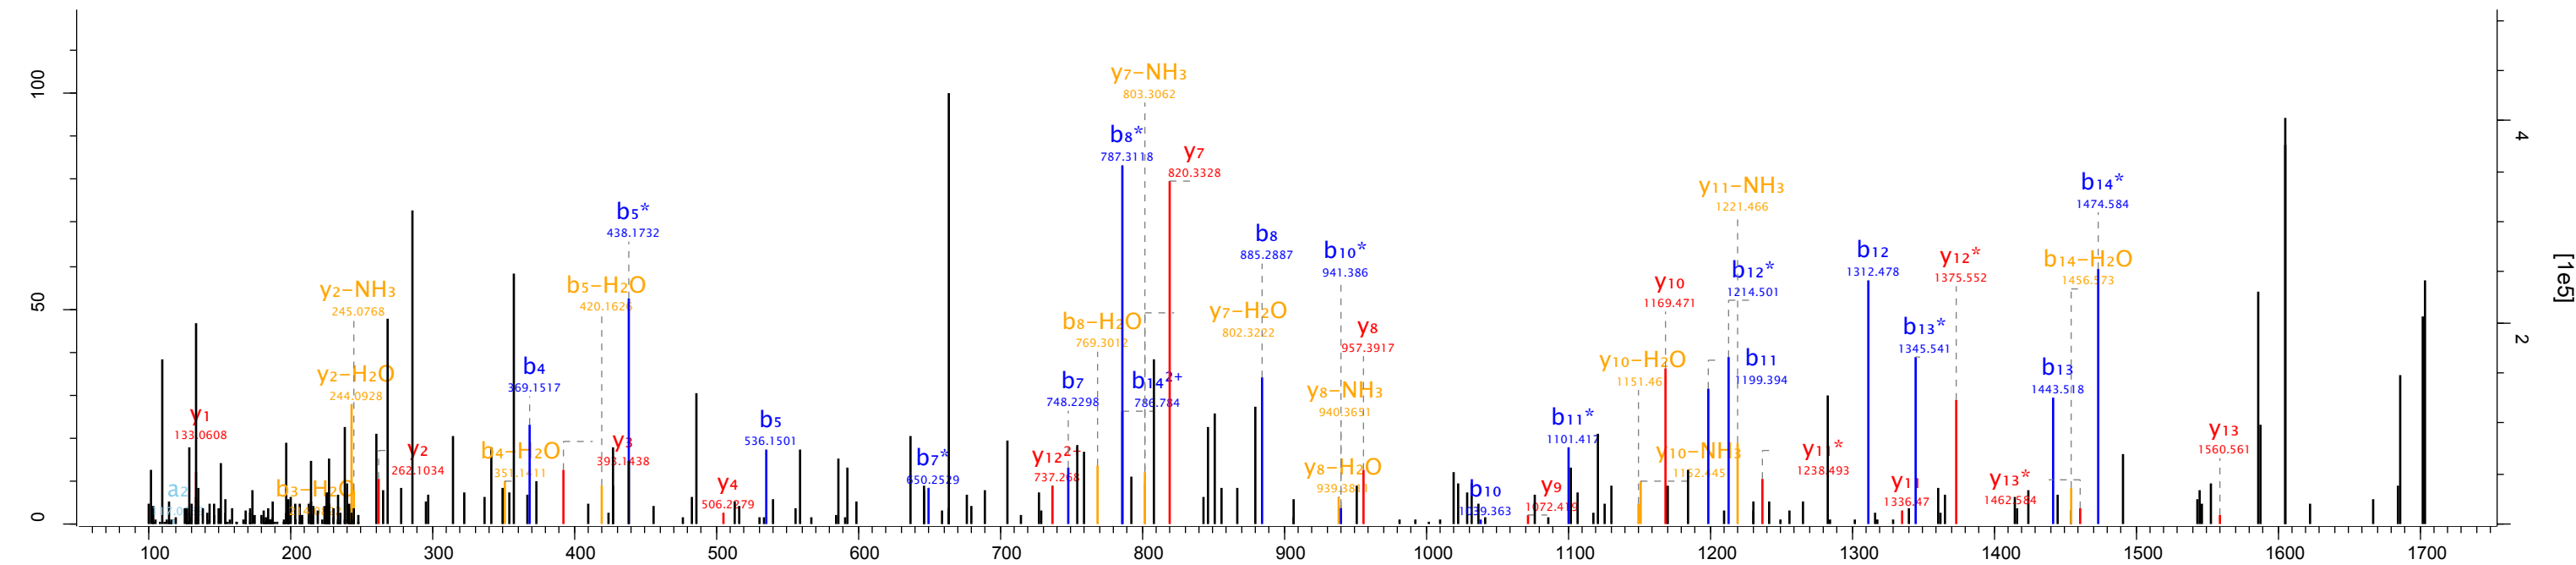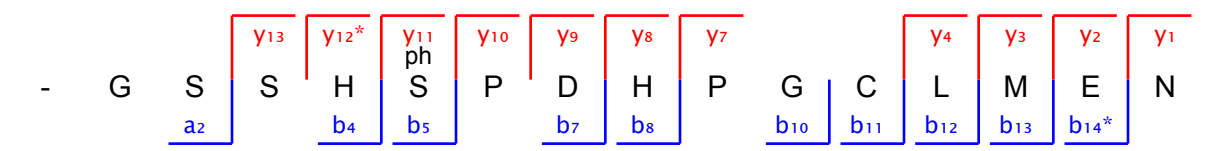

Raw file 20150812\_A375SR\_Phospho\_BR1\_07 Scan 11905 Method FTMS; HCD Score 218.83 m/z 701.88 Gene names CCNL1

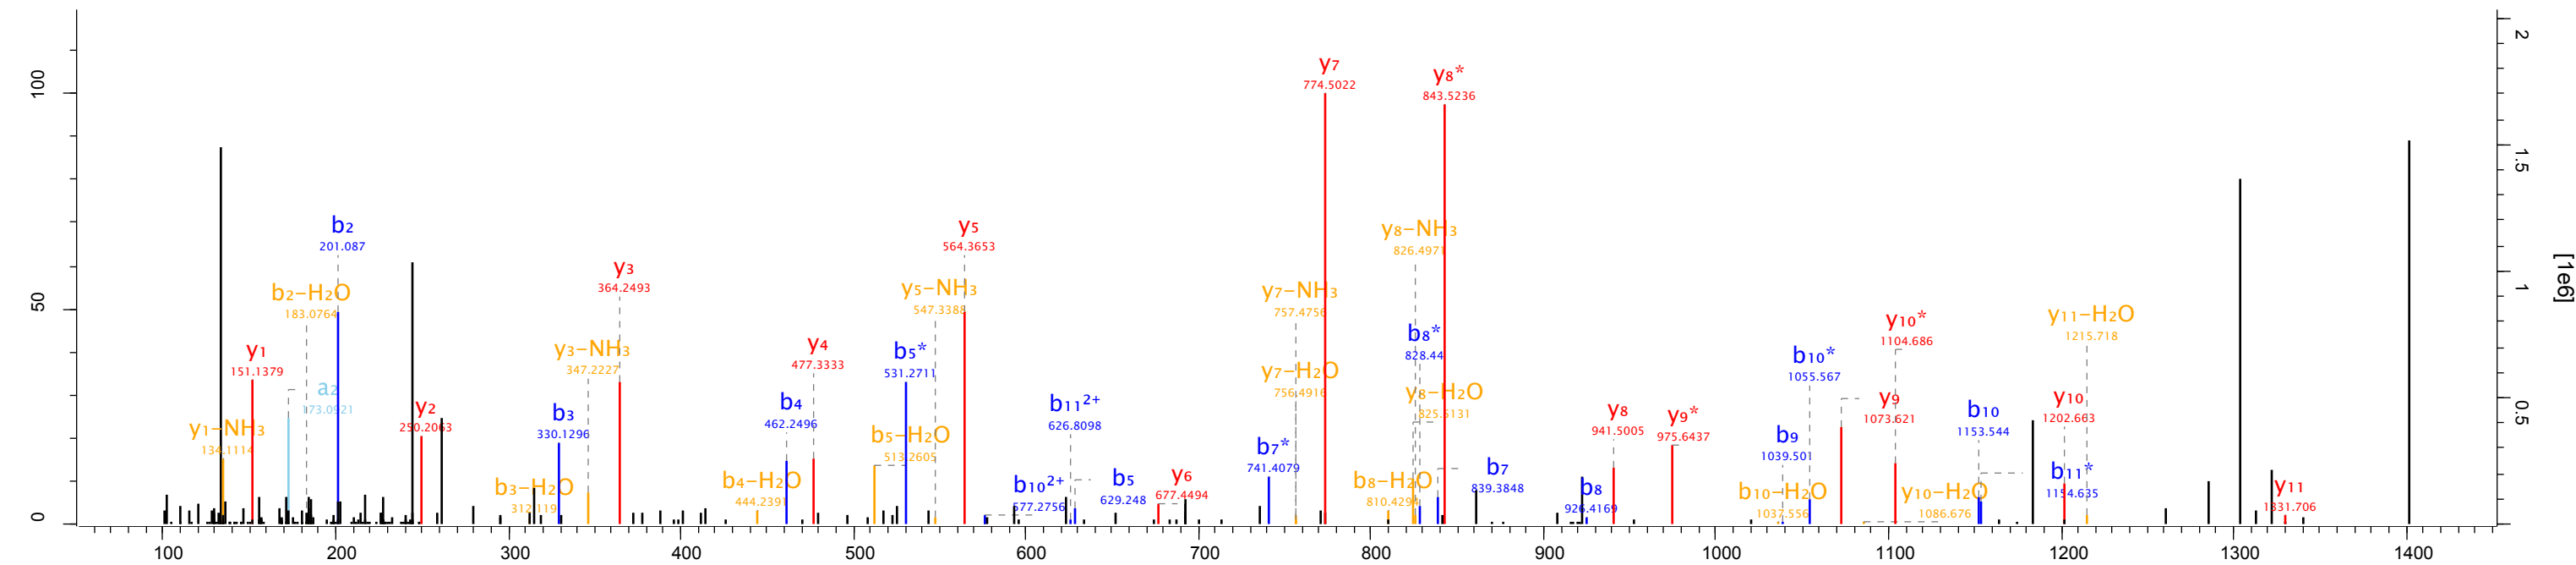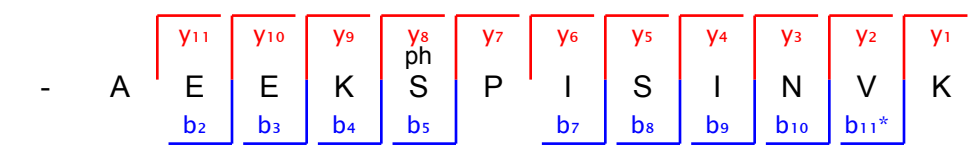

Raw file: 20150812\_A375SR\_Phospho\_BR1\_07  
 Scan: 11985 Method: FTMS; HCD Score: 289.13 m/z: 771.34 Gene names: PTPN2

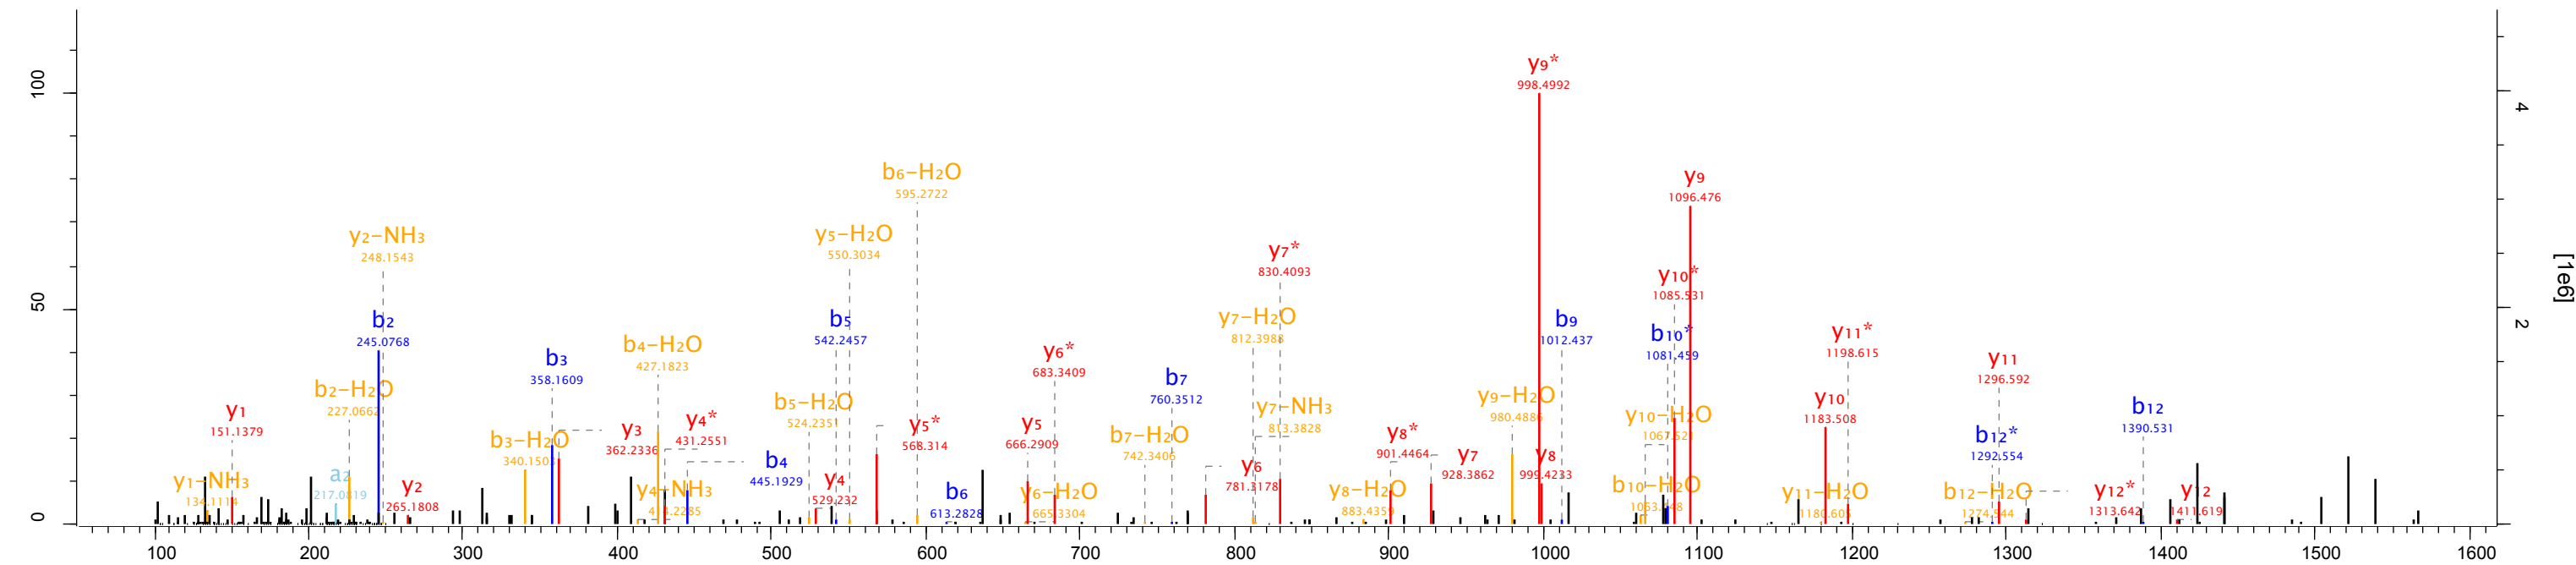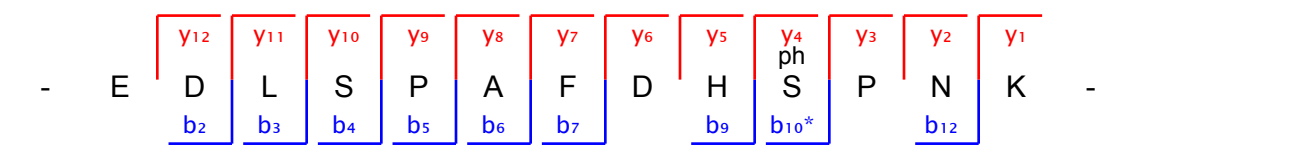

Raw file: 20150812\_A375SR\_Phospho\_BR1\_07  
 Scan: 13125 Method: FTMS; HCD Score: 263.54 m/z: 1051.45 Gene names: GOLGA4

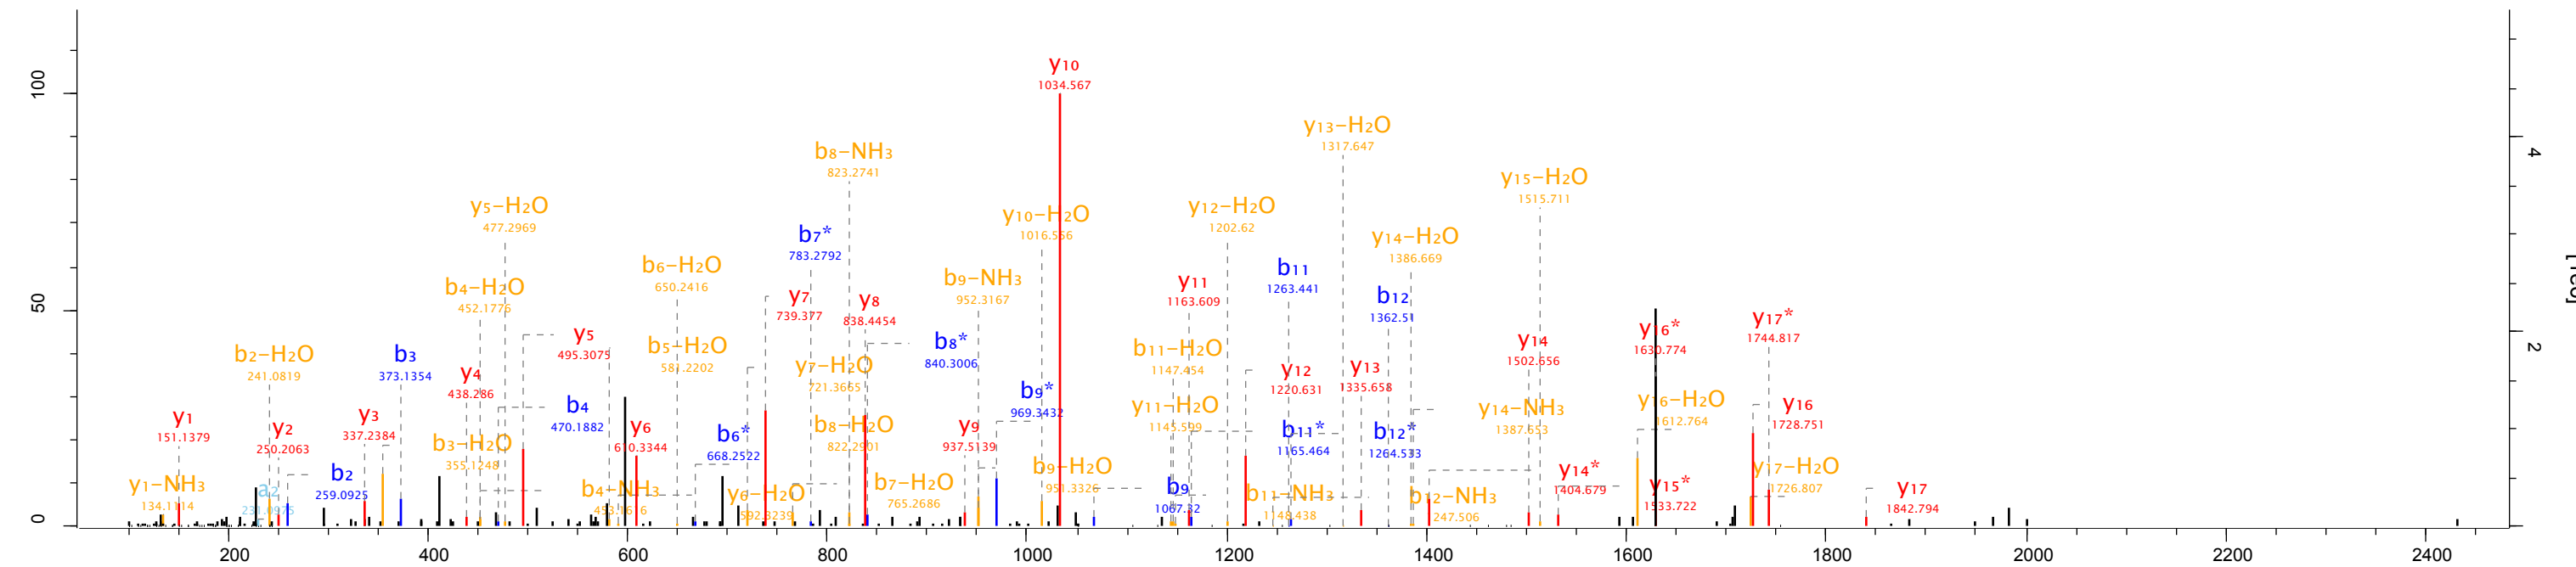

- E E N P E S D G E P V V E D G T S V K -  
 b2 b3 b4 b6\* b7\* b8\* b9 b11 b12

Raw file: 20150812\_A375SR\_Phospho\_BR1\_07  
 Scan: 16205 Method: FTMS; HCD Score: 143.04 m/z: 741.86 Gene names: HJURP

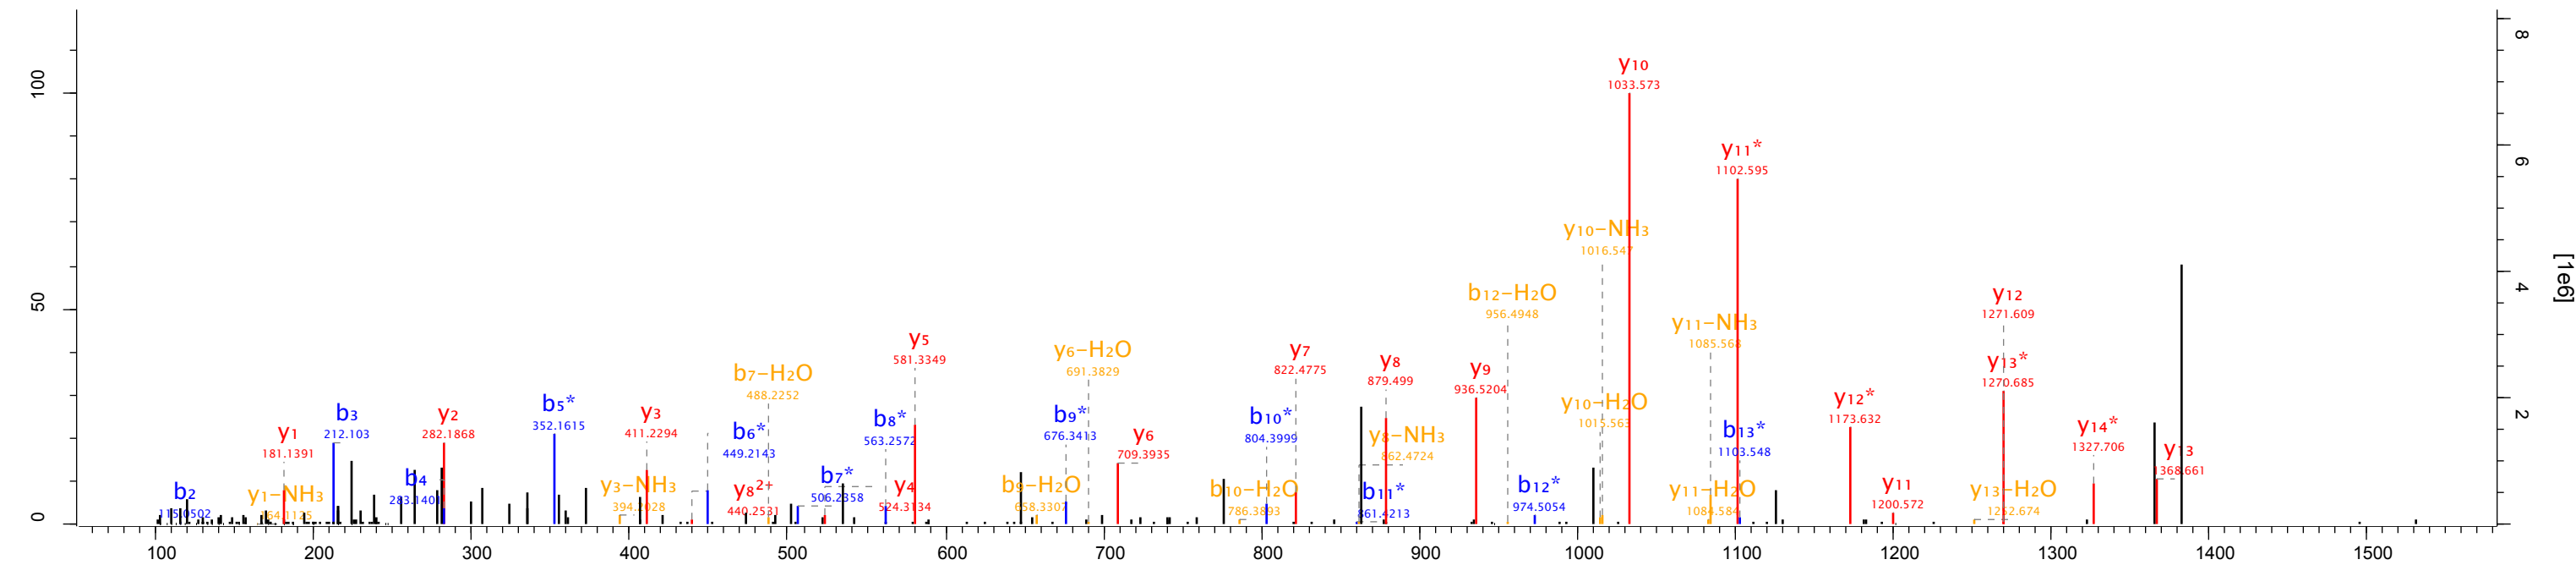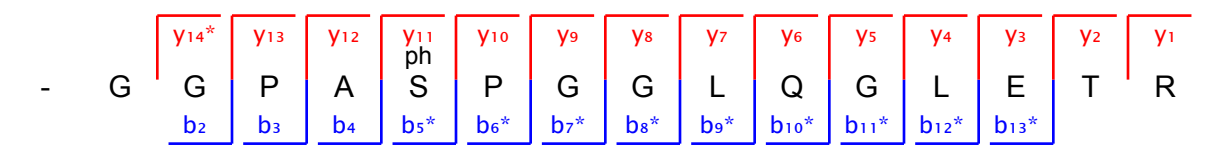

Raw file: 20150812\_A375SR\_Phospho\_BR1\_07  
 Scan: 16925 Method: FTMS; HCD Score: 193.42 m/z: 830.44 Gene names: PEA15

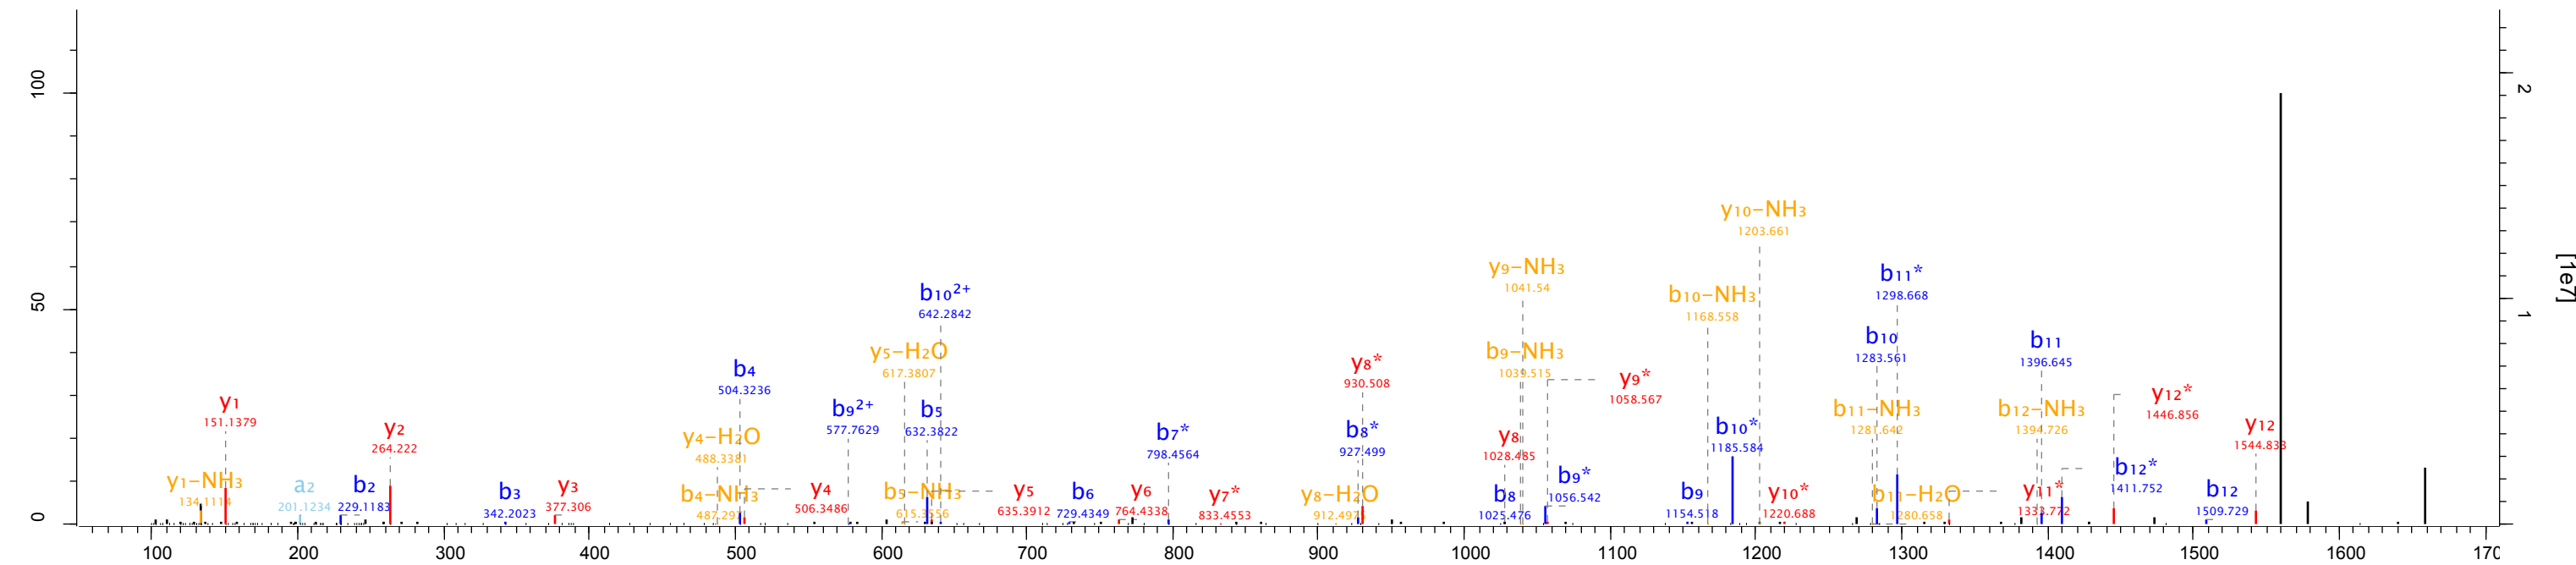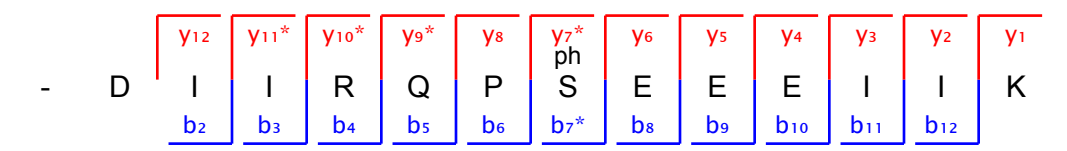



Raw file: 20150812\_A375SR\_Phospho\_BR1\_07  
 Scan: 17885 Method: FTMS; HCD Score: 305.85 m/z: 818.41 Gene names: MAP4

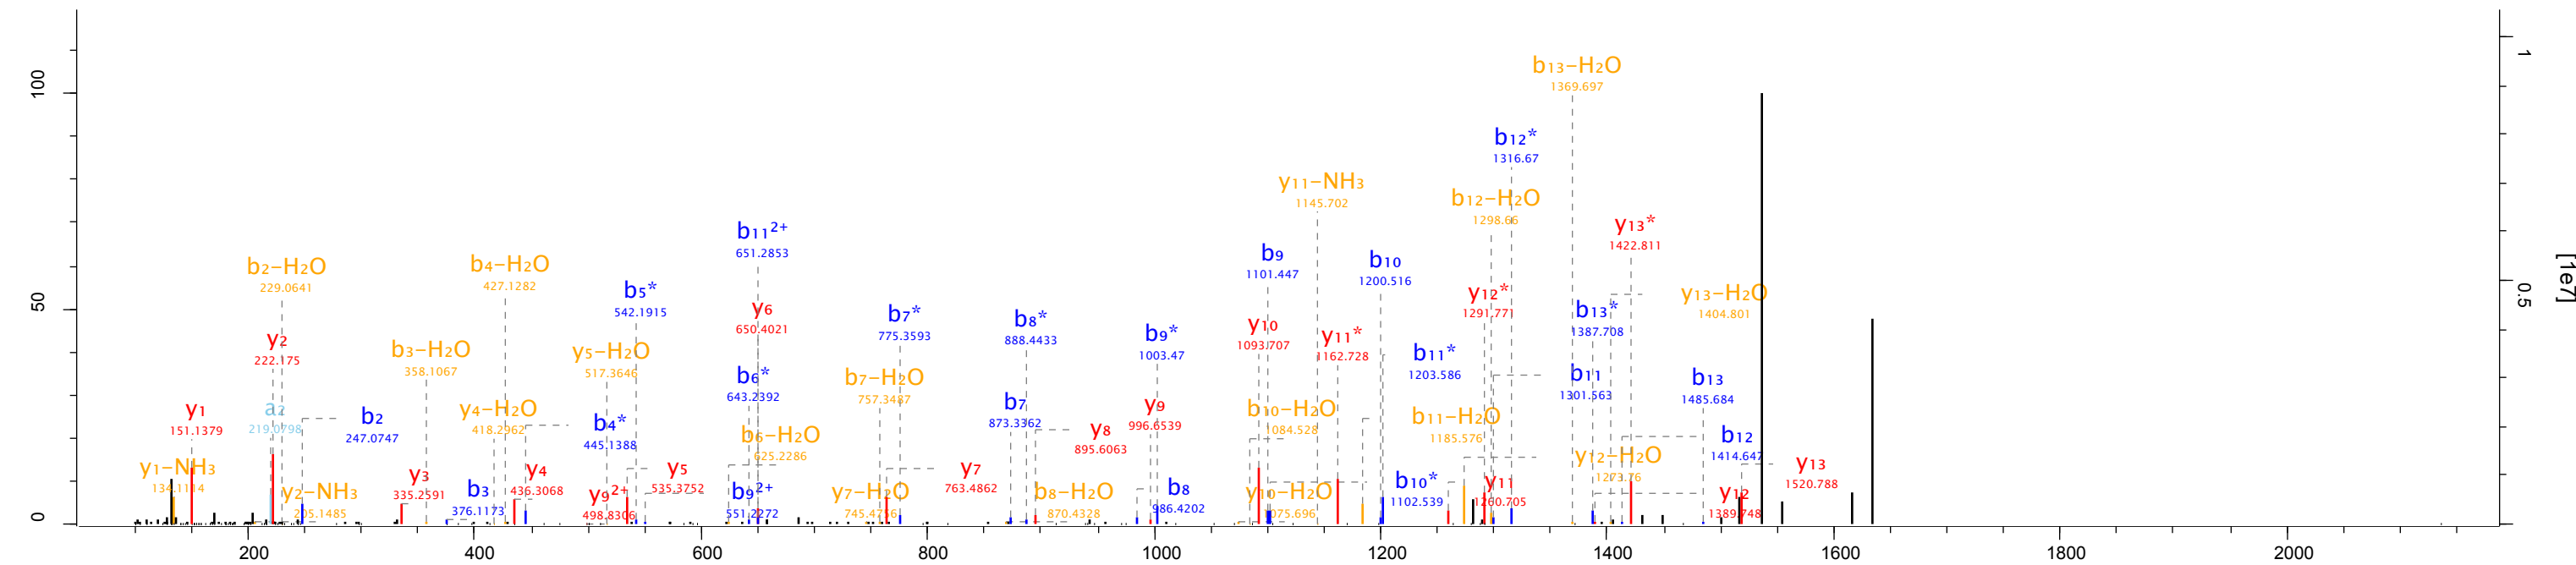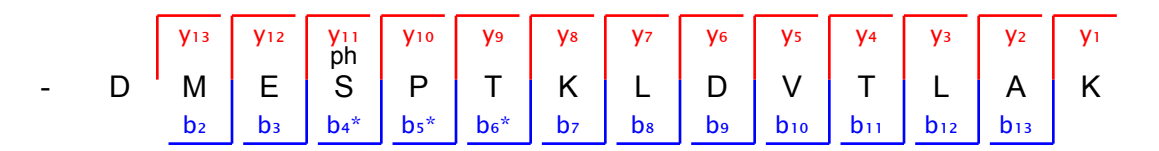

Raw file: 20150812\_A375SR\_Phospho\_BR1\_07  
 Scan: 17995 Method: FTMS; HCD Score: 60.67 m/z: 802.39 Gene names: SPRTN

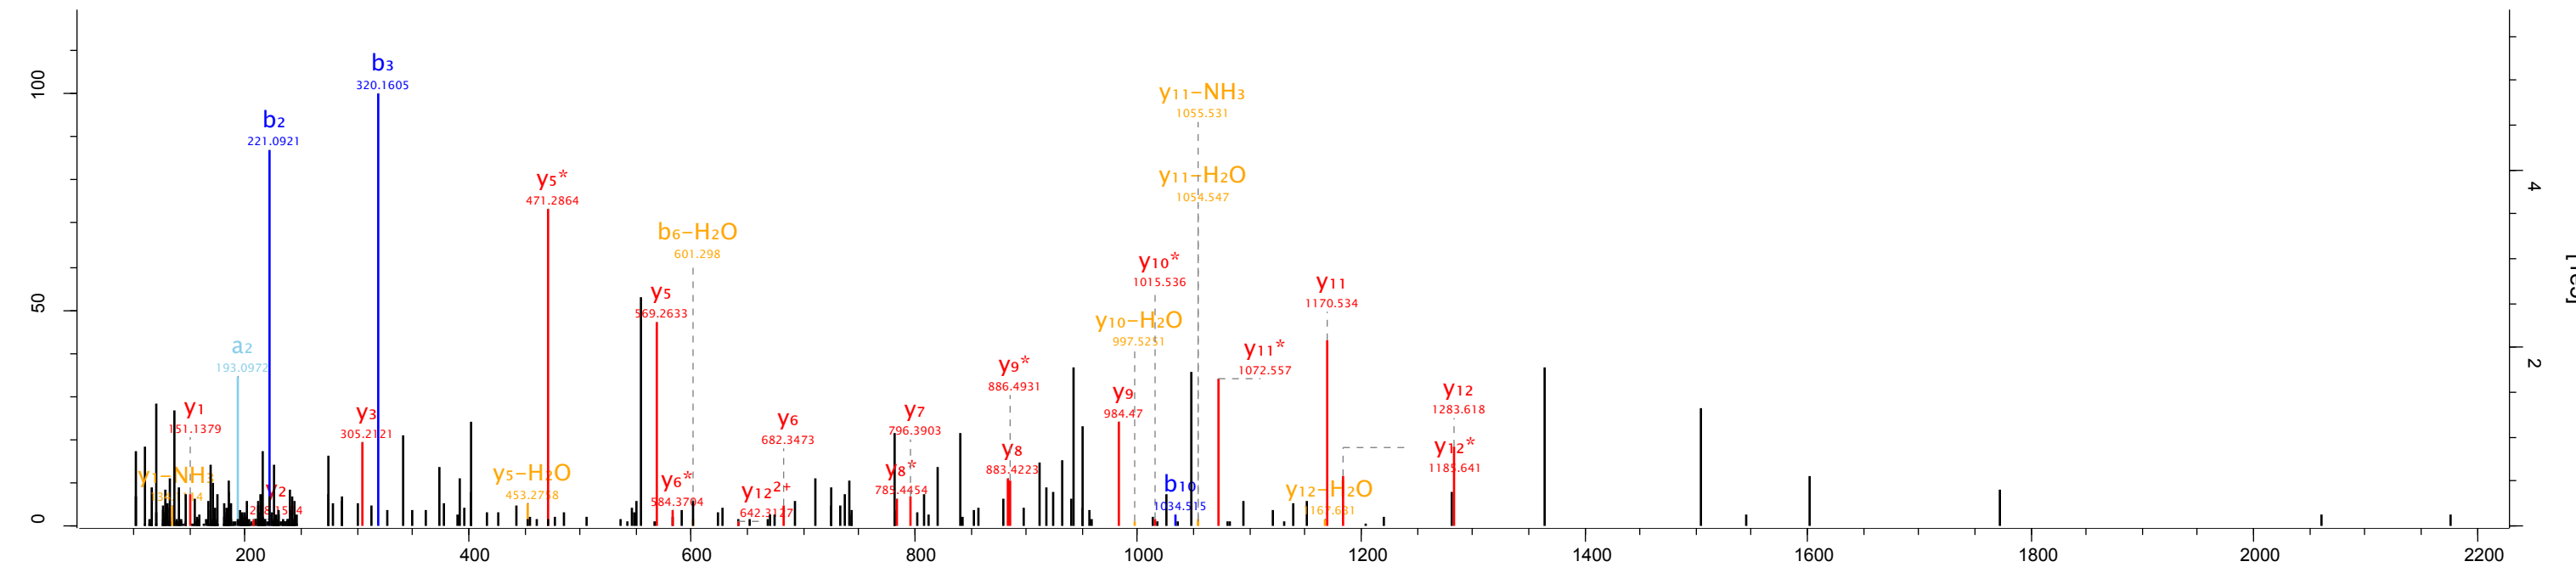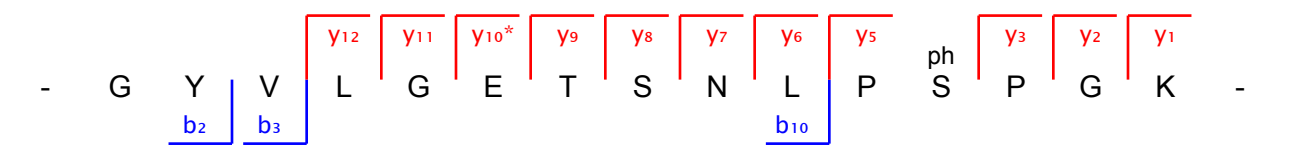

Raw file 20150812\_A375SR\_Phospho\_BR1\_07 Scan 18535 Method FTMS; HCD Score 221.83 m/z 778.73 Gene names FAM21C;FAM21D;FAM21A

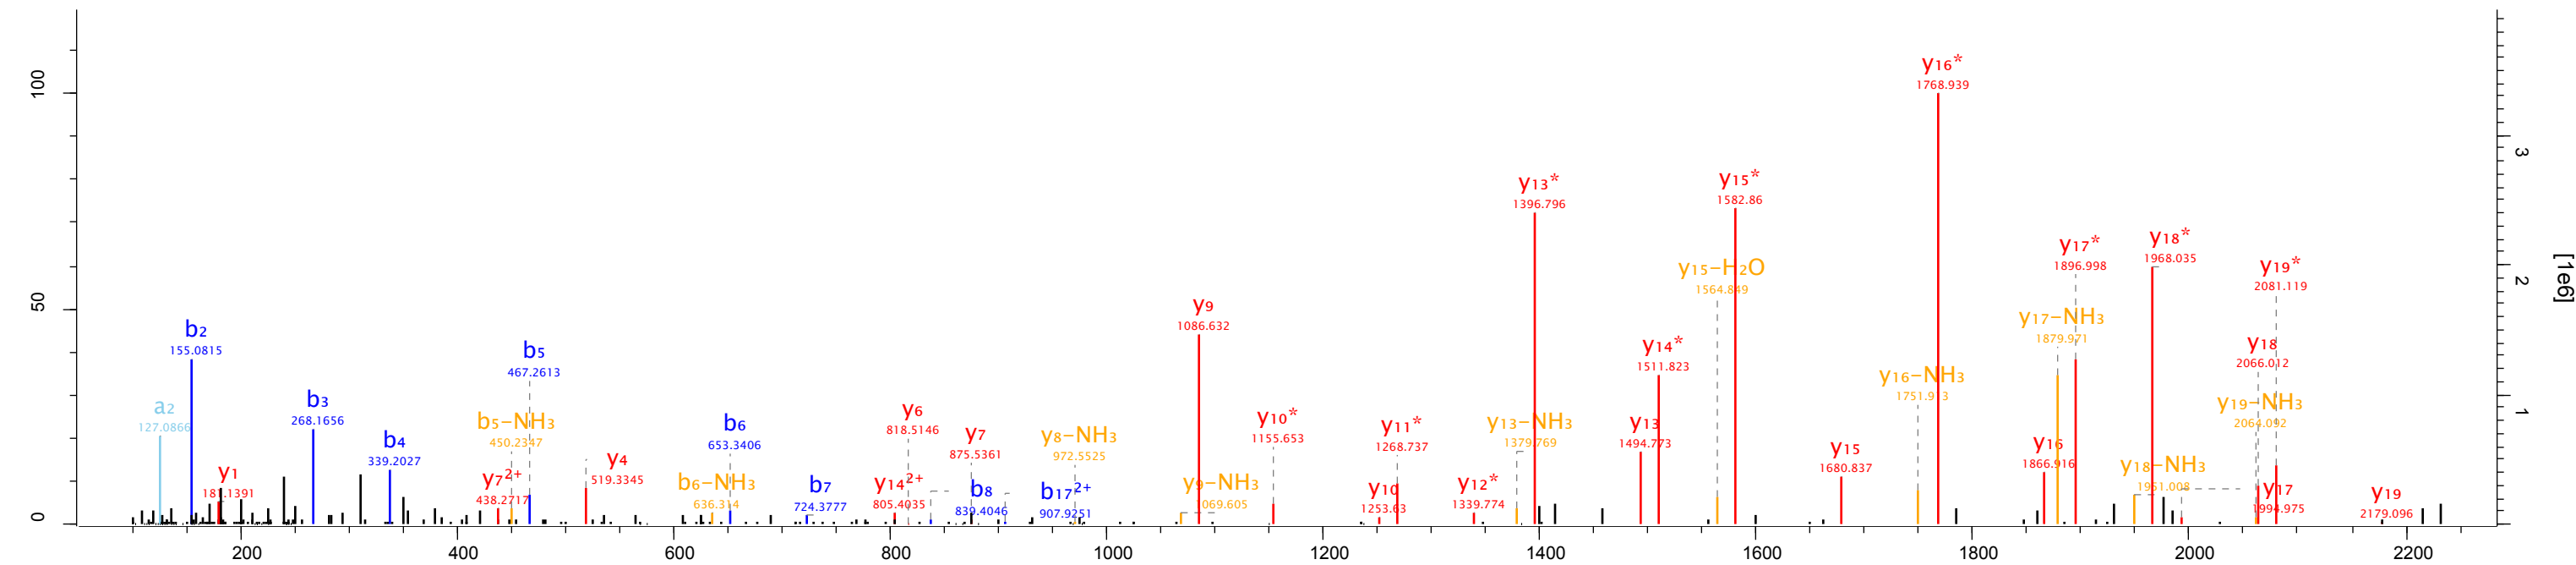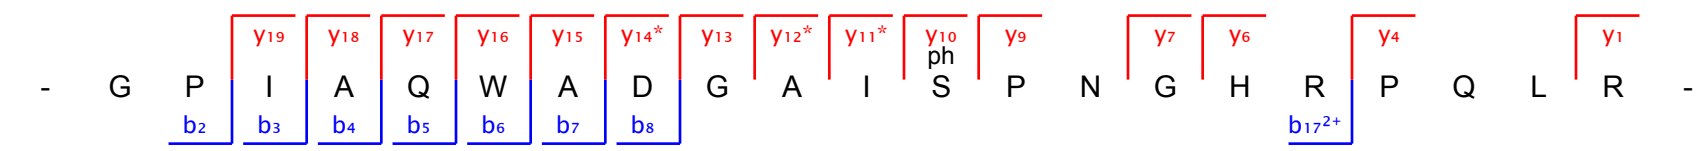

Raw file 20150812\_A375SR\_Phospho\_BR1\_07 Scan 19825 Method FTMS; HCD Score 78.75 m/z 1200.92 Gene names ATXN2L

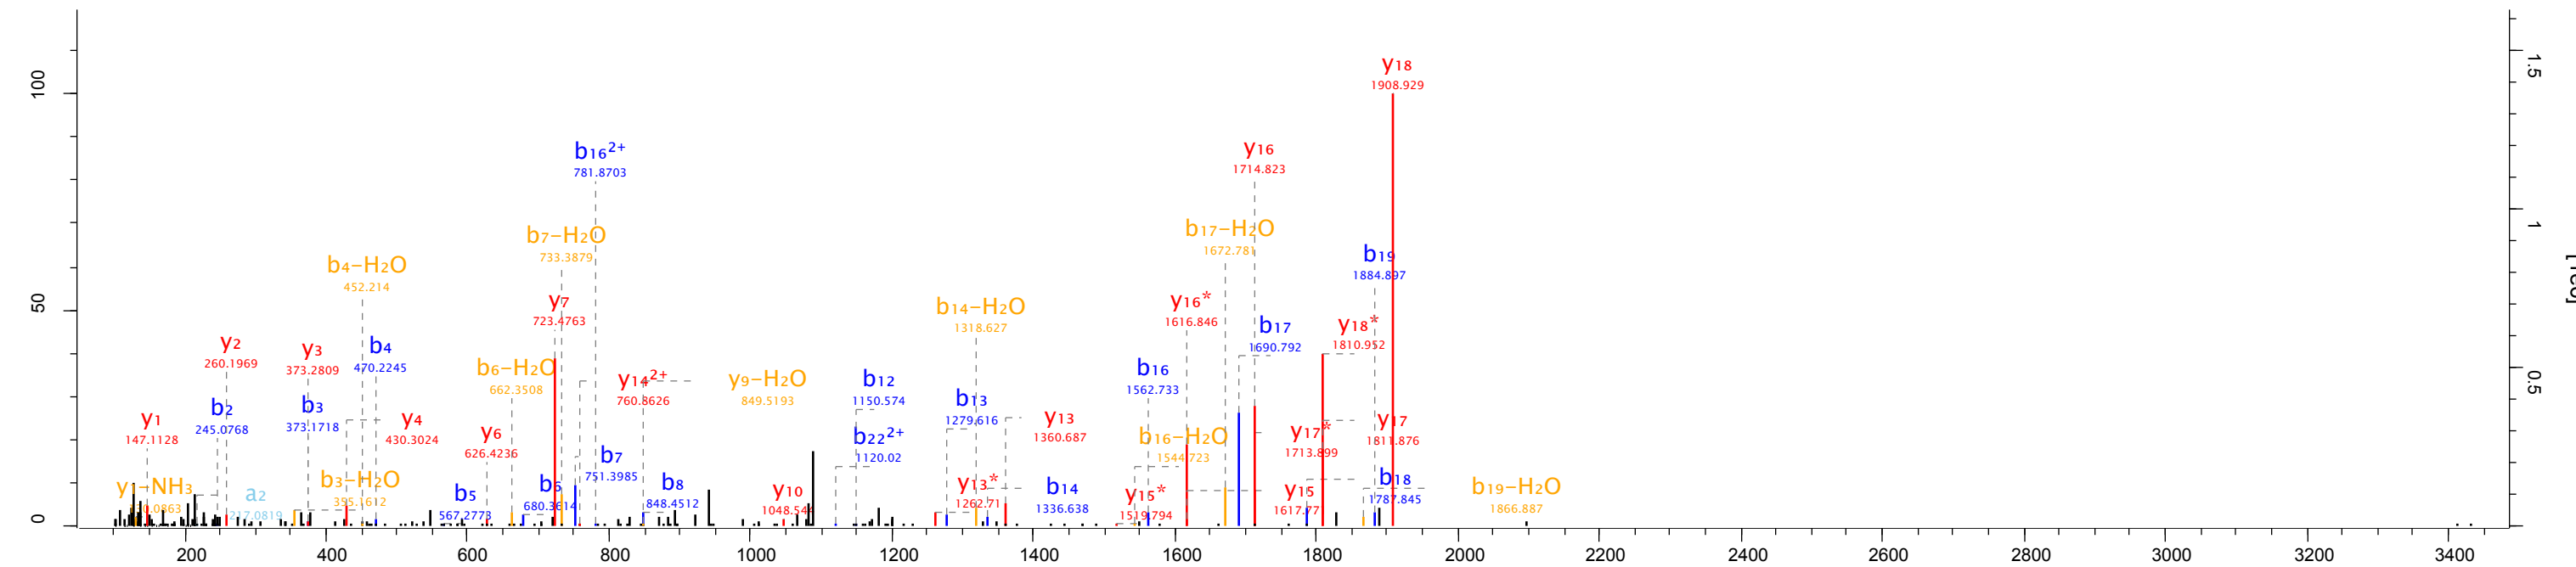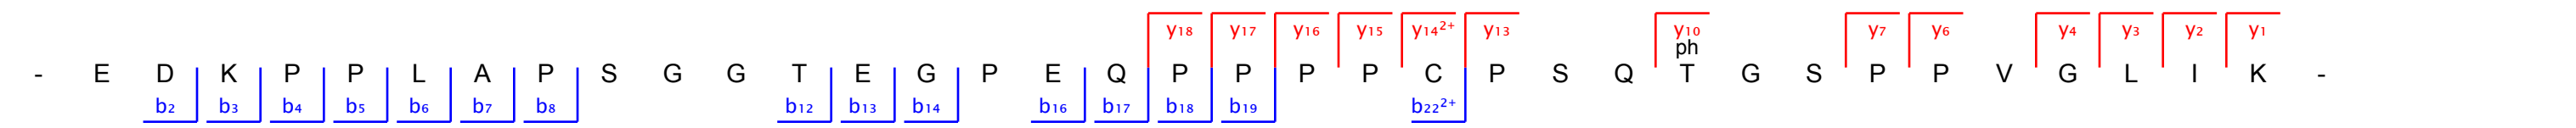

Raw file Scan Method Score m/z Gene names

20150812\_A375SR\_Phospho\_BR1\_07

21635 FTMS; HCD 61.54 1153.51 SIRT1

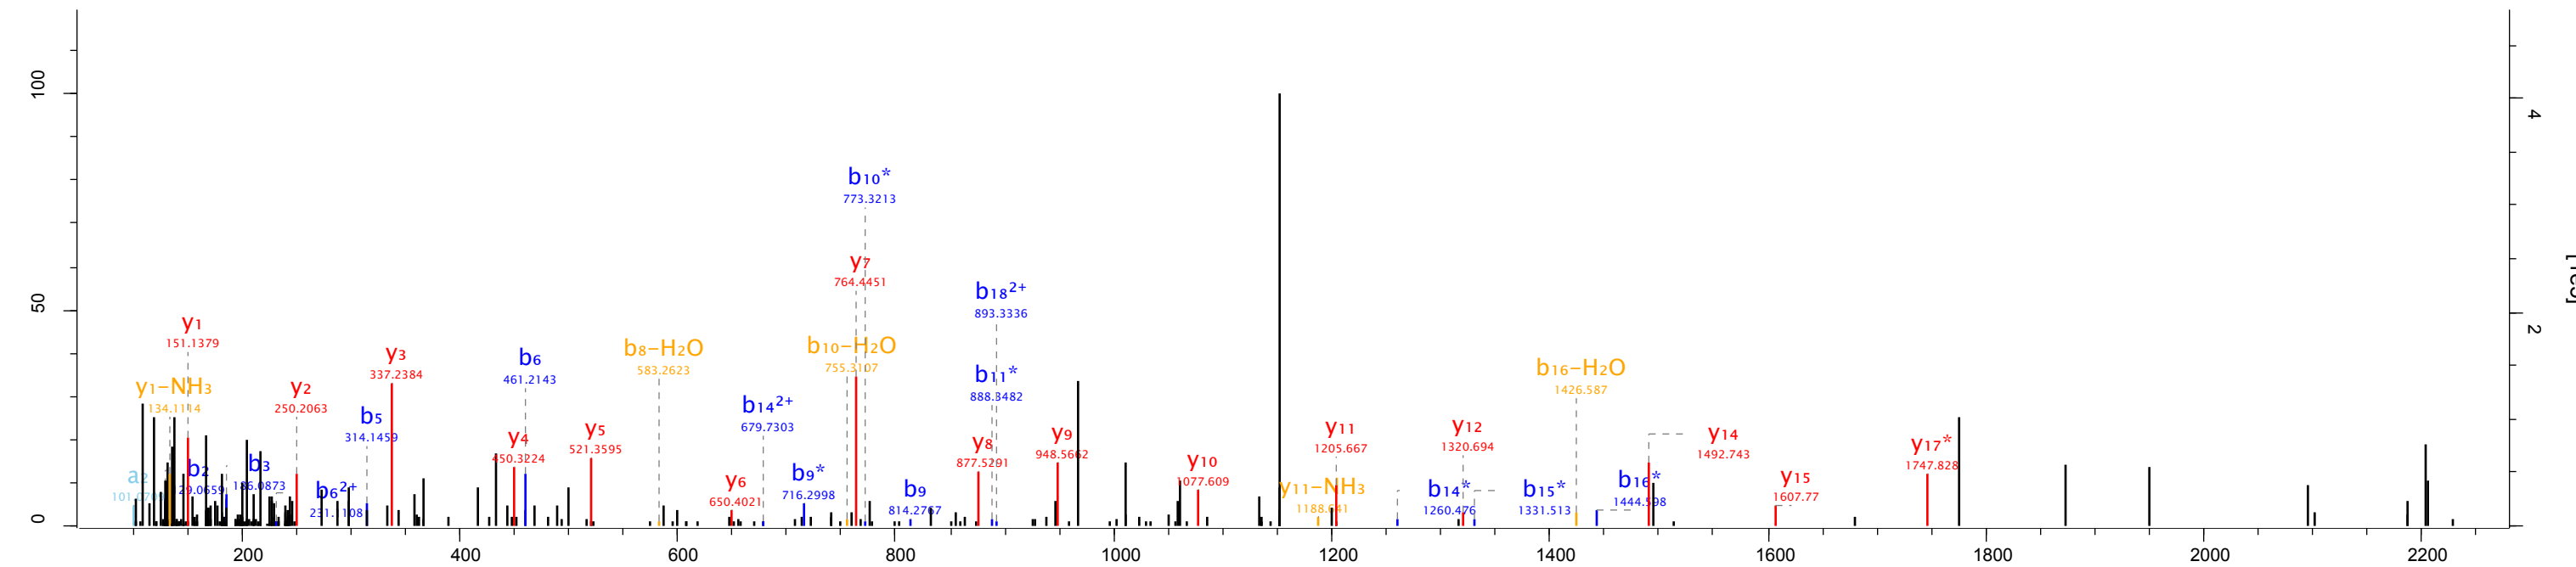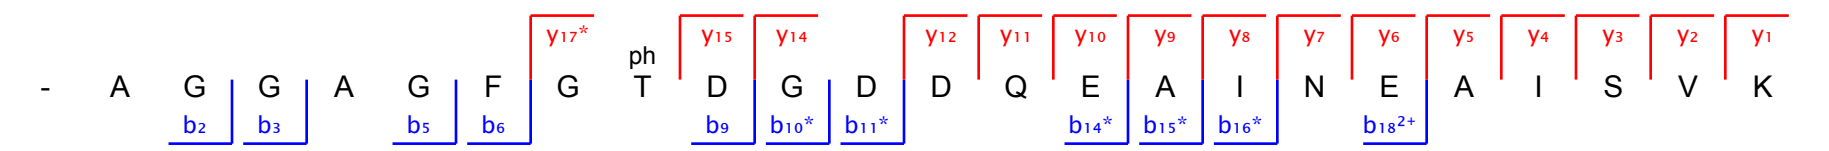

Raw file  
20150812\_A375SR\_Phospho\_BR1\_07

Scan 22505 Method FTMS; HCD Score 235.53 m/z 904.97 Gene names YAP1

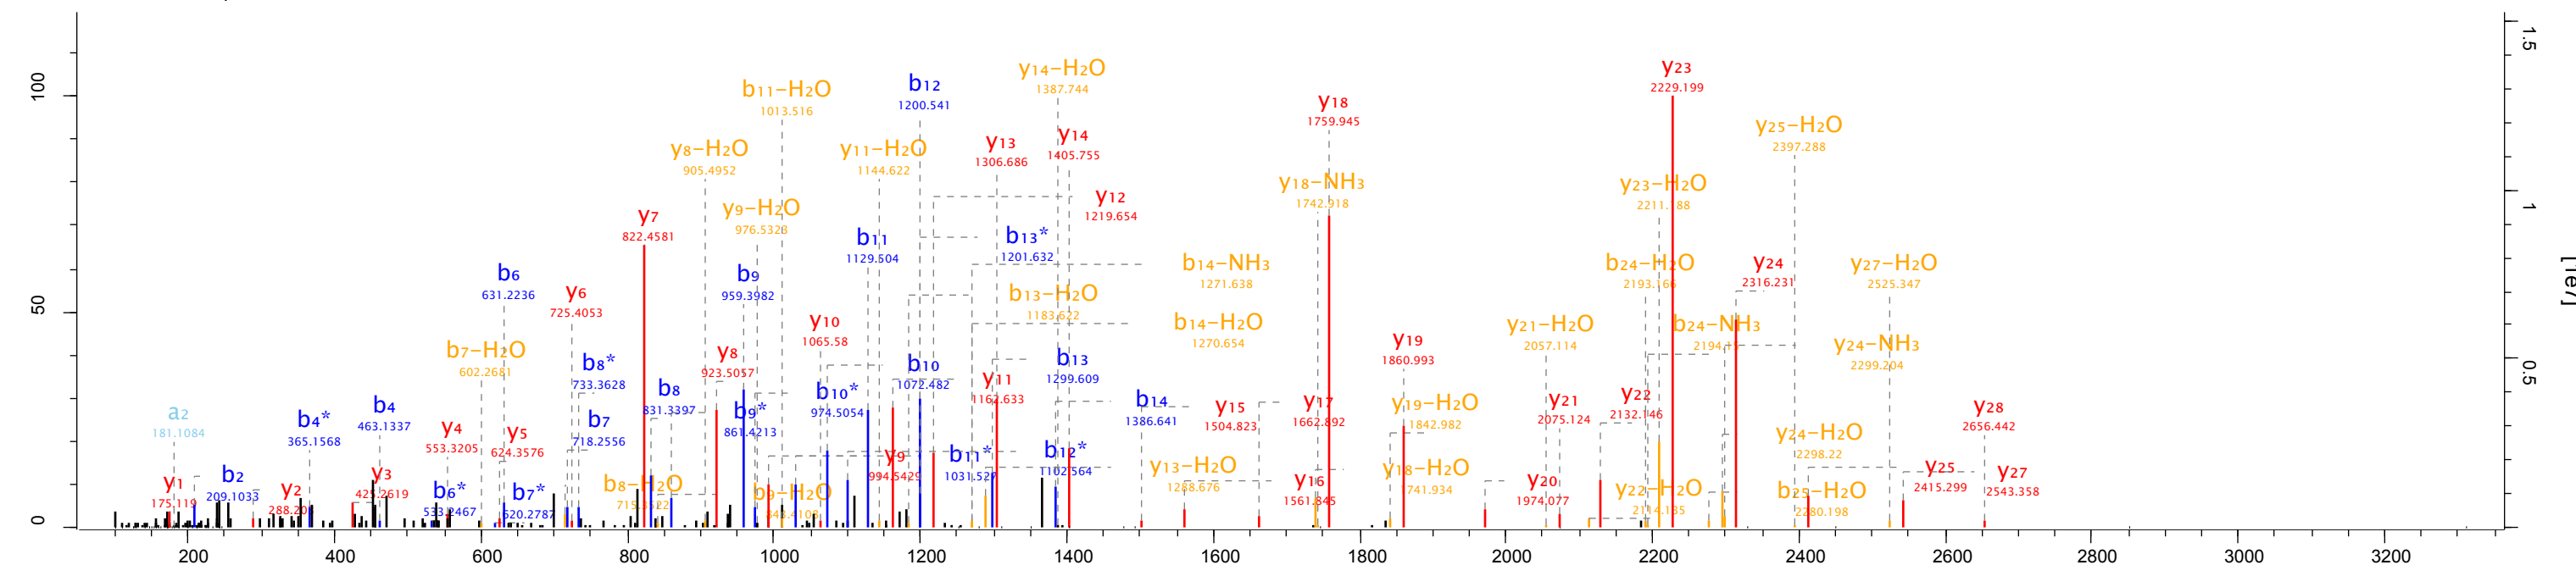

- A H S S P A S L Q L G A V S P G T L T P T G V V S G P A A T P T A Q H L R -

ph

b2 b4 b6 b7 b8 b9 b10 b11 b12 b13 b14

y1 y2 y3 y4 y5 y6 y7 y8 y9 y10 y11 y12 y13 y14 y15 y16 y17 y18 y19 y20 y21 y22 y23 y24 y25 y27 y28

Raw file: 20150812\_A375SR\_Phospho\_BR1\_07  
 Scan: 22845 Method: FTMS; HCD Score: 157.07 m/z: 757.38 Gene names: EIF4ENIF1

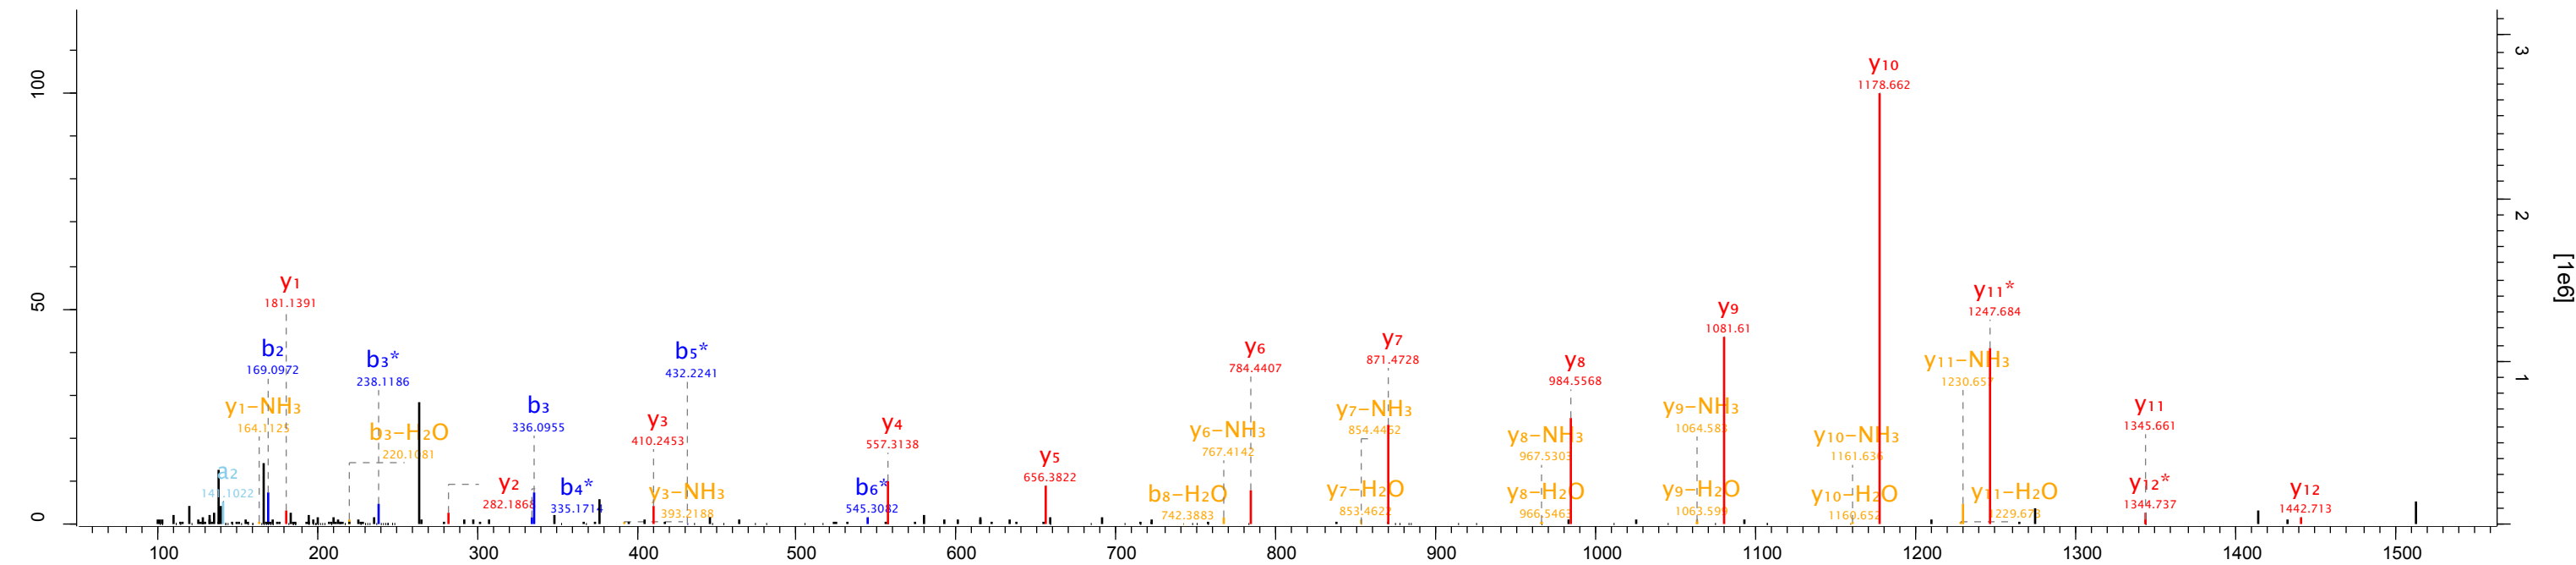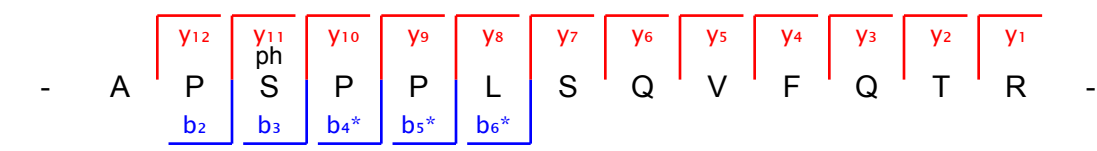

Raw file: 20150812\_A375SR\_Phospho\_BR1\_07  
 Scan: 3135 Method: FTMS; HCD Score: 122.29 m/z: 504.58 Gene names: PIKFYVE

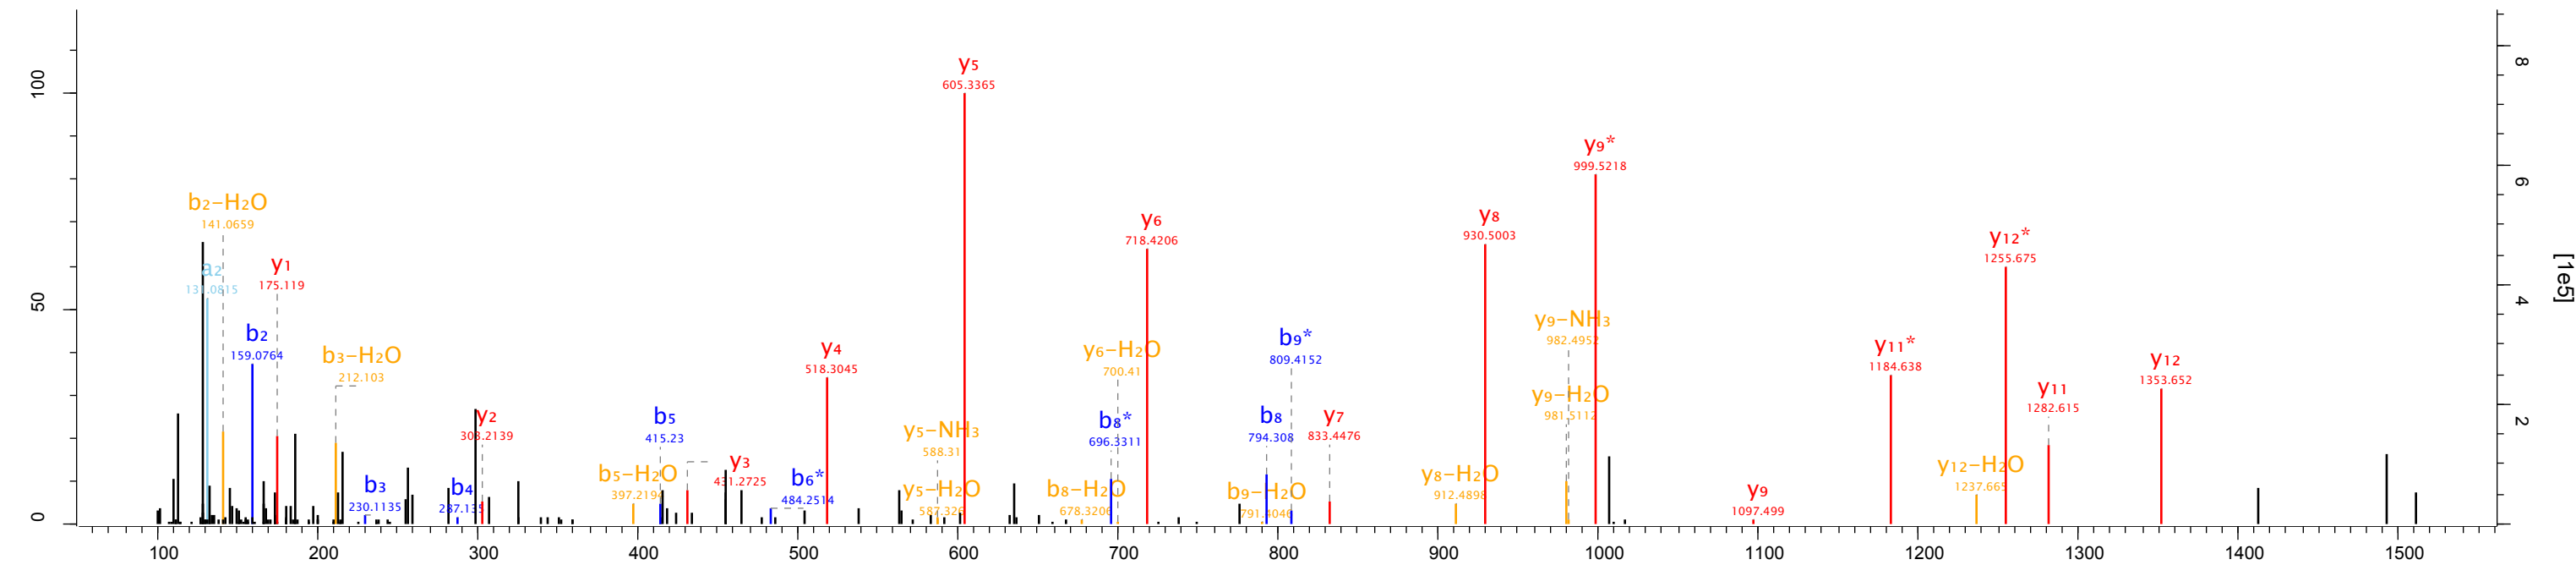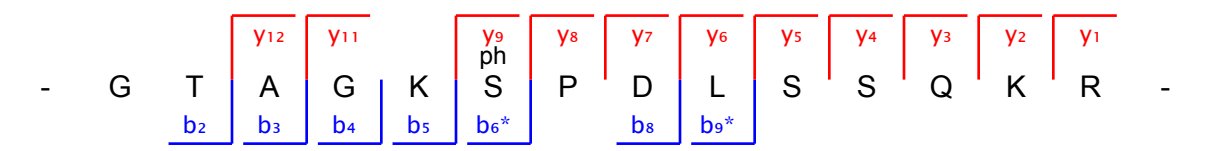



Raw file: 20150812\_A375SR\_Phospho\_BR1\_07  
 Scan: 3425 Method: FTMS; HCD Score: 146.88 m/z: 692.81 Gene names: TRIO

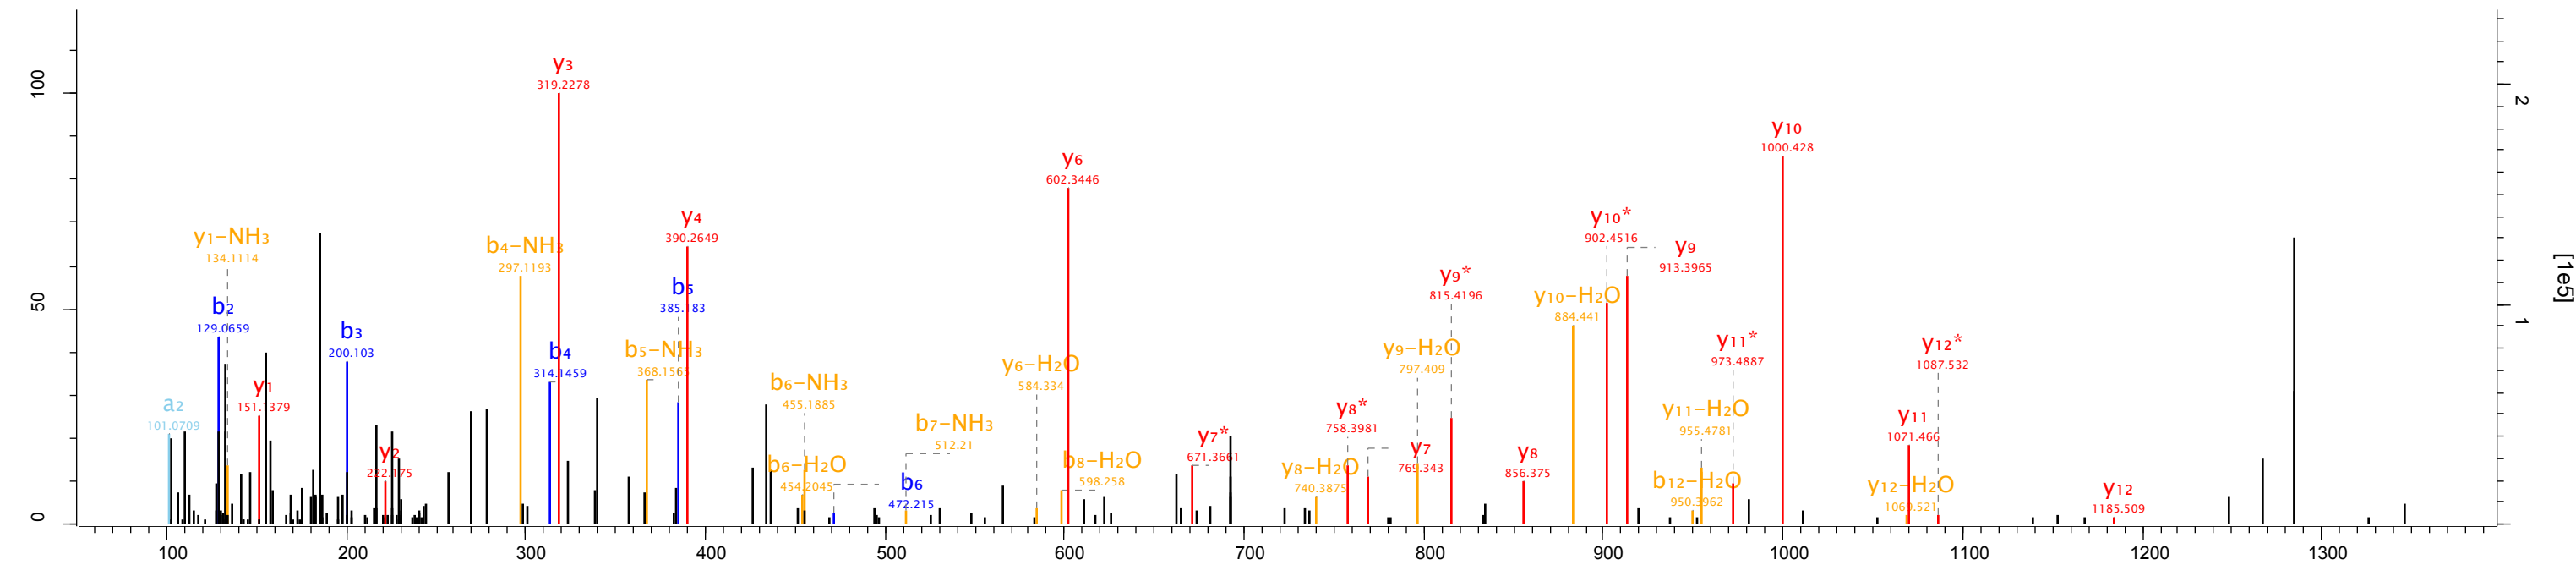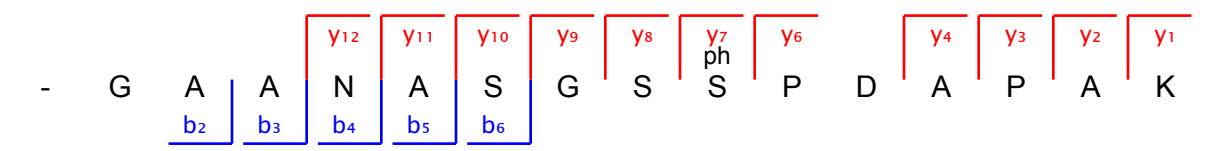

Raw file 20150812\_A375SR\_Phospho\_BR1\_07 Scan 3995 Method FTMS; HCD Score 73.33 m/z 460.72 Gene names CIC

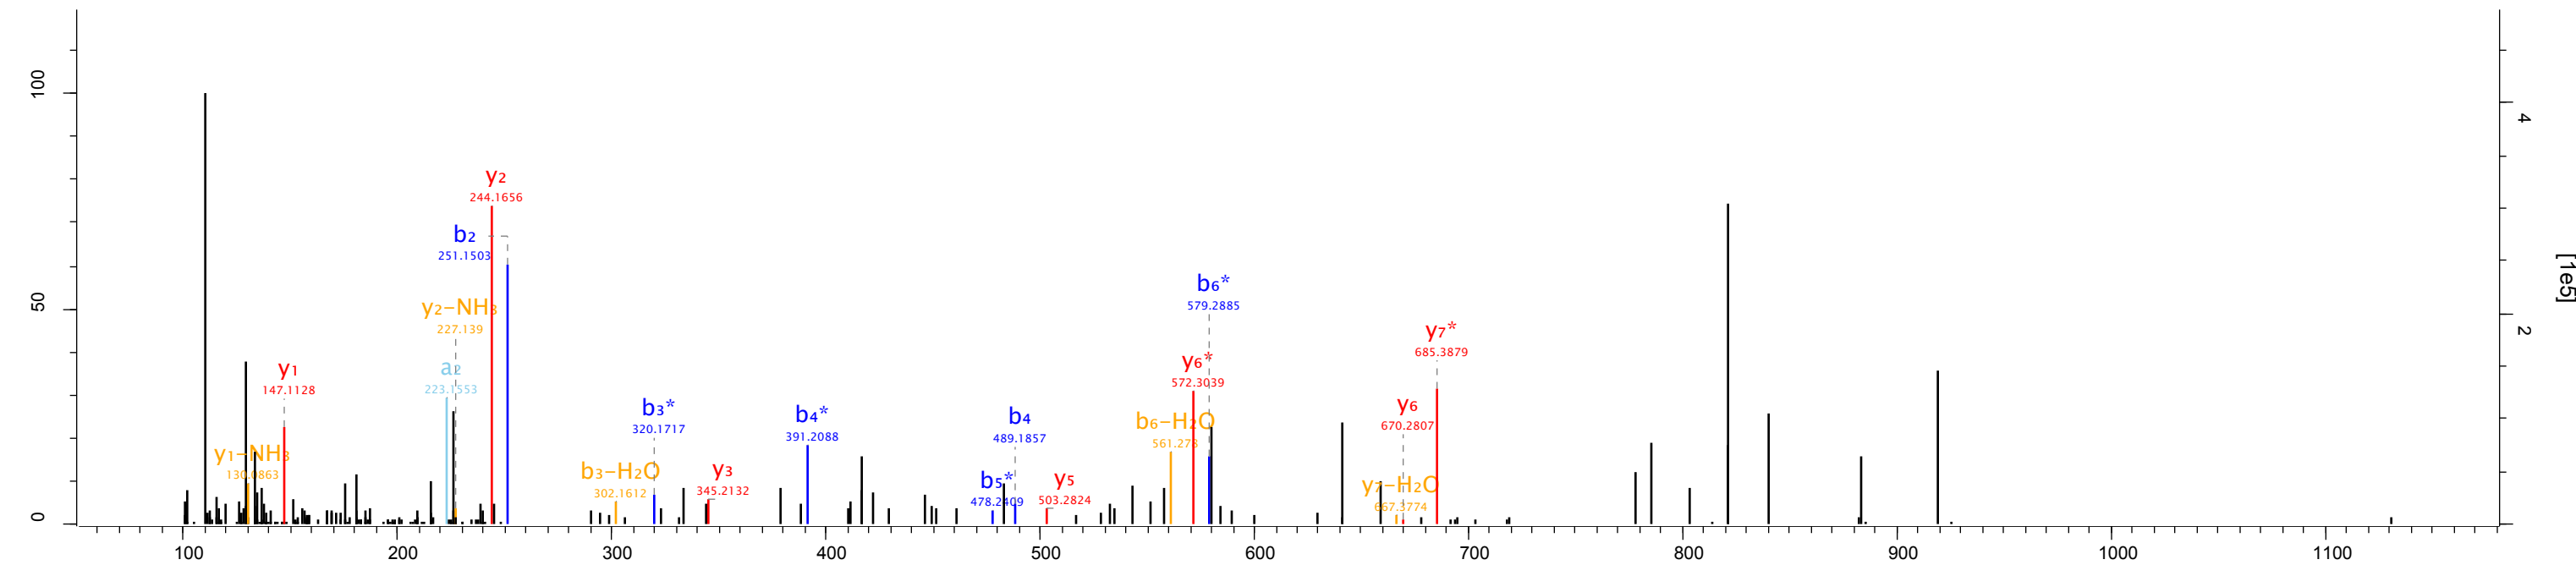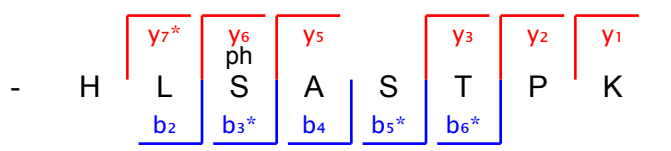

Raw file: 20150812\_A375SR\_Phospho\_BR1\_07  
 Scan: 4235 Method: FTMS; HCD Score: 79.89 m/z: 578.26 Gene names: STX12

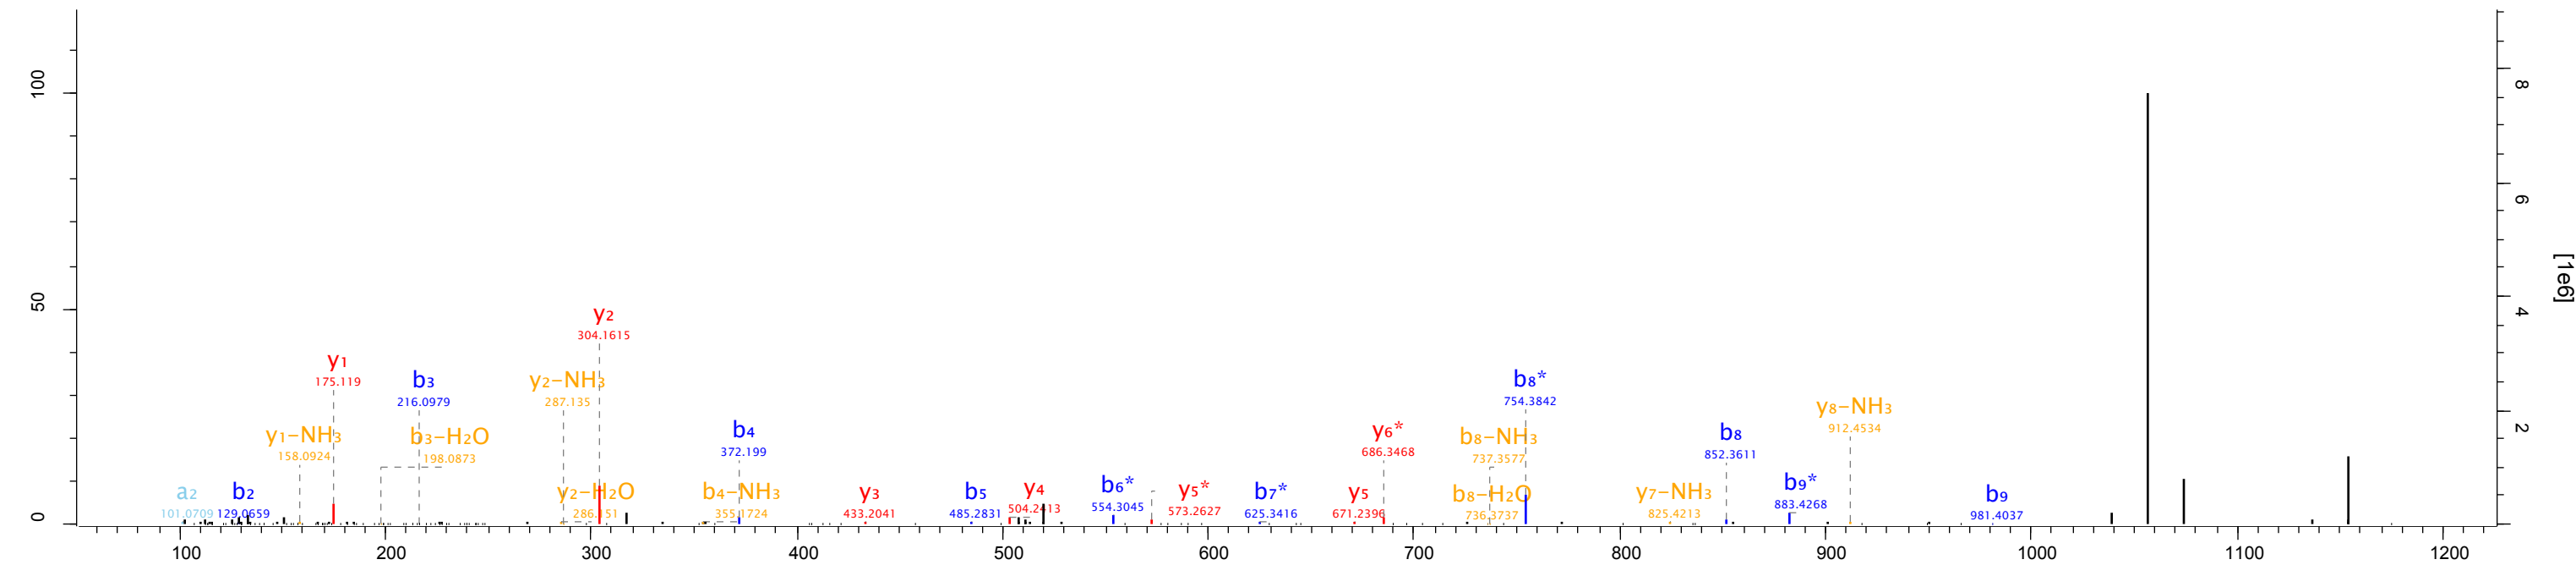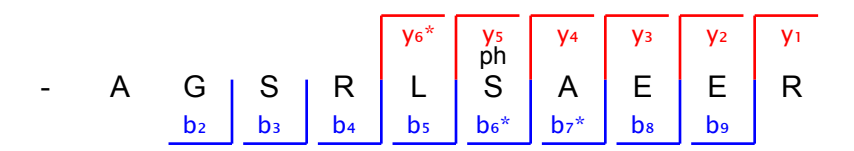

Raw file: 20150812\_A375SR\_Phospho\_BR1\_07  
 Scan: 4985 Method: FTMS; HCD Score: 134.81 m/z: 457.91 Gene names: SRRM1

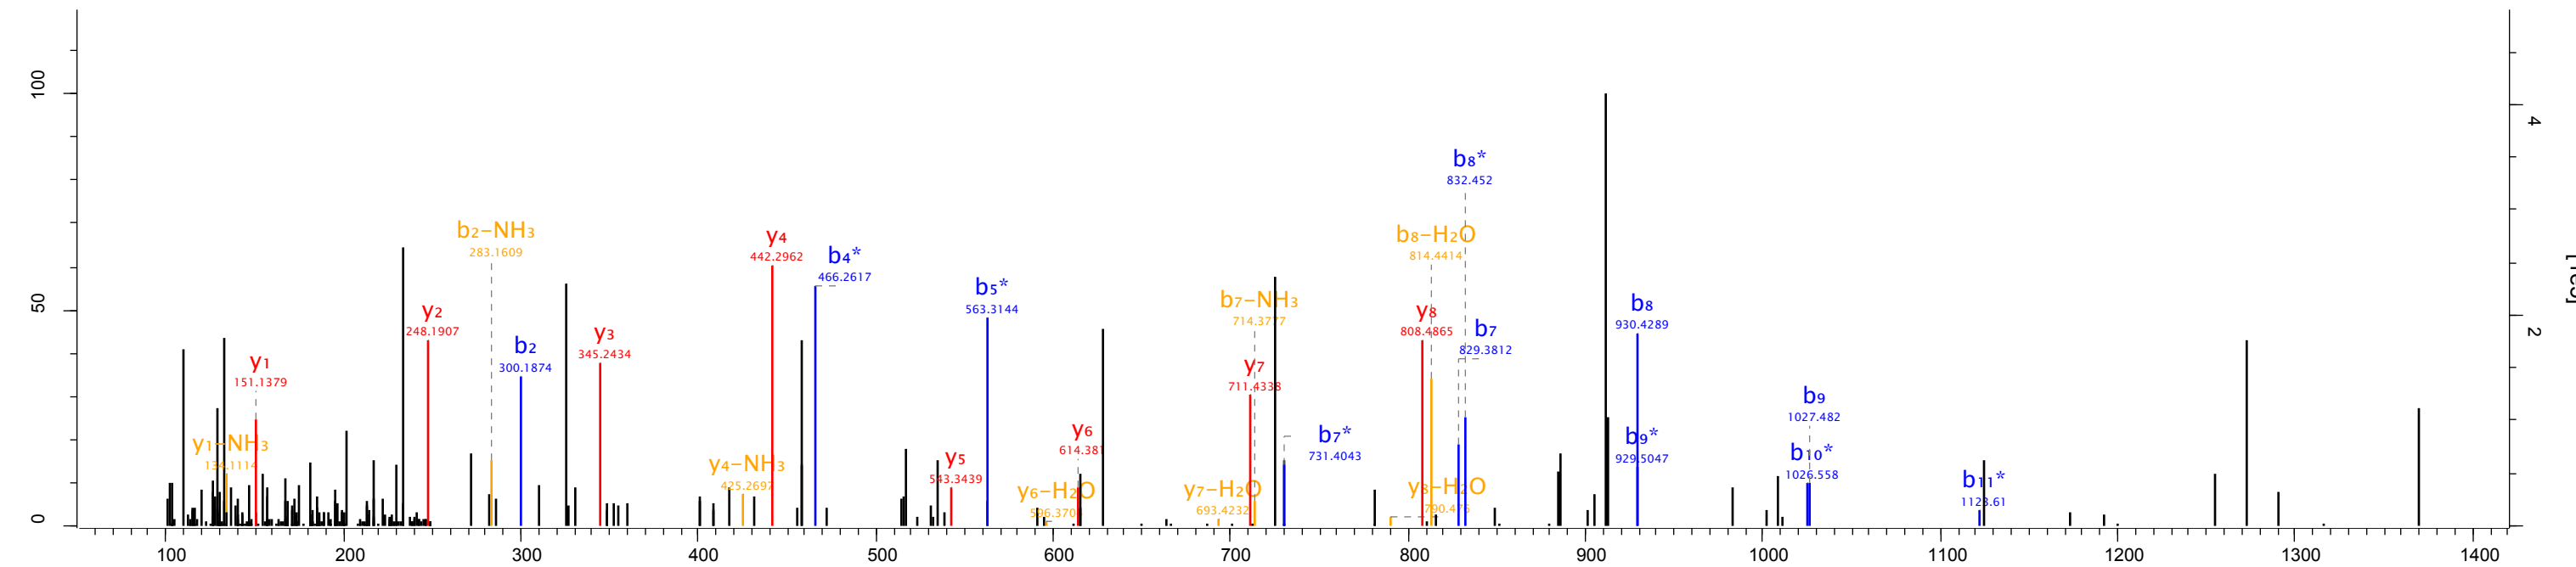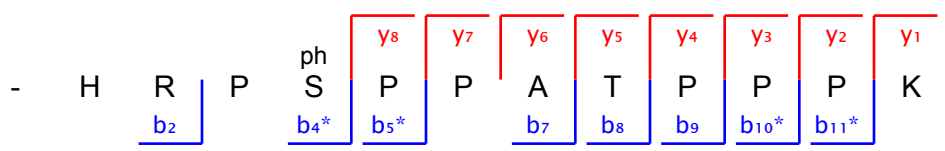

Raw file: 20150812\_A375SR\_Phospho\_BR1\_07  
 Scan: 7805 Method: FTMS; HCD Score: 194.32 m/z: 707.82 Gene names: CBX8

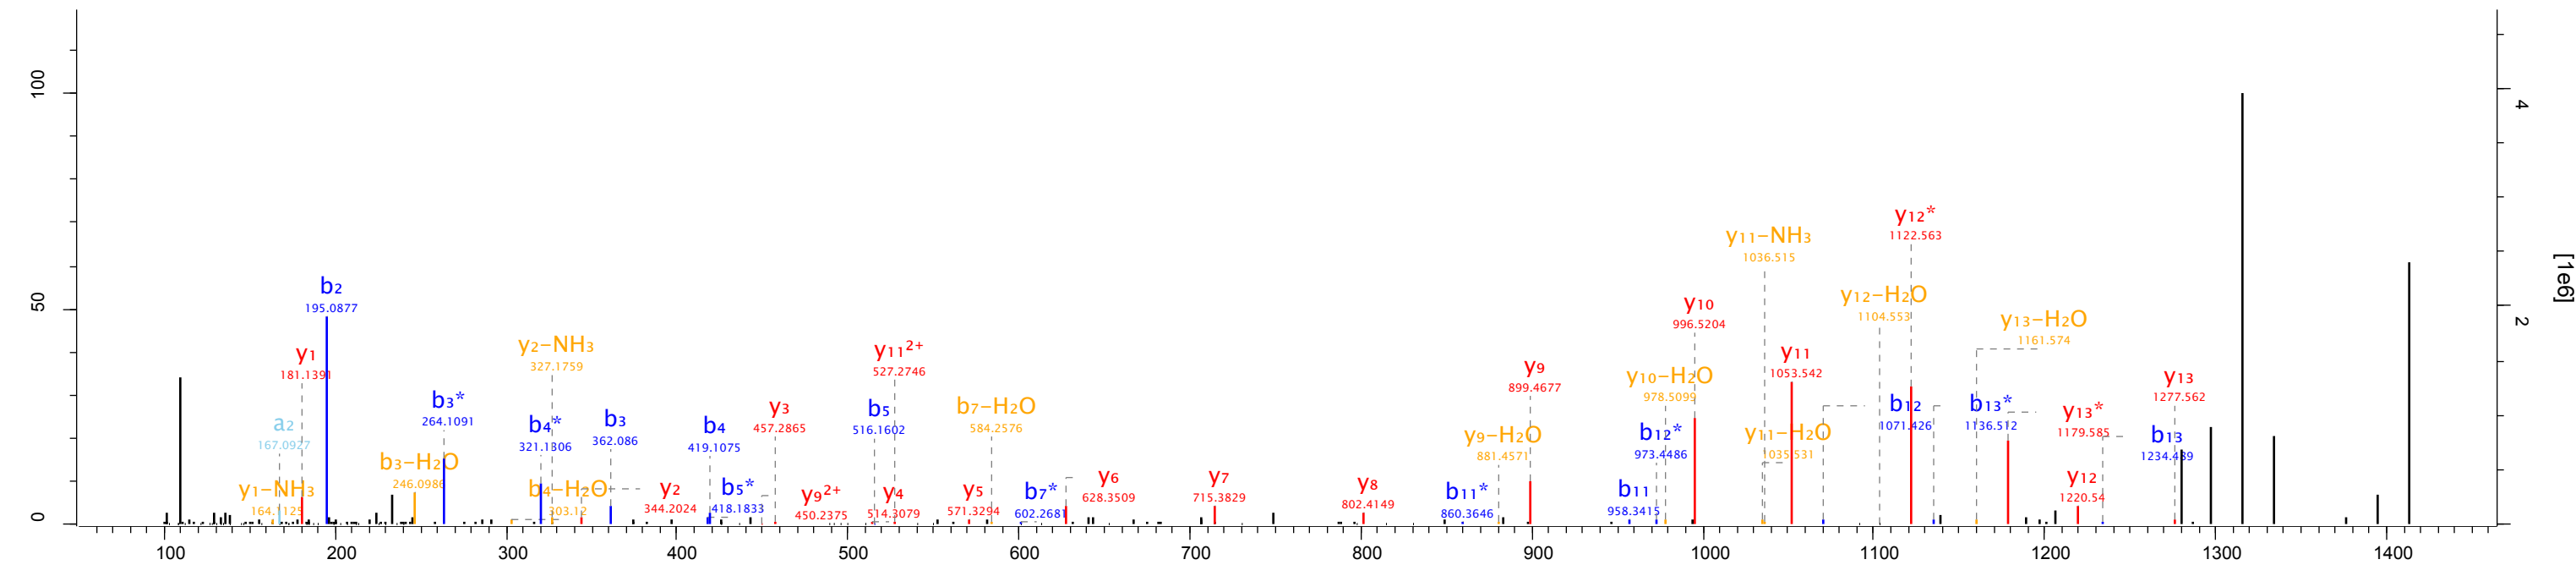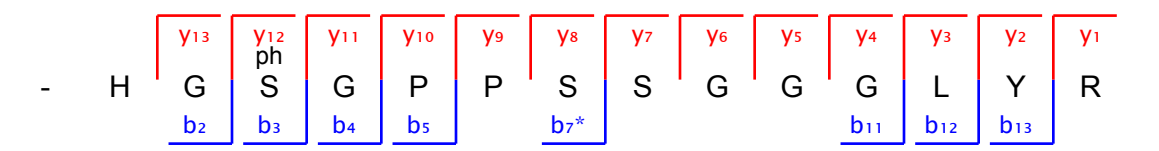

Raw file  
20150812\_A375SR\_Phospho\_BR1\_08

Scan 10315 Method FTMS; HCD Score 135.36 m/z 584.27 Gene names PHLDB2

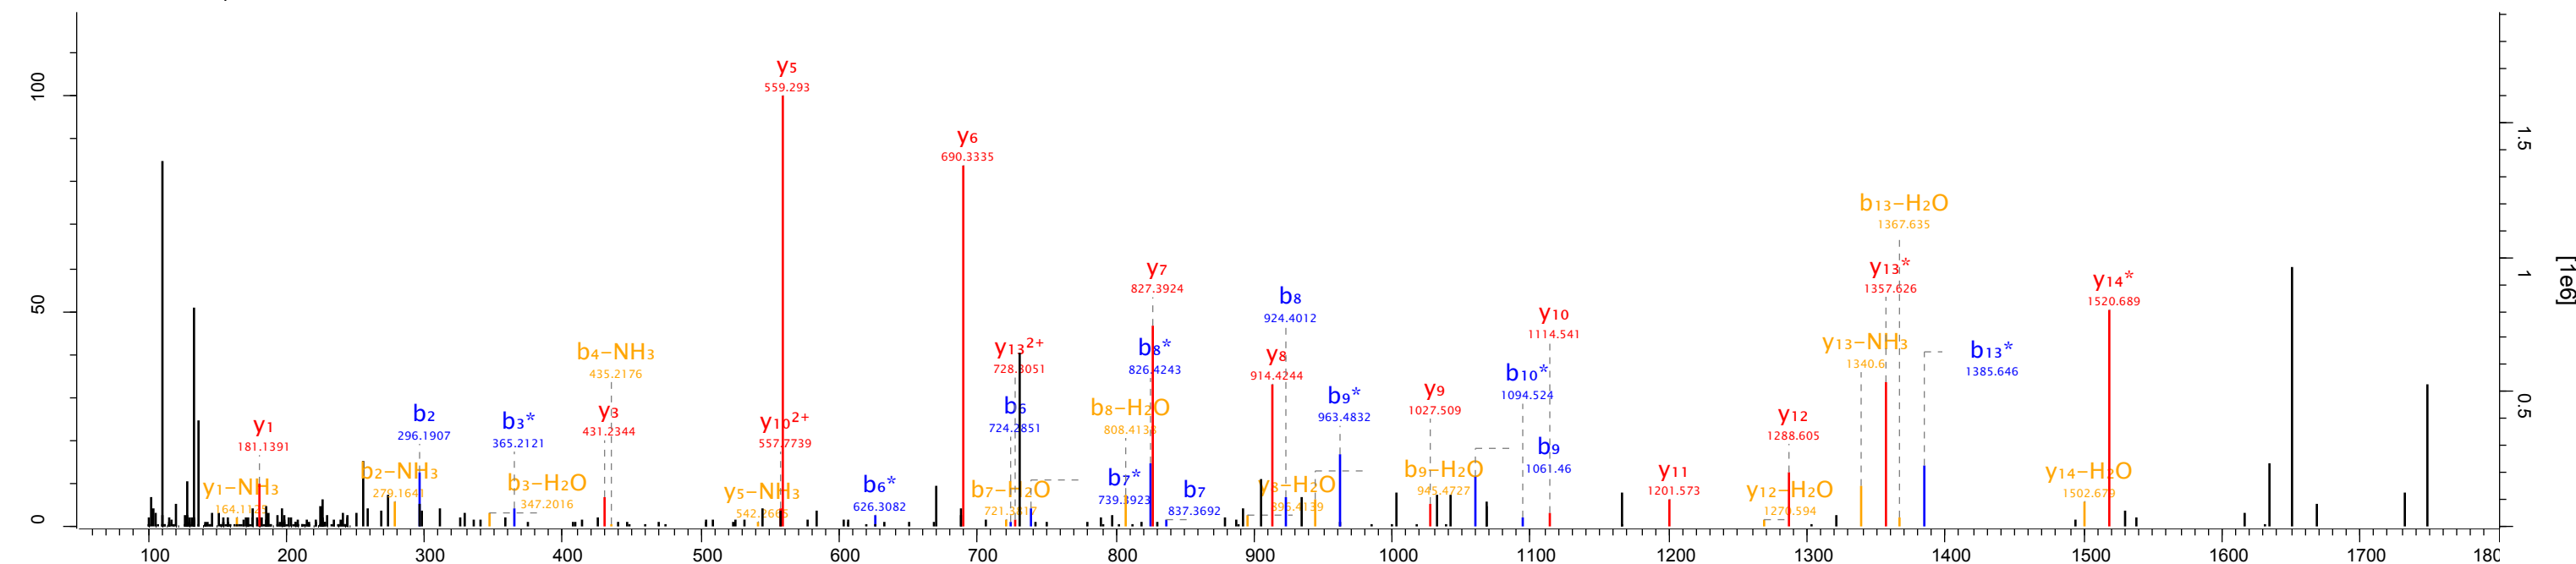

- K Y S S S L S H M G A Y S R -  
b2 b3\* b6 b7 b8 b9 b10\* b13\*

Raw file 20150812\_A375SR\_Phospho\_BR1\_08 Scan 10855 Method FTMS; HCD Score 58.25 m/z 648.97 Gene names THRAP3

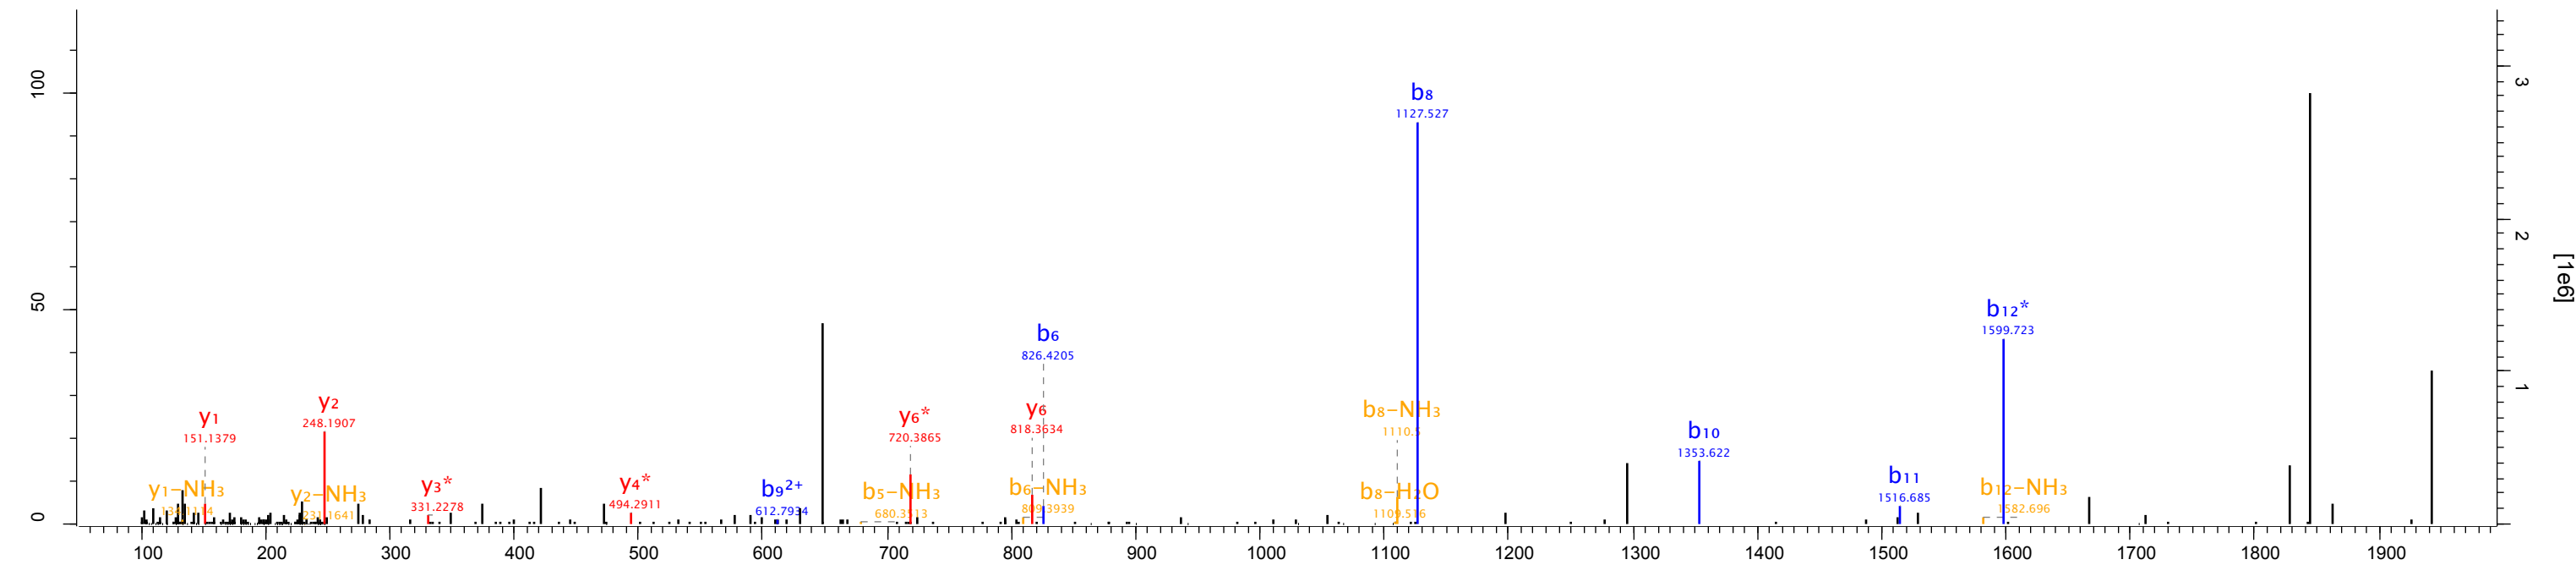

- R N R E E E W D P E Y T P K -

b6
b8
b9<sup>2+</sup>
b10
b11
b12\*
y6
y4\*
y3\*  
ph
y2
y1

Raw file 20150812\_A375SR\_Phospho\_BR1\_08 Scan 11455 Method FTMS; HCD Score 66.56 m/z 524.21 Gene names ANKRD11

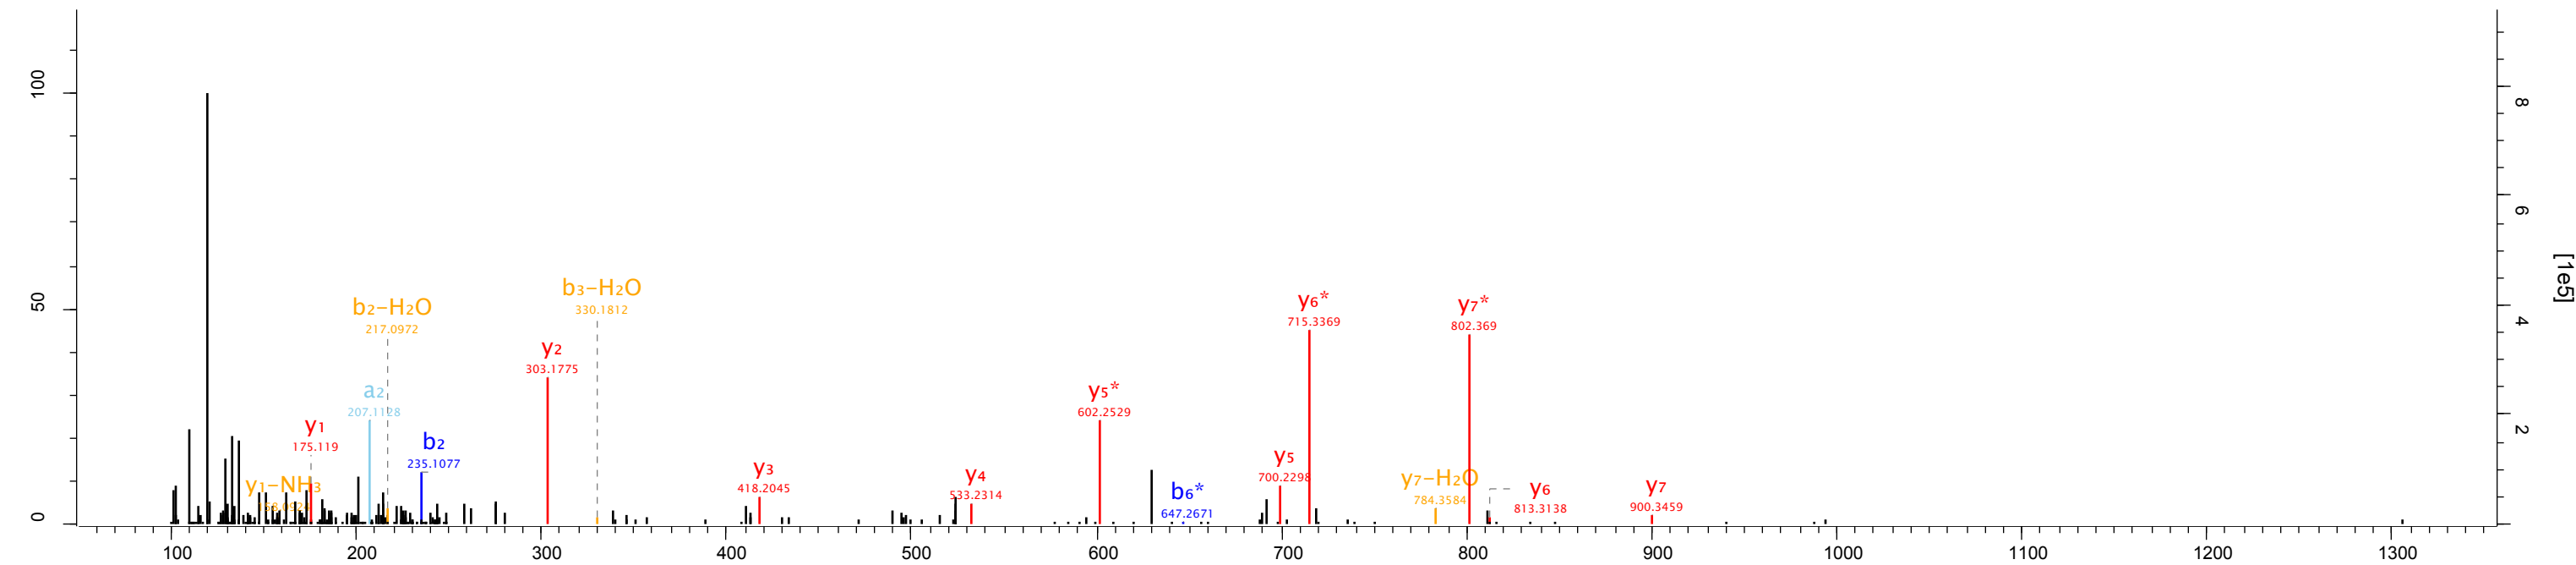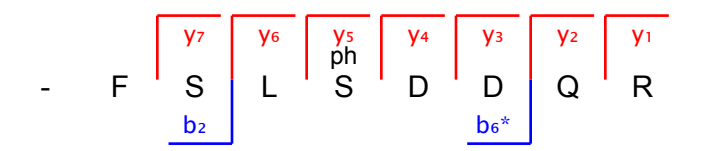



Raw file 20150812\_A375SR\_Phospho\_BR1\_08 Scan 12385 Method FTMS; HCD Score 165.87 m/z 745.82 Gene names LMNA

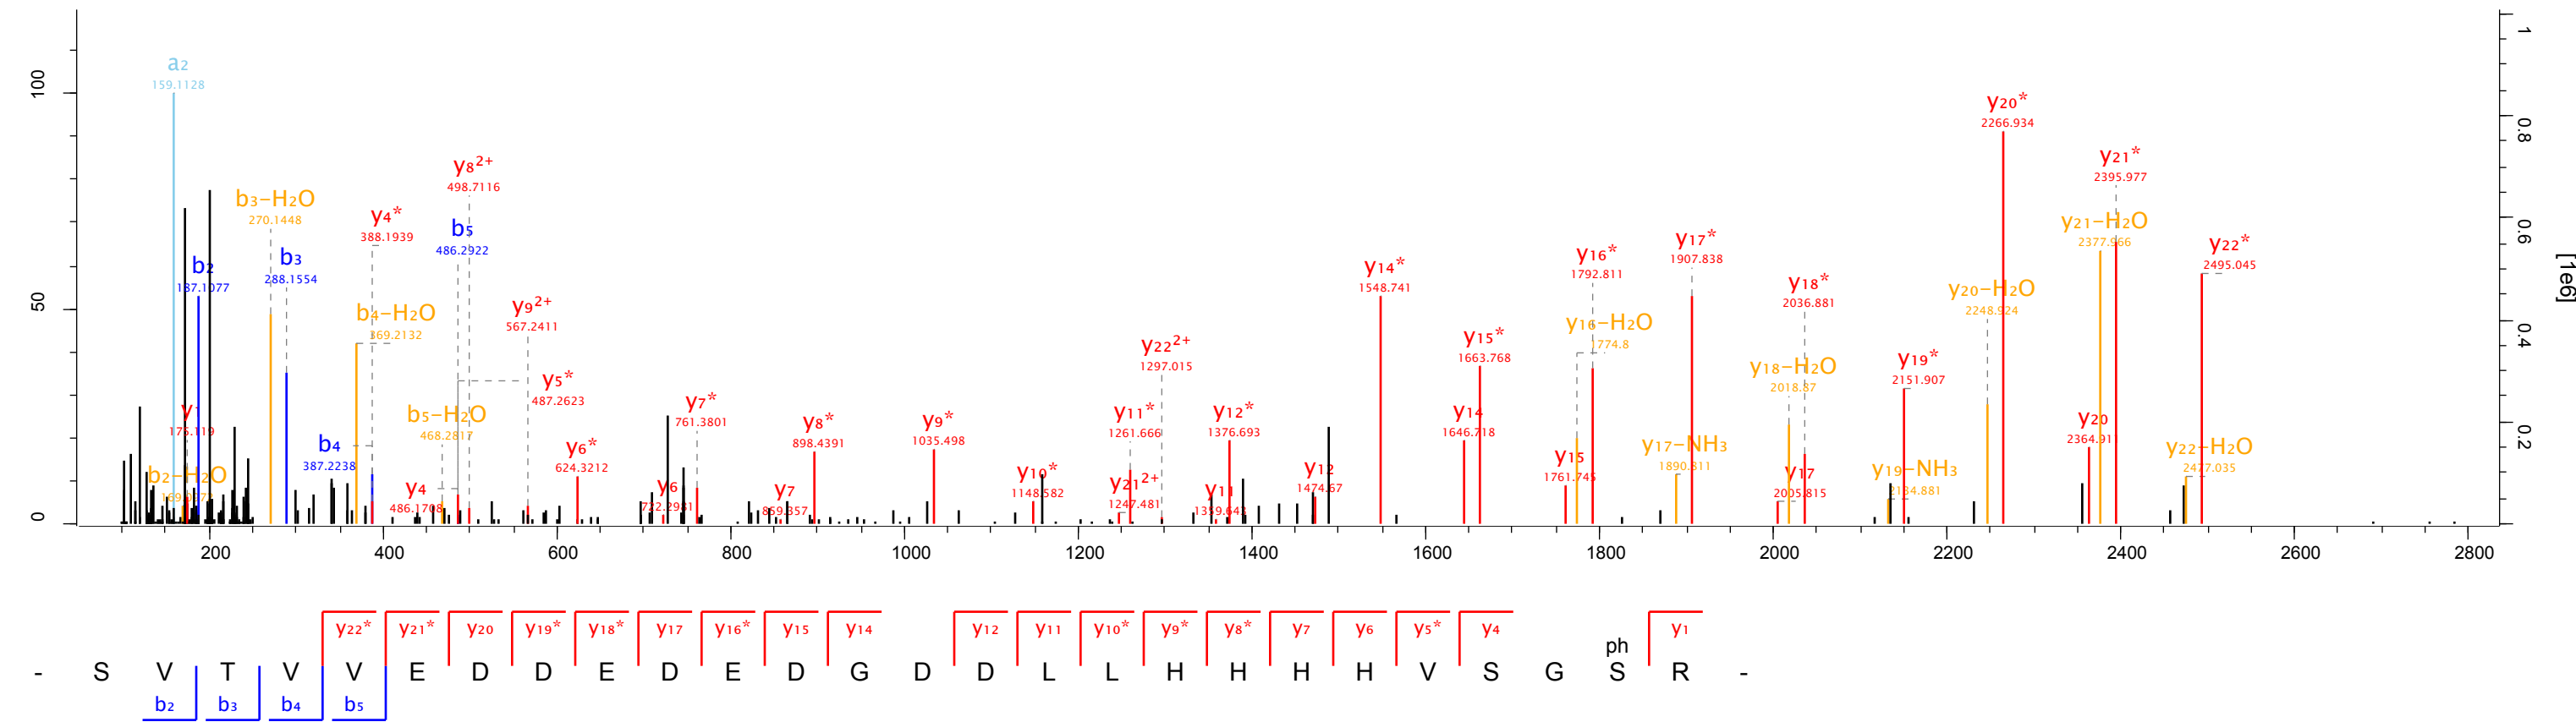

Raw file: 20150812\_A375SR\_Phospho\_BR1\_08  
 Scan: 1275 Method: FTMS; HCD Score: 199.51 m/z: 594.8 Gene names: THRAP3

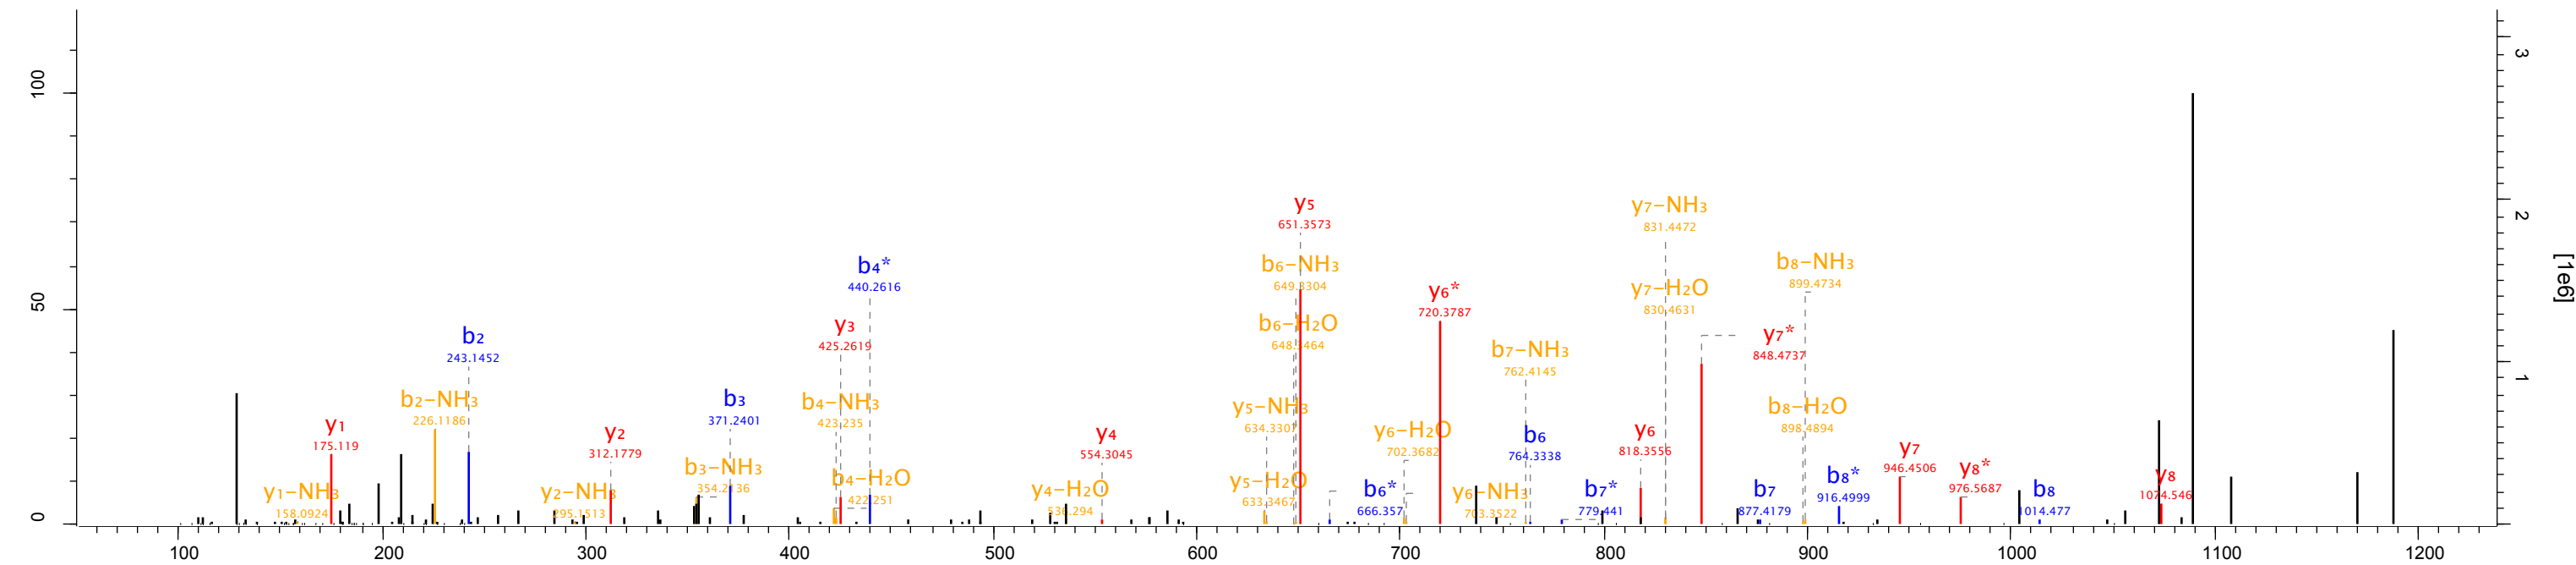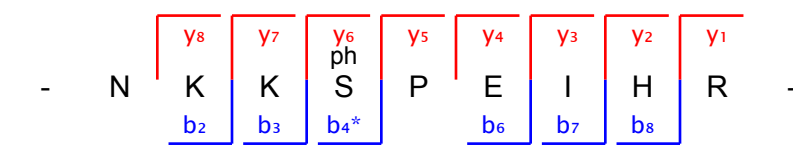

Raw file 20150812\_A375SR\_Phospho\_BR1\_08 Scan 12935 Method FTMS; HCD Score 131.41 m/z 974.43 Gene names ZHX3

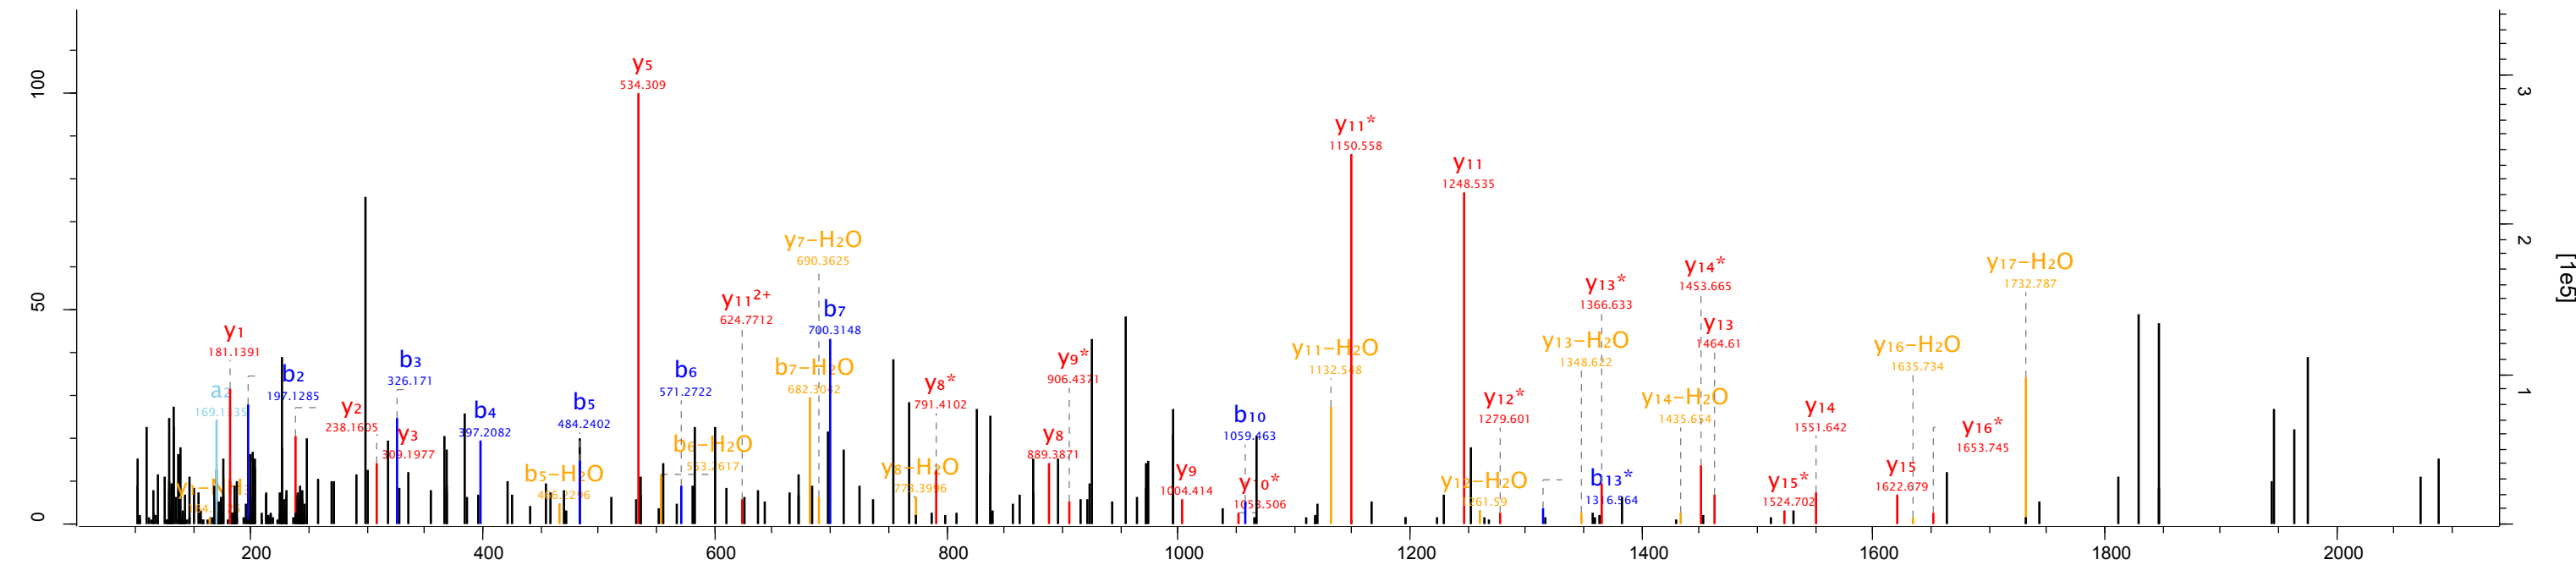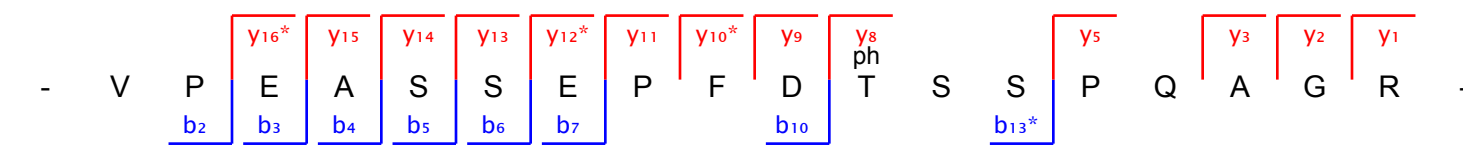

Raw file 20150812\_A375SR\_Phospho\_BR1\_08 Scan 12955 Method FTMS; HCD Score 186.39 m/z 873.08 Gene names SART1

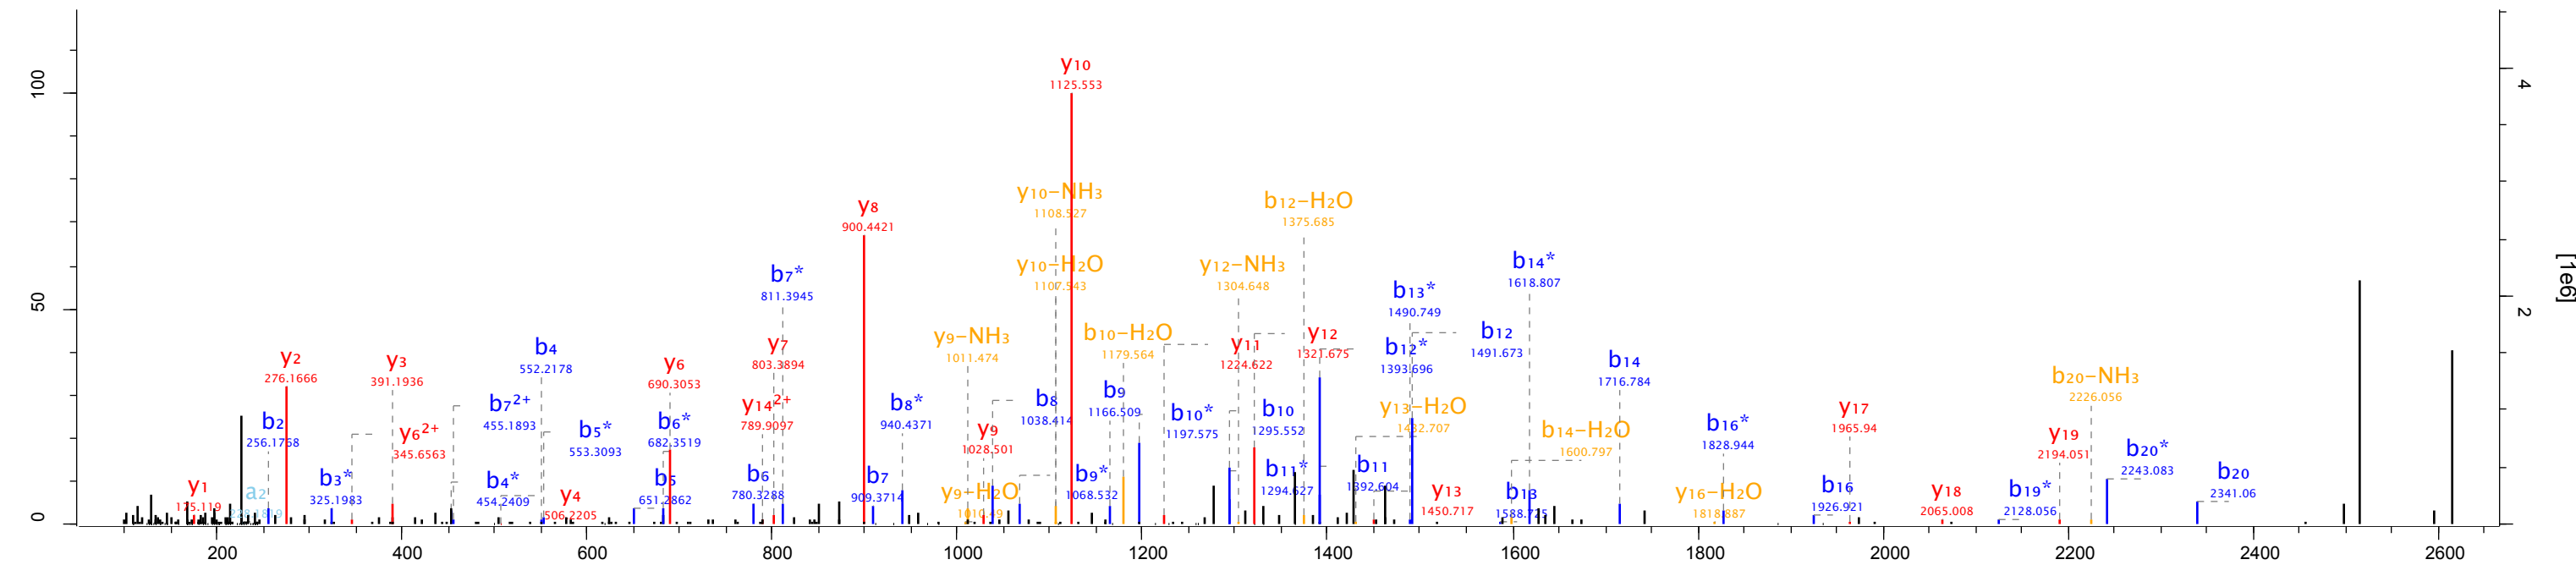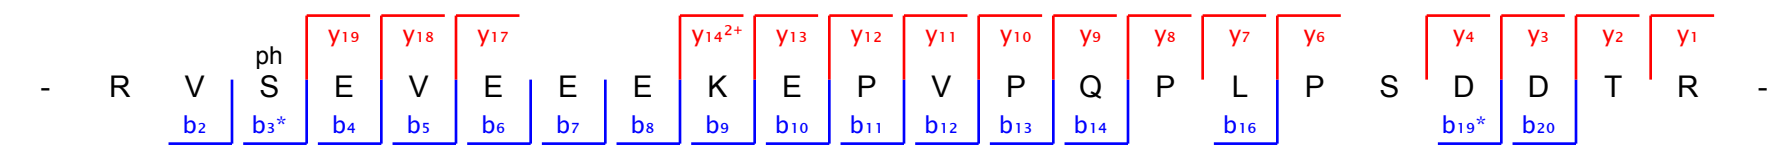

Raw file 20150812\_A375SR\_Phospho\_BR1\_08 Scan 13155 Method FTMS; HCD Score 123.32 m/z 674.67 Gene names VIM

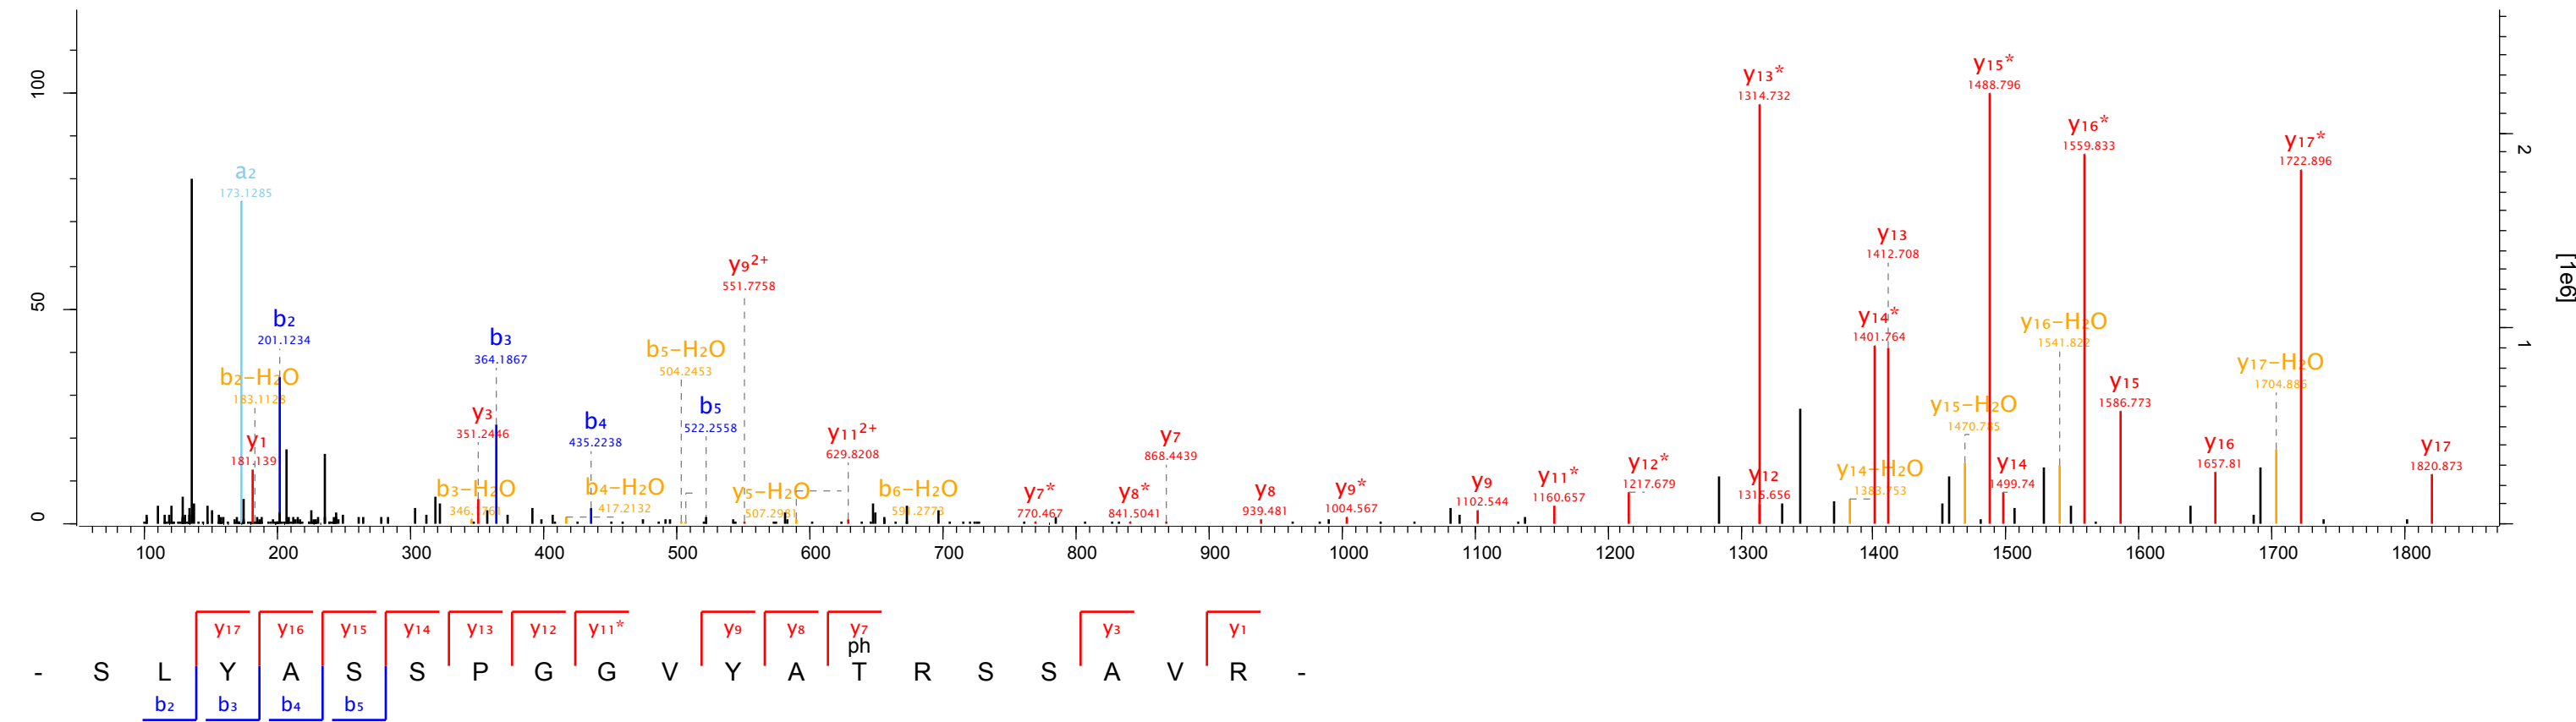

Raw file 20150812\_A375SR\_Phospho\_BR1\_08 Scan 13595 Method FTMS; HCD Score 100.27 m/z 775.88 Gene names DUT

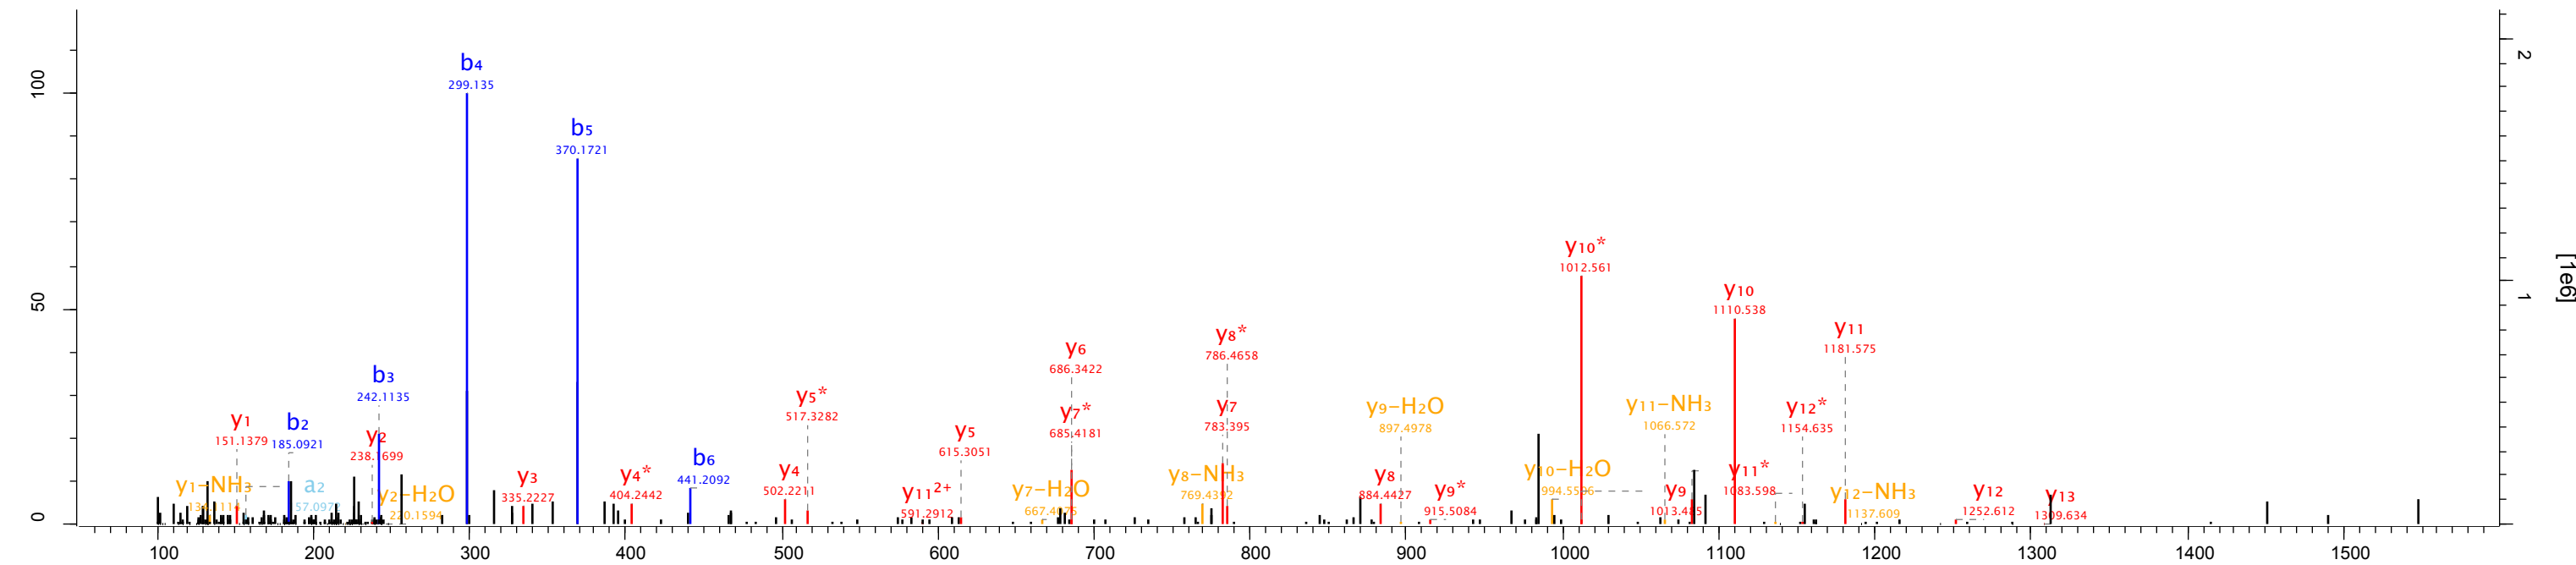

ac  
 - A A G G A A P E T P A I S P S K -  
 b2 b3 b4 b5 b6

Raw file: 20150812\_A375SR\_Phospho\_BR1\_08  
 Scan: 14575 Method: FTMS; HCD Score: 137.52 m/z: 764.37 Gene names: USP5

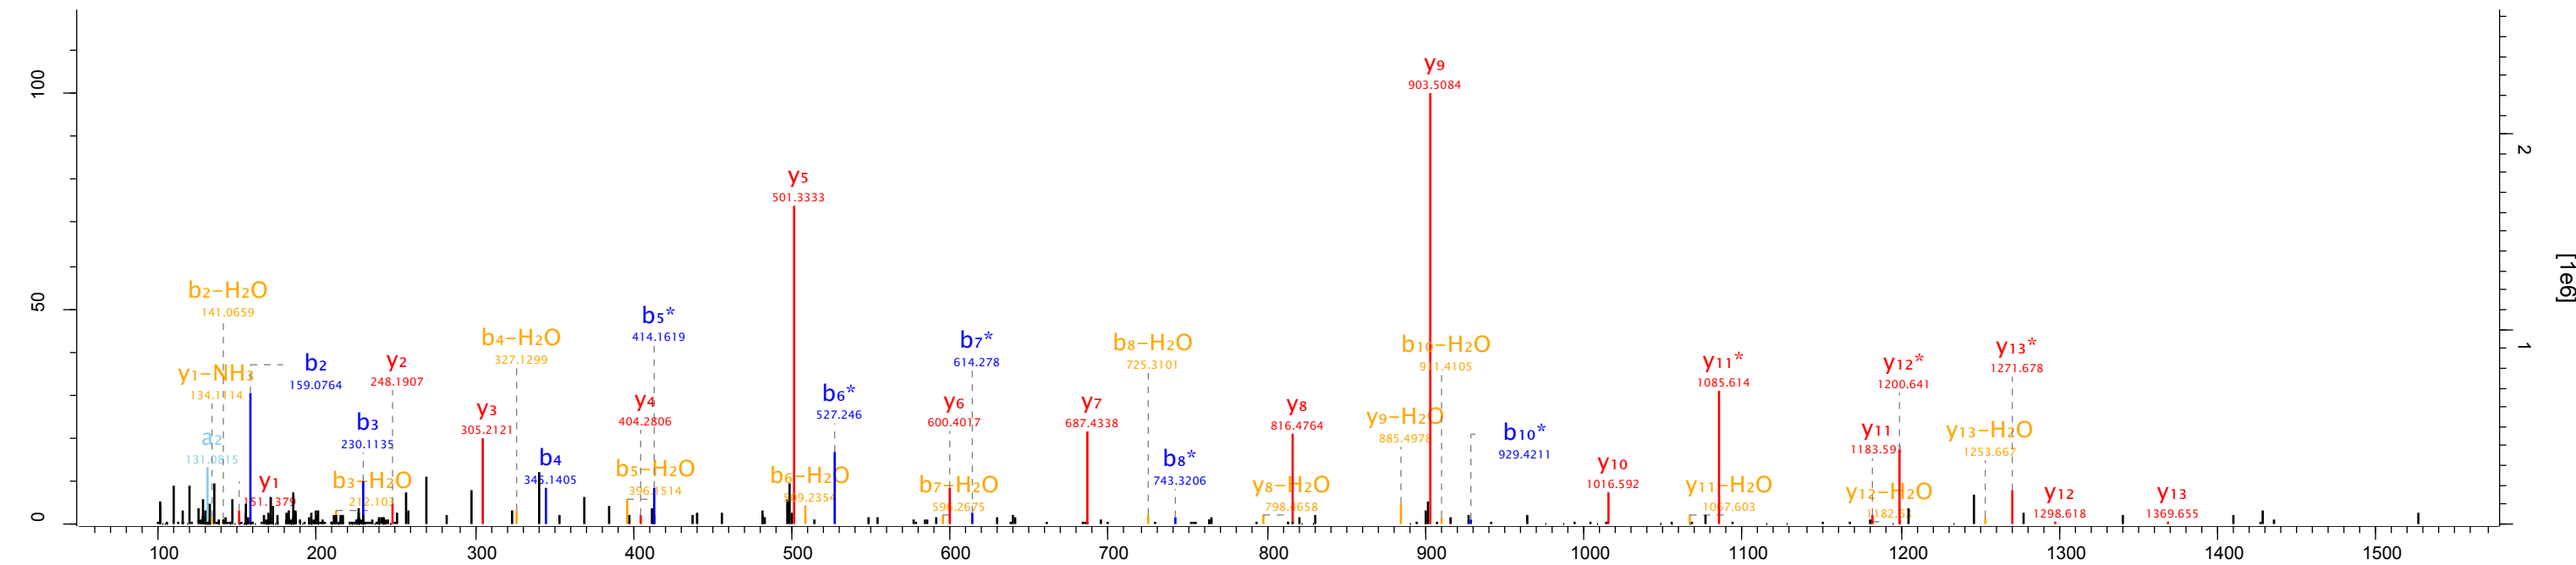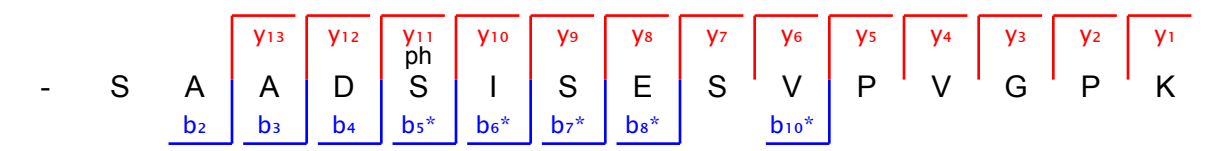

Raw file: 20150812\_A375SR\_Phospho\_BR1\_08  
 Scan: 14635  
 Method: FTMS; HCD  
 Score: 209.45  
 m/z: 1103.56  
 Gene names: G3BP2

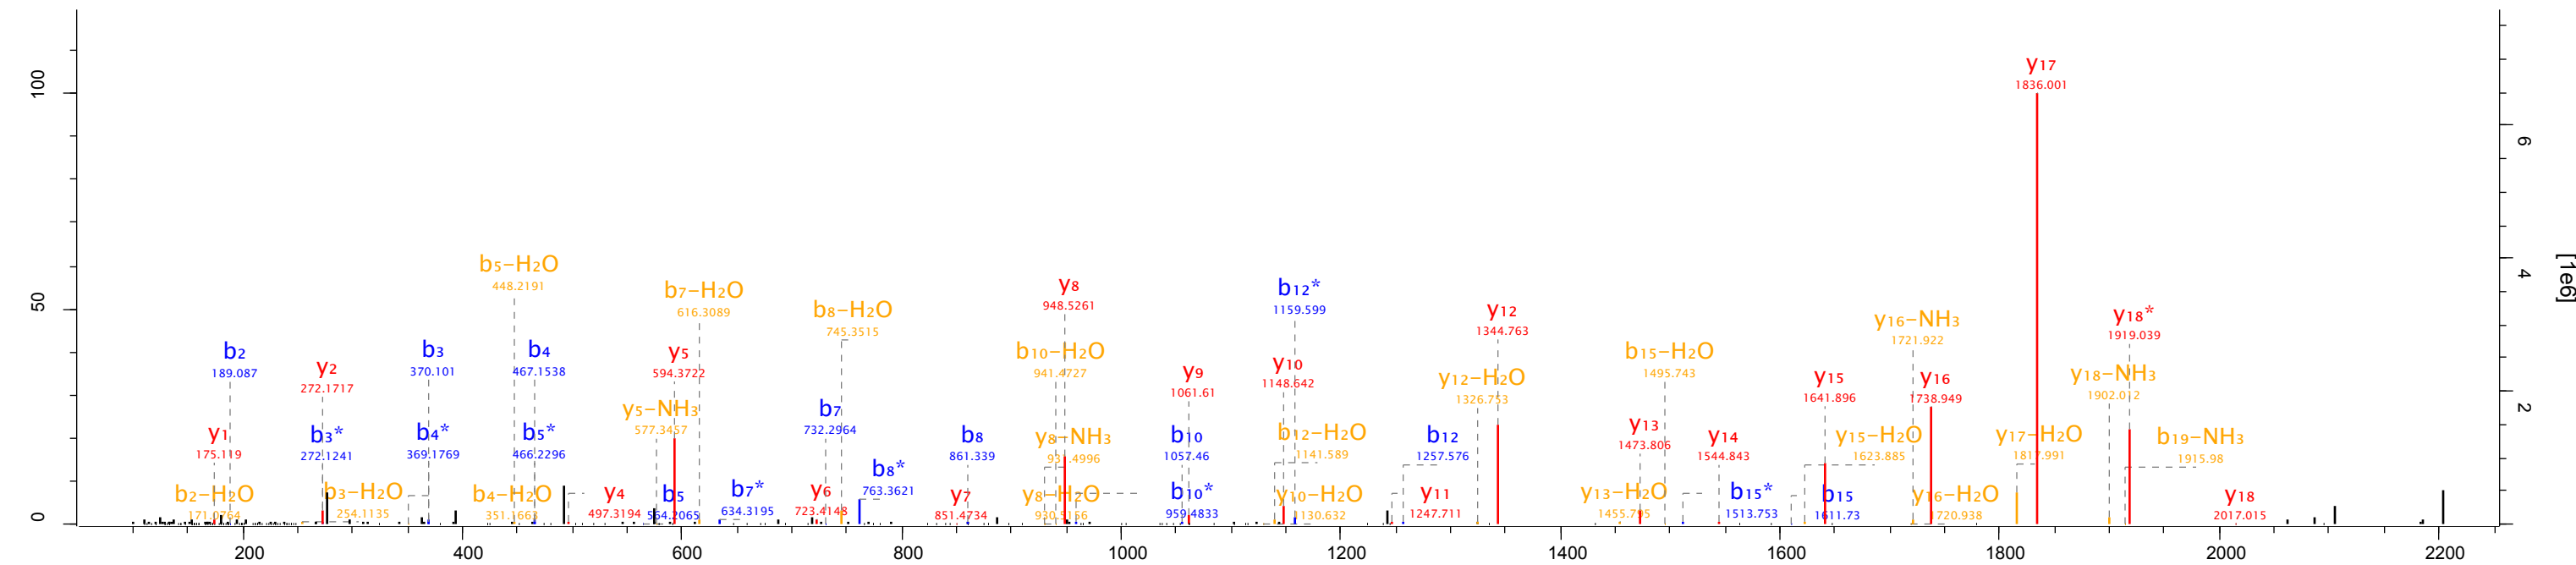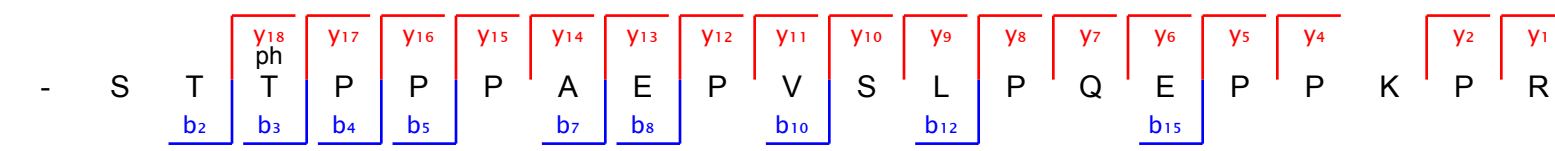



Raw file: 20150812\_A375SR\_Phospho\_BR1\_08  
 Scan: 1585 Method: FTMS; HCD Score: 173.62 m/z: 440.53 Gene names: ZC3H13

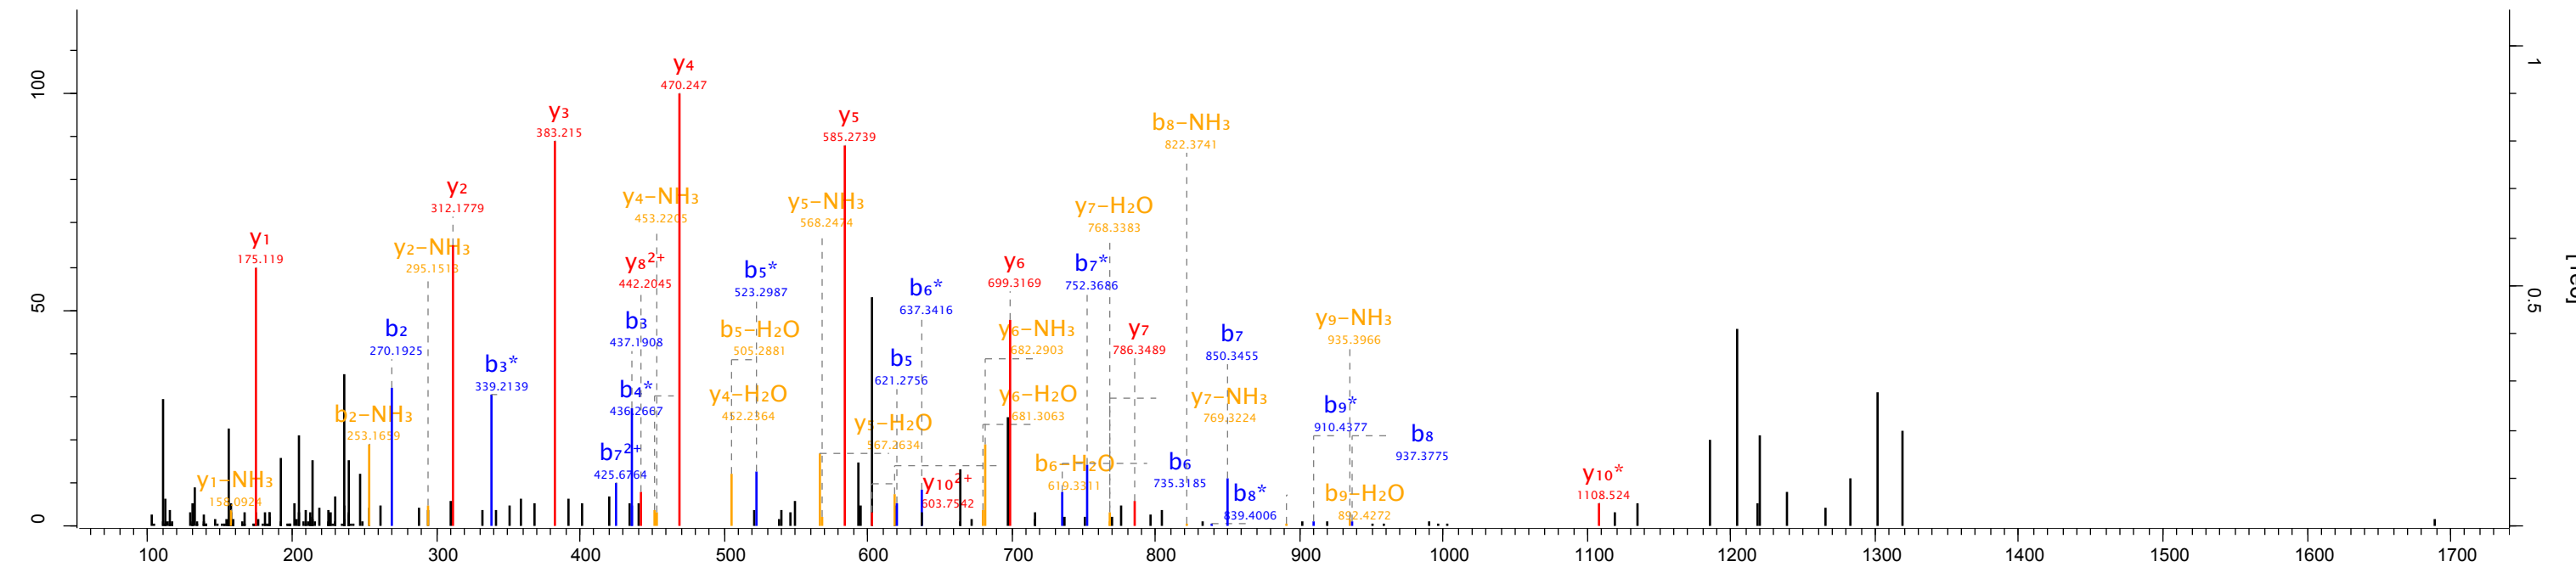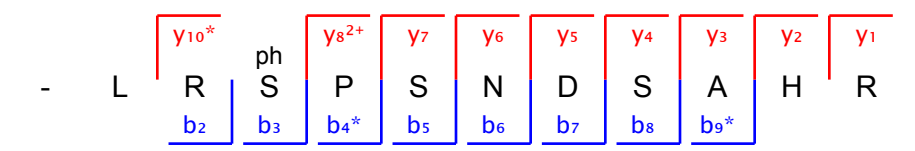

Raw file: 20150812\_A375SR\_Phospho\_BR1\_08  
 Scan: 20215 Method: FTMS; HCD Score: 235.71 m/z: 802.85 Gene names: GFPT1

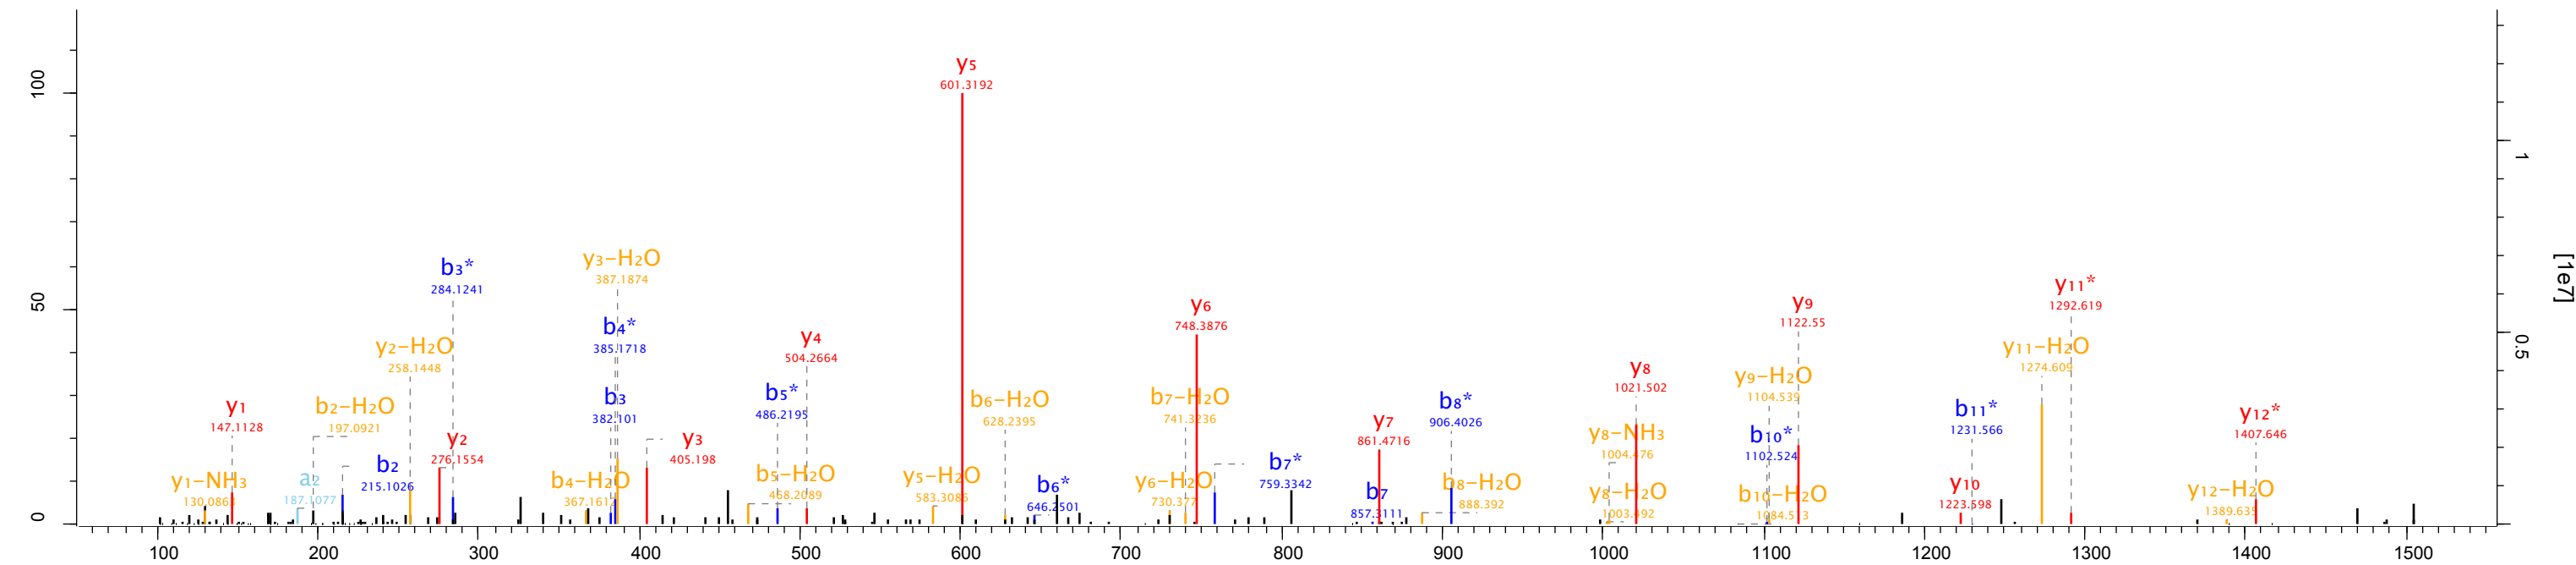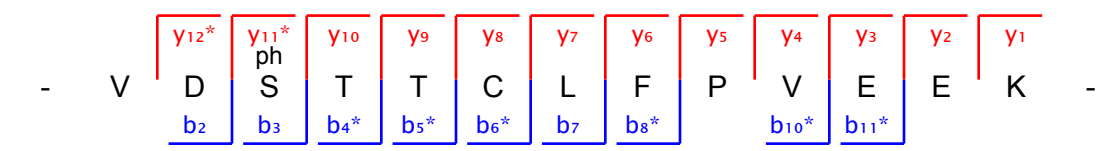

Raw file: 20150812\_A375SR\_Phospho\_BR1\_08  
 Scan: 20415 Method: FTMS; HCD Score: 89.3 m/z: 539.27 Gene names: ZFHX4

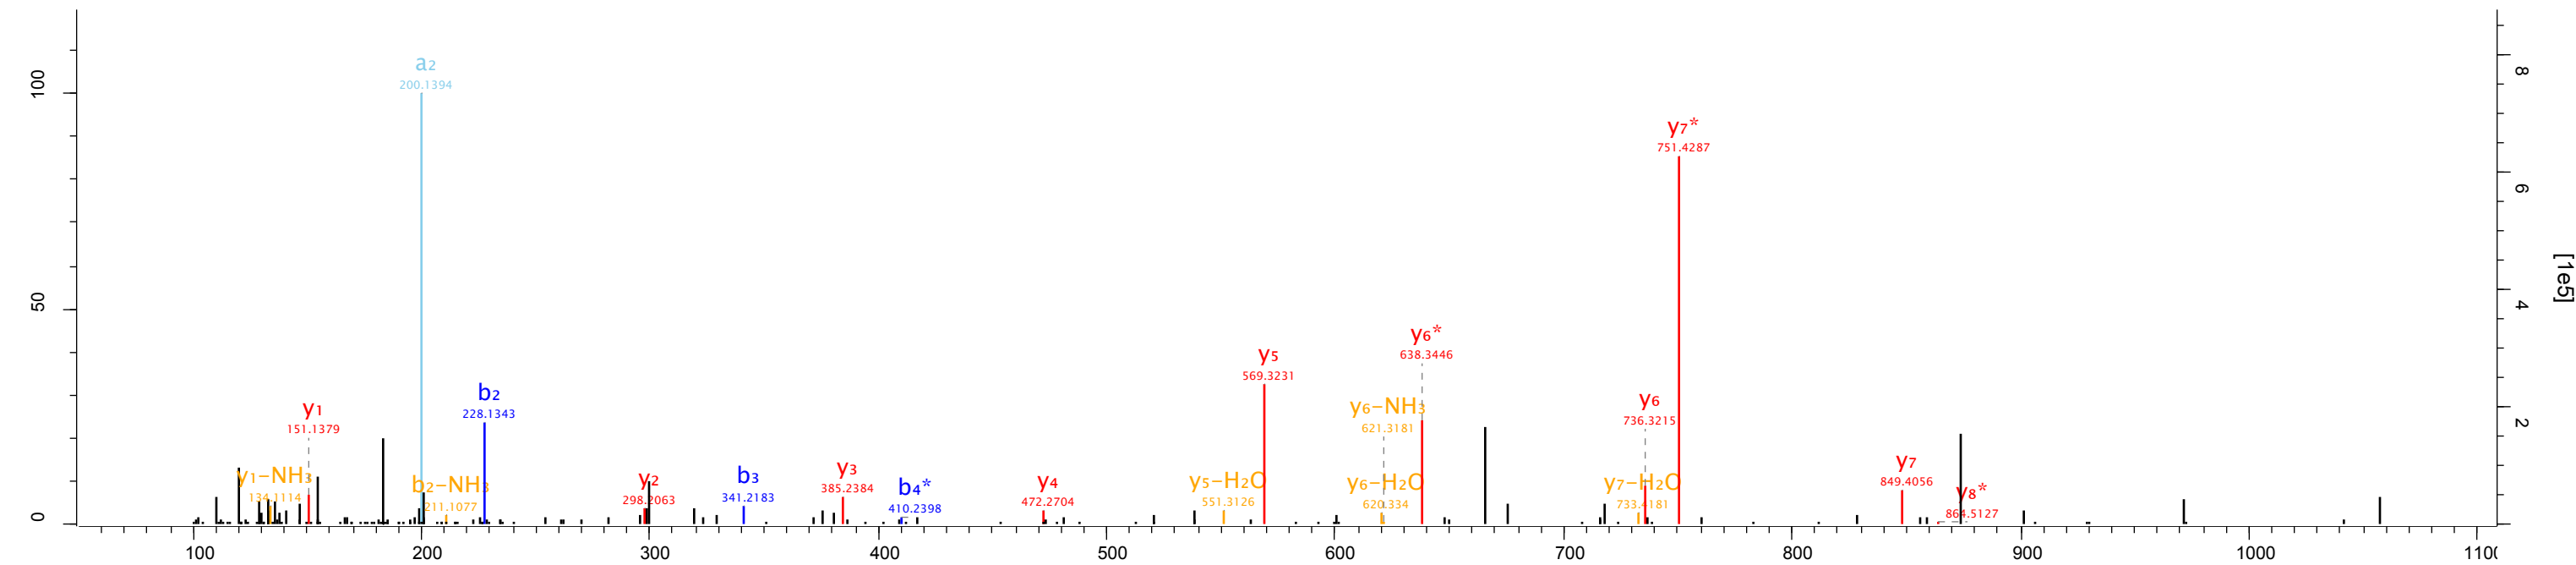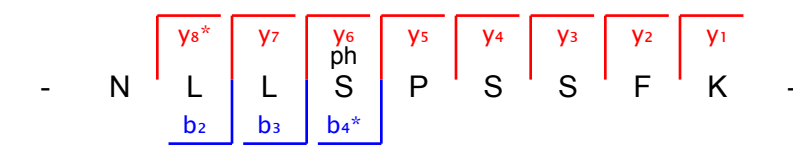

Raw file: 20150812\_A375SR\_Phospho\_BR1\_08  
 Scan: 22605 Method: FTMS; HCD Score: 290.61 m/z: 1130.53 Gene names: SRRM2

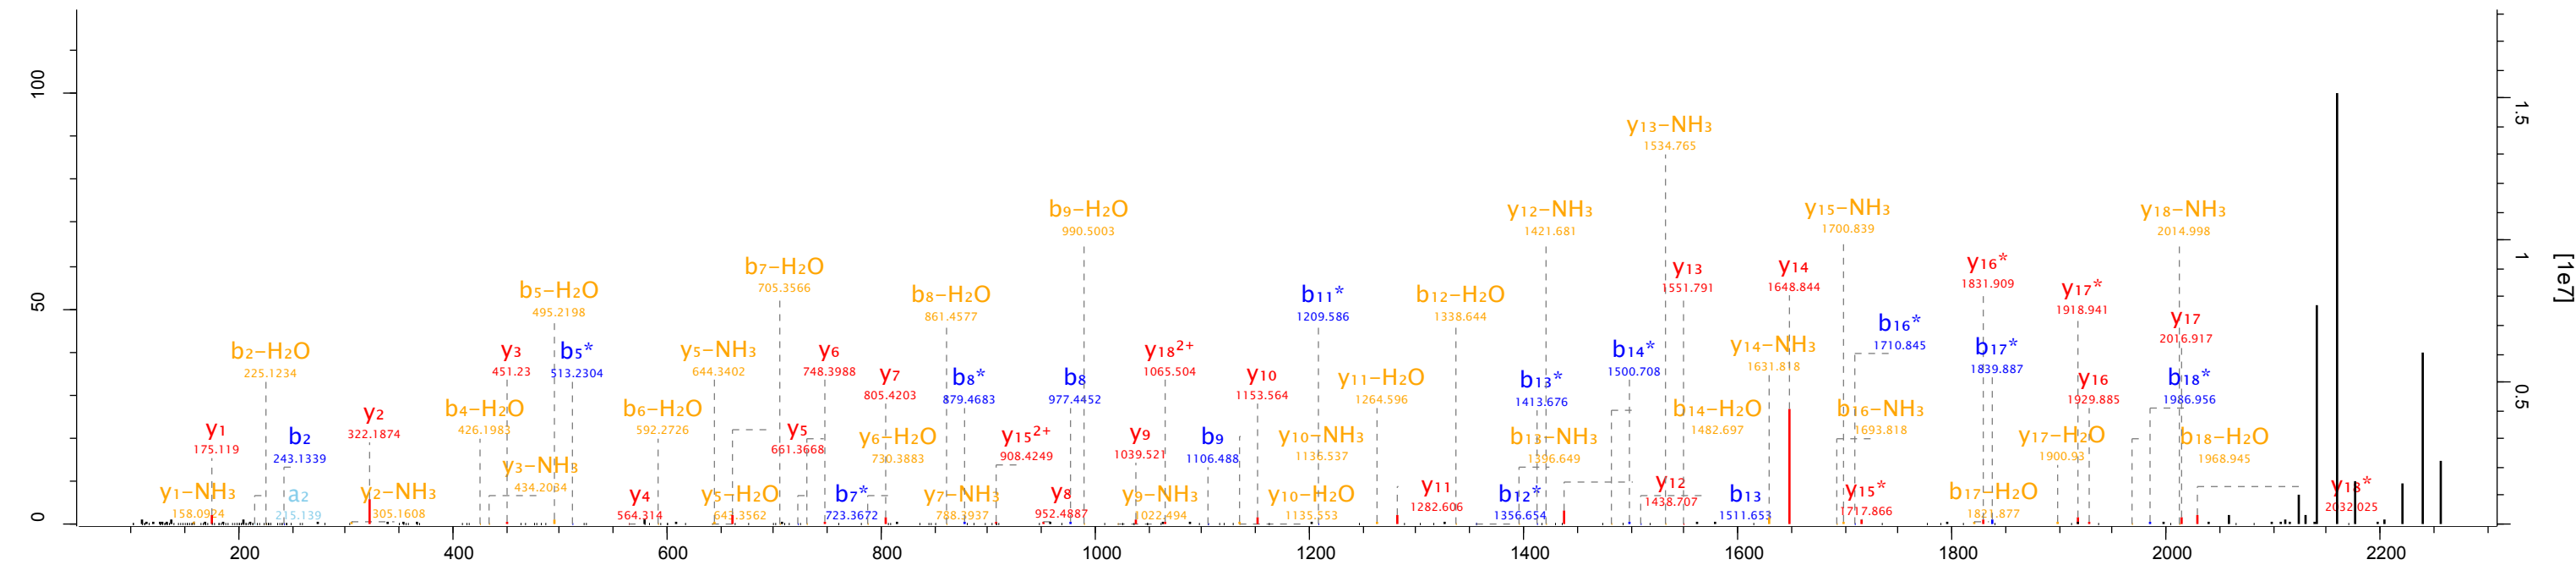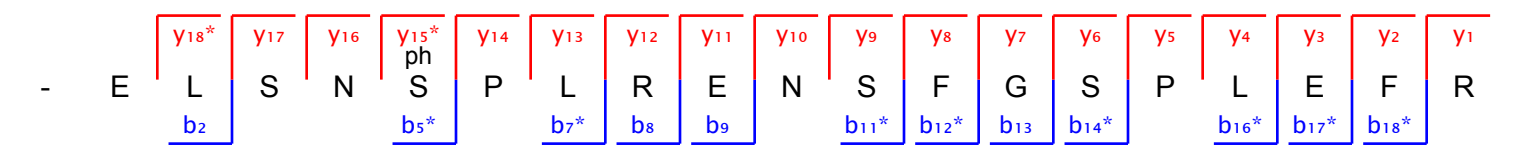

Raw file 20150812\_A375SR\_Phospho\_BR1\_08 Scan 22665 Method FTMS; HCD Score 172.95 m/z 888.15 Gene names ZNF800

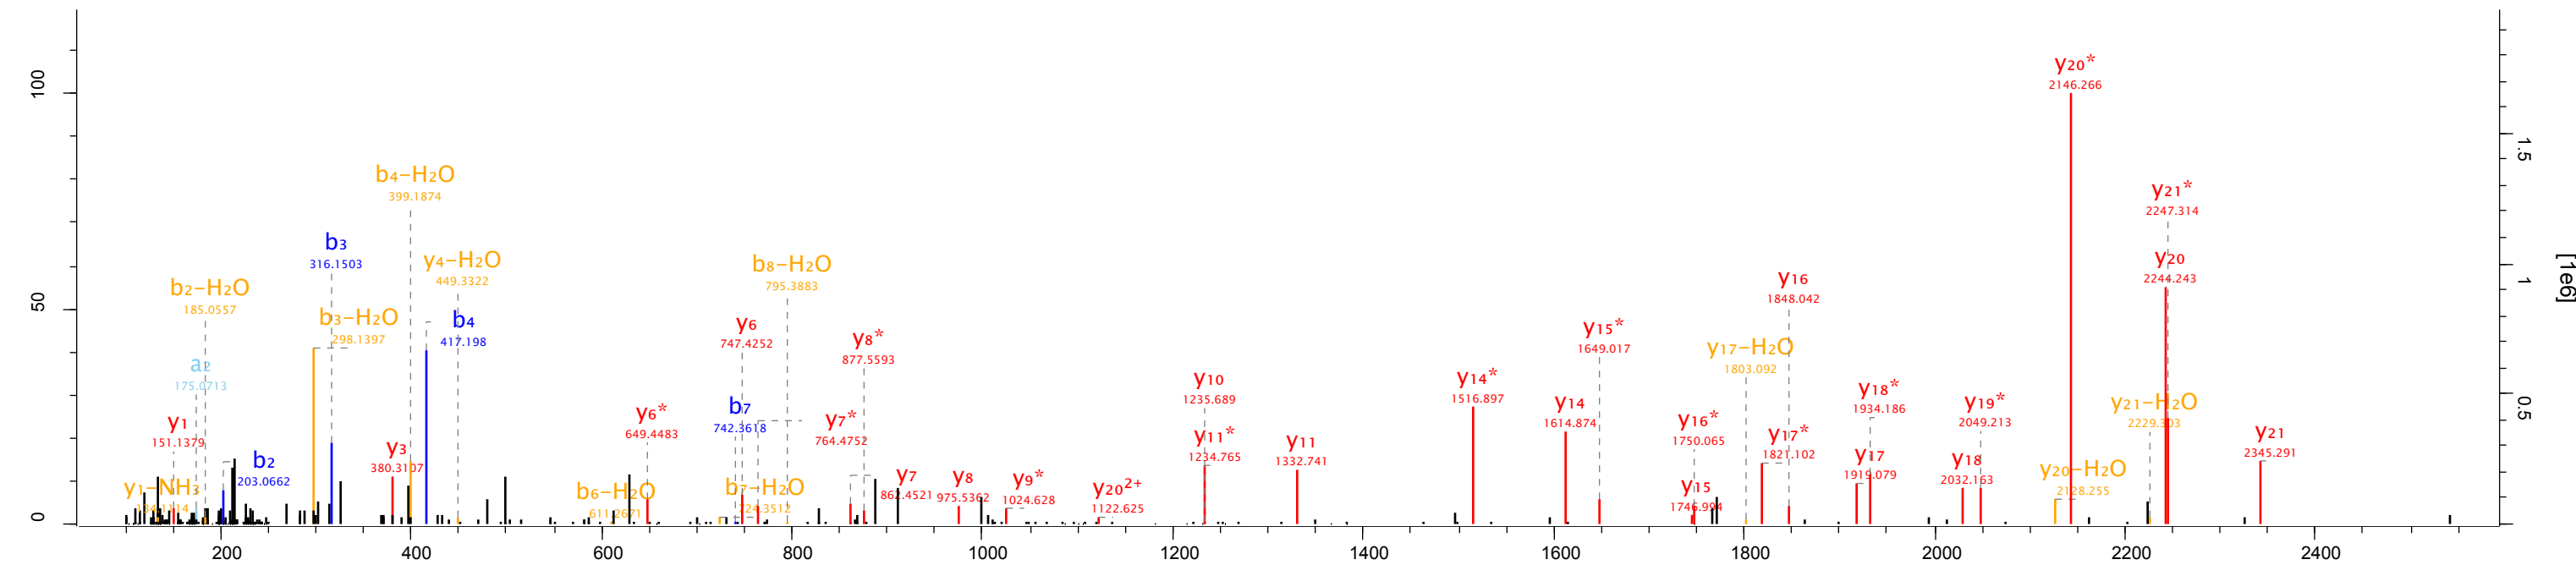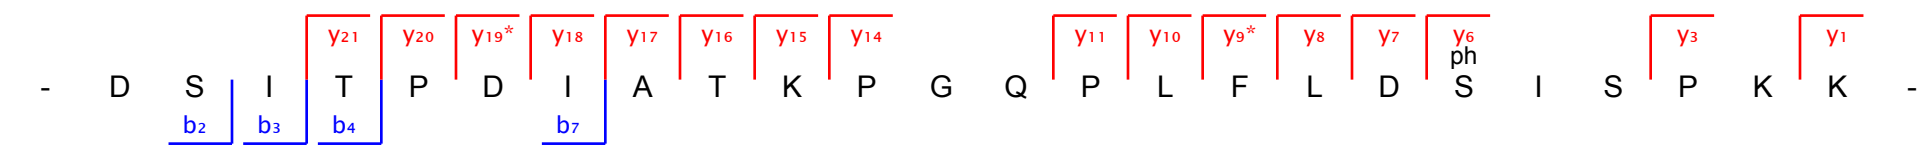

Raw file: 20150812\_A375SR\_Phospho\_BR1\_08  
 Scan: 2815 Method: FTMS; HCD Score: 192.09 m/z: 635.62 Gene names: RNPC3

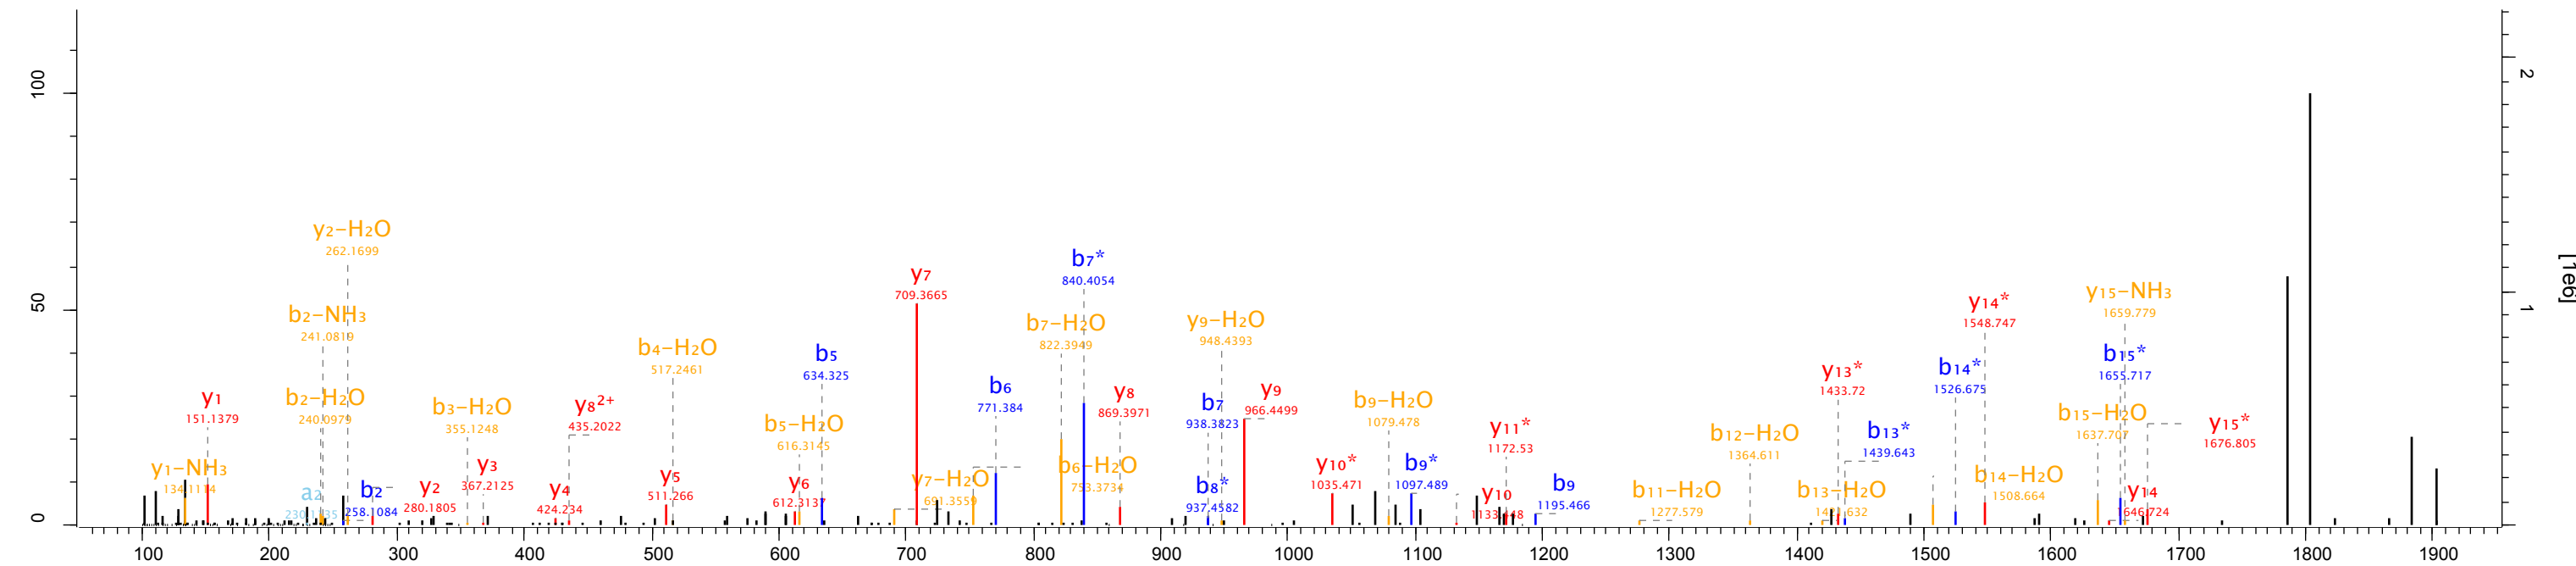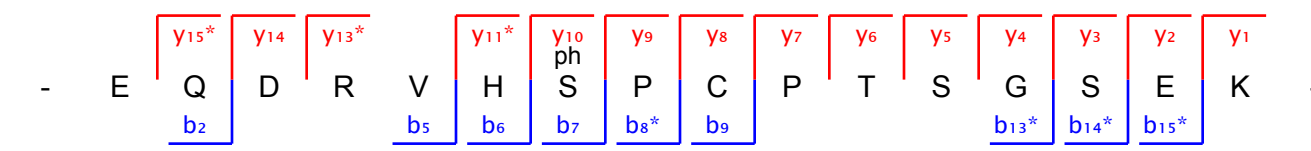

Raw file: 20150812\_A375SR\_Phospho\_BR1\_08  
 Scan: 3385 Method: FTMS; HCD Score: 222.32 m/z: 855.38 Gene names: MARCKS

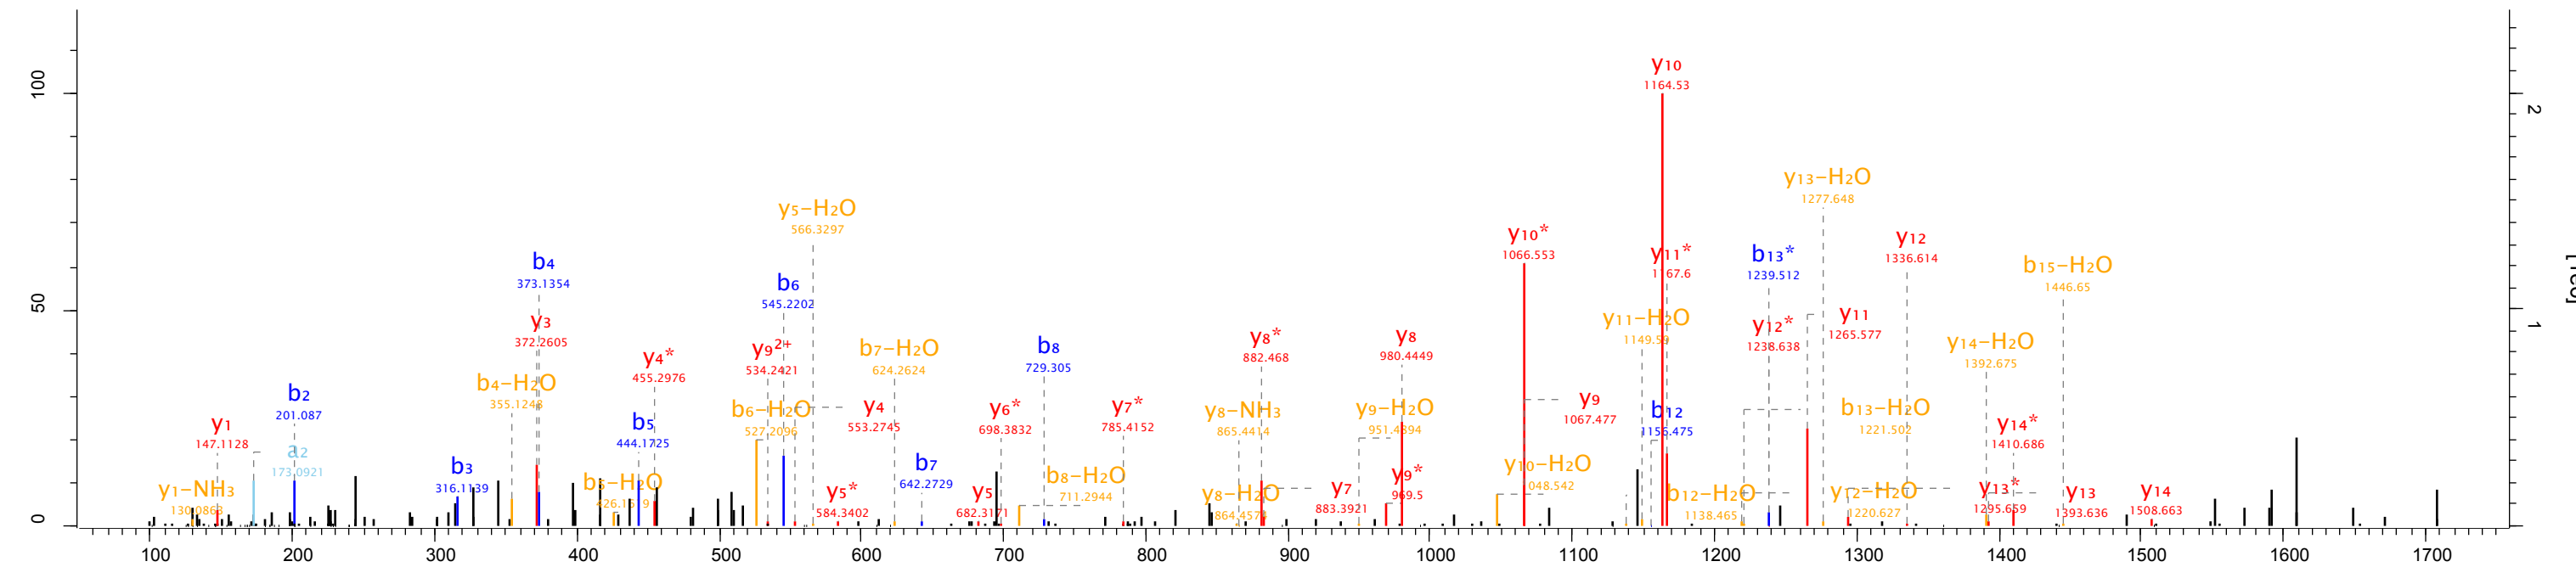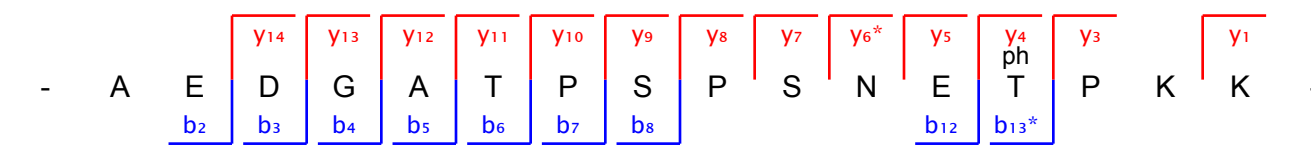

Raw file: 20150812\_A375SR\_Phospho\_BR1\_08  
 Scan: 4015 Method: FTMS; HCD Score: 123.16 m/z: 618.97 Gene names: NSD1

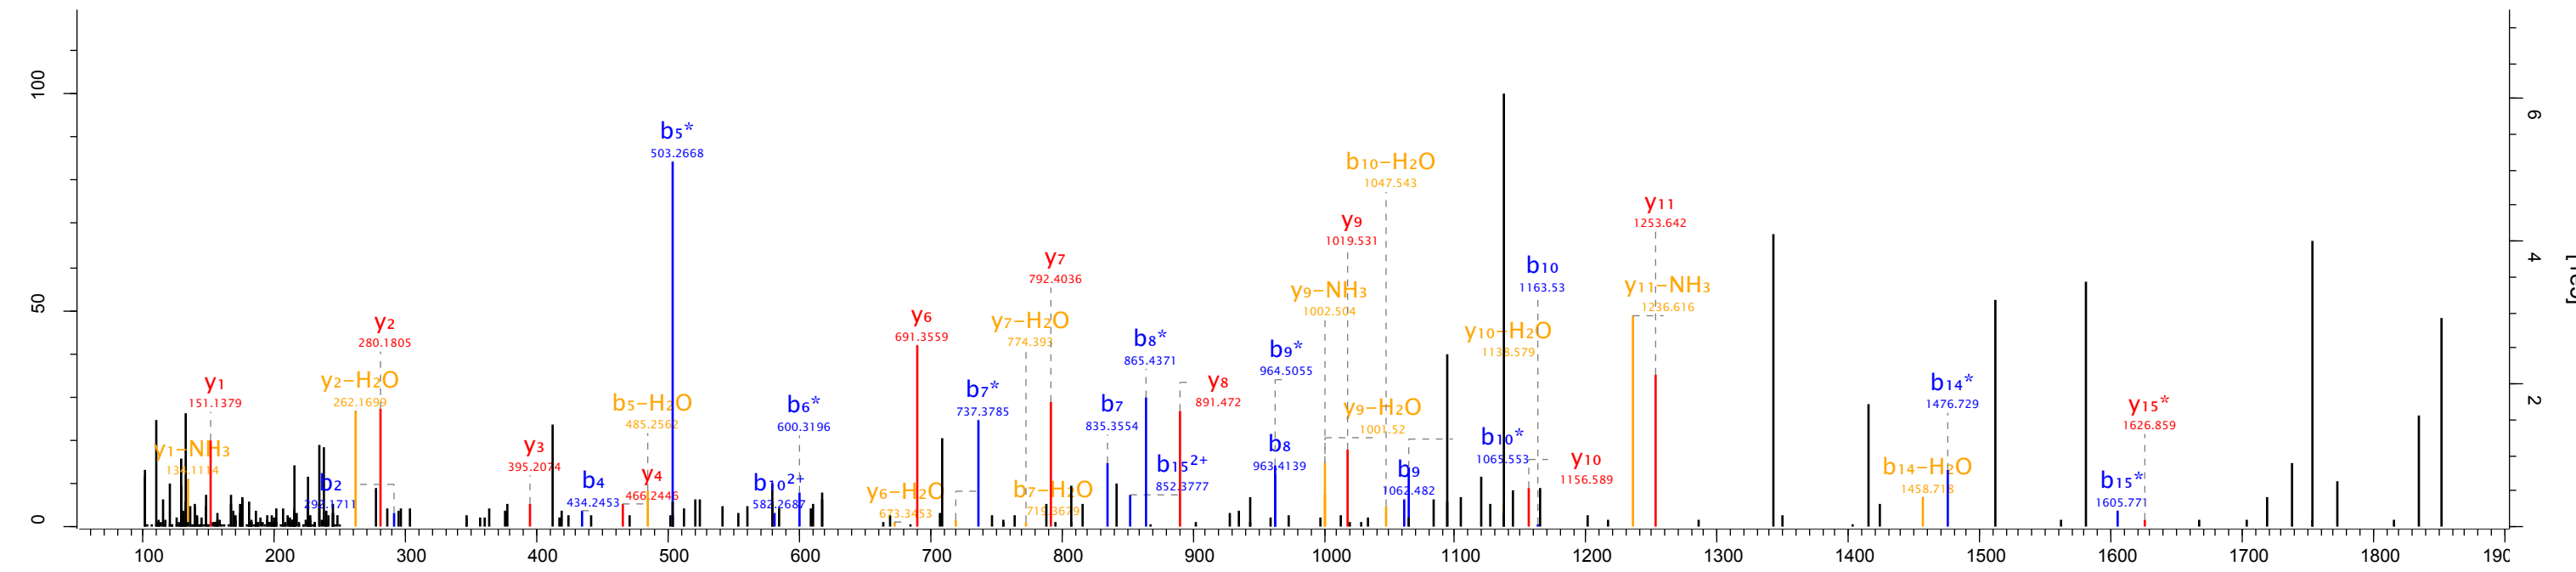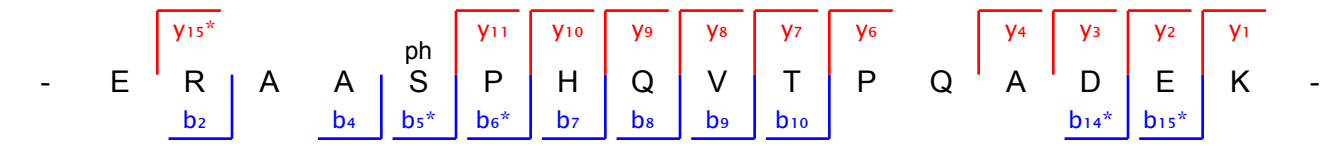



Raw file: 20150812\_A375SR\_Phospho\_BR1\_08  
 Scan: 4075 Method: FTMS; HCD Score: 100.95 m/z: 483.23 Gene names: LMNA

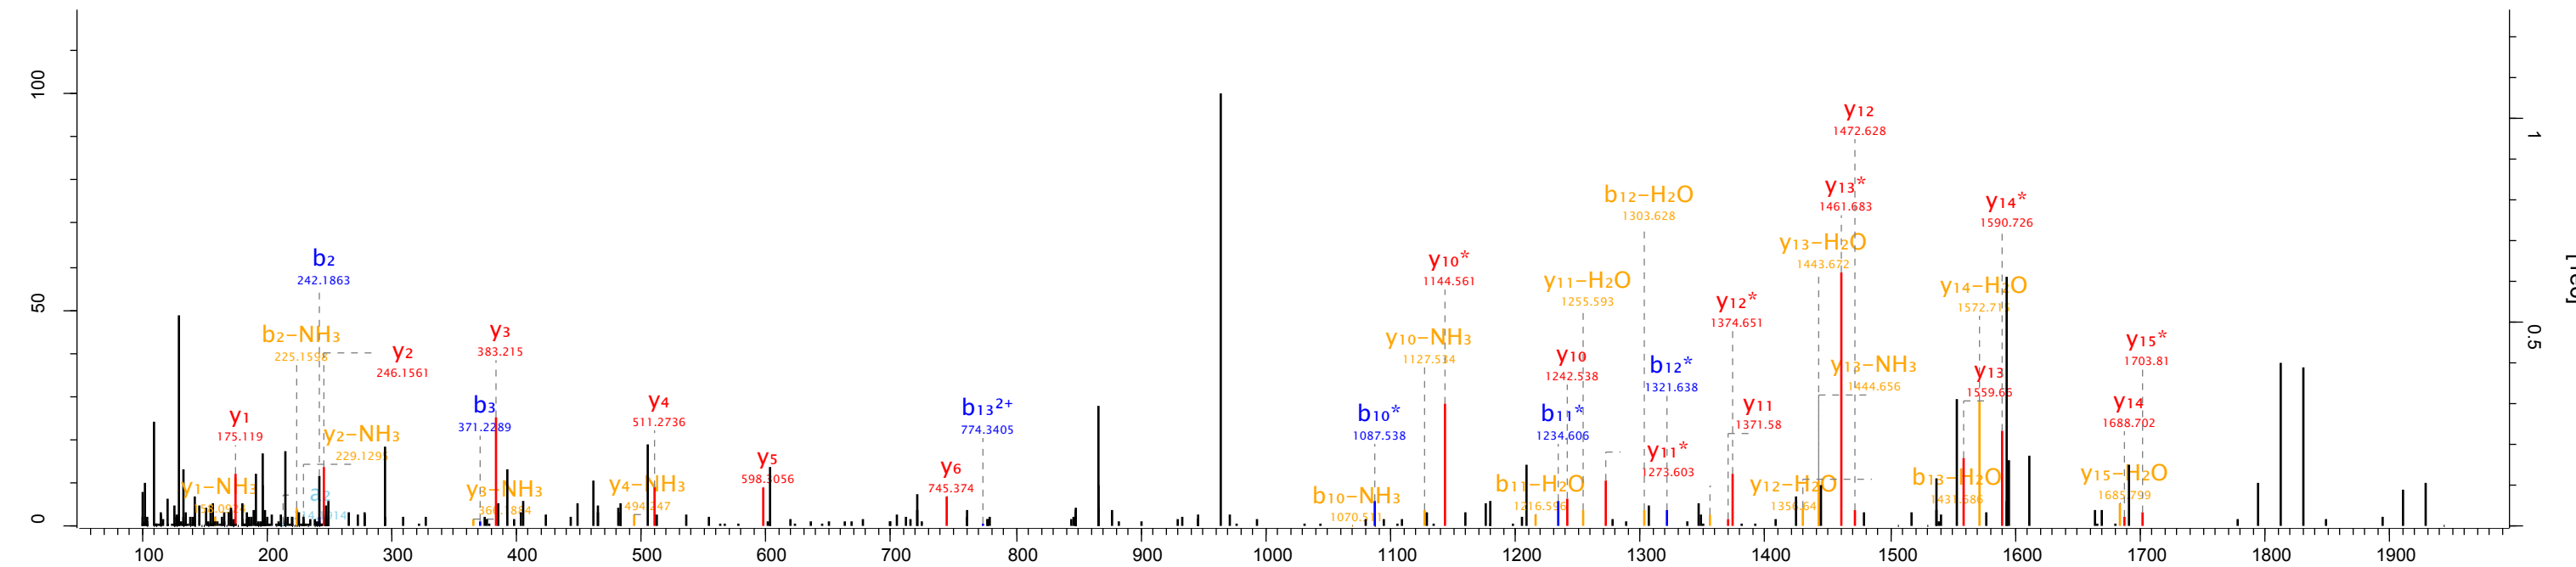

- K L E S T E S R S S F S Q H A R -

Fragmentation sites (b and y ions) are indicated by boxes below the amino acid sequence:

- Red boxes: y15\* (L), y14 (E), y13 (S), y12 (T), y11 (E), y10-ph (S)
- Blue boxes: b2 (L), b3 (E), b10\* (S), b11\* (F), b12\* (S), b13<sup>2+</sup> (Q)

Raw file: 20150812\_A375SR\_Phospho\_BR1\_08  
 Scan: 5585 Method: FTMS; HCD Score: 146.43 m/z: 436.88 Gene names: HDGFRP2

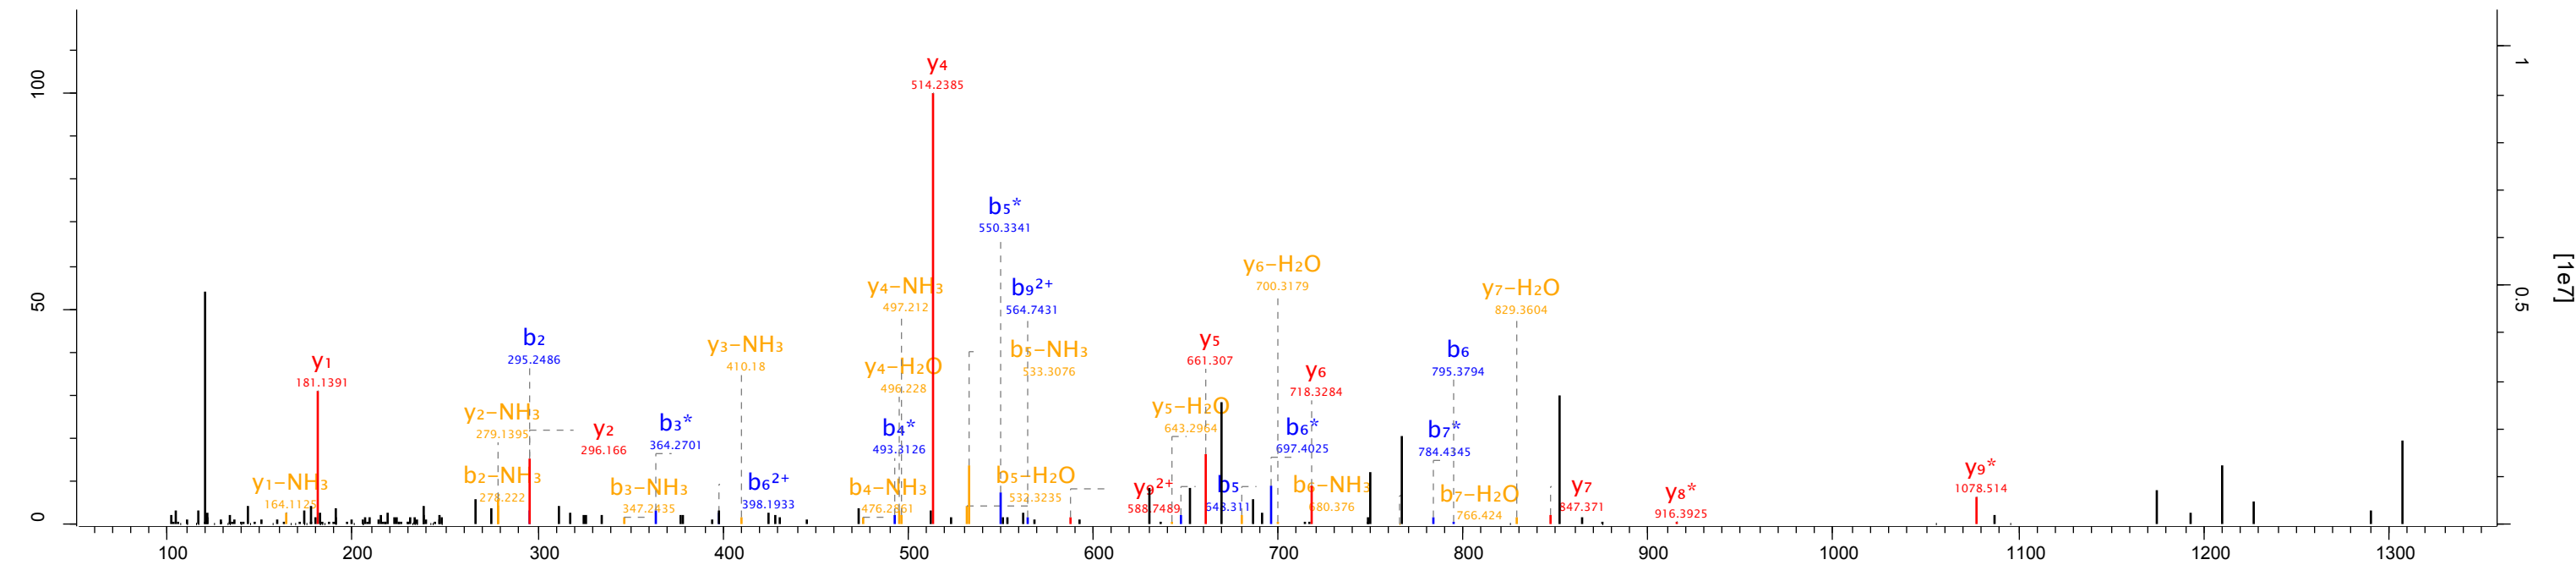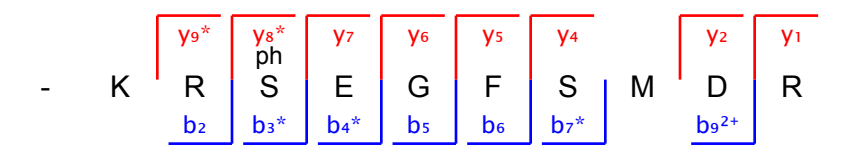

Raw file: 20150812\_A375SR\_Phospho\_BR1\_08  
 Scan: 6395 Method: FTMS; HCD Score: 168.86 m/z: 817.42 Gene names: CIAPIN1

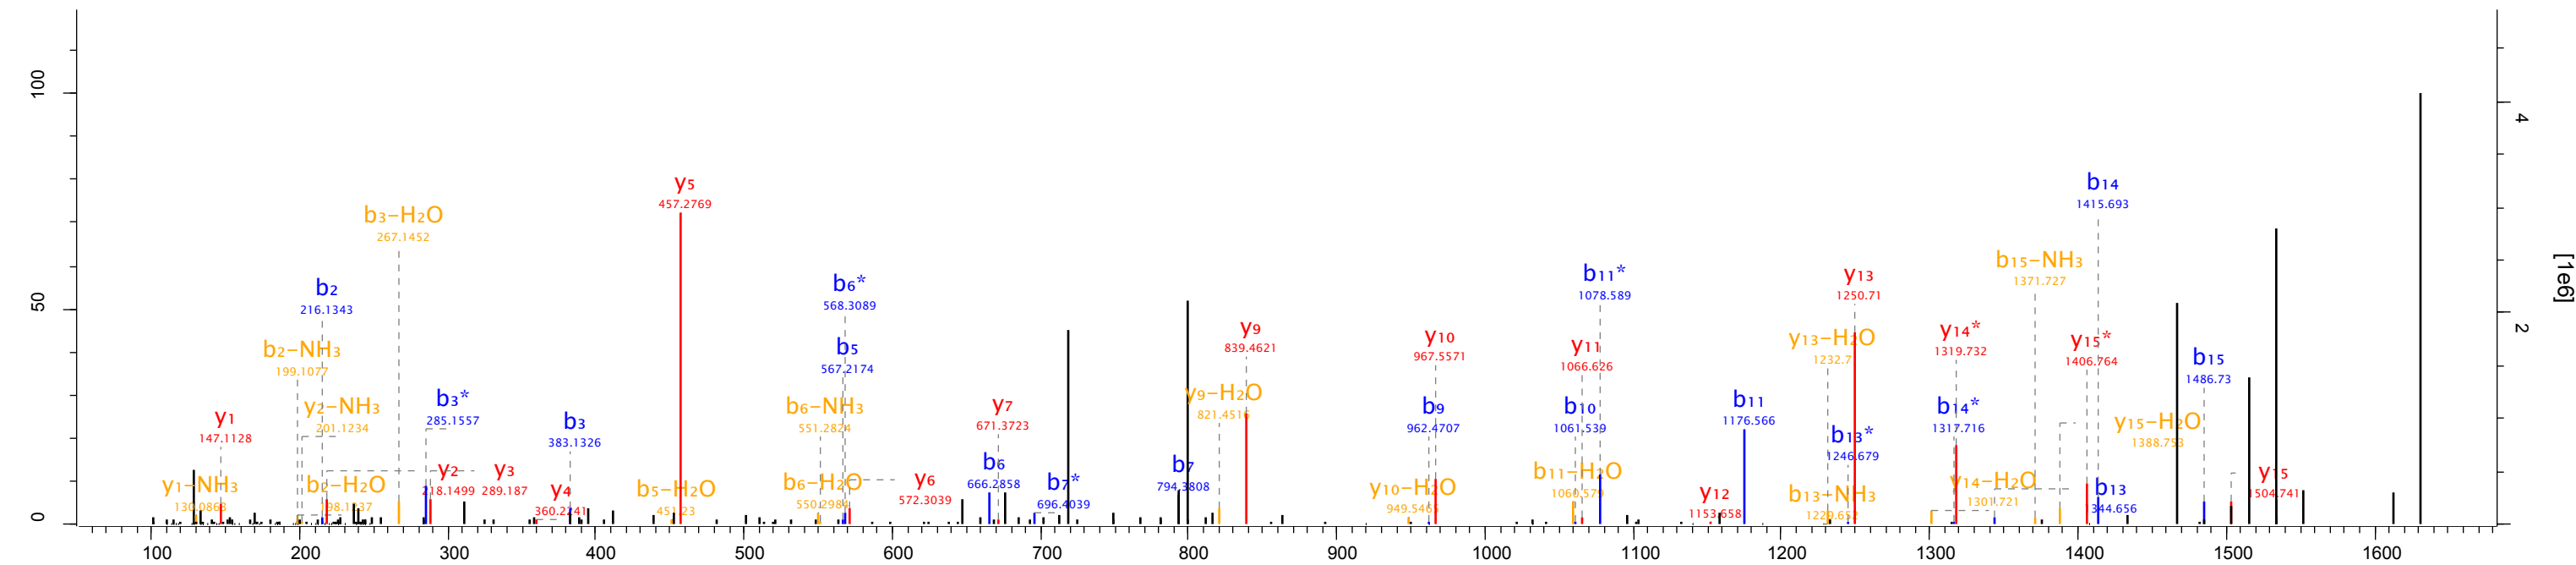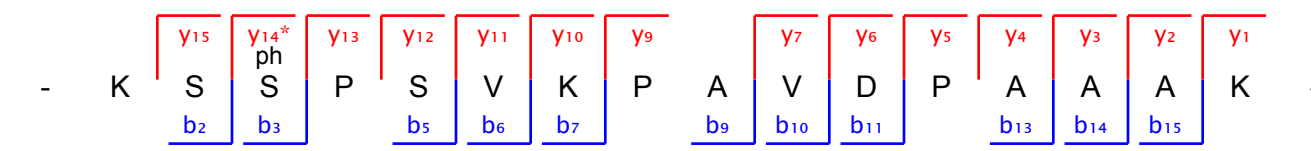



Raw file: 20150812\_A375SR\_Phospho\_BR1\_08  
 Scan: 8315 Method: FTMS; HCD Score: 50.66 m/z: 632.79 Gene names: CNTN3

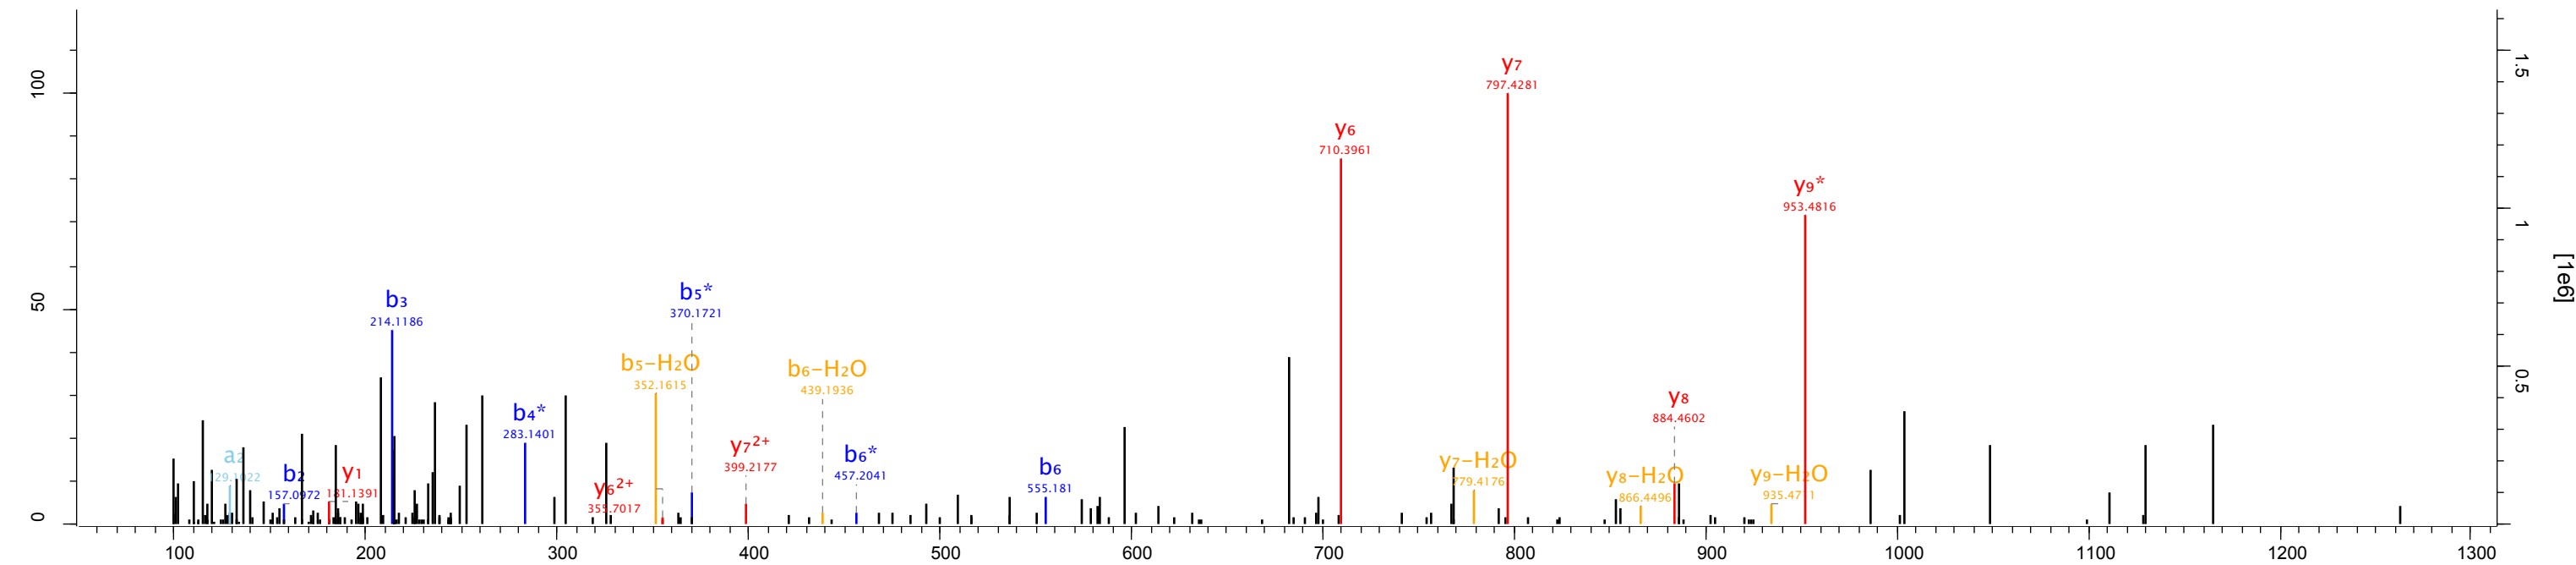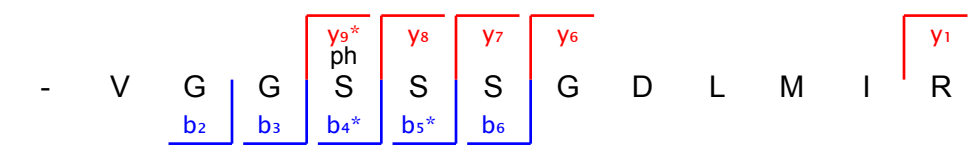

Raw file: 20150812\_A375SR\_Phospho\_BR1\_08  
 Scan: 8465 Method: FTMS; HCD Score: 149.31 m/z: 734.81 Gene names: TLDC1

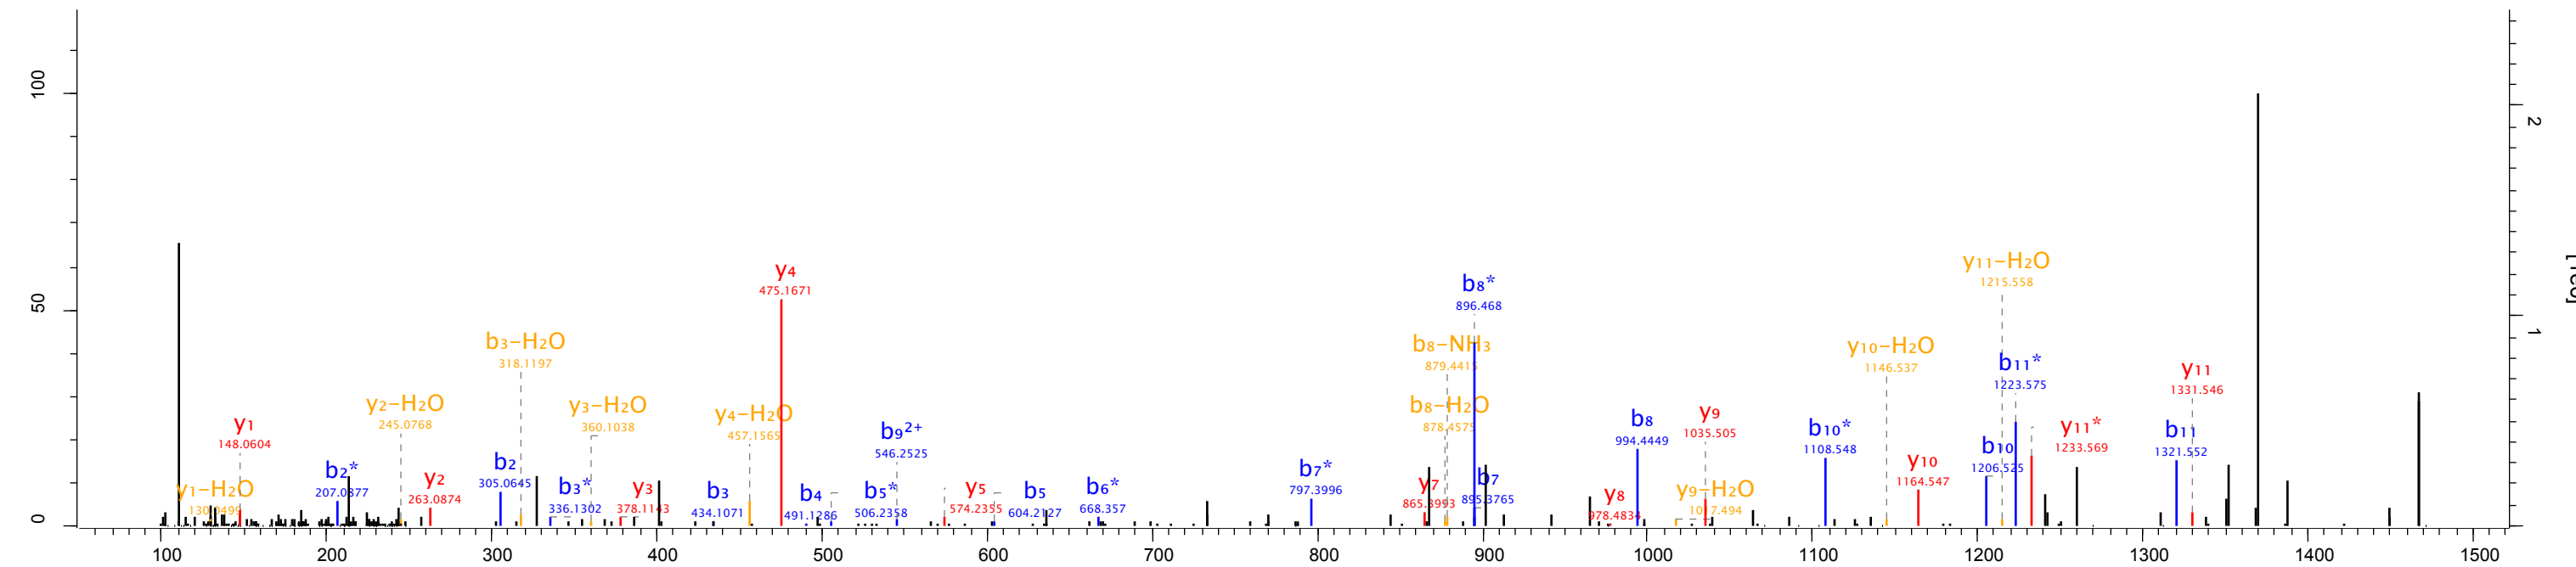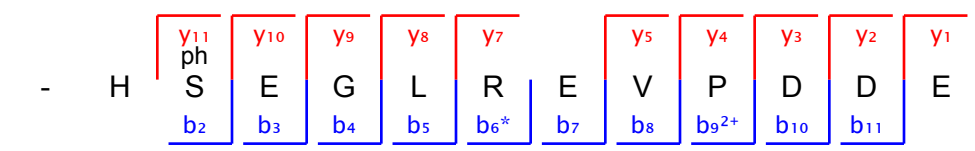

Raw file 20150812\_A375SR\_Phospho\_BR1\_08 Scan 8945 Method FTMS; HCD Score 255.55 m/z 933.95 Gene names PCNP

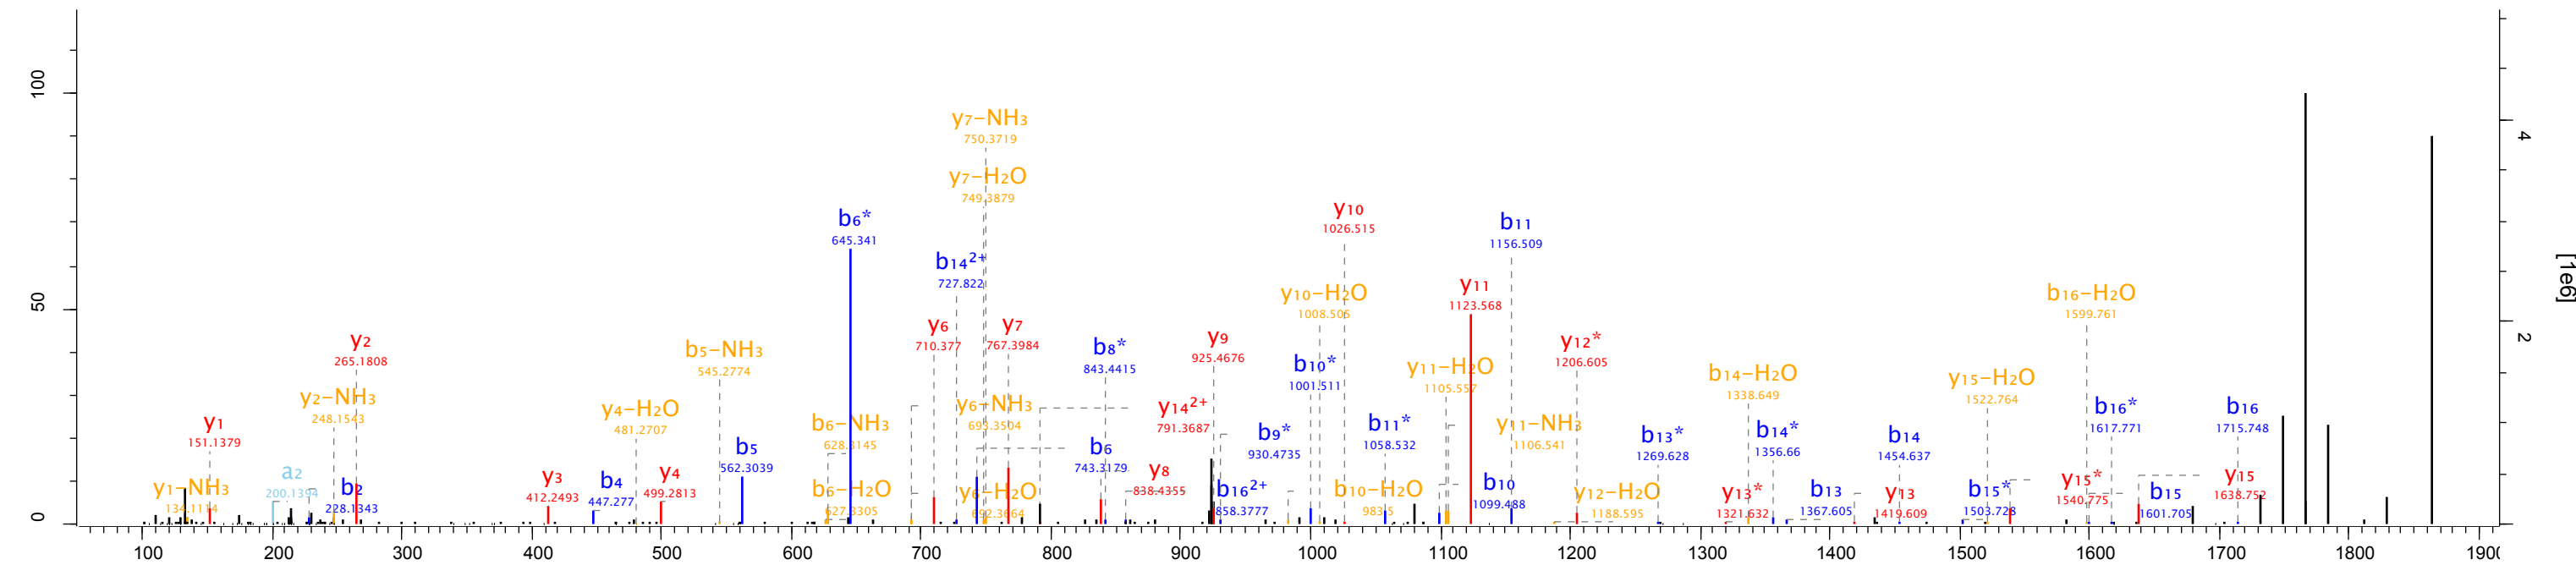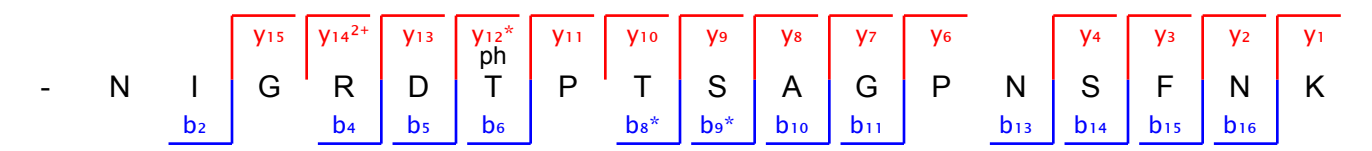

Raw file: 20150812\_A375SR\_Phospho\_BR1\_08  
 Scan: 9065 Method: FTMS; HCD Score: 66.47 m/z: 664.69 Gene names: USP1

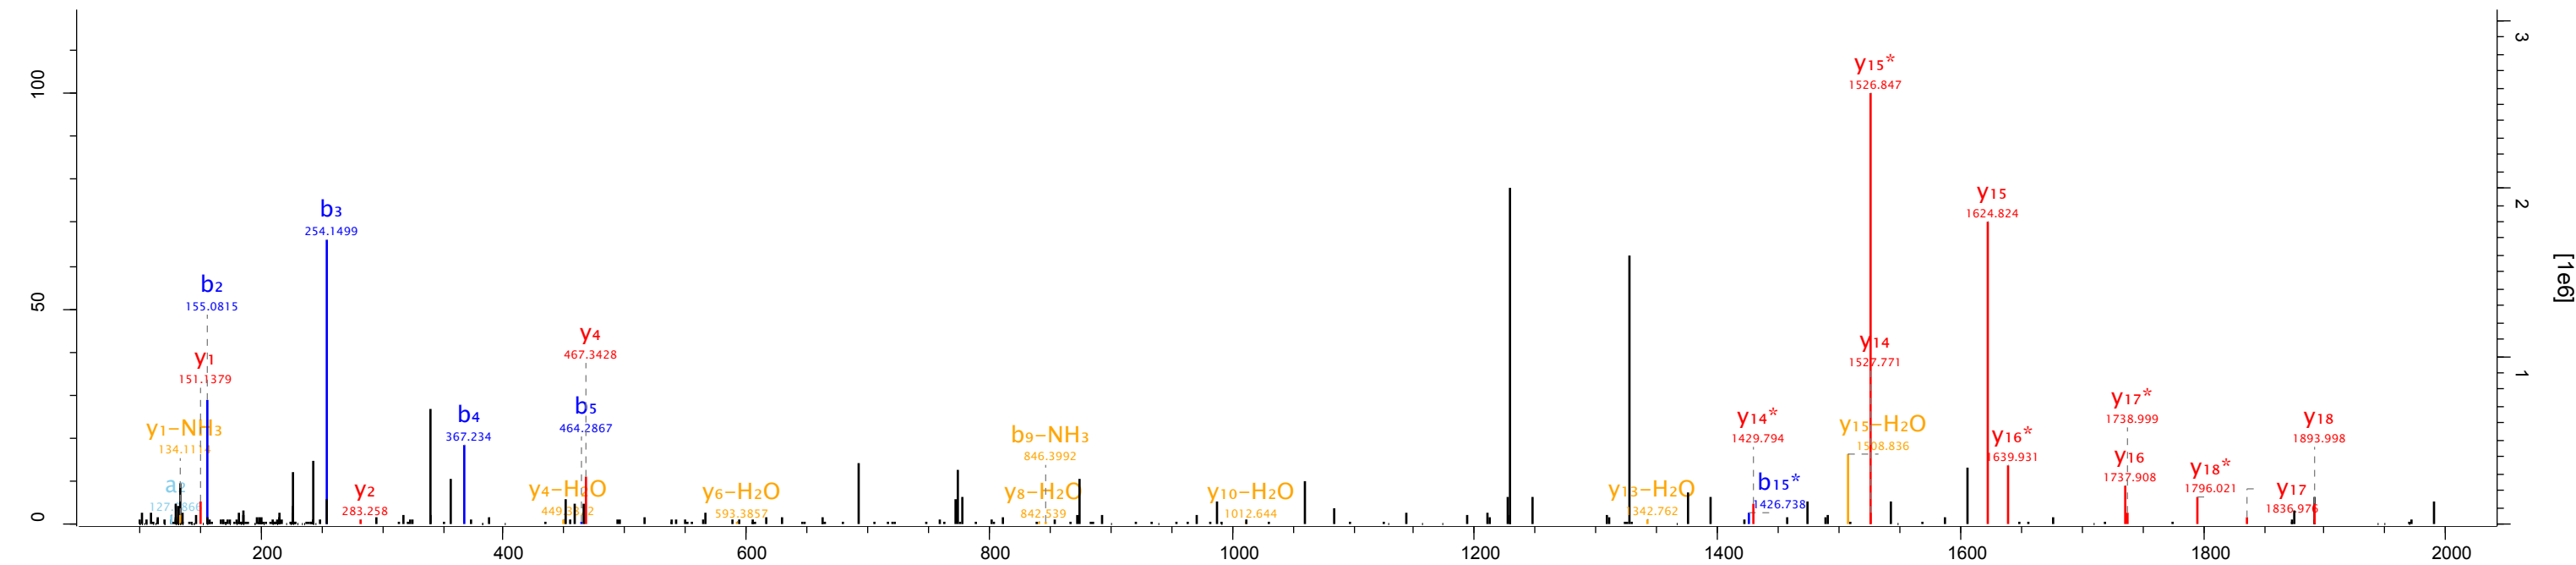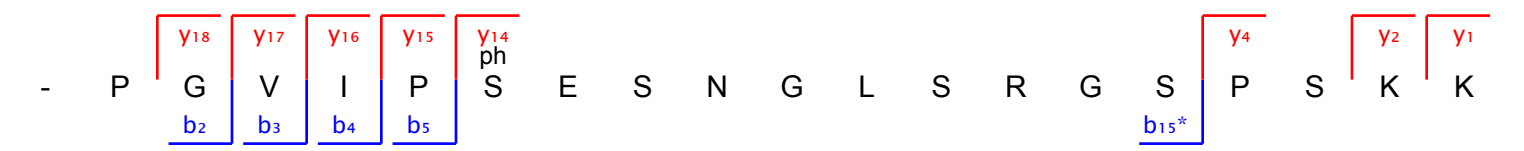



Raw file 20150812\_A375SR\_Phospho\_BR1\_09 Scan 13235 Method FTMS; HCD Score 153.39 m/z 625.28 Gene names KIAA1429

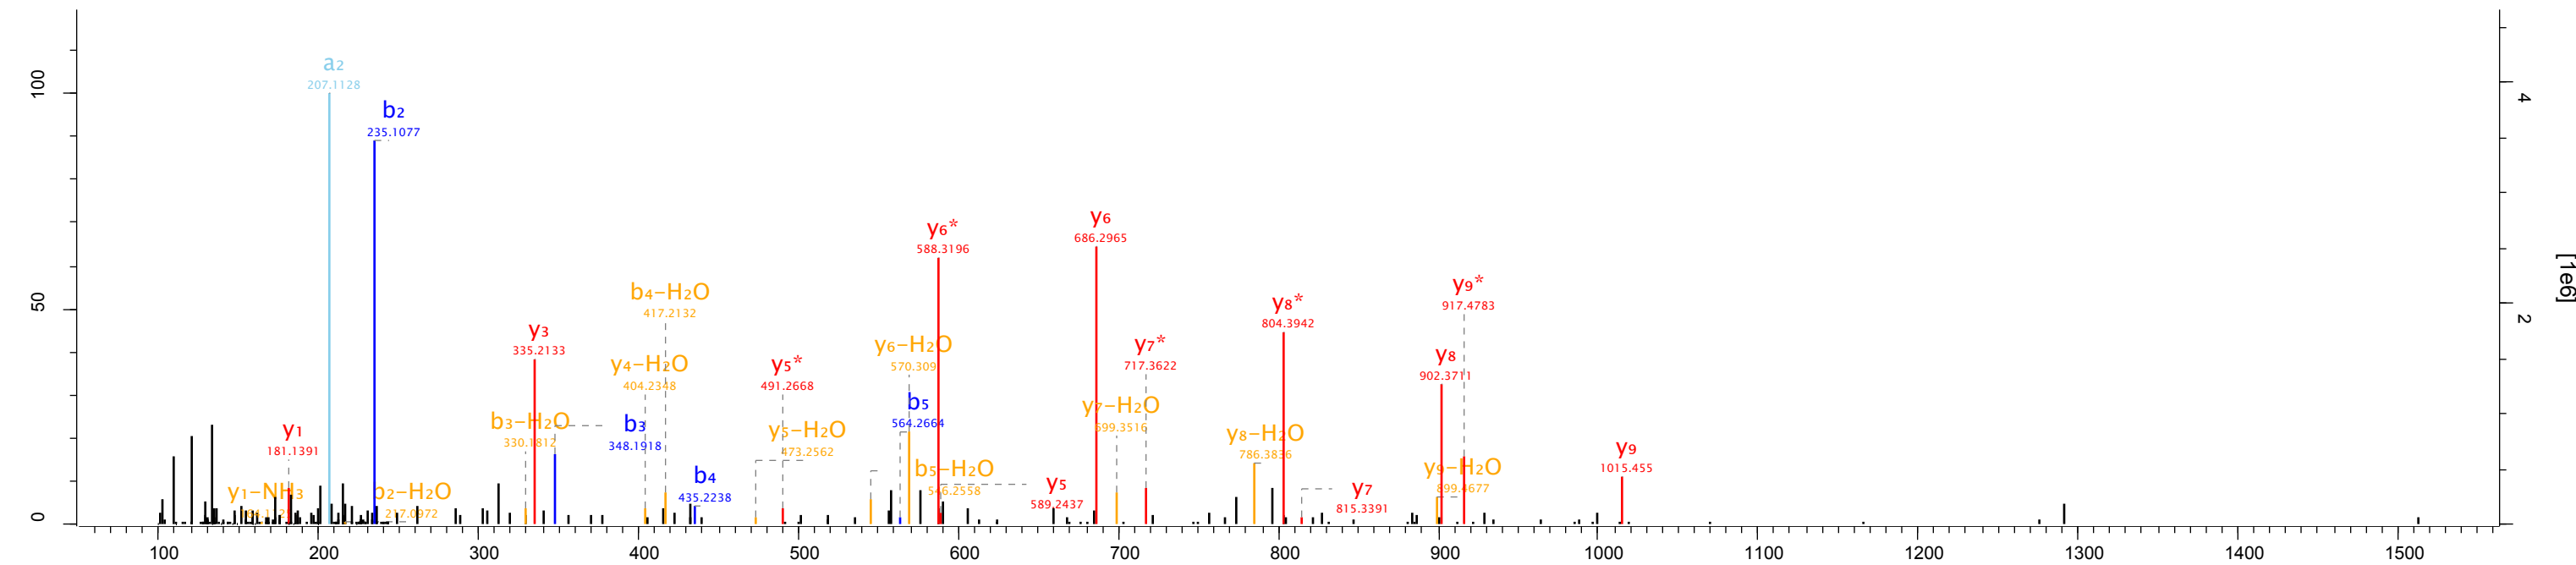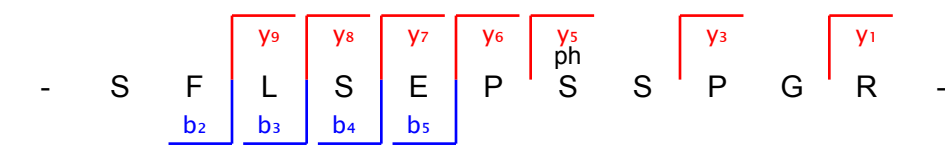

Raw file 20150812\_A375SR\_Phospho\_BR1\_09 Scan 13595 Method FTMS; HCD Score 326.12 m/z 930.38 Gene names RBBP6

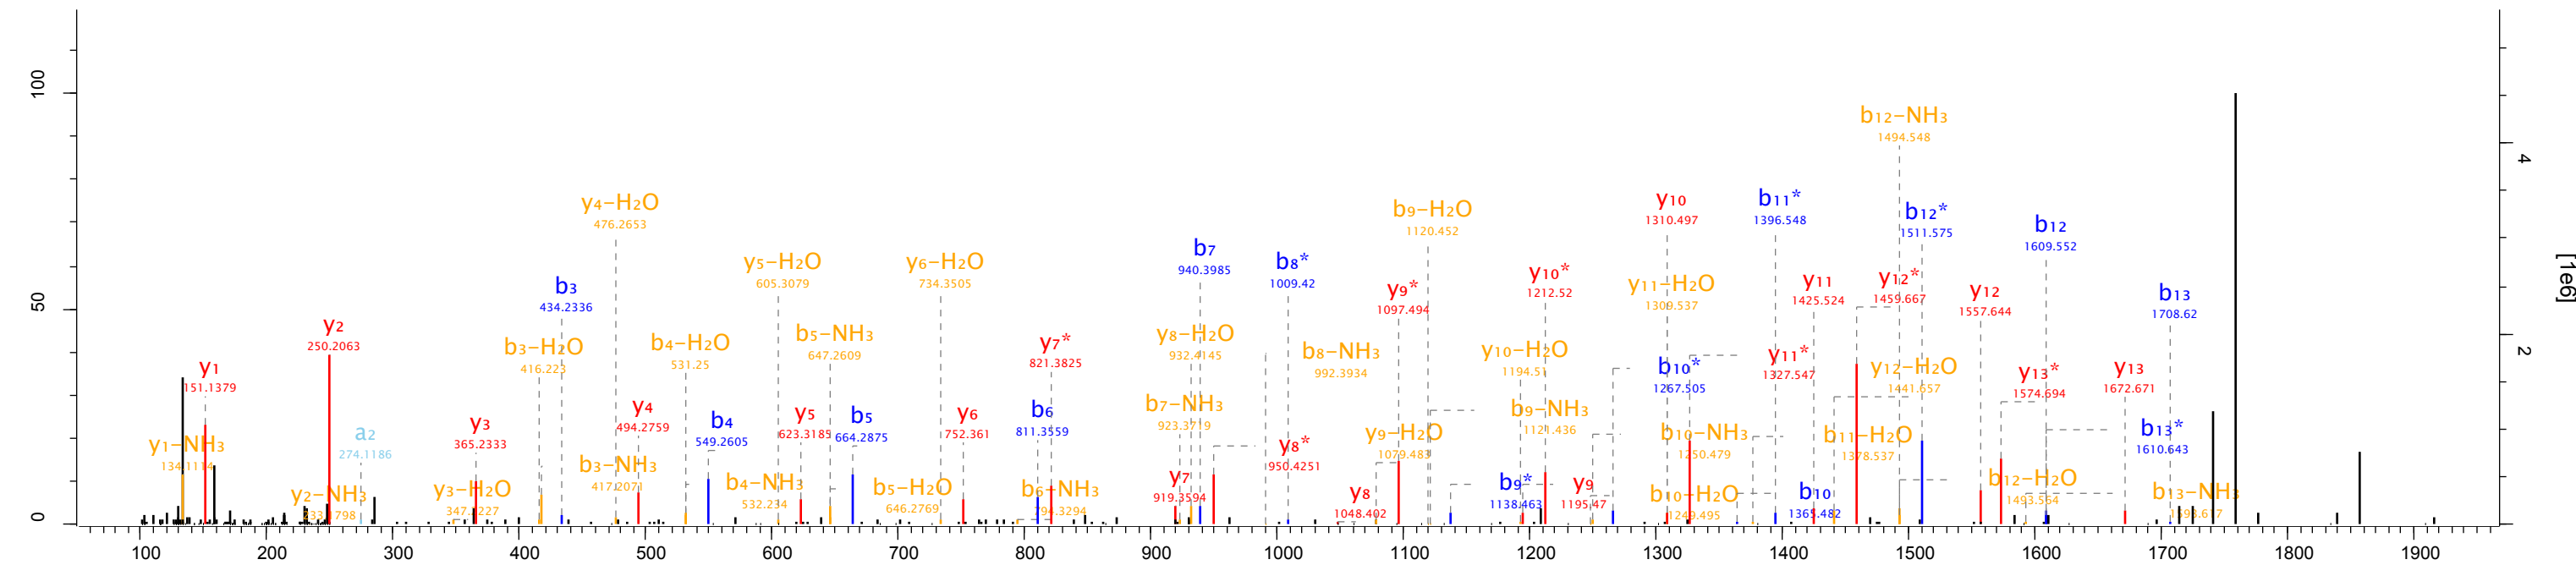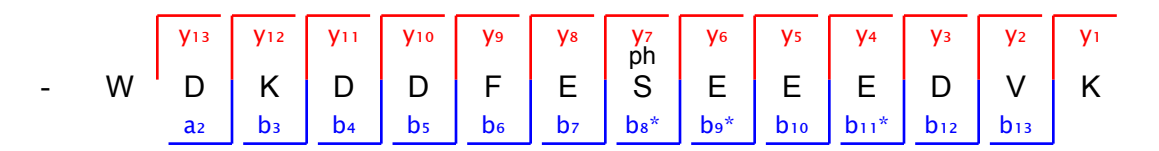

Raw file  
20150812\_A375SR\_Phospho\_BR1\_09

Scan Method Score m/z Gene names  
14065 FTMS; HCD 185.41 888.39 PRRC2B

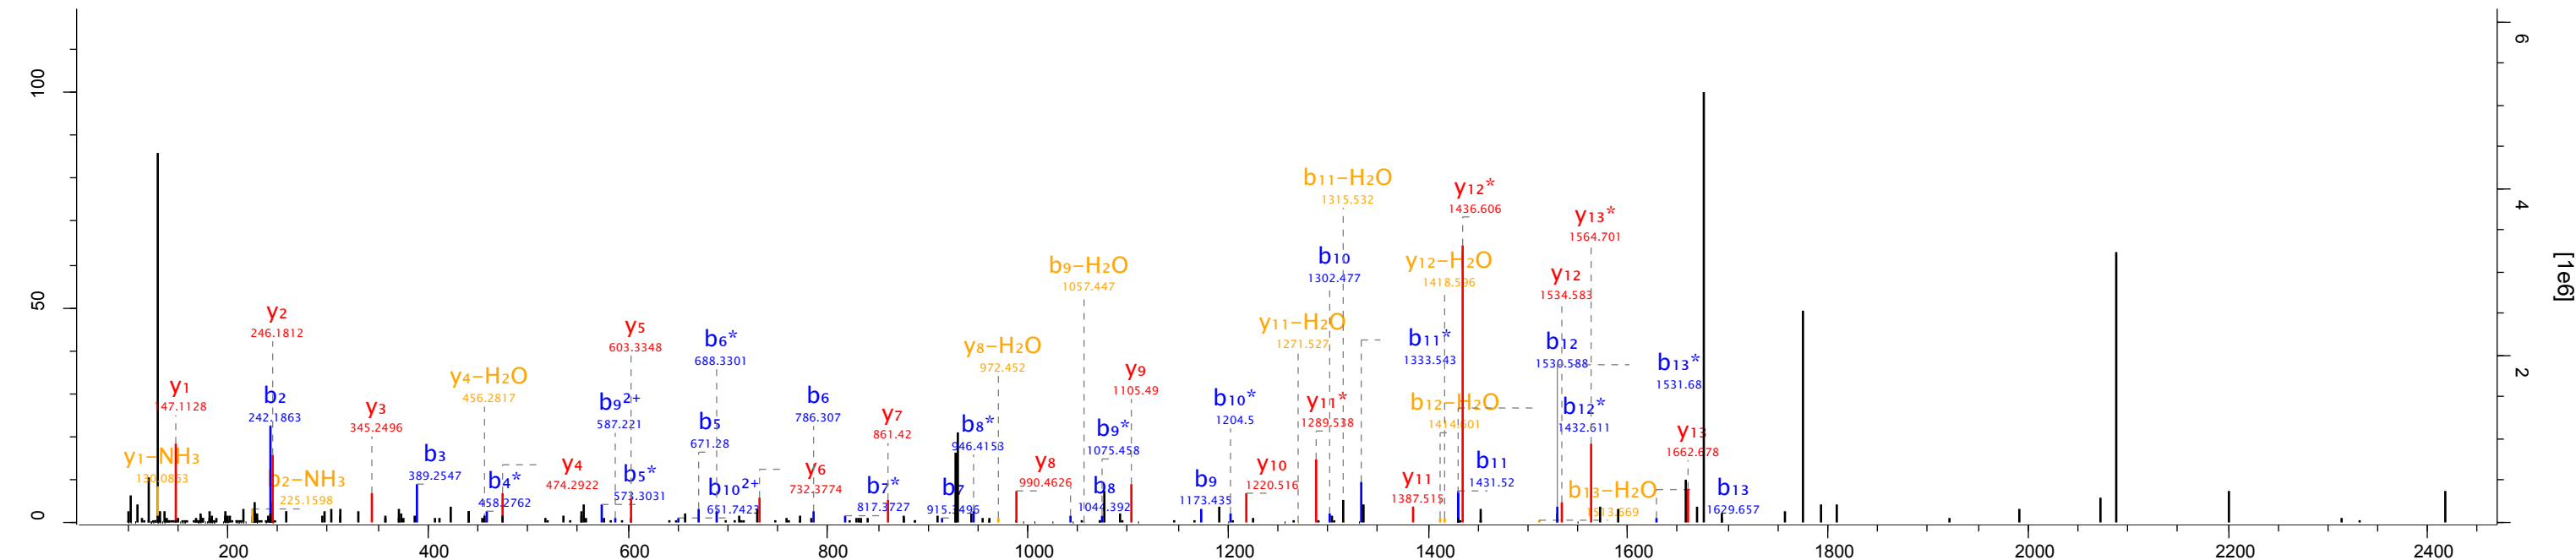

- L K F S D D E E E E V V K -

b<sub>2</sub> b<sub>3</sub> b<sub>4</sub>\* b<sub>5</sub> b<sub>6</sub> b<sub>7</sub> b<sub>8</sub> b<sub>9</sub> b<sub>10</sub> b<sub>11</sub> b<sub>12</sub> b<sub>13</sub>

y<sub>13</sub> y<sub>12</sub> y<sub>11</sub> ph y<sub>10</sub> y<sub>9</sub> y<sub>8</sub> y<sub>7</sub> y<sub>6</sub> y<sub>5</sub> y<sub>4</sub> y<sub>3</sub> y<sub>2</sub> y<sub>1</sub>

Raw file: 20150812\_A375SR\_Phospho\_BR1\_09  
 Scan: 14855 Method: FTMS; HCD Score: 114.46 m/z: 845.94 Gene names: ATRX

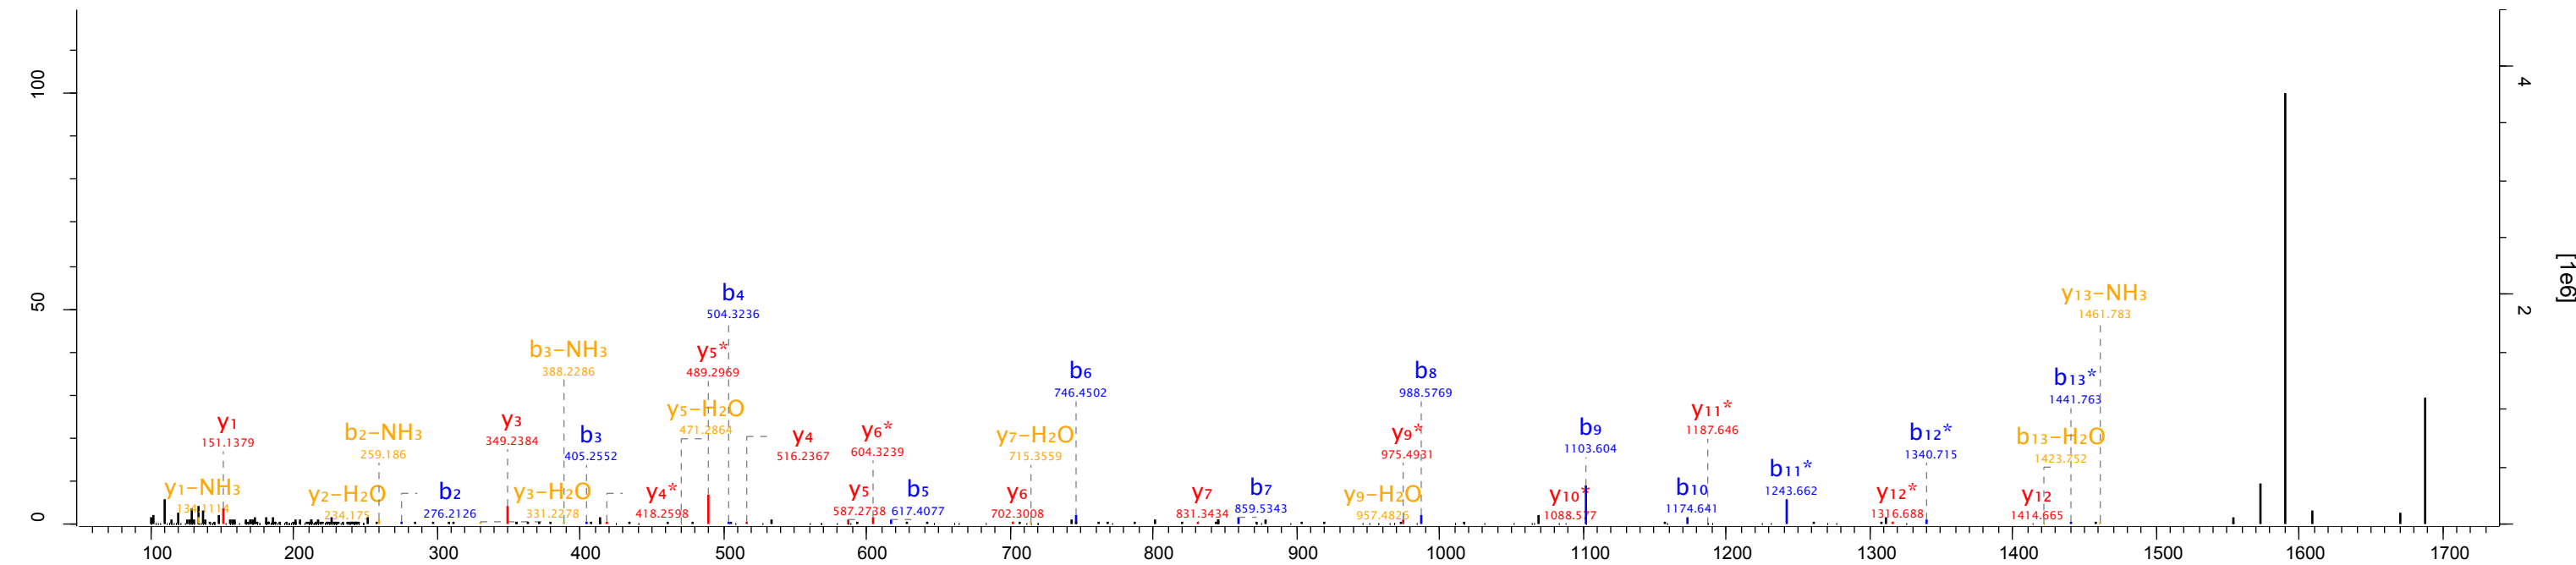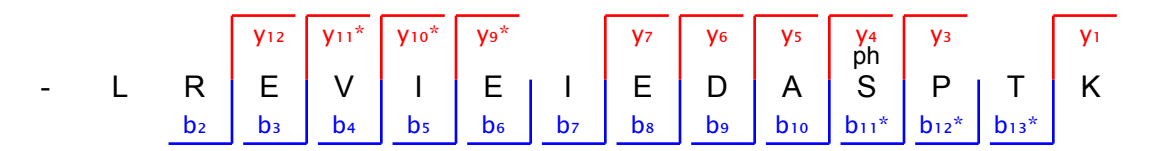

Raw file  
20150812\_A375SR\_Phospho\_BR1\_09

Scan 15595 Method FTMS; HCD Score 282.86 m/z 972.49 Gene names PRRC2B

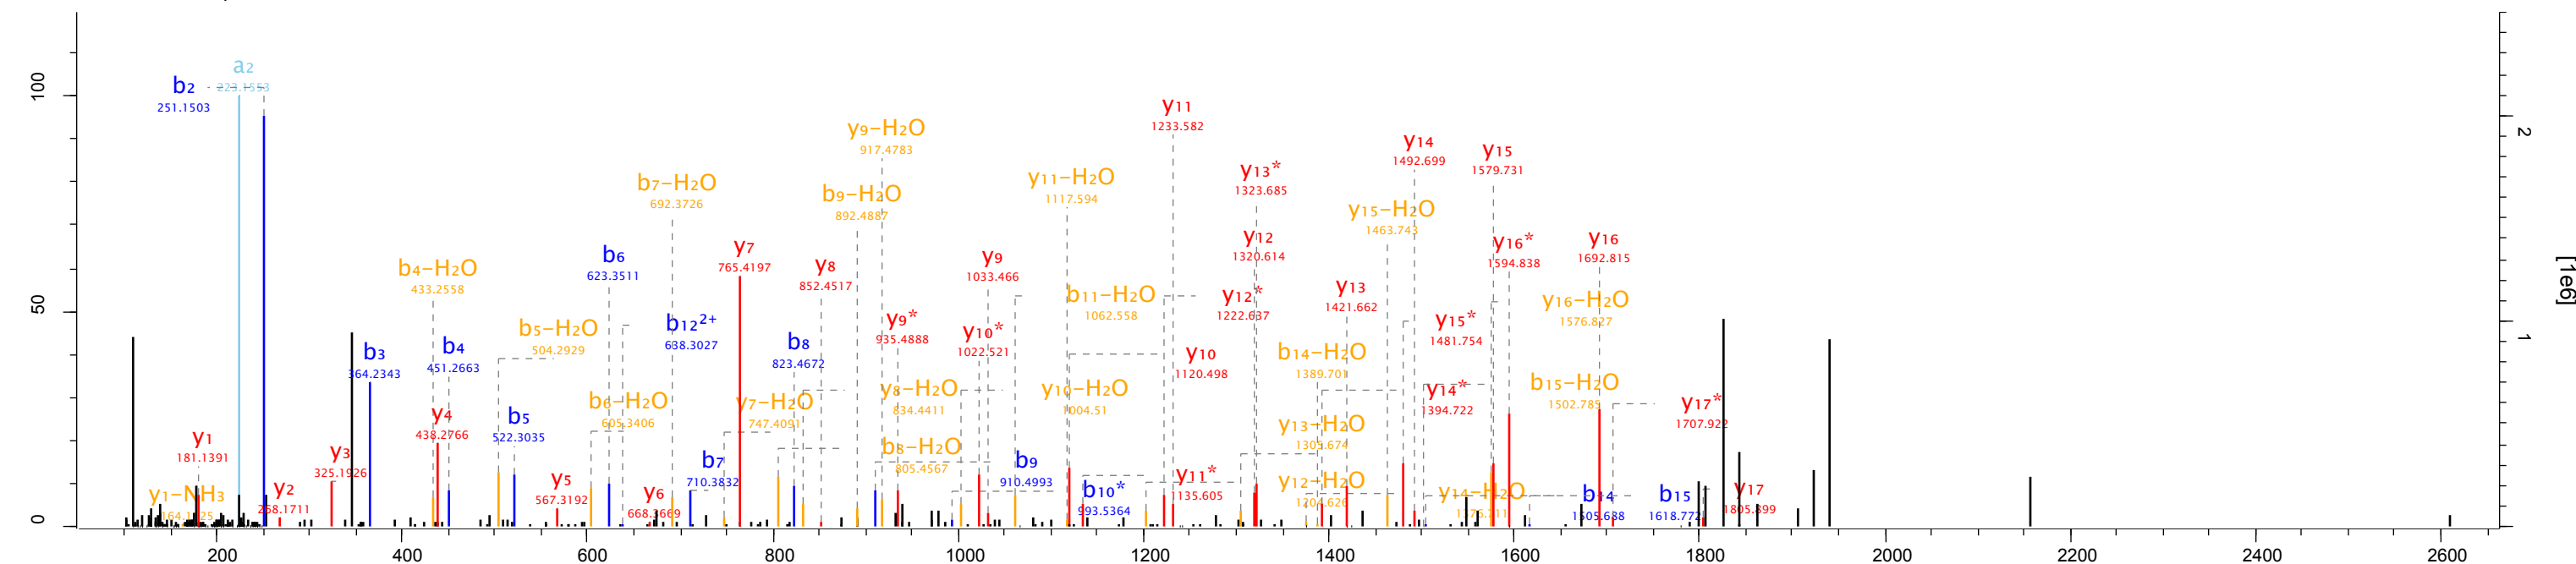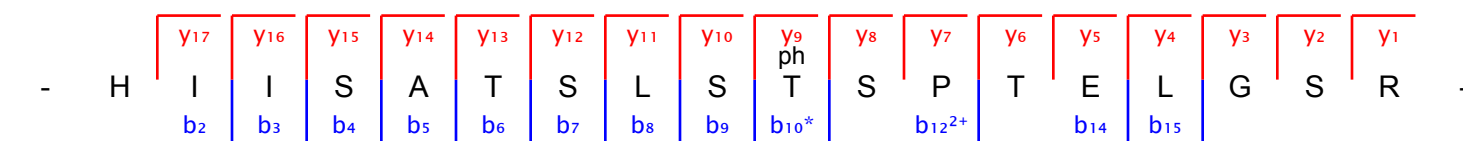

Raw file: 20150812\_A375SR\_Phospho\_BR1\_09  
 Scan: 2065 Method: FTMS; HCD Score: 156.96 m/z: 444.55 Gene names: SPTBN1

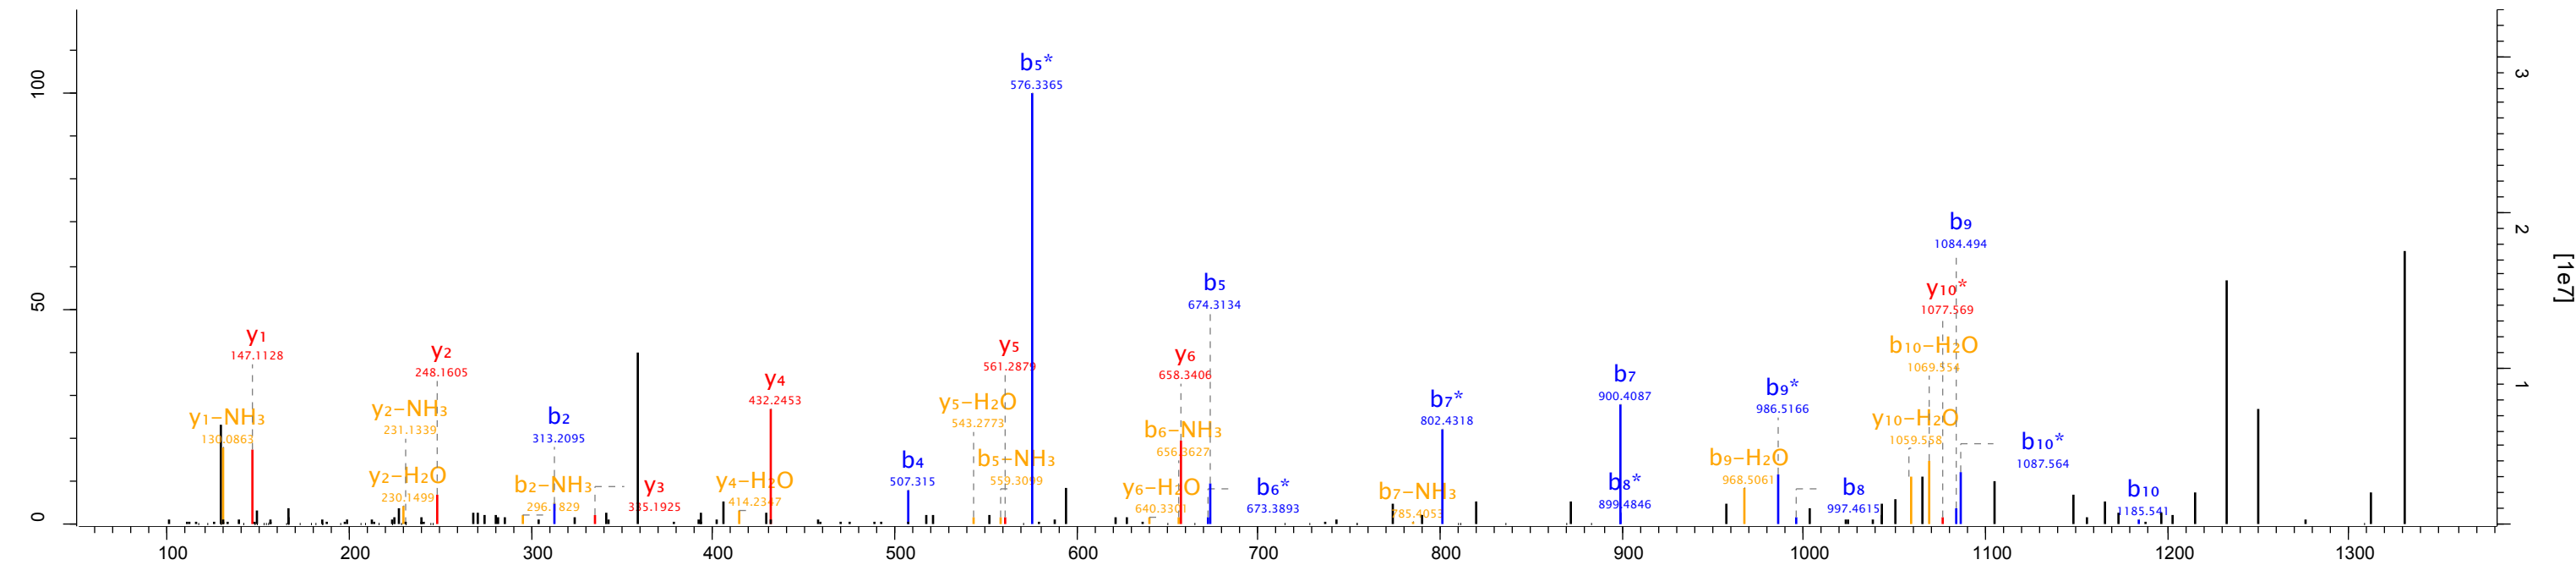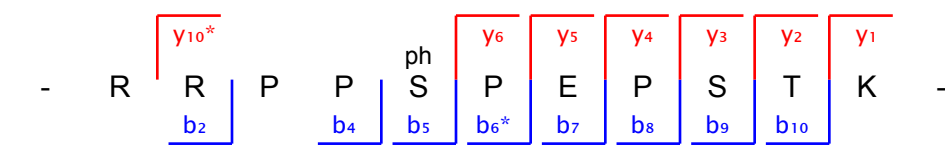

Raw file 20150812\_A375SR\_Phospho\_BR1\_09 Scan 21065 Method FTMS; HCD Score 132.16 m/z 859.42 Gene names ADD1

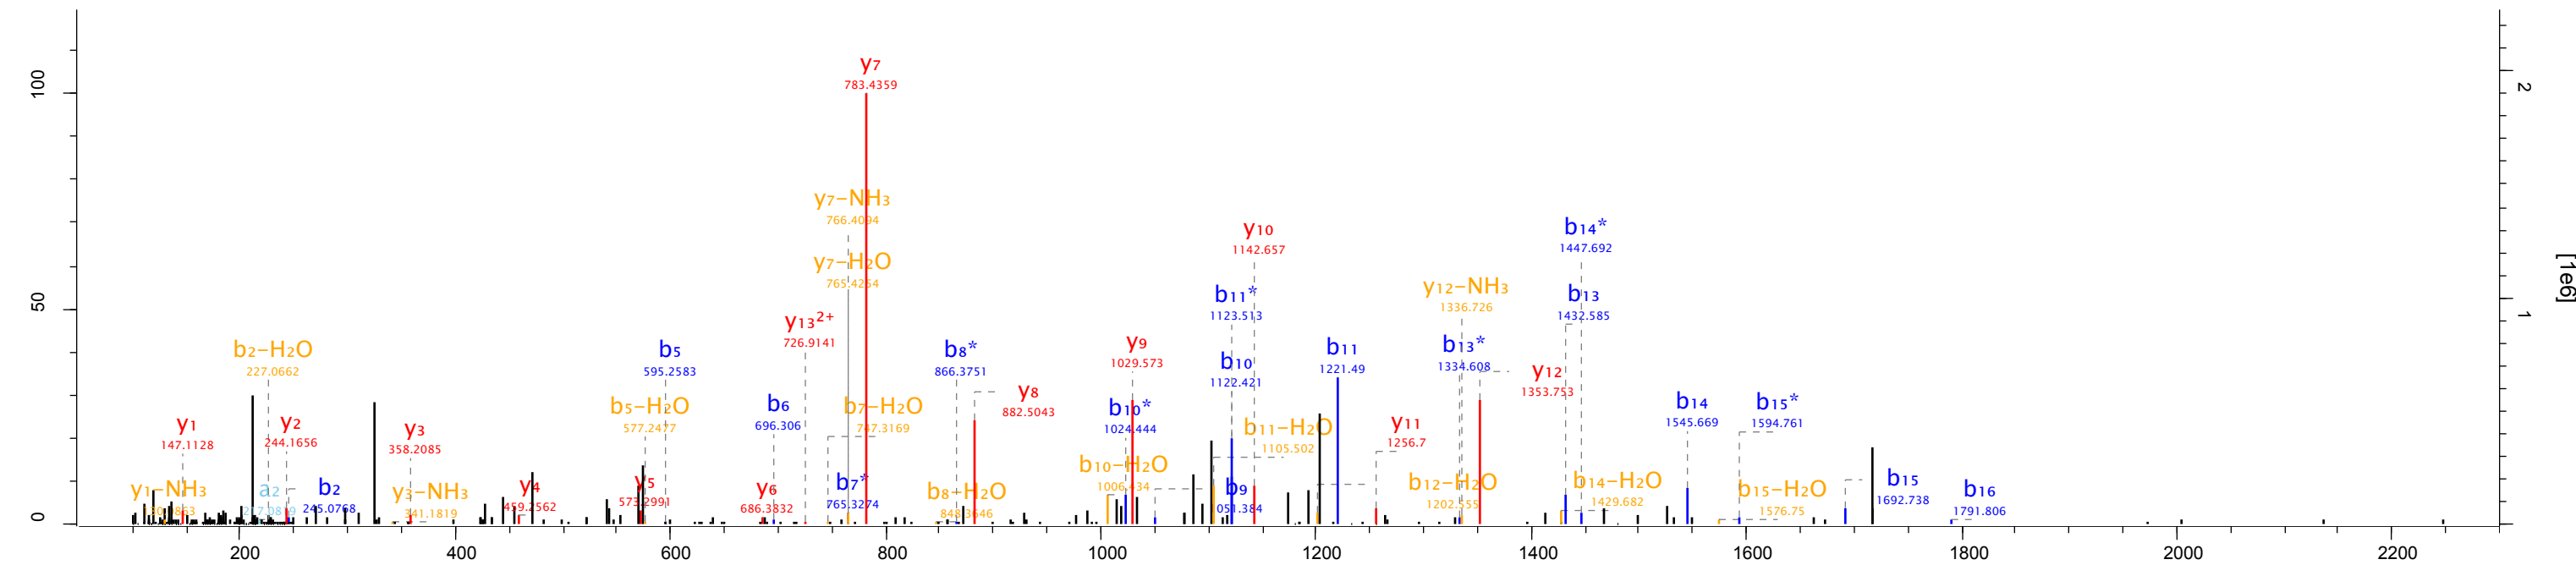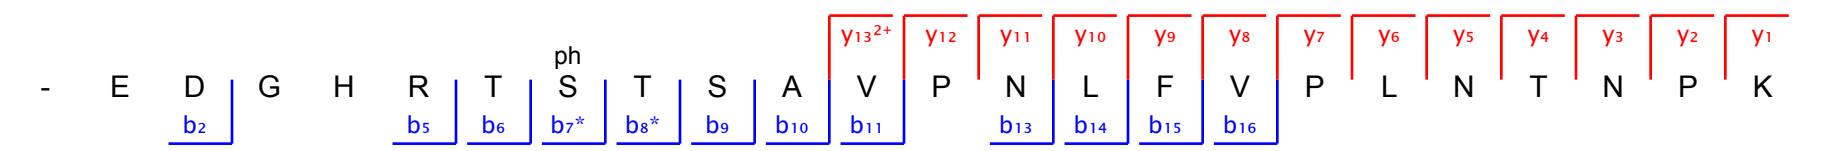

Raw file: 20150812\_A375SR\_Phospho\_BR1\_09  
 Scan: 3395 Method: FTMS; HCD Score: 246.67 m/z: 652.96 Gene names: PBDC1

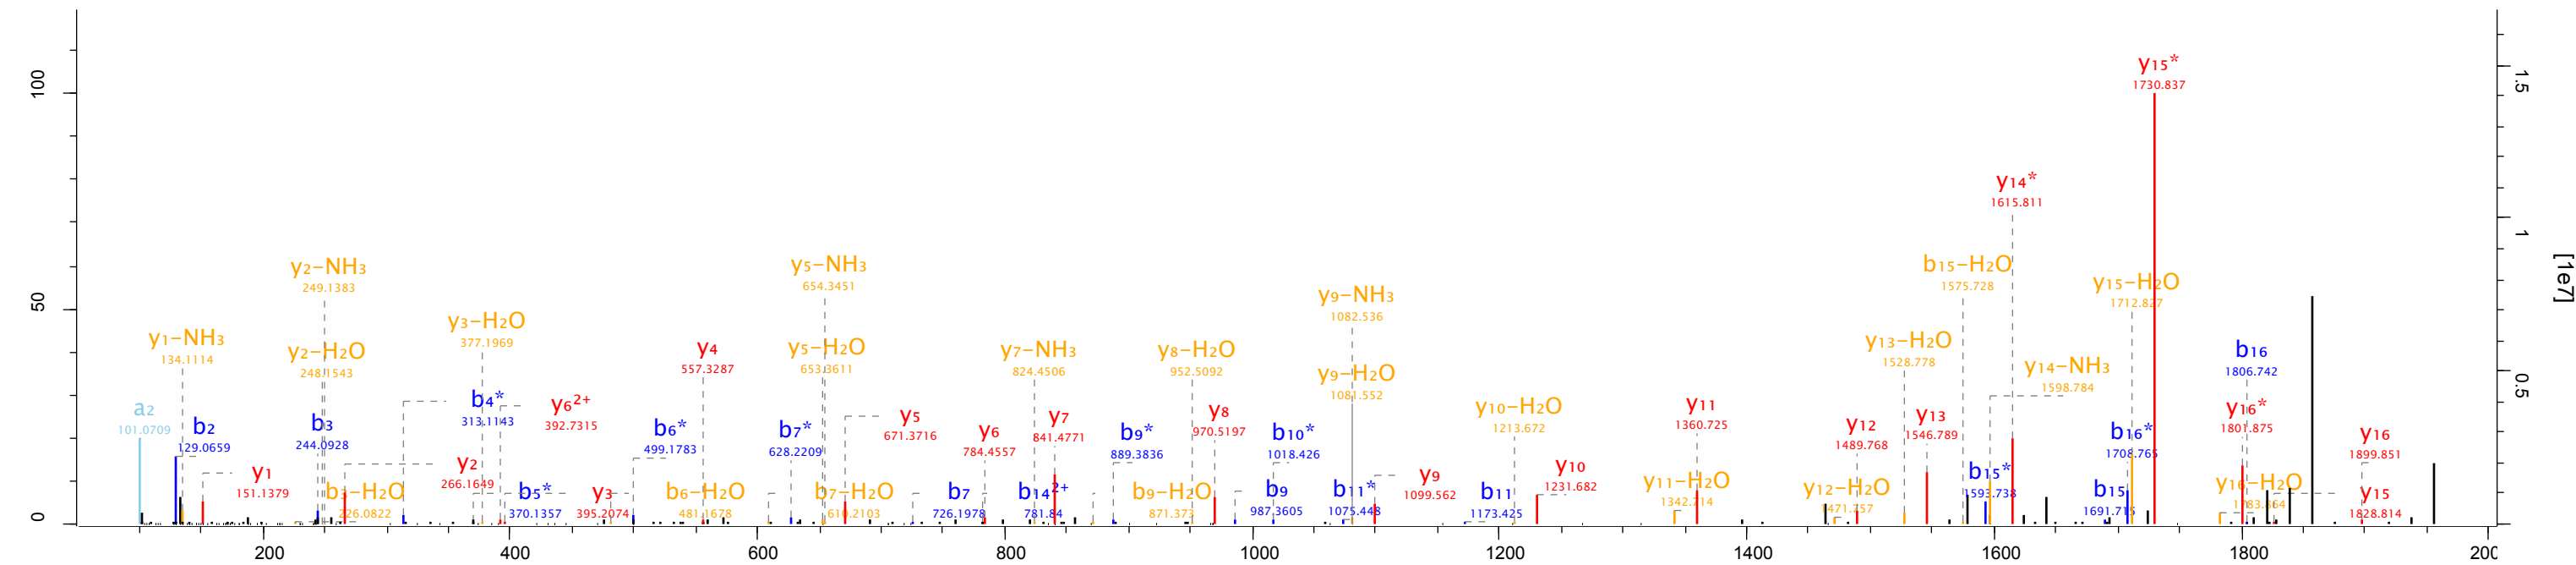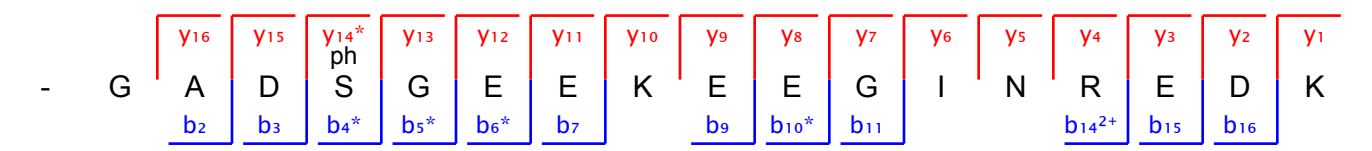



Raw file 20150812\_A375SR\_Phospho\_BR1\_09 Scan 4255 Method FTMS; HCD Score 89.37 m/z 495.62 Gene names REXO4

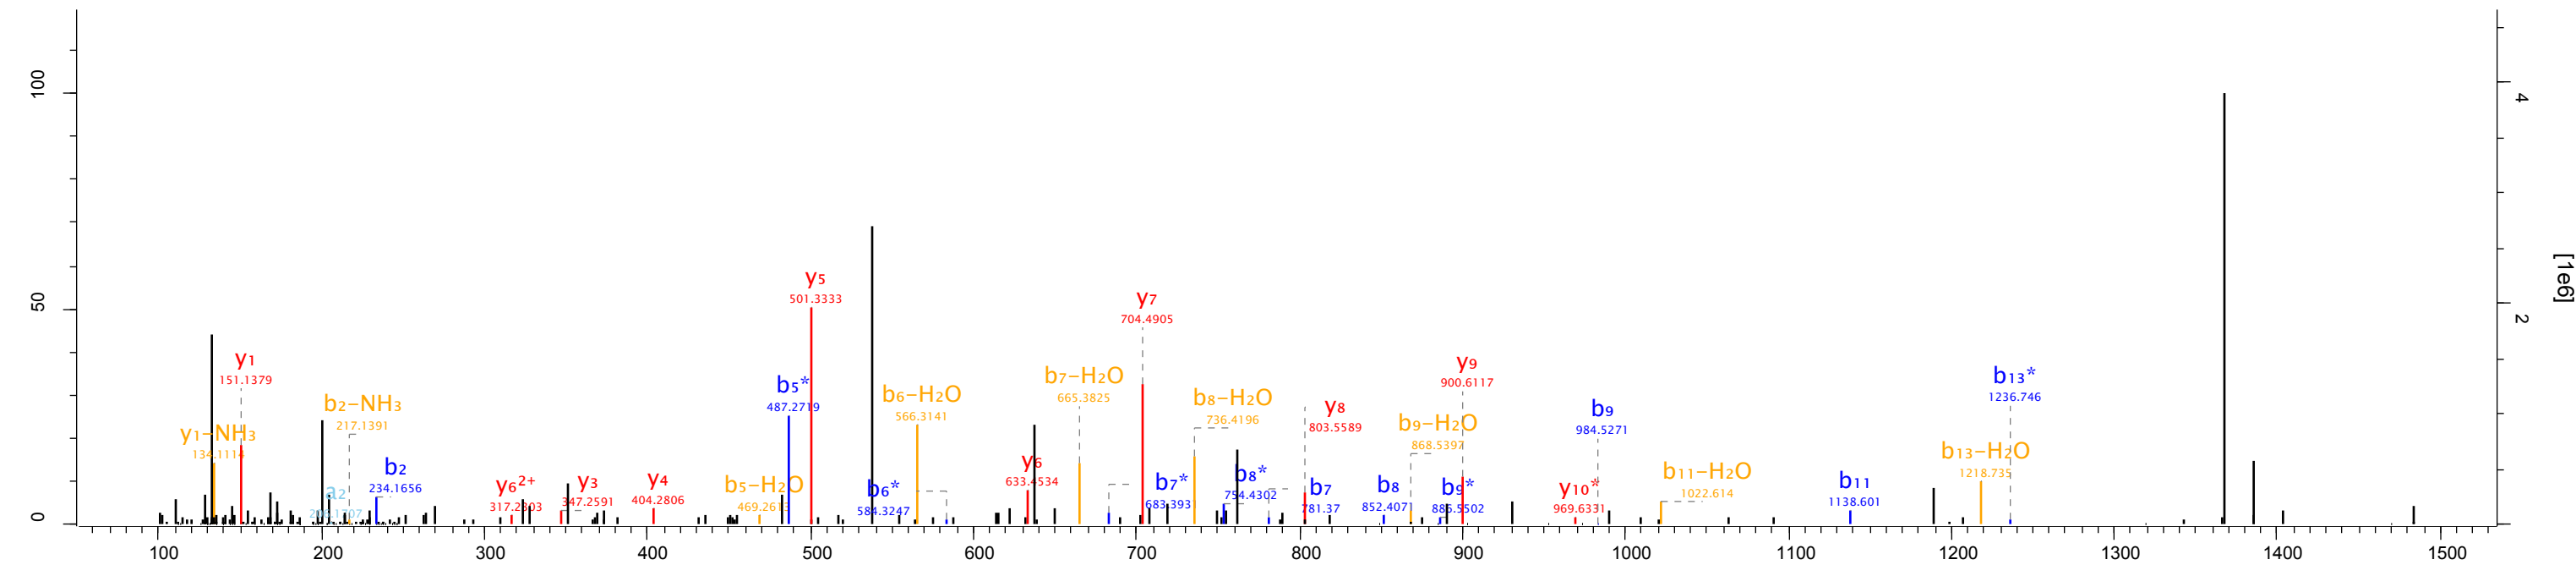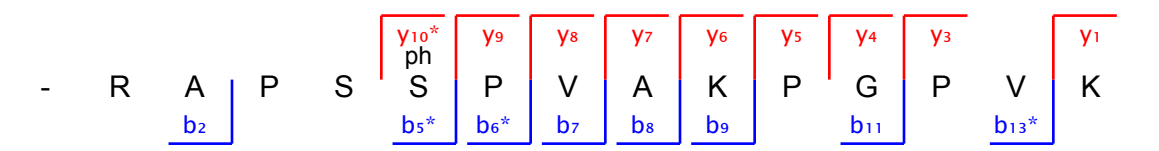

Raw file 20150812\_A375SR\_Phospho\_BR1\_09 Scan 6035 Method FTMS; HCD Score 248.52 m/z 941.45 Gene names SUMO1

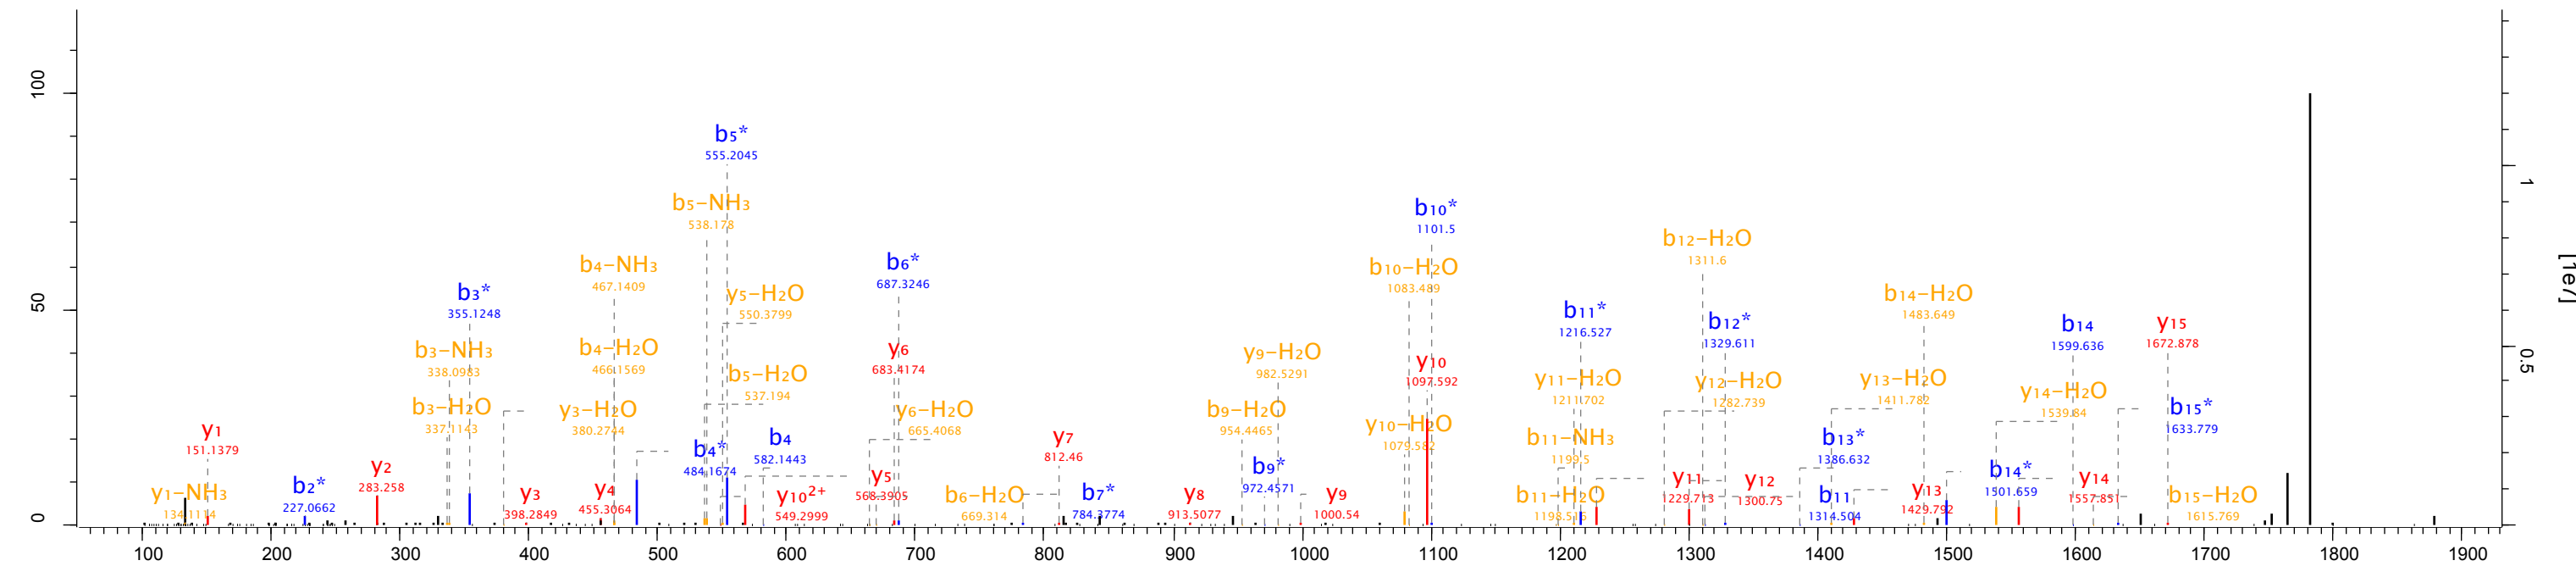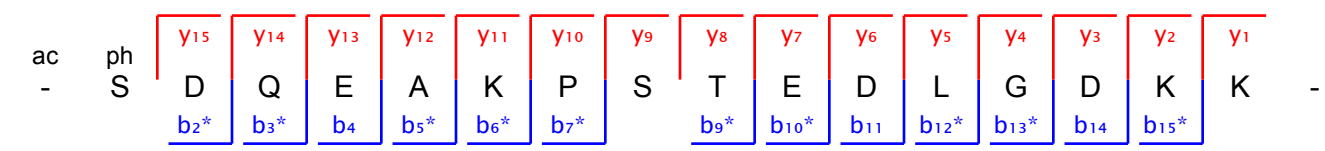

Raw file  
20150812\_A375SR\_Phospho\_BR1\_09

Scan 9265 Method FTMS; HCD Score 289.43 m/z 933.95 Gene names YAP1

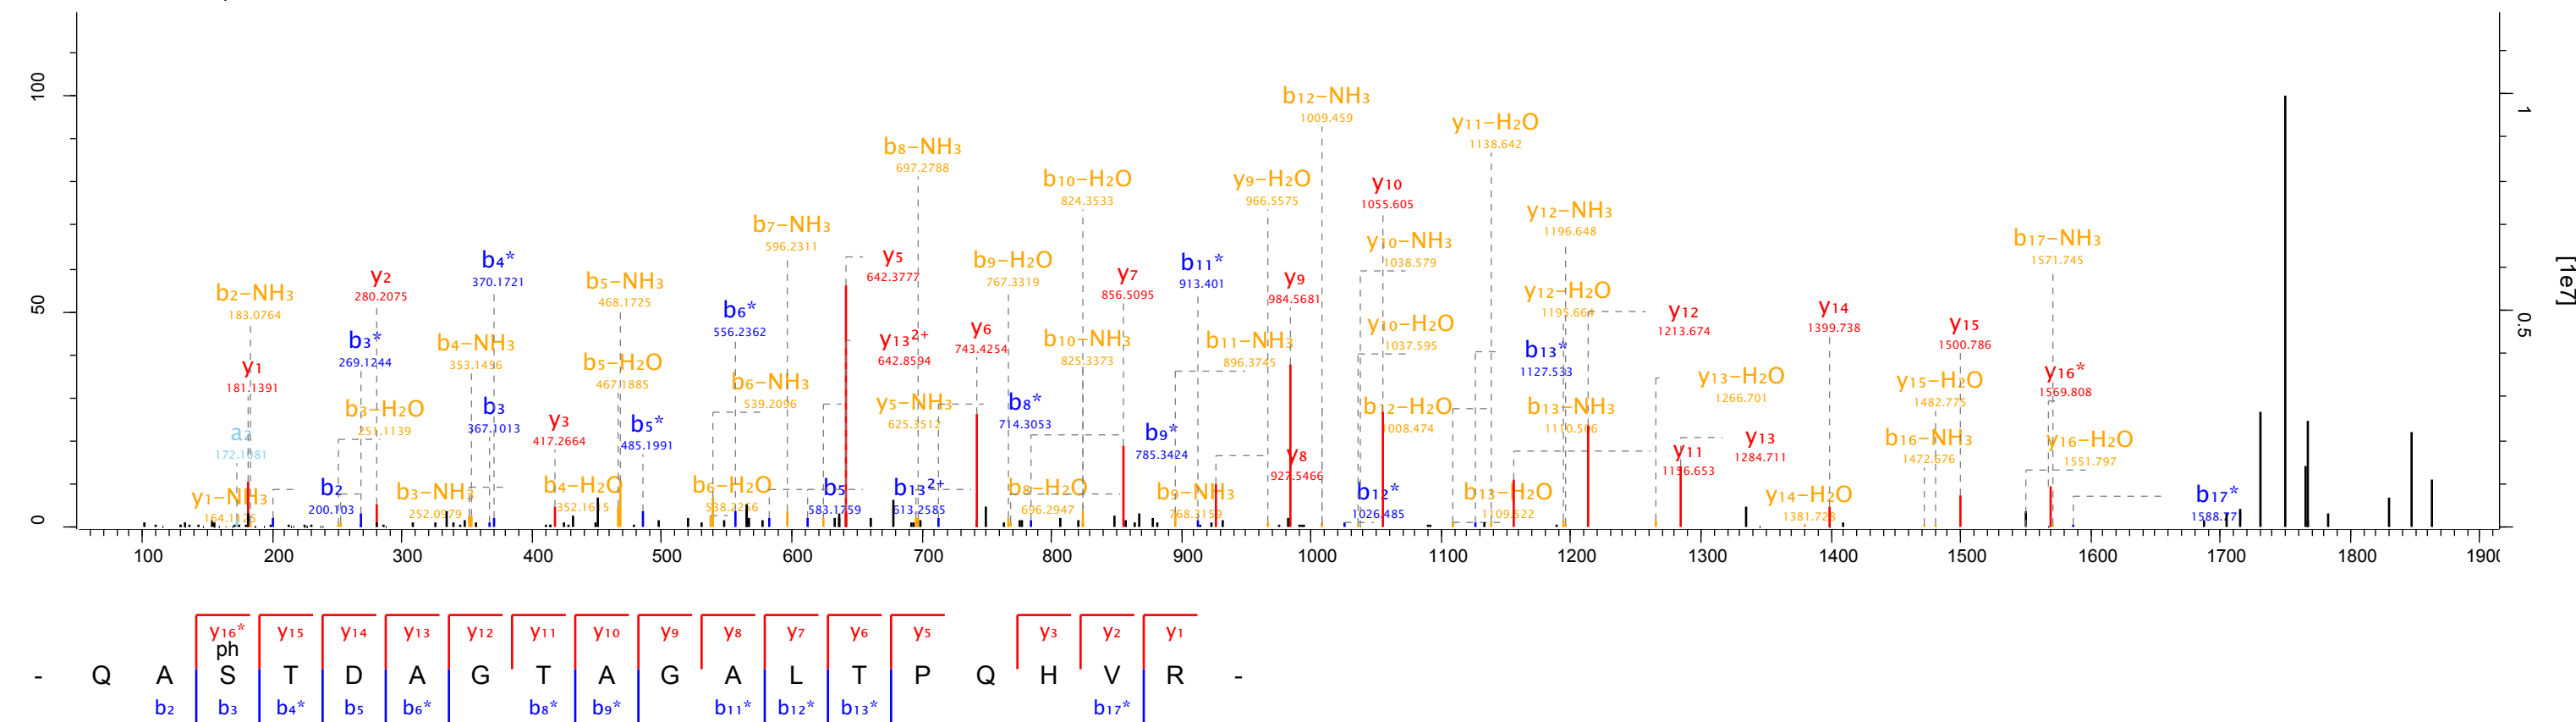

Raw file: 20150812\_A375SR\_Phospho\_BR1\_09  
 Scan: 9545 Method: FTMS; HCD Score: 243.99 m/z: 715.32 Gene names: SVIL

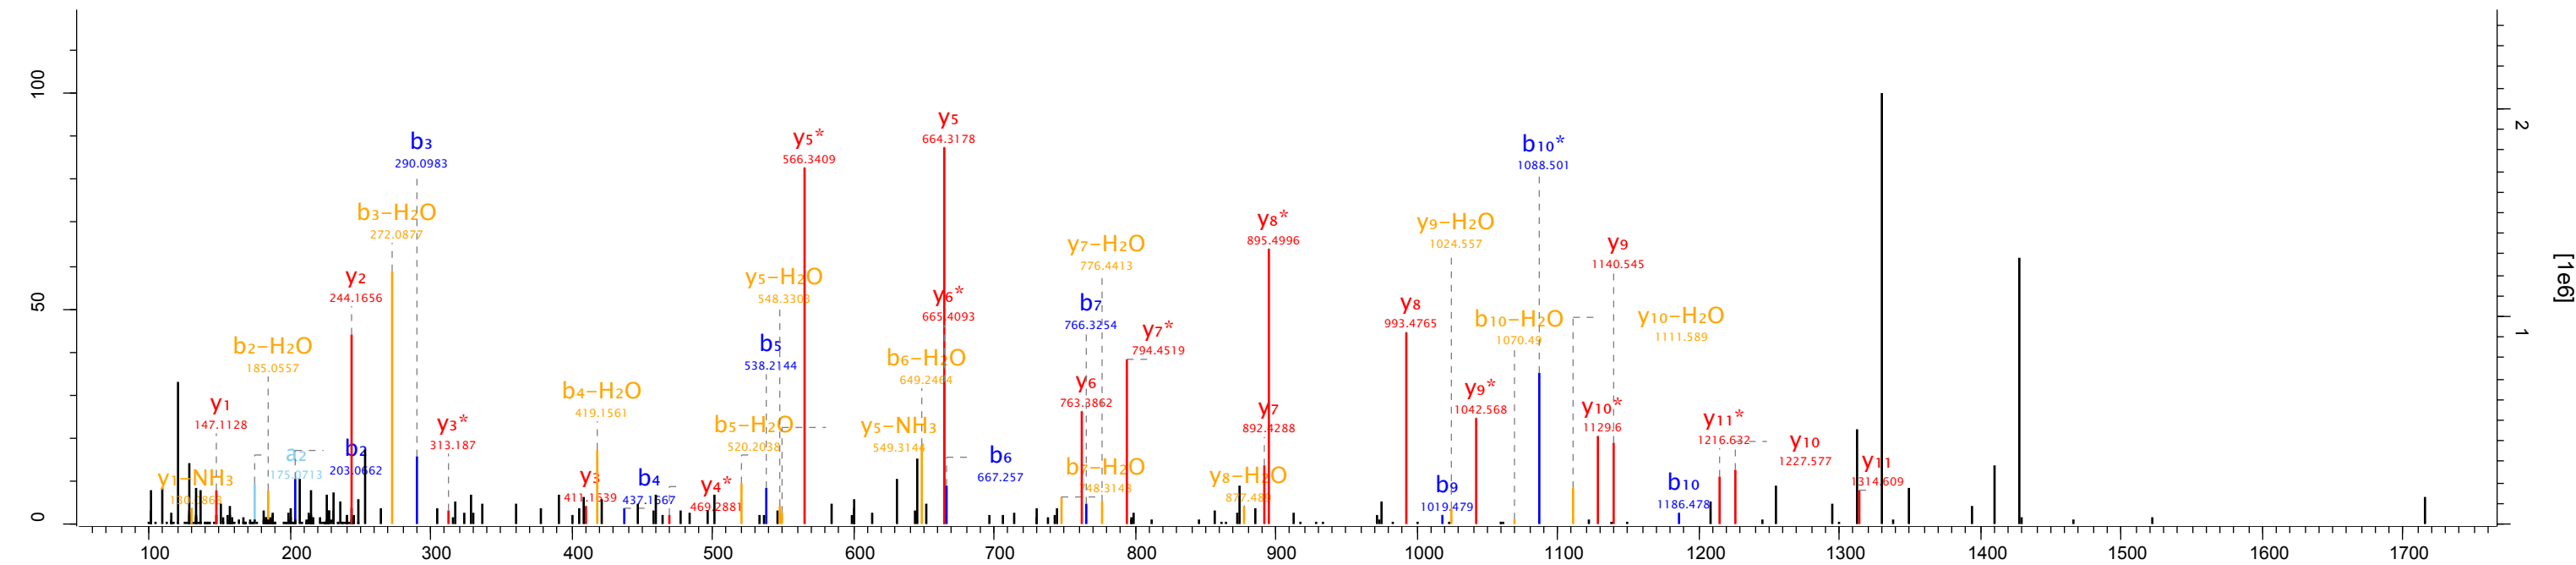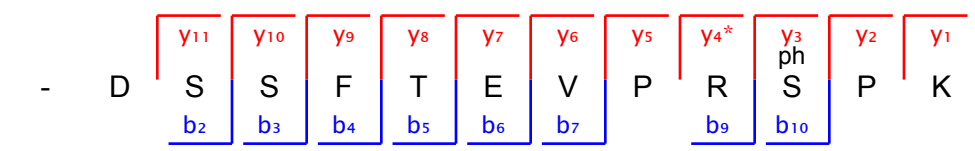

Raw file: 20150812\_A375SR\_Phospho\_BR1\_10  
 Scan: 12445 Method: FTMS; HCD Score: 123.72 m/z: 772.38 Gene names: SMC4

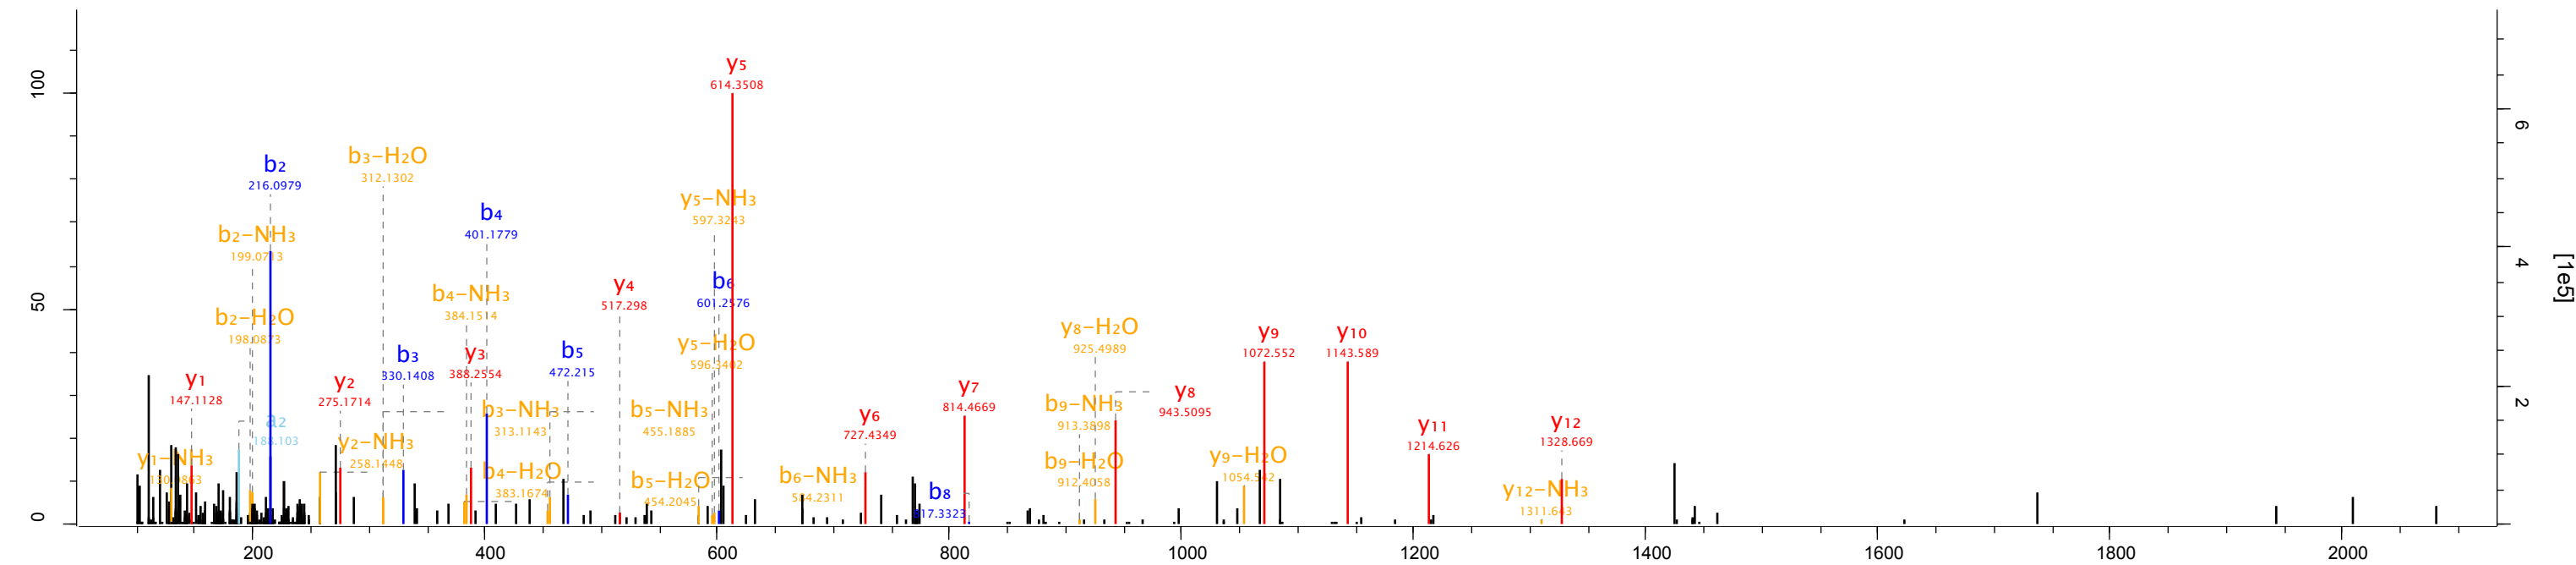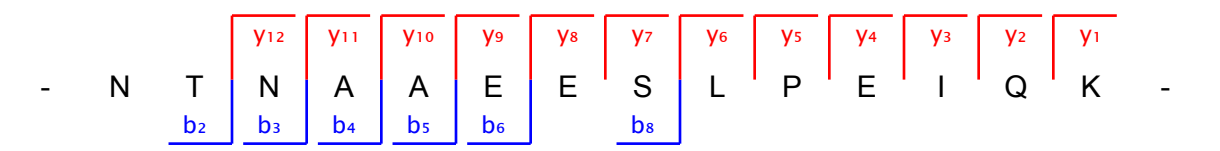

Raw file 20150812\_A375SR\_Phospho\_BR1\_10 Scan 14465 Method FTMS; HCD Score 189.51 m/z 919.97 Gene names CC2D1A

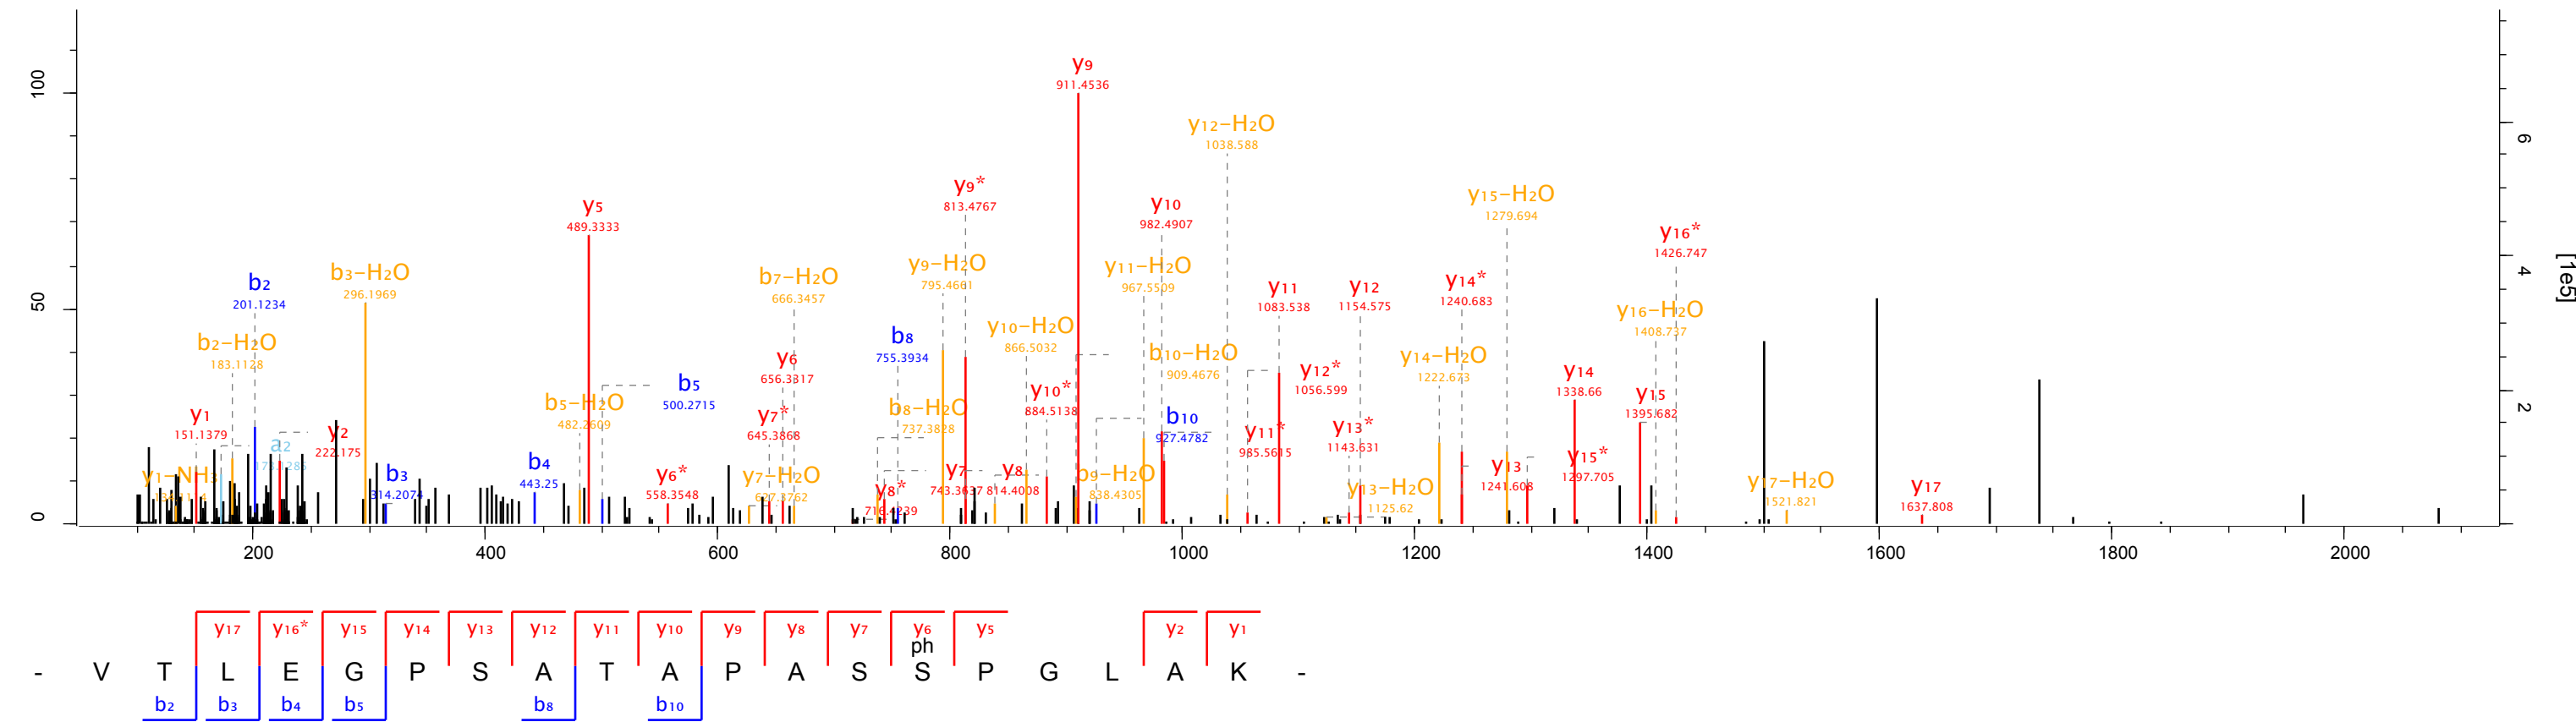

Raw file 20150812\_A375SR\_Phospho\_BR1\_10 Scan 17925 Method FTMS; HCD Score 152.12 m/z 652.33 Gene names SPTAN1

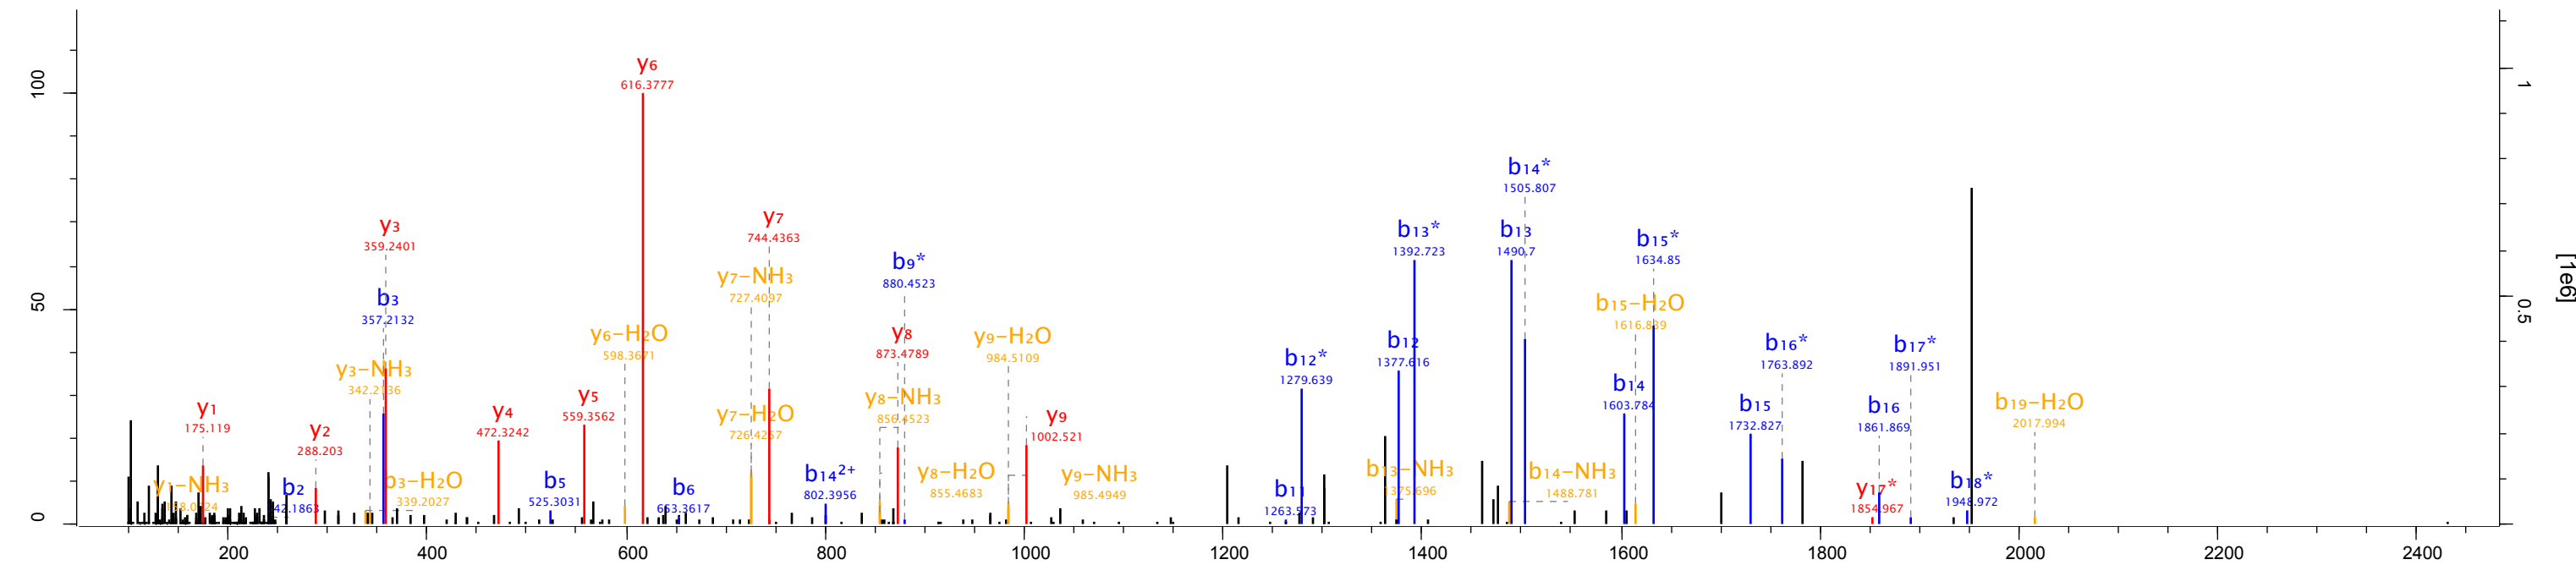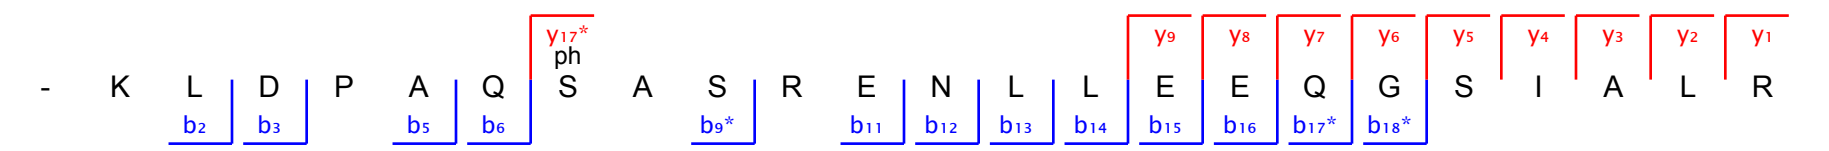

20150812\_A375SR\_Phospho\_BR1\_10

20145 FTMS; HCD 64.1 940.41 MBLAC2

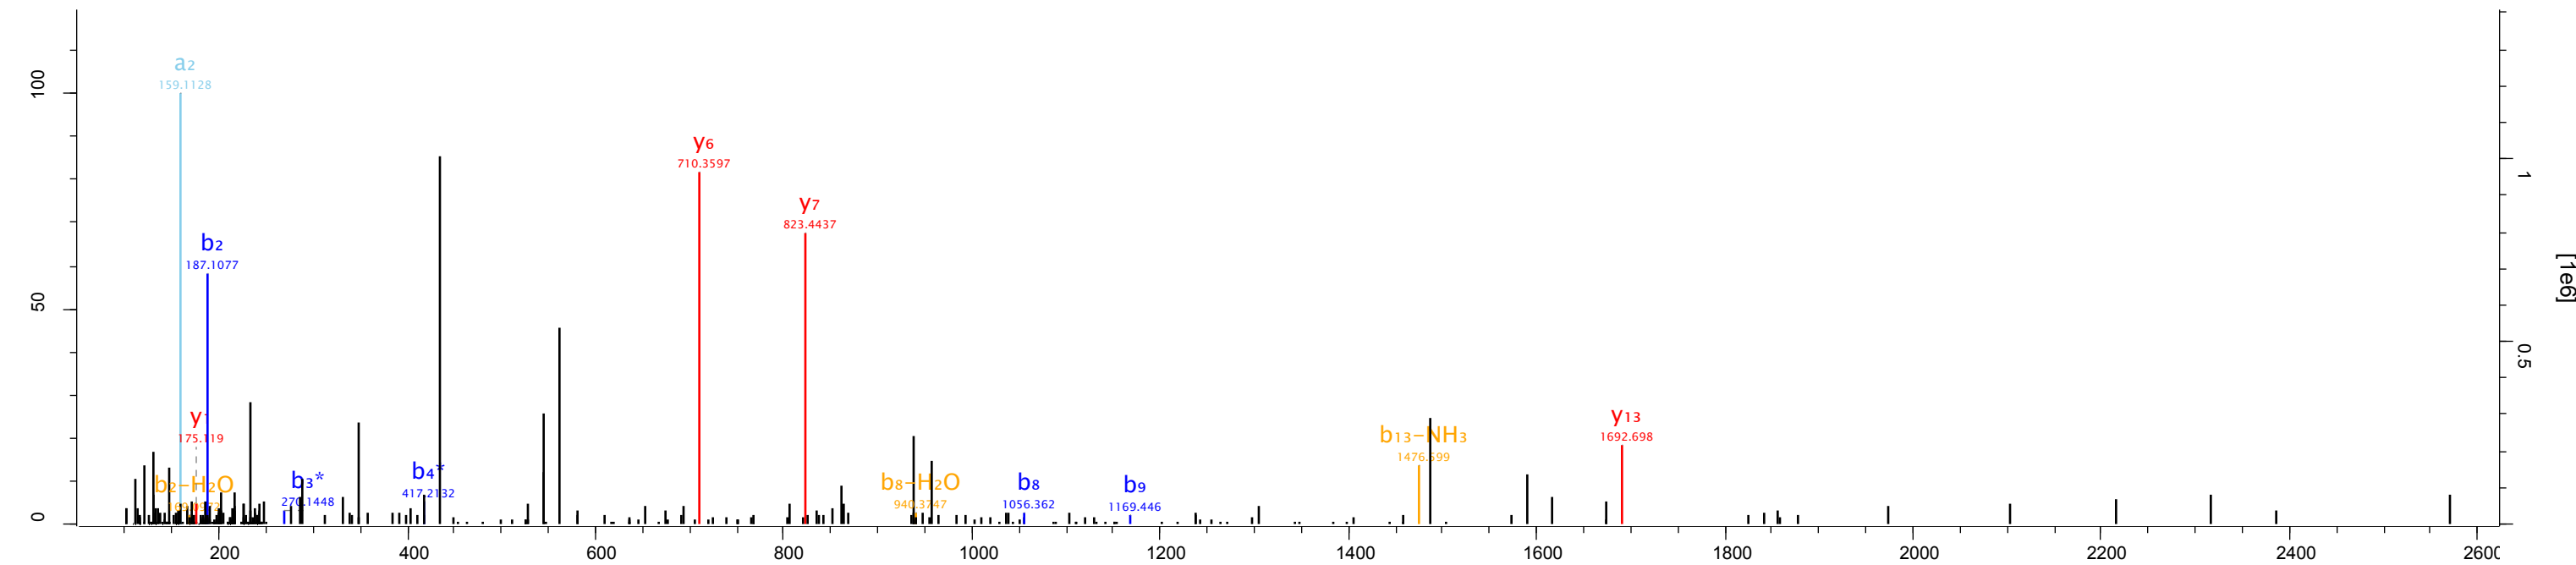

- V S T F A ox M R ph S L A S L A L R -

Fragmentation labels (b and y ions) are shown below the corresponding amino acids:

- b2 (under S)
- b3\* (under T)
- b4\* (under F)
- b8 (under S)
- b9 (under L)
- y7 (above L)
- y6 (above A)
- y13 (above T)
- y1 (above R)



Raw file Scan Method Score m/z Gene names

20150812\_A375SR\_Phospho\_BR1\_10 2045 FTMS; HCD 144.74 739.89 MAP4

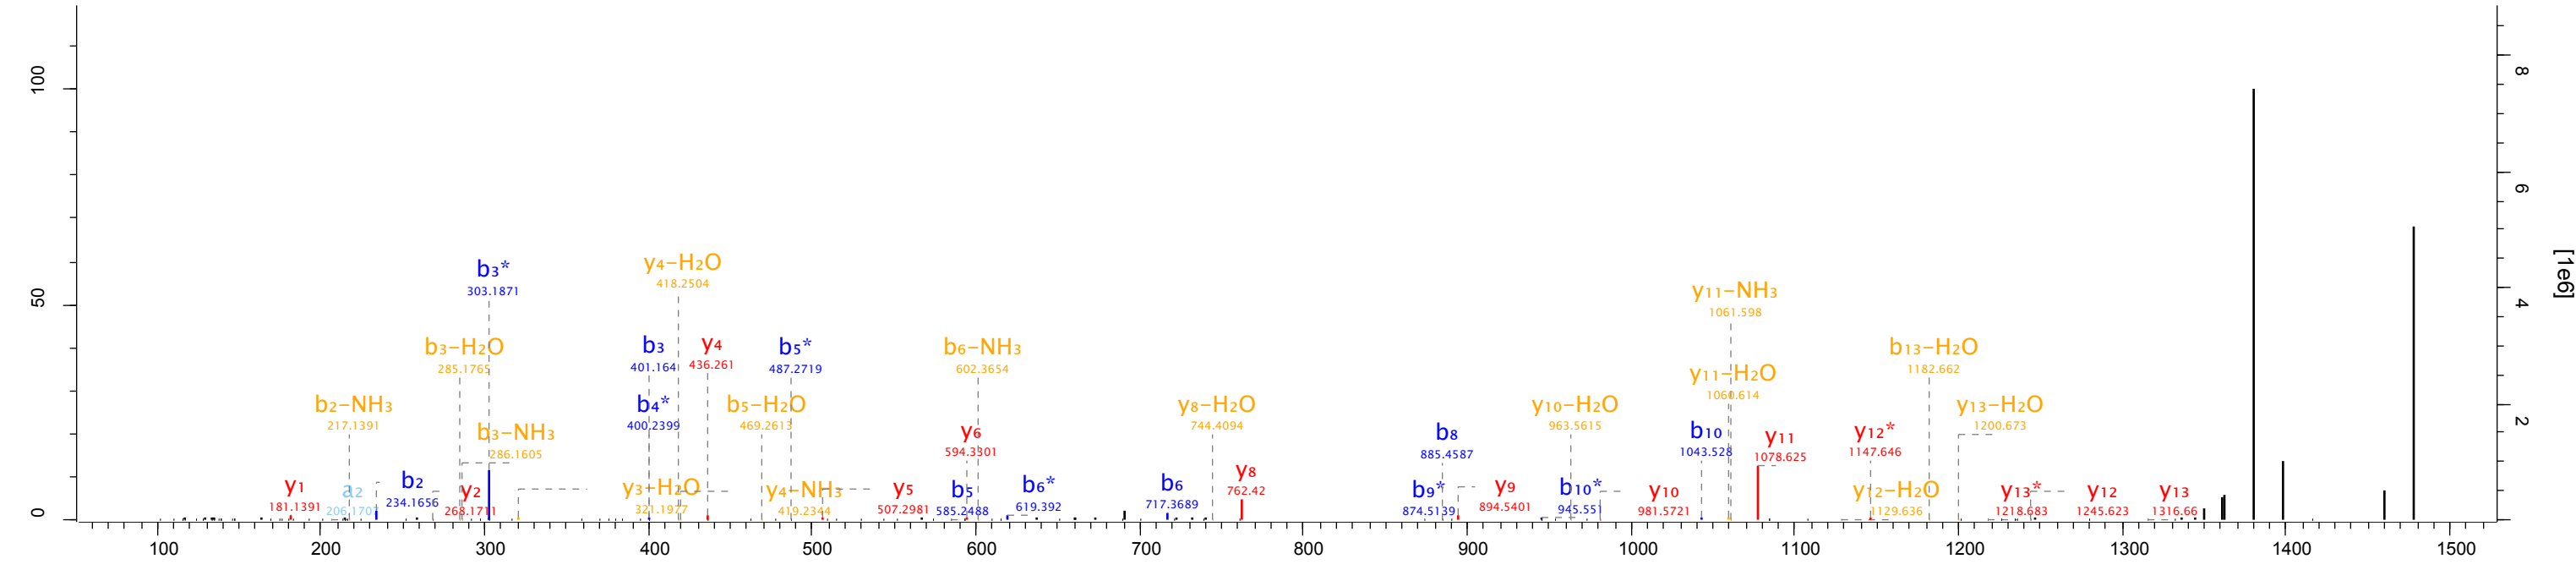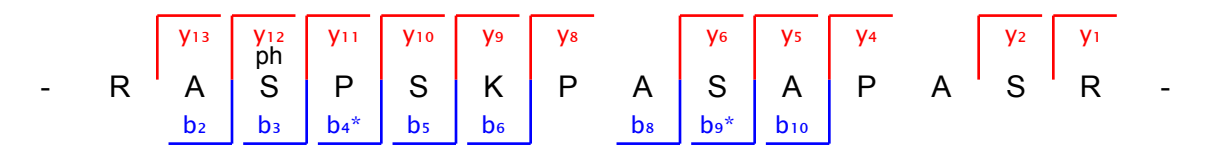

Raw file 20150812\_A375SR\_Phospho\_BR1\_10 Scan 28615 Method FTMS; HCD Score 224.97 m/z 617.33 Gene names PGK1

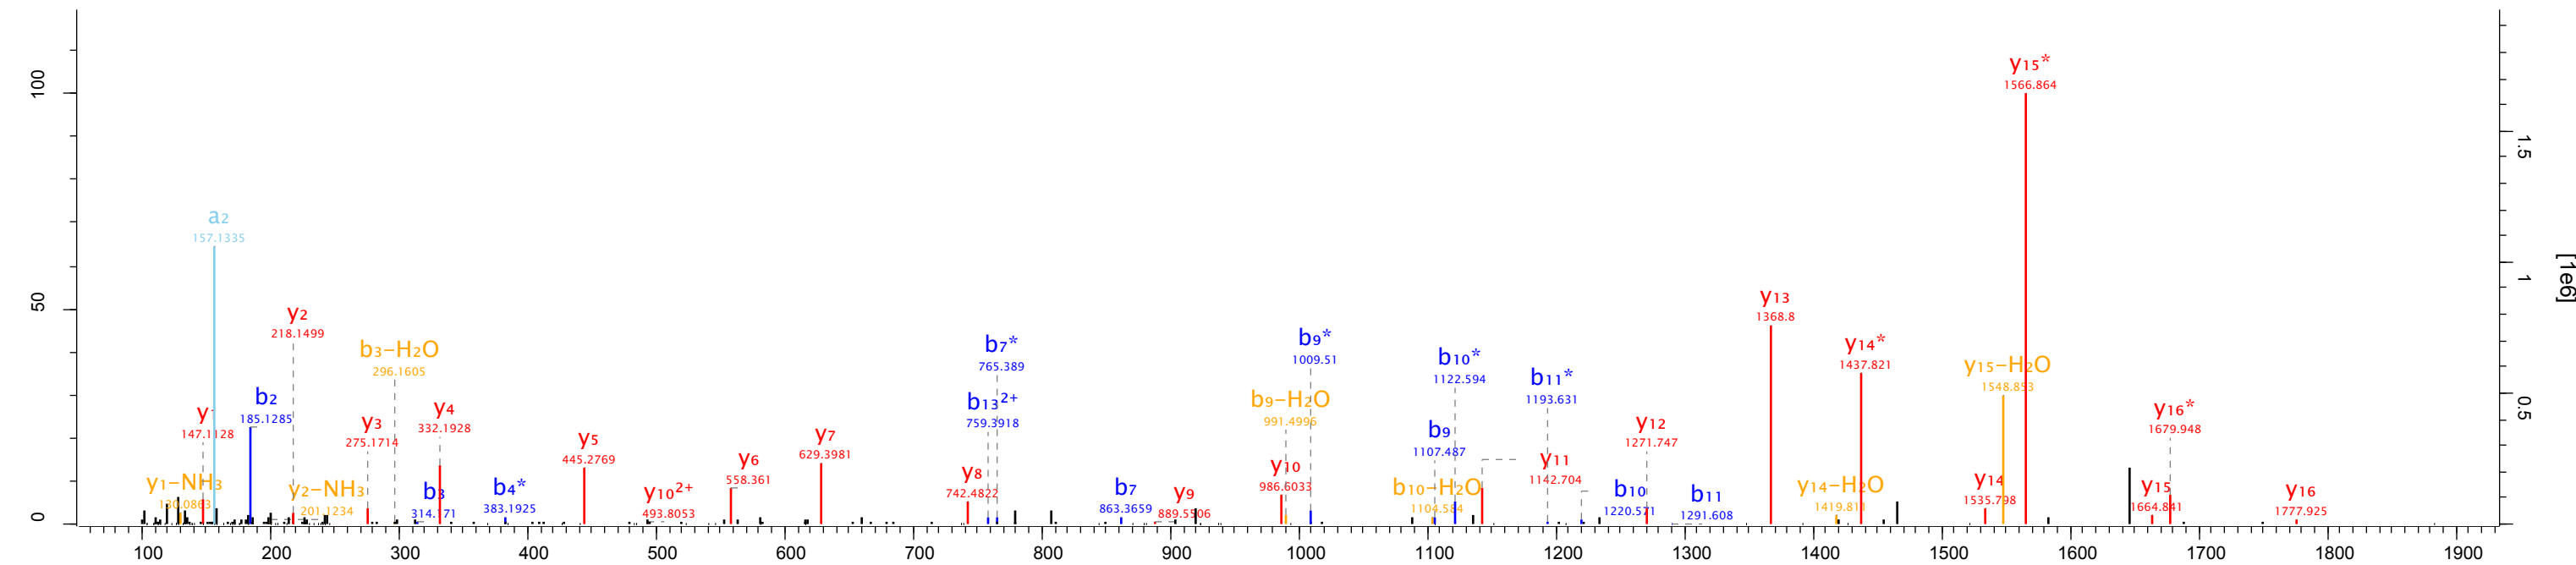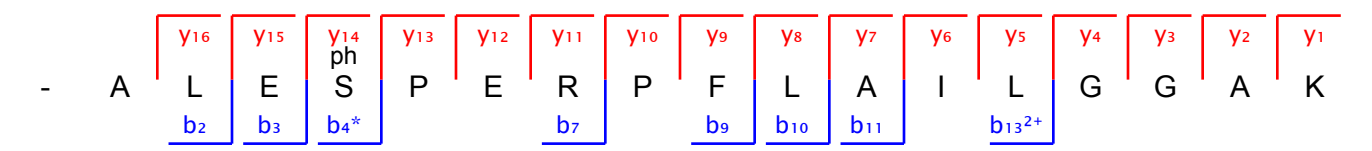

Raw file: 20150812\_A375SR\_Phospho\_BR1\_10  
 Scan: 5705 Method: FTMS; HCD Score: 152.32 m/z: 561.78 Gene names: ZC3H13

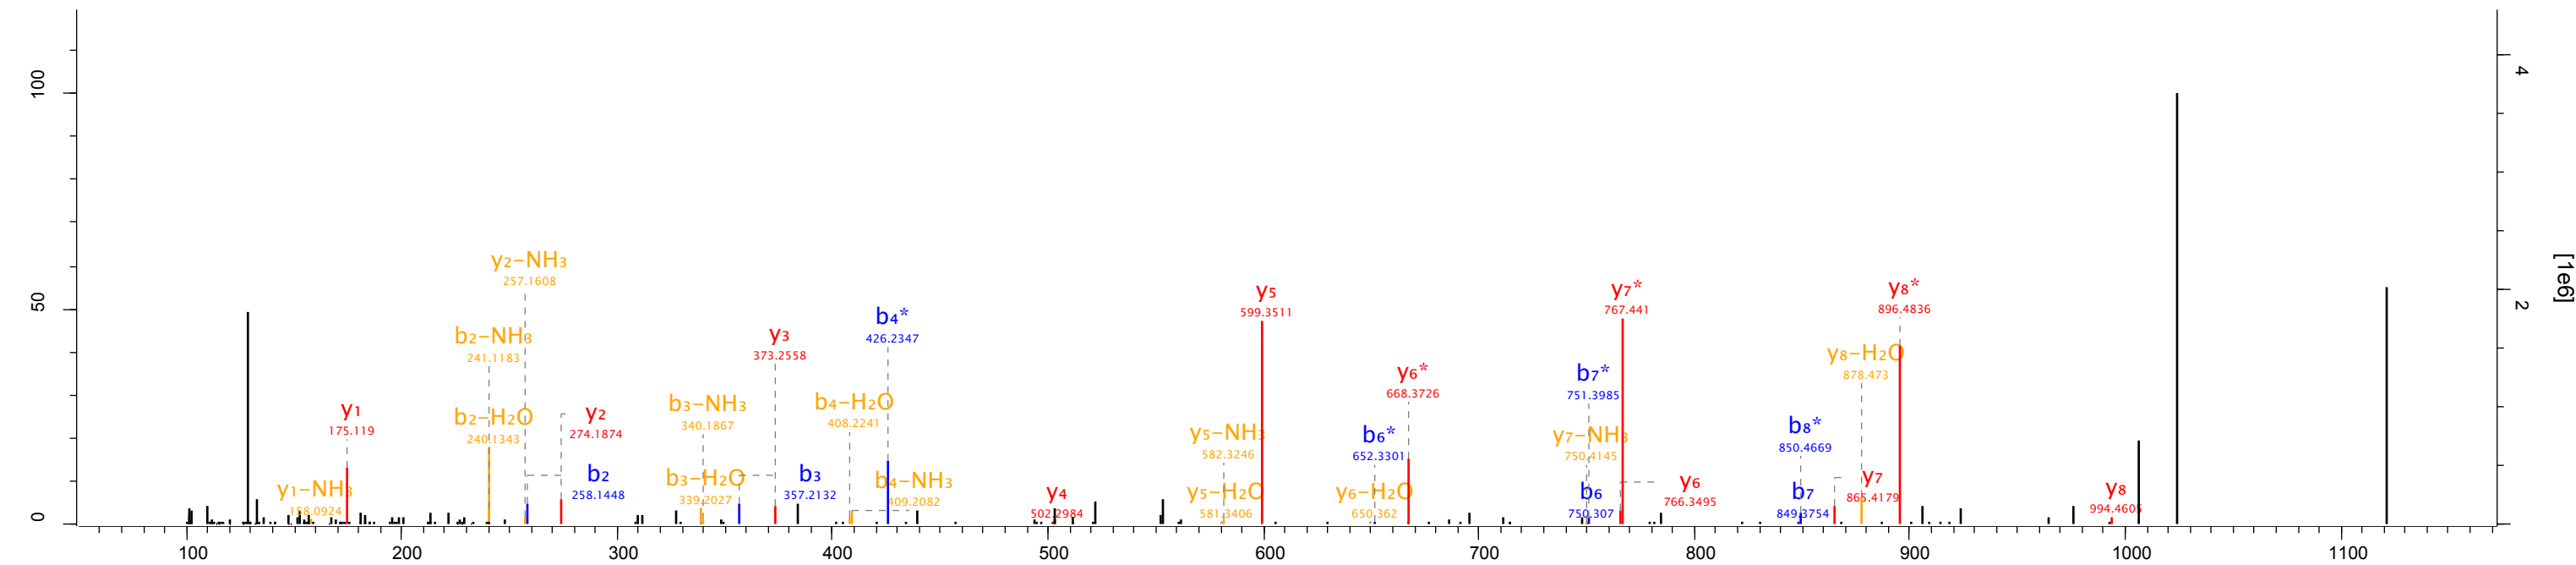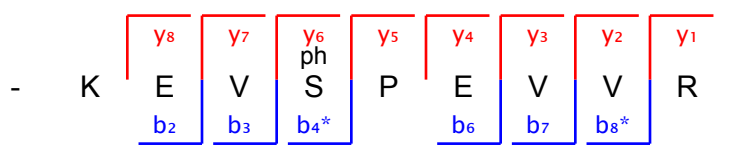

Raw file 20150812\_A375SR\_Phospho\_BR1\_01 Scan 16306 Method FTMS; HCD Score 66.88 m/z 746.99 Gene names BCL9L

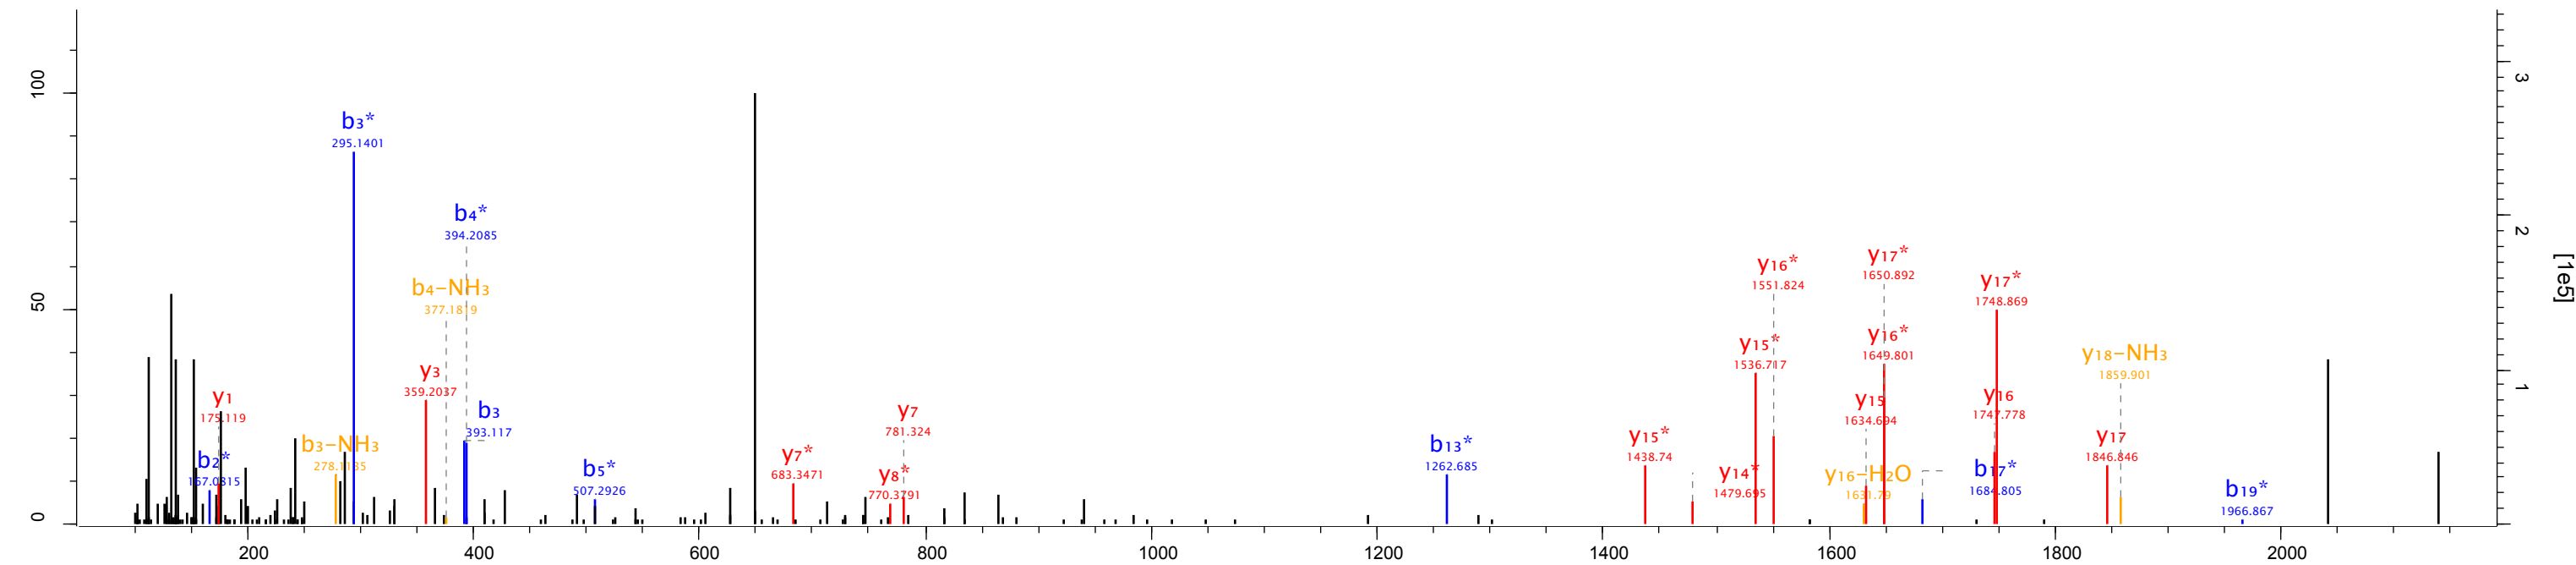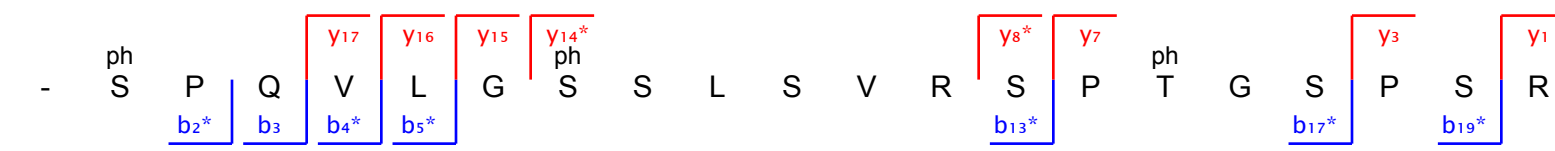

Raw file 20150812\_A375SR\_Phospho\_BR1\_01 Scan 19686 Method FTMS; HCD Score 87.74 m/z 923.08 Gene names RTN4

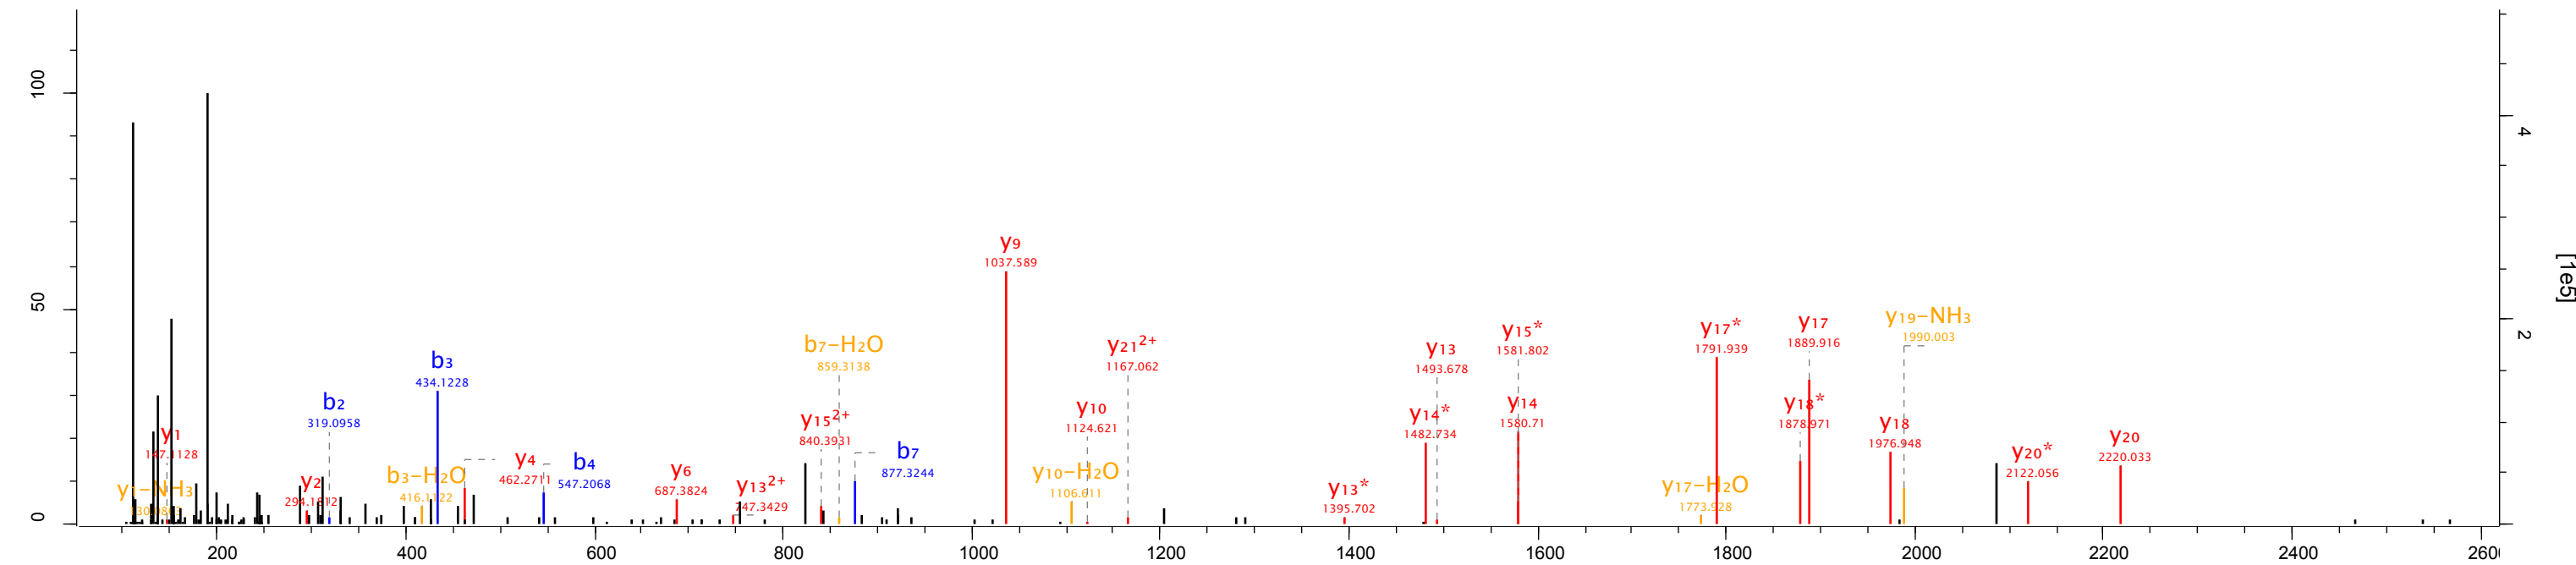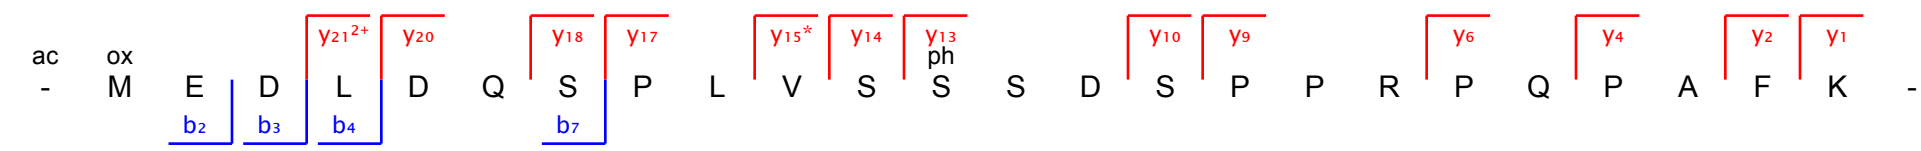

Raw file 20150812\_A375SR\_Phospho\_BR1\_01 Scan 4266 Method FTMS; HCD Score 83.99 m/z 789.94 Gene names HMGA2

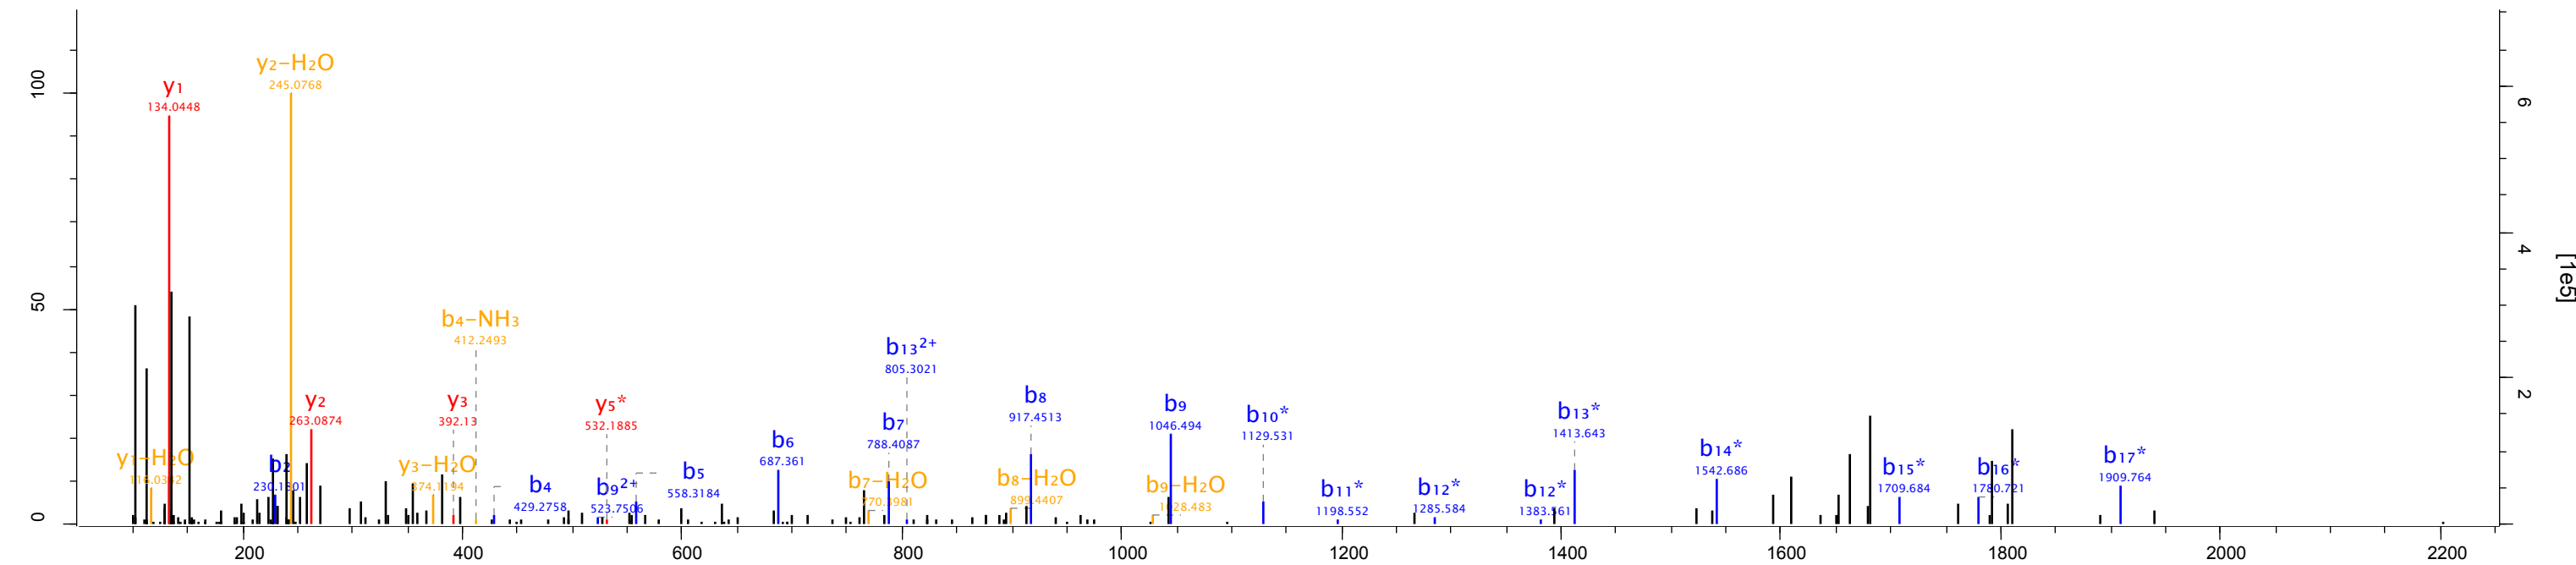

- K P A Q E E T E E T S S Q E S A E E D -

P
Q
E
E
T
E
E
T
S
S
Q
E
S
A
E
E
D

b<sub>2</sub>
b<sub>4</sub>
b<sub>5</sub>
b<sub>6</sub>
b<sub>7</sub>
b<sub>8</sub>
b<sub>9</sub>
b<sub>10</sub>\*
b<sub>11</sub>\*
b<sub>12</sub>\*
b<sub>13</sub>\*
b<sub>14</sub>\*
b<sub>15</sub>\*
b<sub>16</sub>\*
b<sub>17</sub>\*

y<sub>5</sub>\*
y<sub>3</sub>
y<sub>2</sub>
y<sub>1</sub>

Raw file: 20150812\_A375SR\_Phospho\_BR1\_01  
 Scan: 4896 Method: FTMS; HCD Score: 216.6 m/z: 783.31 Gene names: SRRM2

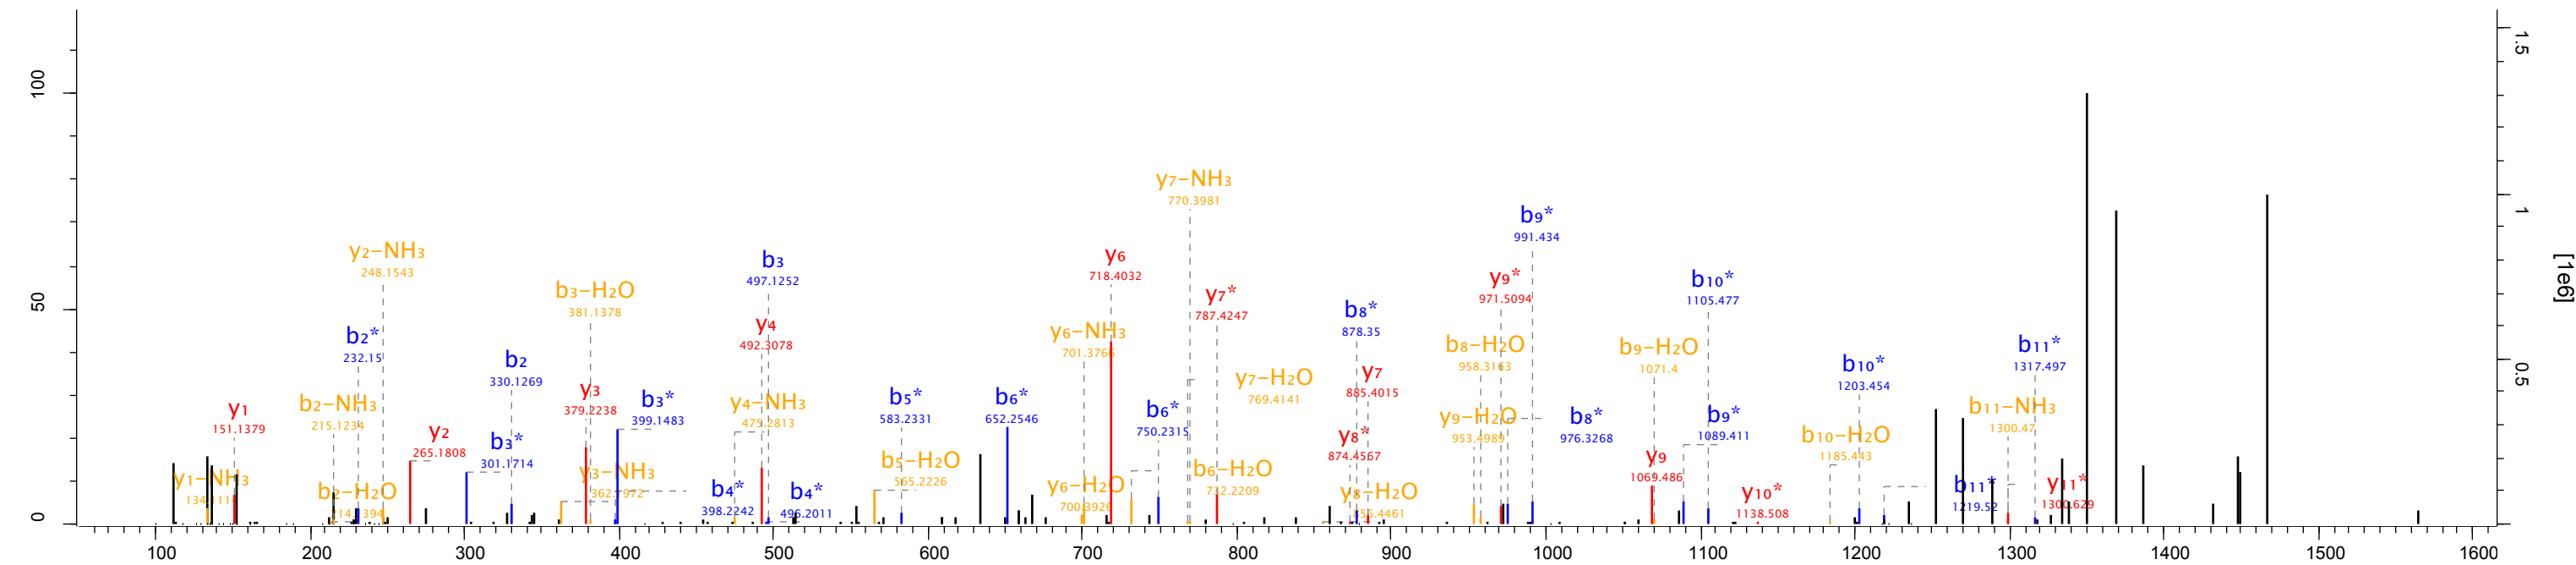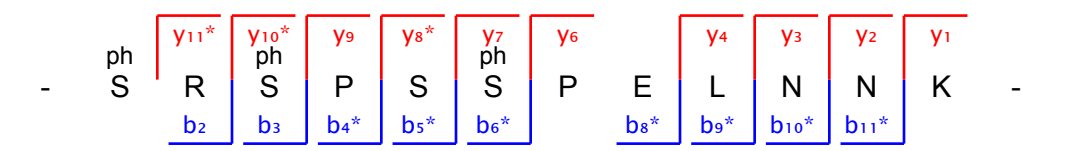

Raw file

20150812\_A375SR\_Phospho\_BR1\_01

| Scan | Method    | Score | m/z    | Gene names |
|------|-----------|-------|--------|------------|
| 9086 | FTMS; HCD | 47.99 | 901.37 | HMG1       |

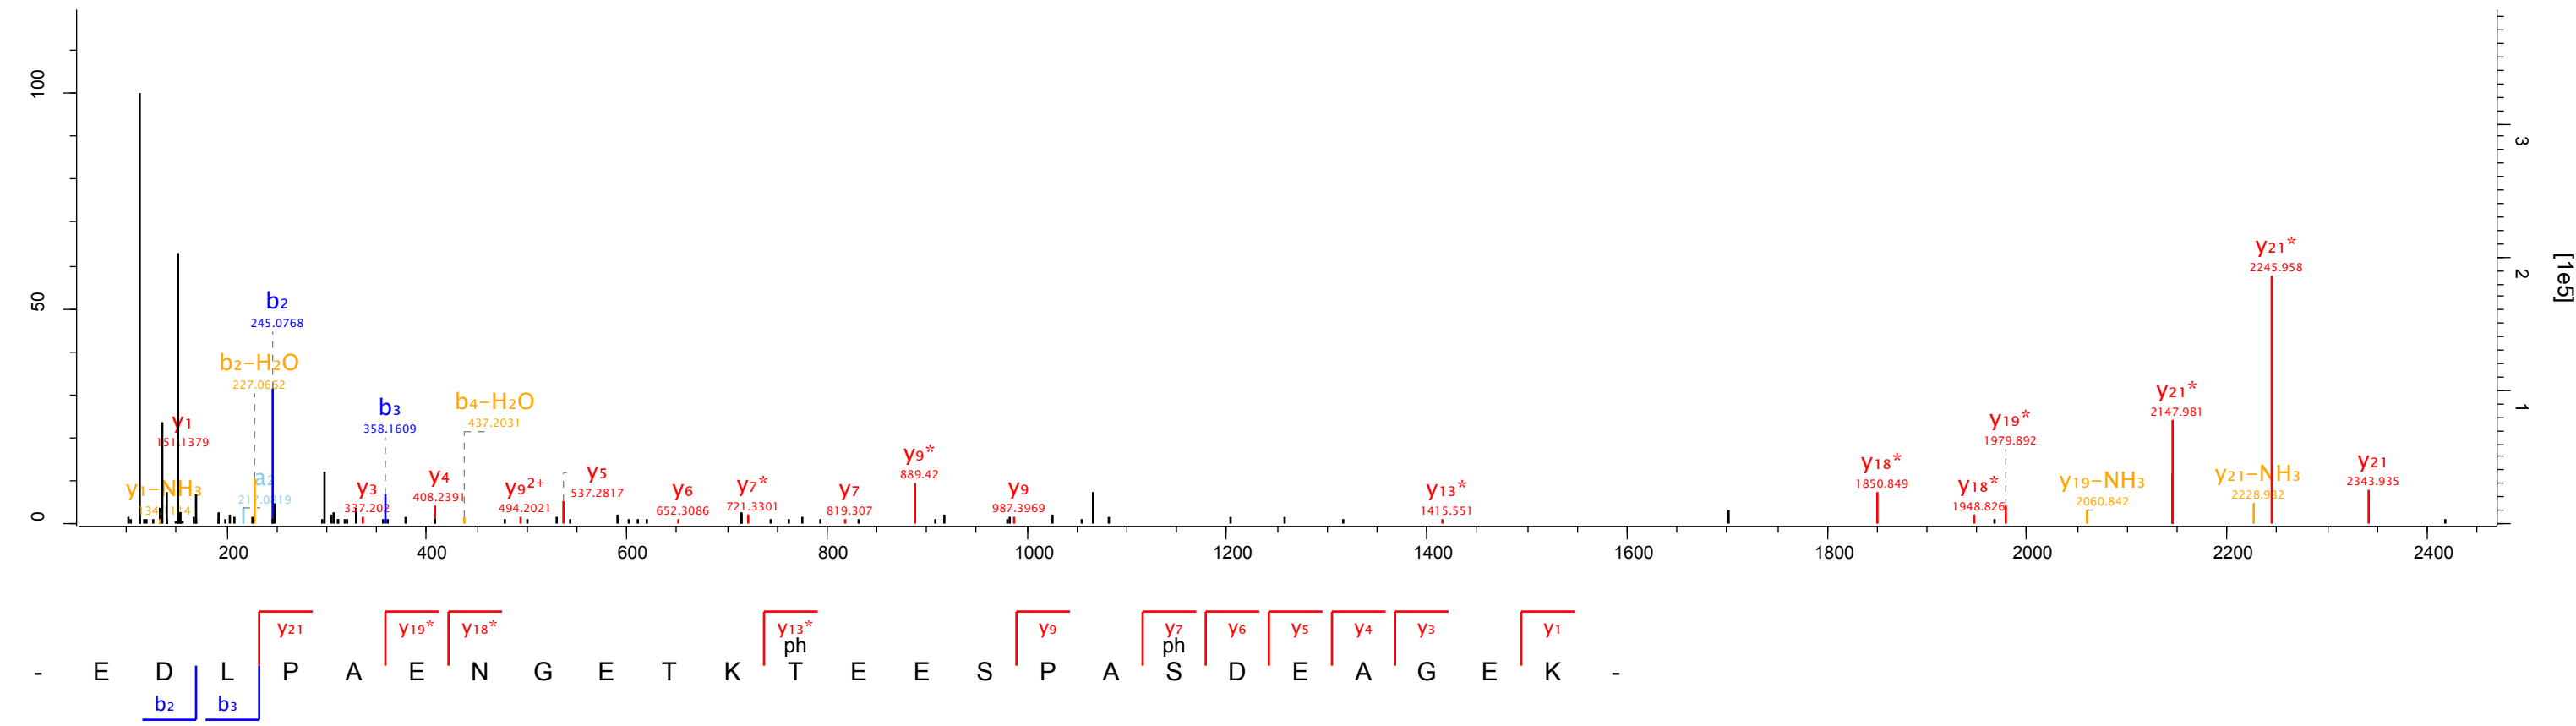



Raw file: 20150812\_A375SR\_Phospho\_BR1\_02  
 Scan: 10236 Method: FTMS; HCD Score: 163.91 m/z: 1020.38 Gene names: SLC9A3R1

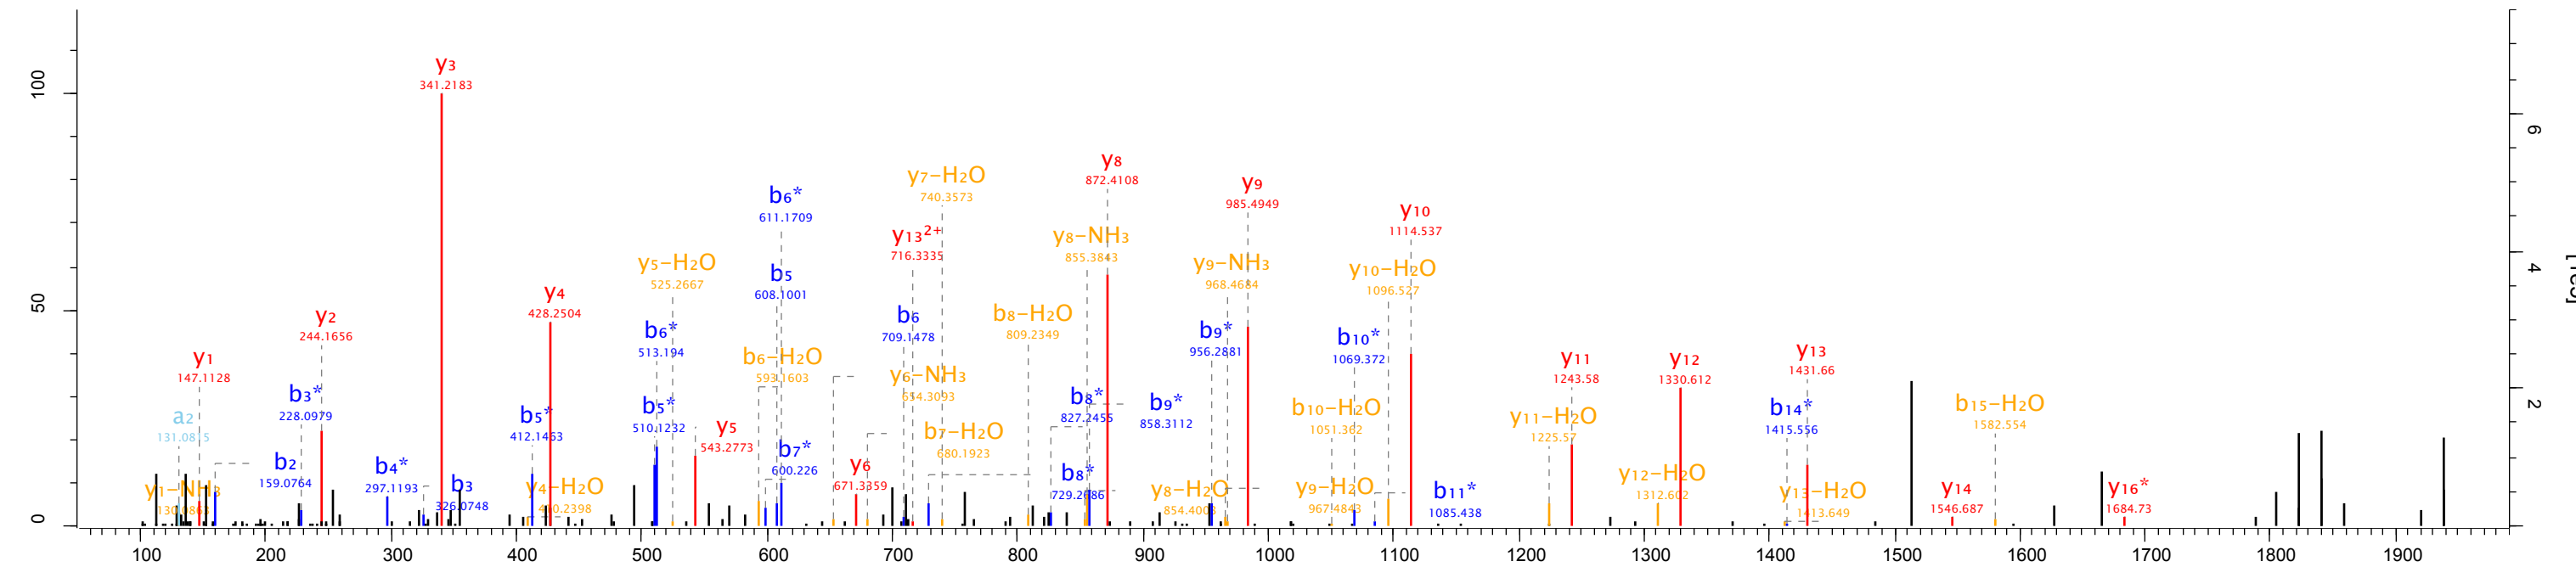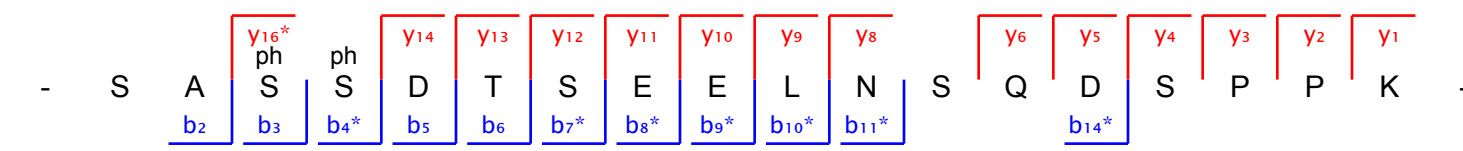

Raw file: 20150812\_A375SR\_Phospho\_BR1\_02  
 Scan: 10316 Method: FTMS; HCD Score: 49.04 m/z: 837.69 Gene names: SPEN

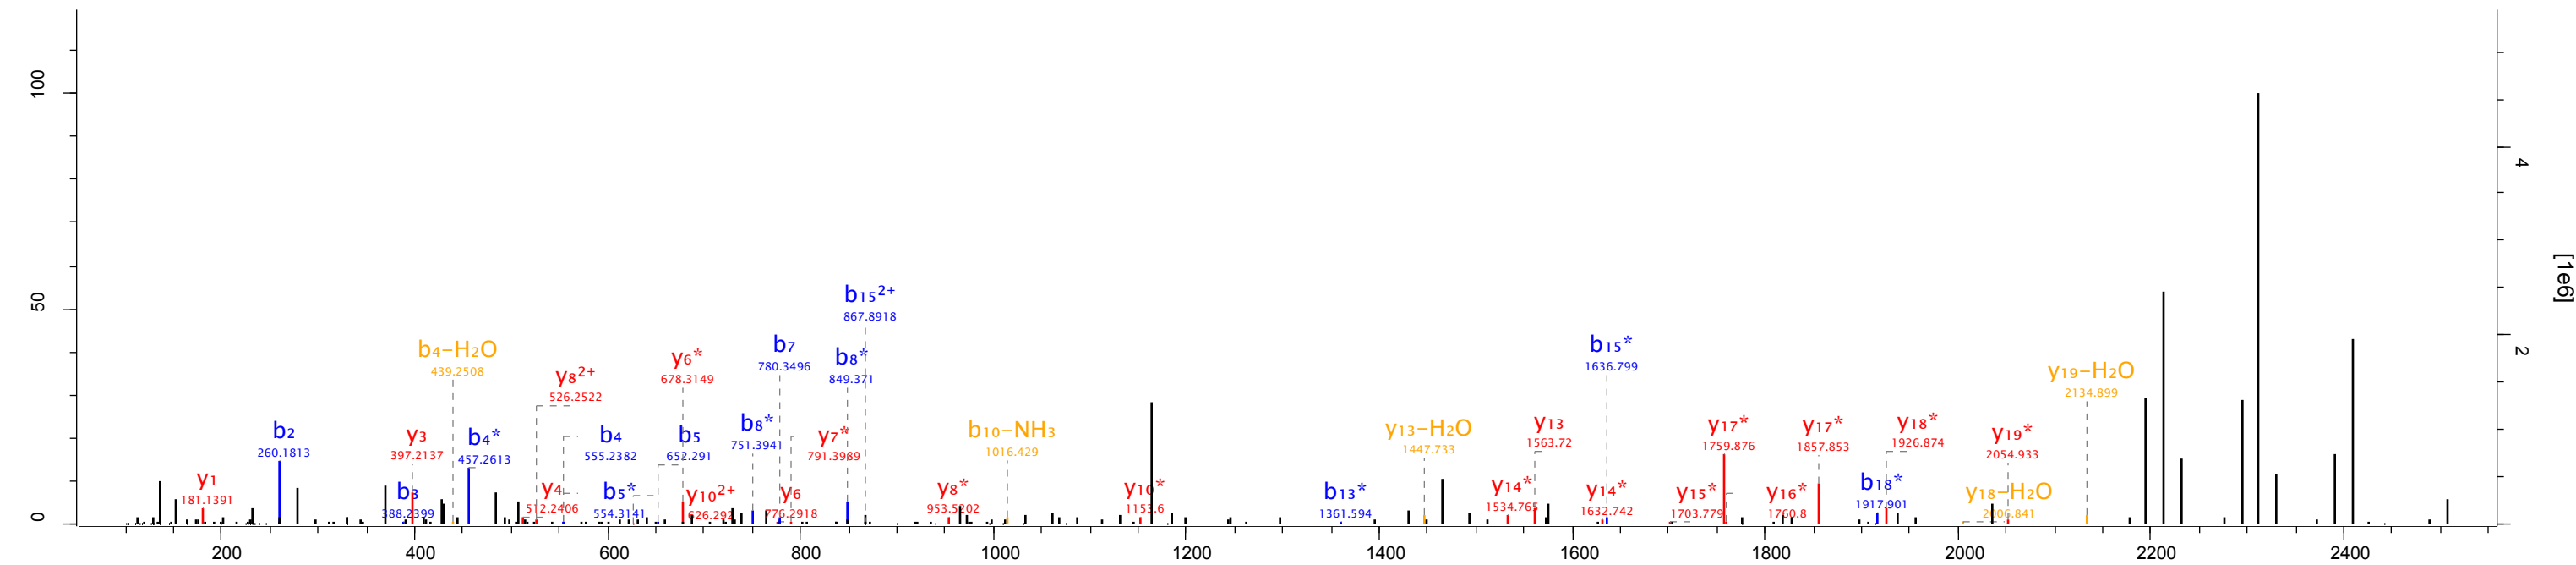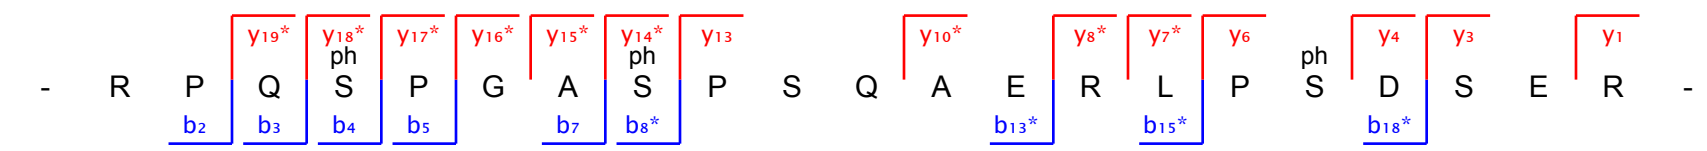



Raw file 20150812\_A375SR\_Phospho\_BR1\_02 Scan 11046 Method FTMS; HCD Score 187.61 m/z 1003.93 Gene names APBB2

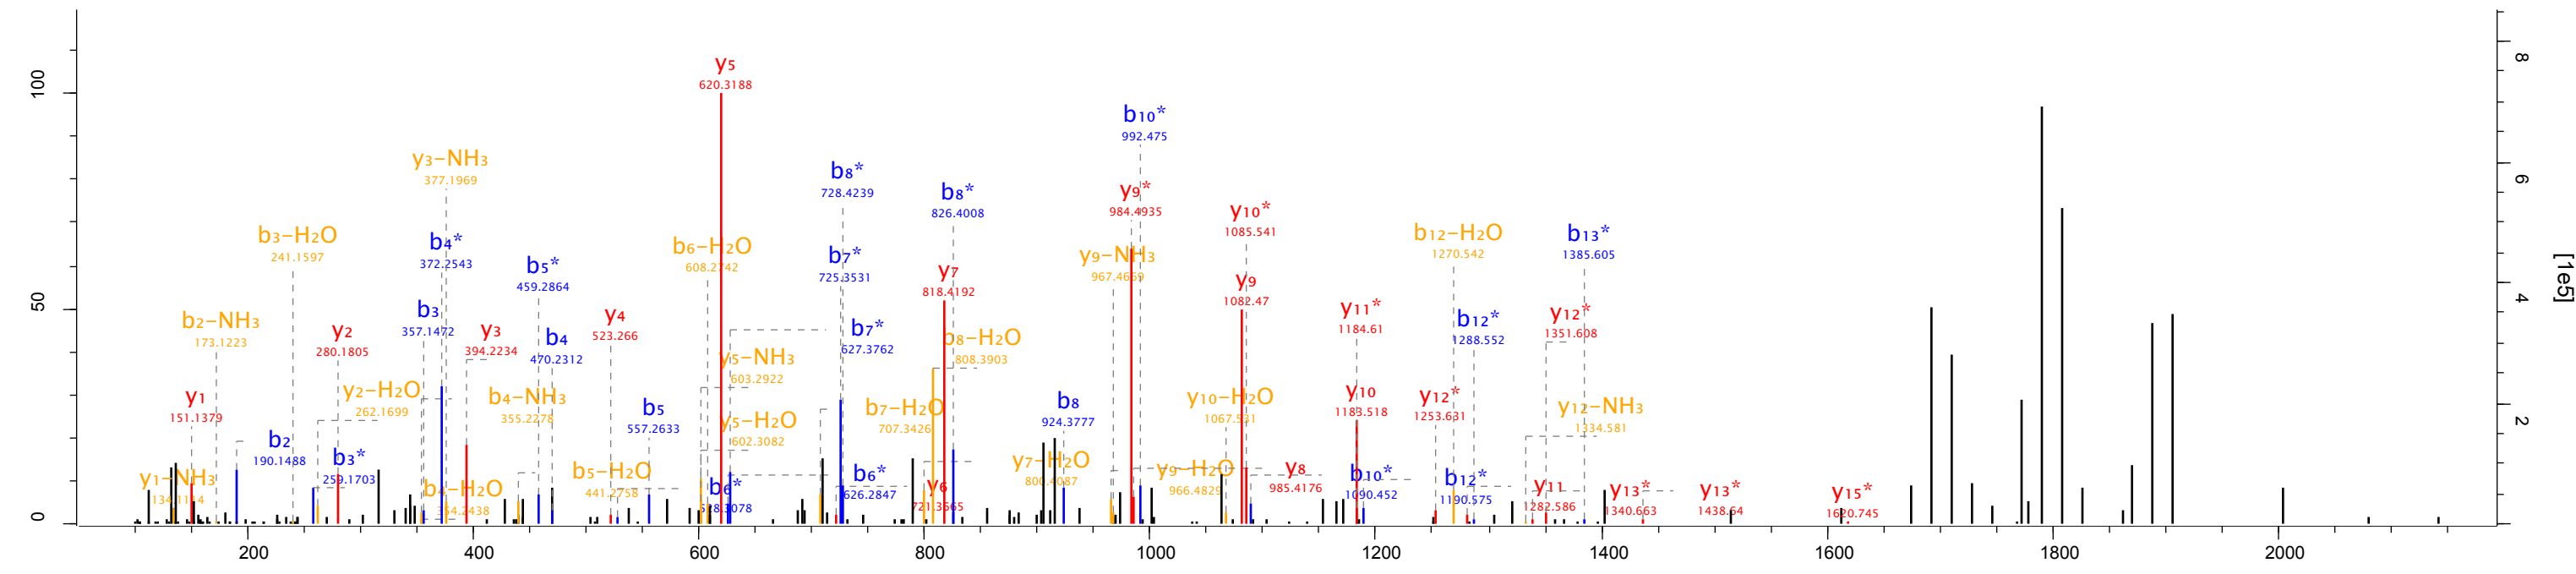

- K G S L S S V T P S P T P E N E K -

Fragmentation mapping (b and y ions) is shown below the sequence:

- b2: G
- b3: S
- b4: L
- b5: S
- b6\*: S
- b7\*: V
- b8: T
- b10\*: S
- b12\*: T
- b13\*: P

Other labeled ions include y1 through y15\* and various modified forms (e.g., y1-NH3, y2-H2O).

Raw file Scan Method Score m/z Gene names  
 20150812\_A375SR\_Phospho\_BR1\_02 11126 FTMS; HCD 287.79 1250.98 RIOK2

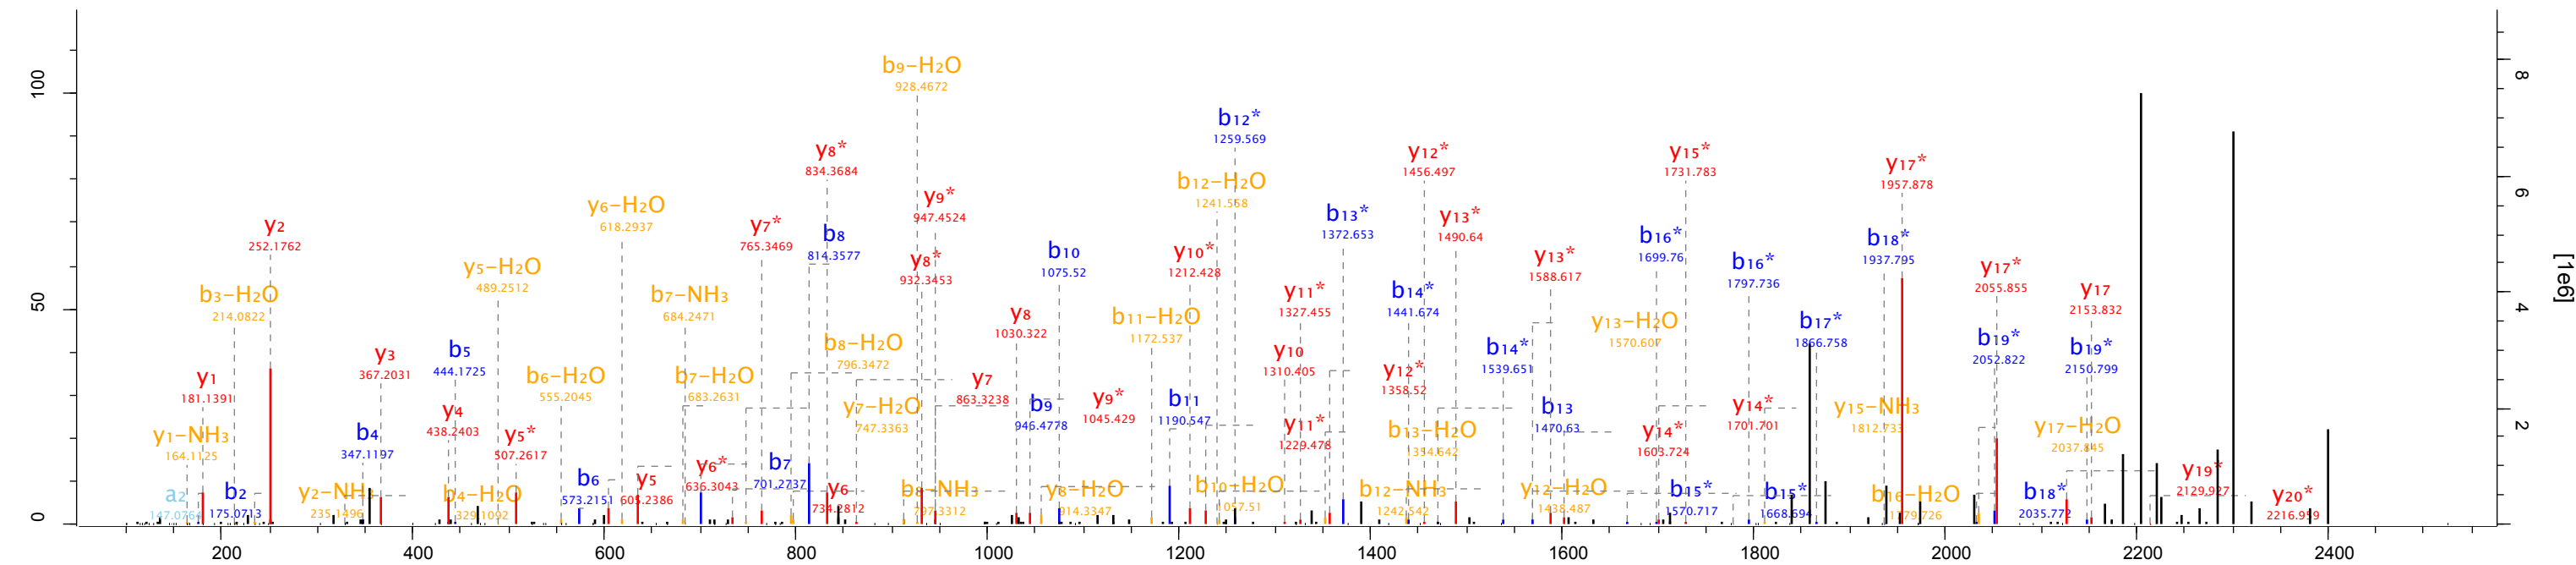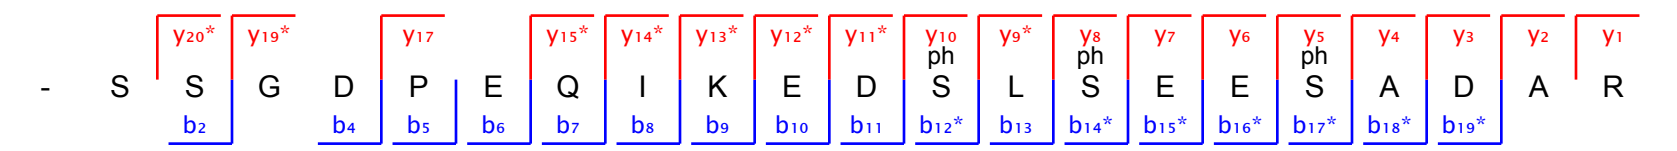

Raw file Scan Method Score m/z Gene names  
 20150812\_A375SR\_Phospho\_BR1\_02 11356 FTMS; HCD 120.27 962.84 SLK

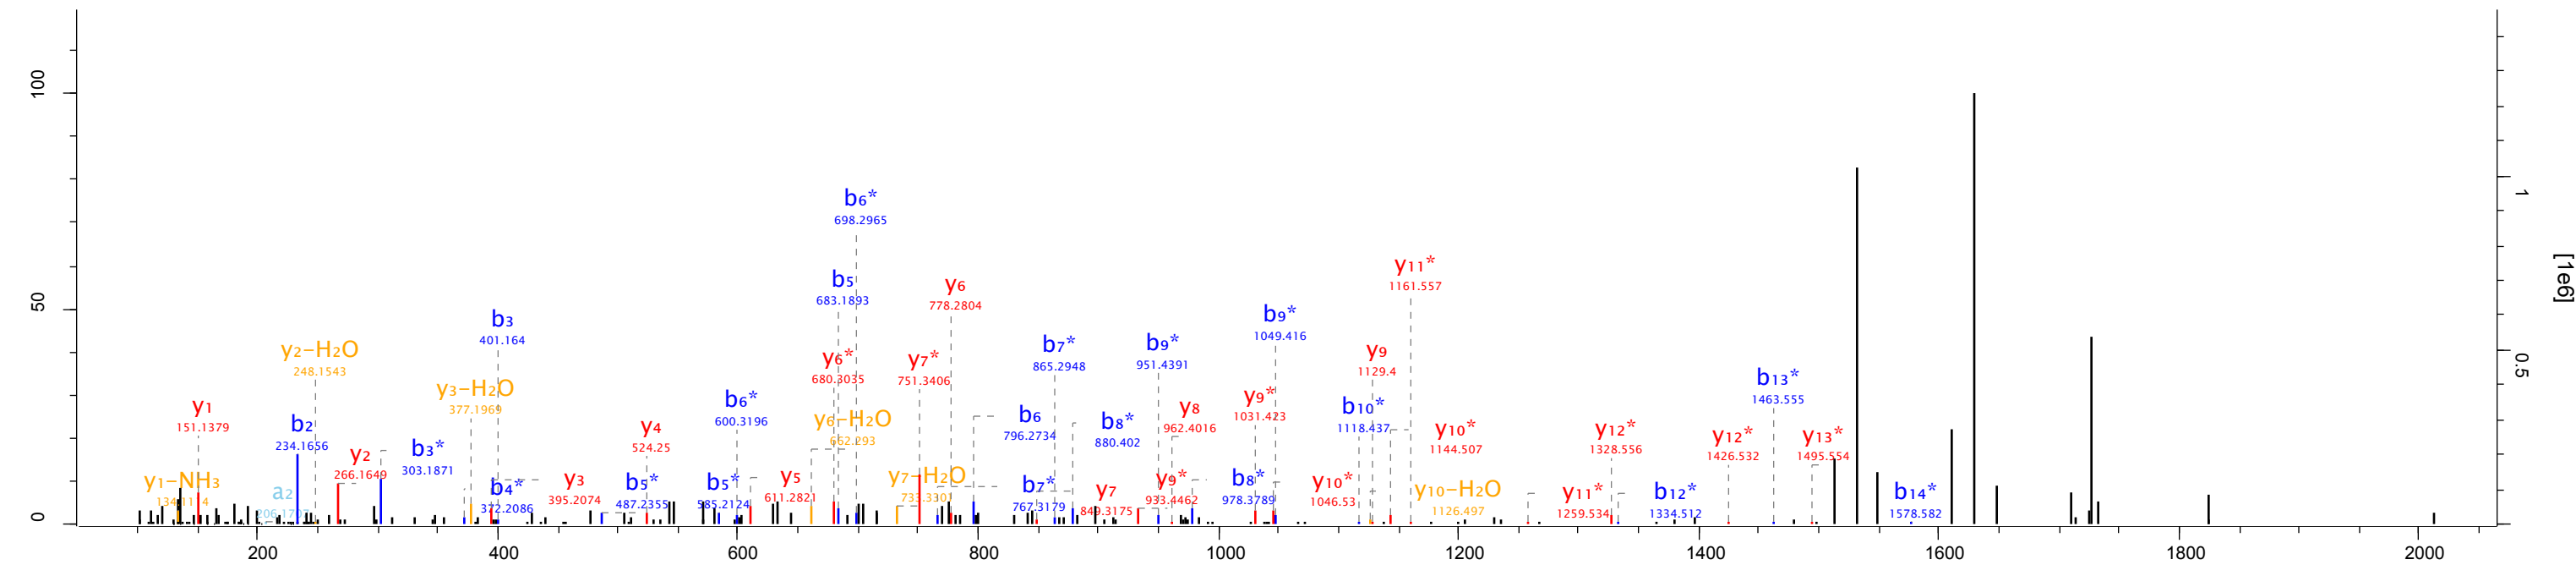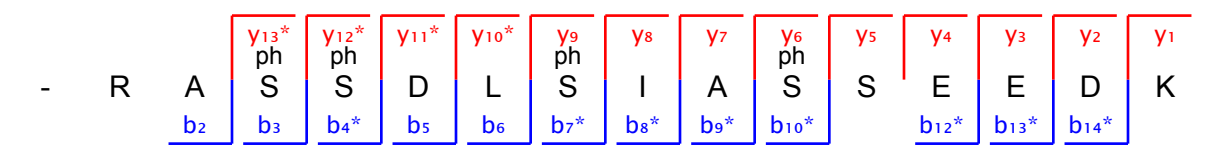

Raw file 20150812\_A375SR\_Phospho\_BR1\_02 Scan 11406 Method FTMS; HCD Score 111.22 m/z 741.3 Gene names LMNA

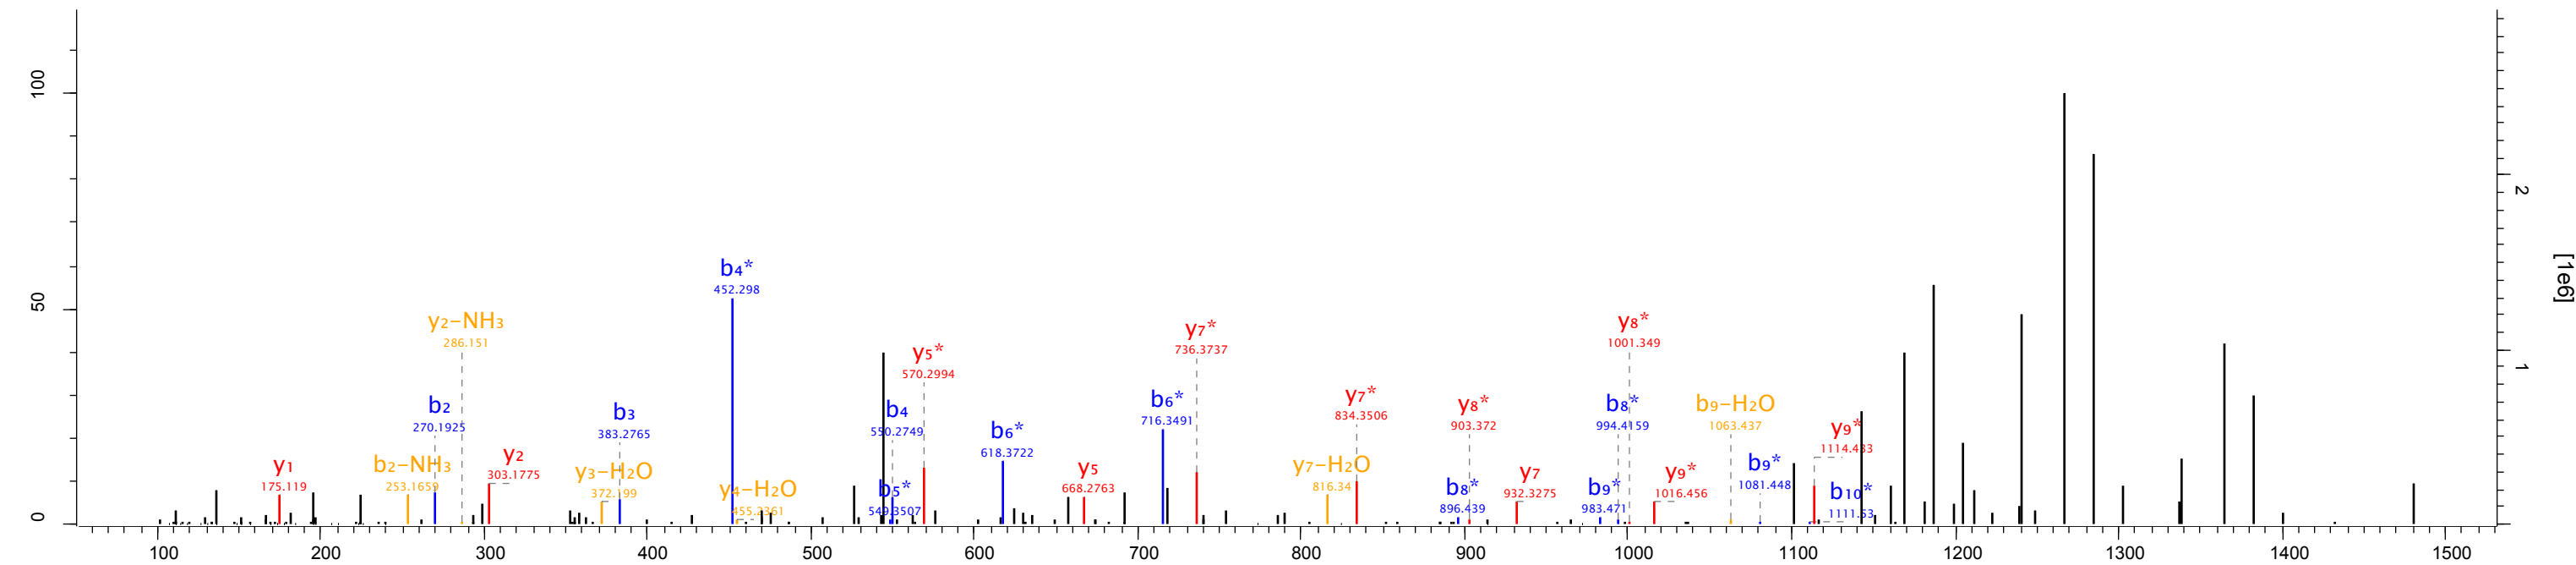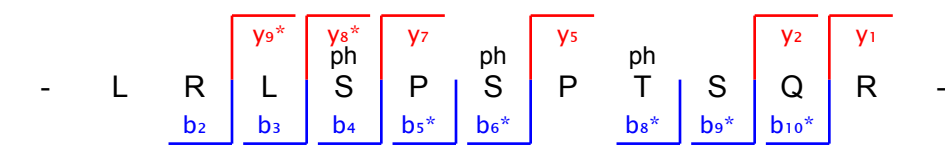

Raw file  
20150812\_A375SR\_Phospho\_BR1\_02

Scan 11446 Method FTMS; HCD Score 105.91 m/z 752.35 Gene names BAP1

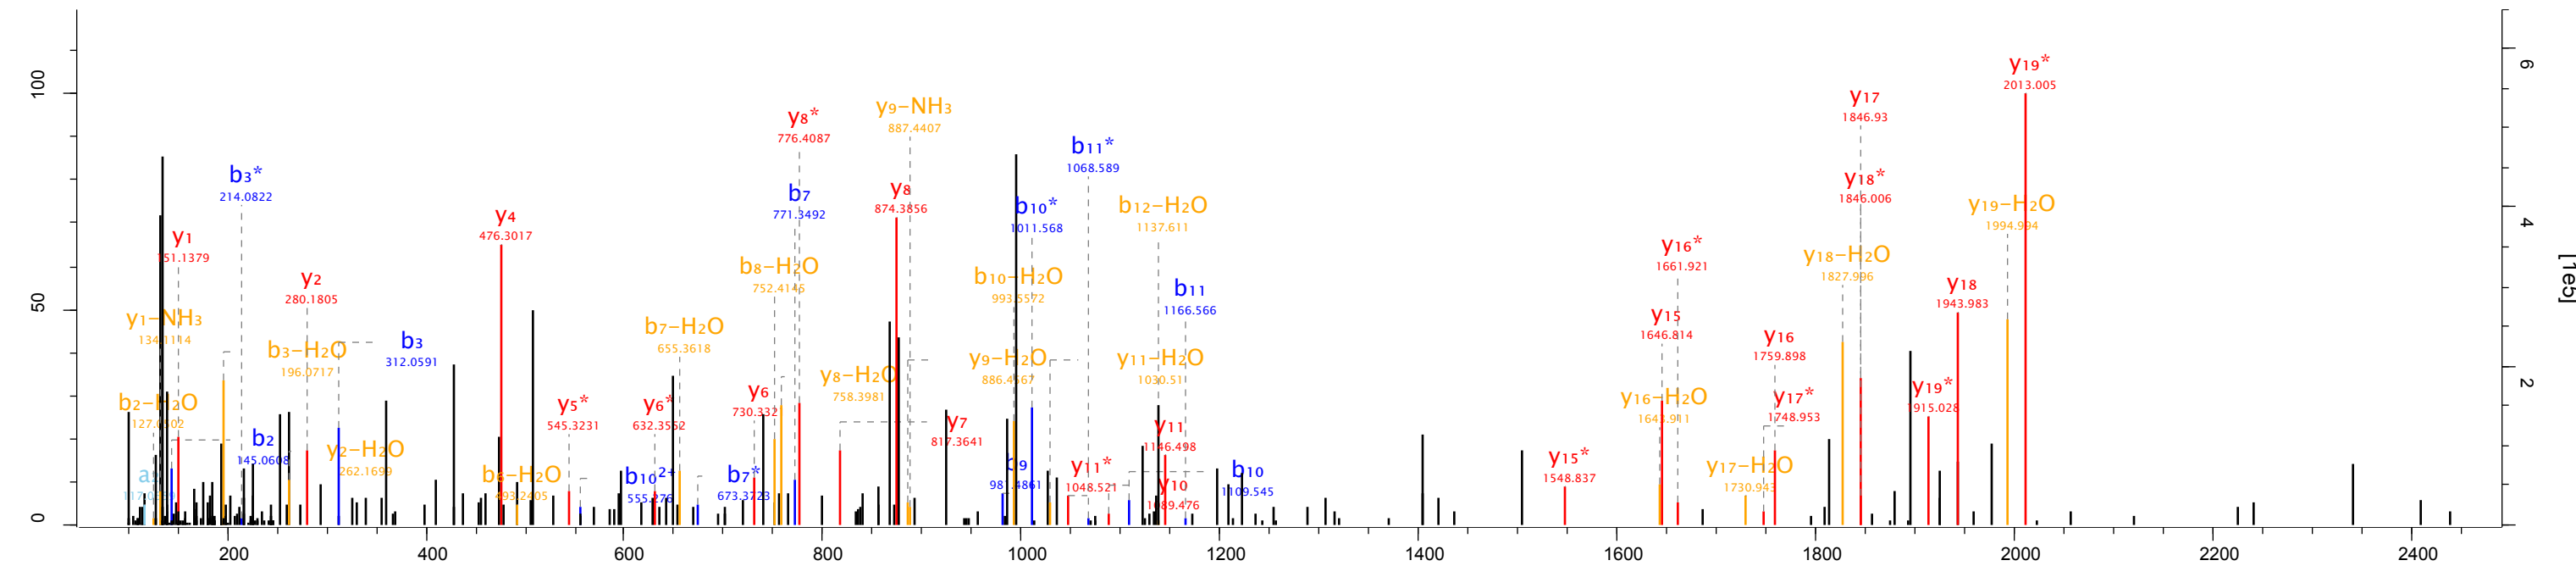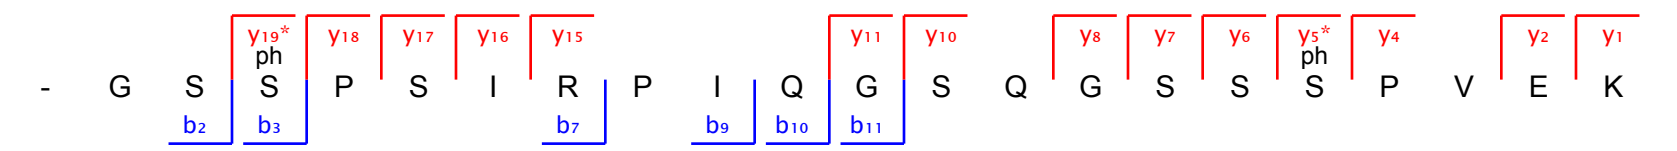



Raw file  
 20150812\_A375SR\_Phospho\_BR1\_02  
 Scan 11486 Method FTMS; HCD Score 106.61 m/z 1031.9 Gene names SRRM2

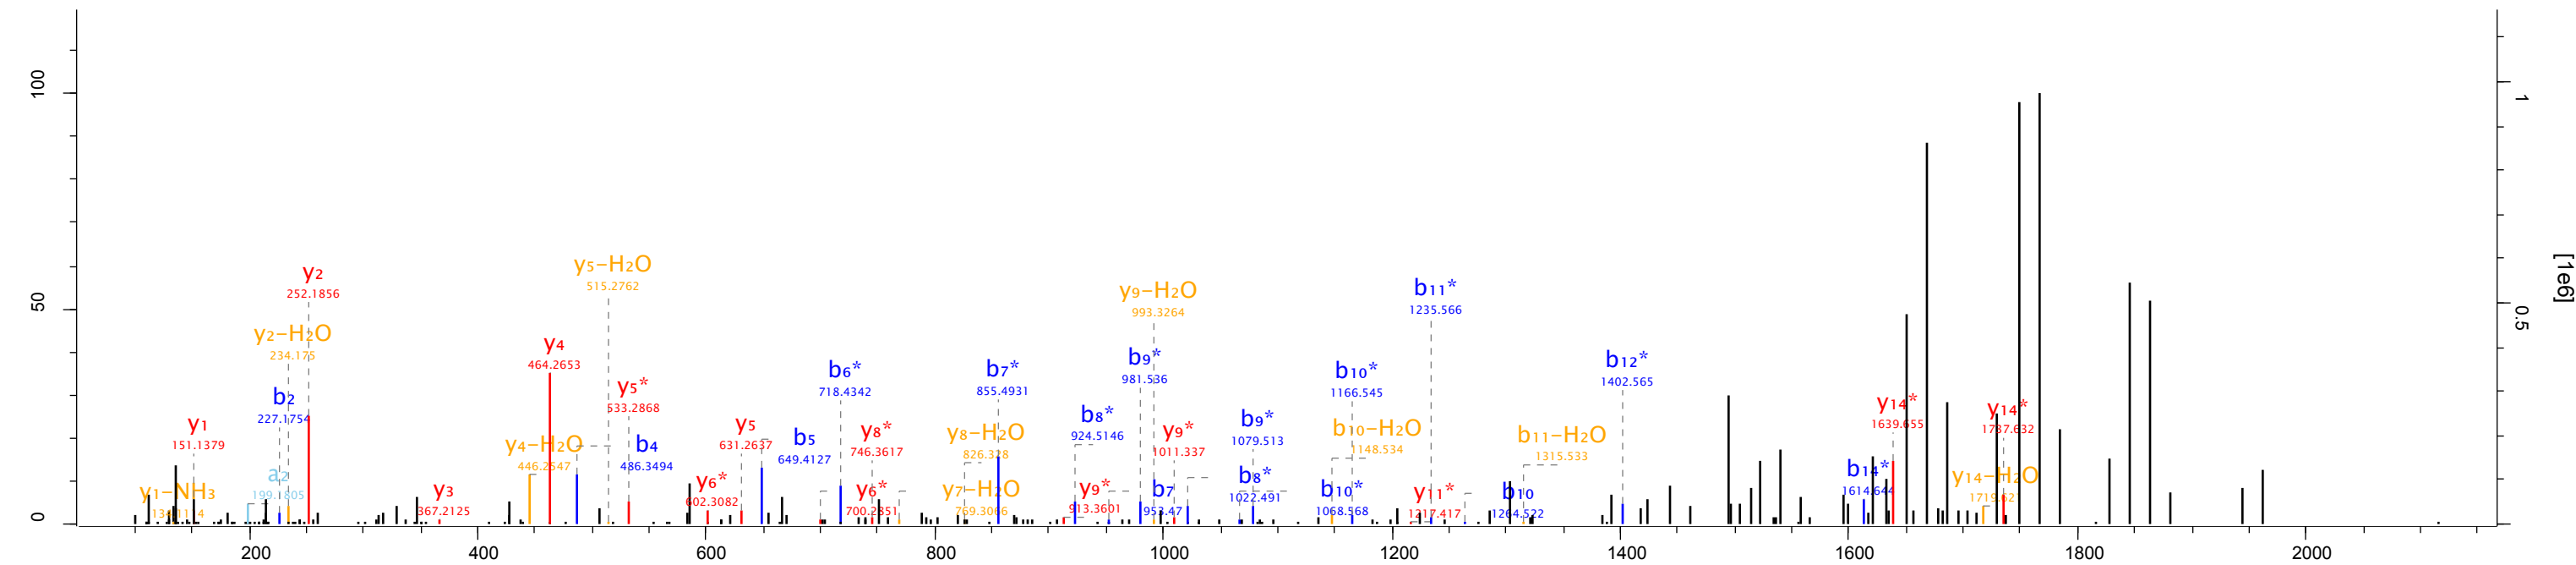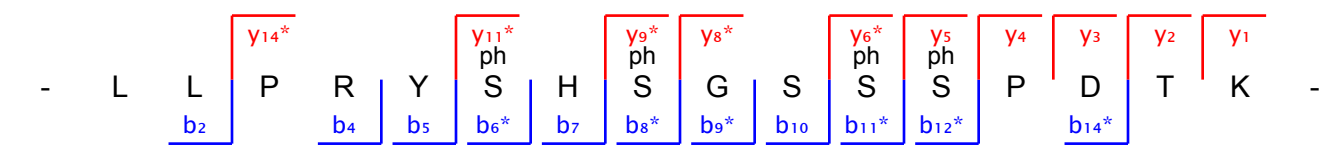

Raw file 20150812\_A375SR\_Phospho\_BR1\_02 Scan 11576 Method FTMS; HCD Score 76.24 m/z 1034.83 Gene names ATRX

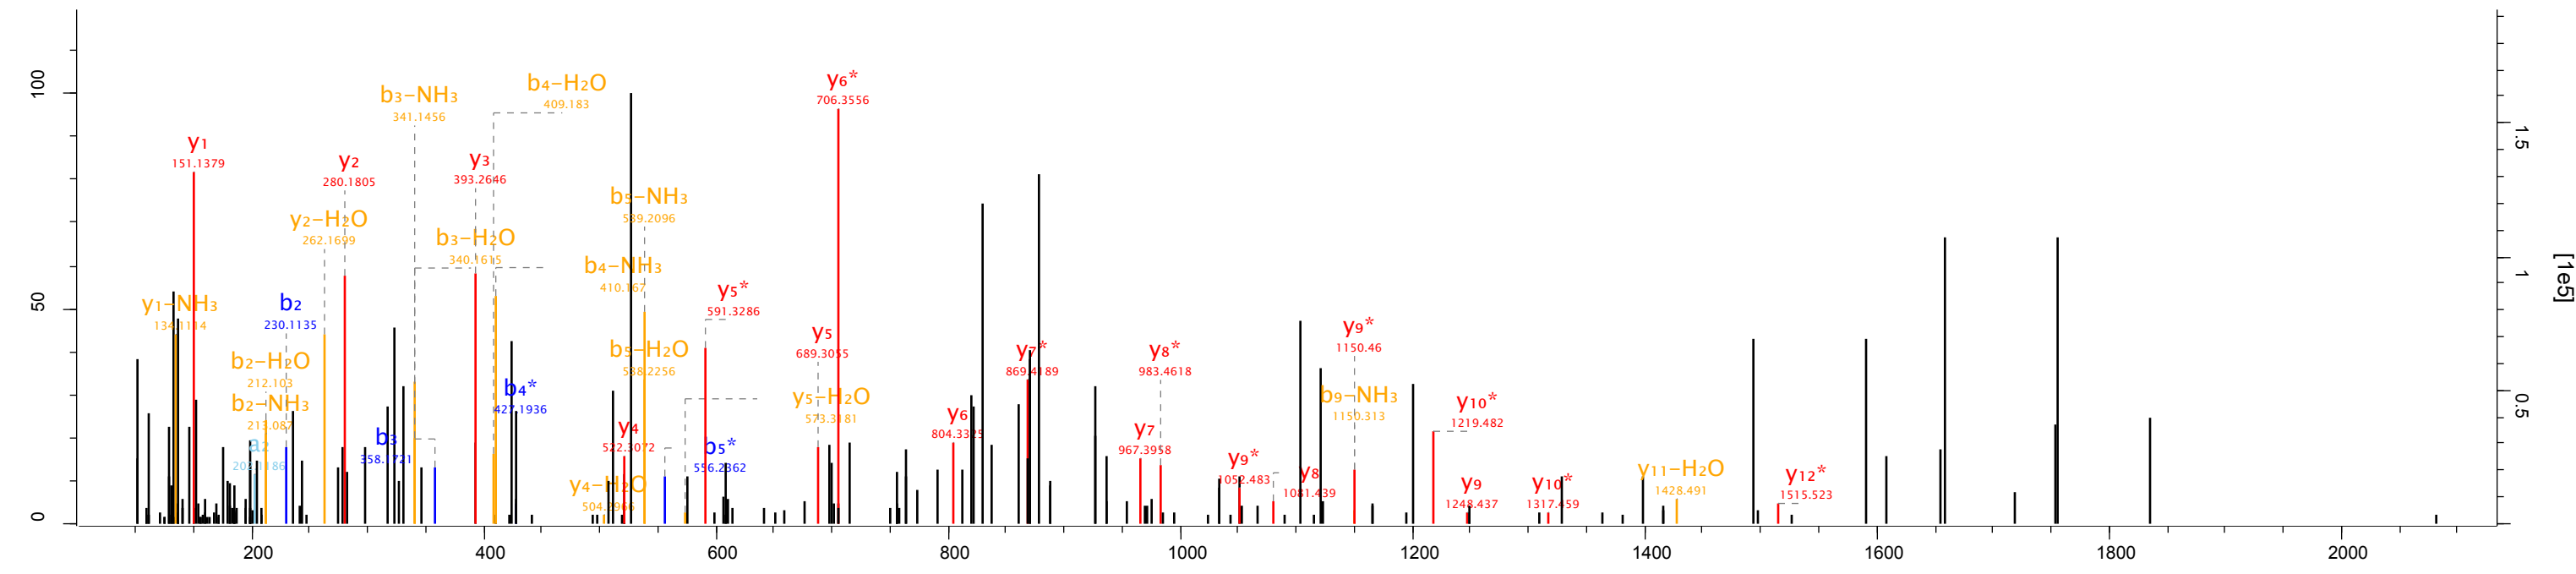

- Q T Q S E S S N Y D S E L E K -

Fragmentation mapping (b and y ions):

- Q (m/z 146) → b2 (m/z 160)
- T (m/z 172) → b3 (m/z 186)
- Q (m/z 146) → b4\* (m/z 160) and b5\* (m/z 186)
- S (m/z 204) → y12\* (m/z 218)
- E (m/z 228) → y10\* (m/z 242)
- S (m/z 204) → y9 (m/z 218)
- N (m/z 230) → y8 (m/z 246)
- Y (m/z 254) → y7 (m/z 268)
- D (m/z 270) → y6 (m/z 282)
- S (m/z 204) → y5 (m/z 218)
- E (m/z 228) → y4 (m/z 242)
- L (m/z 260) → y3 (m/z 274)
- E (m/z 228) → y2 (m/z 252)
- K (m/z 290) → y1 (m/z 304)

Raw file Scan Method Score m/z Gene names  
 20150812\_A375SR\_Phospho\_BR1\_02 11836 FTMS; HCD 156.31 910.86 ARID1A

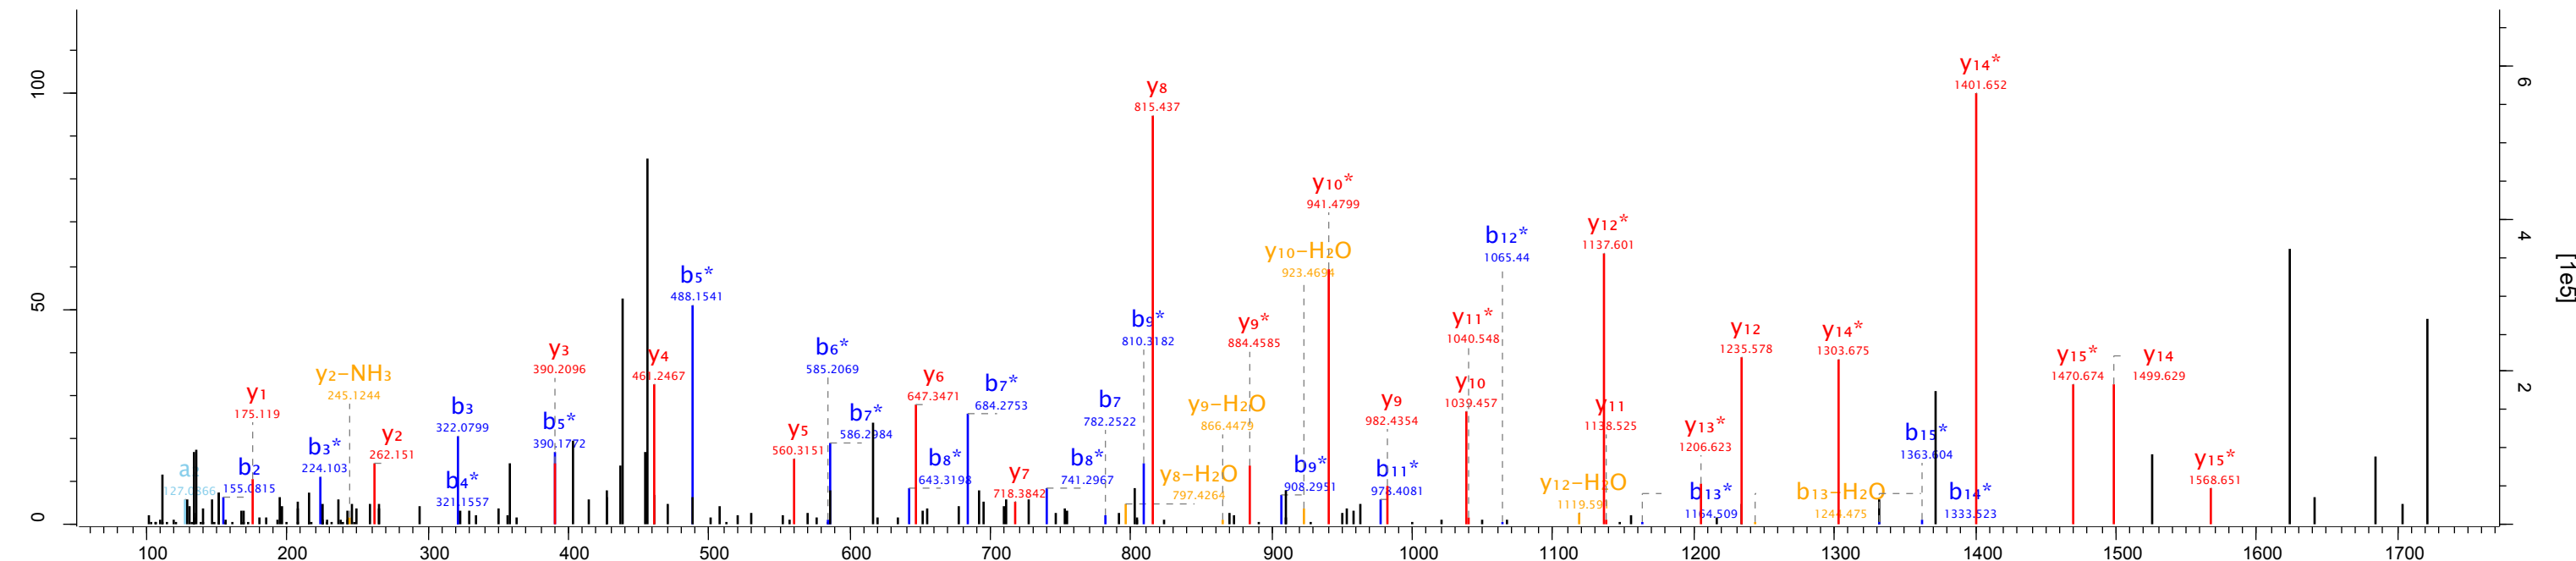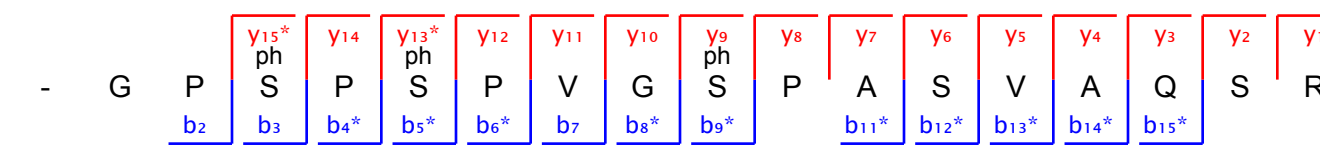

Raw file 20150812\_A375SR\_Phospho\_BR1\_02 Scan 12116 Method FTMS; HCD Score 47.6 m/z 805.87 Gene names CENPC

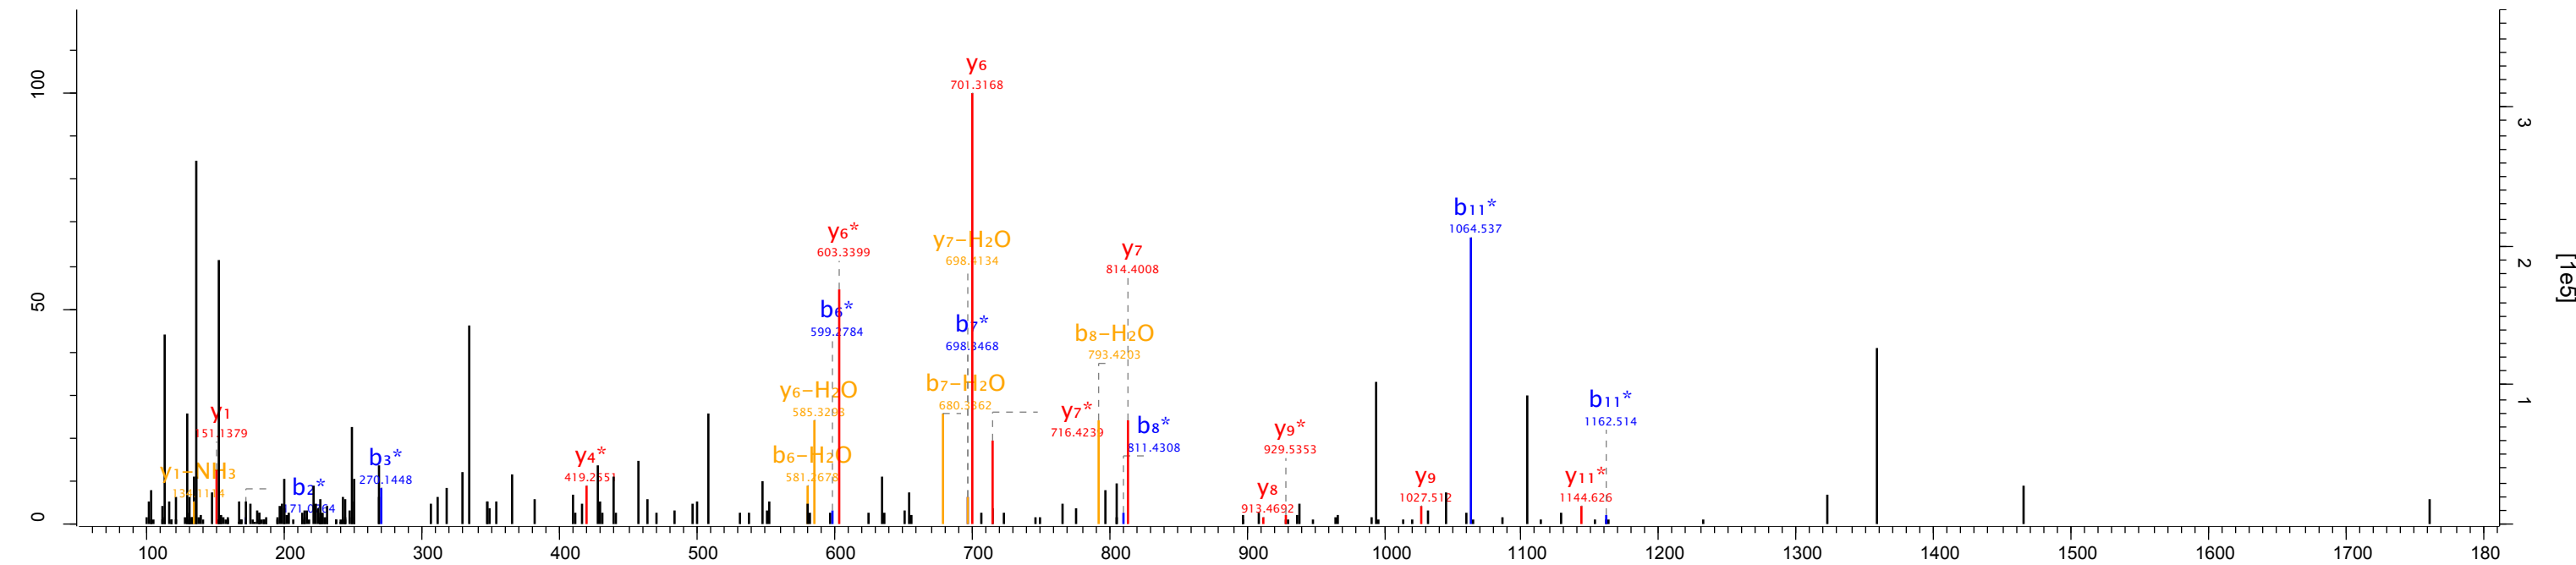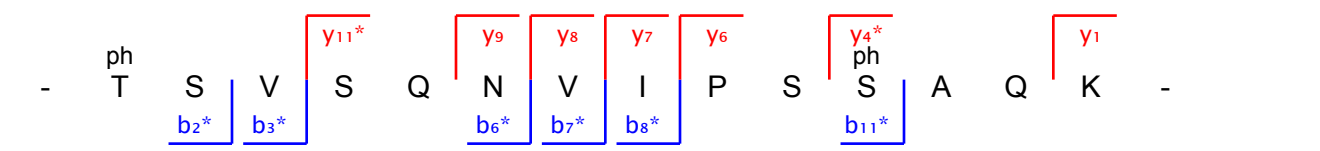

Raw file 20150812\_A375SR\_Phospho\_BR1\_02 Scan 12236 Method FTMS; HCD Score 66.92 m/z 1094.36 Gene names PML

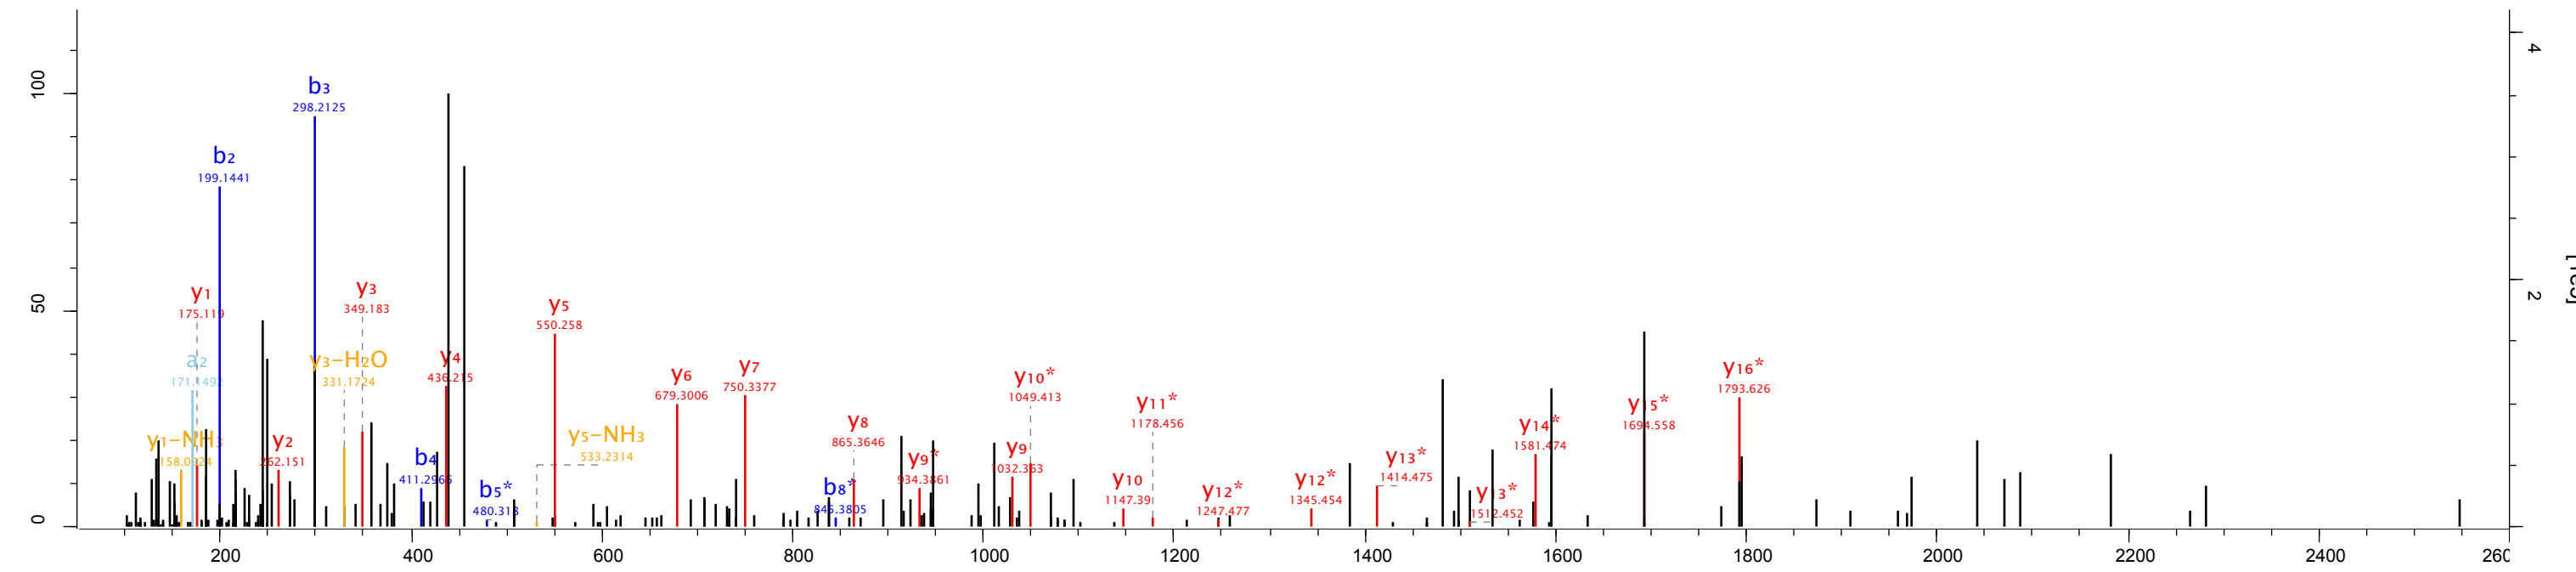

- V V V V I ph S S ph S E D S D A E N S S S R -

b<sub>2</sub>
b<sub>3</sub>
b<sub>4</sub>
b<sub>5</sub>\*
b<sub>8</sub>\*
y<sub>16</sub>\*
y<sub>15</sub>\*
y<sub>14</sub>\*
y<sub>13</sub>\*
y<sub>12</sub>\*
y<sub>11</sub>\*
y<sub>10</sub>
y<sub>9</sub> ph
y<sub>8</sub>
y<sub>7</sub>
y<sub>6</sub>
y<sub>5</sub>
y<sub>4</sub>
y<sub>3</sub>
y<sub>2</sub>
y<sub>1</sub>

Raw file 20150812\_A375SR\_Phospho\_BR1\_02 Scan 12556 Method FTMS; HCD Score 195.92 m/z 798.64 Gene names PURB

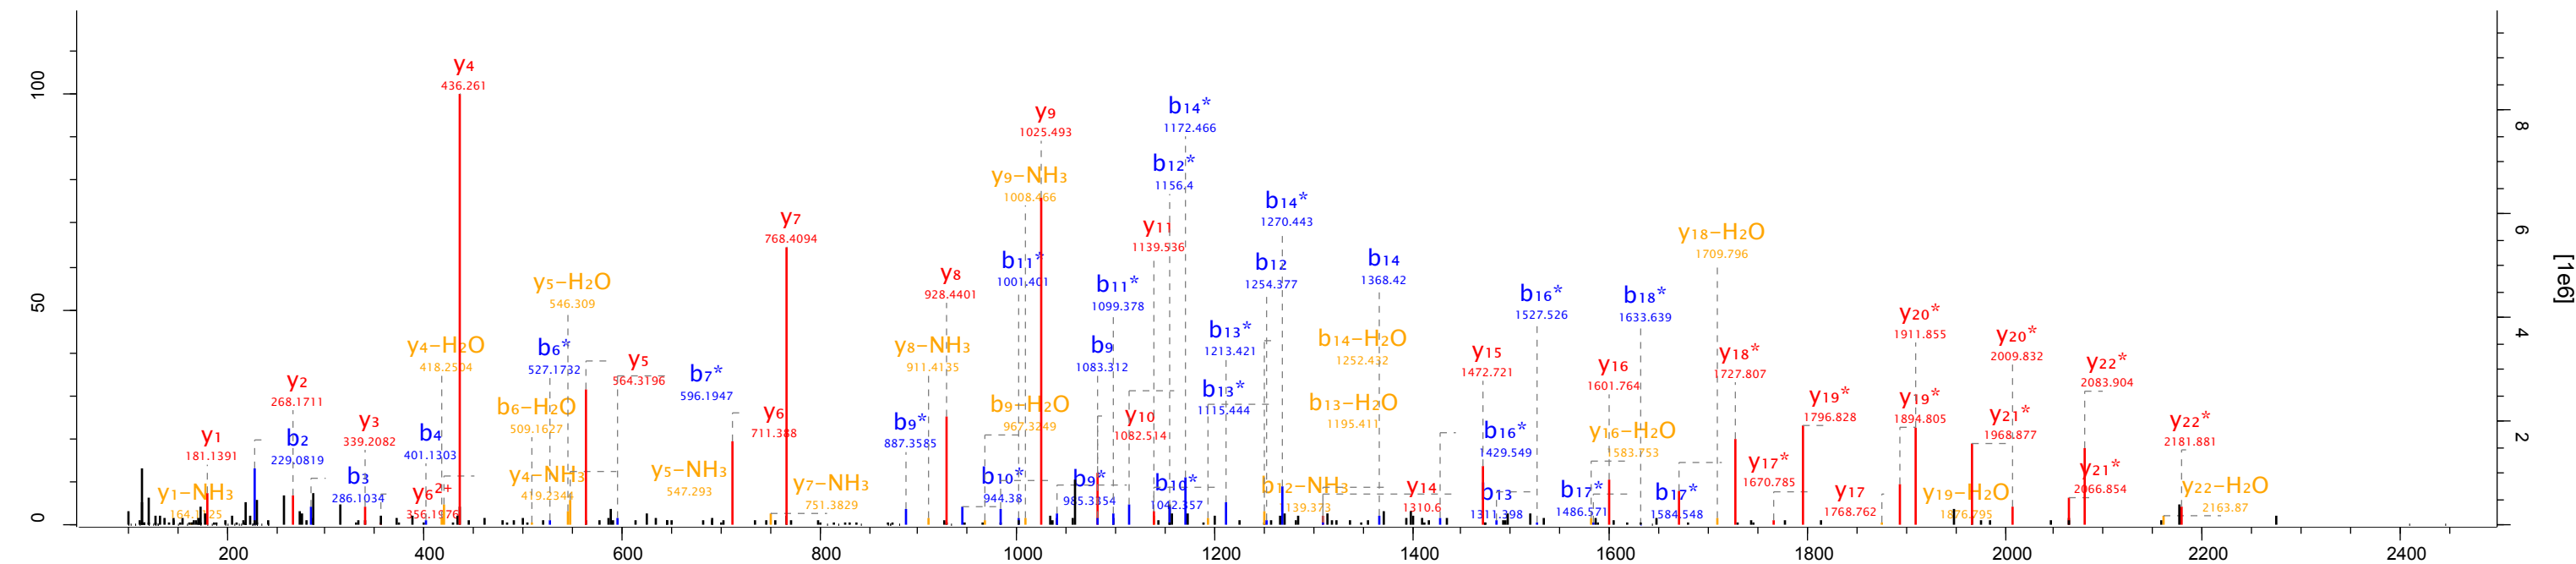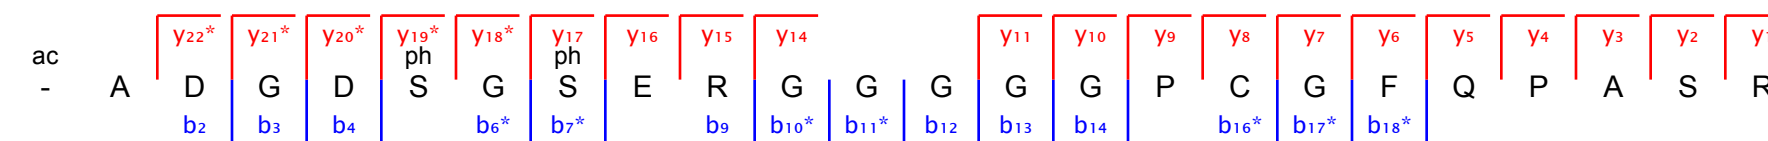

Raw file 20150812\_A375SR\_Phospho\_BR1\_02 Scan 12686 Method FTMS; HCD Score 137.5 m/z 960.42 Gene names SNAPIN

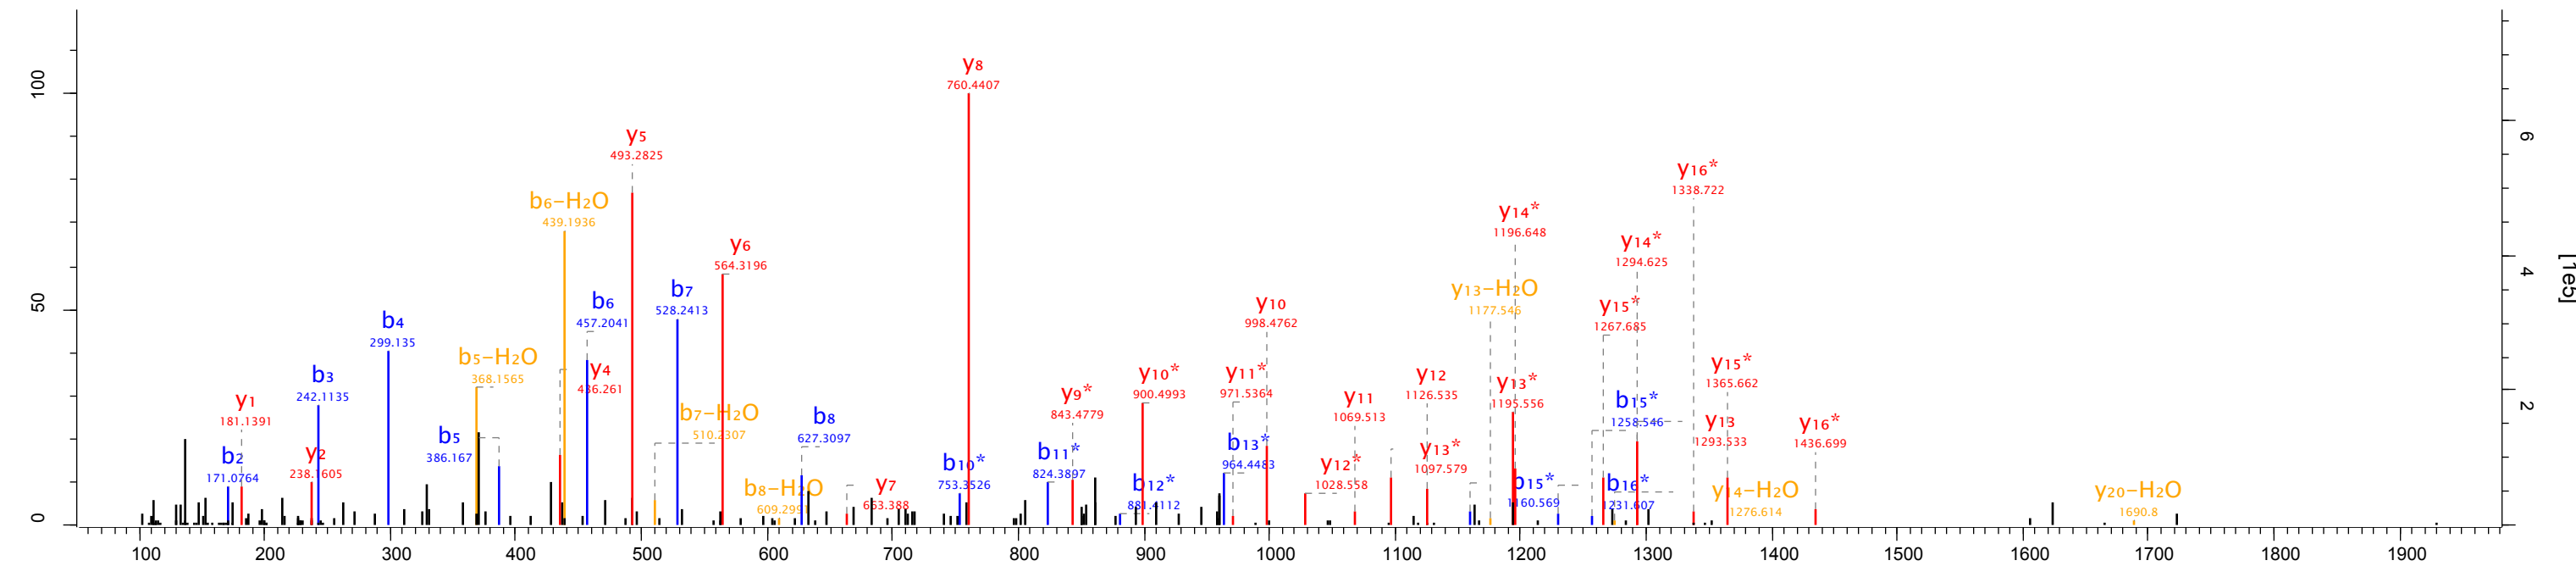

ac  
 - A G A G S A A V S G A G T P V A G P T G R -

Fragmentation mapping (b and y ions) is shown below the sequence:

- b2 (G), b3 (A), b4 (G), b5 (S), b6 (A), b7 (A), b8 (V), b10\* (G), b11\* (A), b12\* (G), b13\* (T), b15\* (V), b16\* (A)
- y1 (R), y2 (G), y4 (P), y5 (G), y6 (A), y7 (V), y8 (P), y9\* (T), y10 (G), y11 (A), y12 (G), y13 (S), y14\* (V), y15\* (A), y16\* (A)

Raw file: 20150812\_A375SR\_Phospho\_BR1\_02  
 Scan: 12716 Method: FTMS; HCD Score: 117.84 m/z: 1027.43 Gene names: MARCKS

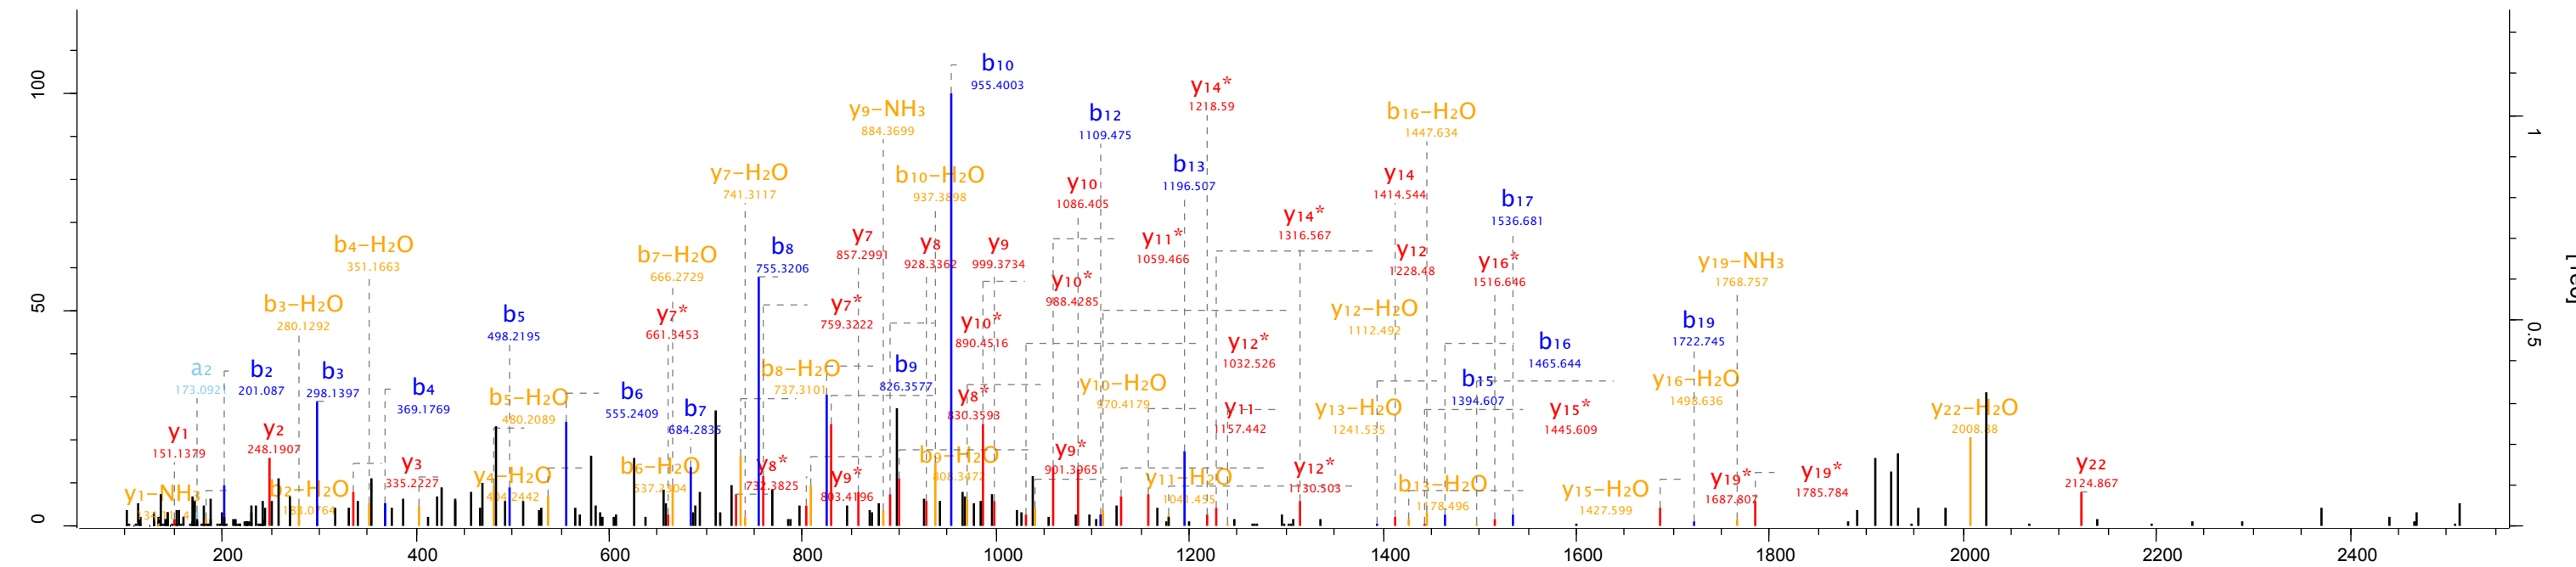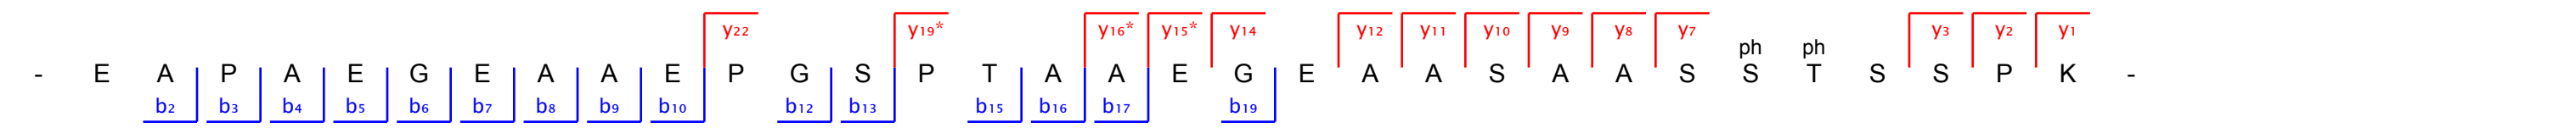



Raw file: 20150812\_A375SR\_Phospho\_BR1\_02  
 Scan: 13096 Method: FTMS; HCD Score: 224.57 m/z: 1042.87 Gene names: MAX

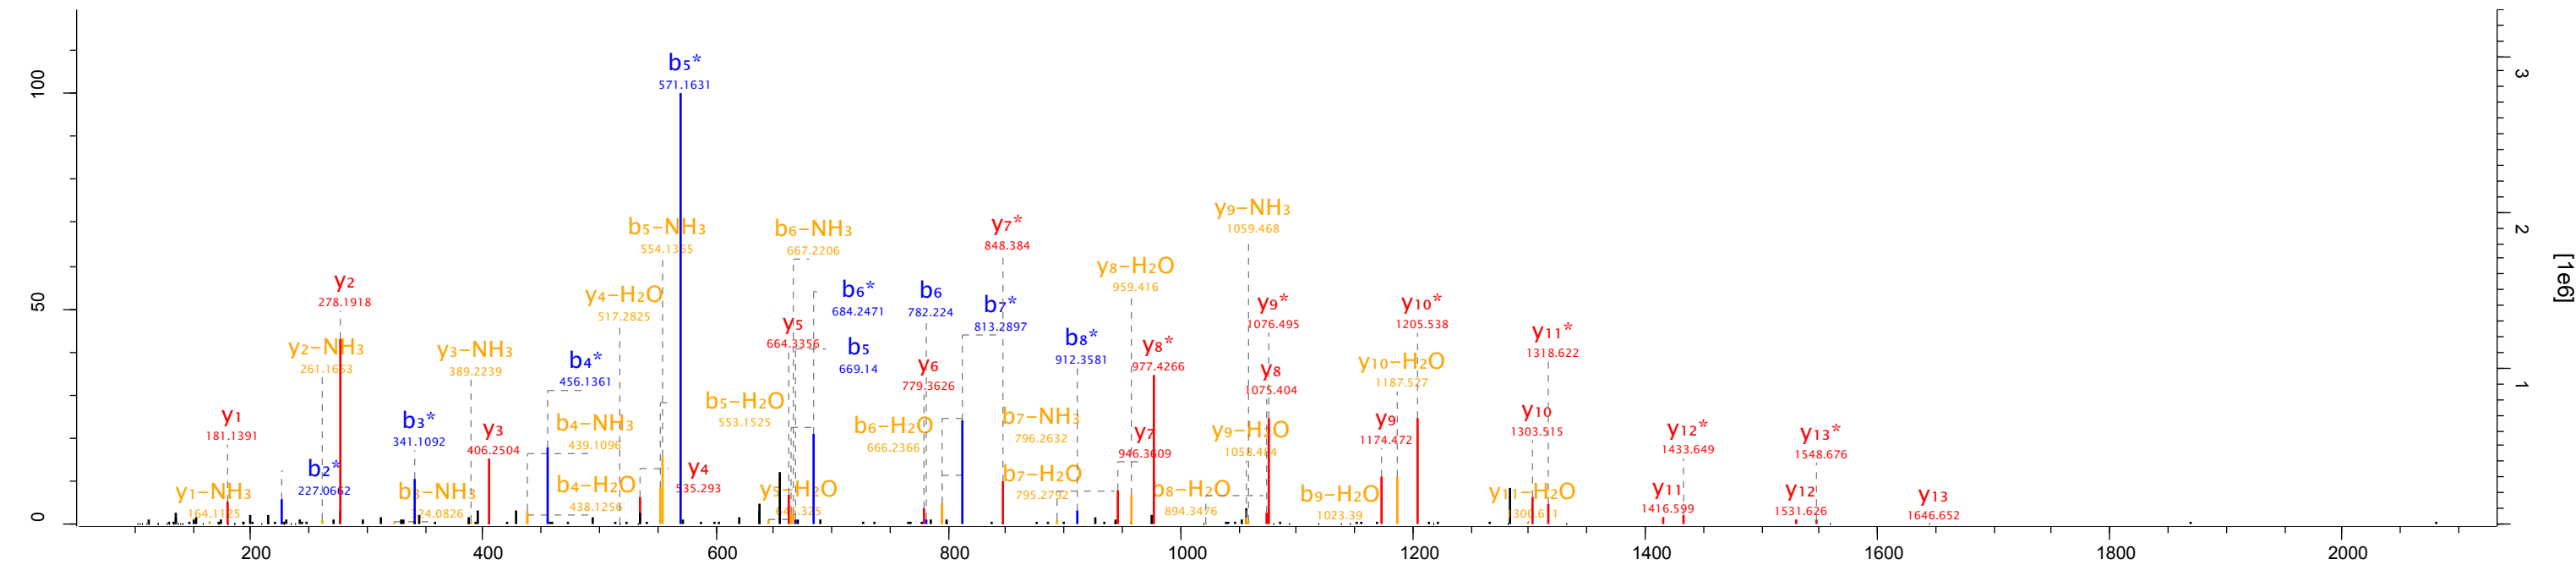

ac - pH S  
 D N D D I E V E S D E E Q P R -  
 b2\* b3\* b4\* b5 b6 b7\* b8\*

Raw file: 20150812\_A375SR\_Phospho\_BR1\_02  
 Scan: 13406 Method: FTMS; HCD Score: 192.99 m/z: 1049.26 Gene names: PLEKHF2

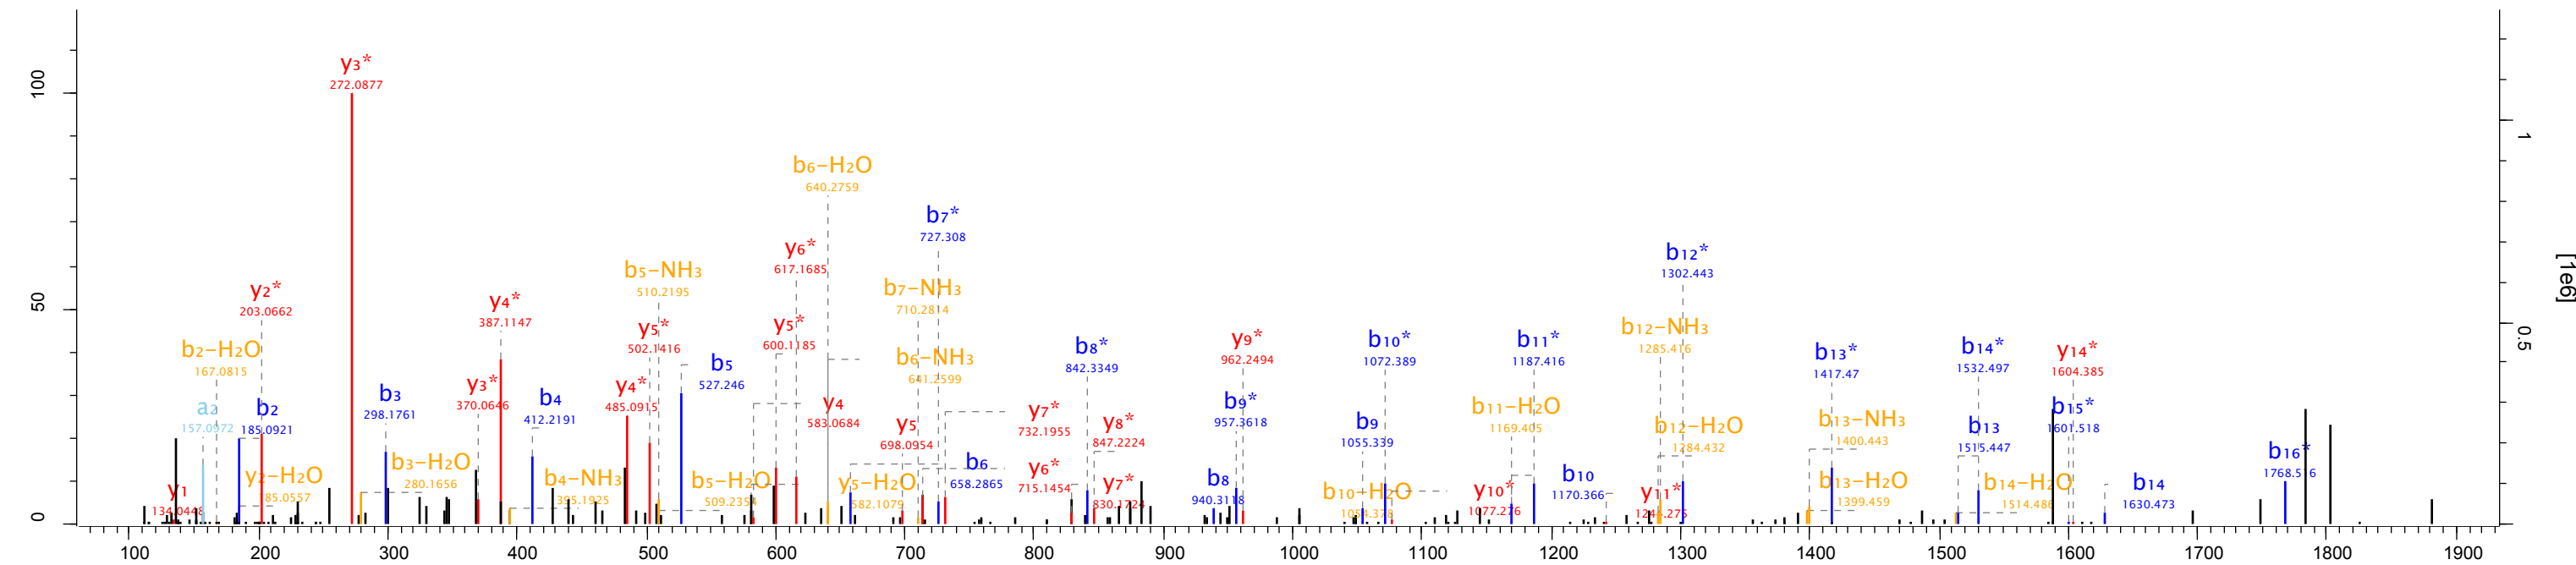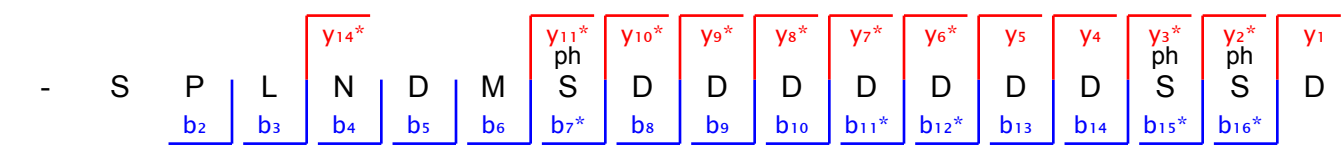

Raw file 20150812\_A375SR\_Phospho\_BR1\_02 Scan 13566 Method FTMS; HCD Score 153.04 m/z 977.07 Gene names DCP2

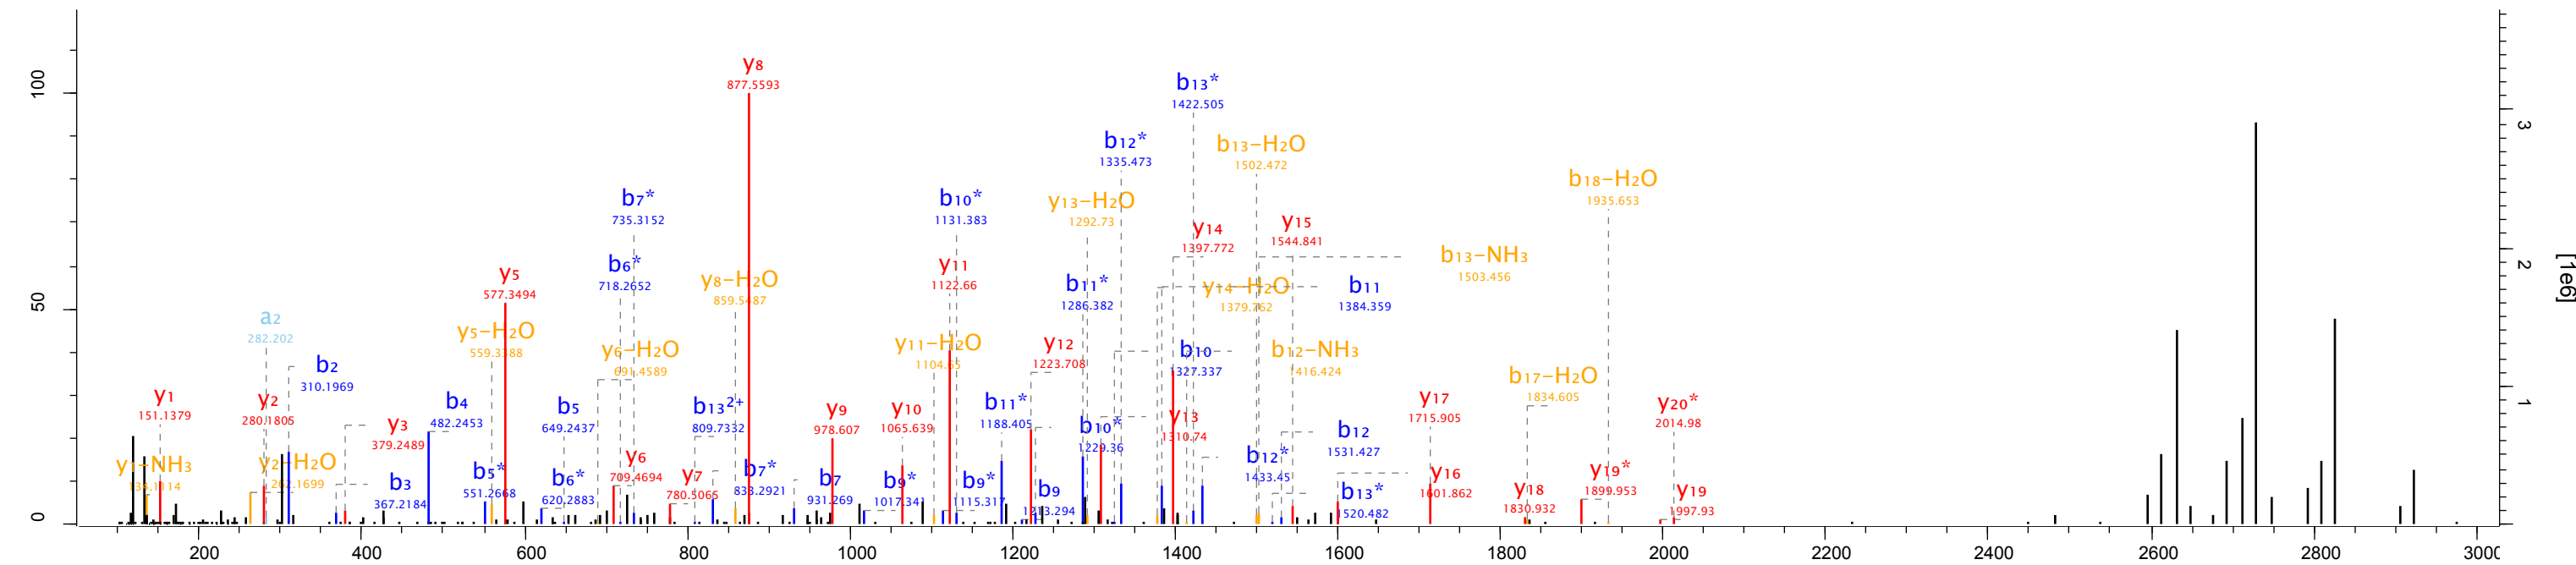

- R F G D ph S ph Y20\* Y19 Y18 Y17 Y16 Y15 Y14 Y13 Y12 Y11 Y10 Y9 Y8 Y7 Y6 Y5 T V Y3 Y2 Y1 -

b2 b3 b4 b5 b6\* b7 b9 b10 b11 b12 b13\*

Raw file 20150812\_A375SR\_Phospho\_BR1\_02 Scan 13576 Method FTMS; HCD Score 181.43 m/z 792.33 Gene names ZNF609

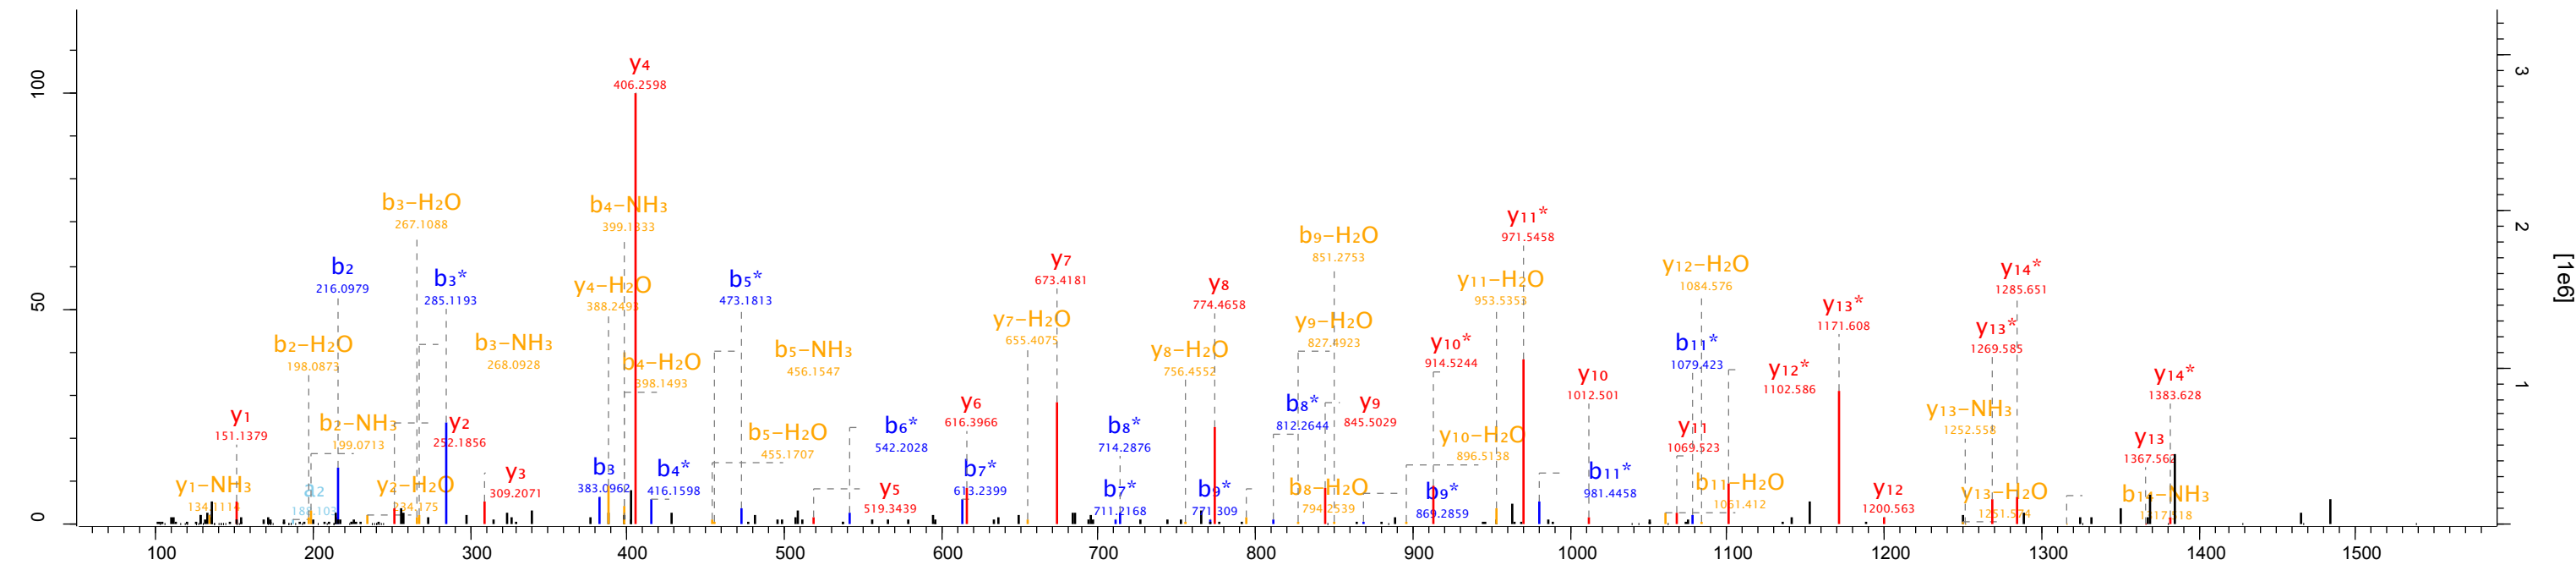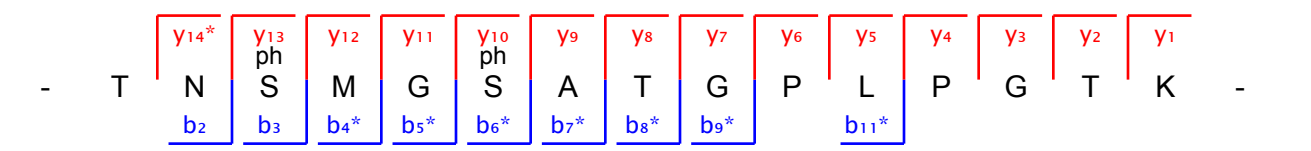

Raw file 20150812\_A375SR\_Phospho\_BR1\_02 Scan 13596 Method FTMS; HCD Score 173.03 m/z 862.31 Gene names TMF1

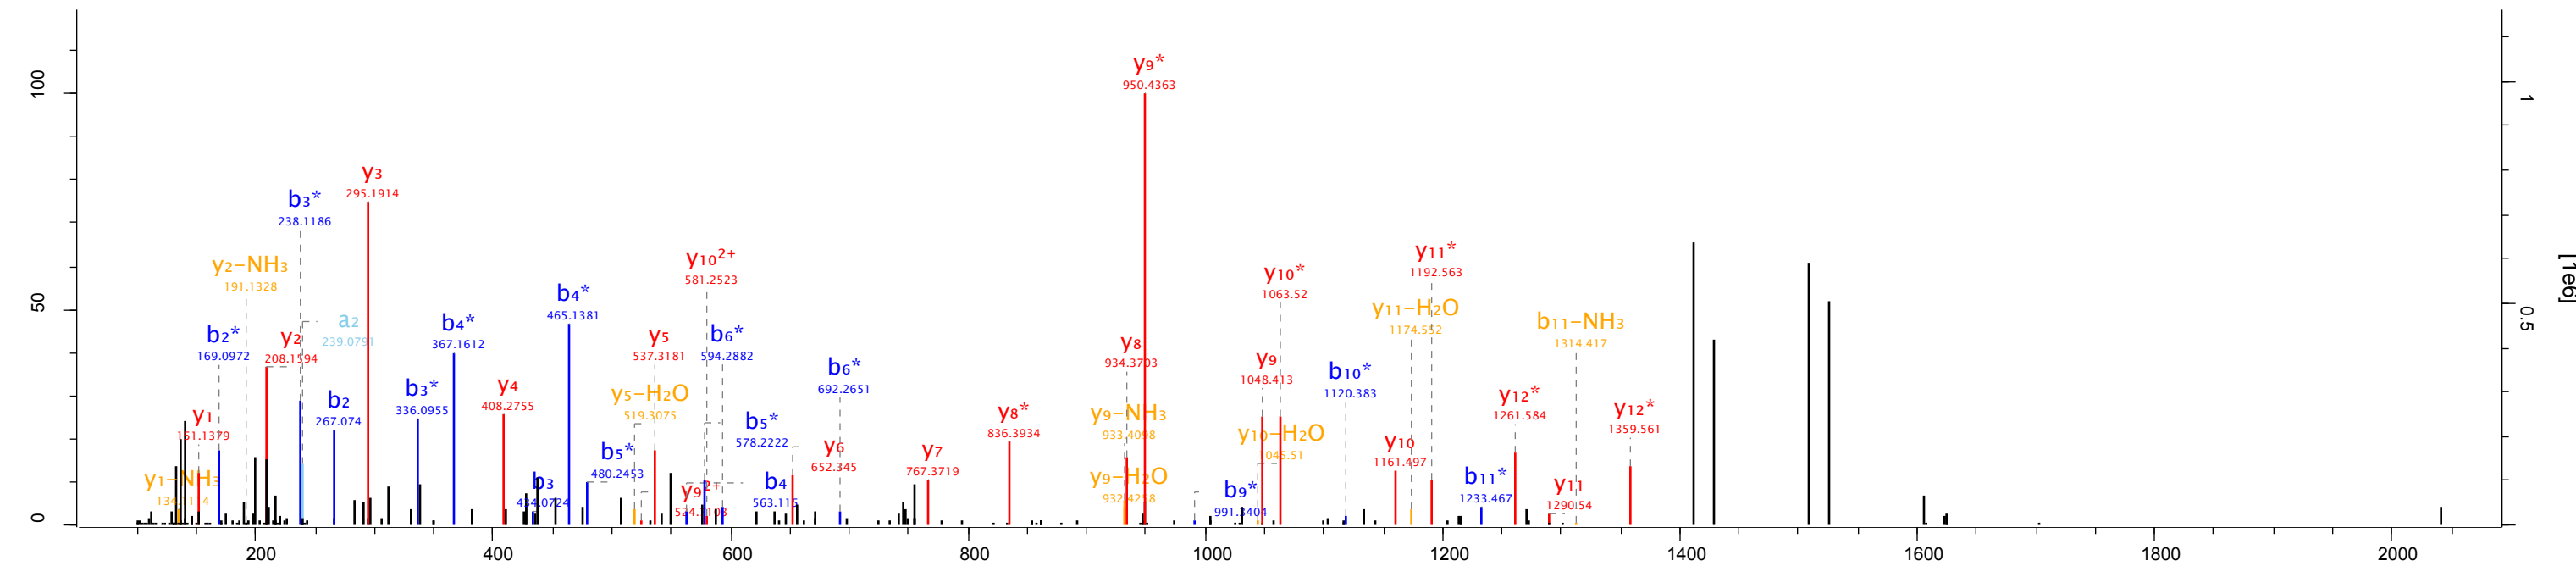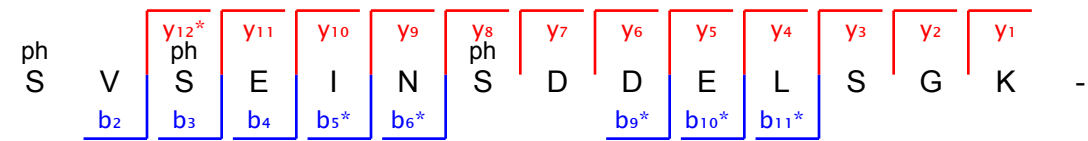

Raw file 20150812\_A375SR\_Phospho\_BR1\_02 Scan 14226 Method FTMS; HCD Score 116.85 m/z 954.72 Gene names AFAP1

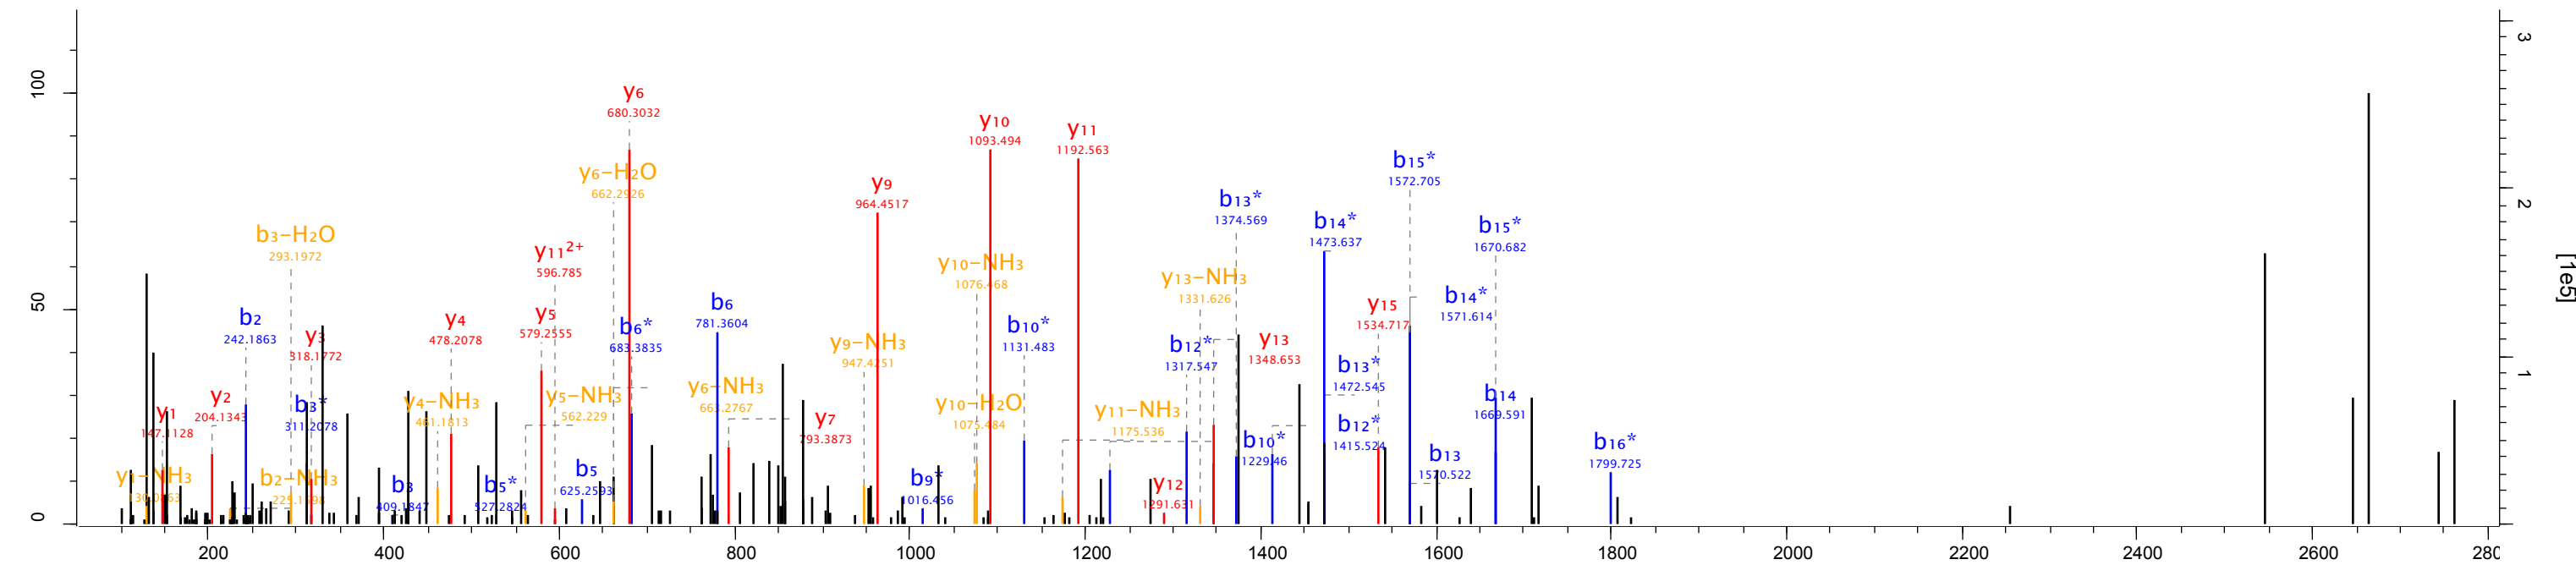

- K L S ph S E R P ph S S D G E G V V E N G I T T C N G K -

Fragmentation mapping (b and y ions):

- b<sub>2</sub> (L), b<sub>3</sub> (S), b<sub>5</sub> (E), b<sub>6</sub> (R), b<sub>9</sub>\* (S), b<sub>10</sub>\* (D), b<sub>12</sub>\* (G), b<sub>13</sub> (G), b<sub>14</sub> (V), b<sub>15</sub>\* (V), b<sub>16</sub>\* (E)
- y<sub>1</sub> (K), y<sub>2</sub> (G), y<sub>3</sub> (N), y<sub>4</sub> (C), y<sub>5</sub> (T), y<sub>6</sub> (T), y<sub>7</sub> (I), y<sub>9</sub> (N), y<sub>10</sub> (E), y<sub>11</sub> (V), y<sub>12</sub> (V), y<sub>13</sub> (G), y<sub>15</sub> (D)

Raw file 20150812\_A375SR\_Phospho\_BR1\_02 Scan 14336 Method FTMS; HCD Score 159.41 m/z 739.79 Gene names OSTM1

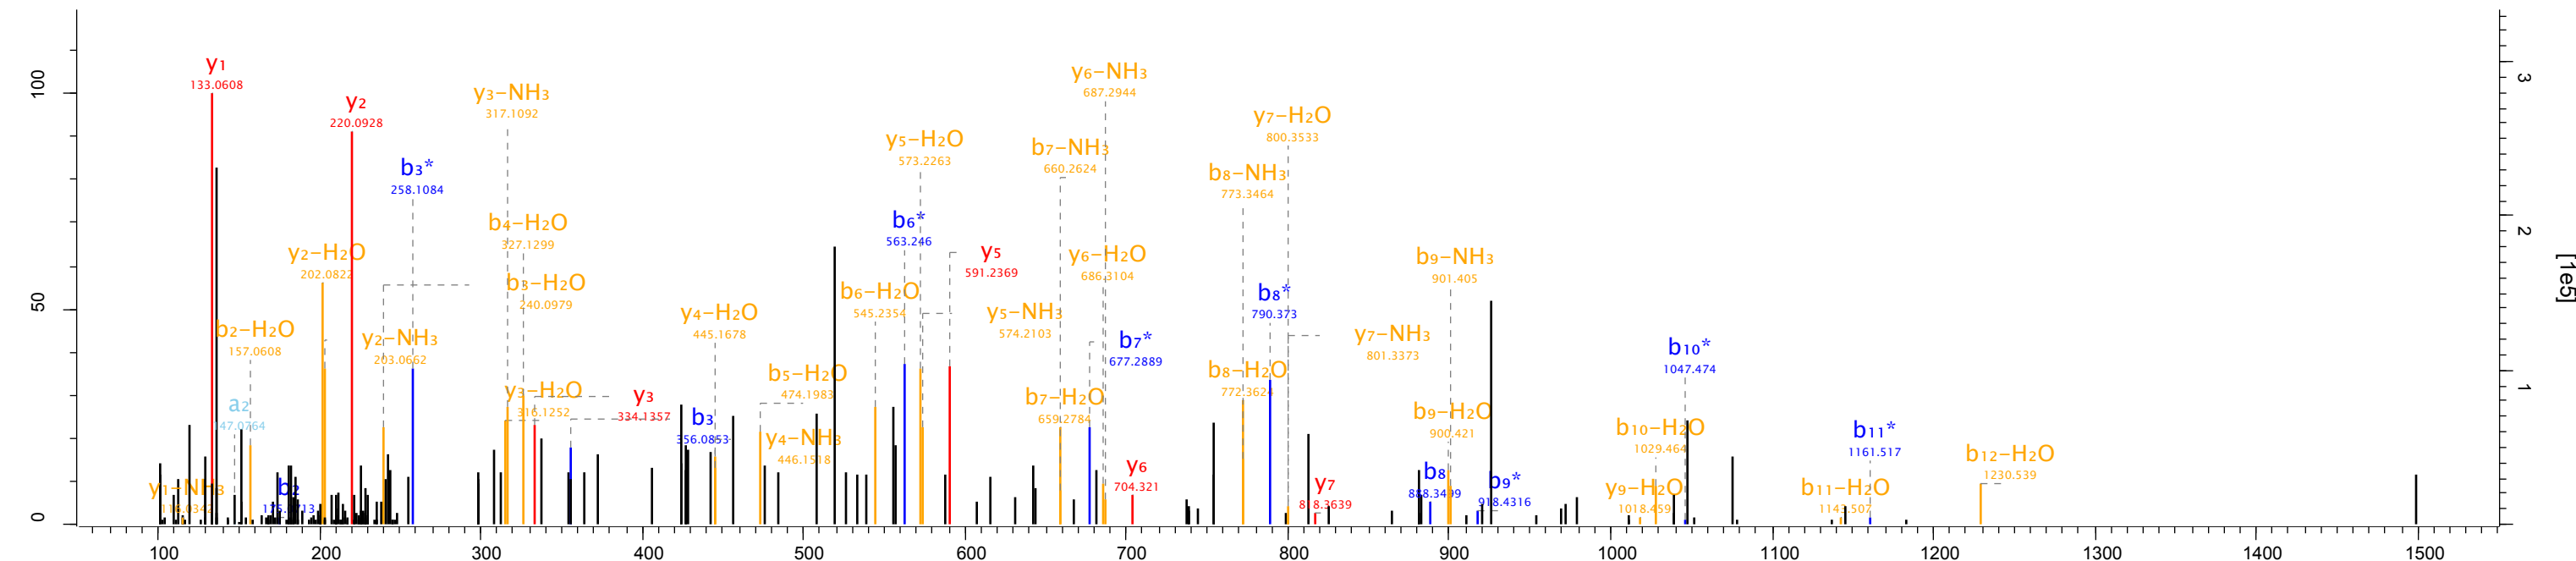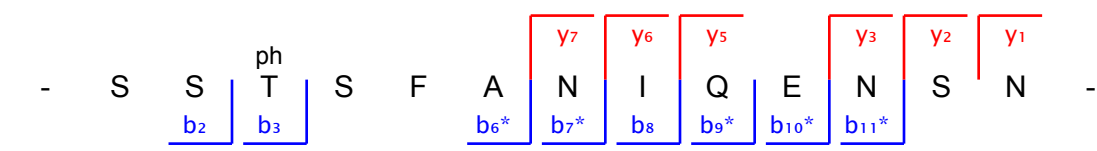

Raw file Scan Method Score m/z Gene names  
 20150812\_A375SR\_Phospho\_BR1\_02 14726 FTMS; HCD 123.73 801.74 PPP4R1

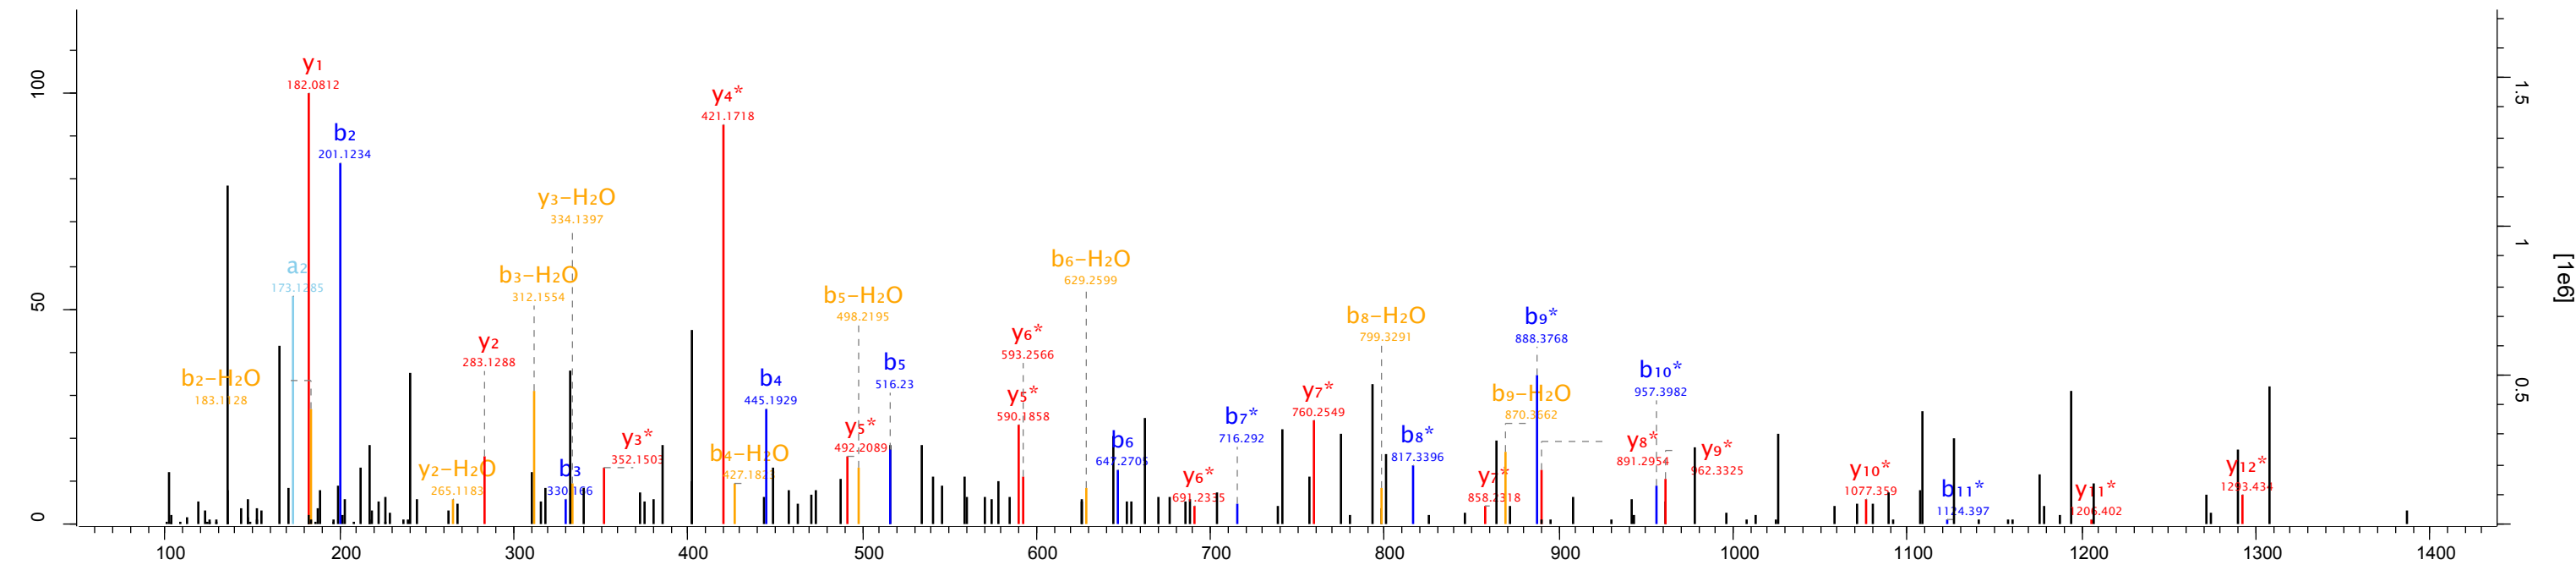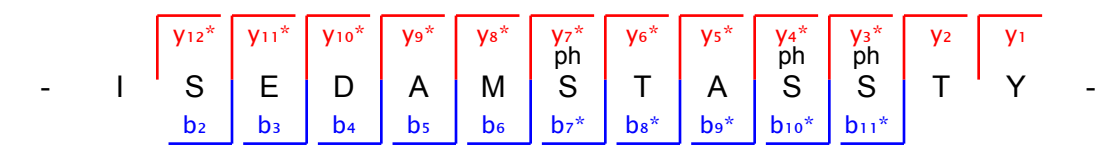



Raw file: 20150812\_A375SR\_Phospho\_BR1\_02  
 Scan: 15166 Method: FTMS; HCD Score: 124.96 m/z: 701.27 Gene names: CDK13

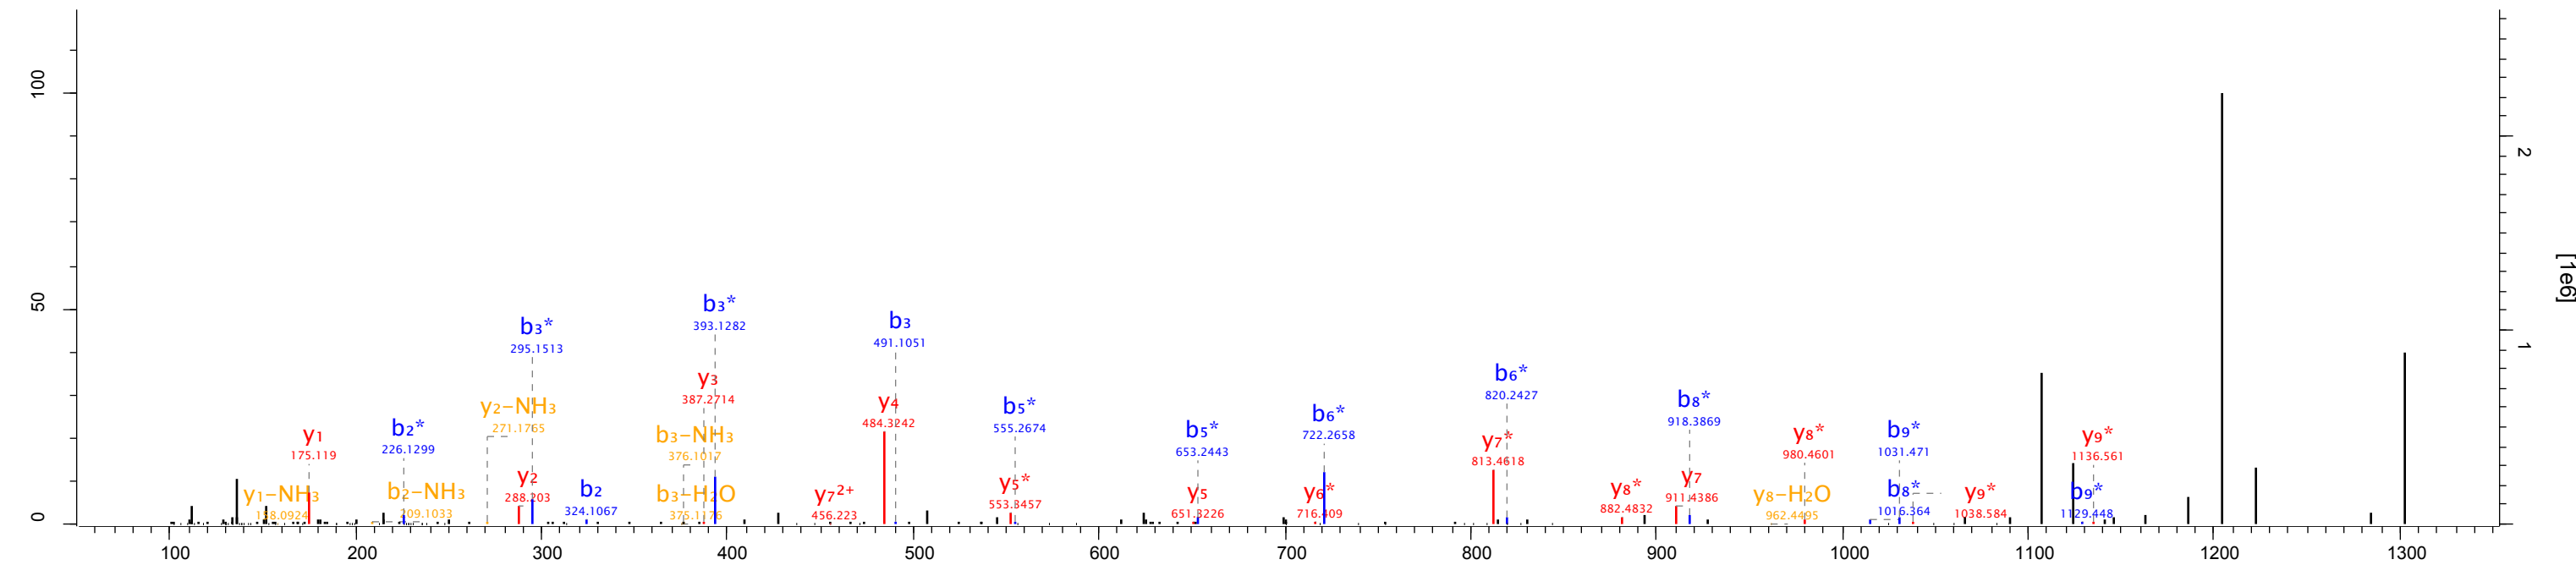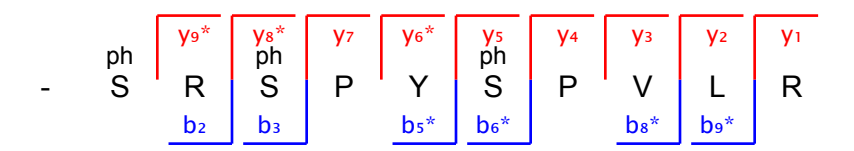

Raw file Scan Method Score m/z Gene names  
 20150812\_A375SR\_Phospho\_BR1\_02 15216 FTMS; HCD 408.3 1116.45 PHF14

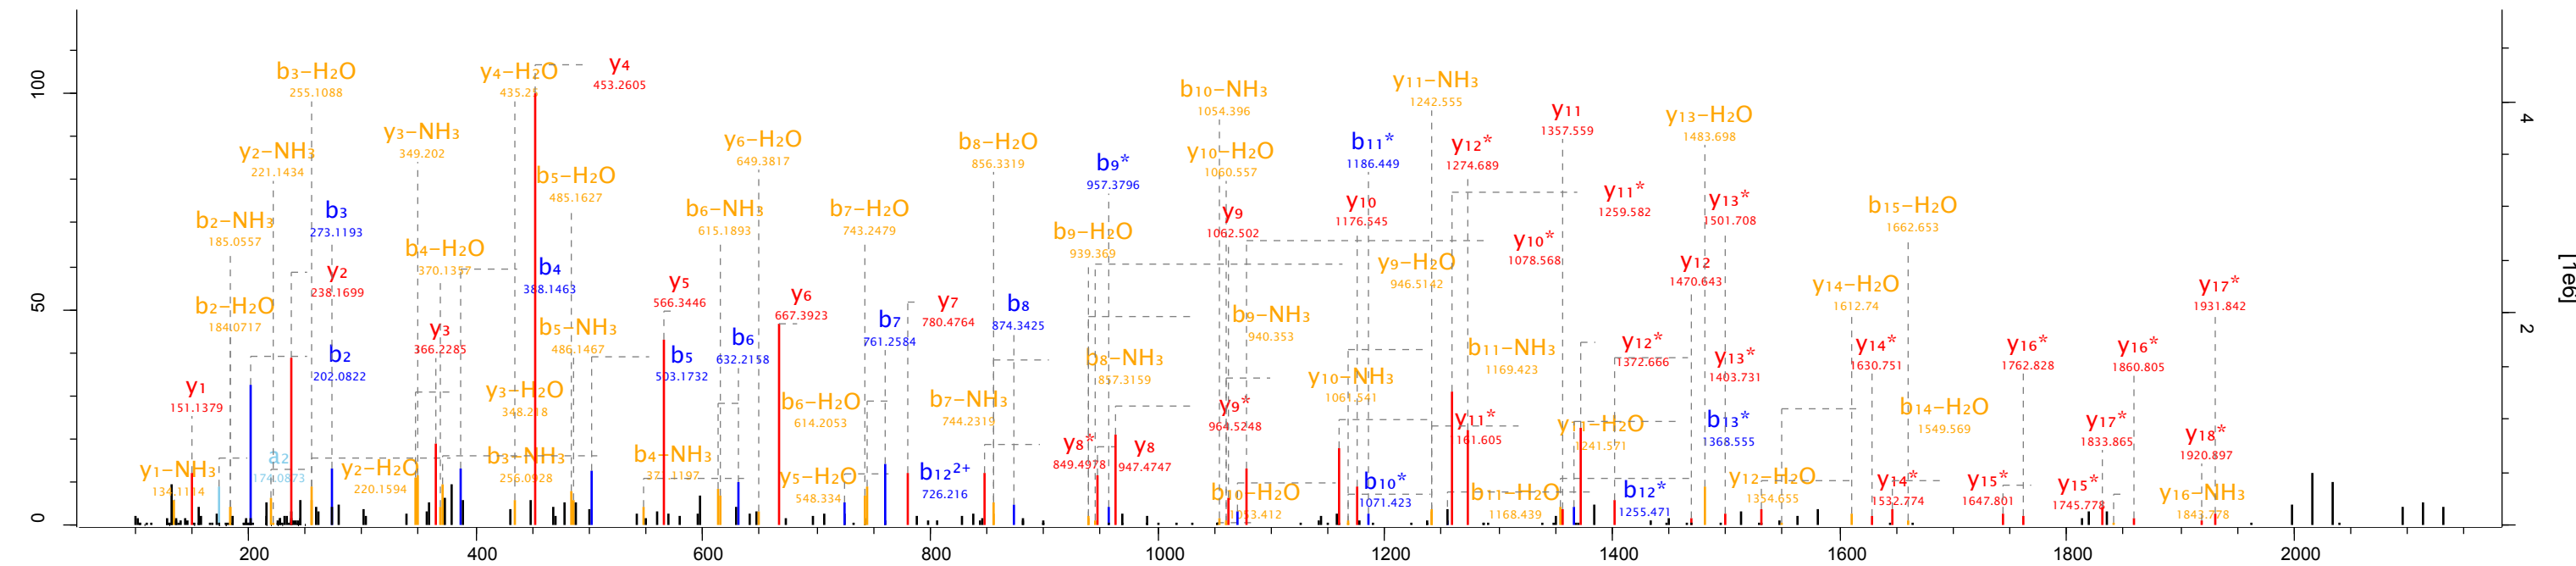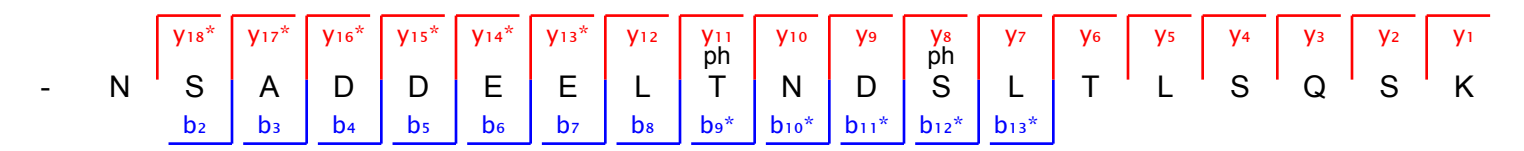

Raw file: 20150812\_A375SR\_Phospho\_BR1\_02  
 Scan: 15276 Method: FTMS; HCD Score: 59.31 m/z: 892 Gene names: PRKAR1B

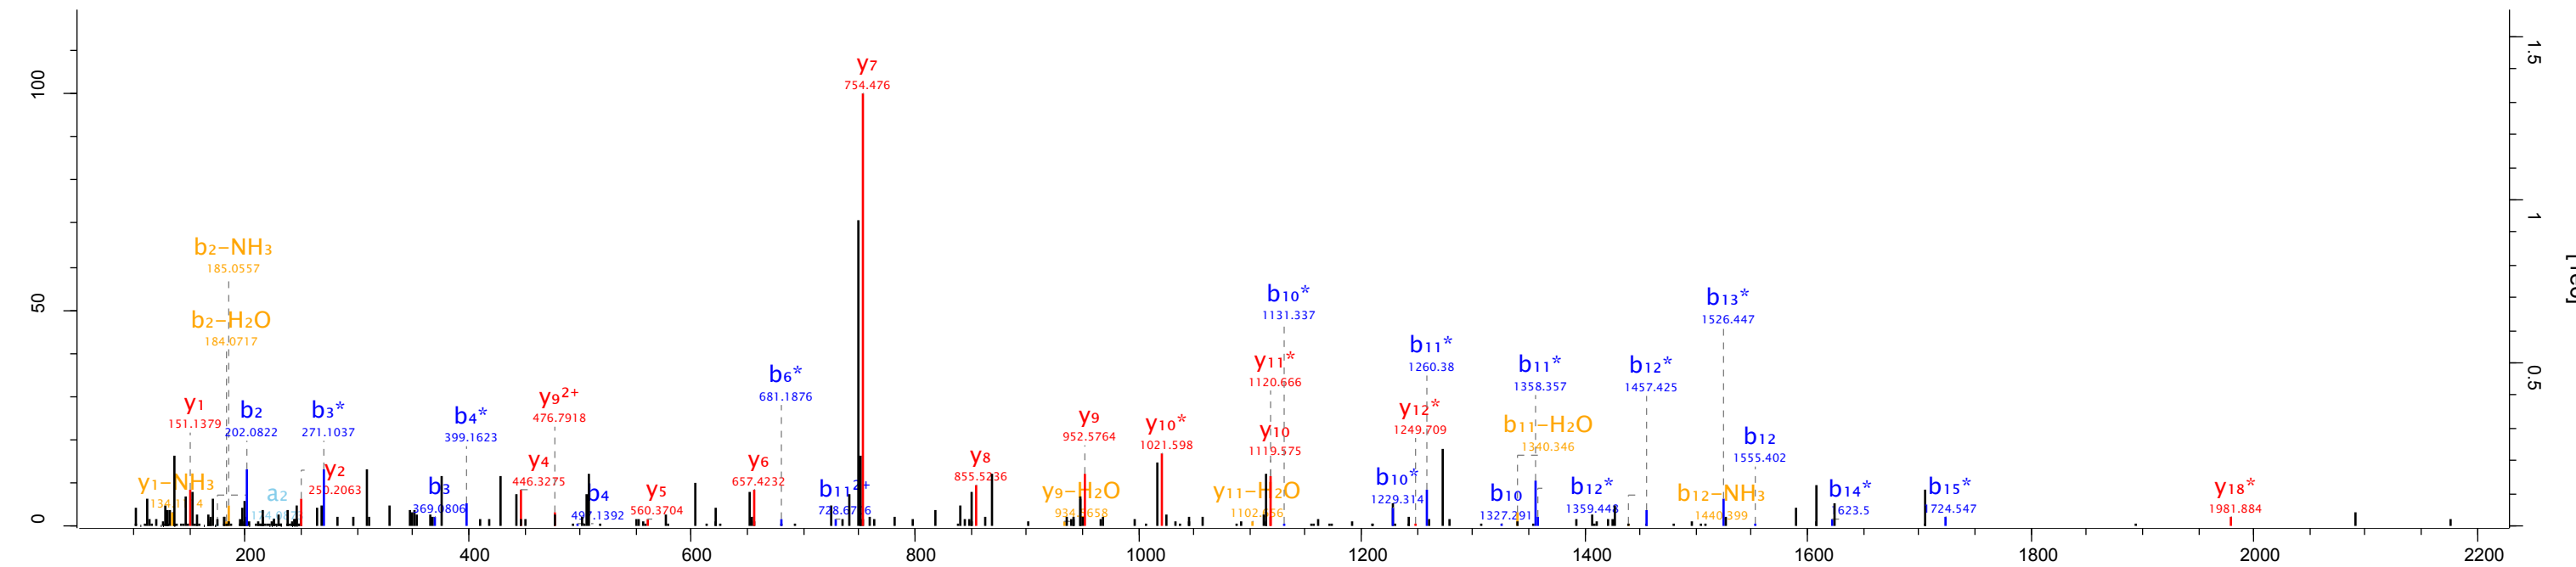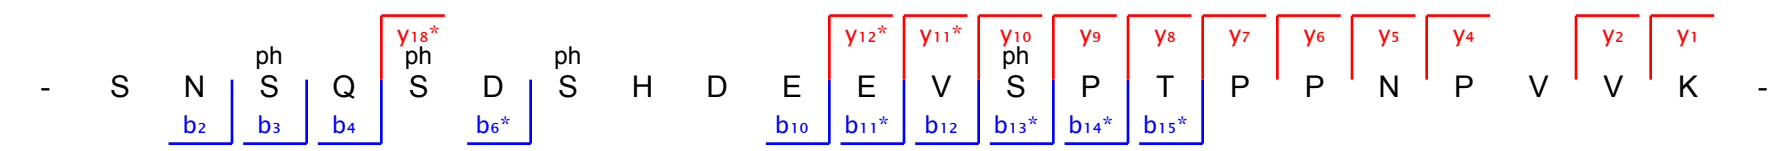

Raw file 20150812\_A375SR\_Phospho\_BR1\_02 Scan 15336 Method FTMS; HCD Score 186.35 m/z 1147.96 Gene names JUNB

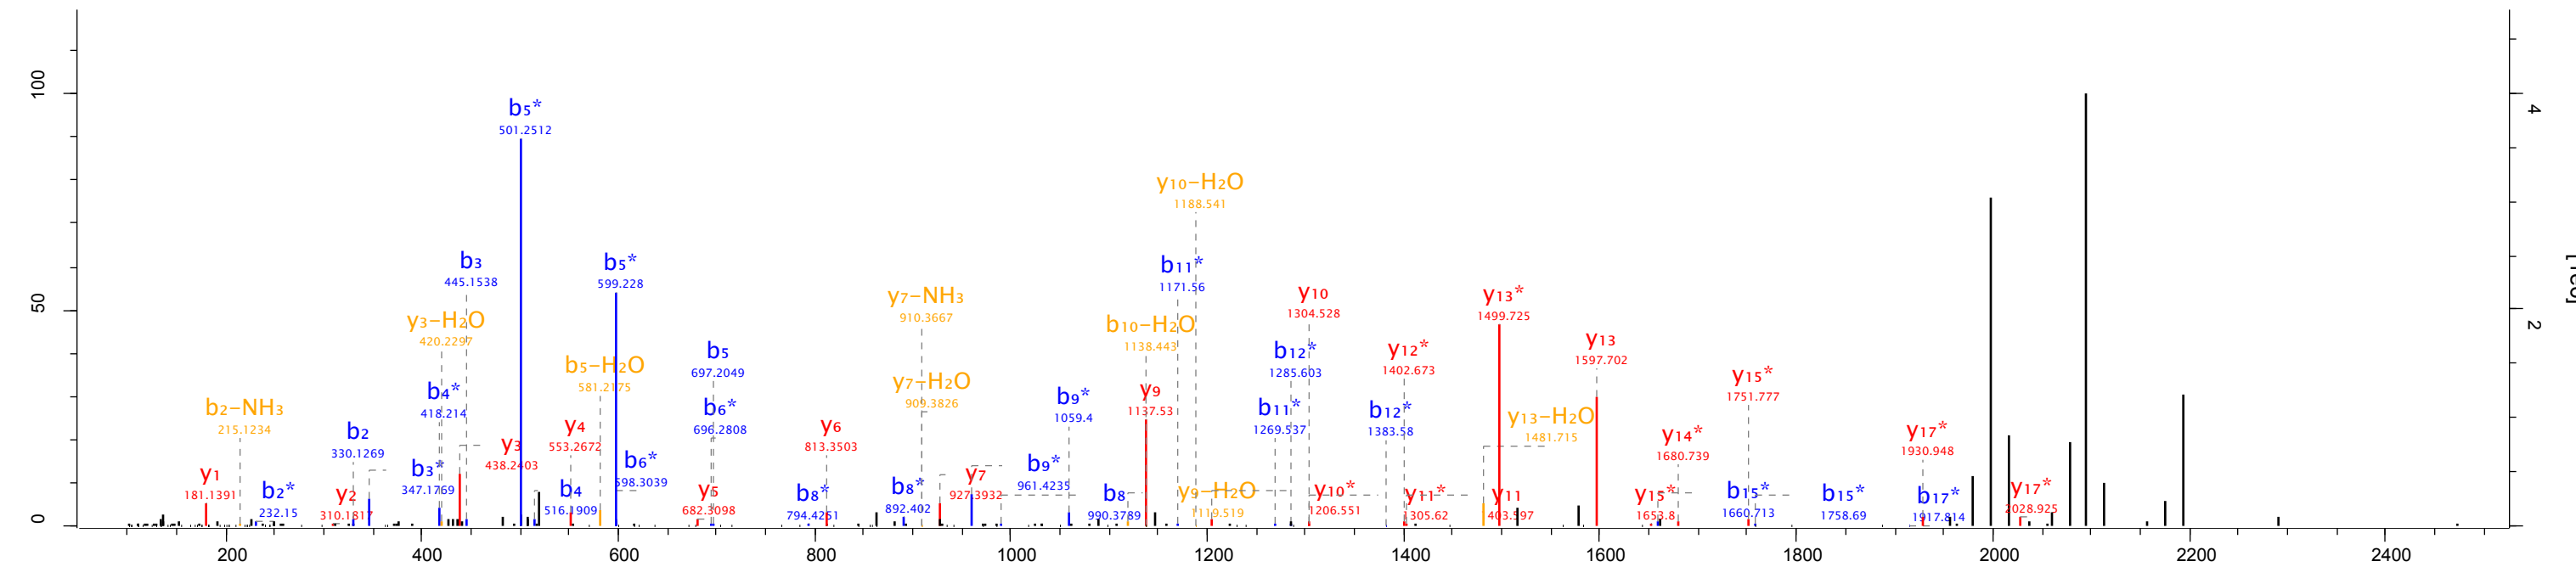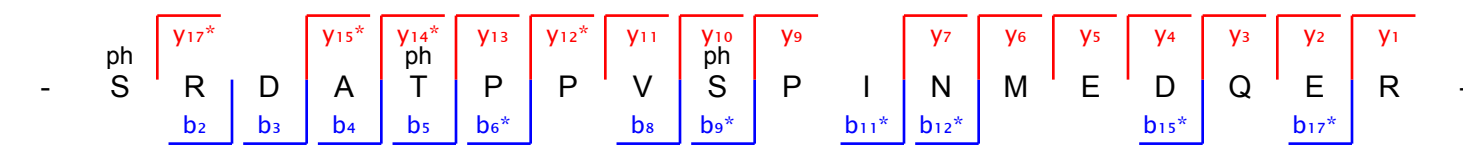

Raw file: 20150812\_A375SR\_Phospho\_BR1\_02  
 Scan: 15406 Method: FTMS; HCD Score: 169.84 m/z: 1003.81 Gene names: HDGFRP2

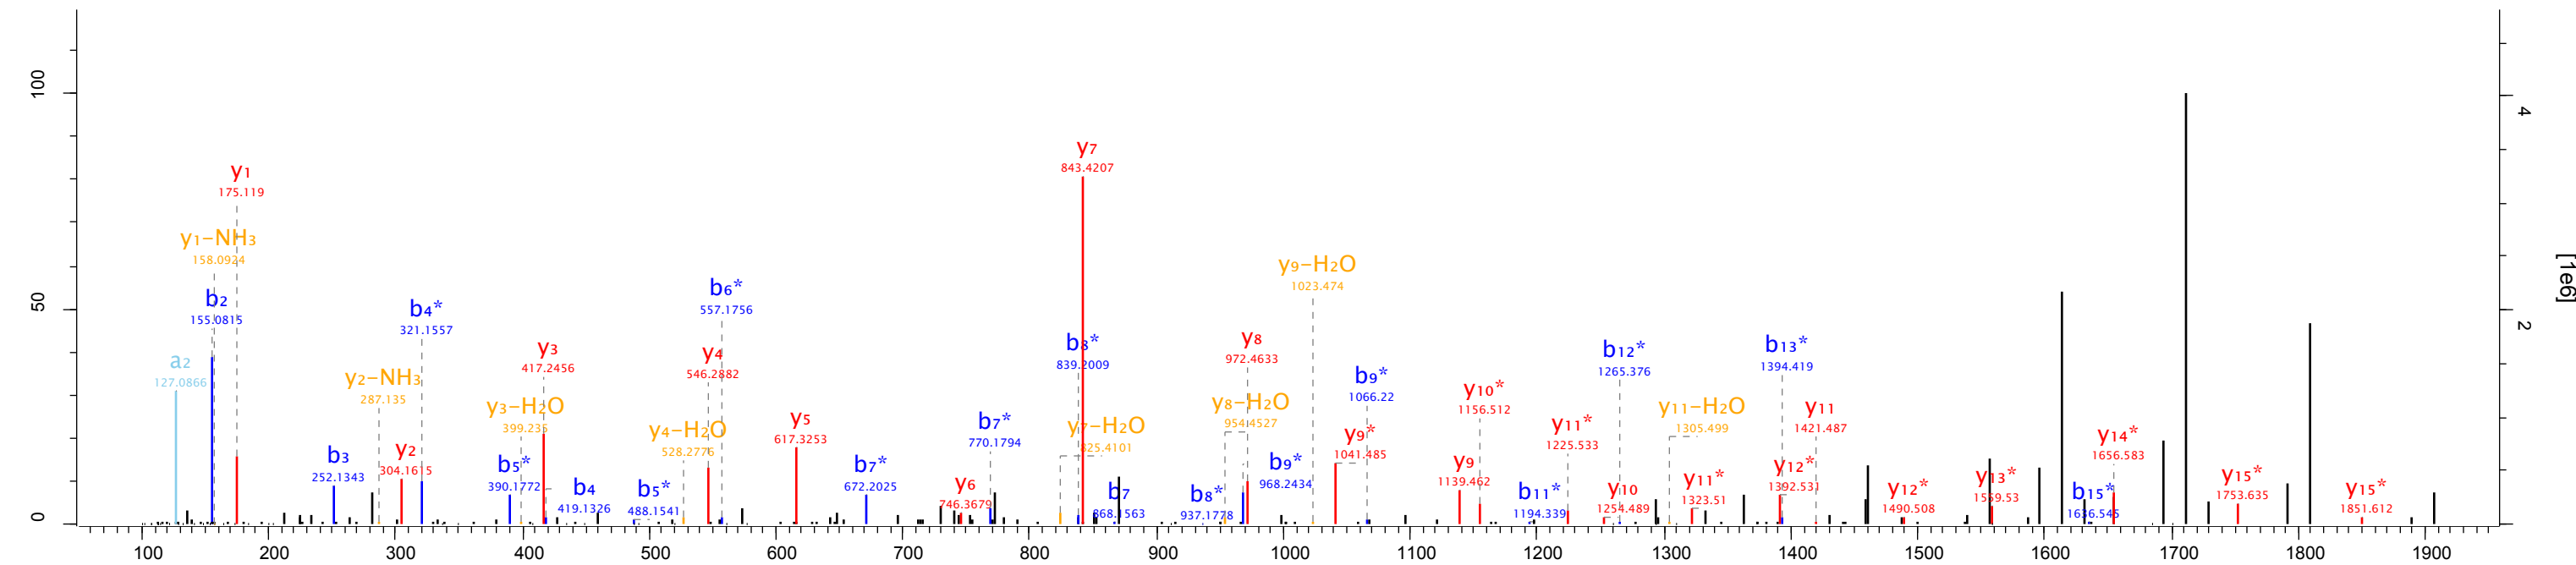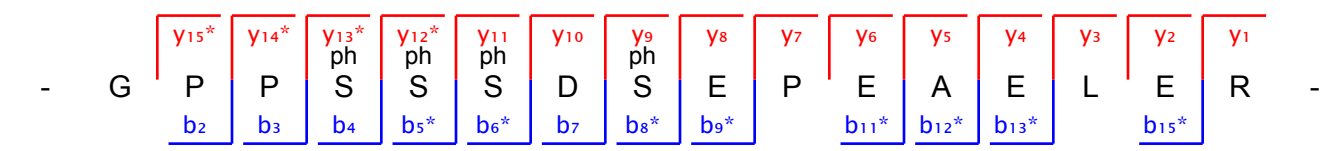

Raw file 20150812\_A375SR\_Phospho\_BR1\_02 Scan 15666 Method FTMS; HCD Score 162.77 m/z 798.34 Gene names VIM

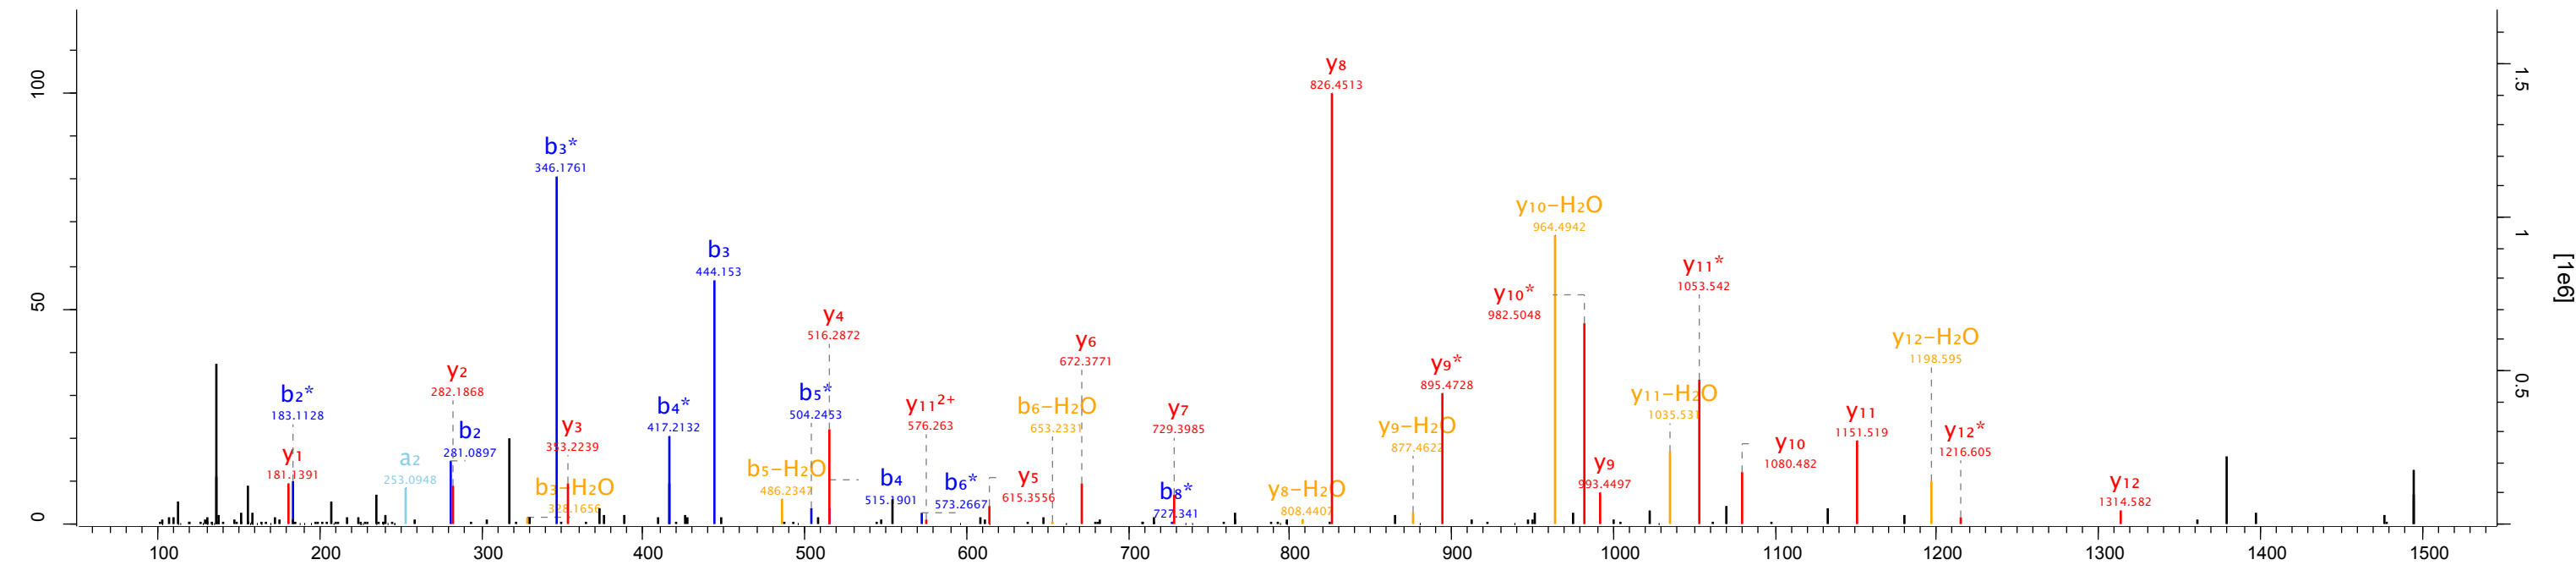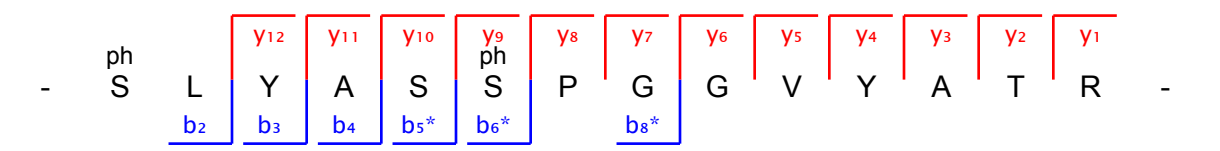

Raw file  
20150812\_A375SR\_Phospho\_BR1\_02

Scan 15816 Method FTMS; HCD Score 184.84 m/z 916.35 Gene names OXR1

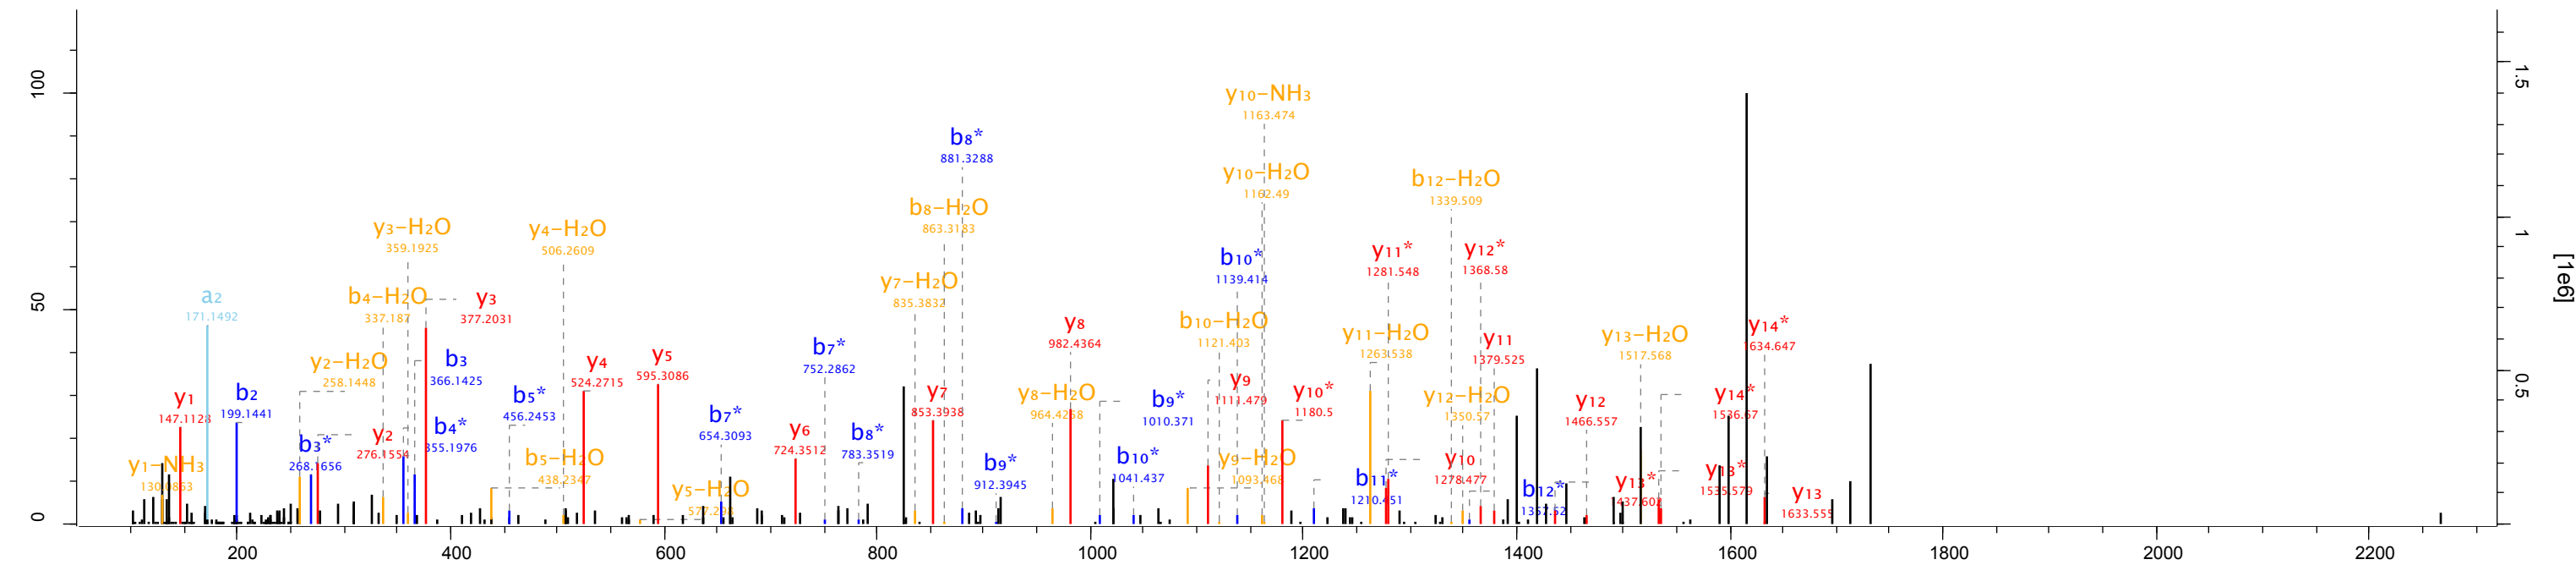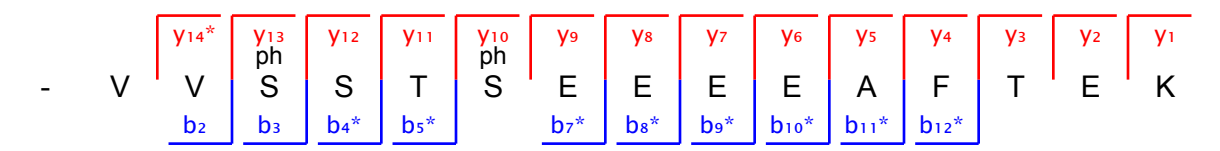

Raw file  
 20150812\_A375SR\_Phospho\_BR1\_02  
 Scan 15946 Method FTMS; HCD Score 66.61 m/z 837.32 Gene names RSRC2

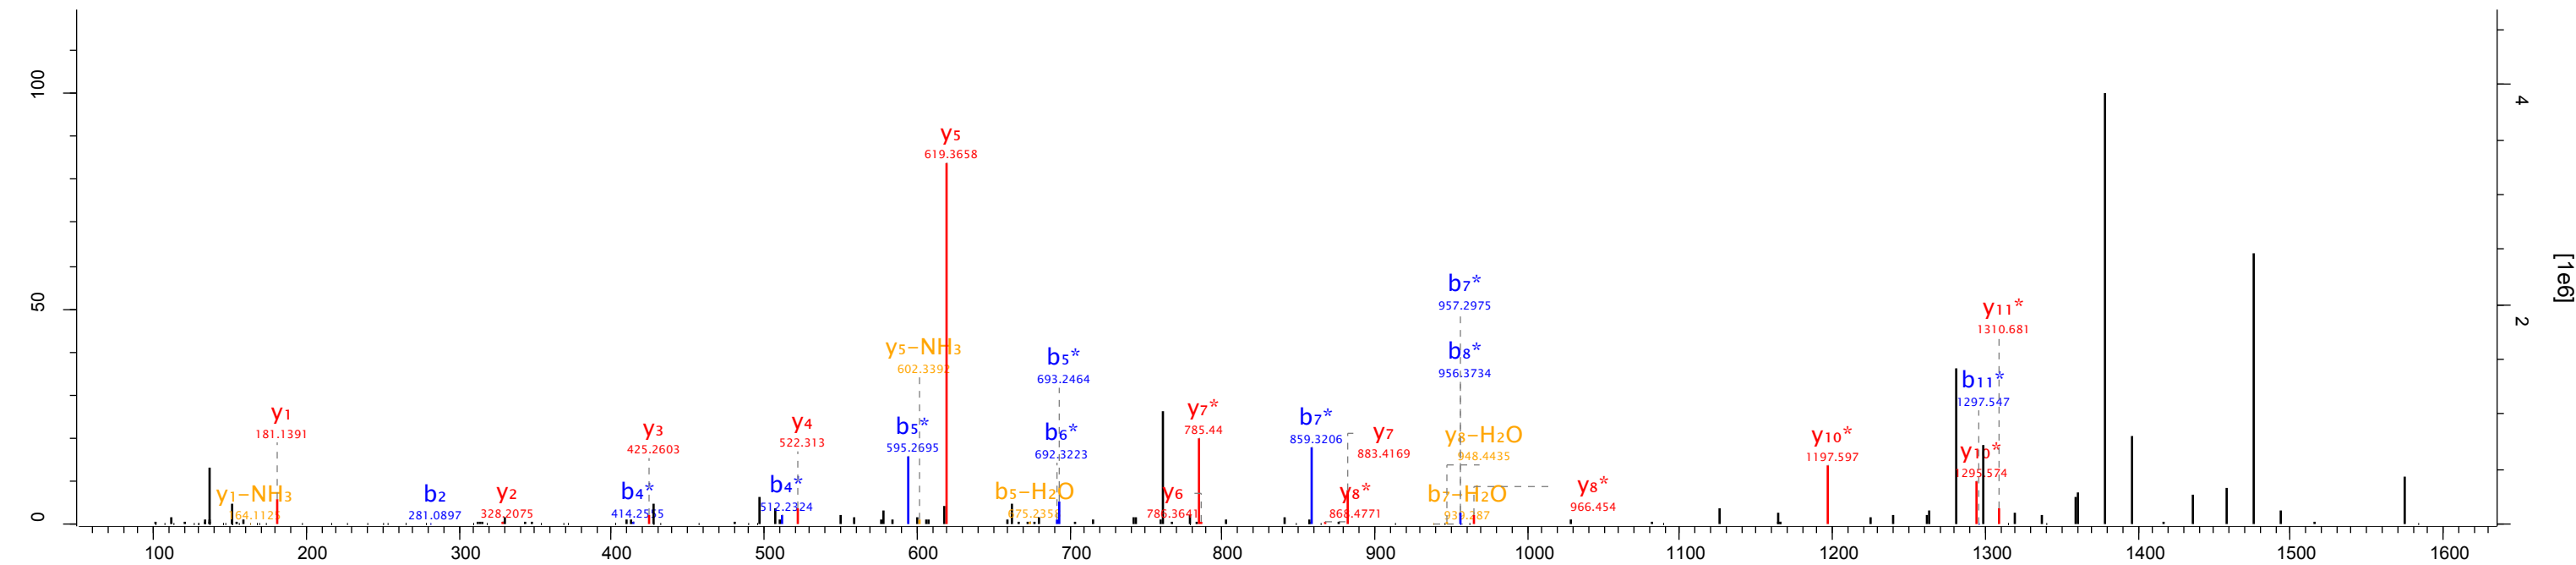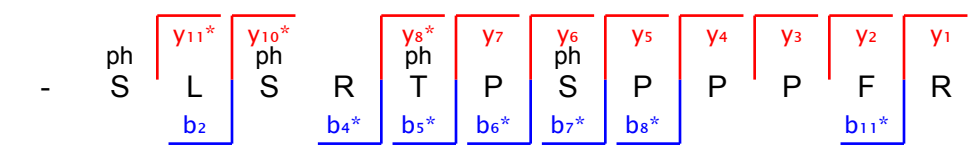



Raw file 20150812\_A375SR\_Phospho\_BR1\_02 Scan 16056 Method FTMS; HCD Score 169.91 m/z 979.9 Gene names ZFC3H1

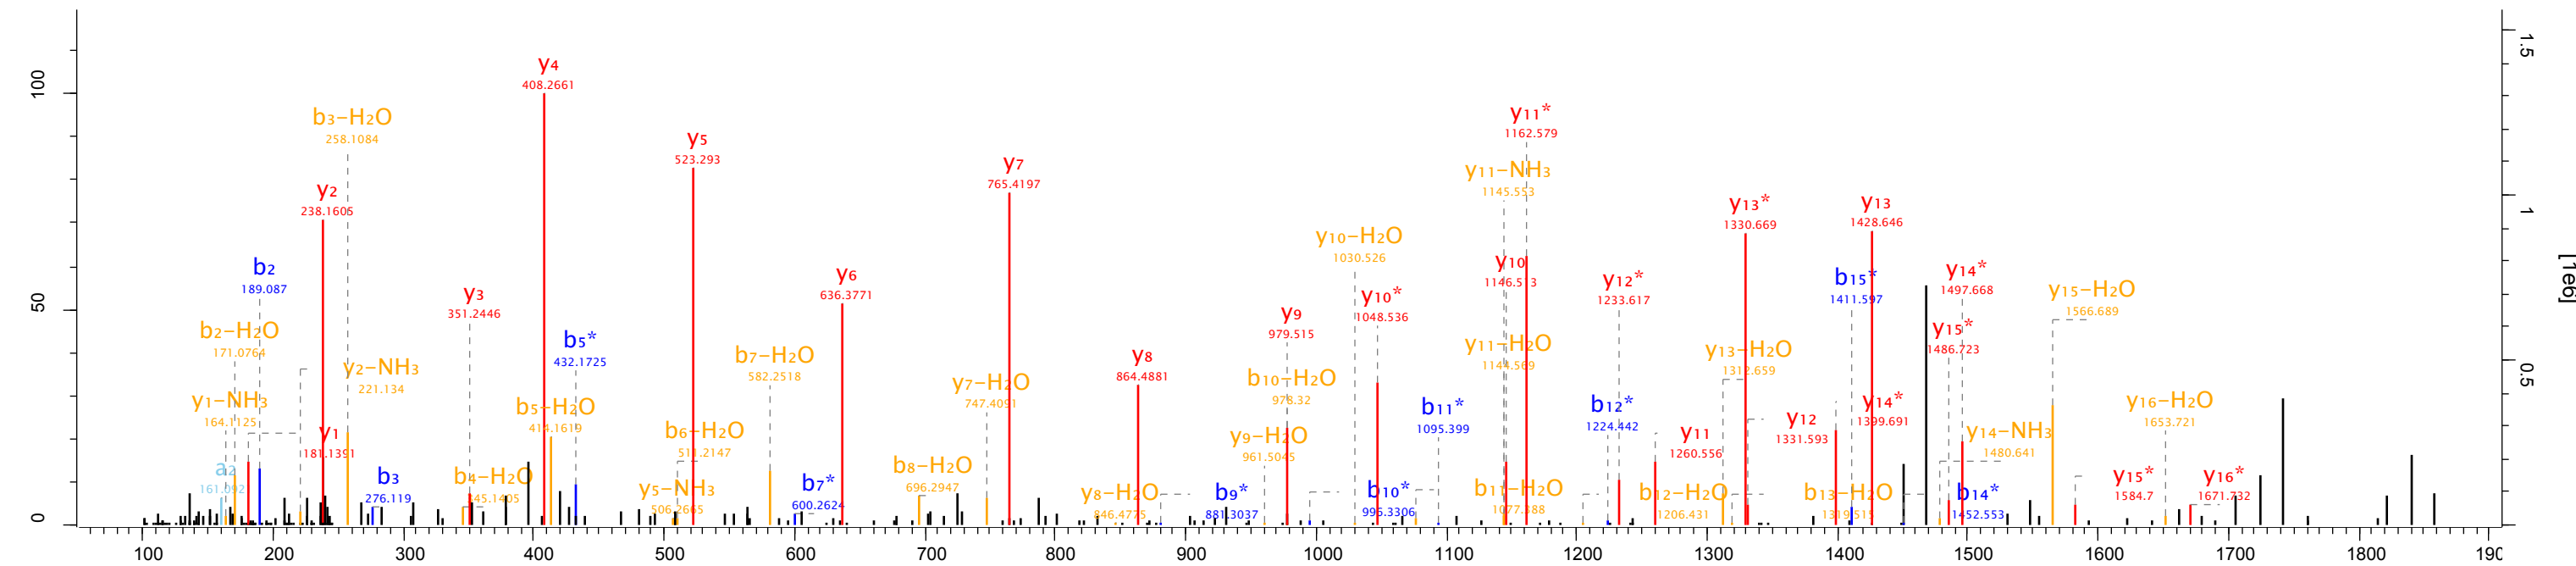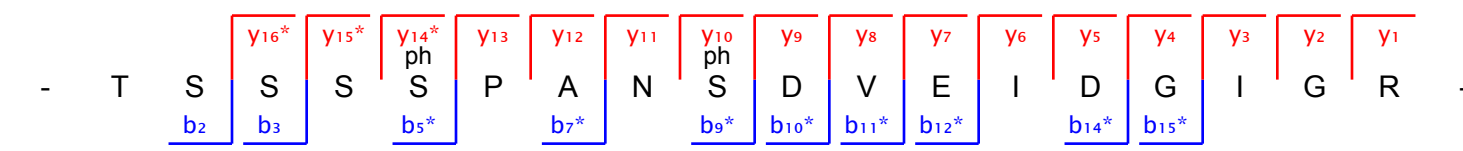

Raw file  
20150812\_A375SR\_Phospho\_BR1\_02

Scan 16186 Method FTMS; HCD Score 212.66 m/z 1144.49 Gene names PRRC2C

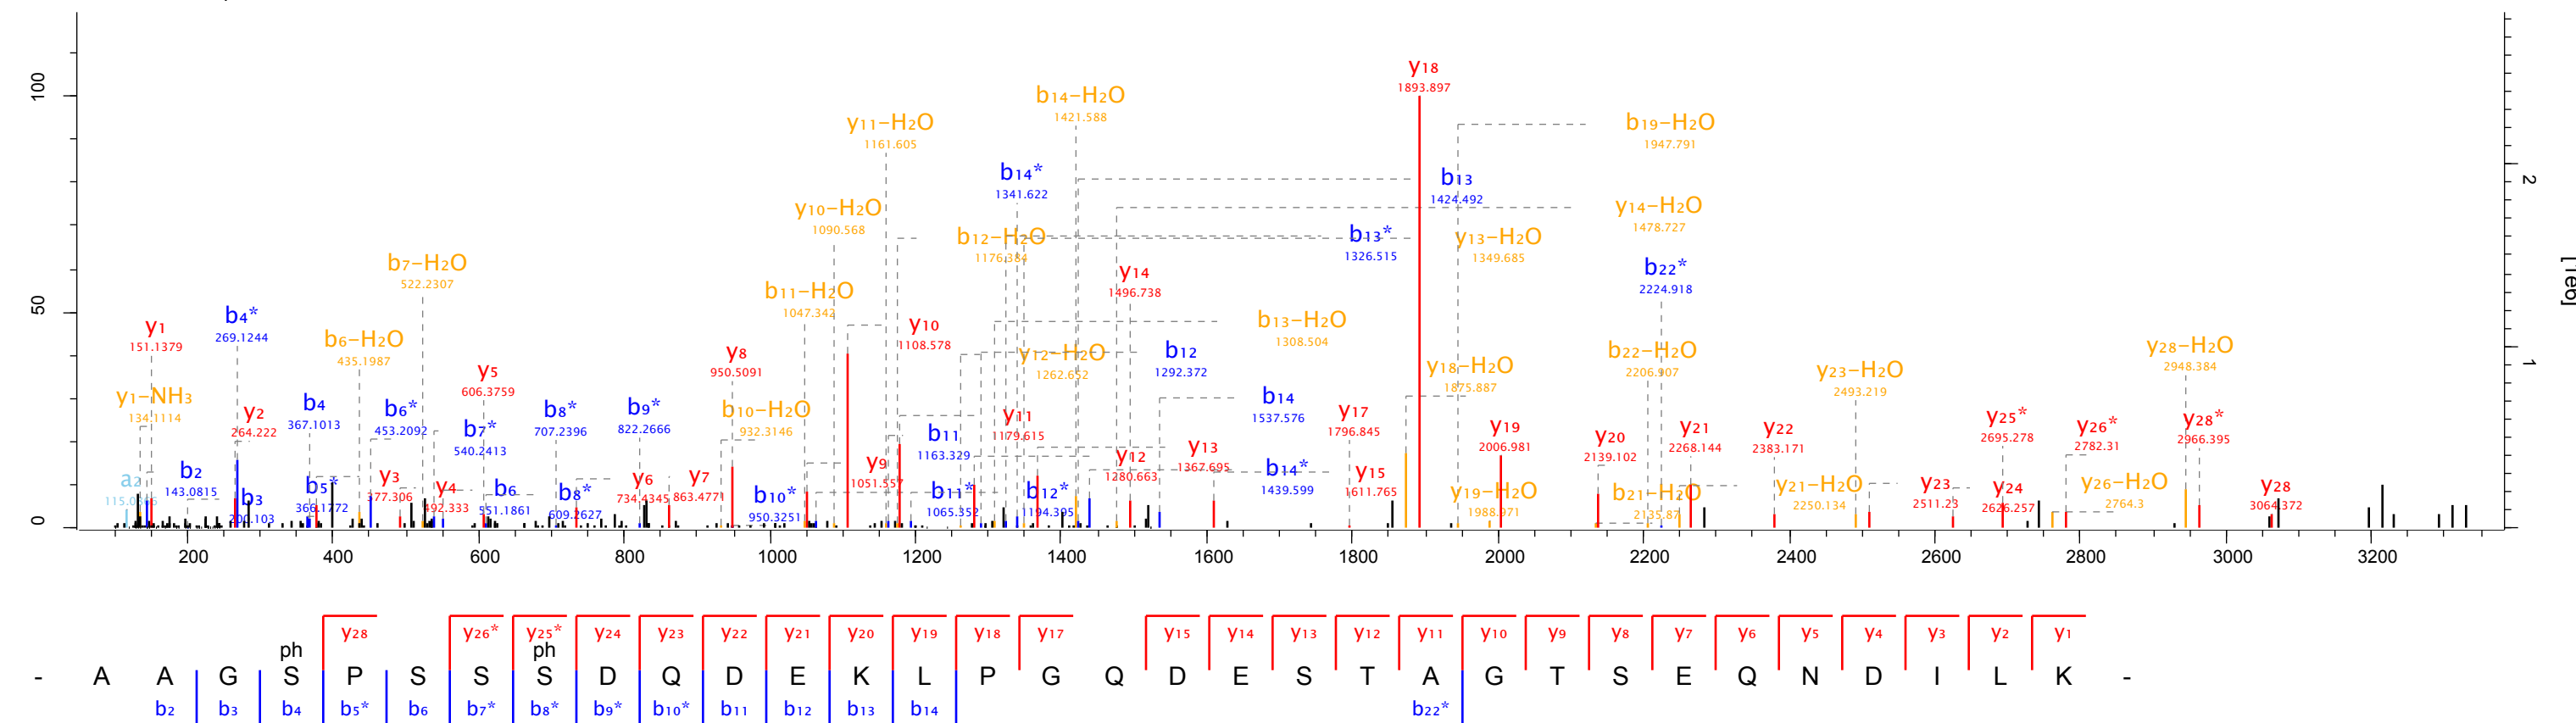

Raw file 20150812\_A375SR\_Phospho\_BR1\_02 Scan 16376 Method FTMS; HCD Score 195.97 m/z 816.33 Gene names TP53BP1

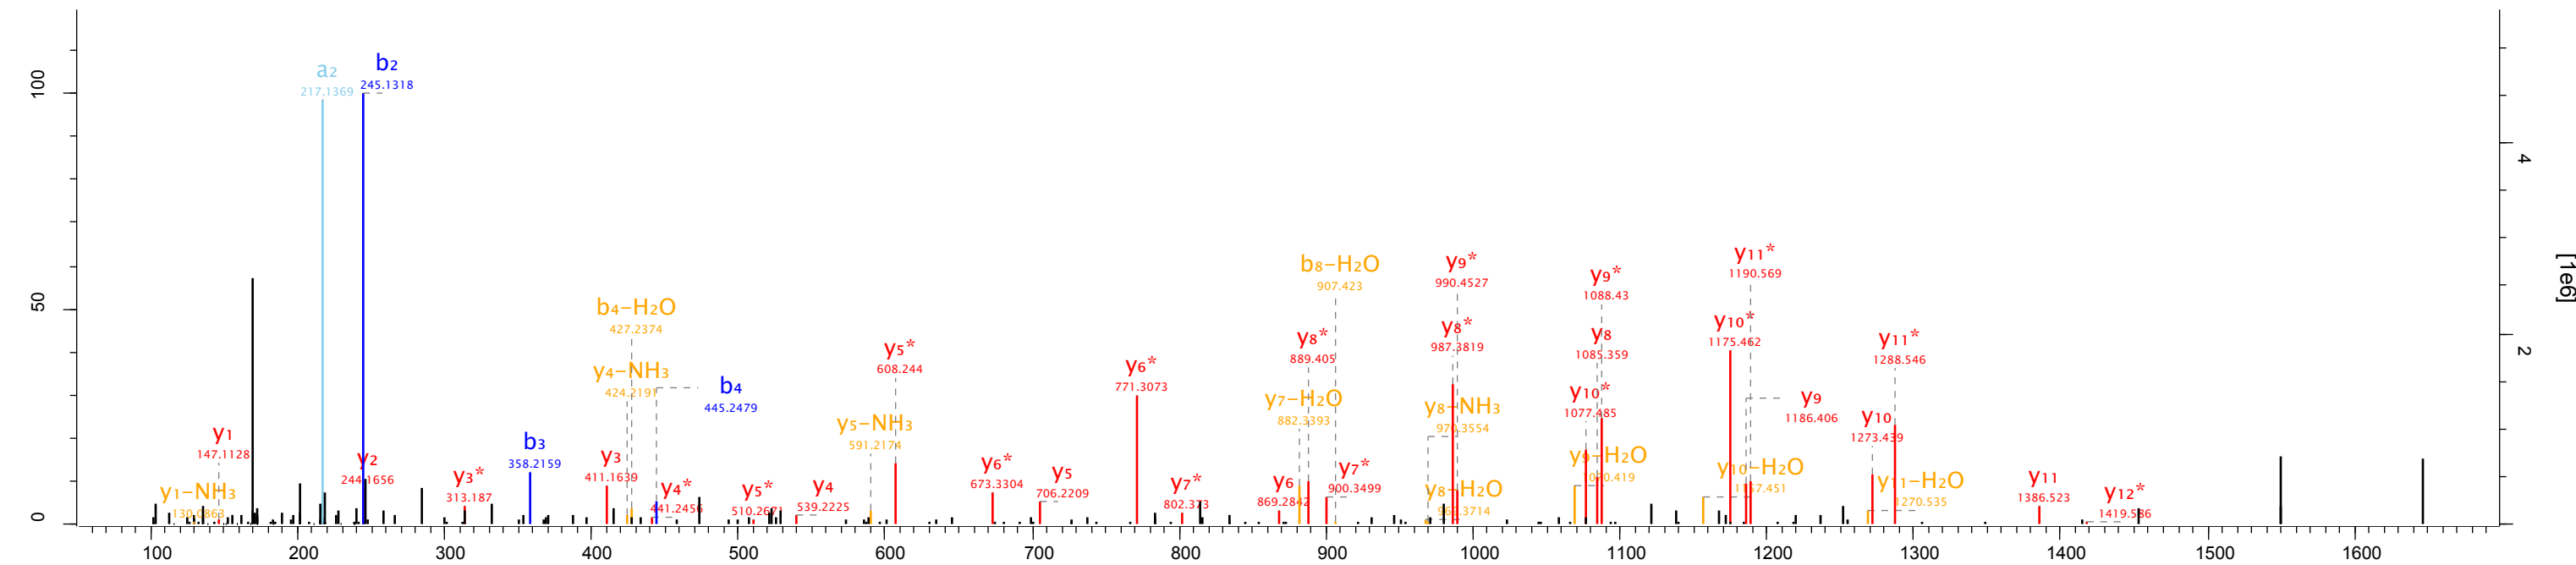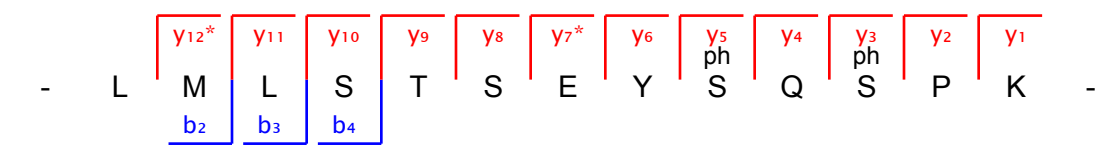

Raw file 20150812\_A375SR\_Phospho\_BR1\_02 Scan 16606 Method FTMS; HCD Score 299.67 m/z 845.72 Gene names OTUD4

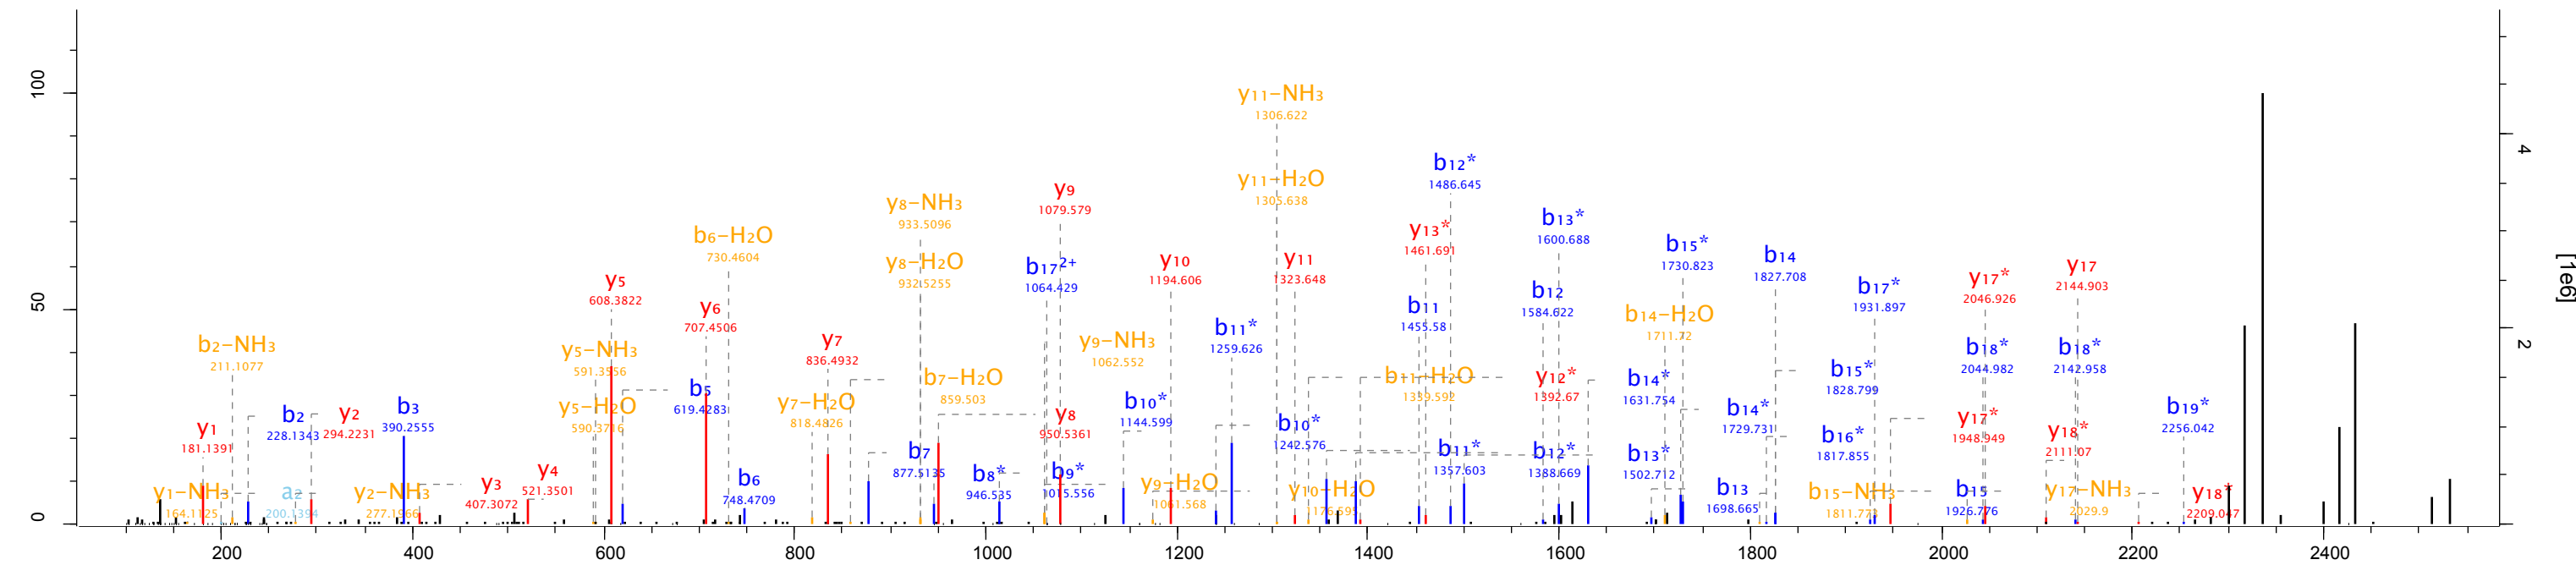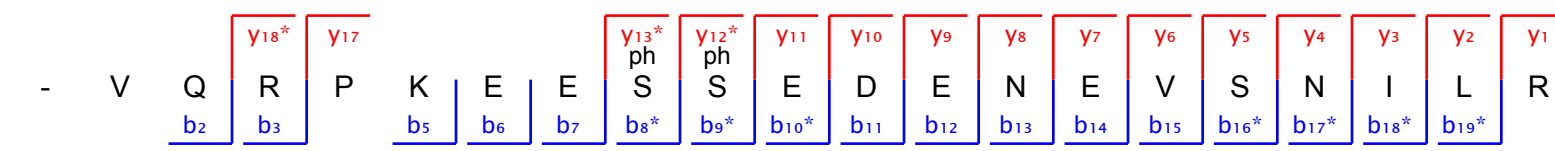

Raw file 20150812\_A375SR\_Phospho\_BR1\_02 Scan 17086 Method FTMS; HCD Score 65.45 m/z 866 Gene names ANKRD50

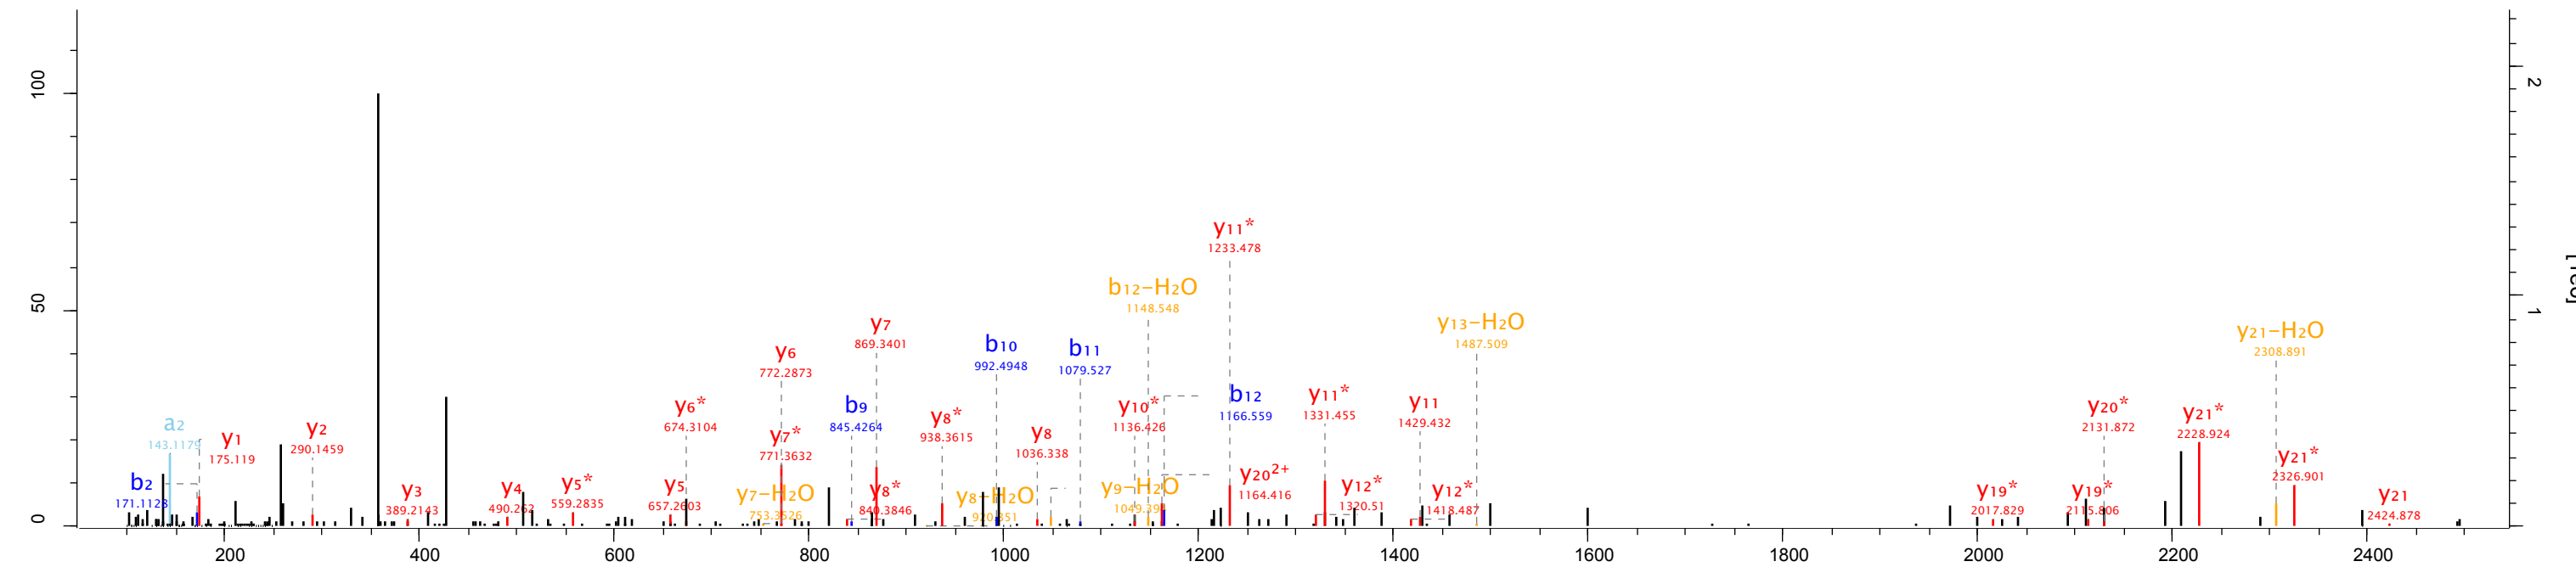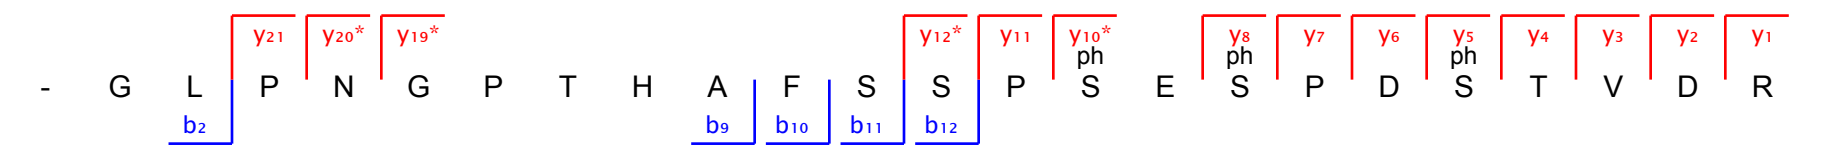

Raw file: 20150812\_A375SR\_Phospho\_BR1\_02  
 Scan: 17316 Method: FTMS; HCD Score: 217.77 m/z: 1120.48 Gene names: BCL9L

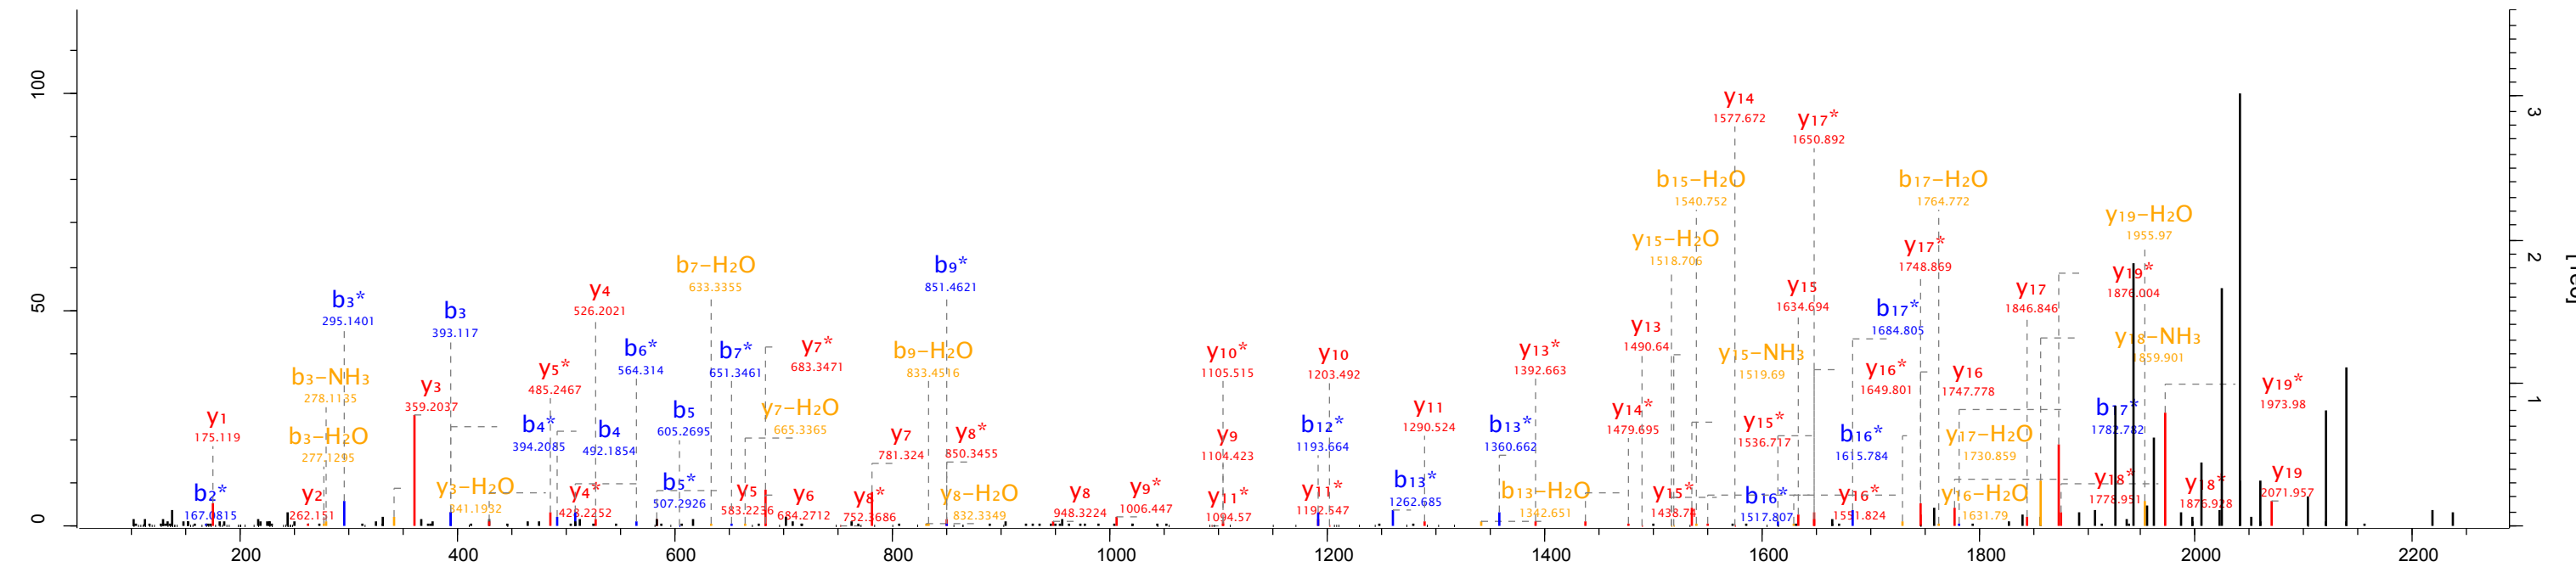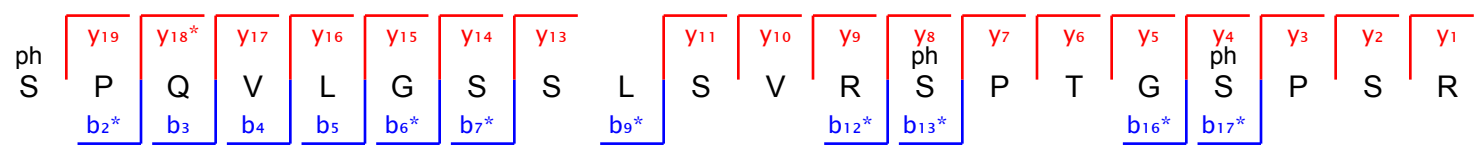

Raw file: 20150812\_A375SR\_Phospho\_BR1\_02  
 Scan: 17326 Method: FTMS; HCD Score: 71.71 m/z: 1186.41 Gene names: NCL

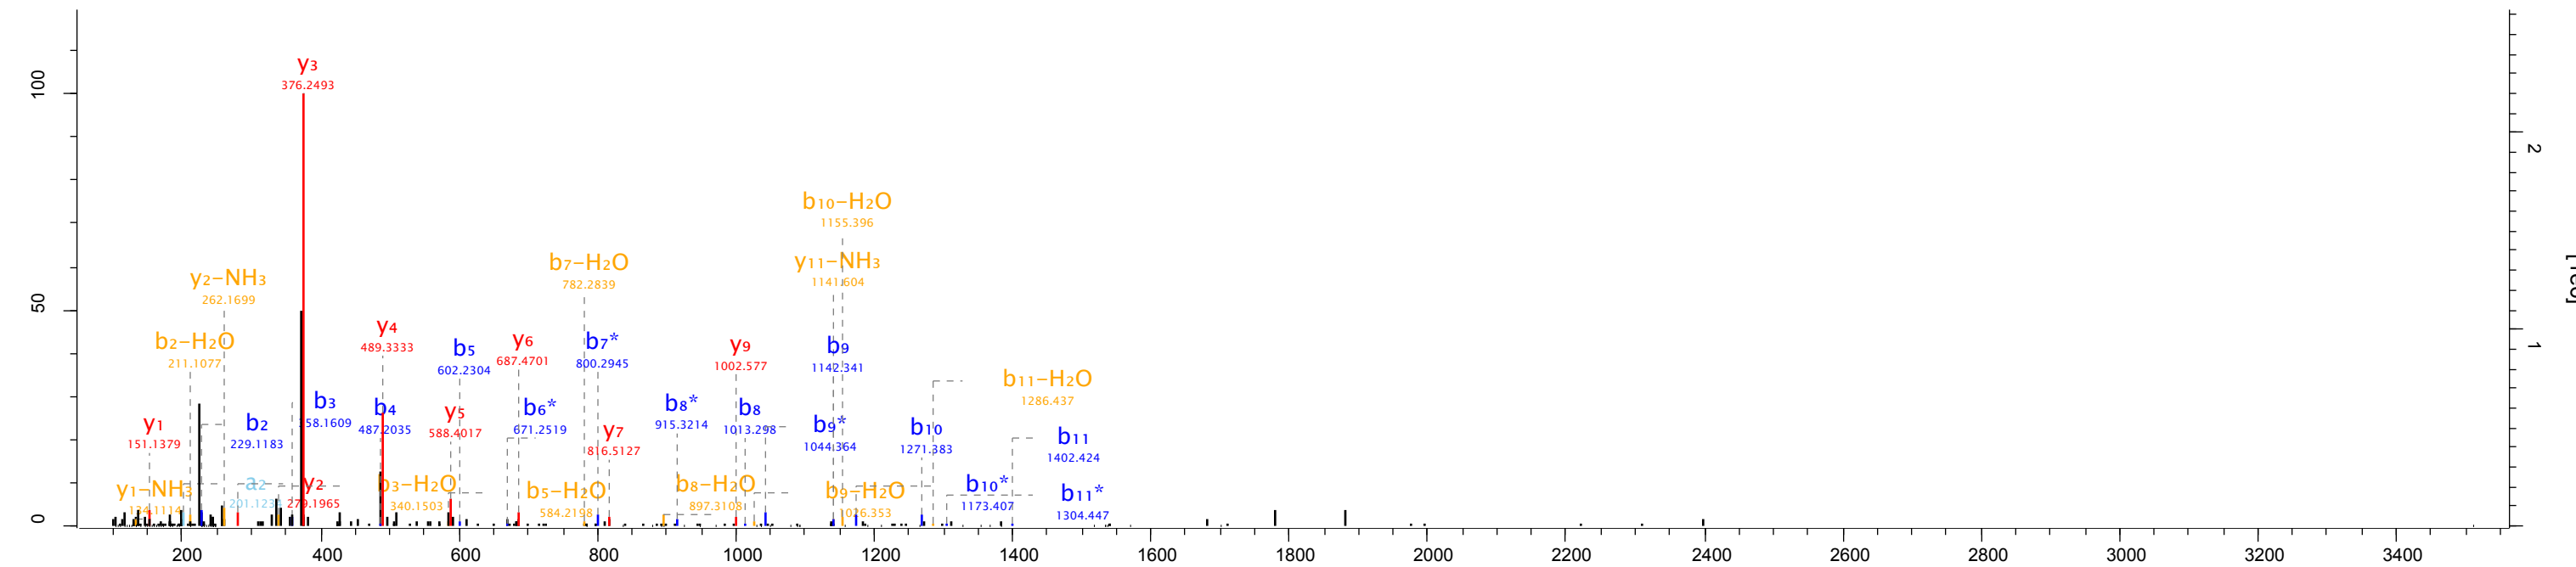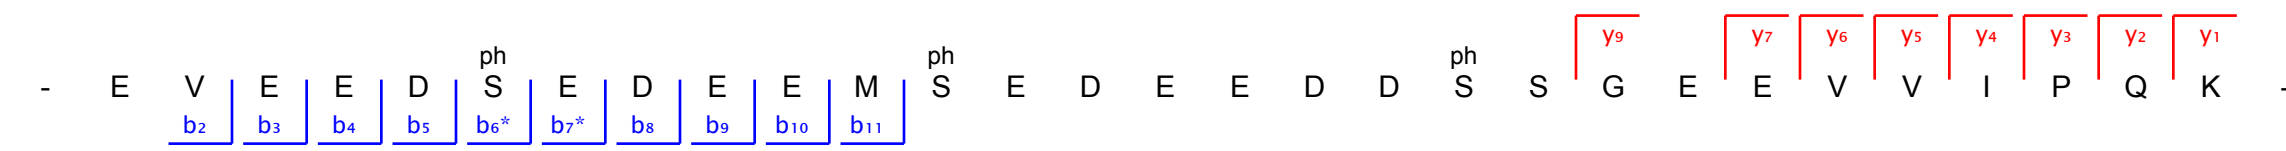







Raw file Scan Method Score m/z Gene names  
 20150812\_A375SR\_Phospho\_BR1\_02 17756 FTMS; HCD 251.34 1165.96 SPIRE1

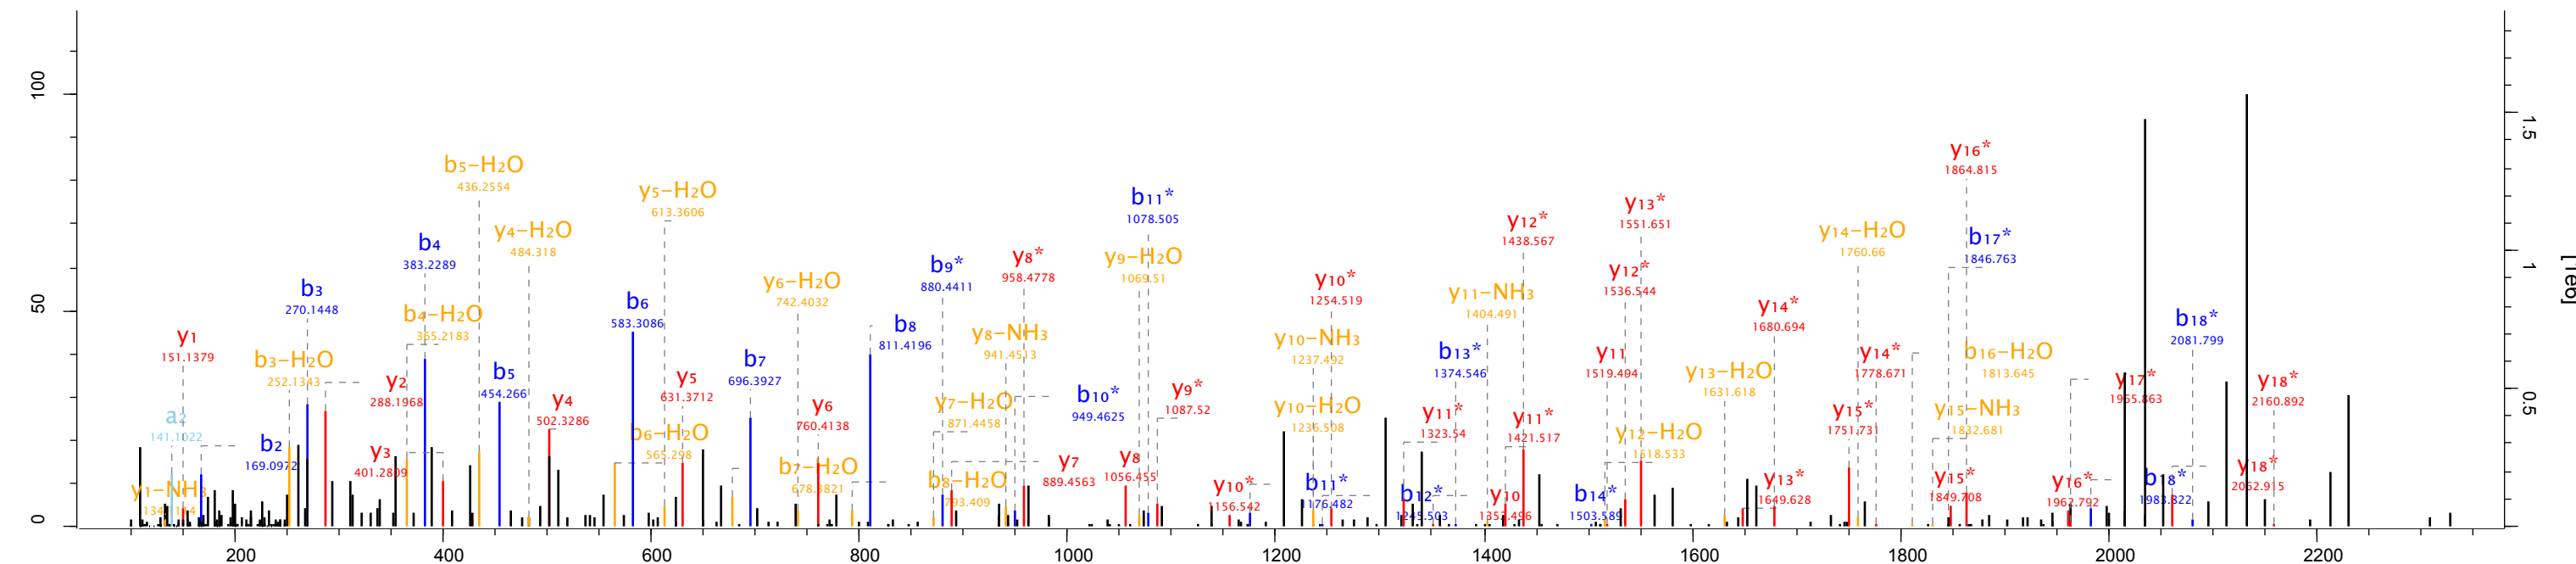

- A P T L A E L D S P S E S E E T L H K -  
 b<sub>2</sub> b<sub>3</sub> b<sub>4</sub> b<sub>5</sub> b<sub>6</sub> b<sub>7</sub> b<sub>8</sub> b<sub>9</sub><sup>\*</sup> b<sub>10</sub><sup>\*</sup> b<sub>11</sub><sup>\*</sup> b<sub>12</sub><sup>\*</sup> b<sub>13</sub><sup>\*</sup> b<sub>14</sub><sup>\*</sup> b<sub>17</sub><sup>\*</sup> b<sub>18</sub><sup>\*</sup>

Raw file Scan Method Score m/z Gene names

20150812\_A375SR\_Phospho\_BR1\_02 17766 FTMS; HCD 46.61 1058.44 SRRM2

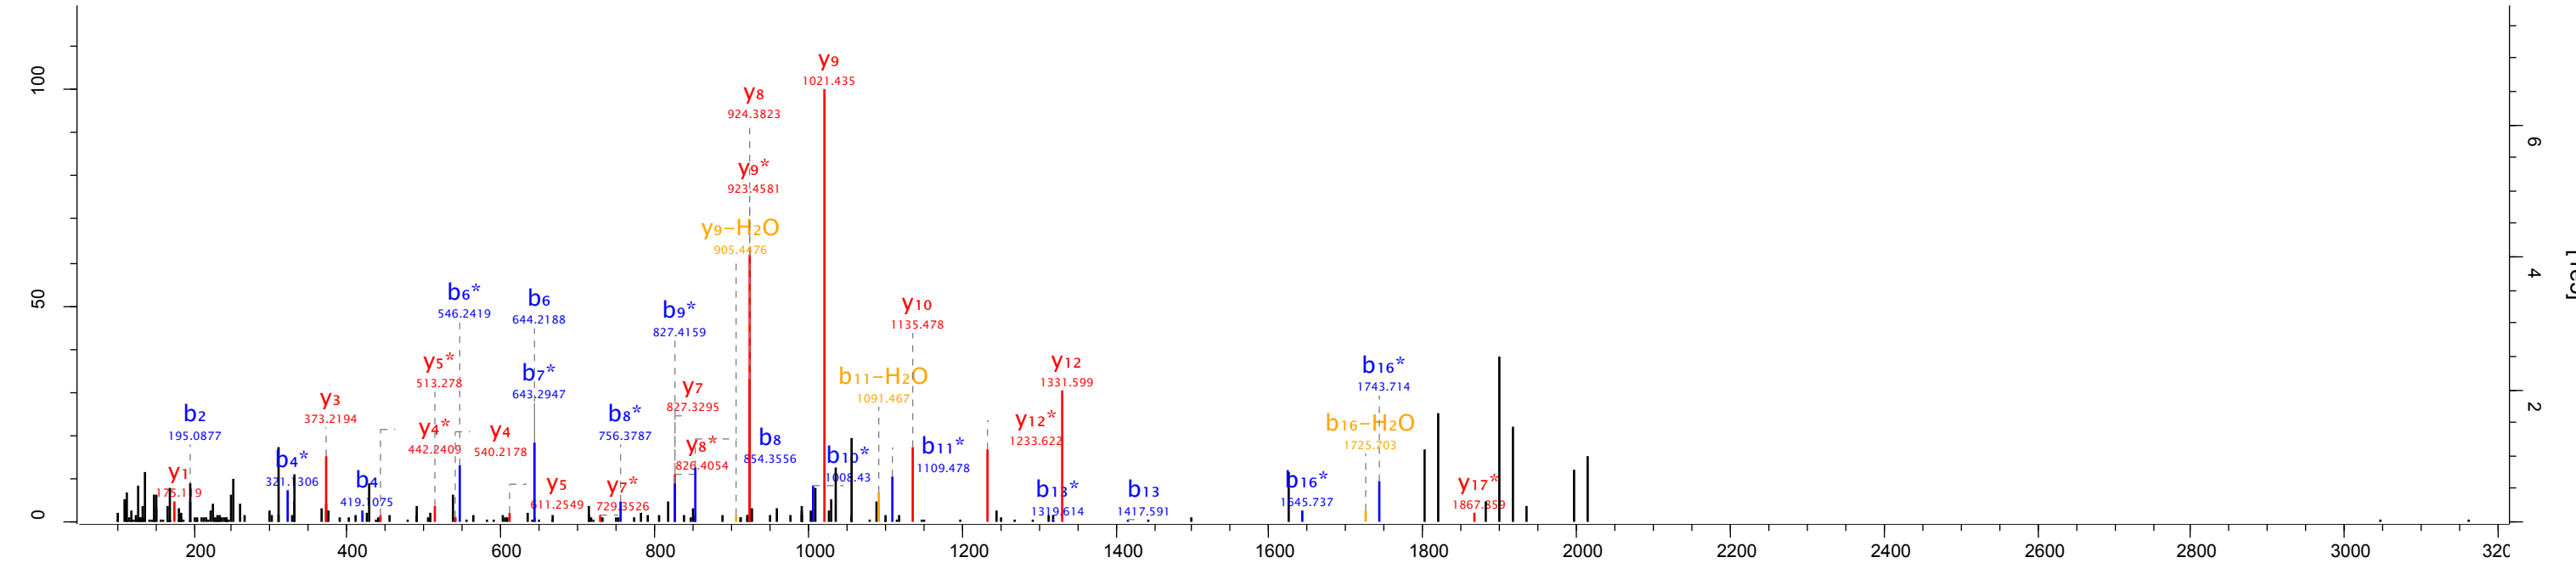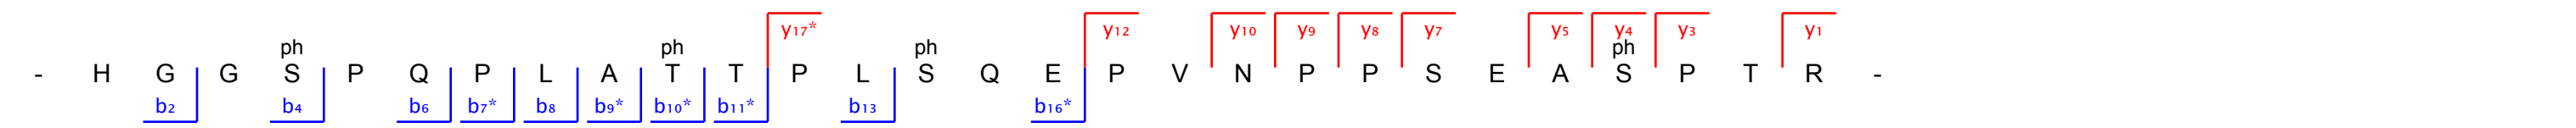

Raw file: 20150812\_A375SR\_Phospho\_BR1\_02  
 Scan: 17866 Method: FTMS; HCD Score: 246.84 m/z: 1141.87 Gene names: EIF5B

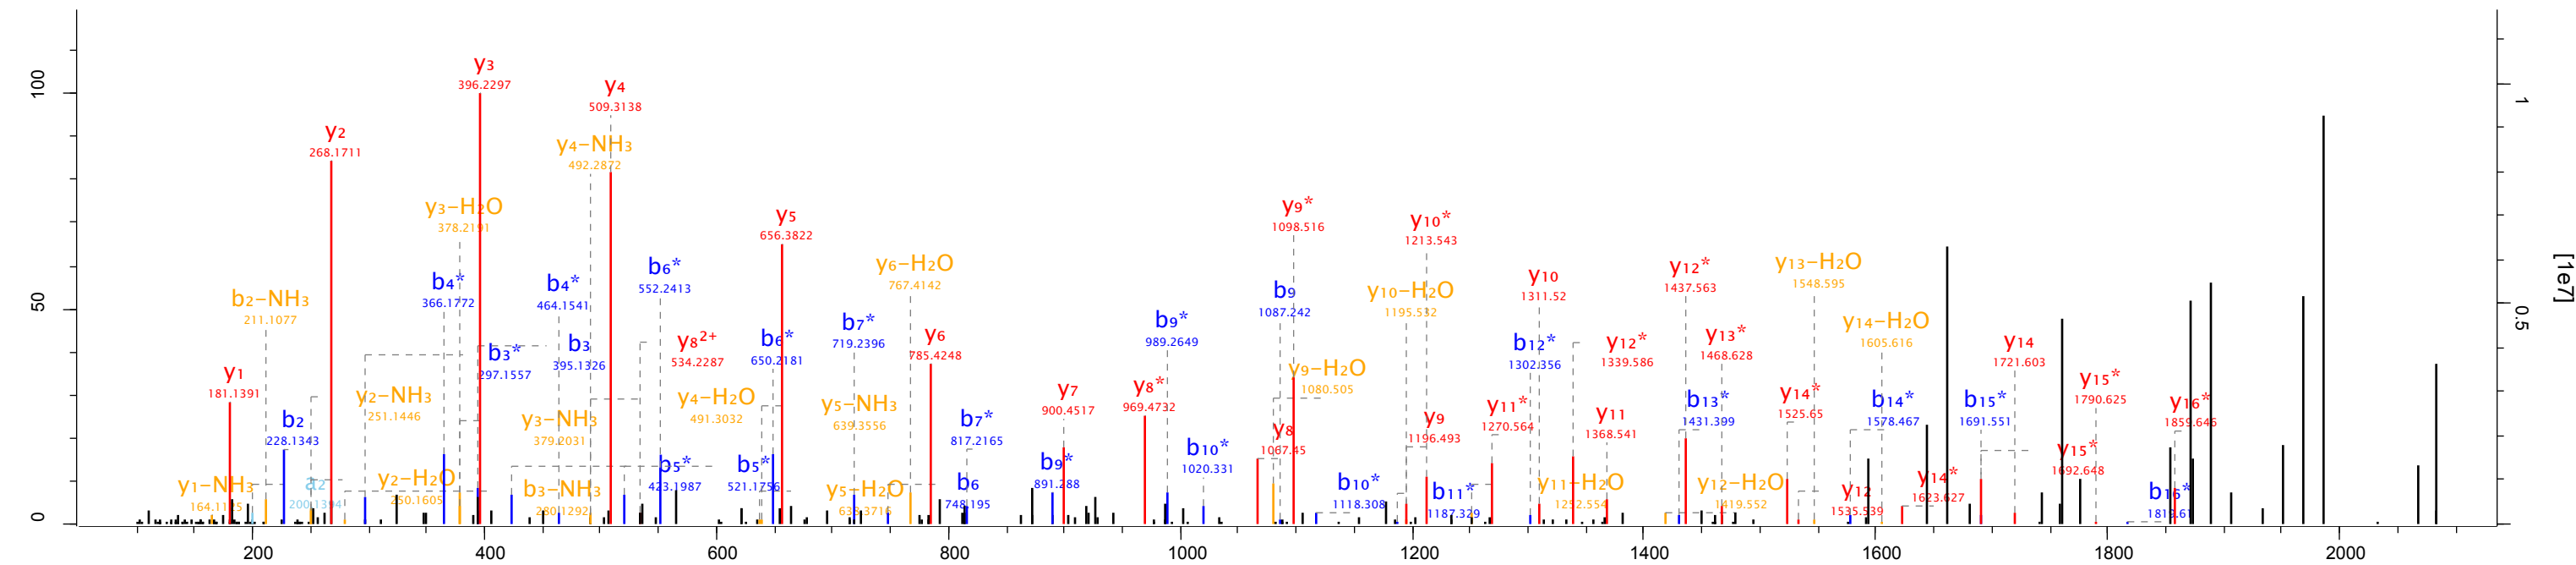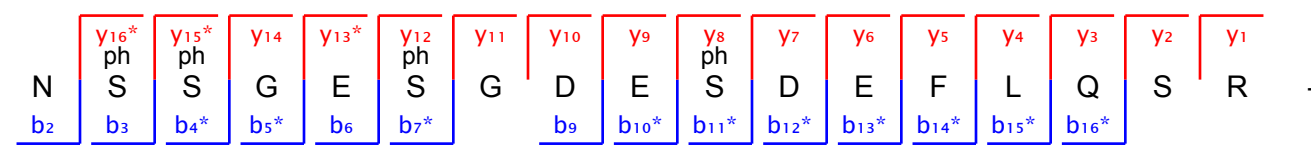

Raw file 20150812\_A375SR\_Phospho\_BR1\_02 Scan 17996 Method FTMS; HCD Score 188.47 m/z 1133.44 Gene names NF1

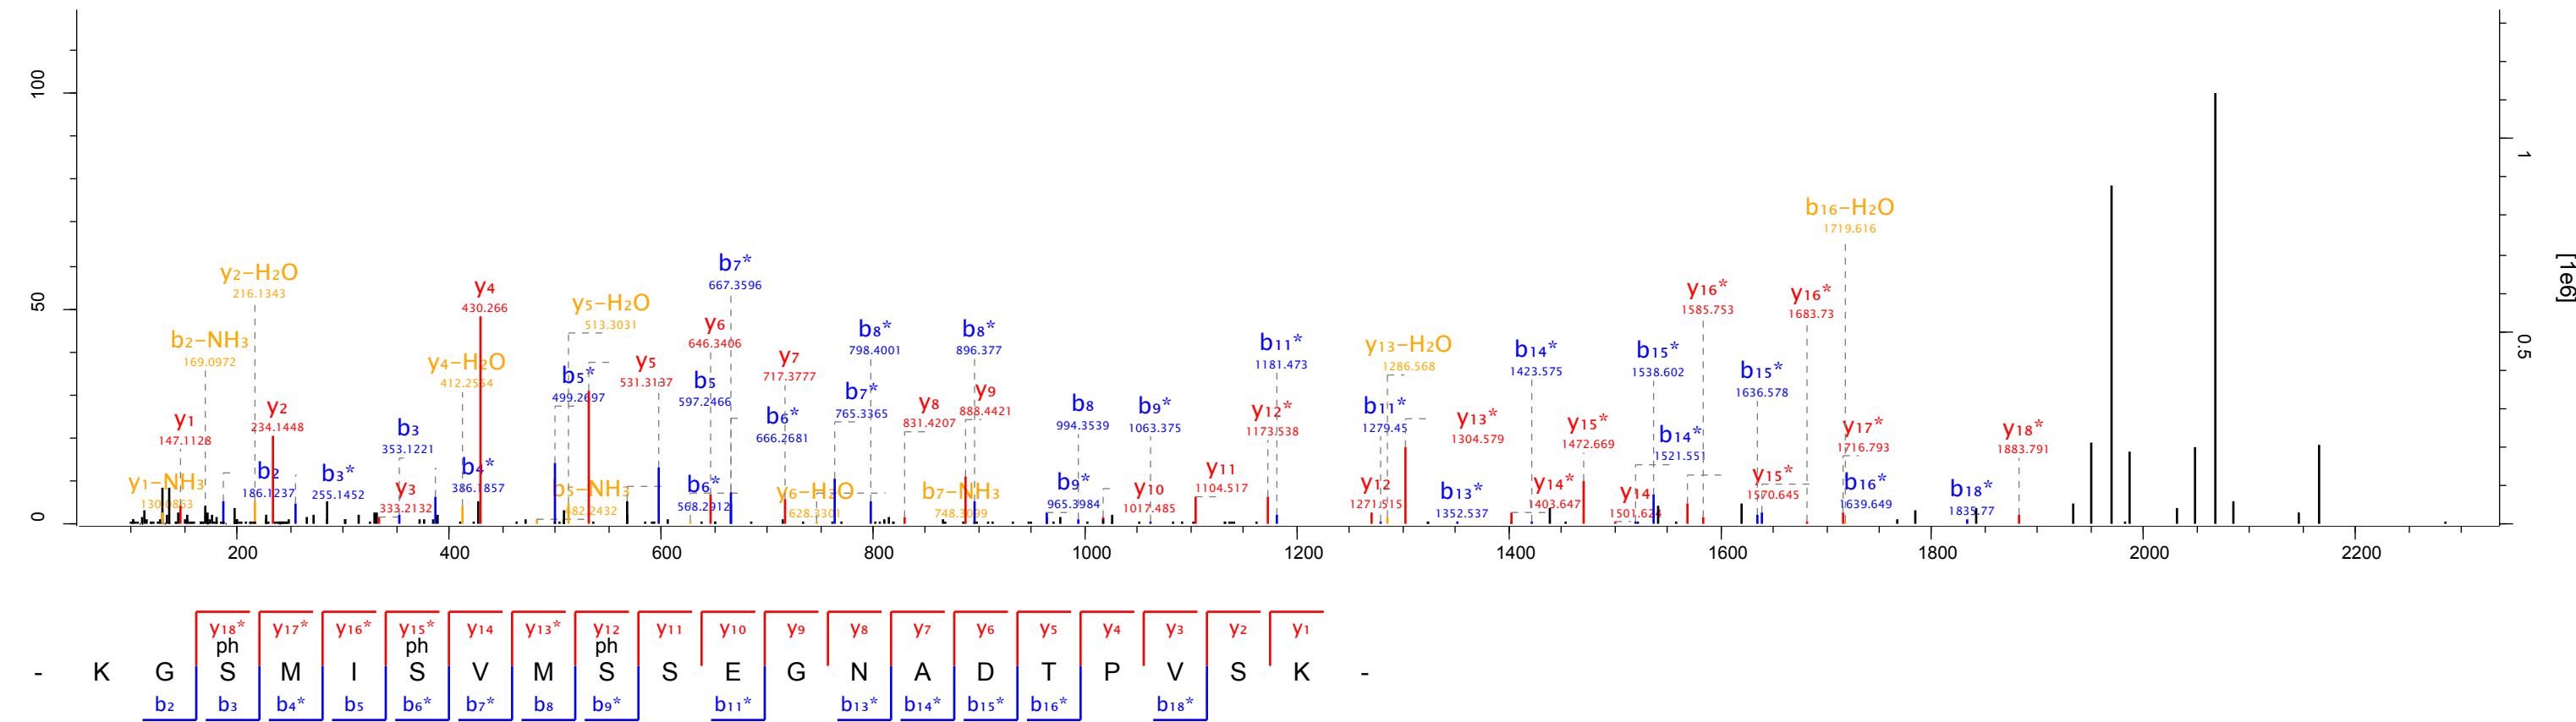

Raw file 20150812\_A375SR\_Phospho\_BR1\_02 Scan 18086 Method FTMS; HCD Score 247.76 m/z 1216.01 Gene names GATAD2A

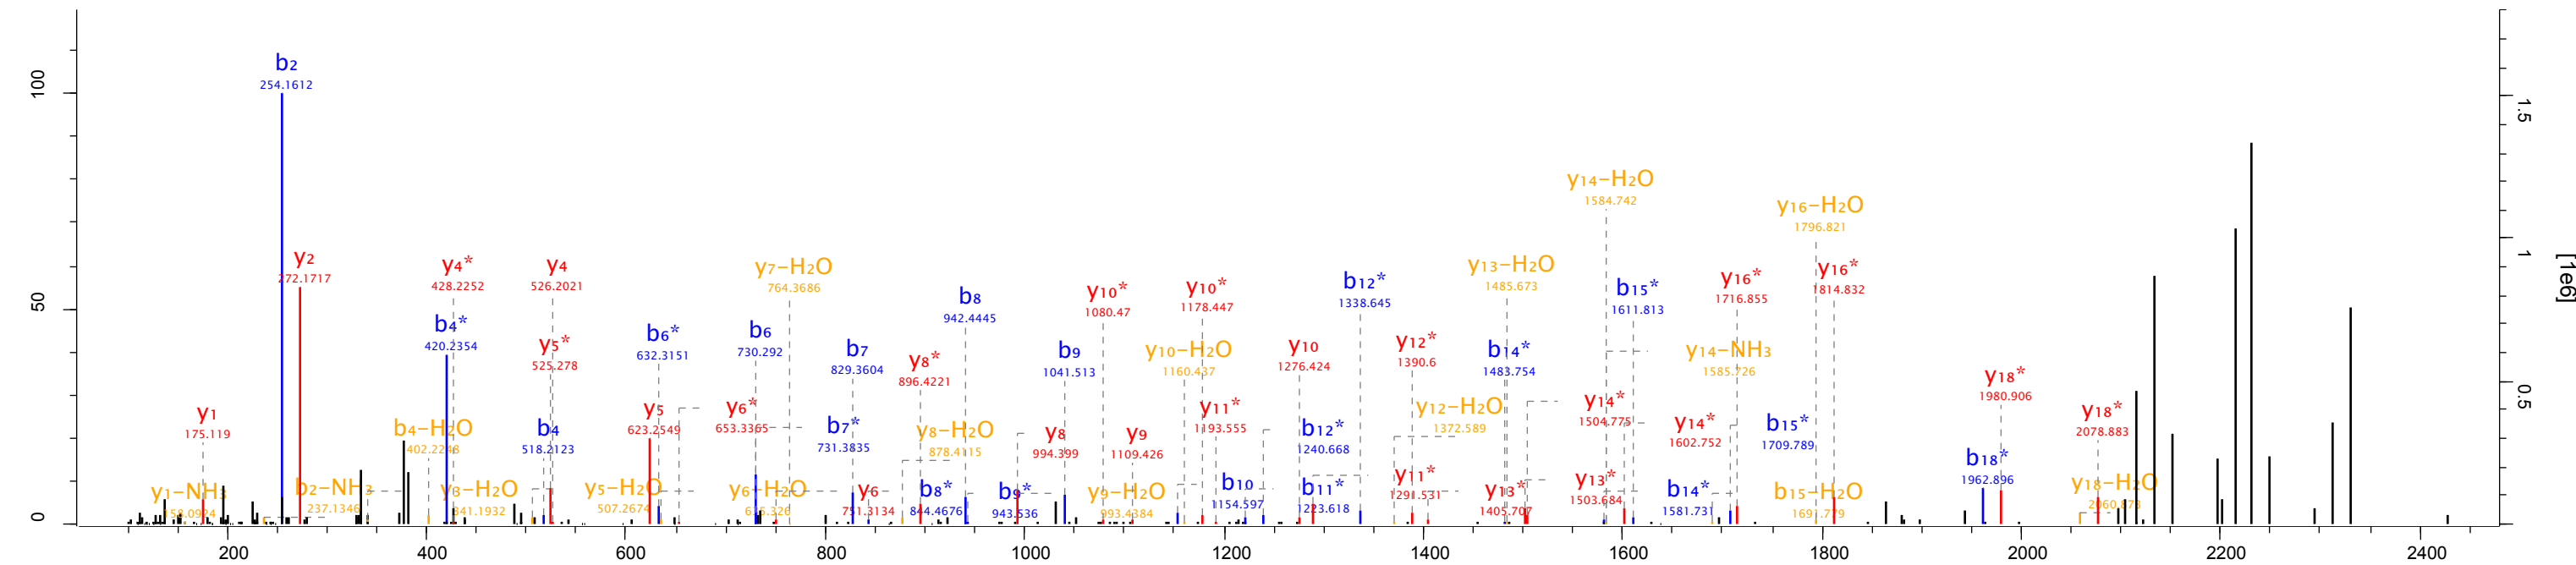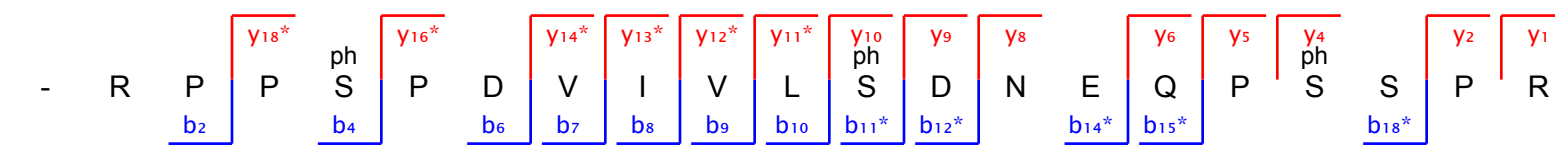

Raw file 20150812\_A375SR\_Phospho\_BR1\_02 Scan 18306 Method FTMS; HCD Score 173.45 m/z 864.4 Gene names HUWE1

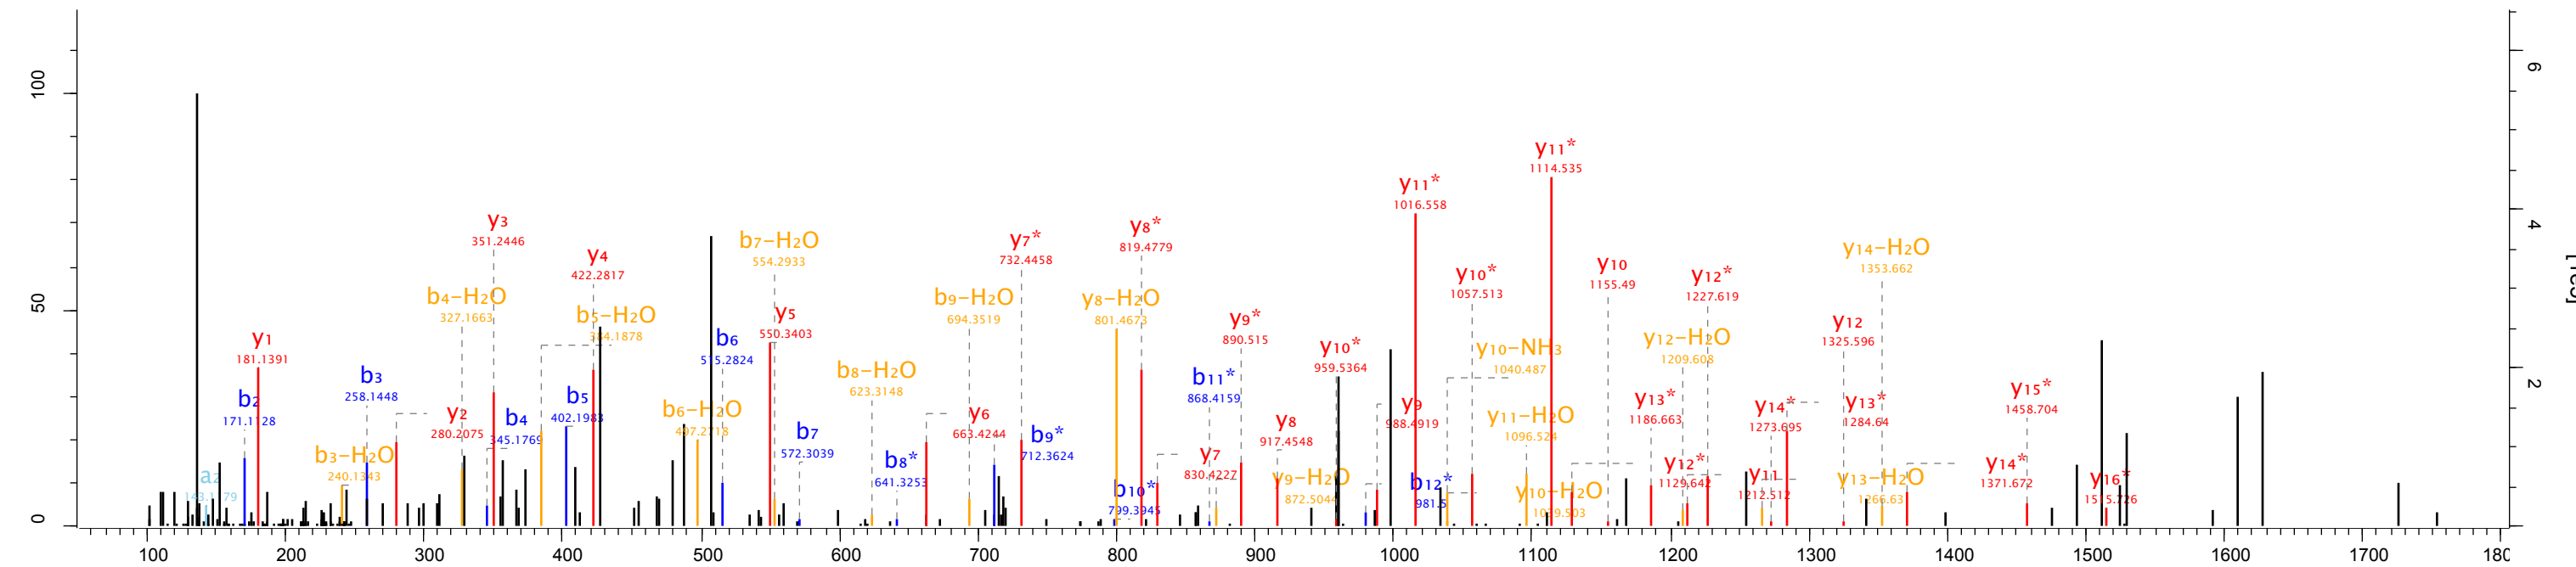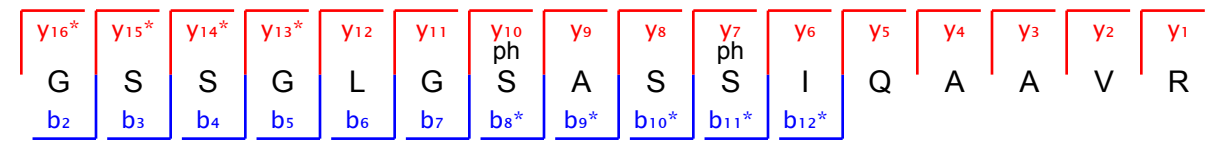

Raw file: 20150812\_A375SR\_Phospho\_BR1\_02  
 Scan: 20426 Method: FTMS; HCD Score: 124.99 m/z: 1208.47 Gene names: PAX3

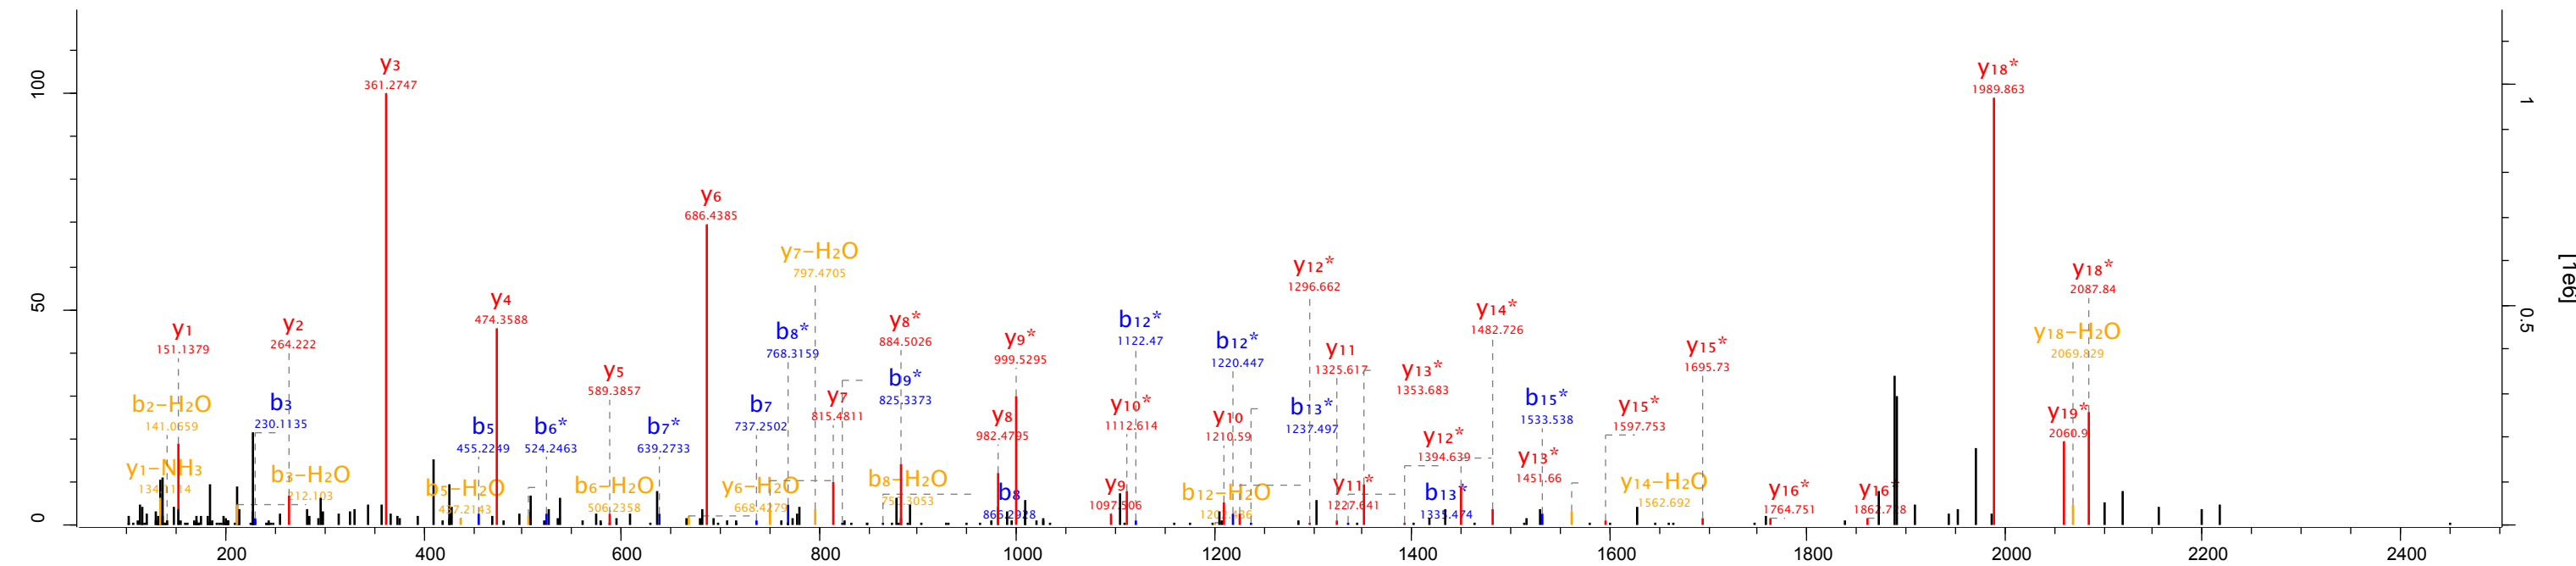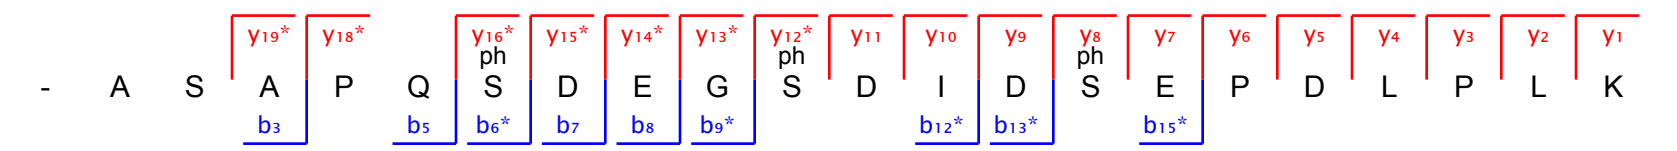



Raw file 20150812\_A375SR\_Phospho\_BR1\_02 Scan 21076 Method FTMS; HCD Score 156.52 m/z 1138.49 Gene names UBXN2B

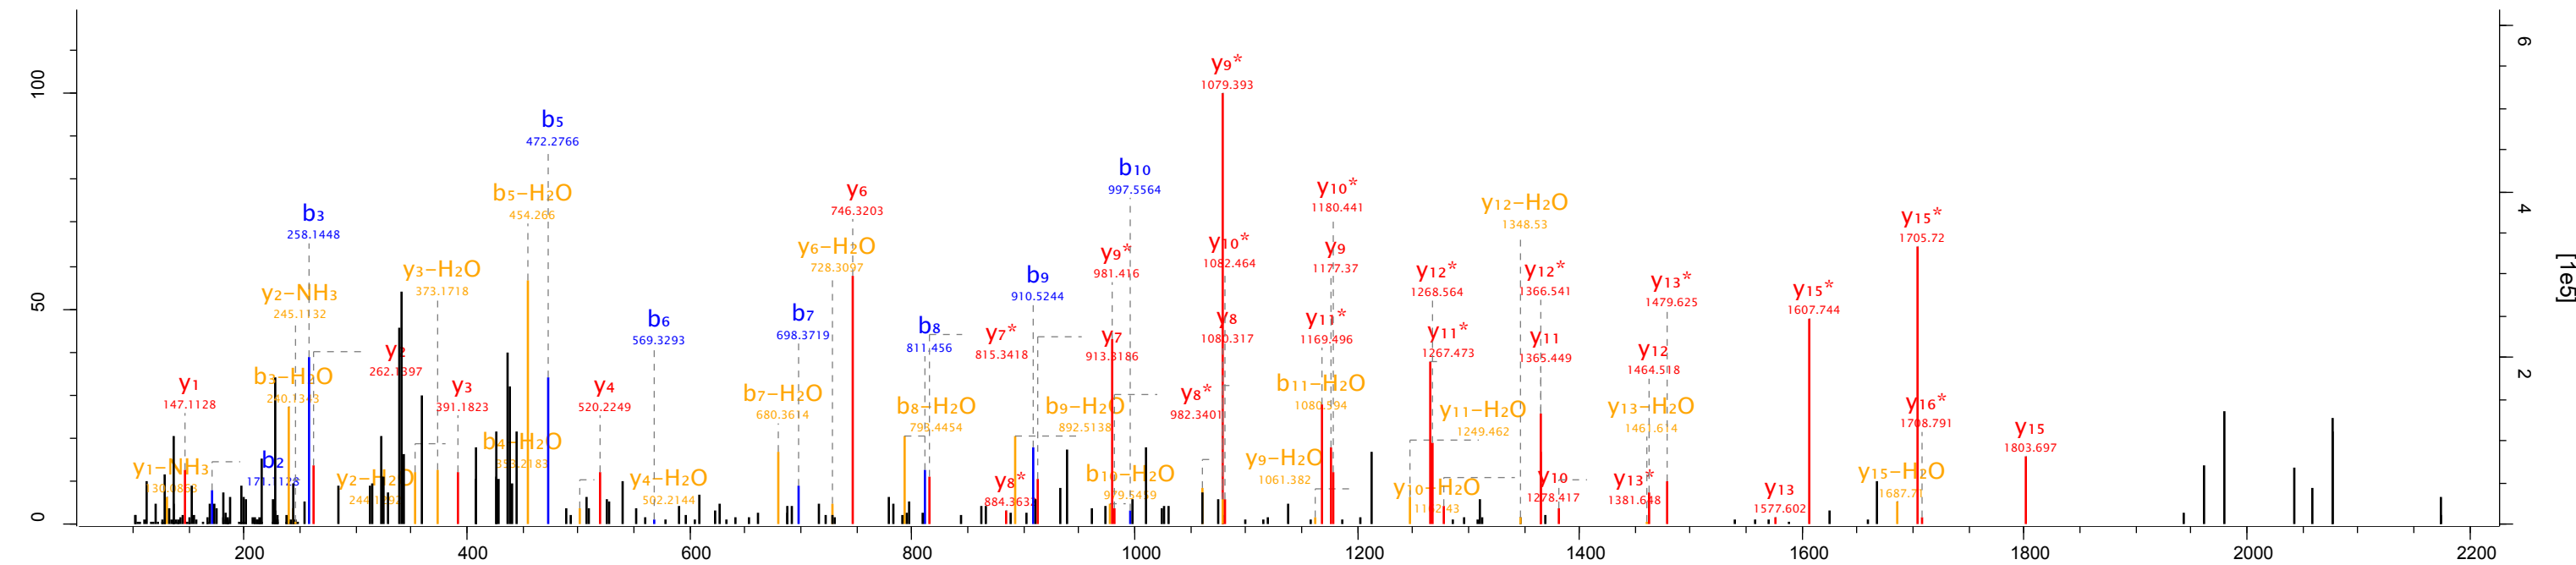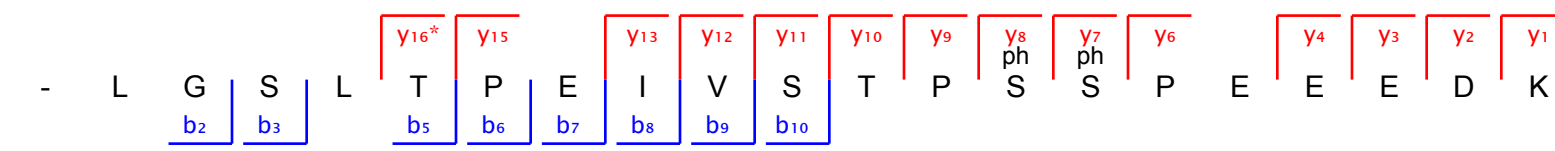

Raw file: 20150812\_A375SR\_Phospho\_BR1\_02  
 Scan: 21496 Method: FTMS; HCD Score: 142.85 m/z: 1010.42 Gene names: ZFYVE20

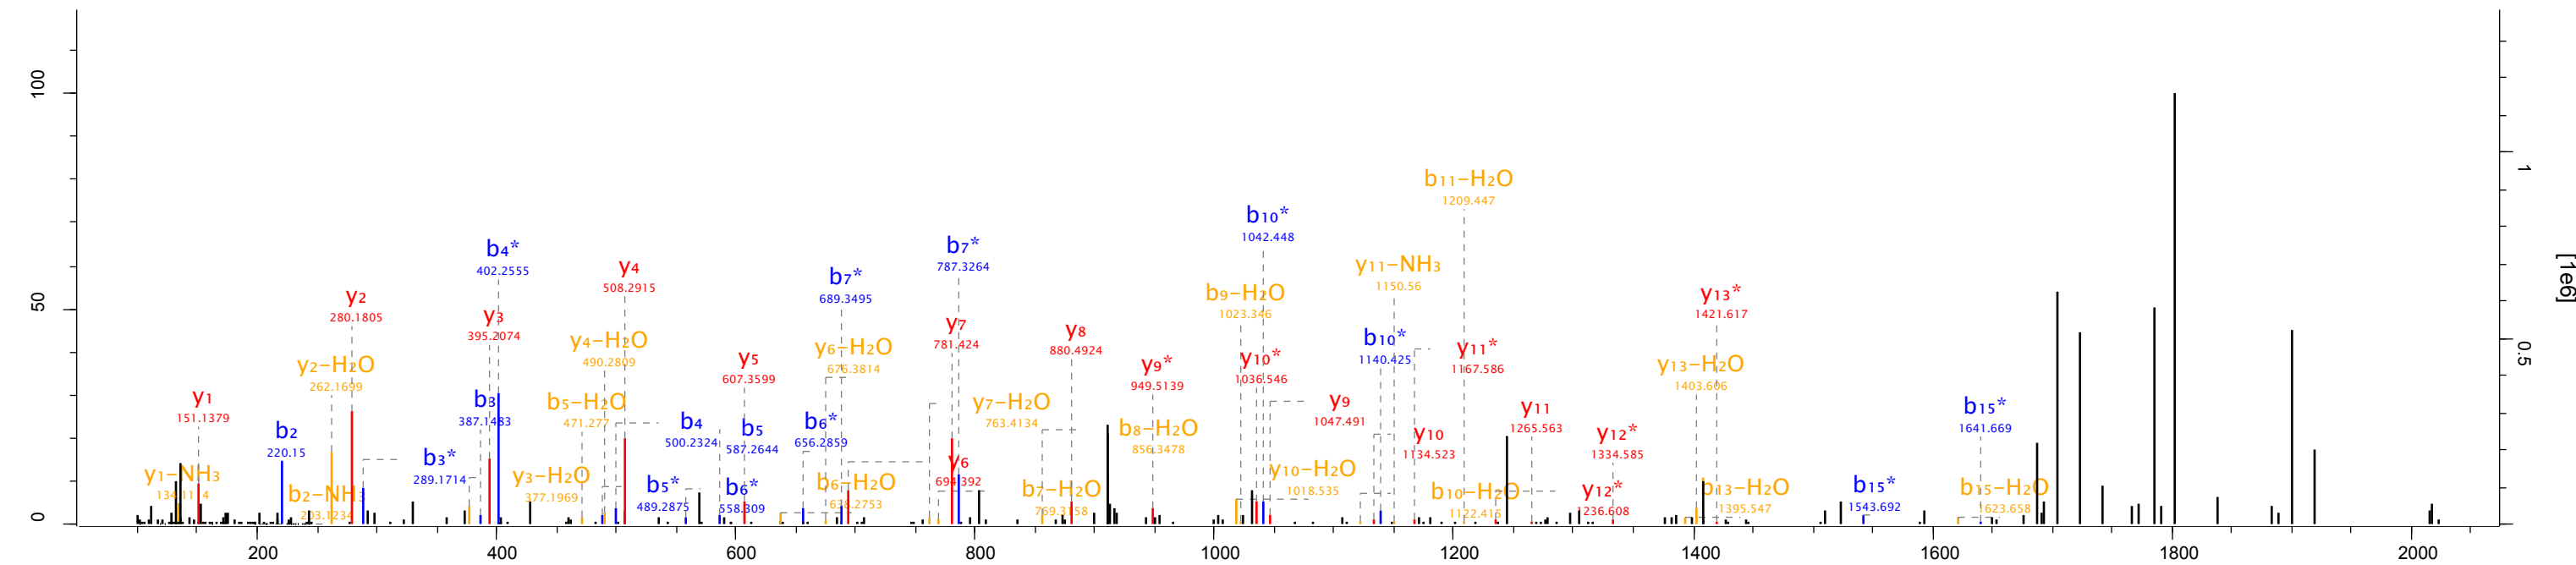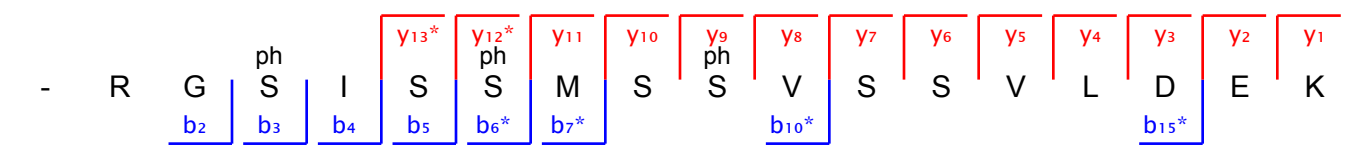

Raw file  
 20150812\_A375SR\_Phospho\_BR1\_02  
 Scan 22376 Method FTMS; HCD Score 64.5 m/z 1240.15 Gene names PRMT3

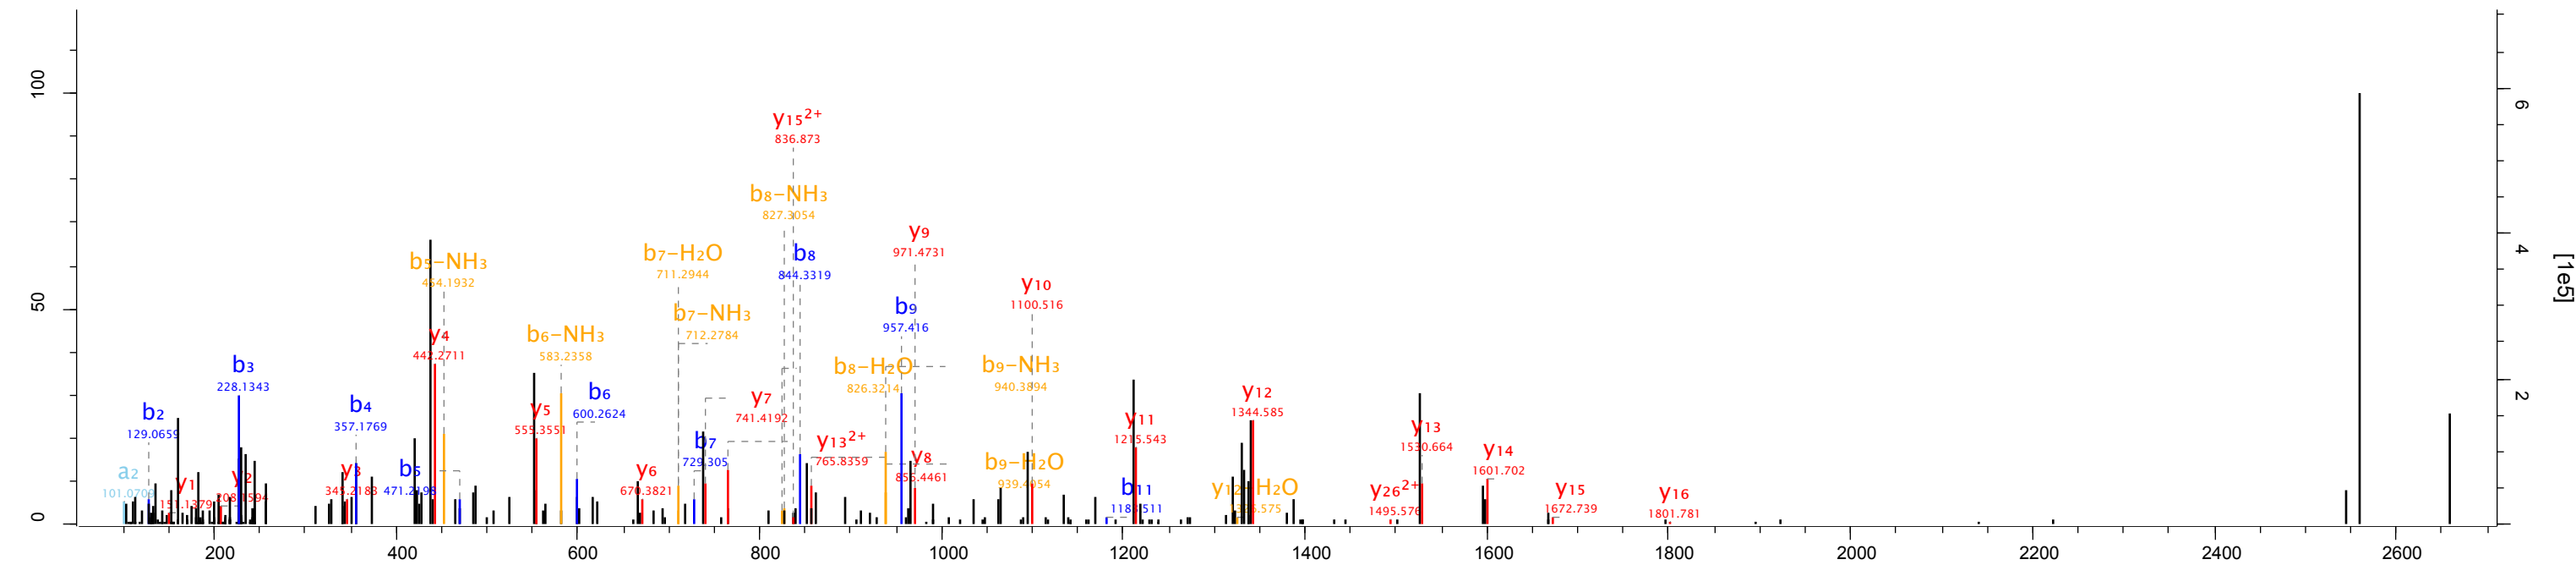

- G A V E N E E D L P E L ph S D ph S G D E A A W E D E D D A D L P H G K -

Fragmentation labels: b<sub>2</sub>, b<sub>3</sub>, b<sub>4</sub>, b<sub>5</sub>, b<sub>6</sub>, b<sub>7</sub>, b<sub>8</sub>, b<sub>9</sub>, b<sub>11</sub>, y<sub>1</sub>, y<sub>2</sub>, y<sub>3</sub>, y<sub>4</sub>, y<sub>5</sub>, y<sub>6</sub>, y<sub>7</sub>, y<sub>8</sub>, y<sub>9</sub>, y<sub>10</sub>, y<sub>11</sub>, y<sub>12</sub>, y<sub>13</sub>, y<sub>14</sub>, y<sub>15</sub>, y<sub>16</sub>, y<sub>26</sub><sup>2+</sup>

Raw file: 20150812\_A375SR\_Phospho\_BR1\_02  
 Scan: 22476 Method: FTMS; HCD Score: 140.33 m/z: 1220.87 Gene names: MICALL1

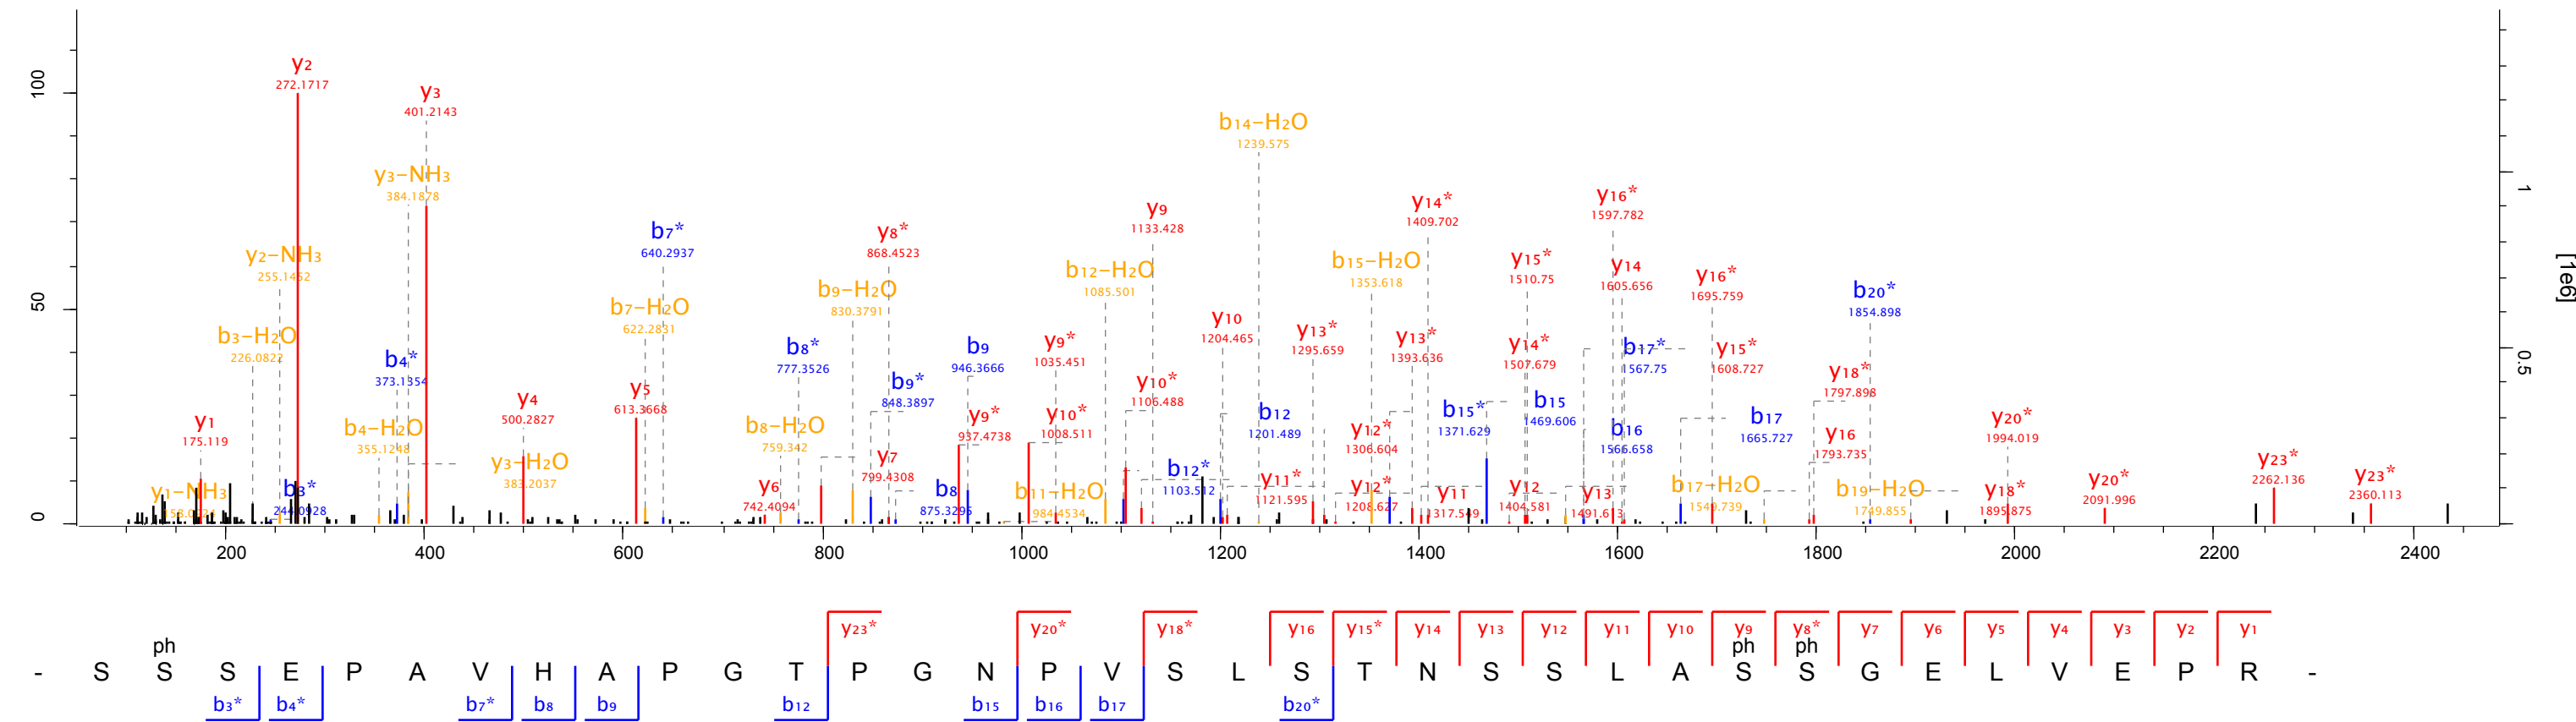



Raw file: 20150812\_A375SR\_Phospho\_BR1\_02  
 Scan: 22786 Method: FTMS; HCD Score: 54.17 m/z: 1168.14 Gene names: SON

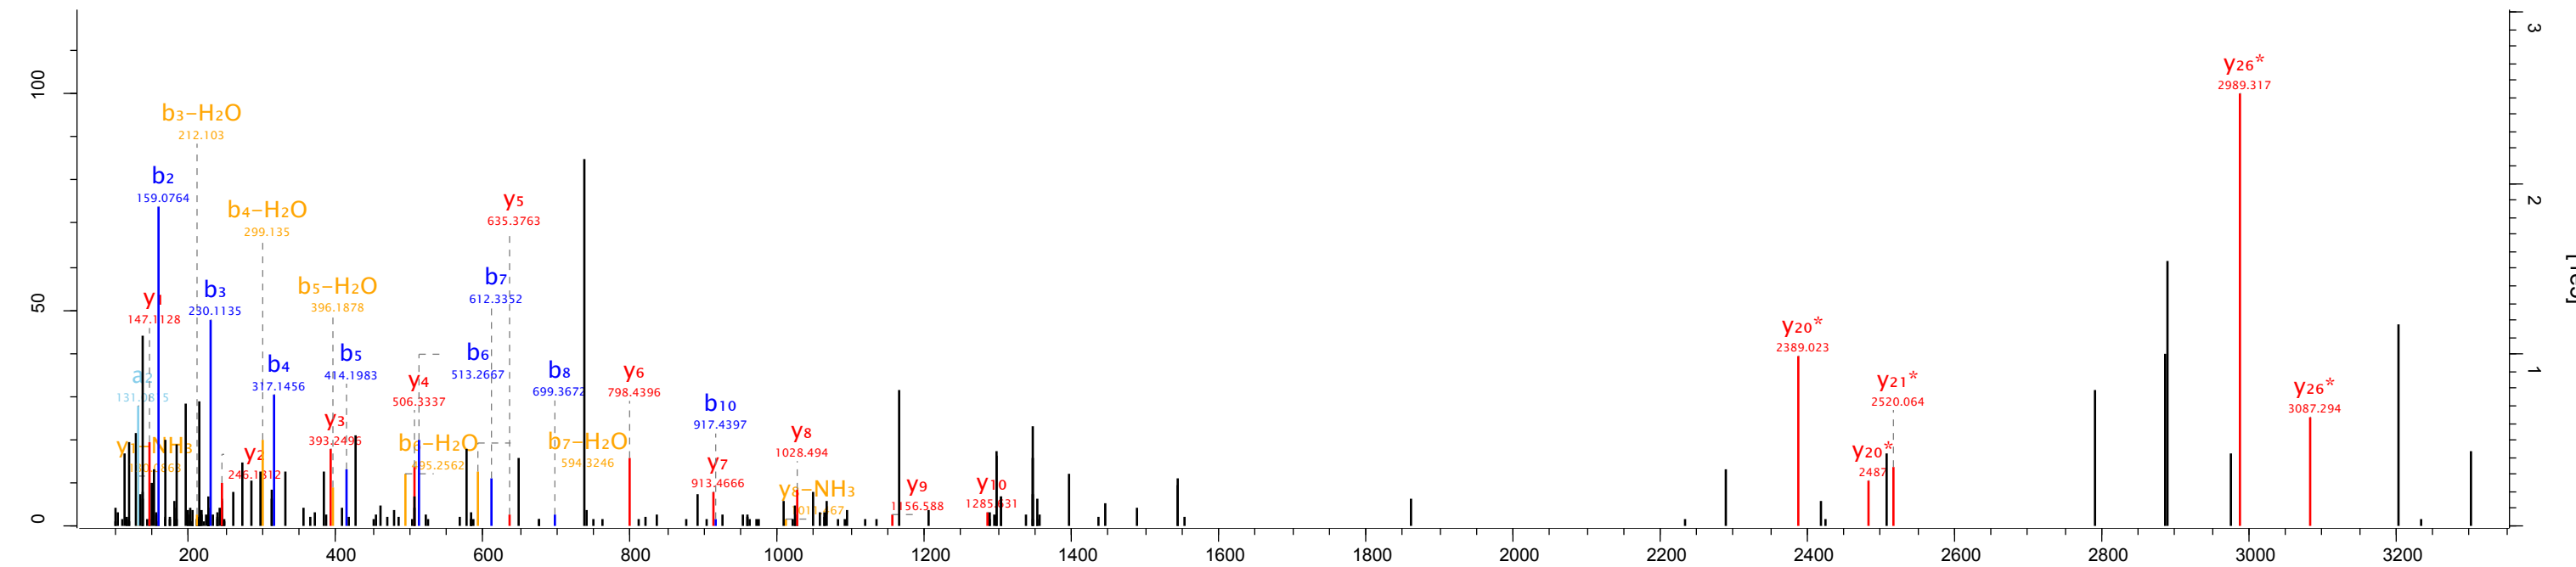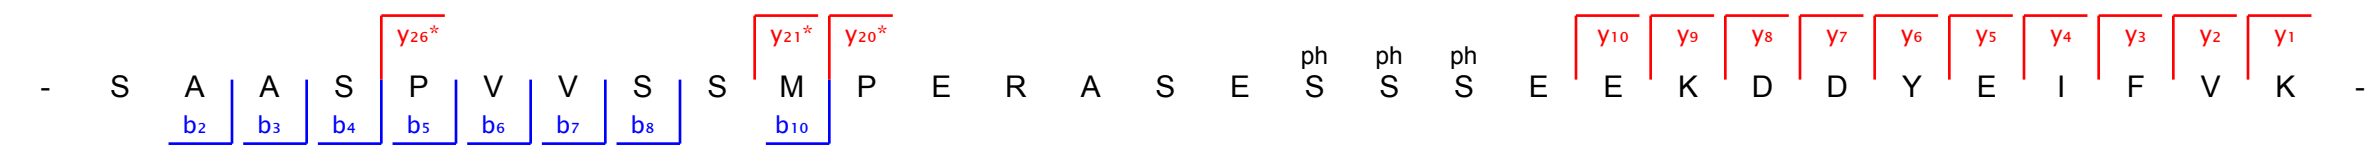

Raw file: 20150812\_A375SR\_Phospho\_BR1\_02  
 Scan: 23556 Method: FTMS; HCD Score: 78.16 m/z: 1467.95 Gene names: AKAP12

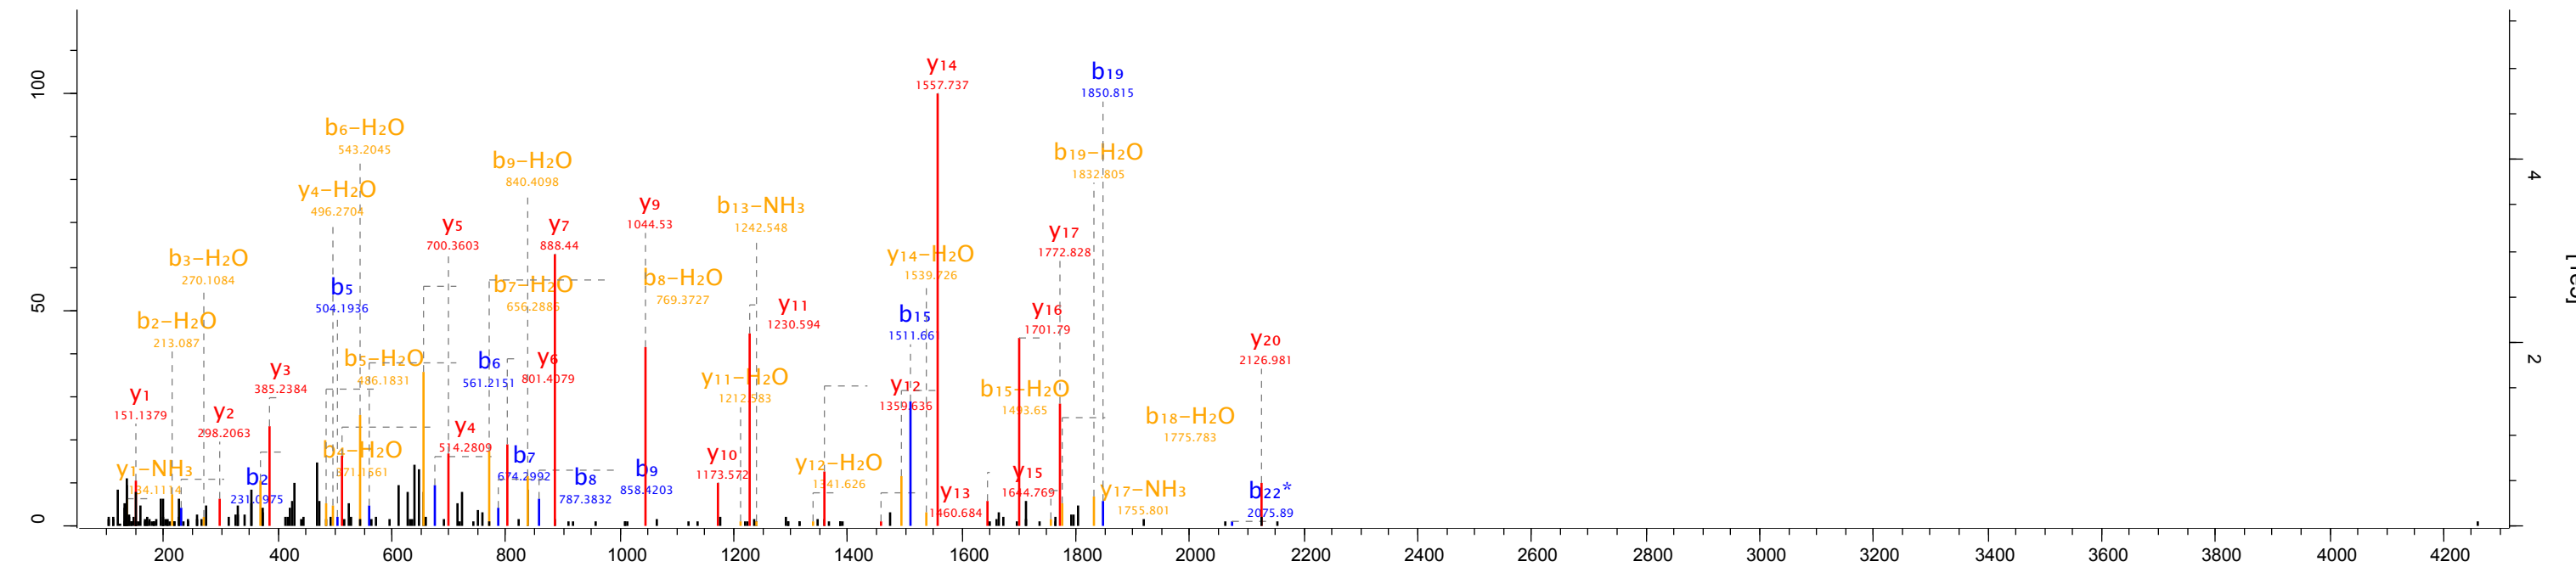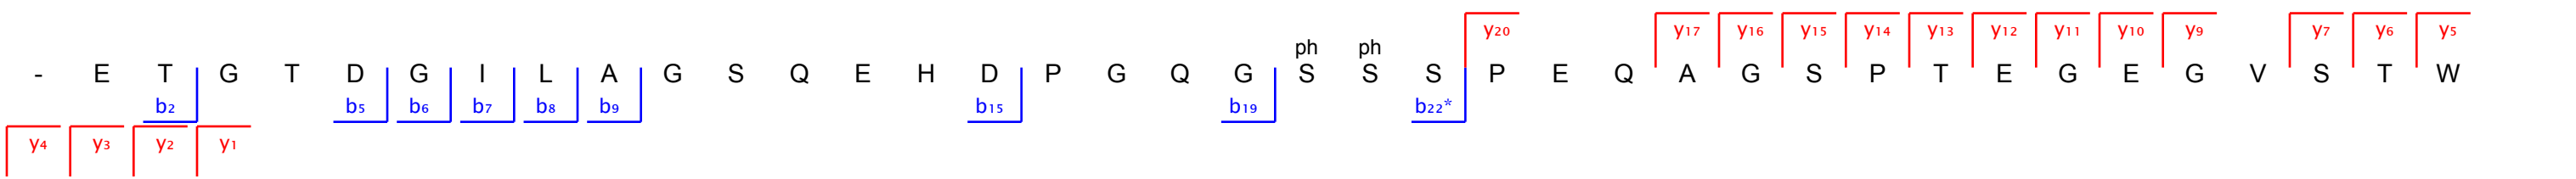

Raw file: 20150812\_A375SR\_Phospho\_BR1\_02  
 Scan: 24566 Method: FTMS; HCD Score: 82.73 m/z: 835.99 Gene names: SMN1

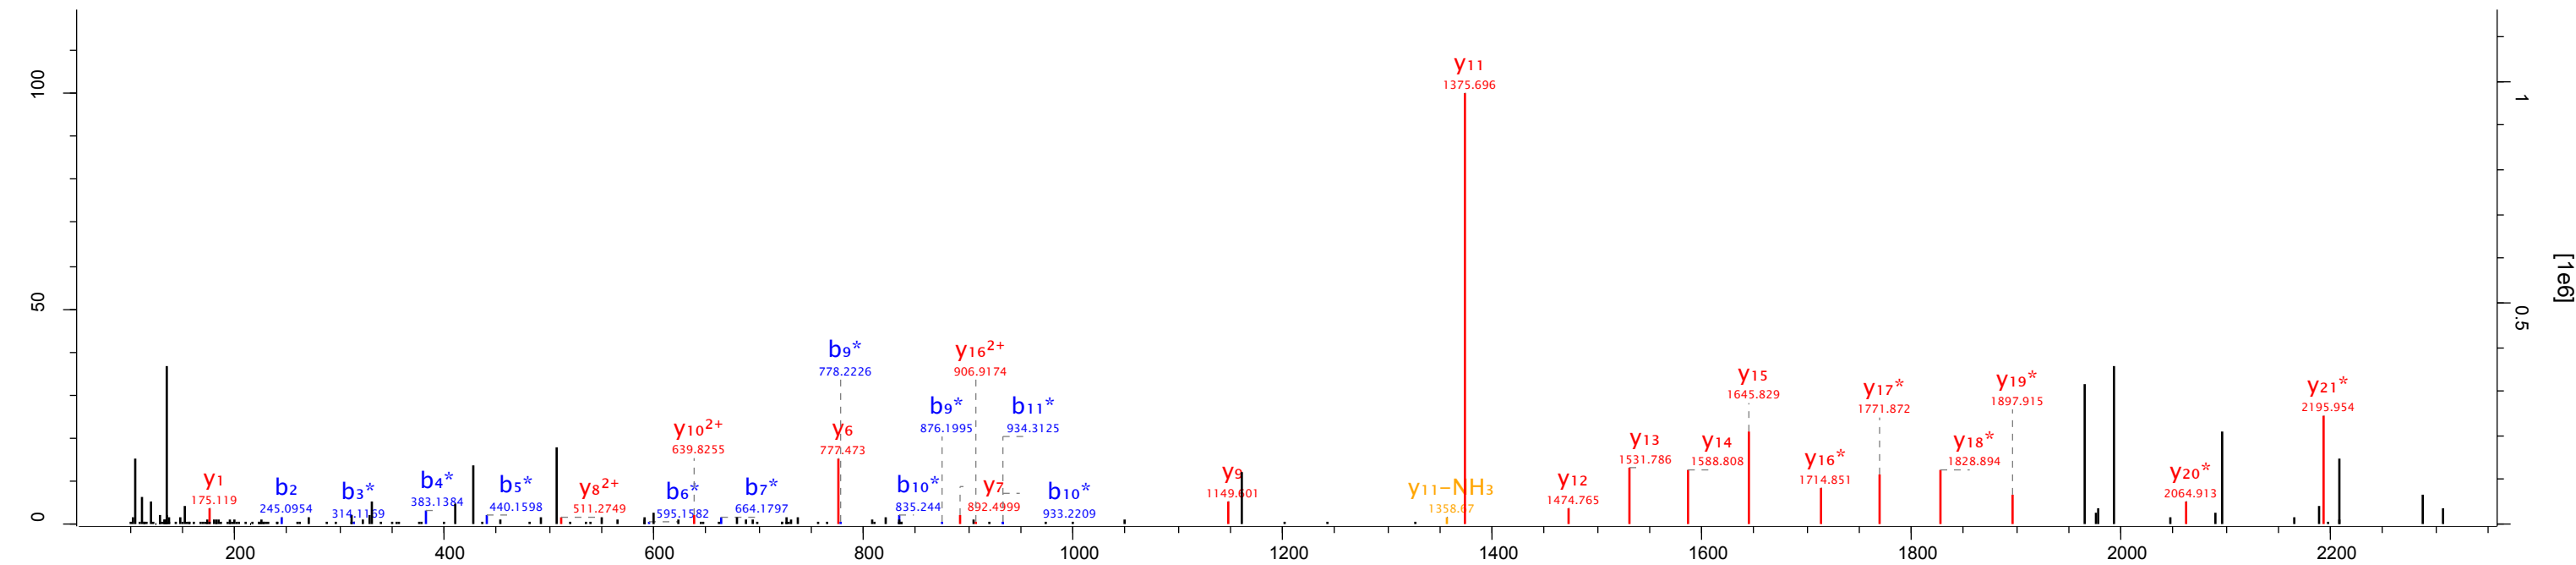

ac - A M S S G G S G G G V P E Q E D S V L F R R -

b<sub>2</sub>
b<sub>3</sub><sup>\*</sup>
b<sub>4</sub><sup>\*</sup>
b<sub>5</sub><sup>\*</sup>
b<sub>6</sub><sup>\*</sup>
b<sub>7</sub><sup>\*</sup>
b<sub>9</sub><sup>\*</sup>
b<sub>10</sub><sup>\*</sup>
b<sub>11</sub><sup>\*</sup>



Raw file: 20150812\_A375SR\_Phospho\_BR1\_02  
 Scan: 25456 Method: FTMS; HCD Score: 56.17 m/z: 1078.5 Gene names: PTPN12

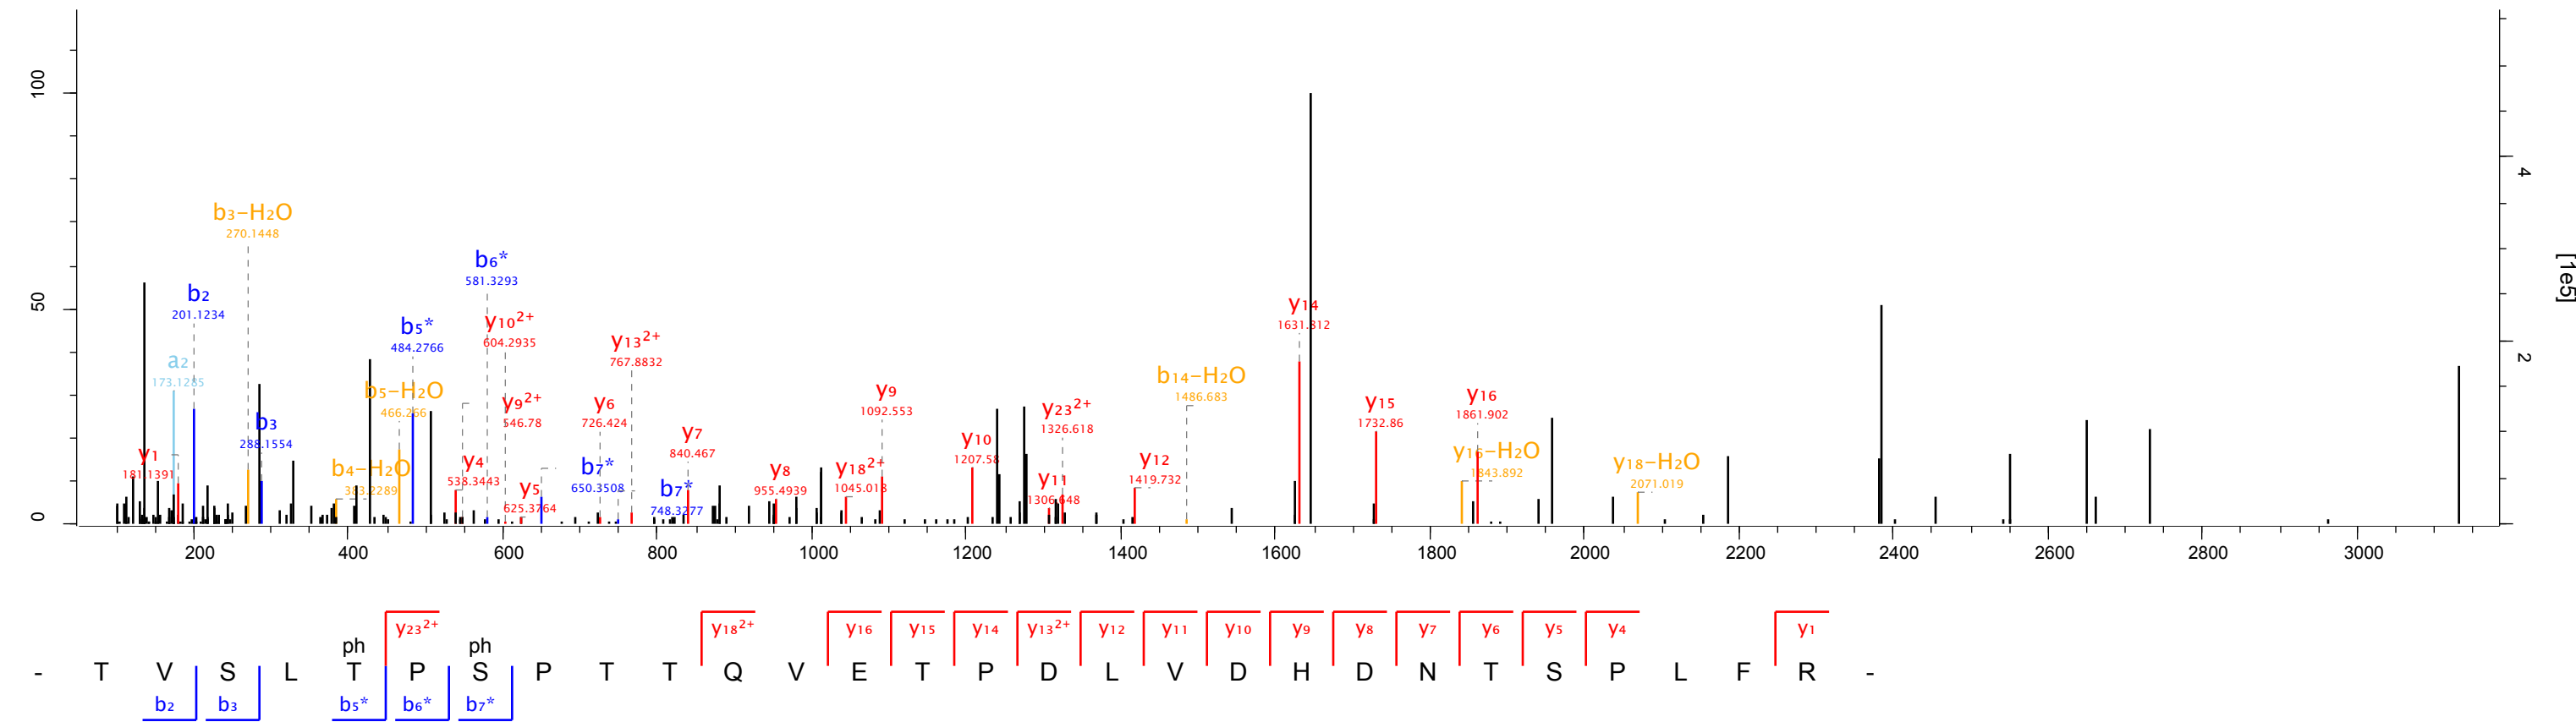

Raw file Scan Method Score m/z Gene names  
 20150812\_A375SR\_Phospho\_BR1\_02 27406 FTMS; HCD 104.55 975.46 SSH3

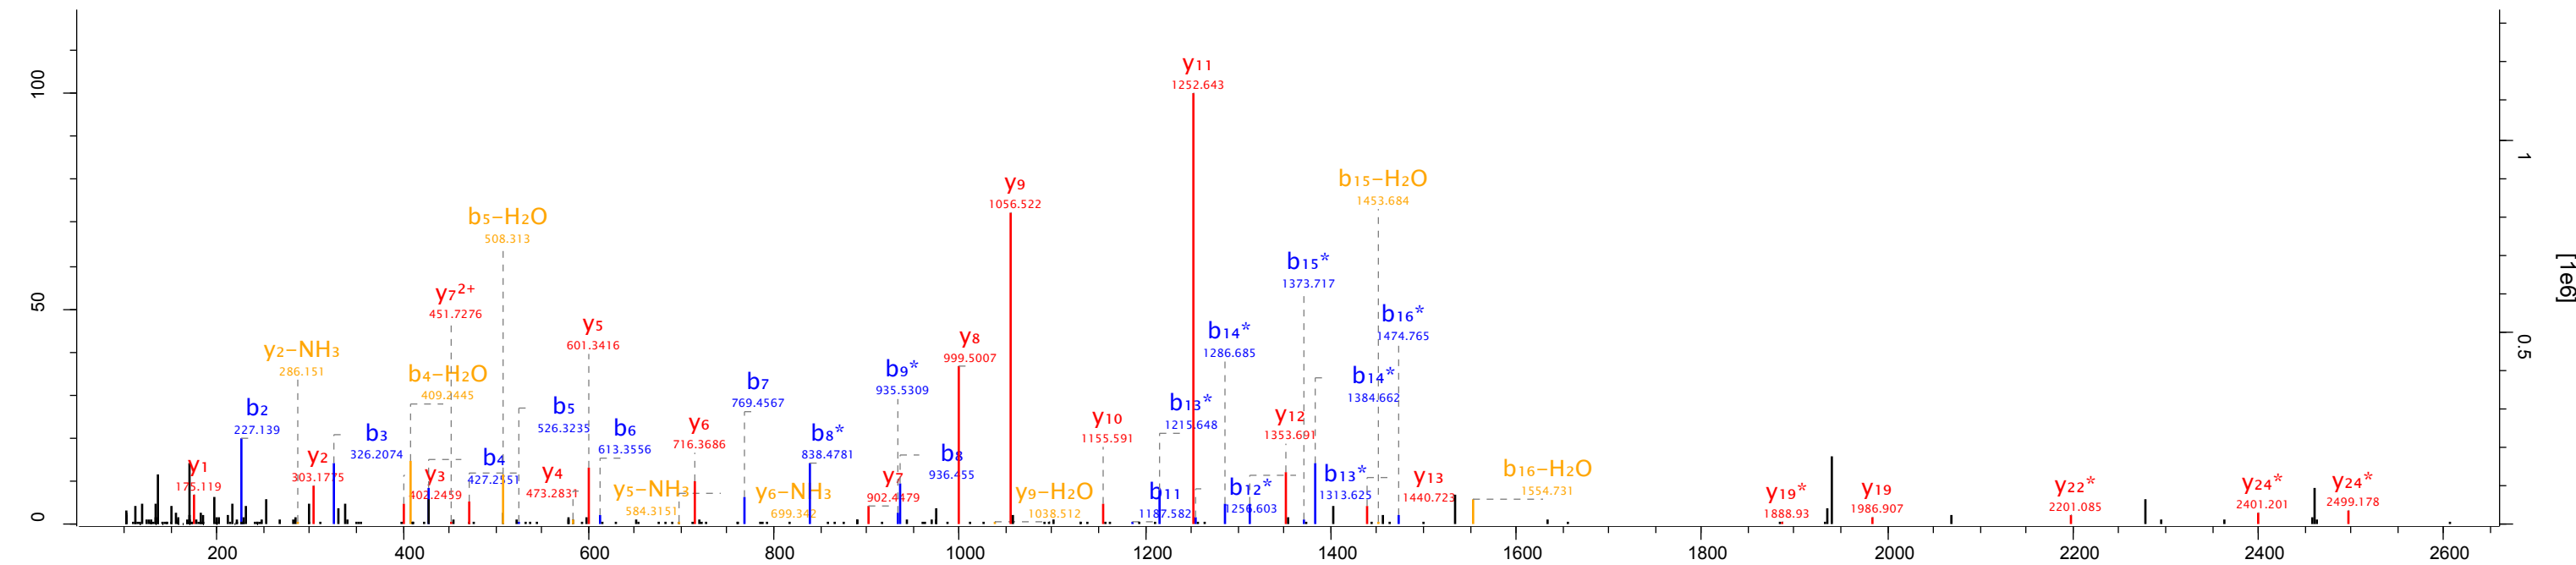

ac  
 - A L V T V S R ph S P P G S G A S T P V G P W D Q A V Q R -

b<sub>2</sub>
b<sub>3</sub>
b<sub>4</sub>
b<sub>5</sub>
b<sub>6</sub>
b<sub>7</sub>
b<sub>8</sub>
b<sub>9</sub><sup>\*</sup>
b<sub>11</sub>
b<sub>12</sub><sup>\*</sup>
b<sub>13</sub><sup>\*</sup>
b<sub>14</sub><sup>\*</sup>
b<sub>15</sub><sup>\*</sup>
b<sub>16</sub><sup>\*</sup>
y<sub>13</sub>
y<sub>12</sub>
y<sub>11</sub>
y<sub>10</sub>
y<sub>9</sub>
y<sub>8</sub>
y<sub>7</sub>
y<sub>6</sub>
y<sub>5</sub>
y<sub>4</sub>
y<sub>3</sub>
y<sub>2</sub>
y<sub>1</sub>
y<sub>19</sub><sup>\*</sup>
y<sub>22</sub><sup>\*</sup>
y<sub>24</sub><sup>\*</sup>



Raw file  
 20150812\_A375SR\_Phospho\_BR1\_02  
 Scan 3246 Method FTMS; HCD Score 119.04 m/z 691.31 Gene names SRRM1

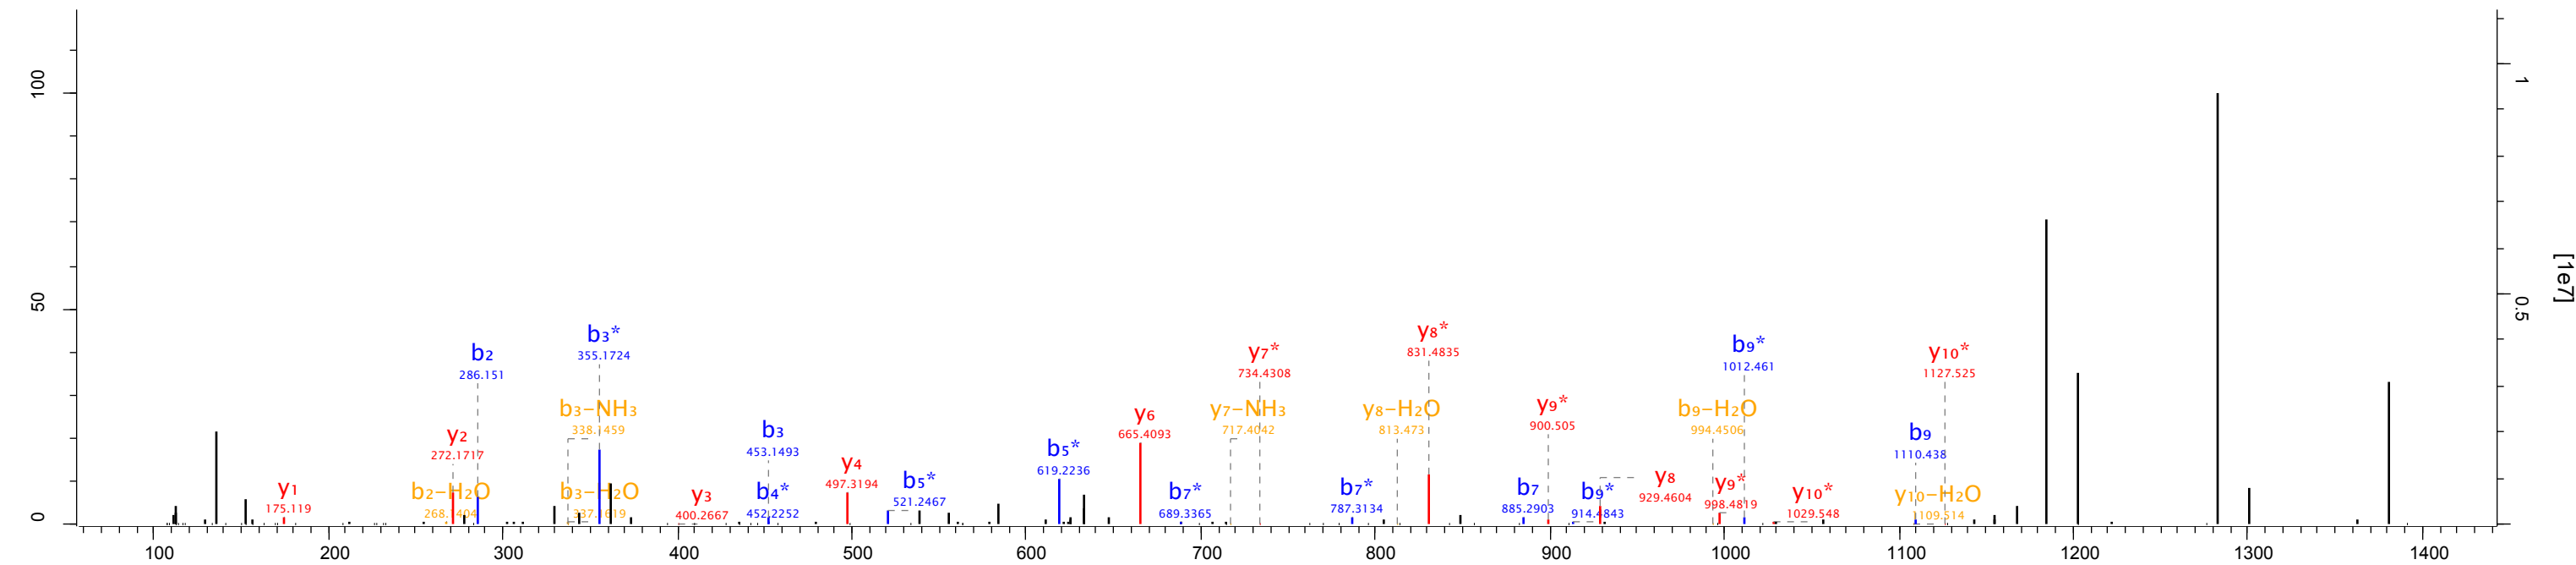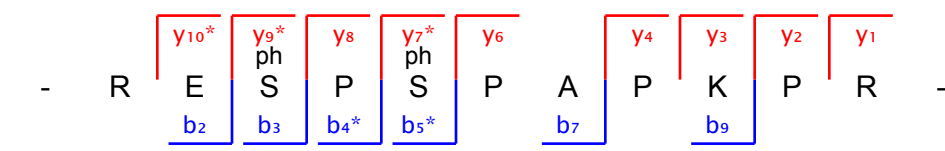

Raw file: 20150812\_A375SR\_Phospho\_BR1\_02  
 Scan: 3696 Method: FTMS; HCD Score: 156.41 m/z: 720.78 Gene names: TJP1

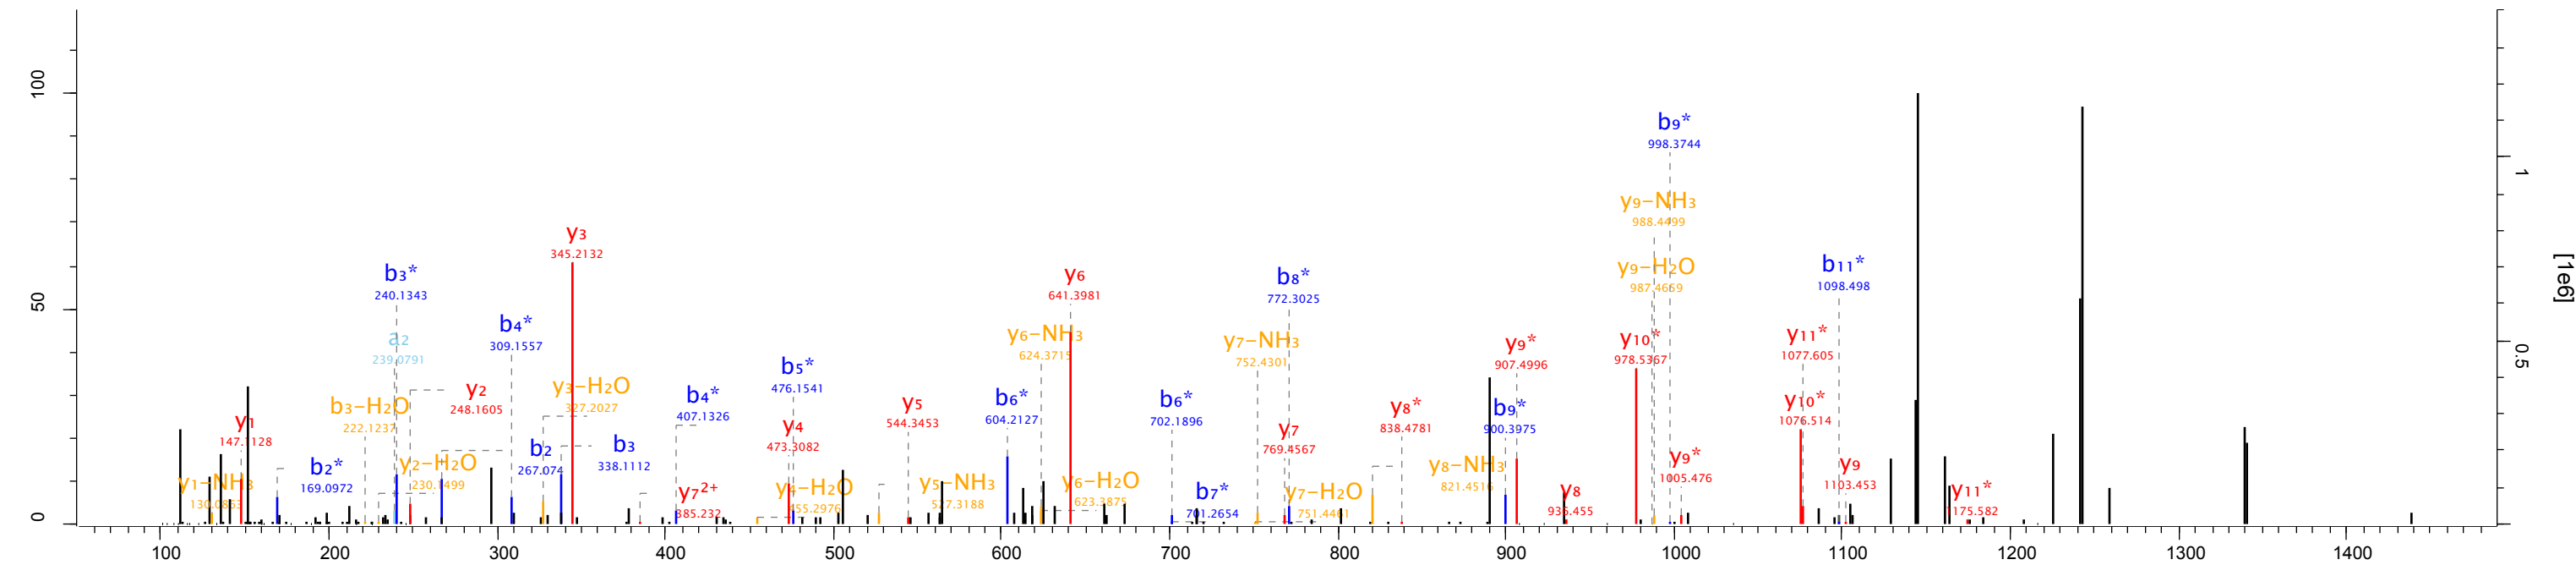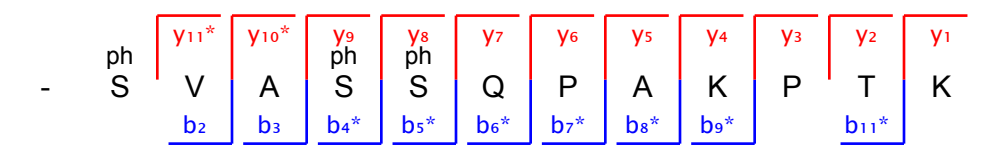

Raw file: 20150812\_A375SR\_Phospho\_BR1\_02  
 Scan: 3896 Method: FTMS; HCD Score: 95.9 m/z: 727.32 Gene names: SRSF2

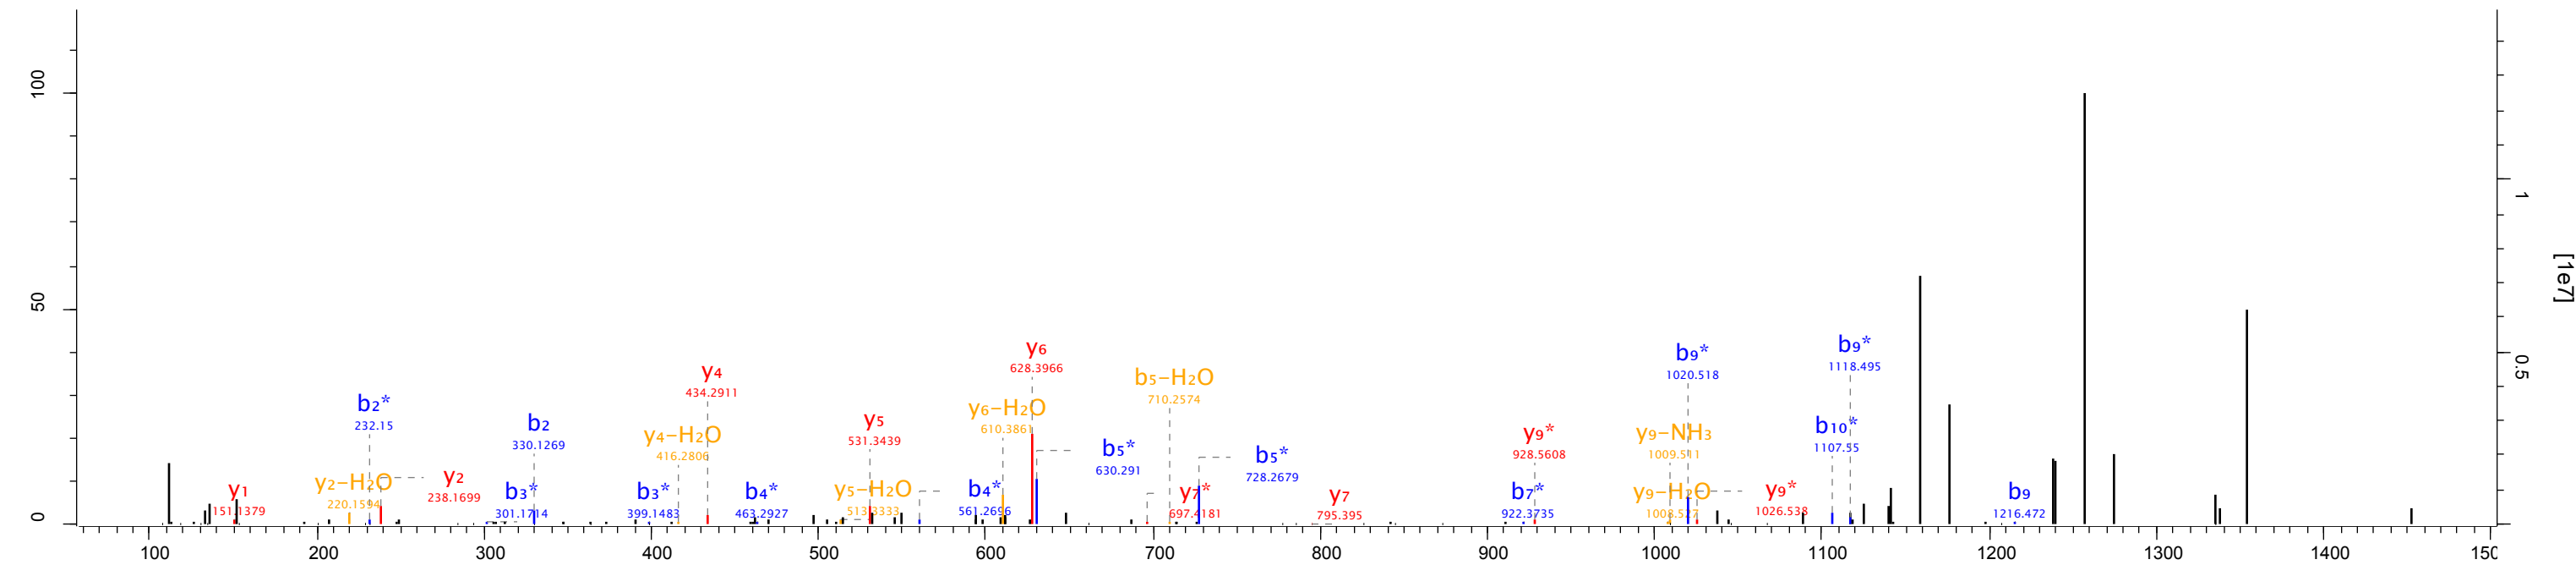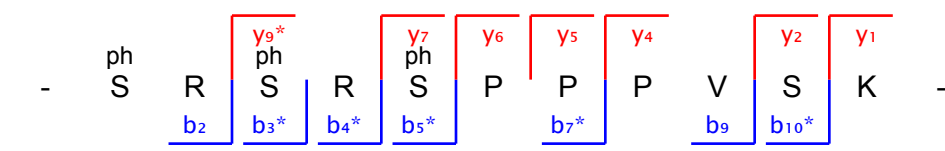

Raw file: 20150812\_A375SR\_Phospho\_BR1\_02  
 Scan: 4406 Method: FTMS; HCD Score: 107.13 m/z: 639.91 Gene names: CDK13

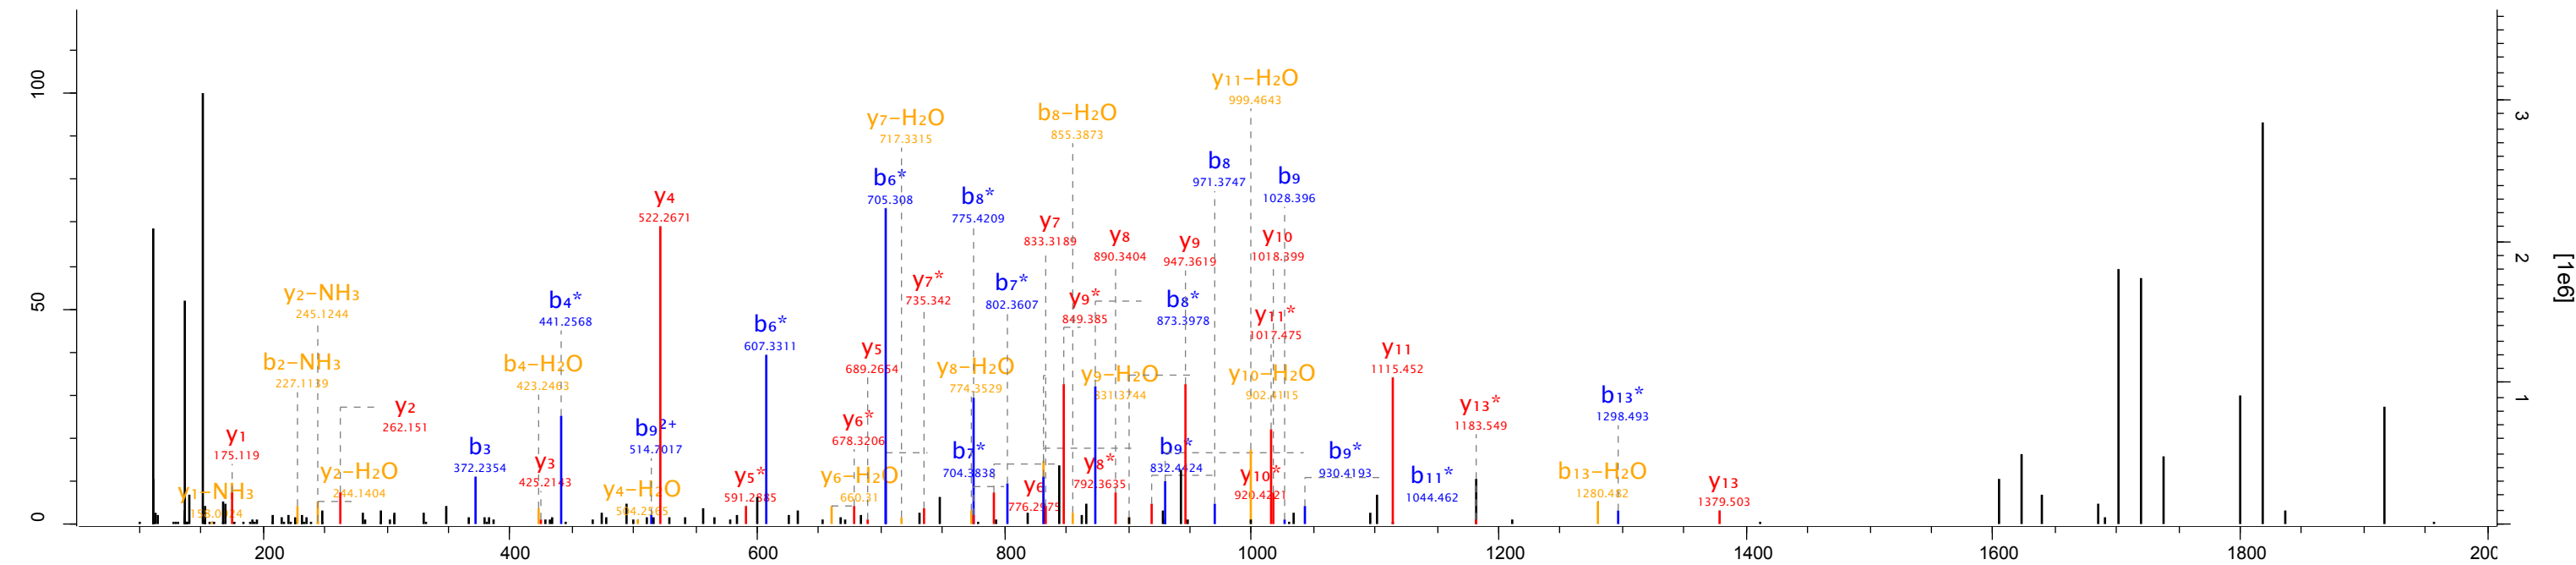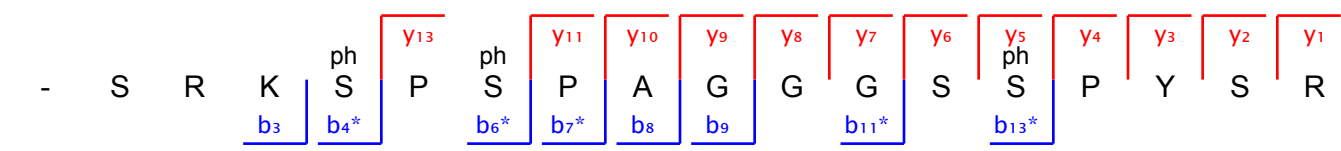

Raw file: 20150812\_A375SR\_Phospho\_BR1\_02  
 Scan: 4486 Method: FTMS; HCD Score: 164.05 m/z: 876.35 Gene names: RAB11FIP1

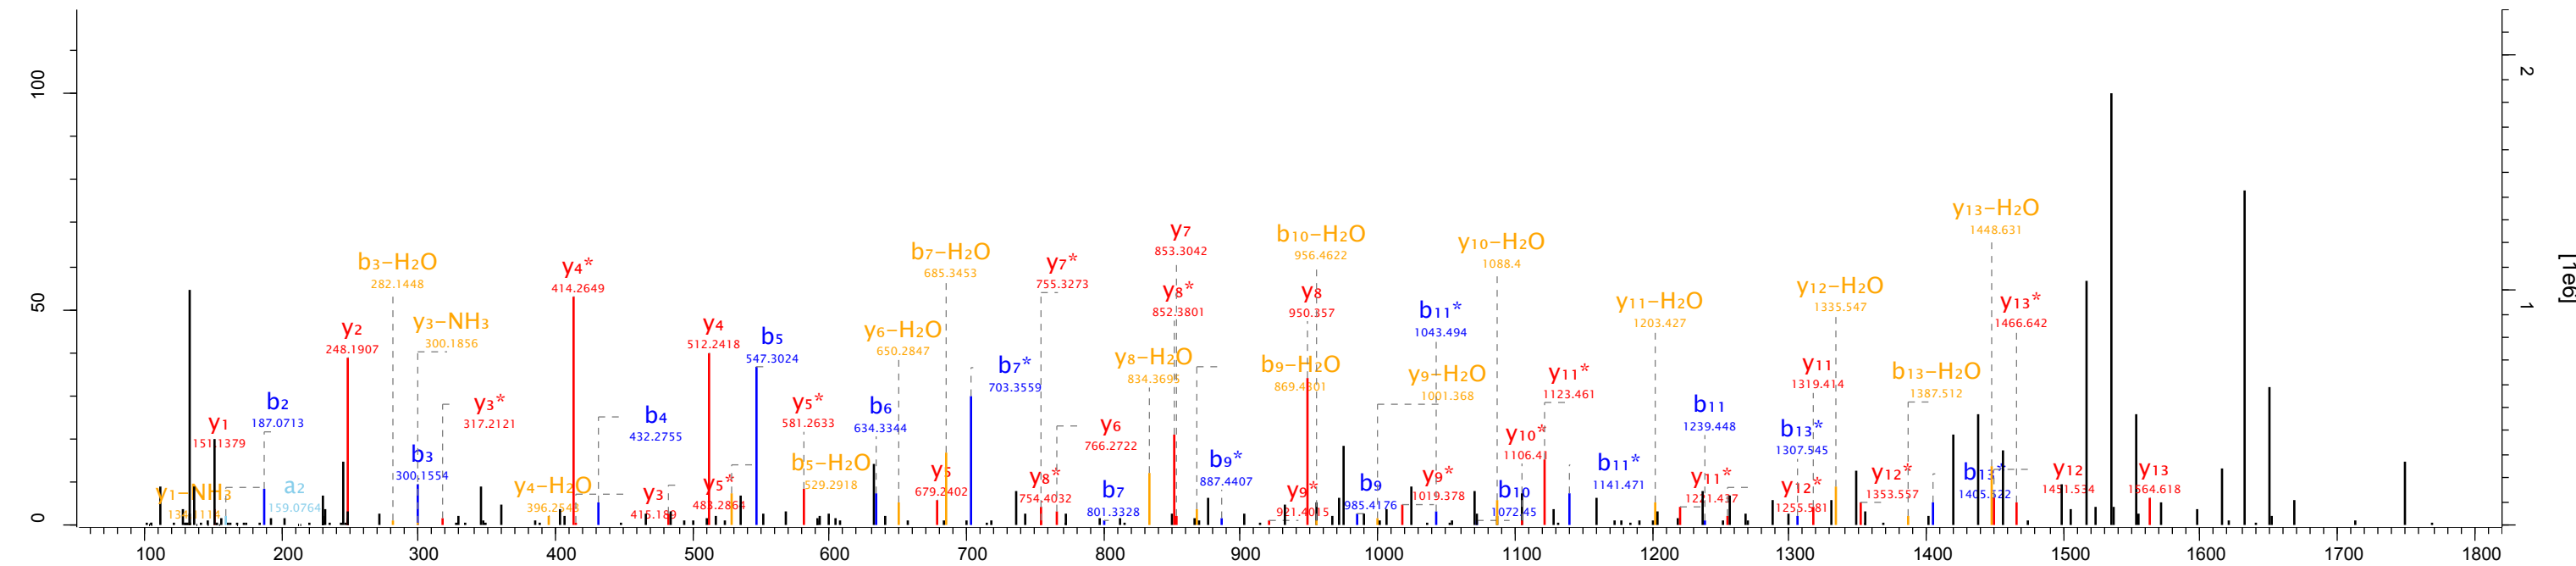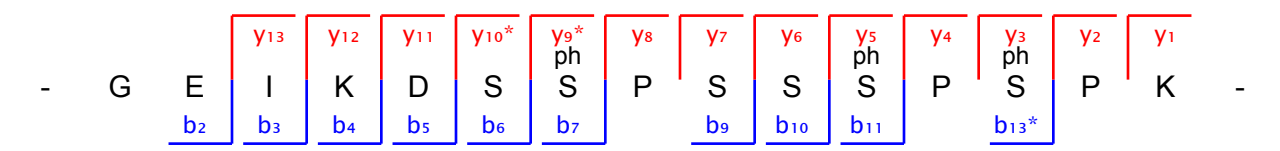



Raw file: 20150812\_A375SR\_Phospho\_BR1\_02  
 Scan: 4886 Method: FTMS; HCD Score: 127.36 m/z: 552.73 Gene names: SRRM1

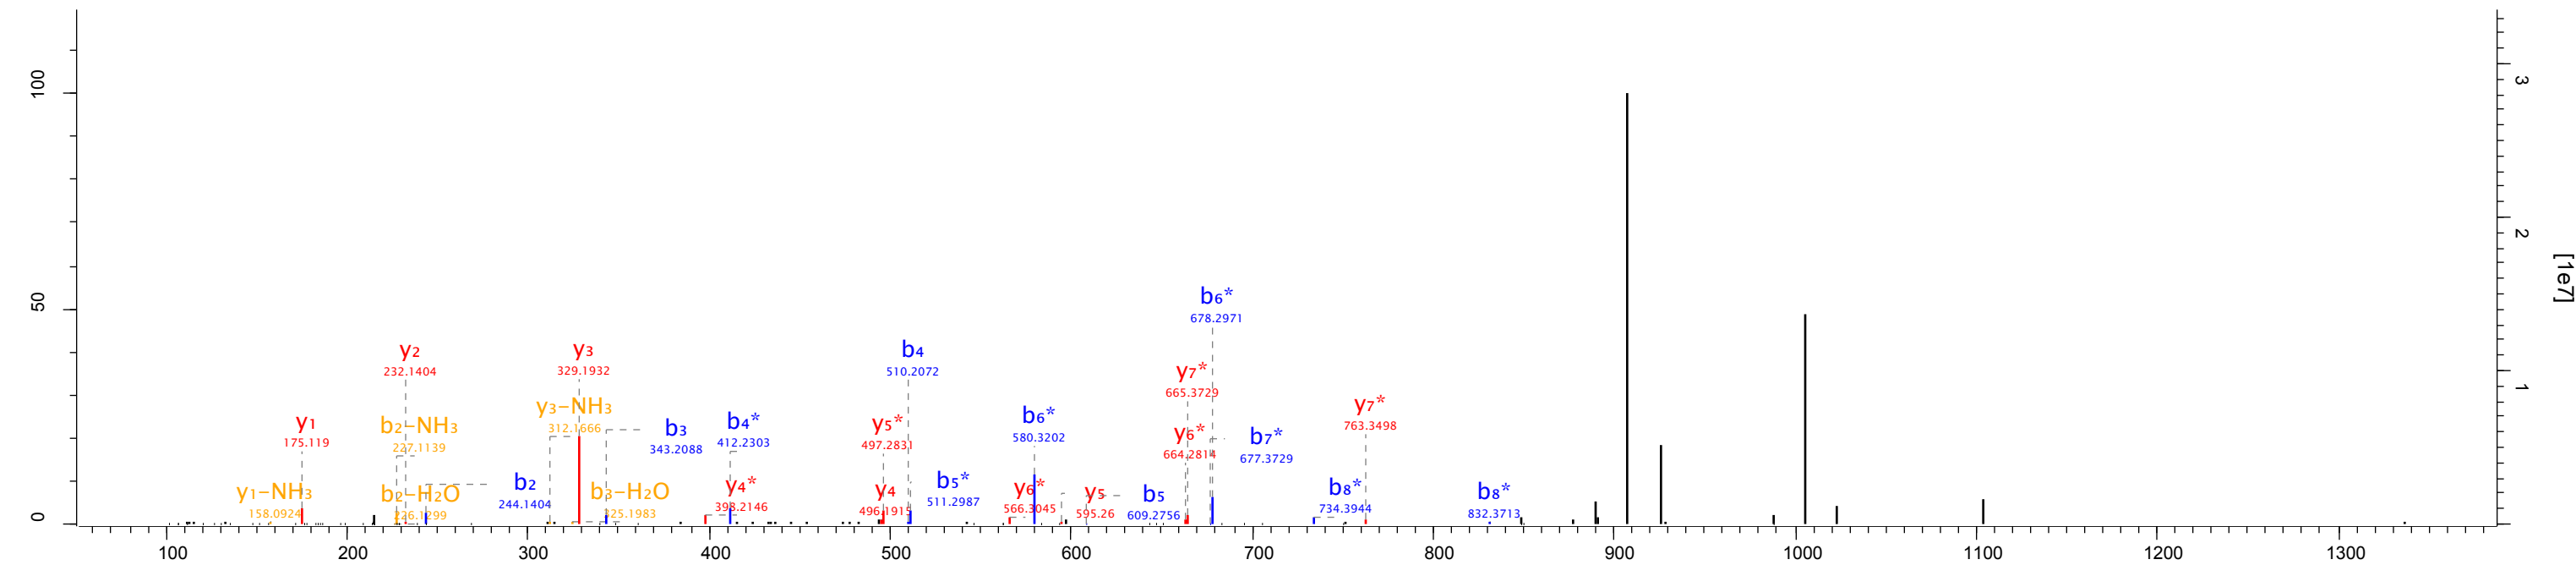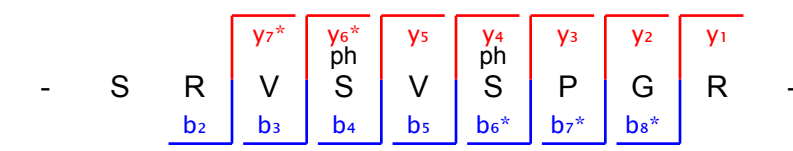

Raw file: 20150812\_A375SR\_Phospho\_BR1\_02  
 Scan: 4936 Method: FTMS; HCD Score: 80.41 m/z: 592.72 Gene names: SRRM1

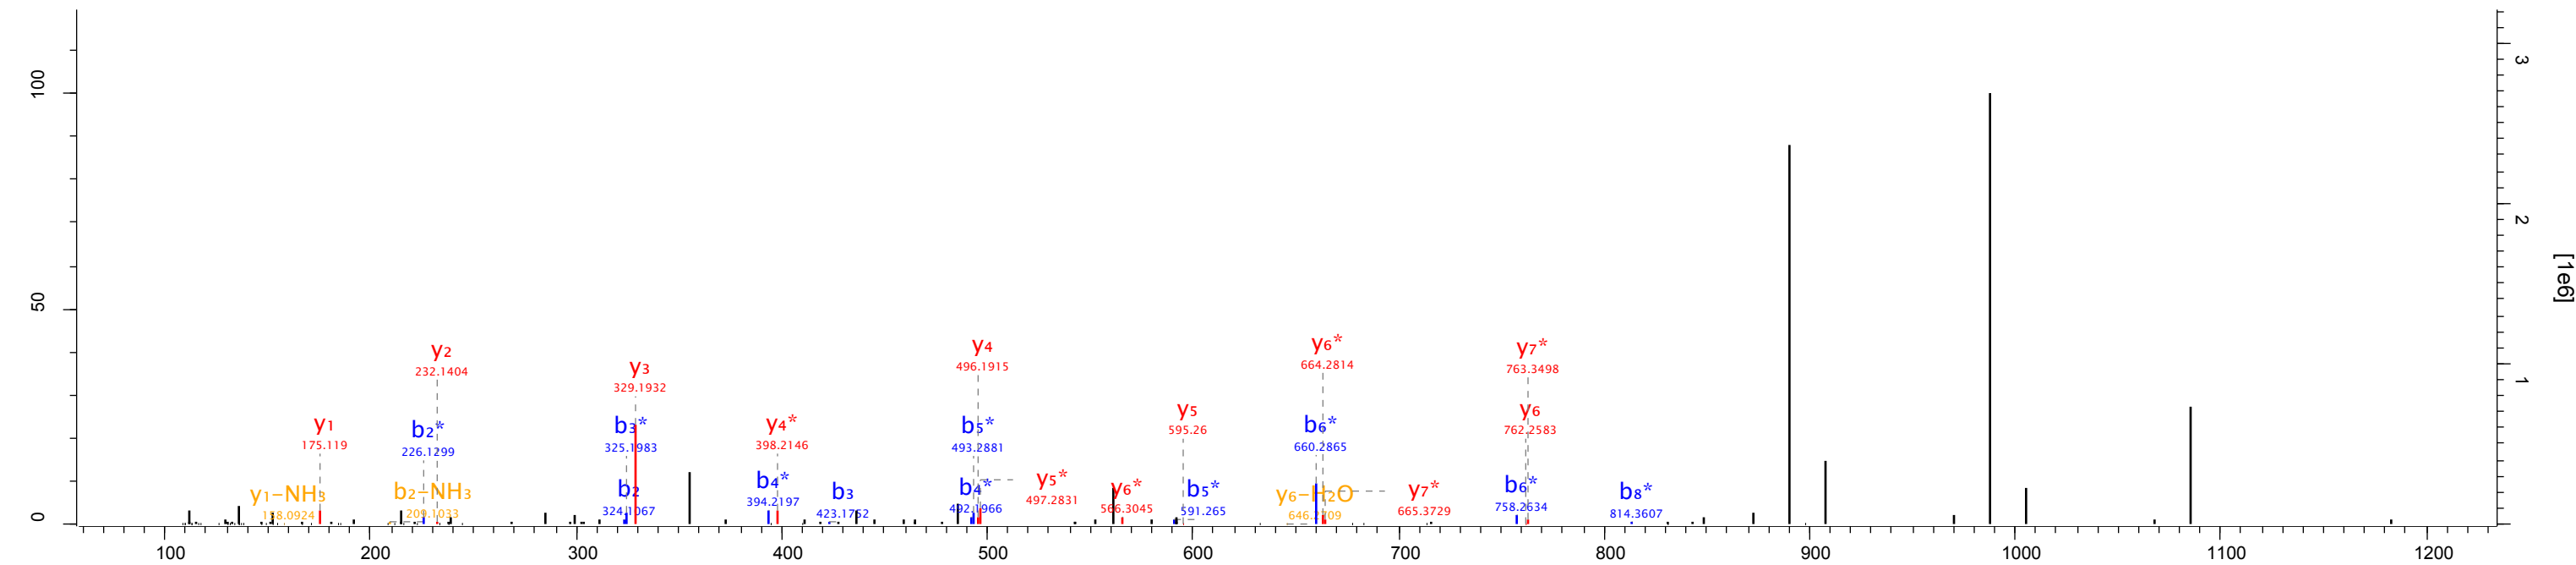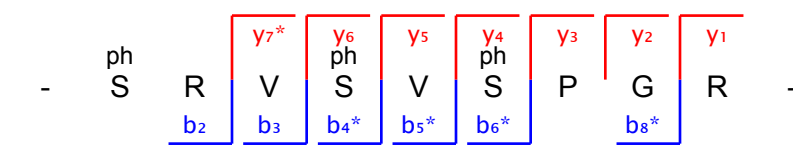

Raw file 20150812\_A375SR\_Phospho\_BR1\_02 Scan 5436 Method FTMS; HCD Score 134.05 m/z 1199.91 Gene names HIRIP3

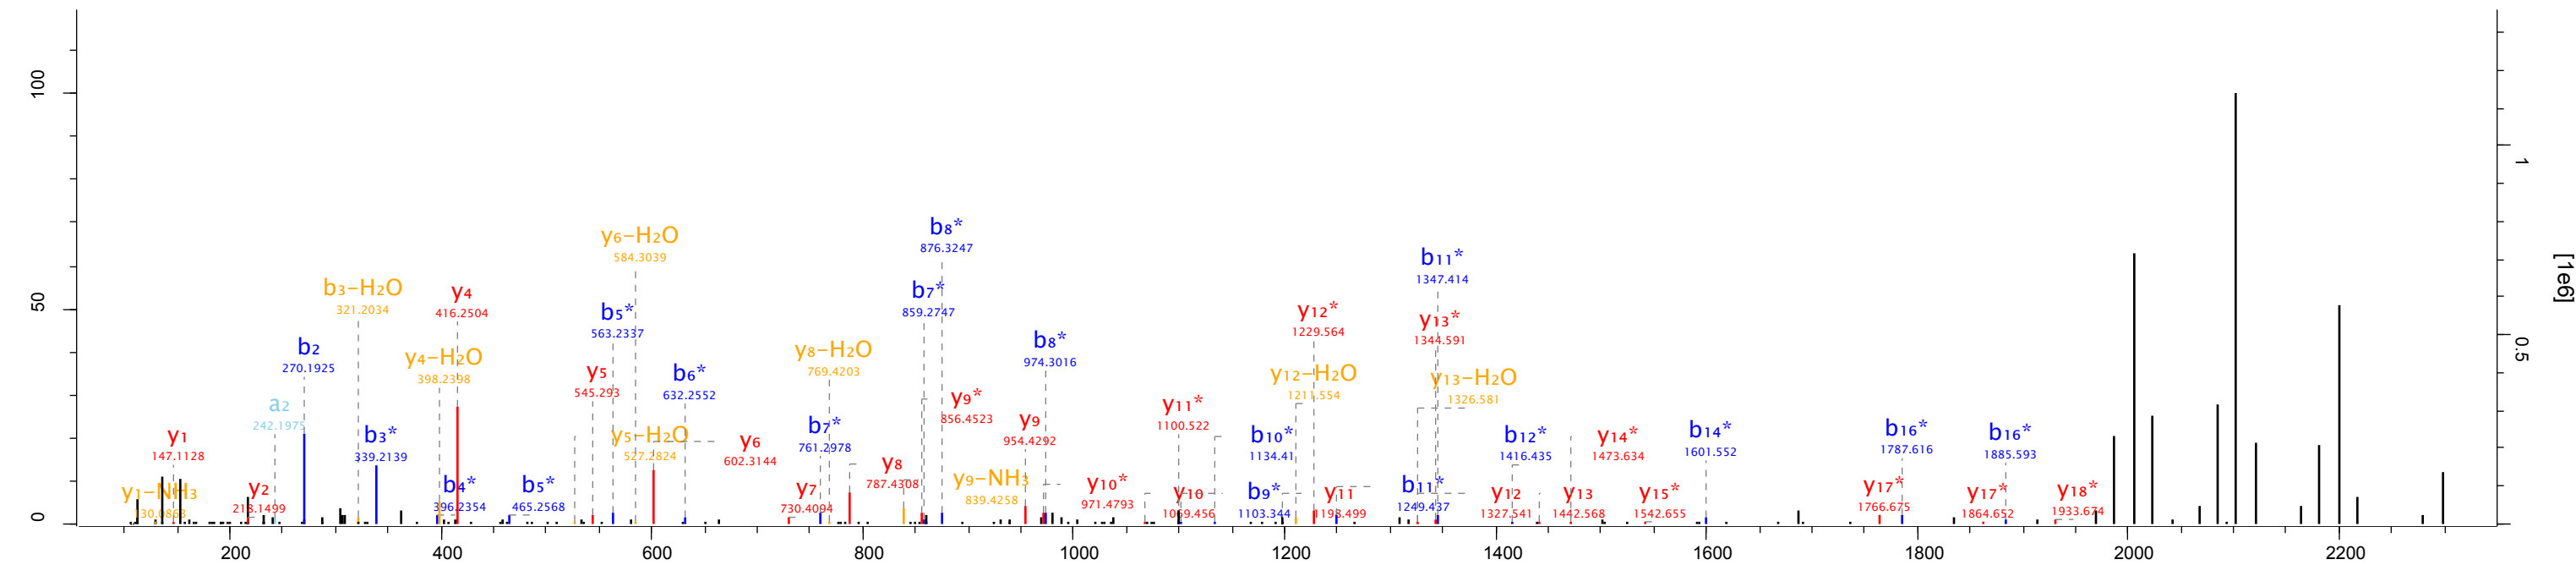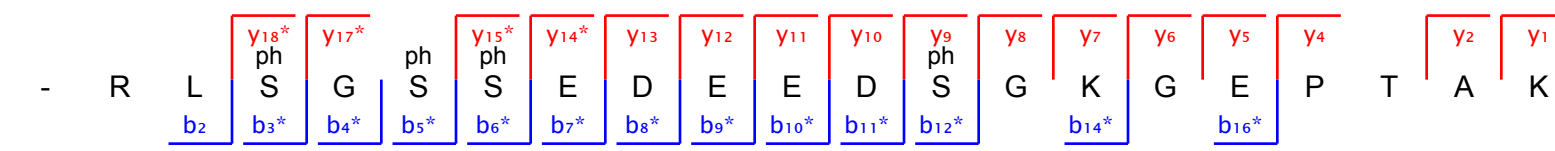

Raw file 20150812\_A375SR\_Phospho\_BR1\_02 Scan 5966 Method FTMS; HCD Score 68.23 m/z 934.82 Gene names ARHGEF11

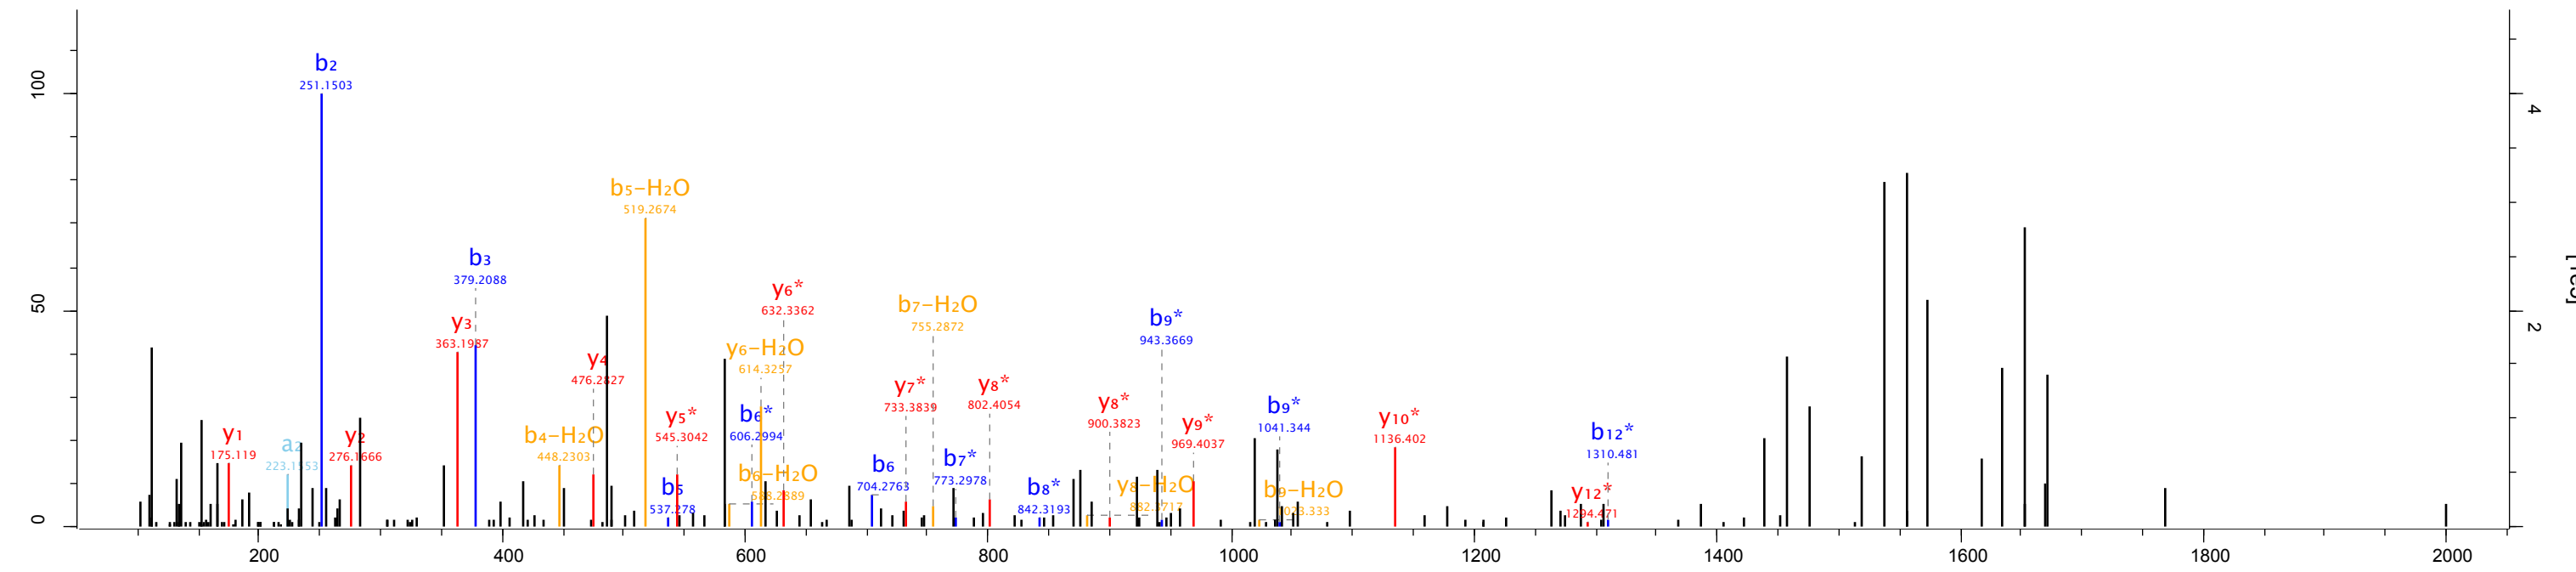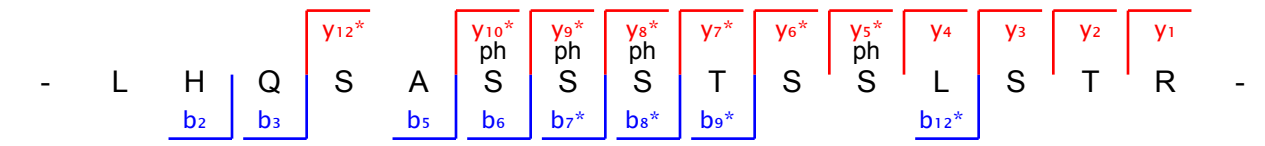

Raw file 20150812\_A375SR\_Phospho\_BR1\_02 Scan 6036 Method FTMS; HCD Score 105.21 m/z 1391.01 Gene names NUCKS1

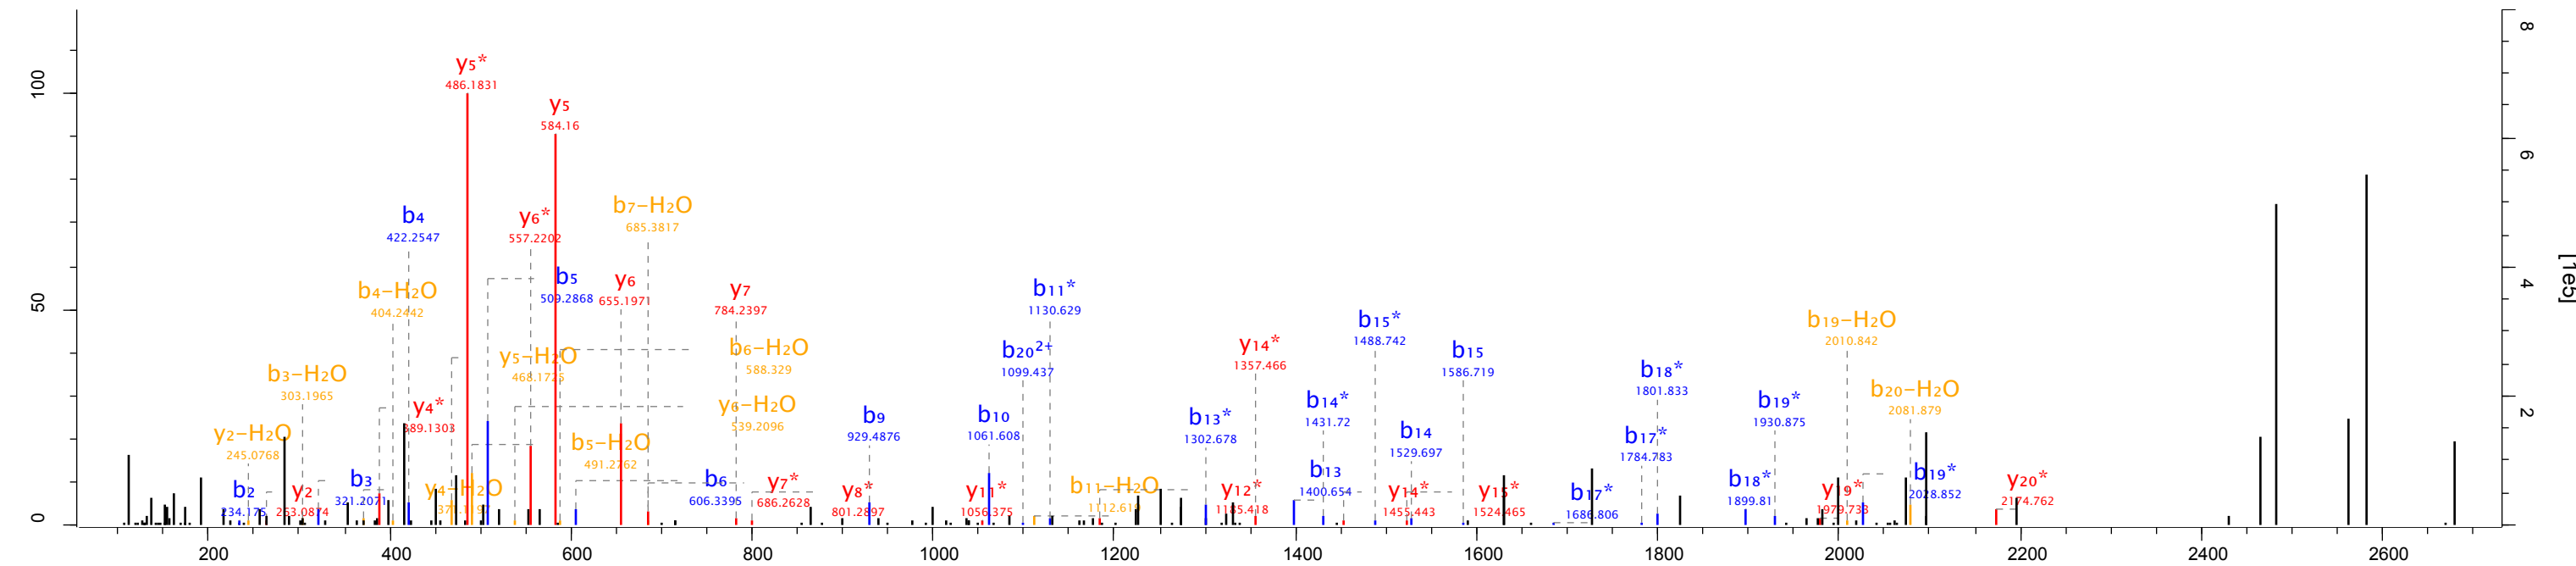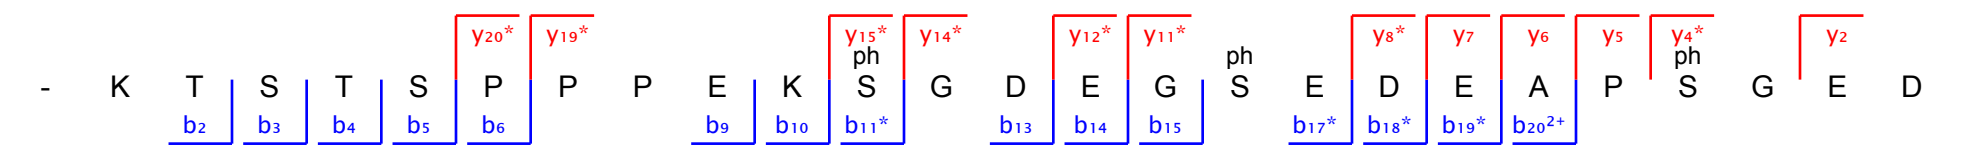

Raw file  
20150812\_A375SR\_Phospho\_BR1\_02

Scan Method Score m/z Gene names  
6596 FTMS; HCD 167.81 1008.38 RPS6

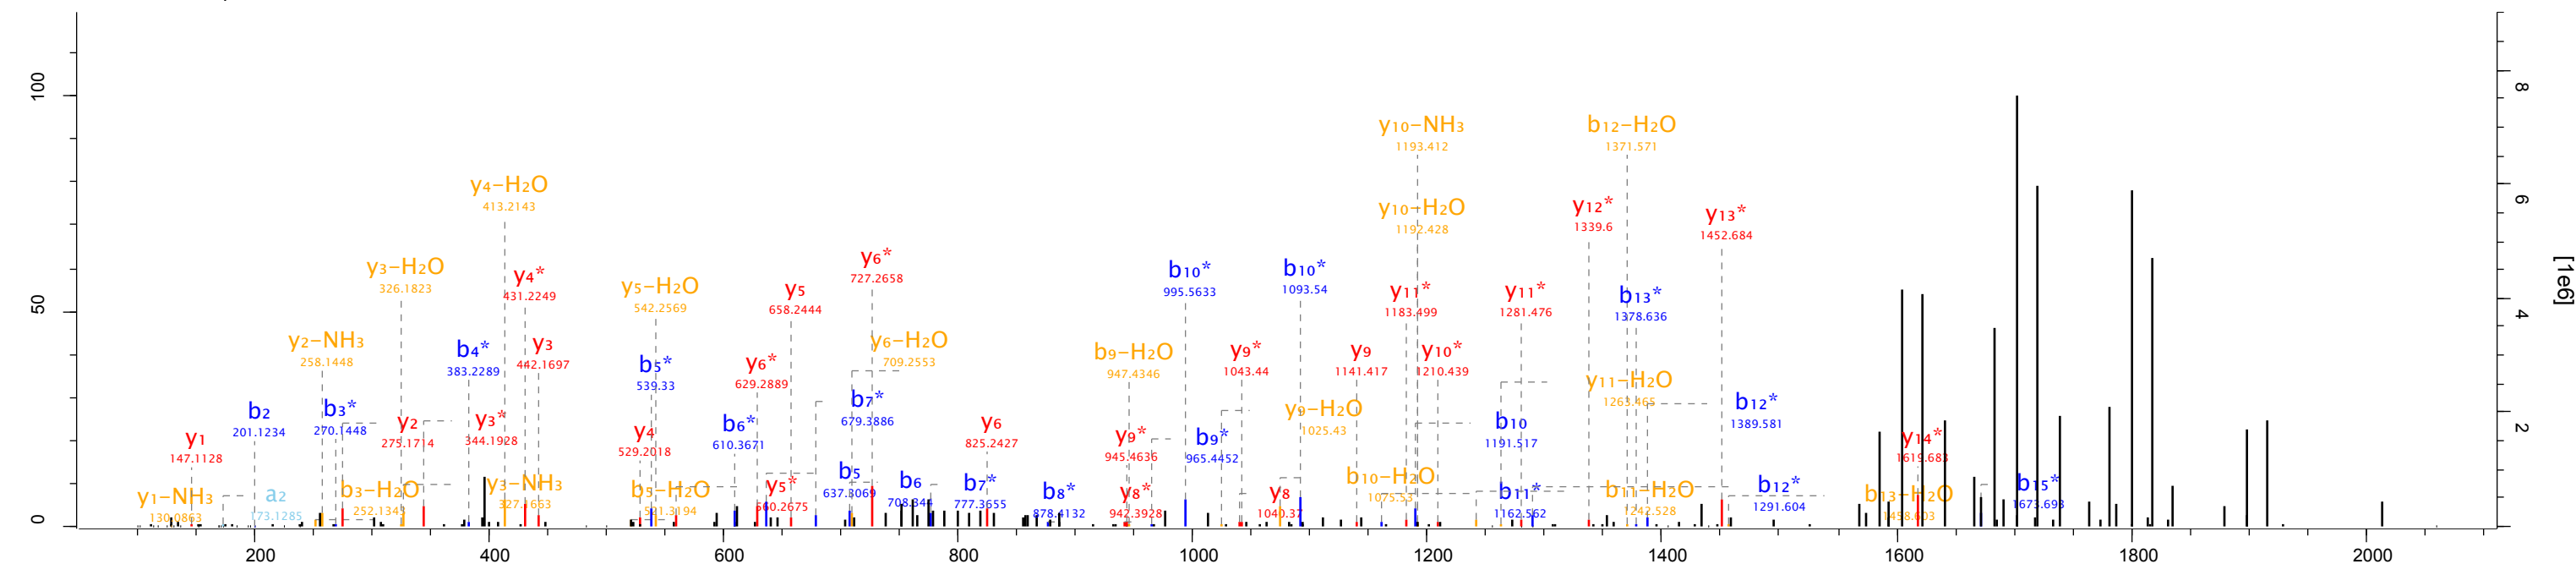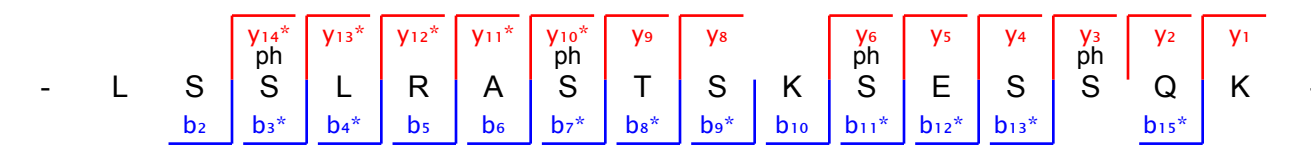

Raw file: 20150812\_A375SR\_Phospho\_BR1\_02  
 Scan: 6646 Method: FTMS; HCD Score: 155.11 m/z: 1100.3 Gene names: EIF5B

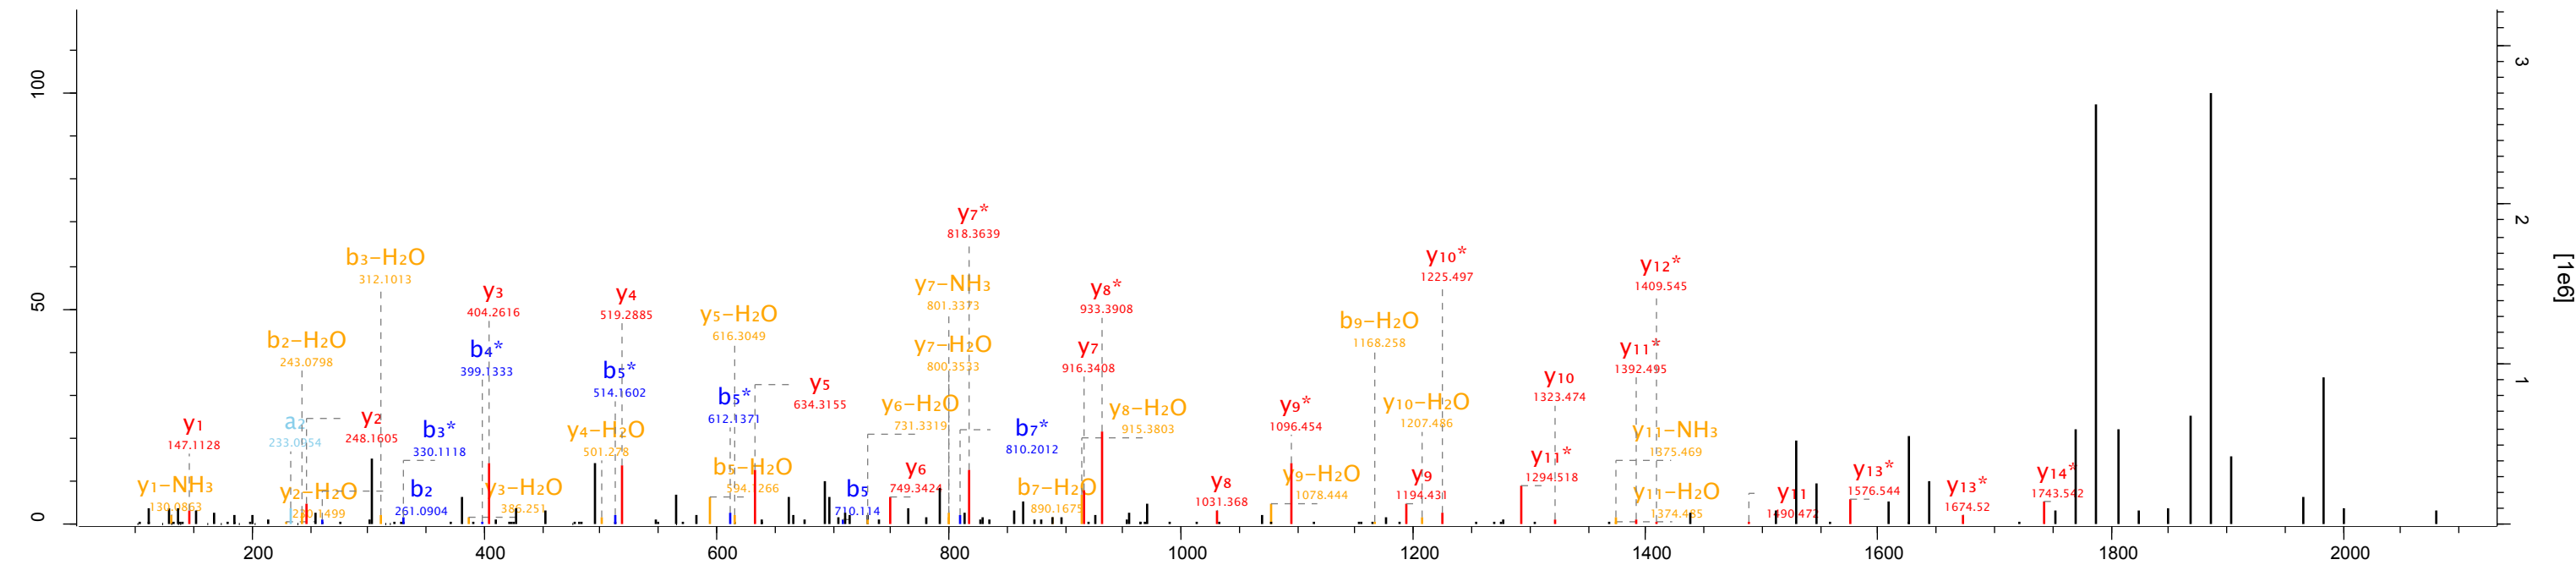

Protein sequence: E M S ph S D S E Y D S D D D R T K -

Fragmentation sites (b and y ions) are indicated by boxes below the sequence:

- Blue boxes (b ions): b2 (M/S), b3\* (S/ph), b4\* (ph/S), b5 (D/S), b7\* (E/S)
- Red boxes (y ions): y14\* (ph/S), y13\* (S/ph), y12\* (D/S), y11 (S/S), y10 (E/S), y9 (Y), y8 (D), y7 (S), y6 (D), y5 (D), y4 (D), y3 (R), y2 (T), y1 (K)

Raw file: 20150812\_A375SR\_Phospho\_BR1\_02  
 Scan: 6756 Method: FTMS; HCD Score: 229.25 m/z: 1002.4 Gene names: HIRIP3

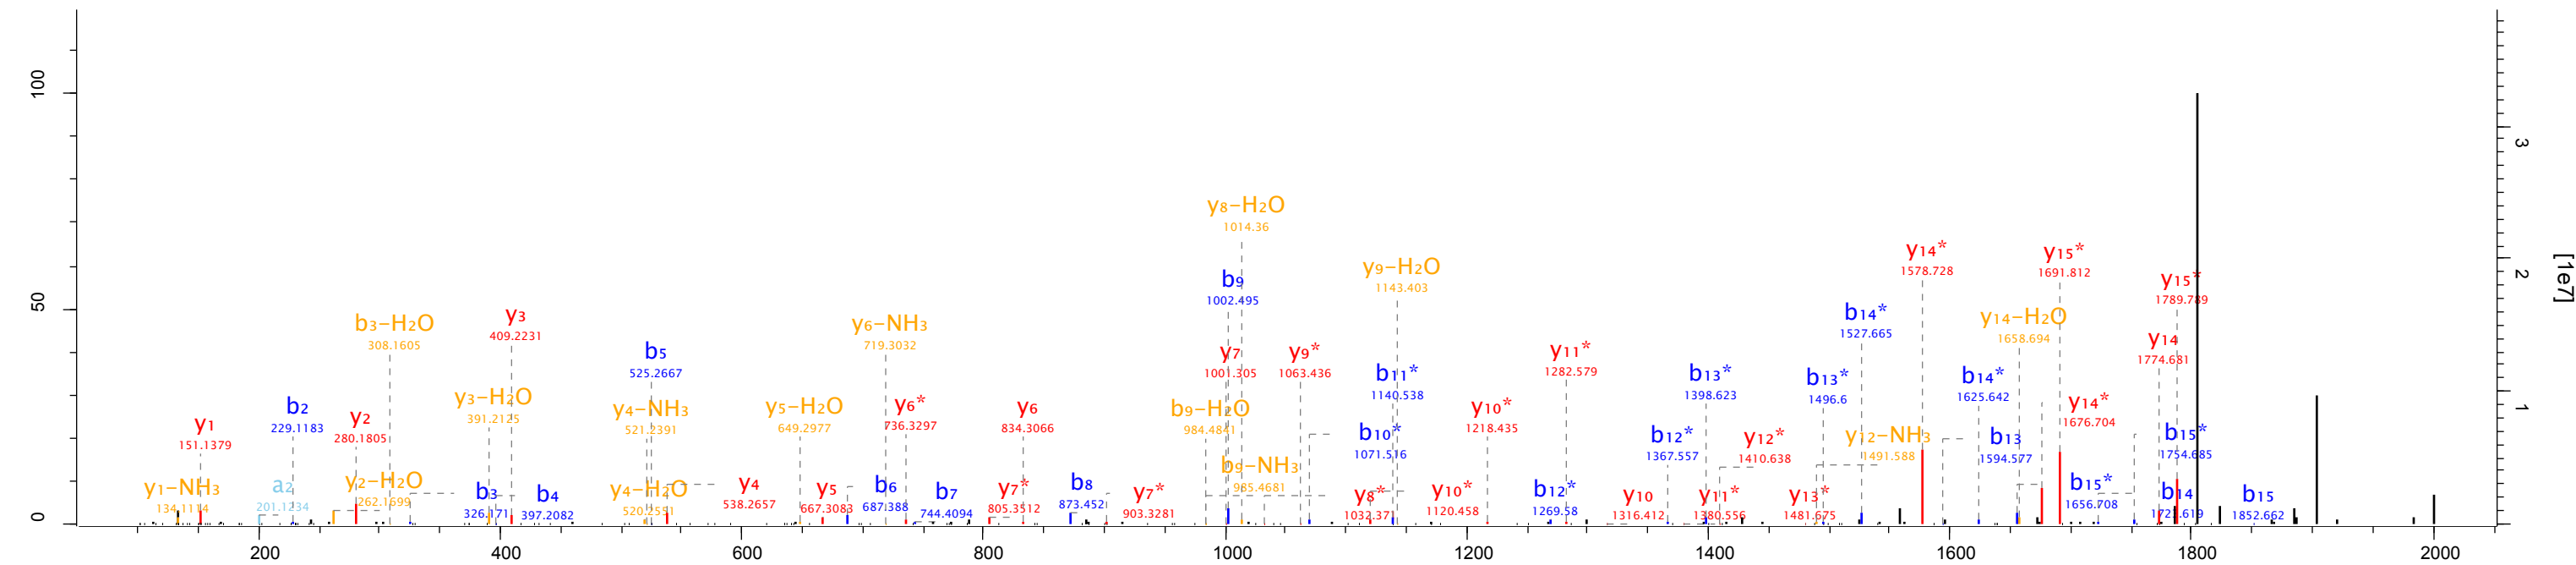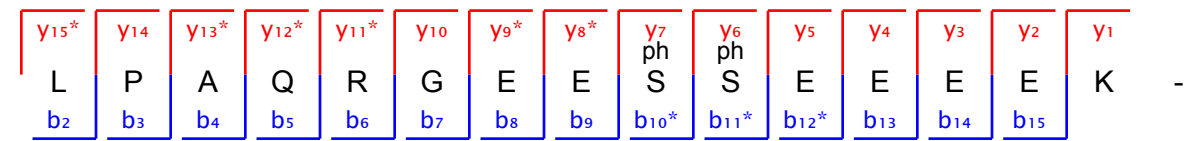



Raw file: 20150812\_A375SR\_Phospho\_BR1\_02  
 Scan: 7086 Method: FTMS; HCD Score: 106.37 m/z: 538.71 Gene names: SRRM2

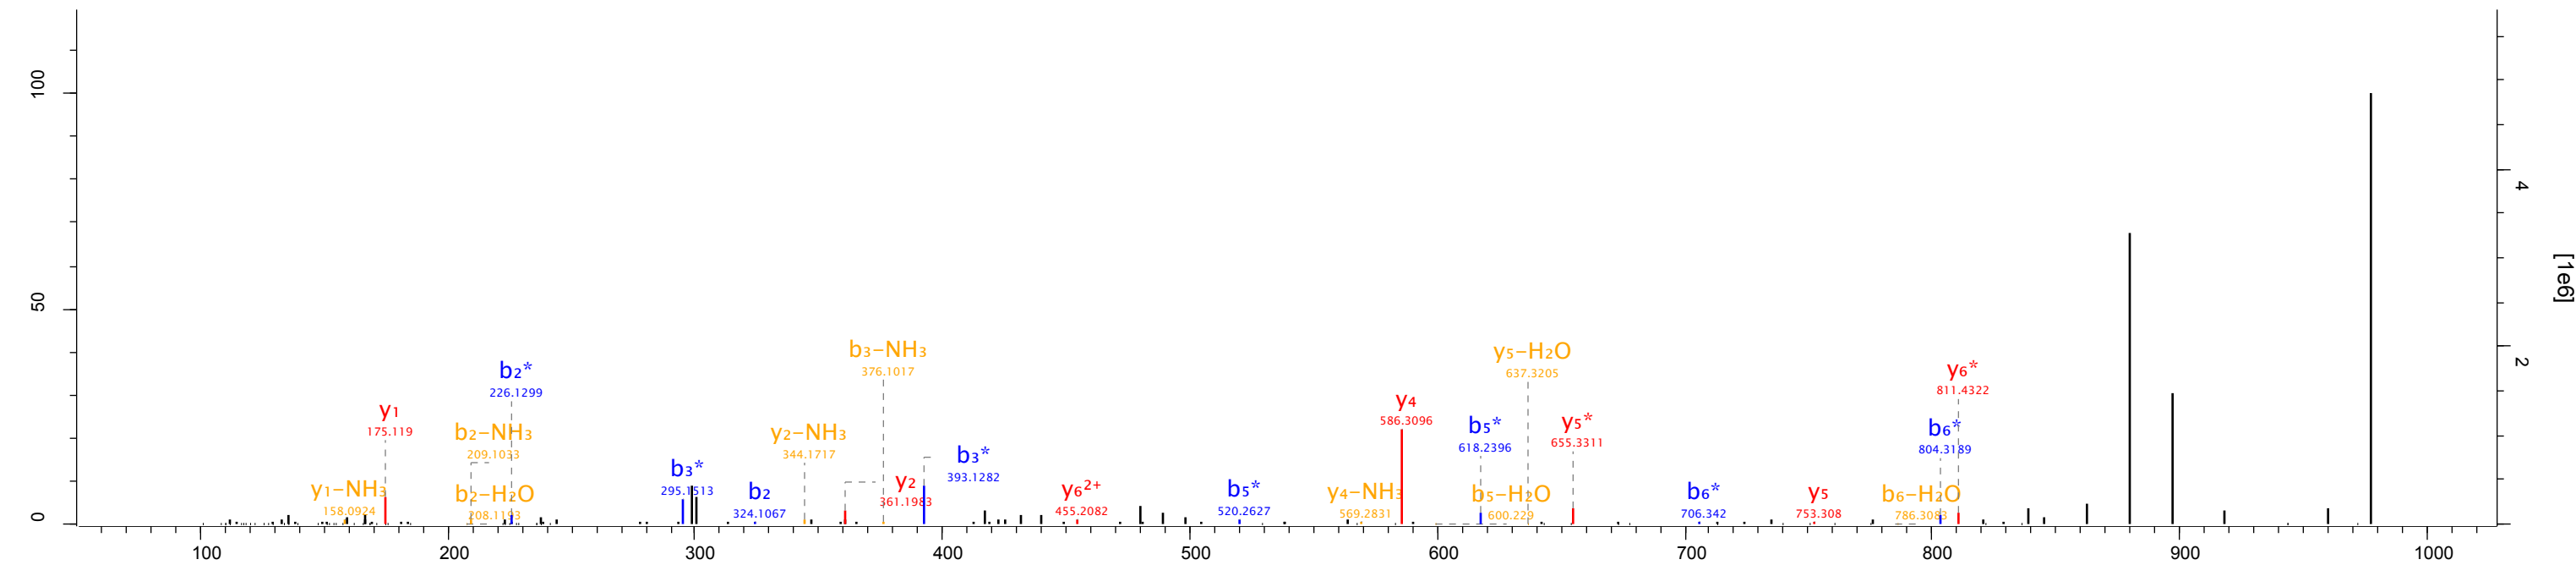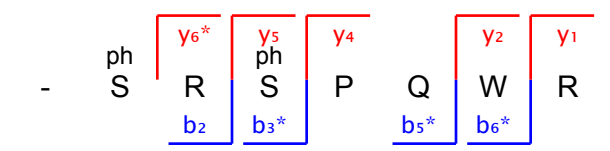

Raw file: 20150812\_A375SR\_Phospho\_BR1\_02  
 Scan: 7116 Method: FTMS; HCD Score: 85.74 m/z: 690.25 Gene names: SRSF7

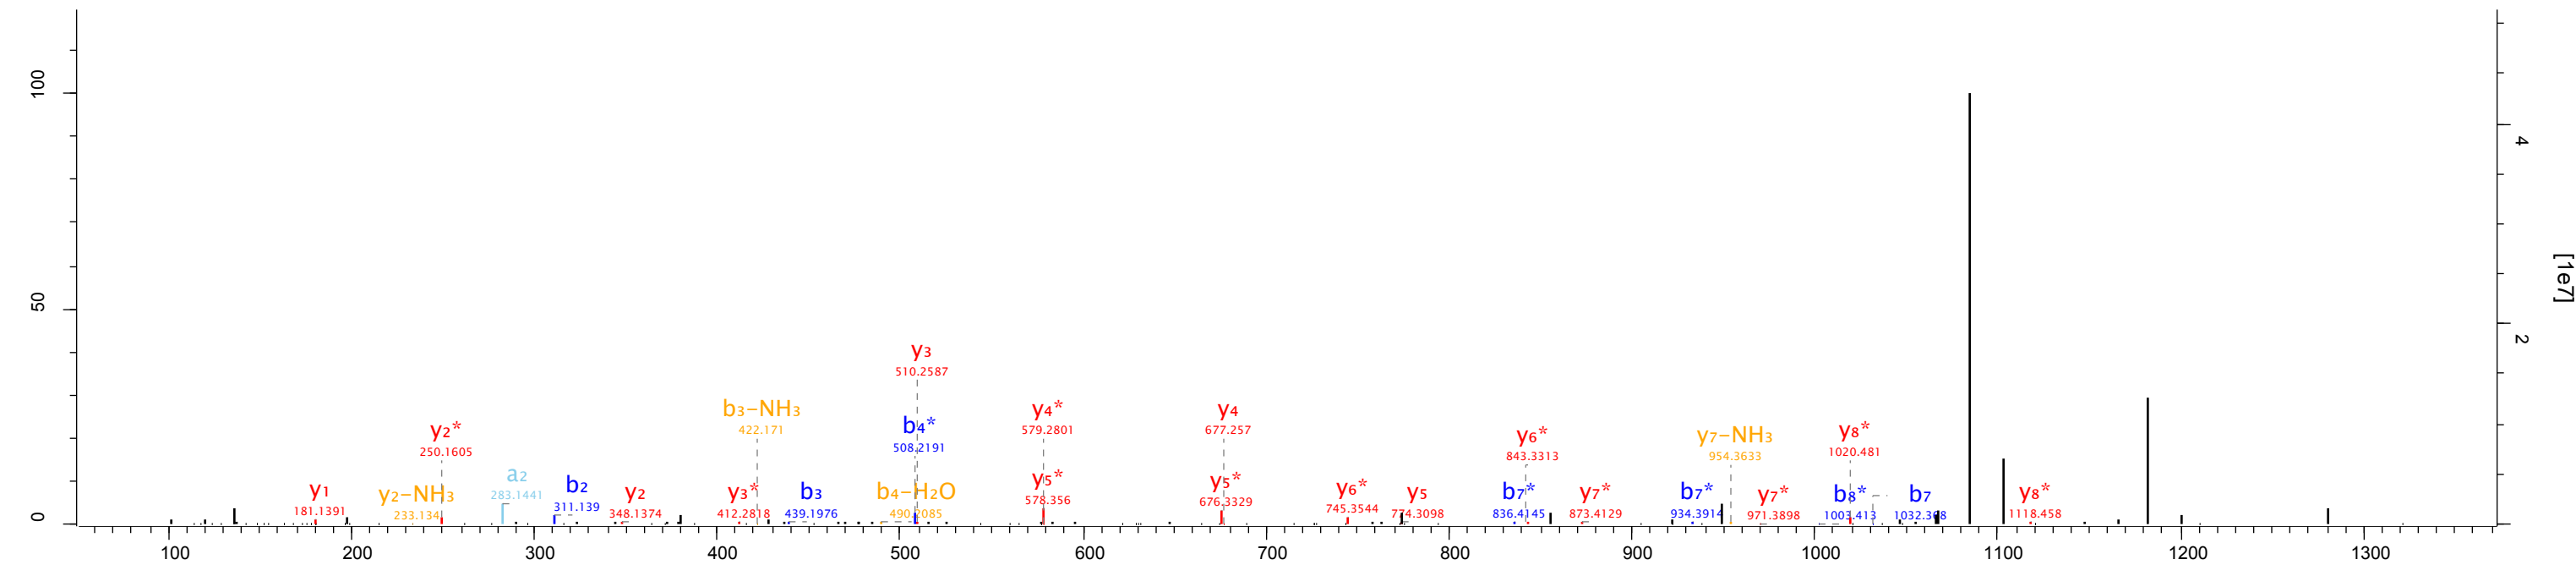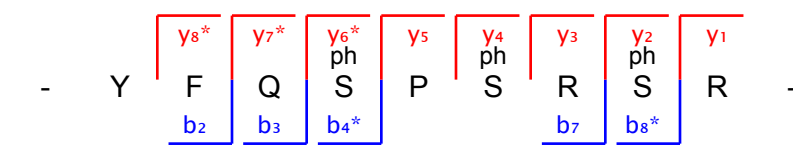

Raw file 20150812\_A375SR\_Phospho\_BR1\_02 Scan 7616 Method FTMS; HCD Score 70.34 m/z 871.7 Gene names UBAP2L

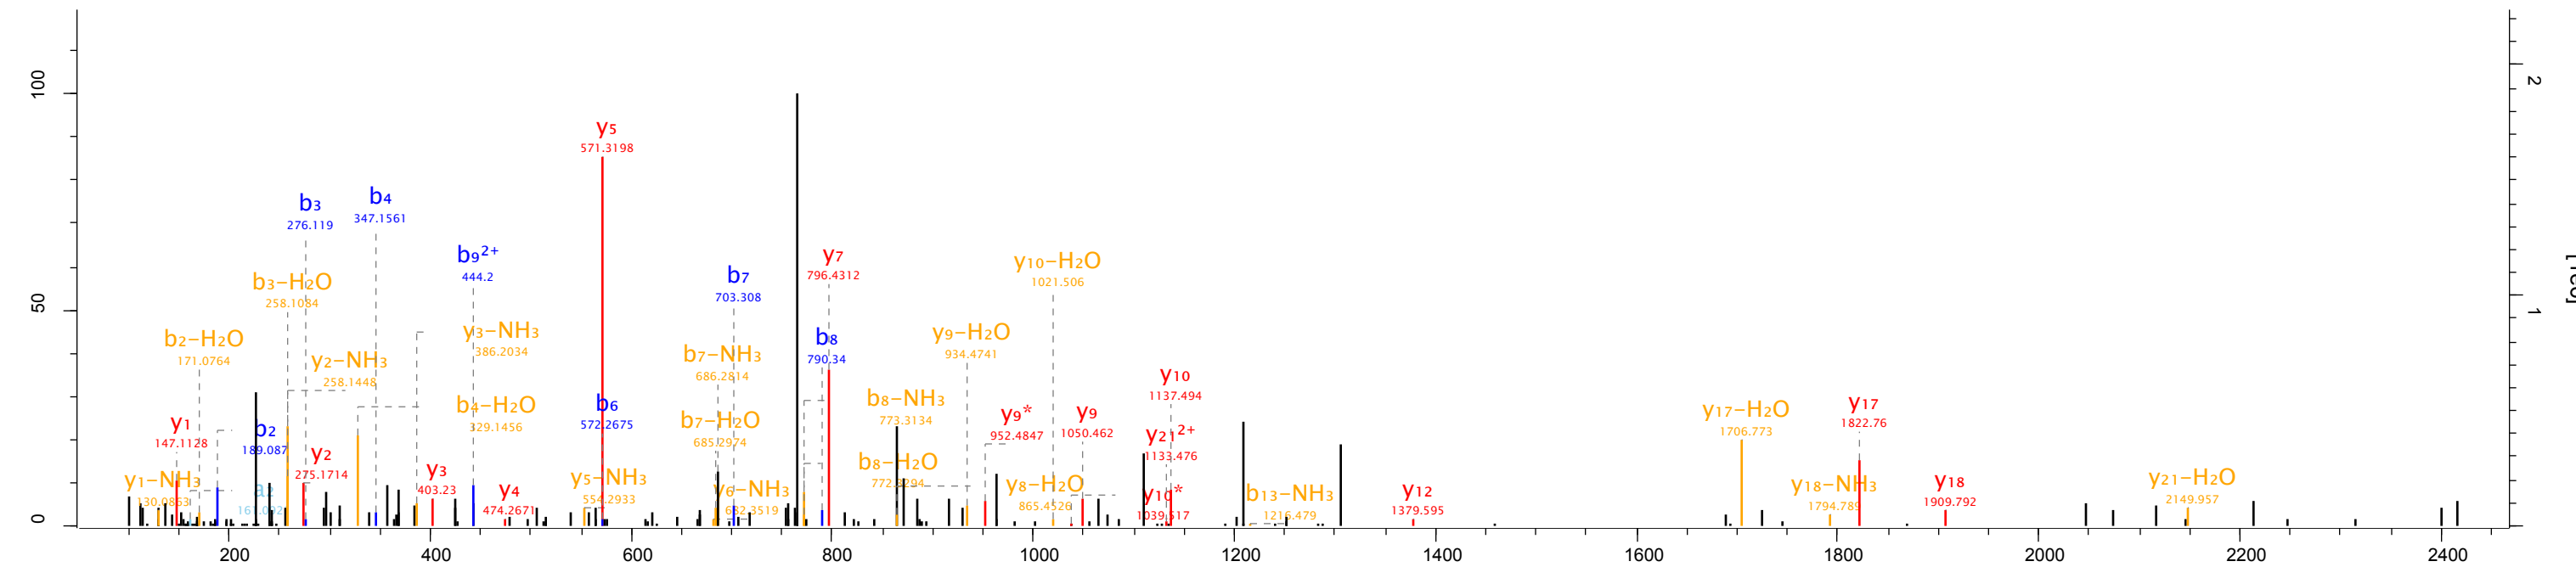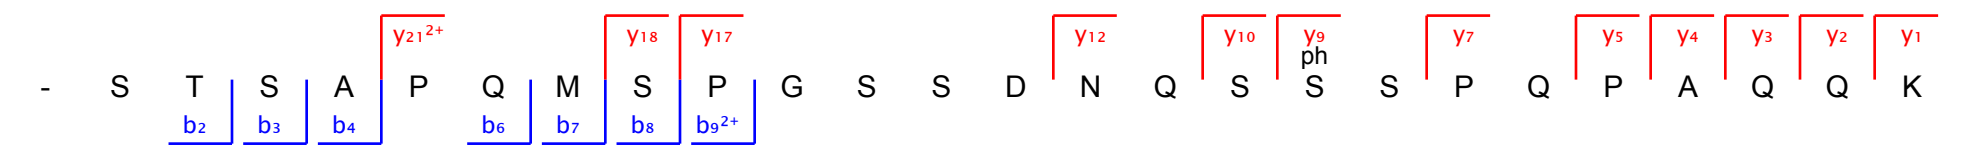

Raw file 20150812\_A375SR\_Phospho\_BR1\_02 Scan 7736 Method FTMS; HCD Score 176.61 m/z 827.34 Gene names BTBD9

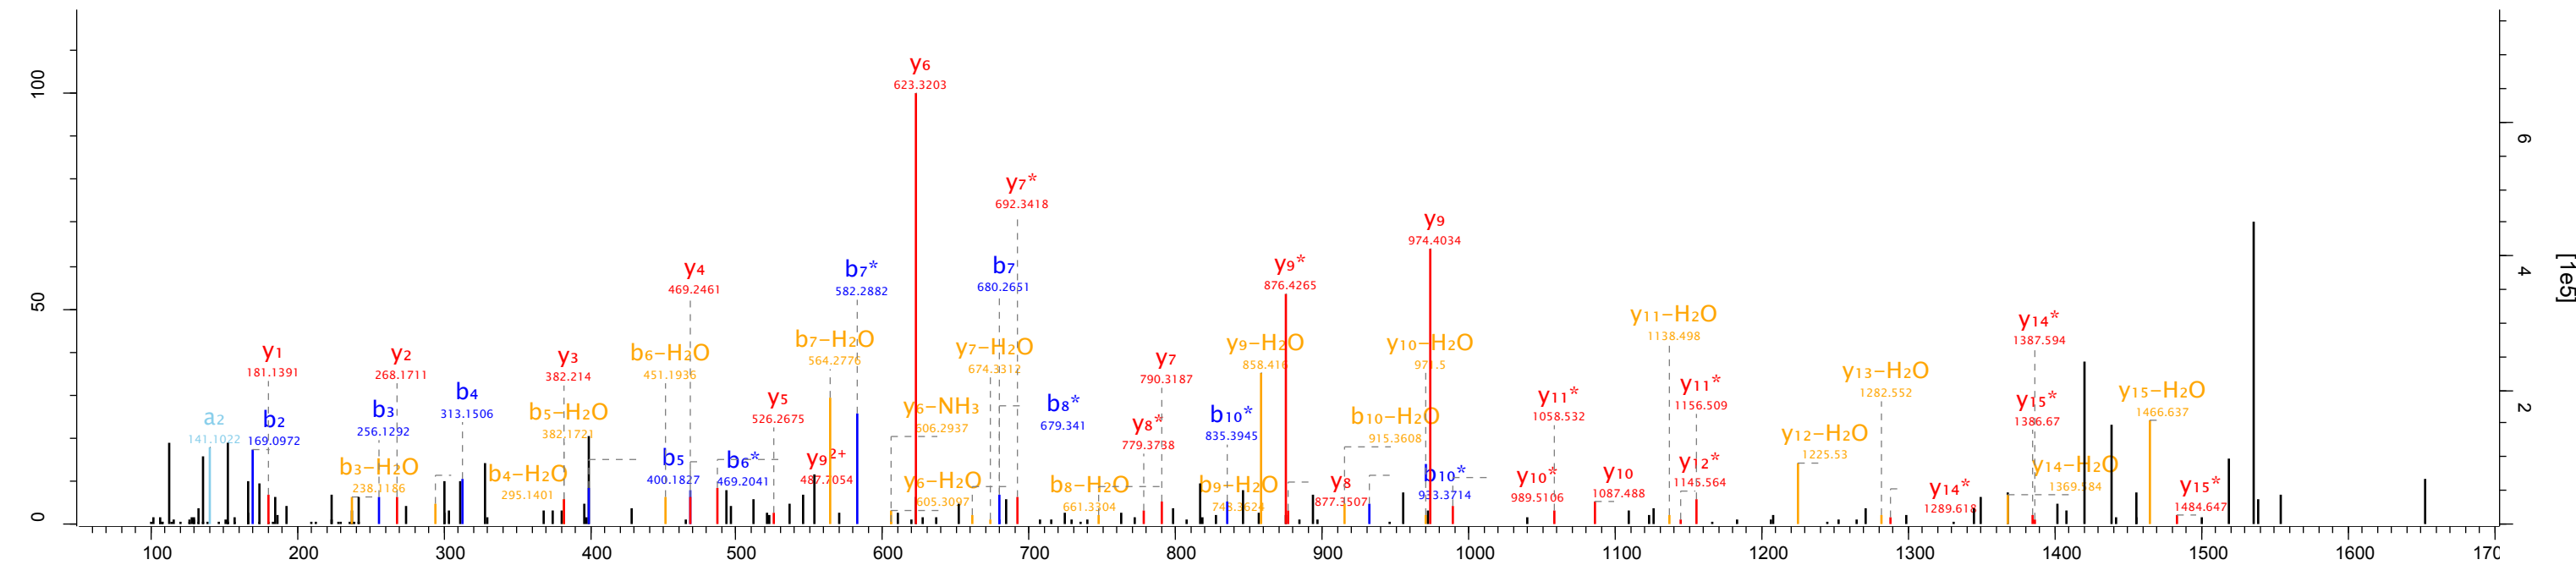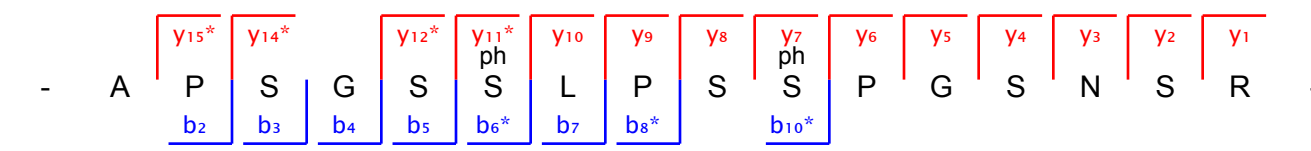

Raw file: 20150812\_A375SR\_Phospho\_BR1\_02  
 Scan: 8196 Method: FTMS; HCD Score: 117.49 m/z: 820.96 Gene names: PRRC2A

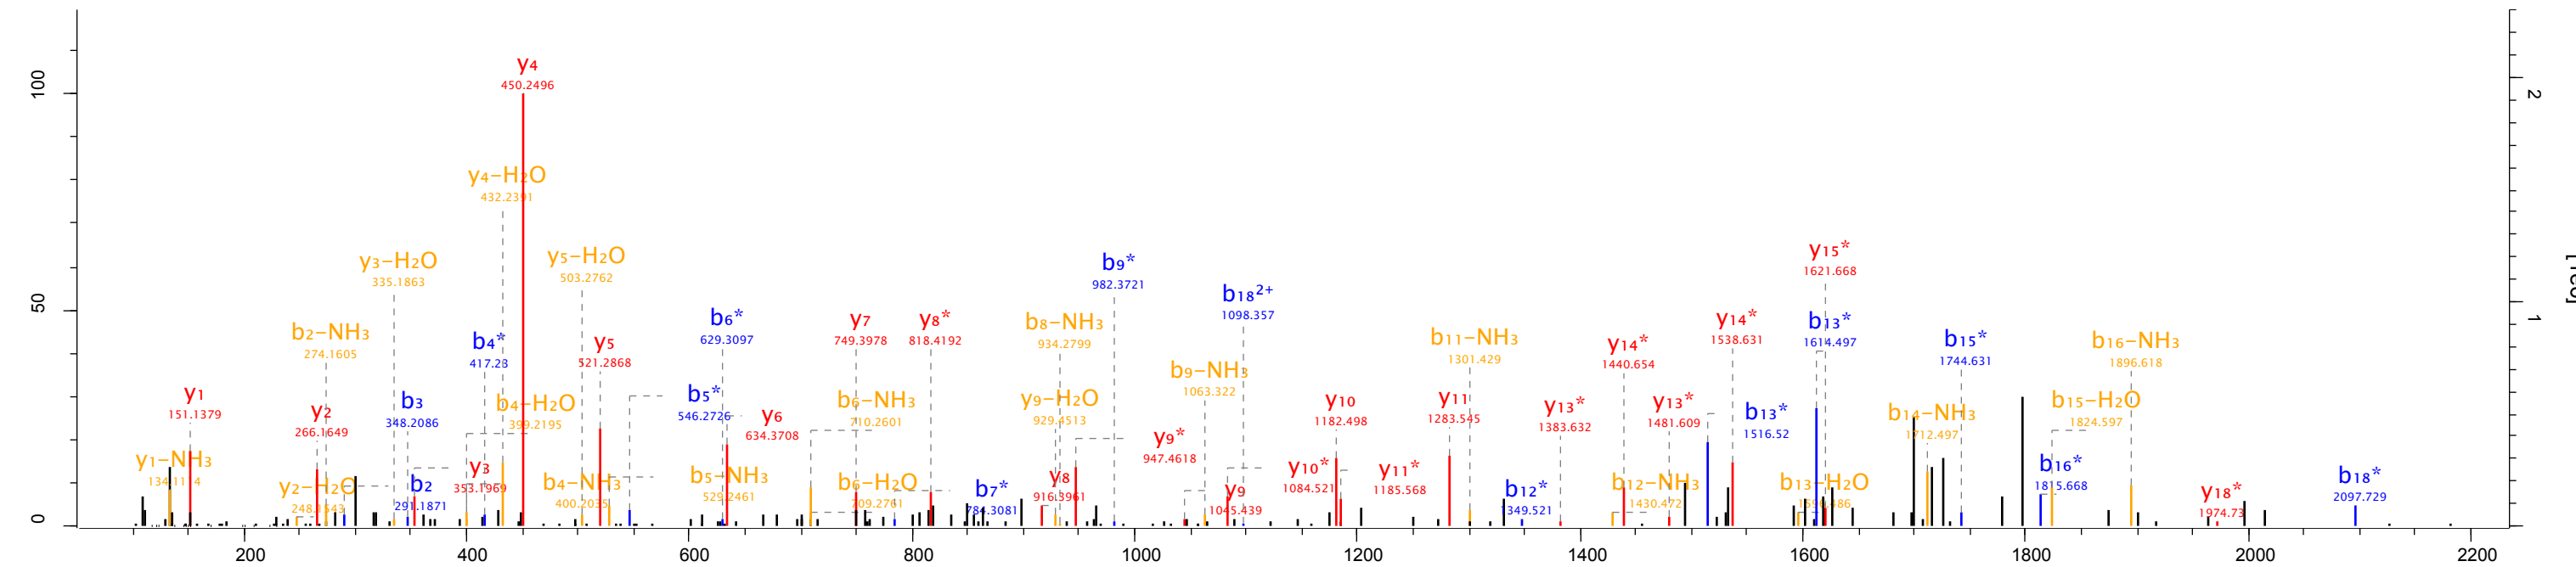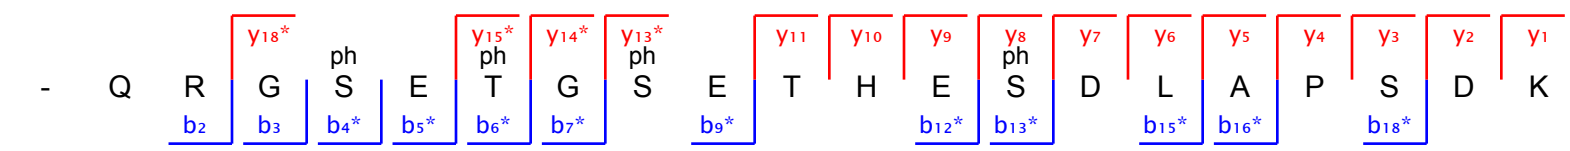

Raw file: 20150812\_A375SR\_Phospho\_BR1\_02  
 Scan: 8486 Method: FTMS; HCD Score: 103.14 m/z: 539.19 Gene names: ESF1

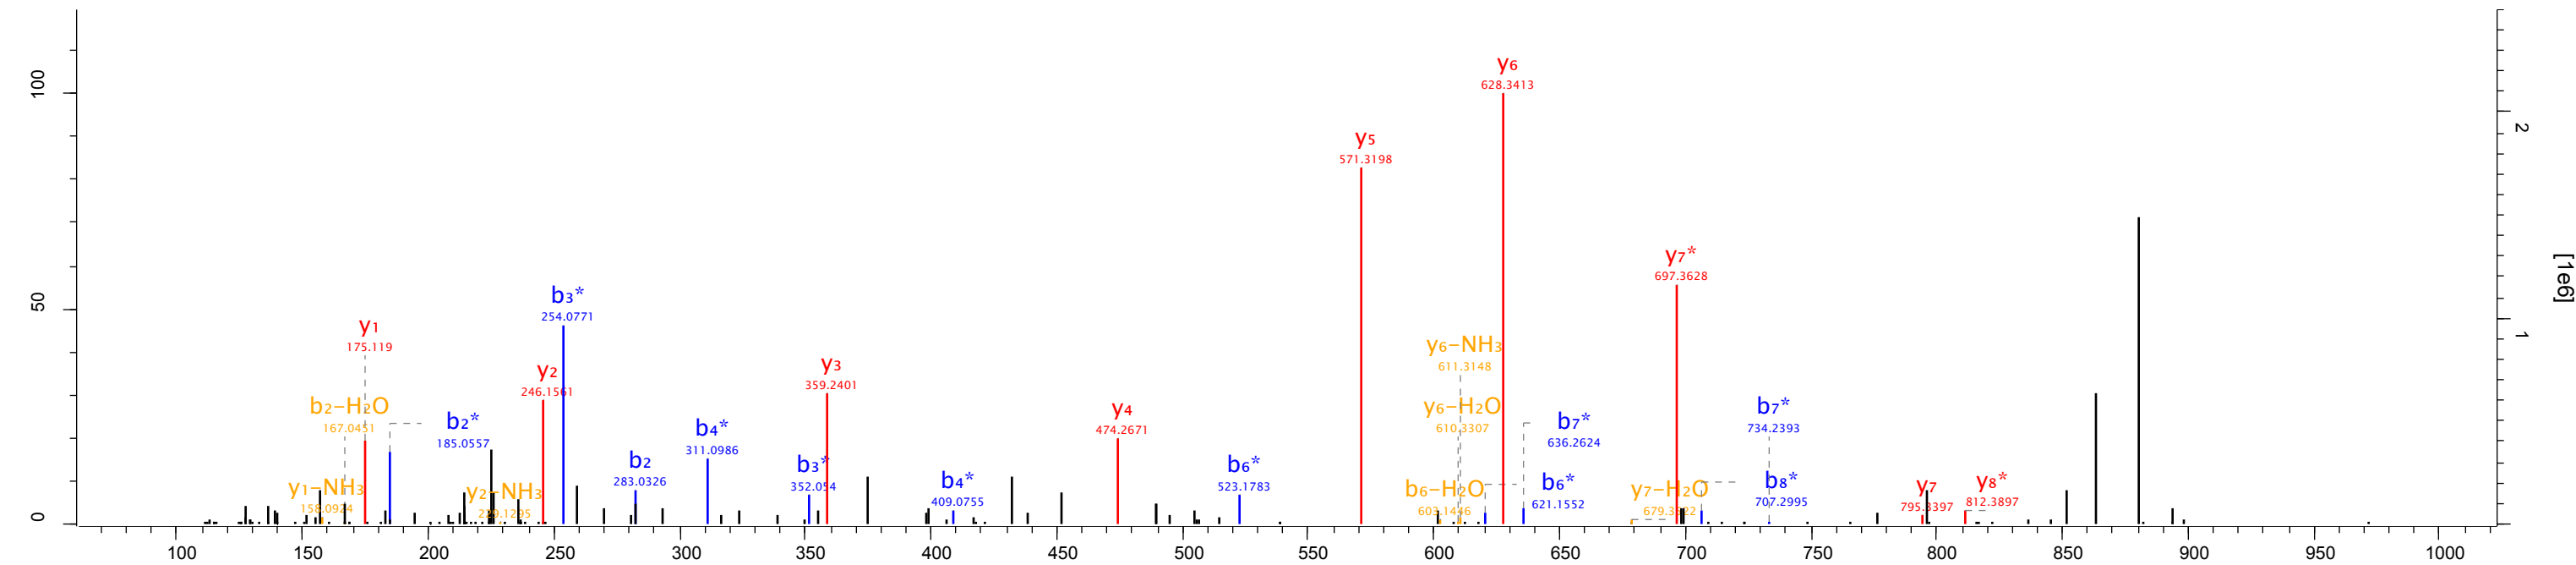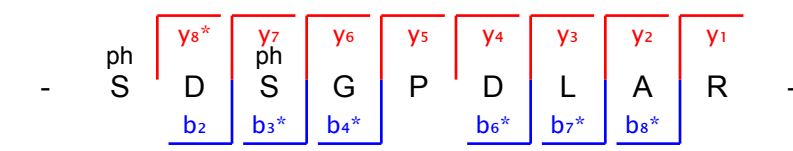

Raw file 20150812\_A375SR\_Phospho\_BR1\_02 Scan 8516 Method FTMS; HCD Score 158.91 m/z 1199.89 Gene names PHF23

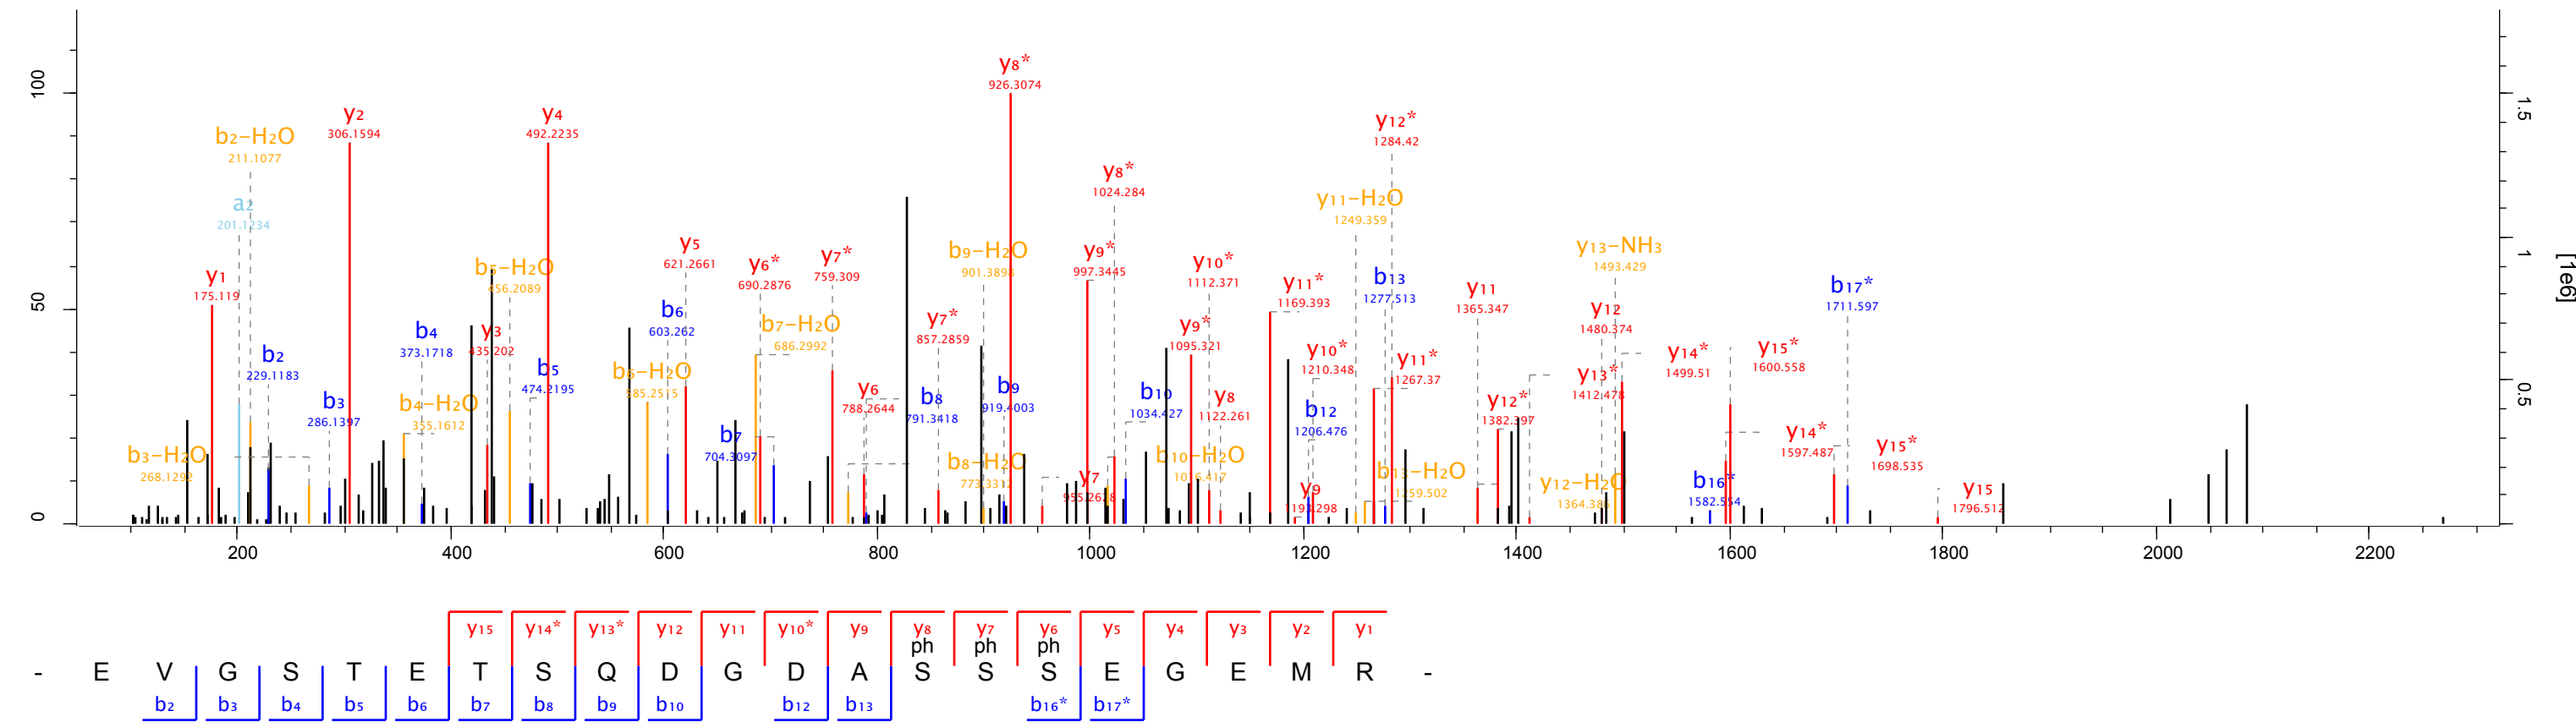

Raw file: 20150812\_A375SR\_Phospho\_BR1\_02  
 Scan: 8566 Method: FTMS; HCD Score: 134.02 m/z: 699.73 Gene names: TRA2A

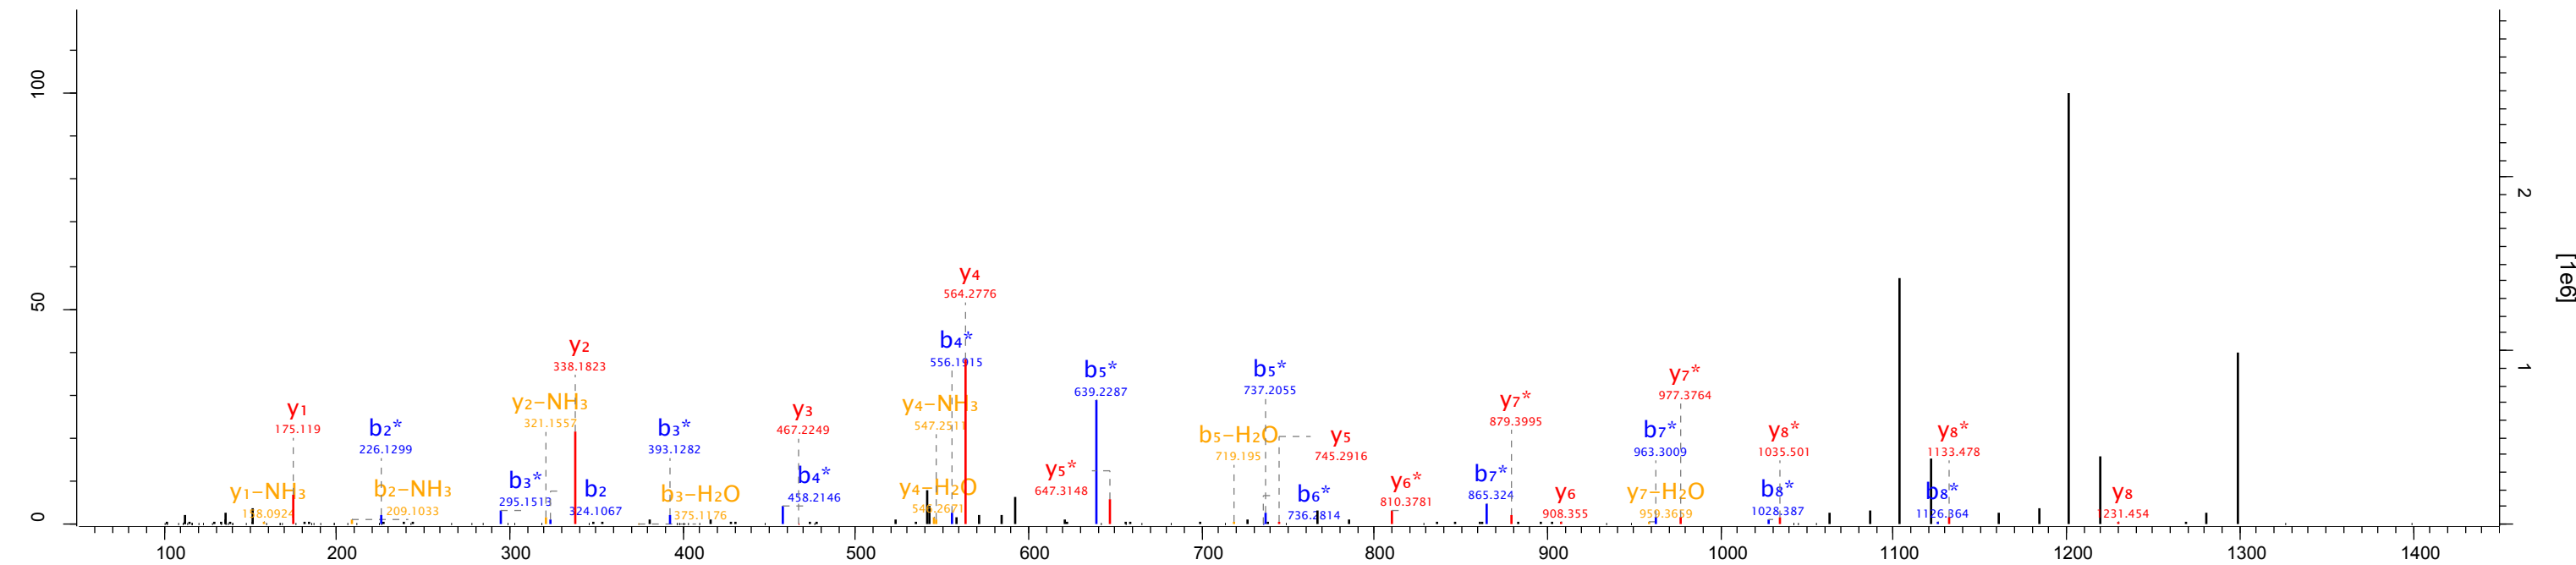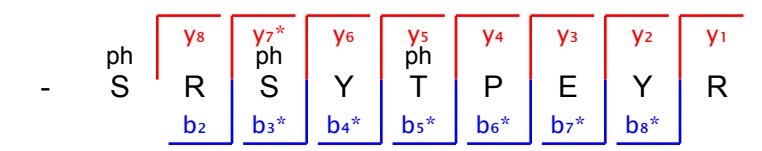



Raw file 20150812\_A375SR\_Phospho\_BR1\_02 Scan 8646 Method FTMS; HCD Score 56.56 m/z 1125.12 Gene names NOS1AP

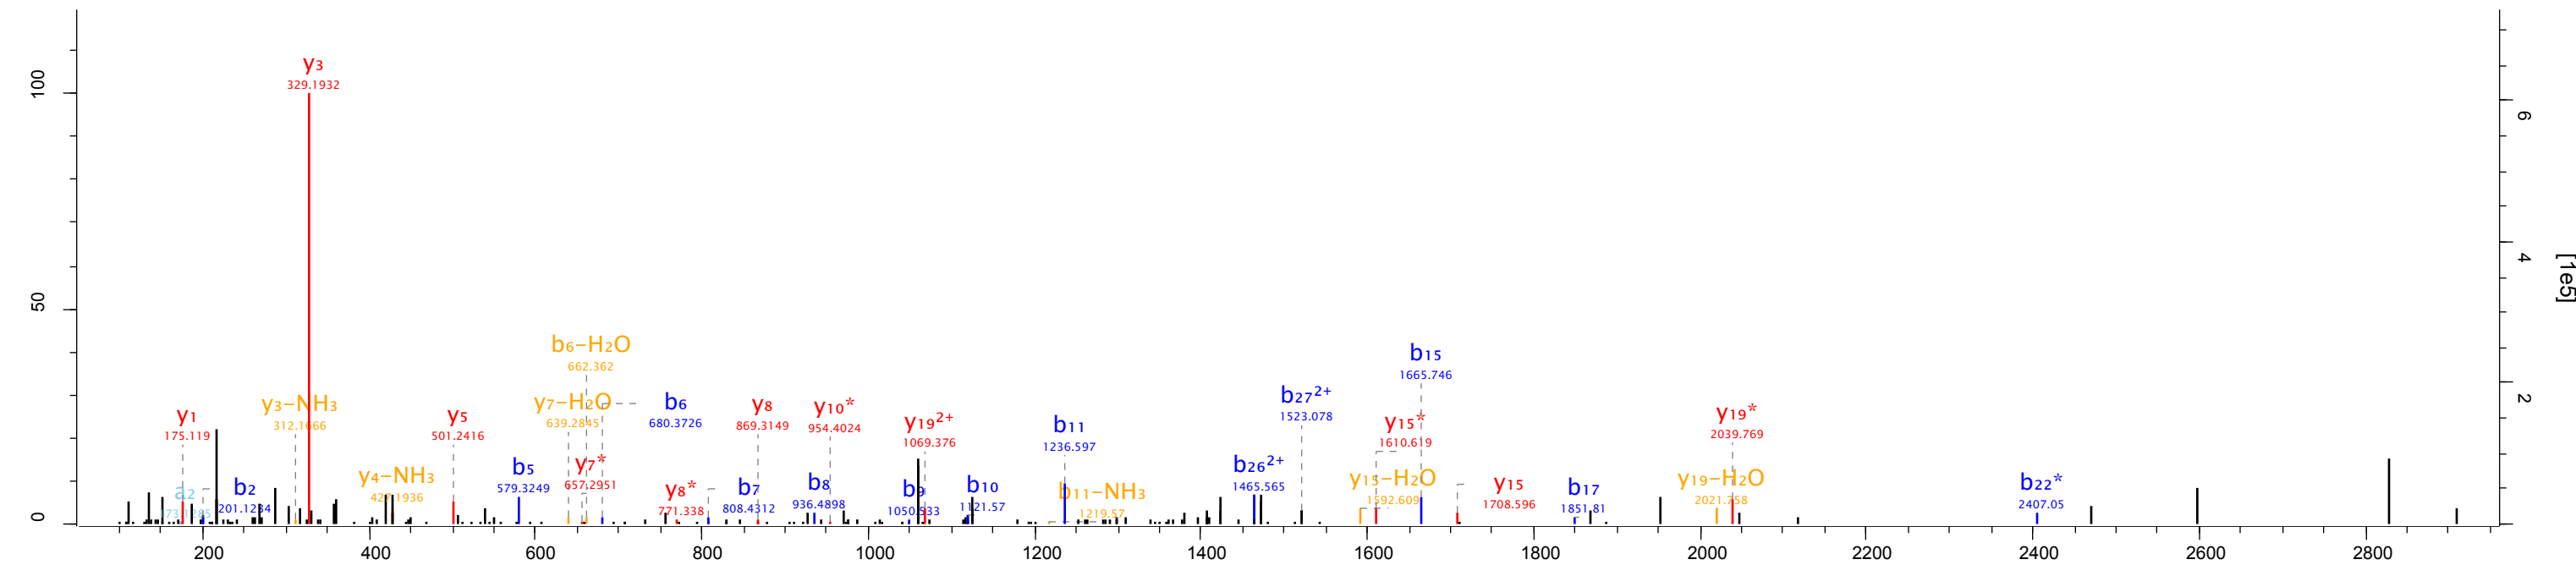

- L S L Q H T Q Q N A D G Q E D G E S E R N S N S S G D P G R -

Fragmentation sites are indicated by brackets below the sequence:

- Blue brackets (b ions): b2 (S), b5 (H), b6 (T), b7 (Q), b8 (Q), b9 (N), b10 (A), b11 (D), b15 (D), b17 (E), b22\* (S), b26<sup>2+</sup> (G), b27<sup>2+</sup> (D)
- Red brackets (y ions): y19\* (G), y15 (G), y10\* (N), y8 (N), y7\* (S), y5 (G), y3 (D), y1 (R)

Raw file: 20150812\_A375SR\_Phospho\_BR1\_02  
 Scan: 8896 Method: FTMS; HCD Score: 118.08 m/z: 876.36 Gene names: MYLK

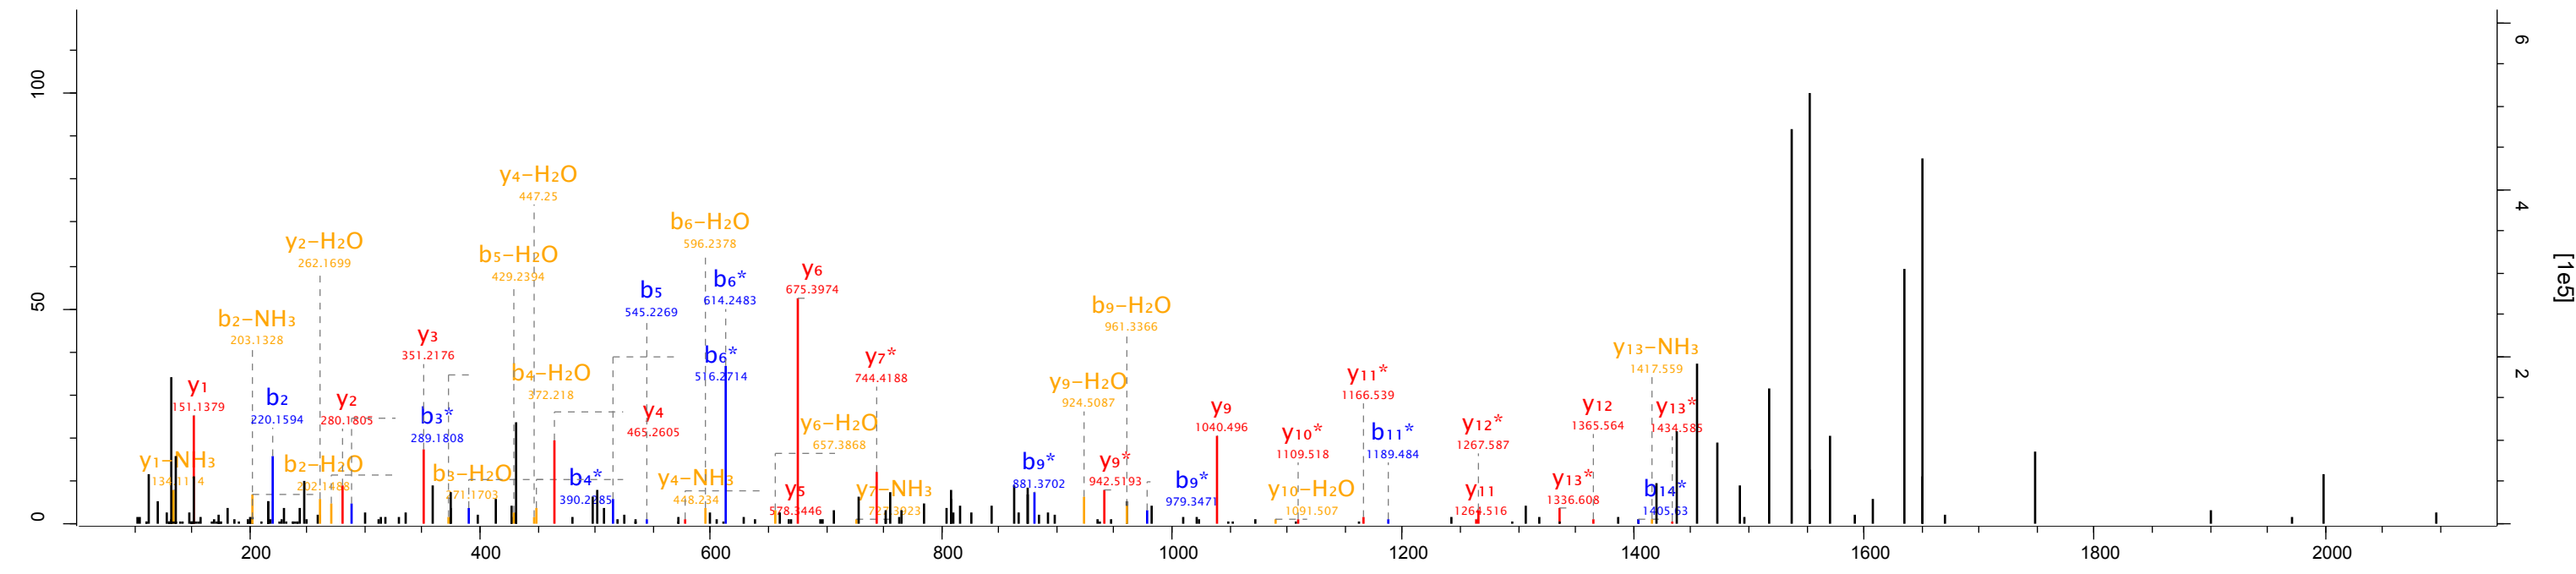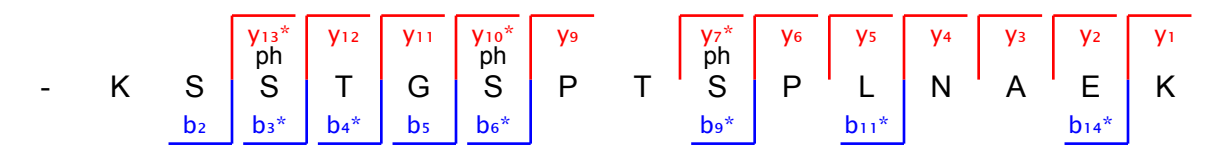

Raw file: 20150812\_A375SR\_Phospho\_BR1\_02  
 Scan: 9166 Method: FTMS; HCD Score: 148.46 m/z: 642.77 Gene names: LMNB2

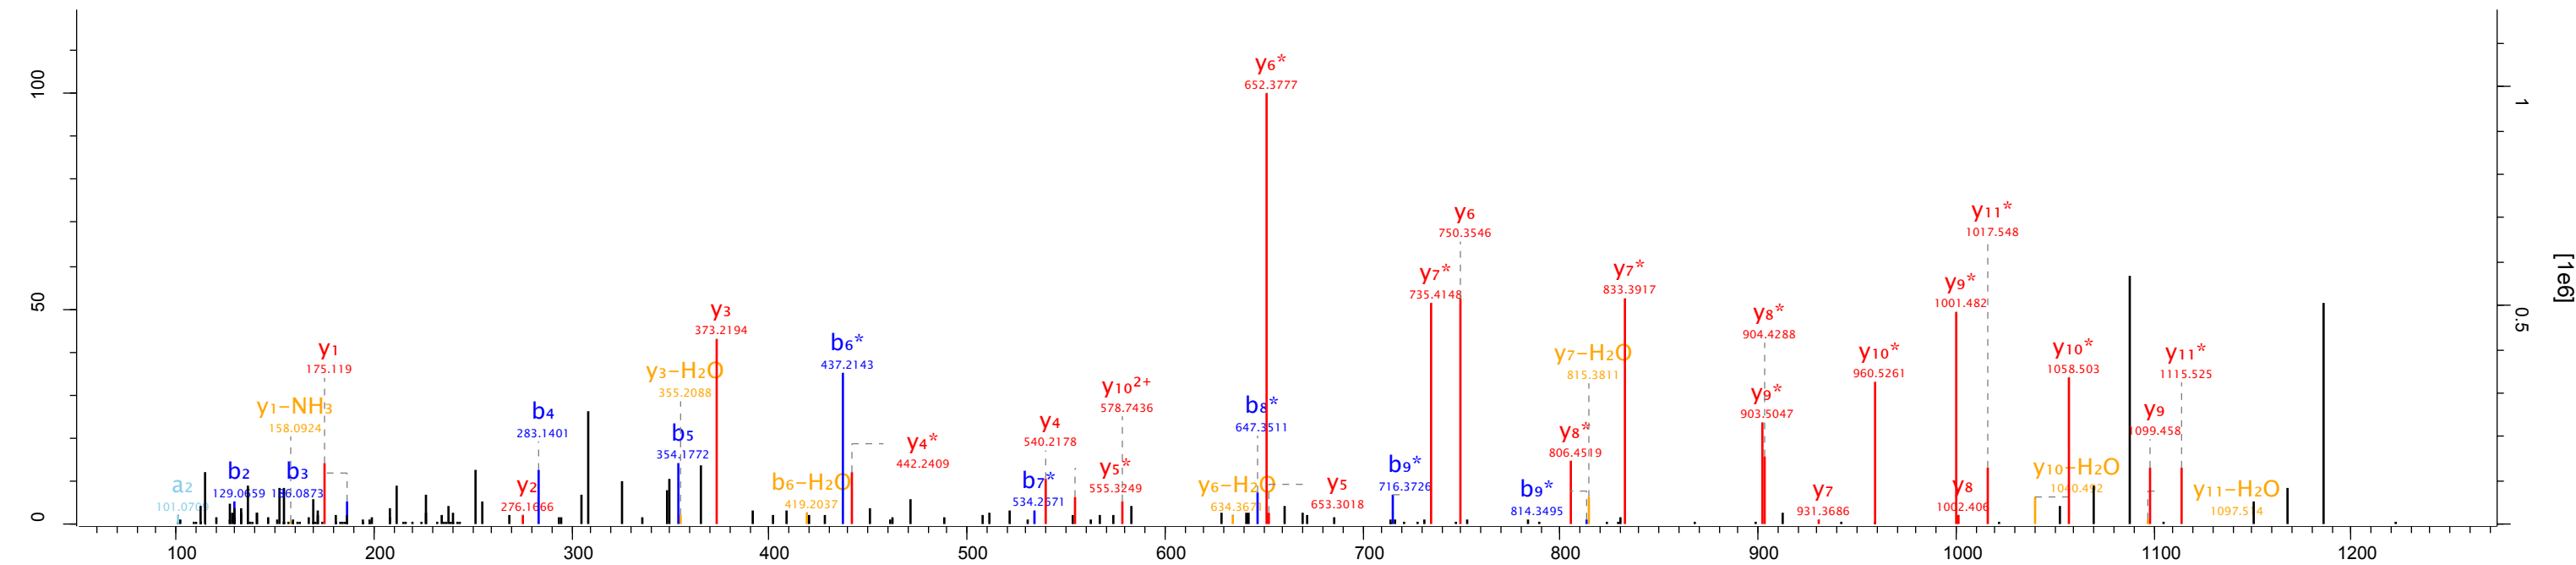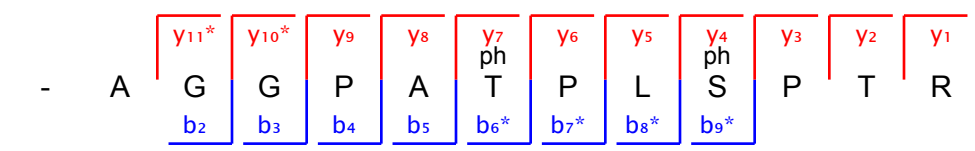

Raw file  
20150812\_A375SR\_Phospho\_BR1\_02

Scan 9396 Method FTMS; HCD Score 210.13 m/z 1231.93 Gene names NGDN

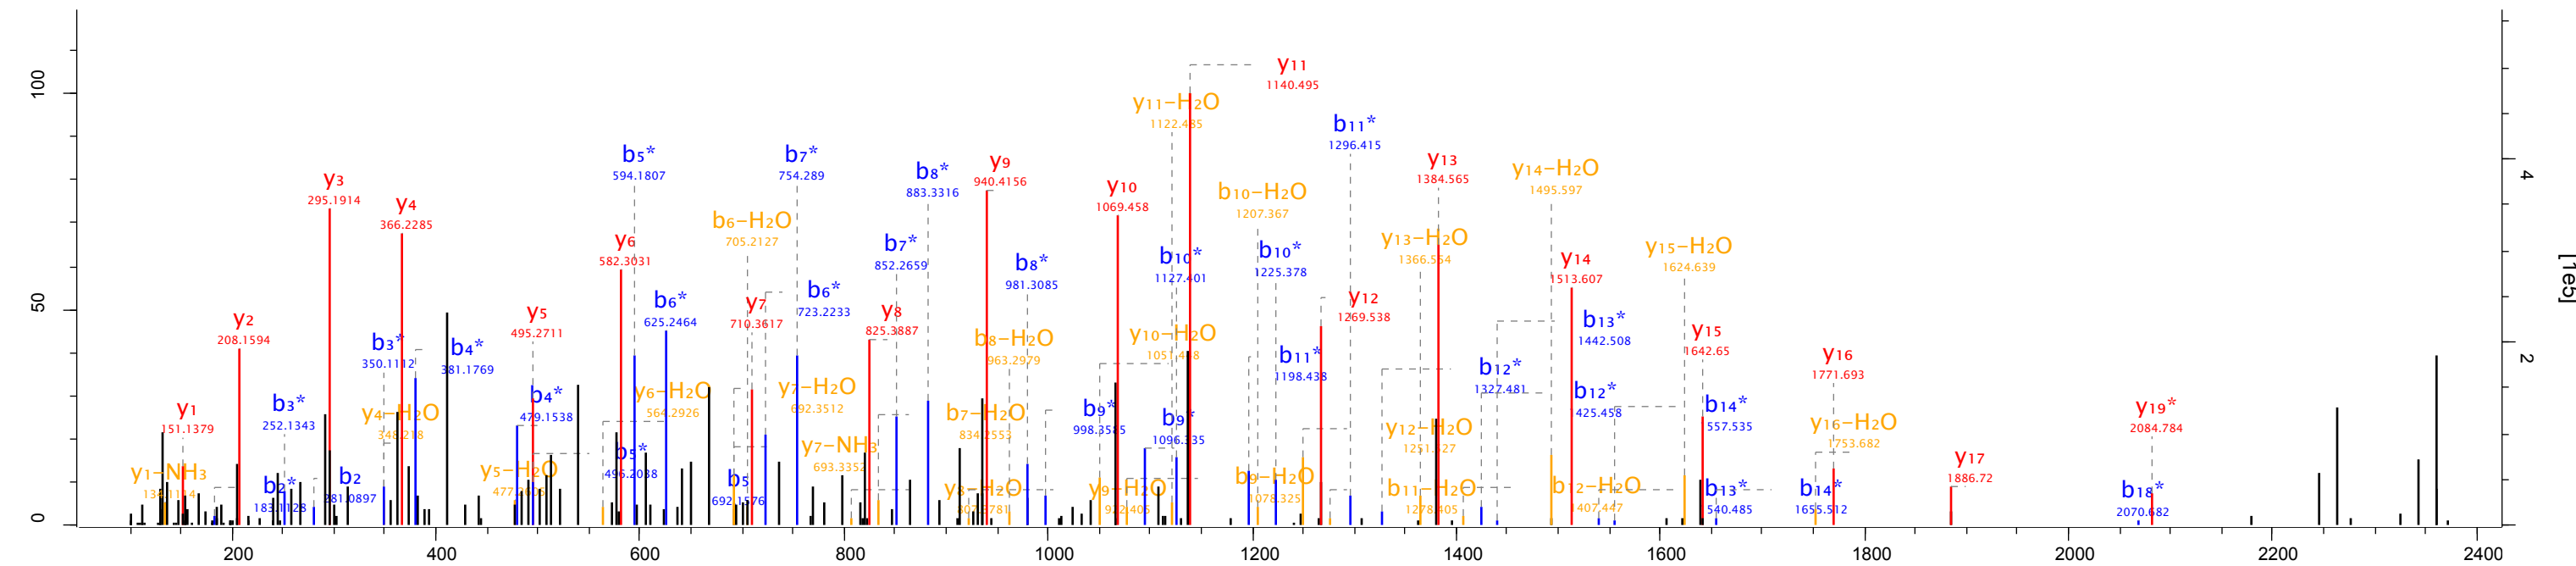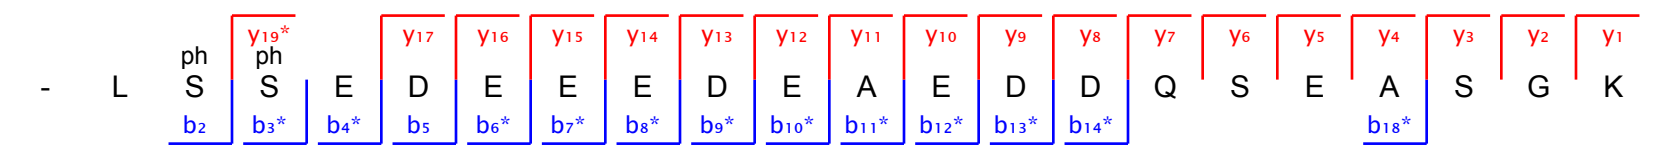

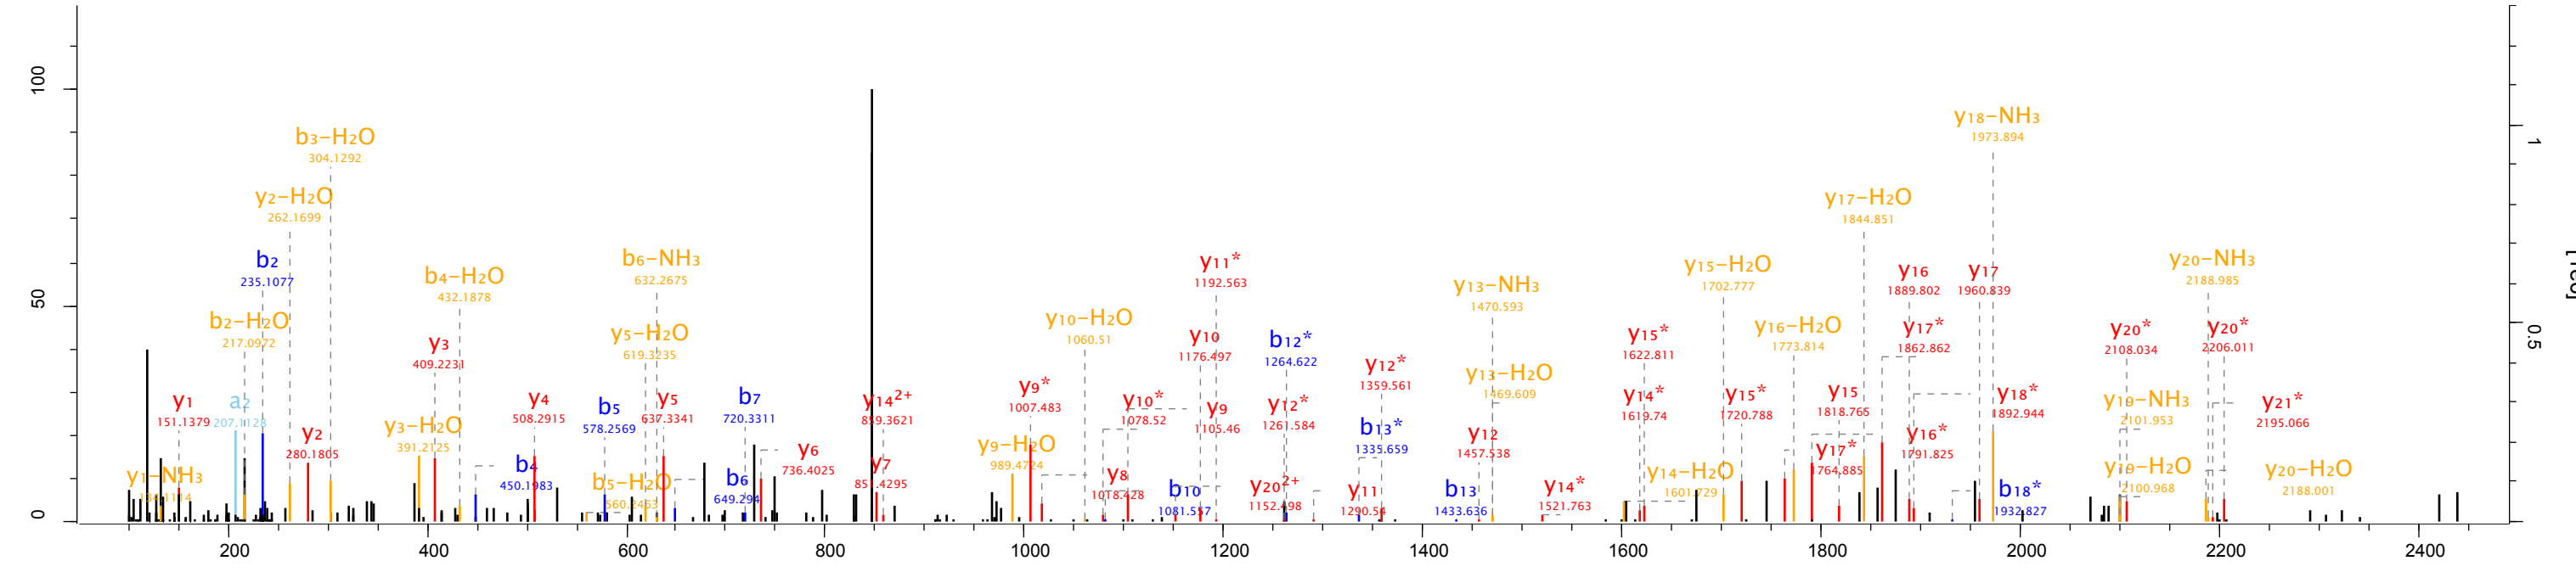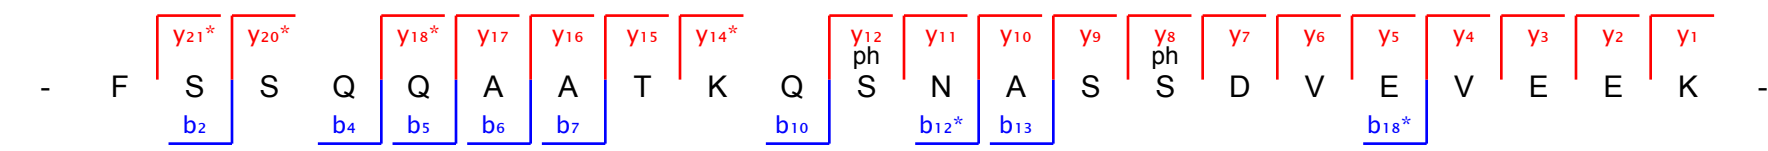

Raw file: 20150812\_A375SR\_Phospho\_BR1\_02  
 Scan: 9686 Method: FTMS; HCD Score: 128.44 m/z: 872.37 Gene names: MYO9B

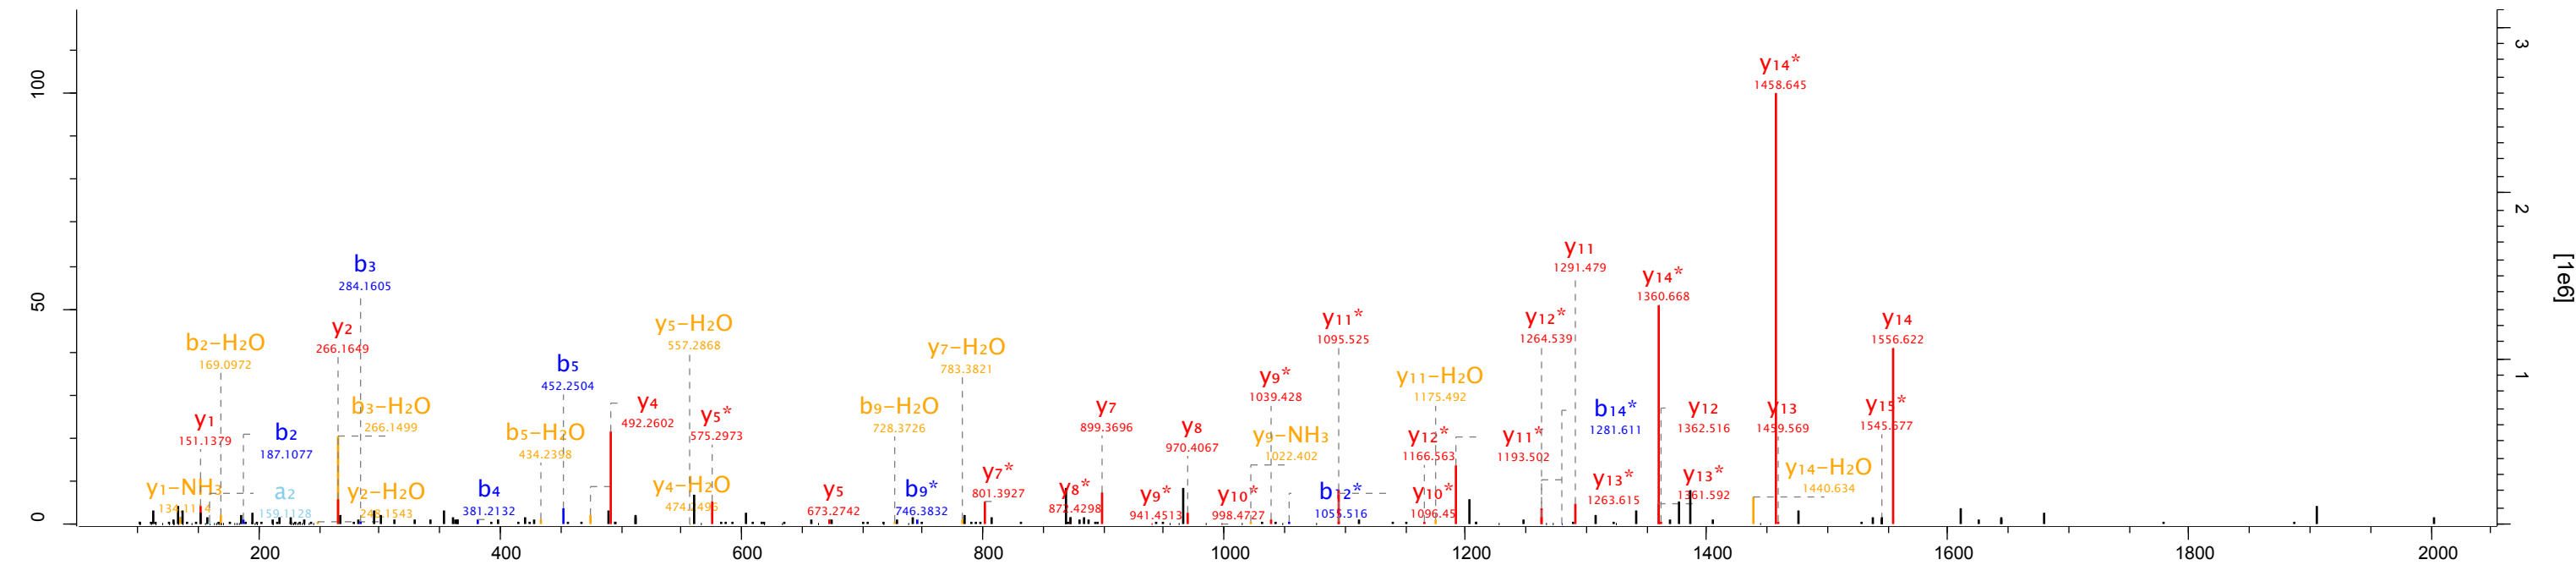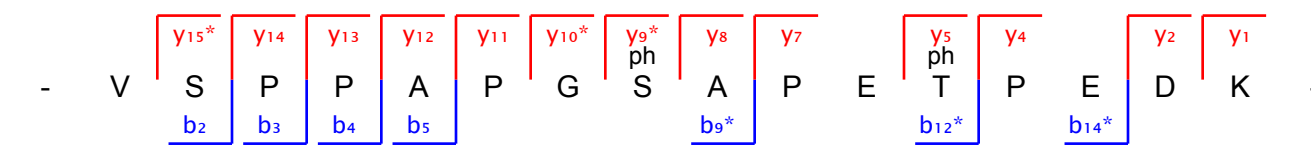

Raw file: 20150812\_A375SR\_Phospho\_BR1\_02  
 Scan: 9756 Method: FTMS; HCD Score: 95.05 m/z: 772.31 Gene names: ANKS6

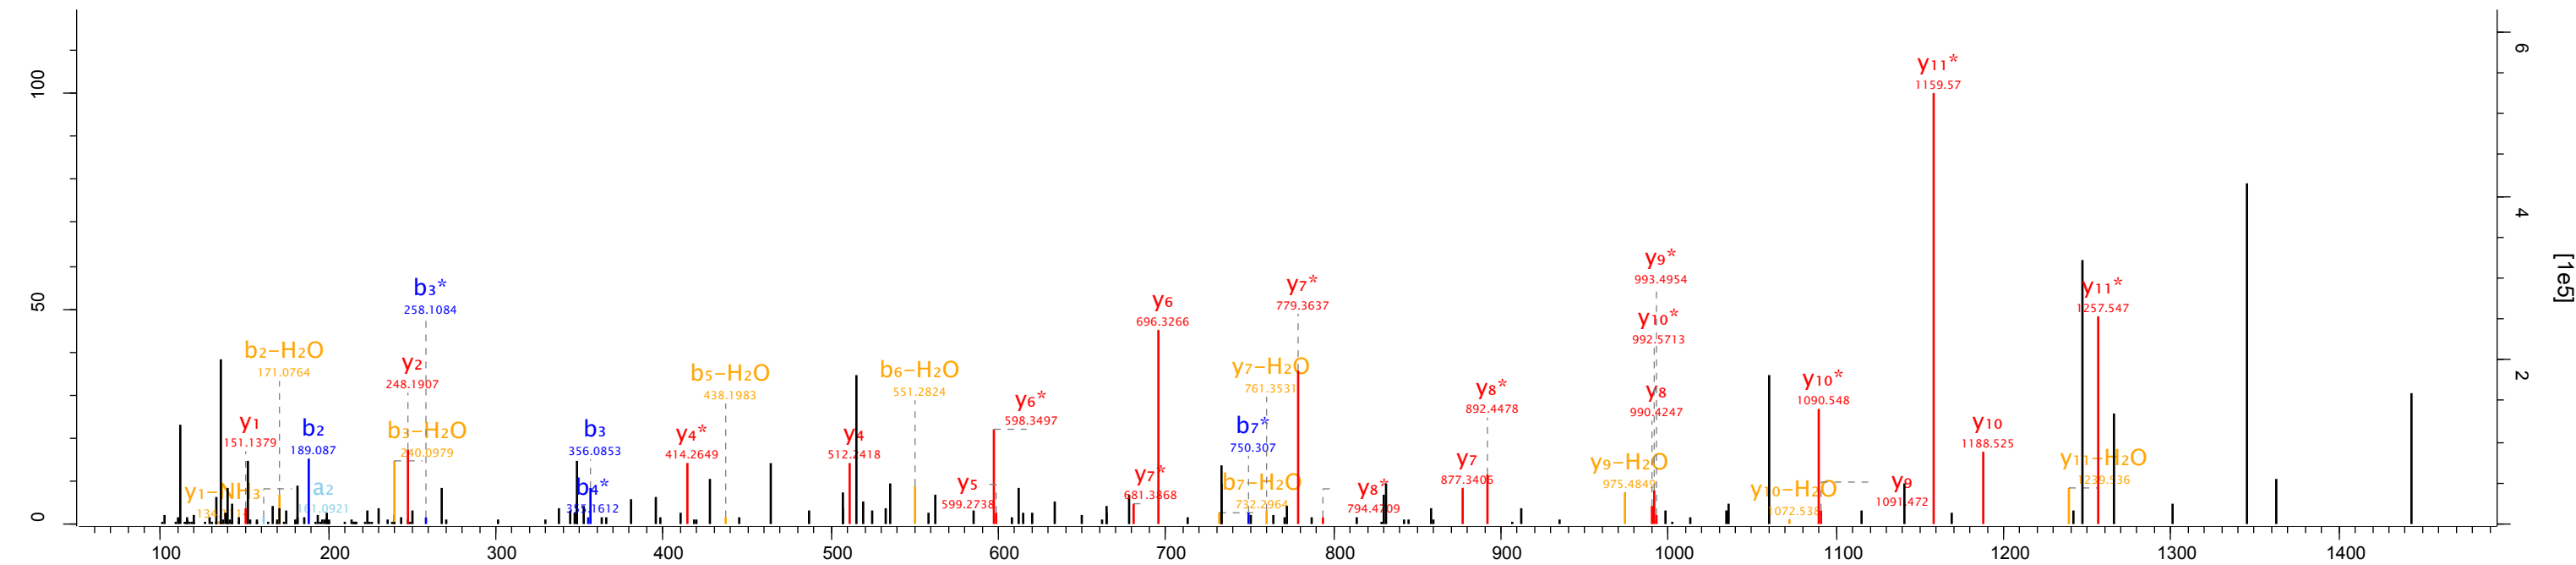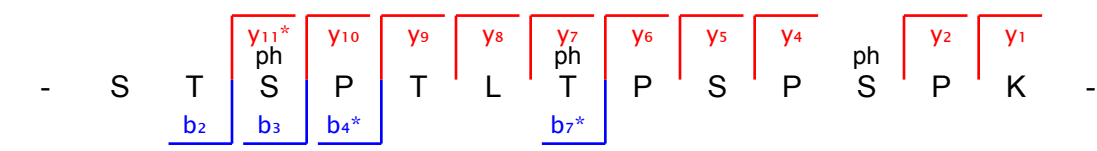

Raw file: 20150812\_A375SR\_Phospho\_BR1\_02  
 Scan: 9846 Method: FTMS; HCD Score: 164.94 m/z: 927.86 Gene names: SHROOM3

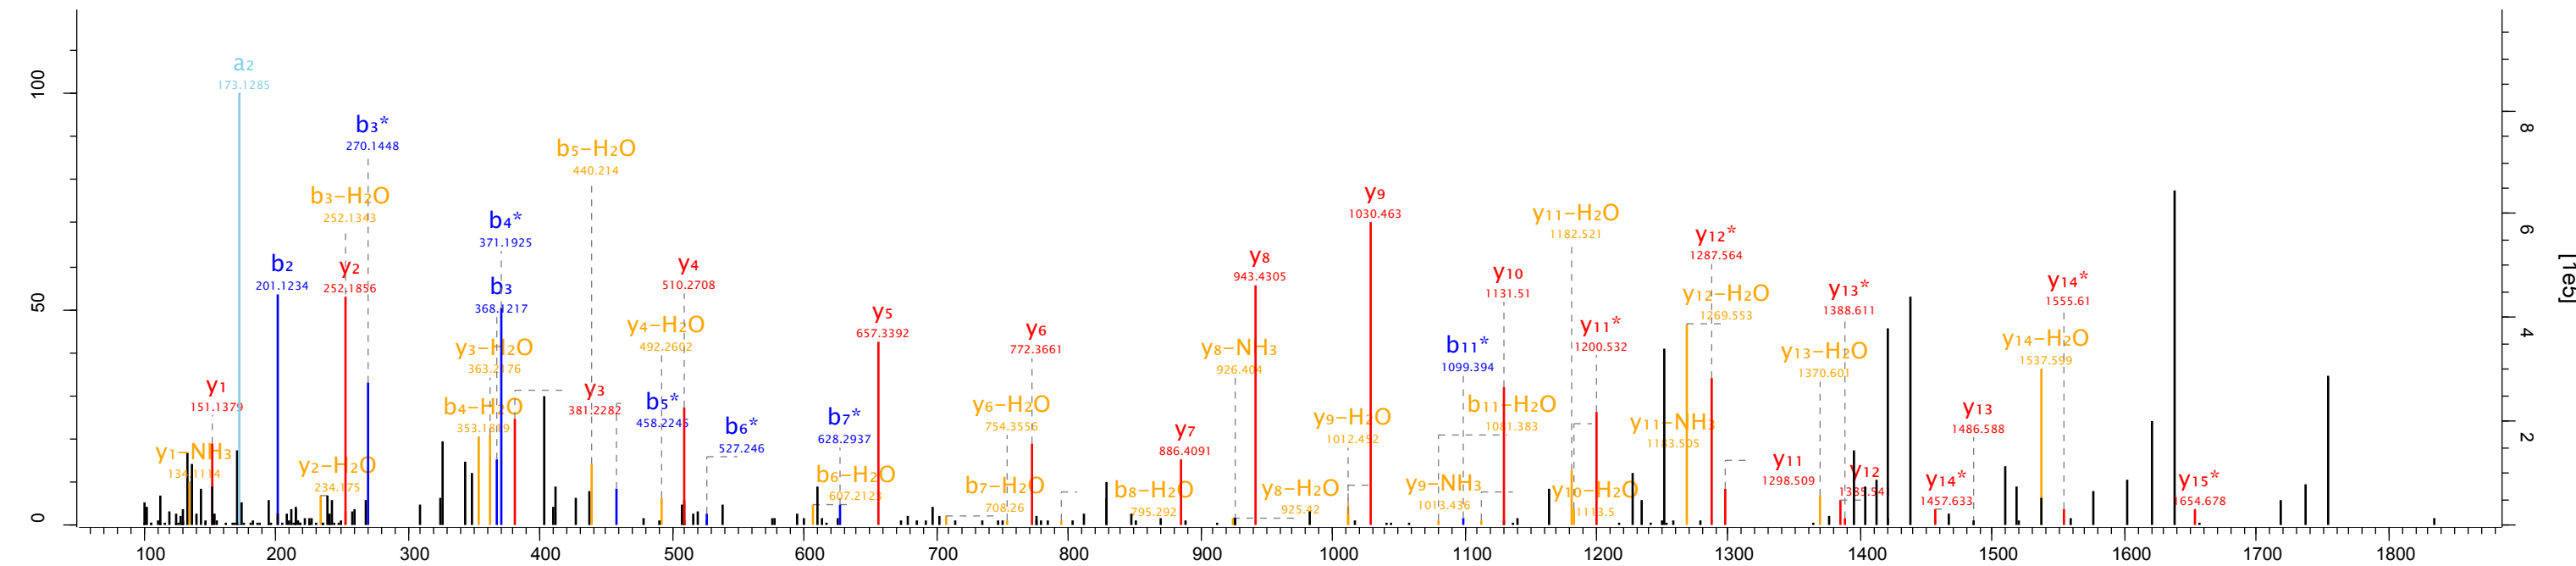

Protein sequence: - T V S T S T S G N D F E E T K -

Fragmentation sites (boxed):

- b2 (V)
- b3 (S)
- b4\* (T)
- b5\* (S)
- b6\* (S)
- b7\* (T)
- b11\* (D)



Raw file: 20150812\_A375SR\_Phospho\_BR1\_03  
 Scan: 10446 Method: FTMS; HCD Score: 183.56 m/z: 1015.41 Gene names: ZRANB2

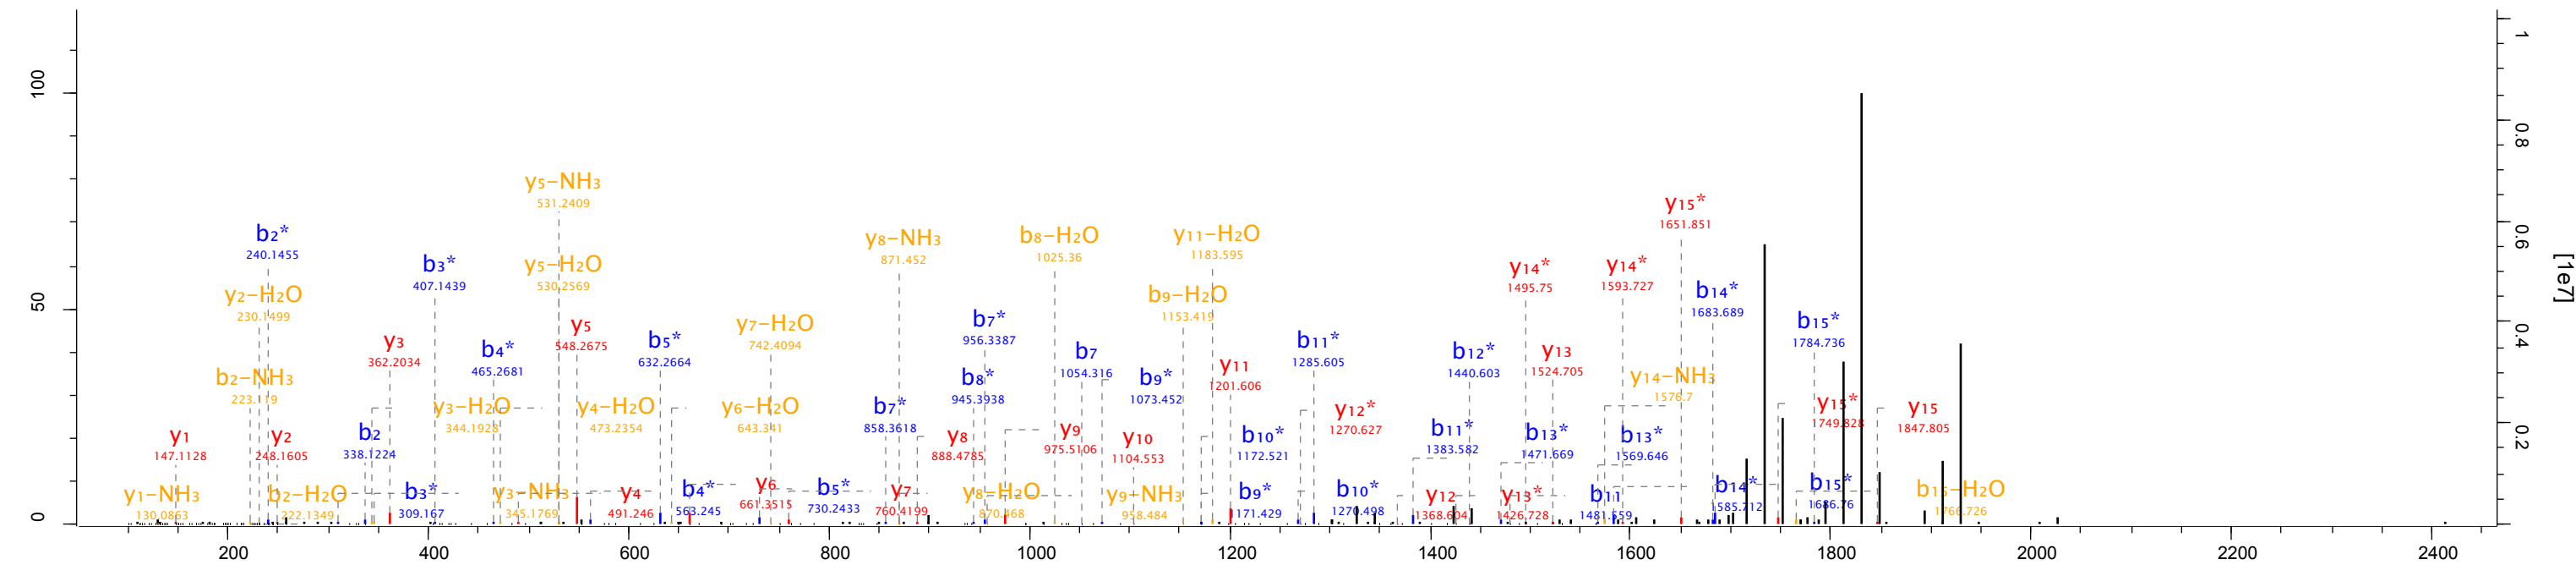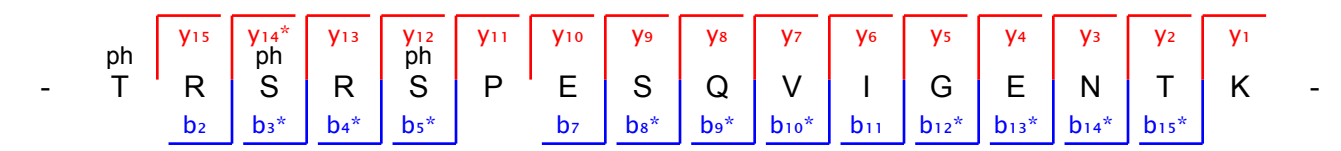

Raw file Scan Method Score m/z Gene names  
 20150812\_A375SR\_Phospho\_BR1\_03 10636 FTMS; HCD 272.51 846.36 ZRANB2

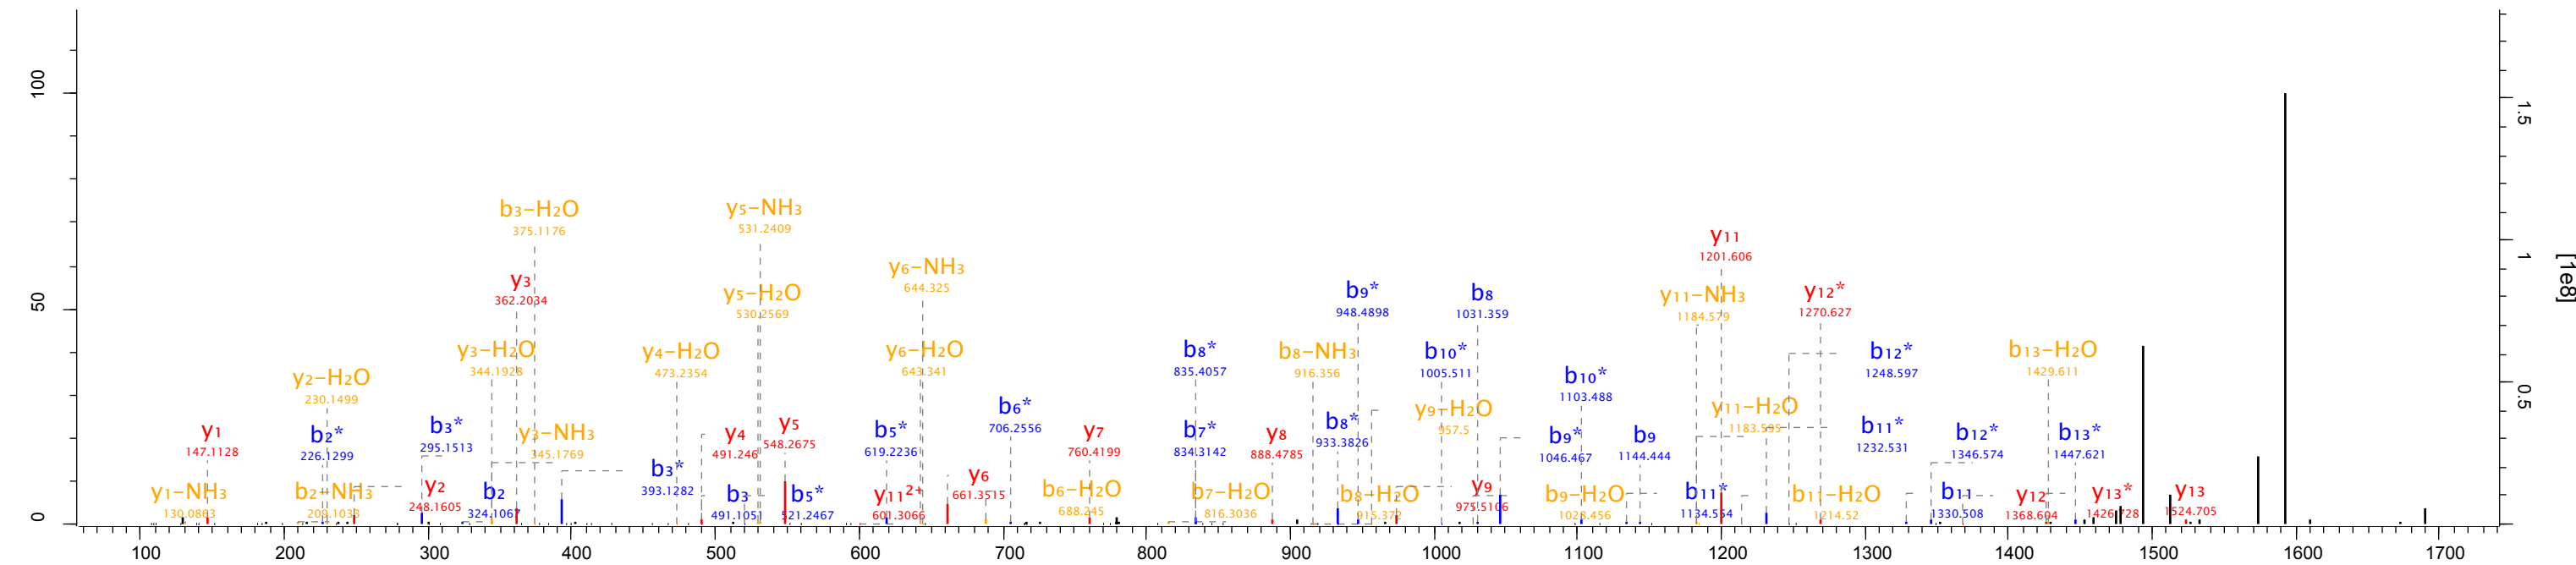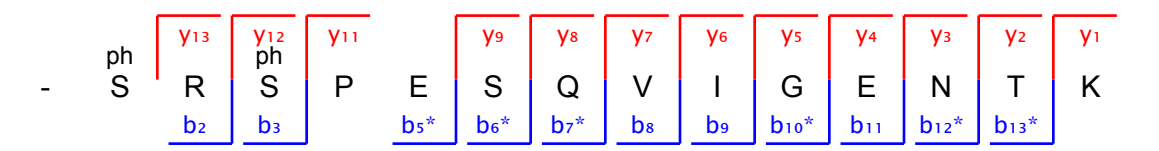

Raw file: 20150812\_A375SR\_Phospho\_BR1\_03  
 Scan: 10836 Method: FTMS; HCD Score: 95.66 m/z: 638.28 Gene names: C1orf226

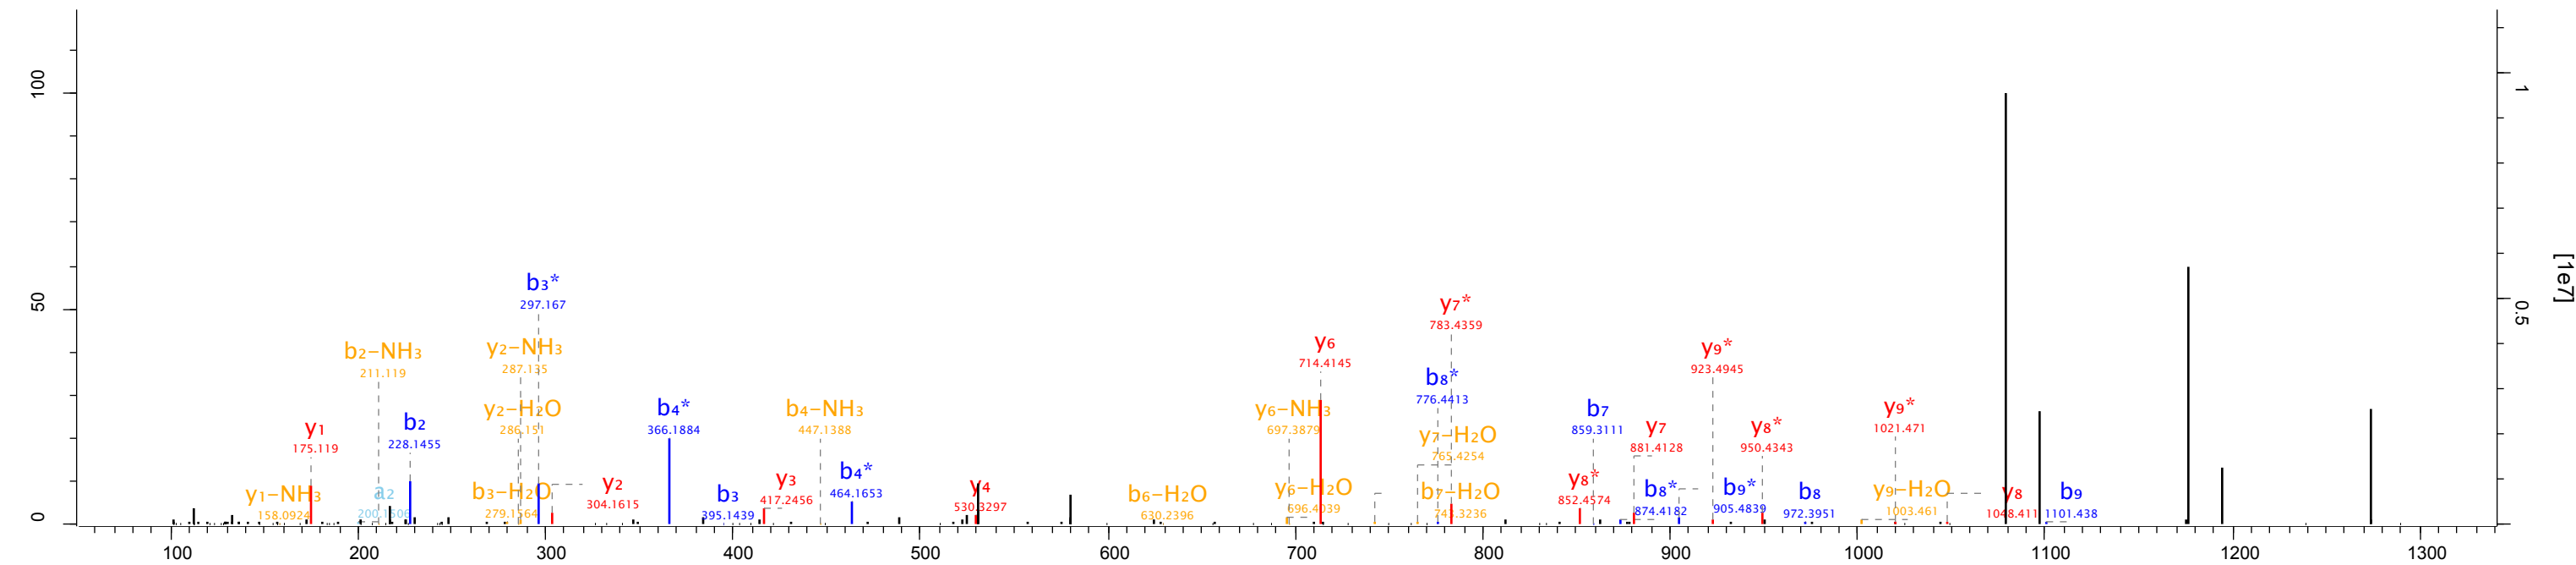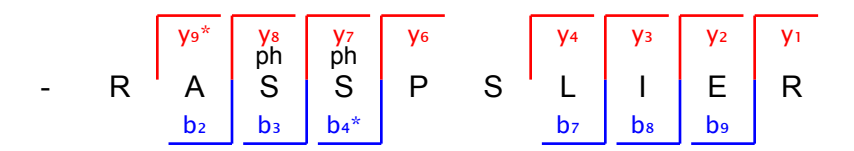

Raw file 20150812\_A375SR\_Phospho\_BR1\_03 Scan 11256 Method FTMS; HCD Score 167.67 m/z 758.67 Gene names ITGB4

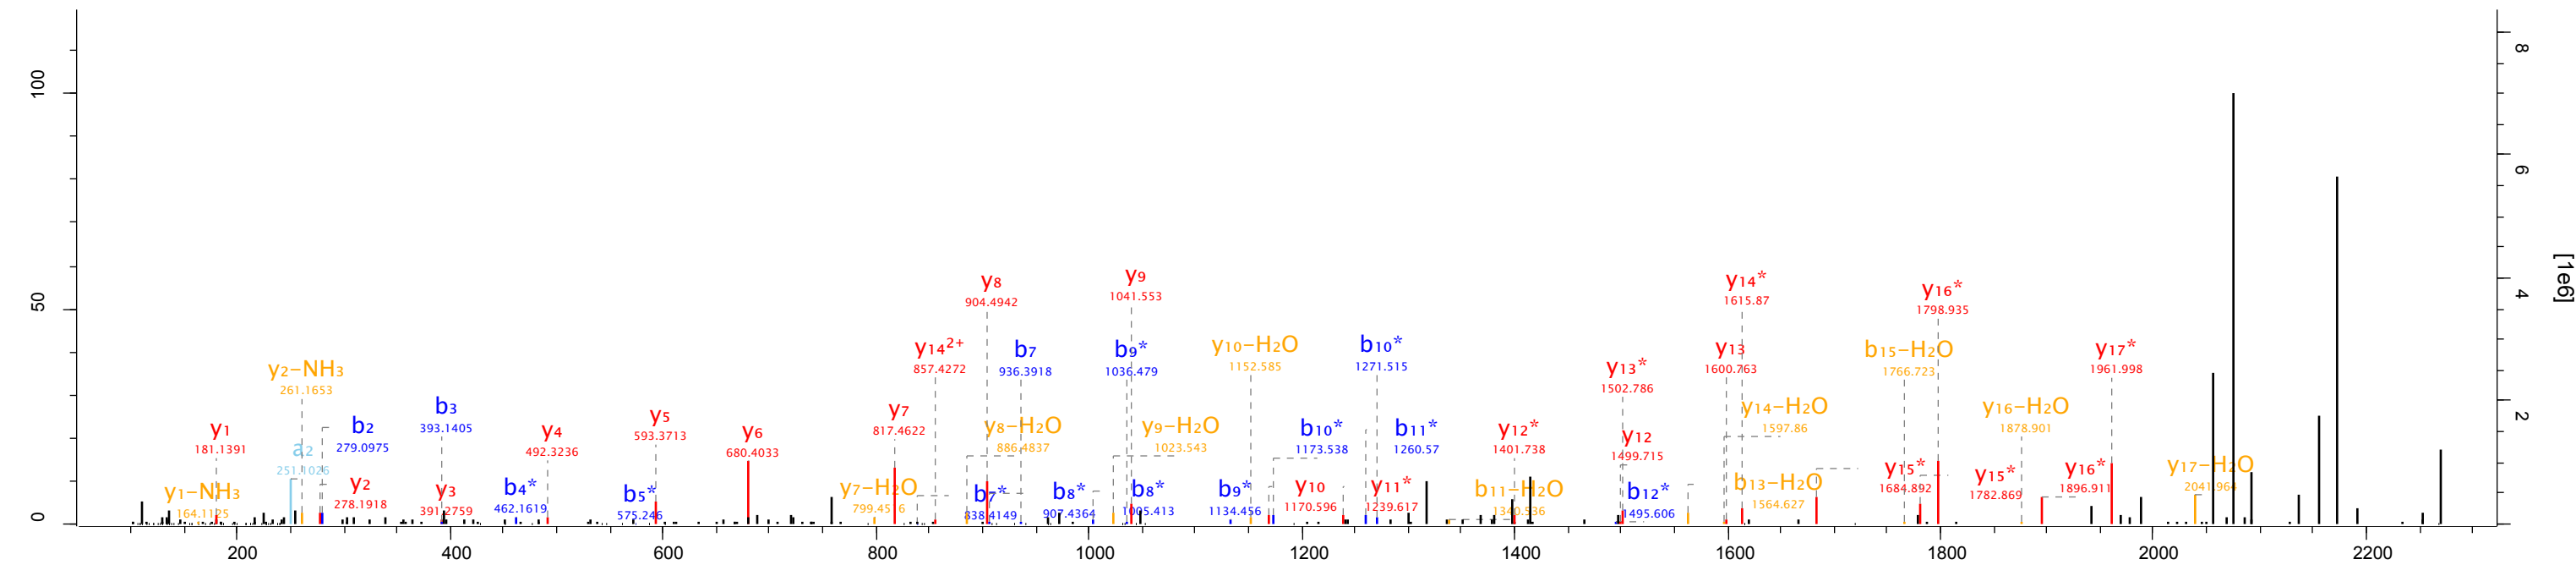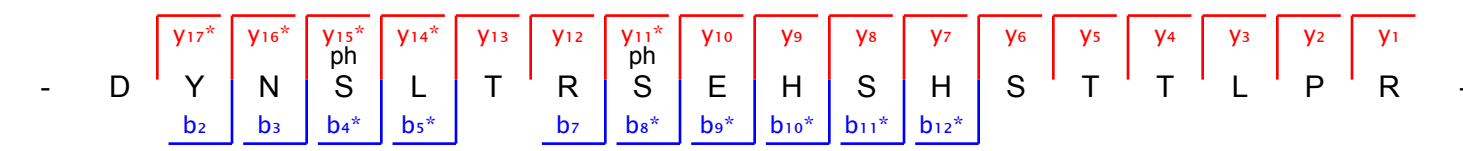

Raw file Scan Method Score m/z Gene names  
 20150812\_A375SR\_Phospho\_BR1\_03 11786 FTMS; HCD 171.47 918.83 IRS2

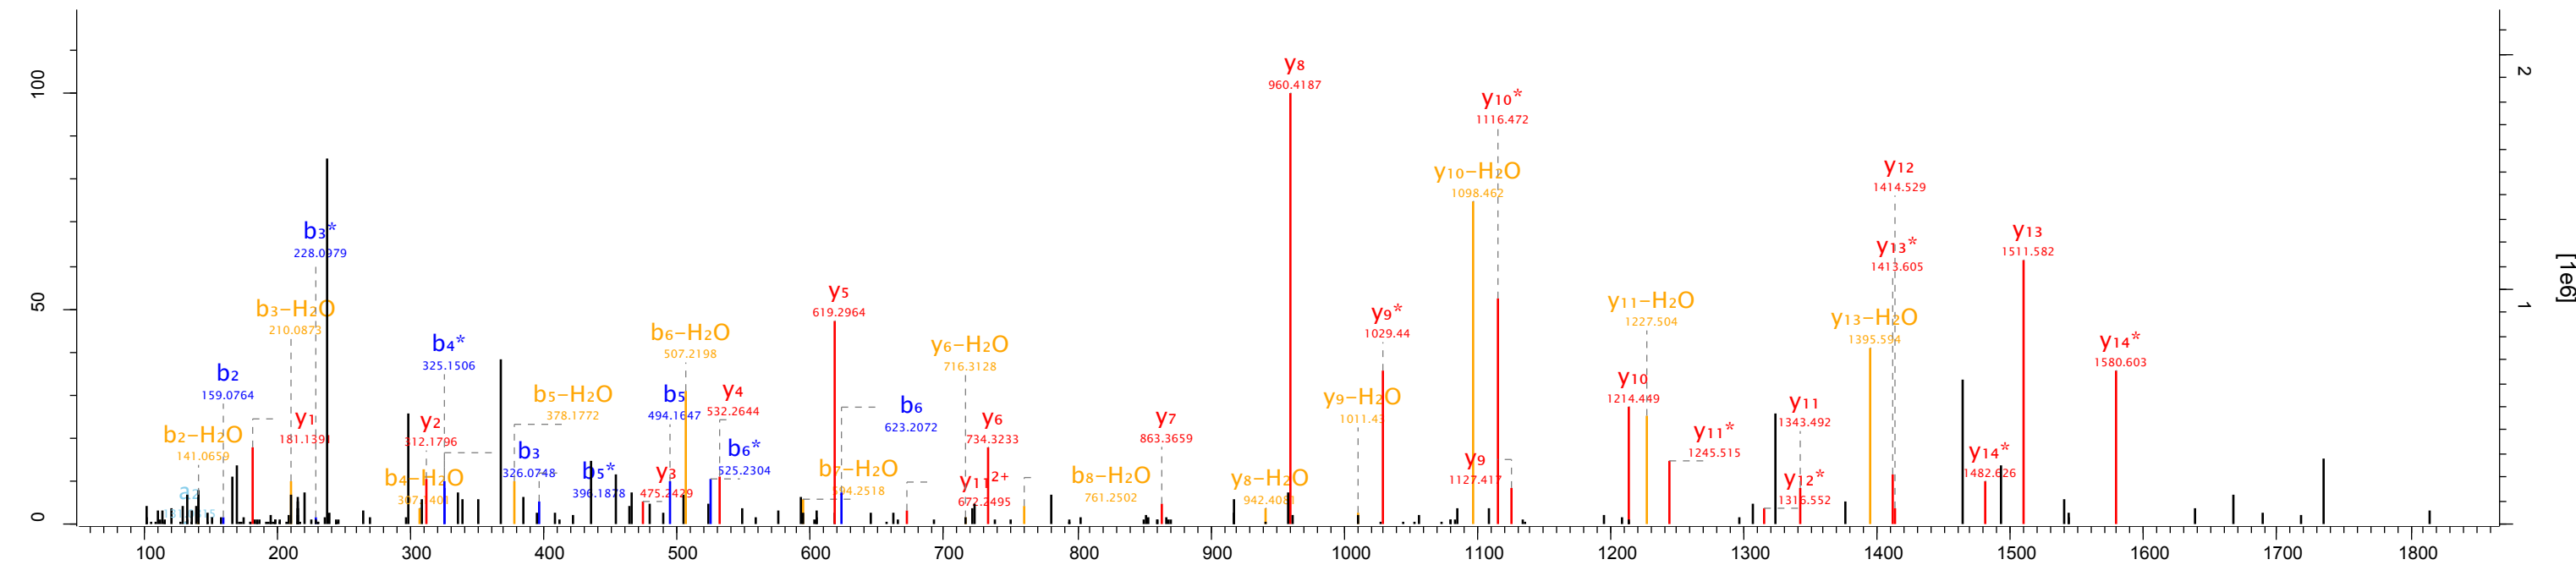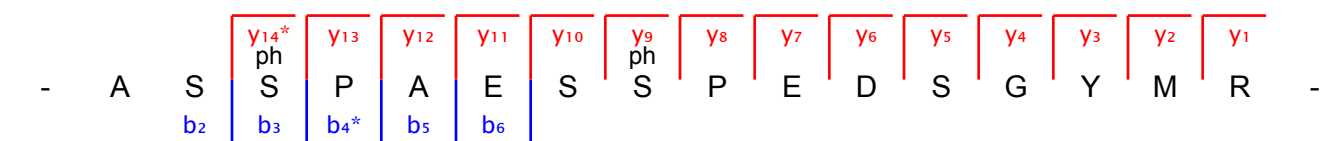

Raw file 20150812\_A375SR\_Phospho\_BR1\_03 Scan 12016 Method FTMS; HCD Score 116.13 m/z 755.31 Gene names SVIL

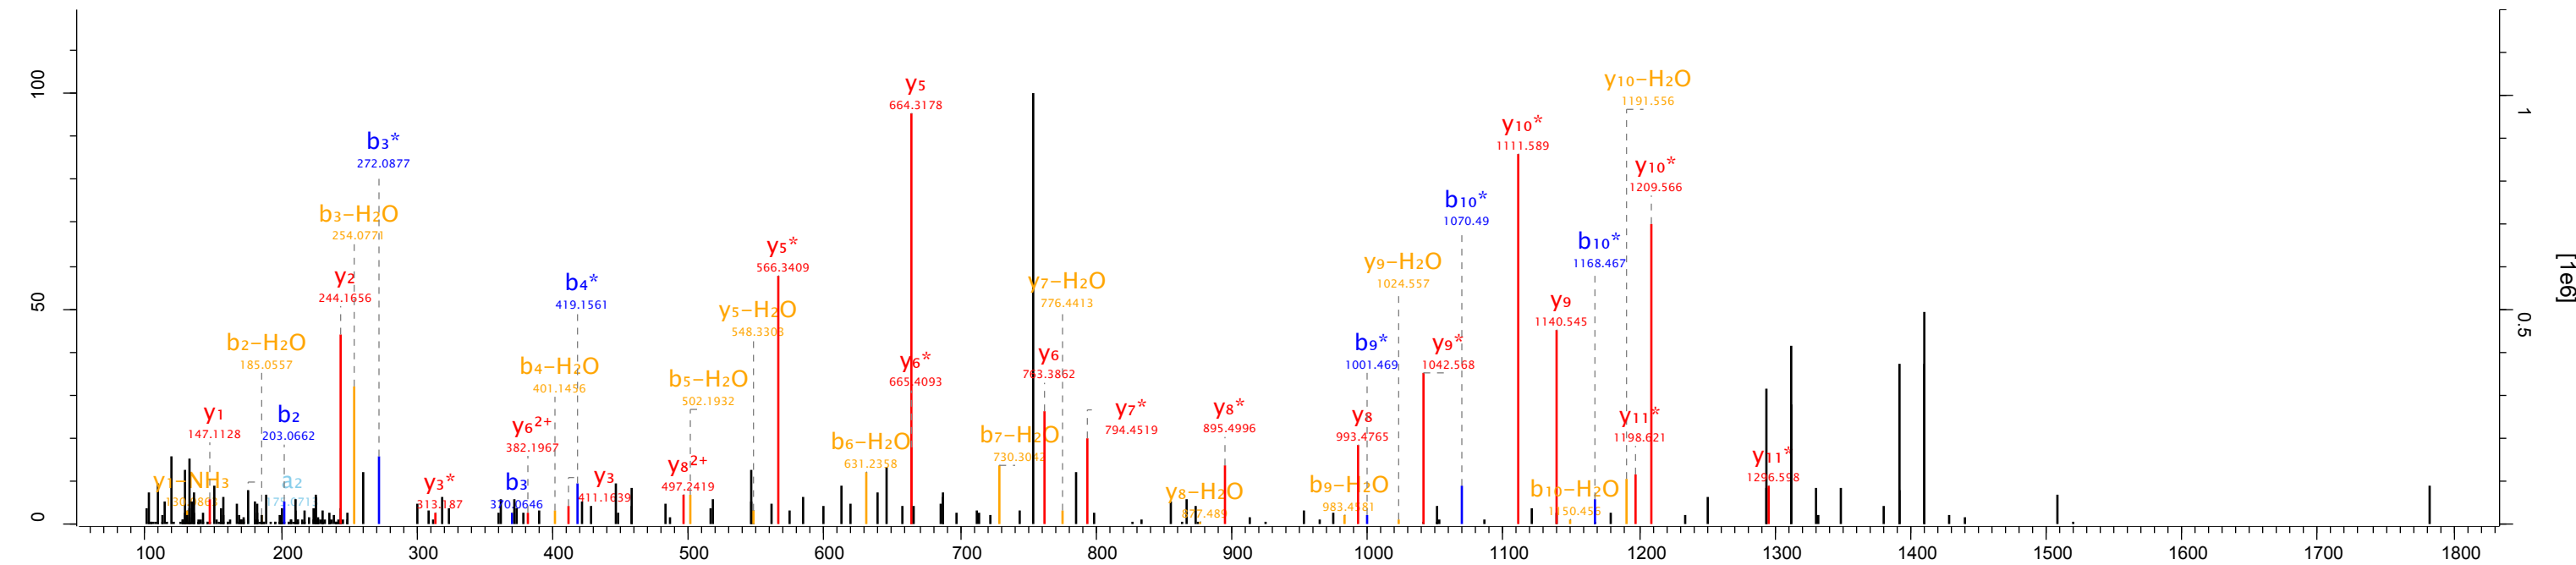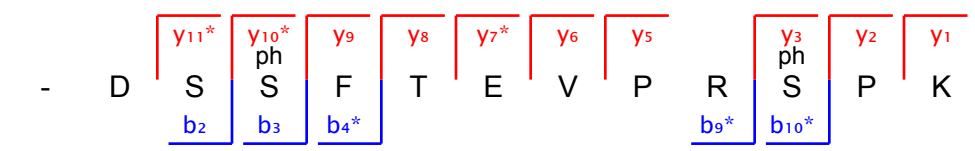

Raw file 20150812\_A375SR\_Phospho\_BR1\_03 Scan 12186 Method FTMS; HCD Score 100.4 m/z 588.75 Gene names CLASP2

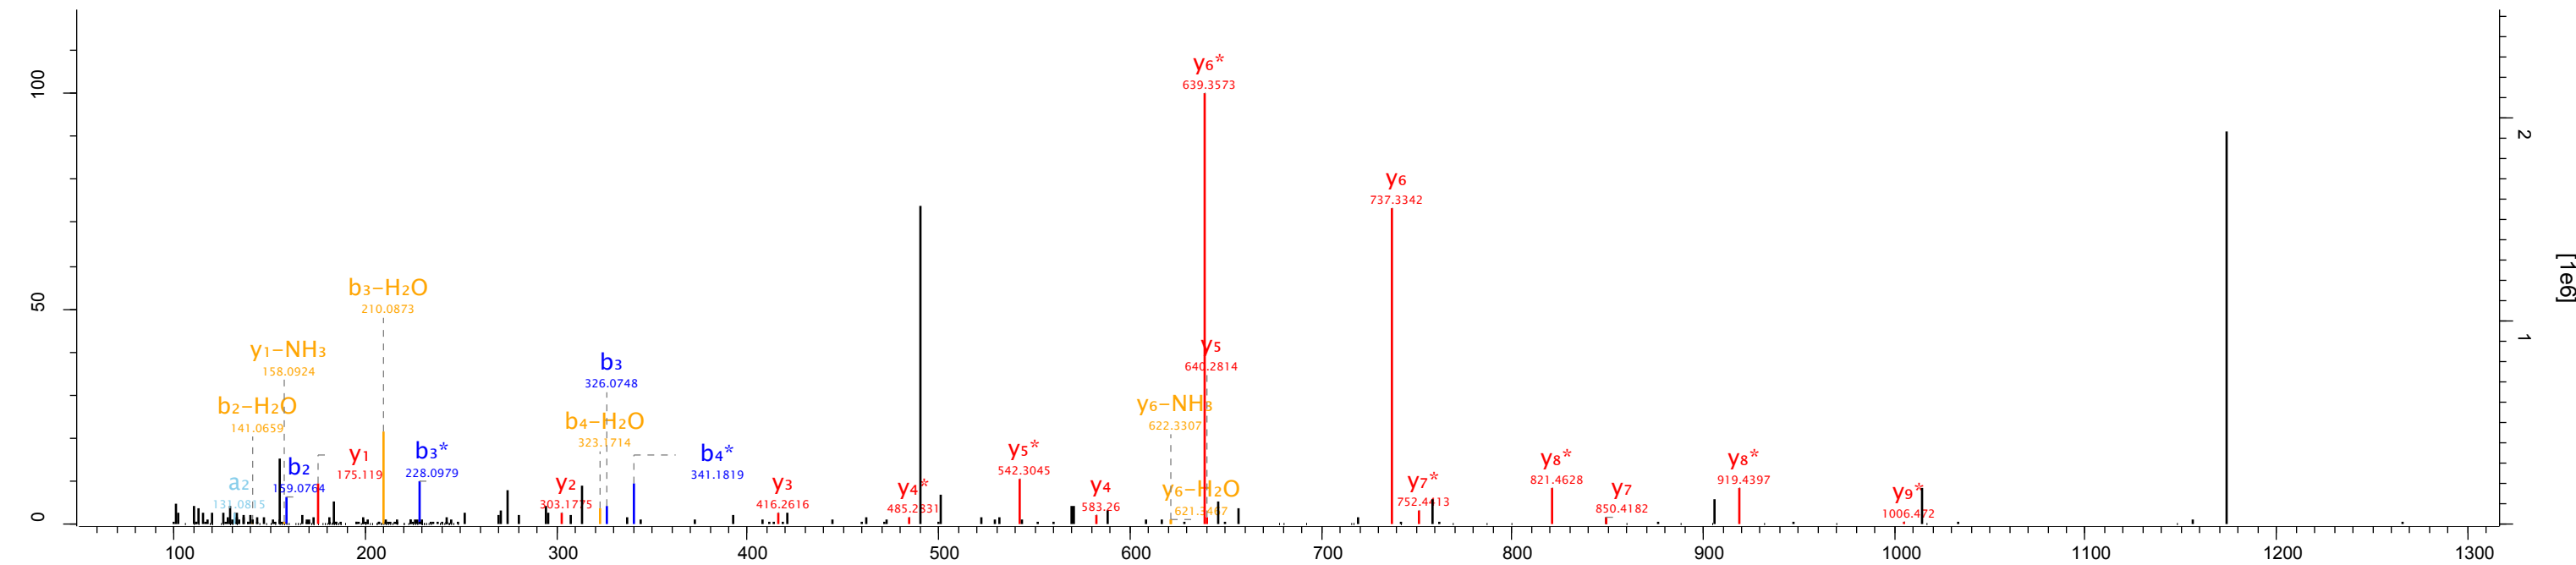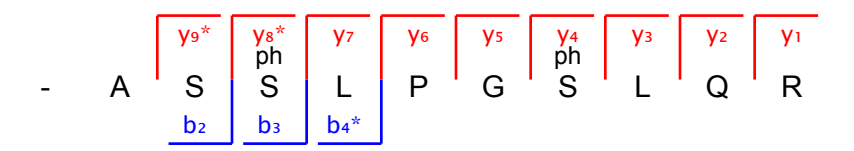

Raw file: 20150812\_A375SR\_Phospho\_BR1\_03  
 Scan: 12356 Method: FTMS; HCD Score: 223.44 m/z: 809.36 Gene names: PLEC

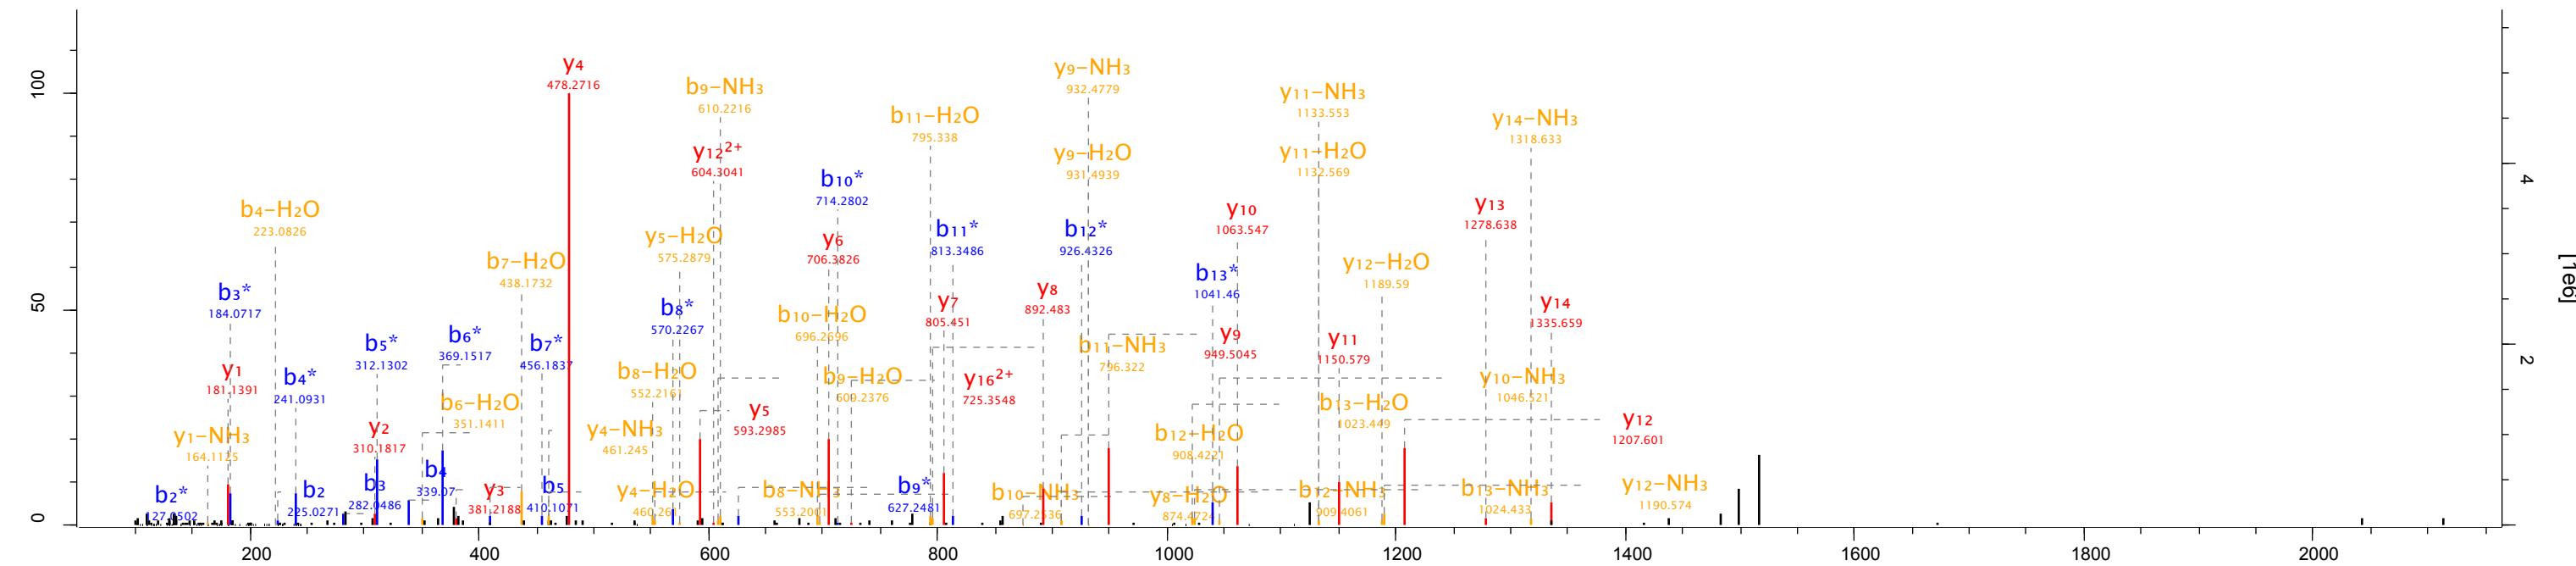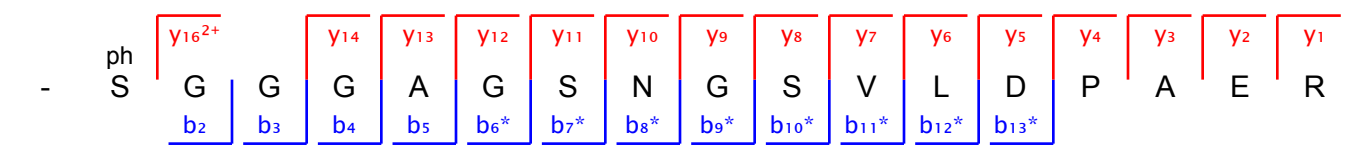



Raw file: 20150812\_A375SR\_Phospho\_BR1\_03  
 Scan: 12436 Method: FTMS; HCD Score: 54.24 m/z: 771.02 Gene names: NDC80

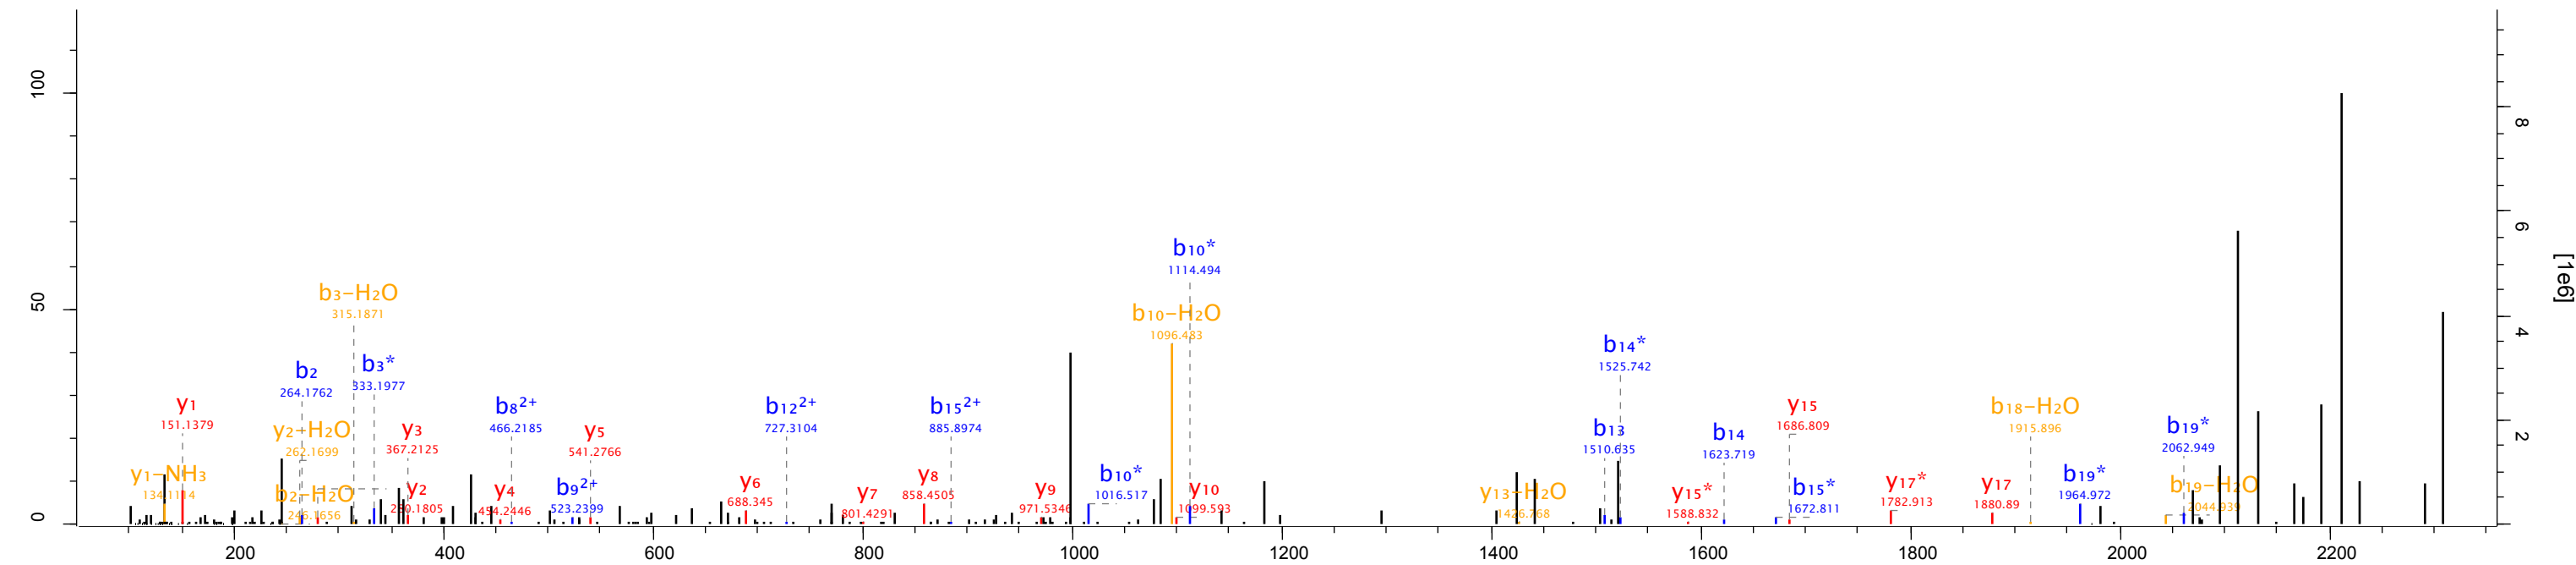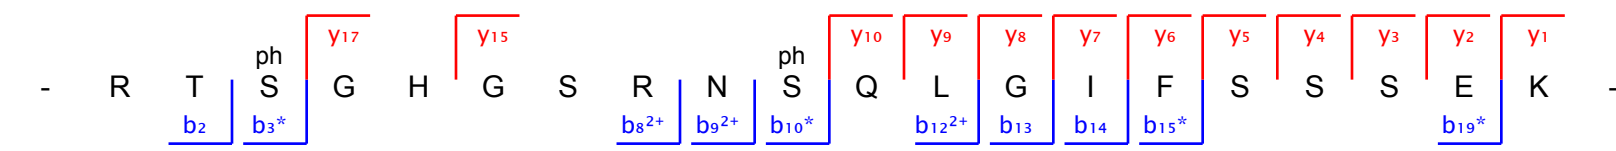

Raw file 20150812\_A375SR\_Phospho\_BR1\_03 Scan 12616 Method FTMS; HCD Score 87.46 m/z 897.35 Gene names ZEB1

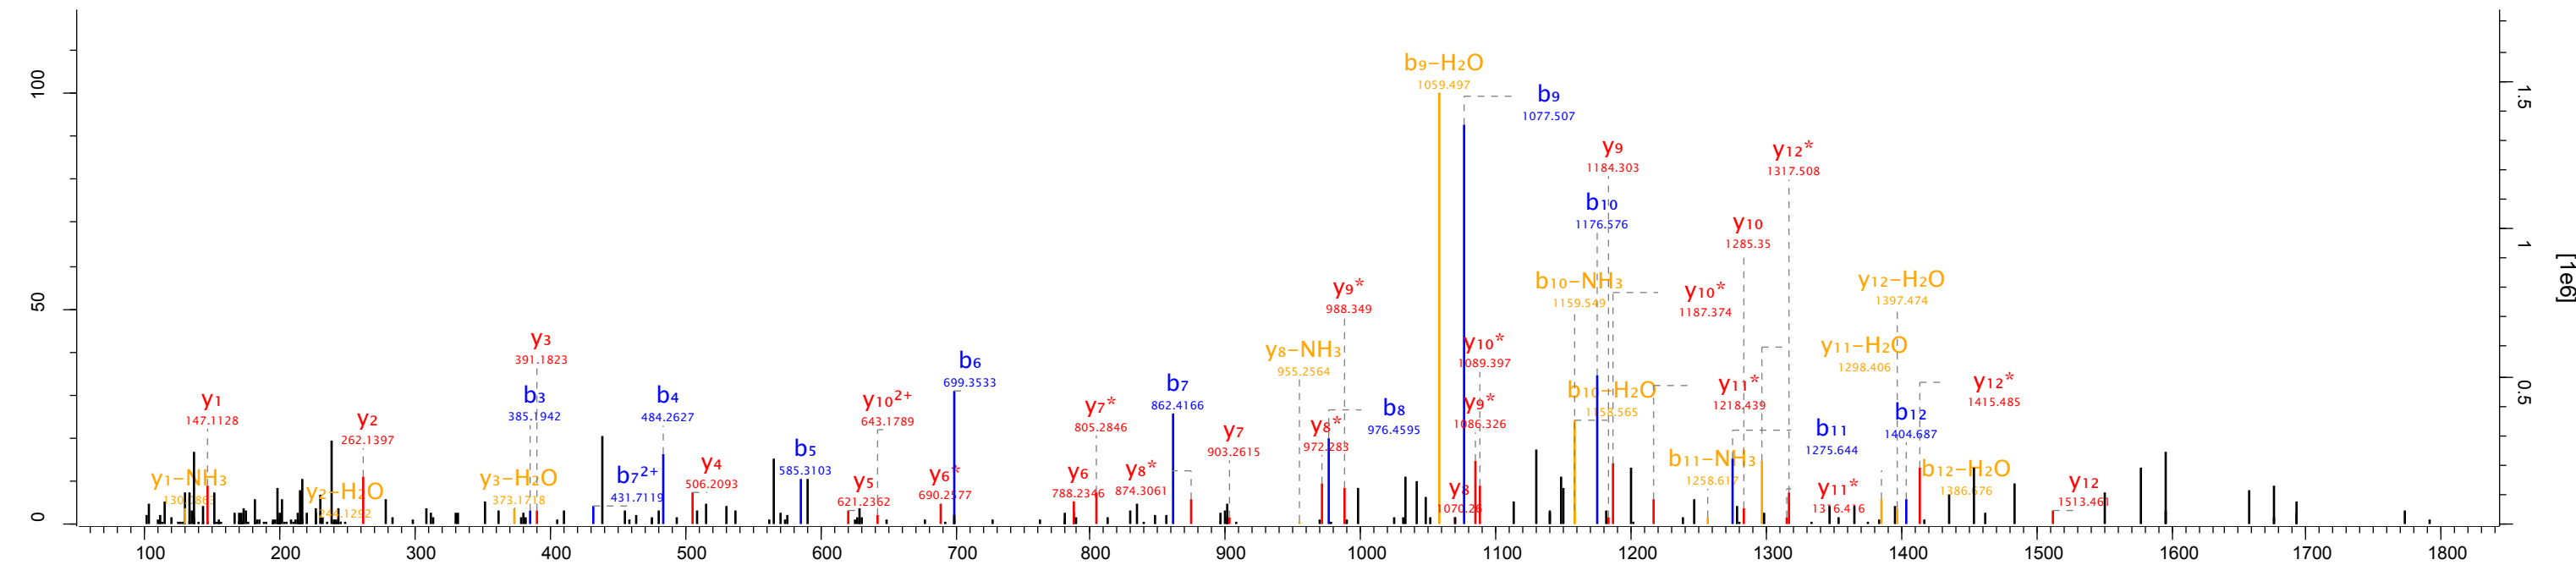

- R N N V T N Y N T V V E T N S D S D D E D K -

b<sub>3</sub>
b<sub>4</sub>
b<sub>5</sub>
b<sub>6</sub>
b<sub>7</sub>
b<sub>8</sub>
b<sub>9</sub>
b<sub>10</sub>
b<sub>11</sub>
b<sub>12</sub>
y<sub>12</sub>
y<sub>11</sub>\*
y<sub>10</sub>
y<sub>9</sub>
y<sub>8</sub><sub>ph</sub>
y<sub>7</sub>
y<sub>6</sub><sub>ph</sub>
y<sub>5</sub>
y<sub>4</sub>
y<sub>3</sub>
y<sub>2</sub>
y<sub>1</sub>

Raw file 20150812\_A375SR\_Phospho\_BR1\_03 Scan 12706 Method FTMS; HCD Score 161.91 m/z 954.06 Gene names SGTA

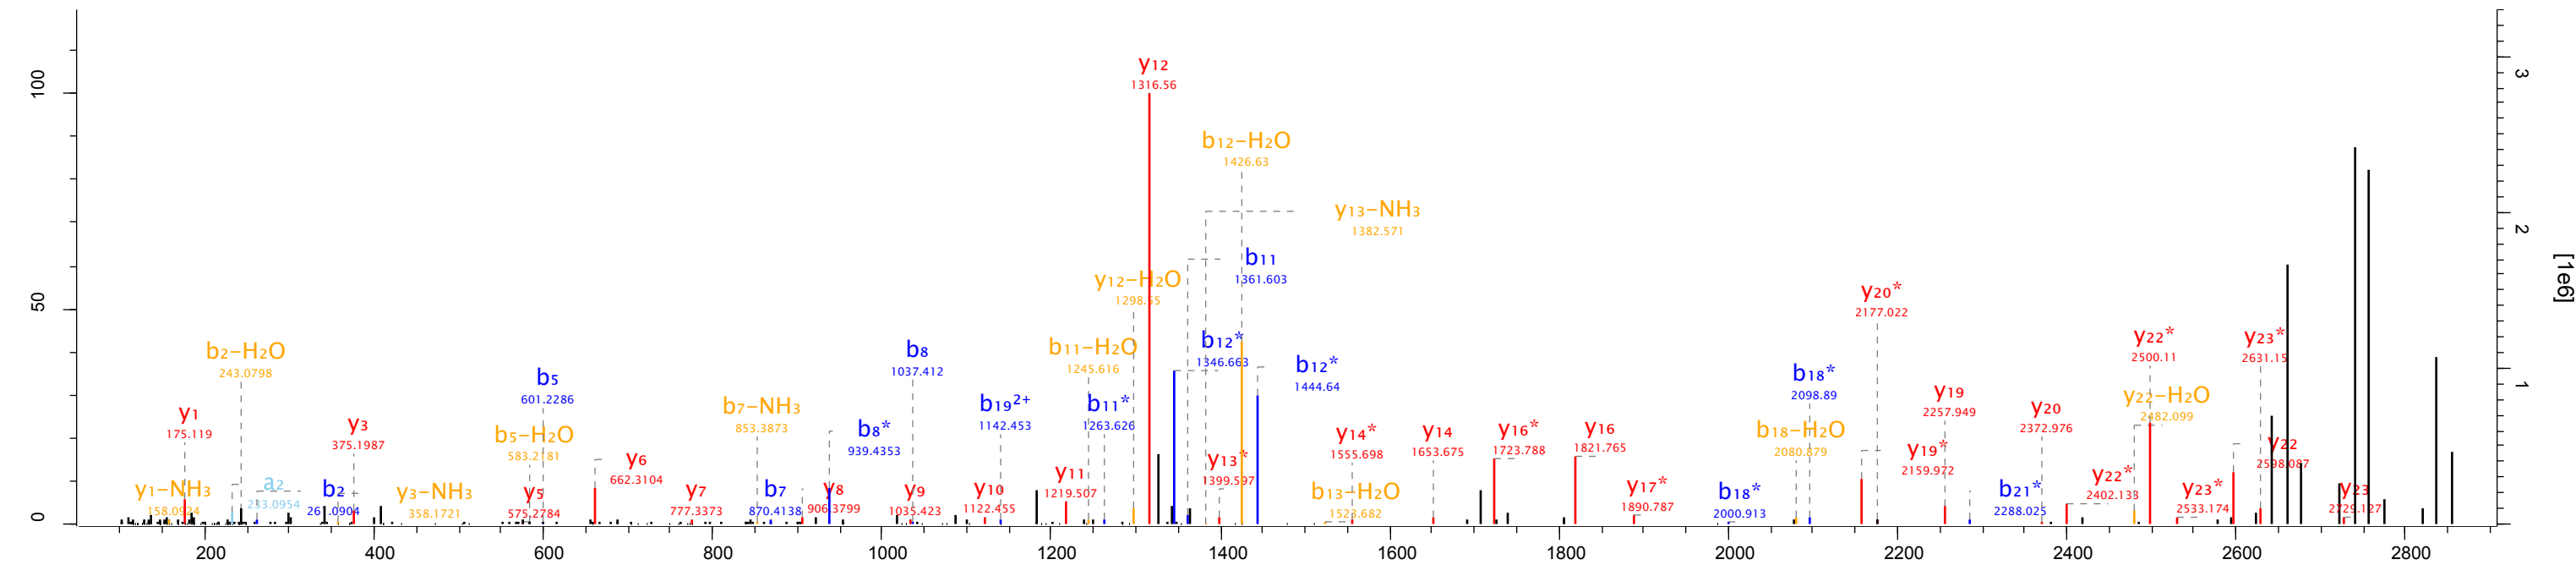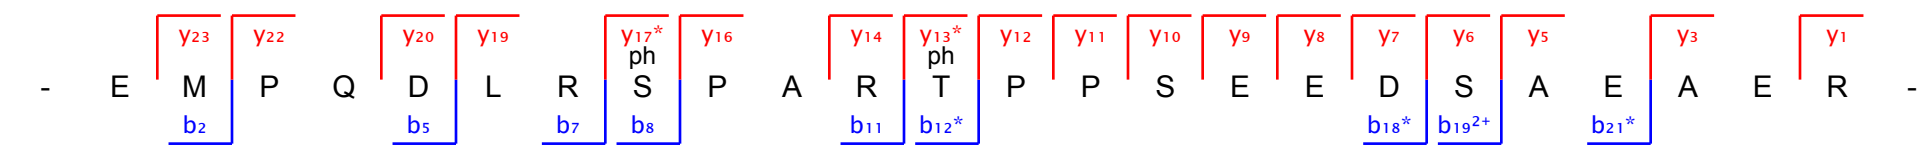

Raw file: 20150812\_A375SR\_Phospho\_BR1\_03  
 Scan: 12796 Method: FTMS; HCD Score: 69.55 m/z: 686.77 Gene names: ANK3

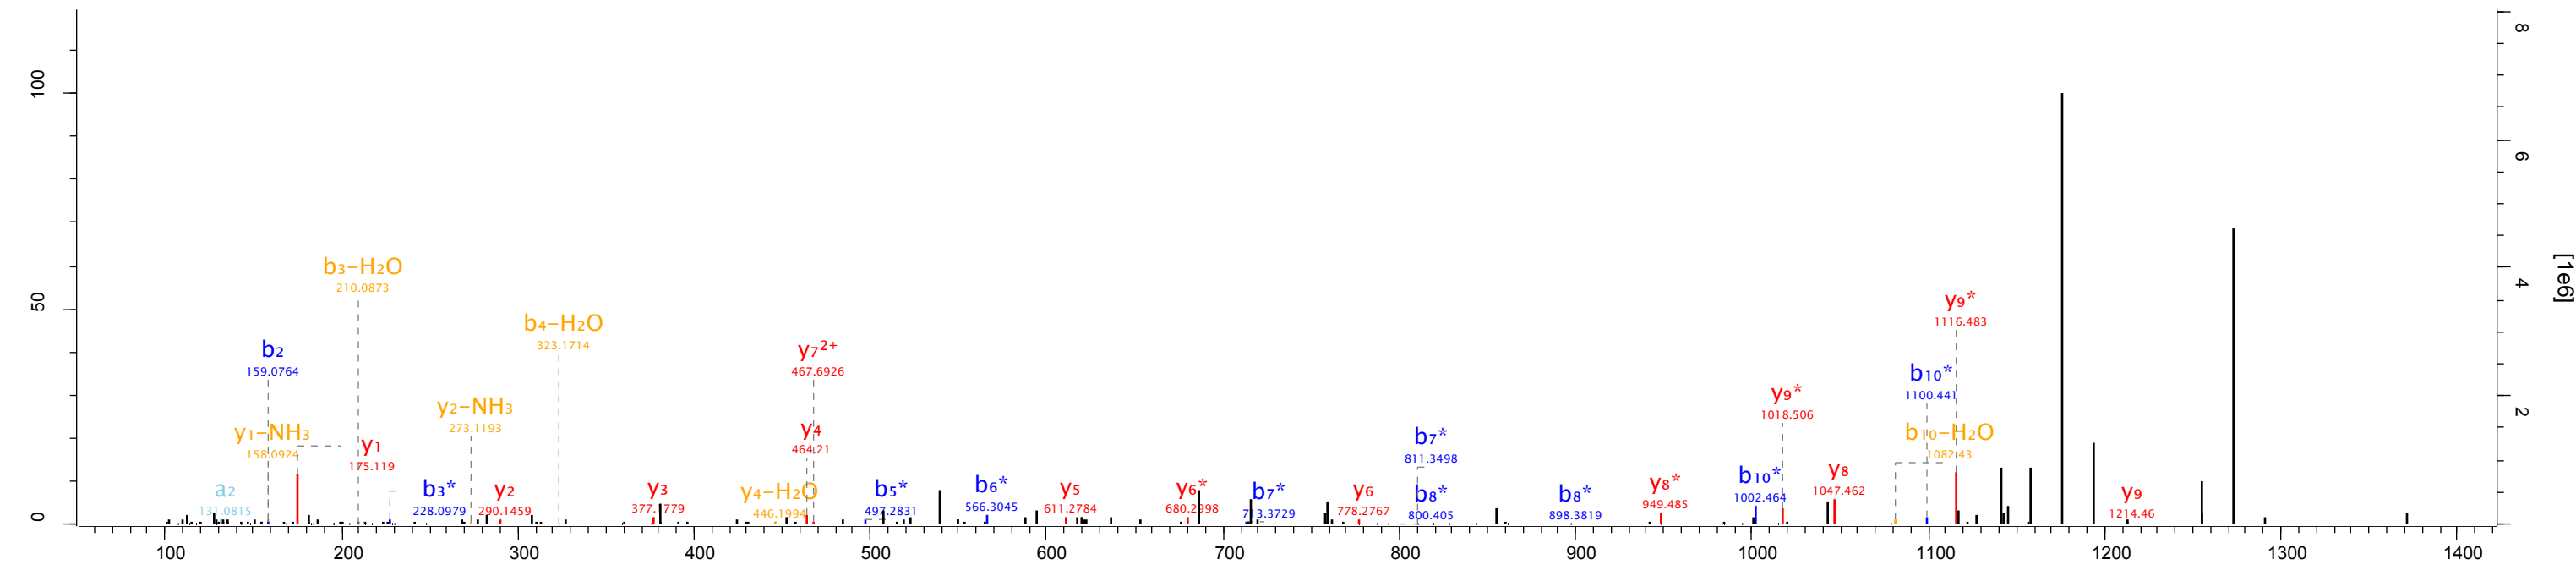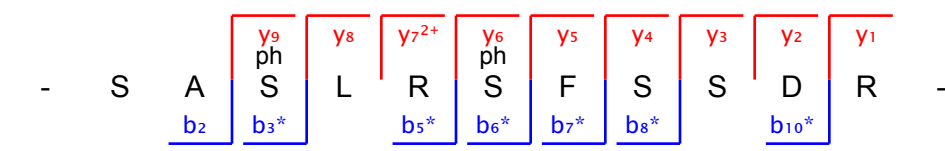

Raw file: 20150812\_A375SR\_Phospho\_BR1\_03  
 Scan: 12946 Method: FTMS; HCD Score: 151.64 m/z: 733.29 Gene names: IRS1

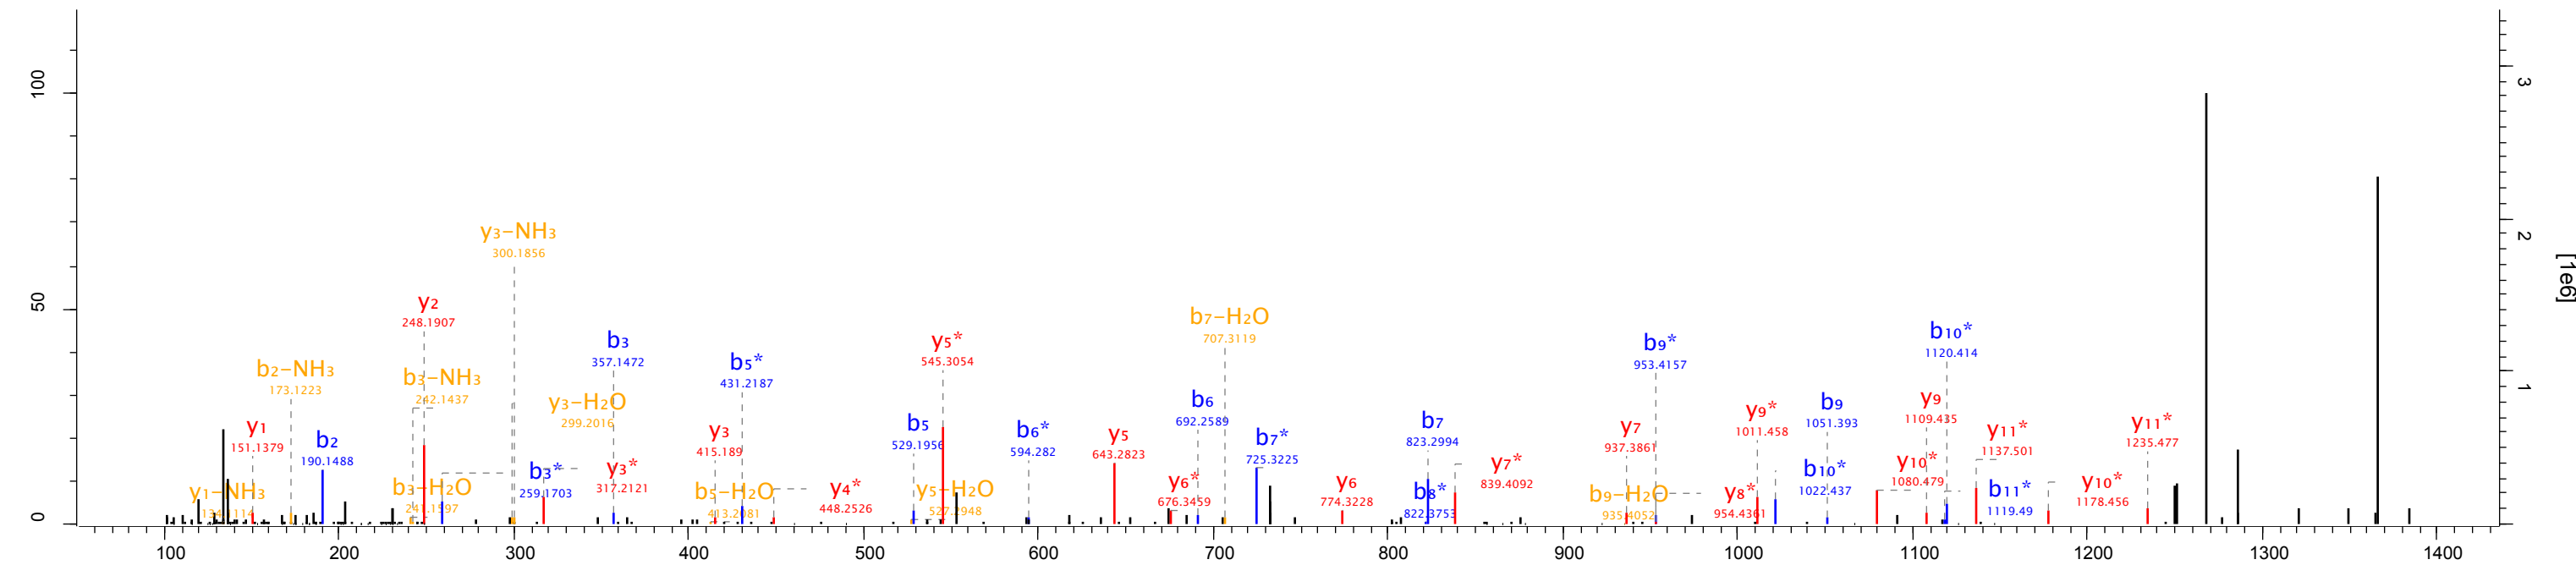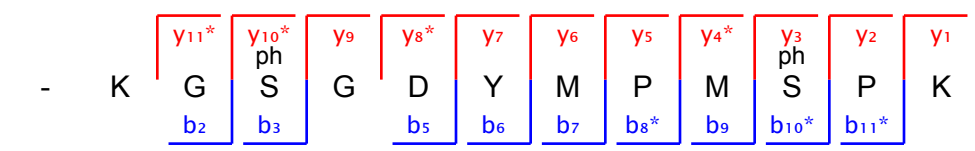

Raw file: 20150812\_A375SR\_Phospho\_BR1\_03  
 Scan: 1316 Method: FTMS; HCD Score: 340.62 m/z: 758.63 Gene names: NUCKS1

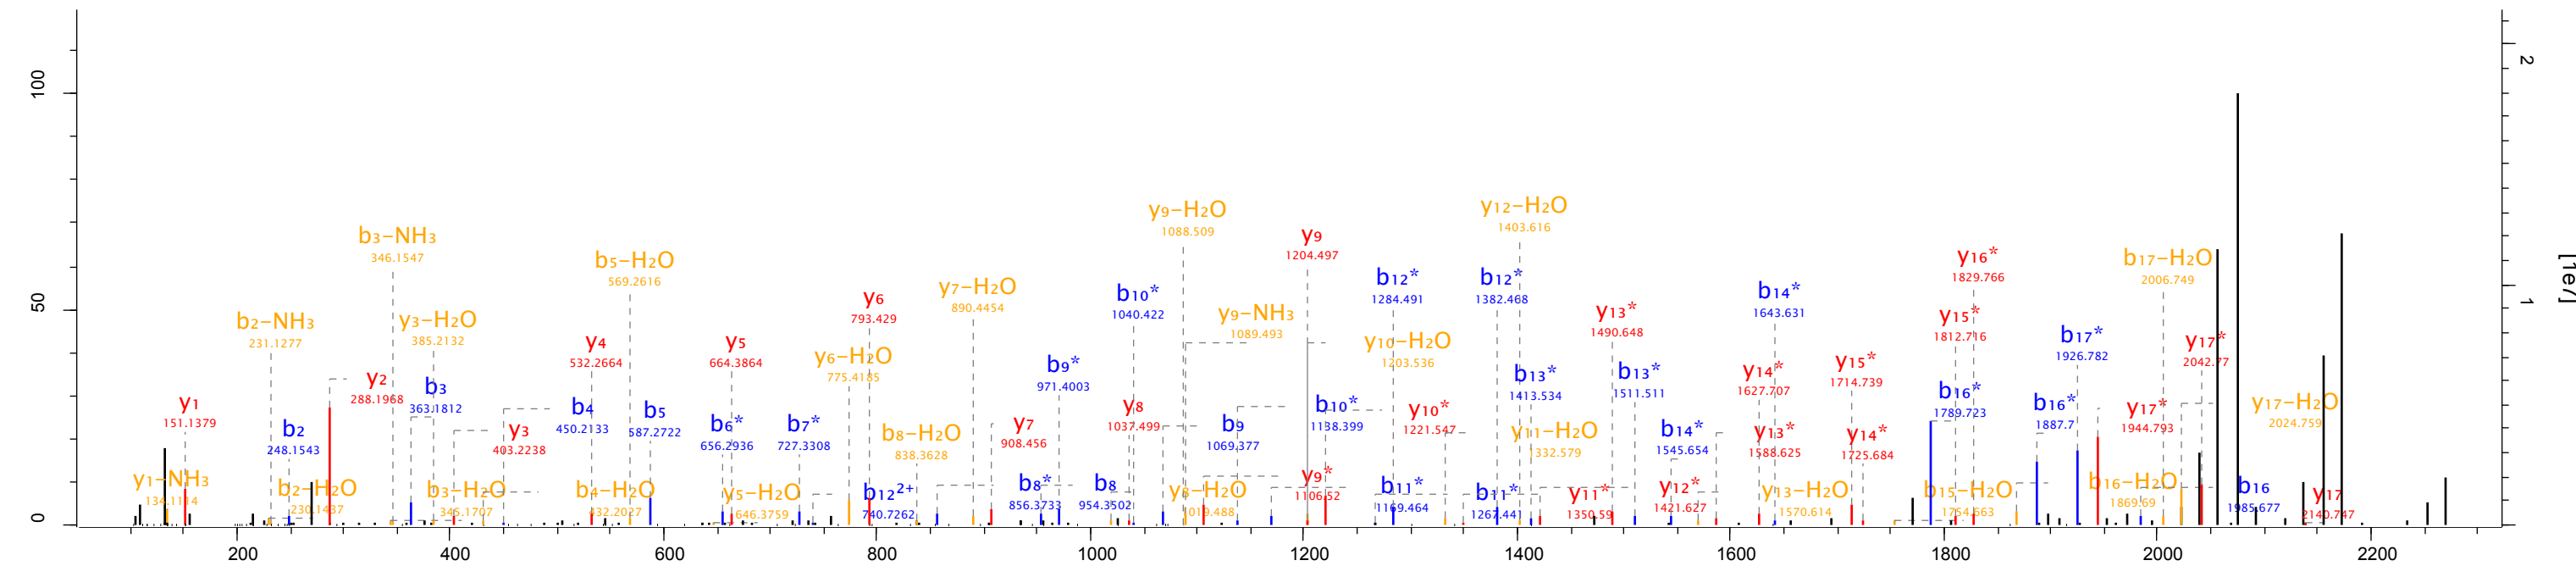

- K D D S H S A E D S E D E K E D H K -

y17 y16\* y15\* y14\* y13\*  
ph y12\* y11\* y10\* y9  
ph y8 y7 y6 y5 y4 y3 y2 y1  
b2 b3 b4 b5 b6\* b7\* b8 b9 b10\* b11\* b12\* b13\* b14\* b16 b17\*

Raw file Scan Method Score m/z Gene names  
 20150812\_A375SR\_Phospho\_BR1\_03 13556 FTMS; HCD 72.01 865.41 ZNF106

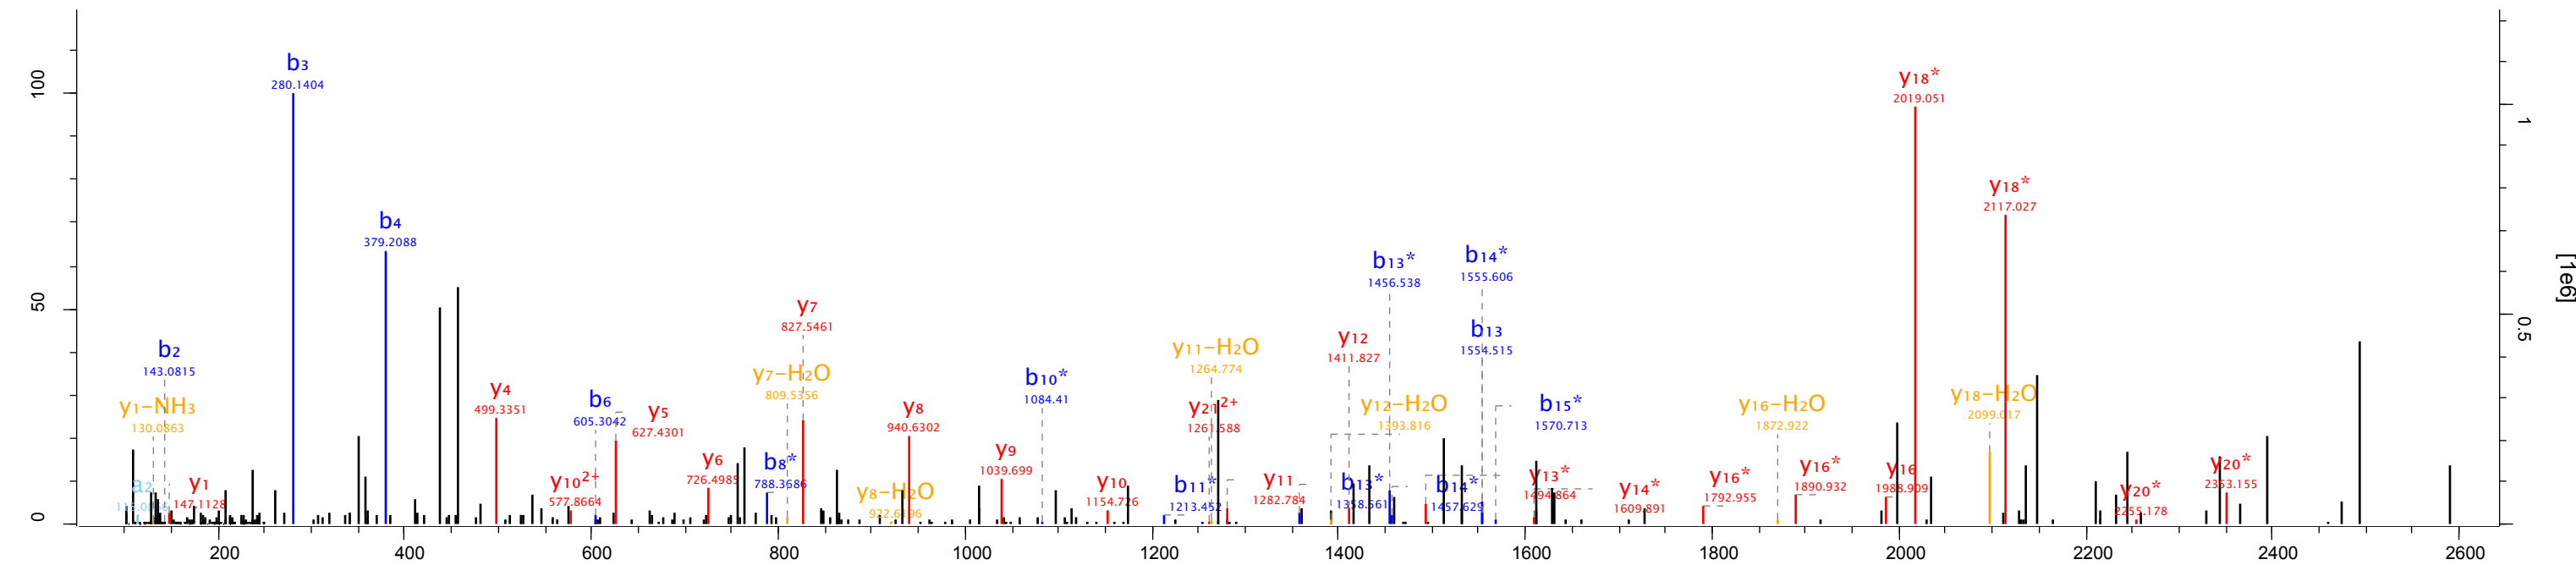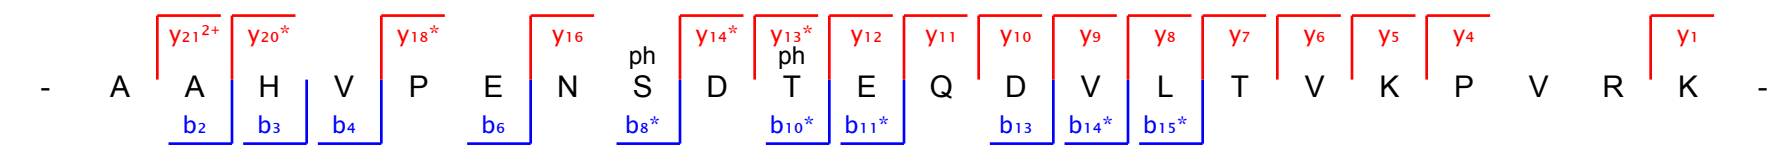

Raw file 20150812\_A375SR\_Phospho\_BR1\_03 Scan 13876 Method FTMS; HCD Score 166.6 m/z 1161.07 Gene names CCNE2

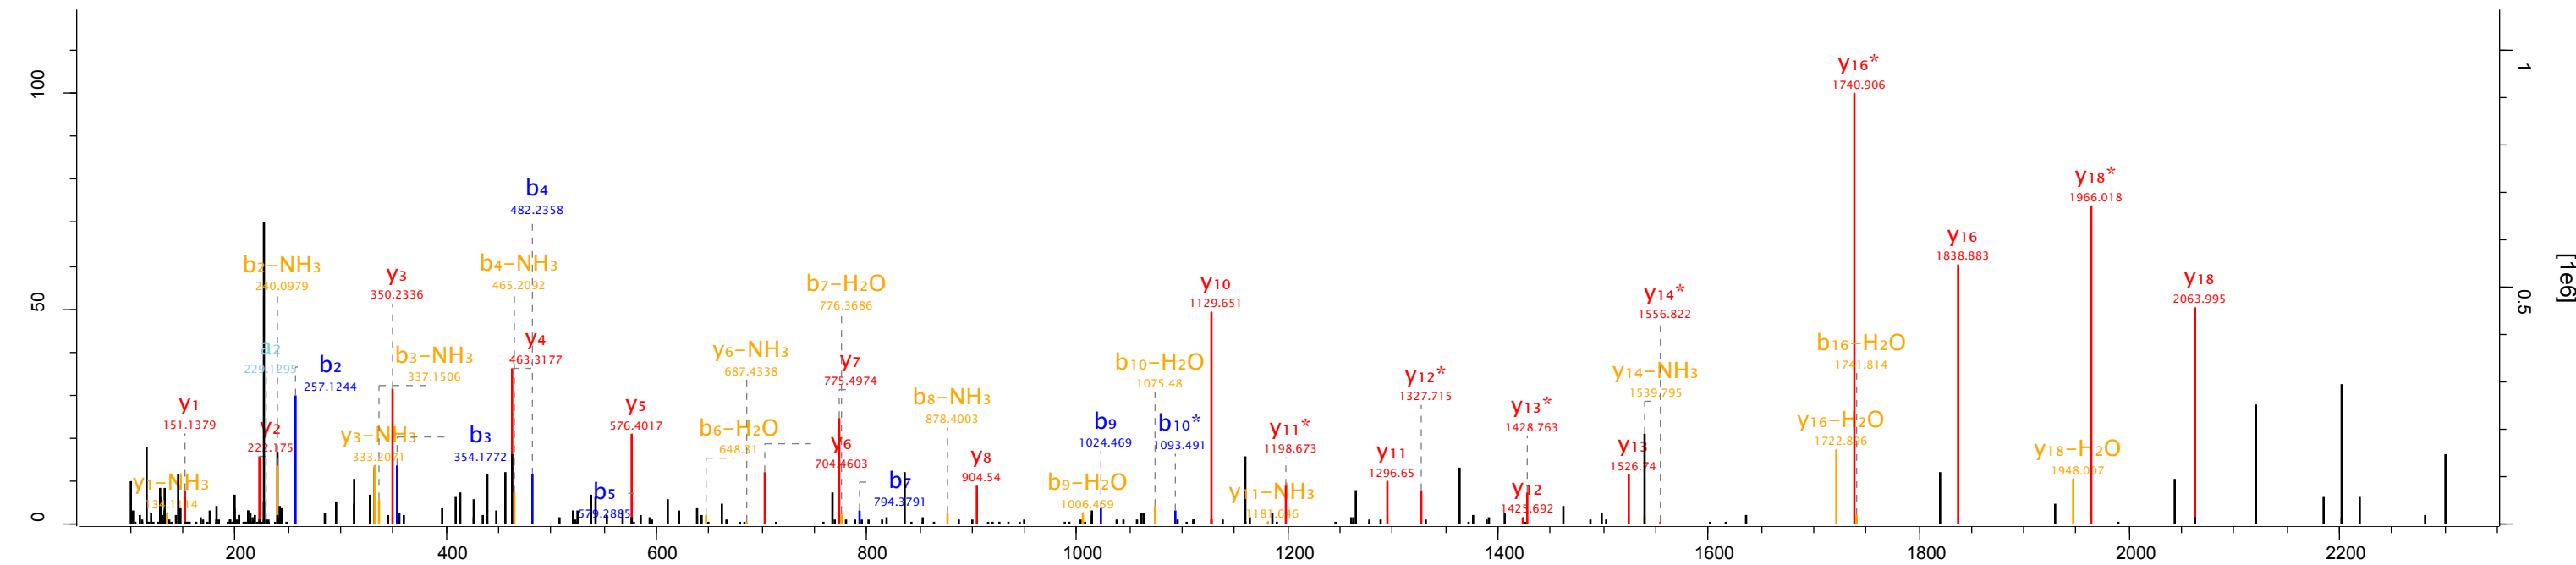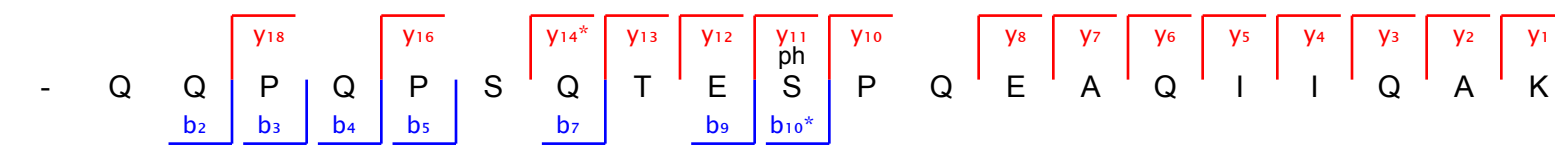



Raw file: 20150812\_A375SR\_Phospho\_BR1\_03  
 Scan: 13996 Method: FTMS; HCD Score: 178.1 m/z: 757.83 Gene names: AMOTL1

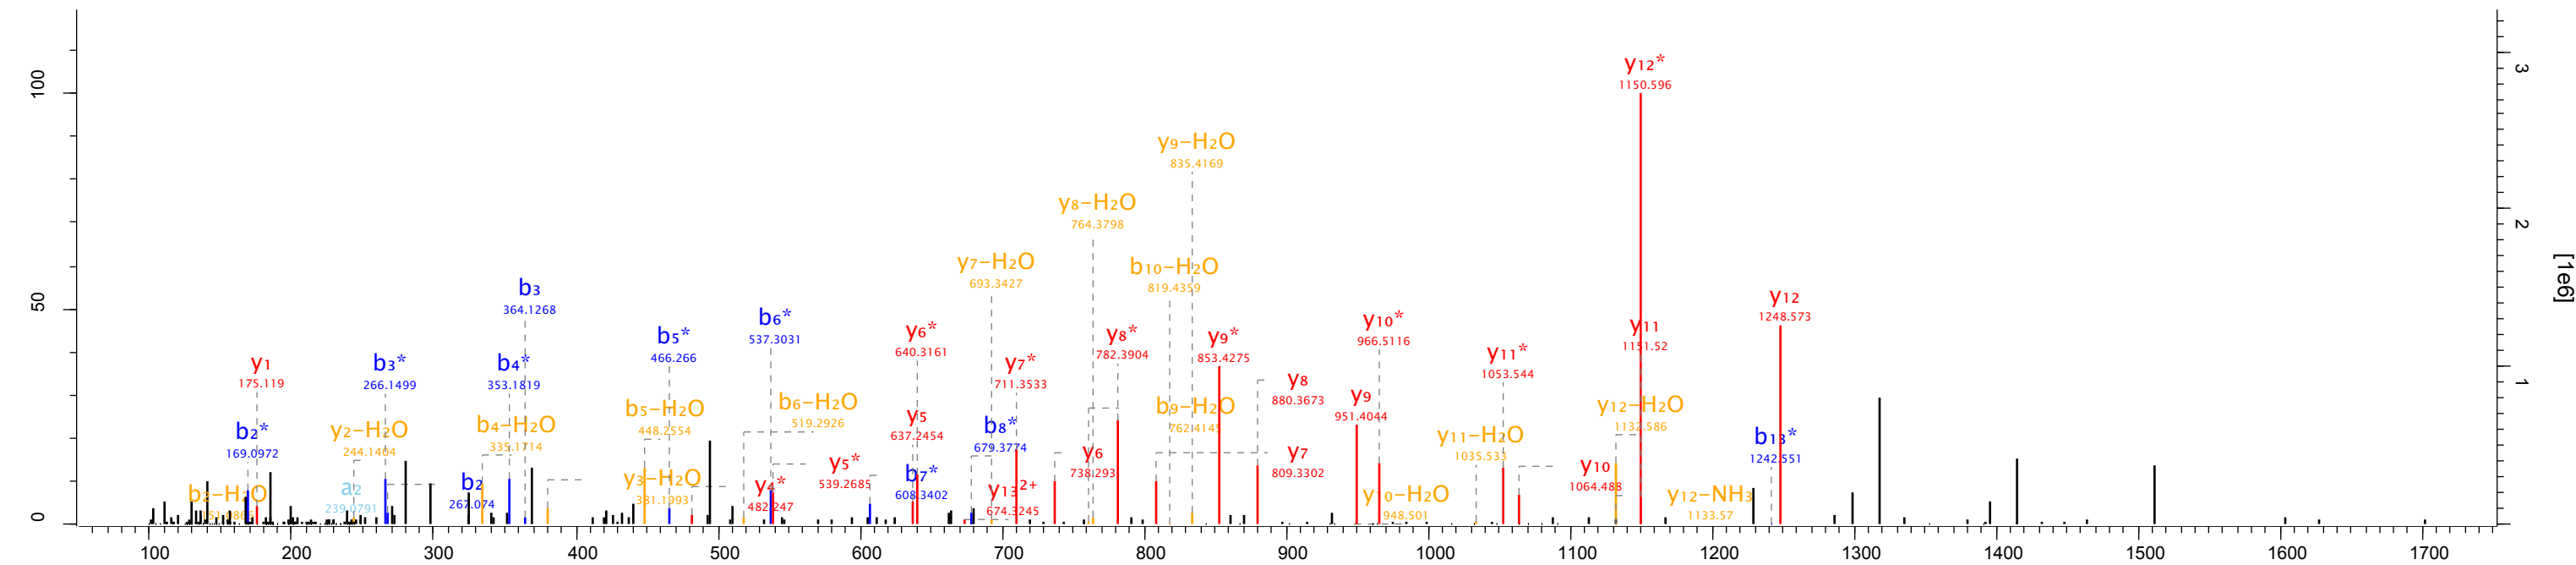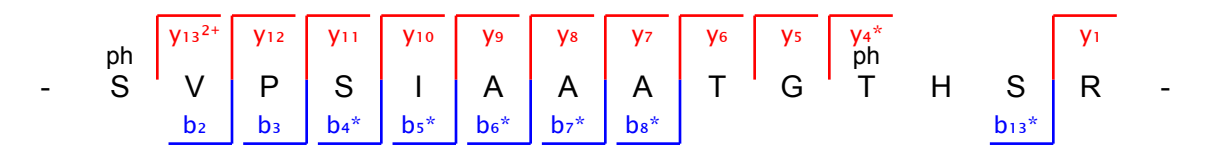

Raw file 20150812\_A375SR\_Phospho\_BR1\_03 Scan 14026 Method FTMS; HCD Score 184 m/z 1063.91 Gene names SMARCA2

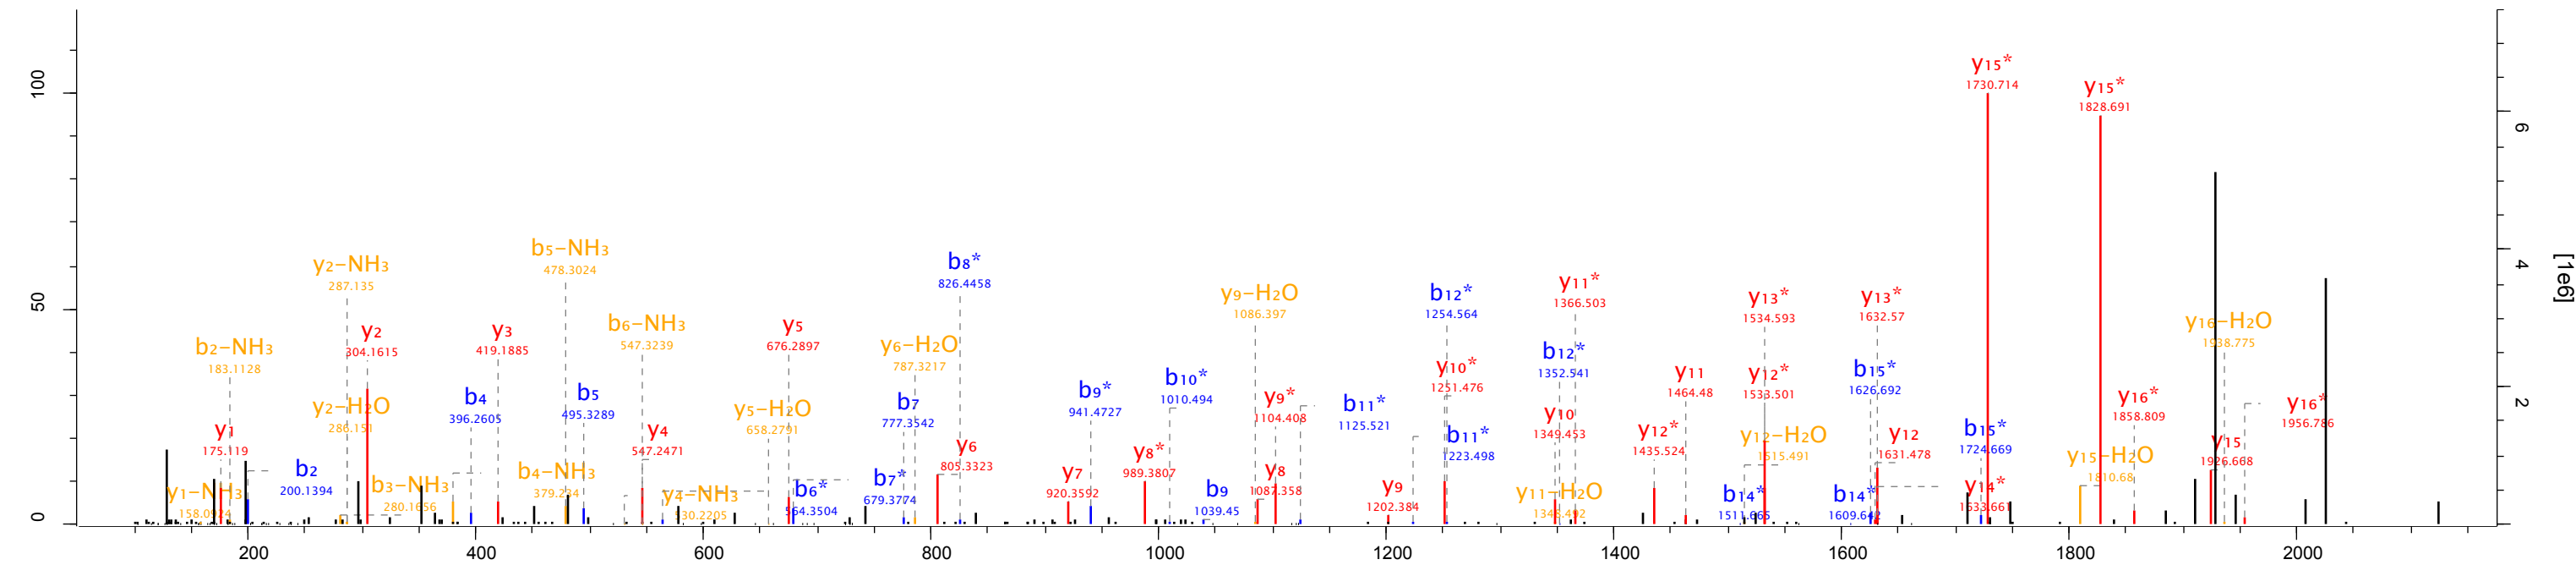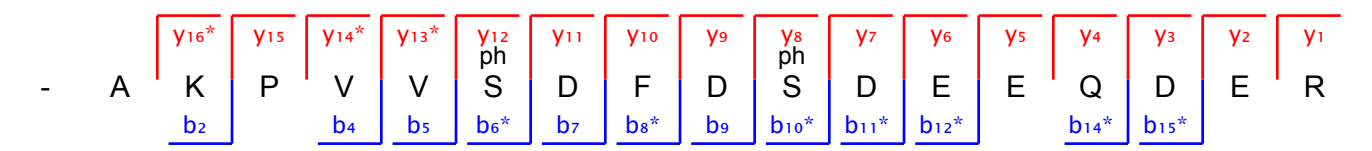

Raw file 20150812\_A375SR\_Phospho\_BR1\_03 Scan 14226 Method FTMS; HCD Score 150.91 m/z 825.33 Gene names BSDC1

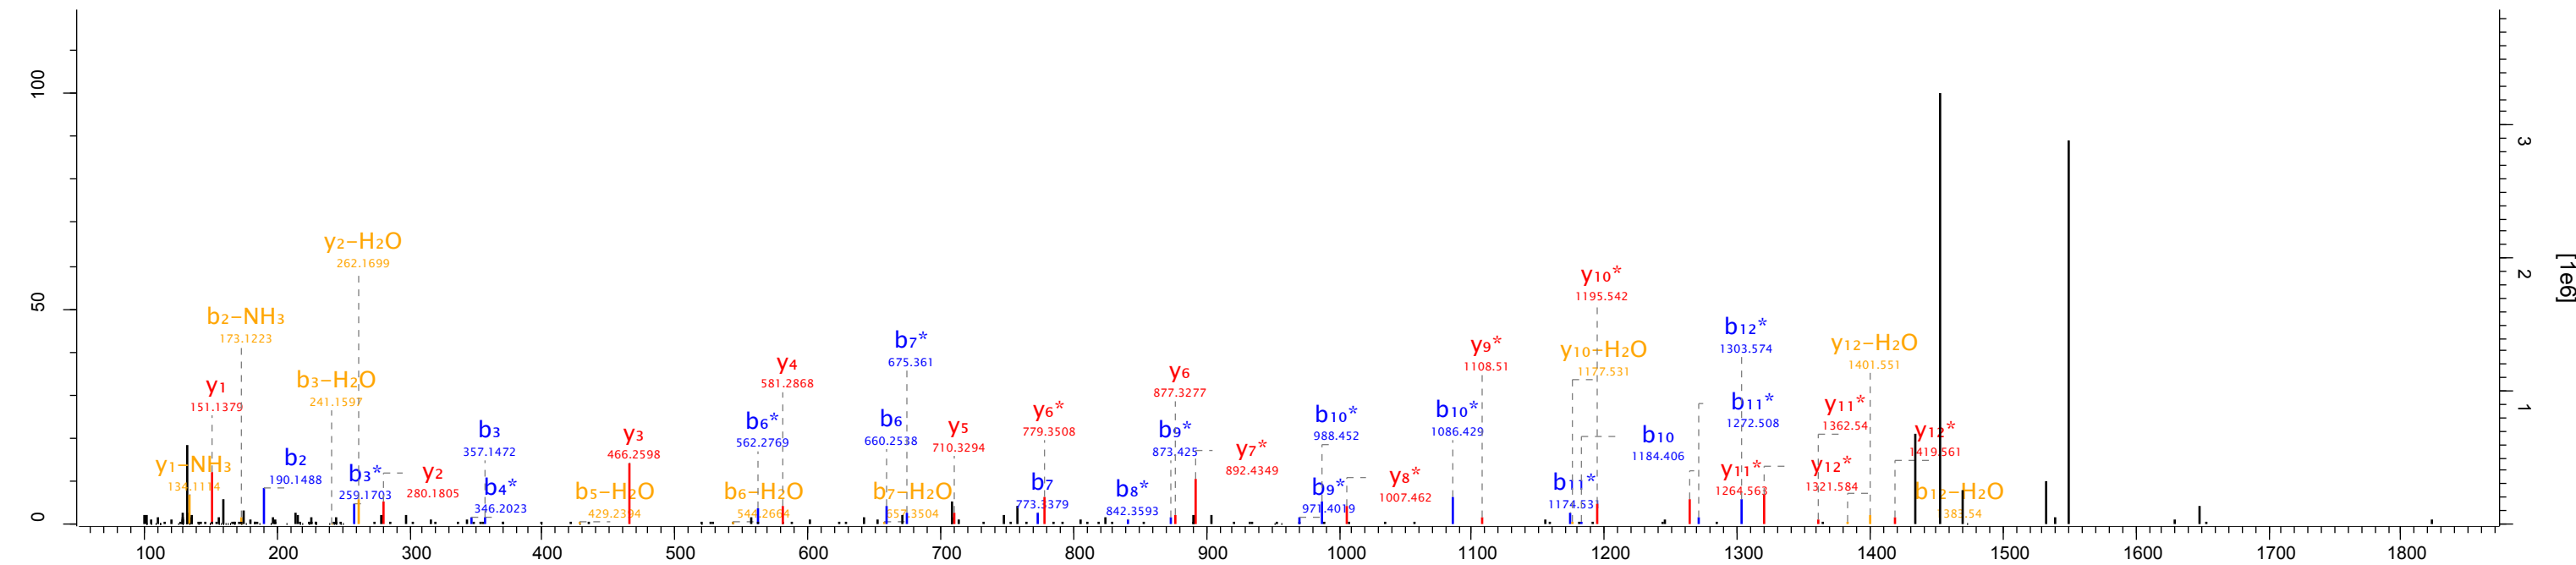

- K y12\* y11\*  
ph y10\* y9\* y8\* y7\* y6  
ph y5 y4 y3 y2 y1 -

b2 b3 b4\* b6 b7 b8\* b9\* b10 b11\* b12\*

Raw file Scan Method Score m/z Gene names  
 20150812\_A375SR\_Phospho\_BR1\_03 14236 FTMS; HCD 127.02 924.76 HEXIM2

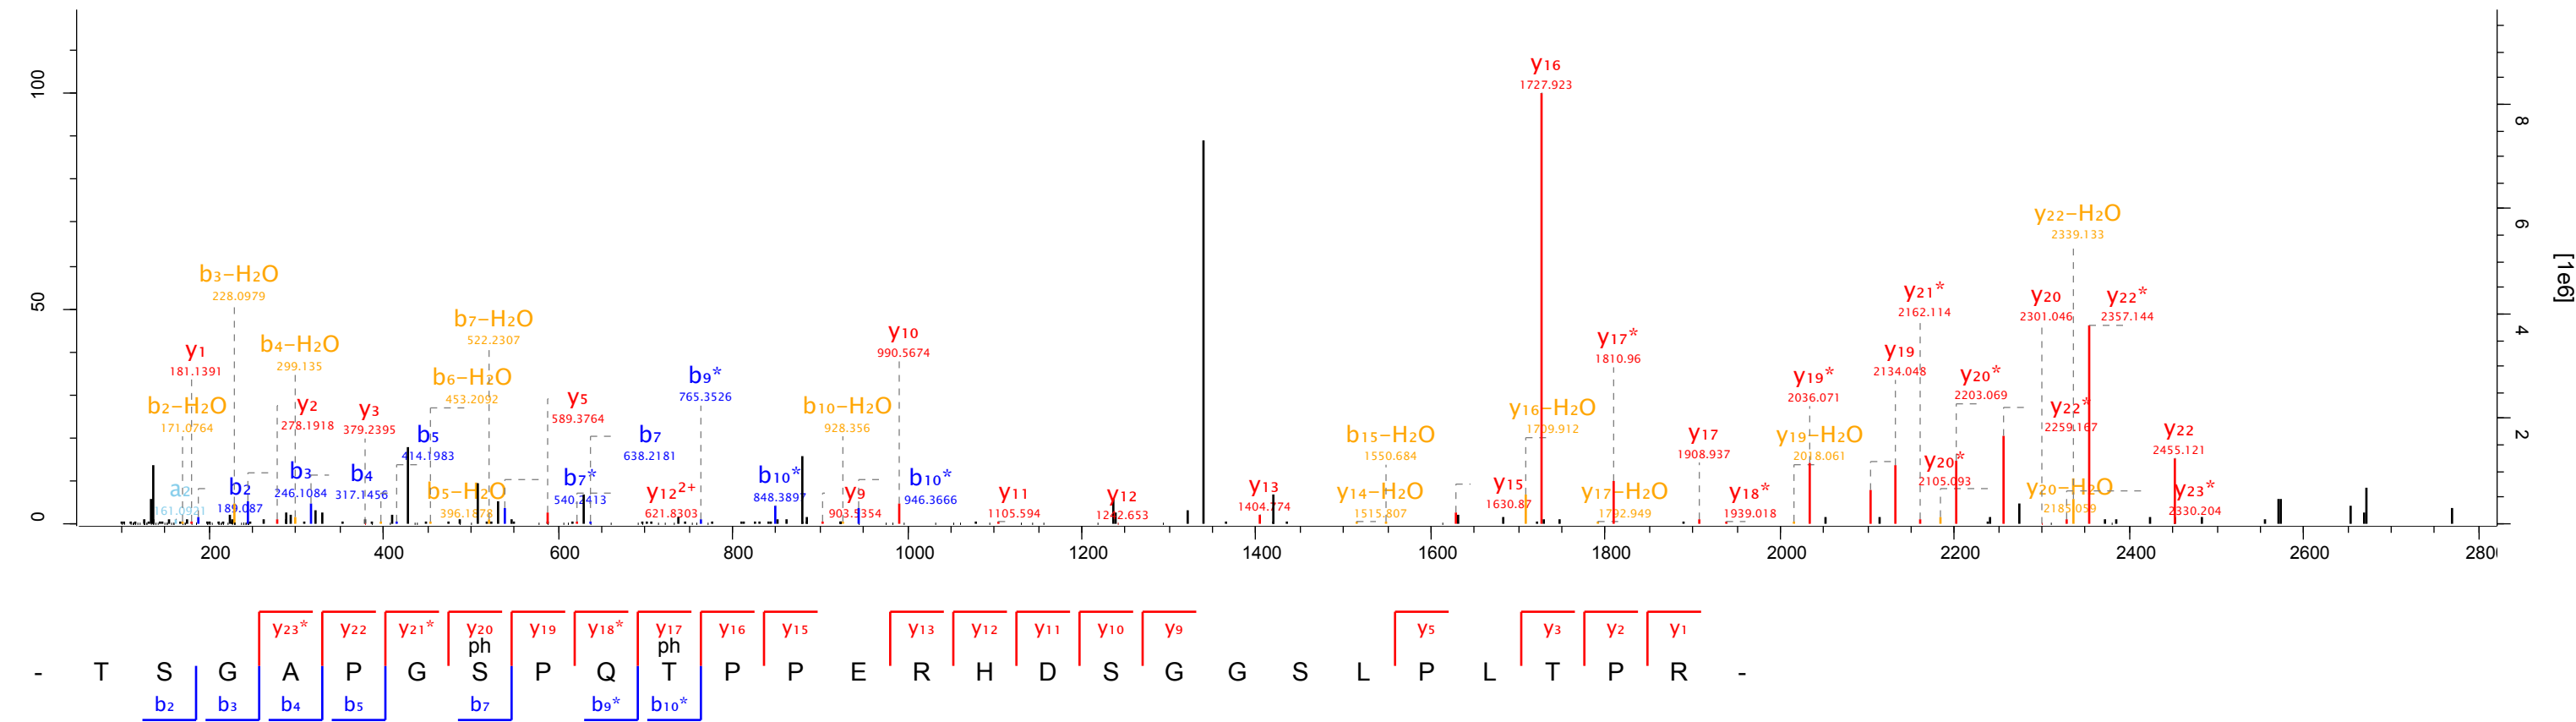

Raw file 20150812\_A375SR\_Phospho\_BR1\_03 Scan 14876 Method FTMS; HCD Score 125.64 m/z 1031.79 Gene names ZC3H4

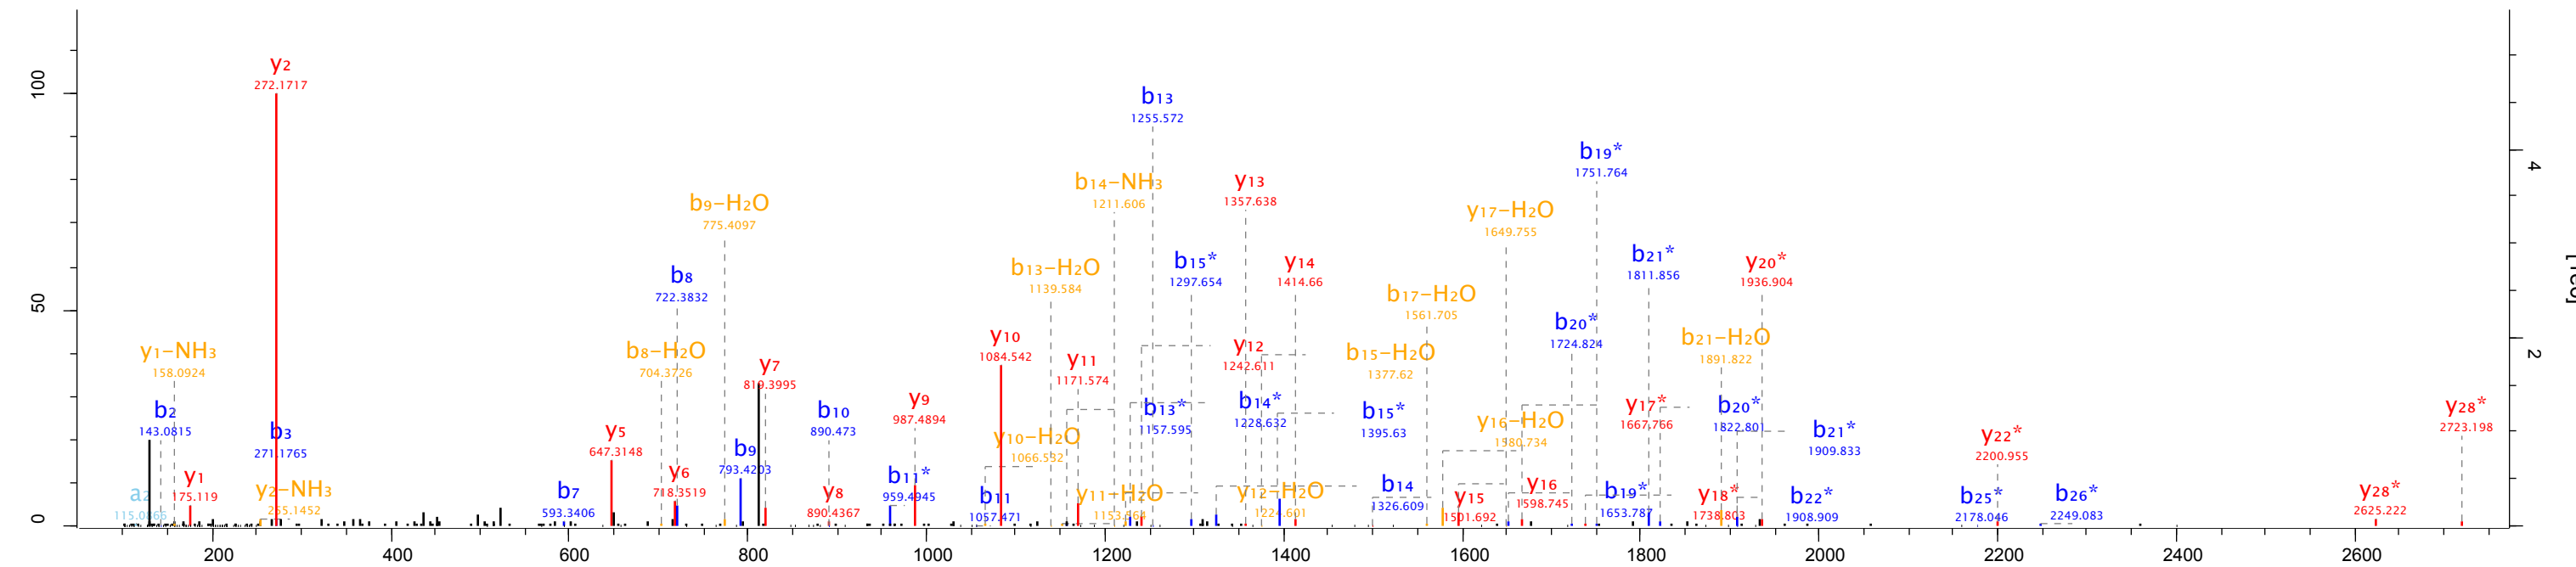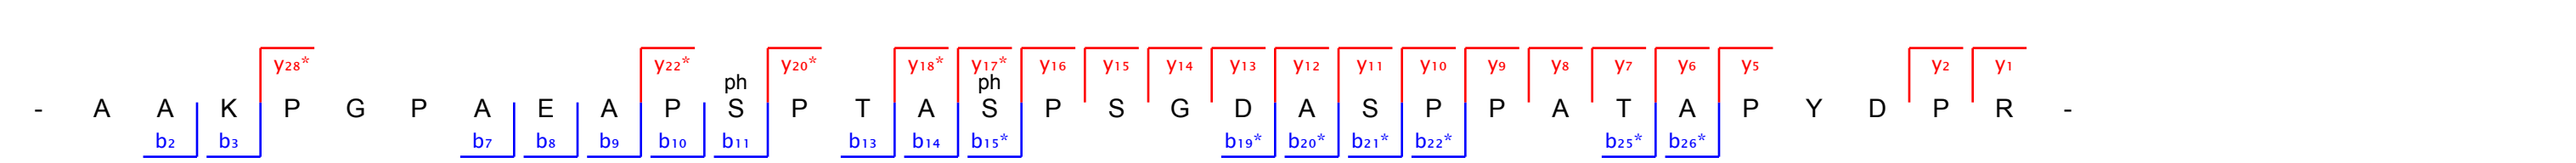

Raw file: 20150812\_A375SR\_Phospho\_BR1\_03  
 Scan: 15046 Method: FTMS; HCD Score: 400.56 m/z: 1557.63 Gene names: USP10

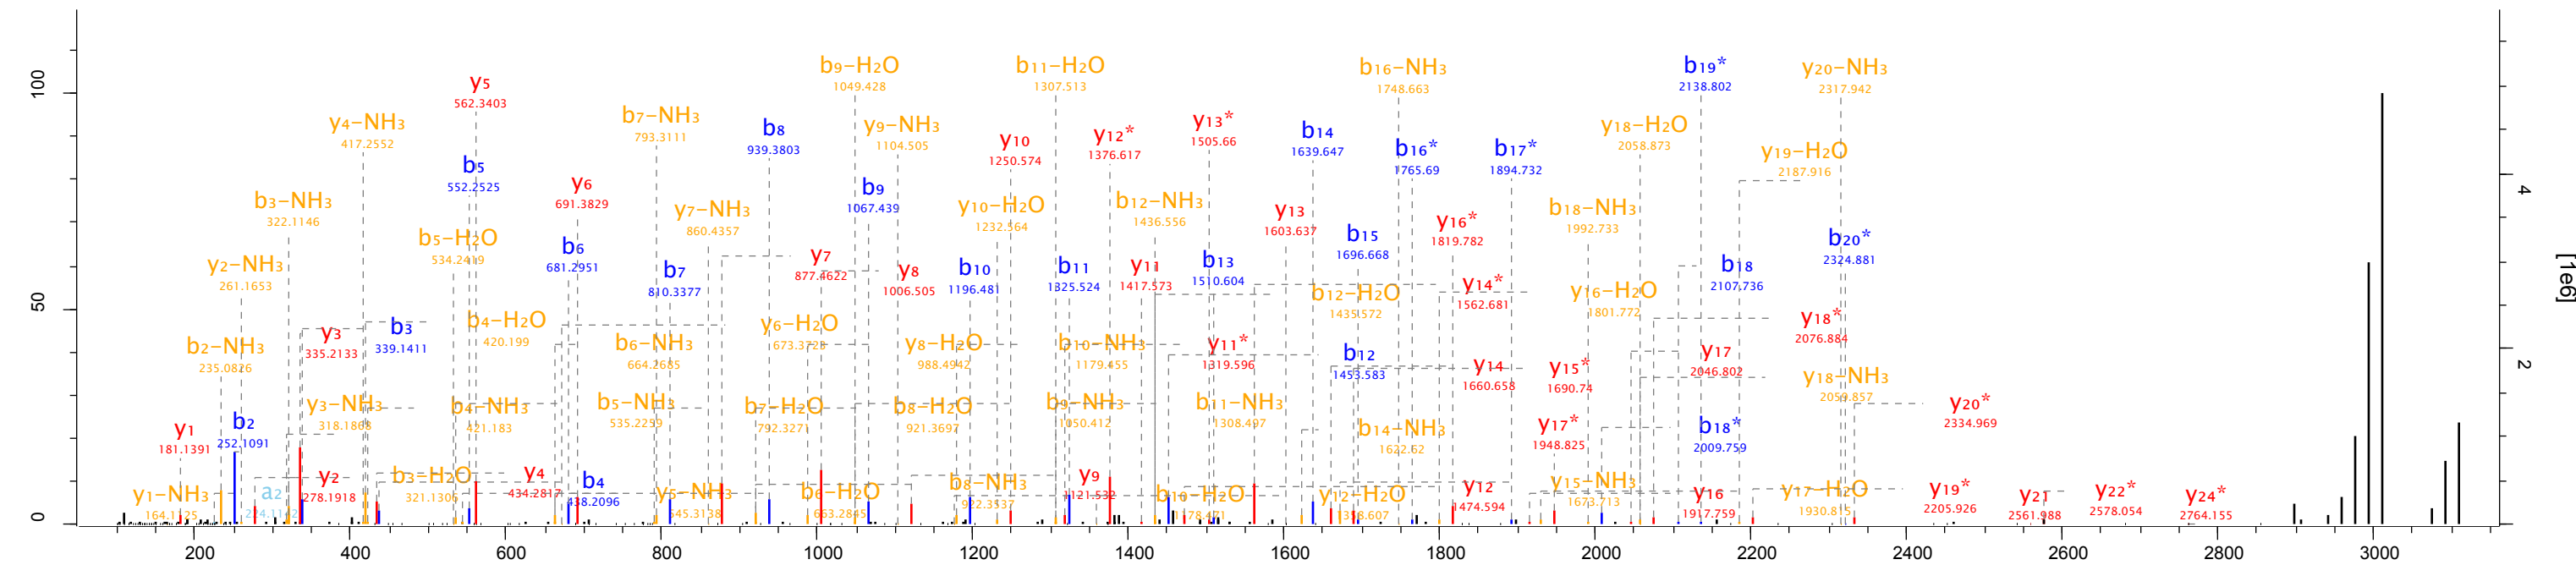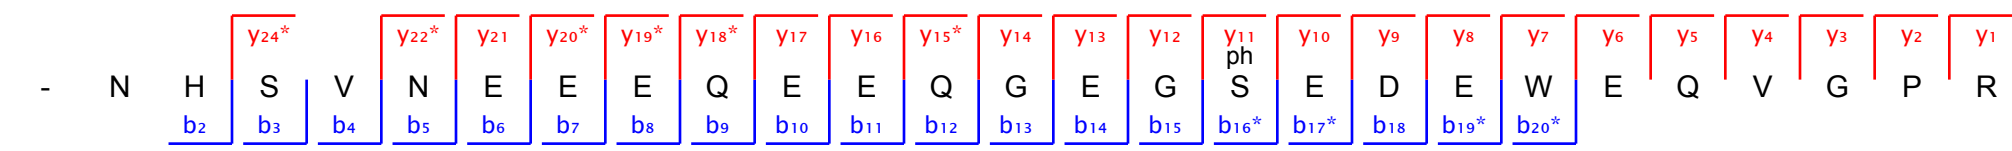

Raw file 20150812\_A375SR\_Phospho\_BR1\_03 Scan 15066 Method FTMS; HCD Score 157.12 m/z 1154.97 Gene names PSIP1

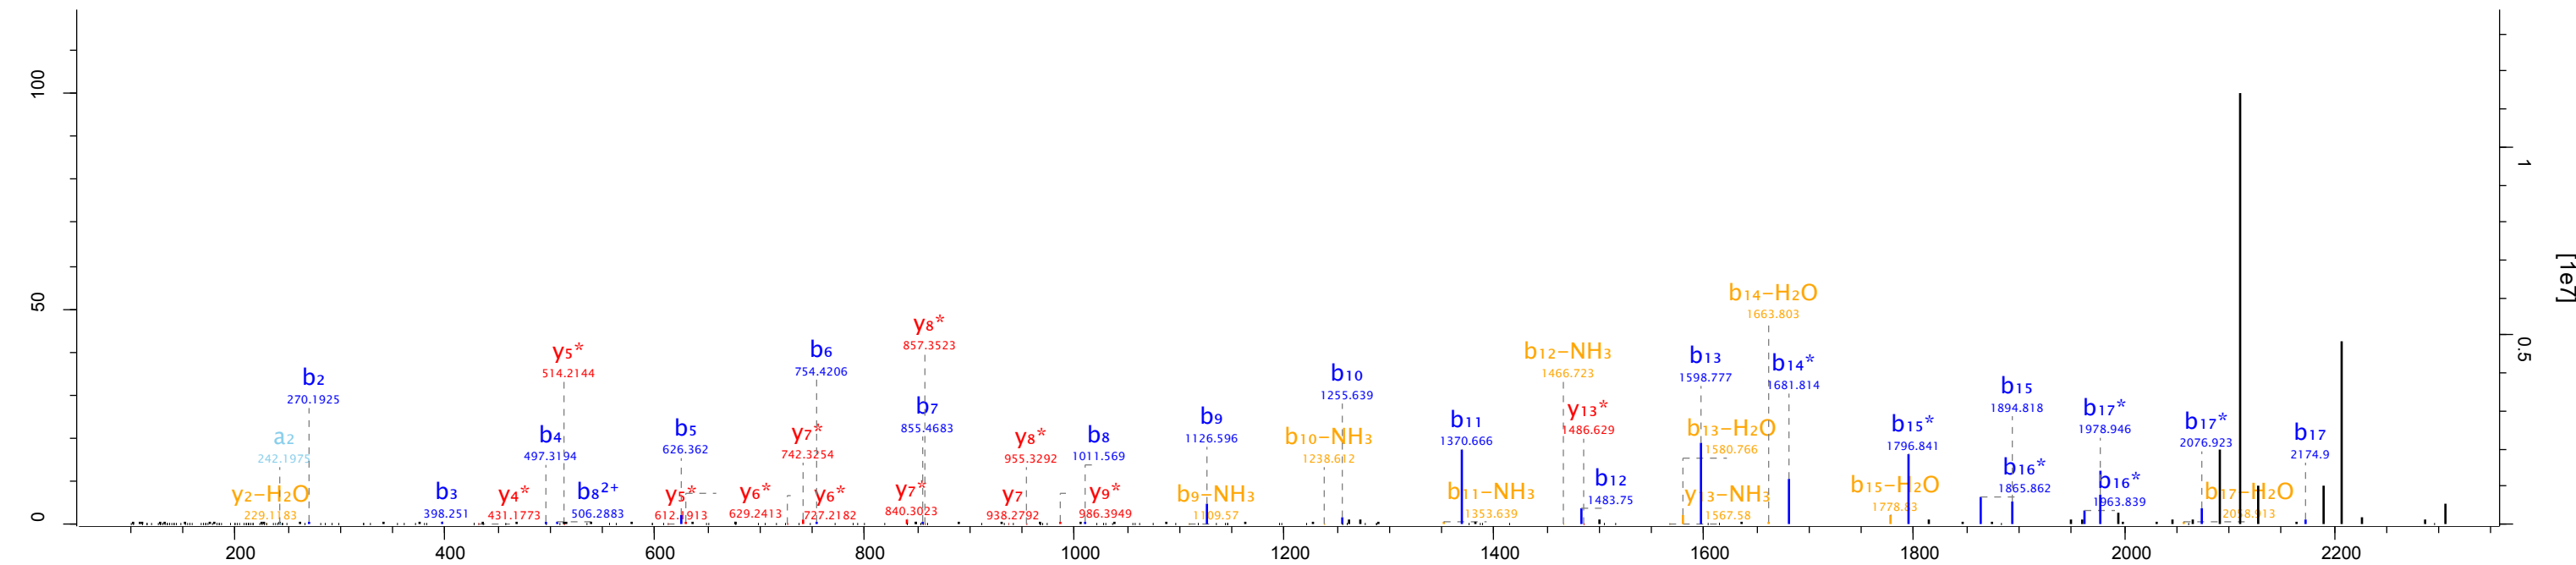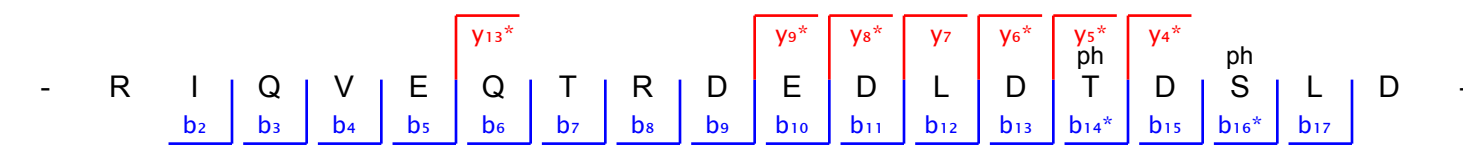

Raw file 20150812\_A375SR\_Phospho\_BR1\_03 Scan 15236 Method FTMS; HCD Score 105.78 m/z 954.43 Gene names KCTD3

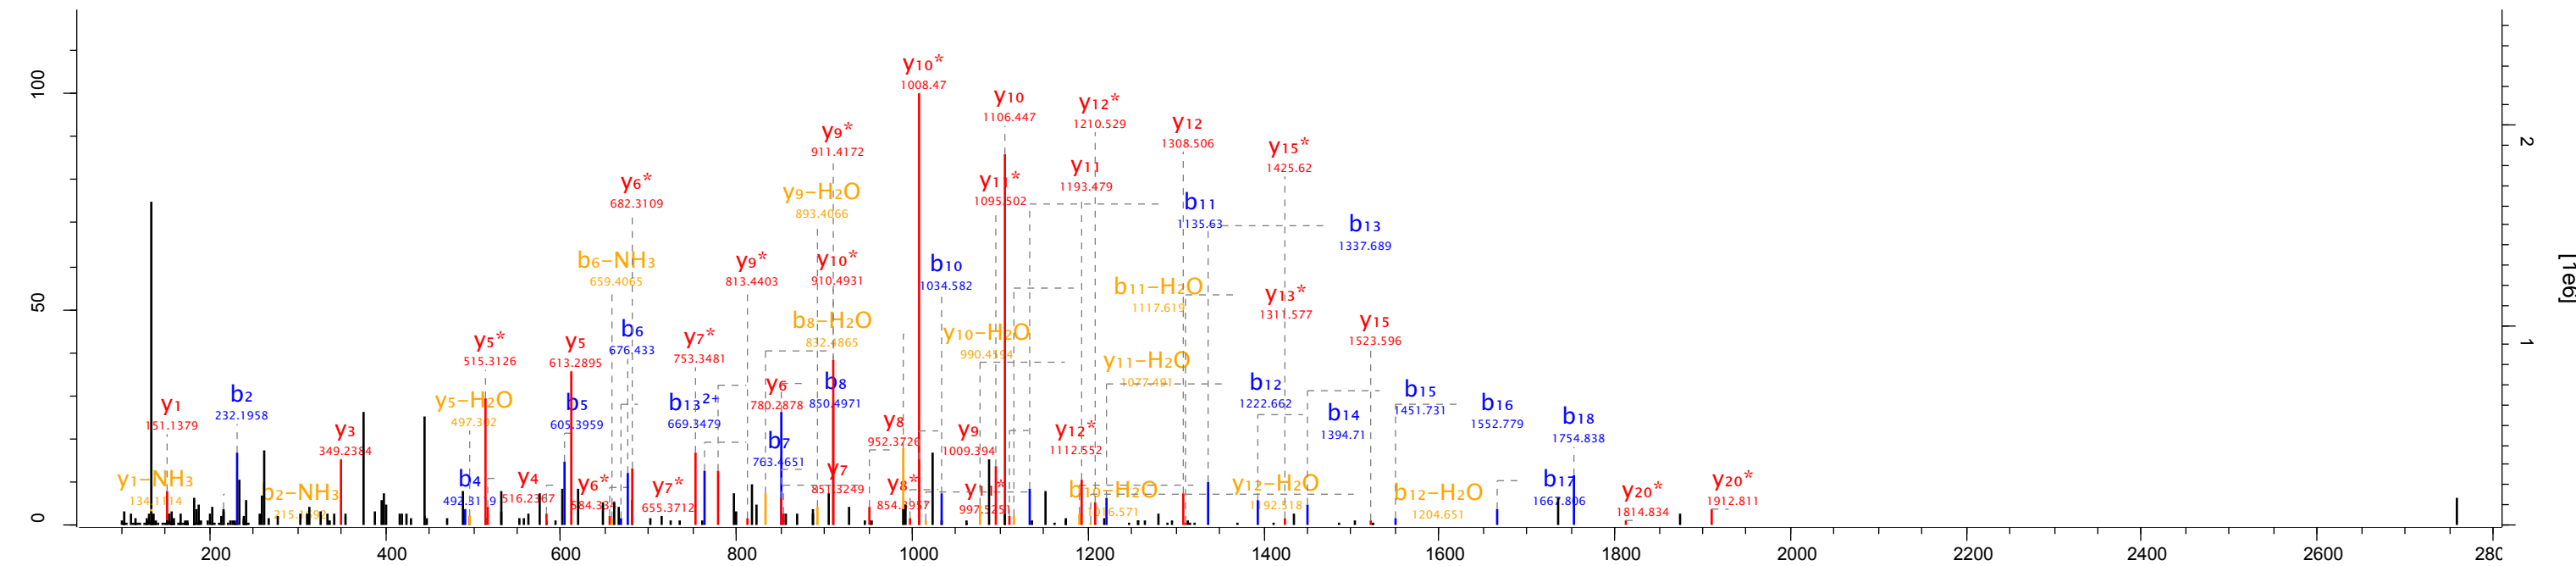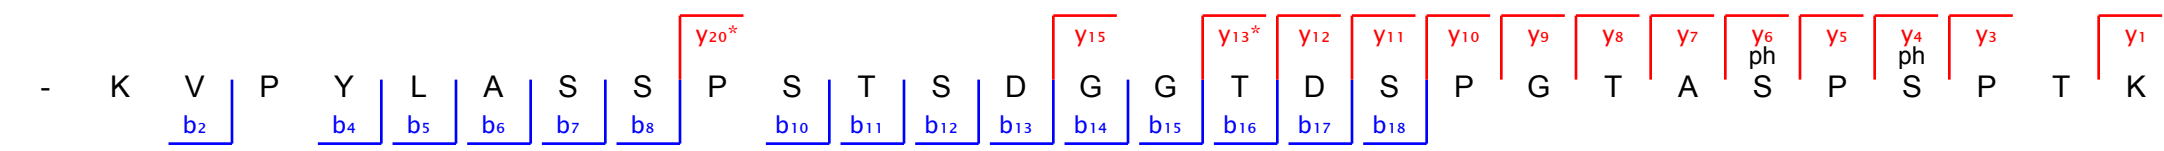



Raw file: 20150812\_A375SR\_Phospho\_BR1\_03  
 Scan: 15386 Method: FTMS; HCD Score: 199.66 m/z: 801.36 Gene names: CTNND1

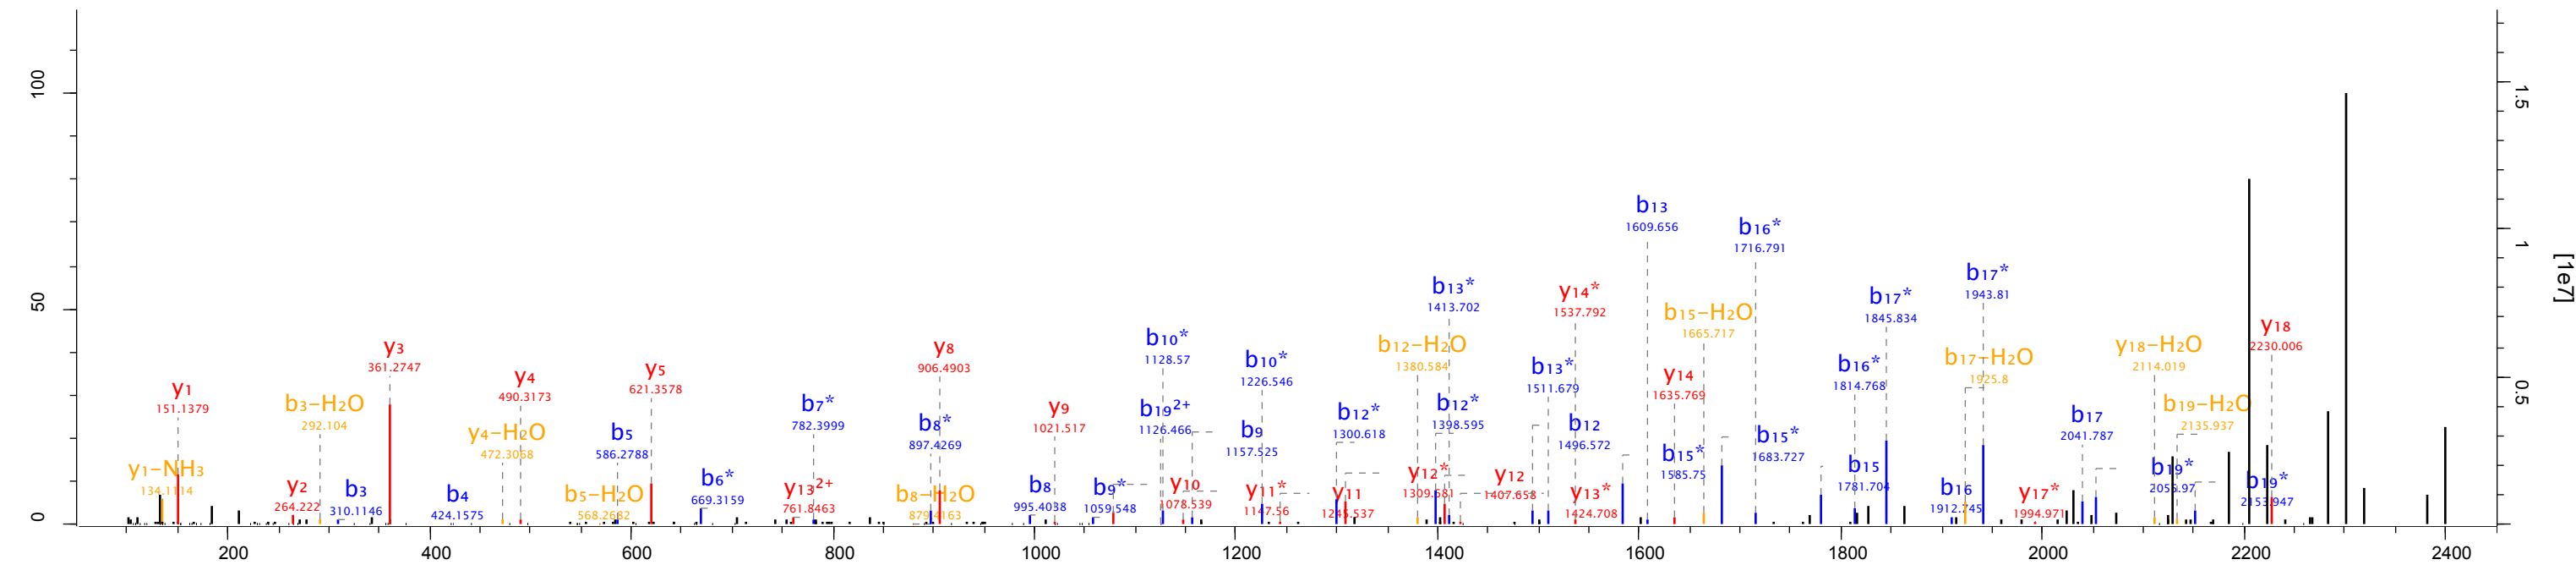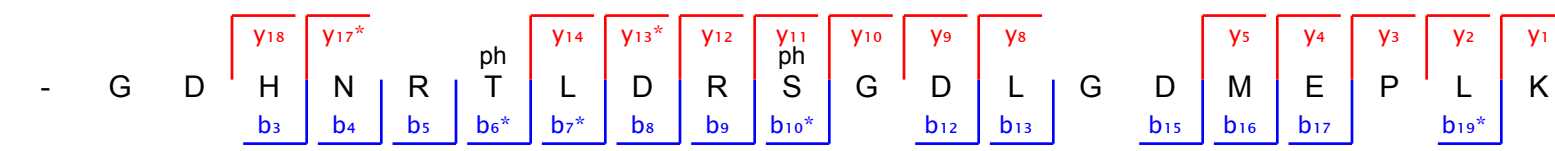

Raw file 20150812\_A375SR\_Phospho\_BR1\_03 Scan 15986 Method FTMS; HCD Score 299.3 m/z 1068.42 Gene names CHD9

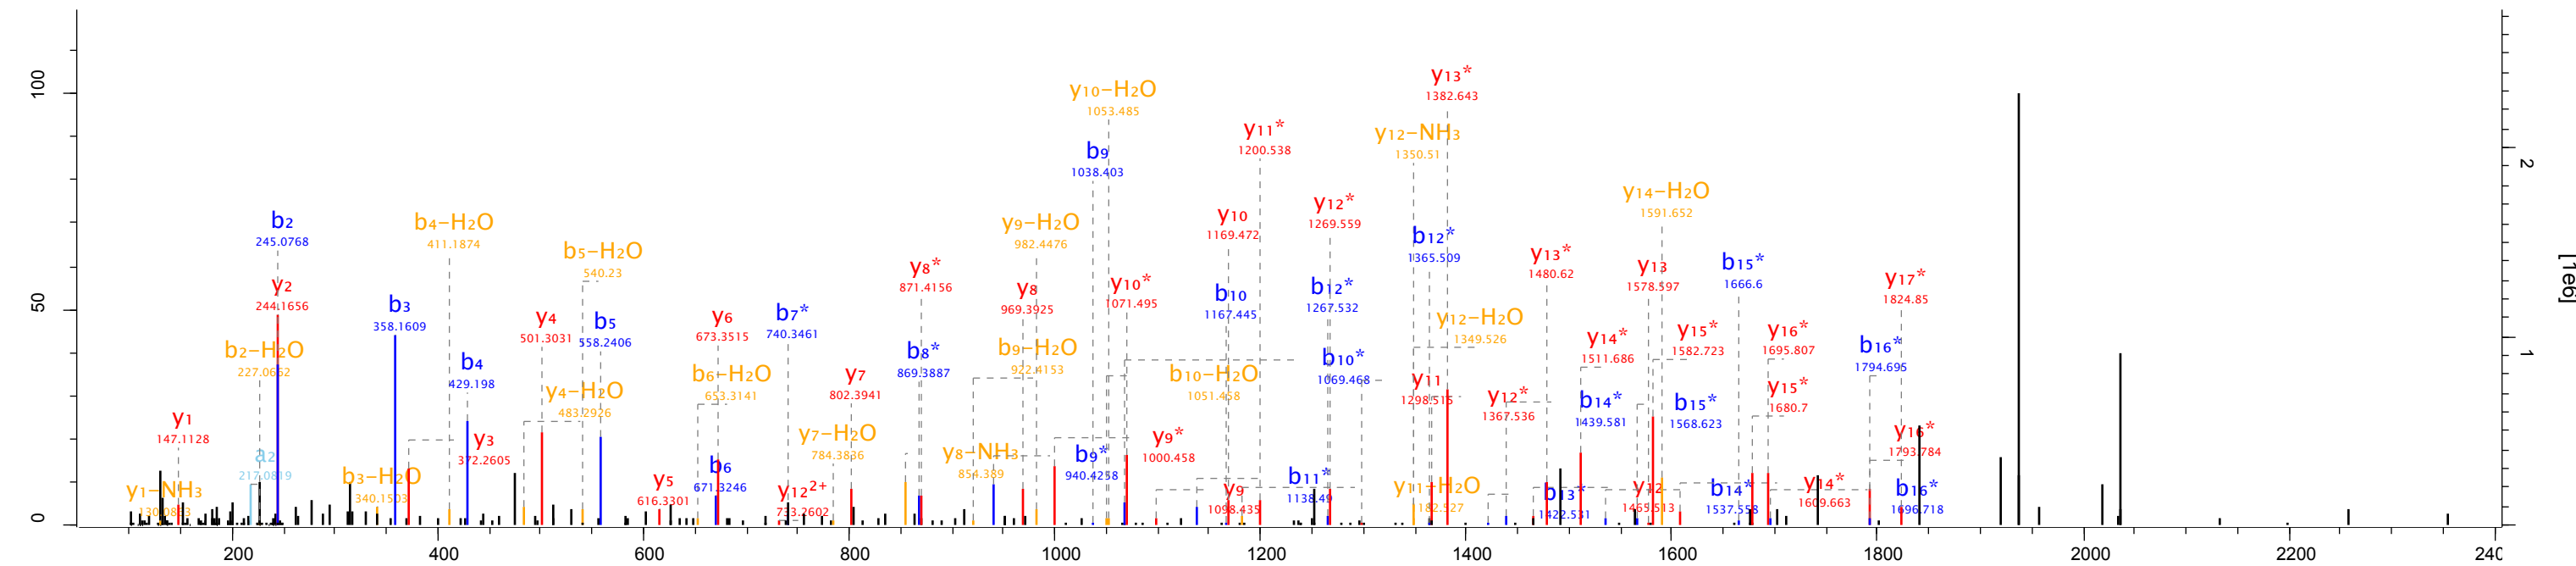

D E L A E L S E A E S E G D E K P K -

b<sub>2</sub> b<sub>3</sub> b<sub>4</sub> b<sub>5</sub> b<sub>6</sub> b<sub>7</sub>\* b<sub>8</sub>\* b<sub>9</sub> b<sub>10</sub> b<sub>11</sub>\* b<sub>12</sub>\* b<sub>13</sub>\* b<sub>14</sub>\* b<sub>15</sub>\* b<sub>16</sub>\*

y<sub>17</sub>\* y<sub>16</sub>\* y<sub>15</sub>\* y<sub>14</sub>\* y<sub>13</sub> y<sub>12</sub> ph y<sub>11</sub> y<sub>10</sub> y<sub>9</sub> y<sub>8</sub> ph y<sub>7</sub> y<sub>6</sub> y<sub>5</sub> y<sub>4</sub> y<sub>3</sub> y<sub>2</sub> y<sub>1</sub>

Raw file: 20150812\_A375SR\_Phospho\_BR1\_03  
 Scan: 16066 Method: FTMS; HCD Score: 267.45 m/z: 1057.11 Gene names: ILF3

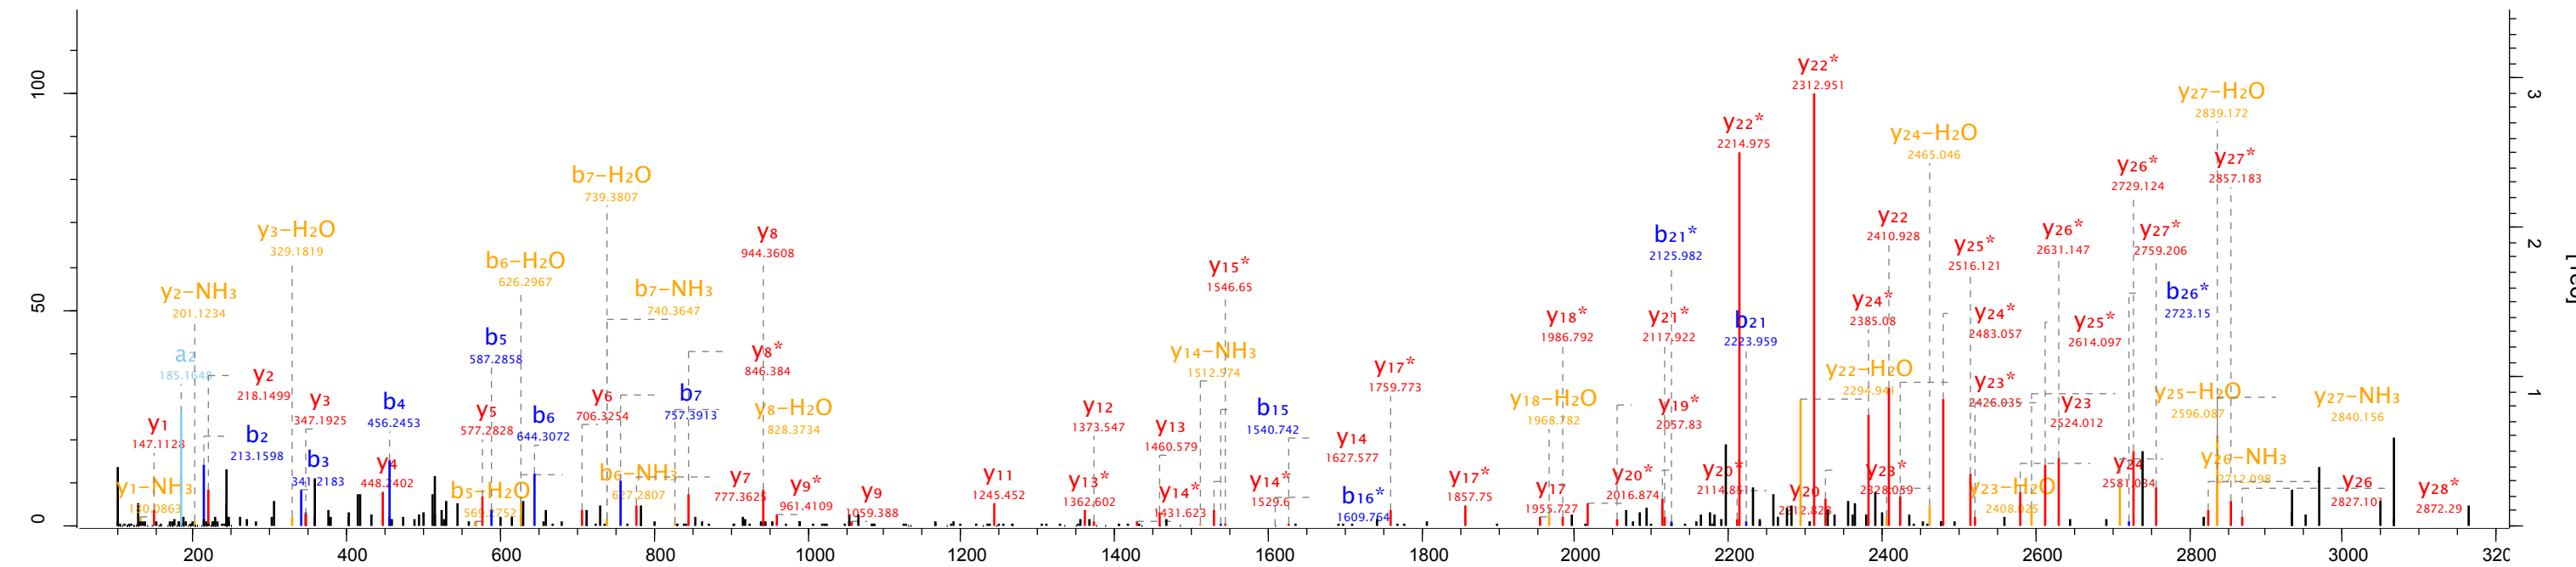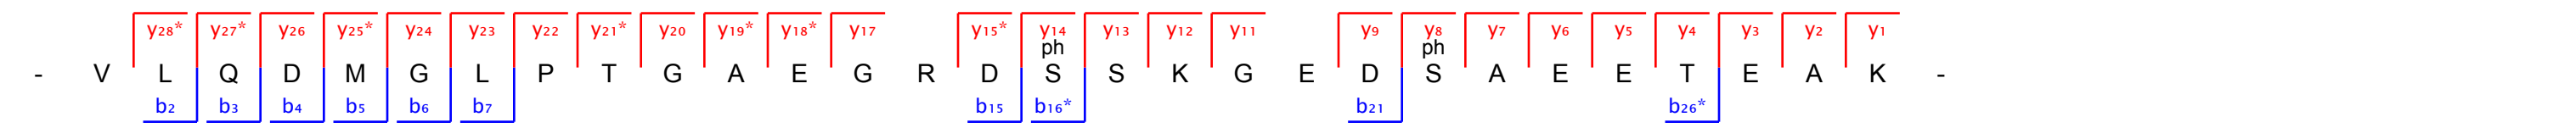

Raw file 20150812\_A375SR\_Phospho\_BR1\_03 Scan 16146 Method FTMS; HCD Score 135.66 m/z 731.27 Gene names FAM178A

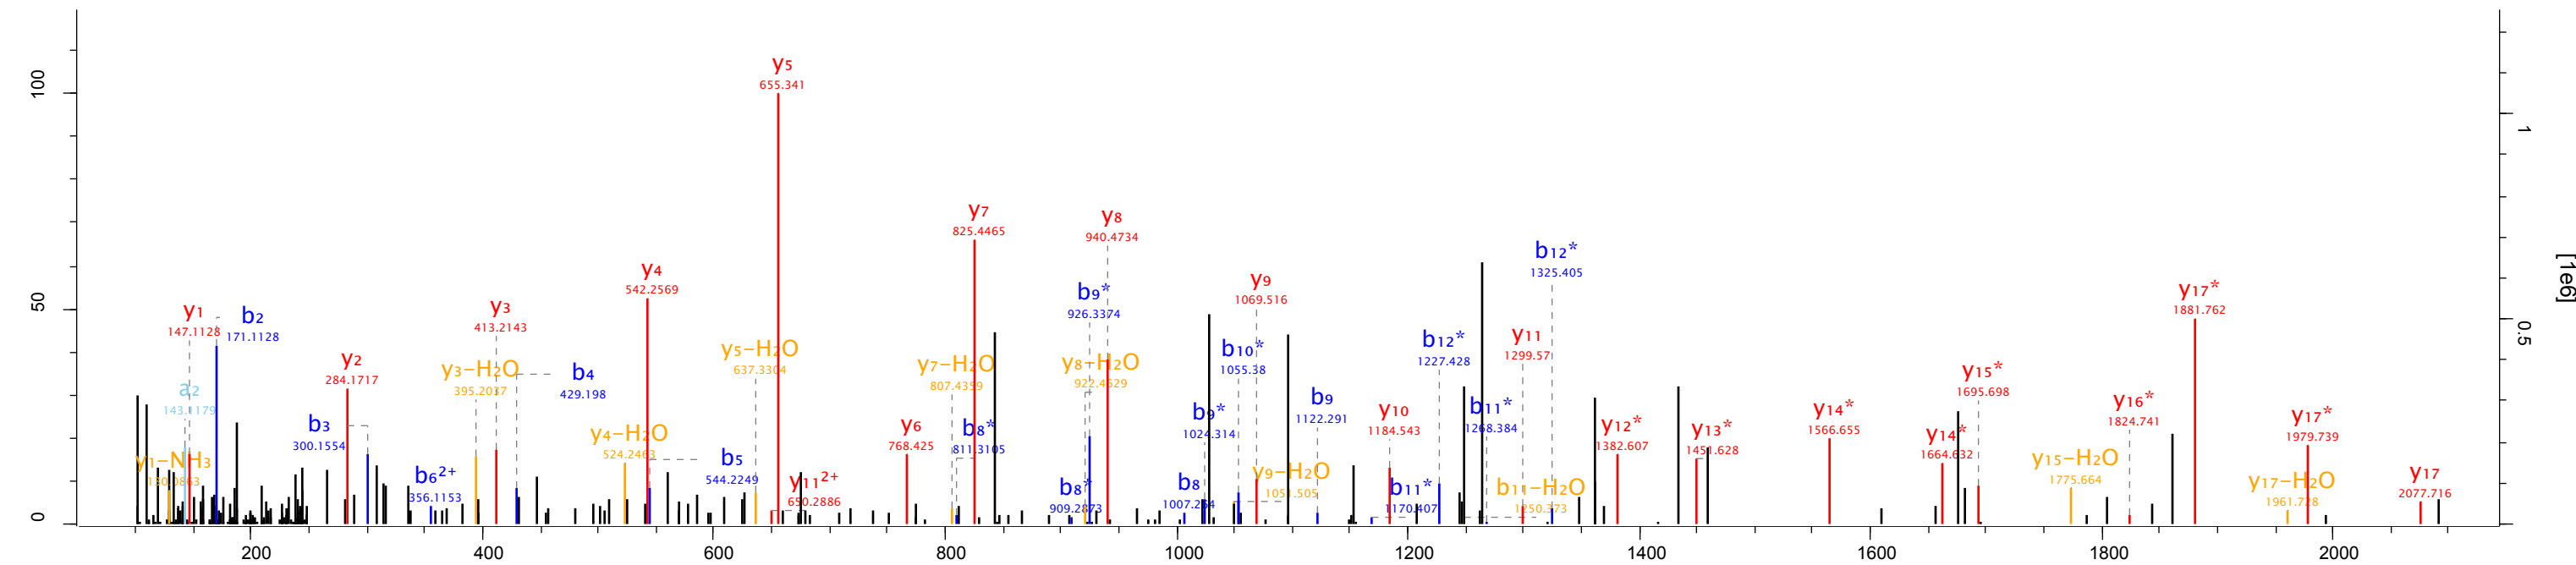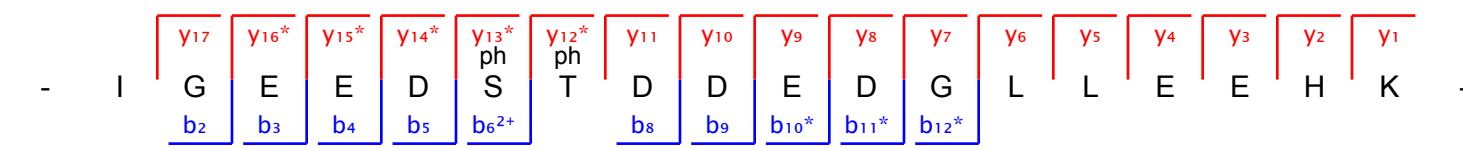

Raw file 20150812\_A375SR\_Phospho\_BR1\_03 Scan 16866 Method FTMS; HCD Score 162.26 m/z 1049.79 Gene names NES

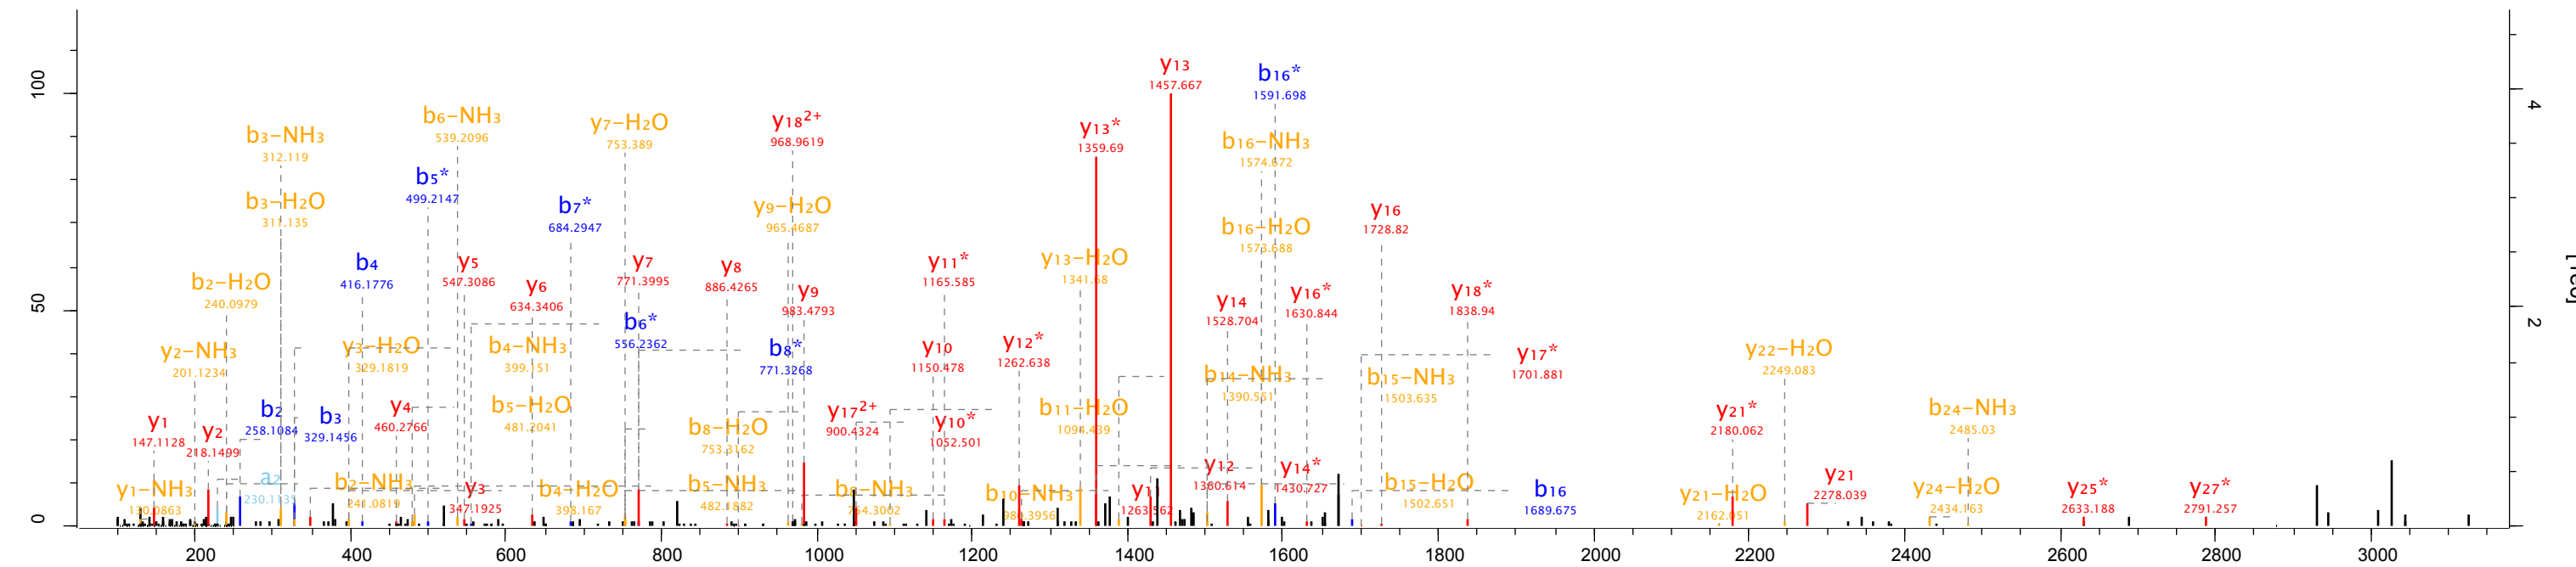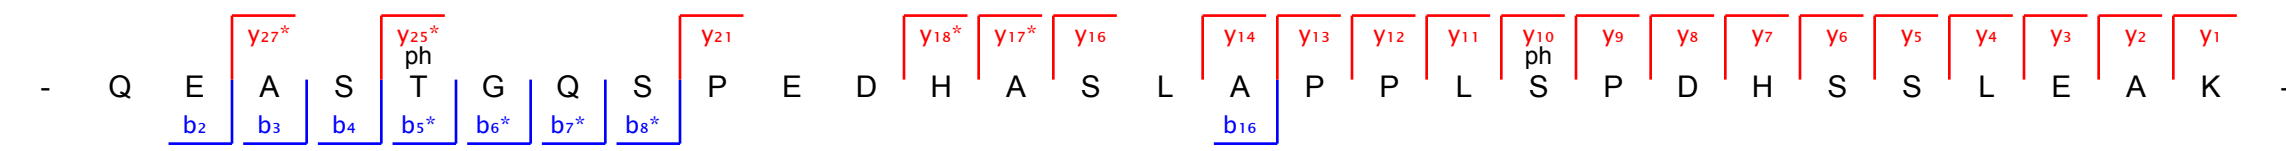

Raw file 20150812\_A375SR\_Phospho\_BR1\_03 Scan 16886 Method FTMS; HCD Score 211.72 m/z 1207.91 Gene names MAP1B

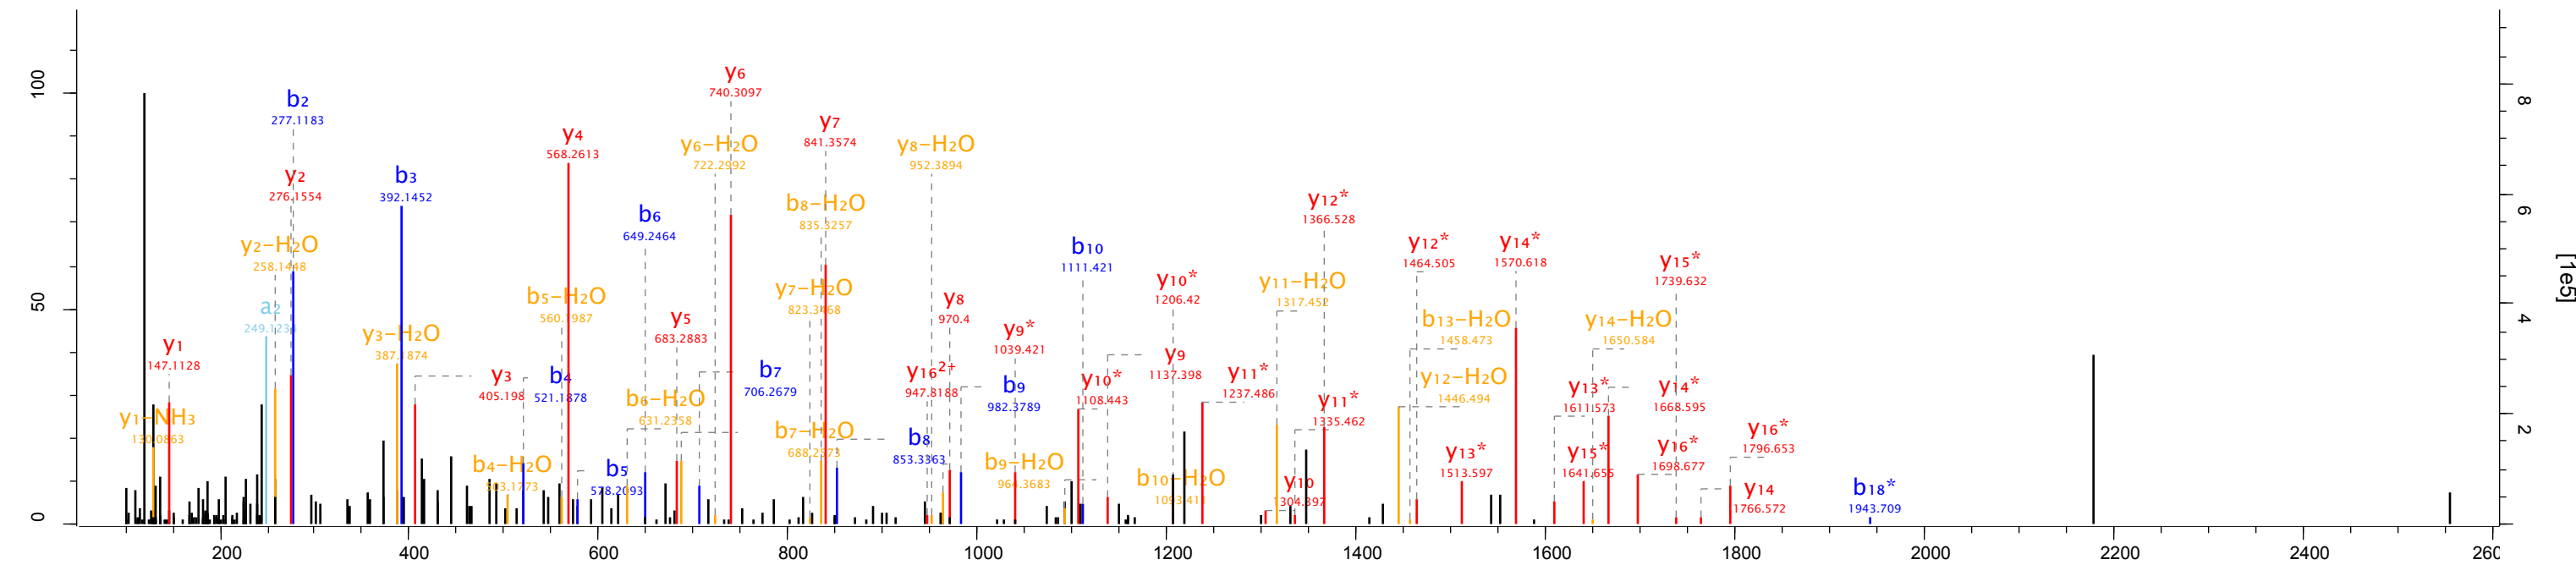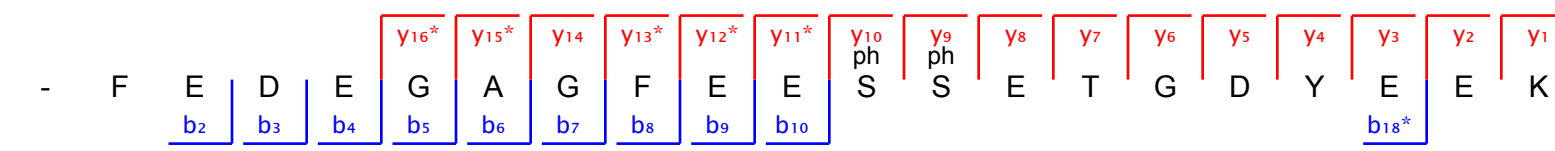

Raw file 20150812\_A375SR\_Phospho\_BR1\_03 Scan 16916 Method FTMS; HCD Score 109.08 m/z 977.42 Gene names TLE4

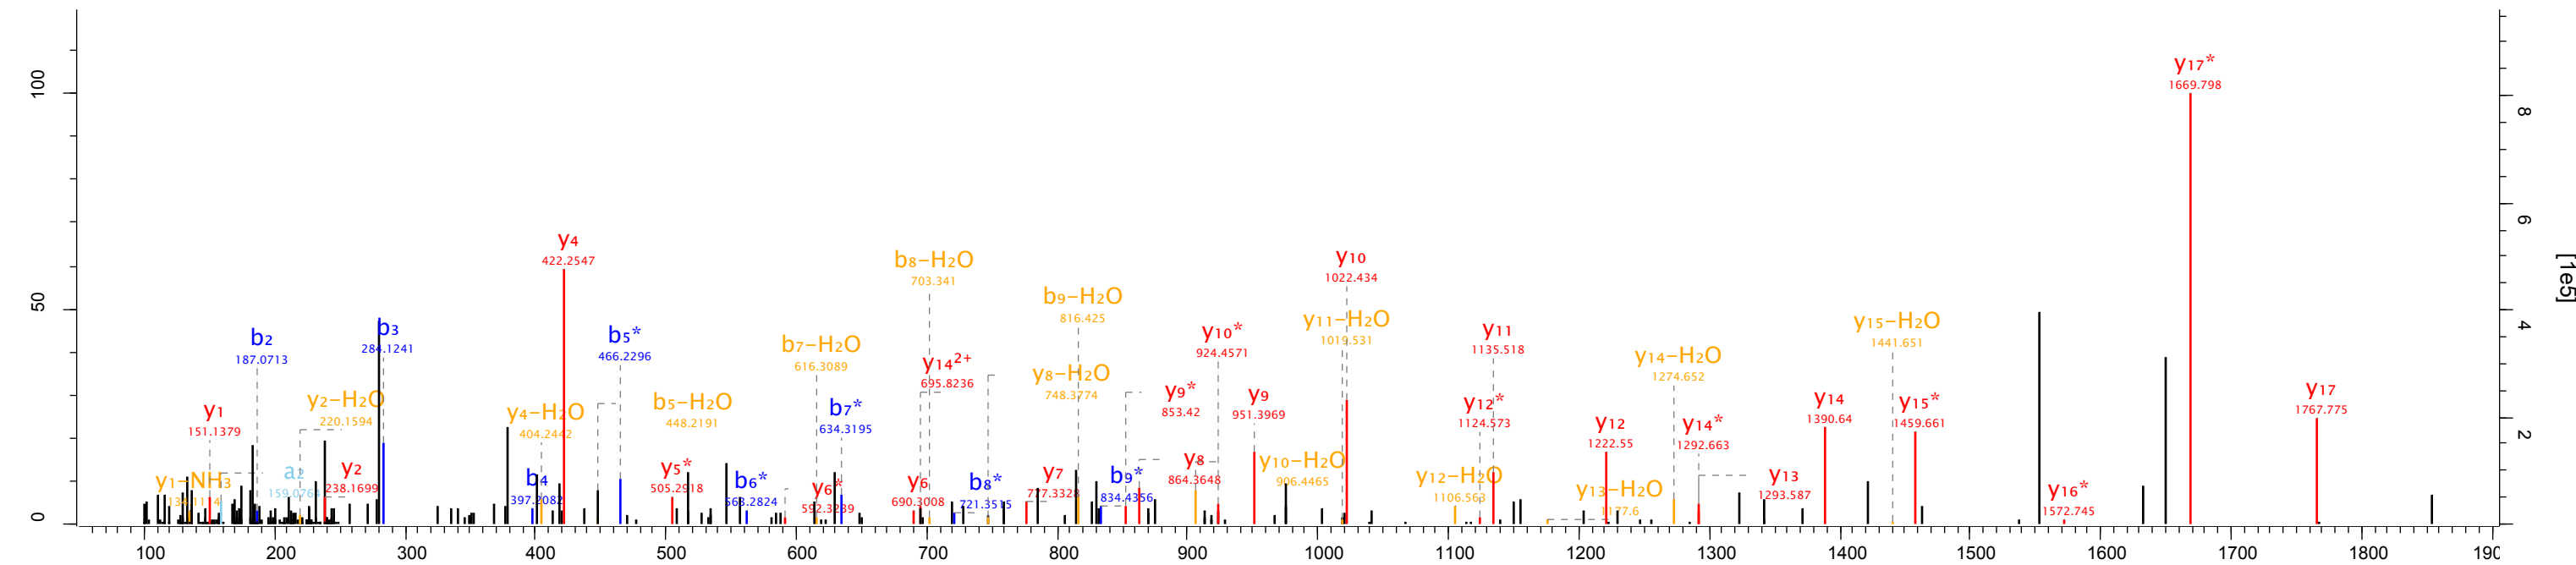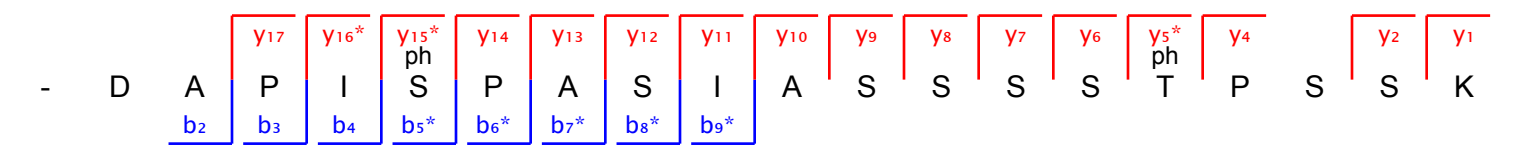

Raw file 20150812\_A375SR\_Phospho\_BR1\_03 Scan 17266 Method FTMS; HCD Score 181.81 m/z 806.39 Gene names TENC1

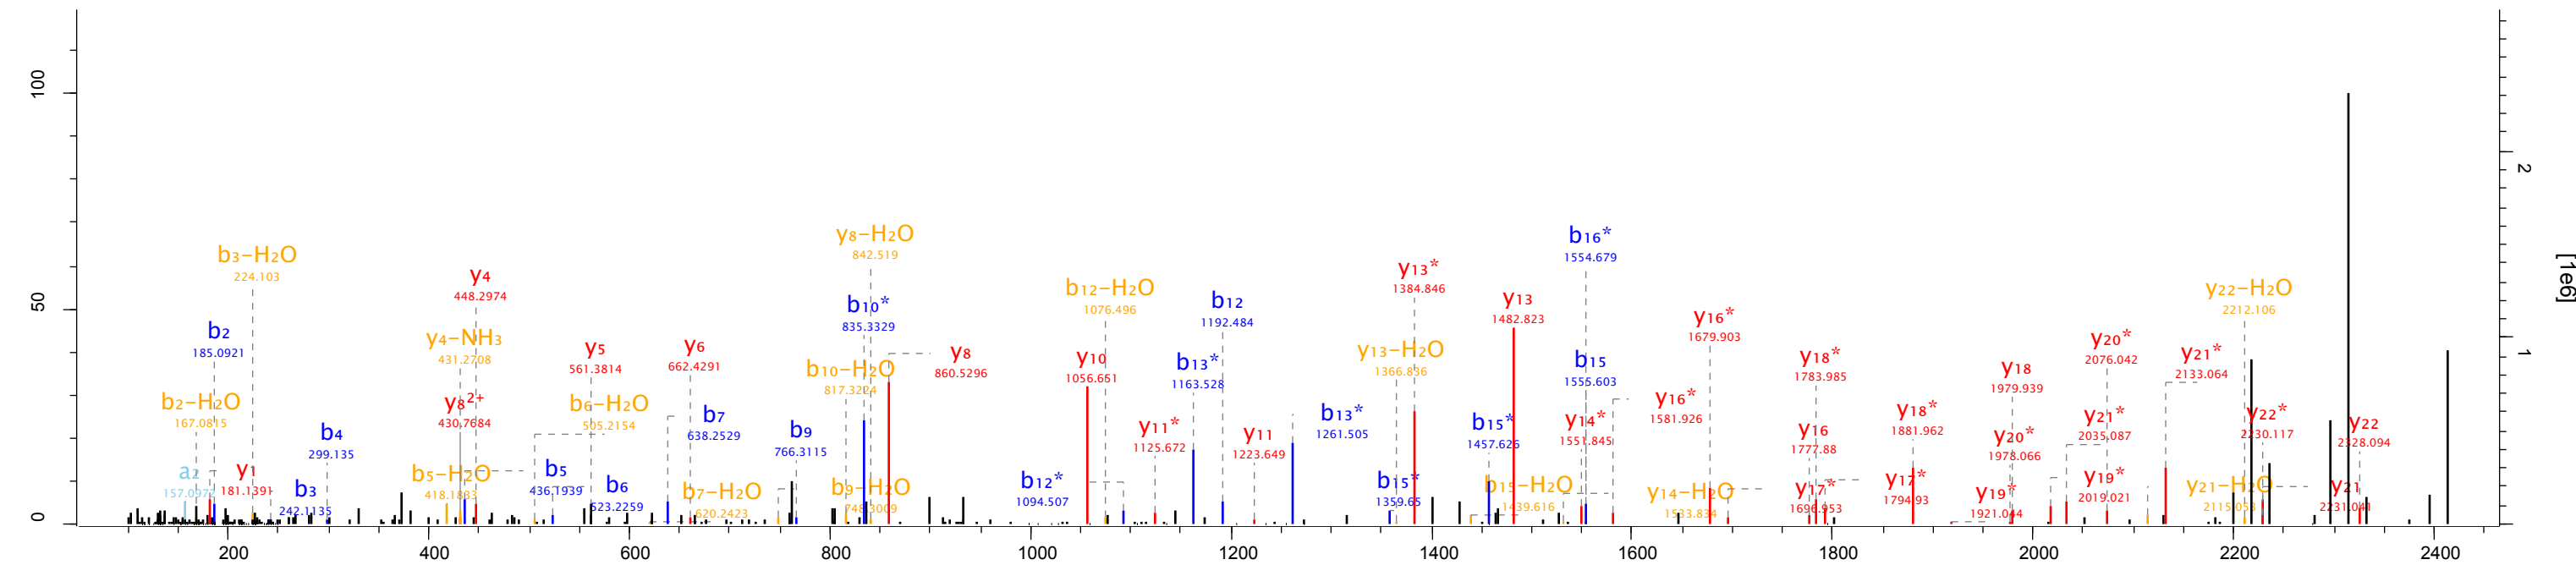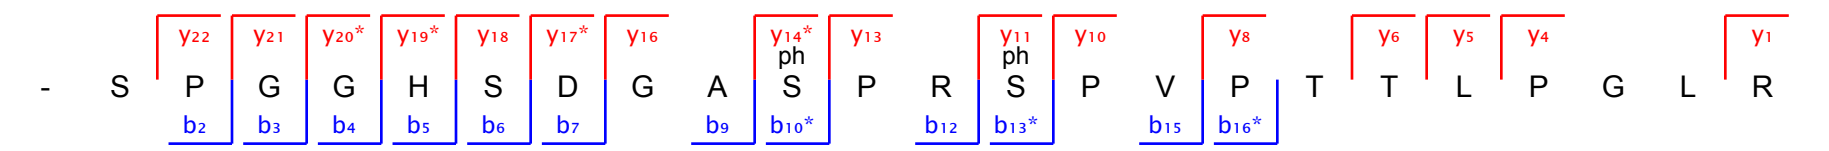



20150812\_A375SR\_Phospho\_BR1\_03

17386 FTMS; HCD 352.48 1320.54 TLE4

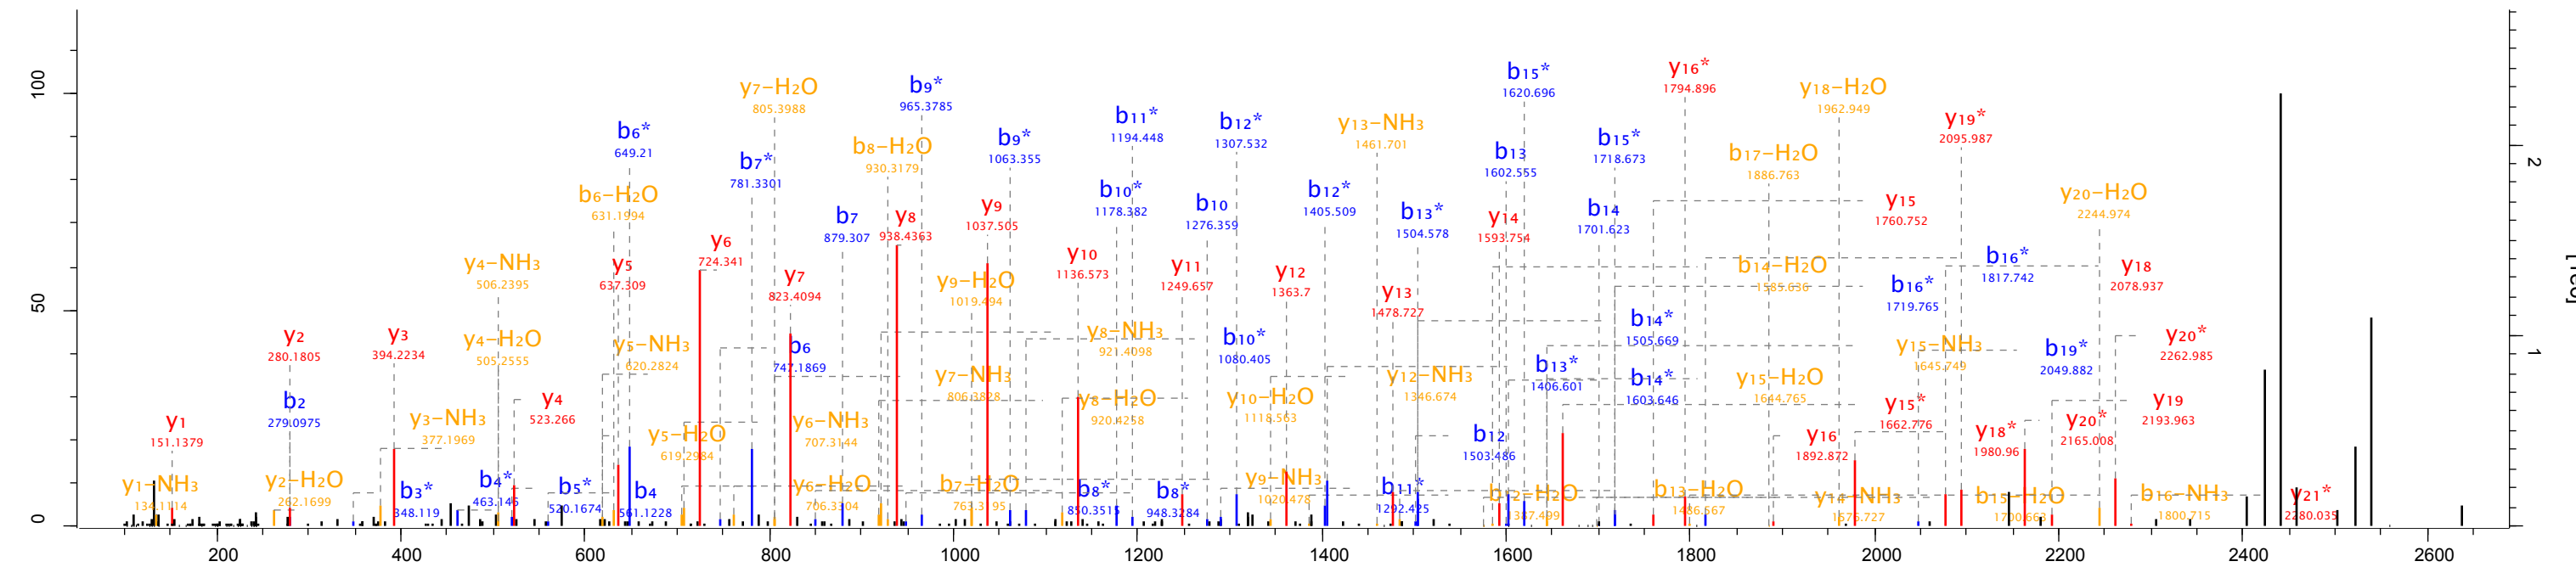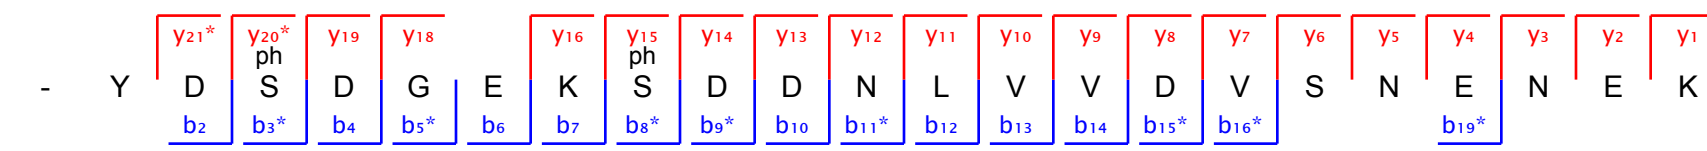

Raw file: 20150812\_A375SR\_Phospho\_BR1\_03  
 Scan: 17556 Method: FTMS; HCD Score: 252.05 m/z: 1086.96 Gene names: RFC1

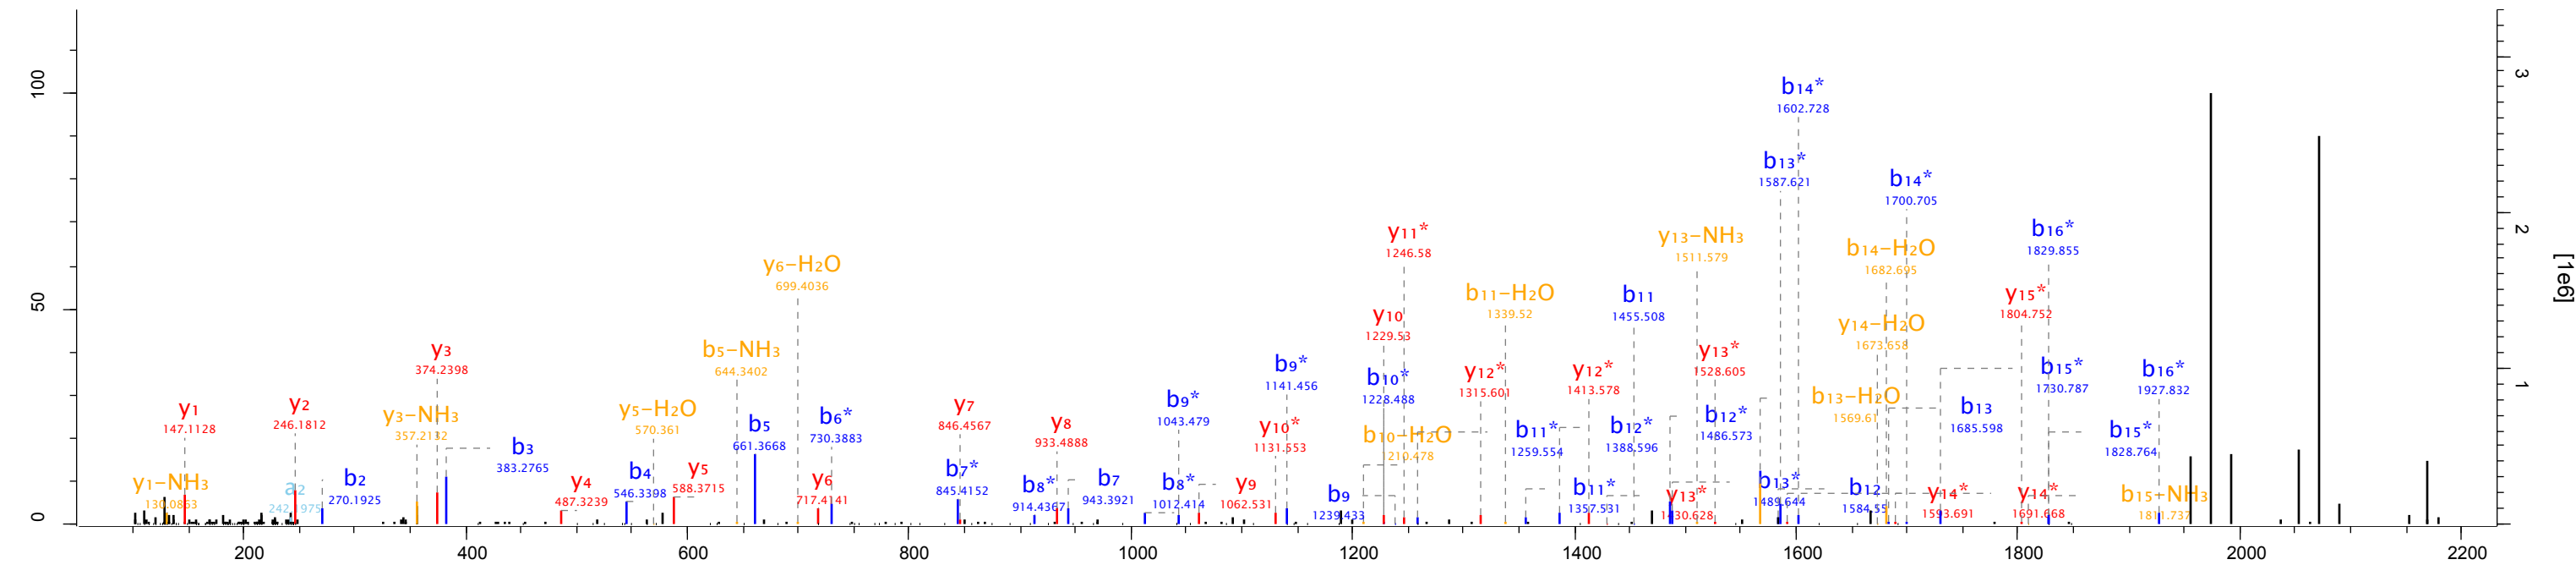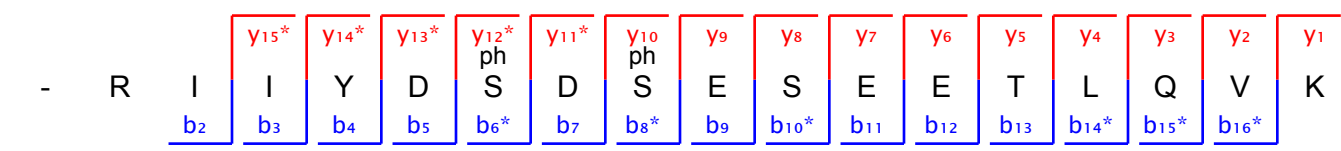

Raw file 20150812\_A375SR\_Phospho\_BR1\_03 Scan 18306 Method FTMS; HCD Score 121.23 m/z 926.69 Gene names ERBB2IP

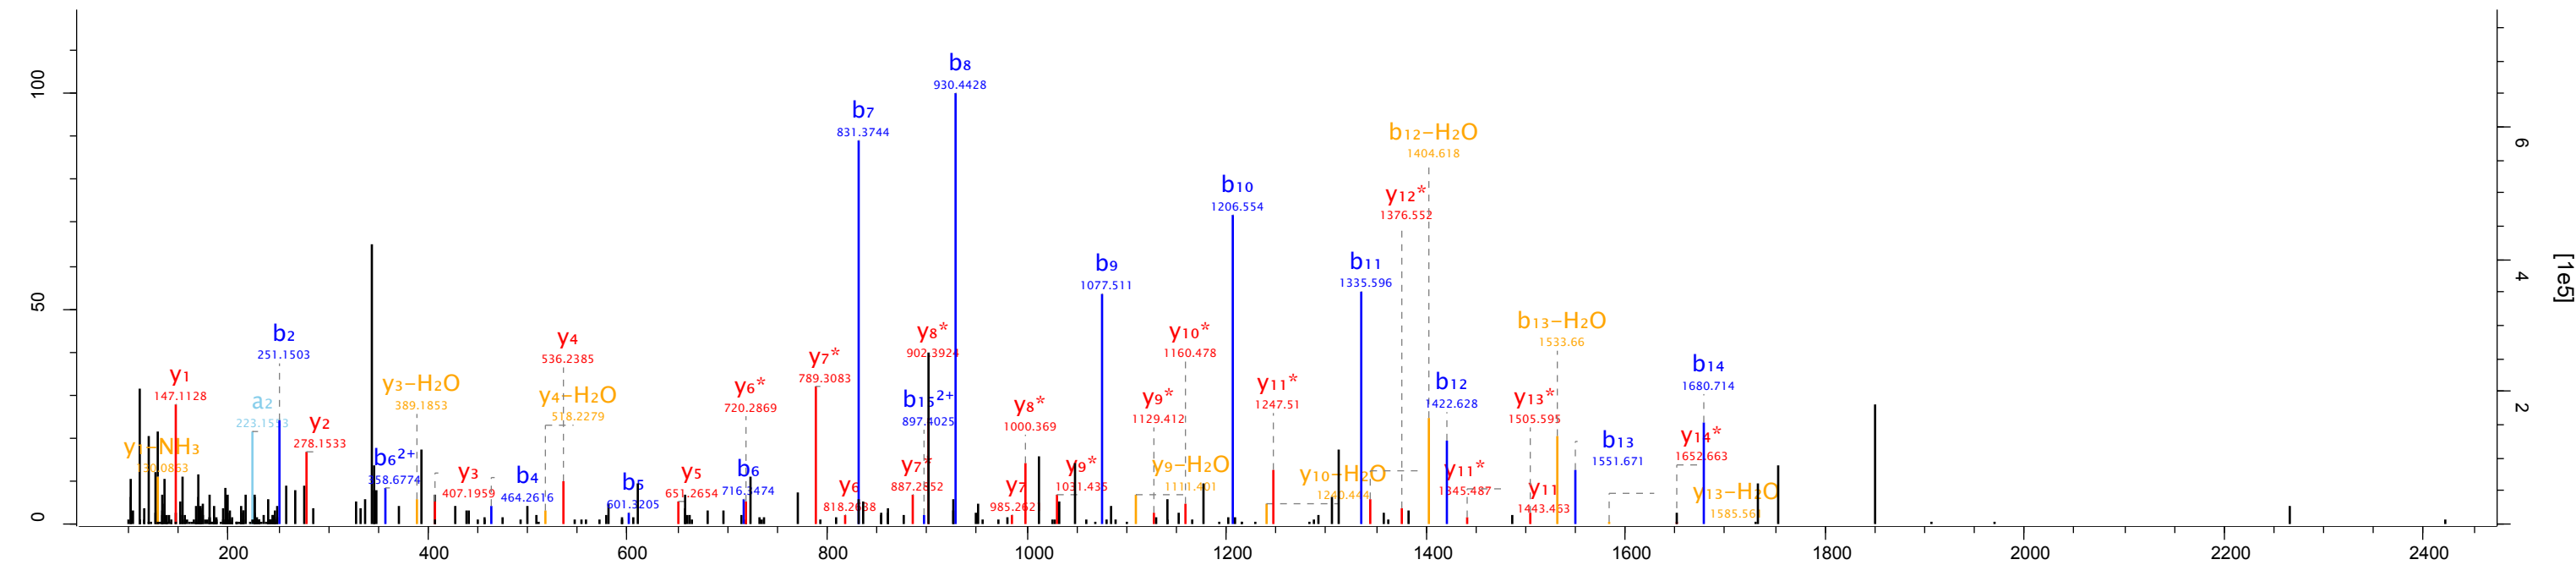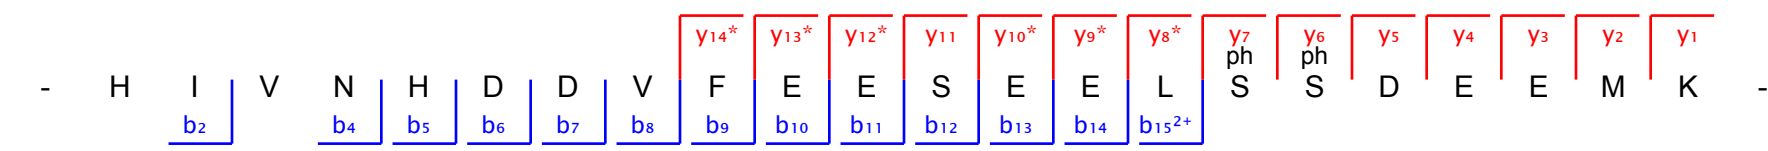

Raw file 20150812\_A375SR\_Phospho\_BR1\_03 Scan 18366 Method FTMS; HCD Score 72.82 m/z 895.38 Gene names SORBS3

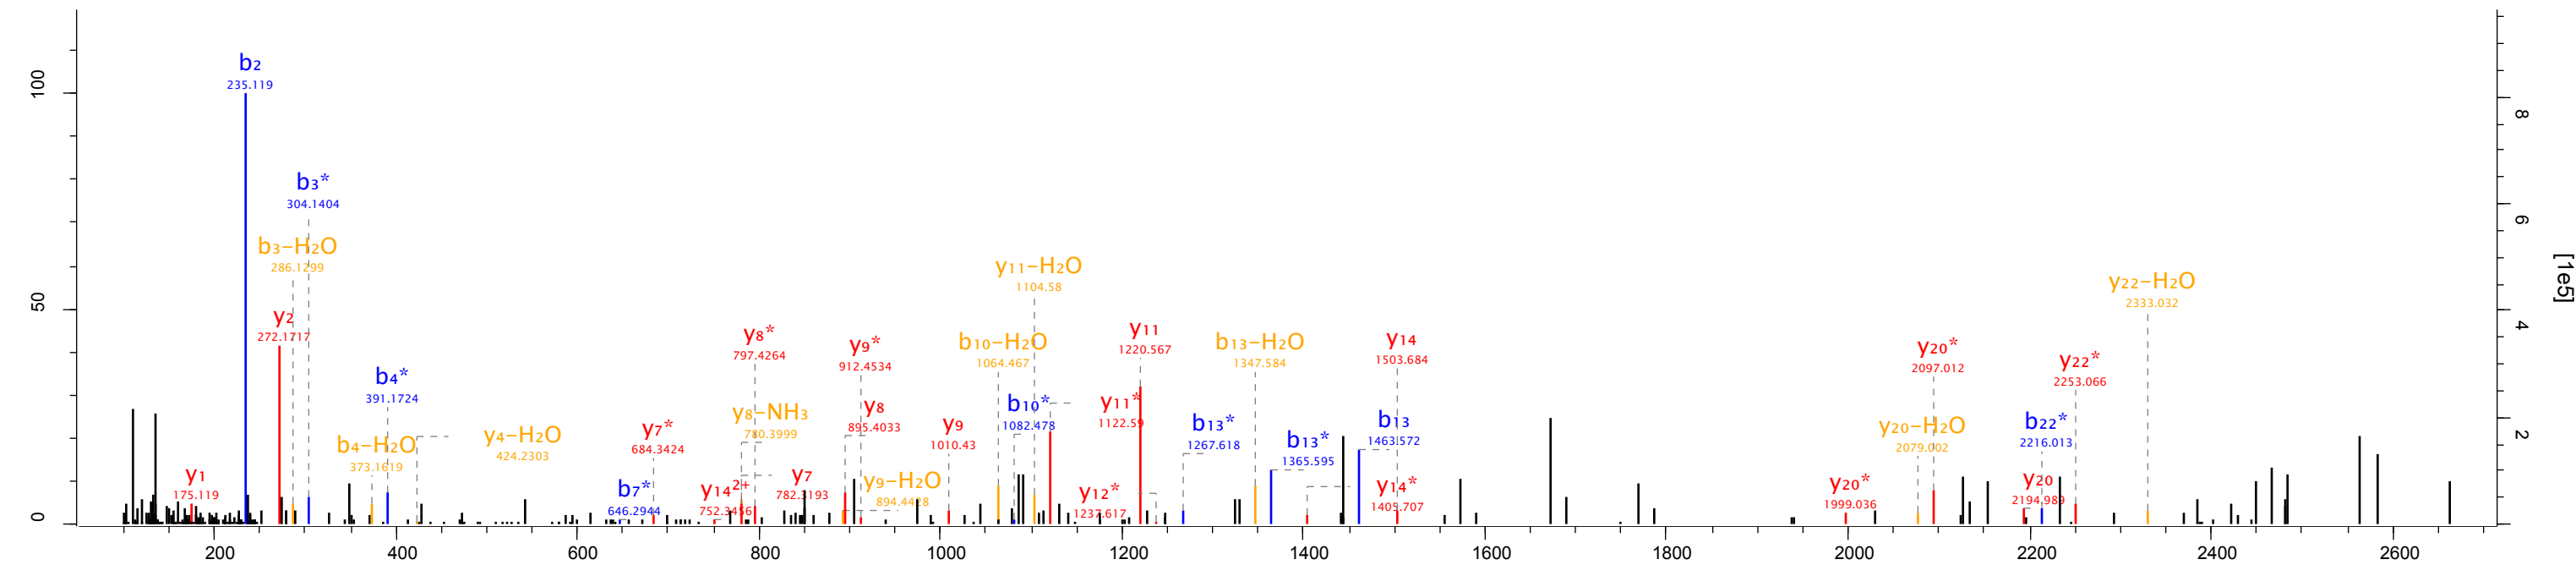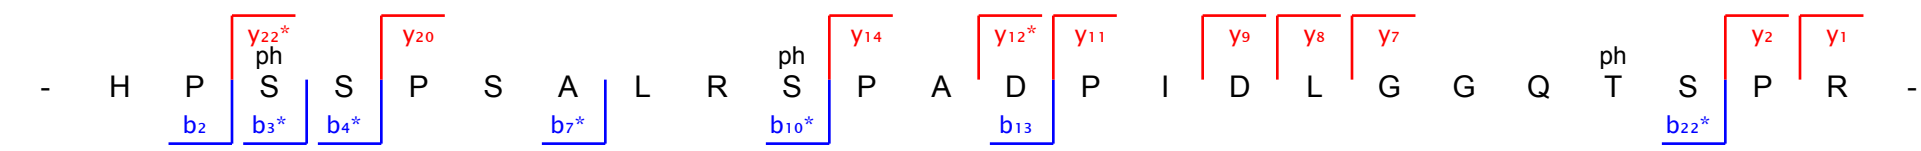

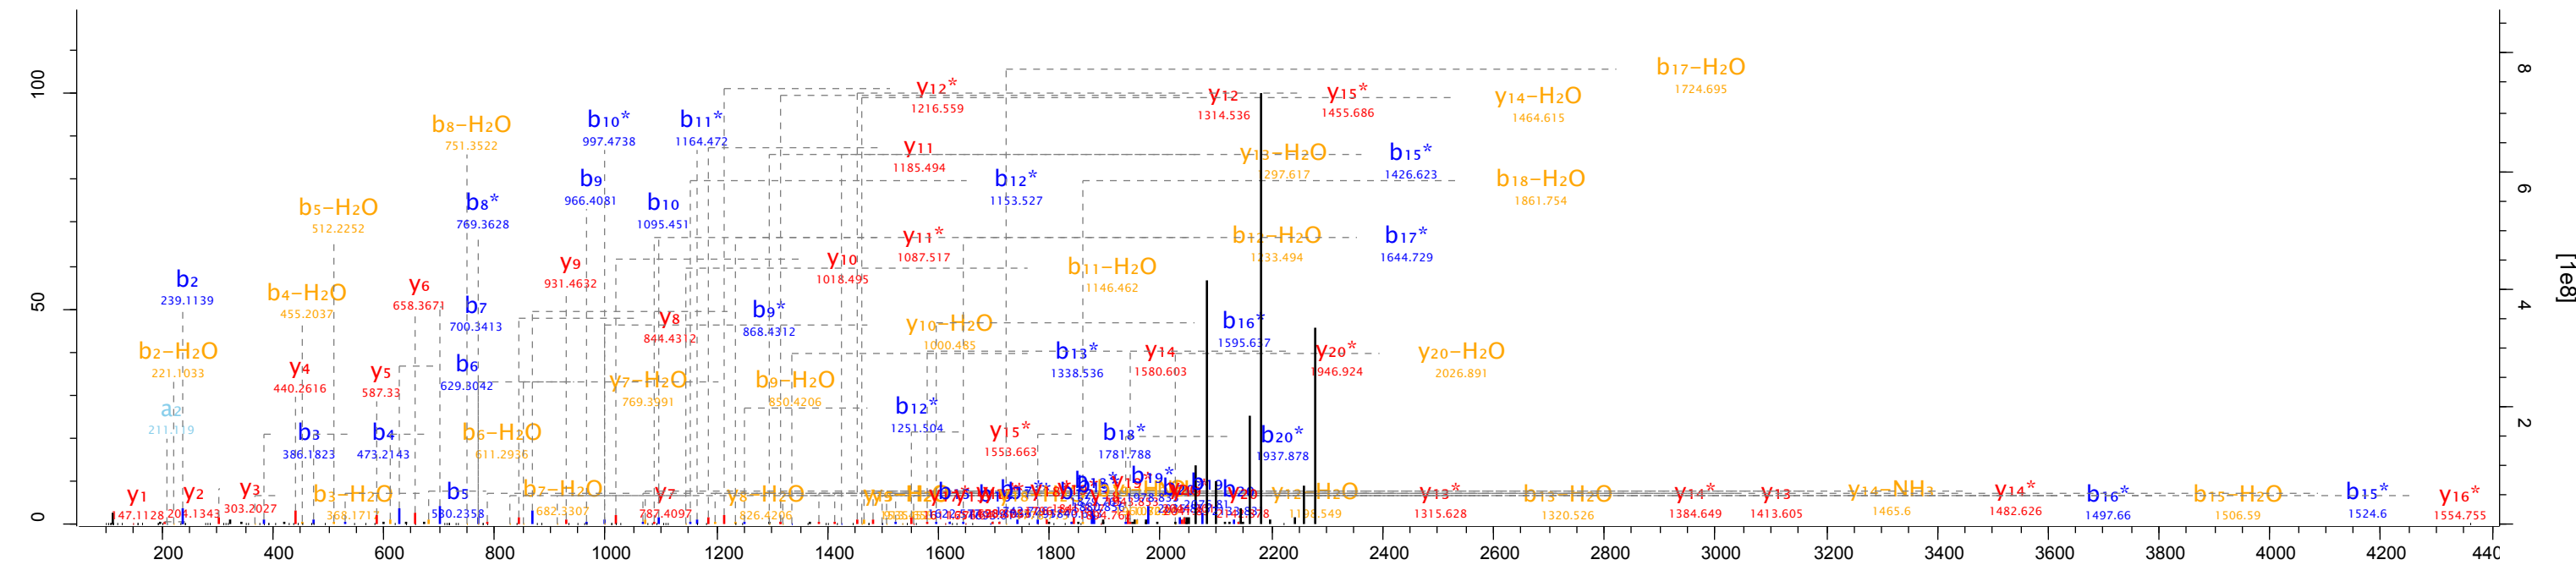

|   |   |                |                |                |                |                |                  |                |                 |                   |                   |                   |   |                 |                 |                 |                   |                 |                 |   |   |
|---|---|----------------|----------------|----------------|----------------|----------------|------------------|----------------|-----------------|-------------------|-------------------|-------------------|---|-----------------|-----------------|-----------------|-------------------|-----------------|-----------------|---|---|
| - | H | T              | F              | S              | G              | V              | A                | S              | V               | E                 | S                 | S                 | G | E               | A               | F               | H                 | V               | G               | K | - |
|   |   | b <sub>2</sub> | b <sub>3</sub> | b <sub>4</sub> | b <sub>5</sub> | b <sub>6</sub> | b <sub>8</sub> * | b <sub>9</sub> | b <sub>10</sub> | b <sub>11</sub> * | b <sub>12</sub> * | b <sub>13</sub> * |   | b <sub>15</sub> | b <sub>16</sub> | b <sub>17</sub> | b <sub>18</sub> * | b <sub>19</sub> | b <sub>20</sub> |   |   |

Raw file: 20150812\_A375SR\_Phospho\_BR1\_03  
 Scan: 18726 Method: FTMS; HCD Score: 167.84 m/z: 796.85 Gene names: FAM21C;FAM21A

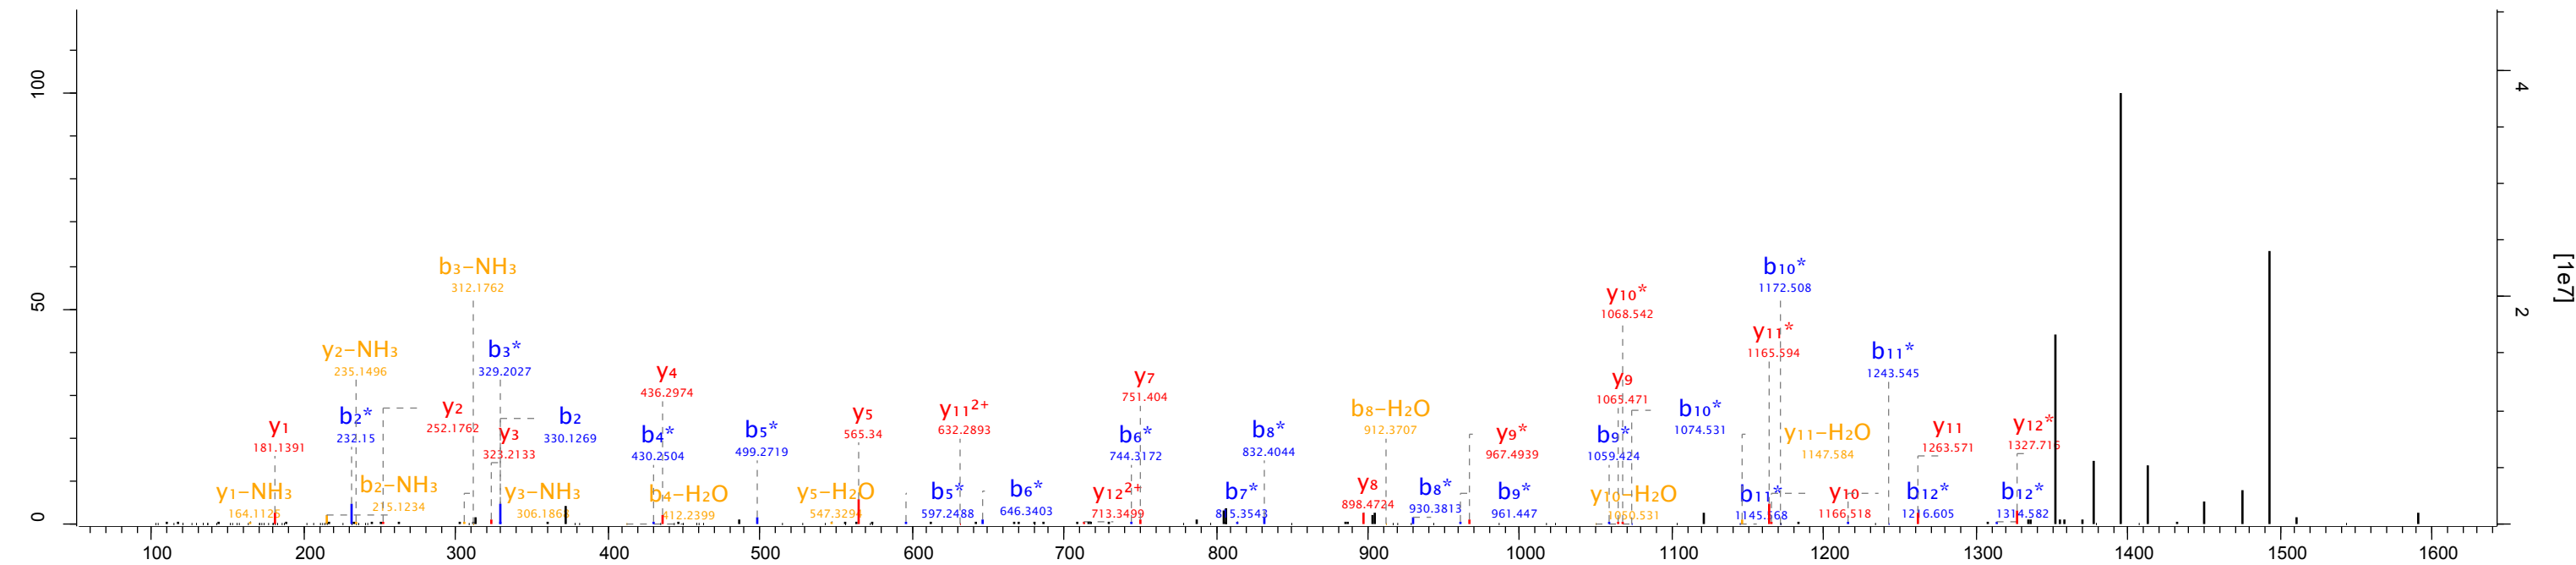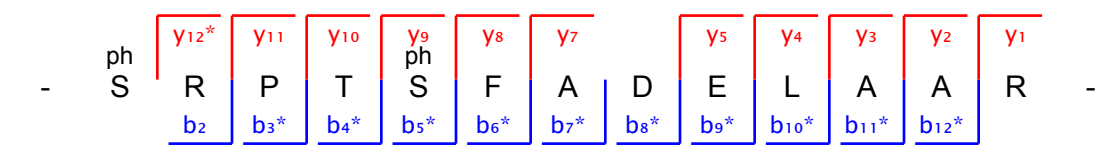

Raw file 20150812\_A375SR\_Phospho\_BR1\_03 Scan 19296 Method FTMS; HCD Score 85.68 m/z 1041.8 Gene names SENP7

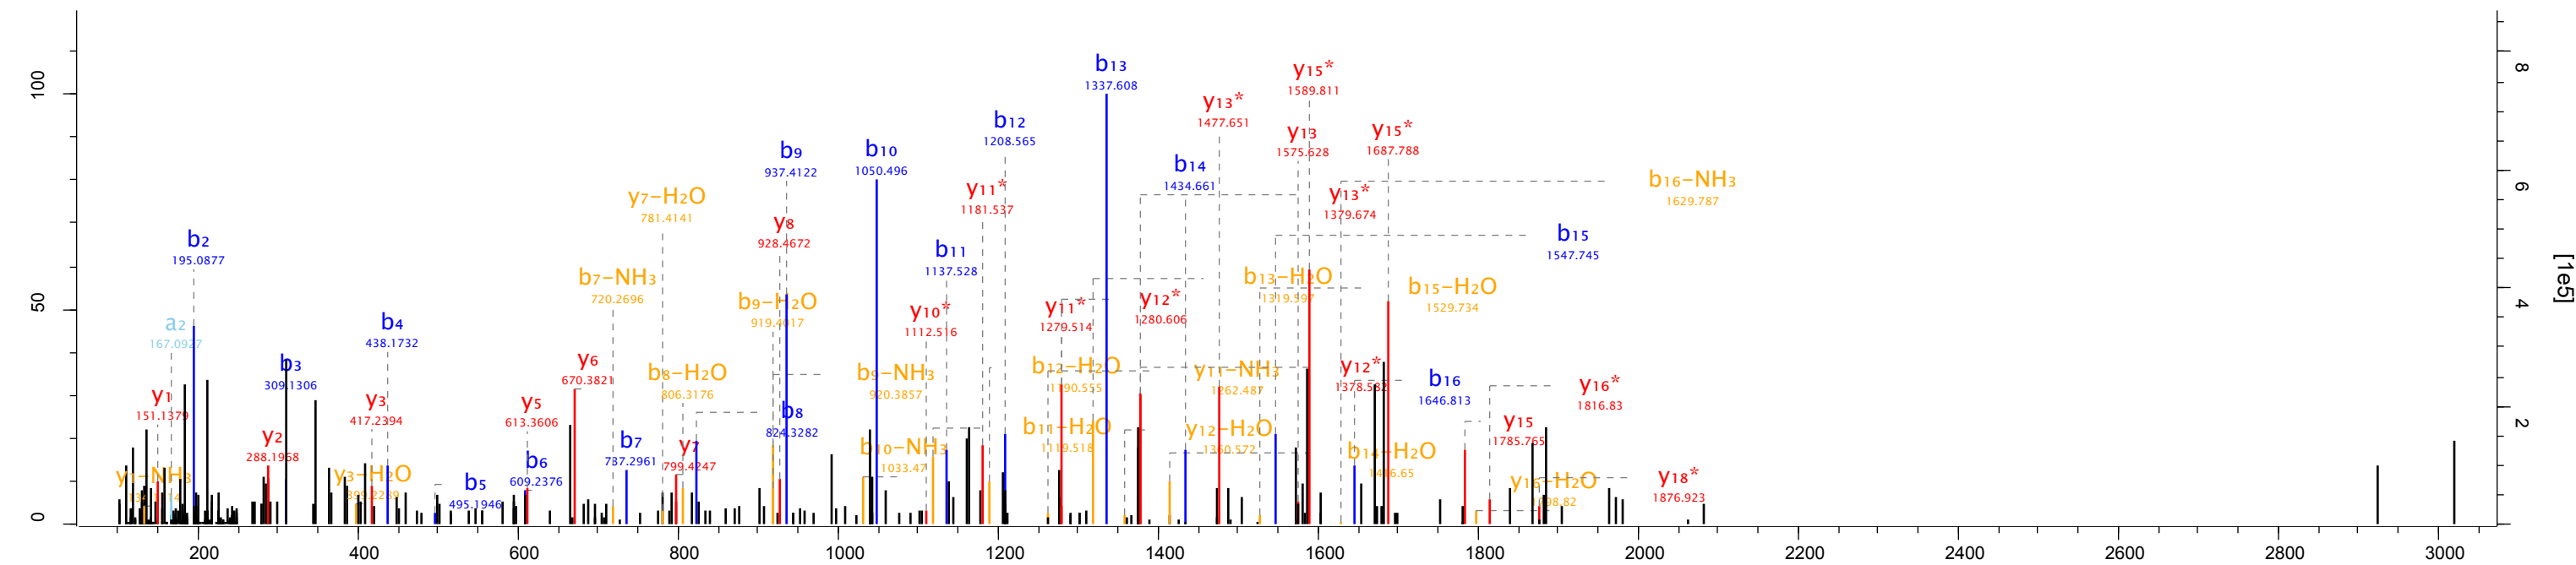

- G H N E G N Q S L I S A E P I V V S S D E E G P V E H K -

Fragmentation mapping below the sequence:

- b<sub>2</sub> (under H)
- b<sub>3</sub> (under N)
- b<sub>4</sub> (under E)
- b<sub>5</sub> (under G)
- b<sub>6</sub> (under N)
- b<sub>7</sub> (under Q)
- b<sub>8</sub> (under S)
- b<sub>9</sub> (under L)
- b<sub>10</sub> (under I)
- b<sub>11</sub> (under S)
- b<sub>12</sub> (under A)
- b<sub>13</sub> (under E)
- b<sub>14</sub> (under P)
- b<sub>15</sub> (under I)
- b<sub>16</sub> (under V)
- y<sub>18</sub><sup>\*</sup> (under S)
- y<sub>16</sub><sup>\*</sup> (under A)
- y<sub>15</sub> (under E)
- y<sub>13</sub> (under V)
- y<sub>12</sub><sup>\*</sup> (under V)
- y<sub>11</sub><sup>\*</sup> (under S)
- y<sub>10</sub><sup>\*</sup> (under S)
- y<sub>8</sub> (under D)
- y<sub>7</sub> (under E)
- y<sub>6</sub> (under G)
- y<sub>5</sub> (under P)
- y<sub>3</sub> (under E)
- y<sub>2</sub> (under H)
- y<sub>1</sub> (under K)

Raw file 20150812\_A375SR\_Phospho\_BR1\_03 Scan 19356 Method FTMS; HCD Score 120.44 m/z 967.9 Gene names DDX59

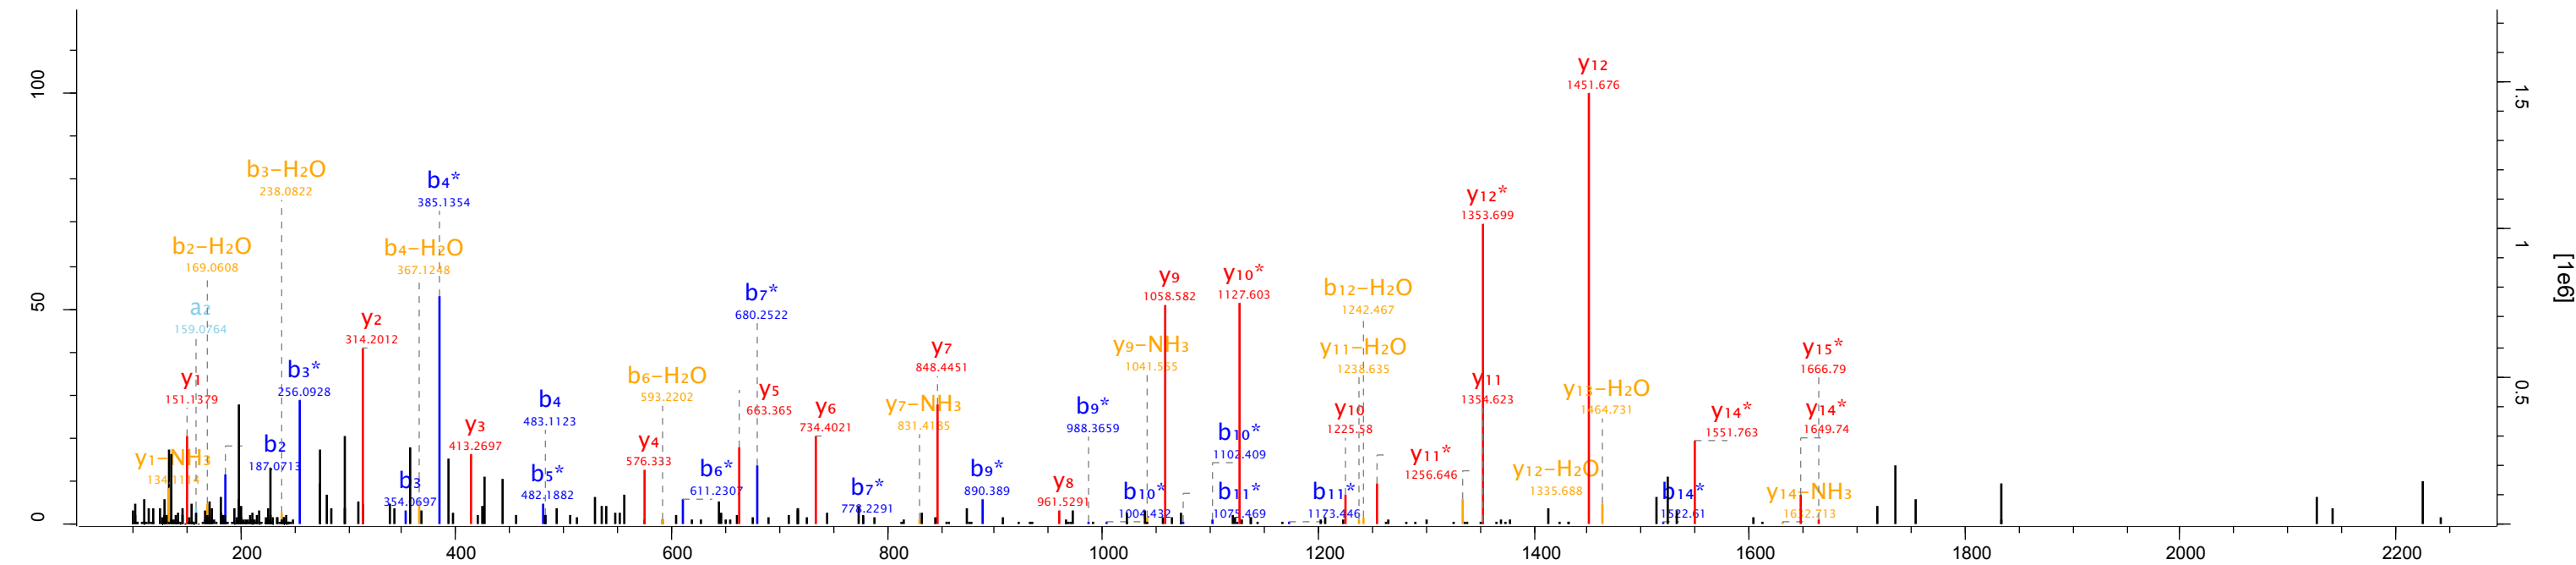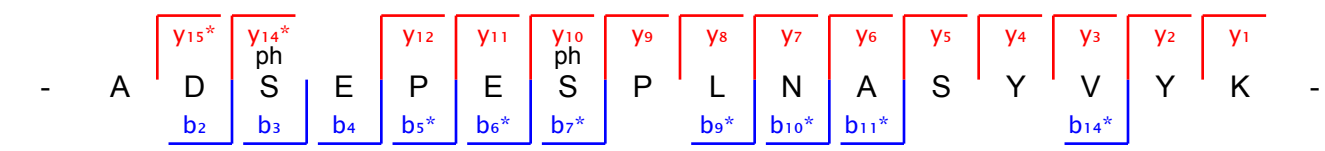



Raw file Scan Method Score m/z Gene names  
 20150812\_A375SR\_Phospho\_BR1\_03 19976 FTMS; HCD 118.19 773.83 SF3B1

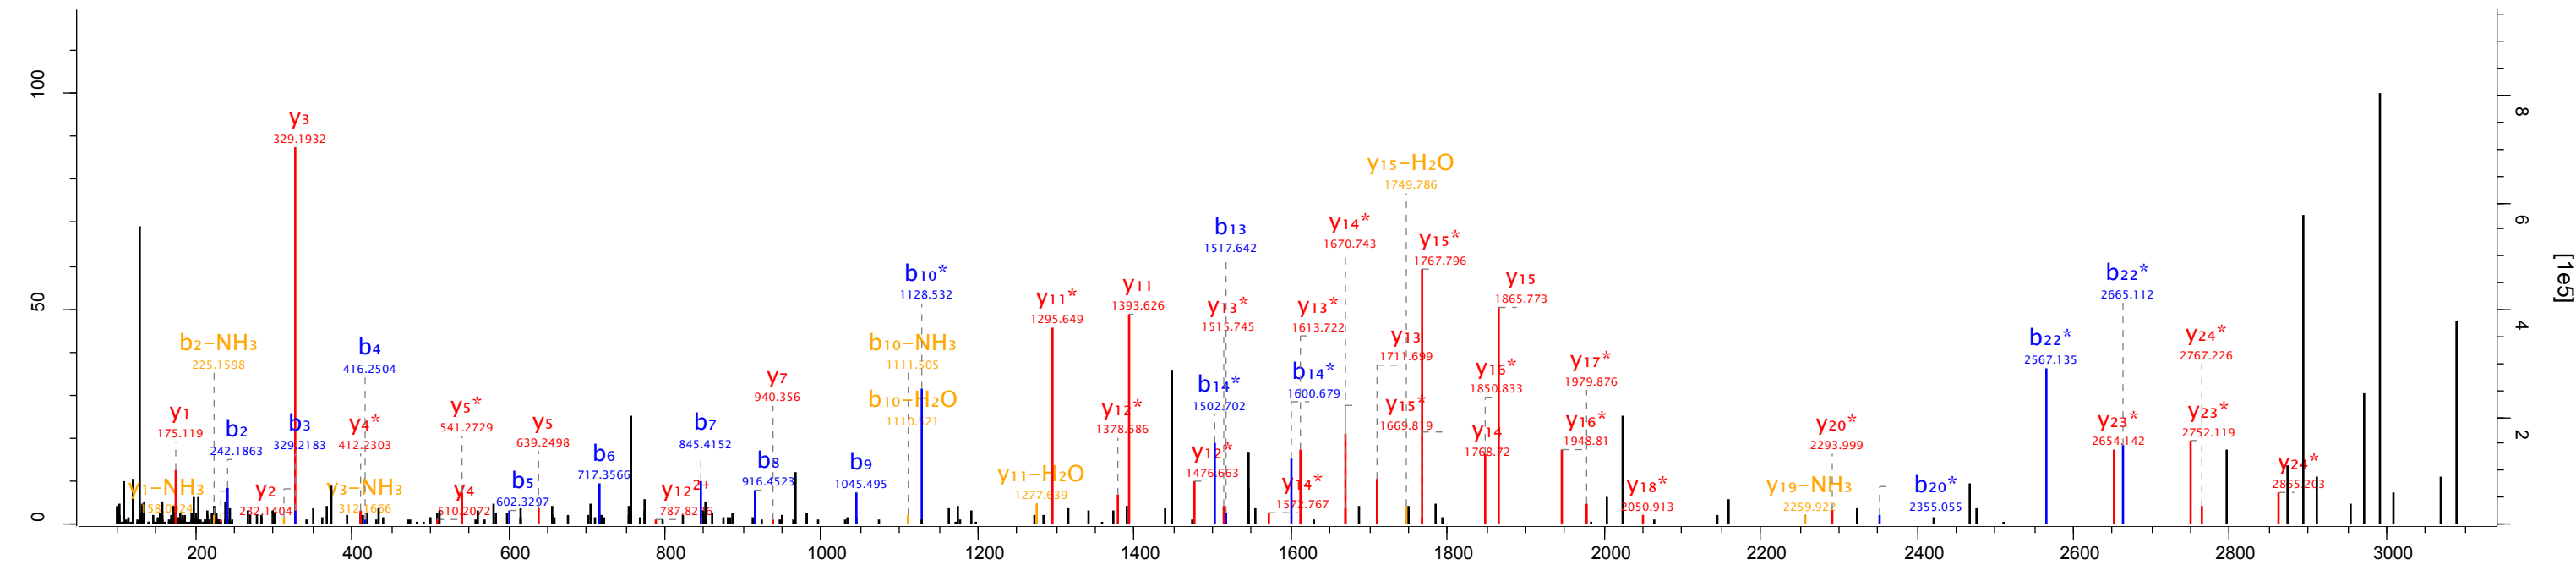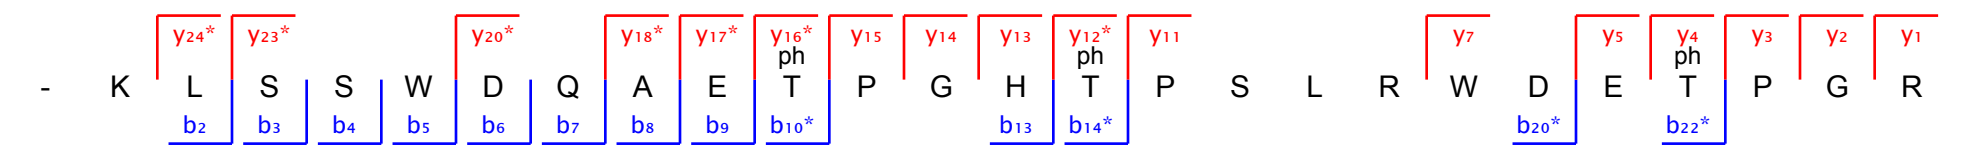

Raw file 20150812\_A375SR\_Phospho\_BR1\_03 Scan 20366 Method FTMS; HCD Score 243.34 m/z 1287.56 Gene names NCOR1

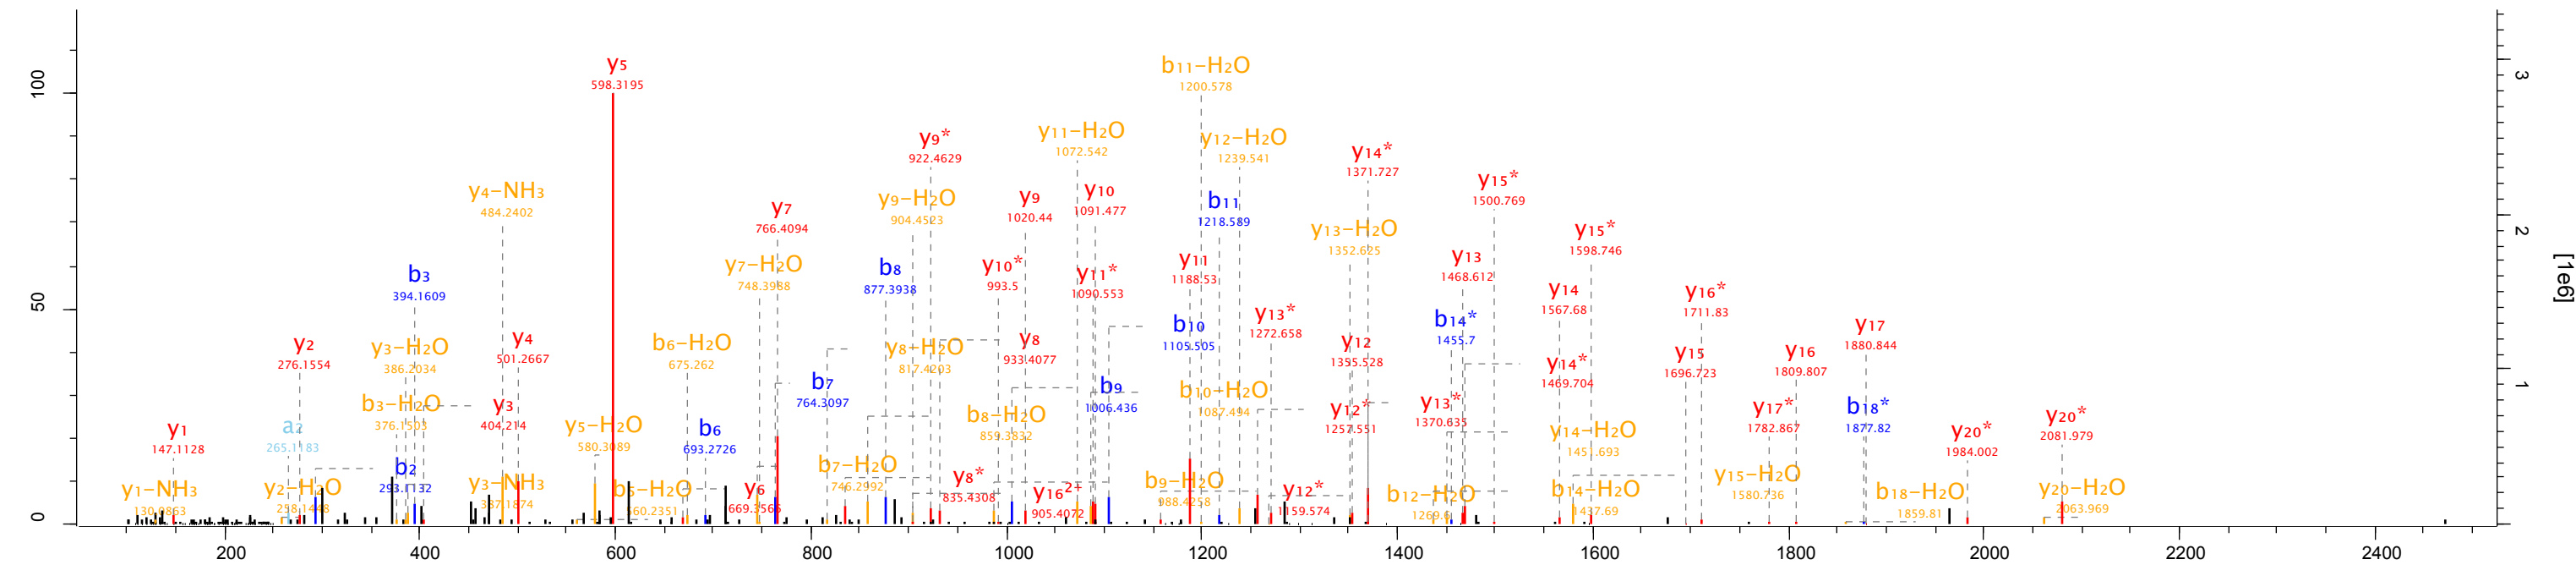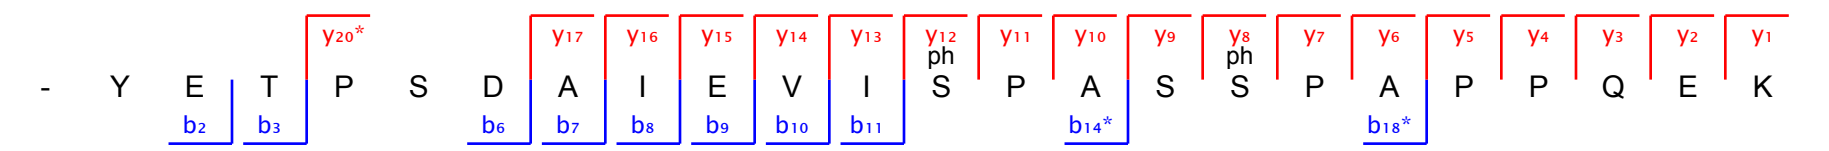

Raw file: 20150812\_A375SR\_Phospho\_BR1\_03  
 Scan: 2046 Method: FTMS; HCD Score: 89.51 m/z: 581.26 Gene names: BTBD10

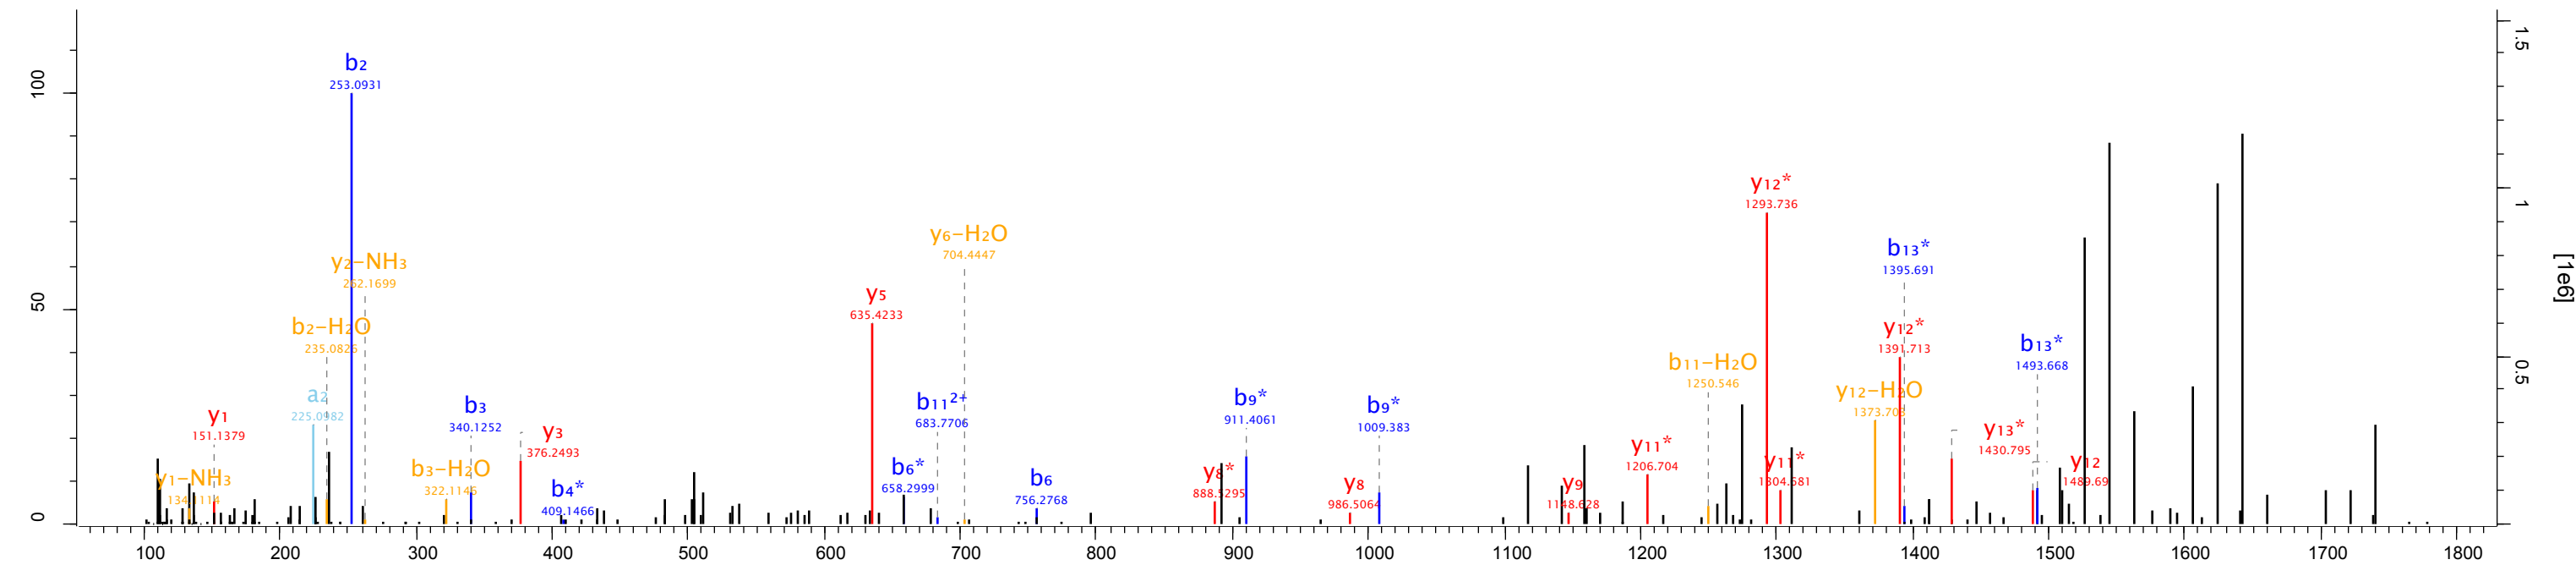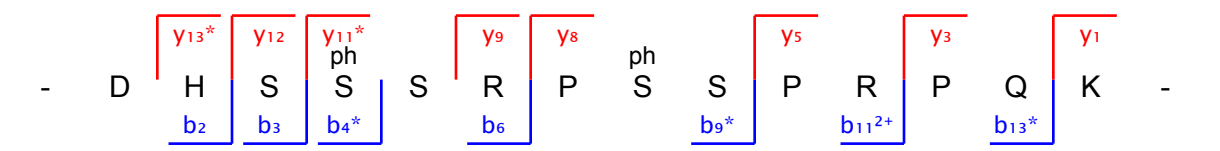

Raw file 20150812\_A375SR\_Phospho\_BR1\_03 Scan 20476 Method FTMS; HCD Score 102.39 m/z 1044.97 Gene names EHBP1

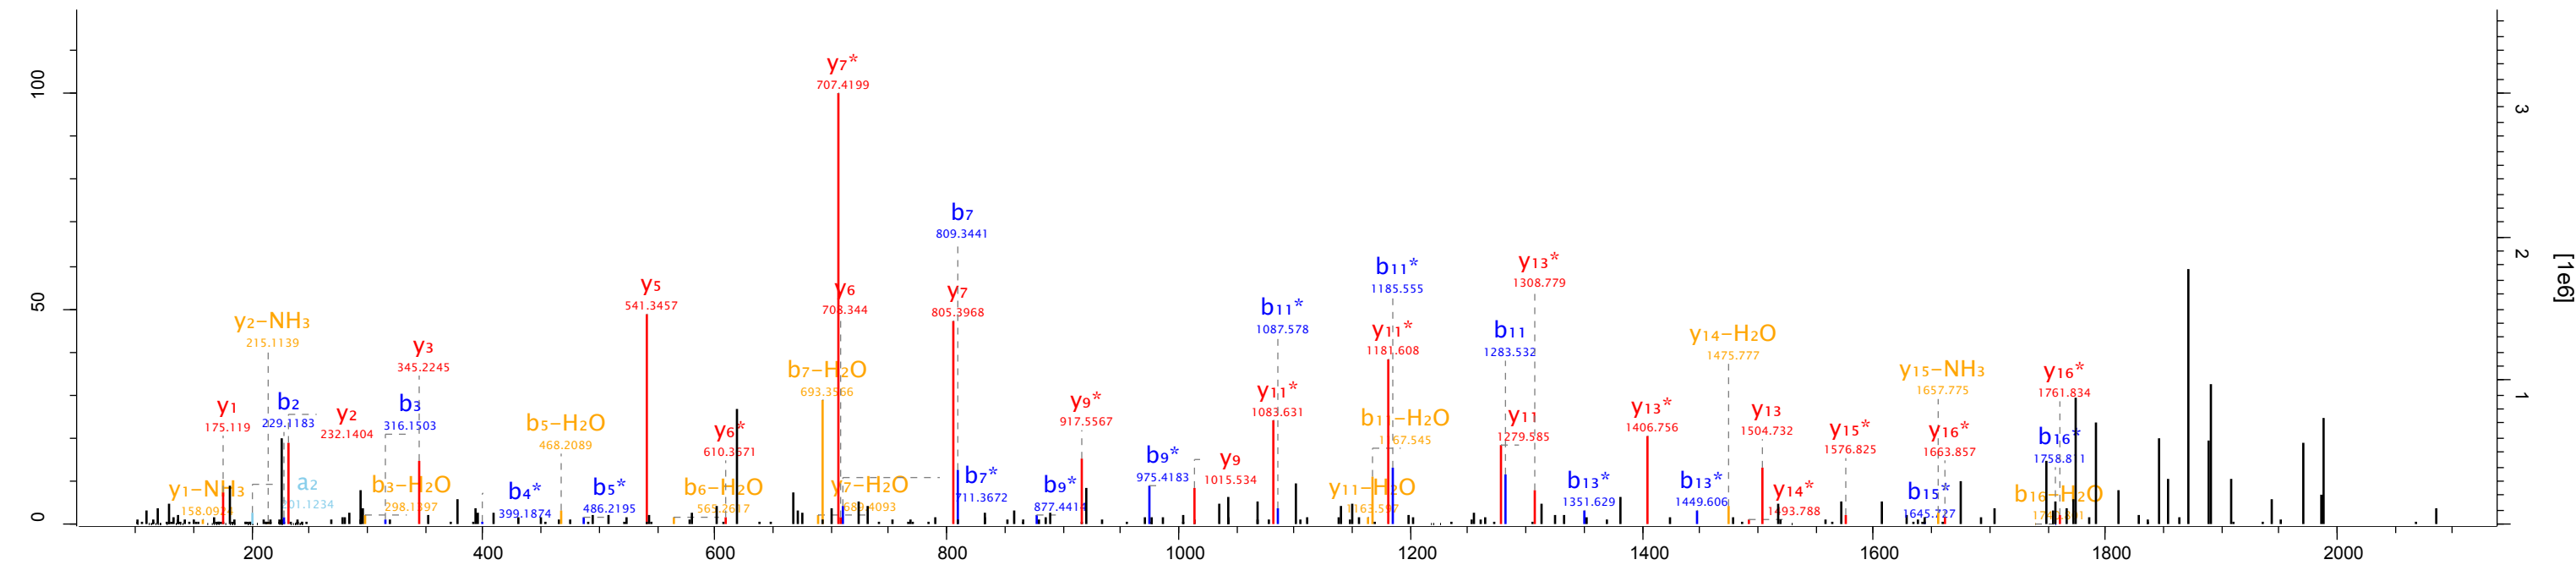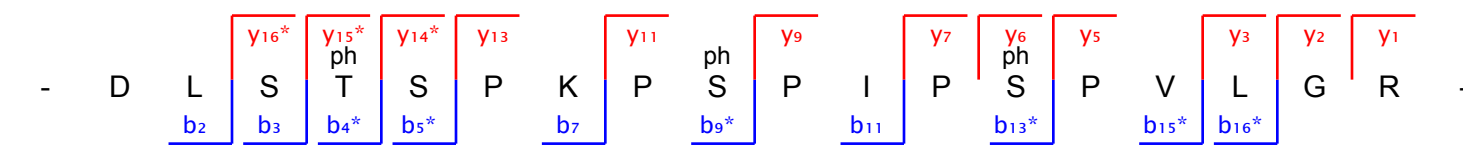

Raw file: 20150812\_A375SR\_Phospho\_BR1\_03  
 Scan: 2076 Method: FTMS; HCD Score: 162.41 m/z: 984.88 Gene names: IWS1

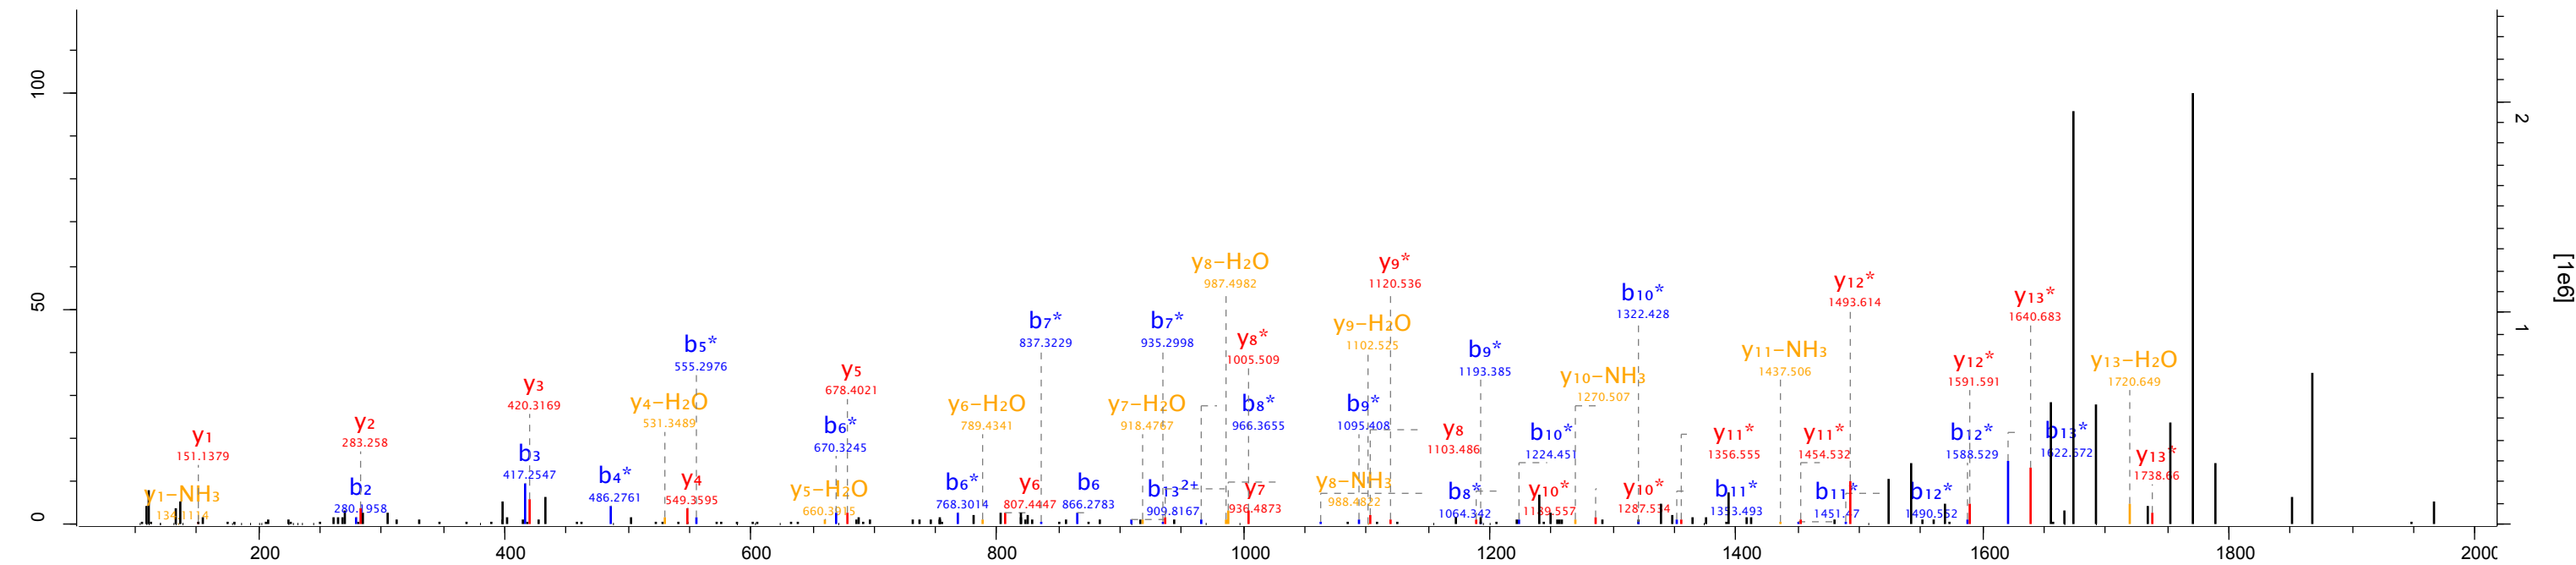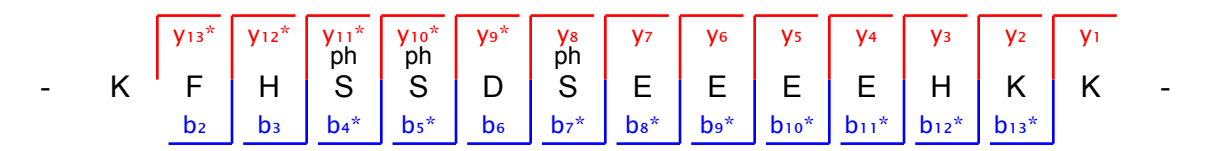

Raw file: 20150812\_A375SR\_Phospho\_BR1\_03  
 Scan: 2086 Method: FTMS; HCD Score: 65.21 m/z: 672.28 Gene names: TJP2

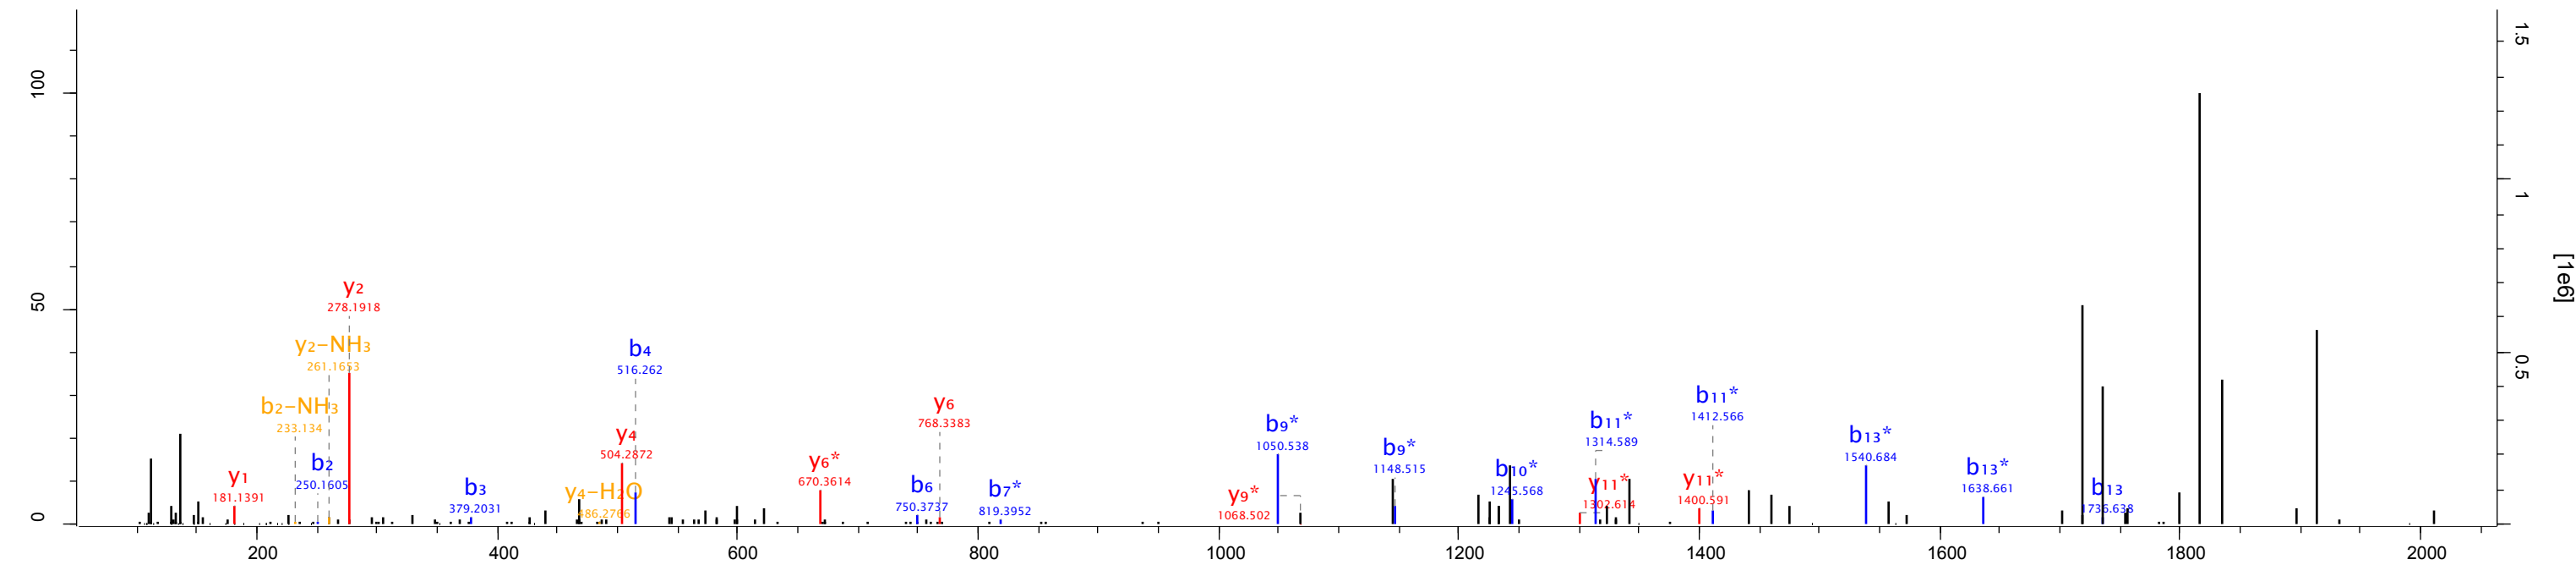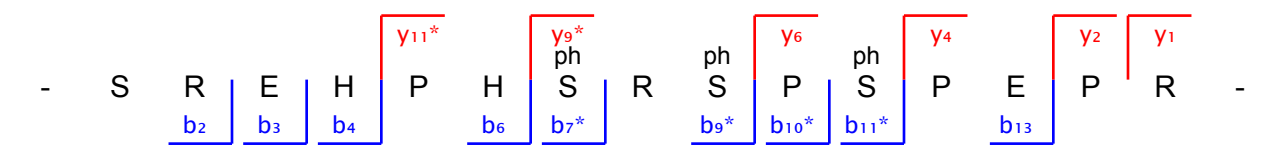

Raw file: 20150812\_A375SR\_Phospho\_BR1\_03  
 Scan: 21226 Method: FTMS; HCD Score: 56.09 m/z: 1510.31 Gene names: PACSIN2

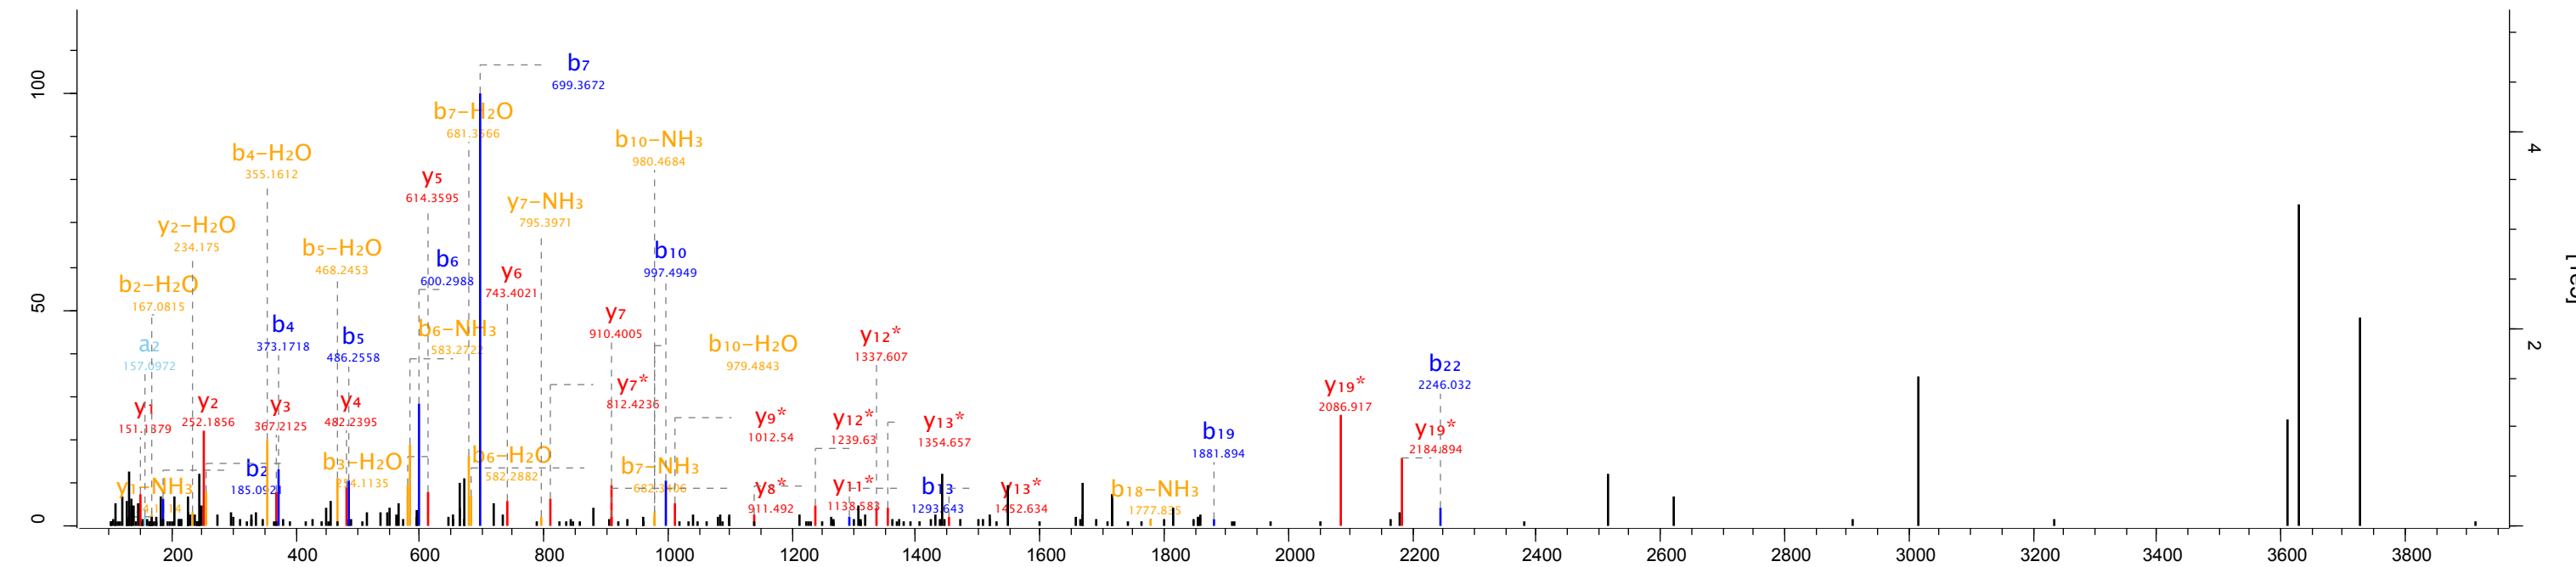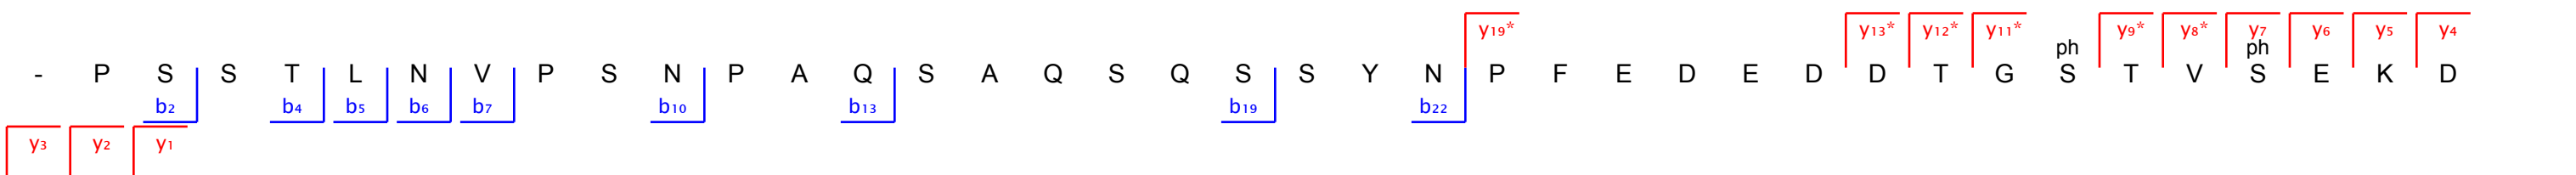

Raw file Scan Method Score m/z Gene names  
 20150812\_A375SR\_Phospho\_BR1\_03 21736 FTMS; HCD 142.26 1018.77 GPHN

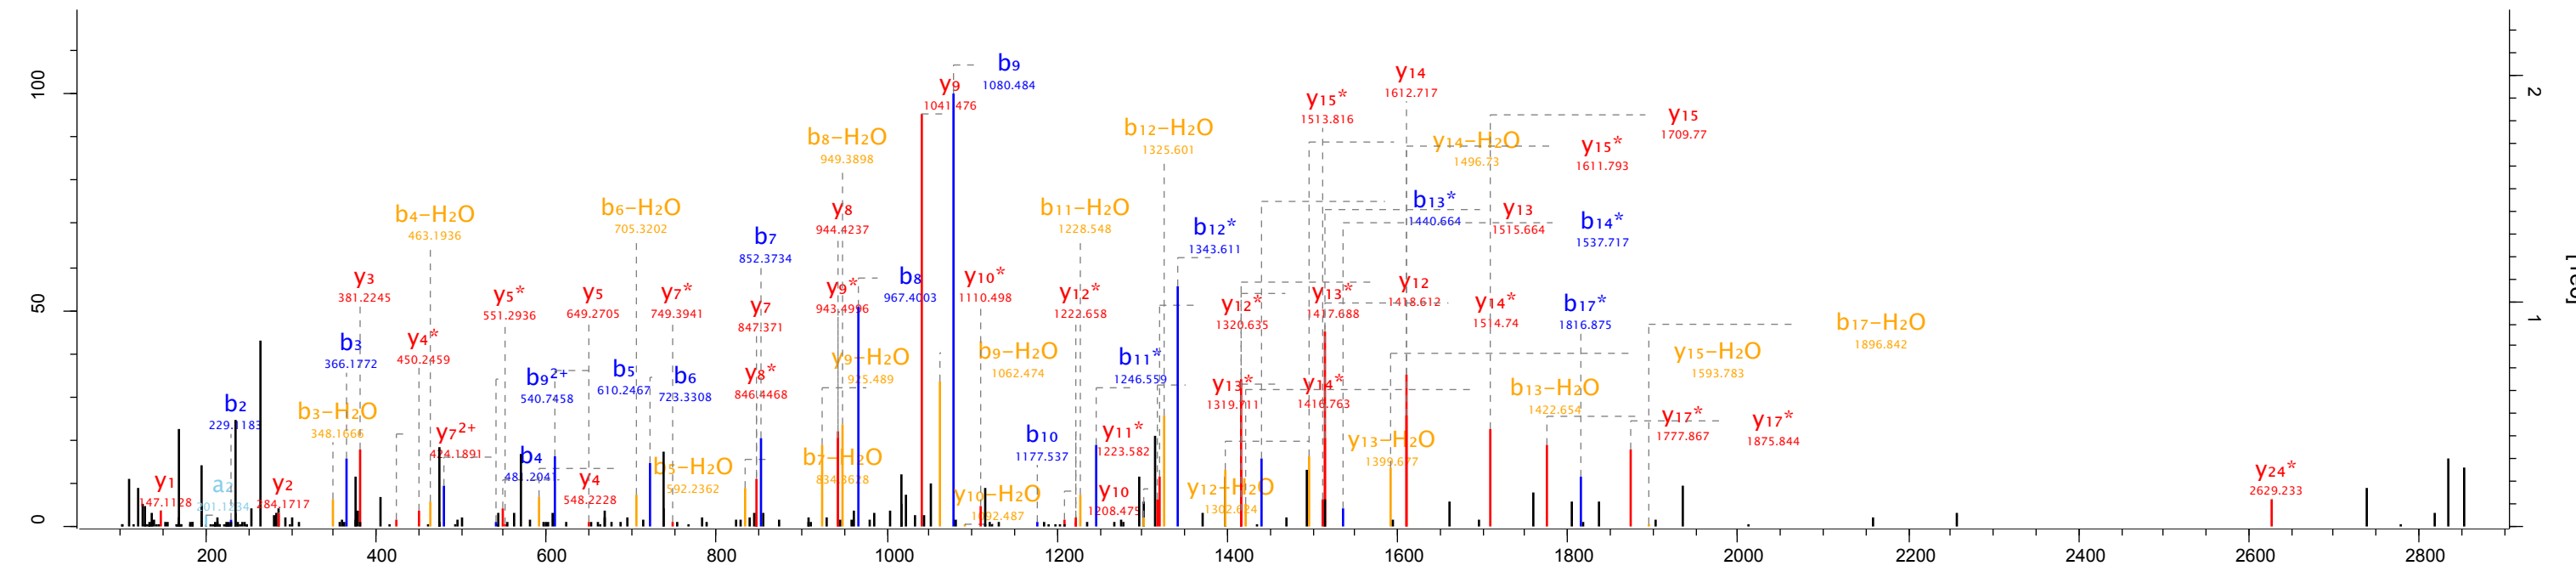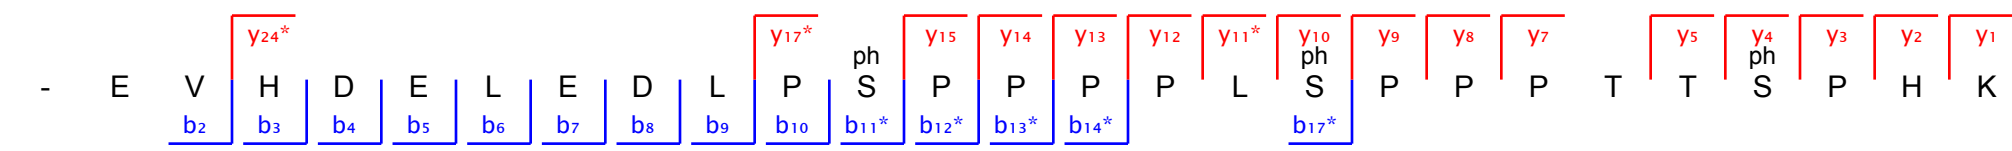



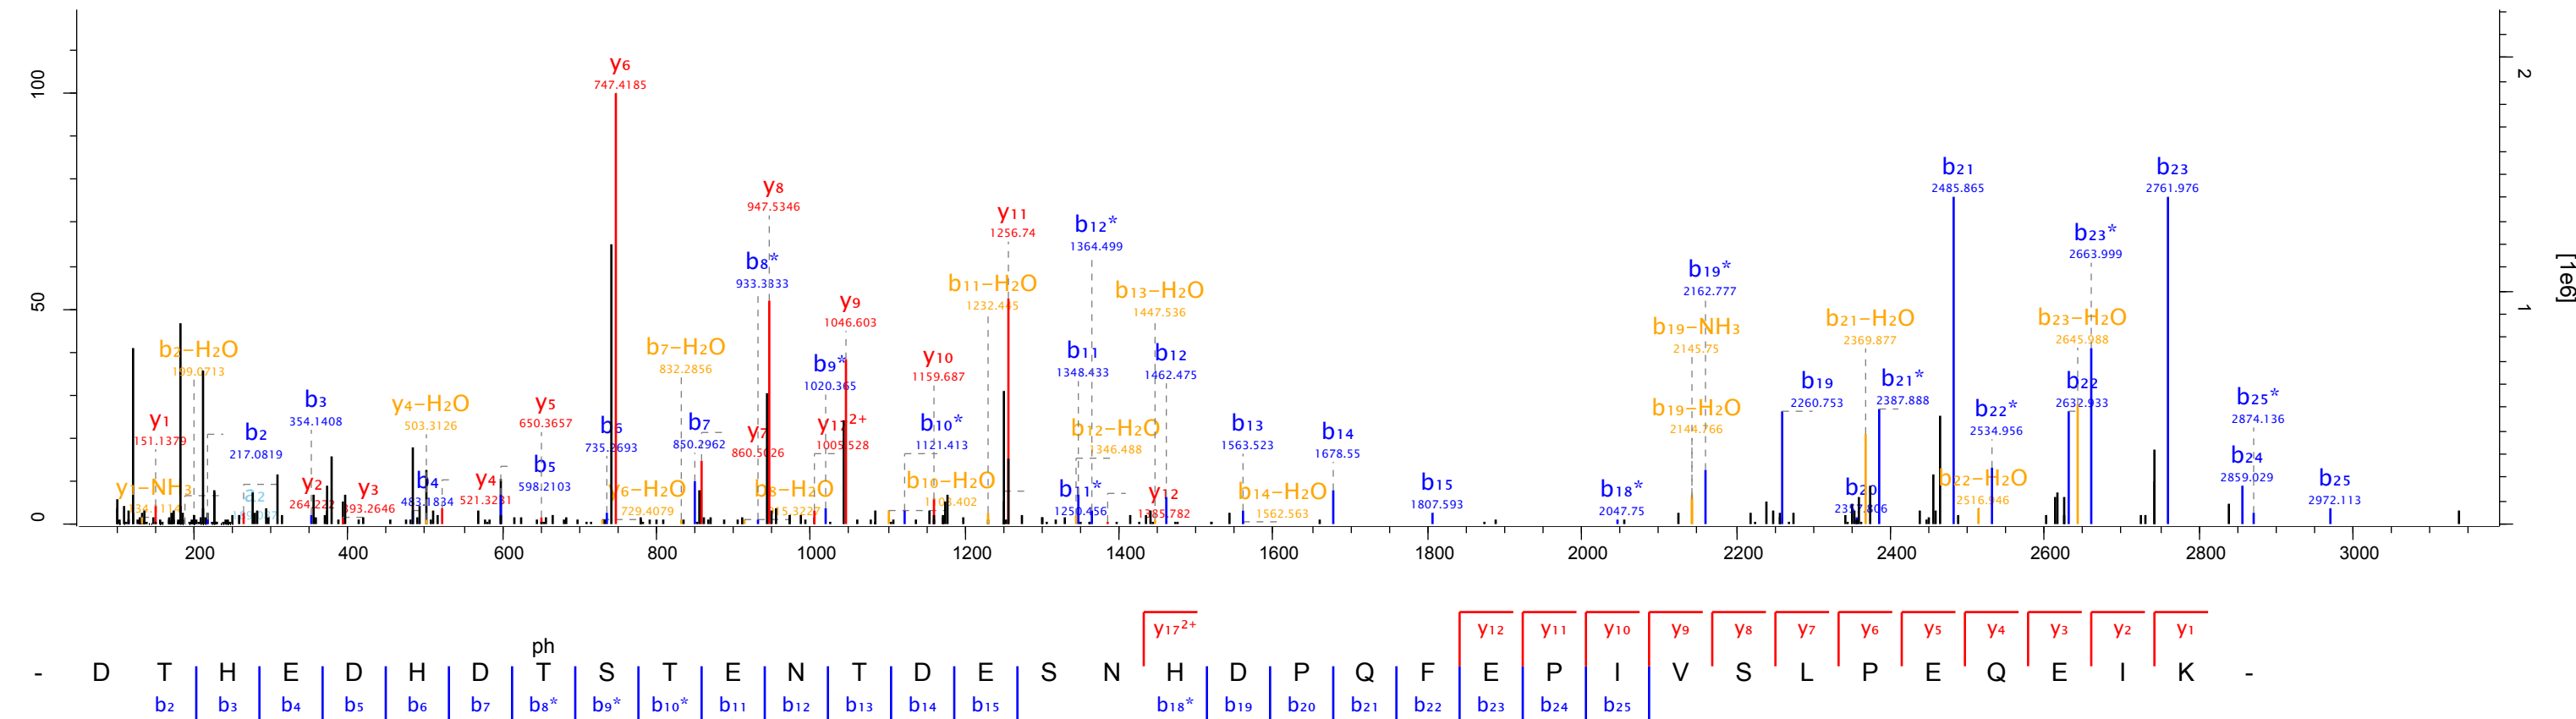

Raw file Scan Method m/z Gene names  
 20150812\_A375SR\_Phospho\_BR1\_03 21886 FTMS; HCD 222.61 1456.13 TCOF1

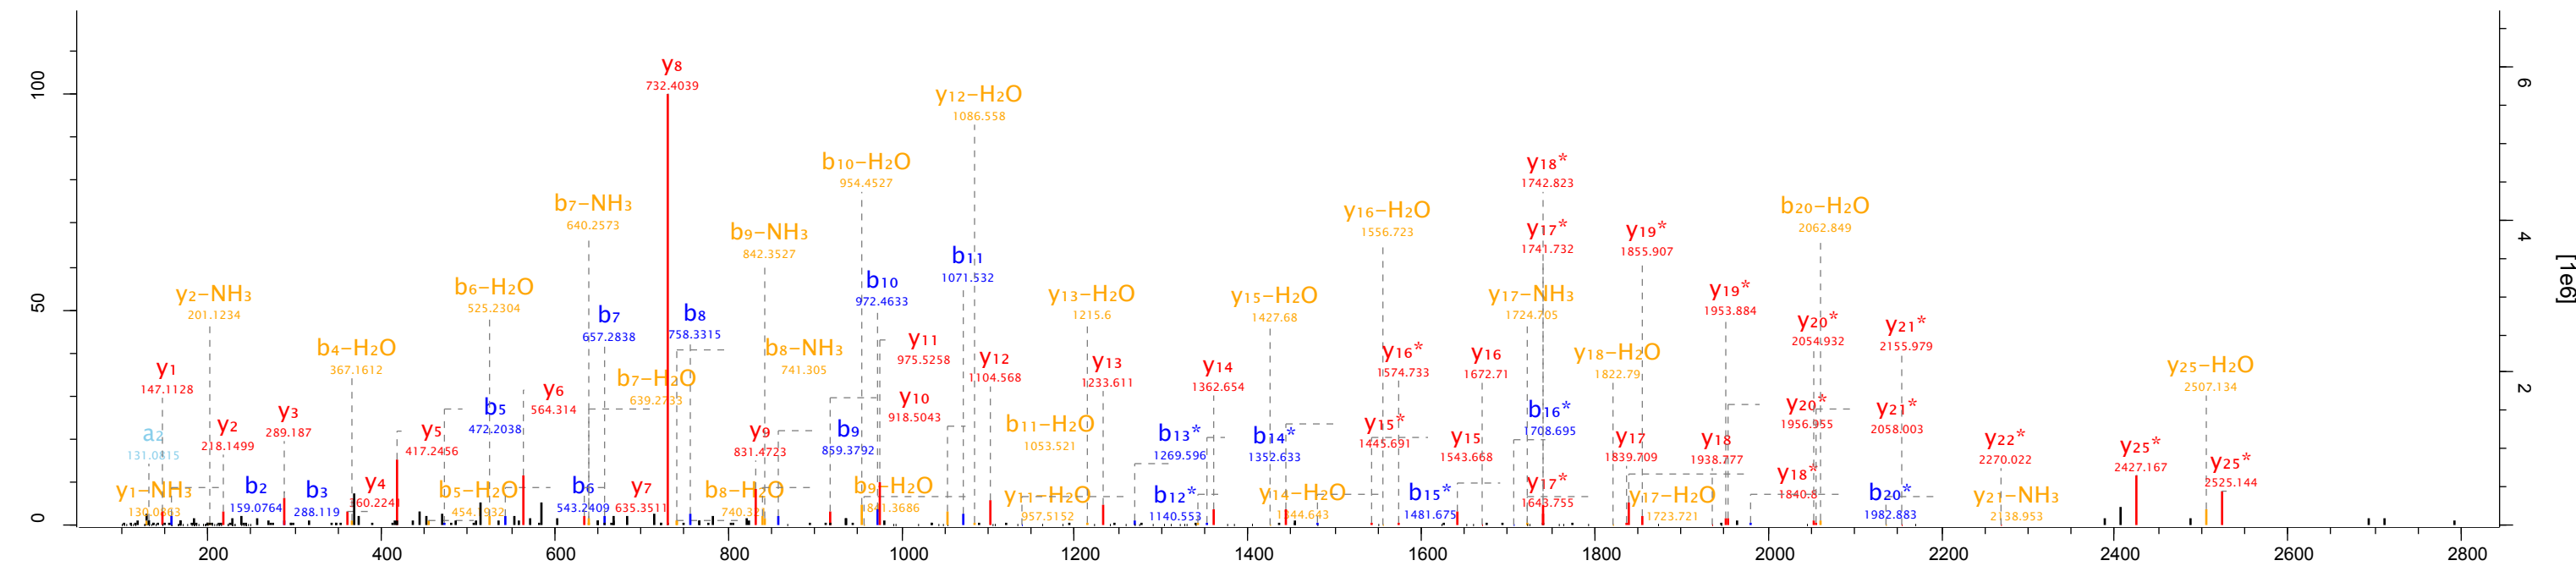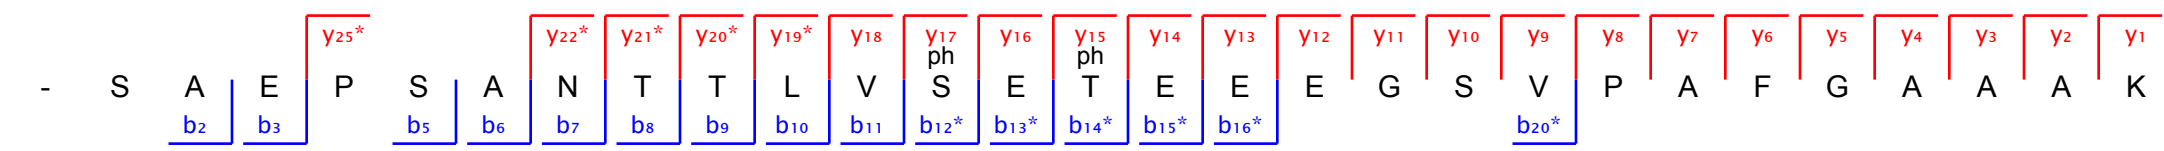

Raw file  
20150812\_A375SR\_Phospho\_BR1\_03

Scan 22006 Method FTMS; HCD Score 244.08 m/z 1167.16 Gene names DDX41

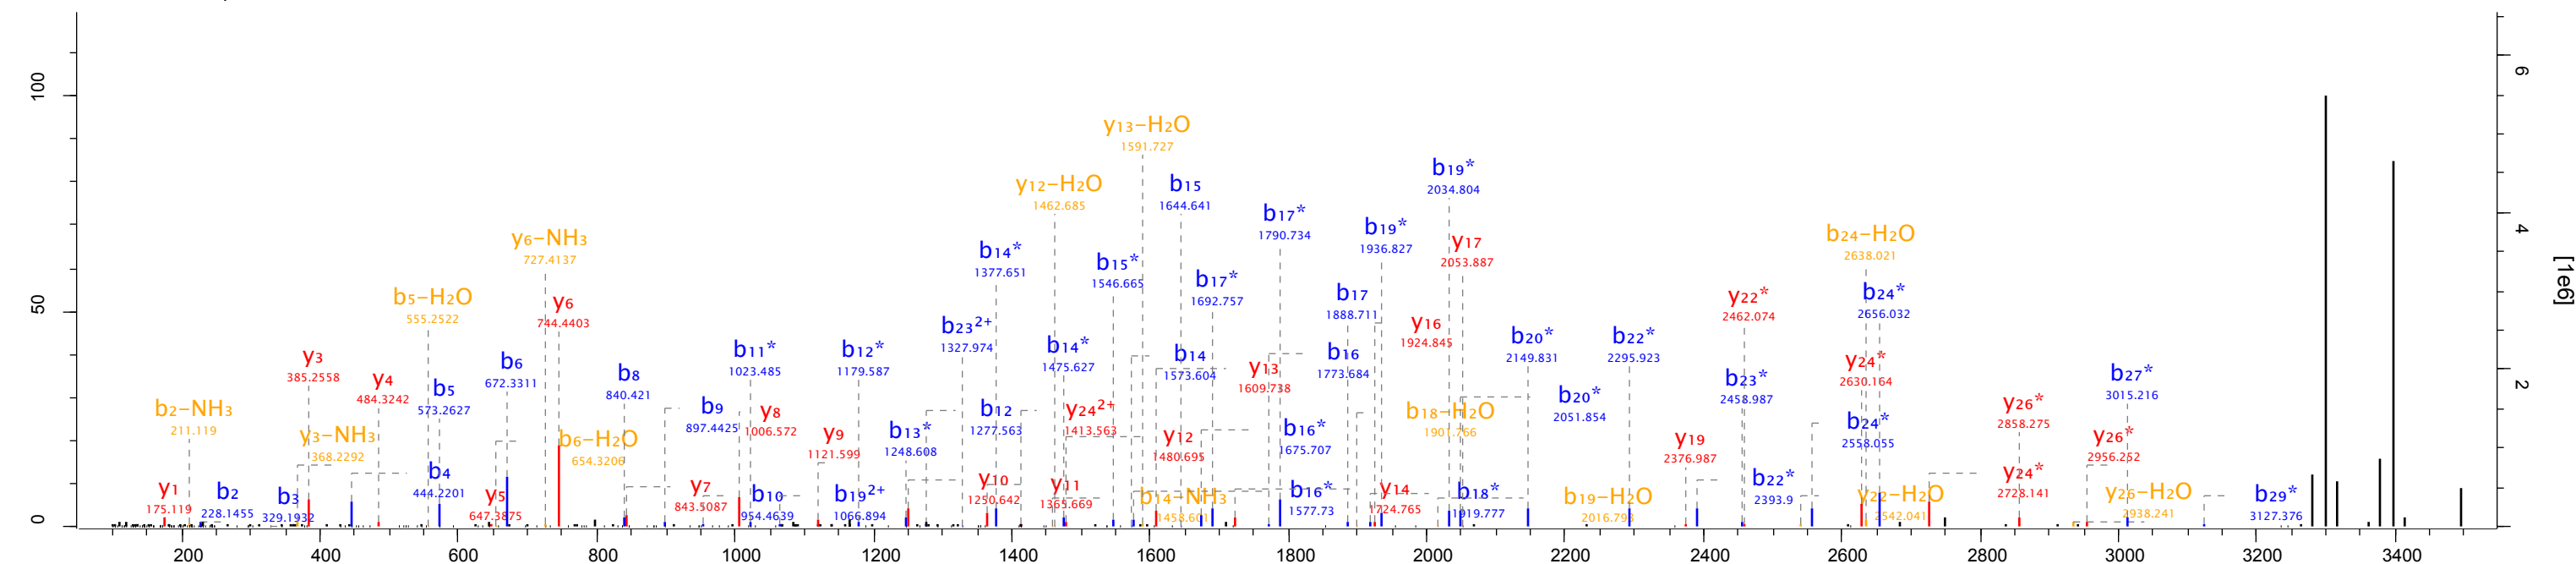

- A R T D E V P A G G S R S E A E D E D D E D Y V P Y V P L R -

b<sub>2</sub> b<sub>3</sub> b<sub>4</sub> b<sub>5</sub> b<sub>6</sub> b<sub>8</sub> b<sub>9</sub> b<sub>10</sub> b<sub>11</sub>\* b<sub>12</sub> b<sub>13</sub>\* b<sub>14</sub> b<sub>15</sub> b<sub>16</sub> b<sub>17</sub> b<sub>18</sub>\* b<sub>19</sub>\* b<sub>20</sub>\* b<sub>22</sub>\* b<sub>23</sub>\* b<sub>24</sub>\* b<sub>27</sub>\* b<sub>29</sub>\*

y<sub>26</sub>\* y<sub>24</sub>\* y<sub>22</sub>\* y<sub>19</sub> y<sub>17</sub> y<sub>16</sub> y<sub>14</sub> y<sub>13</sub> y<sub>12</sub> y<sub>11</sub> y<sub>10</sub> y<sub>9</sub> y<sub>8</sub> y<sub>7</sub> y<sub>6</sub> y<sub>5</sub> y<sub>4</sub> y<sub>3</sub> y<sub>1</sub>

Raw file: 20150812\_A375SR\_Phospho\_BR1\_03  
 Scan: 22106 Method: FTMS; HCD Score: 203.64 m/z: 1133.53 Gene names: CTTN

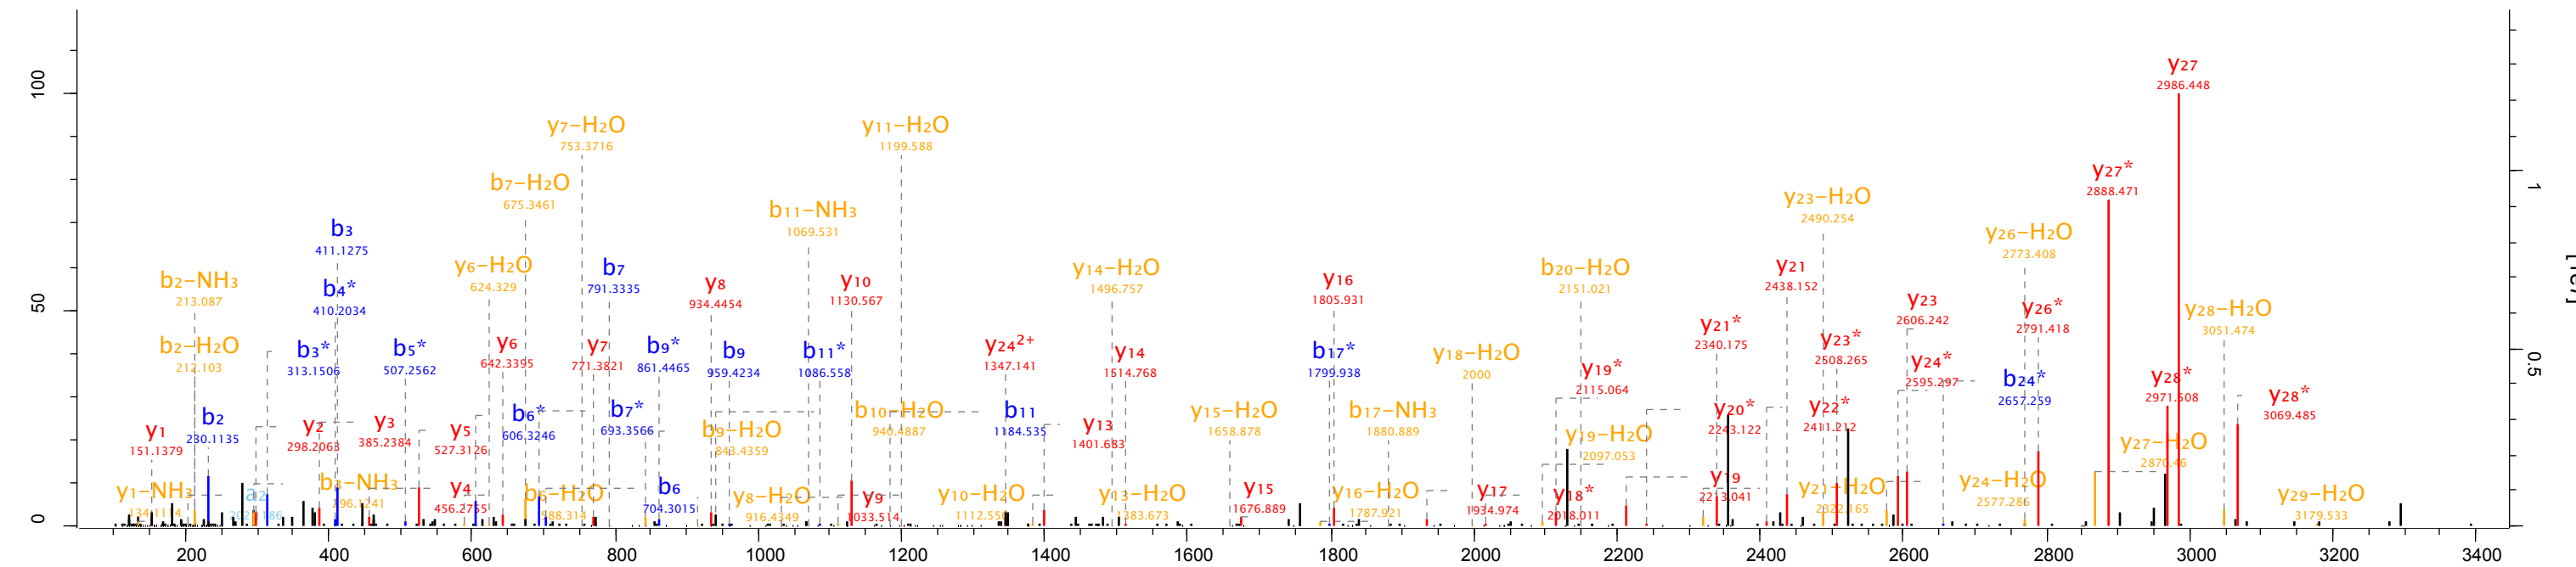

- T Q Q T P P V S P A P Q P P S S P V Y E D A A S F K -

b<sub>2</sub>
b<sub>3</sub>
b<sub>4</sub>\*
b<sub>5</sub>\*
b<sub>6</sub>
b<sub>7</sub>
b<sub>9</sub>
b<sub>11</sub>
b<sub>17</sub>\*
b<sub>24</sub>\*

y<sub>28</sub>\*
y<sub>27</sub>
y<sub>26</sub>\*
y<sub>24</sub>\*
y<sub>23</sub>
y<sub>22</sub>\*
y<sub>21</sub>
y<sub>20</sub>\*
y<sub>19</sub>
y<sub>18</sub>\*
y<sub>17</sub>
y<sub>16</sub>
y<sub>15</sub>
y<sub>14</sub>
y<sub>13</sub>
y<sub>10</sub>
y<sub>9</sub>
y<sub>8</sub>
y<sub>7</sub>
y<sub>6</sub>
y<sub>5</sub>
y<sub>4</sub>
y<sub>3</sub>
y<sub>2</sub>
y<sub>1</sub>

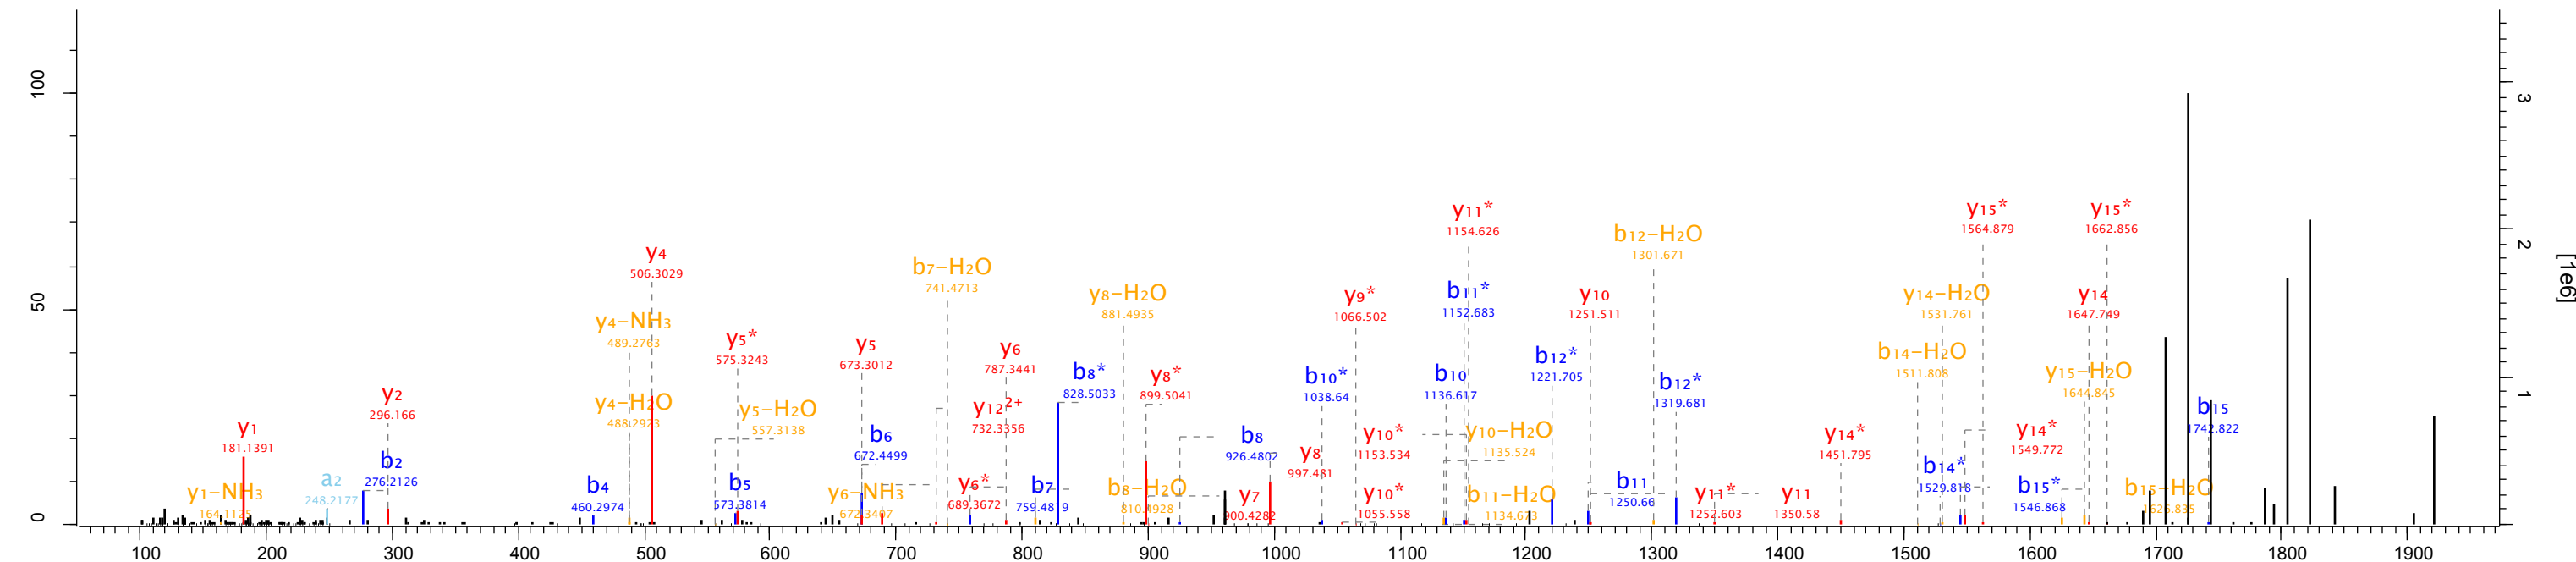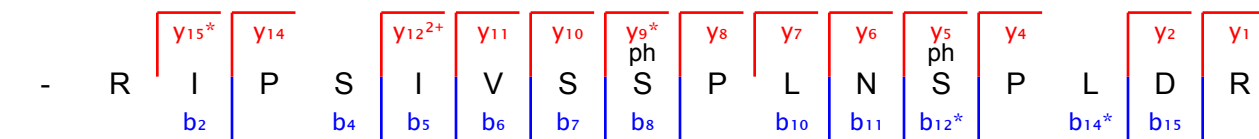

Raw file 20150812\_A375SR\_Phospho\_BR1\_03 Scan 22666 Method FTMS; HCD Score 128.52 m/z 682.3 Gene names CDC42EP3

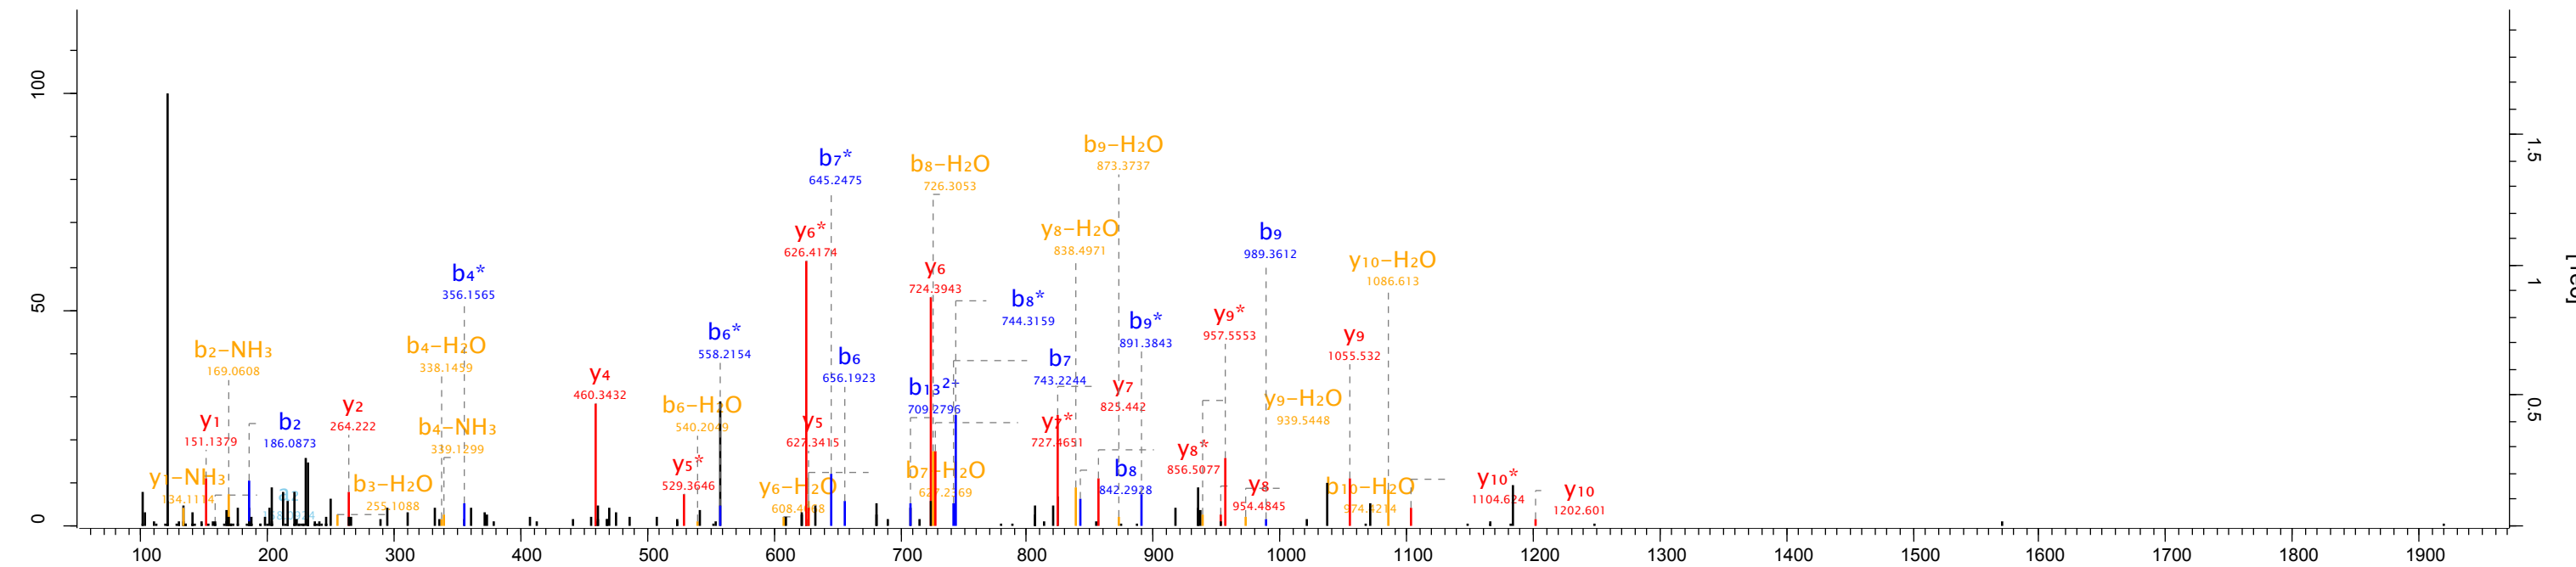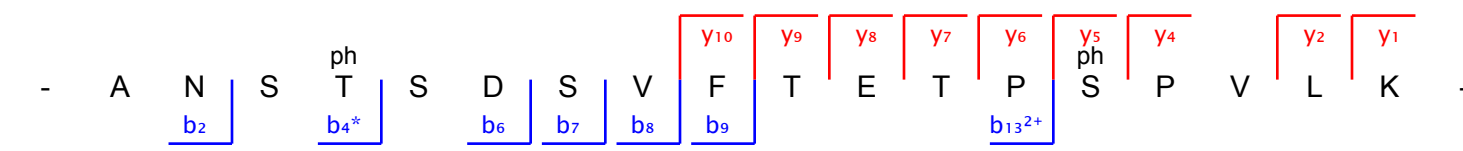

Raw file: 20150812\_A375SR\_Phospho\_BR1\_03  
 Scan: 2286 Method: FTMS; HCD Score: 73.93 m/z: 464.51 Gene names: SRRM2

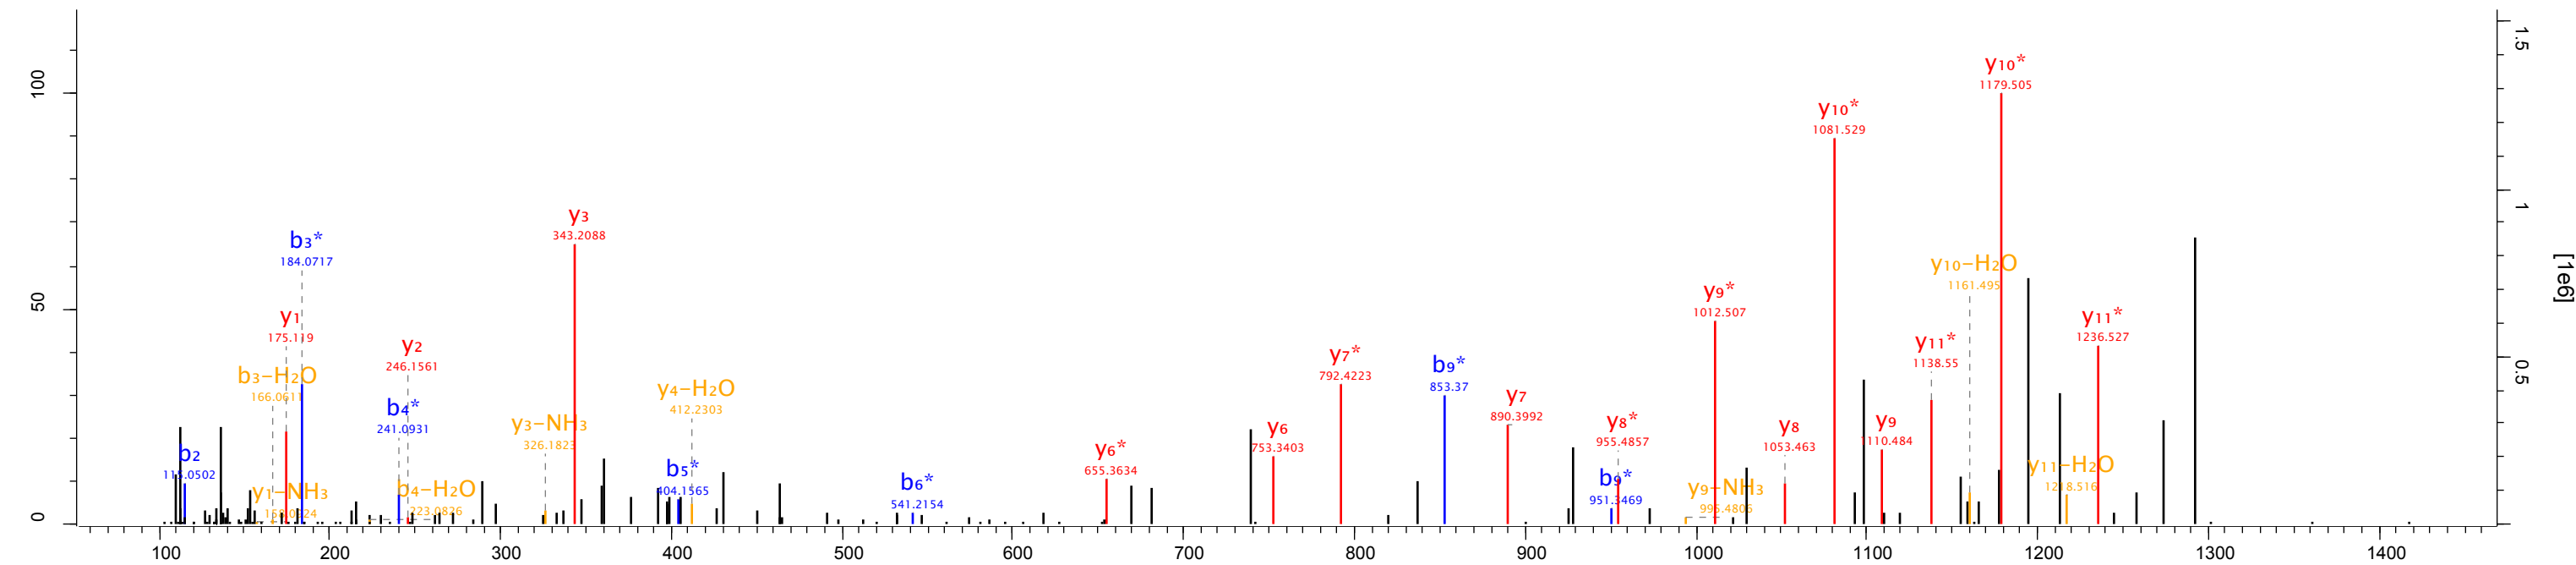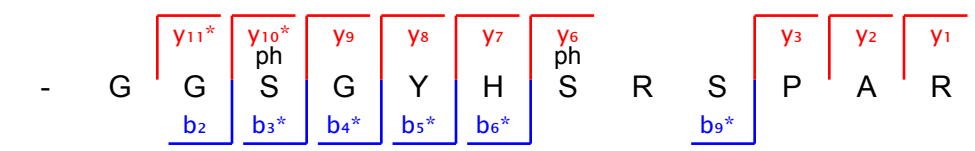

Raw file Scan Method Score m/z Gene names

20150812\_A375SR\_Phospho\_BR1\_03 22966 FTMS; HCD 149.54 1372.63 DDHD1

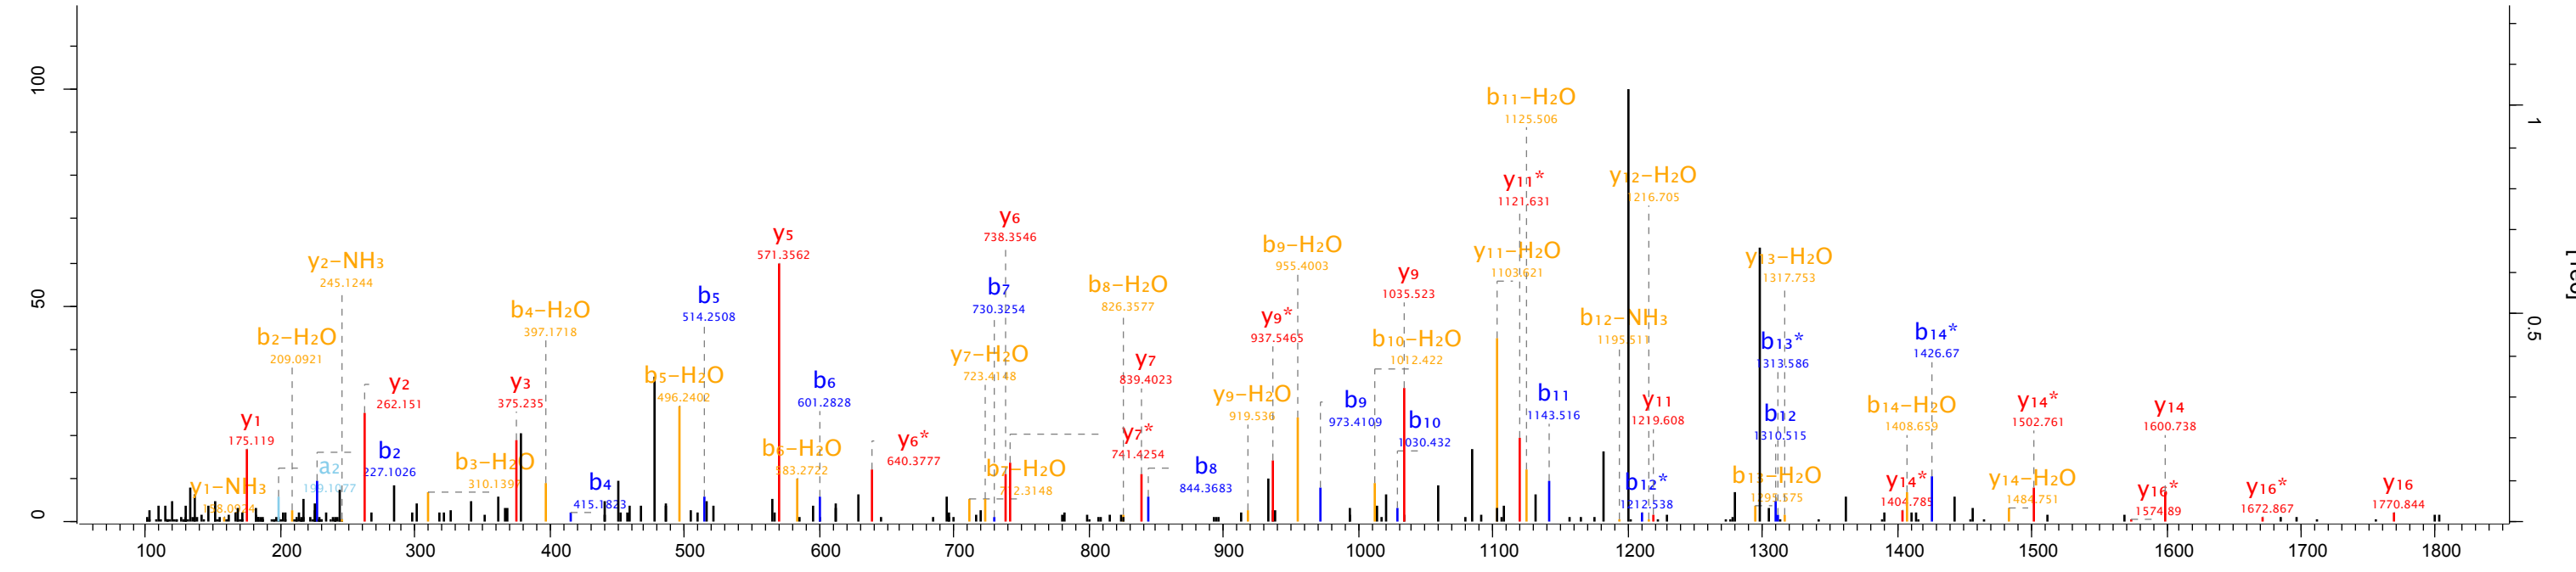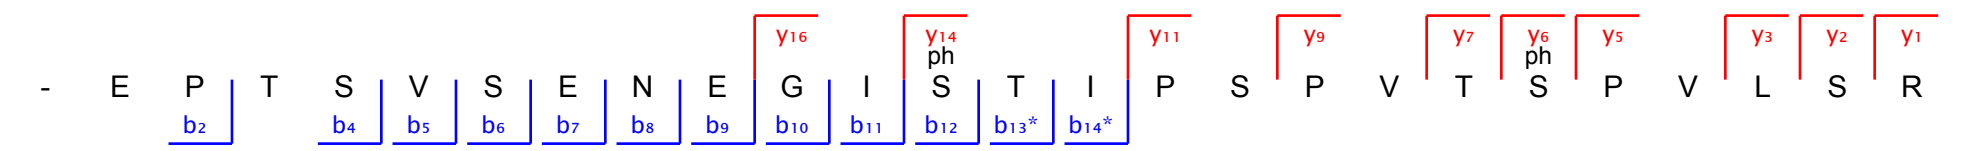



20150812\_A375SR\_Phospho\_BR1\_03

23436 FTMS; HCD 89.11 909.11 BUB1

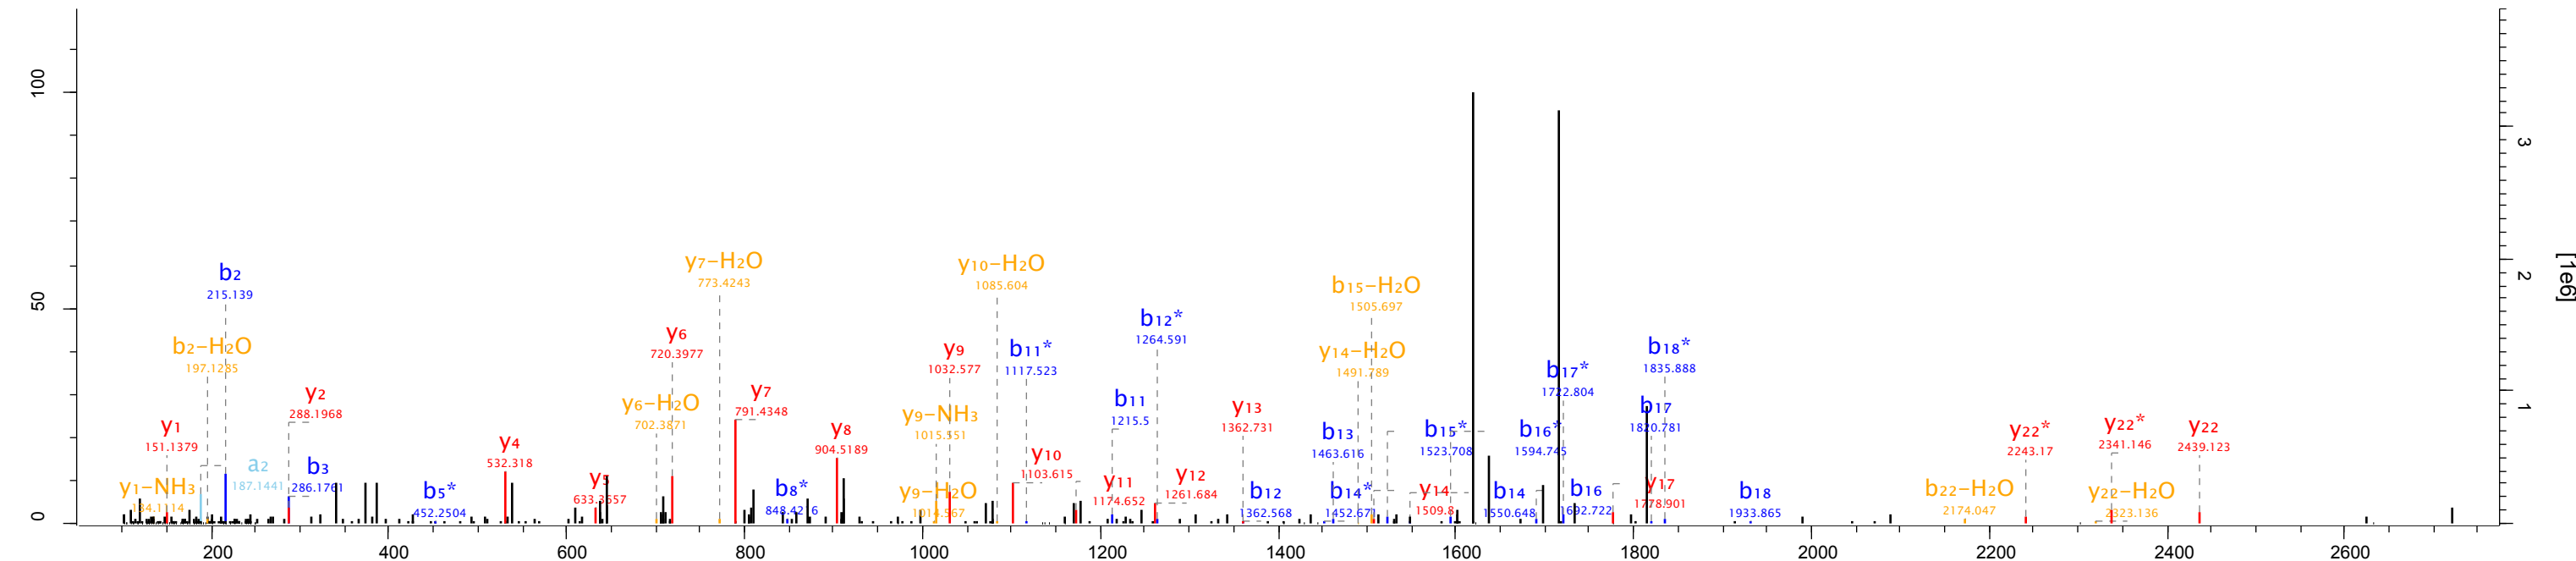

- T L A P ph S P K ph S P G D F T S A A Q L A S T P F H K -

Fragmentation sites are indicated by brackets below the amino acid sequence:

- Blue brackets (b ions): L (b<sub>2</sub>), A (b<sub>3</sub>), S (b<sub>5</sub>\*), S (b<sub>8</sub>\*), F (b<sub>11</sub>), F (b<sub>12</sub>), T (b<sub>13</sub>), S (b<sub>14</sub>), A (b<sub>15</sub>\*), A (b<sub>16</sub>), Q (b<sub>17</sub>), L (b<sub>18</sub>)
- Red brackets (y ions): P (y<sub>22</sub>), S (y<sub>17</sub>), F (y<sub>14</sub>), T (y<sub>13</sub>), S (y<sub>12</sub>), A (y<sub>11</sub>), A (y<sub>10</sub>), Q (y<sub>9</sub>), L (y<sub>8</sub>), A (y<sub>7</sub>), S (y<sub>6</sub>), T (y<sub>5</sub>), P (y<sub>4</sub>), H (y<sub>2</sub>), K (y<sub>1</sub>)

Raw file: 20150812\_A375SR\_Phospho\_BR1\_03  
 Scan: 23466 Method: FTMS; HCD Score: 70.72 m/z: 1172.83 Gene names: SON

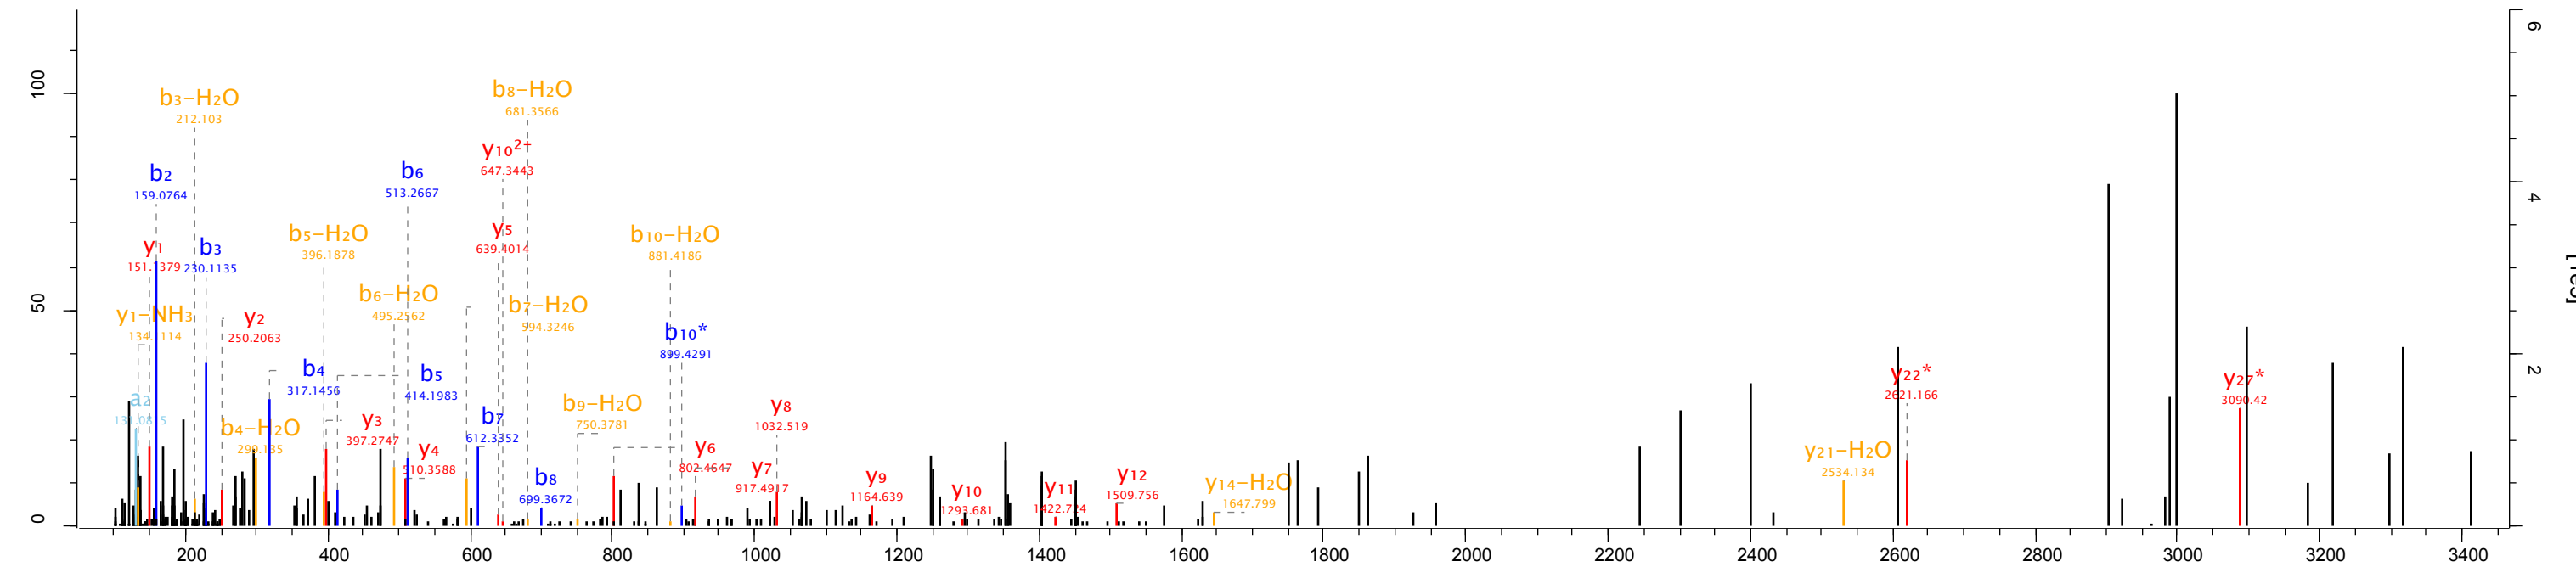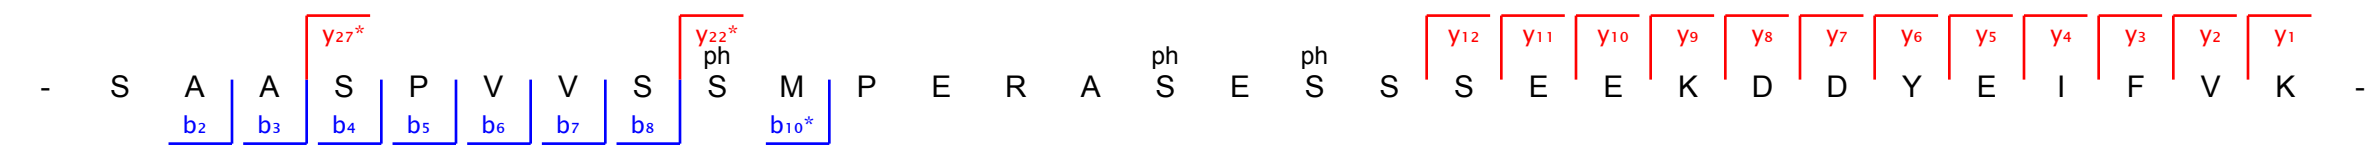

Raw file: 20150812\_A375SR\_Phospho\_BR1\_03  
 Scan: 23586 Method: FTMS; HCD Score: 120.27 m/z: 1160.96 Gene names: PHF8

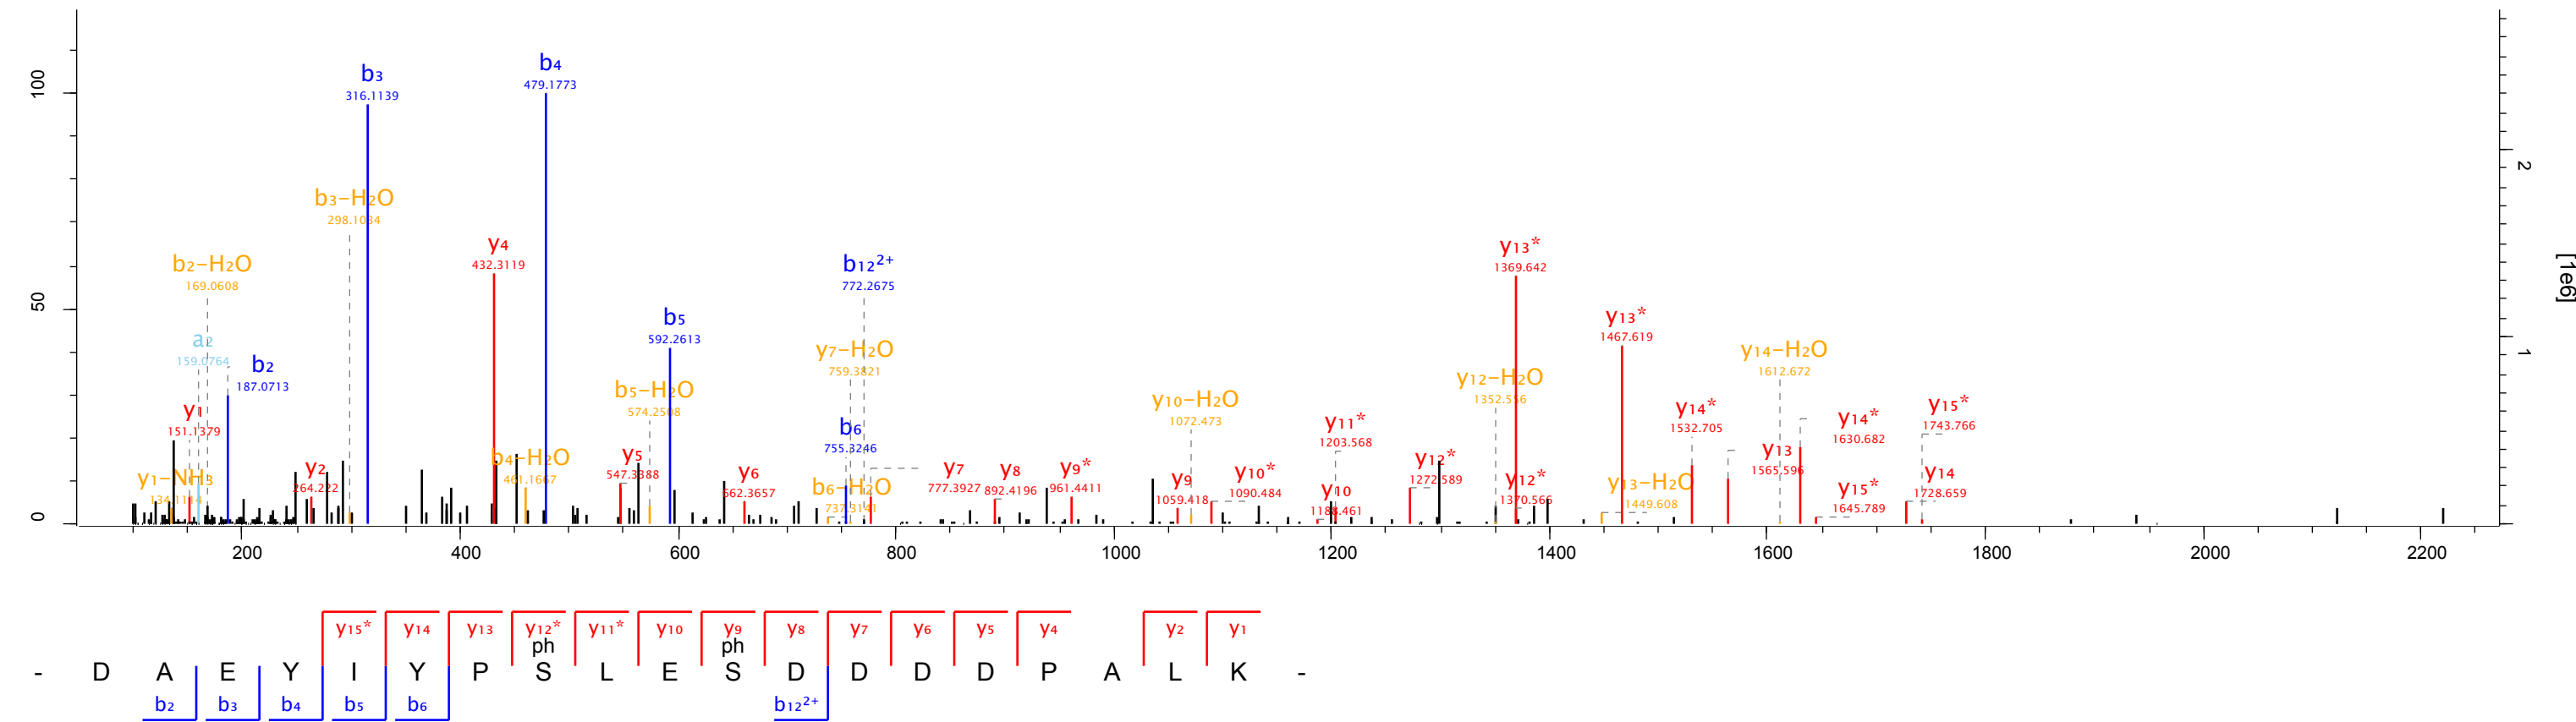

Raw file Scan Method Score m/z Gene names  
 20150812\_A375SR\_Phospho\_BR1\_03 23666 FTMS; HCD 77.37 1166.53 ERCC6-PGBD3;ERCC6

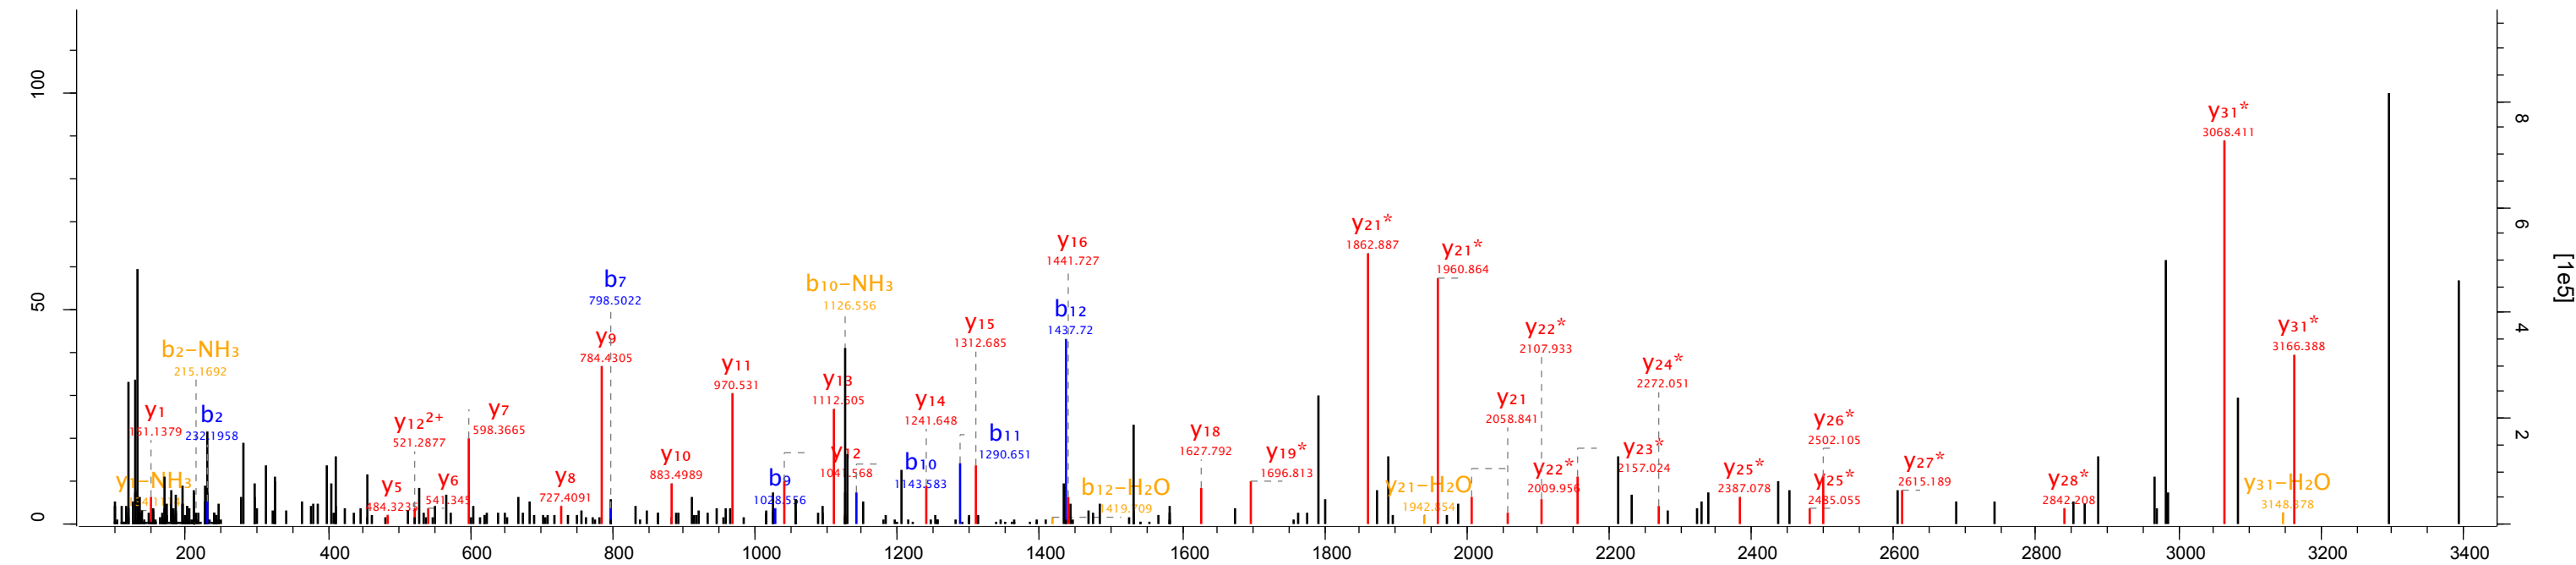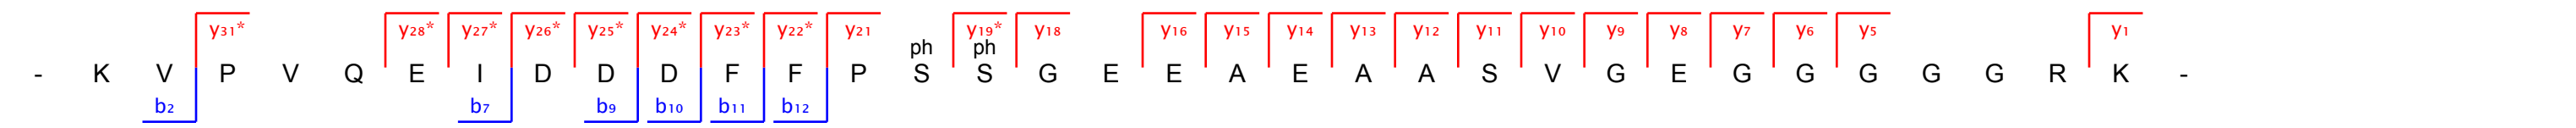

Raw file 20150812\_A375SR\_Phospho\_BR1\_03 Scan 24586 Method FTMS; HCD Score 254.76 m/z 1461.66 Gene names CEP170

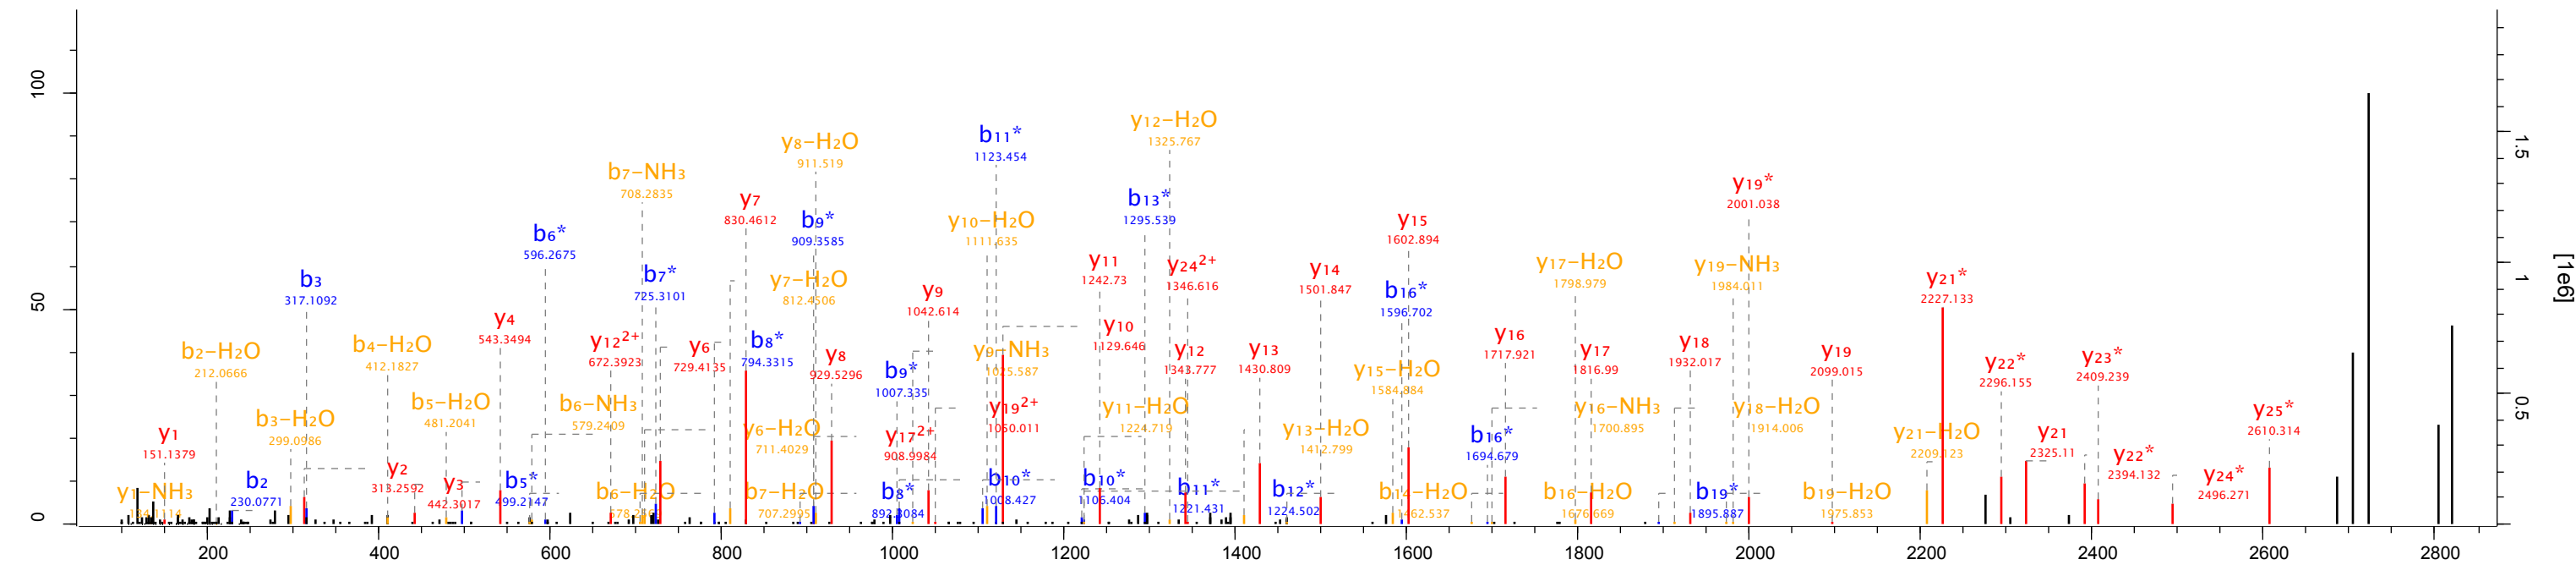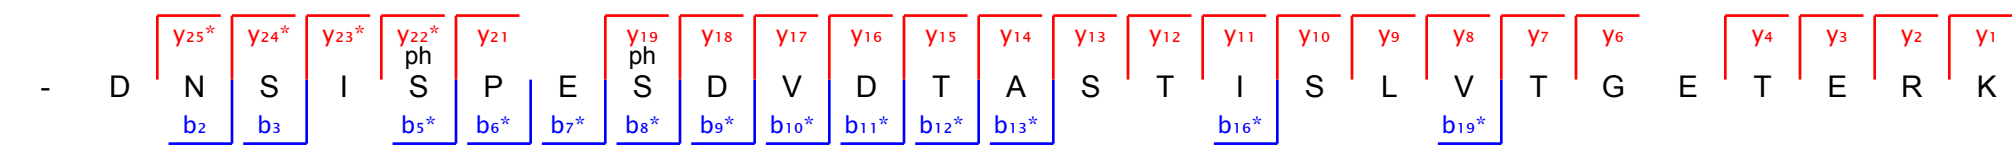

- D N S I S P E S D V D T A S T I S L V T G E T E R K -

Raw file Scan Method Score m/z Gene names  
 20150812\_A375SR\_Phospho\_BR1\_03 24796 FTMS; HCD 57.15 907.08 FAM122A

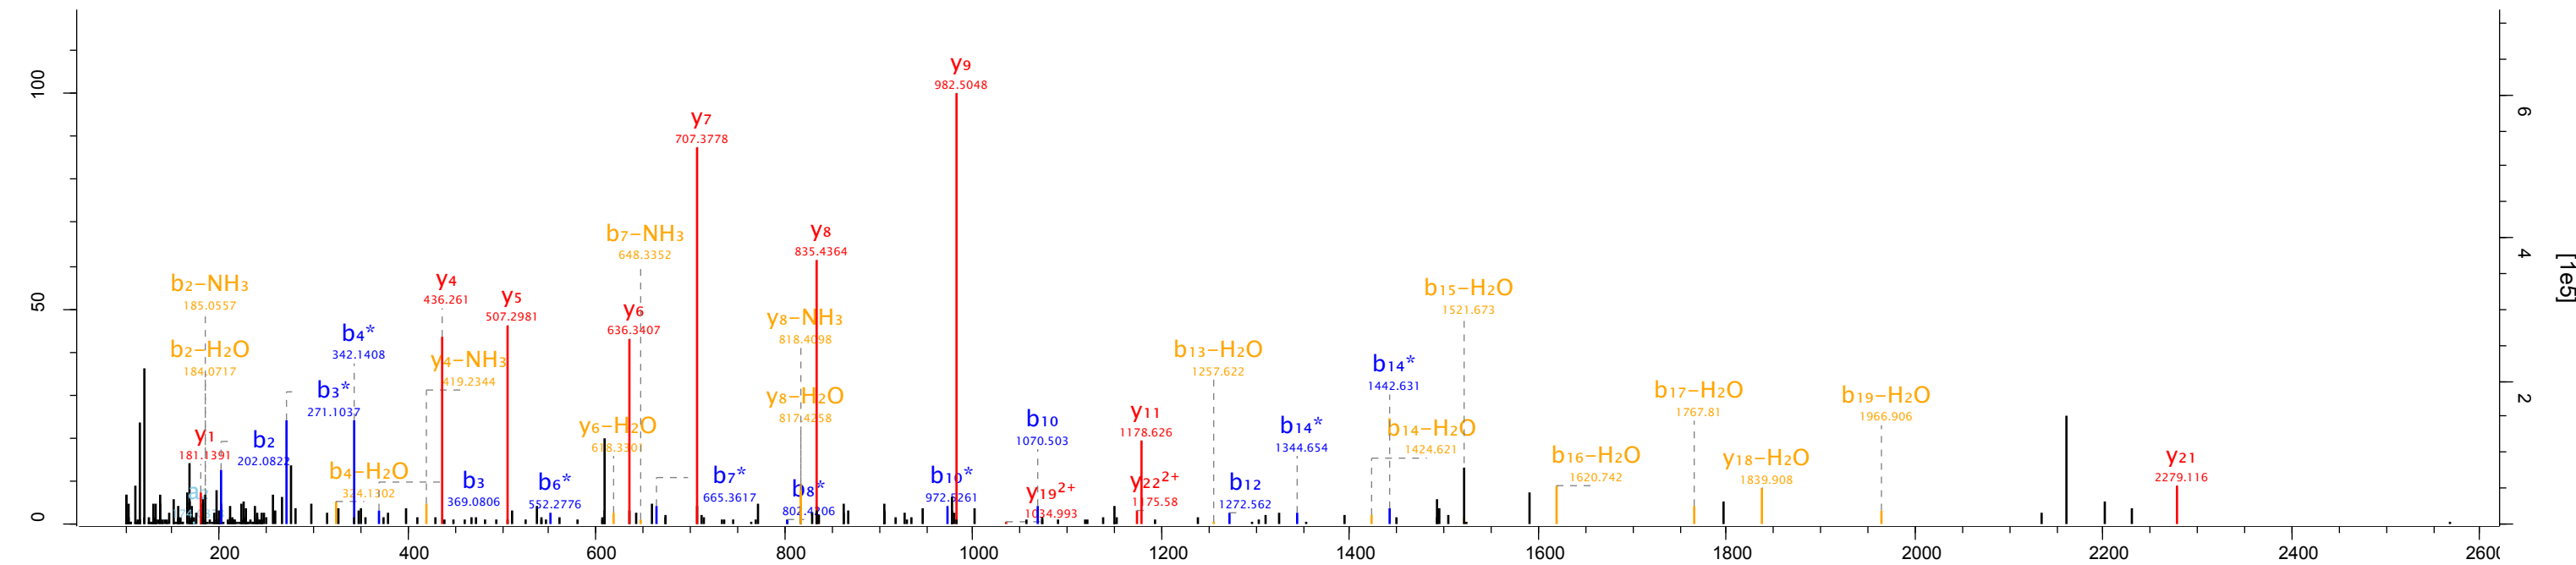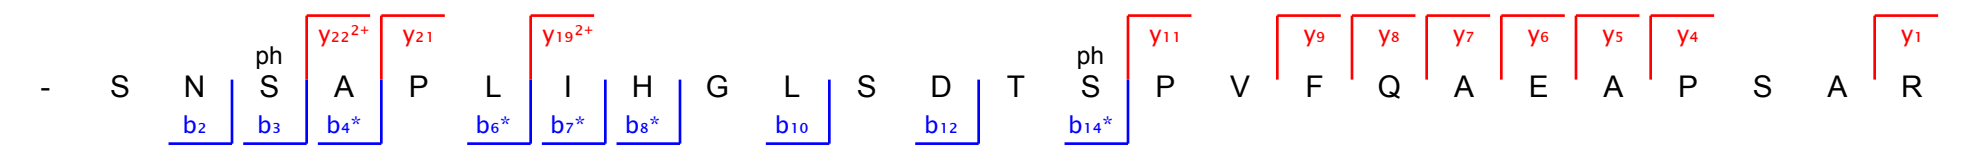

Raw file: 20150812\_A375SR\_Phospho\_BR1\_03  
 Scan: 24816 Method: FTMS; HCD Score: 43.83 m/z: 1185.82 Gene names: ANAPC2

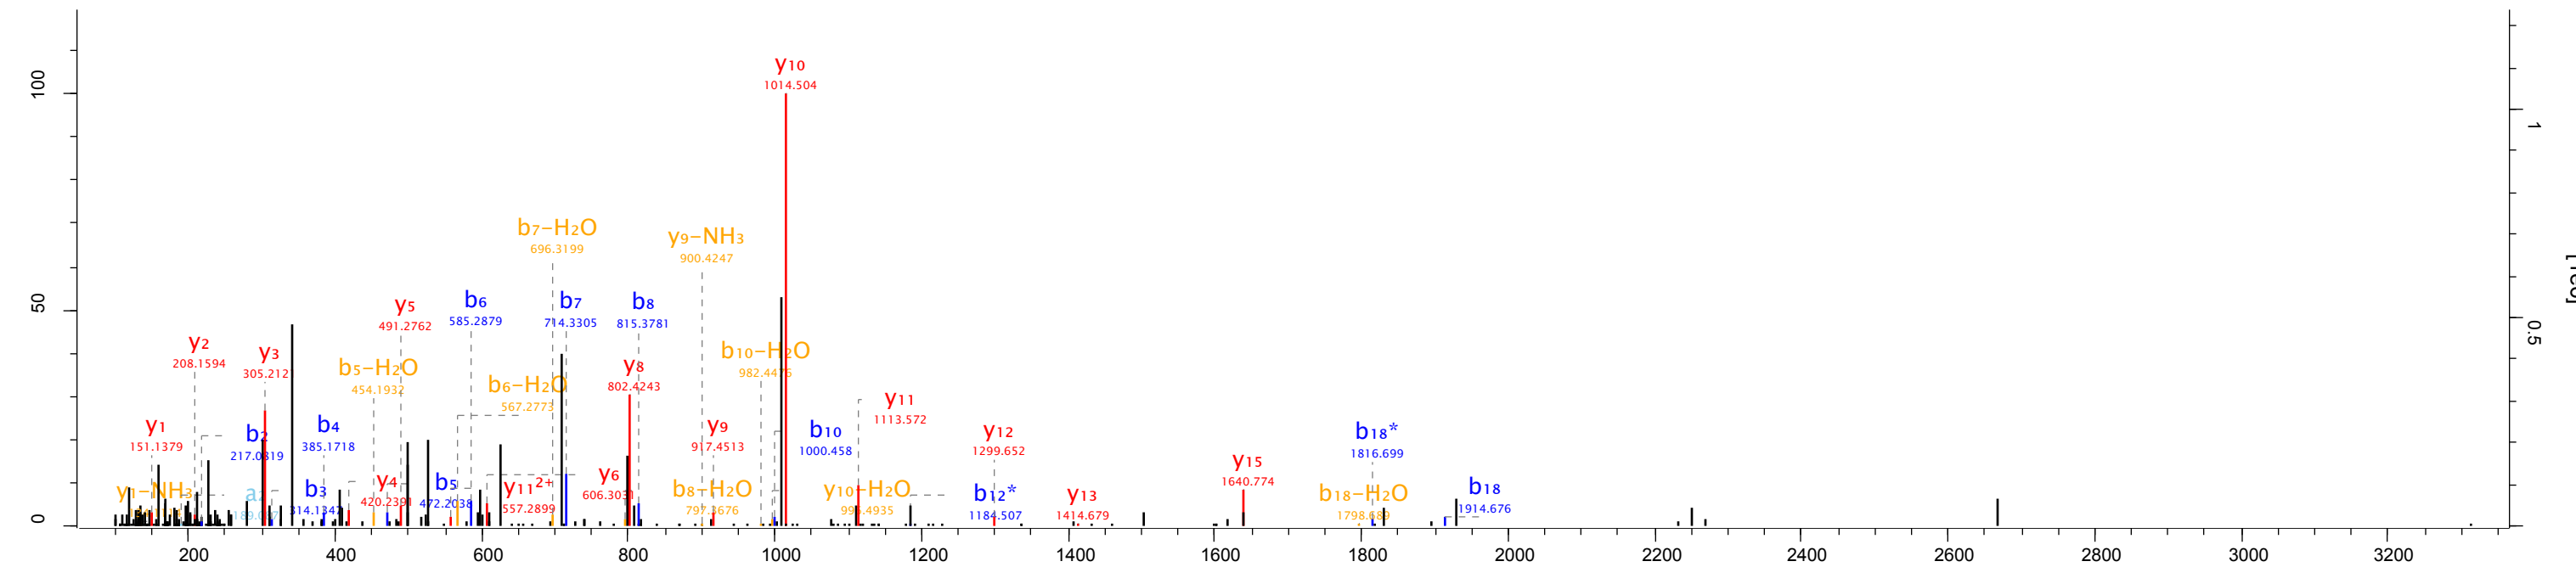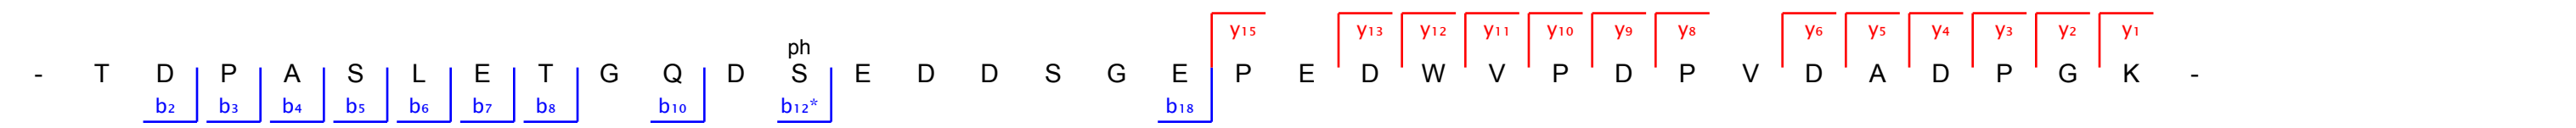

Raw file: 20150812\_A375SR\_Phospho\_BR1\_03  
 Scan: 25276 Method: FTMS; HCD Score: 203.16 m/z: 1199.5 Gene names: AHNAK

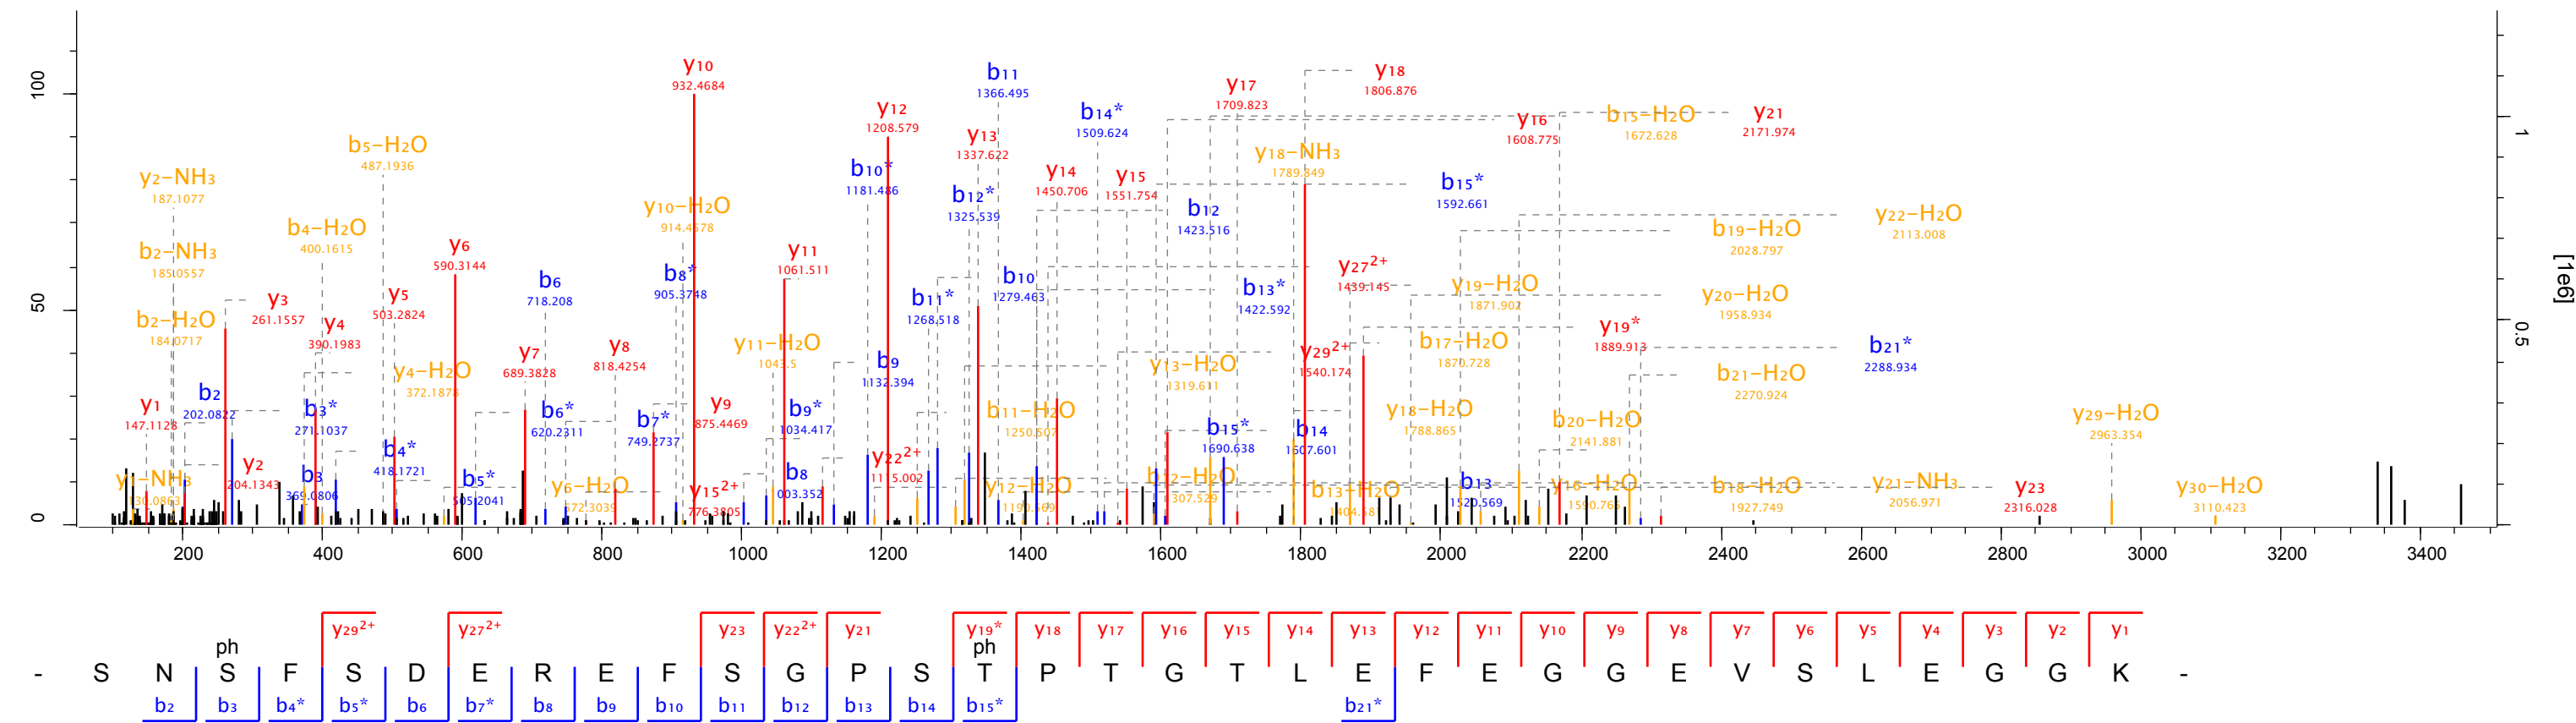



Raw file: 20150812\_A375SR\_Phospho\_BR1\_03  
 Scan: 25856 Method: FTMS; HCD Score: 126.73 m/z: 1221.53 Gene names: PHAX

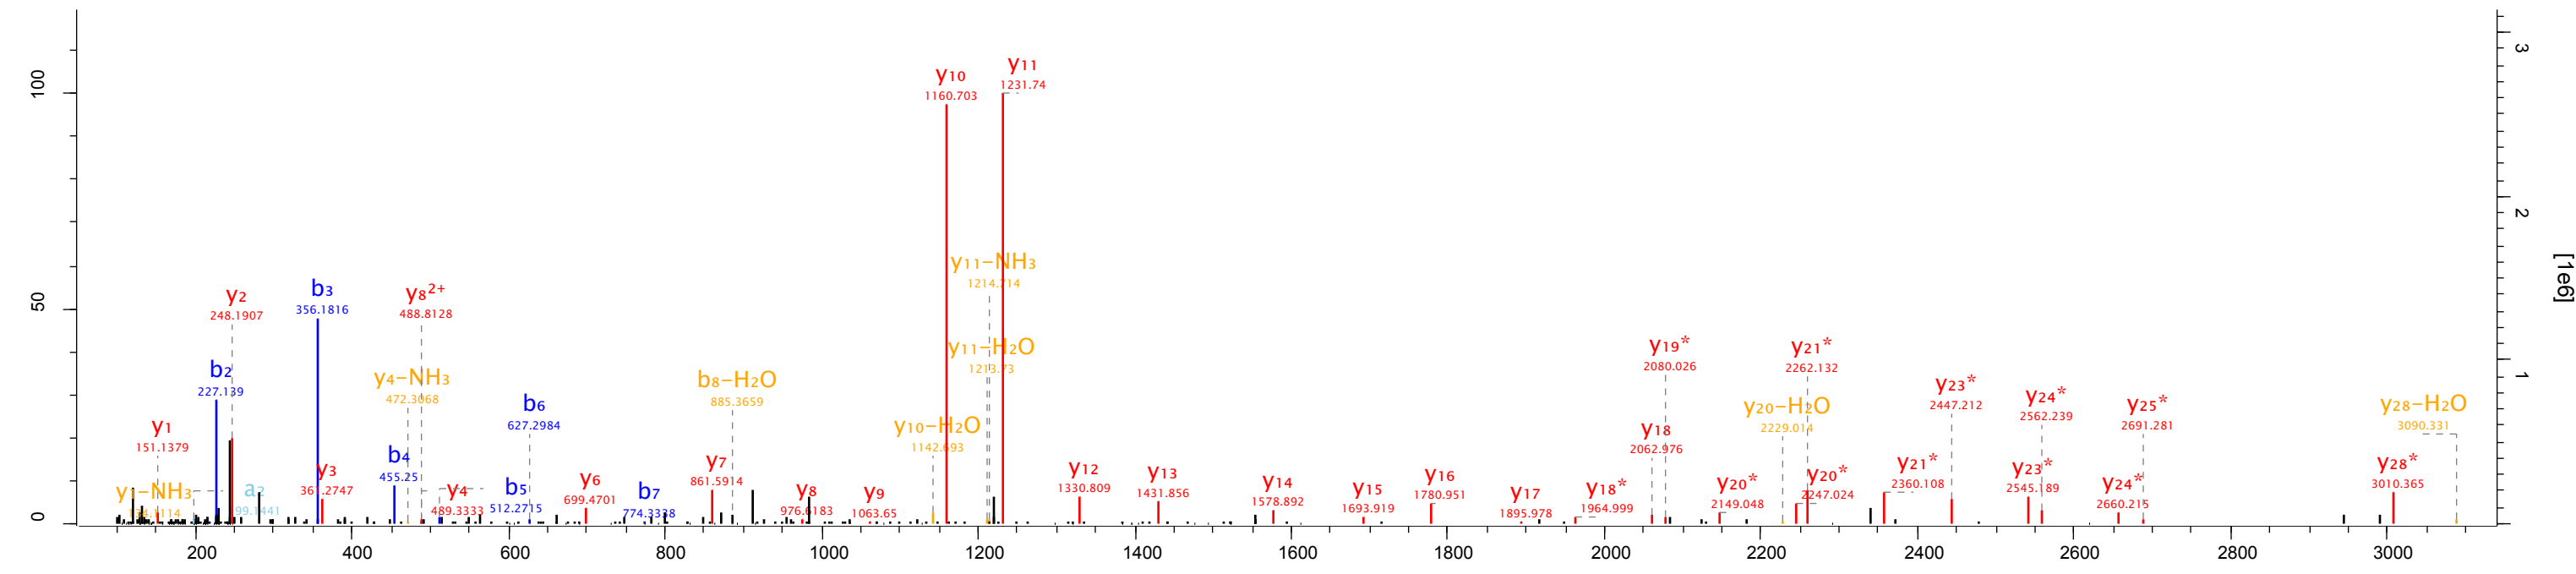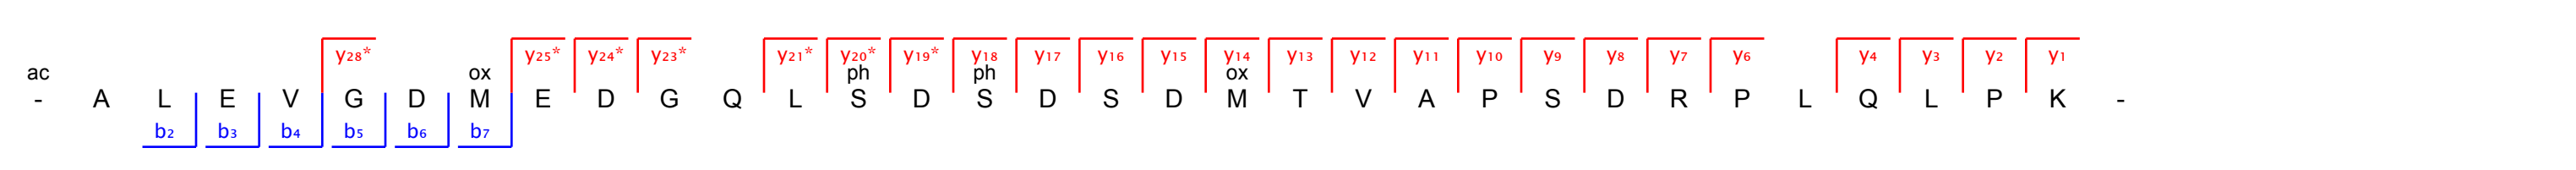

Raw file: 20150812\_A375SR\_Phospho\_BR1\_03  
 Scan: 25916 Method: FTMS; HCD Score: 132.9 m/z: 854.87 Gene names: SLC39A10

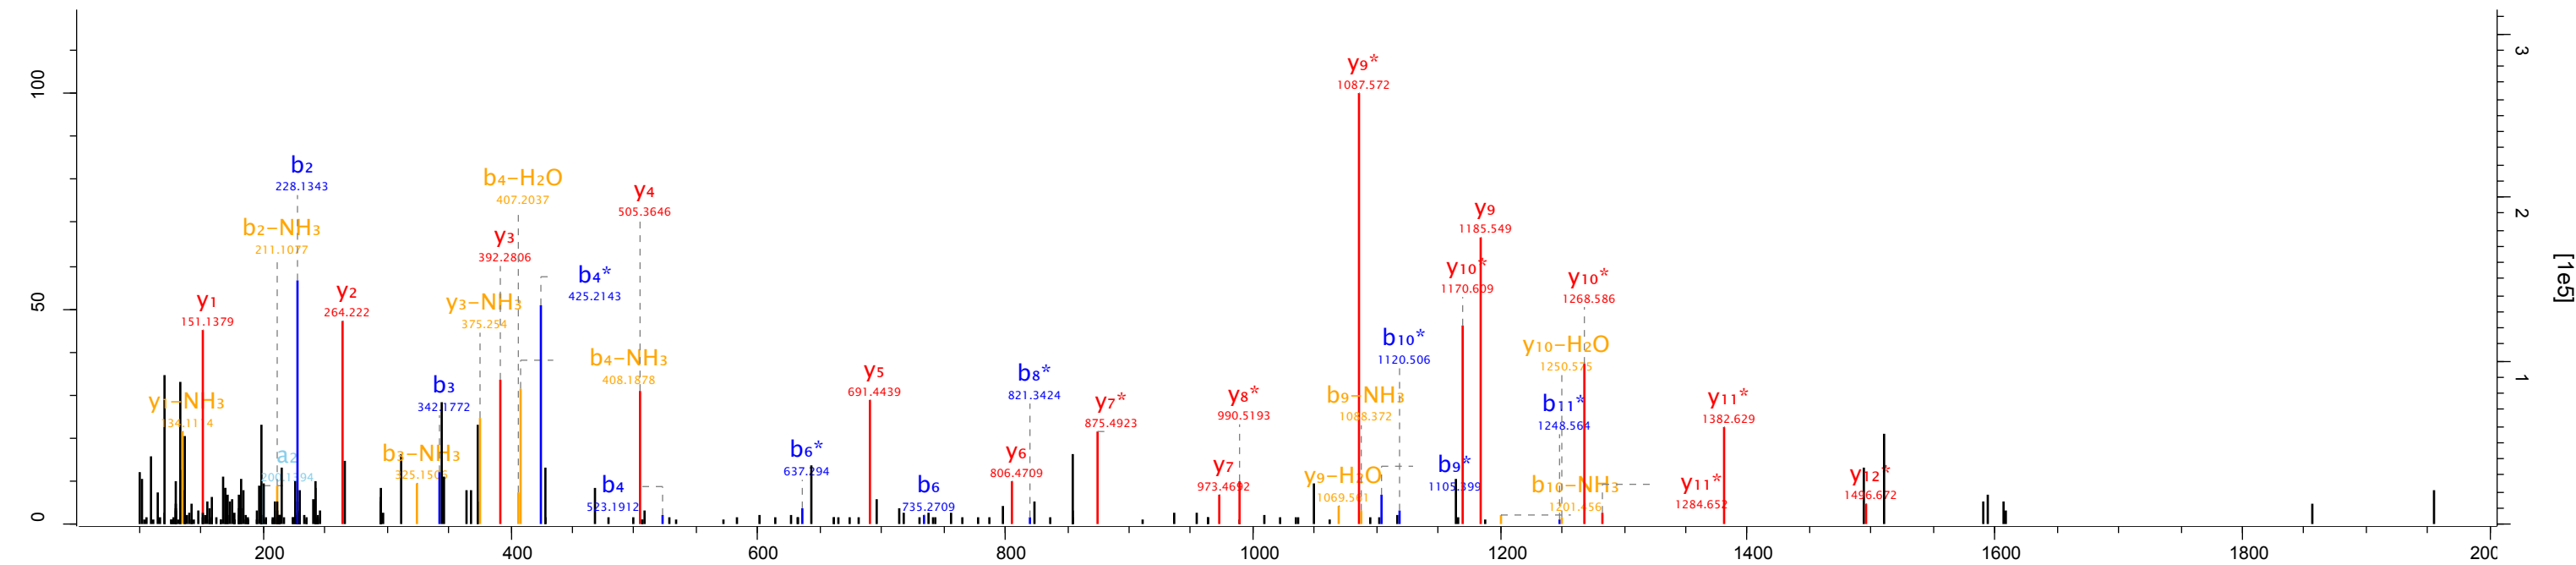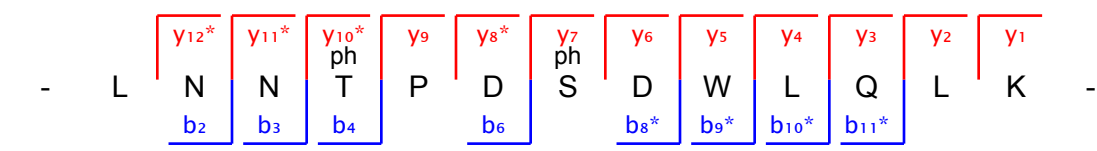



Raw file 20150812\_A375SR\_Phospho\_BR1\_03 Scan 26116 Method FTMS; HCD Score 267.7 m/z 1038.9 Gene names MPHOSPH10

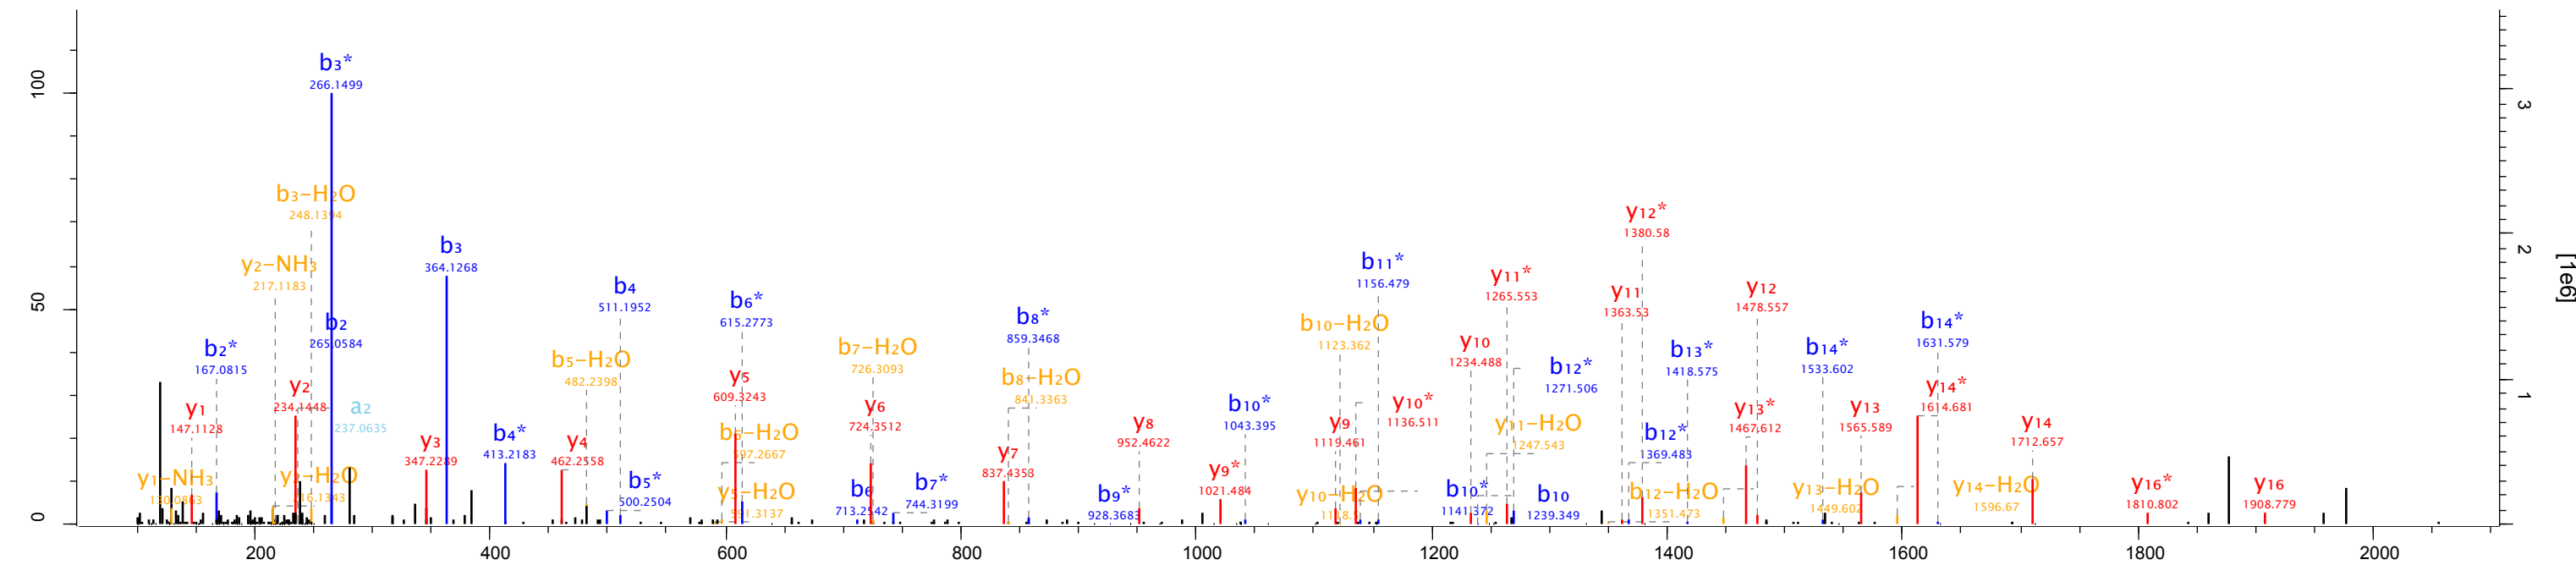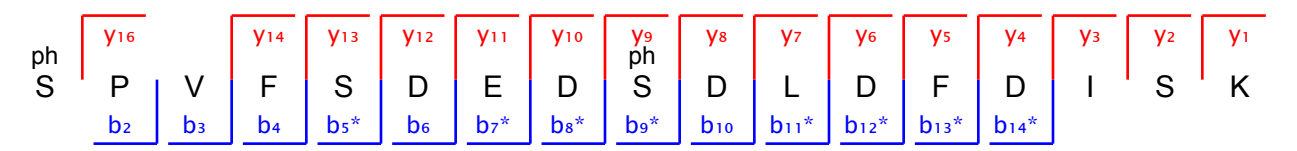

Raw file: 20150812\_A375SR\_Phospho\_BR1\_03  
 Scan: 2646 Method: FTMS; HCD Score: 112.59 m/z: 531.21 Gene names: SRRM2

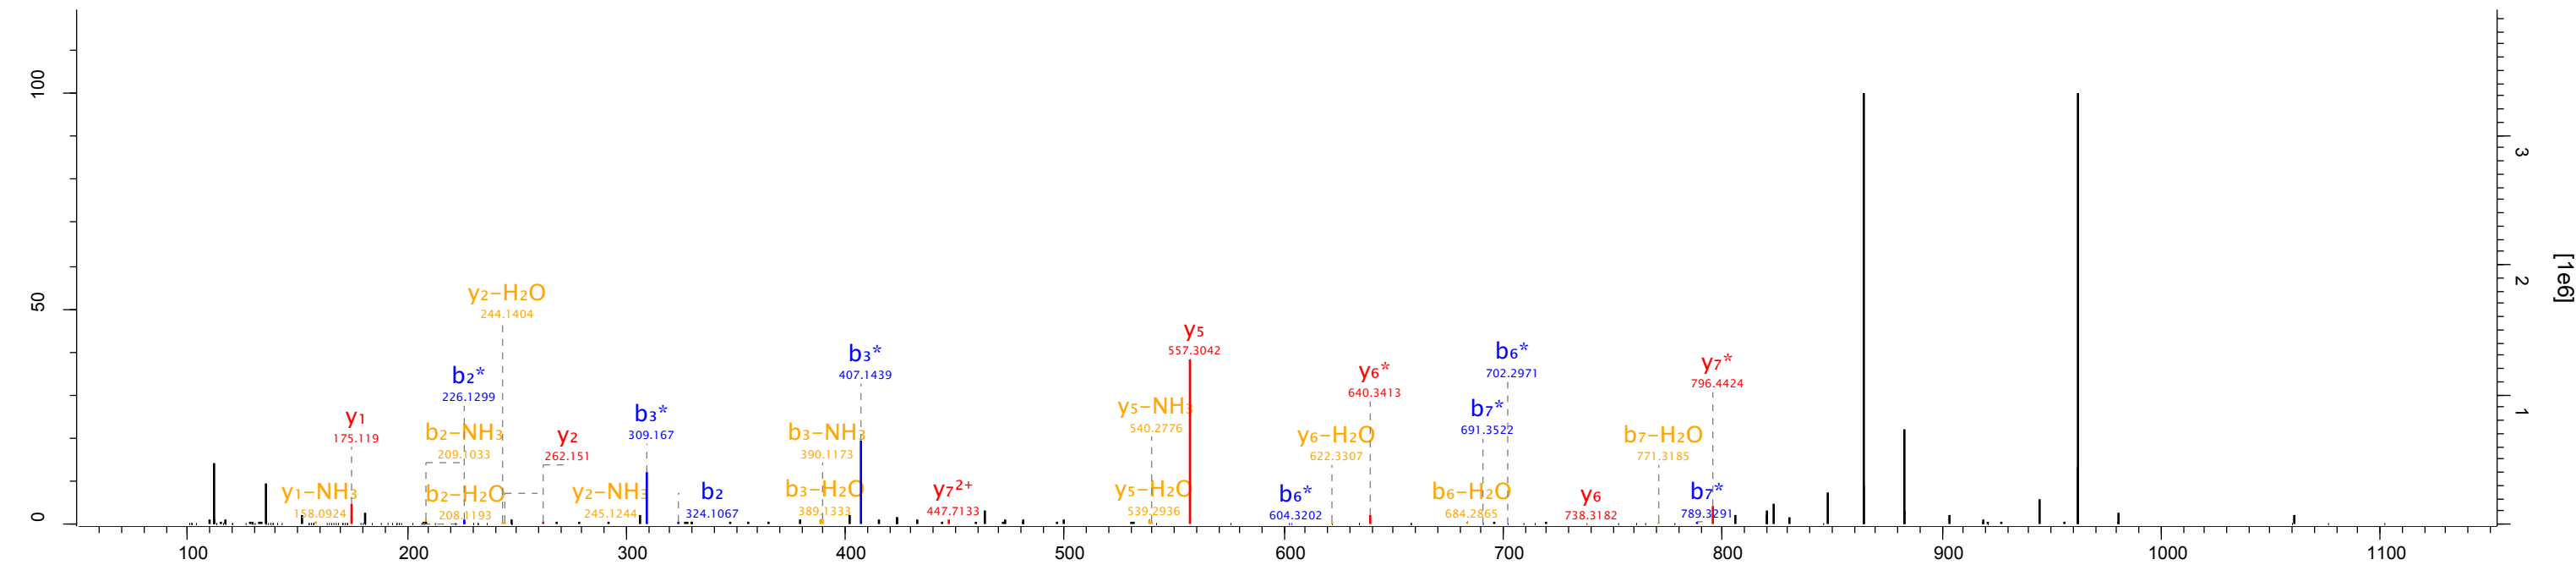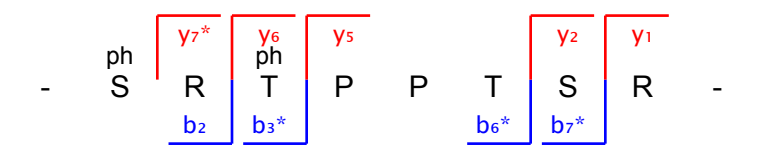

Raw file 20150812\_A375SR\_Phospho\_BR1\_03 Scan 2656 Method FTMS; HCD Score 56.02 m/z 514.25 Gene names PDS5B

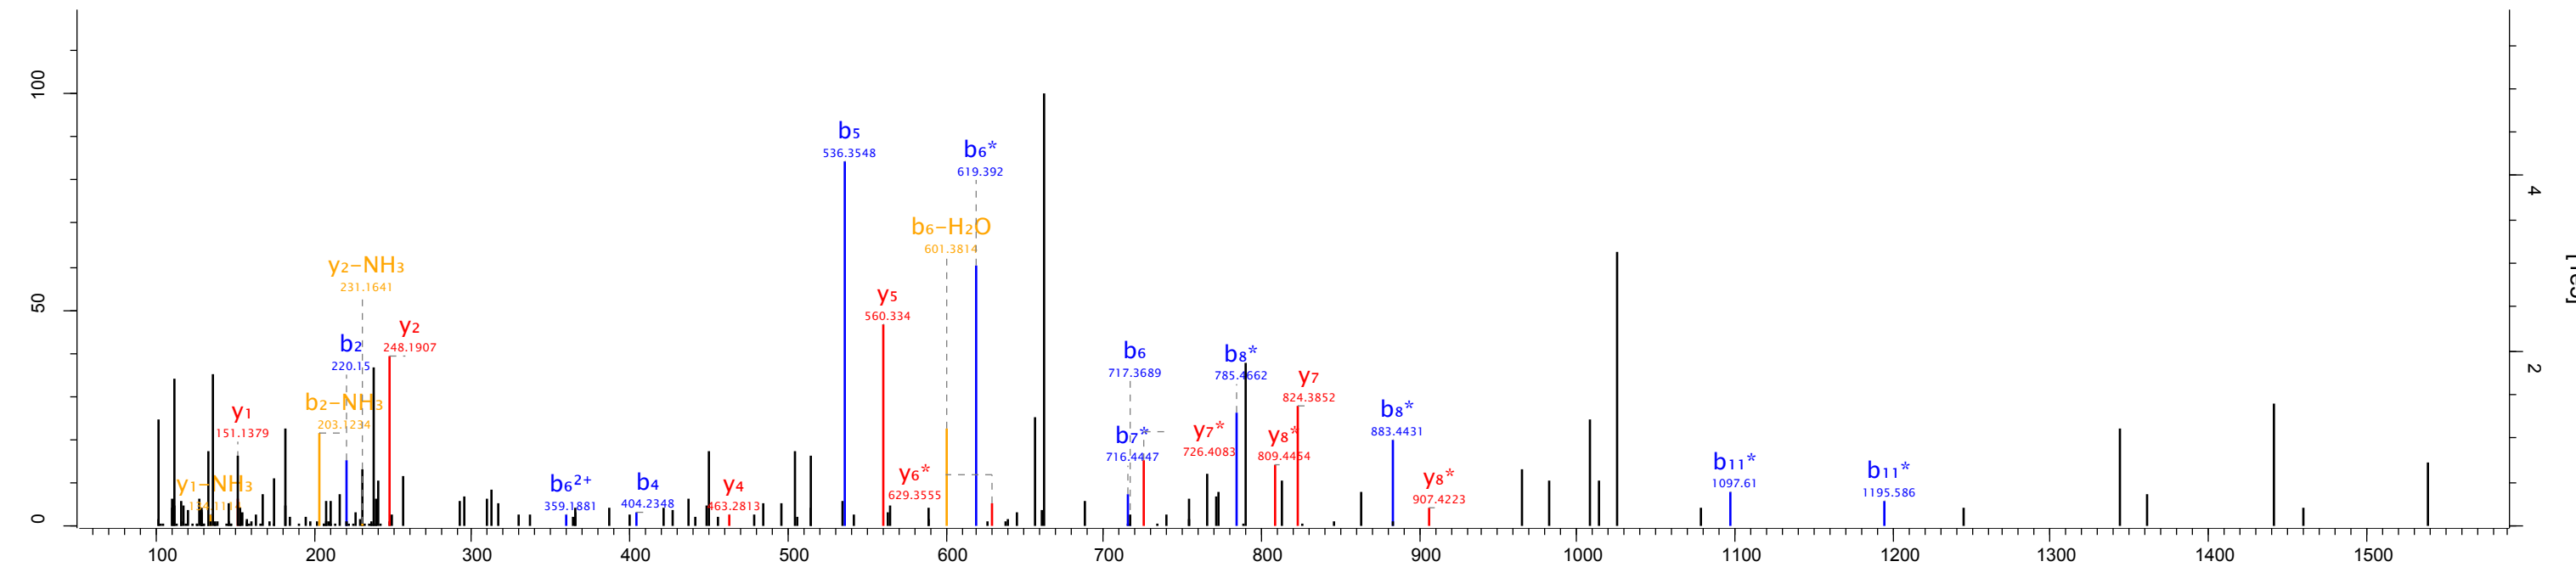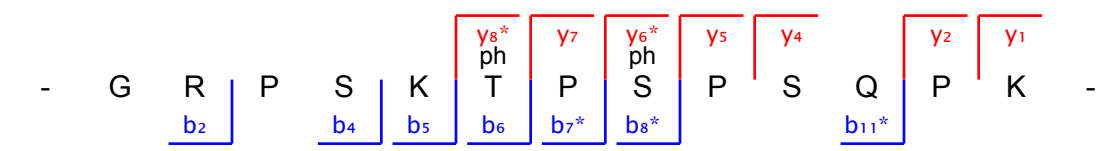

Raw file: 20150812\_A375SR\_Phospho\_BR1\_03  
 Scan: 2696 Method: FTMS; HCD Score: 58.66 m/z: 669.3 Gene names: SRRM2

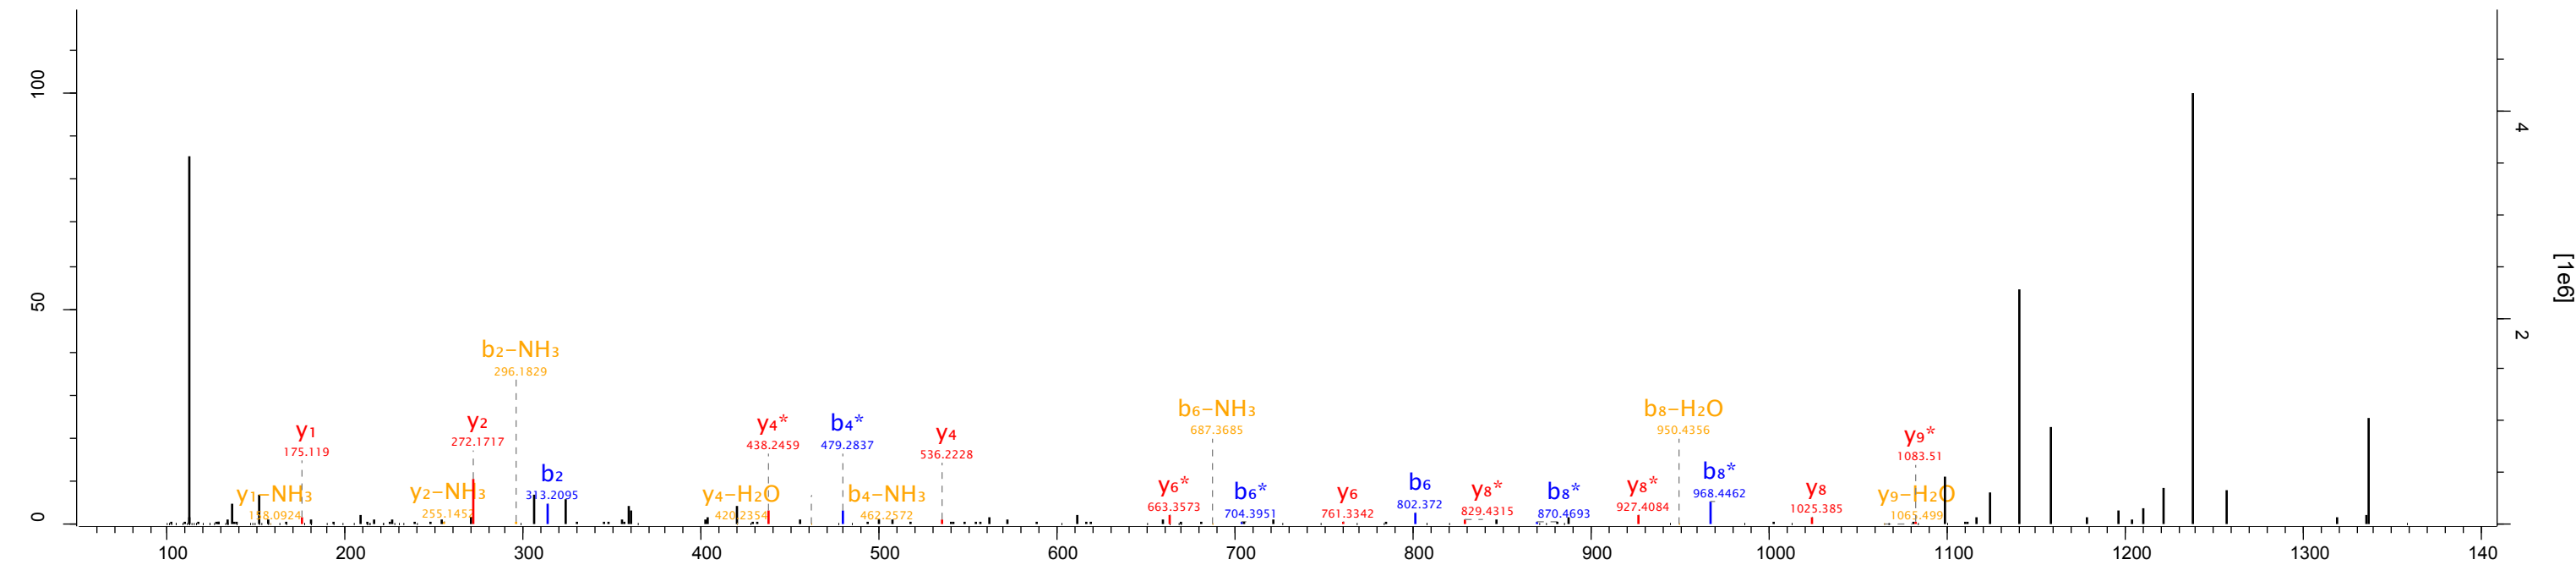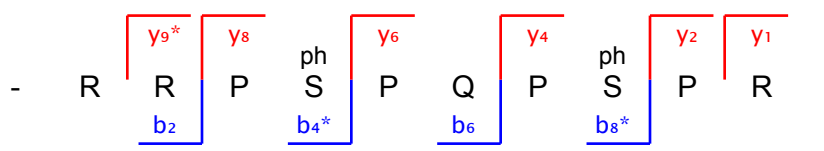

Raw file  
20150812\_A375SR\_Phospho\_BR1\_03

Scan 27396 Method FTMS; HCD Score 304.4 m/z 1296.28 Gene names CCDC94

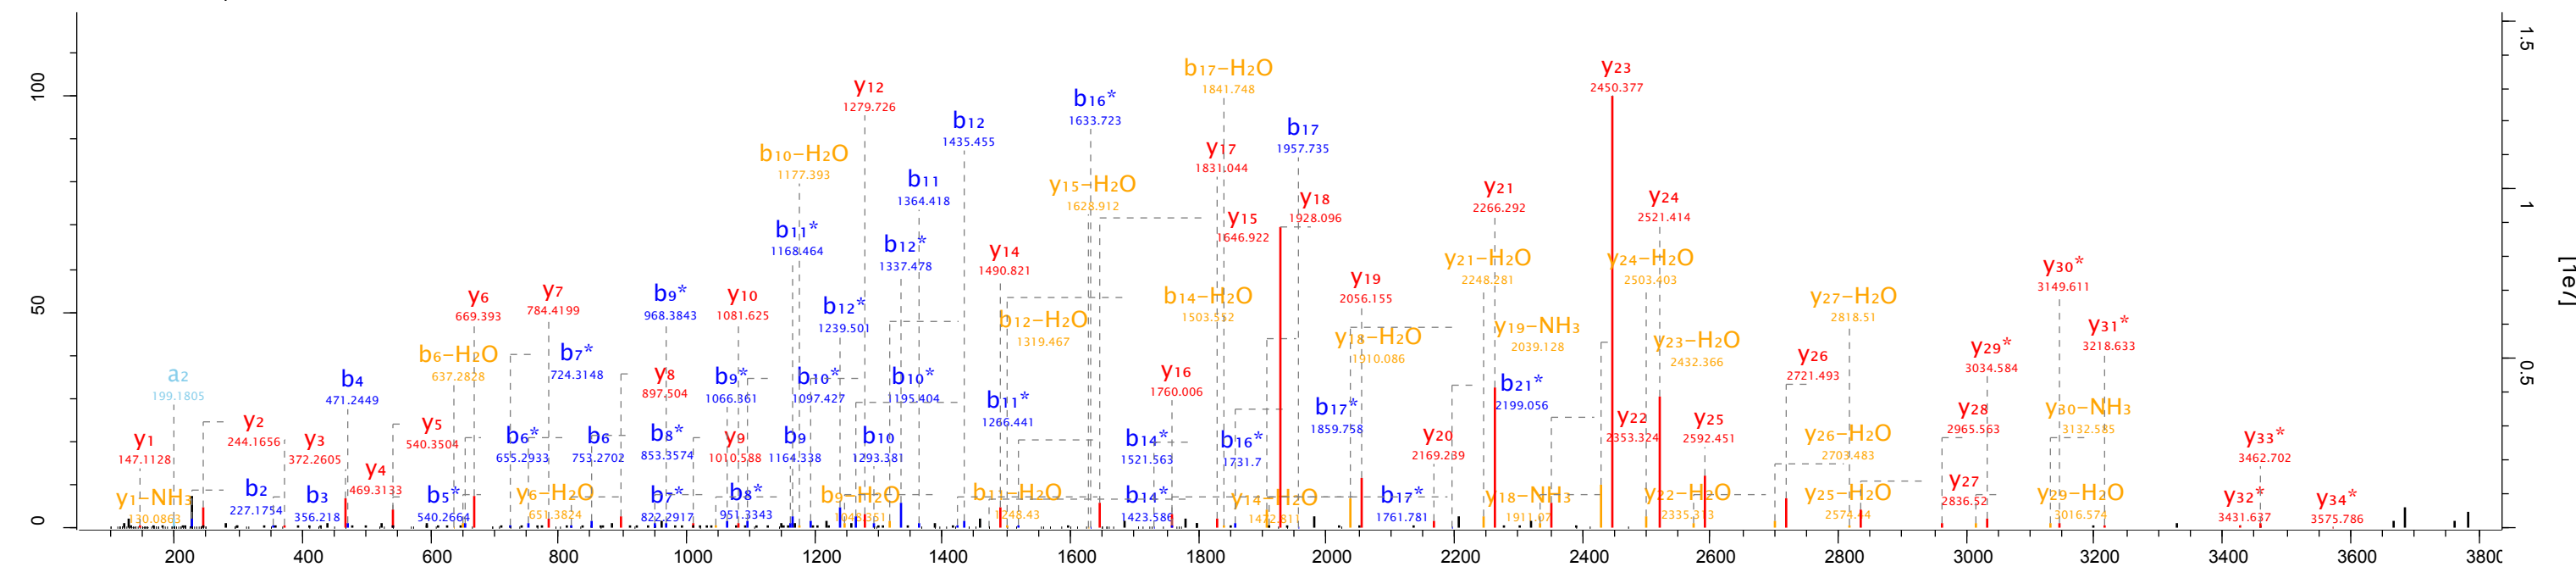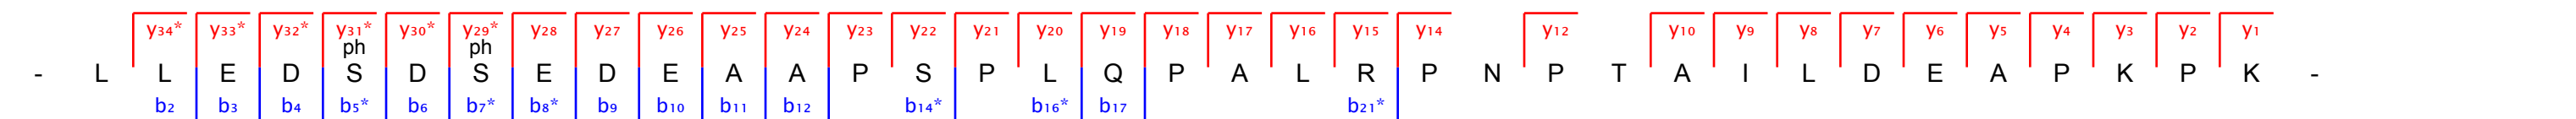



Raw file: 20150812\_A375SR\_Phospho\_BR1\_03  
 Scan: 27476 Method: FTMS; HCD Score: 148.33 m/z: 893.4 Gene names: ANAPC1

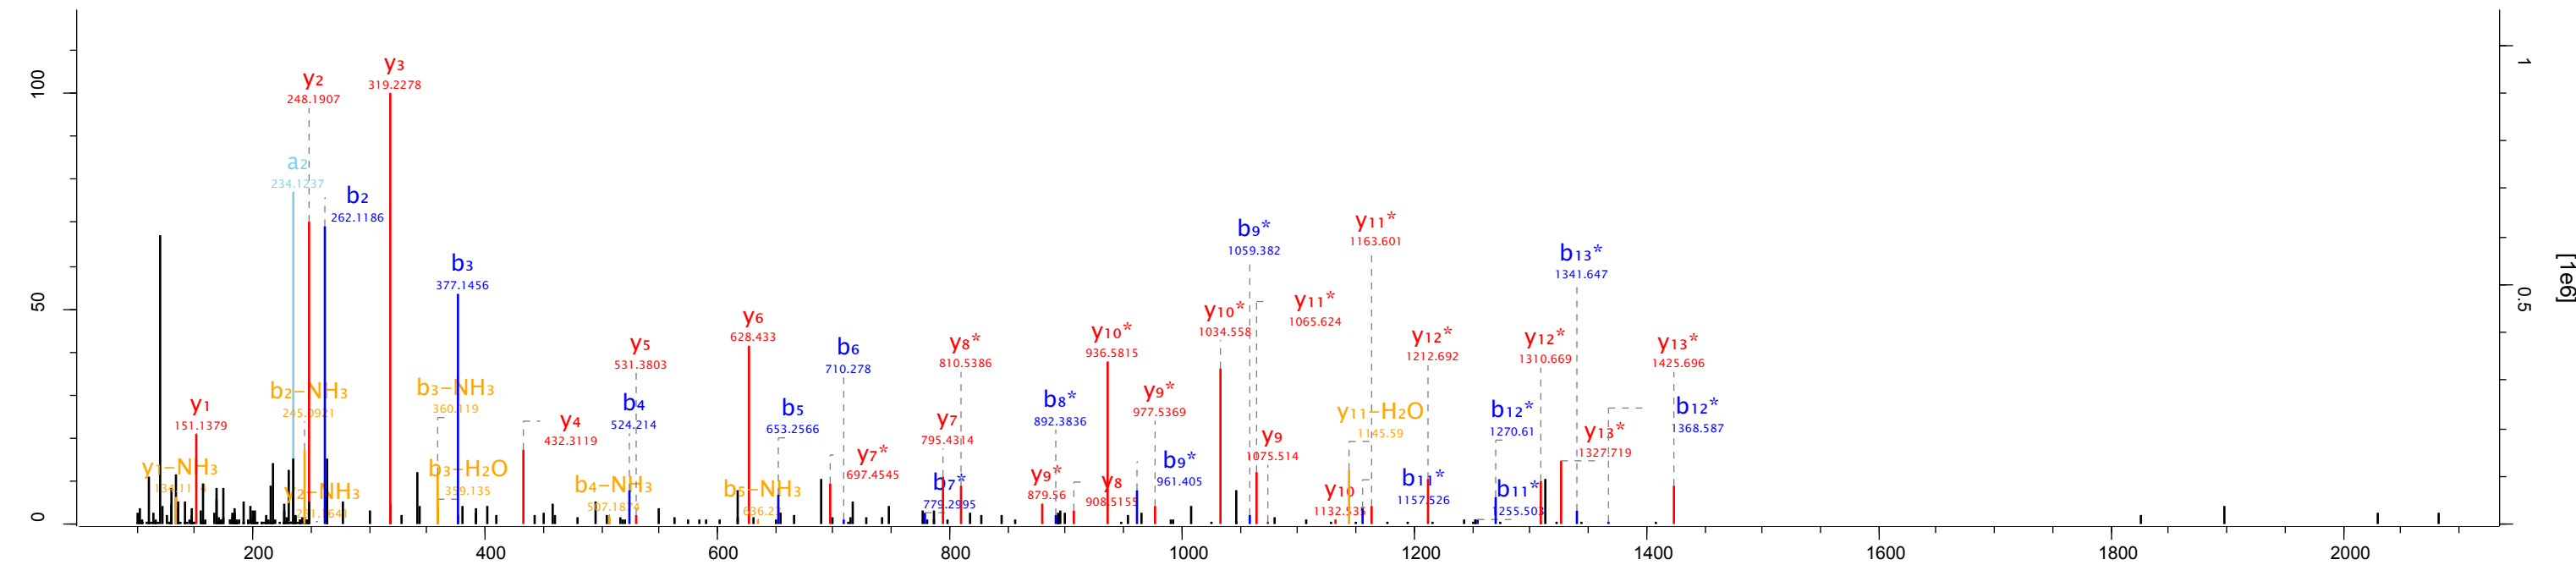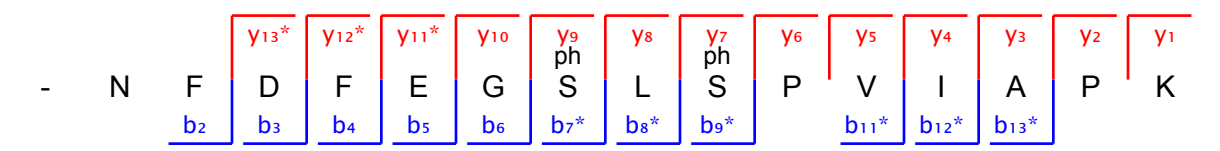

Raw file: 20150812\_A375SR\_Phospho\_BR1\_03  
 Scan: 2756 Method: FTMS; HCD Score: 98.74 m/z: 344.49 Gene names: PRPF4B

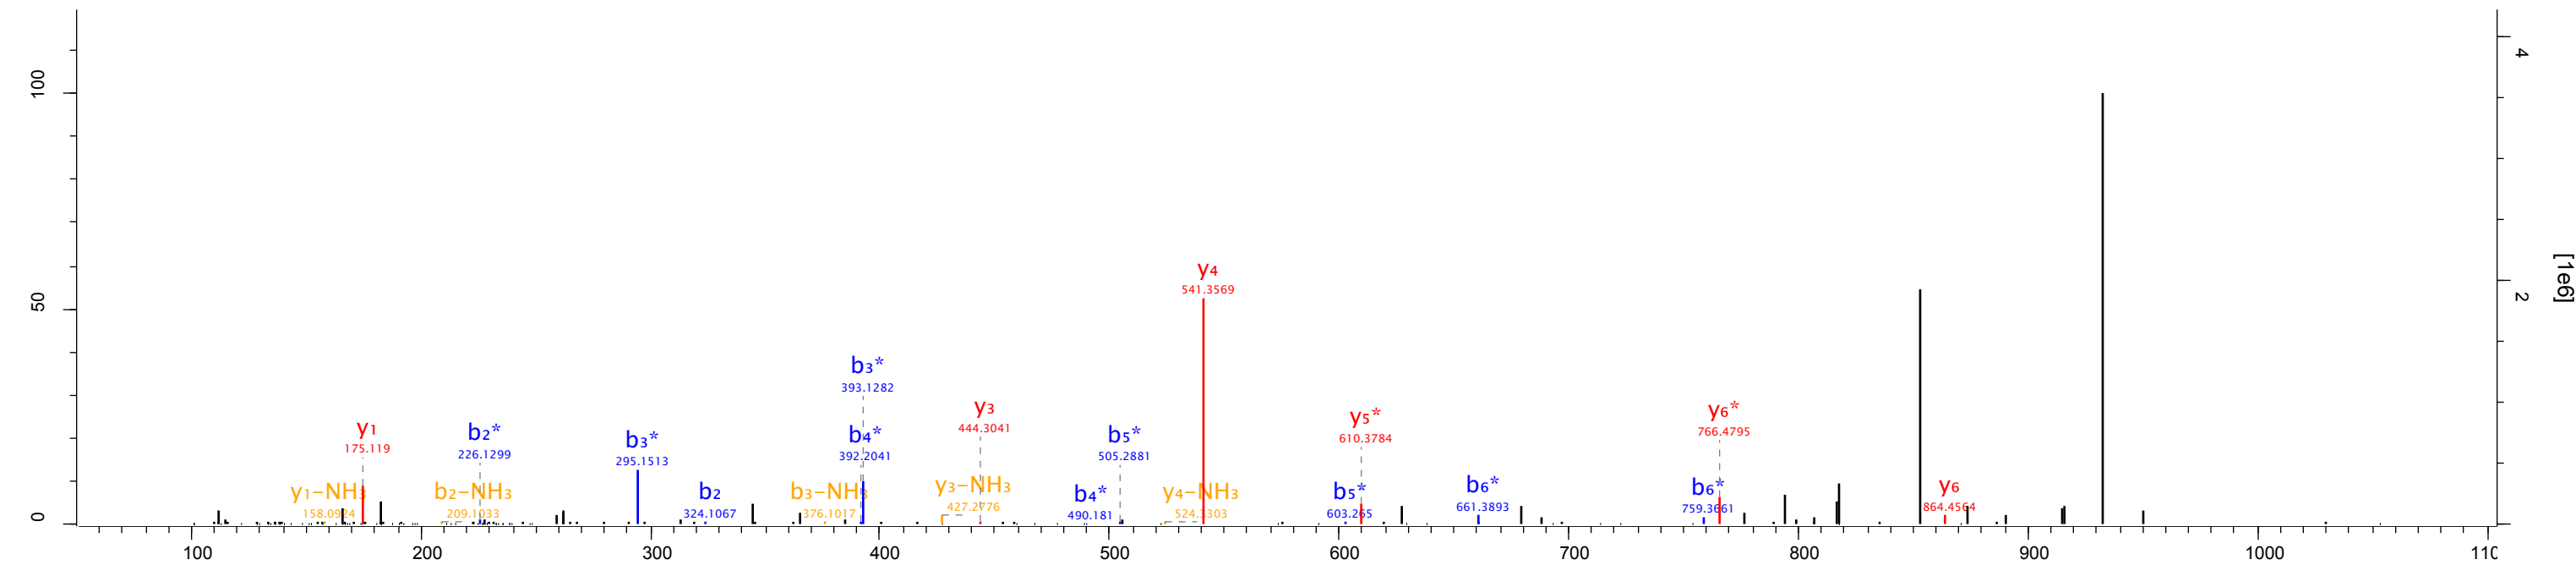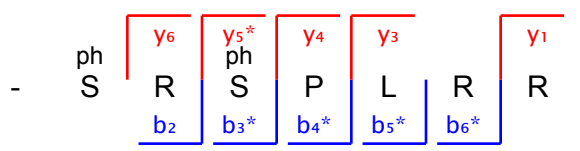

Raw file  
20150812\_A375SR\_Phospho\_BR1\_03

Scan 27576 Method FTMS; HCD Score 148.08 m/z 876.92 Gene names GAPVD1

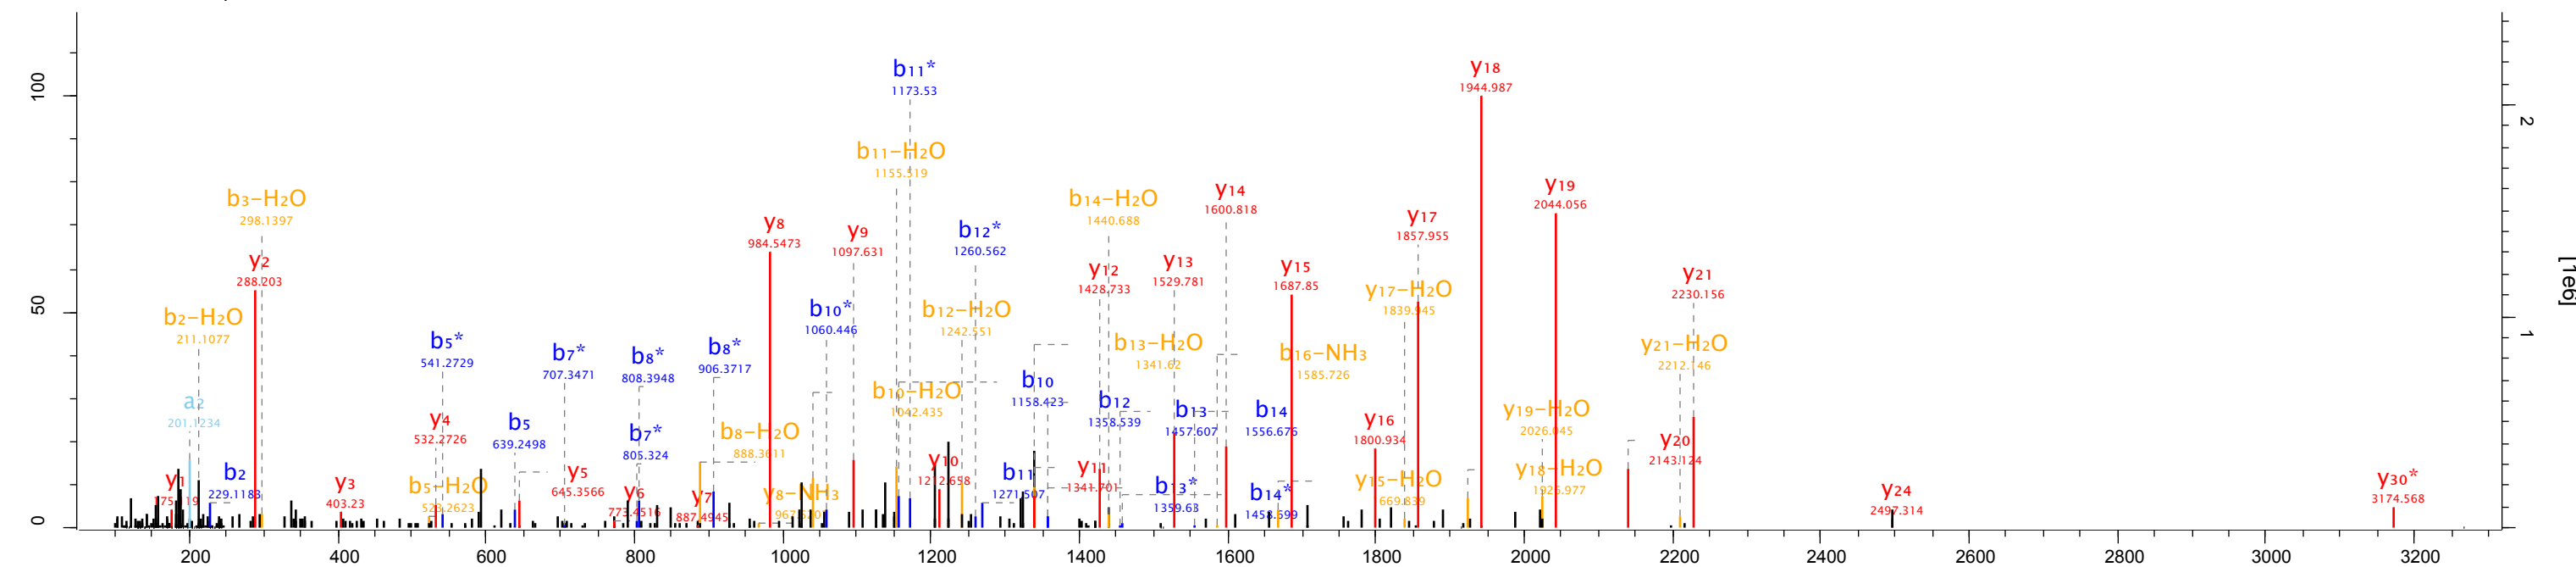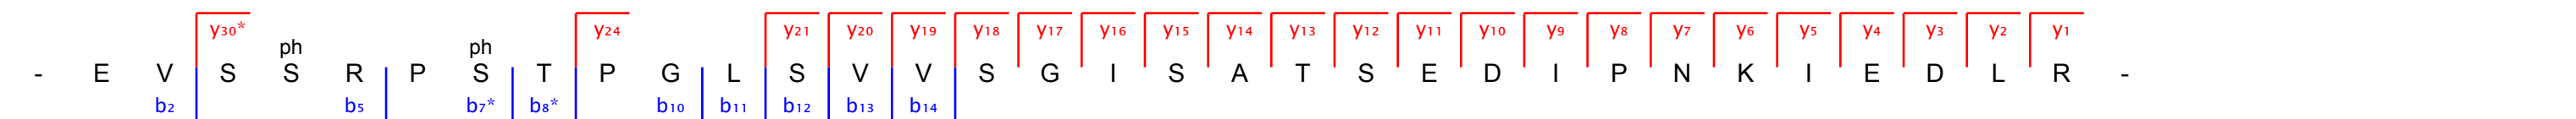

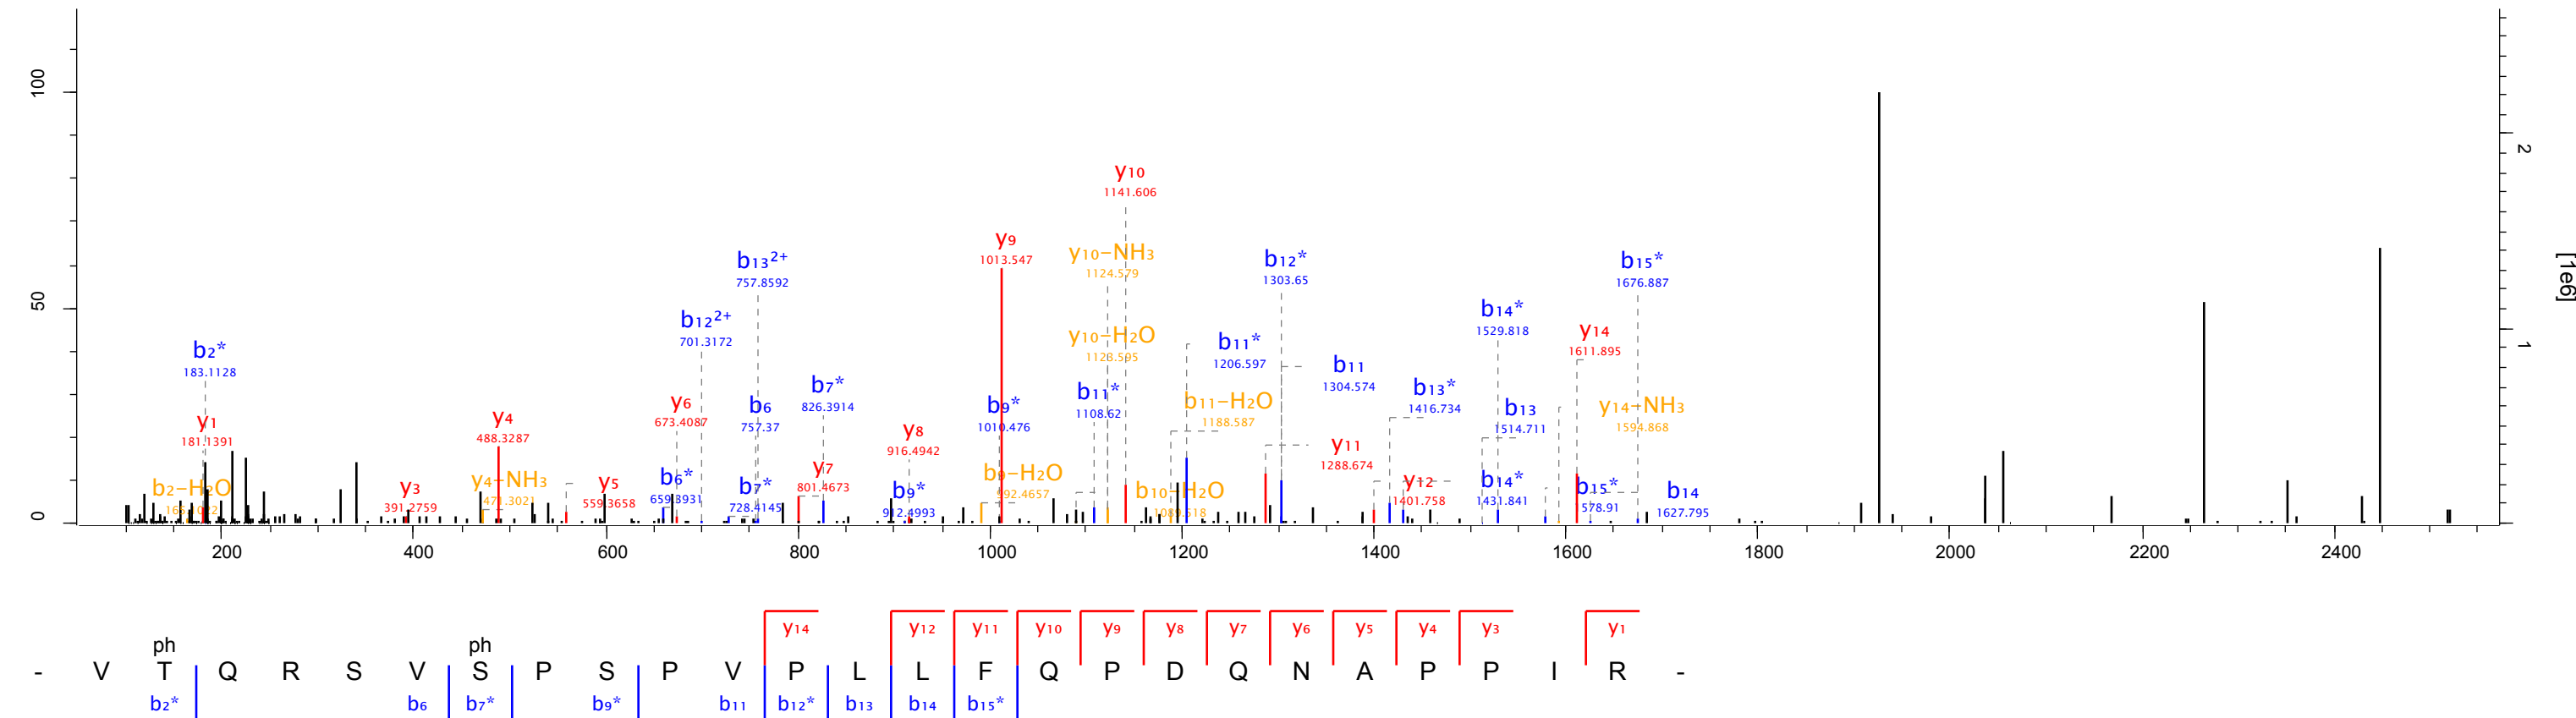

Raw file 20150812\_A375SR\_Phospho\_BR1\_03 Scan 28136 Method FTMS; HCD Score 109.79 m/z 1133.51 Gene names IL1A

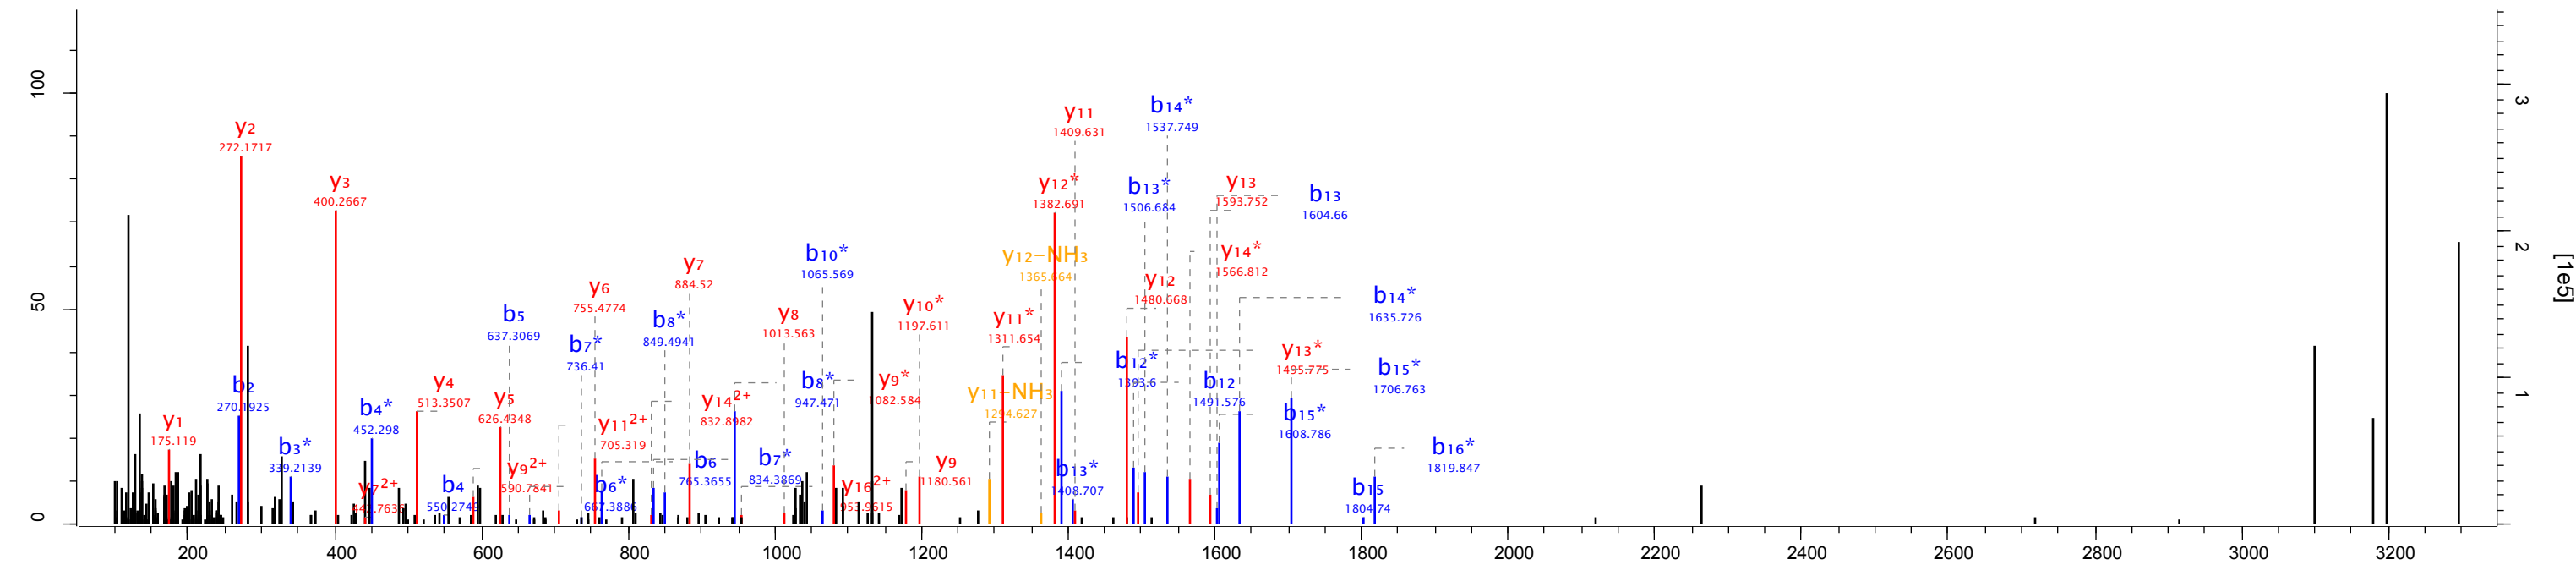

- R L S L S Q S I T D D D L E A I A N D S E E E I I K P R -

ph ph

b<sub>2</sub> b<sub>3</sub><sup>\*</sup> b<sub>4</sub> b<sub>5</sub> b<sub>6</sub> b<sub>7</sub><sup>\*</sup> b<sub>8</sub><sup>\*</sup> b<sub>10</sub><sup>\*</sup> b<sub>12</sub> b<sub>13</sub> b<sub>14</sub><sup>\*</sup> b<sub>15</sub> b<sub>16</sub><sup>\*</sup> y<sub>16</sub><sup>2+</sup> y<sub>14</sub><sup>\*</sup> y<sub>13</sub> y<sub>12</sub> y<sub>11</sub> y<sub>10</sub><sup>\*</sup> y<sub>9</sub> ph y<sub>8</sub> y<sub>7</sub> y<sub>6</sub> y<sub>5</sub> y<sub>4</sub> y<sub>3</sub> y<sub>2</sub> y<sub>1</sub>

Raw file 20150812\_A375SR\_Phospho\_BR1\_03 Scan 28356 Method FTMS; HCD Score 231.75 m/z 1022.44 Gene names TP53BP1

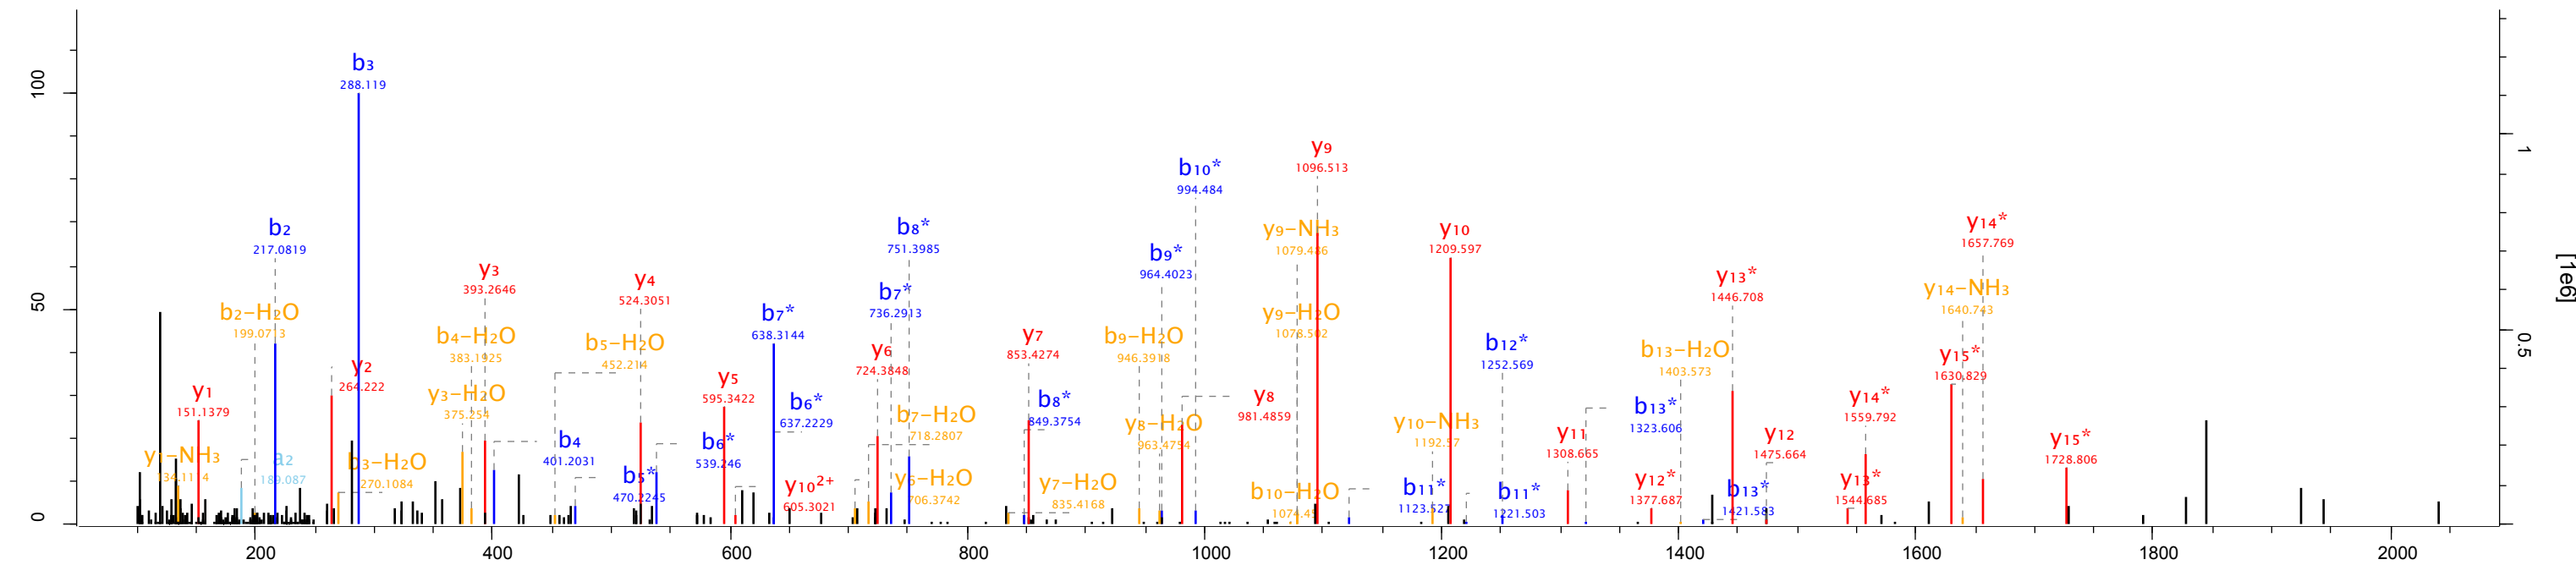

- S E A L S ph S V L D Q E A M E I K -  
 b<sub>2</sub> b<sub>3</sub> b<sub>4</sub> b<sub>5</sub>\* b<sub>6</sub>\* b<sub>7</sub>\* b<sub>8</sub>\* b<sub>9</sub>\* b<sub>10</sub>\* b<sub>11</sub>\* b<sub>12</sub>\* b<sub>13</sub>\*

Raw file: 20150812\_A375SR\_Phospho\_BR1\_03  
 Scan: 28596 Method: FTMS; HCD Score: 191.11 m/z: 979.14 Gene names: TRIP11

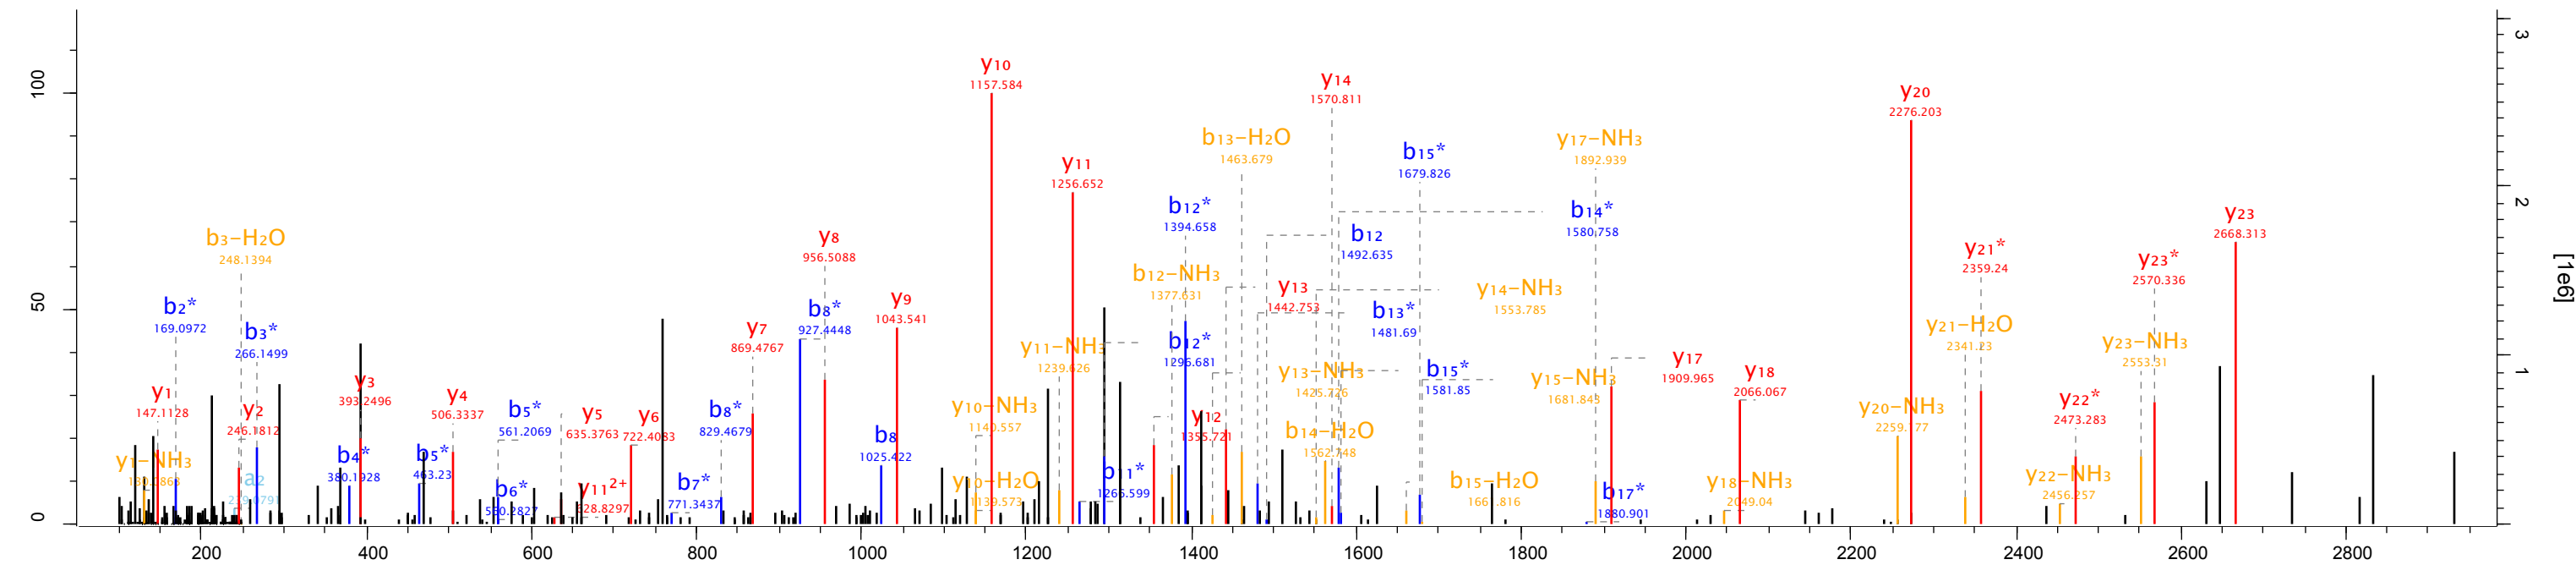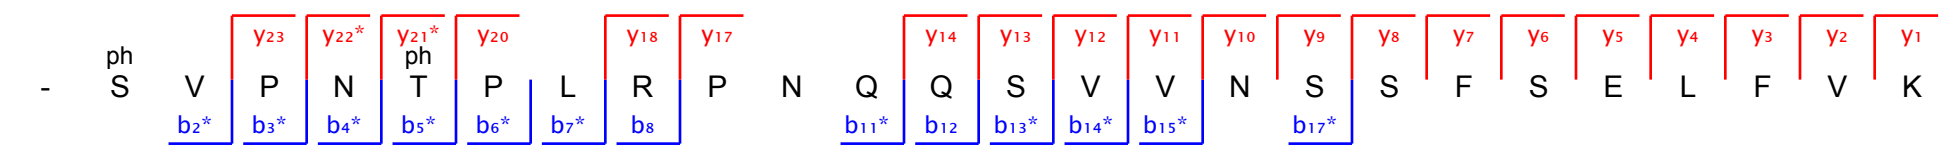

Raw file  
20150812\_A375SR\_Phospho\_BR1\_03

Scan 28656 Method FTMS; HCD Score 93.41 m/z 863.07 Gene names CRTC2

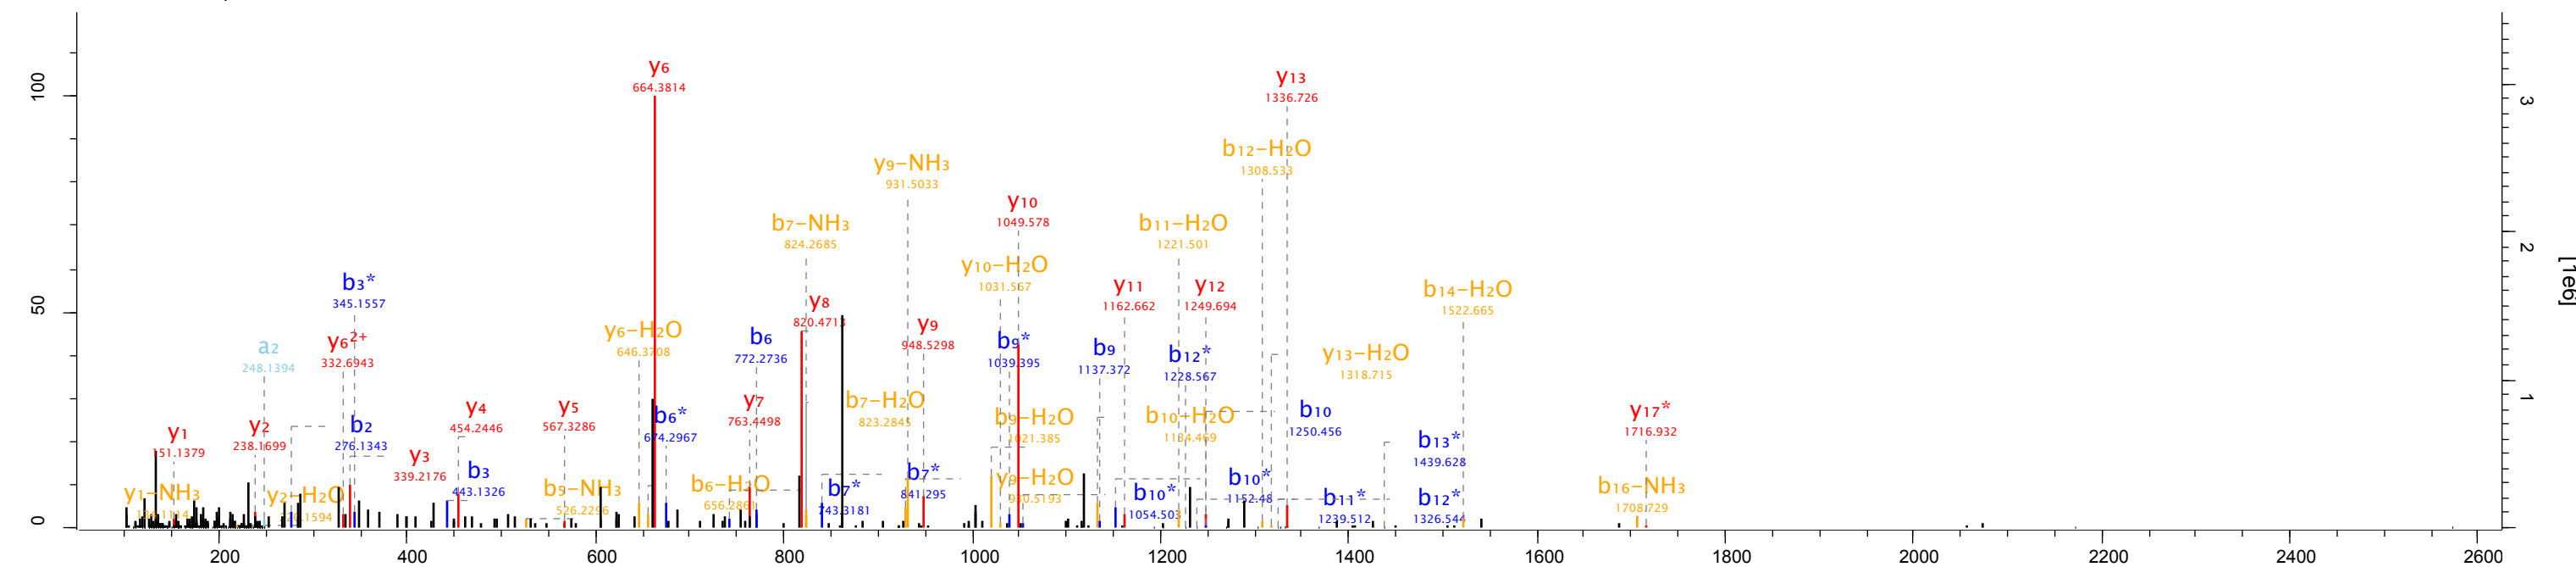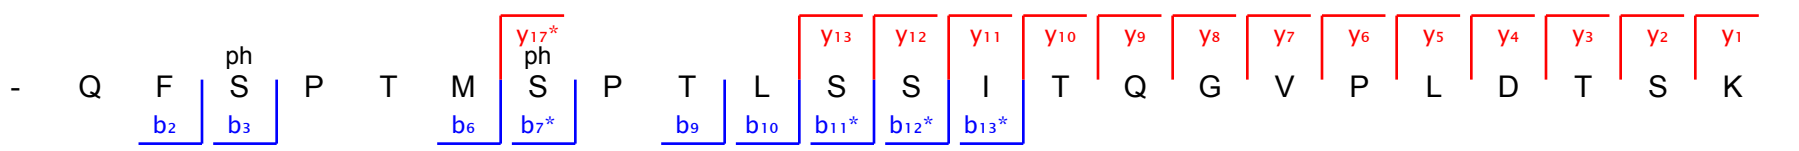



Raw file: 20150812\_A375SR\_Phospho\_BR1\_03  
 Scan: 3006 Method: FTMS; HCD Score: 344.65 m/z: 1004.91 Gene names: BCLAF1

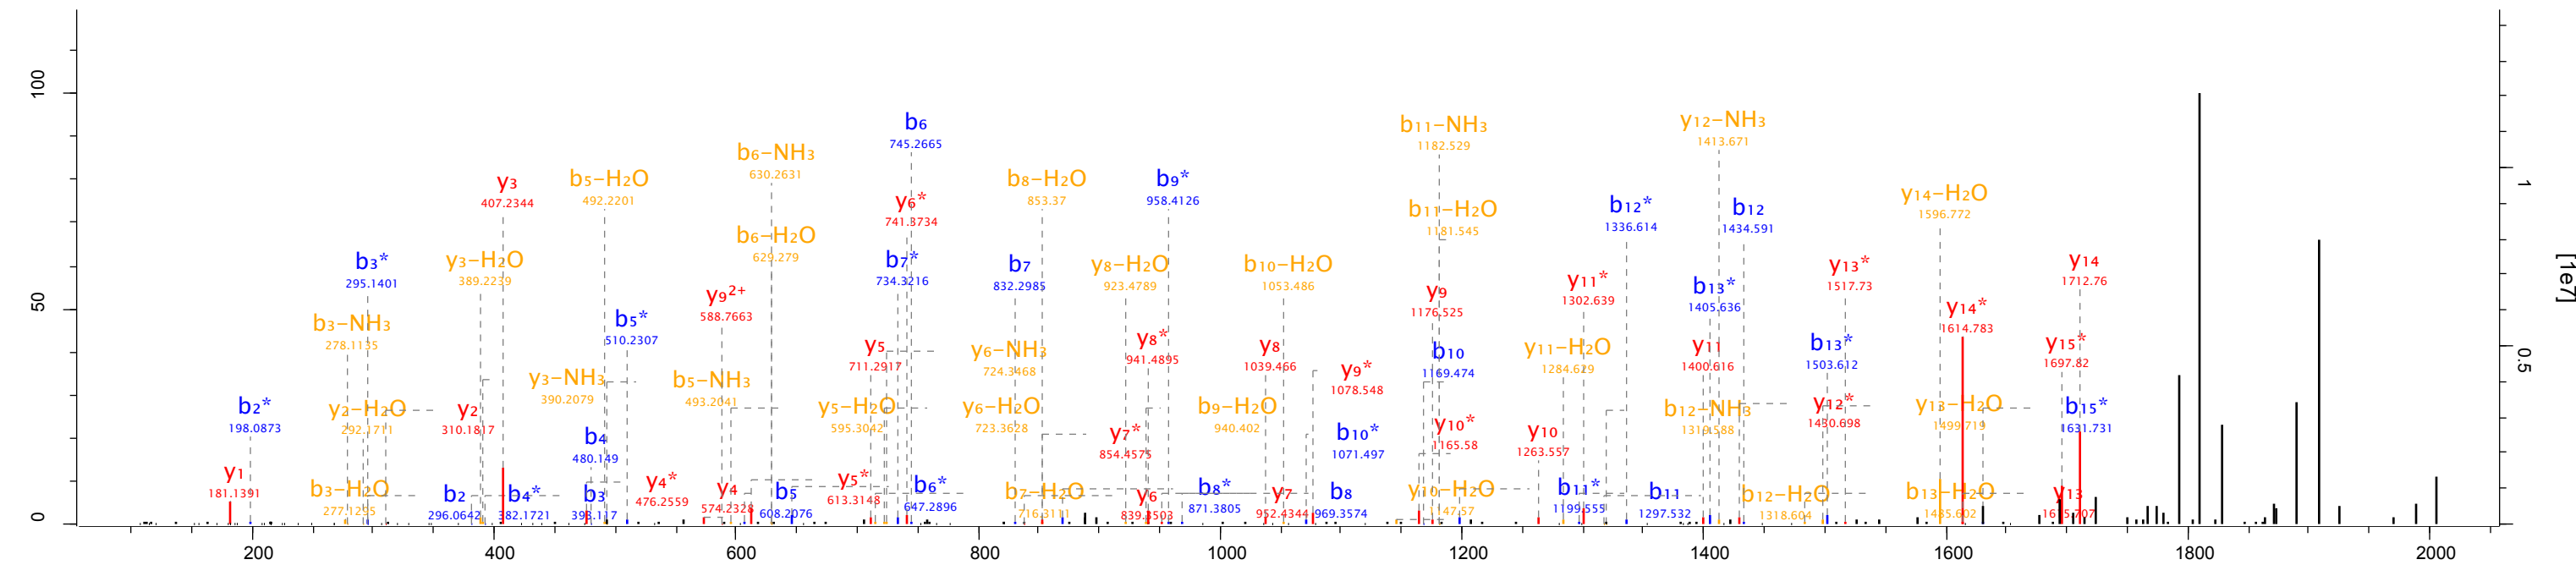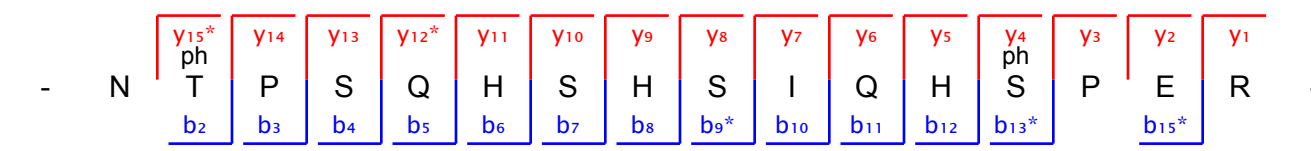

Raw file 20150812\_A375SR\_Phospho\_BR1\_03 Scan 3146 Method FTMS; HCD Score 71.93 m/z 430.52 Gene names VGLL4

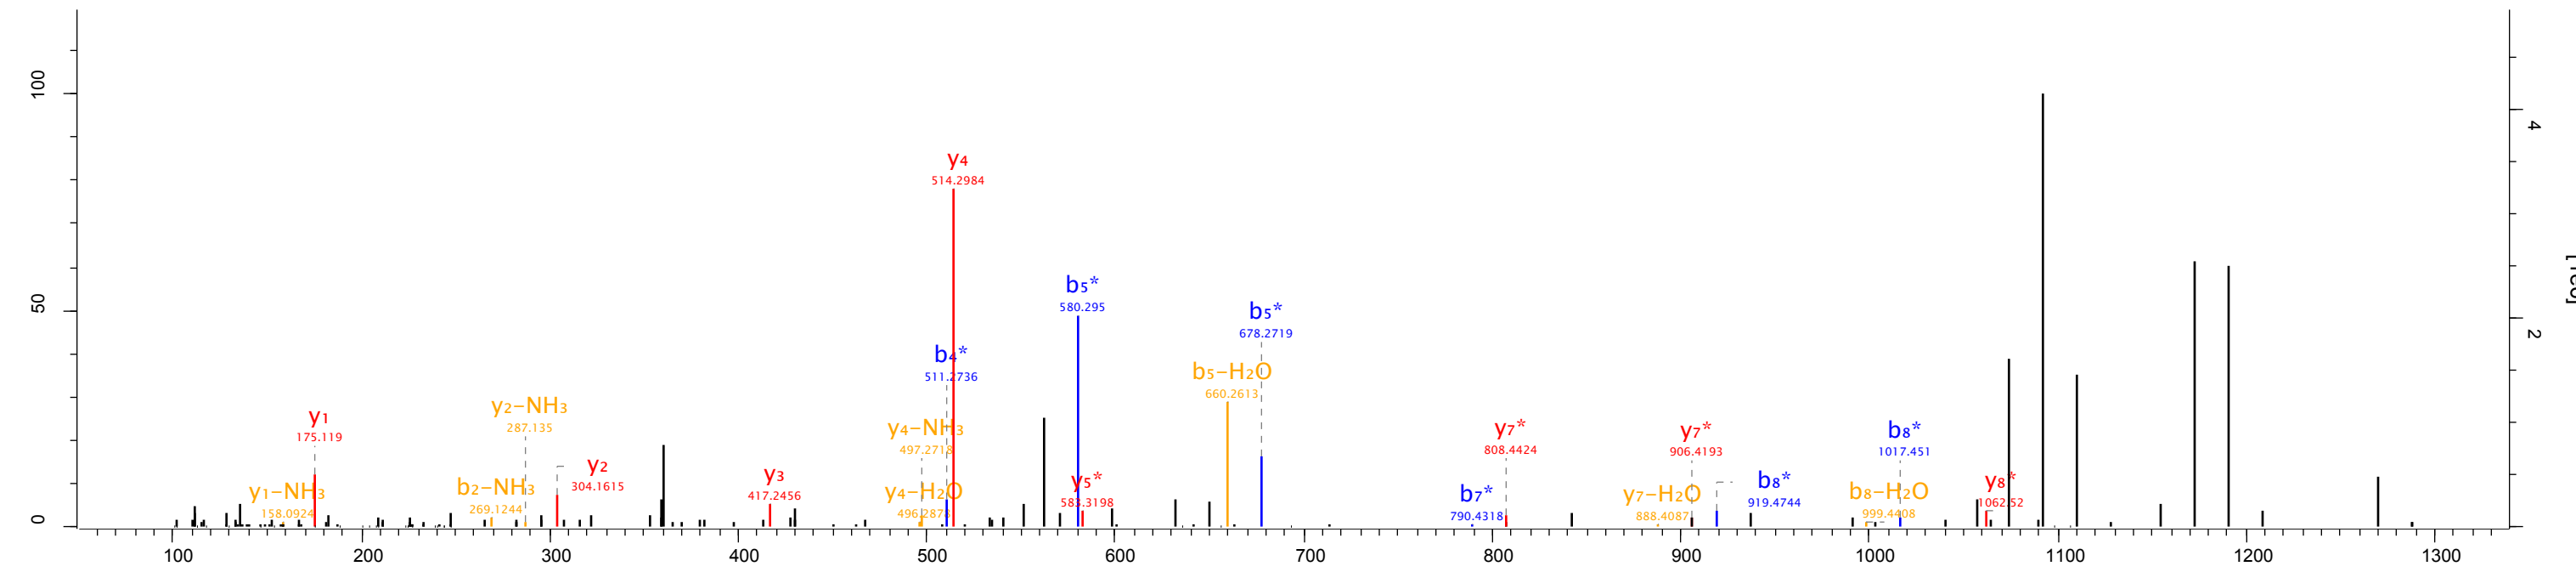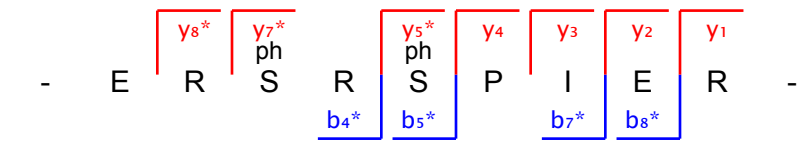

Raw file: 20150812\_A375SR\_Phospho\_BR1\_03  
 Scan: 3316 Method: FTMS; HCD Score: 138.64 m/z: 696.63 Gene names: BICD2

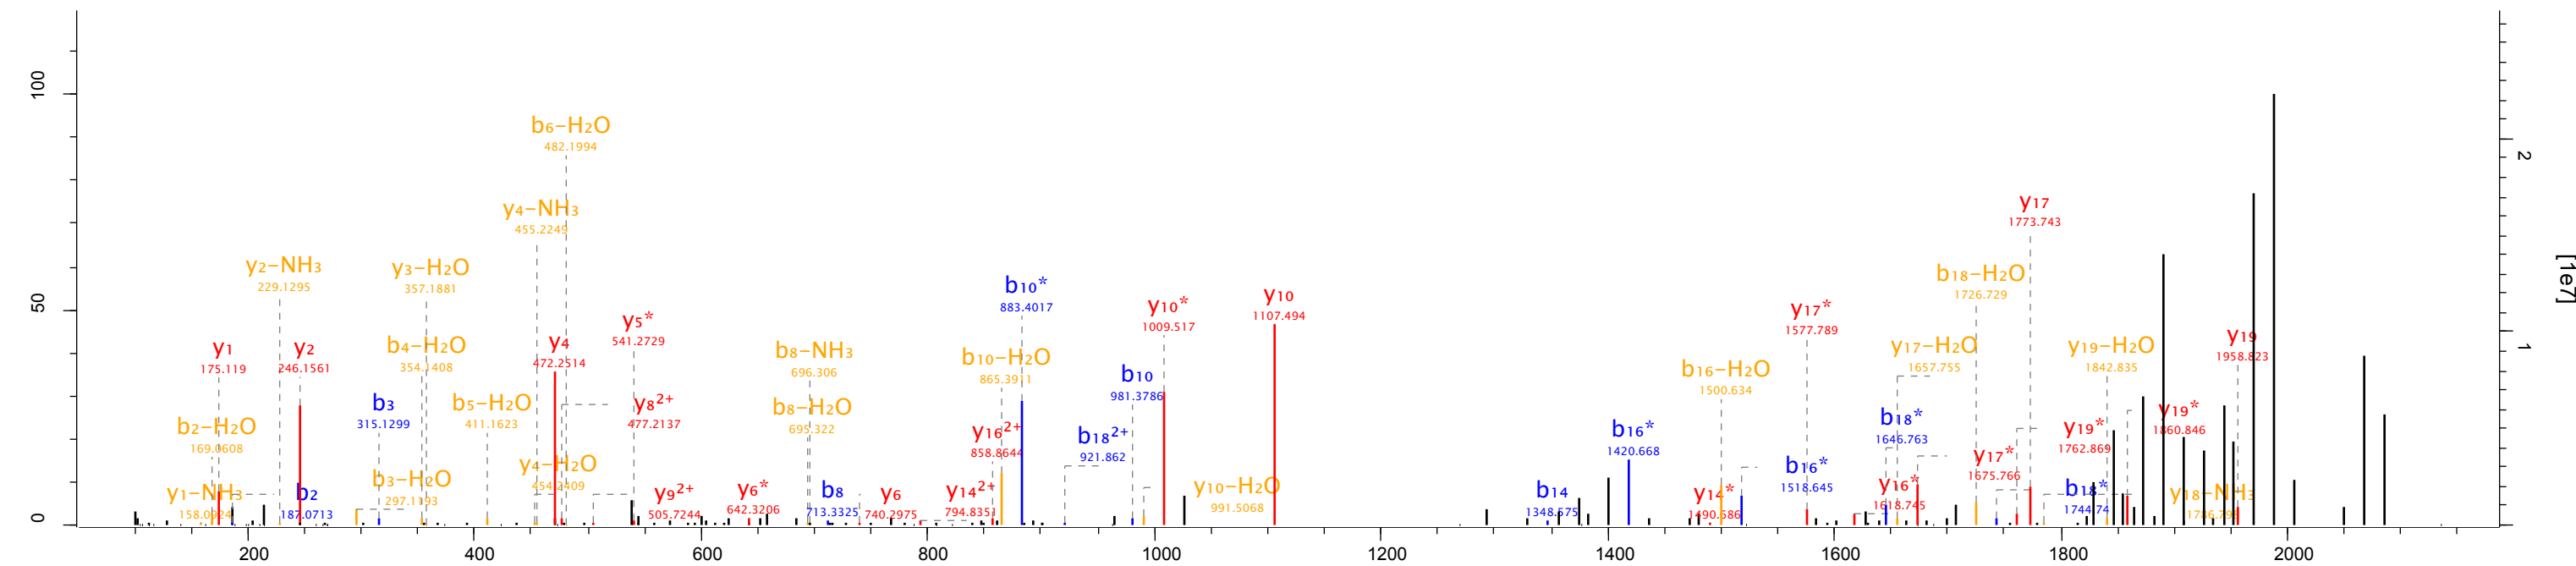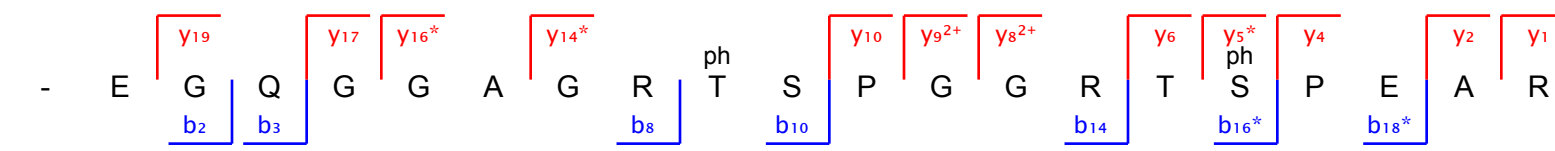

Raw file: 20150812\_A375SR\_Phospho\_BR1\_03  
 Scan: 3856 Method: FTMS; HCD Score: 114.29 m/z: 641.78 Gene names: EIF4G1

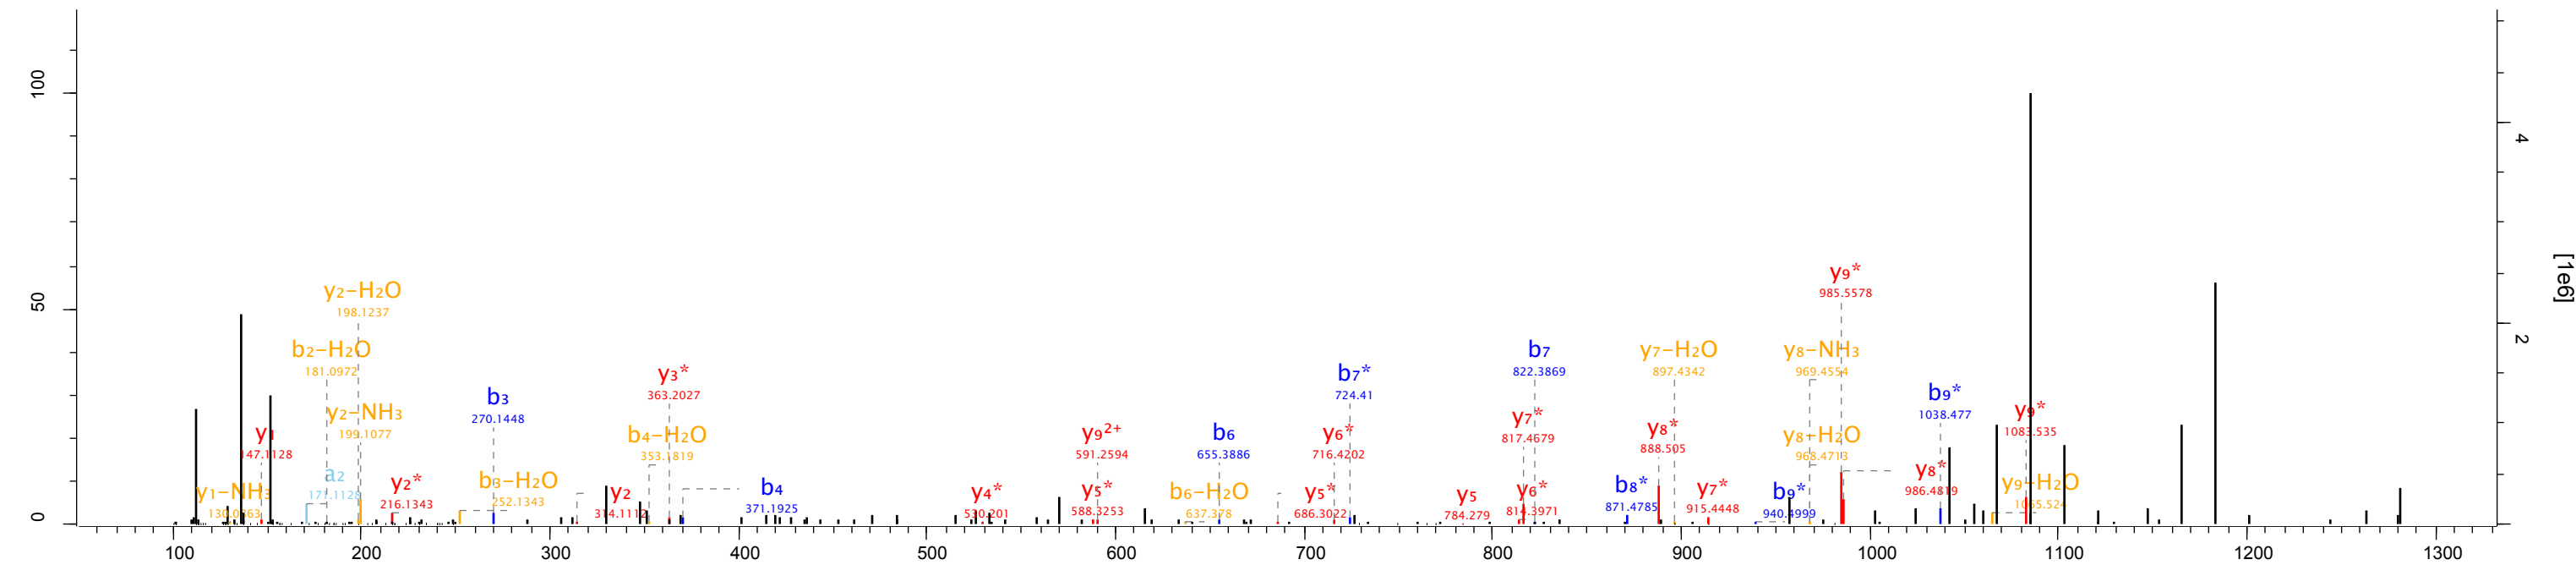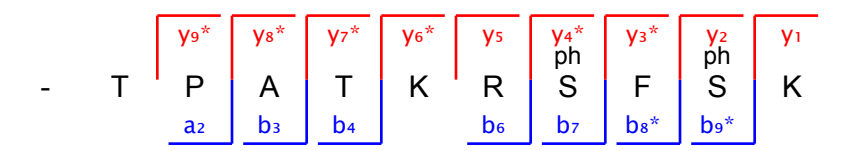

Raw file: 20150812\_A375SR\_Phospho\_BR1\_03  
 Scan: 4506 Method: FTMS; HCD Score: 158.92 m/z: 712.32 Gene names: SMARCC2

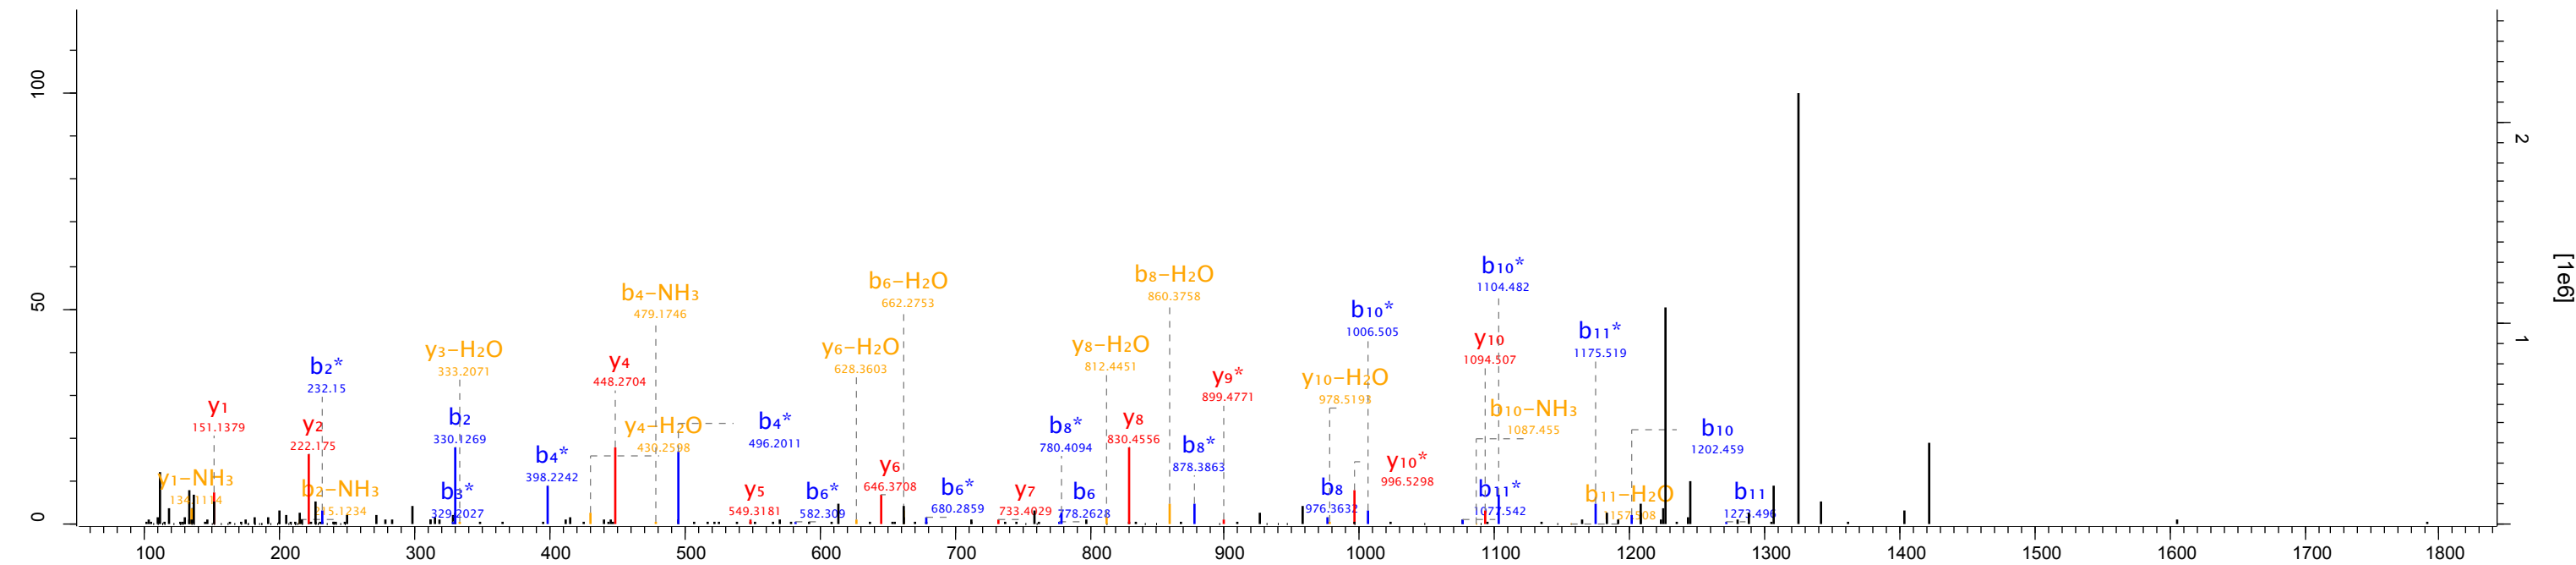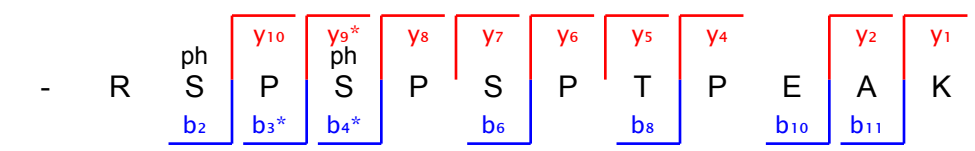

Raw file 20150812\_A375SR\_Phospho\_BR1\_03 Scan 4856 Method FTMS; HCD Score 83.37 m/z 874.02 Gene names BUD13

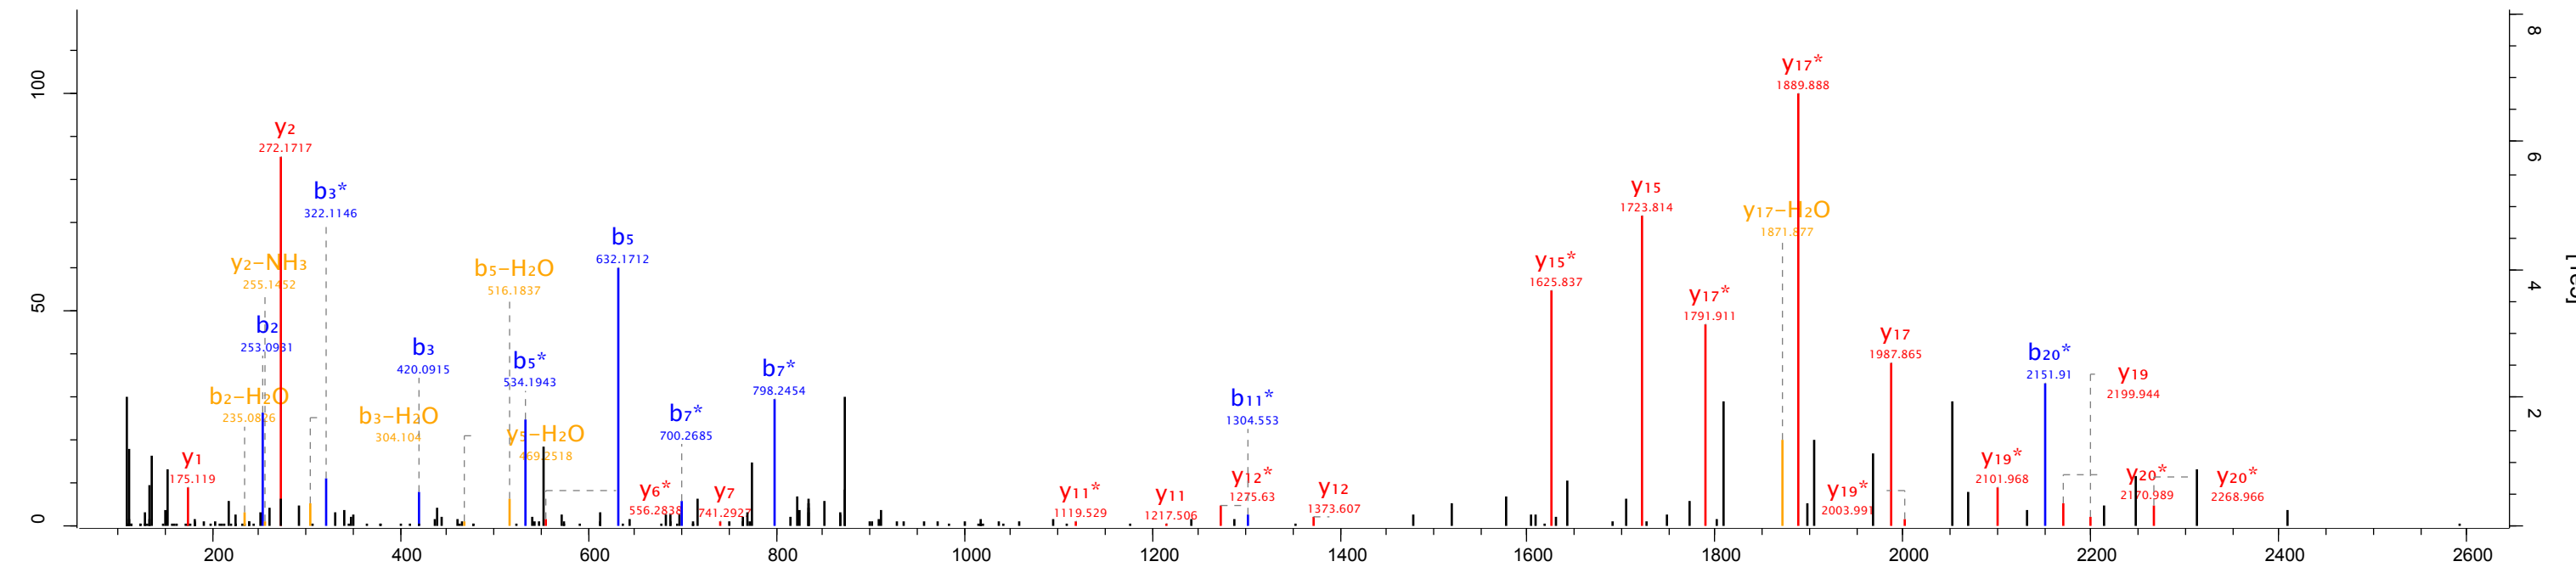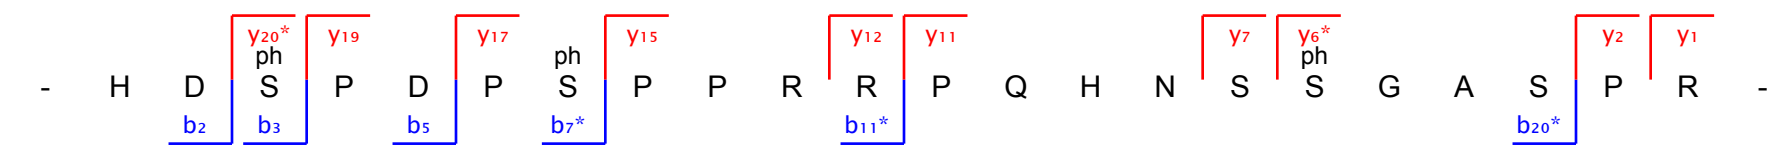

Raw file: 20150812\_A375SR\_Phospho\_BR1\_03  
 Scan: 4996 Method: FTMS; HCD Score: 87.23 m/z: 600.74 Gene names: SRRM2

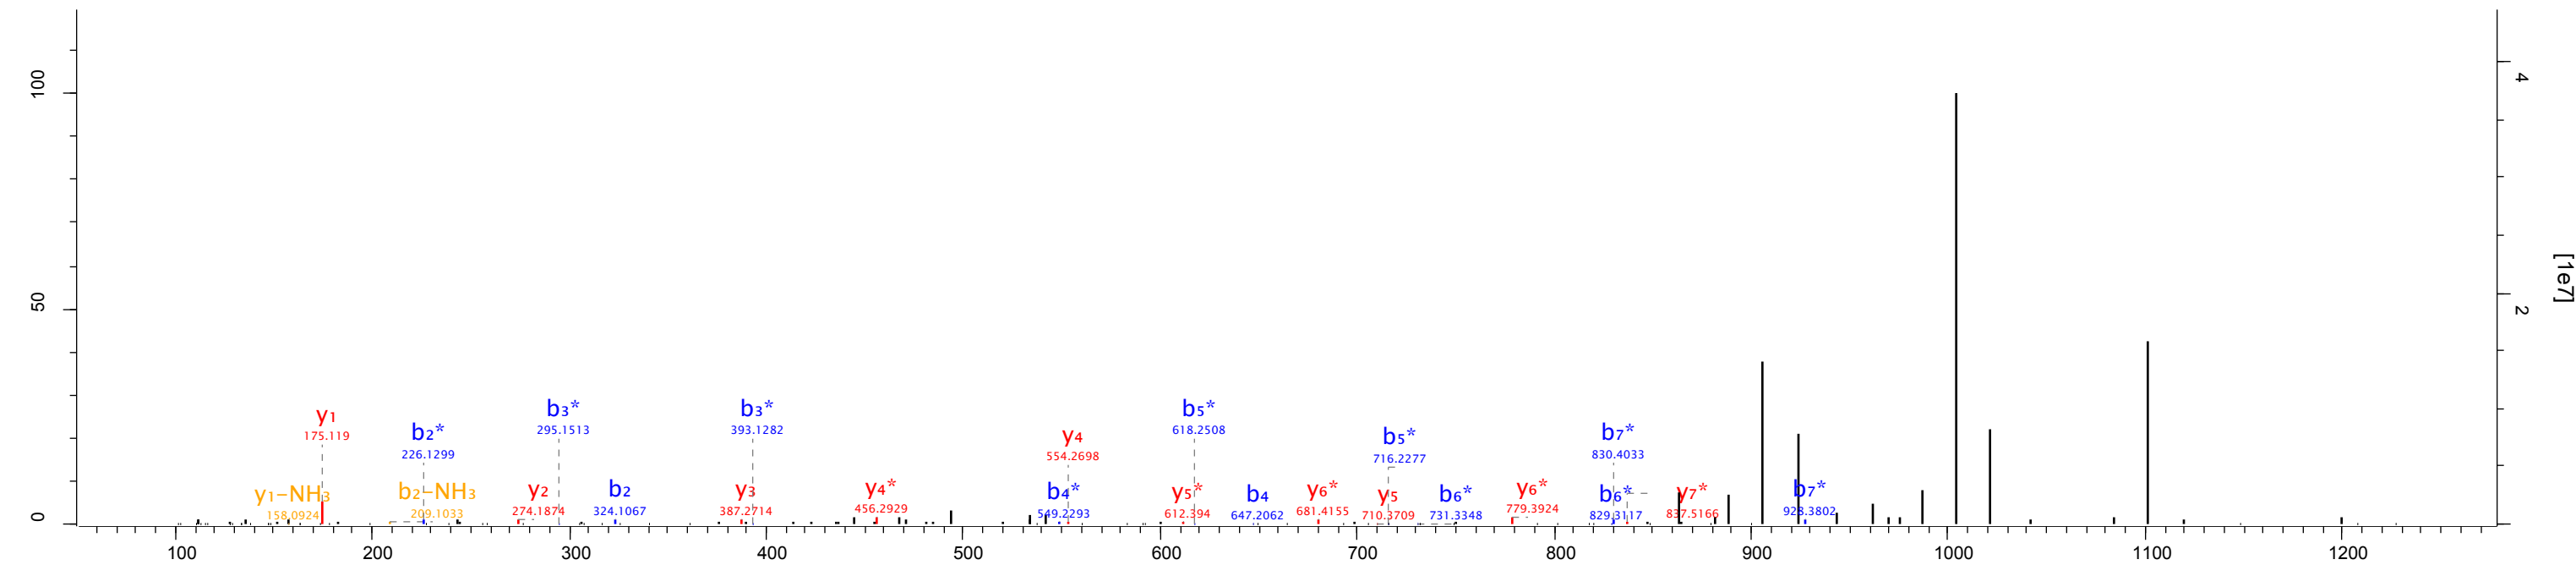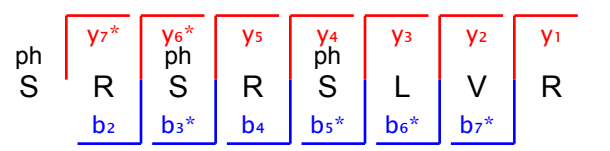

Raw file: 20150812\_A375SR\_Phospho\_BR1\_03  
 Scan: 5626 Method: FTMS; HCD Score: 129.77 m/z: 635.73 Gene names: BUD13

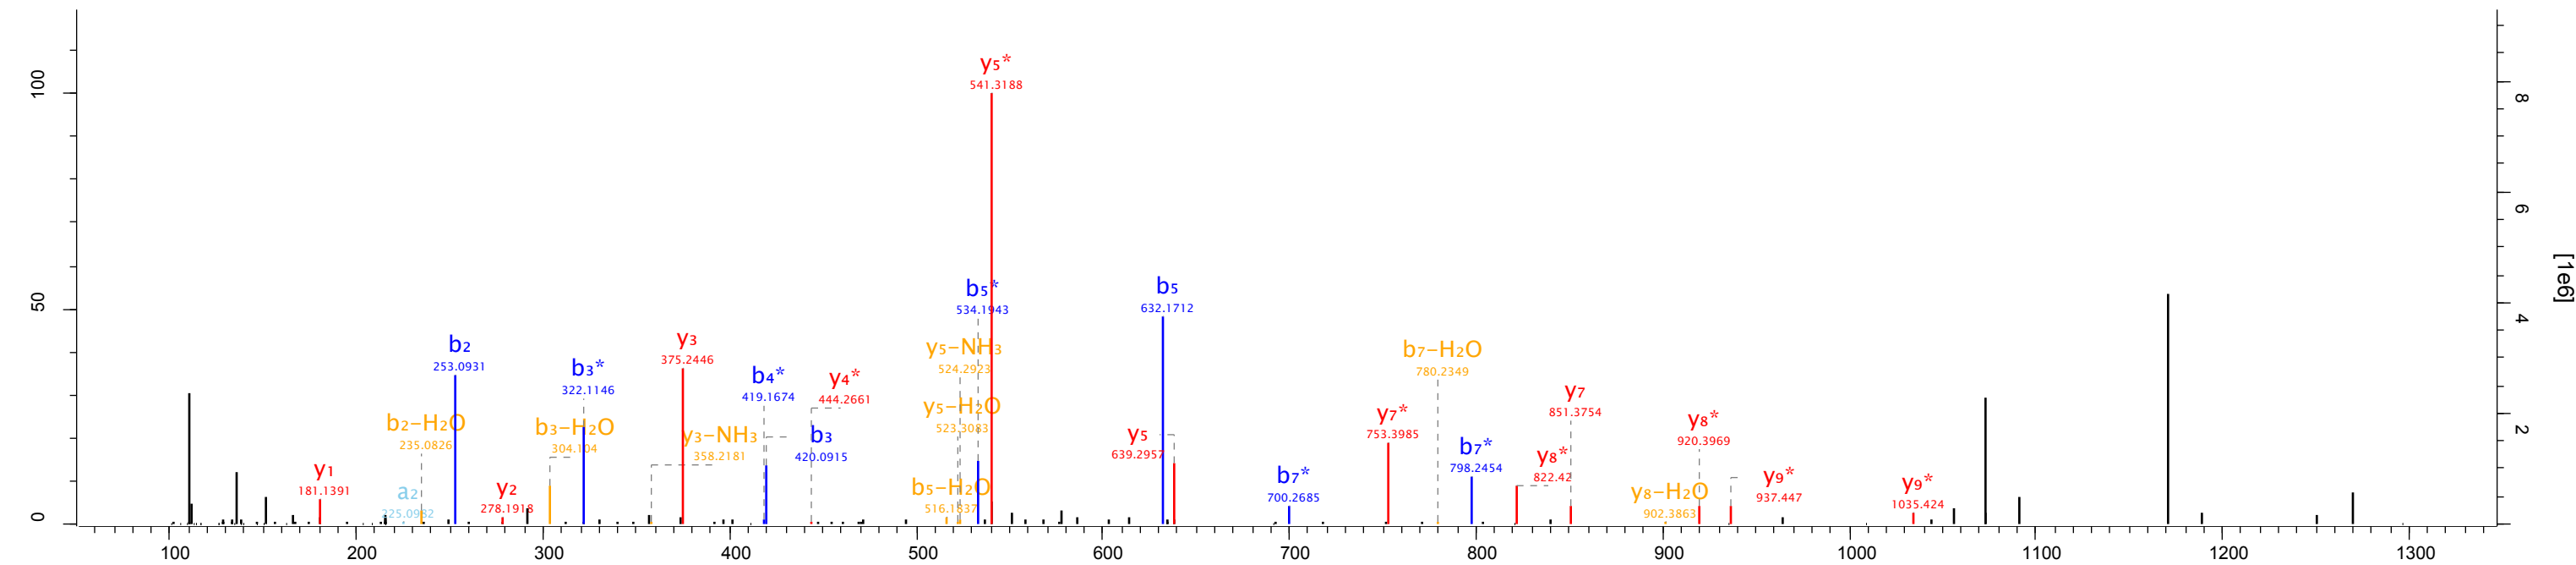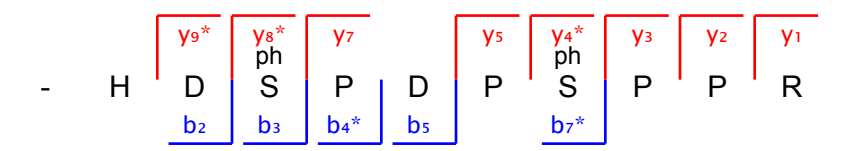



Raw file: 20150812\_A375SR\_Phospho\_BR1\_03  
 Scan: 5906 Method: FTMS; HCD Score: 124.38 m/z: 533.21 Gene names: SRRM1

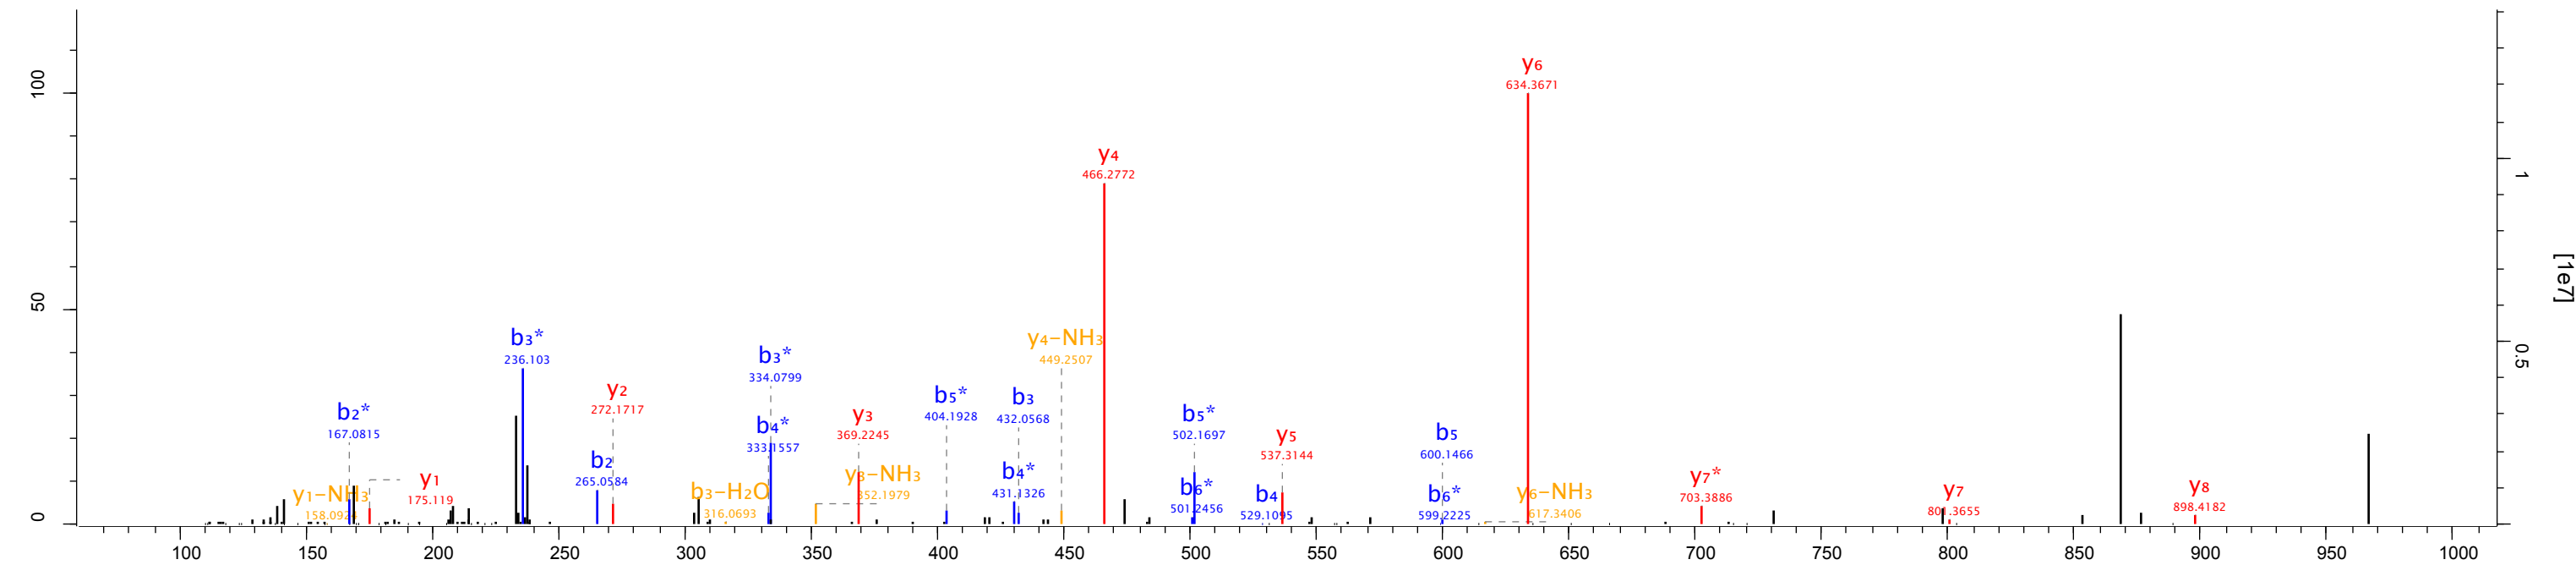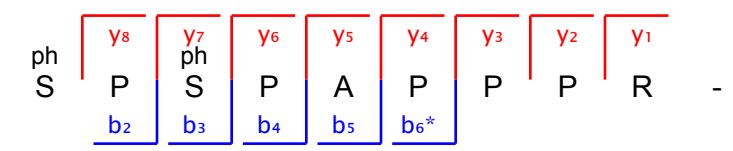

Raw file 20150812\_A375SR\_Phospho\_BR1\_03 Scan 6036 Method FTMS; HCD Score 91.42 m/z 643.62 Gene names TBX3

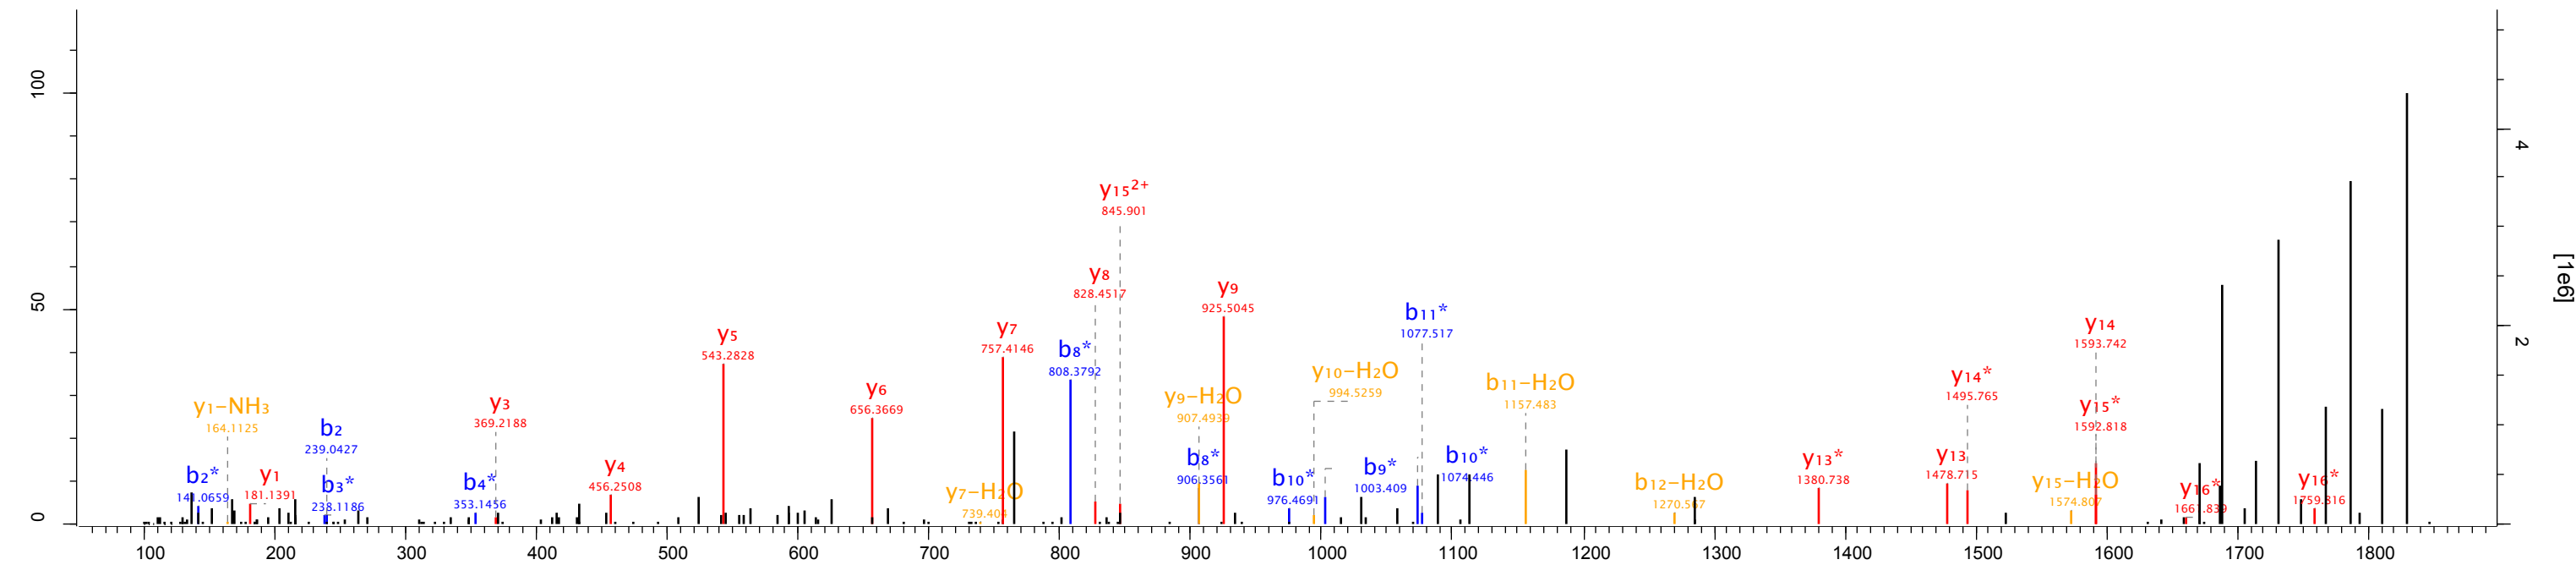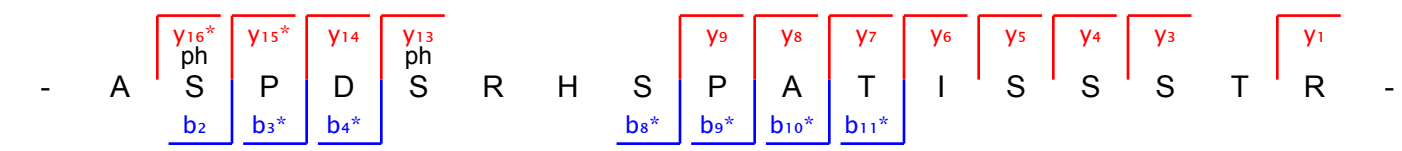

Raw file: 20150812\_A375SR\_Phospho\_BR1\_03  
 Scan: 6396 Method: FTMS; HCD Score: 114.19 m/z: 744.81 Gene names: TAF6

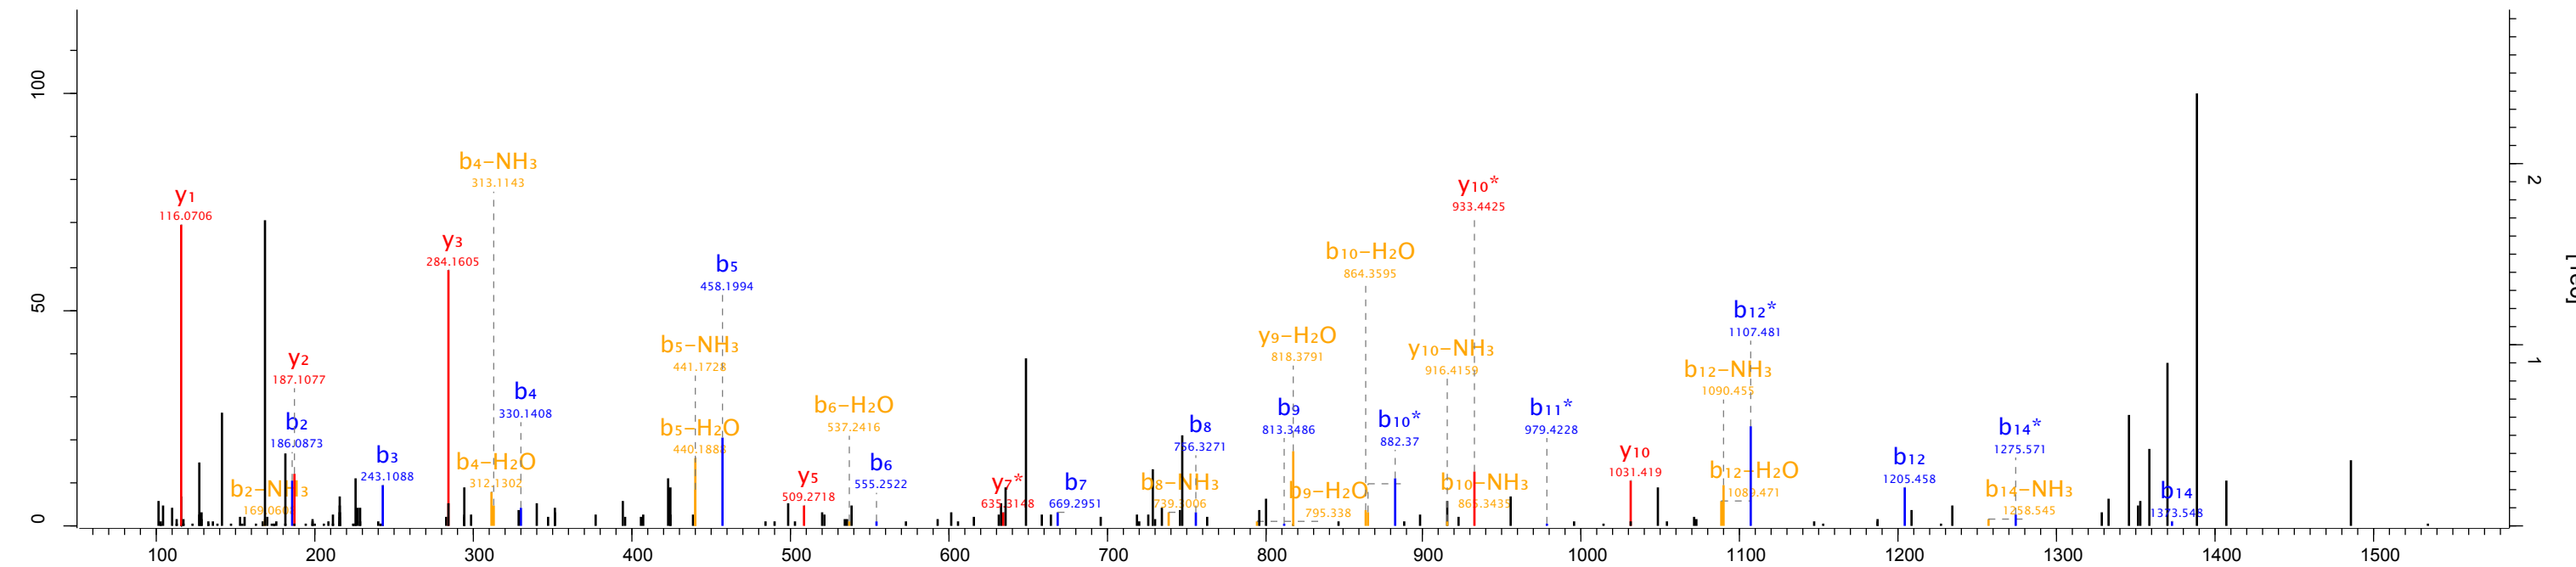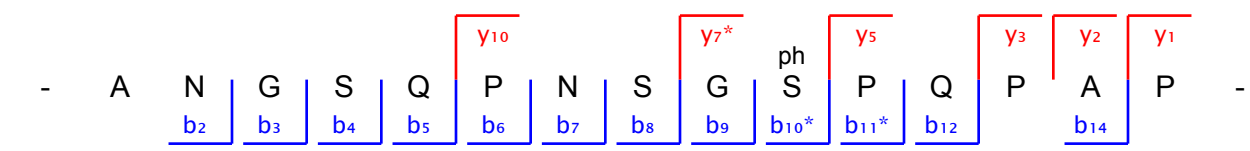

Raw file: 20150812\_A375SR\_Phospho\_BR1\_03  
 Scan: 6836 Method: FTMS; HCD Score: 155.34 m/z: 584.24 Gene names: EXOC1

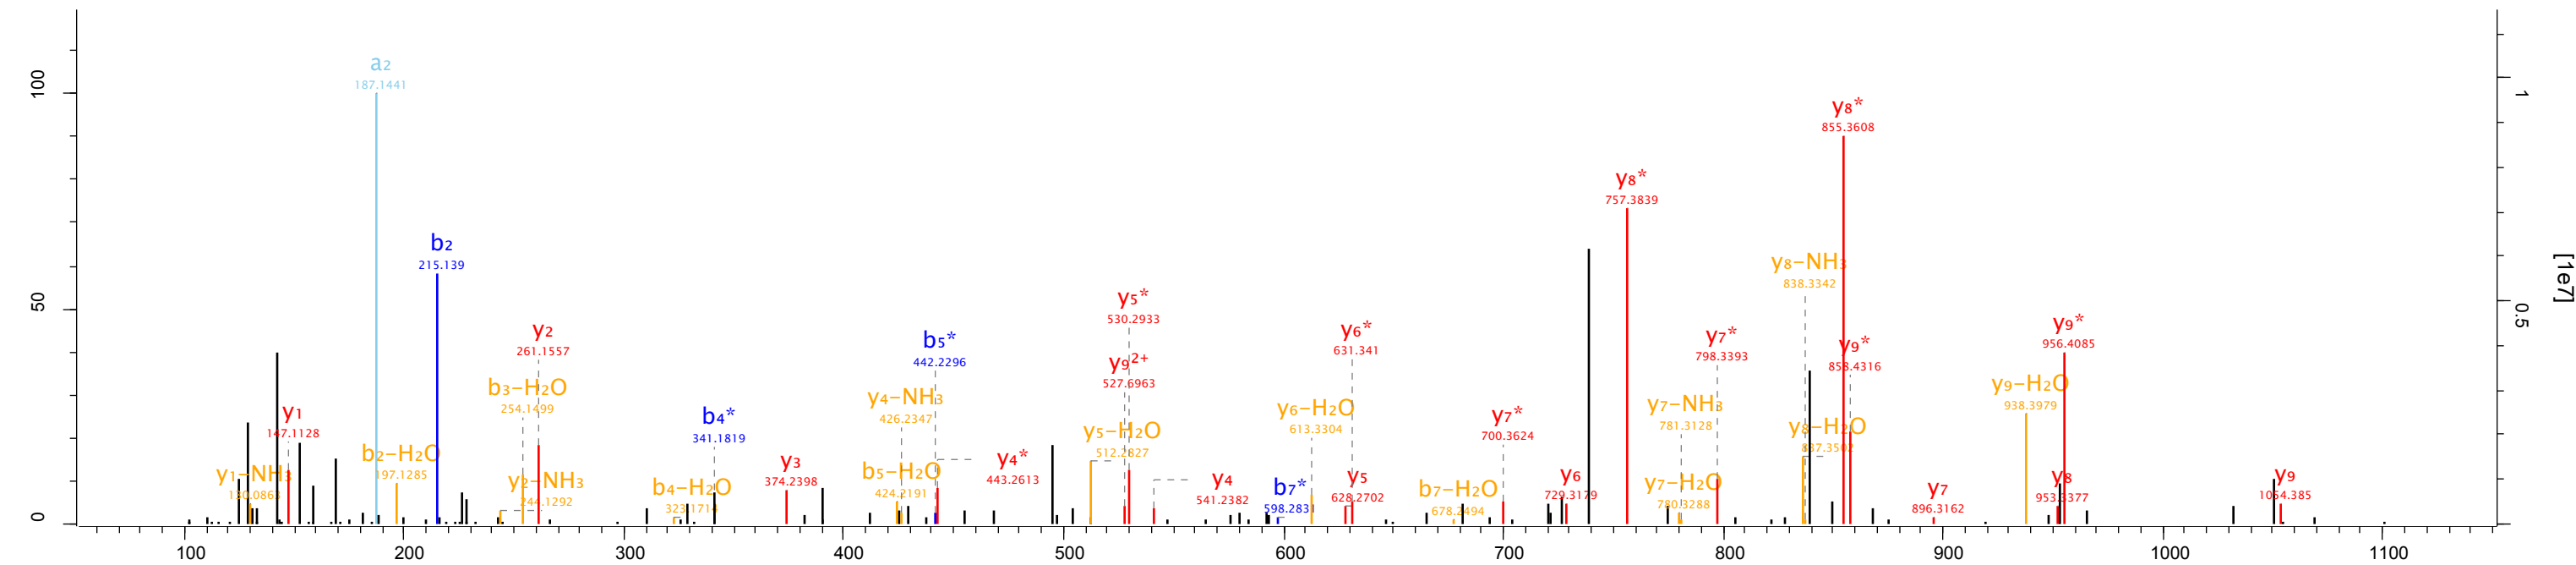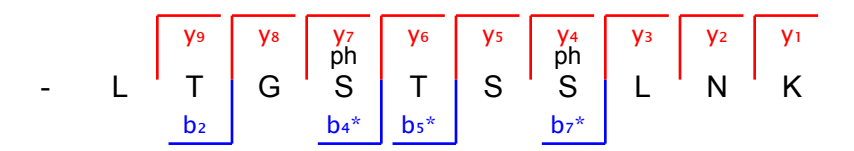

Raw file  
20150812\_A375SR\_Phospho\_BR1\_03

Scan 7046 Method FTMS; HCD Score 136.22 m/z 884.39 Gene names ADD1

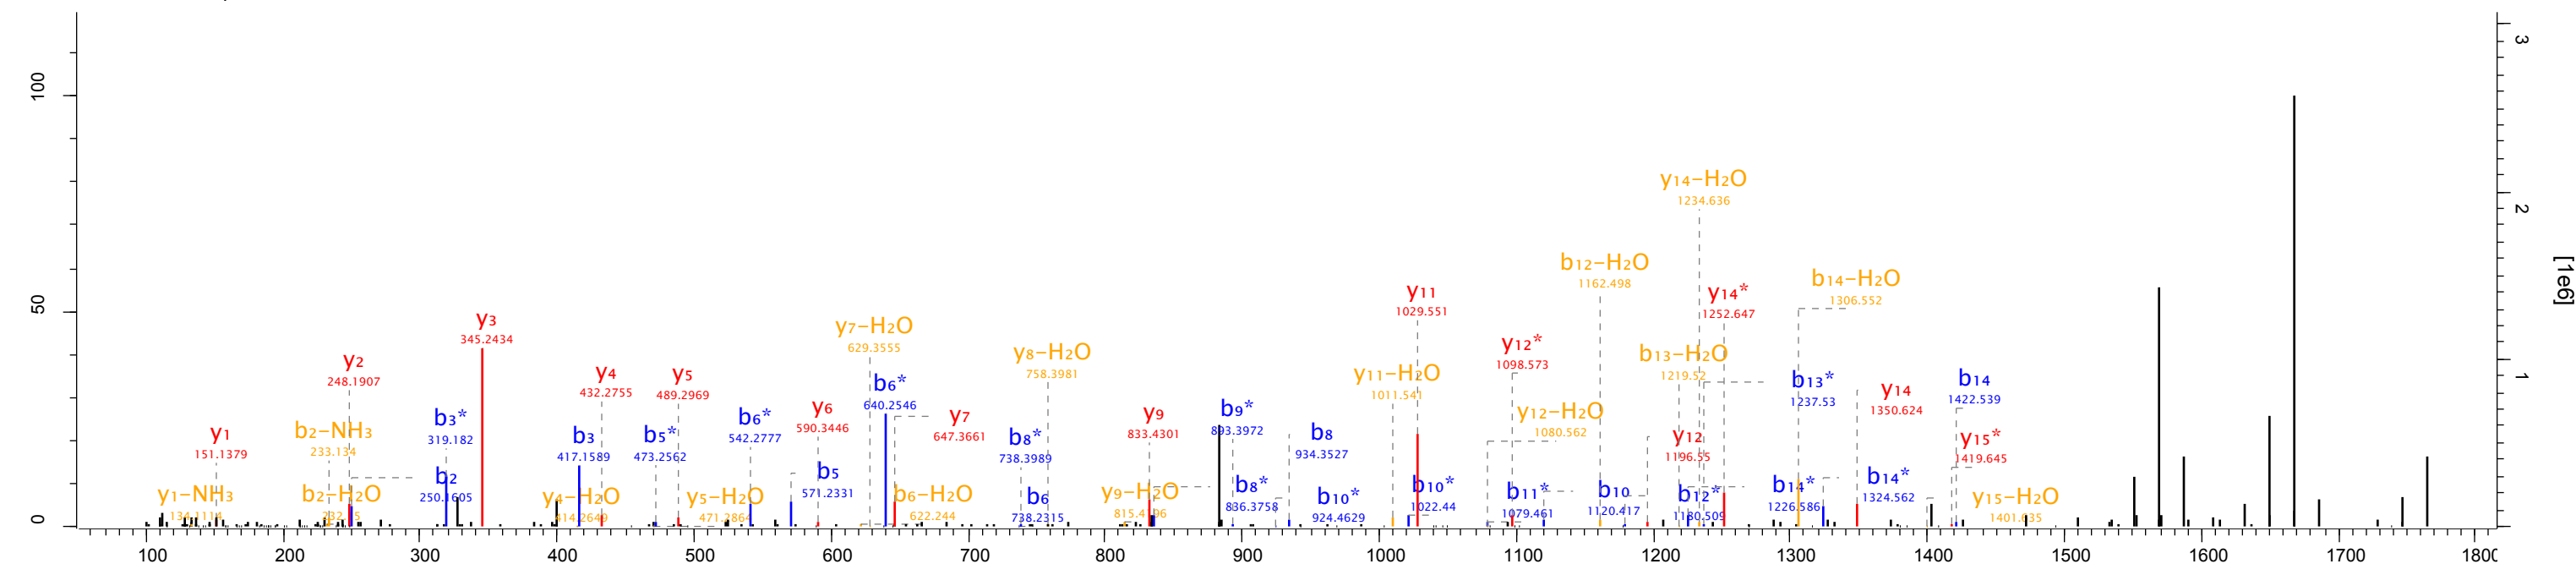

- S R S P G S P V G E G T G S P P K -

Fragmentation labels below the sequence:

- Red boxes: y15\* (S), y14 (P), y12 ph (S), y11 (P), y9 (G), y7 (G), y6 (T), y5 (G), y4 (S), y3 (P), y2 (P), y1 (K)
- Blue boxes: b2 (R), b3 (S), b5 (G), b6 (S), b8 (V), b9\* (G), b10 (E), b11\* (G), b12\* (T), b13\* (G), b14 (S)

Raw file: 20150812\_A375SR\_Phospho\_BR1\_03  
 Scan: 7086 Method: FTMS; HCD Score: 137.43 m/z: 962.91 Gene names: RBM12B

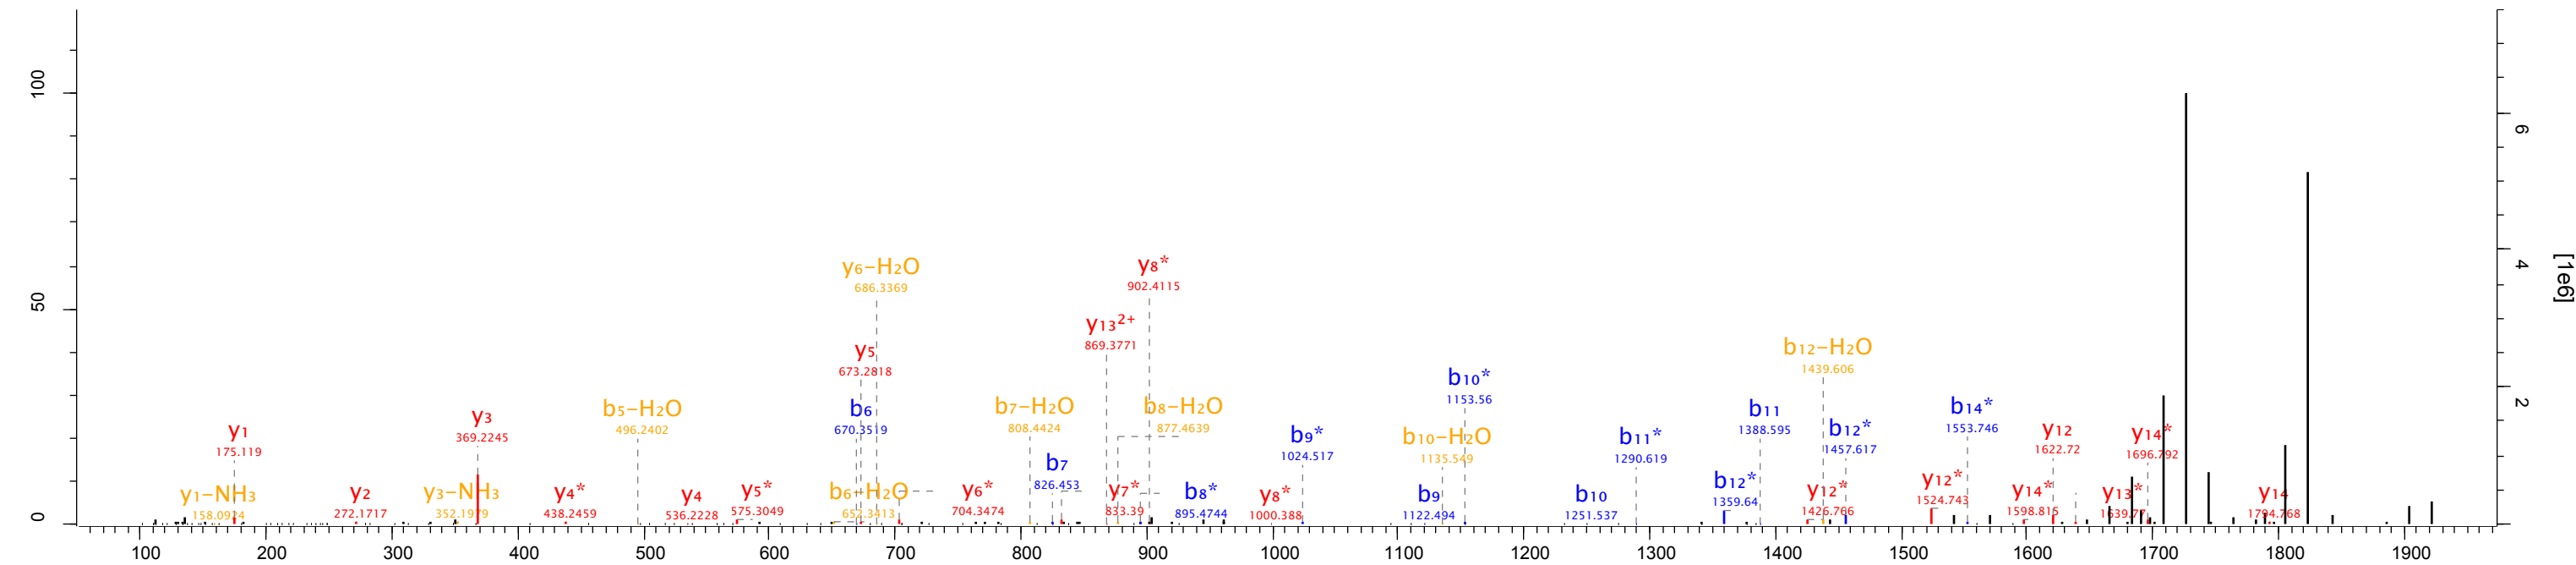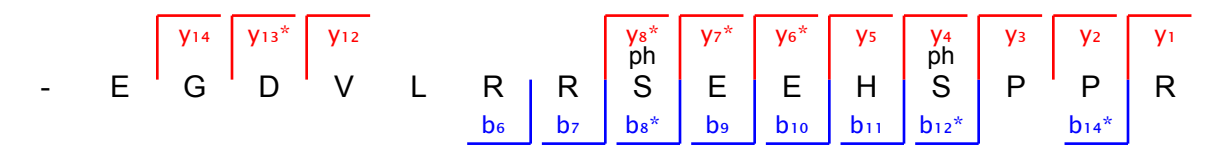

Raw file: 20150812\_A375SR\_Phospho\_BR1\_03  
 Scan: 7216 Method: FTMS; HCD Score: 130.02 m/z: 505.23 Gene names: DOCK1

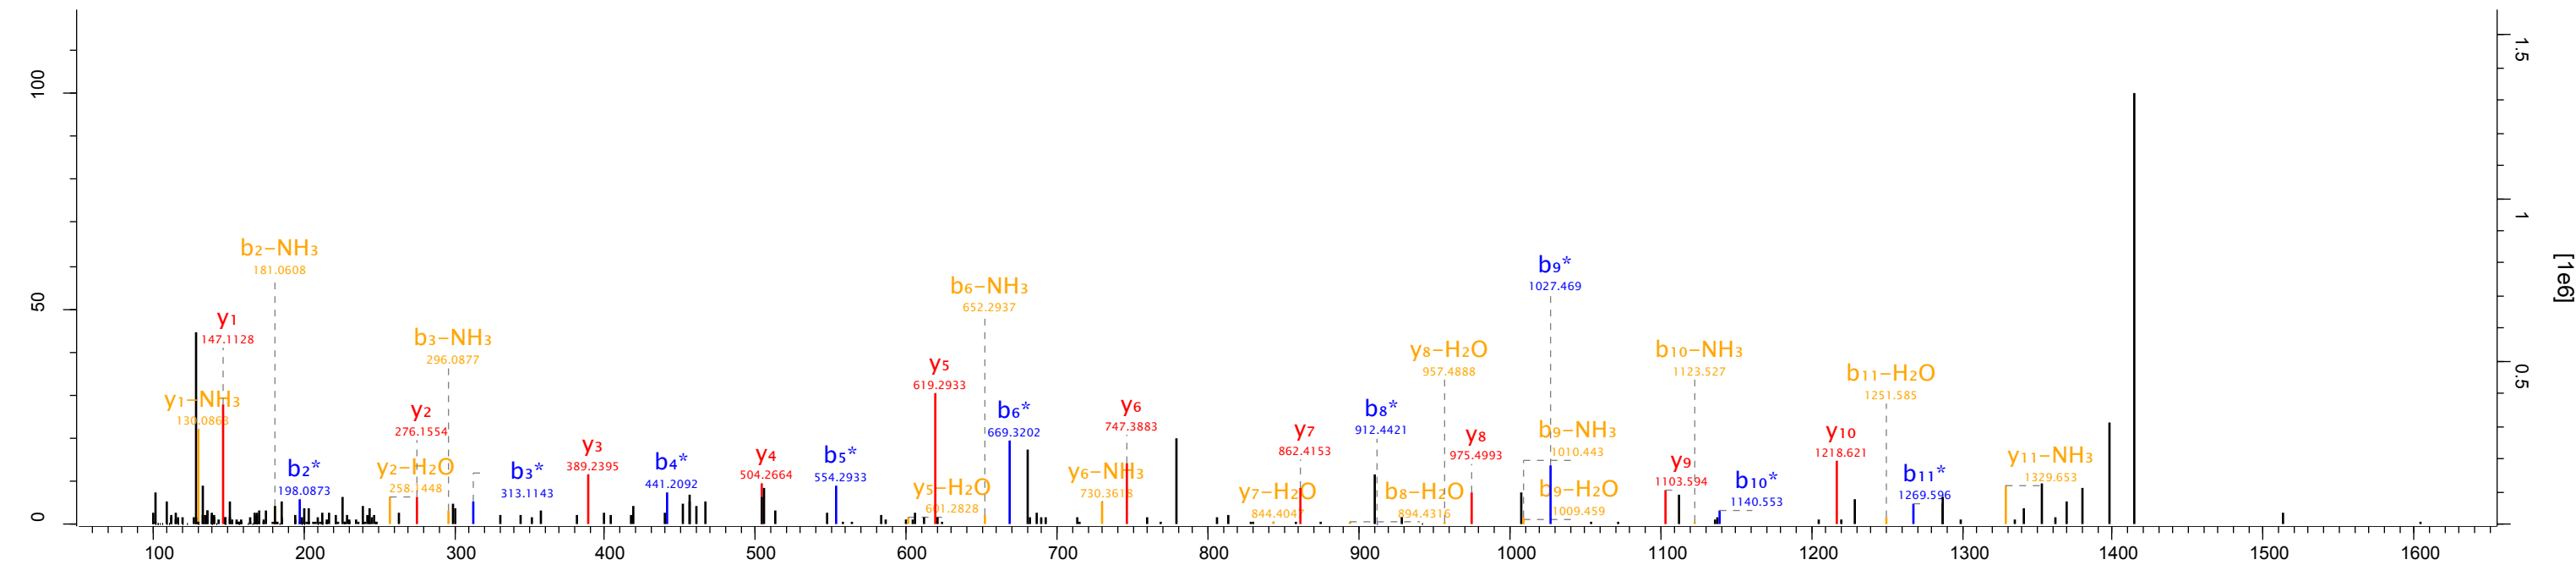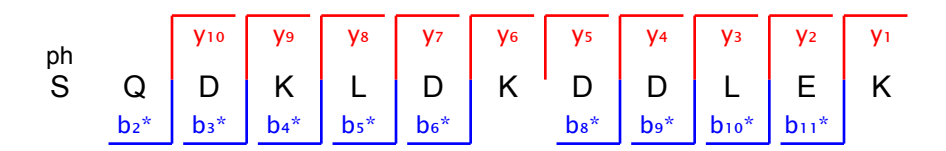

Raw file 20150812\_A375SR\_Phospho\_BR1\_03 Scan 7386 Method FTMS; HCD Score 297.3 m/z 1031.93 Gene names ATN1

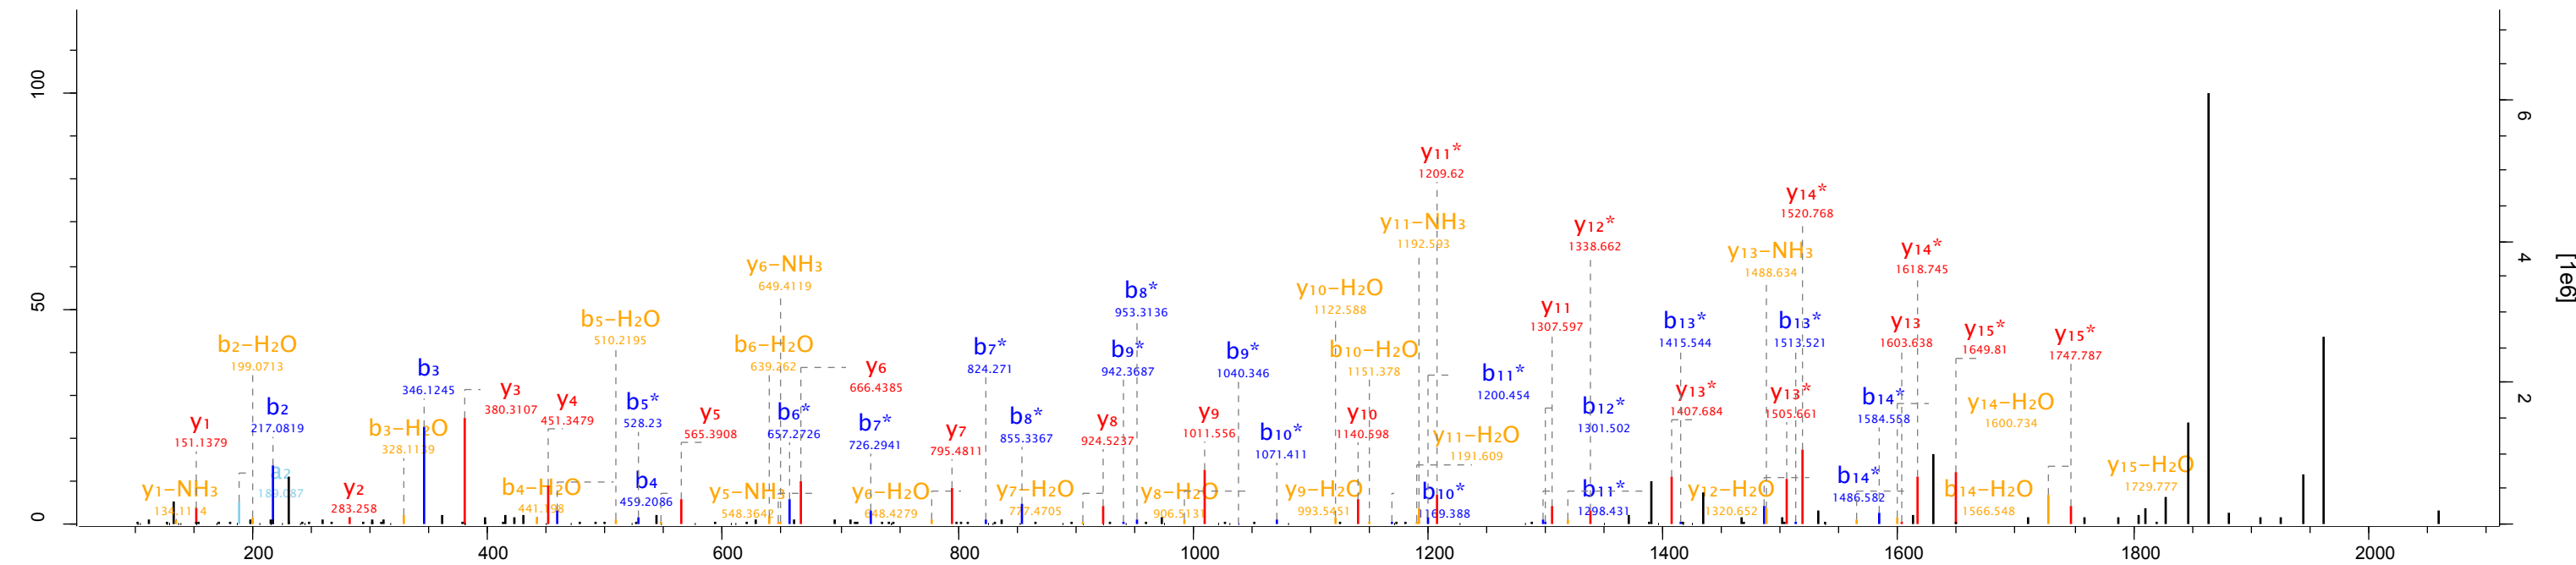

- S E E I S E S E E T N A P K K -

b<sub>2</sub>
b<sub>3</sub>
b<sub>4</sub>
b<sub>5</sub>\*
b<sub>6</sub>\*
b<sub>7</sub>\*
b<sub>8</sub>\*
b<sub>9</sub>\*
b<sub>10</sub>\*
b<sub>11</sub>\*
b<sub>12</sub>\*
b<sub>13</sub>\*
b<sub>14</sub>\*
y<sub>15</sub>\*
y<sub>14</sub>\*
y<sub>13</sub>ph
y<sub>12</sub>\*
y<sub>11</sub>ph
y<sub>10</sub>
y<sub>9</sub>
y<sub>8</sub>
y<sub>7</sub>
y<sub>6</sub>
y<sub>5</sub>
y<sub>4</sub>
y<sub>3</sub>
y<sub>2</sub>
y<sub>1</sub>



Raw file: 20150812\_A375SR\_Phospho\_BR1\_03  
 Scan: 7676 Method: FTMS; HCD Score: 62.23 m/z: 794.81 Gene names: COL4A3BP

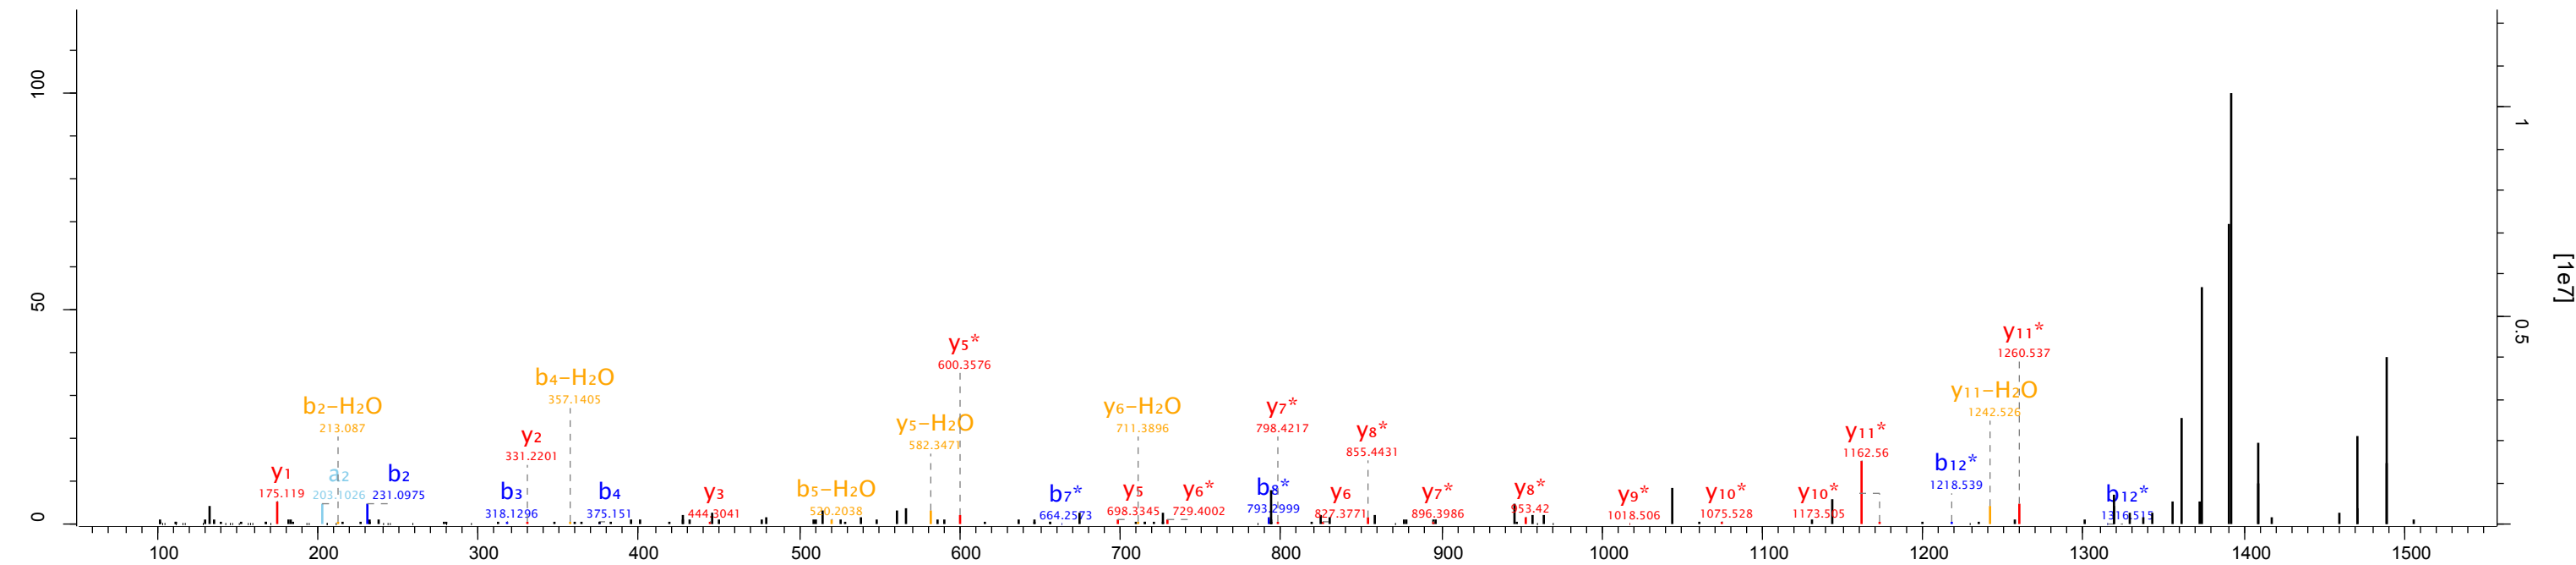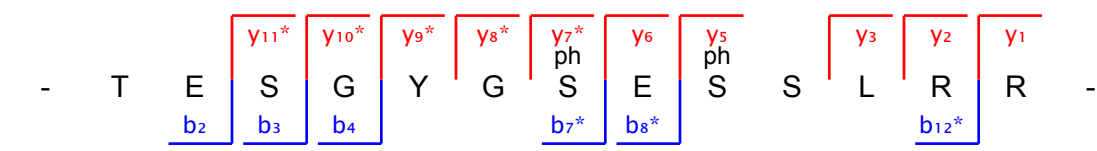

Raw file  
20150812\_A375SR\_Phospho\_BR1\_03

Scan 7886 Method FTMS; HCD Score 240.61 m/z 769.87 Gene names TJP1

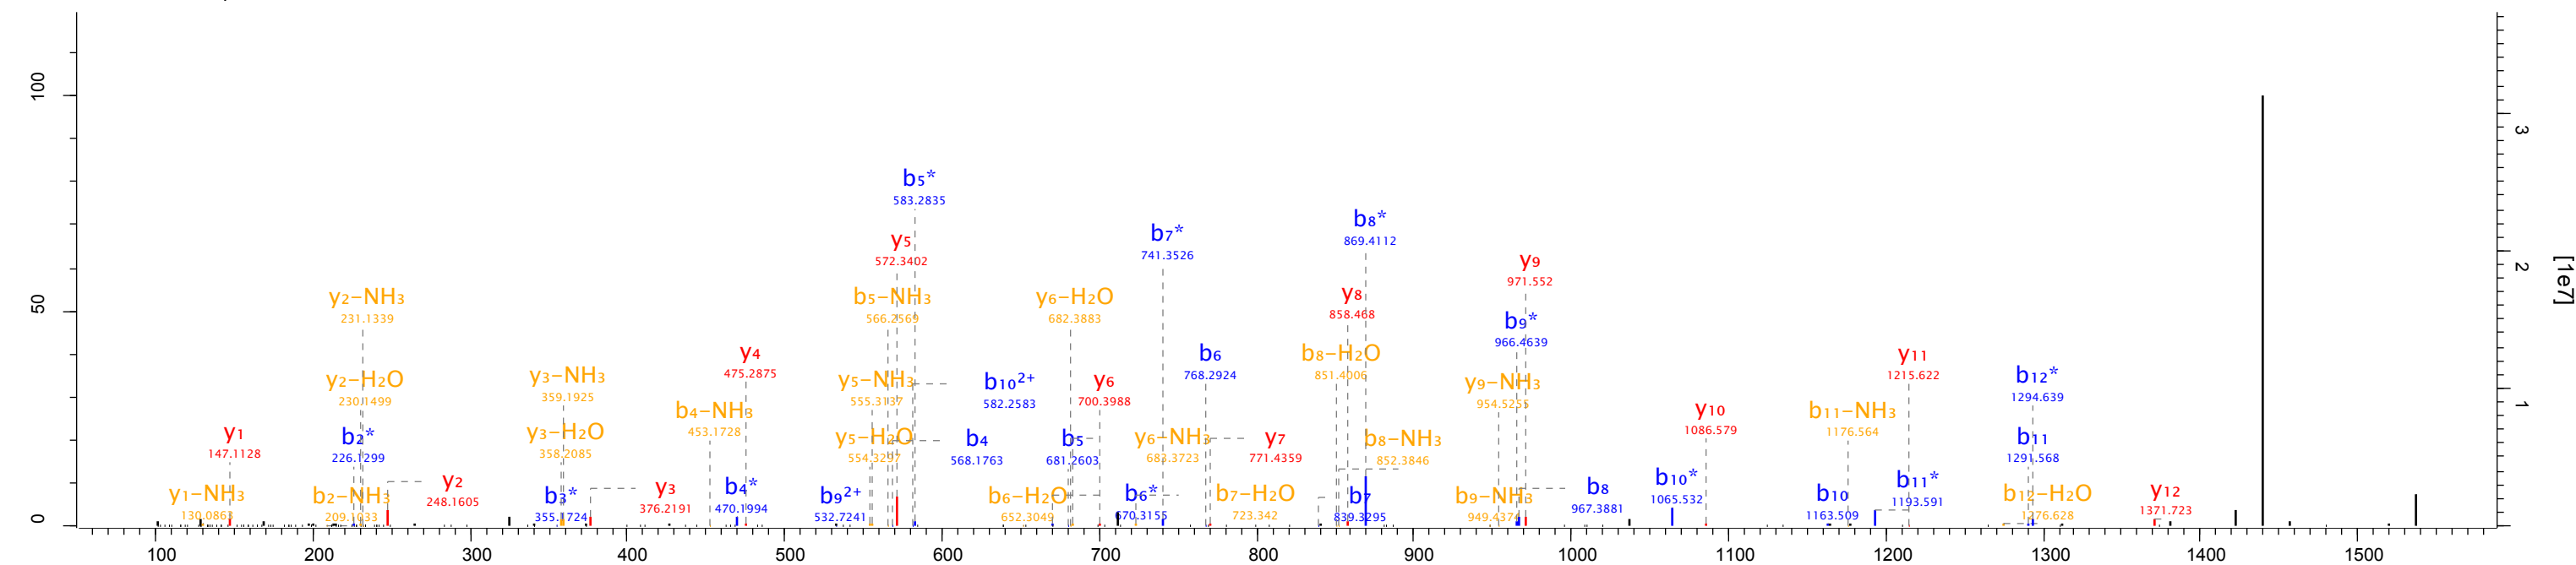

ph S  
- R E D L S A Q P V Q T K -  
b2\* b3\* b4 b5 b6 b7 b8 b9\* b10 b11 b12\*

Raw file 20150812\_A375SR\_Phospho\_BR1\_03 Scan 7976 Method FTMS; HCD Score 78.04 m/z 650.24 Gene names SNRNP27

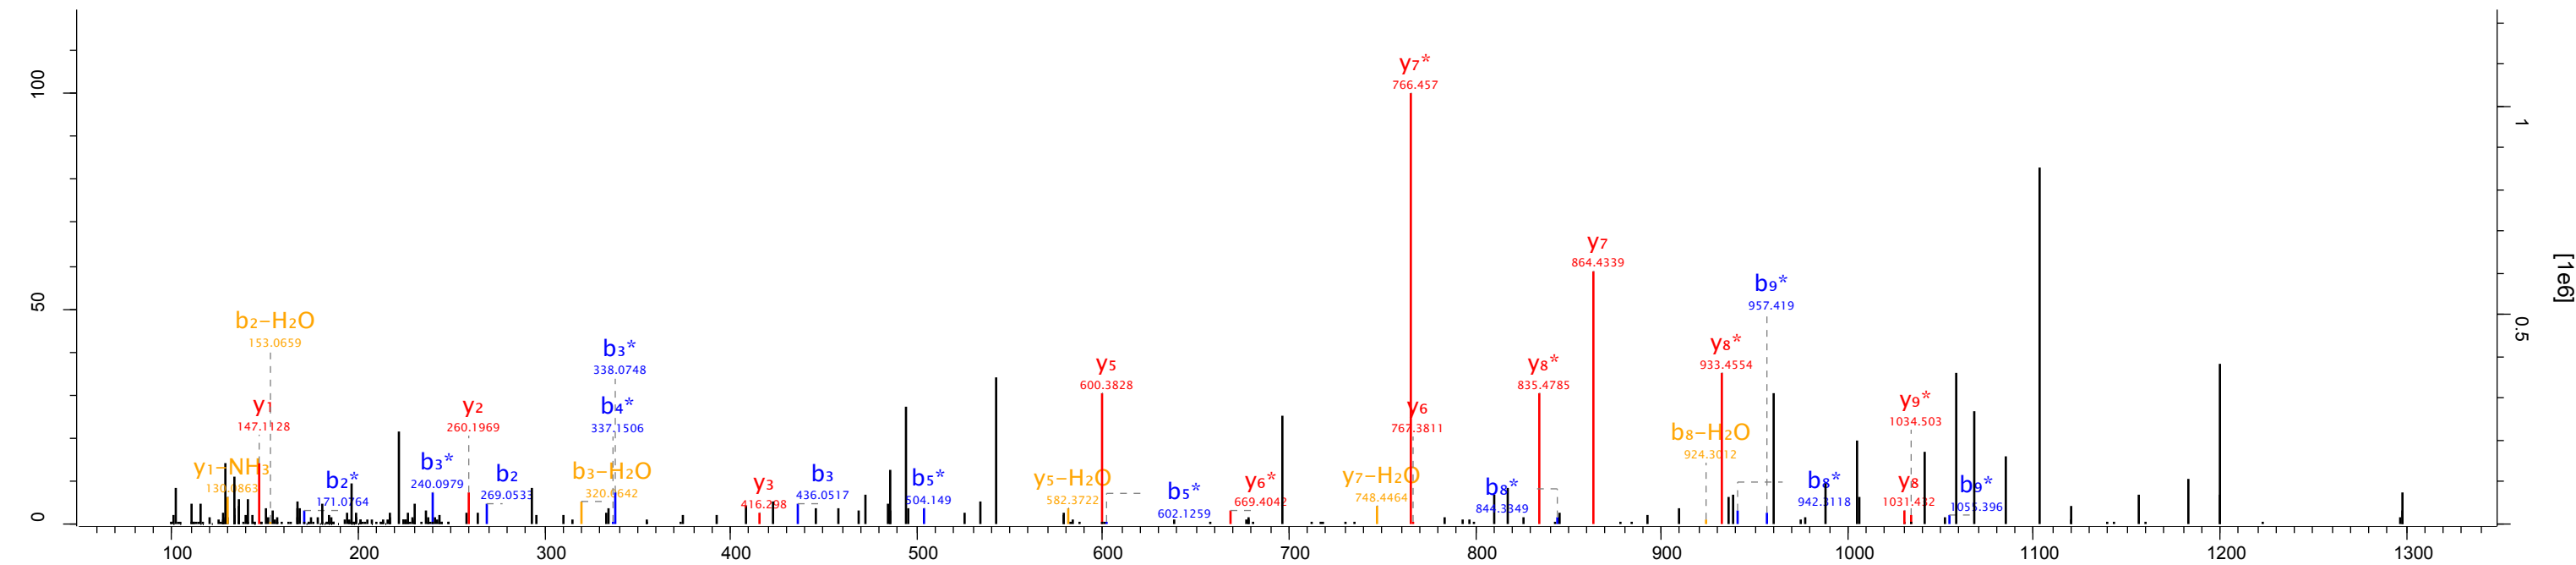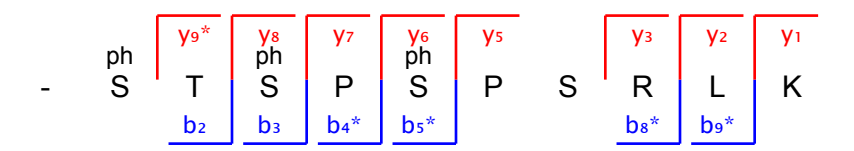

Raw file: 20150812\_A375SR\_Phospho\_BR1\_03  
 Scan: 8376 Method: FTMS; HCD Score: 224.54 m/z: 1002.41 Gene names: DKC1

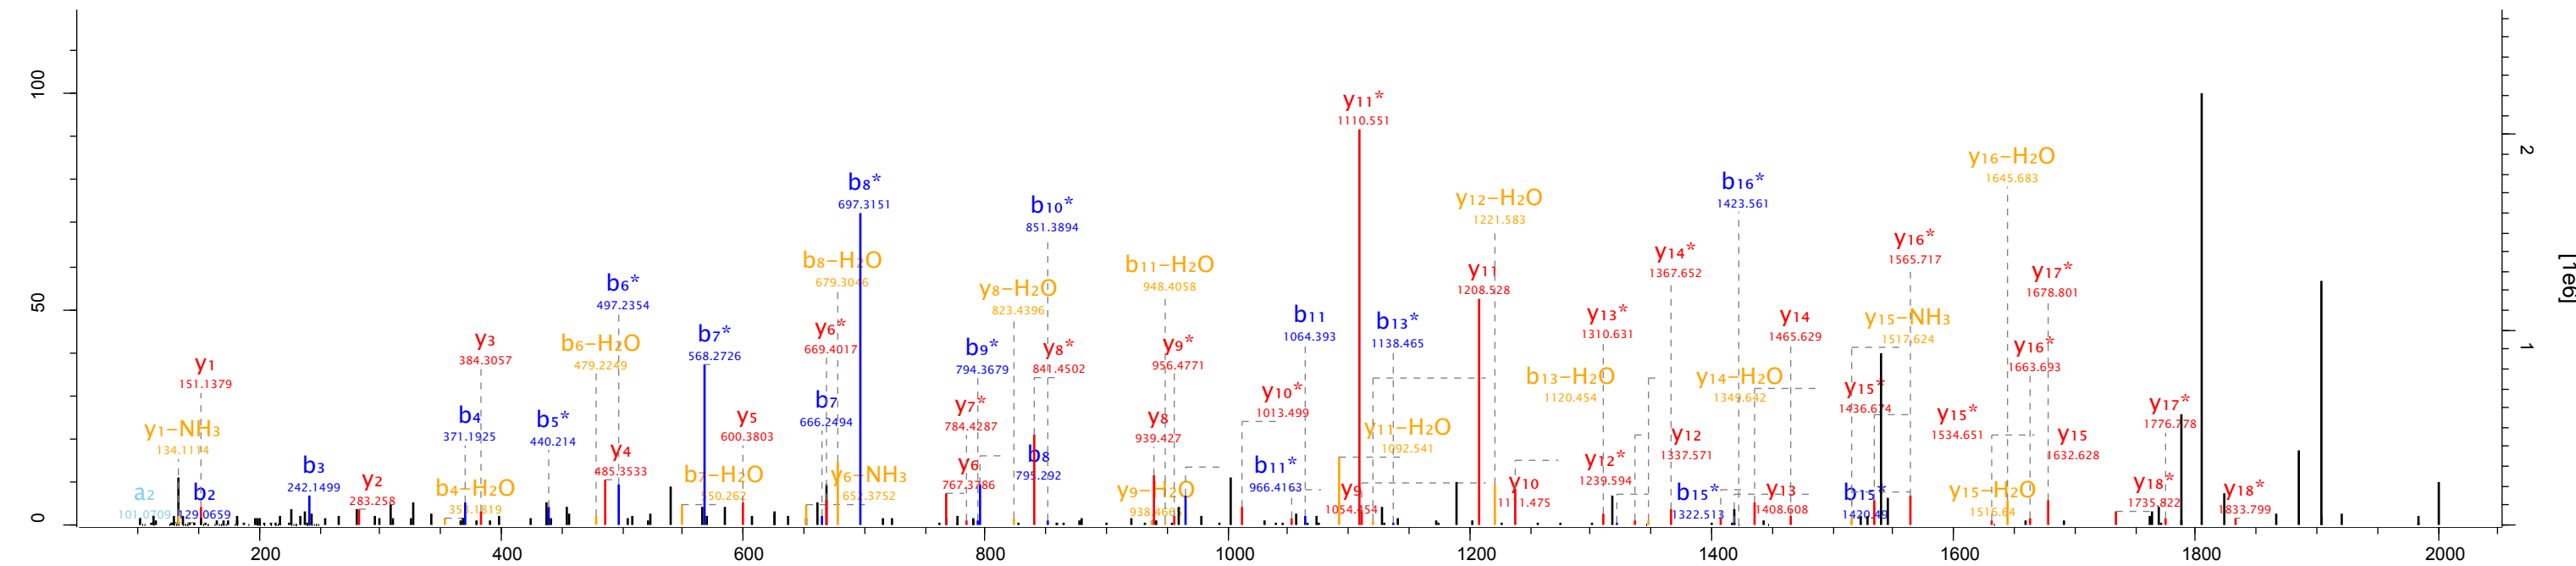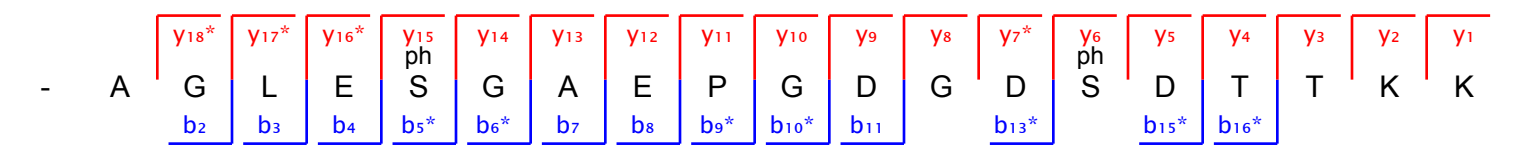

Raw file: 20150812\_A375SR\_Phospho\_BR1\_03  
 Scan: 8406 Method: FTMS; HCD Score: 45.22 m/z: 555.91 Gene names: WNK4

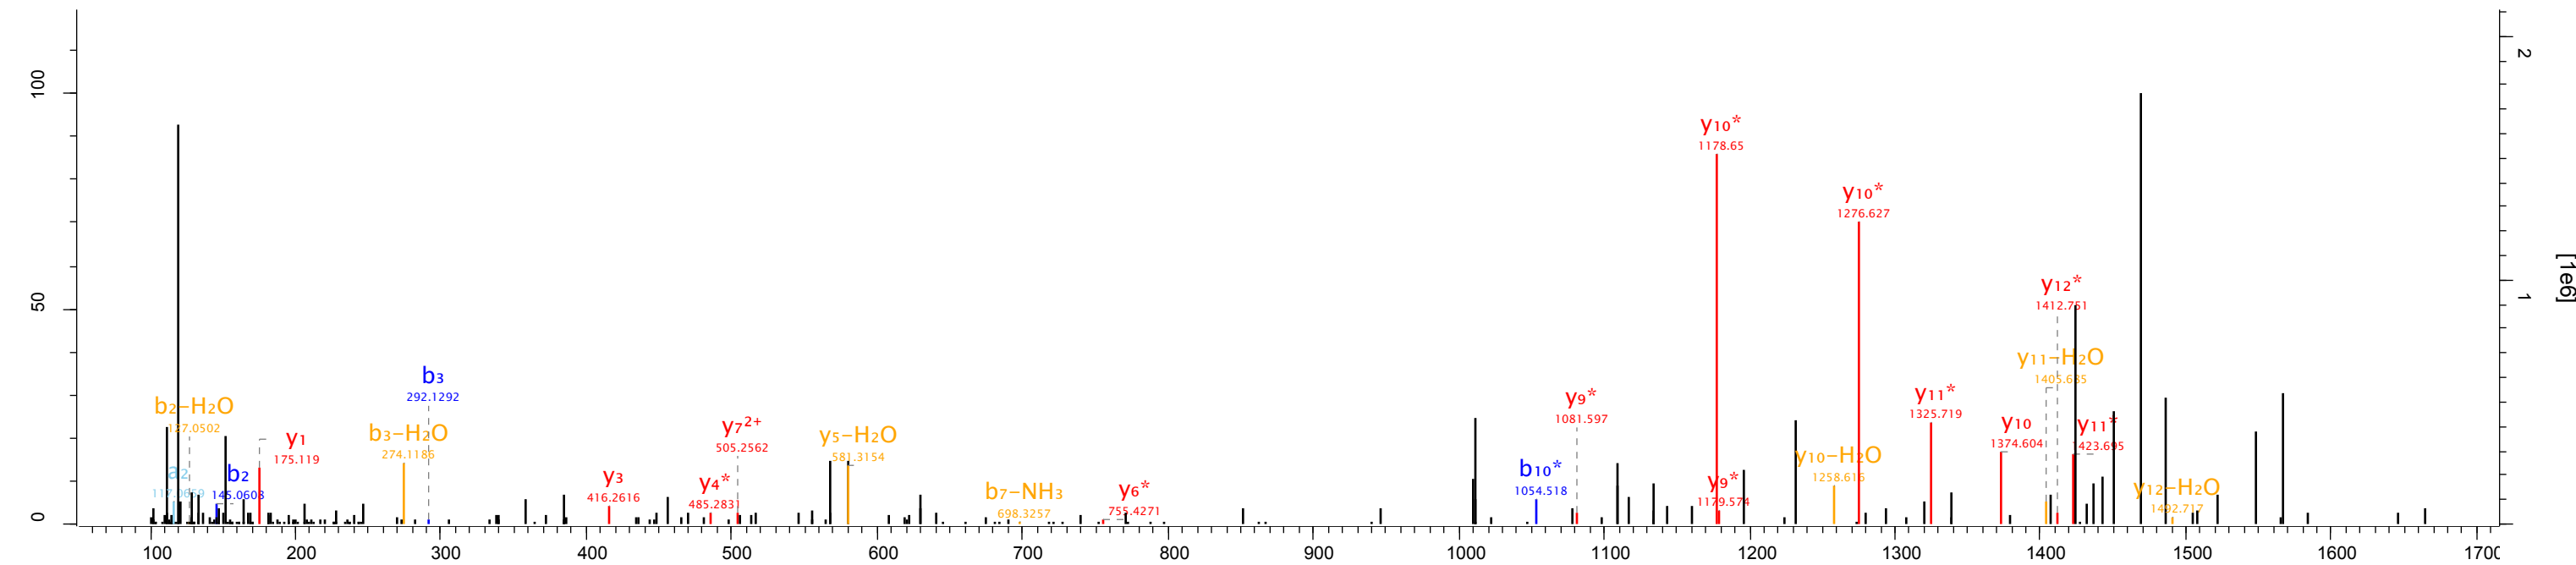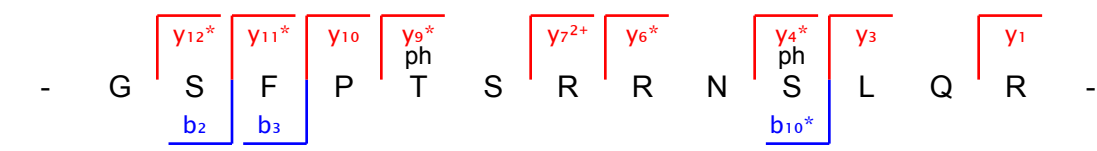

Raw file: 20150812\_A375SR\_Phospho\_BR1\_03  
 Scan: 9026 Method: FTMS; HCD Score: 144.73 m/z: 630.29 Gene names: NUMA1

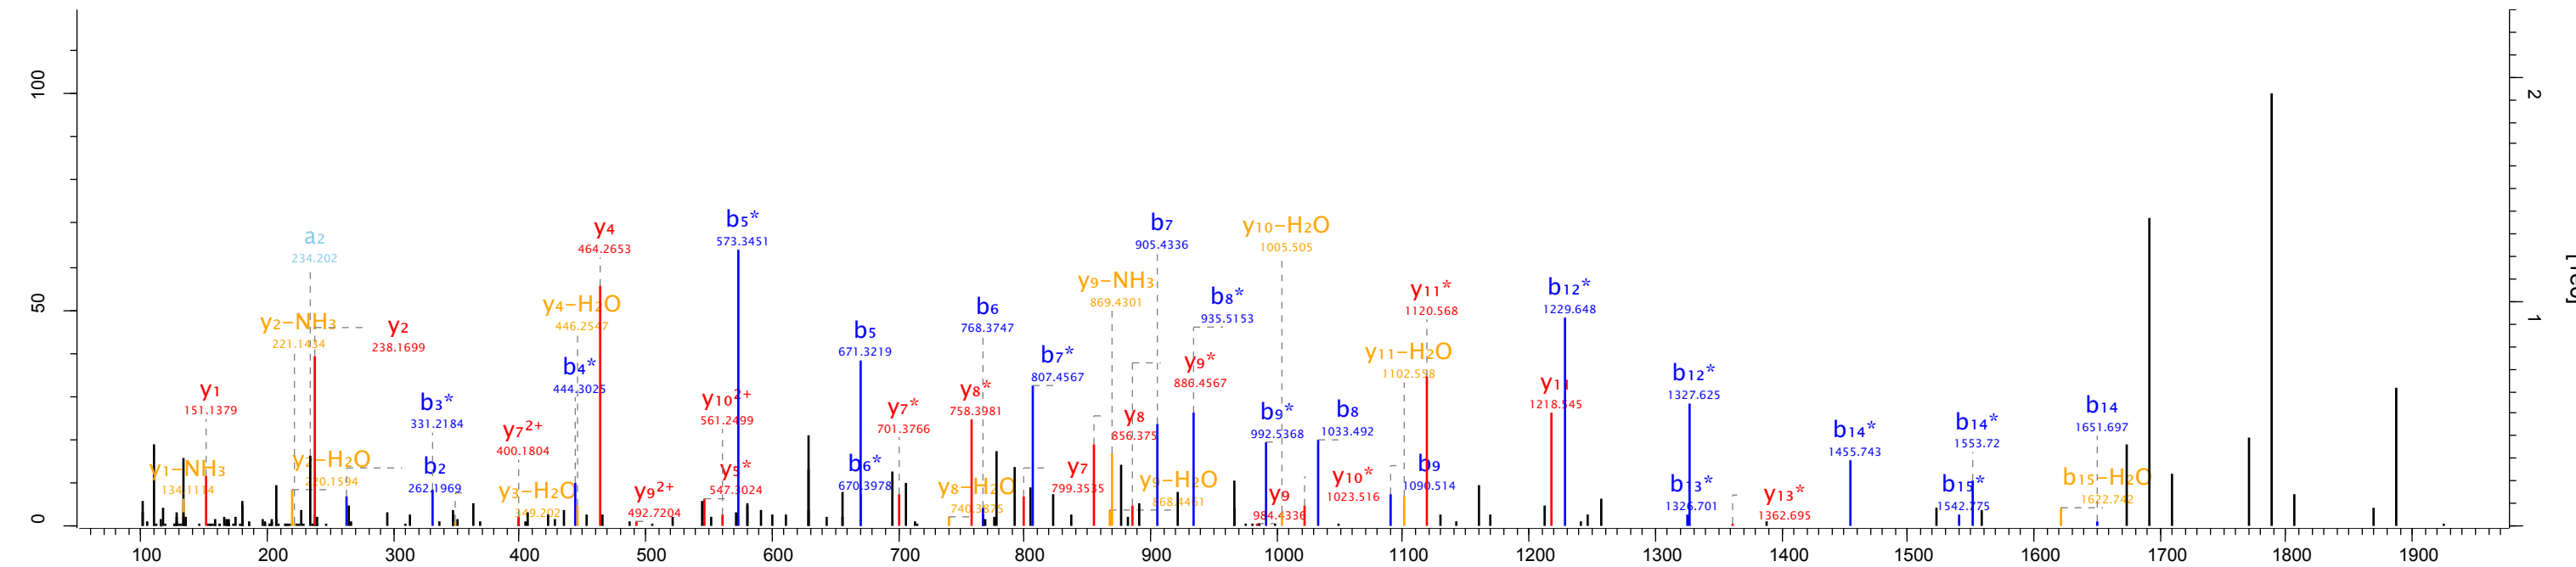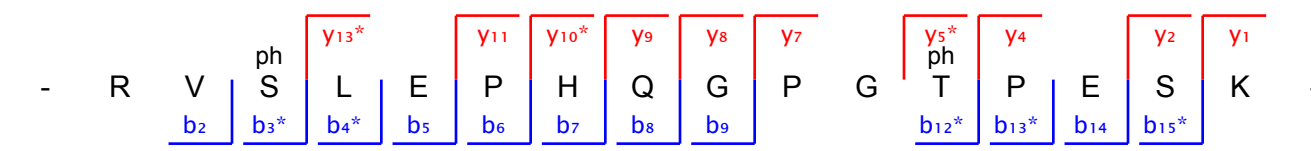

Raw file 20150812\_A375SR\_Phospho\_BR1\_03 Scan 9236 Method FTMS; HCD Score 61.28 m/z 599.93 Gene names WDR20

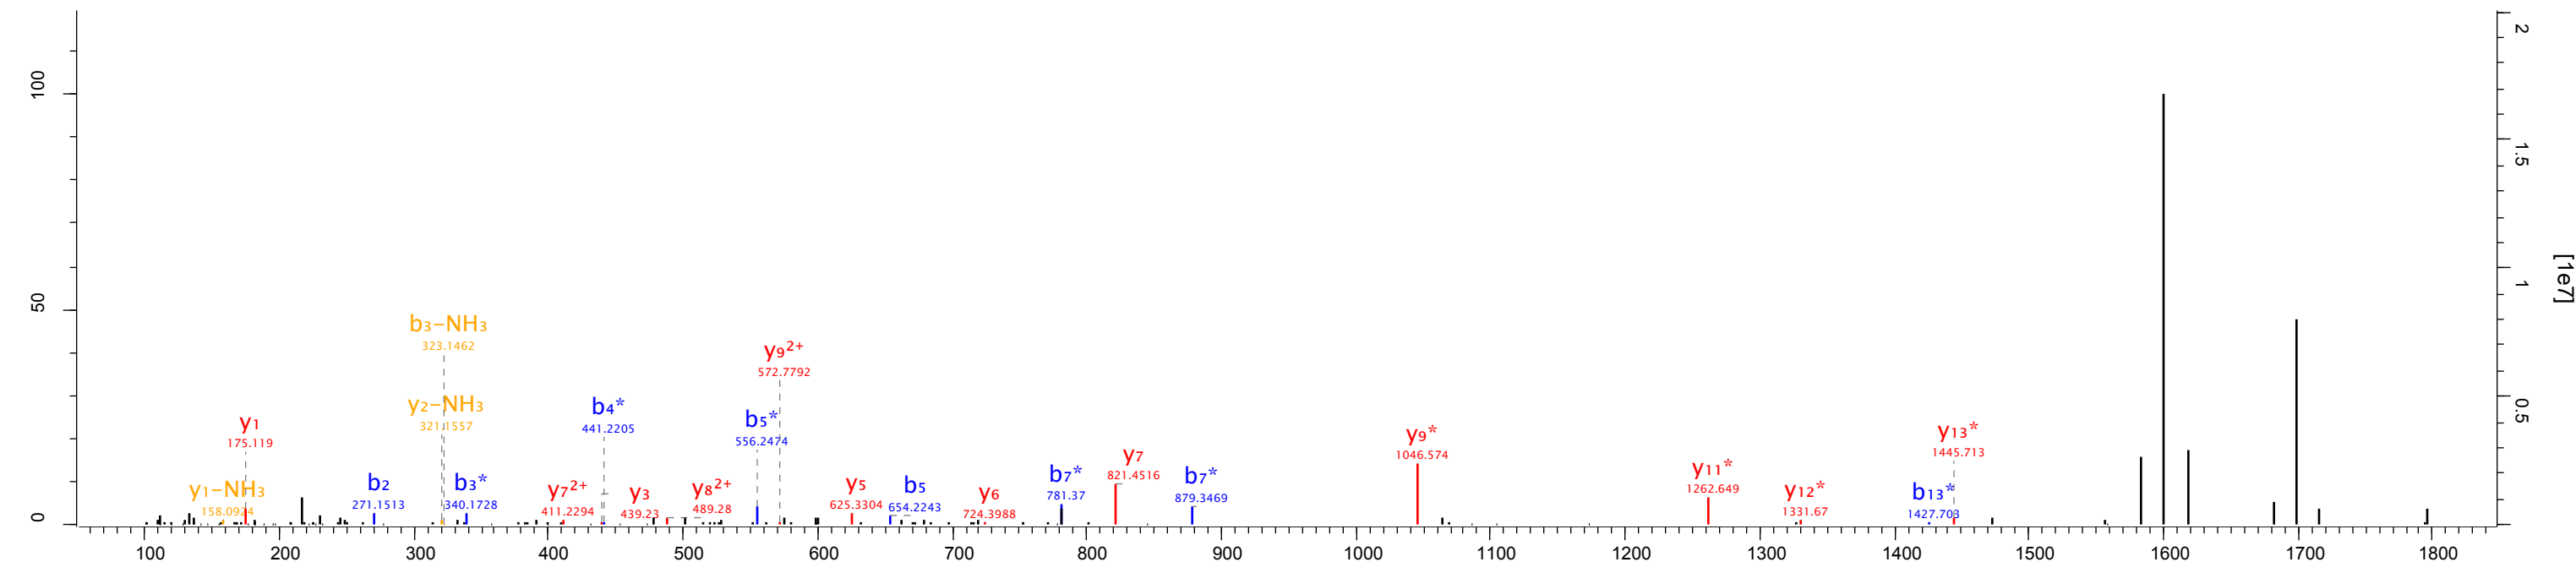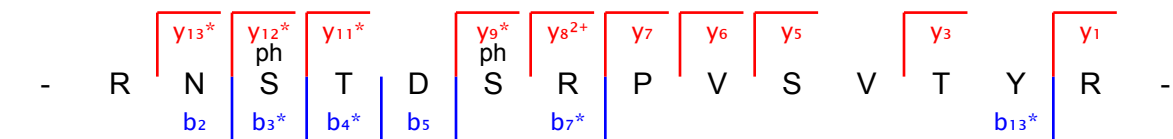

Raw file: 20150812\_A375SR\_Phospho\_BR1\_03  
 Scan: 9496 Method: FTMS; HCD Score: 93.23 m/z: 658.8 Gene names: RAI14

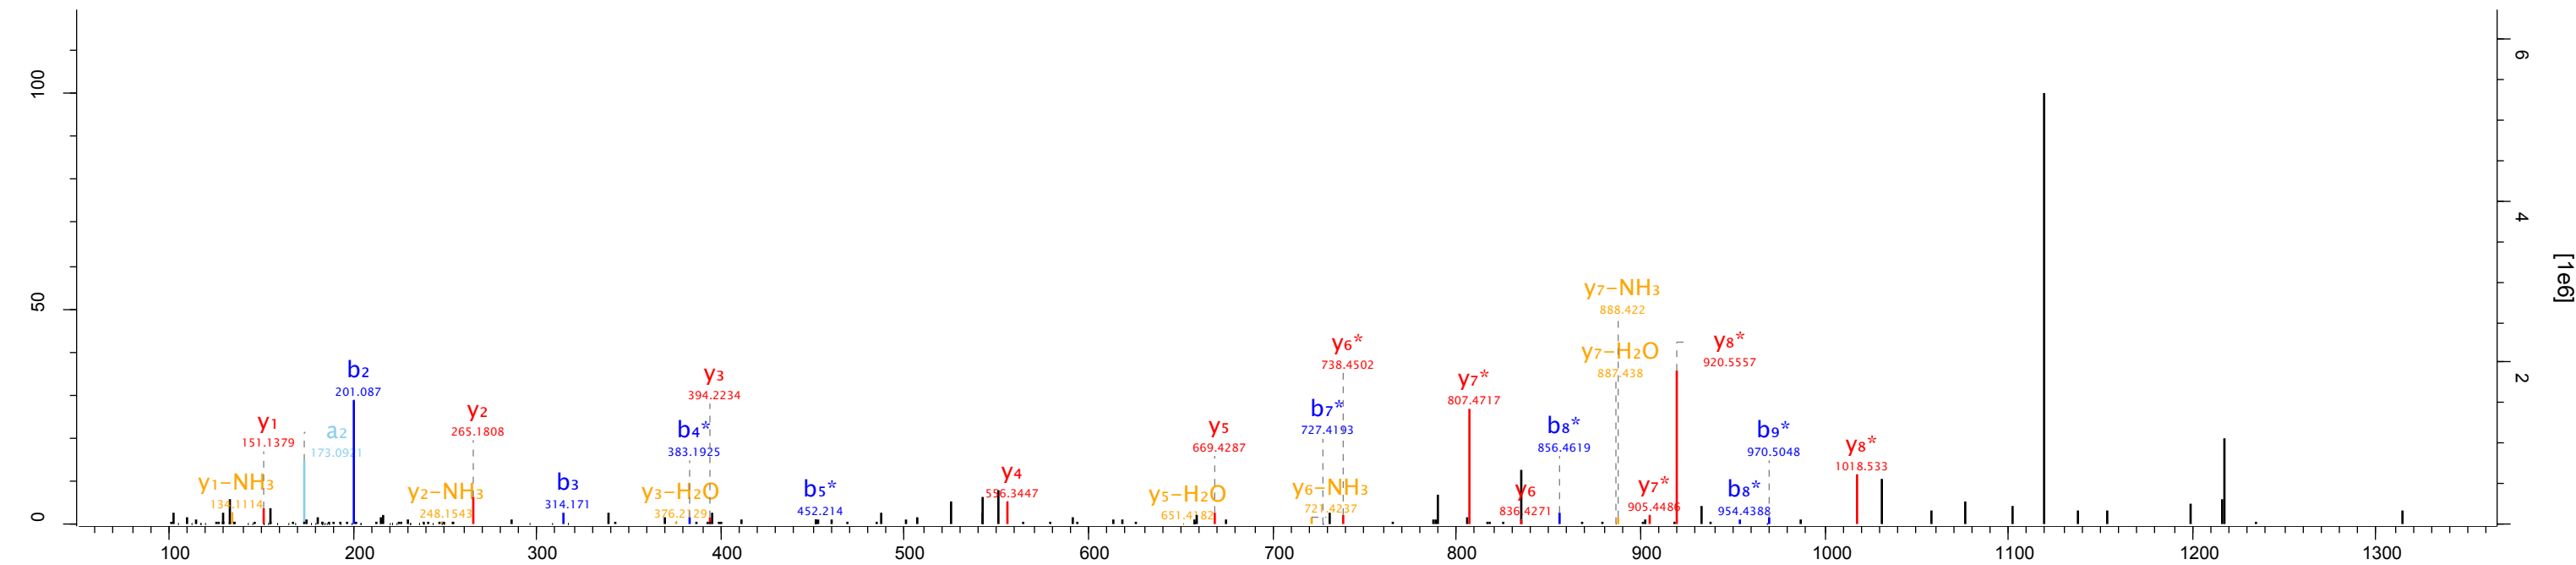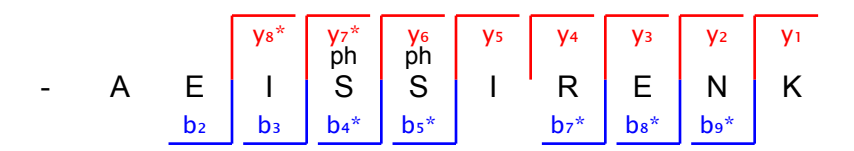



Raw file: 20150812\_A375SR\_Phospho\_BR1\_03  
 Scan: 9636 Method: FTMS; HCD Score: 117.38 m/z: 704.62 Gene names: PRRC2C

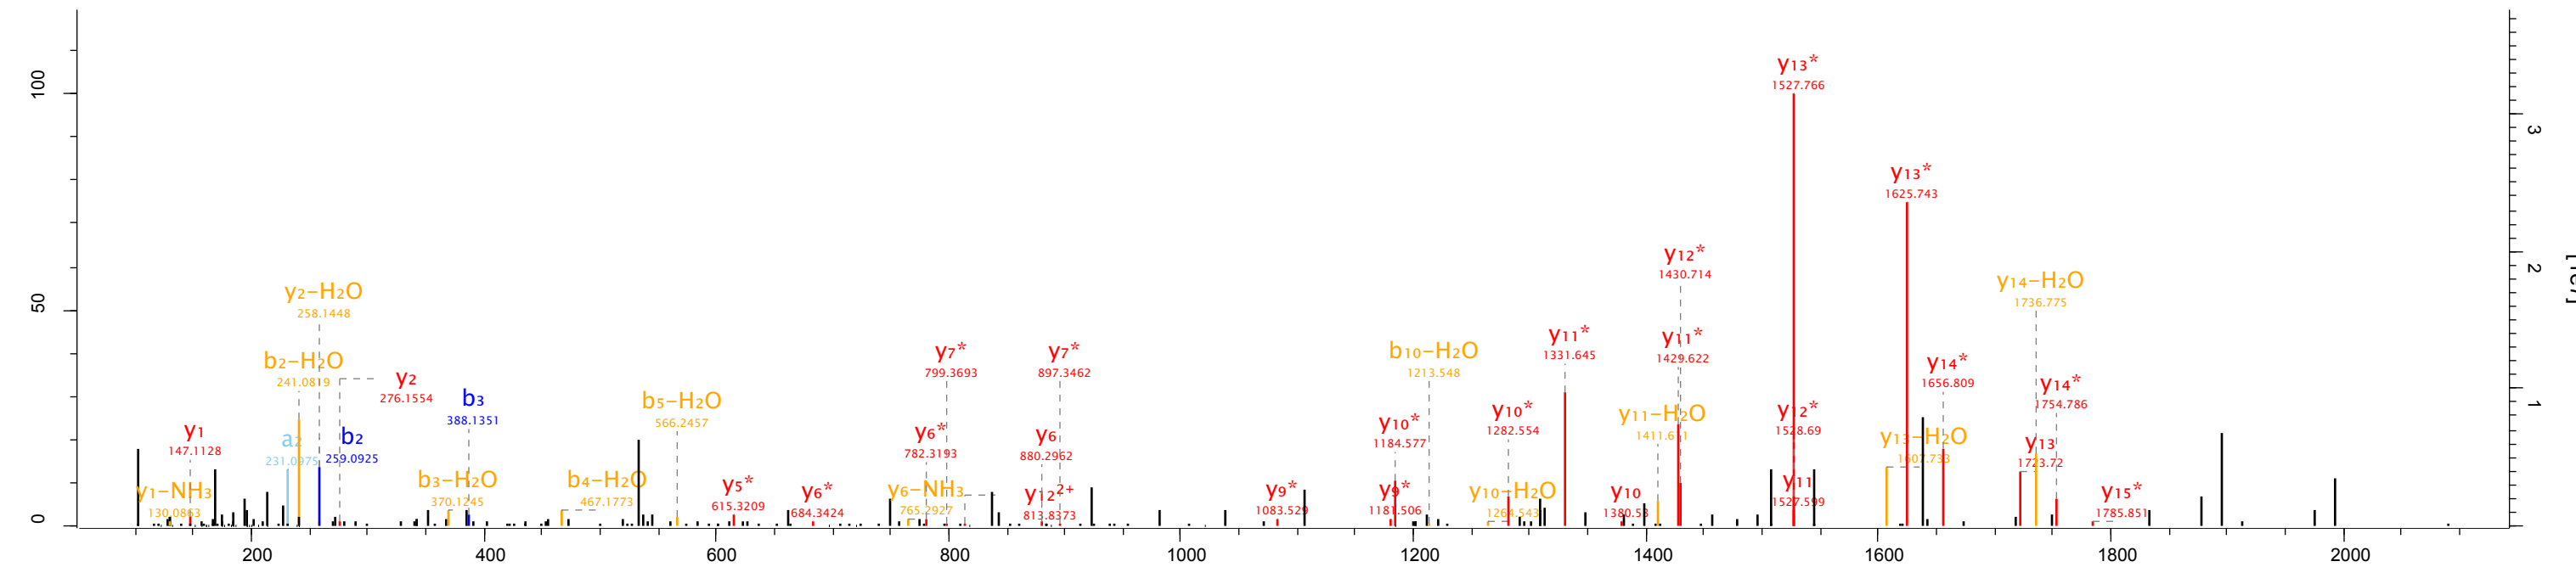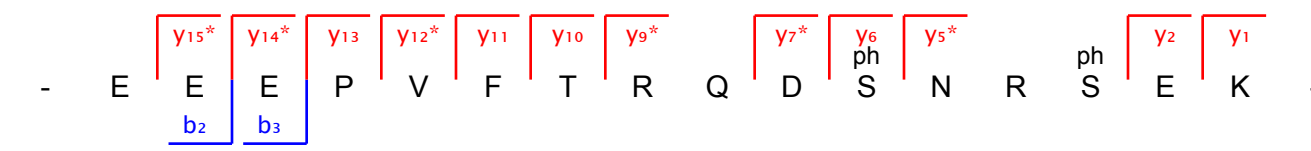

Raw file 20150812\_A375SR\_Phospho\_BR1\_03 Scan 9866 Method FTMS; HCD Score 56.08 m/z 585.26 Gene names SETD2

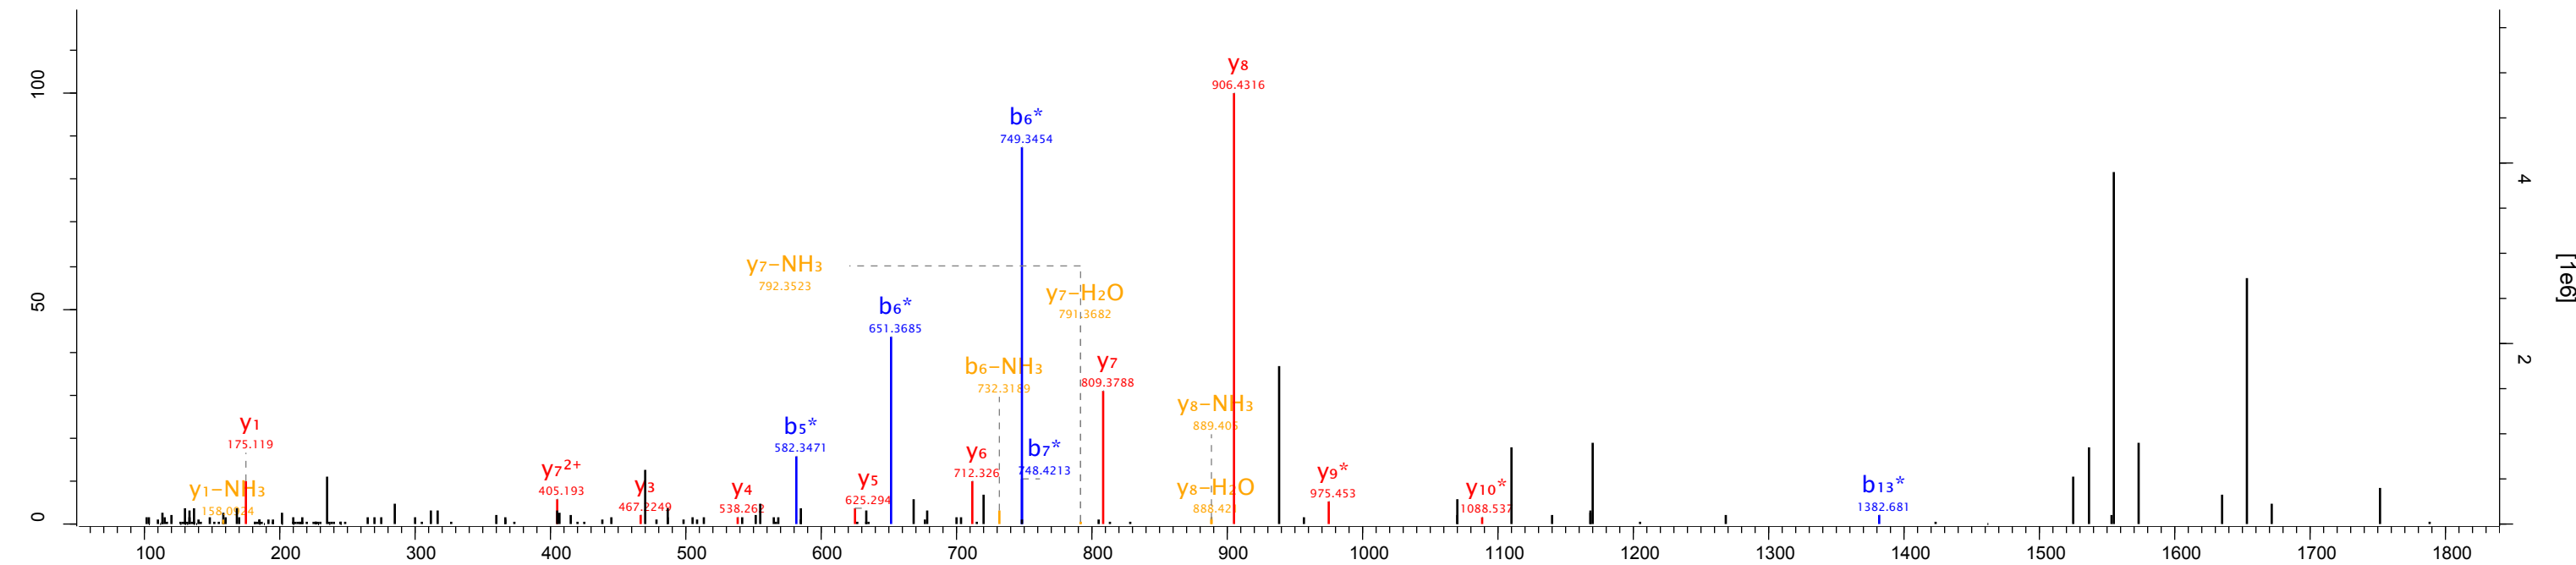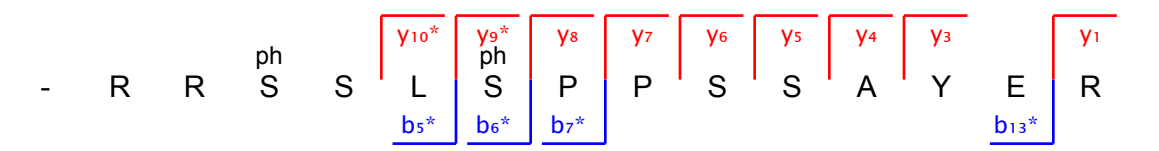

Raw file: 20150812\_A375SR\_Phospho\_BR1\_03  
 Scan: 9956 Method: FTMS; HCD Score: 254.53 m/z: 535.92 Gene names: ERRFI1

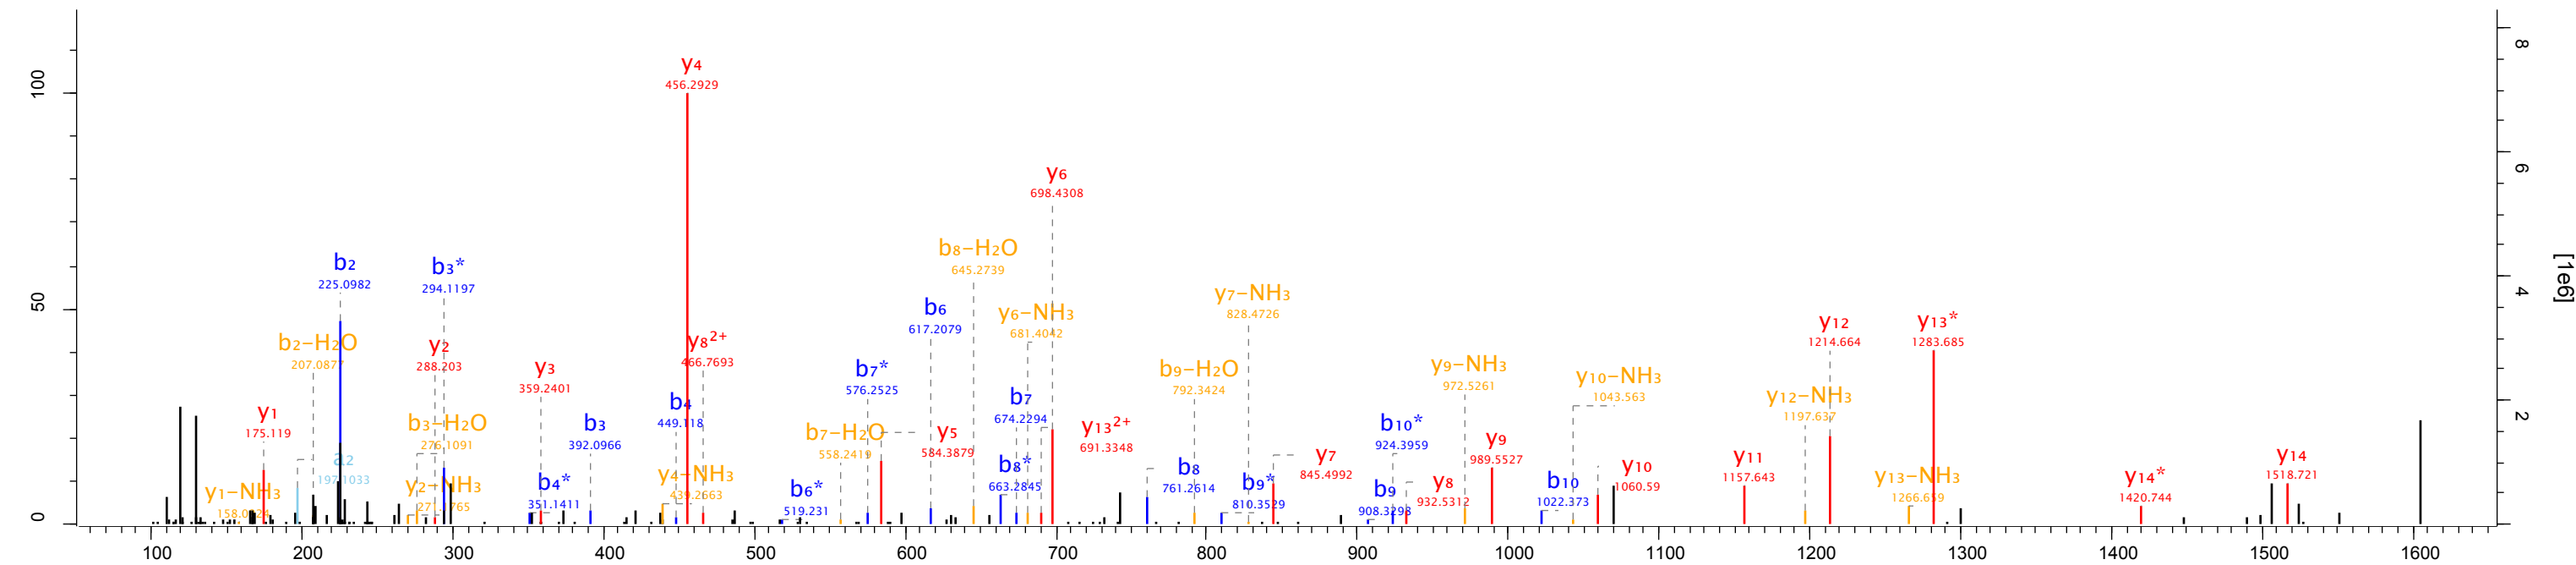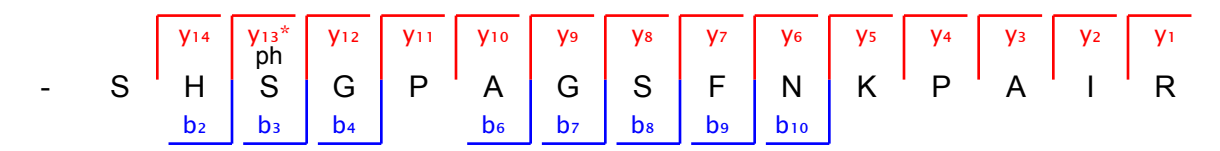

Raw file: 20150812\_A375SR\_Phospho\_BR1\_04  
 Scan: 10576 Method: FTMS; HCD Score: 99.41 m/z: 611.95 Gene names: PDLIM5

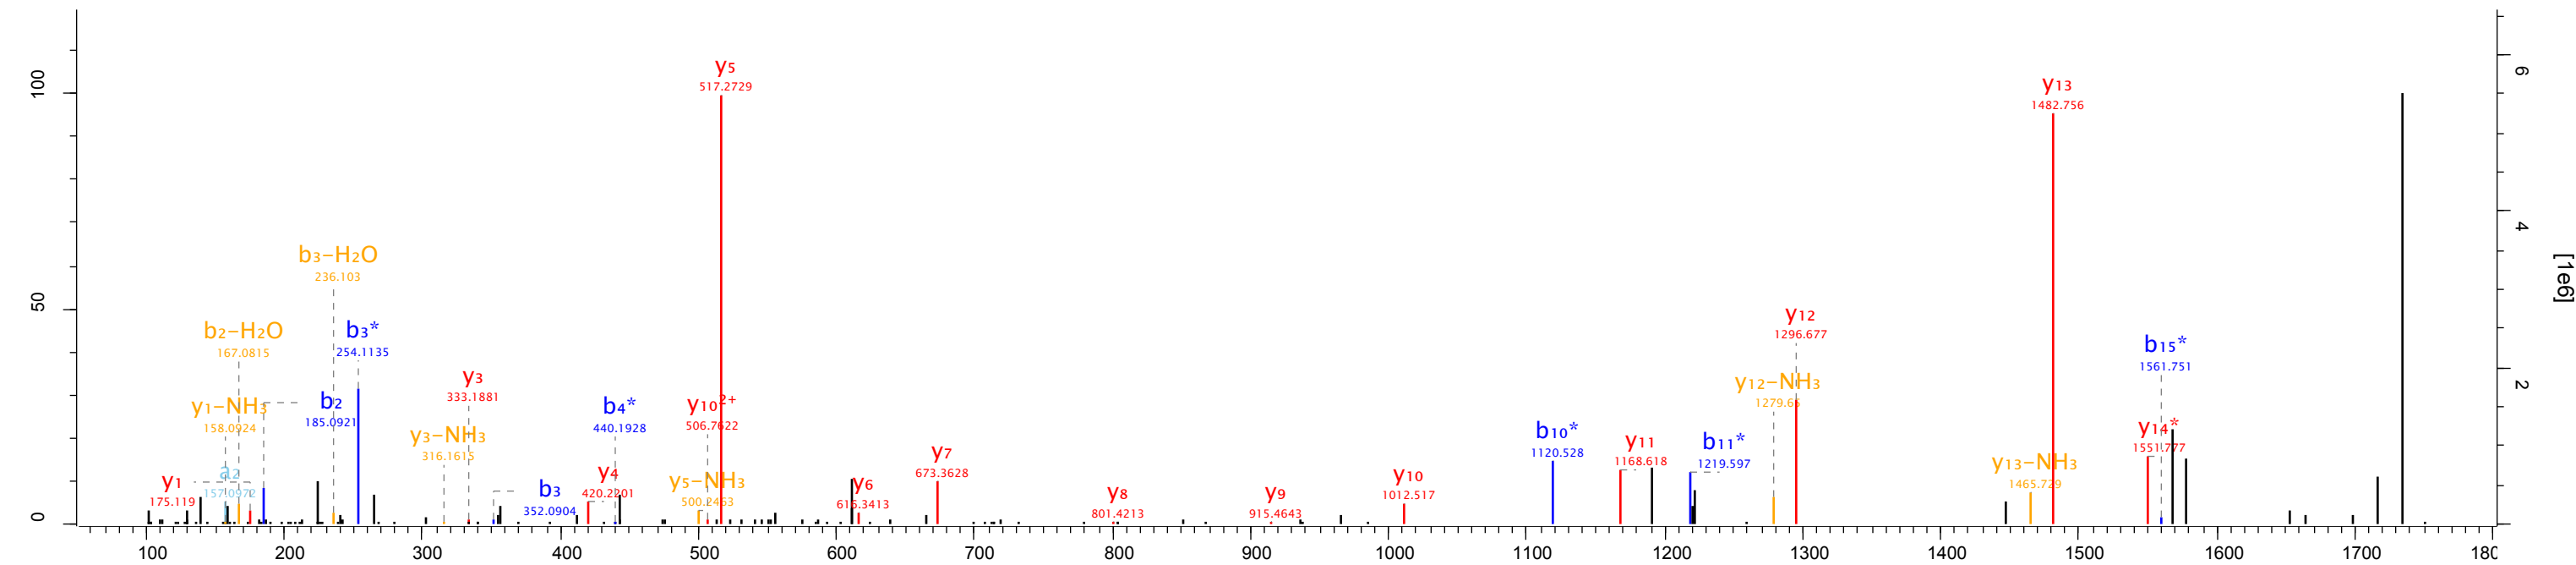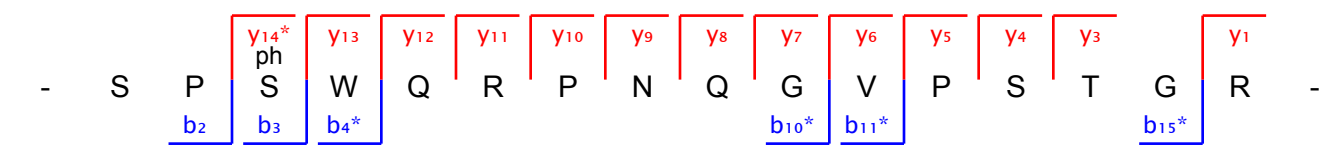

Raw file 20150812\_A375SR\_Phospho\_BR1\_04 Scan 10736 Method FTMS; HCD Score 119.8 m/z 765.38 Gene names CENPC

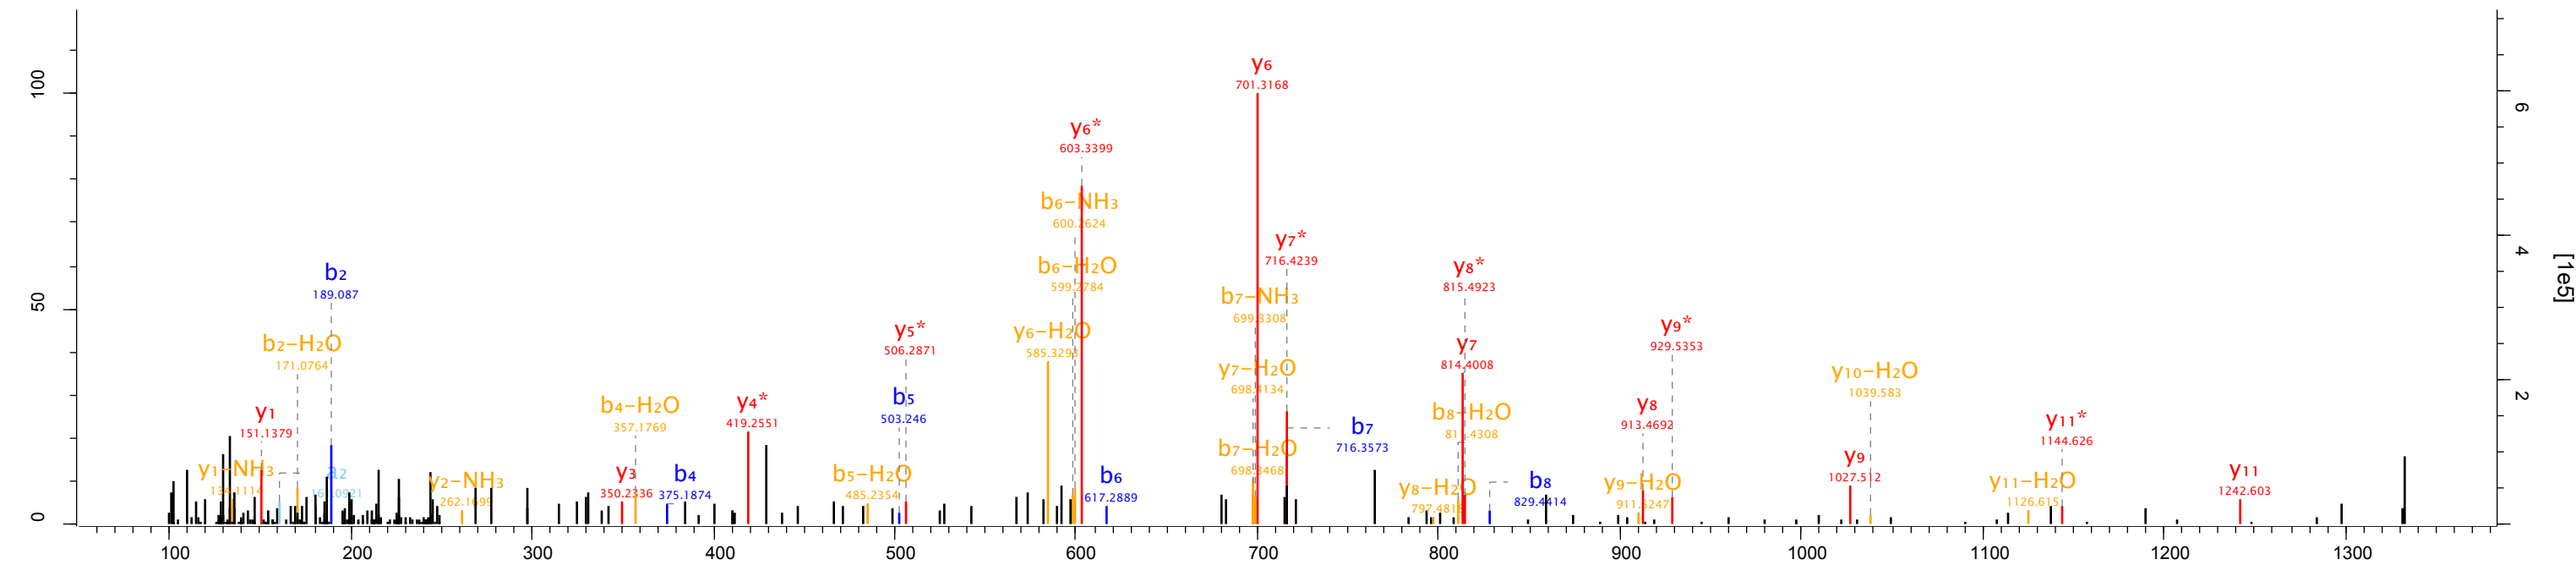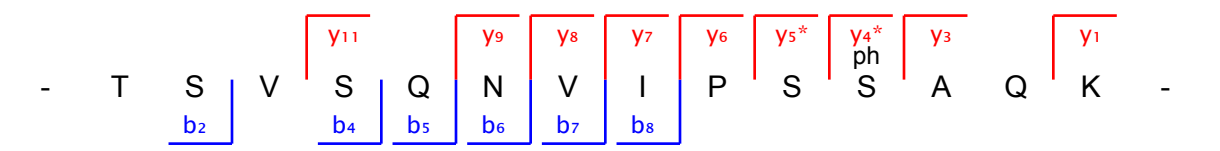

Raw file Scan Method Score m/z Gene names

20150812\_A375SR\_Phospho\_BR1\_04 11026 FTMS; HCD 53.48 916.09 KIAA1033

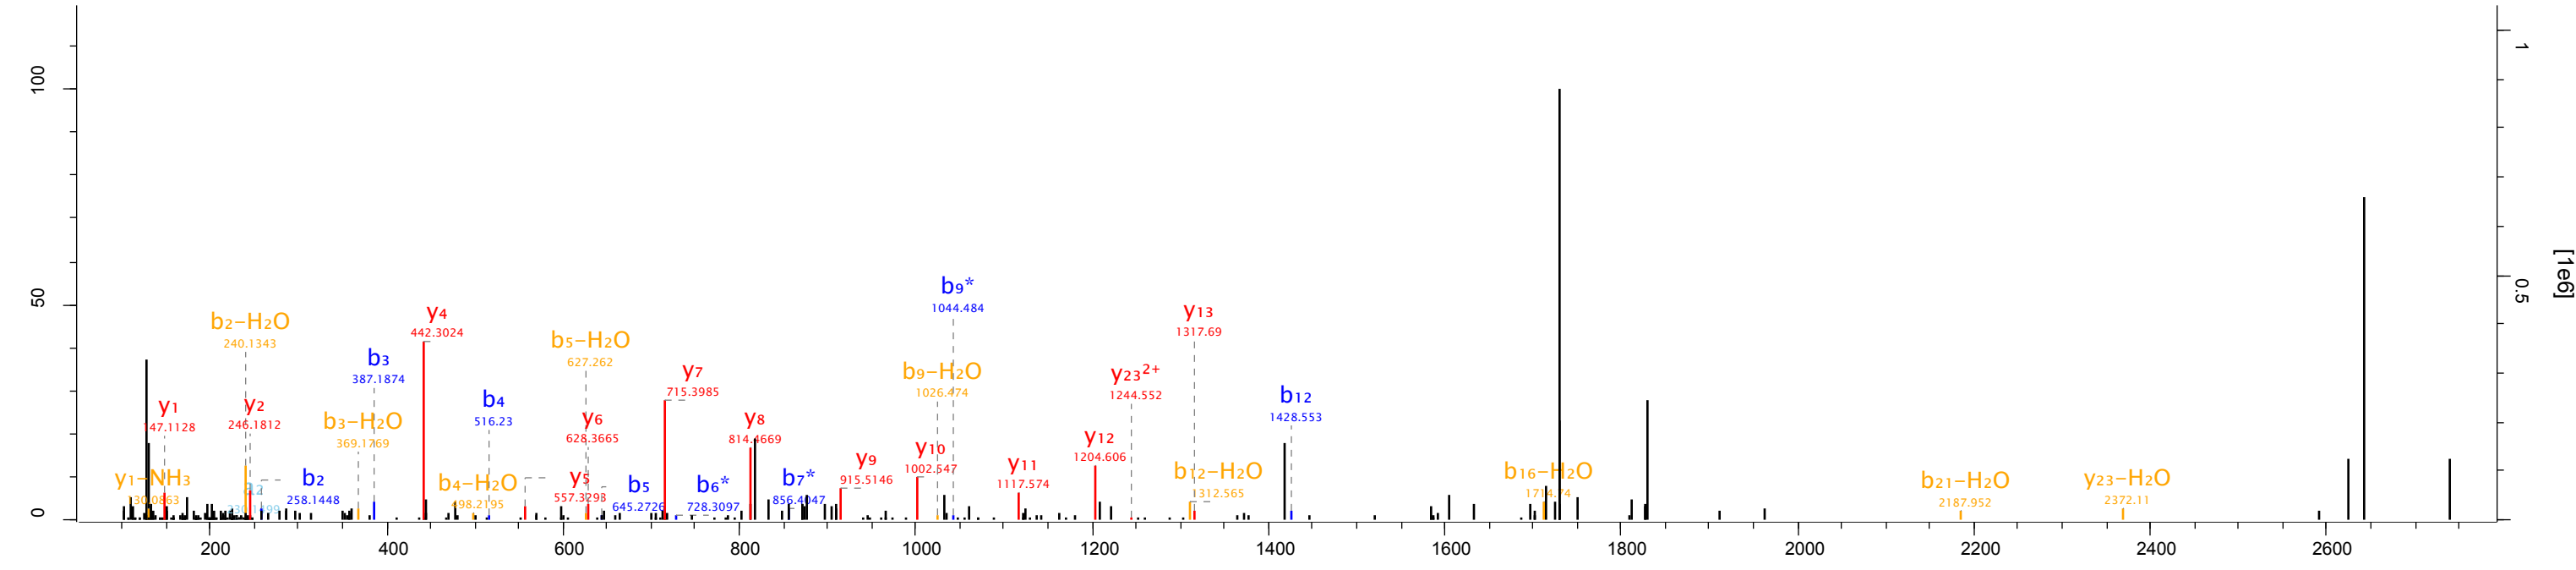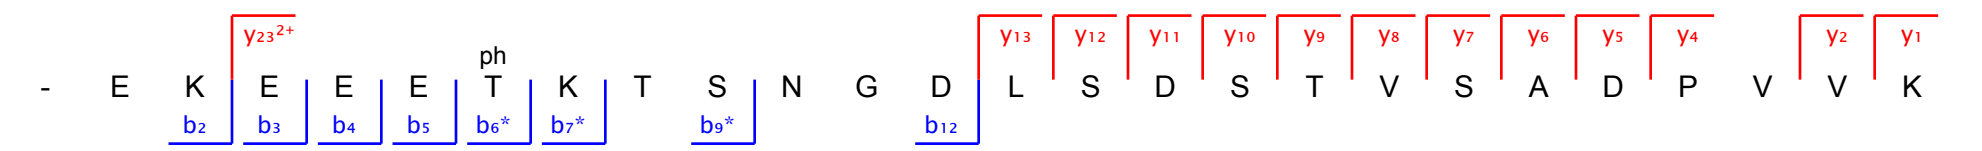

Raw file 20150812\_A375SR\_Phospho\_BR1\_04 Scan 12216 Method FTMS; HCD Score 150.91 m/z 861.45 Gene names TGFB111

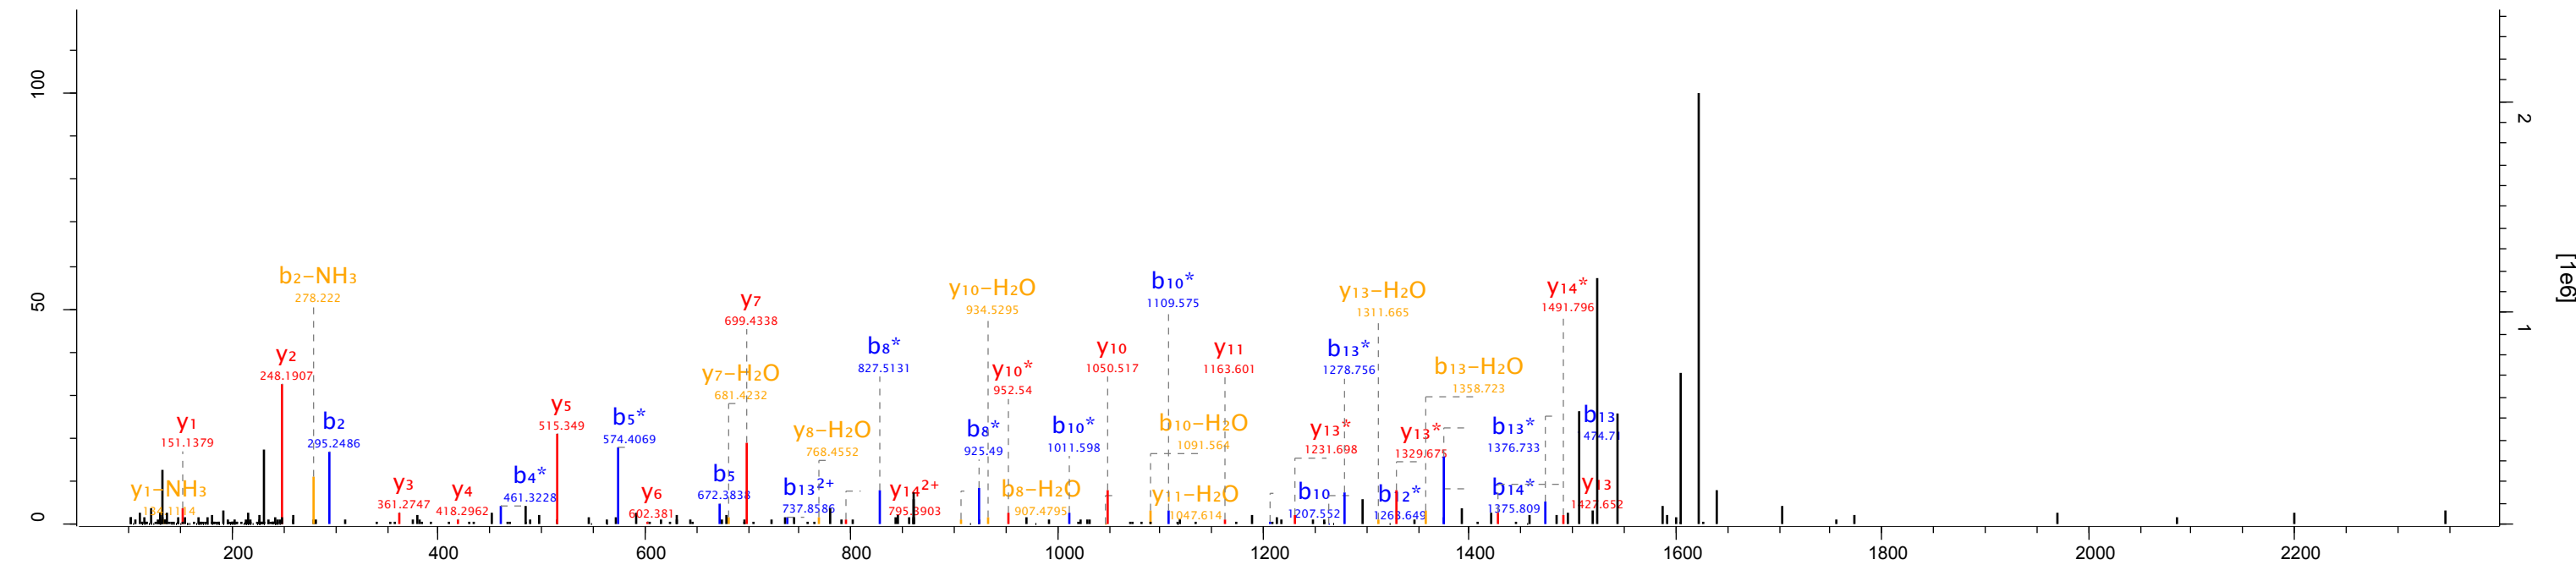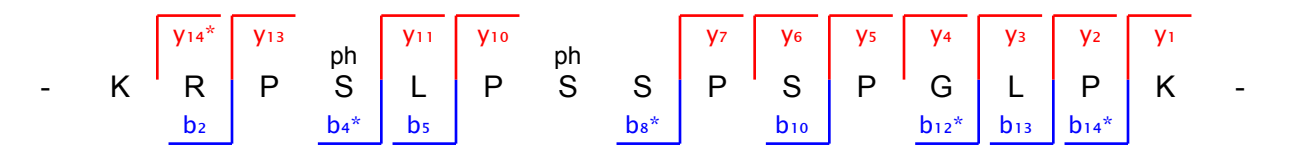

Raw file Scan Method Score m/z Gene names  
 20150812\_A375SR\_Phospho\_BR1\_04 12286 FTMS; HCD 174.87 699.82 MIOS

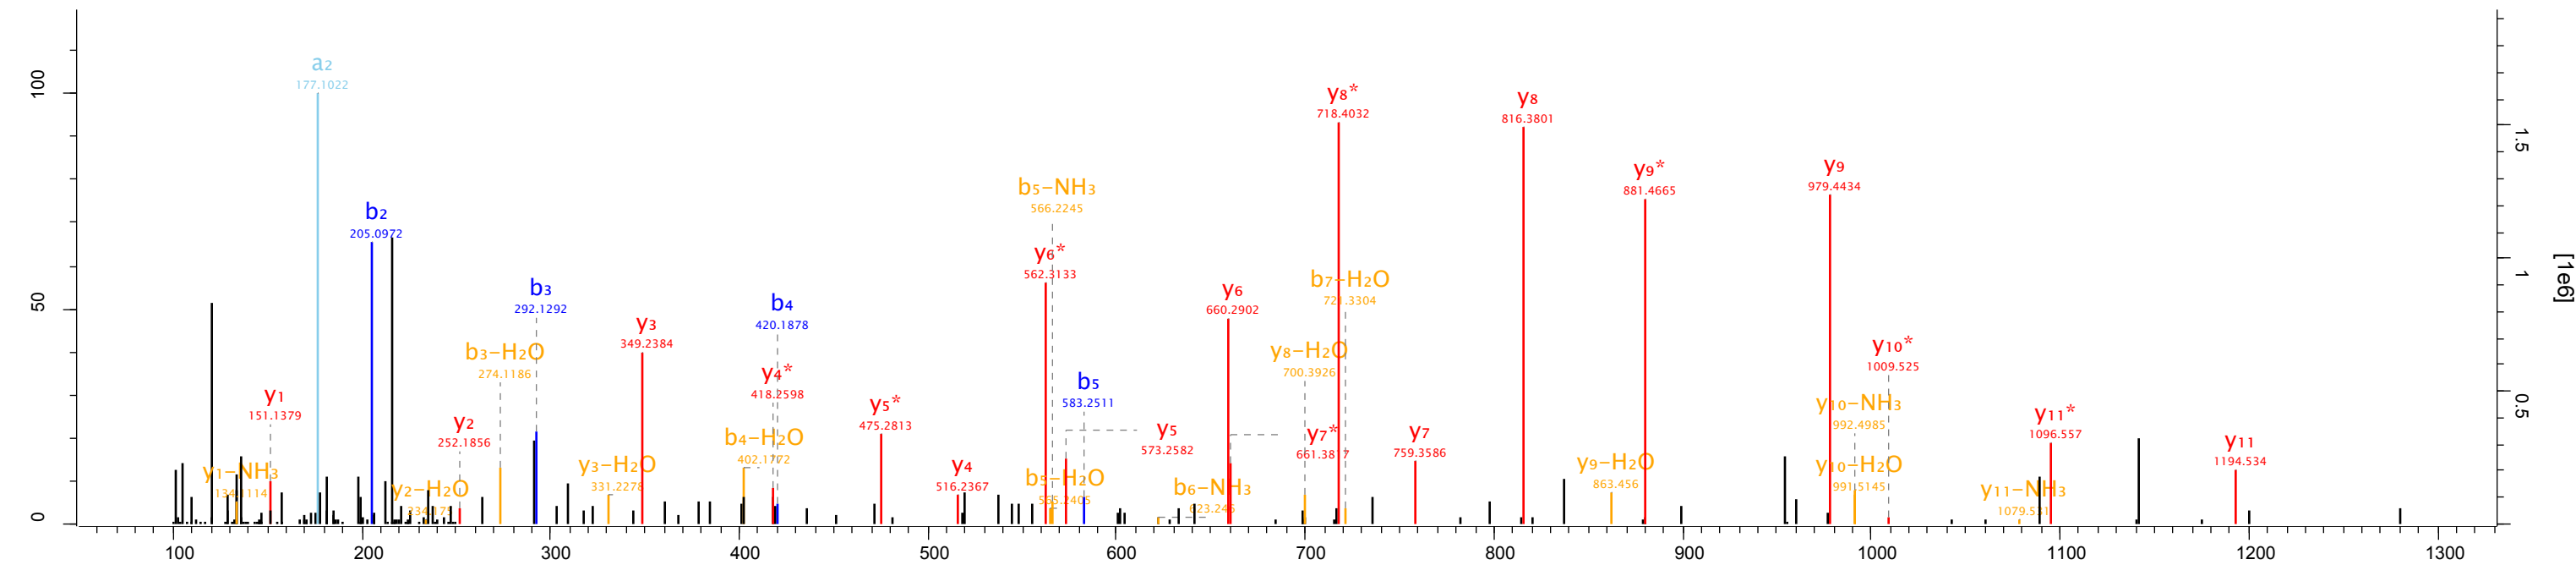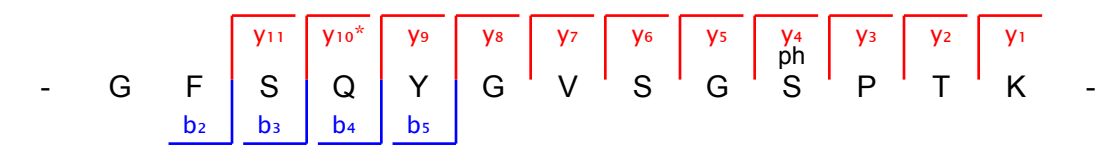



Raw file 20150812\_A375SR\_Phospho\_BR1\_04 Scan 12396 Method FTMS; HCD Score 117.61 m/z 881.43 Gene names MED1

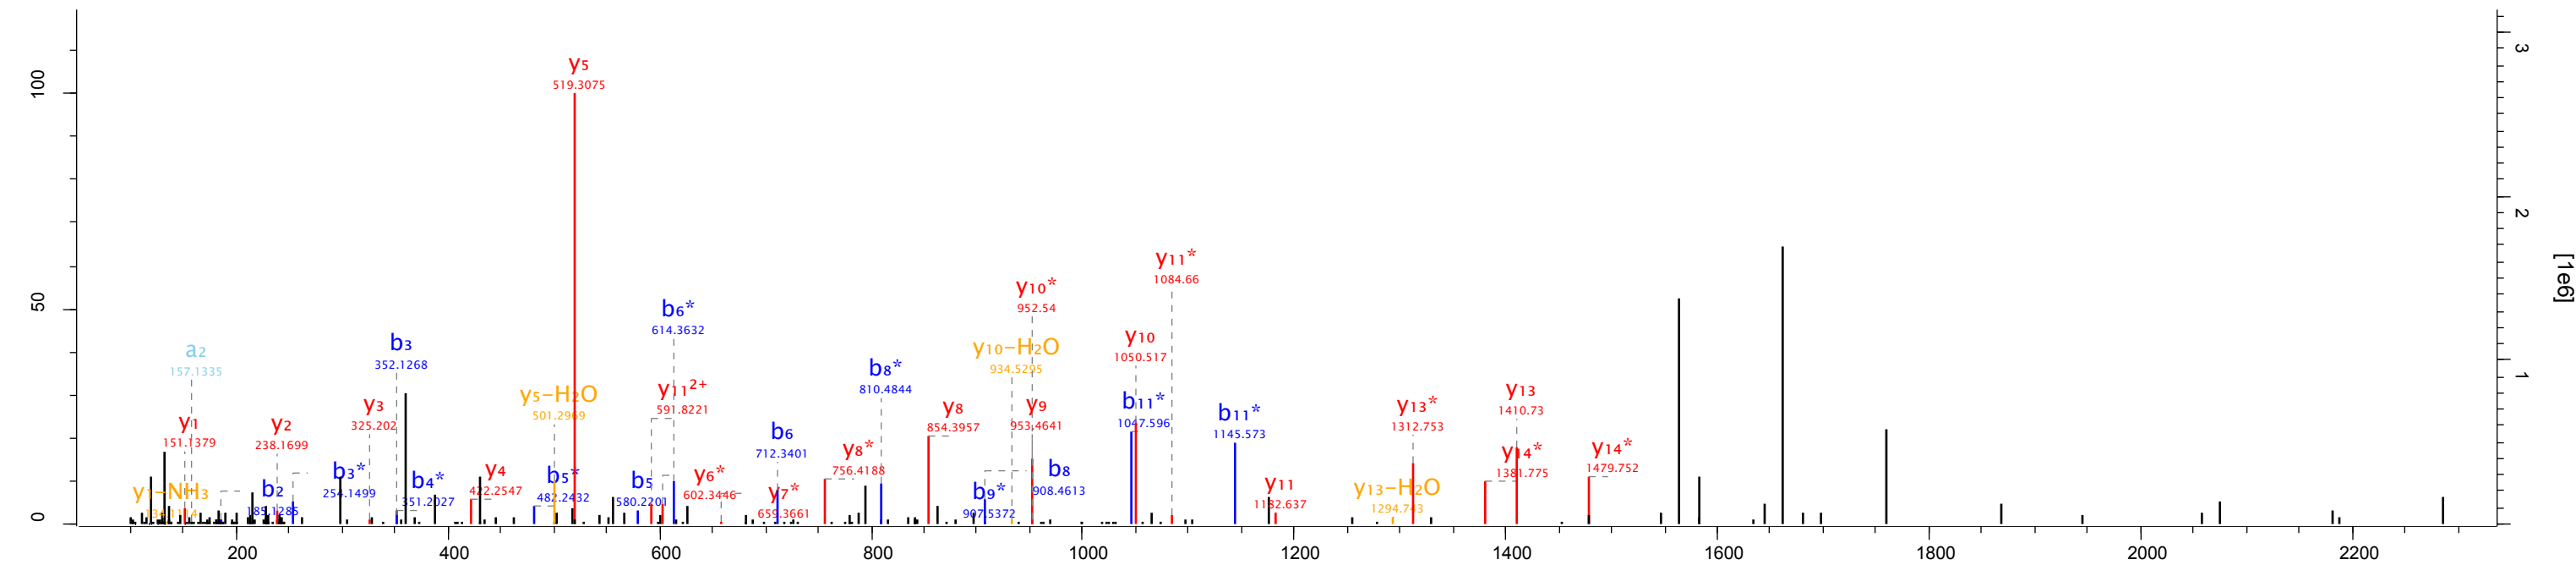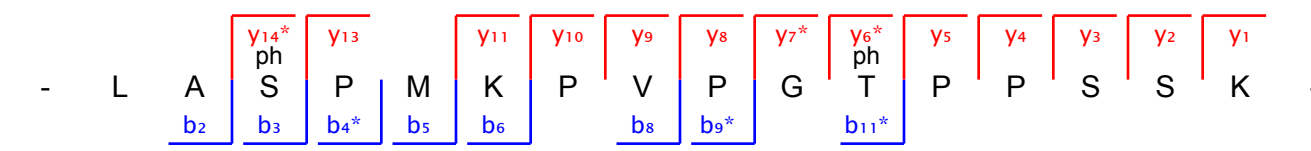

Raw file 20150812\_A375SR\_Phospho\_BR1\_04 Scan 12636 Method FTMS; HCD Score 179.09 m/z 719.32 Gene names MICALL1

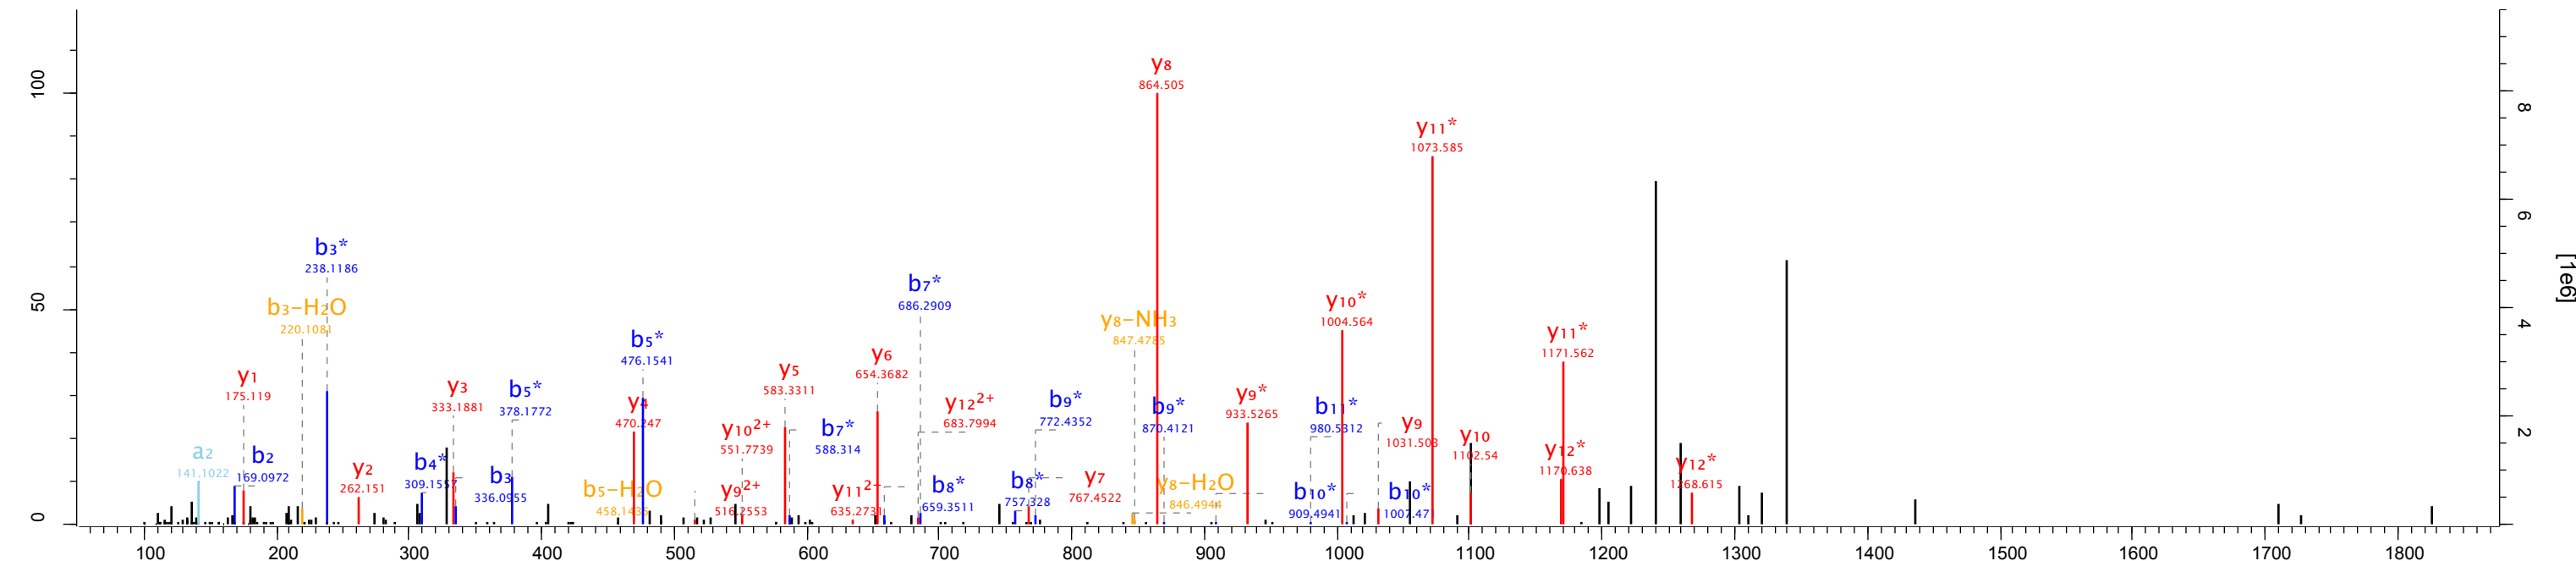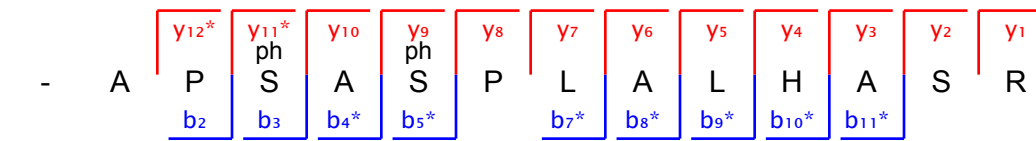

Raw file: 20150812\_A375SR\_Phospho\_BR1\_04  
 Scan: 12726 Method: FTMS; HCD Score: 166.21 m/z: 758.36 Gene names: FLNA

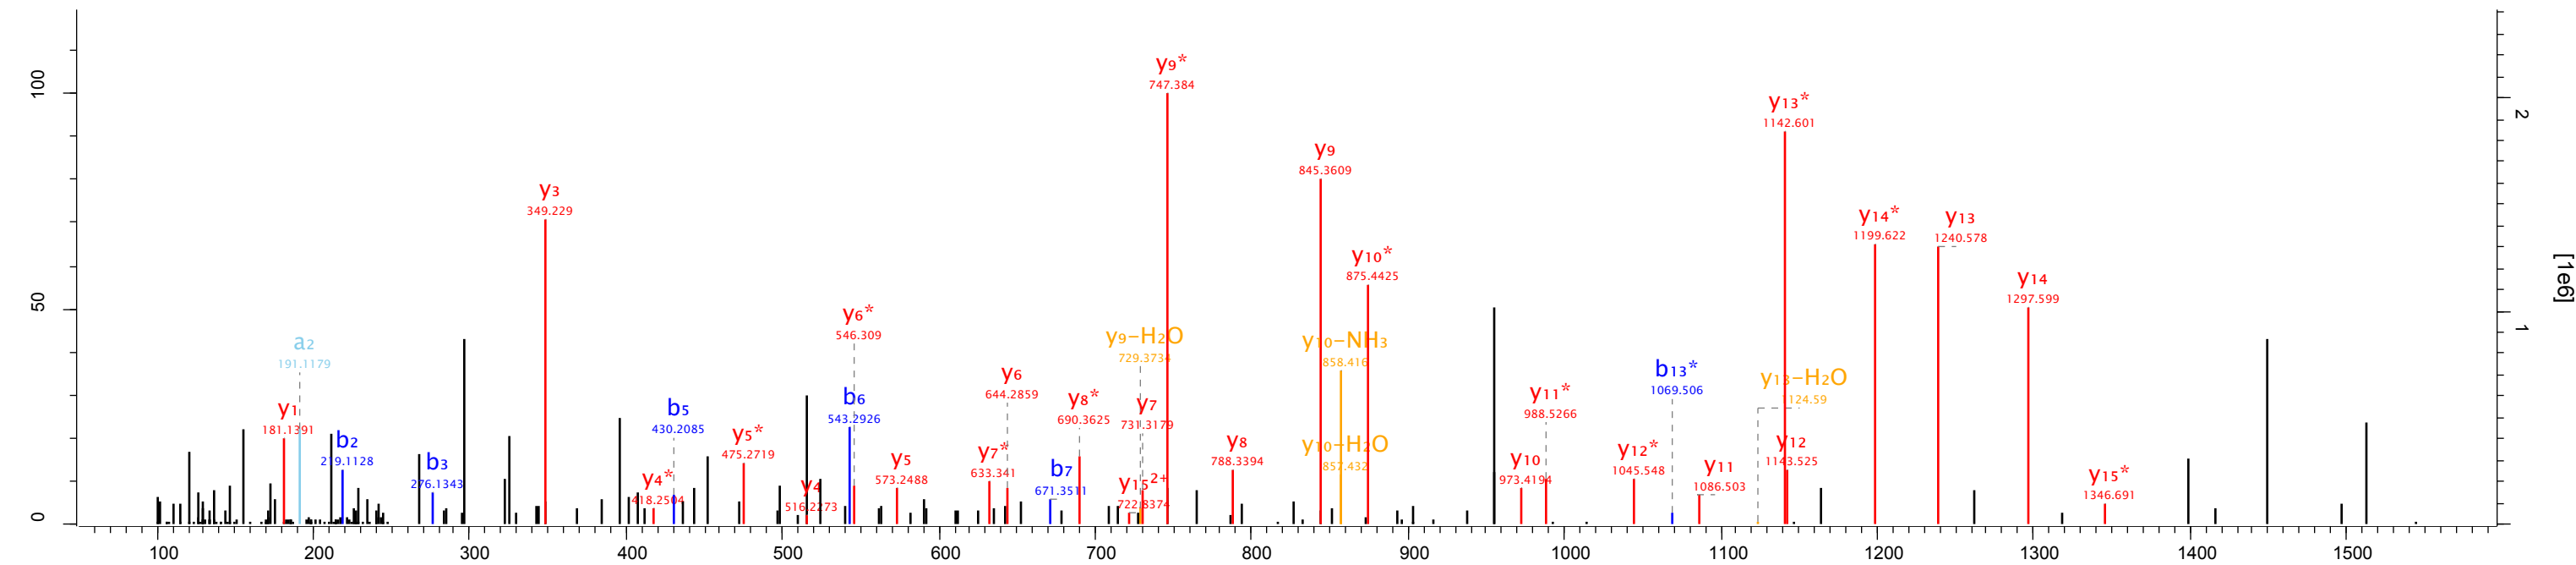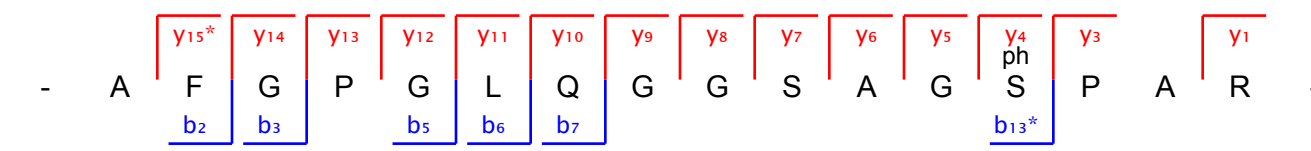

Raw file 20150812\_A375SR\_Phospho\_BR1\_04 Scan 12776 Method FTMS; HCD Score 135.29 m/z 577.94 Gene names SRSF2

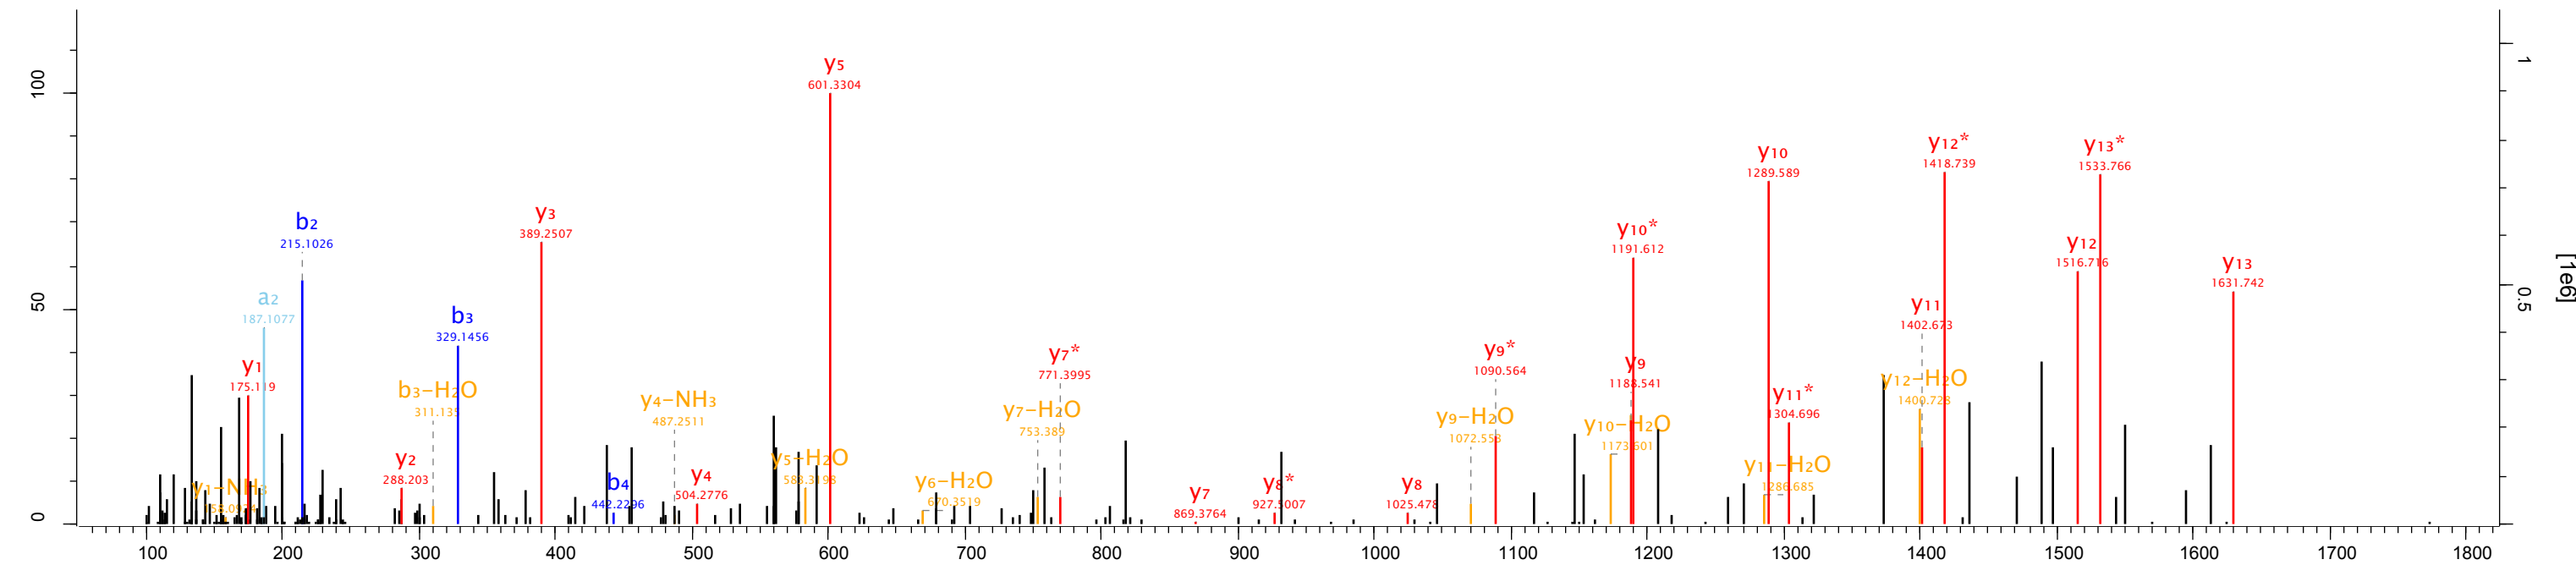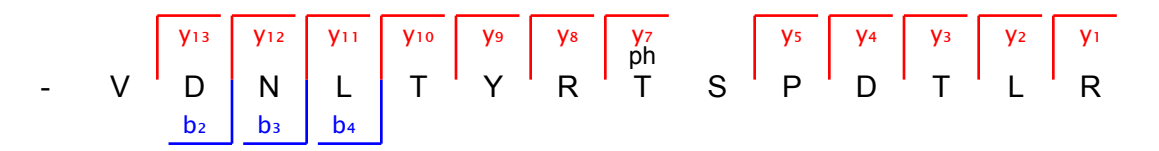

Raw file: 20150812\_A375SR\_Phospho\_BR1\_04  
 Scan: 1286 Method: FTMS; HCD Score: 122.13 m/z: 523.56 Gene names: CDC20

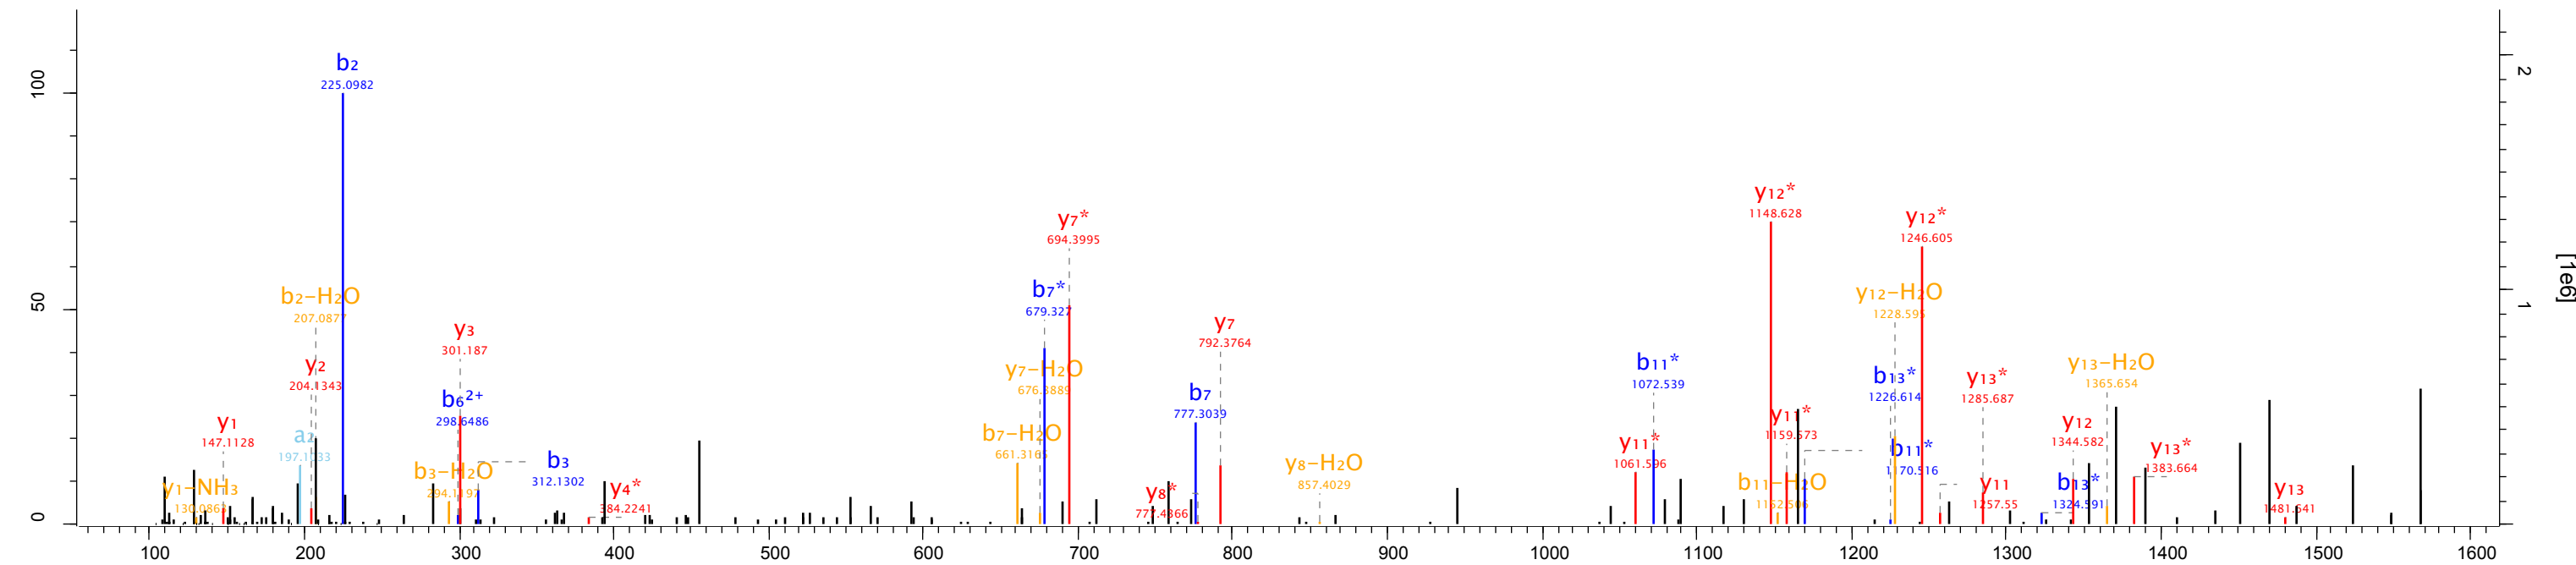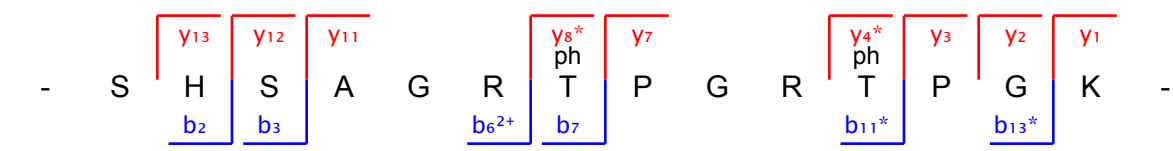

Raw file  
 20150812\_A375SR\_Phospho\_BR1\_04  
 Scan 13196 Method FTMS; HCD Score 115.32 m/z 1028.09 Gene names CASP7

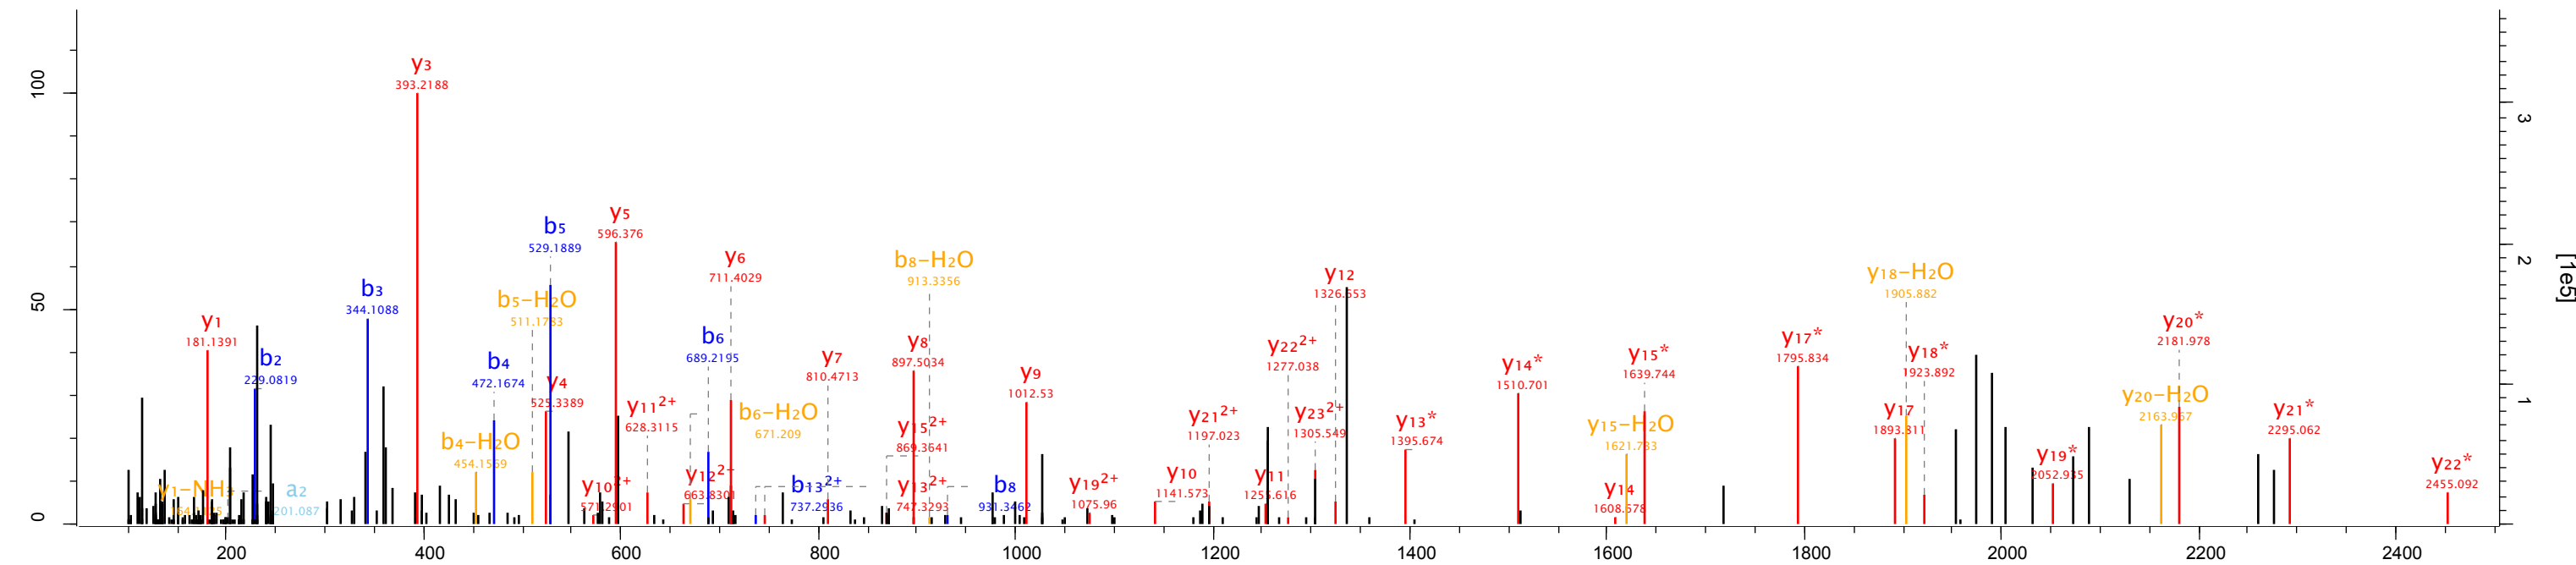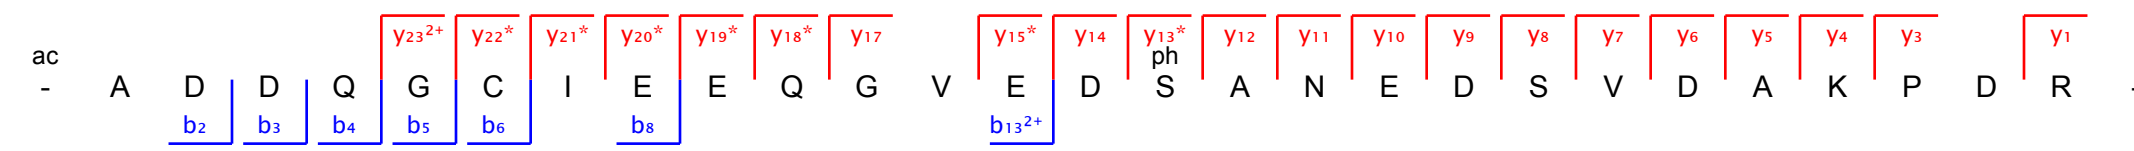

Raw file 20150812\_A375SR\_Phospho\_BR1\_04 Scan 13766 Method FTMS; HCD Score 147.09 m/z 768.33 Gene names SORBS3

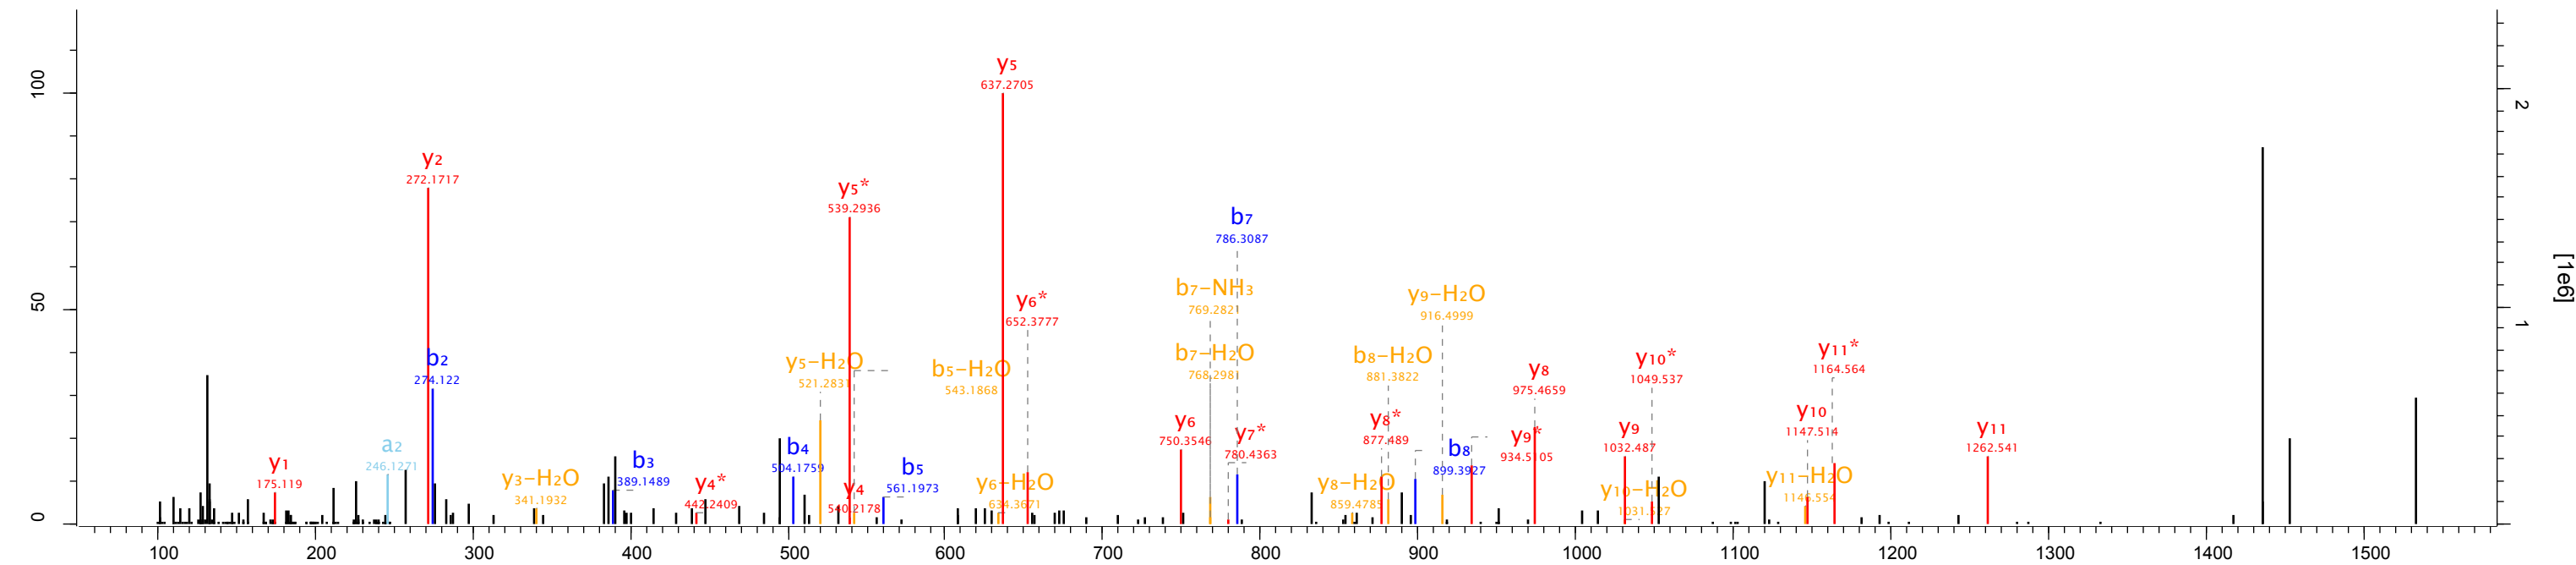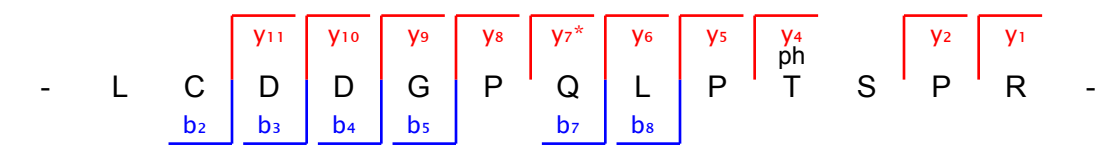

Raw file 20150812\_A375SR\_Phospho\_BR1\_04 Scan 13916 Method FTMS; HCD Score 327.31 m/z 991.43 Gene names PEX19;DCAF8

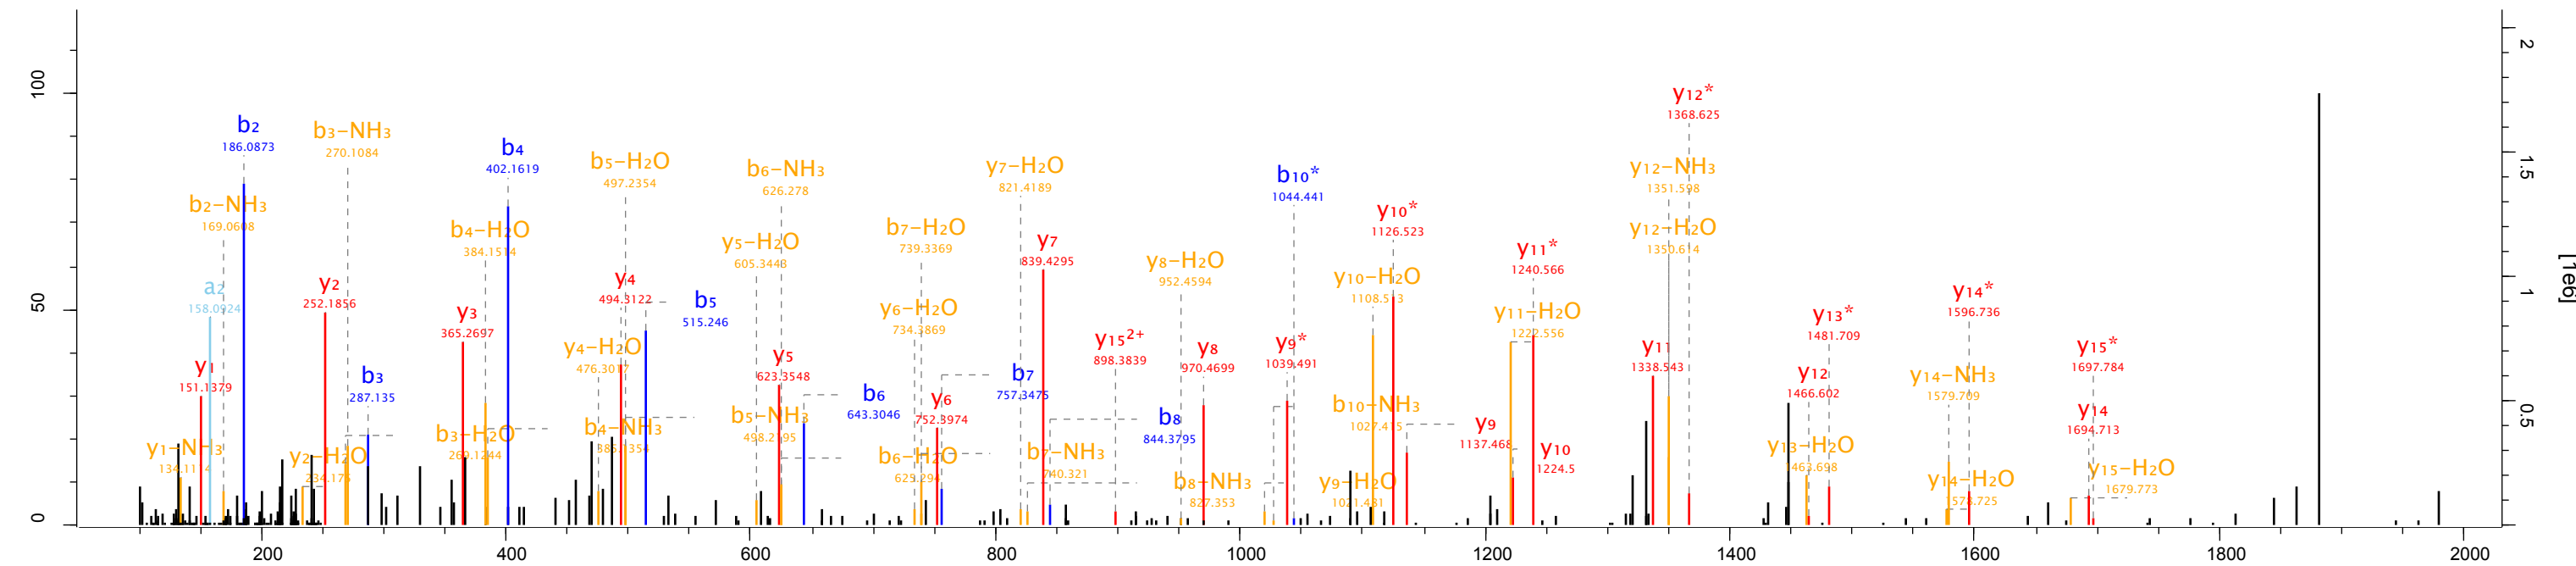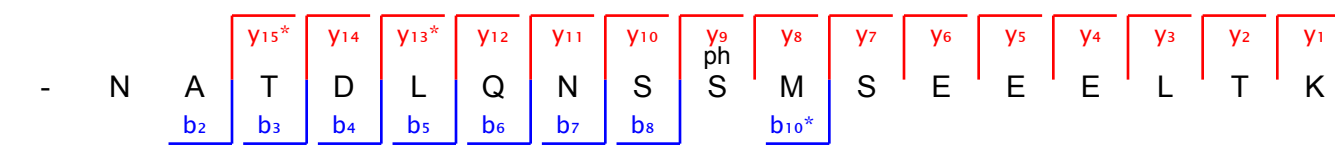



Raw file 20150812\_A375SR\_Phospho\_BR1\_04 Scan 14166 Method FTMS; HCD Score 323.45 m/z 1051.5 Gene names ARHGEF12

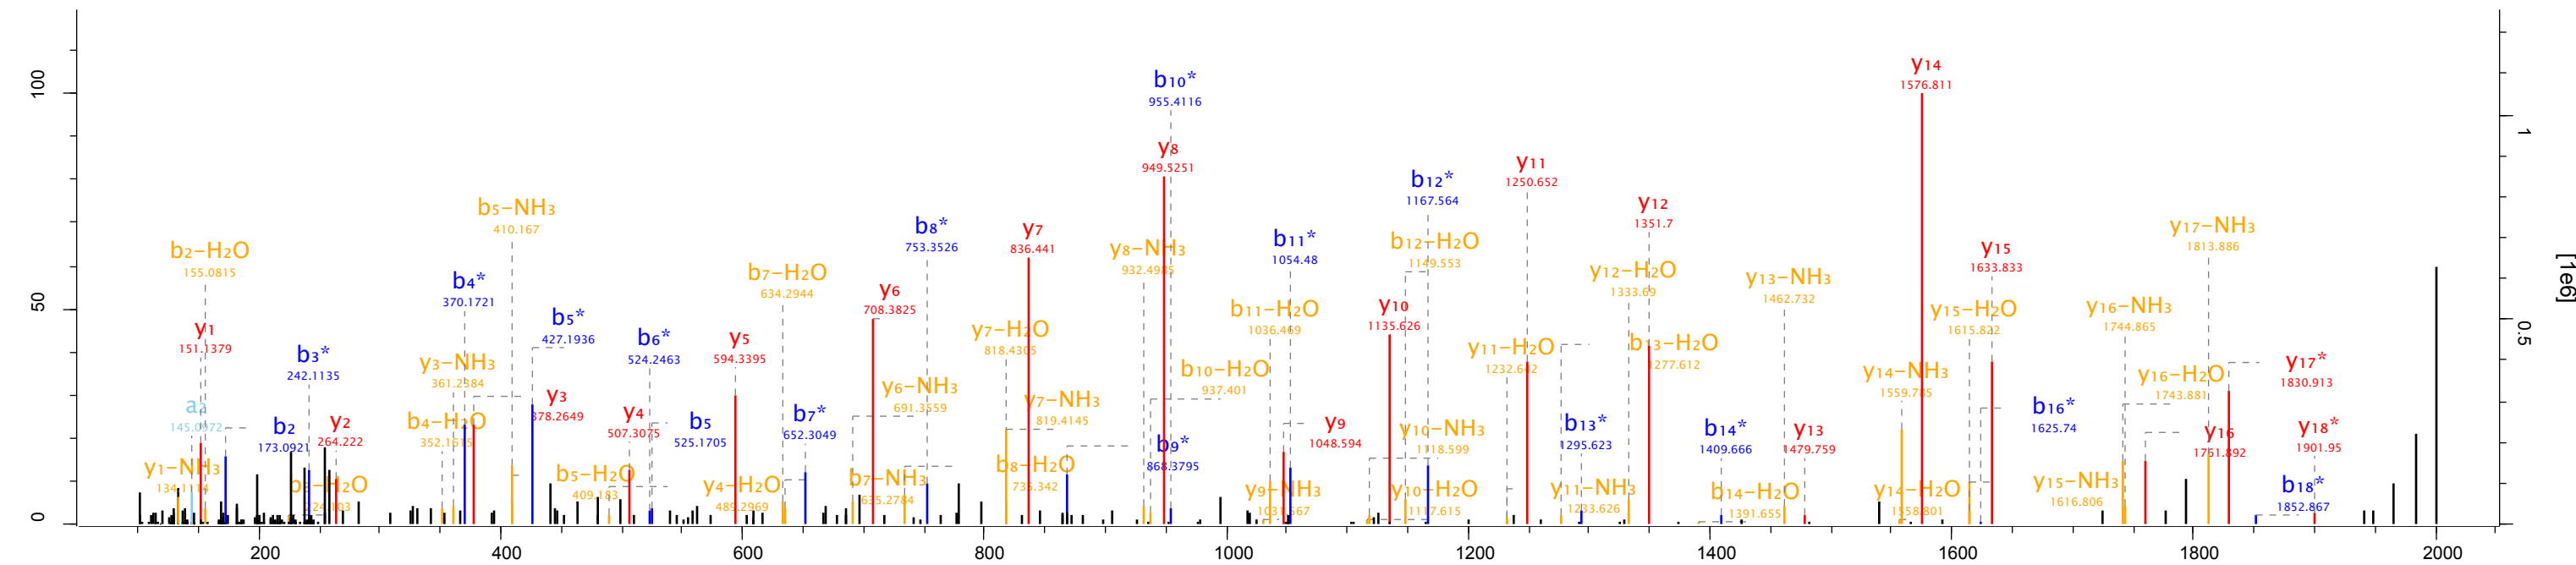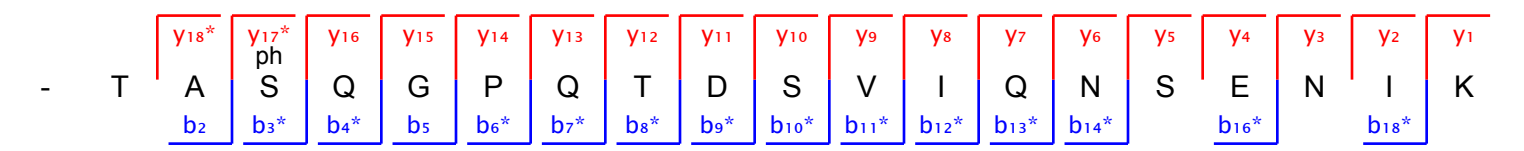

Raw file  
 20150812\_A375SR\_Phospho\_BR1\_04  
 Scan 14426 Method FTMS; HCD Score 86.8 m/z 651.3 Gene names BRCA1

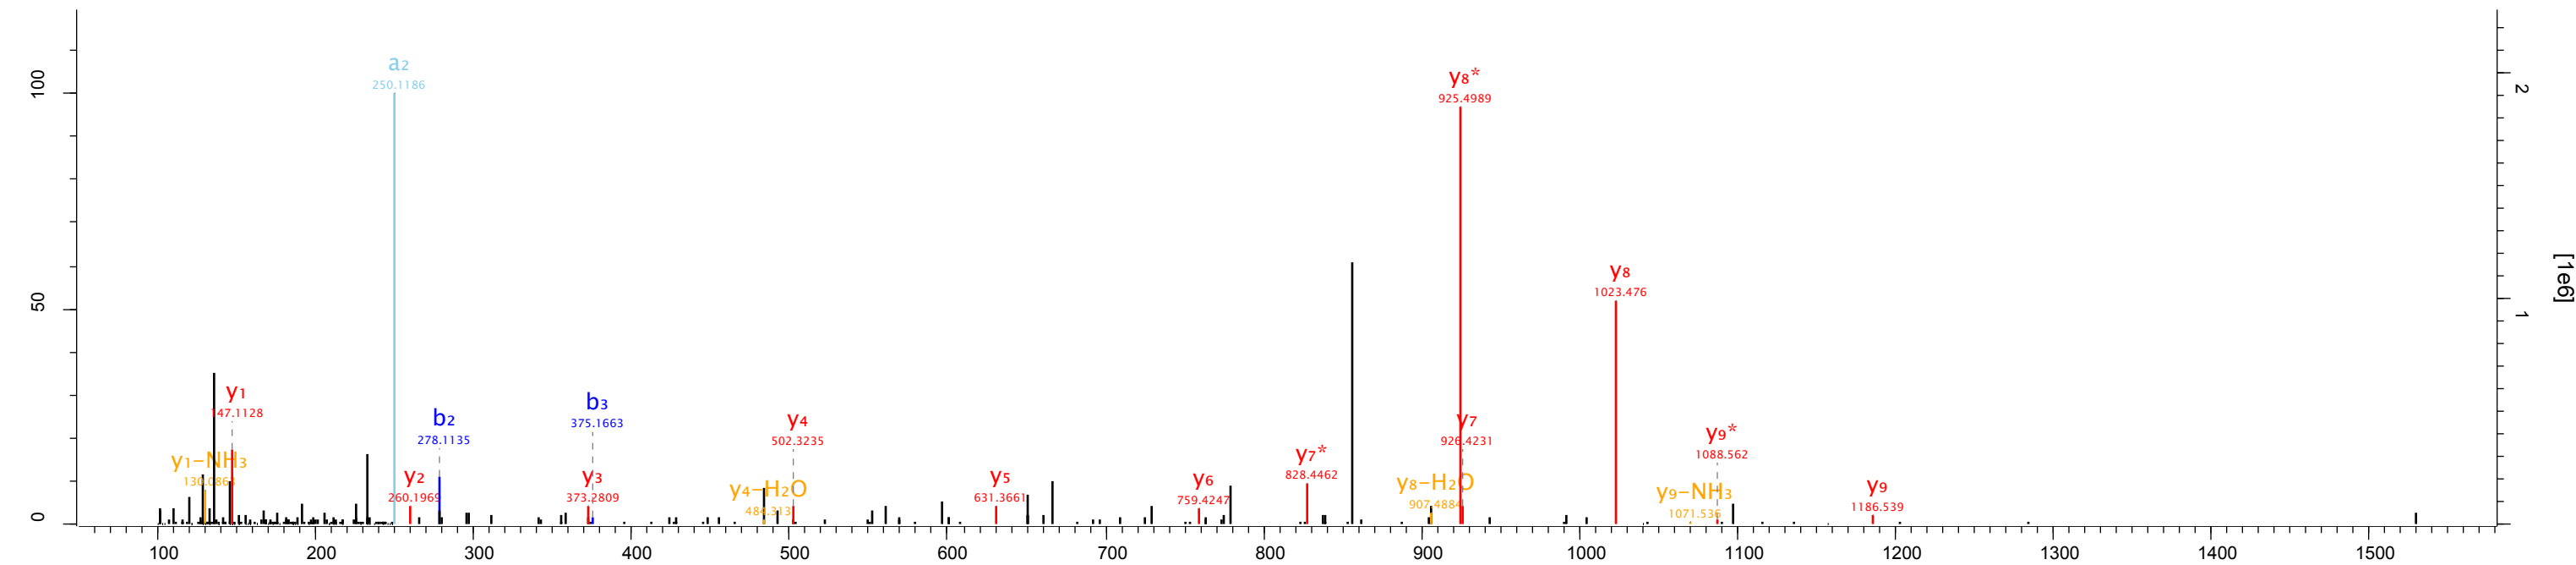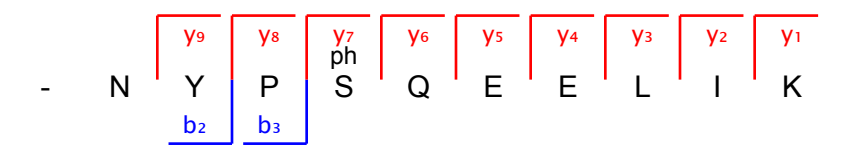

Raw file 20150812\_A375SR\_Phospho\_BR1\_04 Scan 14786 Method FTMS; HCD Score 88.68 m/z 883.06 Gene names REPS1

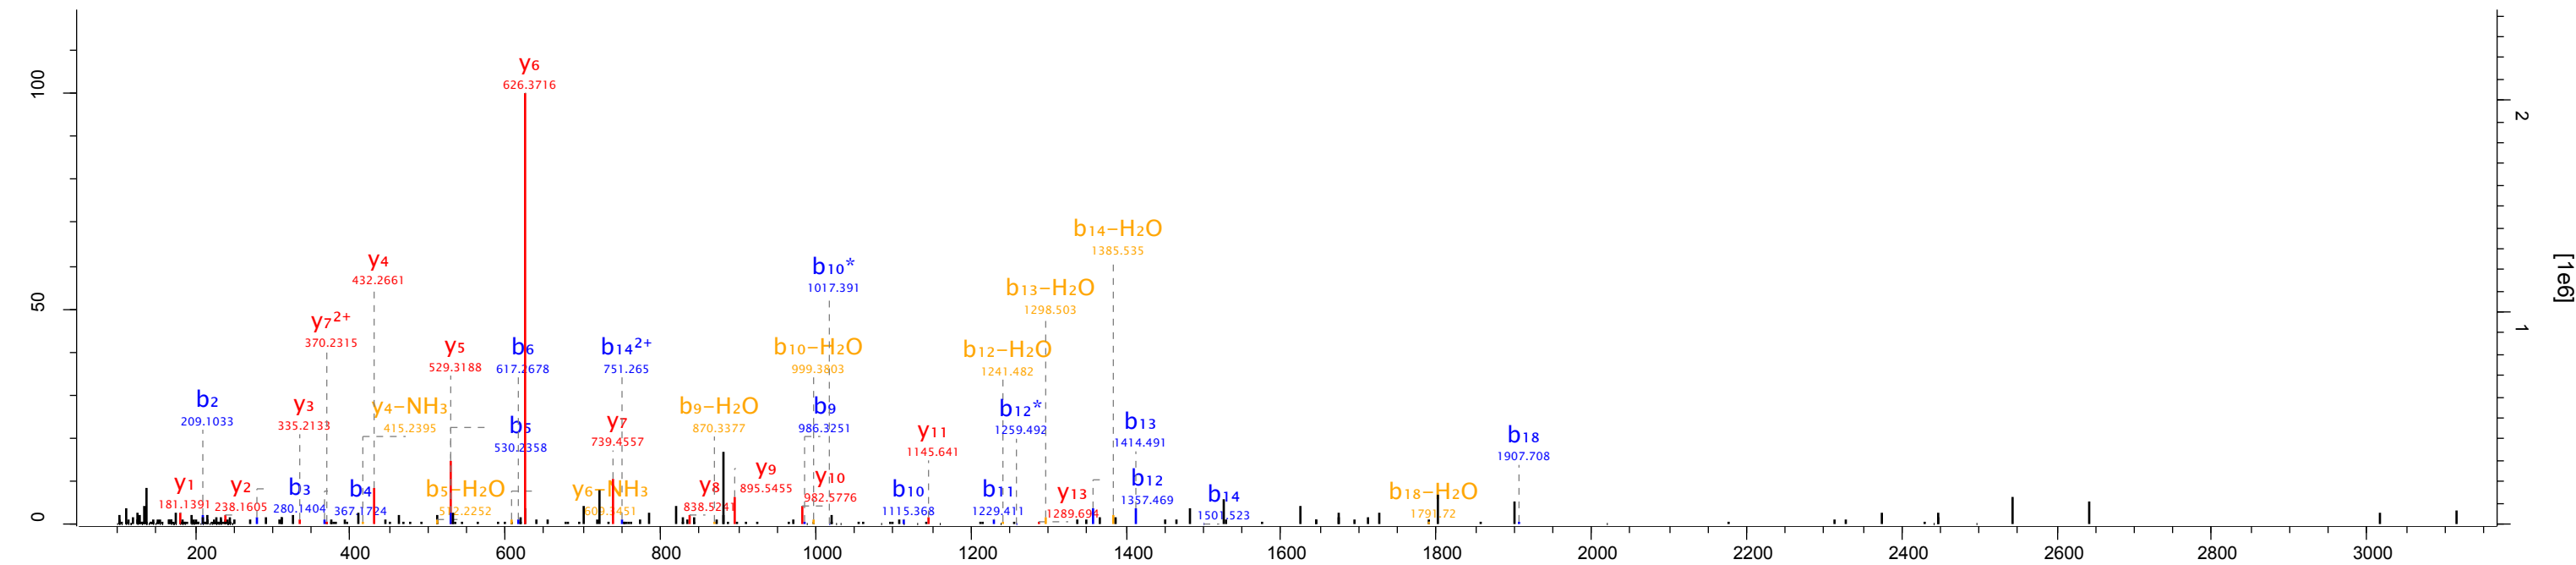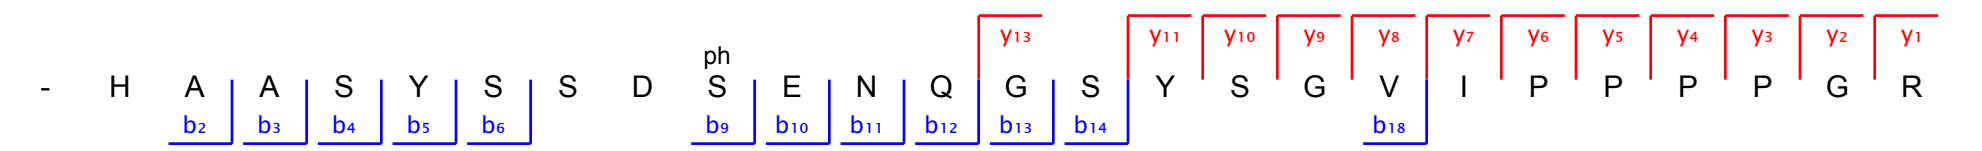

Raw file: 20150812\_A375SR\_Phospho\_BR1\_04  
 Scan: 14816 Method: FTMS; HCD Score: 111.05 m/z: 723.58 Gene names: GTF3C2

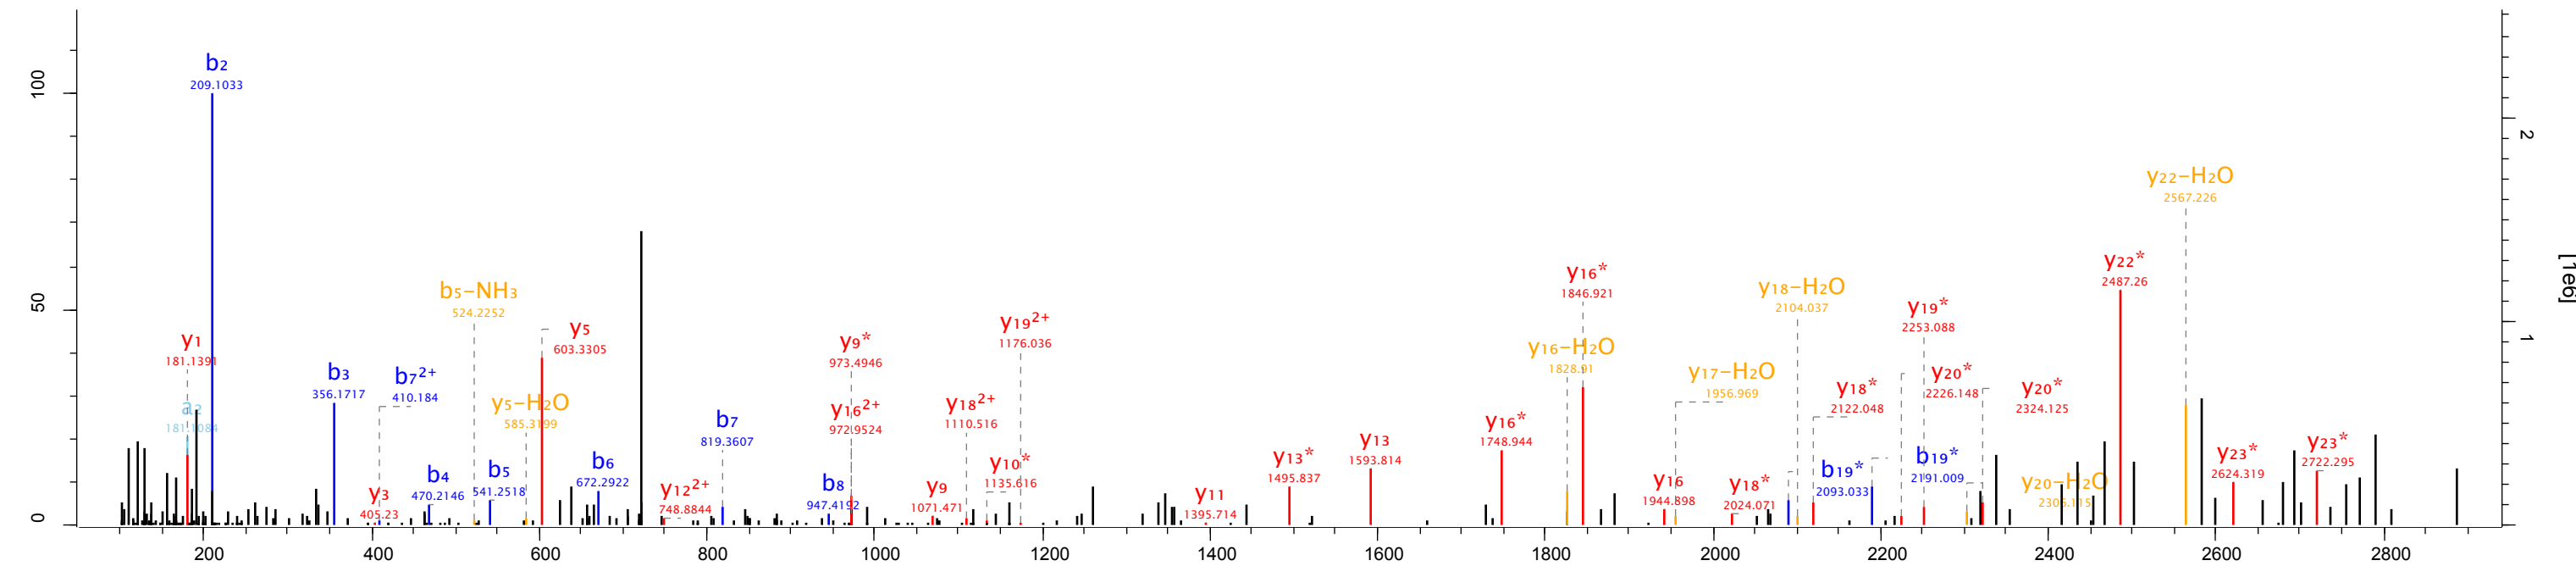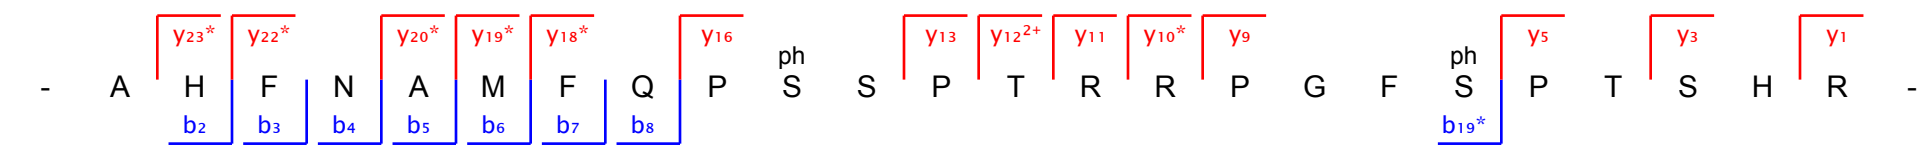

Raw file  
20150812\_A375SR\_Phospho\_BR1\_04

Scan 14926 Method FTMS; HCD Score 319.29 m/z 857.41 Gene names NAV1

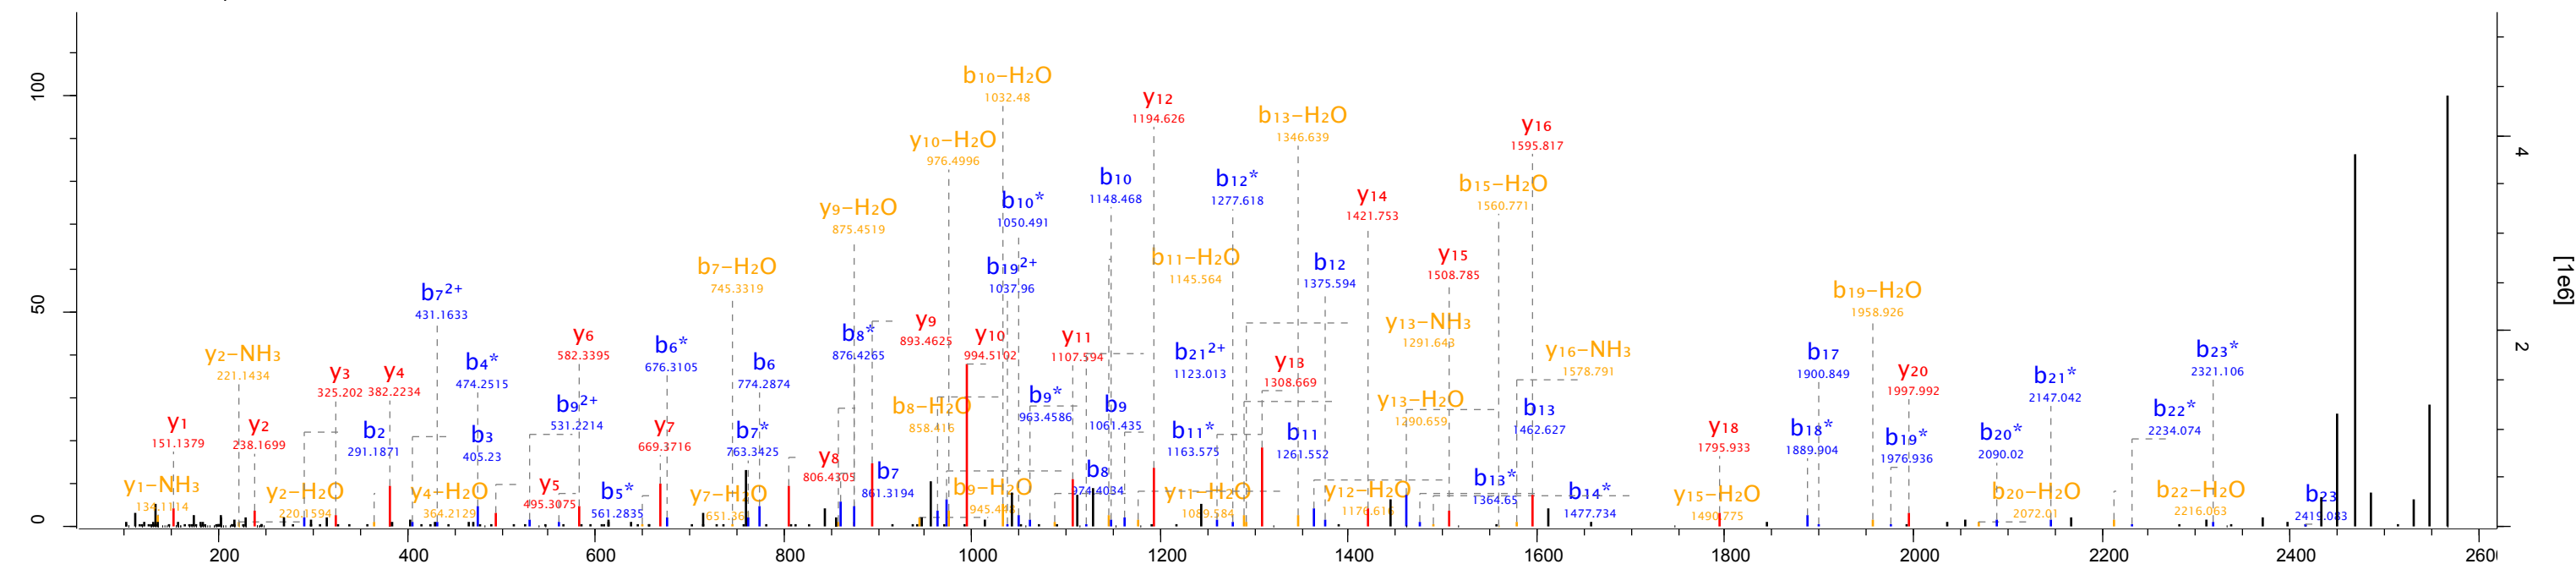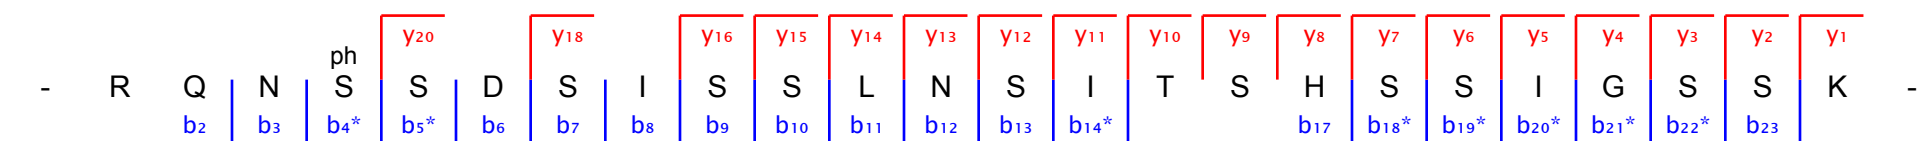

Raw file Scan Method Score m/z Gene names  
 20150812\_A375SR\_Phospho\_BR1\_04 14936 FTMS; HCD 155.88 943.15 FXR1

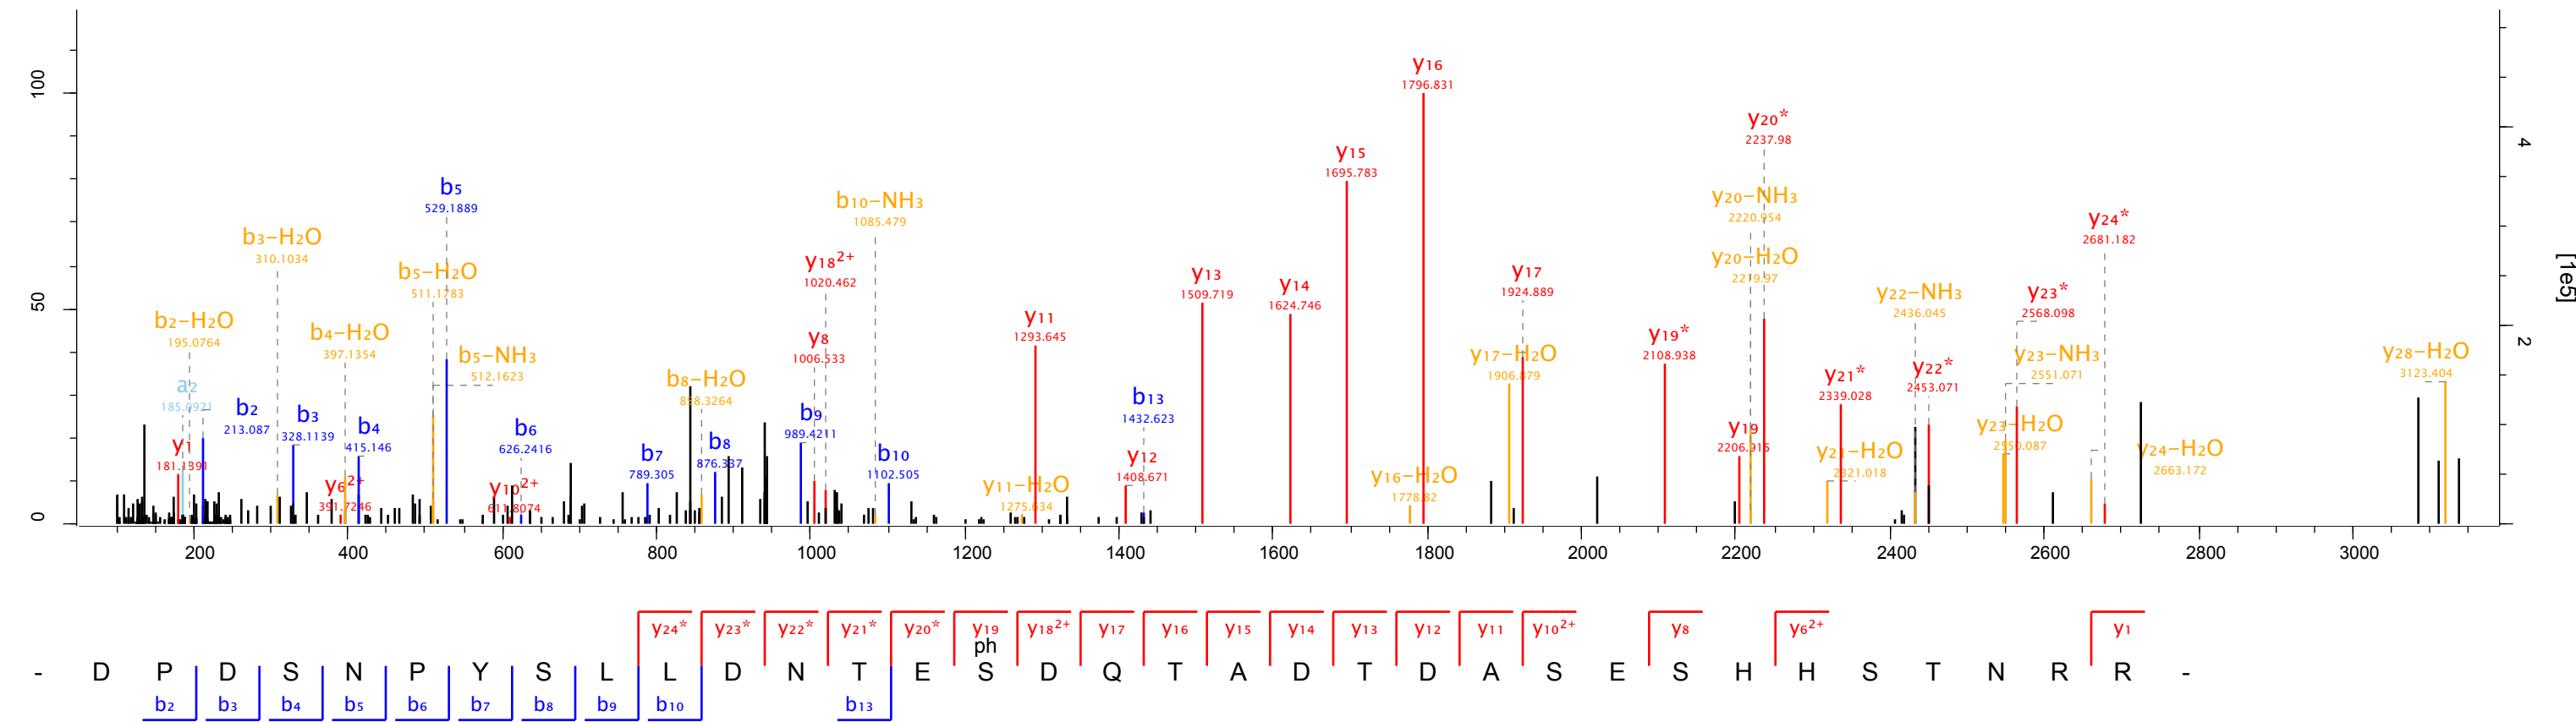

Raw file Scan Method Score m/z Gene names  
 20150812\_A375SR\_Phospho\_BR1\_04 15006 FTMS; HCD 351.19 972.43 TNC

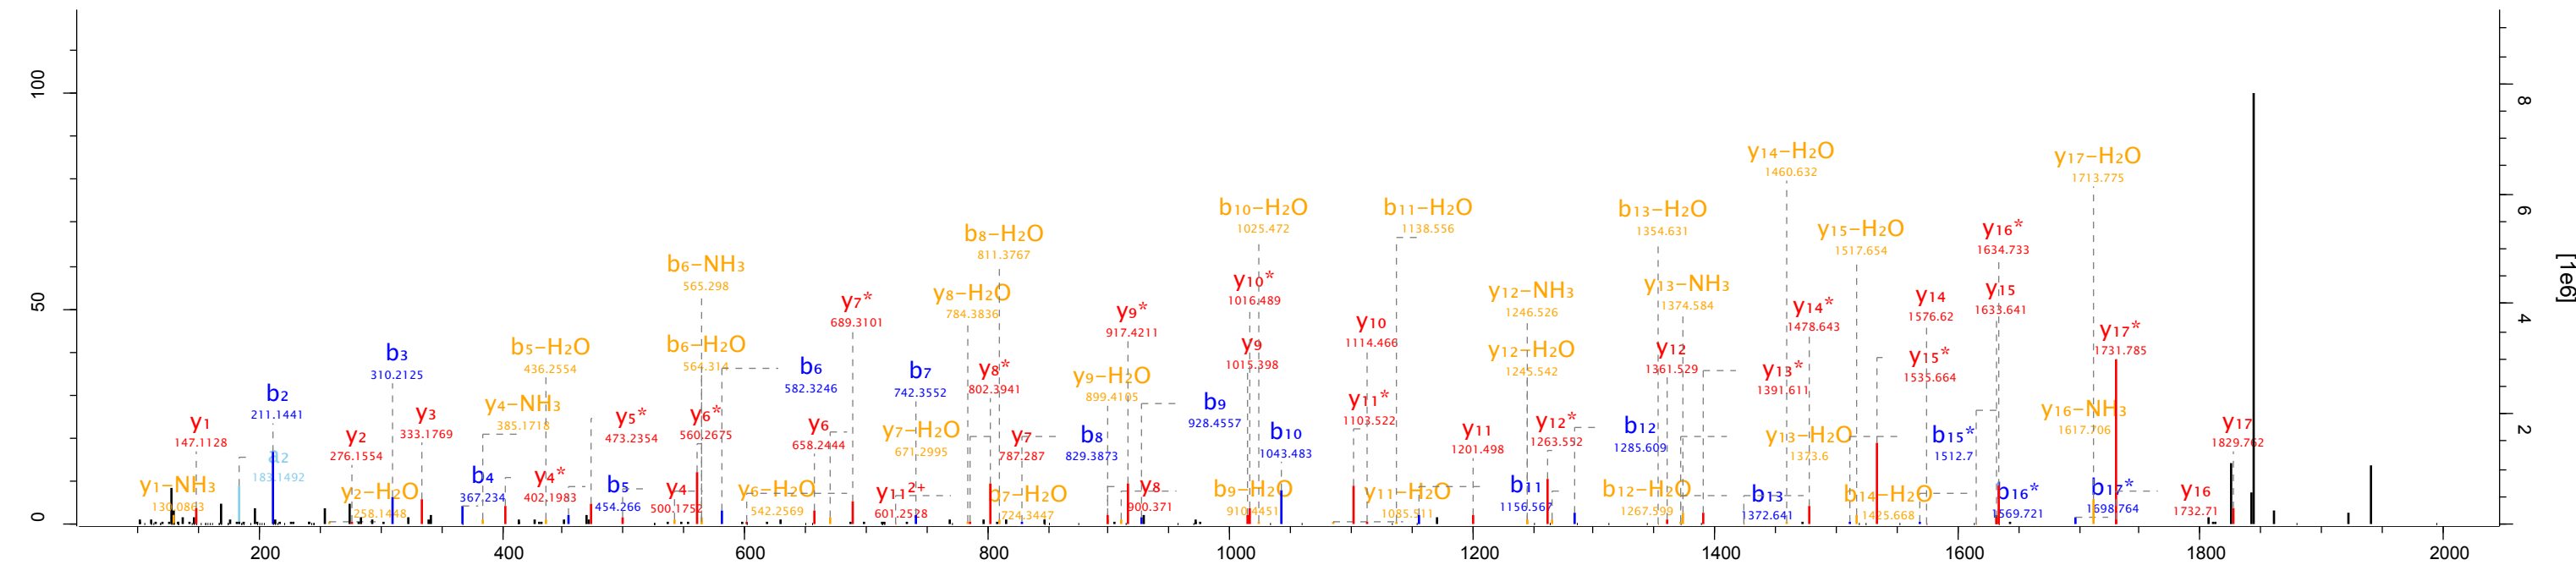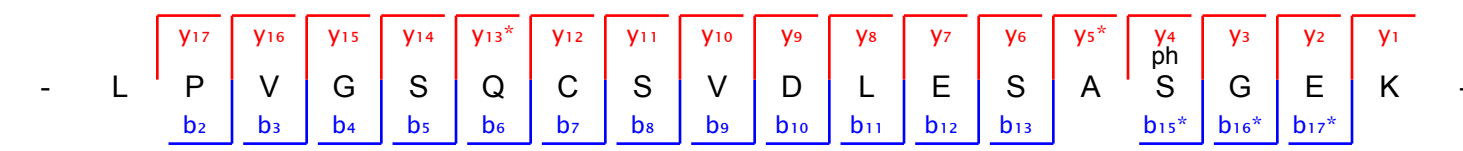

Raw file 20150812\_A375SR\_Phospho\_BR1\_04 Scan 15046 Method FTMS; HCD Score 348.93 m/z 833.36 Gene names NAP1L4

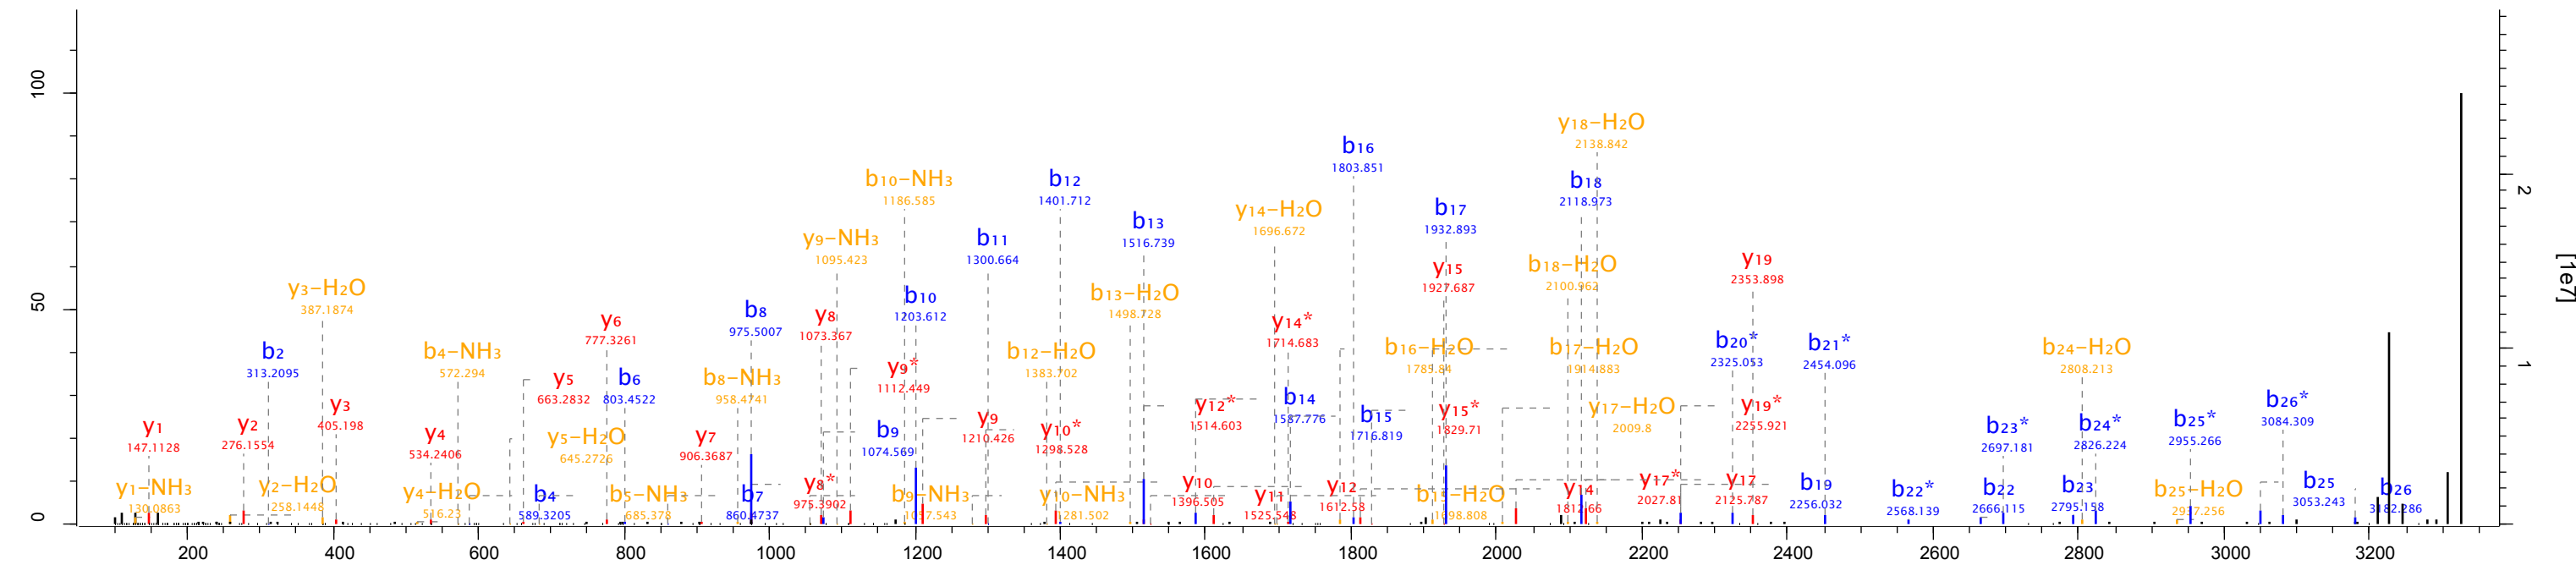

- R R E F I T G D V E P T D A E S E W H S E N E E E E K -

b<sub>2</sub>
b<sub>4</sub>
b<sub>6</sub>
b<sub>7</sub>
b<sub>8</sub>
b<sub>9</sub>
b<sub>10</sub>
b<sub>11</sub>
b<sub>12</sub>
b<sub>13</sub>
b<sub>14</sub>
b<sub>15</sub>
b<sub>16</sub>
b<sub>17</sub>
b<sub>18</sub>
b<sub>19</sub>
b<sub>20</sub>\*
b<sub>21</sub>\*
b<sub>22</sub>
b<sub>23</sub>
b<sub>24</sub>\*
b<sub>25</sub>
b<sub>26</sub>

y<sub>19</sub>
y<sub>17</sub>
y<sub>15</sub>
y<sub>14</sub>
y<sub>12</sub>
y<sub>11</sub>
y<sub>10</sub>
y<sub>9</sub>
y<sub>8</sub>
y<sub>7</sub>
y<sub>6</sub>
y<sub>5</sub>
y<sub>4</sub>
y<sub>3</sub>
y<sub>2</sub>
y<sub>1</sub>



Raw file: 20150812\_A375SR\_Phospho\_BR1\_04  
 Scan: 15366 Method: FTMS; HCD Score: 101.88 m/z: 1050.12 Gene names: NES

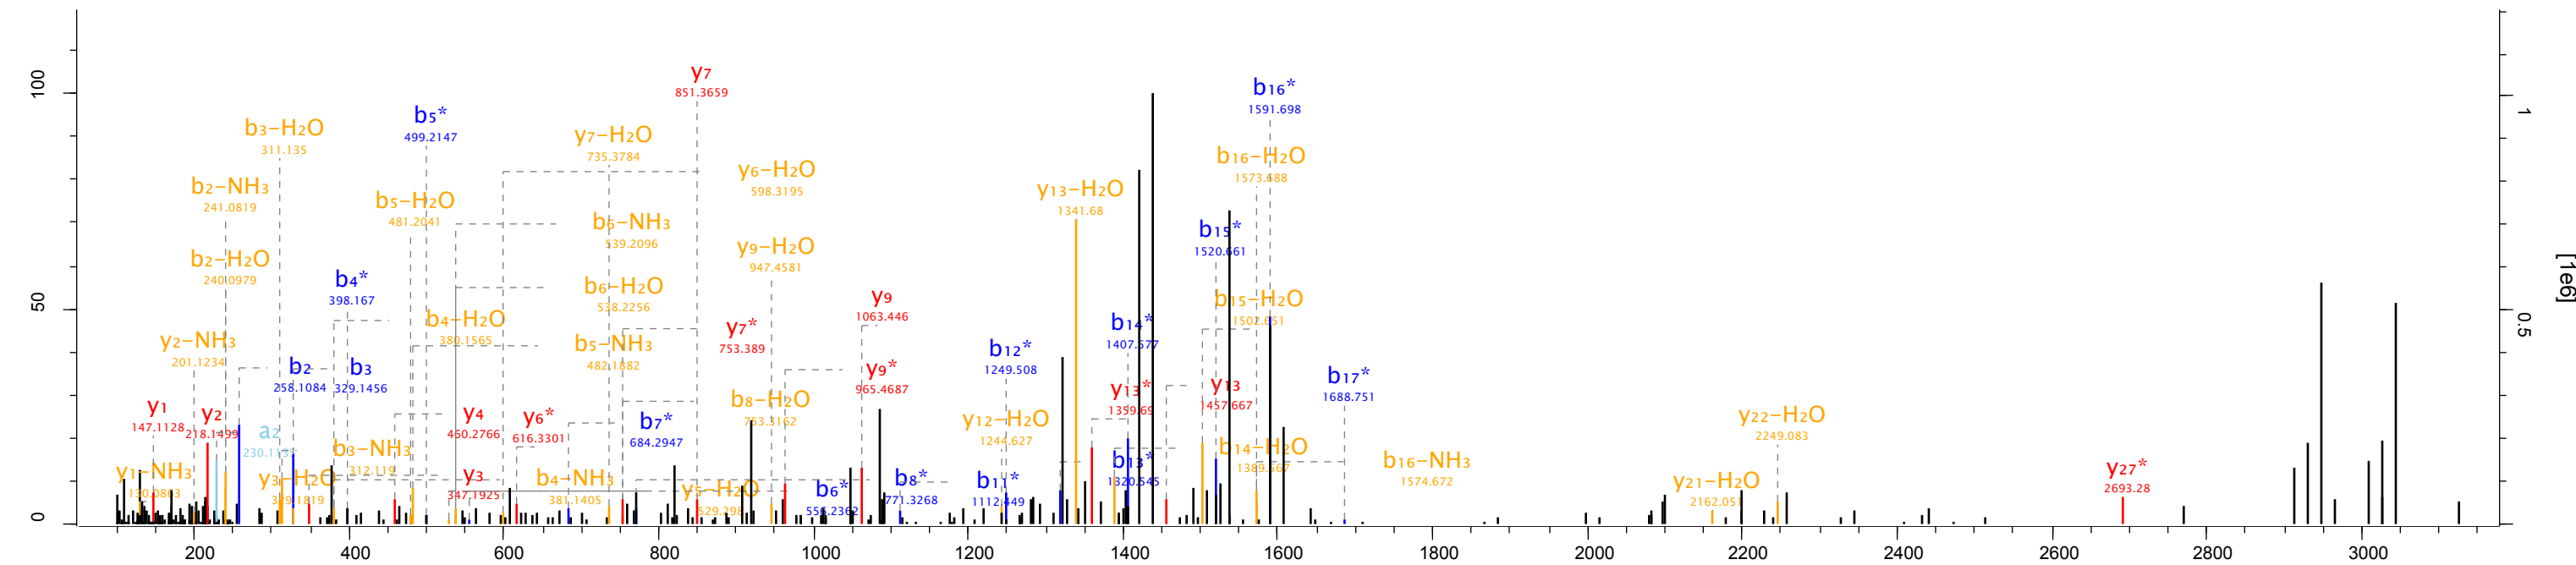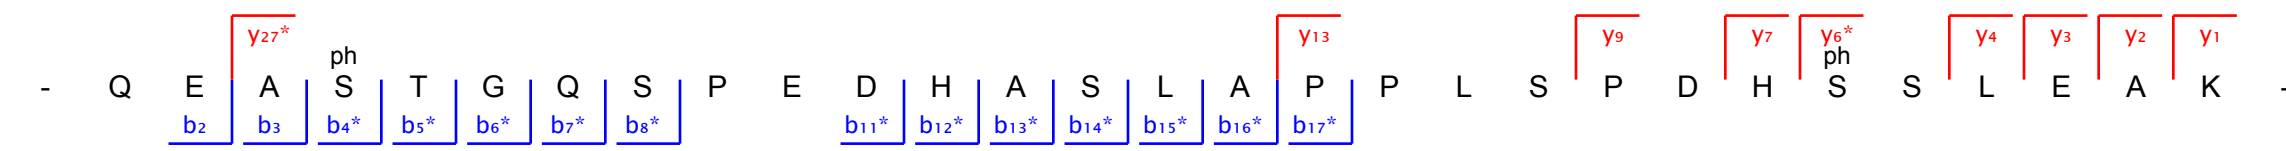

Raw file: 20150812\_A375SR\_Phospho\_BR1\_04  
 Scan: 15656 Method: FTMS; HCD Score: 138.53 m/z: 832.35 Gene names: ZC3H4

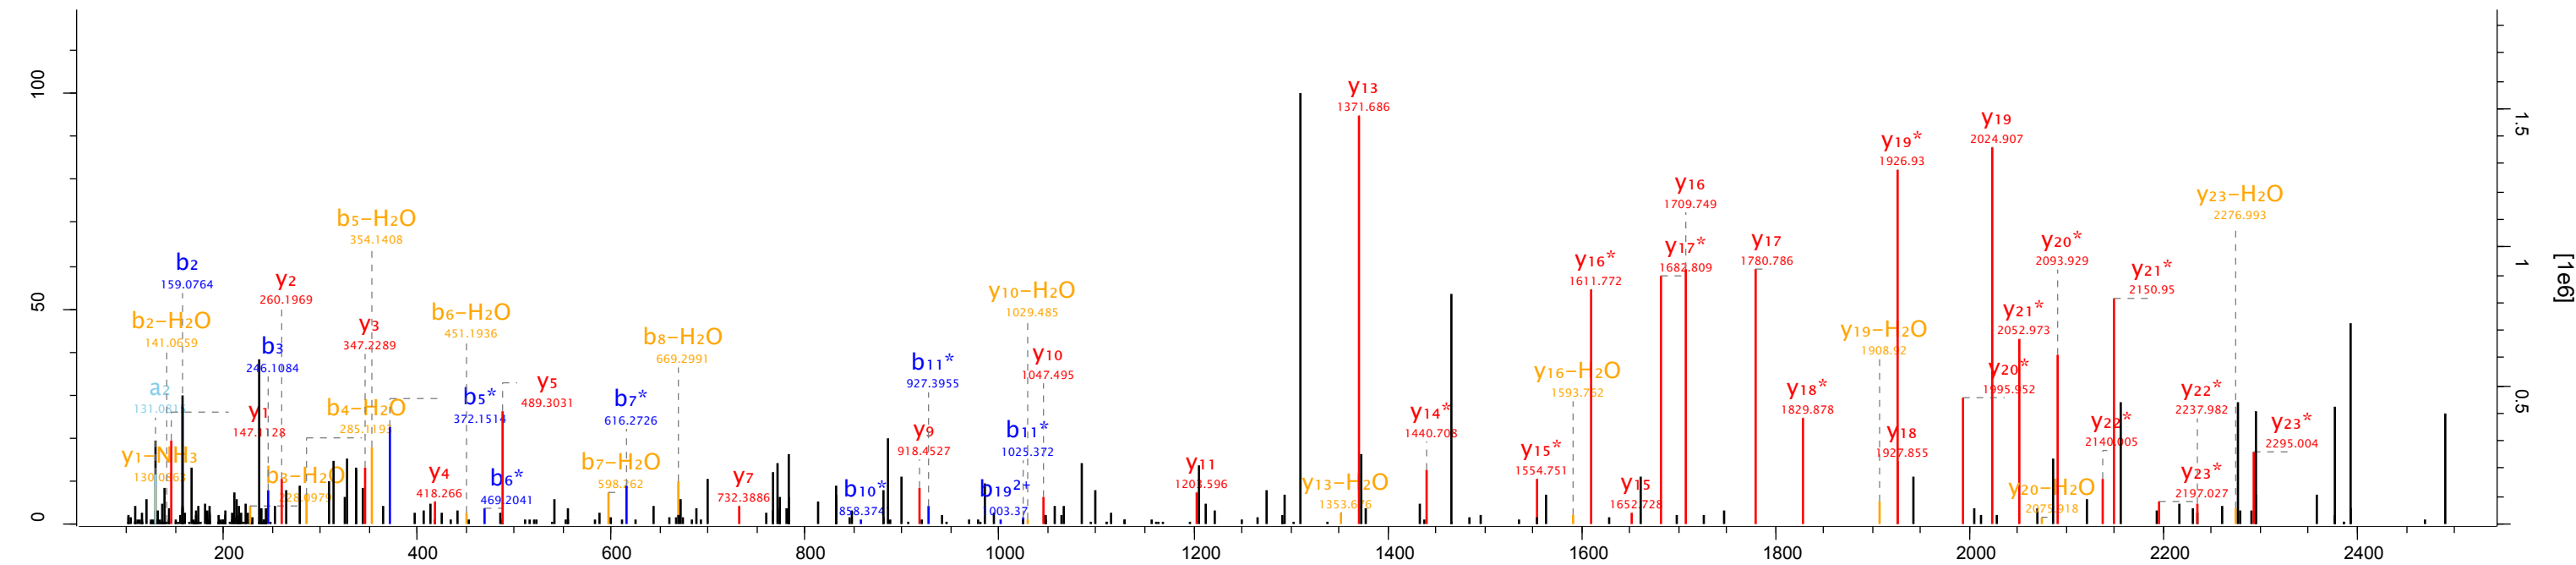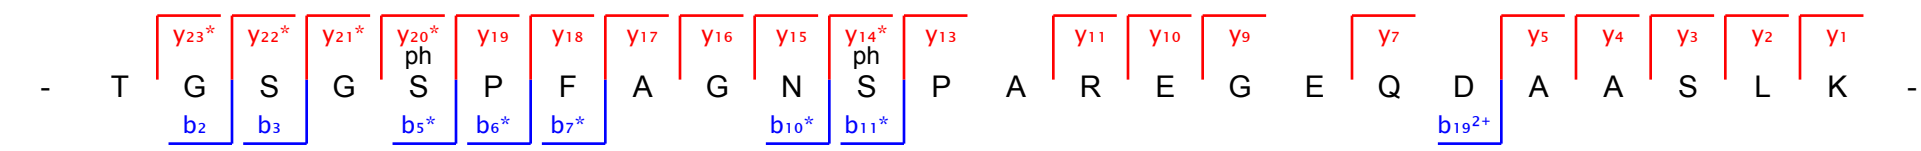

Raw file: 20150812\_A375SR\_Phospho\_BR1\_04  
 Scan: 1566 Method: FTMS; HCD Score: 131.42 m/z: 530.25 Gene names: PALLD

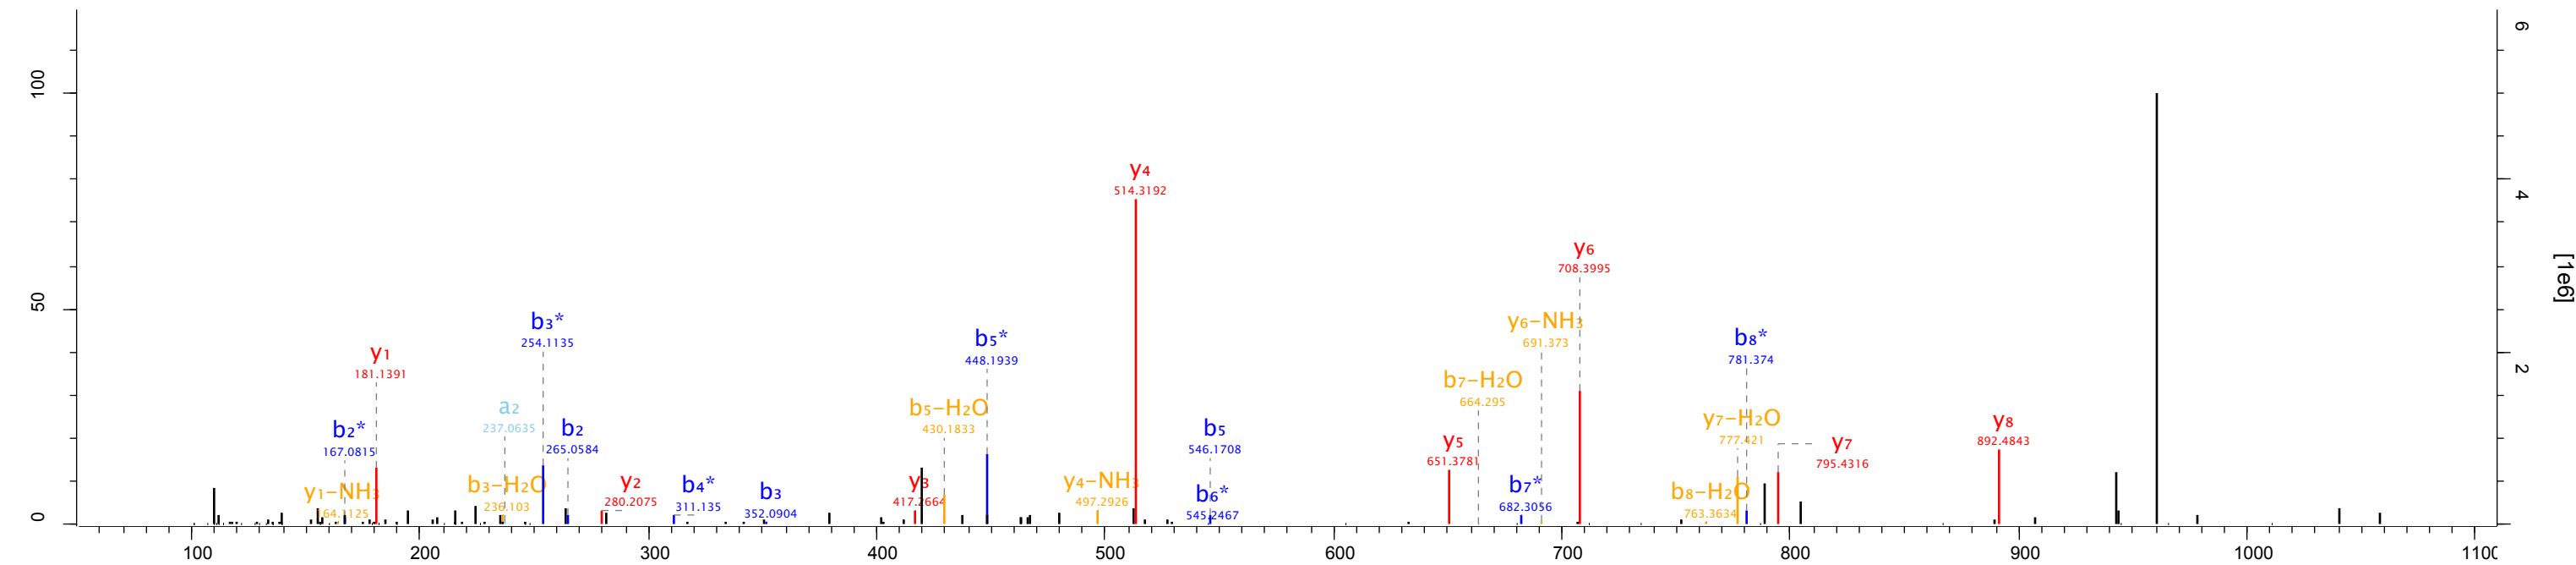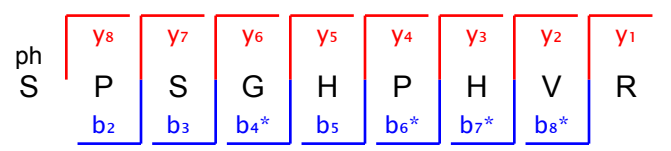

Raw file 20150812\_A375SR\_Phospho\_BR1\_04 Scan 1586 Method FTMS; HCD Score 48.33 m/z 607.59 Gene names RERE

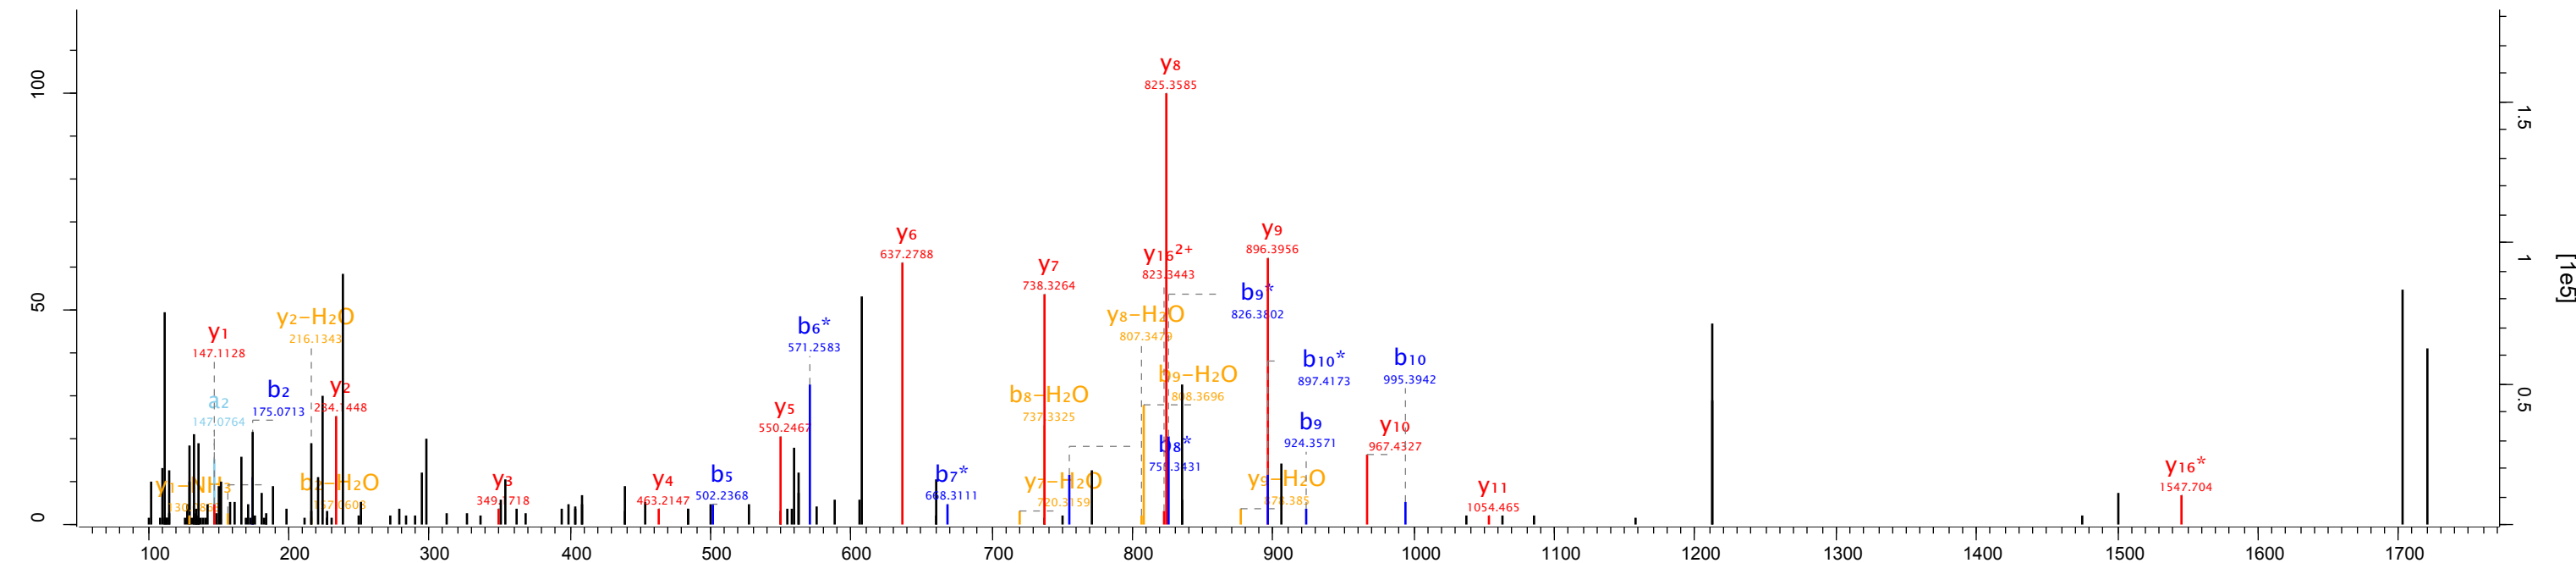

- S S G R N S P S A A S T S S N D S K -

Fragmentation scheme showing b and y ions for the peptide sequence: - S S G R N S P S A A S T S S N D S K -

Red boxes indicate y ions: y16\* (G), y11 (S), y10 (A), y9 (A), y8 (S), y7 (T), y6 (S), y5 (S), y4 (N), y3 (D), y2 (S), y1 (K).

Blue boxes indicate b ions: b2 (SS), b5 (NR), b6\* (NS), b7\* (NSP), b8\* (NSPA), b9 (NSPA), b10 (NSPA).



Raw file 20150812\_A375SR\_Phospho\_BR1\_04 Scan 16346 Method FTMS; HCD Score 201.17 m/z 946.42 Gene names UBE4B

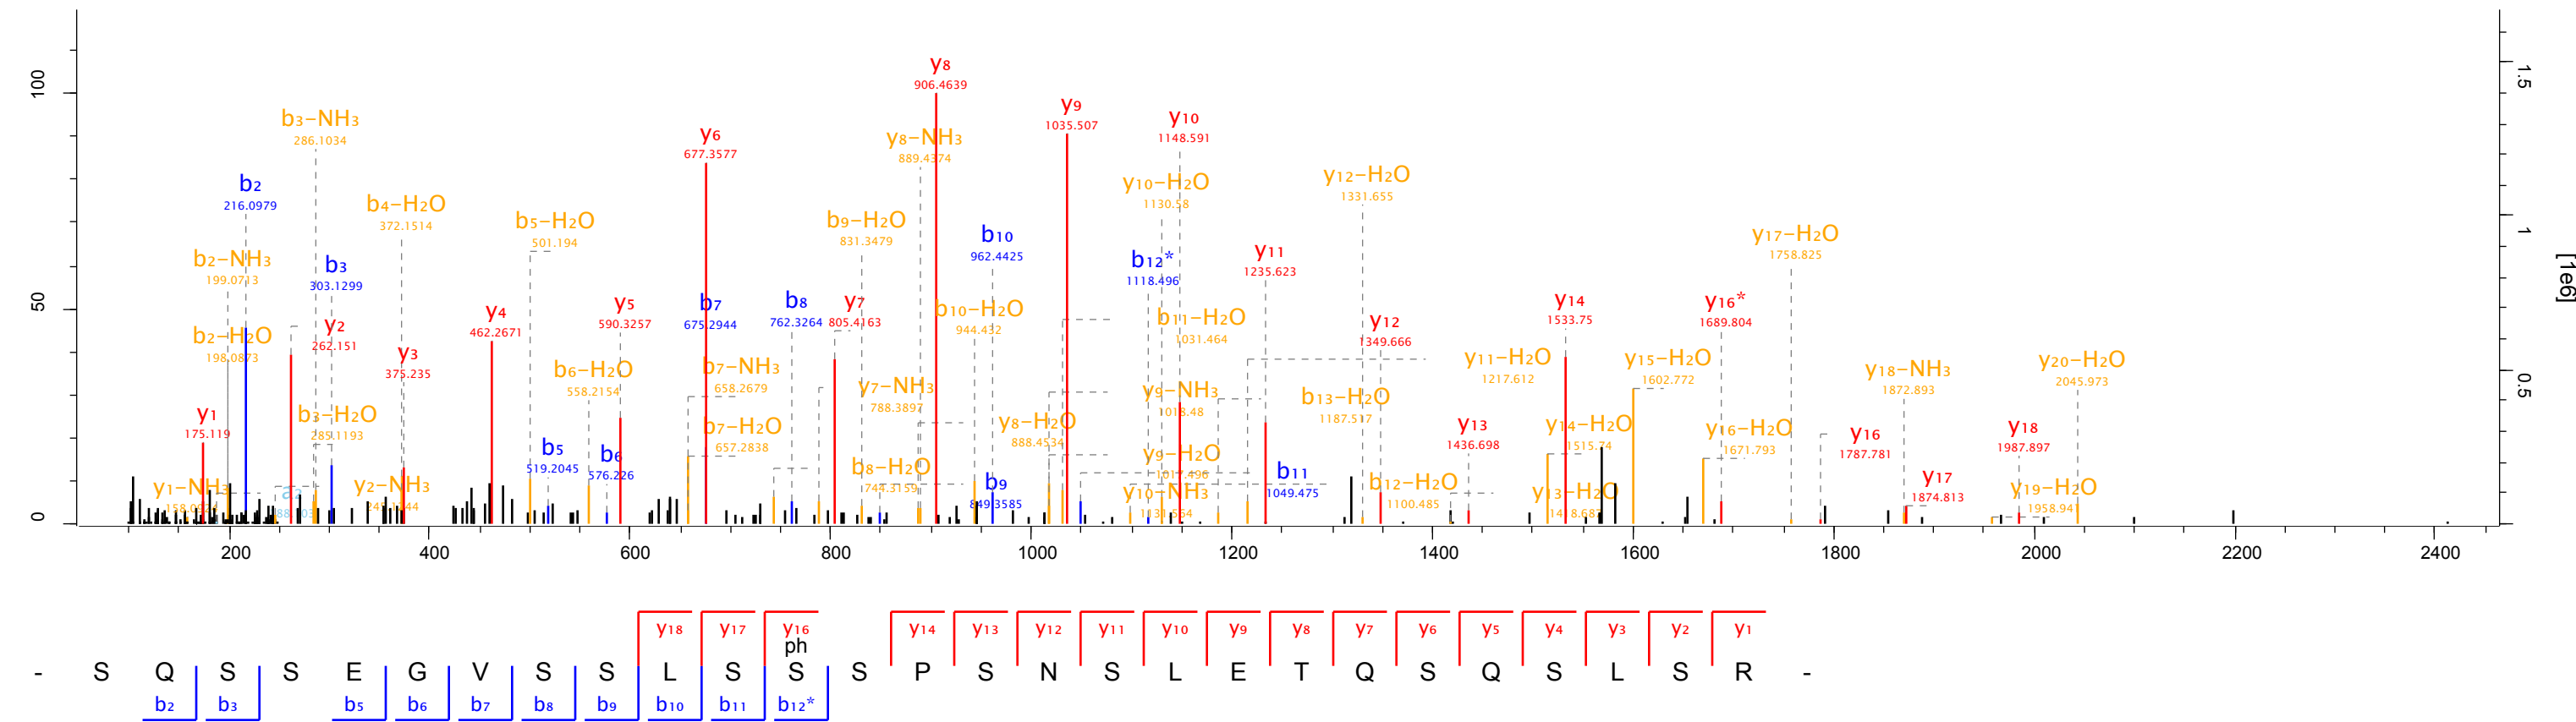

Raw file: 20150812\_A375SR\_Phospho\_BR1\_04  
 Scan: 16456 Method: FTMS; HCD Score: 65.83 m/z: 874.46 Gene names: KIAA0430

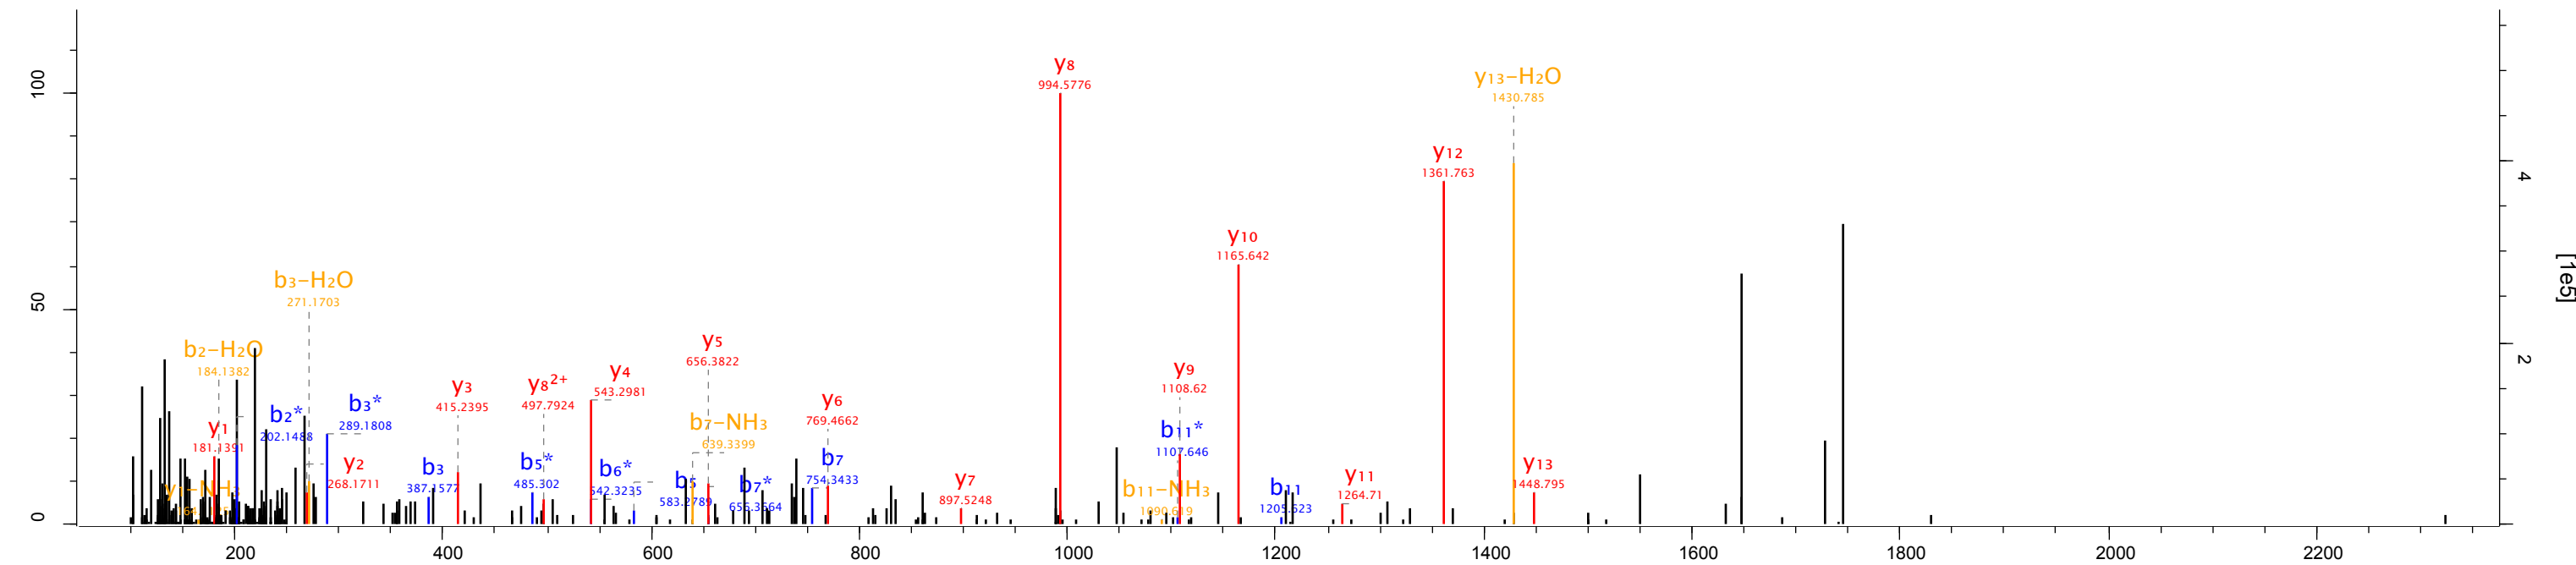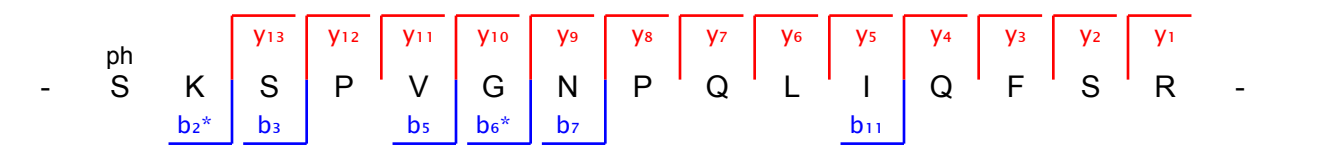

Raw file 20150812\_A375SR\_Phospho\_BR1\_04 Scan 16566 Method FTMS; HCD Score 144.73 m/z 830.69 Gene names MAP1B

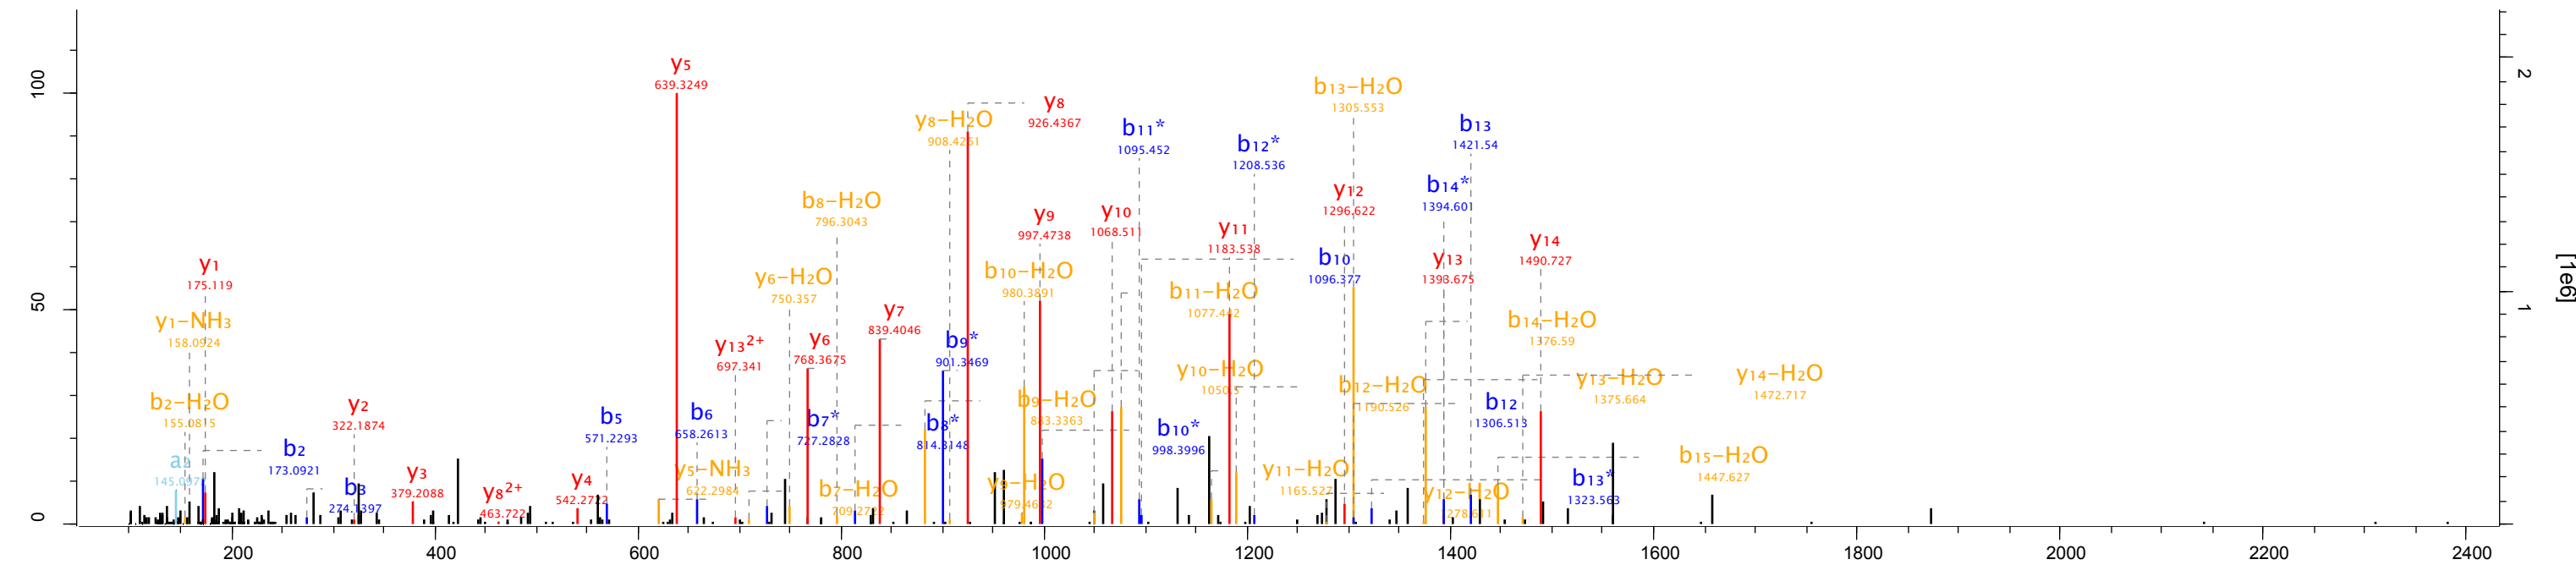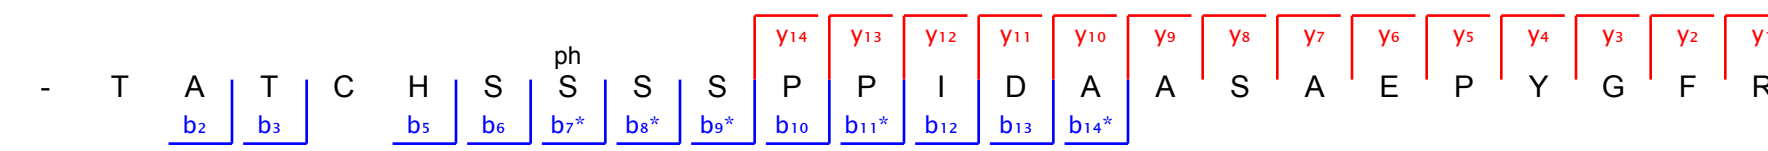



Raw file: 20150812\_A375SR\_Phospho\_BR1\_04  
 Scan: 16766 Method: FTMS; HCD Score: 350.57 m/z: 1000.92 Gene names: NOB1

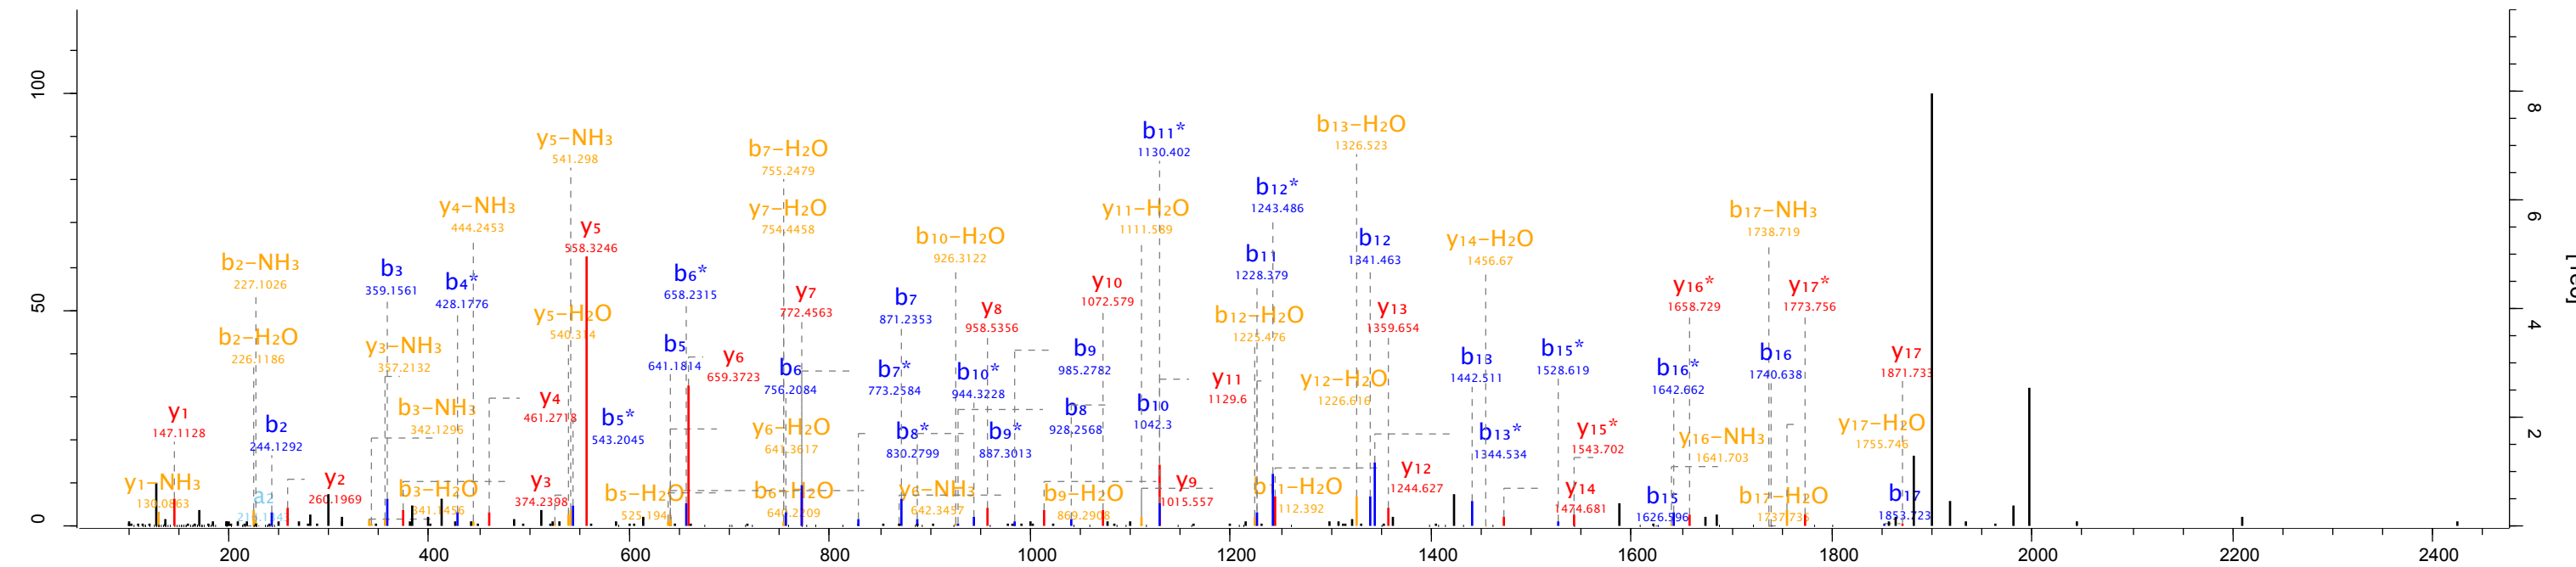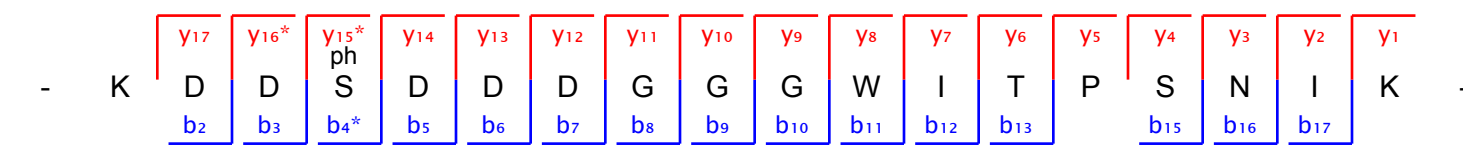

Raw file 20150812\_A375SR\_Phospho\_BR1\_04 Scan 17066 Method FTMS; HCD Score 119.35 m/z 895.43 Gene names ZYX

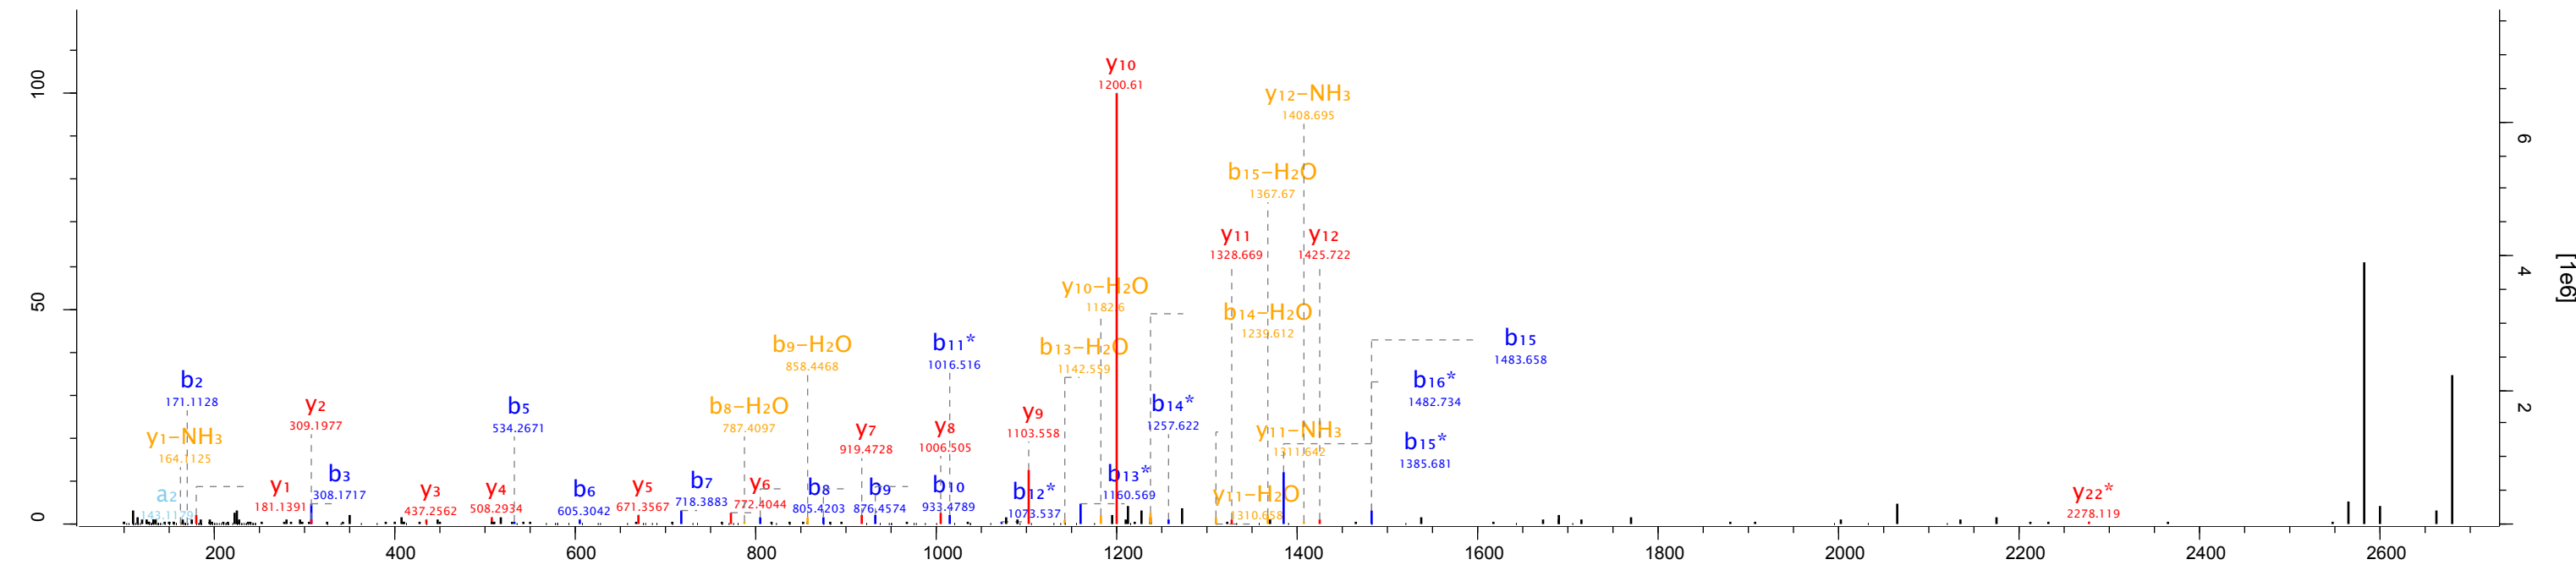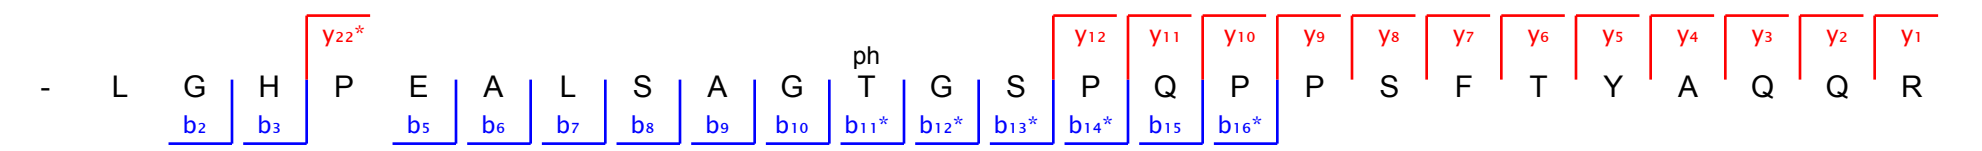

Raw file 20150812\_A375SR\_Phospho\_BR1\_04 Scan 17376 Method FTMS; HCD Score 288.61 m/z 957.43 Gene names AHNAK

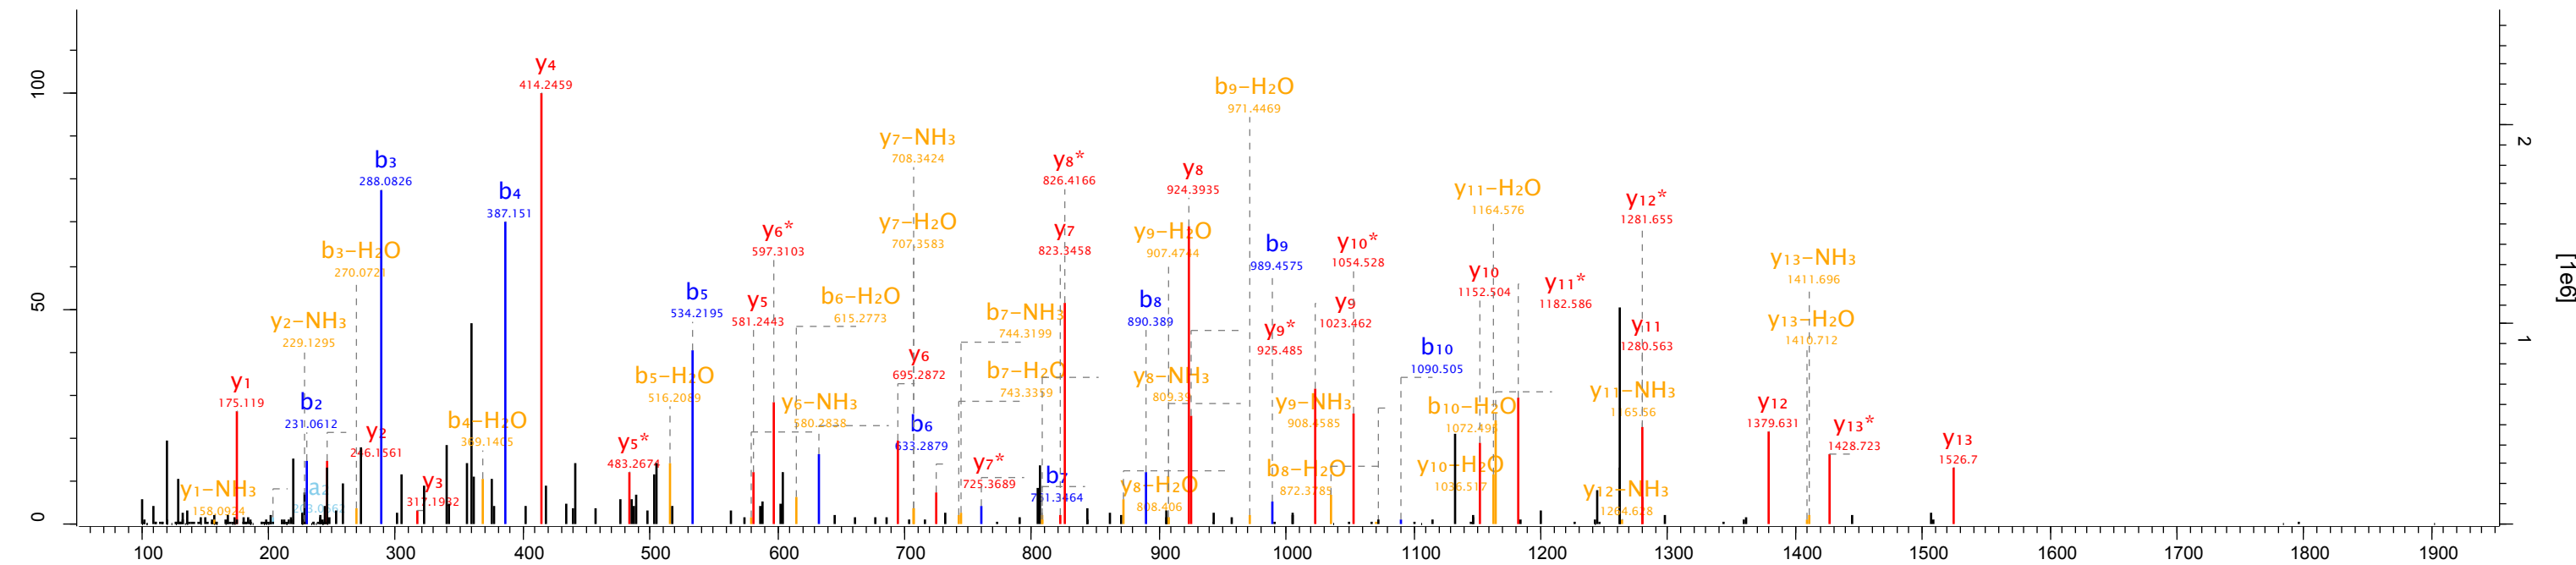

- D D G V F V Q E V T Q N S P A A R -  
 b<sub>2</sub> b<sub>3</sub> b<sub>4</sub> b<sub>5</sub> b<sub>6</sub> b<sub>7</sub> b<sub>8</sub> b<sub>9</sub> b<sub>10</sub> y<sub>1</sub> y<sub>2</sub> y<sub>3</sub> y<sub>4</sub> y<sub>5</sub> y<sub>6</sub> y<sub>7</sub> y<sub>8</sub> y<sub>9</sub> y<sub>10</sub> y<sub>11</sub> y<sub>12</sub> y<sub>13</sub>

Raw file 20150812\_A375SR\_Phospho\_BR1\_04 Scan 18096 Method FTMS; HCD Score 201.13 m/z 968.43 Gene names ZNF609

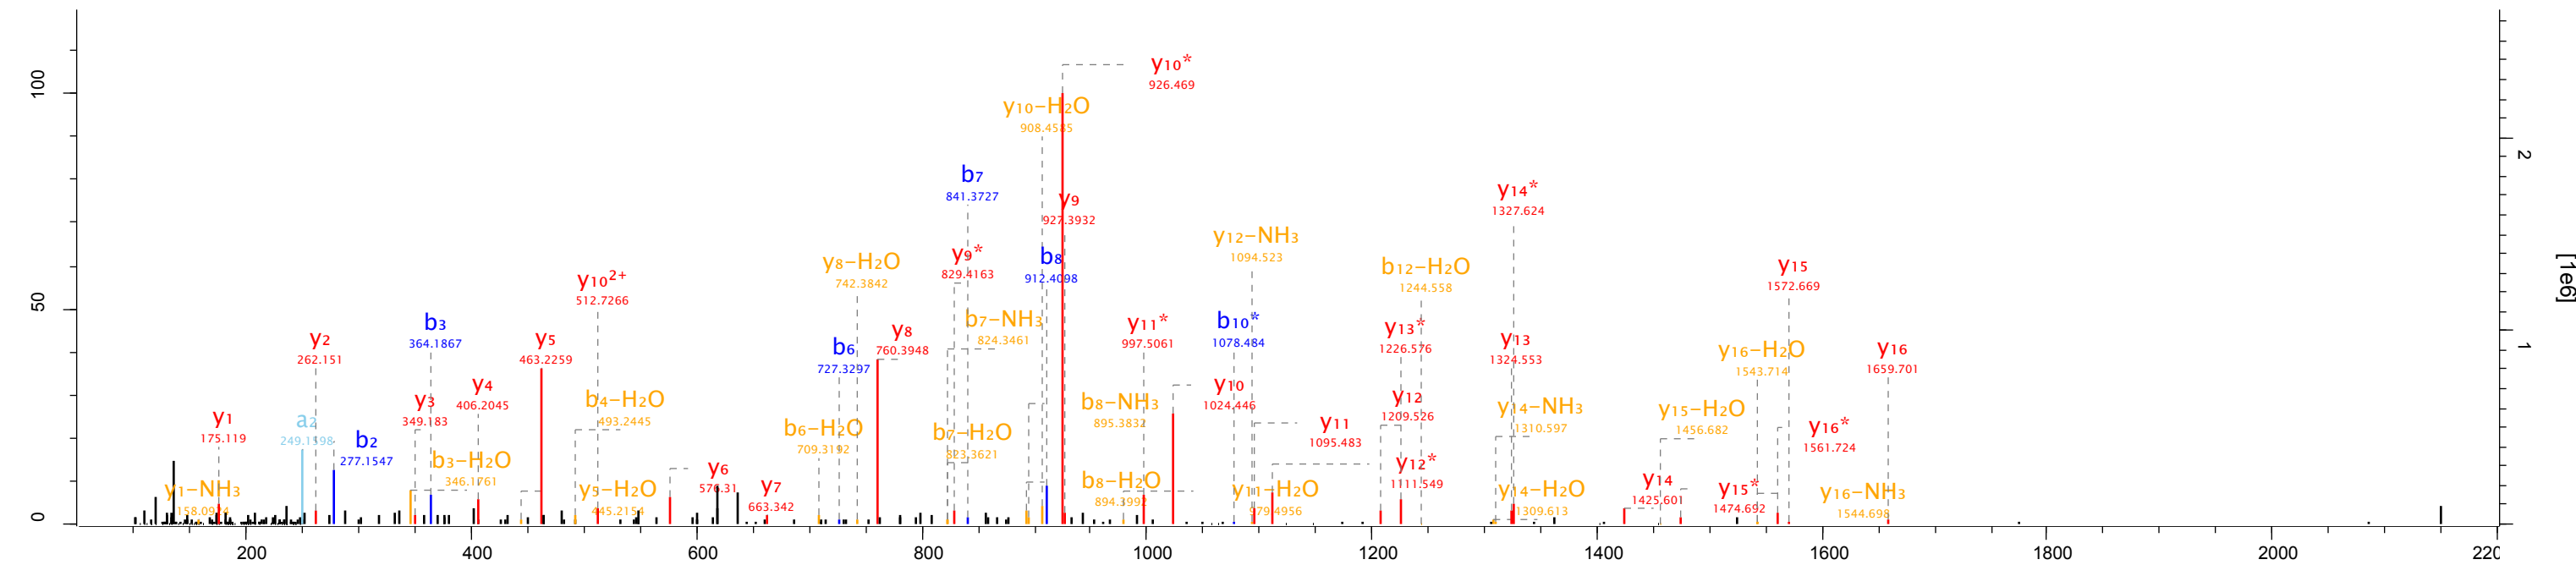

- I Y S F T D N A P S P S I G G S S R -

Fragmentation mapping (b and y ions) is shown below the sequence:

- b2: Y
- b3: S
- b6: D
- b7: N
- b8: A
- b10\*: P

Raw file  
20150812\_A375SR\_Phospho\_BR1\_04

Scan 18256 Method FTMS; HCD Score 327.07 m/z 1253.5 Gene names STRIP1

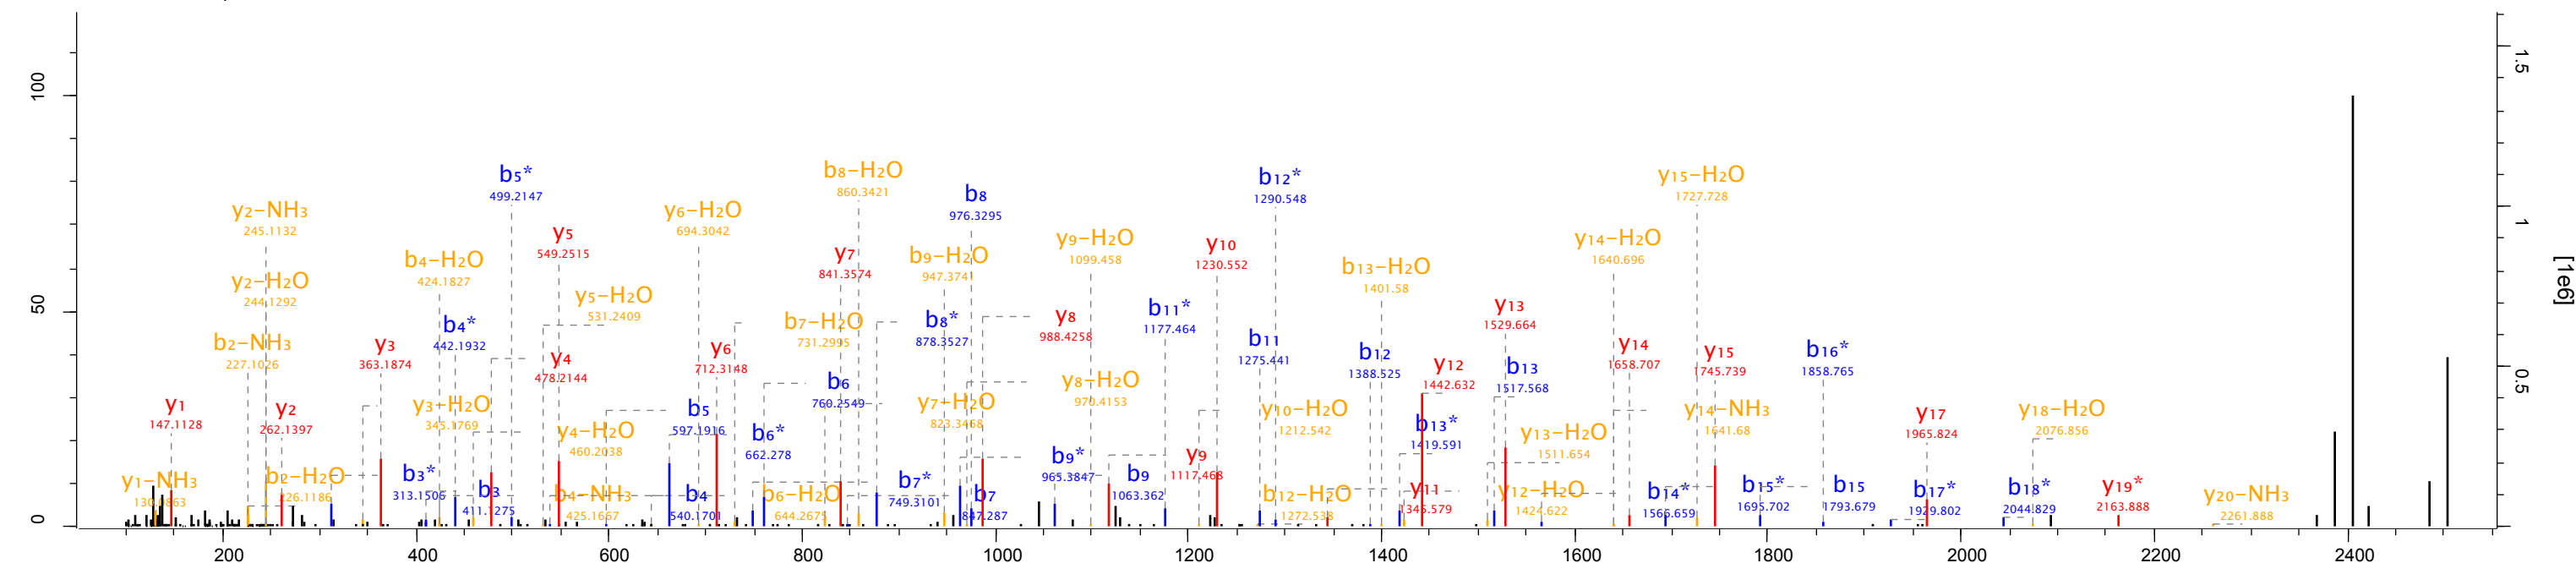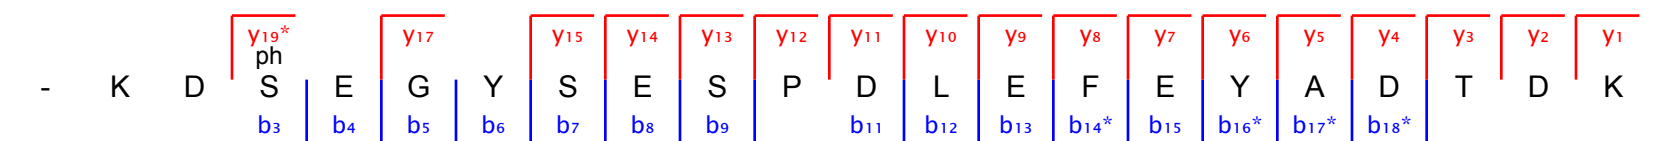

Raw file: 20150812\_A375SR\_Phospho\_BR1\_04  
 Scan: 18456 Method: FTMS; HCD Score: 189.51 m/z: 1055.49 Gene names: PDE1C

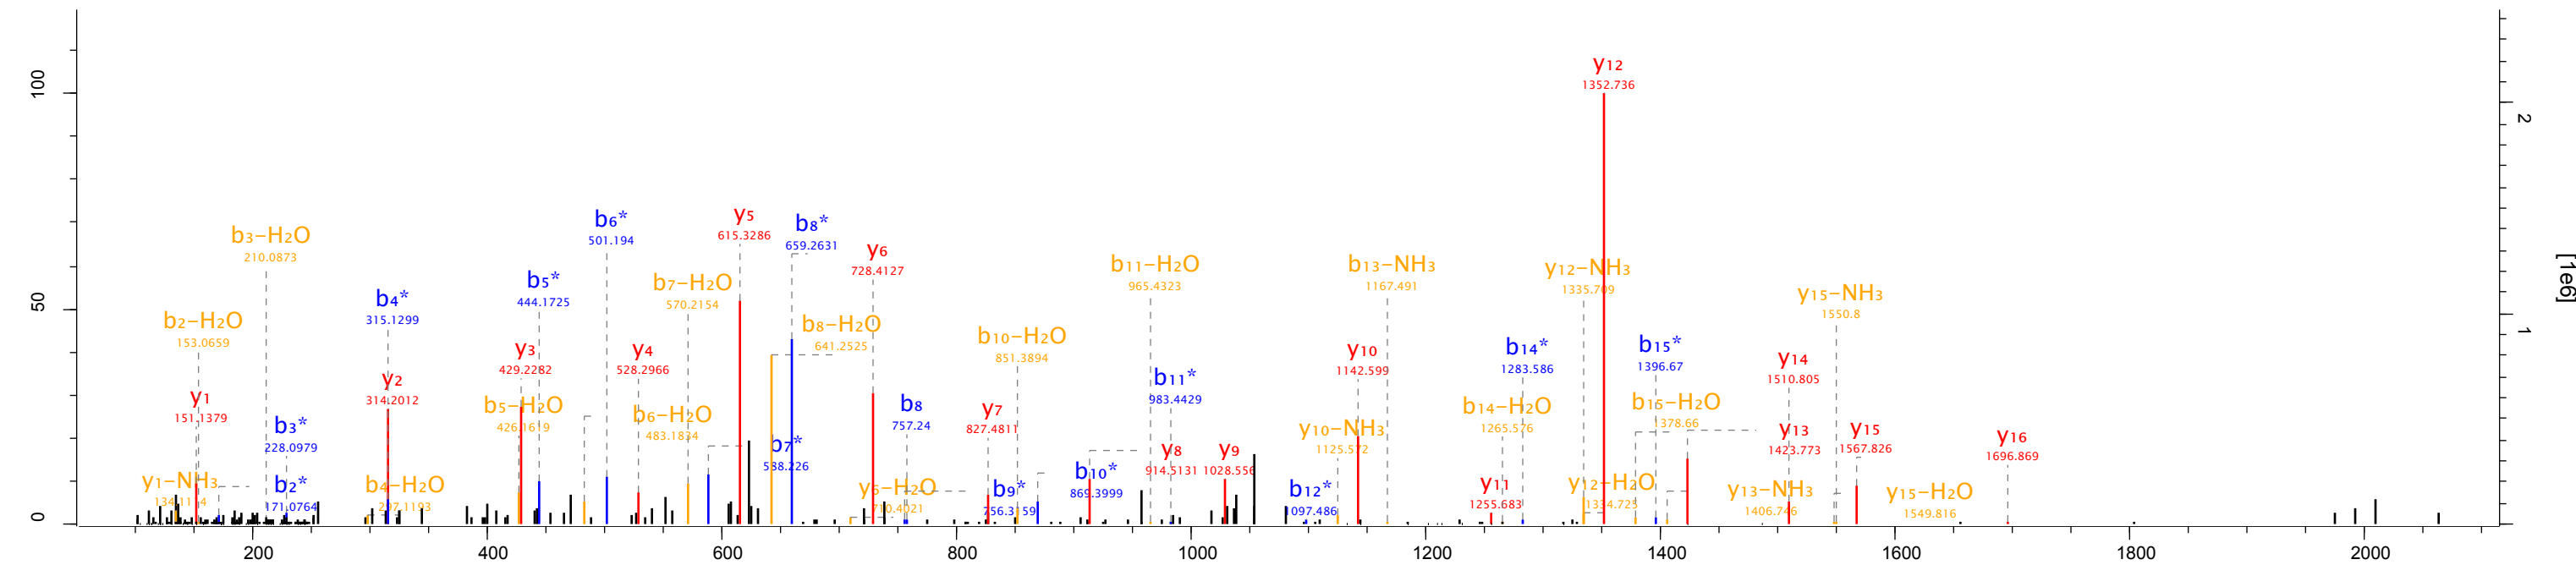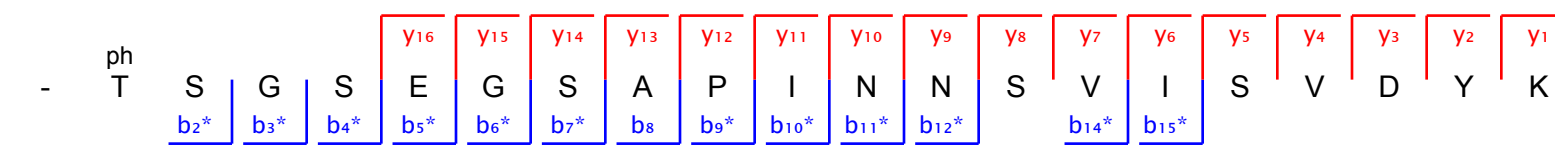

Raw file 20150812\_A375SR\_Phospho\_BR1\_04 Scan 18526 Method FTMS; HCD Score 183.67 m/z 817.71 Gene names LARP4

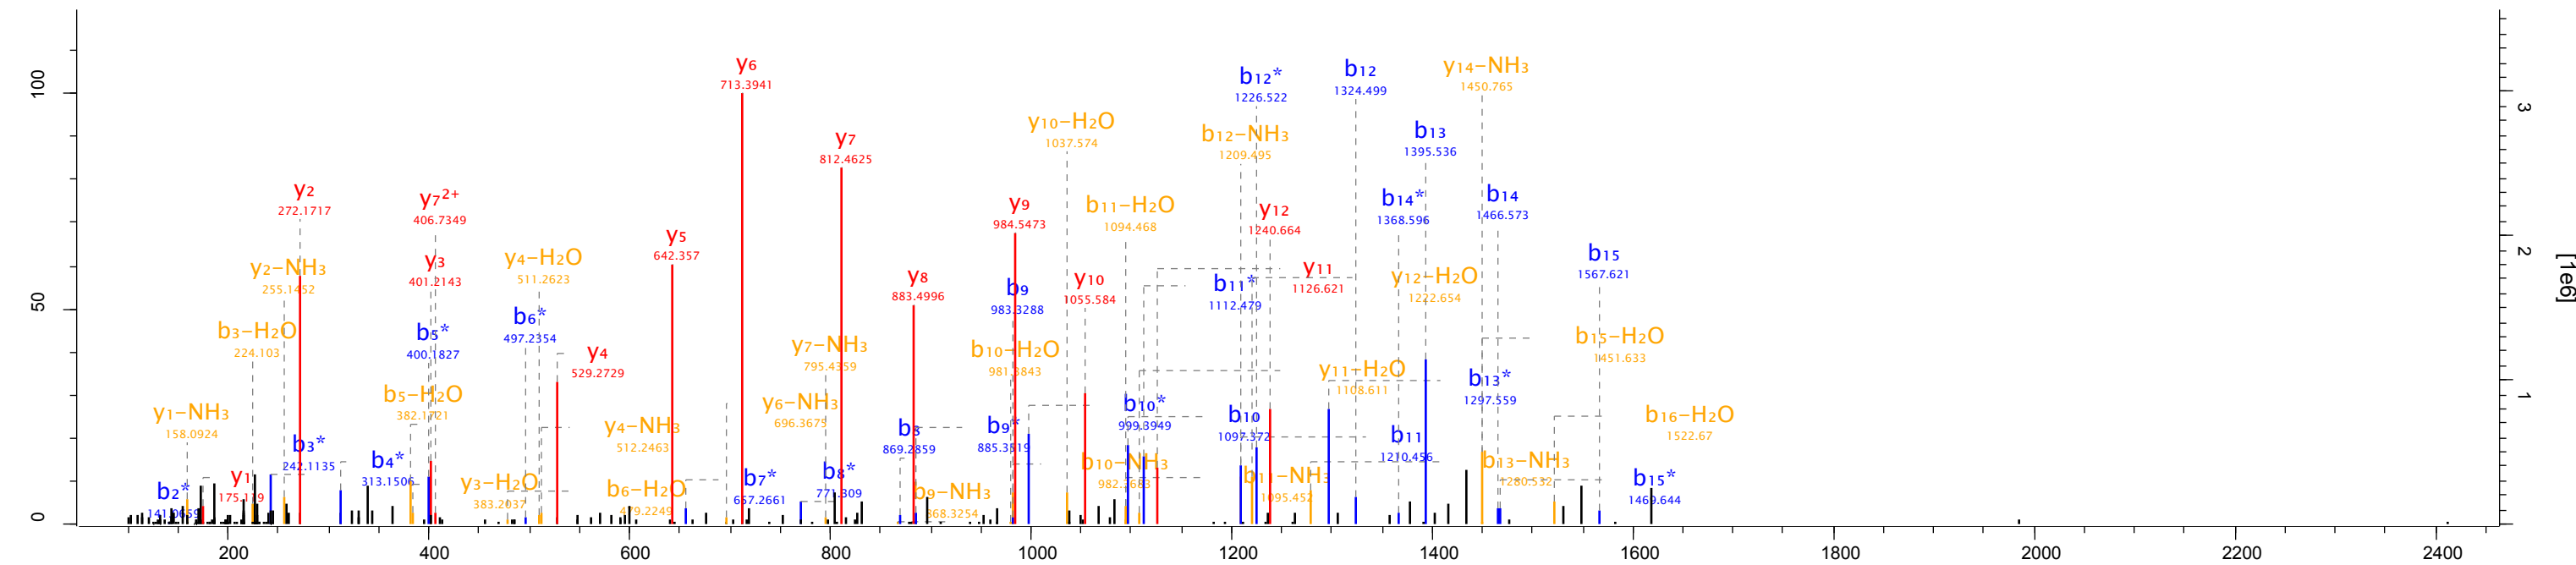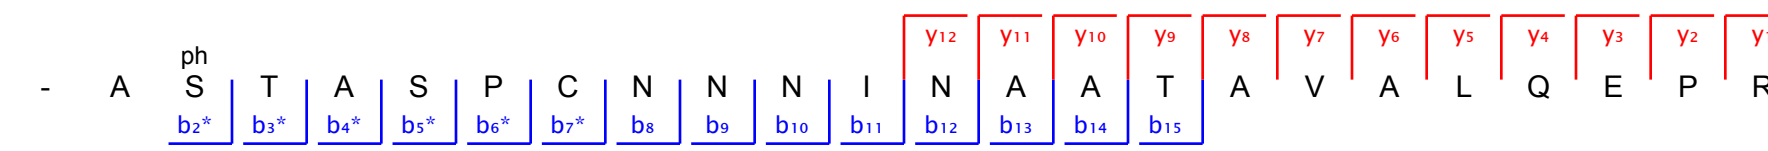

Raw file: 20150812\_A375SR\_Phospho\_BR1\_04  
 Scan: 18716 Method: FTMS; HCD Score: 137.62 m/z: 1020.99 Gene names: KCTD12

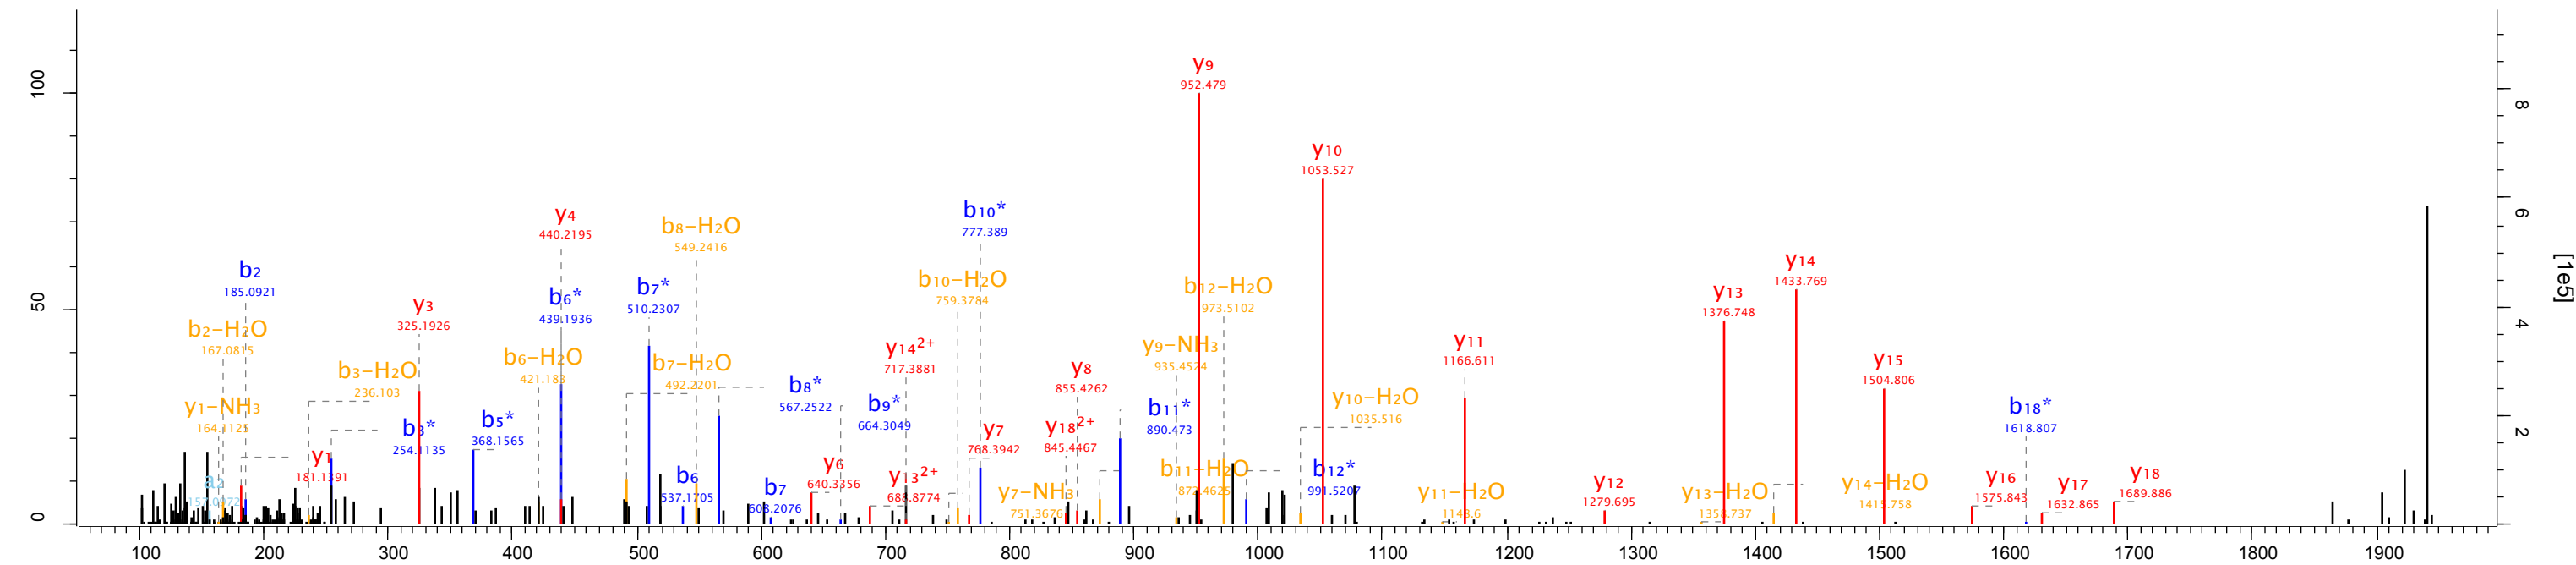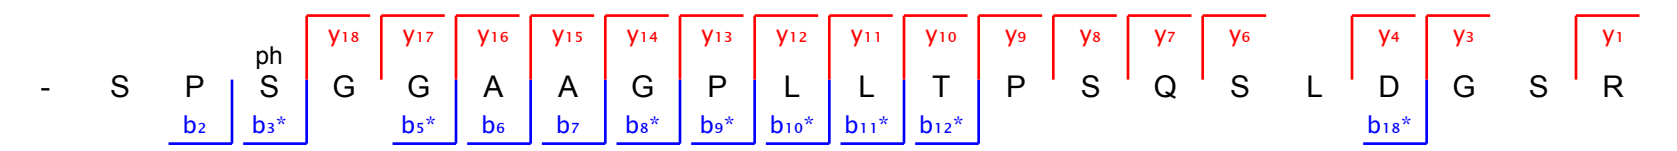



Raw file: 20150812\_A375SR\_Phospho\_BR1\_04  
 Scan: 18836 Method: FTMS; HCD Score: 40.62 m/z: 914.46 Gene names: TAF9B

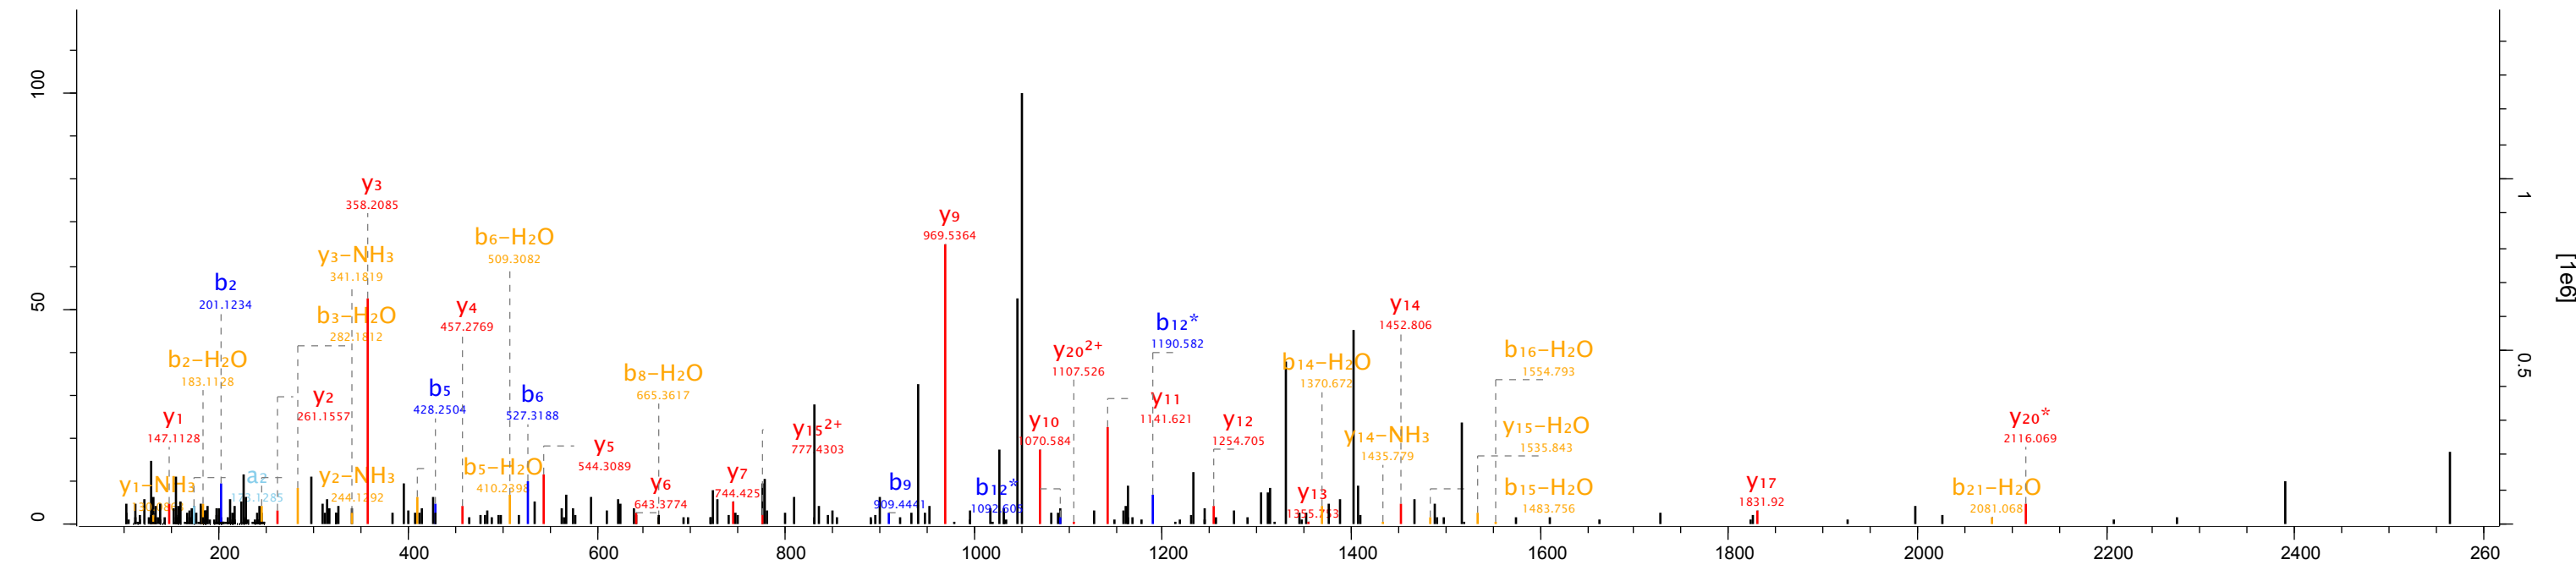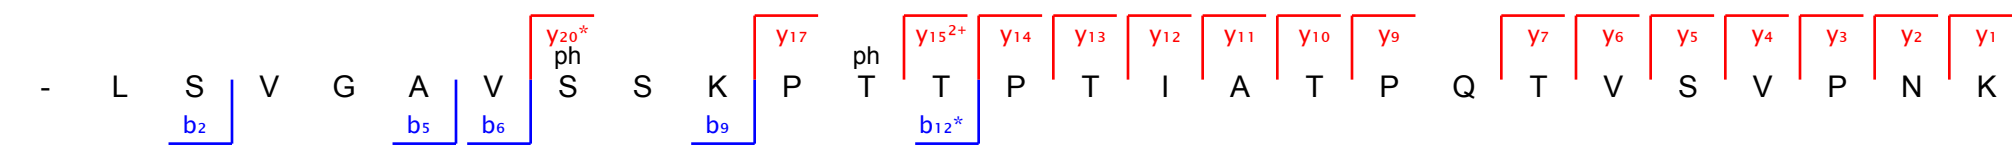

Raw file: 20150812\_A375SR\_Phospho\_BR1\_04  
 Scan: 1906 Method: FTMS; HCD Score: 280.43 m/z: 862.41 Gene names: ZNF326

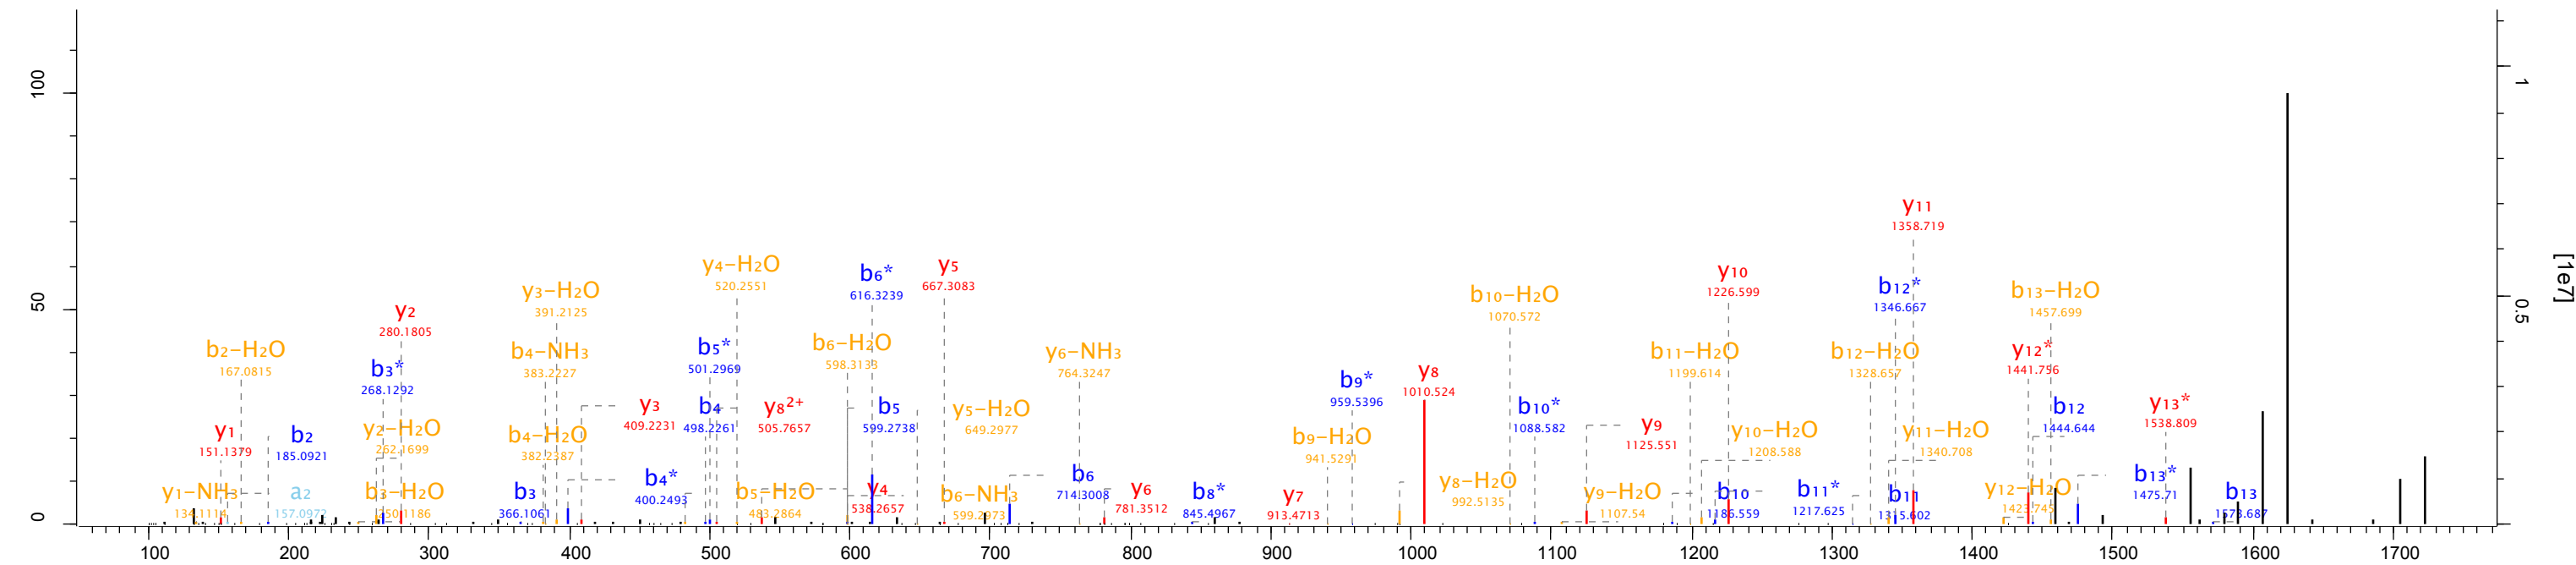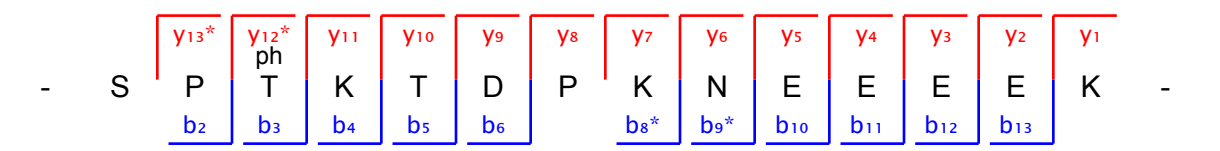

Raw file Scan Method Score m/z Gene names  
 20150812\_A375SR\_Phospho\_BR1\_04 19096 FTMS; HCD 180.62 1036.24 SH3KBP1

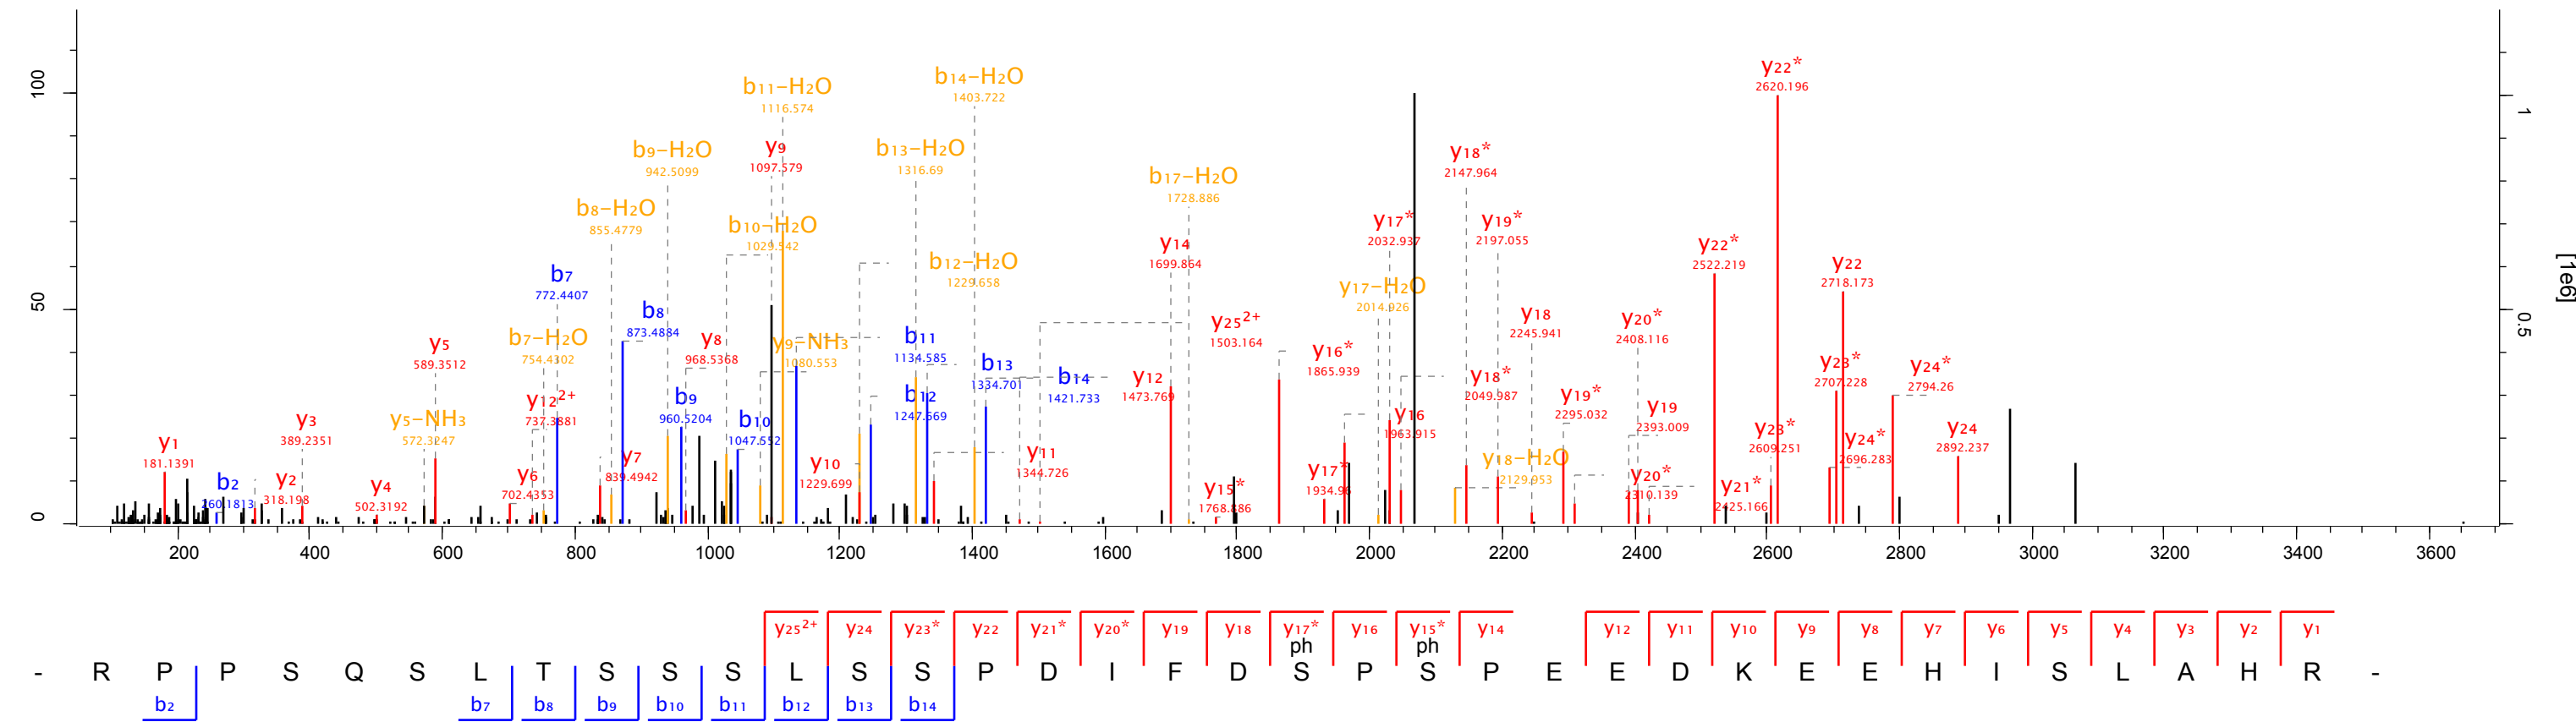

Raw file  
20150812\_A375SR\_Phospho\_BR1\_04

Scan 21556 Method FTMS; HCD Score 98.18 m/z 1255.56 Gene names TNS1

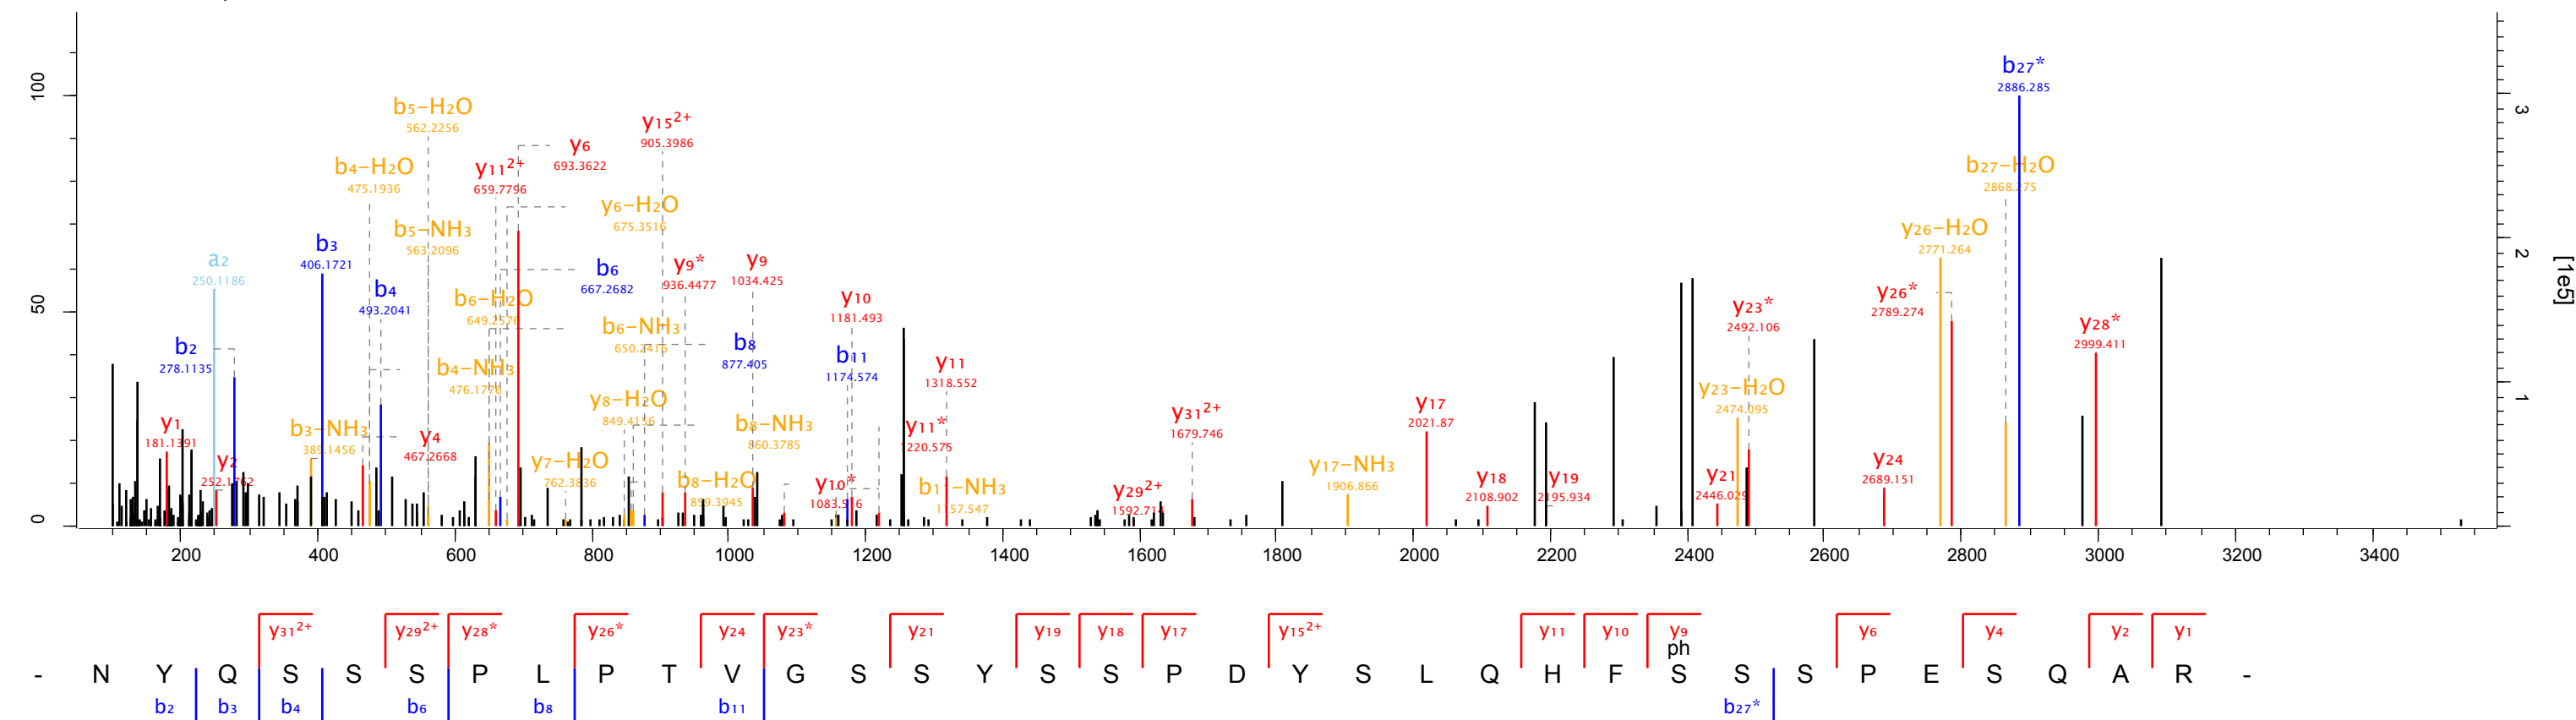

Raw file: 20150812\_A375SR\_Phospho\_BR1\_04  
 Scan: 22976 Method: FTMS; HCD Score: 185.18 m/z: 701.7 Gene names: CTTNBP2NL

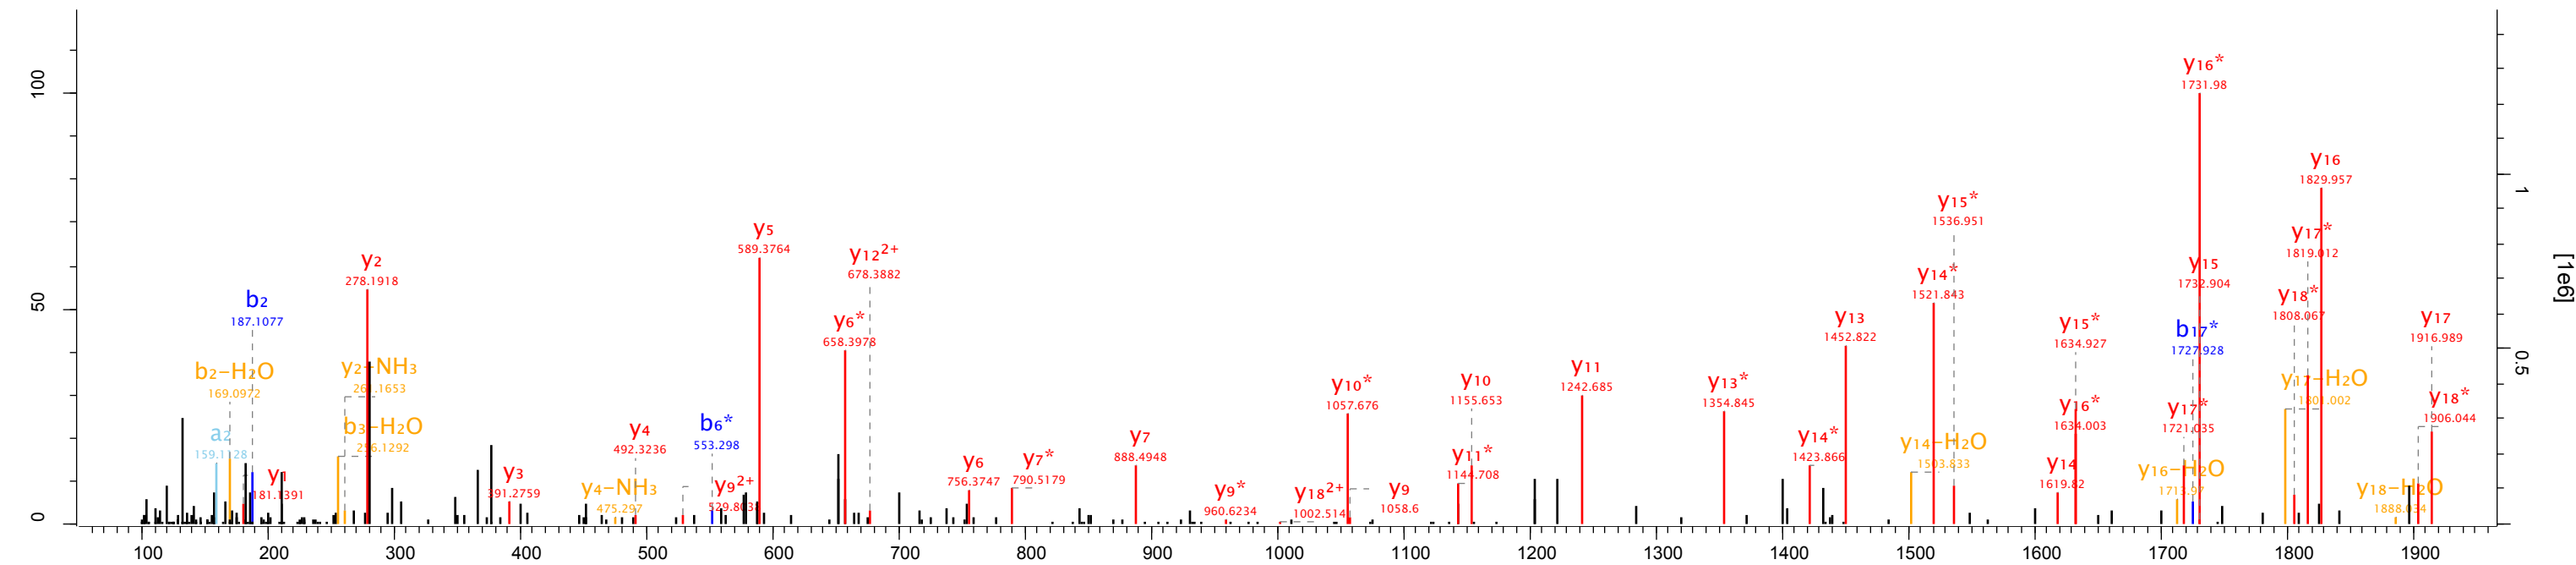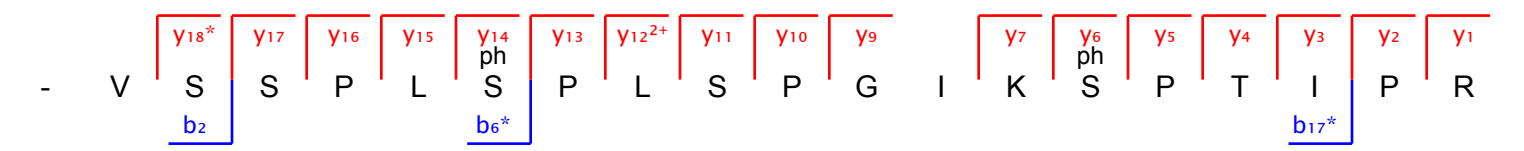

Raw file: 20150812\_A375SR\_Phospho\_BR1\_04  
 Scan: 2336 Method: FTMS; HCD Score: 106.35 m/z: 681.95 Gene names: CWC22

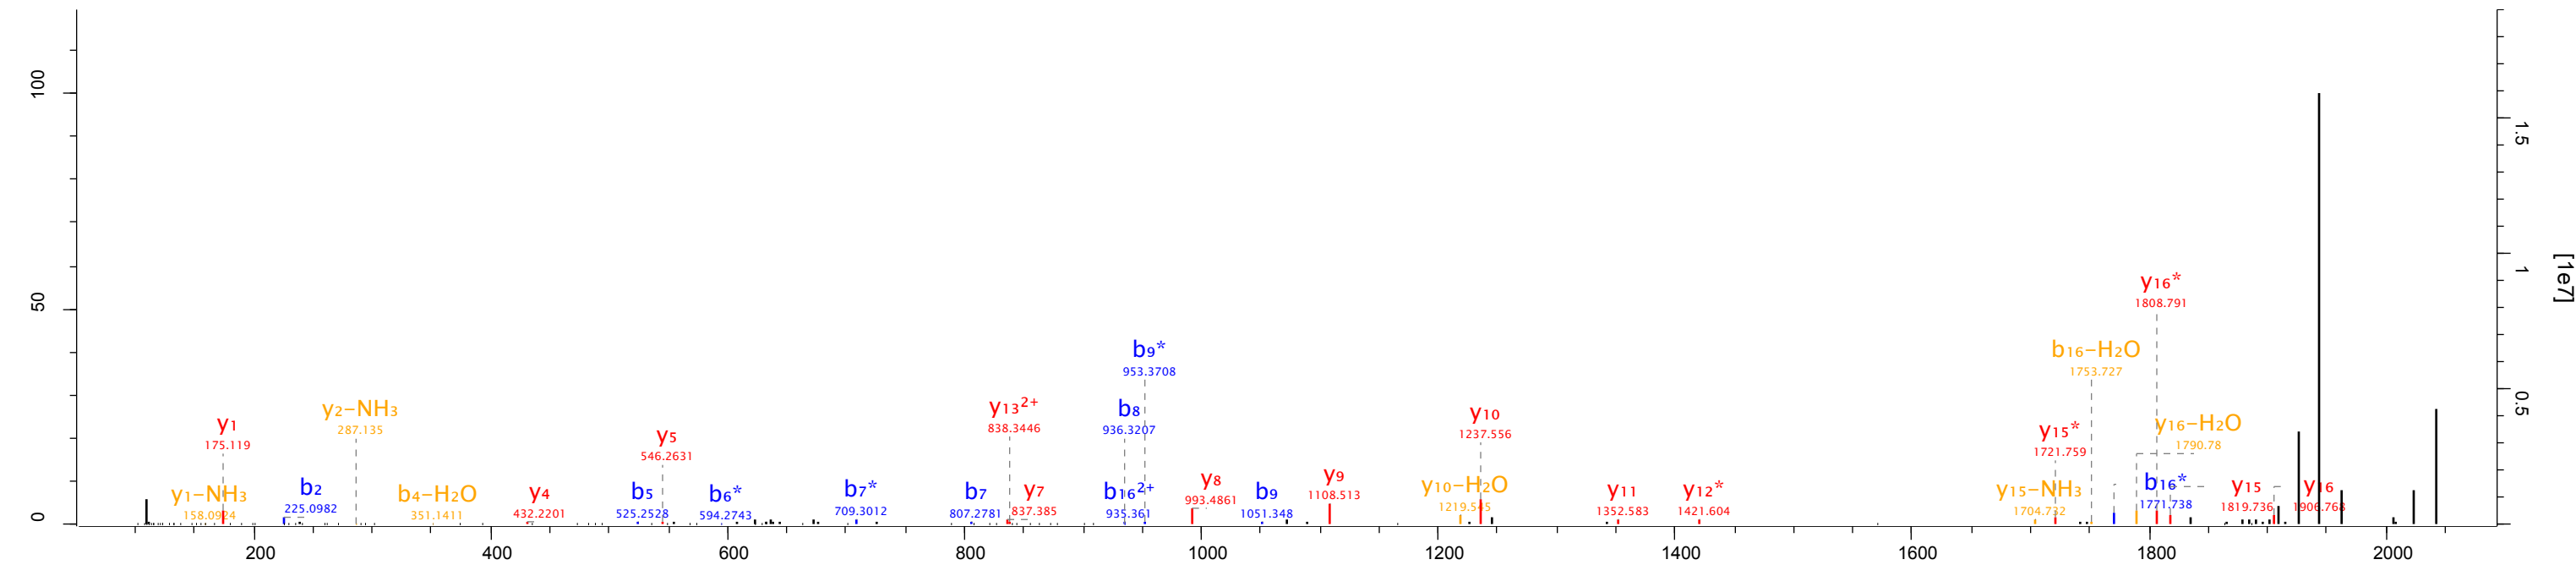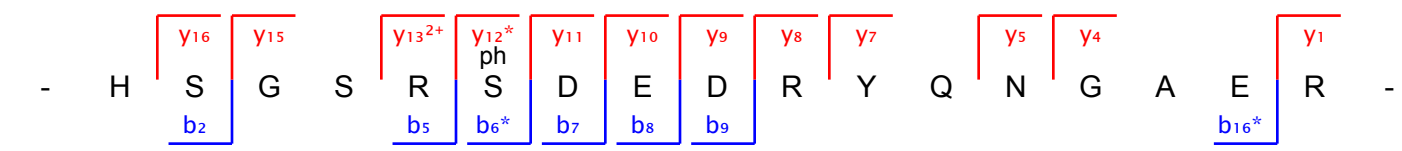

Raw file: 20150812\_A375SR\_Phospho\_BR1\_04  
 Scan: 25906 Method: FTMS; HCD Score: 89.68 m/z: 1381.61 Gene names: ZNF609

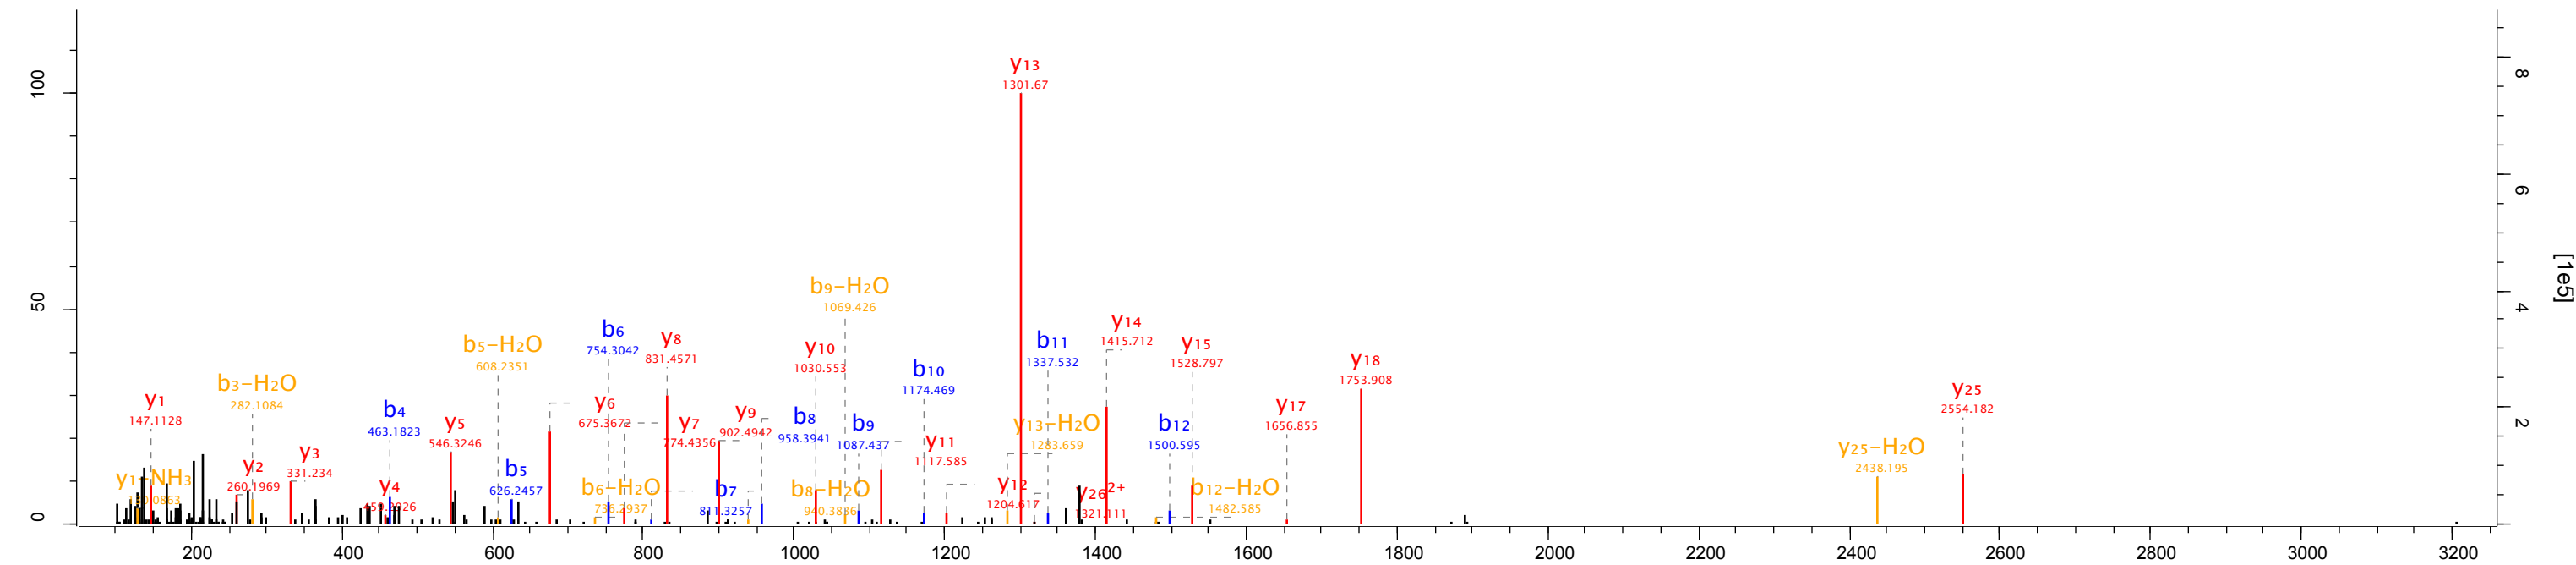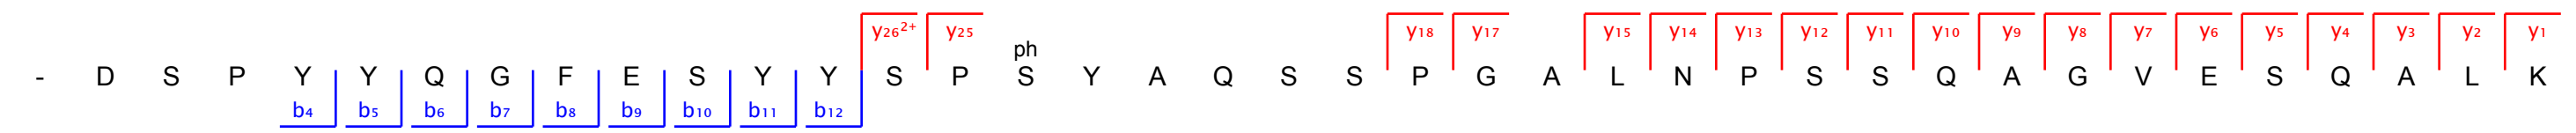

Raw file Scan Method Score m/z Gene names  
 20150812\_A375SR\_Phospho\_BR1\_04 26066 FTMS; HCD 57.61 812.74 CHAMP1

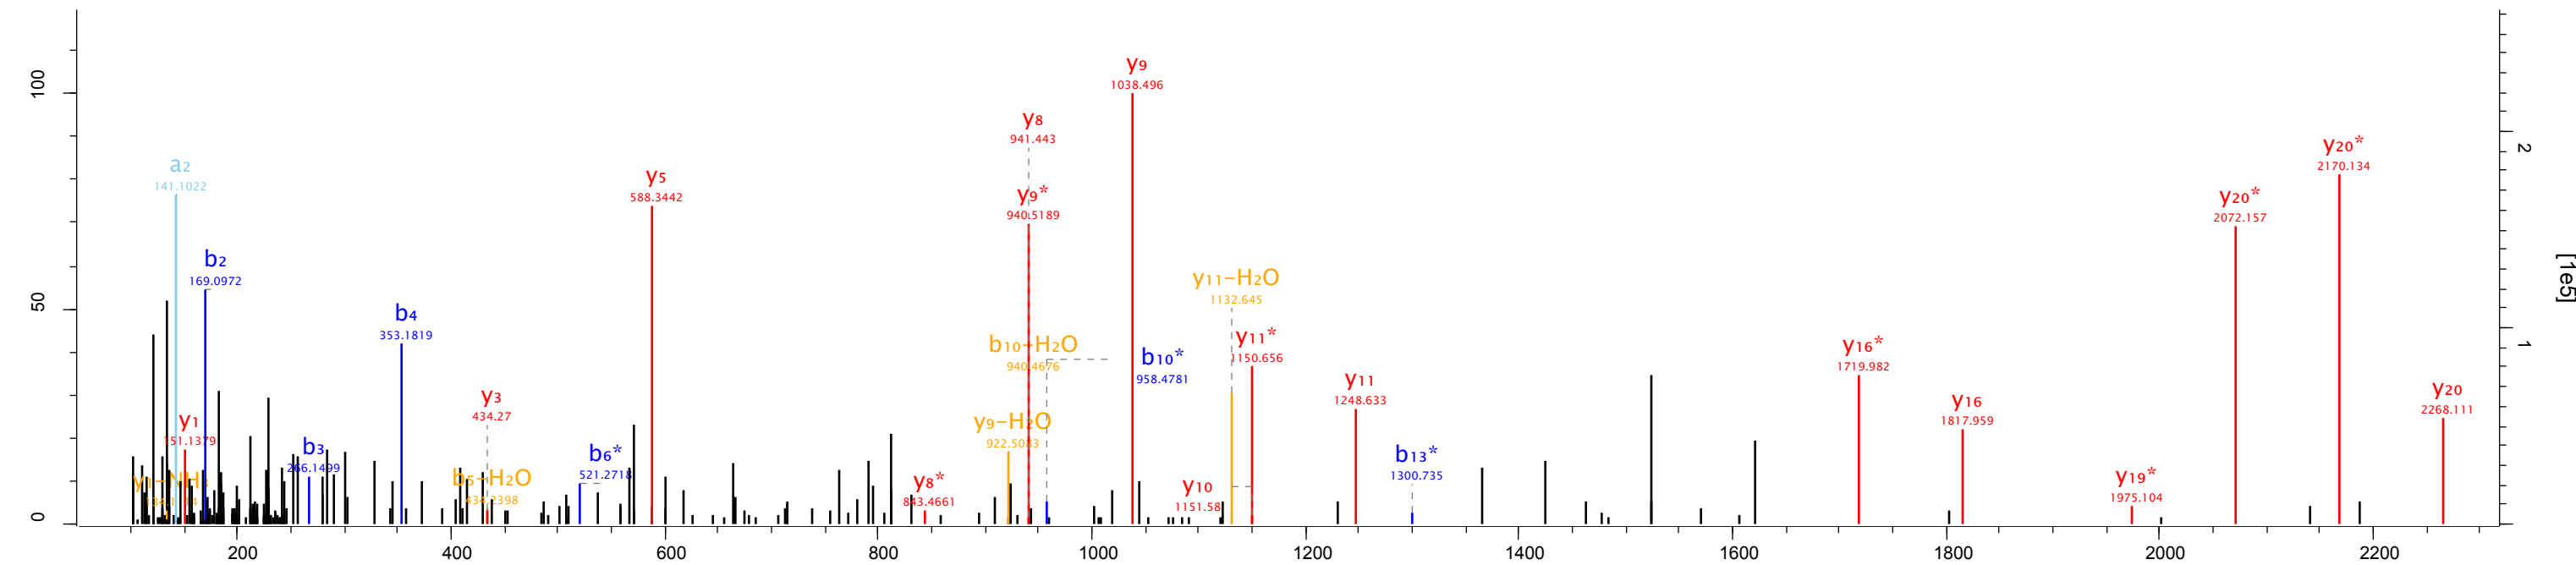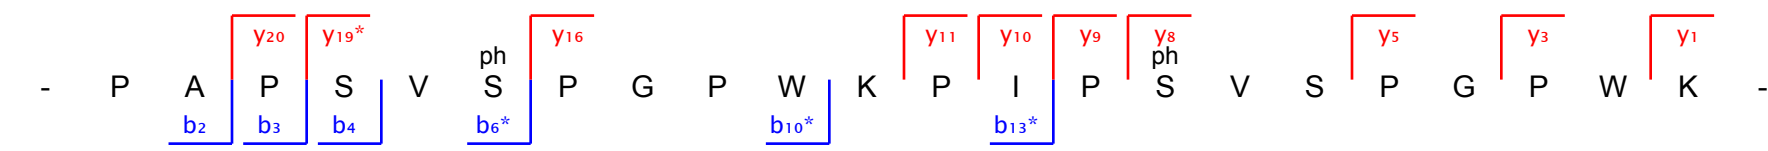



Raw file 20150812\_A375SR\_Phospho\_BR1\_04 Scan 27086 Method FTMS; HCD Score 44.44 m/z 847.95 Gene names ALS2

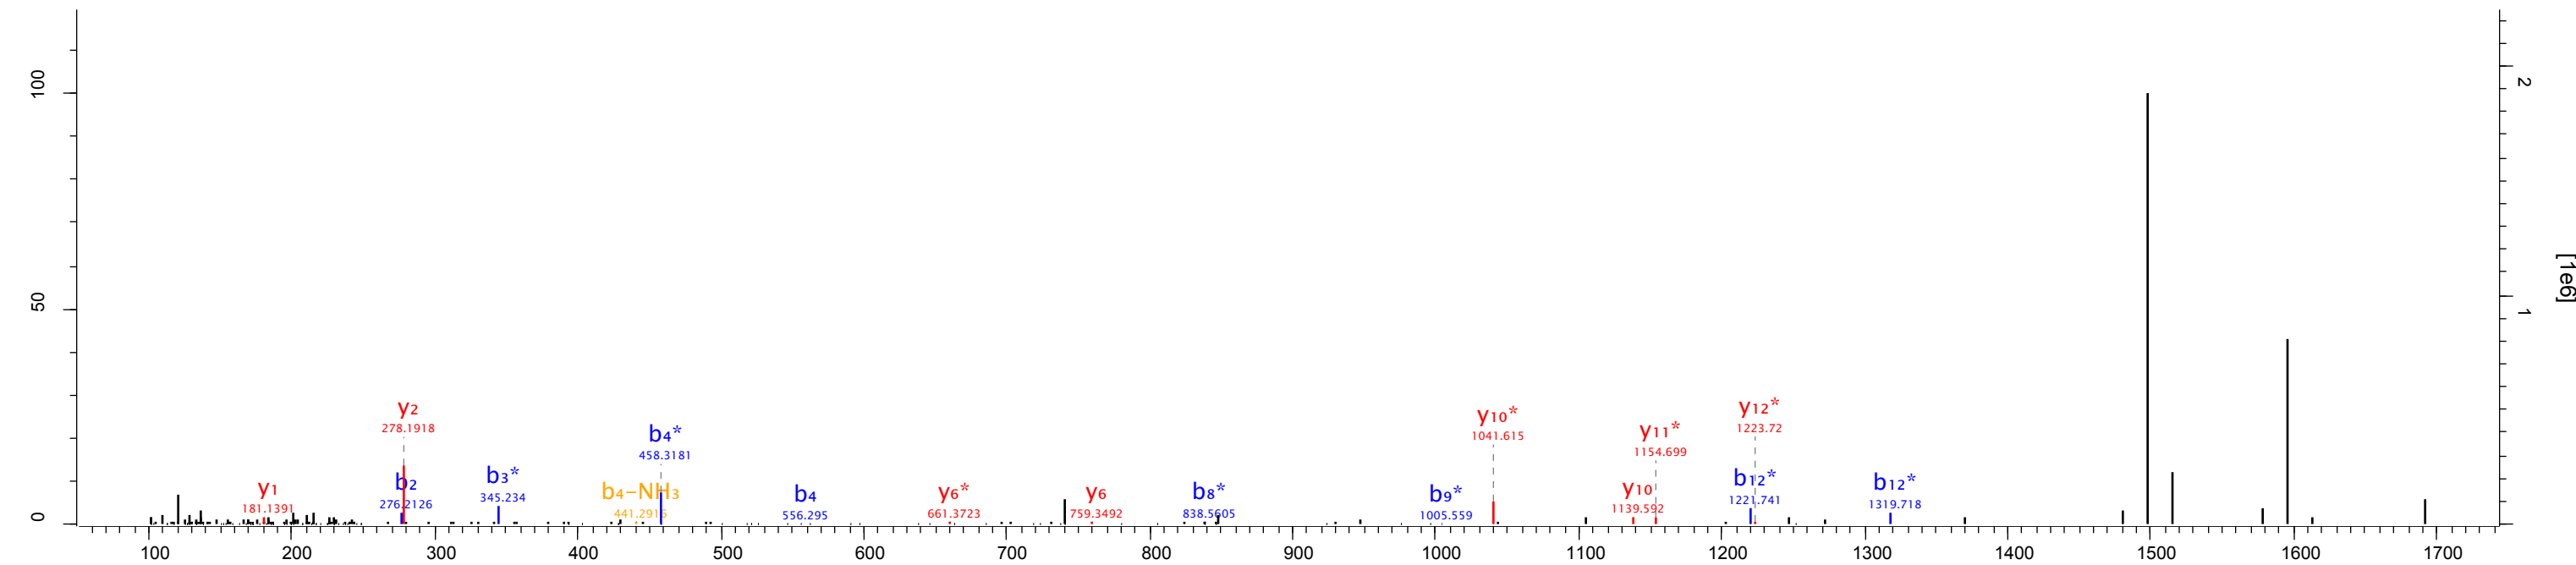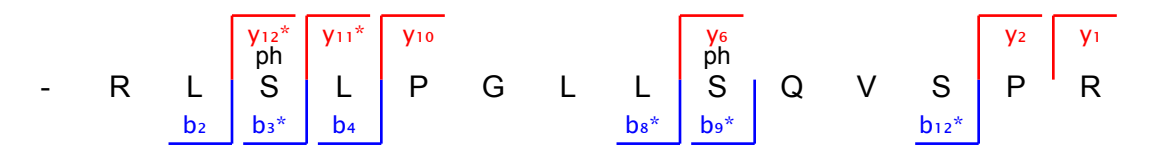

Raw file: 20150812\_A375SR\_Phospho\_BR1\_04  
 Scan: 28146 Method: FTMS; HCD Score: 152.05 m/z: 1043.14 Gene names: TP53BP1

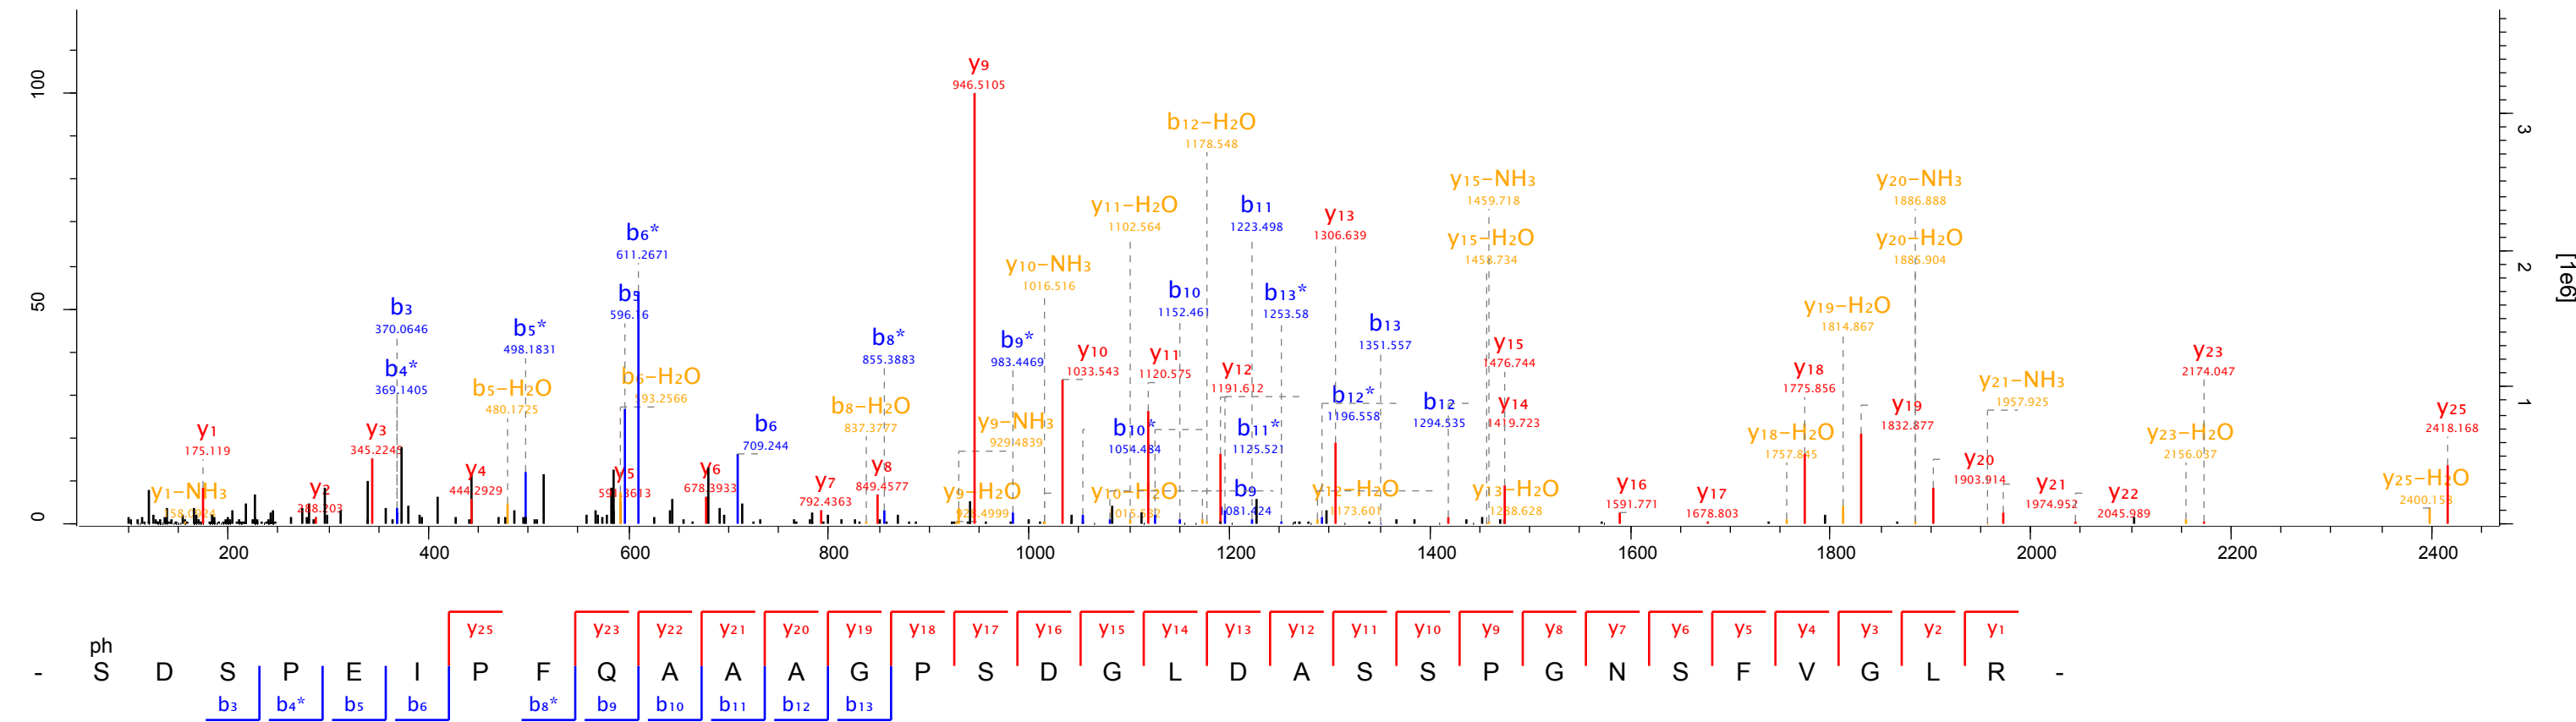

Raw file: 20150812\_A375SR\_Phospho\_BR1\_04  
 Scan: 3216 Method: FTMS; HCD Score: 106.6 m/z: 704.31 Gene names: SRRM2

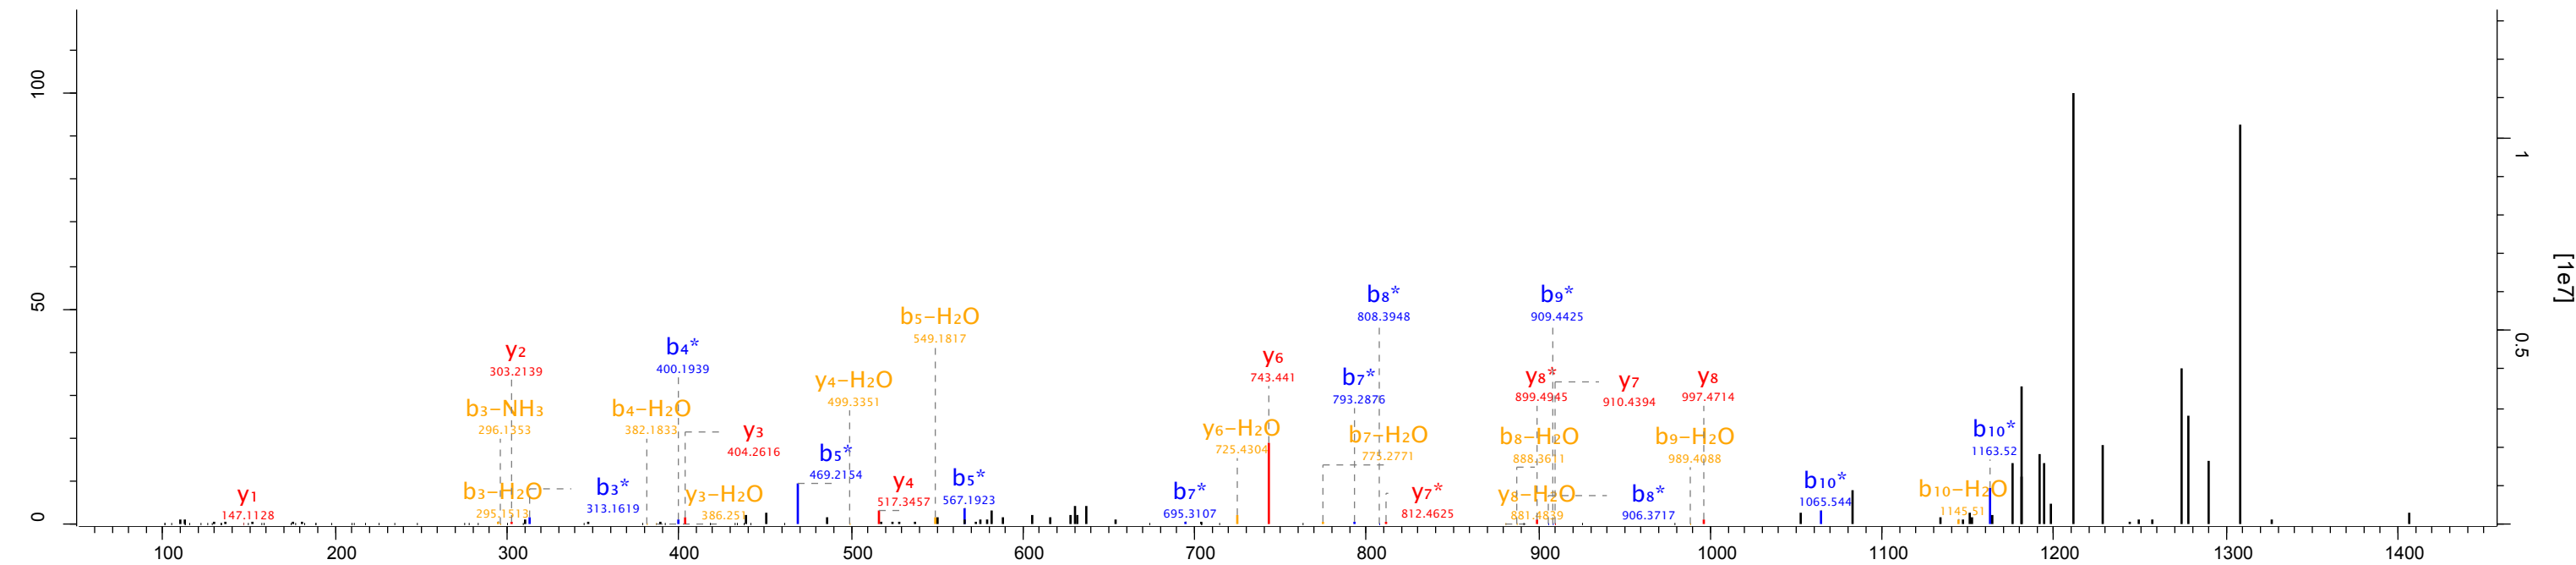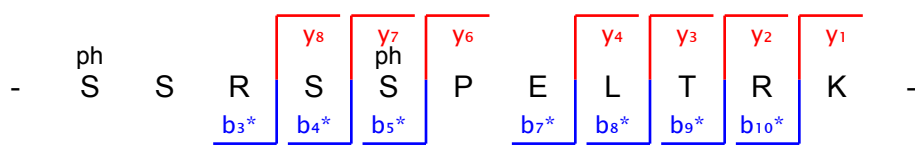

Raw file 20150812\_A375SR\_Phospho\_BR1\_04 Scan 3466 Method FTMS; HCD Score 67.33 m/z 502.91 Gene names GPATCH2

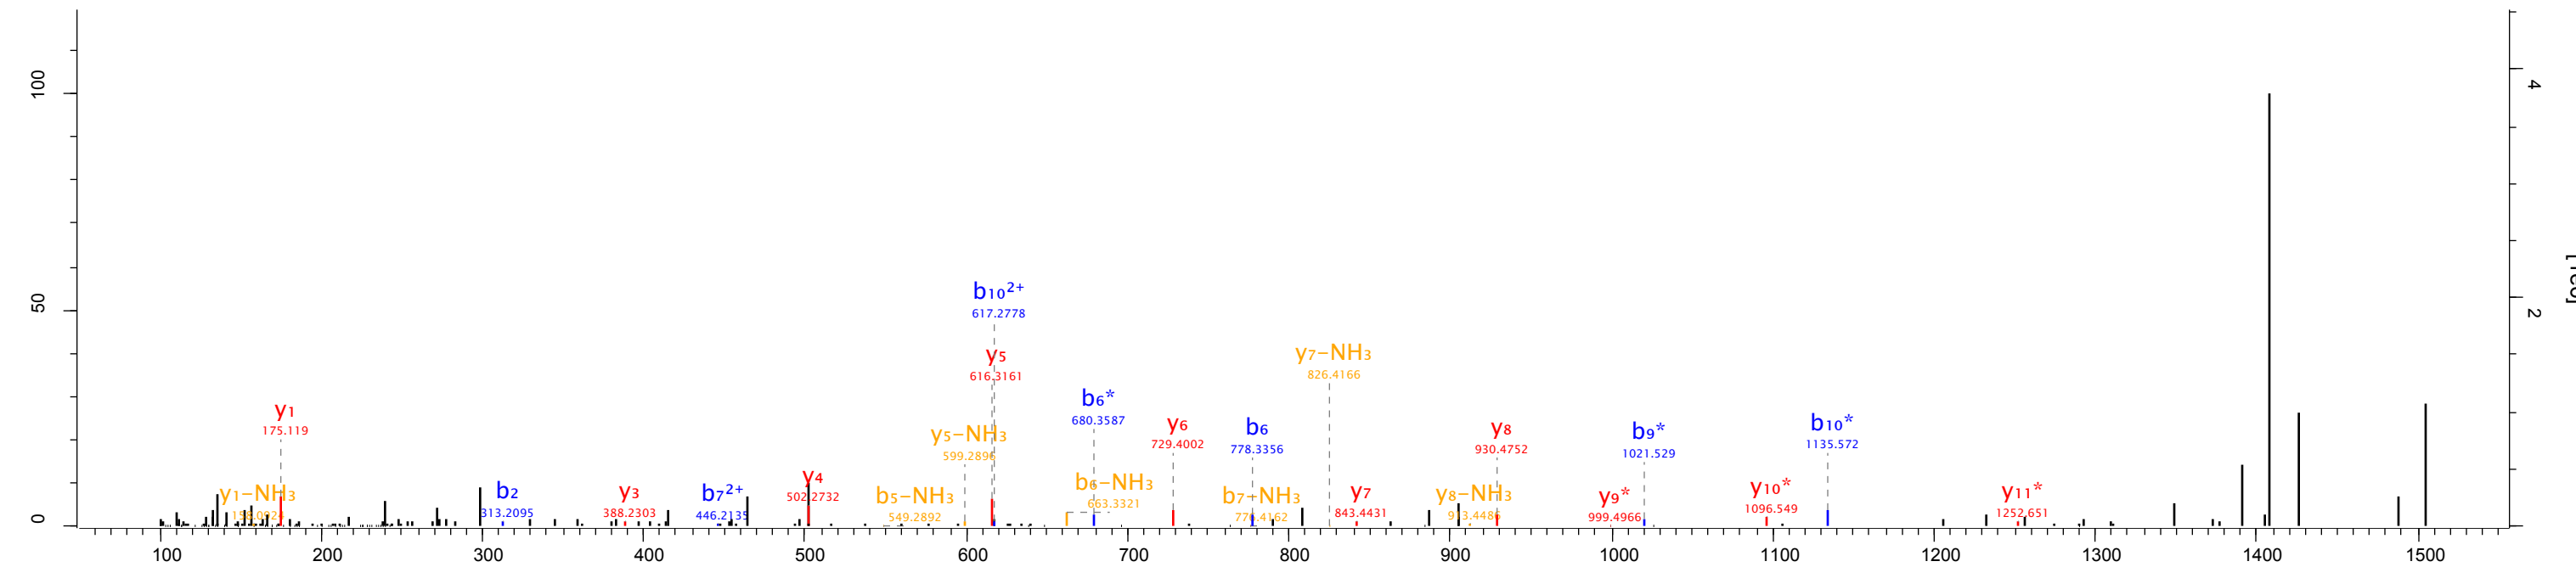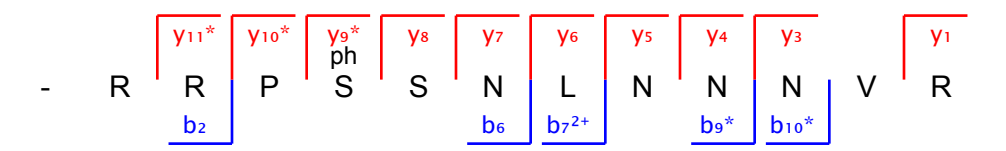

Raw file: 20150812\_A375SR\_Phospho\_BR1\_04  
 Scan: 3556 Method: FTMS; HCD Score: 107.08 m/z: 442.19 Gene names: LUZP1

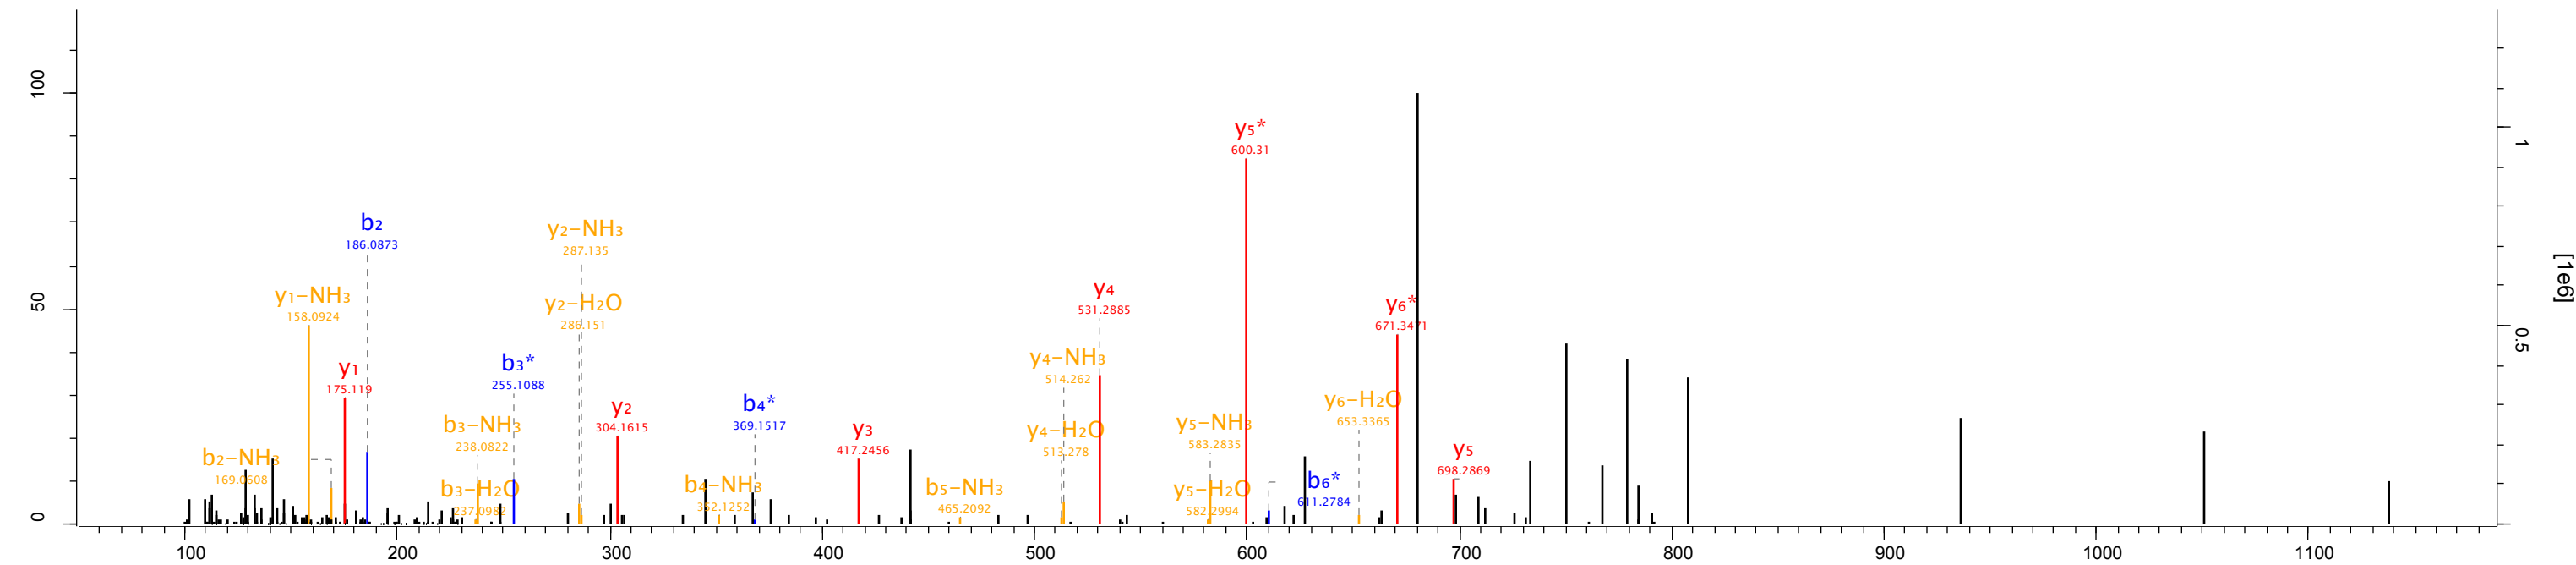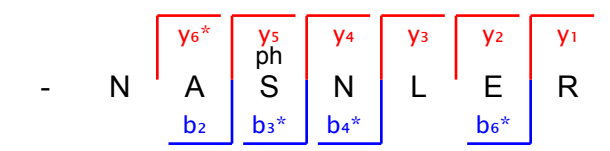

Raw file: 20150812\_A375SR\_Phospho\_BR1\_04  
 Scan: 3726 Method: FTMS; HCD Score: 70.26 m/z: 473.53 Gene names: SRSF8

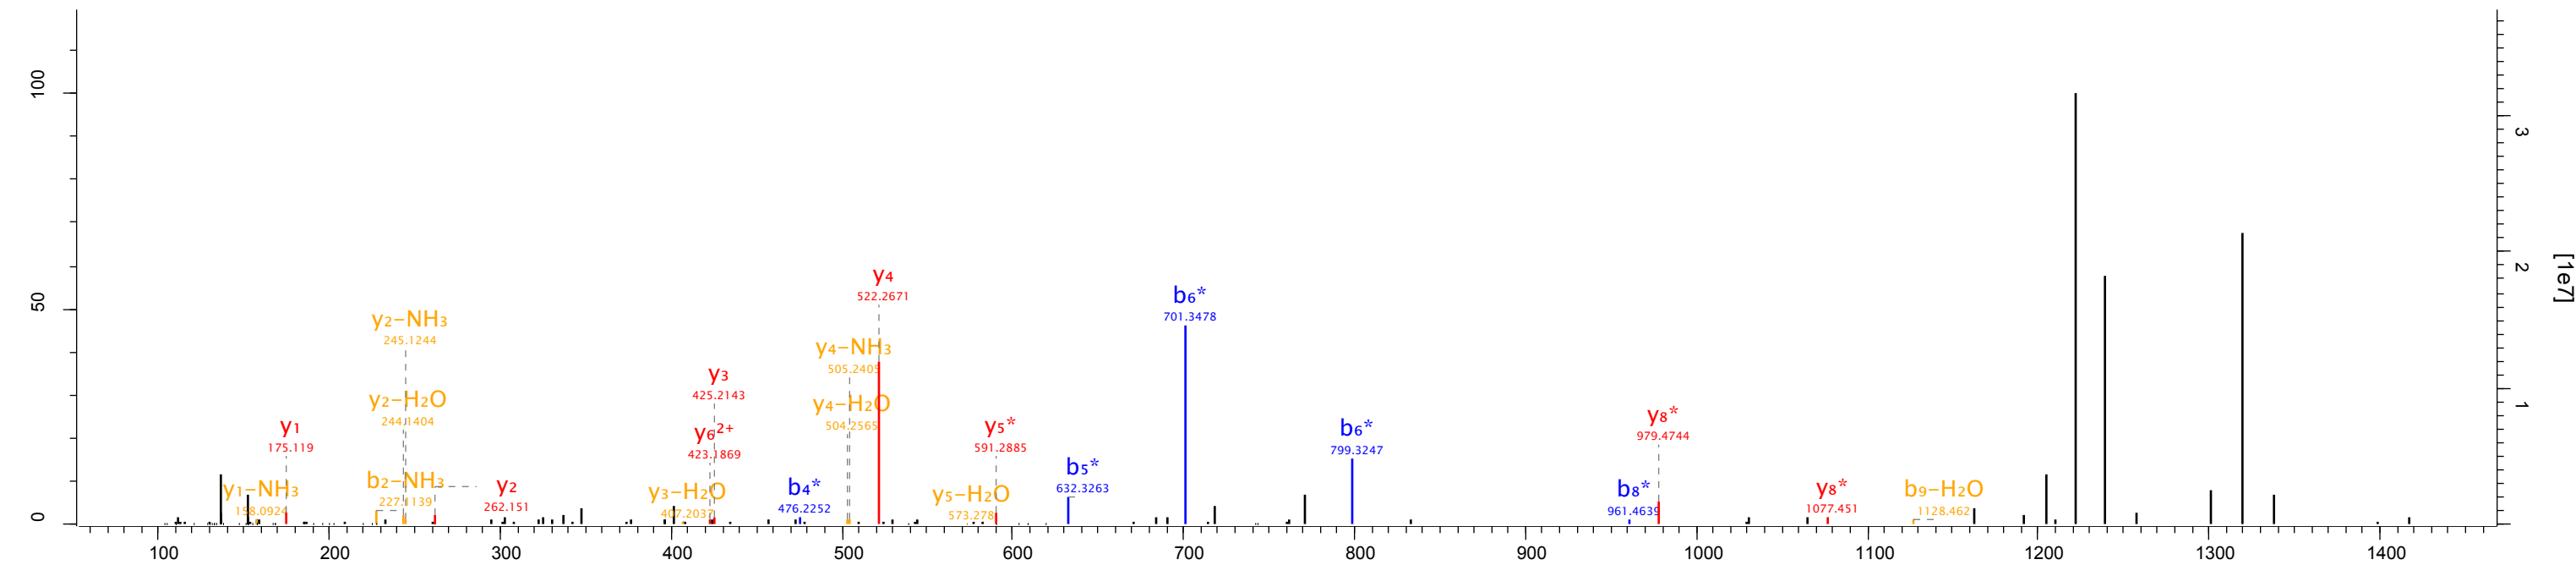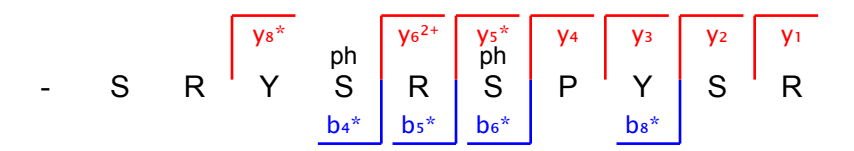

Raw file Scan Method Score m/z Gene names  
 20150812\_A375SR\_Phospho\_BR1\_04 4326 FTMS; HCD 137.86 1104.94 HMGA2

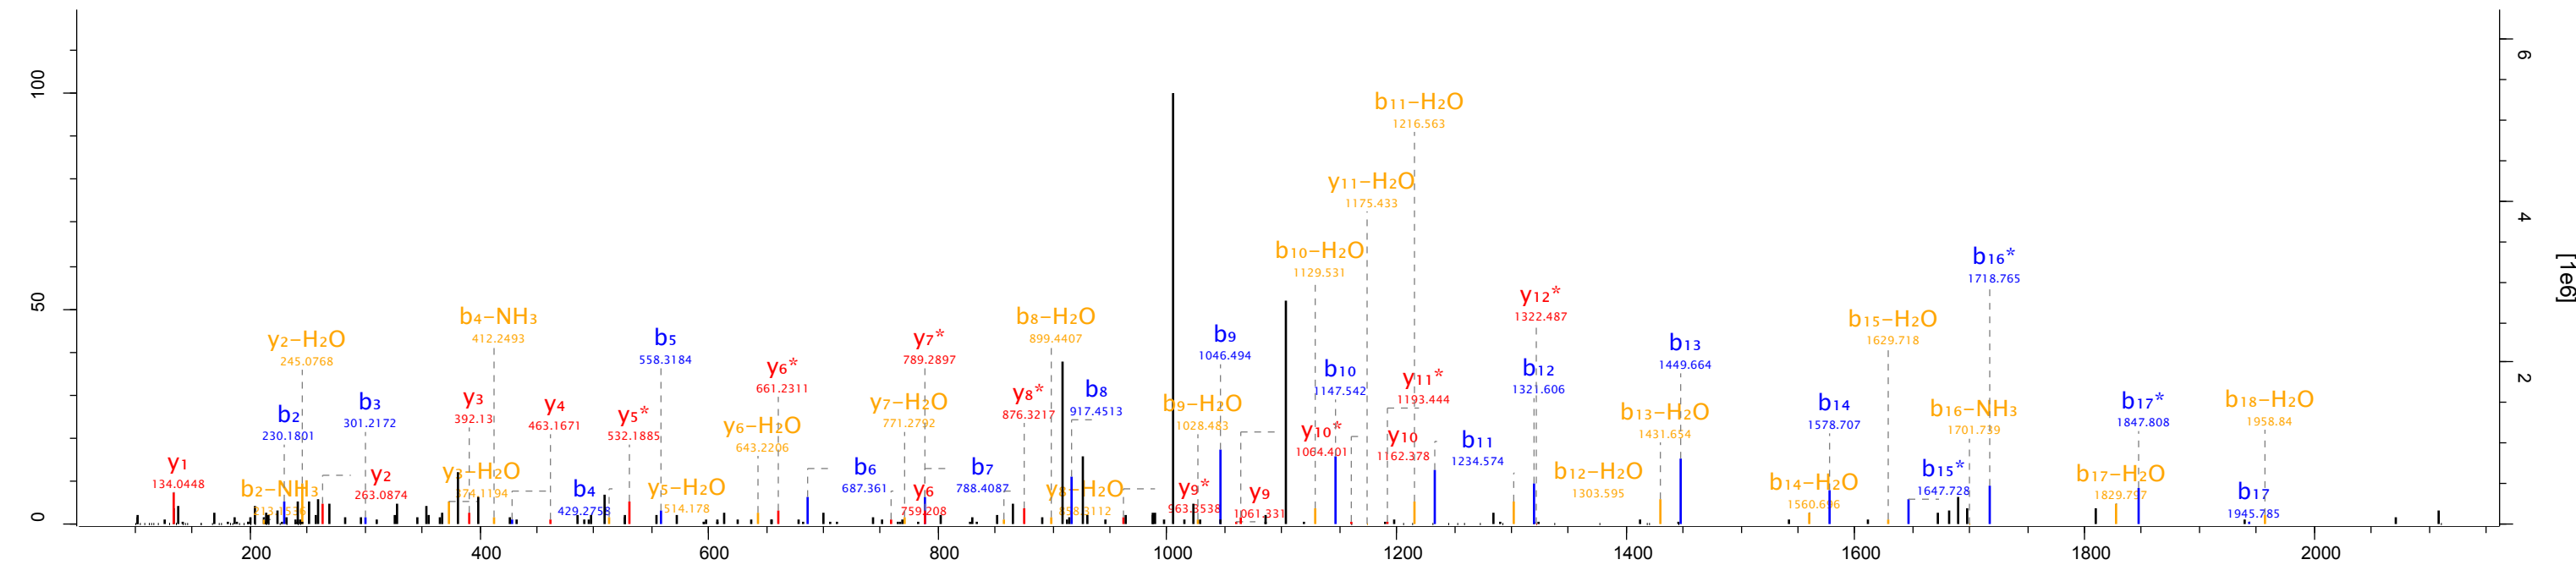

- K P A Q E E T E E T S S Q E S A E E D -

b<sub>2</sub>
b<sub>3</sub>
b<sub>4</sub>
b<sub>5</sub>
b<sub>6</sub>
b<sub>7</sub>
b<sub>8</sub>
b<sub>9</sub>
b<sub>10</sub>
b<sub>11</sub>
b<sub>12</sub>
b<sub>13</sub>
b<sub>14</sub>
b<sub>15</sub>\*
b<sub>16</sub>\*
b<sub>17</sub>

Raw file: 20150812\_A375SR\_Phospho\_BR1\_04  
 Scan: 4456 Method: FTMS; HCD Score: 127.05 m/z: 601.26 Gene names: TBX2

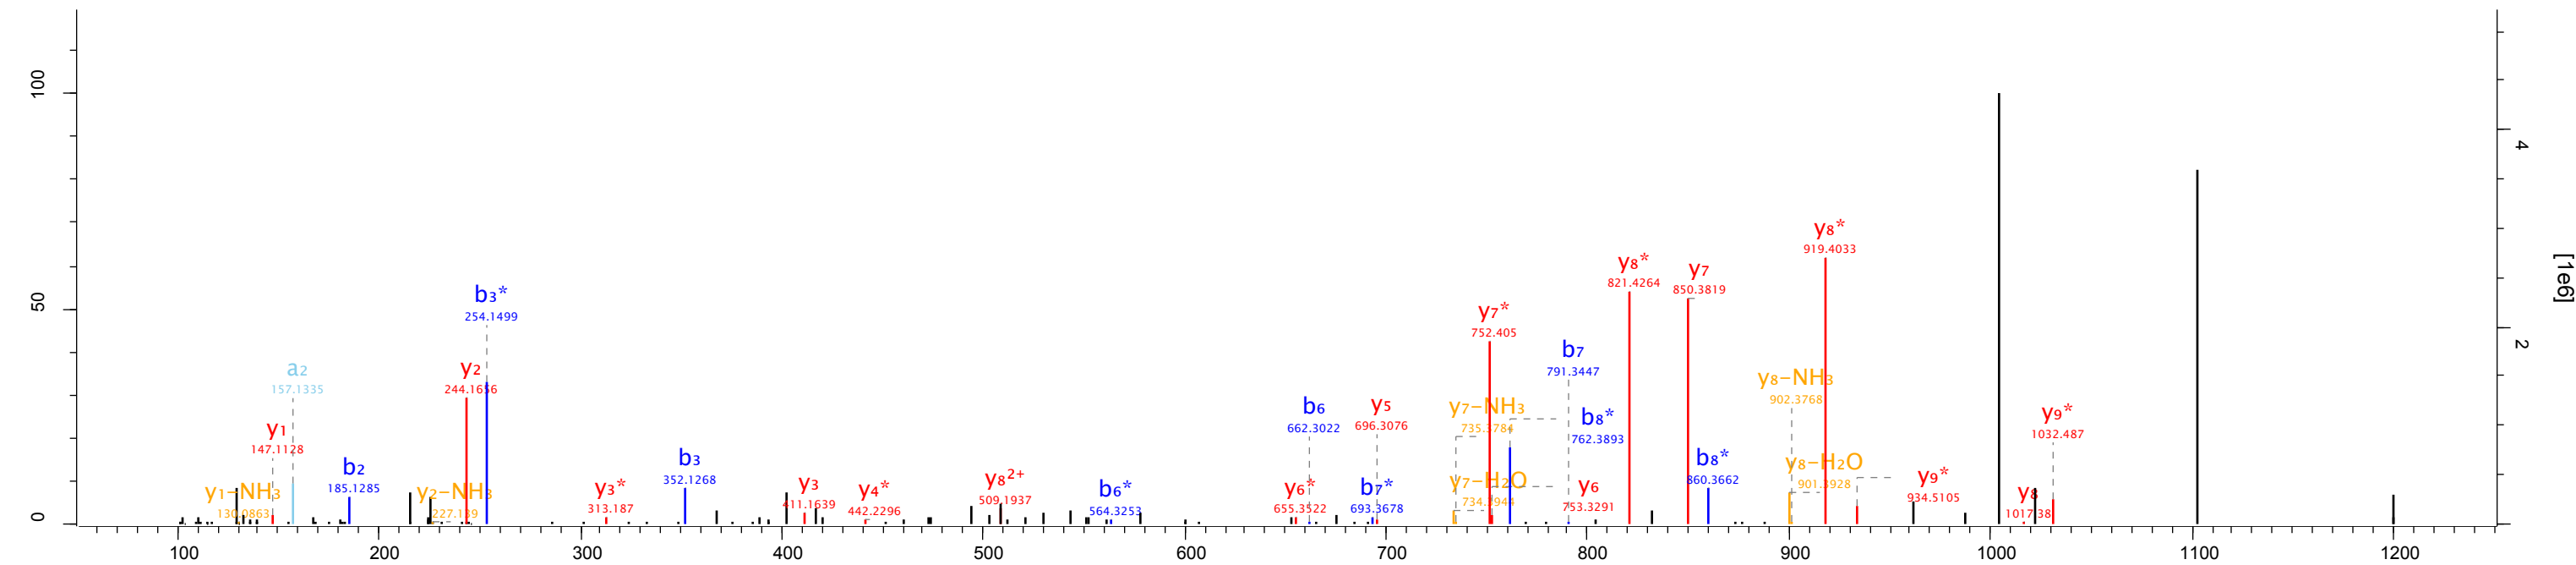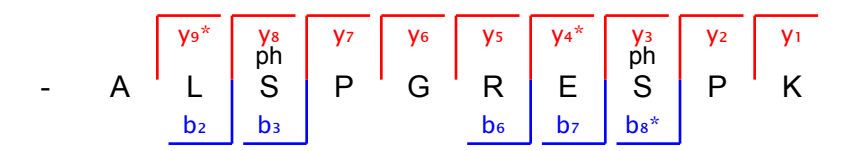



Raw file: 20150812\_A375SR\_Phospho\_BR1\_04  
 Scan: 4606 Method: FTMS; HCD Score: 118.31 m/z: 578.57 Gene names: RBMX;RBMXL1

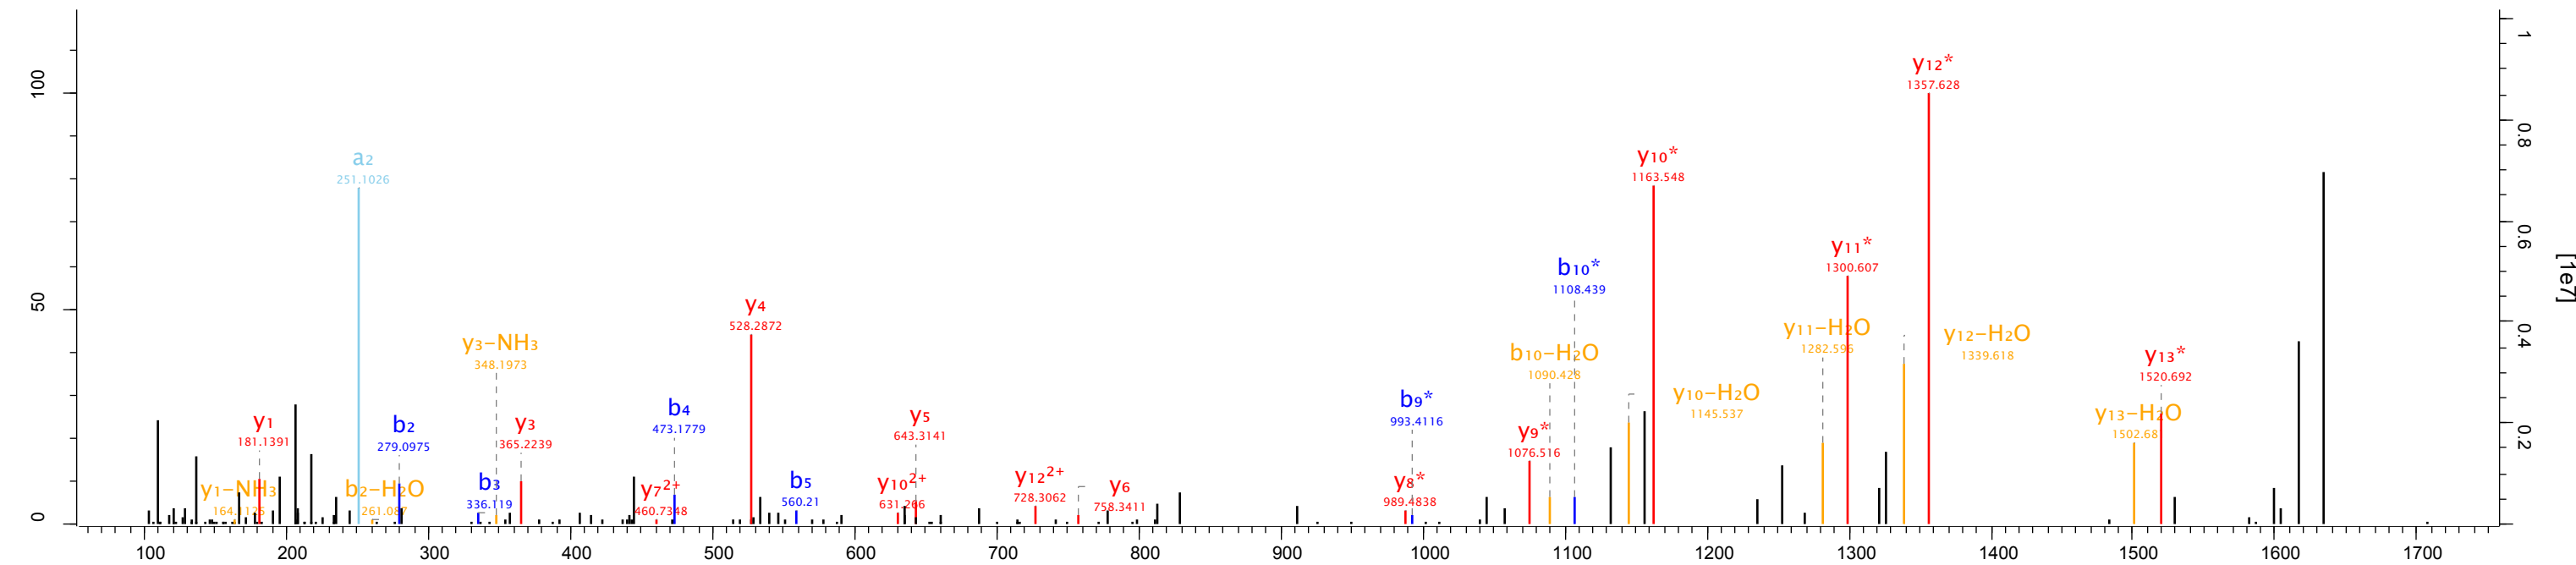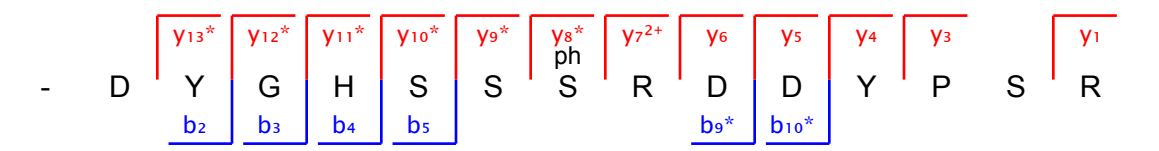

Raw file 20150812\_A375SR\_Phospho\_BR1\_04 Scan 4716 Method FTMS; HCD Score 262.78 m/z 1067.47

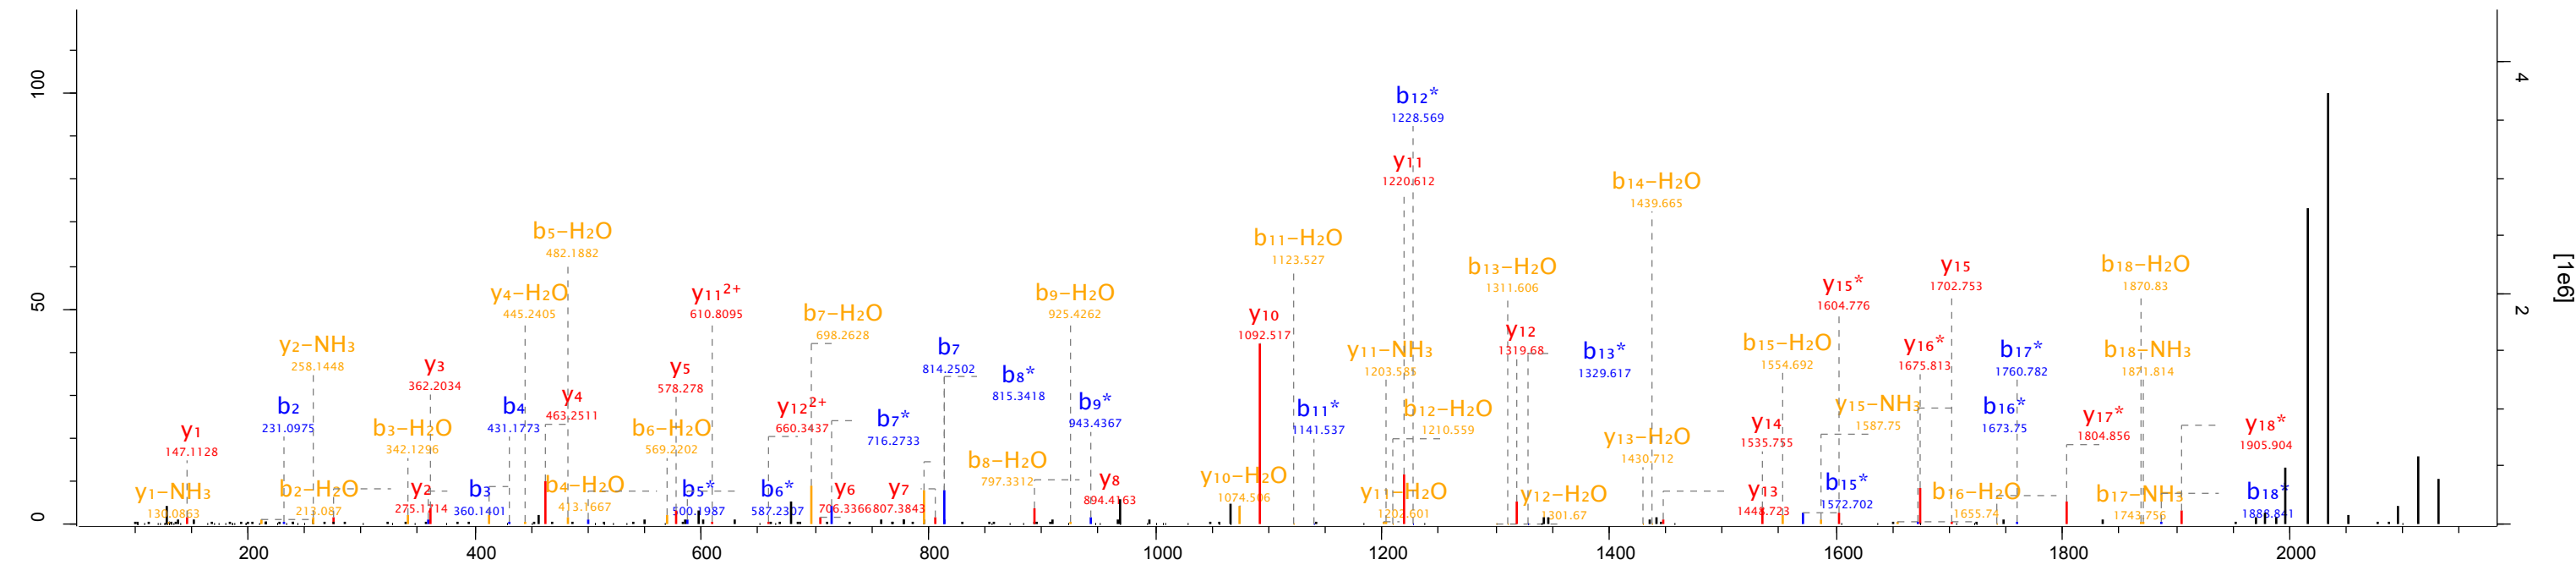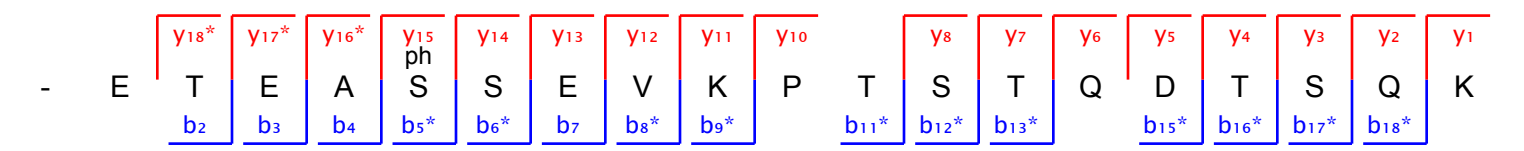

Raw file: 20150812\_A375SR\_Phospho\_BR1\_04  
 Scan: 4746 Method: FTMS; HCD Score: 154.46 m/z: 801.65 Gene names: PAXBP1

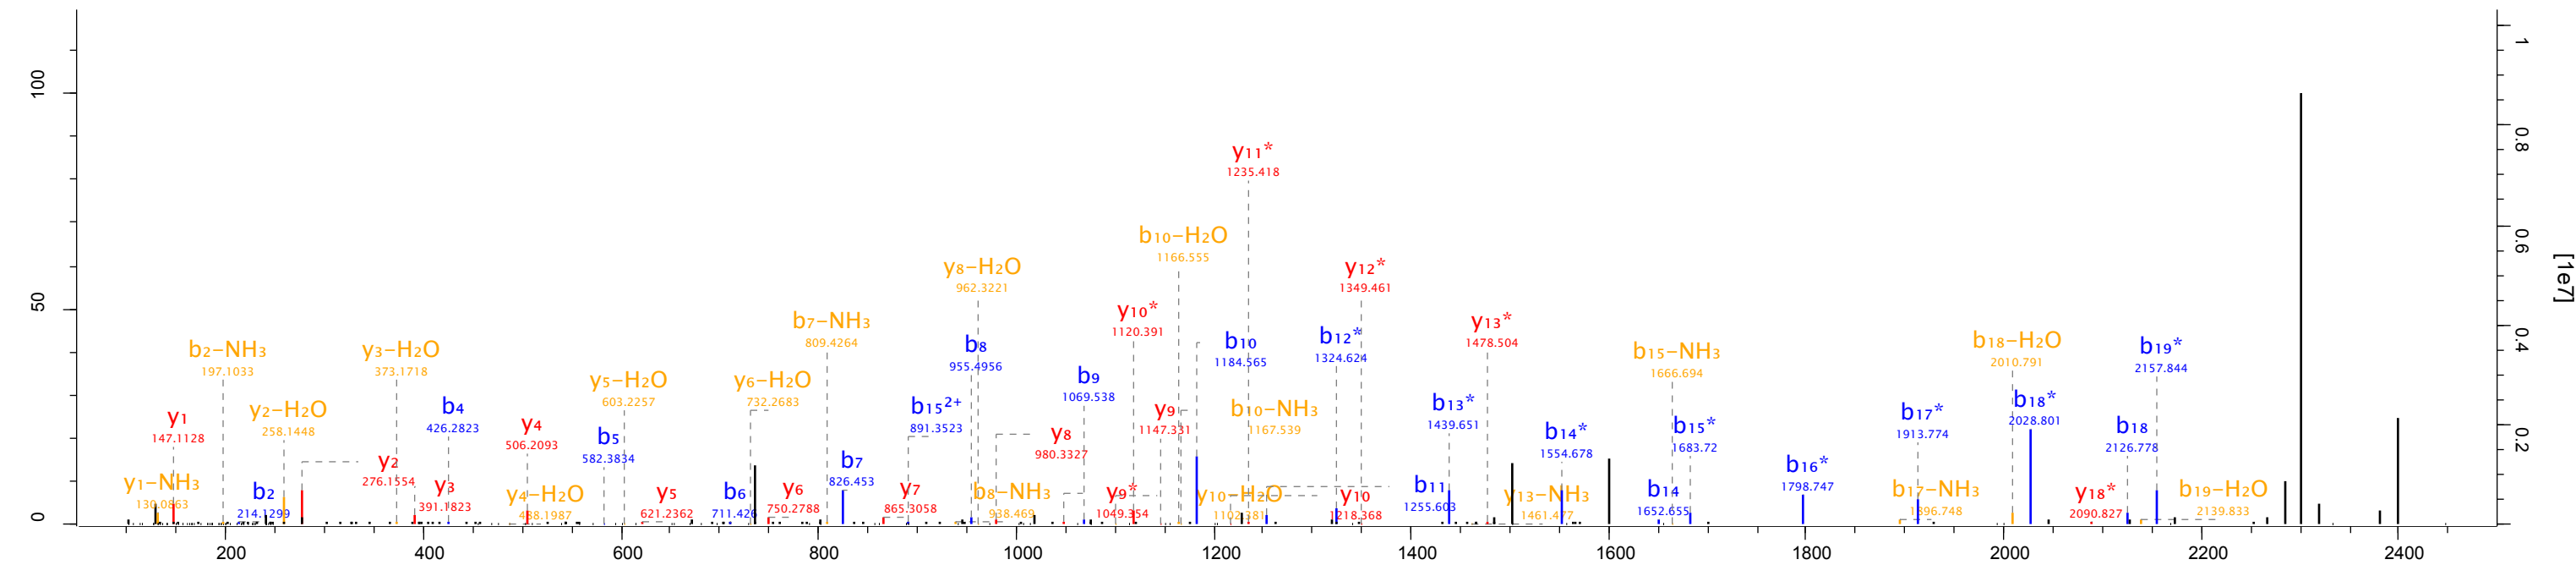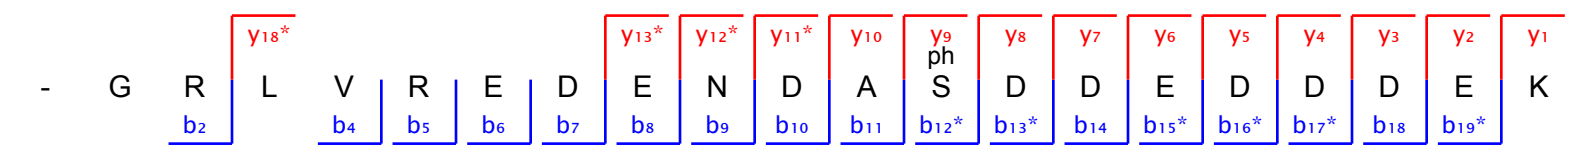

Raw file: 20150812\_A375SR\_Phospho\_BR1\_04  
 Scan: 5066 Method: FTMS; HCD Score: 237.06 m/z: 887.36 Gene names: YBX1

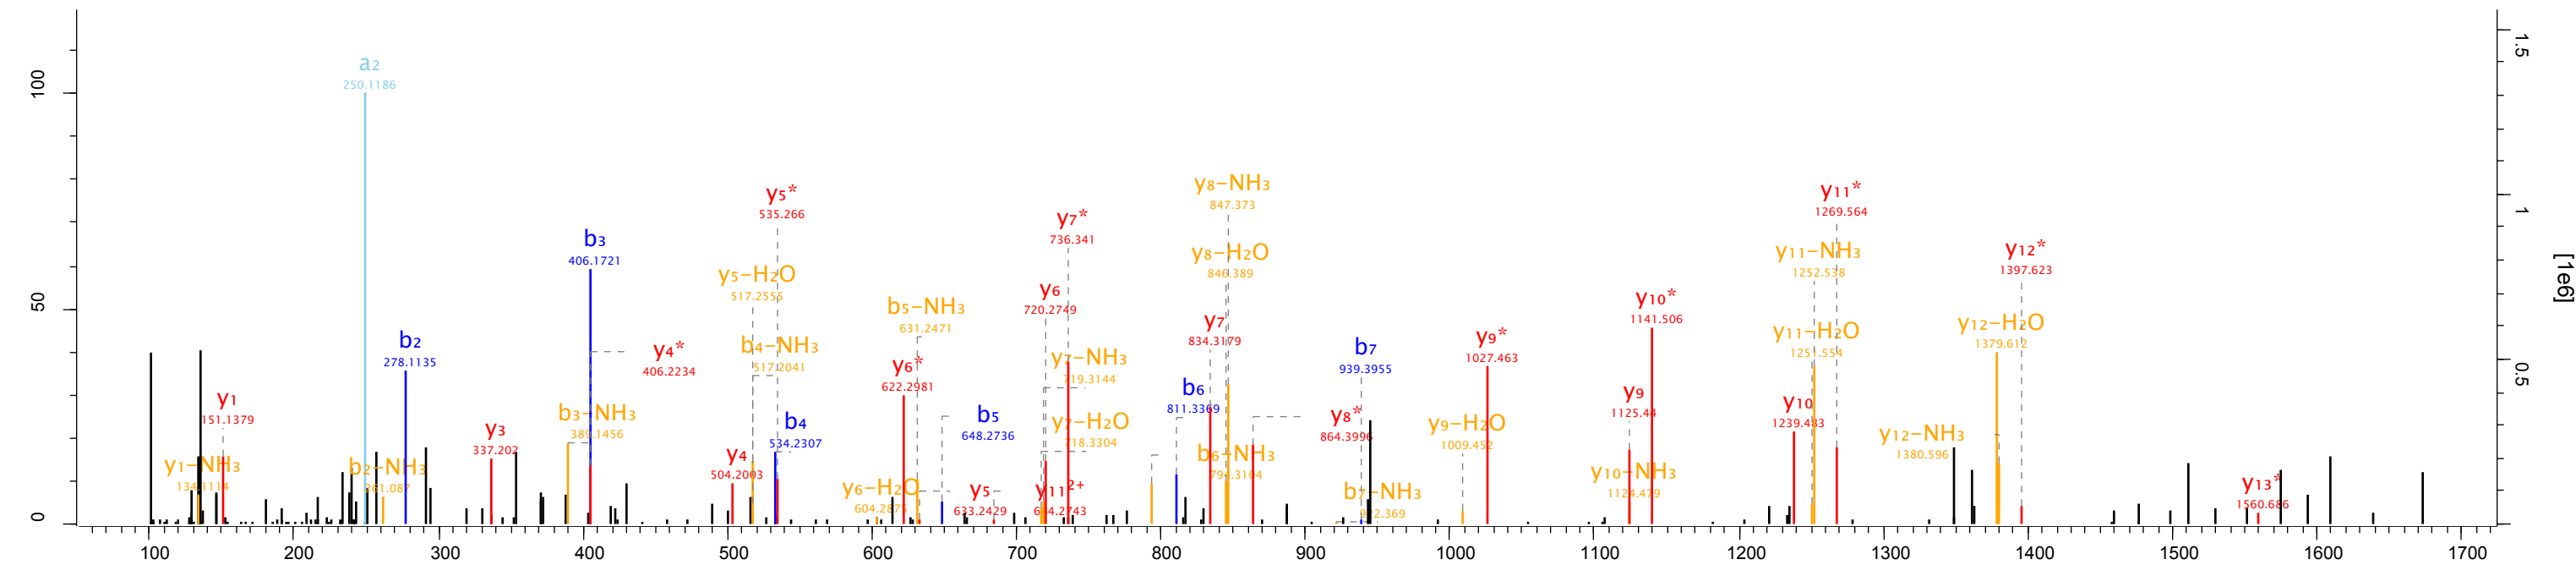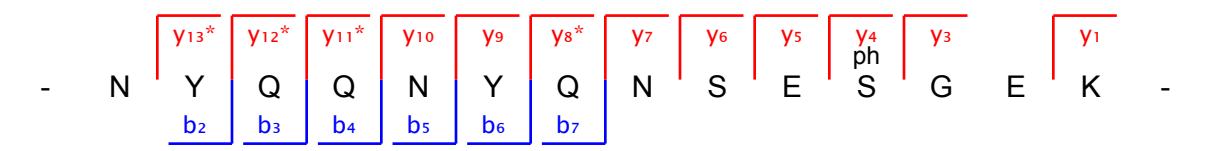

Raw file 20150812\_A375SR\_Phospho\_BR1\_04 Scan 5826 Method FTMS; HCD Score 332.22 m/z 985.48 Gene names RRBP1

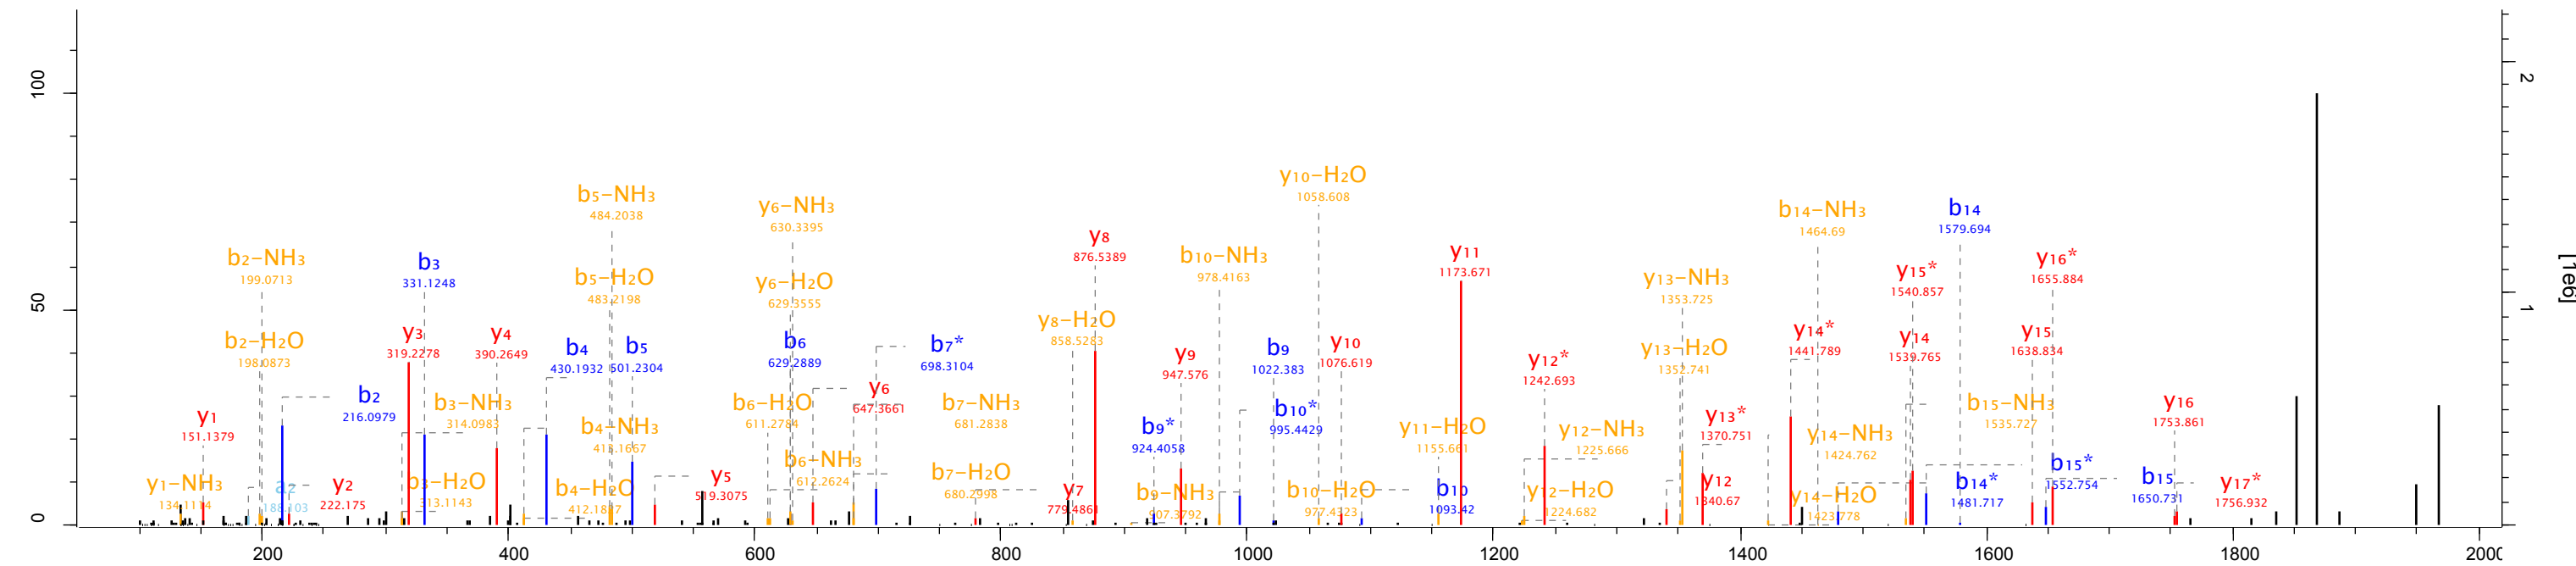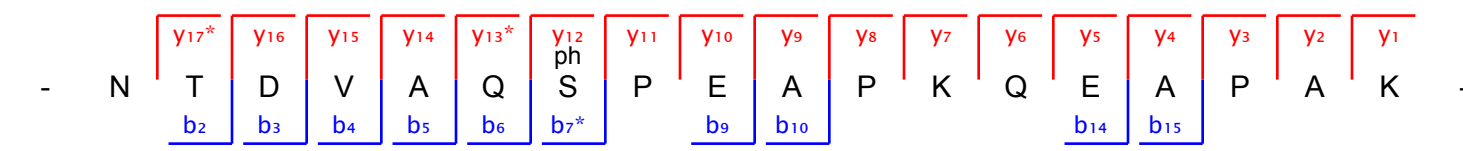

Raw file: 20150812\_A375SR\_Phospho\_BR1\_04  
 Scan: 6276 Method: FTMS; HCD Score: 127.59 m/z: 587.61 Gene names: SRRM2

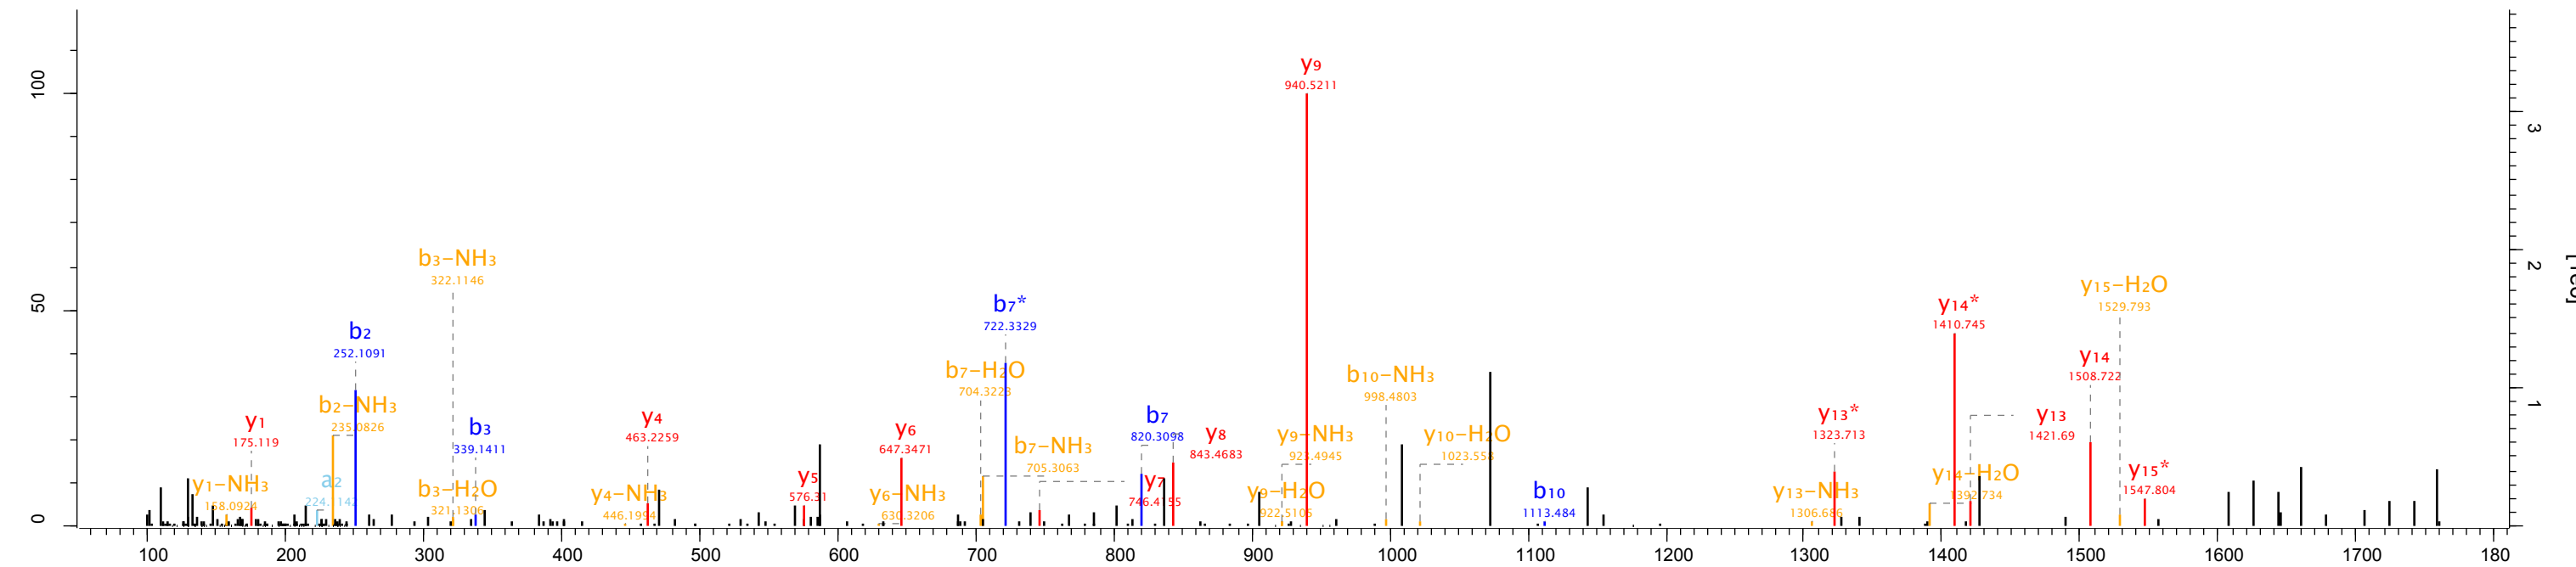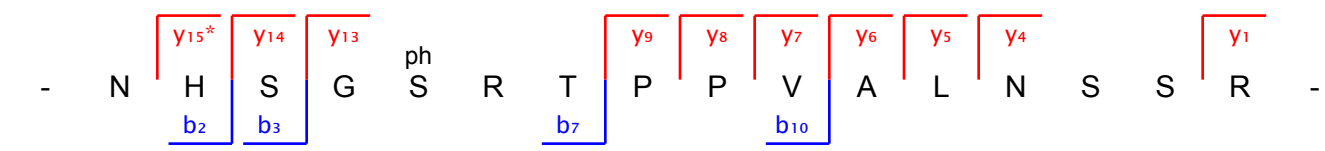

Raw file: 20150812\_A375SR\_Phospho\_BR1\_04  
 Scan: 6536 Method: FTMS; HCD Score: 572.15 m/z: 1216.47 Gene names: NUDC

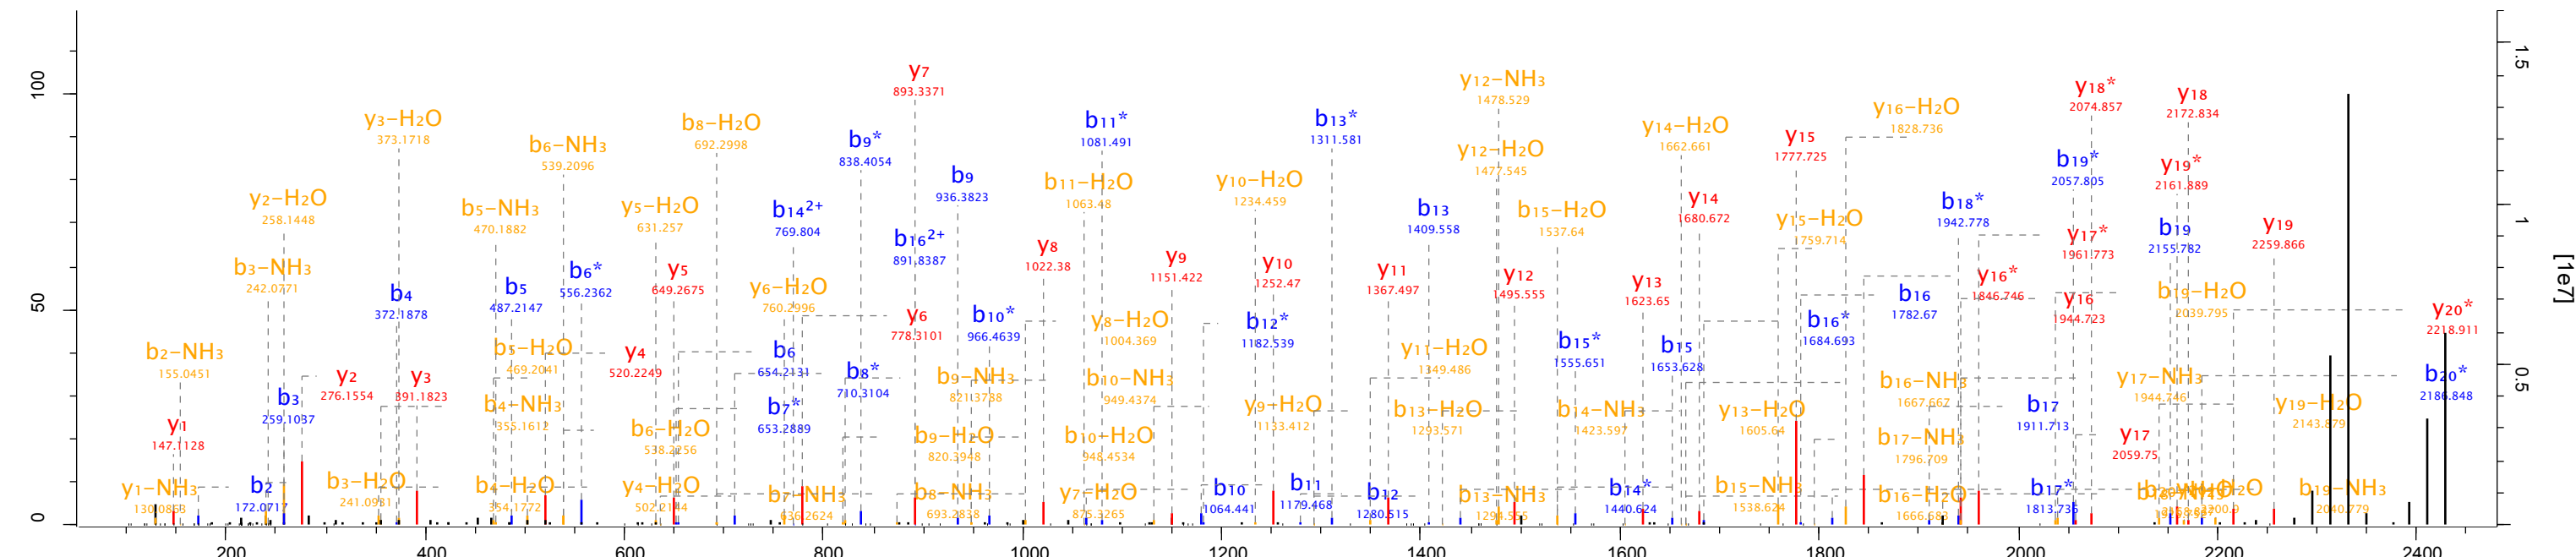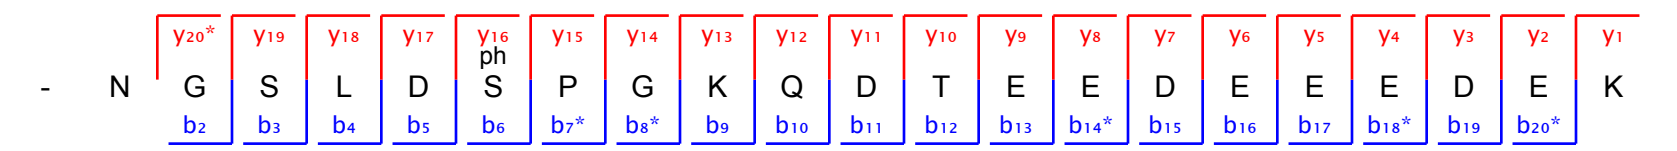

Raw file 20150812\_A375SR\_Phospho\_BR1\_04 Scan 6546 Method FTMS; HCD Score 81.65 m/z 506.92 Gene names NCAPH2

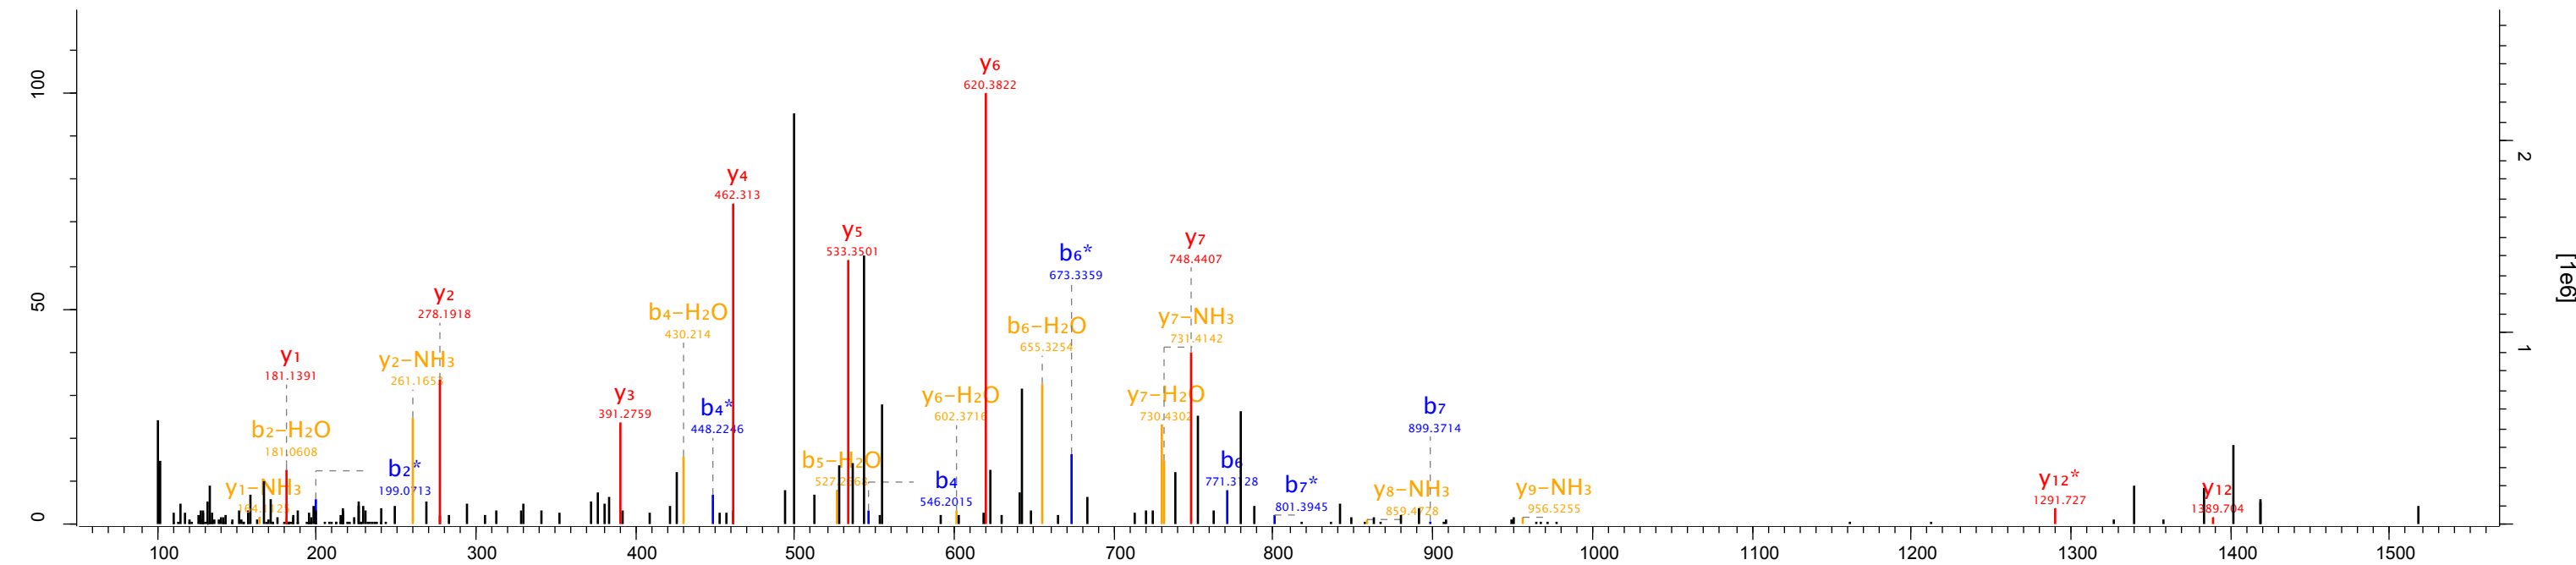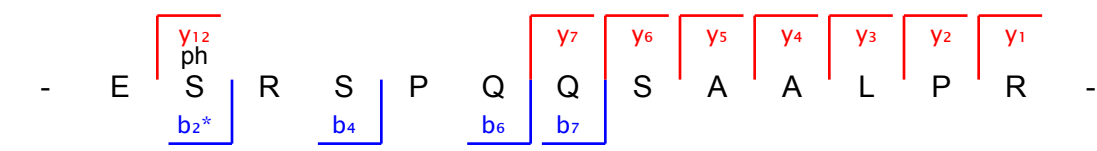



Raw file: 20150812\_A375SR\_Phospho\_BR1\_04  
 Scan: 7146 Method: FTMS; HCD Score: 122.94 m/z: 793.32 Gene names: SSRP1

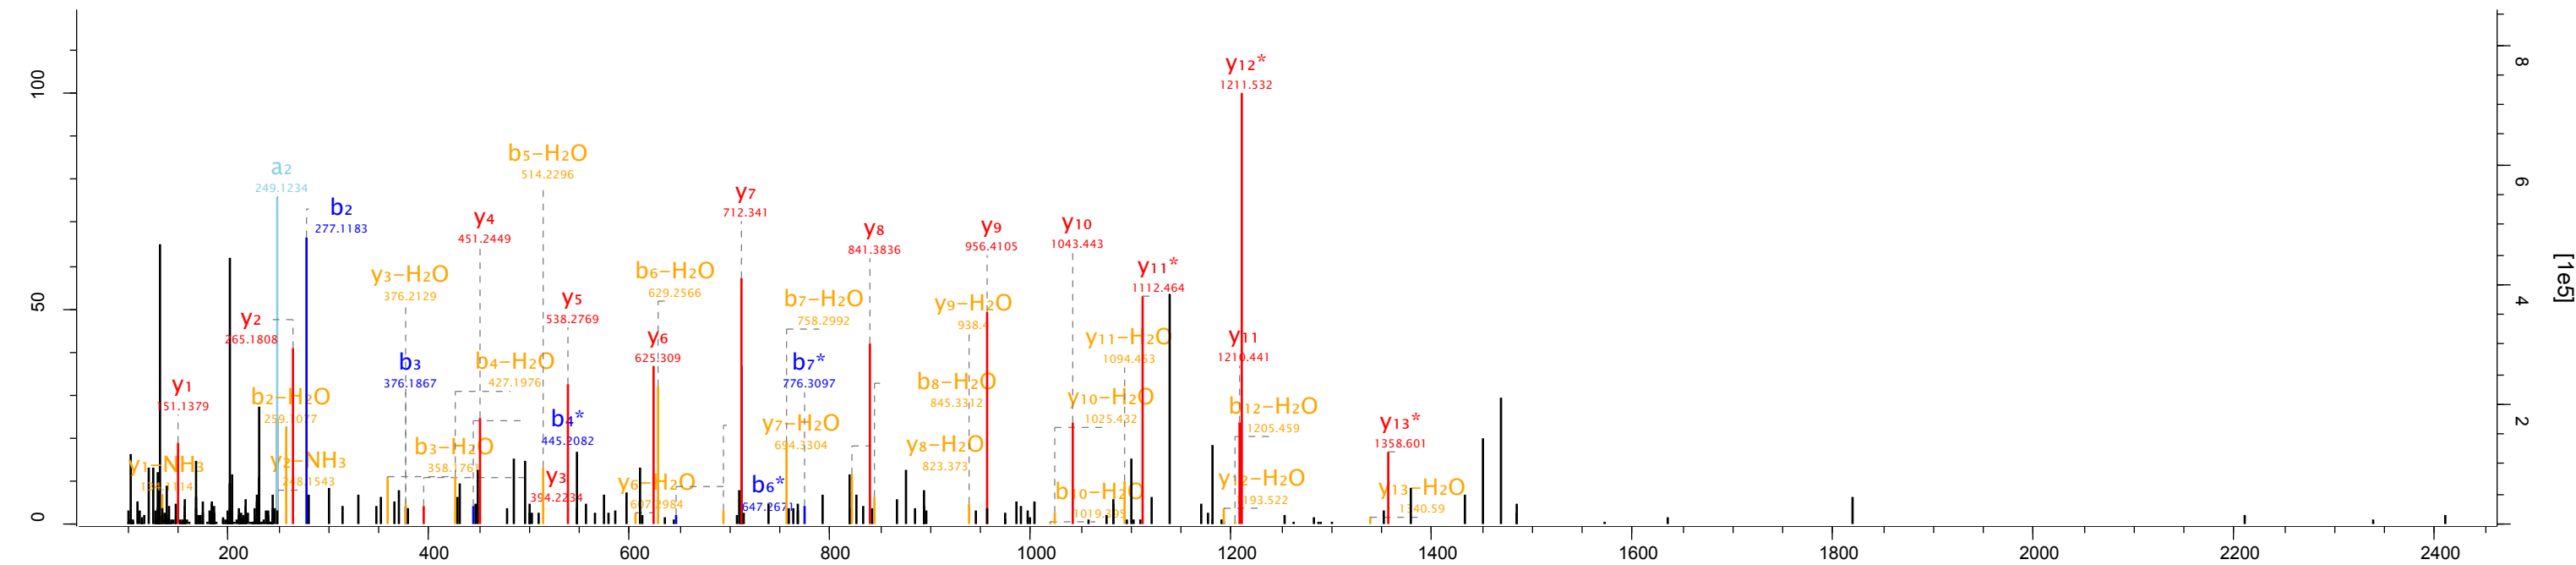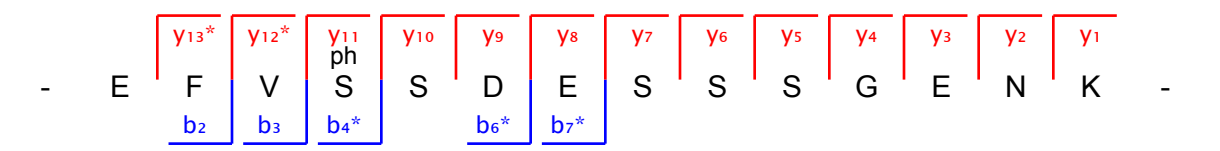

Raw file: 20150812\_A375SR\_Phospho\_BR1\_04  
 Scan: 7376 Method: FTMS; HCD Score: 255.83 m/z: 897.37 Gene names: TBC1D23

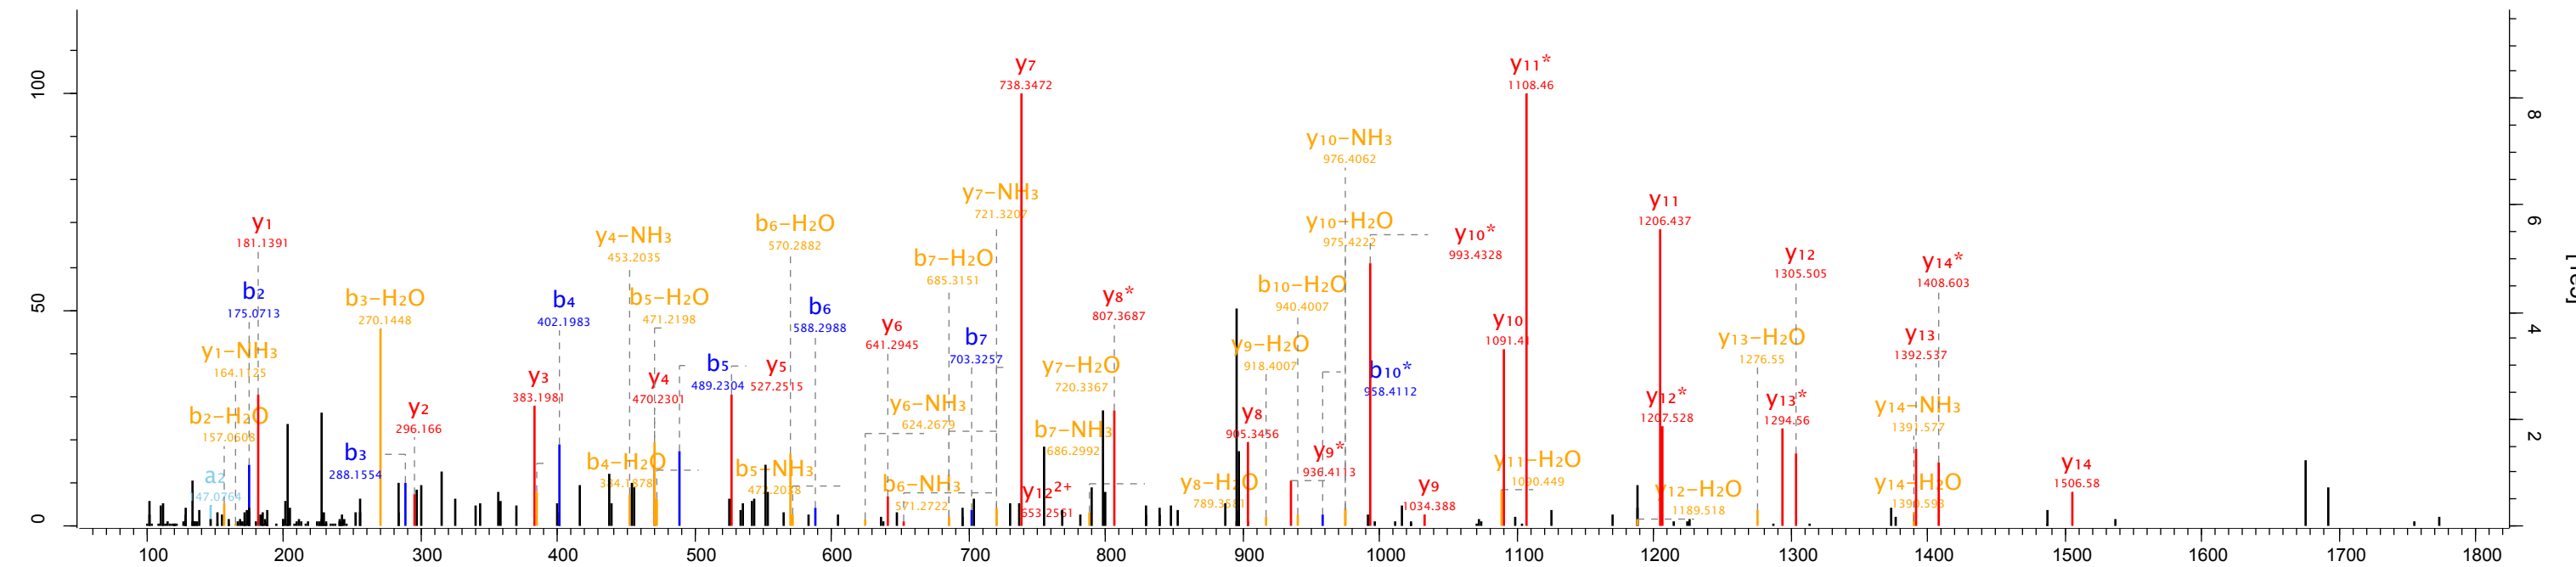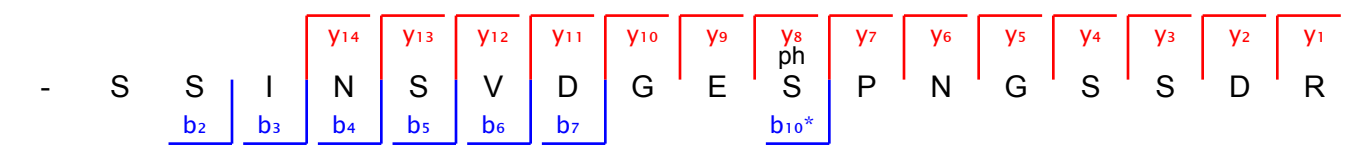

Raw file 20150812\_A375SR\_Phospho\_BR1\_04  
 Scan 7786 Method FTMS; HCD Score 121.39 m/z 509.77 Gene names URI1

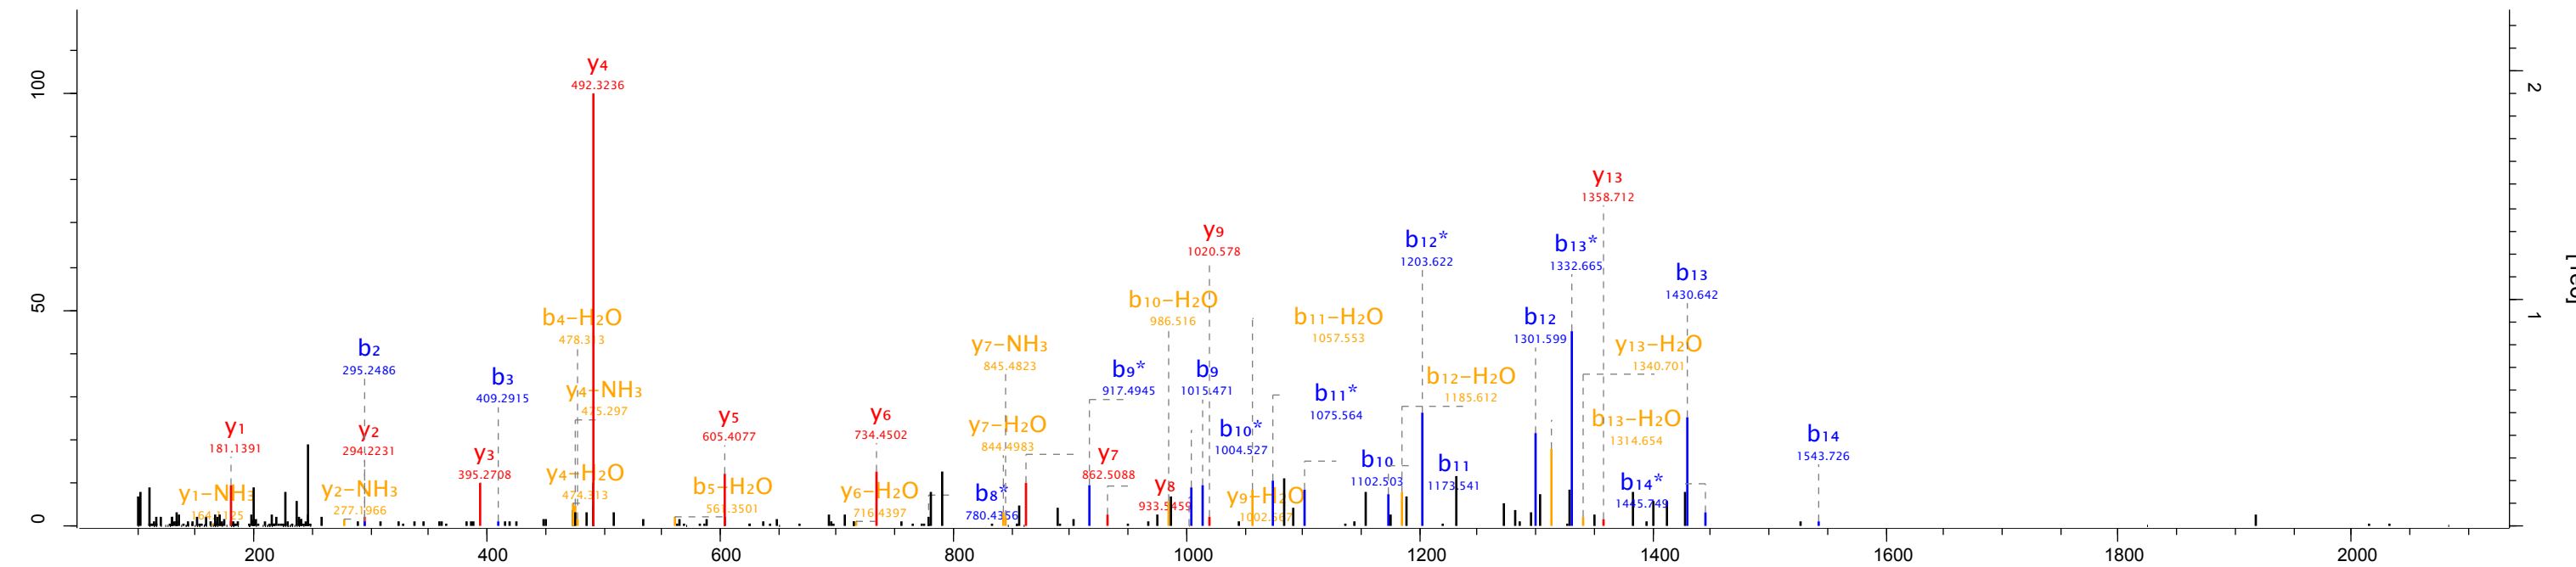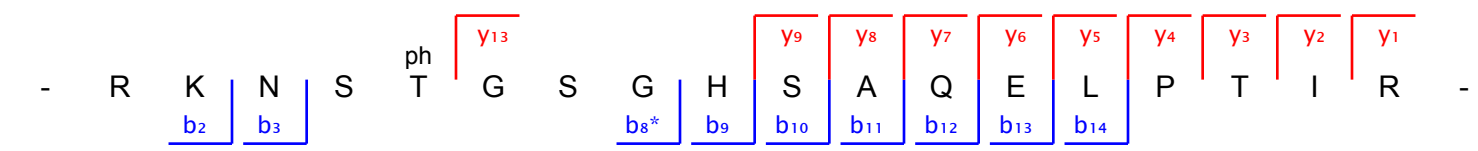

Raw file: 20150812\_A375SR\_Phospho\_BR1\_04  
 Scan: 7906 Method: FTMS; HCD Score: 131.13 m/z: 884.93 Gene names: CLASP1

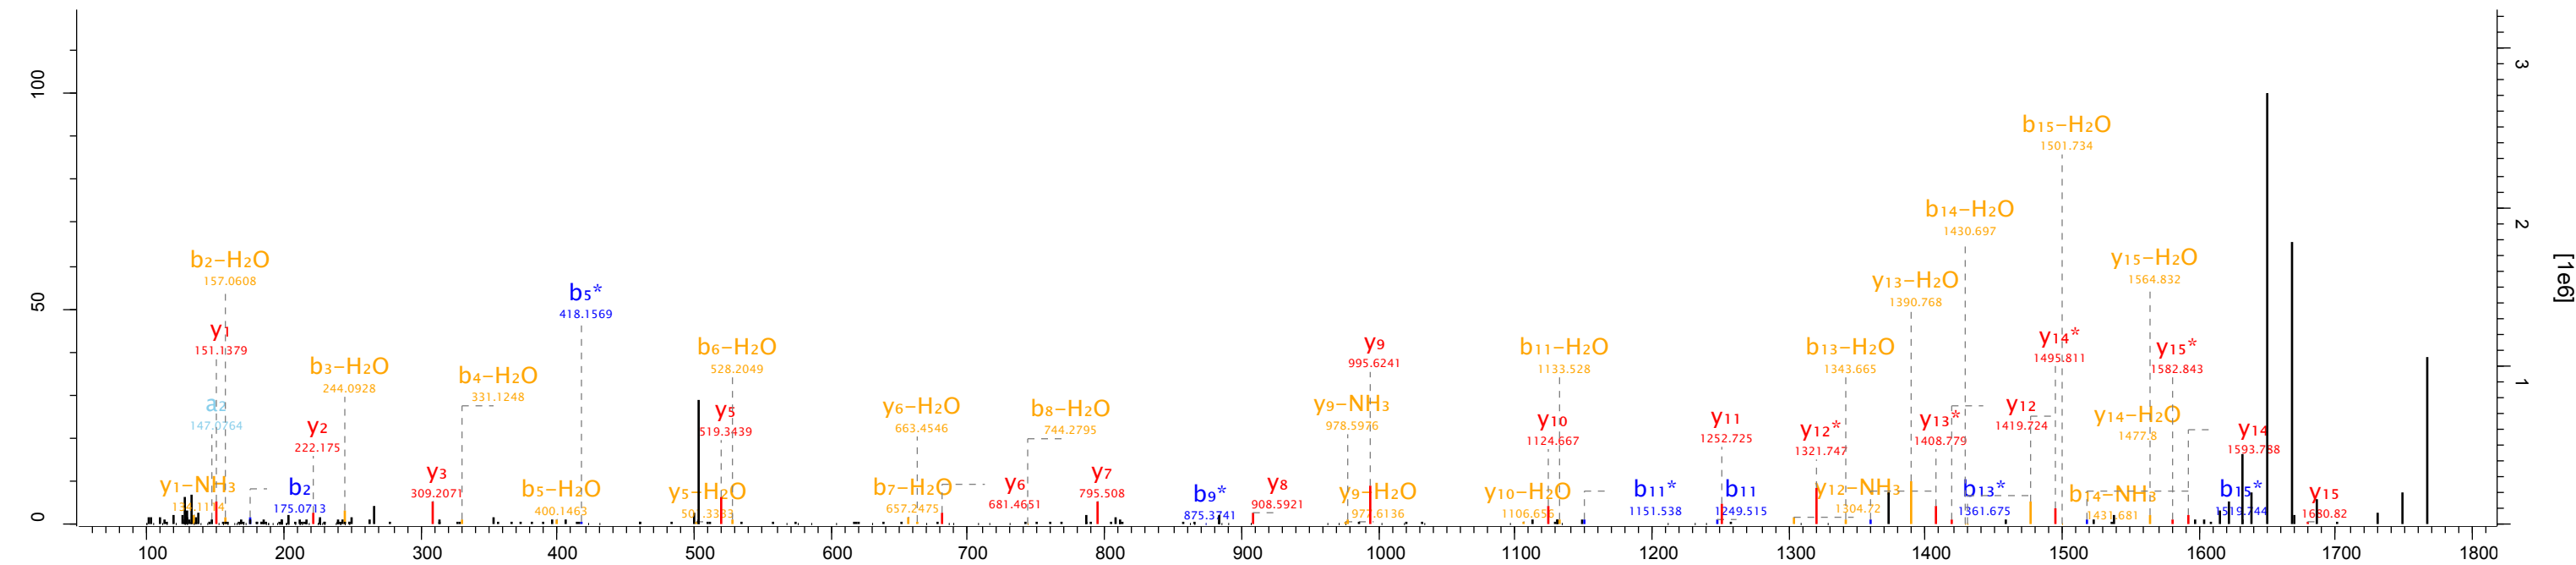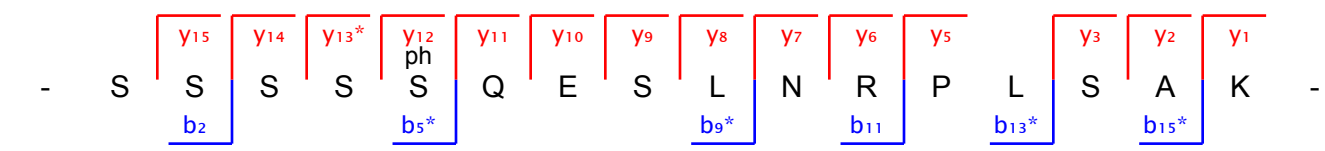

Raw file: 20150812\_A375SR\_Phospho\_BR1\_04  
 Scan: 8356 Method: FTMS; HCD Score: 157.03 m/z: 537.22 Gene names: CAV1

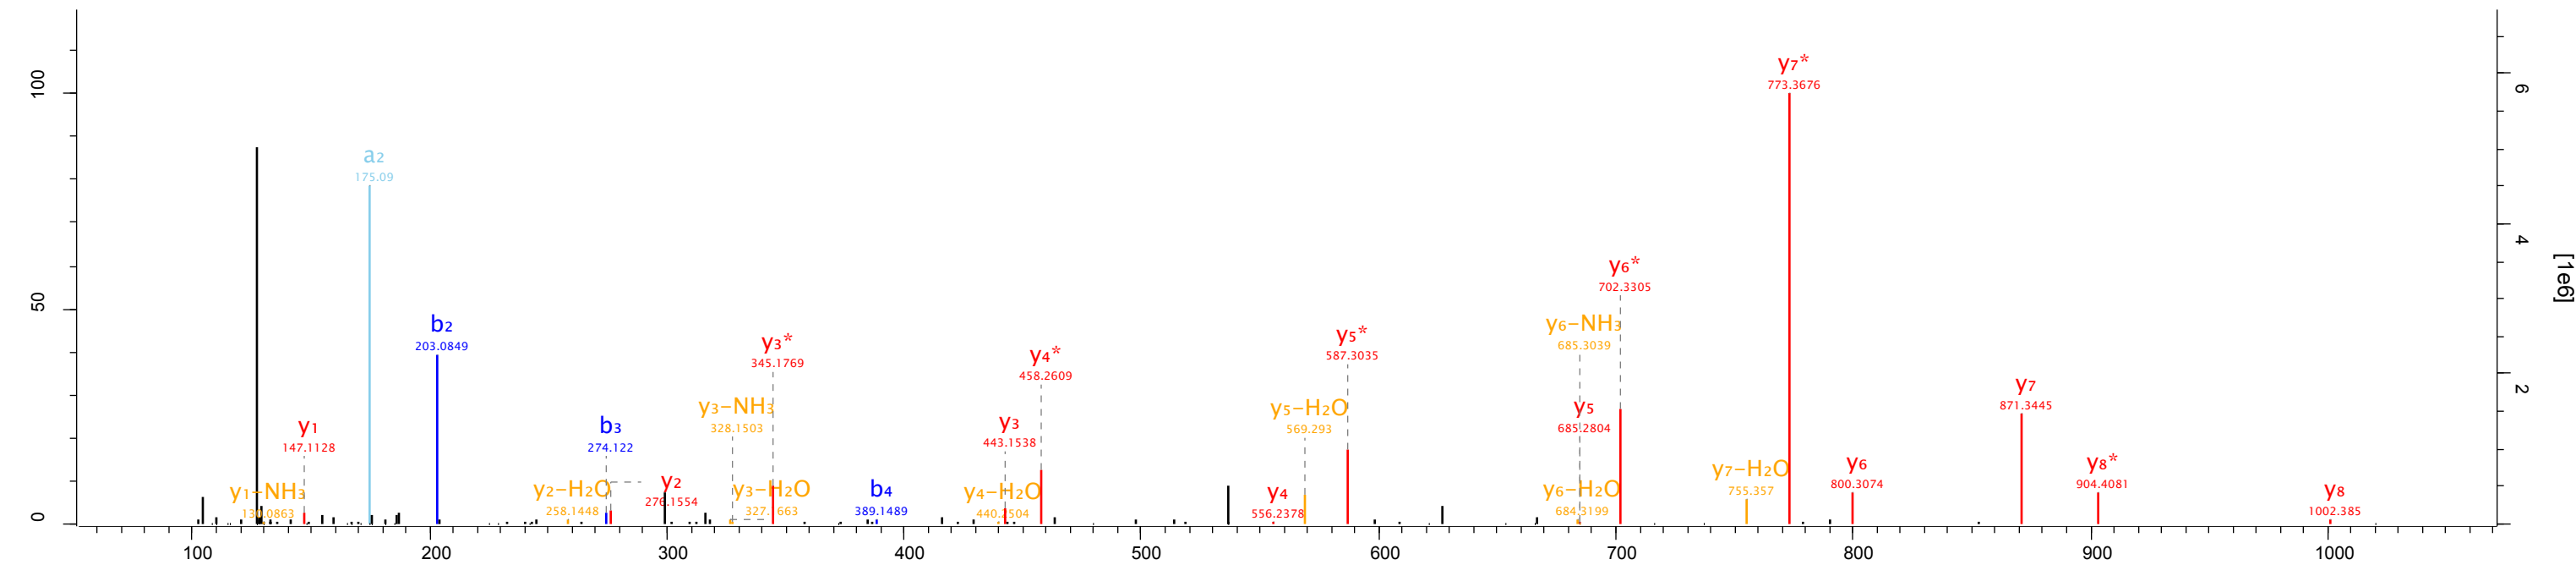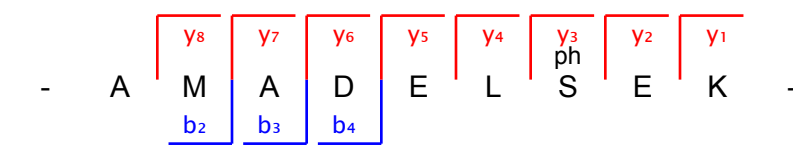

Raw file: 20150812\_A375SR\_Phospho\_BR1\_04  
 Scan: 9296 Method: FTMS; HCD Score: 166.61 m/z: 637.62 Gene names: TRIM25

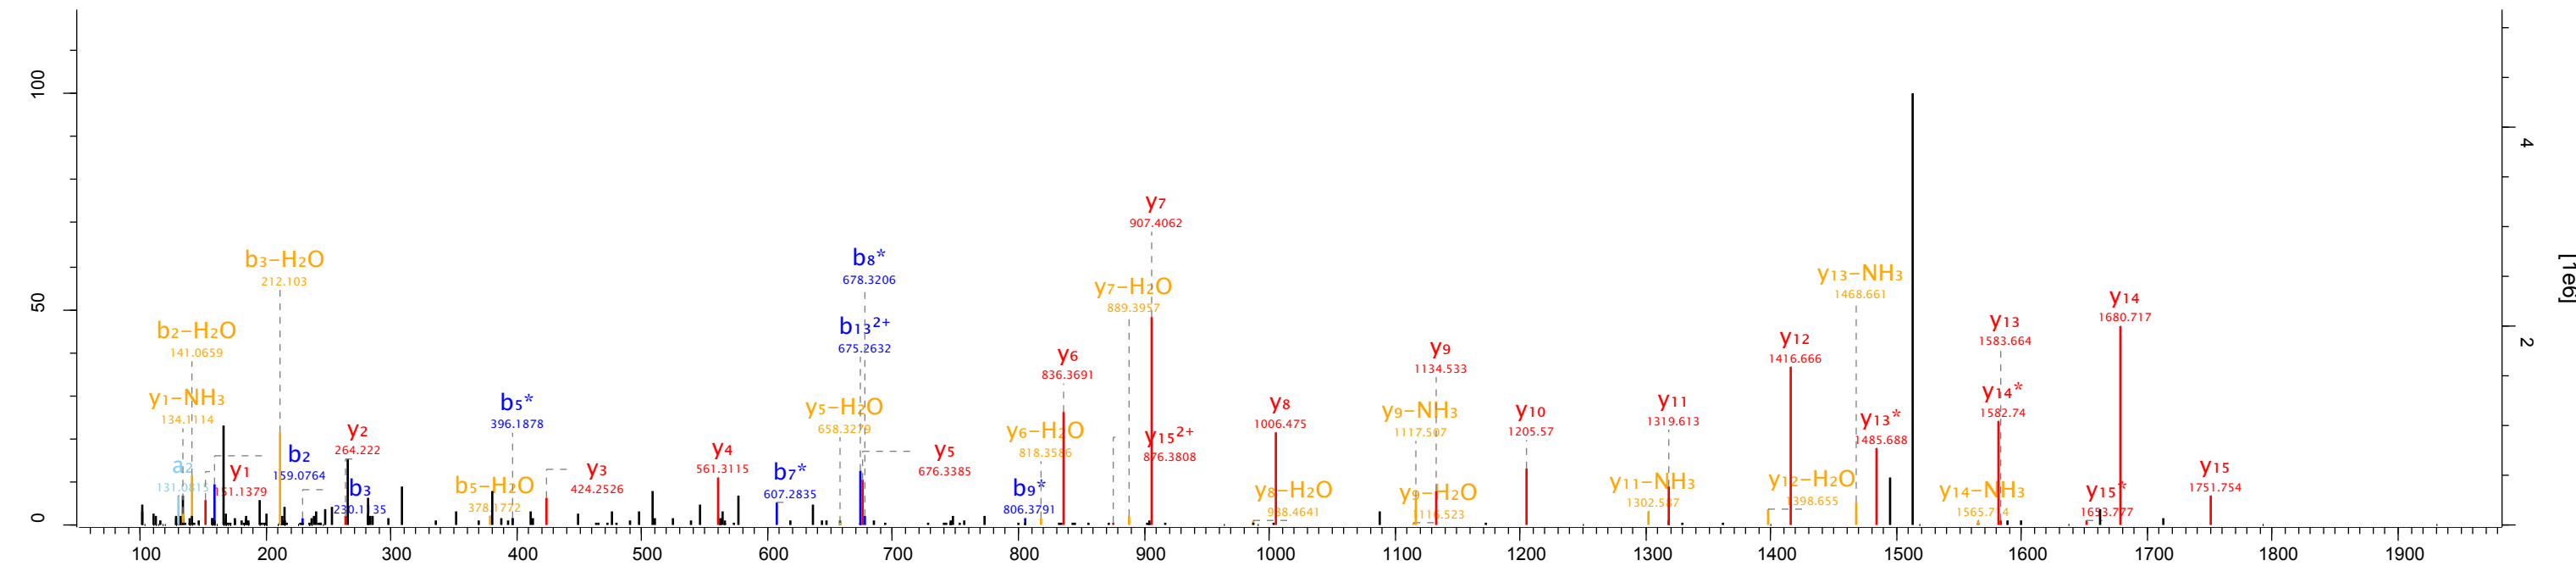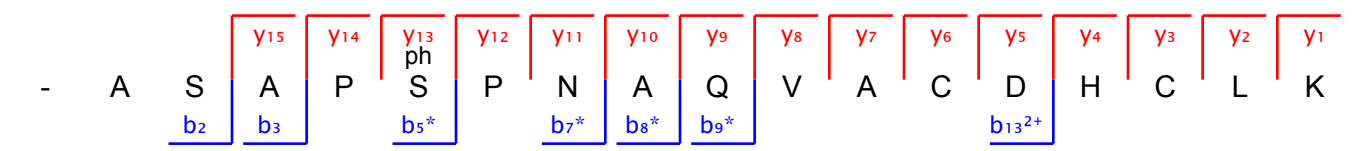

Raw file: 20150812\_A375SR\_Phospho\_BR1\_04  
 Scan: 9956 Method: FTMS; HCD Score: 117.31 m/z: 813.36 Gene names: GPATCH8

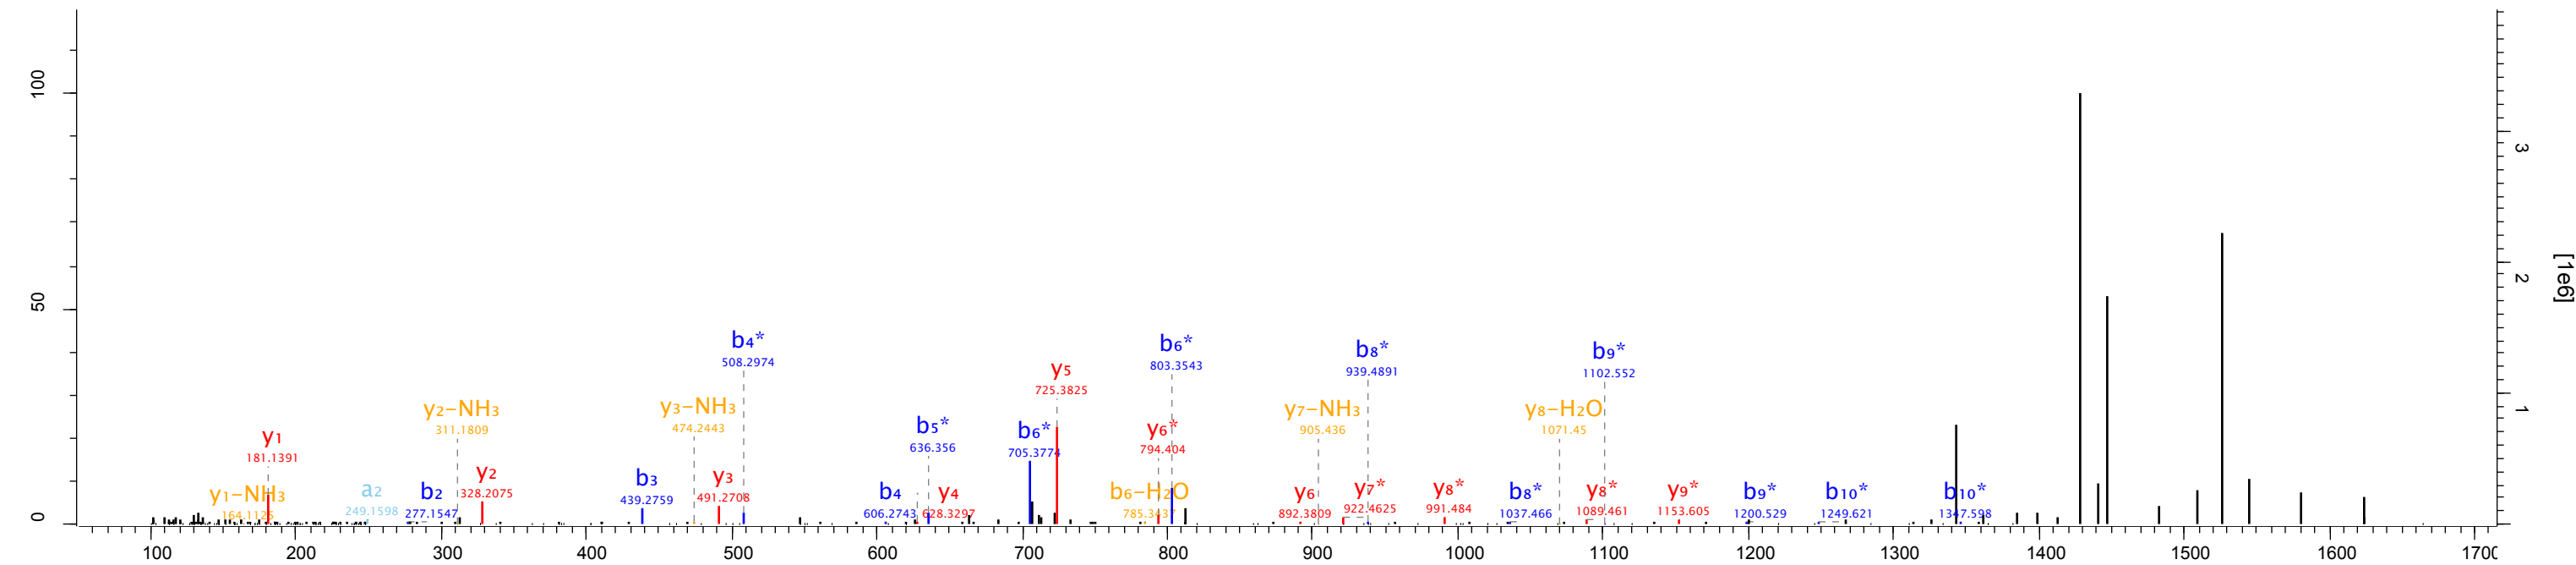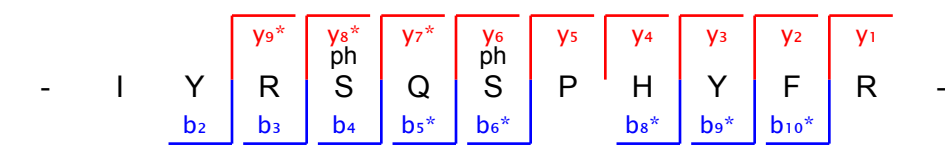

Raw file: 20150812\_A375SR\_Phospho\_BR1\_05  
 Scan: 10276 Method: FTMS; HCD Score: 82.64 m/z: 461.24 Gene names: SNRPD2

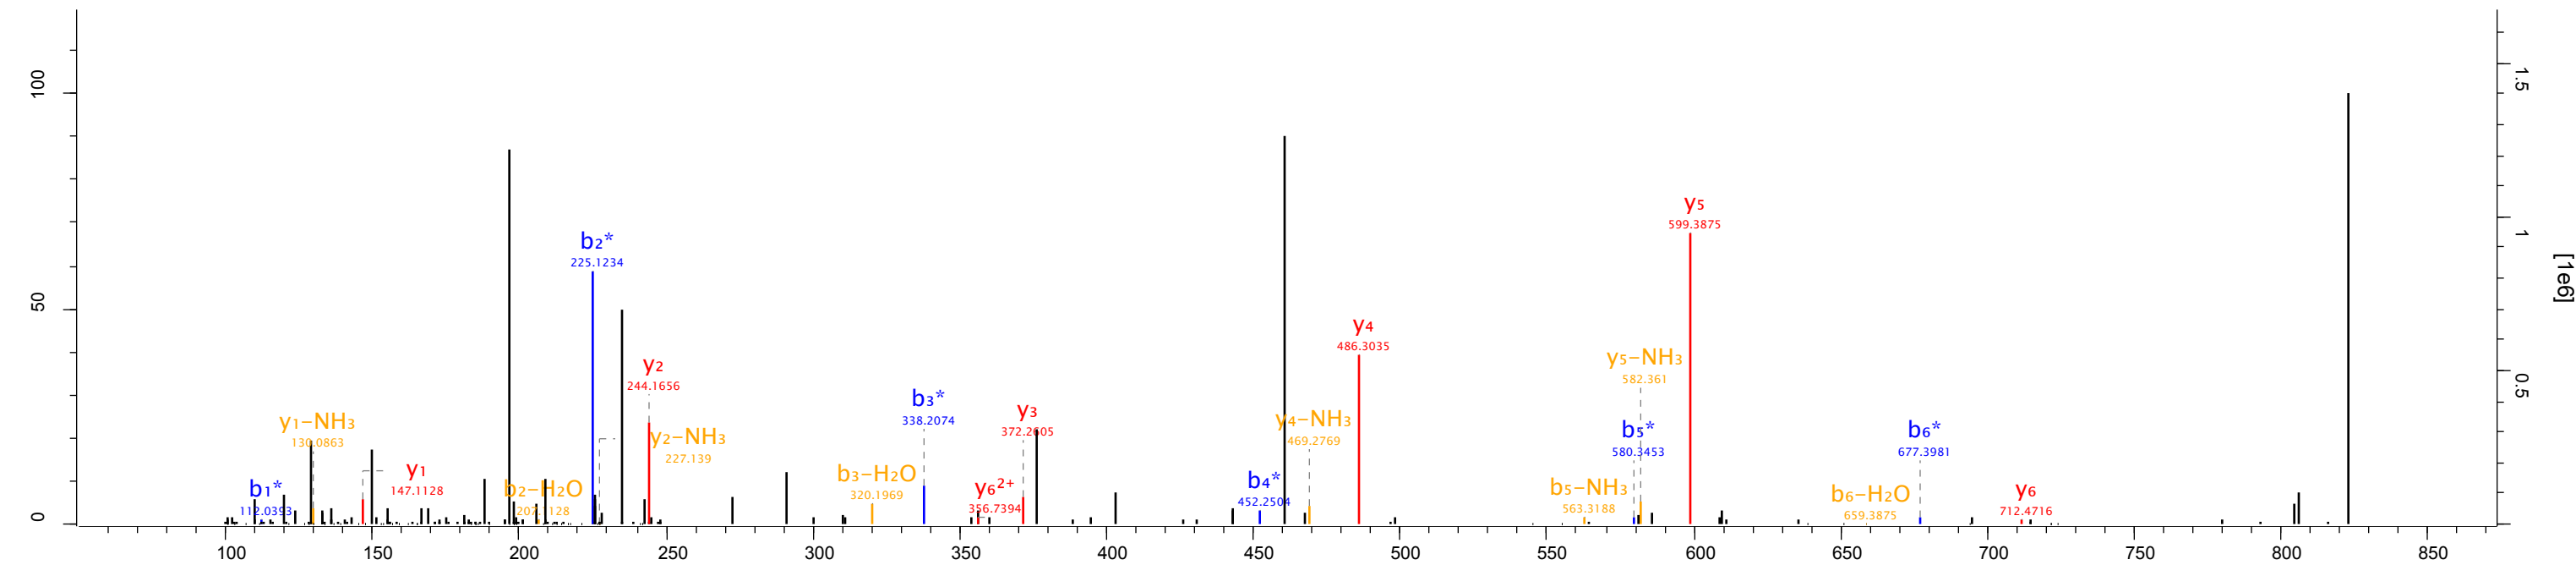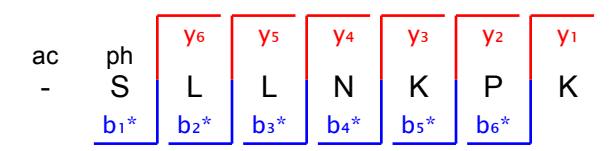



Raw file: 20150812\_A375SR\_Phospho\_BR1\_05  
 Scan: 10486 Method: FTMS; HCD Score: 86.49 m/z: 507.57 Gene names: RBM4

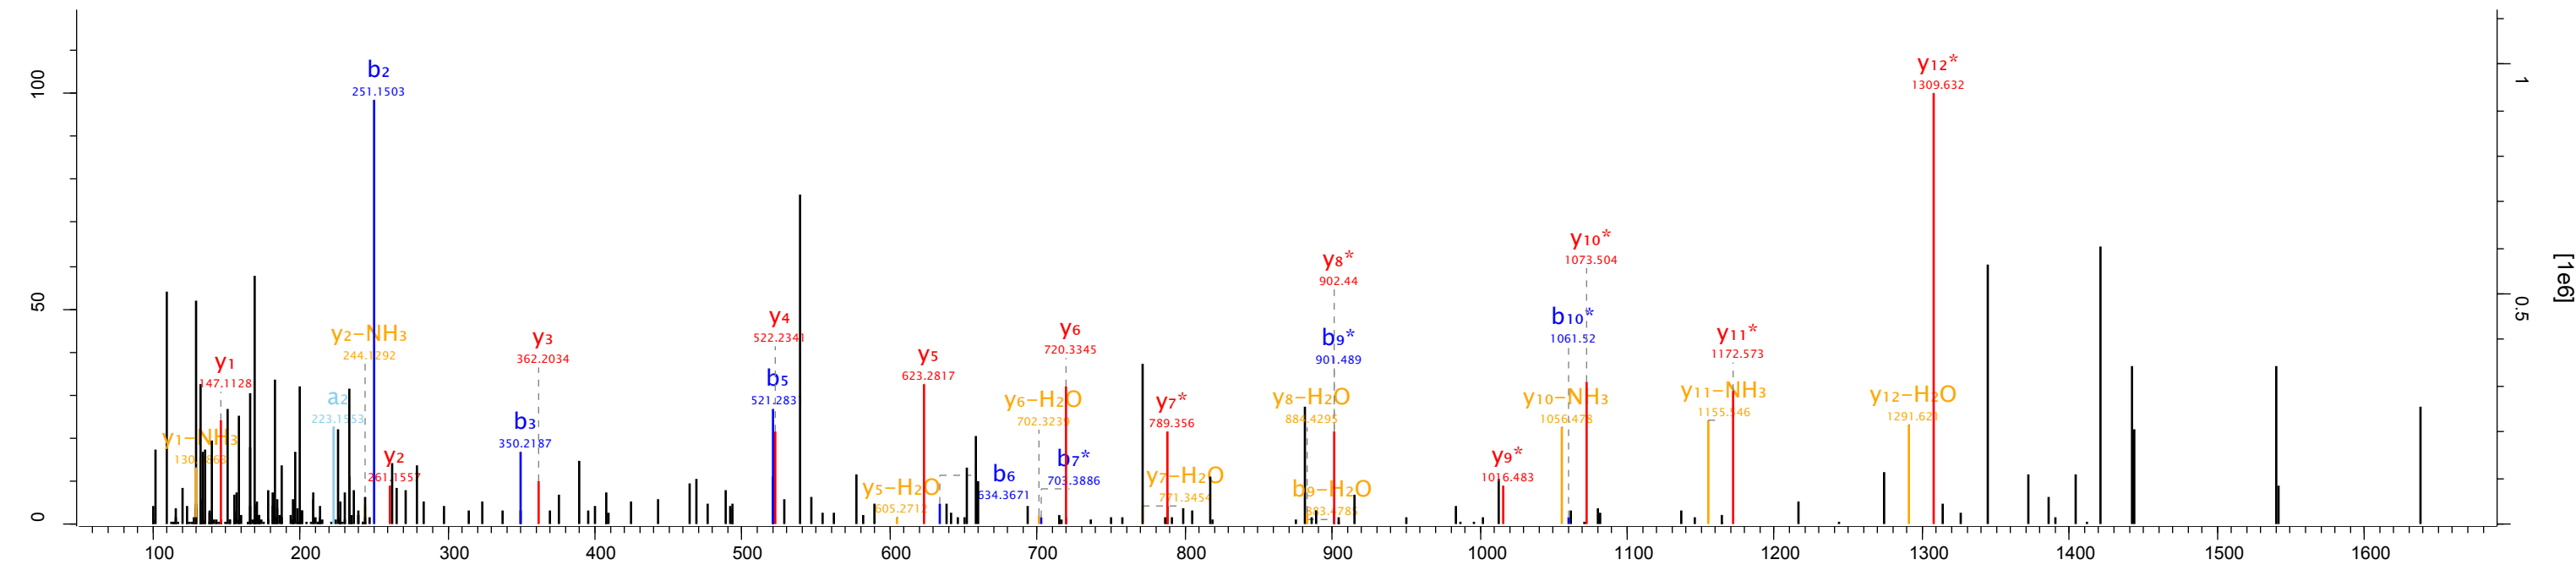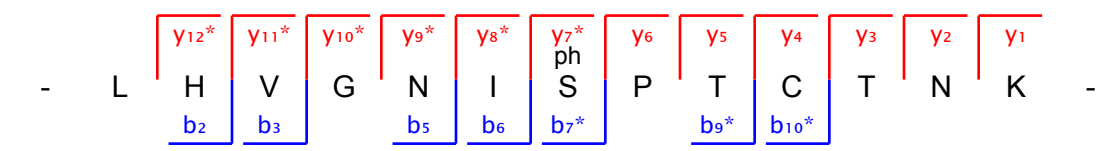

Raw file Scan Method Score m/z Gene names  
 20150812\_A375SR\_Phospho\_BR1\_05 10516 FTMS; HCD 111.94 559.8 DENND1A

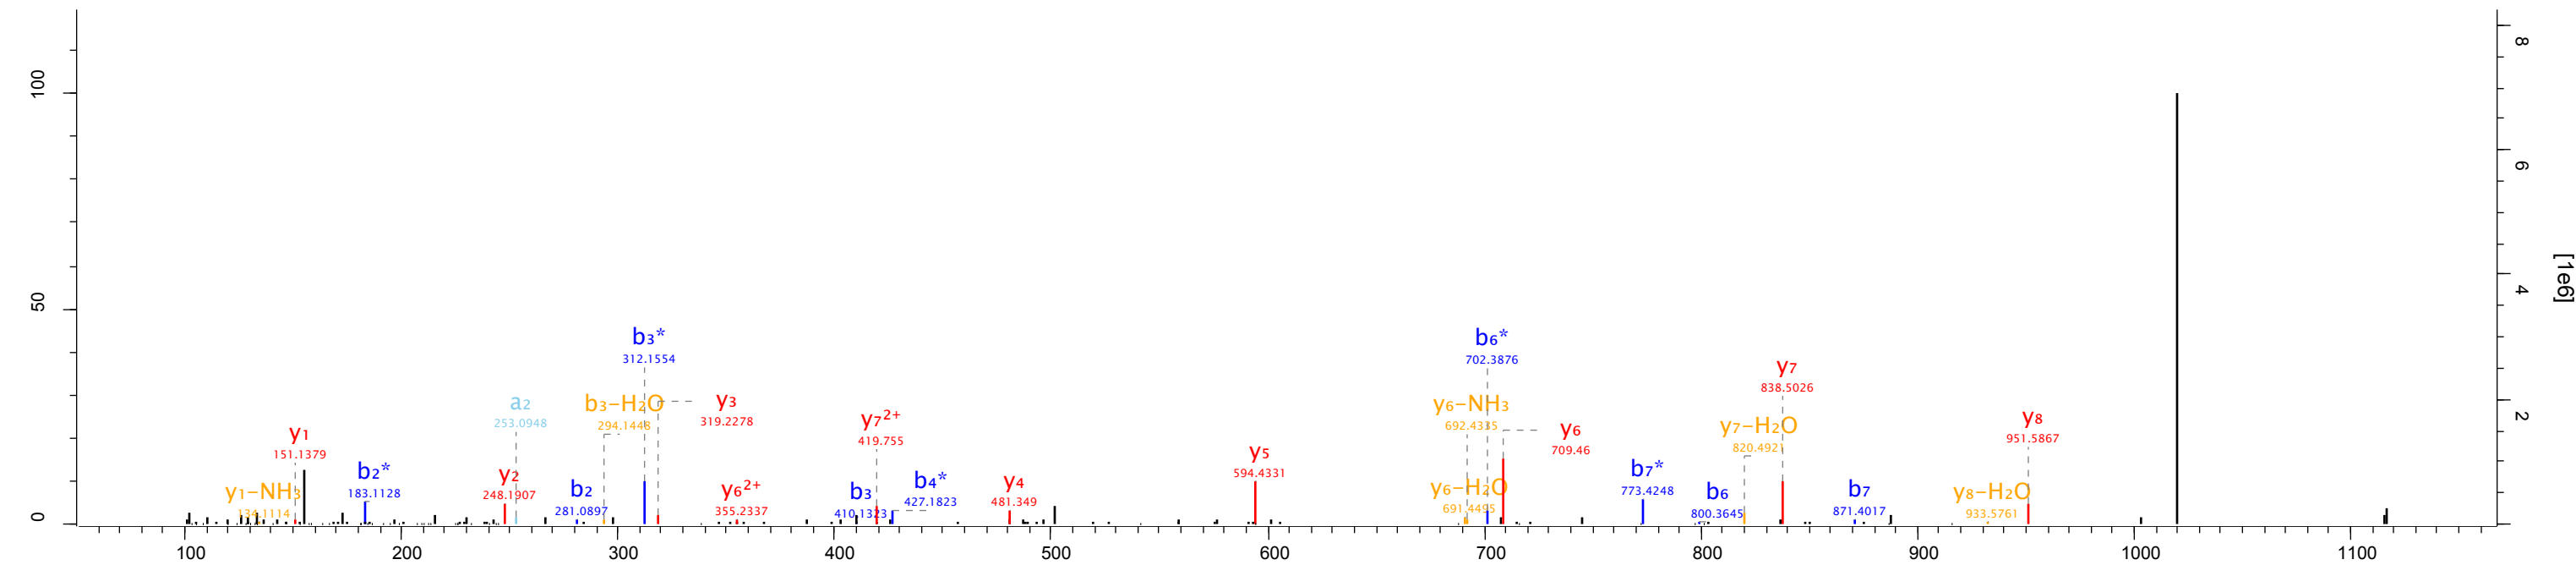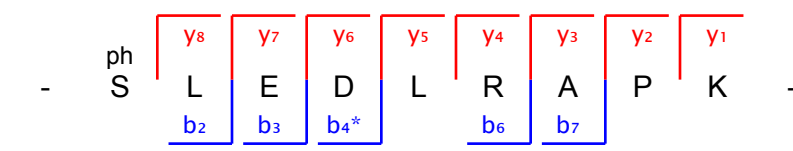

Raw file: 20150812\_A375SR\_Phospho\_BR1\_05  
 Scan: 10816 Method: FTMS; HCD Score: 233.21 m/z: 1257.08 Gene names: KIF21A

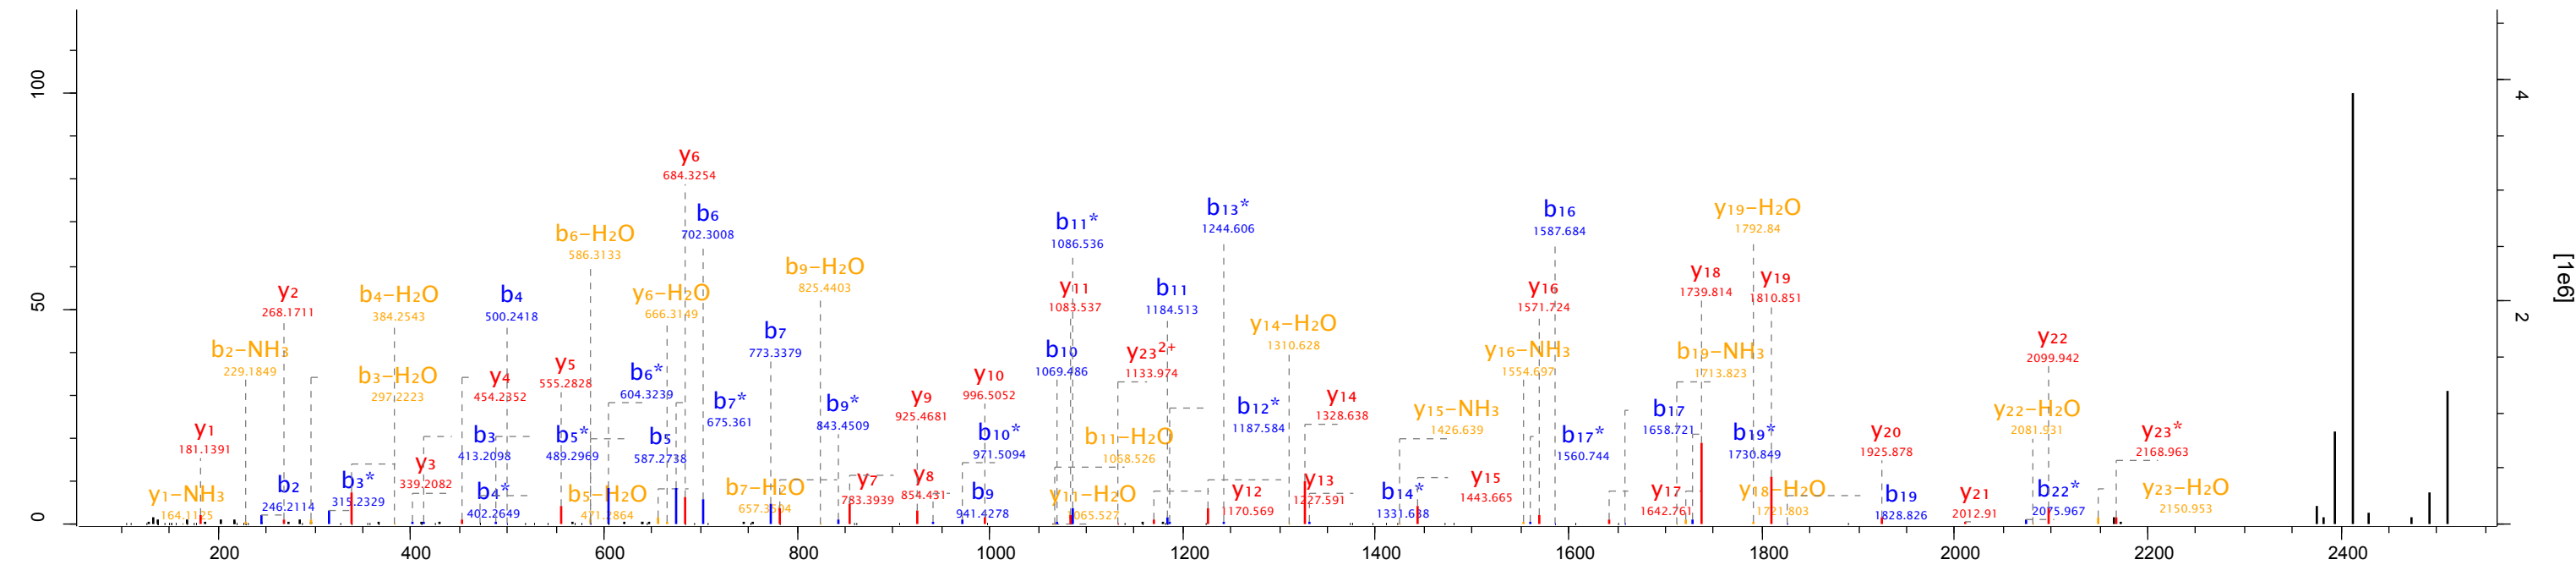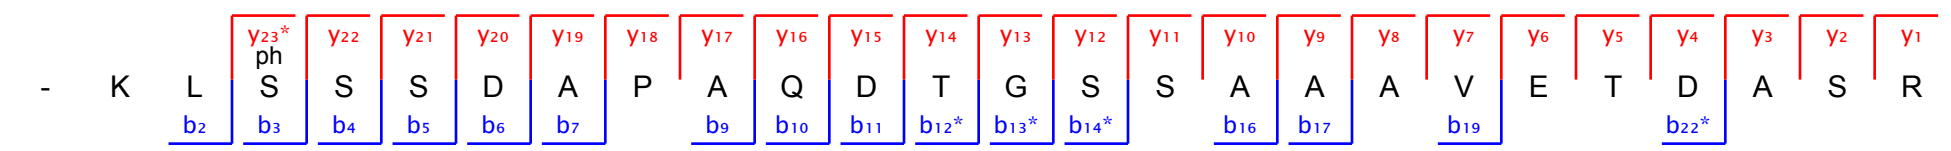

Raw file: 20150812\_A375SR\_Phospho\_BR1\_05  
 Scan: 11286 Method: FTMS; HCD Score: 59.2 m/z: 512.25 Gene names: SMARCAD1

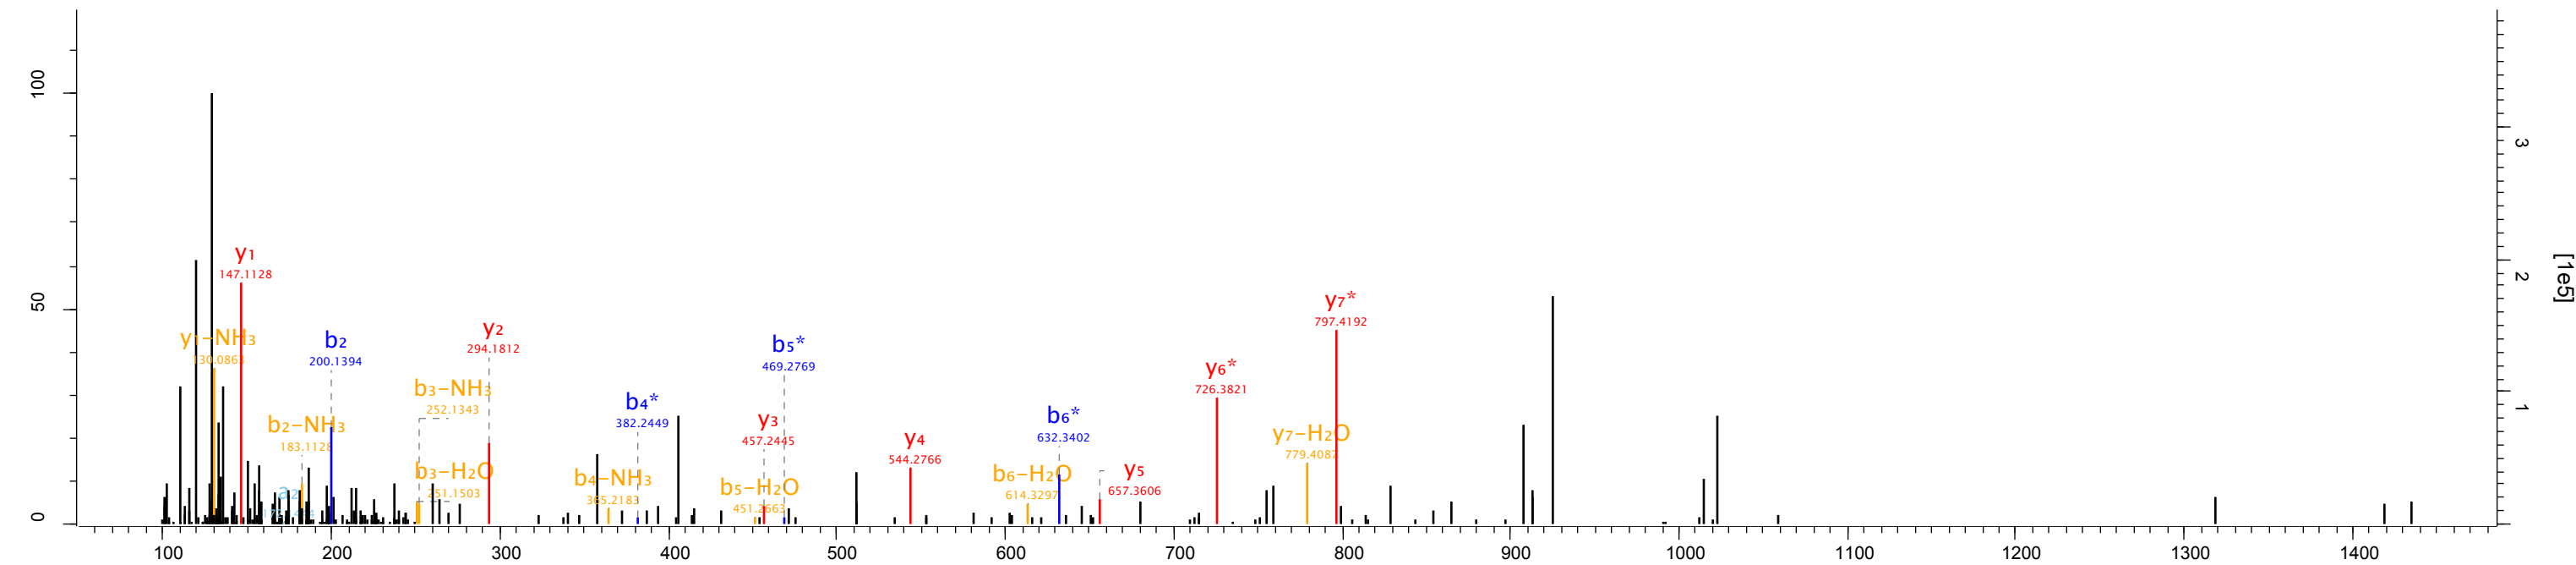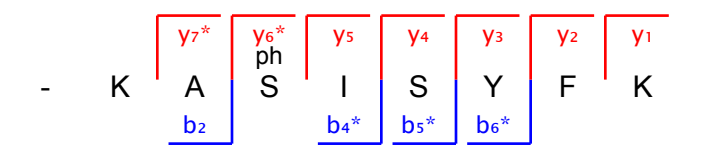



Raw file 20150812\_A375SR\_Phospho\_BR1\_05 Scan 12296 Method FTMS; HCD Score 72.57 m/z 859.88 Gene names MAP9

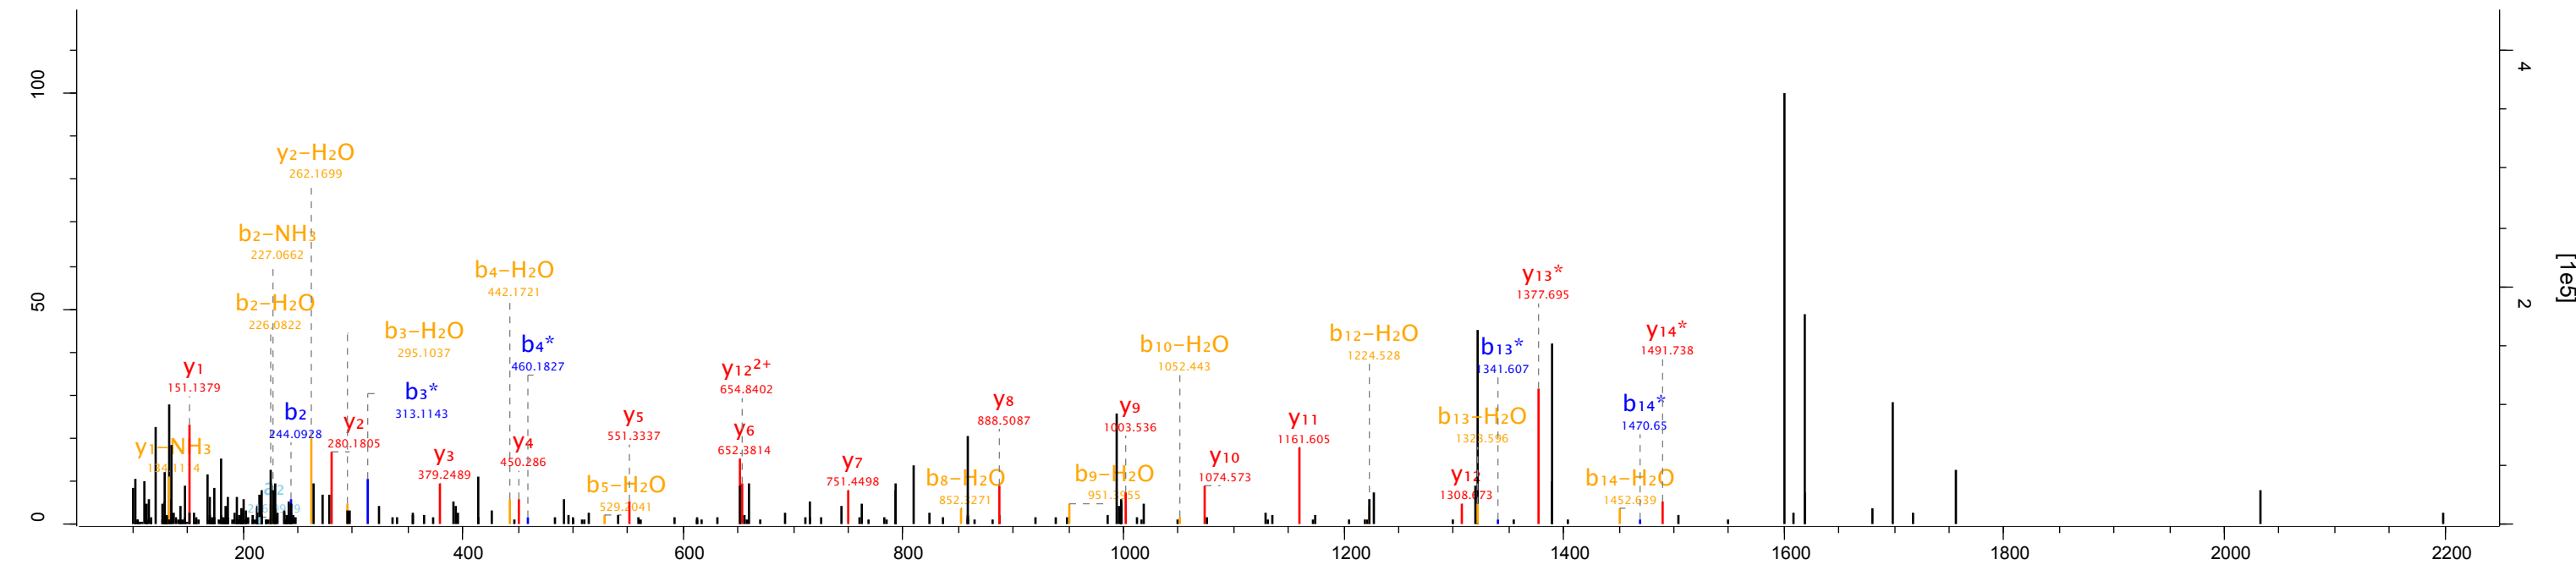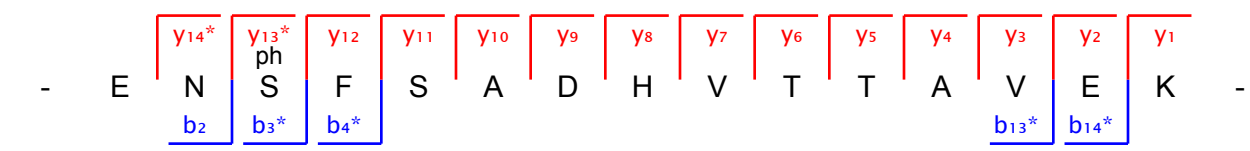

Raw file 20150812\_A375SR\_Phospho\_BR1\_05 Scan 12336 Method FTMS; HCD Score 89.26 m/z 628.78 Gene names SH3PXD2A

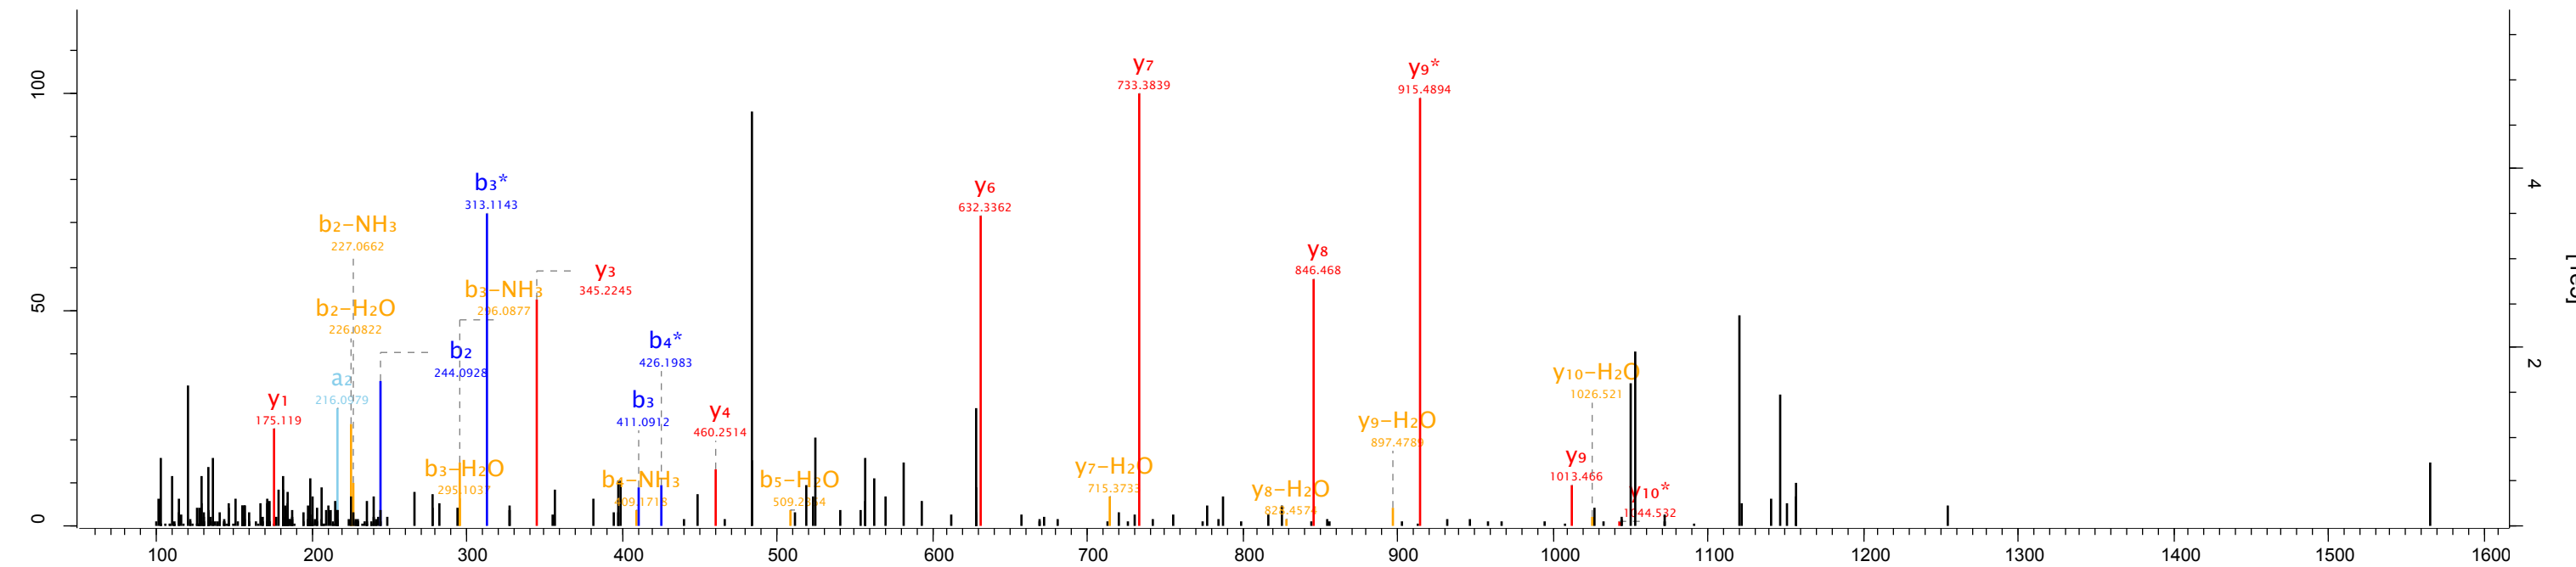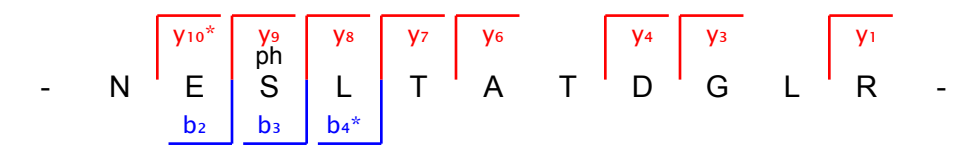

Raw file: 20150812\_A375SR\_Phospho\_BR1\_05  
 Scan: 1256 Method: FTMS; HCD Score: 123.96 m/z: 496.76 Gene names: SRRM1

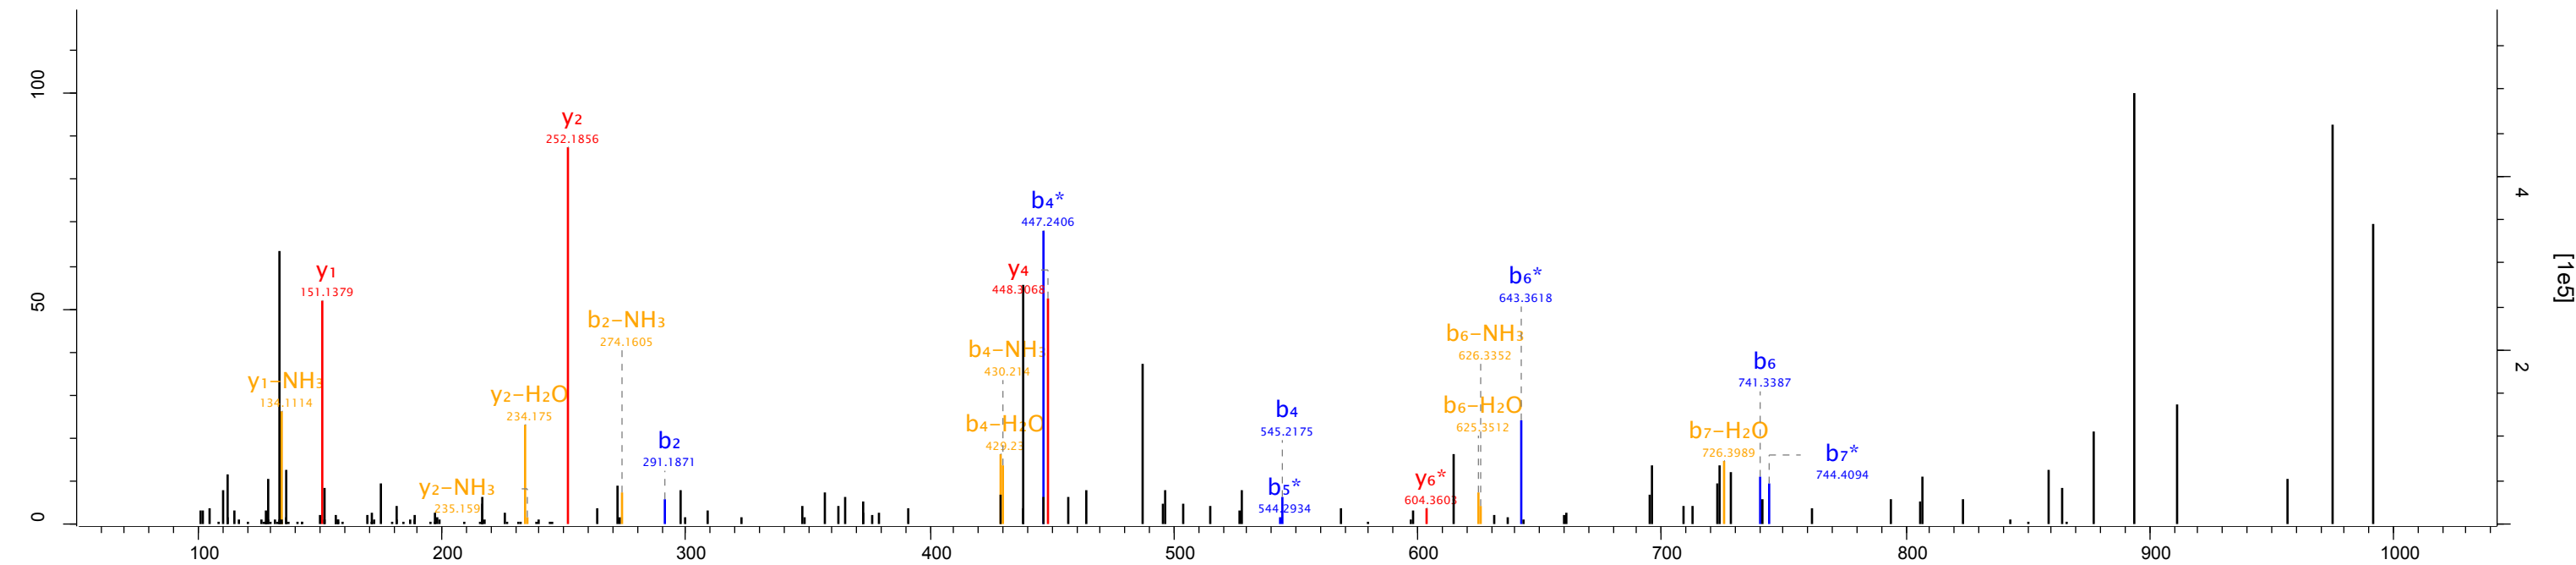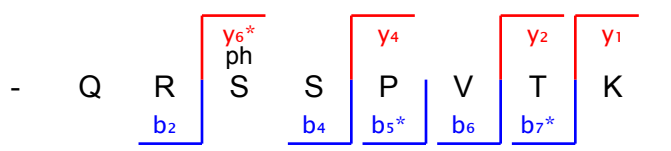



Raw file: 20150812\_A375SR\_Phospho\_BR1\_05  
 Scan: 12786 Method: FTMS; HCD Score: 127.61 m/z: 807.85 Gene names: IRS1

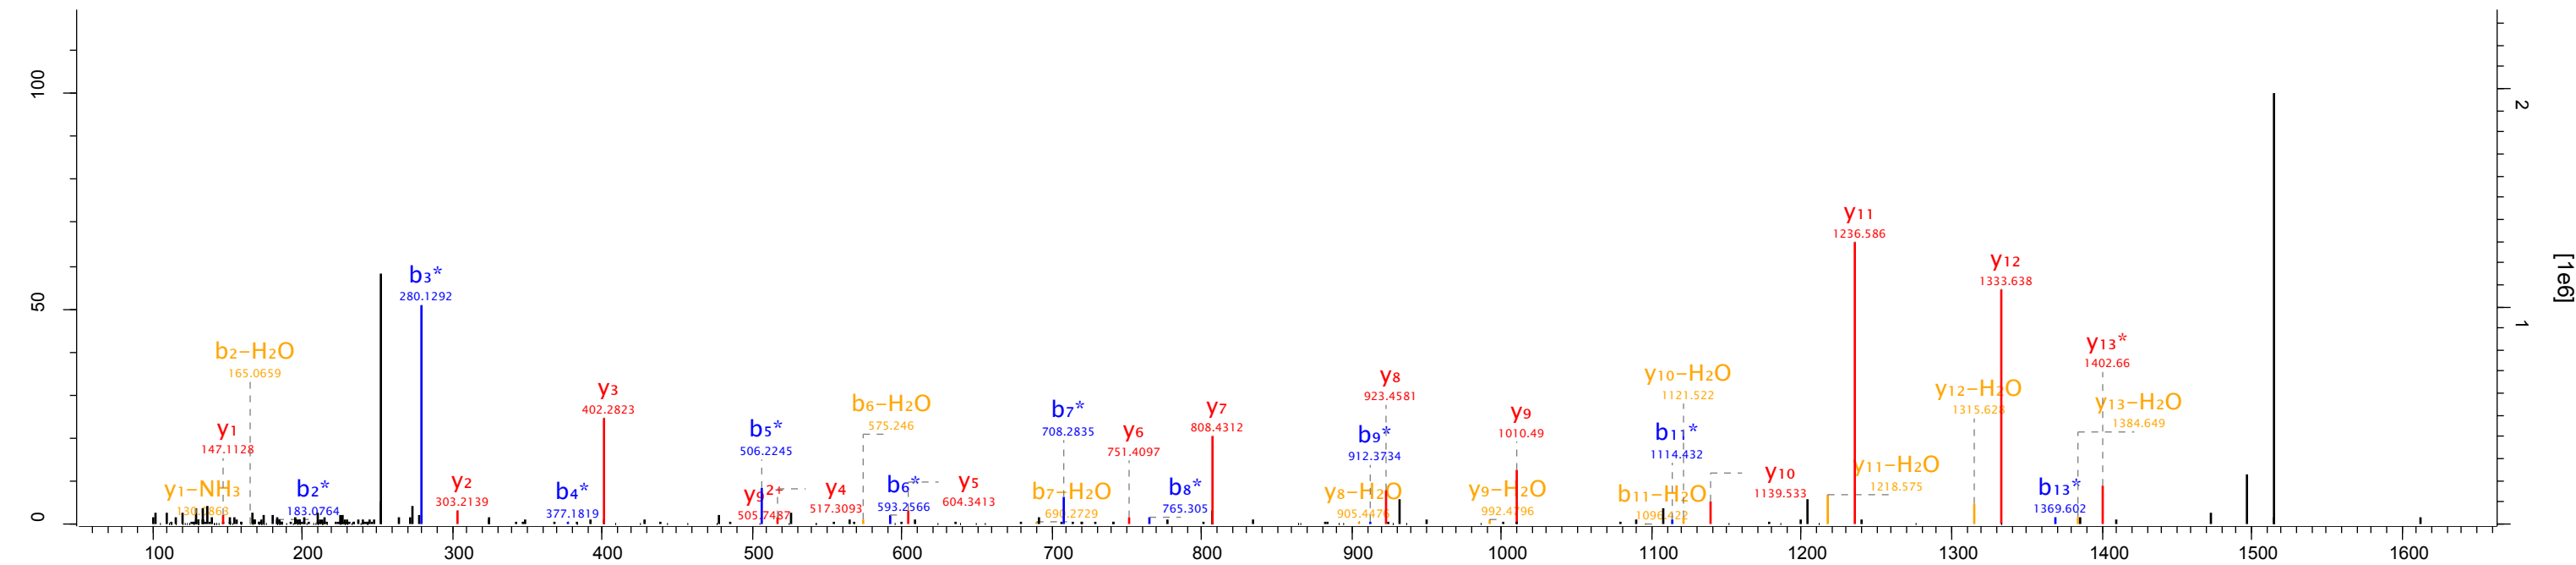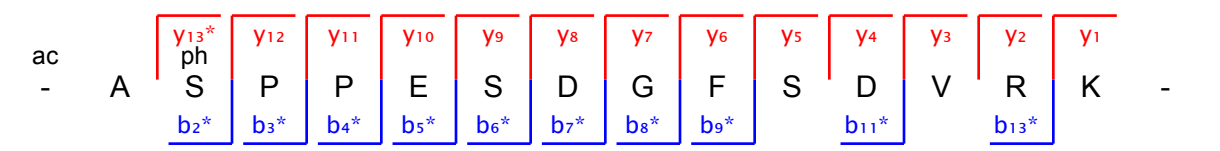

Raw file 20150812\_A375SR\_Phospho\_BR1\_05 Scan 12846 Method FTMS; HCD Score 59 m/z 704.85 Gene names CENPO

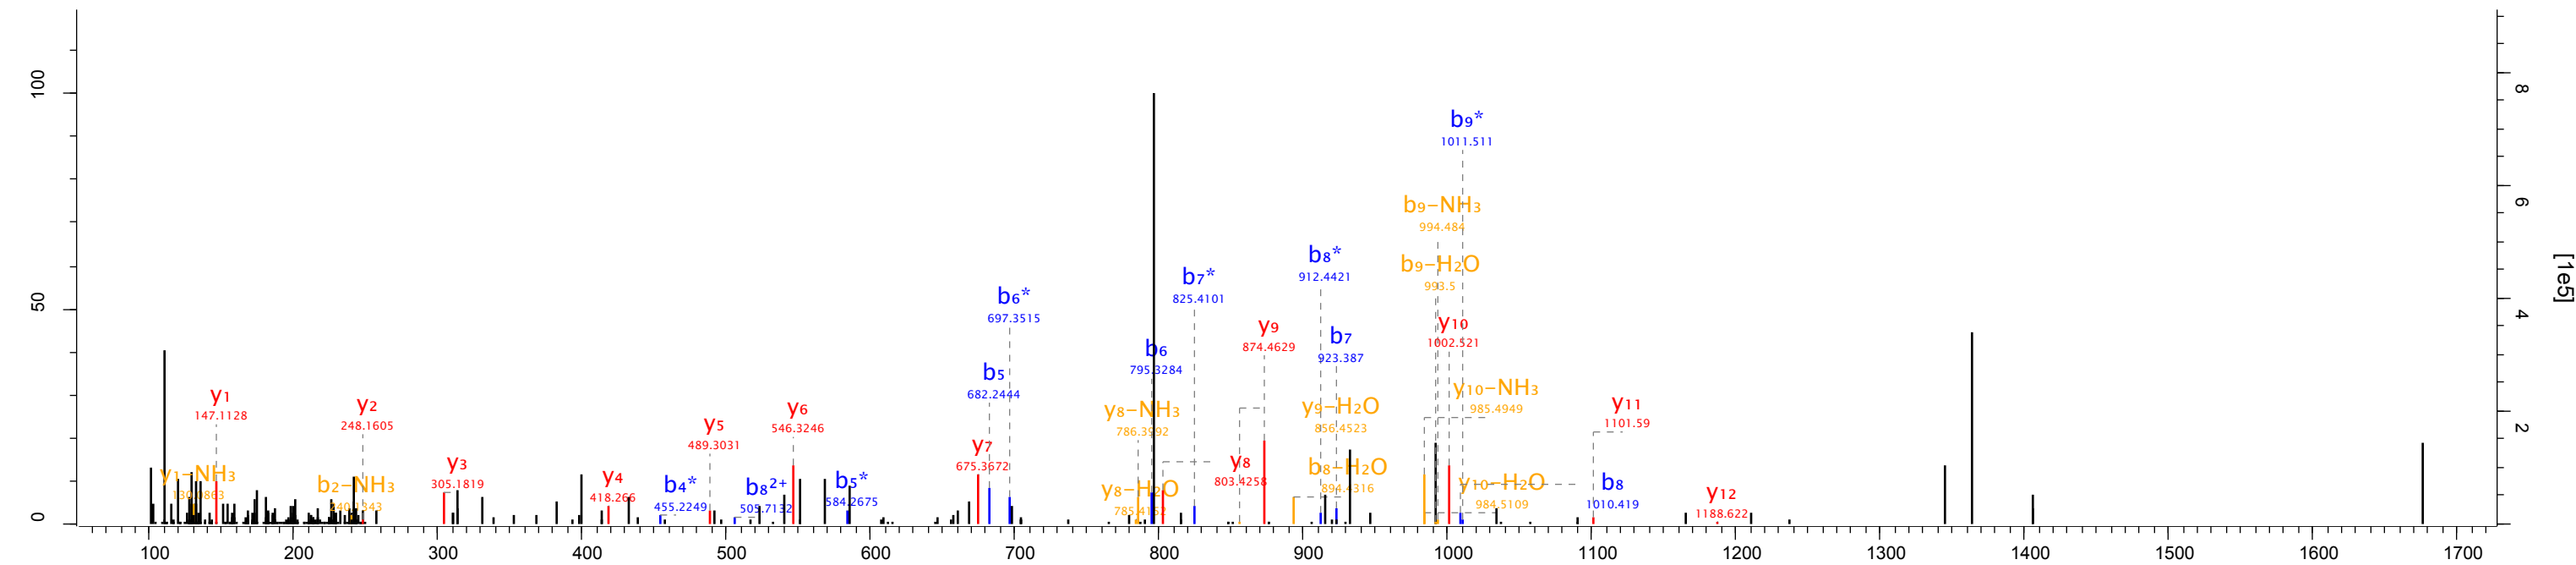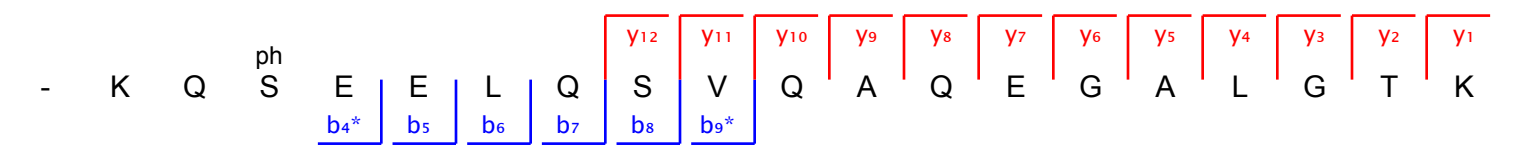

Raw file 20150812\_A375SR\_Phospho\_BR1\_05 Scan 13096 Method FTMS; HCD Score 180.05 m/z 845.9 Gene names MAP4K4

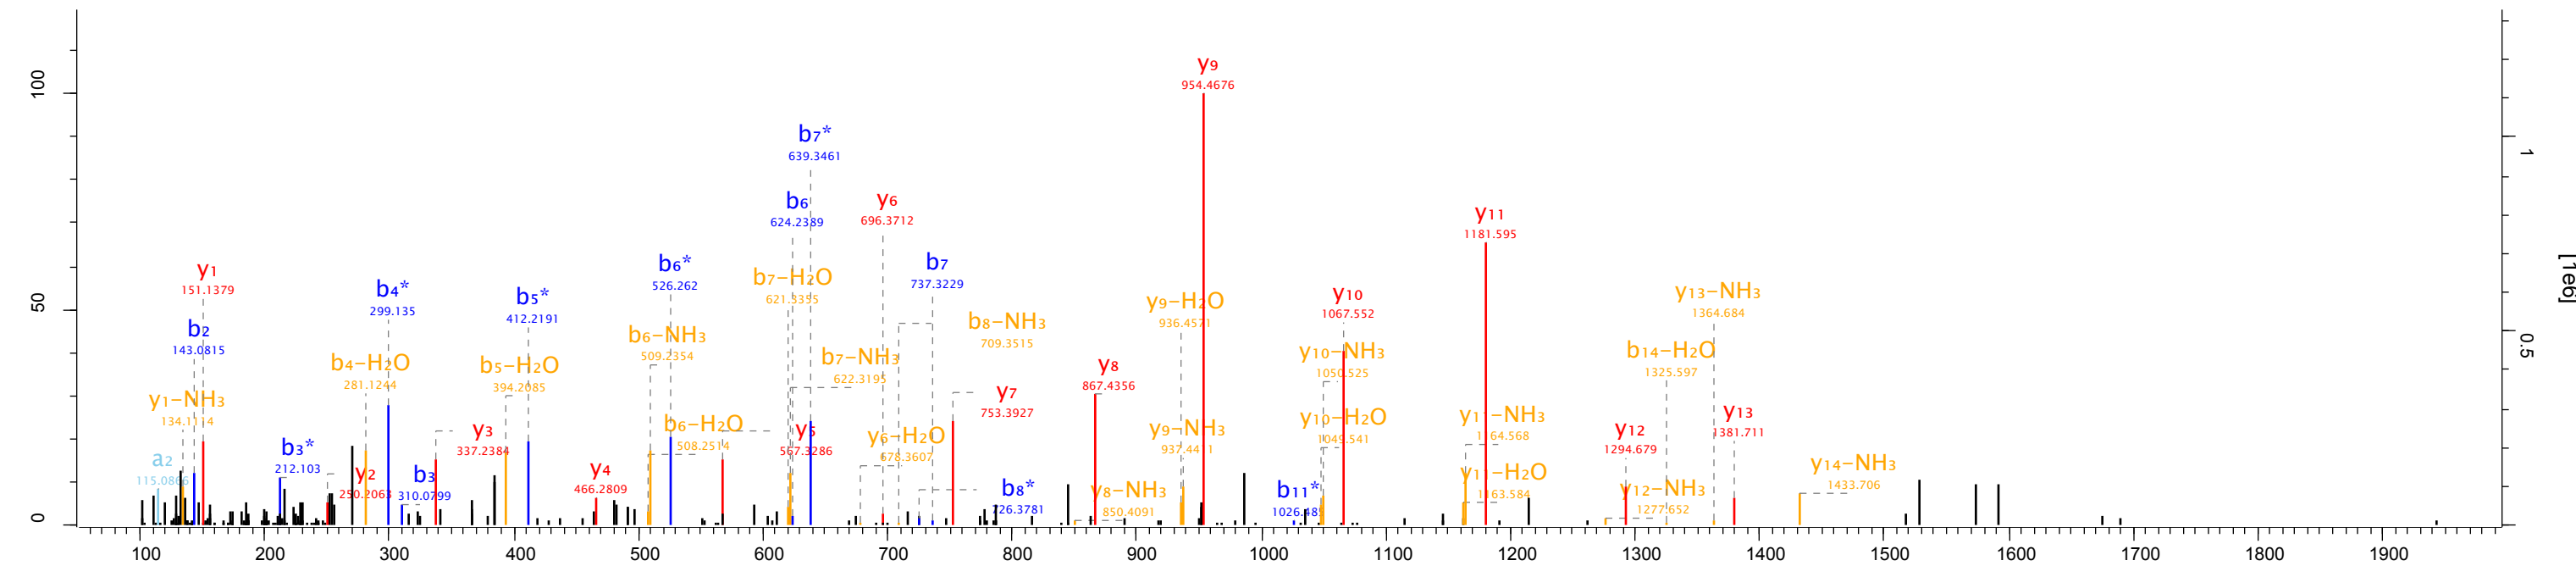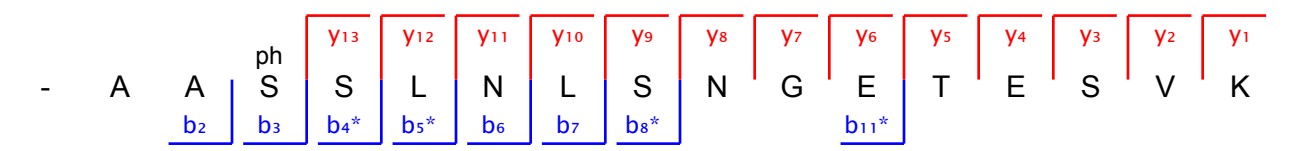

Raw file: 20150812\_A375SR\_Phospho\_BR1\_05  
 Scan: 13176 Method: FTMS; HCD Score: 139.11 m/z: 510.94 Gene names: PARD3

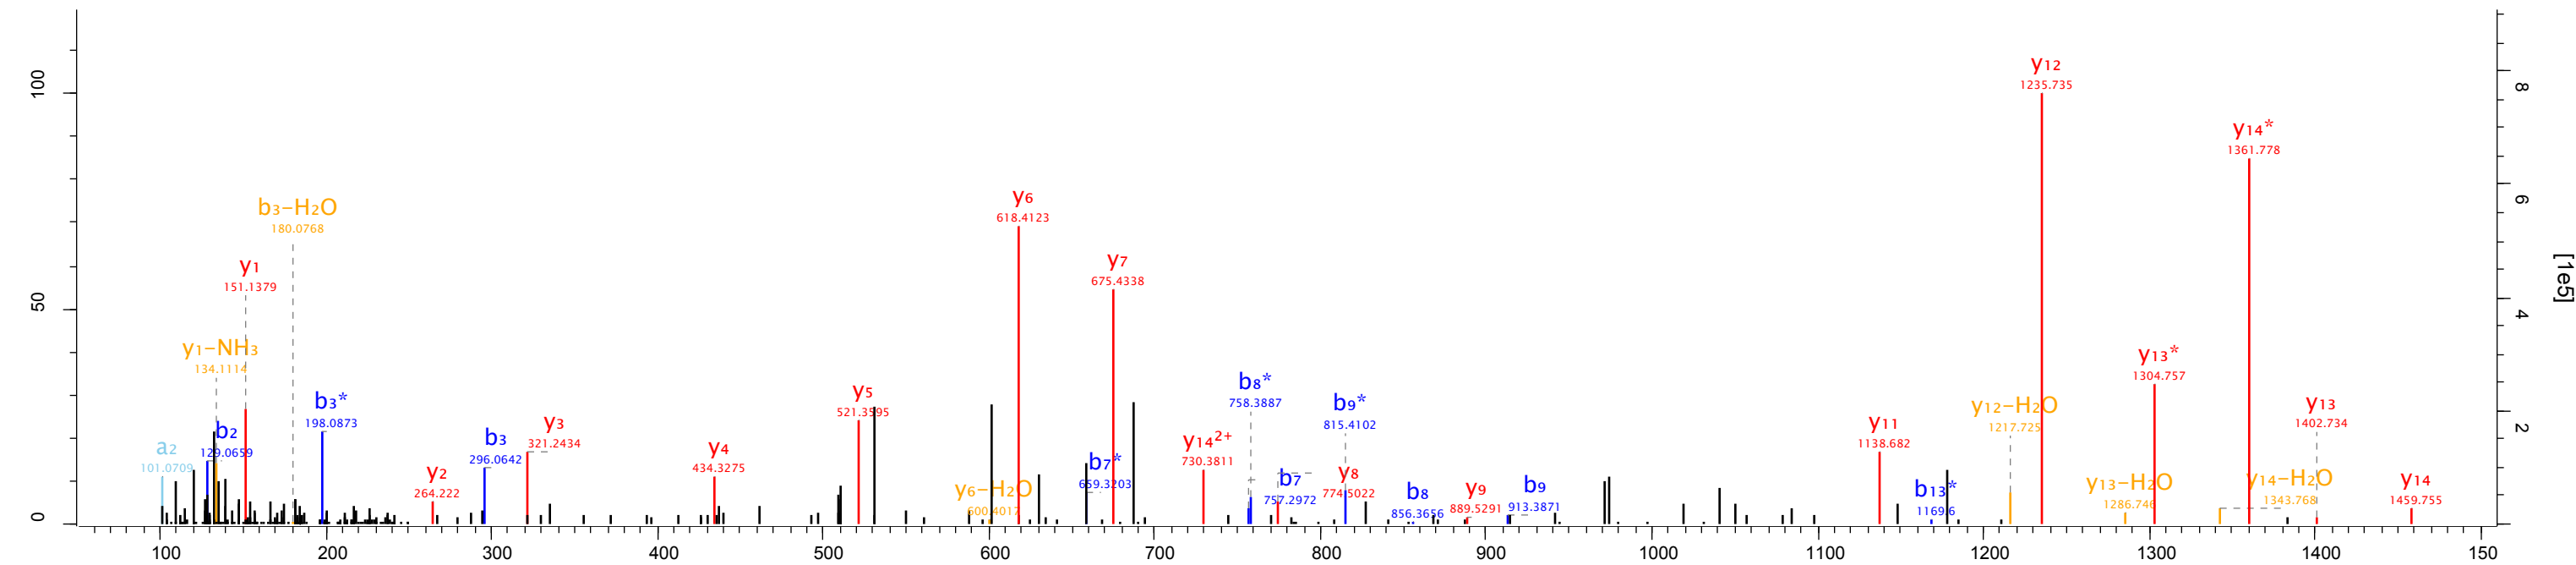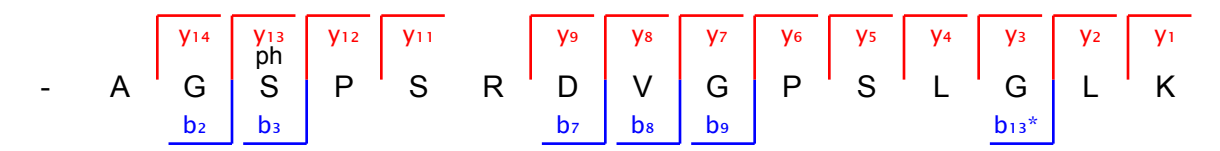

Raw file: 20150812\_A375SR\_Phospho\_BR1\_05  
 Scan: 13286 Method: FTMS; HCD Score: 130.15 m/z: 635.76 Gene names: PPP1R12A

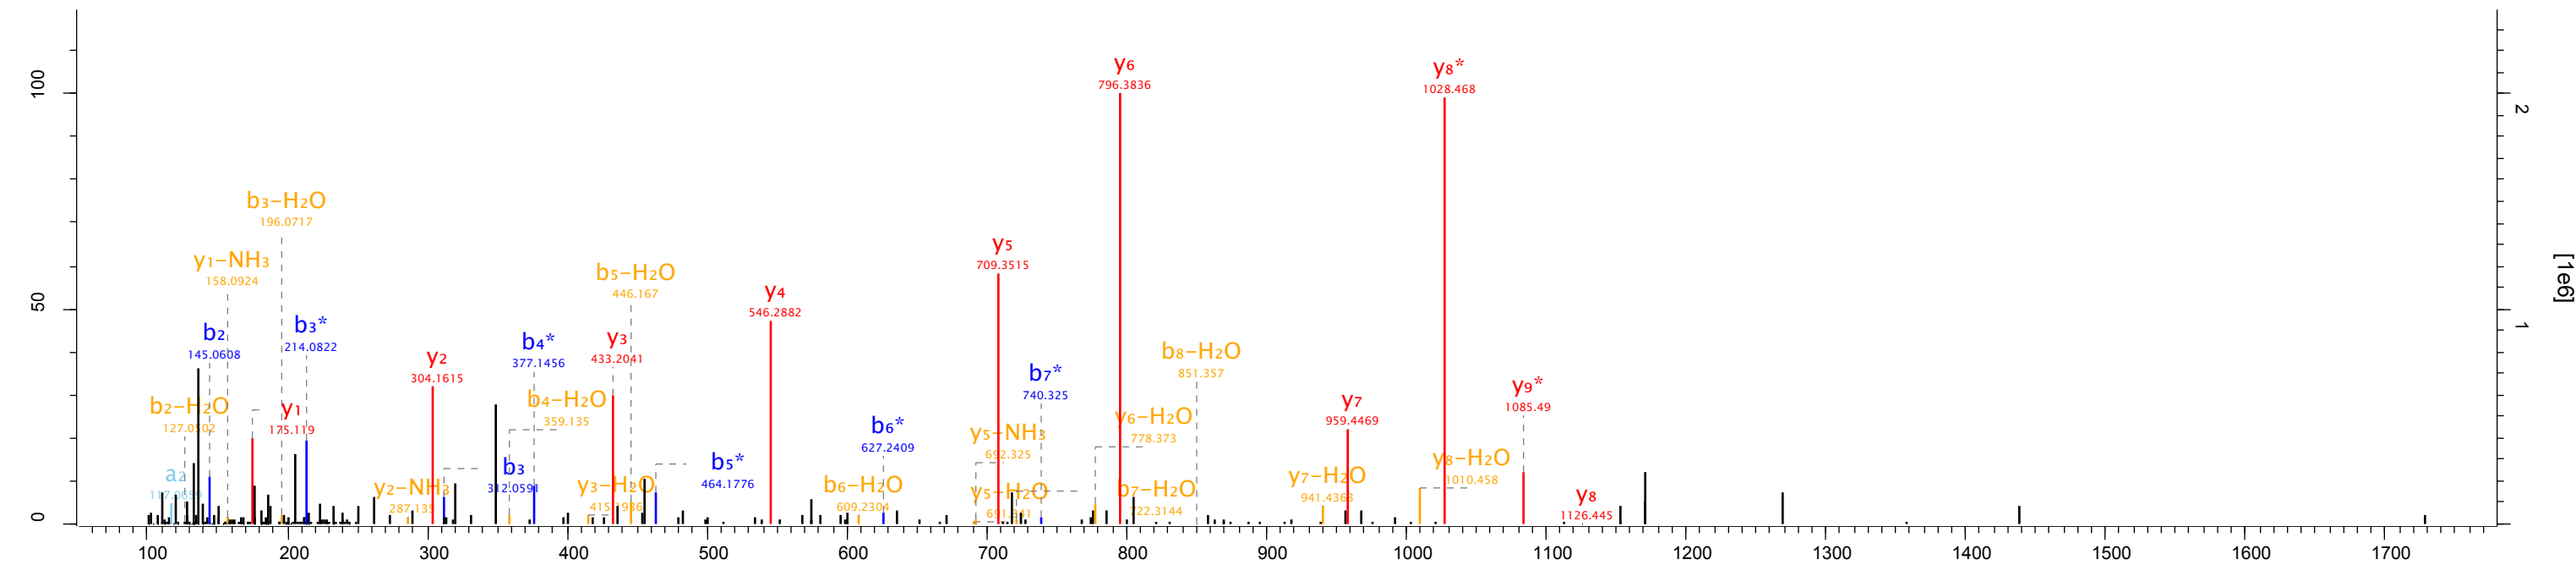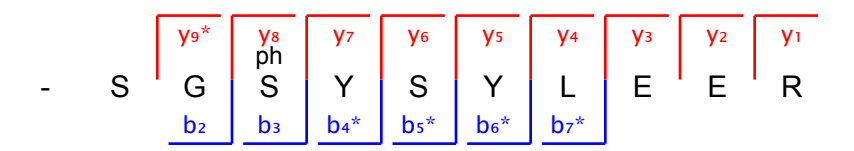

Raw file: 20150812\_A375SR\_Phospho\_BR1\_05  
 Scan: 13446 Method: FTMS; HCD Score: 195.05 m/z: 846.91 Gene names: MAP4

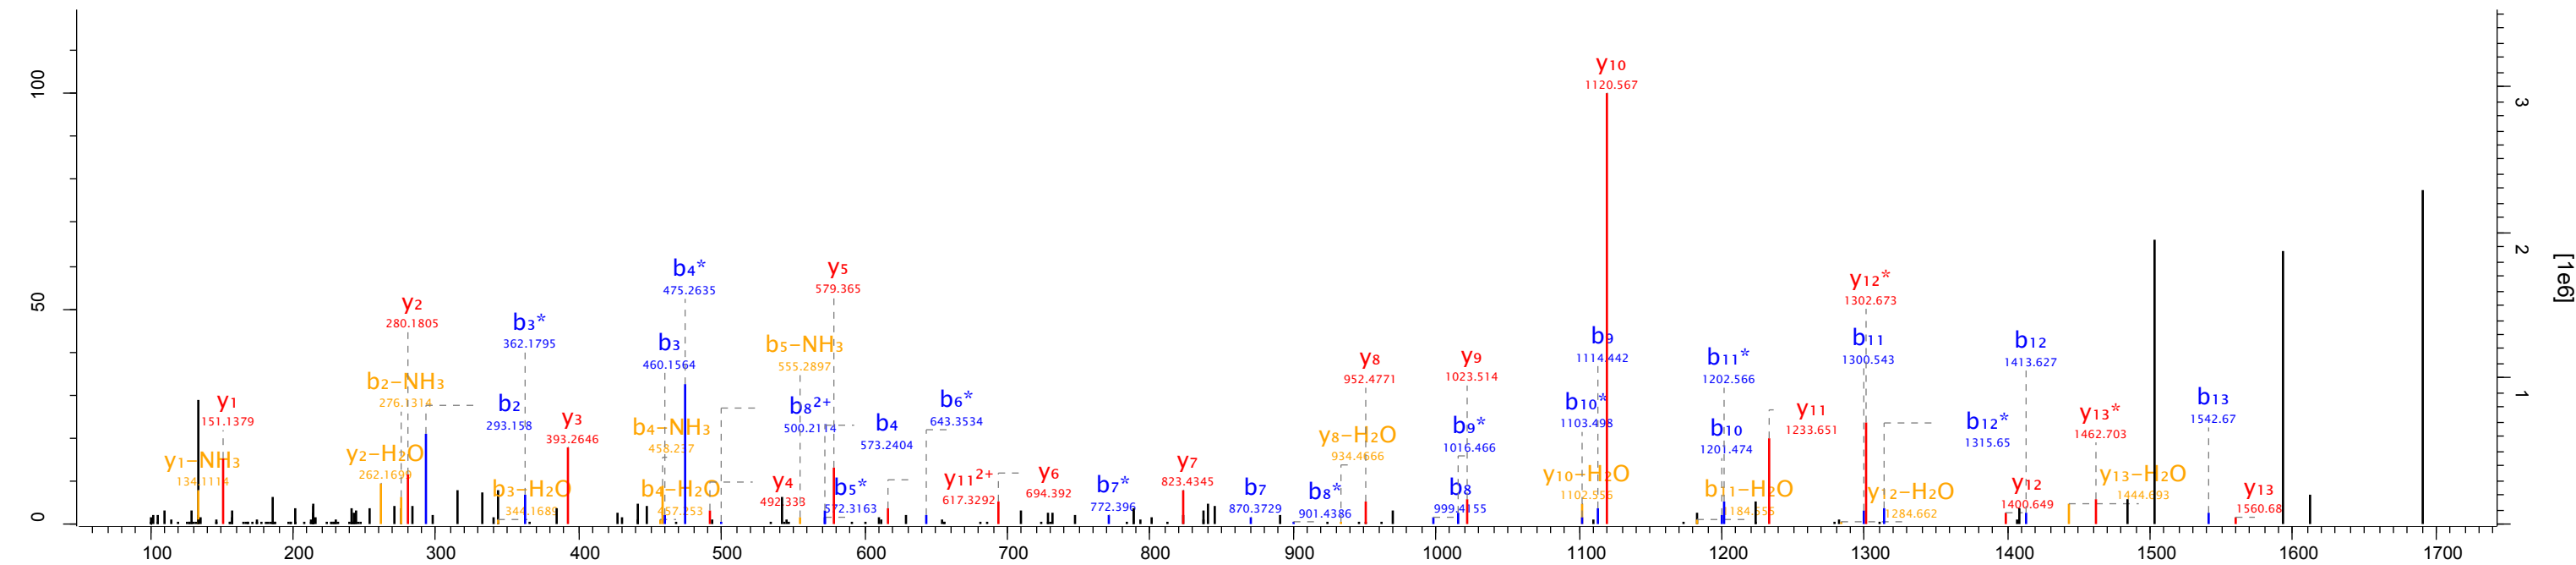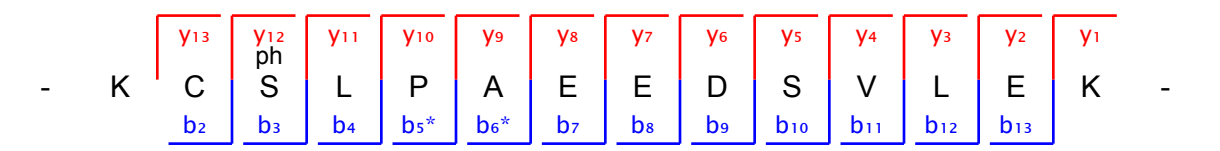

Raw file 20150812\_A375SR\_Phospho\_BR1\_05 Scan 13536 Method FTMS; HCD Score 133.07 m/z 579.78 Gene names MAP7D1

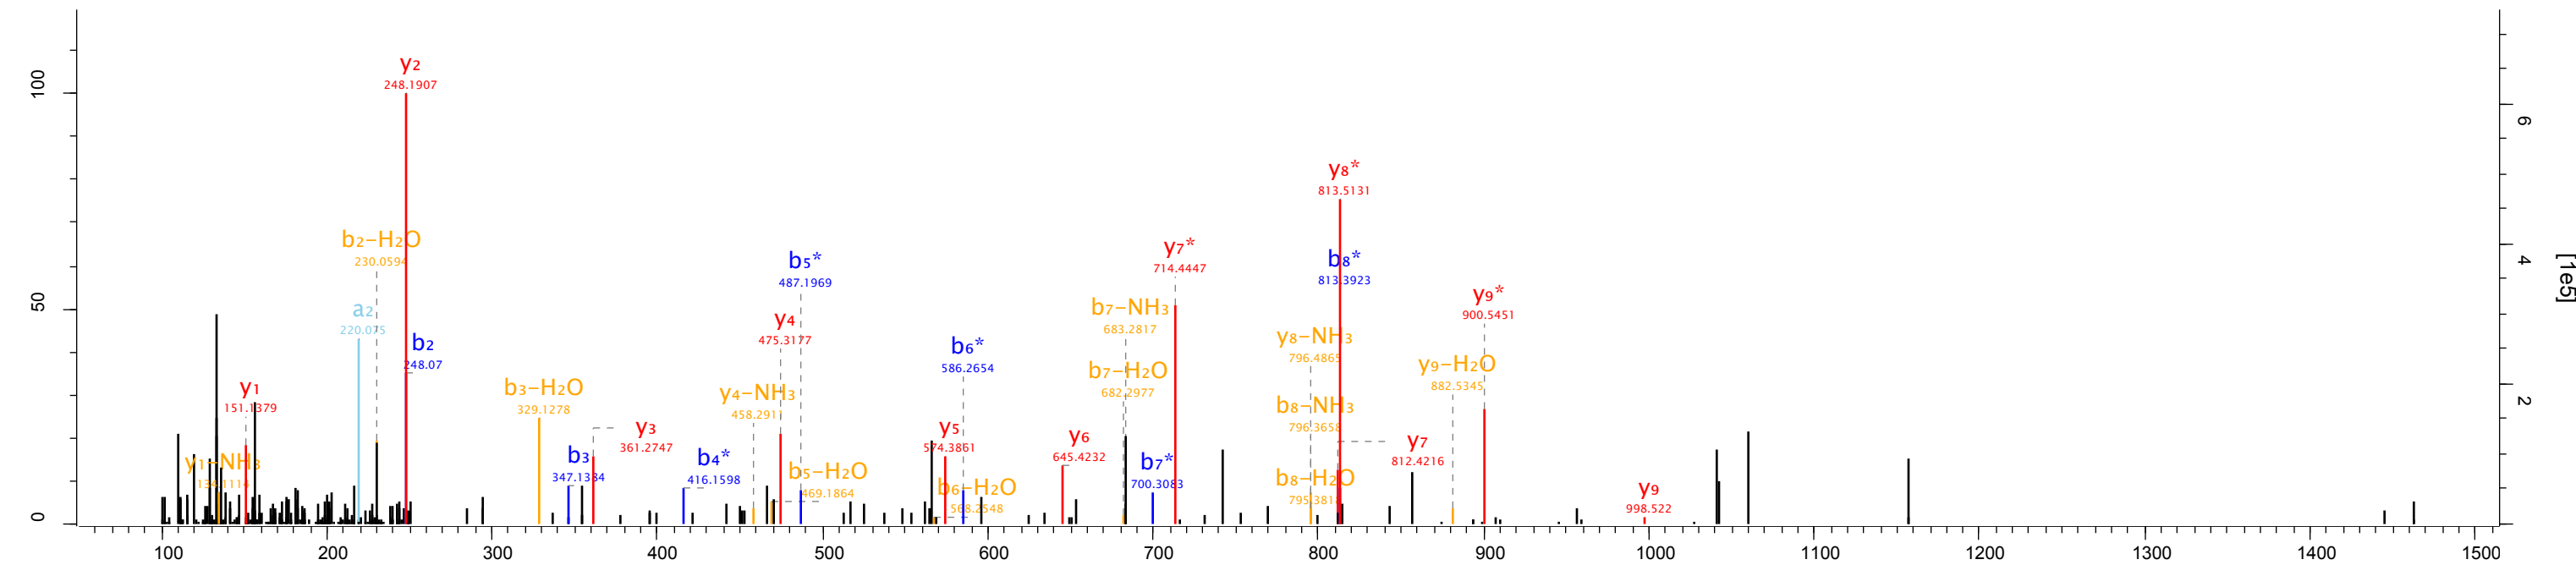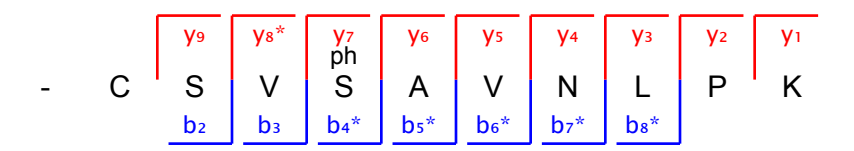

Raw file: 20150812\_A375SR\_Phospho\_BR1\_05  
 Scan: 1376 Method: FTMS; HCD Score: 125.98 m/z: 499.91 Gene names: ANLN

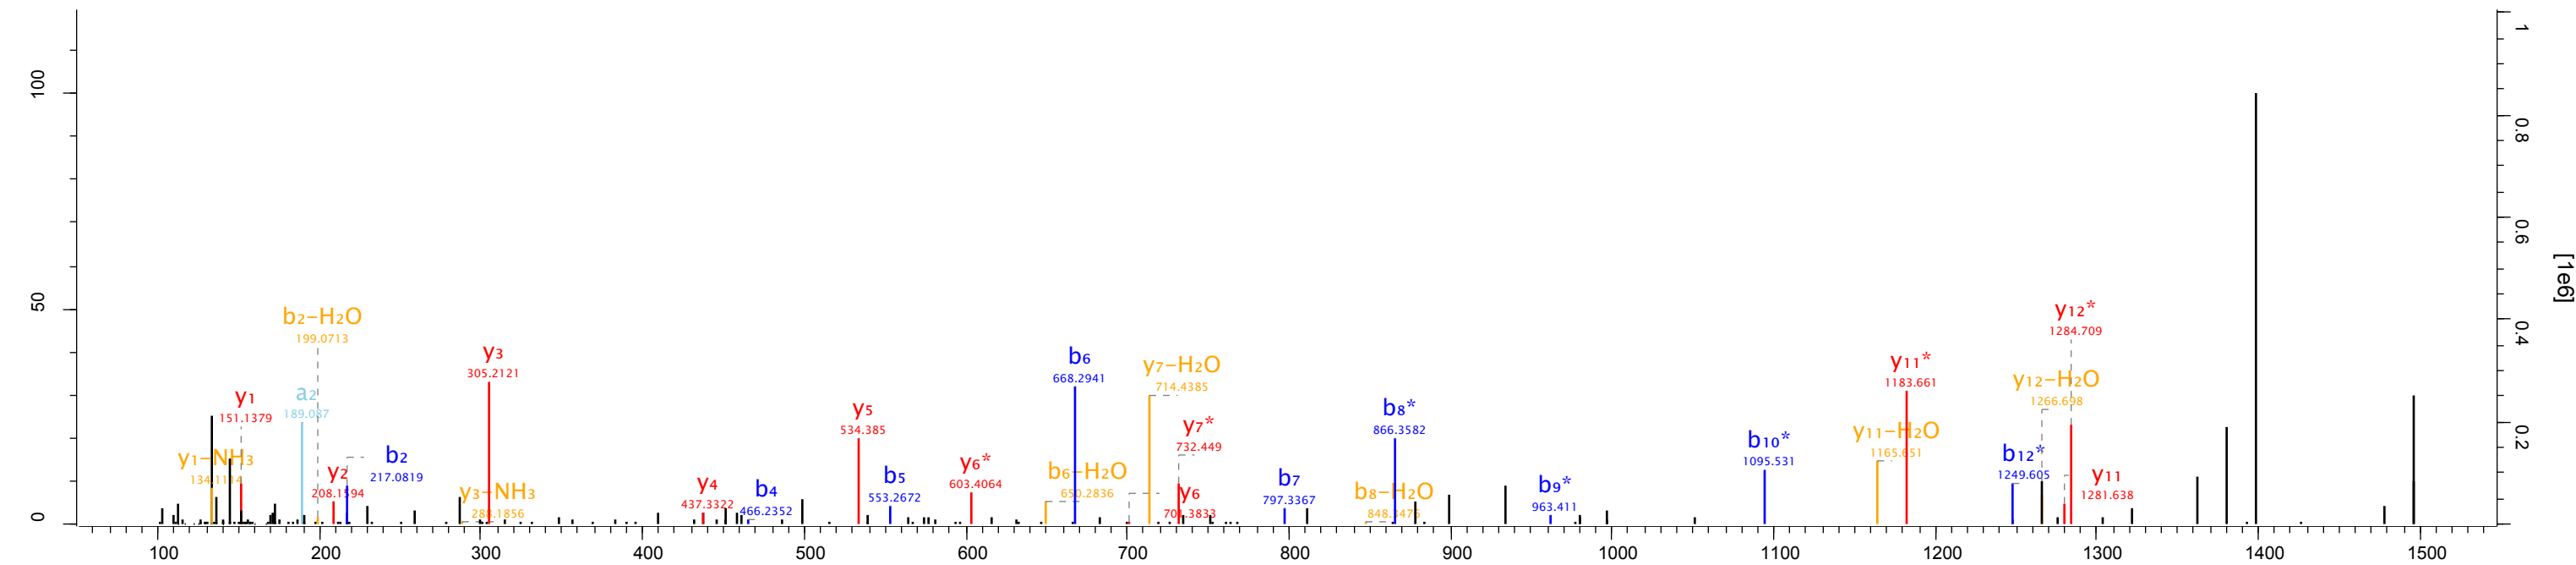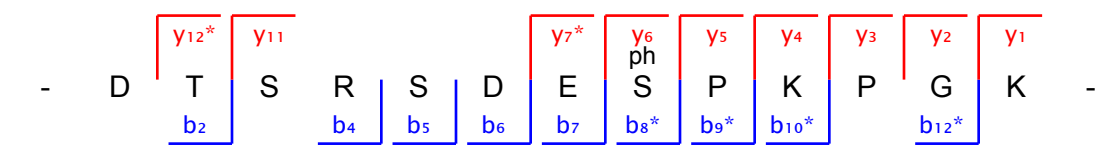



Raw file 20150812\_A375SR\_Phospho\_BR1\_05 Scan 14296 Method FTMS; HCD Score 244.31 m/z 859.08 Gene names ASUN

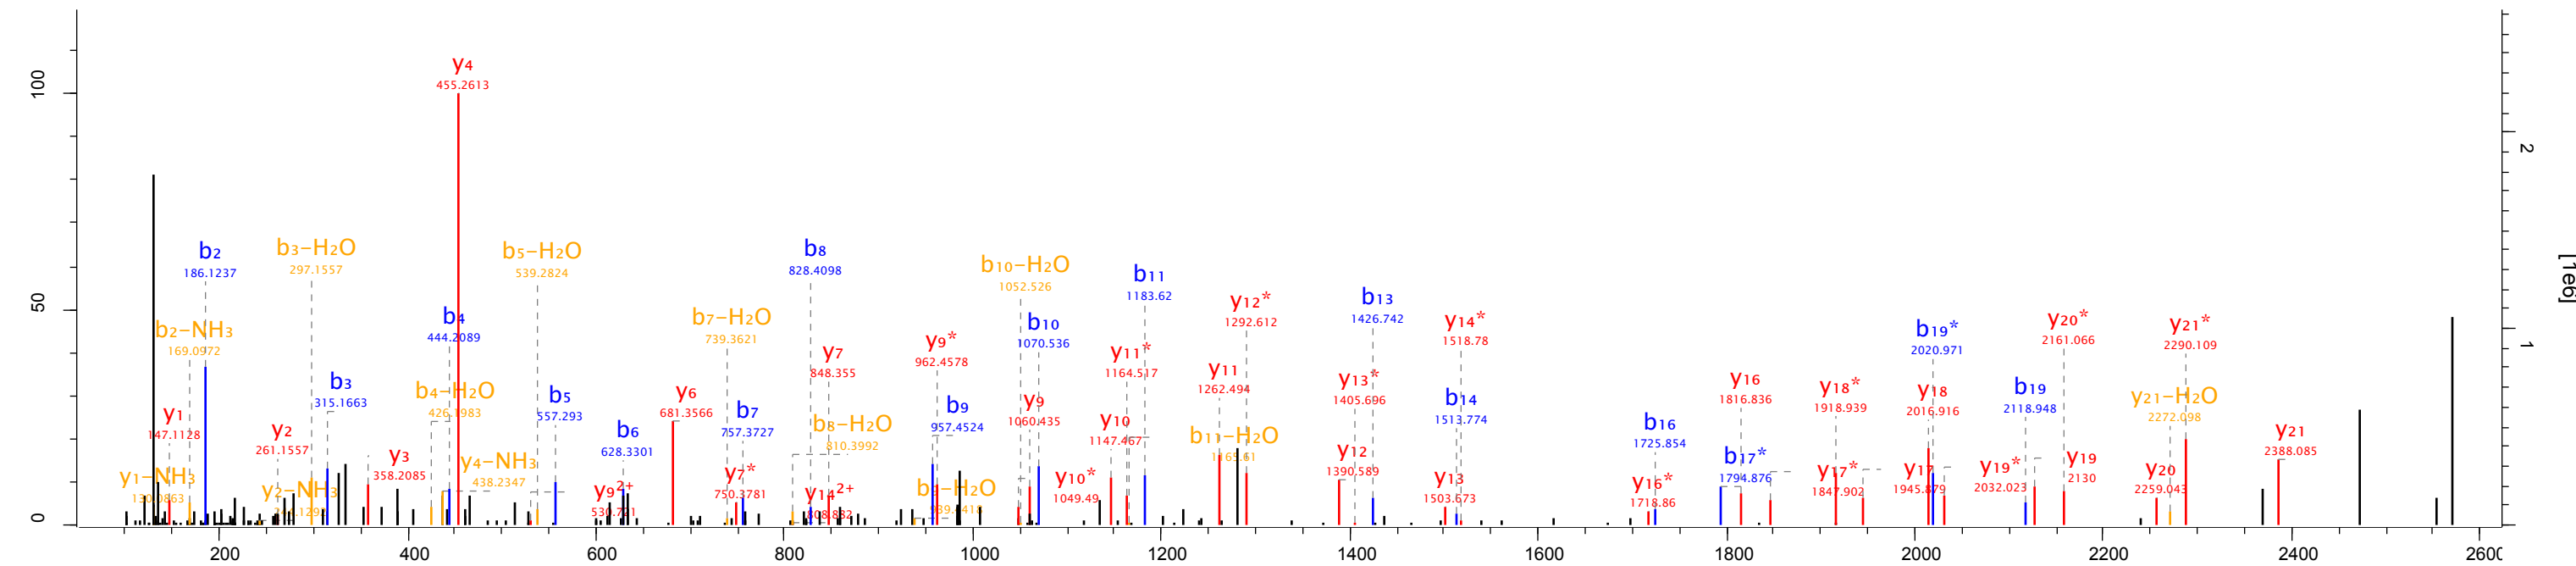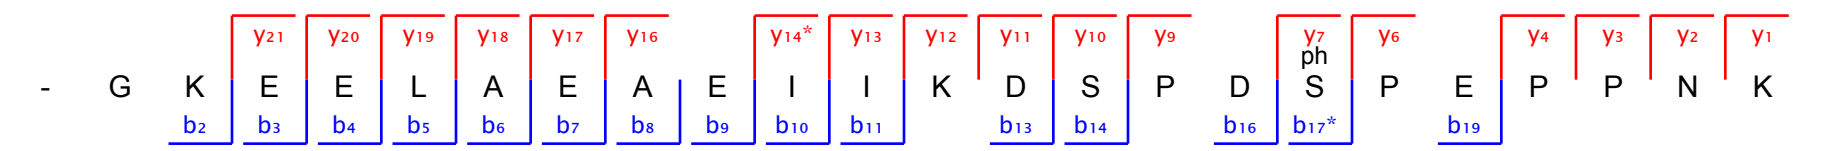

Raw file 20150812\_A375SR\_Phospho\_BR1\_05 Scan 14696 Method FTMS; HCD Score 251.03 m/z 1023.13 Gene names NES

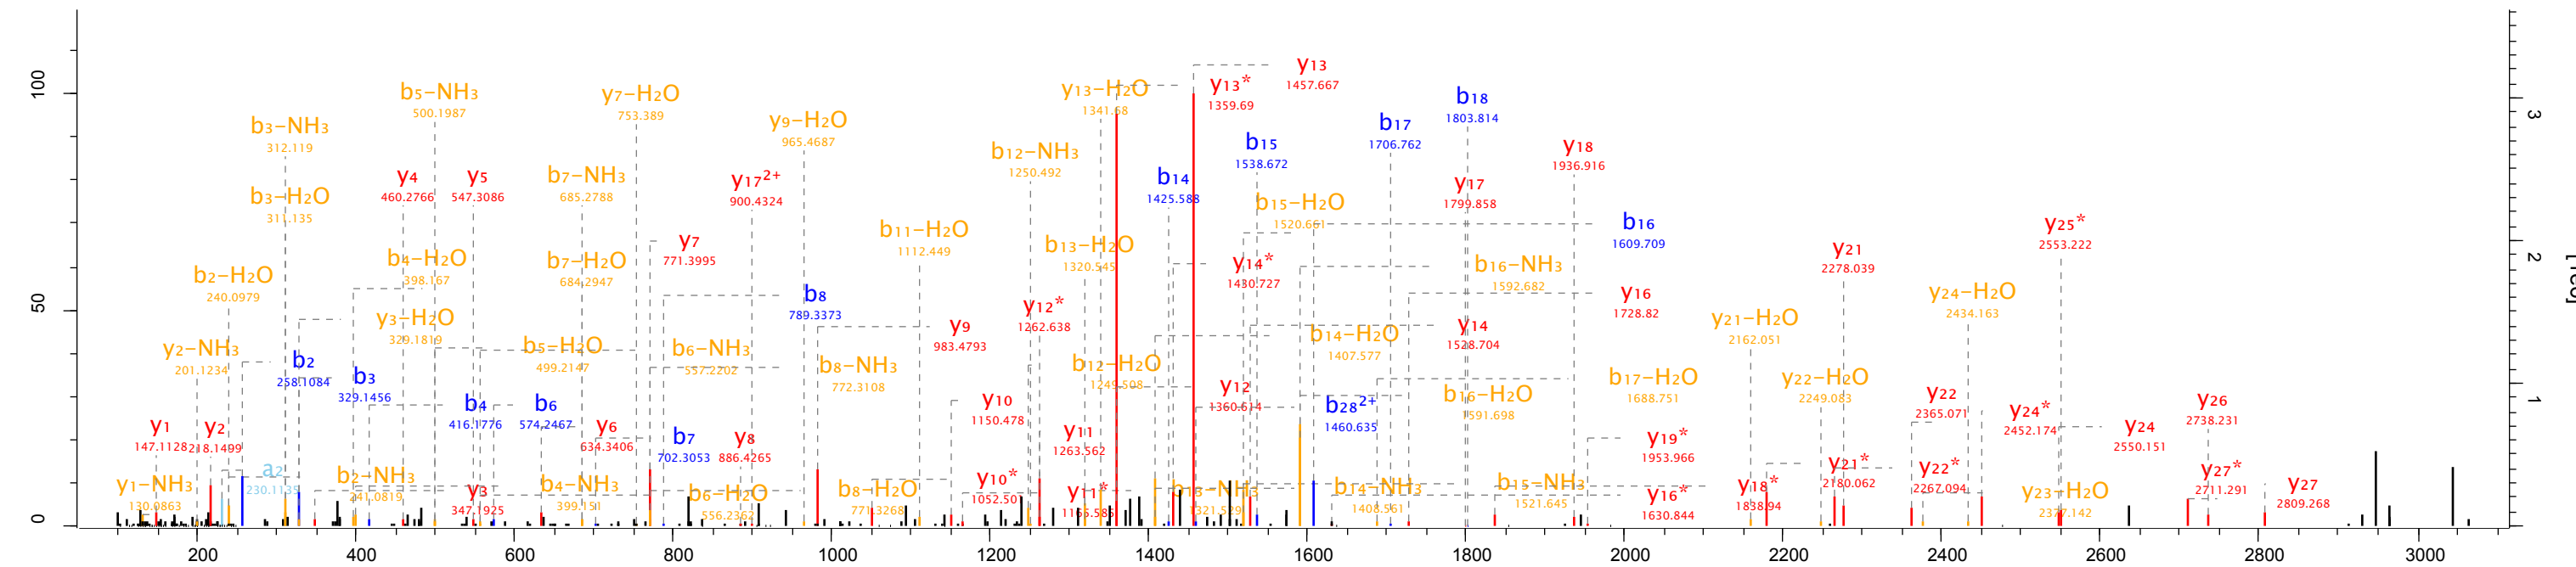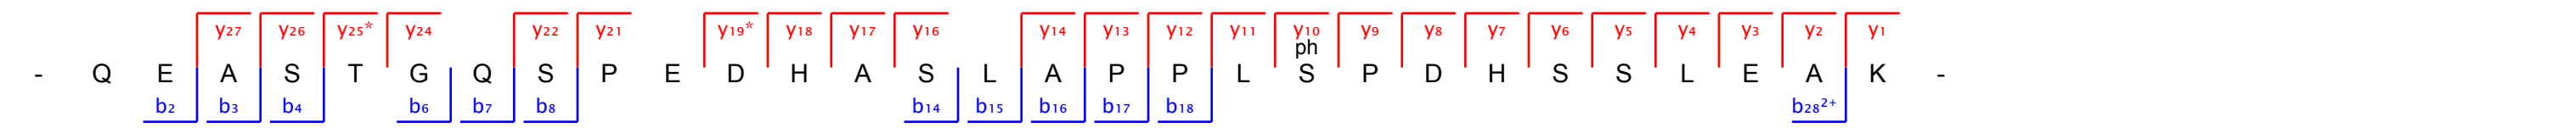

Raw file 20150812\_A375SR\_Phospho\_BR1\_05 Scan 14856 Method FTMS; HCD Score 138.42 m/z 559.22 Gene names TP53BP1

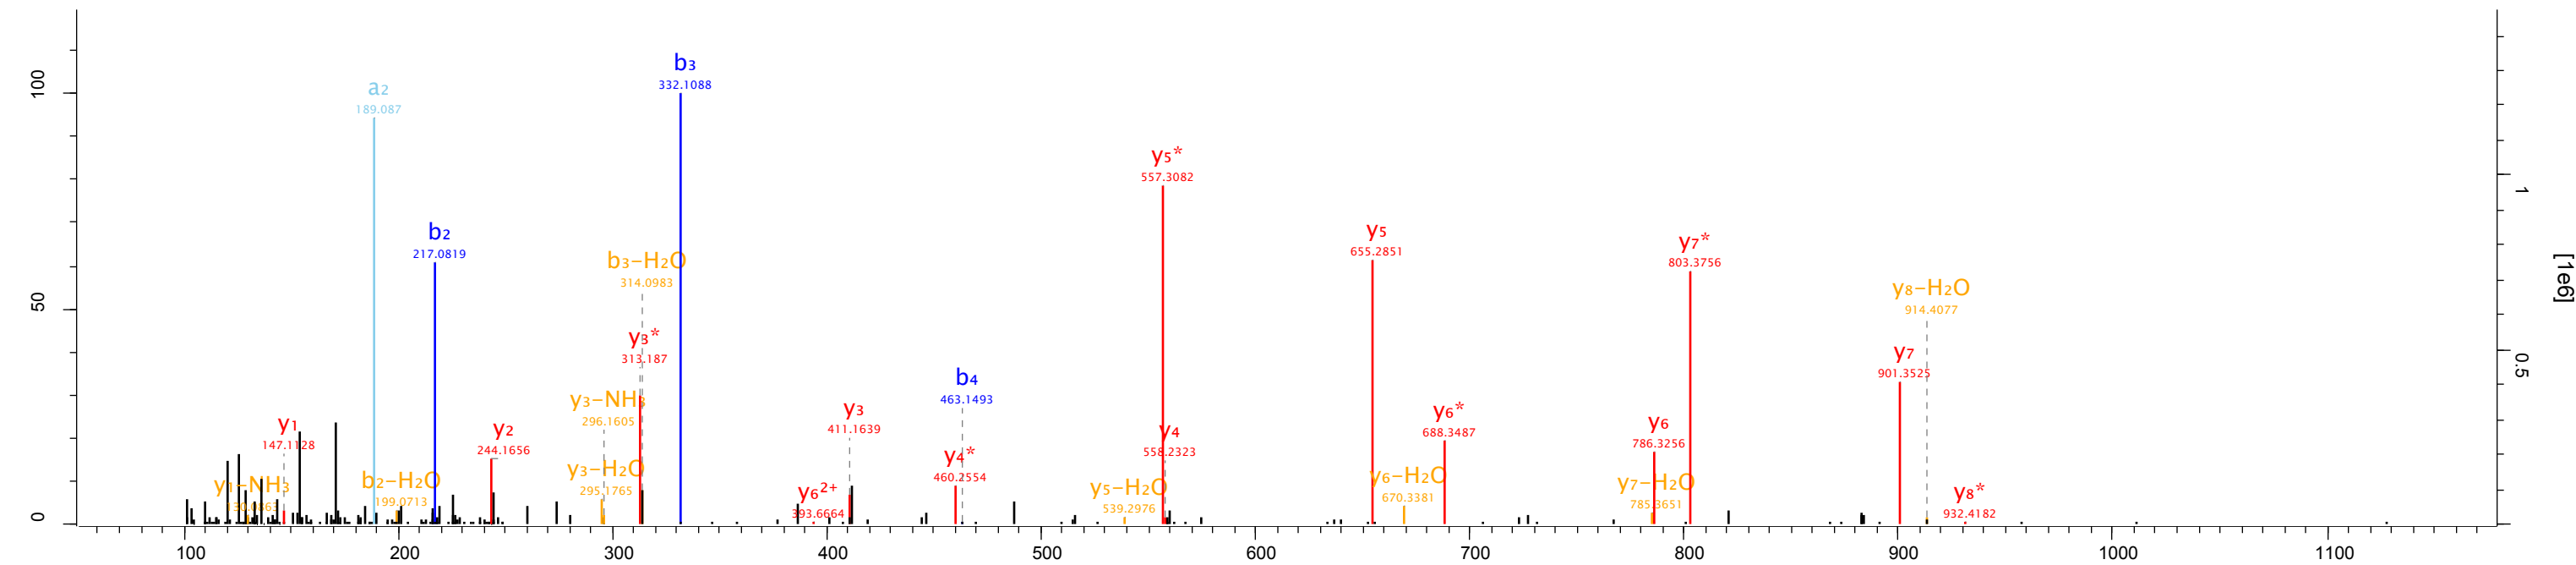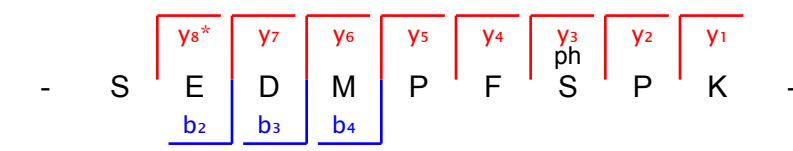

Raw file Scan Method Score m/z Gene names  
 20150812\_A375SR\_Phospho\_BR1\_05 14916 FTMS; HCD 174.19 714 ATG16L1

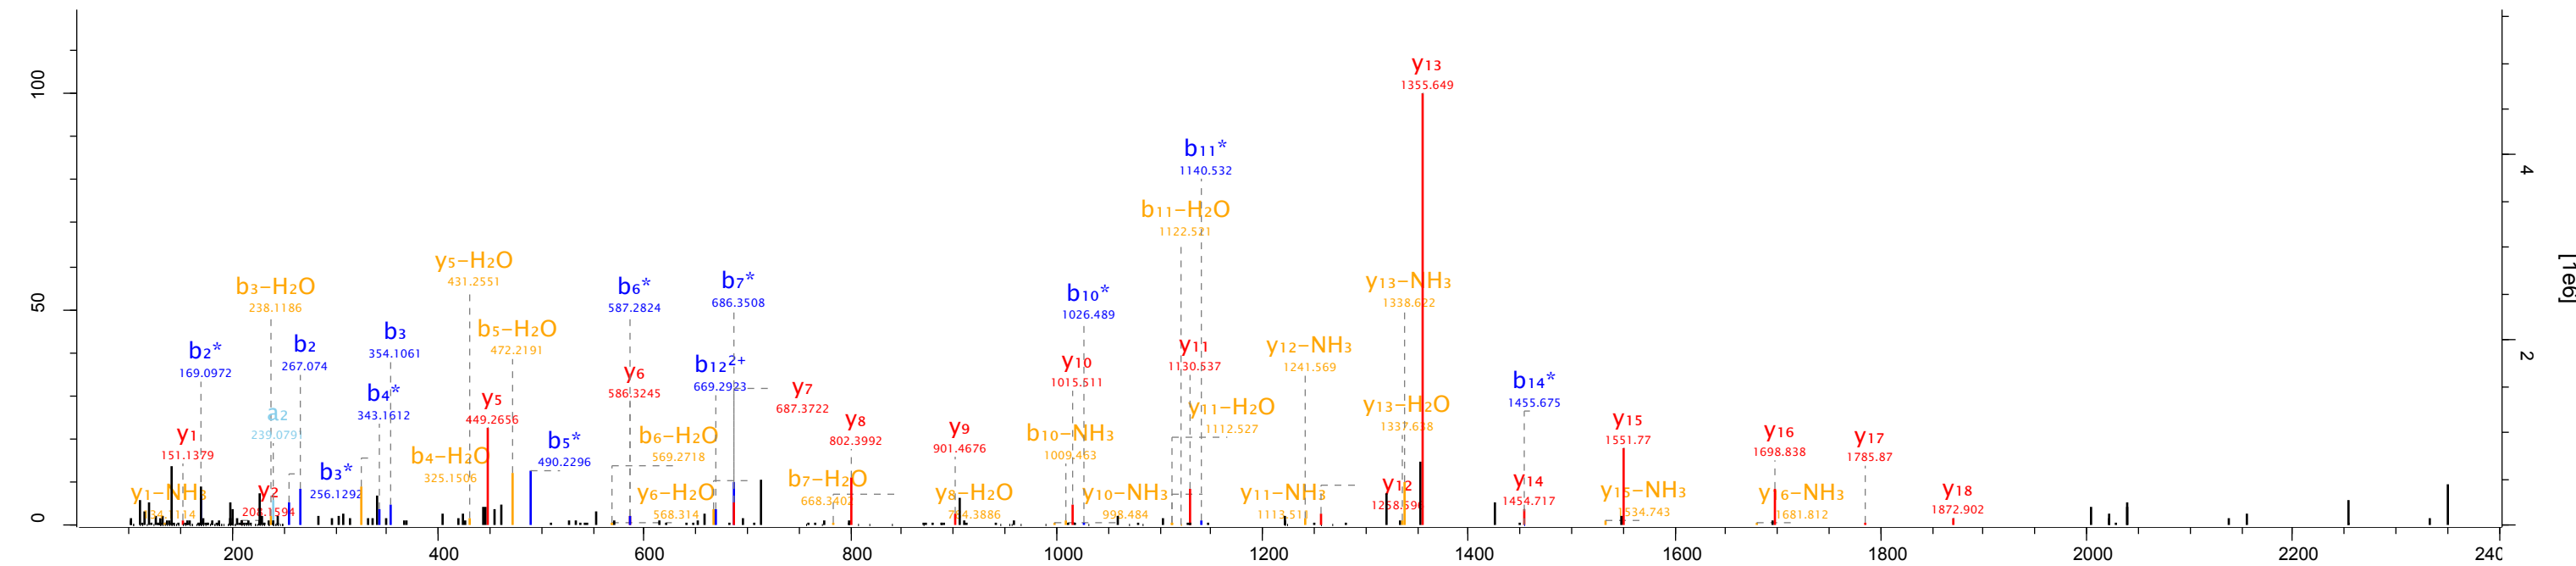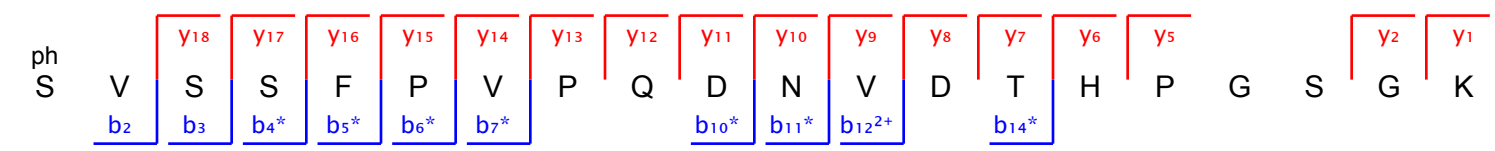

Raw file: 20150812\_A375SR\_Phospho\_BR1\_05  
 Scan: 14936 Method: FTMS; HCD Score: 255.98 m/z: 1035.97 Gene names: FAM195B

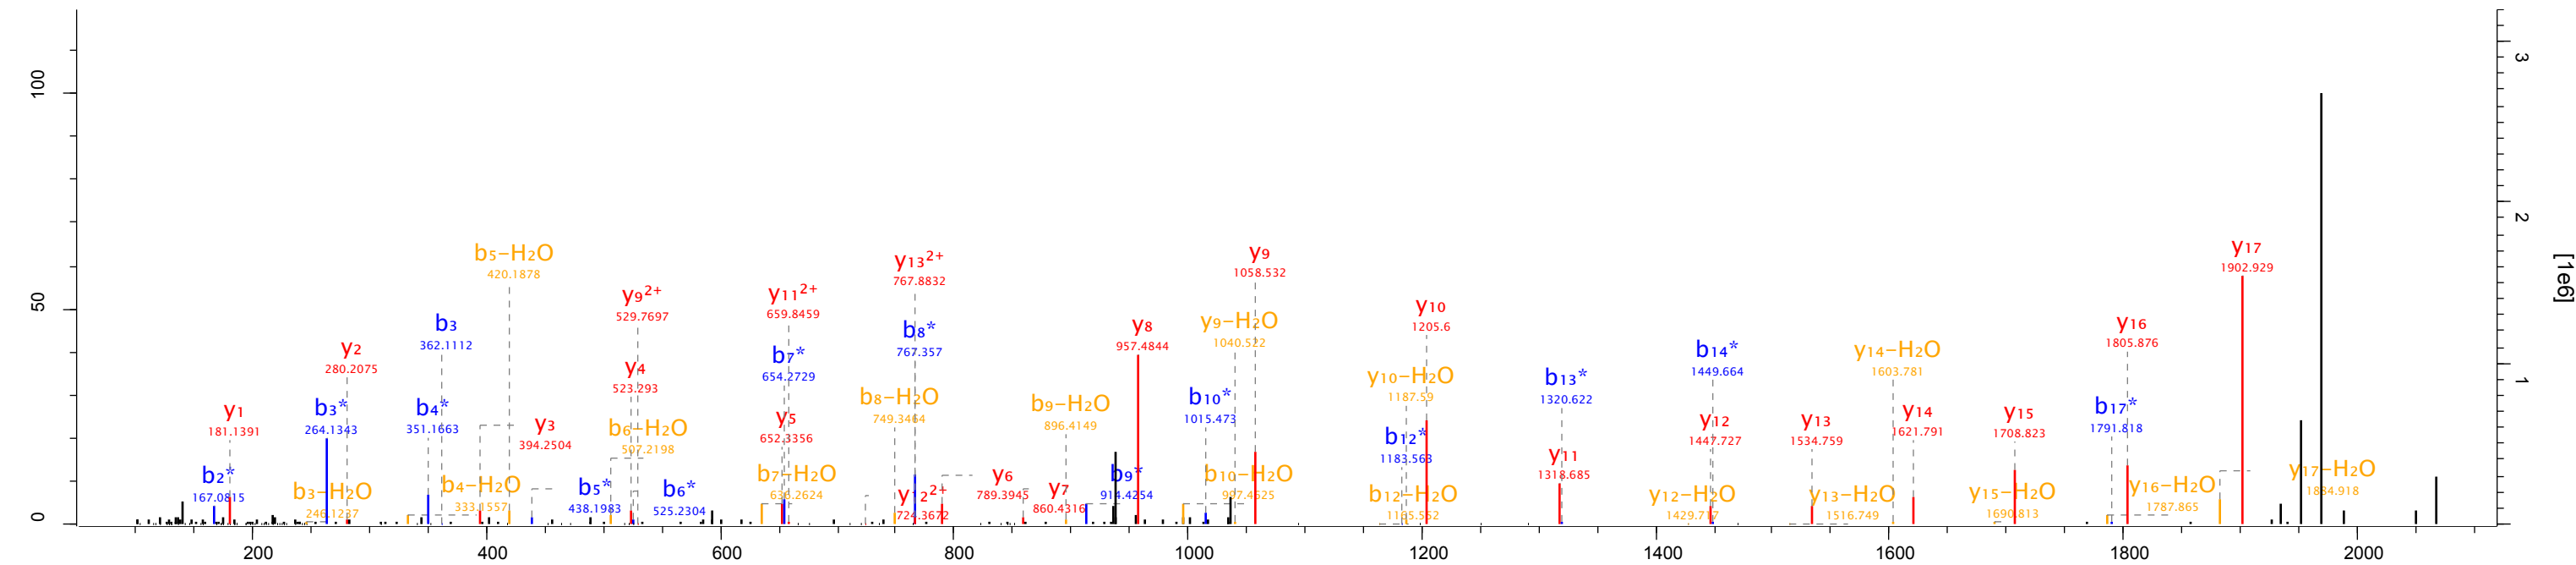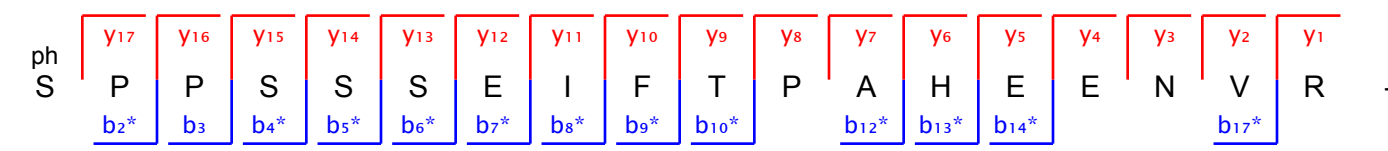

Raw file: 20150812\_A375SR\_Phospho\_BR1\_05  
 Scan: 15276 Method: FTMS; HCD Score: 117 m/z: 795.84 Gene names: ESF1

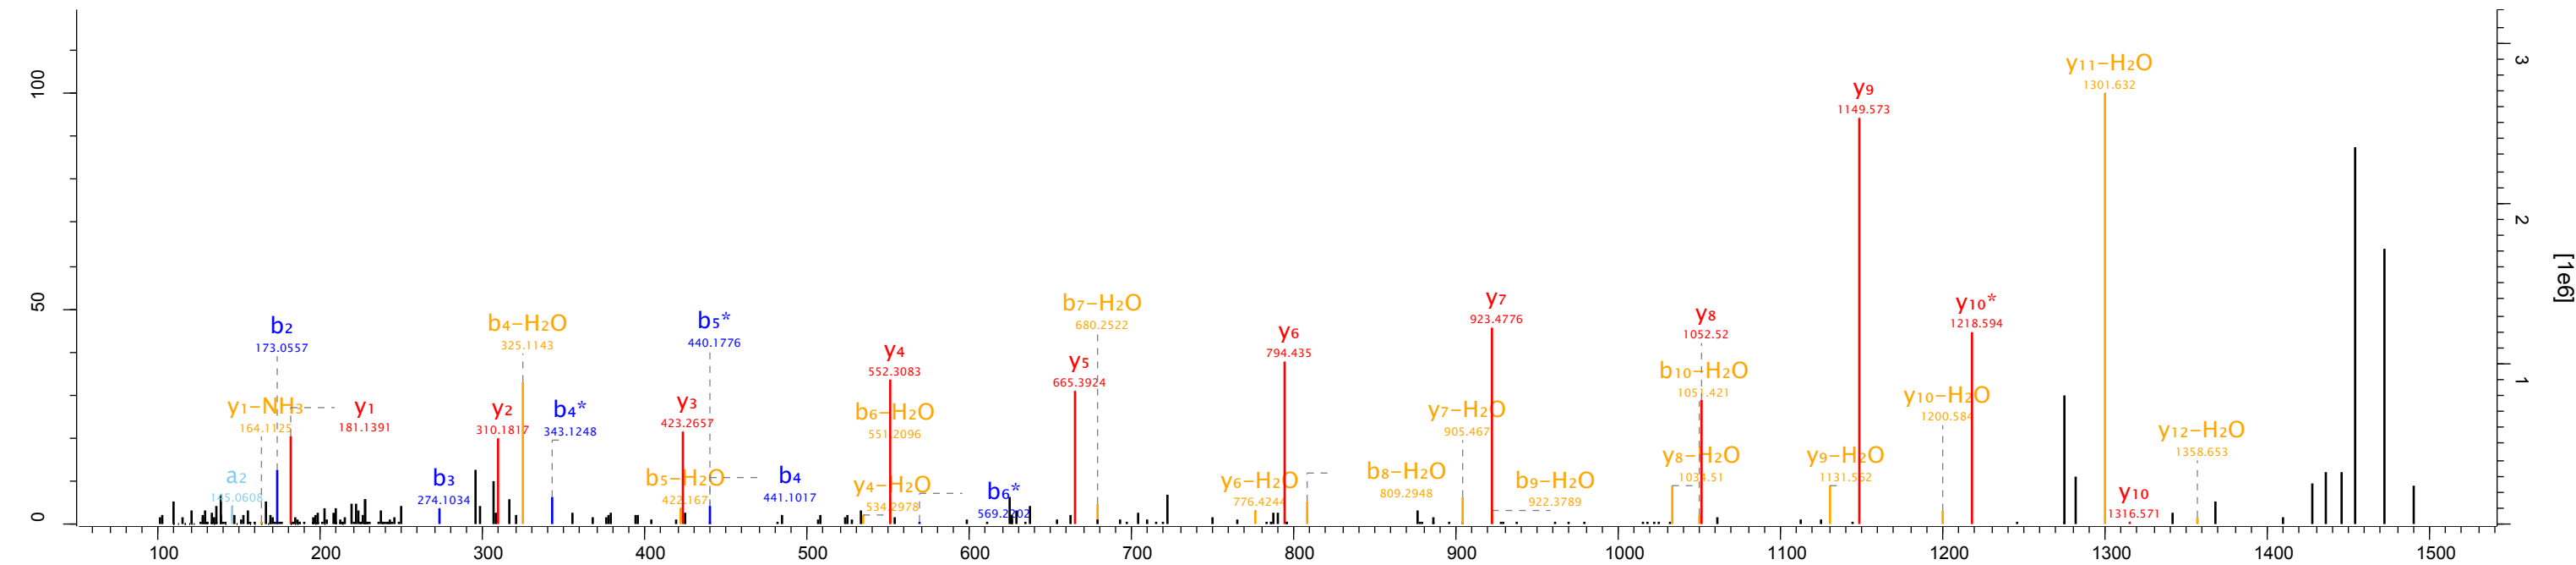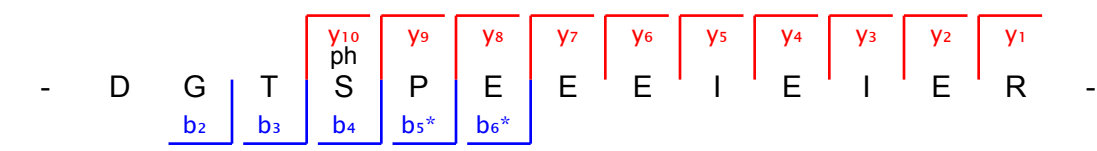

Raw file: 20150812\_A375SR\_Phospho\_BR1\_05  
 Scan: 15876 Method: FTMS; HCD Score: 147.39 m/z: 636.3 Gene names: TSC22D4

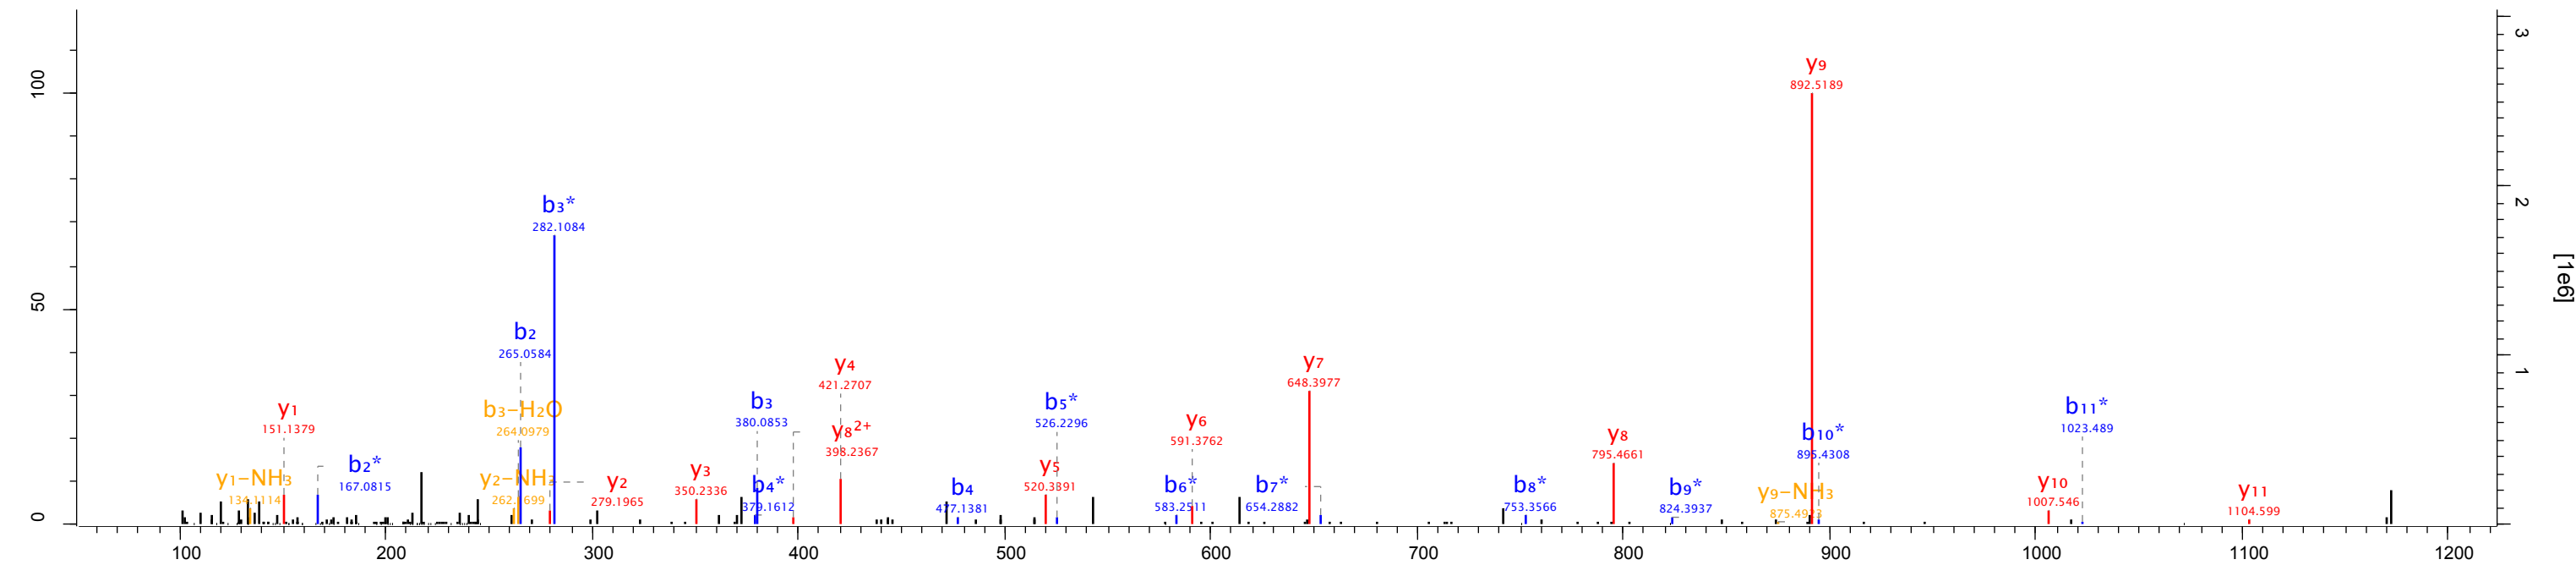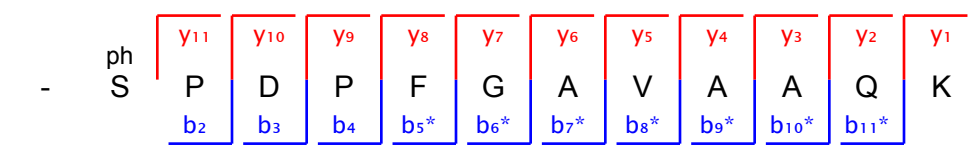

Raw file: 20150812\_A375SR\_Phospho\_BR1\_05  
 Scan: 16726 Method: FTMS; HCD Score: 164.46 m/z: 1021.96 Gene names: SOX10

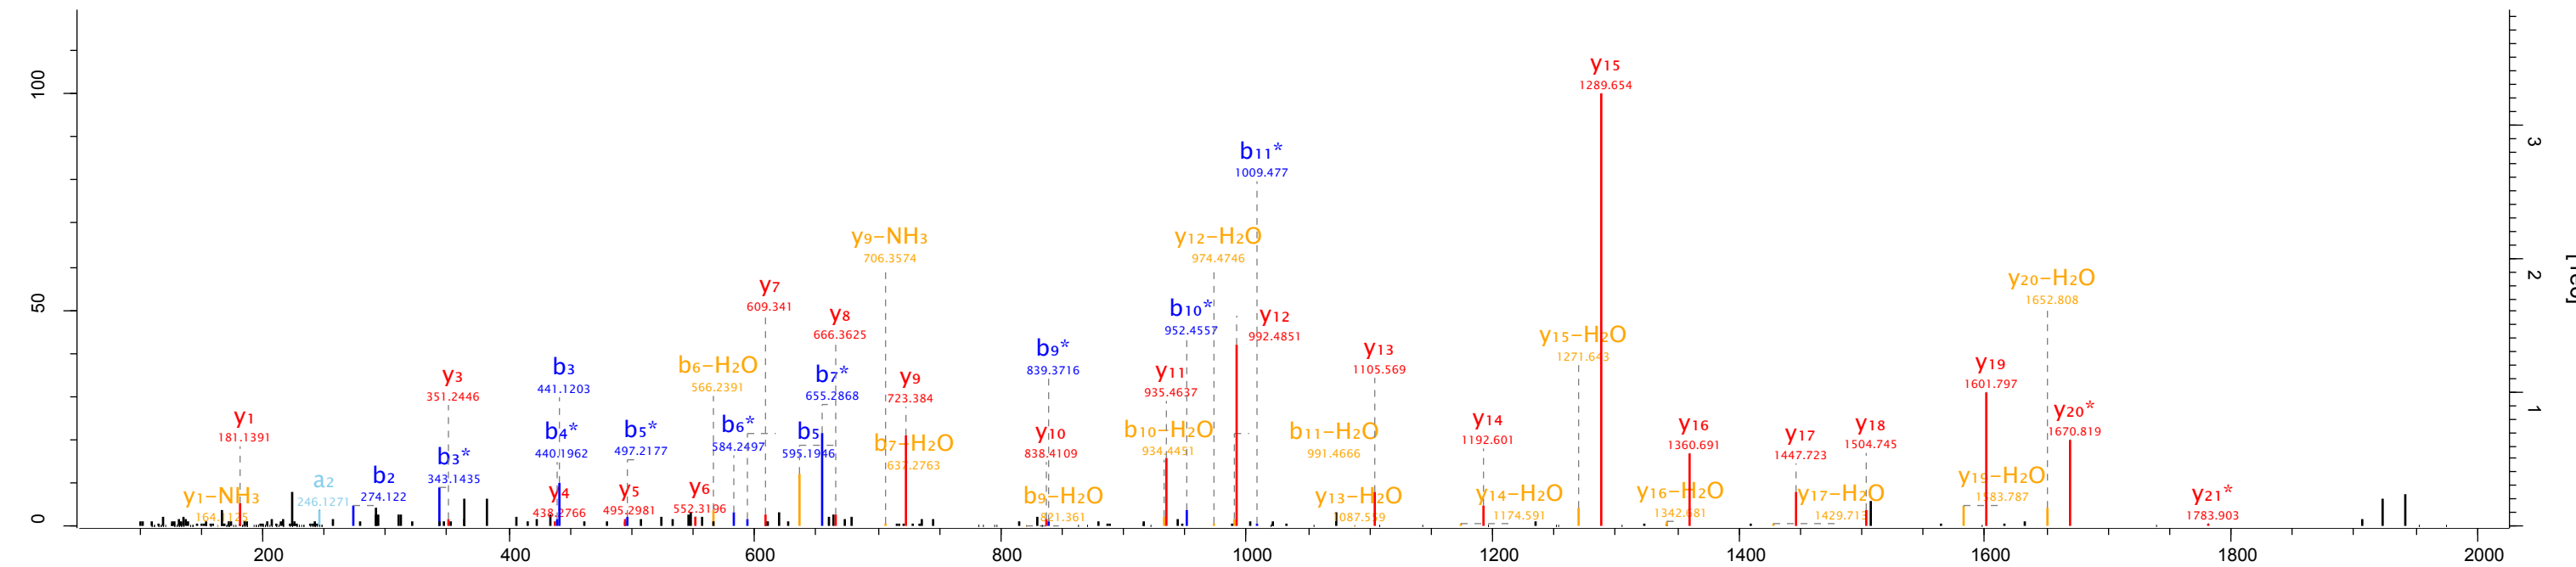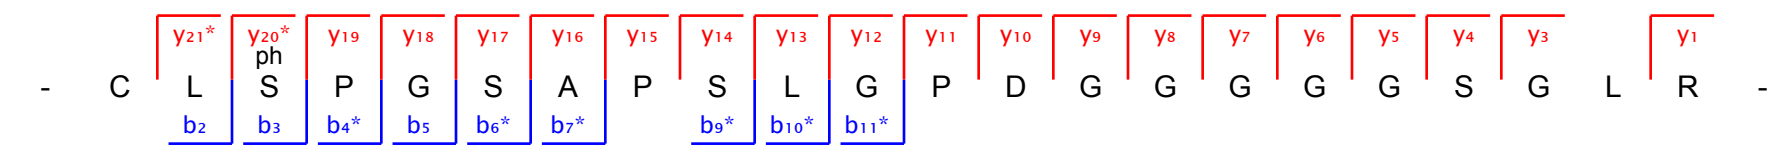



Raw file 20150812\_A375SR\_Phospho\_BR1\_05 Scan 17336 Method FTMS; HCD Score 145.65 m/z 975.94 Gene names ZNF608

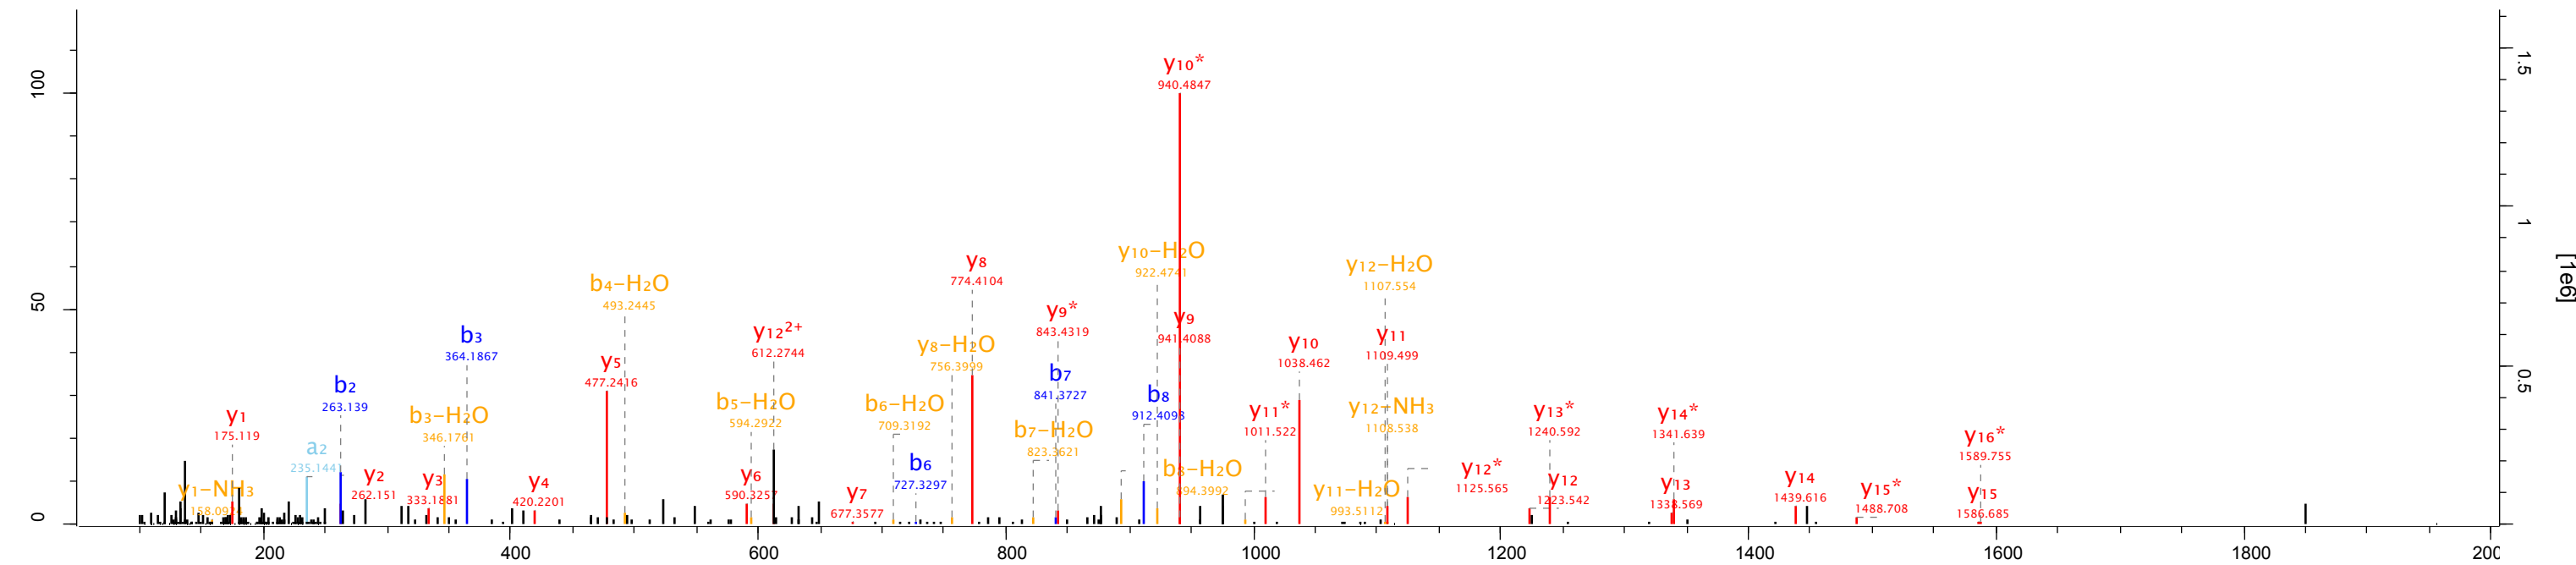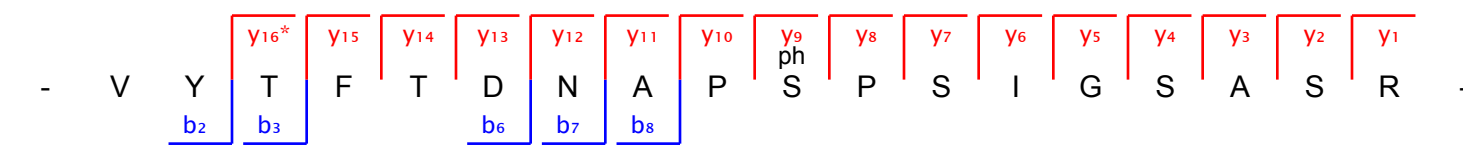

Raw file: 20150812\_A375SR\_Phospho\_BR1\_05  
 Scan: 17536 Method: FTMS; HCD Score: 135.61 m/z: 692.33 Gene names: UFD1L

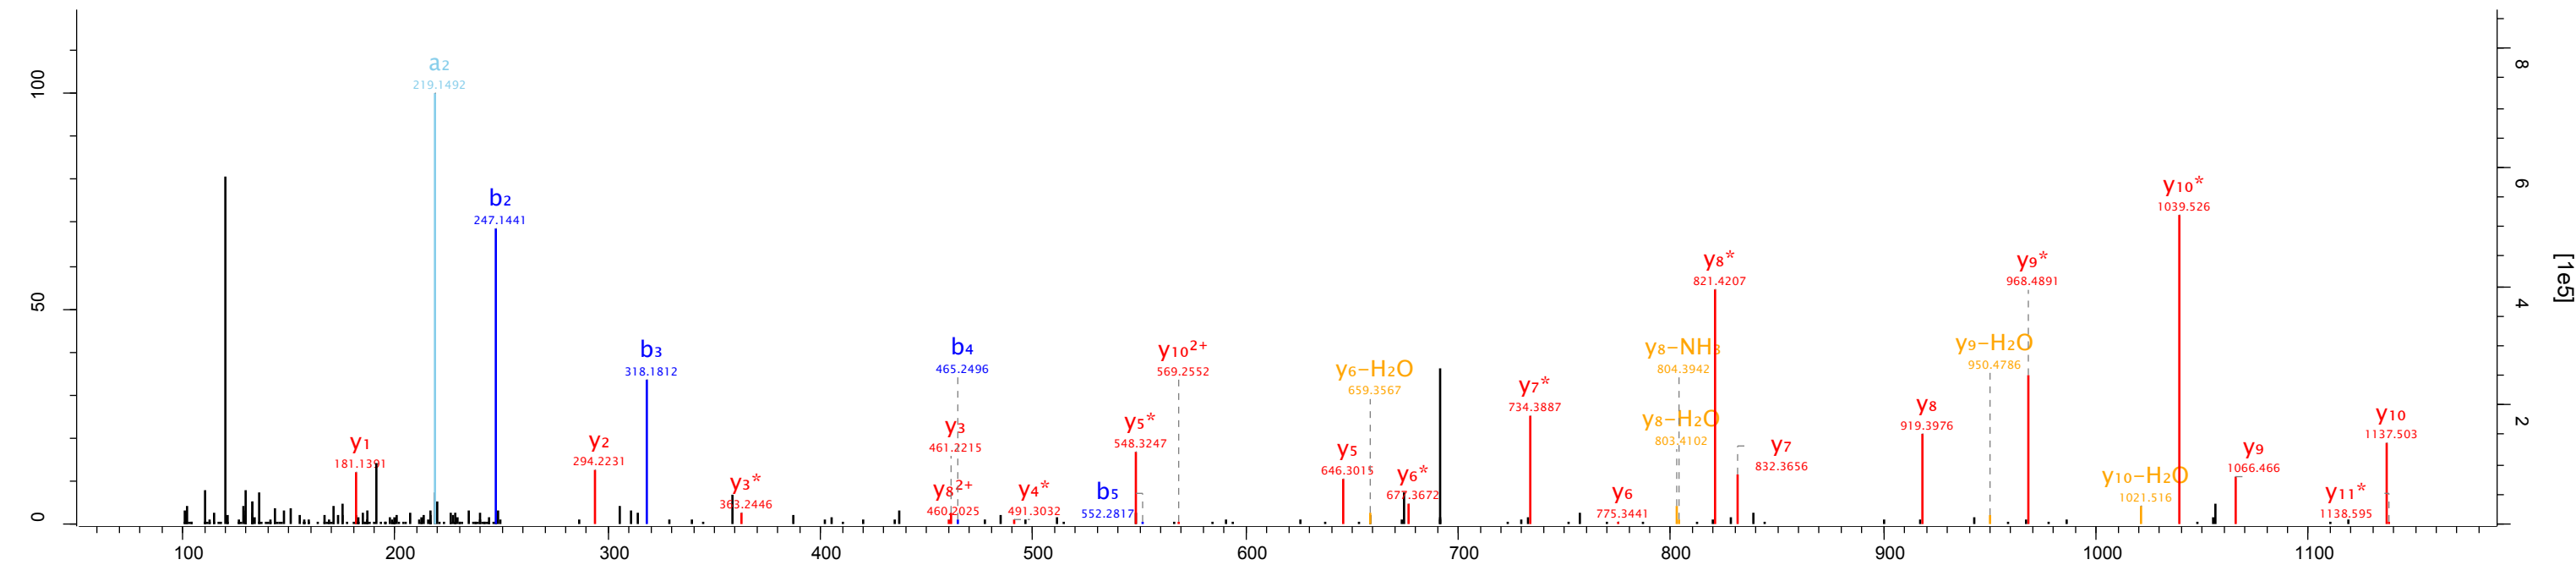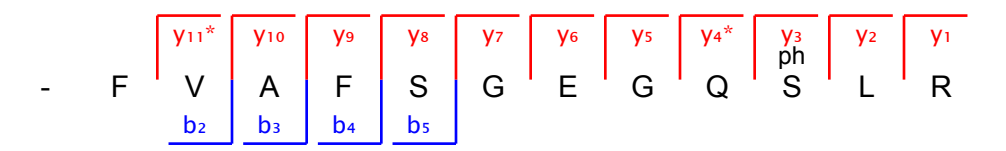

Raw file: 20150812\_A375SR\_Phospho\_BR1\_05  
 Scan: 1796 Method: FTMS; HCD Score: 103.92 m/z: 589.8 Gene names: RPL29

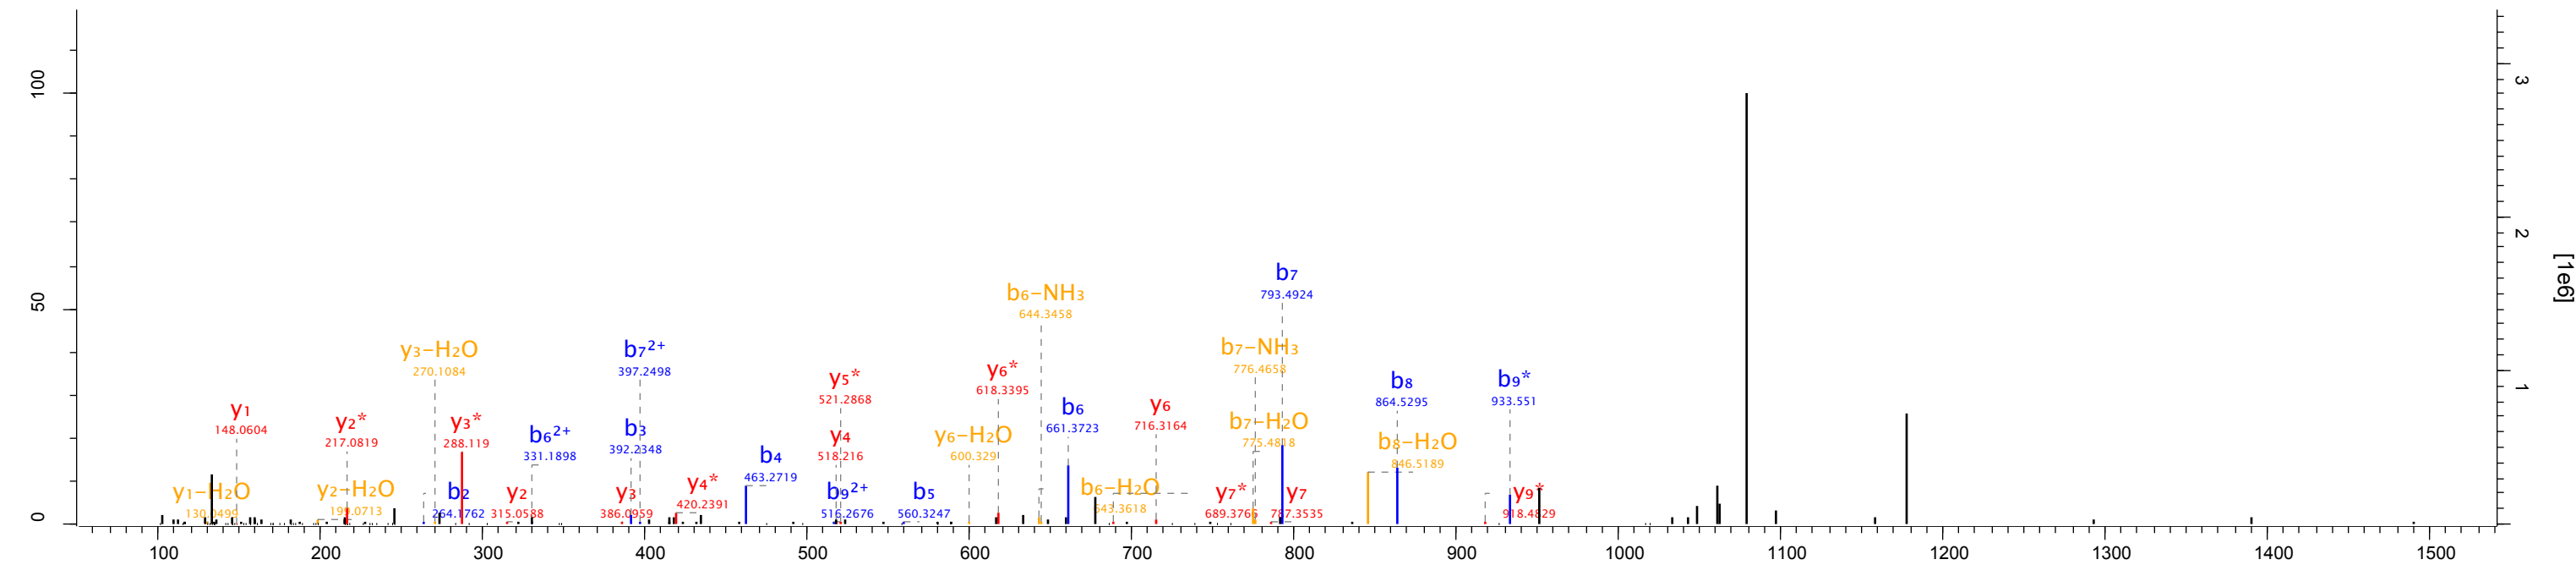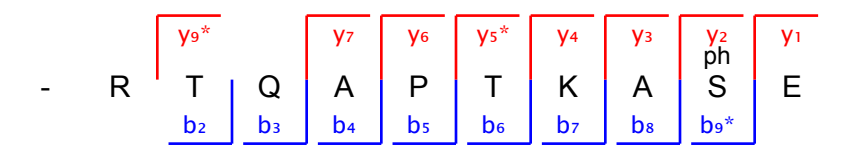

Raw file Scan Method Score m/z Gene names  
 20150812\_A375SR\_Phospho\_BR1\_05 18526 FTMS; HCD 145.86 770.83 FKBP15

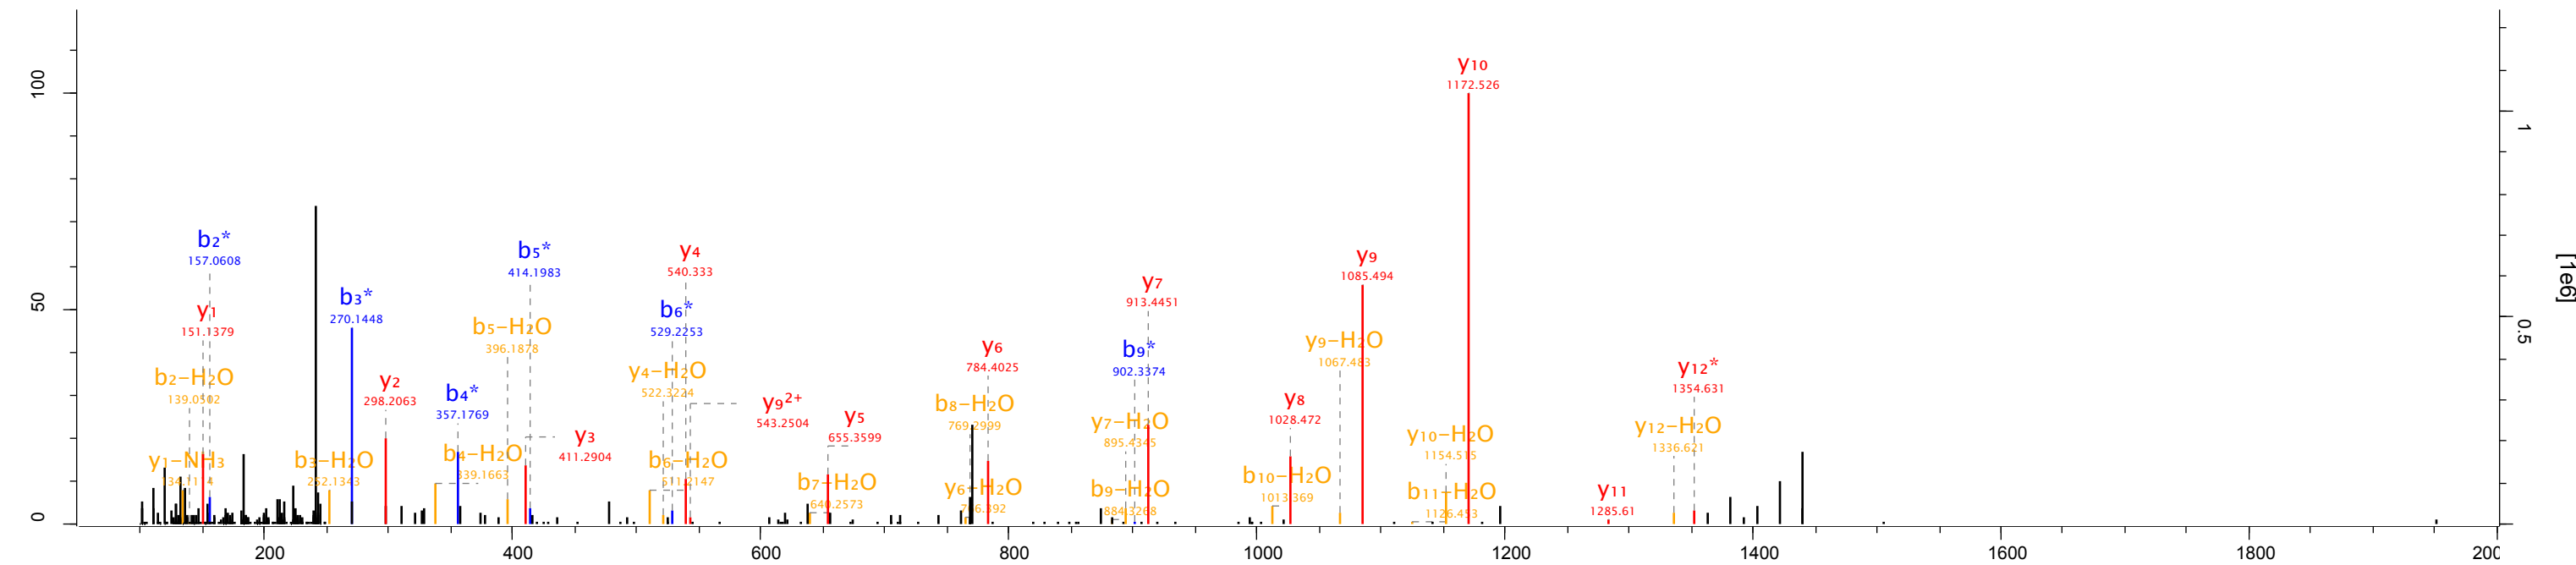

- S -  
 y12\* ph  
 S L S G D E E D E L F K -  
 b2\* b3\* b4\* b5\* b6\* b9\*

Raw file: 20150812\_A375SR\_Phospho\_BR1\_05  
 Scan: 18636 Method: FTMS; HCD Score: 218.93 m/z: 1021.49 Gene names: KCTD12

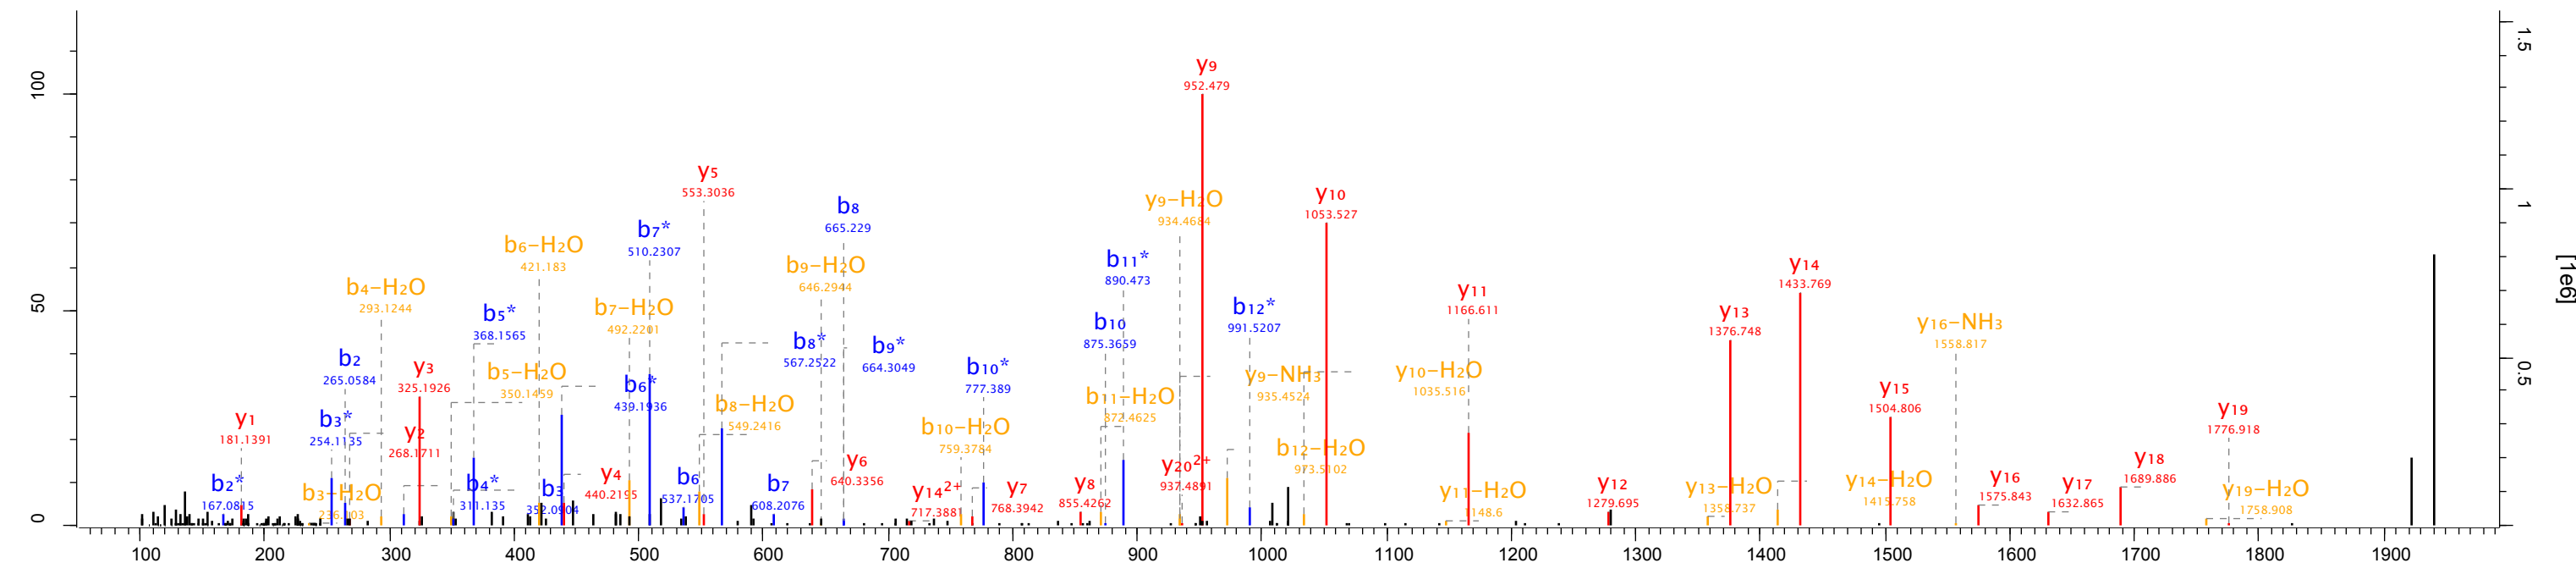

- pH S  
 - y<sub>20</sub><sup>2+</sup> y<sub>19</sub> y<sub>18</sub> y<sub>17</sub> y<sub>16</sub> y<sub>15</sub> y<sub>14</sub> y<sub>13</sub> y<sub>12</sub> y<sub>11</sub> y<sub>10</sub> y<sub>9</sub> y<sub>8</sub> y<sub>7</sub> y<sub>6</sub> y<sub>5</sub> y<sub>4</sub> y<sub>3</sub> y<sub>2</sub> y<sub>1</sub> -  
 - P S G G A A G P L L T P S Q S L D G S R -  
 - b<sub>2</sub> b<sub>3</sub> b<sub>4</sub><sup>\*</sup> b<sub>5</sub><sup>\*</sup> b<sub>6</sub> b<sub>7</sub> b<sub>8</sub> b<sub>9</sub><sup>\*</sup> b<sub>10</sub> b<sub>11</sub><sup>\*</sup> b<sub>12</sub><sup>\*</sup>

Raw file: 20150812\_A375SR\_Phospho\_BR1\_05  
 Scan: 18886 Method: FTMS; HCD Score: 135.43 m/z: 930.44 Gene names: PTPN12

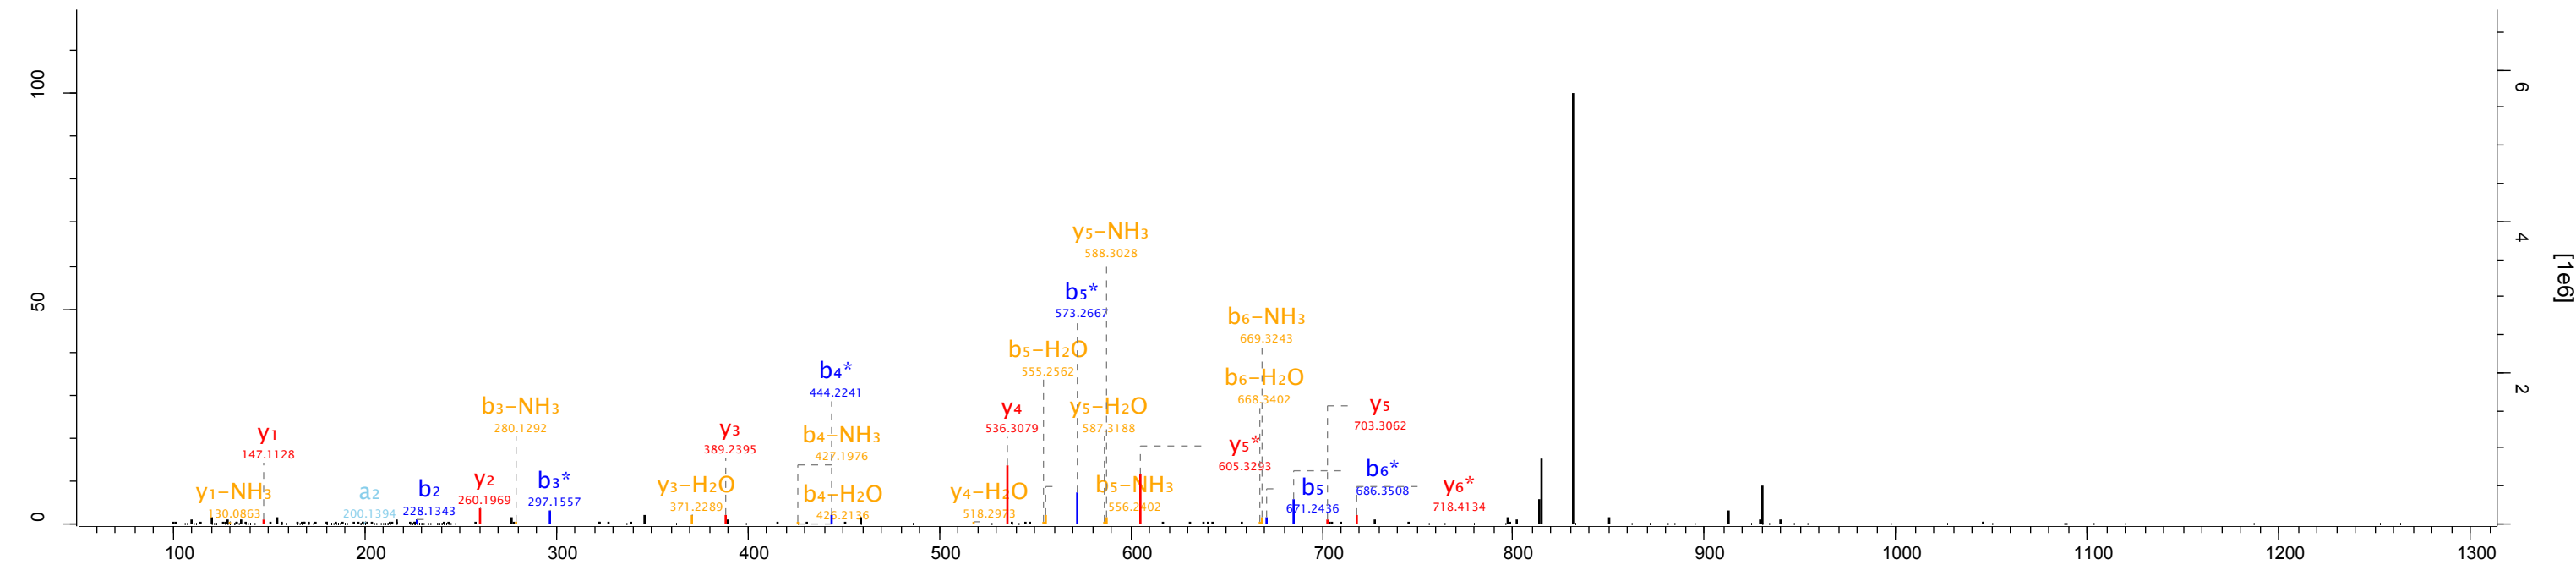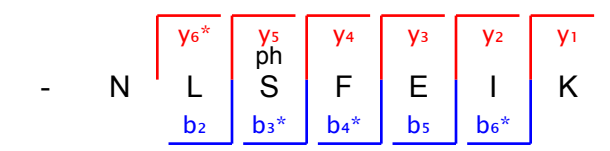

Raw file: 20150812\_A375SR\_Phospho\_BR1\_05  
 Scan: 19346 Method: FTMS; HCD Score: 125.73 m/z: 881.95 Gene names: LPIN2

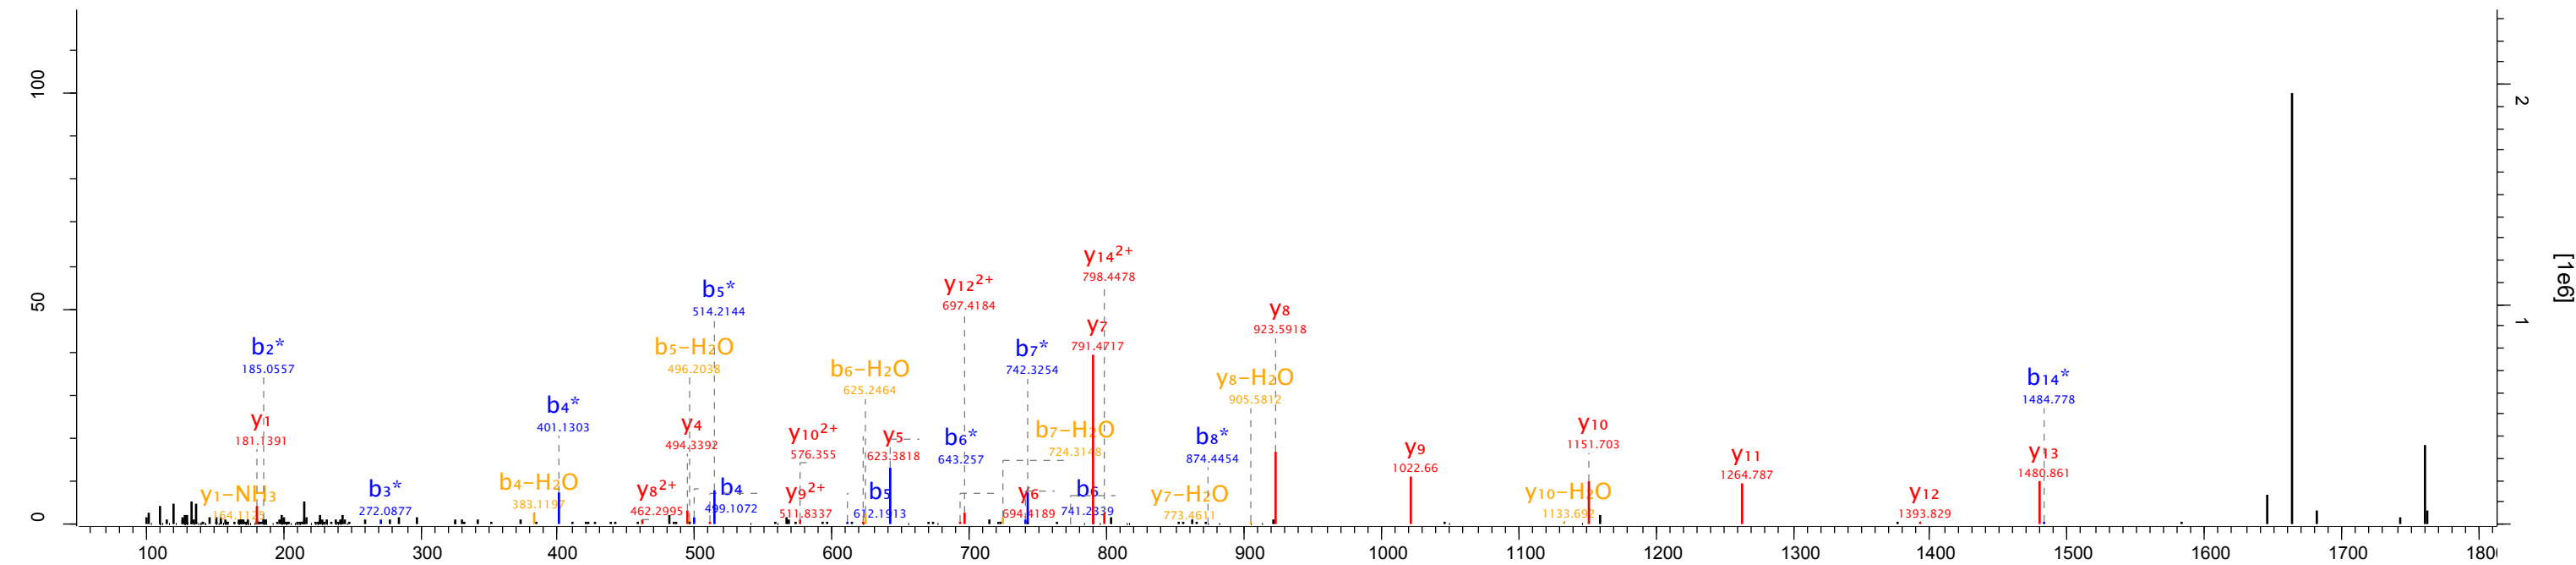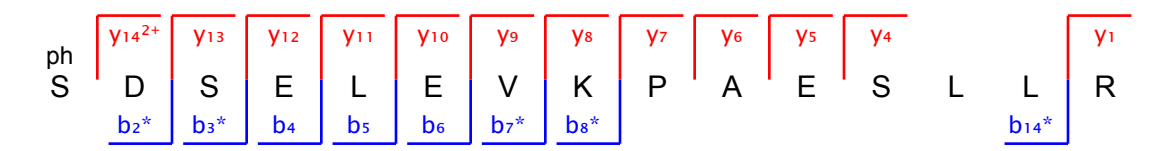

Raw file: 20150812\_A375SR\_Phospho\_BR1\_05  
 Scan: 19476 Method: FTMS; HCD Score: 83.98 m/z: 1105.53 Gene names: METTL3

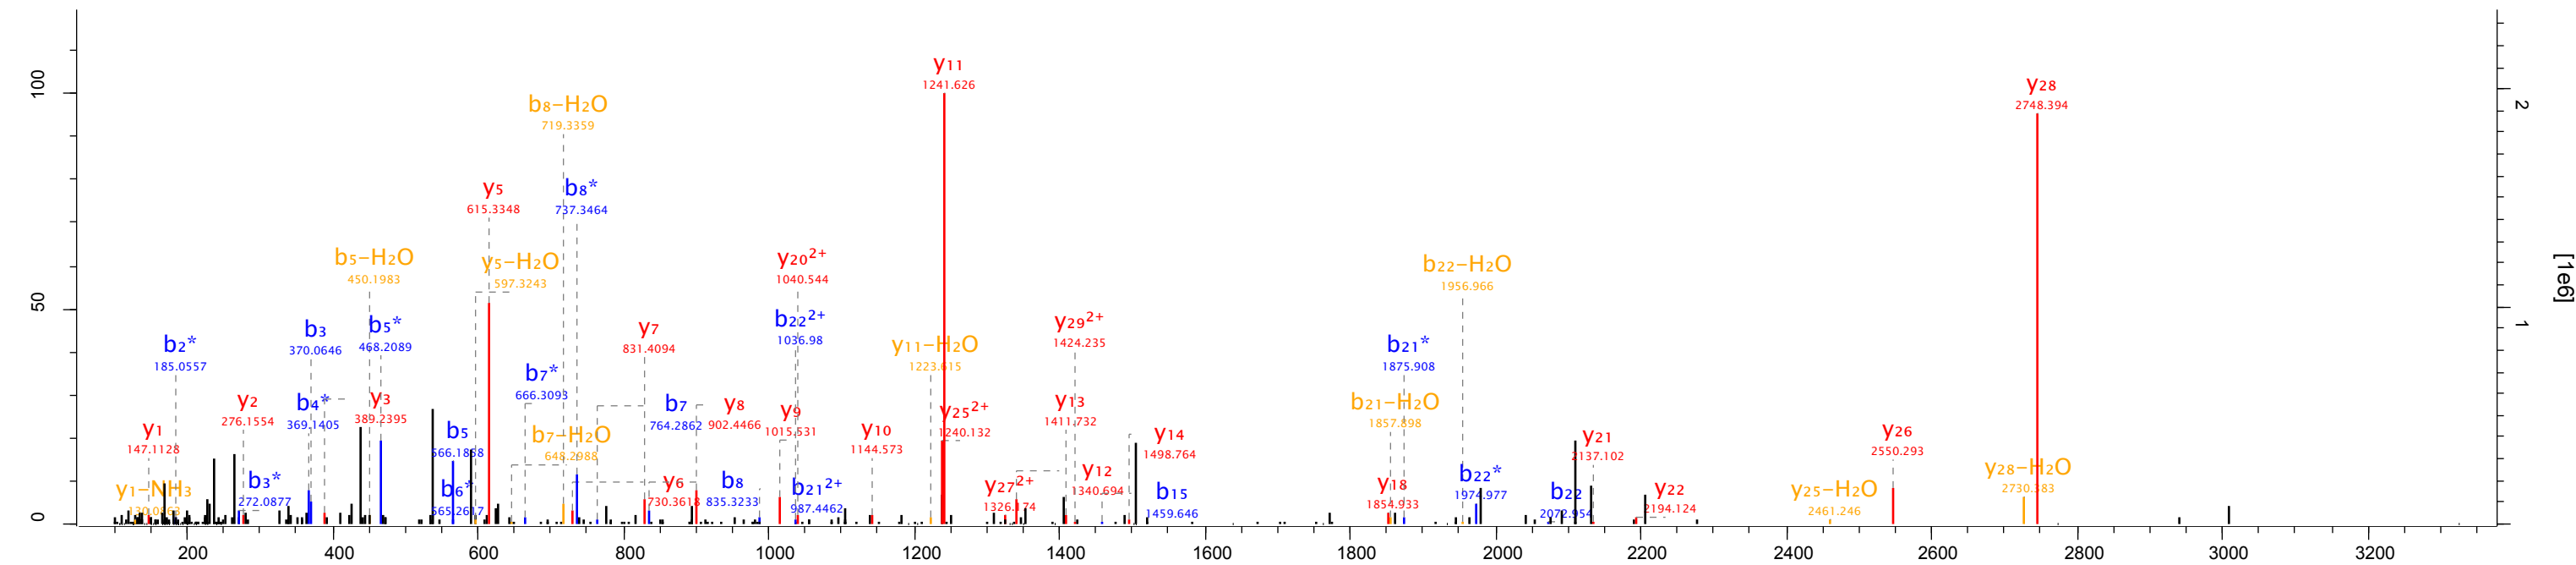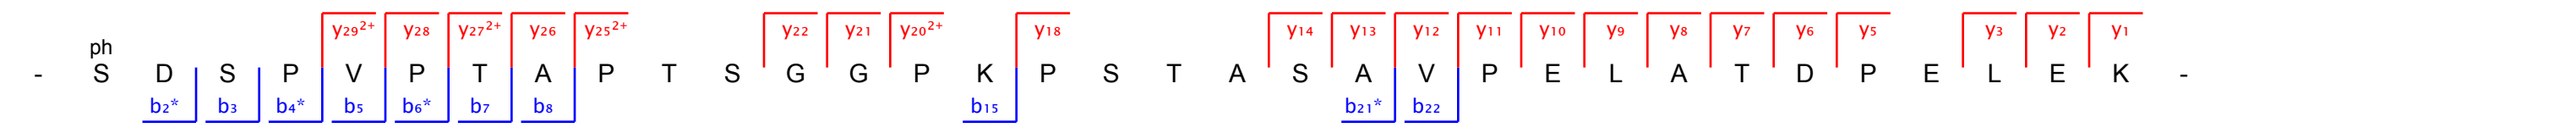



Raw file: 20150812\_A375SR\_Phospho\_BR1\_05  
 Scan: 2096 Method: FTMS; HCD Score: 105.79 m/z: 556.93 Gene names: FLJ33167;PRIMPOL

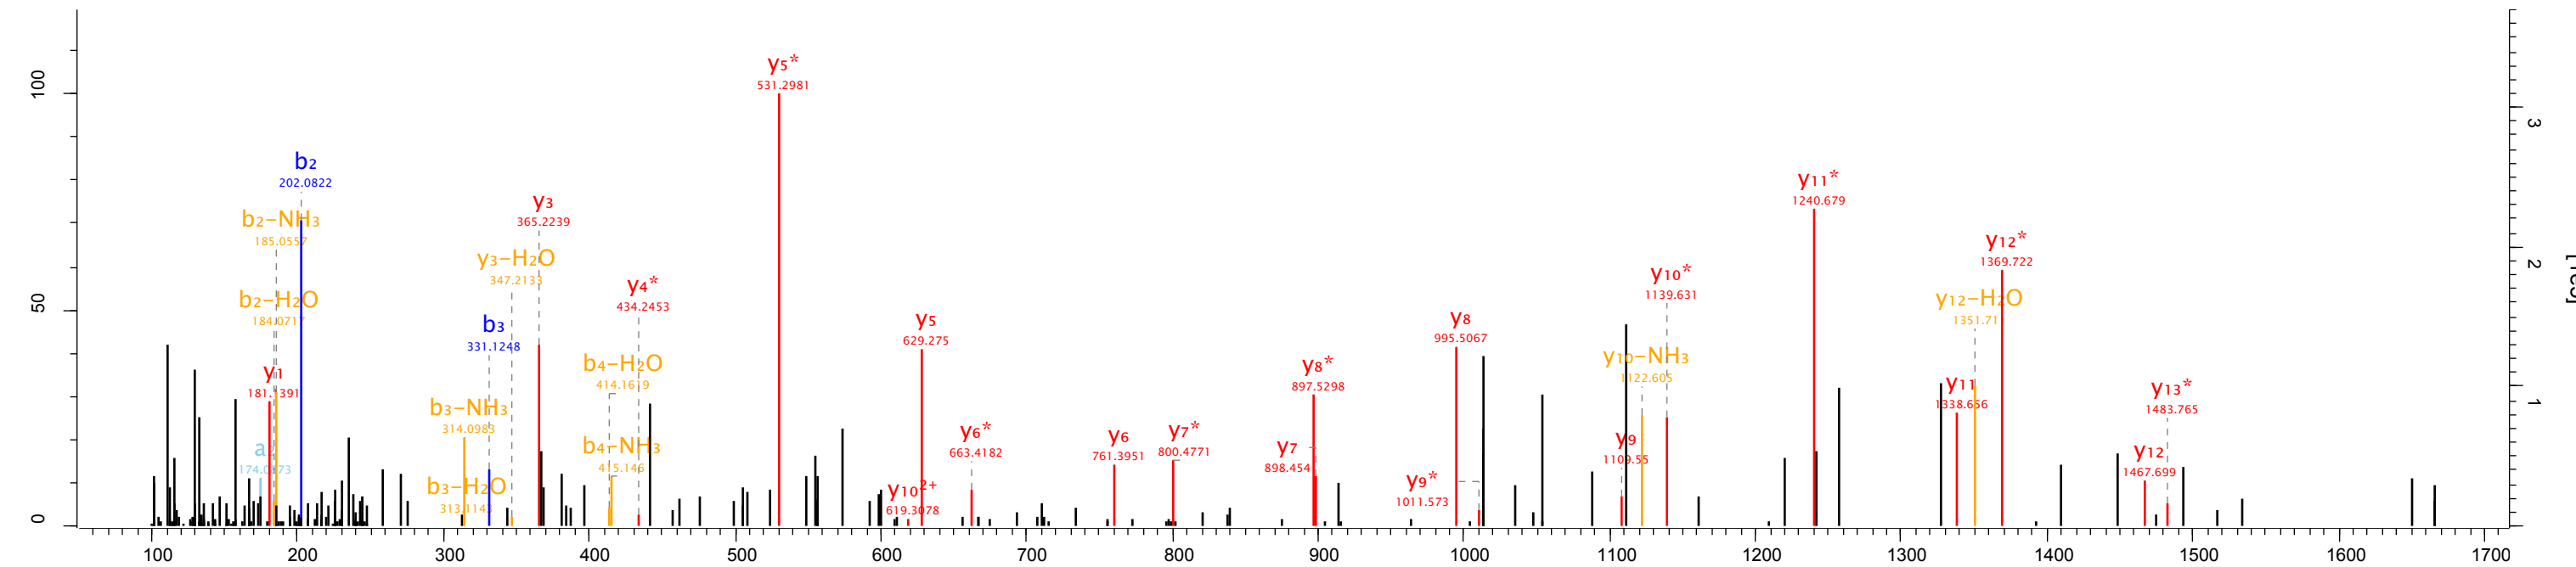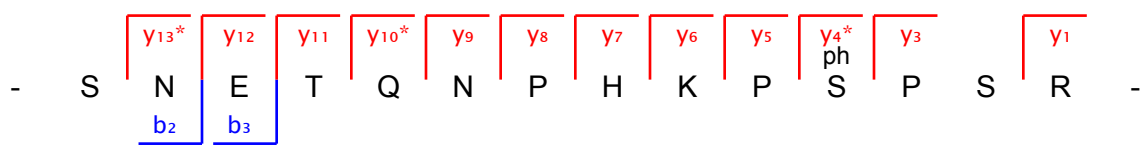

Raw file 20150812\_A375SR\_Phospho\_BR1\_05 Scan 22426 Method FTMS; HCD Score 167.53 m/z 965.98 Gene names PCBP2

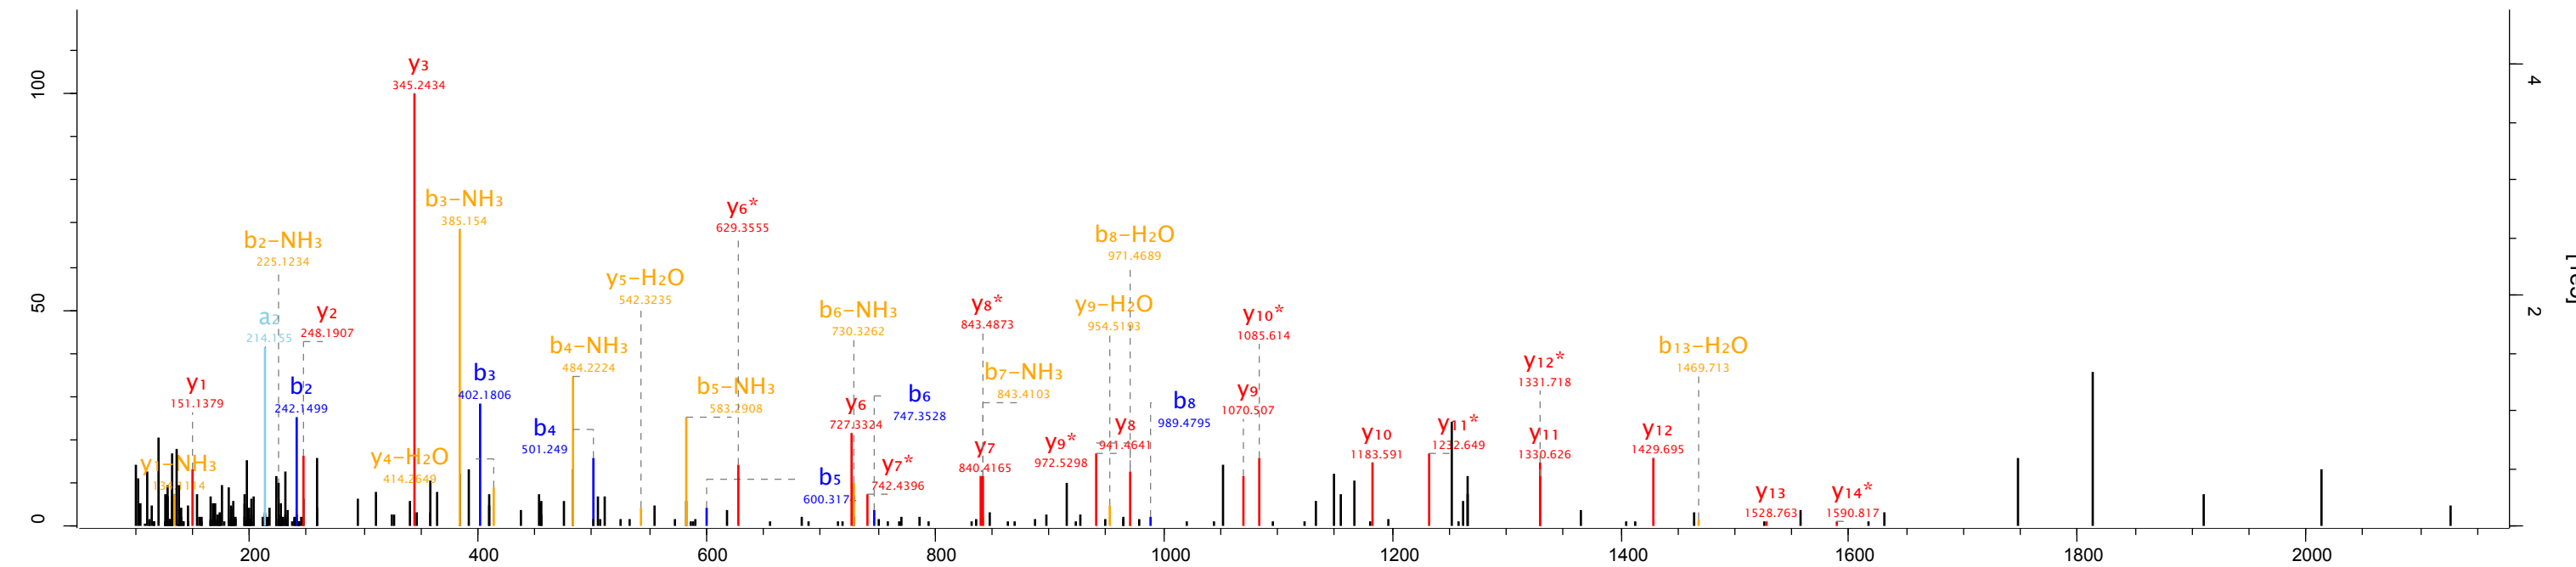

- Q I C V V M L E T L S Q S P P K -

b<sub>2</sub>
y<sub>14</sub>\*
y<sub>13</sub>
y<sub>12</sub>
y<sub>11</sub>  
OX
y<sub>10</sub>
y<sub>9</sub>
y<sub>8</sub>
y<sub>7</sub>
y<sub>6</sub>  
ph
b<sub>8</sub>
y<sub>3</sub>
y<sub>2</sub>
y<sub>1</sub>

Raw file: 20150812\_A375SR\_Phospho\_BR1\_05  
 Scan: 2356 Method: FTMS; HCD Score: 118.54 m/z: 666.92 Gene names: BCCIP

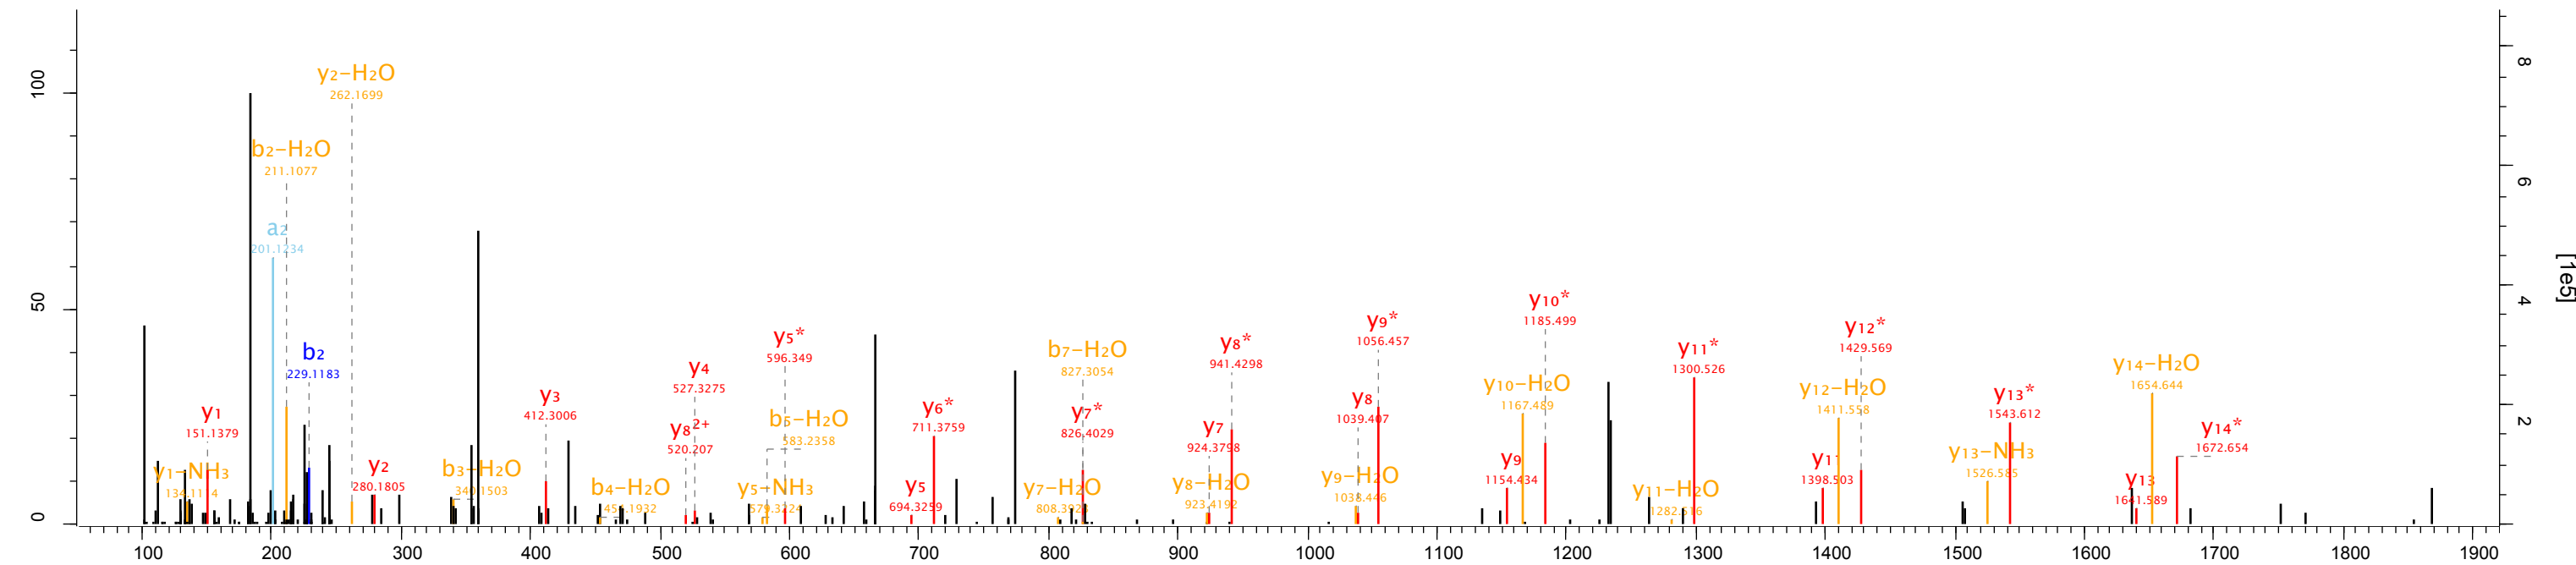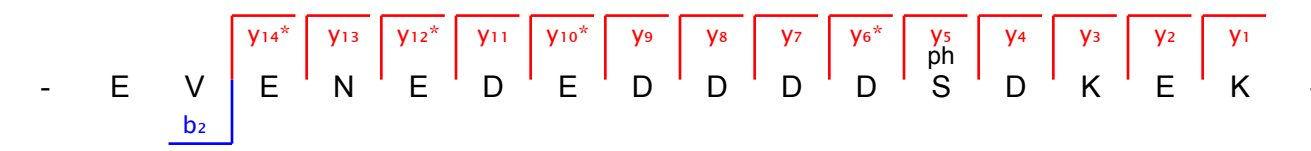



Raw file: 20150812\_A375SR\_Phospho\_BR1\_05  
 Scan: 2476 Method: FTMS; HCD Score: 184.83 m/z: 669.84 Gene names: CEP170

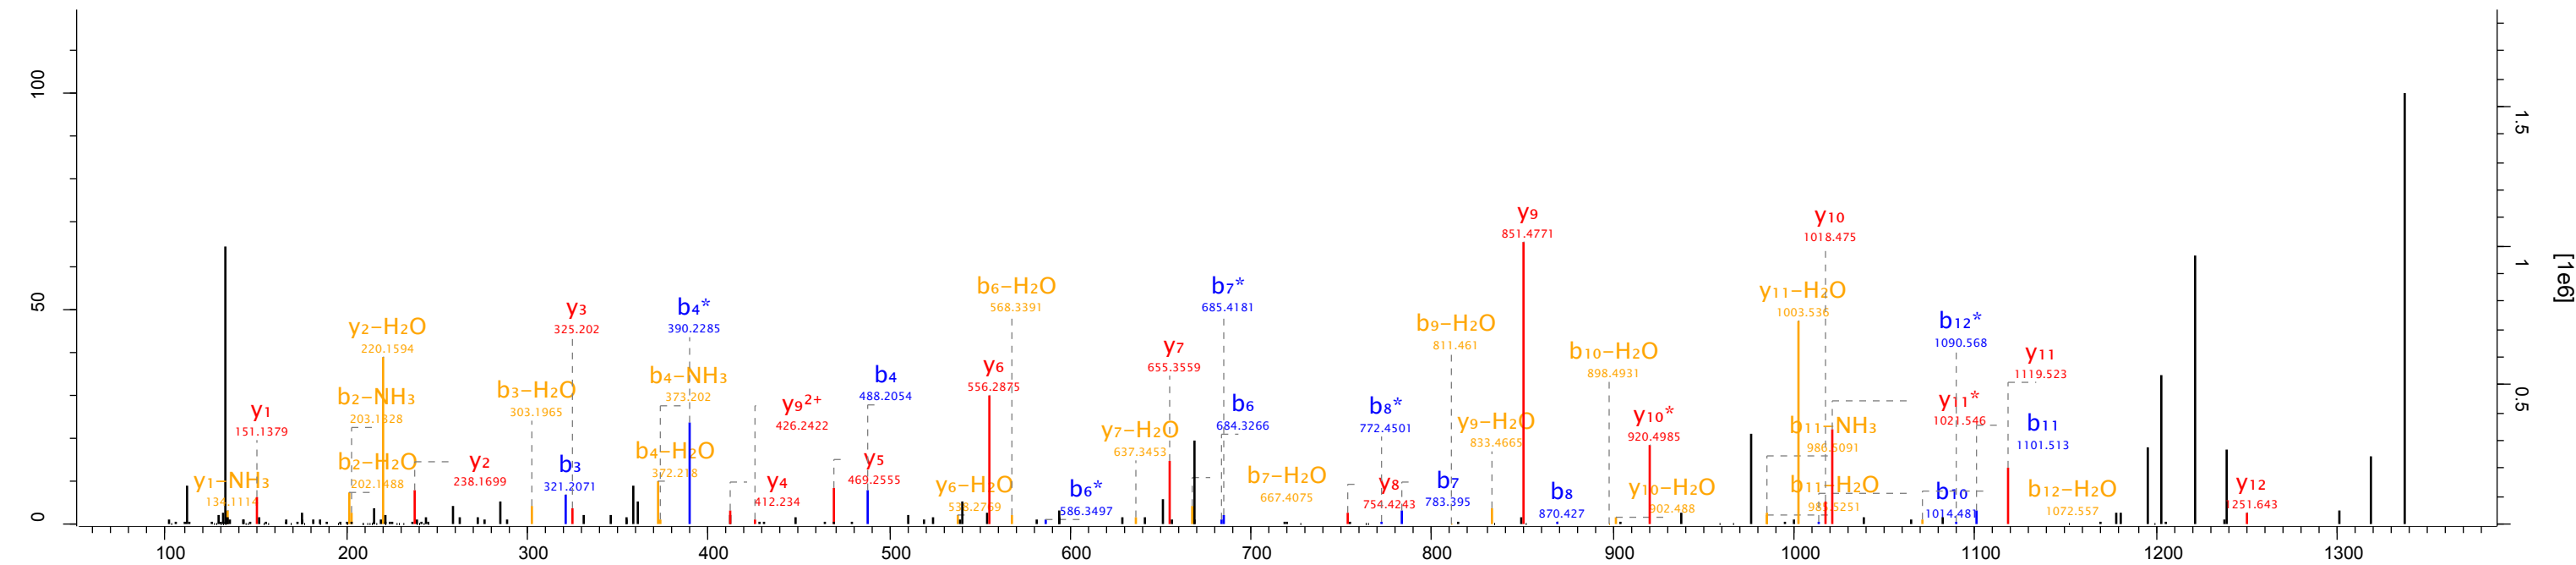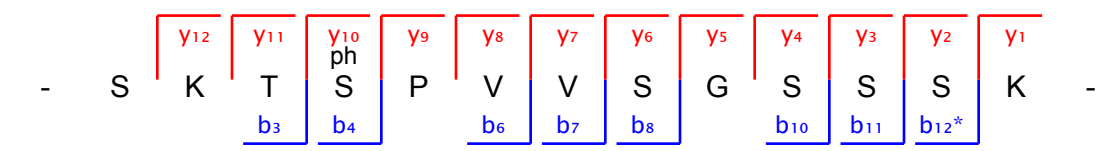

Raw file 20150812\_A375SR\_Phospho\_BR1\_05 Scan 25276 Method FTMS; HCD Score 105.9 m/z 833.89 Gene names TK1

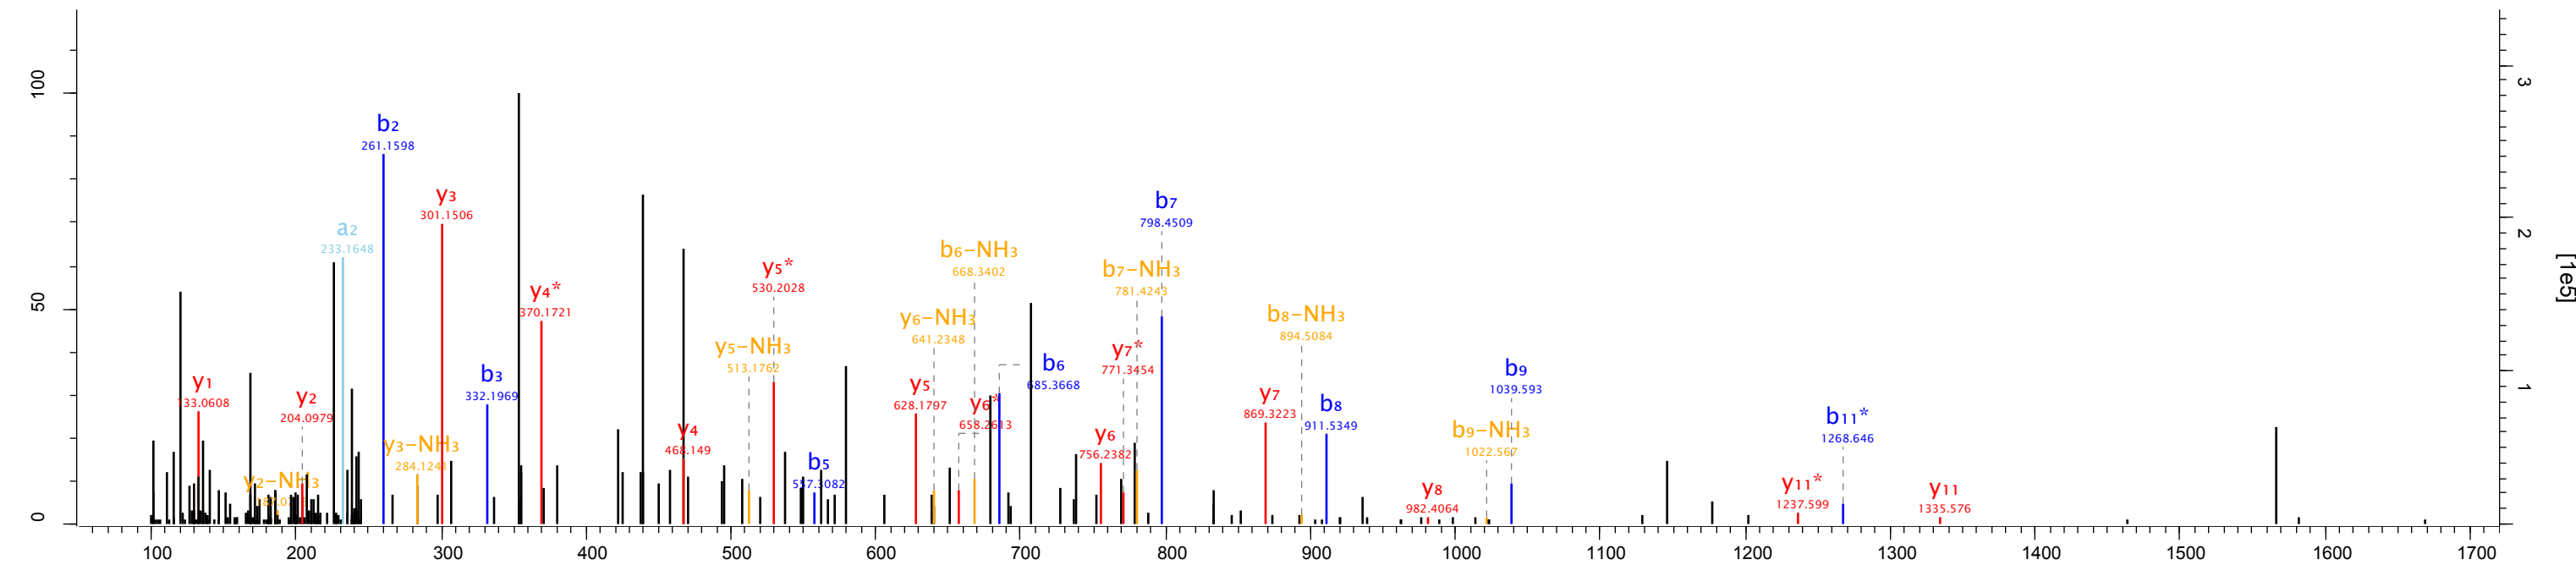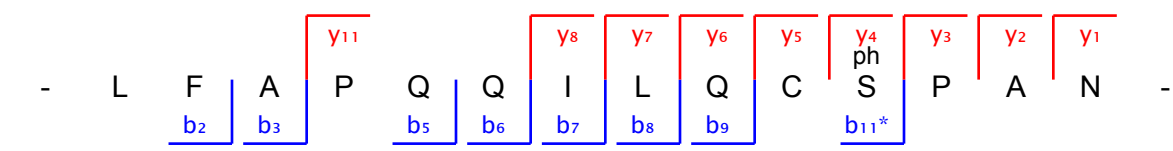

Raw file: 20150812\_A375SR\_Phospho\_BR1\_05  
 Scan: 26256 Method: FTMS; HCD Score: 66.97 m/z: 1222.54 Gene names: SRRM2

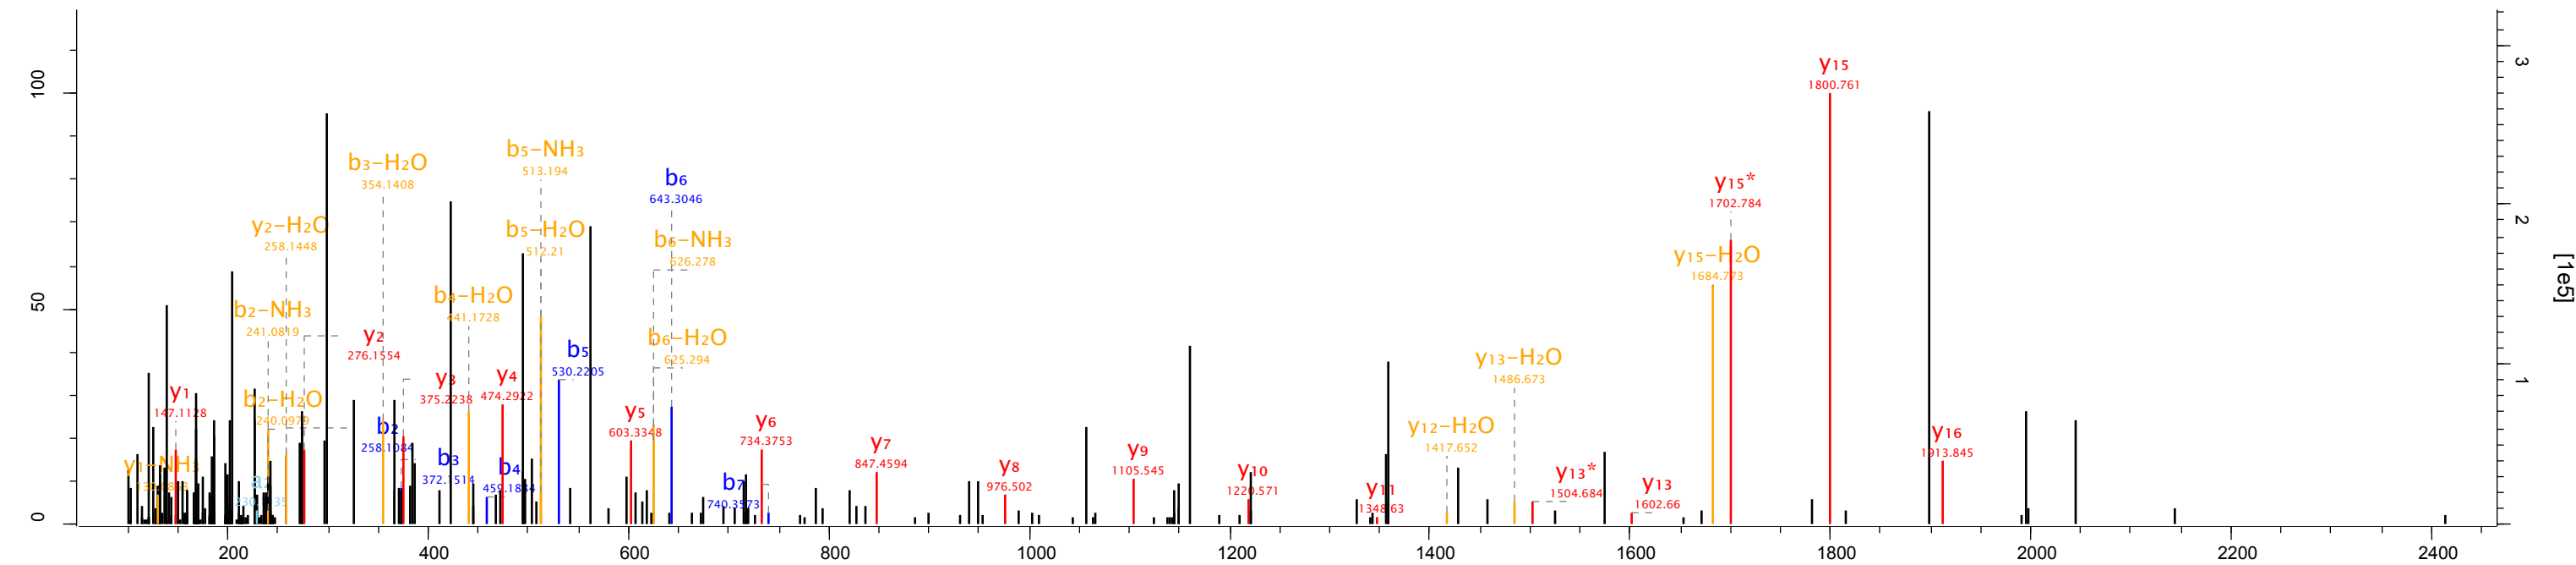

- E Q N S A L P T S S Q D E E L M E V V E K -

Fragmentation sites are indicated by brackets below the sequence:

- Blue brackets (b2-b7) are under Q, N, S, A, L, P.
- Red brackets (y1-y16) are under L, P, S, S, Q, D, E, E, L, M, E, V, V, E, K.

Raw file: 20150812\_A375SR\_Phospho\_BR1\_05  
 Scan: 2726 Method: FTMS; HCD Score: 181.08 m/z: 705.83 Gene names: IRF2BPL

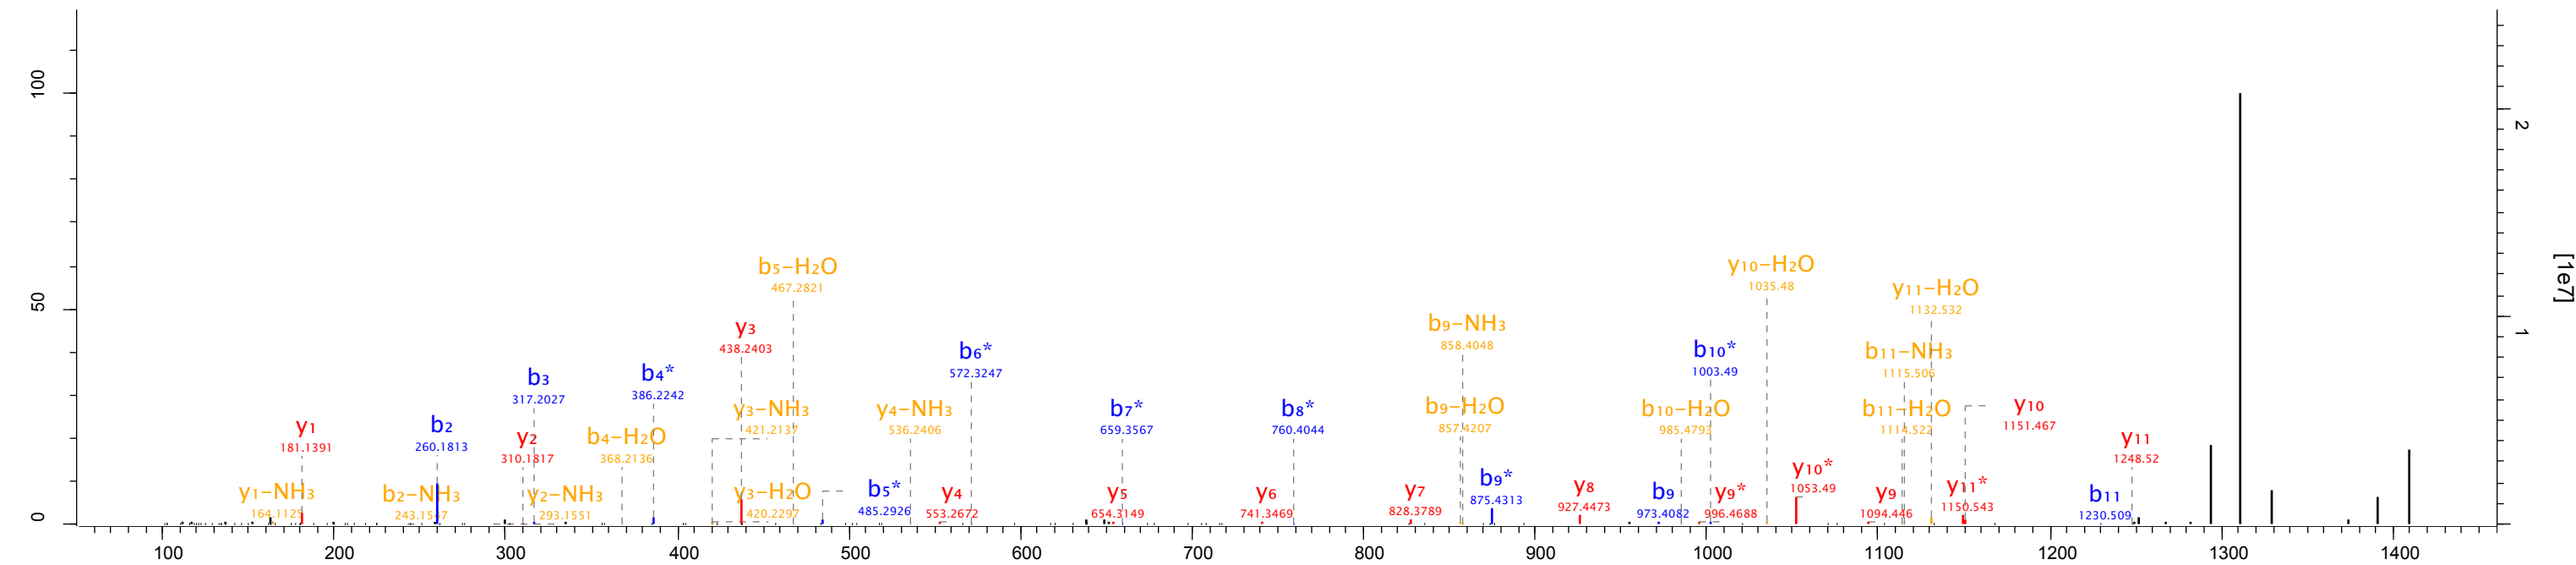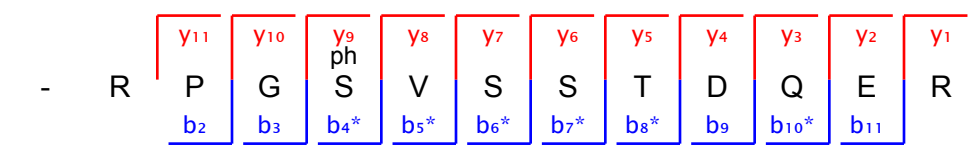



Raw file 20150812\_A375SR\_Phospho\_BR1\_05 Scan 27786 Method FTMS; HCD Score 126.47 m/z 849.11 Gene names EIF3G

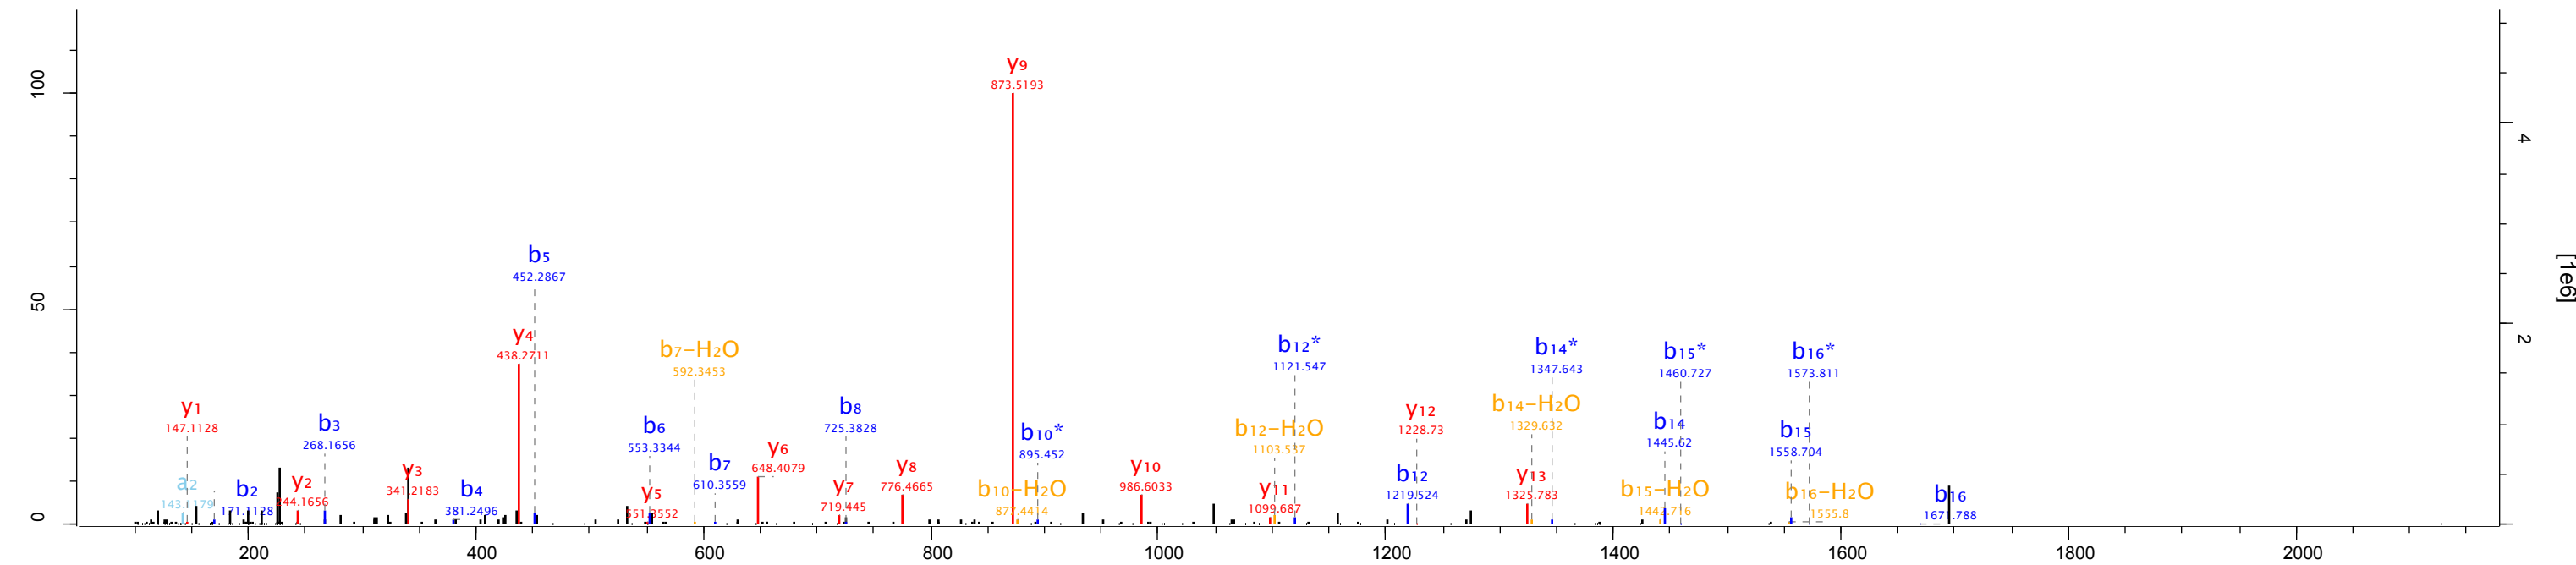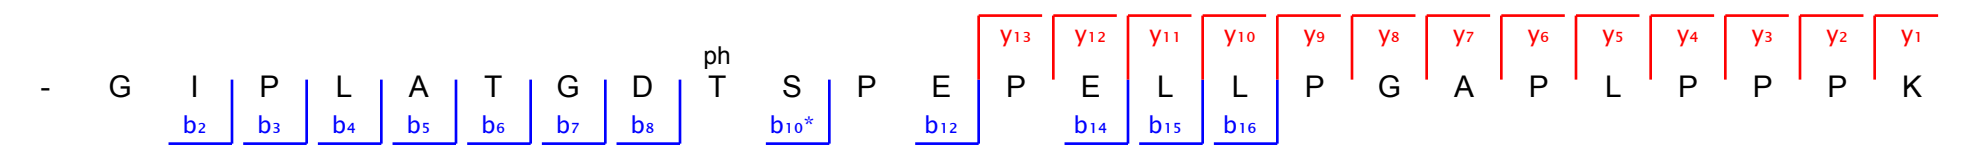

Raw file 20150812\_A375SR\_Phospho\_BR1\_05 Scan 2826 Method FTMS; HCD Score 129.53 m/z 657.31 Gene names TRIM25

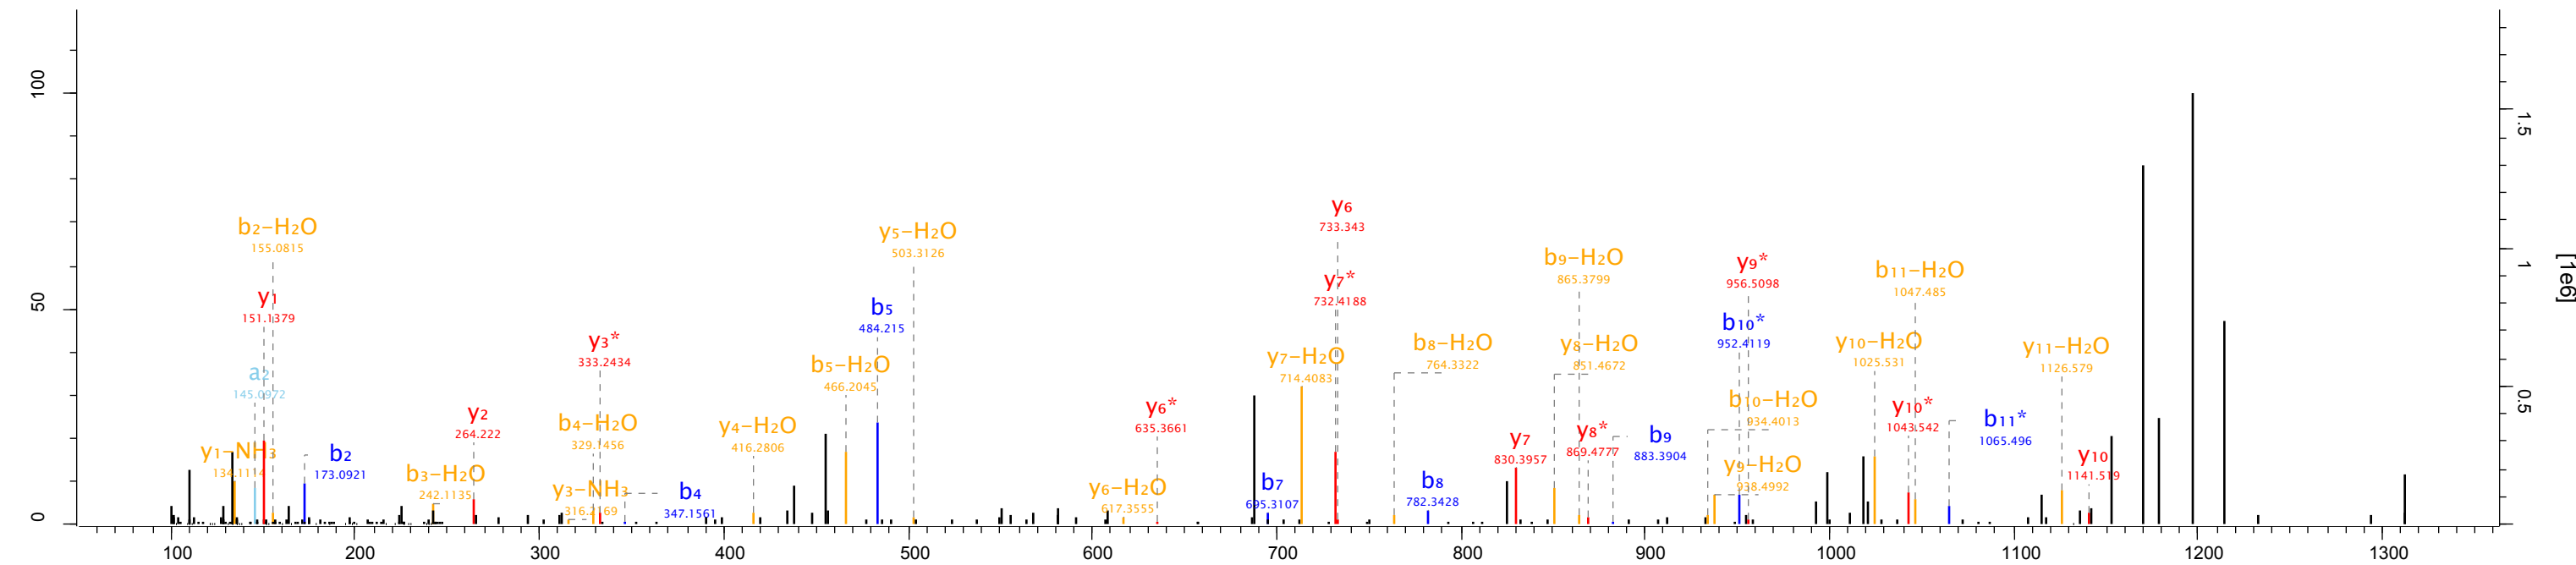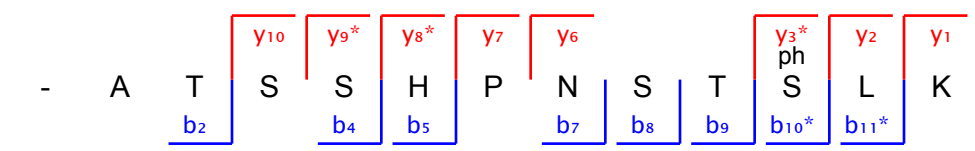

Raw file: 20150812\_A375SR\_Phospho\_BR1\_05  
 Scan: 3056 Method: FTMS; HCD Score: 67.3 m/z: 675.79 Gene names: BCAR2;TRERF1

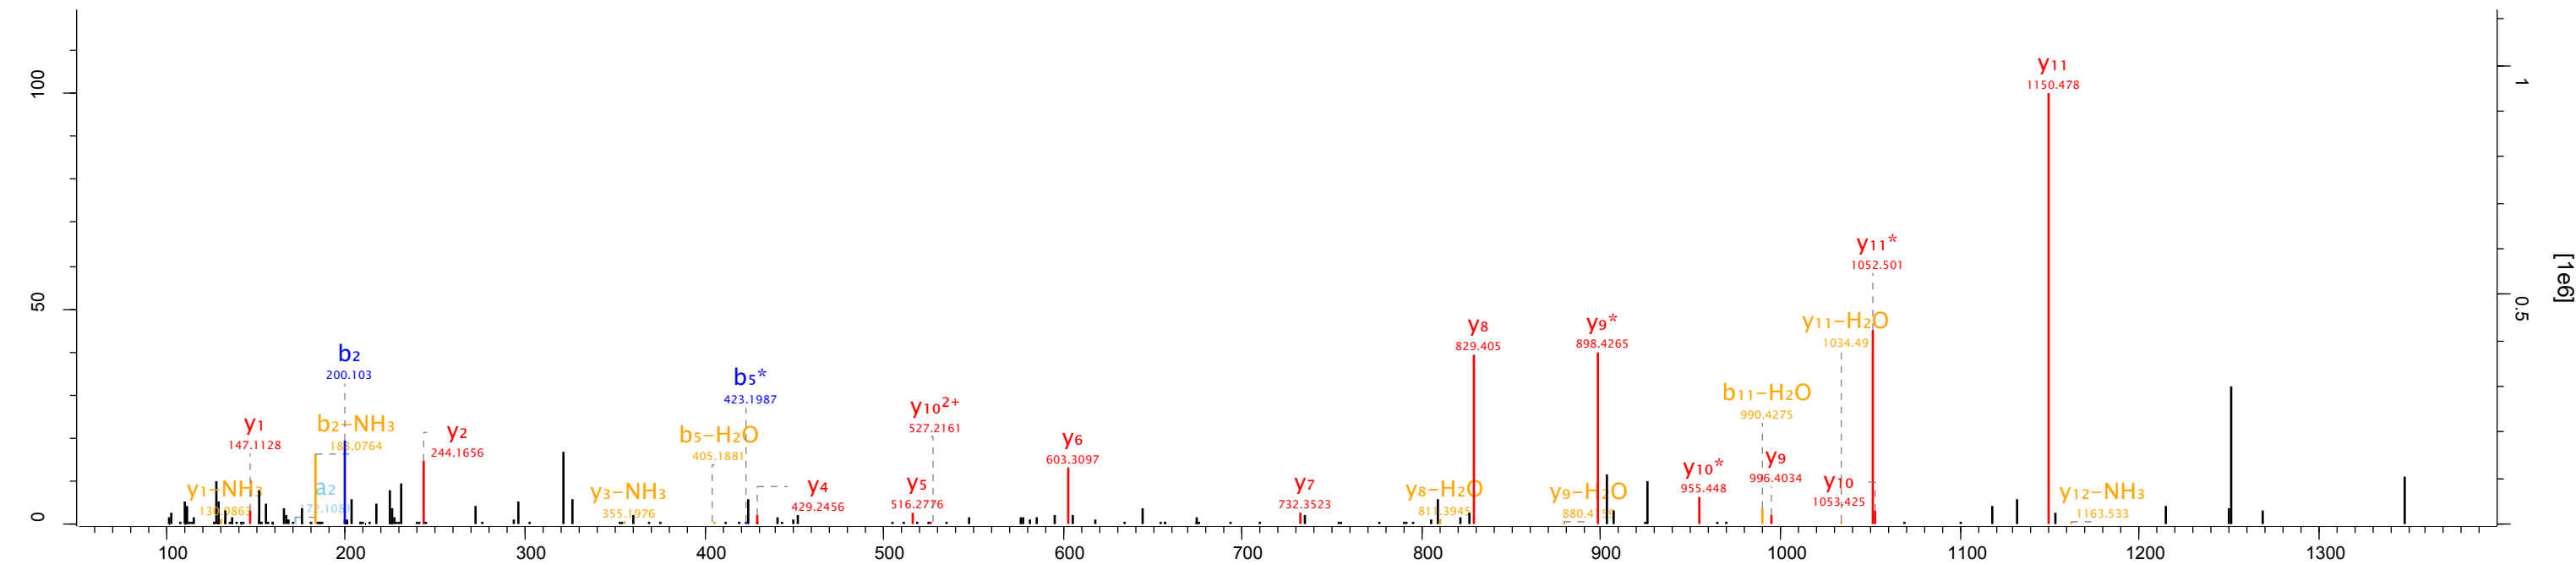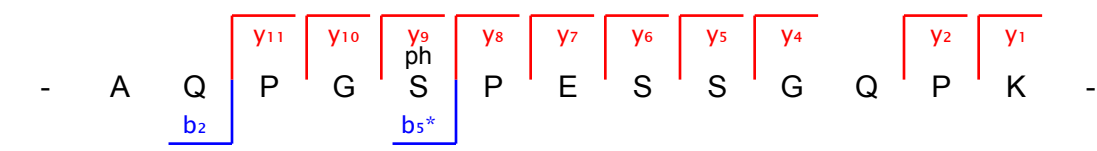

Raw file: 20150812\_A375SR\_Phospho\_BR1\_05  
 Scan: 3456 Method: FTMS; HCD Score: 55.74 m/z: 600.93 Gene names: ATXN2L

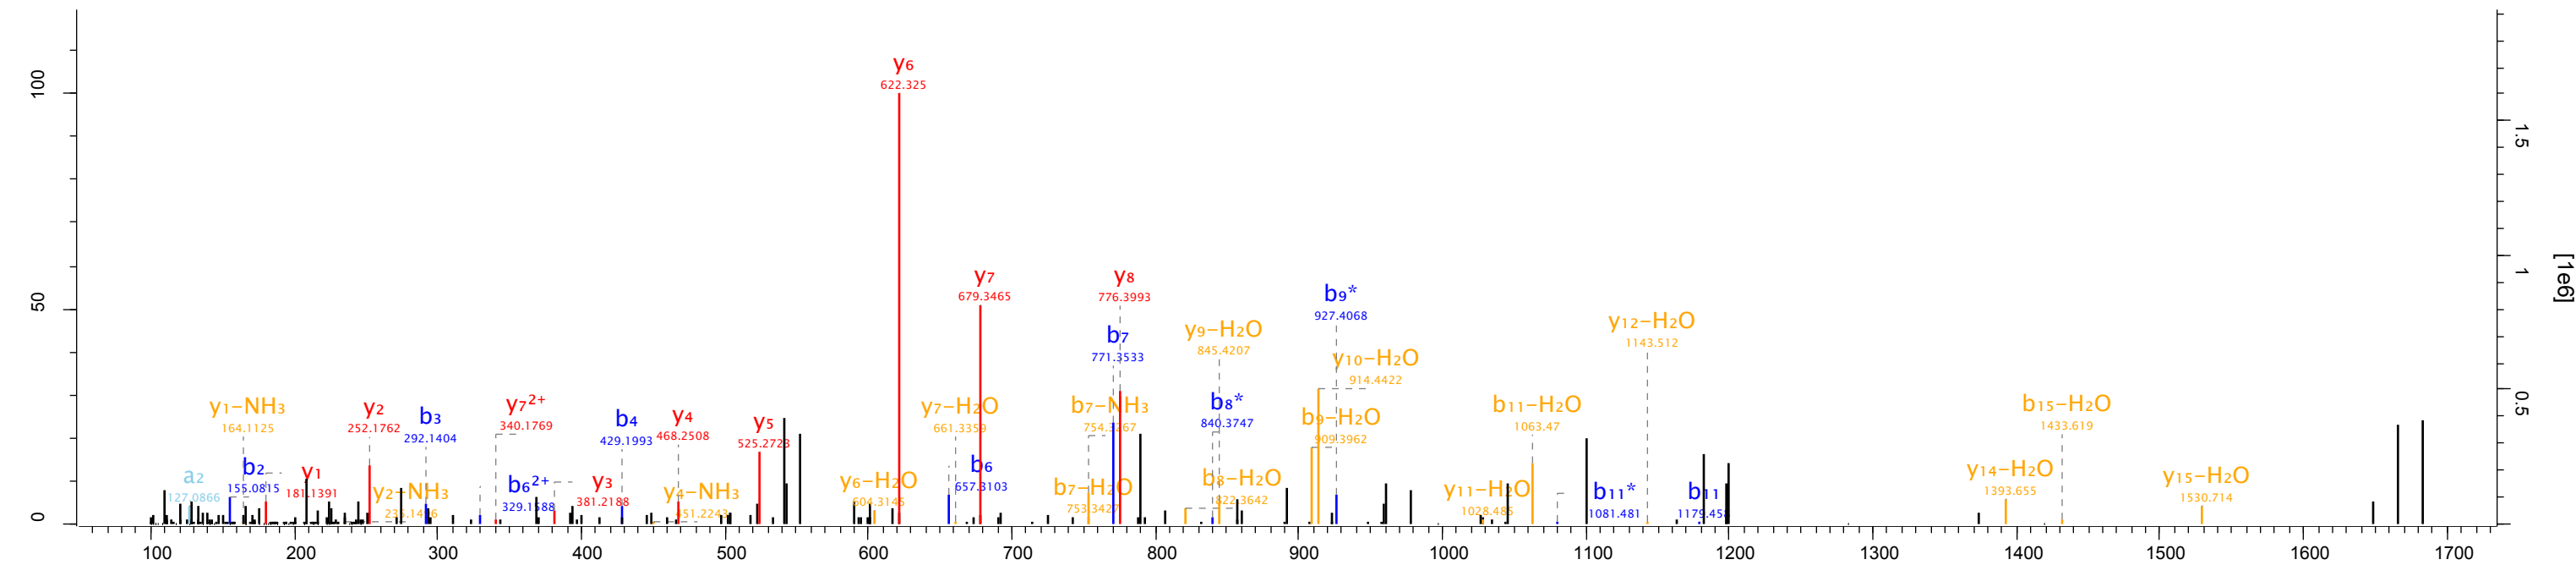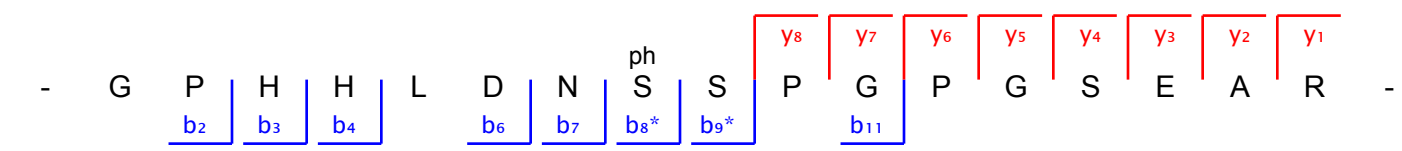

Raw file: 20150812\_A375SR\_Phospho\_BR1\_05  
 Scan: 3486 Method: FTMS; HCD Score: 297.36 m/z: 864.84 Gene names: PNN

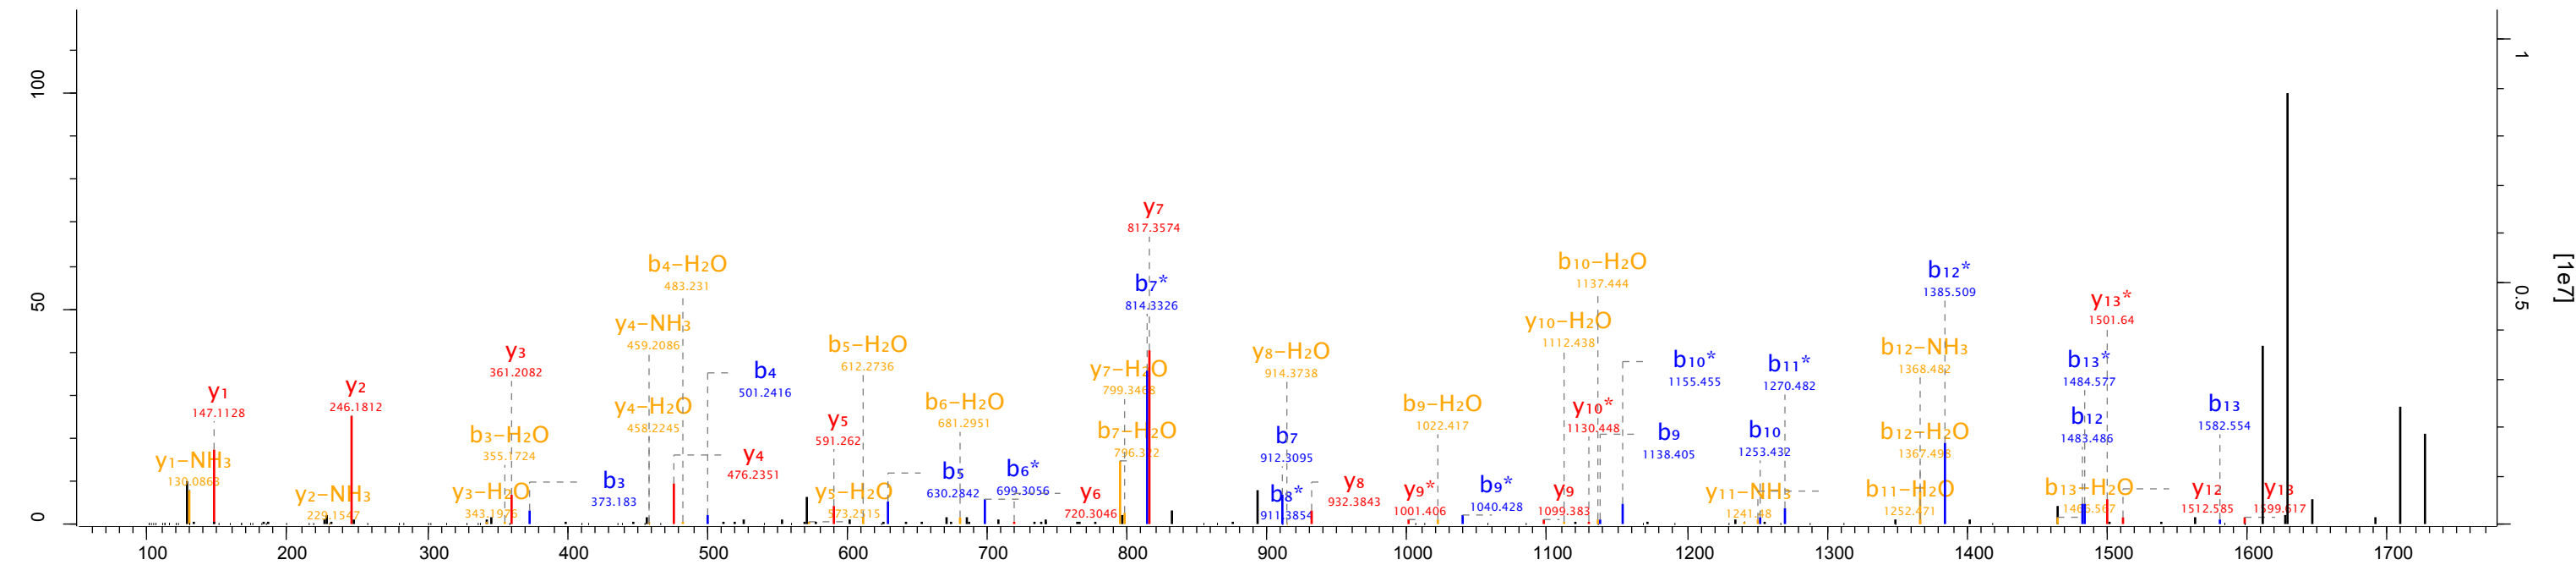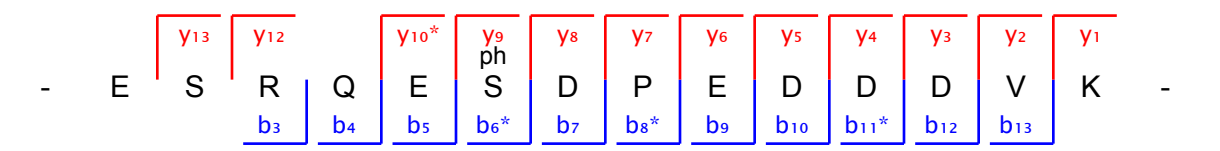

Raw file: 20150812\_A375SR\_Phospho\_BR1\_05  
 Scan: 3656 Method: FTMS; HCD Score: 166.79 m/z: 575.8 Gene names: MAP4

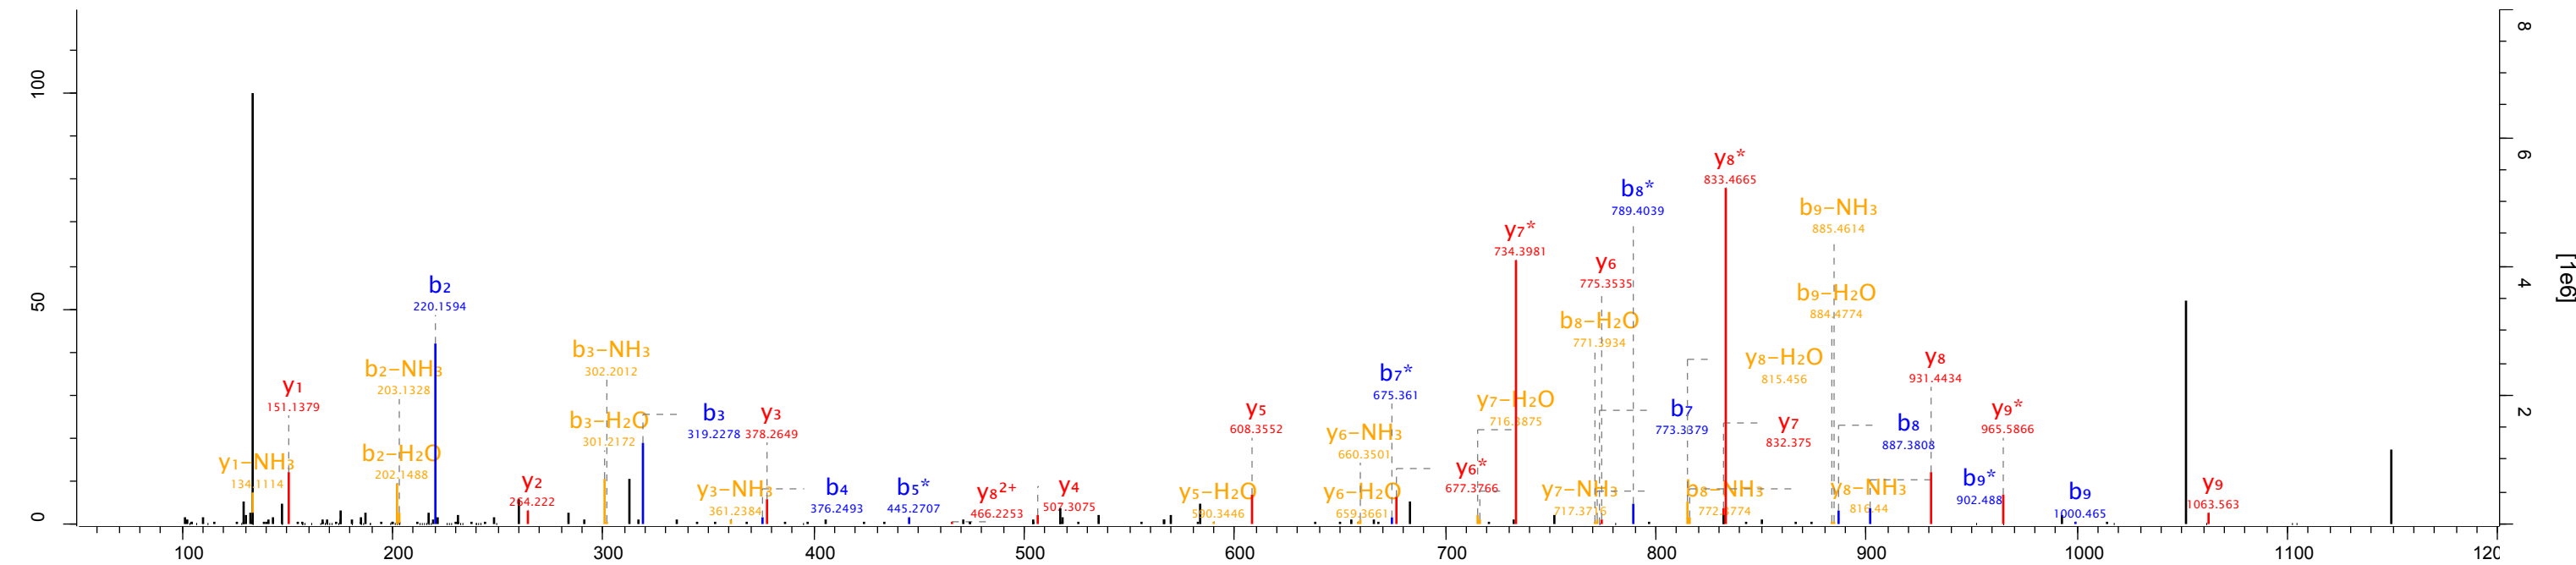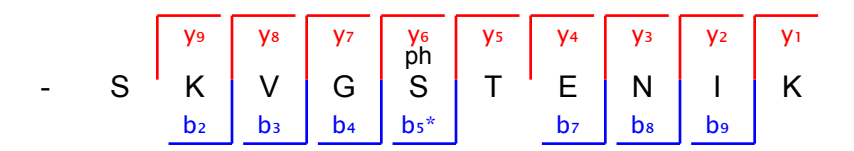

Raw file: 20150812\_A375SR\_Phospho\_BR1\_05  
 Scan: 3786 Method: FTMS; HCD Score: 145.49 m/z: 642.78 Gene names: CEP131

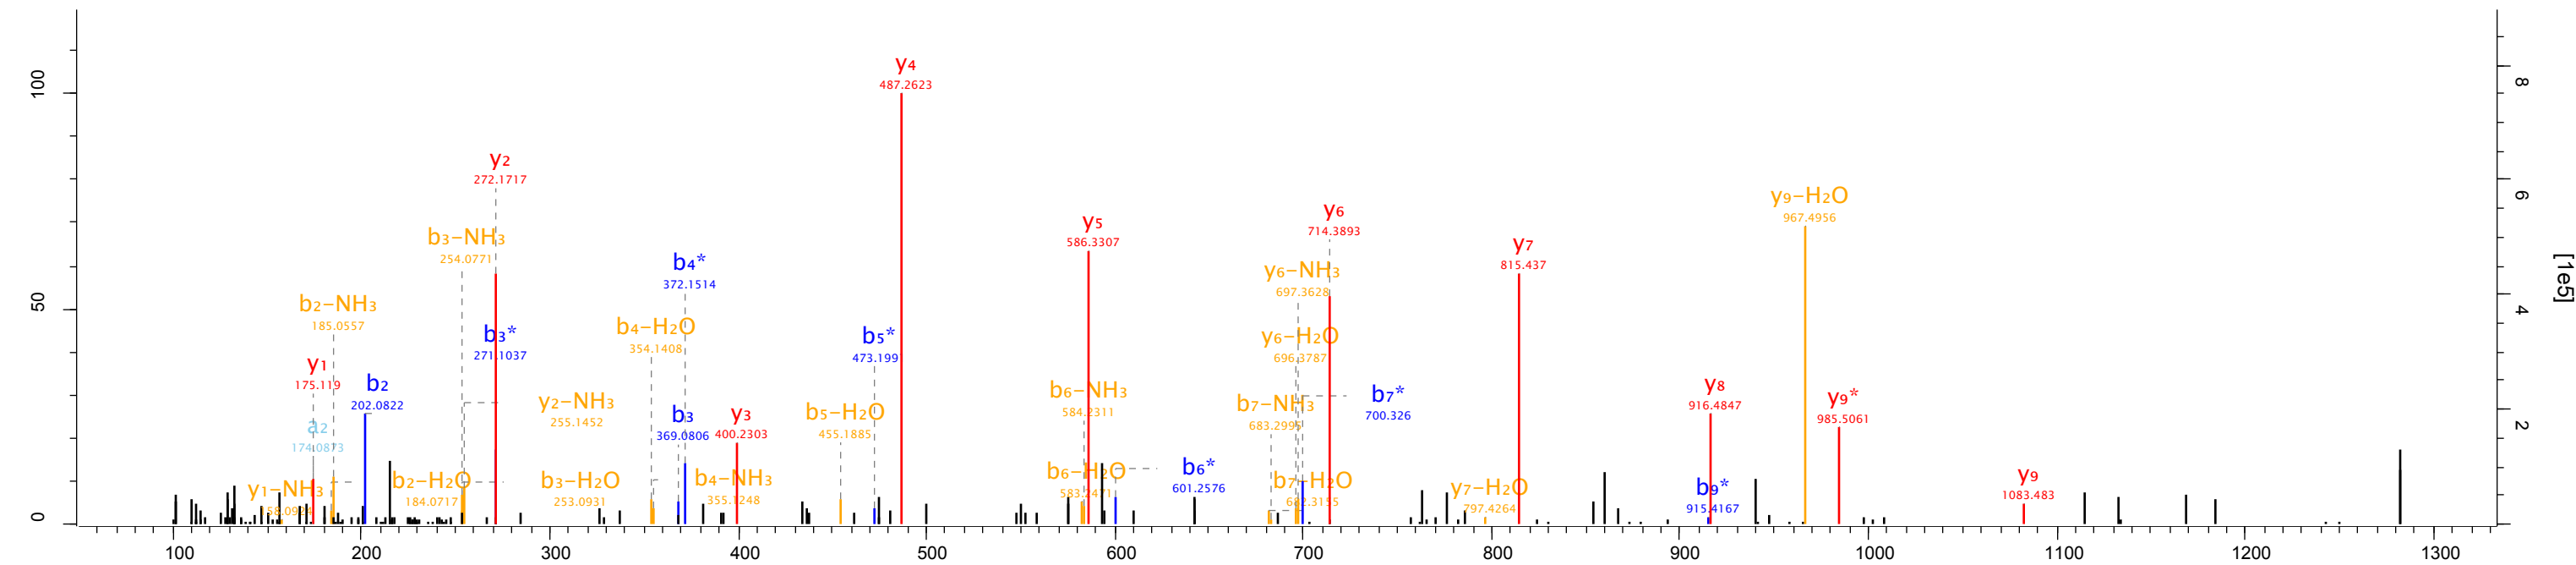

Raw file: 20150812\_A375SR\_Phospho\_BR1\_05  
 Scan: 3816 Method: FTMS; HCD Score: 92.43 m/z: 483.57 Gene names: LARP4B

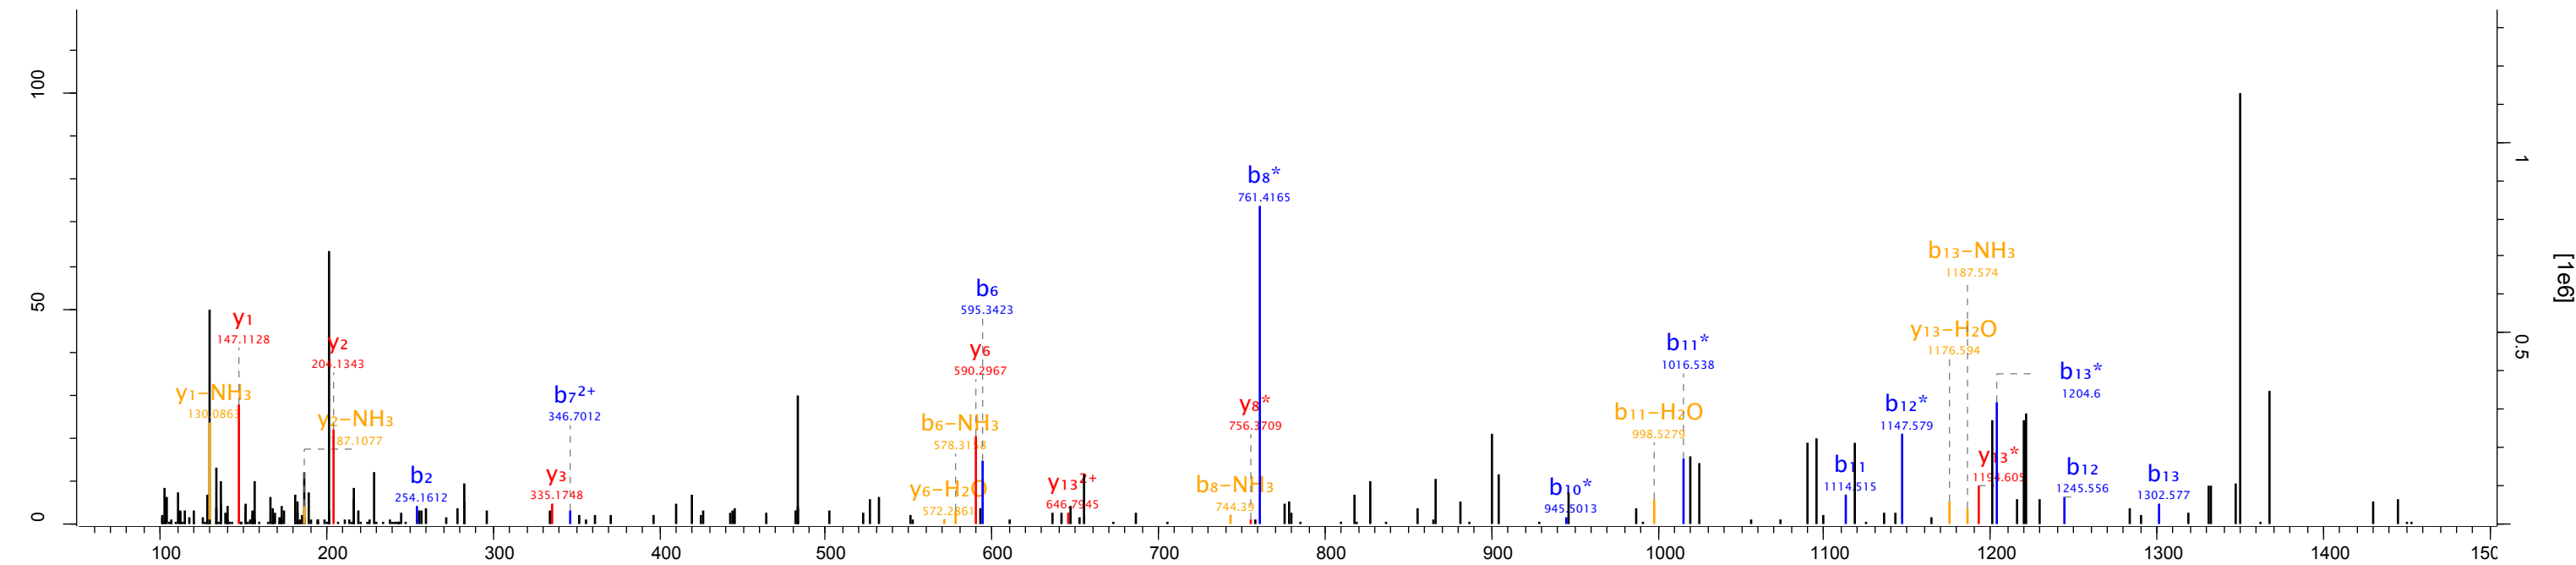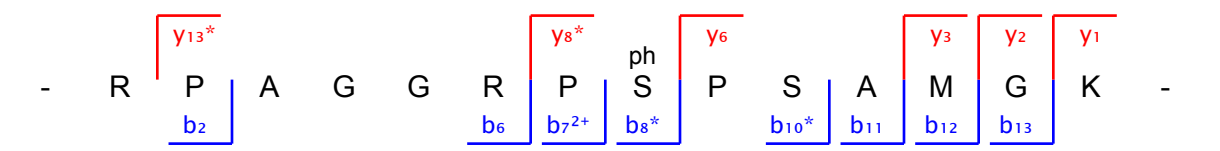



Raw file: 20150812\_A375SR\_Phospho\_BR1\_05  
 Scan: 4126 Method: FTMS; HCD Score: 109.54 m/z: 755.79 Gene names: CD276

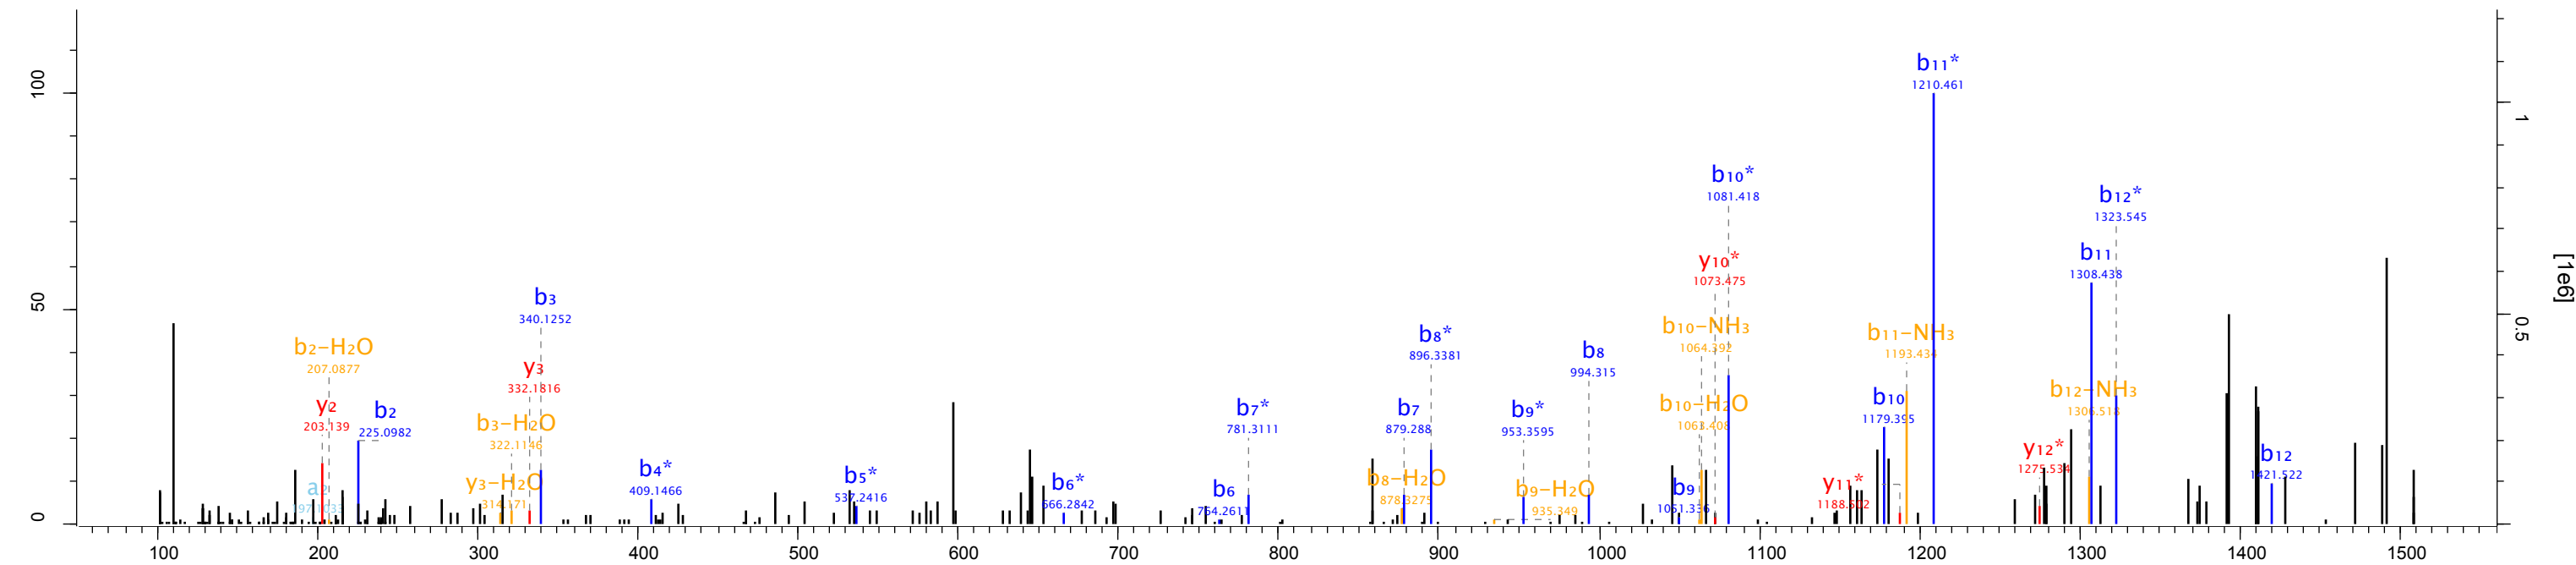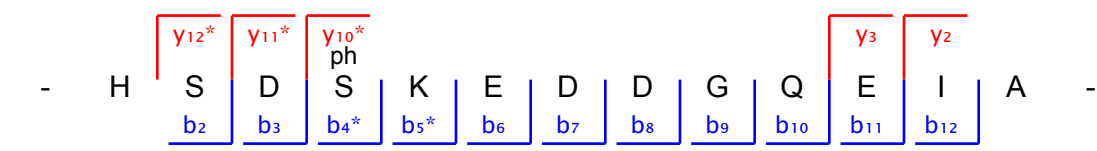

Raw file  
 20150812\_A375SR\_Phospho\_BR1\_05  
 Scan 4226 Method FTMS; HCD Score 116.36 m/z 656.79 Gene names BCL9L

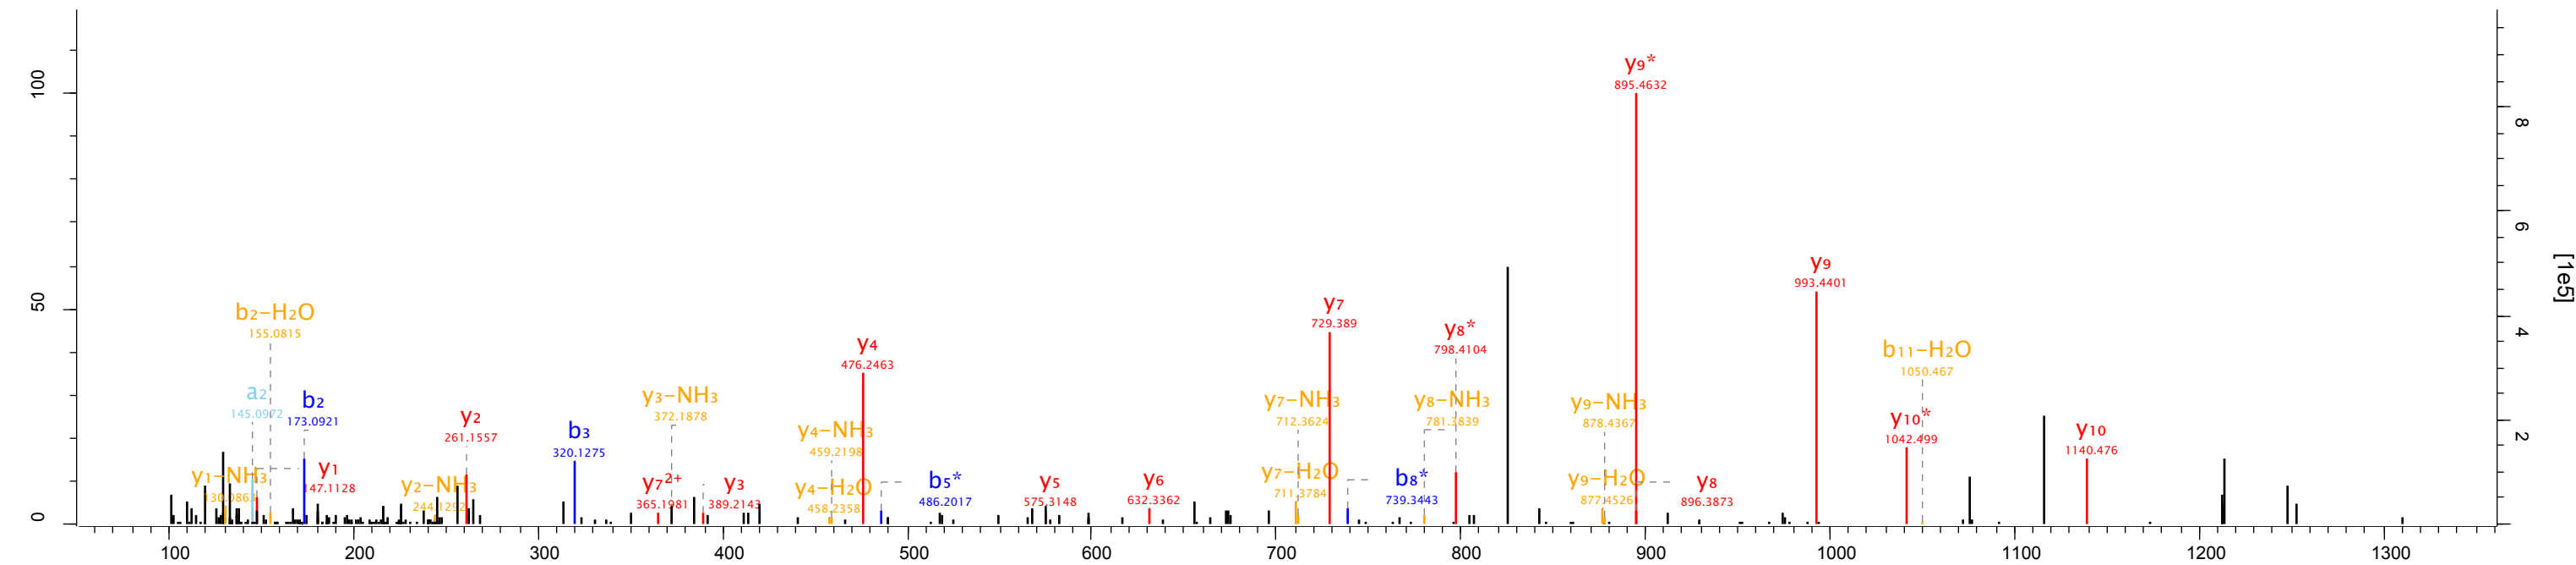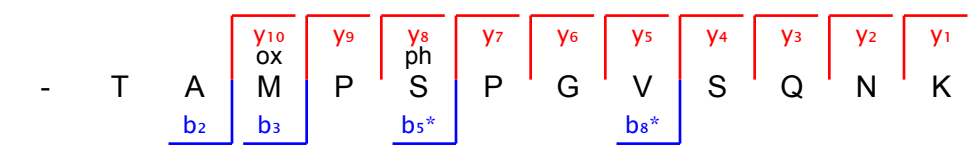

Raw file: 20150812\_A375SR\_Phospho\_BR1\_05  
 Scan: 4326 Method: FTMS; HCD Score: 97.46 m/z: 566.25 Gene names: CEP170

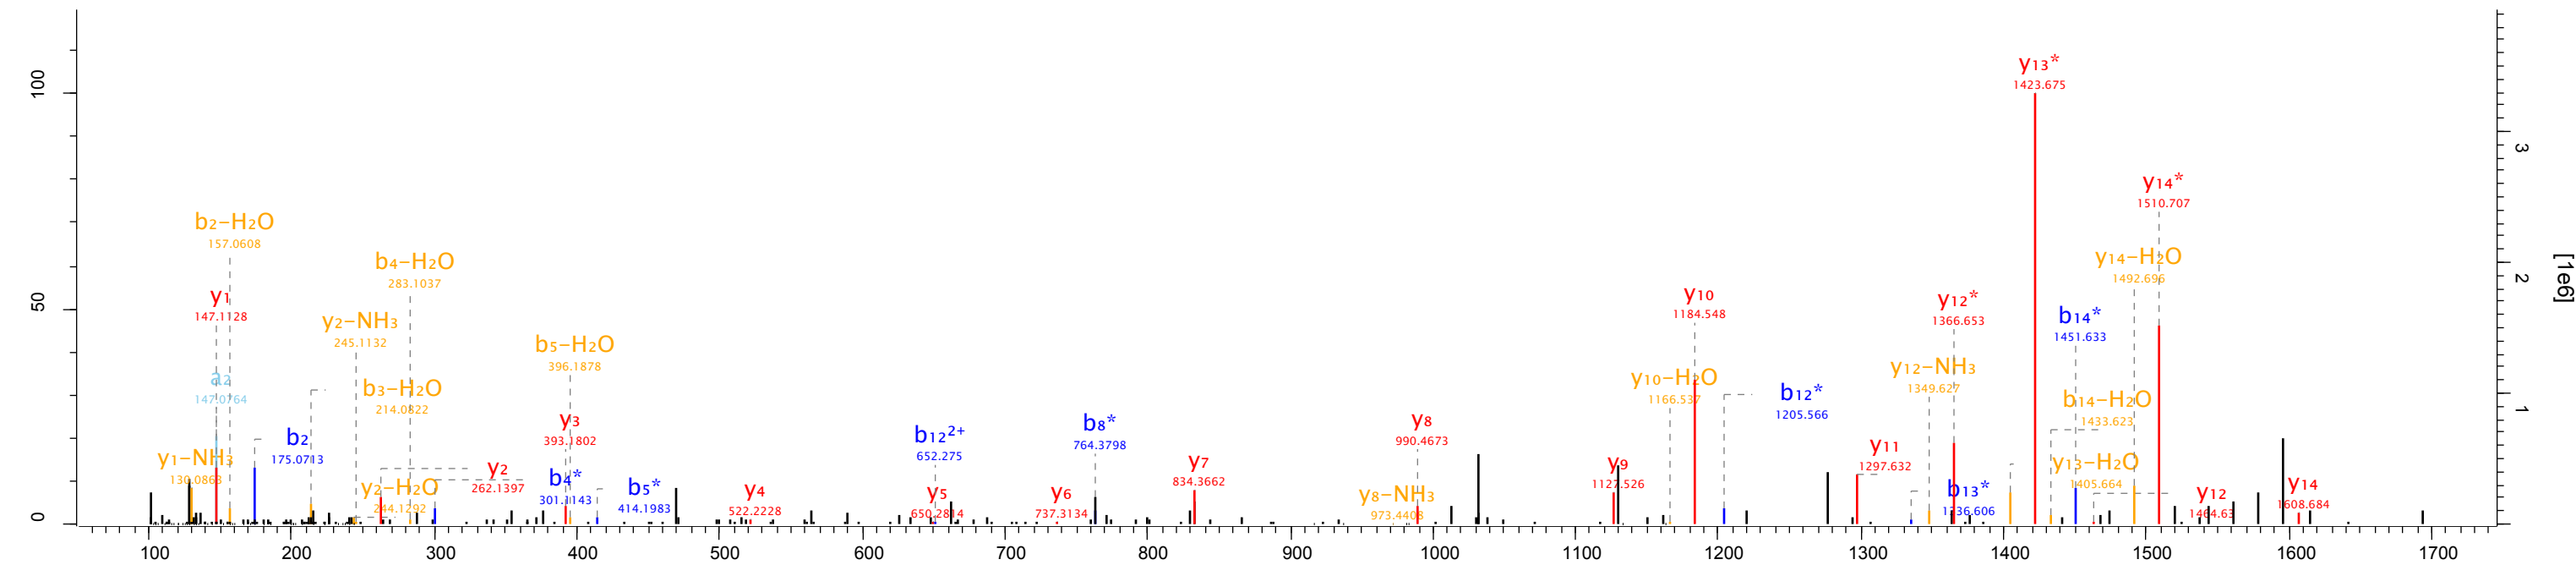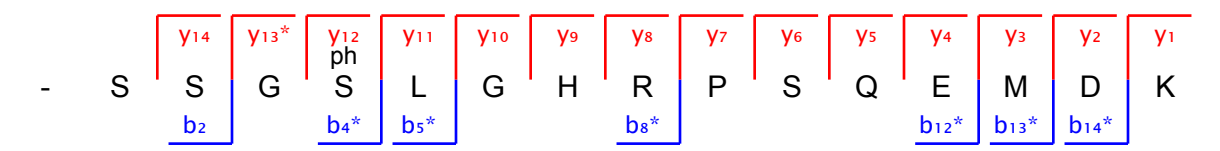

Raw file 20150812\_A375SR\_Phospho\_BR1\_05 Scan 4376 Method FTMS; HCD Score 238.3 m/z 843.85 Gene names ELF4

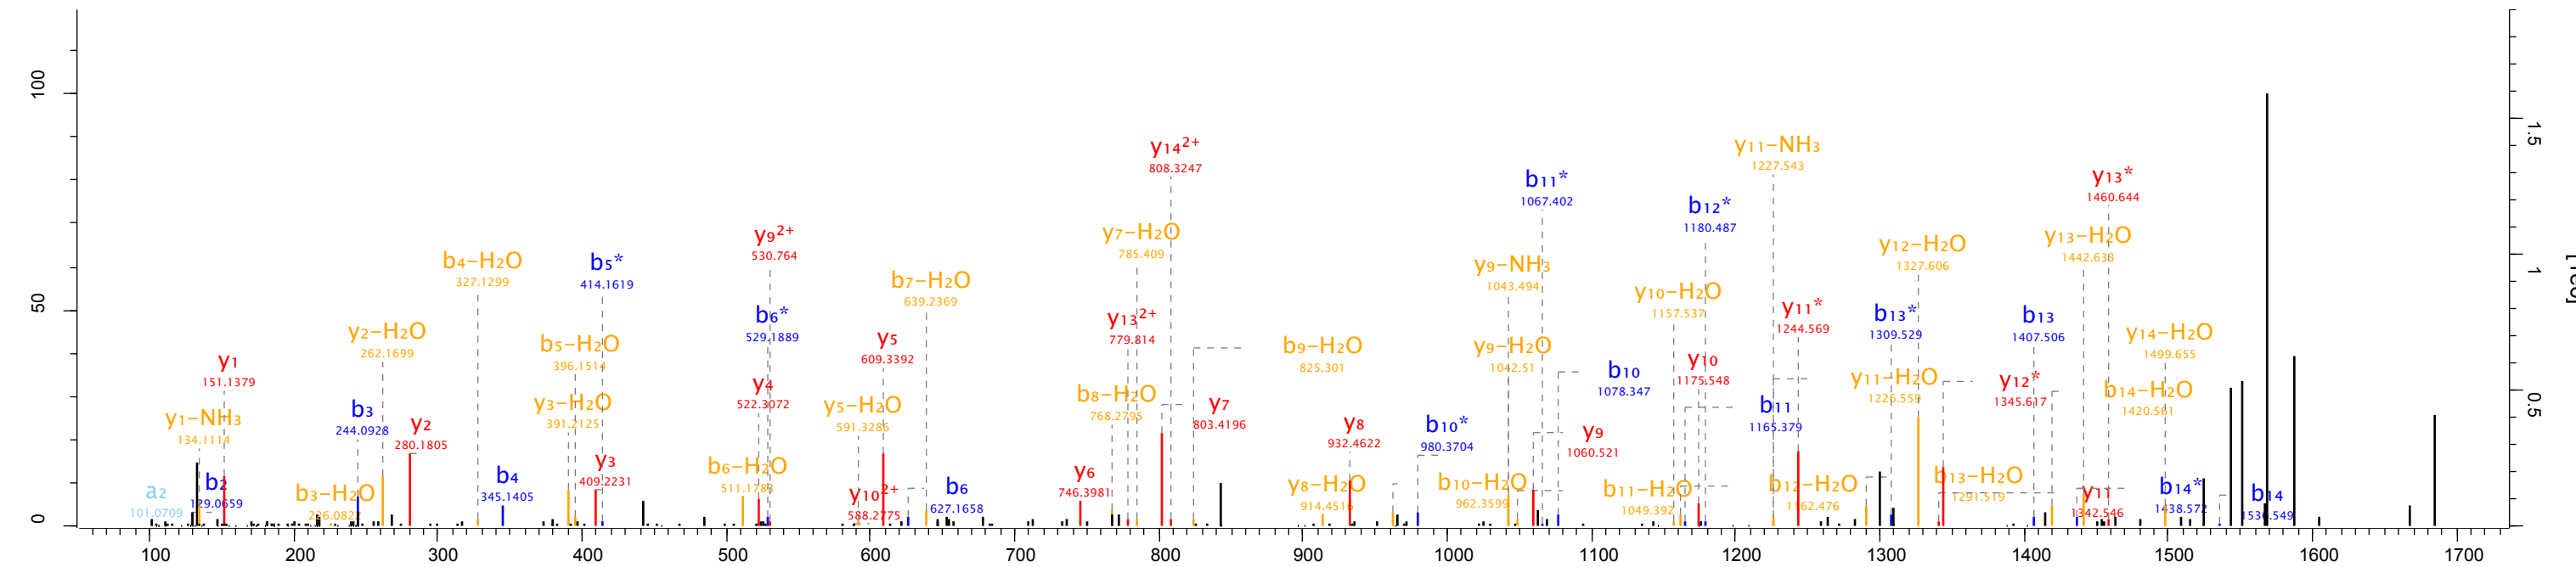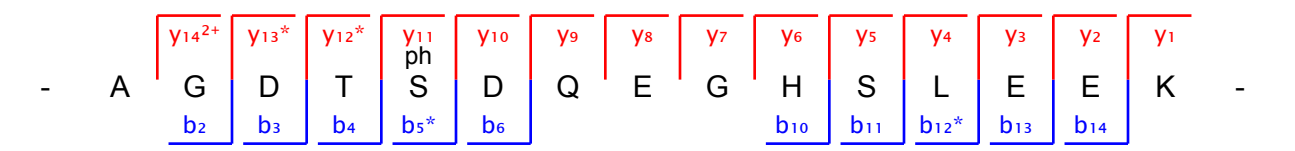

Raw file: 20150812\_A375SR\_Phospho\_BR1\_05  
 Scan: 4456 Method: FTMS; HCD Score: 163.84 m/z: 698.78 Gene names: SGTB

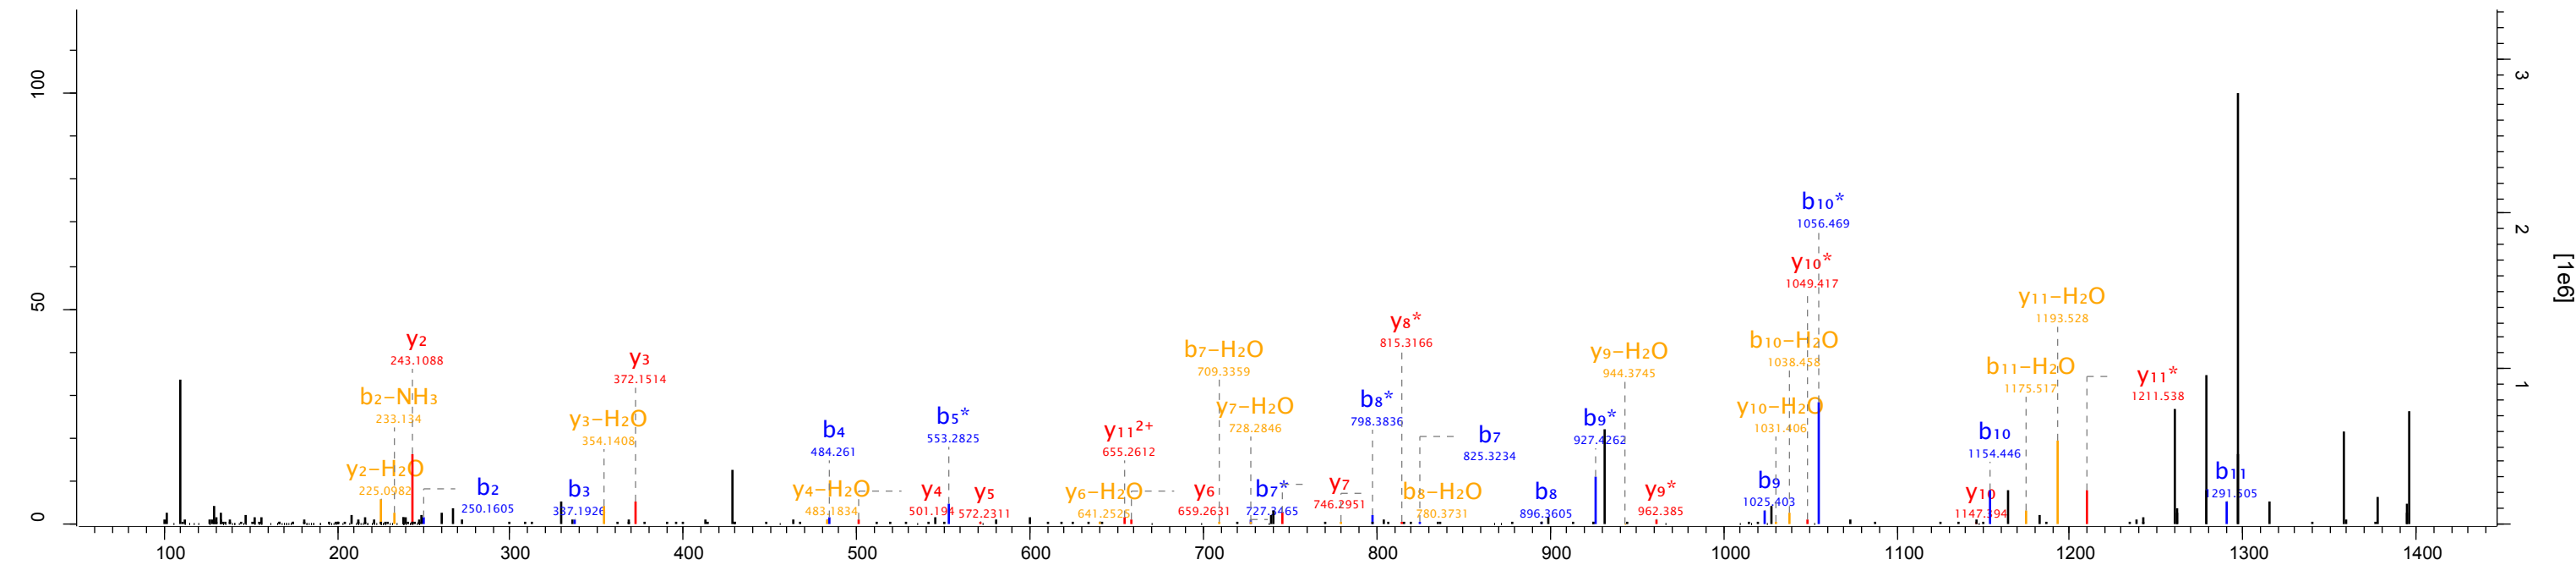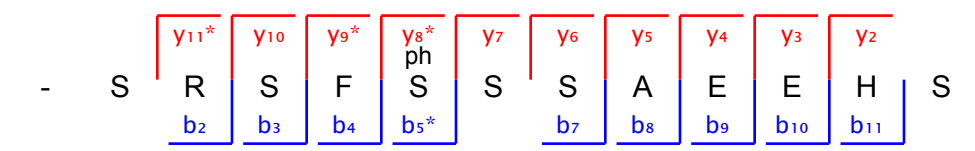

Raw file: 20150812\_A375SR\_Phospho\_BR1\_05  
 Scan: 4896 Method: FTMS; HCD Score: 66.22 m/z: 437.88 Gene names: SLC4A7

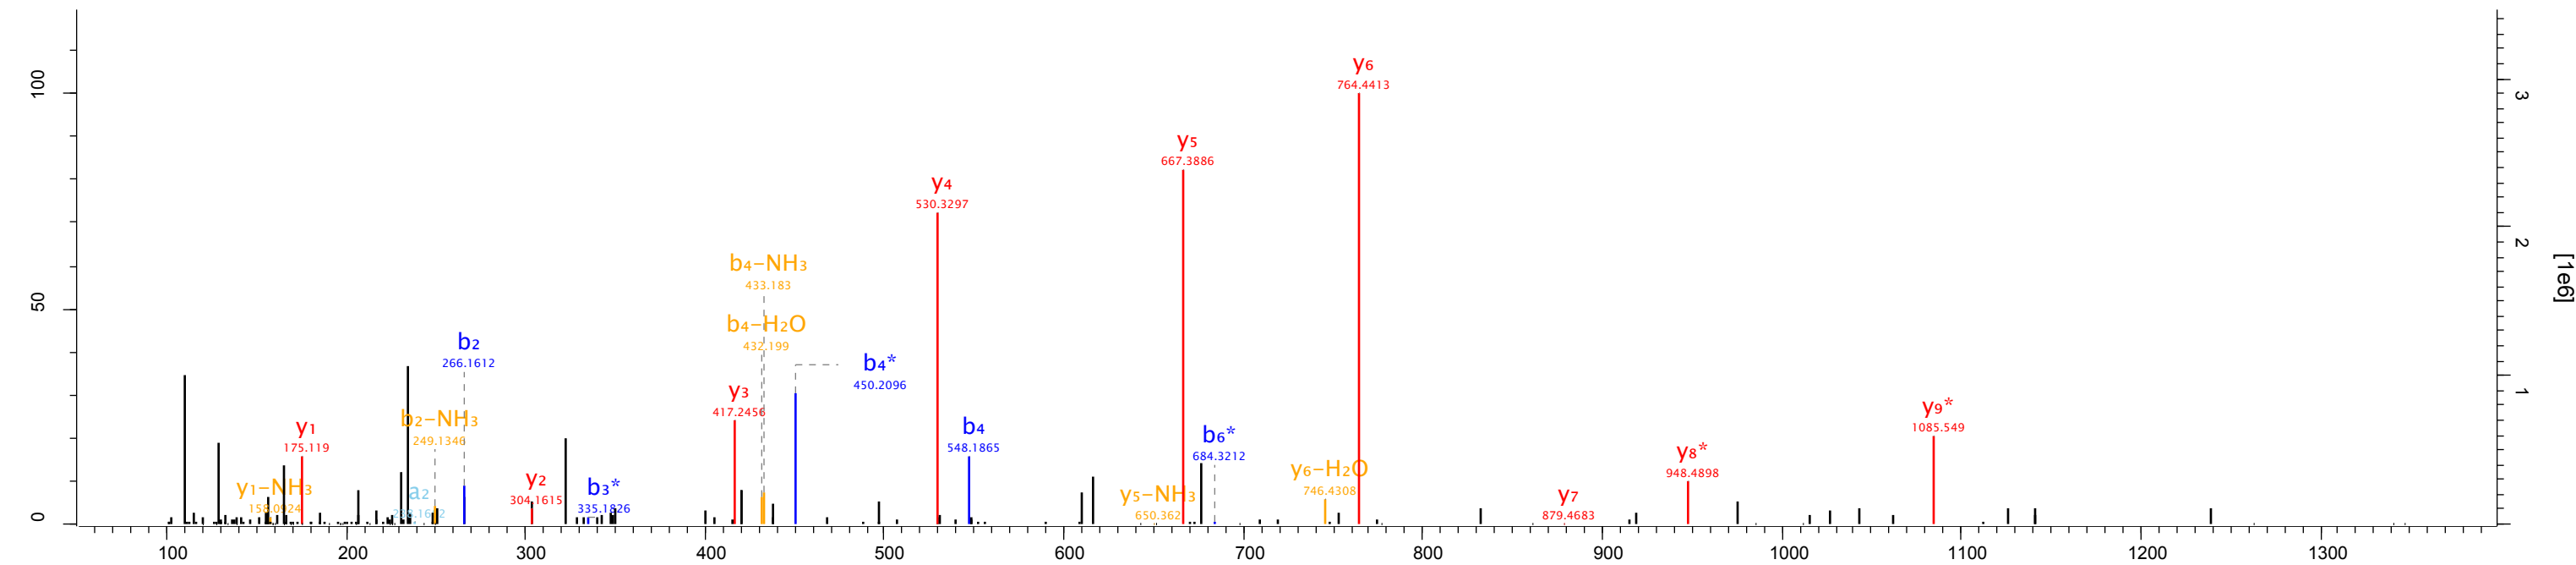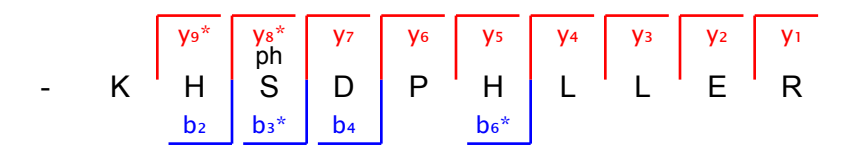

Raw file: 20150812\_A375SR\_Phospho\_BR1\_05  
 Scan: 4936 Method: FTMS; HCD Score: 177.22 m/z: 966.85 Gene names: PURB

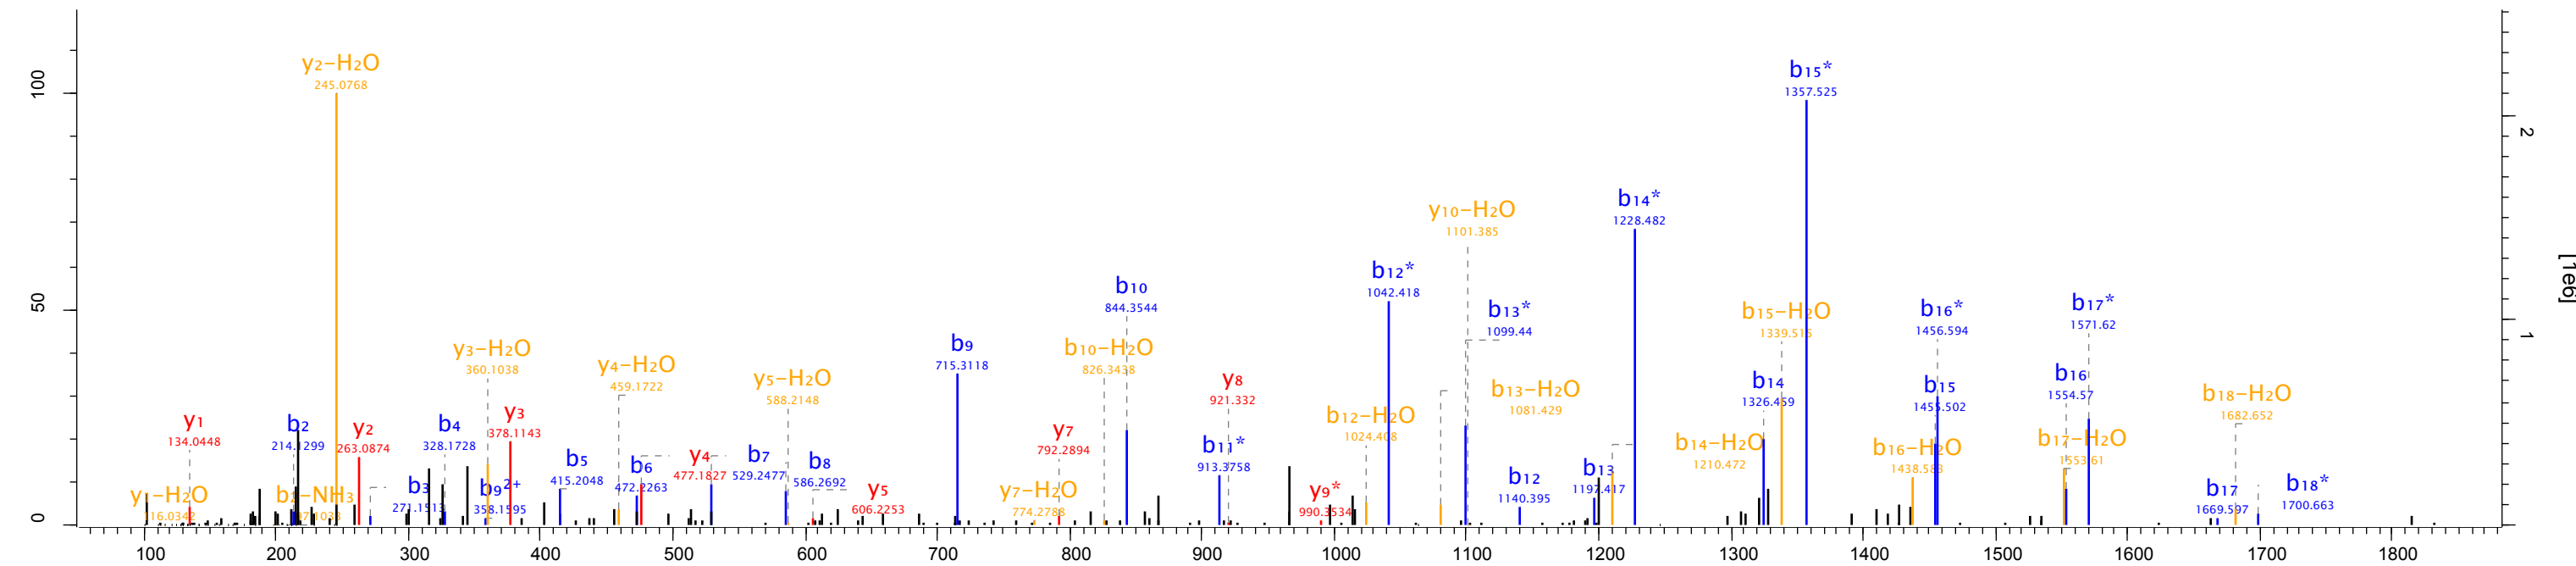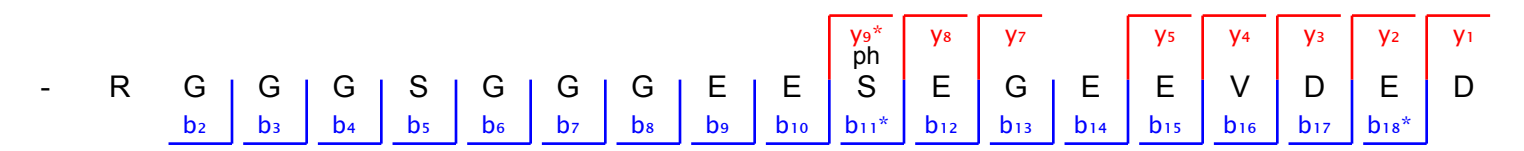

Raw file: 20150812\_A375SR\_Phospho\_BR1\_05  
 Scan: 5716 Method: FTMS; HCD Score: 183.36 m/z: 794.81 Gene names: C17orf75

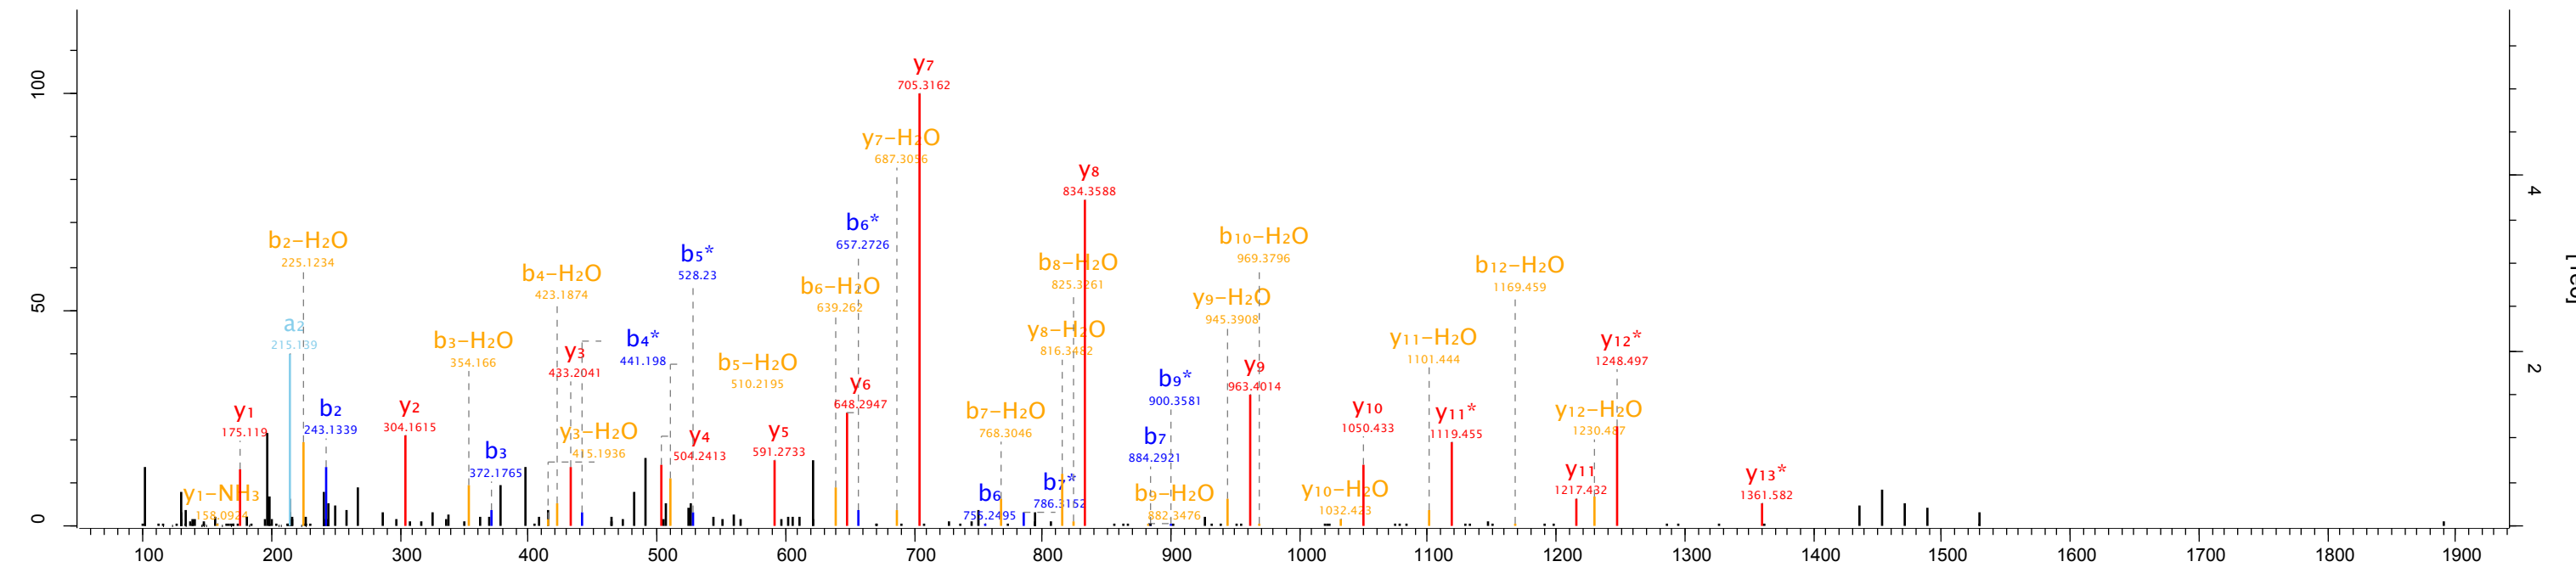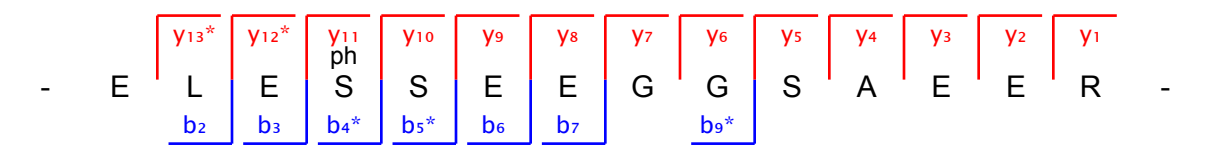



Raw file: 20150812\_A375SR\_Phospho\_BR1\_05  
 Scan: 6166 Method: FTMS; HCD Score: 154.46 m/z: 776.84 Gene names: LRRFIP2

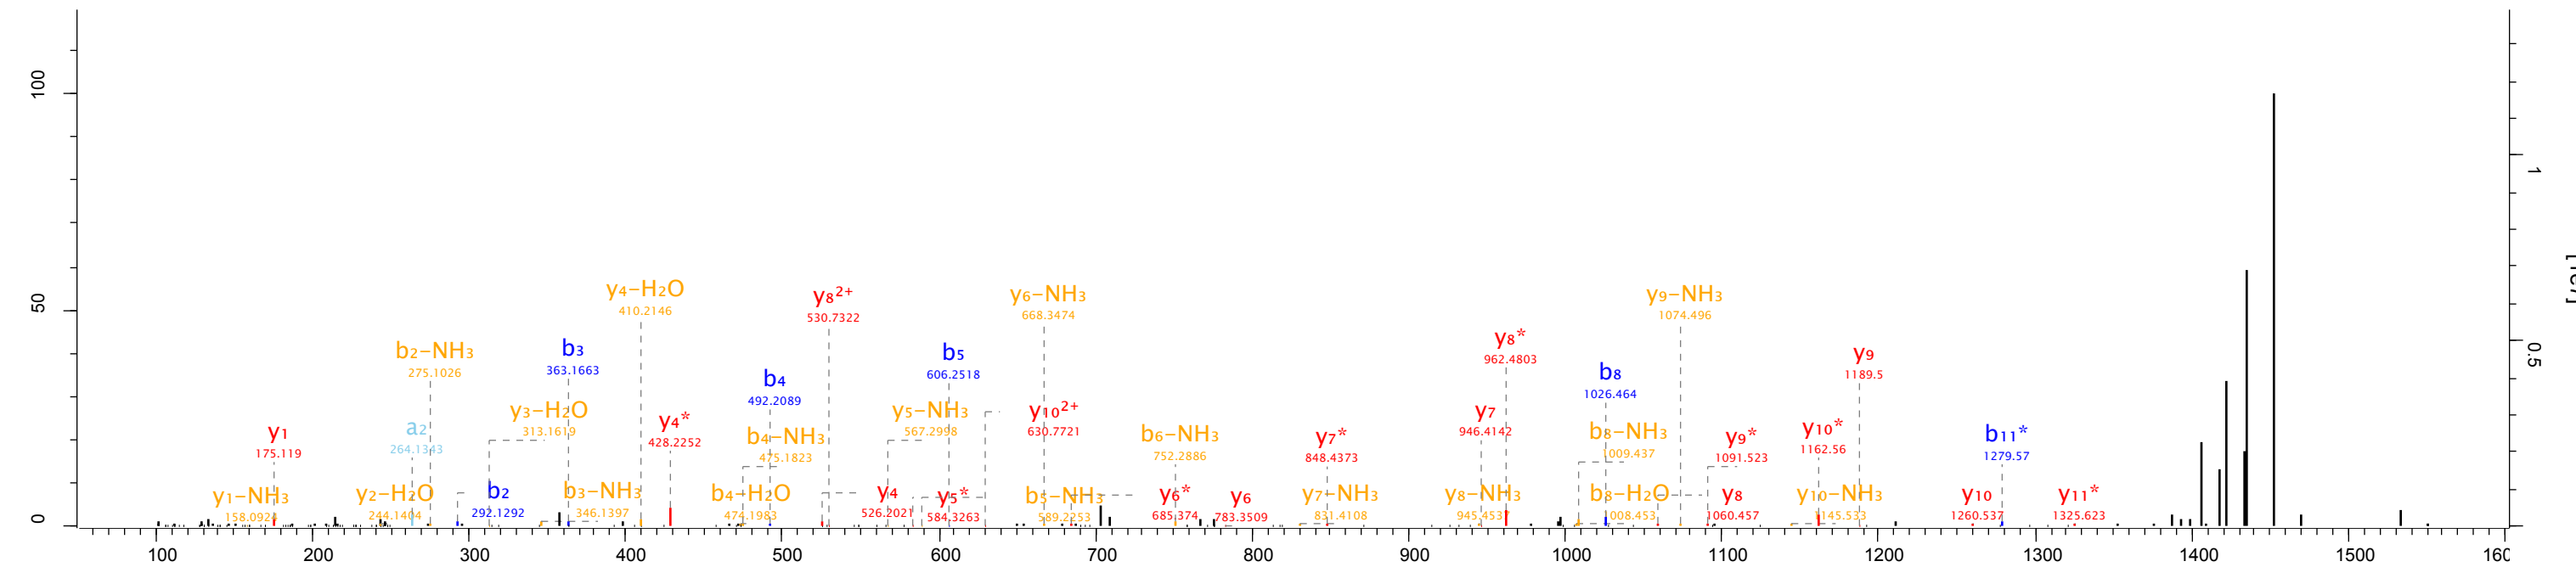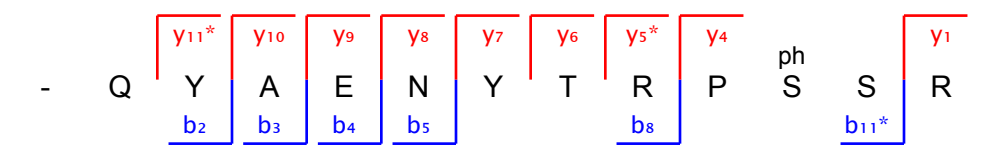

Raw file 20150812\_A375SR\_Phospho\_BR1\_05 Scan 6286 Method FTMS; HCD Score 159.69 m/z 744.31 Gene names RBM34

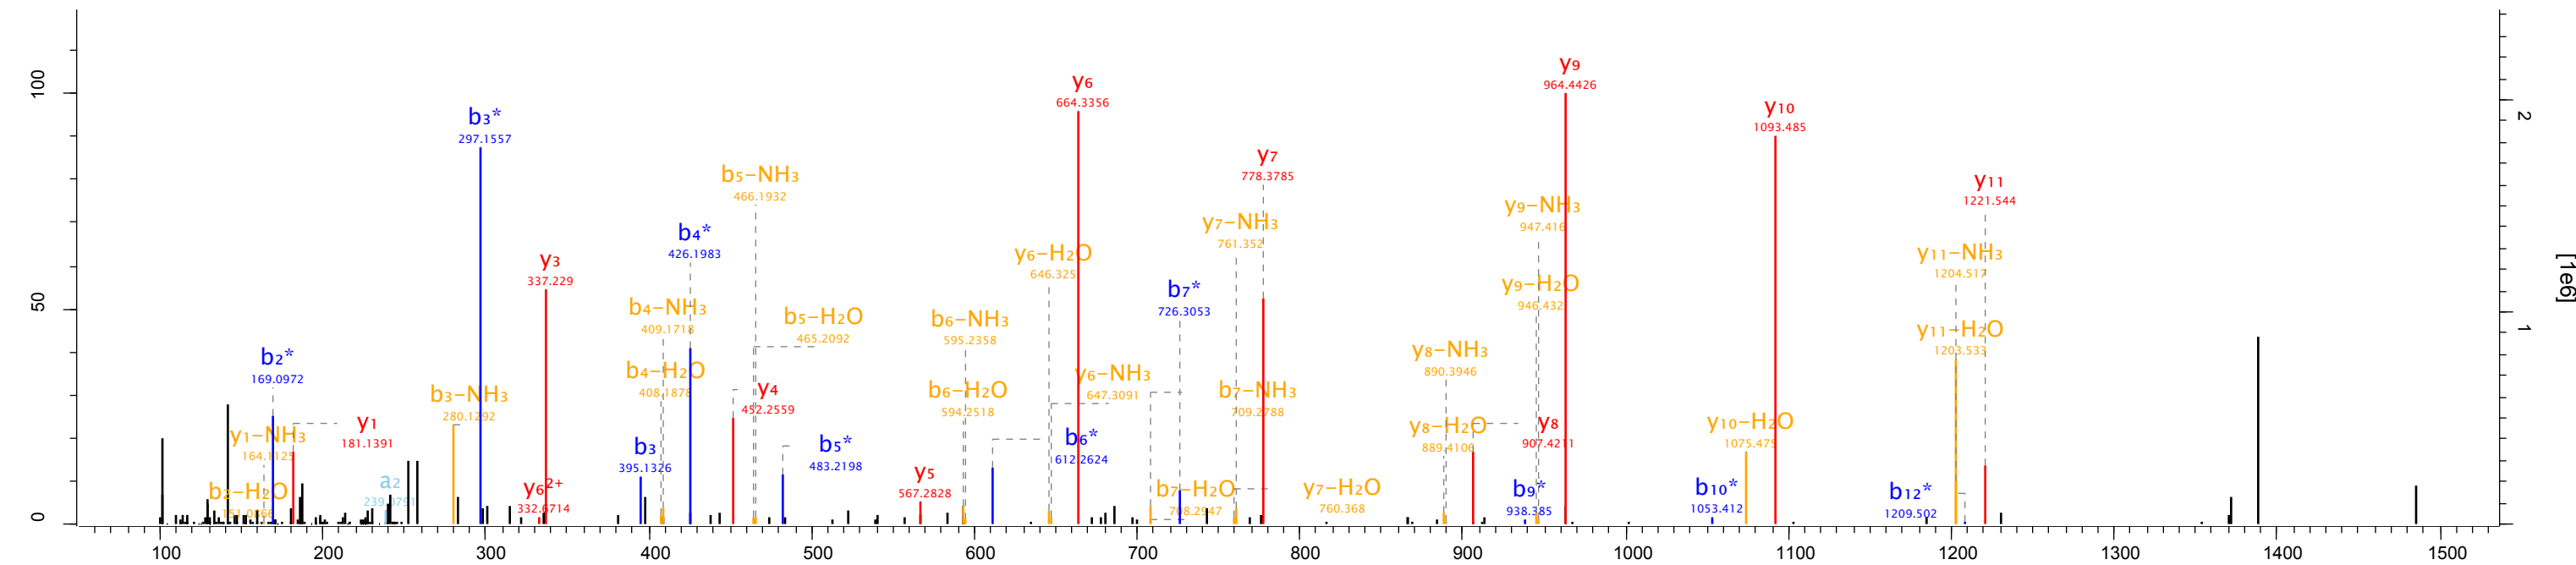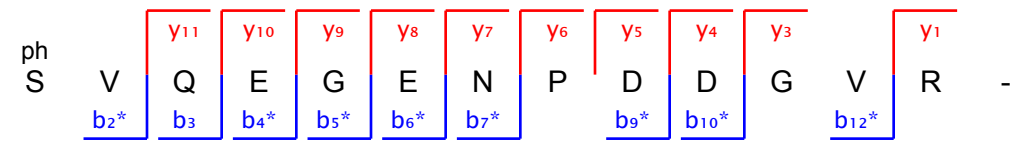

Raw file 20150812\_A375SR\_Phospho\_BR1\_05 Scan 7076 Method FTMS; HCD Score 178.2 m/z 724.38 Gene names ZFP91

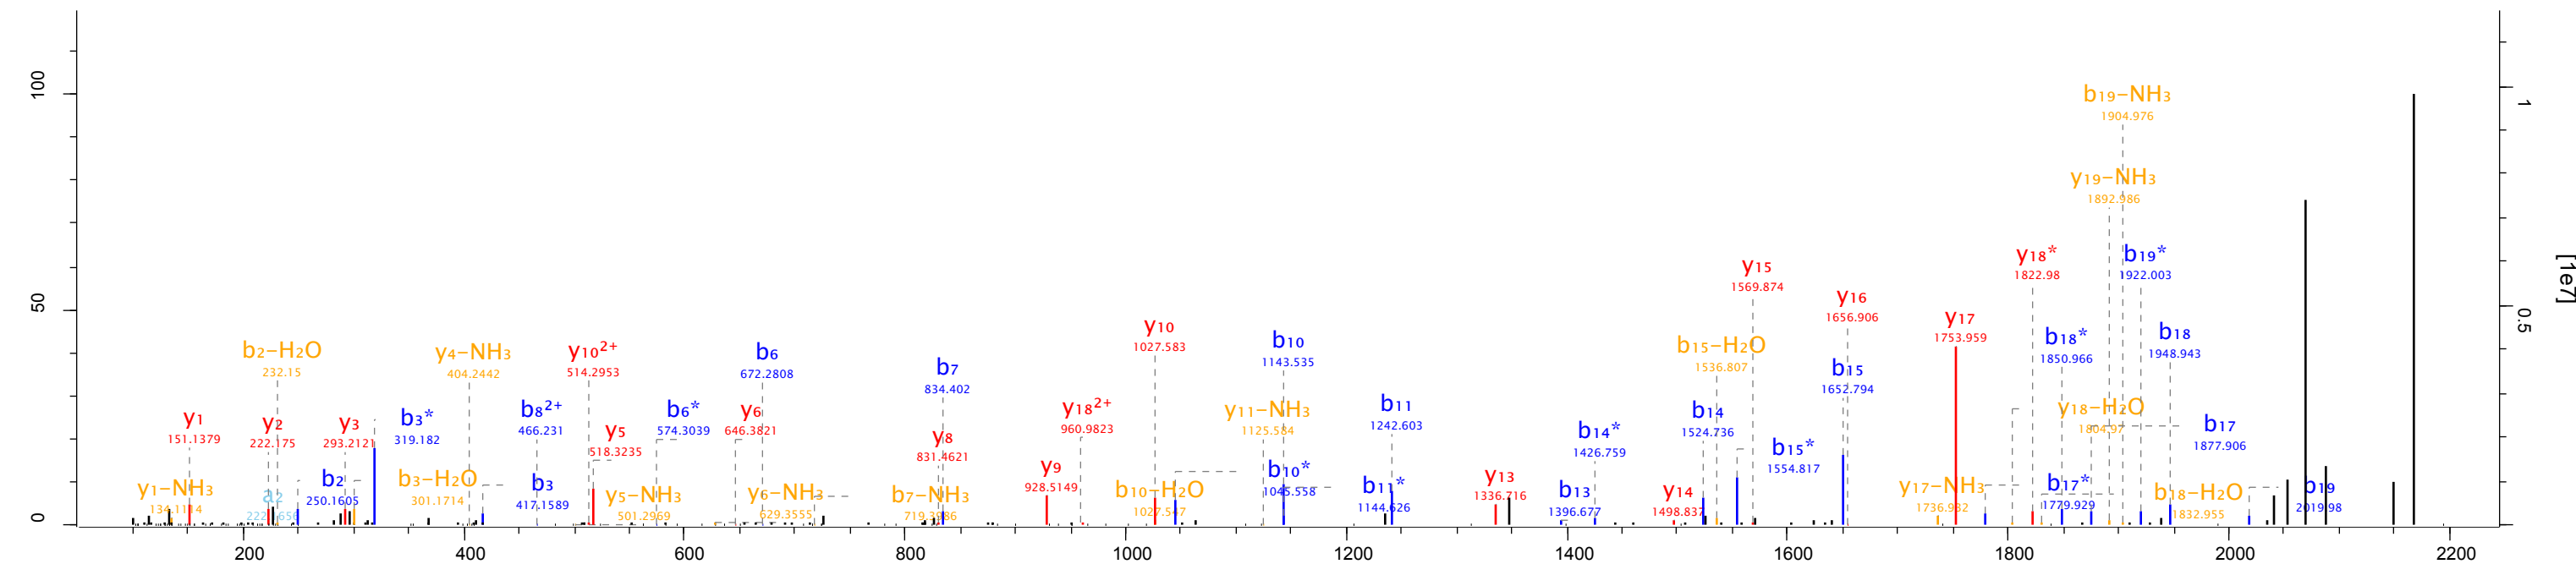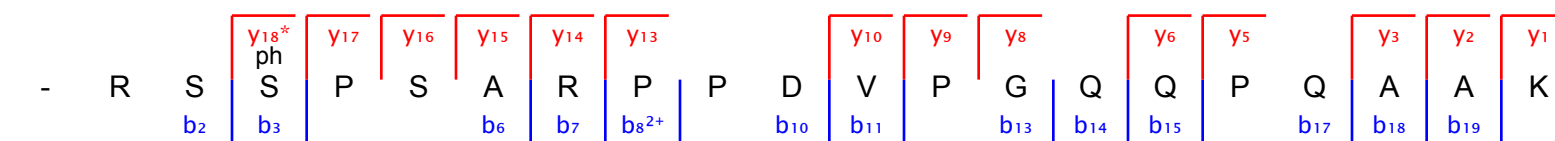

Raw file: 20150812\_A375SR\_Phospho\_BR1\_05  
 Scan: 7436 Method: FTMS; HCD Score: 202.68 m/z: 516.73 Gene names: AKT1S1

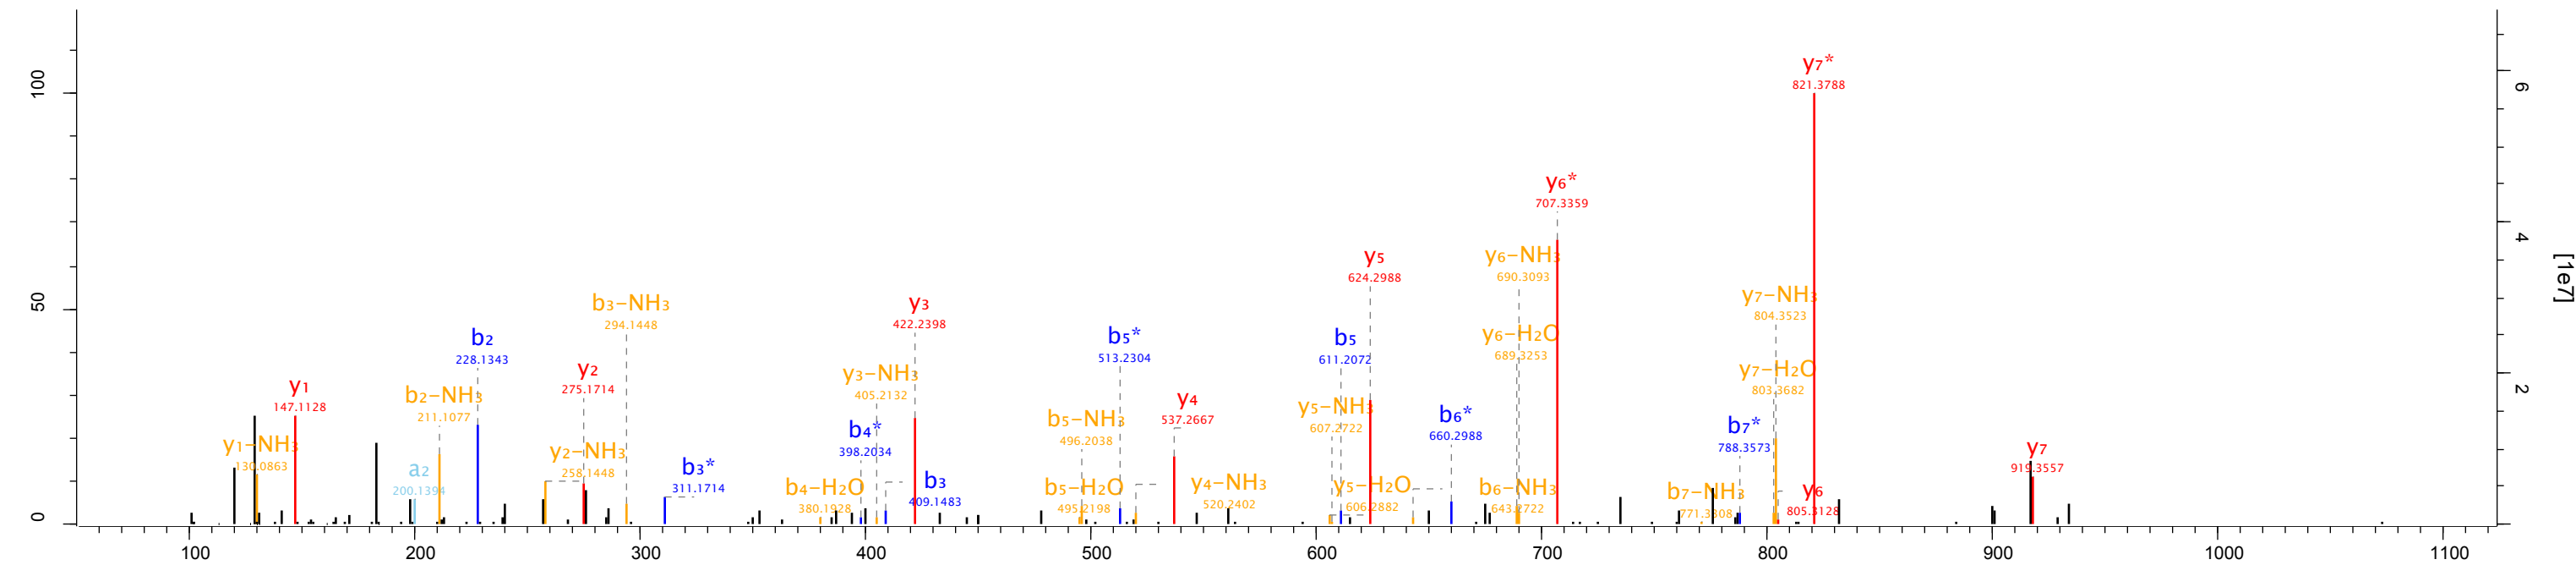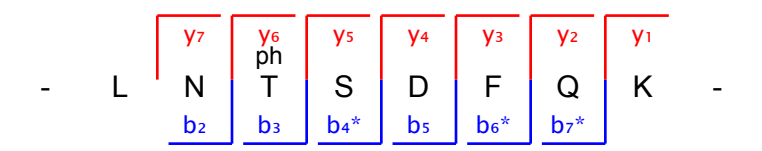

Raw file: 20150812\_A375SR\_Phospho\_BR1\_05  
 Scan: 7586 Method: FTMS; HCD Score: 121.82 m/z: 622.31 Gene names: PPP2R5D

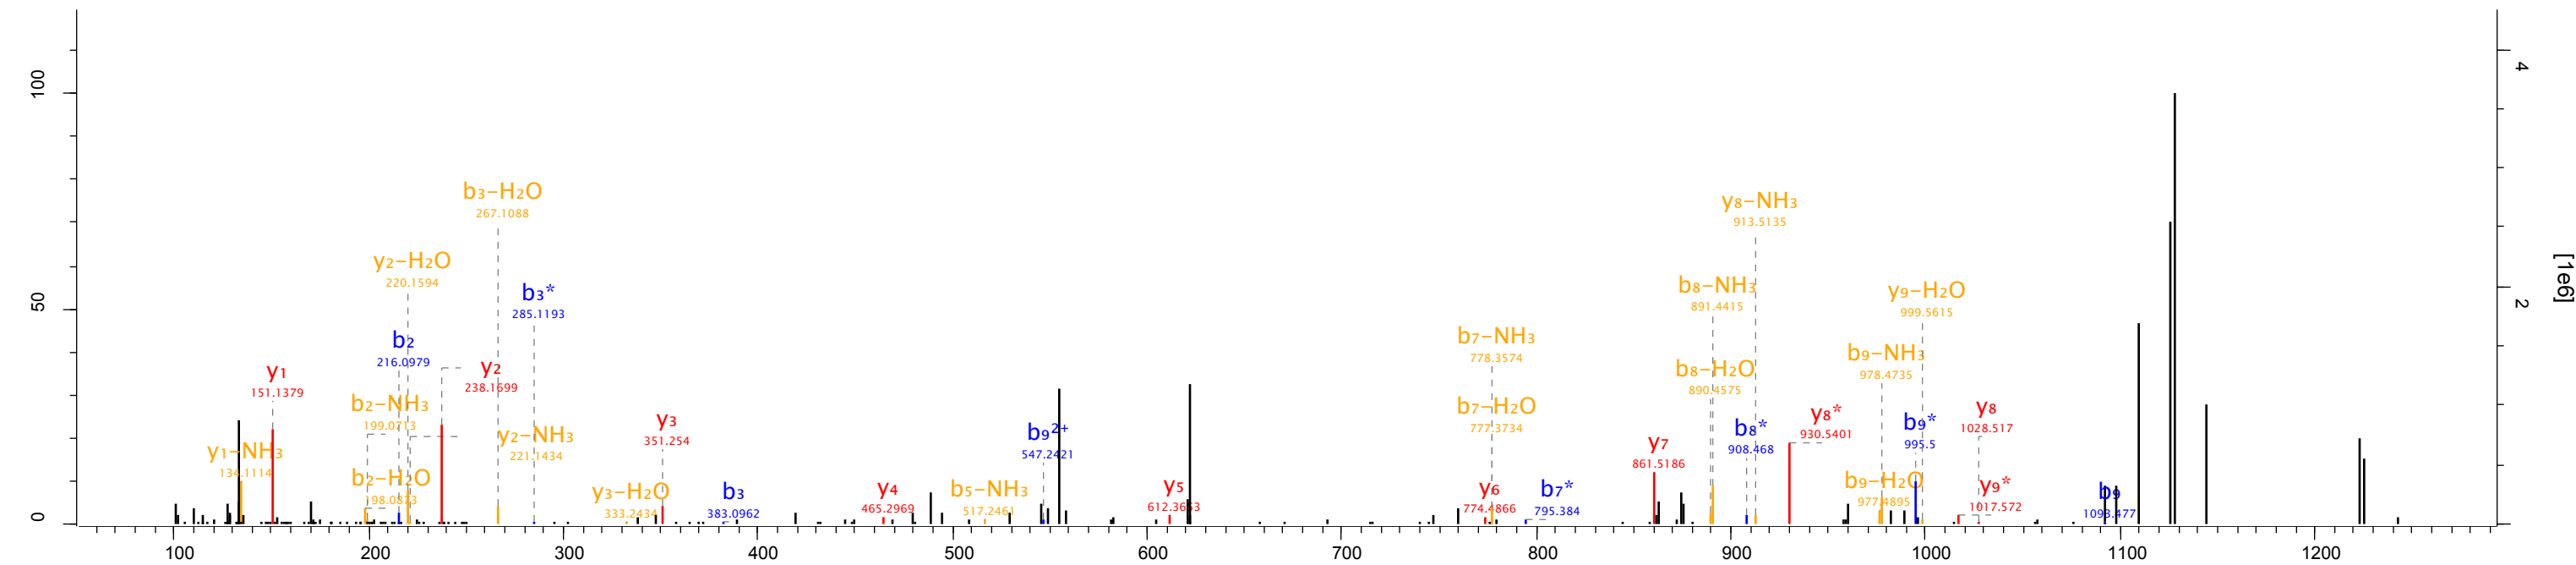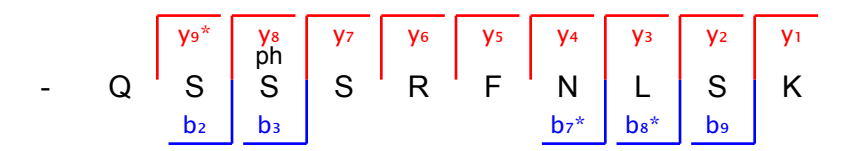

Raw file 20150812\_A375SR\_Phospho\_BR1\_05 Scan 8946 Method FTMS; HCD Score 151.22 m/z 639.29 Gene names CCDC102B

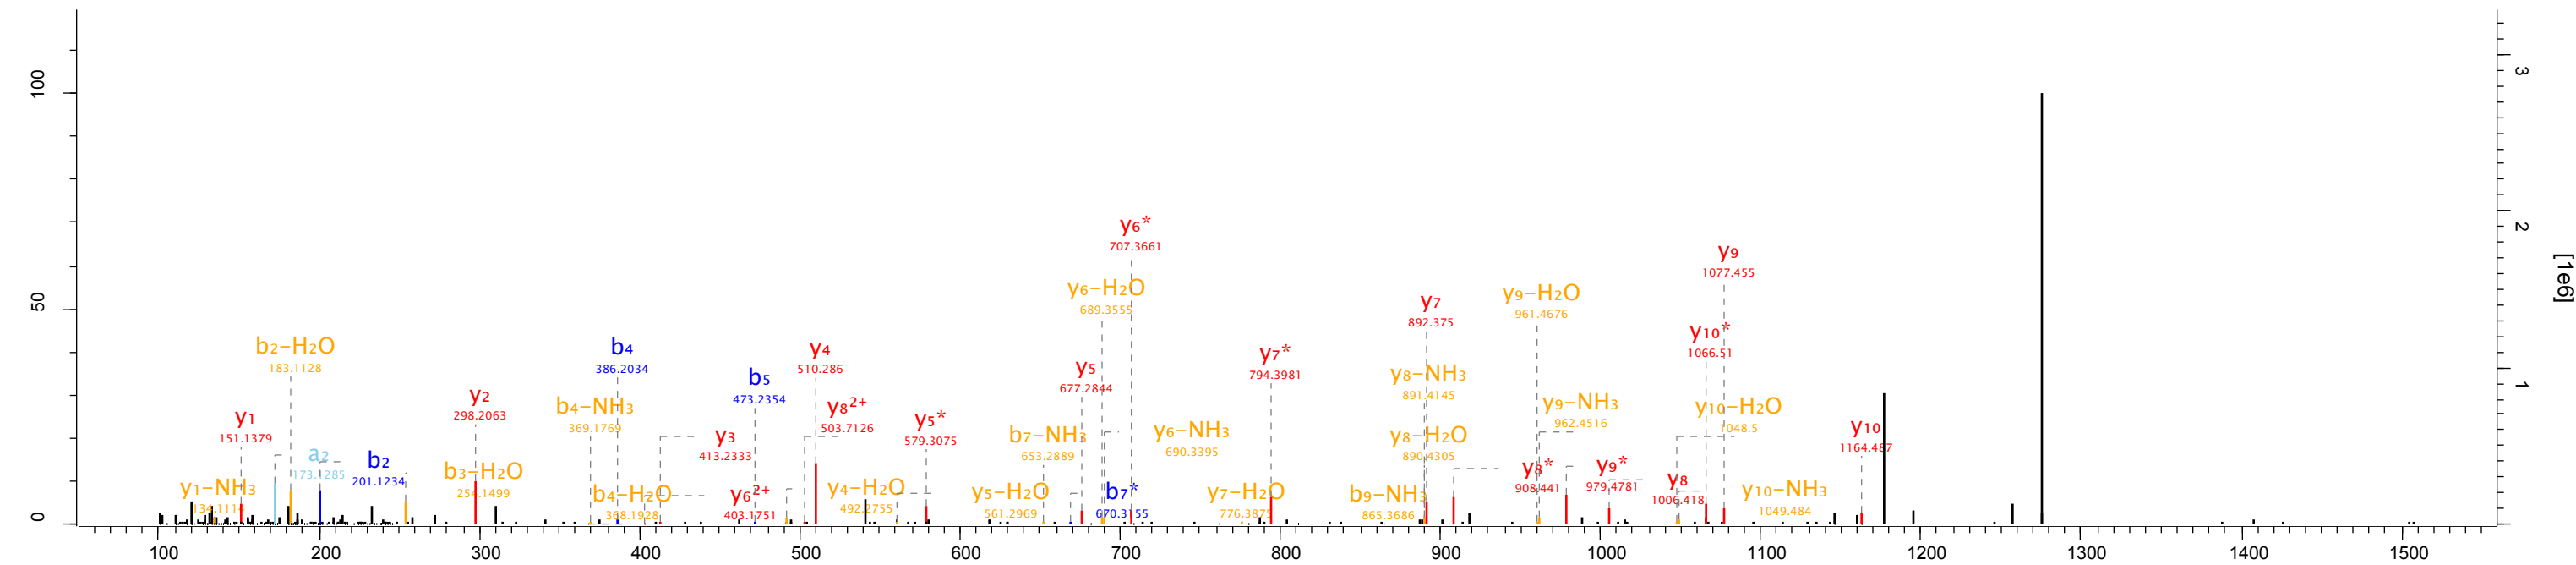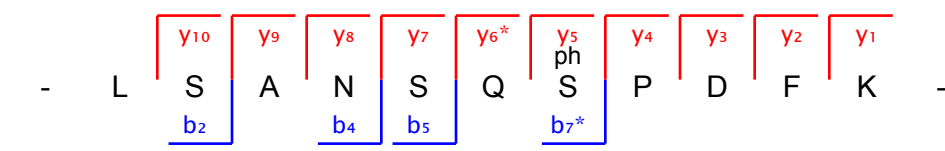

Raw file: 20150812\_A375SR\_Phospho\_BR1\_05  
 Scan: 9056 Method: FTMS; HCD Score: 125.04 m/z: 913.91 Gene names: TLE1

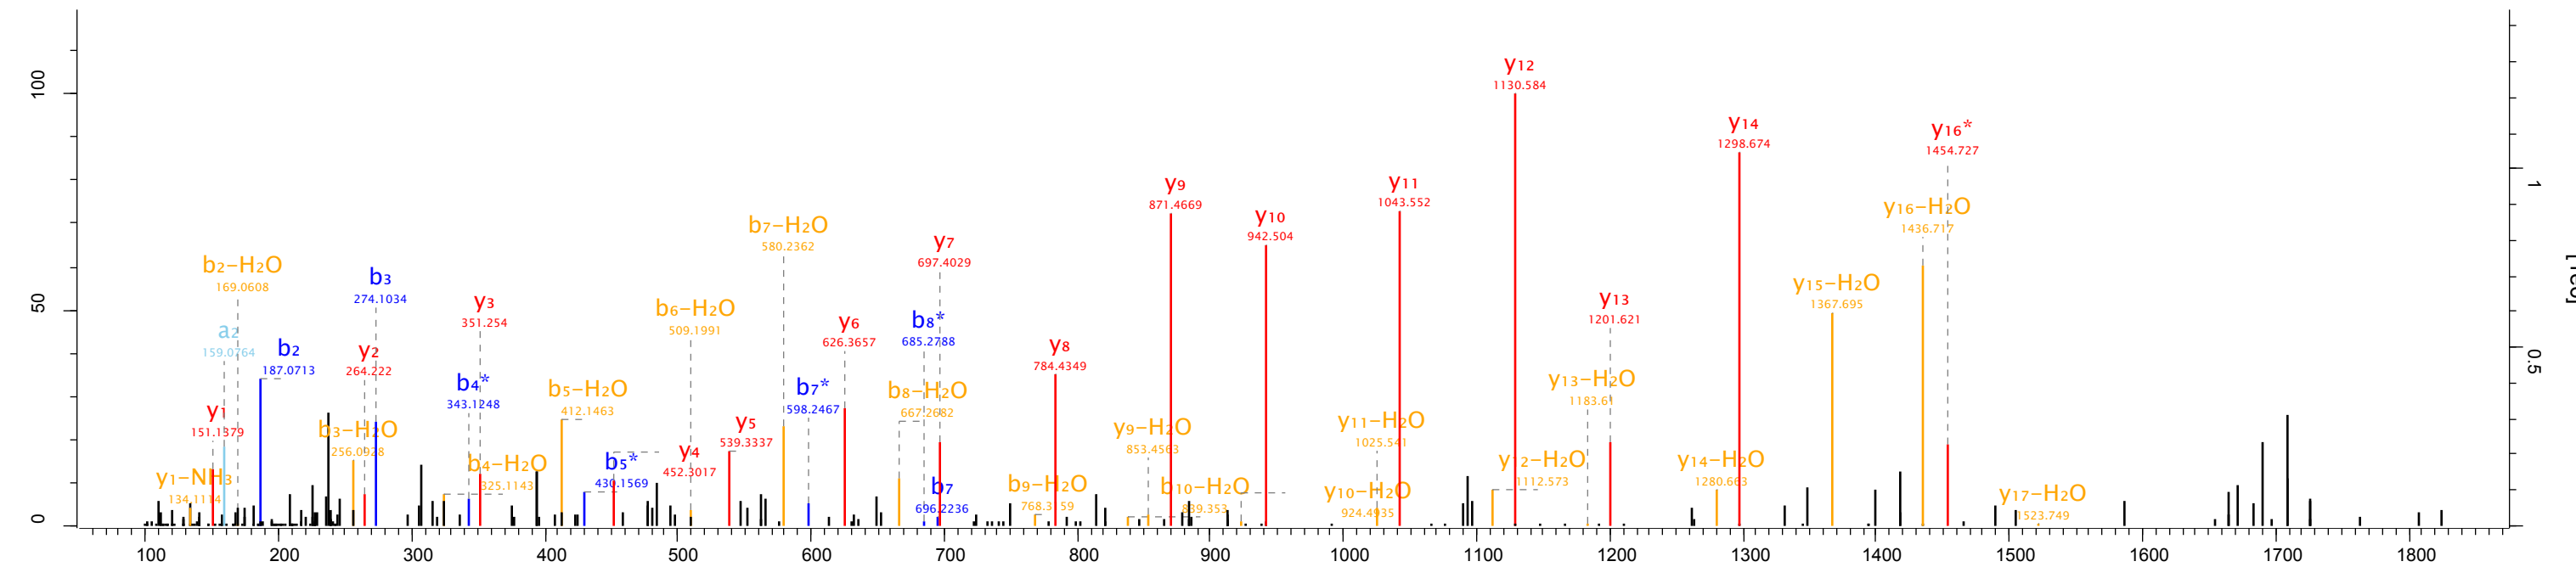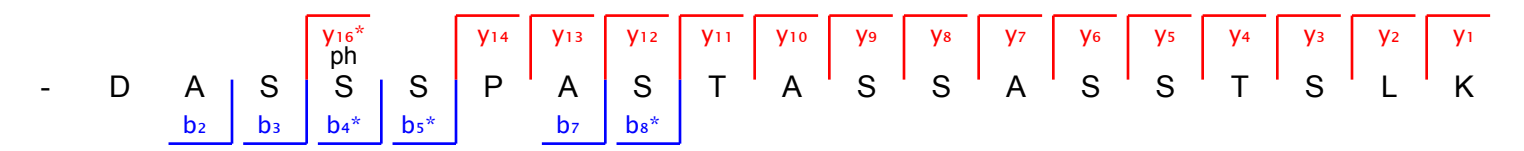

Raw file: 20150812\_A375SR\_Phospho\_BR1\_05  
 Scan: 9296 Method: FTMS; HCD Score: 123.44 m/z: 689.31 Gene names: EEF1D

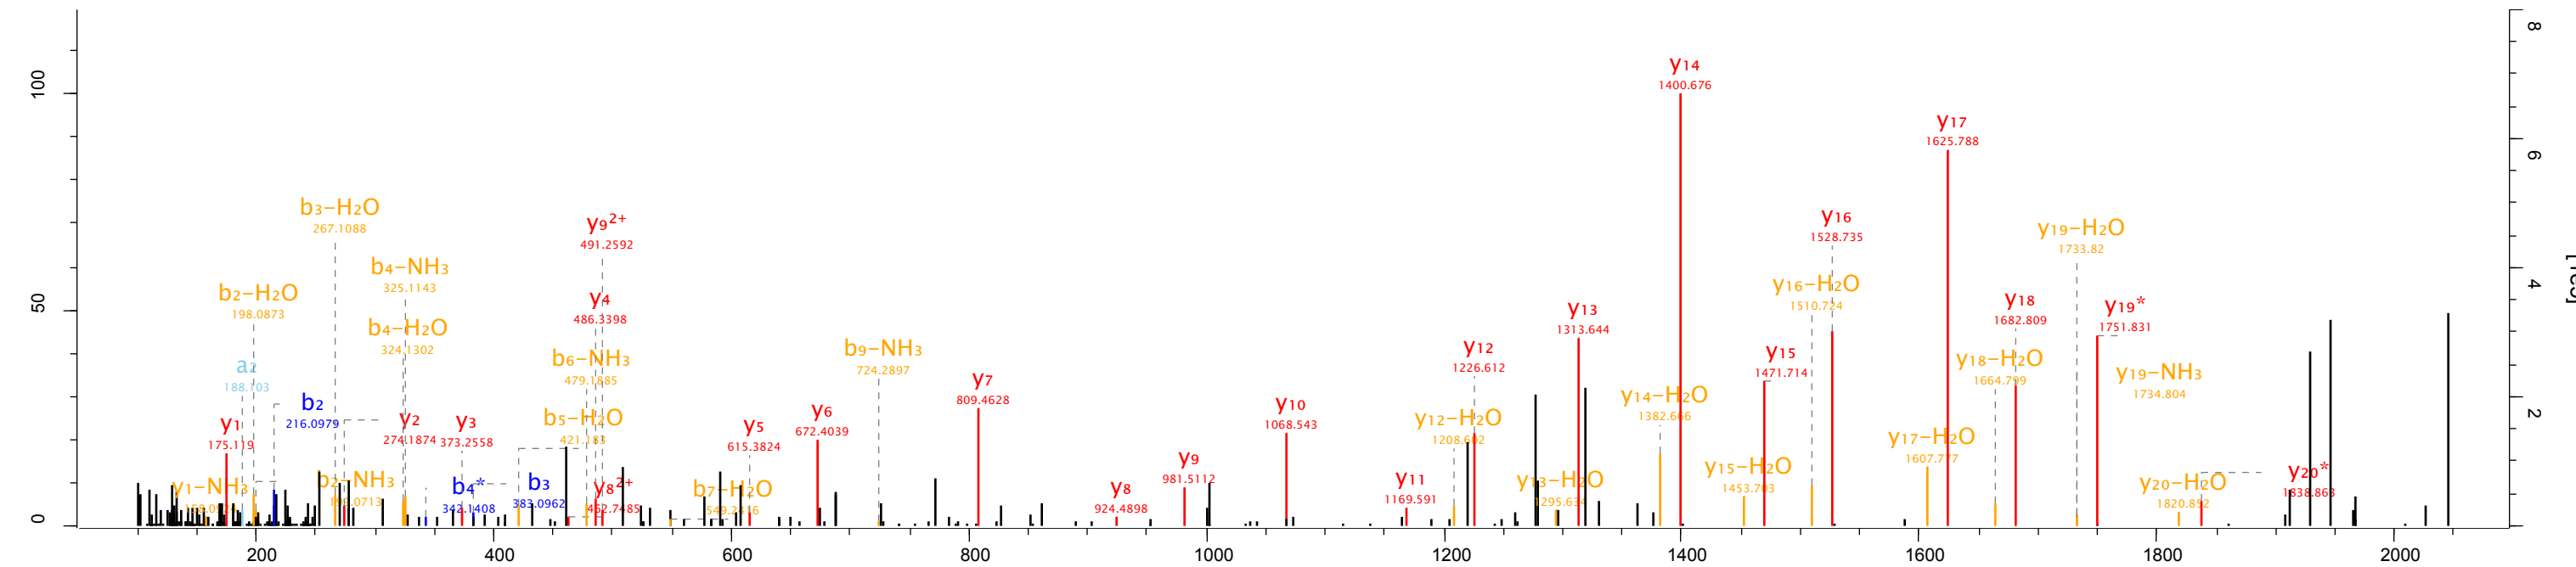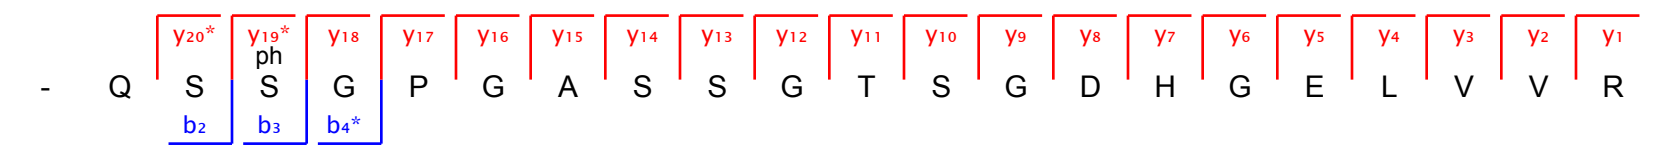



Raw file 20150812\_A375SR\_Phospho\_BR1\_06 Scan 11446 Method FTMS; HCD Score 139.31 m/z 831.99 Gene names PRKAR2B

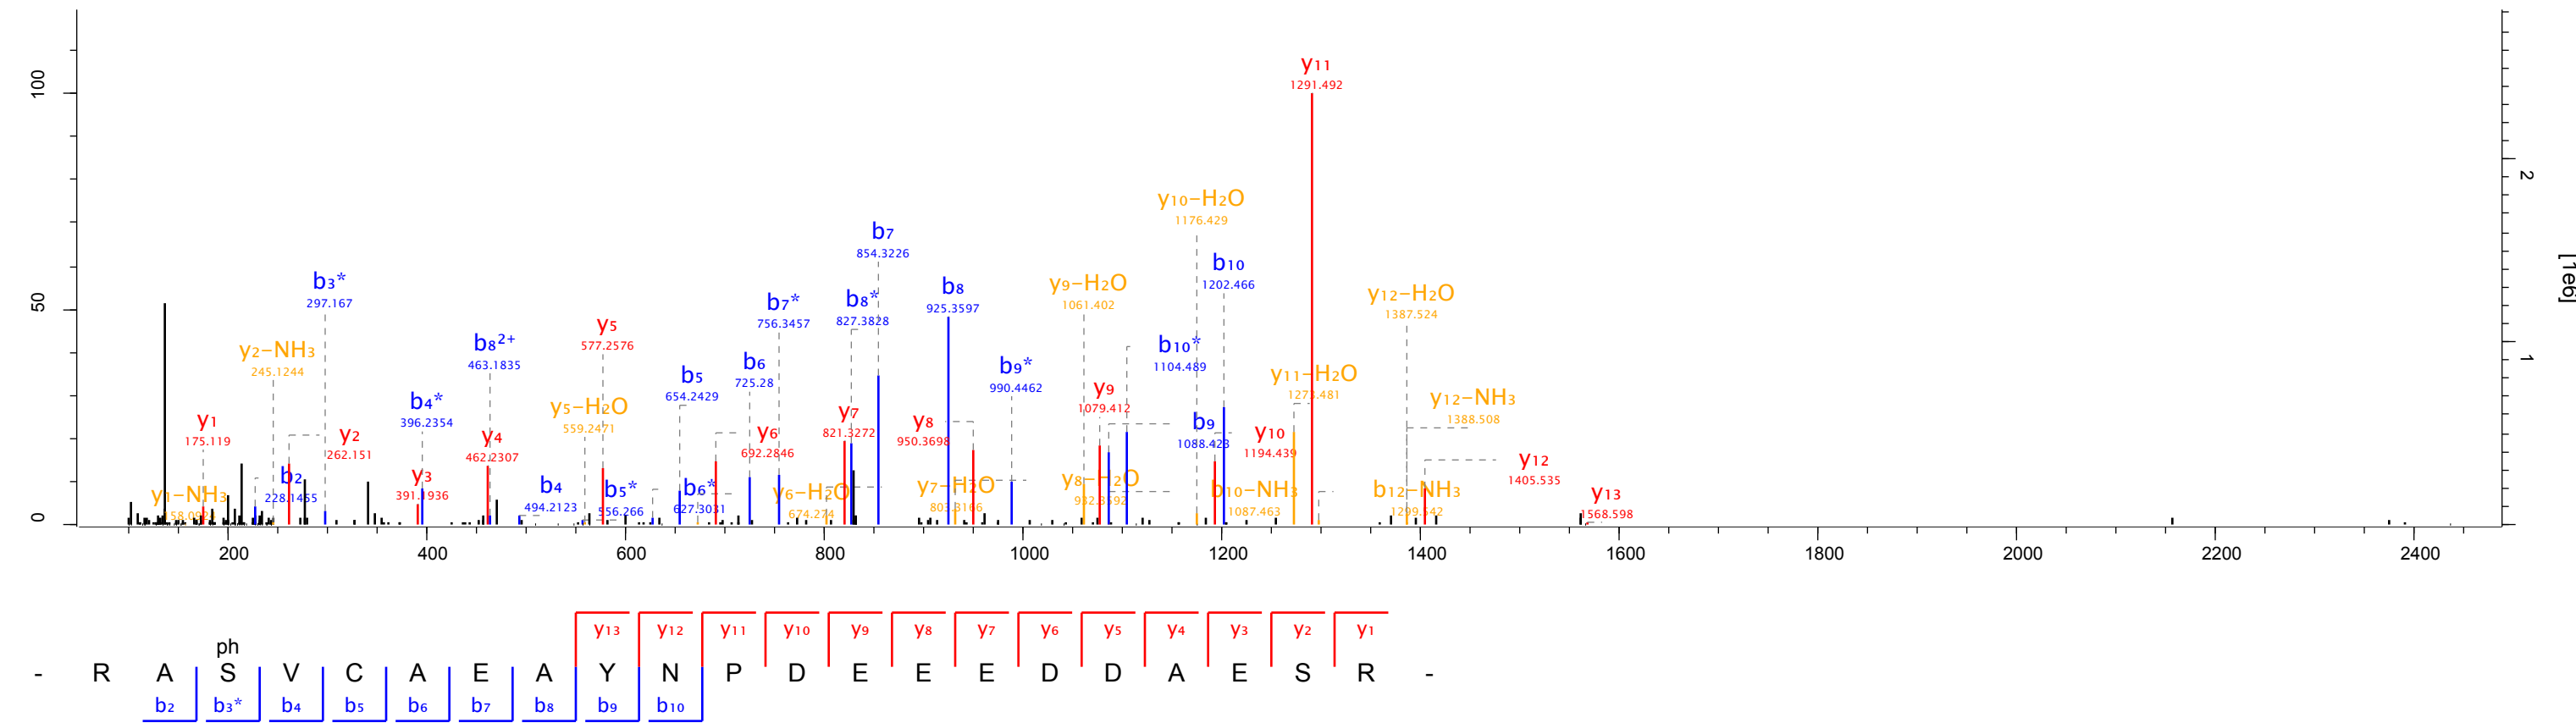

Raw file: 20150812\_A375SR\_Phospho\_BR1\_06  
 Scan: 12106 Method: FTMS; HCD Score: 375.98 m/z: 1022.93 Gene names: MPHOSPH6

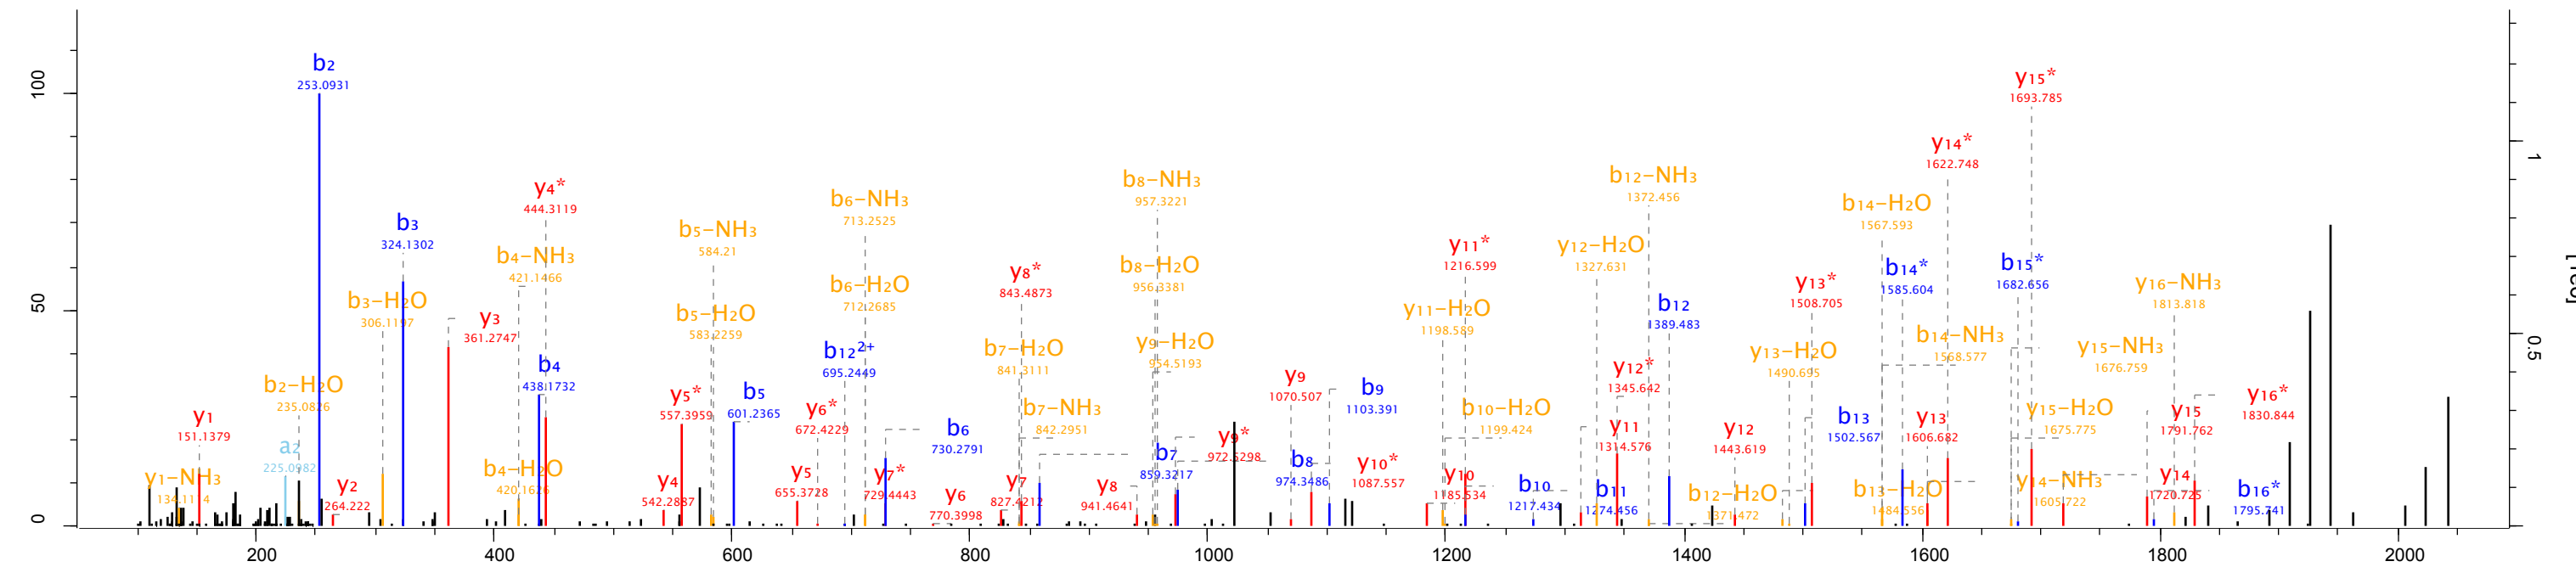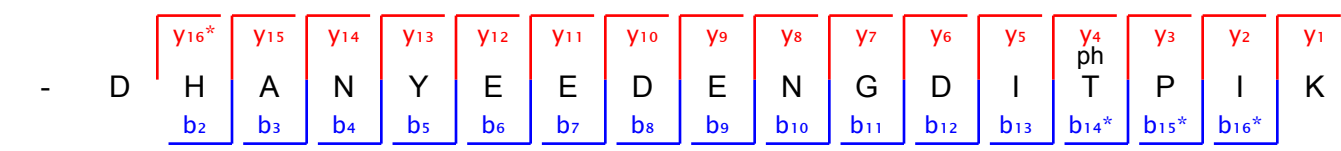

Raw file: 20150812\_A375SR\_Phospho\_BR1\_06  
 Scan: 13066 Method: FTMS; HCD Score: 153.04 m/z: 757.87 Gene names: PRRC2A

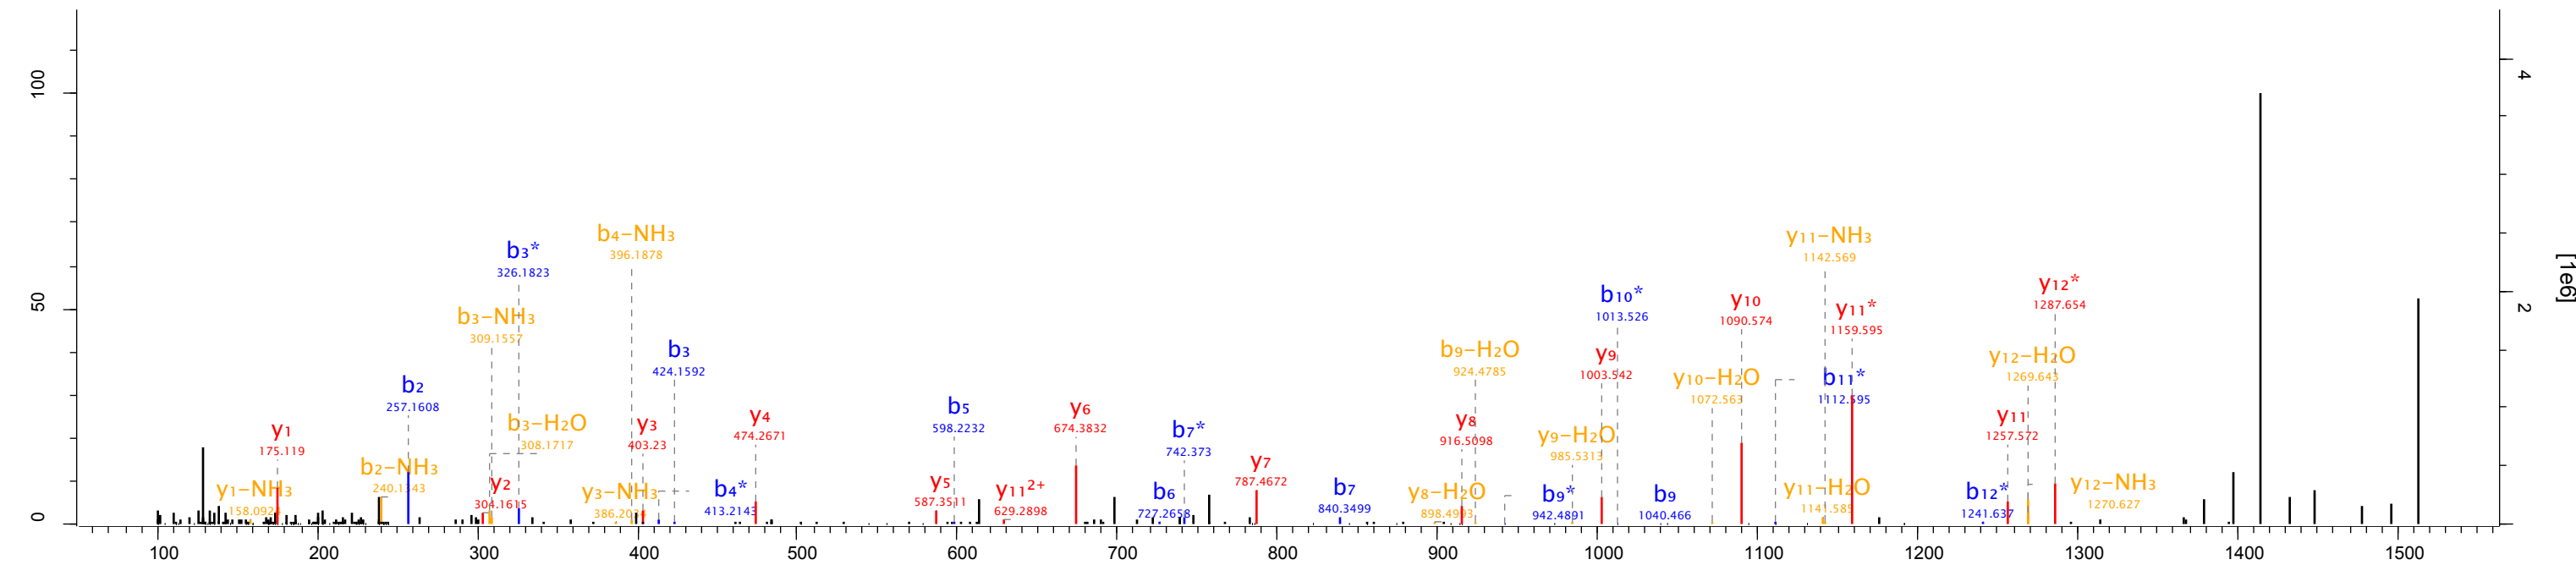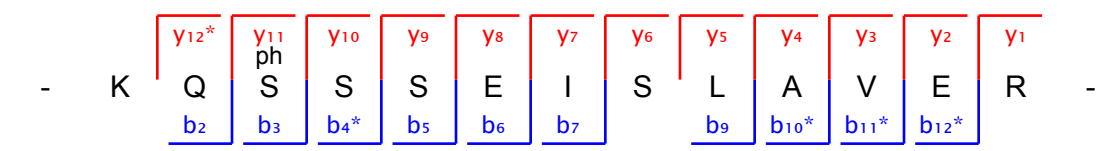

Raw file 20150812\_A375SR\_Phospho\_BR1\_06 Scan 14336 Method FTMS; HCD Score 116.9 m/z 643.26 Gene names HSPA1A

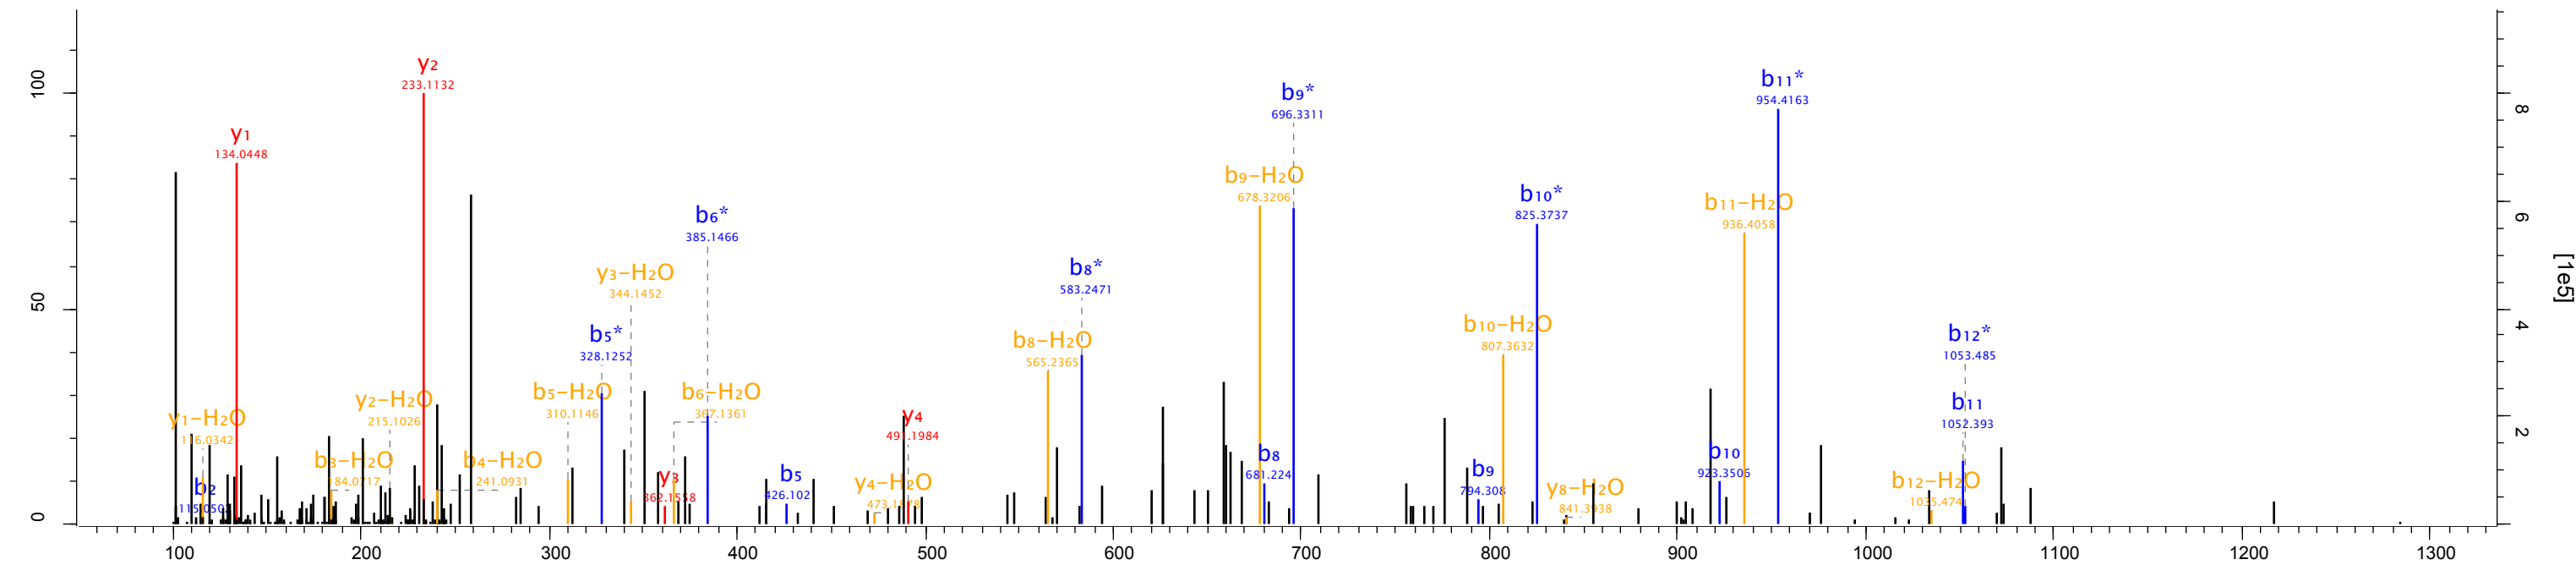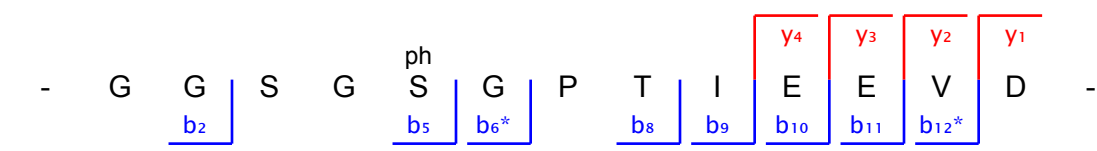

Raw file 20150812\_A375SR\_Phospho\_BR1\_06 Scan 15826 Method FTMS; HCD Score 242.26 m/z 748.37 Gene names PHLDB1

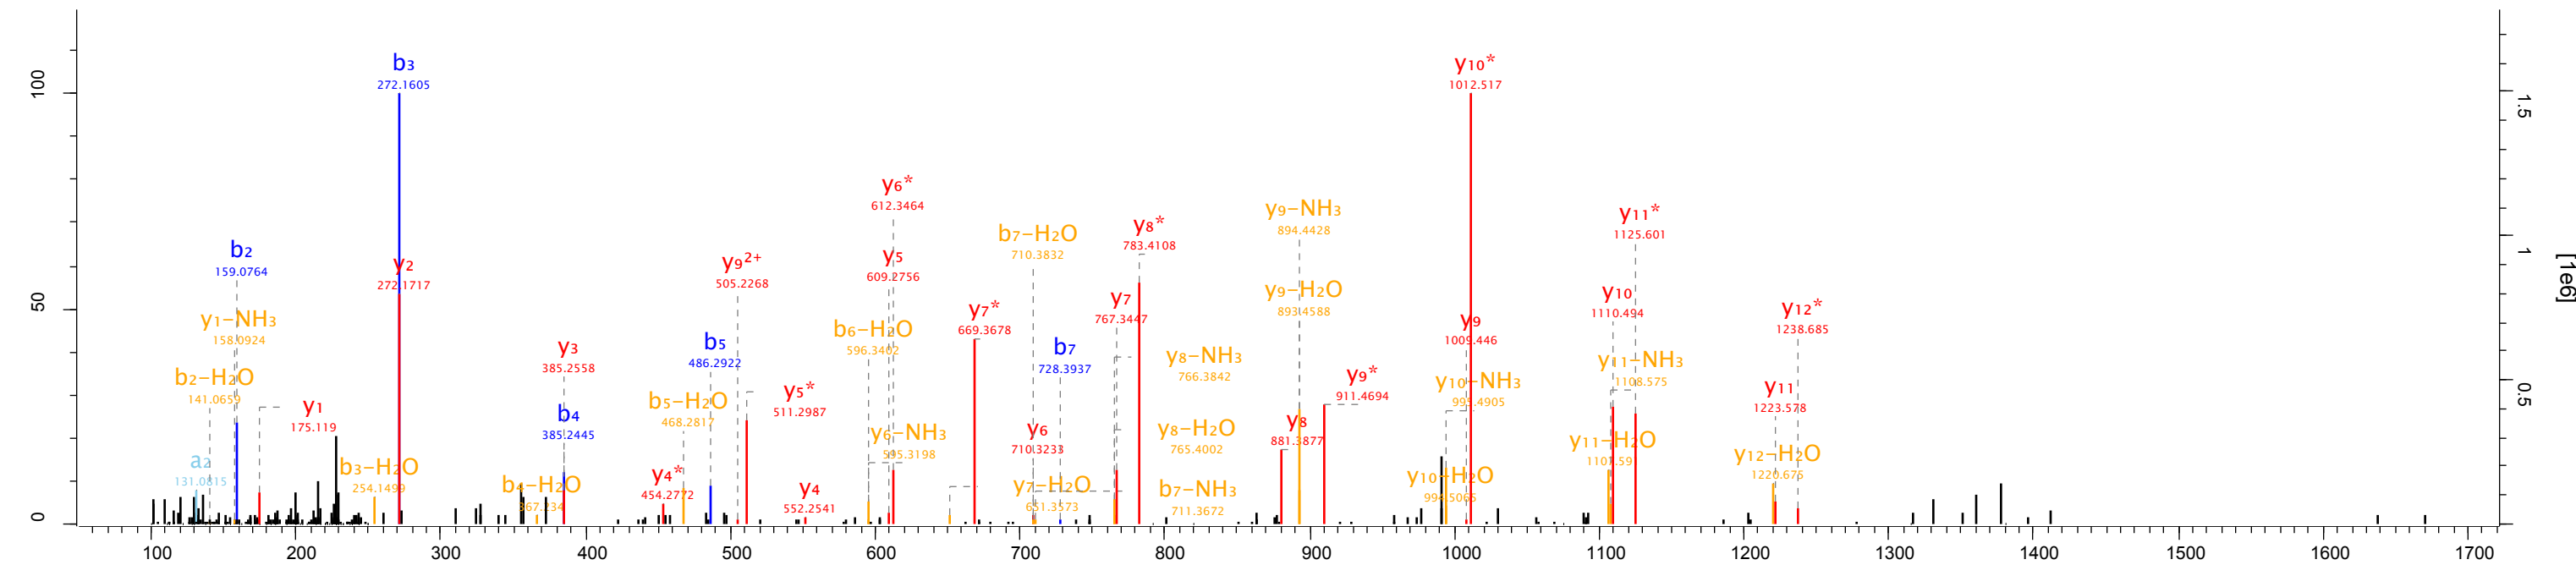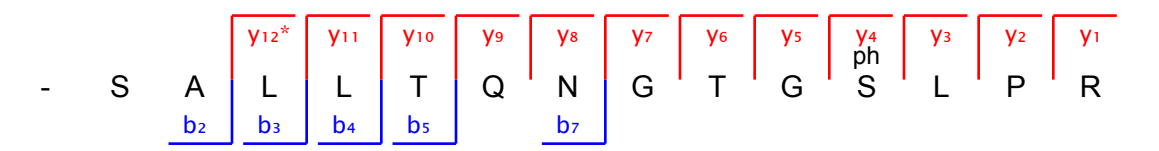

Raw file: 20150812\_A375SR\_Phospho\_BR1\_06  
 Scan: 16006 Method: FTMS; HCD Score: 95.26 m/z: 670.79 Gene names: SUB1

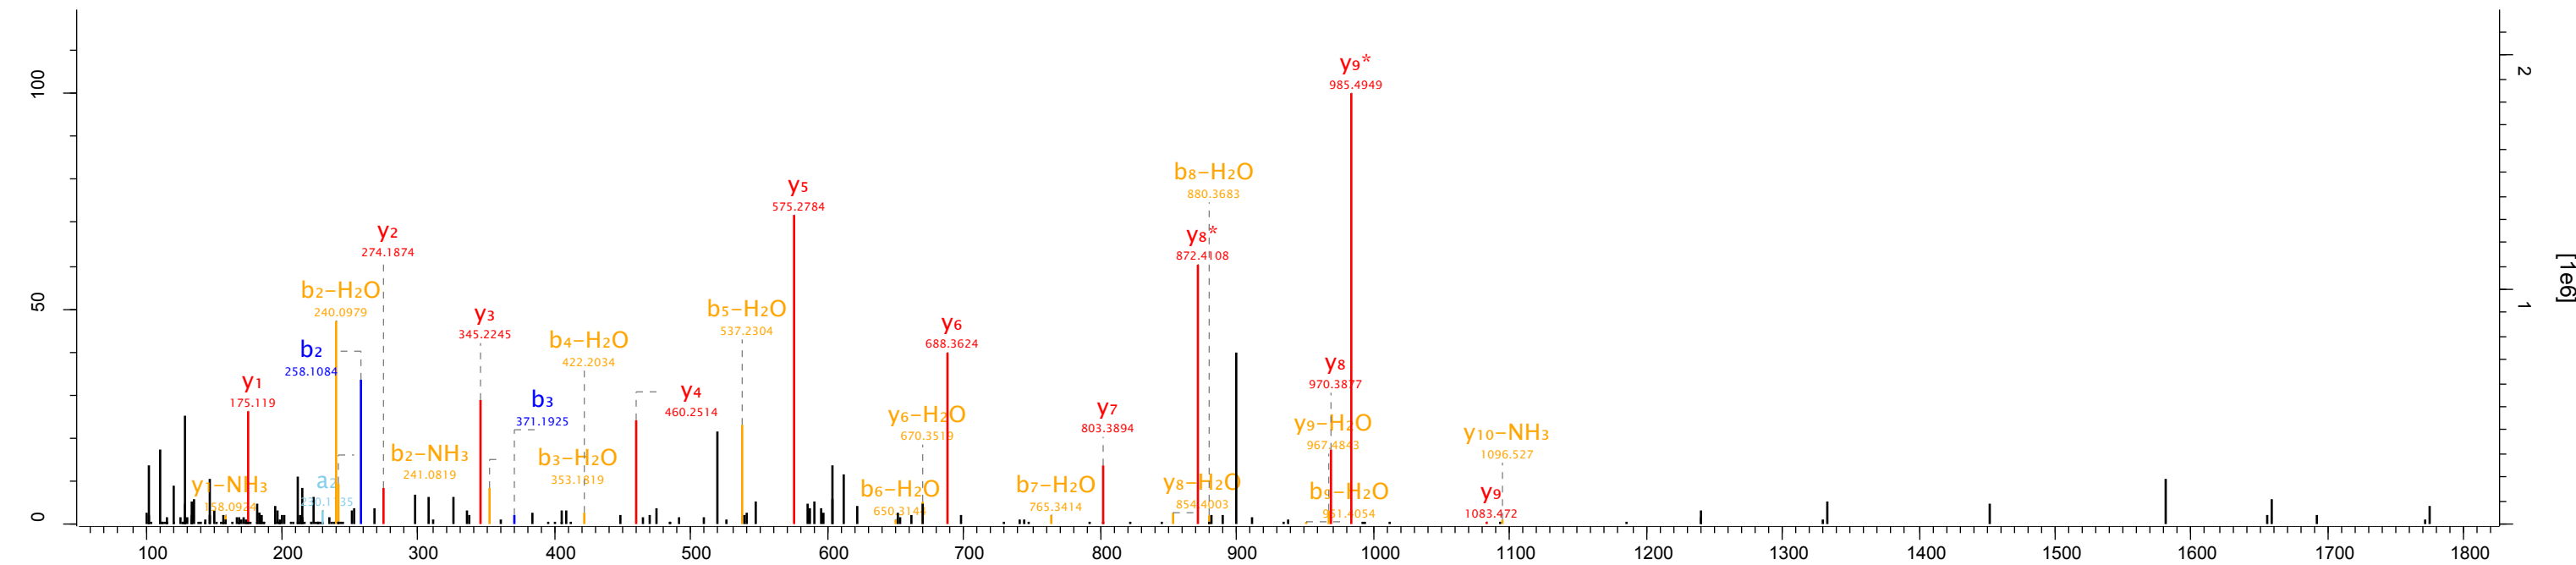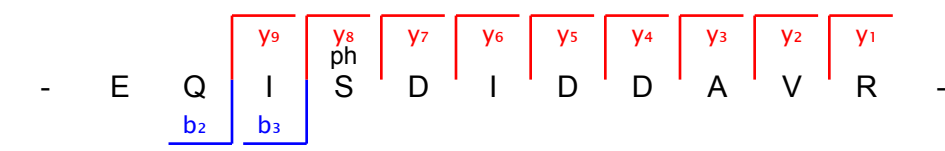

Raw file: 20150812\_A375SR\_Phospho\_BR1\_06  
 Scan: 1816 Method: FTMS; HCD Score: 123.59 m/z: 484.57 Gene names: WDR4

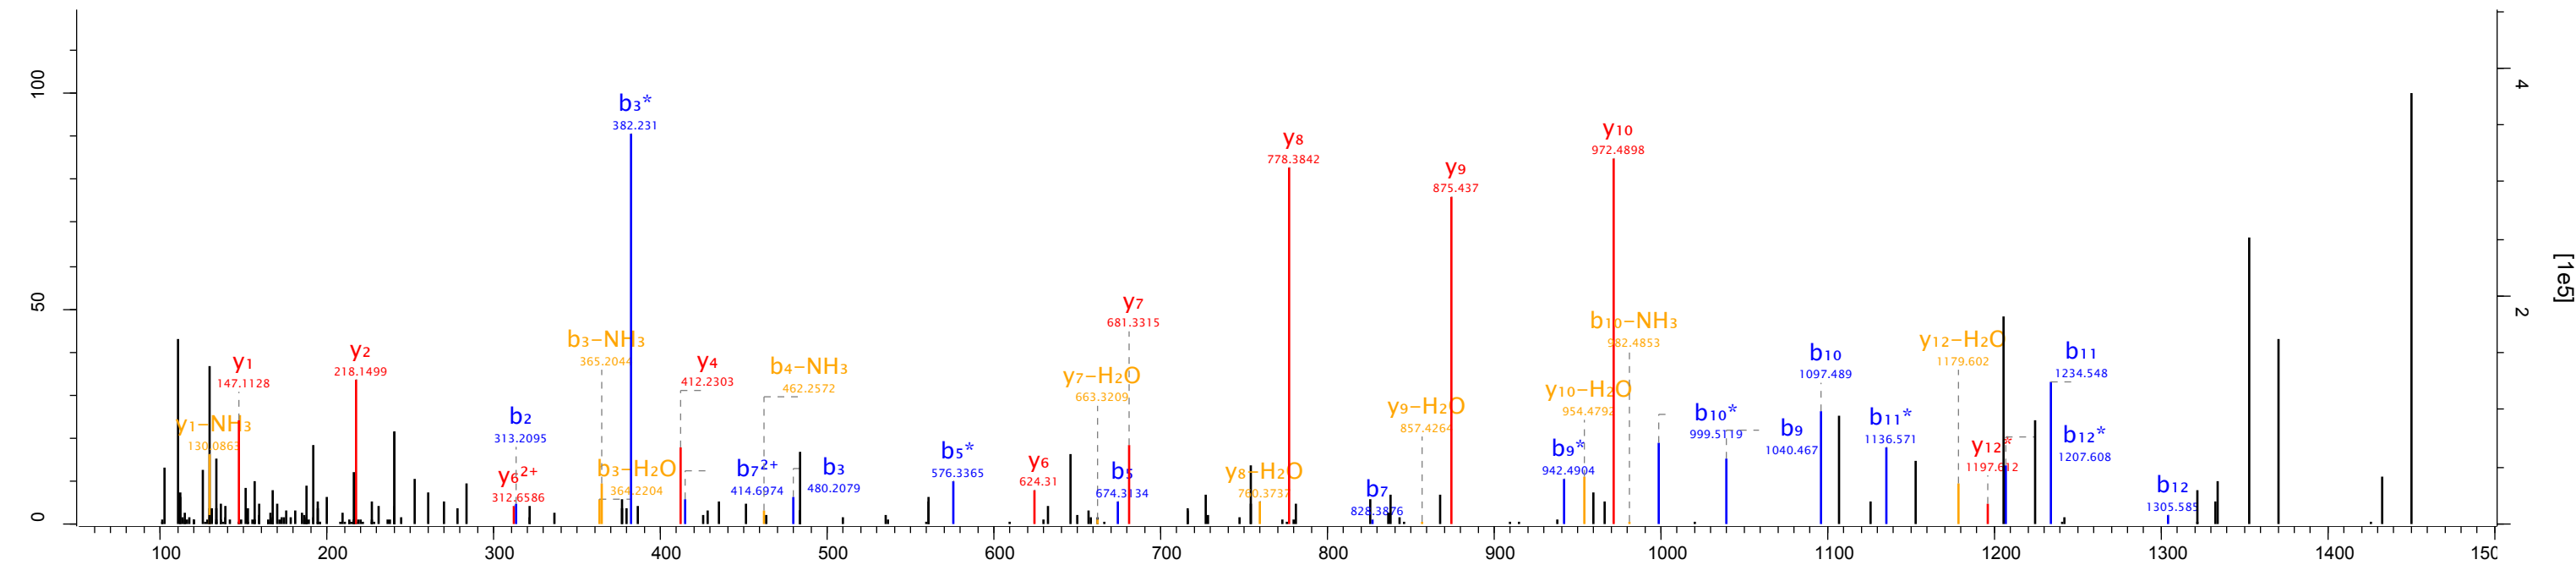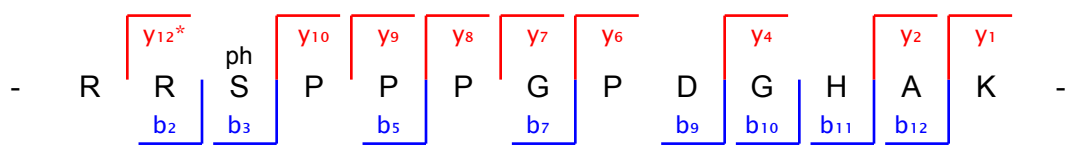

Raw file Scan Method Score m/z Gene names  
 20150812\_A375SR\_Phospho\_BR1\_06 18186 FTMS; HCD 195.56 886.45 RALGPS2

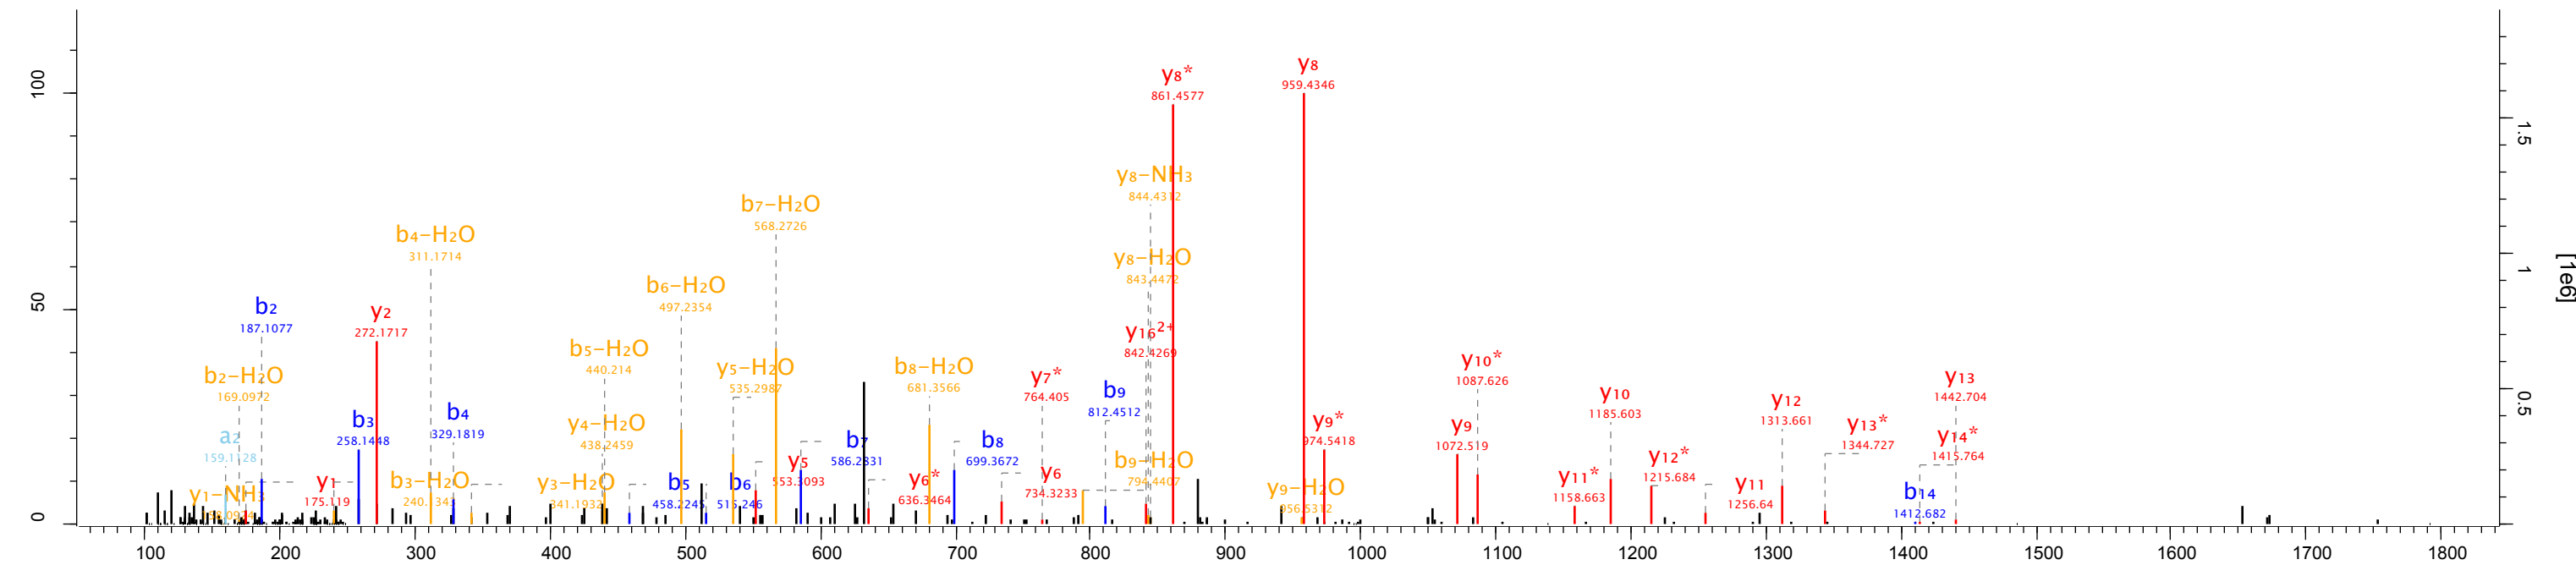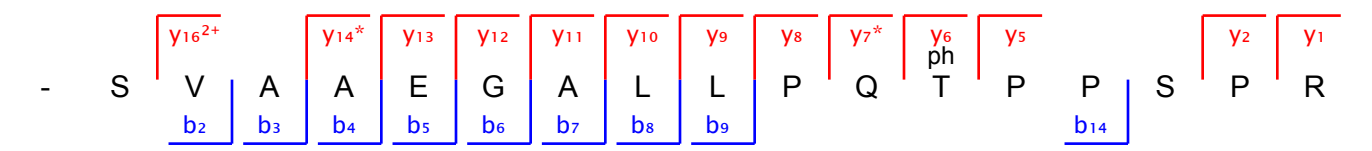



Raw file 20150812\_A375SR\_Phospho\_BR1\_06 Scan 19996 Method FTMS; HCD Score 283.37 m/z 825.37 Gene names VIM

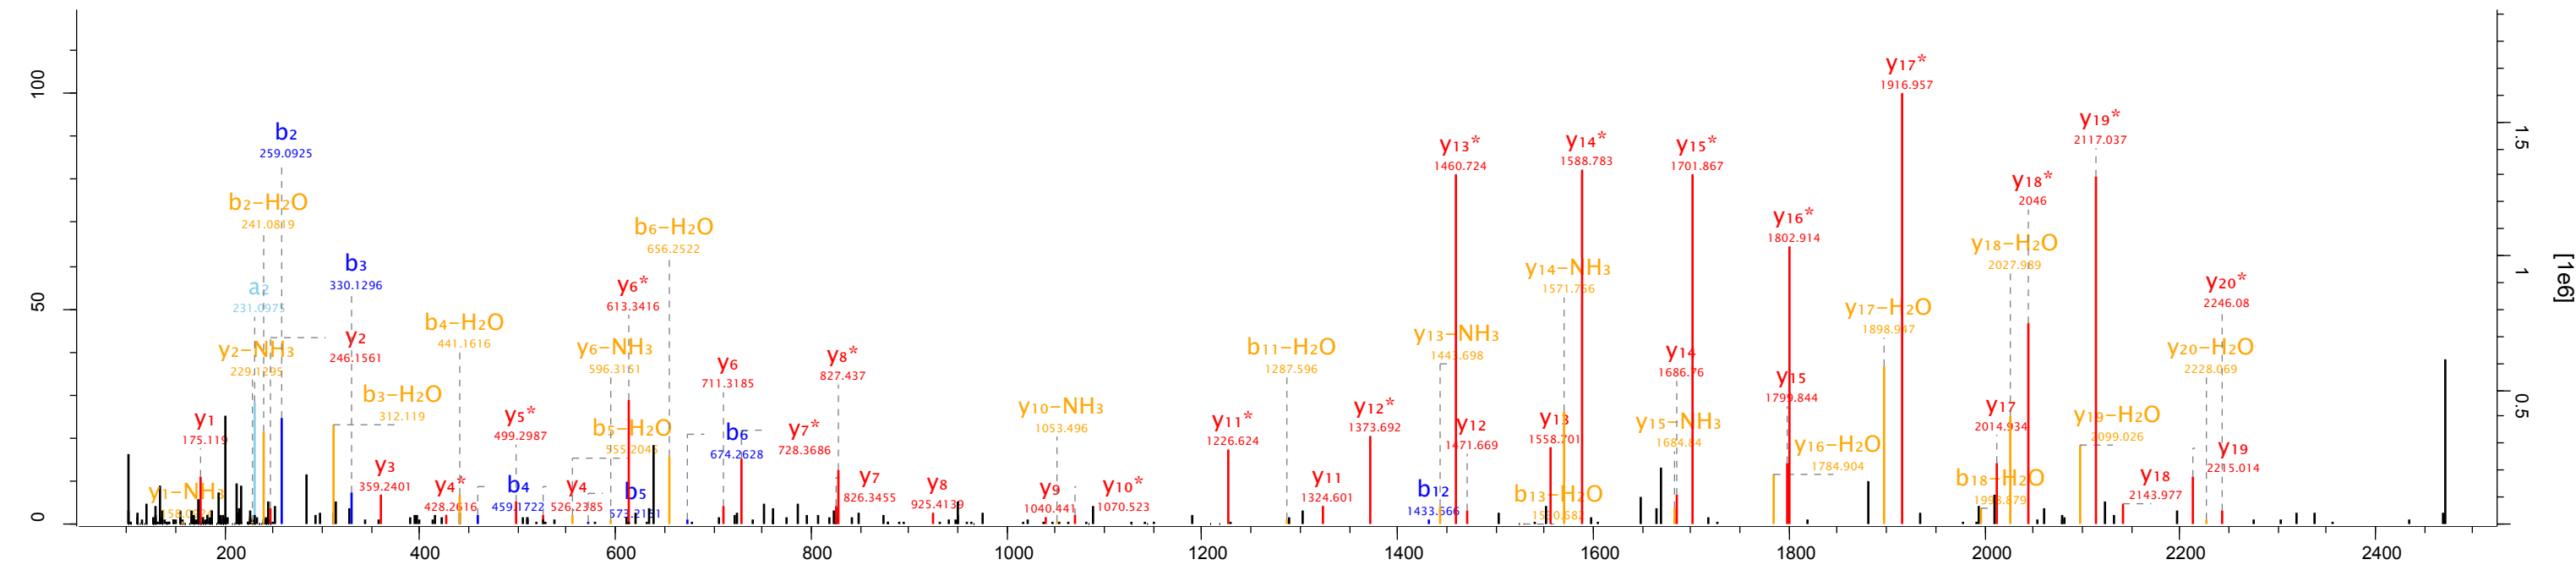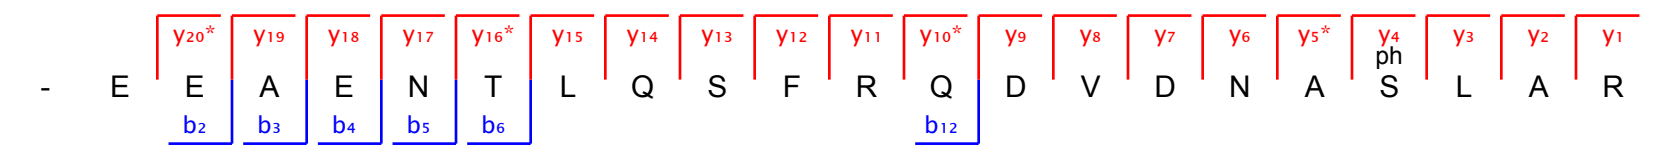

Raw file: 20150812\_A375SR\_Phospho\_BR1\_06  
 Scan: 20286 Method: FTMS; HCD Score: 110.38 m/z: 450.21 Gene names: ARHGAP29

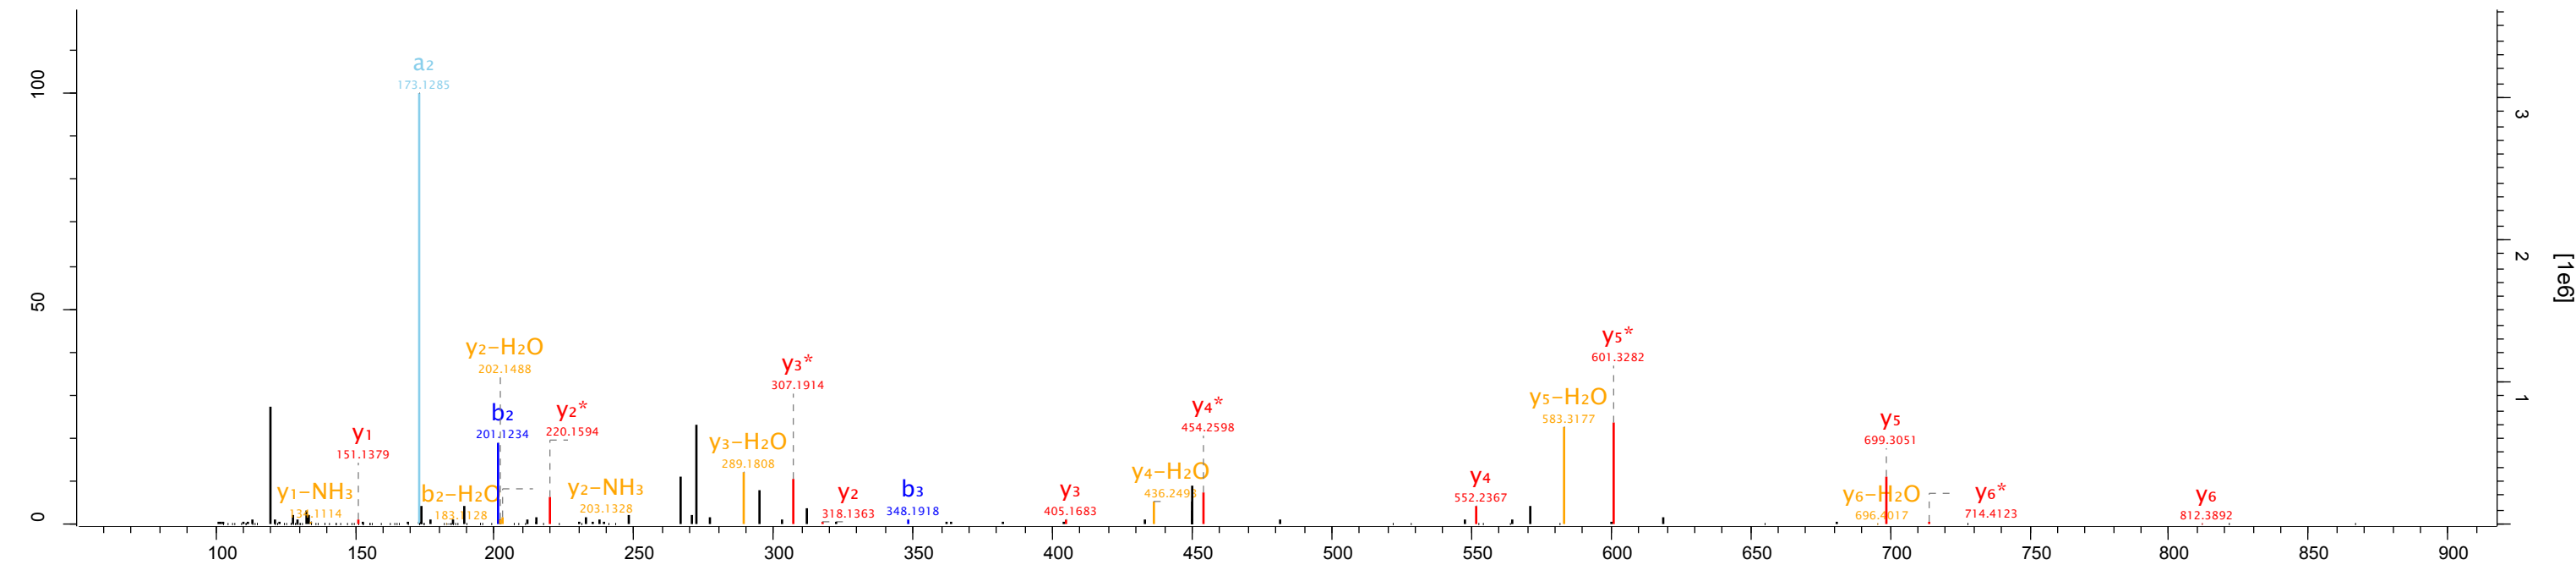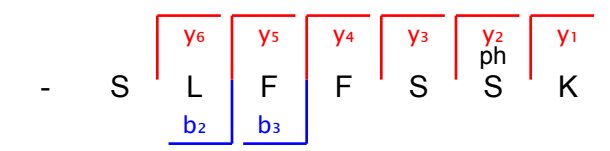

Raw file 20150812\_A375SR\_Phospho\_BR1\_06 Scan 20386 Method FTMS; HCD Score 220.97 m/z 864.4 Gene names AKAP11

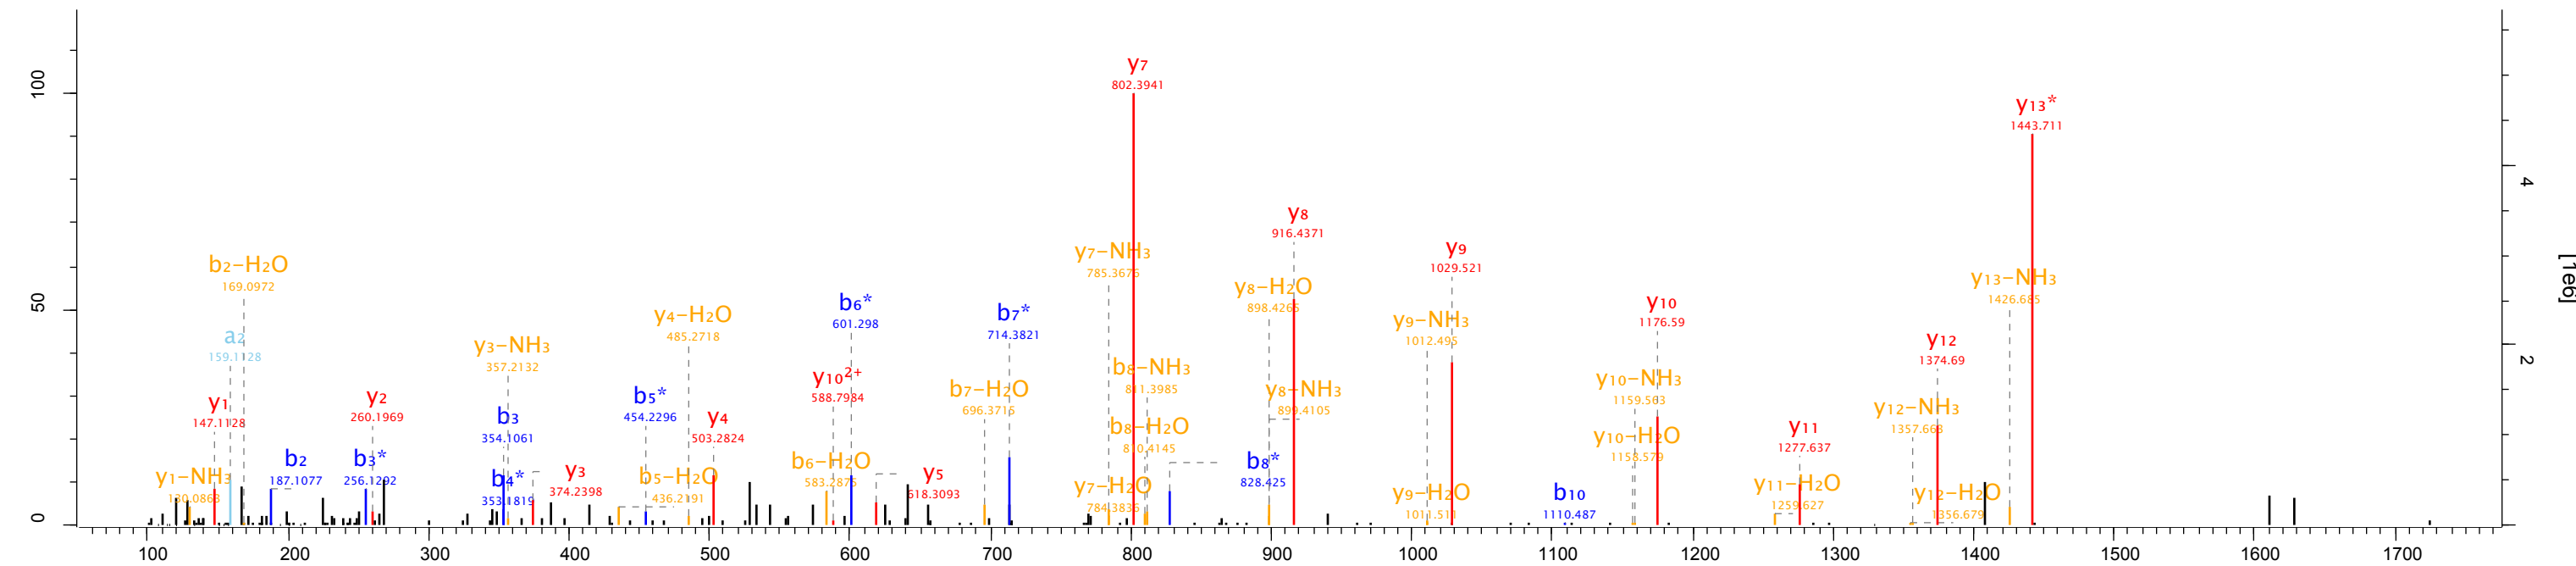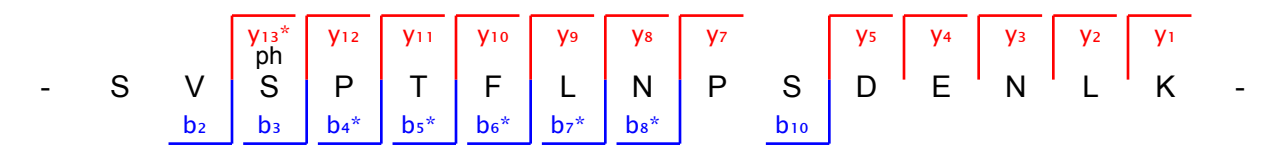

Raw file: 20150812\_A375SR\_Phospho\_BR1\_06  
 Scan: 2056 Method: FTMS; HCD Score: 132.88 m/z: 620.28 Gene names: LMNA

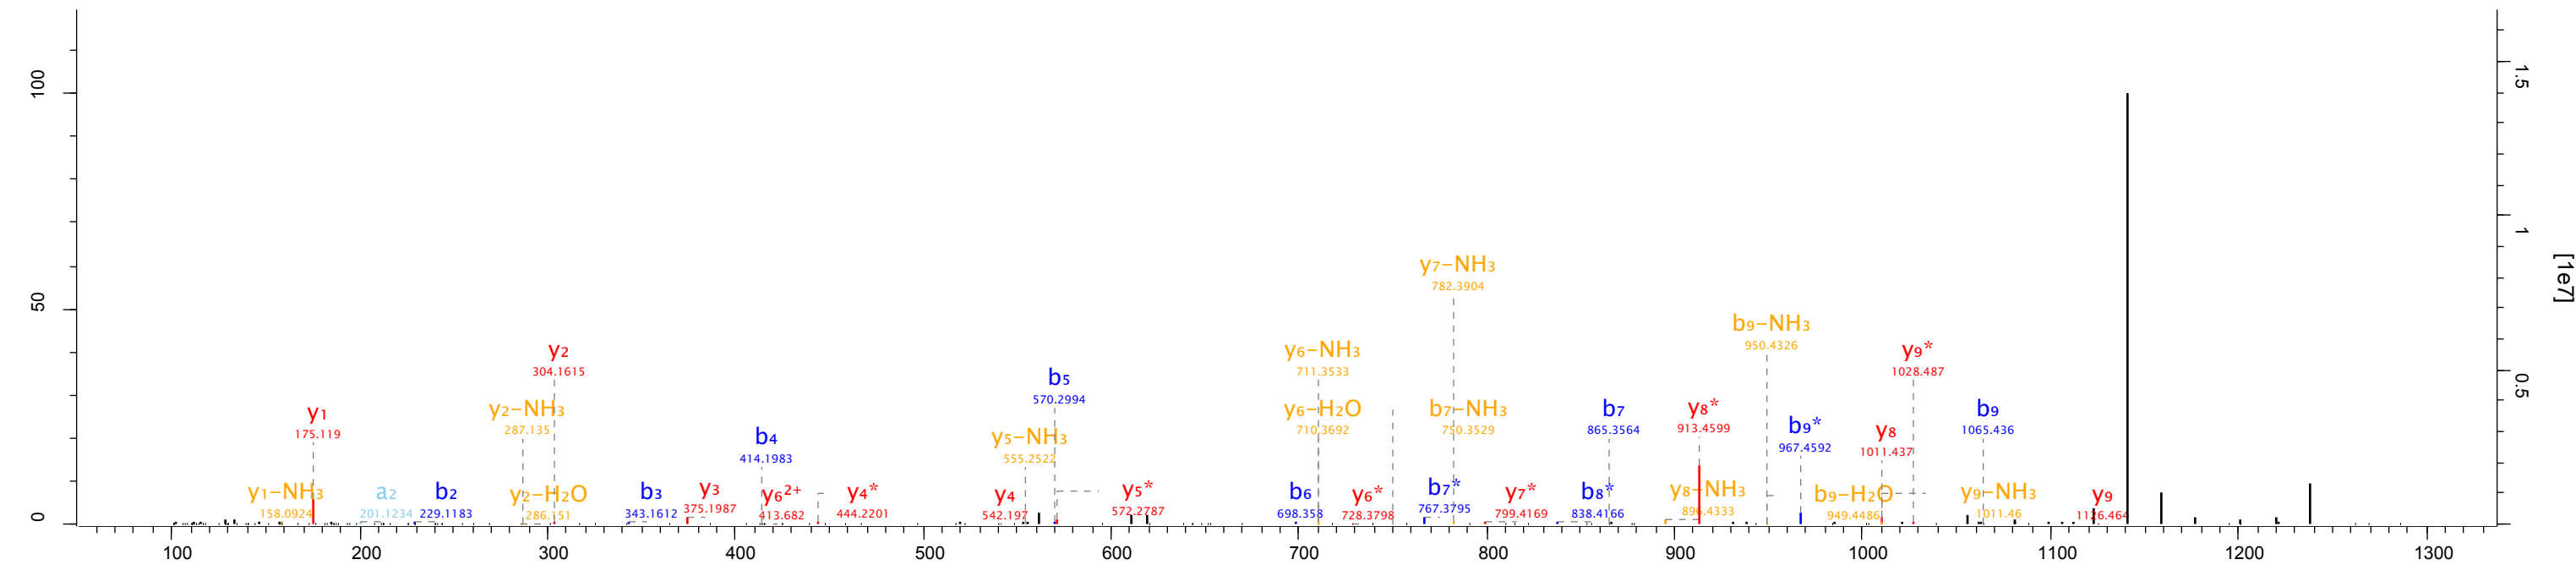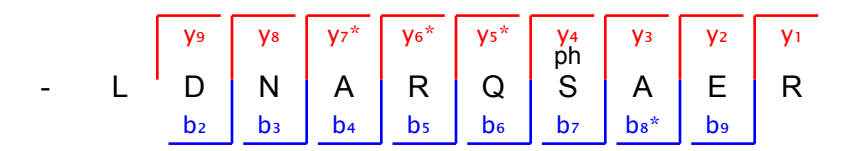

Raw file 20150812\_A375SR\_Phospho\_BR1\_06 Scan 21116 Method FTMS; HCD Score 192.39 m/z 767.83 Gene names SRSF9

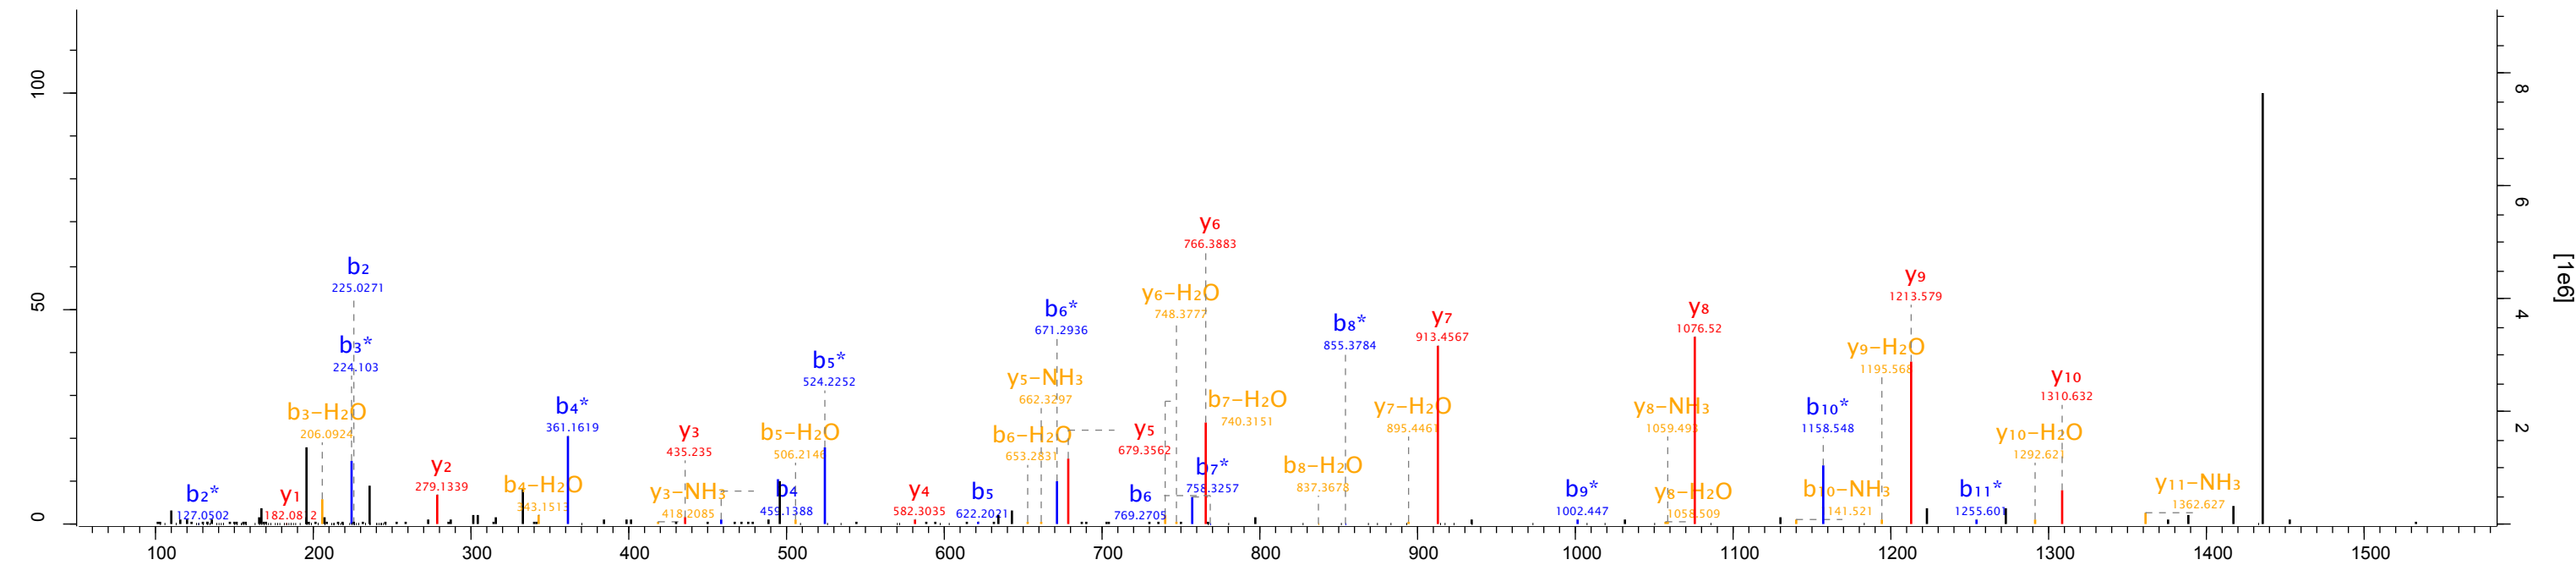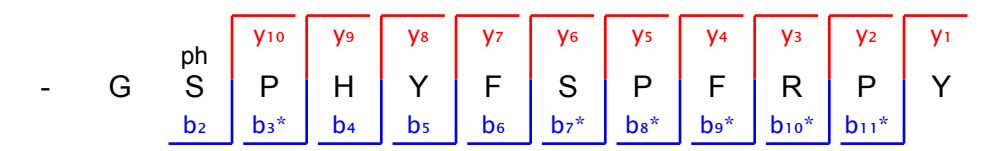

Raw file: 20150812\_A375SR\_Phospho\_BR1\_06  
 Scan: 21486 Method: FTMS; HCD Score: 102.07 m/z: 885.95 Gene names: AKAP11

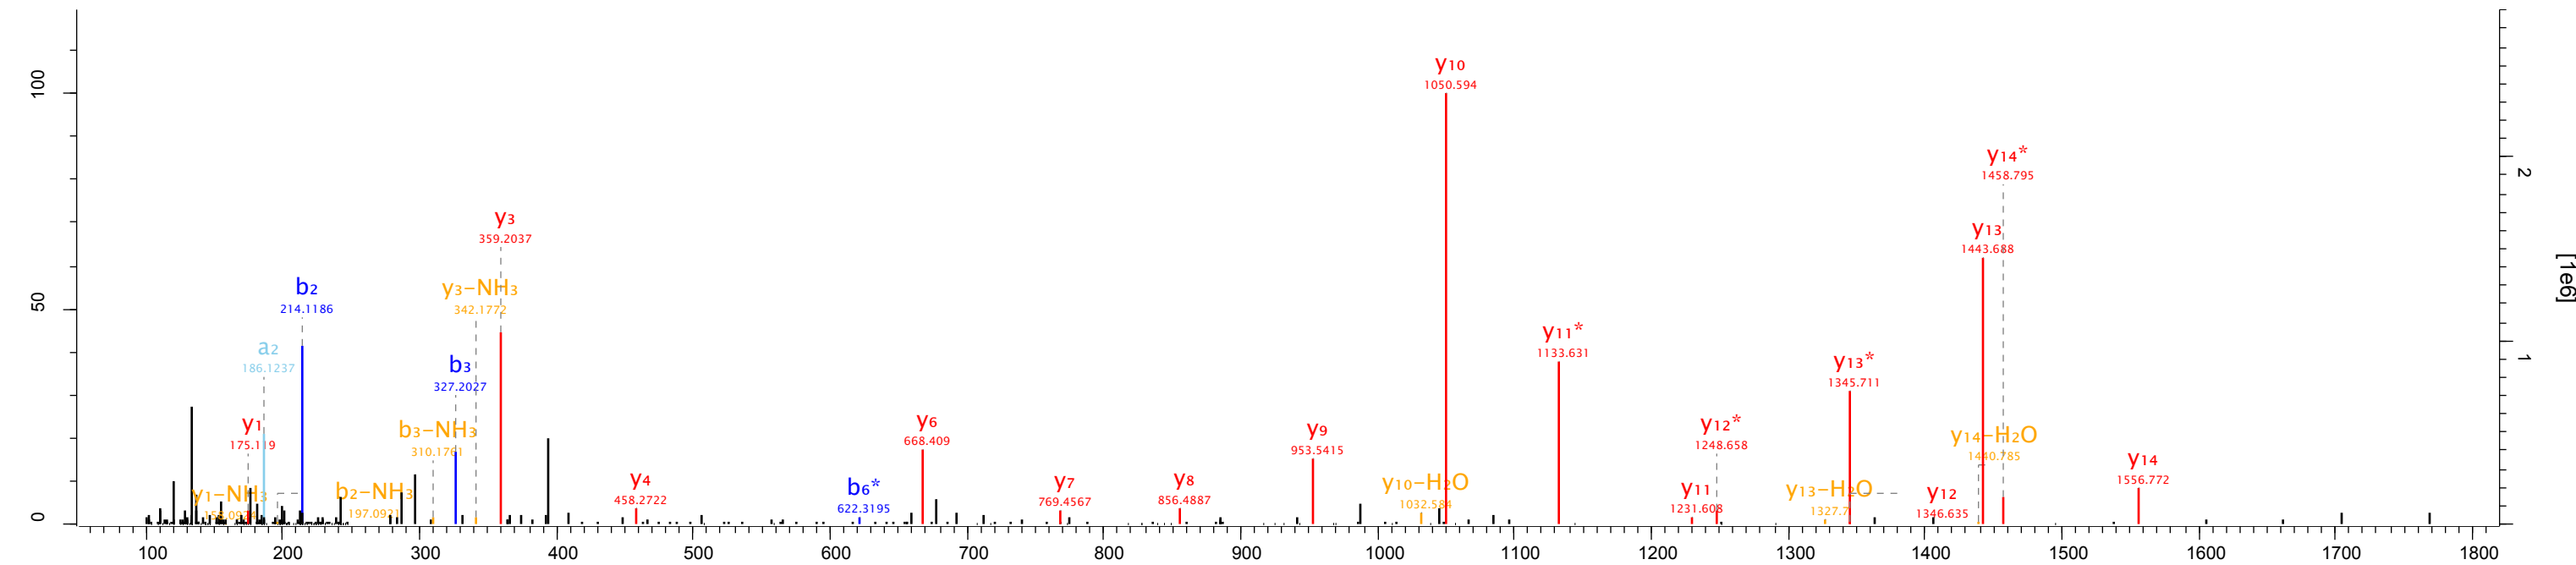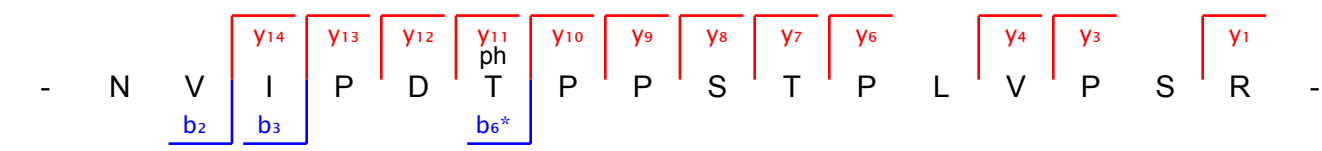

Raw file: 20150812\_A375SR\_Phospho\_BR1\_06  
 Scan: 2686 Method: FTMS; HCD Score: 113.69 m/z: 518.76 Gene names: SRSF11

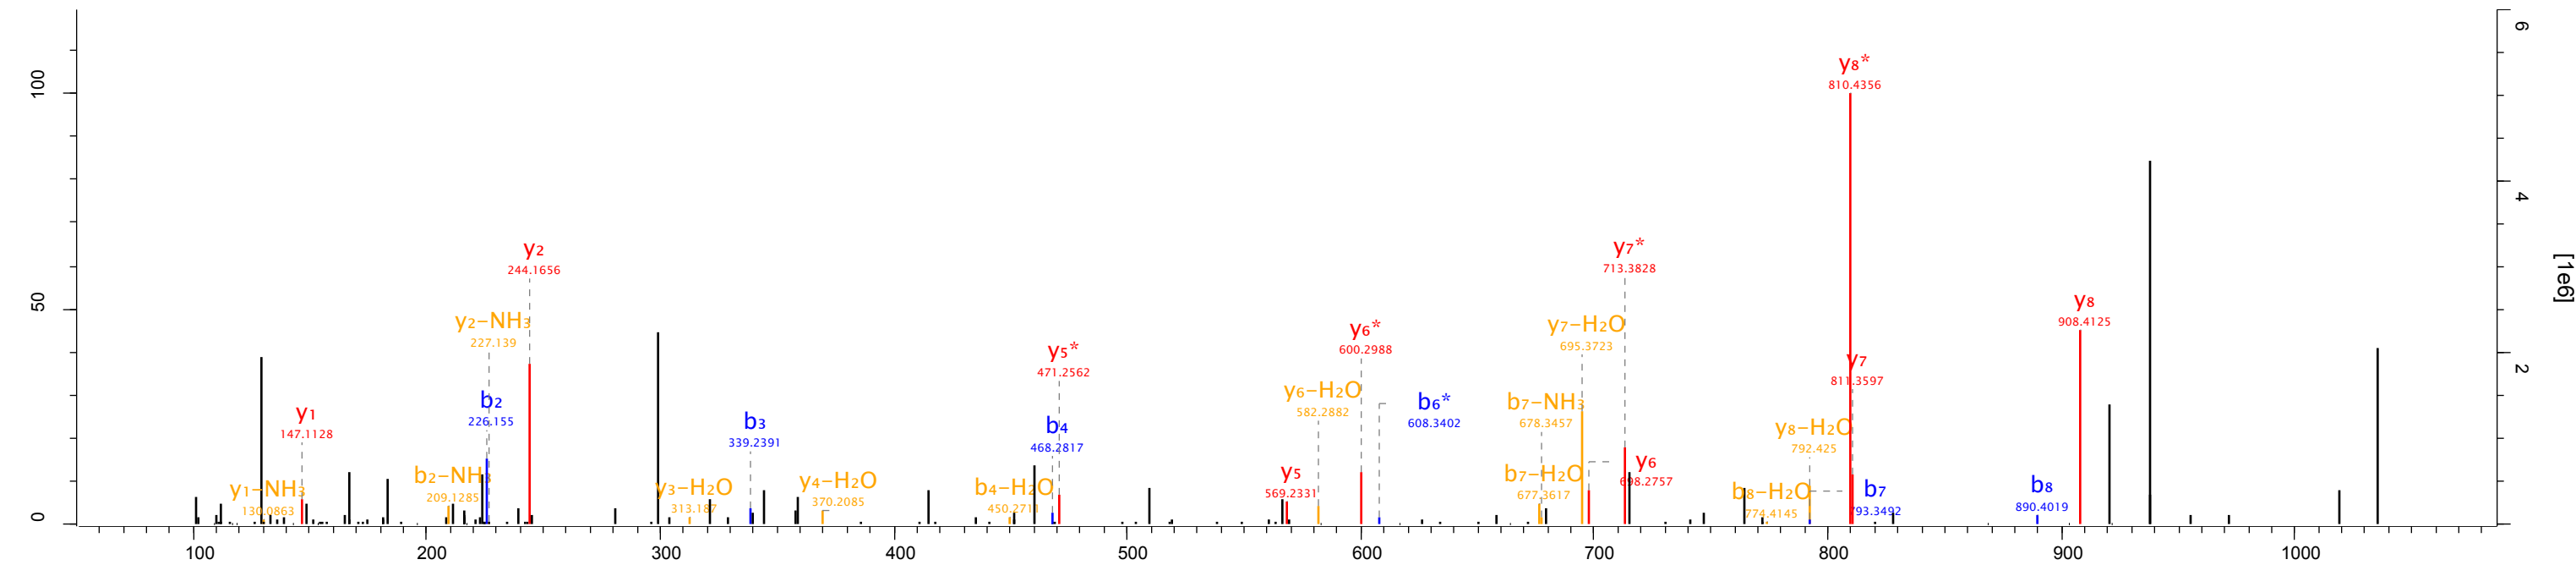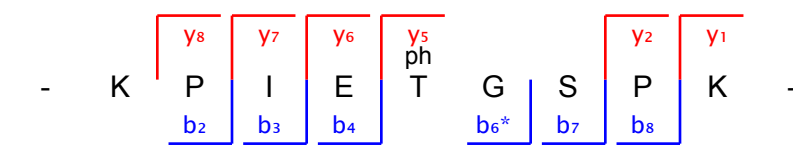

Raw file: 20150812\_A375SR\_Phospho\_BR1\_06  
 Scan: 2996 Method: FTMS; HCD Score: 155.24 m/z: 551.27 Gene names: ZC3H18

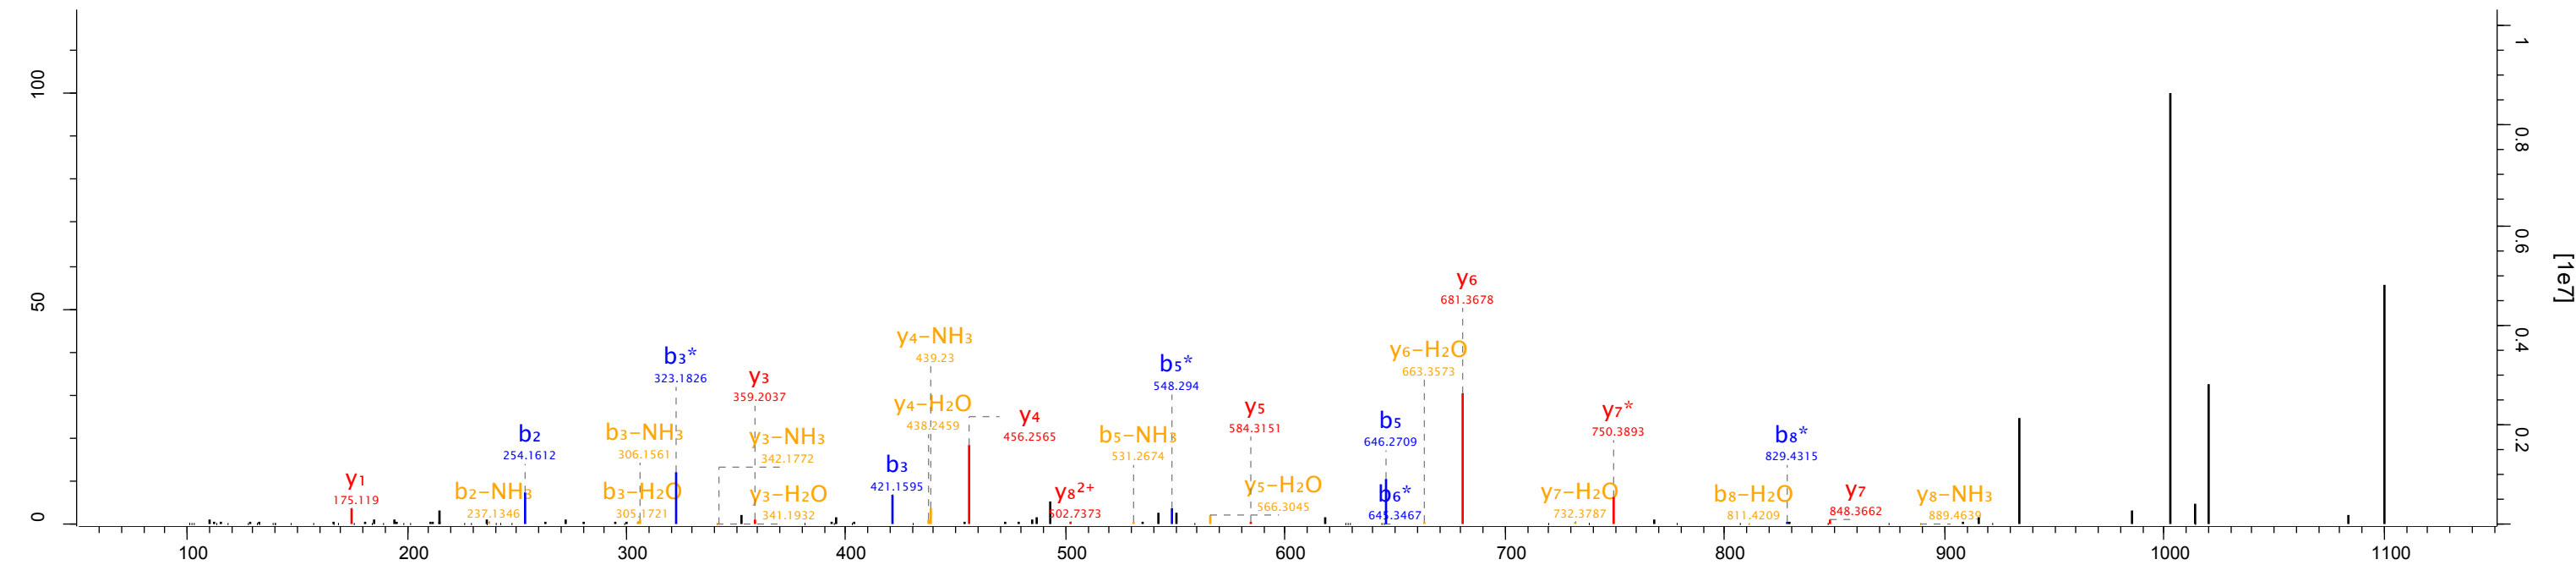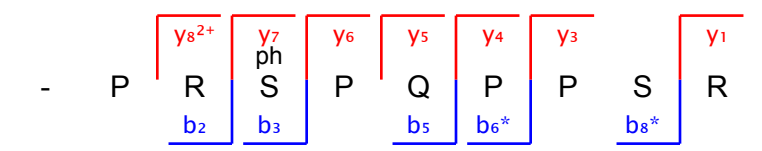



Raw file 20150812\_A375SR\_Phospho\_BR1\_06 Scan 3186 Method FTMS; HCD Score 41.7 m/z 422.21 Gene names PHLDB1

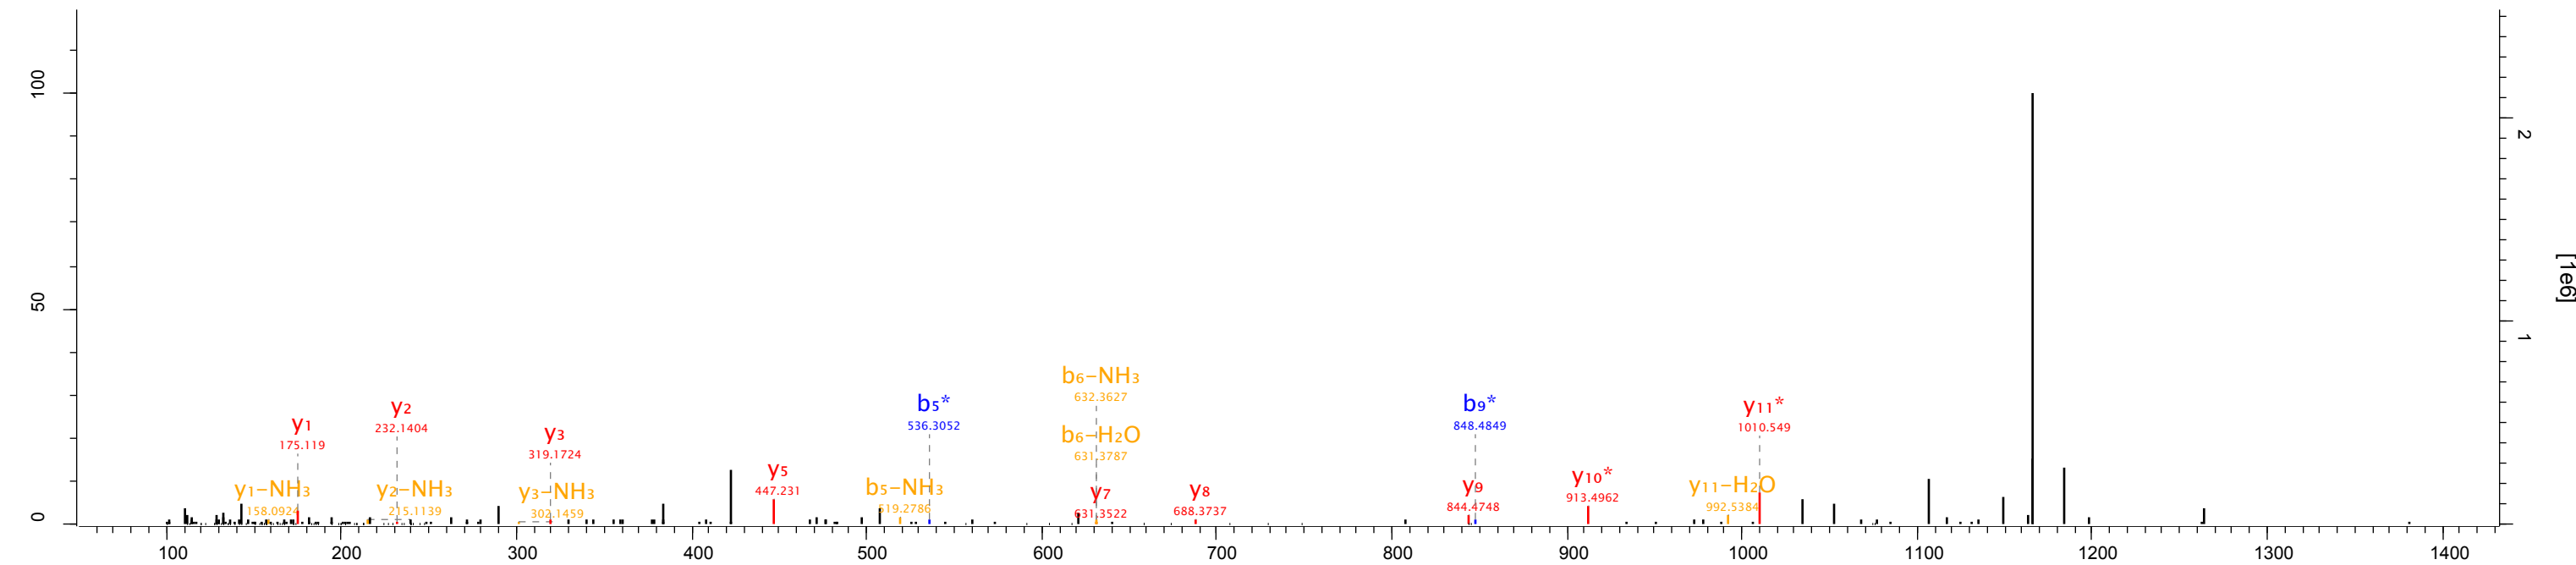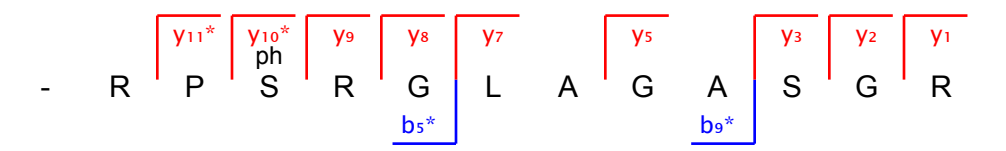

Raw file  
20150812\_A375SR\_Phospho\_BR1\_06

Scan 3416 Method FTMS; HCD Score 383.65 m/z 942.37 Gene names CTR9

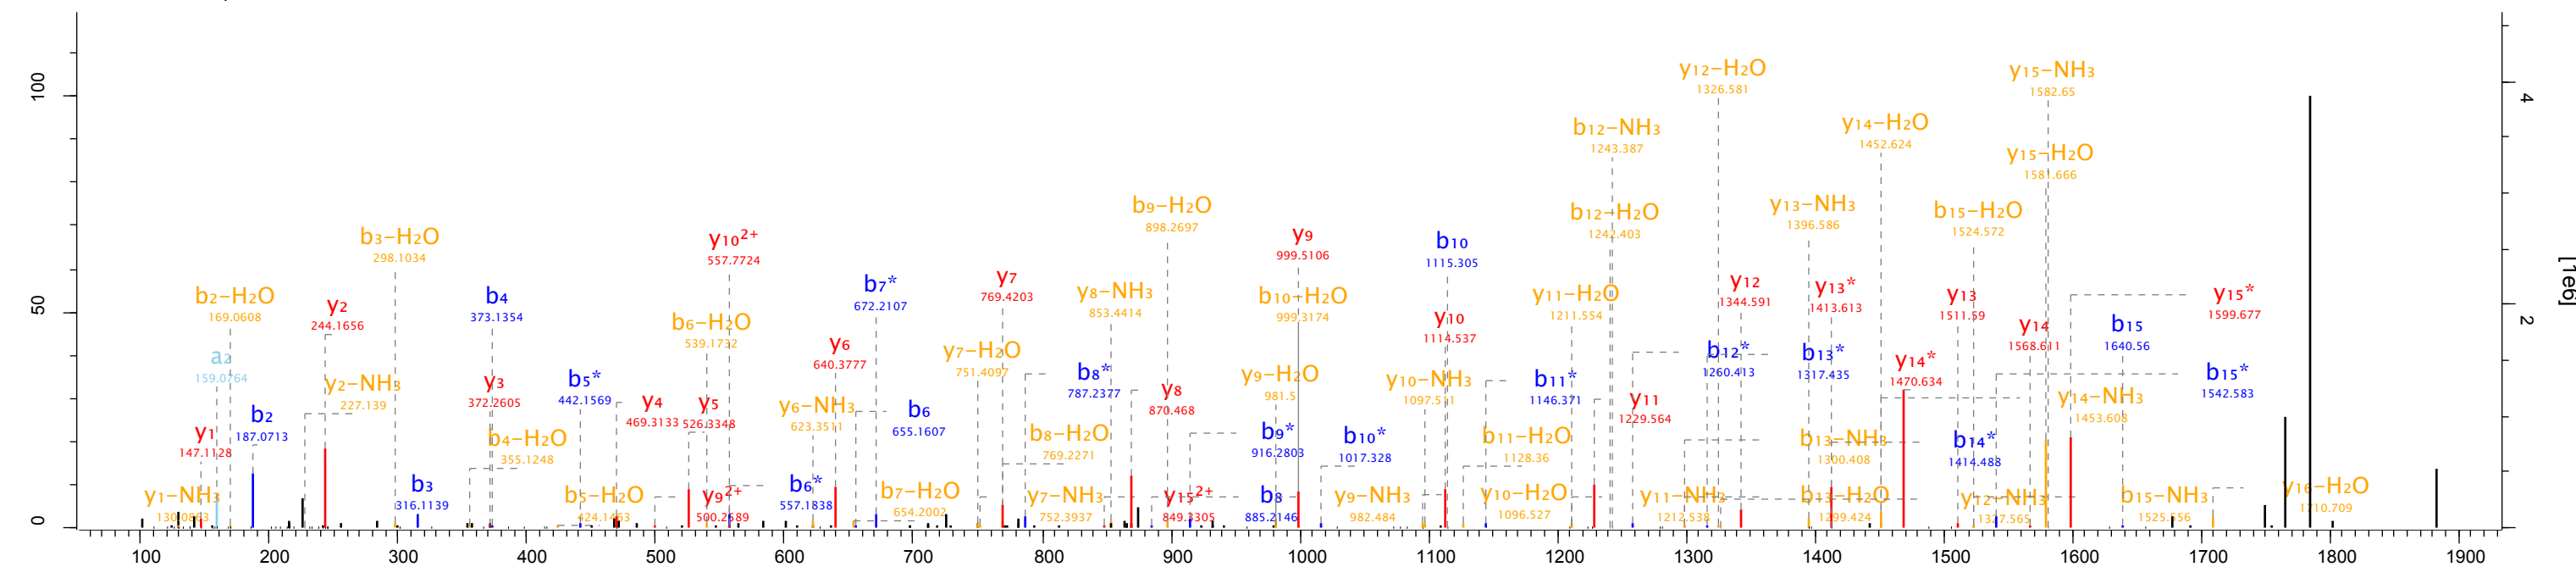

- G E E E G S D D D E T E N G P K P K -

b<sub>2</sub> b<sub>3</sub> b<sub>4</sub> b<sub>5</sub>\* b<sub>6</sub> b<sub>7</sub>\* b<sub>8</sub> b<sub>9</sub>\* b<sub>10</sub> b<sub>11</sub>\* b<sub>12</sub>\* b<sub>13</sub>\* b<sub>14</sub>\* b<sub>15</sub>

y<sub>15</sub>\* y<sub>14</sub> y<sub>13</sub> ph y<sub>12</sub> y<sub>11</sub> y<sub>10</sub> y<sub>9</sub> y<sub>8</sub> y<sub>7</sub> y<sub>6</sub> y<sub>5</sub> y<sub>4</sub> y<sub>3</sub> y<sub>2</sub> y<sub>1</sub>

Raw file Scan Method Score m/z Gene names

20150812\_A375SR\_Phospho\_BR1\_06 3996 FTMS; HCD 86.95 667.32 STK11IP

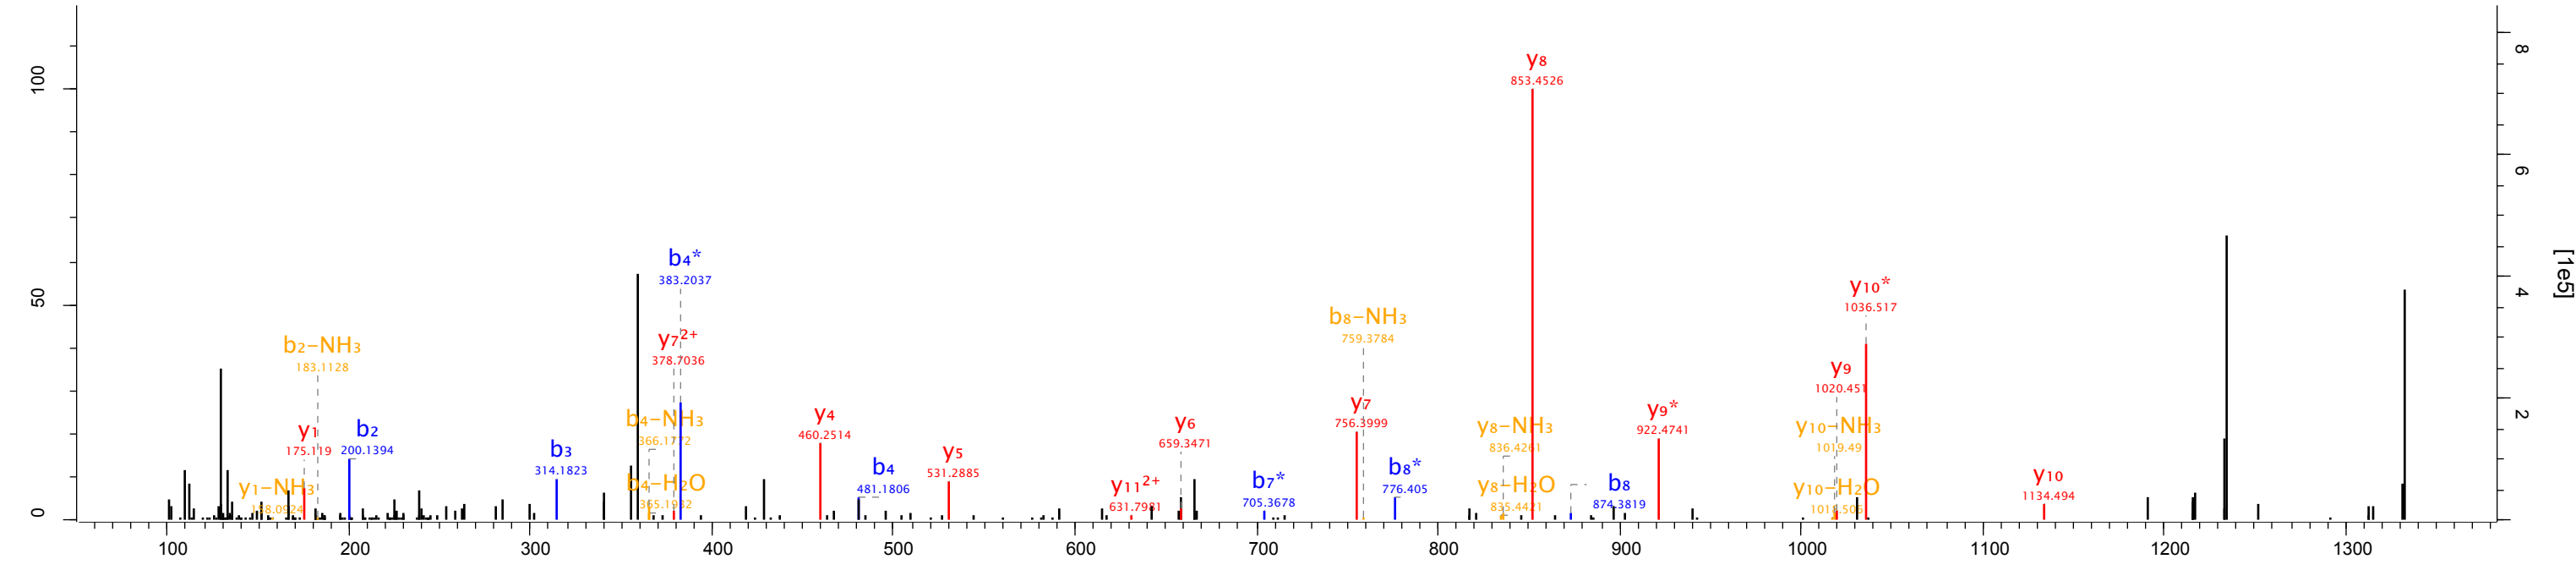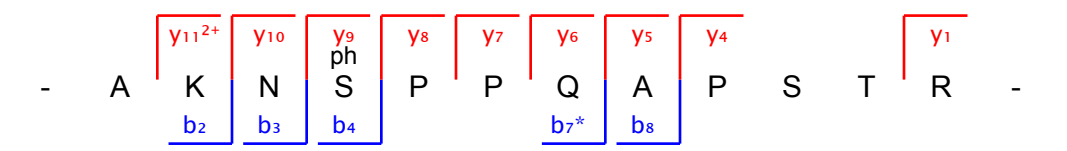

Raw file: 20150812\_A375SR\_Phospho\_BR1\_06  
 Scan: 4076 Method: FTMS; HCD Score: 254.24 m/z: 868.42 Gene names: TCEA1

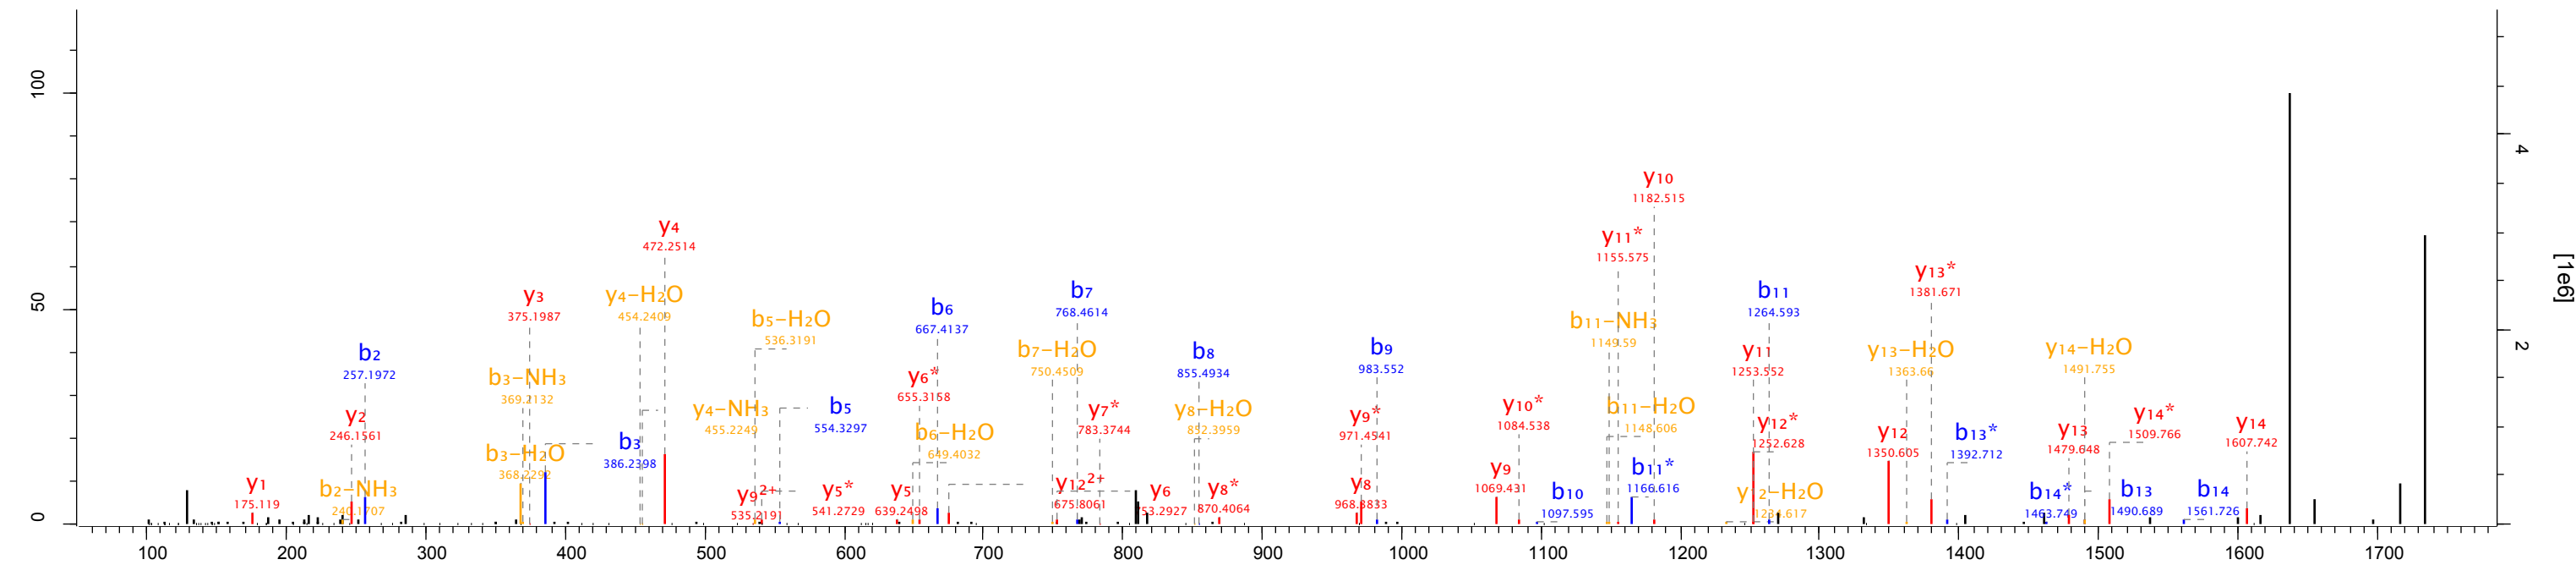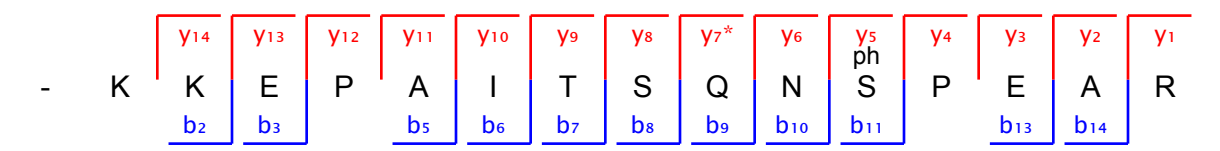

Raw file: 20150812\_A375SR\_Phospho\_BR1\_06  
 Scan: 4186 Method: FTMS; HCD Score: 195.6 m/z: 706.33 Gene names: MARCKSL1

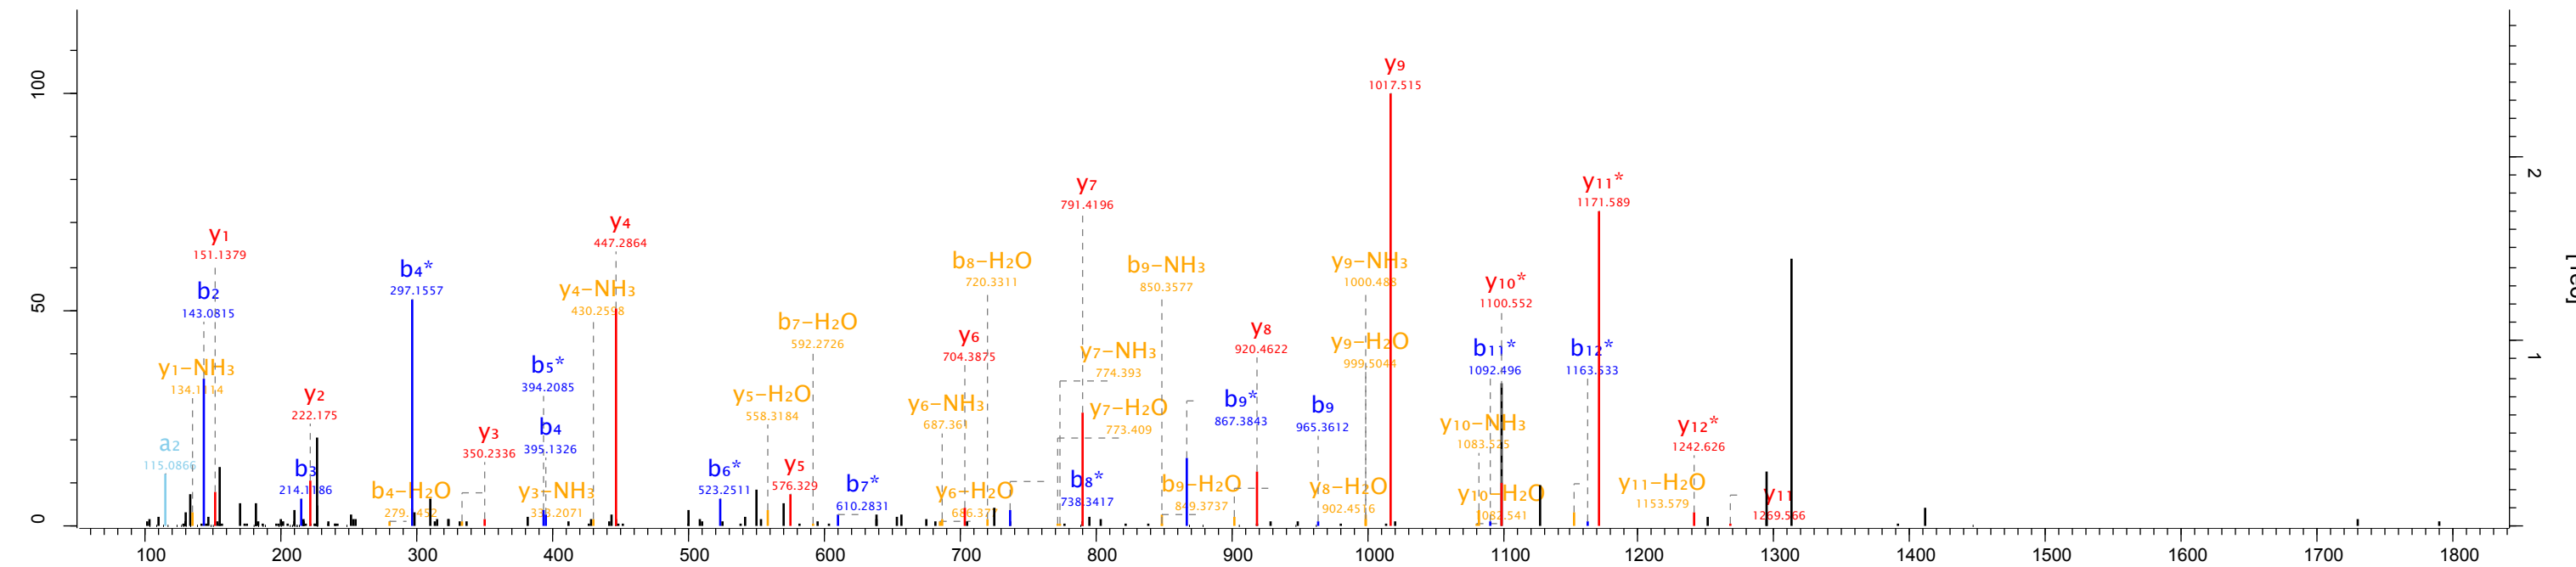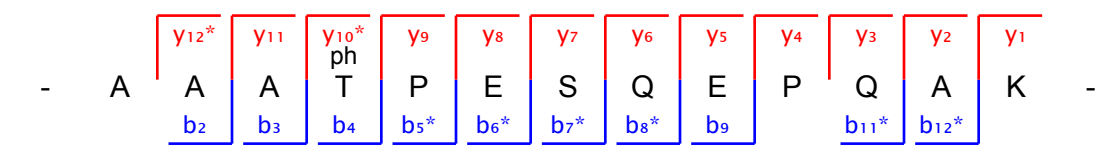

Raw file 20150812\_A375SR\_Phospho\_BR1\_06 Scan 5256 Method FTMS; HCD Score 85.52 m/z 496.76 Gene names MKI67

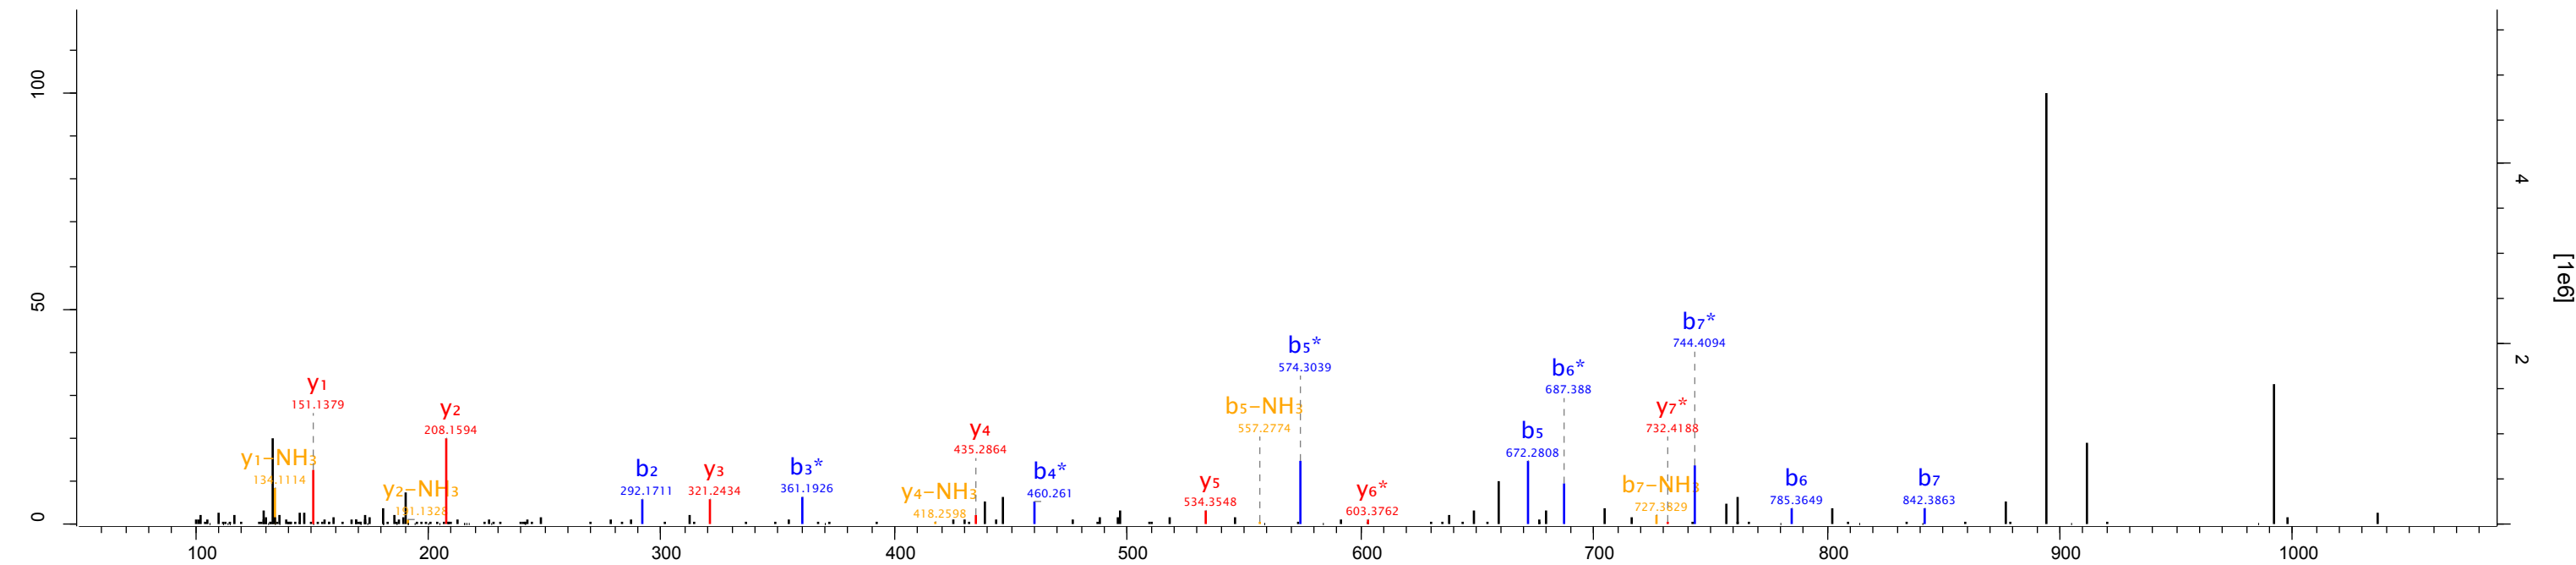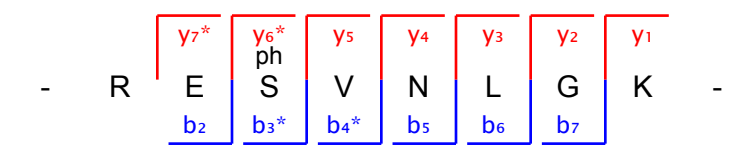

Raw file 20150812\_A375SR\_Phospho\_BR1\_06 Scan 5296 Method FTMS; HCD Score 191.44 m/z 866.89 Gene names DDX51

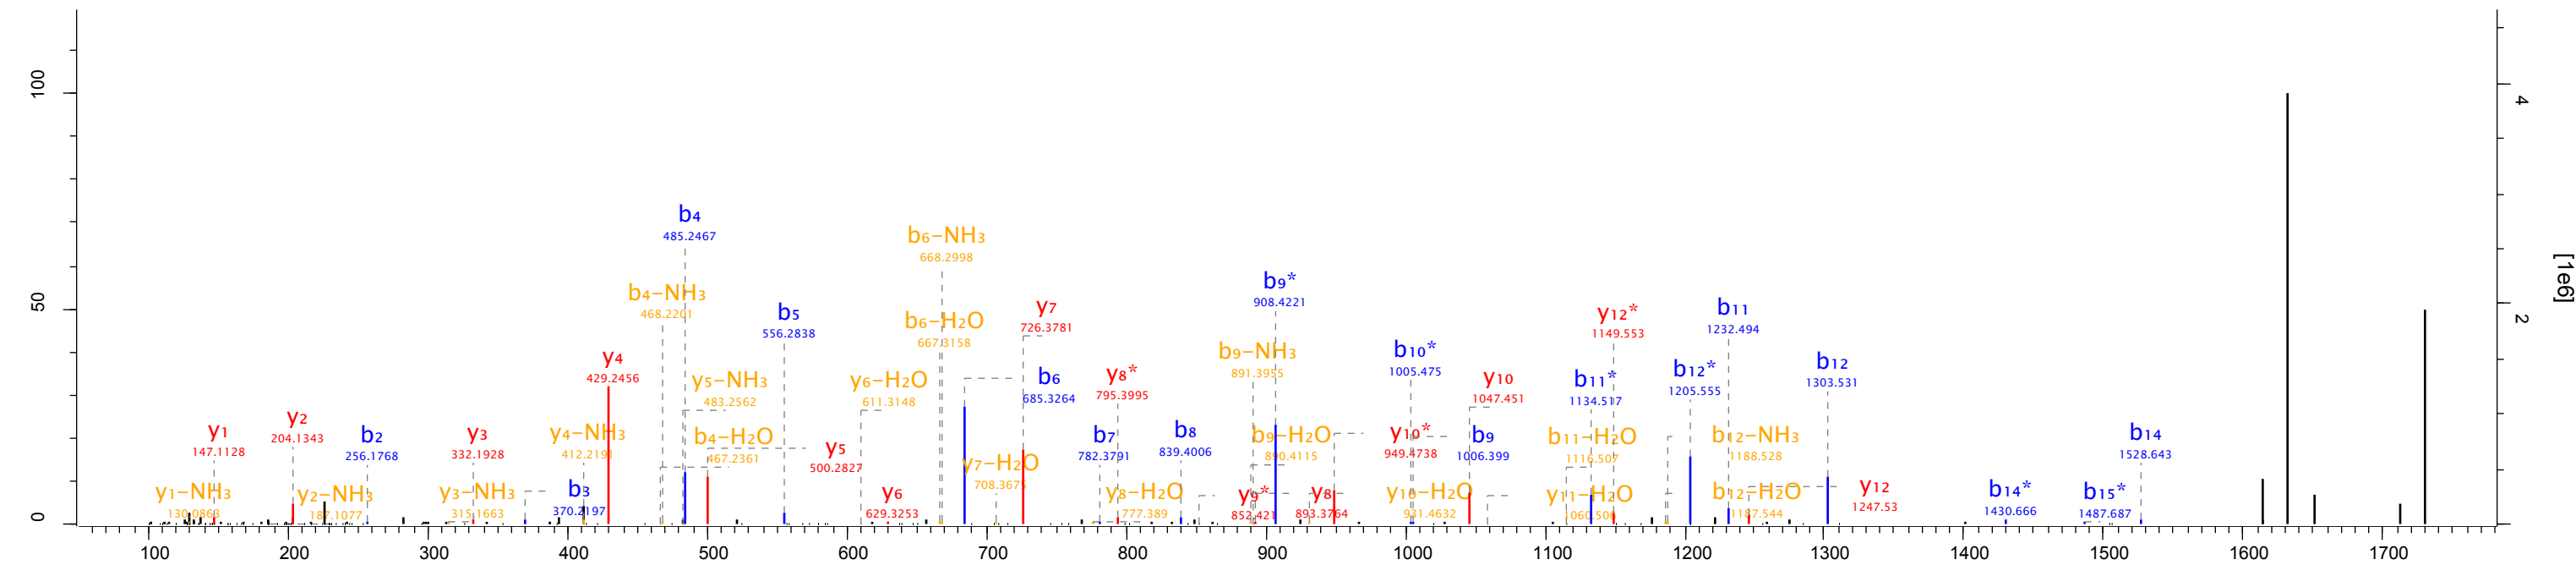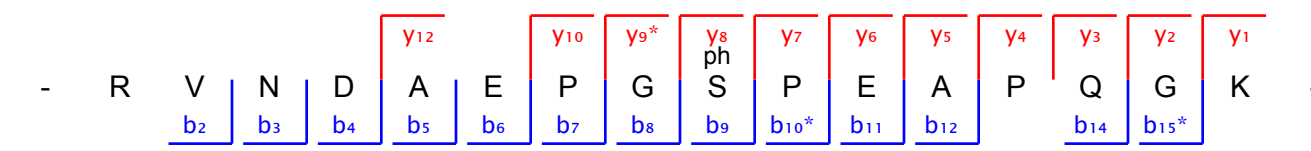

Raw file: 20150812\_A375SR\_Phospho\_BR1\_06  
 Scan: 5656 Method: FTMS; HCD Score: 85.08 m/z: 599.27 Gene names: NASP

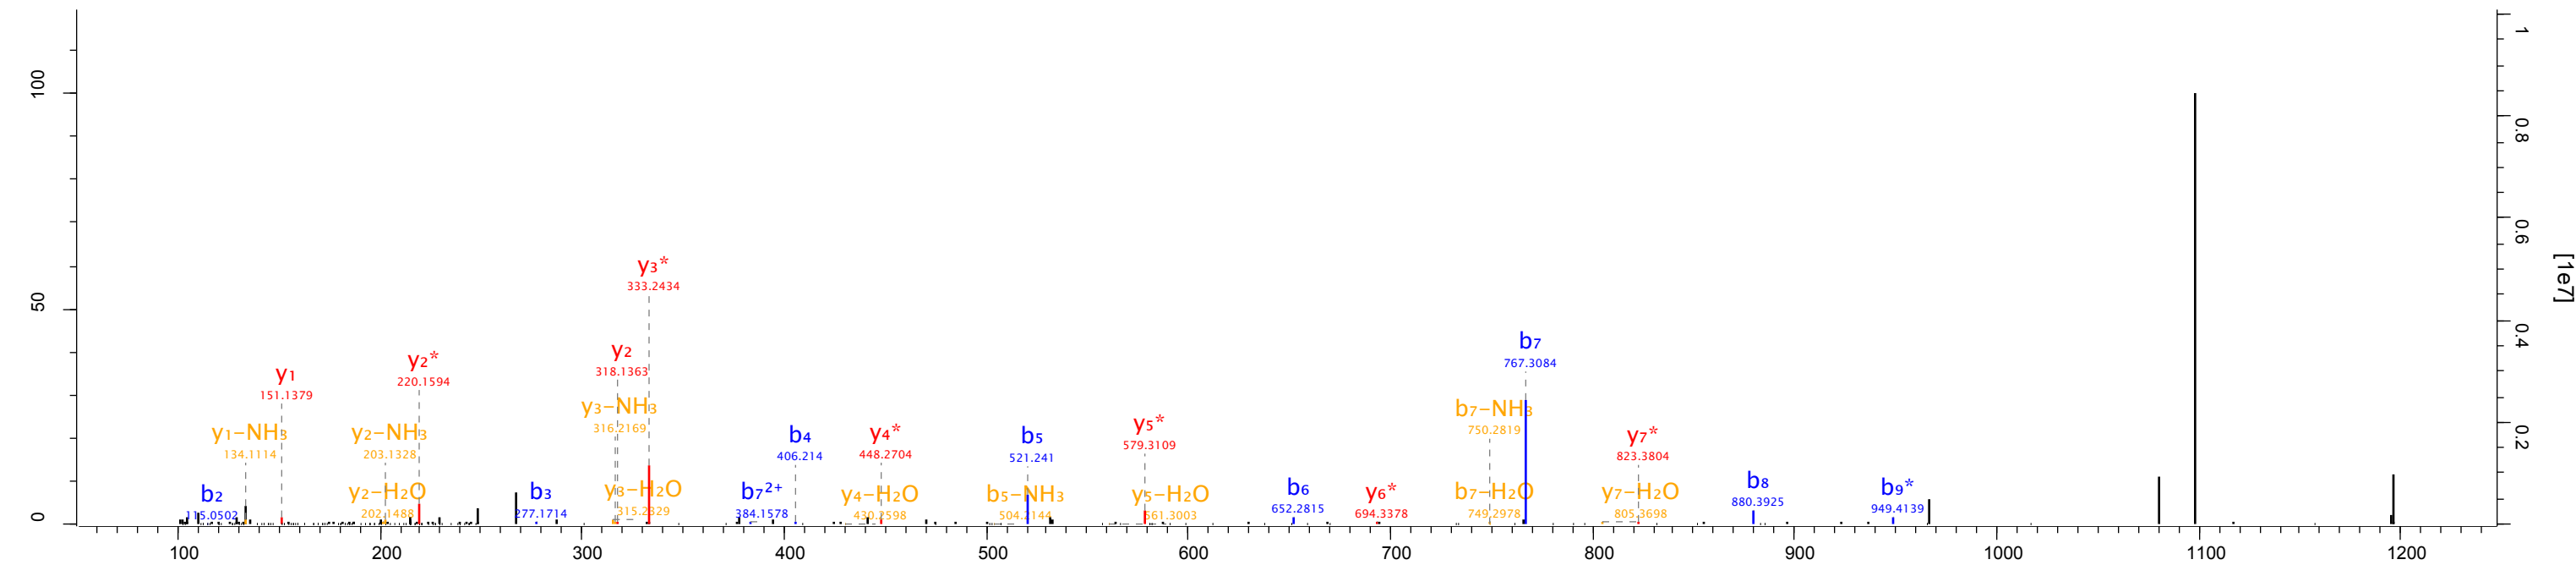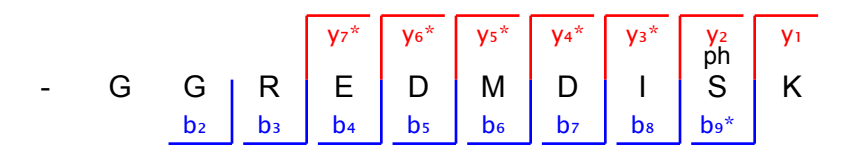



Raw file 20150812\_A375SR\_Phospho\_BR1\_06 Scan 6316 Method FTMS; HCD Score 73.63 m/z 544.3 Gene names MZT2B;MZT2A

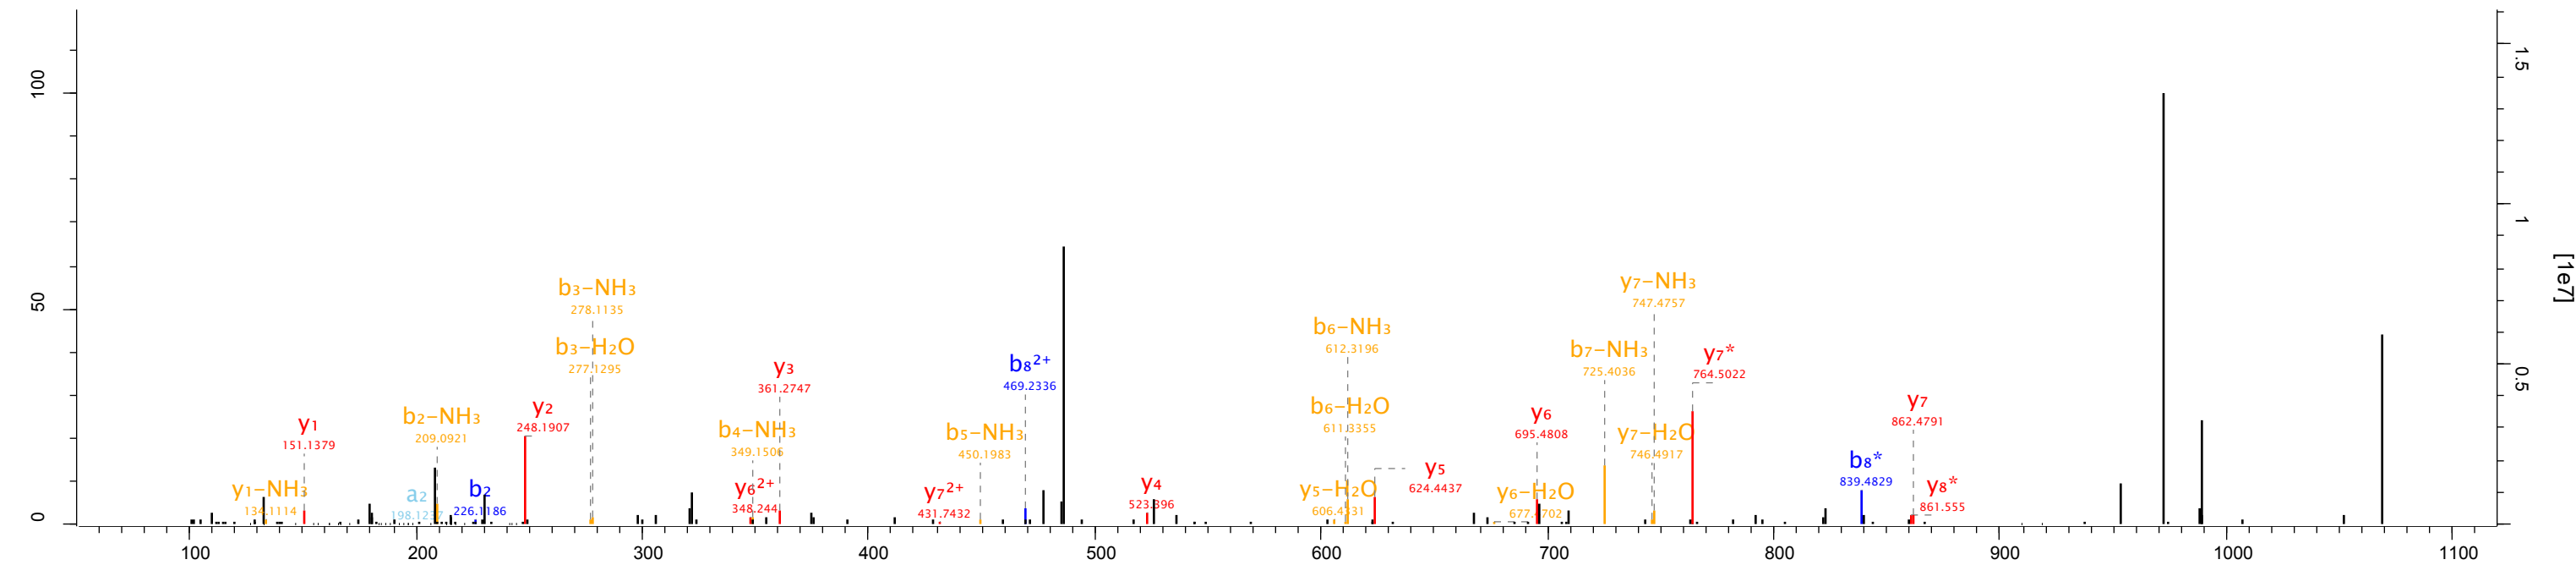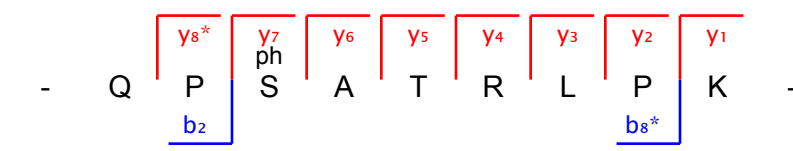

Raw file: 20150812\_A375SR\_Phospho\_BR1\_06  
 Scan: 6686 Method: FTMS; HCD Score: 170.77 m/z: 684.78 Gene names: BRAP

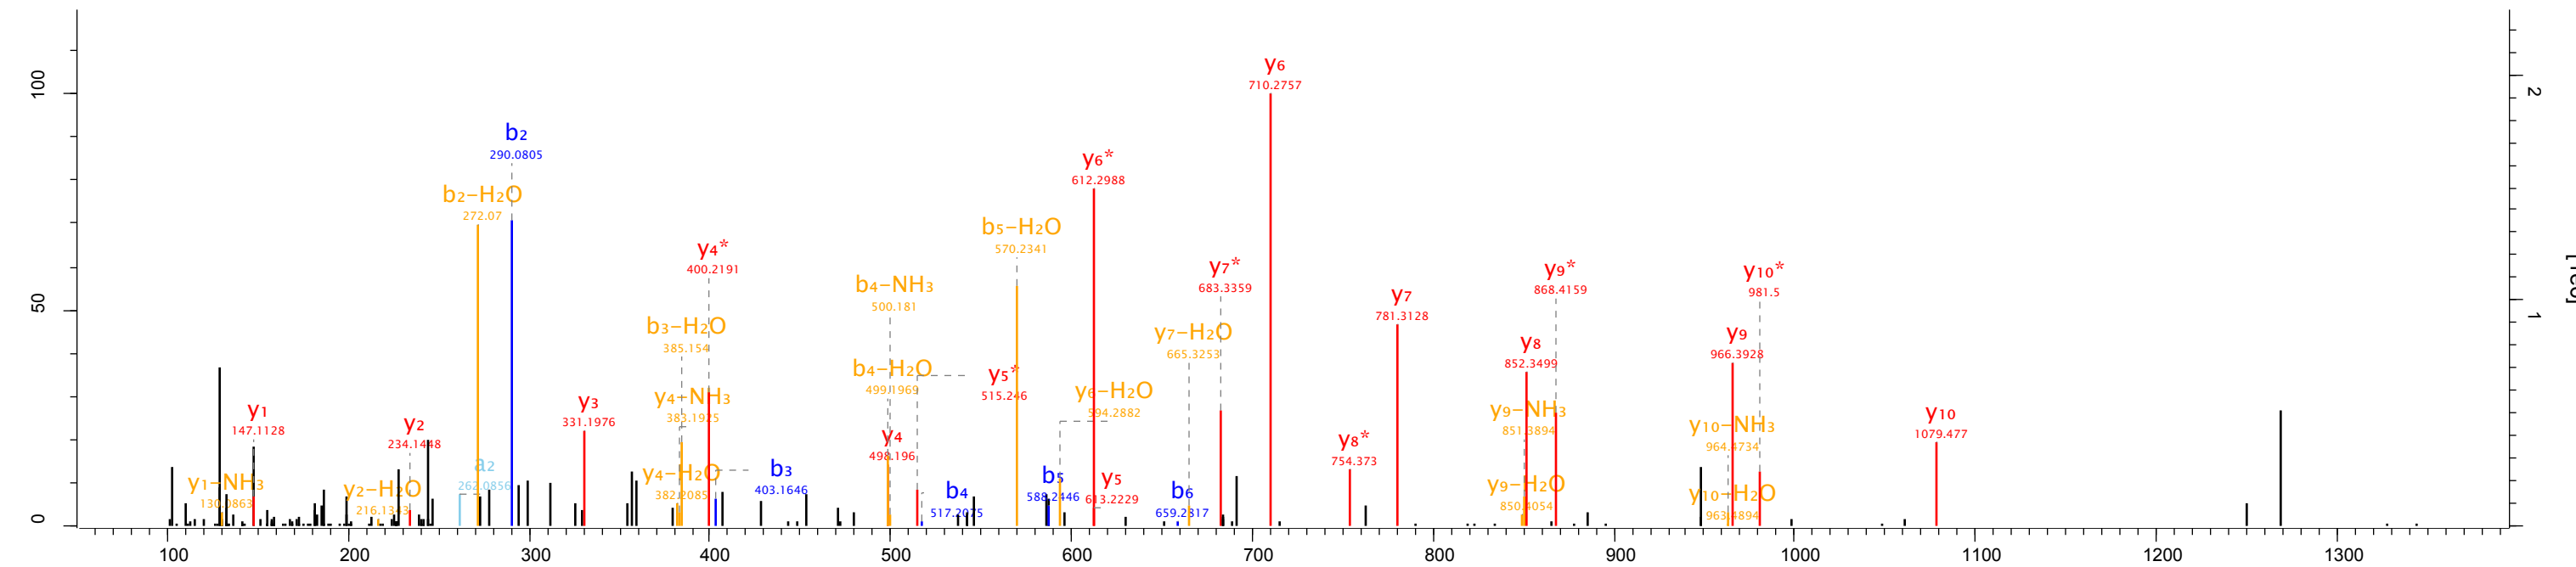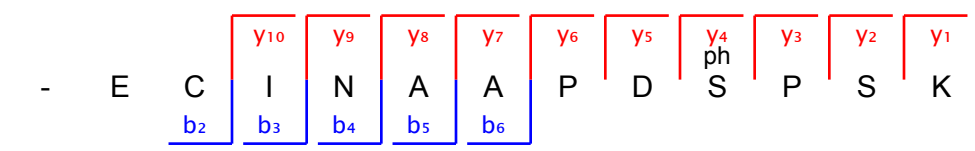

Raw file Scan Method Score m/z Gene names  
 20150812\_A375SR\_Phospho\_BR1\_06 9686 FTMS; HCD 282.37 708.71 EHBP1

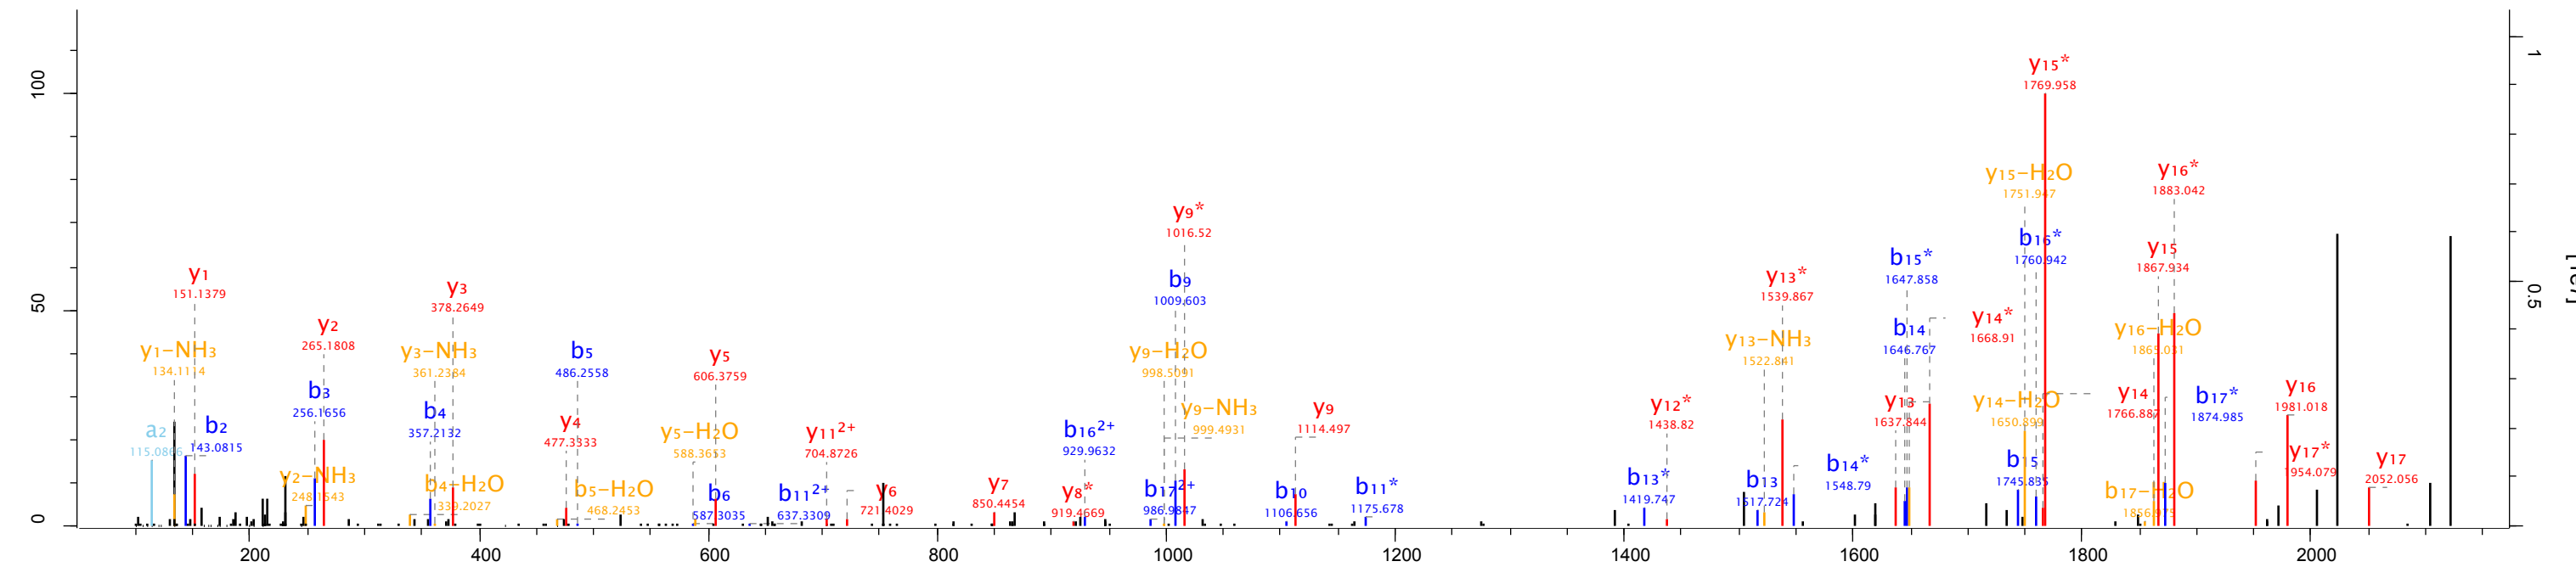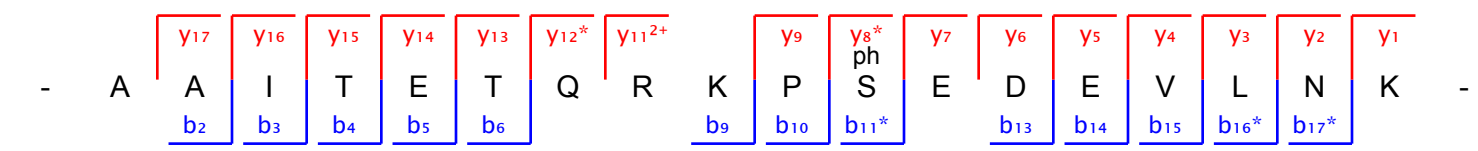

Raw file: 20150812\_A375SR\_Phospho\_BR1\_07  
 Scan: 11456 Method: FTMS; HCD Score: 161.91 m/z: 600.63 Gene names: PPF1A1

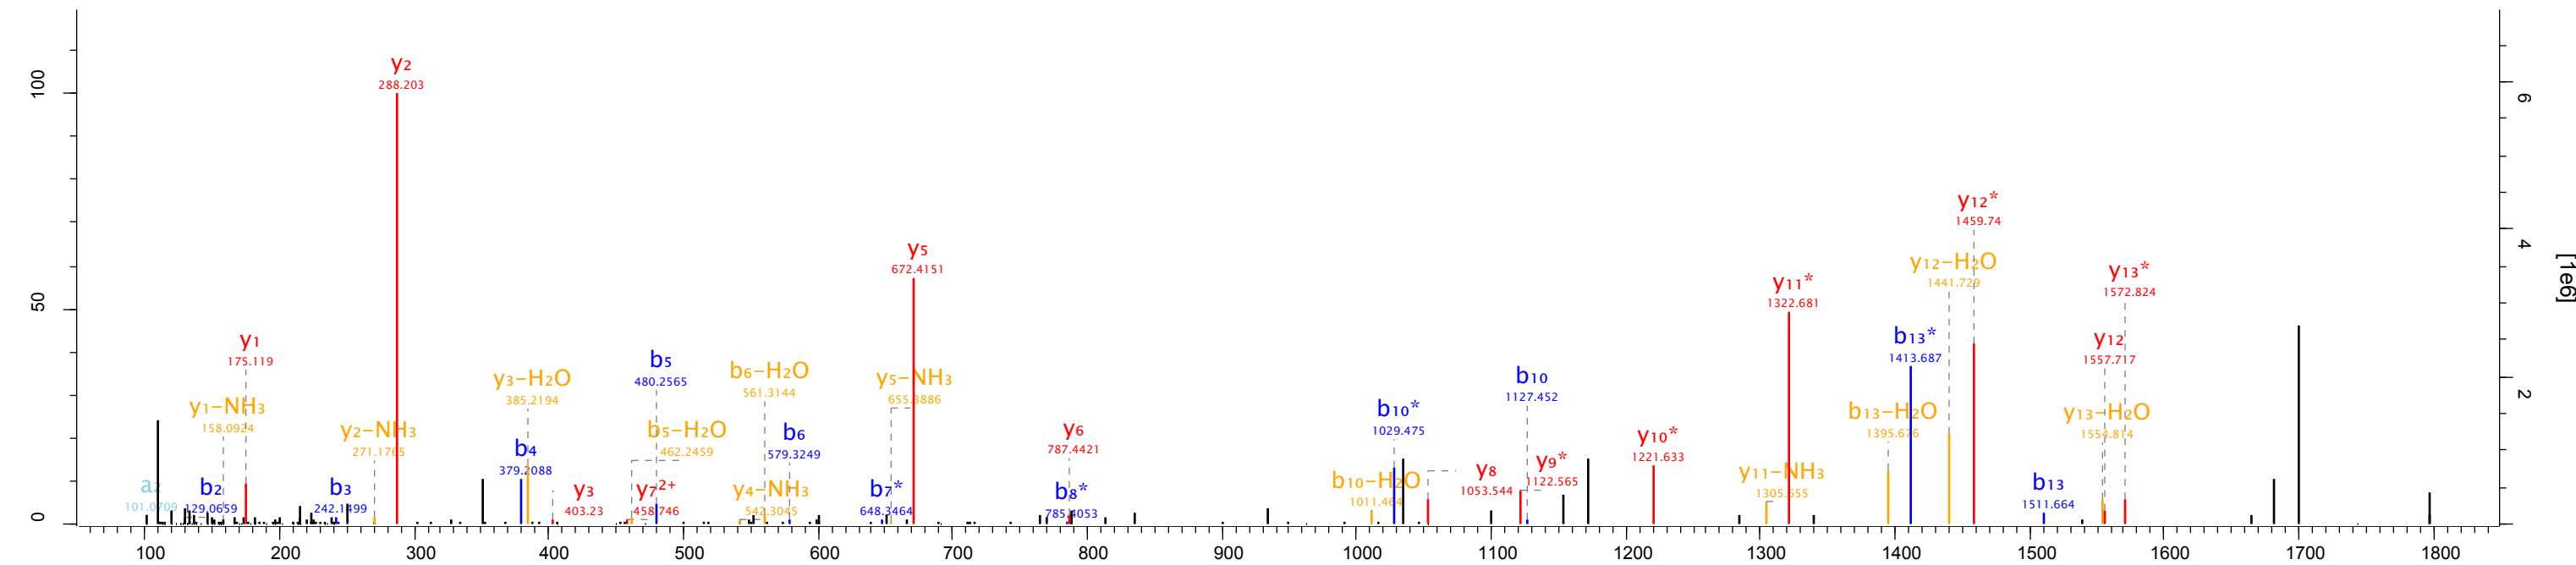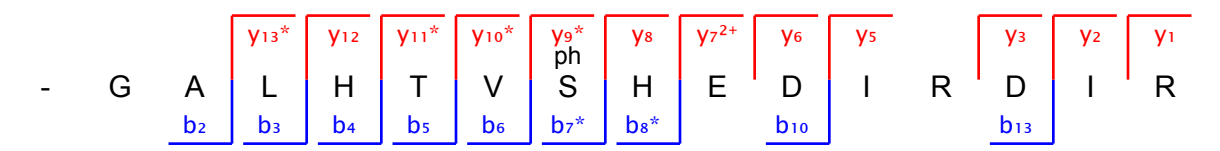

Raw file 20150812\_A375SR\_Phospho\_BR1\_07 Scan 14956 Method FTMS; HCD Score 136.63 m/z 721.32 Gene names APEH

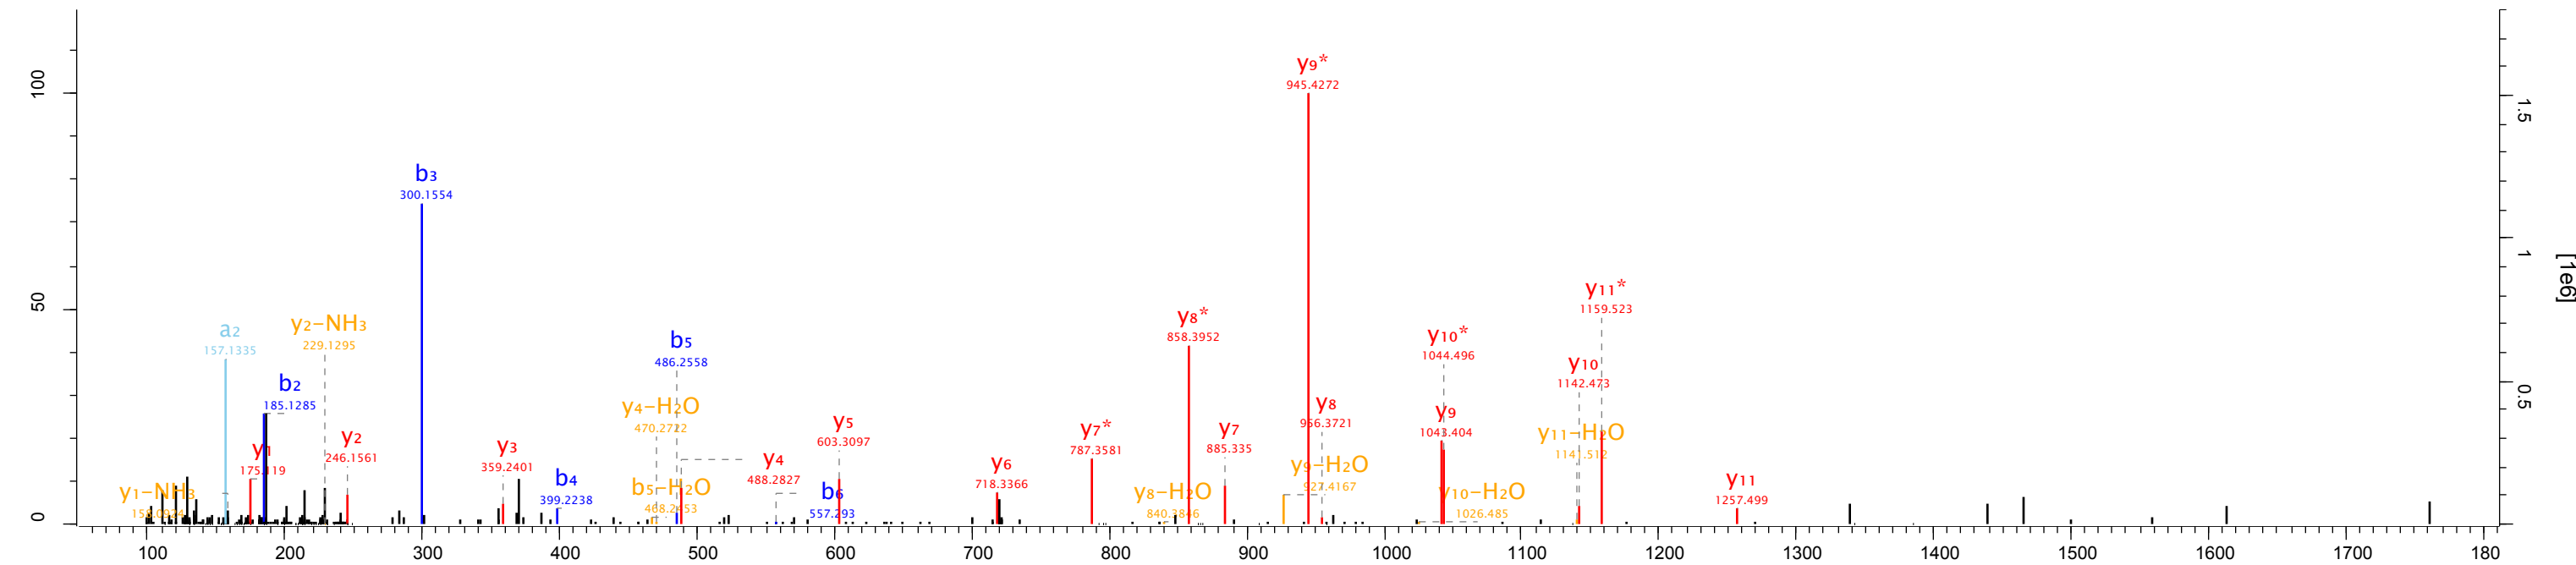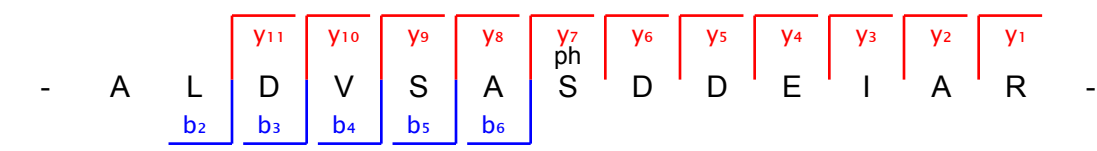

Raw file: 20150812\_A375SR\_Phospho\_BR1\_07  
 Scan: 16436 Method: FTMS; HCD Score: 183.07 m/z: 1468.06 Gene names: SSRP1

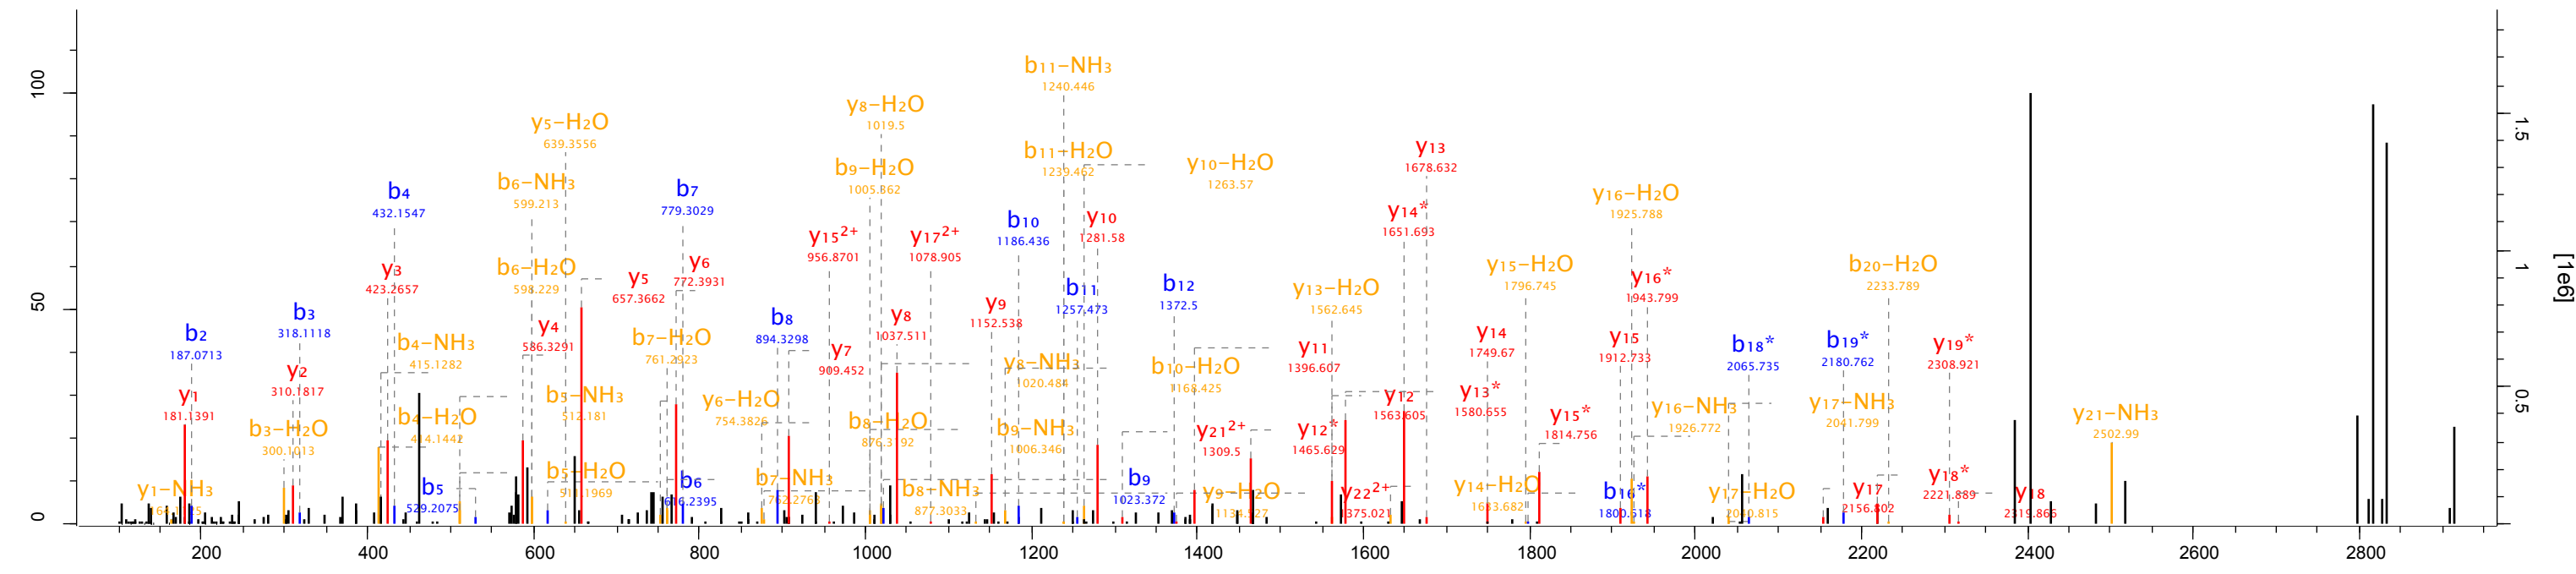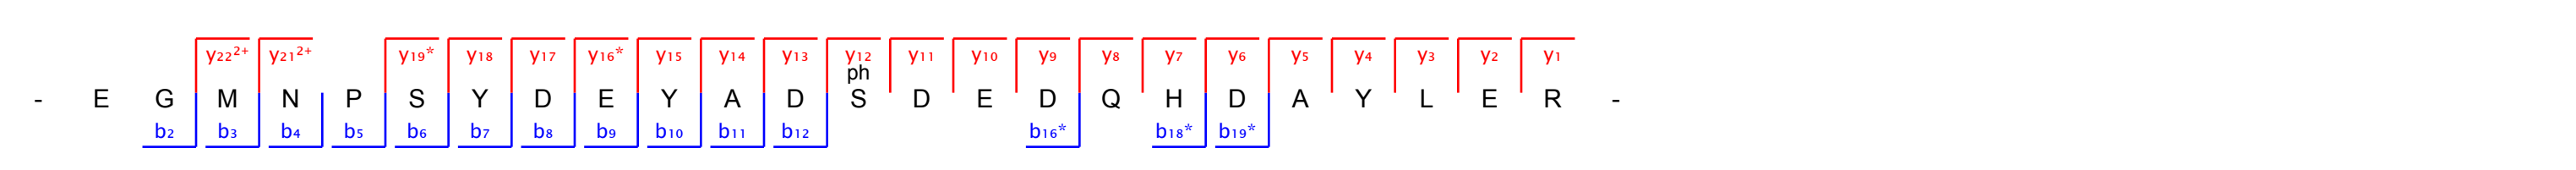

Raw file 20150812\_A375SR\_Phospho\_BR1\_07 Scan 21346 Method FTMS; HCD Score 177.91 m/z 688.28 Gene names PFDN4

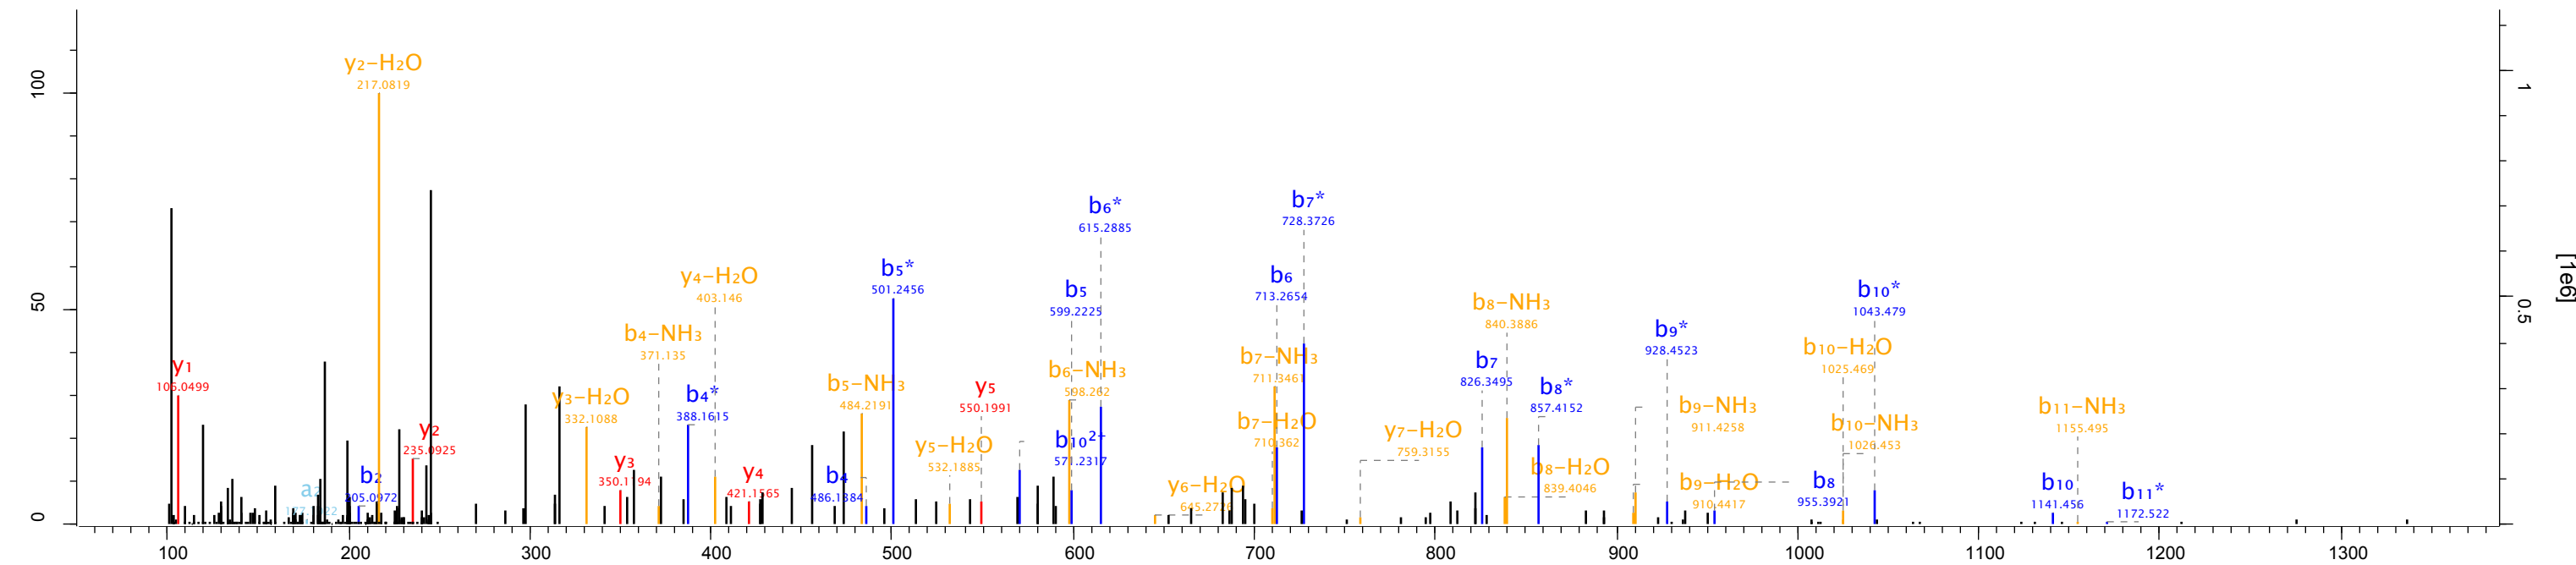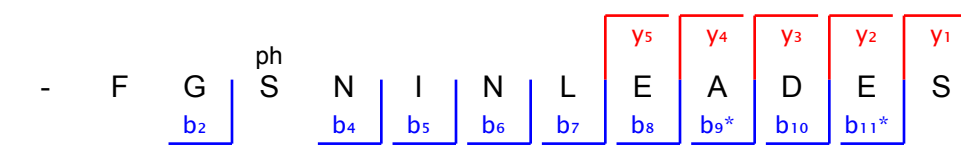

Raw file 20150812\_A375SR\_Phospho\_BR1\_07 Scan 22706 Method FTMS; HCD Score 155.47 m/z 803.07 Gene names ZNF592

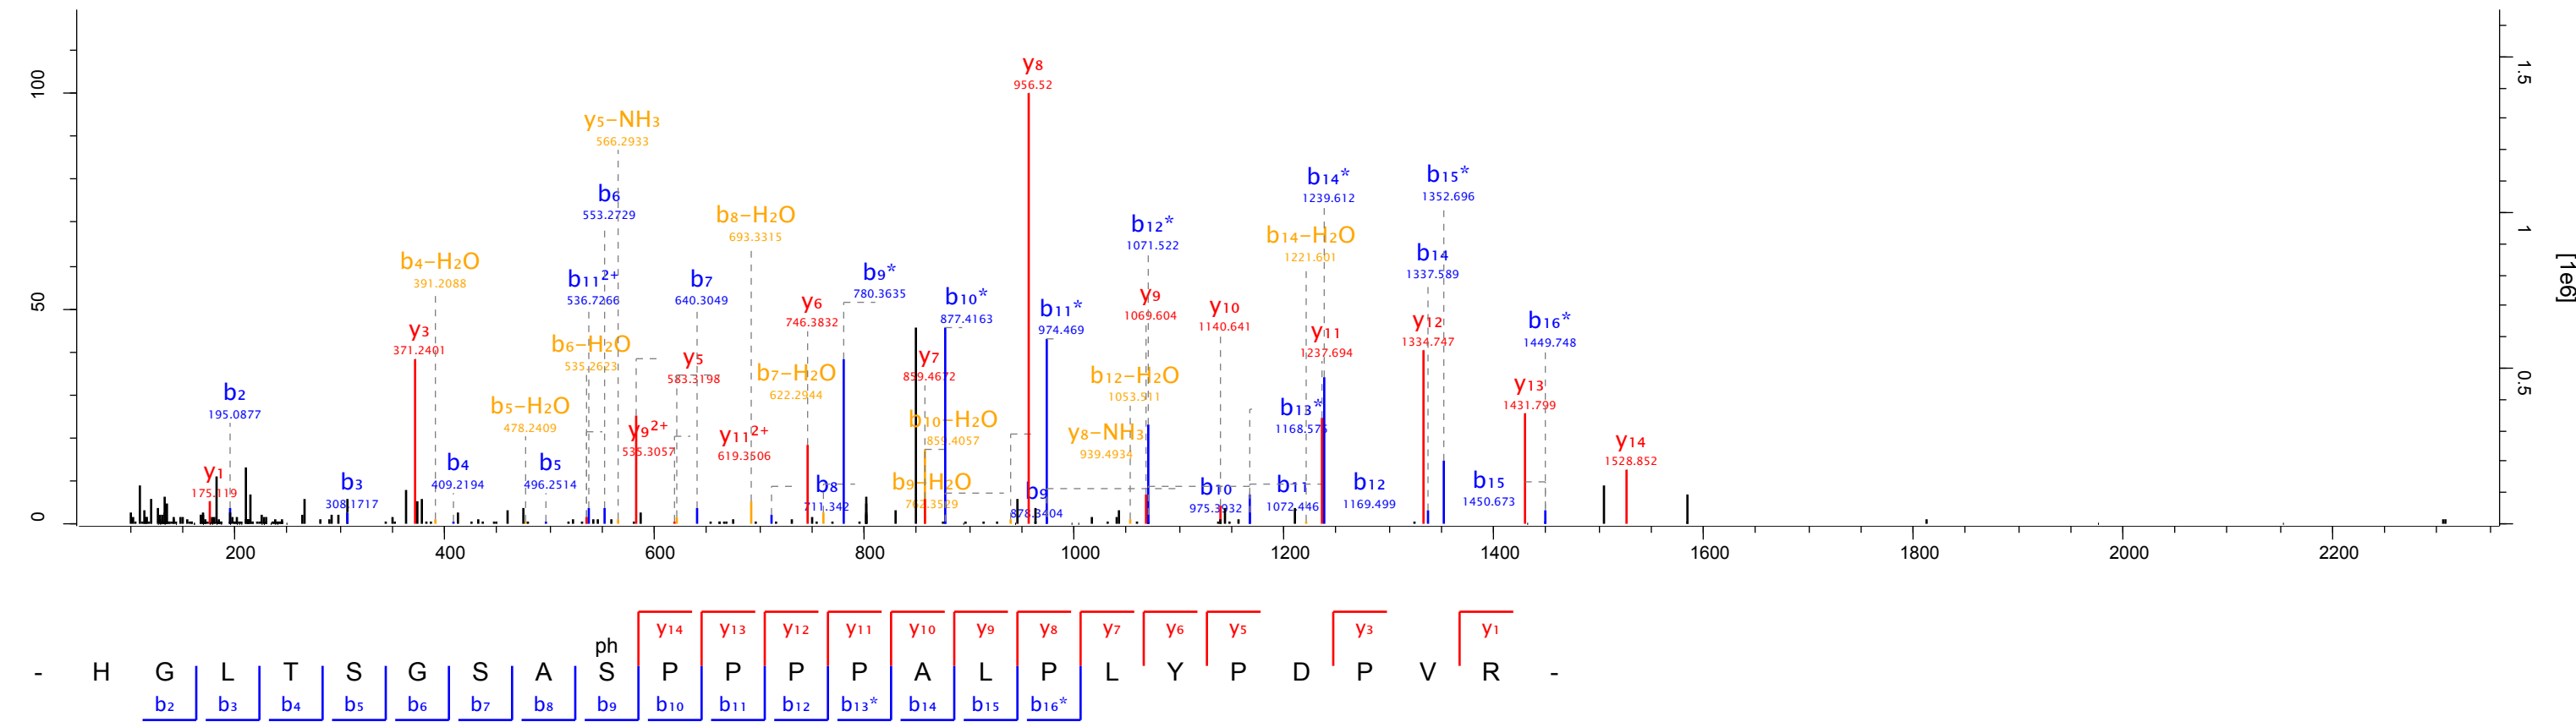



Raw file: 20150812\_A375SR\_Phospho\_BR1\_07  
 Scan: 24506 Method: FTMS; HCD Score: 159.26 m/z: 728.87 Gene names: SON

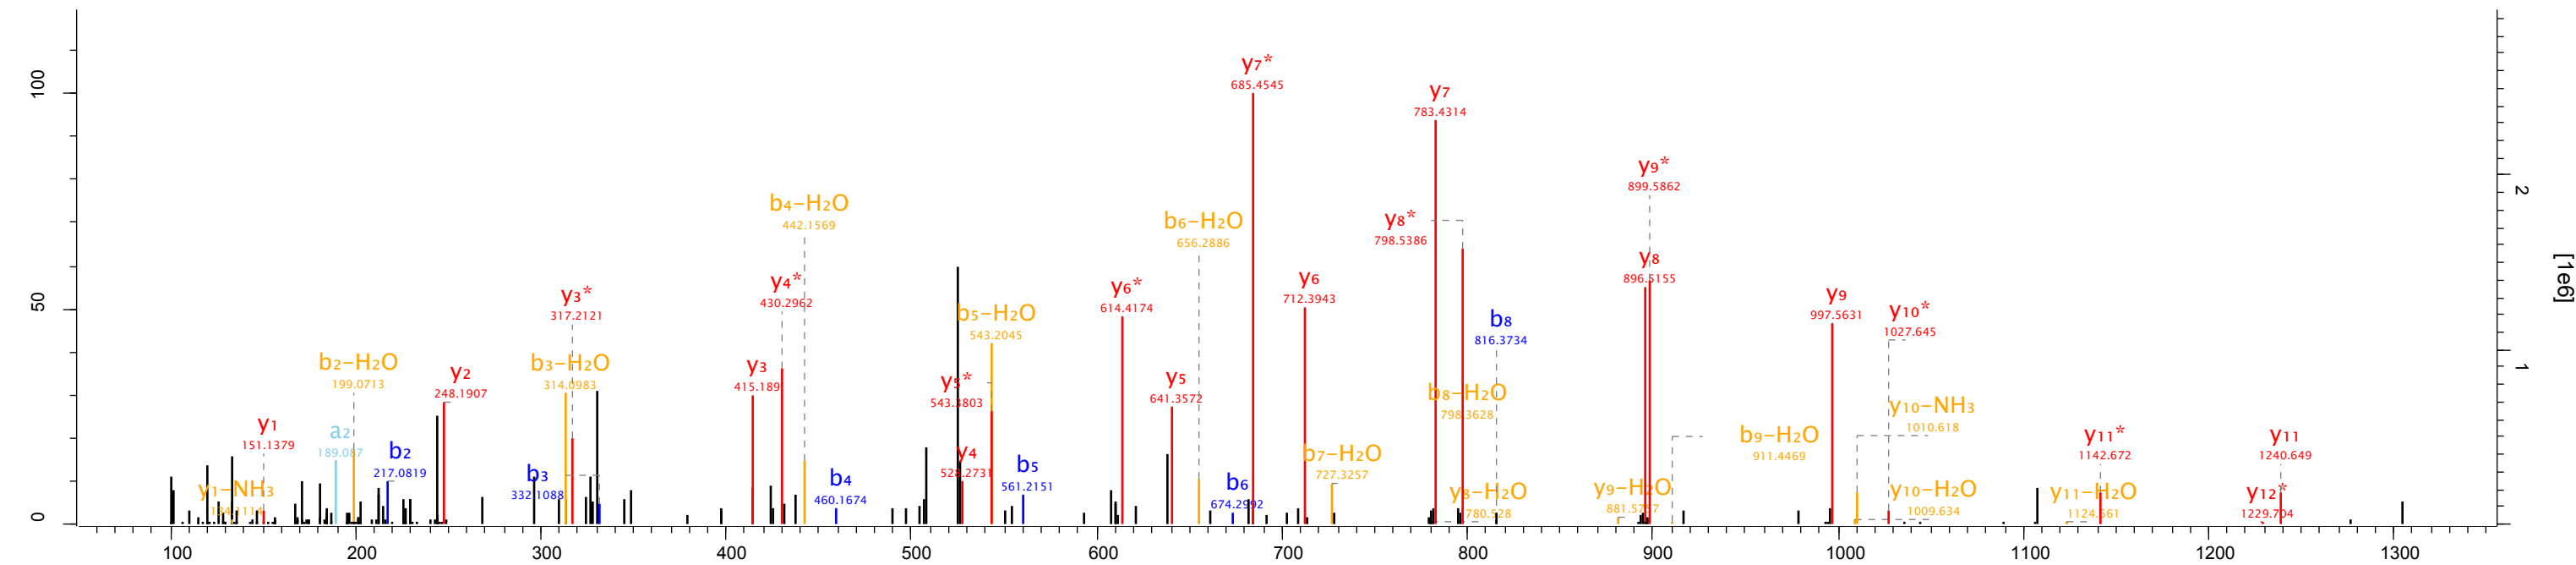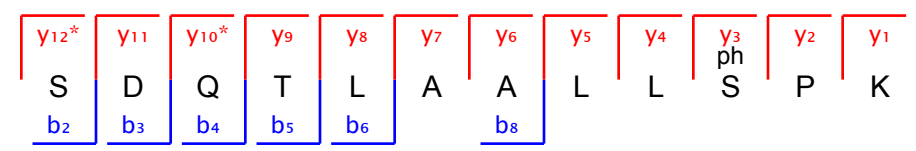

Raw file 20150812\_A375SR\_Phospho\_BR1\_07 Scan 25326 Method FTMS; HCD Score 255.83 m/z 1070.02 Gene names PDPK1;PDPK2

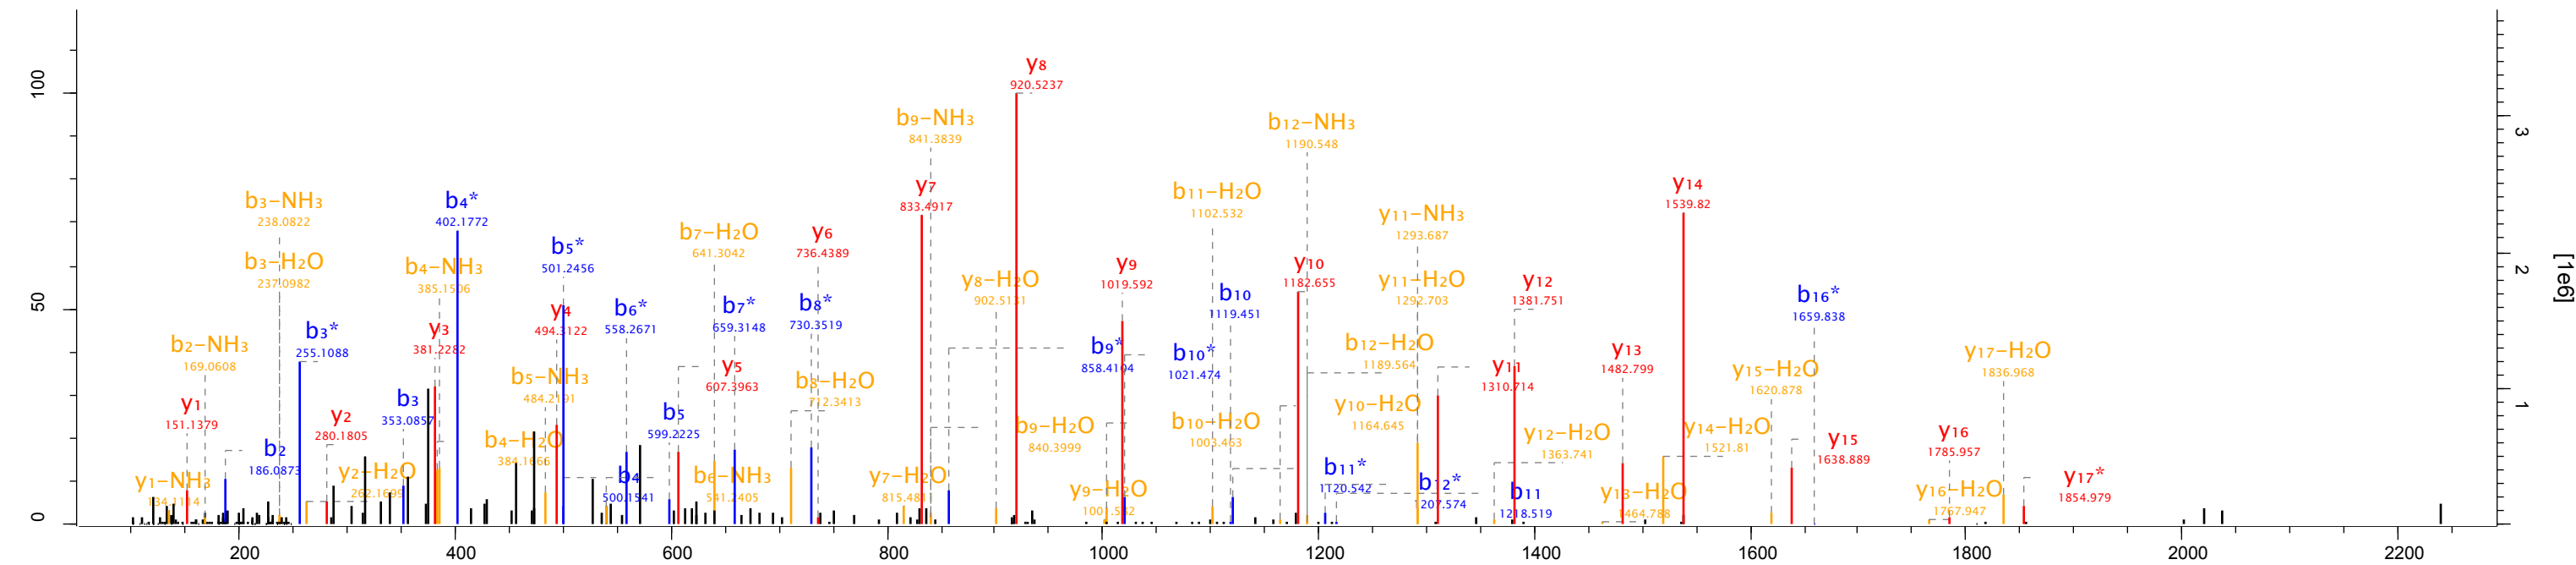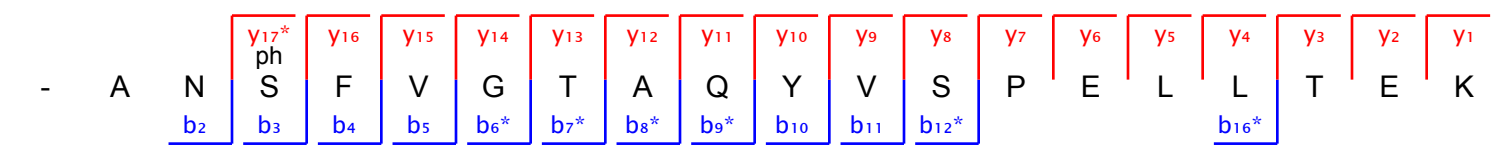

Raw file  
 20150812\_A375SR\_Phospho\_BR1\_07  
 Scan 27156 Method FTMS; HCD Score 149.45 m/z 992.15 Gene names SNRK

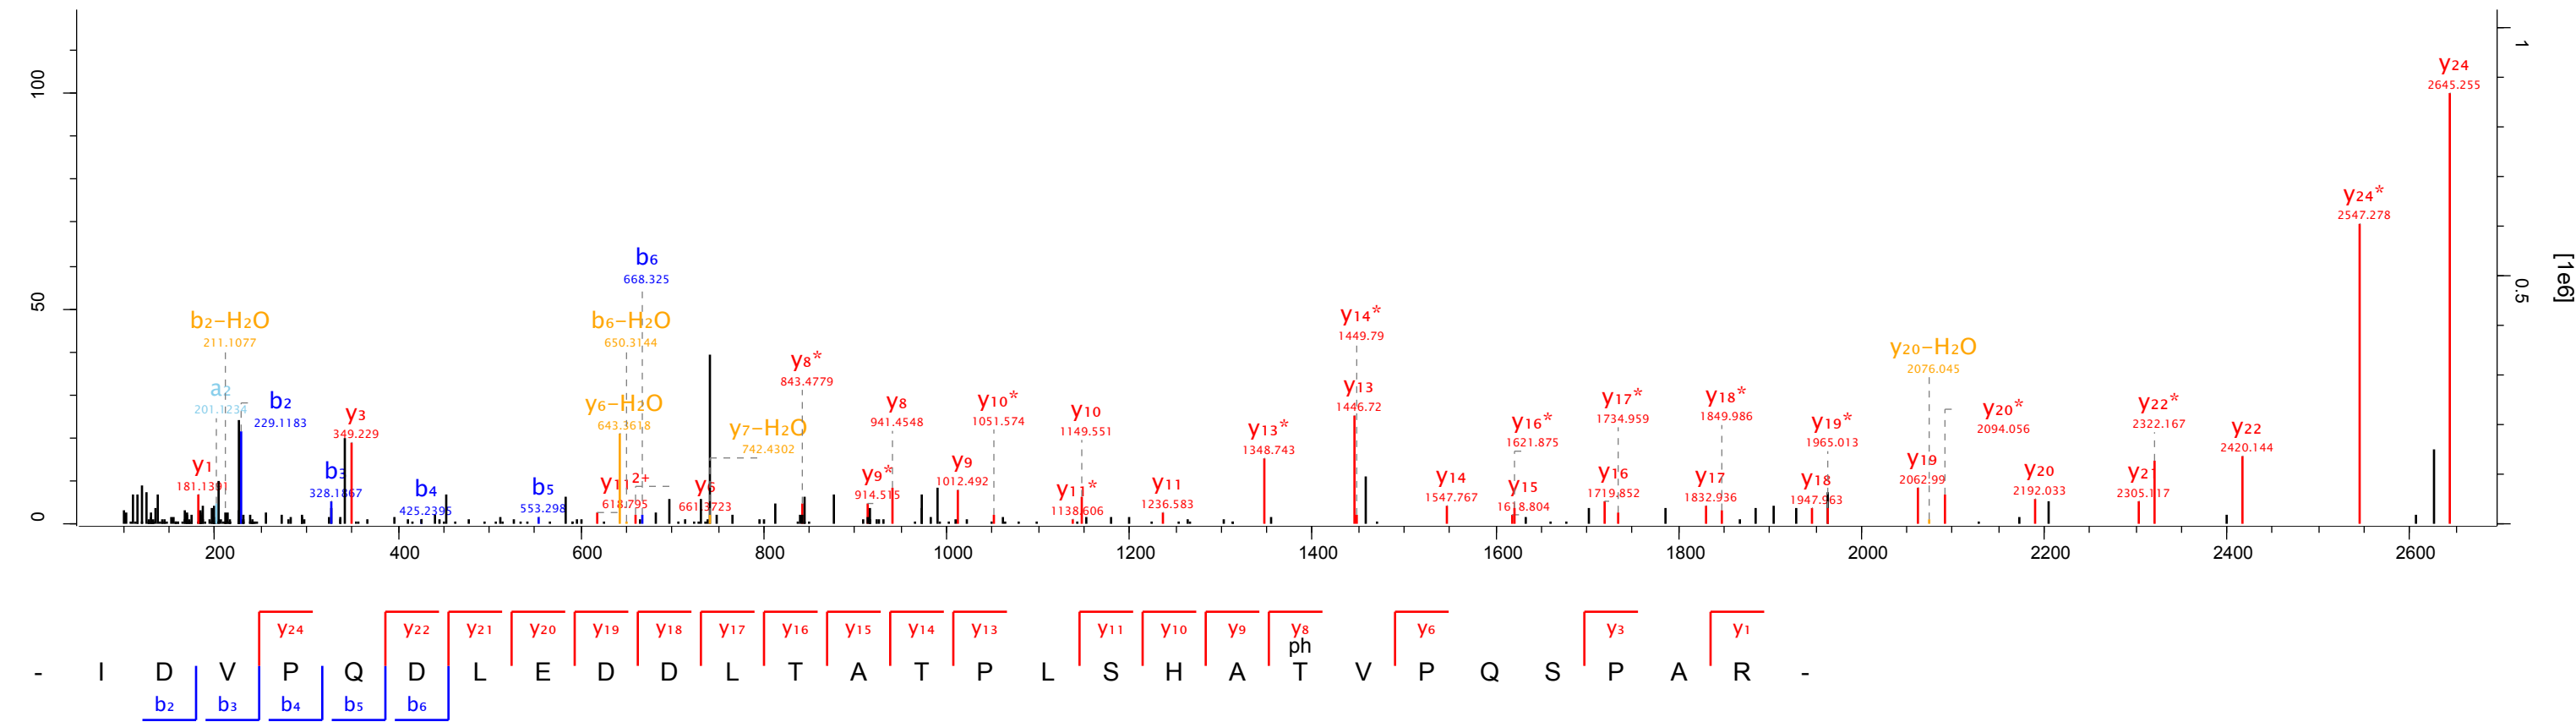

Raw file: 20150812\_A375SR\_Phospho\_BR1\_07  
 Scan: 3086 Method: FTMS; HCD Score: 241.71 m/z: 877.86 Gene names: ZBTB7A

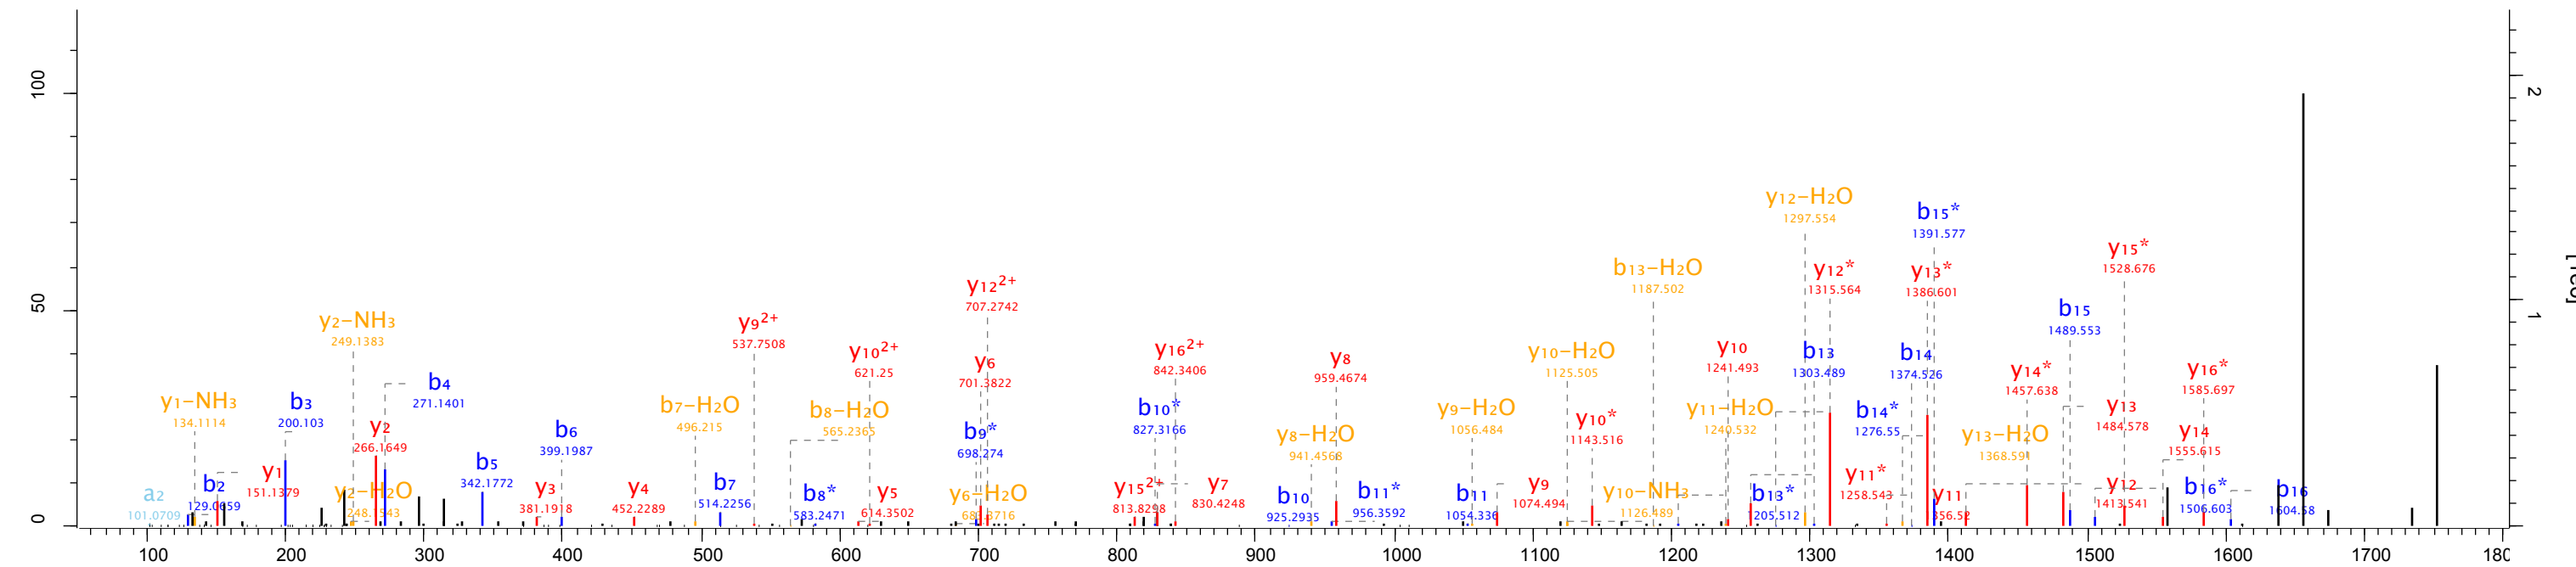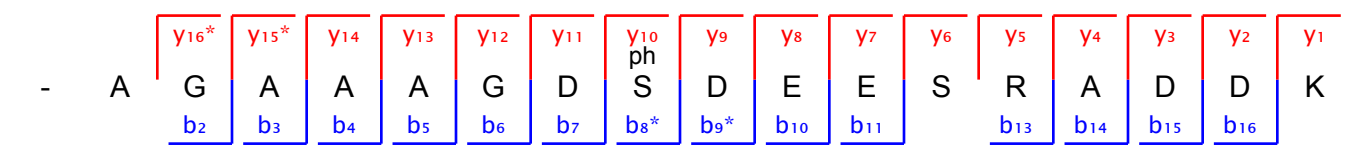

Raw file: 20150812\_A375SR\_Phospho\_BR1\_07  
 Scan: 3126 Method: FTMS; HCD Score: 321.67 m/z: 812.85 Gene names: SPTBN1

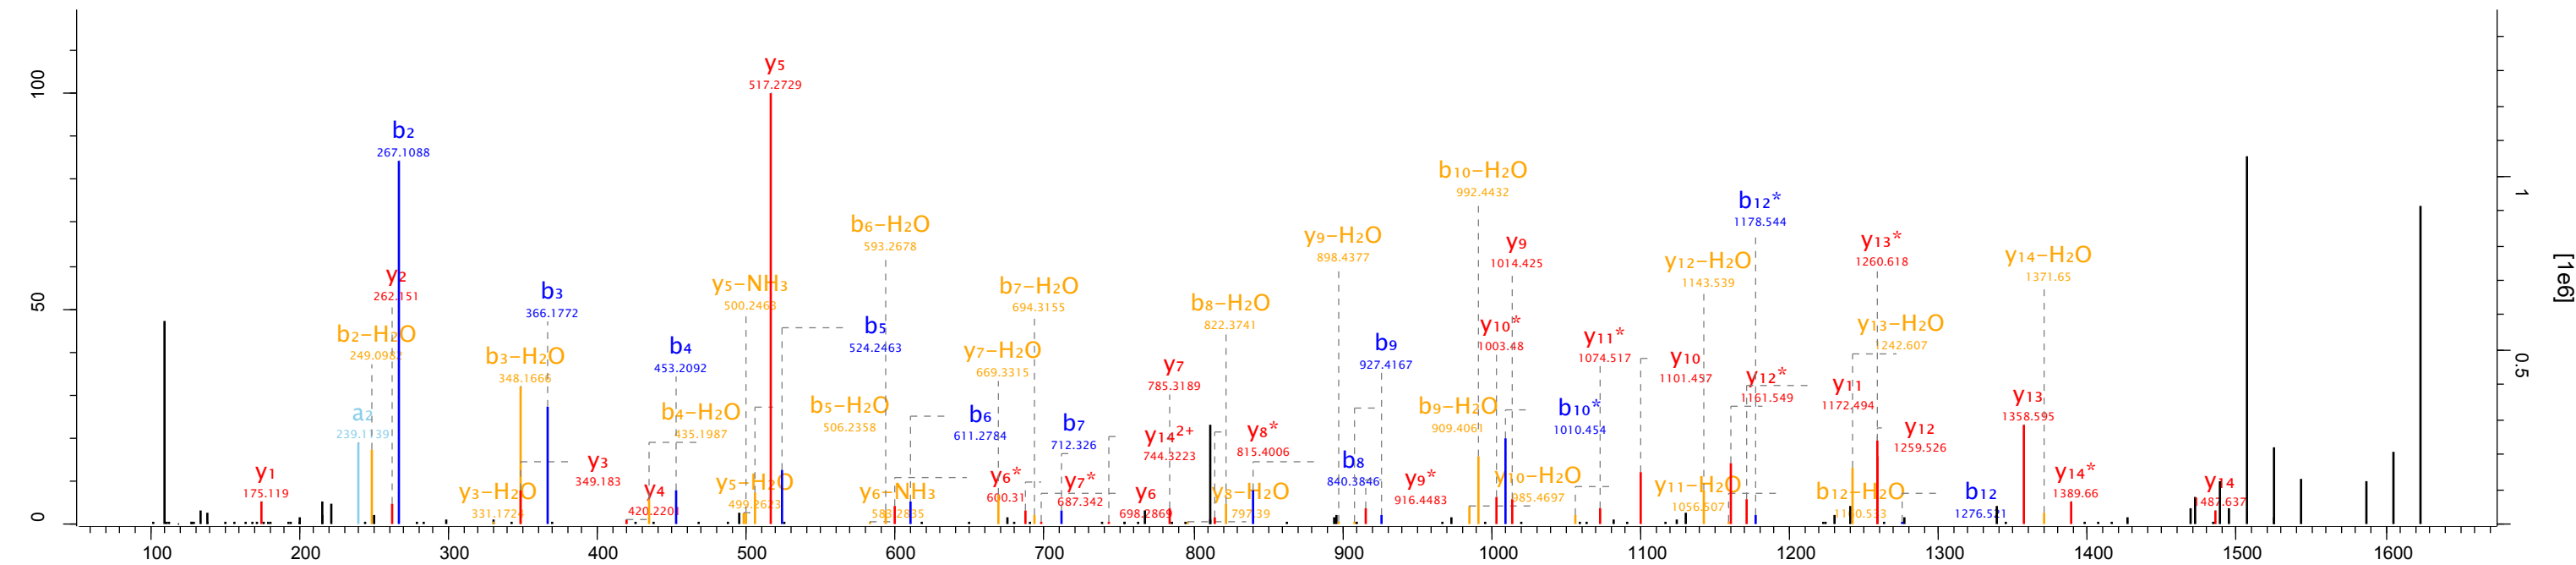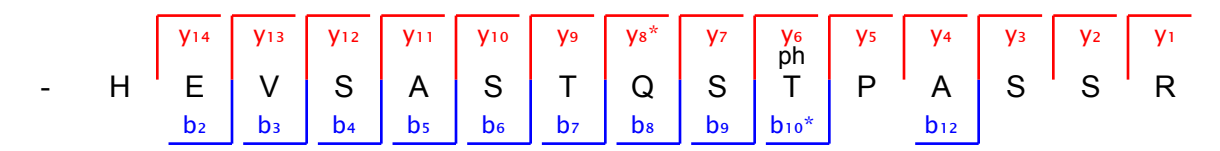

Raw file: 20150812\_A375SR\_Phospho\_BR1\_07  
 Scan: 5156 Method: FTMS; HCD Score: 126.48 m/z: 467.2 Gene names: IRS2

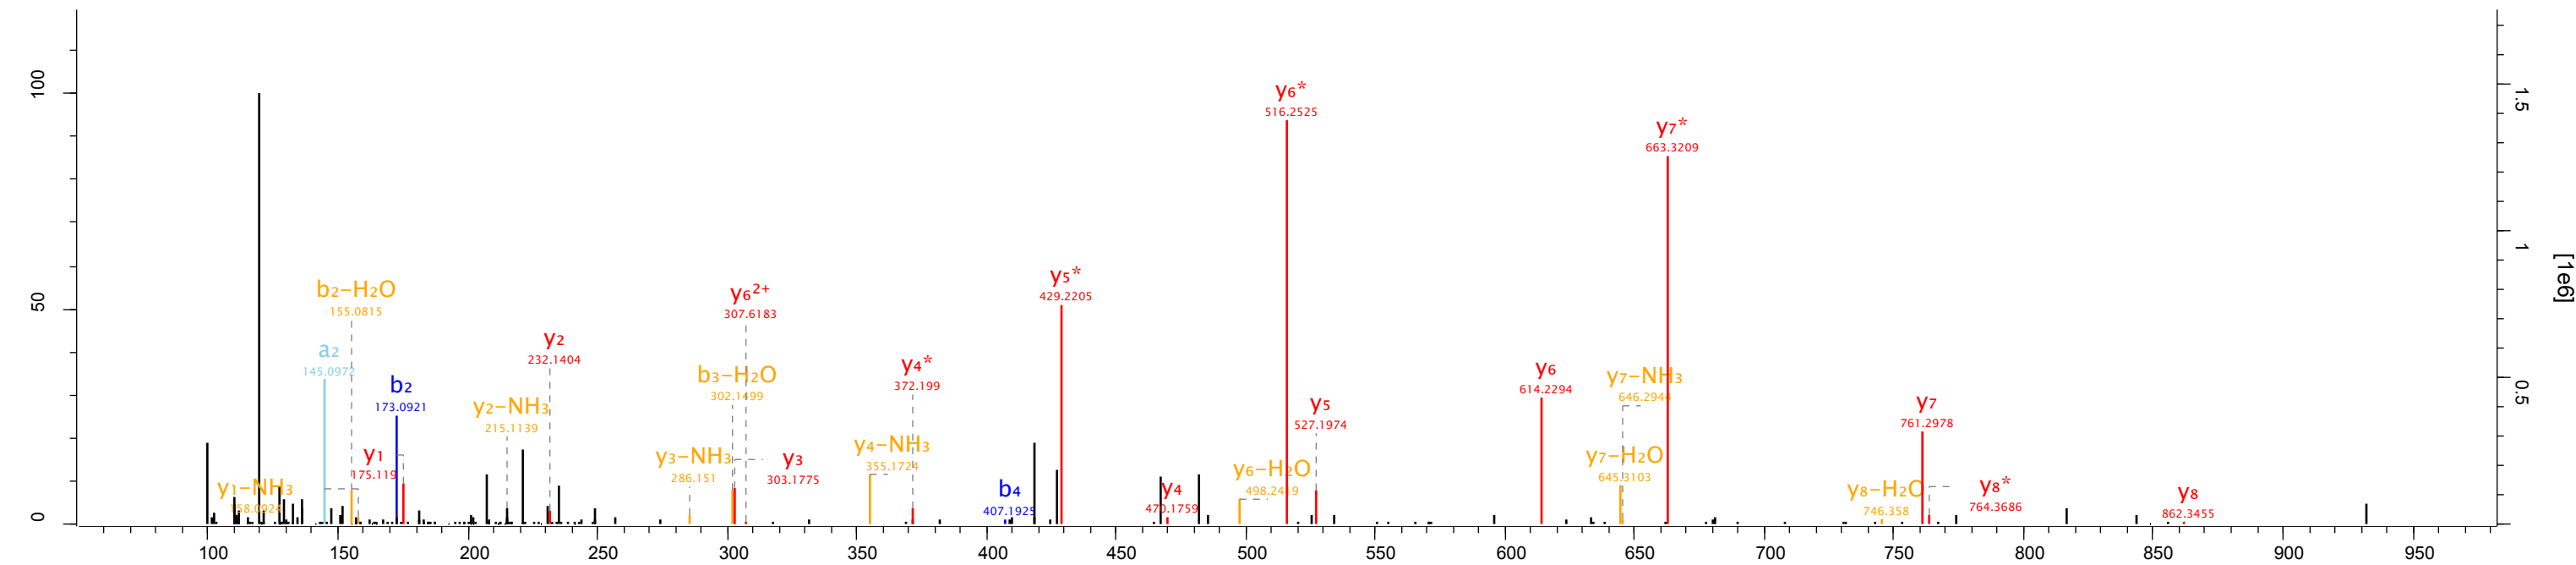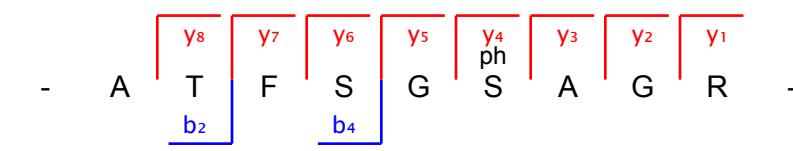

Raw file: 20150812\_A375SR\_Phospho\_BR1\_07  
 Scan: 8136 Method: FTMS; HCD Score: 159.75 m/z: 703.28 Gene names: RABGAP1

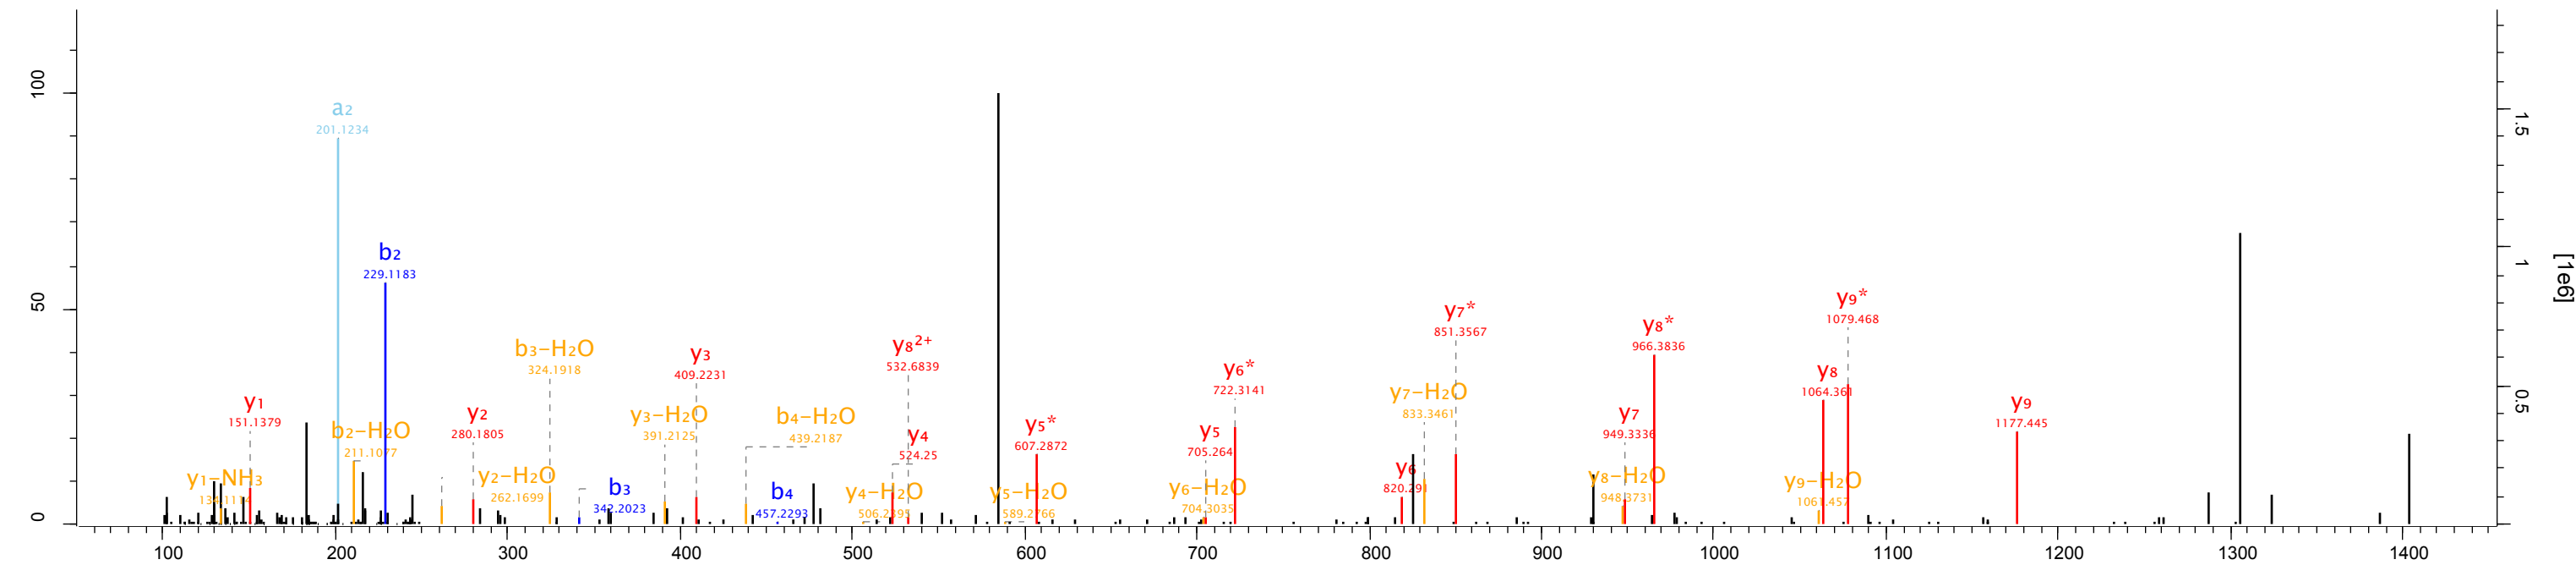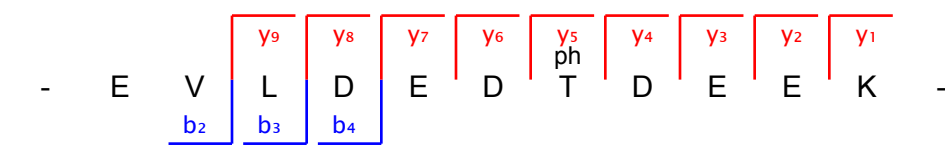

Raw file: 20150812\_A375SR\_Phospho\_BR1\_07  
 Scan: 8536 Method: FTMS; HCD Score: 75.57 m/z: 525.26 Gene names: RPAIN

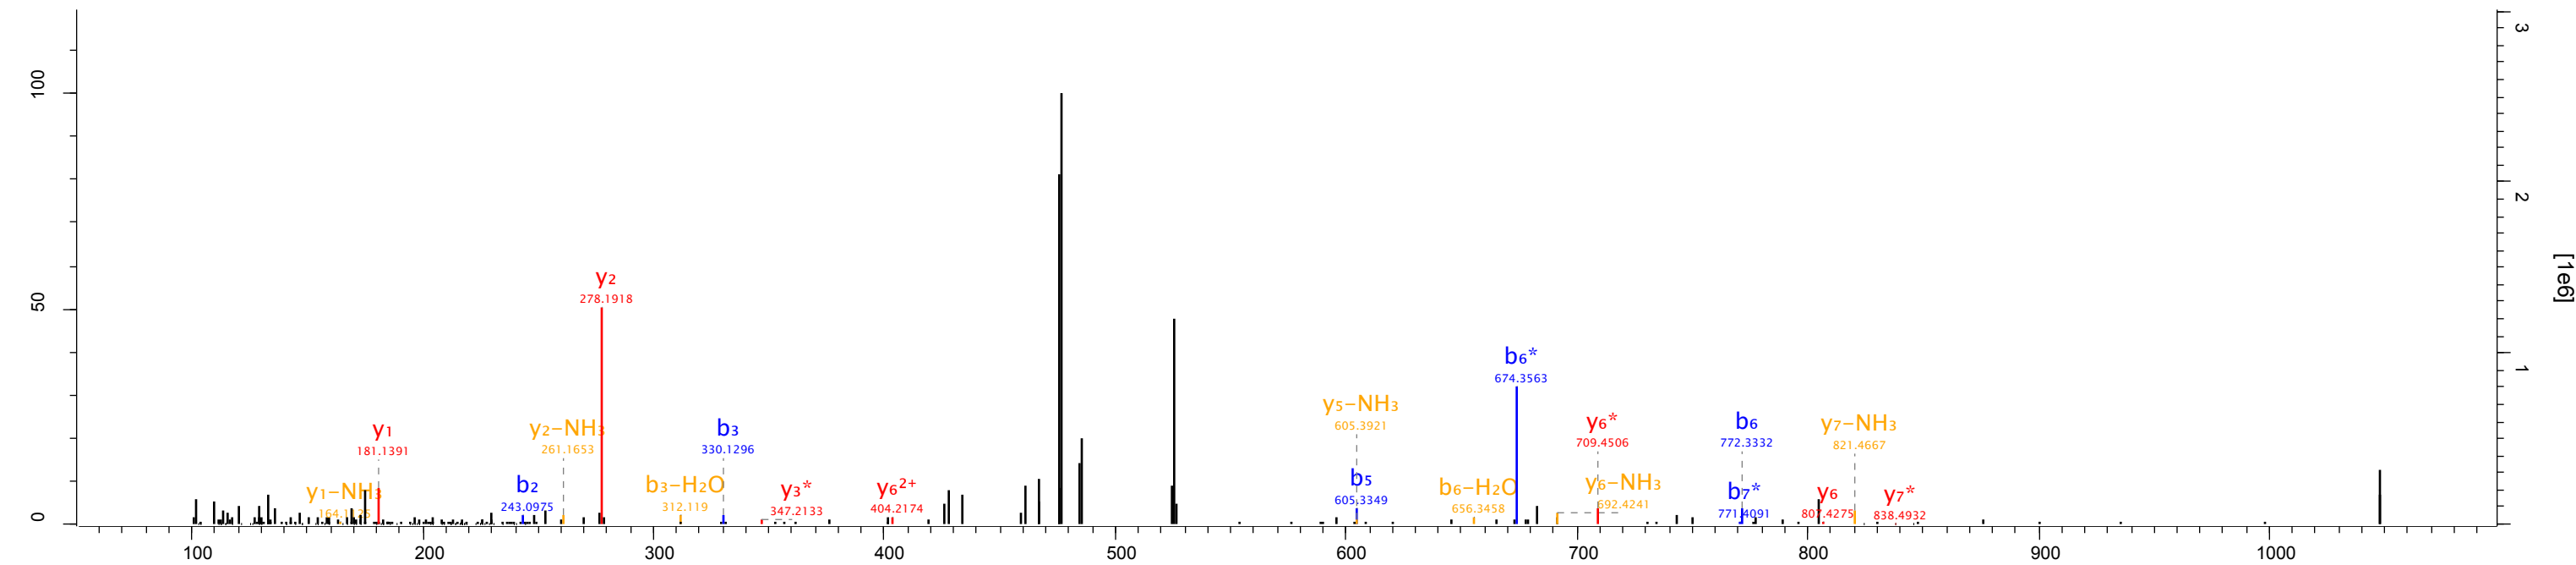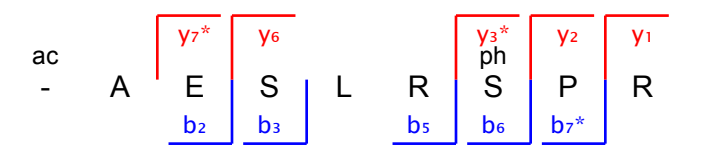



Raw file 20150812\_A375SR\_Phospho\_BR1\_07 Scan 8896 Method FTMS; HCD Score 181.04 m/z 638.82 Gene names CCNL2

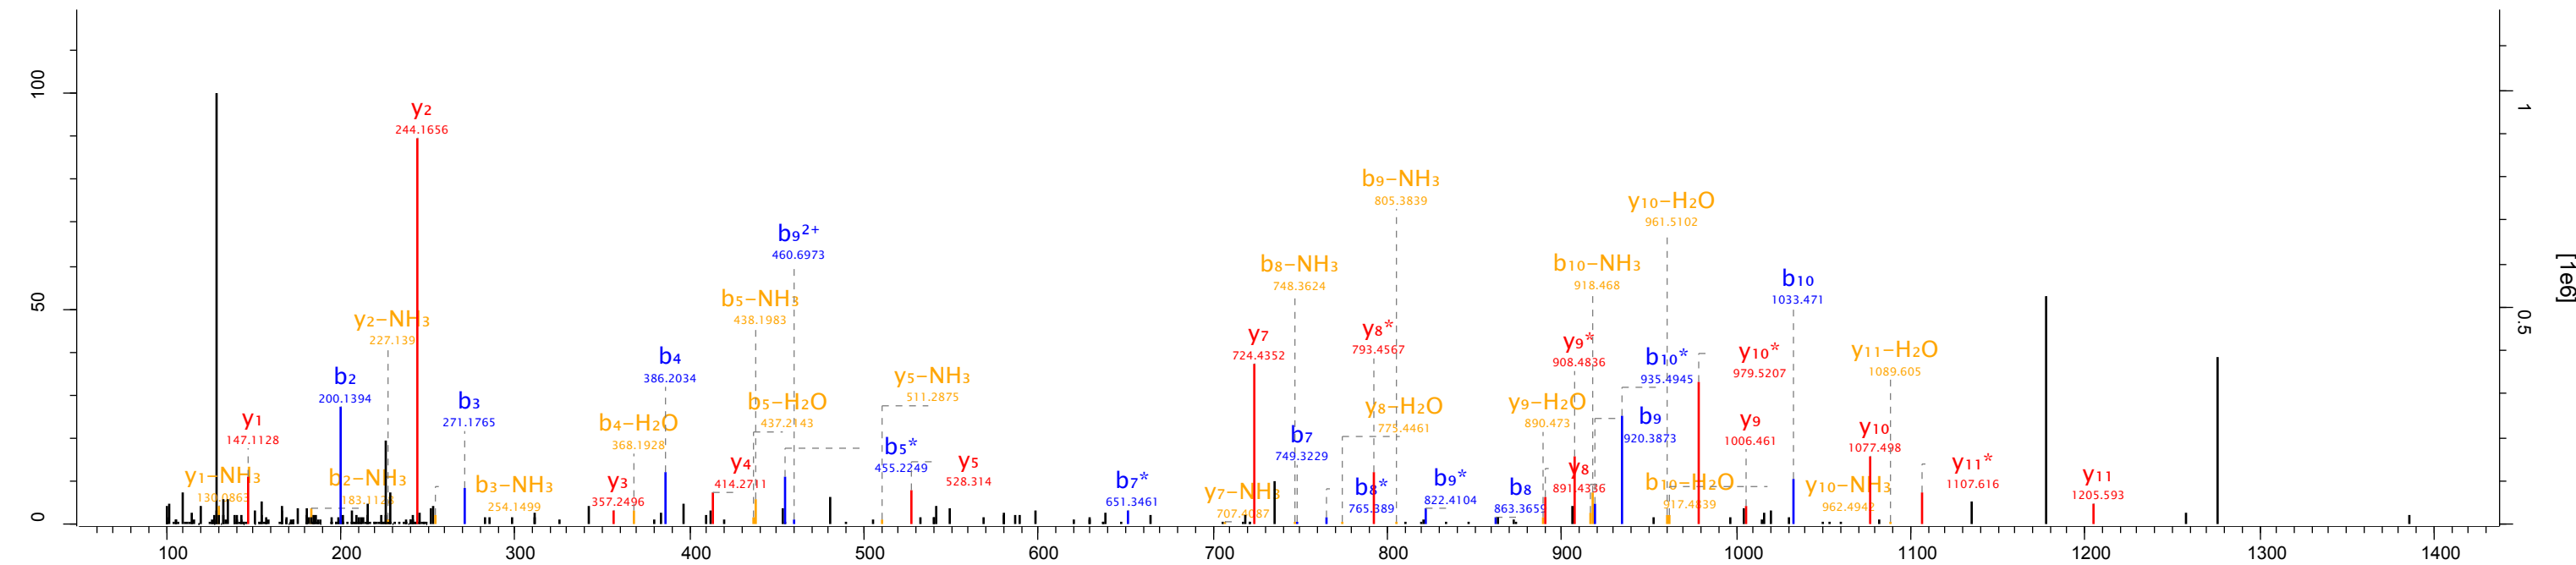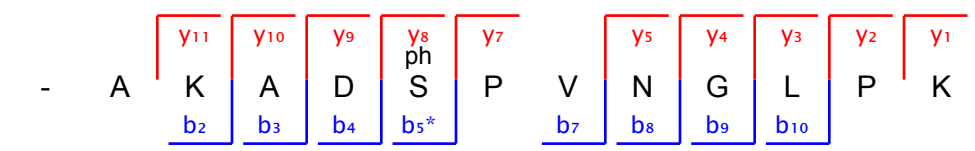

Raw file: 20150812\_A375SR\_Phospho\_BR1\_08  
 Scan: 10446 Method: FTMS; HCD Score: 376.04 m/z: 782.74 Gene names: CD44

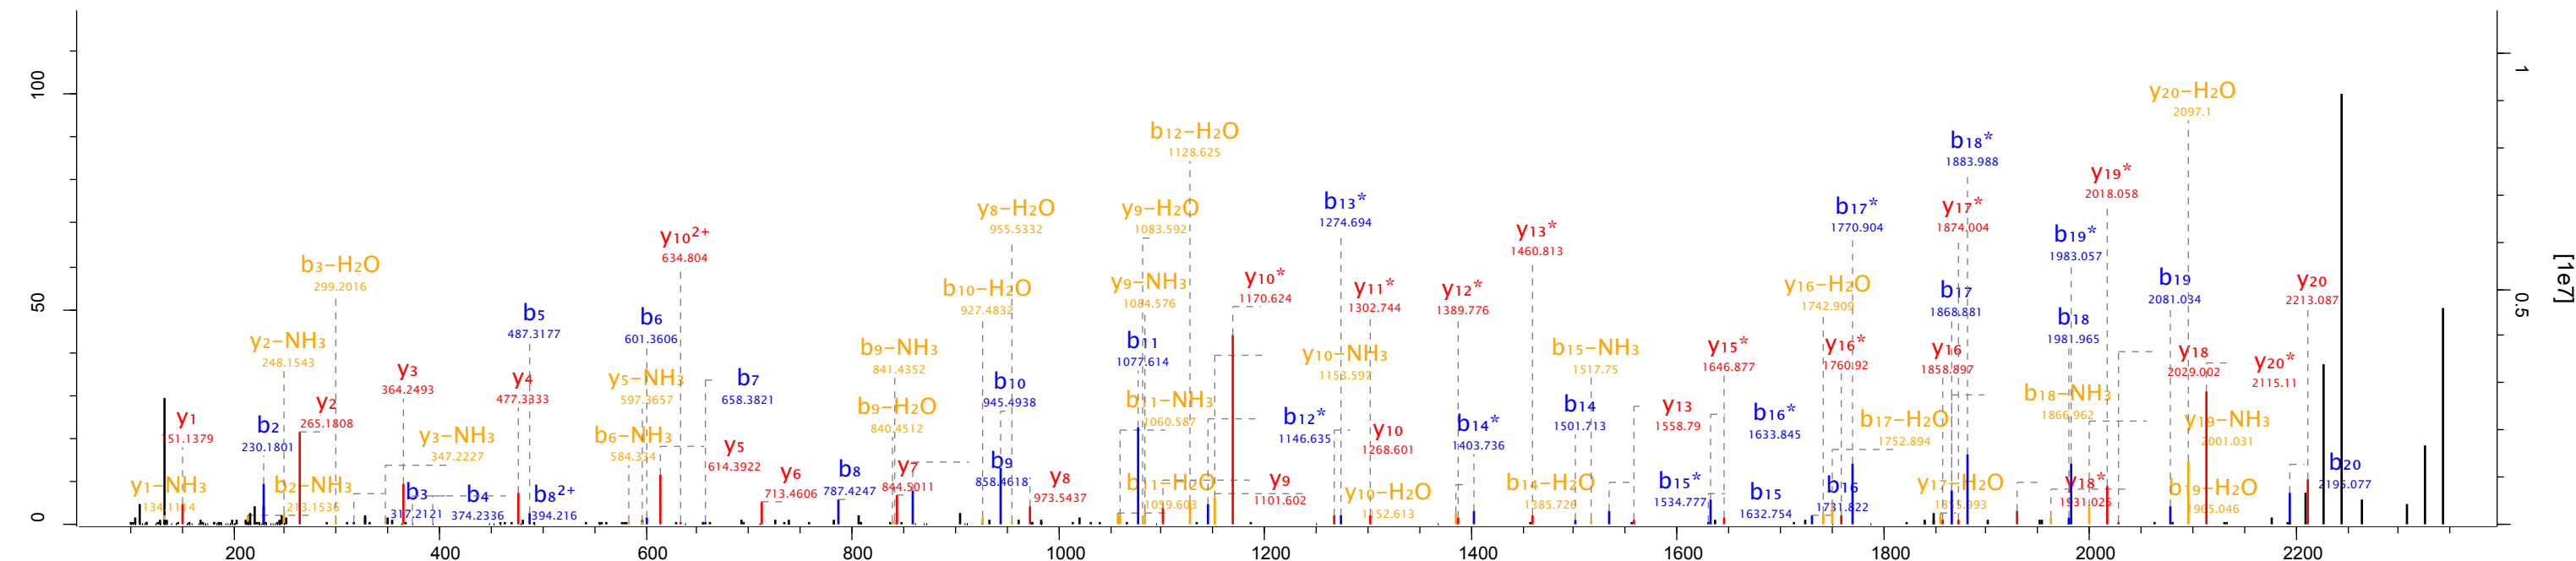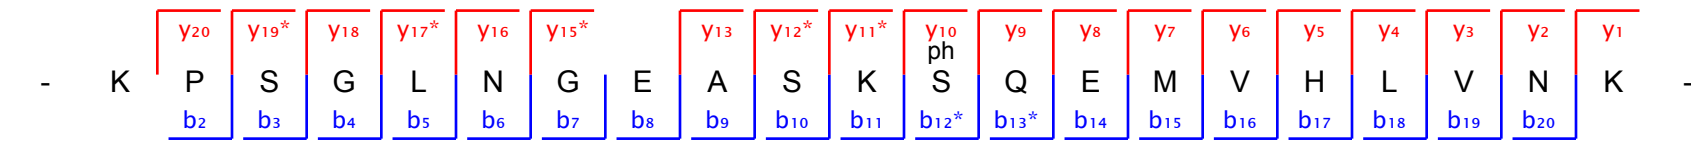

Raw file 20150812\_A375SR\_Phospho\_BR1\_08 Scan 12256 Method FTMS; HCD Score 150.14 m/z 560.74 Gene names DHX8

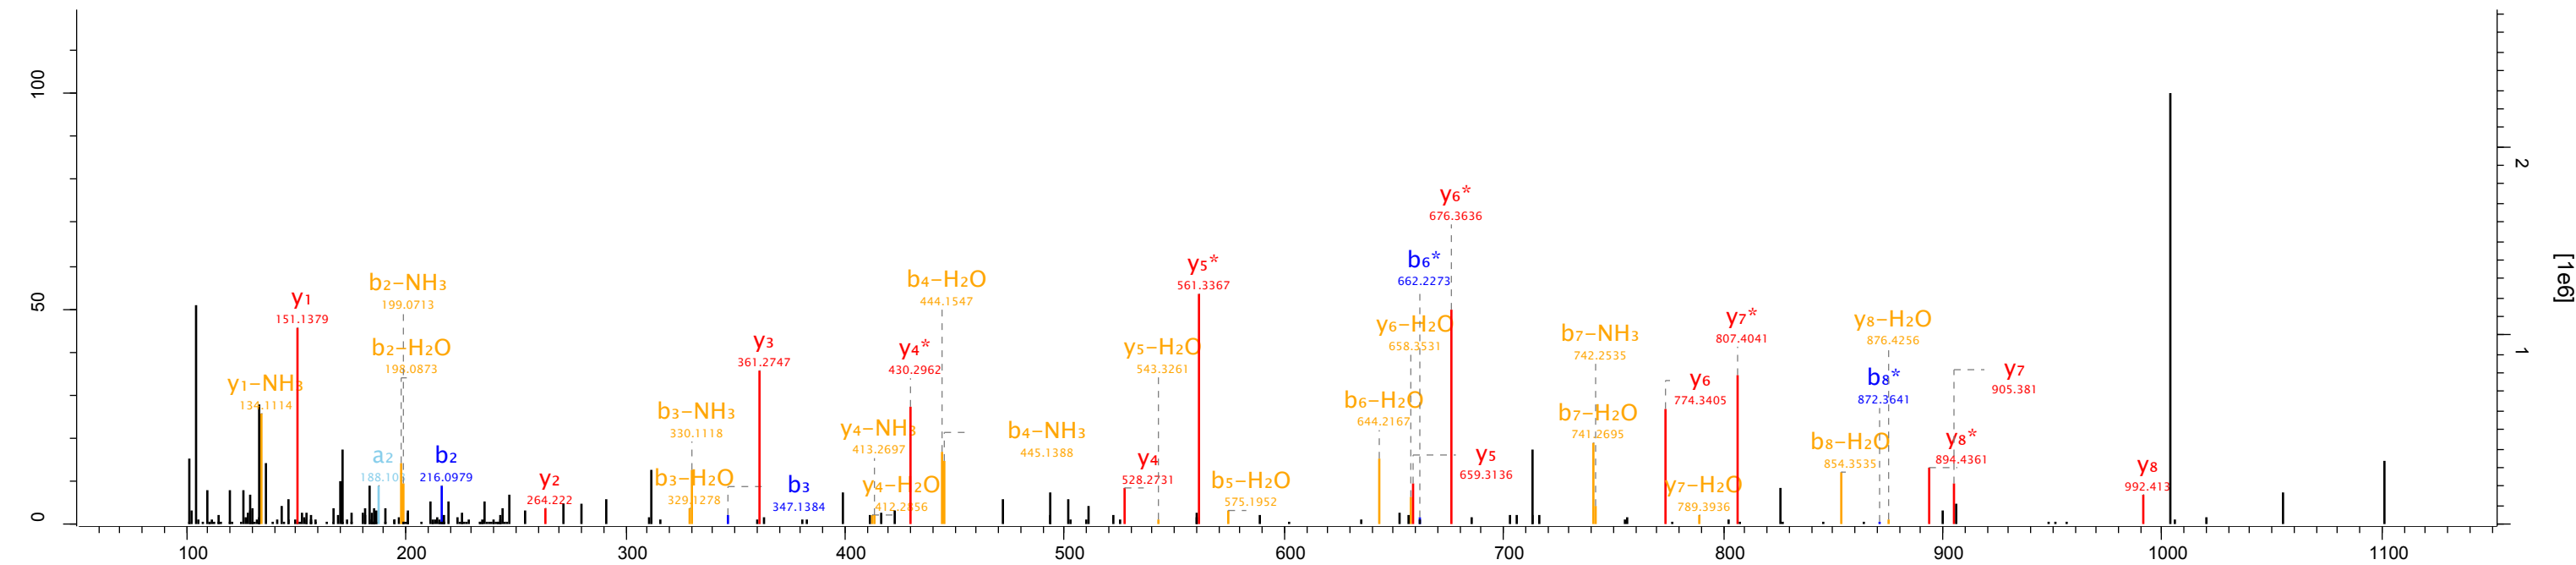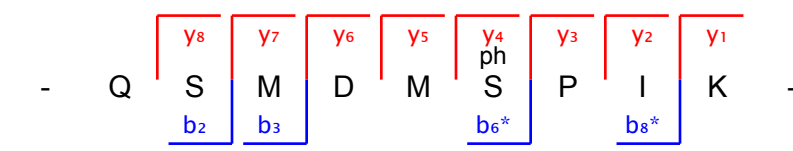

Raw file: 20150812\_A375SR\_Phospho\_BR1\_08  
 Scan: 1266 Method: FTMS; HCD Score: 94.54 m/z: 529.23 Gene names: RPRD2

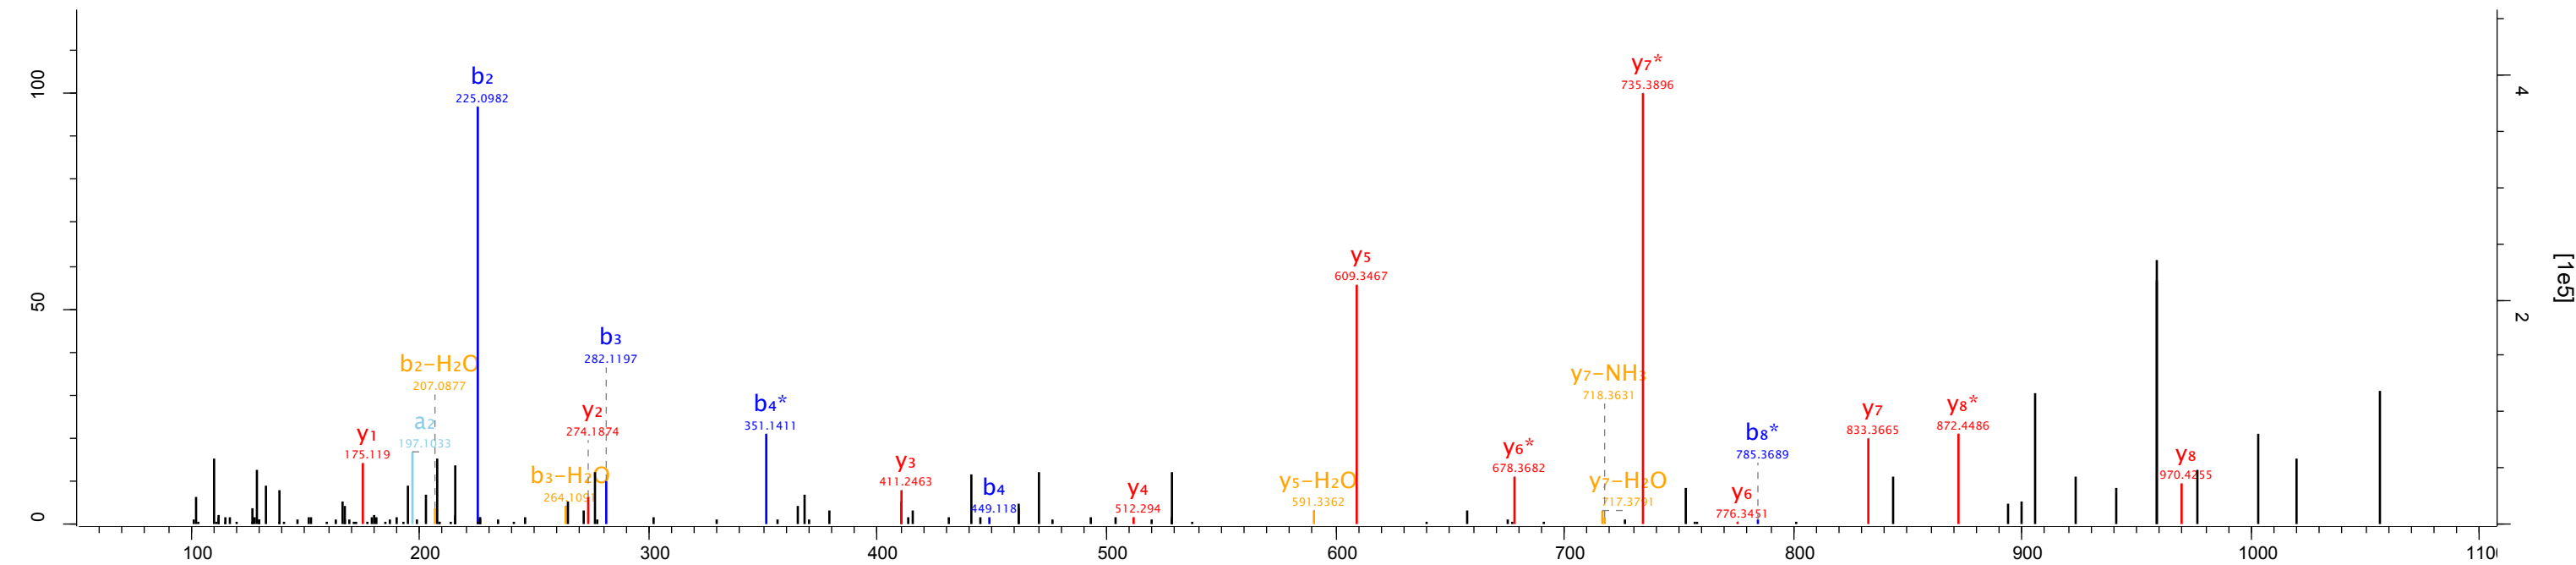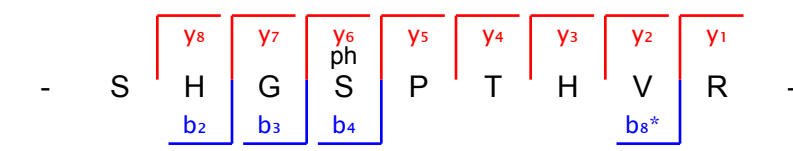

Raw file: 20150812\_A375SR\_Phospho\_BR1\_08  
 Scan: 1286 Method: FTMS; HCD Score: 78.55 m/z: 532.75 Gene names: NPM1

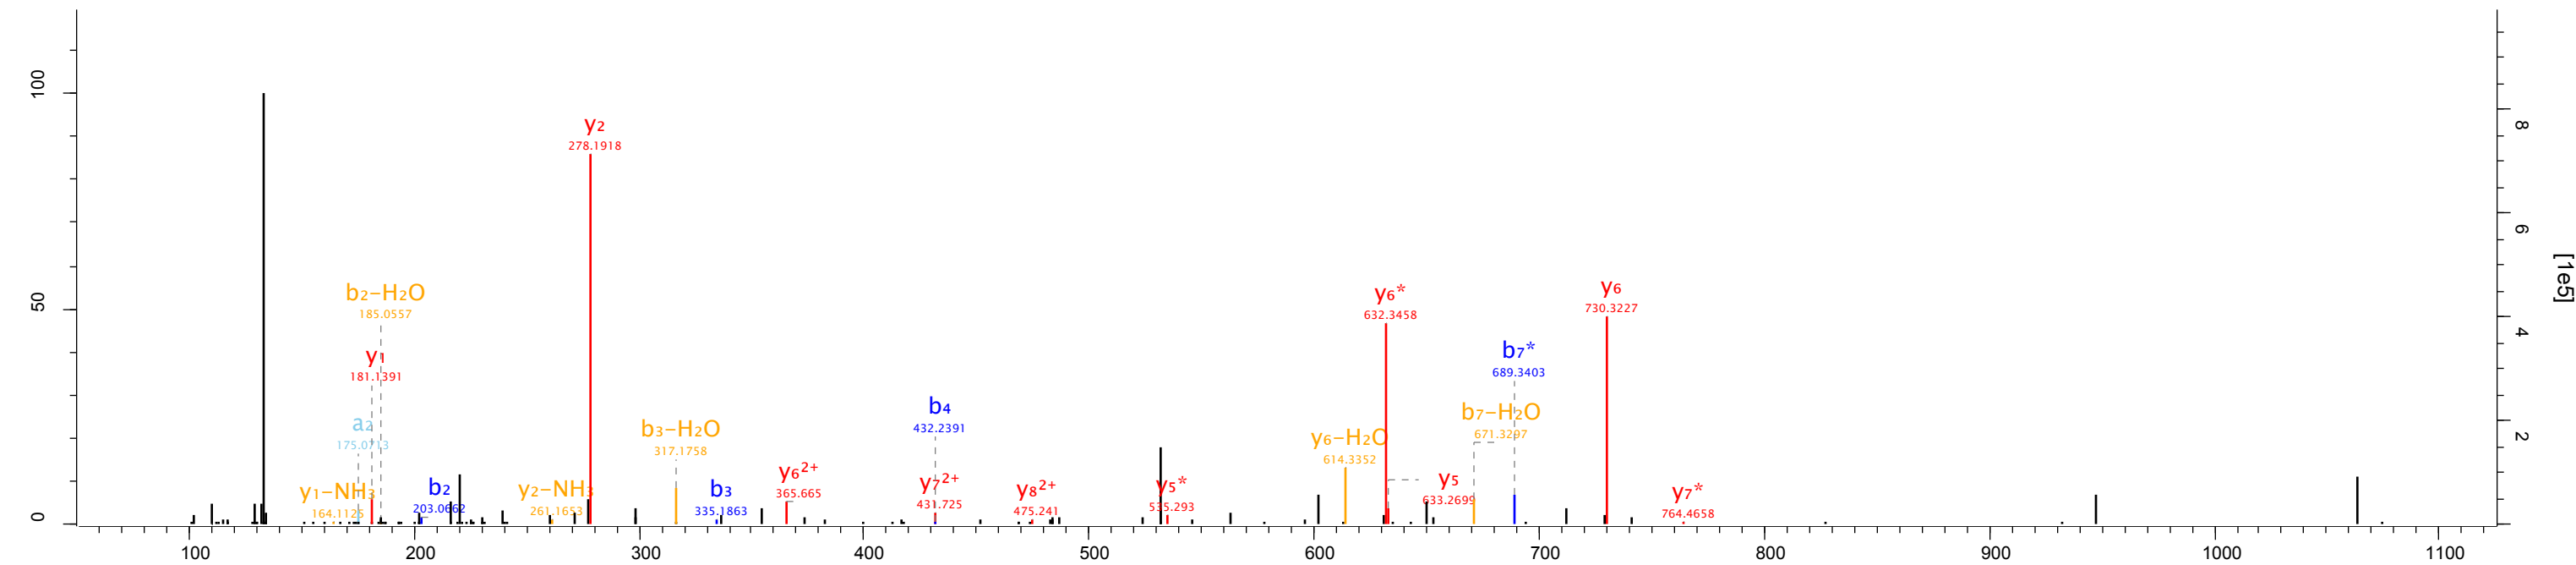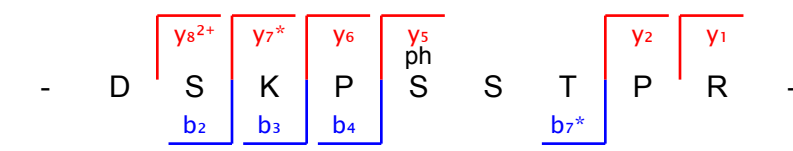

Raw file  
 20150812\_A375SR\_Phospho\_BR1\_08  
 Scan 13056 Method FTMS; HCD Score 56.12 m/z 933.93 Gene names CPM

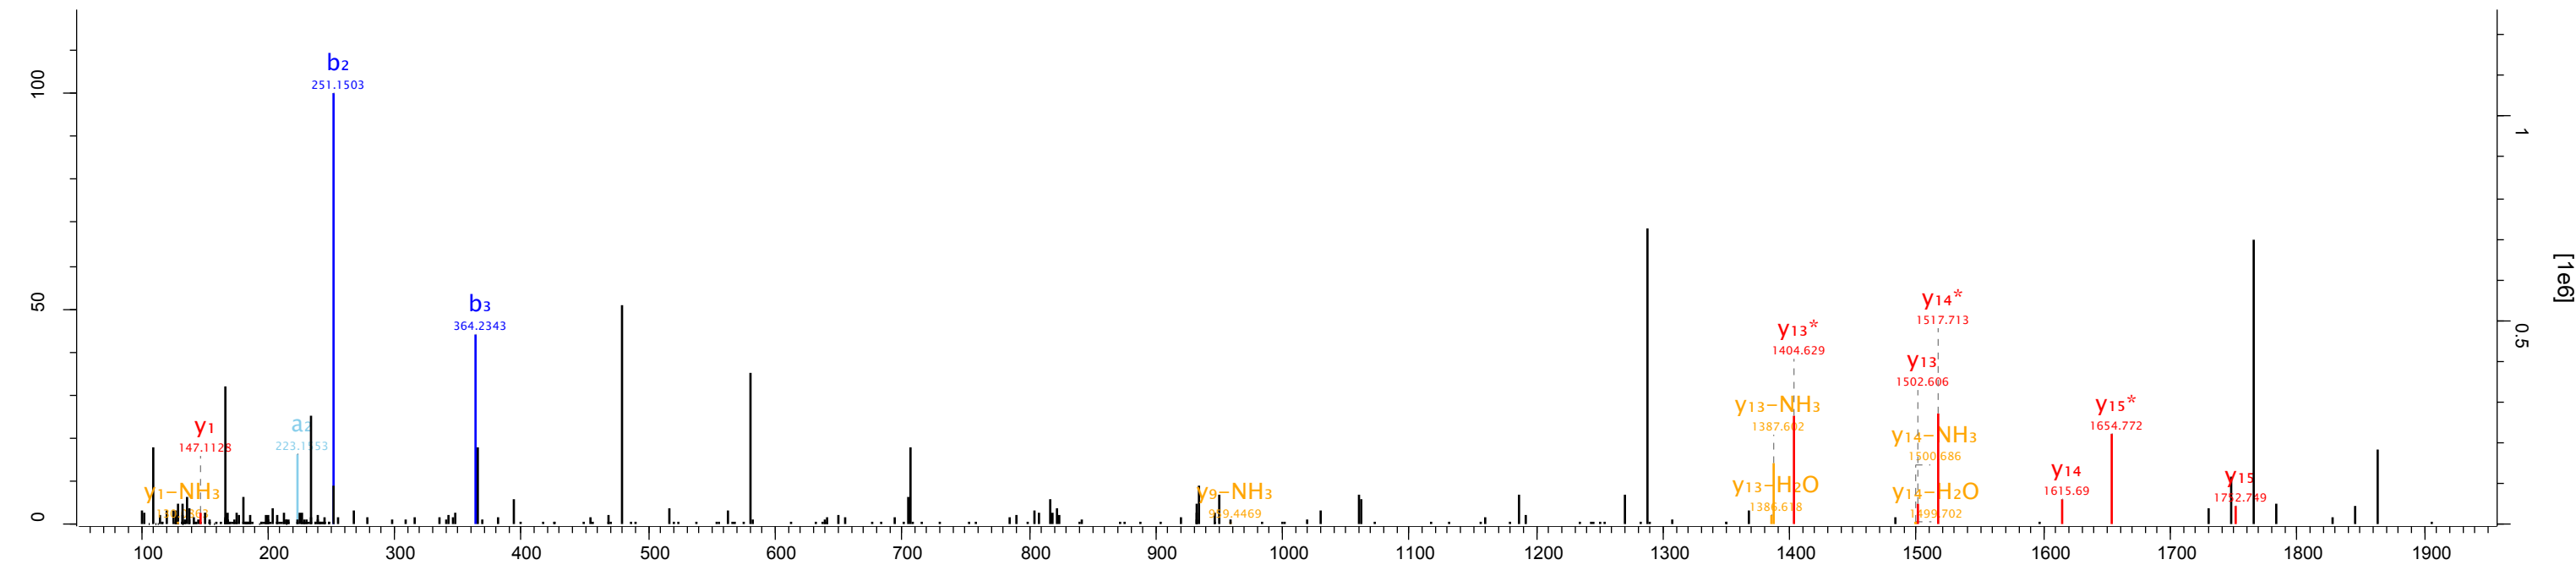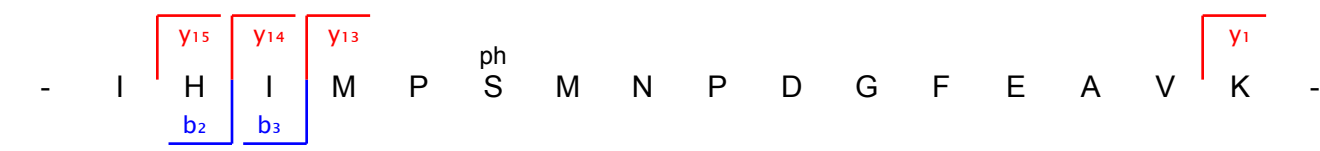

Raw file Scan Method Score m/z Gene names  
 20150812\_A375SR\_Phospho\_BR1\_08 13086 FTMS; HCD 88.31 515.62 RBM15

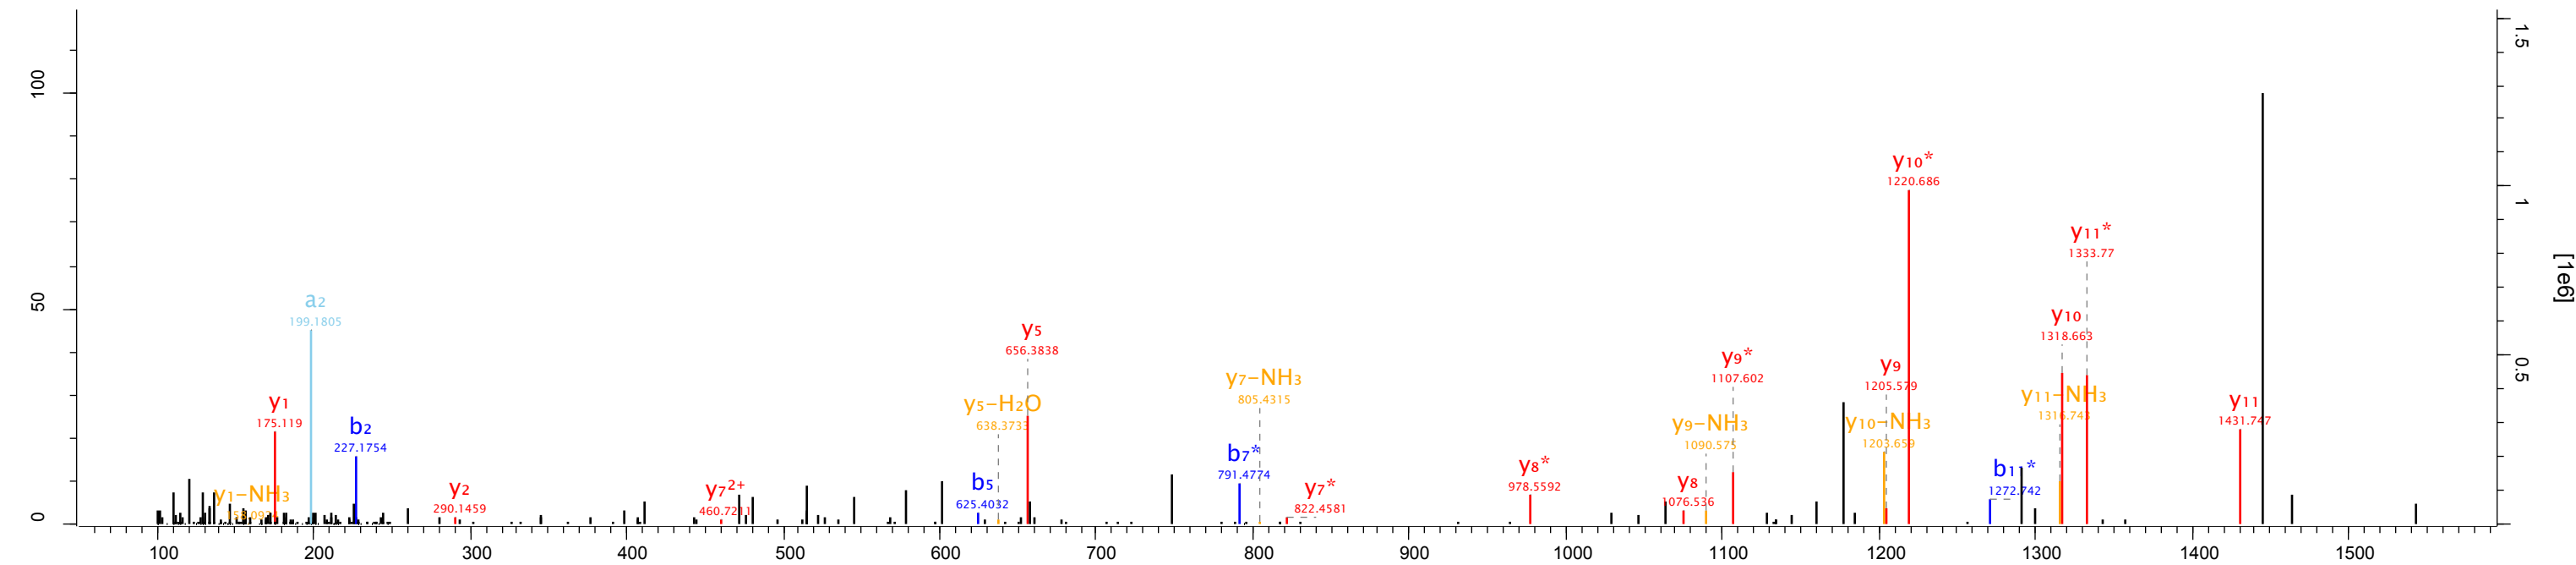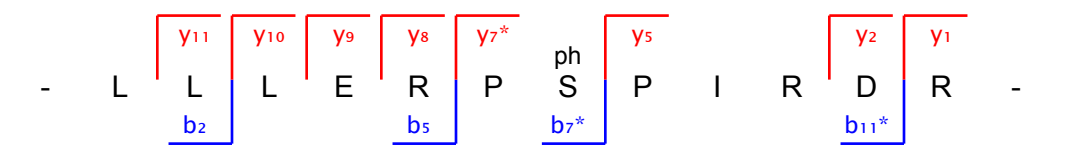

Raw file: 20150812\_A375SR\_Phospho\_BR1\_08  
 Scan: 13206 Method: FTMS; HCD Score: 160.76 m/z: 779.39 Gene names: ASPSCR1

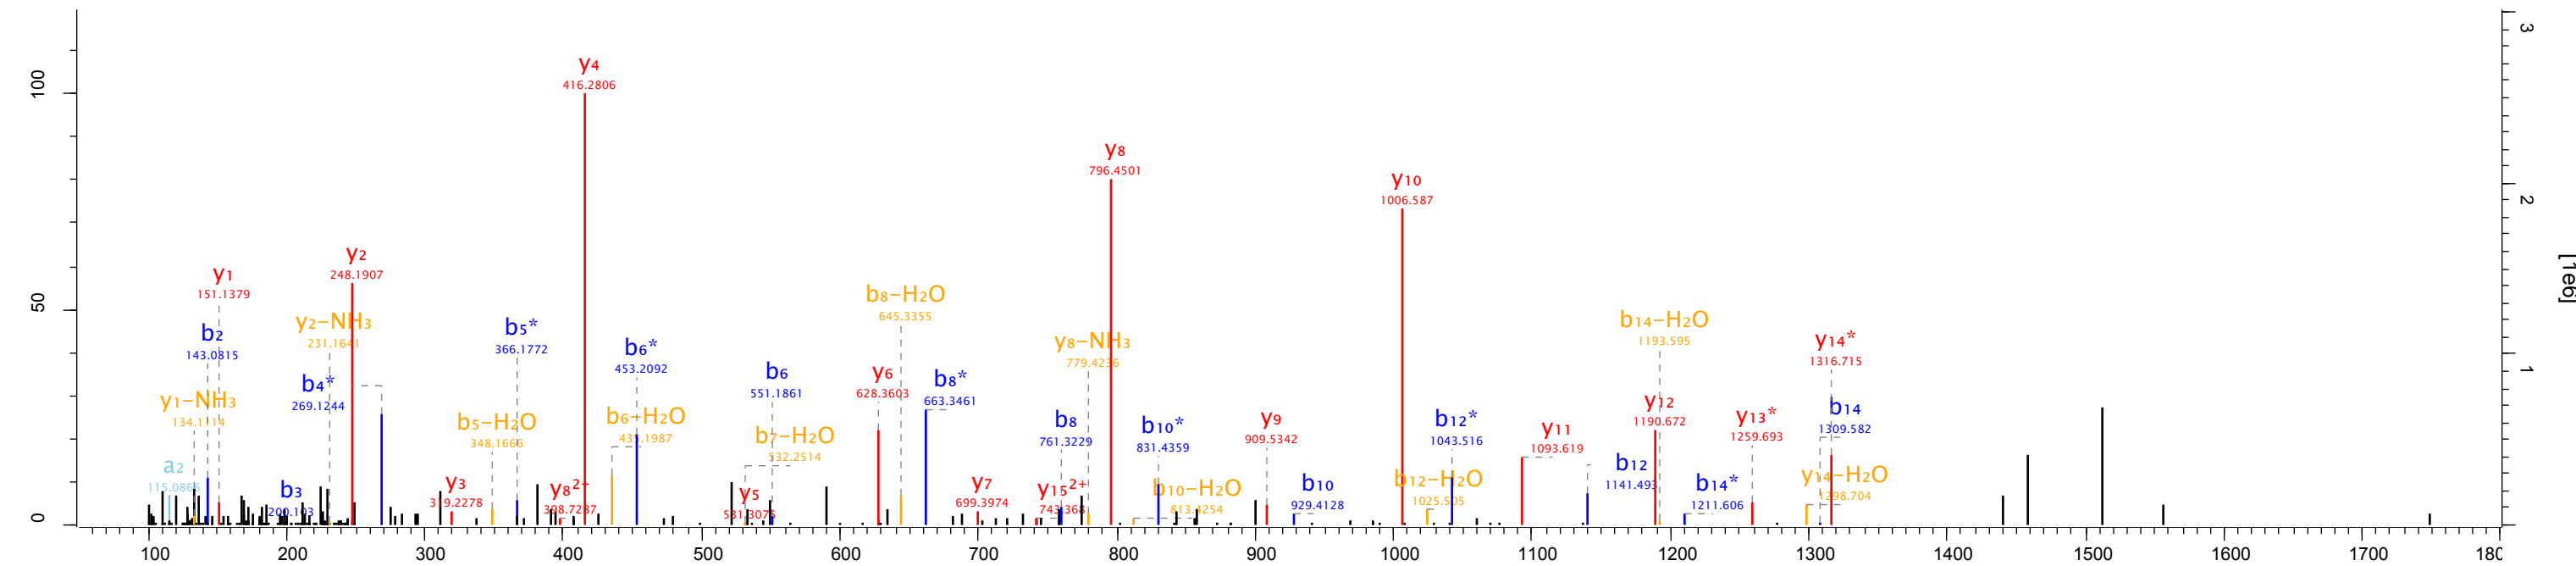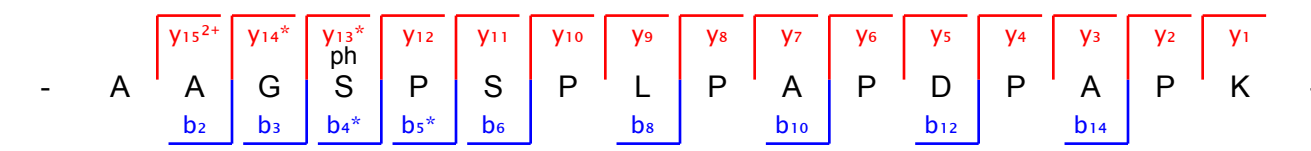



Raw file: 20150812\_A375SR\_Phospho\_BR1\_08  
 Scan: 14316 Method: FTMS; HCD Score: 139.11 m/z: 948.4 Gene names: NOL4L

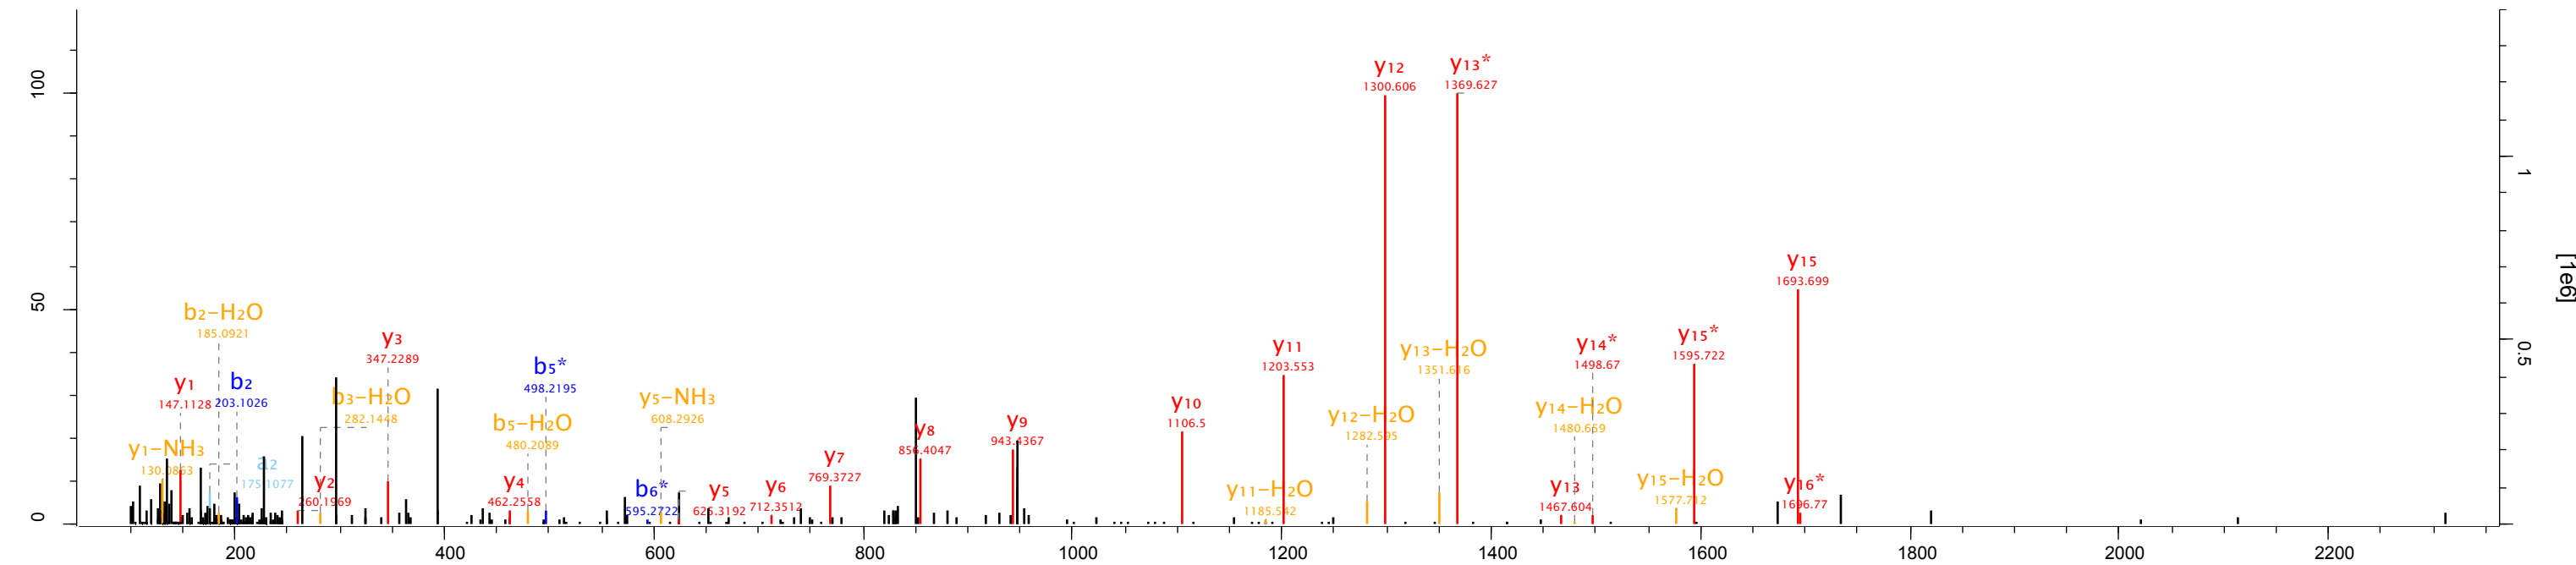

Sequence: - T T P E S P P Y S S G S Y D S I K -

Fragmentation sites (b and y ions):

- b<sub>2</sub> (between T and P)
- b<sub>5</sub>\*
- b<sub>6</sub>\*
- y<sub>16</sub>\*
- y<sub>15</sub>
- y<sub>14</sub>\*
- y<sub>13</sub> ph
- y<sub>12</sub>
- y<sub>11</sub>
- y<sub>10</sub>
- y<sub>9</sub>
- y<sub>8</sub>
- y<sub>7</sub>
- y<sub>6</sub>
- y<sub>5</sub>
- y<sub>4</sub>
- y<sub>3</sub>
- y<sub>2</sub>
- y<sub>1</sub>

Raw file 20150812\_A375SR\_Phospho\_BR1\_08 Scan 14716 Method FTMS; HCD Score 170.95 m/z 752.4 Gene names RBBP6

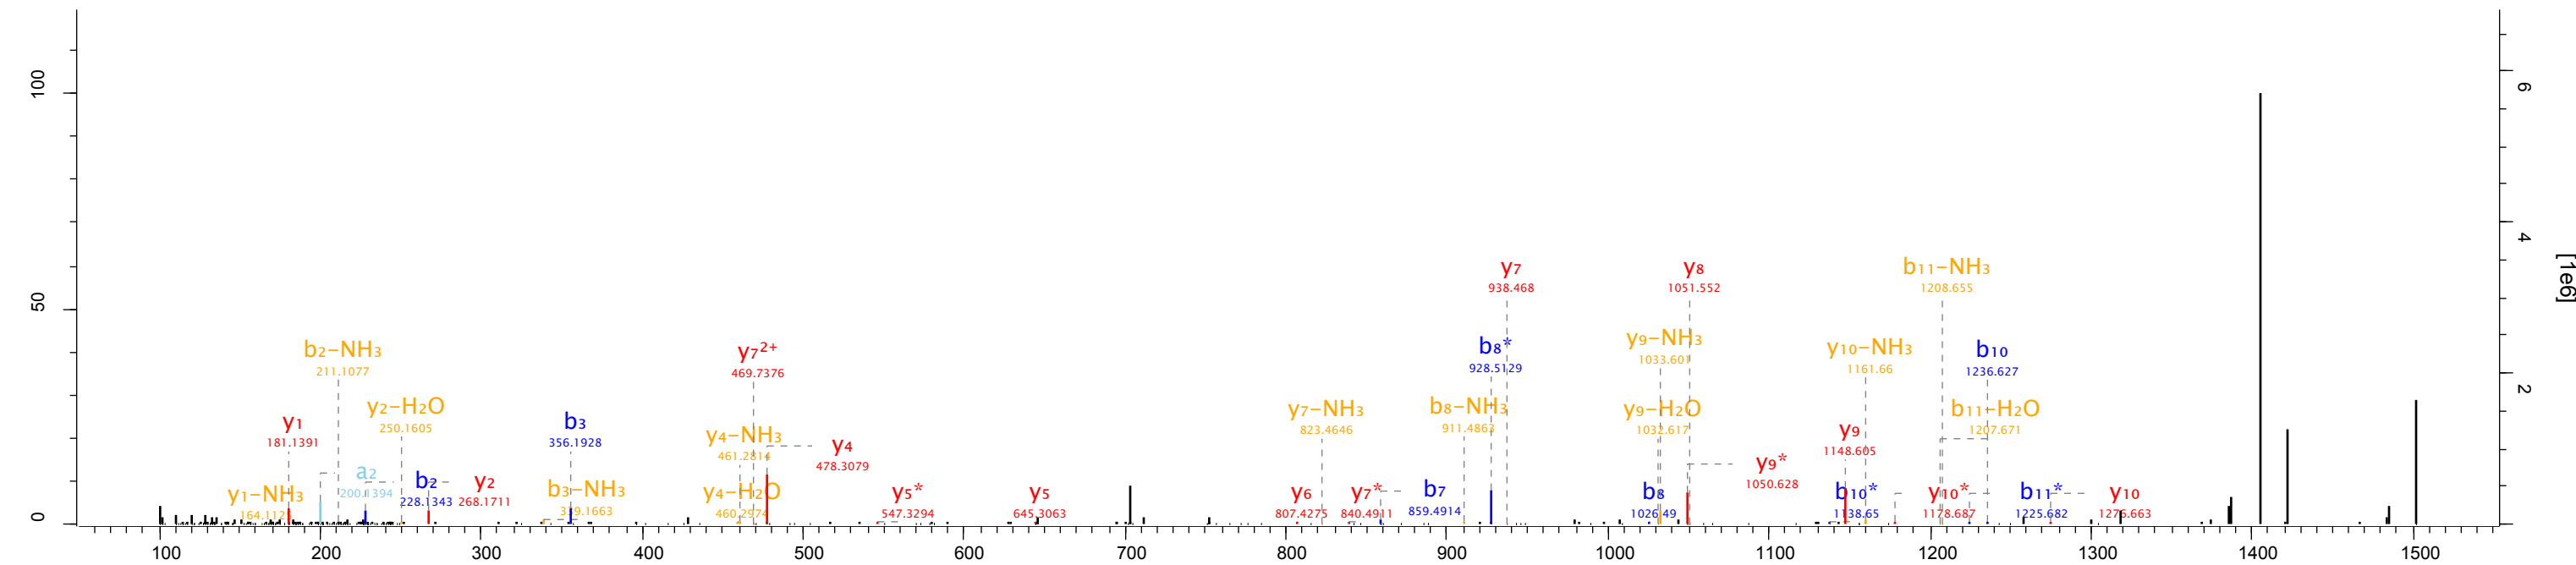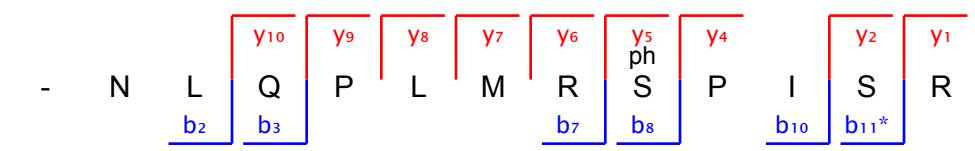

Raw file 20150812\_A375SR\_Phospho\_BR1\_08 Scan 16176 Method FTMS; HCD Score 193.64 m/z 771.87 Gene names TERF2IP

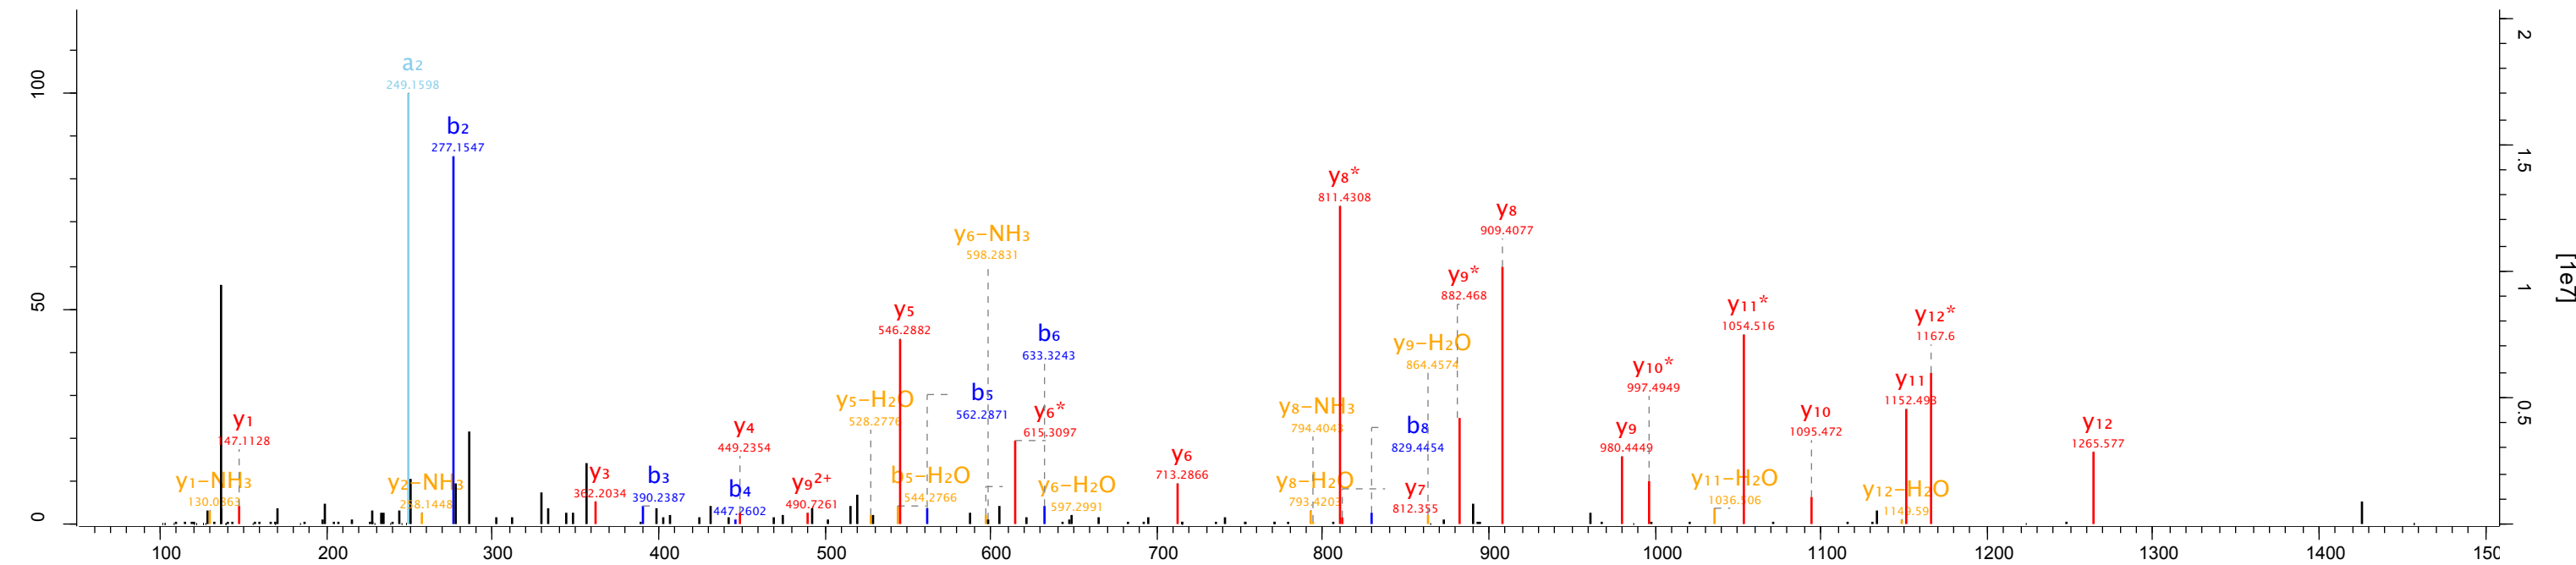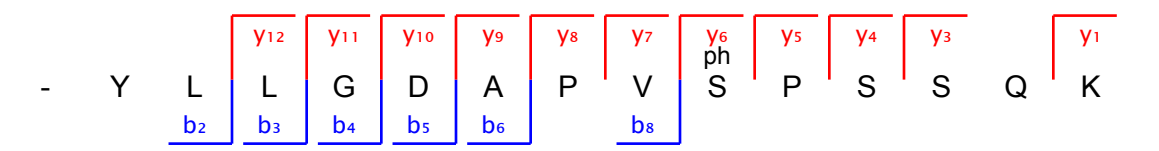

Raw file 20150812\_A375SR\_Phospho\_BR1\_08 Scan 16276 Method FTMS; HCD Score 40.09 m/z 871.37 Gene names PHF14

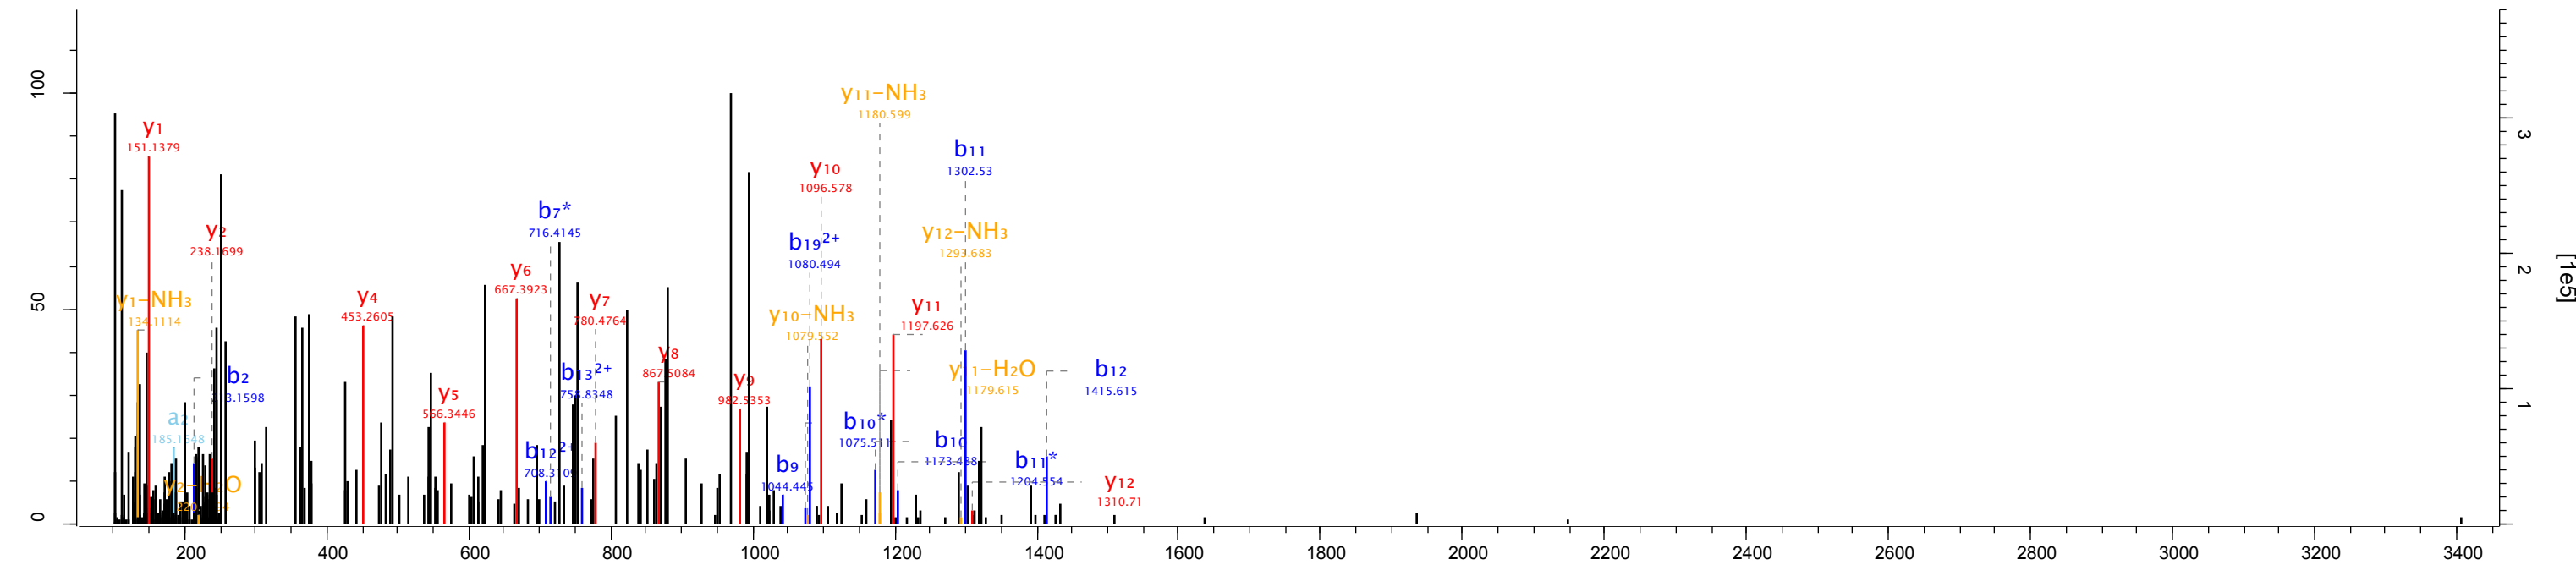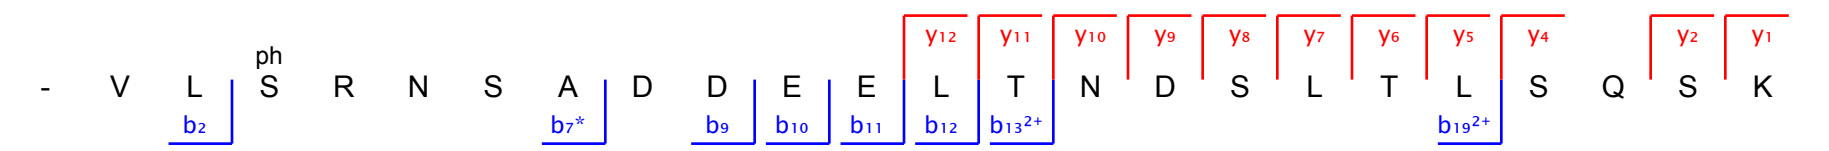

Raw file 20150812\_A375SR\_Phospho\_BR1\_08 Scan 16486 Method FTMS; HCD Score 81.66 m/z 761.35 Gene names TCF3

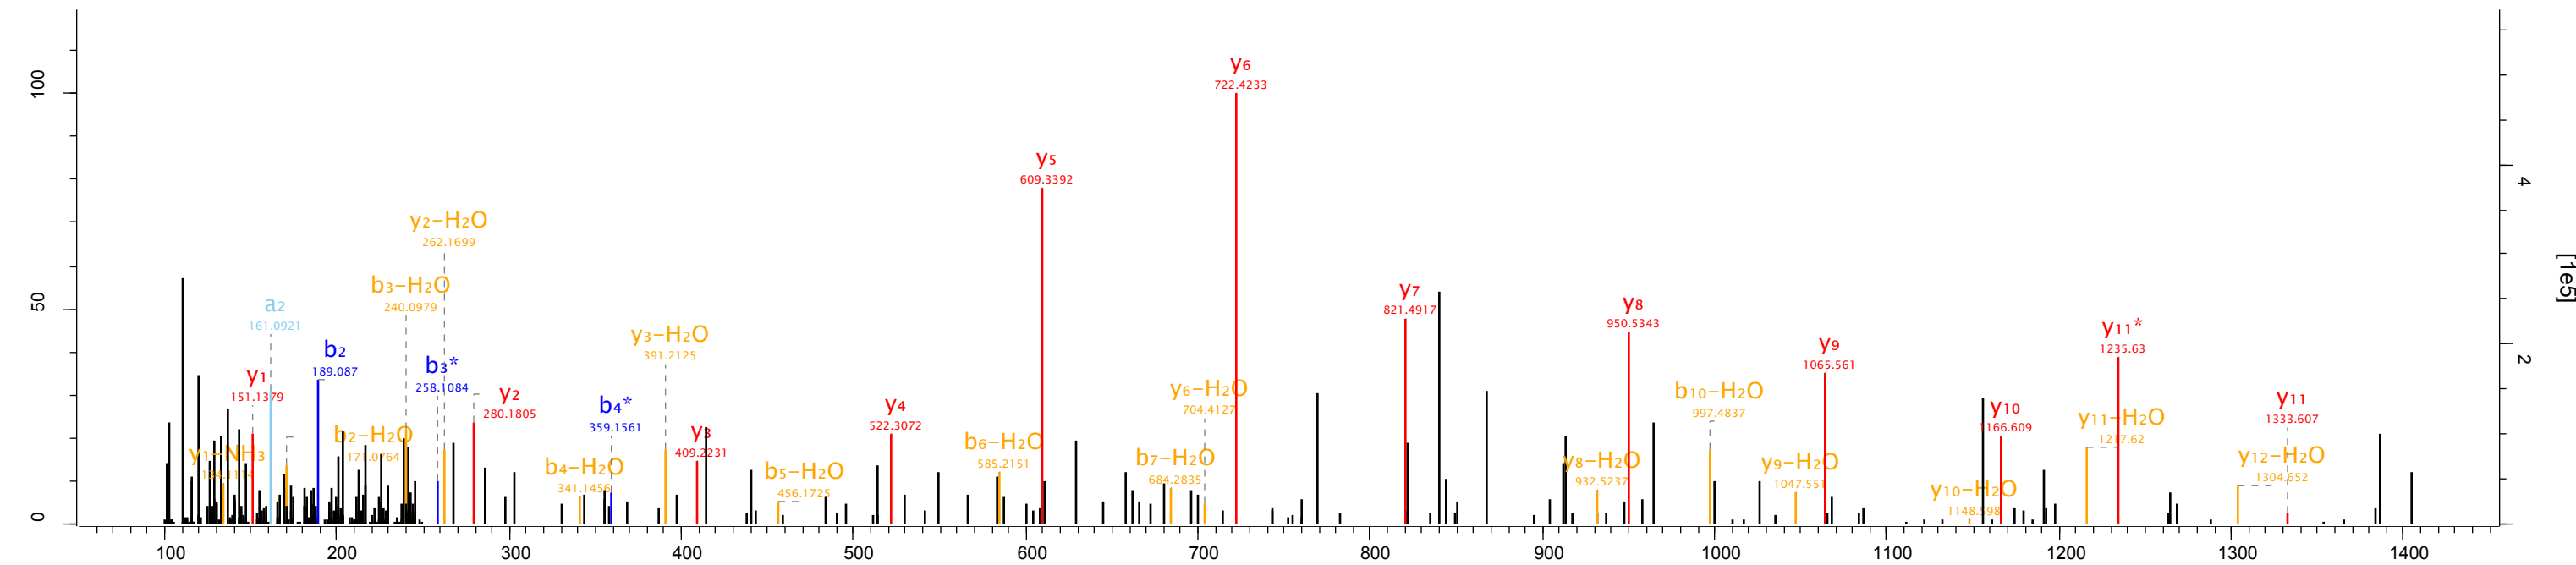

- T S S T D E V L S L E E K -

Fragmentation sites are indicated by brackets below the sequence:

- Red brackets: y11 (S), y10 (T), y9 (D), y8 (E), y7 (V), y6 (L), y5 (S), y4 (L), y3 (E), y2 (E), y1 (K)
- Blue brackets: b2 (S), b3\* (S), b4\* (T)

Raw file 20150812\_A375SR\_Phospho\_BR1\_08 Scan 17086 Method FTMS; HCD Score 125.73 m/z 742.84 Gene names RAI14

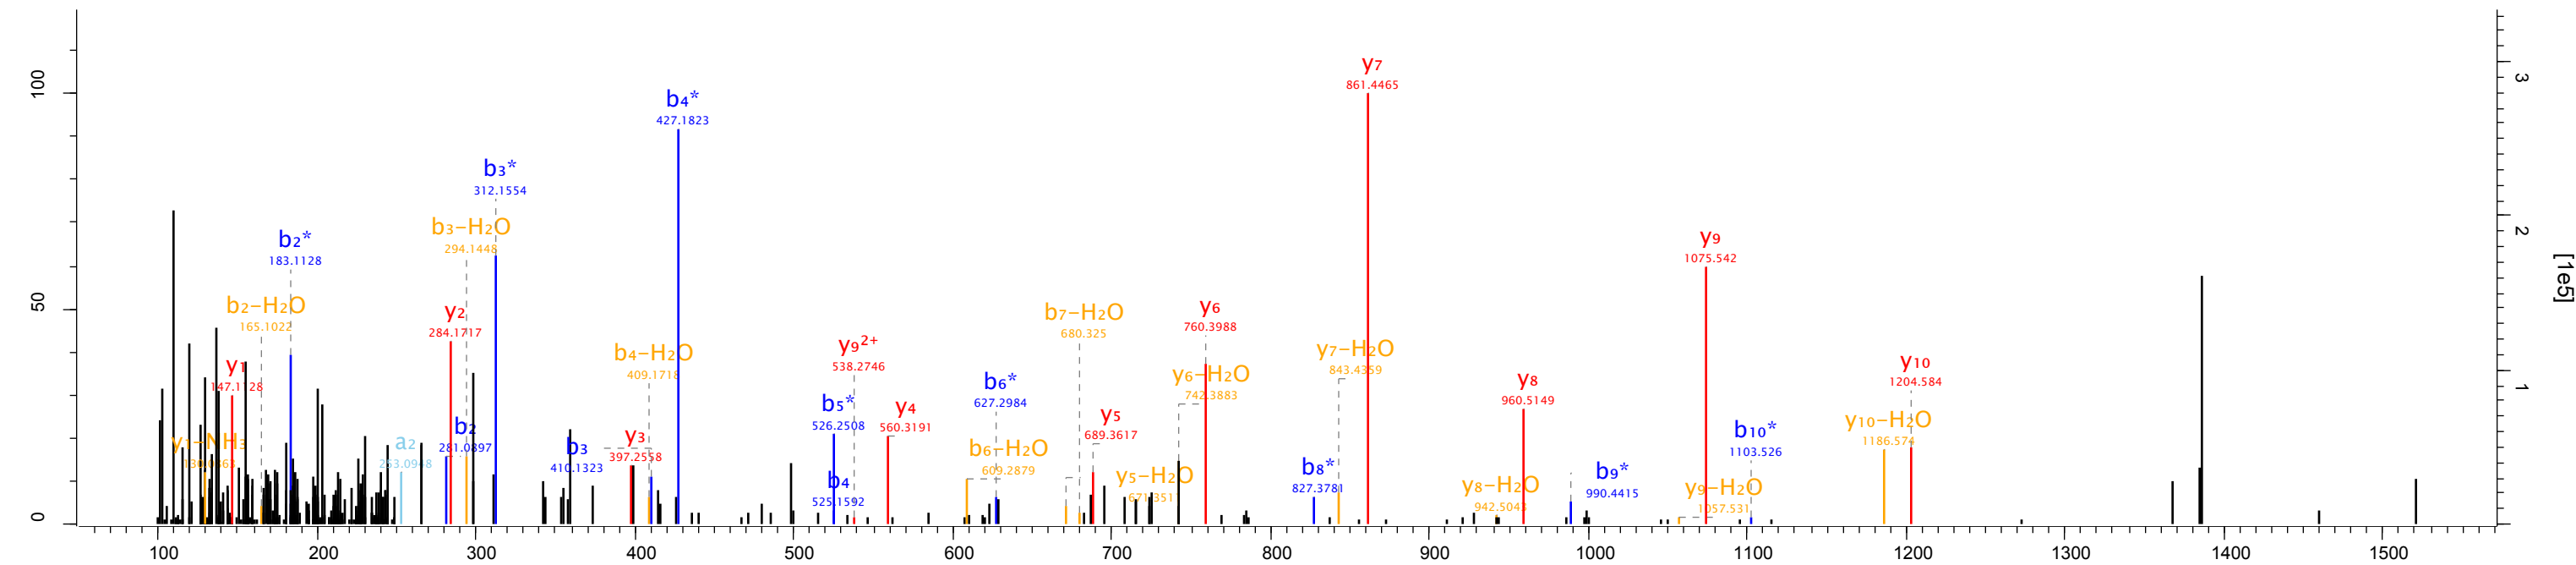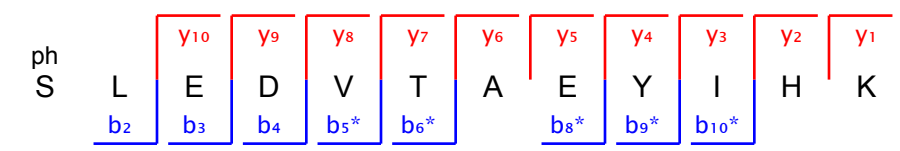

Raw file: 20150812\_A375SR\_Phospho\_BR1\_08  
 Scan: 17436 Method: FTMS; HCD Score: 164.16 m/z: 850.4 Gene names: CEP55

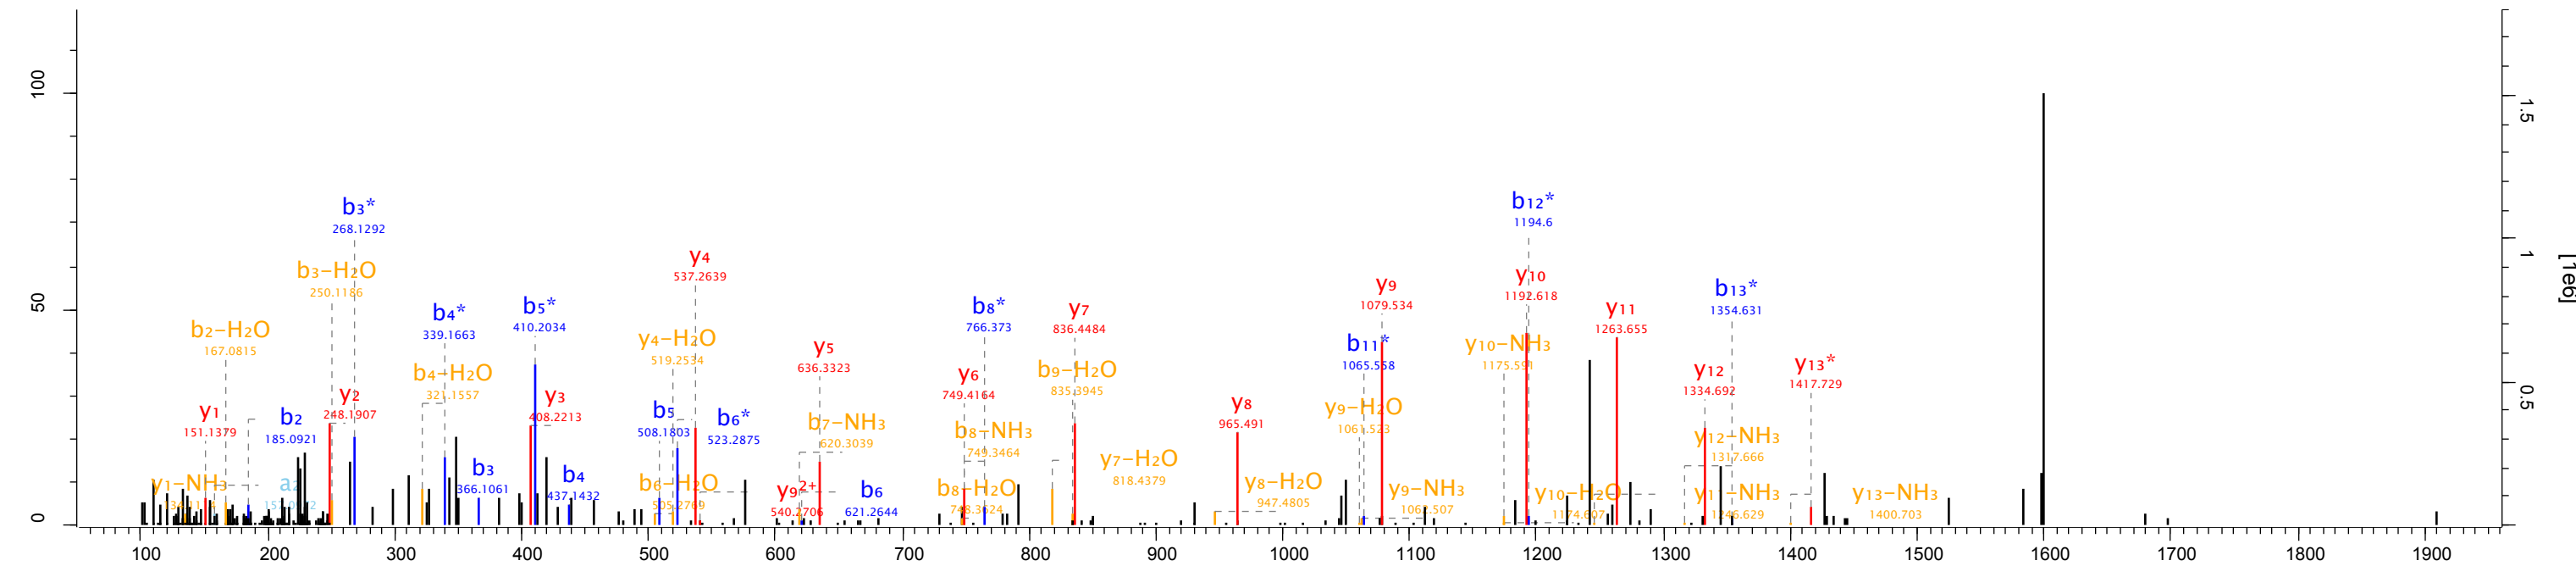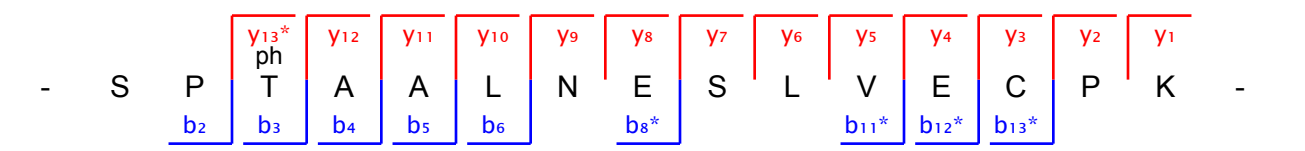

Raw file Scan Method Score m/z Gene names  
 20150812\_A375SR\_Phospho\_BR1\_08 19536 FTMS; HCD 274.63 808.73 C12orf43

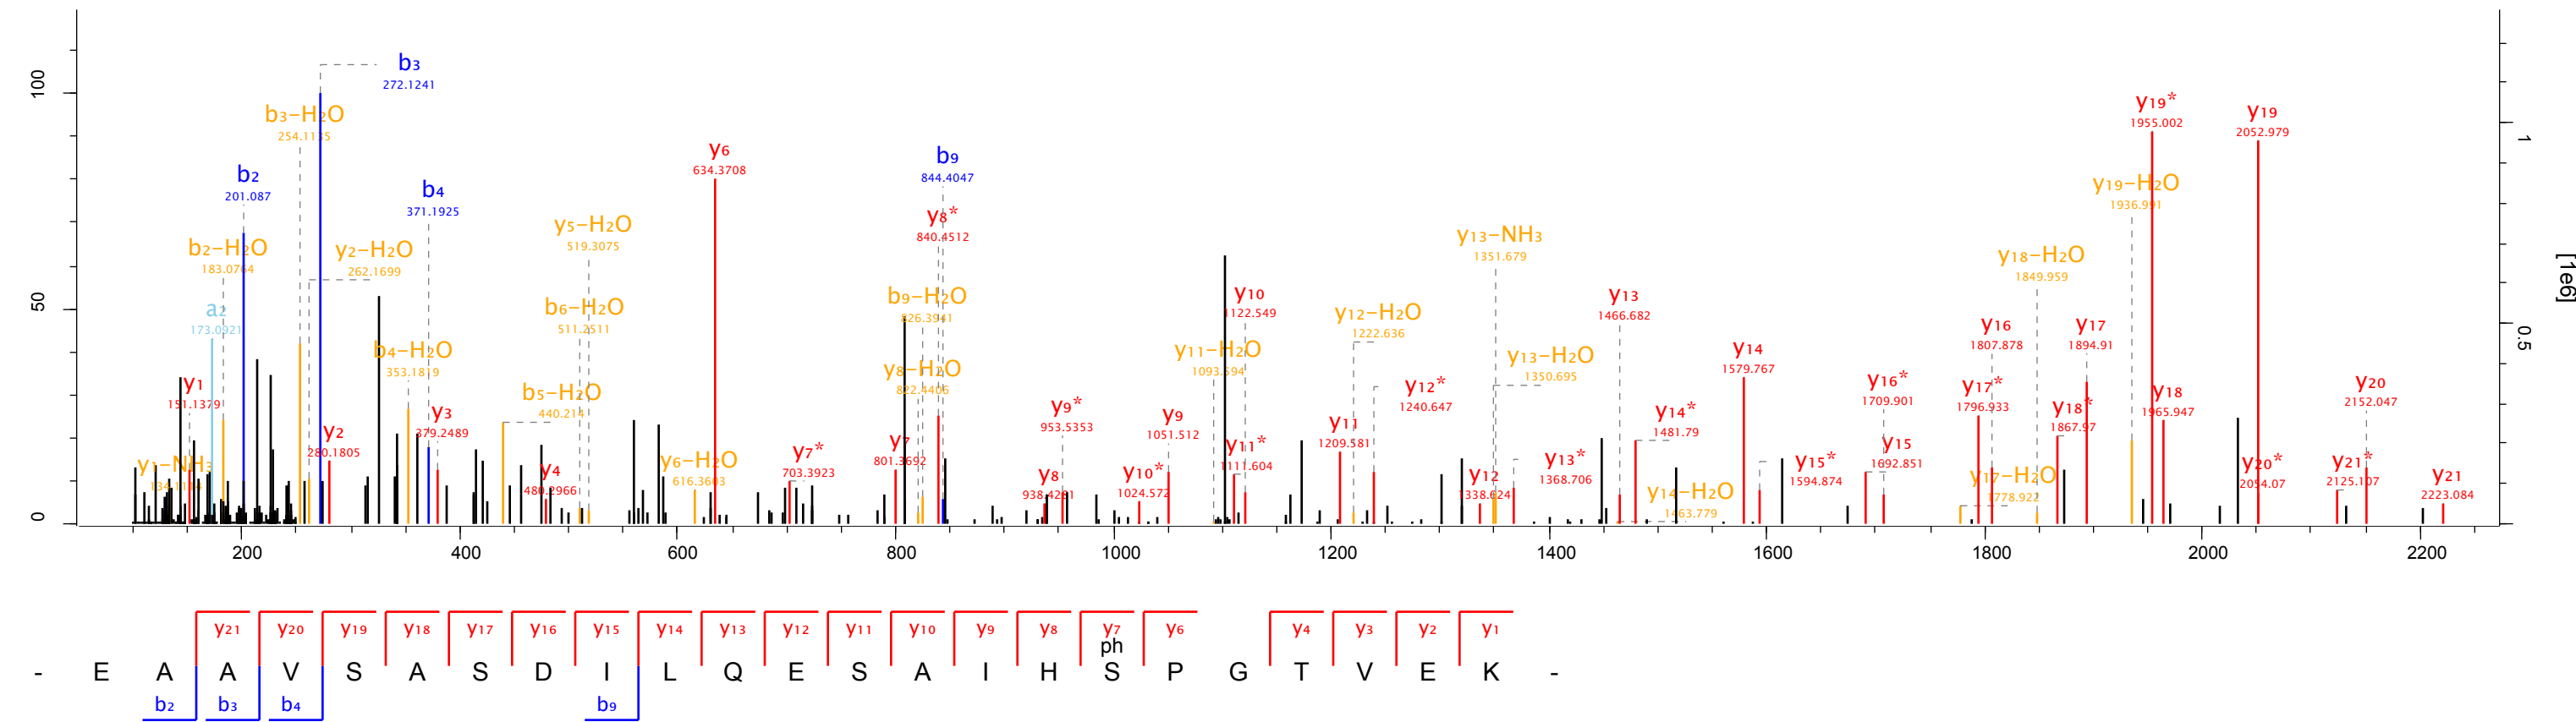



Raw file 20150812\_A375SR\_Phospho\_BR1\_08 Scan 19656 Method FTMS; HCD Score 71.43 m/z 876.39 Gene names PKP3

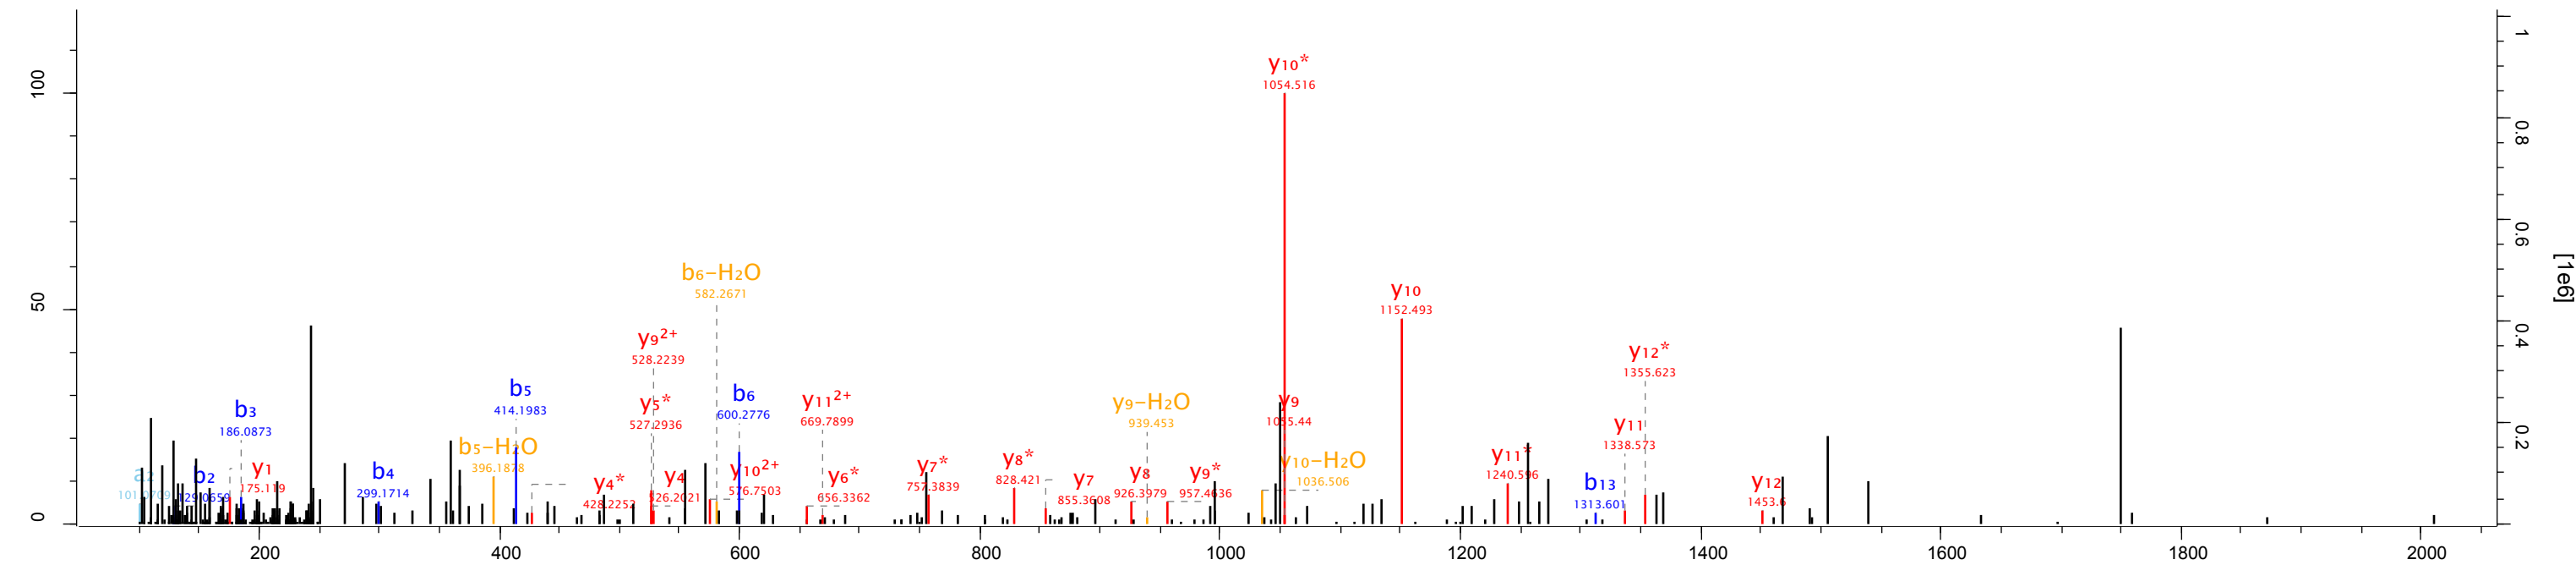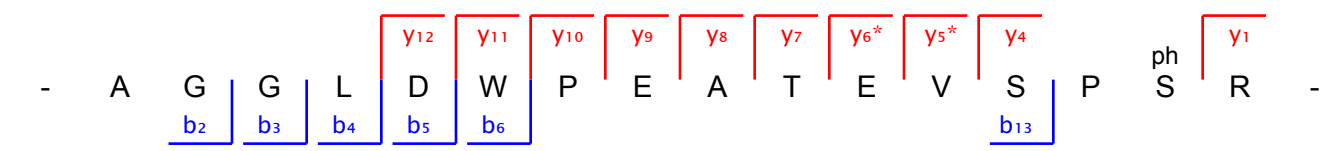

Raw file: 20150812\_A375SR\_Phospho\_BR1\_08  
 Scan: 1976 Method: FTMS; HCD Score: 112.94 m/z: 492.24 Gene names: SRRM2

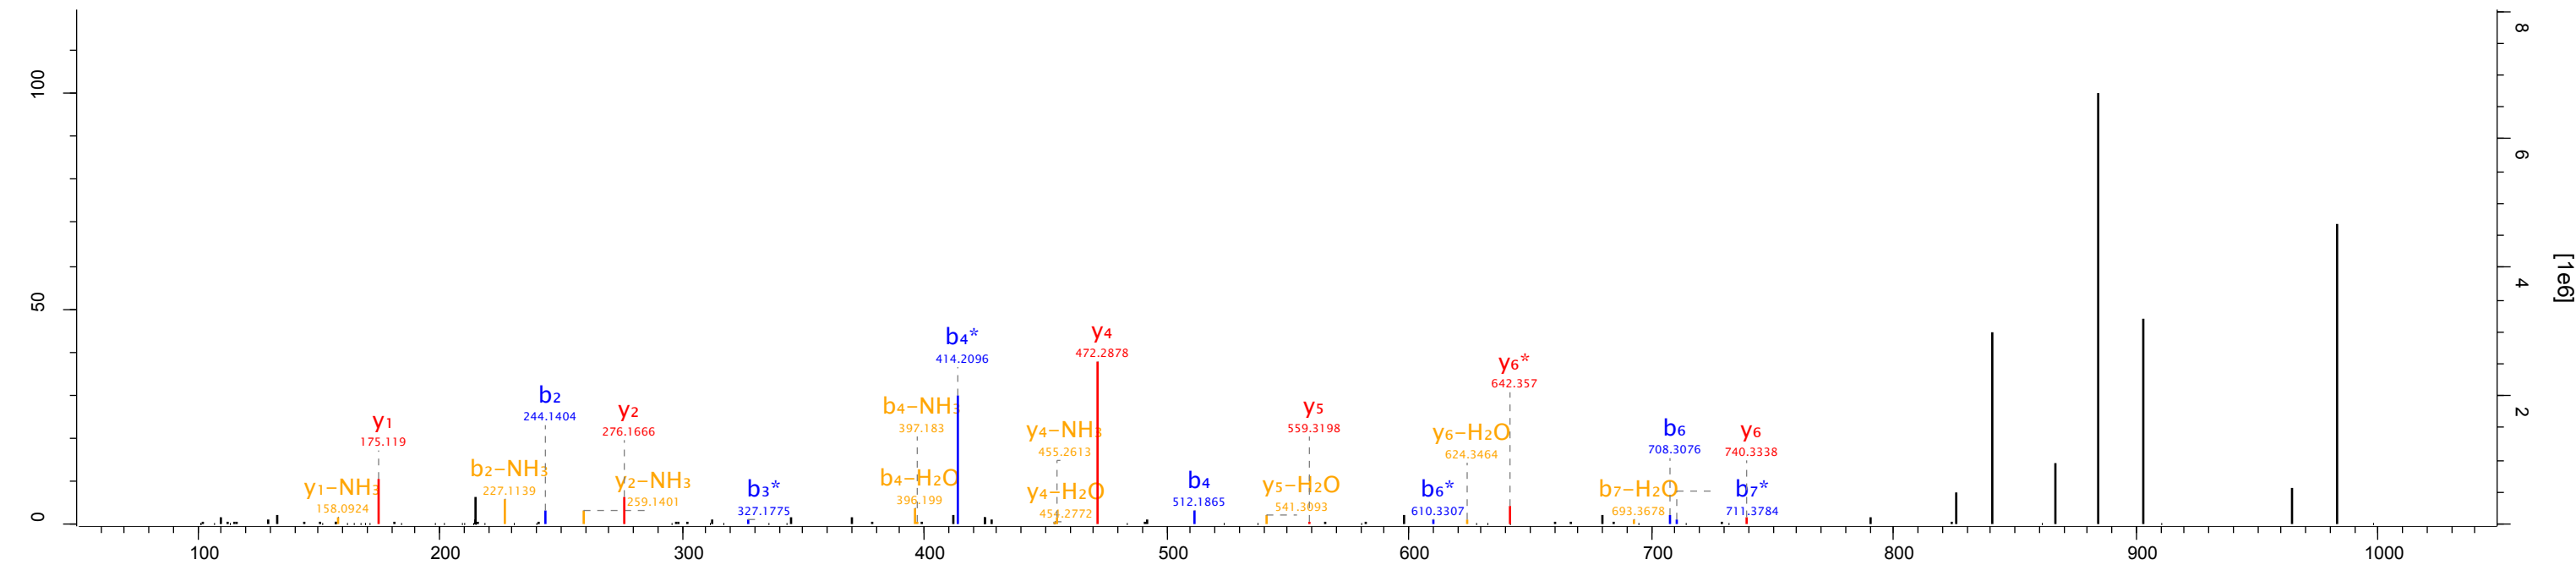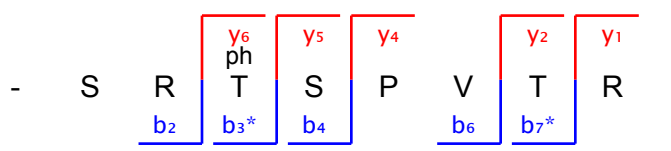

Raw file 20150812\_A375SR\_Phospho\_BR1\_08 Scan 20976 Method FTMS; HCD Score 159.13 m/z 940.11 Gene names PARD3

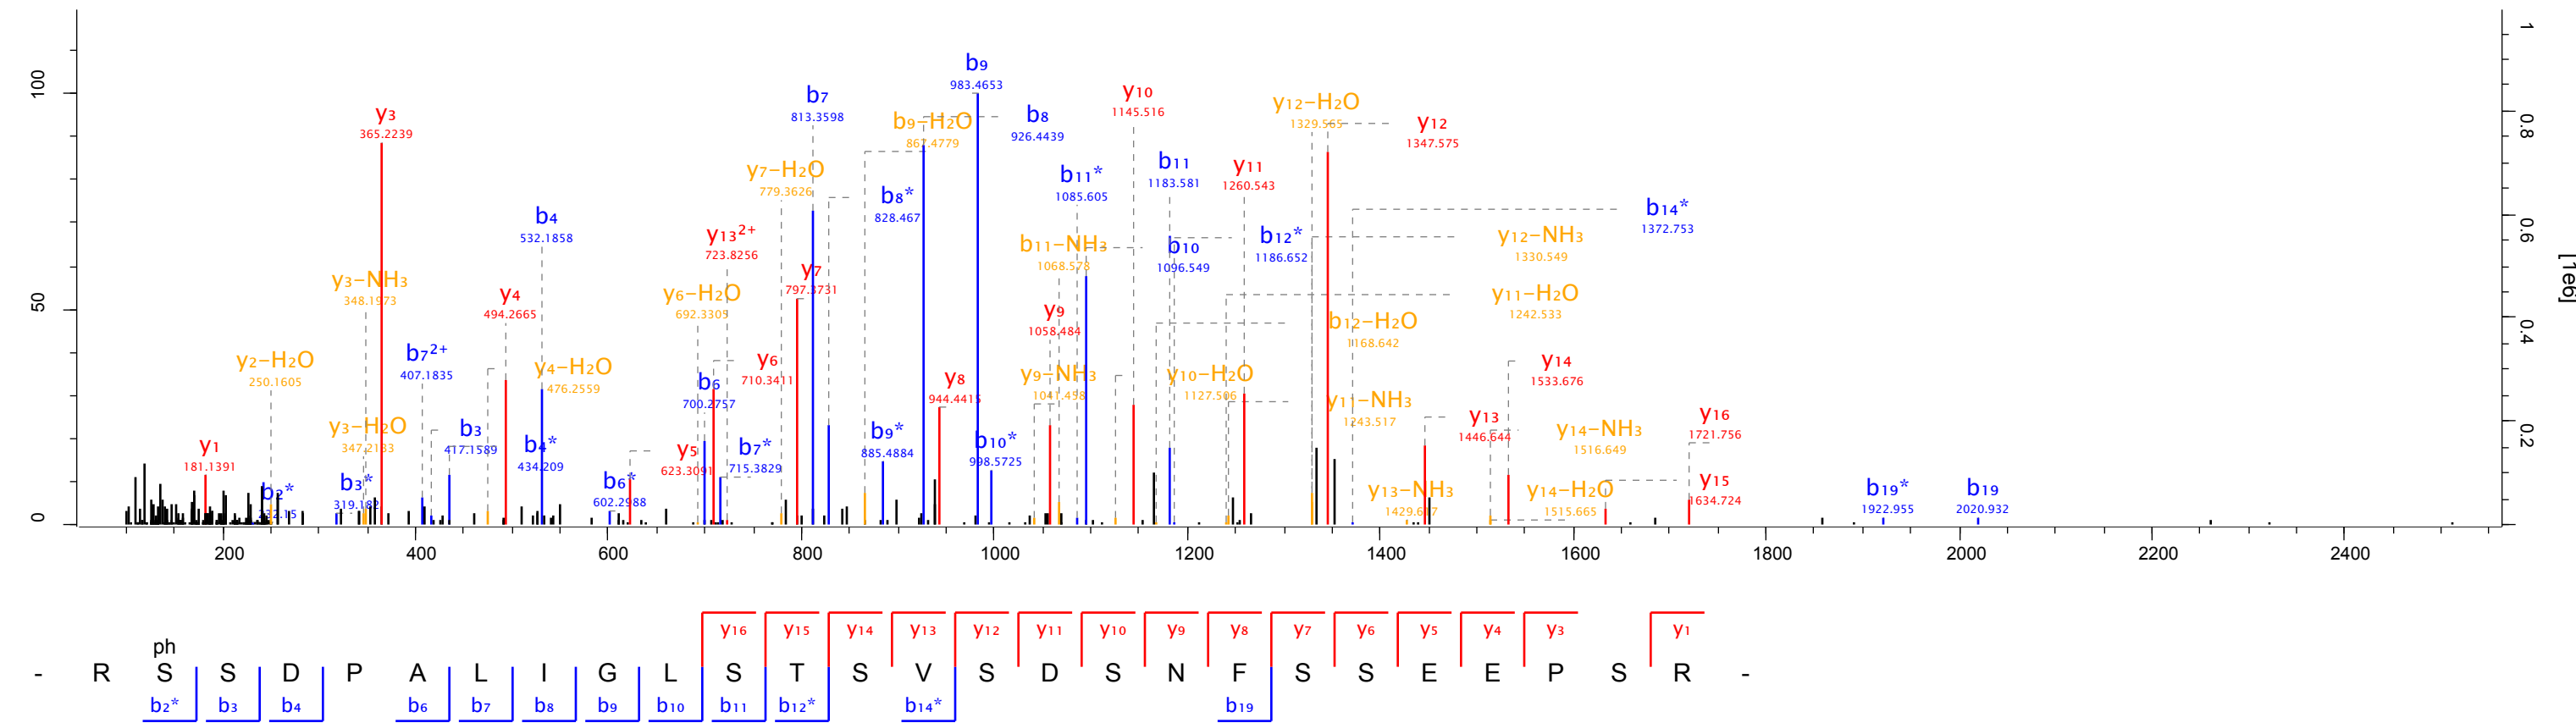

Raw file 20150812\_A375SR\_Phospho\_BR1\_08 Scan 21026 Method FTMS; HCD Score 60.18 m/z 842.64 Gene names BMP2K

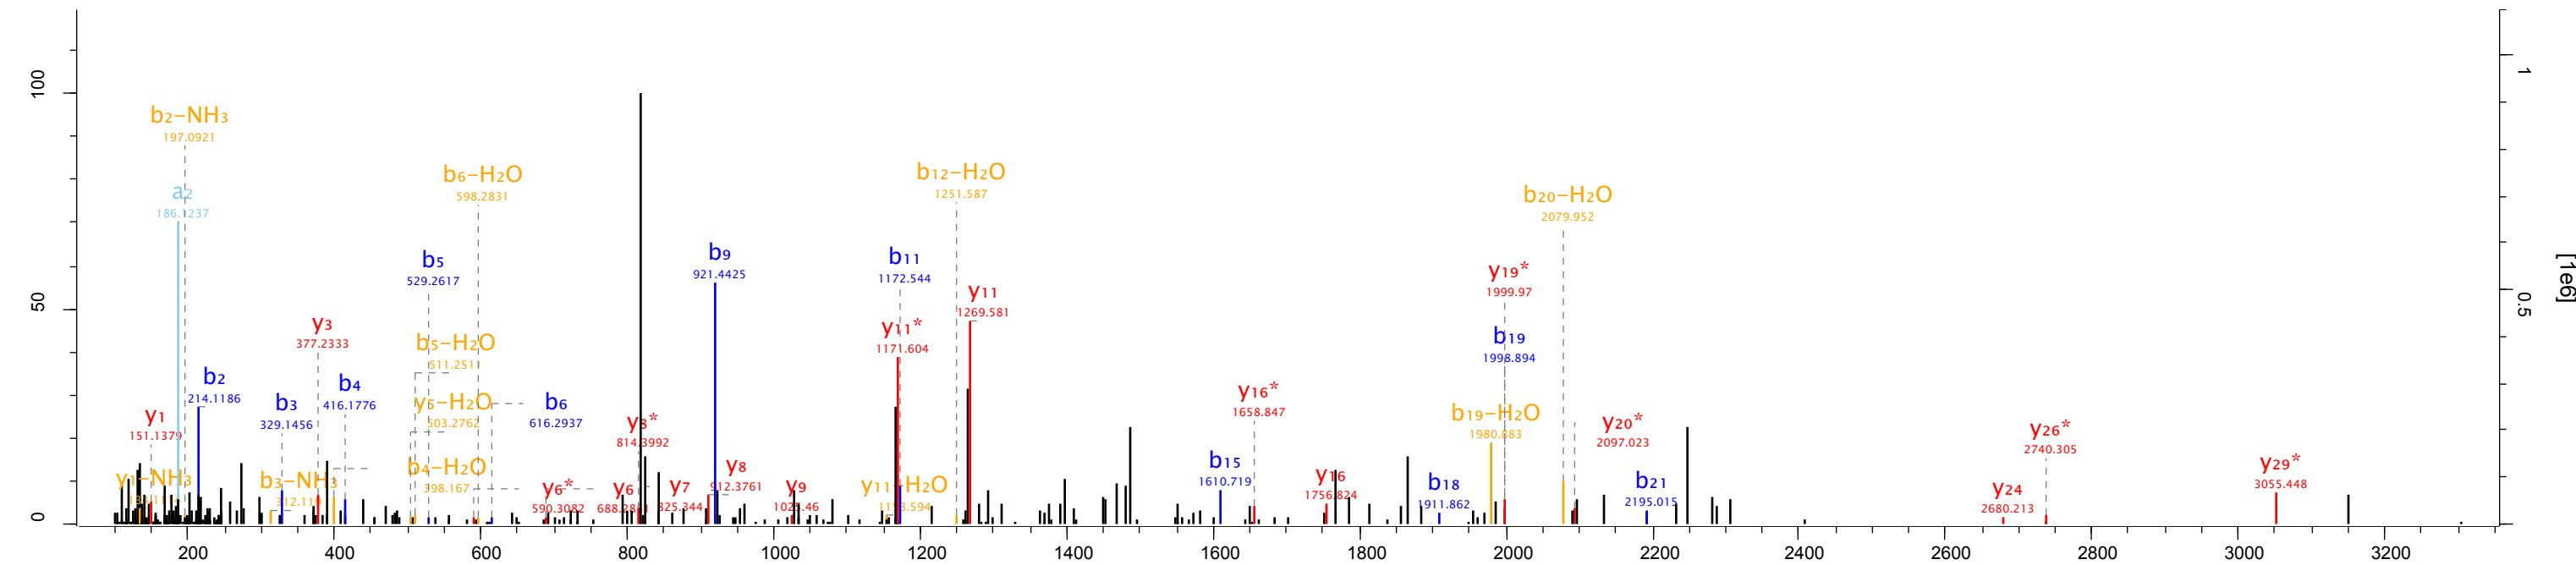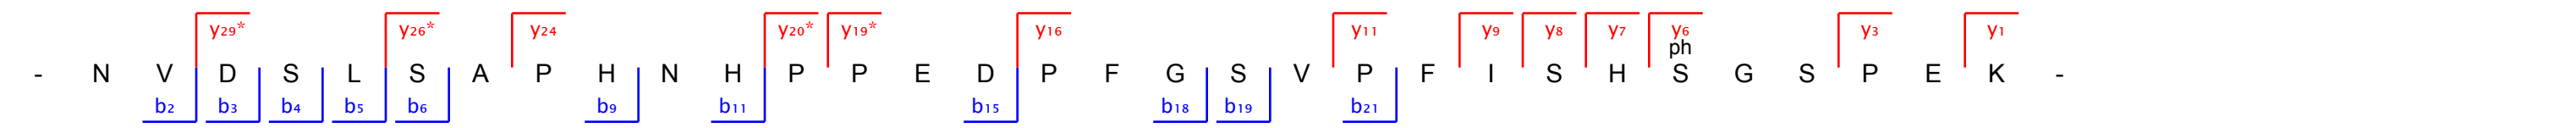

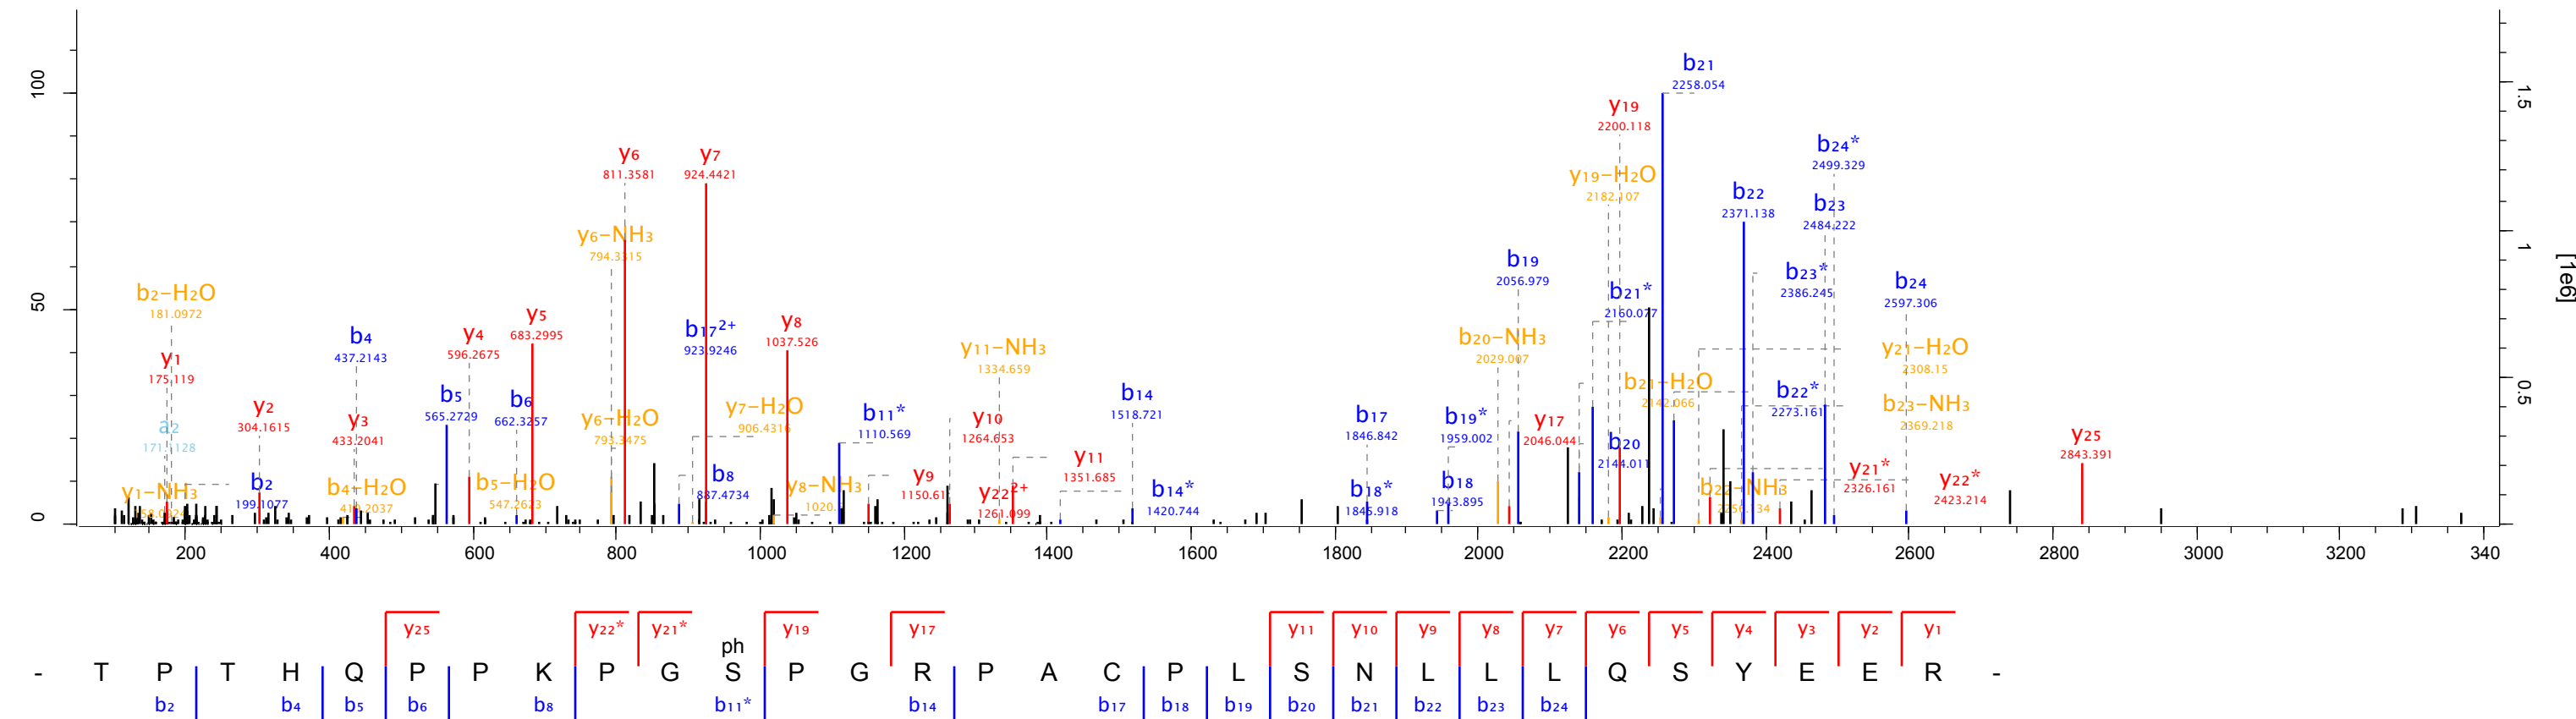

Raw file 20150812\_A375SR\_Phospho\_BR1\_08 Scan 2226 Method FTMS; HCD Score 59.54 m/z 681.95 Gene names CWC22

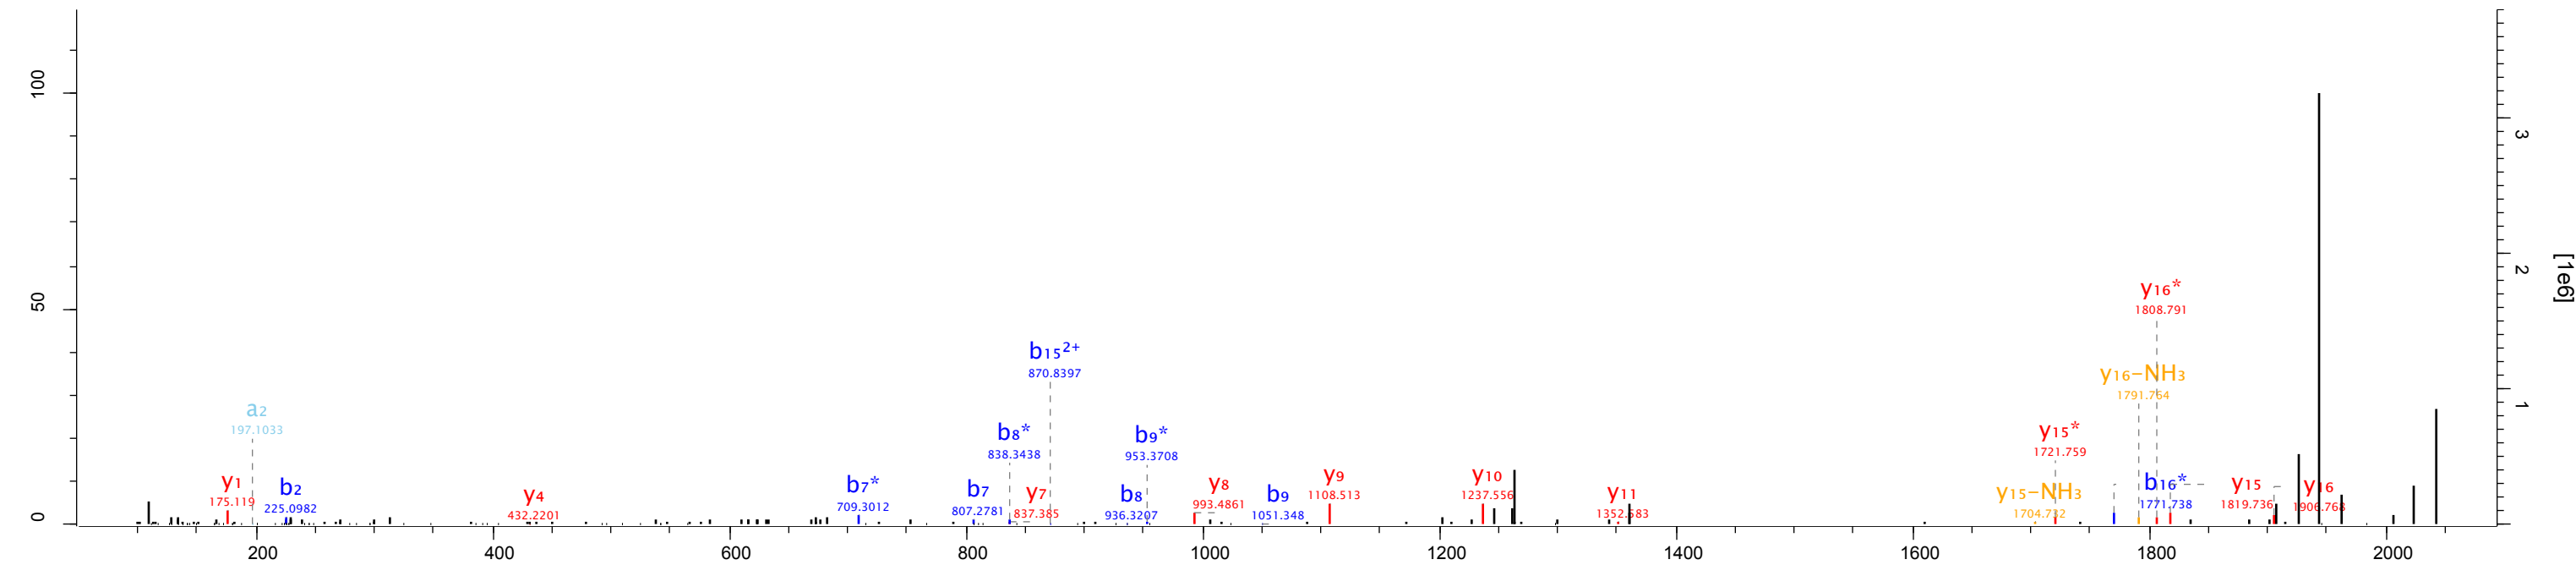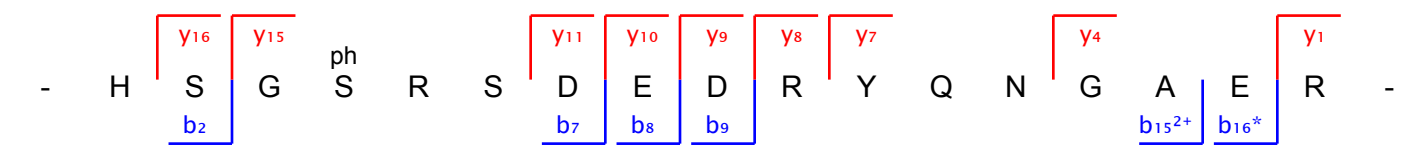

Raw file: 20150812\_A375SR\_Phospho\_BR1\_08  
 Scan: 23936 Method: FTMS; HCD Score: 199.03 m/z: 1036.86 Gene names: RB1

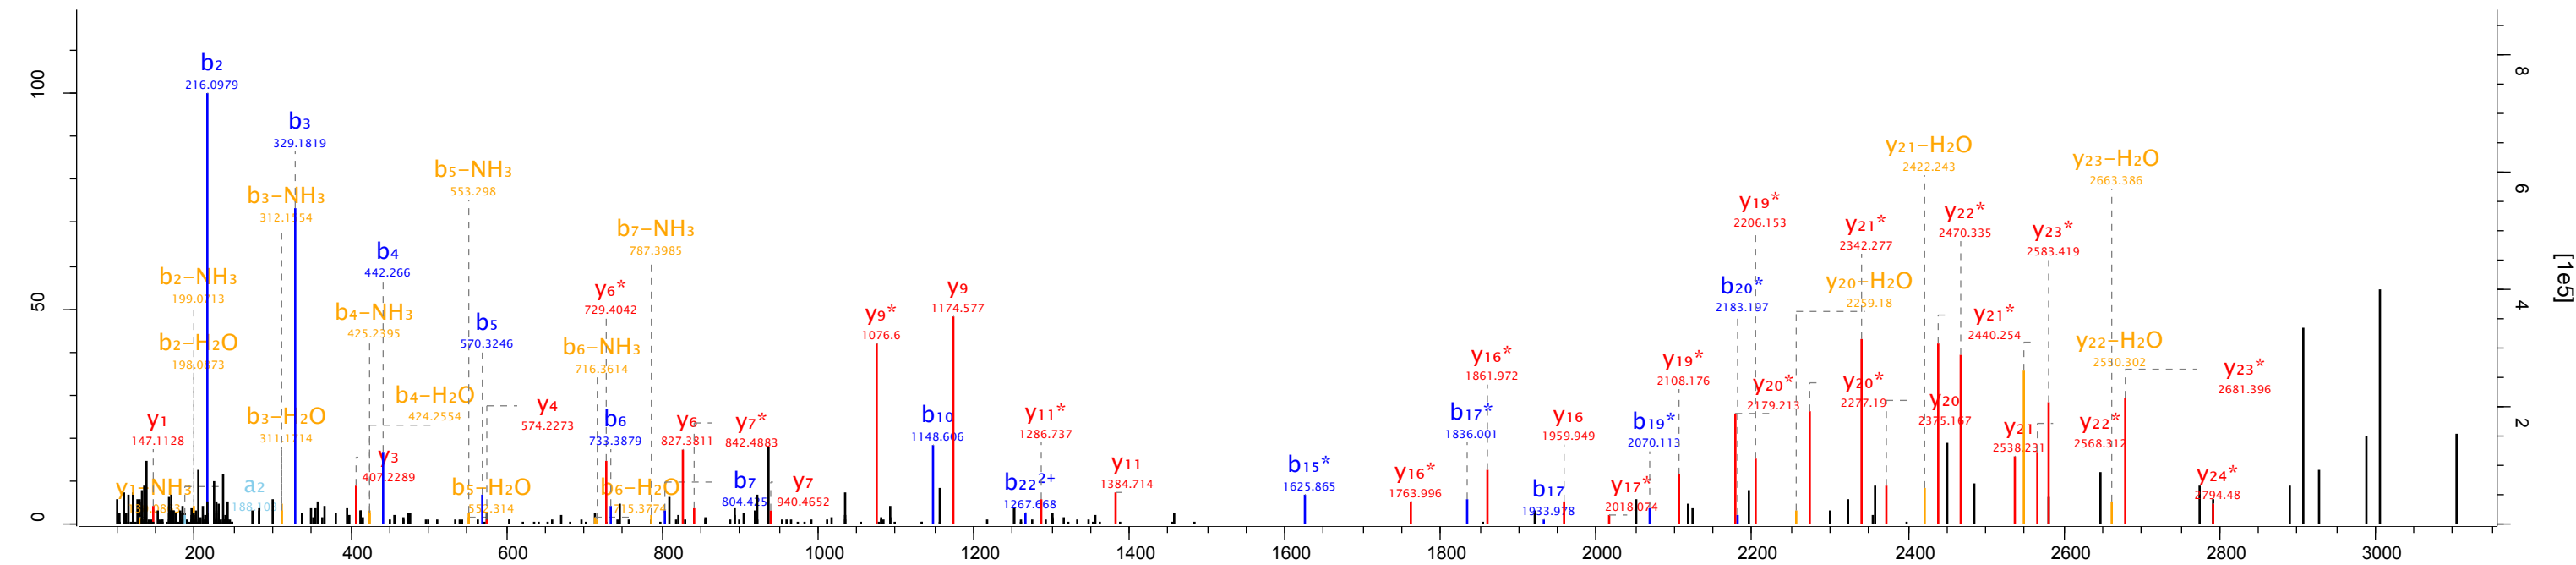

- T N I L Q Y A S T R P P ph T L S P I P H I P R S P Y K -

Fragmentation mapping (b and y ions) is shown below the sequence:

- b<sub>2</sub> (N)
- b<sub>3</sub> (I)
- b<sub>4</sub> (L)
- b<sub>5</sub> (Q)
- b<sub>6</sub> (Y)
- b<sub>7</sub> (A)
- b<sub>10</sub> (R)
- b<sub>15</sub>\* (S)
- b<sub>17</sub> (P)
- b<sub>19</sub>\* (H)
- b<sub>20</sub>\* (I)
- b<sub>22</sub><sup>2+</sup> (P)
- y<sub>1</sub> (K)
- y<sub>3</sub> (P)
- y<sub>4</sub> (ph)
- y<sub>6</sub> (P)
- y<sub>7</sub> (I)
- y<sub>9</sub> (P)
- y<sub>11</sub> (S)
- y<sub>16</sub> (P)
- y<sub>17</sub>\* (R)
- y<sub>19</sub>\* (S)
- y<sub>20</sub>\* (A)
- y<sub>21</sub>\* (Y)
- y<sub>22</sub>\* (Q)
- y<sub>23</sub>\* (L)
- y<sub>24</sub>\* (I)

Raw file Scan Method Score m/z Gene names  
 20150812\_A375SR\_Phospho\_BR1\_08 24926 FTMS; HCD 196.36 982.96 SRRM2

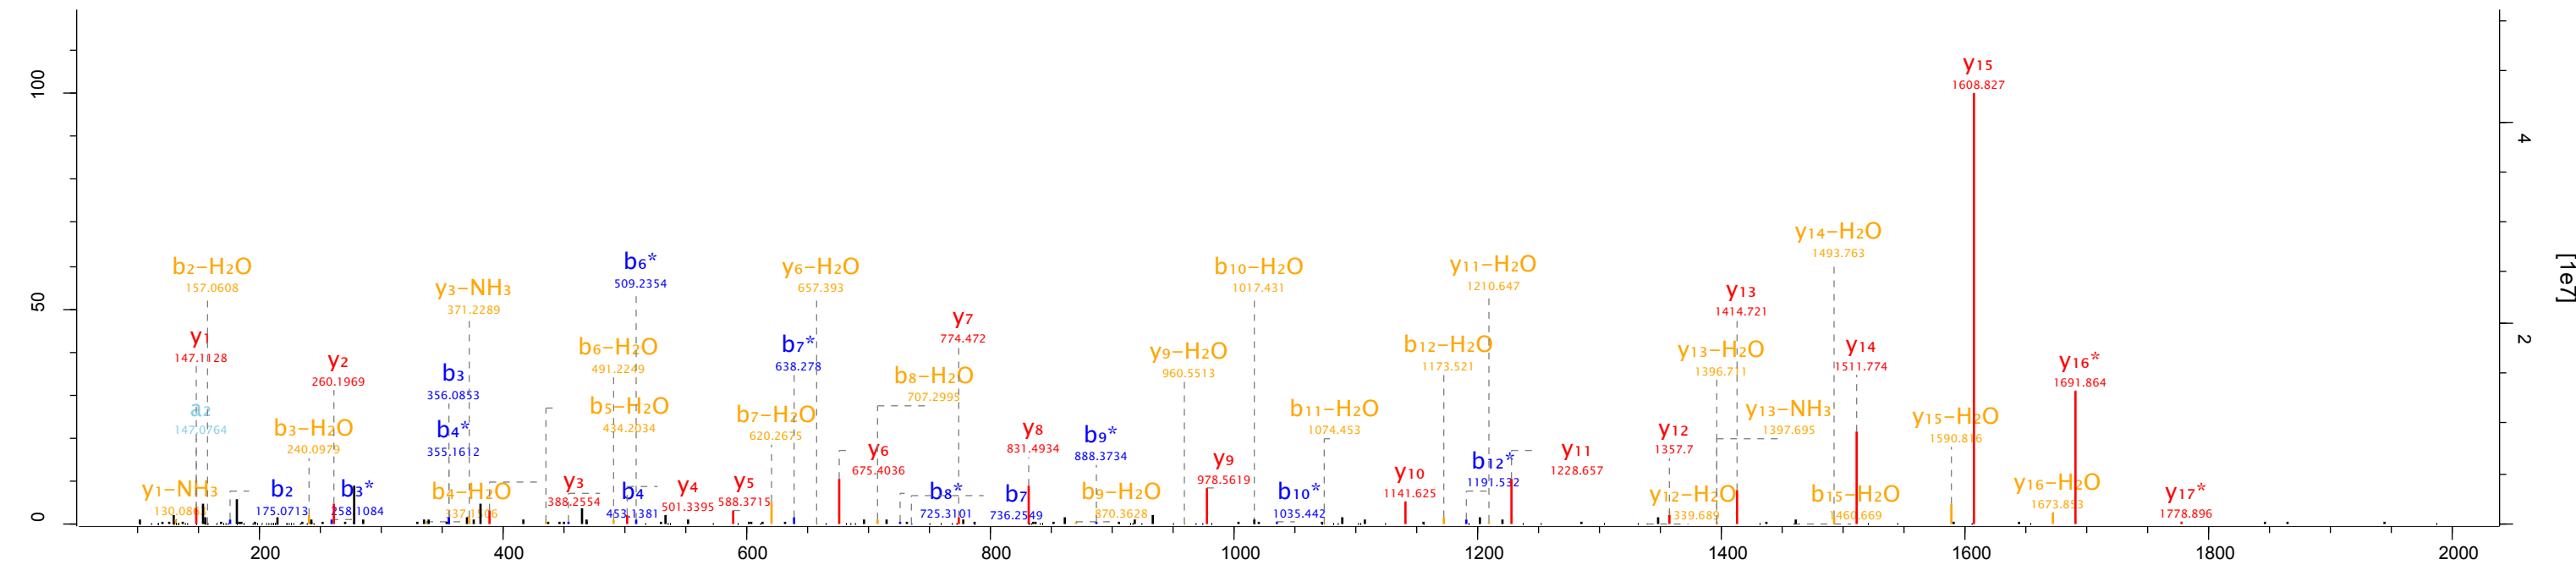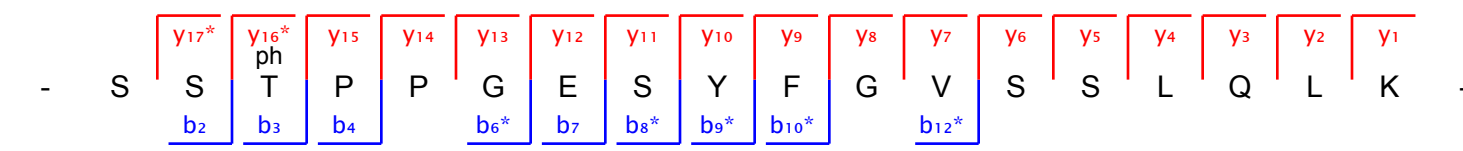



Raw file 20150812\_A375SR\_Phospho\_BR1\_08 Scan 26726 Method FTMS; HCD Score 140.69 m/z 1171.91 Gene names FAM120A;C9orf129

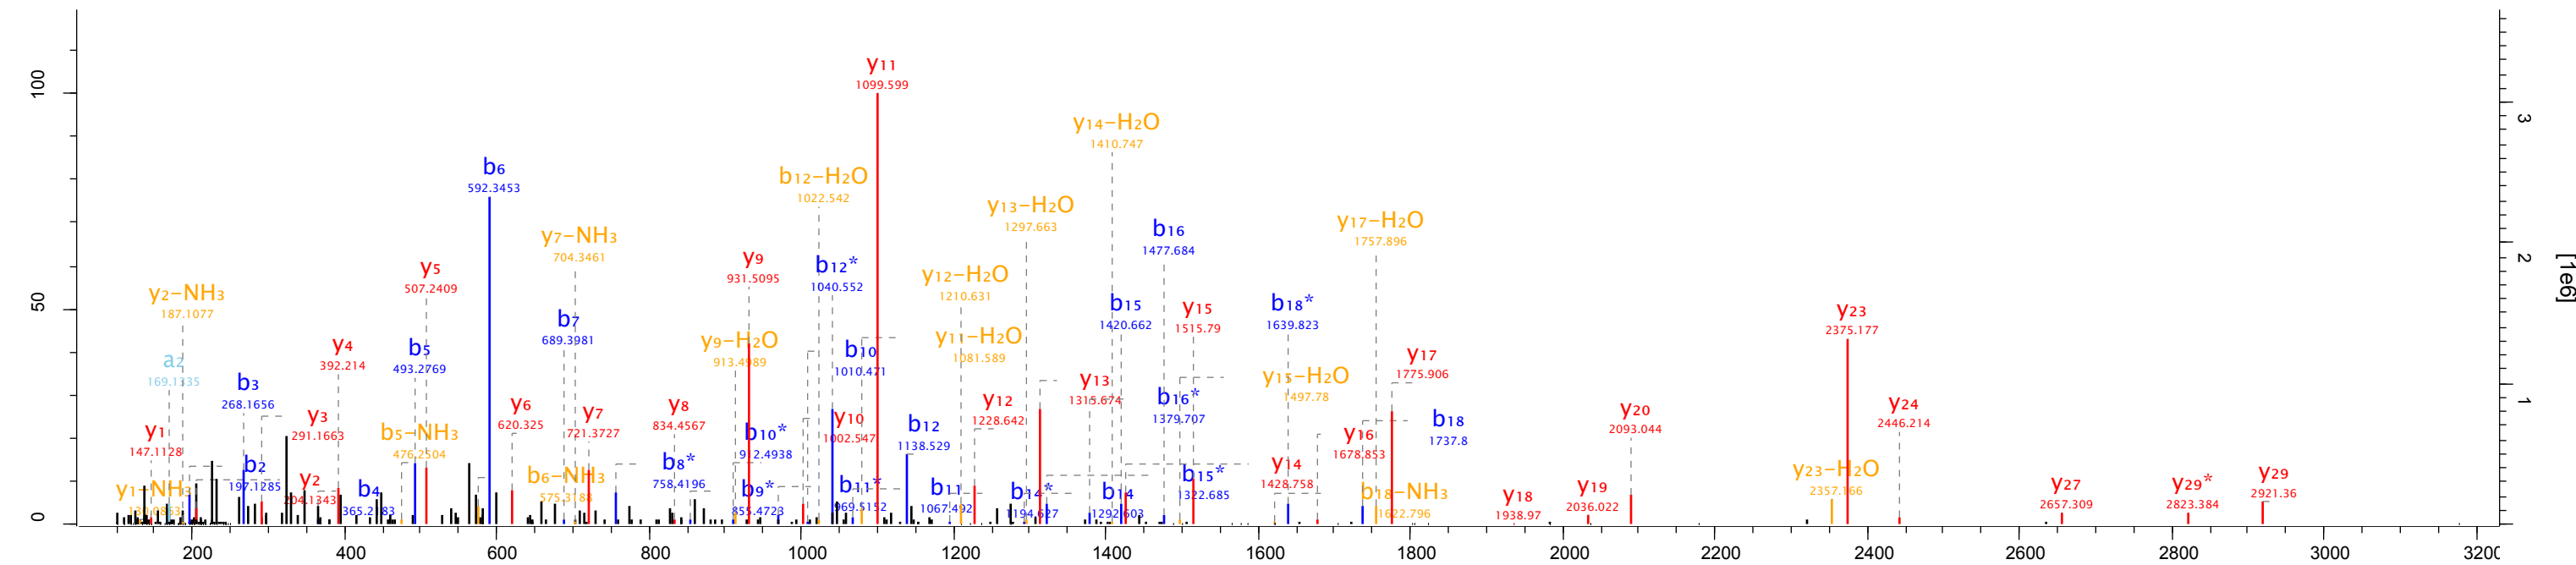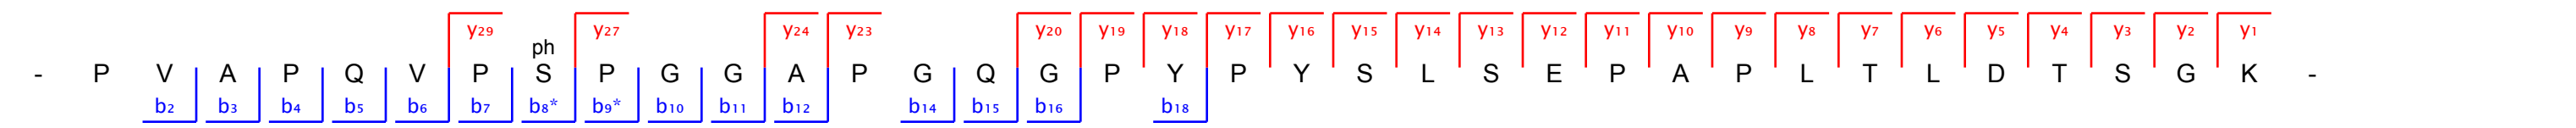

Raw file: 20150812\_A375SR\_Phospho\_BR1\_08  
 Scan: 2976 Method: FTMS; HCD Score: 187.77 m/z: 561.77 Gene names: TCOF1

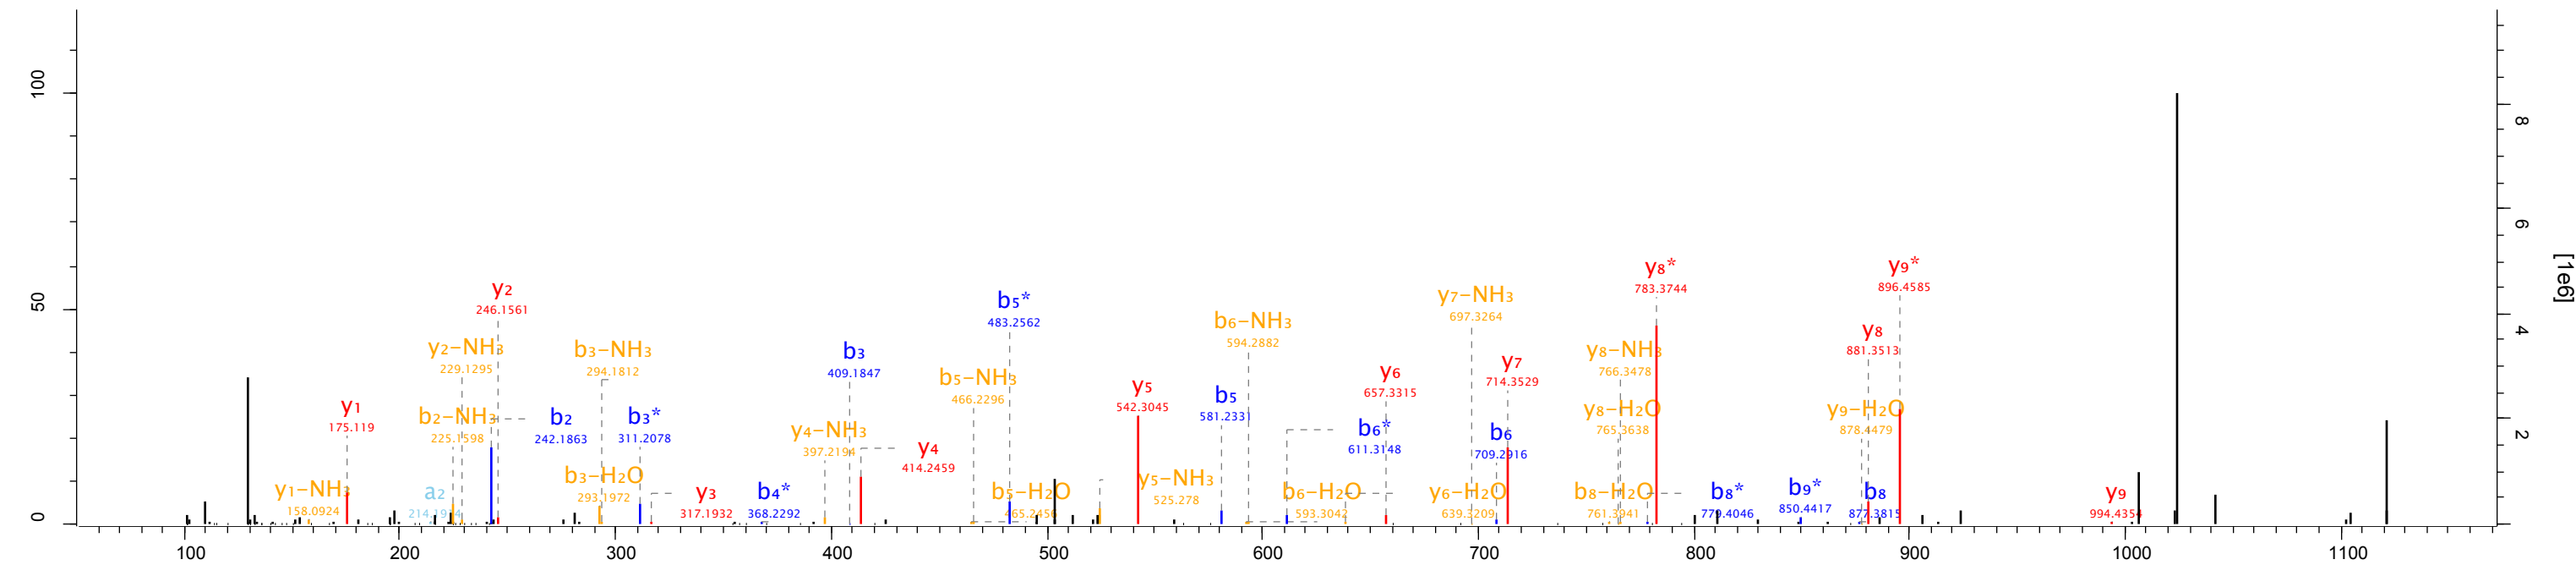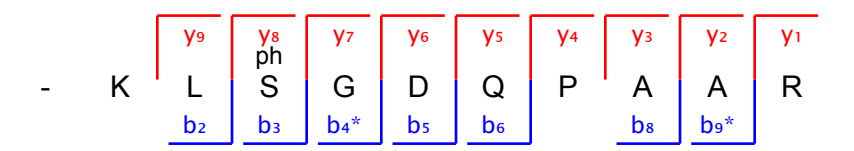

Raw file: 20150812\_A375SR\_Phospho\_BR1\_08  
 Scan: 3506 Method: FTMS; HCD Score: 115.68 m/z: 709.32 Gene names: BAZ2A

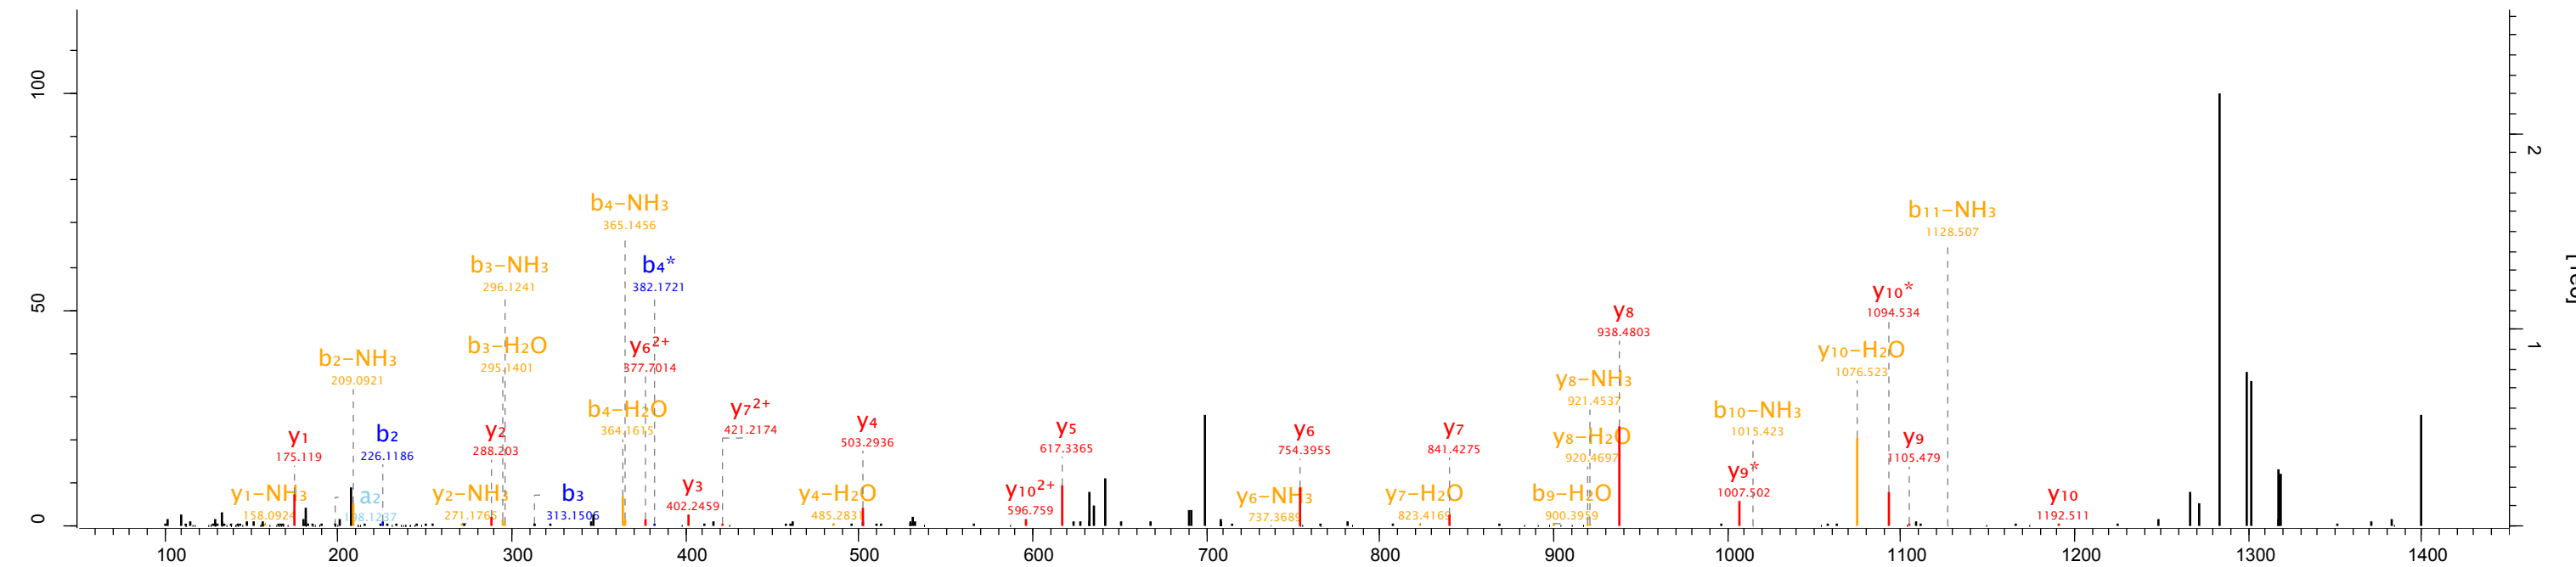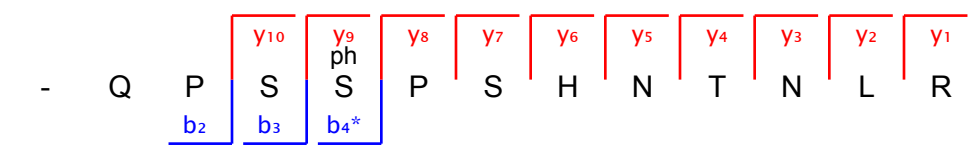

Raw file: 20150812\_A375SR\_Phospho\_BR1\_08  
 Scan: 3586 Method: FTMS; HCD Score: 112.84 m/z: 540.77 Gene names: POLDIP3

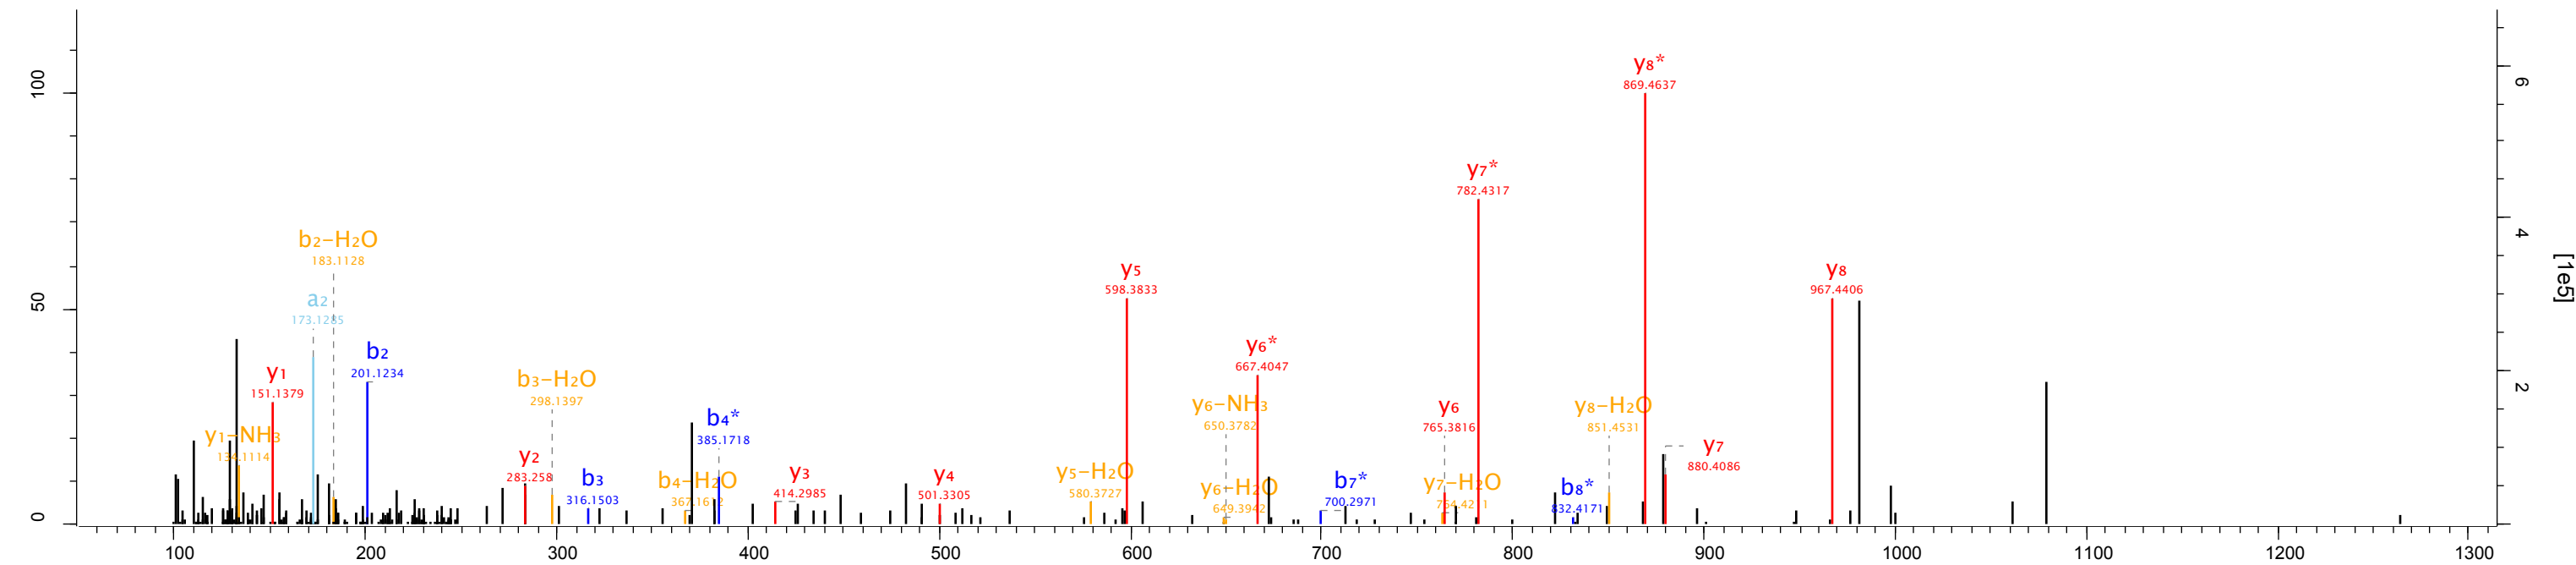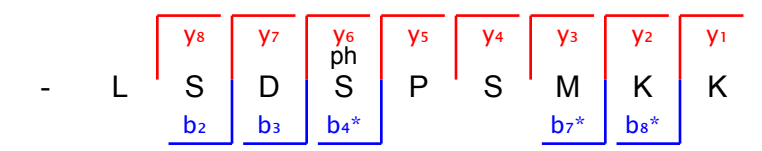

Raw file: 20150812\_A375SR\_Phospho\_BR1\_08  
 Scan: 4056 Method: FTMS; HCD Score: 196.76 m/z: 952.47 Gene names: C9orf78

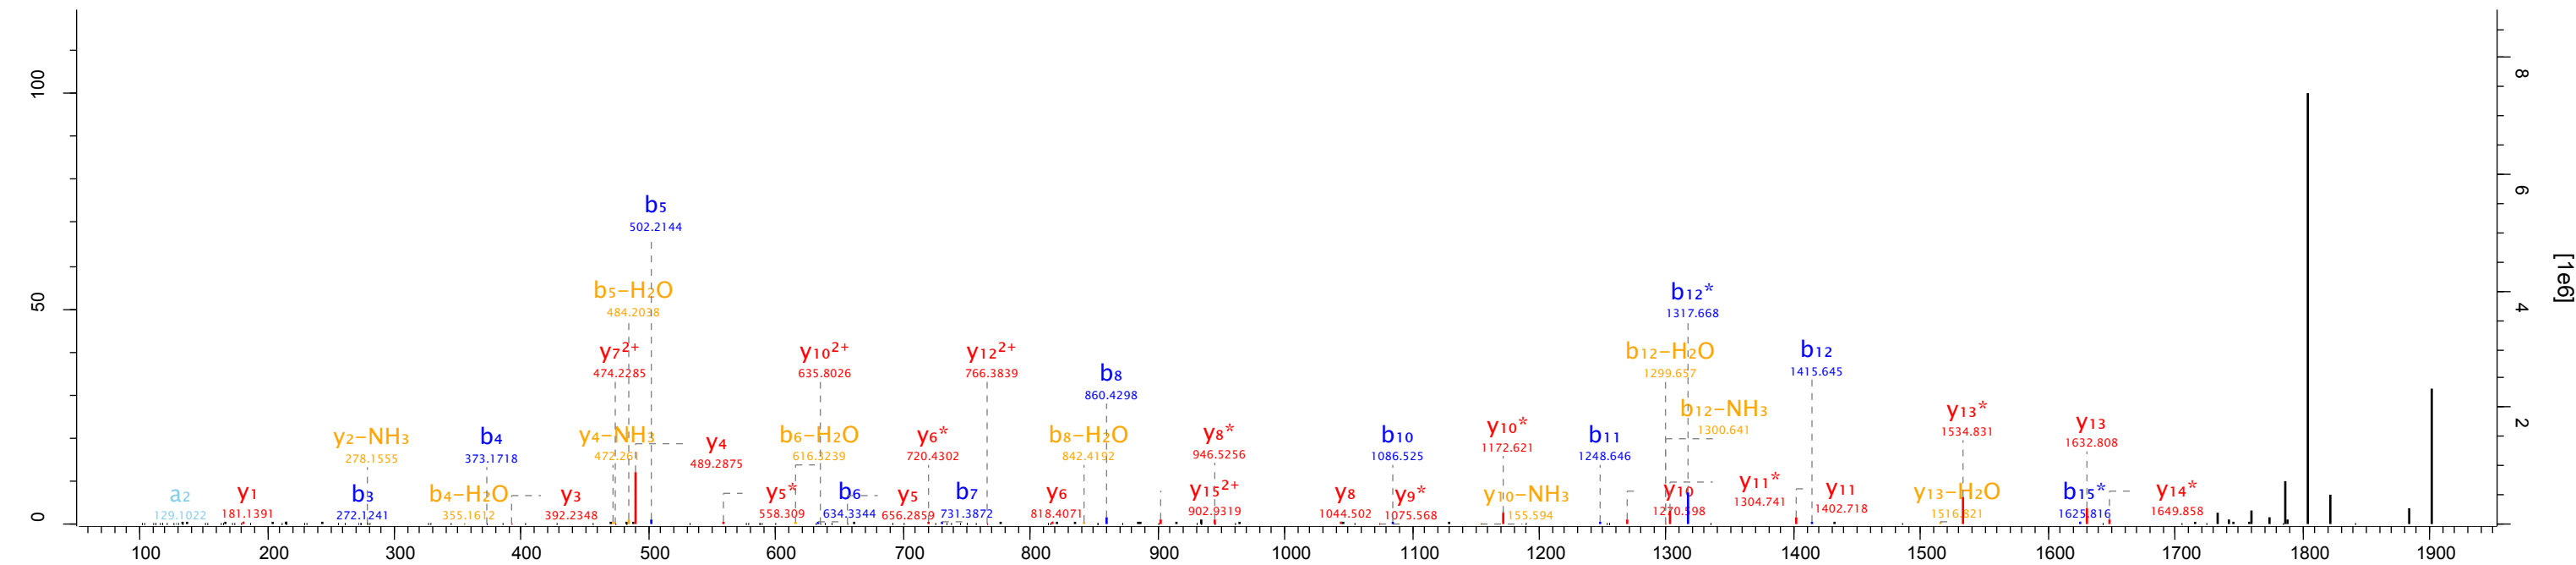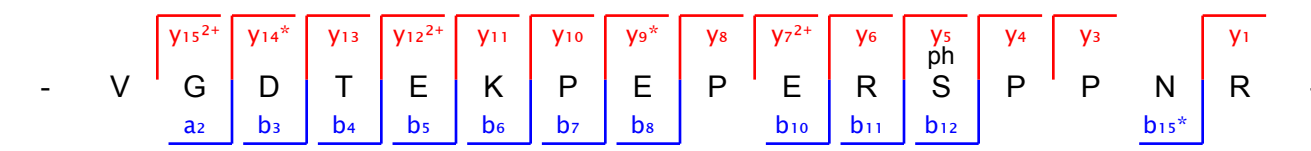

Raw file: 20150812\_A375SR\_Phospho\_BR1\_08  
 Scan: 4206 Method: FTMS; HCD Score: 73.08 m/z: 584.76 Gene names: SCAF11

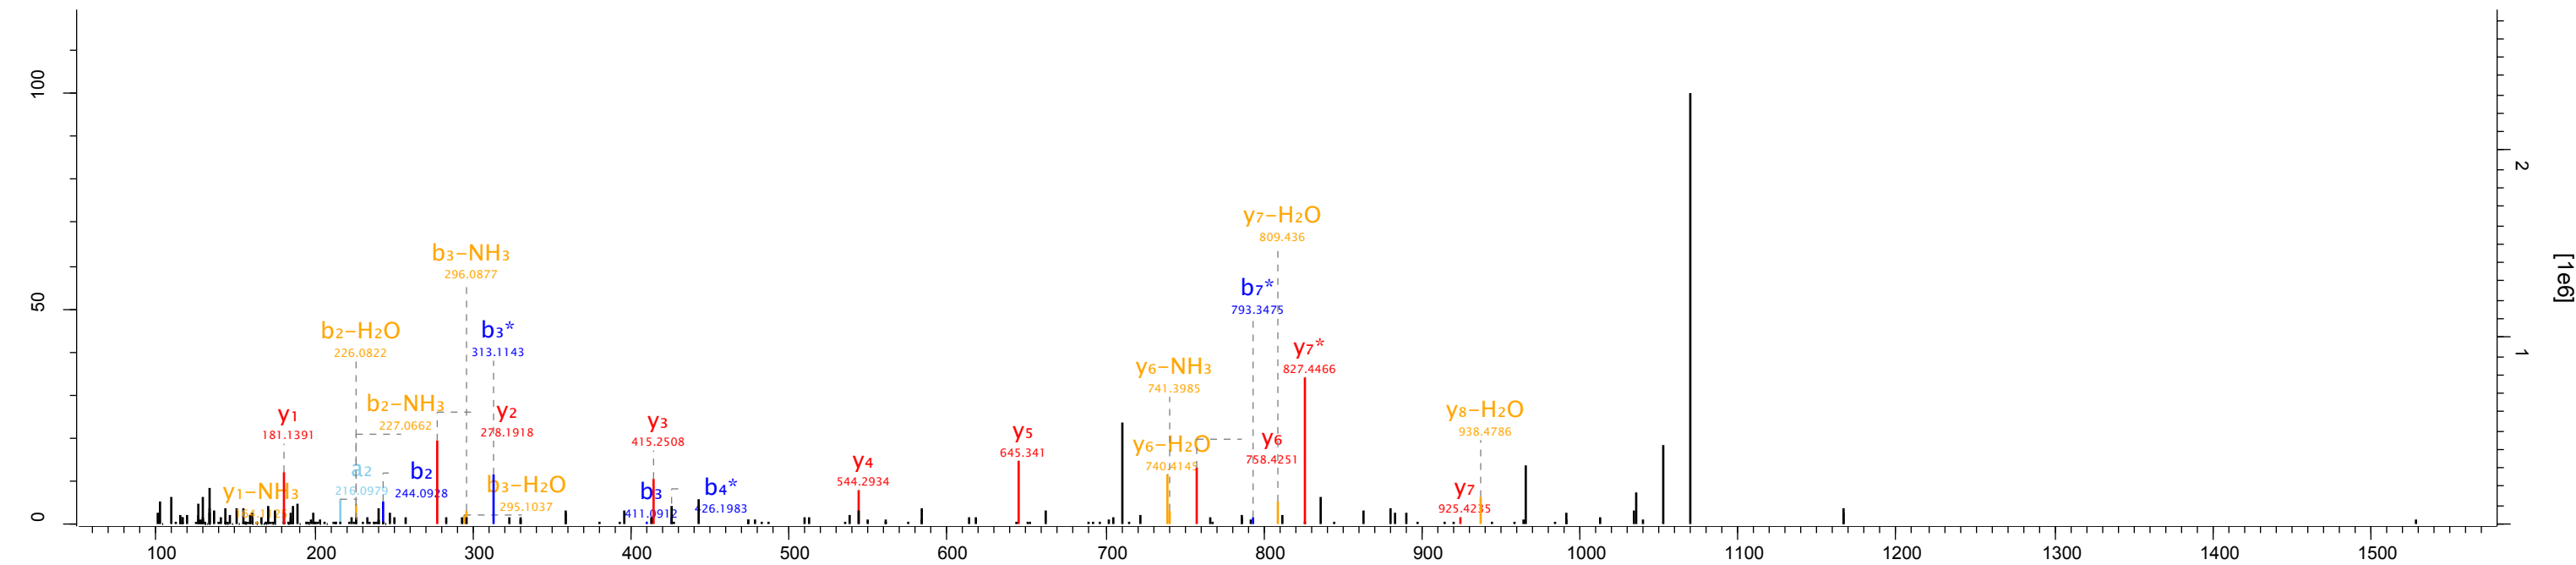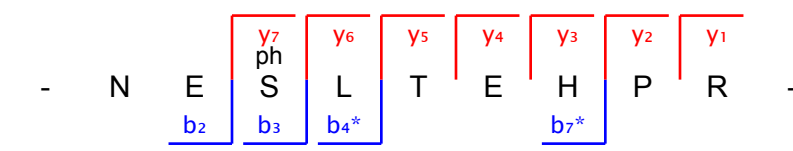

Raw file 20150812\_A375SR\_Phospho\_BR1\_08 Scan 5516 Method FTMS; HCD Score 171.04 m/z 578.59 Gene names SUPT5H

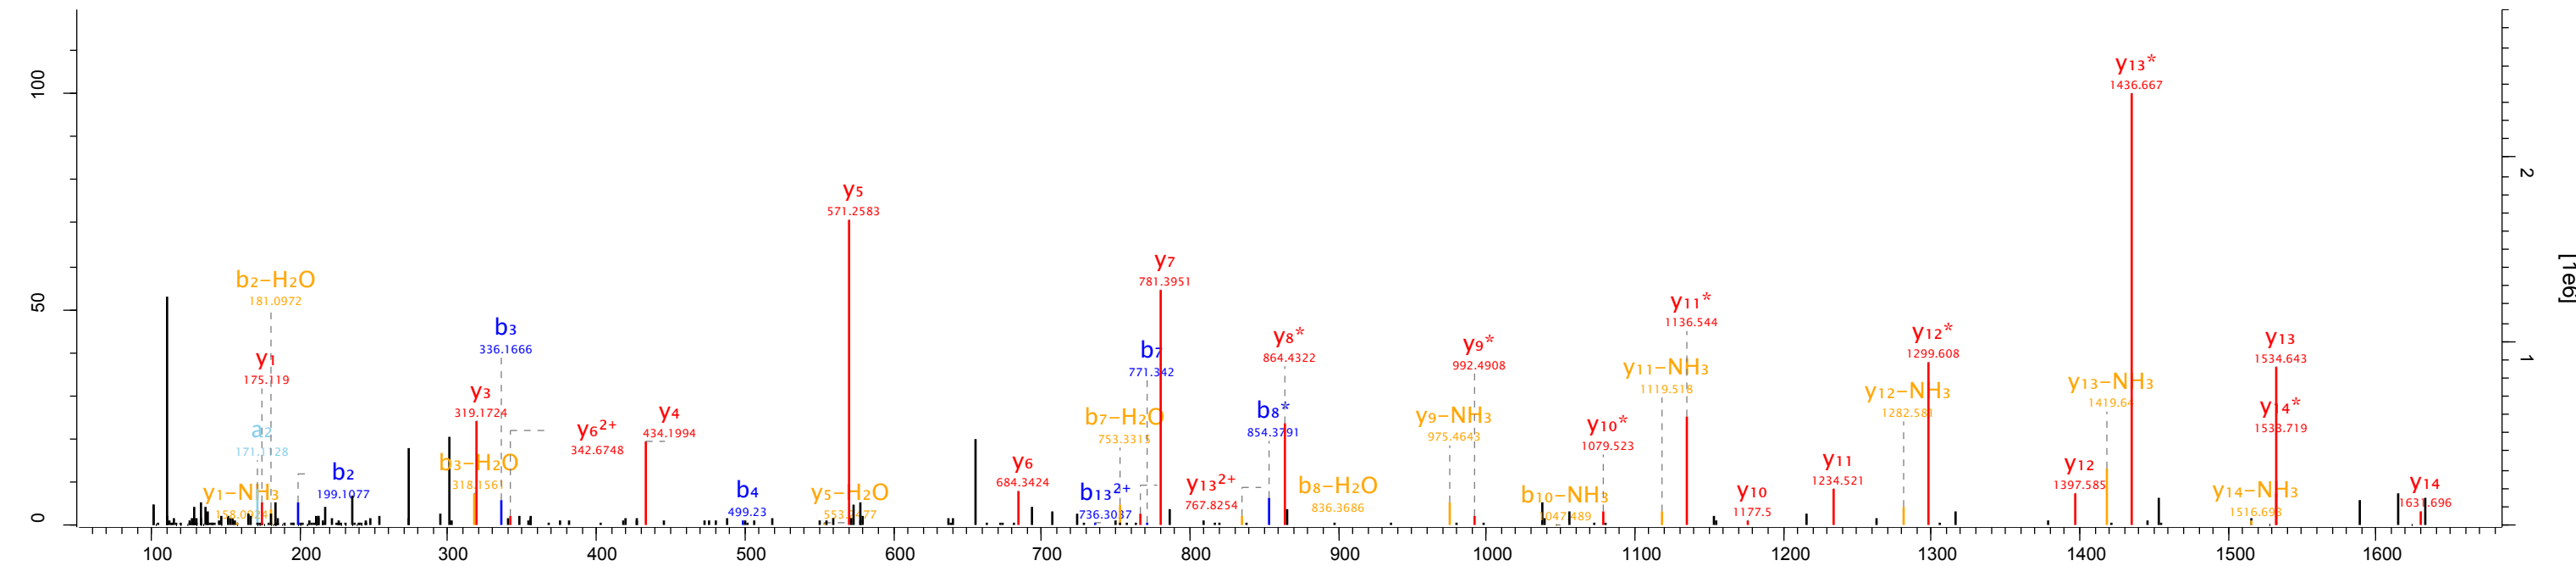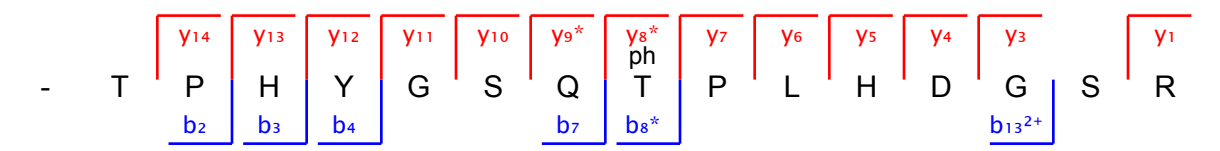

Raw file: 20150812\_A375SR\_Phospho\_BR1\_08  
 Scan: 5846 Method: FTMS; HCD Score: 188.77 m/z: 713.85 Gene names: UBAP2L

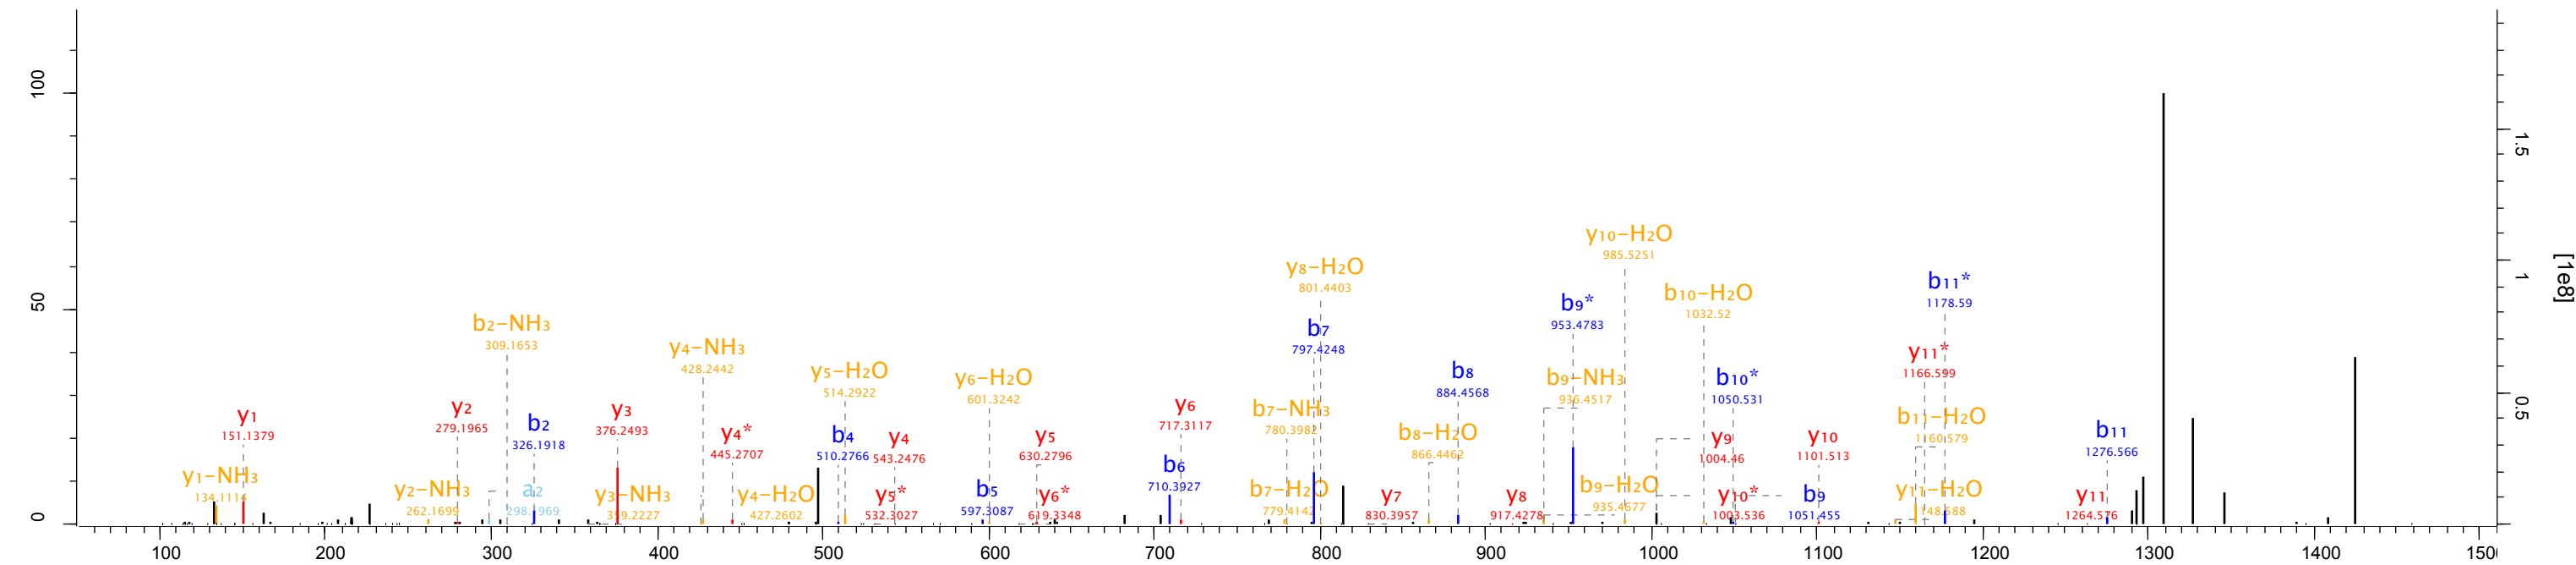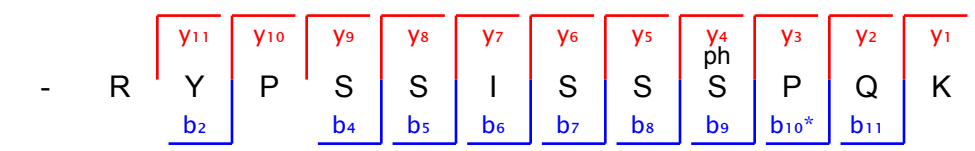



Raw file: 20150812\_A375SR\_Phospho\_BR1\_08  
 Scan: 6276 Method: FTMS; HCD Score: 142.39 m/z: 606.3 Gene names: PHLDB2

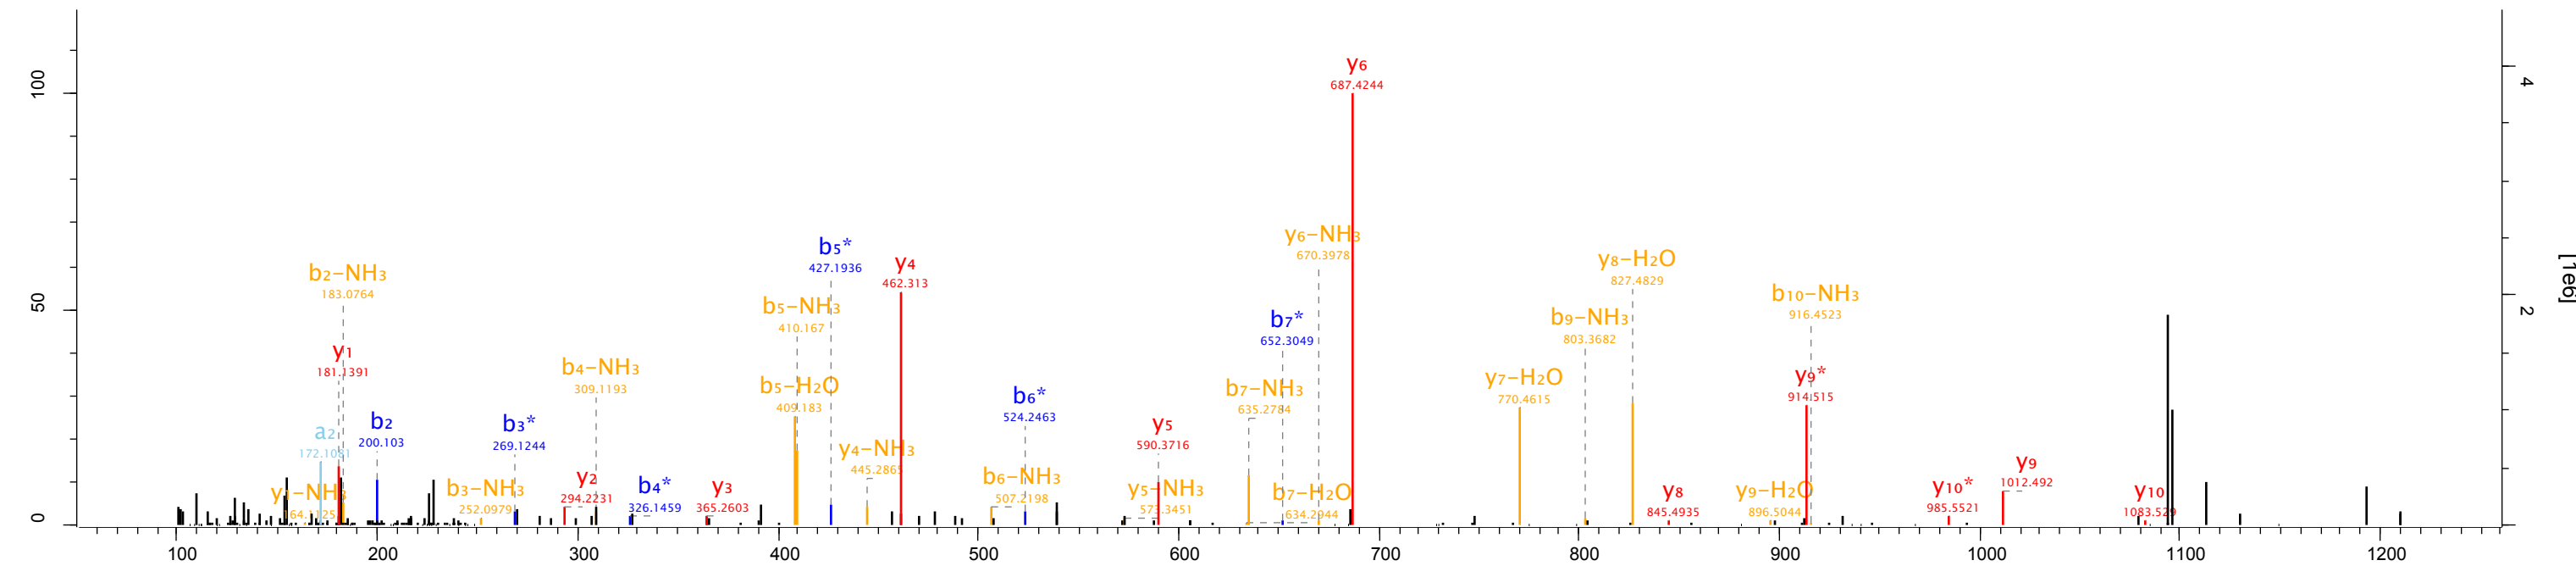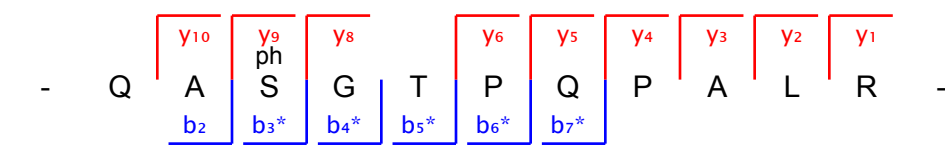

Raw file: 20150812\_A375SR\_Phospho\_BR1\_08  
 Scan: 6996 Method: FTMS; HCD Score: 205.96 m/z: 732.86 Gene names: CLASP2

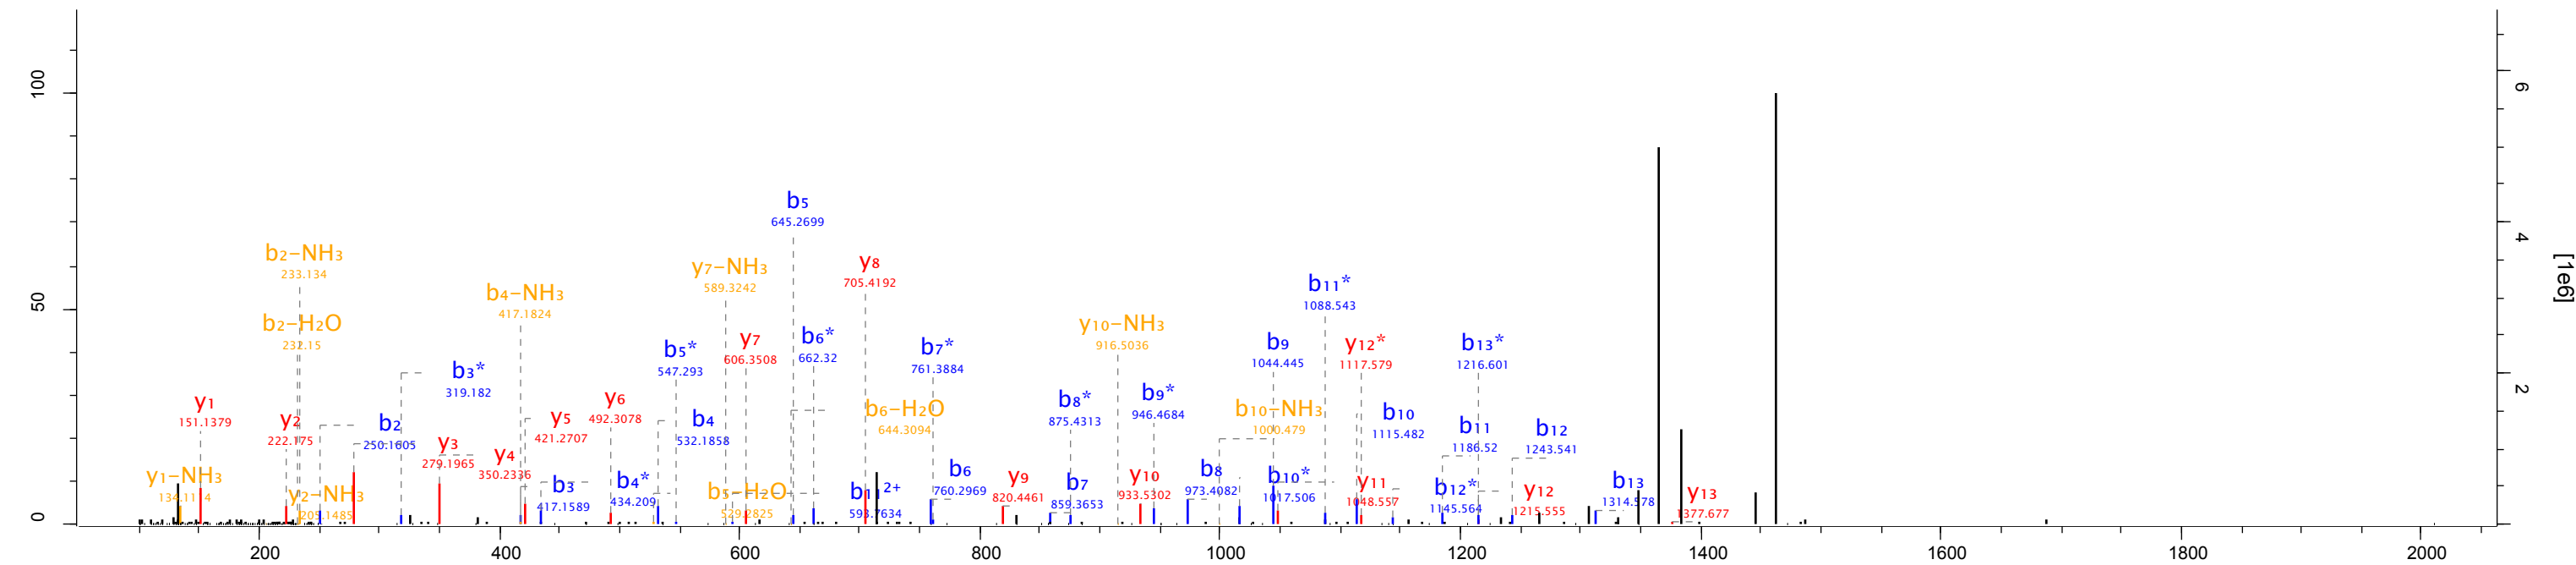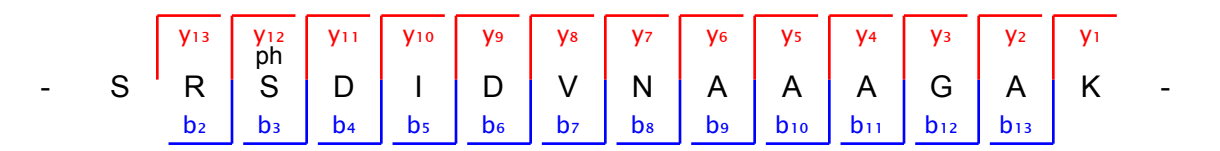

Raw file: 20150812\_A375SR\_Phospho\_BR1\_08  
 Scan: 7176 Method: FTMS; HCD Score: 110.31 m/z: 478.22 Gene names: SASH1

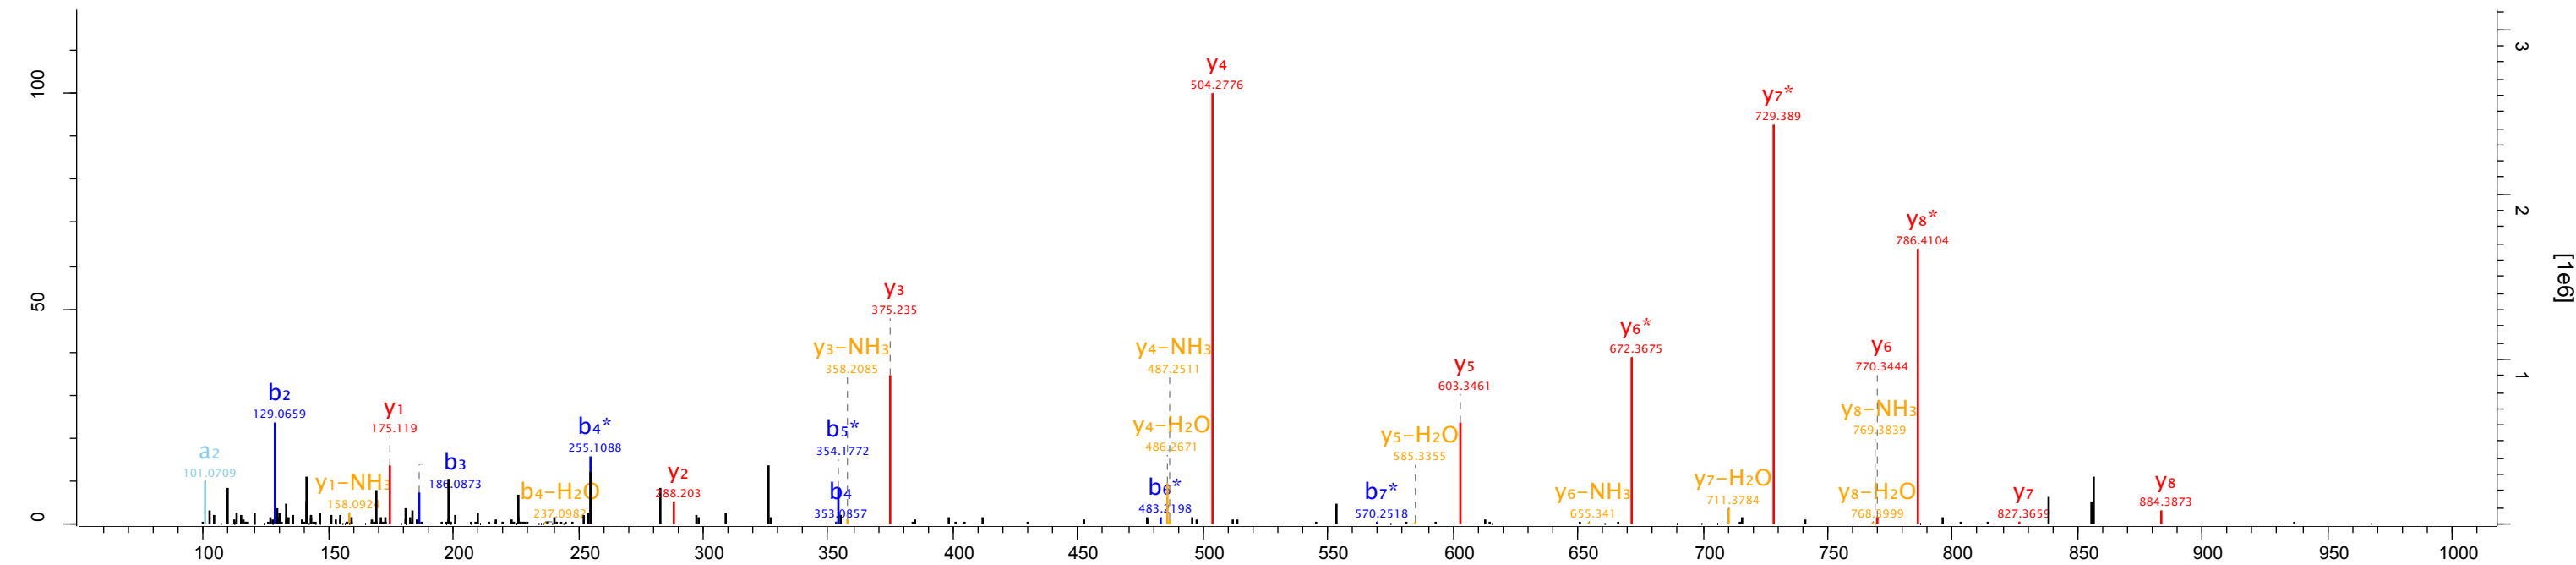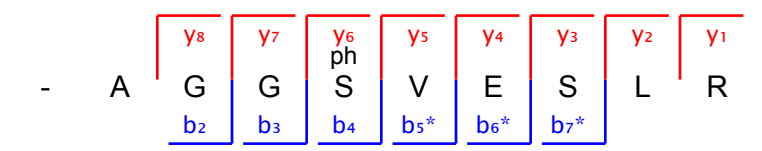

Raw file: 20150812\_A375SR\_Phospho\_BR1\_08  
 Scan: 7306 Method: FTMS; HCD Score: 226.39 m/z: 688.33 Gene names: ZBTB21

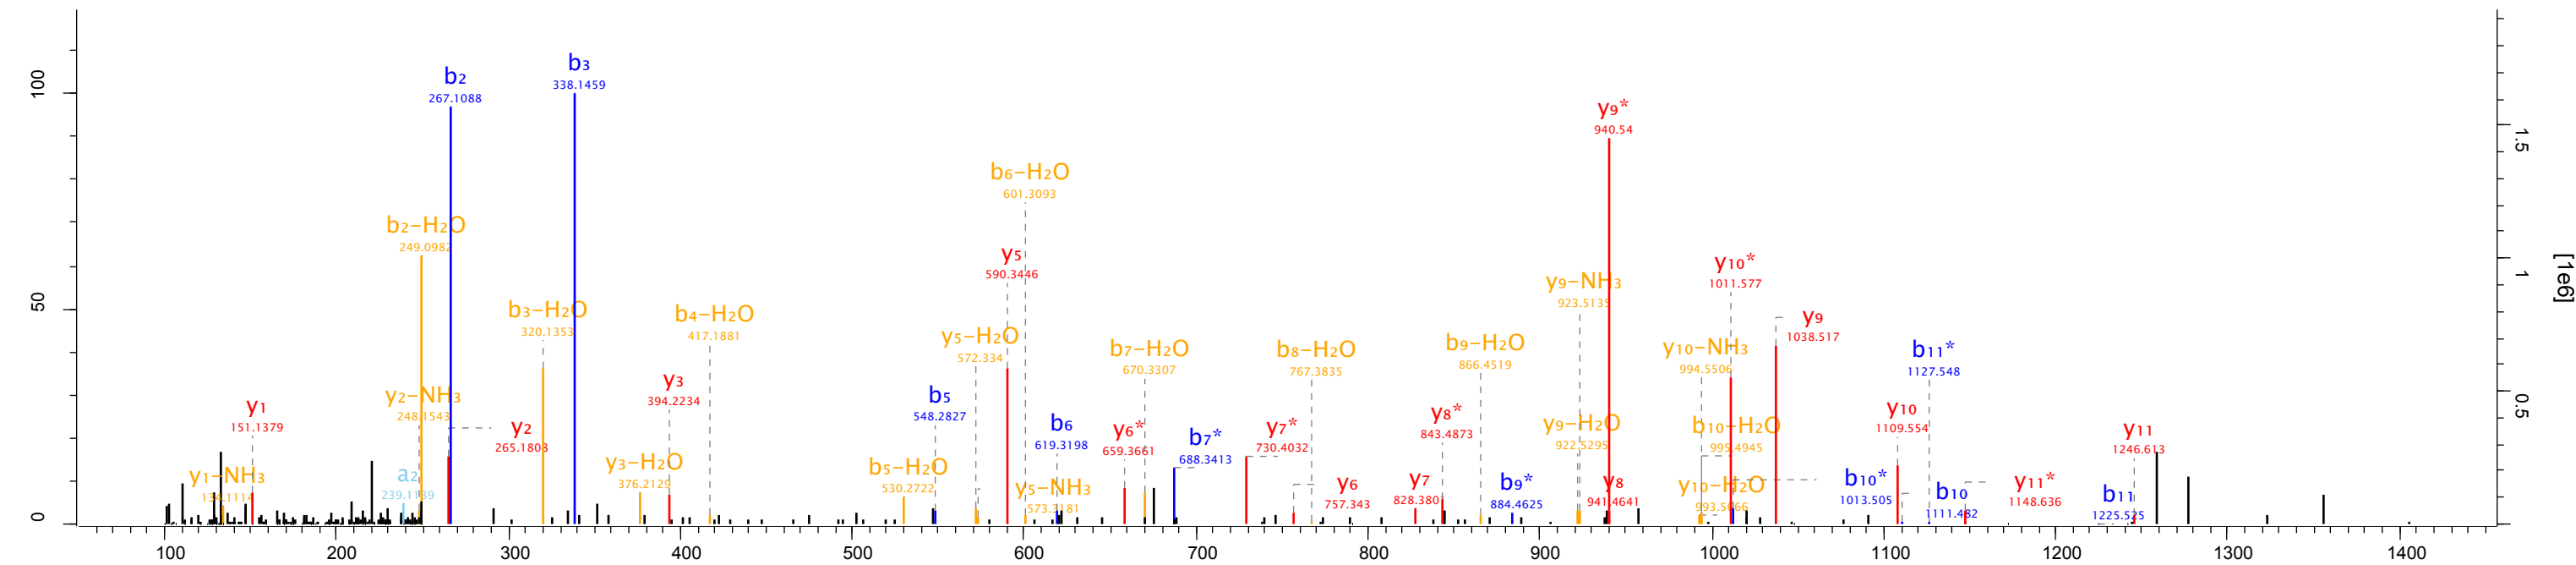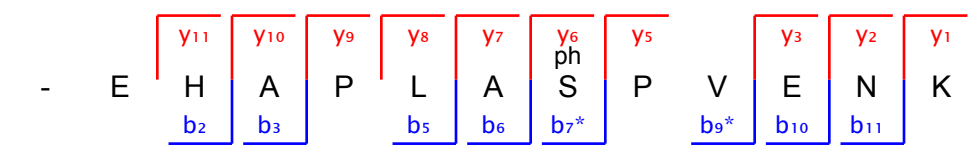

Raw file: 20150812\_A375SR\_Phospho\_BR1\_08  
 Scan: 7976 Method: FTMS; HCD Score: 199.41 m/z: 637.8 Gene names: PALLD

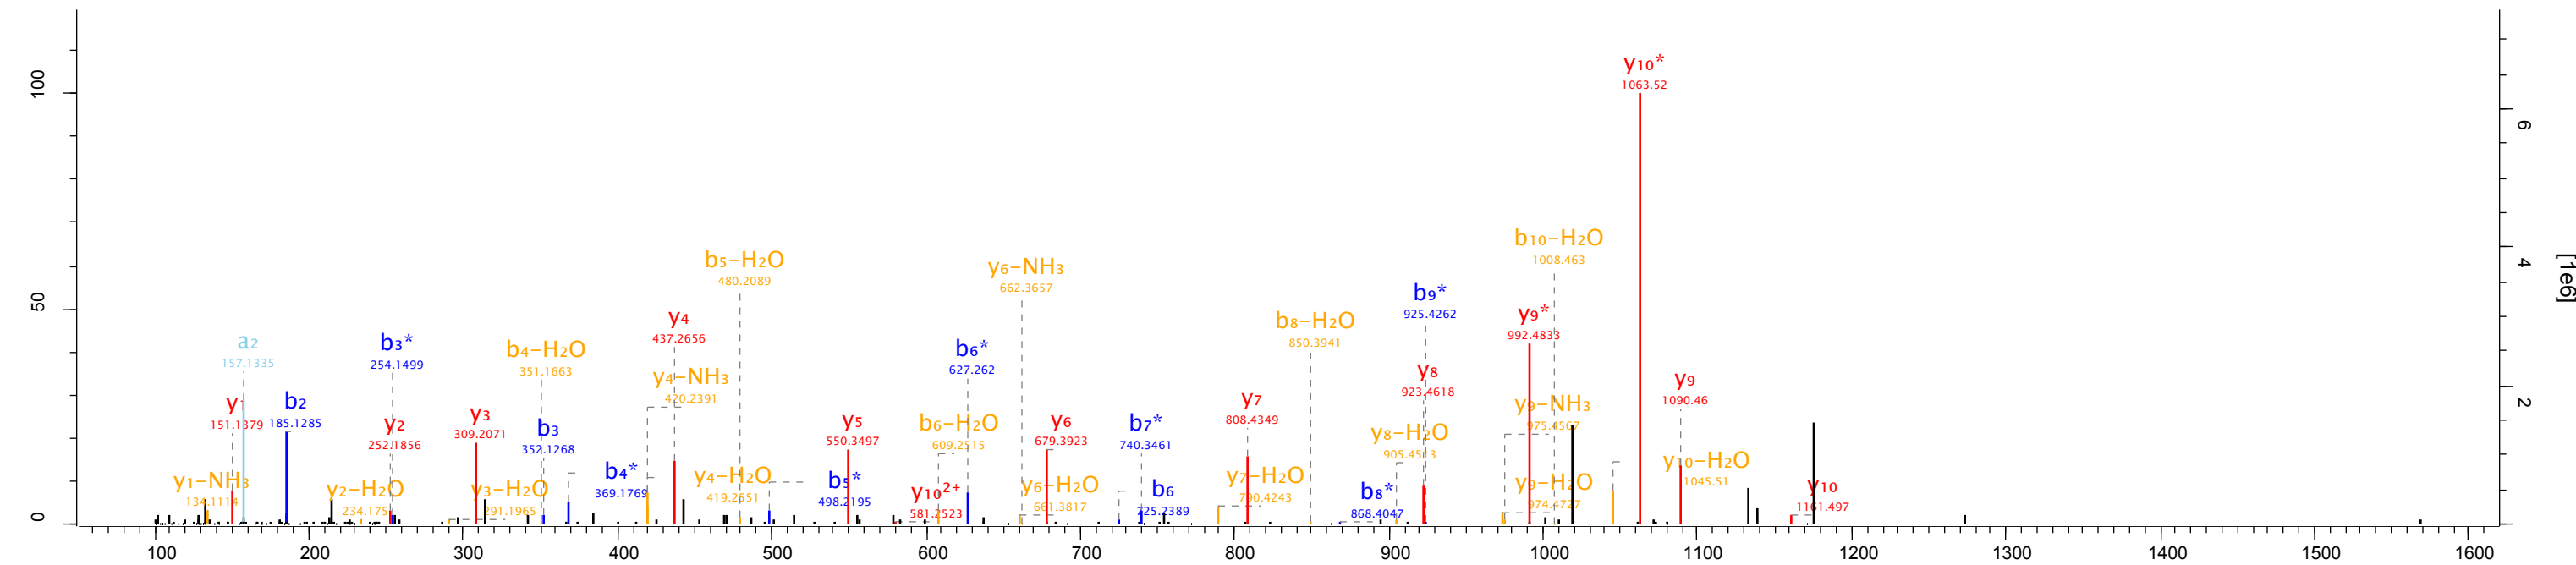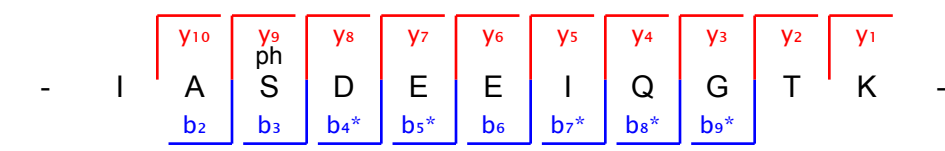

Raw file: 20150812\_A375SR\_Phospho\_BR1\_08  
 Scan: 8426 Method: FTMS; HCD Score: 261.02 m/z: 850.85 Gene names: SART3

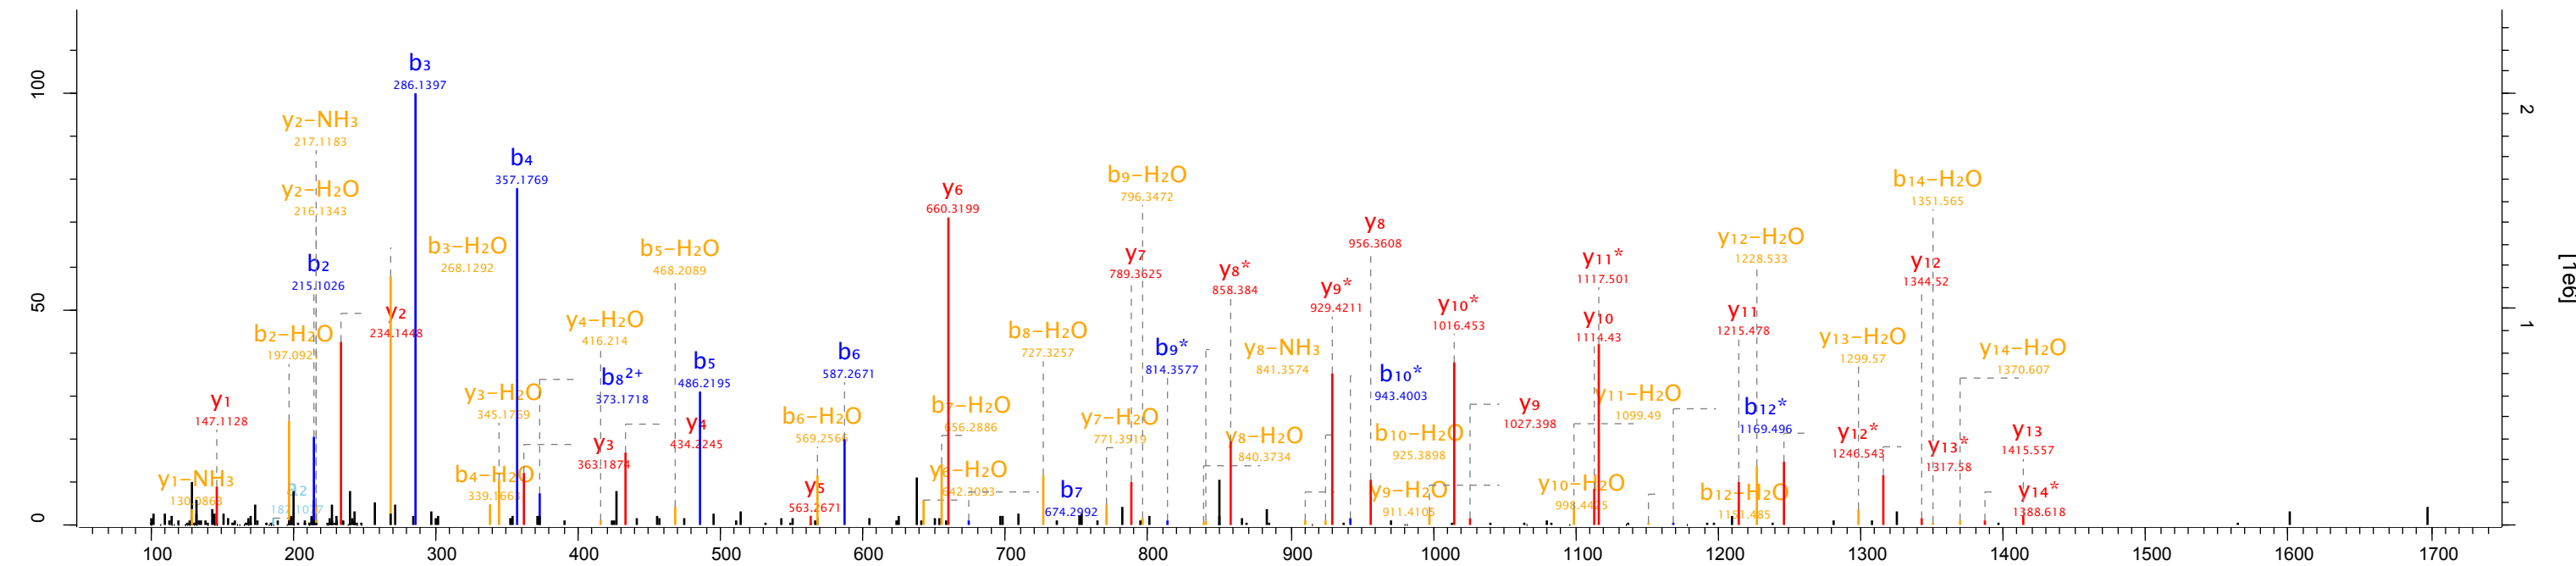

ac - A T A A E T S A S E P E A E S K -

Fragmentation mapping (b and y ions):

- b<sub>2</sub> (151.1077)
- b<sub>3</sub> (286.1397)
- b<sub>4</sub> (357.1769)
- b<sub>5</sub> (486.2195)
- b<sub>6</sub> (587.2671)
- b<sub>7</sub> (674.2992)
- b<sub>8</sub><sup>2+</sup> (373.1718)
- b<sub>9</sub><sup>\*</sup> (814.3577)
- b<sub>10</sub><sup>\*</sup> (943.4003)
- b<sub>12</sub><sup>\*</sup> (1169.496)

Fragmentation mapping (y ions):

- y<sub>1</sub> (147.1128)
- y<sub>2</sub> (234.1448)
- y<sub>3</sub> (363.1871)
- y<sub>4</sub> (434.2245)
- y<sub>5</sub> (563.2671)
- y<sub>6</sub> (660.3199)
- y<sub>7</sub> (789.3625)
- y<sub>8</sub> (956.3608)
- y<sub>9</sub> (1027.398)
- y<sub>10</sub> (1114.43)
- y<sub>11</sub> (1215.478)
- y<sub>12</sub> (1344.52)
- y<sub>13</sub> (1415.557)
- y<sub>14</sub><sup>\*</sup> (1388.618)

Raw file: 20150812\_A375SR\_Phospho\_BR1\_08  
 Scan: 8736 Method: FTMS; HCD Score: 188.96 m/z: 646.24 Gene names: HTATSF1

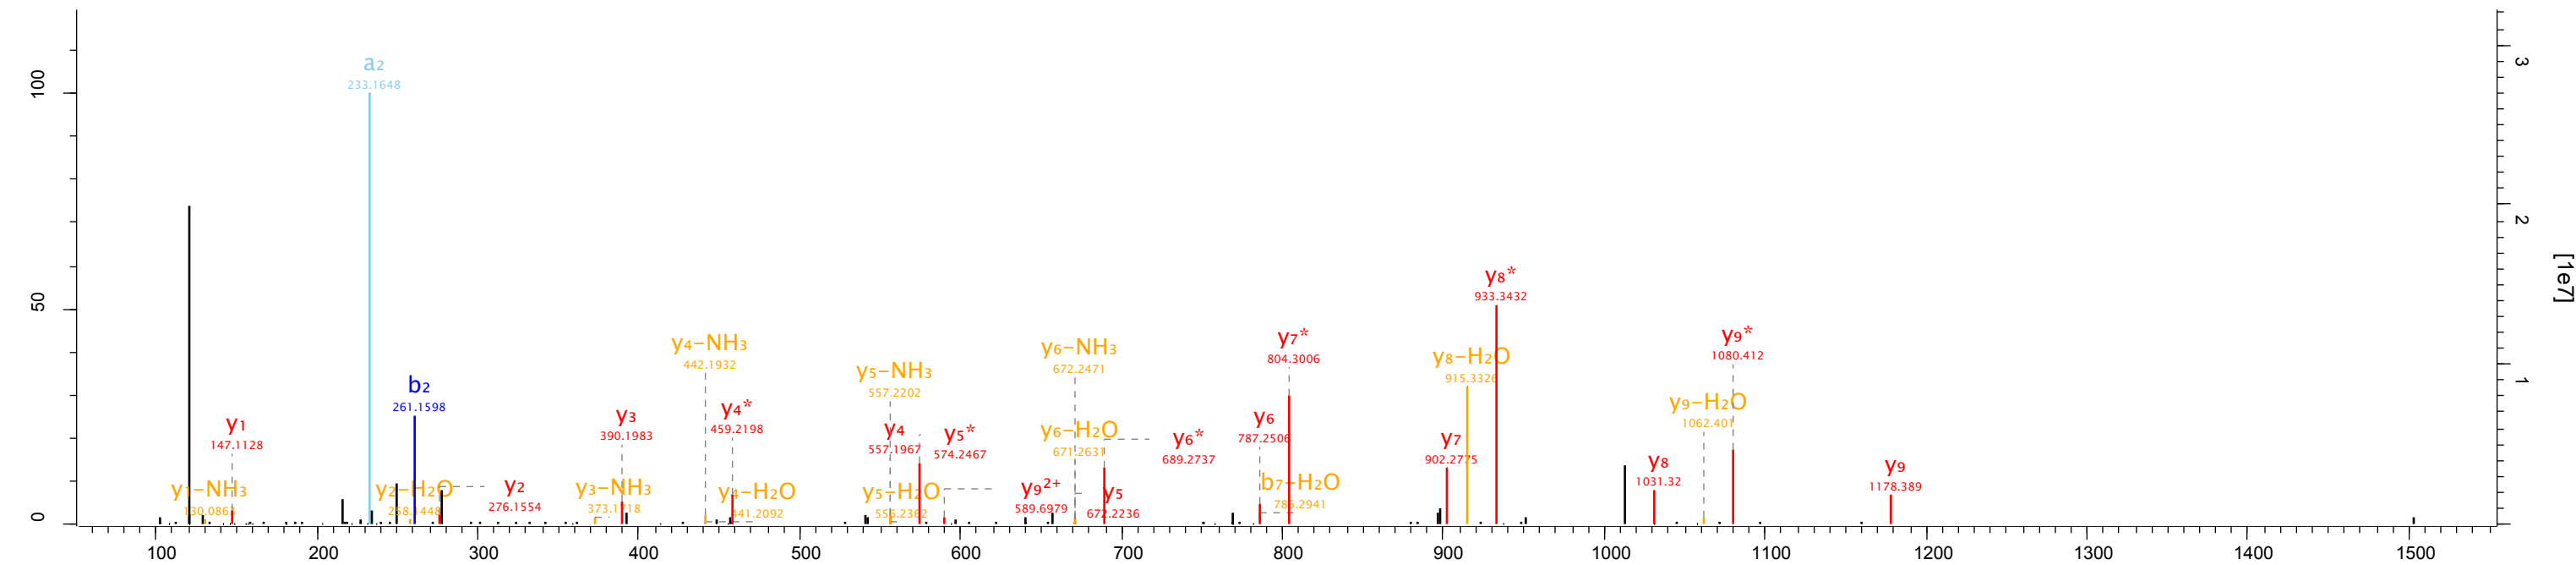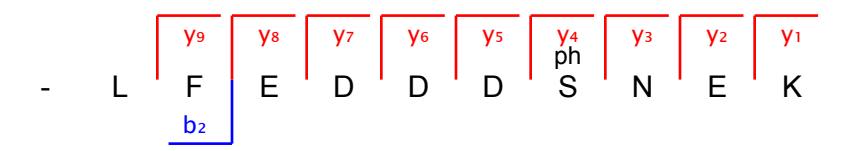

Raw file: 20150812\_A375SR\_Phospho\_BR1\_08  
 Scan: 9096 Method: FTMS; HCD Score: 196.87 m/z: 923.41 Gene names: EPB41L1

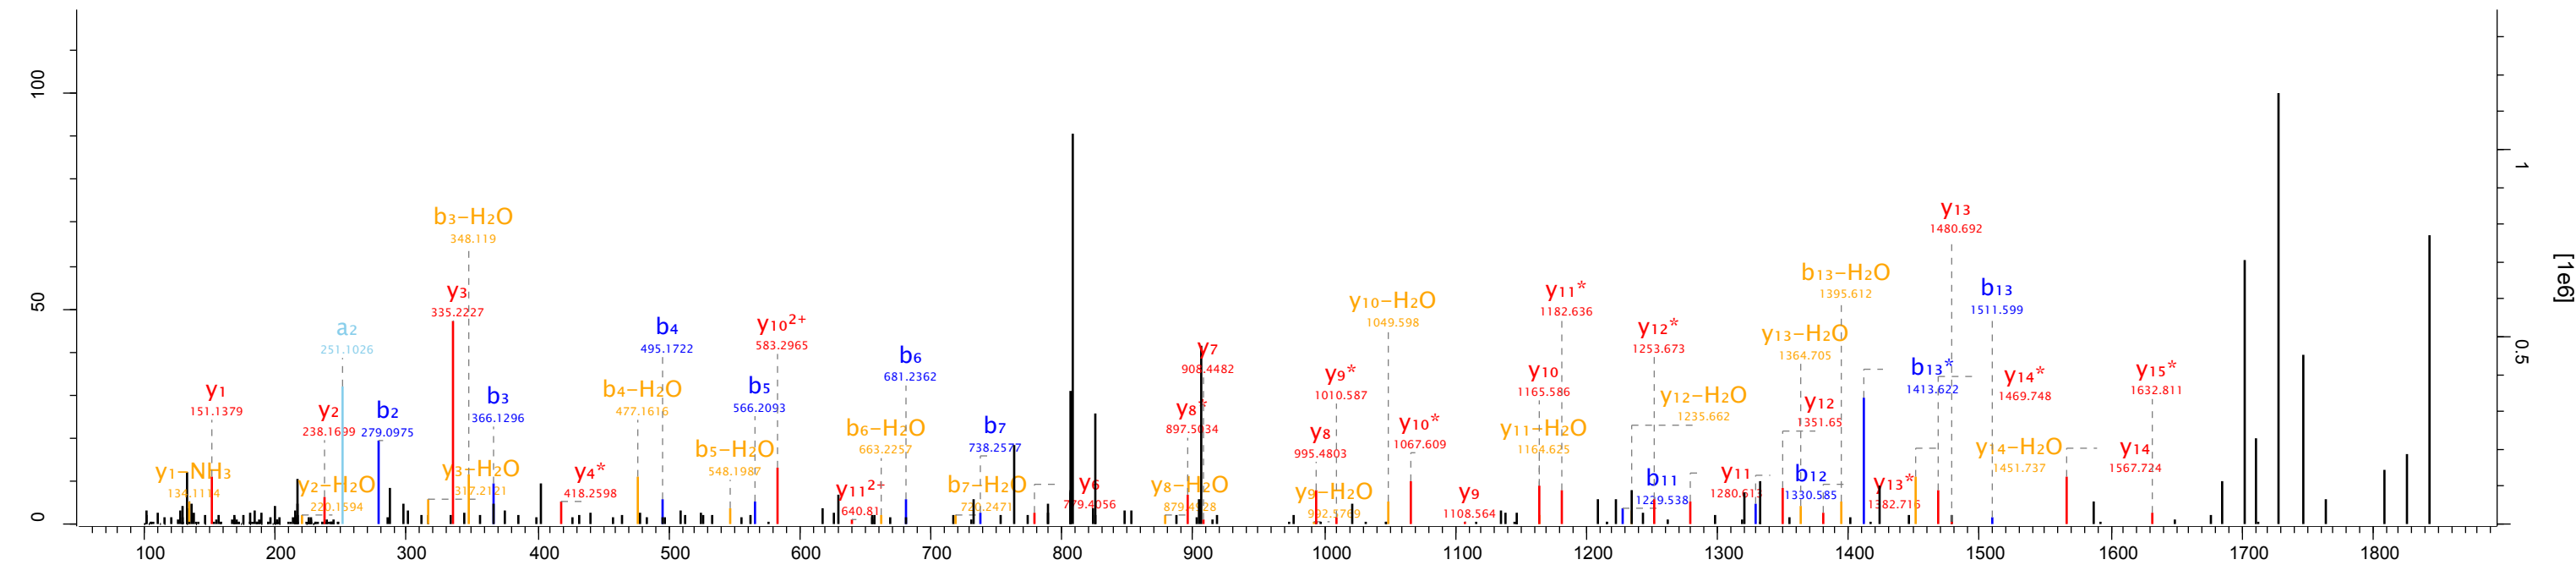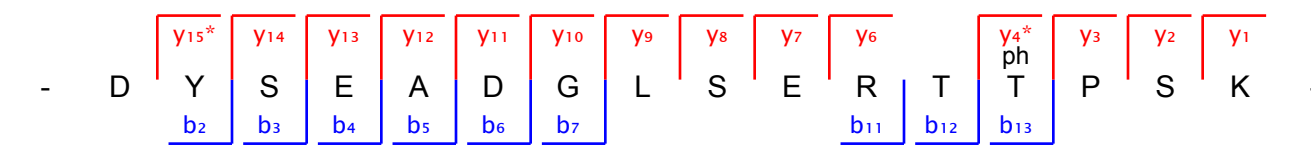



Raw file 20150812\_A375SR\_Phospho\_BR1\_09 Scan 10976 Method FTMS; HCD Score 112.34 m/z 694.84 Gene names WWTR1

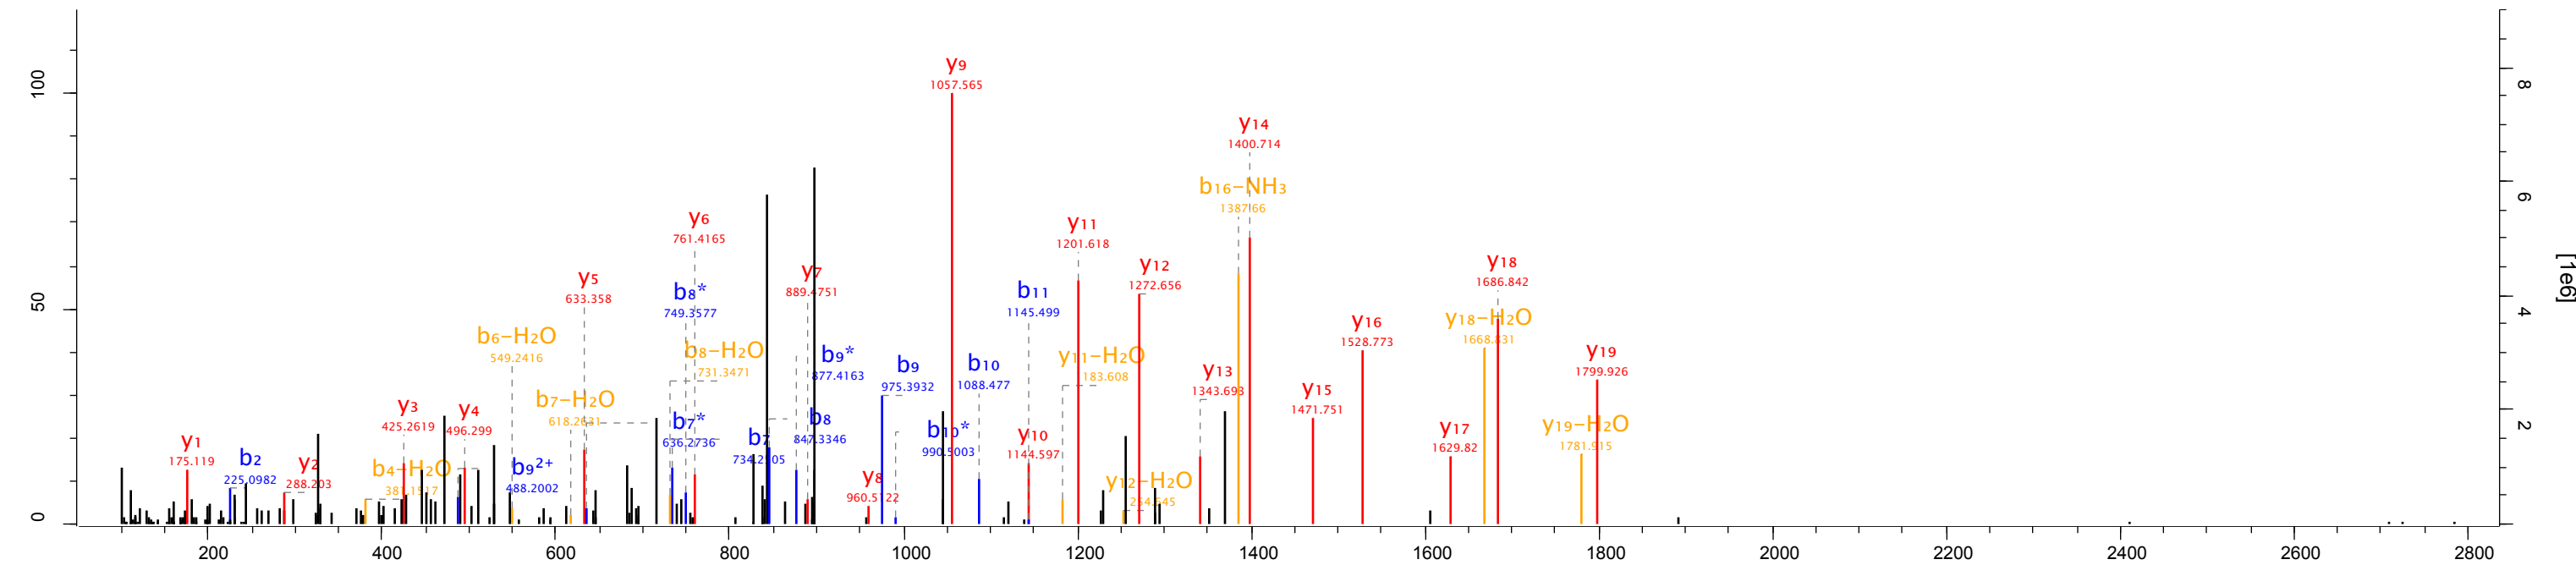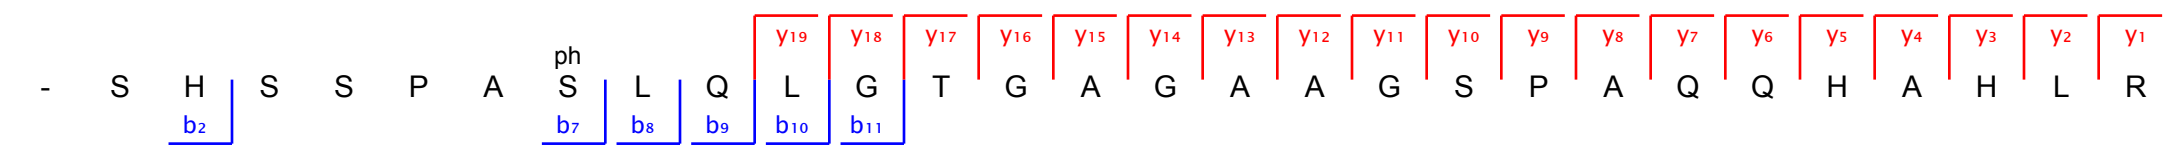

Raw file 20150812\_A375SR\_Phospho\_BR1\_09 Scan 11936 Method FTMS; HCD Score 174.55 m/z 1002.48 Gene names POGZ

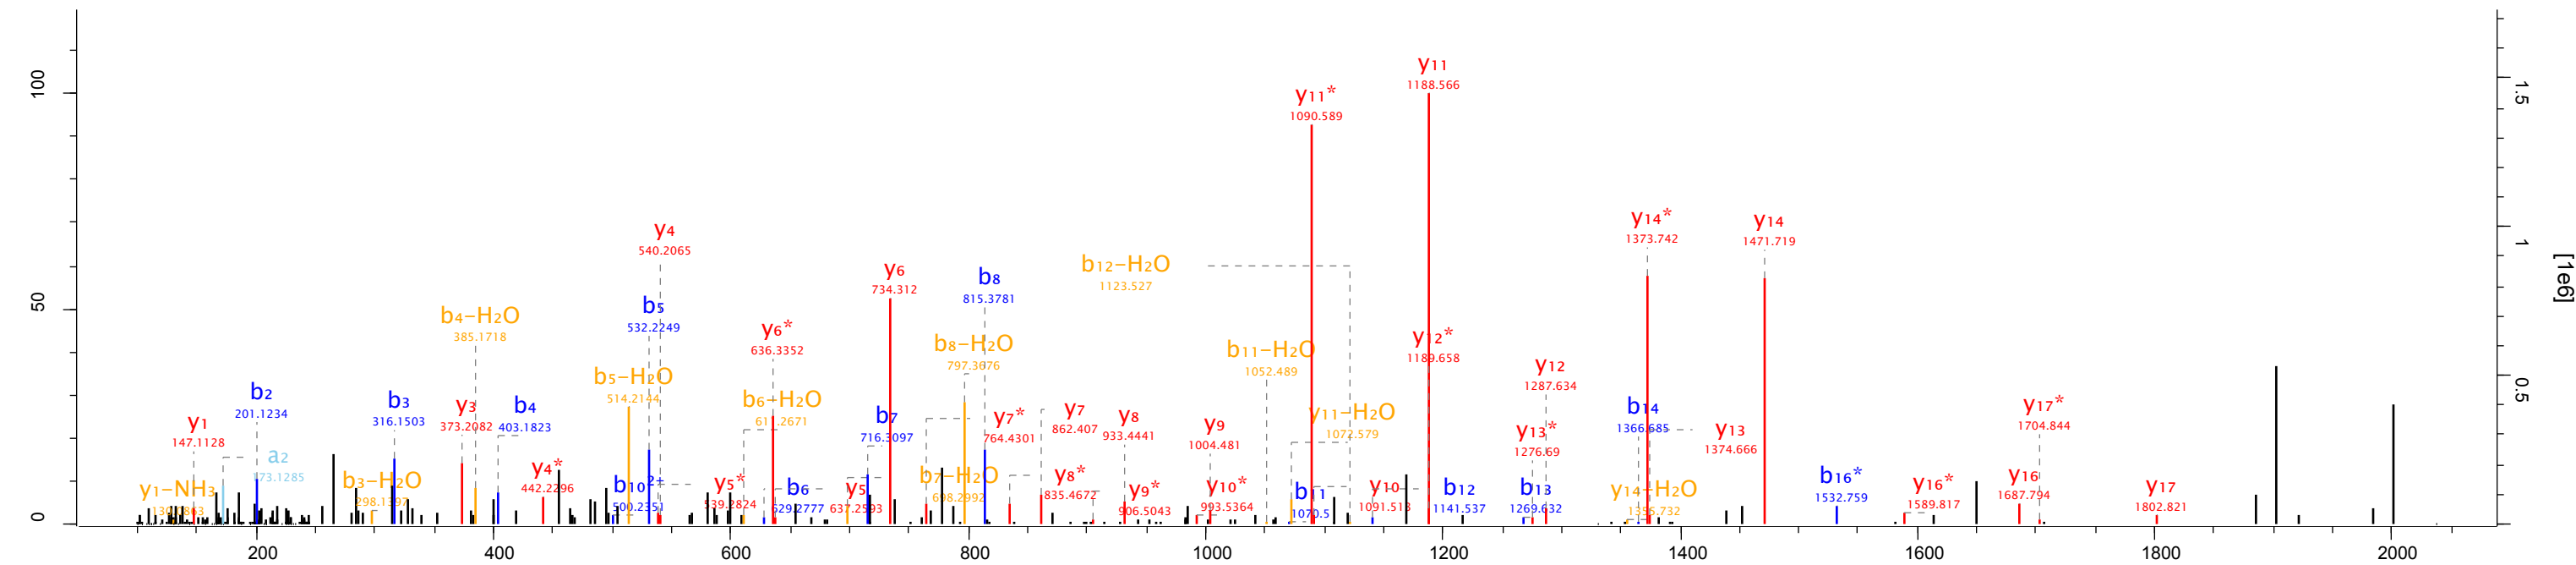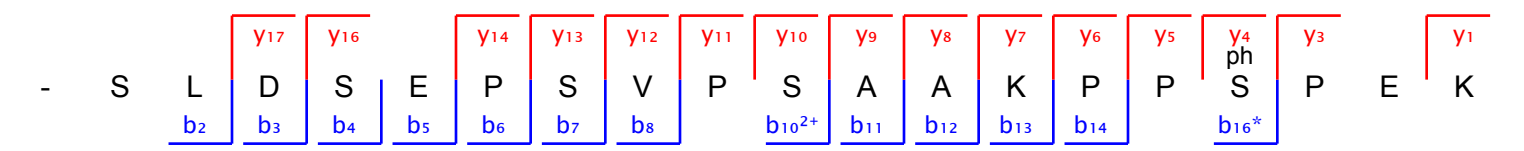

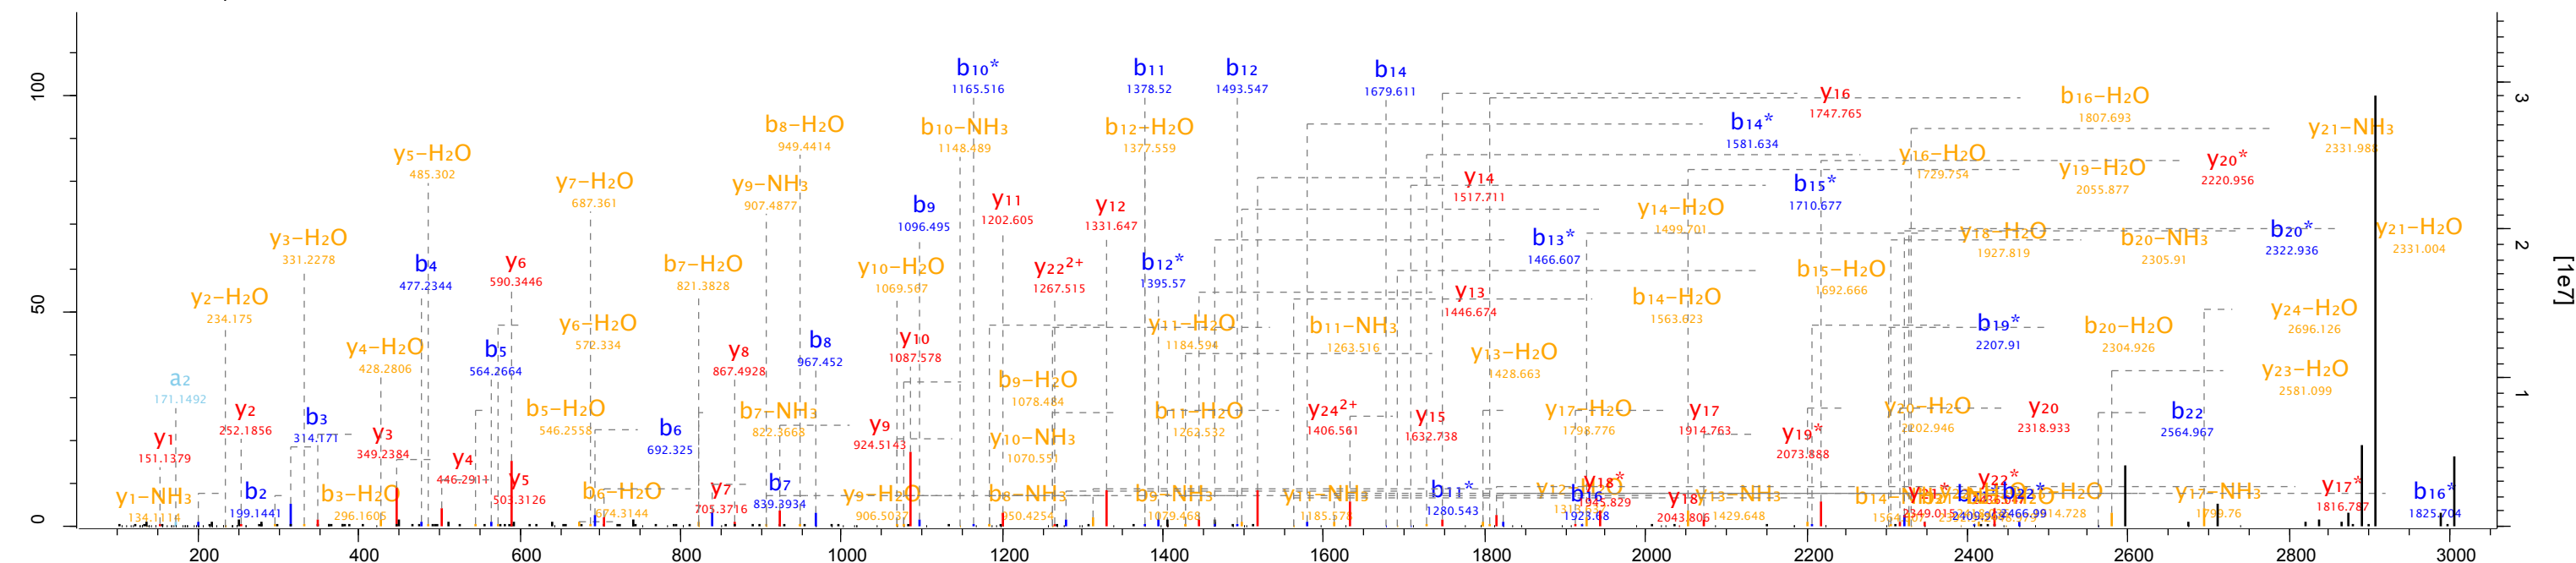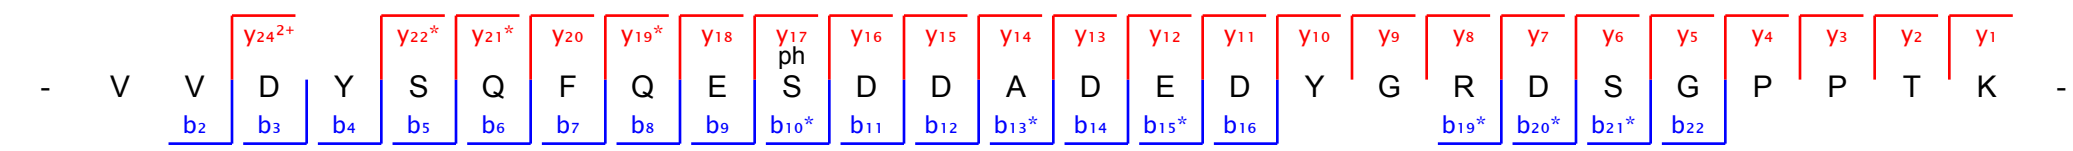

Raw file: 20150812\_A375SR\_Phospho\_BR1\_09  
 Scan: 1886 Method: FTMS; HCD Score: 91.96 m/z: 550.31 Gene names: METTL14

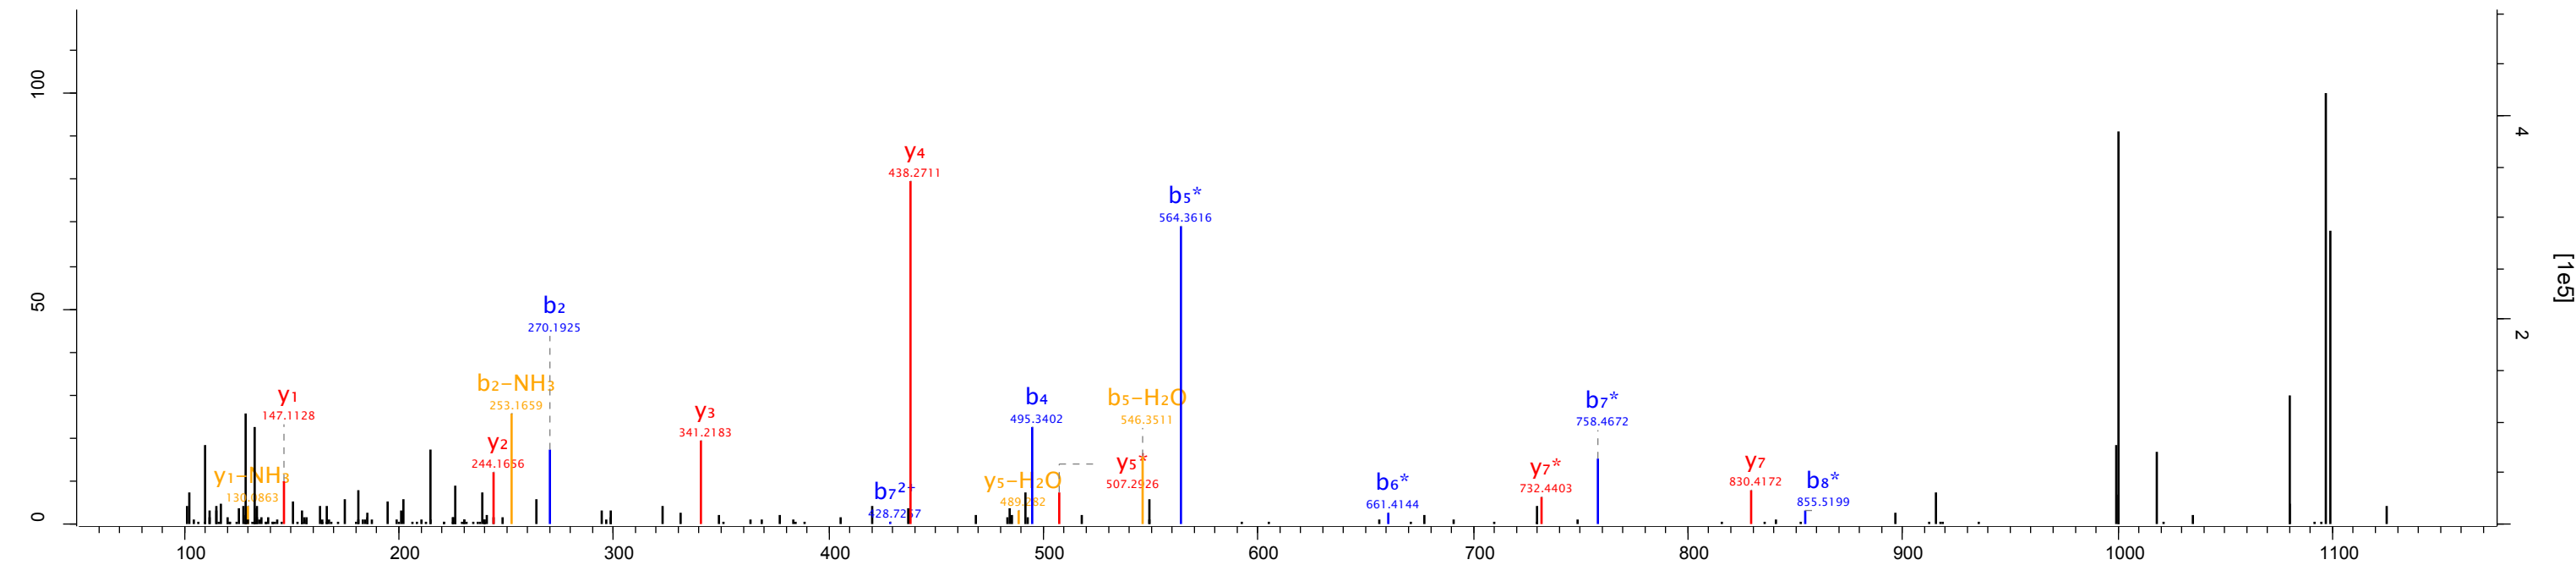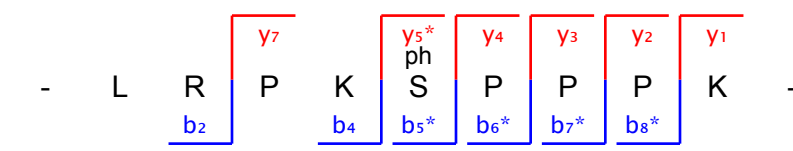

Raw file: 20150812\_A375SR\_Phospho\_BR1\_09  
 Scan: 19206  
 Method: FTMS; HCD  
 Score: 202.35  
 m/z: 1247.22  
 Gene names: HDAC1

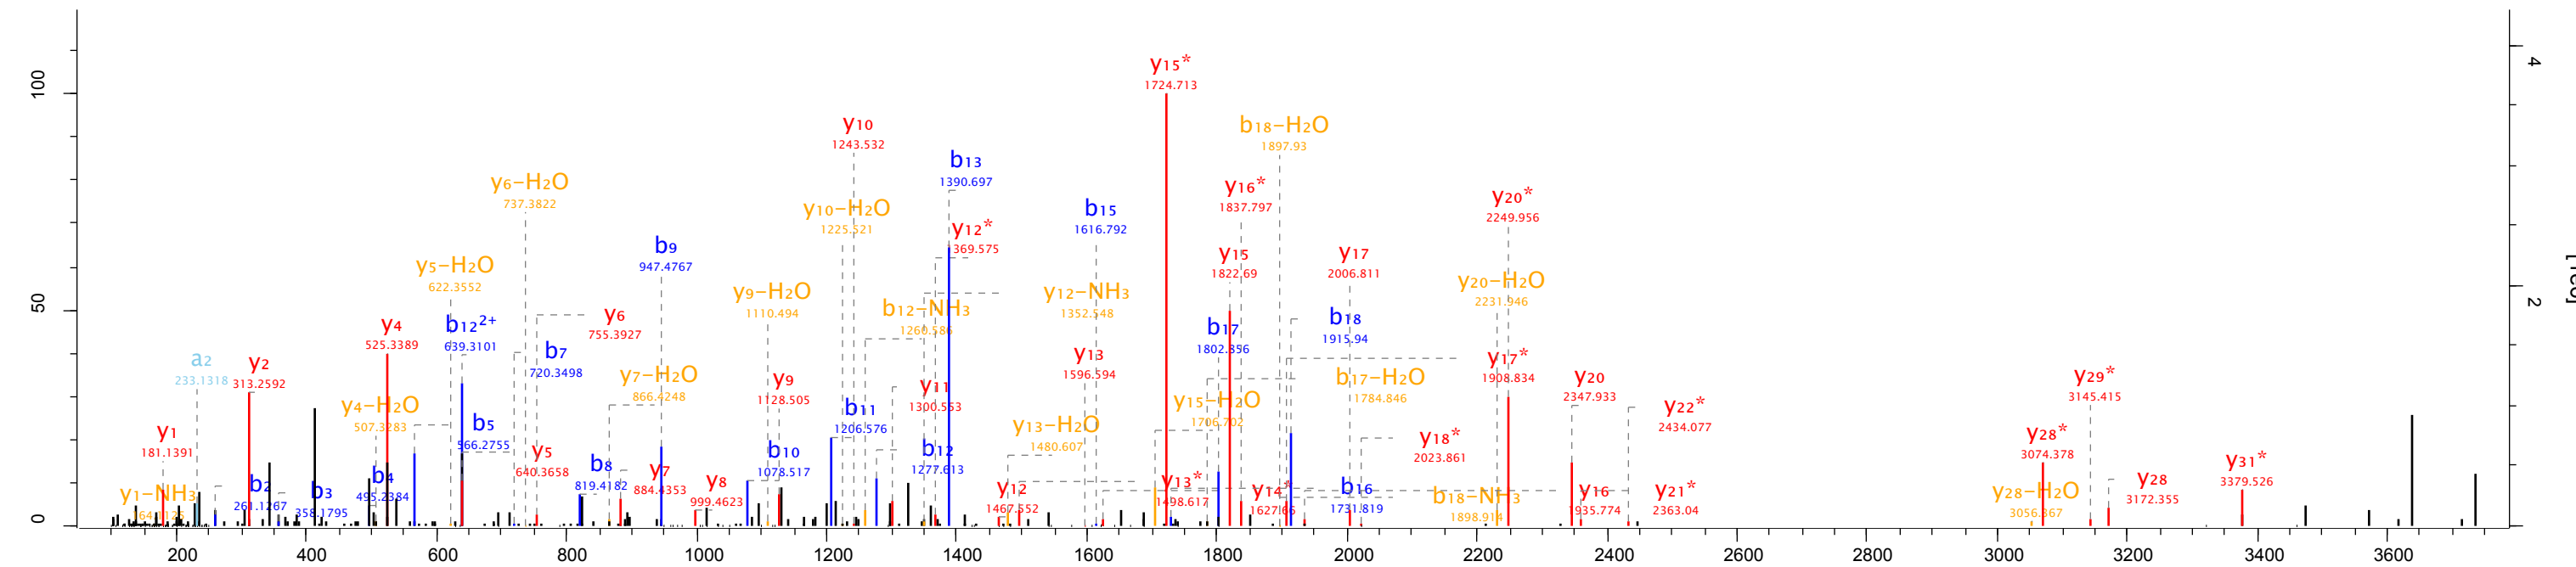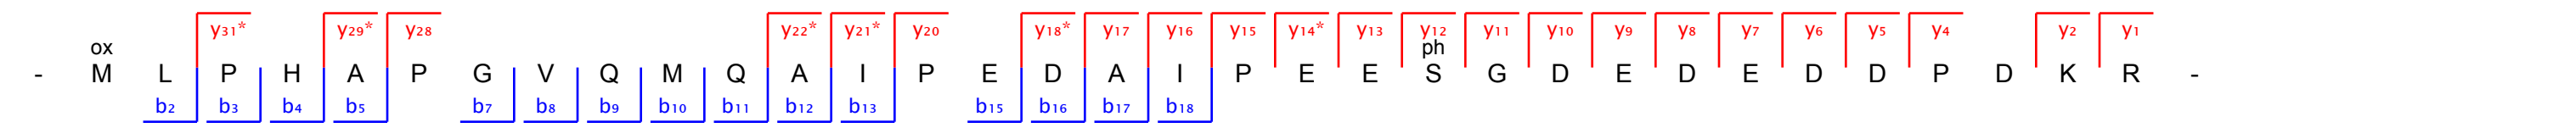

Raw file  
 20150812\_A375SR\_Phospho\_BR1\_09  
 Scan 26506 Method FTMS; HCD Score 58.32 m/z 732.88 Gene names PVRL3

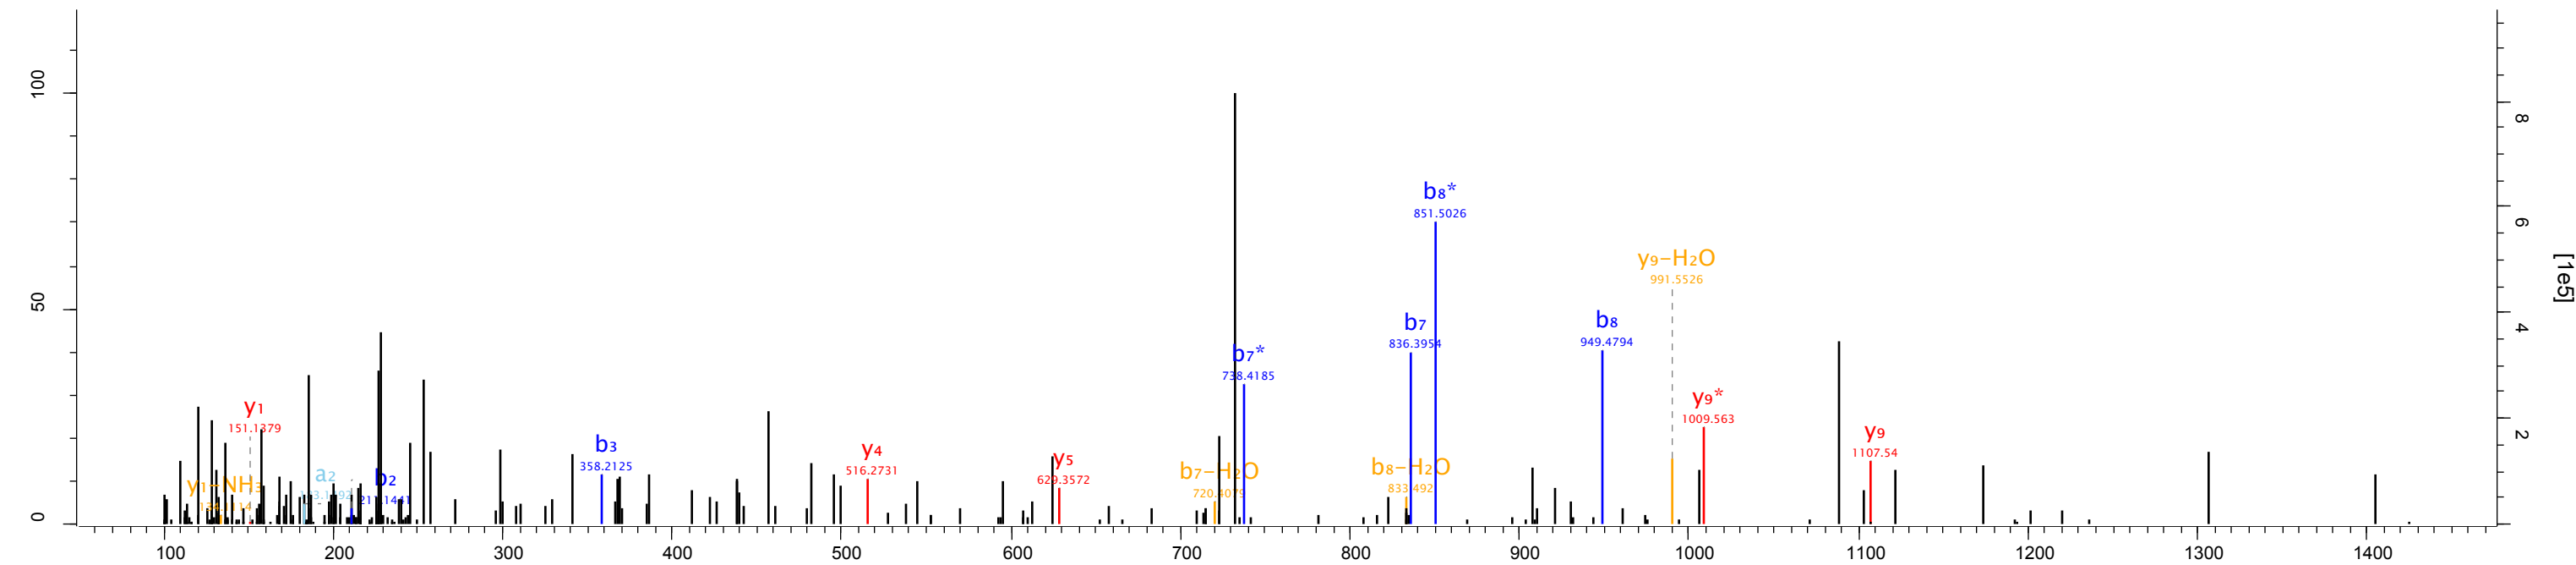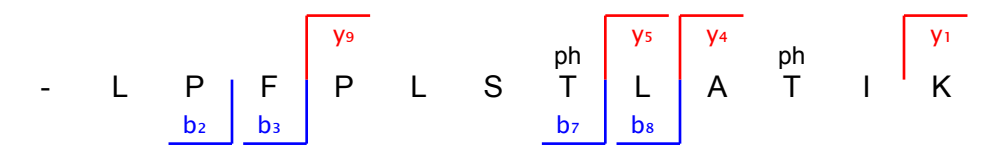

Raw file: 20150812\_A375SR\_Phospho\_BR1\_09  
 Scan: 3656 Method: FTMS; HCD Score: 166.86 m/z: 588.31 Gene names: RERE

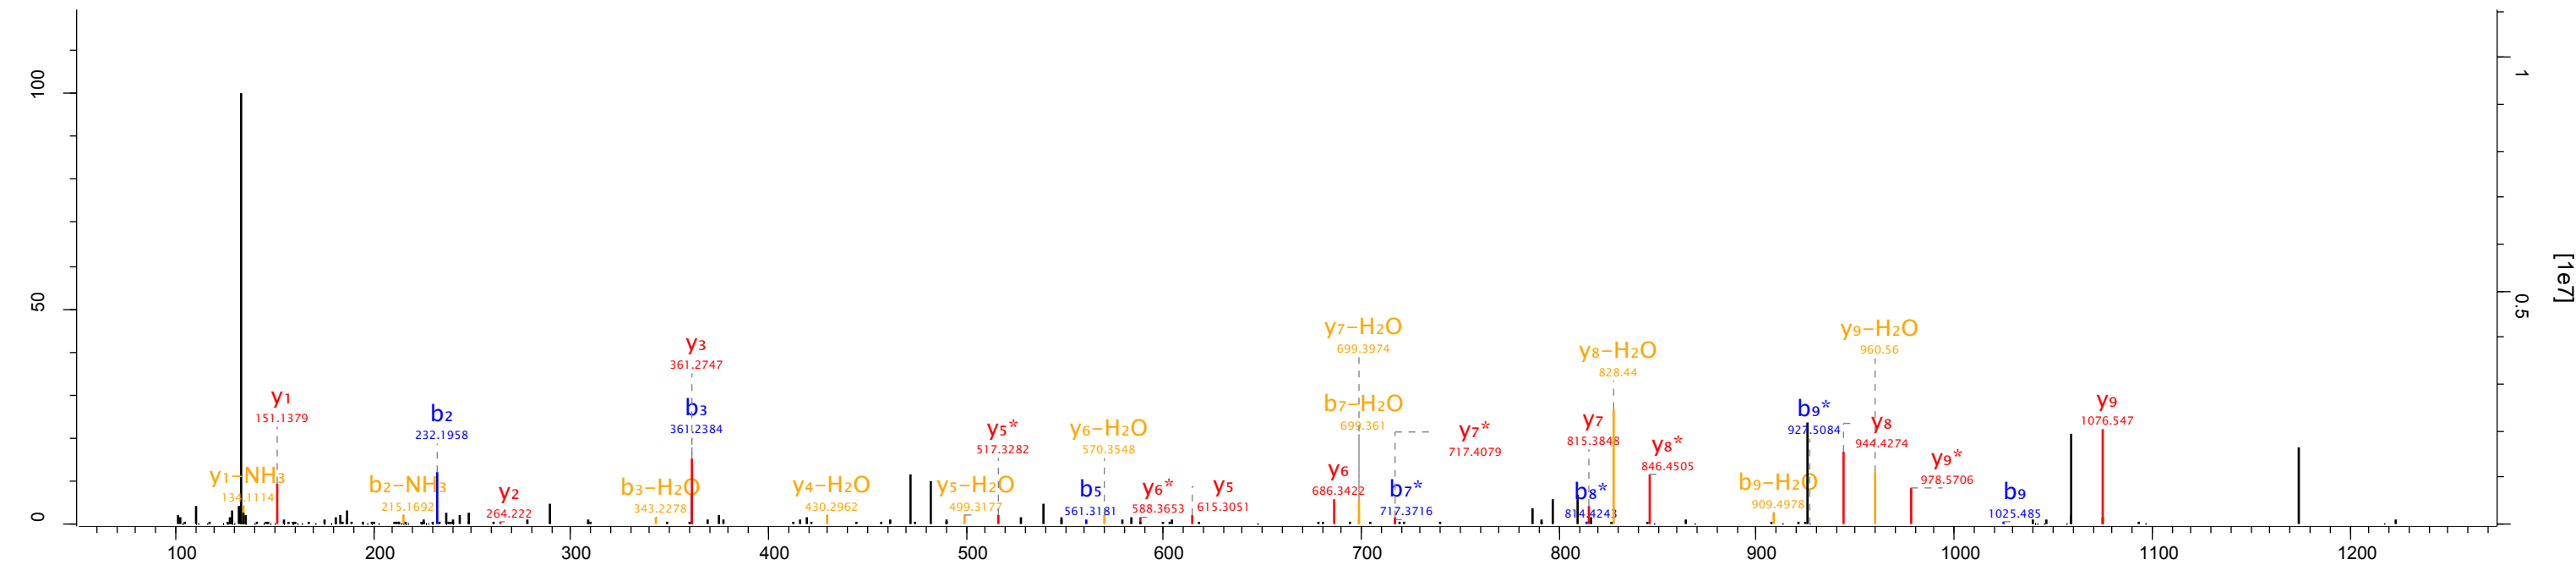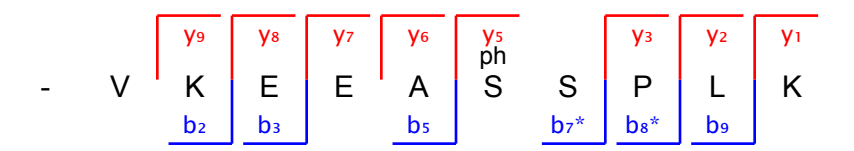





Raw file  
20150812\_A375SR\_Phospho\_BR1\_09

Scan 5306 Method FTMS; HCD Score 310.51 m/z 898.94 Gene names ENAH

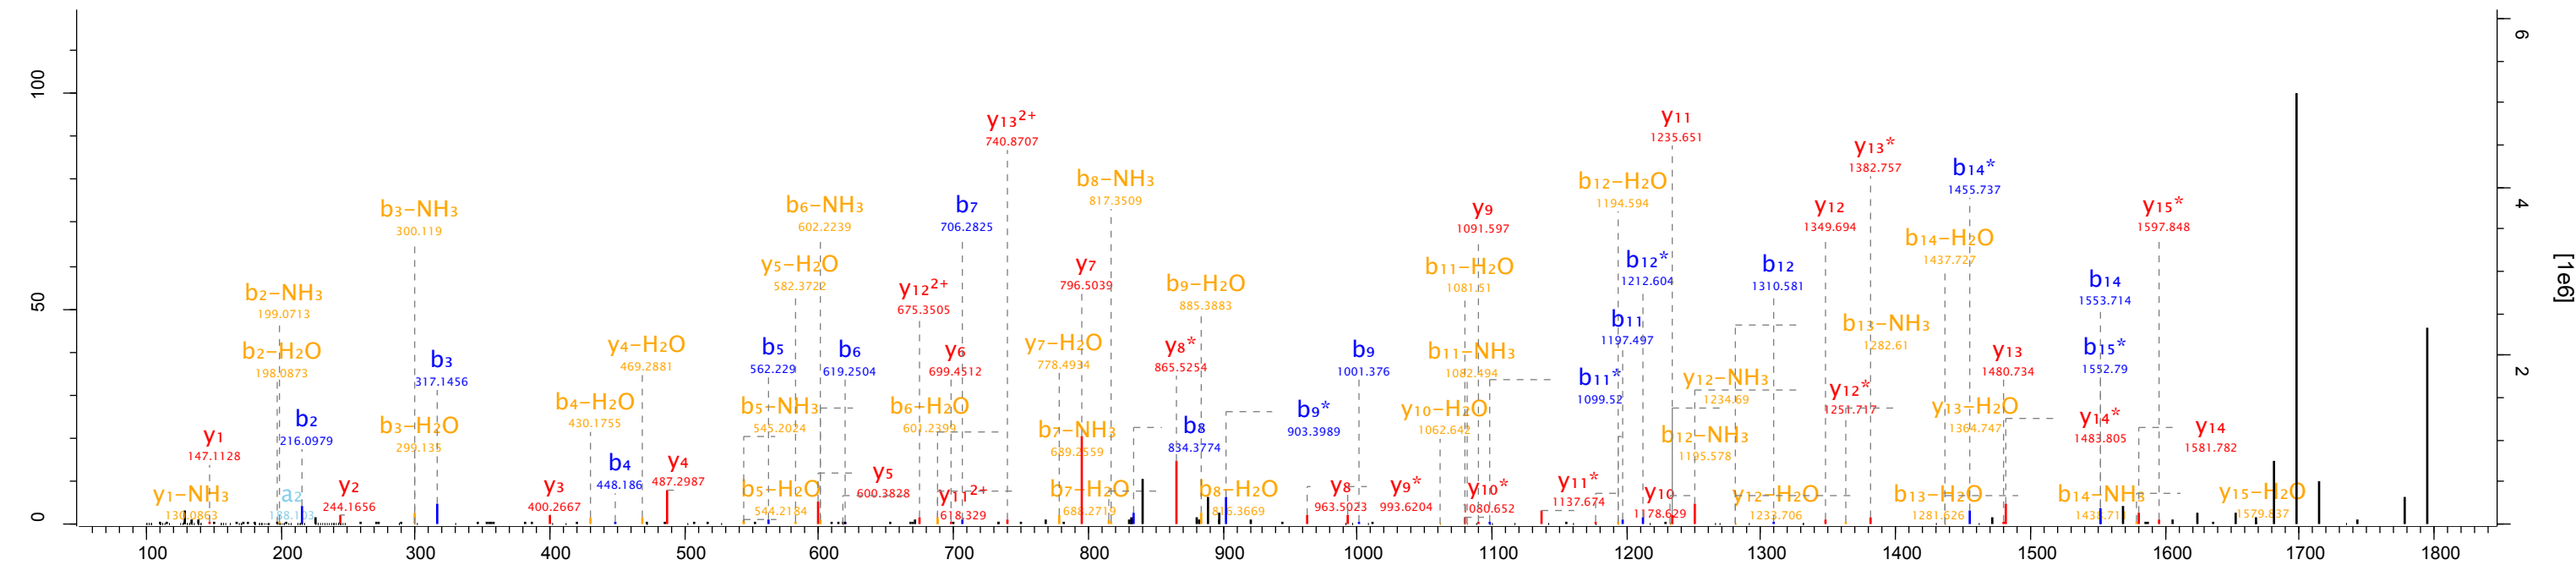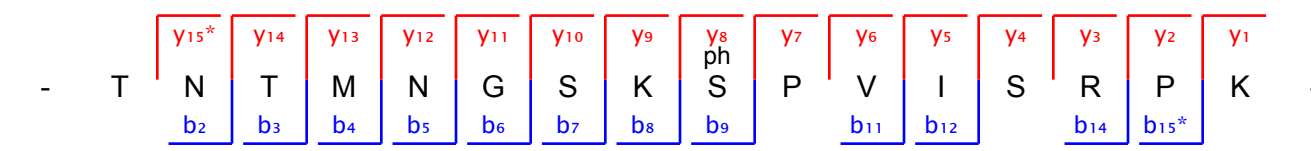

Raw file: 20150812\_A375SR\_Phospho\_BR1\_09  
 Scan: 5996 Method: FTMS; HCD Score: 198.54 m/z: 636.64 Gene names: PPF1BP1

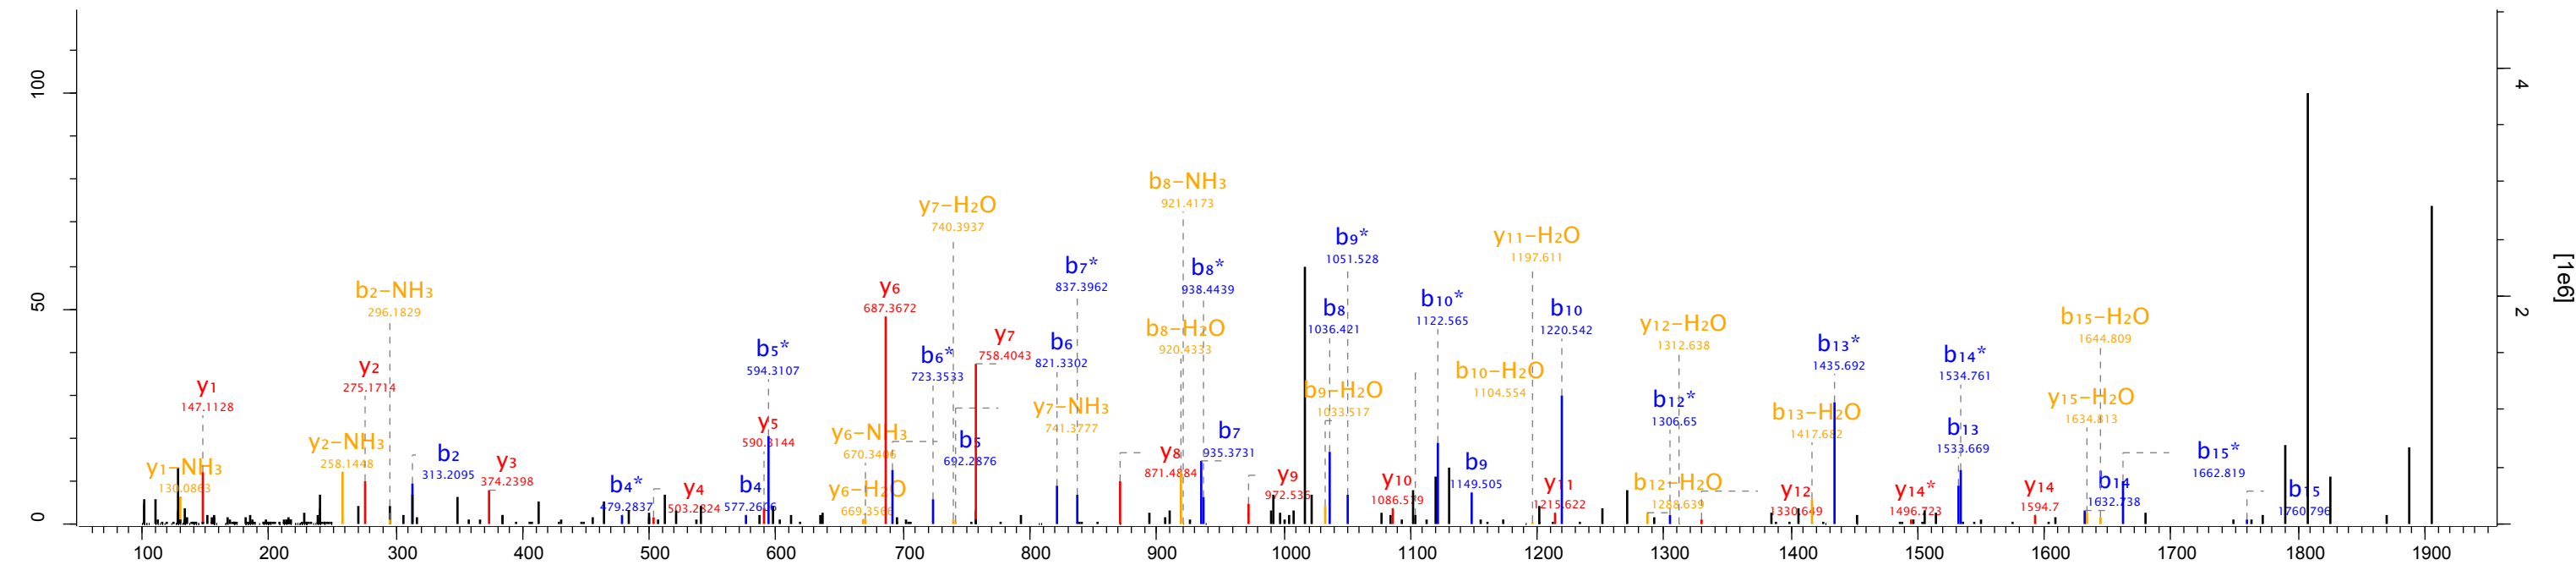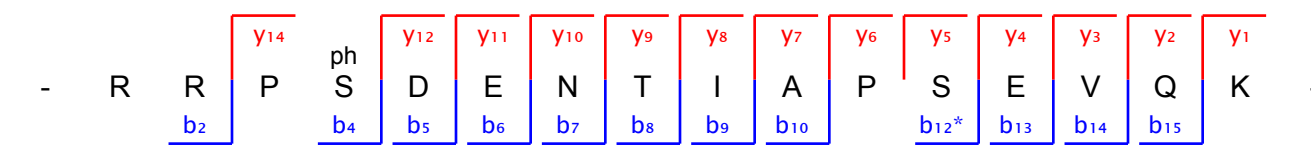

Raw file 20150812\_A375SR\_Phospho\_BR1\_09 Scan 6106 Method FTMS; HCD Score 109.79 m/z 564.25 Gene names NHSL1

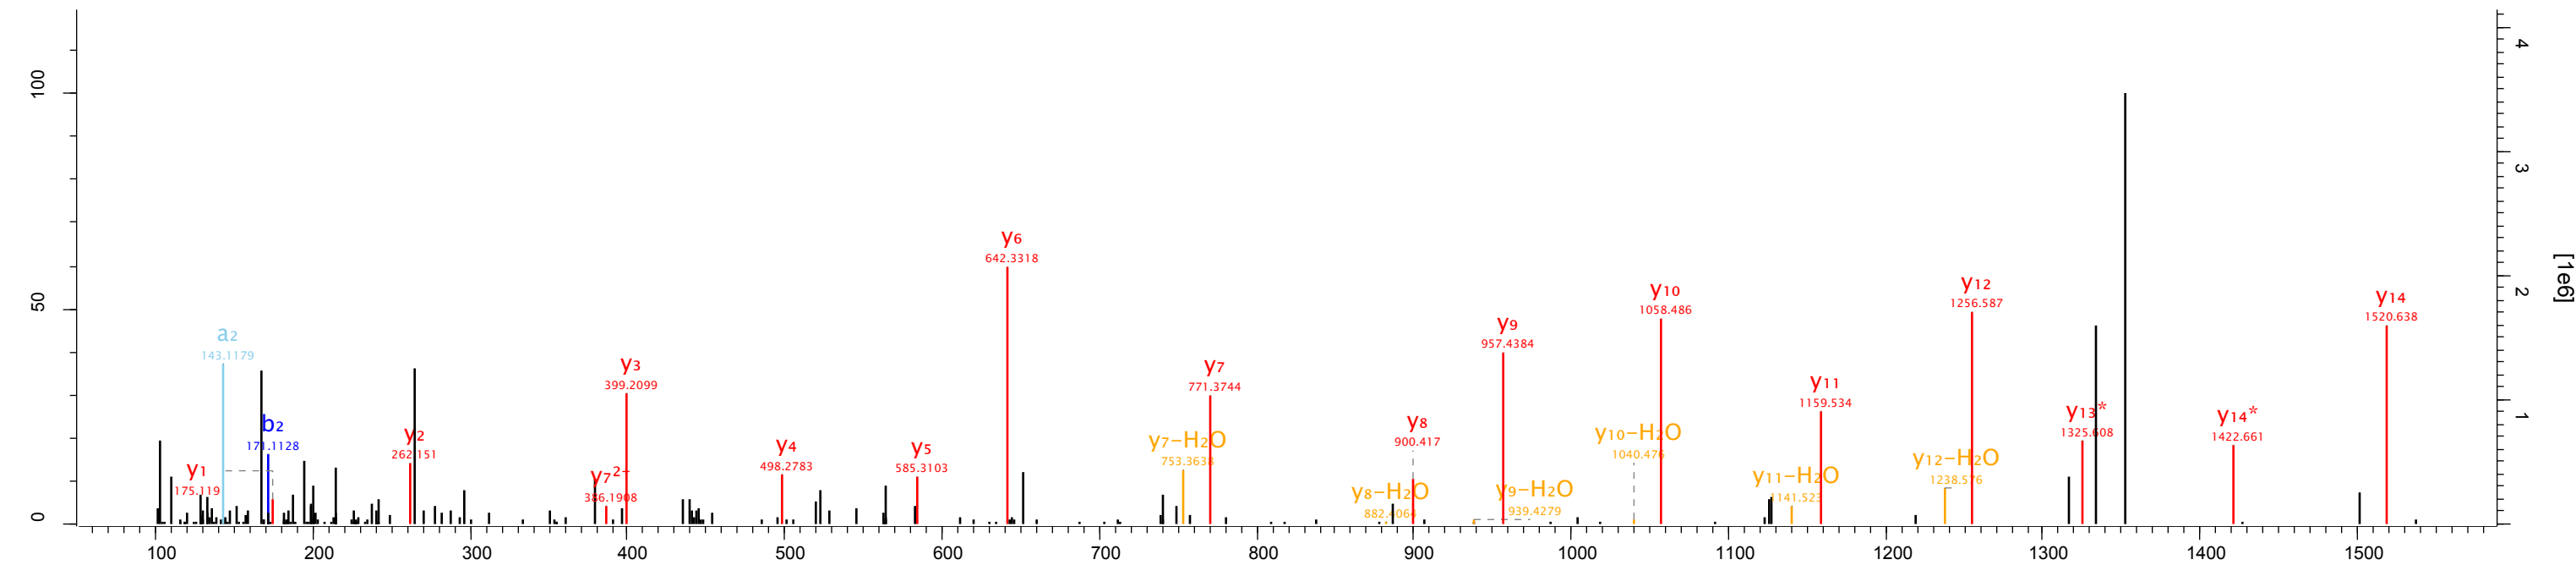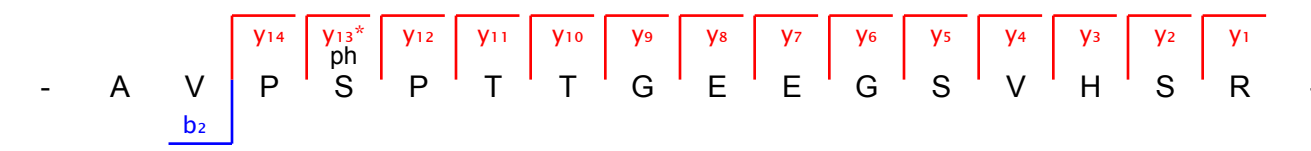

Raw file: 20150812\_A375SR\_Phospho\_BR1\_09  
 Scan: 6626 Method: FTMS; HCD Score: 256.4 m/z: 809.35 Gene names: IRS2

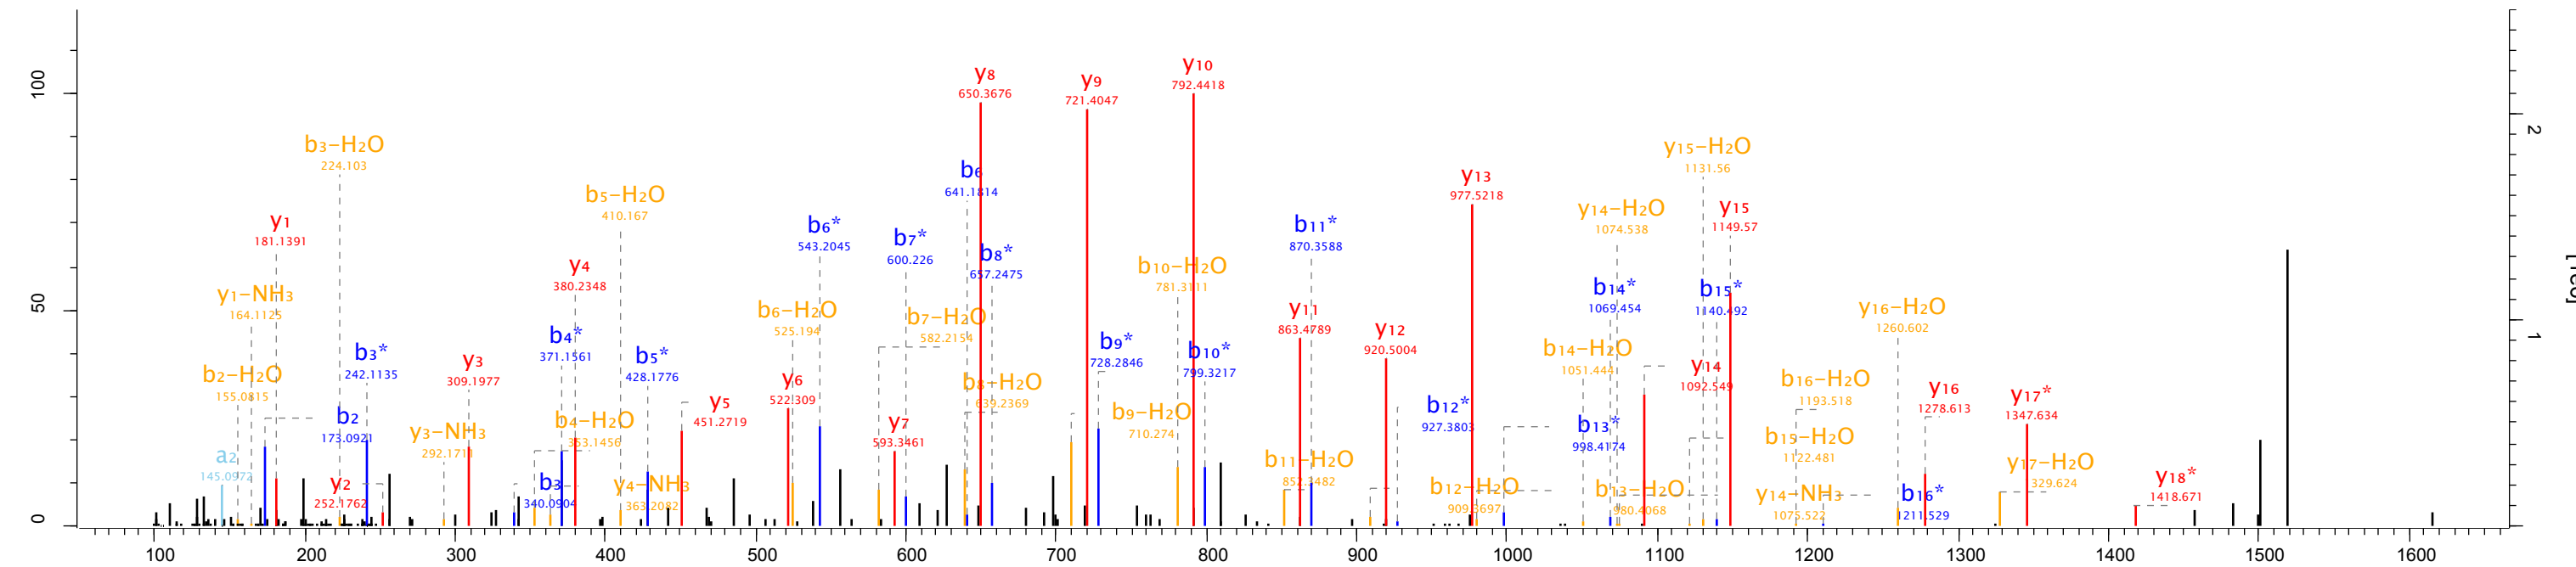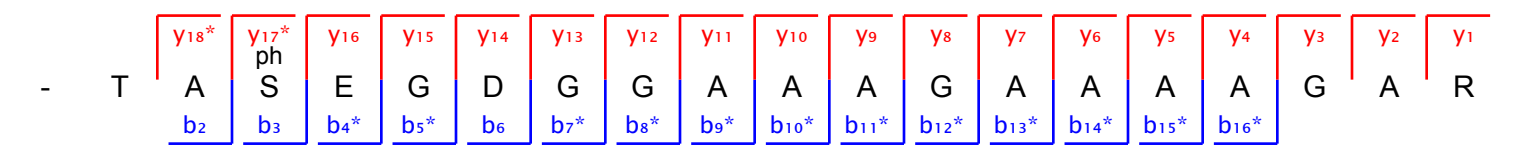

Raw file 20150812\_A375SR\_Phospho\_BR1\_09 Scan 8276 Method FTMS; HCD Score 172.09 m/z 492.58 Gene names NCL

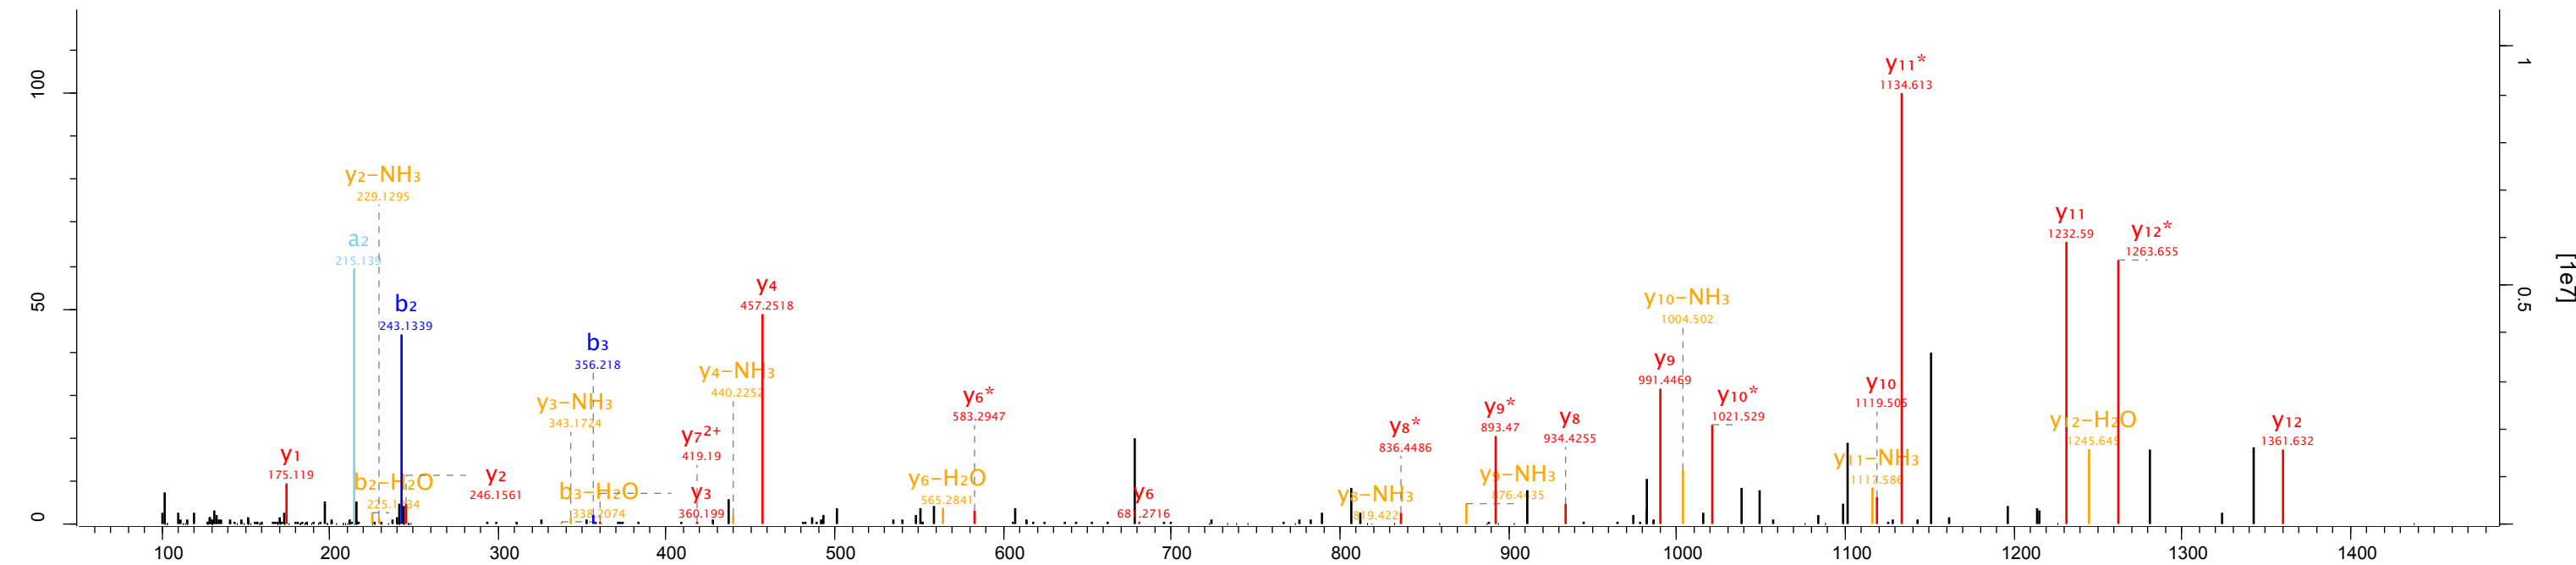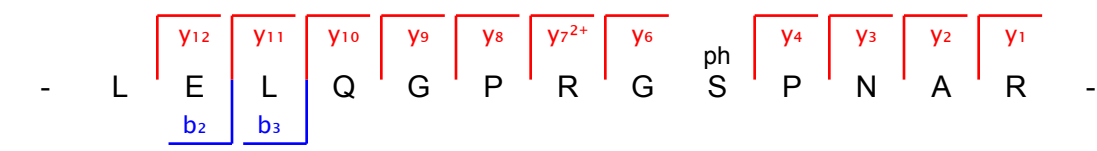

Raw file: 20150812\_A375SR\_Phospho\_BR1\_09  
 Scan: 9316 Method: FTMS; HCD Score: 255.23 m/z: 958.1 Gene names: SRRM2

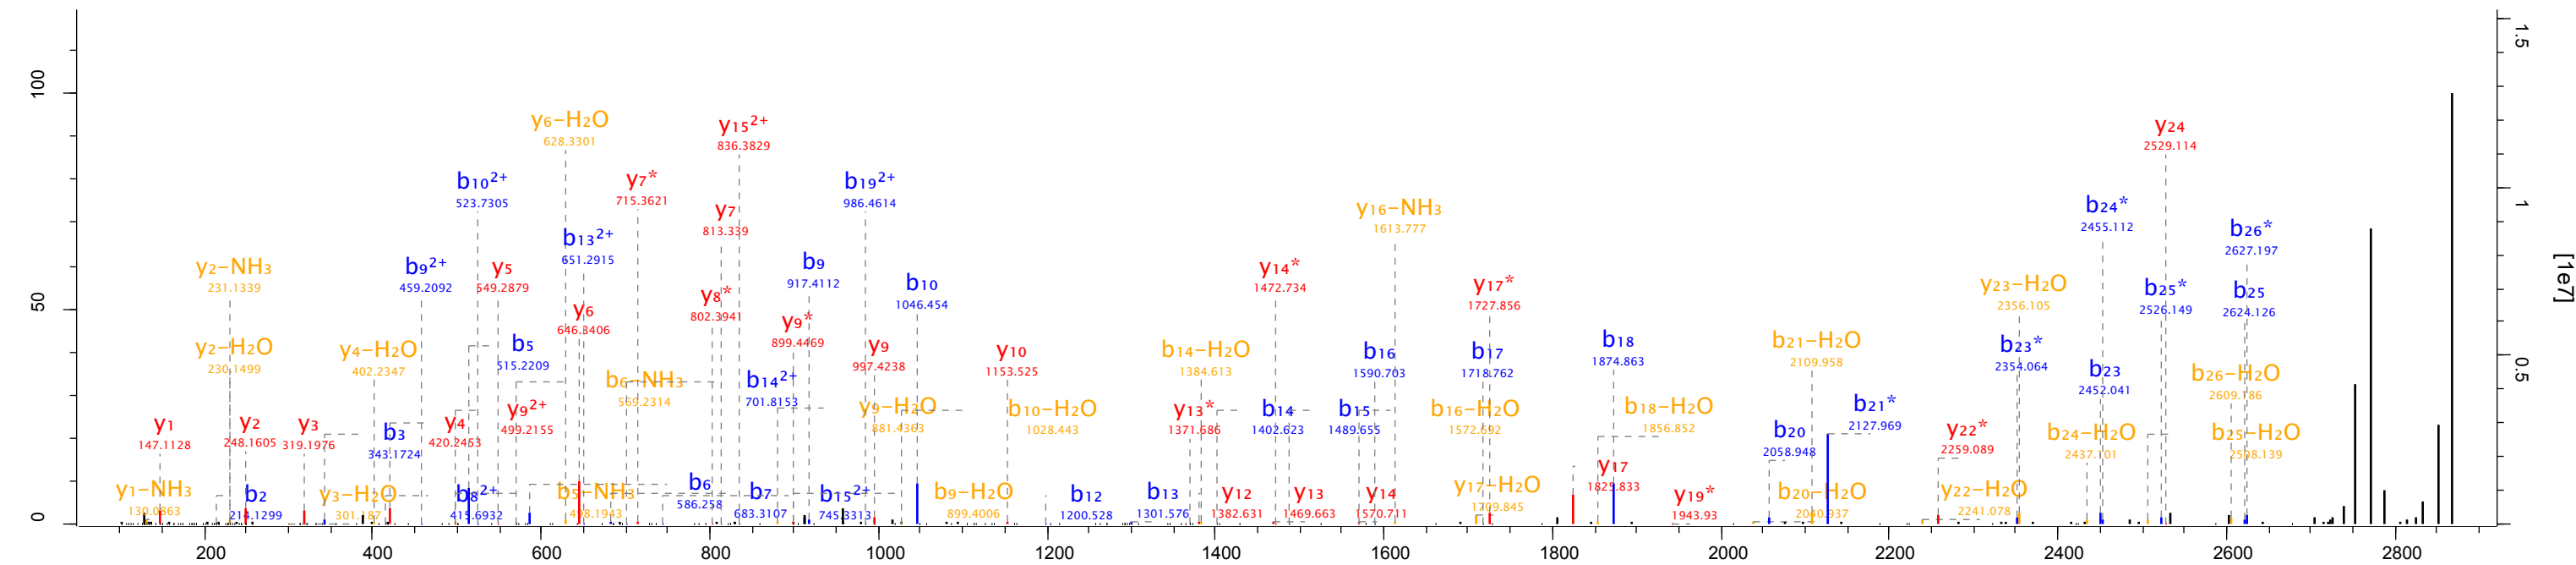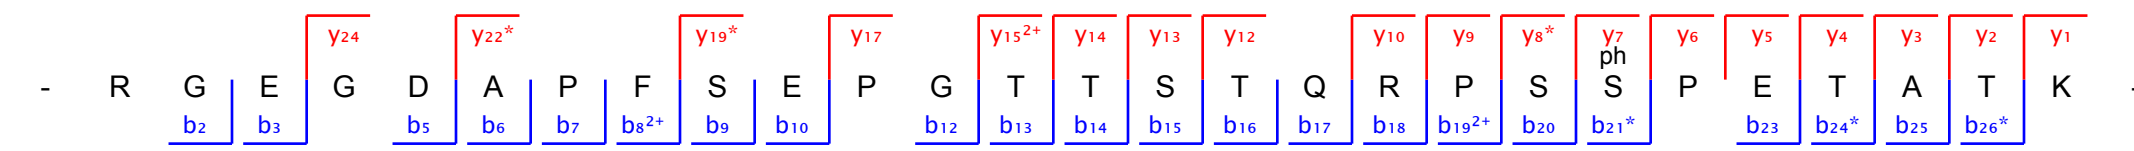

Raw file: 20150812\_A375SR\_Phospho\_BR1\_10  
 Scan: 10536 Method: FTMS; HCD Score: 199.65 m/z: 682.35 Gene names: MICALL1

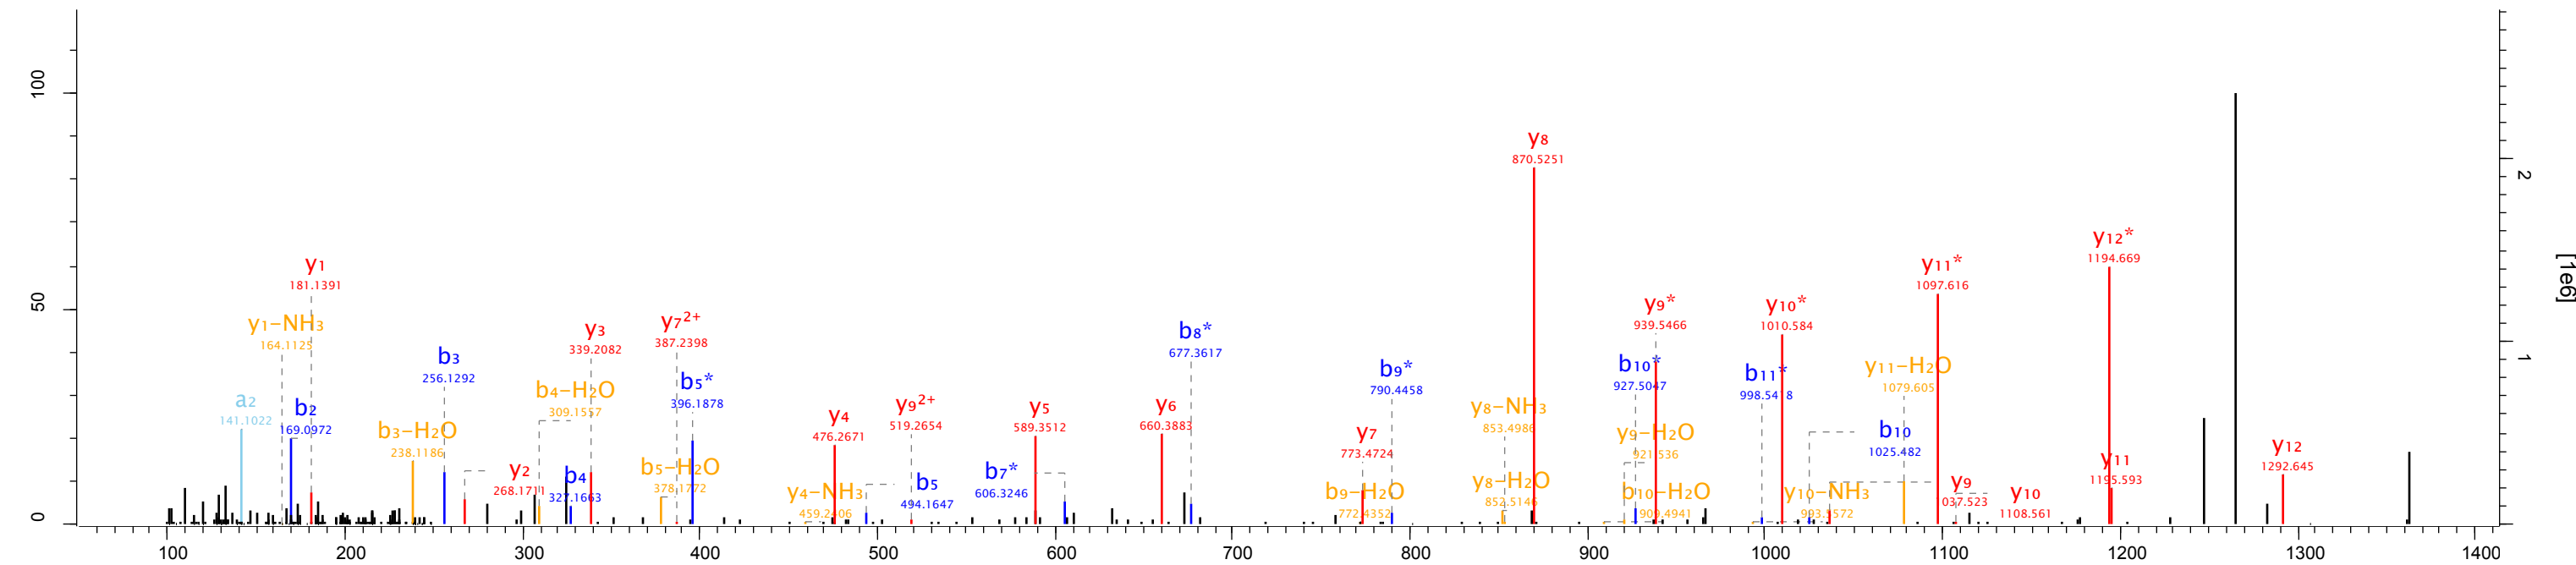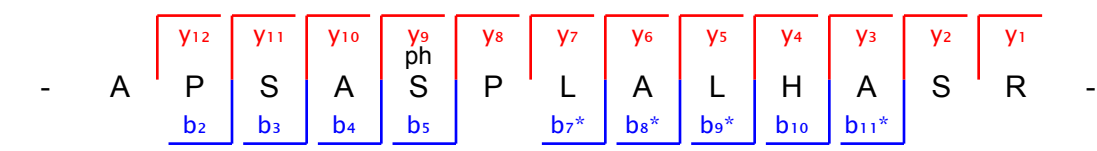

Raw file: 20150812\_A375SR\_Phospho\_BR1\_10  
 Scan: 11546 Method: FTMS; HCD Score: 375.77 m/z: 902.88 Gene names: NDRG3

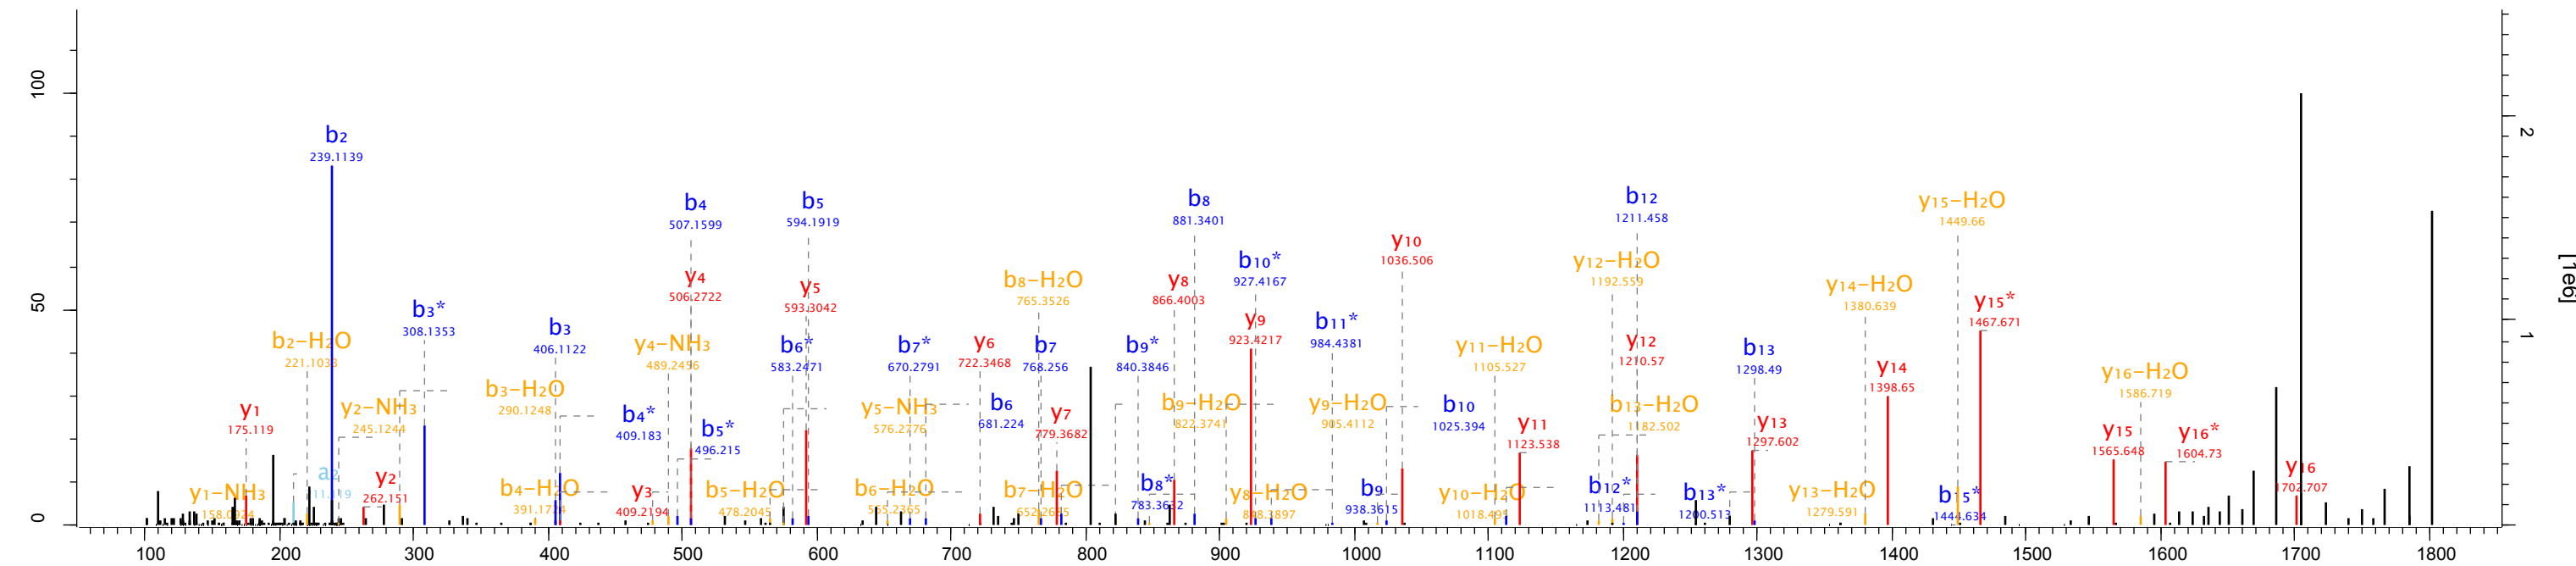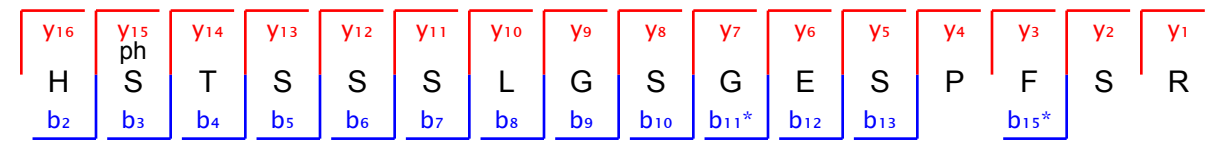





Raw file: 20150812\_A375SR\_Phospho\_BR1\_10  
 Scan: 1406 Method: FTMS; HCD Score: 124.91 m/z: 479.91 Gene names: MAP4

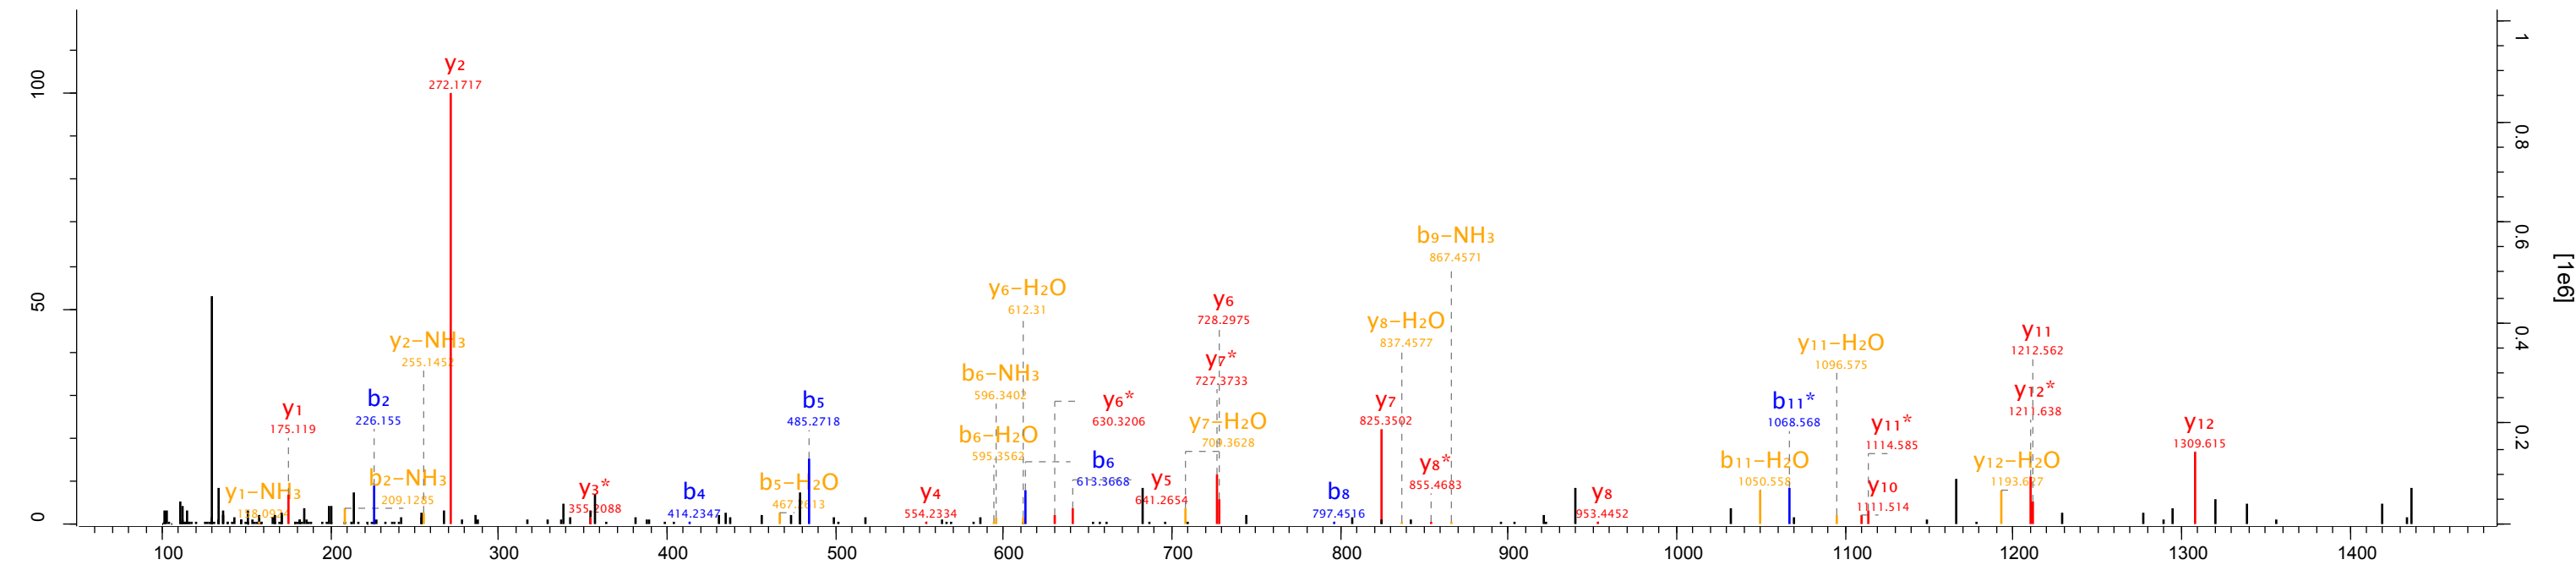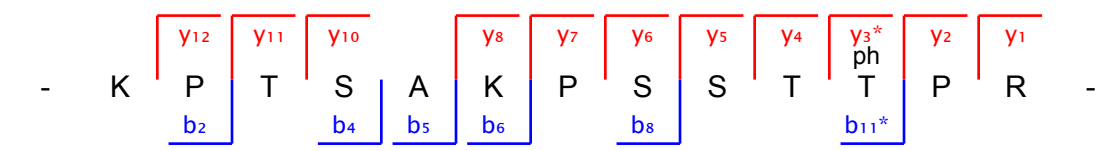

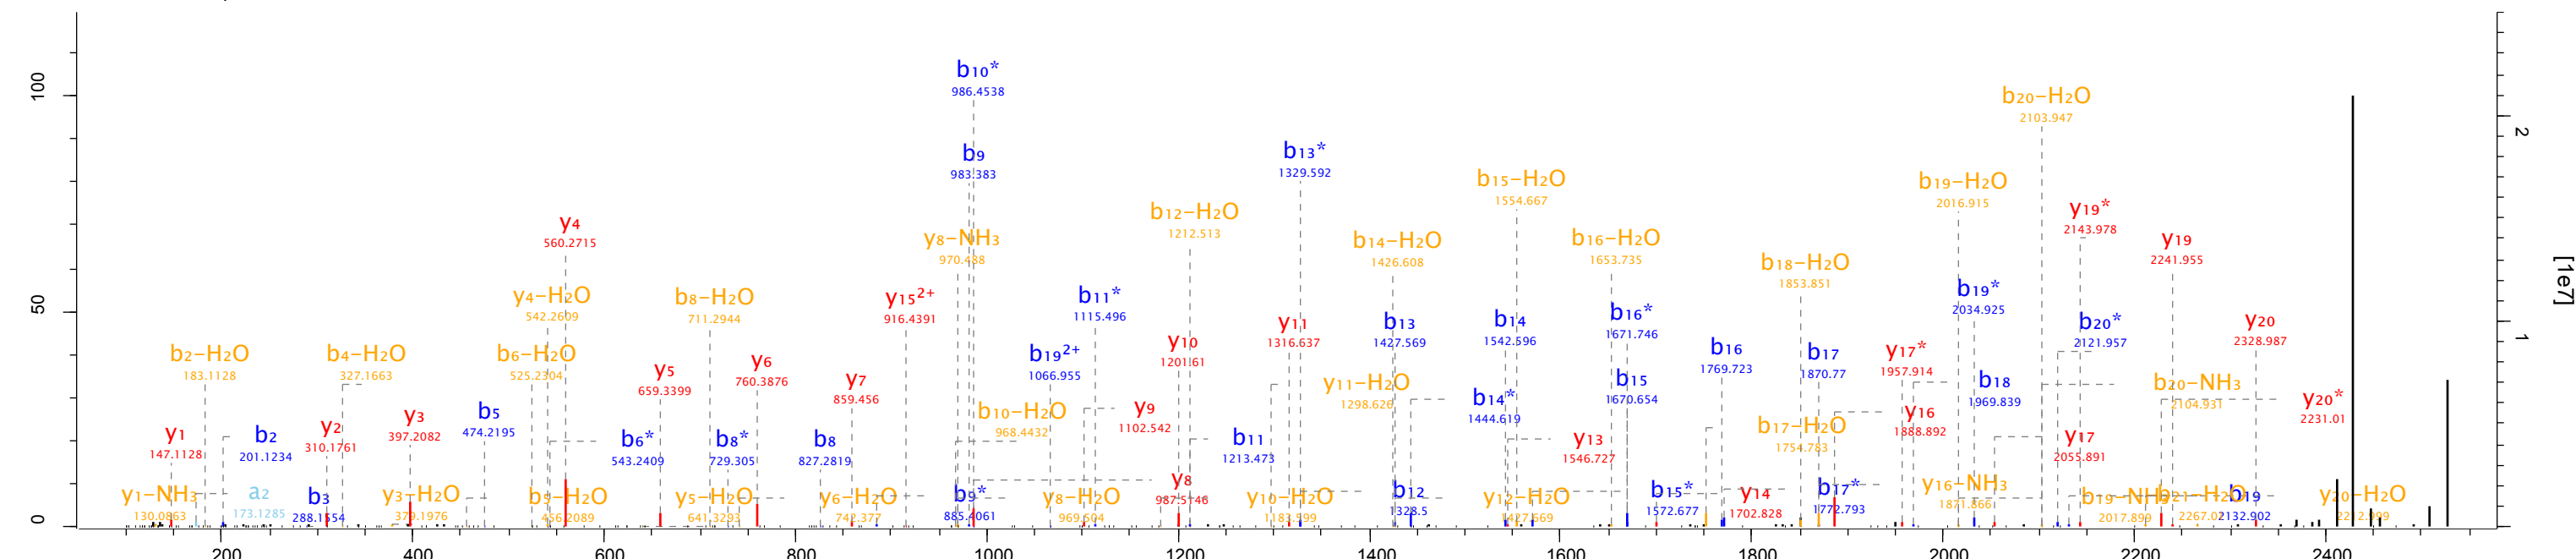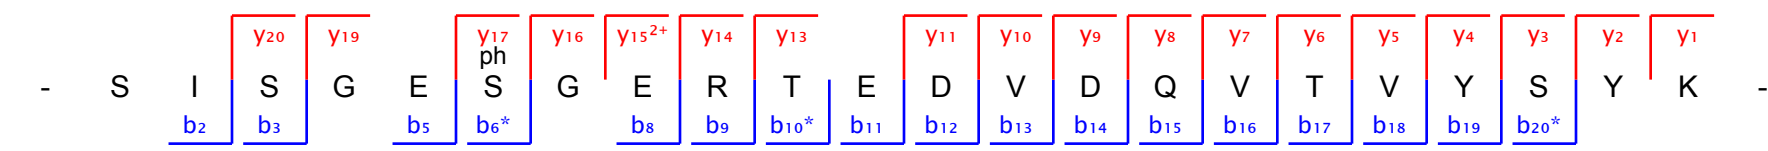

Raw file 20150812\_A375SR\_Phospho\_BR1\_10 Scan 15856 Method FTMS; HCD Score 118.32 m/z 719.69 Gene names TRIM24

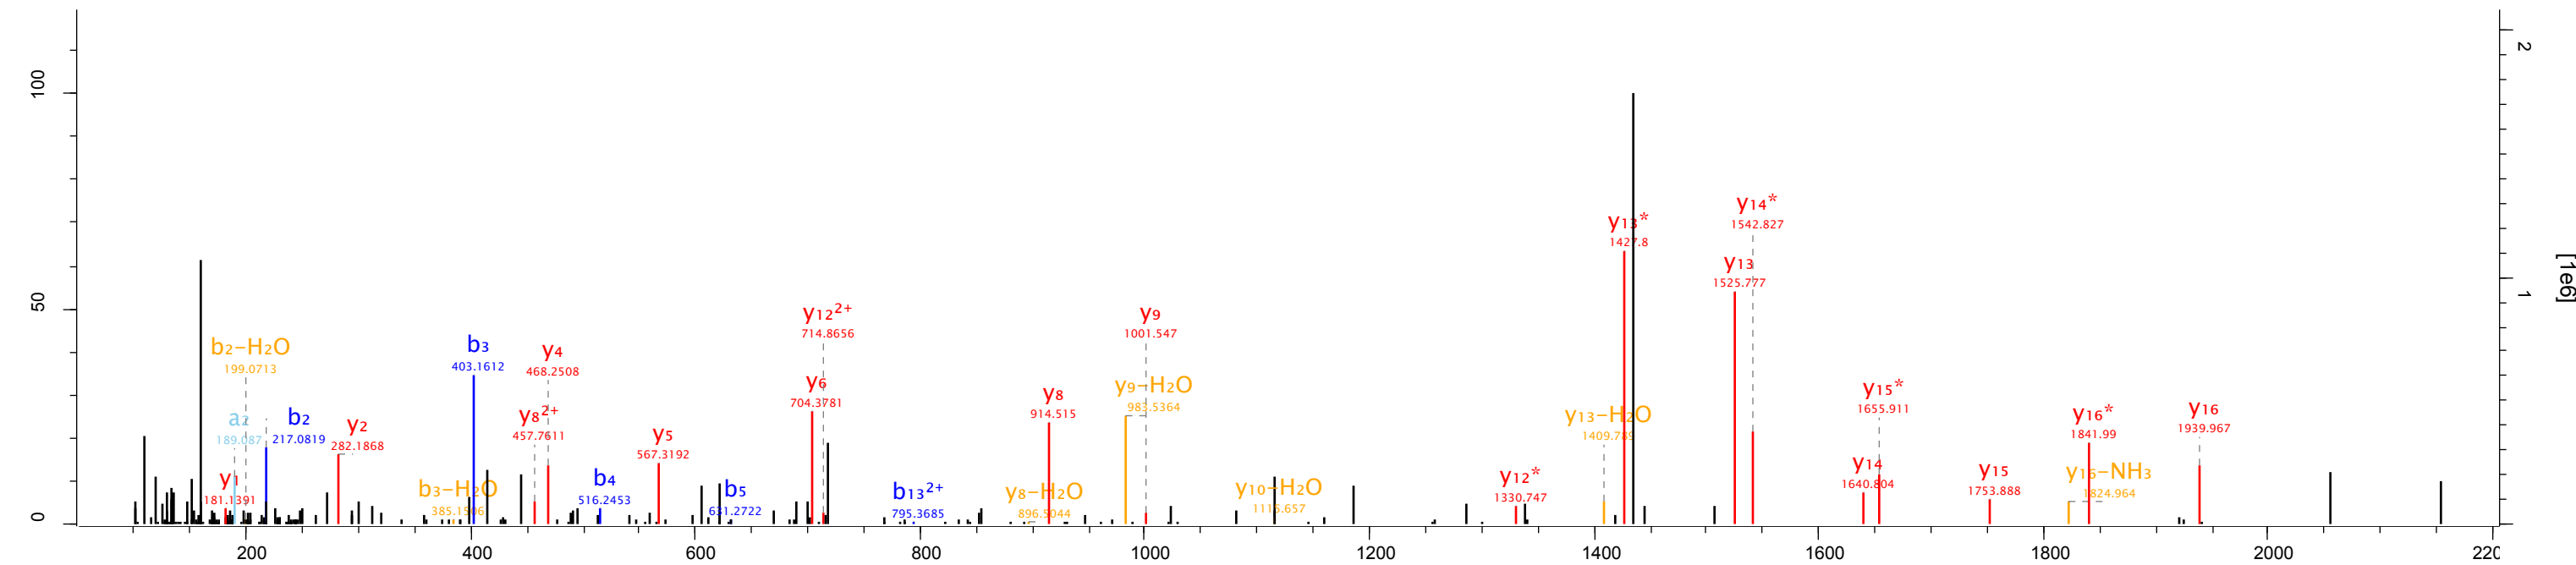

- S E W L D P S Q K S P L H V G E T R -

Fragmentation mapping (b and y ions):

- b2: E
- b3: W
- b4: L
- b5: D
- b13 2+: H
- y1: R
- y2: T
- y4: G
- y5: V
- y6: H
- y8: P
- y9: S
- y12 \*: T
- y13: V
- y14 \*: G
- y15 \*: V
- y16: R
- y16 \*: R

Raw file 20150812\_A375SR\_Phospho\_BR1\_10 Scan 17126 Method FTMS; HCD Score 215.59 m/z 842.78 Gene names PCBP2

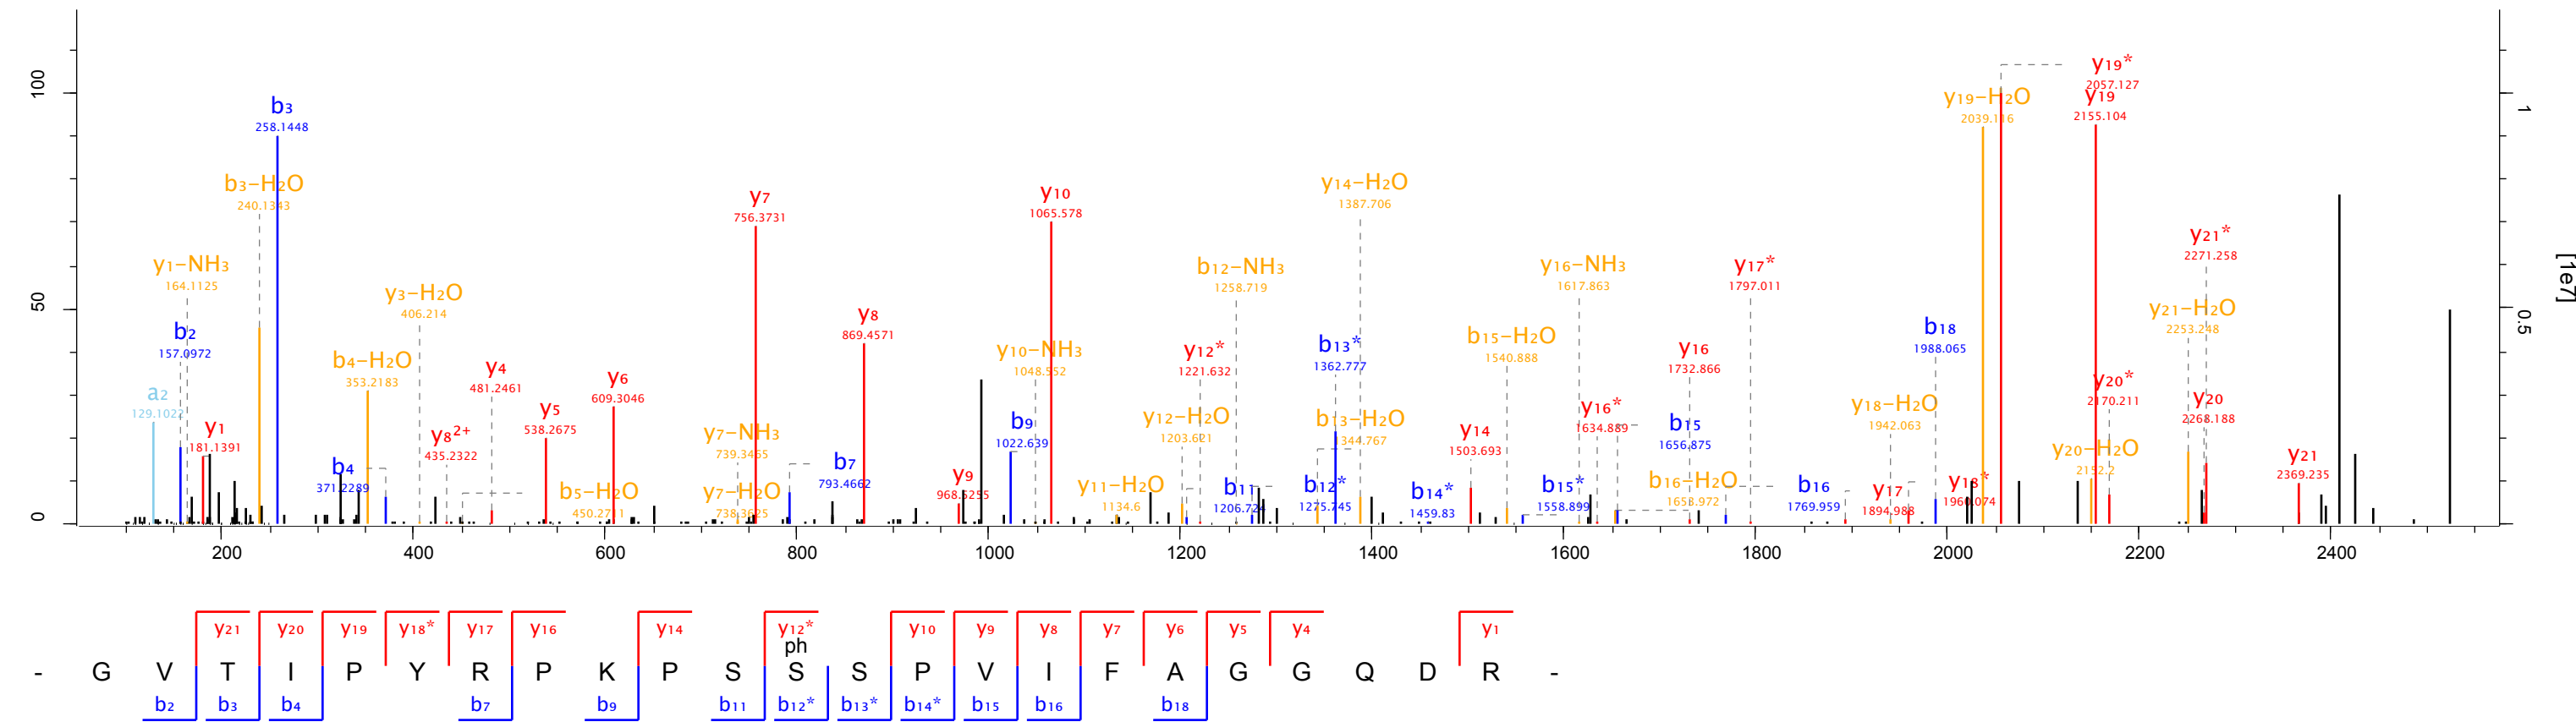

Raw file: 20150812\_A375SR\_Phospho\_BR1\_10  
 Scan: 1886 Method: FTMS; HCD Score: 111.66 m/z: 556.26 Gene names: RNPS1

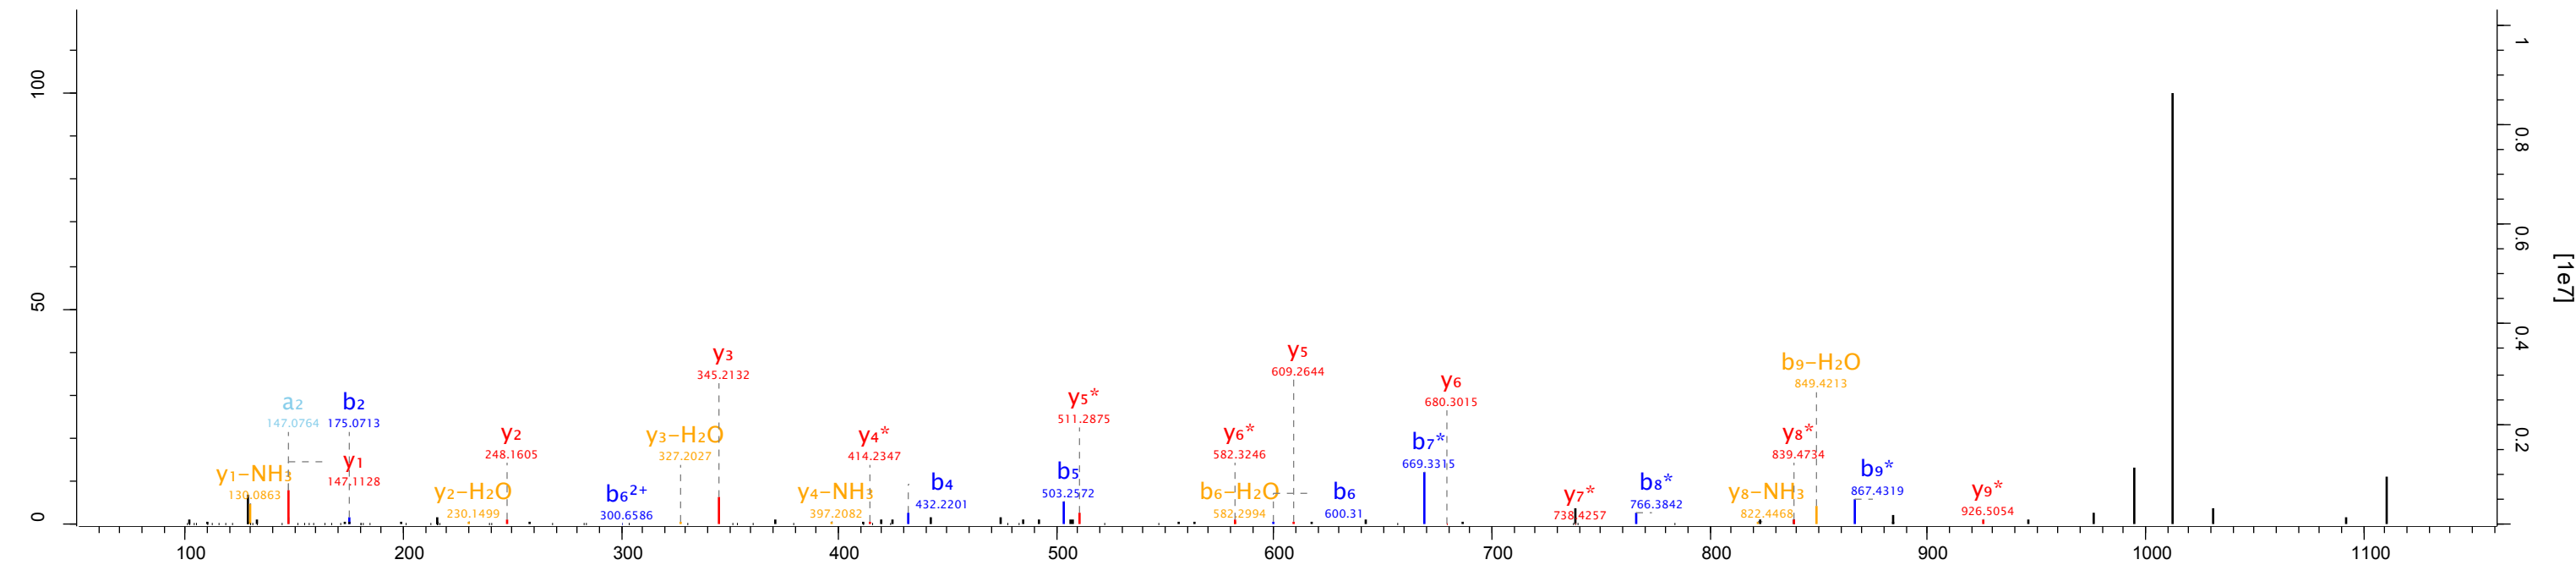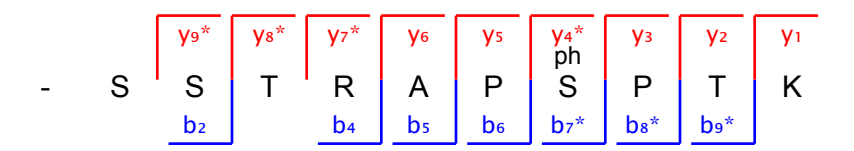

Raw file: 20150812\_A375SR\_Phospho\_BR1\_10  
 Scan: 2246 Method: FTMS; HCD Score: 120.53 m/z: 436.91 Gene names: PPIG

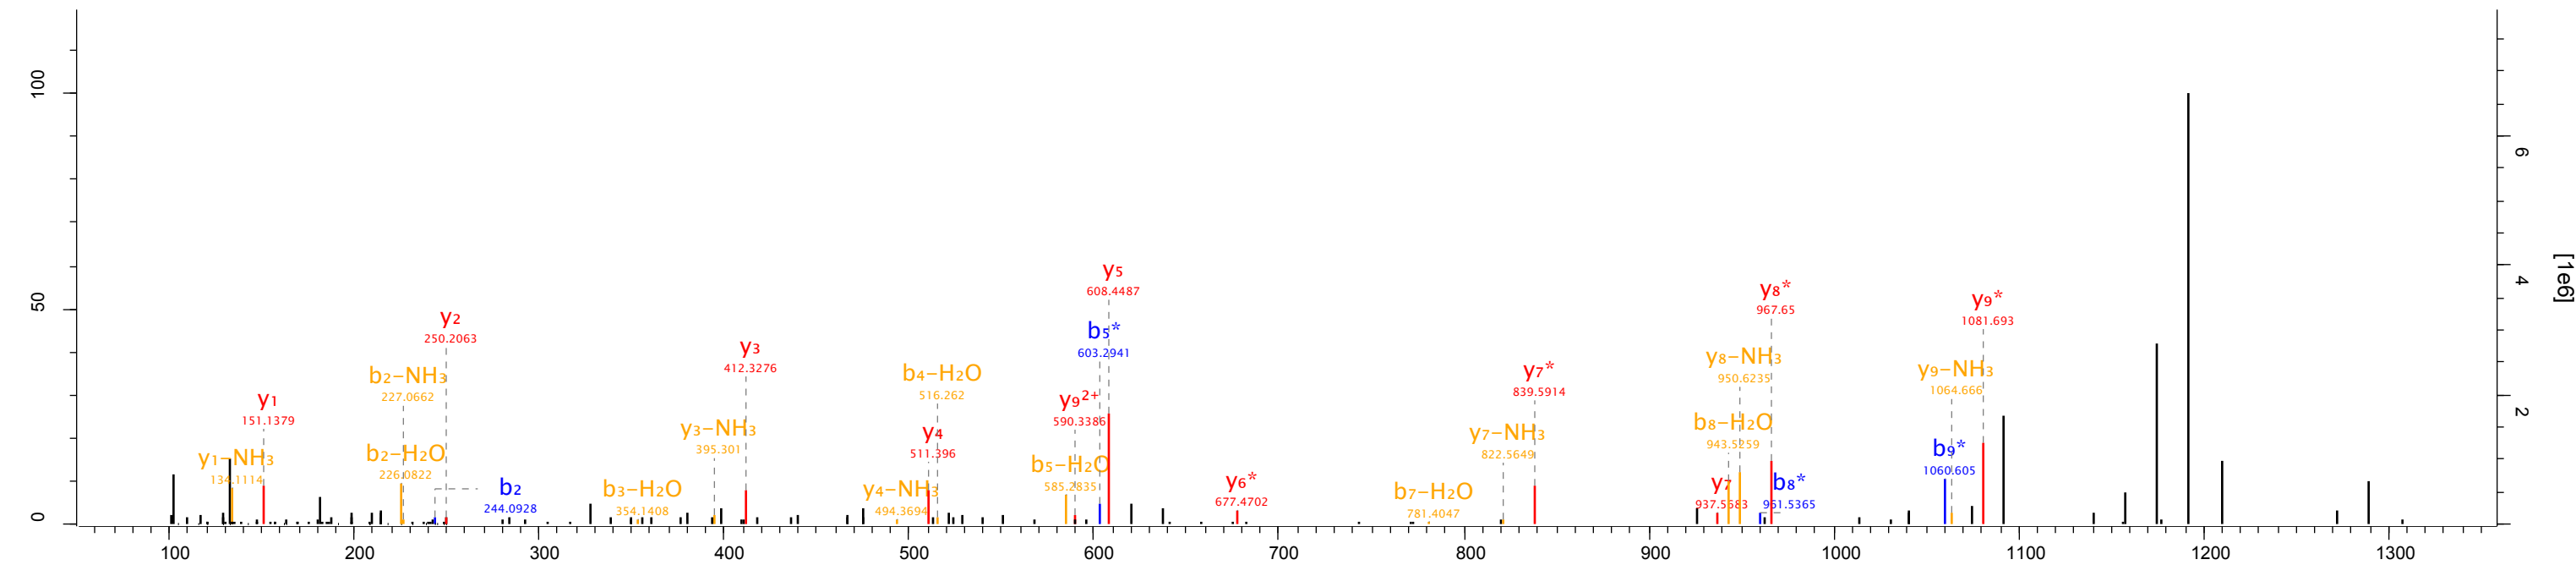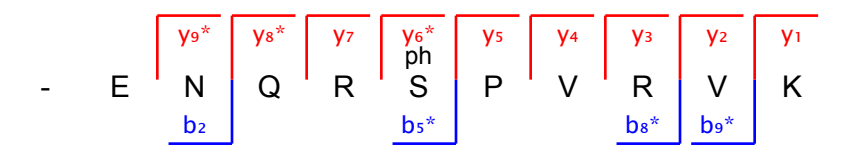

Raw file 20150812\_A375SR\_Phospho\_BR1\_10 Scan 2666 Method FTMS; HCD Score 54 m/z 887.7 Gene names DYNC1H1

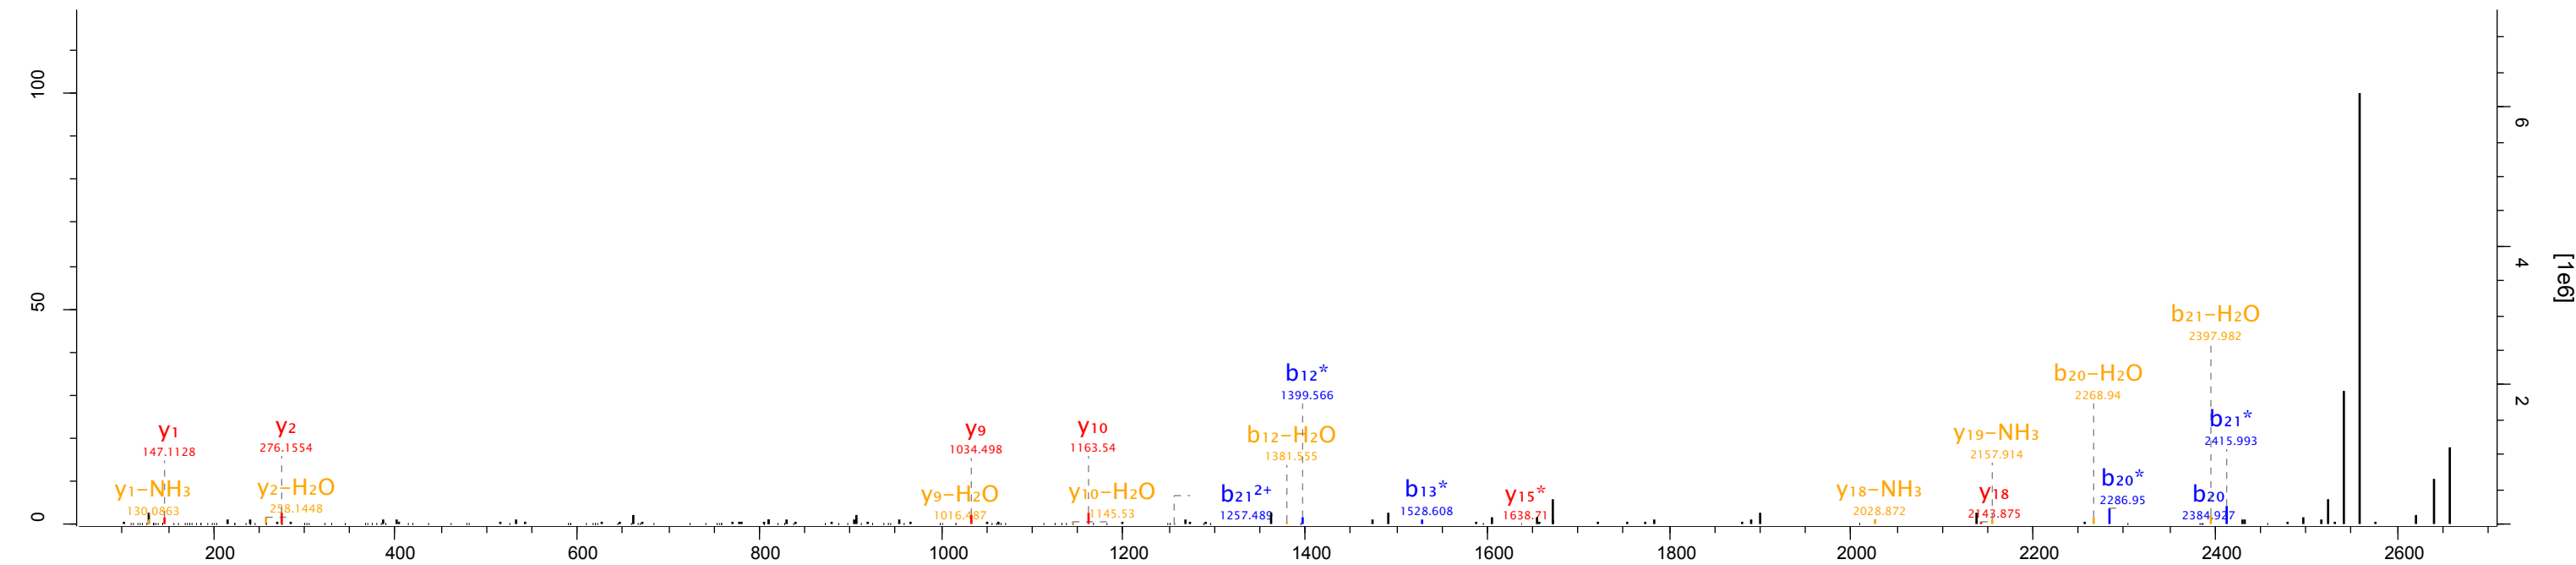

- V C Q E M Y L T Y G D G E E V G G M W V E K -

Fragmentation sites are indicated by red boxes above the sequence:  $y_{18}$  (above M),  $y_{15}^{ph}$  (above T),  $y_{10}$  (above E),  $y_9$  (above E),  $y_2$  (above E), and  $y_1$  (above K). Blue boxes below the sequence indicate b-ion fragmentation sites:  $b_{12}^*$  (below G),  $b_{13}^*$  (below E),  $b_{20}$  (below V),  $b_{21}^*$  (below E).



Raw file: 20150812\_A375SR\_Phospho\_BR1\_10  
 Scan: 2776 Method: FTMS; HCD Score: 265.85 m/z: 656.27 Gene names: RNPEP

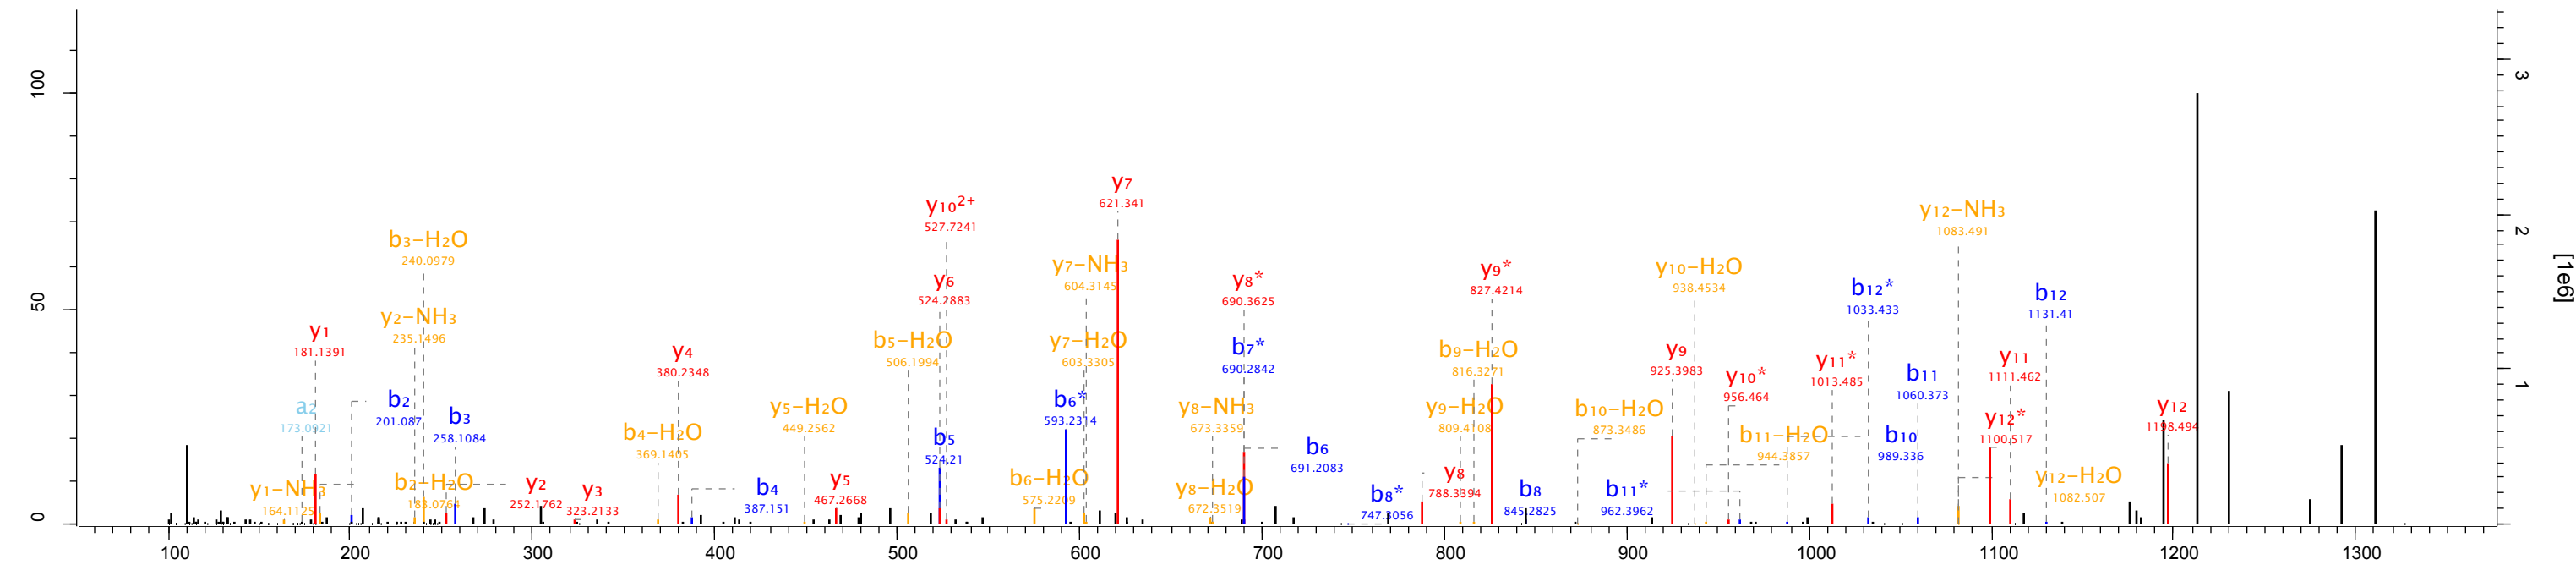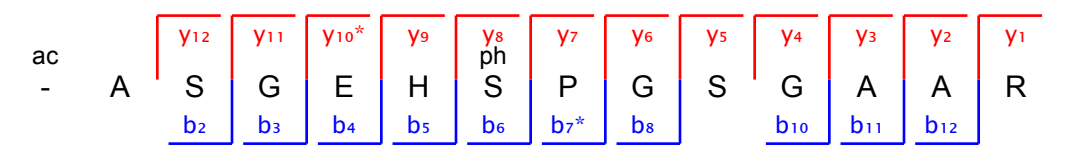

Raw file 20150812\_A375SR\_Phospho\_BR1\_10 Scan 6456 Method FTMS; HCD Score 66.19 m/z 447.73 Gene names MICALL2

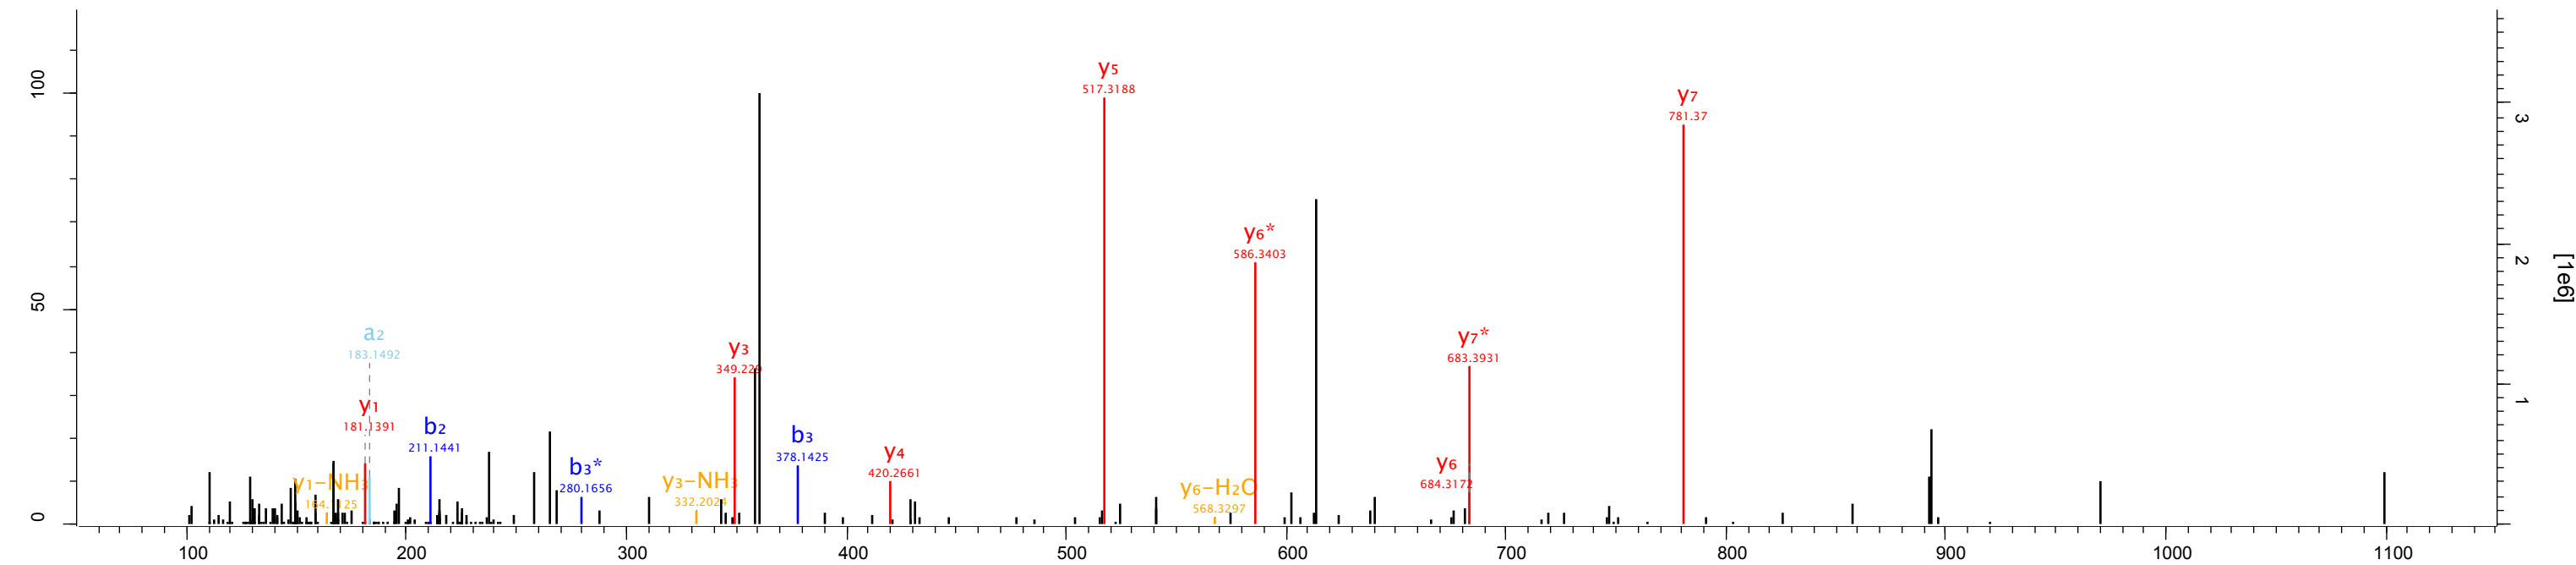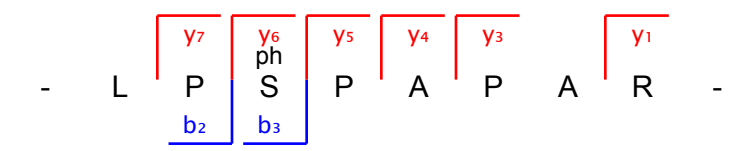

Raw file 20150812\_A375SR\_Phospho\_BR1\_10 Scan 9856 Method FTMS; HCD Score 204.26 m/z 716.34 Gene names PUM1

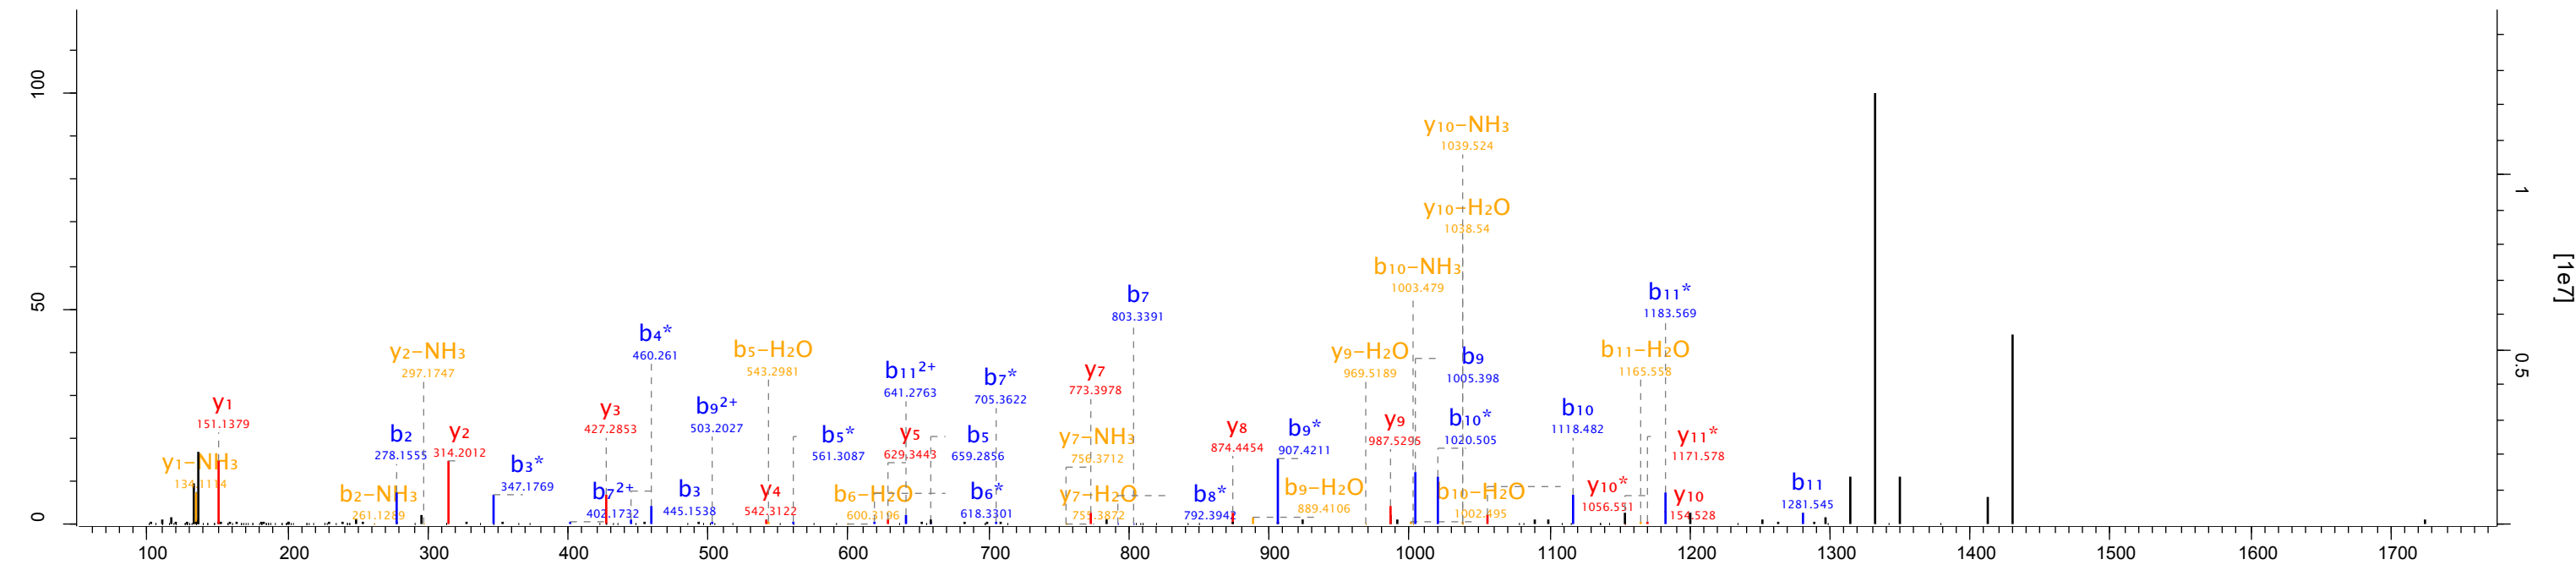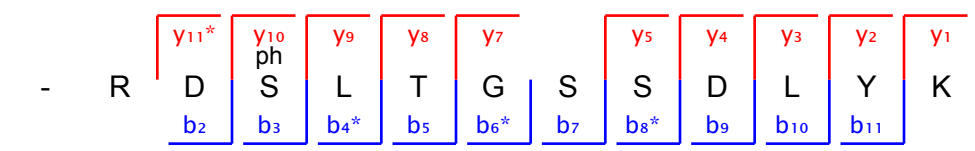

Raw file 20150812\_A375SR\_Phospho\_BR1\_01 Scan 10867 Method FTMS; HCD Score 90.46 m/z 869.32 Gene names FRMD6

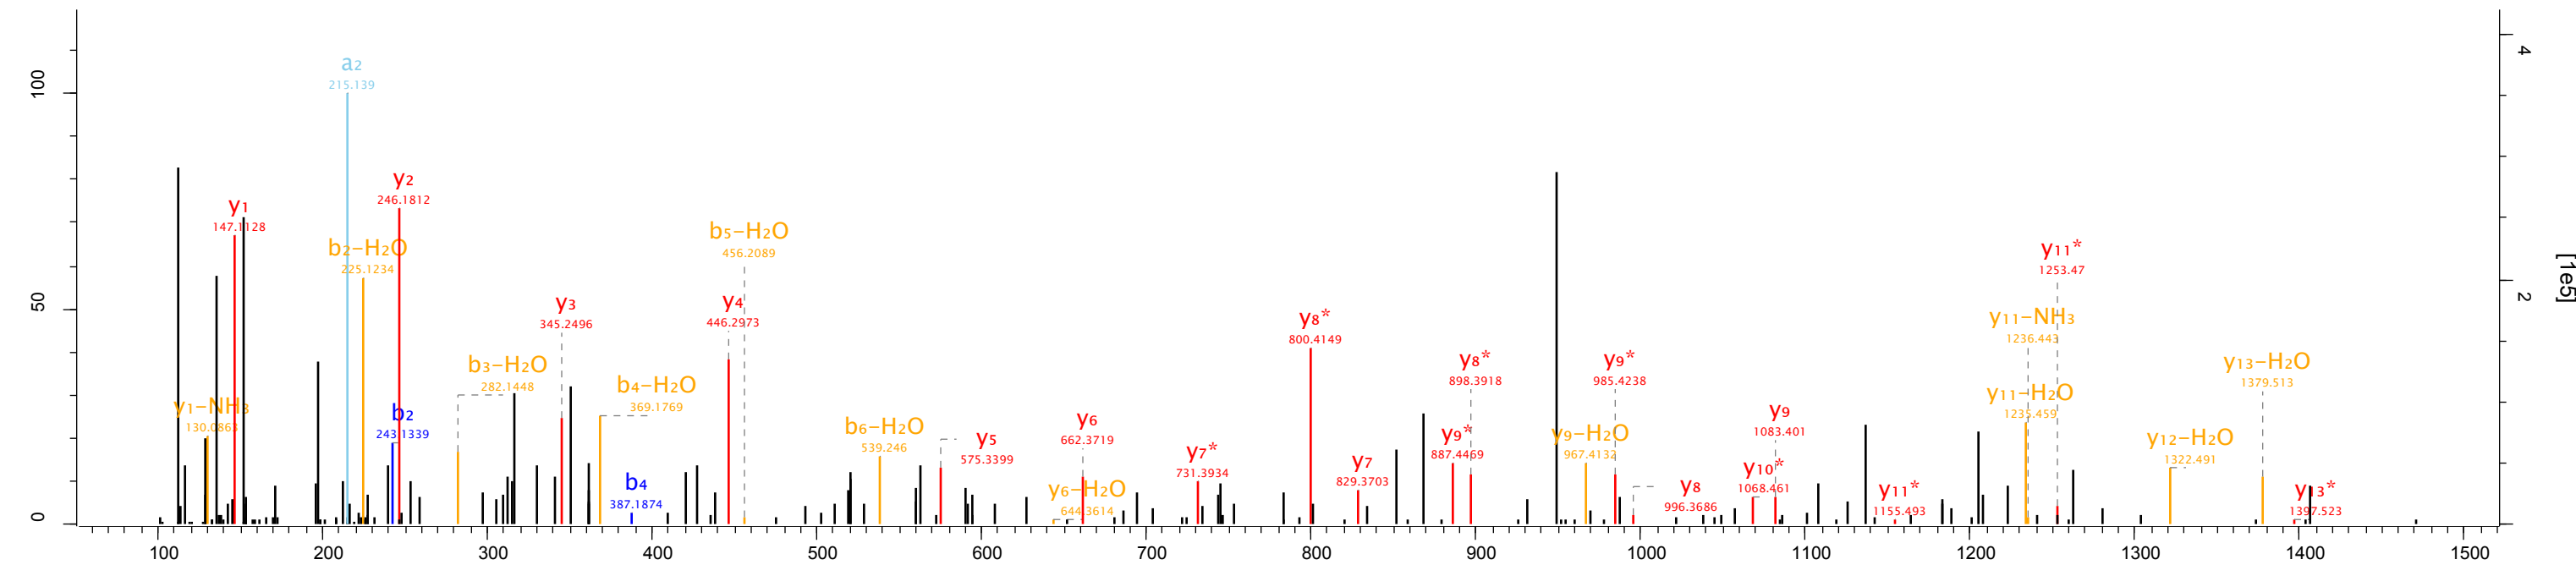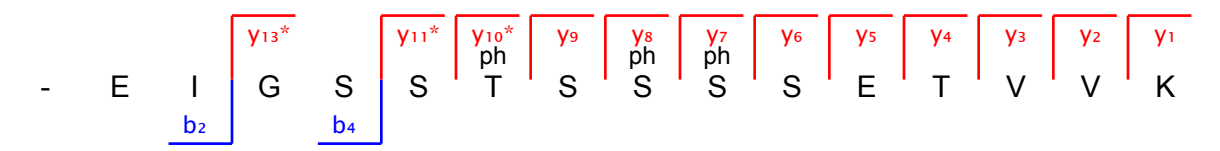

Raw file: 20150812\_A375SR\_Phospho\_BR1\_01  
 Scan: 12597 Method: FTMS; HCD Score: 87.15 m/z: 819.34 Gene names: MAPT

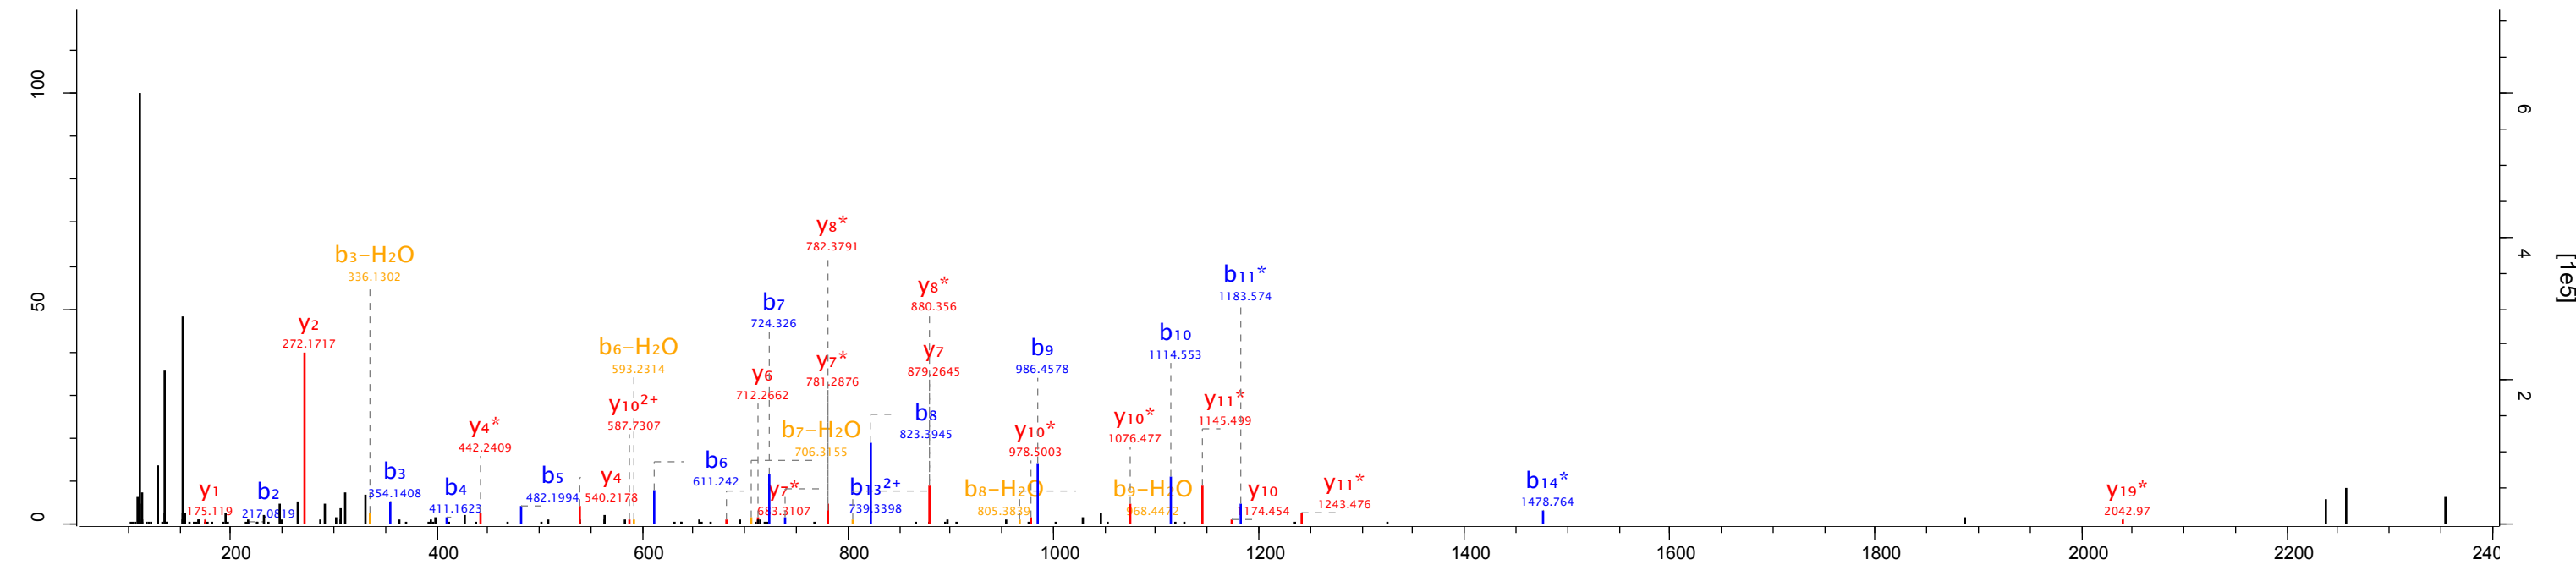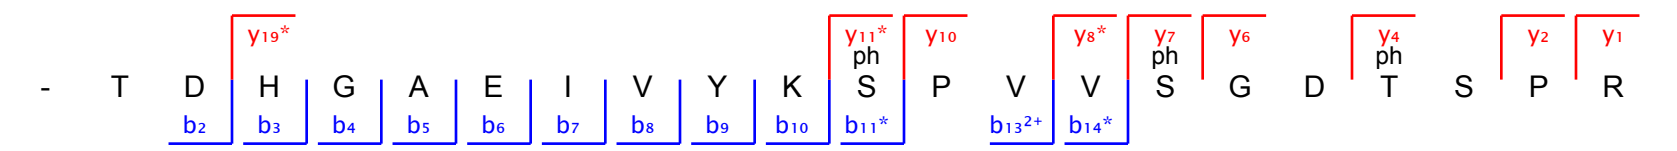

Raw file 20150812\_A375SR\_Phospho\_BR1\_01 Scan 12687 Method FTMS; HCD Score 85.19 m/z 1236.18 Gene names MARCKSL1

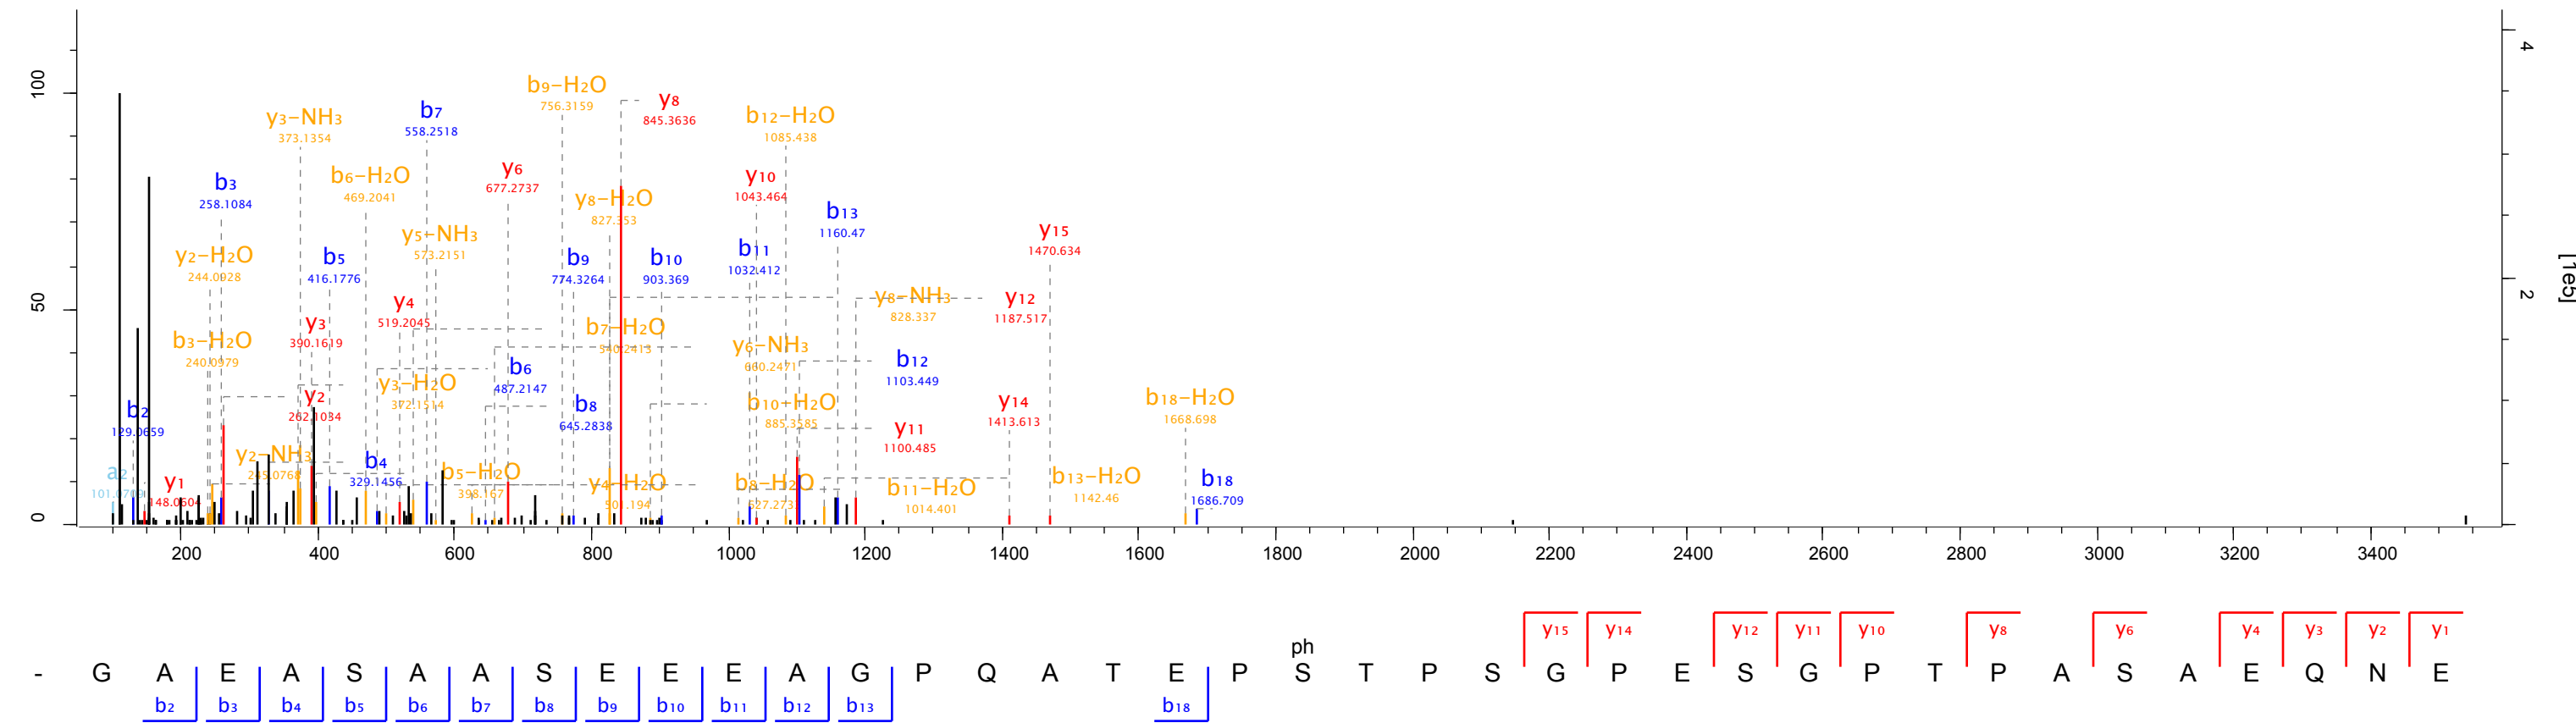

Raw file 20150812\_A375SR\_Phospho\_BR1\_01 Scan 16047 Method FTMS; HCD Score 43.1 m/z 1209.1 Gene names USP15

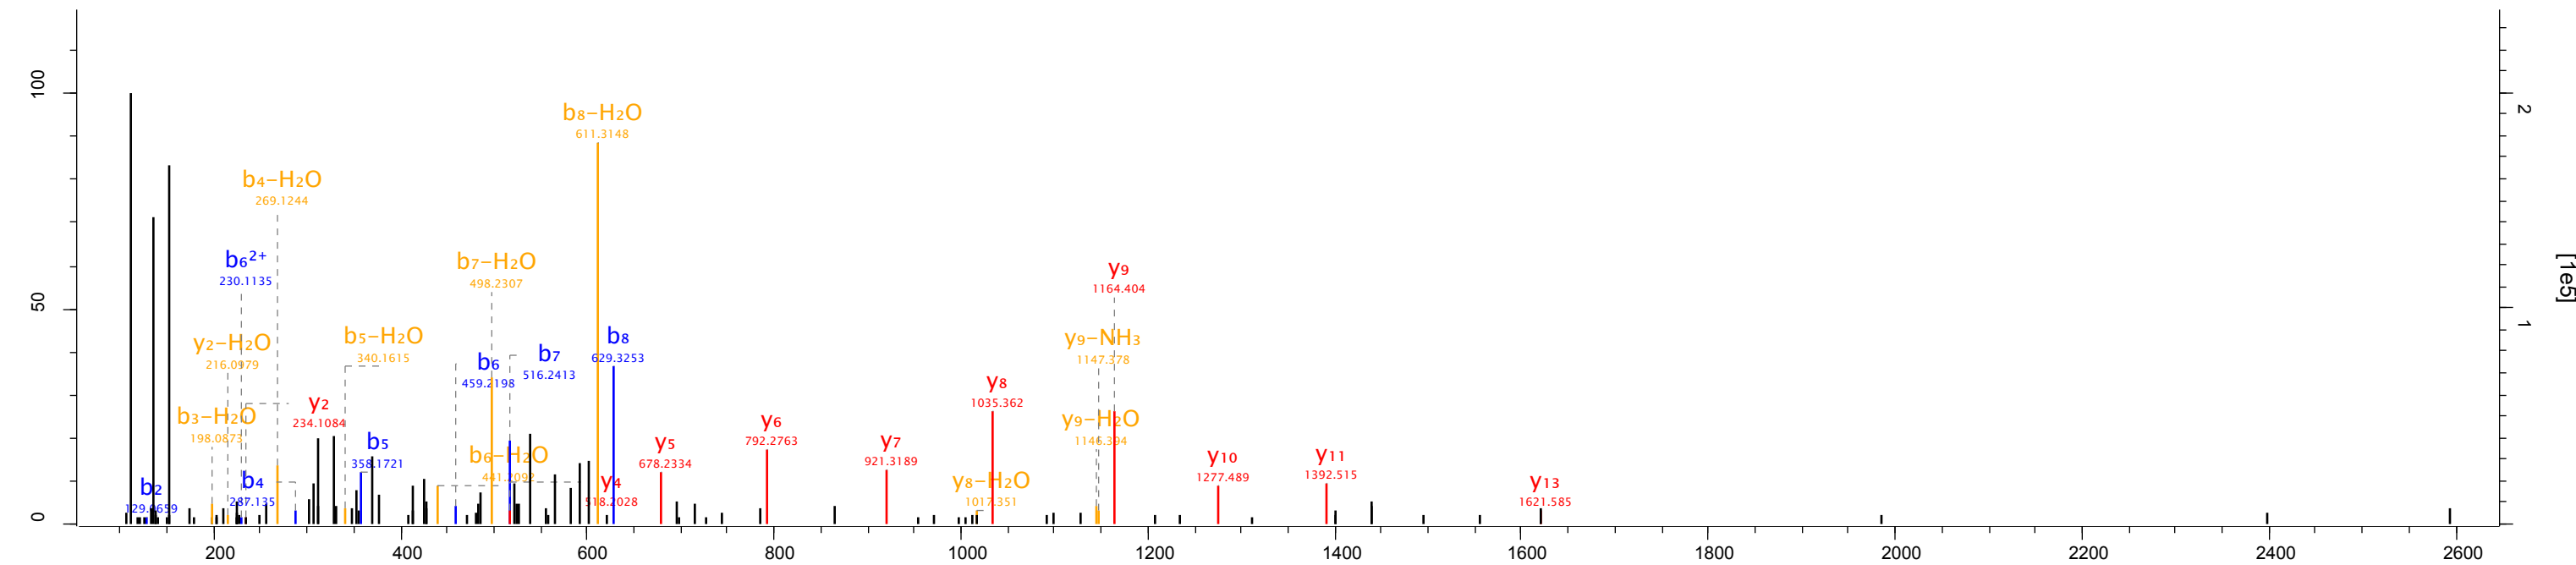

- G A S A A T G I P L E S D E D S N D N D N D I E N E N C M H T N -

b<sub>2</sub>
b<sub>4</sub>
b<sub>5</sub>
b<sub>6</sub>
b<sub>7</sub>
b<sub>8</sub>
y<sub>13</sub>
y<sub>11</sub>
y<sub>10</sub>
y<sub>9</sub>
y<sub>8</sub>
y<sub>7</sub>
y<sub>6</sub>
y<sub>5</sub>
y<sub>4</sub>  
OX
y<sub>2</sub>

Raw file: 20150812\_A375SR\_Phospho\_BR1\_01  
 Scan: 3127 Method: FTMS; HCD Score: 89.86 m/z: 609.23 Gene names: DNMI

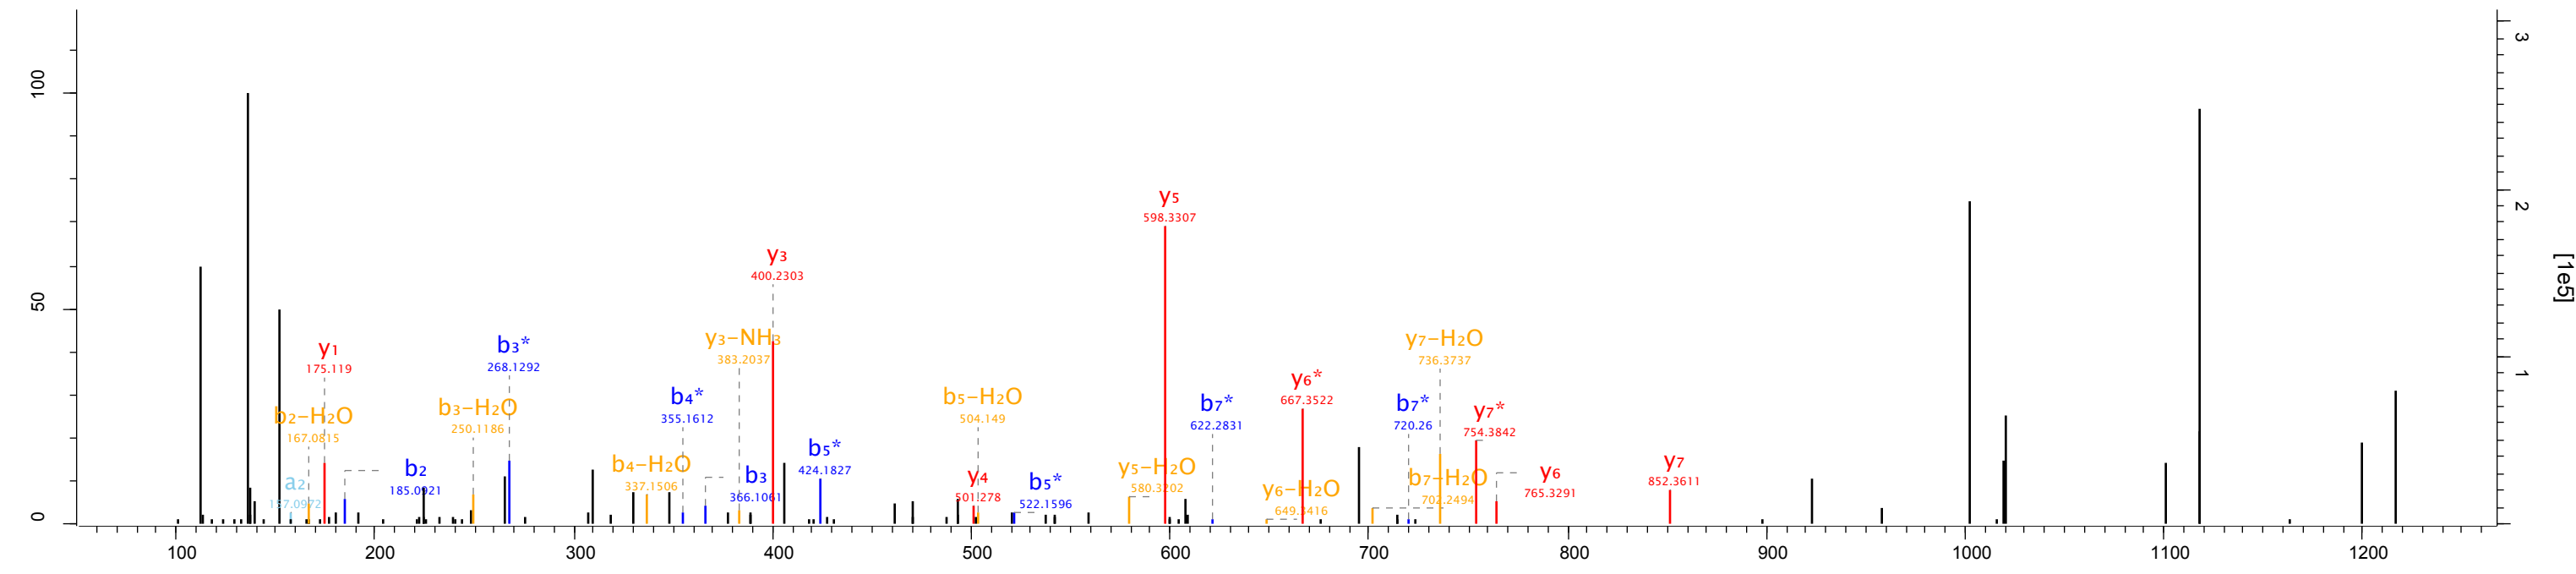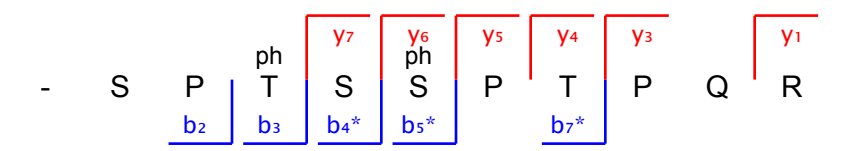



Raw file 20150812\_A375SR\_Phospho\_BR1\_01 Scan 4257 Method FTMS; HCD Score 51.76 m/z 708.25 Gene names SRRM2

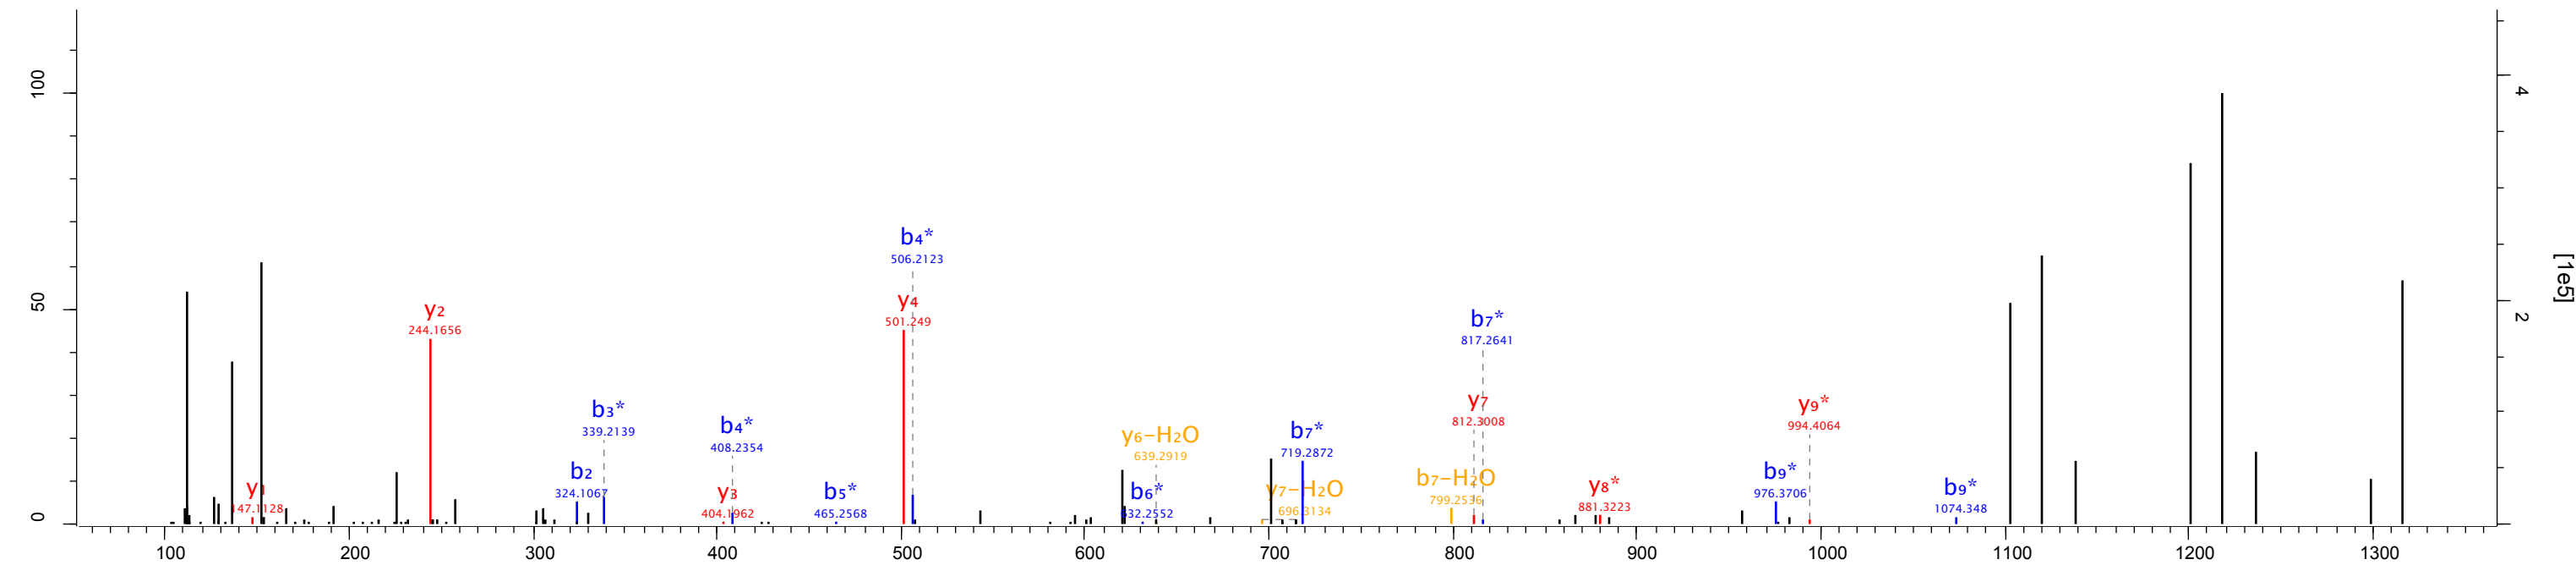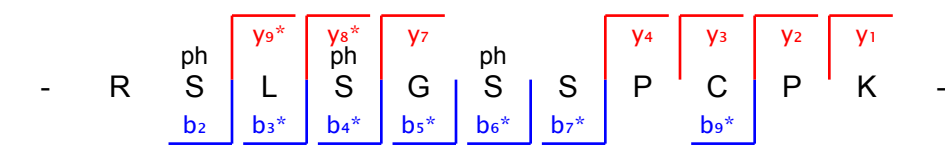

Raw file: 20150812\_A375SR\_Phospho\_BR1\_01  
 Scan: 4947 Method: FTMS; HCD Score: 67.68 m/z: 878.31 Gene names: PSMA3

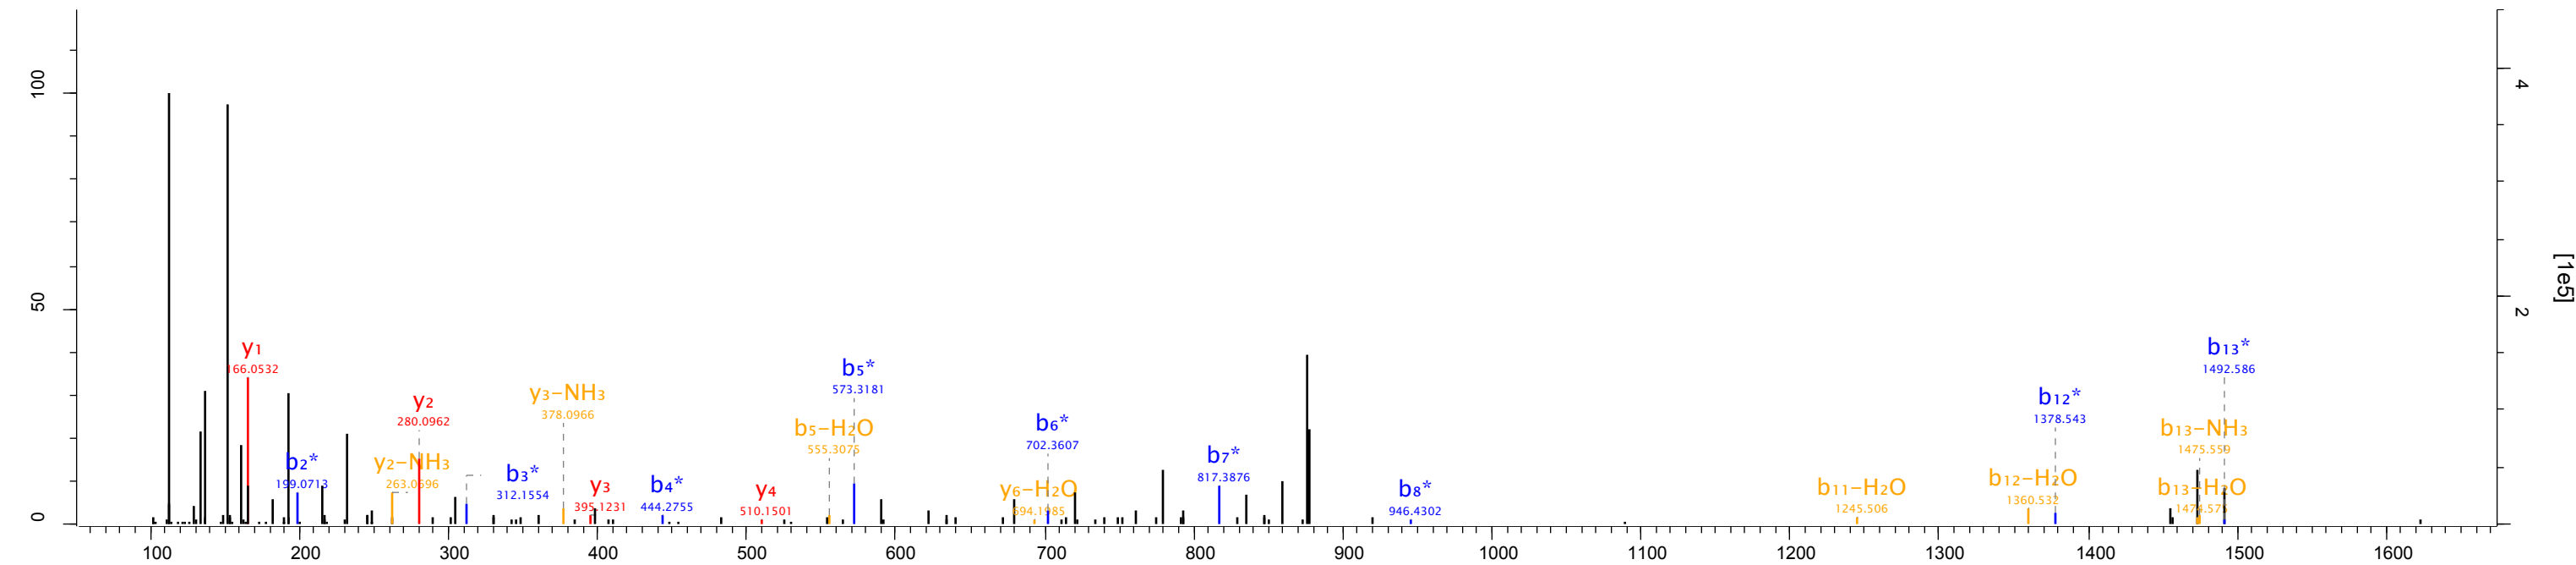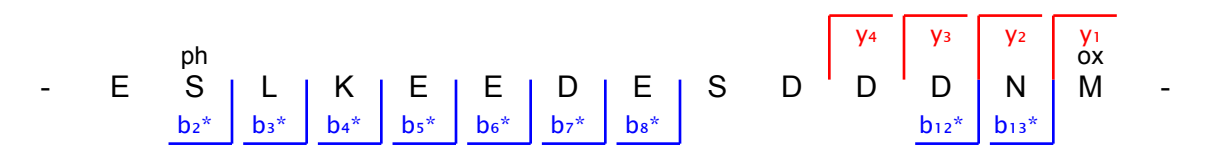

Raw file: 20150812\_A375SR\_Phospho\_BR1\_01  
 Scan: 5747 Method: FTMS; HCD Score: 121.45 m/z: 584.24 Gene names: EXOC1

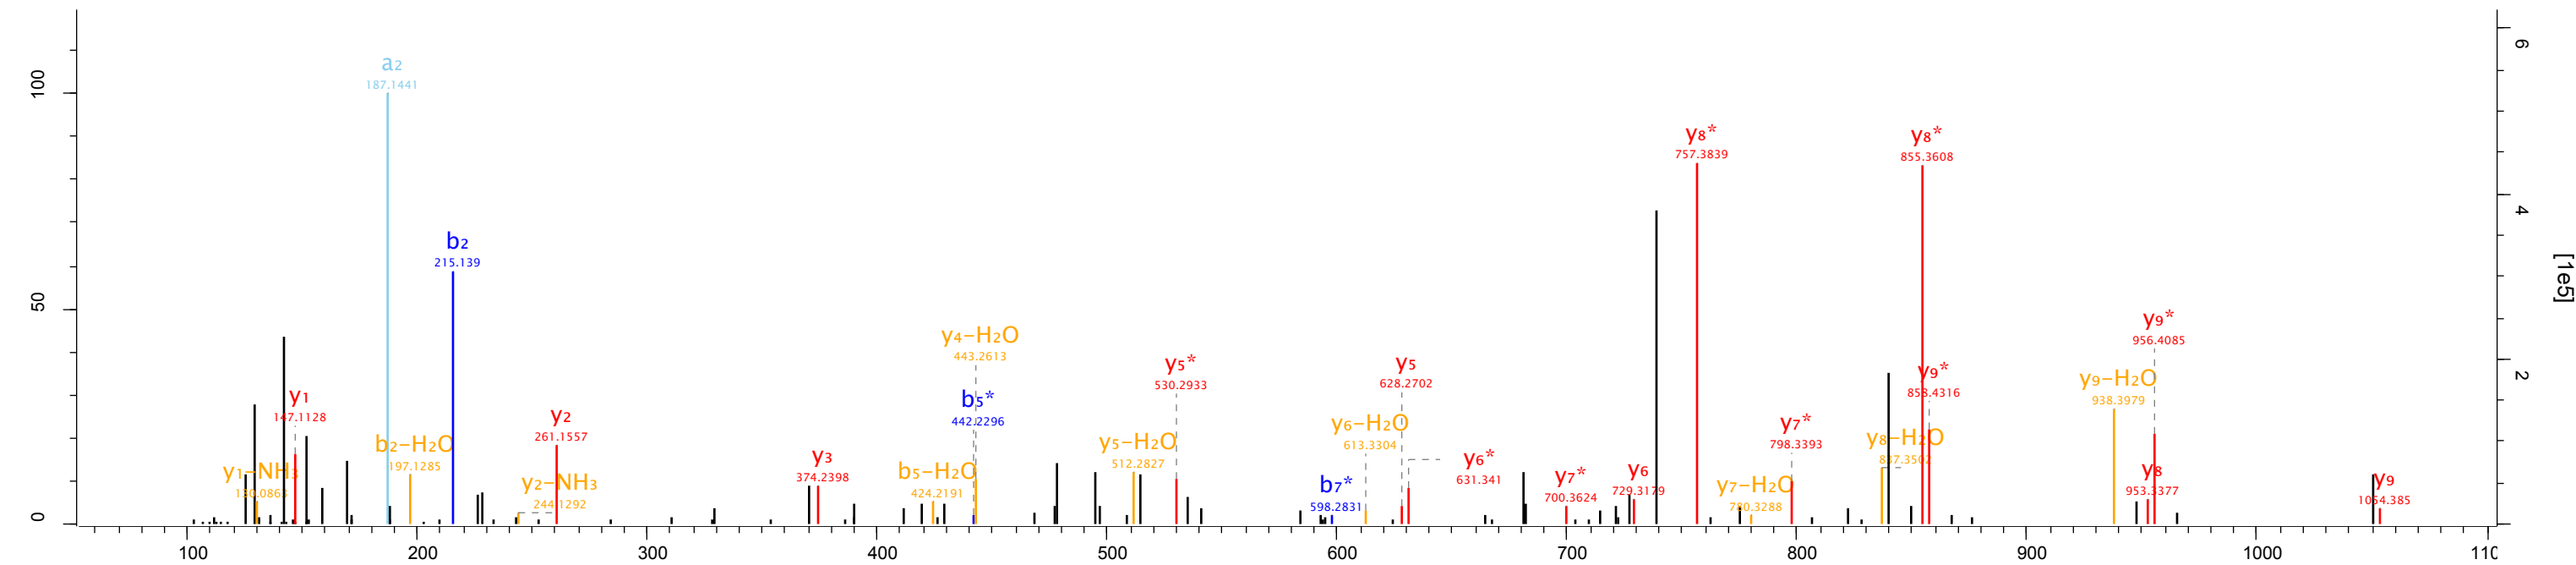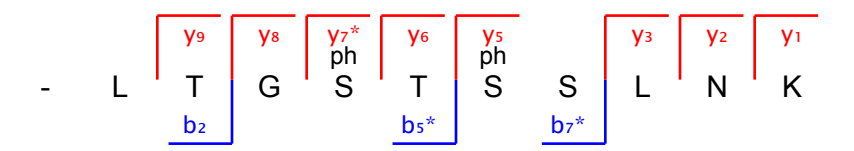

Raw file 20150812\_A375SR\_Phospho\_BR1\_01 Scan 9687 Method FTMS; HCD Score 73.07 m/z 1162.46 Gene names CCDC9

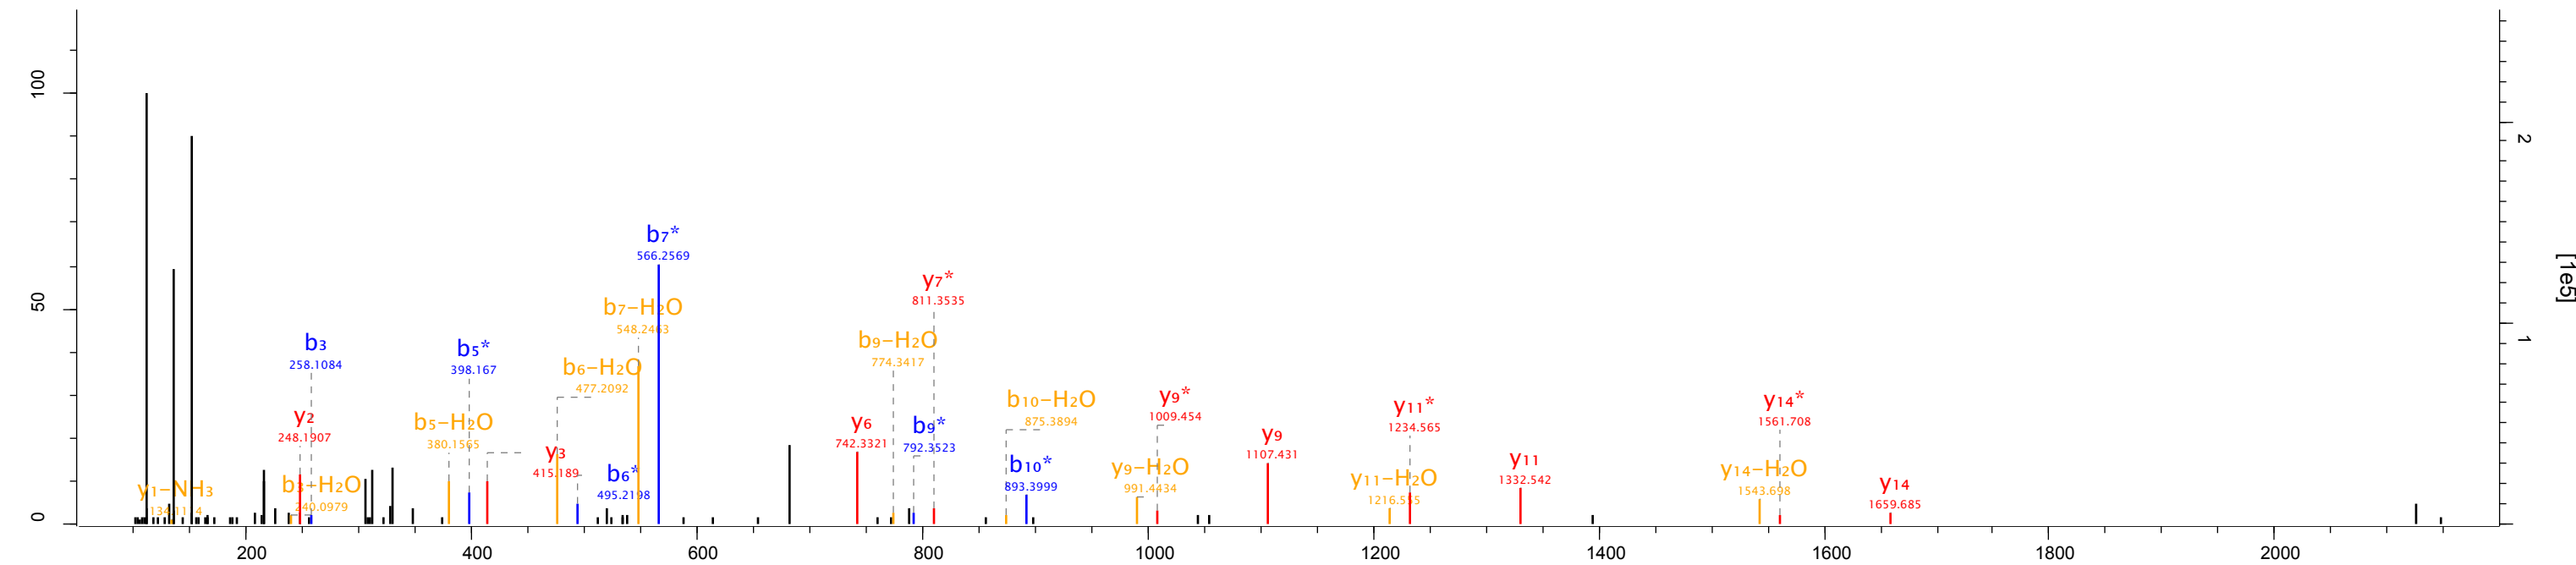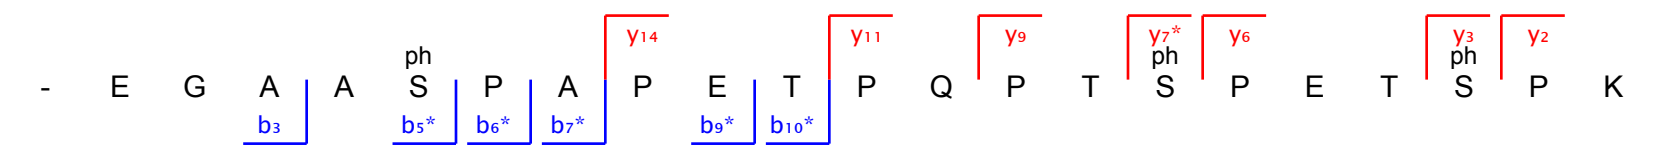

Raw file: 20150812\_A375SR\_Phospho\_BR1\_02  
 Scan: 10037 Method: FTMS; HCD Score: 85.19 m/z: 826.33 Gene names: THRAP3

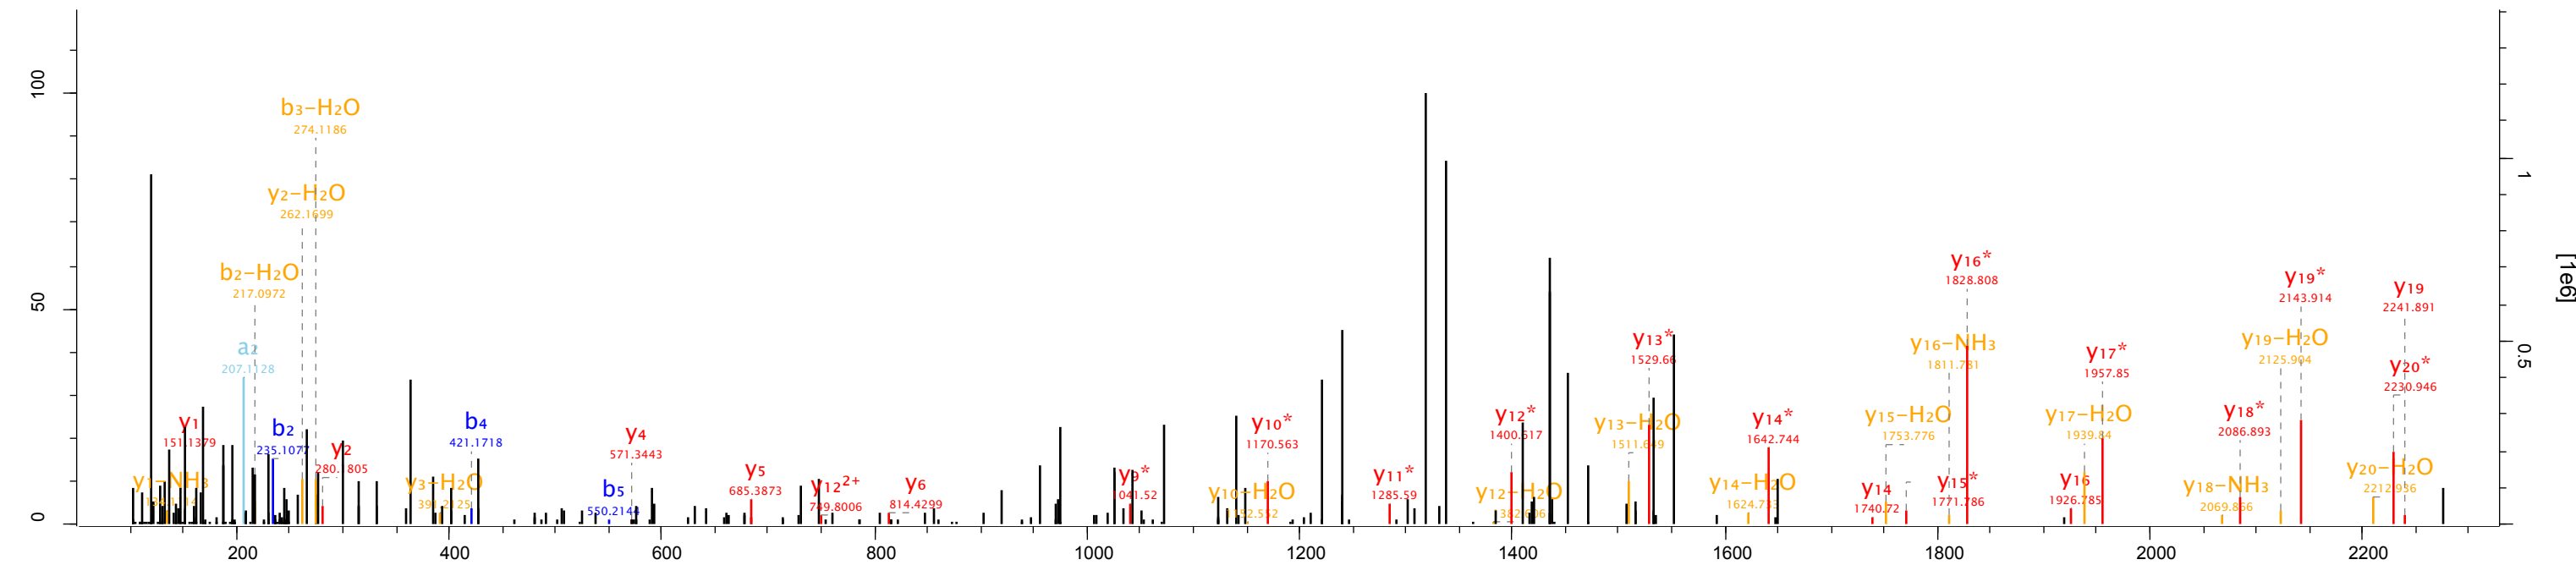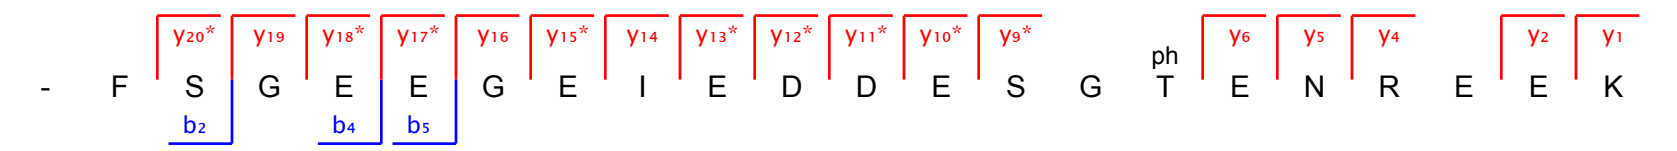

Raw file 20150812\_A375SR\_Phospho\_BR1\_02 Scan 10437 Method FTMS; HCD Score 60.53 m/z 657.72 Gene names RAI14

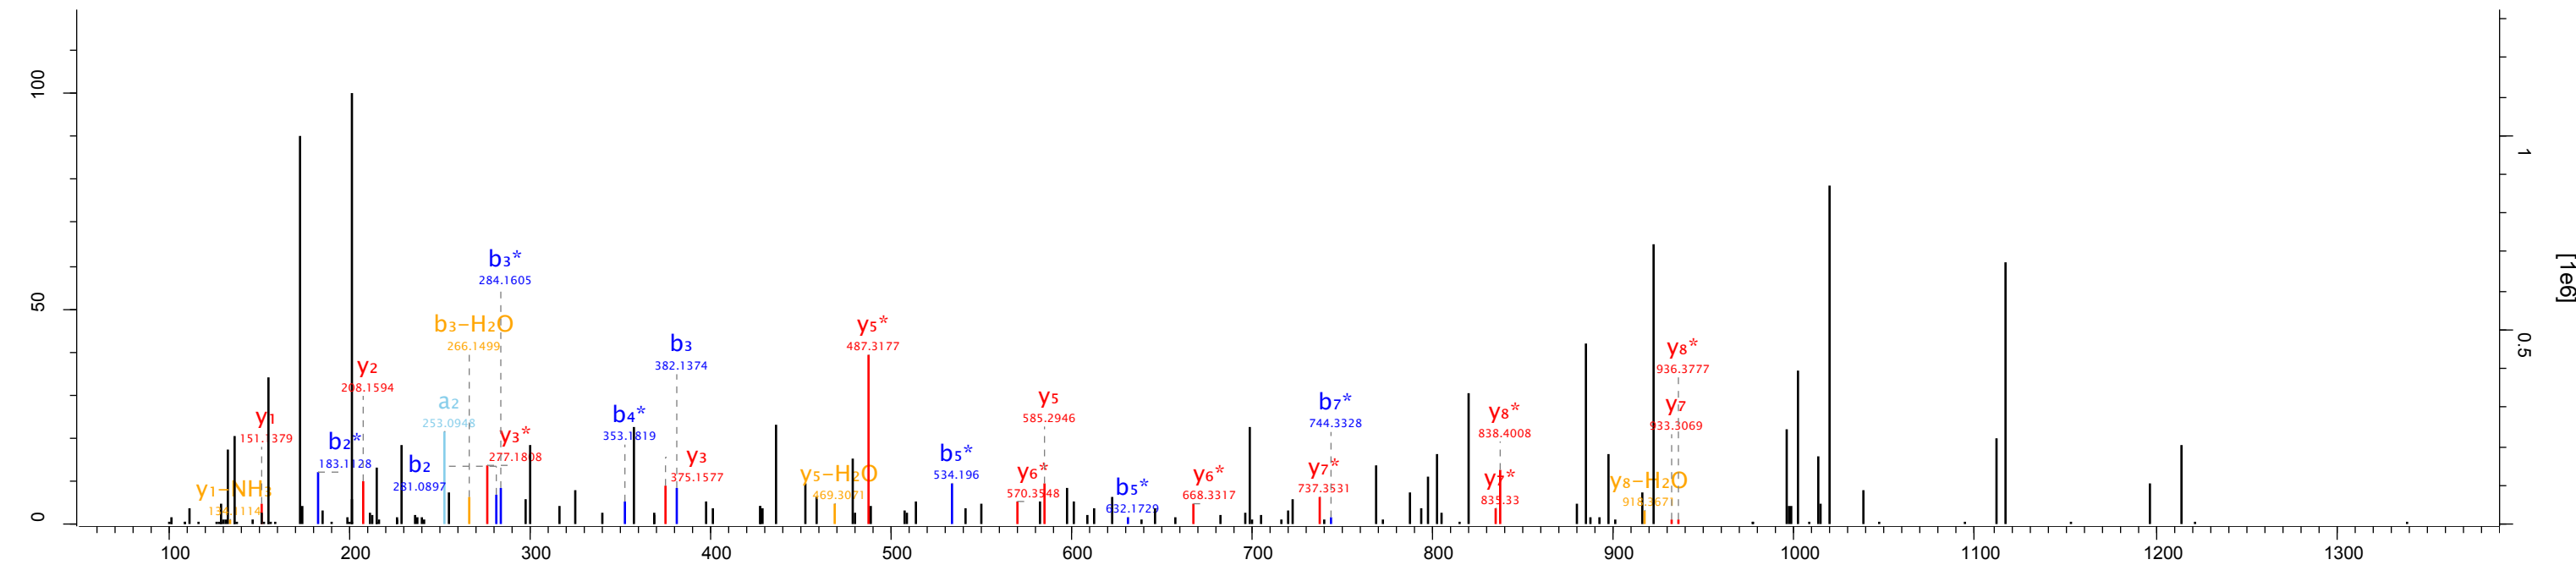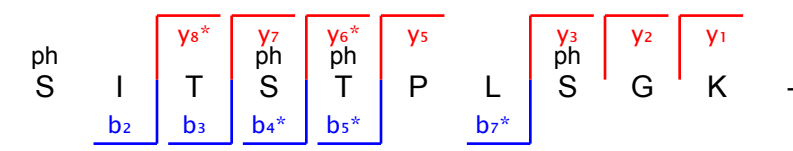

Raw file: 20150812\_A375SR\_Phospho\_BR1\_02  
 Scan: 10517 Method: FTMS; HCD Score: 48.23 m/z: 871.34 Gene names: ZHX1

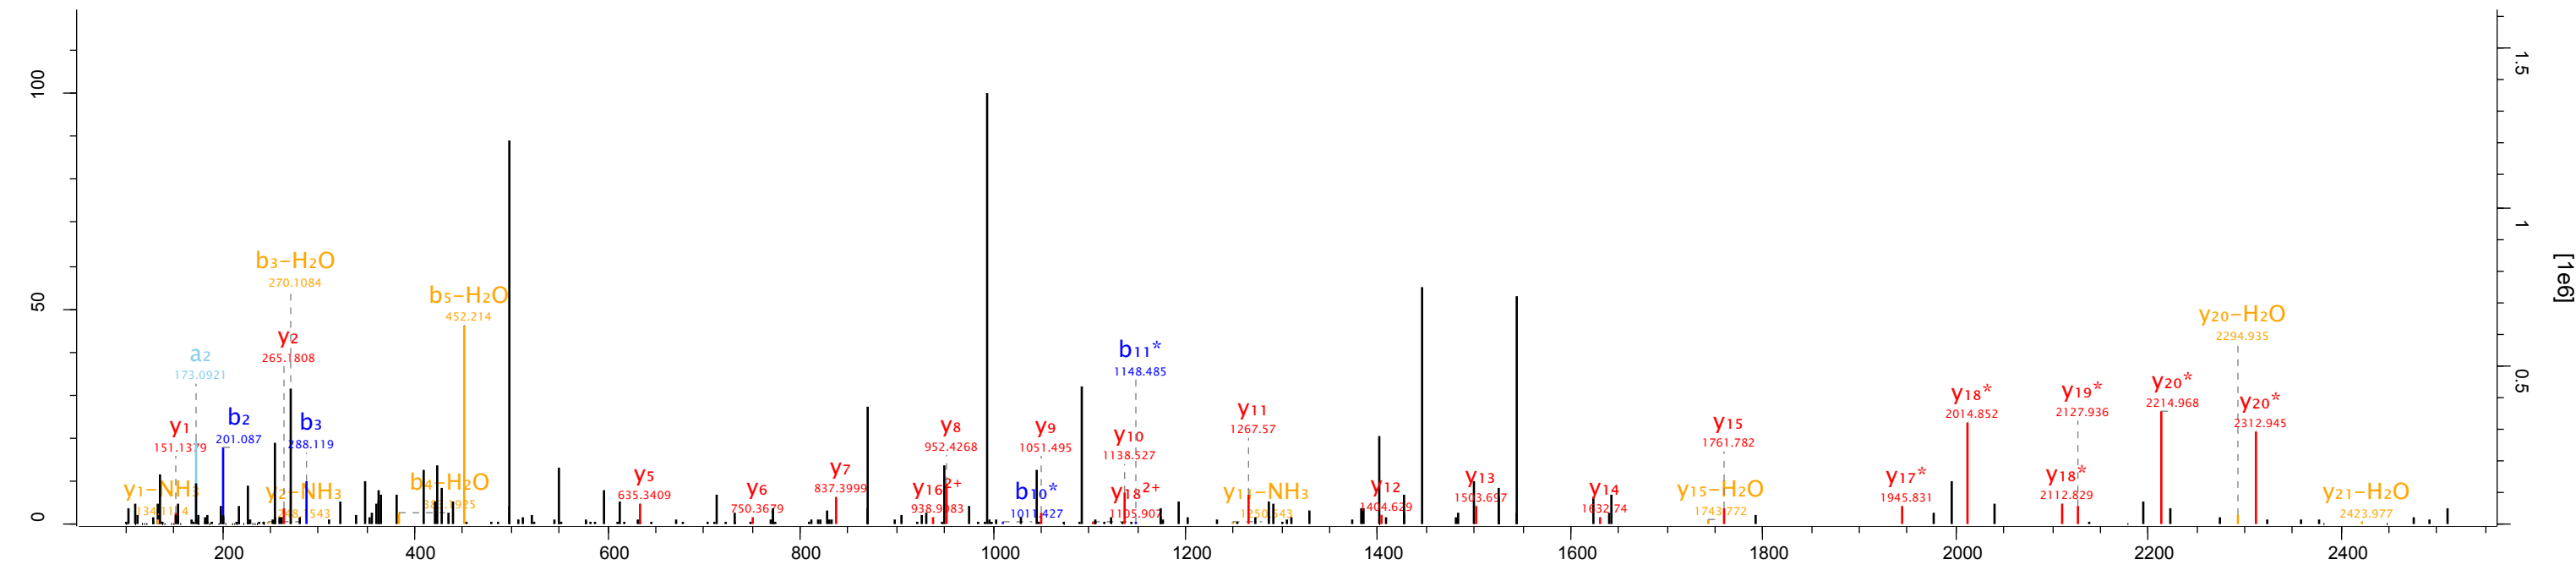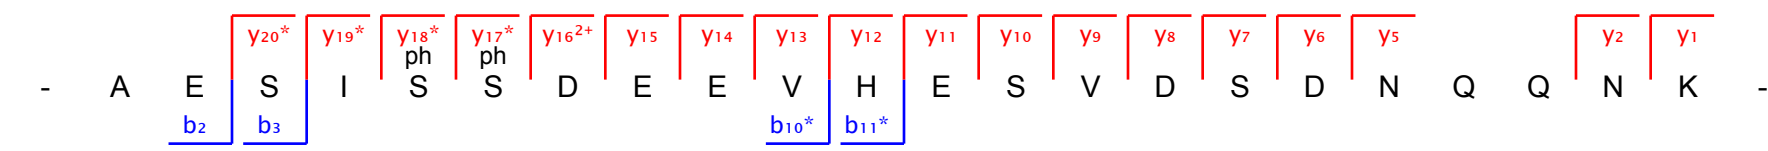

Raw file: 20150812\_A375SR\_Phospho\_BR1\_02  
 Scan: 10887 Method: FTMS; HCD Score: 190.79 m/z: 775.33 Gene names: ERCC5;BIVM-ERCC5

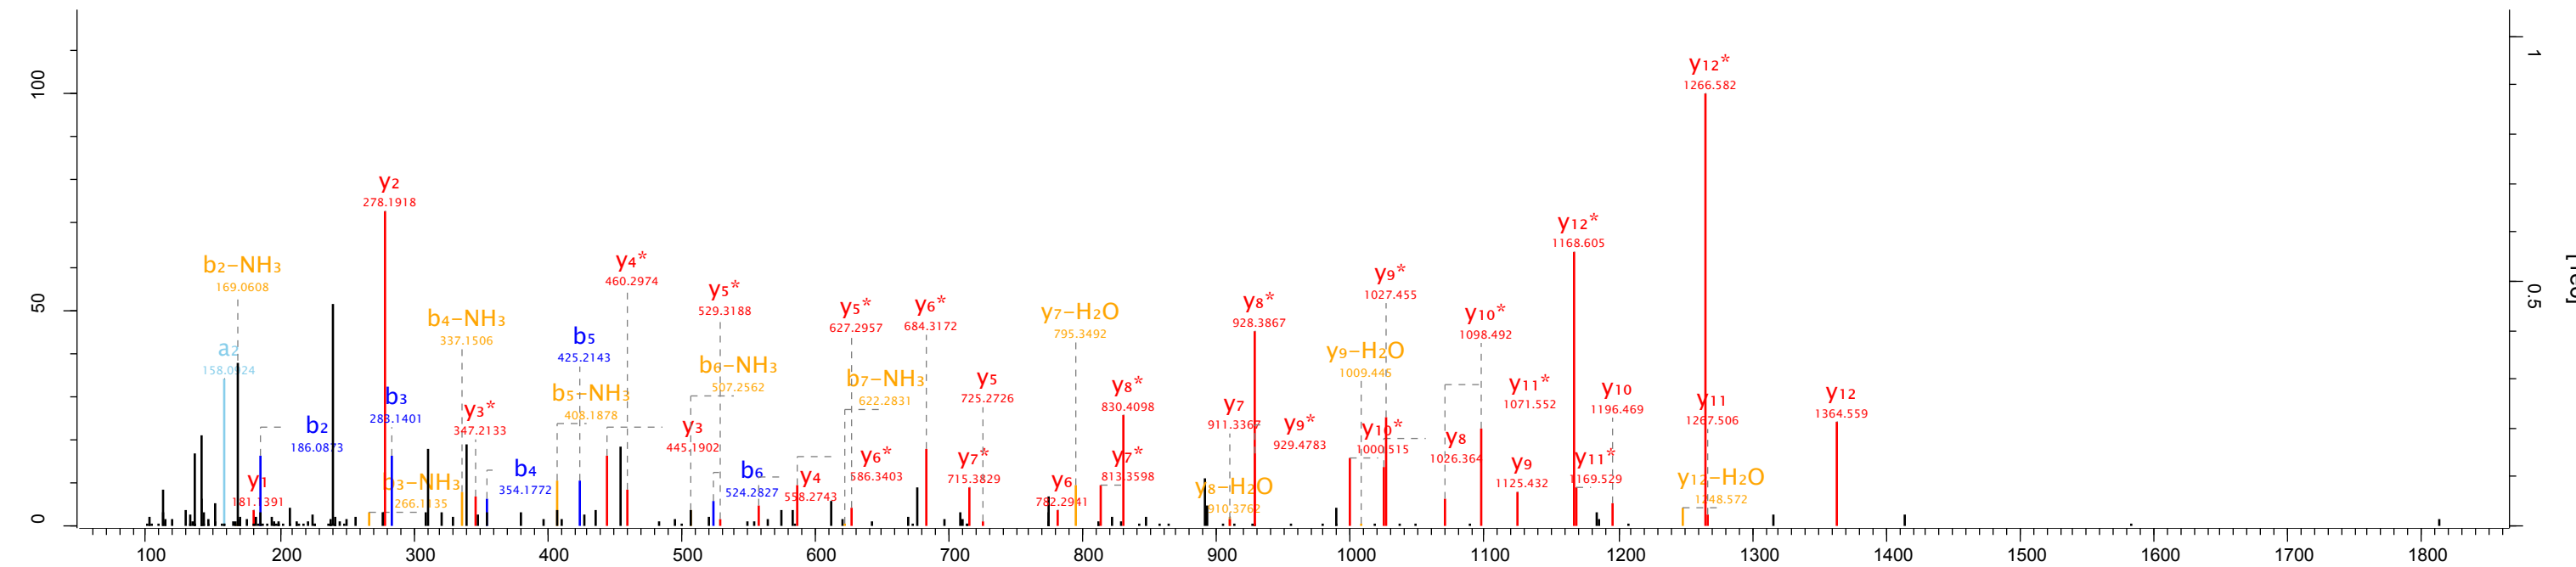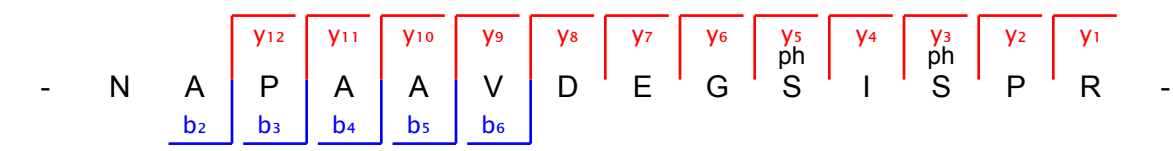



Raw file  
20150812\_A375SR\_Phospho\_BR1\_02

Scan 11237 Method FTMS; HCD Score 88.77 m/z 764.82 Gene names BAG3

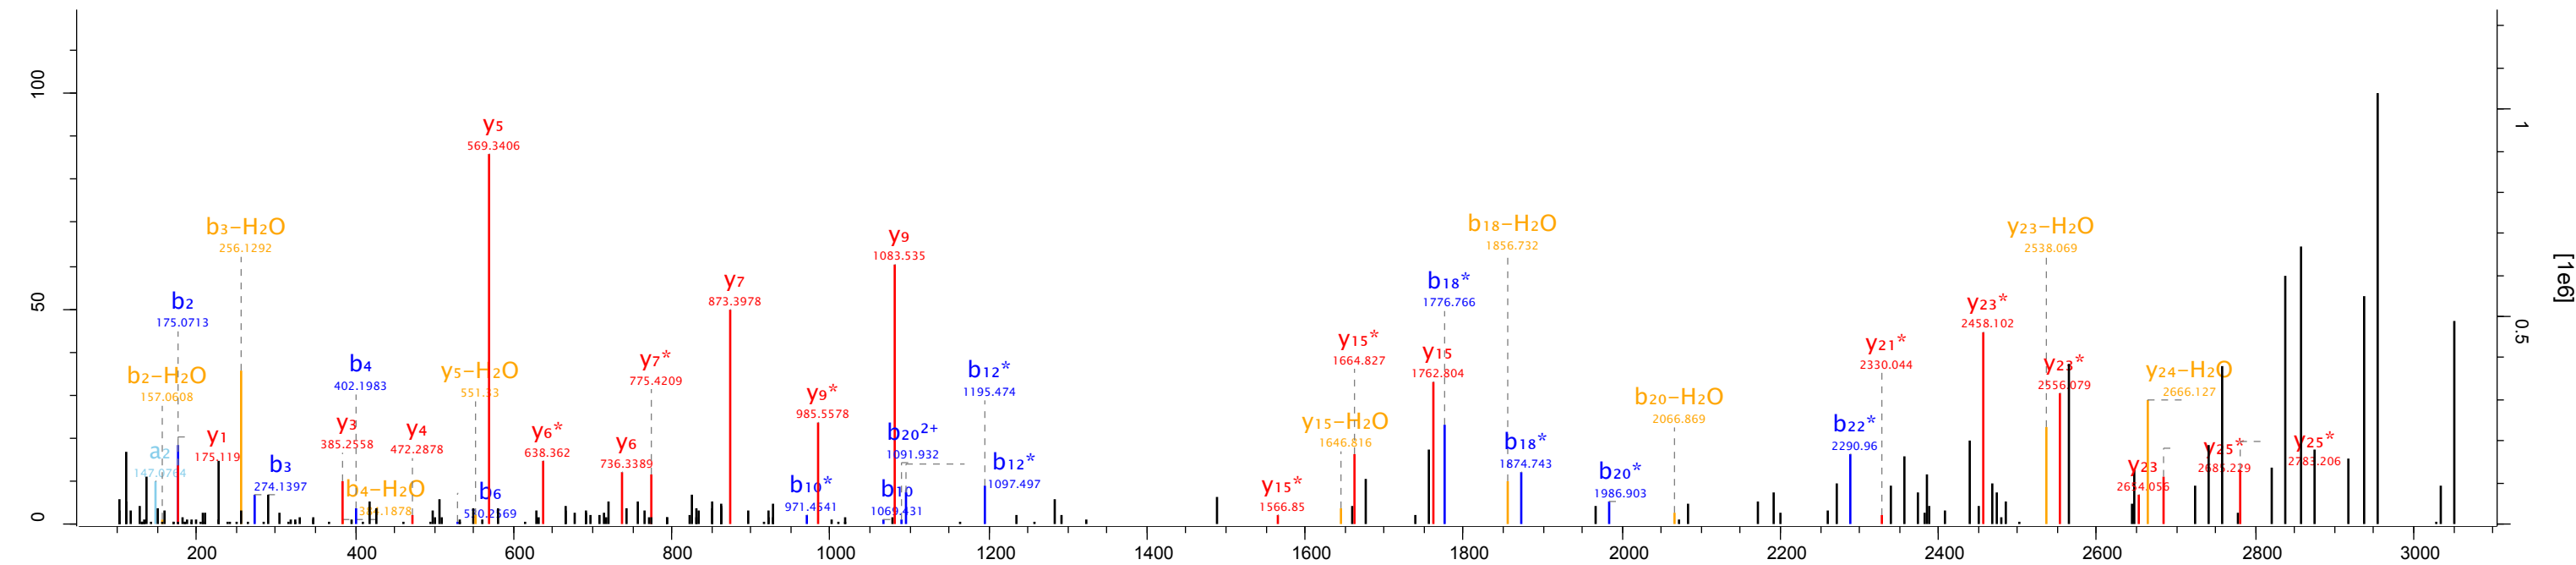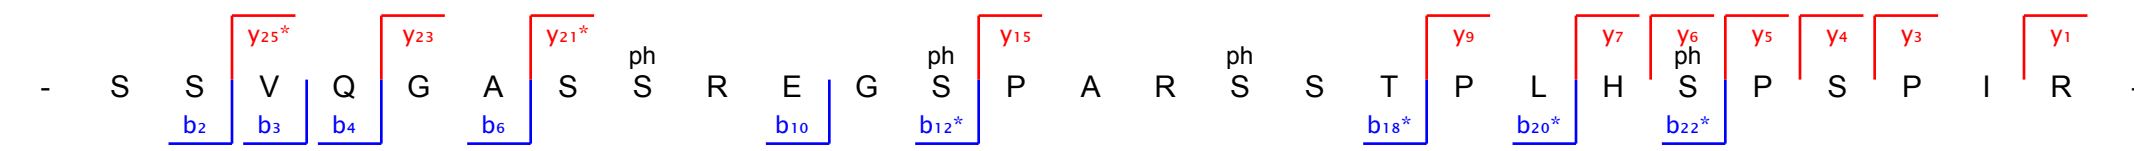

Raw file: 20150812\_A375SR\_Phospho\_BR1\_02  
 Scan: 11357 Method: FTMS; HCD Score: 119.95 m/z: 754.78 Gene names: HUWE1

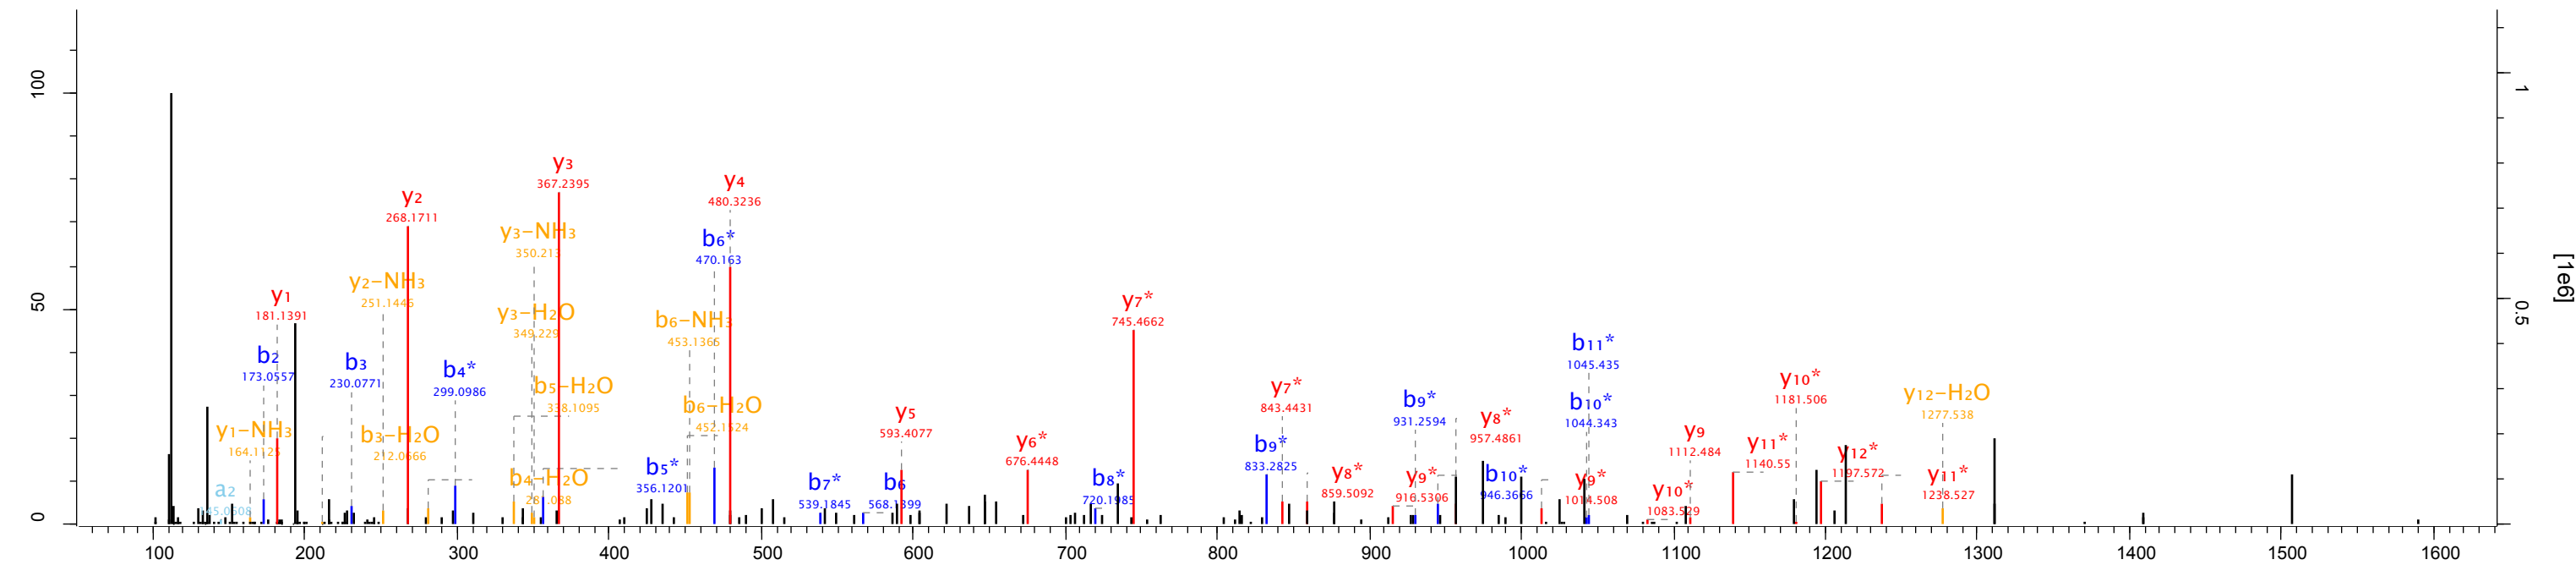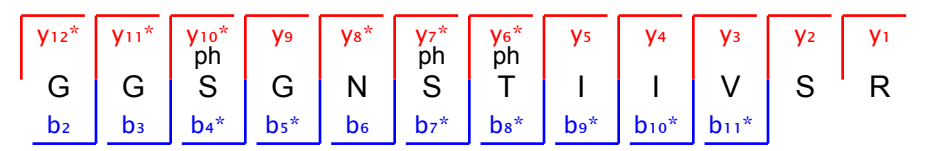

Raw file 20150812\_A375SR\_Phospho\_BR1\_02 Scan 11487 Method FTMS; HCD Score 57.89 m/z 559.25 Gene names NUP205

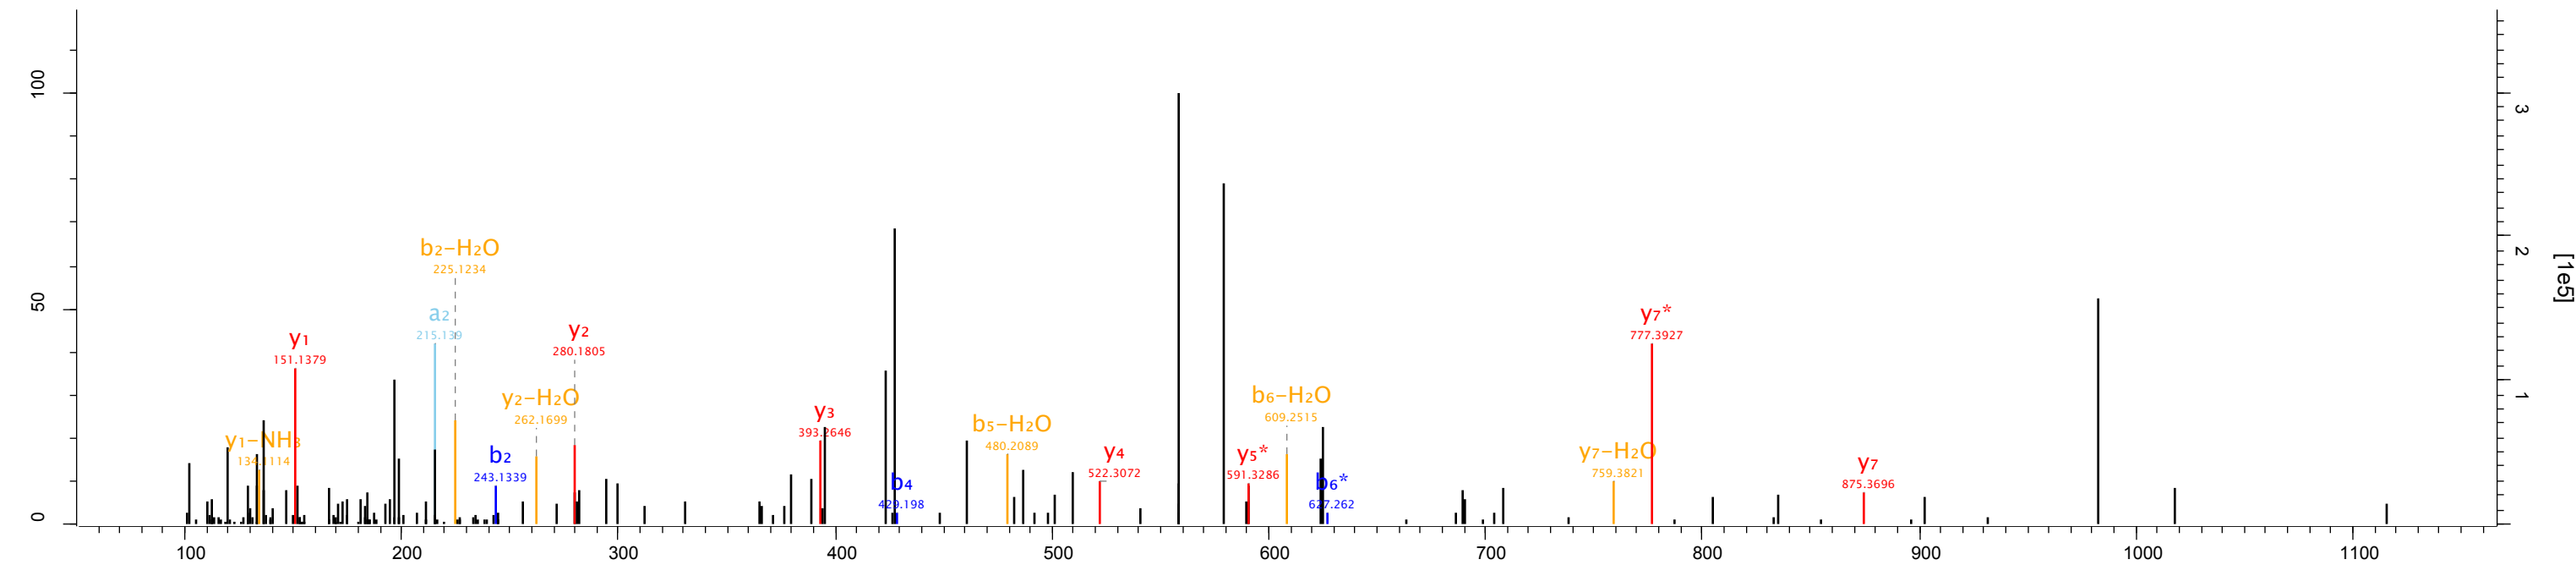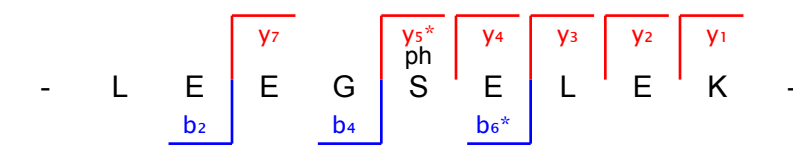

Raw file 20150812\_A375SR\_Phospho\_BR1\_02 Scan 11667 Method FTMS; HCD Score 166.32 m/z 1071.41 Gene names SRRM2

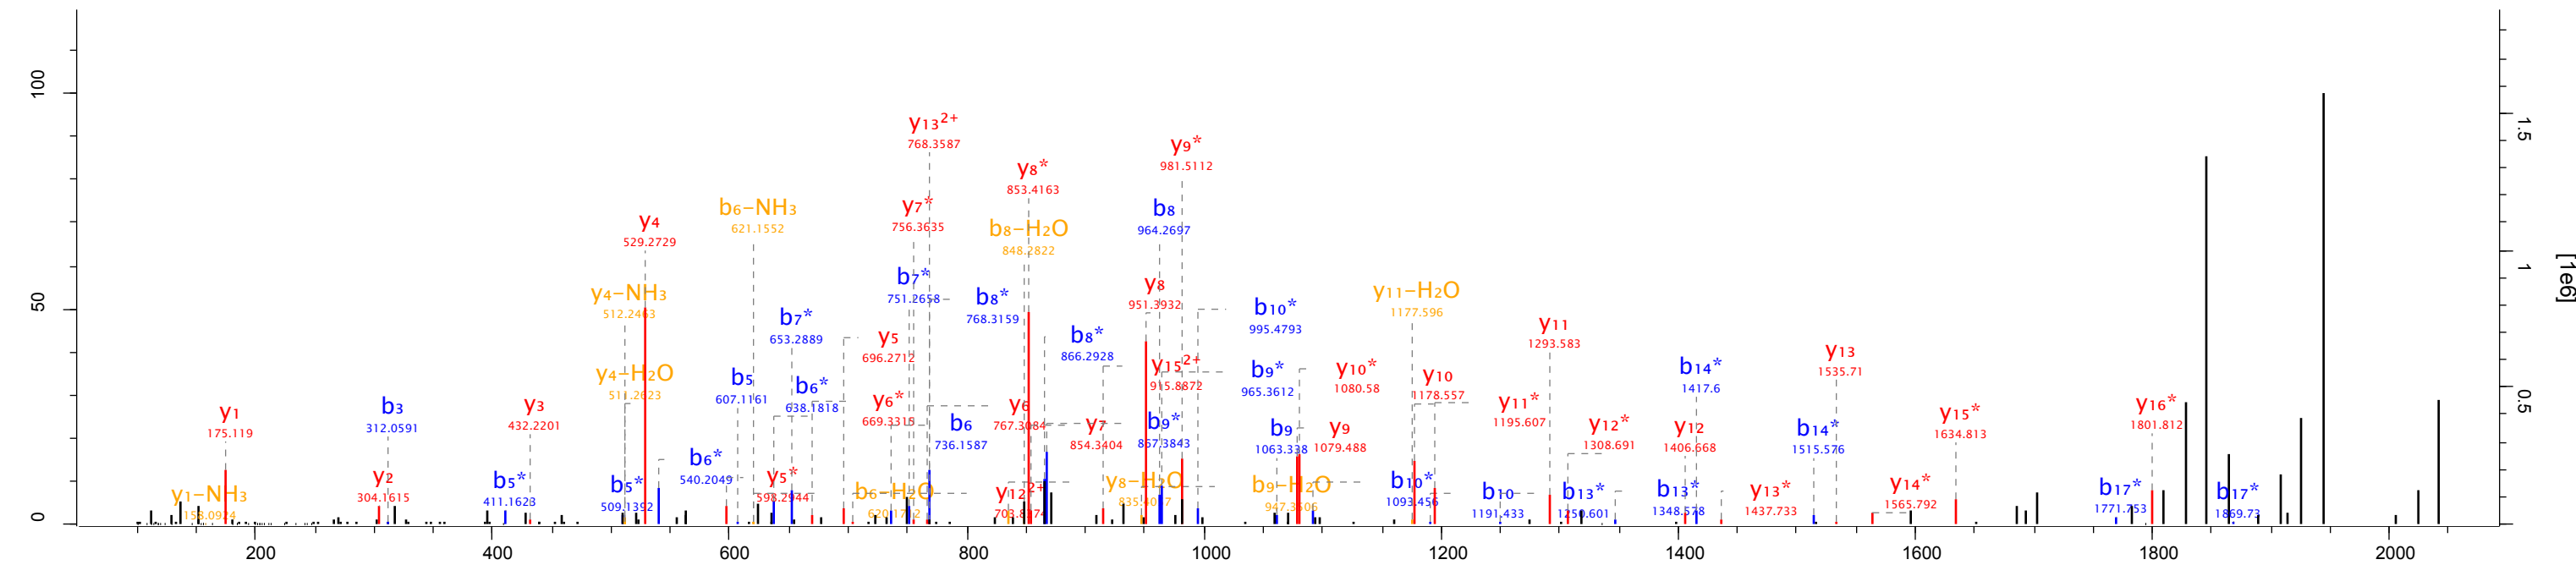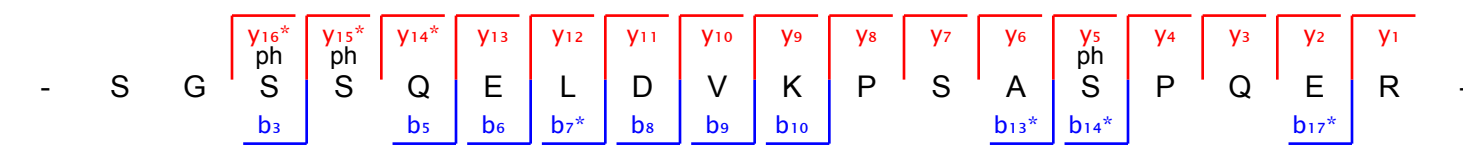

Raw file 20150812\_A375SR\_Phospho\_BR1\_02 Scan 11767 Method FTMS; HCD Score 68.9 m/z 756.01 Gene names MICALL2

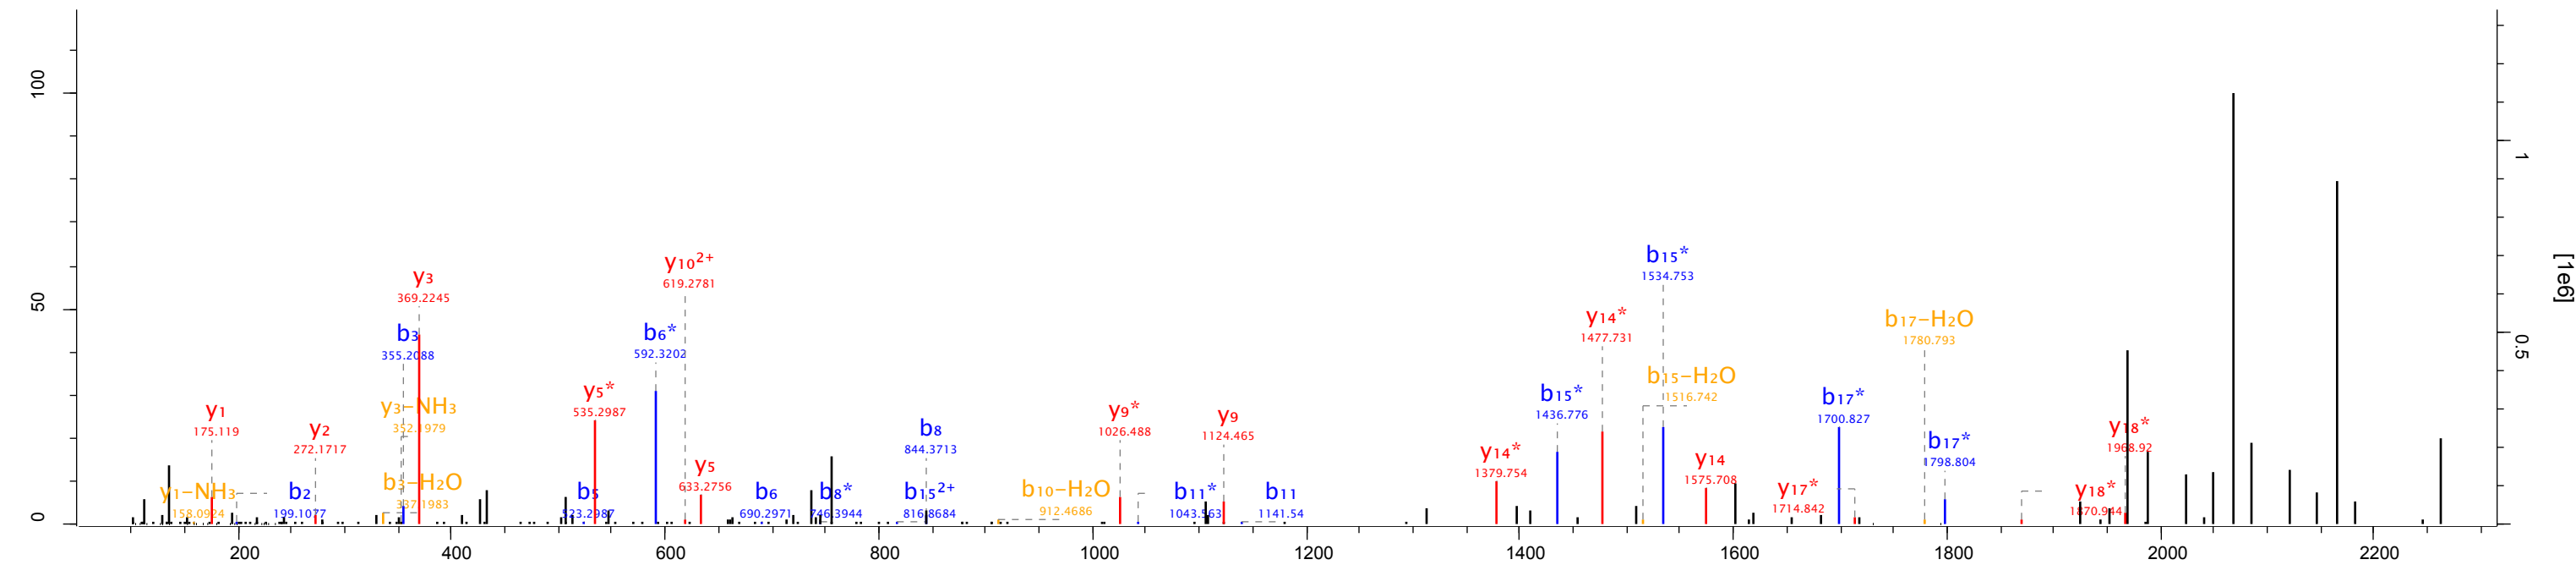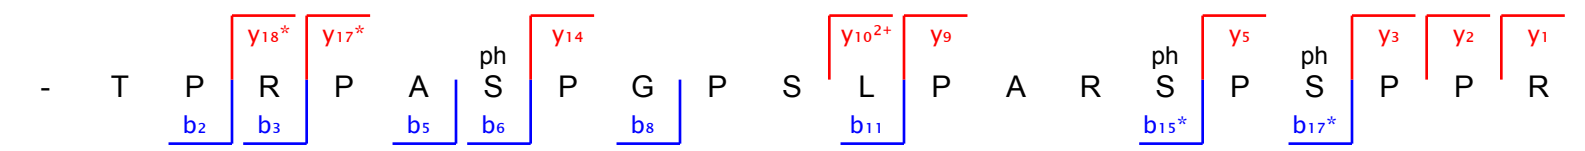

Raw file 20150812\_A375SR\_Phospho\_BR1\_02 Scan 11807 Method FTMS; HCD Score 45.99 m/z 869.32 Gene names FRMD6

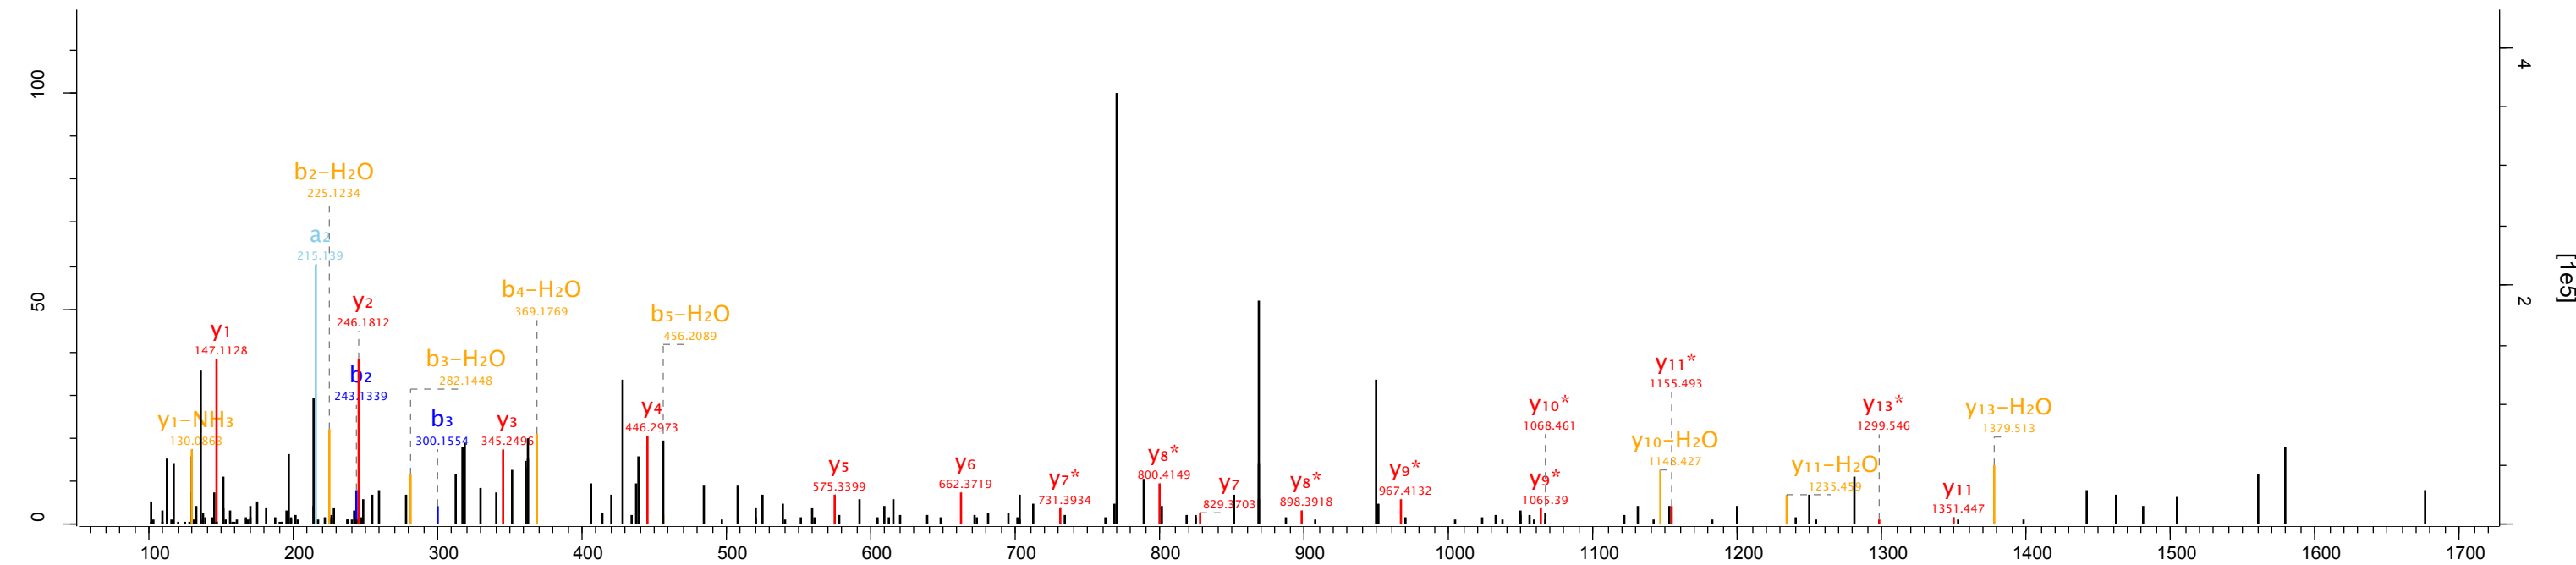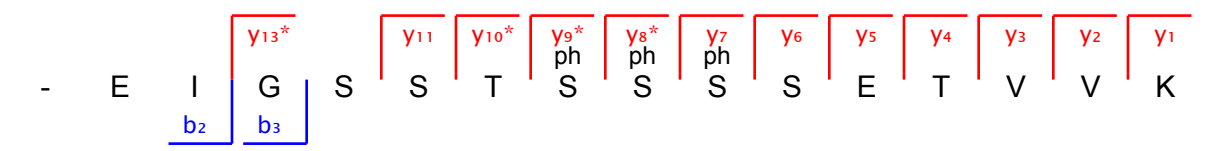

Raw file Scan Method Score m/z Gene names  
 20150812\_A375SR\_Phospho\_BR1\_02 12287 FTMS; HCD 66.62 476.71 CENPJ

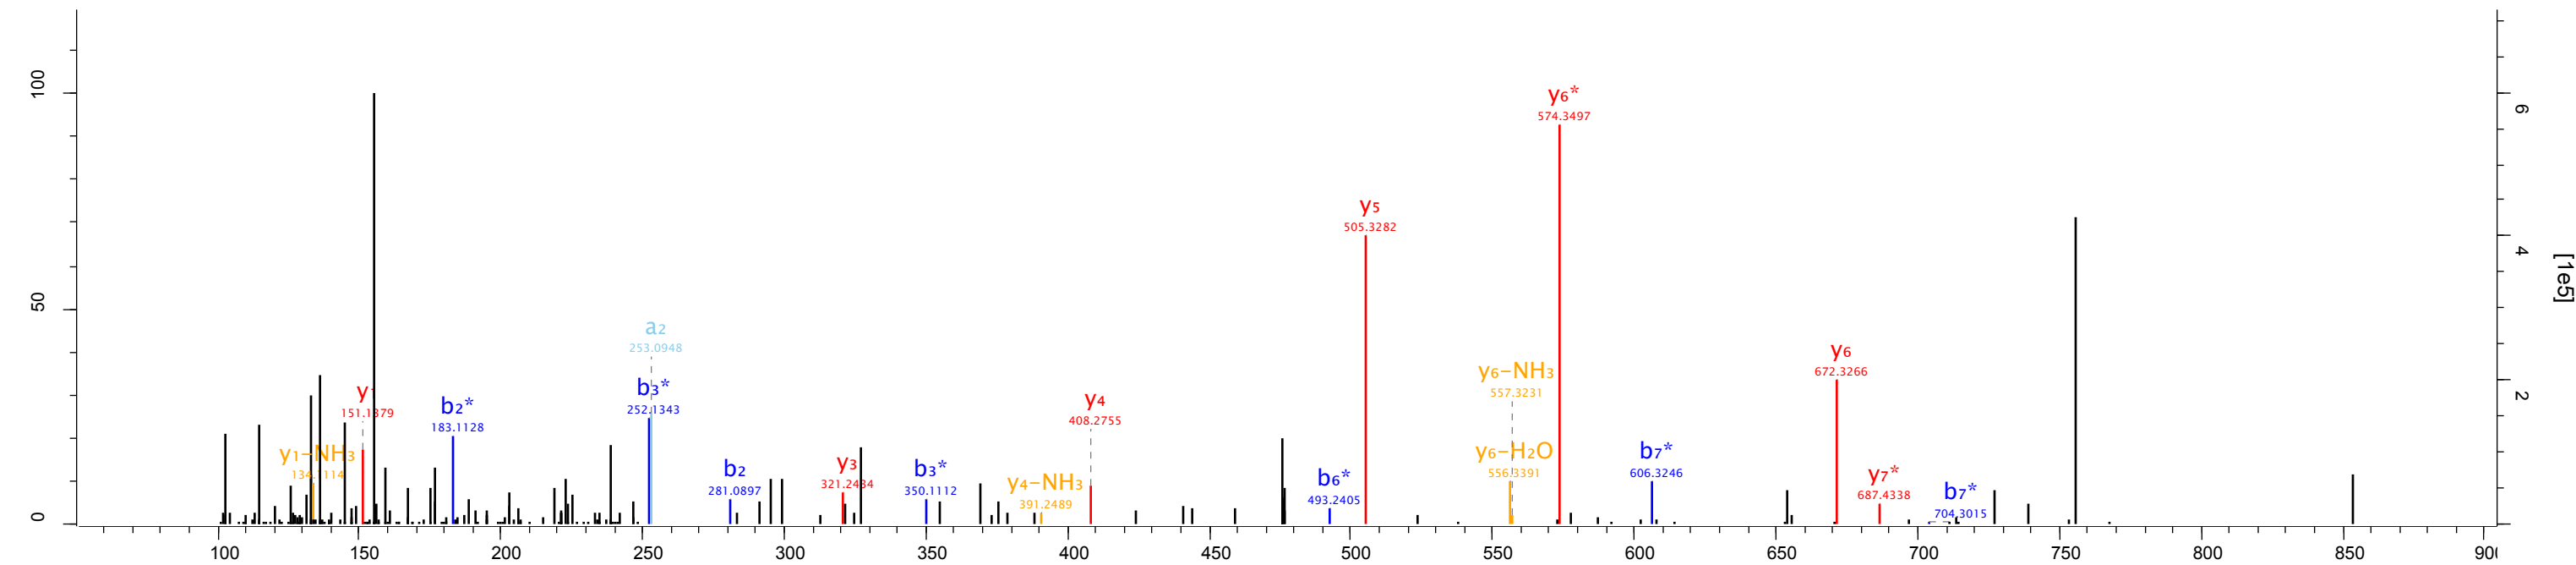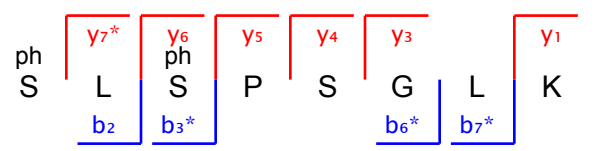

Raw file 20150812\_A375SR\_Phospho\_BR1\_02 Scan 12427 Method FTMS; HCD Score 149.12 m/z 1027.43 Gene names MARCKS

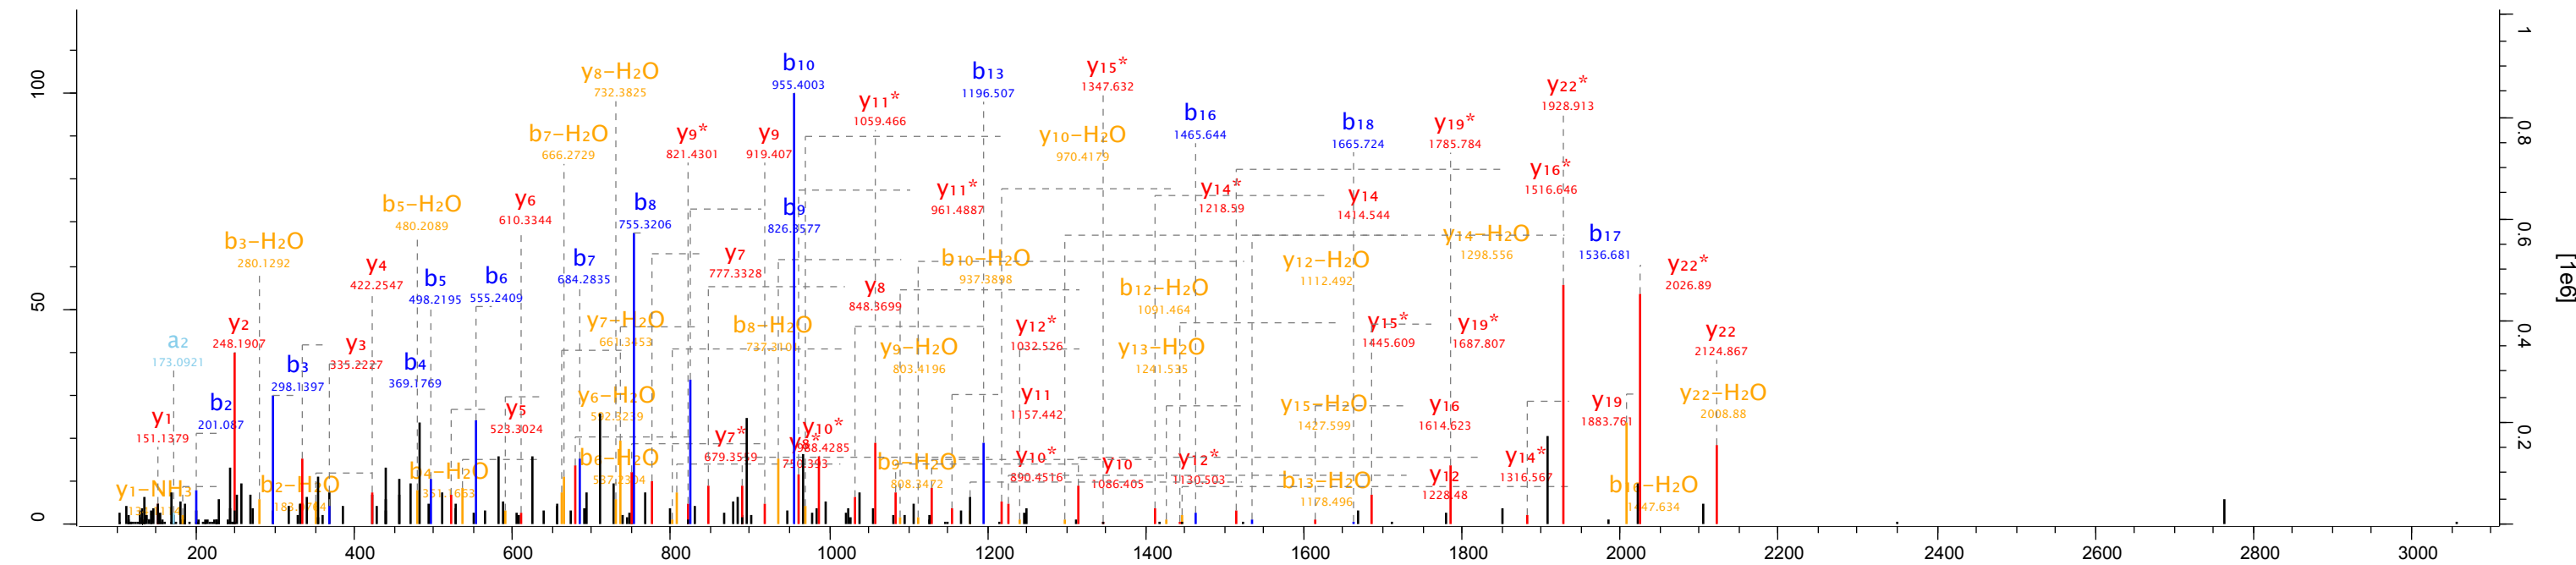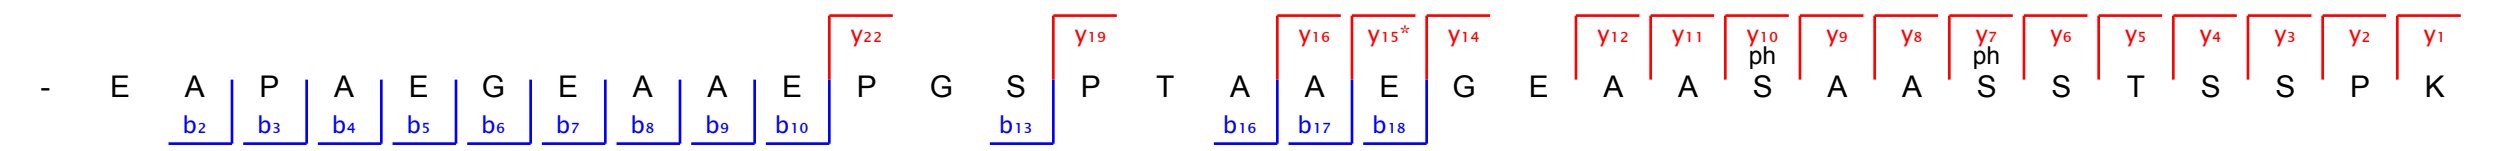



Raw file 20150812\_A375SR\_Phospho\_BR1\_02 Scan 12677 Method FTMS; HCD Score 72.89 m/z 644.75 Gene names SON

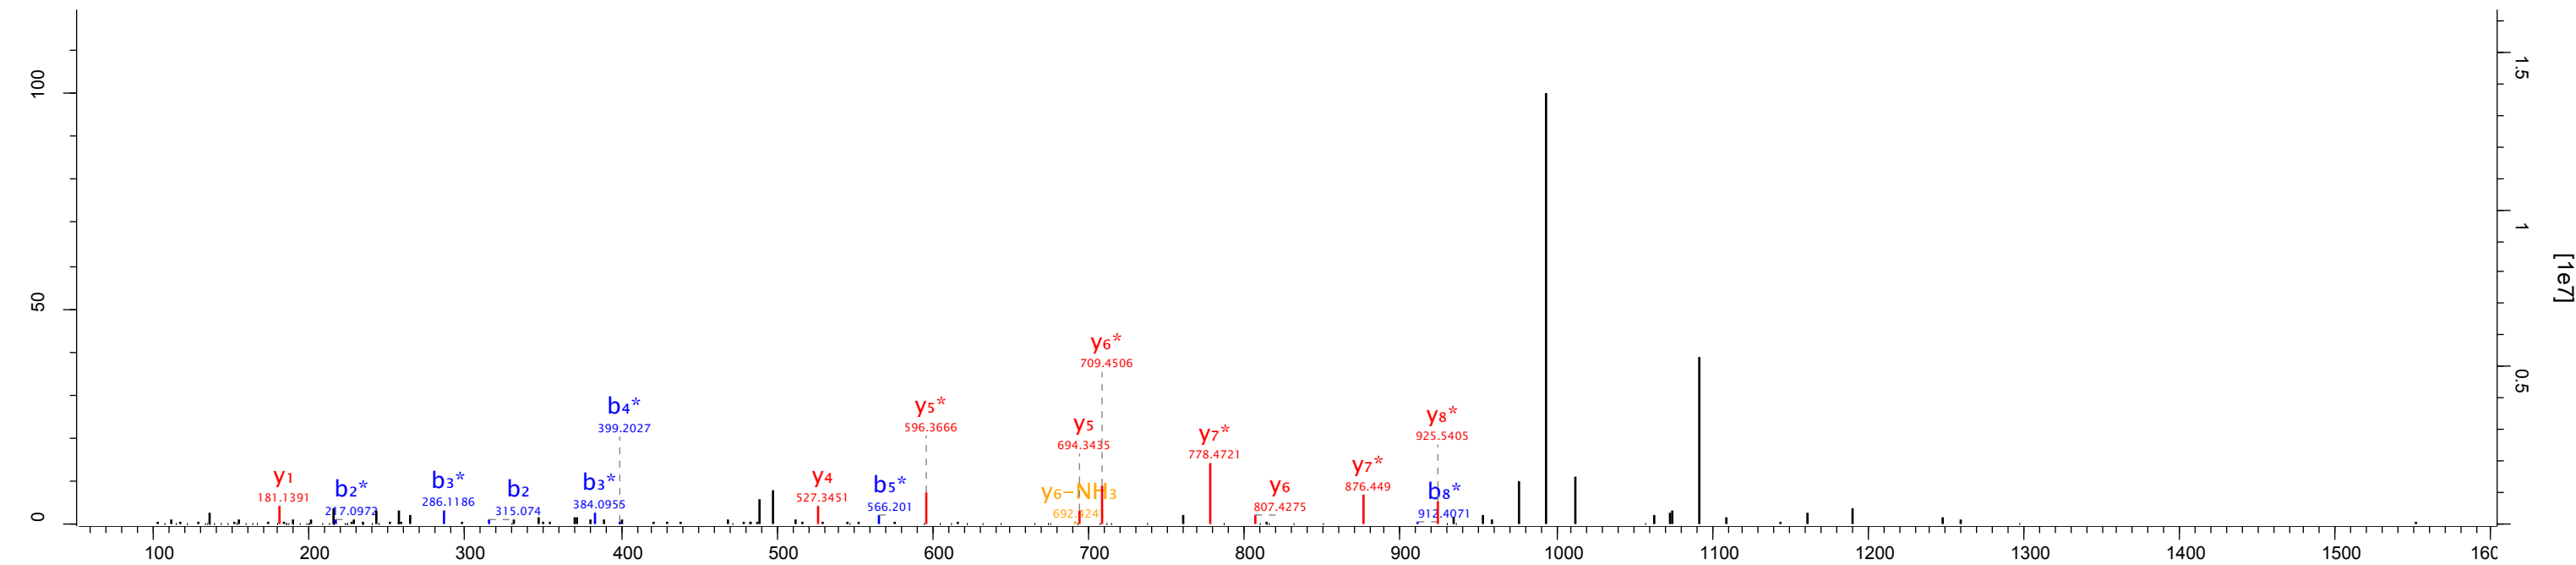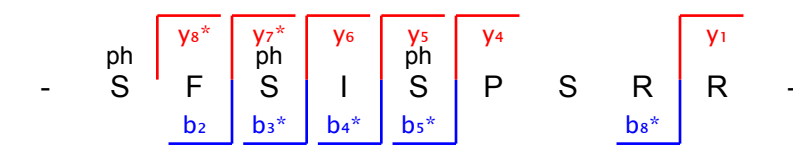

Raw file 20150812\_A375SR\_Phospho\_BR1\_02 Scan 13057 Method FTMS; HCD Score 68.29 m/z 910.05 Gene names ZNF446

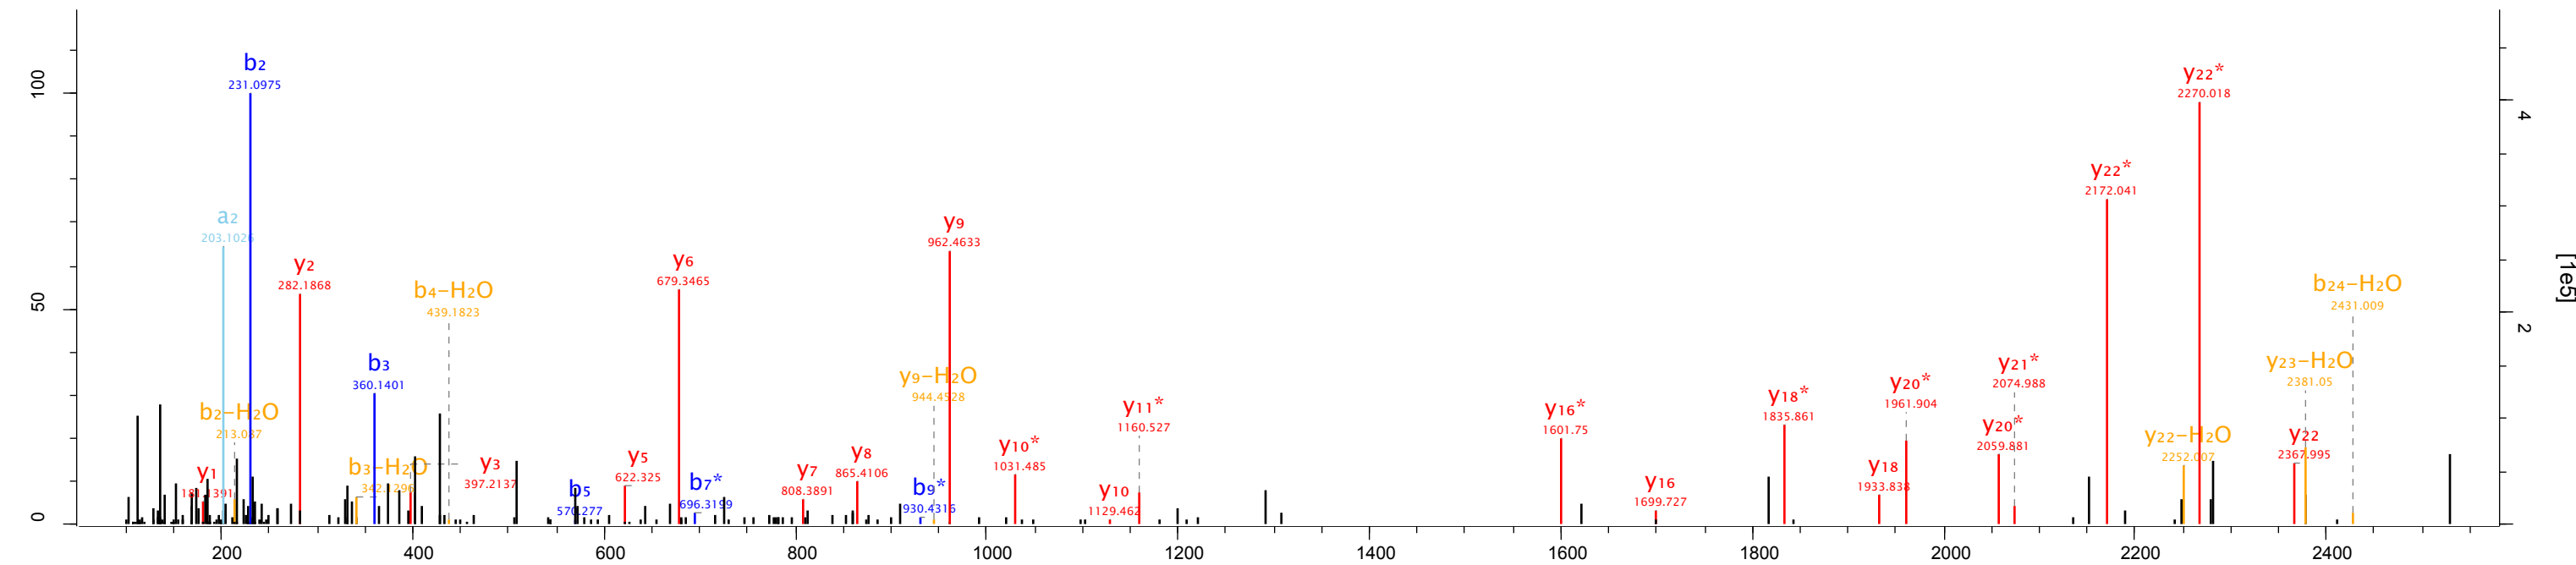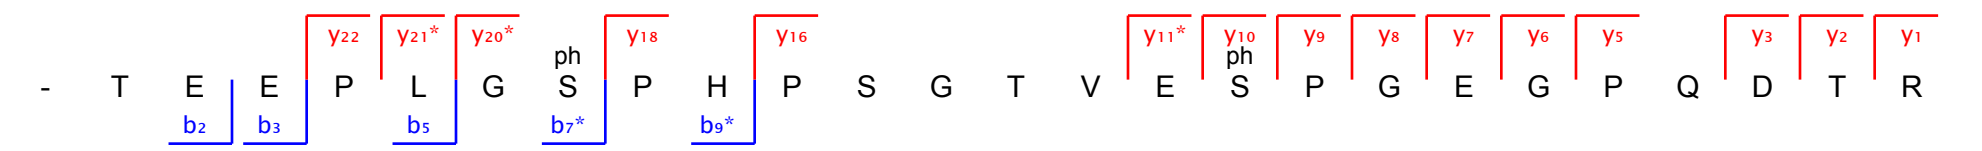

Raw file 20150812\_A375SR\_Phospho\_BR1\_02 Scan 13187 Method FTMS; HCD Score 107.03 m/z 1108.84 Gene names RRP9

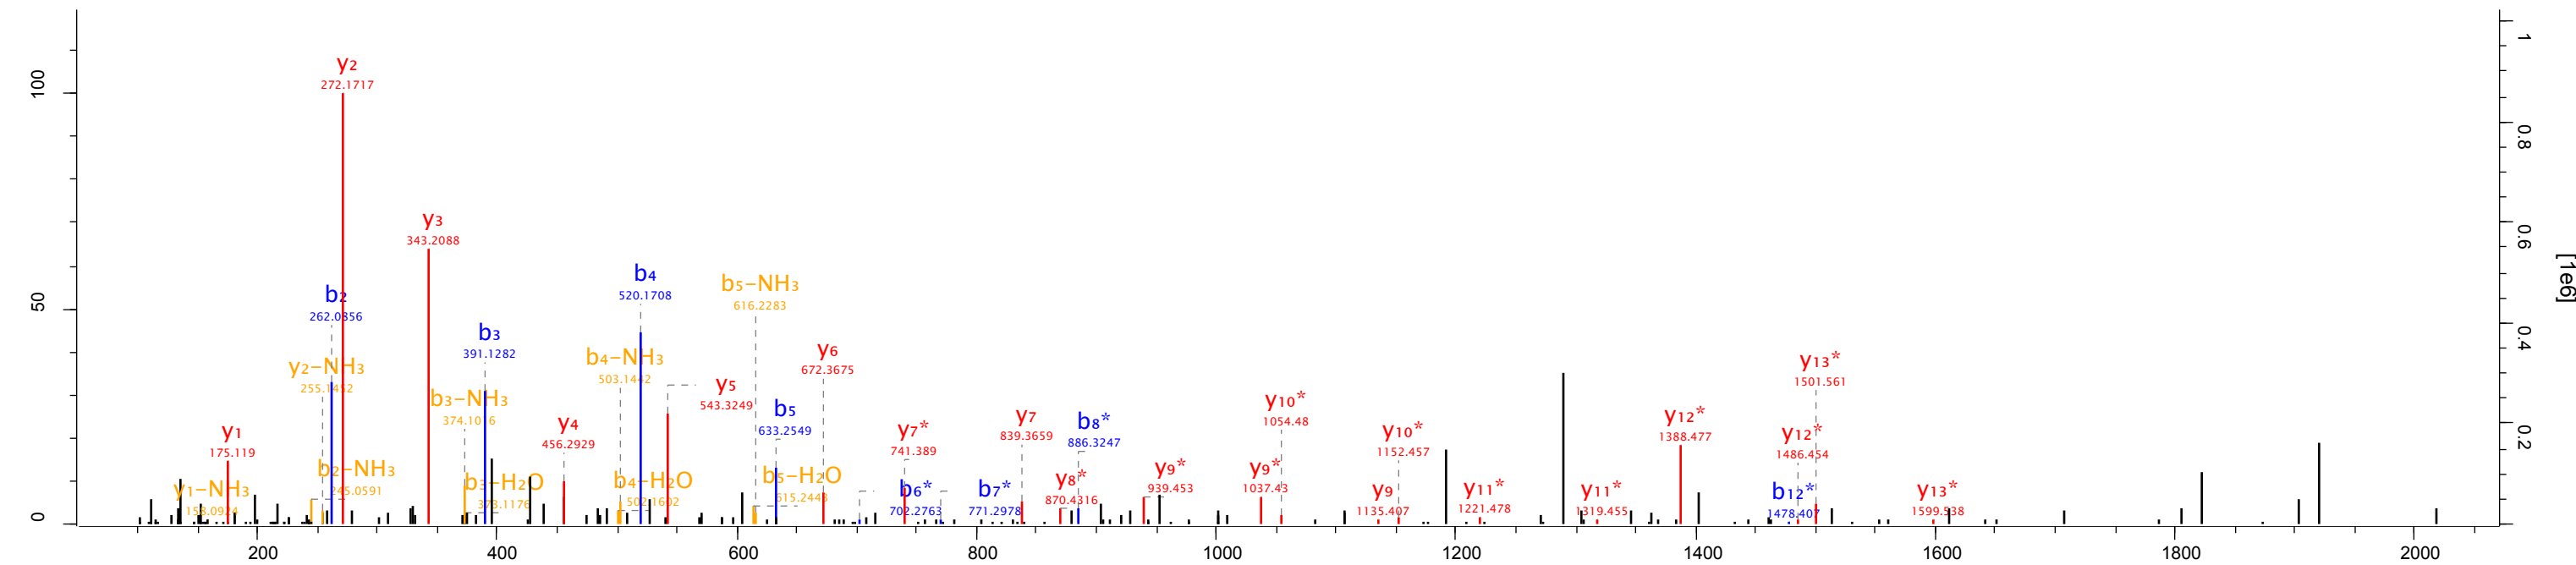

ox  
M - N E E I S S D S E S L A P R -

b<sub>2</sub> b<sub>3</sub> b<sub>4</sub> b<sub>5</sub> b<sub>6</sub>\* b<sub>7</sub>\* b<sub>8</sub>\* b<sub>12</sub>\*

y<sub>13</sub>\* y<sub>12</sub>\* ph y<sub>11</sub>\* ph y<sub>10</sub>\* y<sub>9</sub> ph y<sub>8</sub>\* y<sub>7</sub> ph y<sub>6</sub> y<sub>5</sub> y<sub>4</sub> y<sub>3</sub> y<sub>2</sub> y<sub>1</sub>

Raw file: 20150812\_A375SR\_Phospho\_BR1\_02  
 Scan: 13257 Method: FTMS; HCD Score: 229.46 m/z: 1252 Gene names: SON

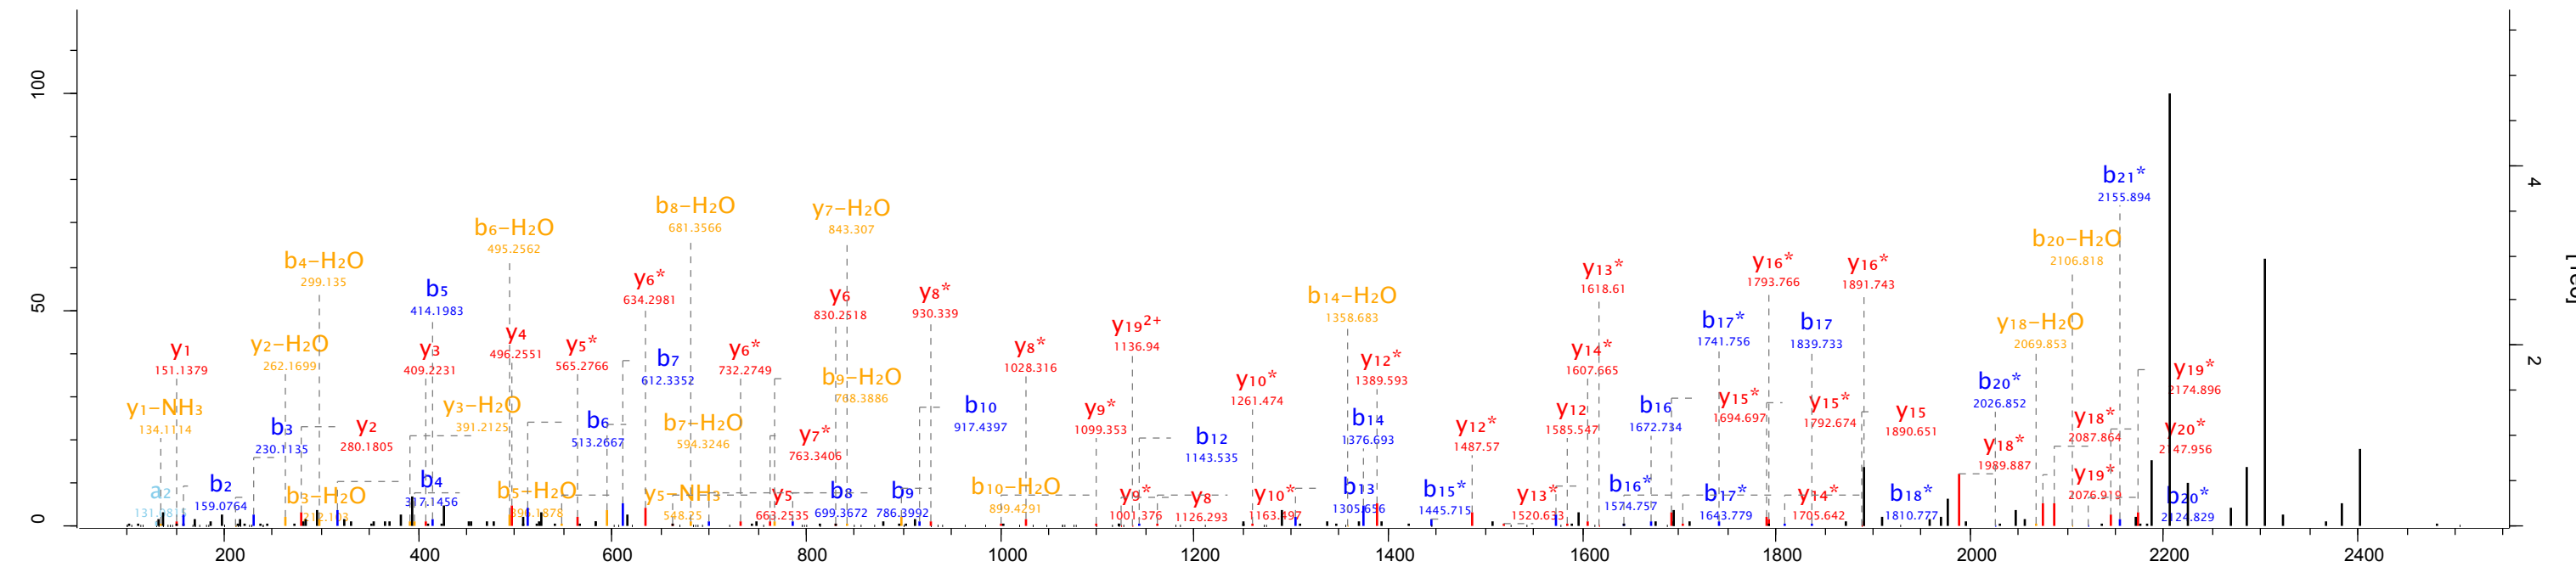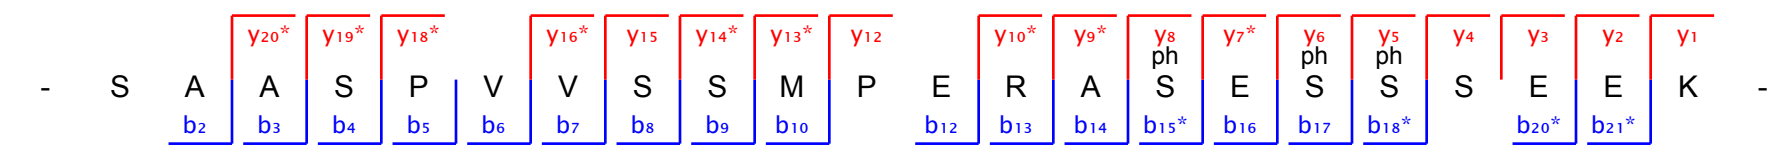

Raw file Scan Method Score m/z Gene names  
 20150812\_A375SR\_Phospho\_BR1\_02 13707 FTMS; HCD 74.88 997.37 STARD3NL

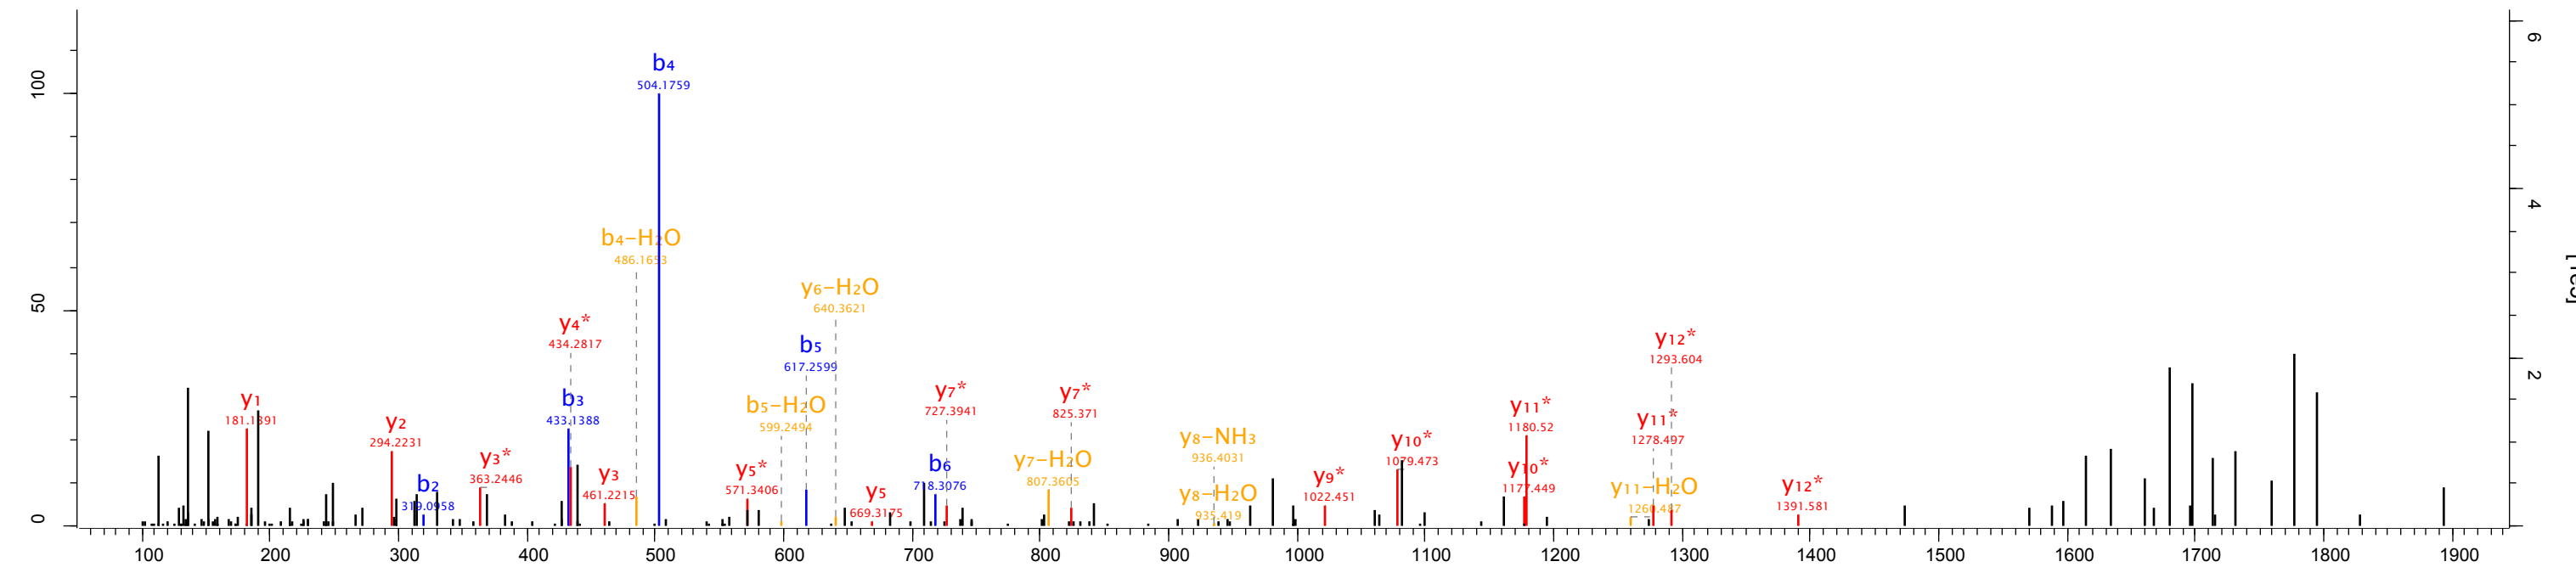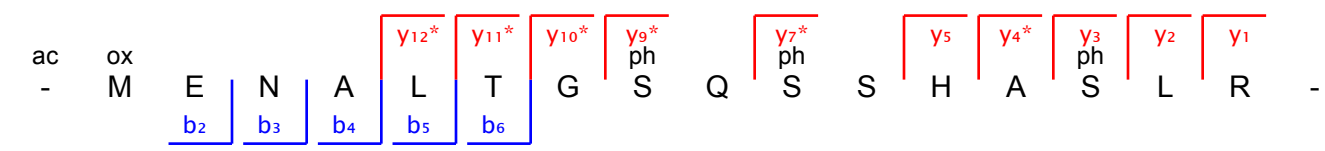

Raw file: 20150812\_A375SR\_Phospho\_BR1\_02  
 Scan: 13967 Method: FTMS; HCD Score: 119 m/z: 655.76 Gene names: ITGB4

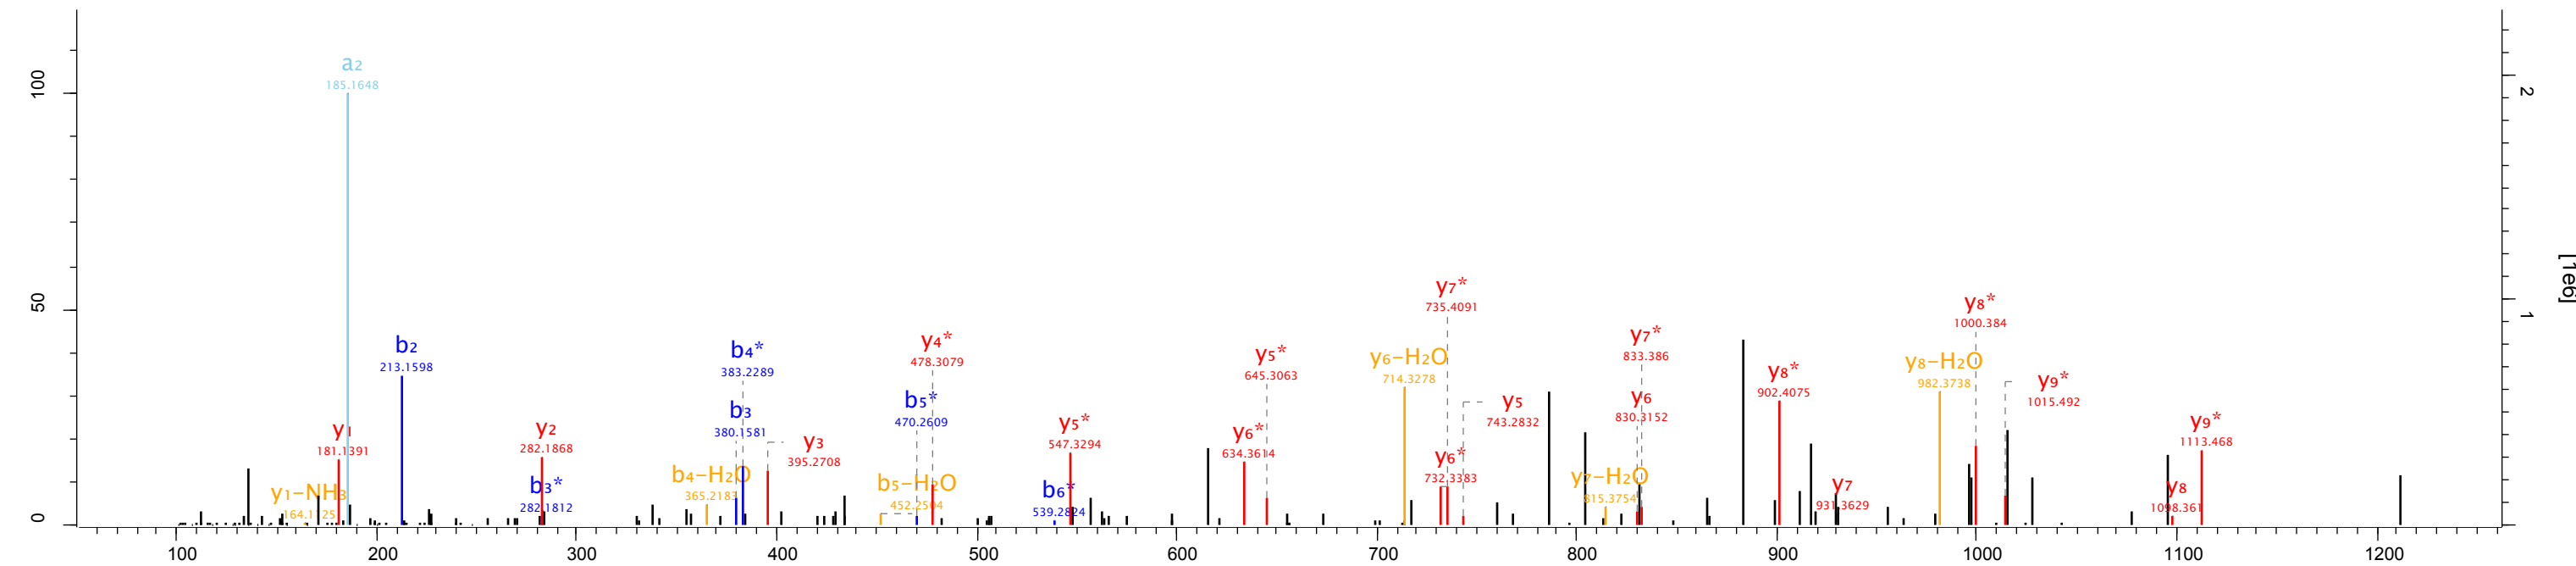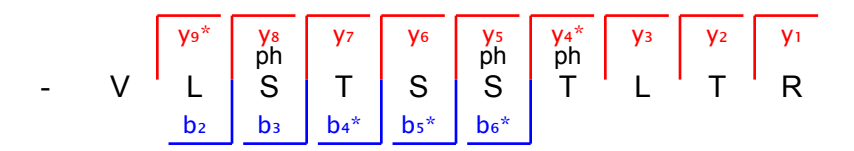

Raw file: 20150812\_A375SR\_Phospho\_BR1\_02  
 Scan: 14247 Method: FTMS; HCD Score: 202.45 m/z: 904.9 Gene names: AHNAK

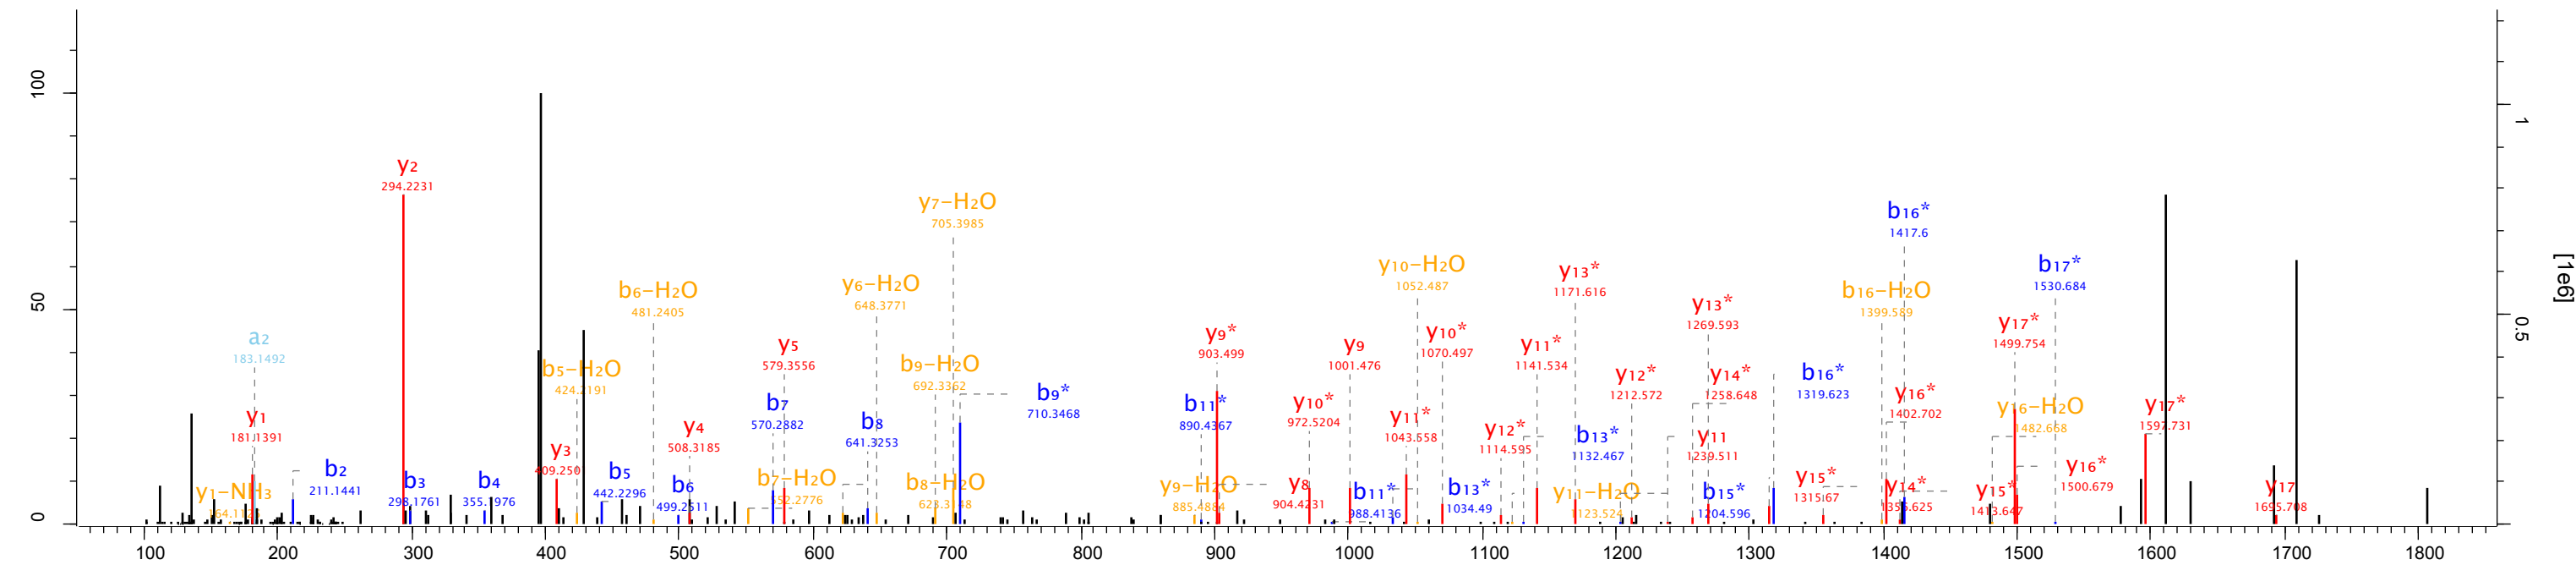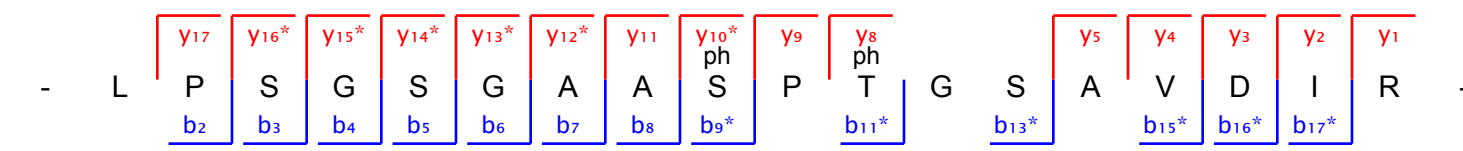

Raw file 20150812\_A375SR\_Phospho\_BR1\_02 Scan 14257 Method FTMS; HCD Score 121.56 m/z 760.83 Gene names KHSRP

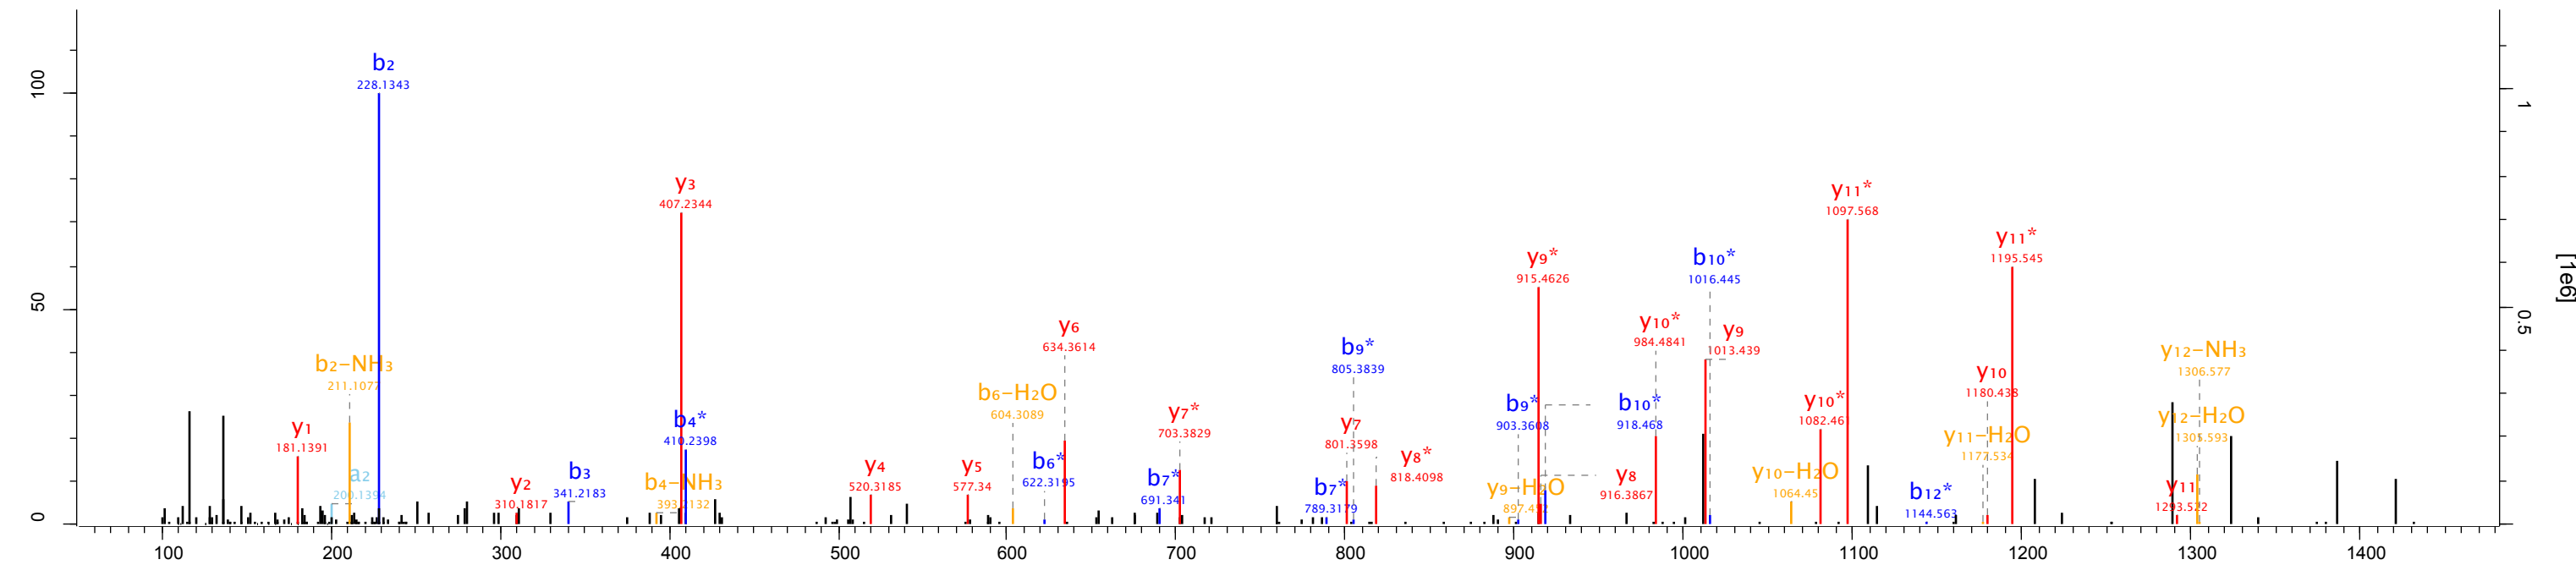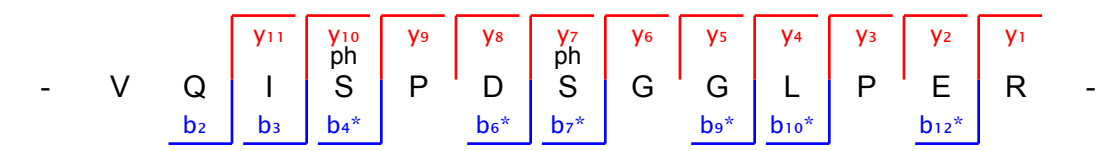



Raw file  
20150812\_A375SR\_Phospho\_BR1\_02

Scan 14447 Method FTMS; HCD Score 195.02 m/z 873.39 Gene names TP53BP1

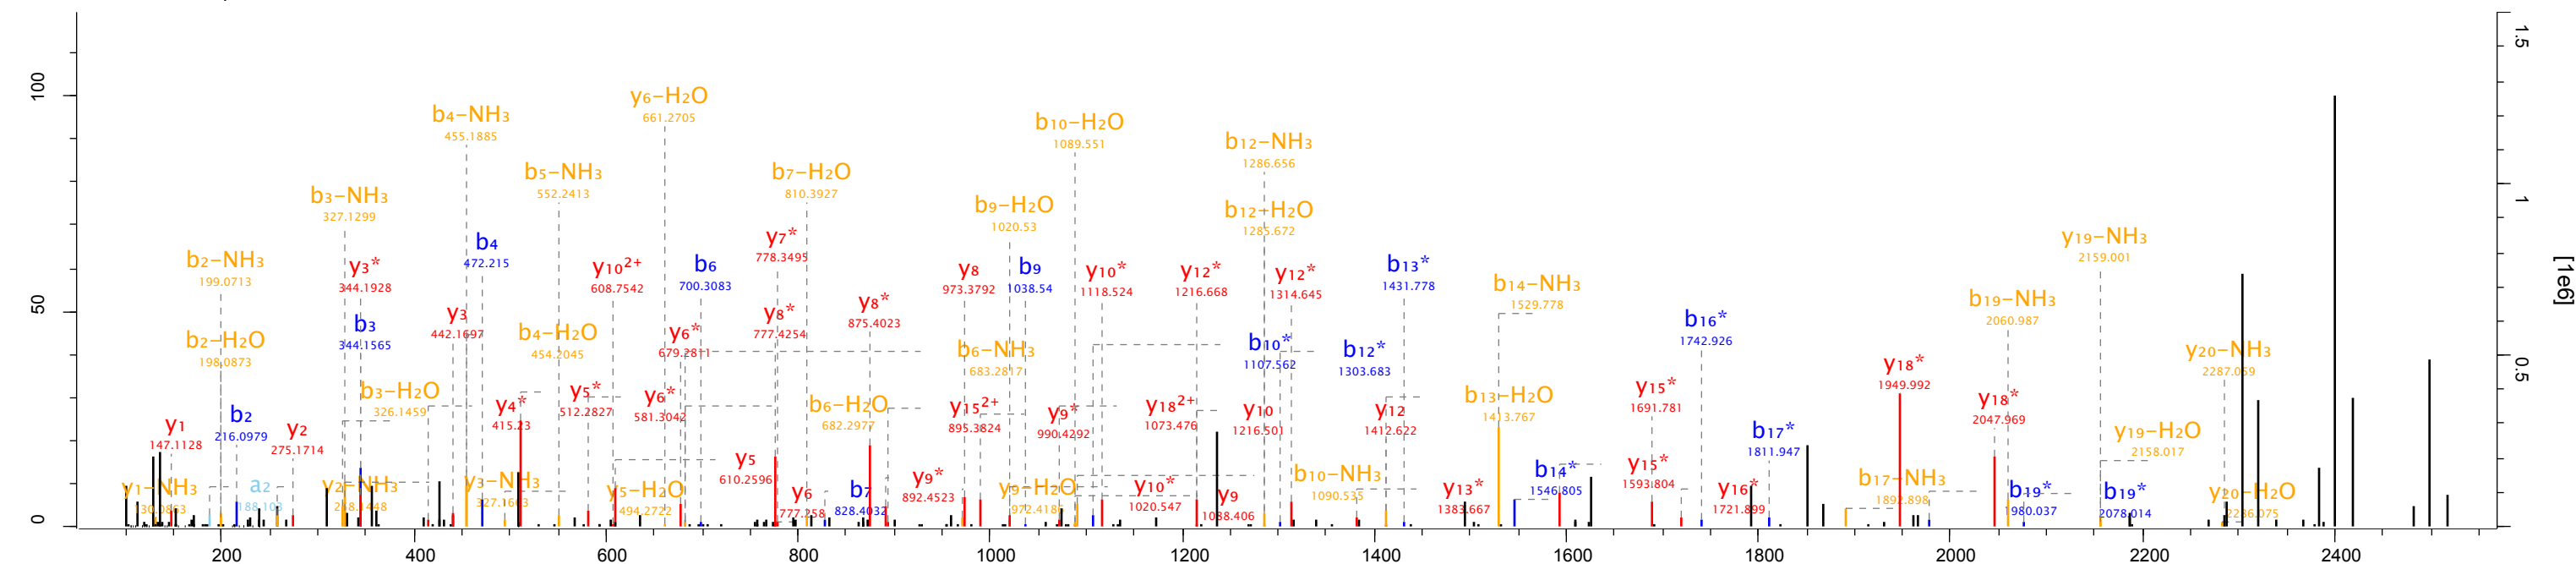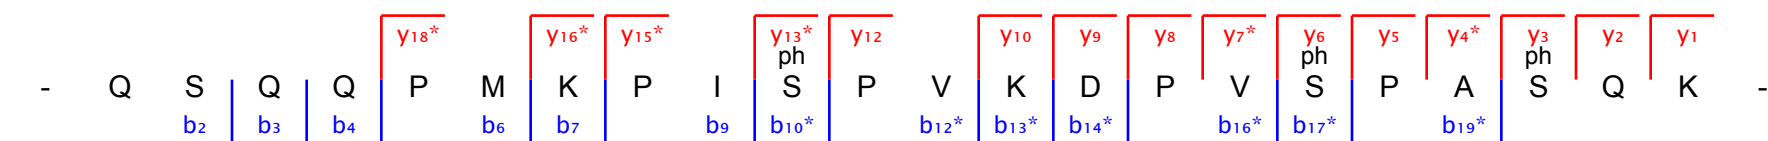

Raw file 20150812\_A375SR\_Phospho\_BR1\_02 Scan 14457 Method FTMS; HCD Score 125.39 m/z 982.4 Gene names STRADA

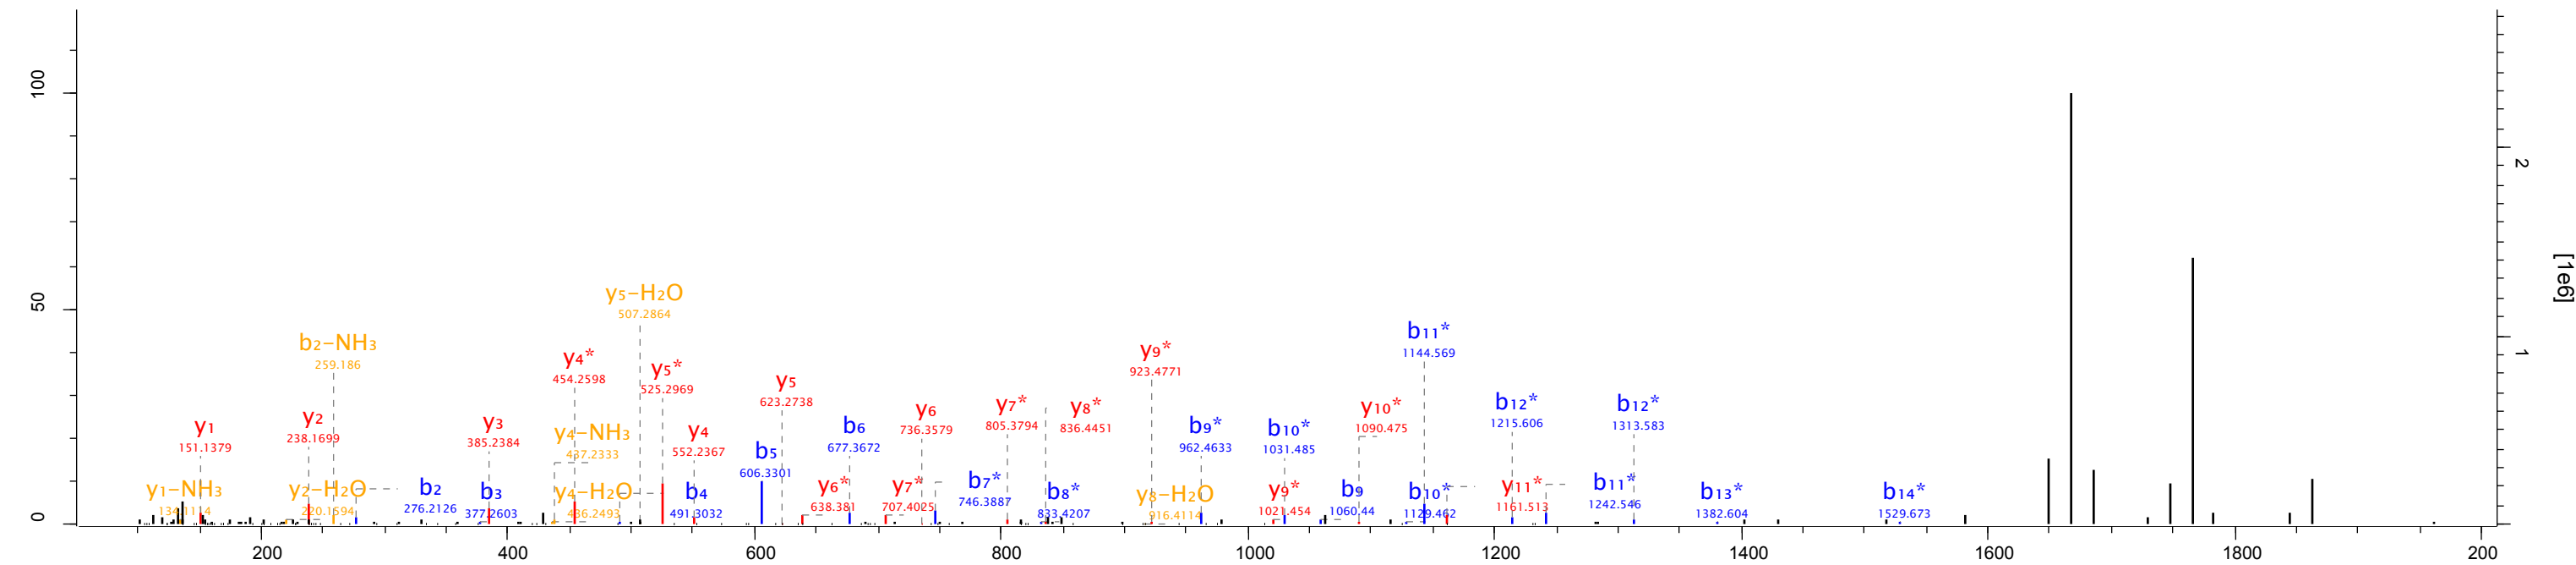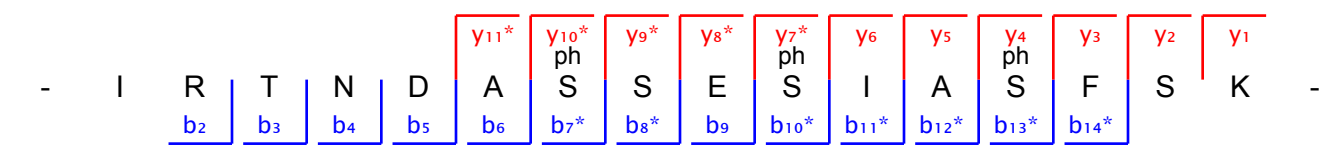

Raw file 20150812\_A375SR\_Phospho\_BR1\_02 Scan 14467 Method FTMS; HCD Score 82.9 m/z 713.86 Gene names SAFB

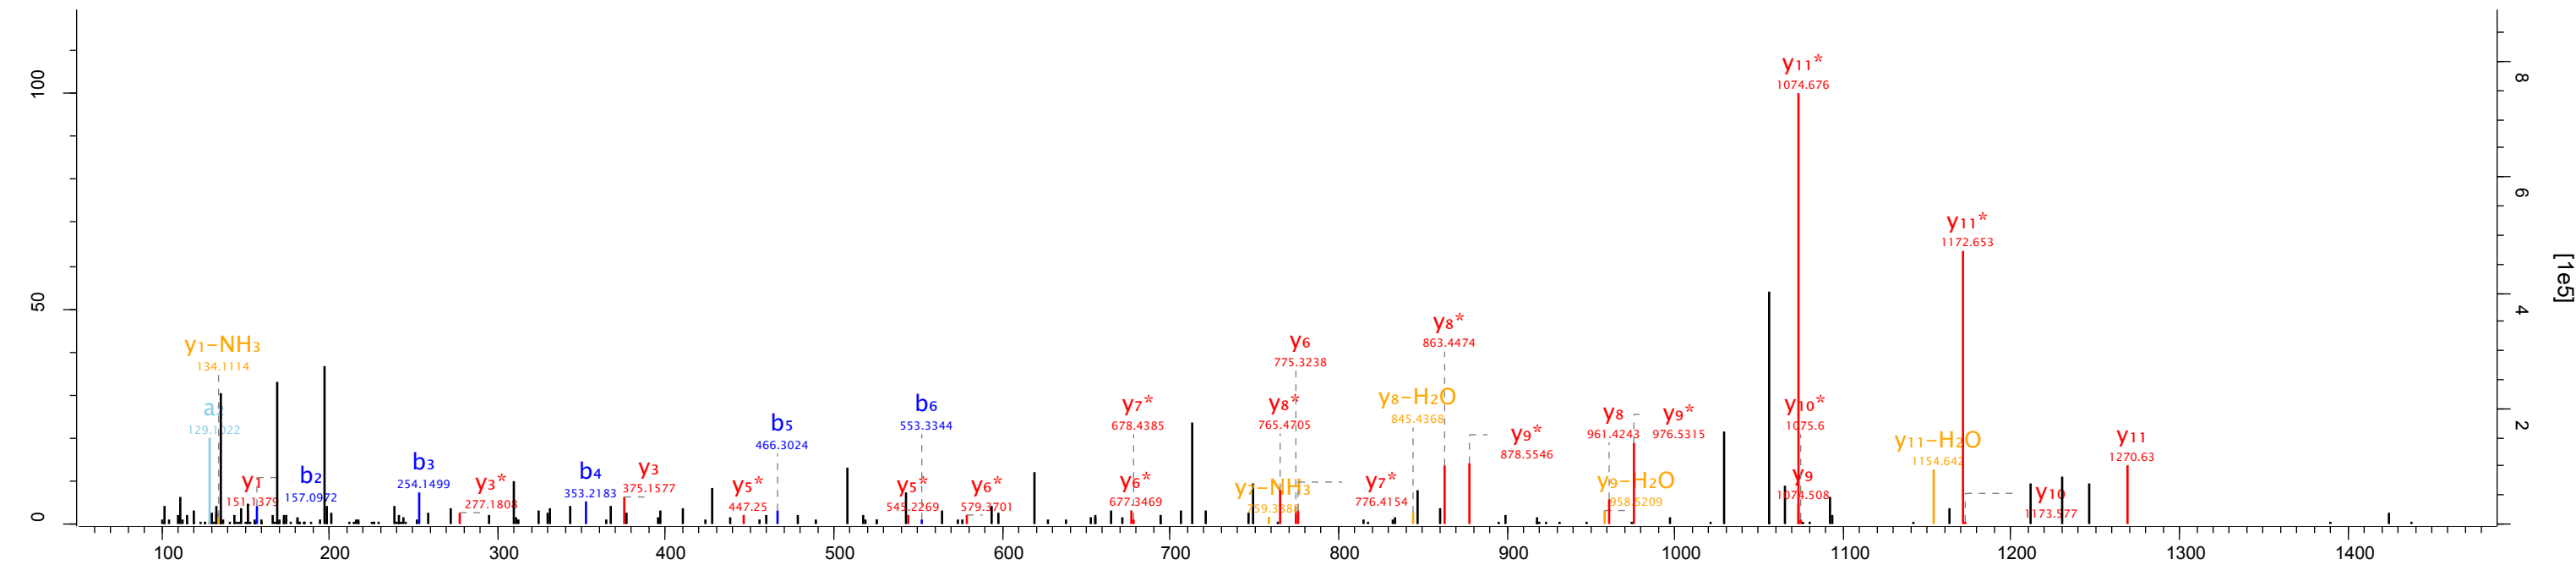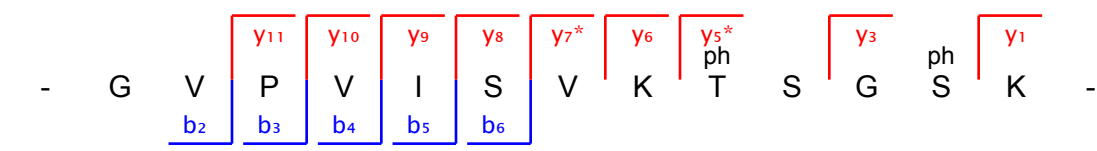

Raw file 20150812\_A375SR\_Phospho\_BR1\_02 Scan 15127 Method FTMS; HCD Score 41.62 m/z 813.67 Gene names POLR2A

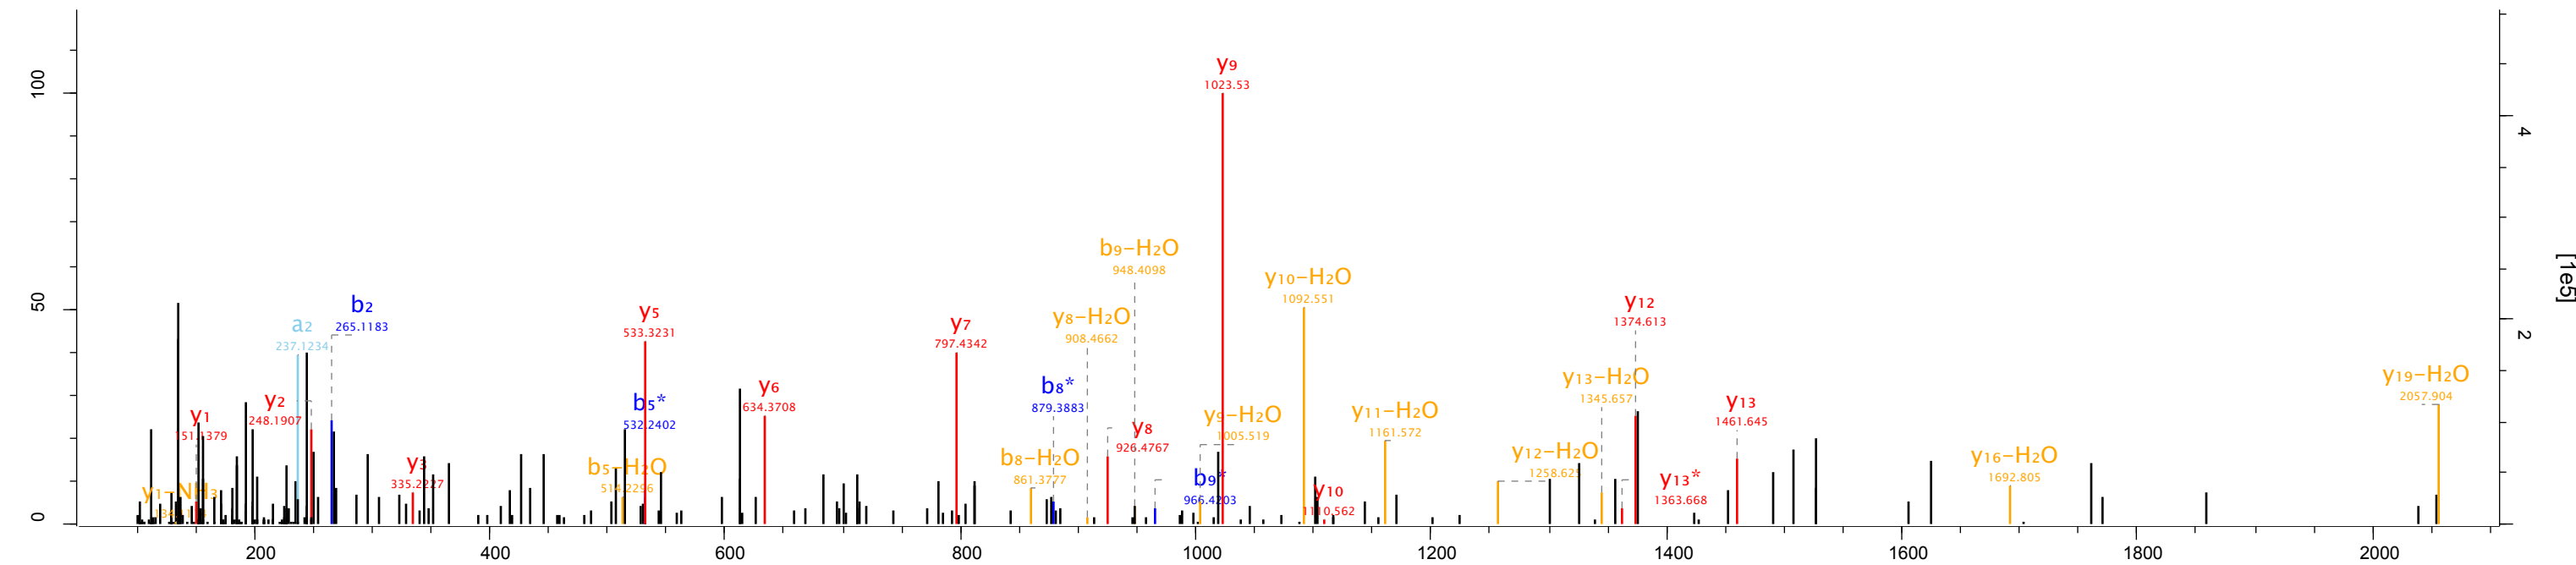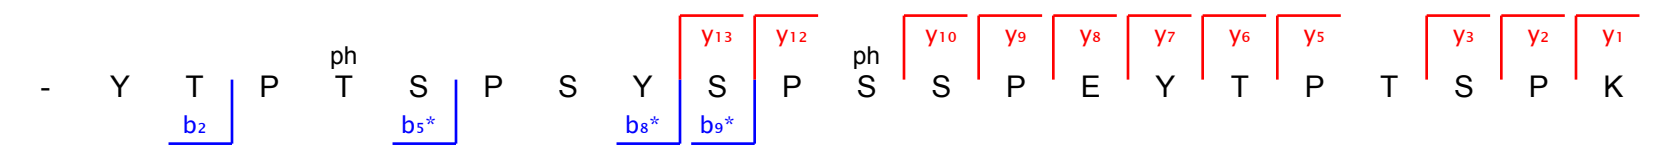

Raw file 20150812\_A375SR\_Phospho\_BR1\_02 Scan 15147 Method FTMS; HCD Score 113.14 m/z 822.85 Gene names SOX5

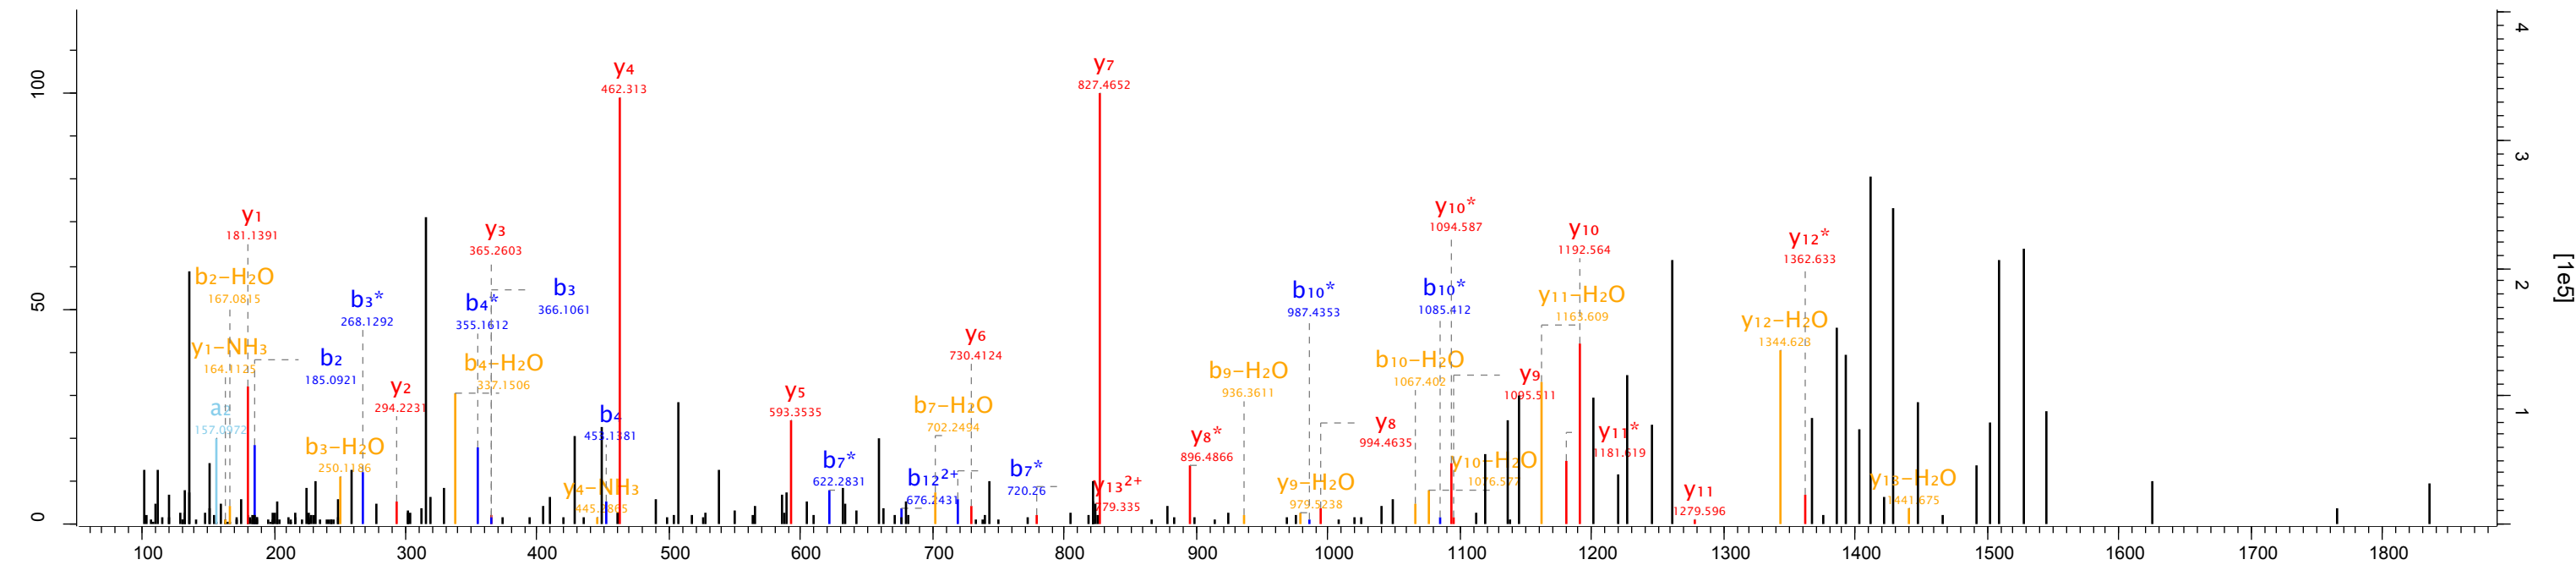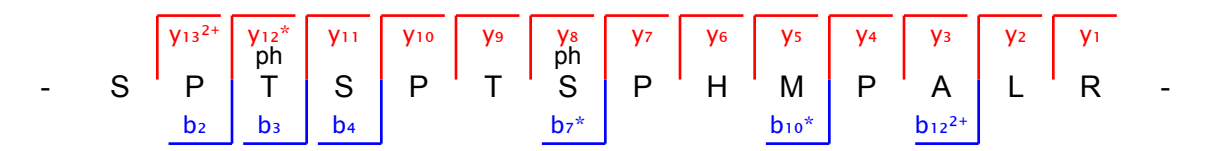

Raw file: 20150812\_A375SR\_Phospho\_BR1\_02  
 Scan: 15207 Method: FTMS; HCD Score: 184.82 m/z: 876.04 Gene names: ZC3HC1

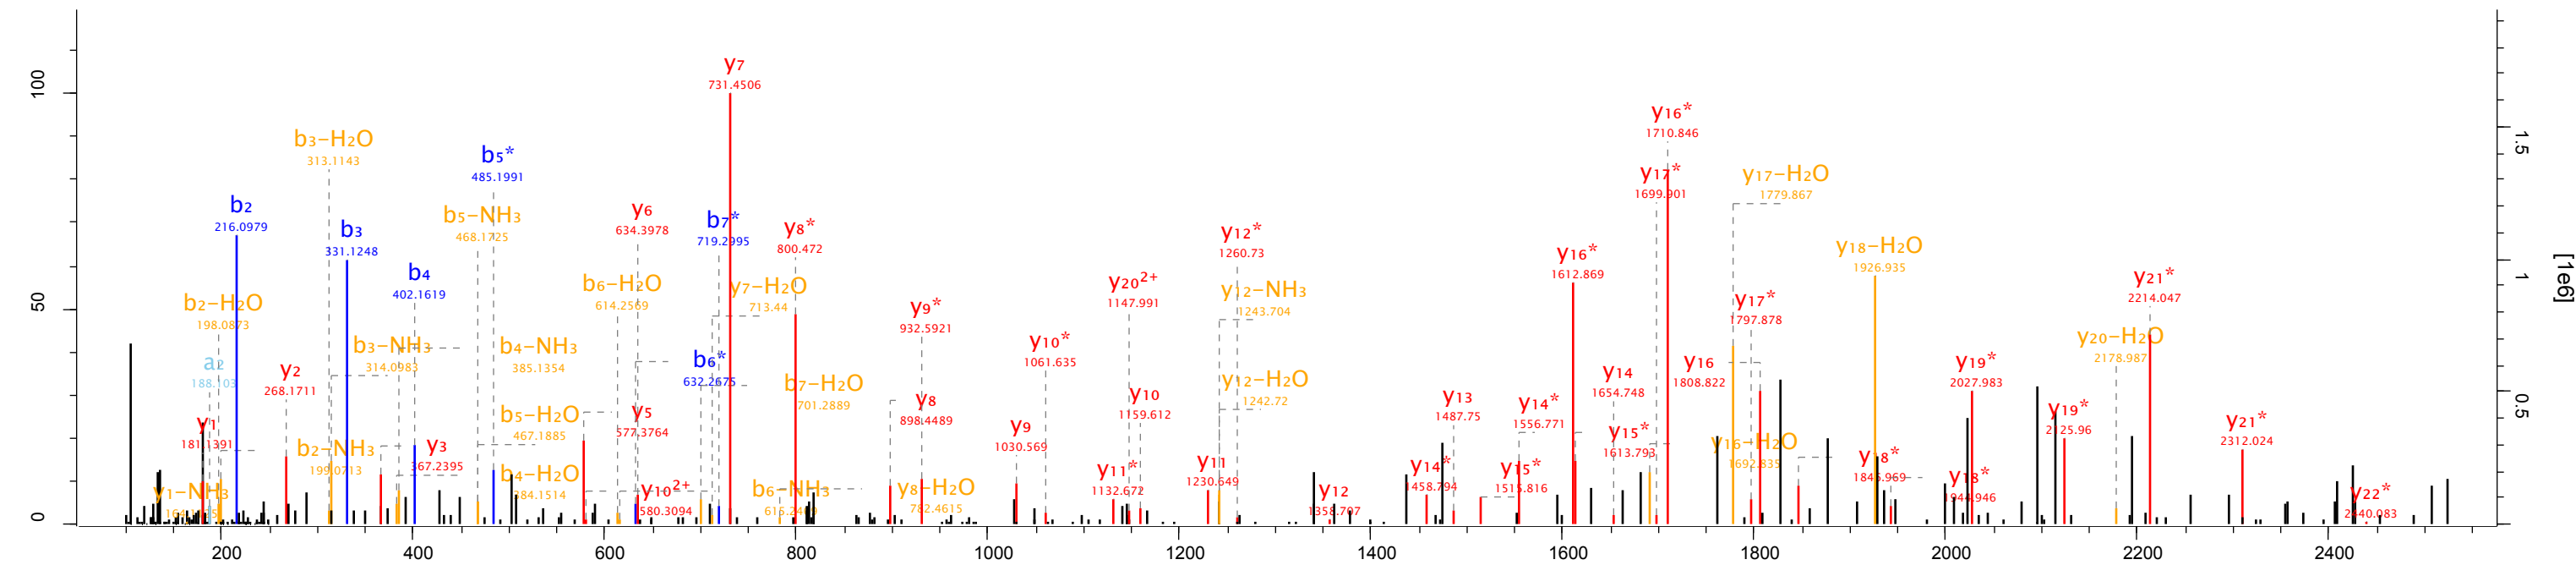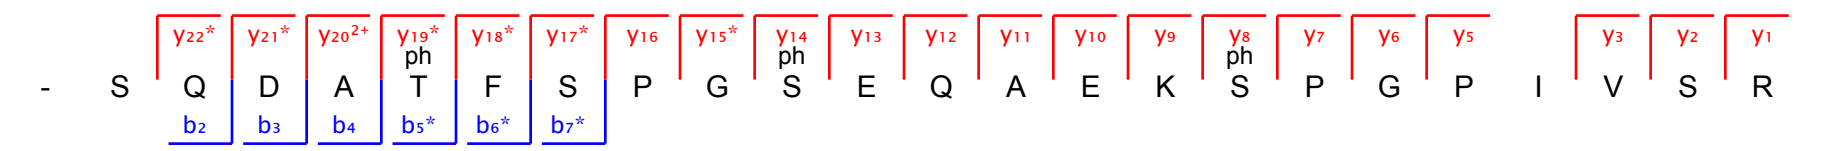

Raw file: 20150812\_A375SR\_Phospho\_BR1\_02  
 Scan: 15217 Method: FTMS; HCD Score: 117.03 m/z: 734.29 Gene names: RALGAPA1

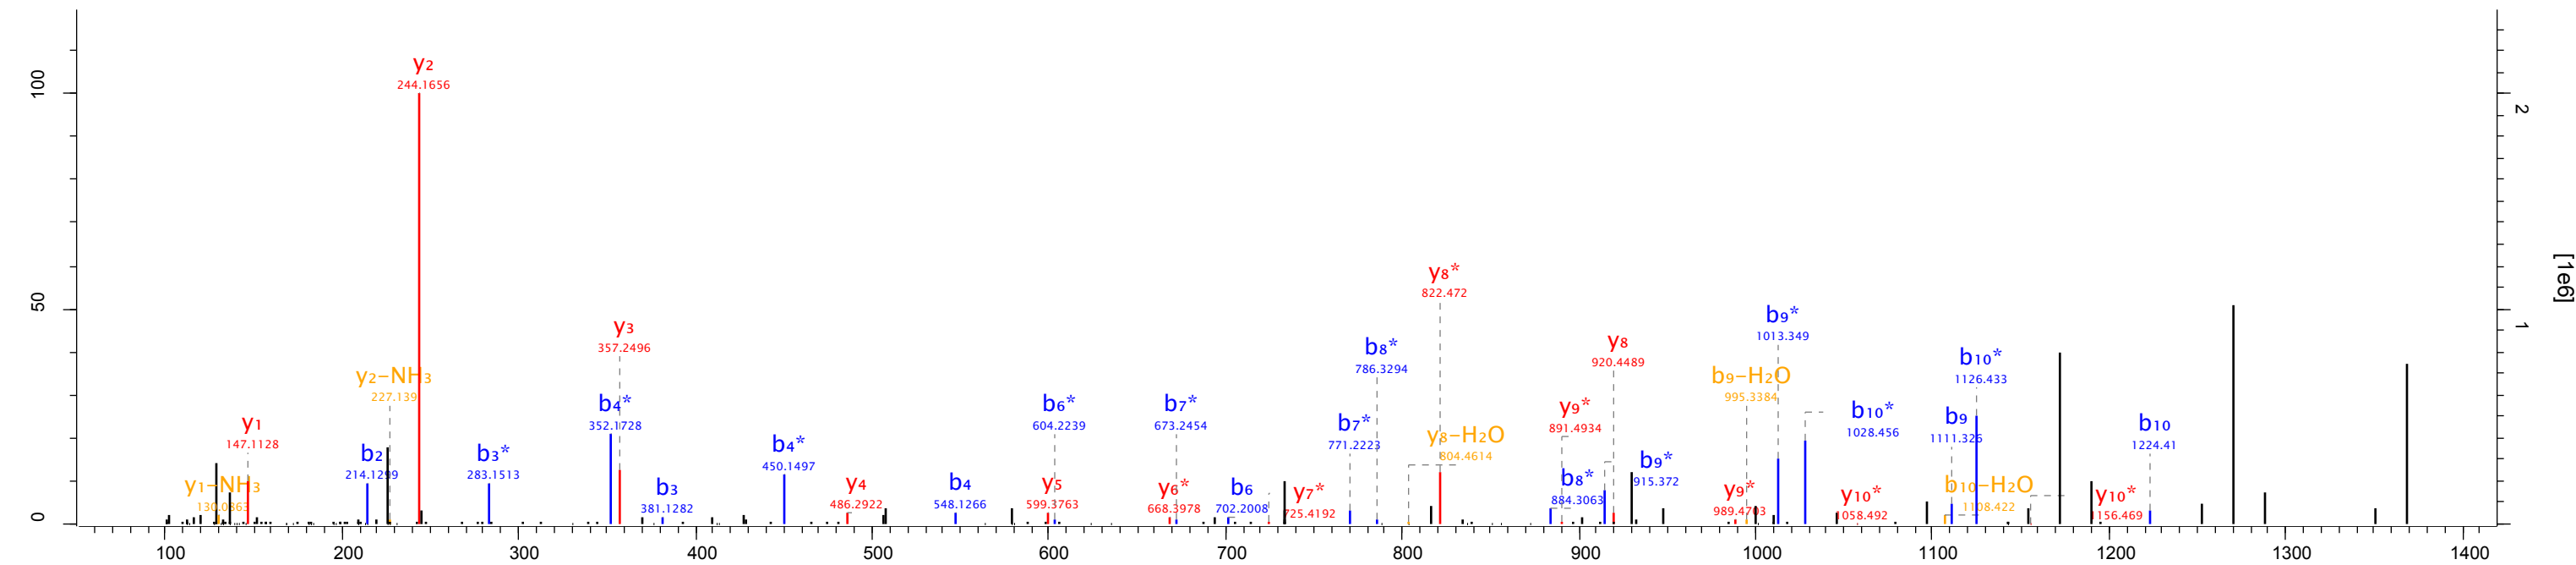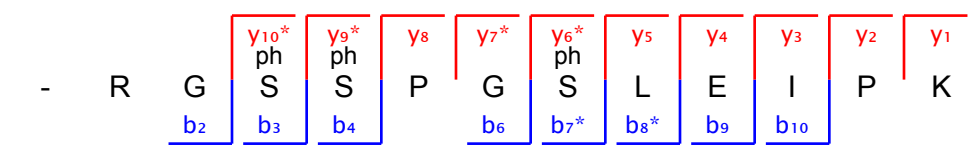

Raw file 20150812\_A375SR\_Phospho\_BR1\_02 Scan 15487 Method FTMS; HCD Score 70.41 m/z 815.65 Gene names RIOK1

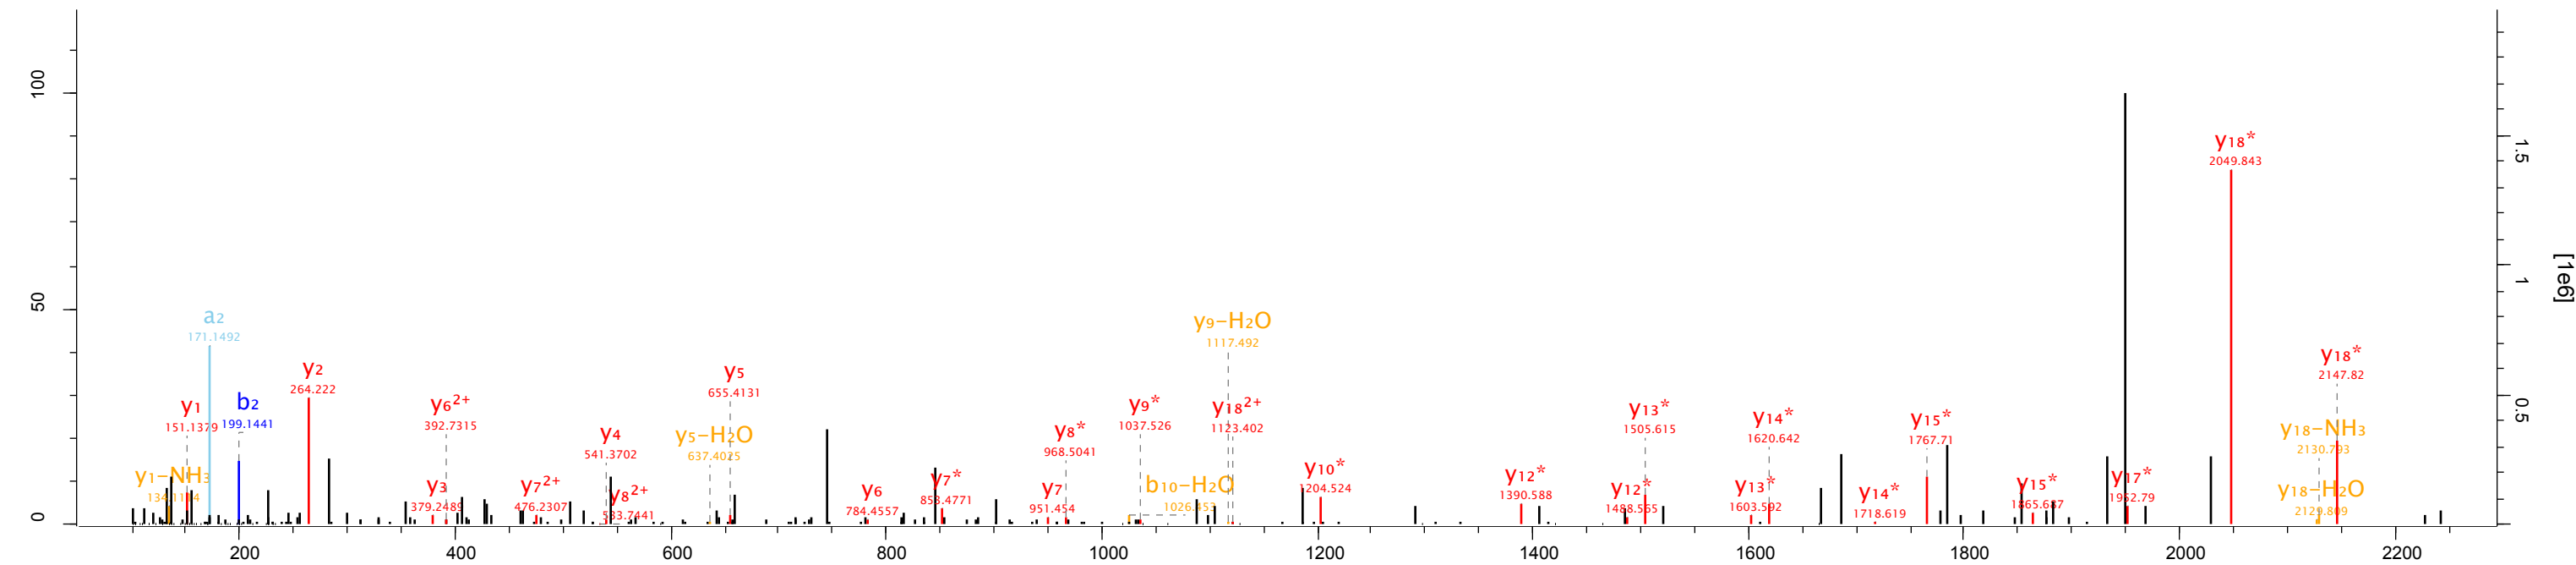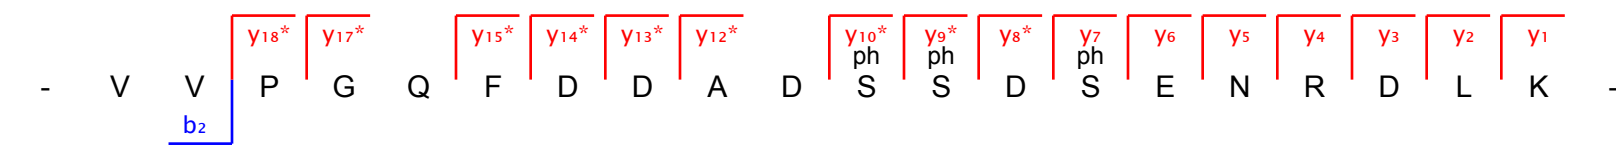



Raw file 20150812\_A375SR\_Phospho\_BR1\_02 Scan 15507 Method FTMS; HCD Score 156.78 m/z 1051.9 Gene names DBN1

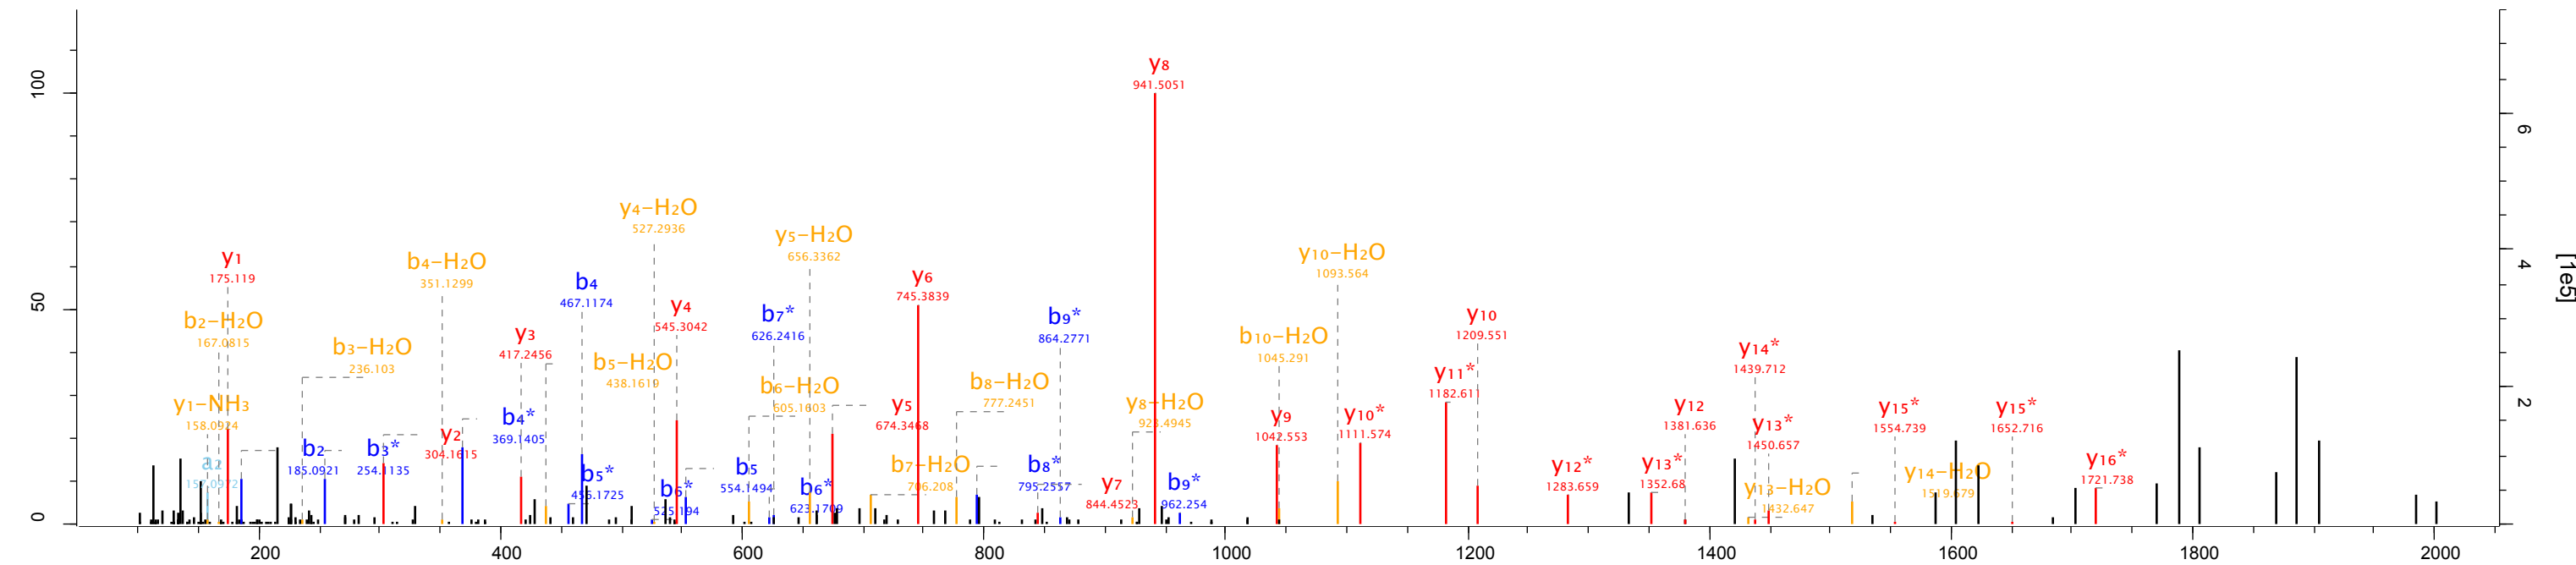

- S P S D S S T A S T P V A E Q I E R -

b<sub>2</sub>
b<sub>3</sub><sup>\*</sup>
b<sub>4</sub>
b<sub>5</sub>
b<sub>6</sub><sup>\*</sup>
b<sub>7</sub><sup>\*</sup>
b<sub>8</sub><sup>\*</sup>
b<sub>9</sub><sup>\*</sup>
y<sub>16</sub><sup>\*</sup>
y<sub>15</sub><sup>\*</sup>
y<sub>14</sub><sup>\*</sup>
y<sub>13</sub><sup>\*</sup>
y<sub>12</sub>
y<sub>11</sub><sup>\*</sup>
y<sub>10</sub>
y<sub>9</sub>
y<sub>8</sub>
y<sub>7</sub>
y<sub>6</sub>
y<sub>5</sub>
y<sub>4</sub>
y<sub>3</sub>
y<sub>2</sub>
y<sub>1</sub>

Raw file 20150812\_A375SR\_Phospho\_BR1\_02 Scan 15747 Method FTMS; HCD Score 162.1 m/z 1150.9 Gene names GOLGA1

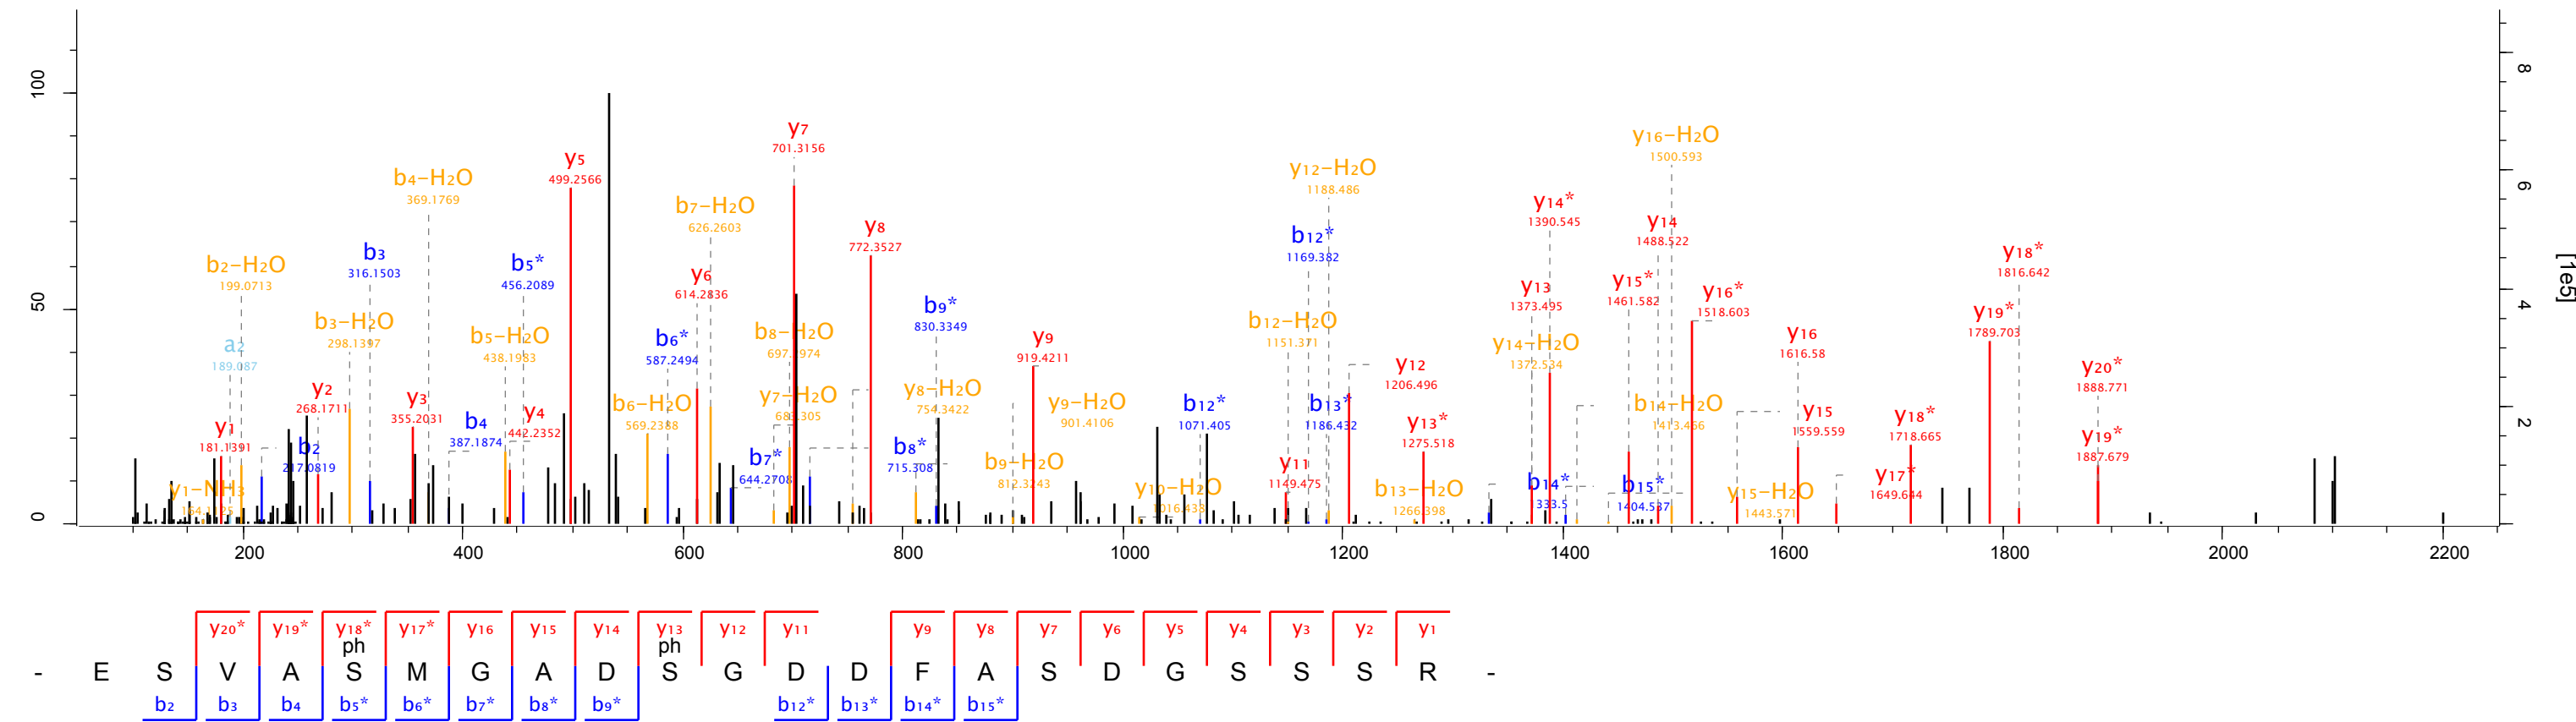

Raw file Scan Method Score m/z Gene names  
 20150812\_A375SR\_Phospho\_BR1\_02 15777 FTMS; HCD 206.67 1014.86 PLEC

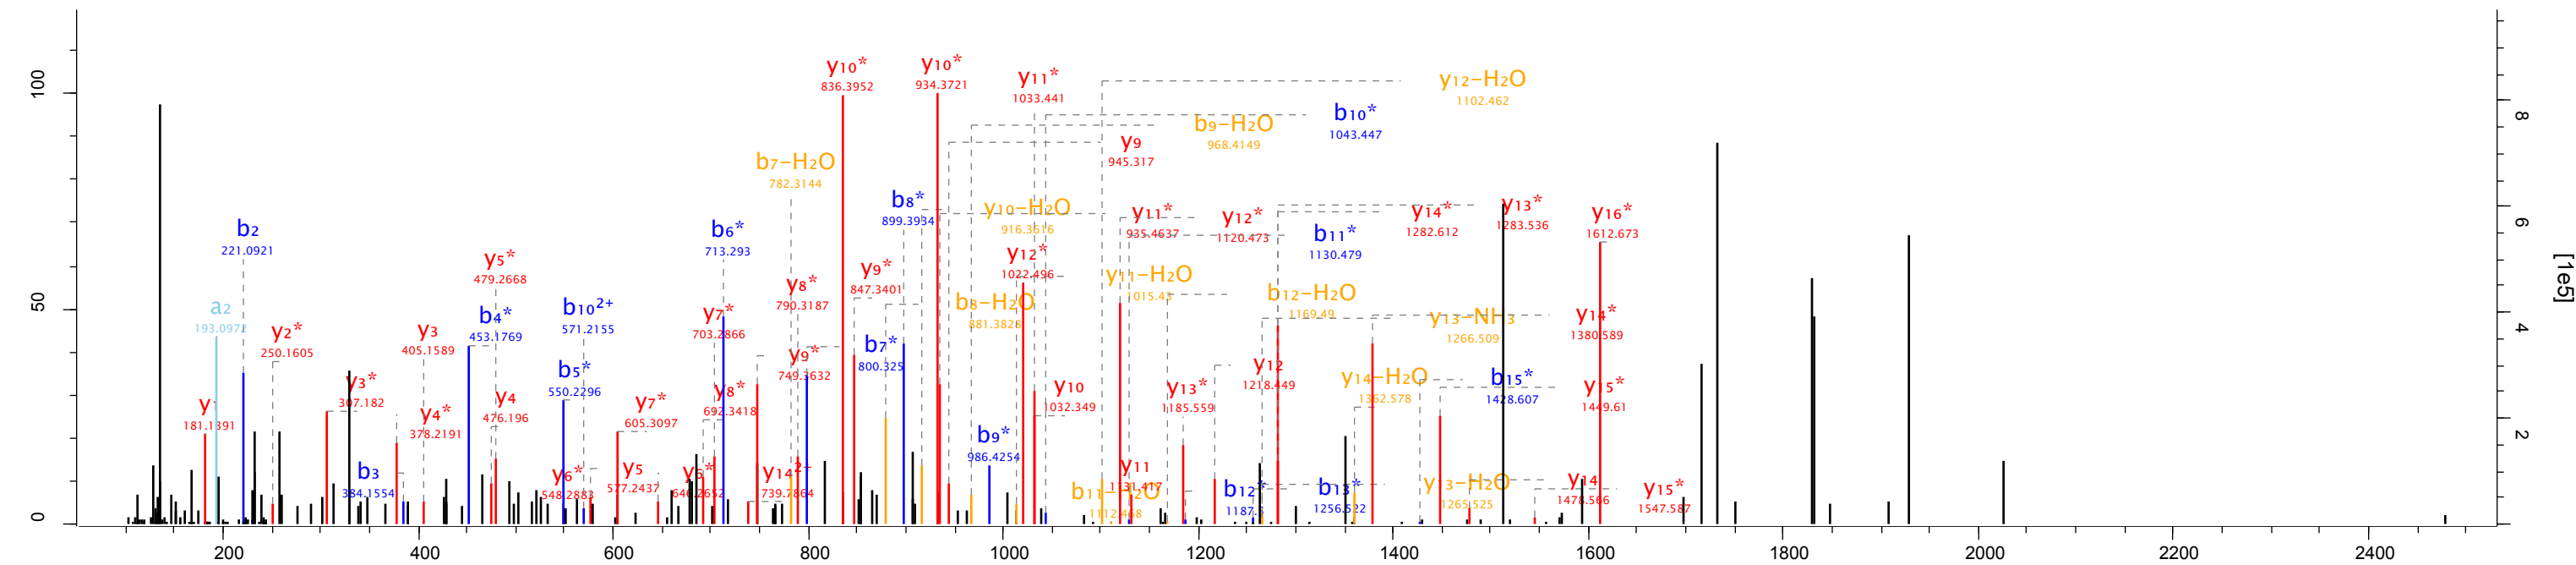

- G Y Y Y S Y S V S G S G S T A G S R -

b<sub>2</sub>
b<sub>3</sub>
b<sub>4</sub><sup>\*</sup>
b<sub>5</sub><sup>\*</sup>
b<sub>6</sub><sup>\*</sup>
b<sub>7</sub><sup>\*</sup>
b<sub>8</sub><sup>\*</sup>
b<sub>9</sub><sup>\*</sup>
b<sub>10</sub><sup>\*</sup>
b<sub>11</sub><sup>\*</sup>
b<sub>12</sub><sup>\*</sup>
b<sub>13</sub><sup>\*</sup>
b<sub>15</sub><sup>\*</sup>

y<sub>16</sub><sup>\*</sup>
y<sub>15</sub><sup>\*</sup>
y<sub>14</sub>
y<sub>13</sub><sup>\*</sup>
y<sub>12</sub>
y<sub>11</sub>
y<sub>10</sub>
y<sub>9</sub>
y<sub>8</sub><sup>\*</sup>
y<sub>7</sub><sup>\*</sup>
y<sub>6</sub><sup>\*</sup>
y<sub>5</sub>
y<sub>4</sub>
y<sub>3</sub>
y<sub>2</sub><sup>\*</sup>
y<sub>1</sub>

Raw file 20150812\_A375SR\_Phospho\_BR1\_02 Scan 16297 Method FTMS; HCD Score 187.07 m/z 947.36 Gene names MCM2

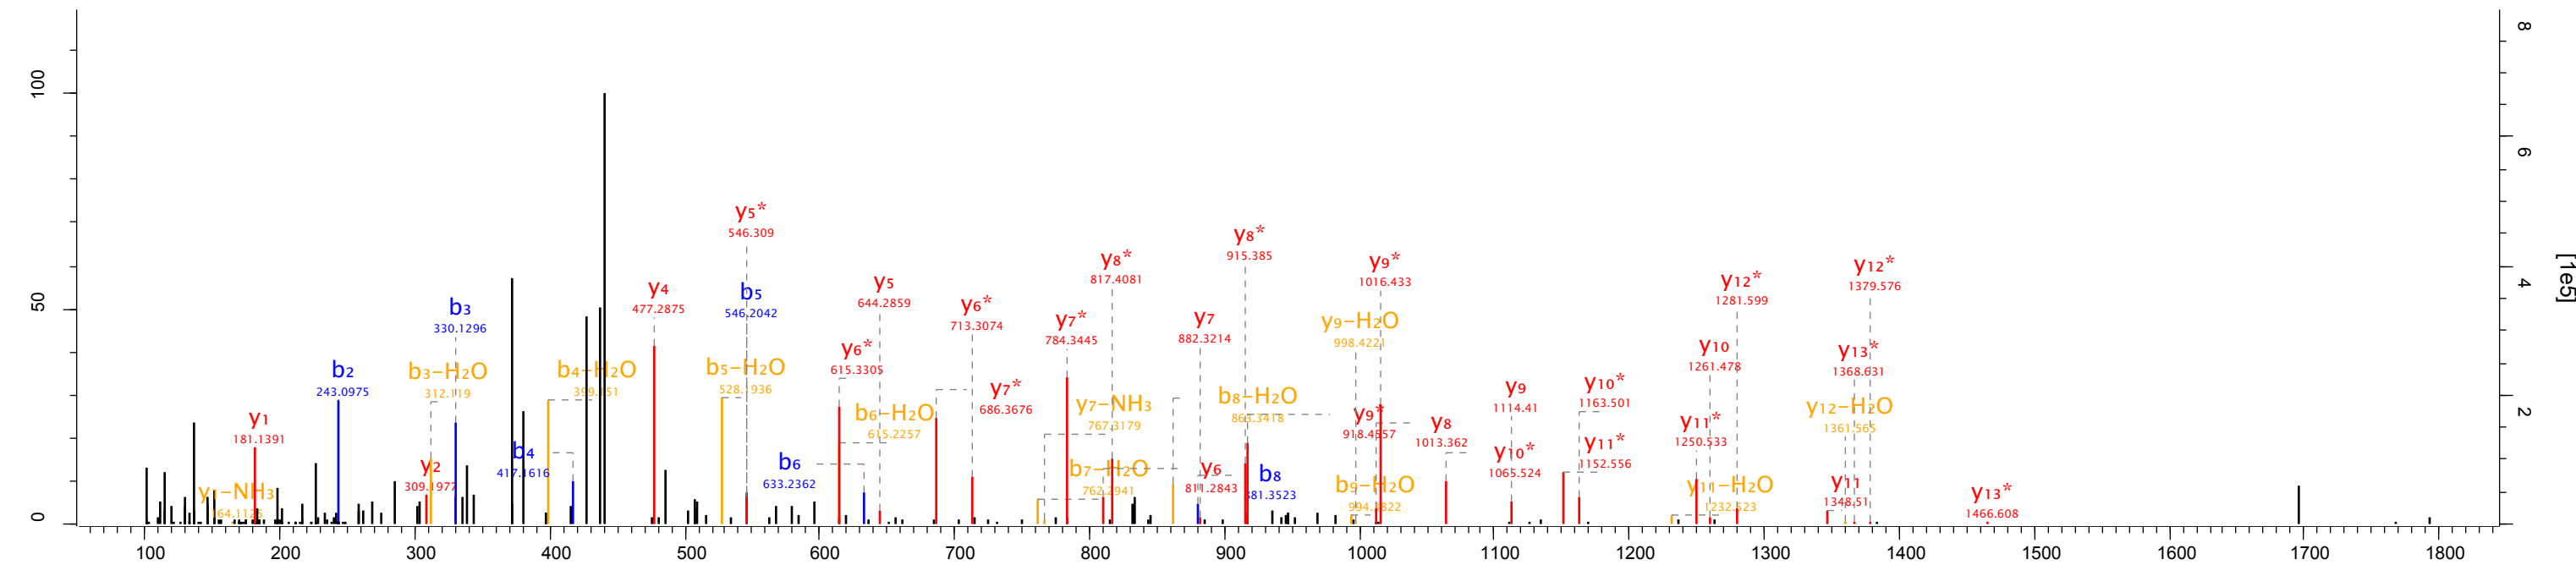

ac  
 - A E S S E S F T M A S S P A Q R -  
 b<sub>2</sub> b<sub>3</sub> b<sub>4</sub> b<sub>5</sub> b<sub>6</sub> b<sub>8</sub> y<sub>13</sub>\* y<sub>12</sub>\* y<sub>11</sub> y<sub>10</sub> y<sub>9</sub> y<sub>8</sub> y<sub>7</sub> y<sub>6</sub> ph y<sub>5</sub> ph y<sub>4</sub> y<sub>2</sub> y<sub>1</sub>

Raw file 20150812\_A375SR\_Phospho\_BR1\_02 Scan 16577 Method FTMS; HCD Score 154.63 m/z 859.36 Gene names CHERP

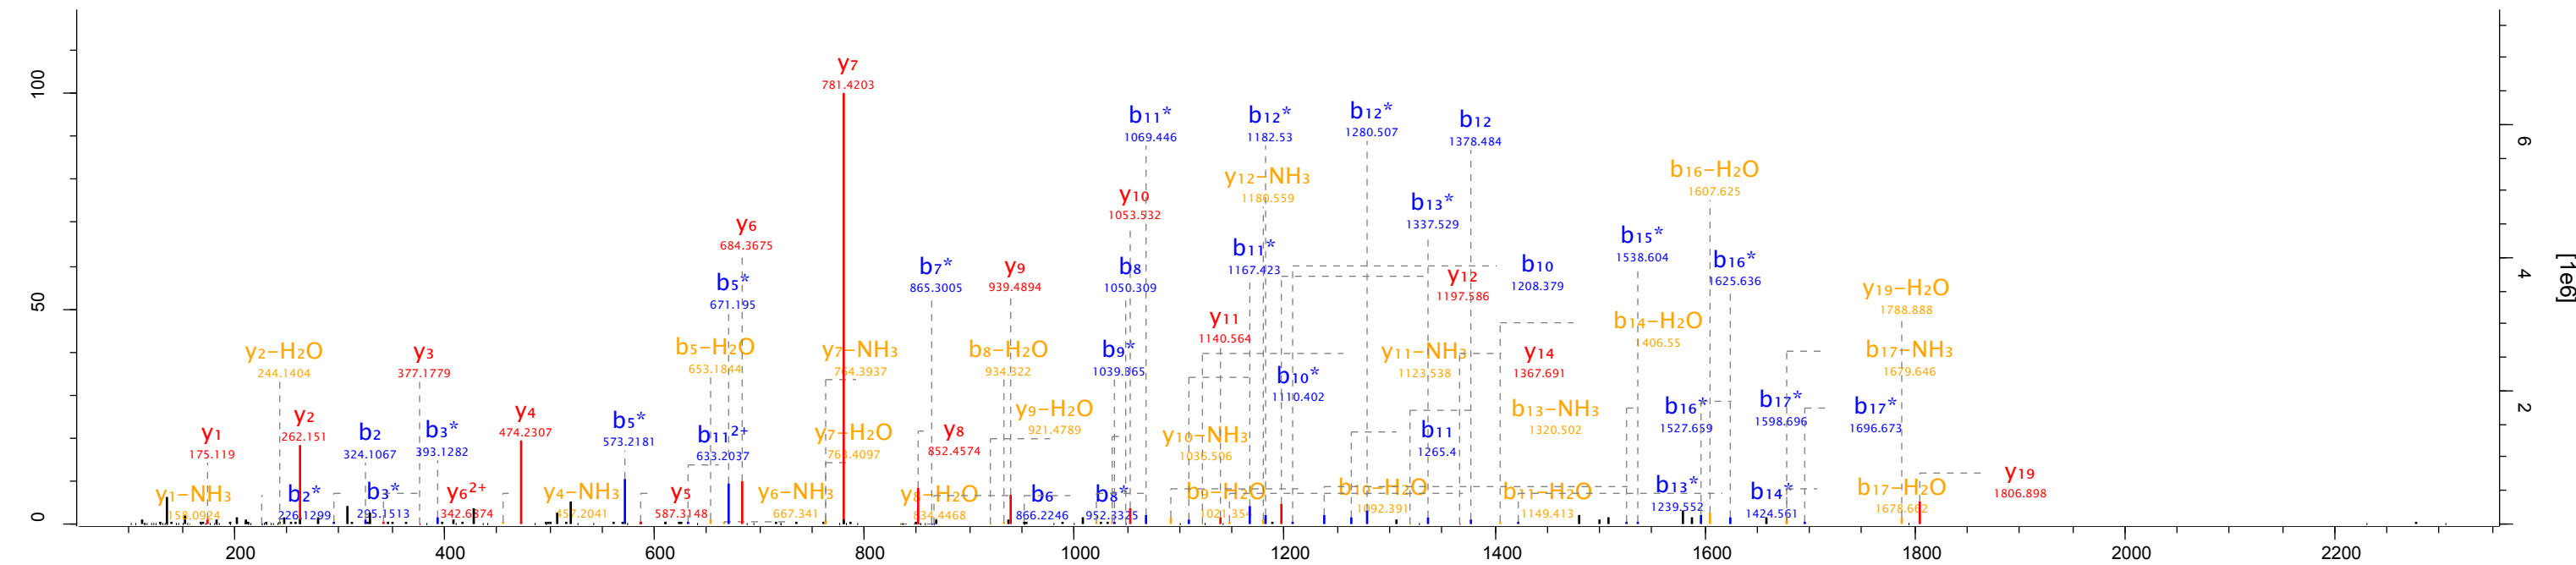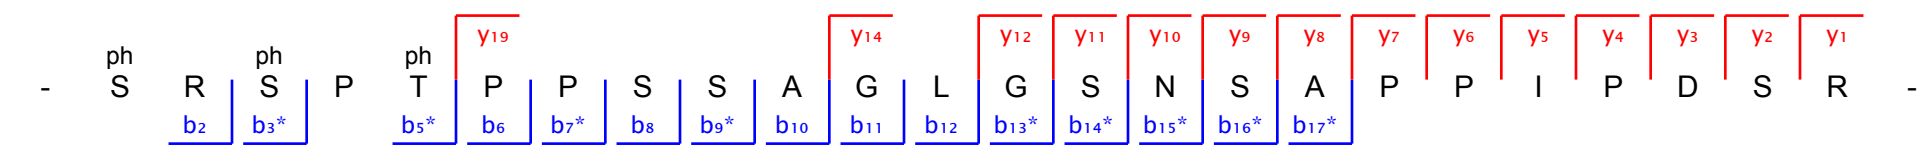

Raw file: 20150812\_A375SR\_Phospho\_BR1\_02  
 Scan: 17277 Method: FTMS; HCD Score: 80.72 m/z: 971.4 Gene names: SMG6

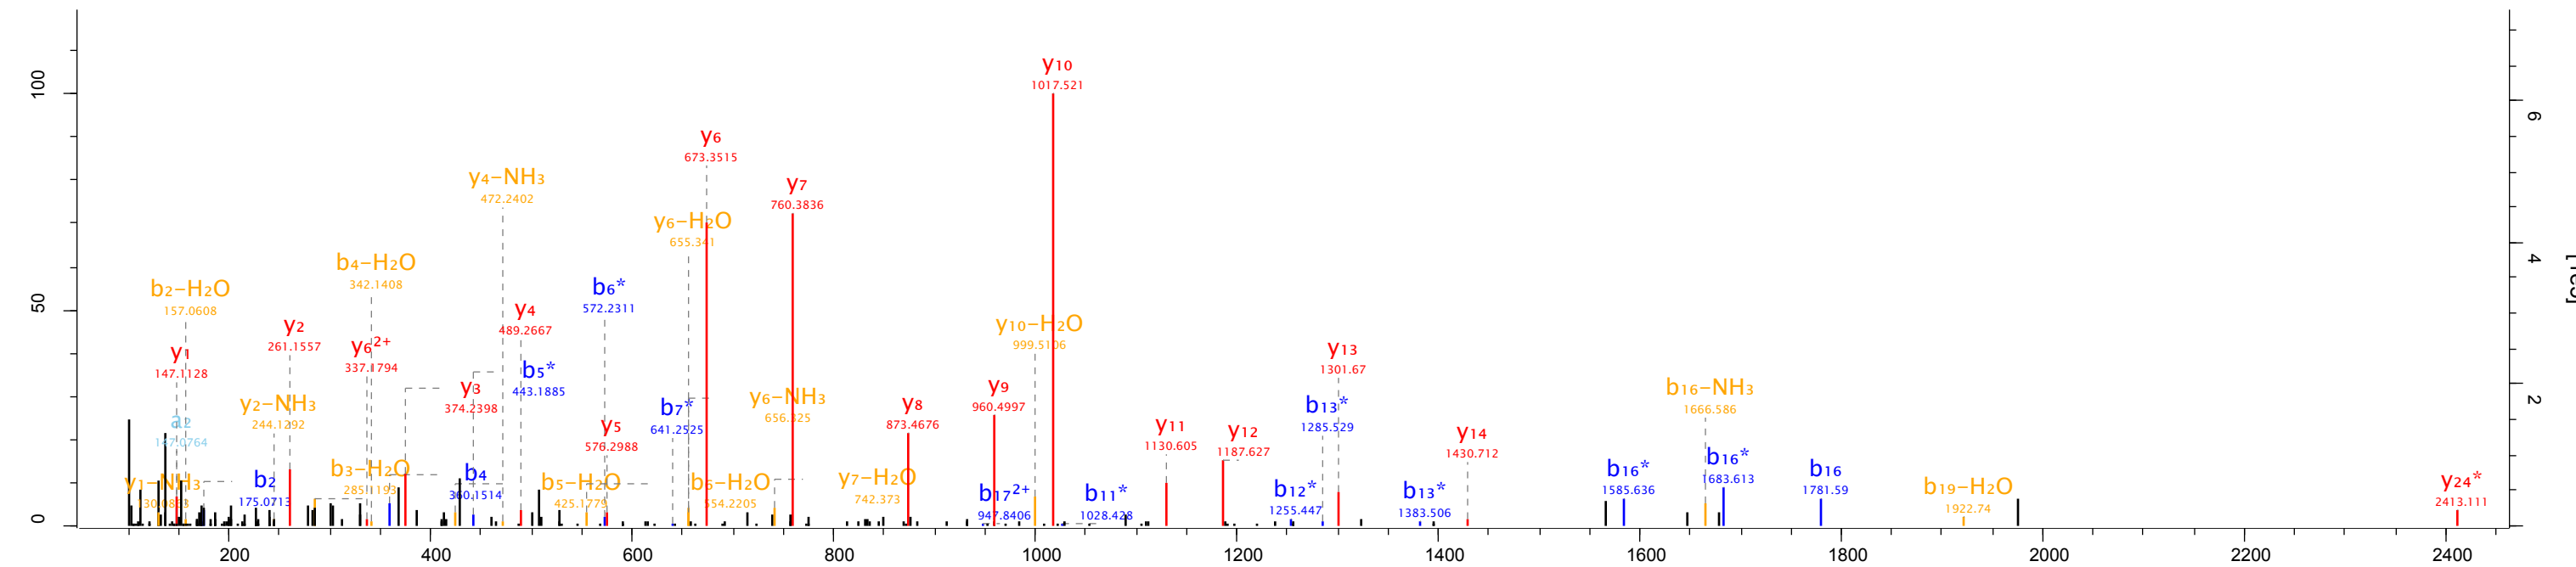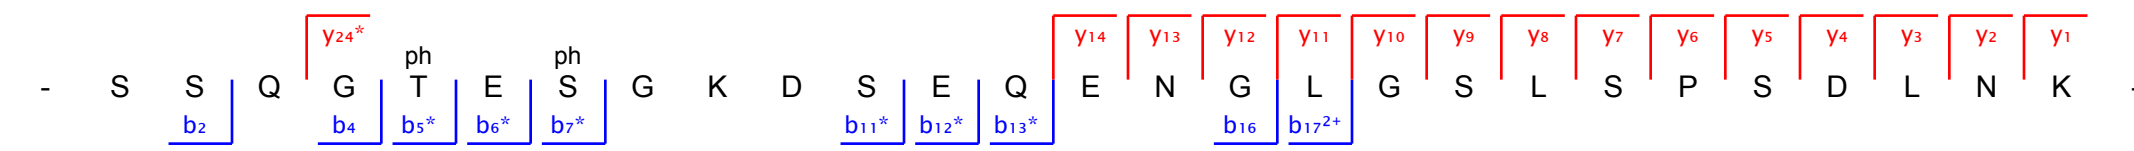

Raw file: 20150812\_A375SR\_Phospho\_BR1\_02  
 Scan: 17347 Method: FTMS; HCD Score: 78.48 m/z: 1067.42 Gene names: UNK

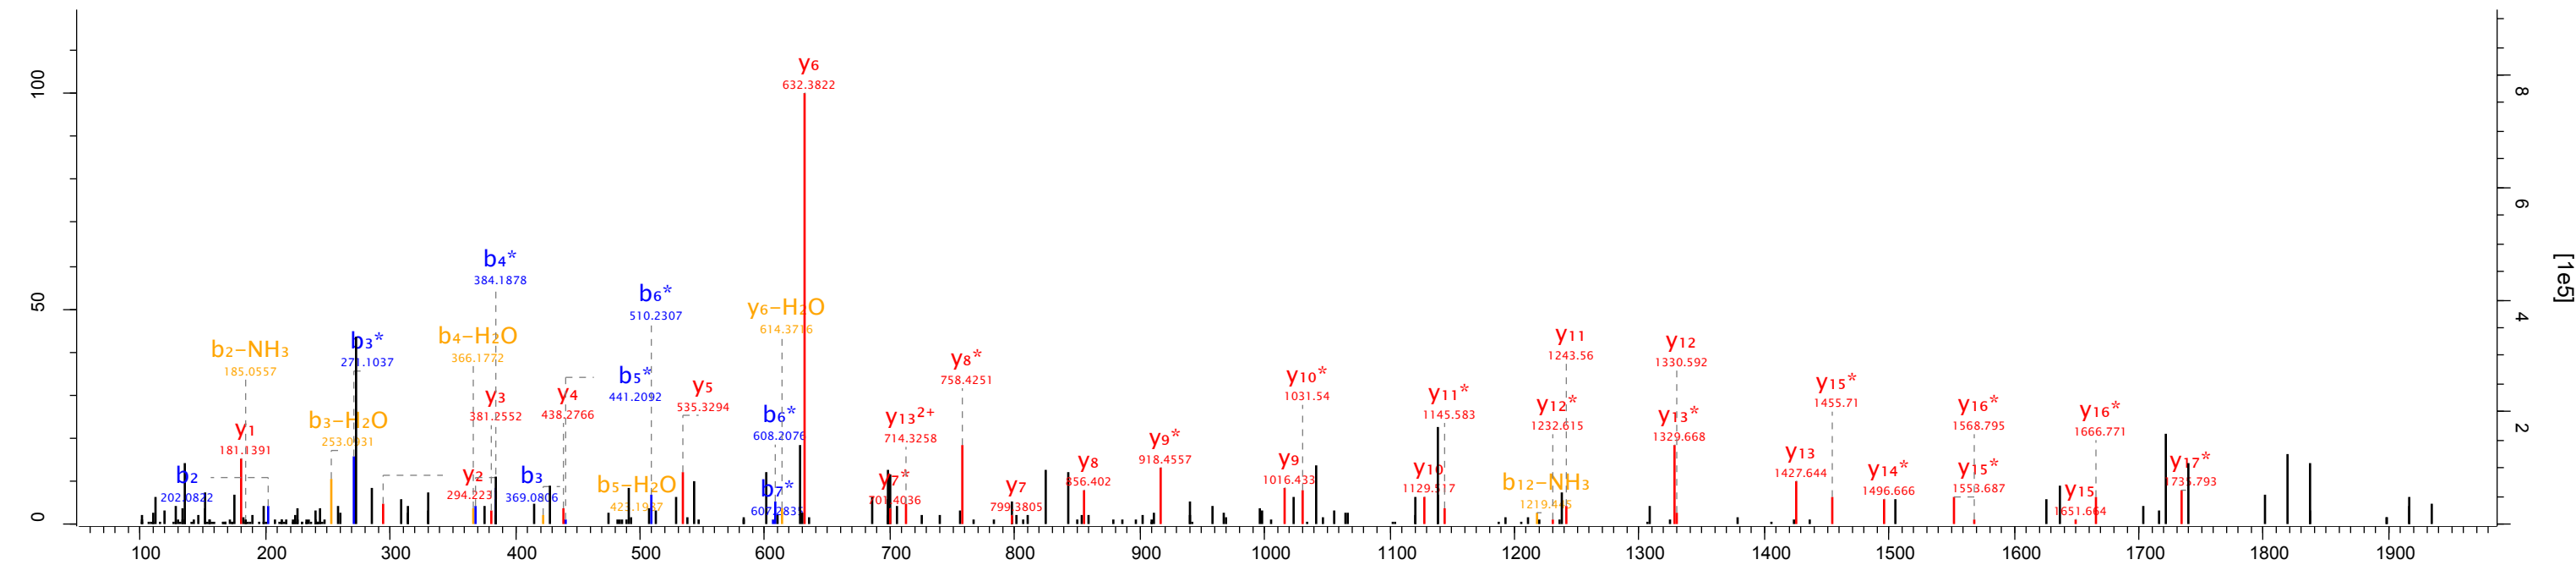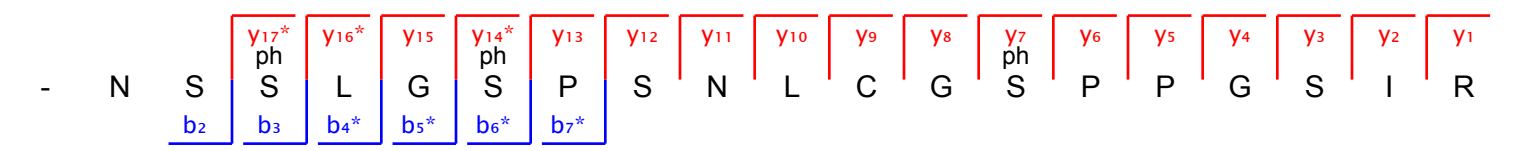

Raw file: 20150812\_A375SR\_Phospho\_BR1\_02  
 Scan: 17577 Method: FTMS; HCD Score: 198.55 m/z: 1106.43 Gene names: AKAP12

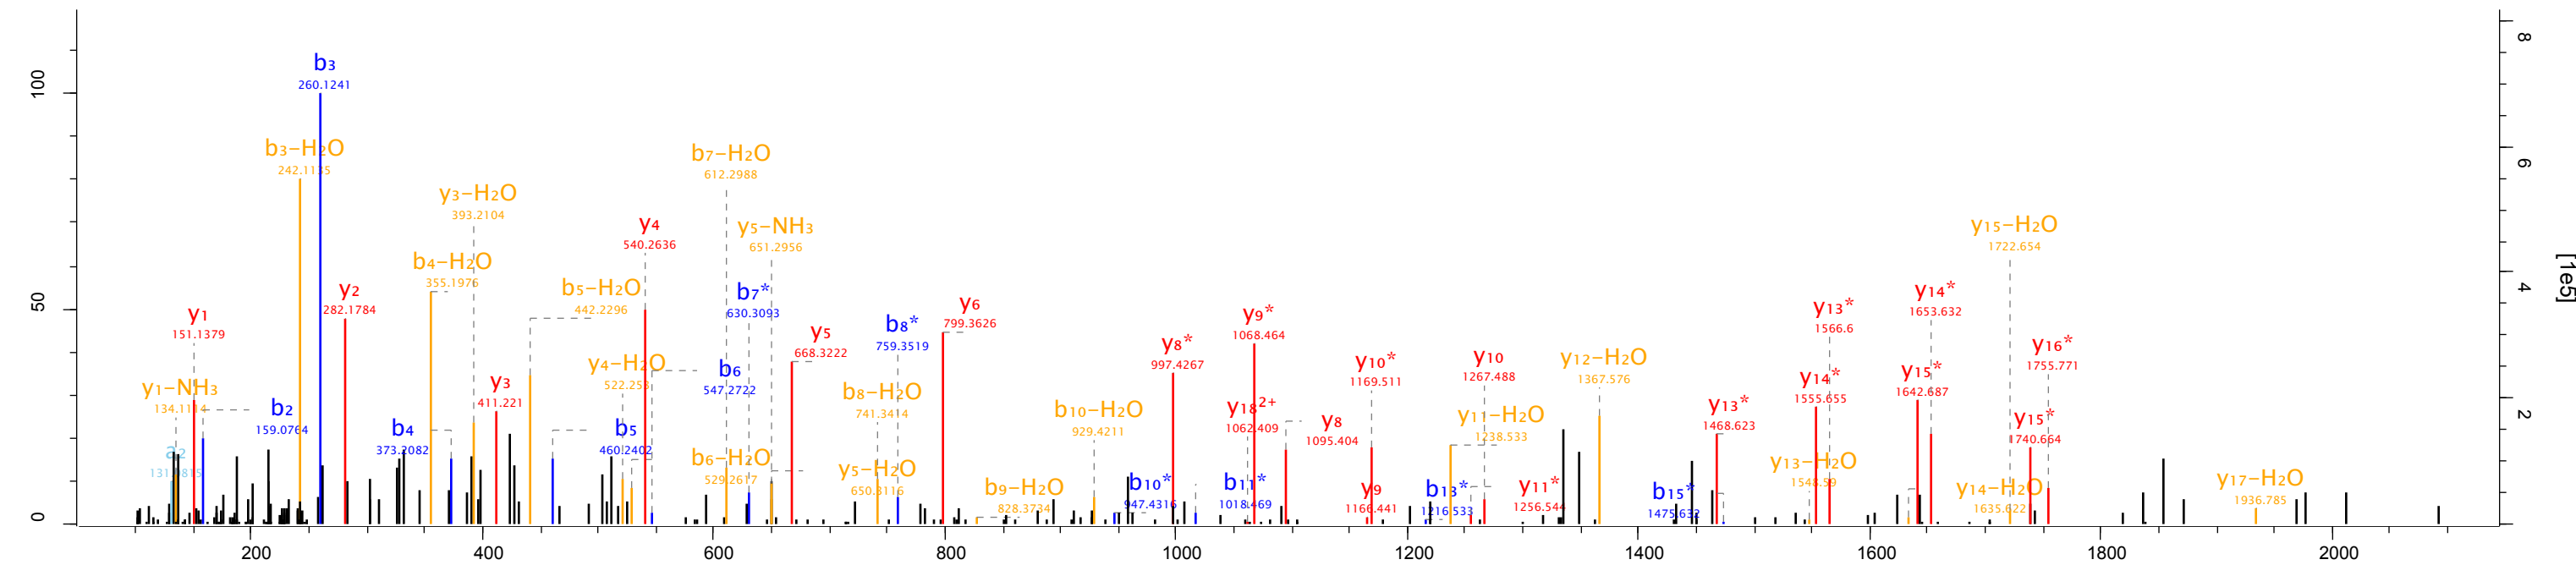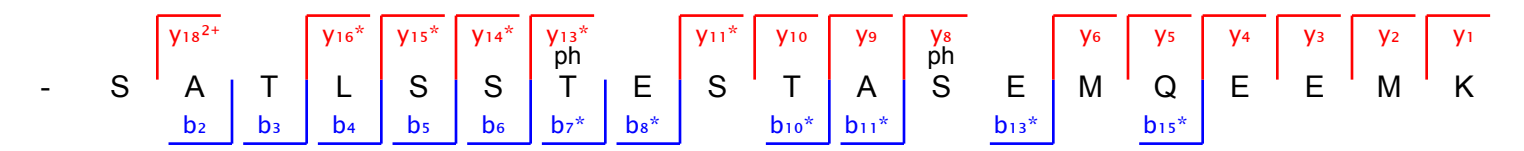



Raw file 20150812\_A375SR\_Phospho\_BR1\_02 Scan 17687 Method FTMS; HCD Score 71.6 m/z 1058.79 Gene names CEP170

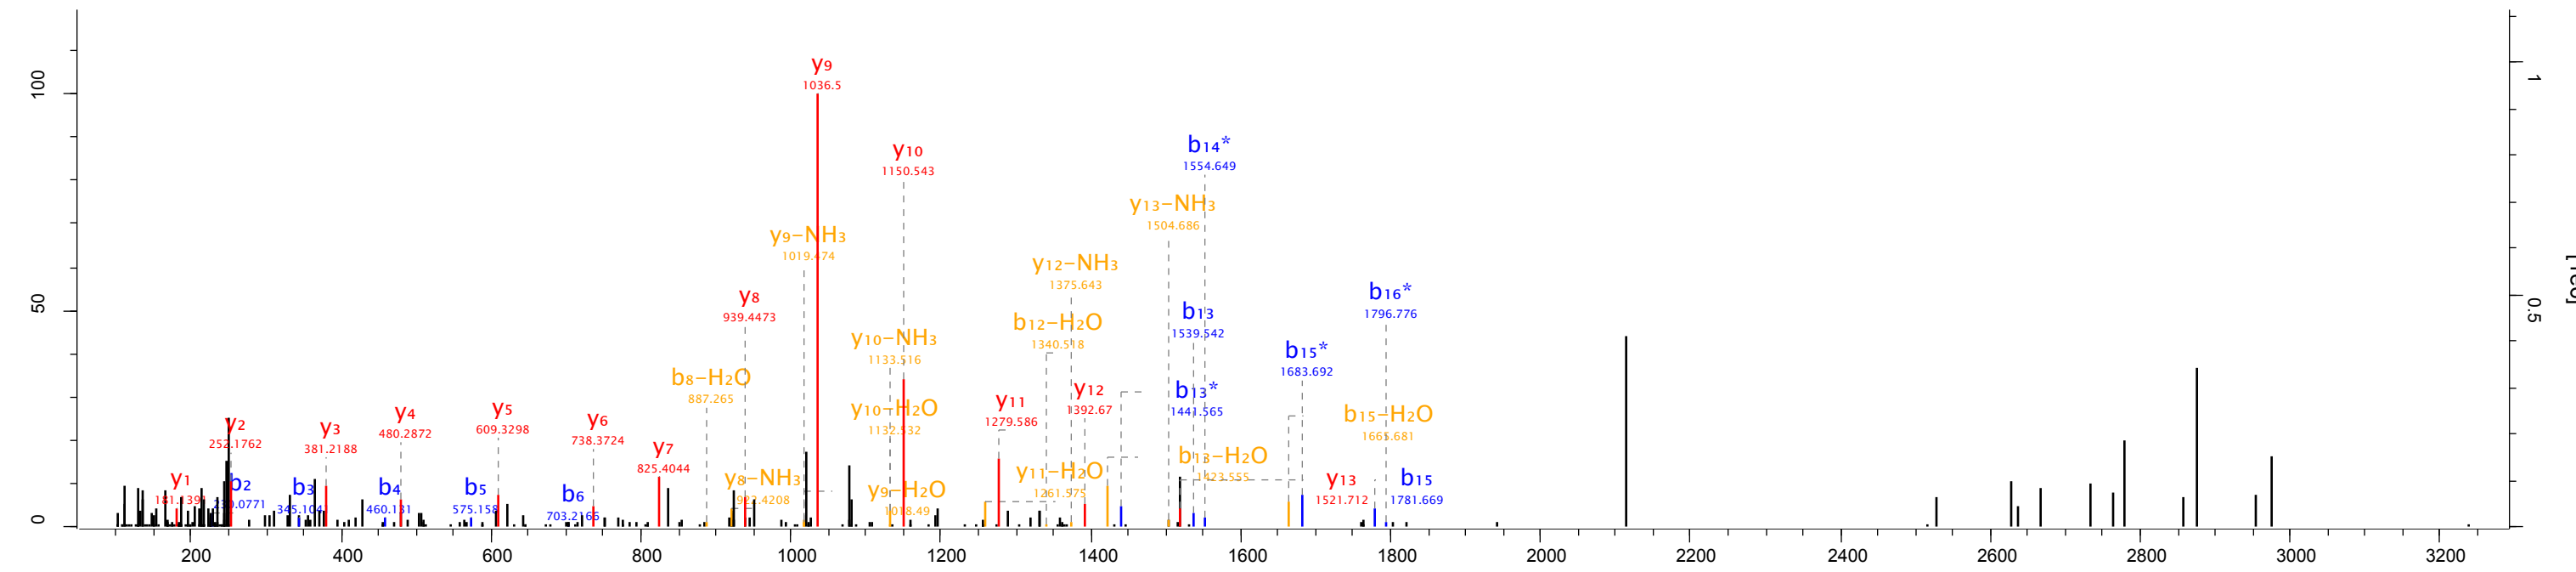

- D N D D Q S D K G T Y ph T I E L E N P N S E E V E A R -

b<sub>2</sub>
b<sub>3</sub>
b<sub>4</sub>
b<sub>5</sub>
b<sub>6</sub>
b<sub>13</sub>
b<sub>14</sub>\*
b<sub>15</sub>
b<sub>16</sub>\*
y<sub>13</sub>
y<sub>12</sub>
y<sub>11</sub>
y<sub>10</sub>
y<sub>9</sub>
y<sub>8</sub>
y<sub>7</sub>
y<sub>6</sub>
y<sub>5</sub>
y<sub>4</sub>
y<sub>3</sub>
y<sub>2</sub>
y<sub>1</sub>

Raw file: 20150812\_A375SR\_Phospho\_BR1\_02  
 Scan: 17717 Method: FTMS; HCD Score: 147.78 m/z: 908.87 Gene names: FOXC2

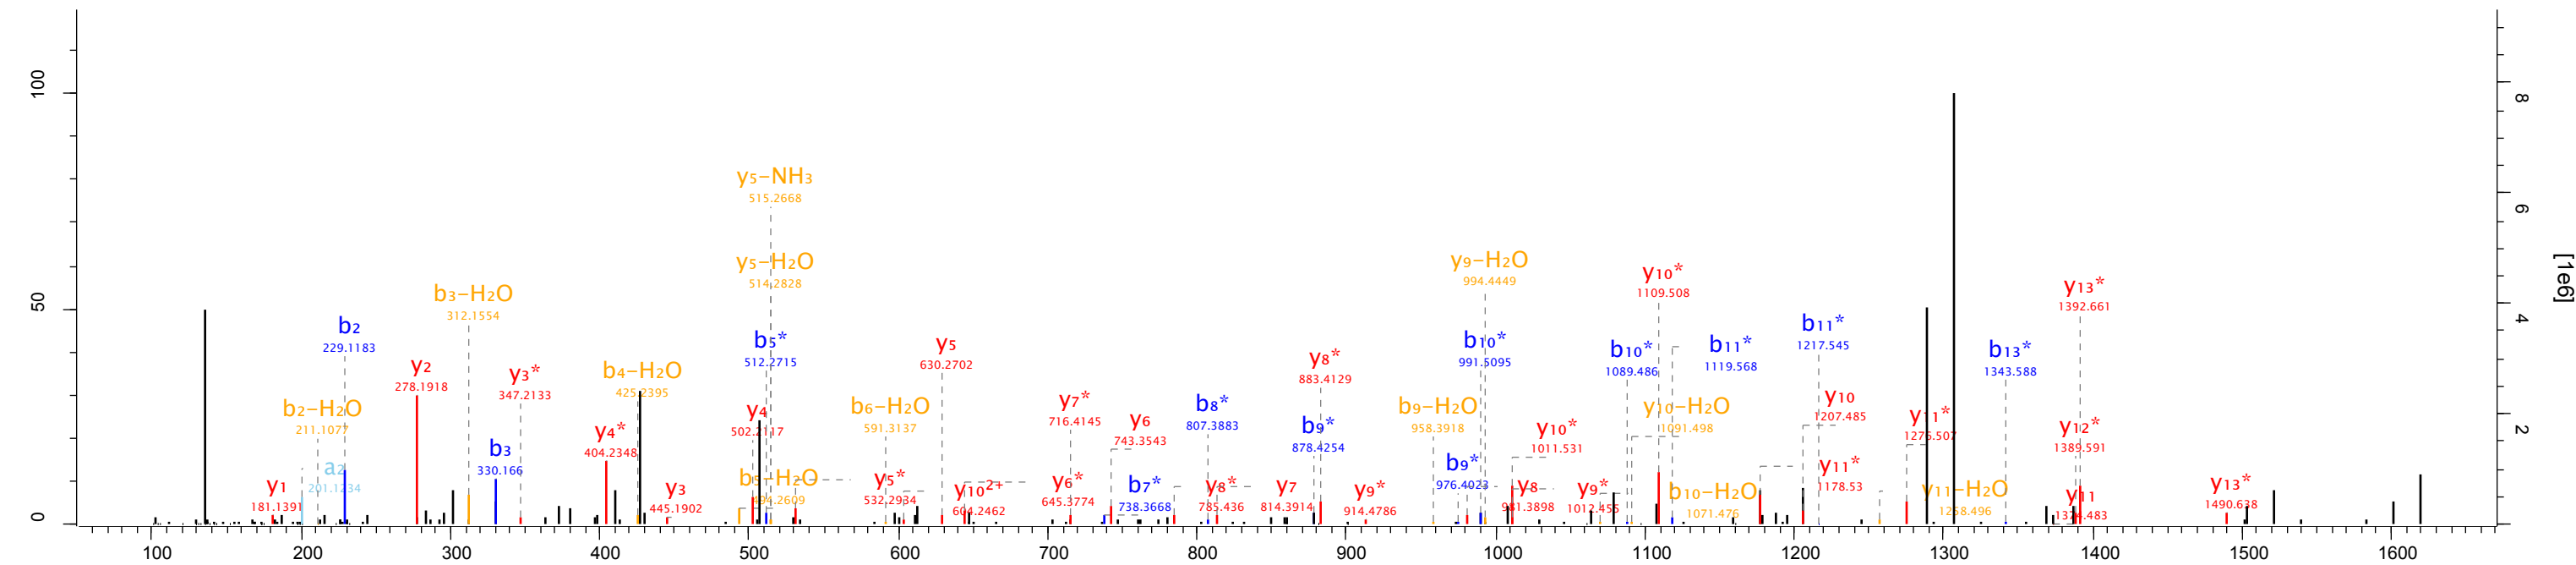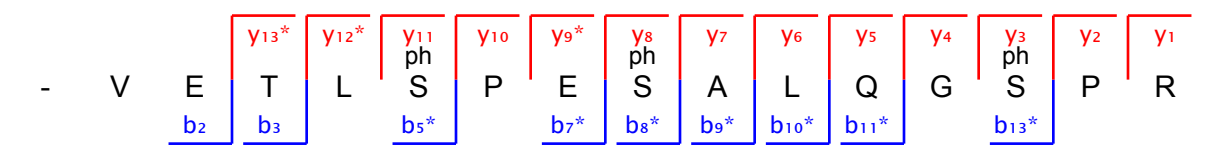

Raw file 20150812\_A375SR\_Phospho\_BR1\_02 Scan 18047 Method FTMS; HCD Score 129.56 m/z 907.38 Gene names SMAD1

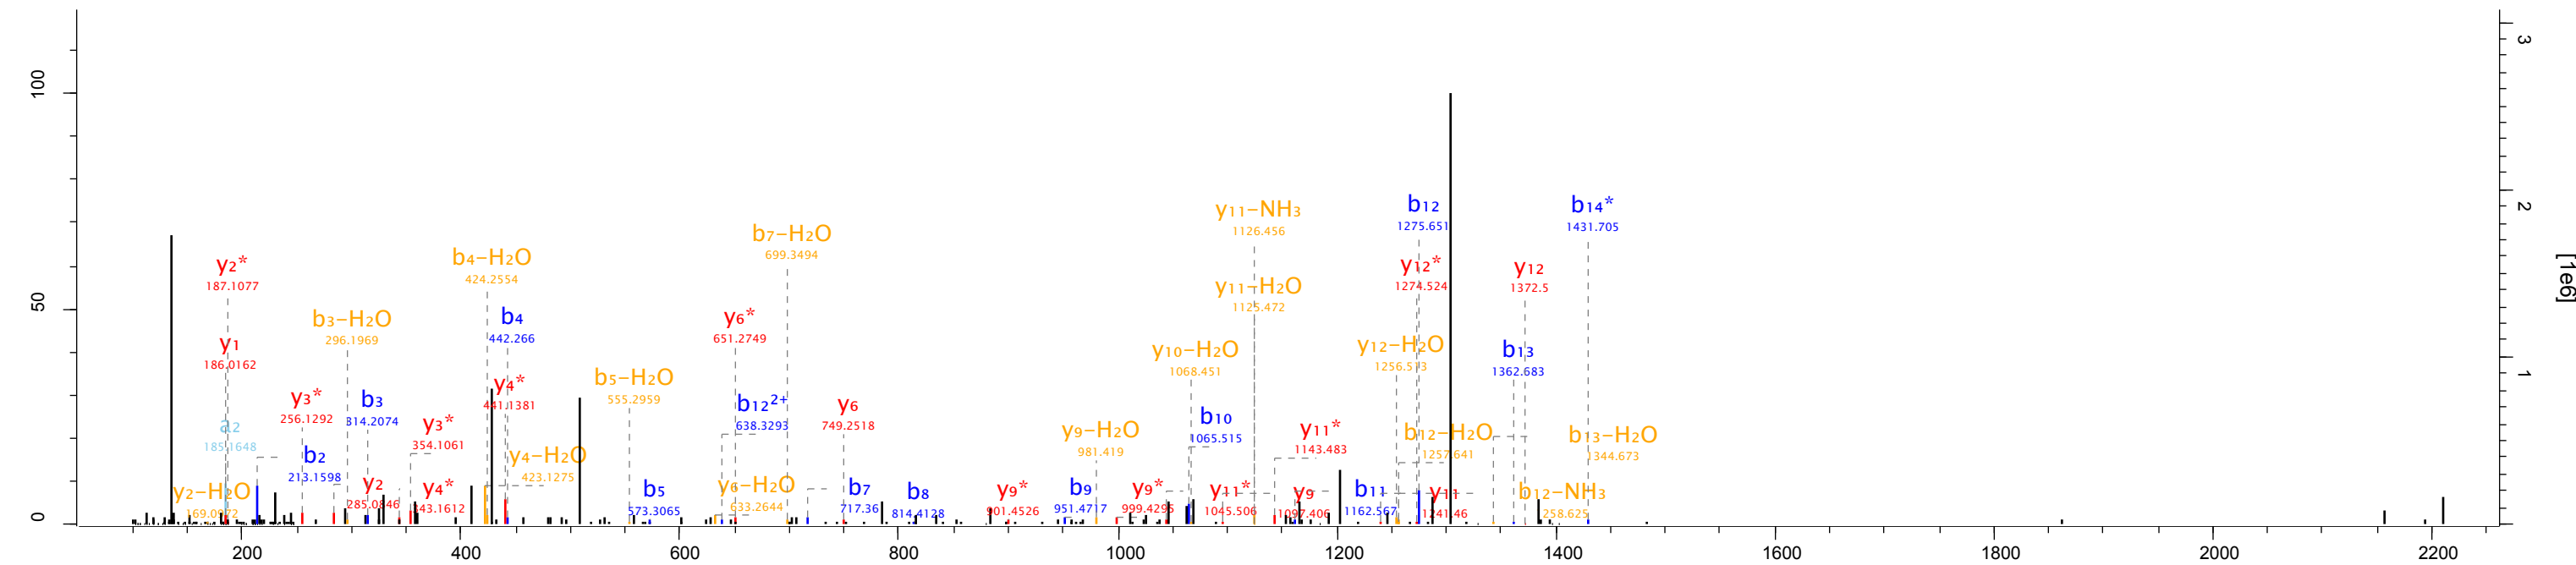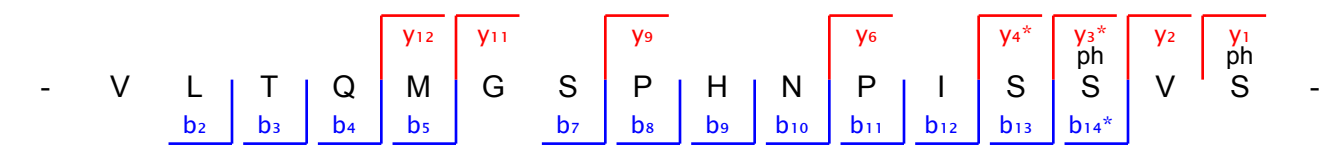

Raw file: 20150812\_A375SR\_Phospho\_BR1\_02  
 Scan: 18467 Method: FTMS; HCD Score: 147.25 m/z: 900.37 Gene names: TICRR

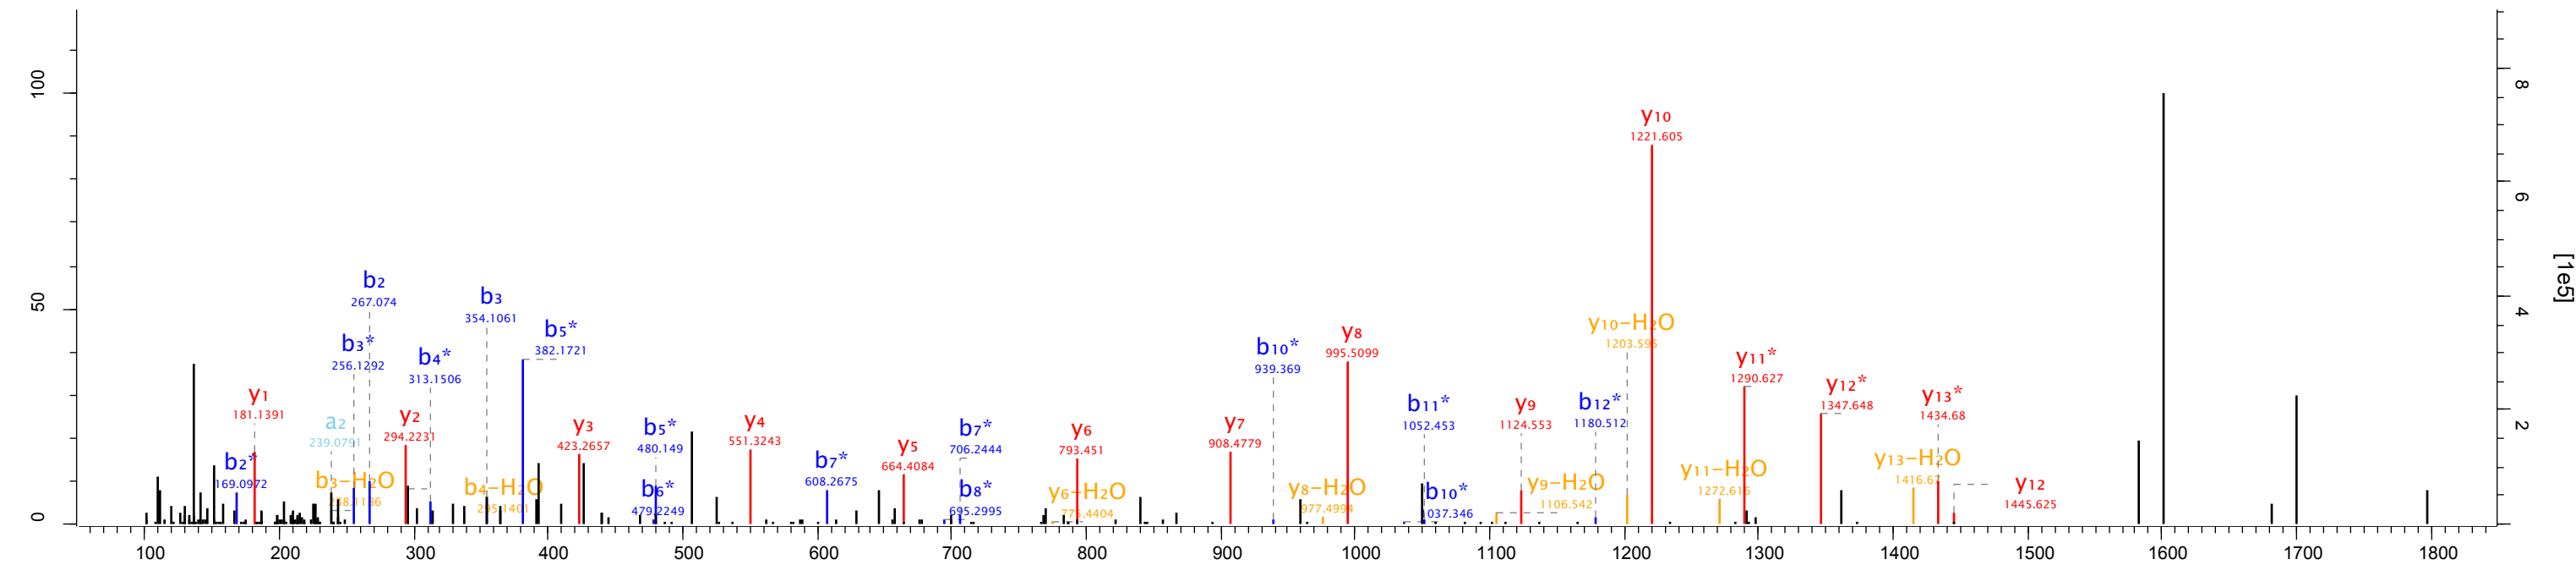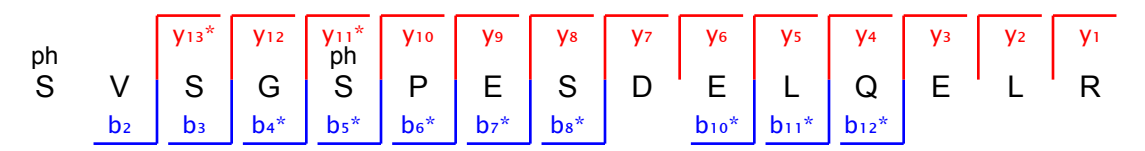

Raw file 20150812\_A375SR\_Phospho\_BR1\_02 Scan 18627 Method FTMS; HCD Score 121.02 m/z 1395 Gene names CPSF2

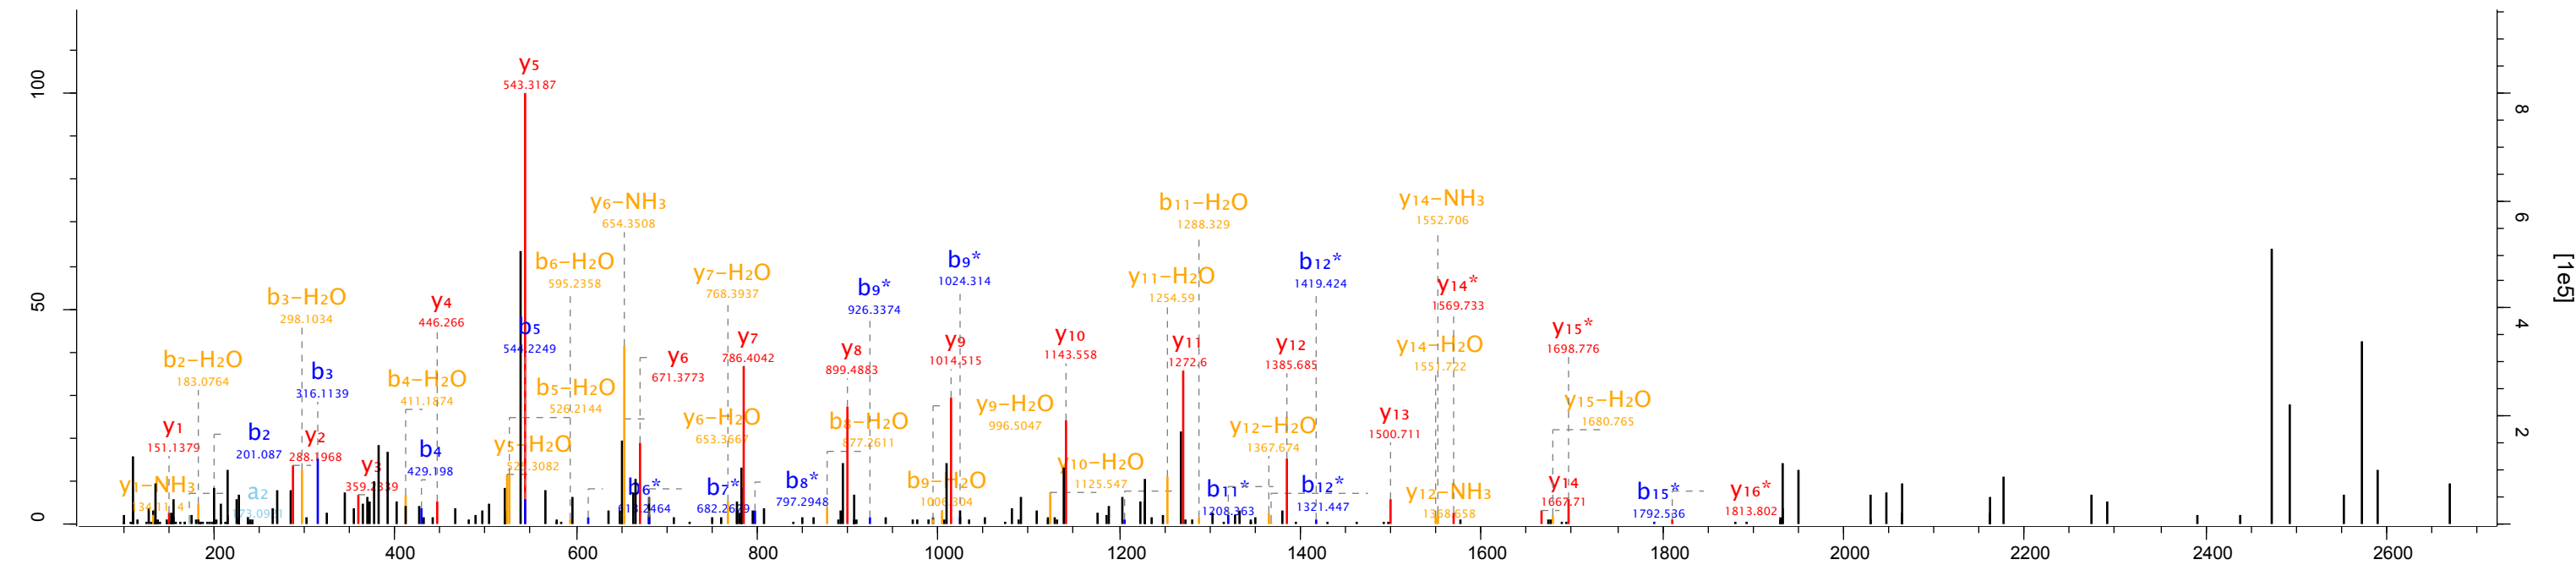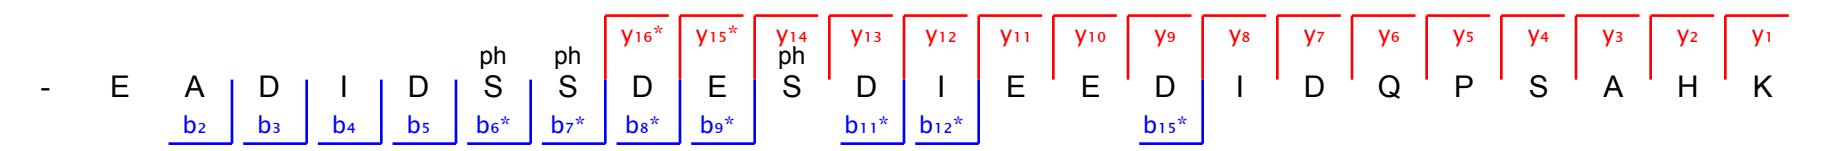

Raw file 20150812\_A375SR\_Phospho\_BR1\_02 Scan 18757 Method FTMS; HCD Score 179.66 m/z 1227.98 Gene names HIRIP3

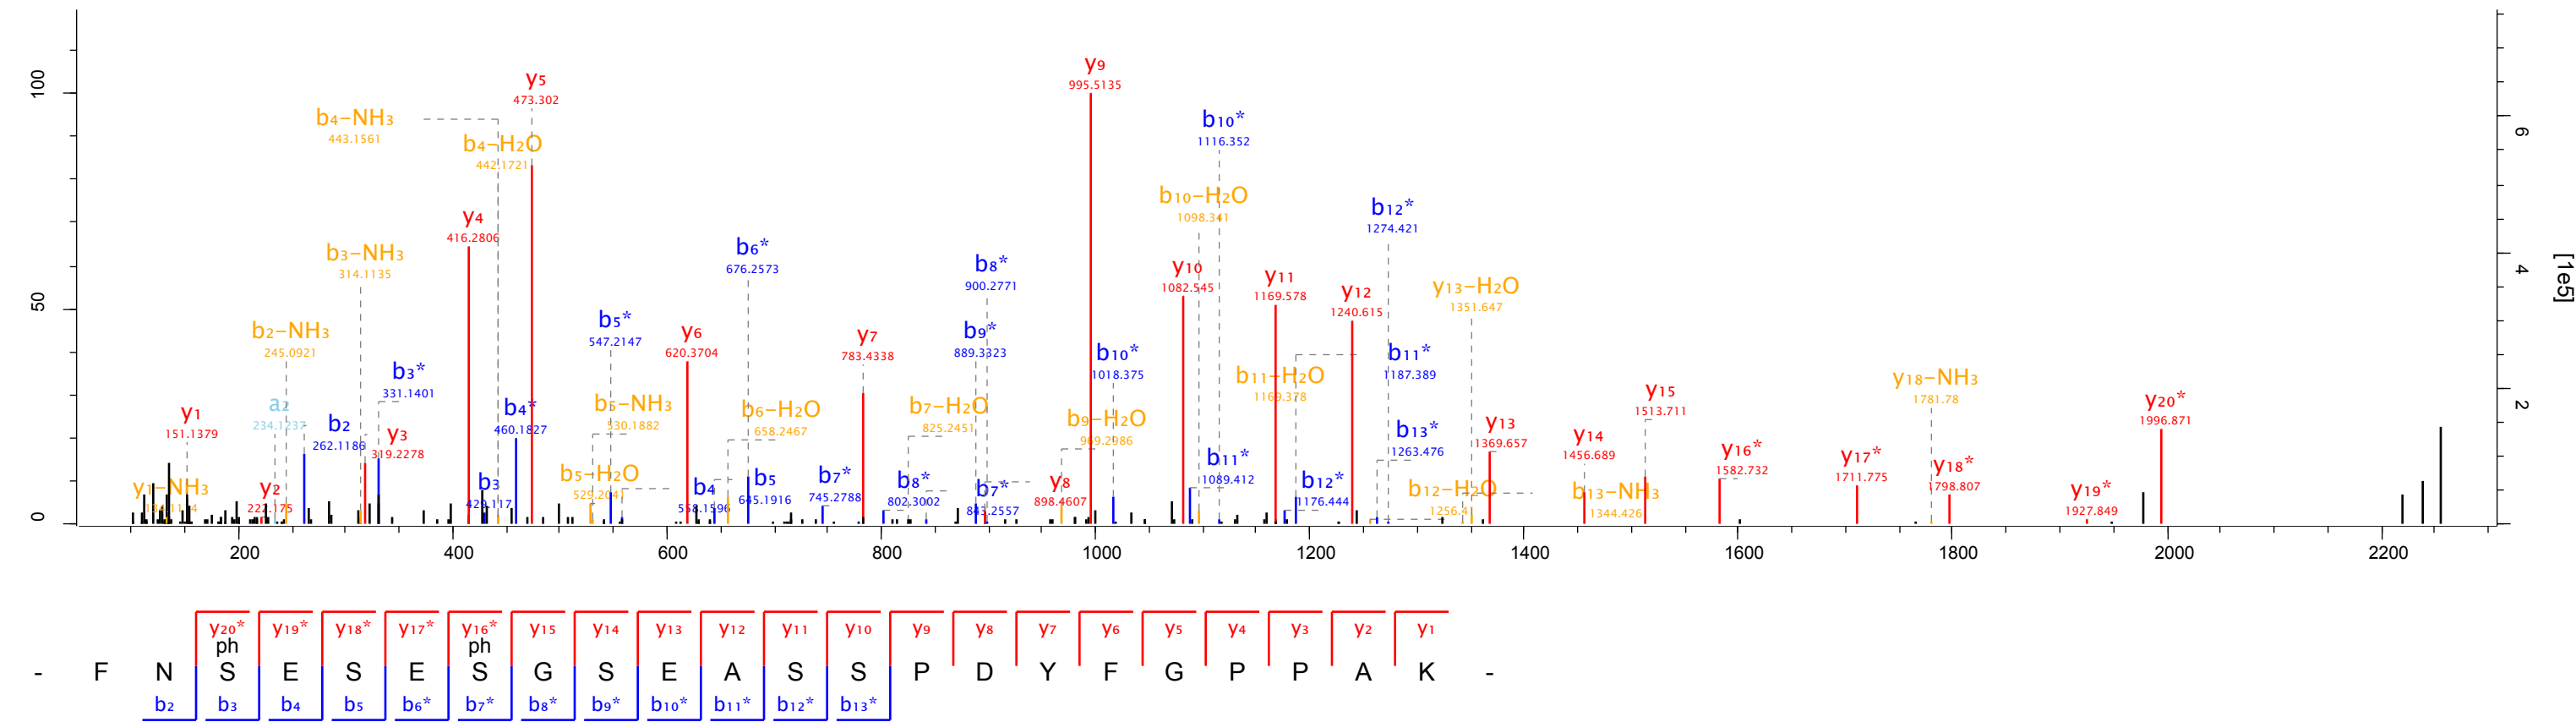



Raw file: 20150812\_A375SR\_Phospho\_BR1\_02  
 Scan: 19117 Method: FTMS; HCD Score: 110.9 m/z: 1074.42 Gene names: MAP1B

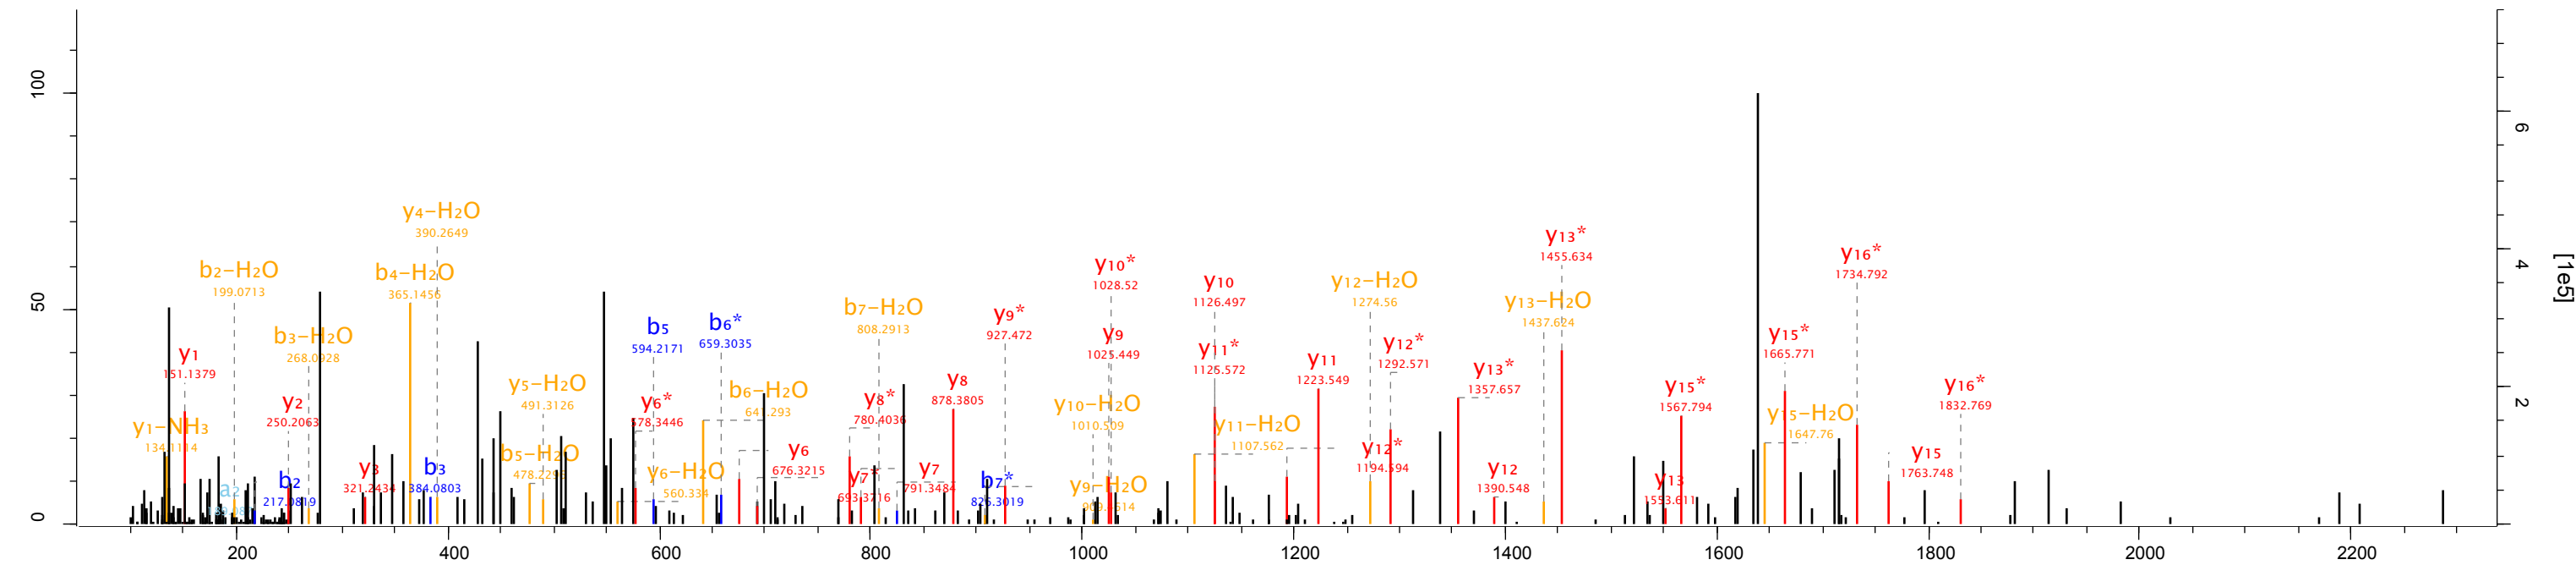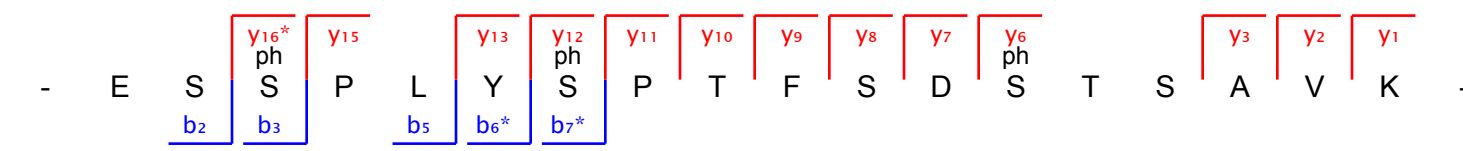



Raw file: 20150812\_A375SR\_Phospho\_BR1\_02  
 Scan: 19237 Method: FTMS; HCD Score: 75.46 m/z: 1033.79 Gene names: SRRM2

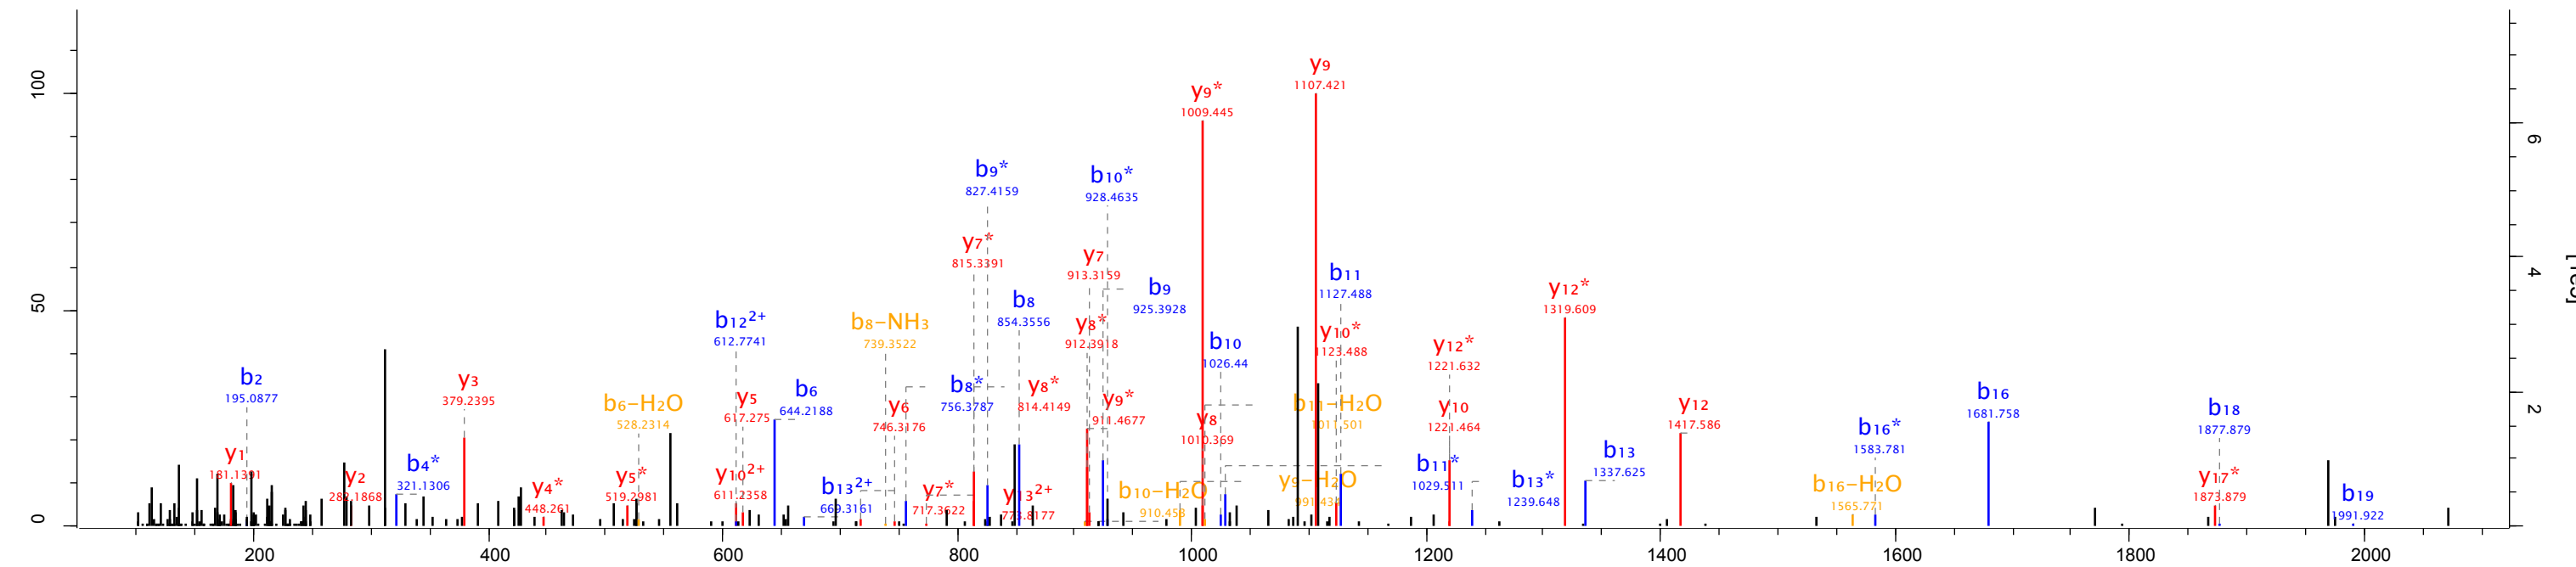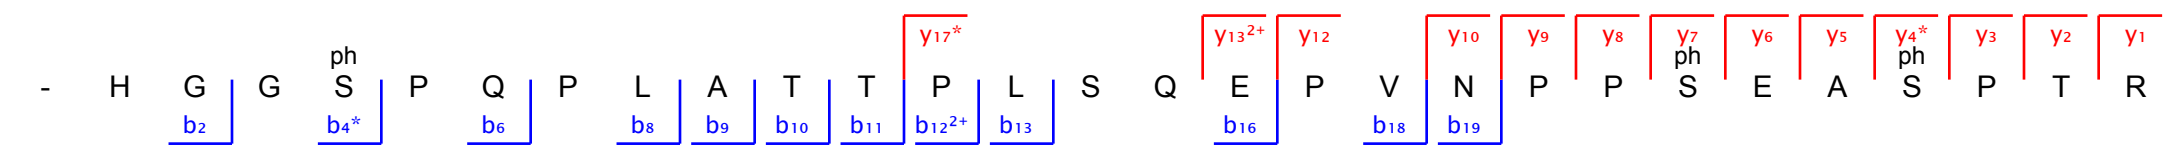

Raw file Scan Method Score m/z Gene names  
 20150812\_A375SR\_Phospho\_BR1\_02 19327 FTMS; HCD 99.31 908.74 INCENP

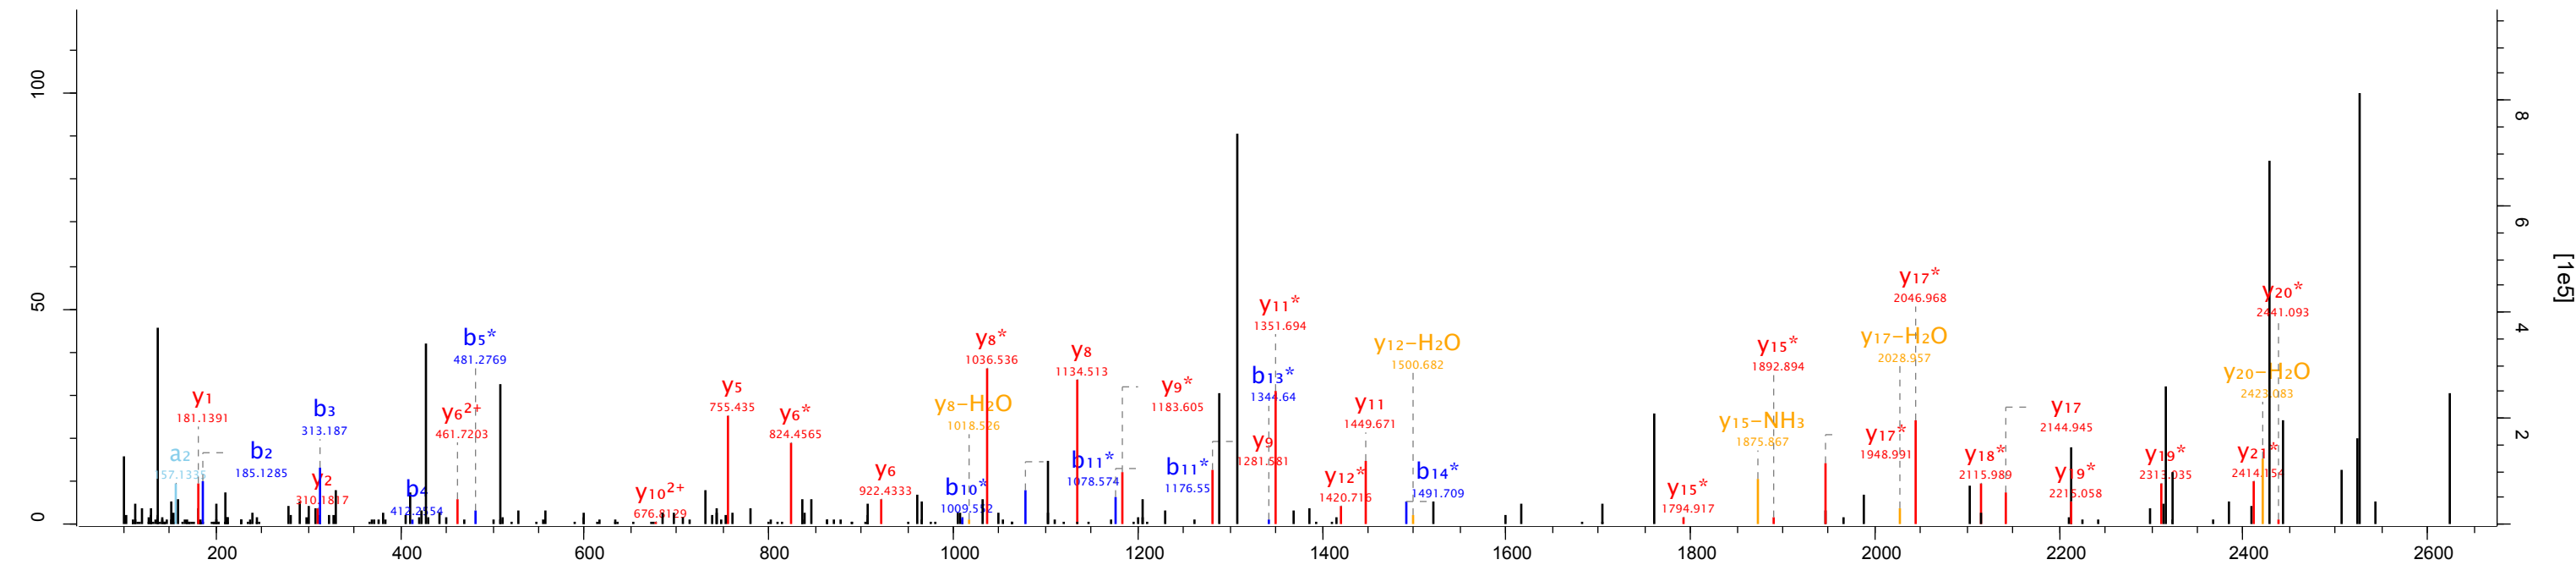

- I A Q V S P G P R D S P A F P D S P W R E R -

Fragmentation mapping (b-ions in blue, y-ions in red):

- b-ions:** b<sub>2</sub> (A), b<sub>3</sub> (Q), b<sub>4</sub> (V), b<sub>5</sub><sup>\*</sup> (S), b<sub>10</sub><sup>\*</sup> (D), b<sub>11</sub><sup>\*</sup> (S), b<sub>13</sub><sup>\*</sup> (A), b<sub>14</sub><sup>\*</sup> (F).
- y-ions:** y<sub>21</sub><sup>\*</sup> (S), y<sub>20</sub><sup>\*</sup> (Q), y<sub>19</sub><sup>\*</sup> (V), y<sub>18</sub><sup>\*</sup> (S), y<sub>17</sub> (P), y<sub>15</sub><sup>\*</sup> (P), y<sub>12</sub><sup>\*</sup> (S), y<sub>11</sub> (P), y<sub>10</sub><sup>2+</sup> (A), y<sub>9</sub> (F), y<sub>8</sub> (P), y<sub>6</sub> (S), y<sub>5</sub> (P), y<sub>2</sub> (E), y<sub>1</sub> (R).



Raw file 20150812\_A375SR\_Phospho\_BR1\_02 Scan 19767 Method FTMS; HCD Score 76.16 m/z 638.94 Gene names NAV1

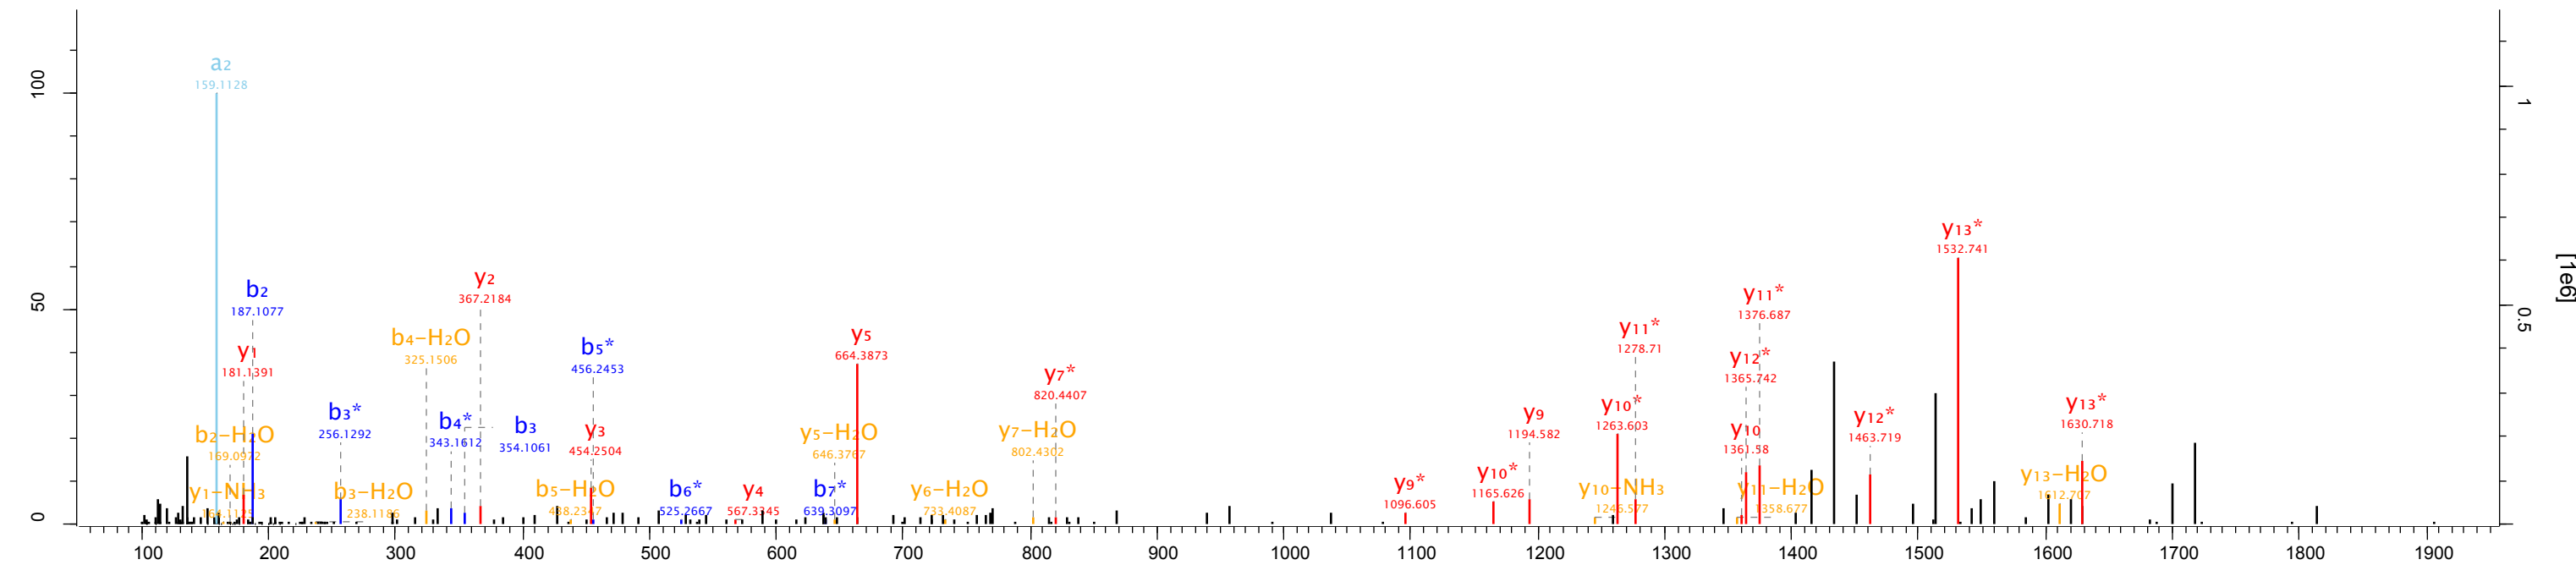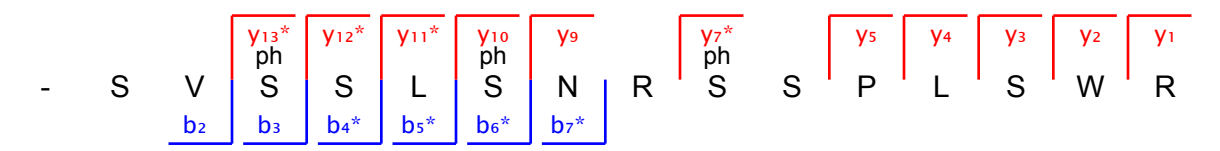

Raw file: 20150812\_A375SR\_Phospho\_BR1\_02  
 Scan: 20087 Method: FTMS; HCD Score: 55.84 m/z: 936.85 Gene names: OPTN

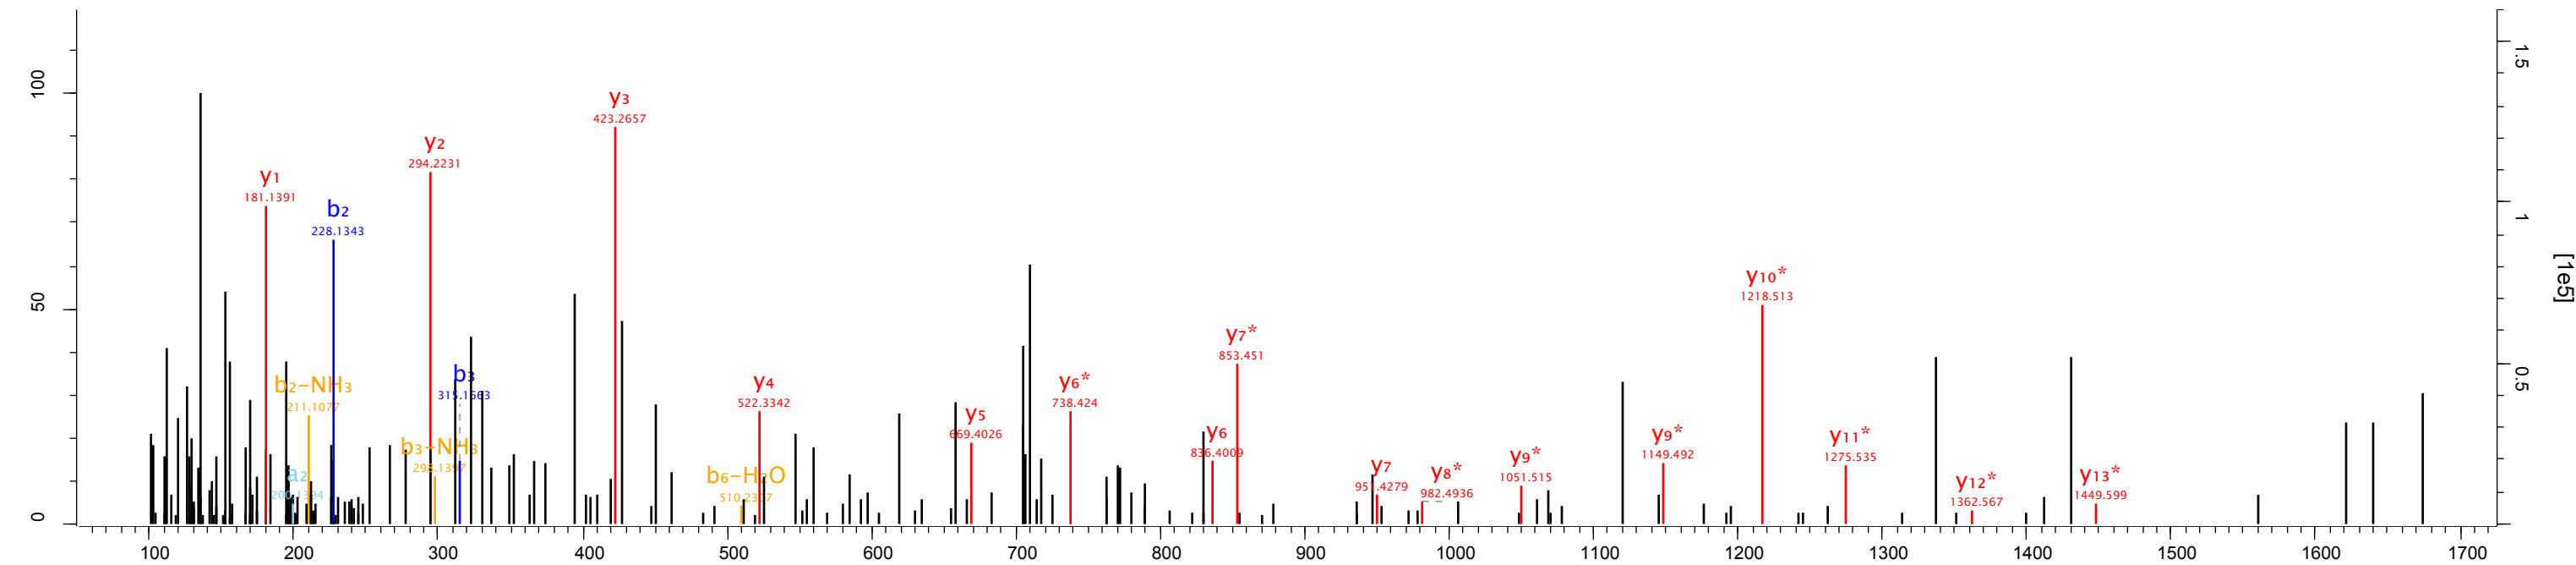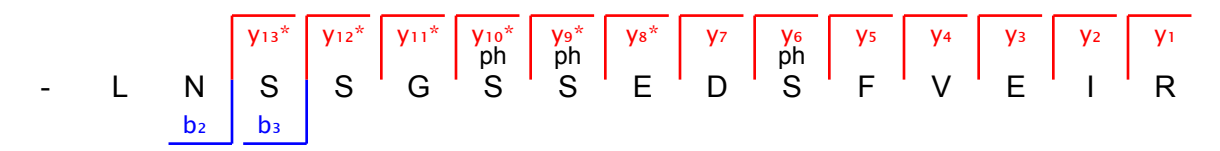

Raw file 20150812\_A375SR\_Phospho\_BR1\_02 Scan 20157 Method FTMS; HCD Score 98.96 m/z 918.87 Gene names SMCR8

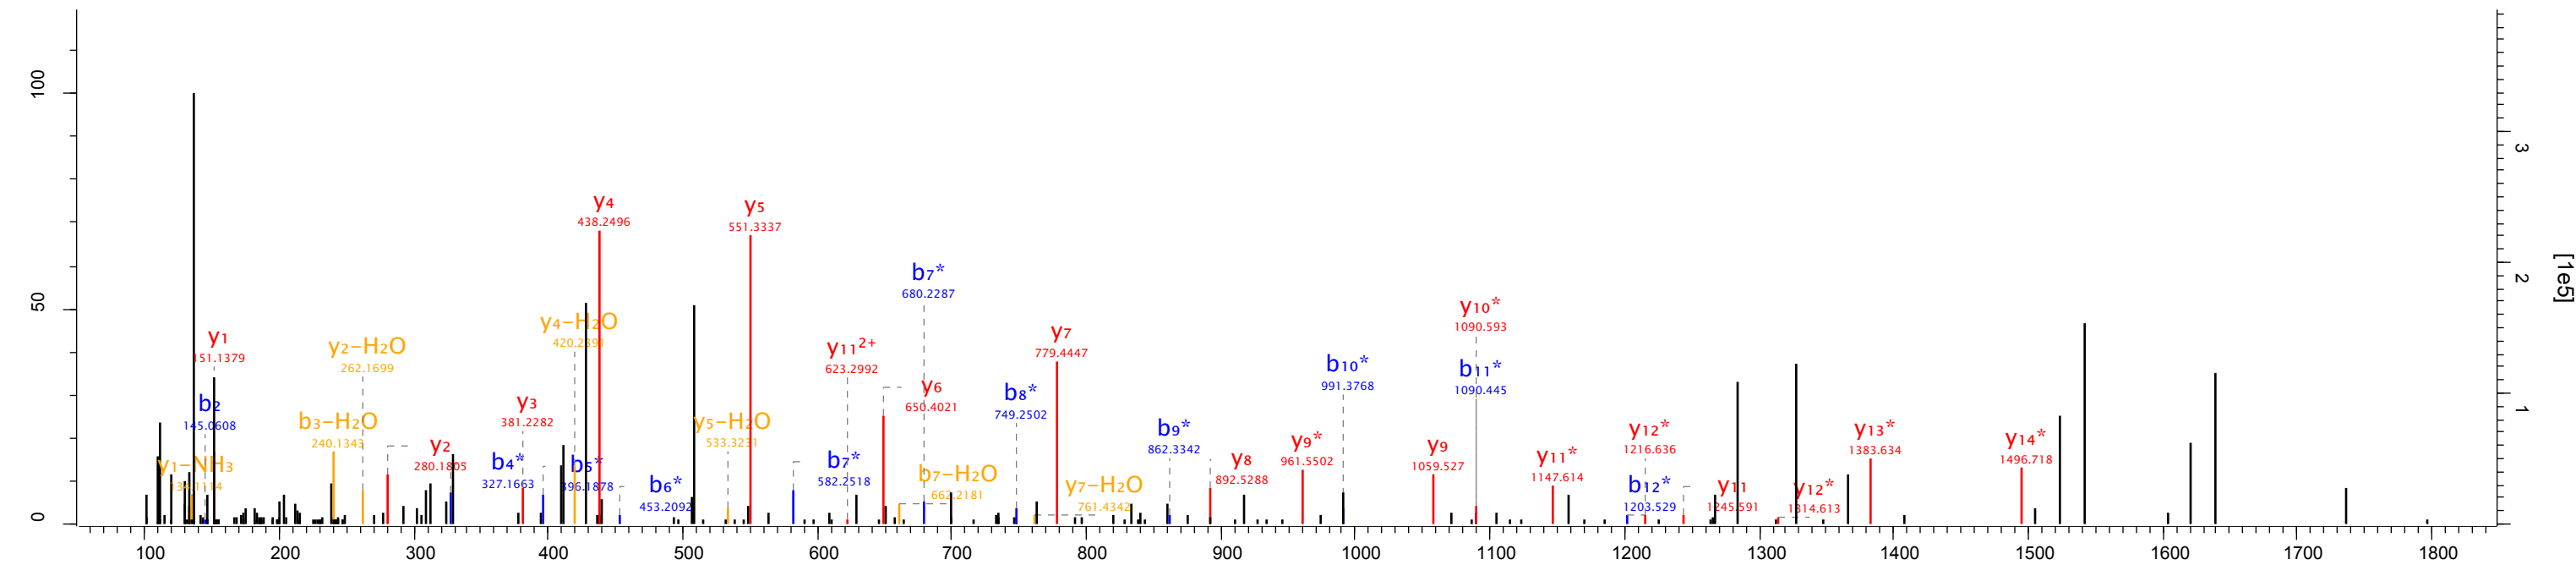

- G S I S ph S G E S I E V L G T E K -

b<sub>2</sub> b<sub>4</sub>\* b<sub>5</sub>\* b<sub>6</sub>\* b<sub>7</sub>\* b<sub>8</sub>\* b<sub>9</sub>\* b<sub>10</sub>\* b<sub>11</sub>\* b<sub>12</sub>\* y<sub>14</sub>\* y<sub>13</sub>\* y<sub>12</sub>\* y<sub>11</sub> y<sub>10</sub>\* y<sub>9</sub> ph y<sub>8</sub> y<sub>7</sub> y<sub>6</sub> y<sub>5</sub> y<sub>4</sub> y<sub>3</sub> y<sub>2</sub> y<sub>1</sub>

Raw file  
20150812\_A375SR\_Phospho\_BR1\_02

Scan 20837 Method FTMS; HCD Score 129.63 m/z 1287.87 Gene names SMARCAD1

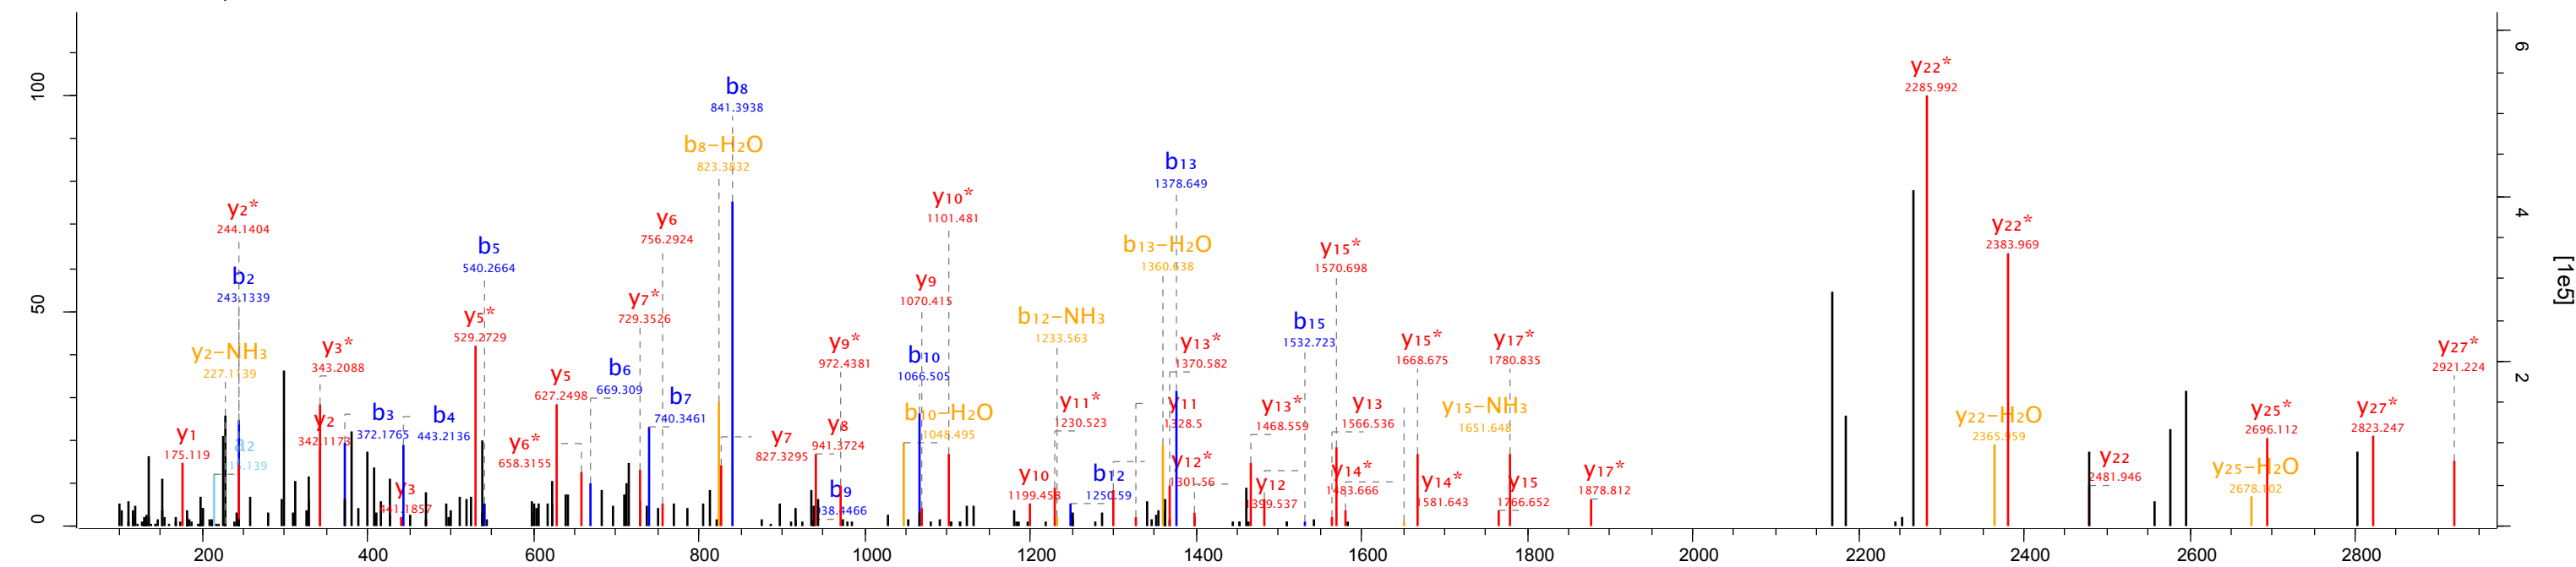

- I E E A P E A T P Q P S Q P G P S S P I S L S A E E E N A E G E V S R -

Fragmentation map below the spectrum shows the sequence of amino acids and the location of b and y ions. Blue boxes indicate b ions (b2 to b15) and red boxes indicate y ions (y1 to y27). The sequence is: I, E (b2), E (b3), A (b4), P (b5), E (b6), A (b7), T (b8), P (b9), Q (b10), P (b11), S (b12), Q (b13), P (b14), G (b15), P, S, S, P (y17), I, S (y15), L (y14), S (y13), A (y12), E (y11), E (y10), E (y9), N (y8), A (y7), E (y6), G (y5), E, V (y3), S (y2), R (y1).

Raw file: 20150812\_A375SR\_Phospho\_BR1\_02  
 Scan: 21027 Method: FTMS; HCD Score: 56.17 m/z: 1045.43 Gene names: PRRX1

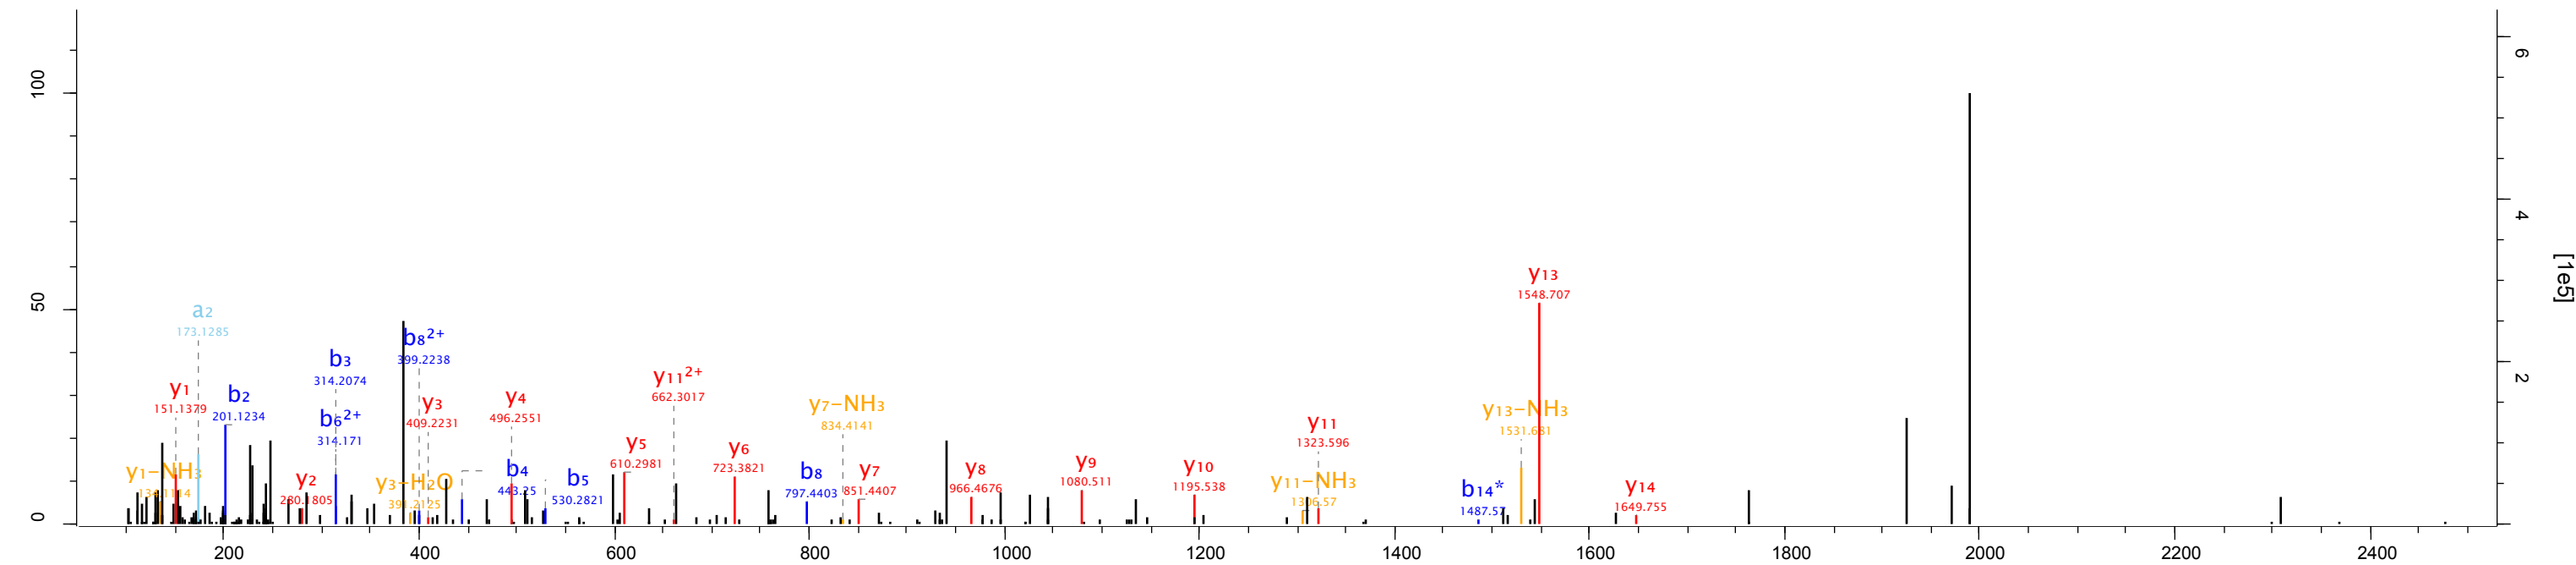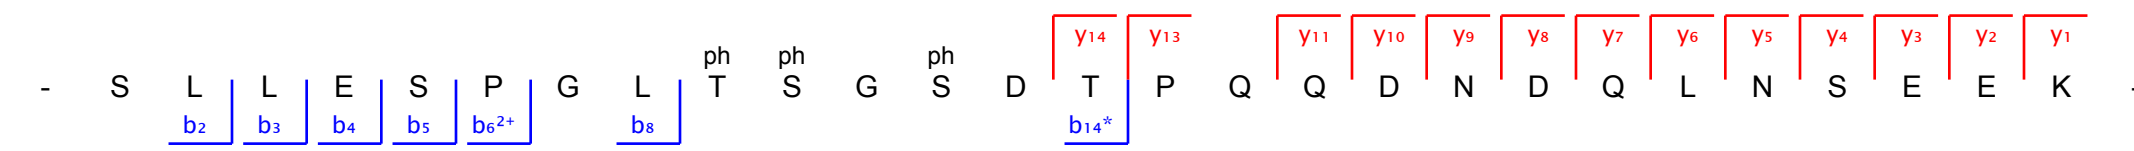



Raw file: 20150812\_A375SR\_Phospho\_BR1\_02  
 Scan: 21507 Method: FTMS; HCD Score: 96.32 m/z: 1252.97 Gene names: PML

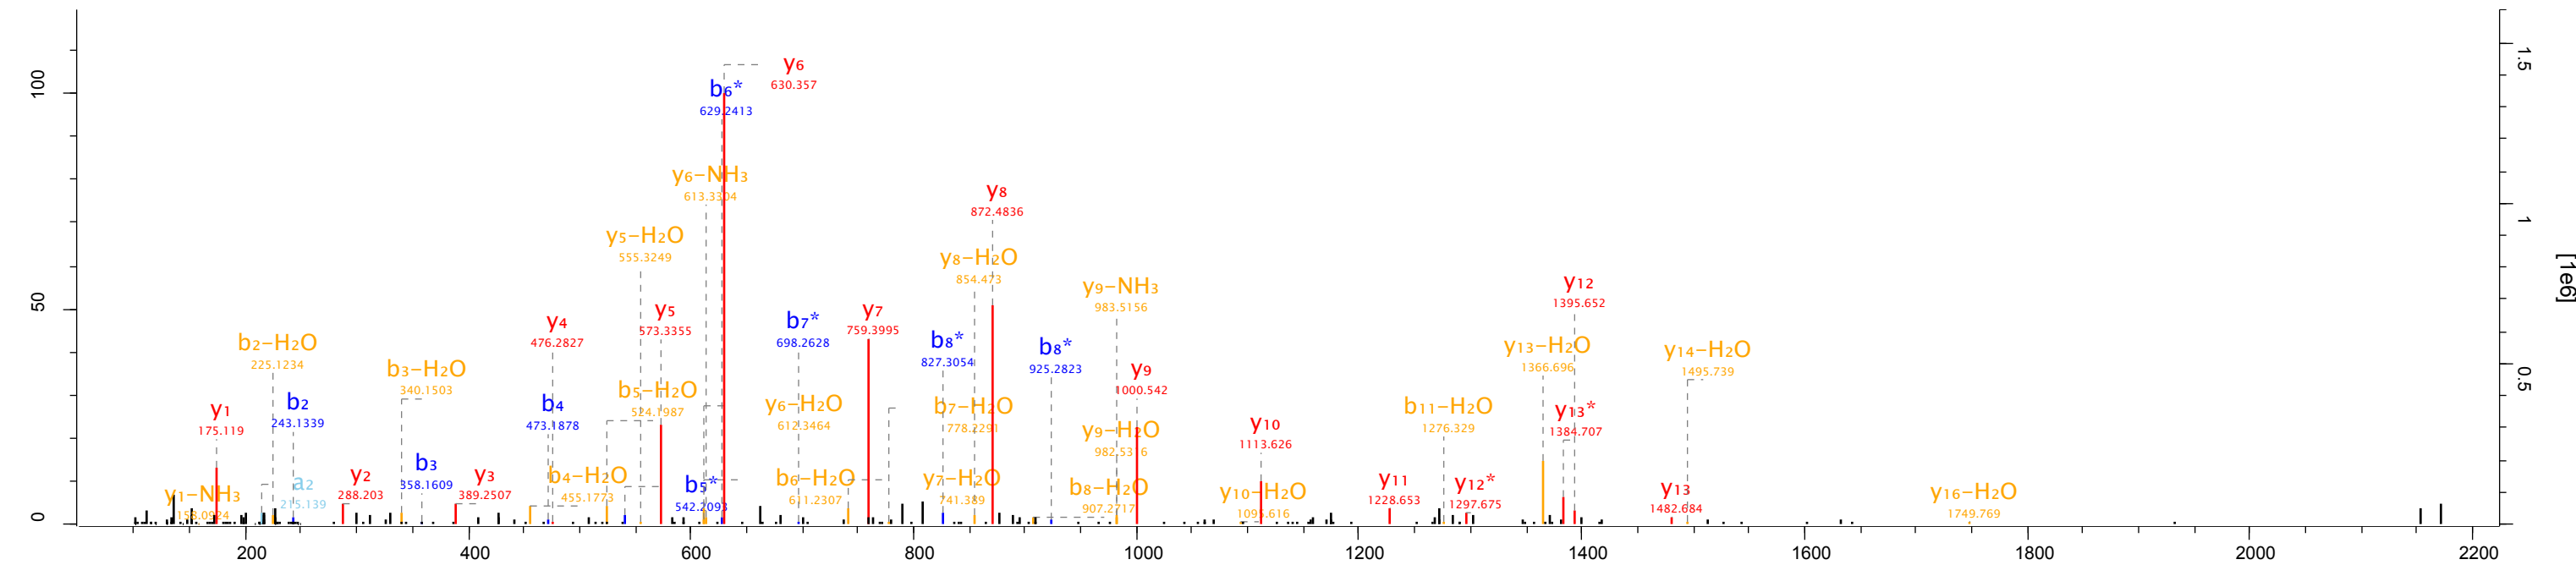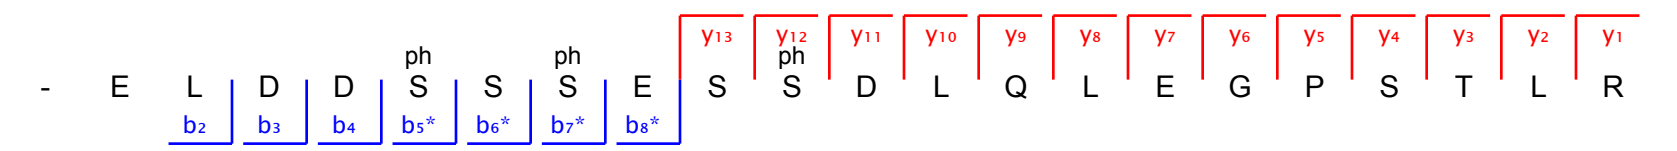

Raw file: 20150812\_A375SR\_Phospho\_BR1\_02  
 Scan: 22327 Method: FTMS; HCD Score: 171.05 m/z: 1144.48 Gene names: H2AFY

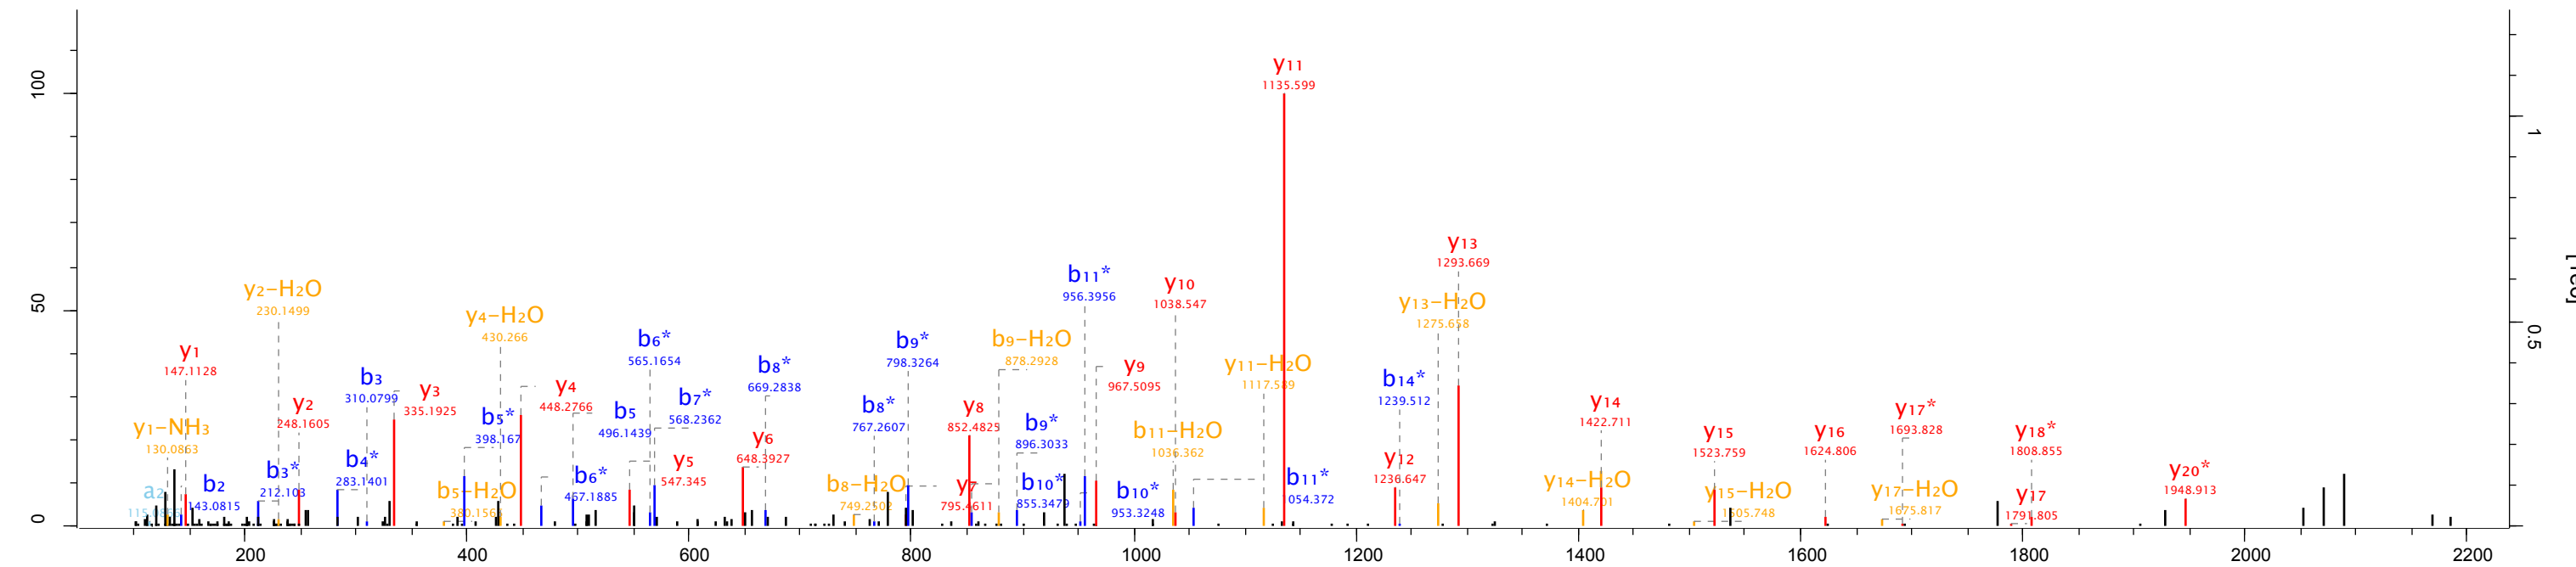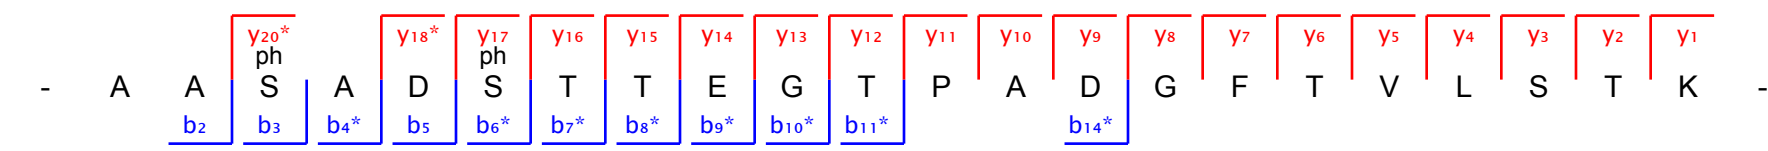

Raw file Scan Method Score m/z Gene names  
 20150812\_A375SR\_Phospho\_BR1\_02 22947 FTMS; HCD 247.9 1258.5 MPHOSPH8

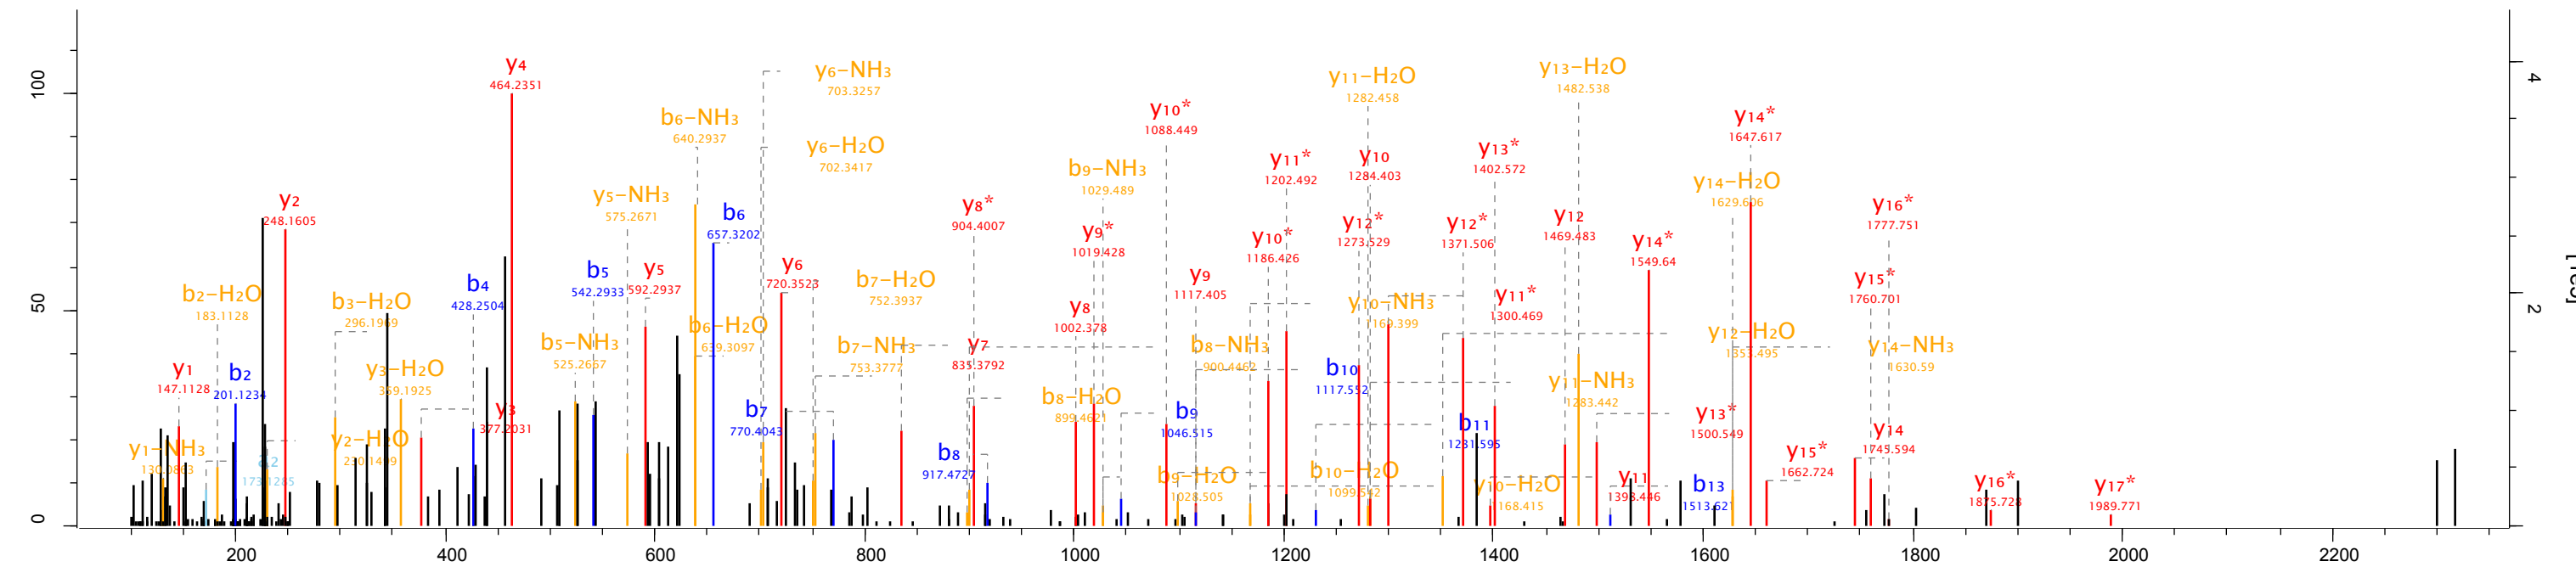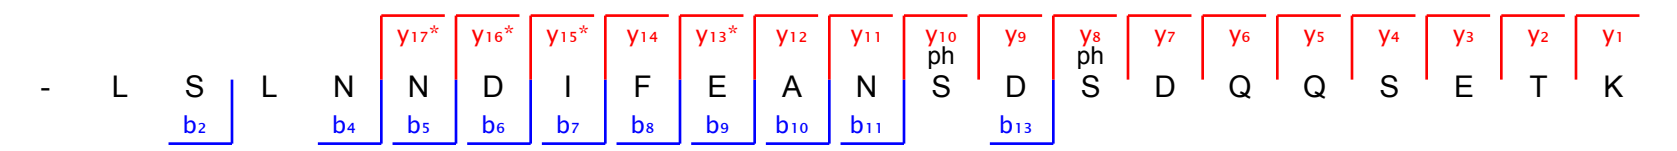

Raw file: 20150812\_A375SR\_Phospho\_BR1\_02  
 Scan: 23307 Method: FTMS; HCD Score: 59.52 m/z: 1467.62 Gene names: AKAP12

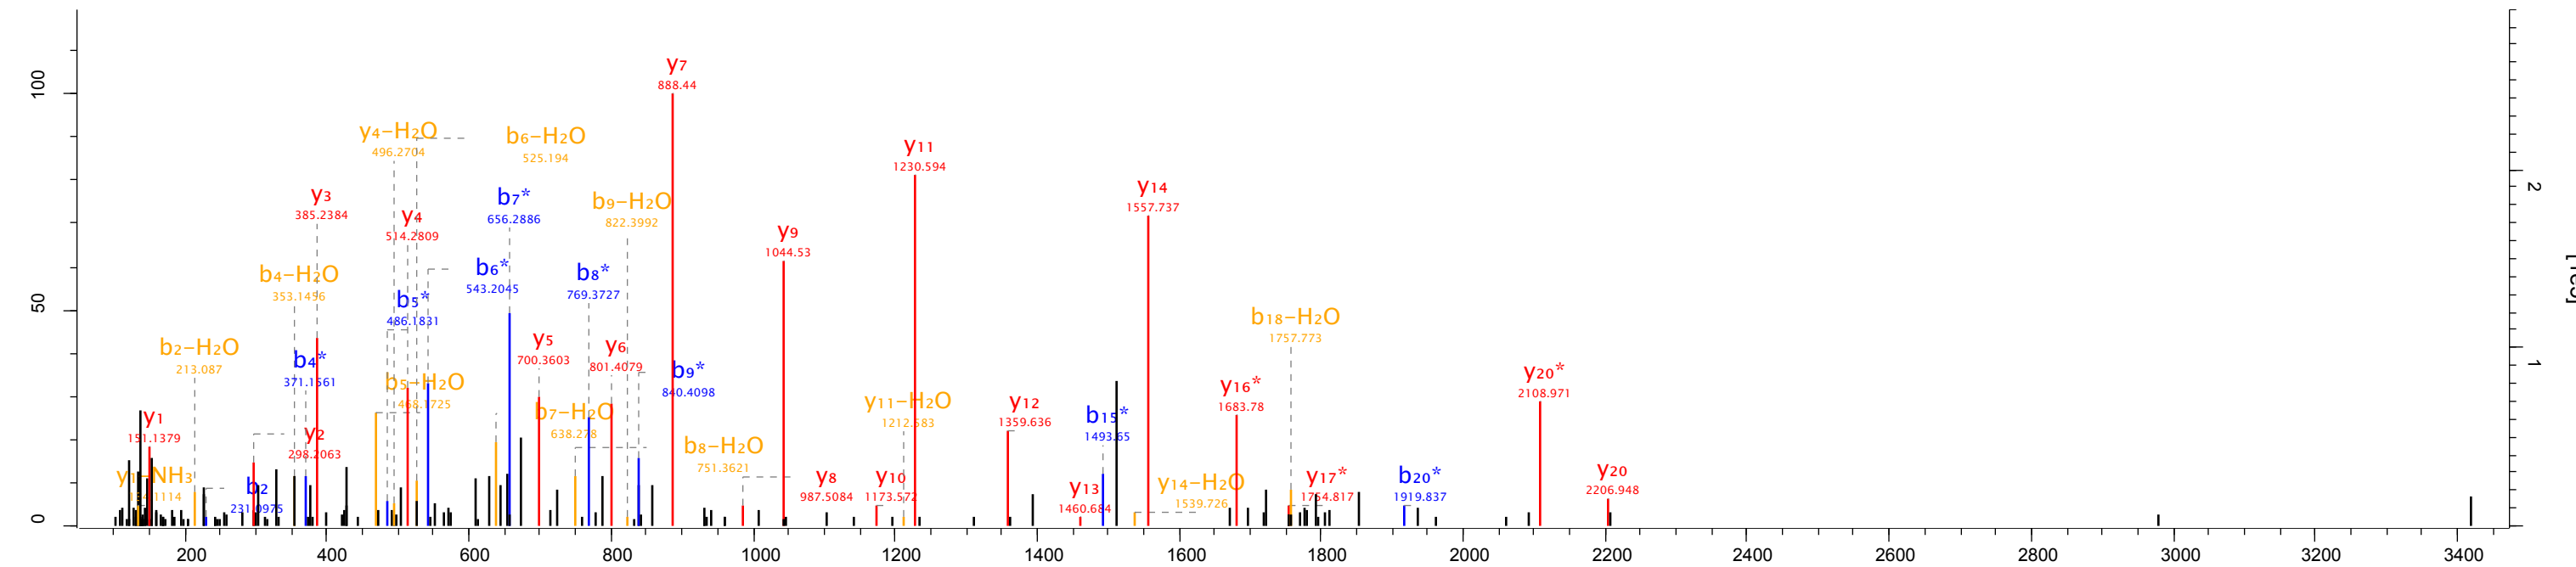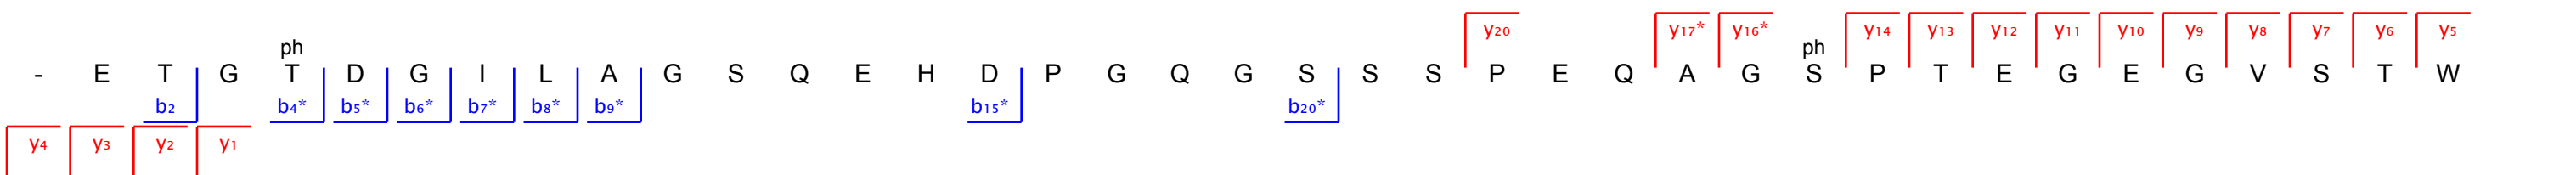

Raw file 20150812\_A375SR\_Phospho\_BR1\_02 Scan 23757 Method FTMS; HCD Score 53.58 m/z 1045.81 Gene names RABL6

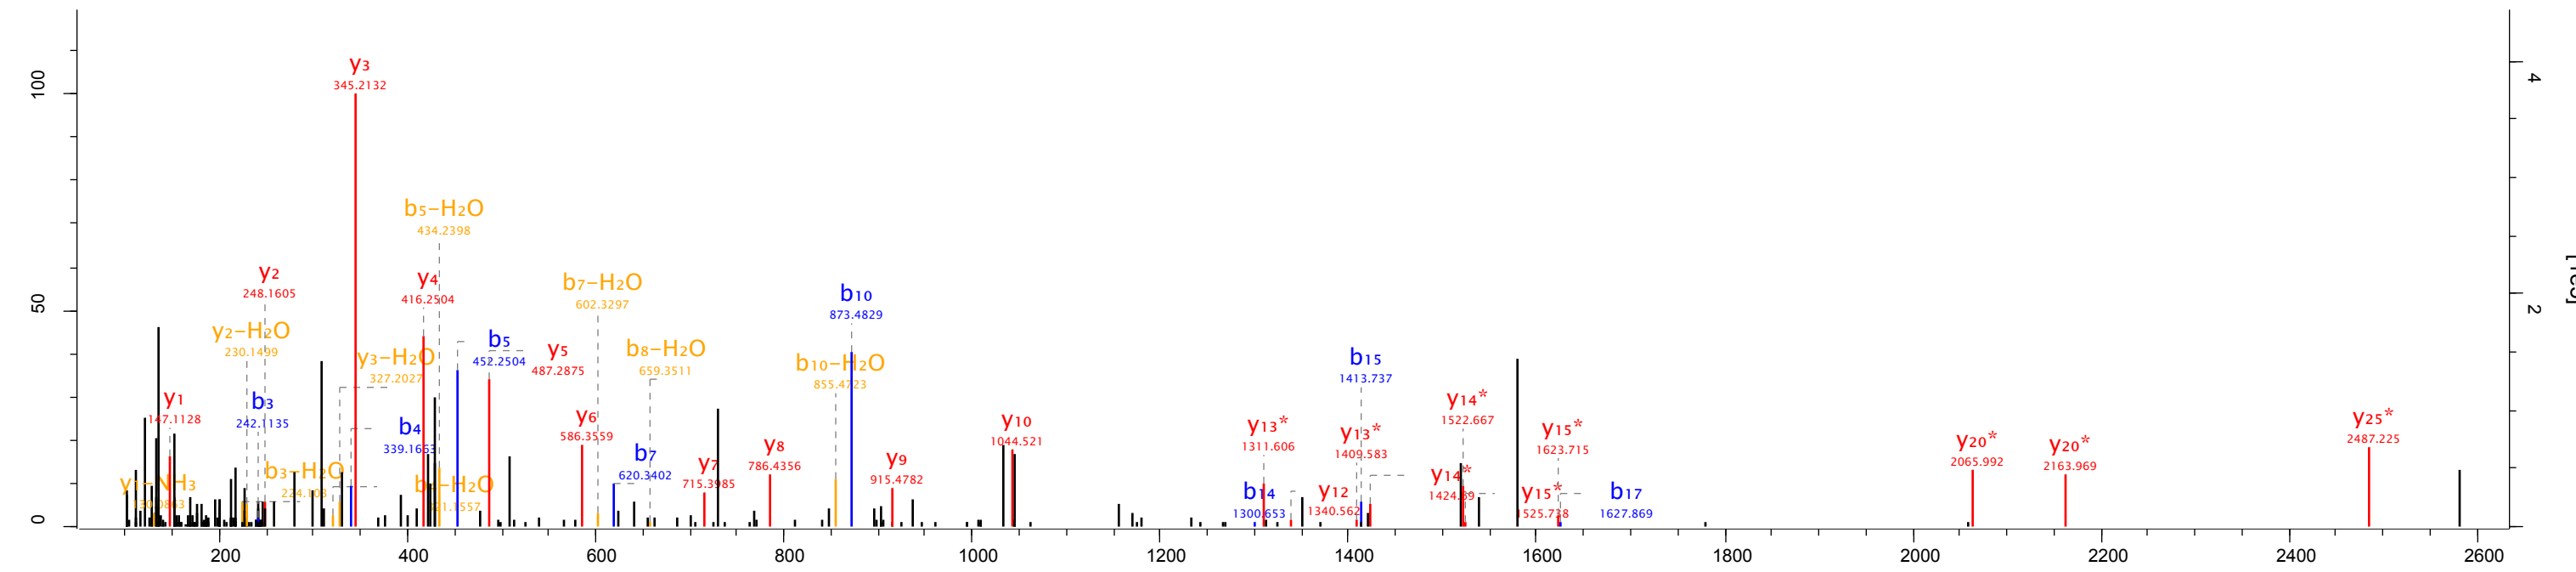

- G S P P L P A G P V P S Q D I T L S S E E E A E V A A P T K -

Fragmentation sites (b ions): b3, b4, b5, b7, b10, b14, b15, b17

Fragmentation sites (y ions): y1, y2, y3, y4, y5, y6, y7, y8, y9, y10, y13\*, y14\*, y15\*, y20\*, y25\*

Raw file 20150812\_A375SR\_Phospho\_BR1\_02 Scan 27477 Method FTMS; HCD Score 66.39 m/z 959.71 Gene names GAB2

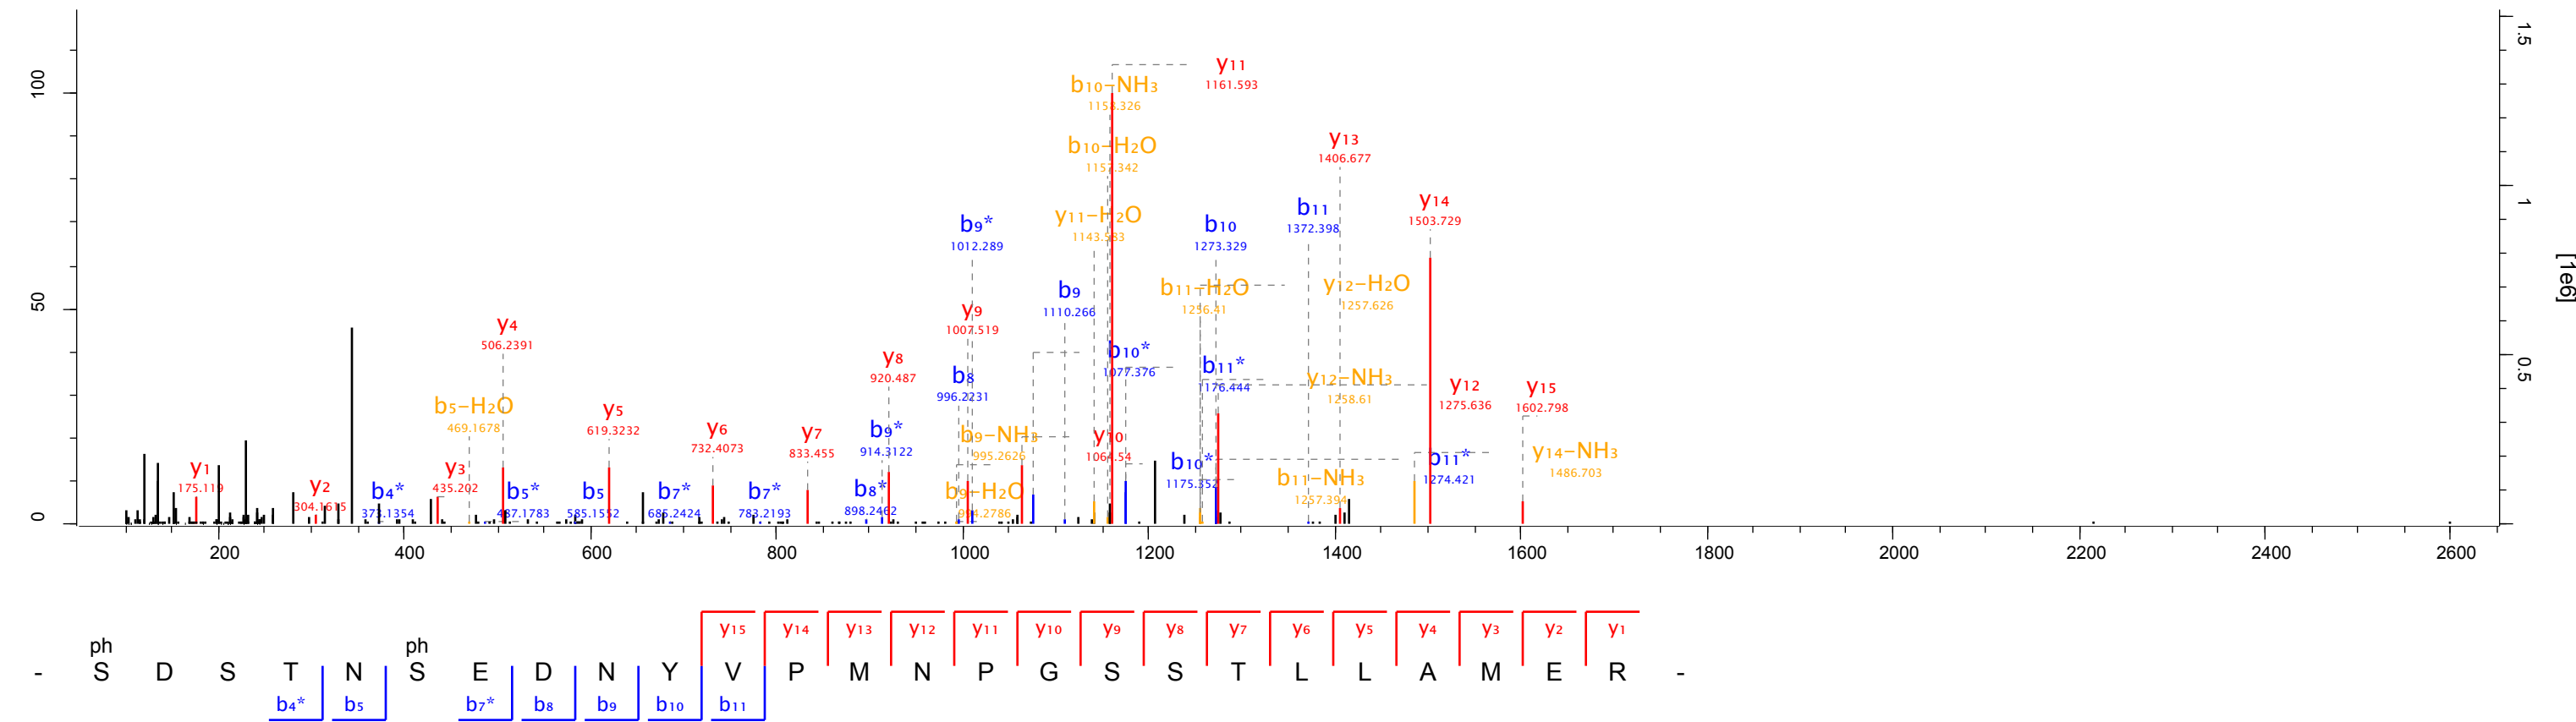

Raw file 20150812\_A375SR\_Phospho\_BR1\_02 Scan 28107 Method FTMS; HCD Score 124.03 m/z 1224.05 Gene names PITPNC1

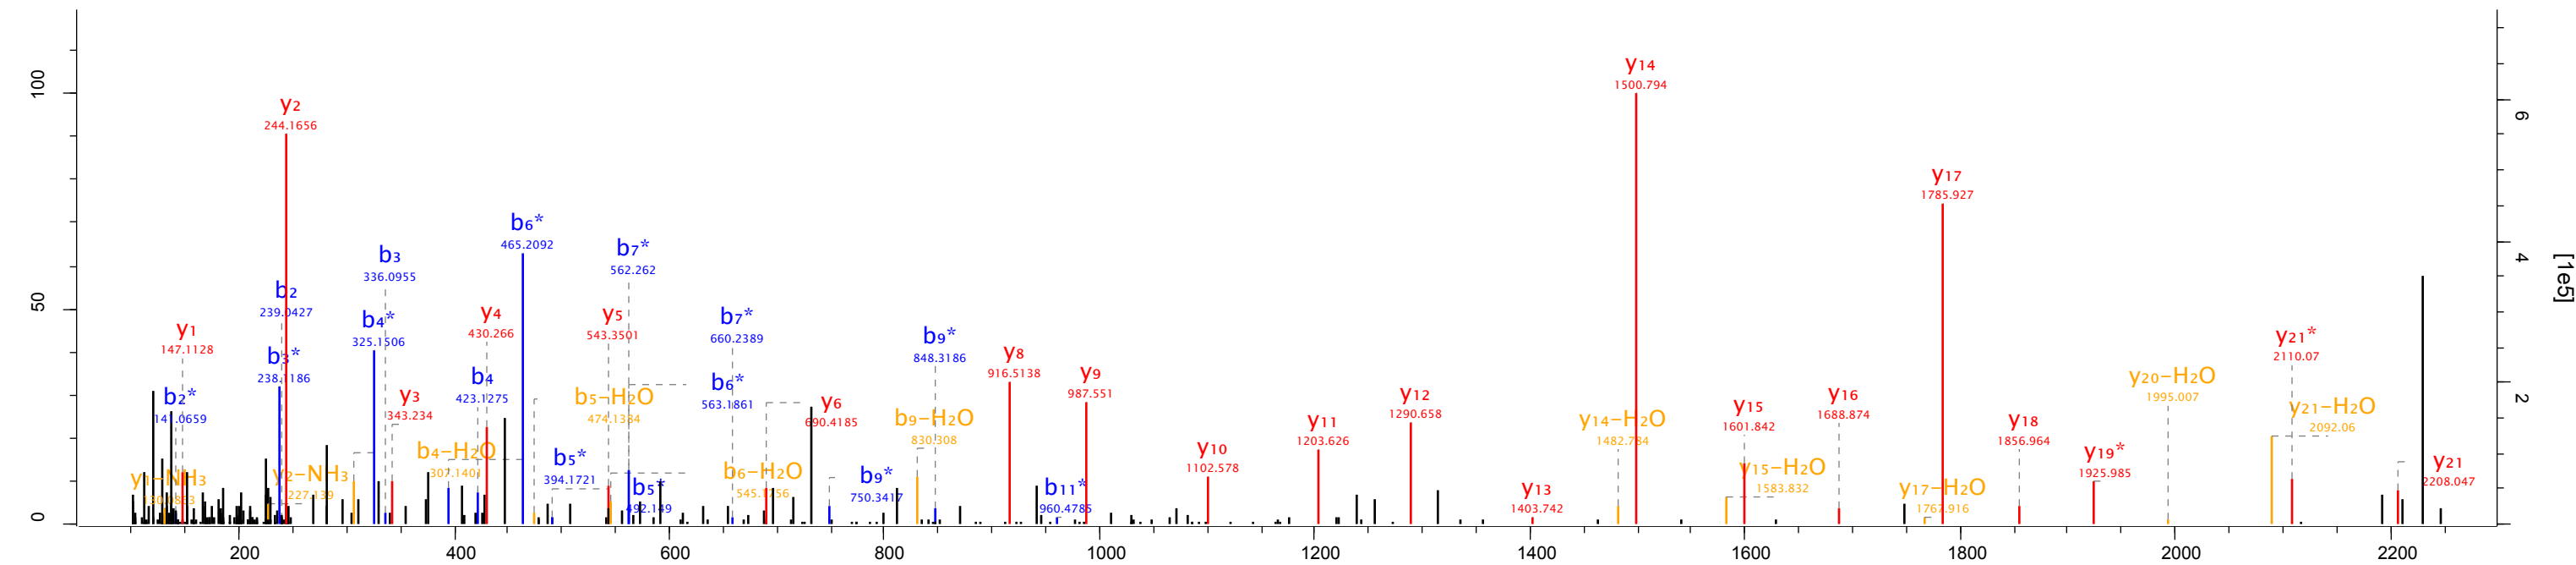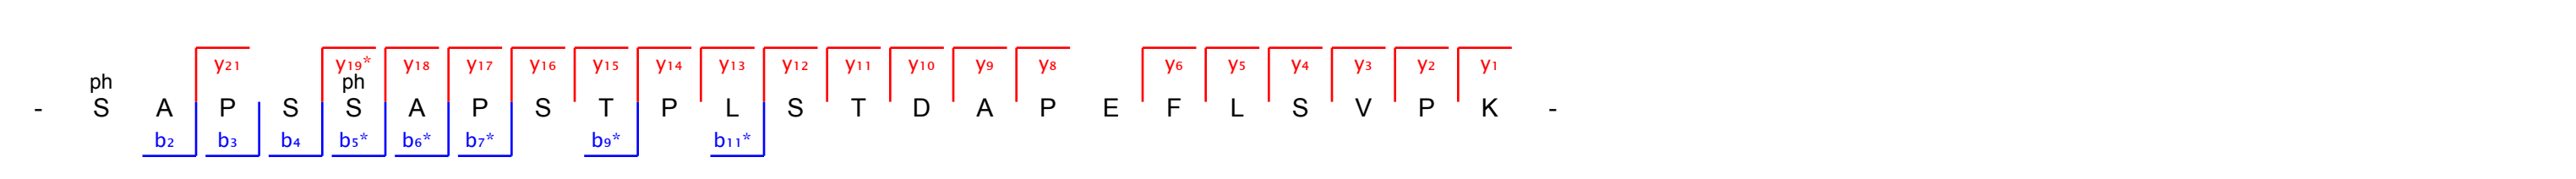

Raw file: 20150812\_A375SR\_Phospho\_BR1\_02  
 Scan: 3407 Method: FTMS; HCD Score: 78.85 m/z: 703.75 Gene names: CDK12

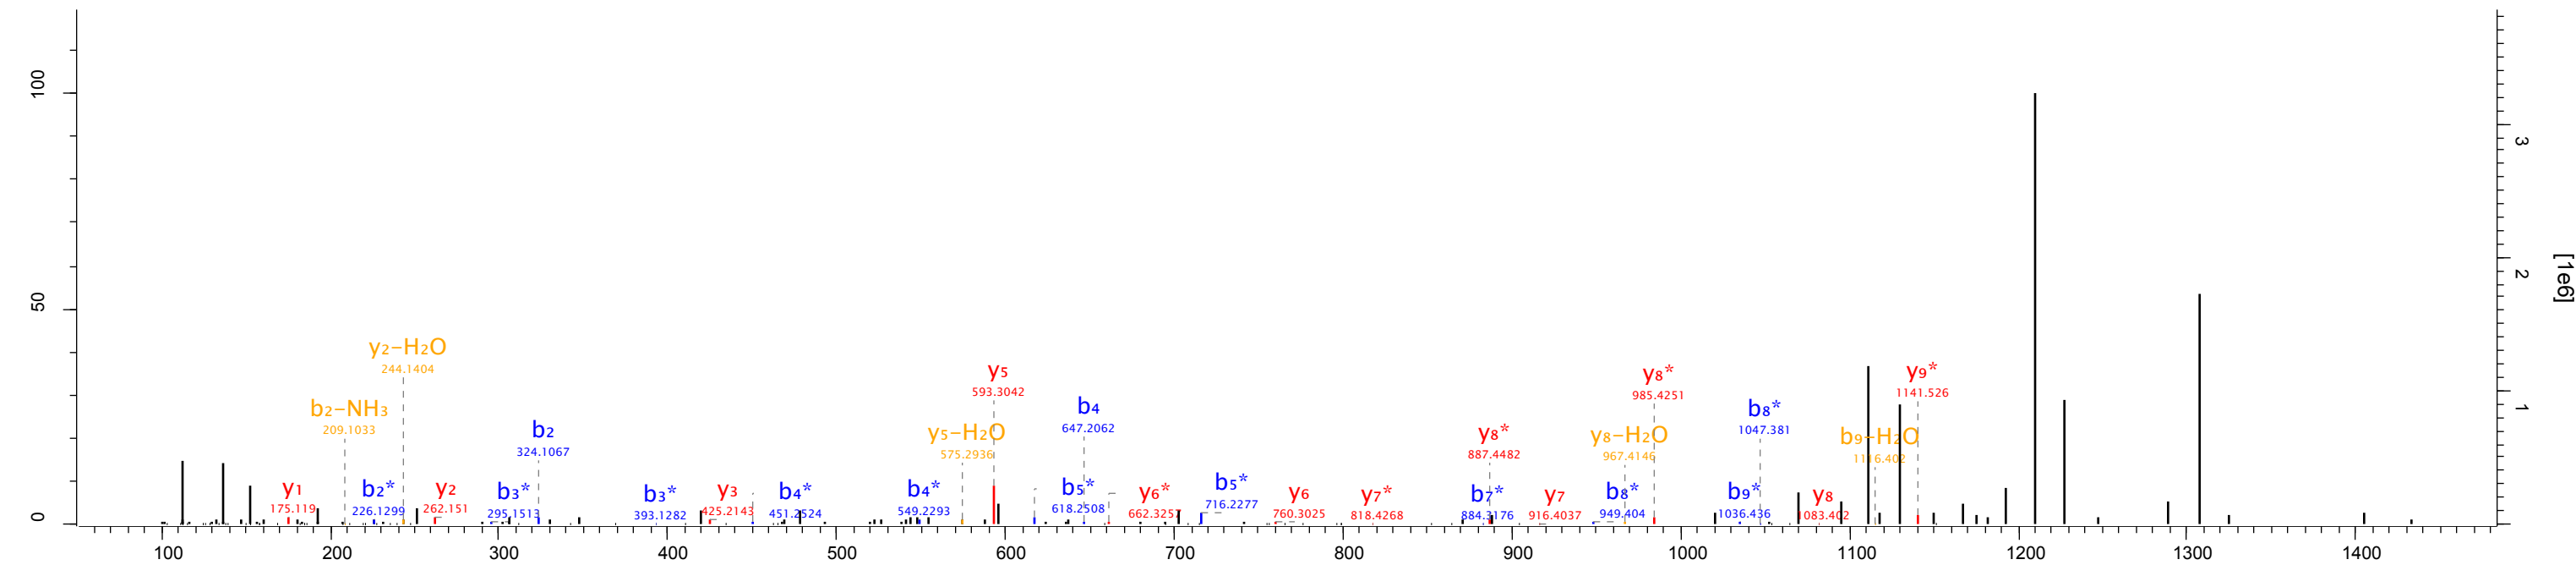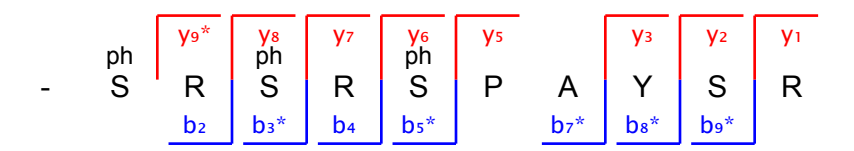



Raw file: 20150812\_A375SR\_Phospho\_BR1\_02  
 Scan: 3807 Method: FTMS; HCD Score: 84.76 m/z: 593.24 Gene names: MATR3

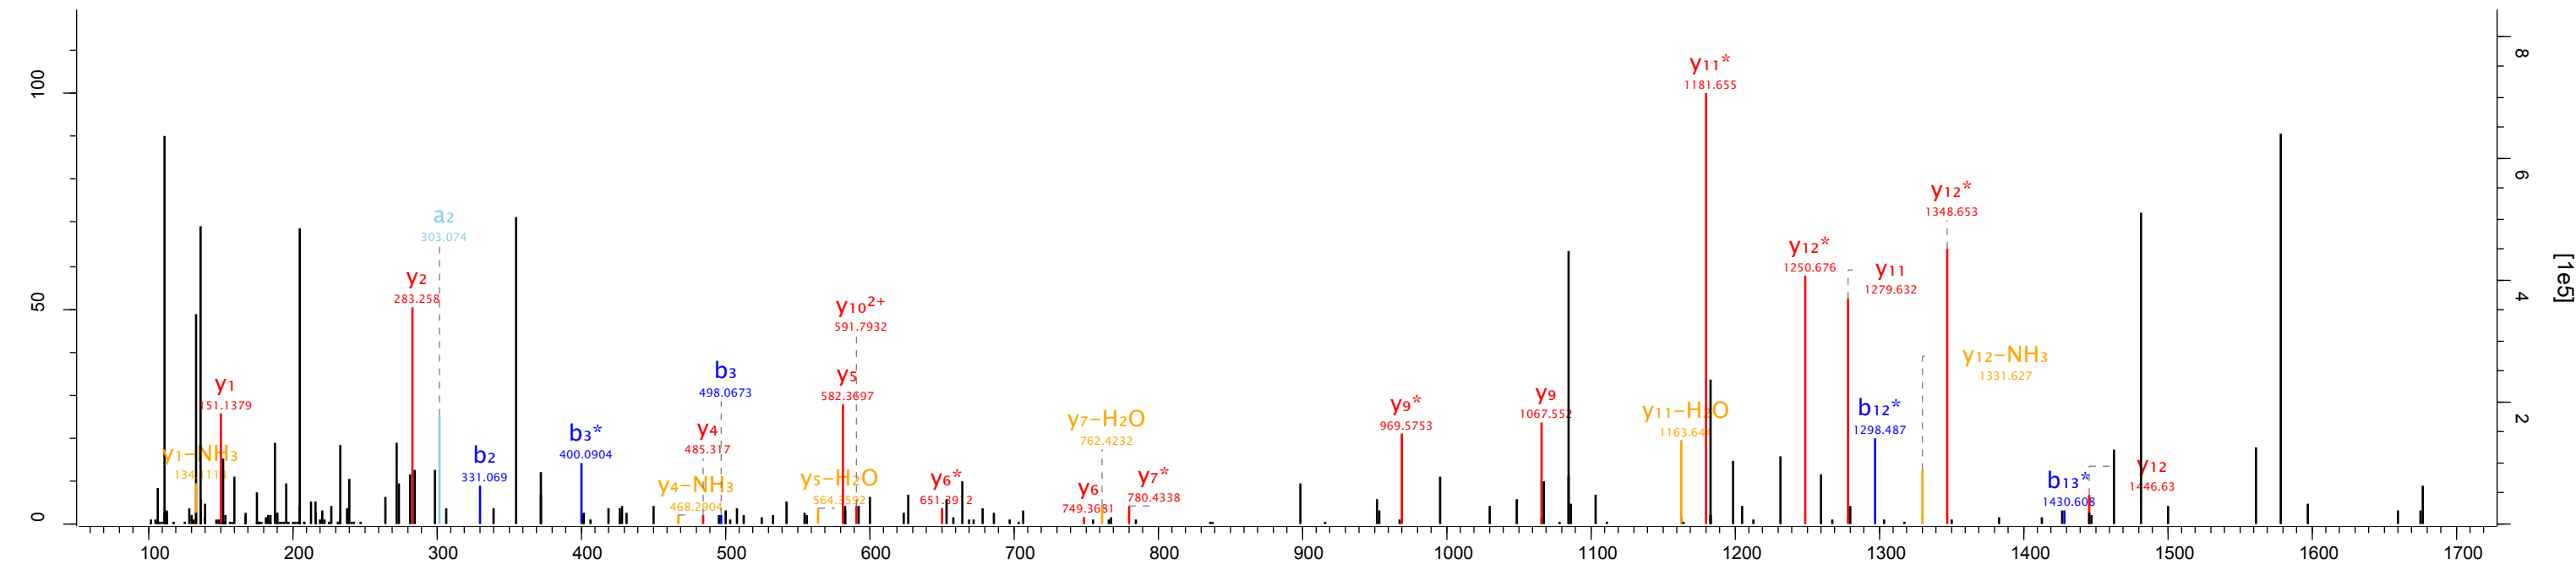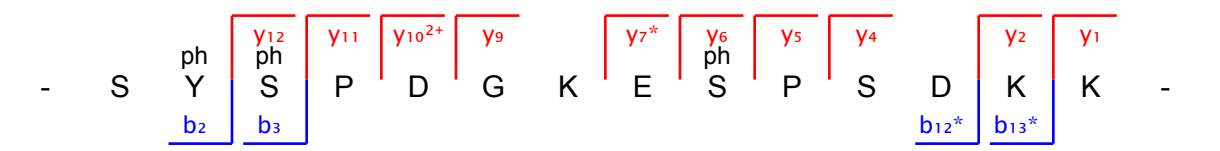

Raw file: 20150812\_A375SR\_Phospho\_BR1\_02  
 Scan: 3937 Method: FTMS; HCD Score: 96.47 m/z: 802.8 Gene names: SRSF10

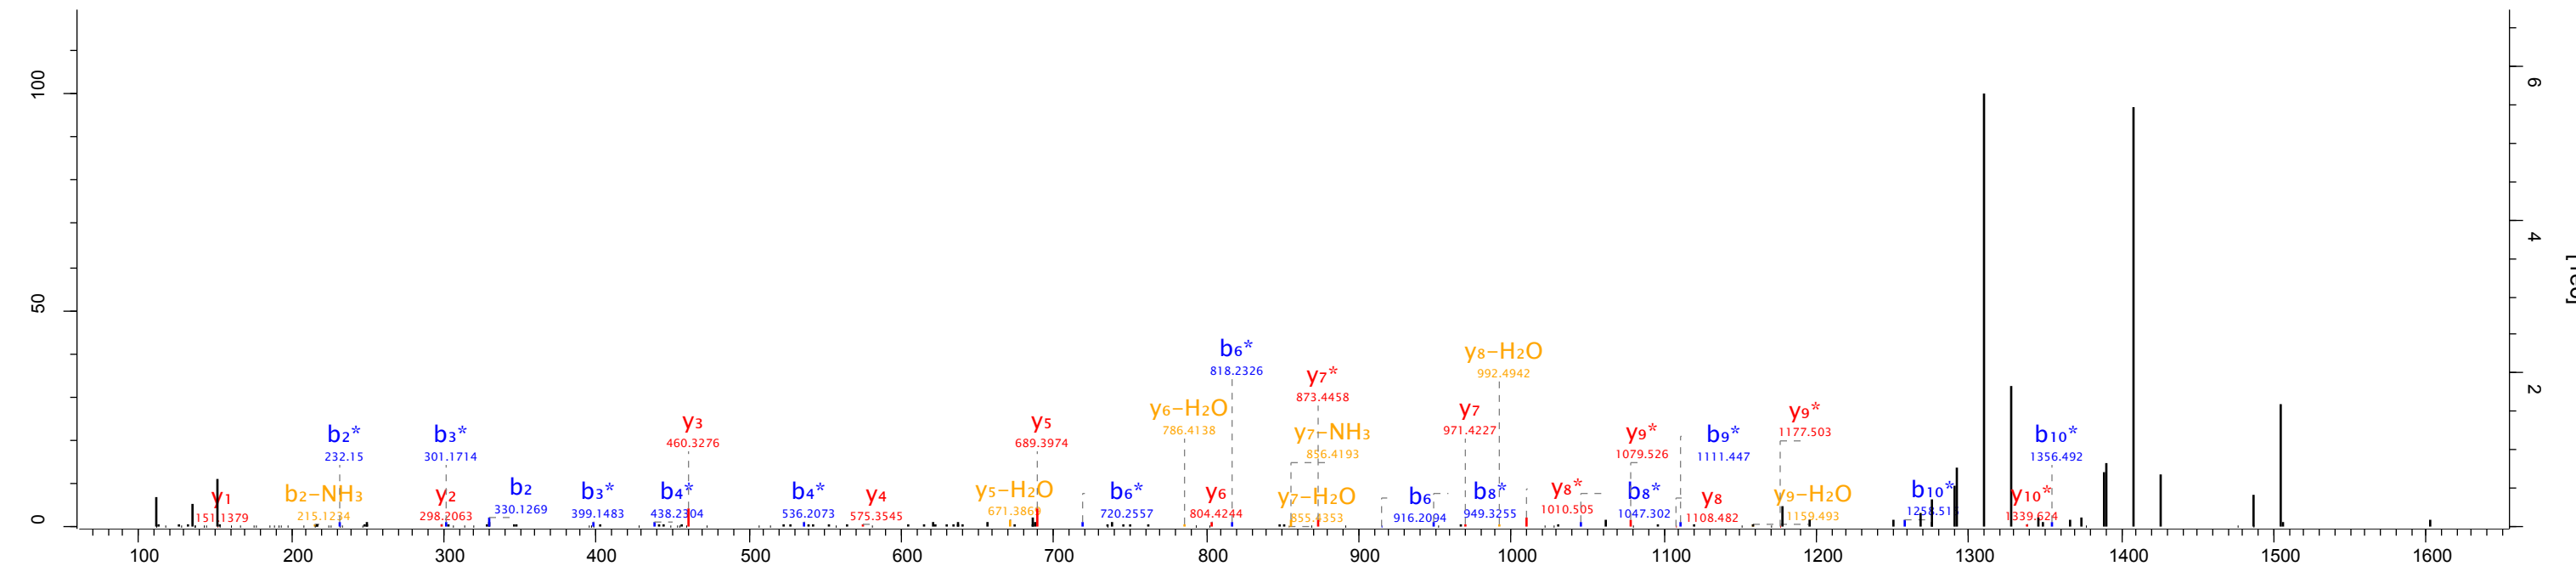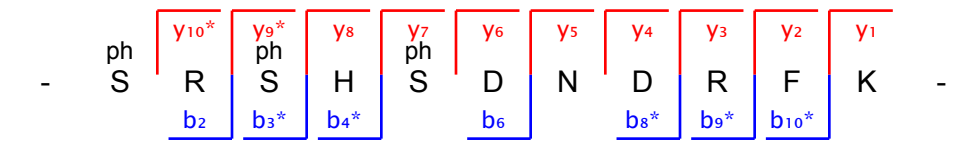

Raw file 20150812\_A375SR\_Phospho\_BR1\_02 Scan 4187 Method FTMS; HCD Score 63.54 m/z 698.78 Gene names SRRM2

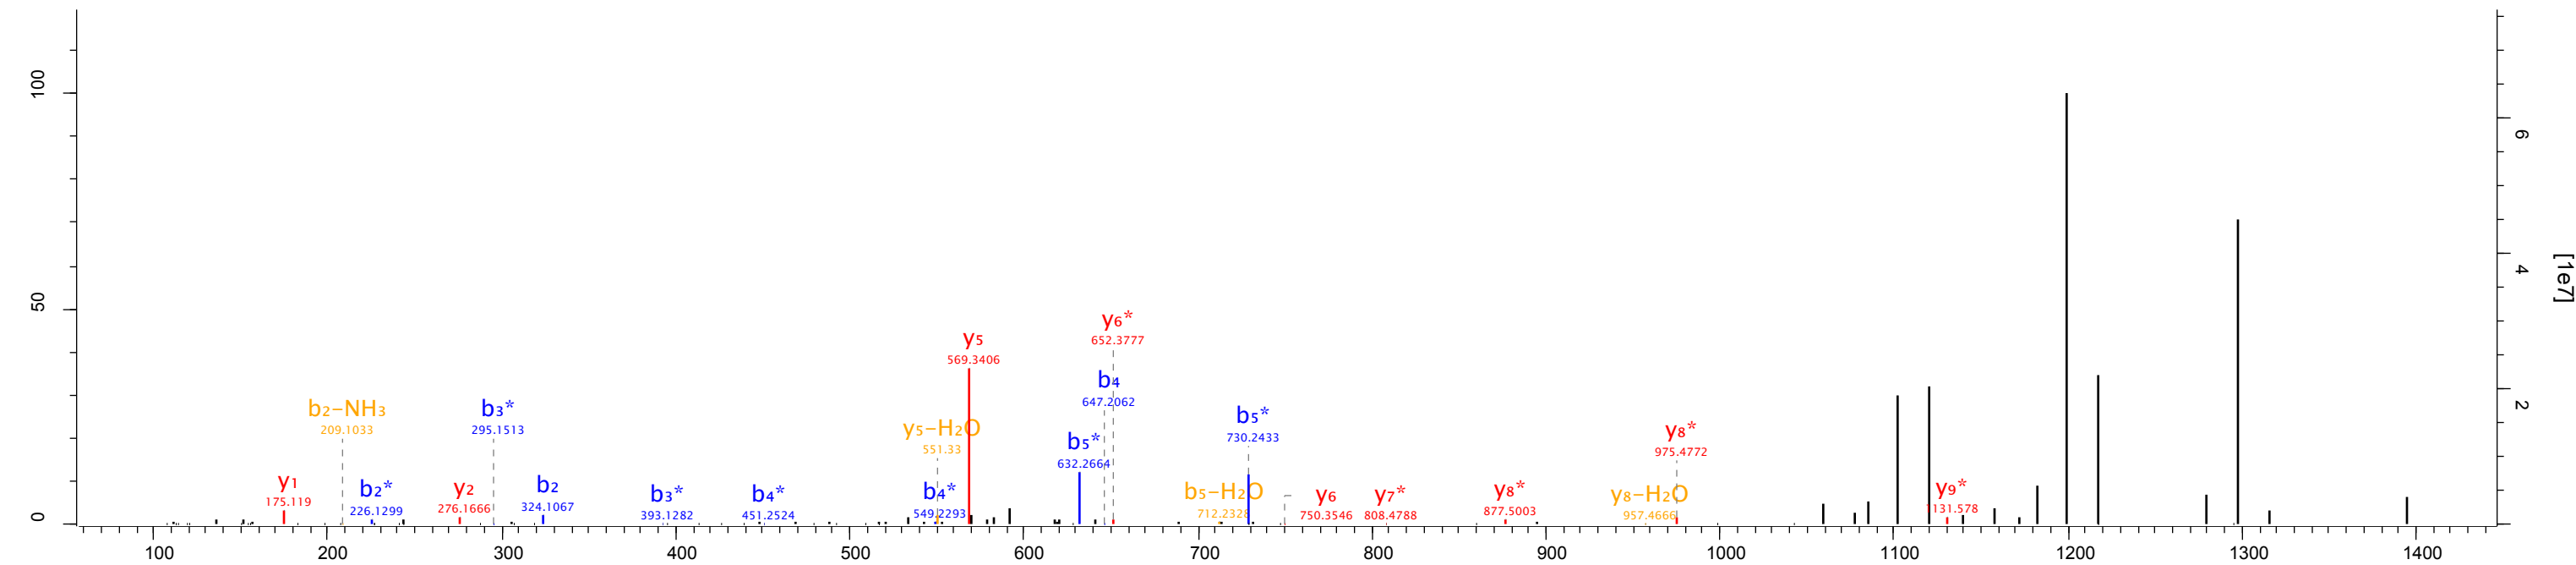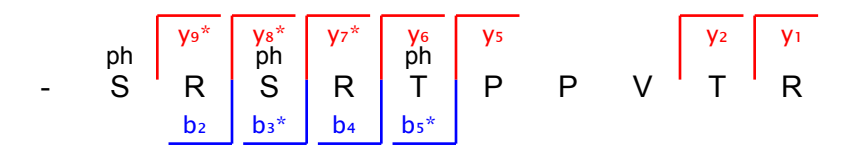

Raw file 20150812\_A375SR\_Phospho\_BR1\_02 Scan 4287 Method FTMS; HCD Score 98.72 m/z 1159.48 Gene names NMT2

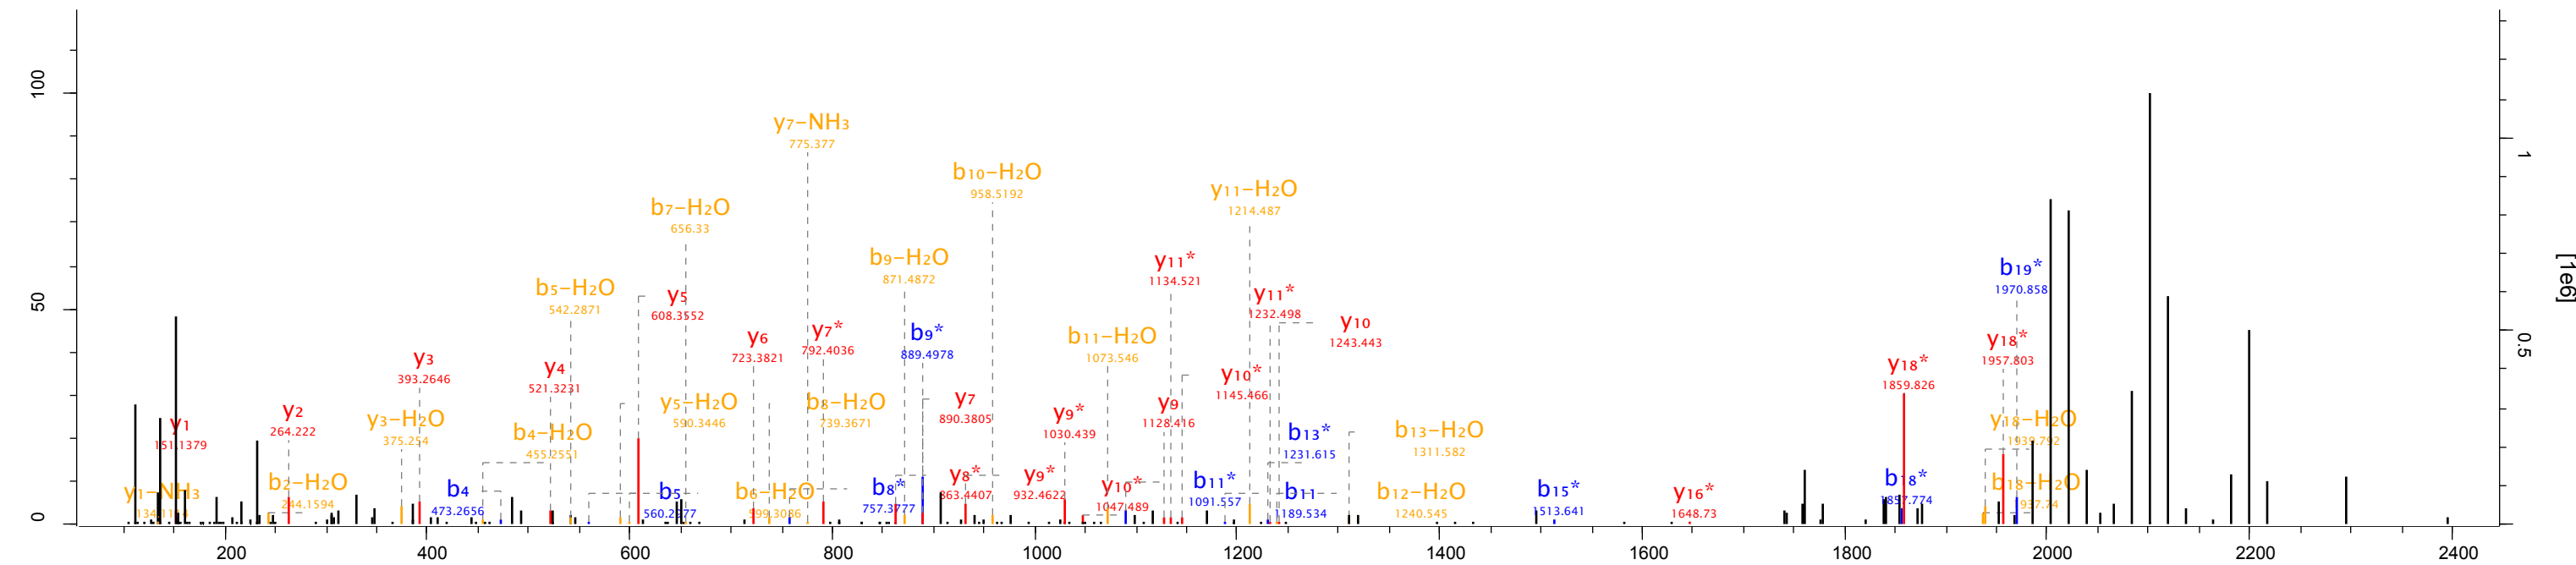

- E K P N S G G ph T K S D S A S D S Q E I K -

Fragmentation labels (b and y ions) are shown below the amino acid sequence, indicating the cleavage sites for the observed peaks.

Raw file: 20150812\_A375SR\_Phospho\_BR1\_02  
 Scan: 4387 Method: FTMS; HCD Score: 136.25 m/z: 935.36 Gene names: CLASP2

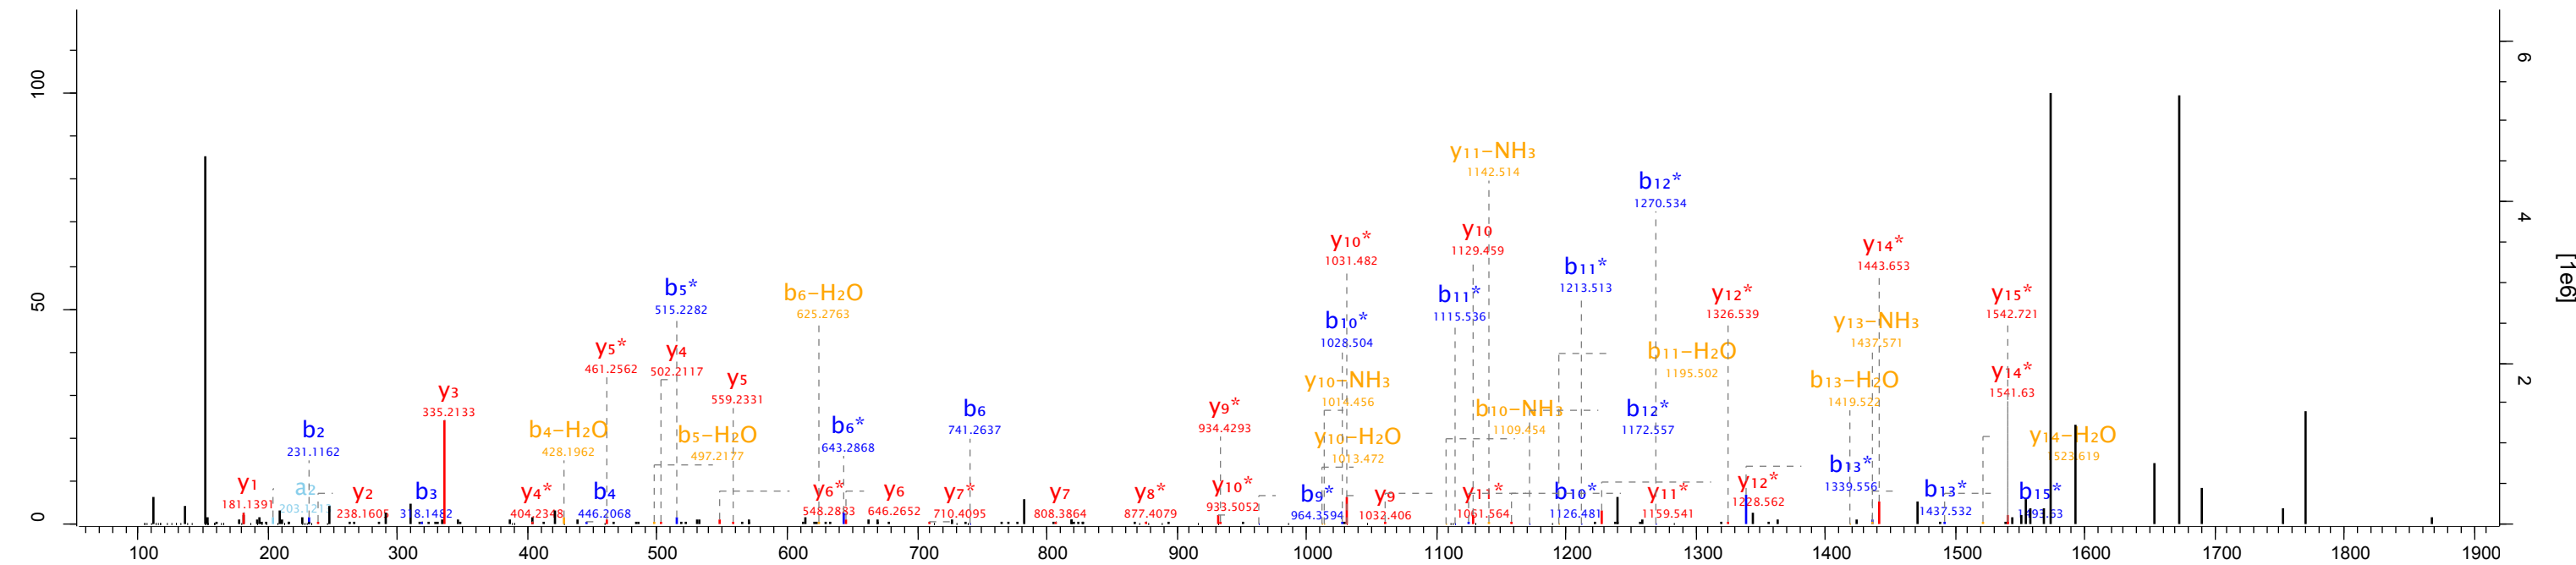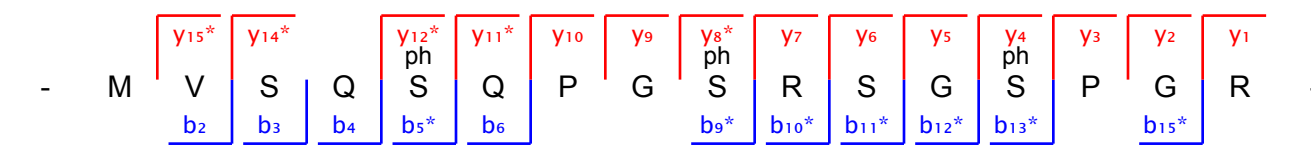

Raw file: 20150812\_A375SR\_Phospho\_BR1\_02  
 Scan: 4657 Method: FTMS; HCD Score: 93.5 m/z: 771.27 Gene names: SRRM1

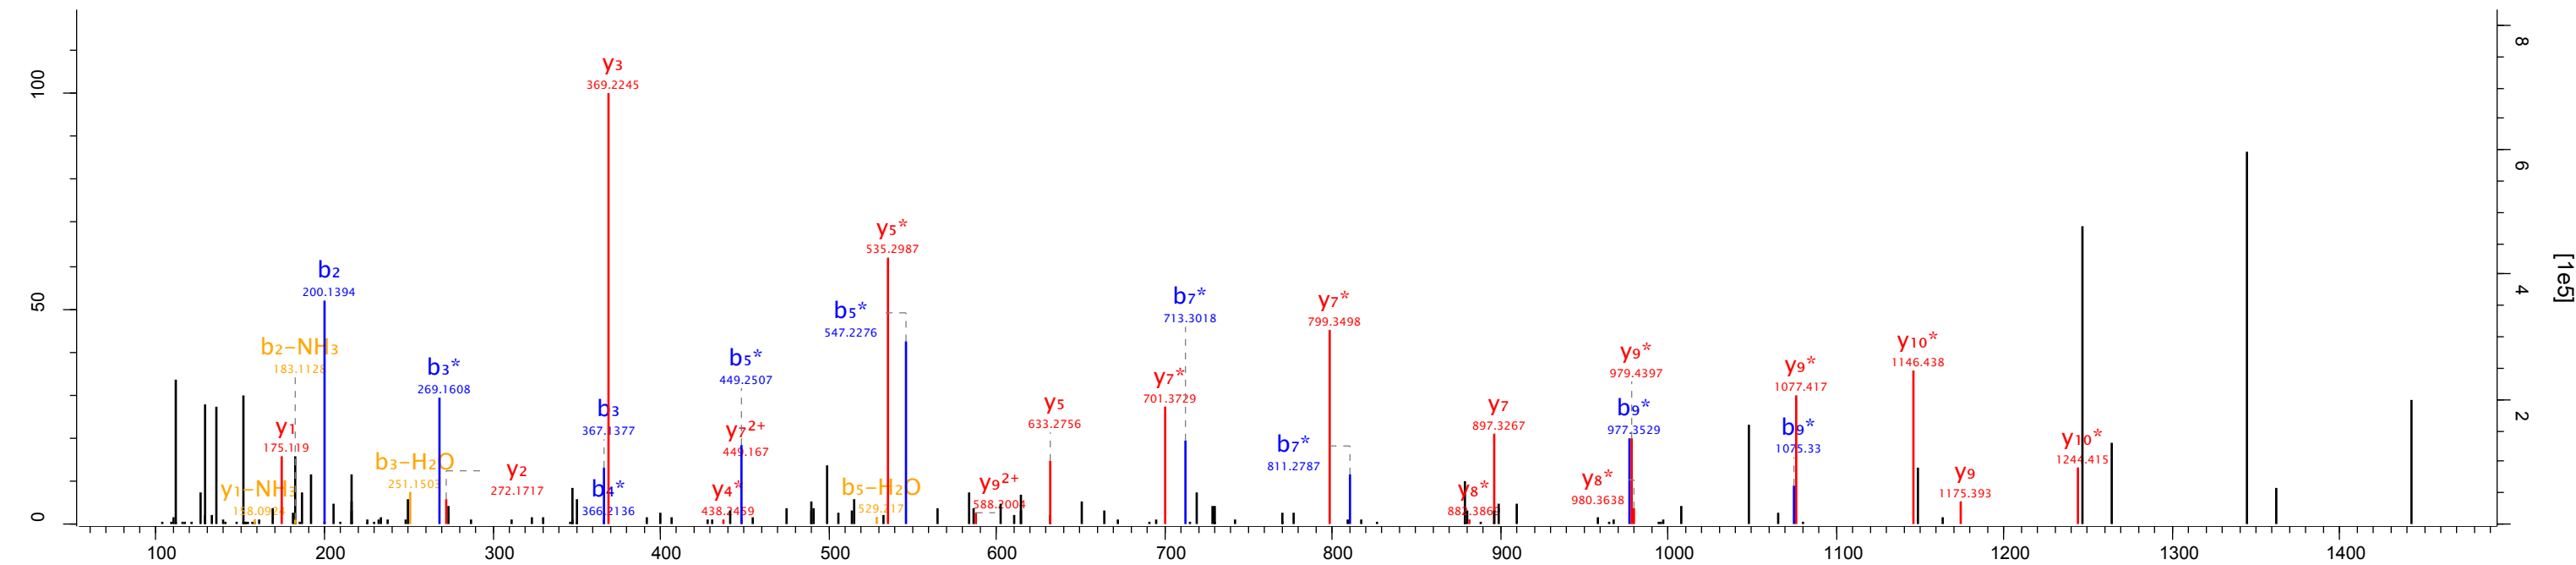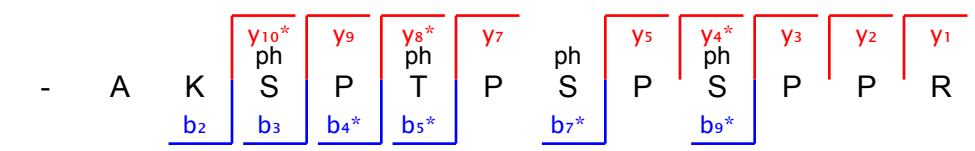

Raw file: 20150812\_A375SR\_Phospho\_BR1\_02  
 Scan: 4717 Method: FTMS; HCD Score: 180.8 m/z: 920.32 Gene names: PPIG

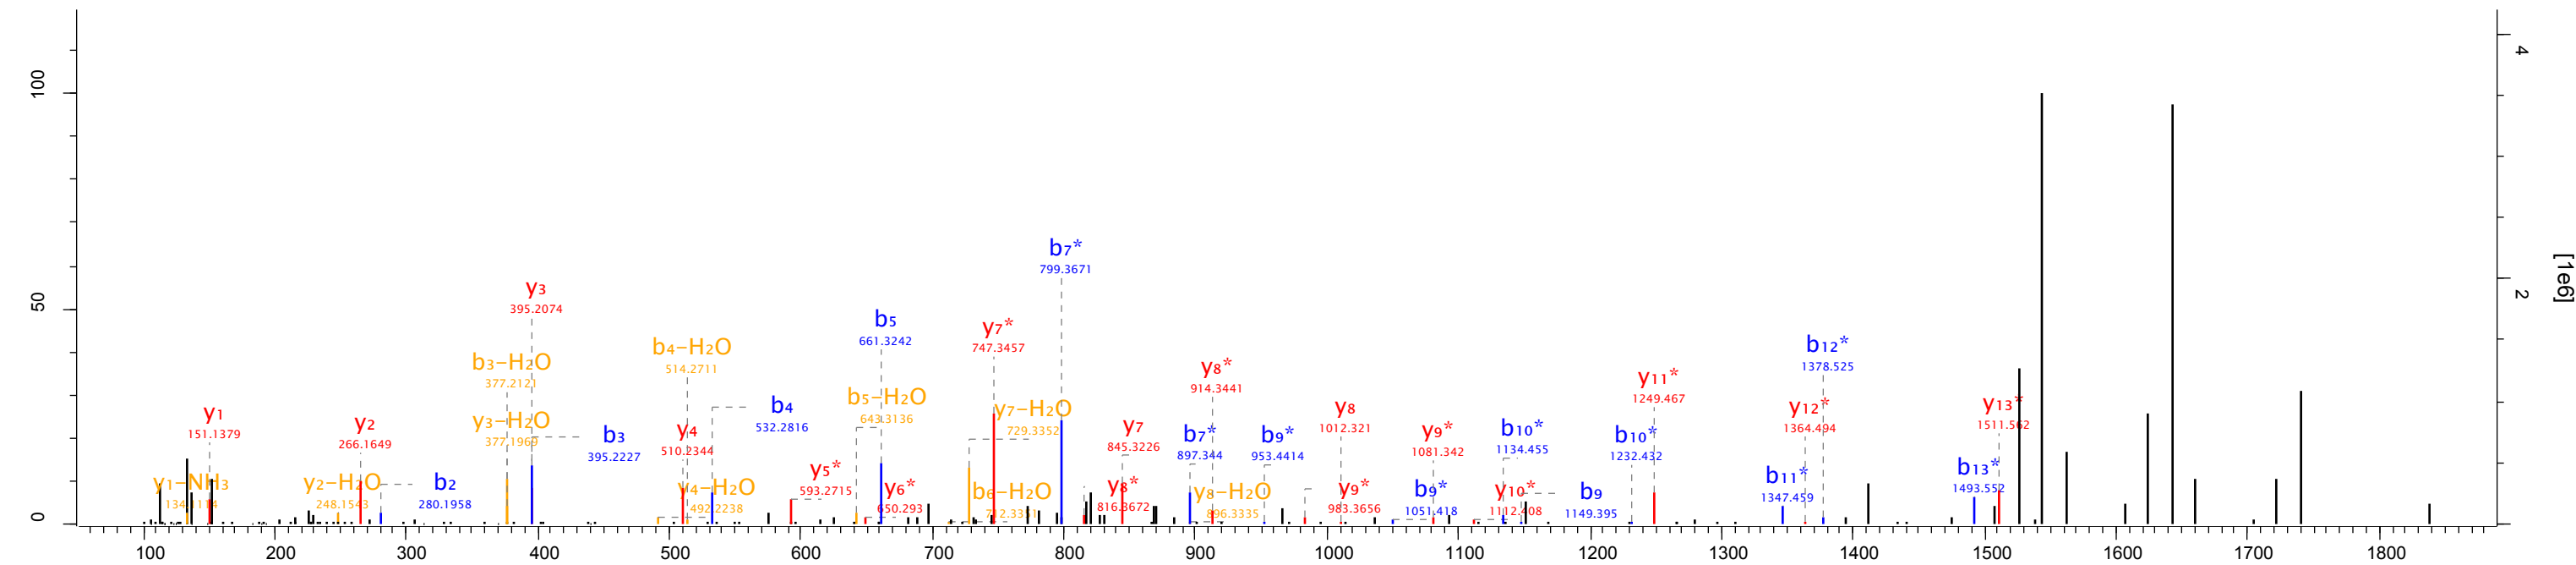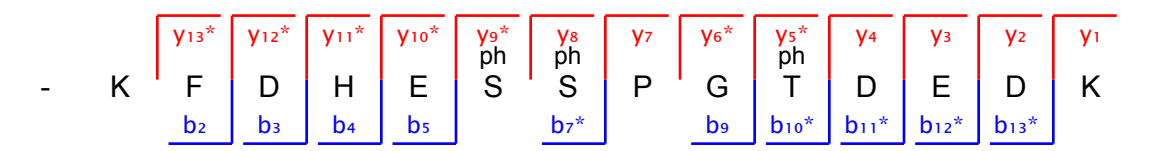

Raw file: 20150812\_A375SR\_Phospho\_BR1\_02  
 Scan: 5457 Method: FTMS; HCD Score: 83.94 m/z: 876.34 Gene names: TOP2B

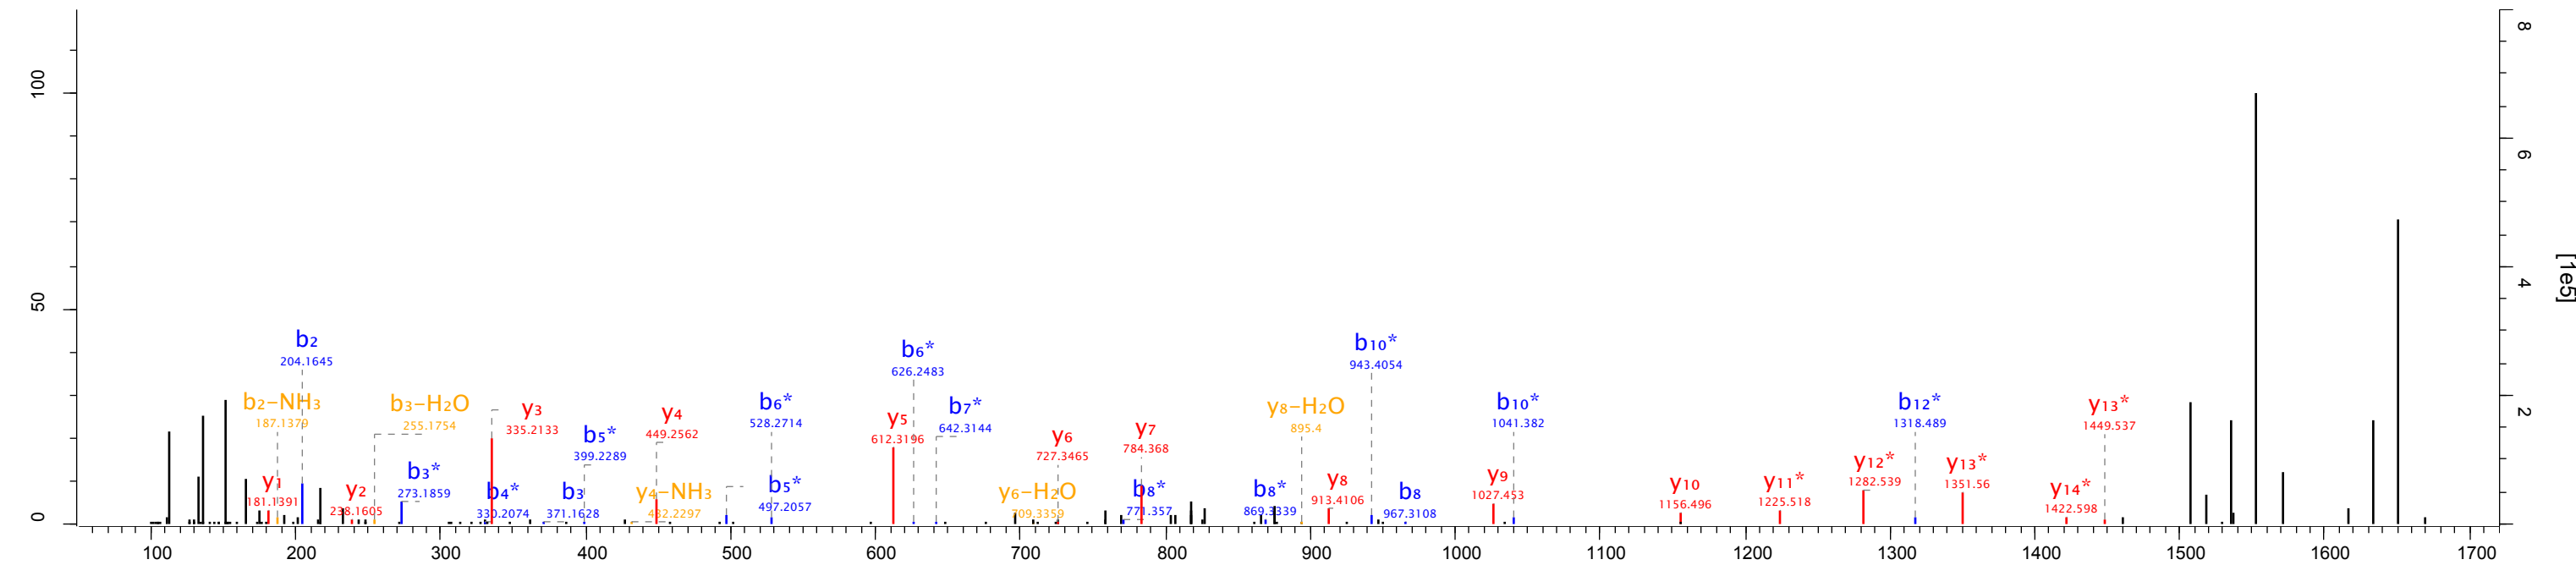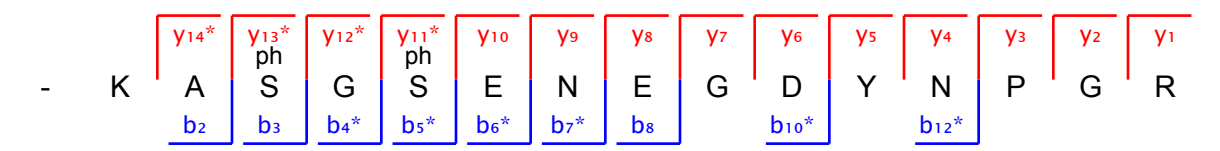



Raw file: 20150812\_A375SR\_Phospho\_BR1\_02  
 Scan: 5487 Method: FTMS; HCD Score: 122.01 m/z: 719.31 Gene names: MED12; TNRC11

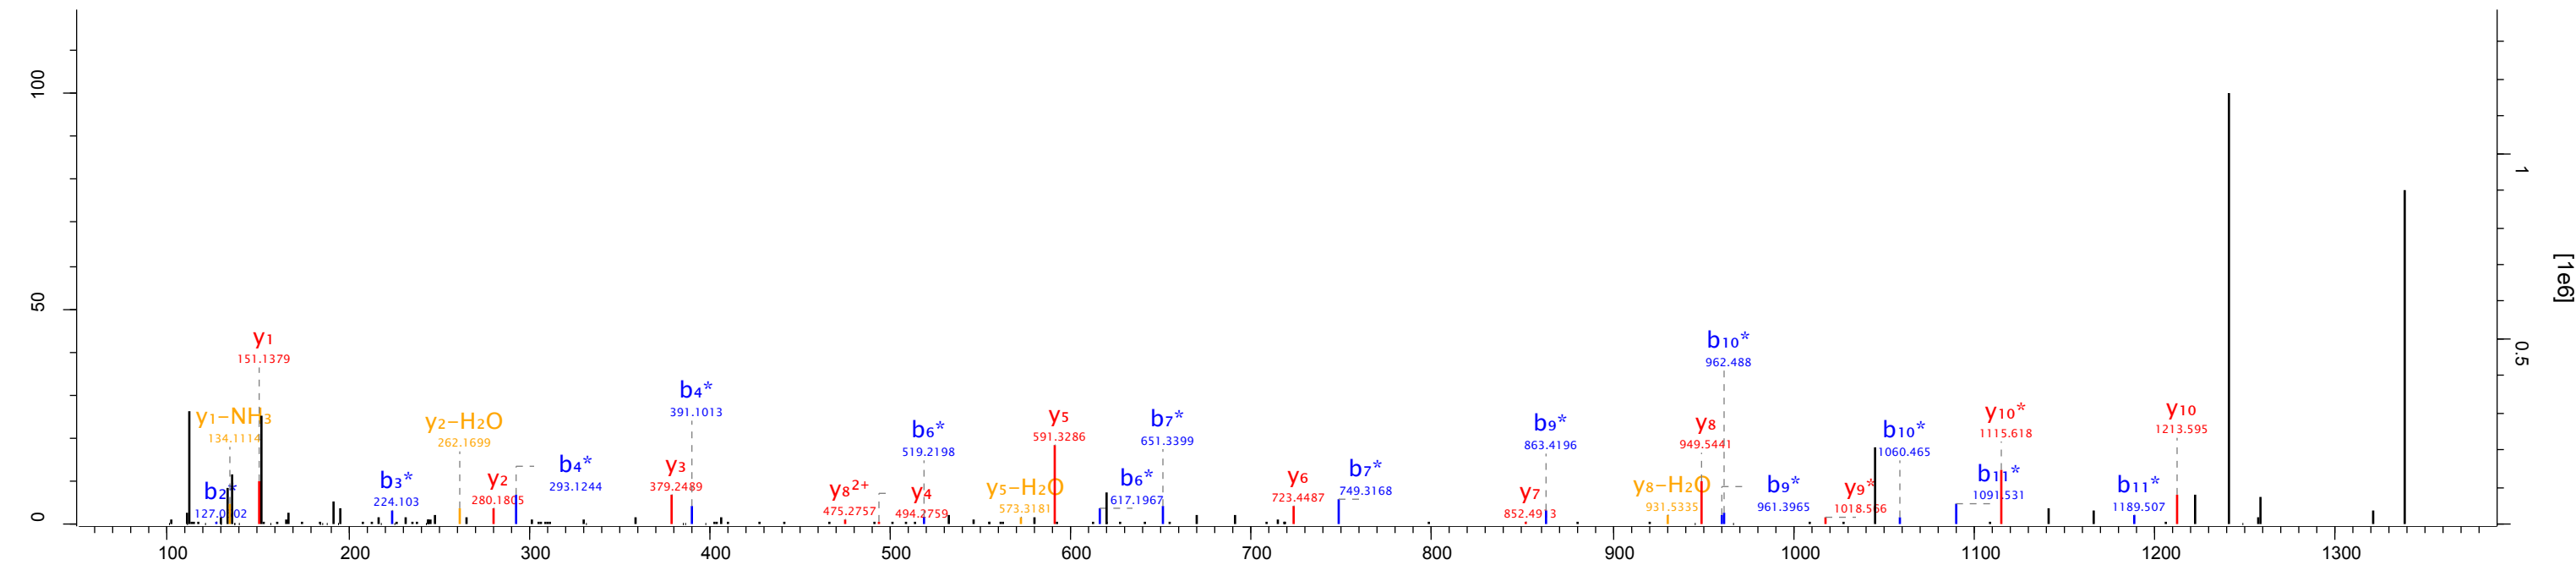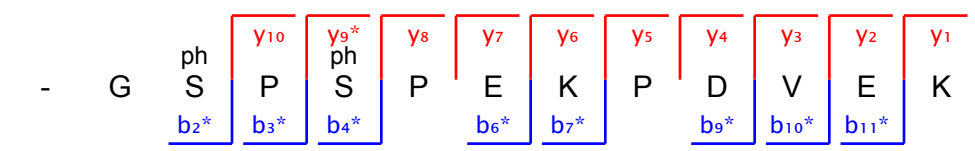

Raw file 20150812\_A375SR\_Phospho\_BR1\_02 Scan 5537 Method FTMS; HCD Score 84.95 m/z 846.35 Gene names SRSF1

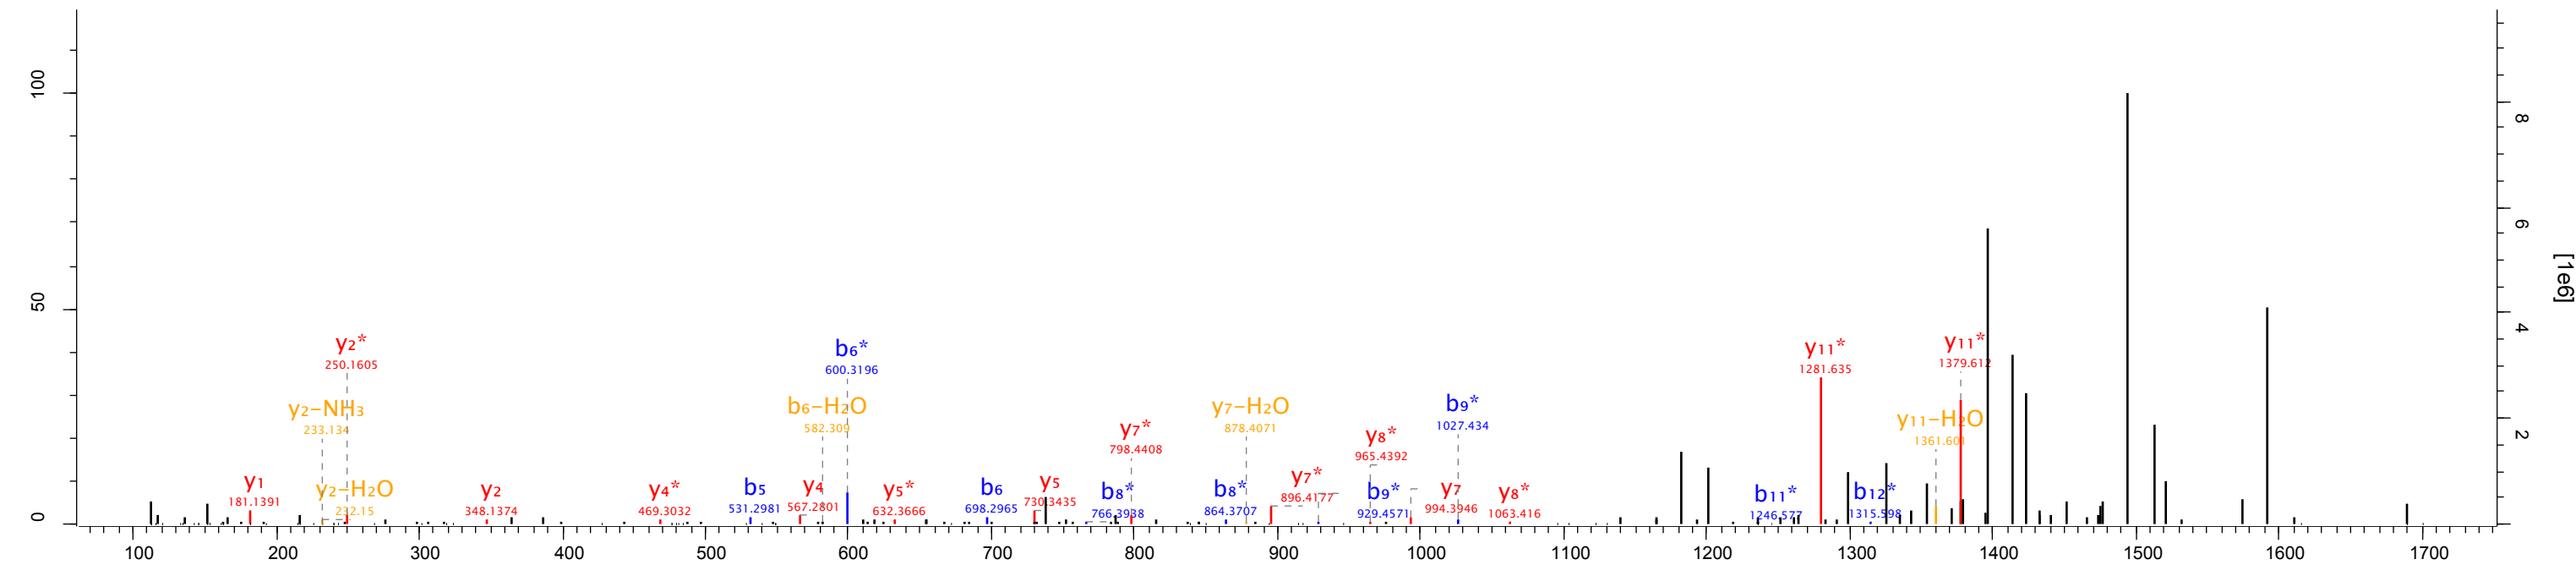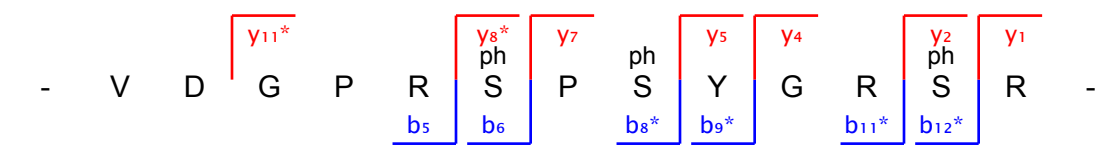

Raw file 20150812\_A375SR\_Phospho\_BR1\_02 Scan 5557 Method FTMS; HCD Score 45.08 m/z 691.26 Gene names SNIP1

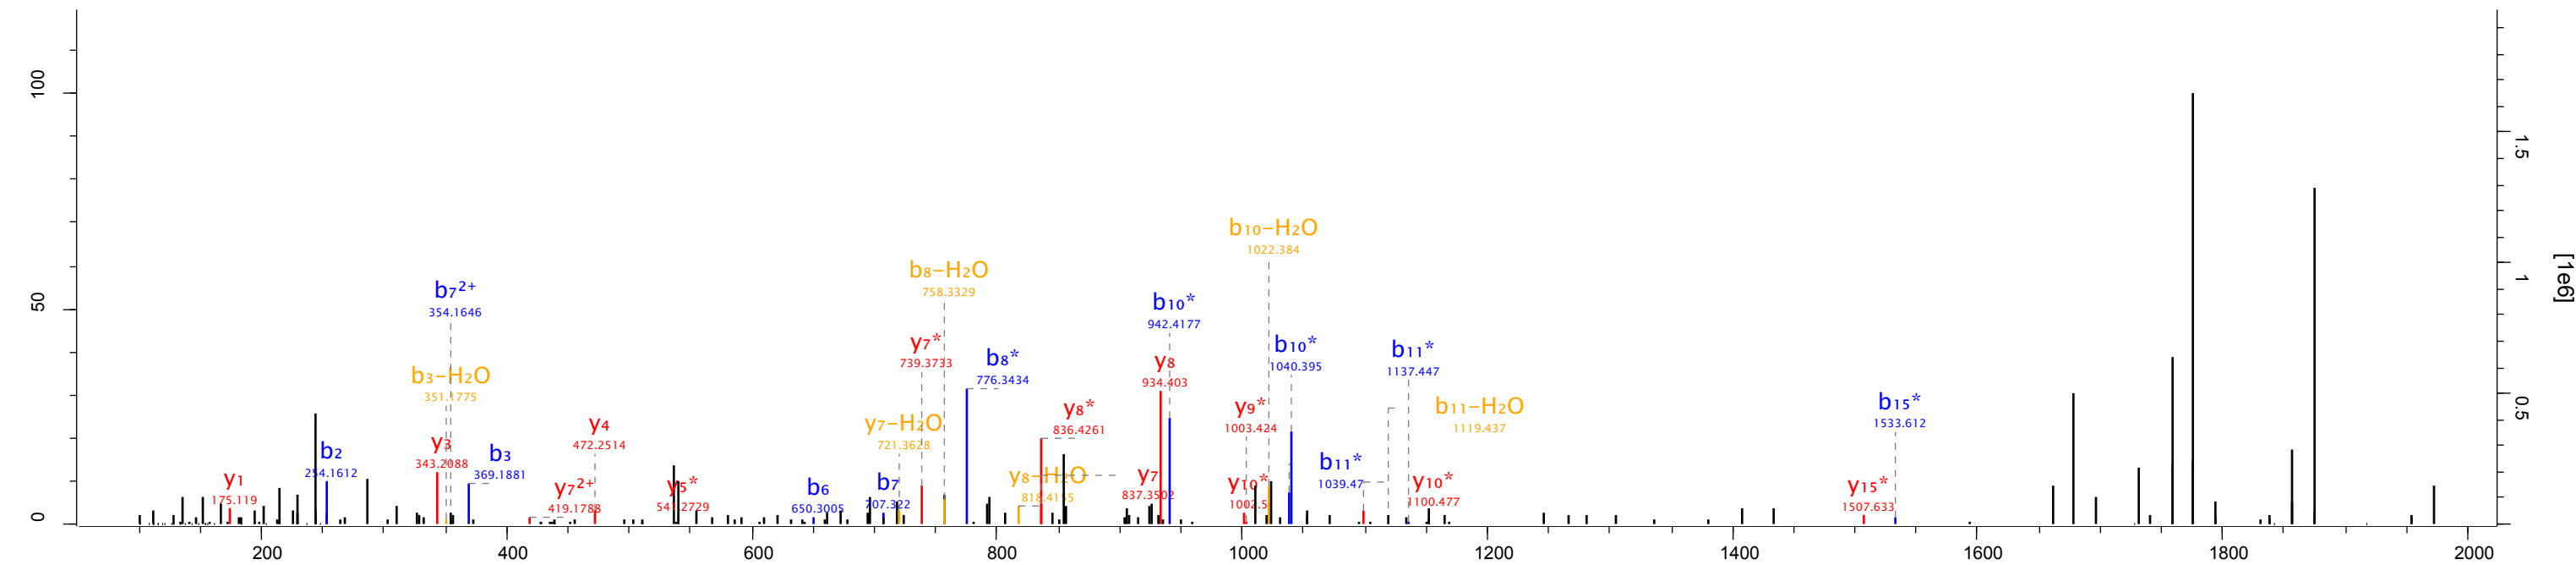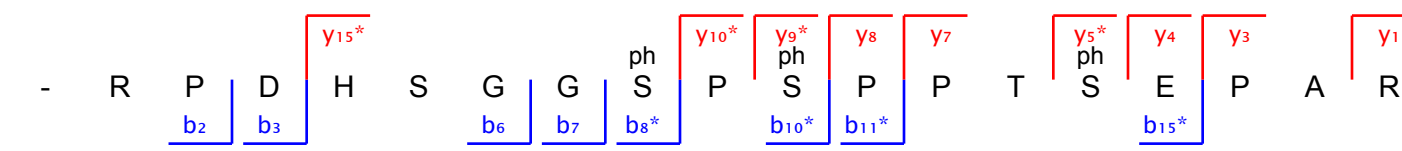

Raw file: 20150812\_A375SR\_Phospho\_BR1\_02  
 Scan: 5867 Method: FTMS; HCD Score: 118.49 m/z: 1108.34 Gene names: MAK16

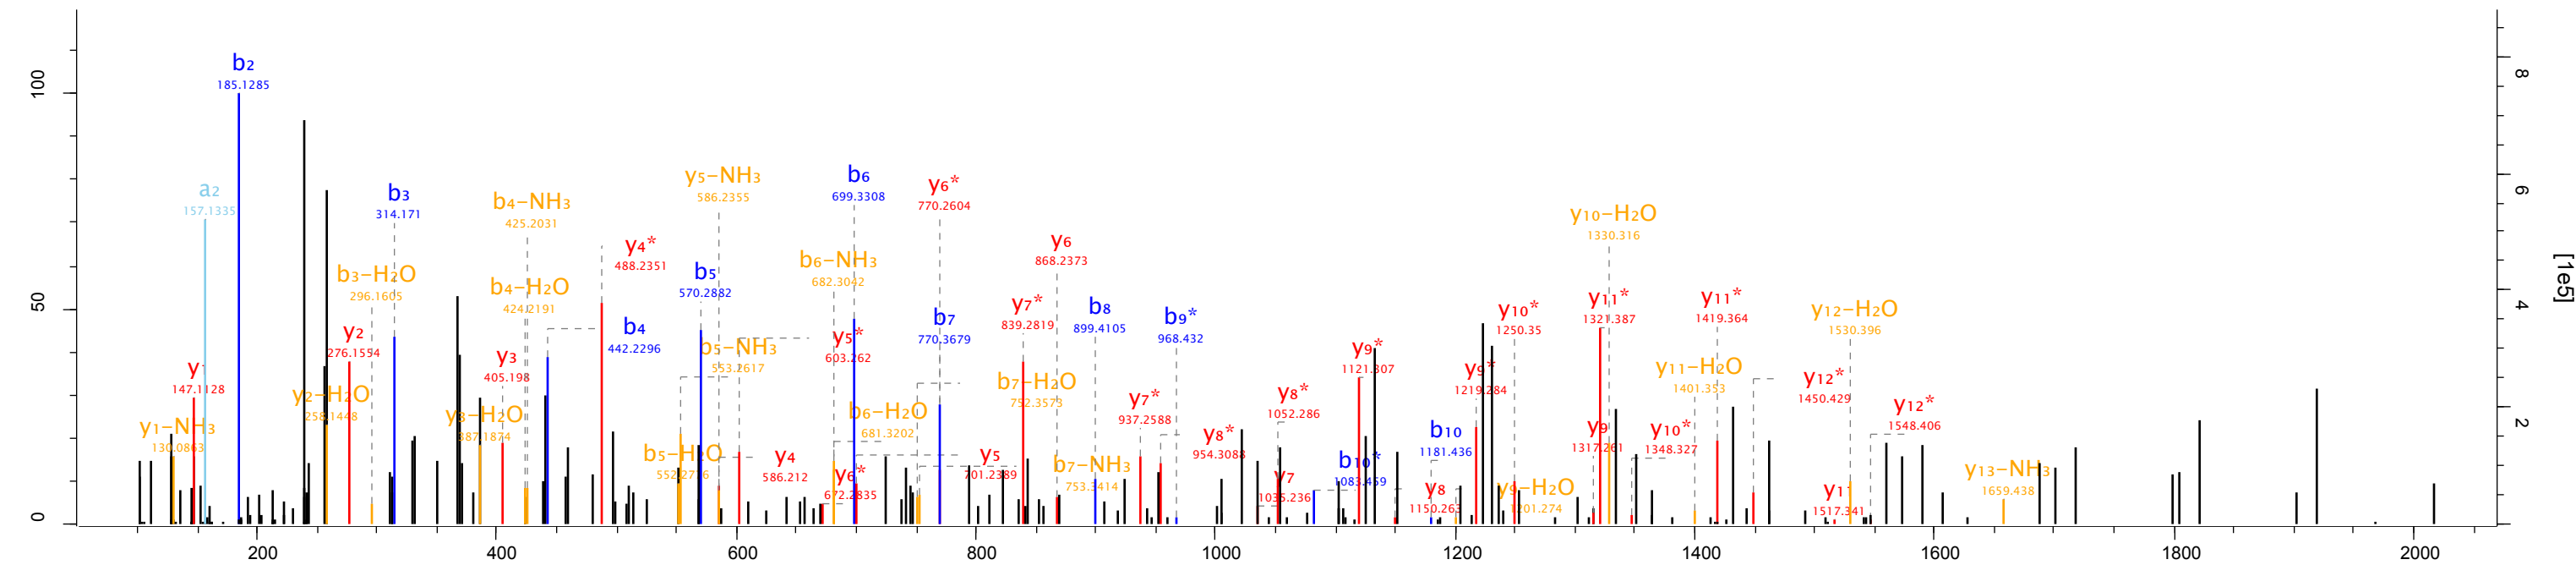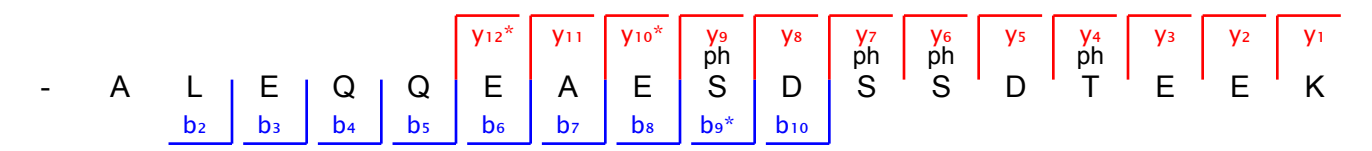

Raw file: 20150812\_A375SR\_Phospho\_BR1\_02  
 Scan: 6117 Method: FTMS; HCD Score: 183.73 m/z: 712.8 Gene names: ZNF609

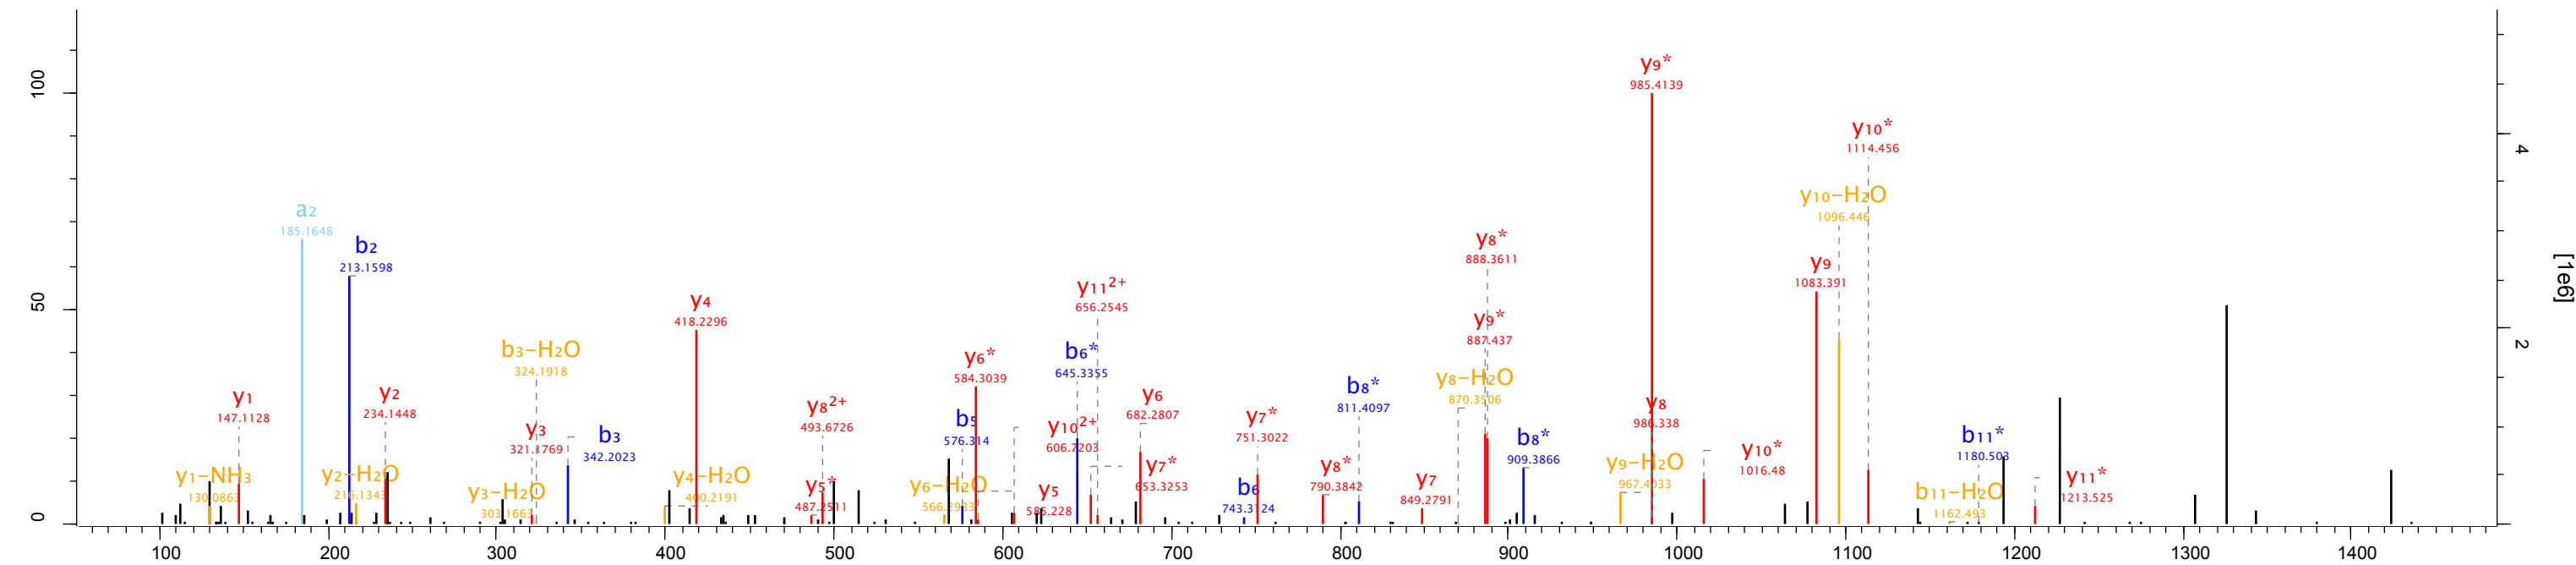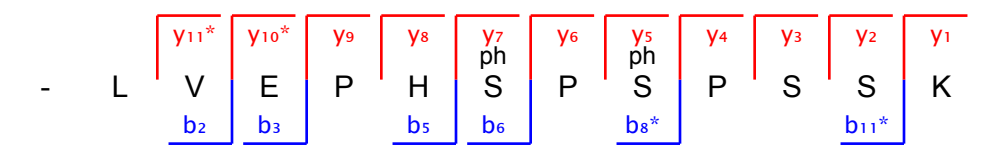

20150812\_A375SR\_Phospho\_BR1\_02 6417 FTMS; HCD 72.03 557.74 PHLDA1

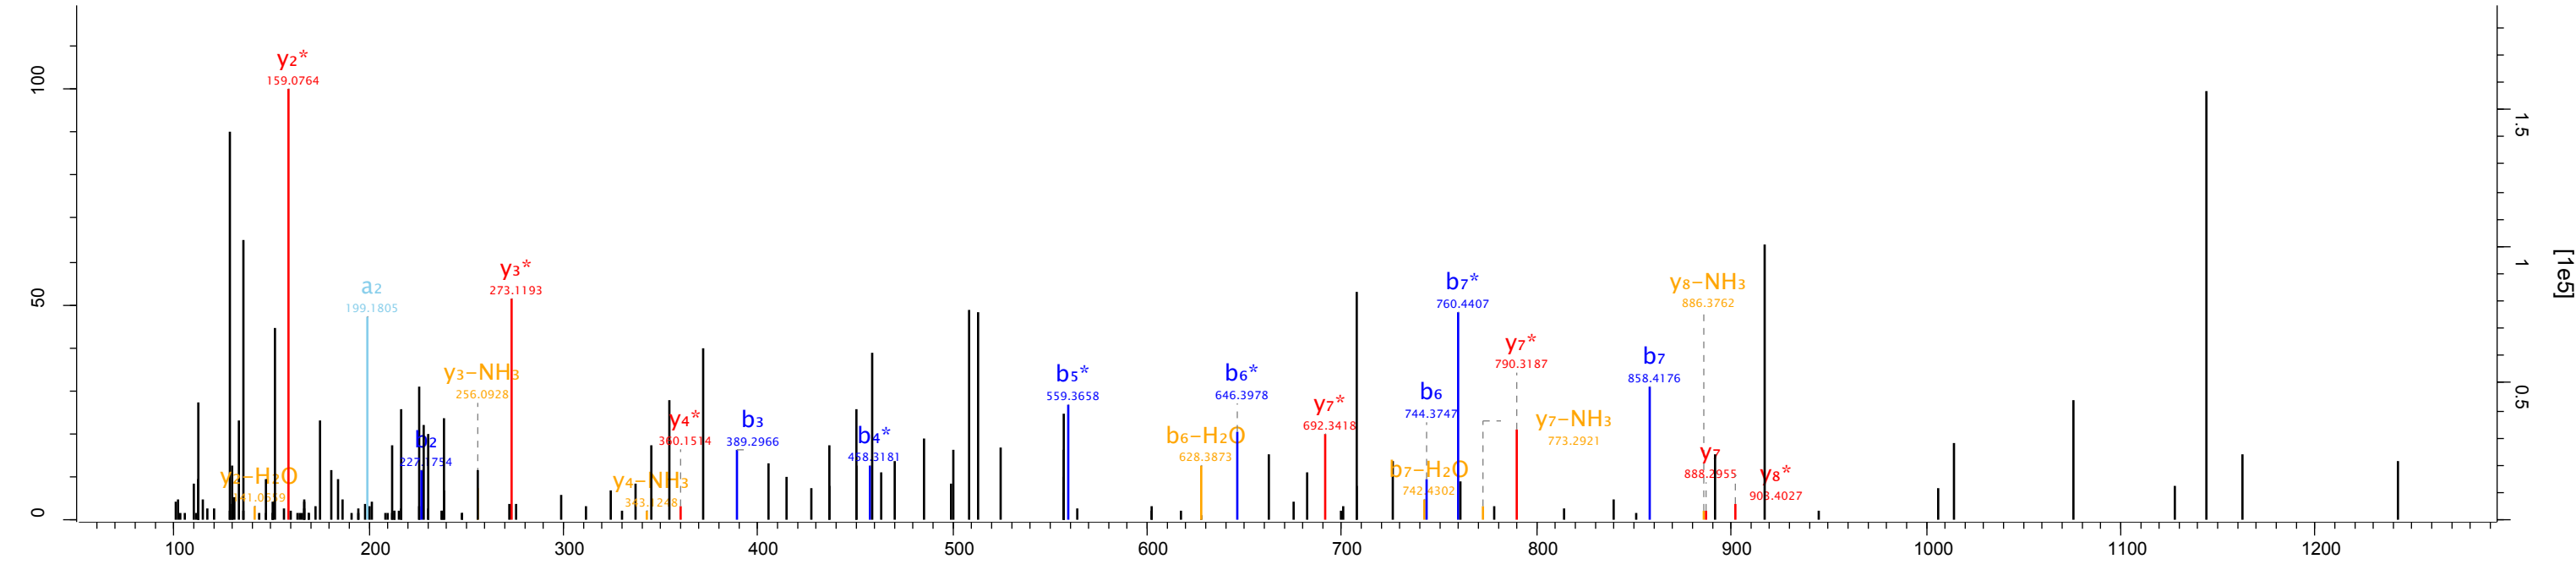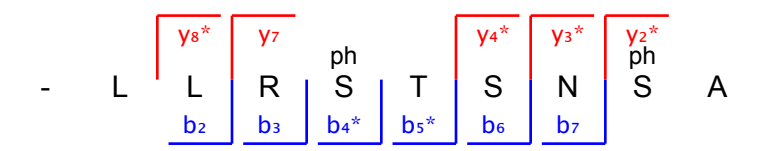

Raw file: 20150812\_A375SR\_Phospho\_BR1\_02  
 Scan: 6507 Method: FTMS; HCD Score: 222.13 m/z: 760.33 Gene names: RBM25

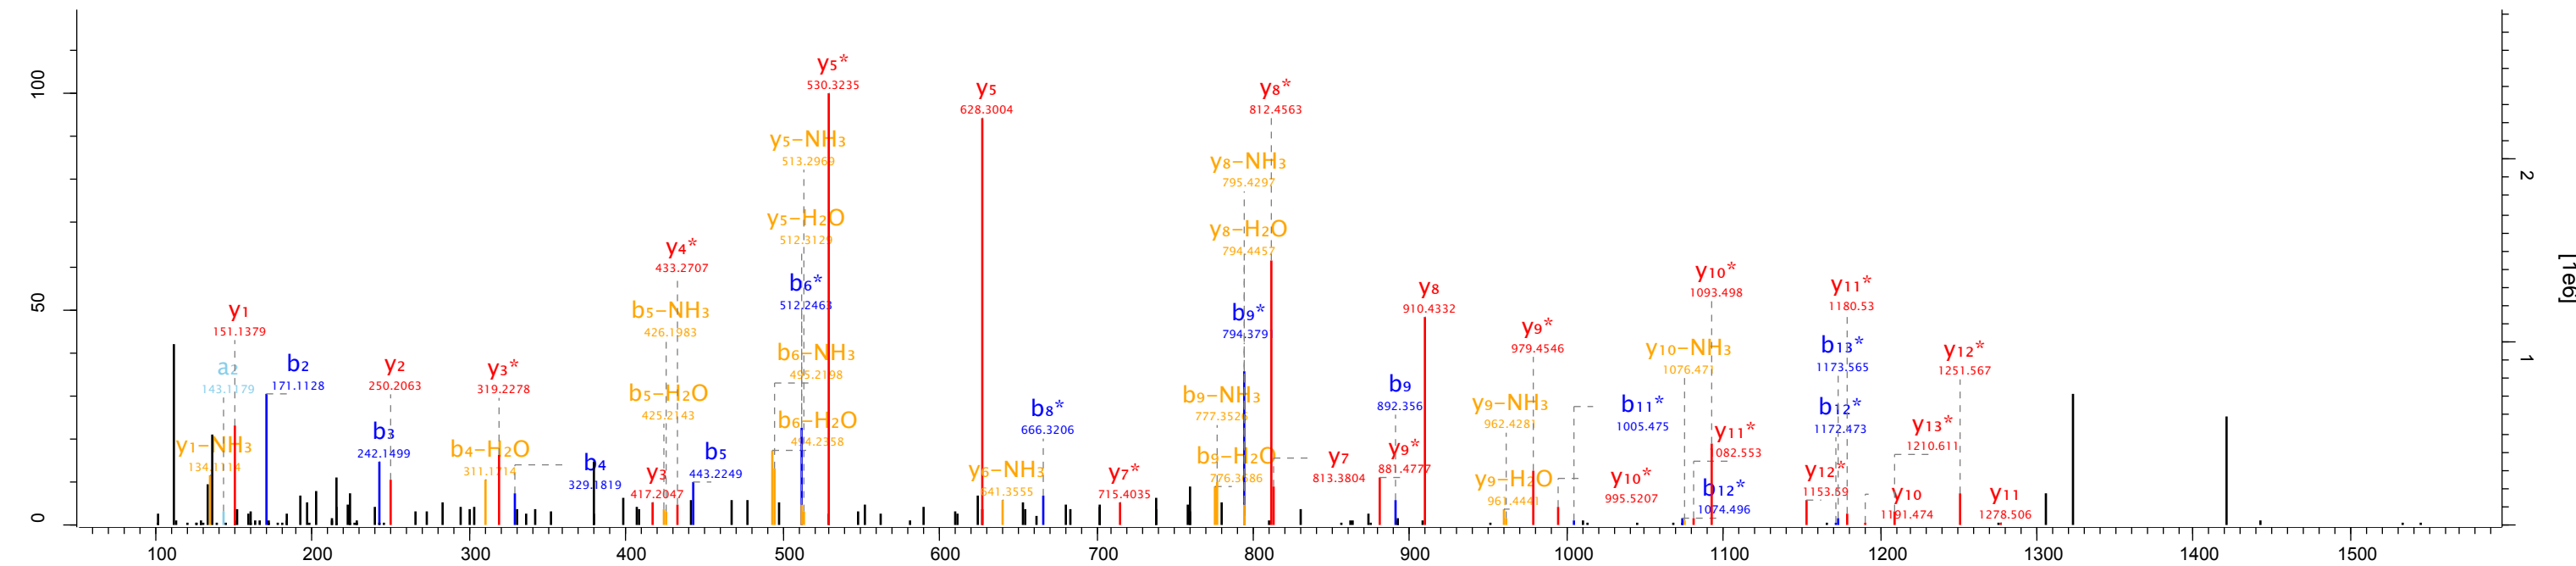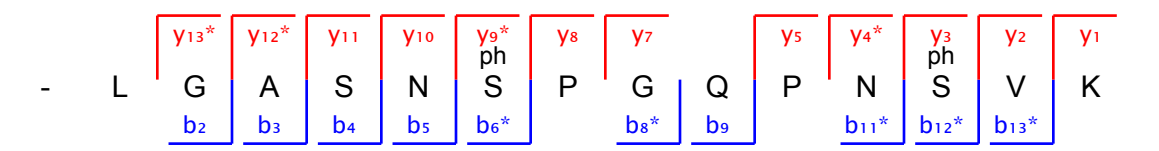

Raw file: 20150812\_A375SR\_Phospho\_BR1\_02  
 Scan: 6537 Method: FTMS; HCD Score: 168.76 m/z: 636.74 Gene names: TRA2B;TRA2A

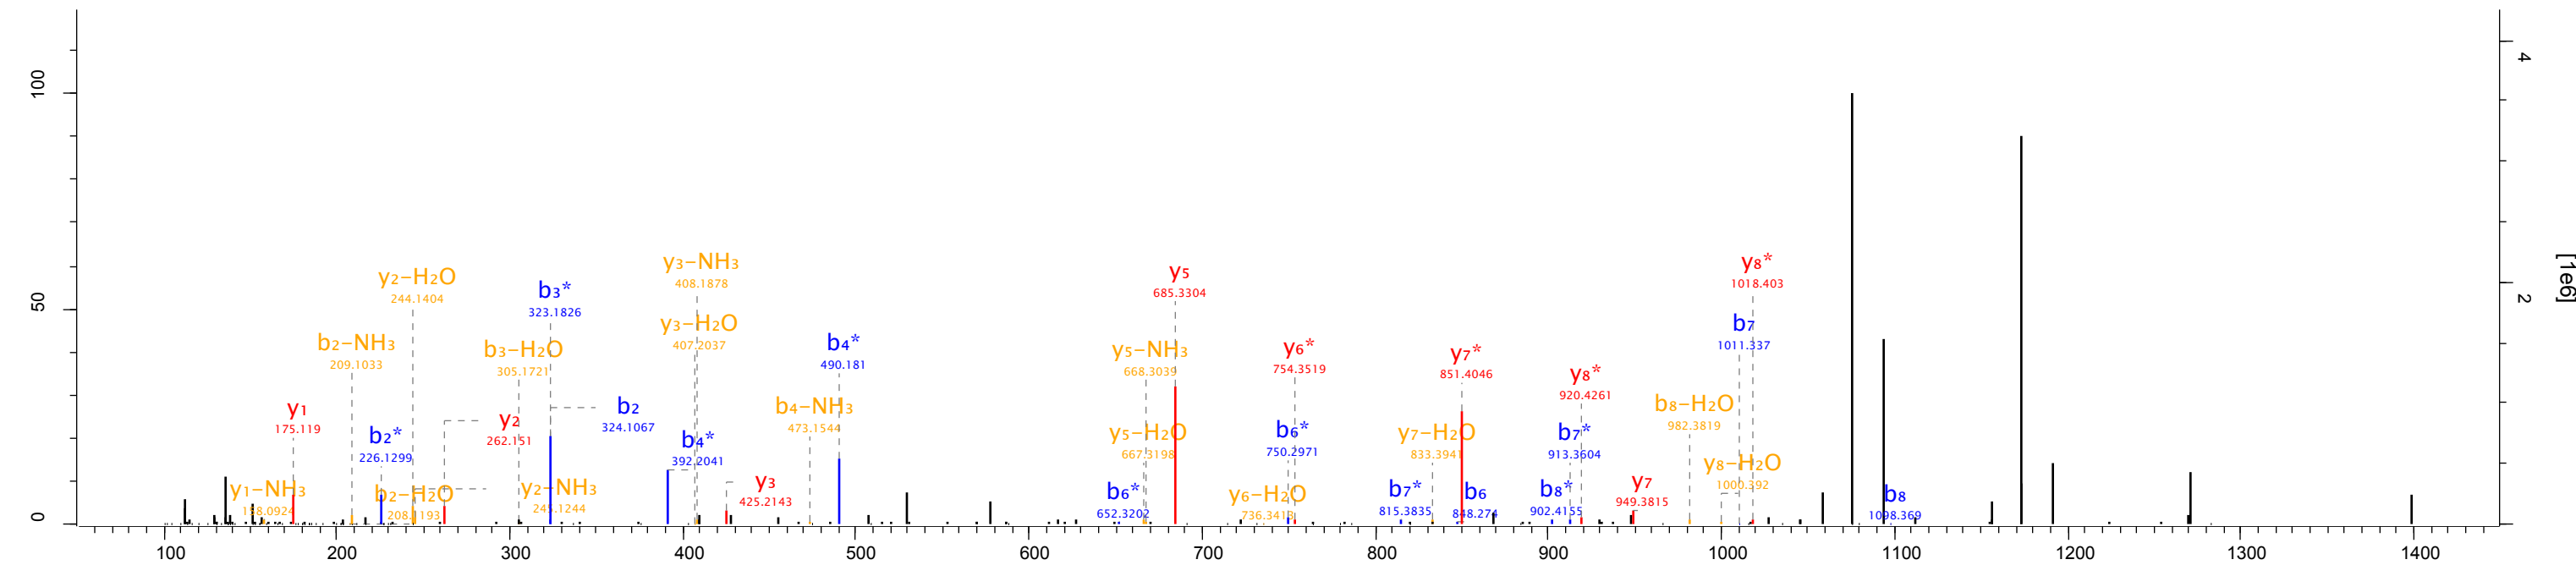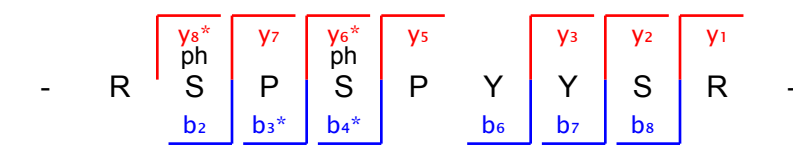



Raw file: 20150812\_A375SR\_Phospho\_BR1\_02  
 Scan: 6557 Method: FTMS; HCD Score: 131.35 m/z: 898.8 Gene names: CMTR1

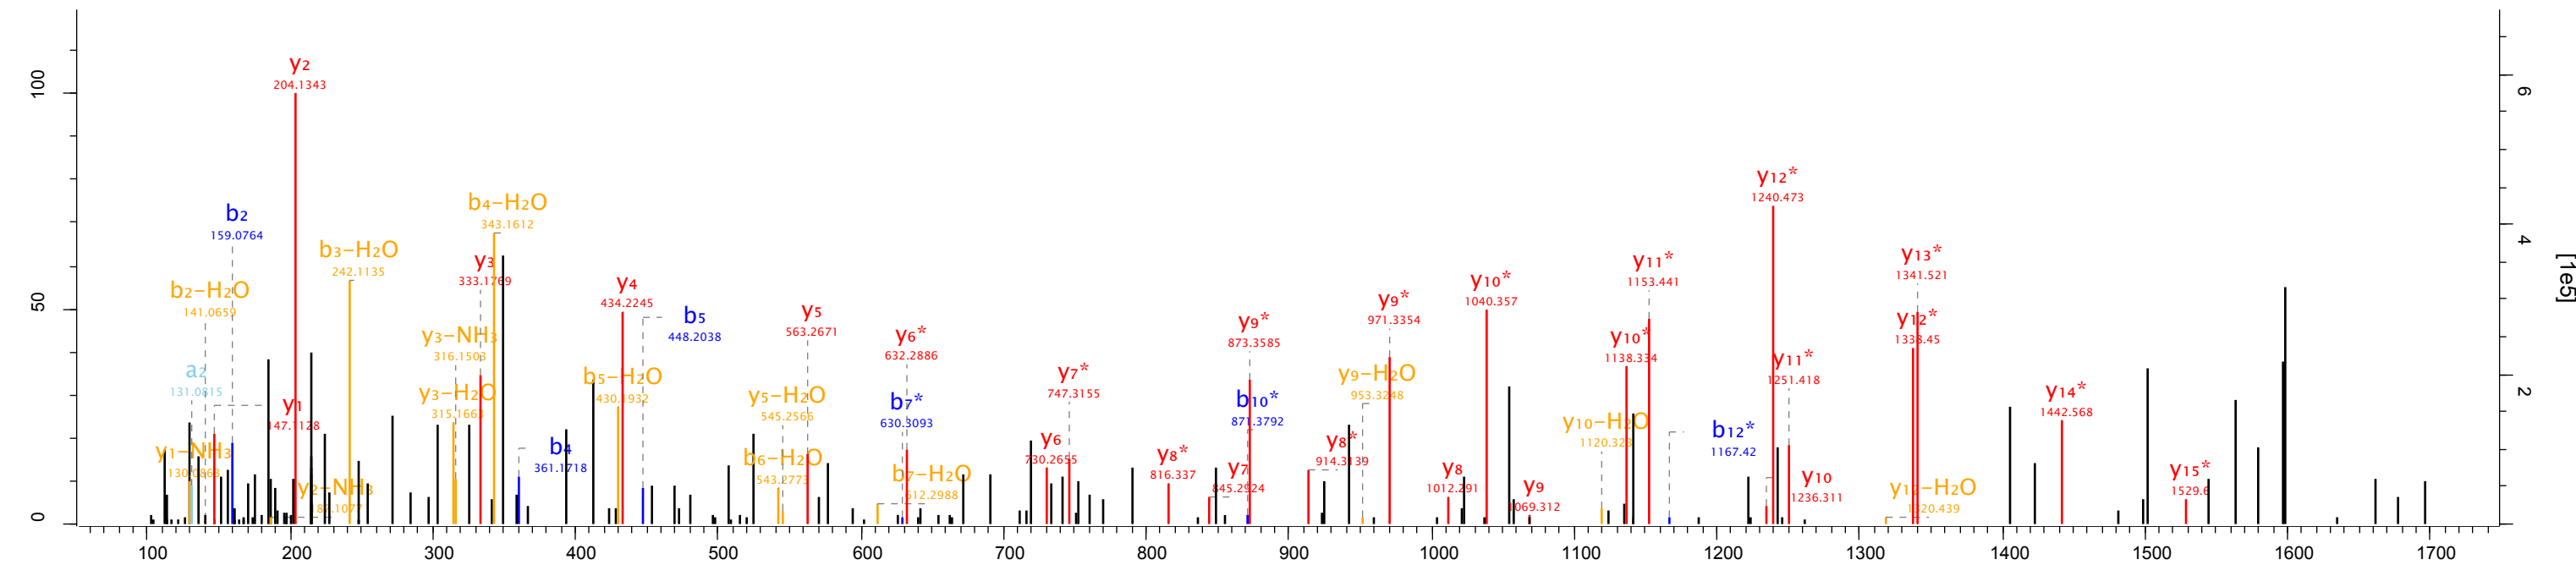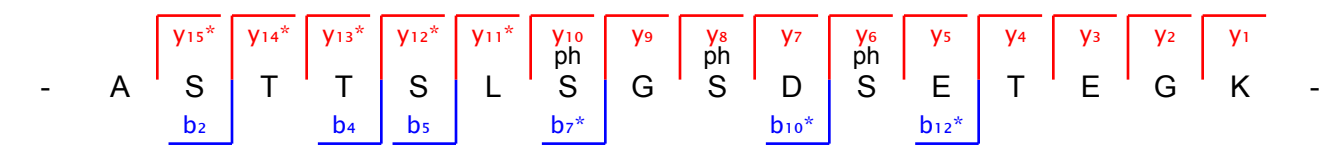

Raw file: 20150812\_A375SR\_Phospho\_BR1\_02  
 Scan: 6887 Method: FTMS; HCD Score: 136.7 m/z: 674.8 Gene names: CEP170

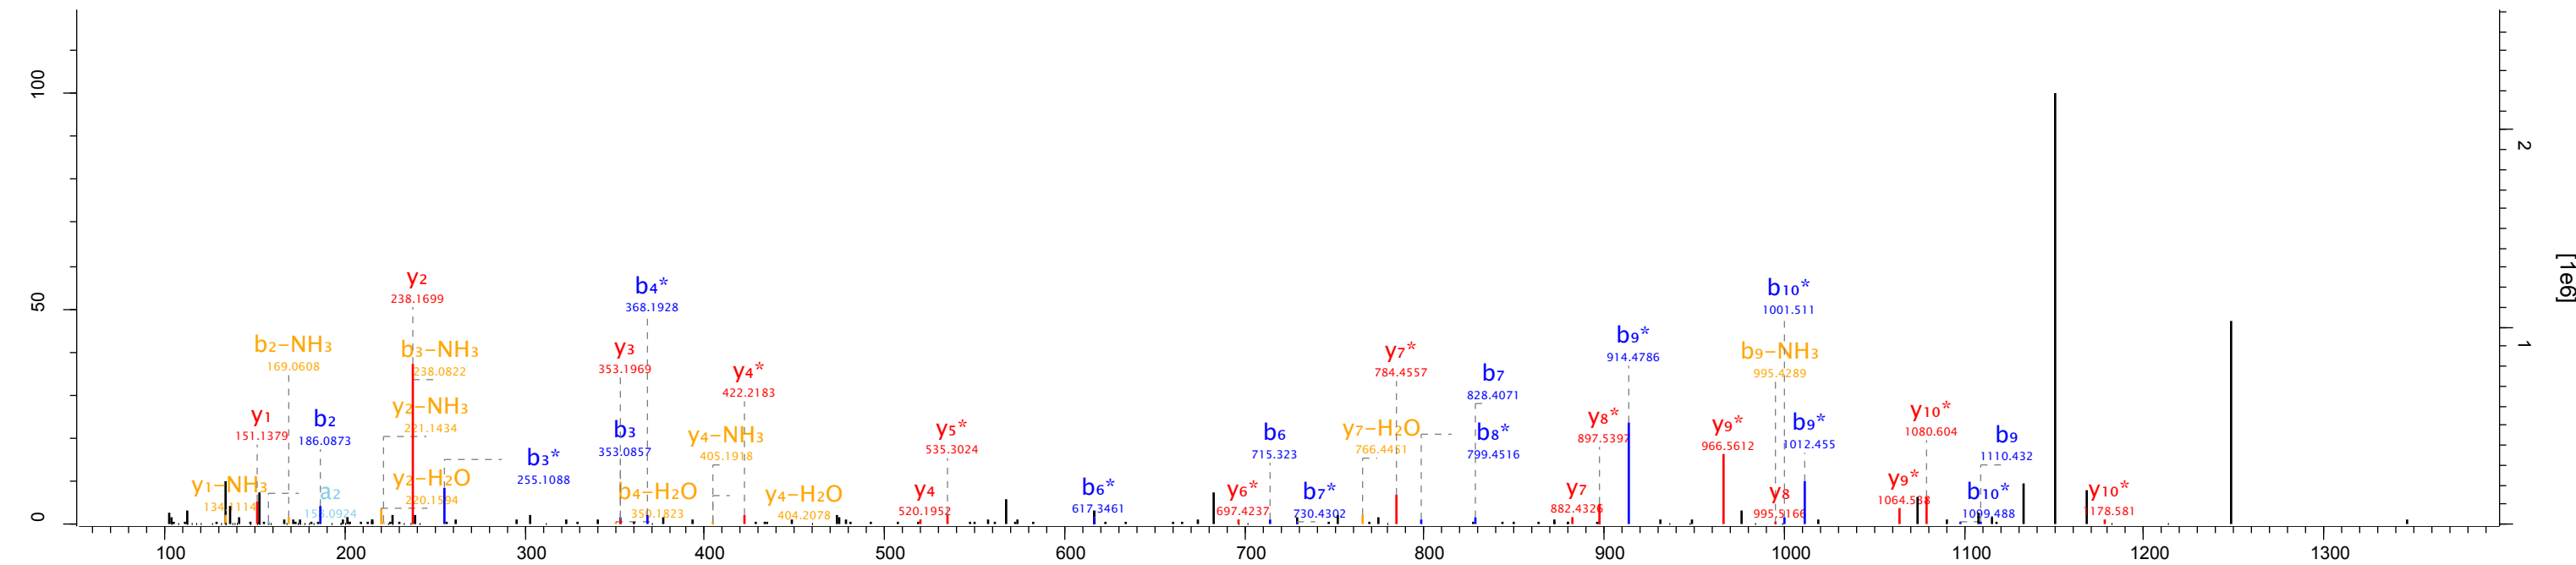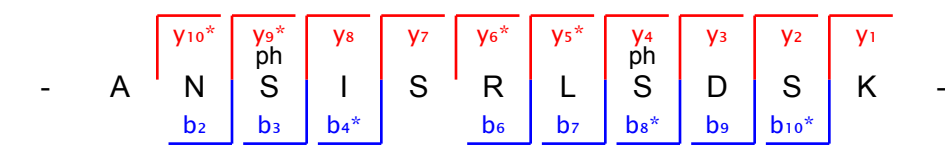

Raw file: 20150812\_A375SR\_Phospho\_BR1\_02  
 Scan: 7037 Method: FTMS; HCD Score: 227.67 m/z: 730.81 Gene names: SRRM1

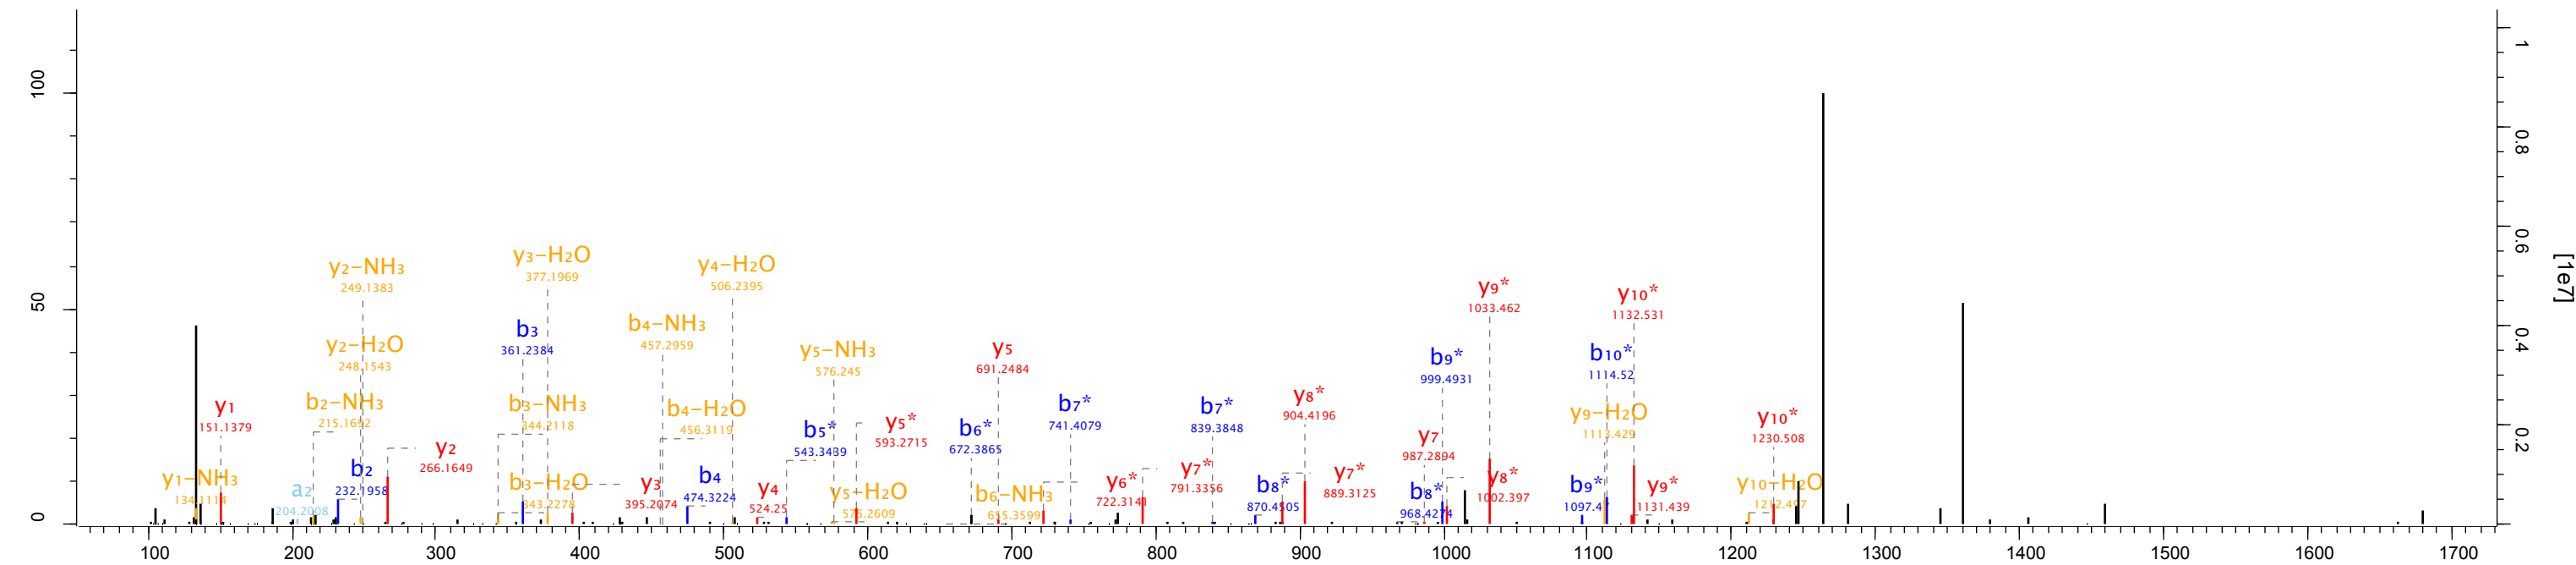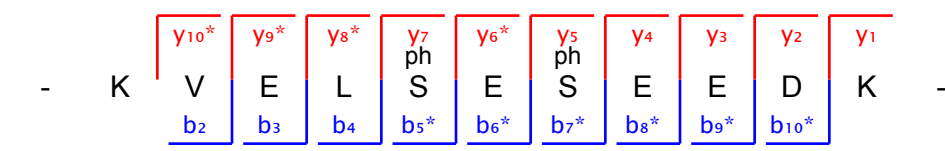

Raw file: 20150812\_A375SR\_Phospho\_BR1\_02  
 Scan: 7107 Method: FTMS; HCD Score: 72.52 m/z: 640.76 Gene names: SHROOM2

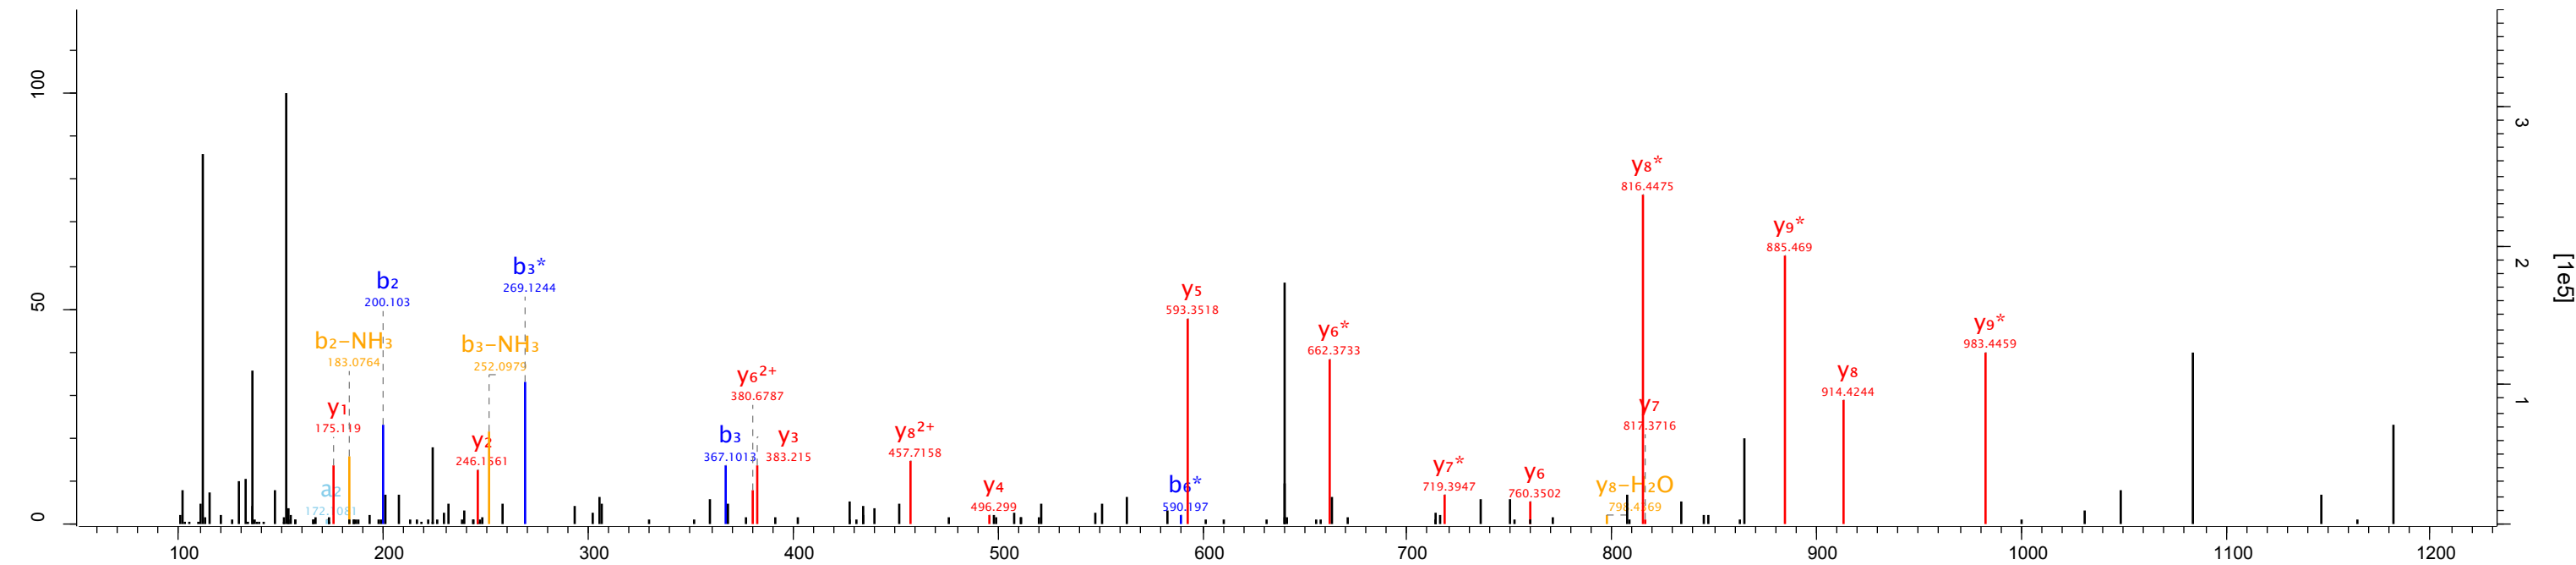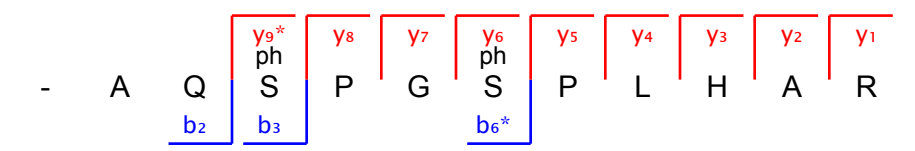

Raw file 20150812\_A375SR\_Phospho\_BR1\_02 Scan 7197 Method FTMS; HCD Score 197.15 m/z 844.86 Gene names SLC6A15

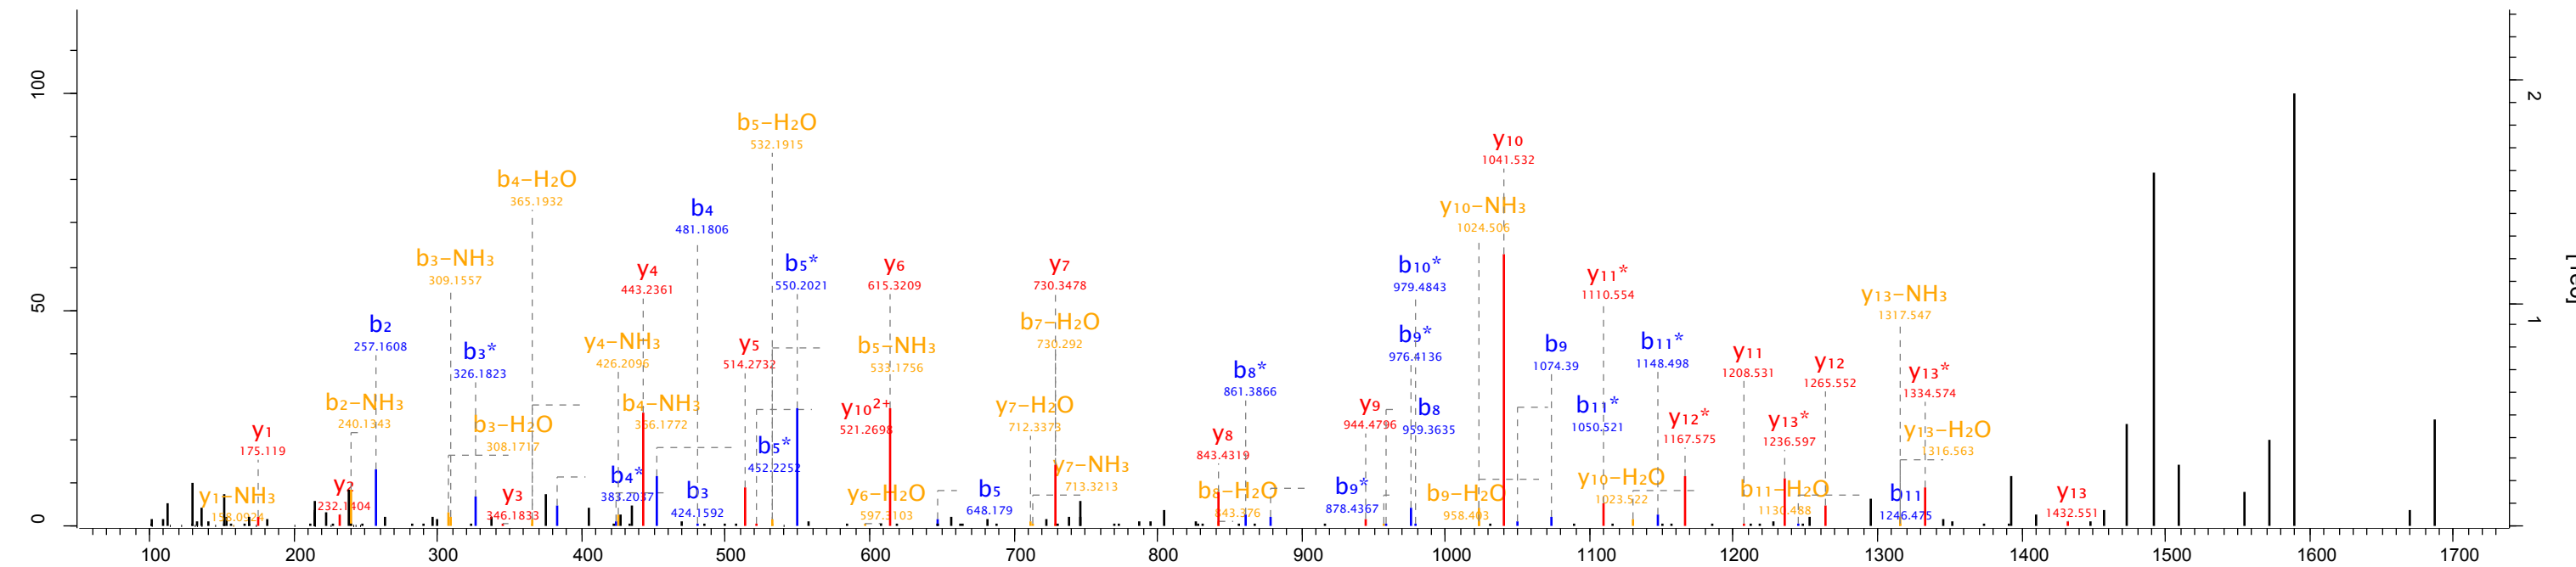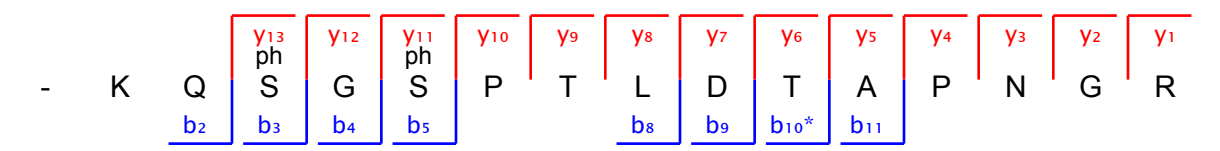

Raw file 20150812\_A375SR\_Phospho\_BR1\_02 Scan 7247 Method FTMS; HCD Score 278.95 m/z 1035.9 Gene names PRPF4B

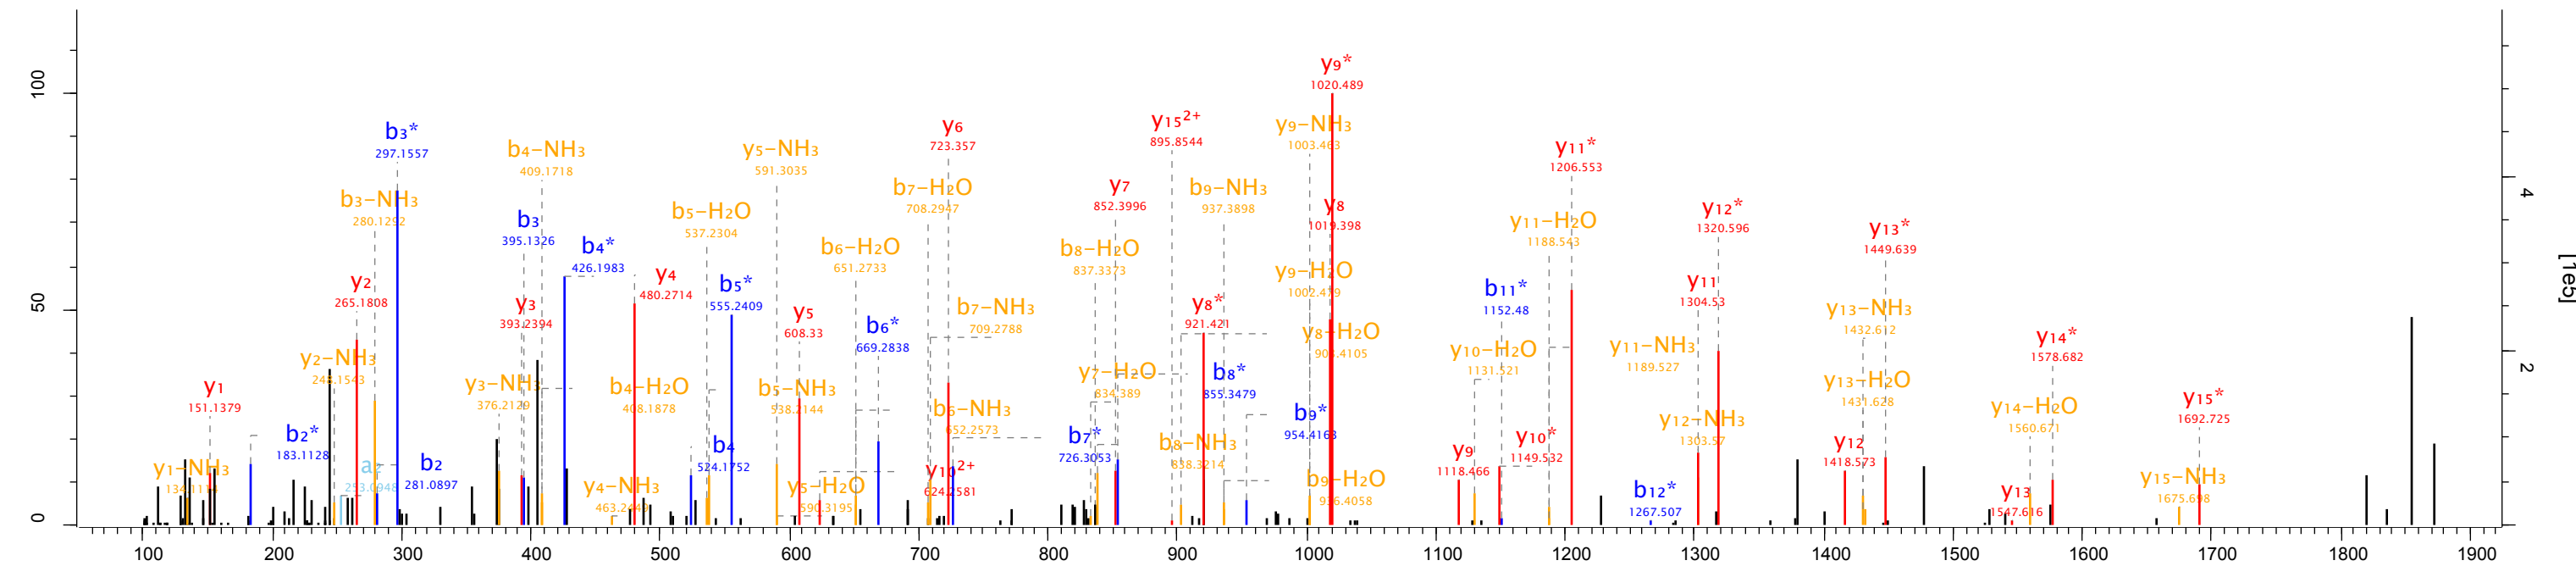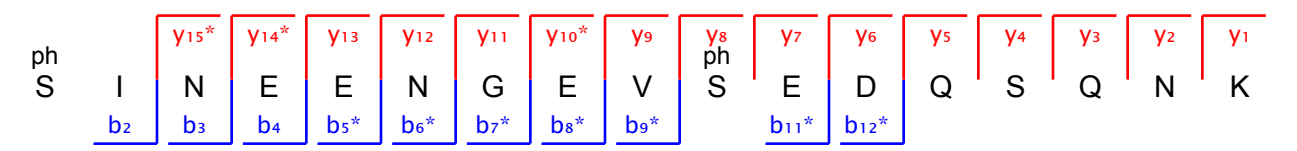

Raw file 20150812\_A375SR\_Phospho\_BR1\_02 Scan 7437 Method FTMS; HCD Score 191.16 m/z 801.34 Gene names MLLT4

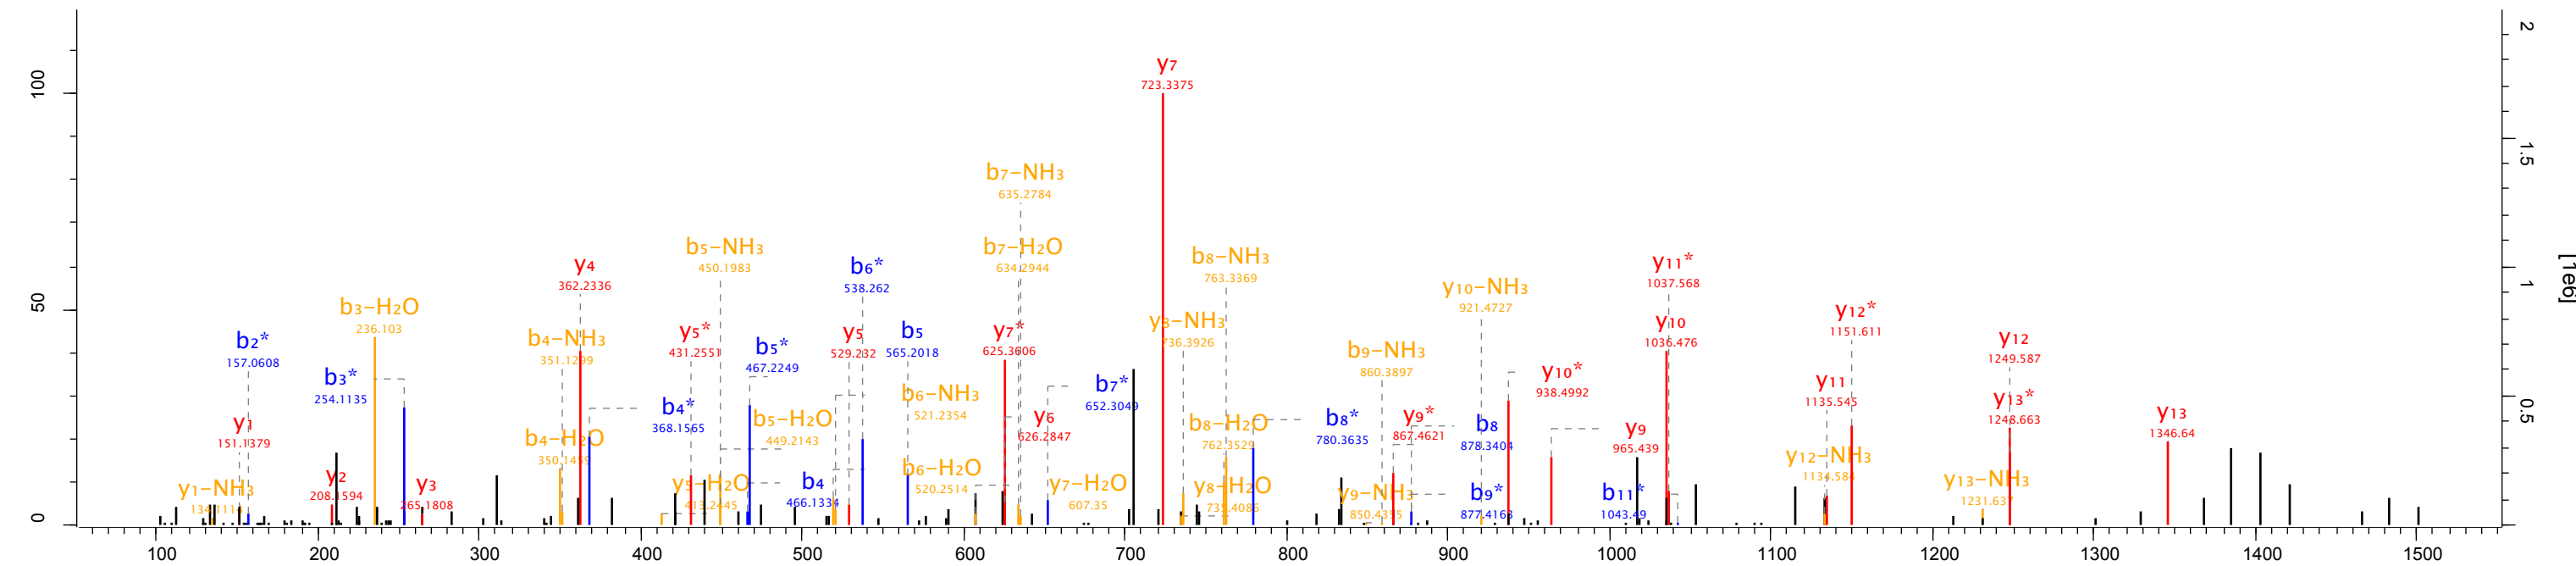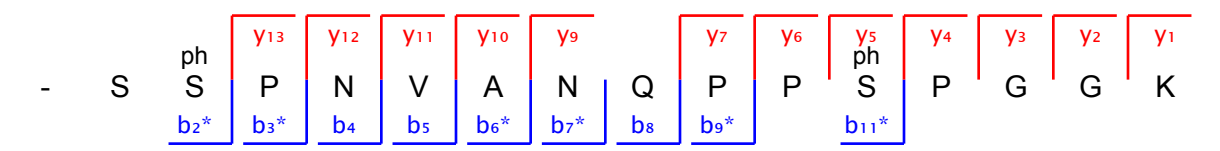

Raw file: 20150812\_A375SR\_Phospho\_BR1\_02  
 Scan: 7517 Method: FTMS; HCD Score: 140.03 m/z: 906.87 Gene names: CEP350

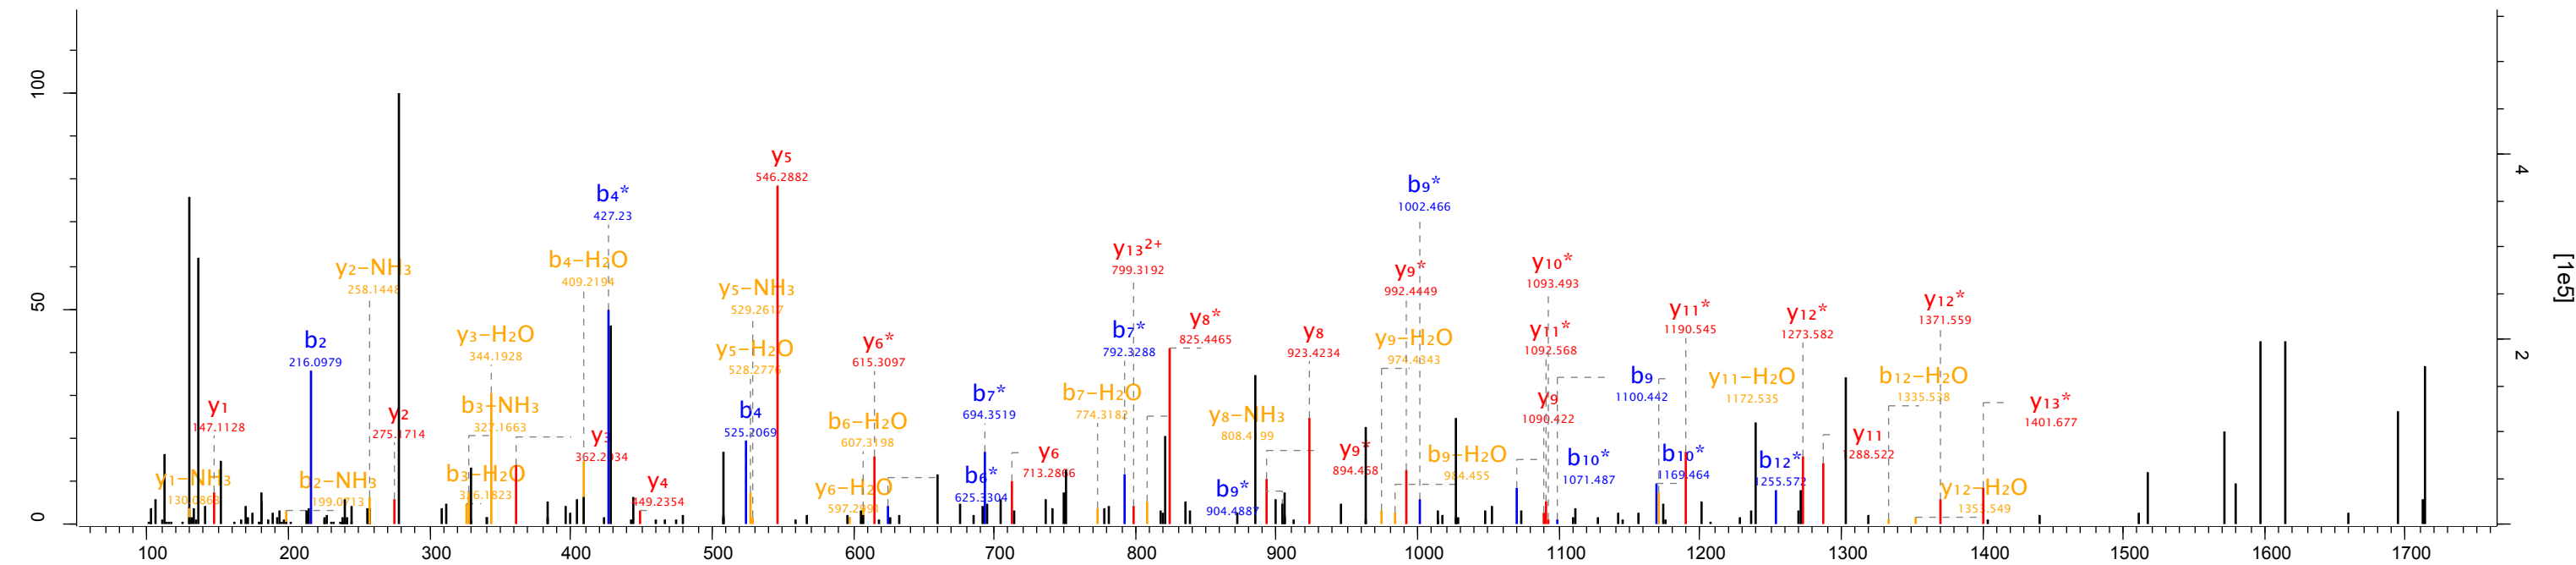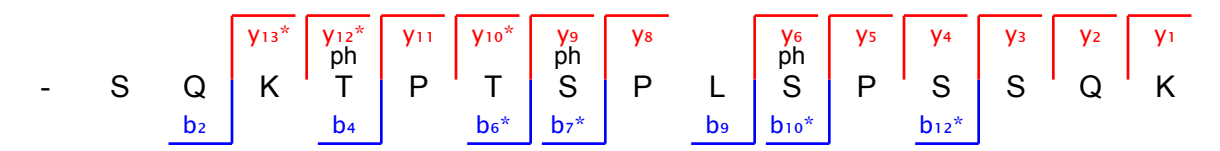



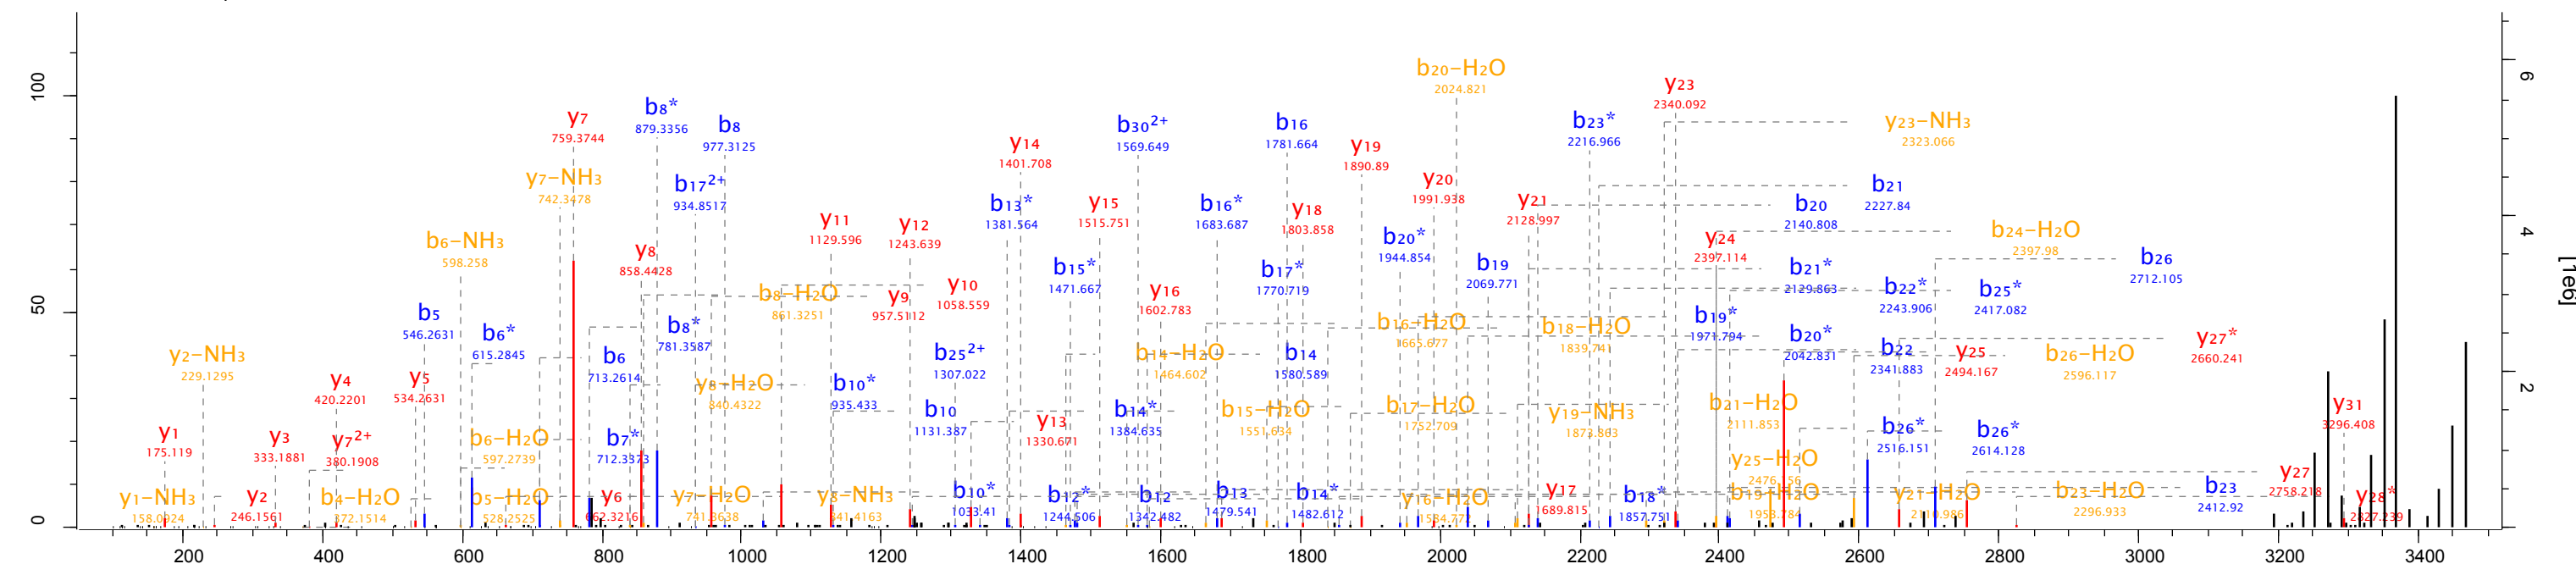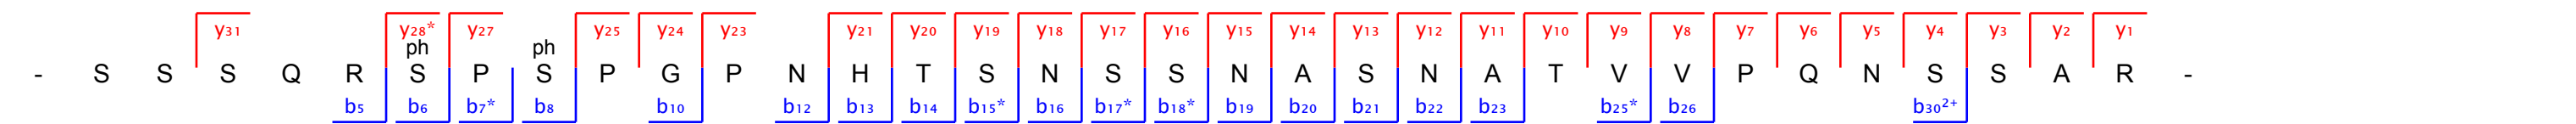

Raw file 20150812\_A375SR\_Phospho\_BR1\_02 Scan 7657 Method FTMS; HCD Score 161.55 m/z 884.86 Gene names TTYH3

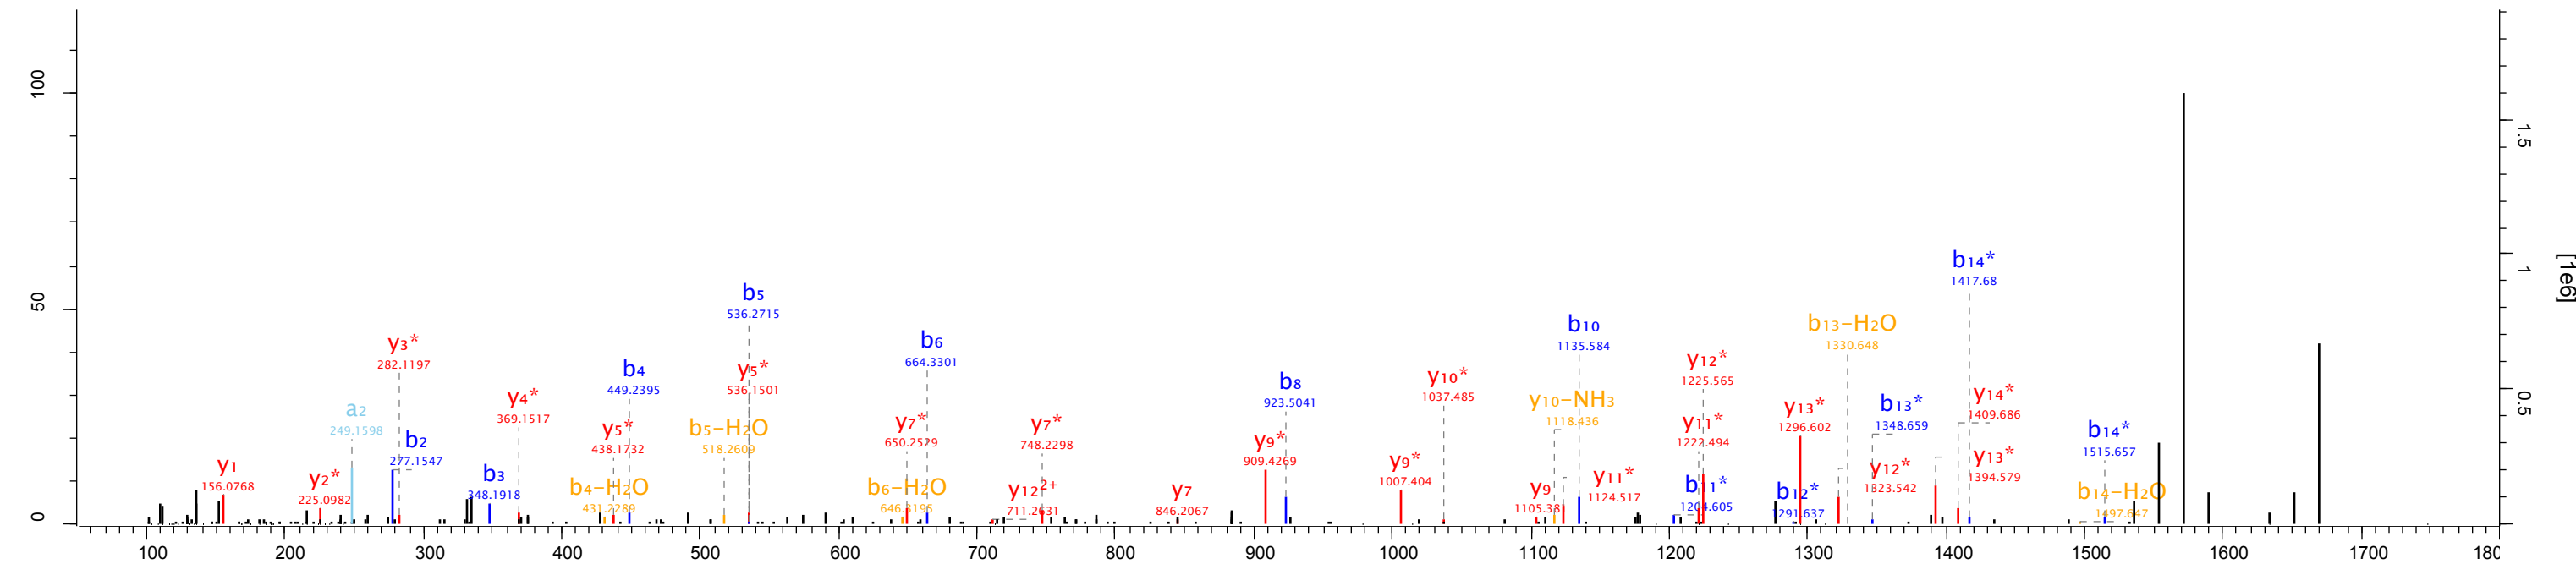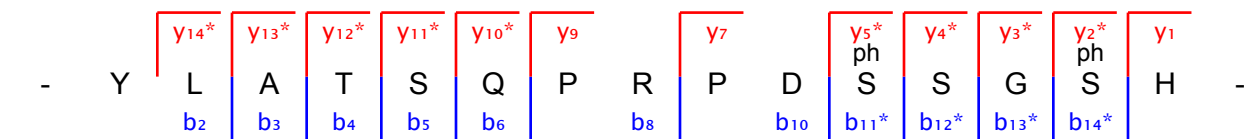

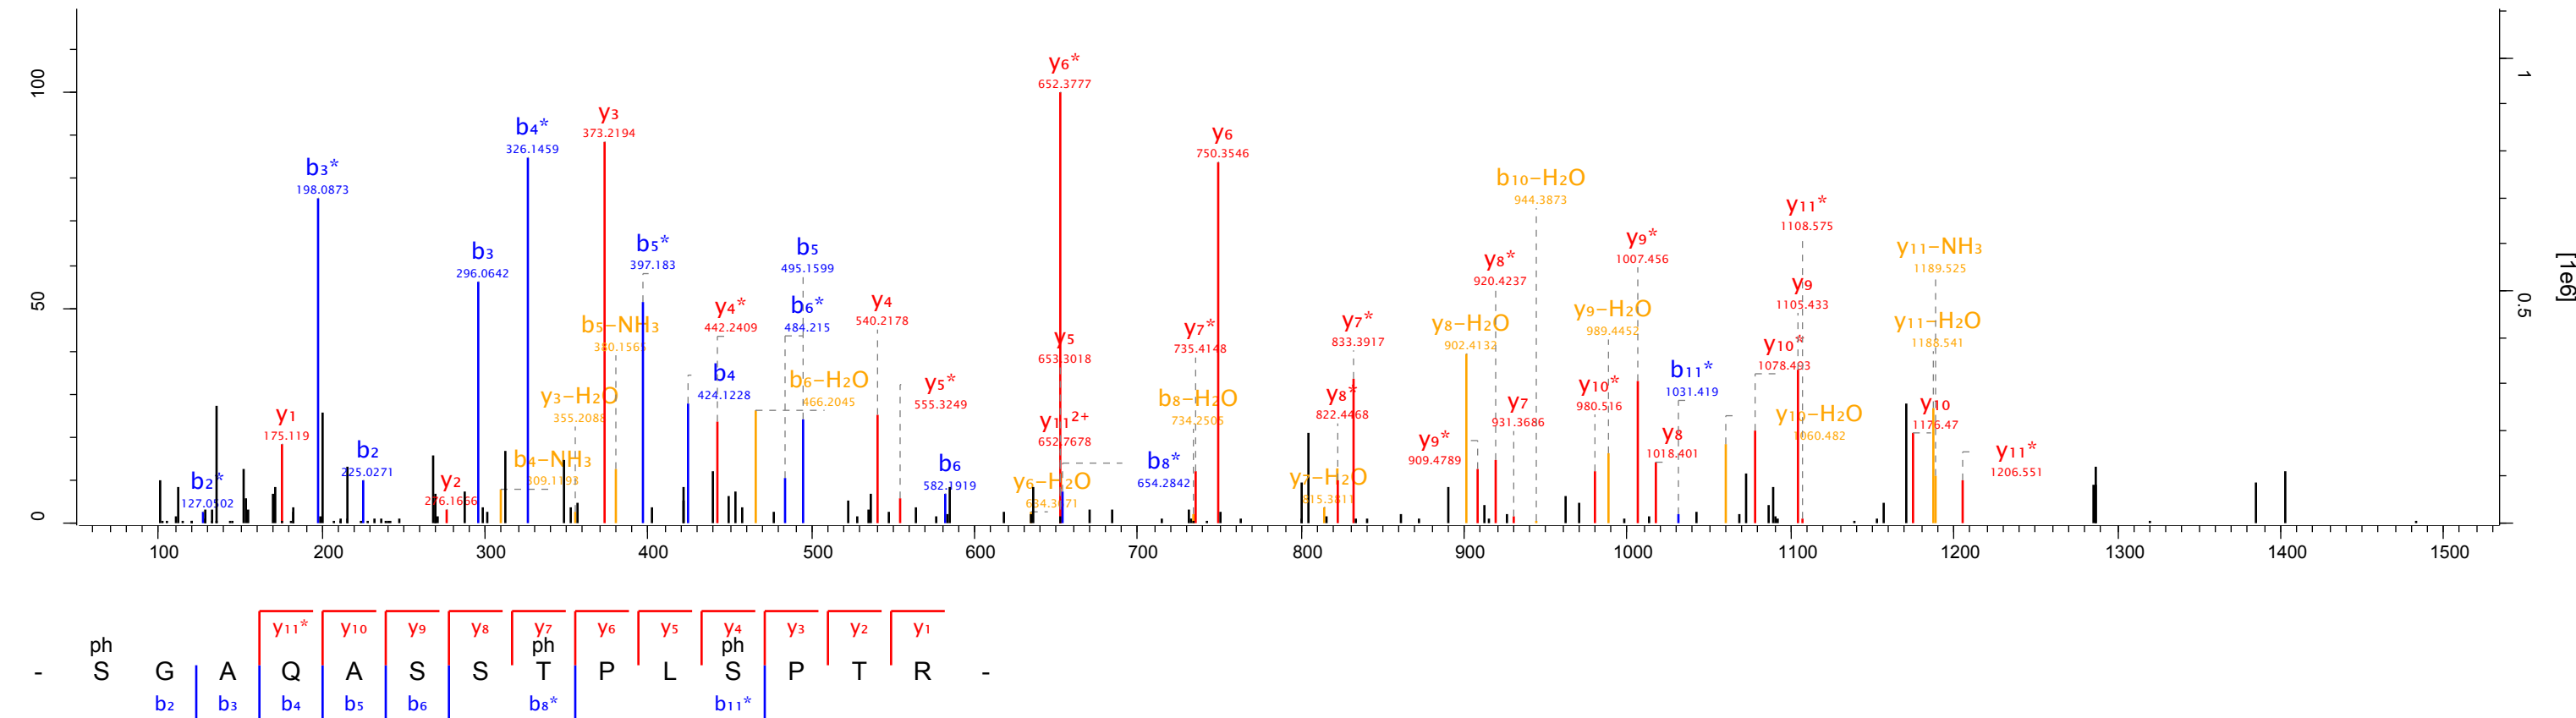

Raw file: 20150812\_A375SR\_Phospho\_BR1\_02  
 Scan: 7977 Method: FTMS; HCD Score: 106.29 m/z: 543.75 Gene names: LARP1B

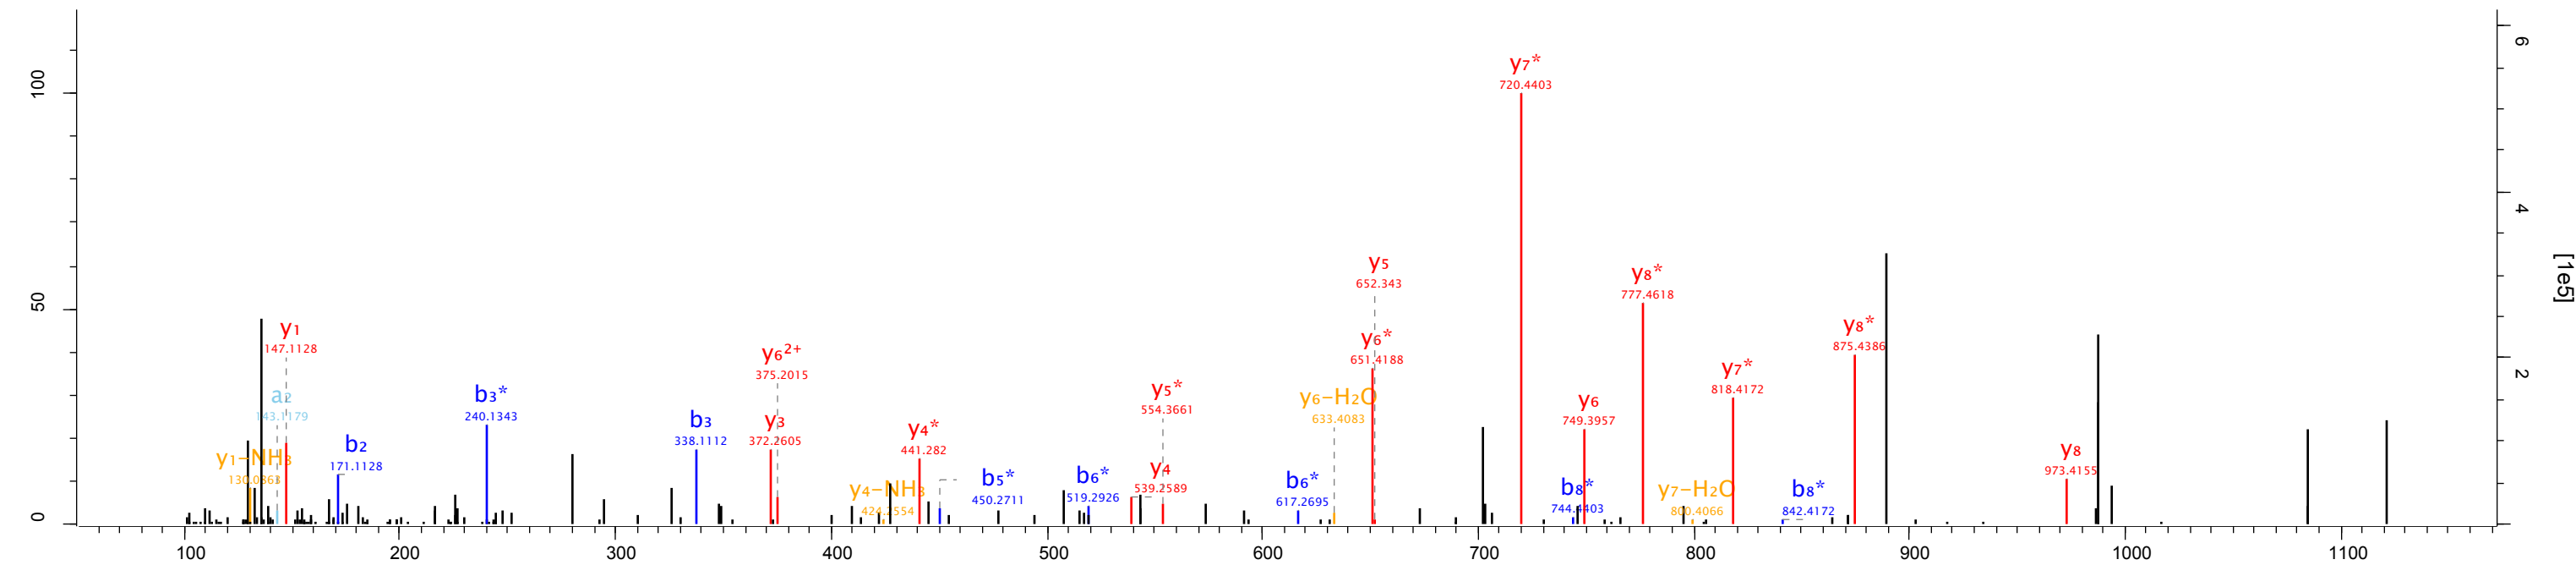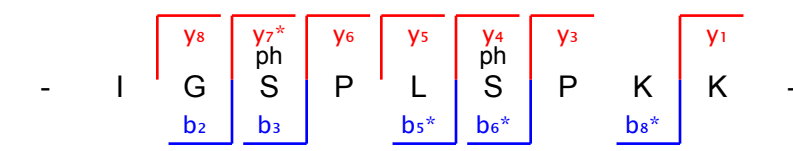

Raw file: 20150812\_A375SR\_Phospho\_BR1\_02  
 Scan: 8577 Method: FTMS; HCD Score: 126.83 m/z: 711.82 Gene names: AHNAK

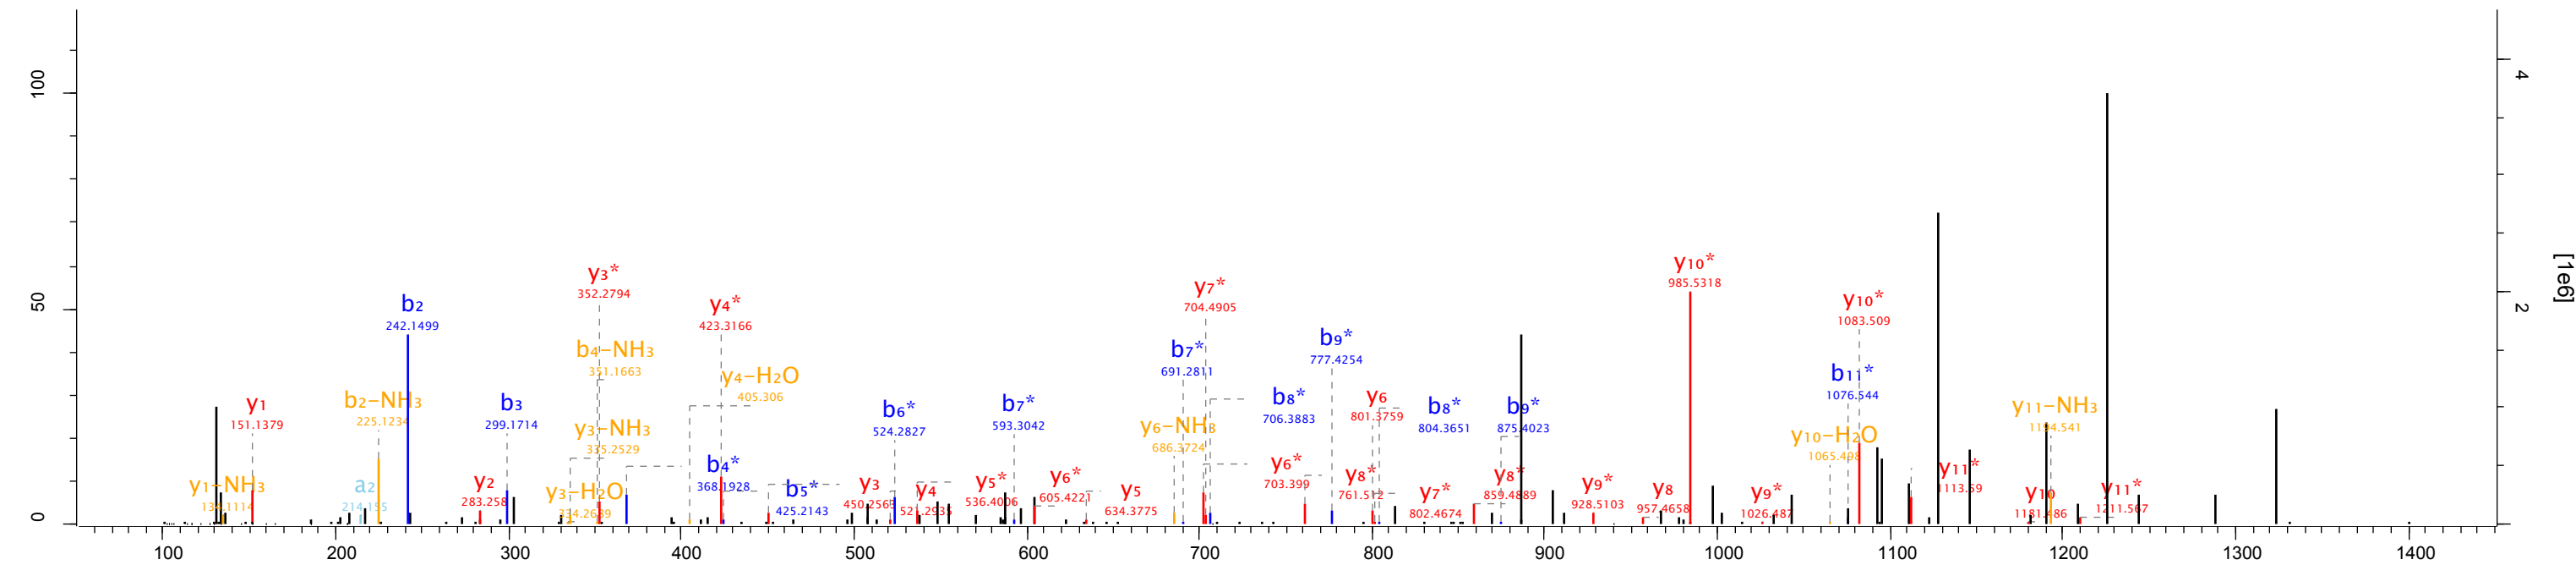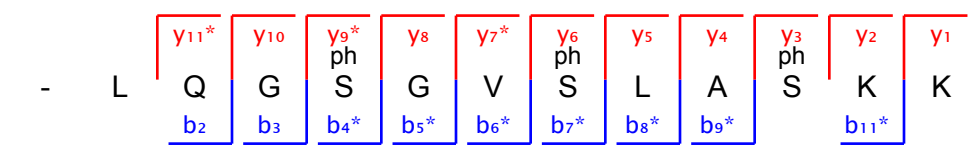

Raw file 20150812\_A375SR\_Phospho\_BR1\_02 Scan 8627 Method FTMS; HCD Score 156.02 m/z 1150.83 Gene names ATRX

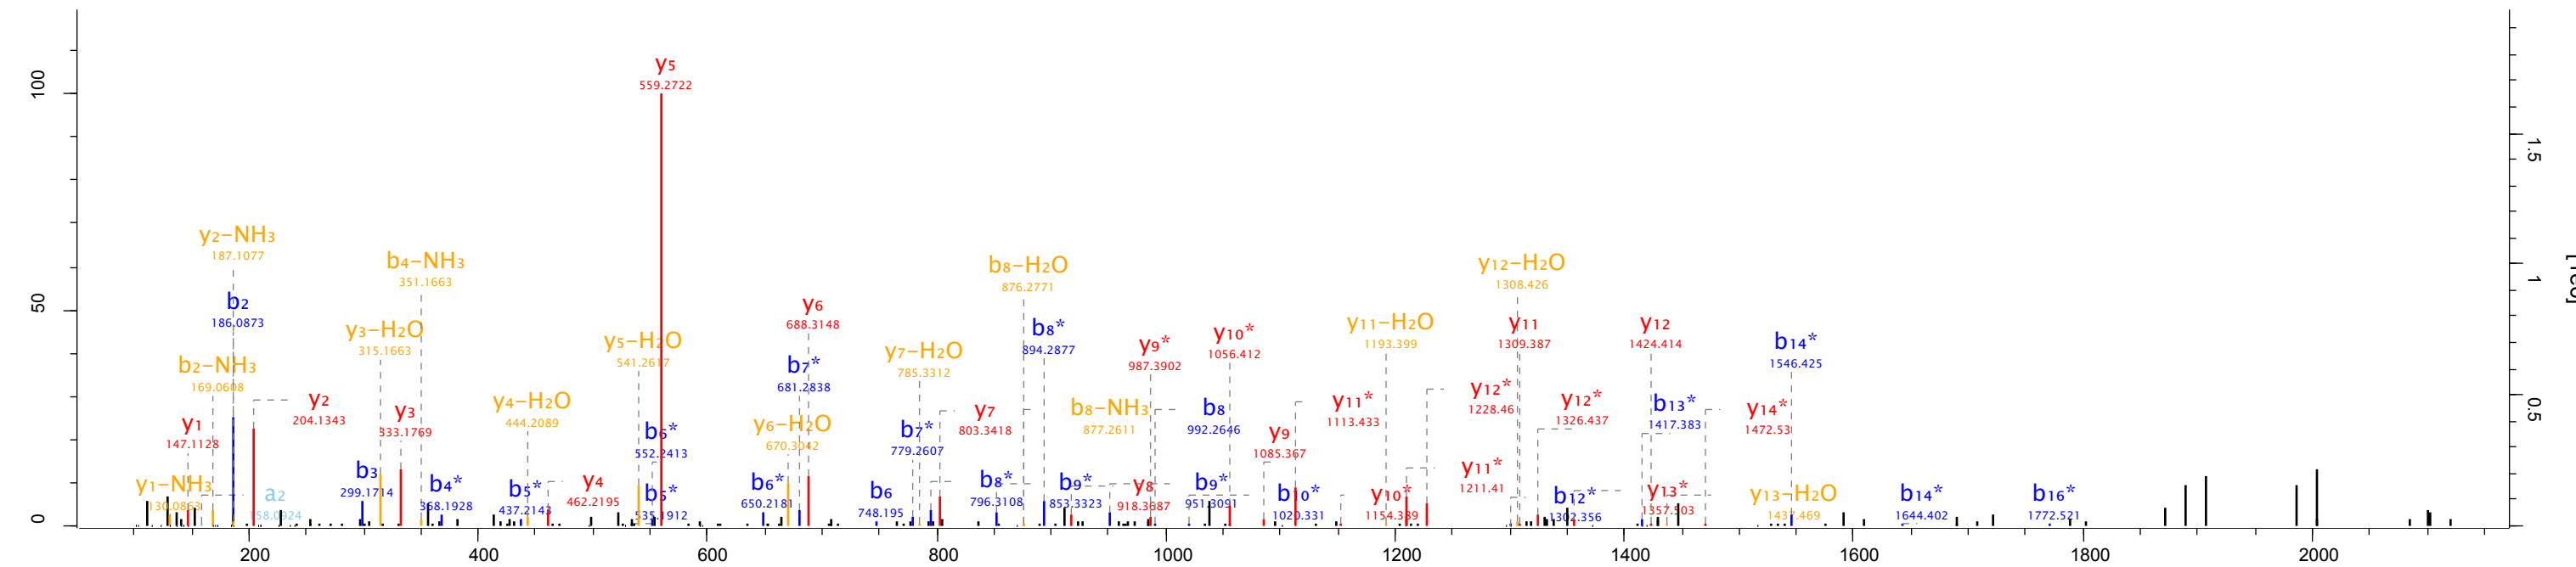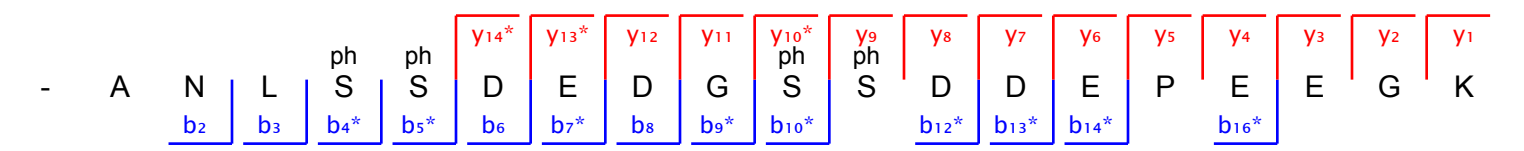

Raw file 20150812\_A375SR\_Phospho\_BR1\_02 Scan 8657 Method FTMS; HCD Score 66.71 m/z 575.75 Gene names WRNIP1

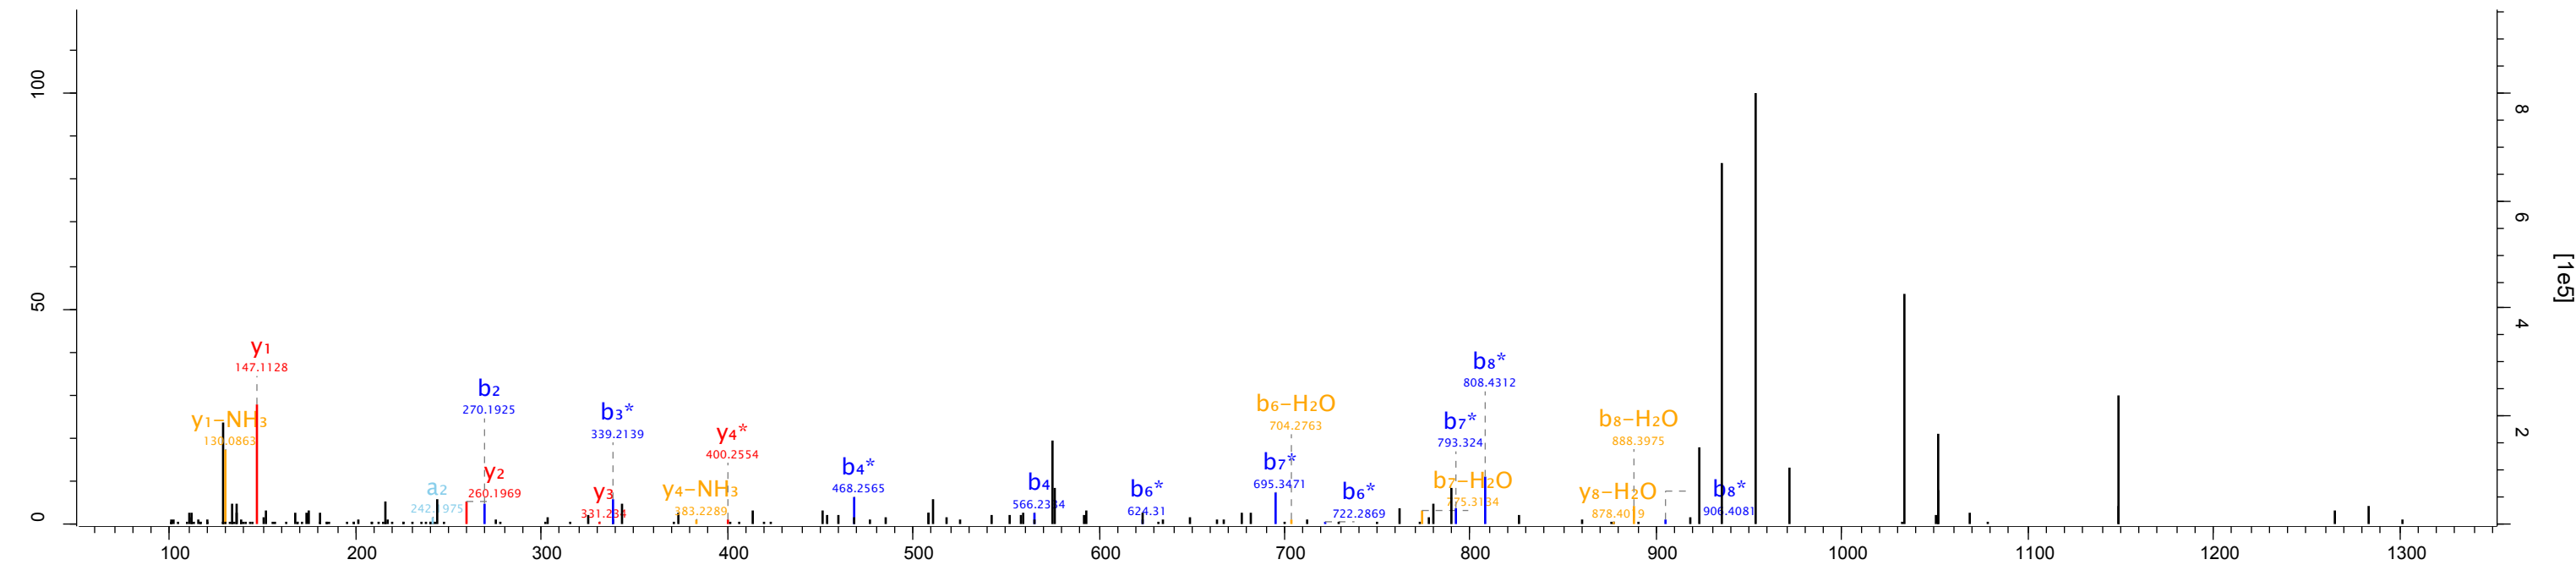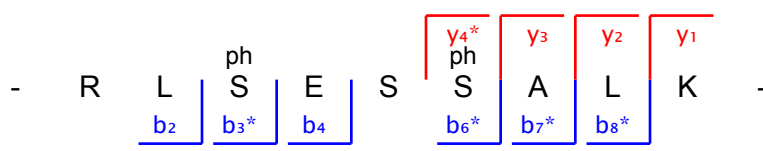

Raw file: 20150812\_A375SR\_Phospho\_BR1\_02  
 Scan: 8697 Method: FTMS; HCD Score: 107.18 m/z: 947.35 Gene names: RAP1GAP2

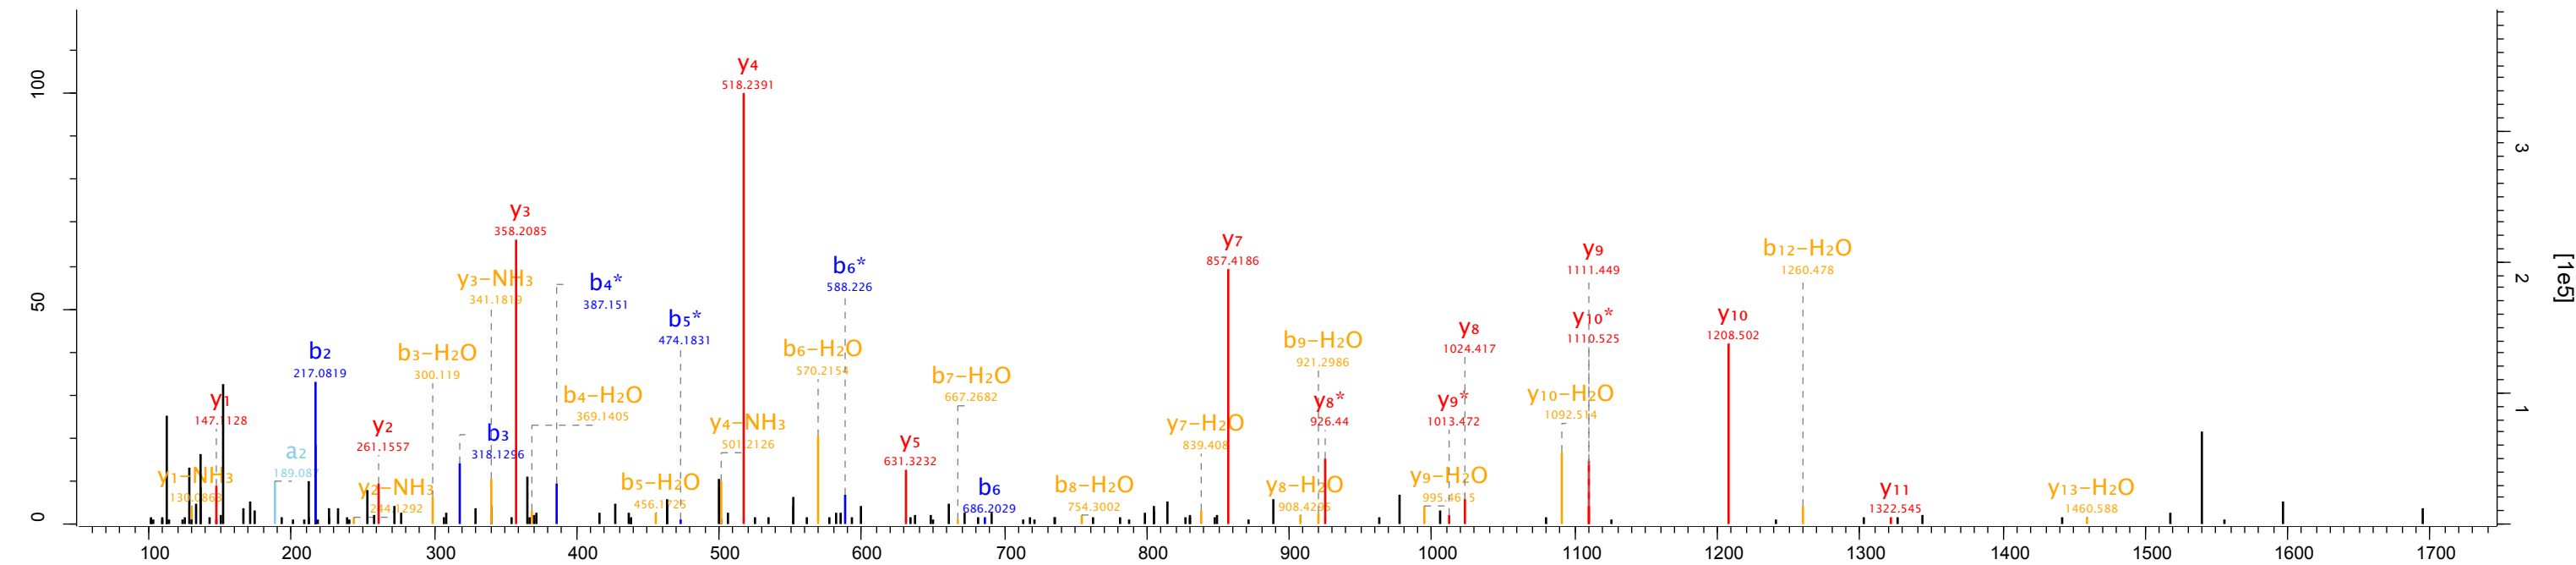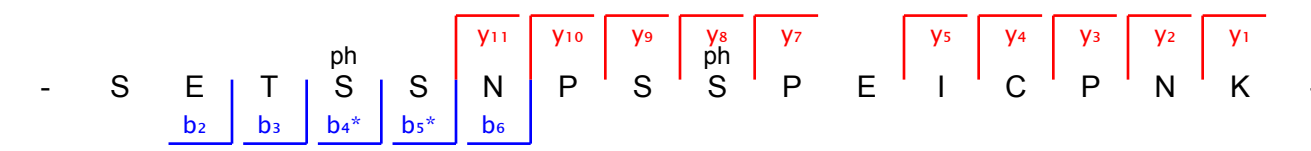



Raw file 20150812\_A375SR\_Phospho\_BR1\_02 Scan 8987 Method FTMS; HCD Score 74.3 m/z 582.24 Gene names SSFA2

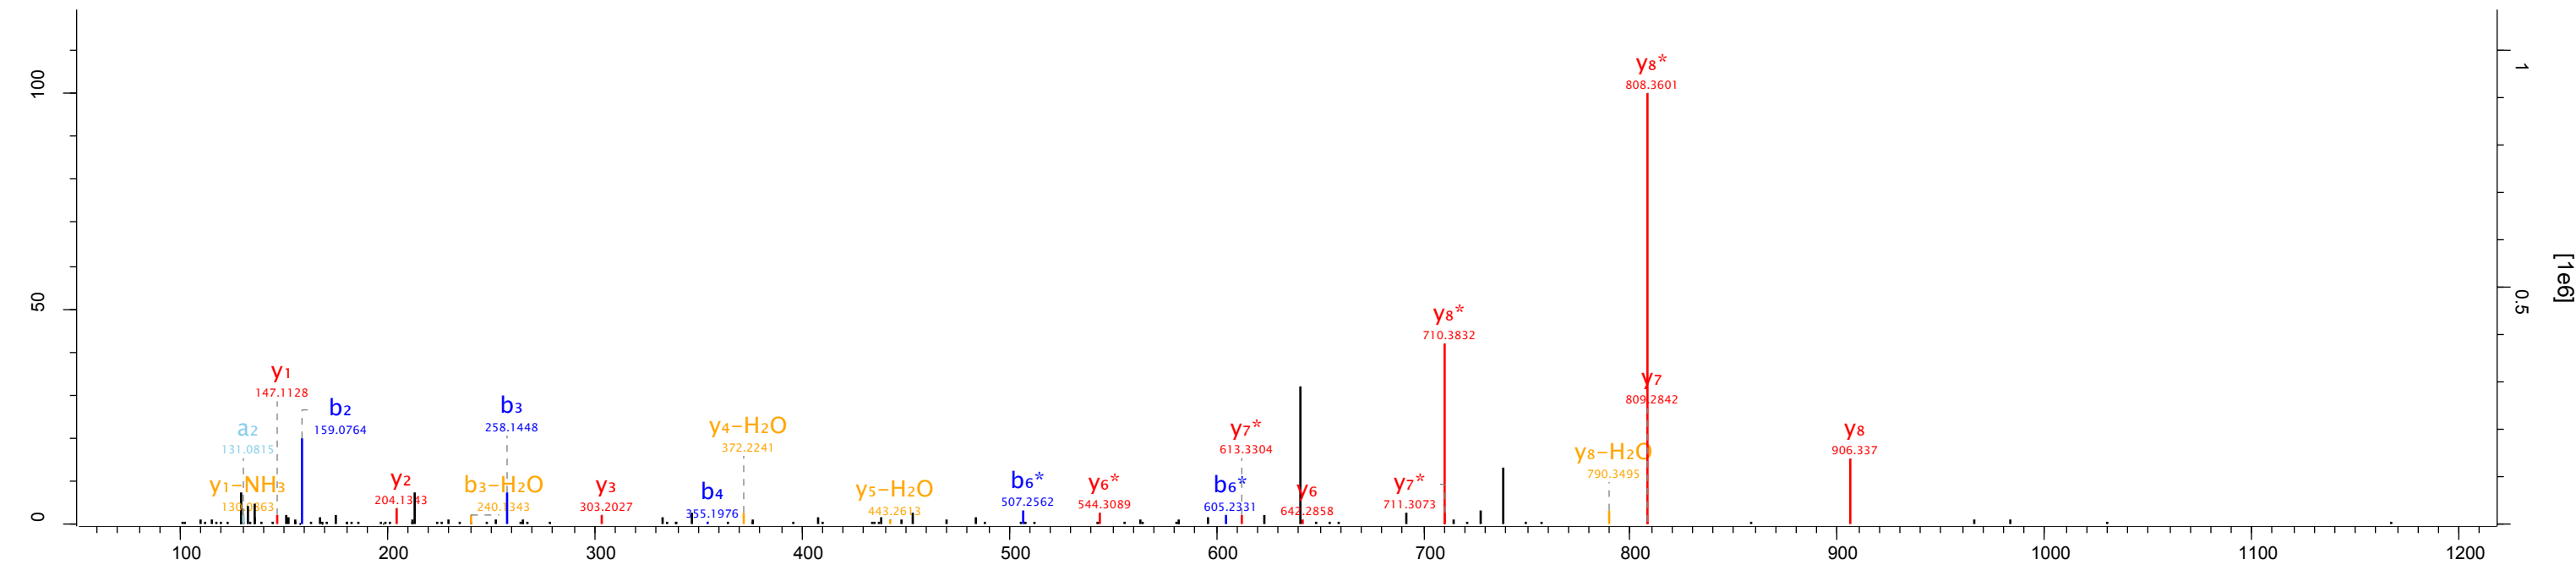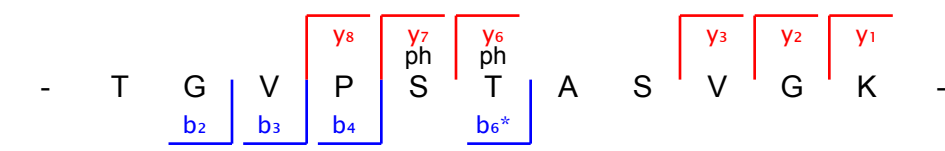

Raw file: 20150812\_A375SR\_Phospho\_BR1\_02  
 Scan: 9127 Method: FTMS; HCD Score: 121.92 m/z: 963.89 Gene names: DBNL

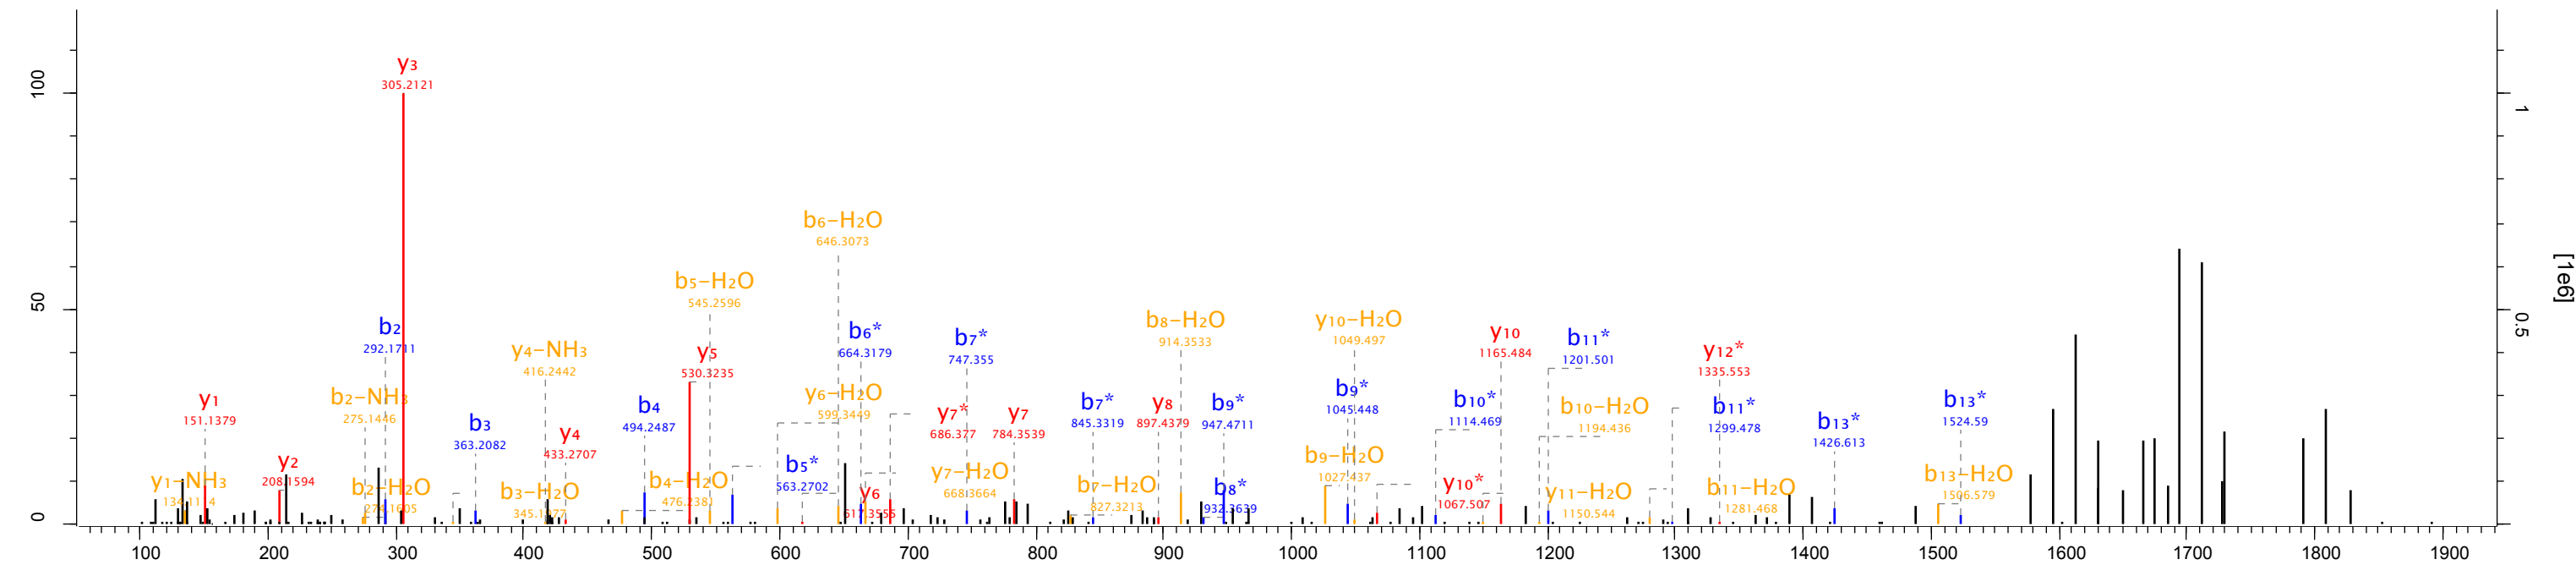

- E R A M S T S I S P Q P G K -

b<sub>2</sub>
b<sub>3</sub>
b<sub>4</sub>
b<sub>5</sub><sup>\*</sup>
b<sub>6</sub><sup>\*</sup>
b<sub>7</sub><sup>\*</sup>
b<sub>8</sub><sup>\*</sup>
b<sub>9</sub><sup>\*</sup>
b<sub>10</sub><sup>\*</sup>
b<sub>11</sub><sup>\*</sup>
b<sub>13</sub><sup>\*</sup>

y<sub>12</sub><sup>\*</sup>
y<sub>10</sub>
y<sub>8</sub>
y<sub>7</sub>
y<sub>6</sub>
y<sub>5</sub>
y<sub>4</sub>
y<sub>3</sub>
y<sub>2</sub>
y<sub>1</sub>

ph  
 ph  
 S  
 T  
 S  
 I  
 S  
 S  
 P  
 Q  
 P  
 G  
 K

Raw file: 20150812\_A375SR\_Phospho\_BR1\_02  
 Scan: 9157 Method: FTMS; HCD Score: 144.33 m/z: 934.34 Gene names: TBC1D23

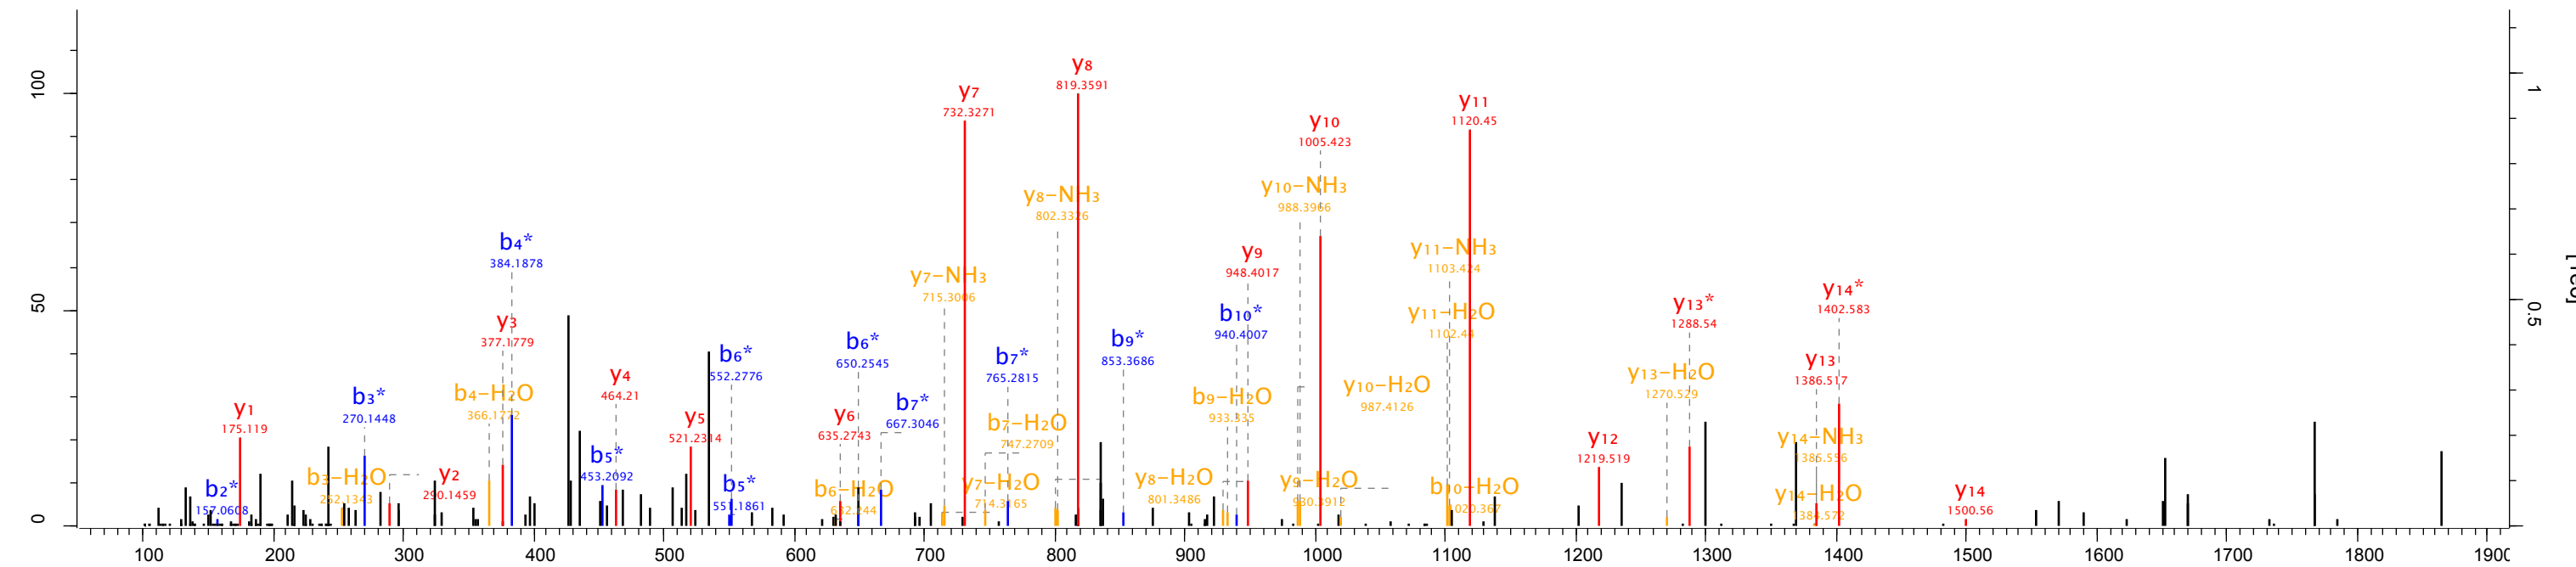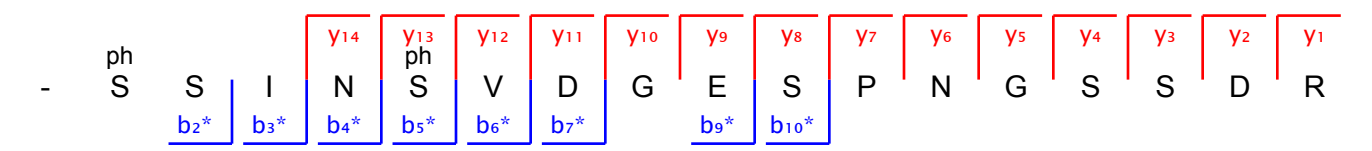

Raw file: 20150812\_A375SR\_Phospho\_BR1\_02  
 Scan: 9367 Method: FTMS; HCD Score: 213.35 m/z: 926.04 Gene names: NEDD4L

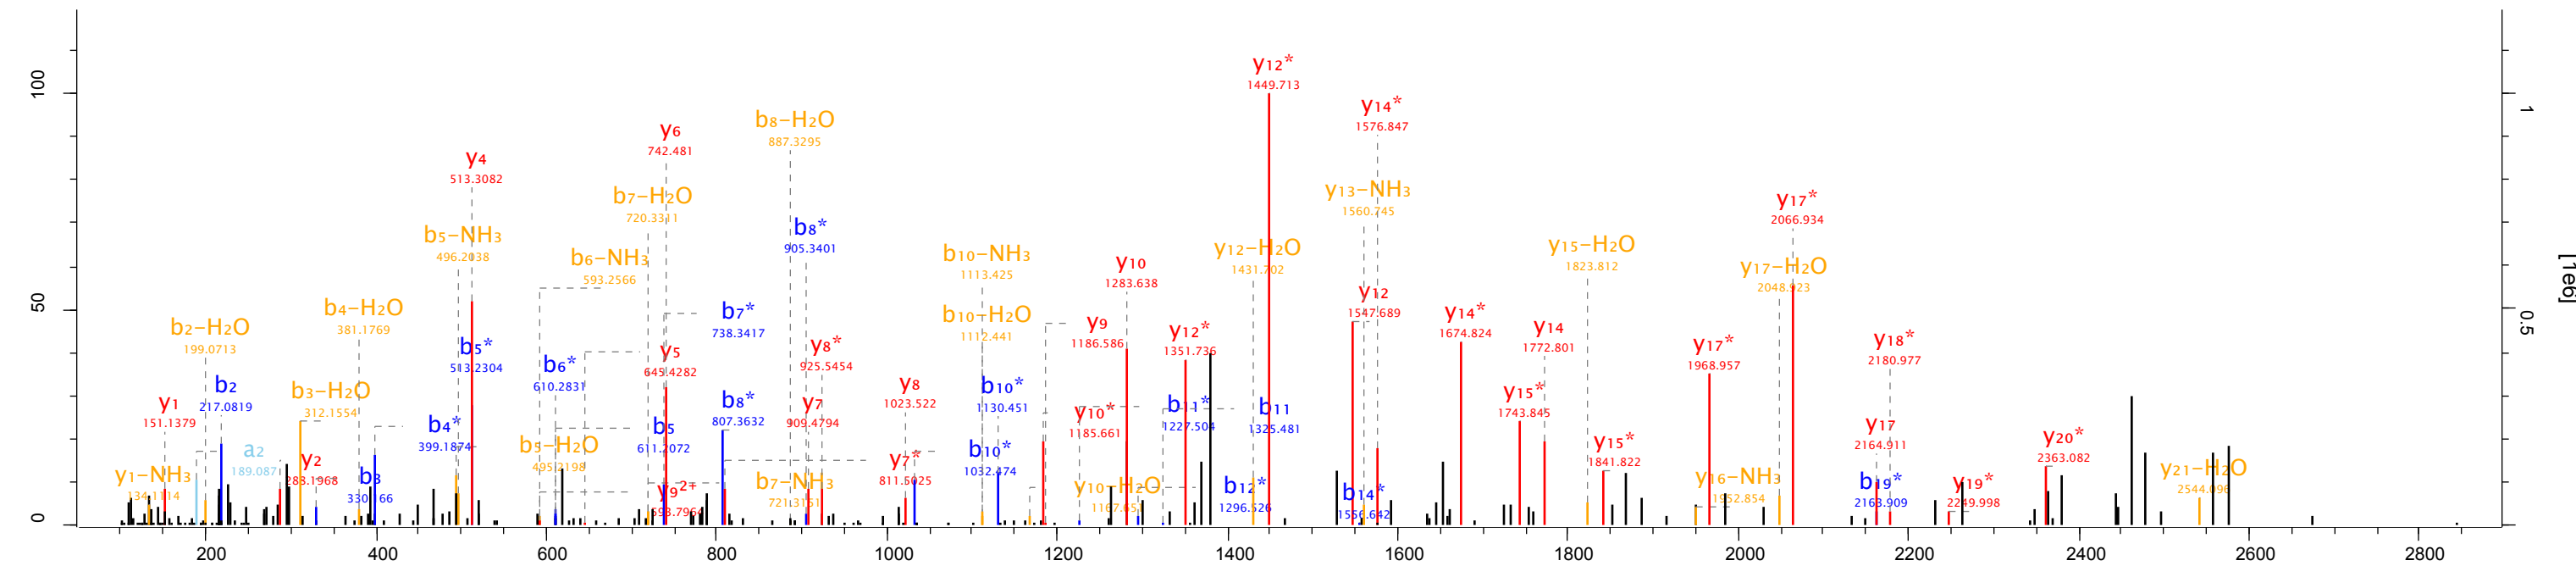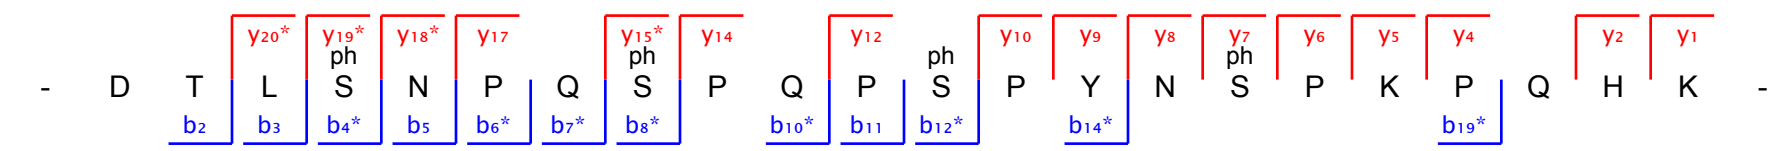

Raw file: 20150812\_A375SR\_Phospho\_BR1\_02  
 Scan: 9387 Method: FTMS; HCD Score: 230.5 m/z: 939.39 Gene names: IRF2BPL

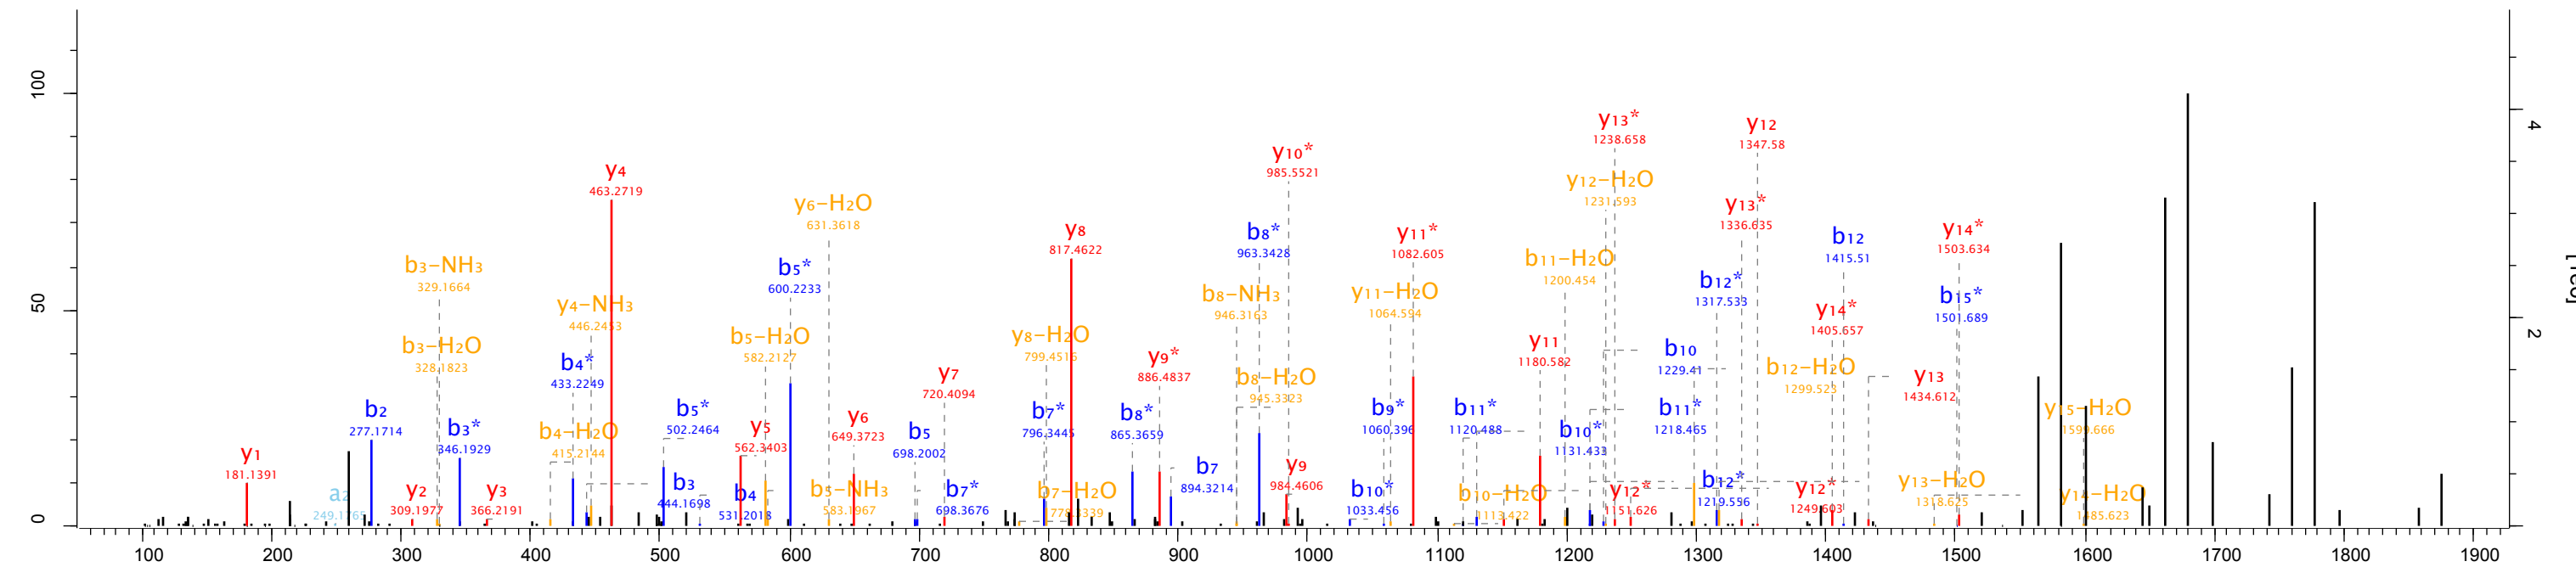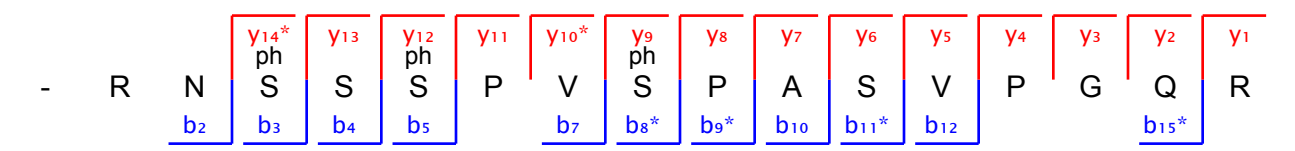

Raw file: 20150812\_A375SR\_Phospho\_BR1\_02  
 Scan: 9437 Method: FTMS; HCD Score: 277.8 m/z: 1025.86 Gene names: LEO1

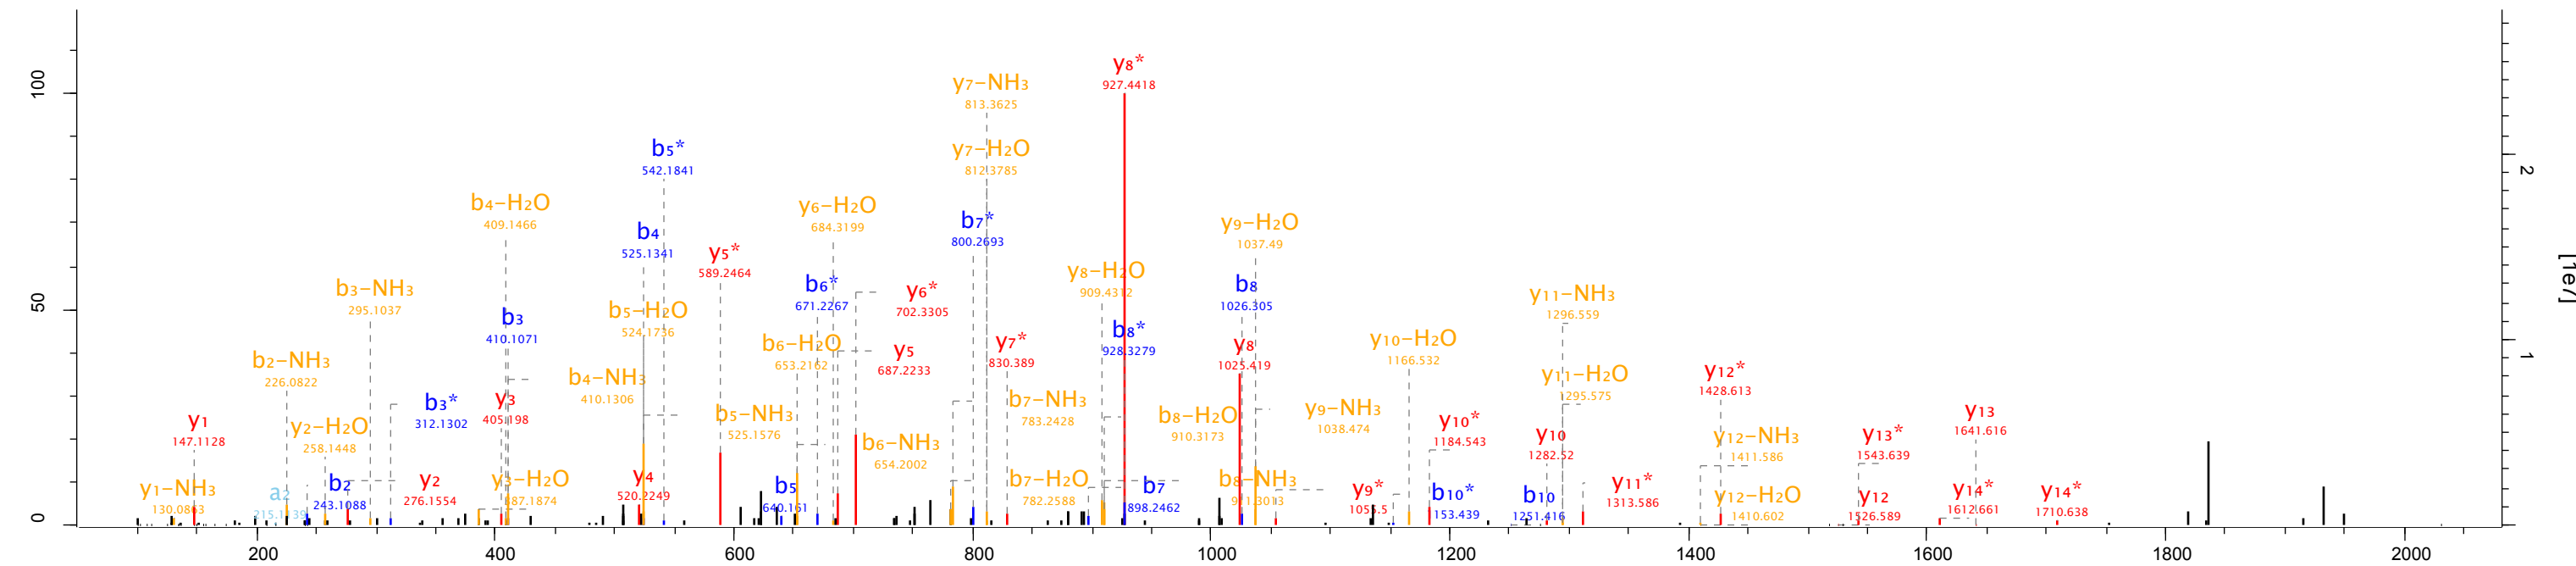

Protein sequence: - Q N S D D E E Q P Q L S D E E K -  
 Fragmentation sites: b2 (under N), b3 (under S), b4 (under D), b5 (under D), b6\* (under E), b7 (under E), b8 (under Q), b10 (under Q)

Raw file: 20150812\_A375SR\_Phospho\_BR1\_02  
 Scan: 9597 Method: FTMS; HCD Score: 190.21 m/z: 1016.43 Gene names: CCDC86

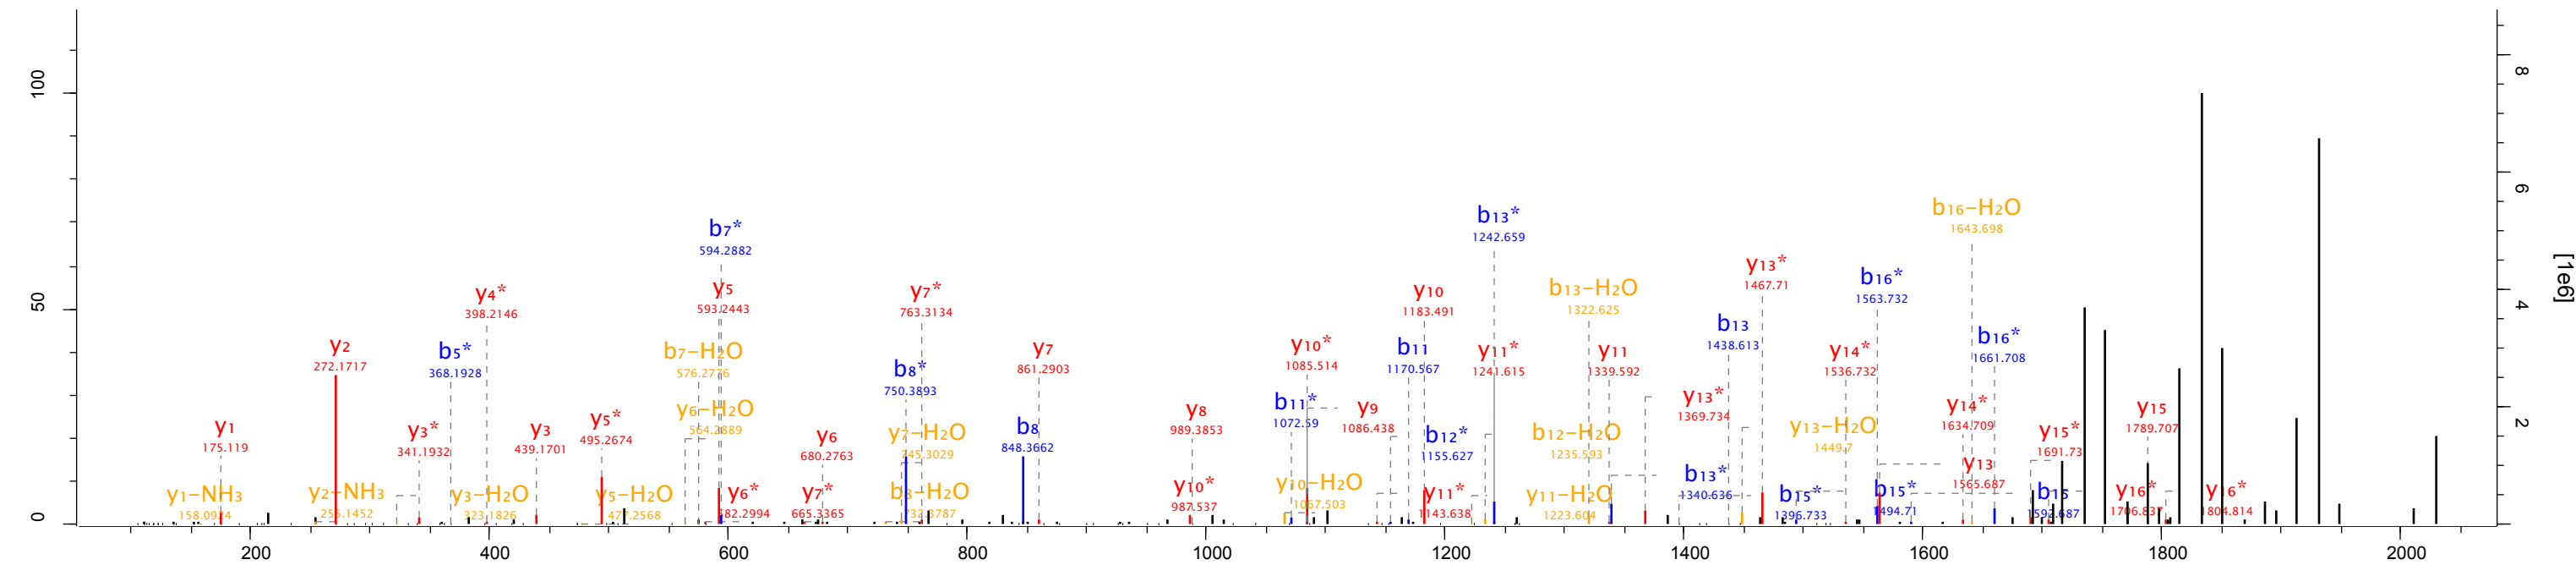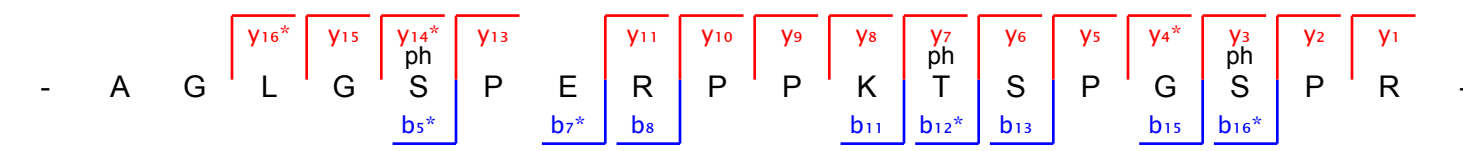

Raw file  
20150812\_A375SR\_Phospho\_BR1\_02

Scan 9687 Method FTMS; HCD Score 242.03 m/z 1461.01 Gene names ARID4B

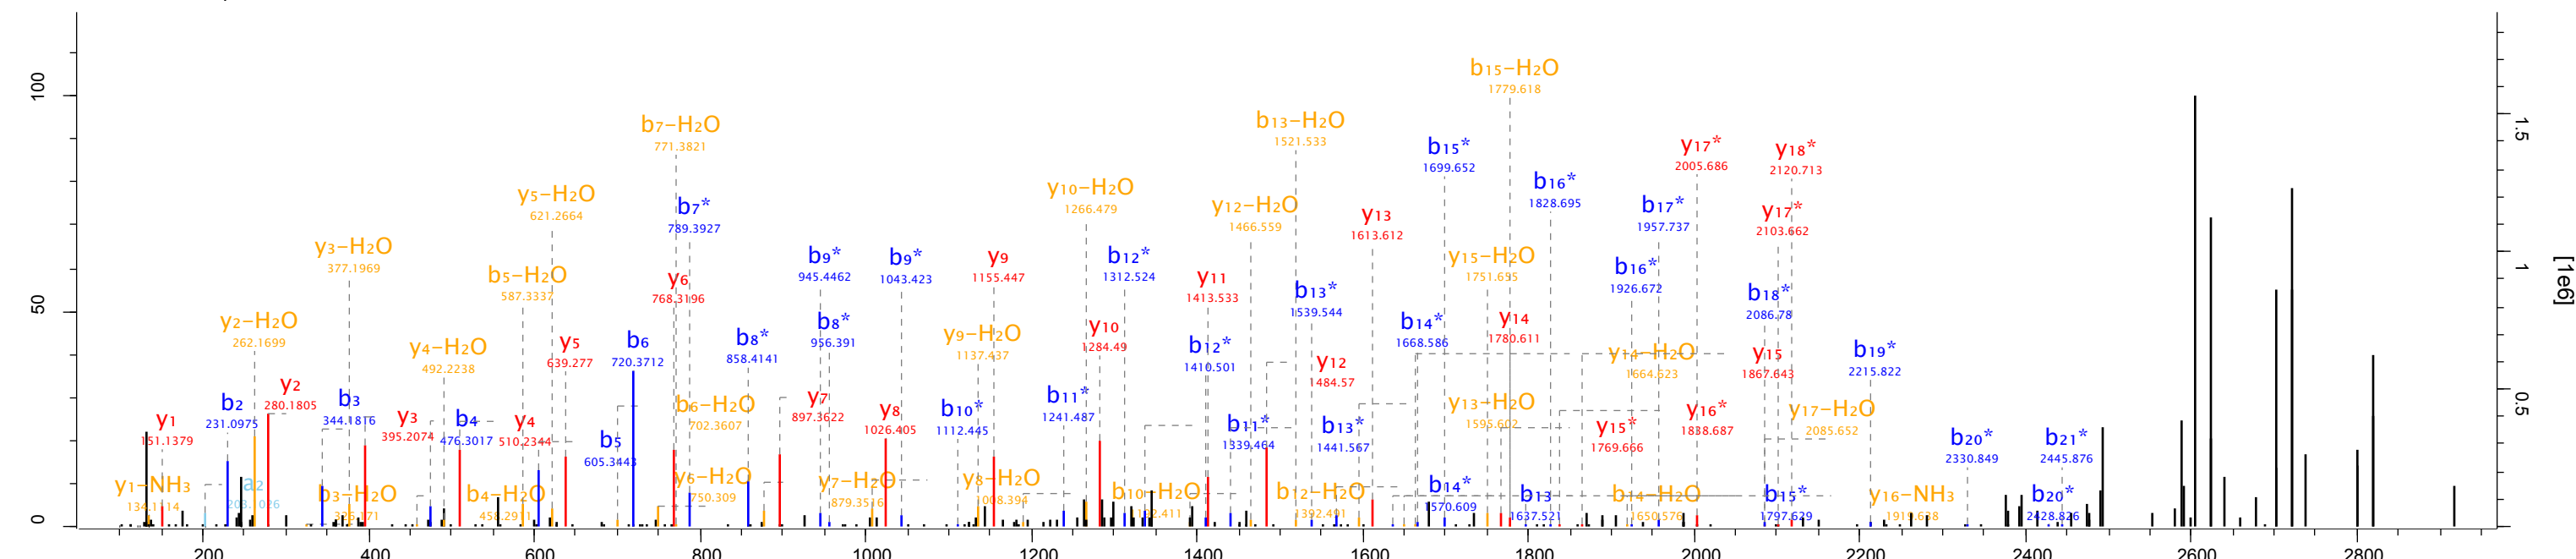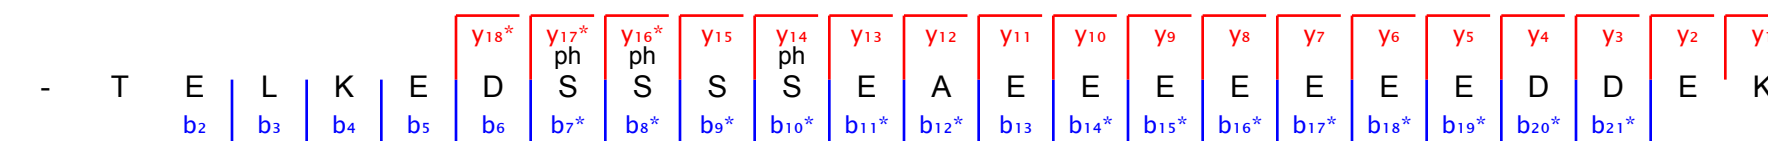



Raw file: 20150812\_A375SR\_Phospho\_BR1\_02  
 Scan: 9757 Method: FTMS; HCD Score: 129.06 m/z: 818.31 Gene names: DBNL

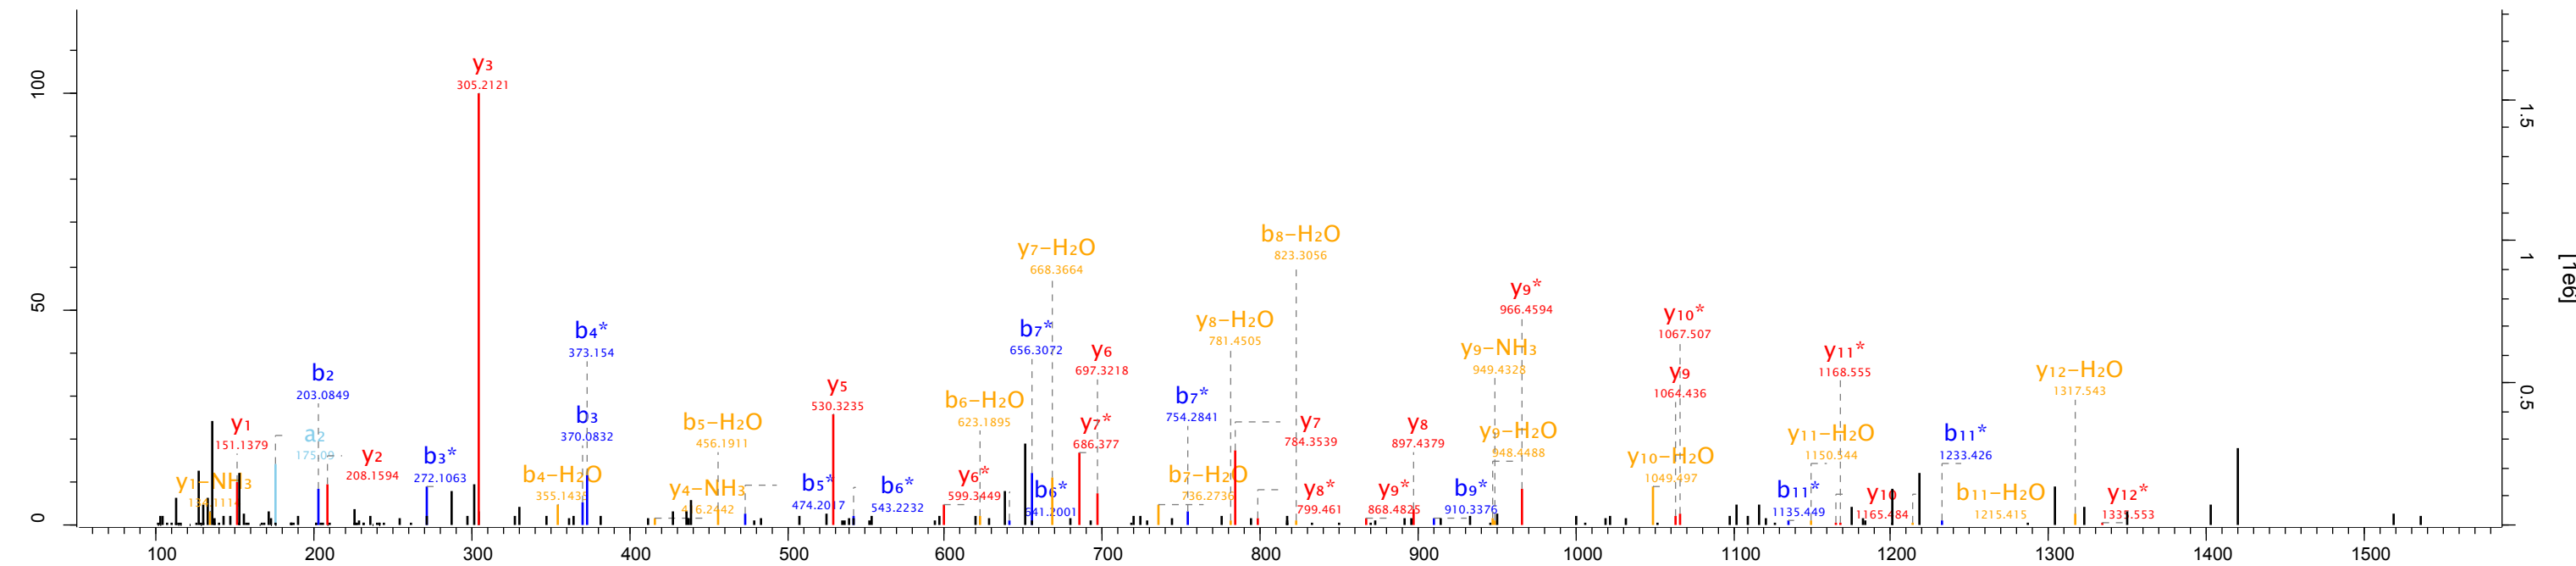

- A M y<sub>12</sub><sup>\*</sup>  
ph  
S y<sub>11</sub><sup>\*</sup>  
T y<sub>10</sub>  
T y<sub>9</sub>  
ph  
S y<sub>8</sub>  
I y<sub>7</sub>  
S y<sub>6</sub>  
ph  
S y<sub>5</sub>  
P y<sub>3</sub>  
Q y<sub>2</sub>  
P y<sub>1</sub>  
G y<sub>1</sub>  
K -

b<sub>2</sub> b<sub>3</sub> b<sub>4</sub><sup>\*</sup> b<sub>5</sub><sup>\*</sup> b<sub>6</sub><sup>\*</sup> b<sub>7</sub><sup>\*</sup> b<sub>9</sub><sup>\*</sup> b<sub>11</sub><sup>\*</sup>

Raw file 20150812\_A375SR\_Phospho\_BR1\_02 Scan 9837 Method FTMS; HCD Score 148.51 m/z 1021.9 Gene names YBX3

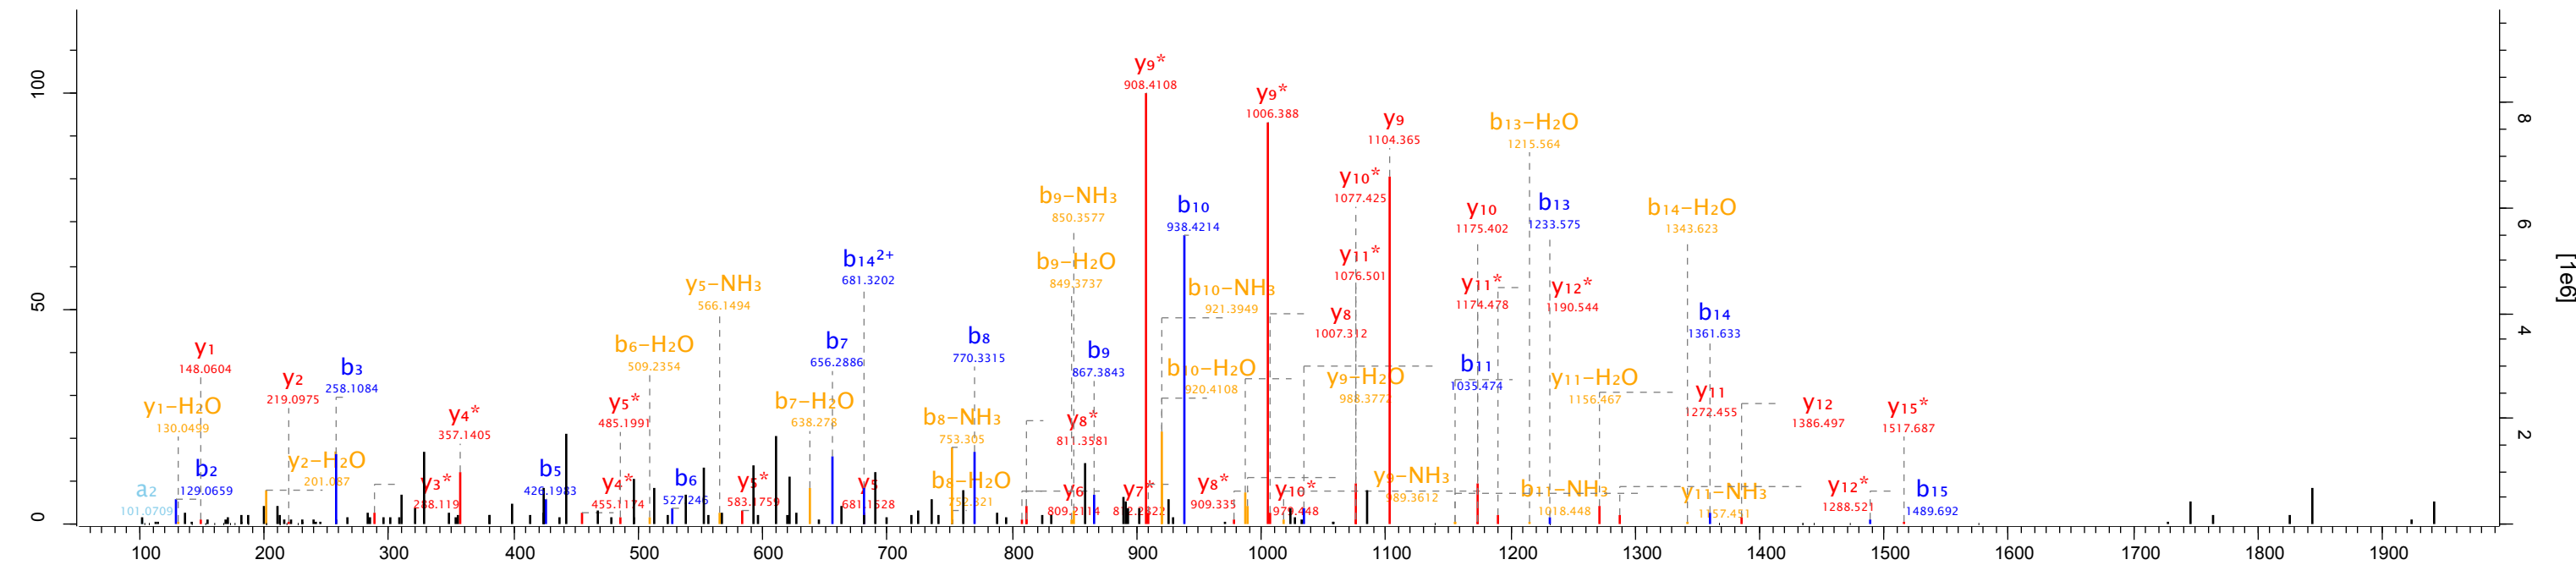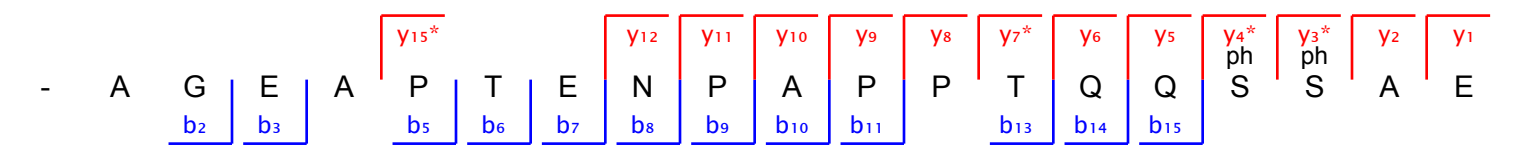

Raw file: 20150812\_A375SR\_Phospho\_BR1\_02  
 Scan: 9907 Method: FTMS; HCD Score: 255.84 m/z: 1075.94 Gene names: MAP7D1

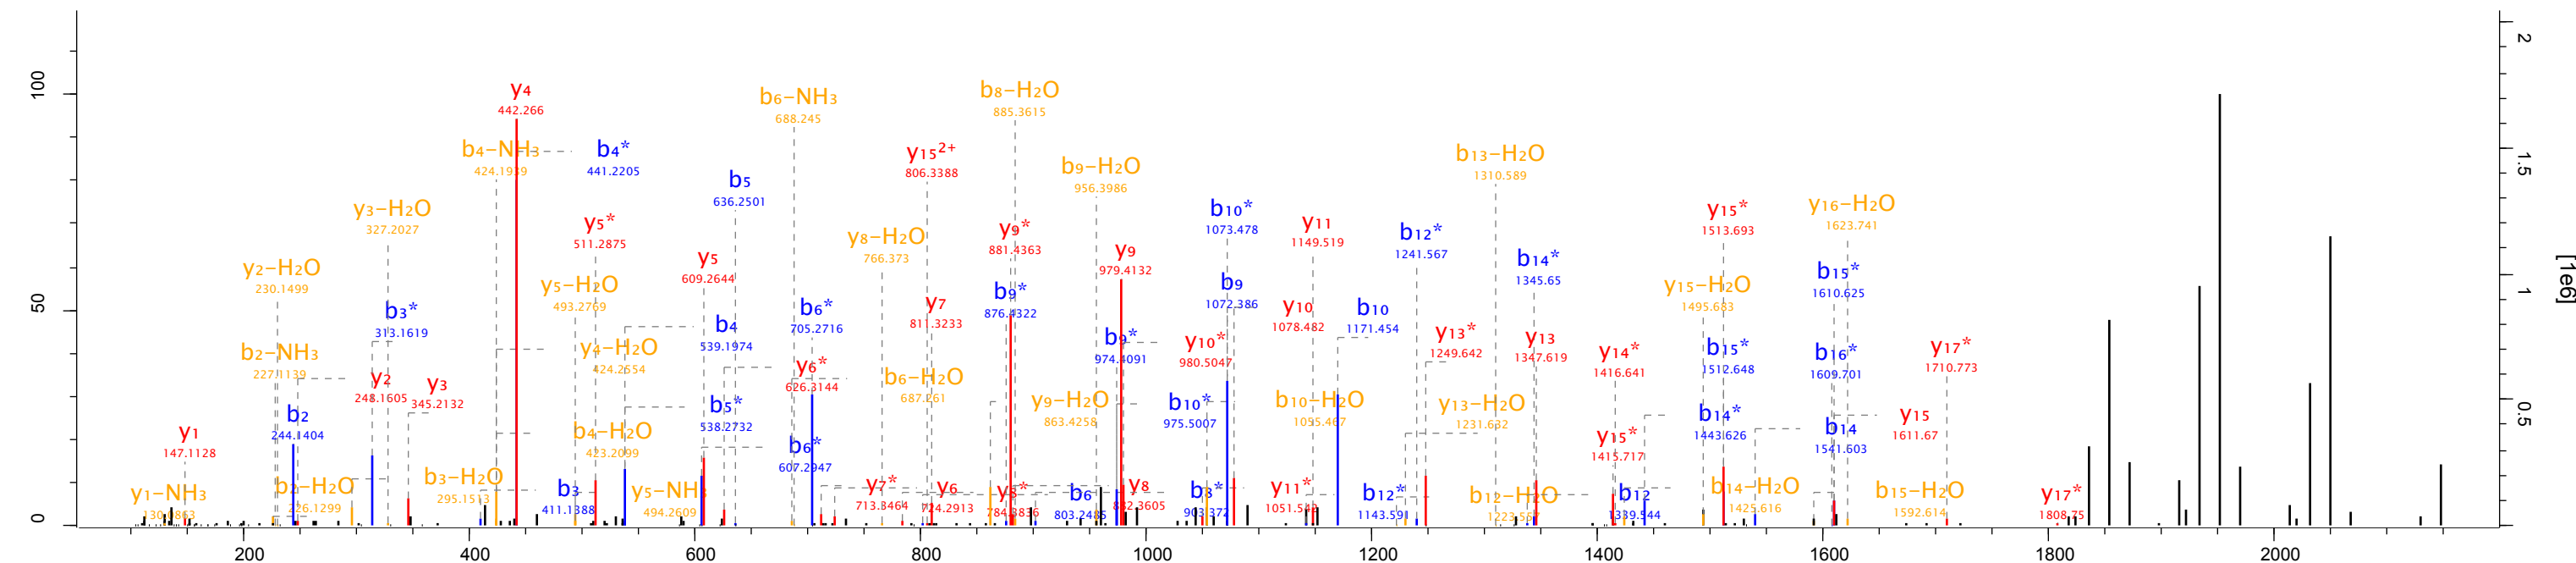

Protein sequence: - R S S S Q P S P T A V P A S D S P P T K -

Fragmentation sites (b and y ions) are indicated by boxes below the sequence:

- Red boxes (y ions): y17\* (S), y15 (P), y14\* (S), y13 (P), y11 (A), y10 (V), y9 (P), y8 (A), y7 (S), y6 (D), y5 ph (S), y4 (P), y3 (P), y2 (T), y1 (K).
- Blue boxes (b ions): b2 (S), b3 (S), b4 (Q), b5 (P), b6 (S), b8\* (T), b9 (A), b10 (V), b12 (A), b14 (D), b15\* (S), b16\* (P).

Raw file 20150812\_A375SR\_Phospho\_BR1\_03 Scan 10087 Method FTMS; HCD Score 193.45 m/z 1046.44 Gene names CRYBG3

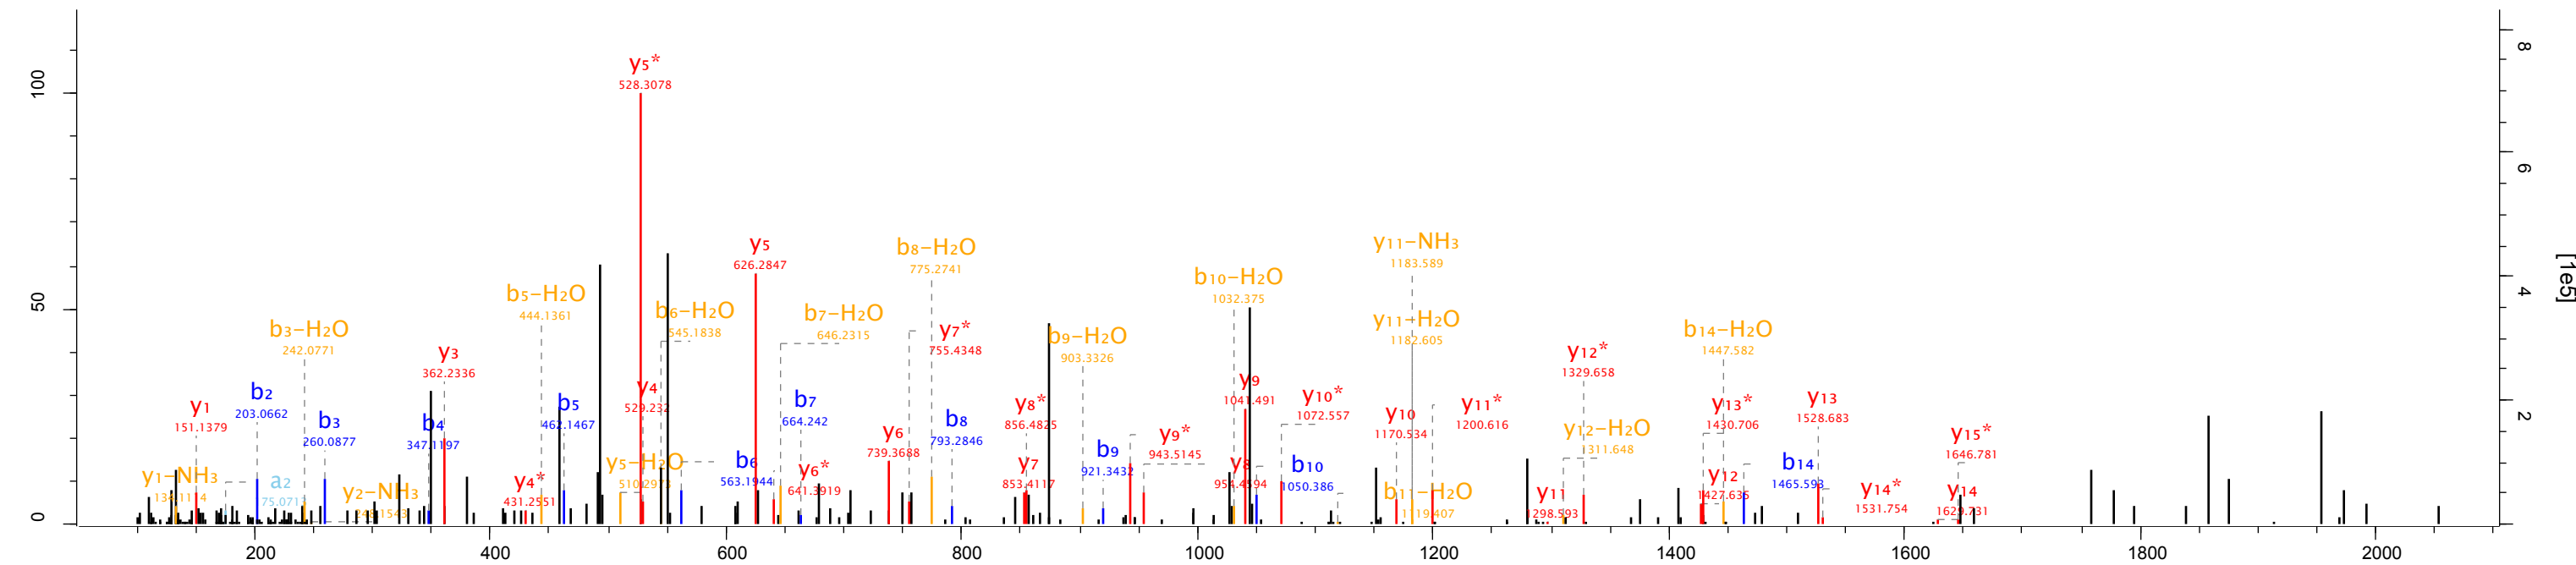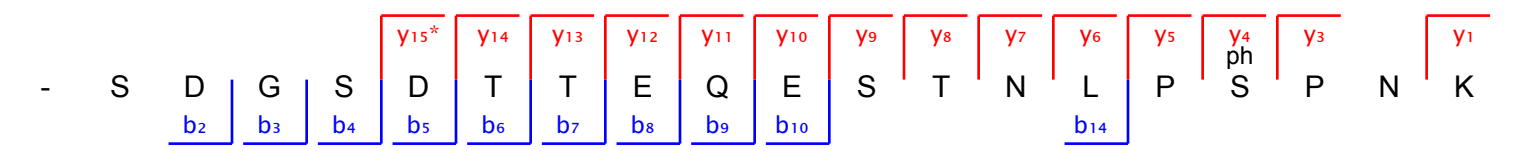

Raw file: 20150812\_A375SR\_Phospho\_BR1\_03  
 Scan: 10157 Method: FTMS; HCD Score: 123.64 m/z: 904.86 Gene names: LEO1

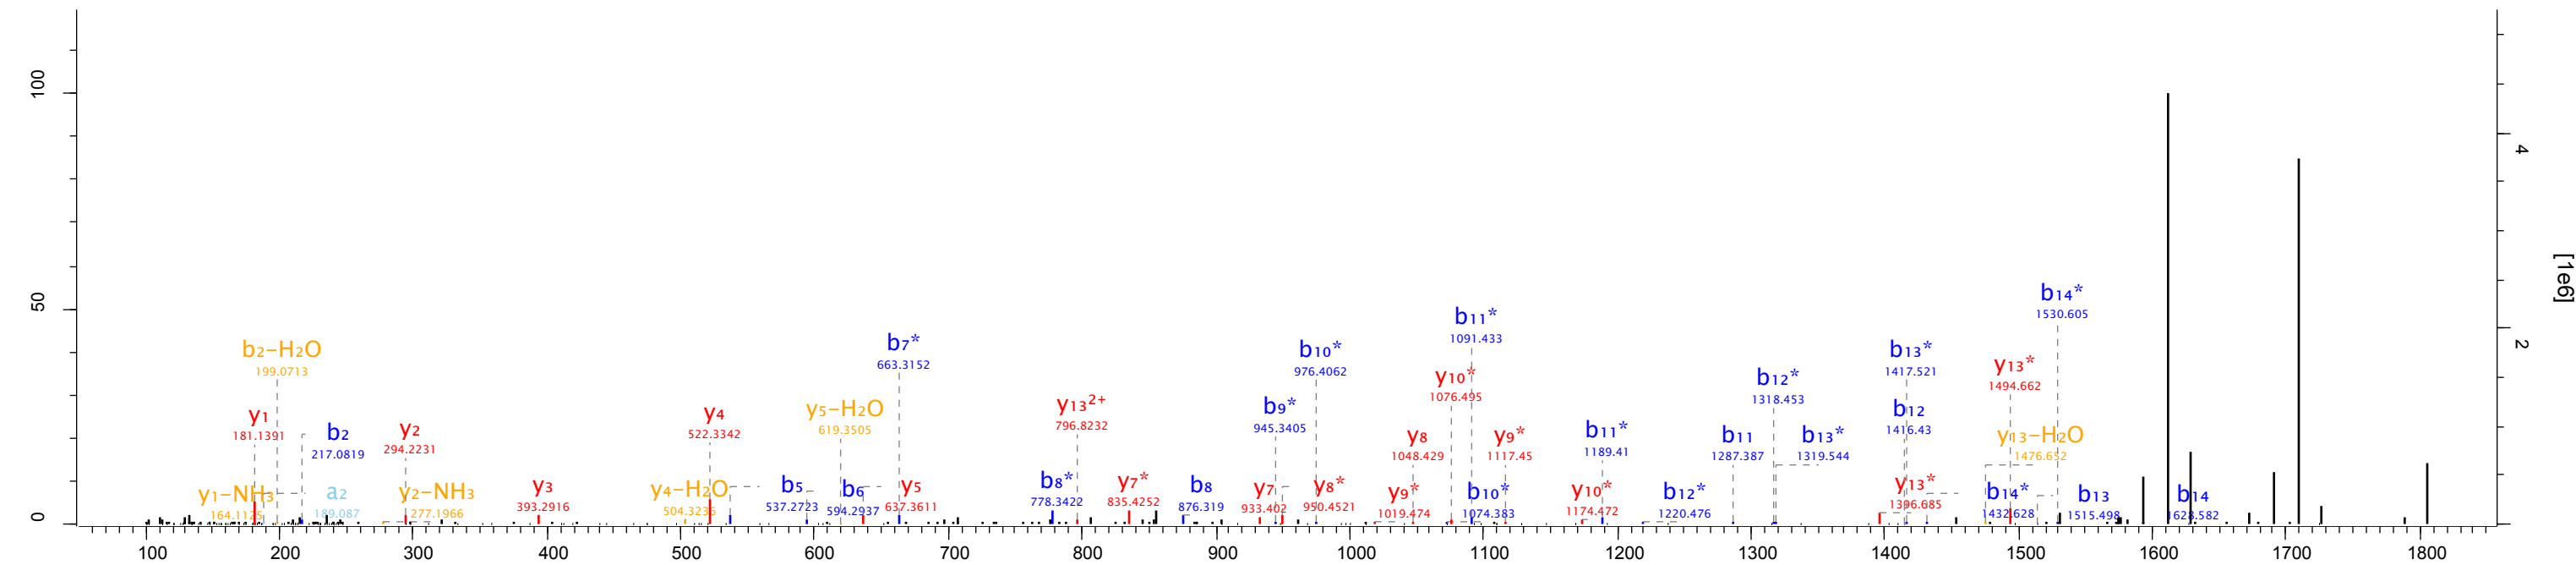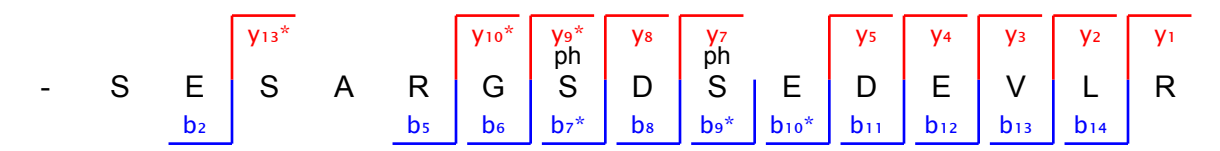

Raw file 20150812\_A375SR\_Phospho\_BR1\_03 Scan 10967 Method FTMS; HCD Score 222.67 m/z 1037.95 Gene names LARP1

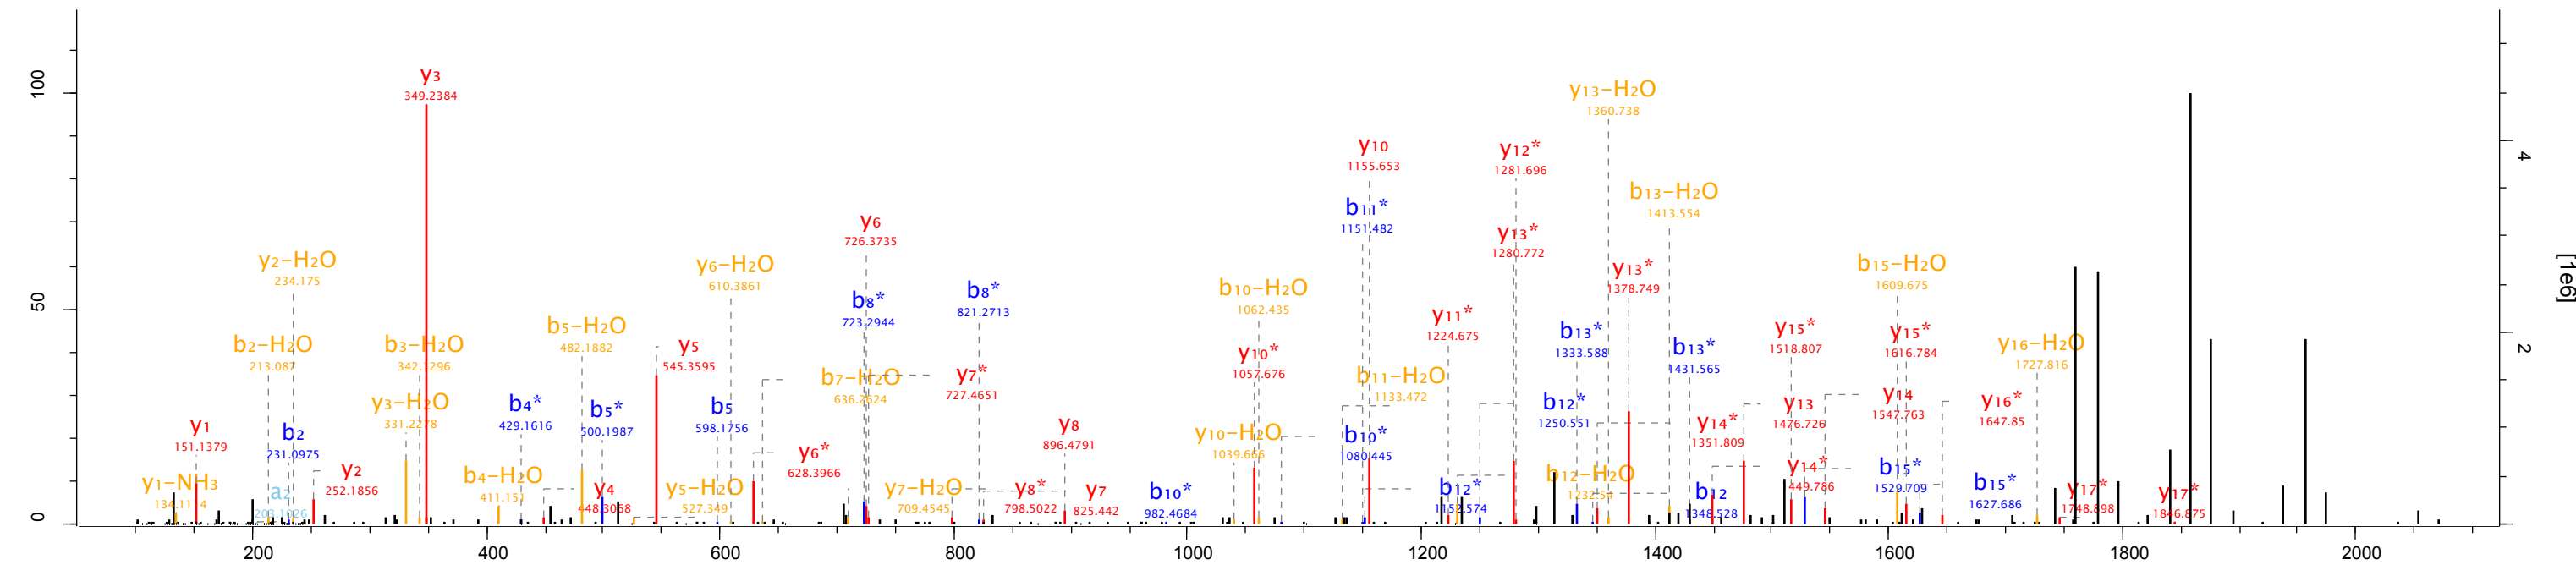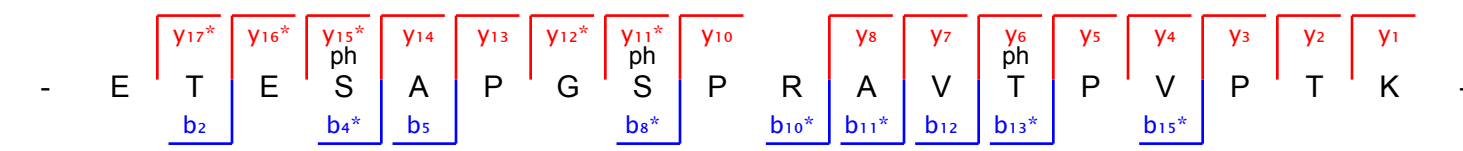

Raw file 20150812\_A375SR\_Phospho\_BR1\_03 Scan 11377 Method FTMS; HCD Score 165.2 m/z 751.83 Gene names RRP1B

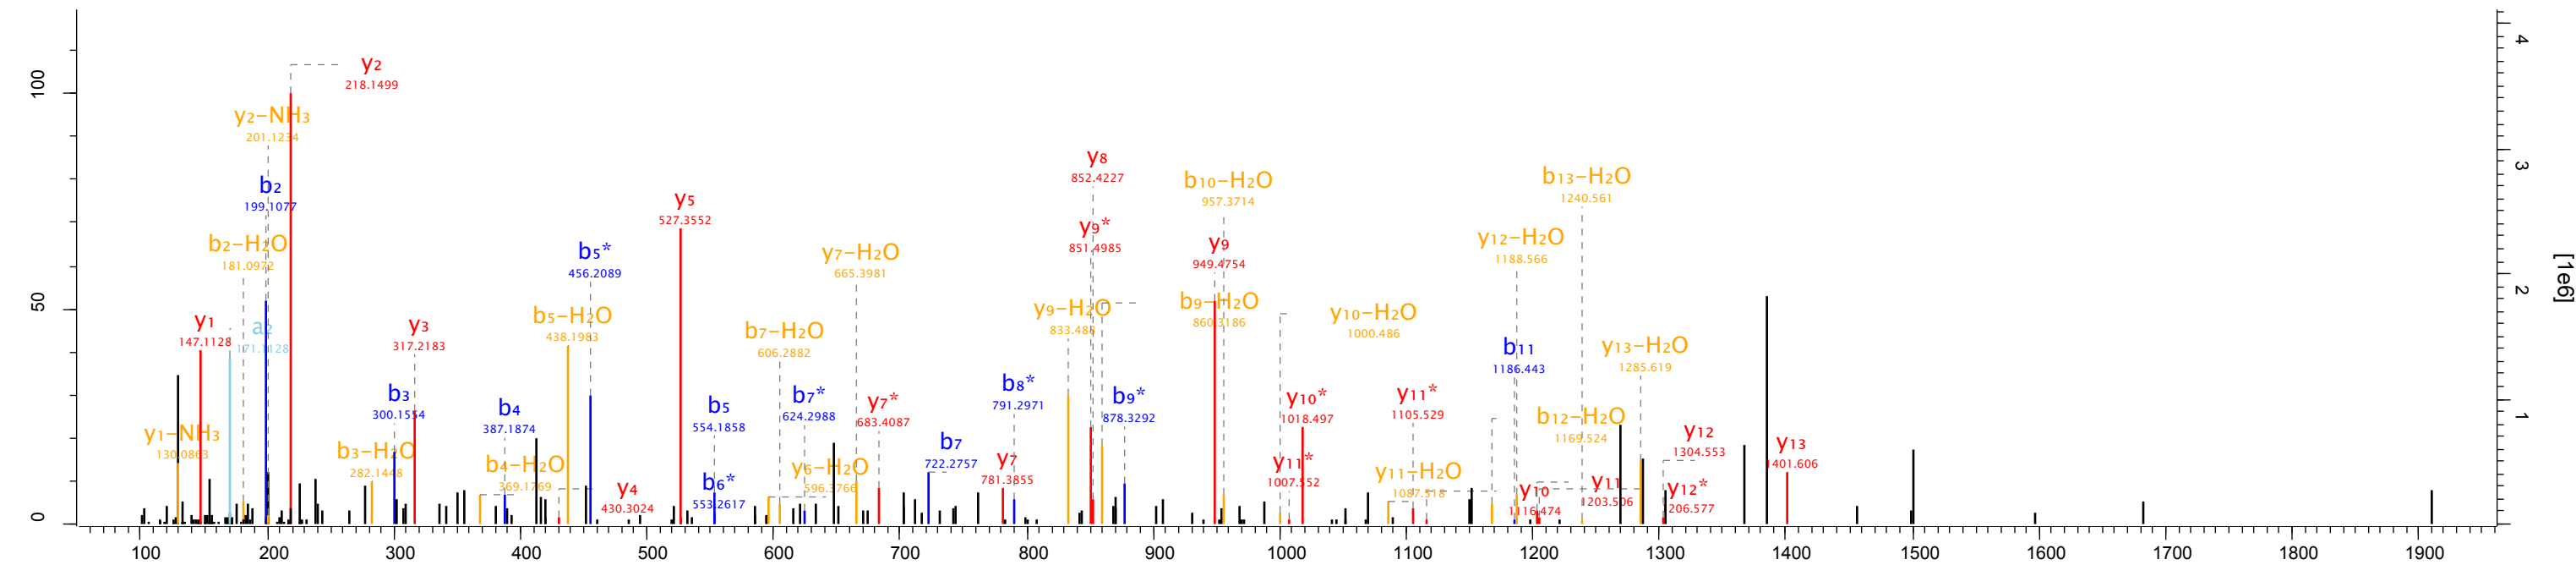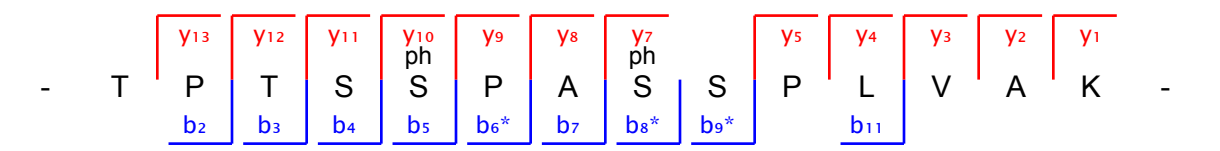

Raw file 20150812\_A375SR\_Phospho\_BR1\_03 Scan 11587 Method FTMS; HCD Score 128.52 m/z 671 Gene names PHLDB1

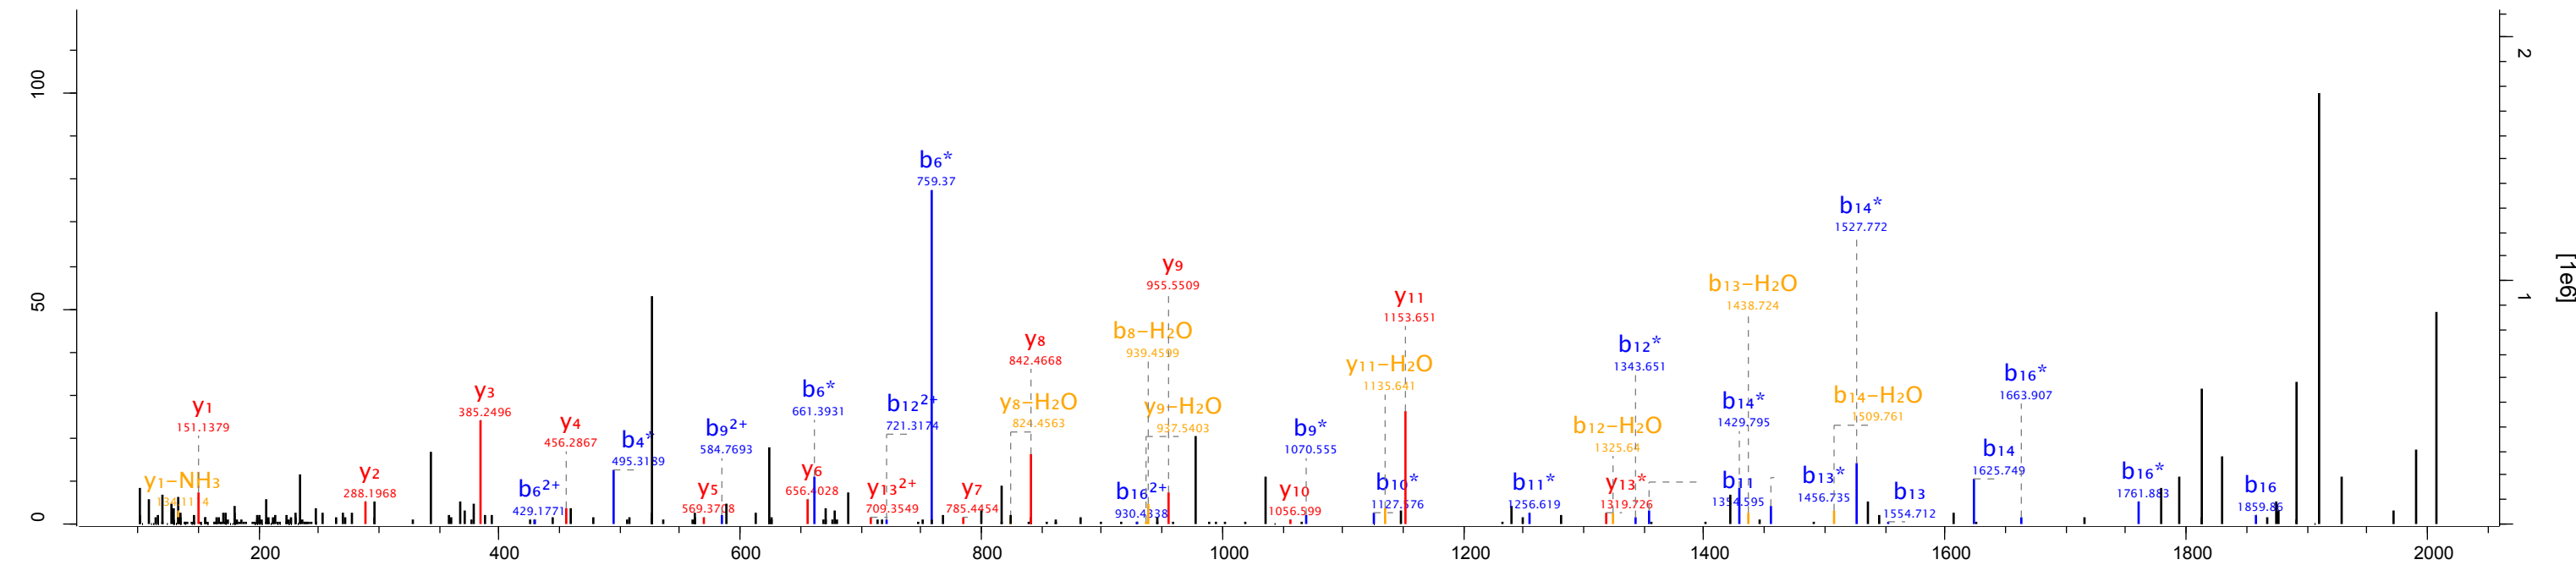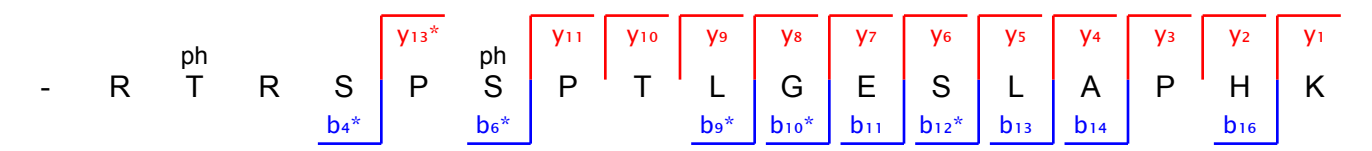



Raw file: 20150812\_A375SR\_Phospho\_BR1\_03  
 Scan: 11777 Method: FTMS; HCD Score: 227.88 m/z: 819.35 Gene names: SLC20A2

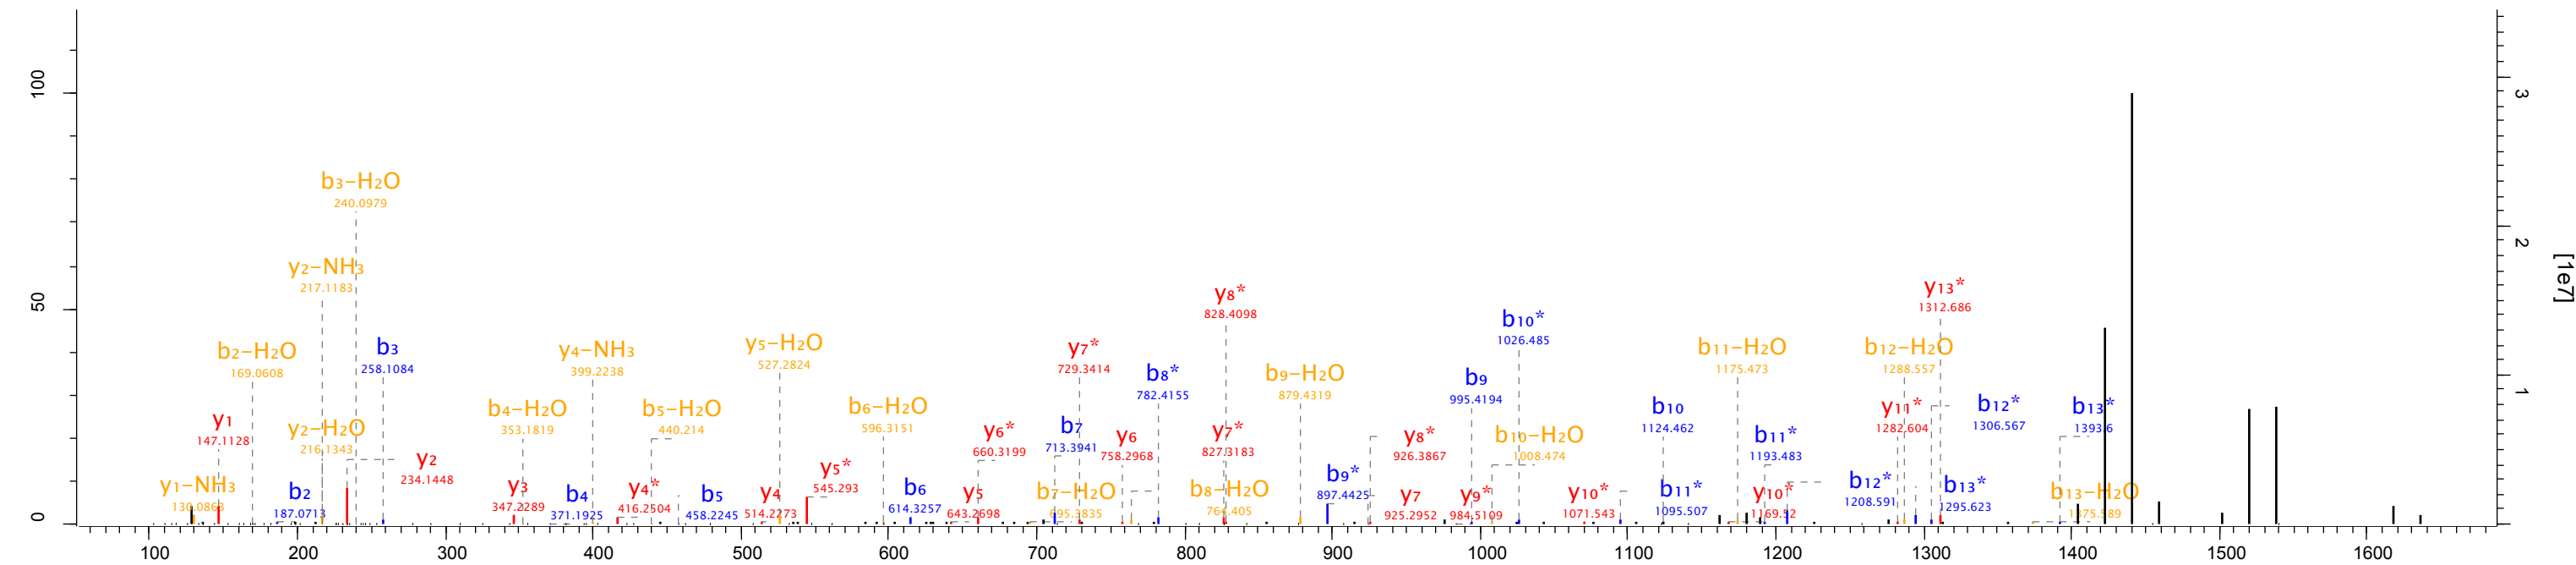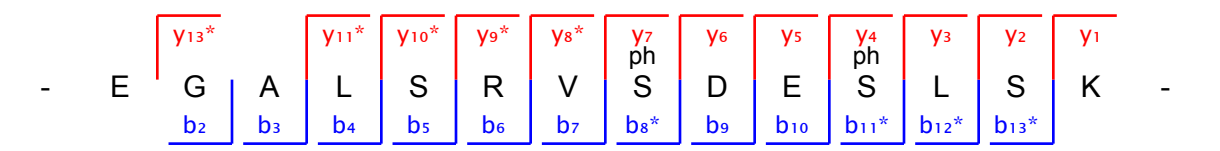

Raw file  
 20150812\_A375SR\_Phospho\_BR1\_03  
 Scan 11797 Method FTMS; HCD Score 86.78 m/z 607.97 Gene names DTL

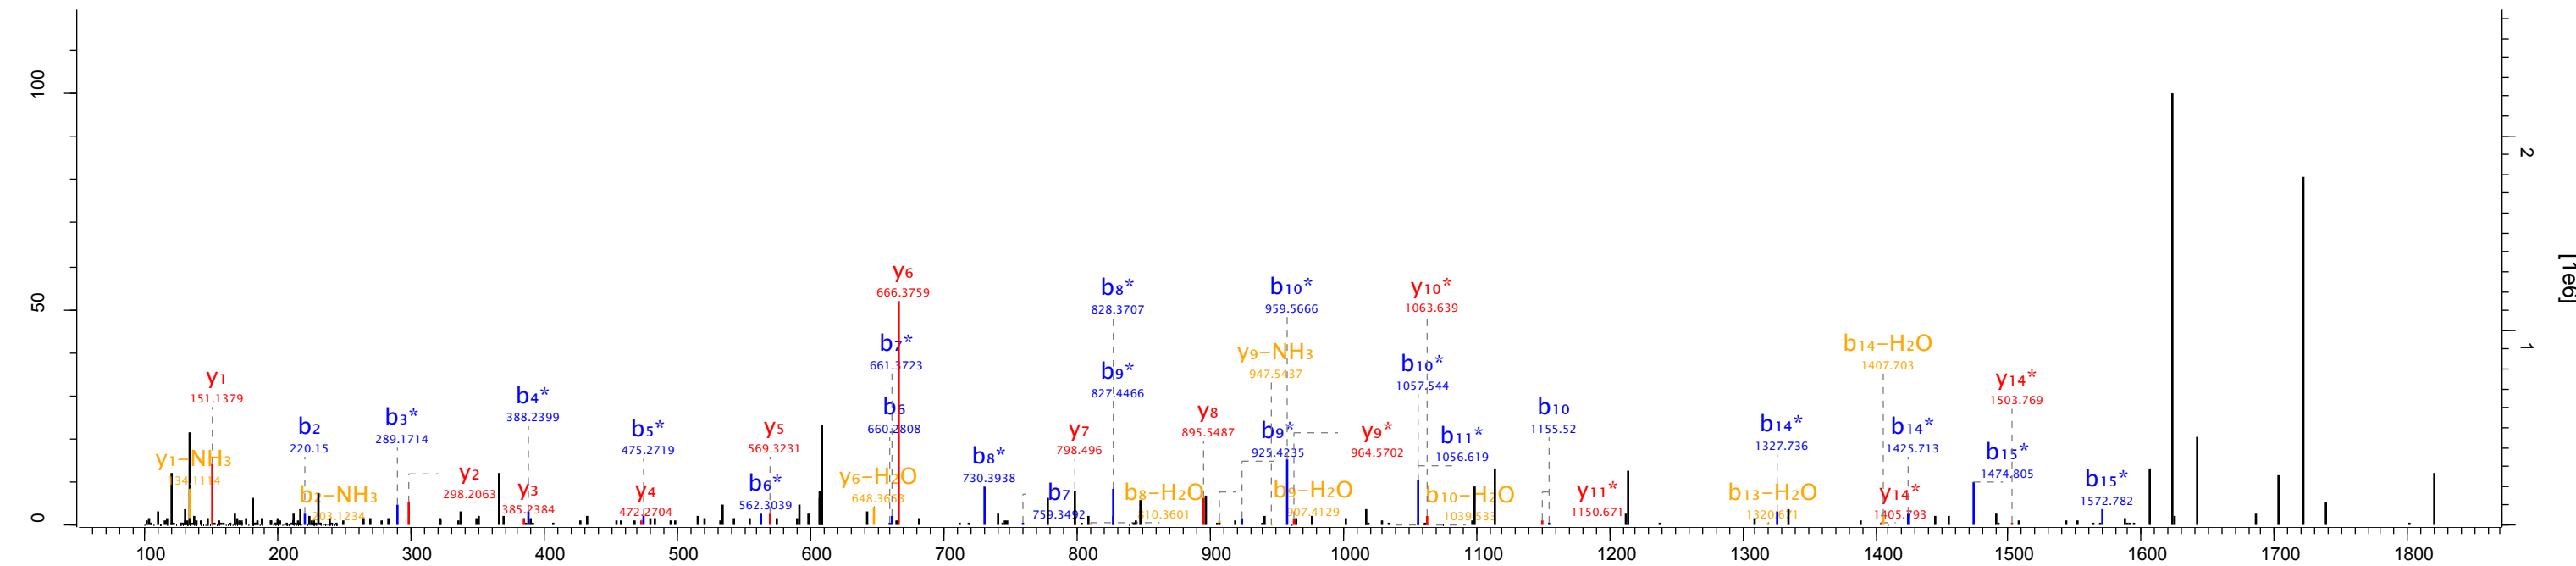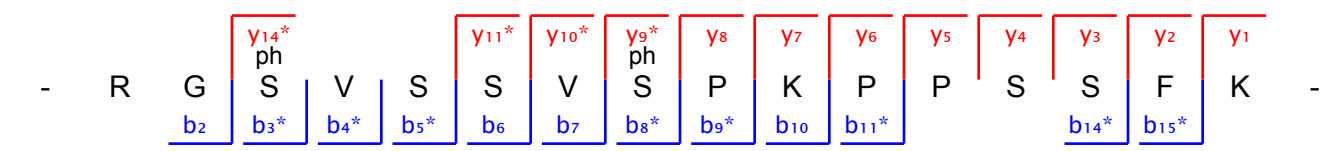

Raw file 20150812\_A375SR\_Phospho\_BR1\_03 Scan 12027 Method FTMS; HCD Score 123.92 m/z 580.9 Gene names ZNF638

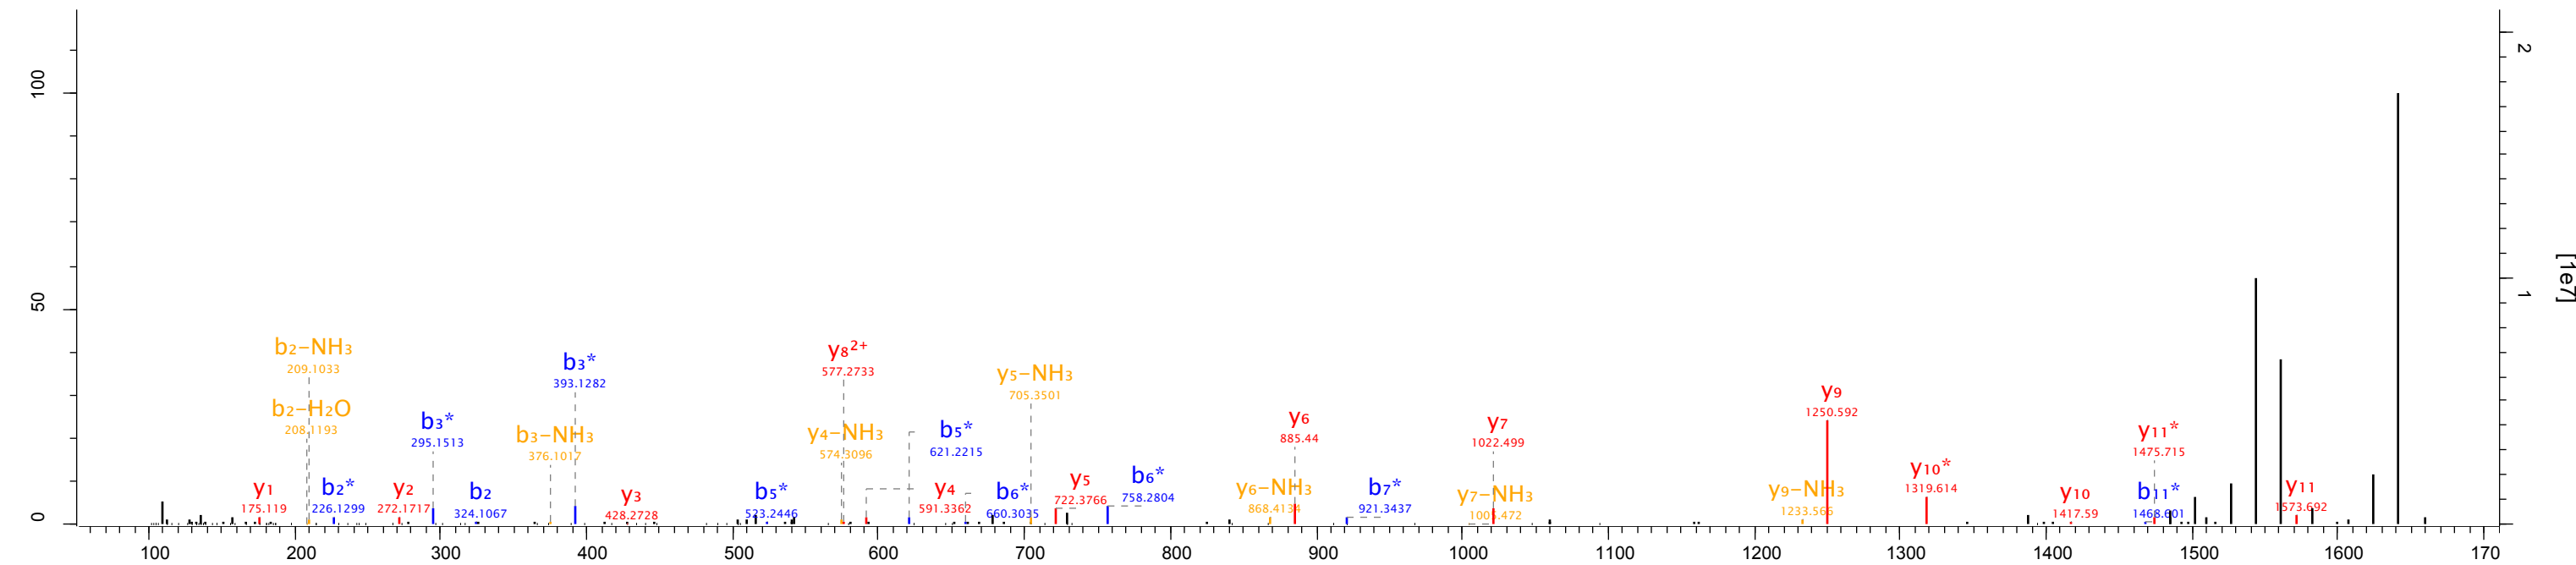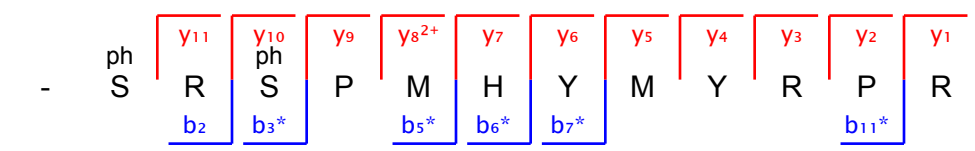

Raw file: 20150812\_A375SR\_Phospho\_BR1\_03  
 Scan: 12657 Method: FTMS; HCD Score: 74.78 m/z: 761 Gene names: KIAA1522

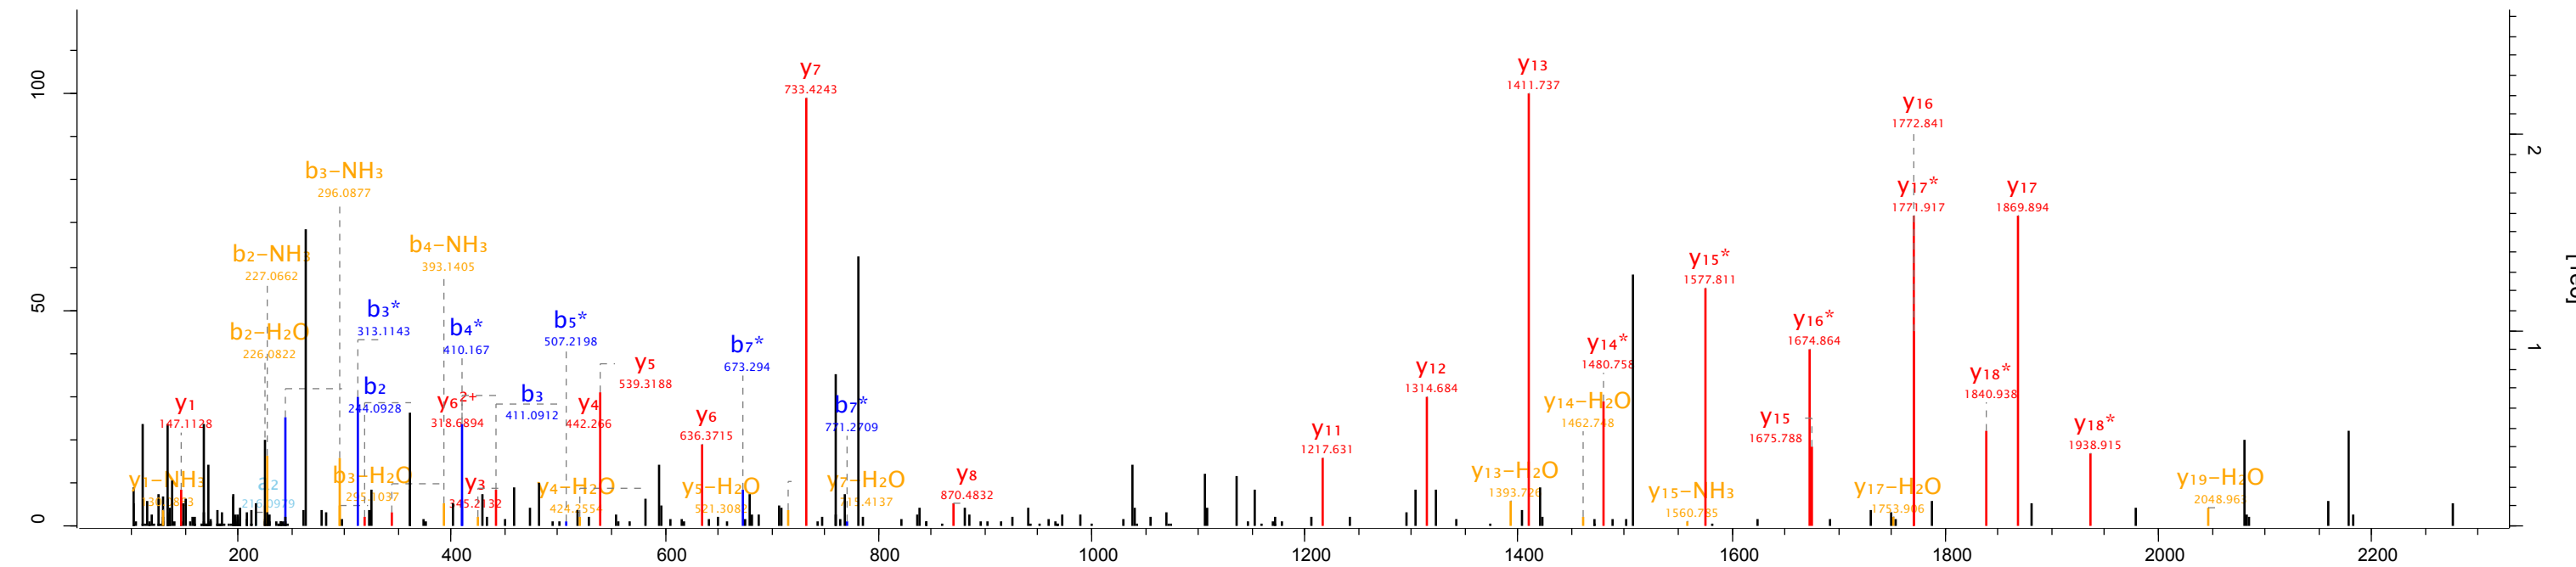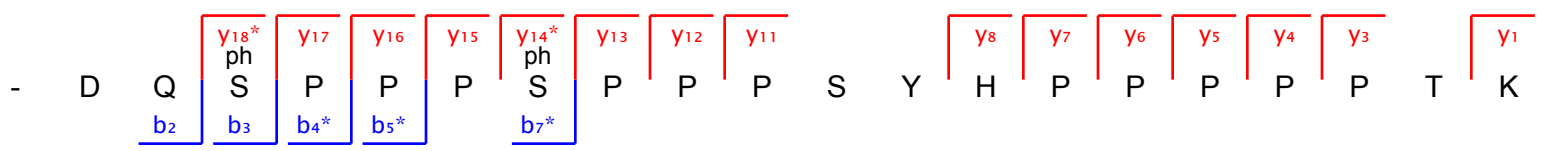

Raw file: 20150812\_A375SR\_Phospho\_BR1\_03  
 Scan: 12837 Method: FTMS; HCD Score: 200.36 m/z: 973.43 Gene names: NOP56

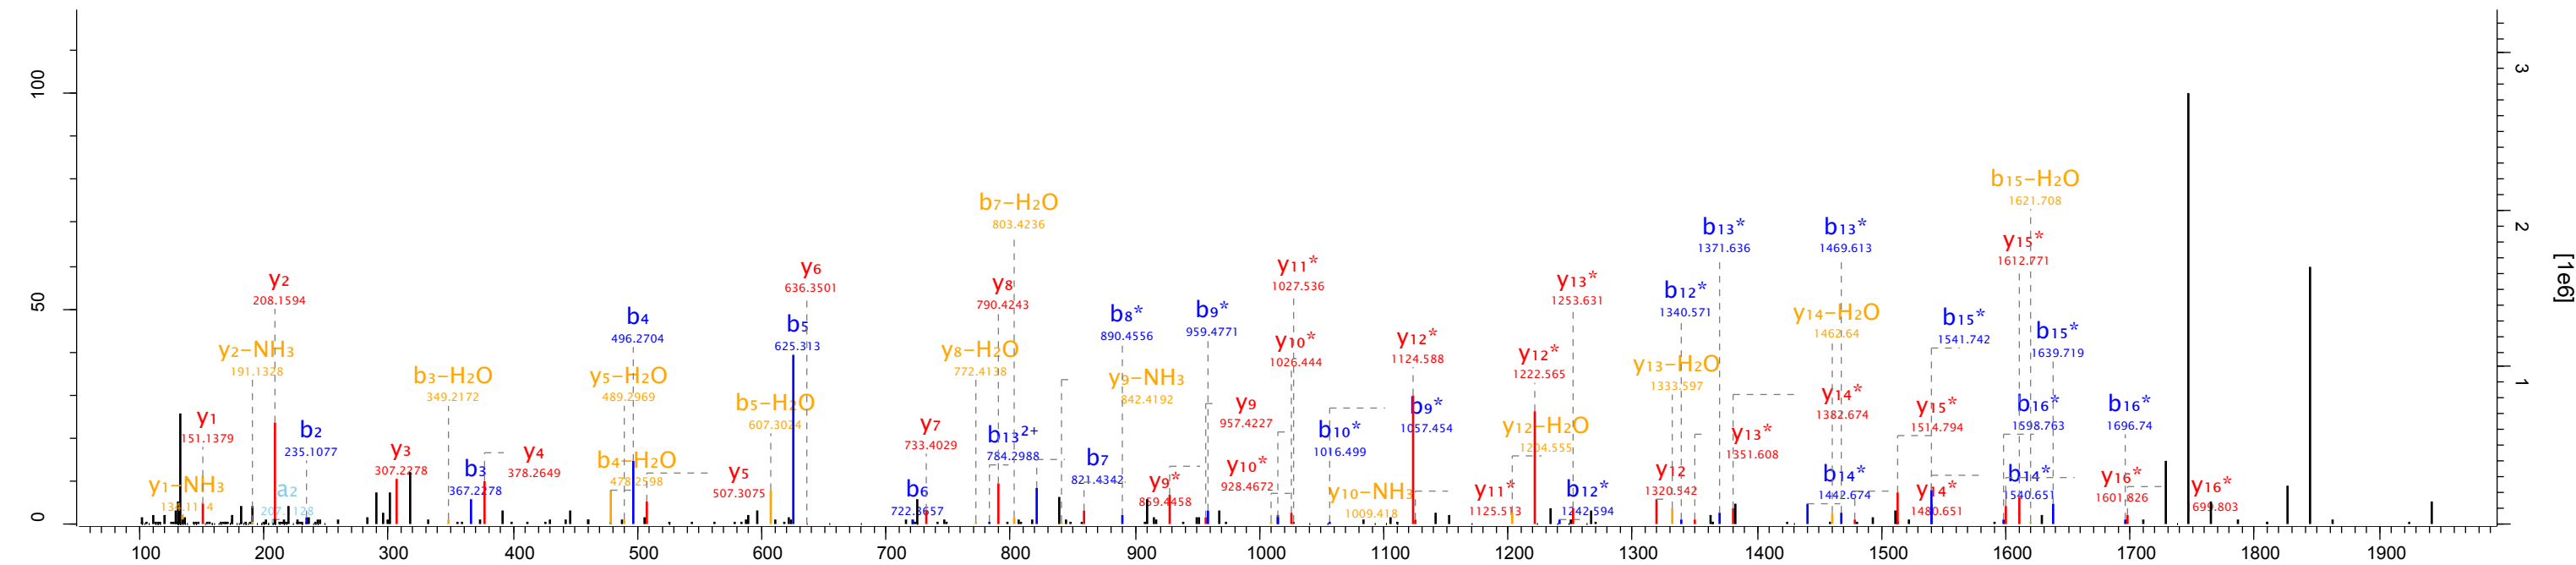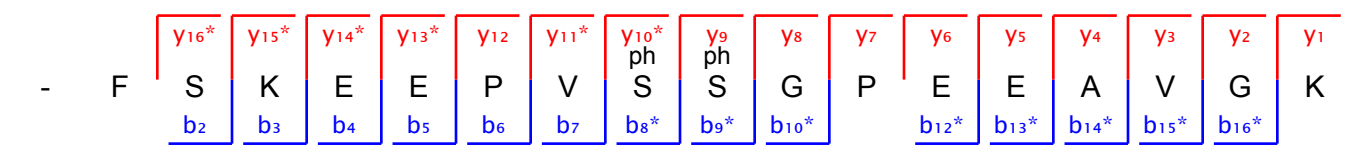

Raw file: 20150812\_A375SR\_Phospho\_BR1\_03  
 Scan: 13197 Method: FTMS; HCD Score: 192.78 m/z: 741.7 Gene names: WIZ

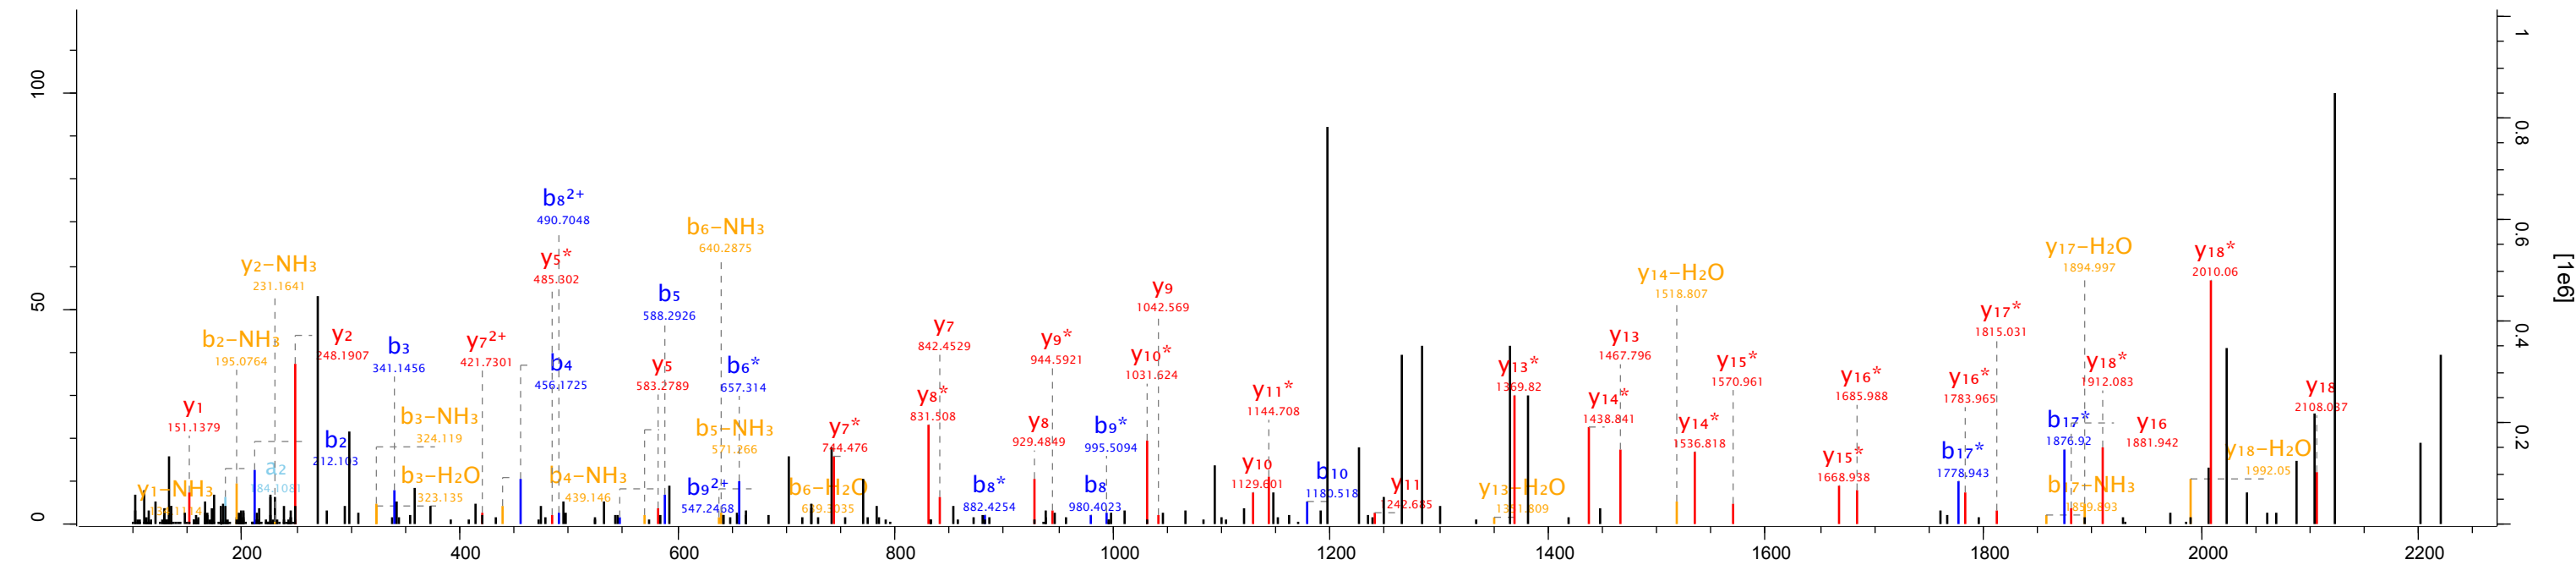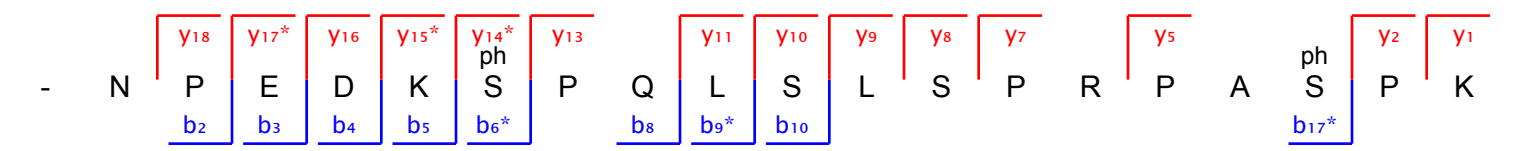

Raw file: 20150812\_A375SR\_Phospho\_BR1\_03  
 Scan: 13207 Method: FTMS; HCD Score: 158.67 m/z: 837.35 Gene names: TJP2

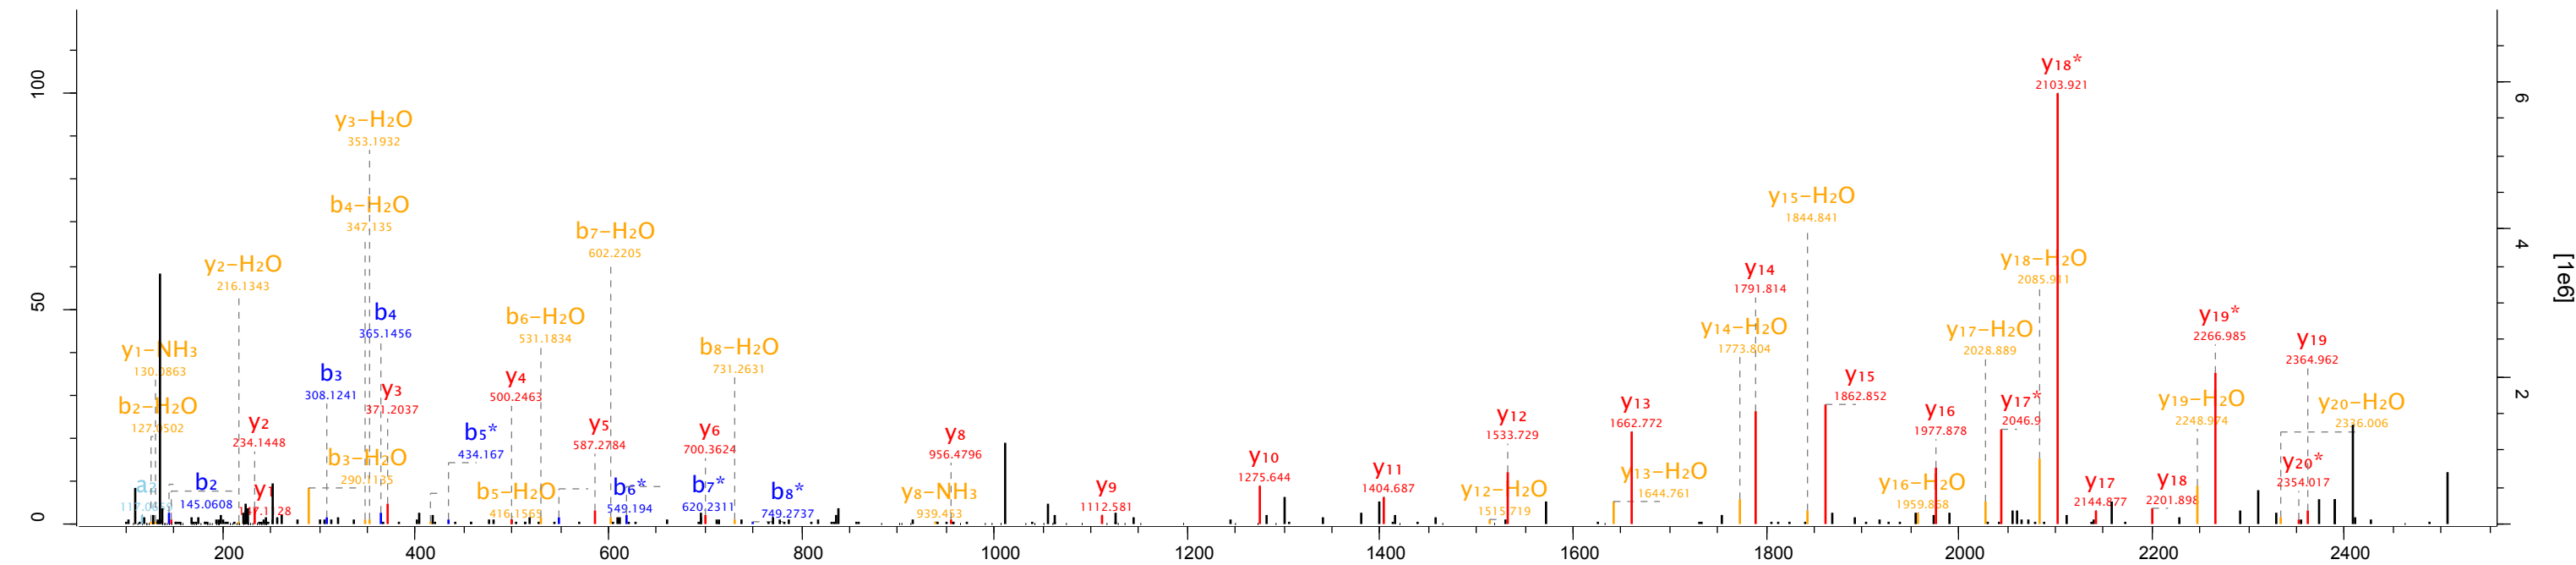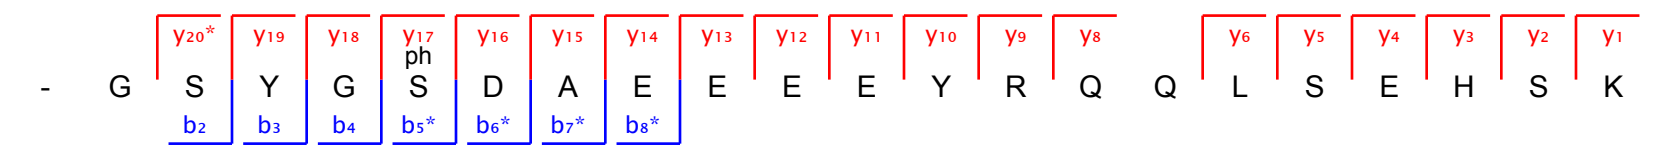

Raw file: 20150812\_A375SR\_Phospho\_BR1\_03  
 Scan: 13397 Method: FTMS; HCD Score: 149.72 m/z: 1169.17 Gene names: ILF3

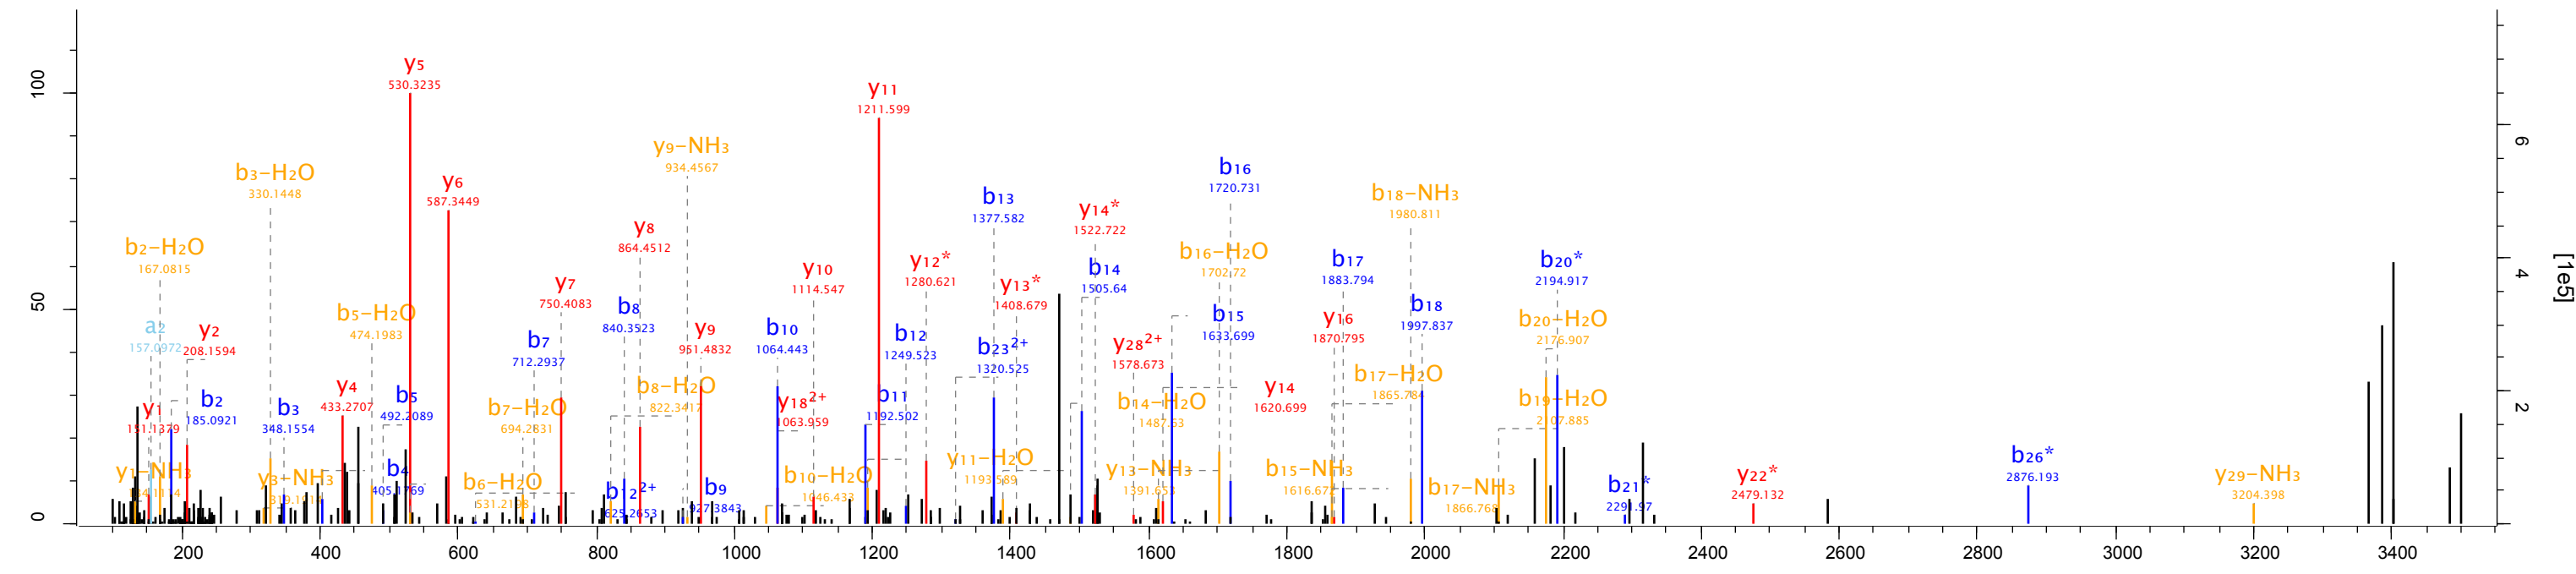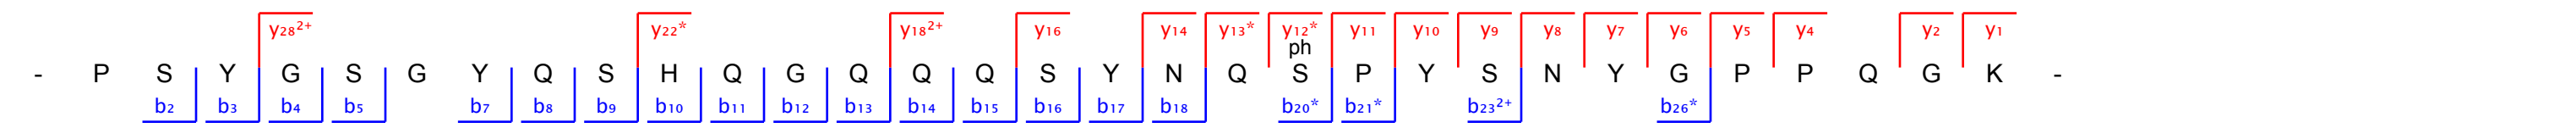



Raw file 20150812\_A375SR\_Phospho\_BR1\_03 Scan 13597 Method FTMS; HCD Score 294.93 m/z 813.83 Gene names DNAJC2

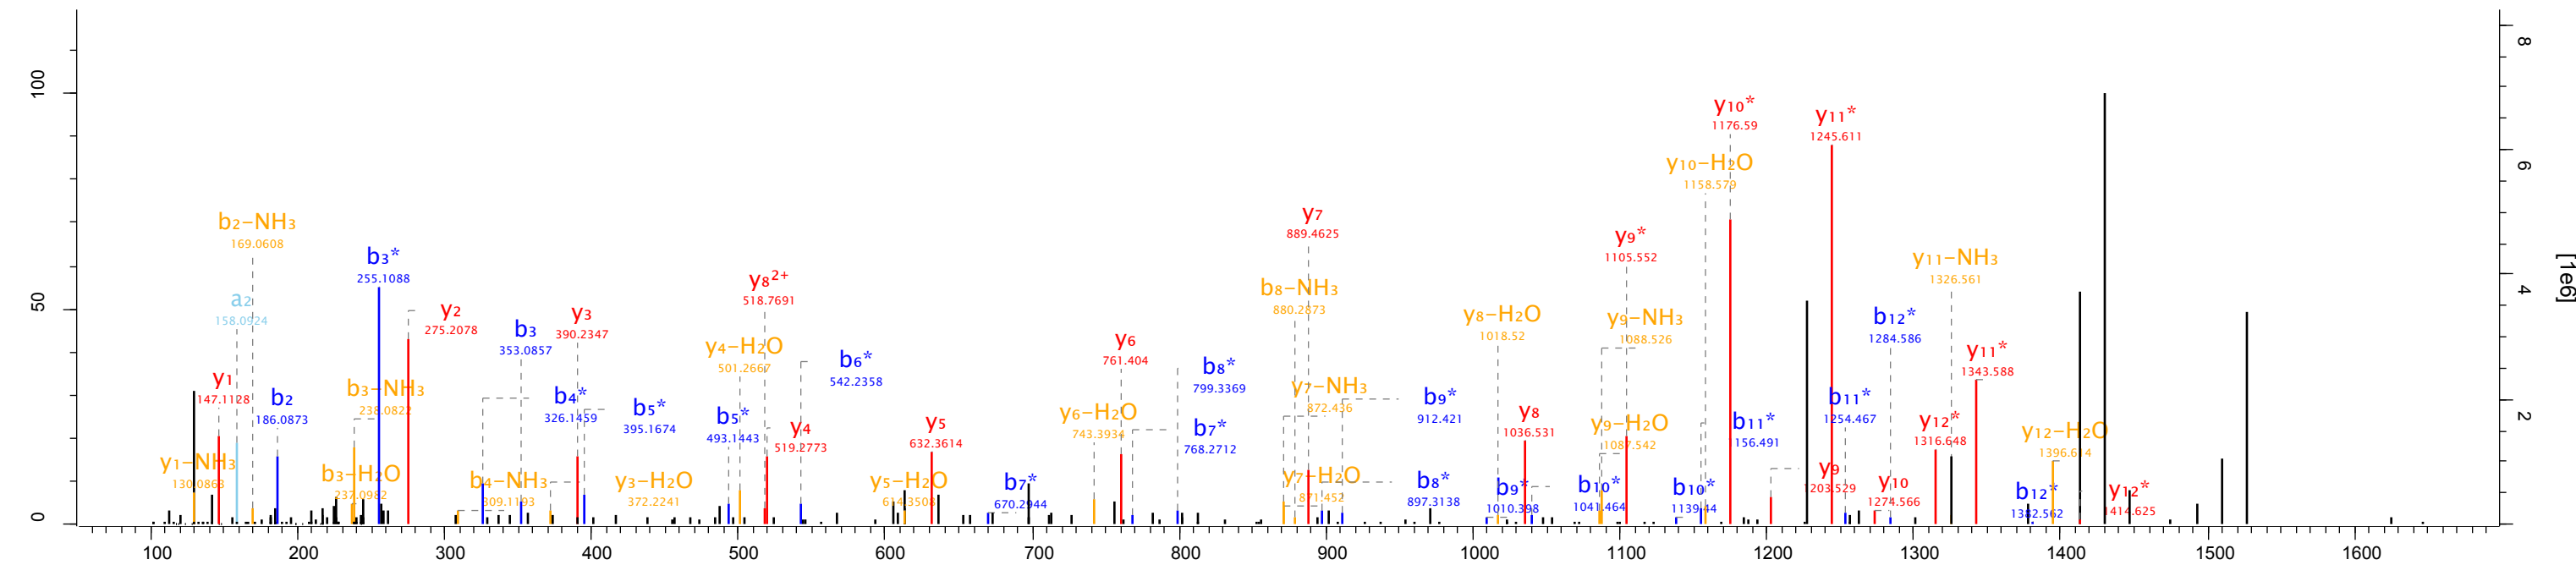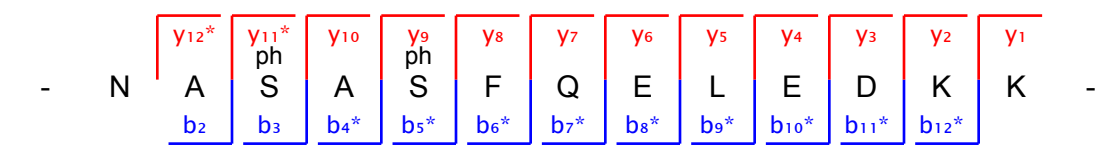

Raw file 20150812\_A375SR\_Phospho\_BR1\_03 Scan 13687 Method FTMS; HCD Score 225.69 m/z 822.33 Gene names TMF1

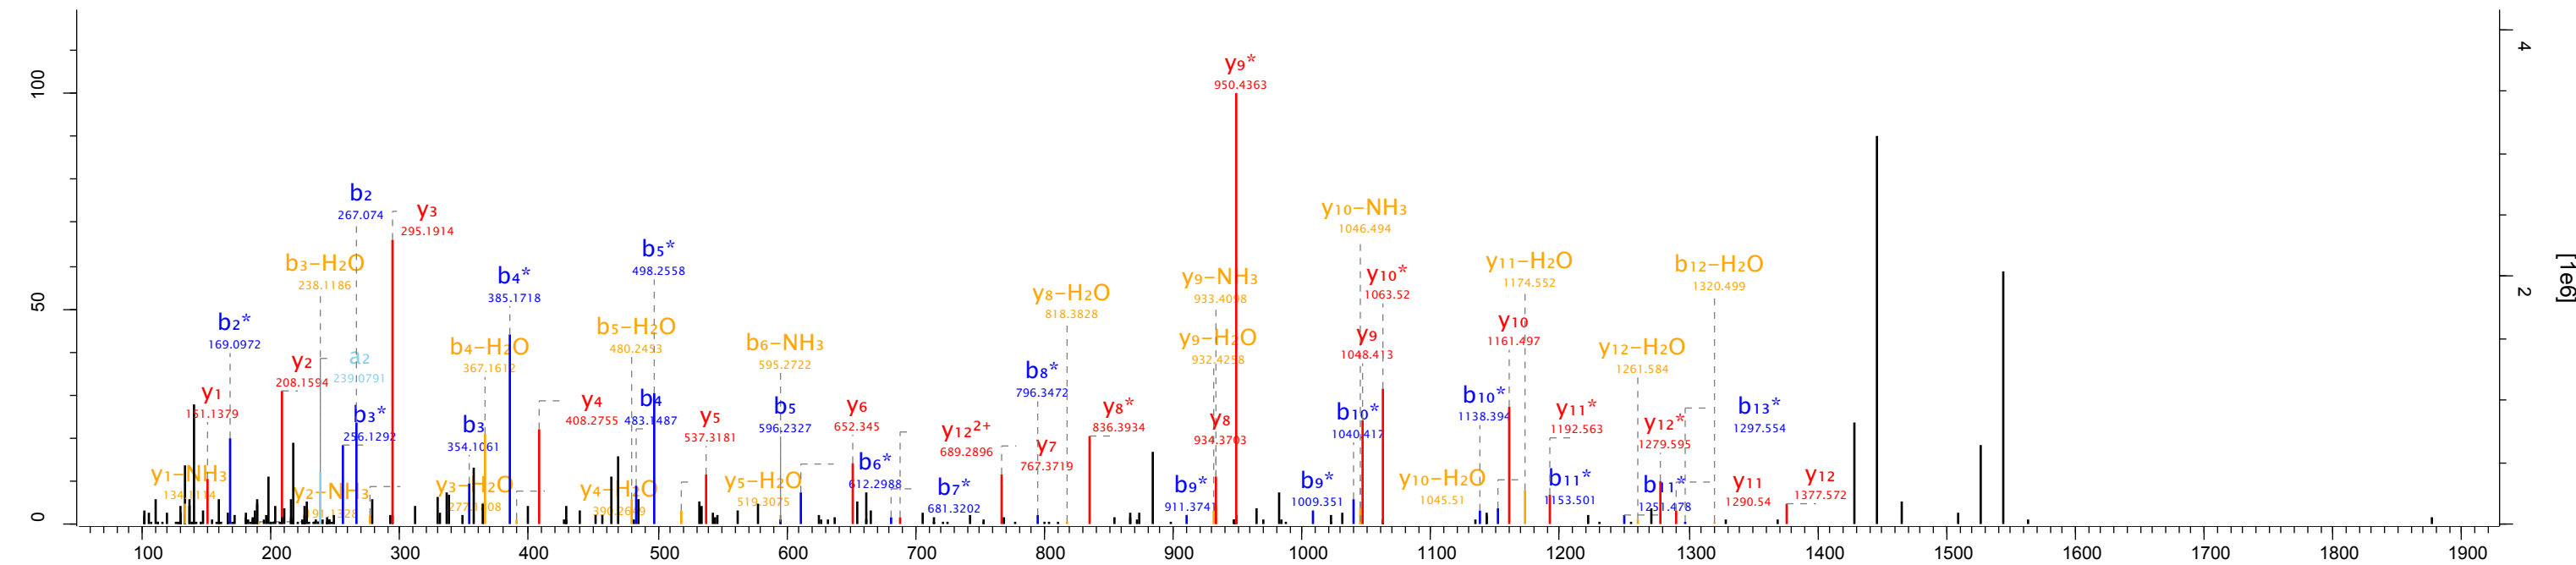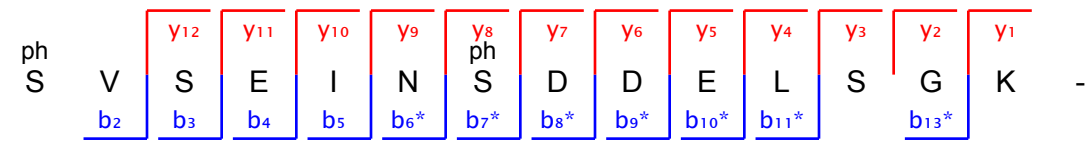

Raw file 20150812\_A375SR\_Phospho\_BR1\_03 Scan 13787 Method FTMS; HCD Score 139.25 m/z 806.85 Gene names CALD1

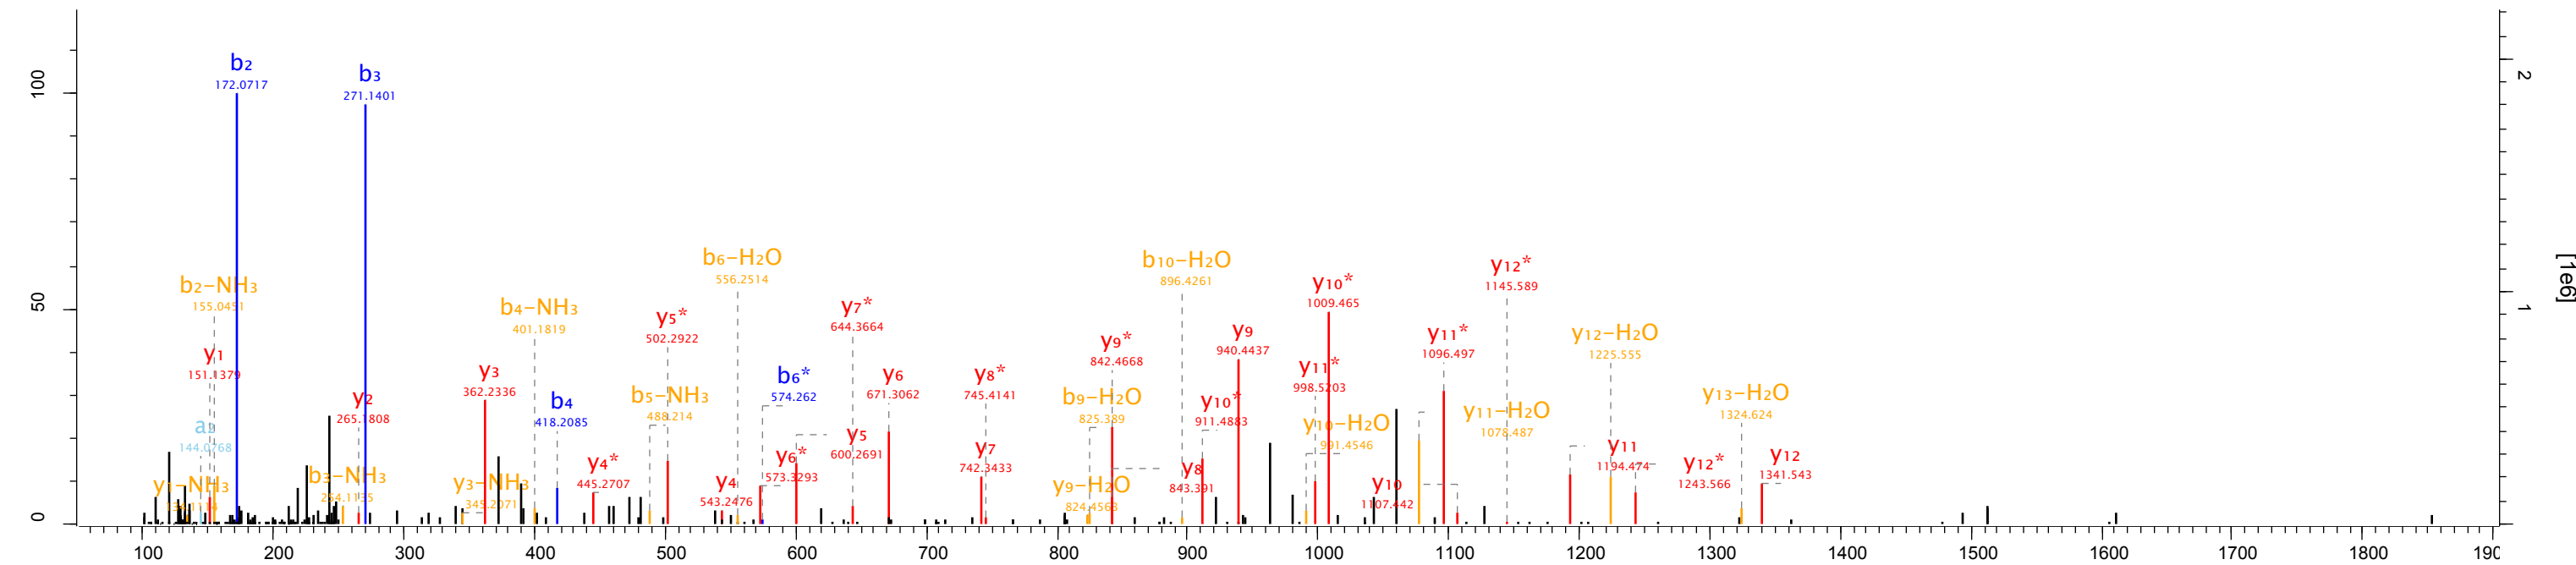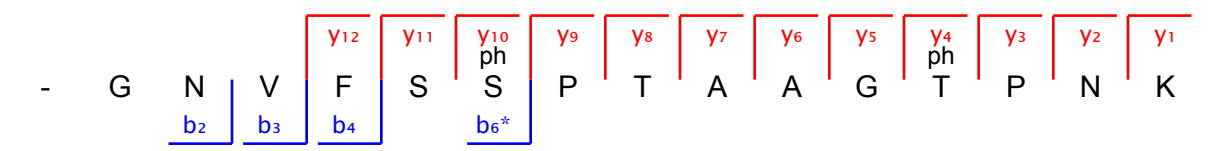

Raw file 20150812\_A375SR\_Phospho\_BR1\_03 Scan 13867 Method FTMS; HCD Score 83.6 m/z 901.44 Gene names TGFB111

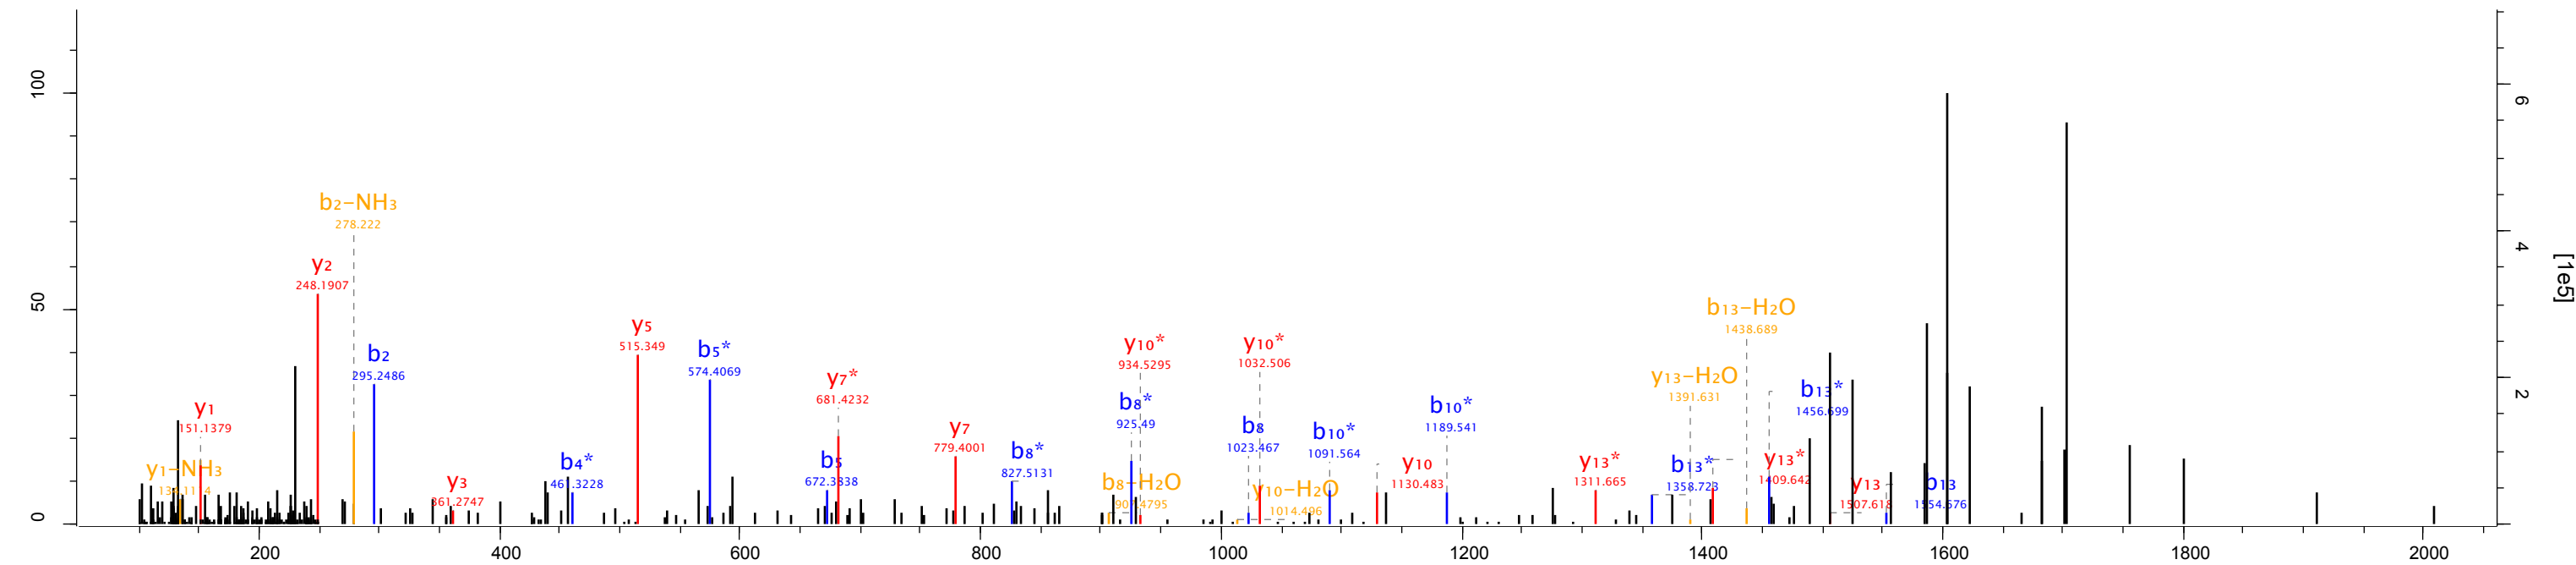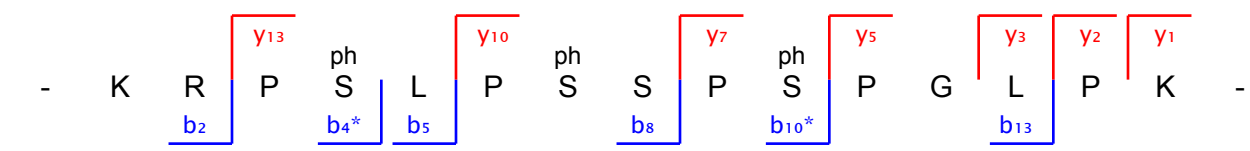

Raw file Scan Score m/z Gene names  
 20150812\_A375SR\_Phospho\_BR1\_03 13997 FTMS; HCD 254.82 846.74 TP53BP1

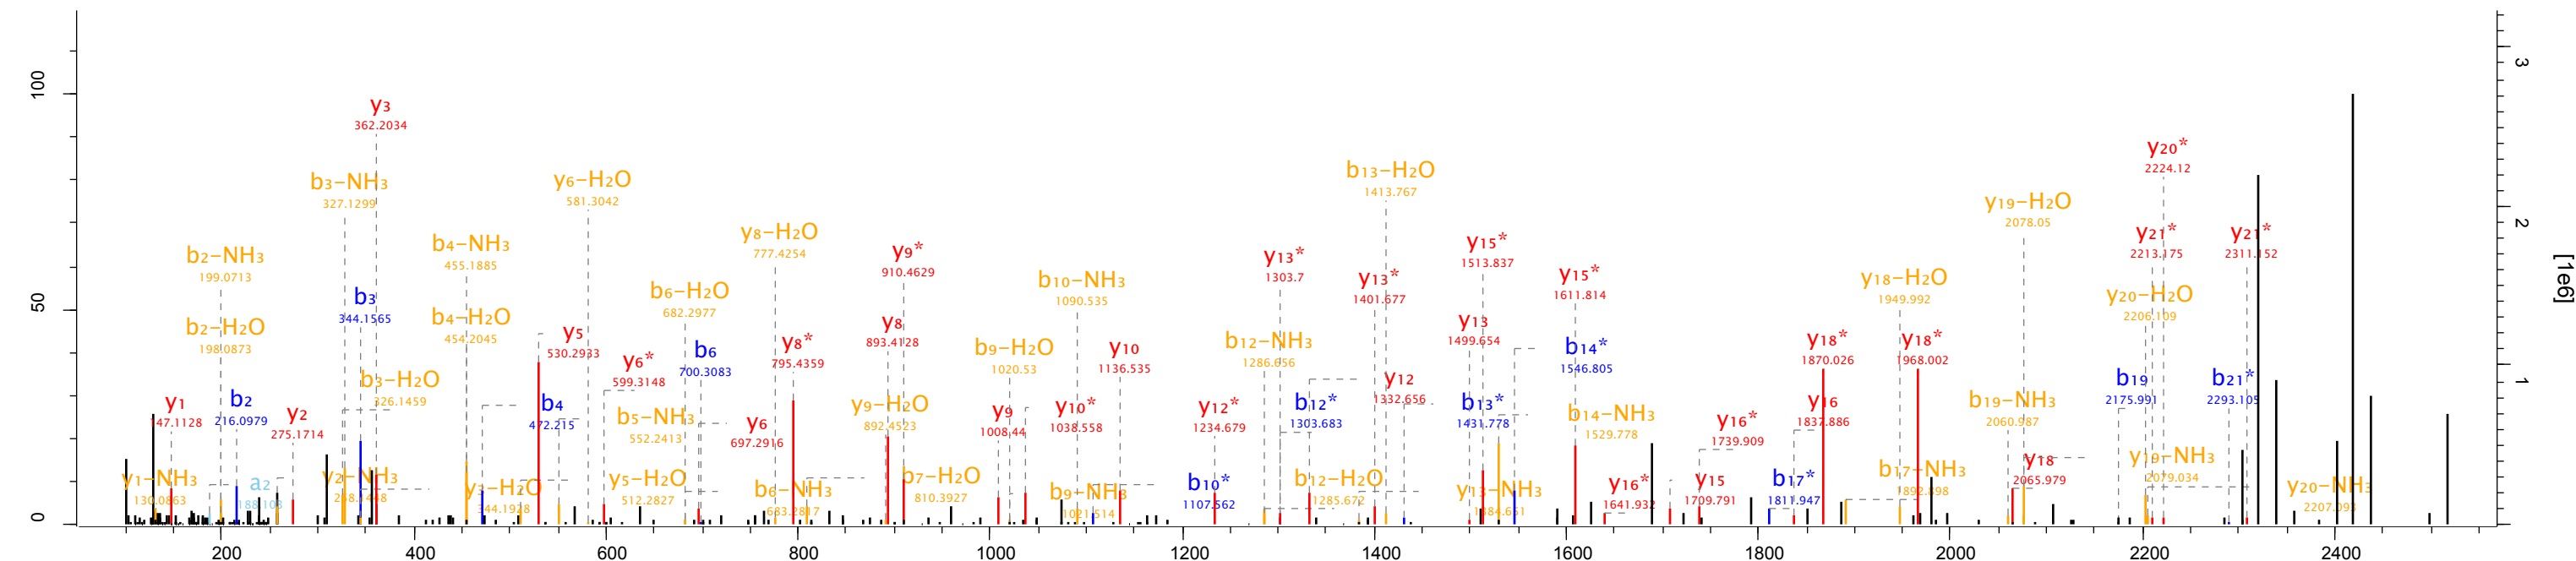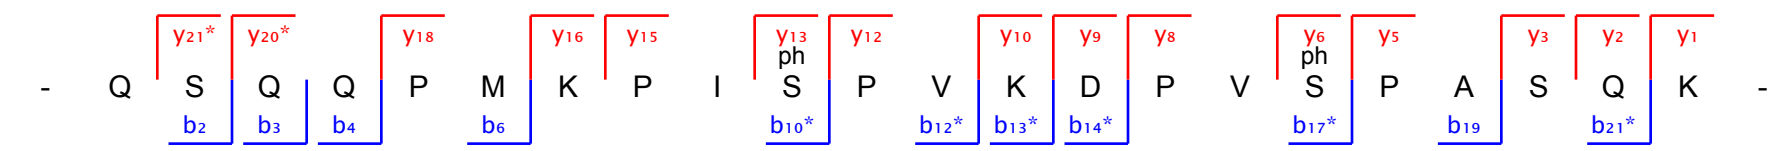

Raw file: 20150812\_A375SR\_Phospho\_BR1\_03  
 Scan: 14007 Method: FTMS; HCD Score: 149.8 m/z: 1014.92 Gene names: DBN1

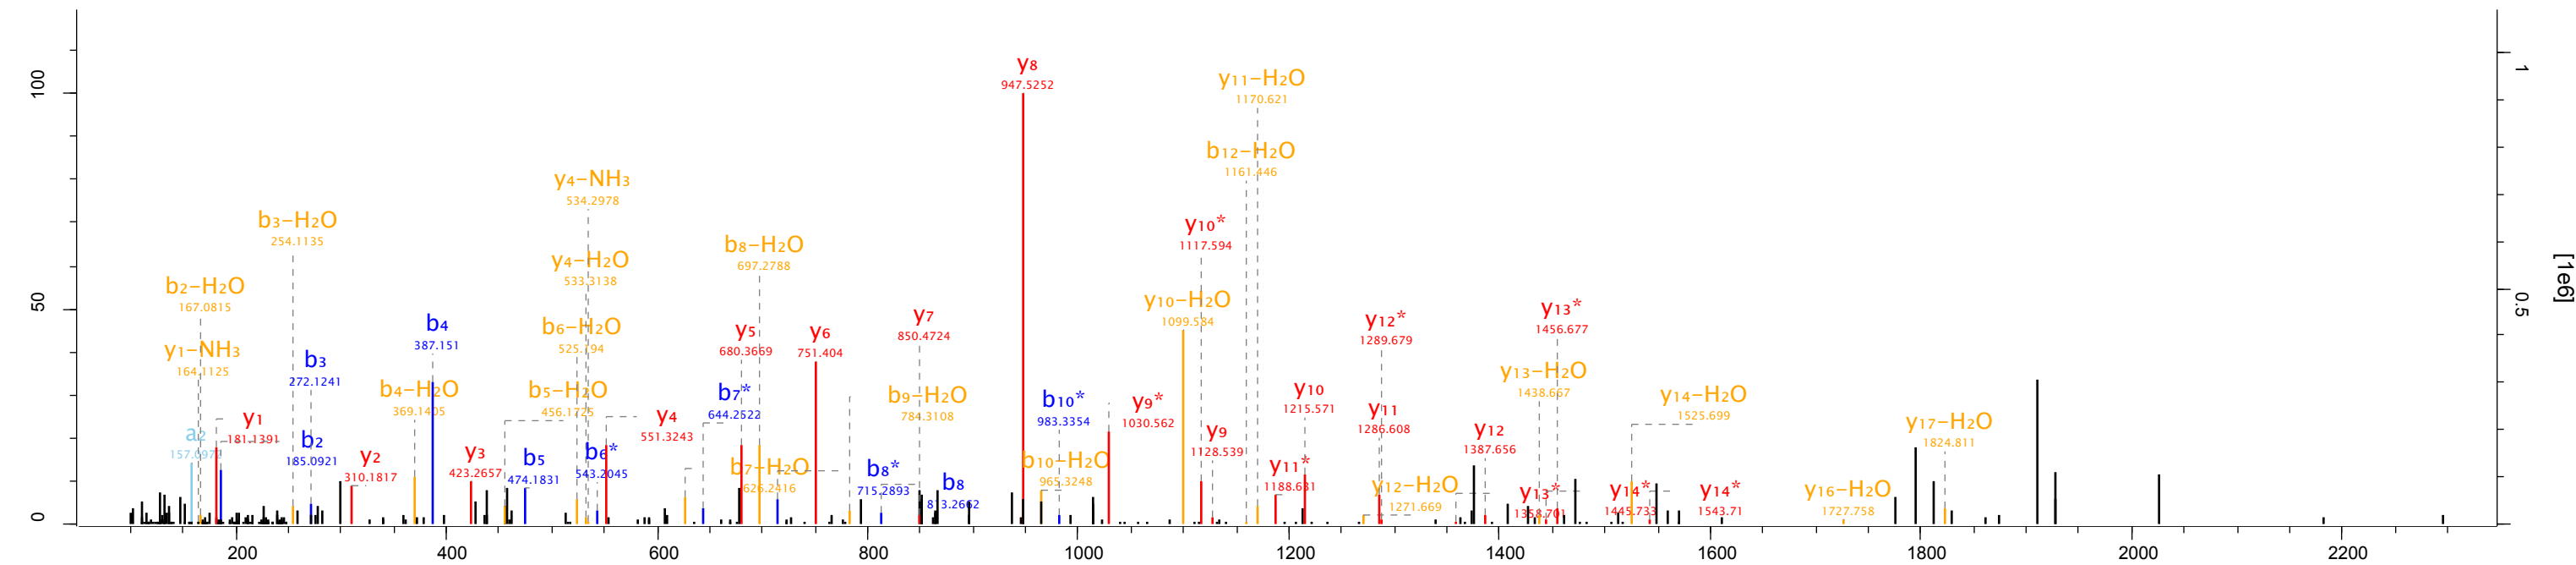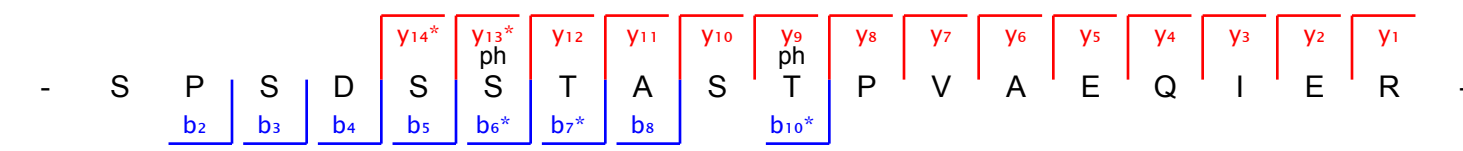

Raw file 20150812\_A375SR\_Phospho\_BR1\_03 Scan 14037 Method FTMS; HCD Score 135.62 m/z 905.85 Gene names NRBP1

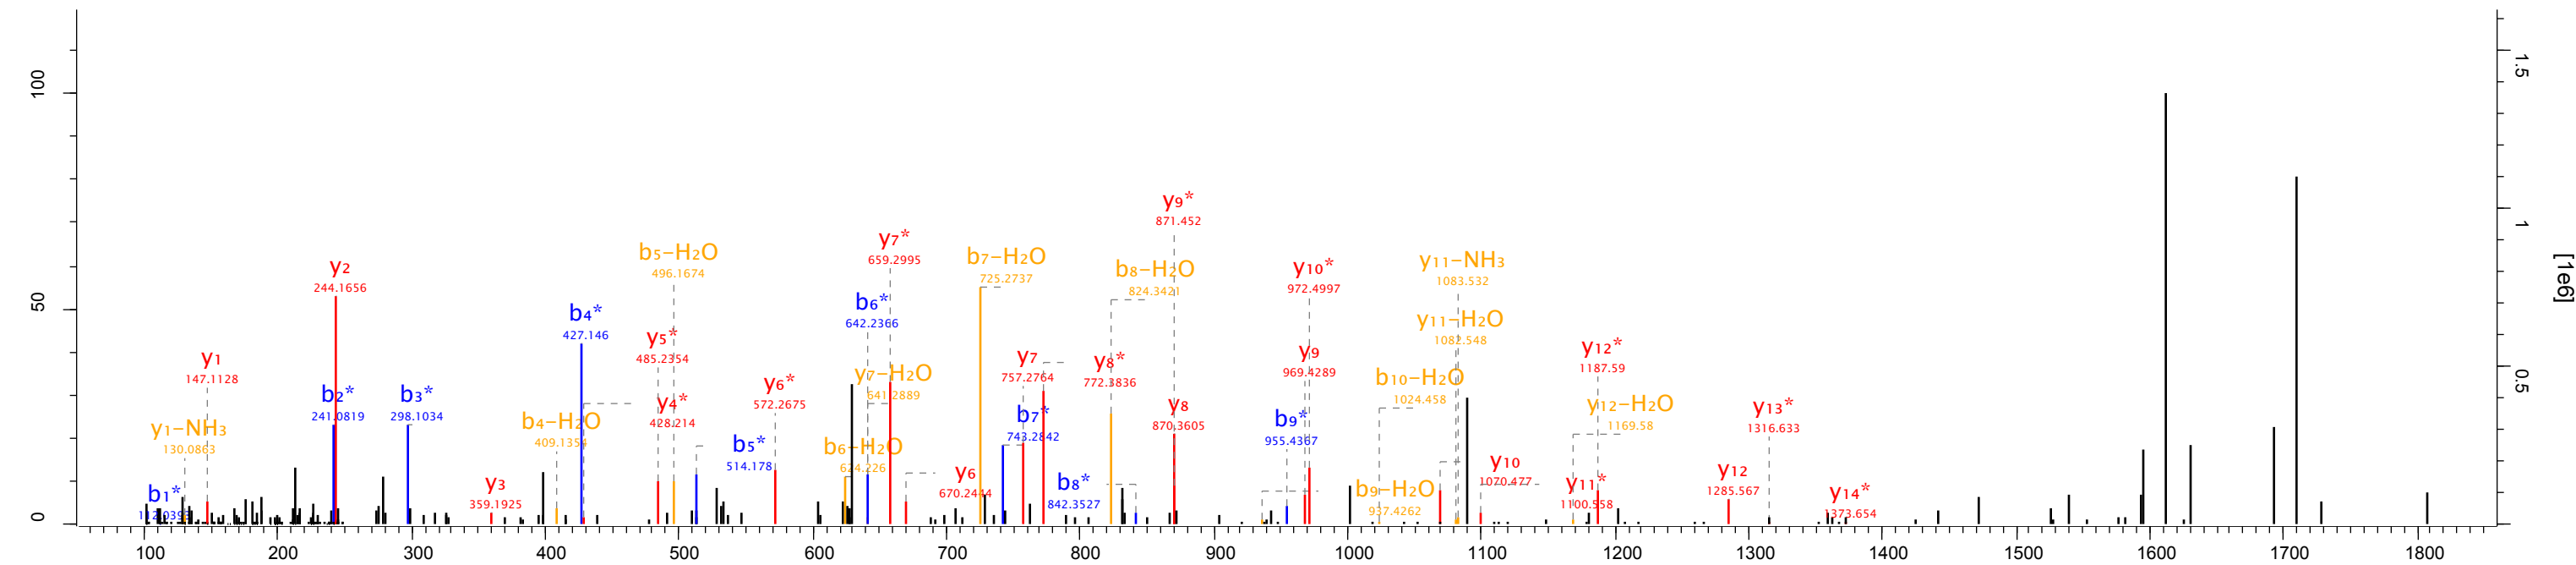

ac - ph S E G E S Q T V L S S G S D P K -

b1\* b2\* b3\* b4\* b5\* b6\* b7\* b8\* b9\*

y14\* y13\* y12 y11\* y10 y9 y8 y7 y6 y5\* y4\* y3 y2 y1

Raw file Scan Method Score m/z Gene names  
 20150812\_A375SR\_Phospho\_BR1\_03 14097 FTMS; HCD 175.76 716.33 SRRM2

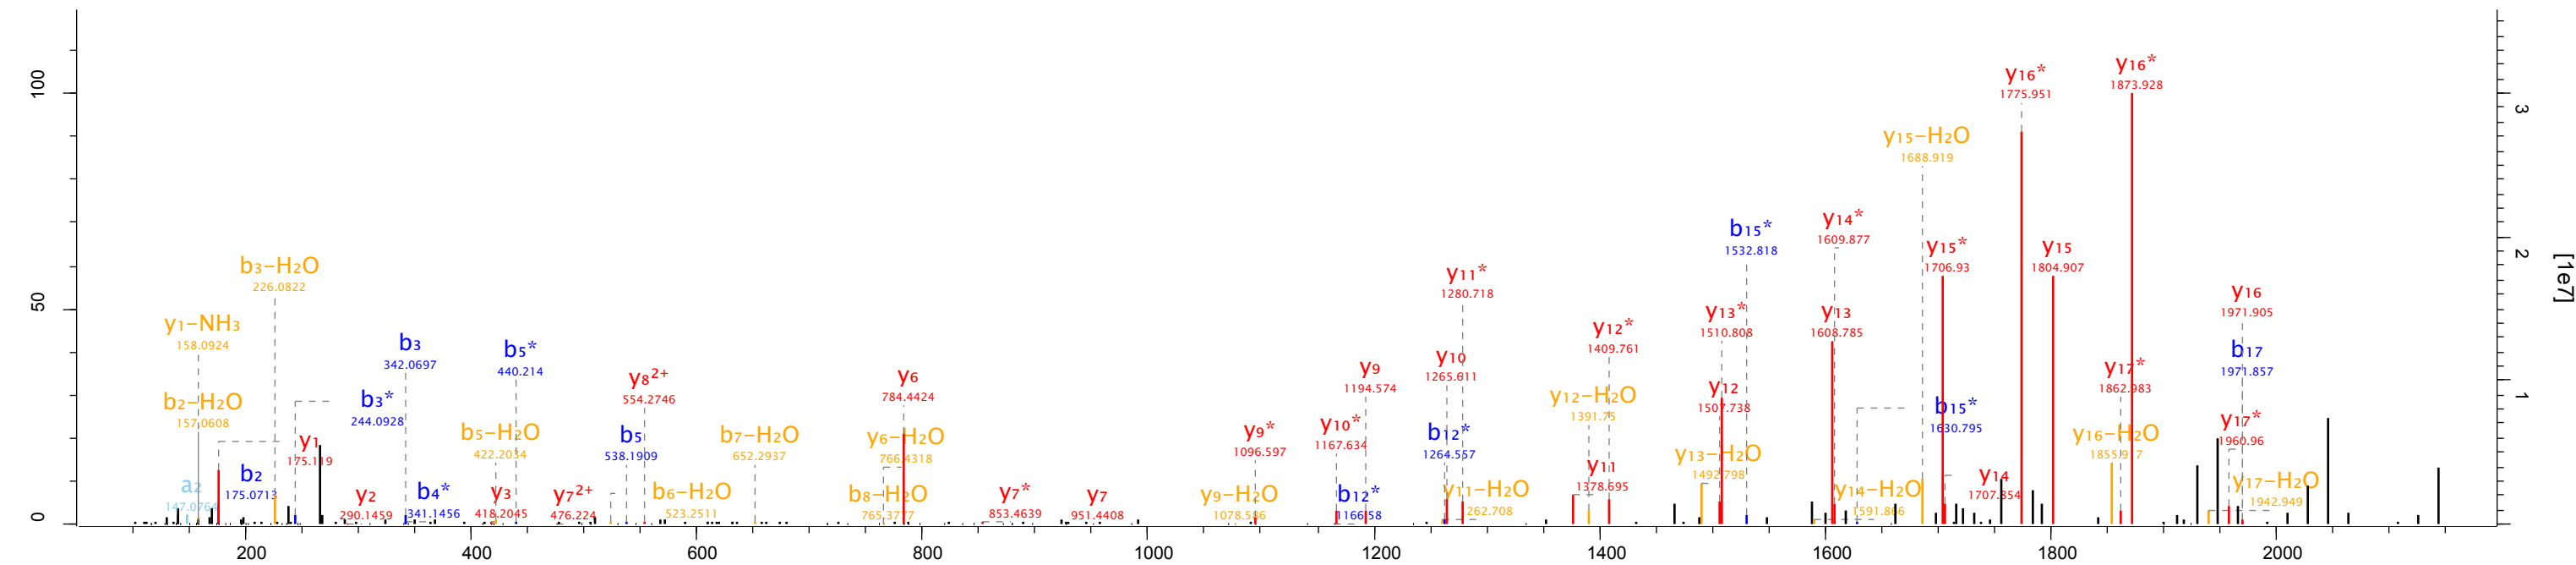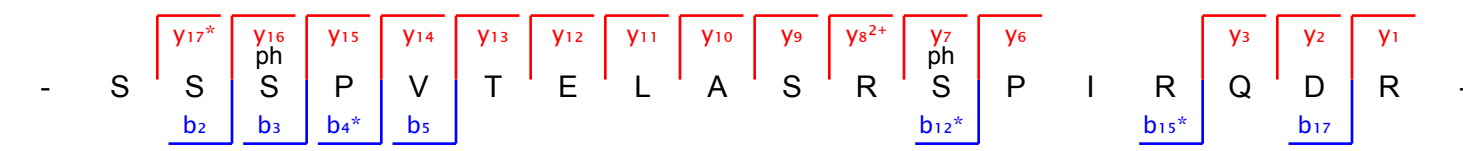



Raw file: 20150812\_A375SR\_Phospho\_BR1\_03  
 Scan: 14247 Method: FTMS; HCD Score: 110.9 m/z: 1029.43 Gene names: NAB1

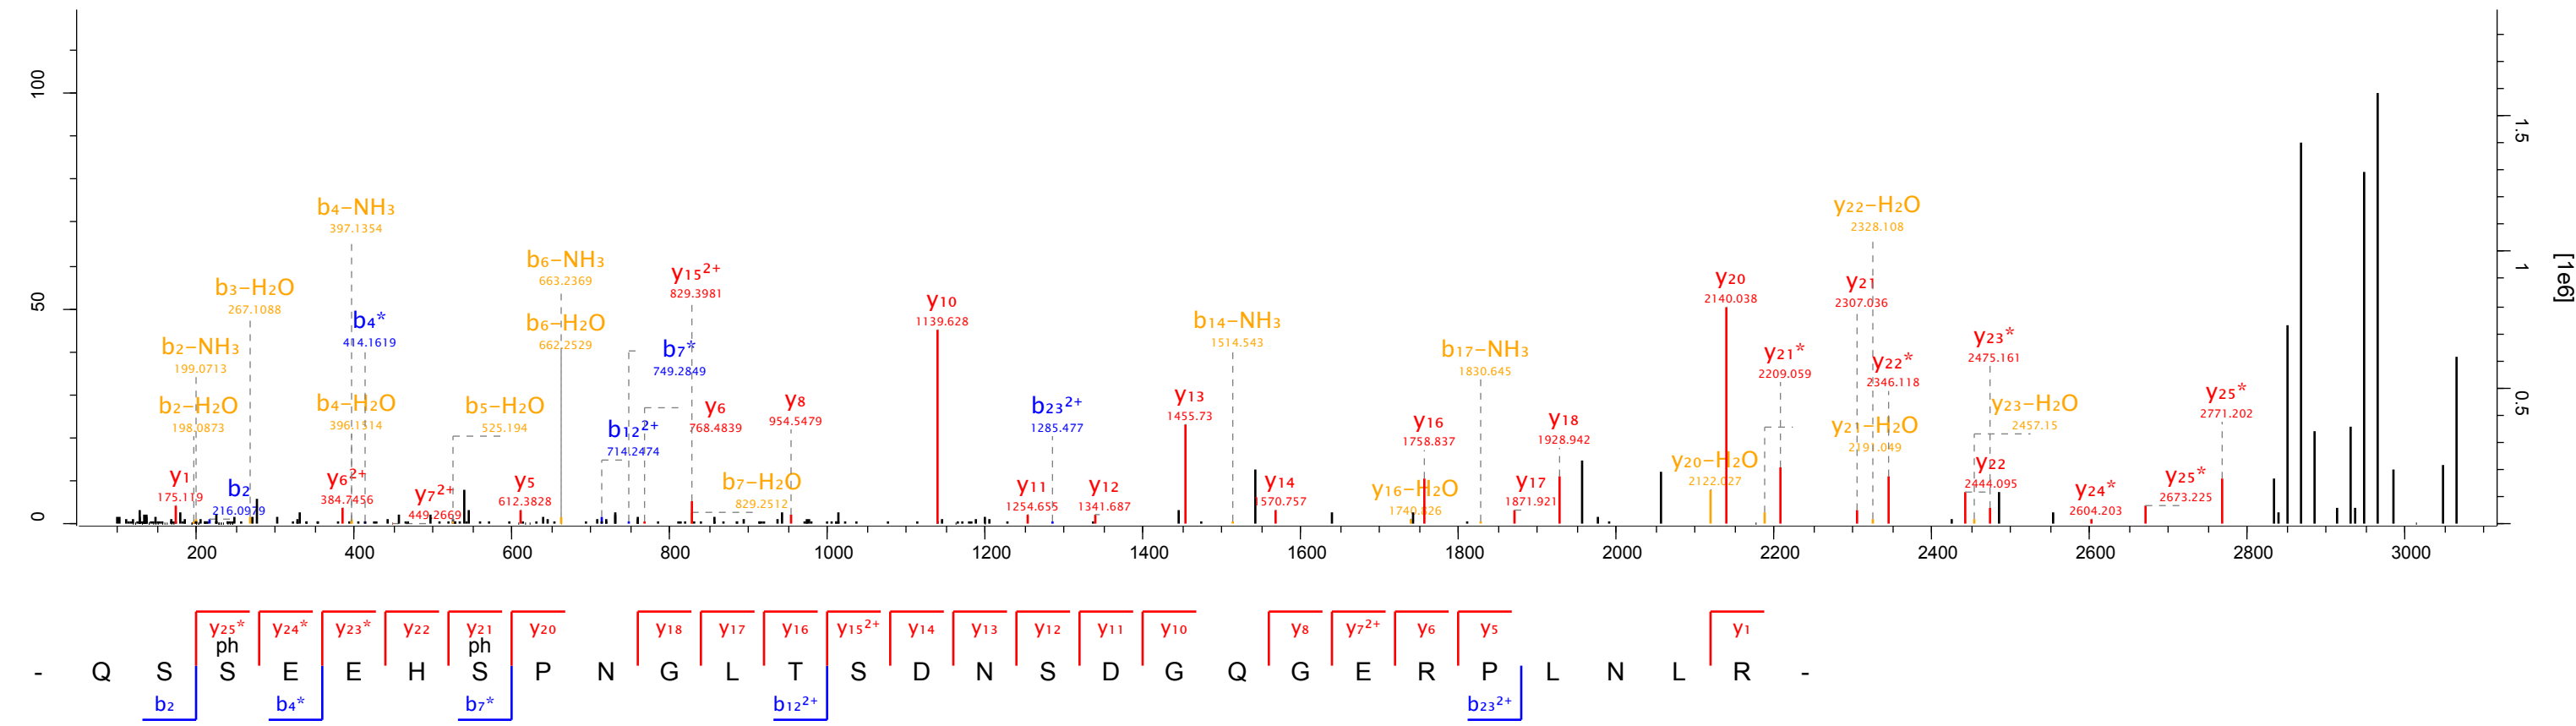

Raw file Scan Method Score m/z Gene names  
 20150812\_A375SR\_Phospho\_BR1\_03 14457 FTMS; HCD 193.06 817.9 WIZ

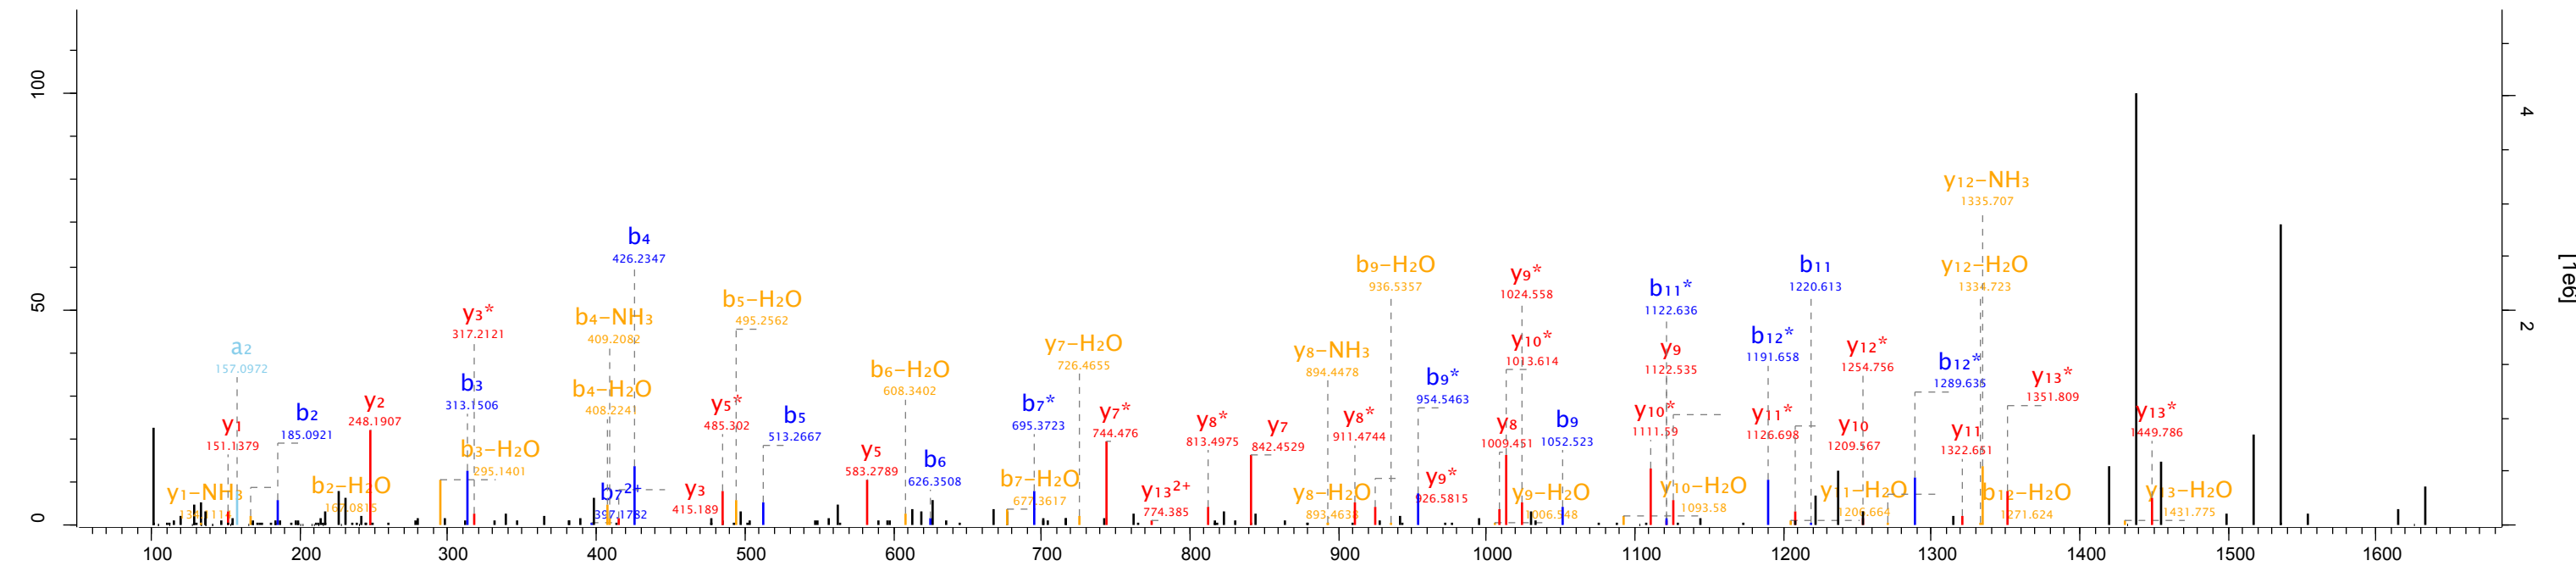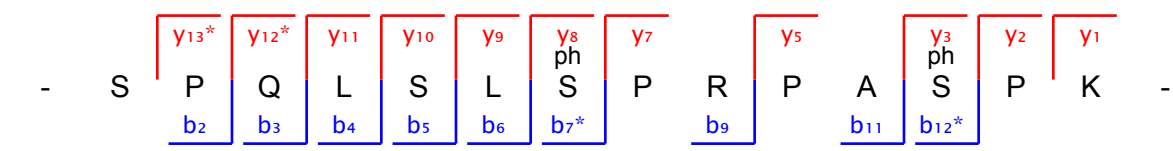

Raw file 20150812\_A375SR\_Phospho\_BR1\_03 Scan 14487 Method FTMS; HCD Score 60.98 m/z 772.38 Gene names BAIAP2L2

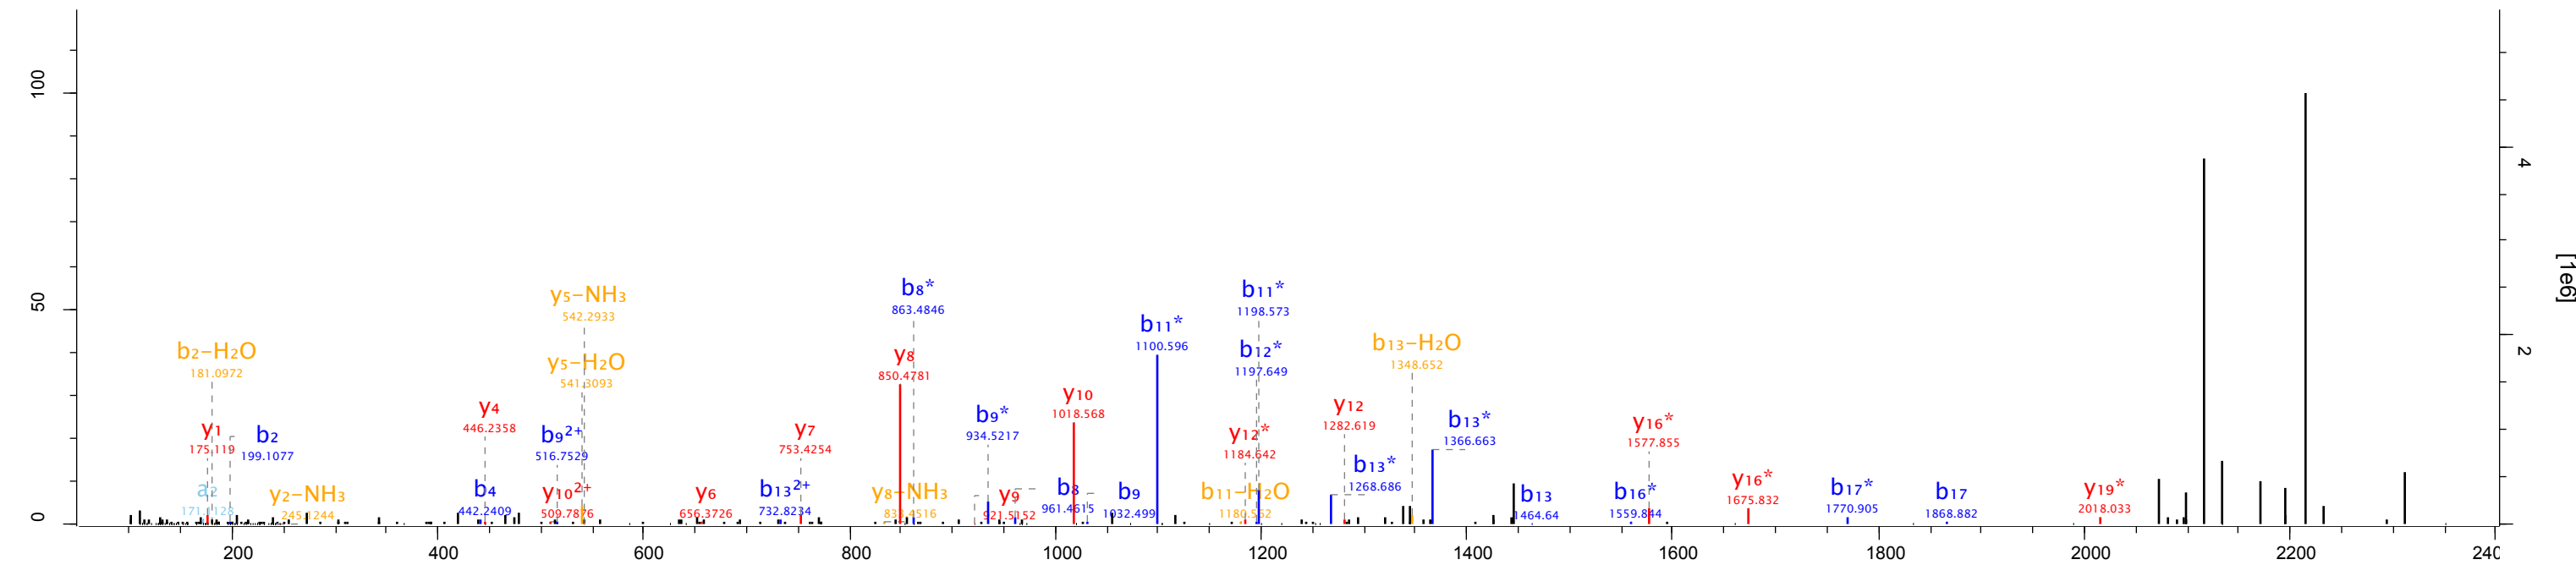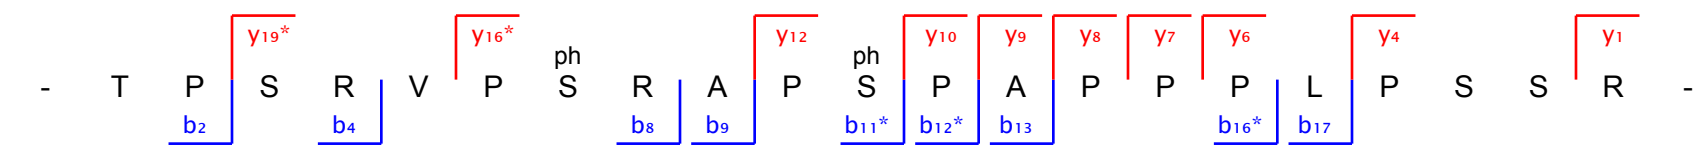

Raw file 20150812\_A375SR\_Phospho\_BR1\_03 Scan 14587 Method FTMS; HCD Score 89.72 m/z 677.65 Gene names KANK2

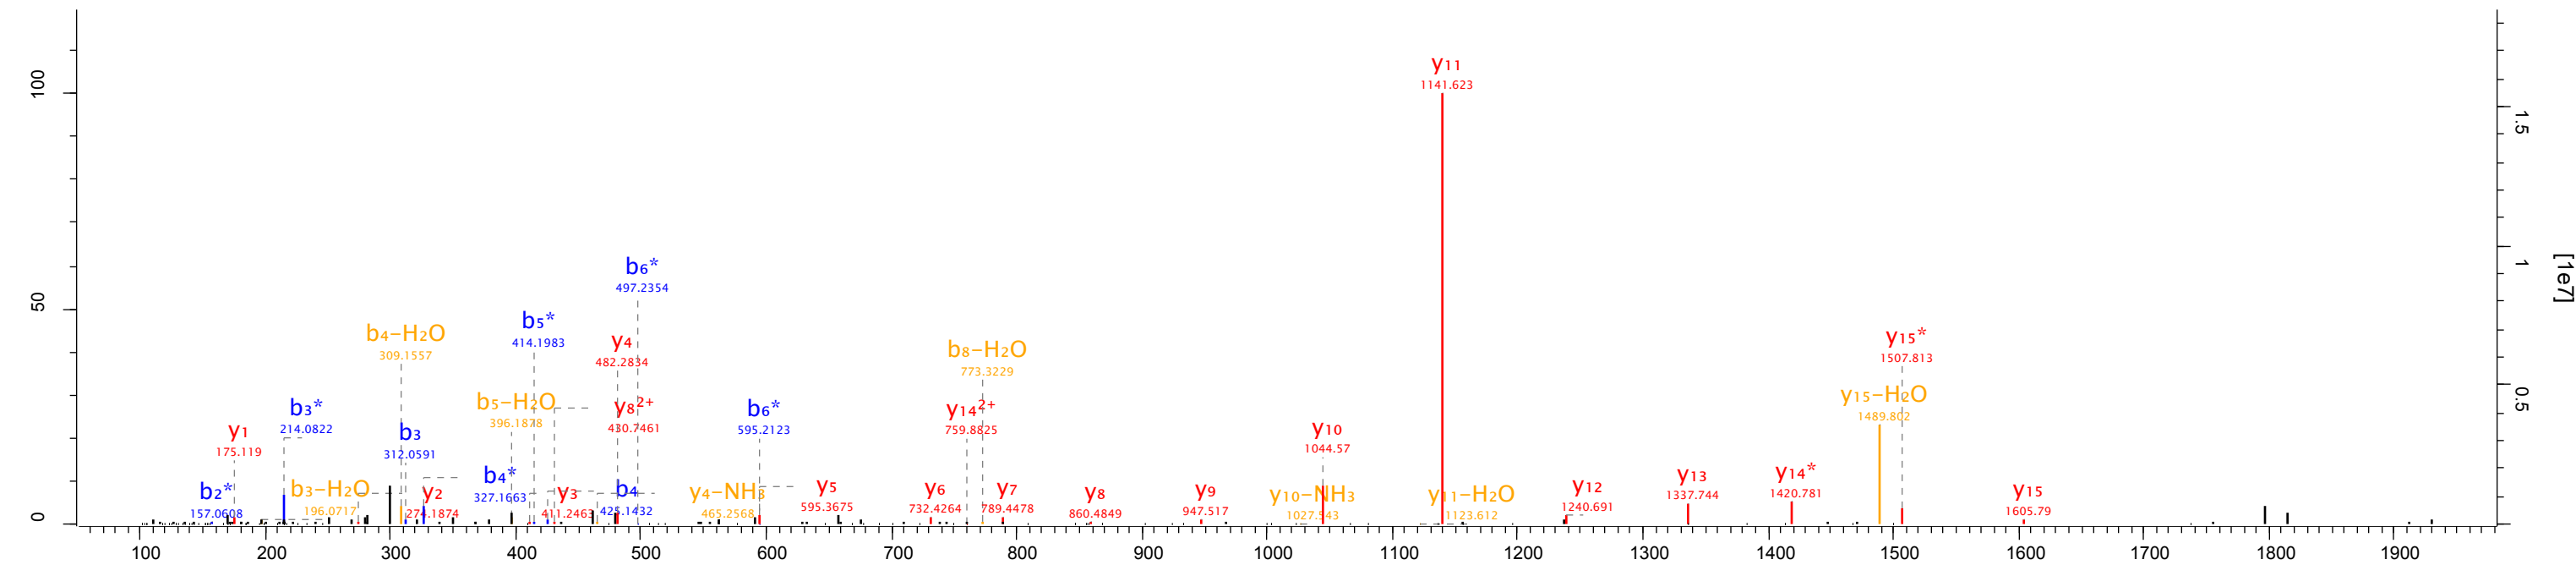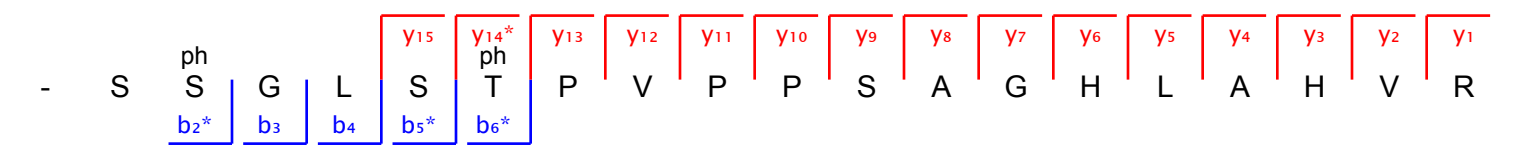

Raw file 20150812\_A375SR\_Phospho\_BR1\_03 Scan 14967 Method FTMS; HCD Score 85.01 m/z 799.07 Gene names IWS1

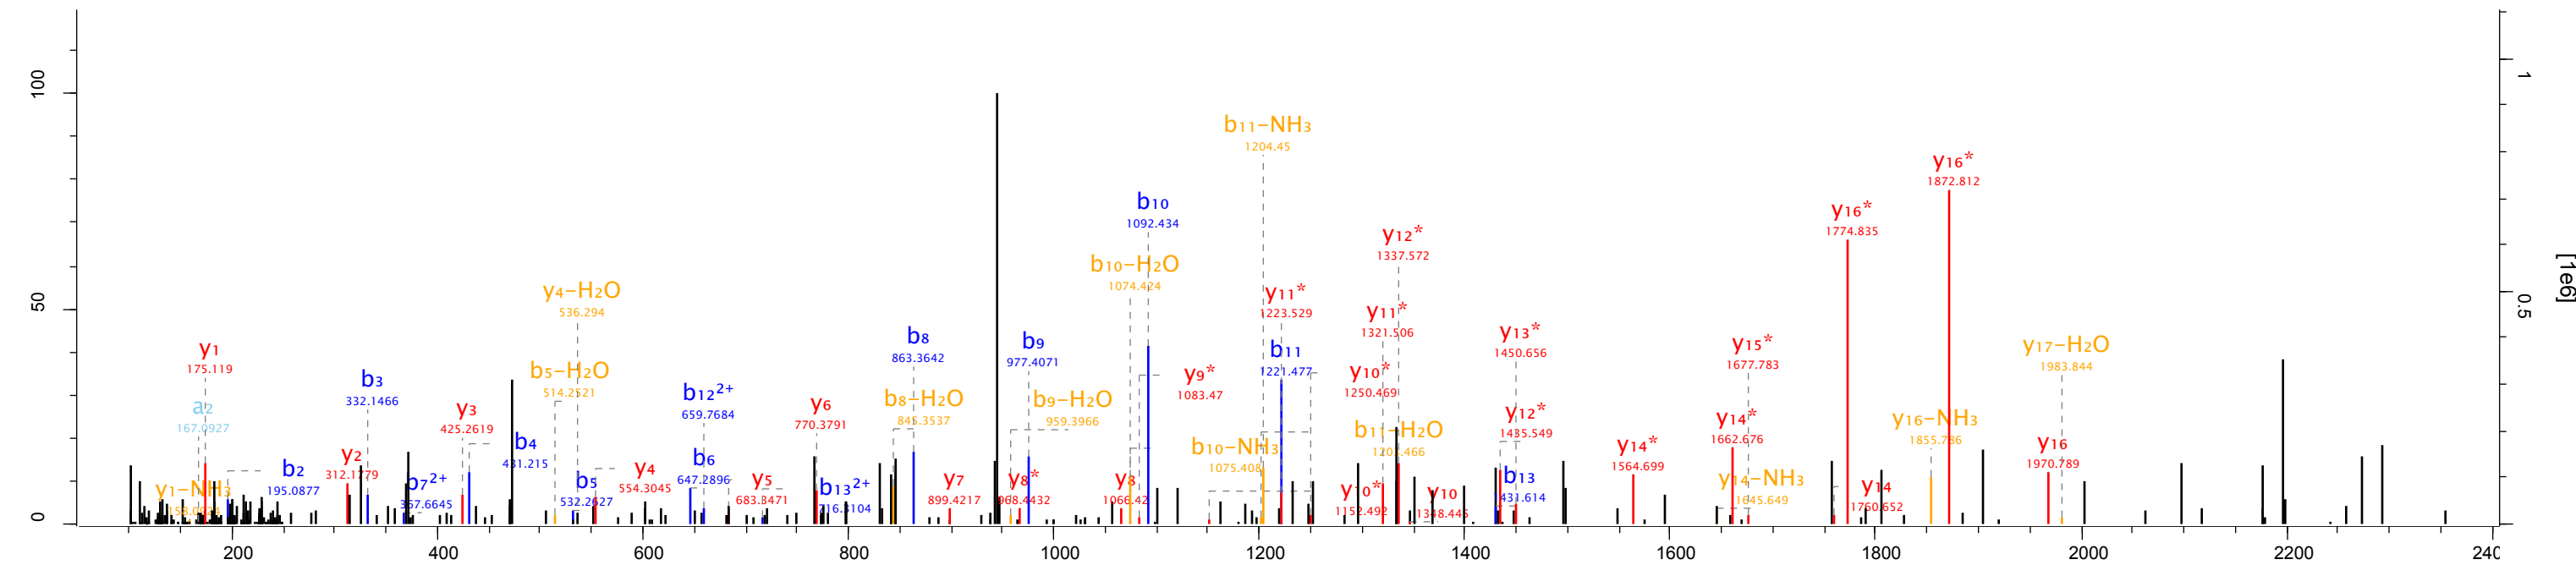

- G H H V T D S E N D E P L N L N A S D S E S E E L H R -

b<sub>2</sub>
b<sub>3</sub>
b<sub>4</sub>
b<sub>5</sub>
b<sub>6</sub>
b<sub>7</sub><sup>2+</sup>
b<sub>8</sub>
b<sub>9</sub>
b<sub>10</sub>
b<sub>11</sub>
b<sub>12</sub><sup>2+</sup>
b<sub>13</sub>
y<sub>16</sub>
y<sub>15</sub>\*
y<sub>14</sub>
y<sub>13</sub>\*
y<sub>12</sub>\*
y<sub>11</sub>\*
y<sub>10</sub> ph
y<sub>9</sub>\*
y<sub>8</sub> ph
y<sub>7</sub>
y<sub>6</sub>
y<sub>5</sub>
y<sub>4</sub>
y<sub>3</sub>
y<sub>2</sub>
y<sub>1</sub>

Raw file: 20150812\_A375SR\_Phospho\_BR1\_03  
 Scan: 15057 Method: FTMS; HCD Score: 67.42 m/z: 1110.79 Gene names: HNRNPUL1

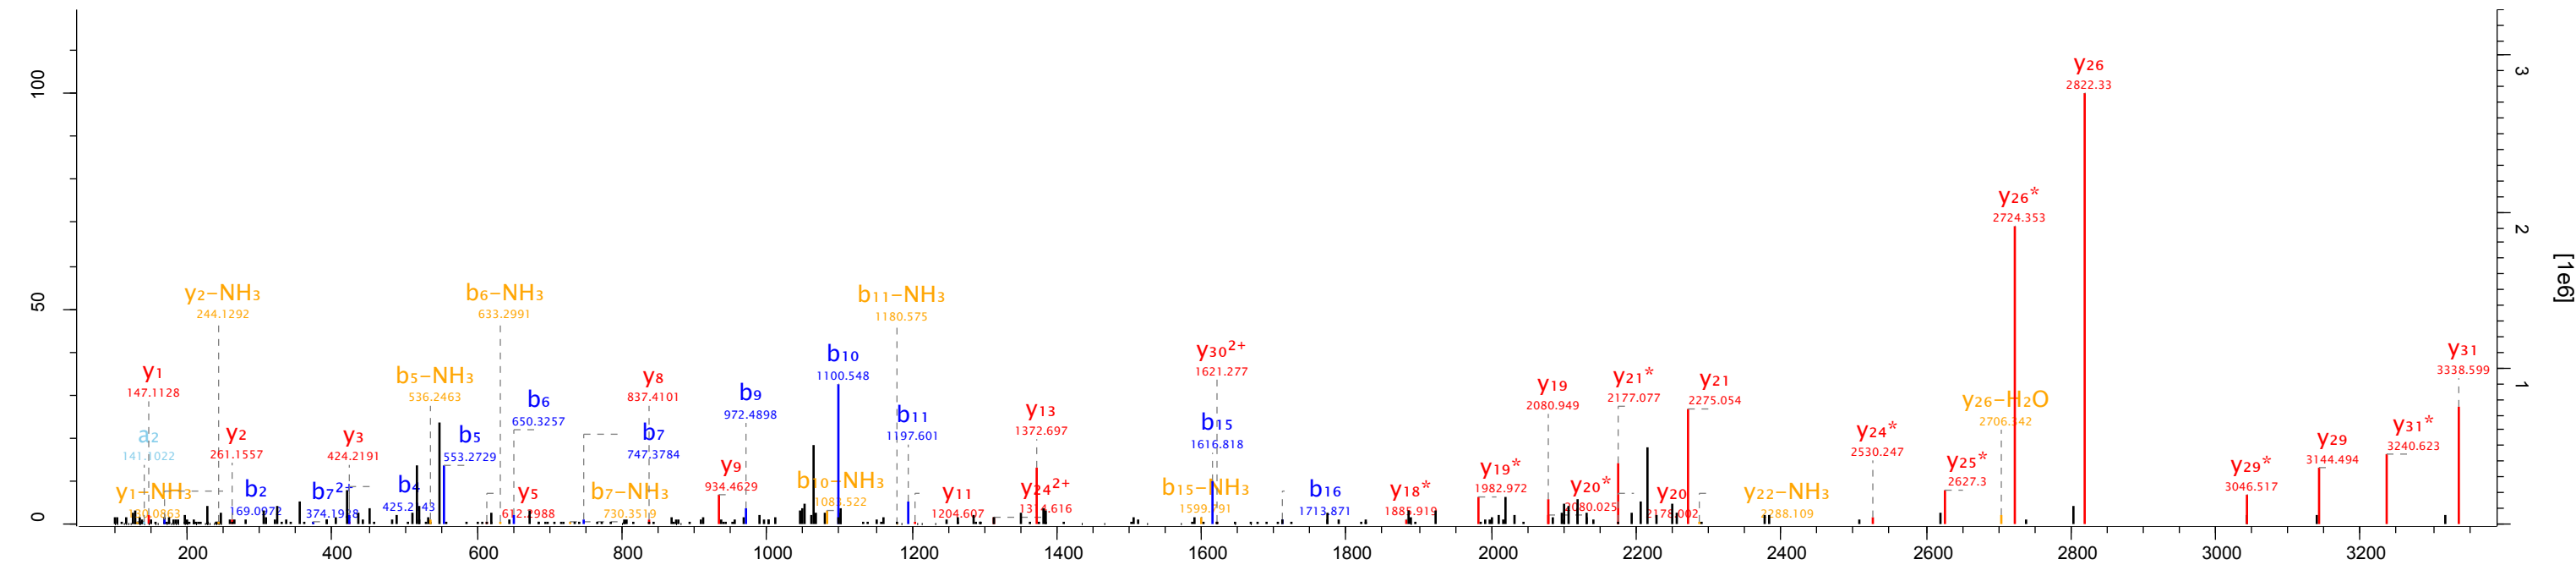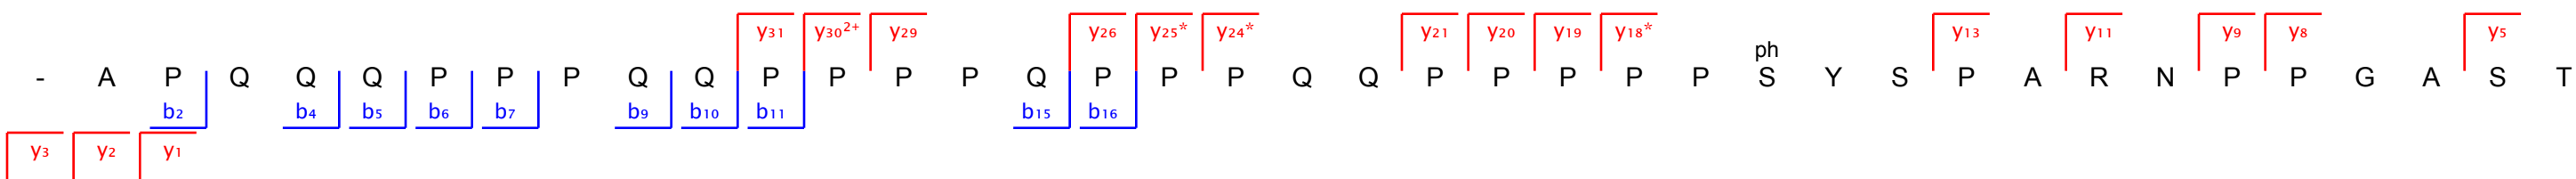

Raw file 20150812\_A375SR\_Phospho\_BR1\_03 Scan 15277 Method FTMS; HCD Score 176.97 m/z 582.78 Gene names DLG5

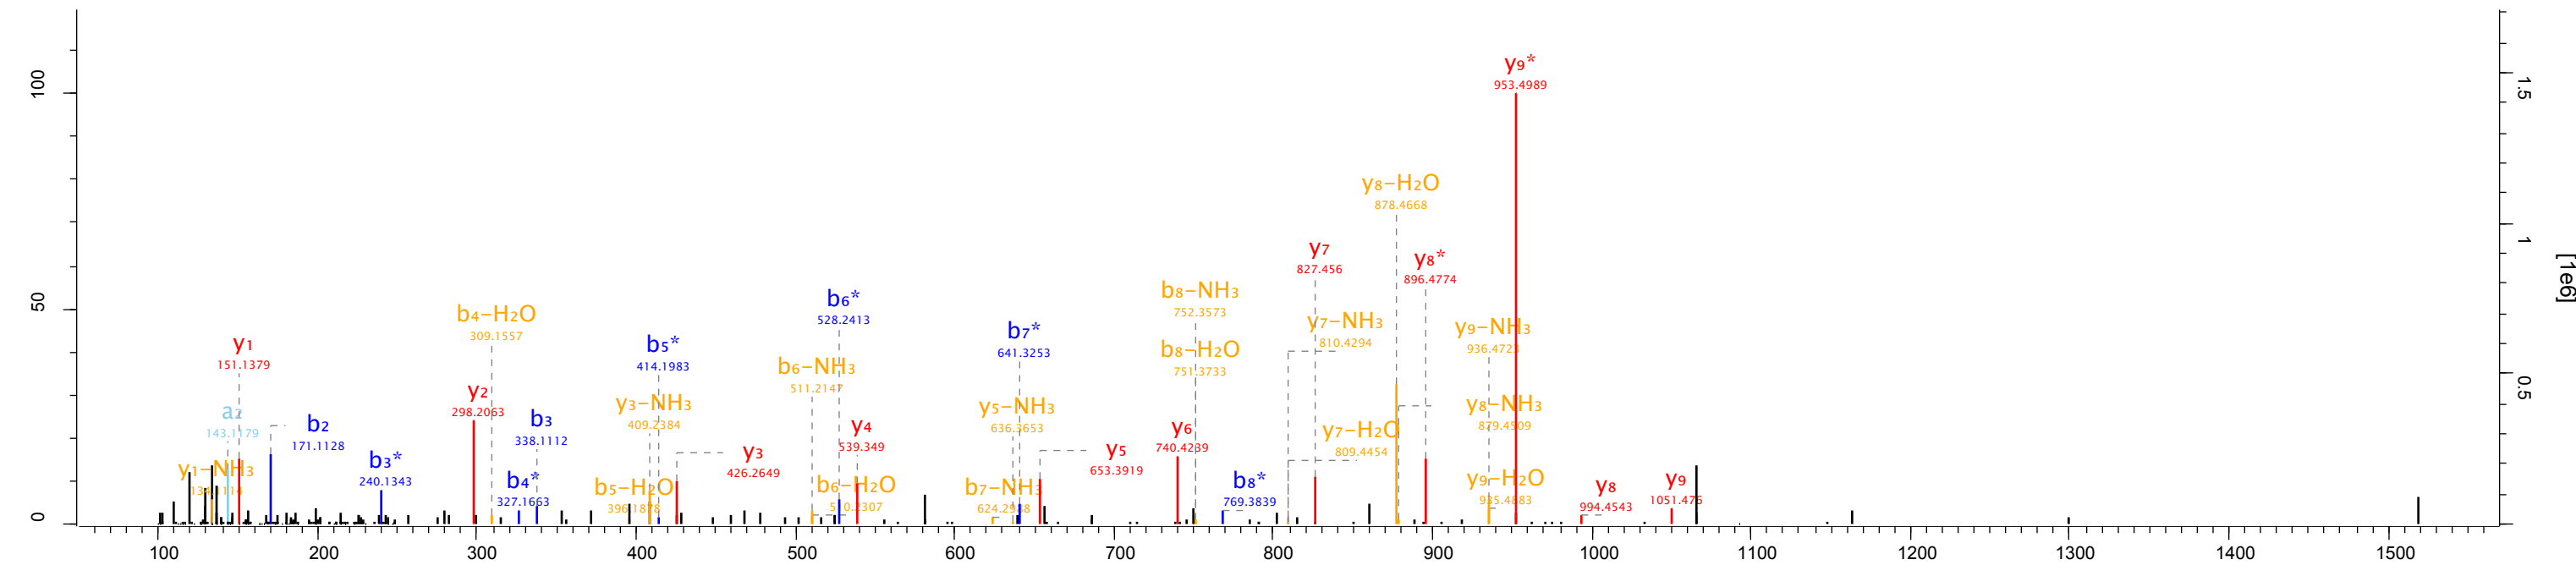

- L y9  
G y8  
ph  
S y7  
S y6  
S y5  
N y4  
L y3  
Q F y1  
K -

b2 b3 b4\* b5\* b6\* b7\* b8\*





Raw file  
 20150812\_A375SR\_Phospho\_BR1\_03  
 Scan 15487 Method FTMS; HCD Score 144.69 m/z 890.9 Gene names ATF7

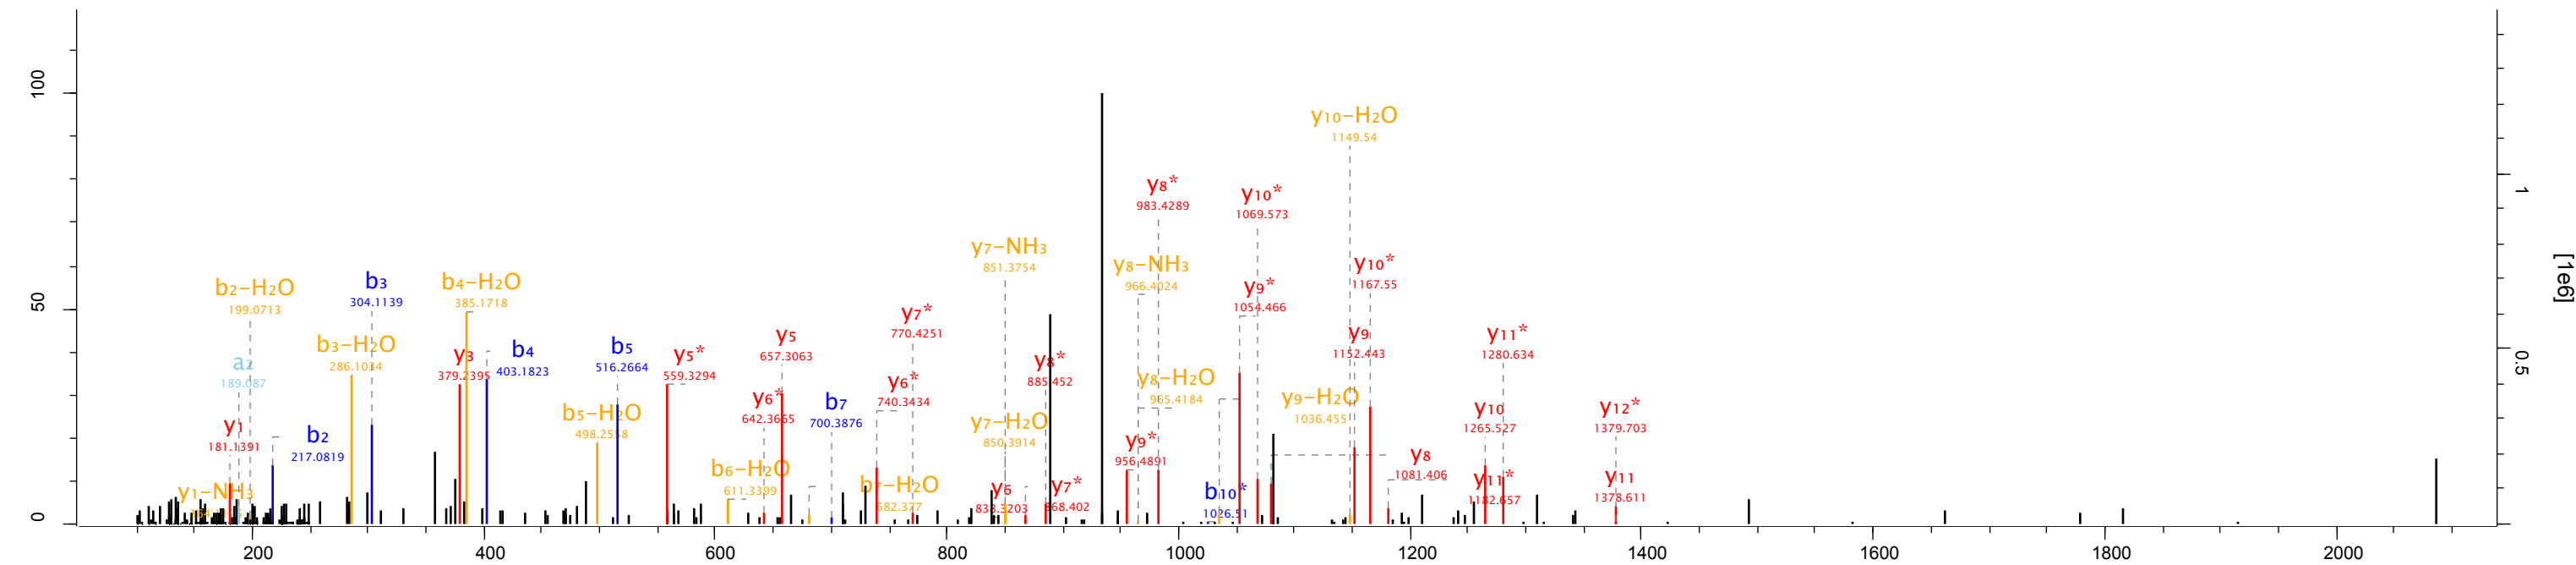

- T D S V I I A D Q P T P T R -

Fragmentation mapping (b and y ions):

- b2: D
- b3: S
- b4: V
- b5: I
- b7: A
- b10\*: P
- y1: R
- y3: P
- y5: P
- y6: T
- y7: Q
- y8: D
- y9: A
- y10: I
- y11: I
- y12\*: V

Raw file 20150812\_A375SR\_Phospho\_BR1\_03 Scan 15857 Method FTMS; HCD Score 205.9 m/z 943.39 Gene names SMARCAD1

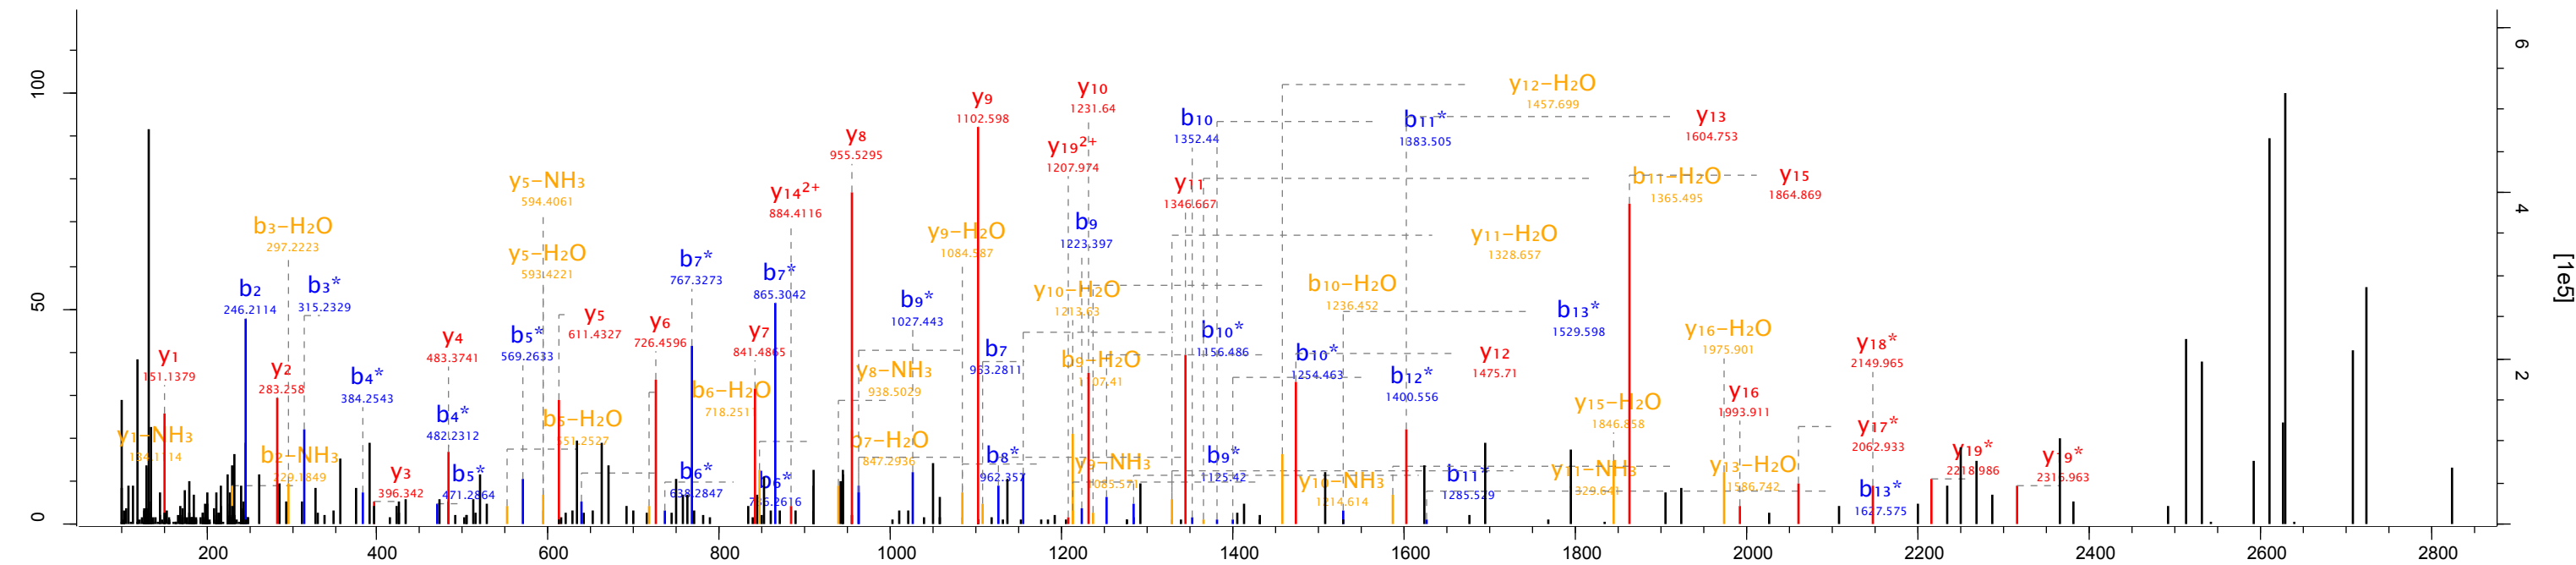

- K L S ph S S S E P Y E E D E F N D D Q S I K K -

Fragmentation labels below the sequence: b2, b3\*, b4\*, b5\*, b6\*, b7, b8\*, b9, b10, b11\*, b12\*, b13\*

Raw file 20150812\_A375SR\_Phospho\_BR1\_03 Scan 16147 Method FTMS; HCD Score 190.35 m/z 792.39 Gene names EIF4ENIF1

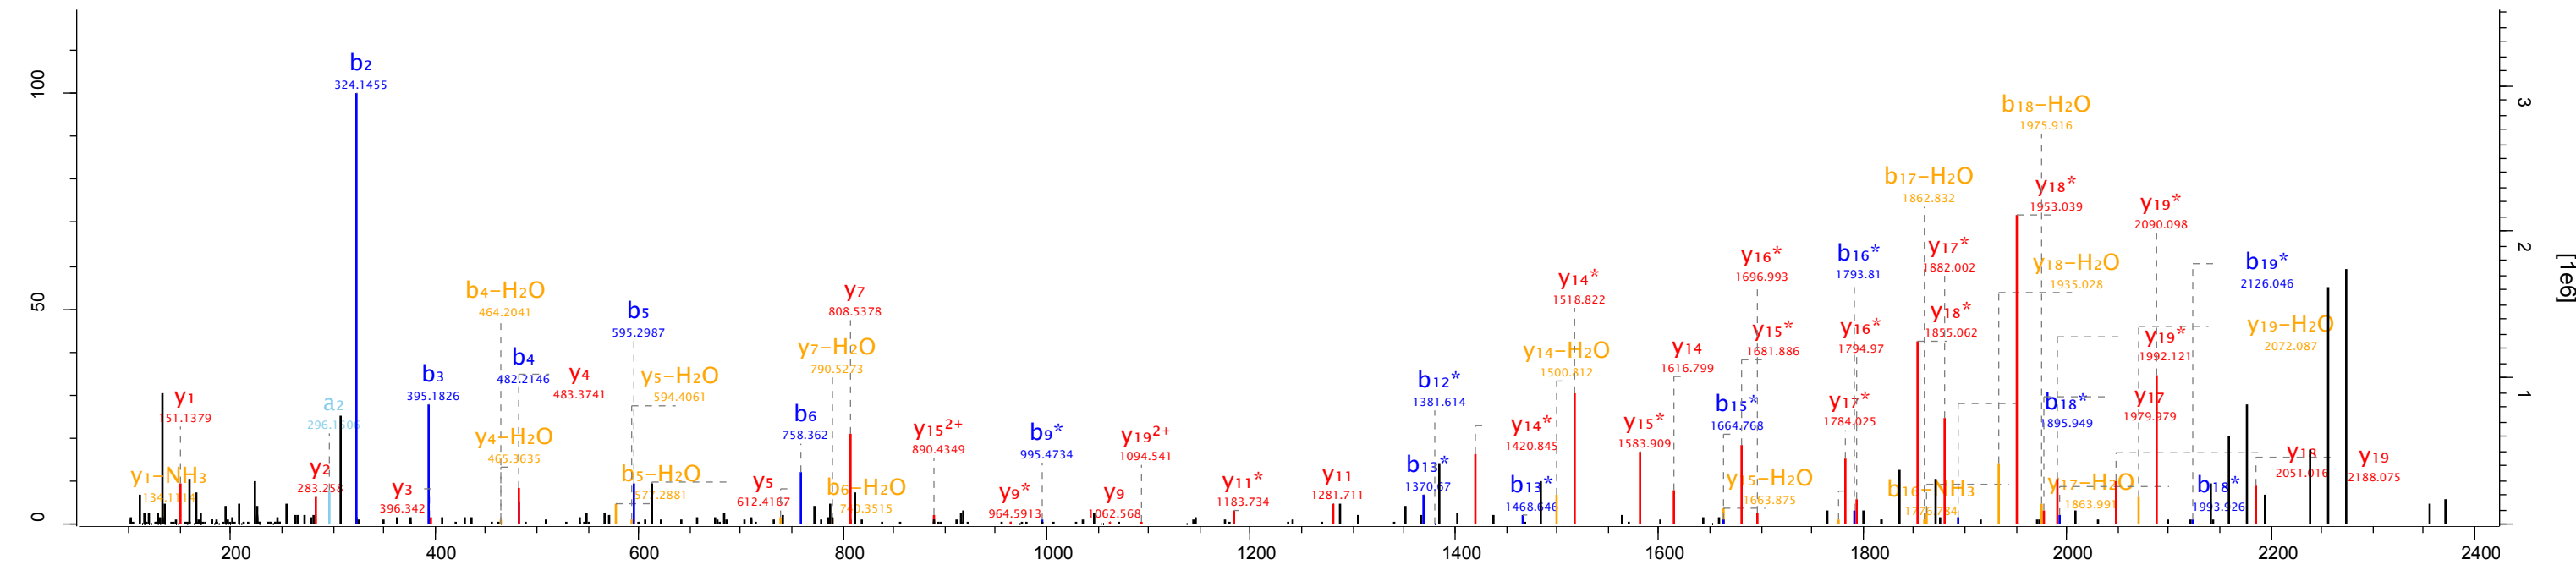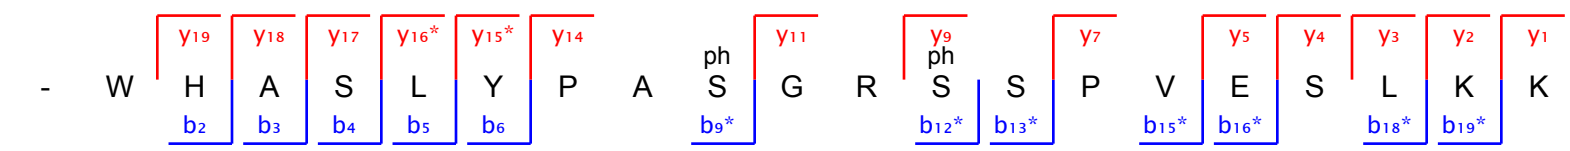

Raw file 20150812\_A375SR\_Phospho\_BR1\_03 Scan 16207 Method FTMS; HCD Score 165.1 m/z 920.39 Gene names ST13

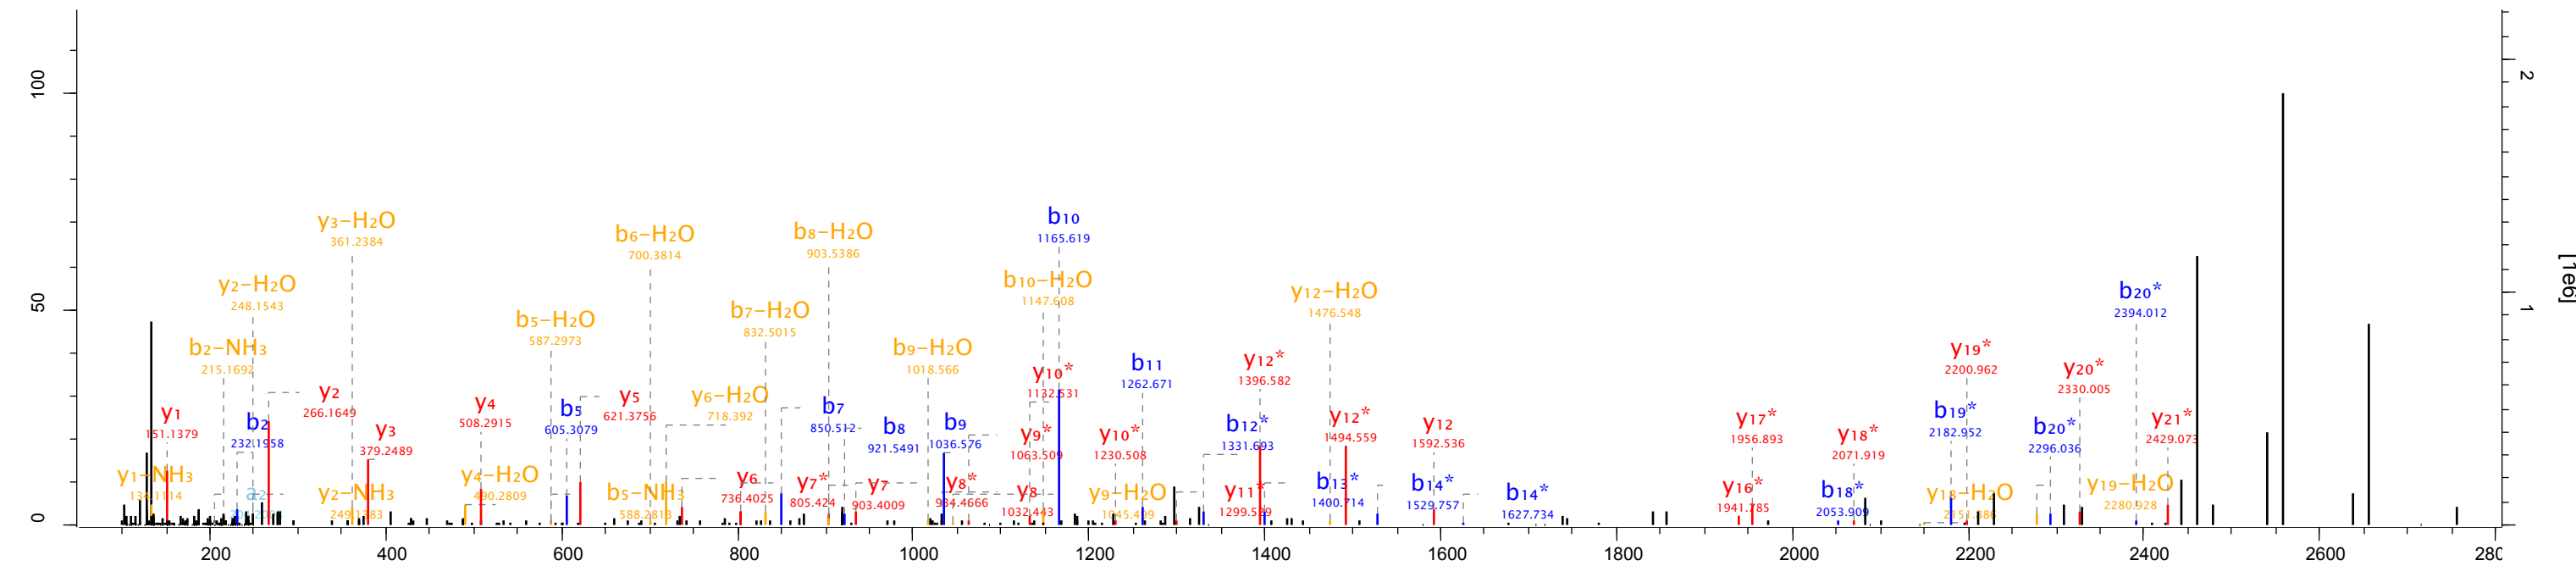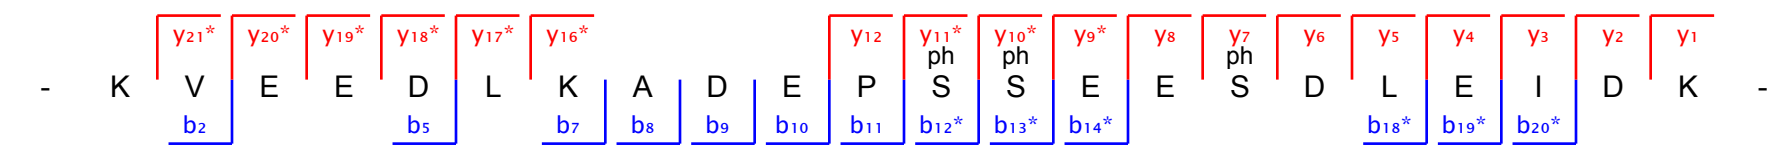

Raw file: 20150812\_A375SR\_Phospho\_BR1\_03  
 Scan: 16327 Method: FTMS; HCD Score: 65.99 m/z: 1062.7 Gene names: RERE

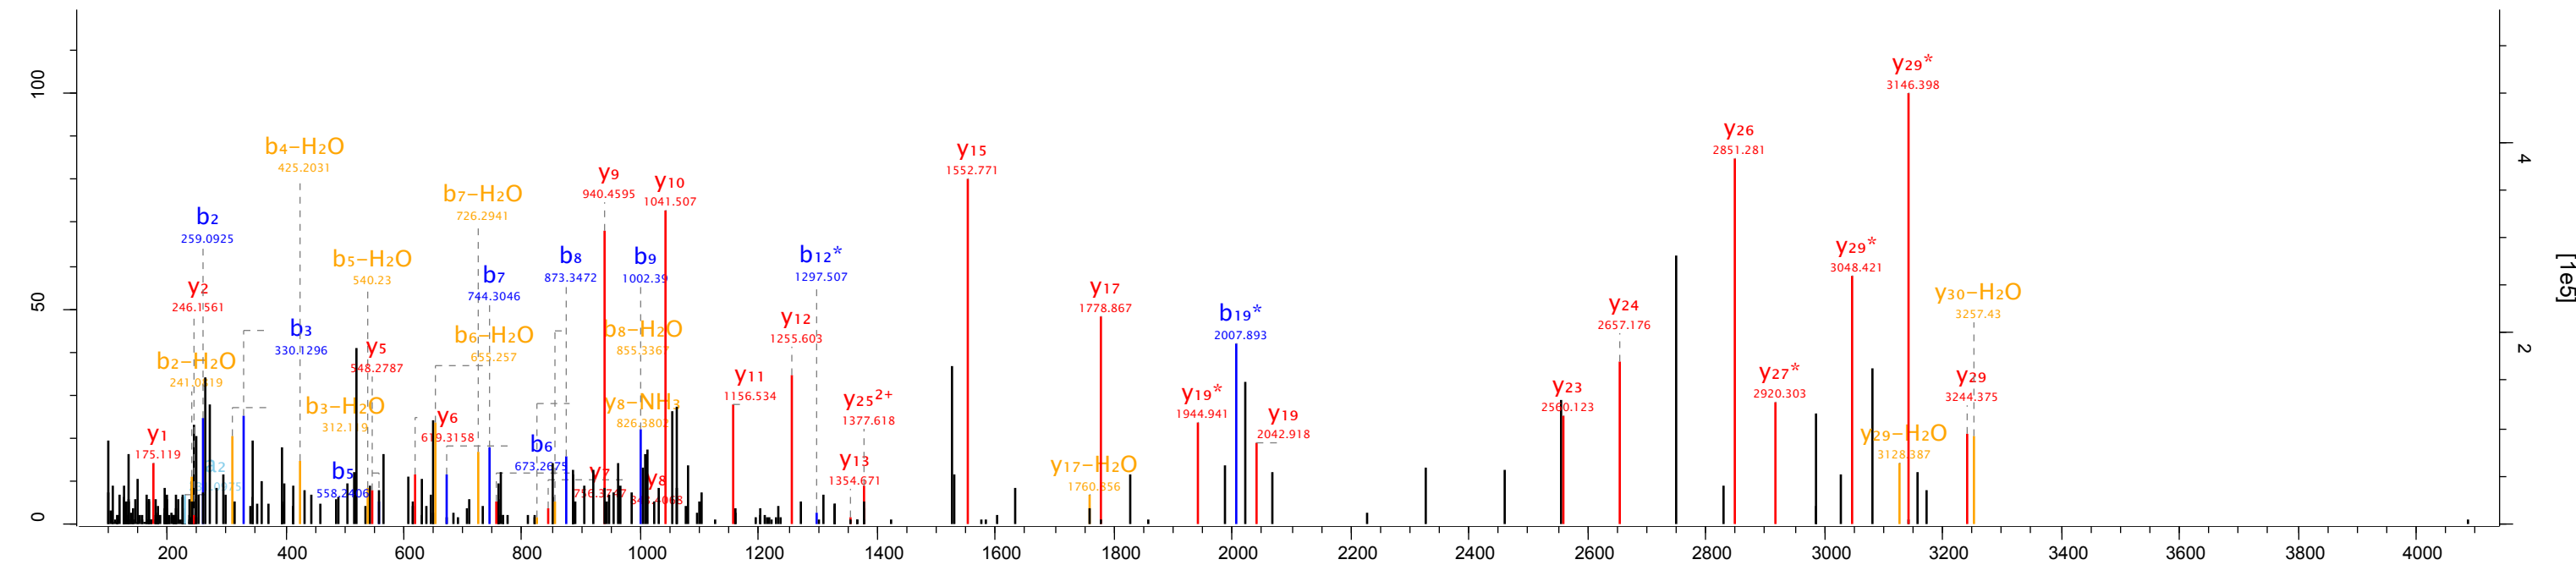

Protein sequence: - E E A L D D A E E P E S P P P P P R S P S P E P T V V D T P S H A S Q S A R

Fragmentation mapping (b and y ions):

- b2: E E
- b3: E A
- b5: D D
- b6: D A
- b7: A E
- b8: E E
- b9: E P
- b12\*: S P
- b19\*: S P
- y1: A R
- y2: E
- y5: D
- y6: D
- y7: A
- y8: E
- y9: E
- y10: P
- y11: S
- y12: H
- y13: A
- y15: S
- y17: Q
- y19: S
- y23: A
- y24: R
- y25<sup>2+</sup>: S
- y26: P
- y27\*: P
- y29: S
- y29\*: P
- y29-H2O: T
- y30-H2O: V

Raw file: 20150812\_A375SR\_Phospho\_BR1\_03  
 Scan: 1637 Method: FTMS; HCD Score: 83.05 m/z: 368.17 Gene names: SRRM2

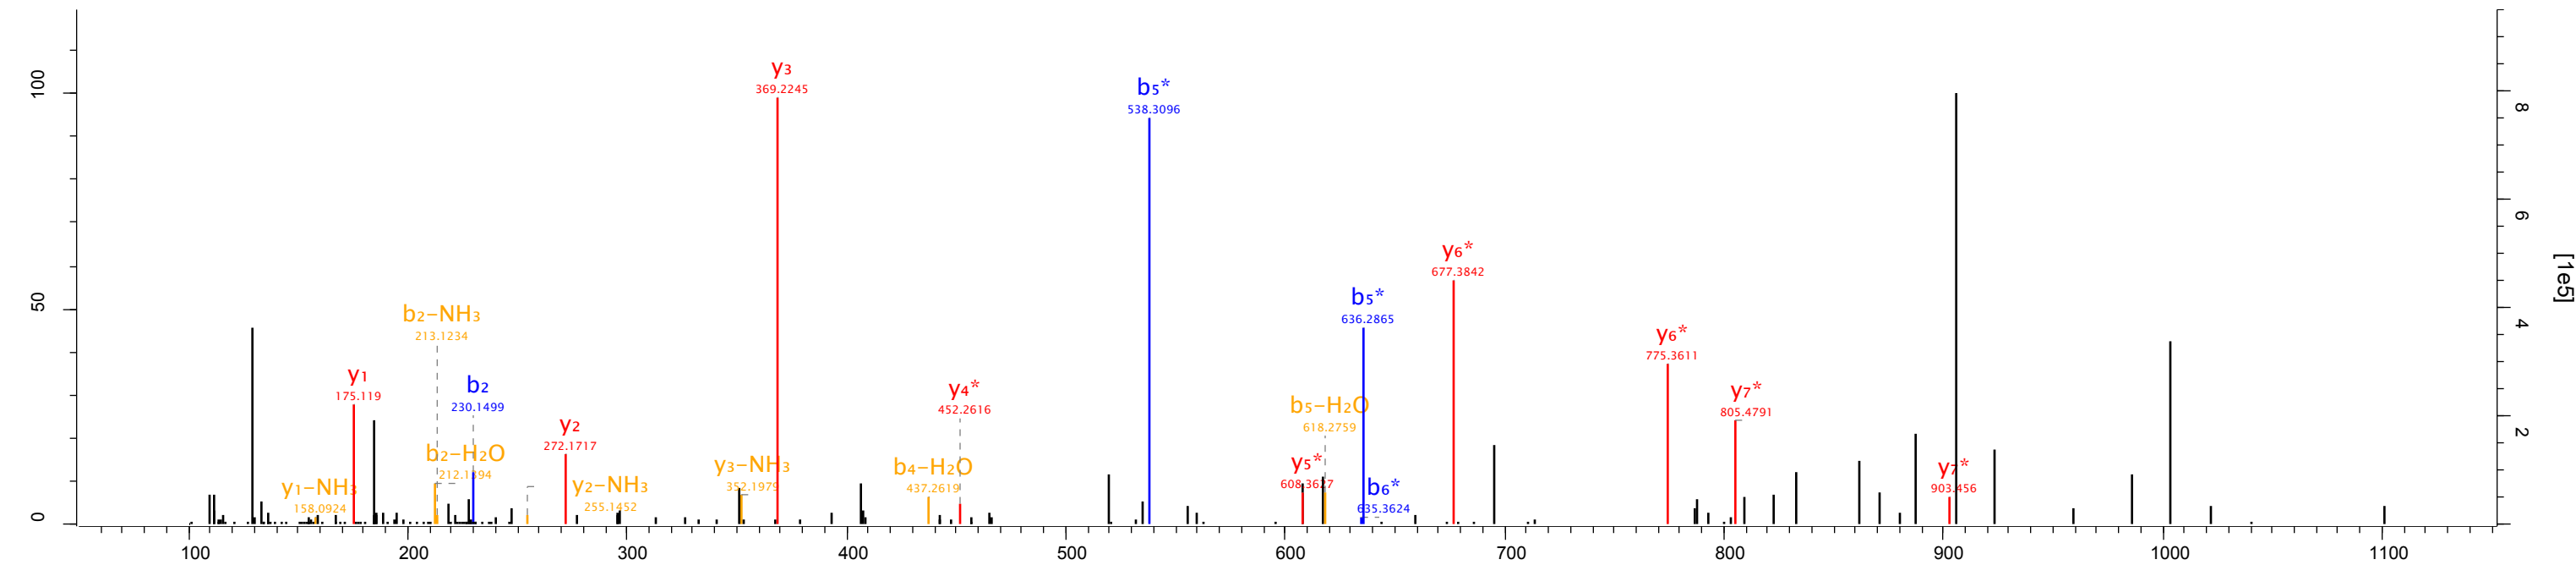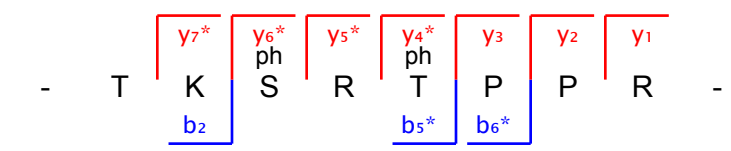

Raw file: 20150812\_A375SR\_Phospho\_BR1\_03  
 Scan: 16457 Method: FTMS; HCD Score: 236.31 m/z: 1020.47 Gene names: LAS1L

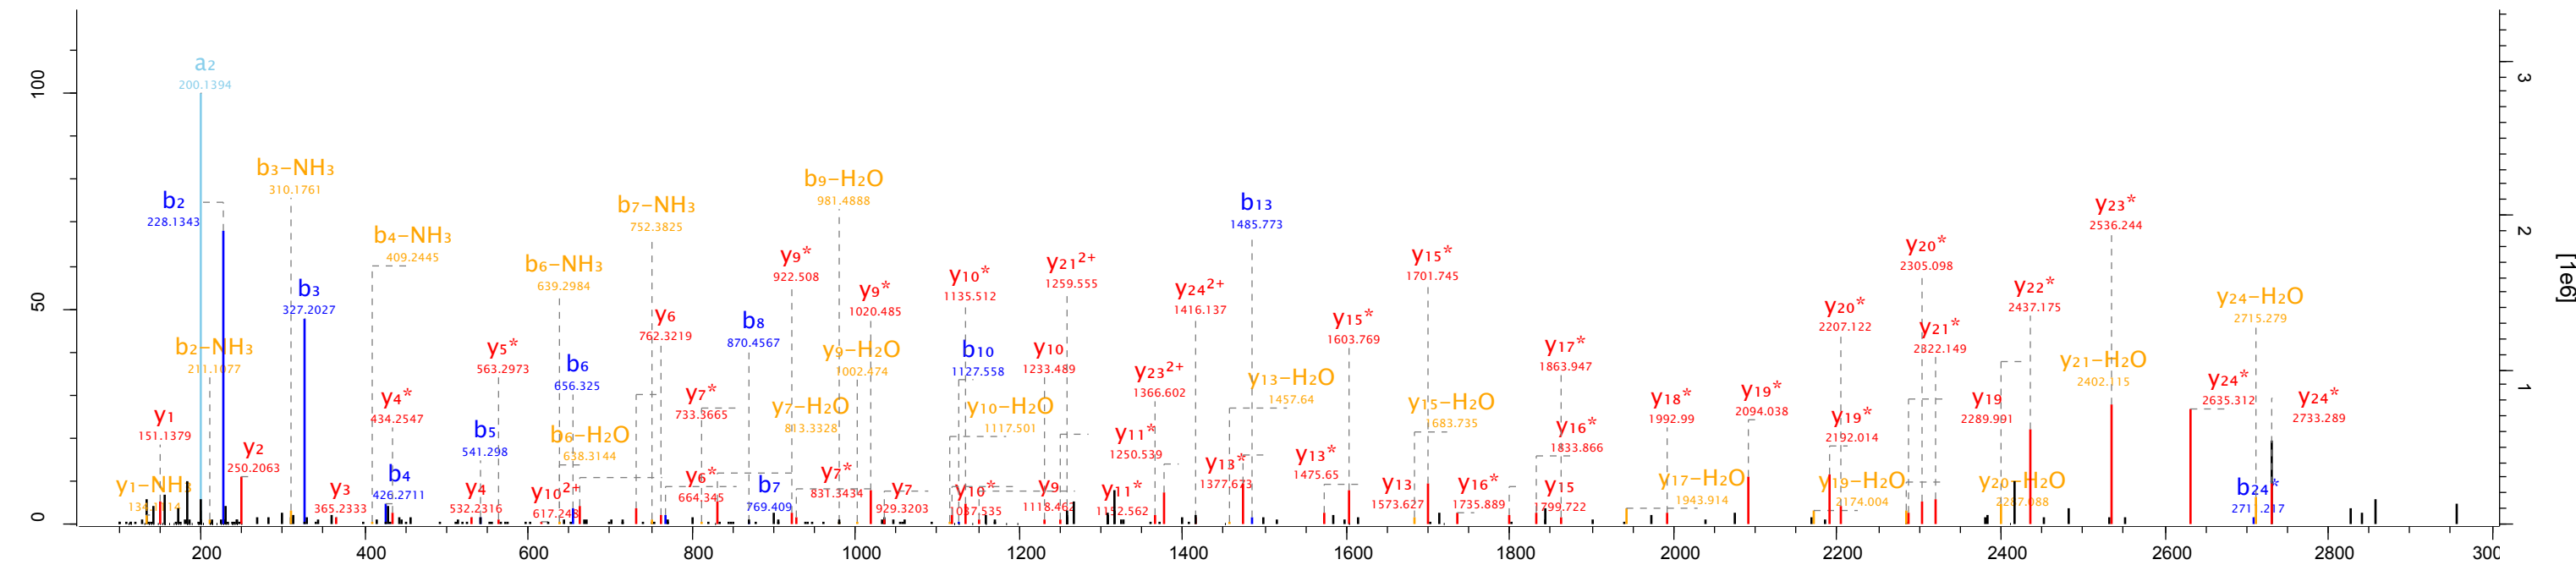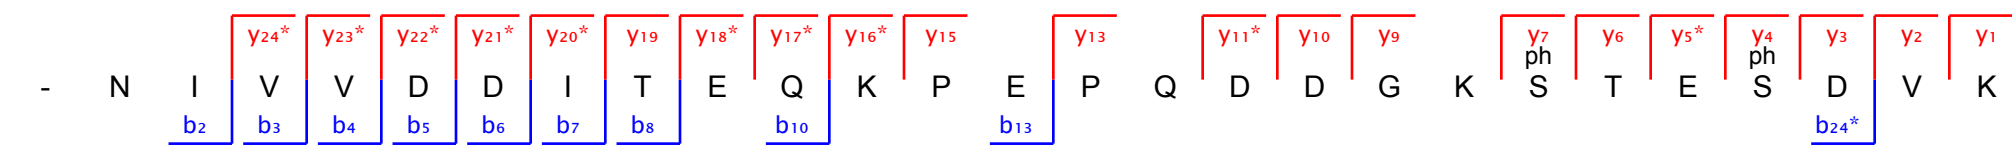

Raw file  
20150812\_A375SR\_Phospho\_BR1\_03

Scan 16517 Method FTMS; HCD Score 179.81 m/z 1007.8 Gene names RAVR1

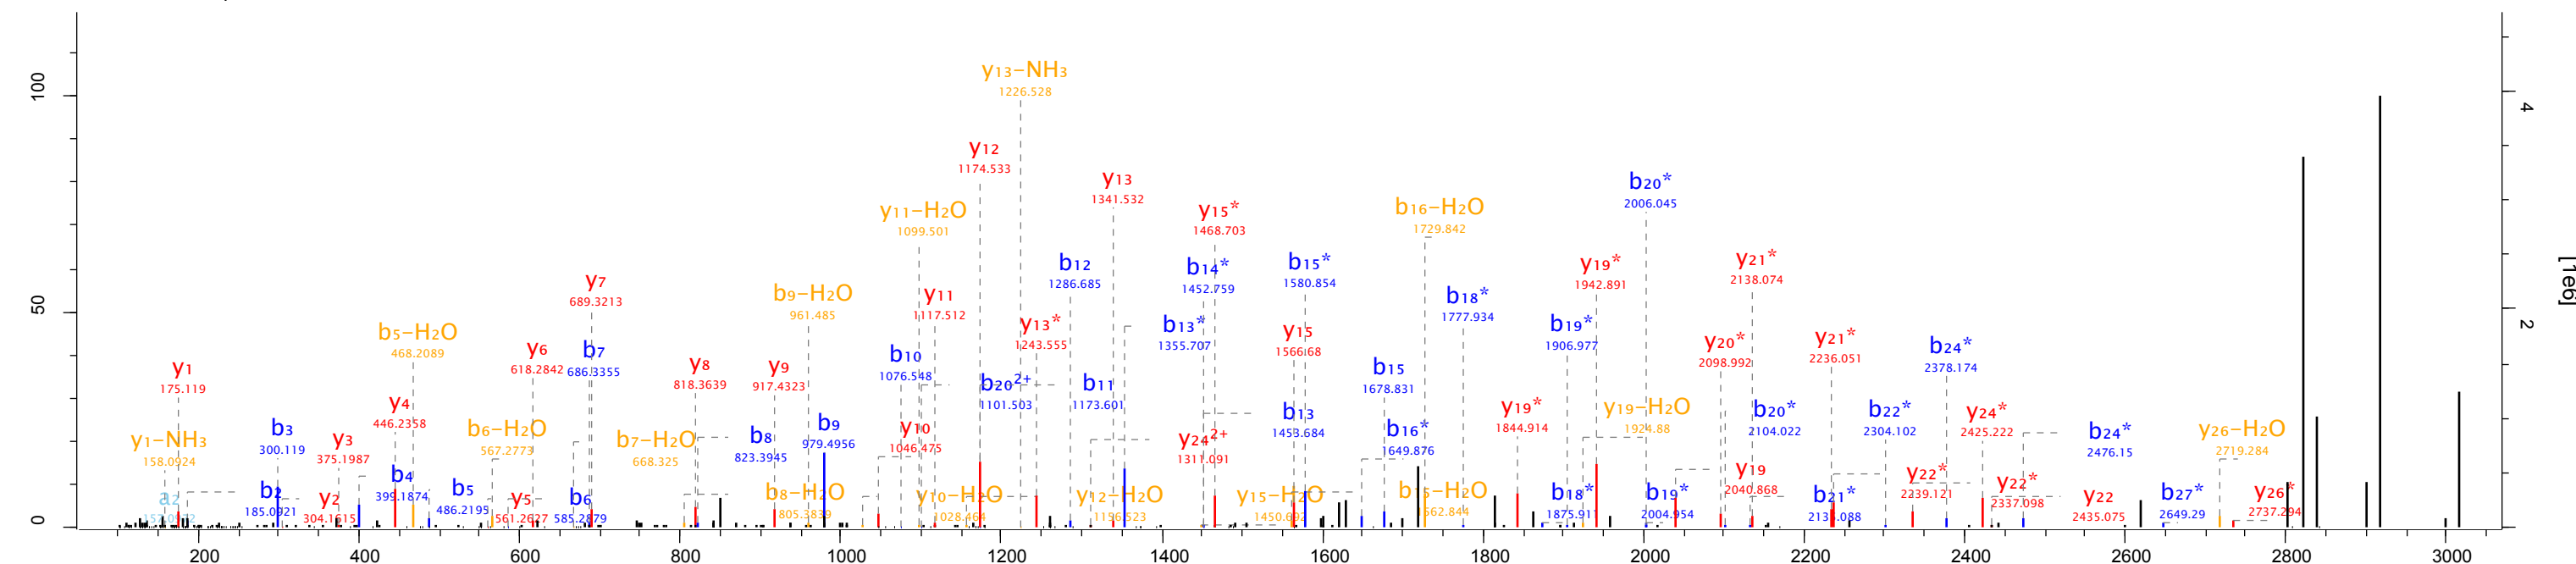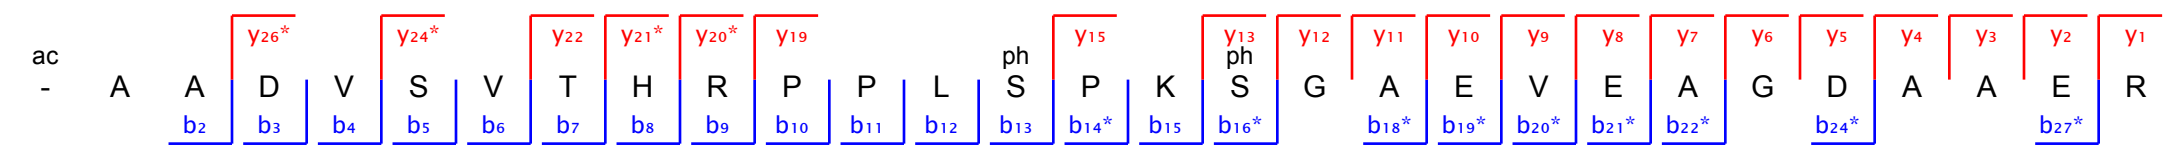



Raw file: 20150812\_A375SR\_Phospho\_BR1\_03  
 Scan: 16577 Method: FTMS; HCD Score: 114.49 m/z: 827.68 Gene names: BRCA1

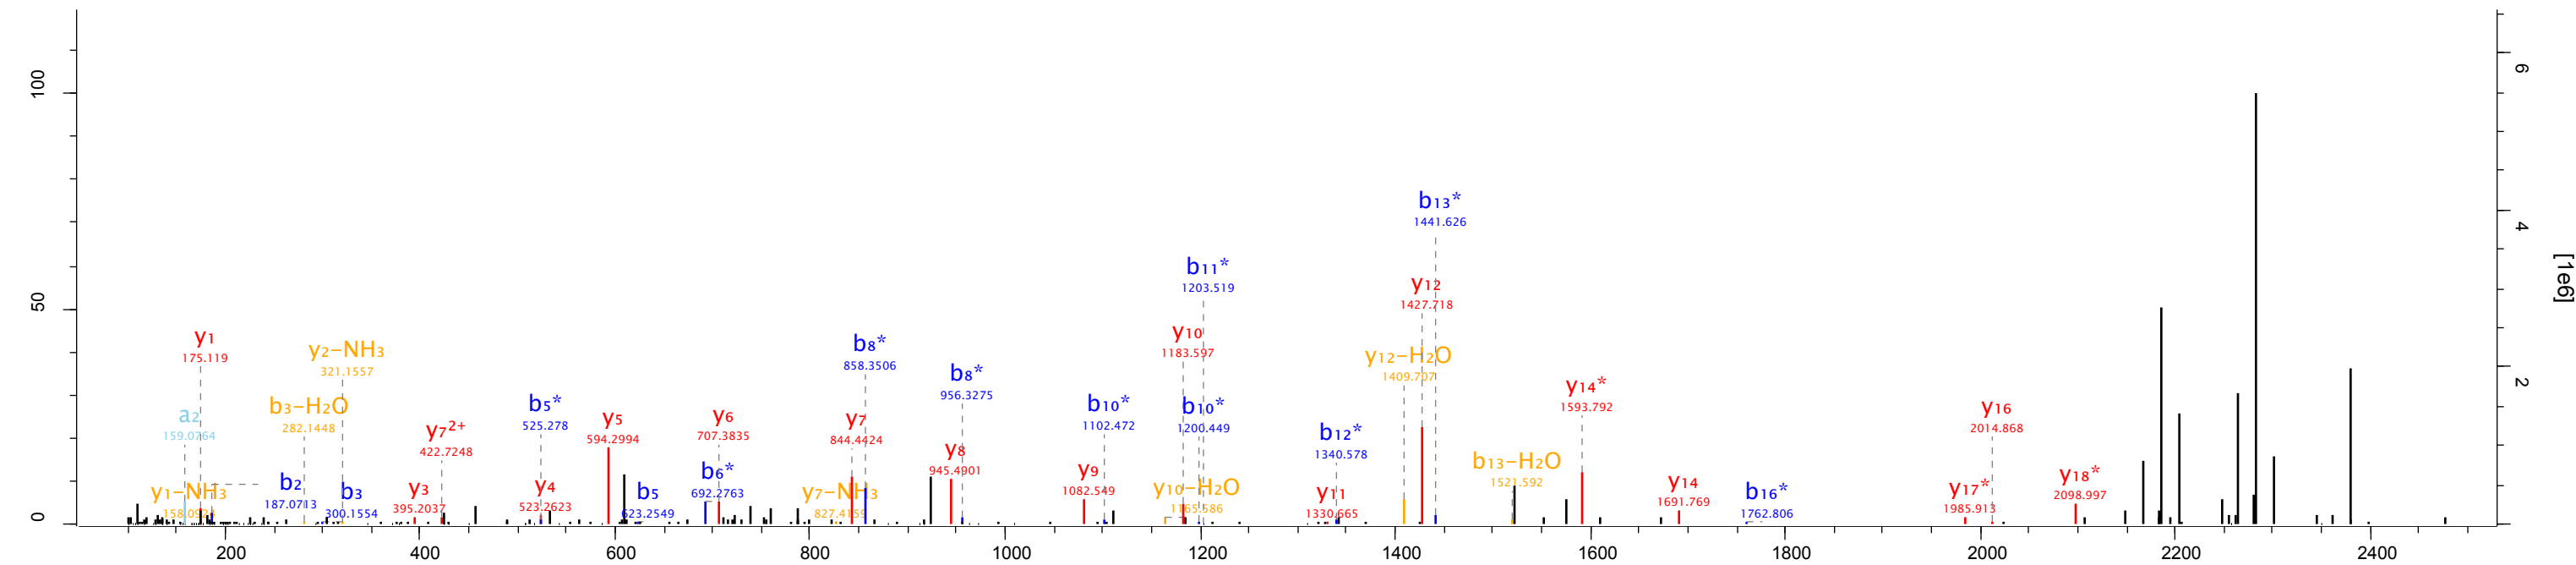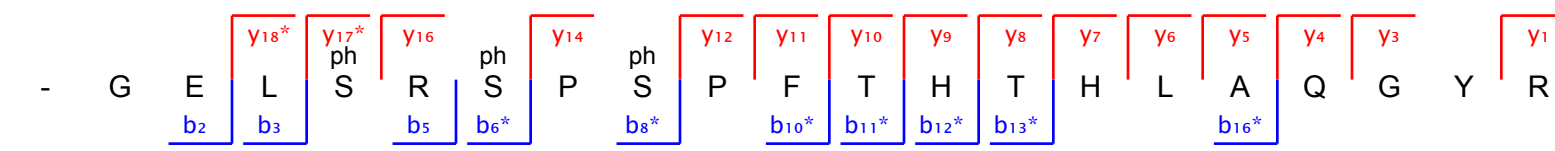

Raw file: 20150812\_A375SR\_Phospho\_BR1\_03  
 Scan: 16597 Method: FTMS; HCD Score: 139.66 m/z: 726.29 Gene names: PTRF

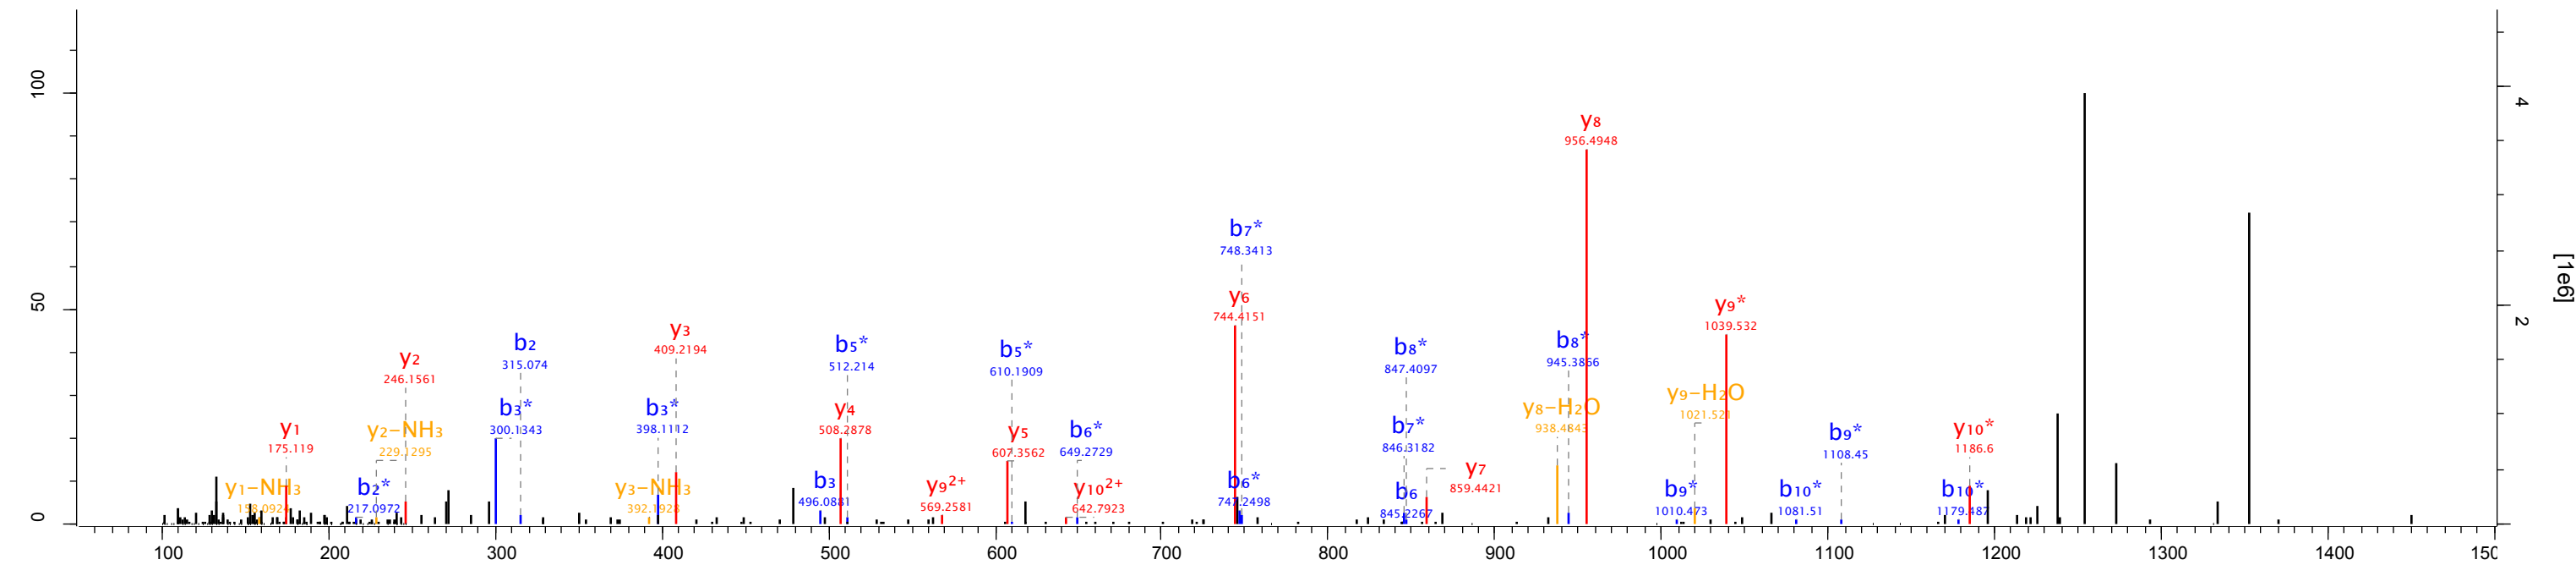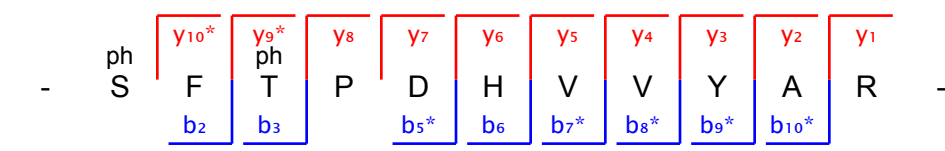

Raw file: 20150812\_A375SR\_Phospho\_BR1\_03  
 Scan: 16887 Method: FTMS; HCD Score: 238.69 m/z: 1151.47 Gene names: CCDC132

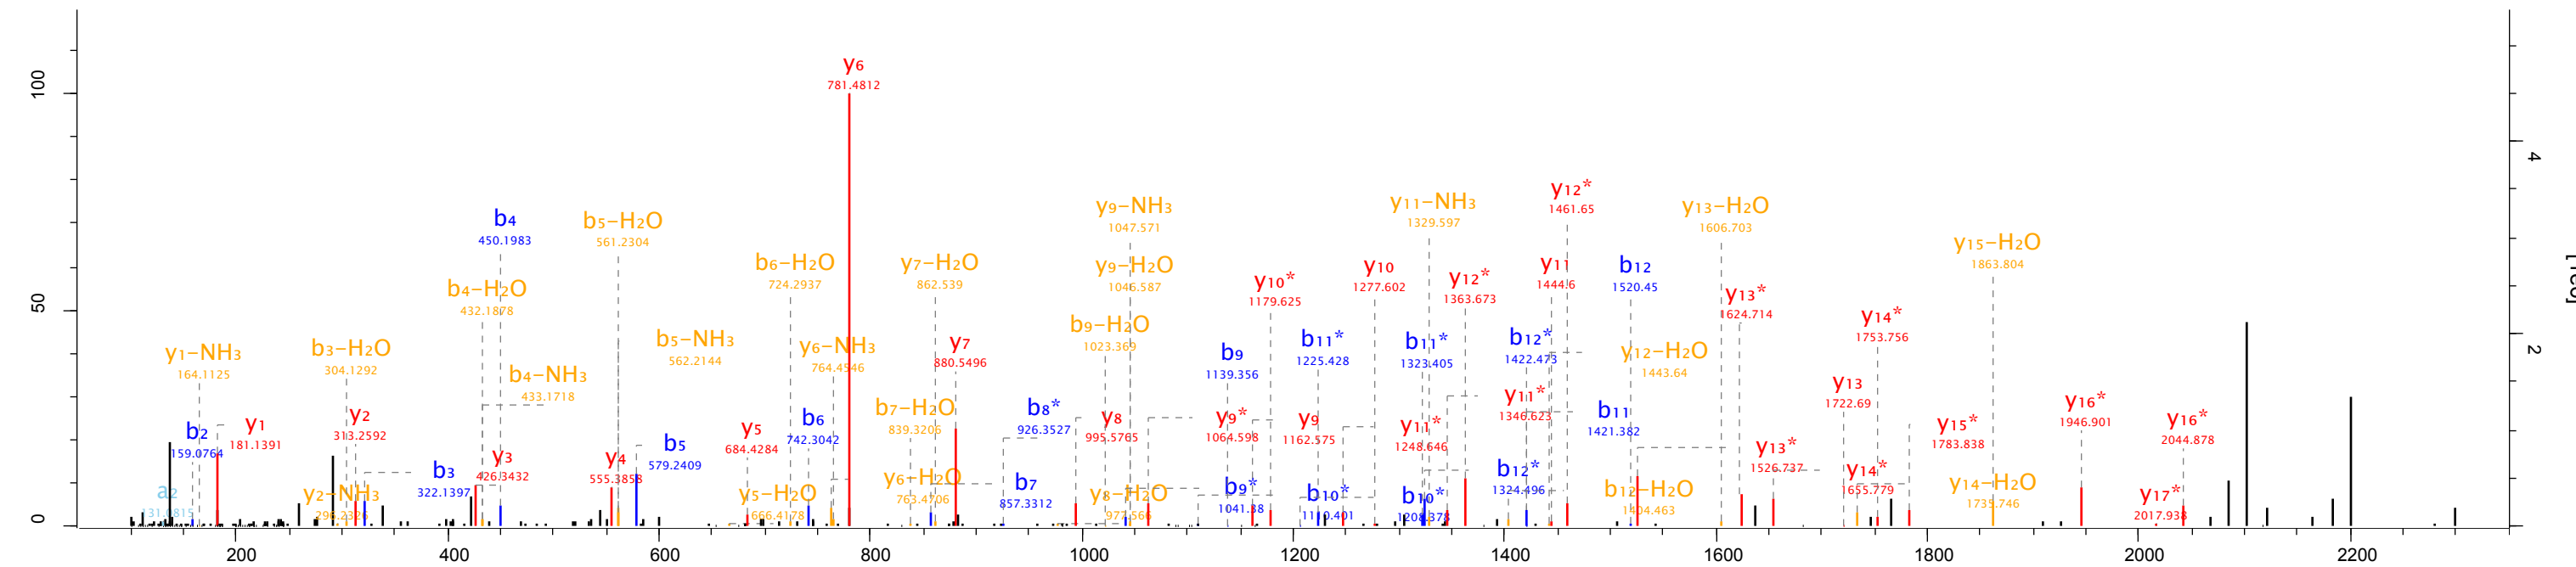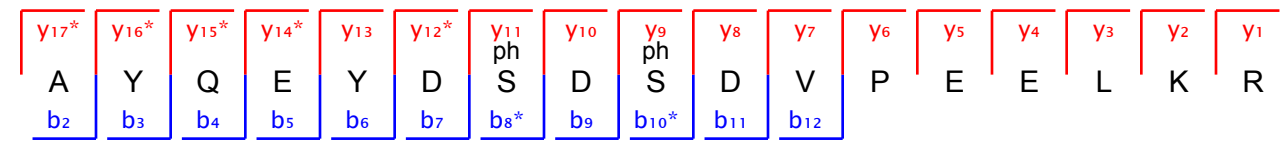

Raw file Scan Method Score m/z Gene names  
 20150812\_A375SR\_Phospho\_BR1\_03 17007 FTMS; HCD 154.27 1166.19 MPRIP

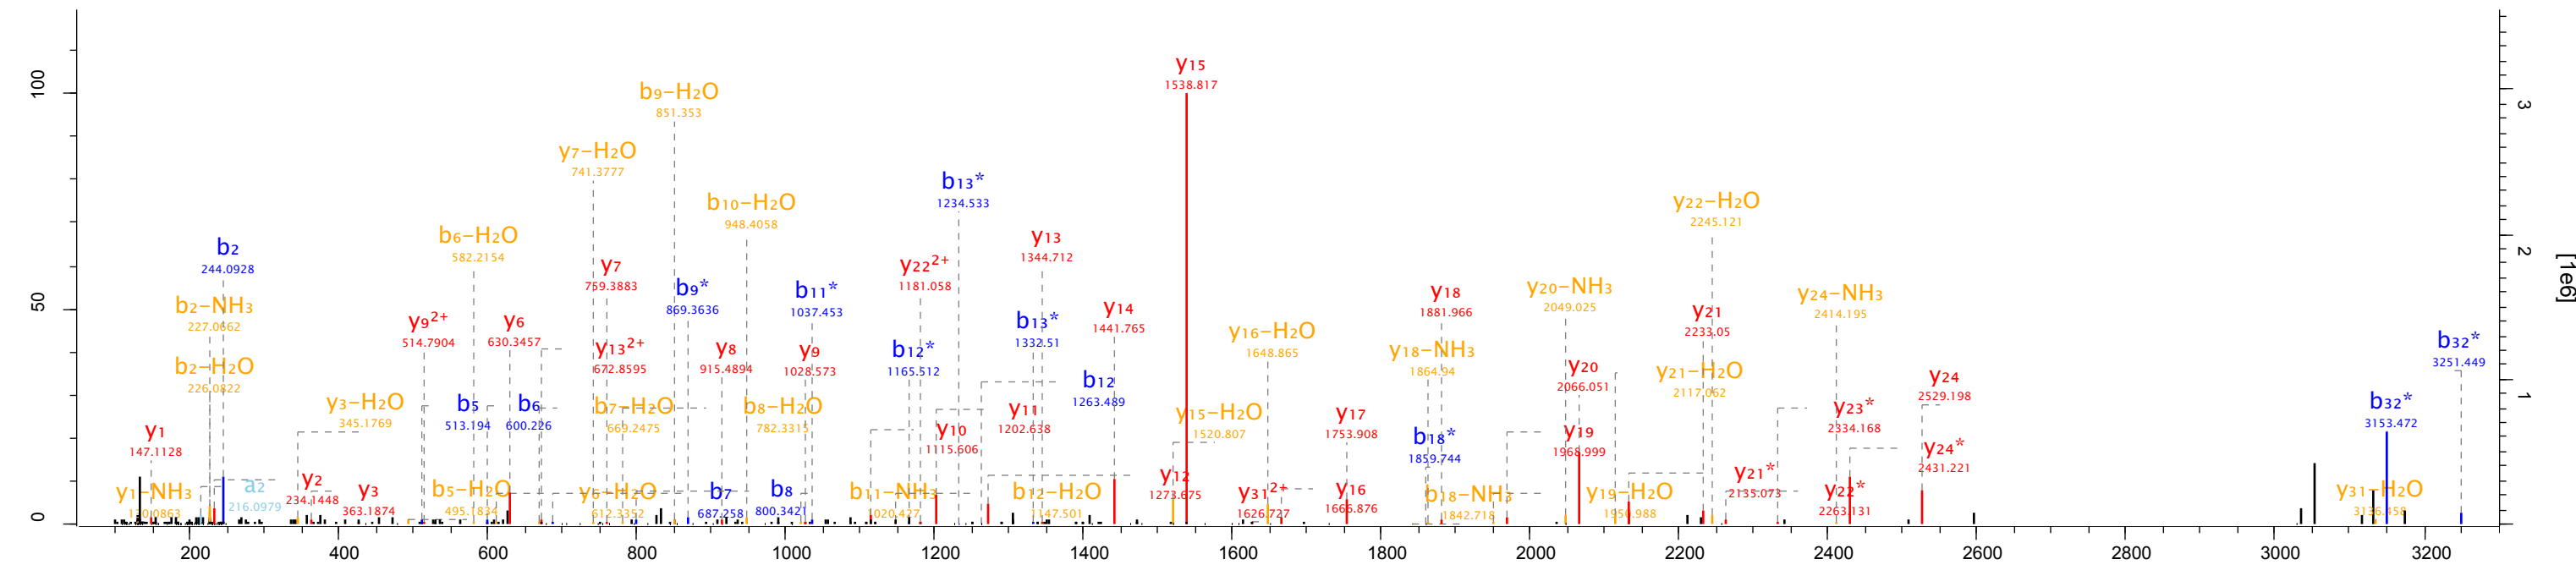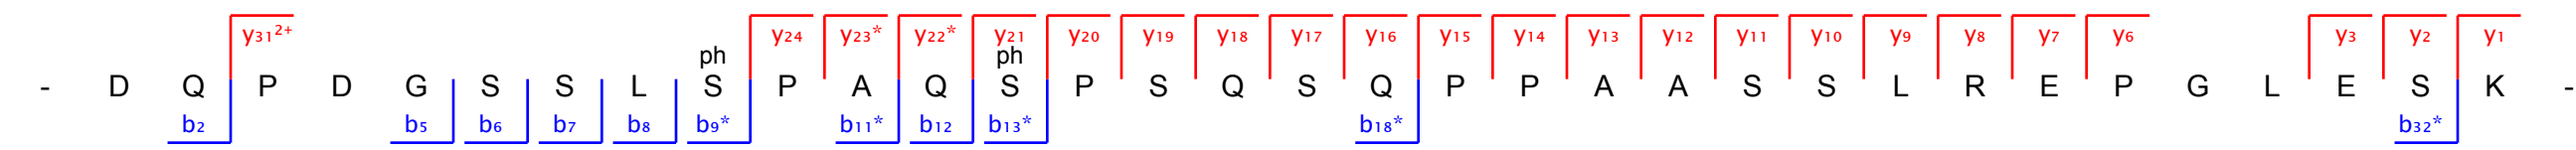

20150812\_A375SR\_Phospho\_BR1\_03

17097 FTMS; HCD 306.85 1052.49 AATF

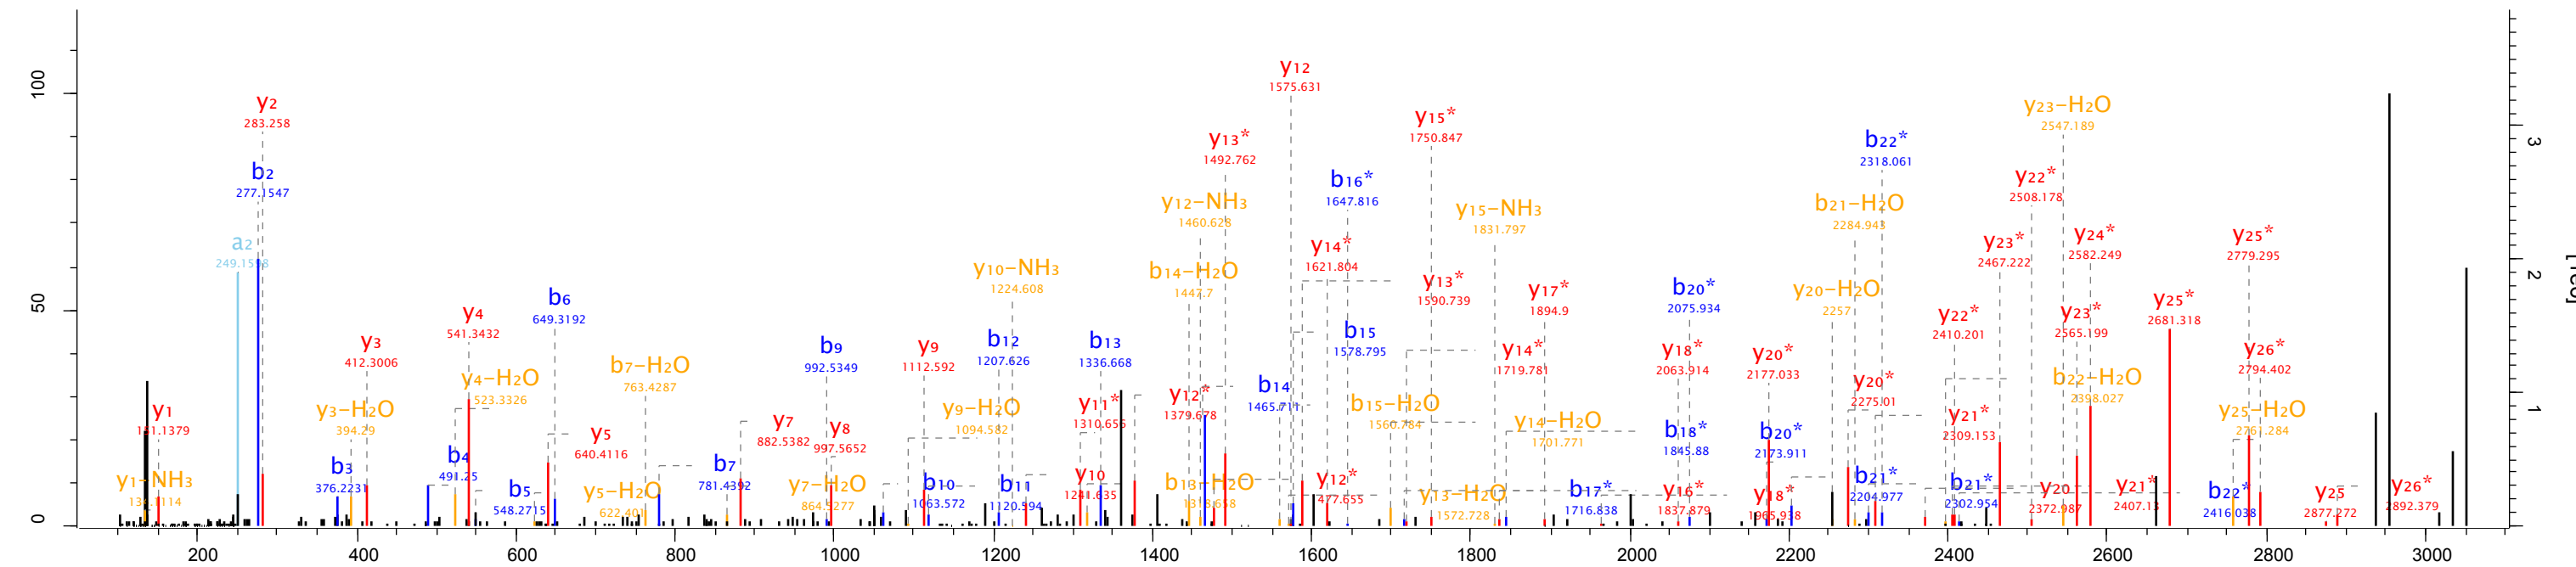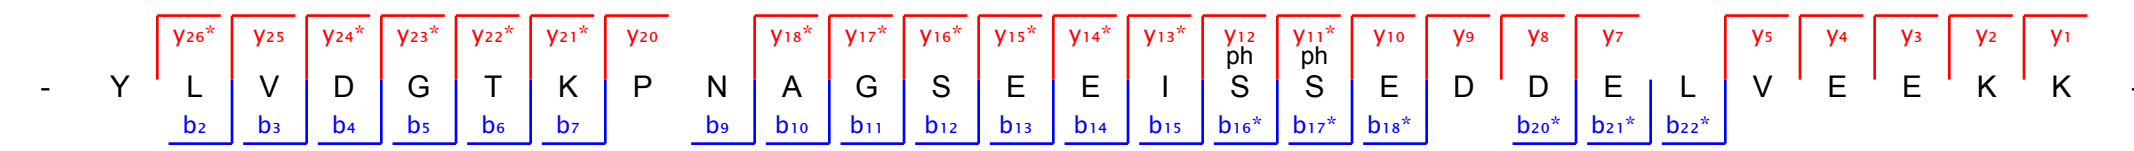

Raw file 20150812\_A375SR\_Phospho\_BR1\_03 Scan 17387 Method FTMS; HCD Score 113.36 m/z 1048.42 Gene names HERC2

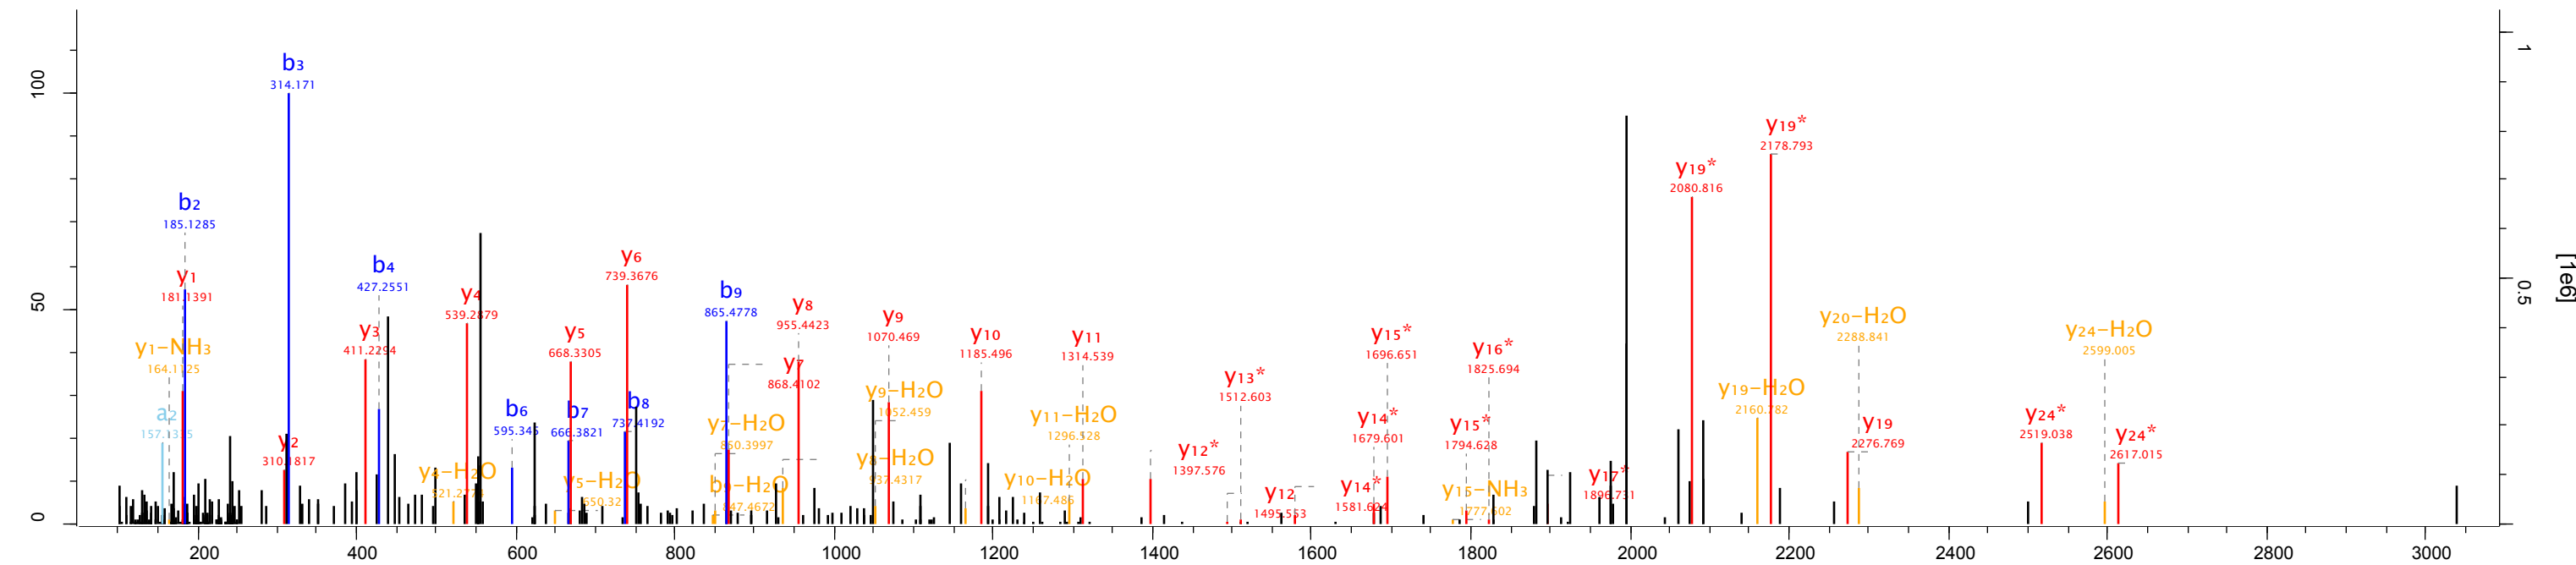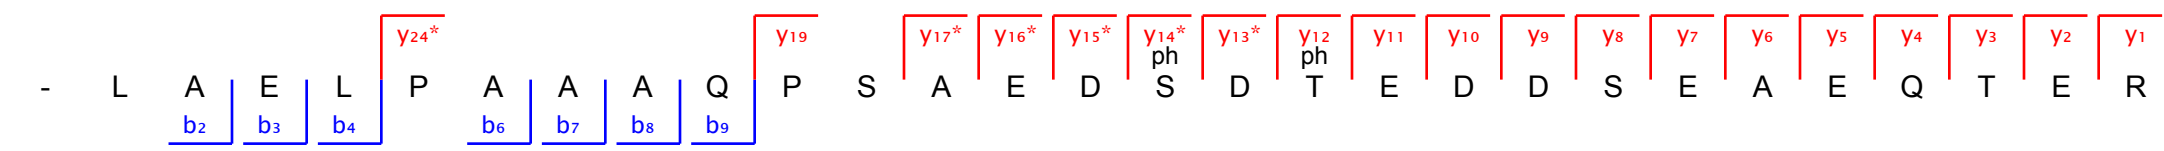

Raw file: 20150812\_A375SR\_Phospho\_BR1\_03  
 Scan: 17427 Method: FTMS; HCD Score: 49.52 m/z: 642.93 Gene names: AKT3

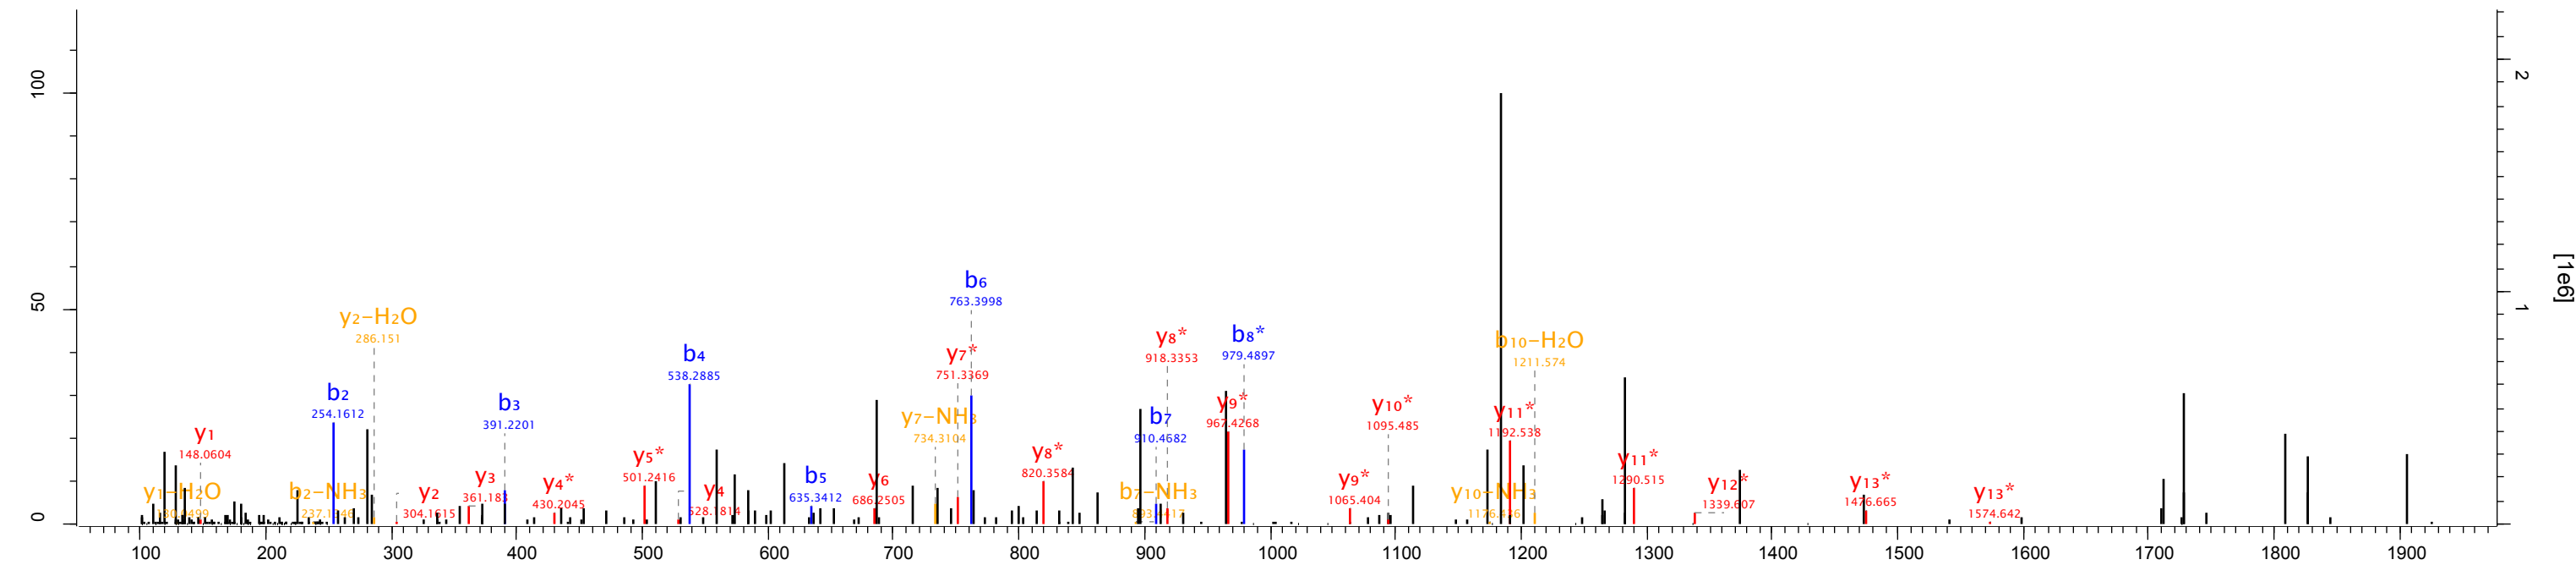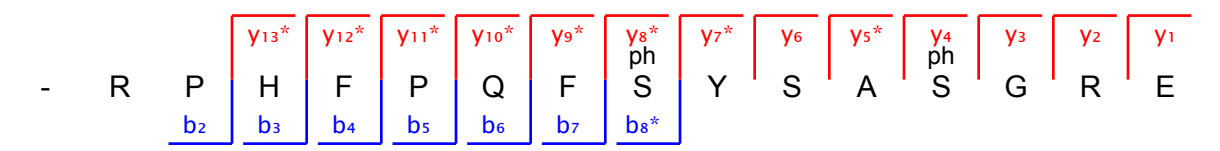

Raw file: 20150812\_A375SR\_Phospho\_BR1\_03  
 Scan: 17597 Method: FTMS; HCD Score: 98.76 m/z: 1103.48 Gene names: CEP170B

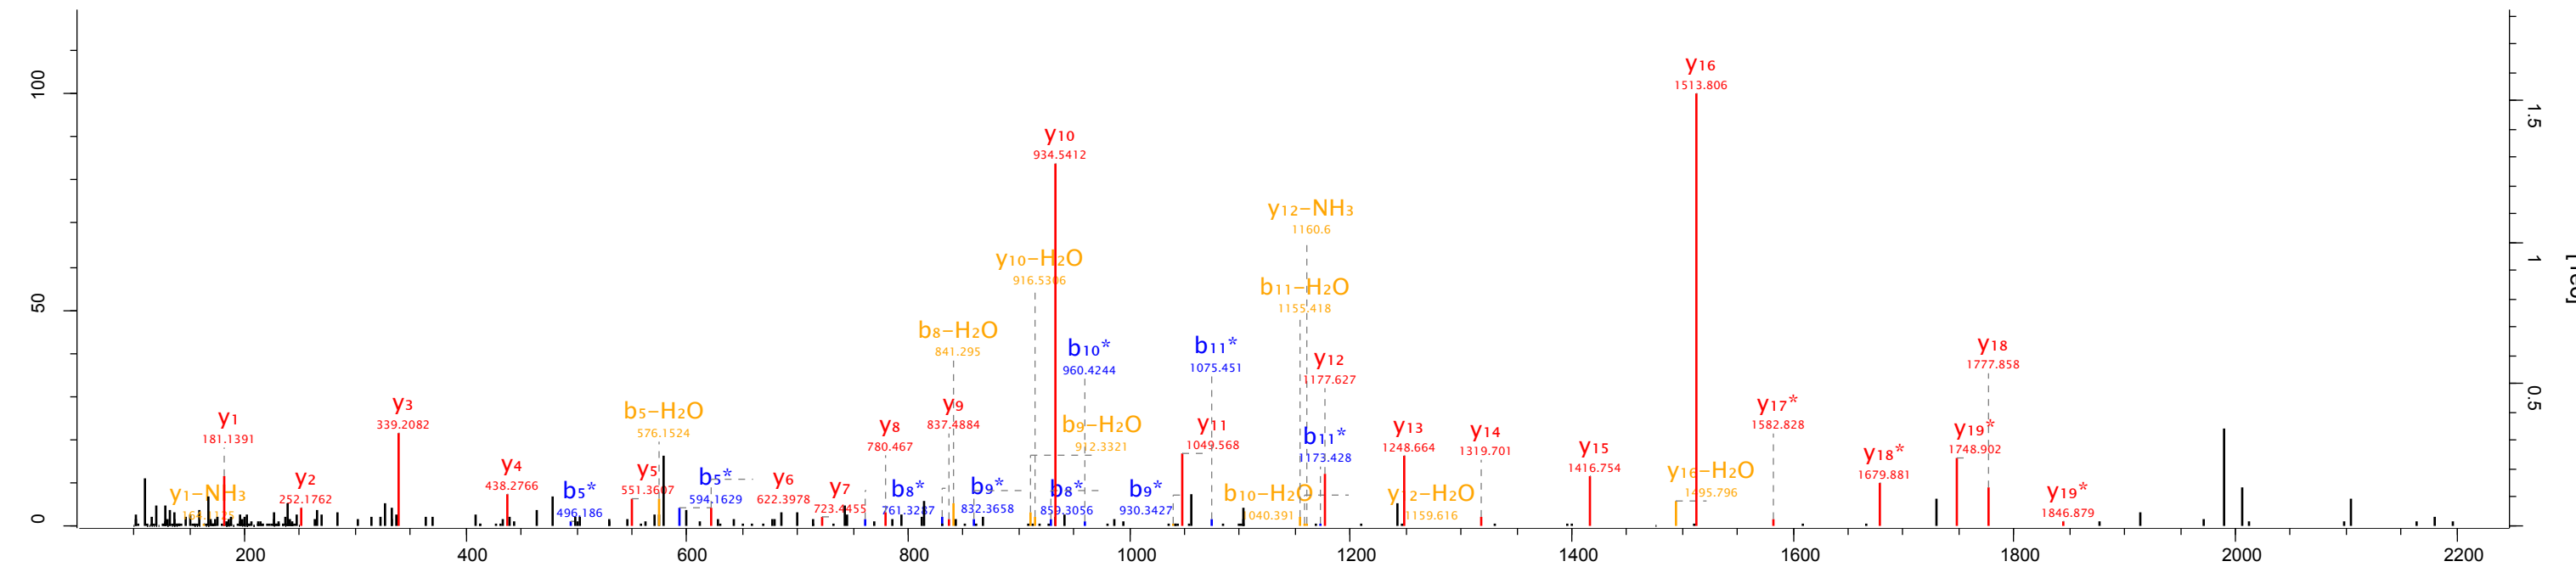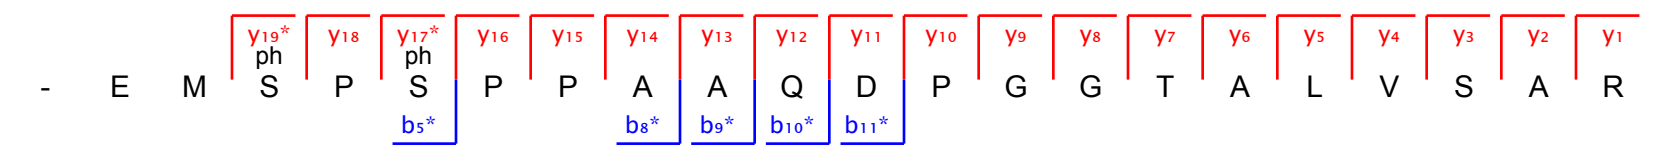



Raw file: 20150812\_A375SR\_Phospho\_BR1\_03  
 Scan: 17947 Method: FTMS; HCD Score: 278.27 m/z: 1002.41 Gene names: SEPT2

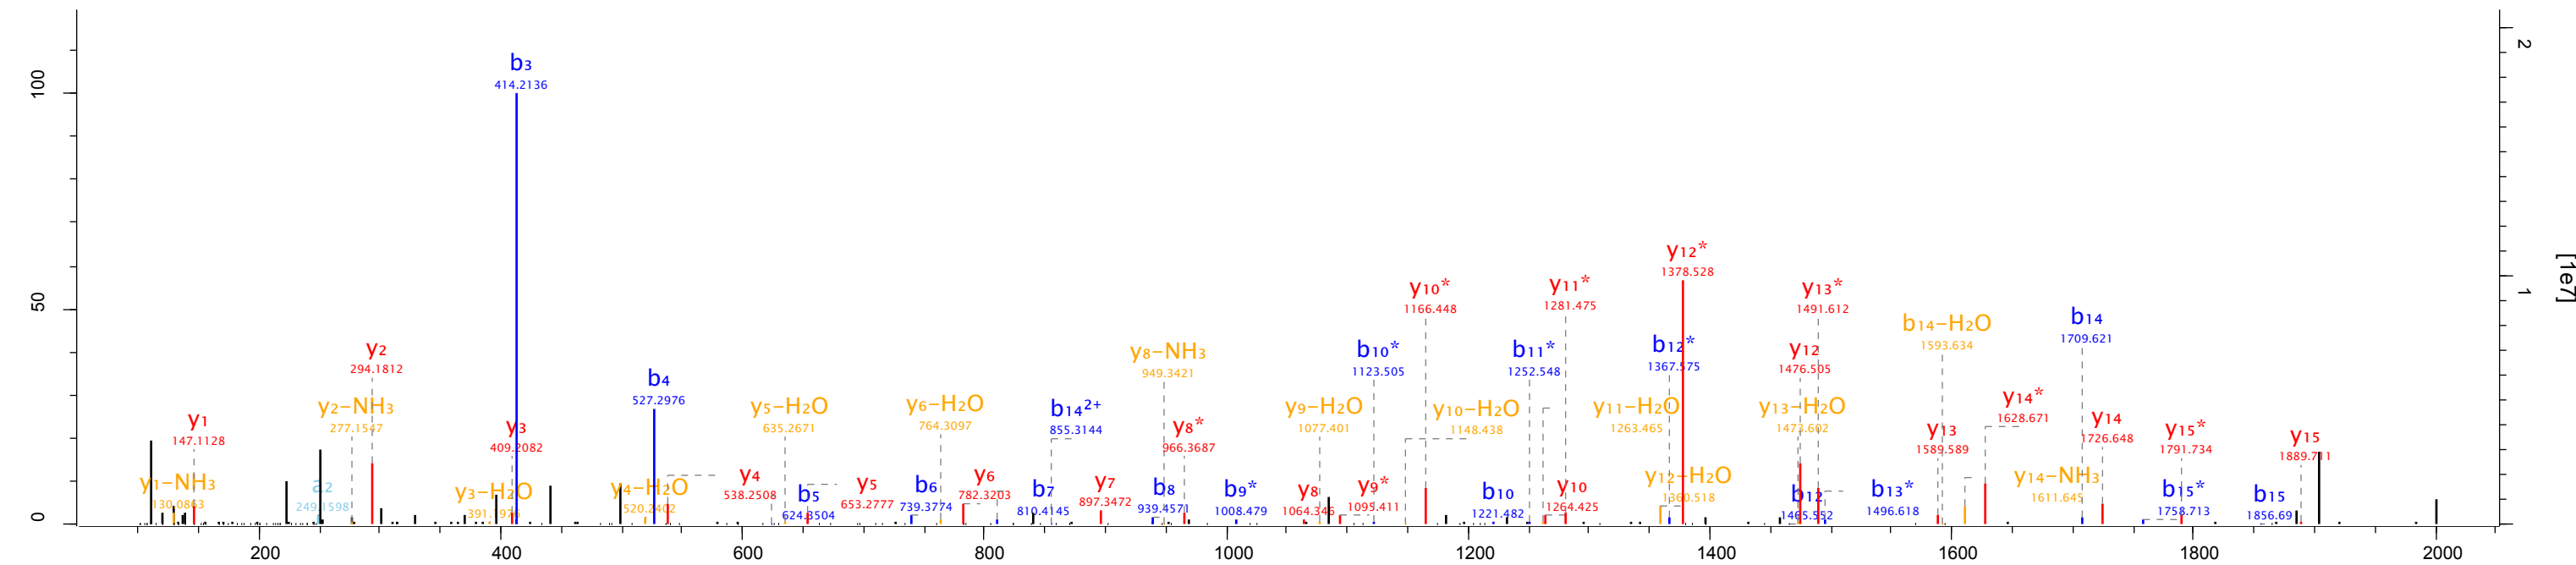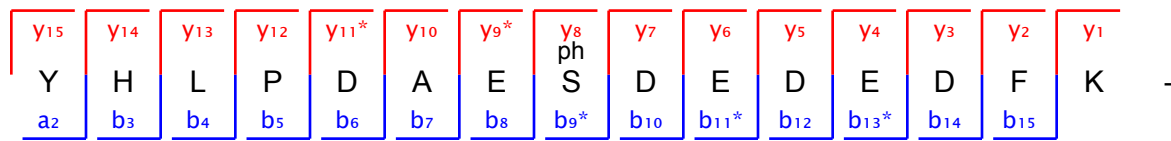

Raw file 20150812\_A375SR\_Phospho\_BR1\_03 Scan 18127 Method FTMS; HCD Score 155.78 m/z 1182.86 Gene names EML4

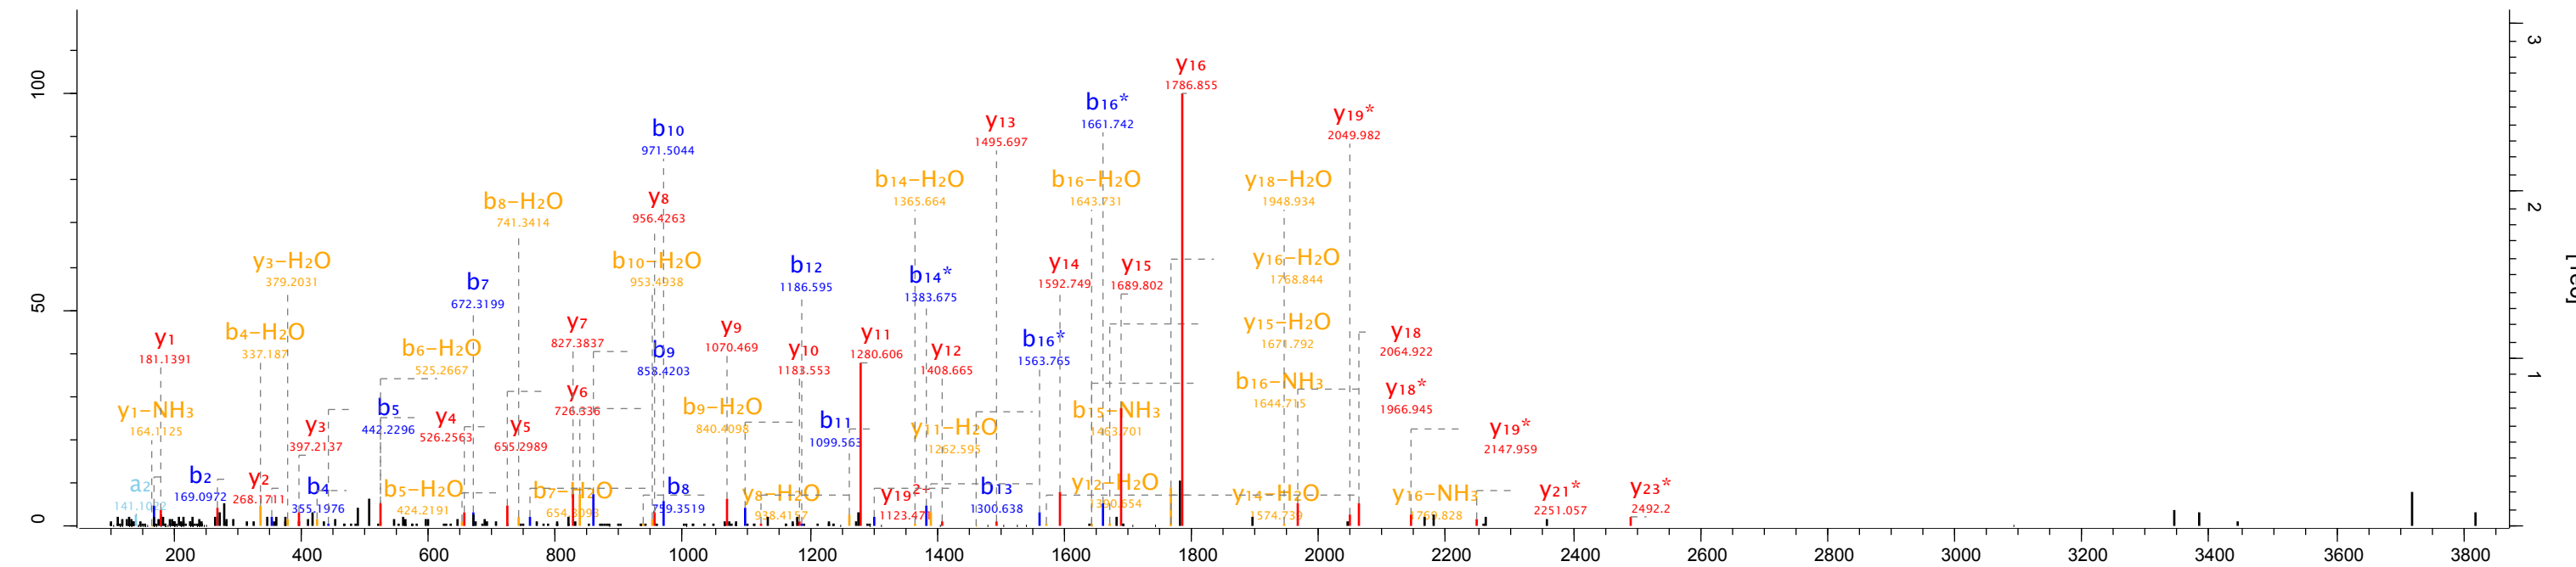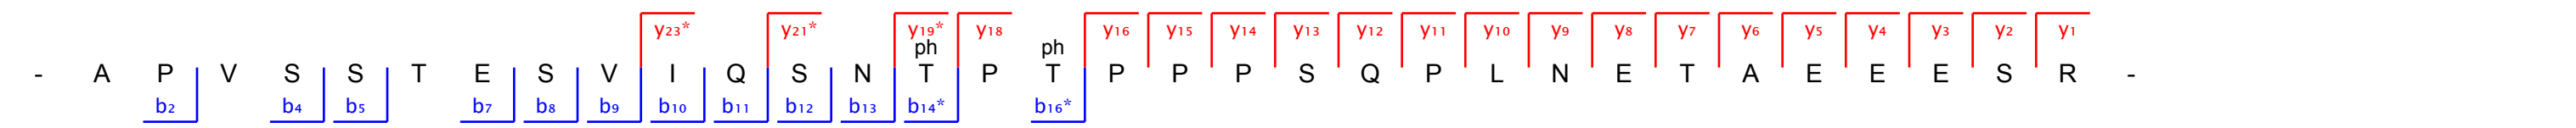

Raw file Scan Method Score m/z Gene names  
 20150812\_A375SR\_Phospho\_BR1\_03 18717 FTMS; HCD 301.65 1236.53 SDCCAG3

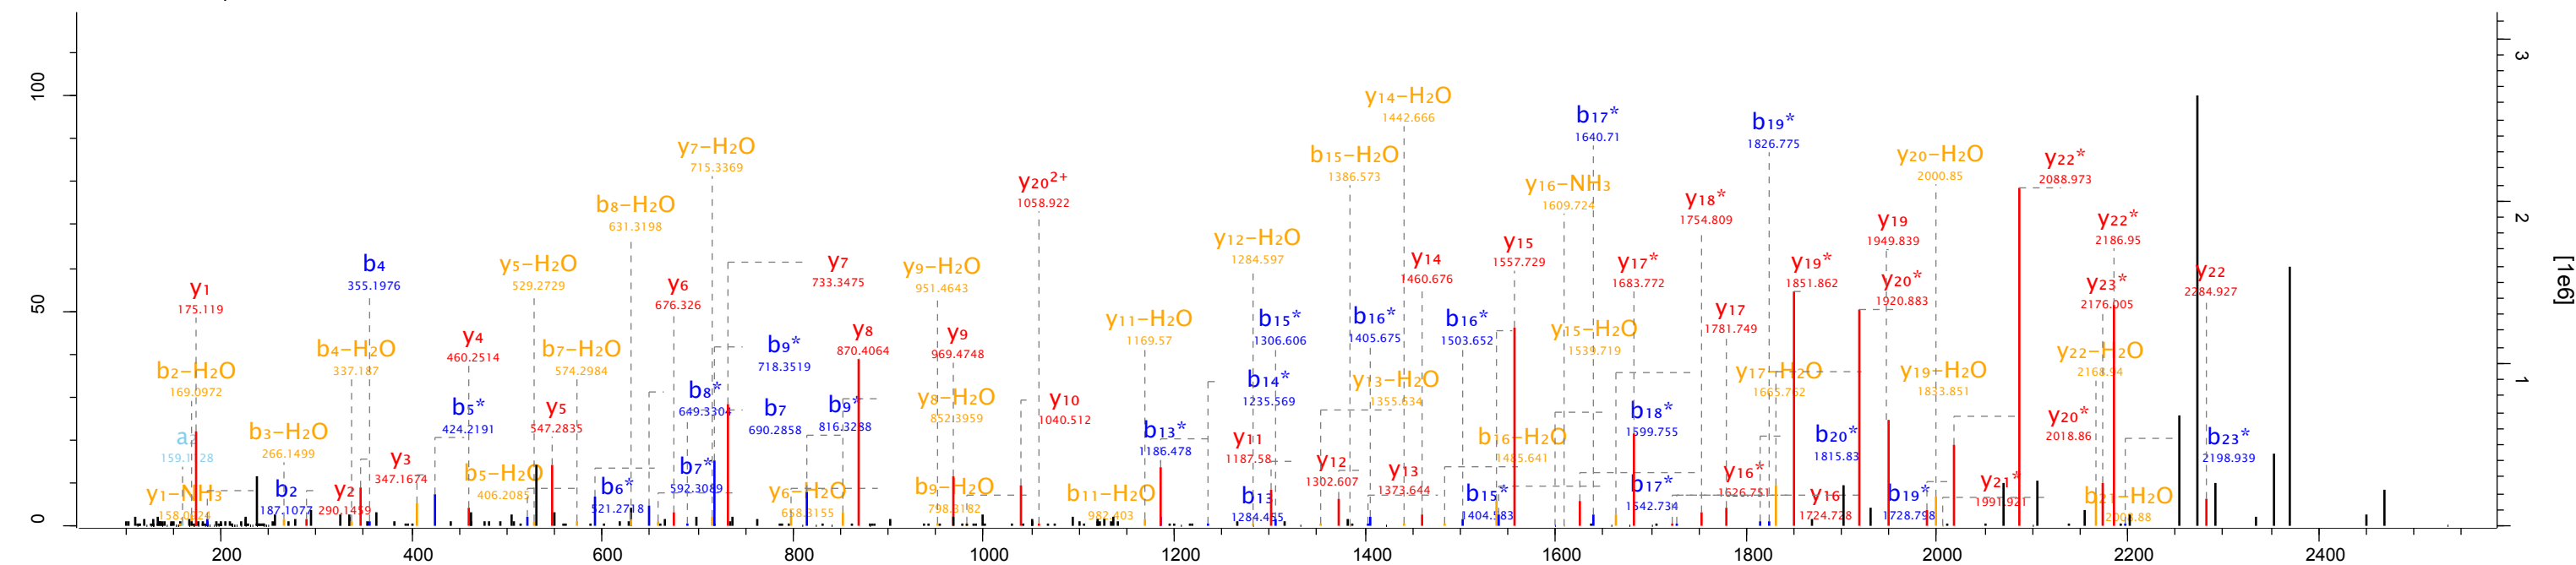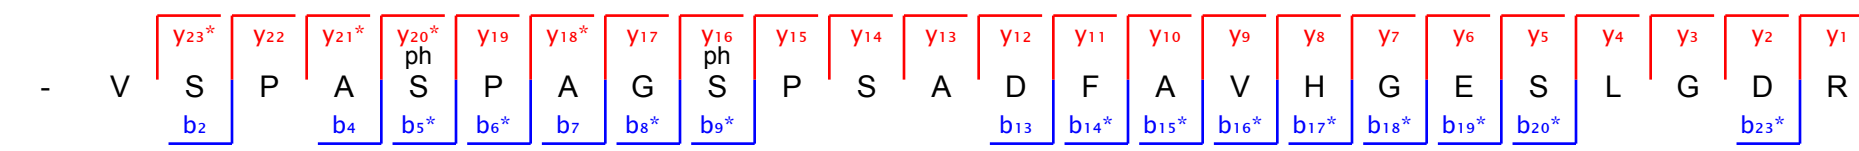

Raw file 20150812\_A375SR\_Phospho\_BR1\_03 Scan 18737 Method FTMS; HCD Score 94.15 m/z 895.36 Gene names TRIP12

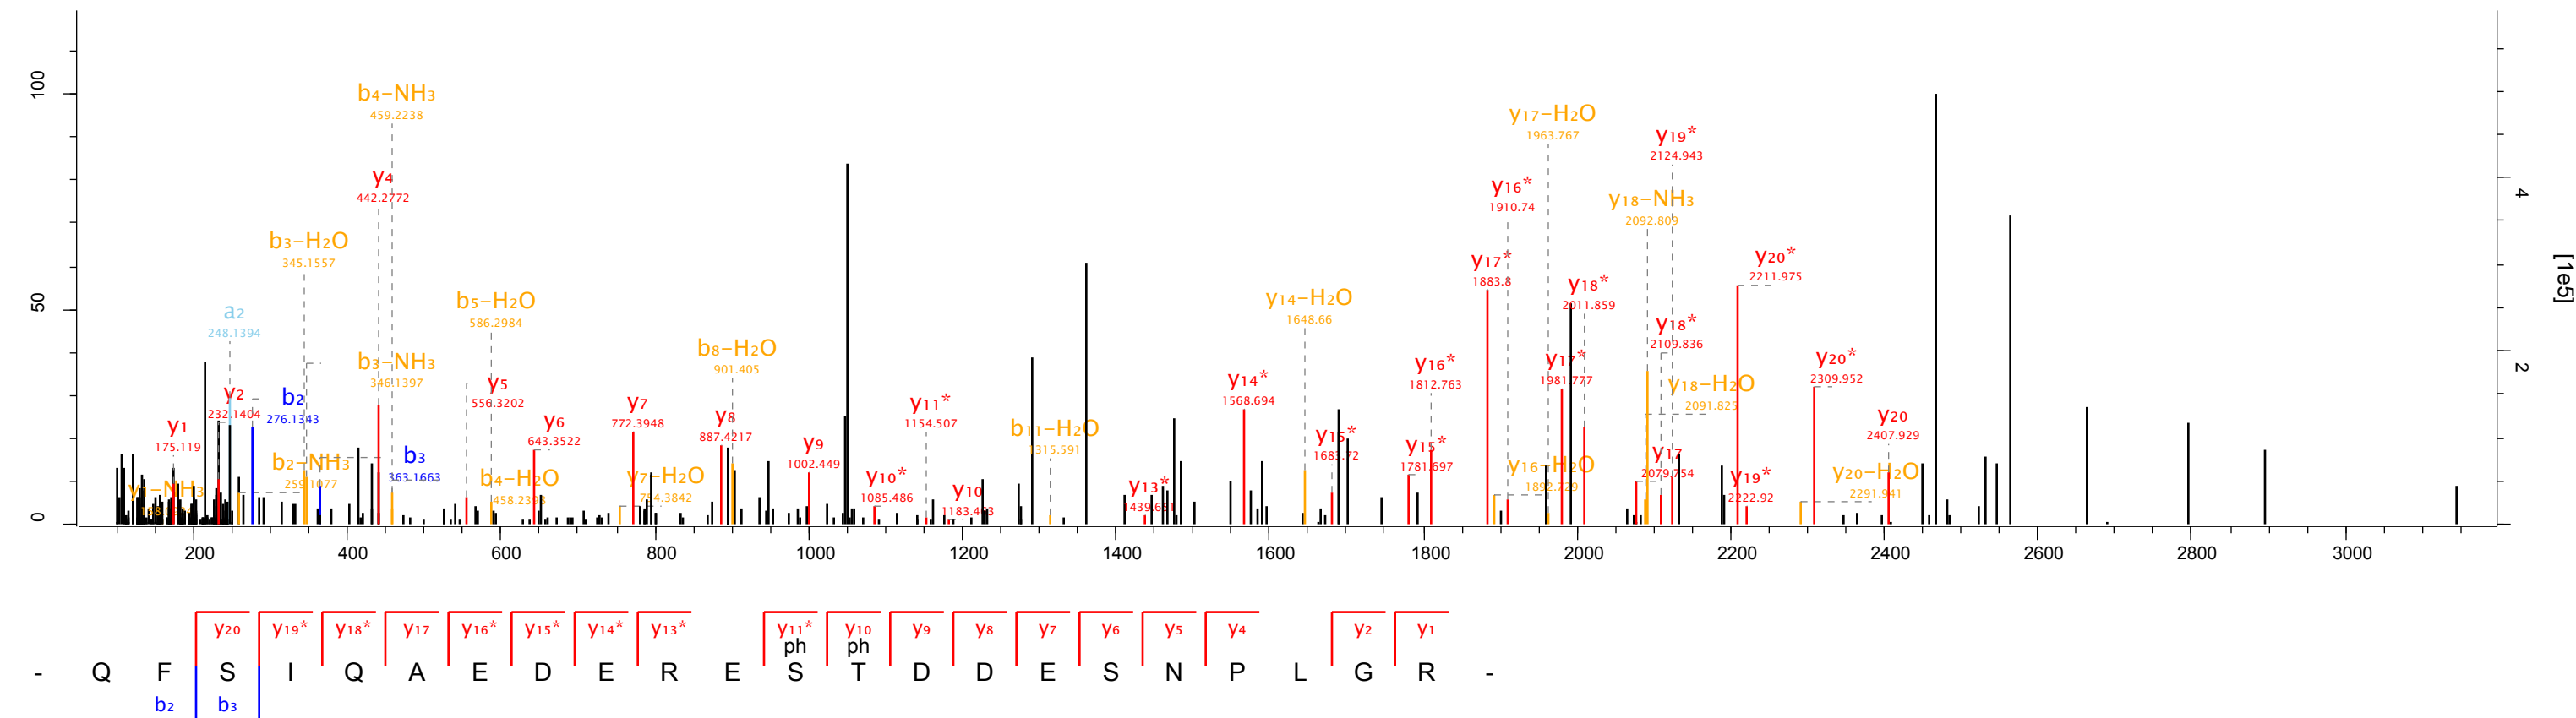

Raw file Scan Method Score m/z Gene names  
 20150812\_A375SR\_Phospho\_BR1\_03 19277 FTMS; HCD 279.82 1409.06 DIDO1

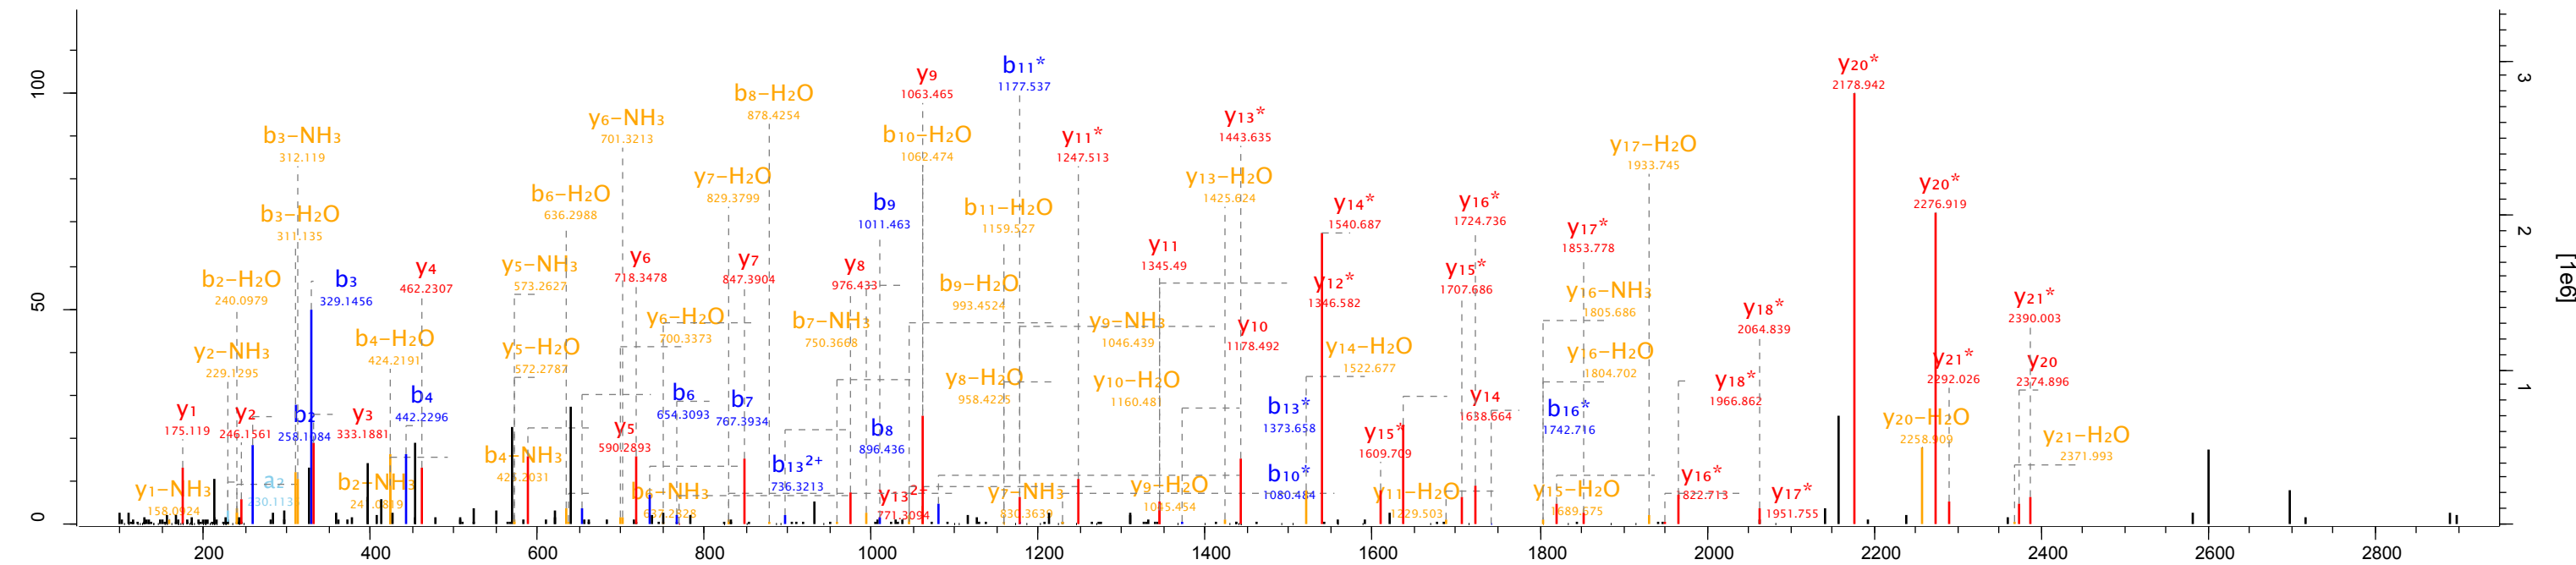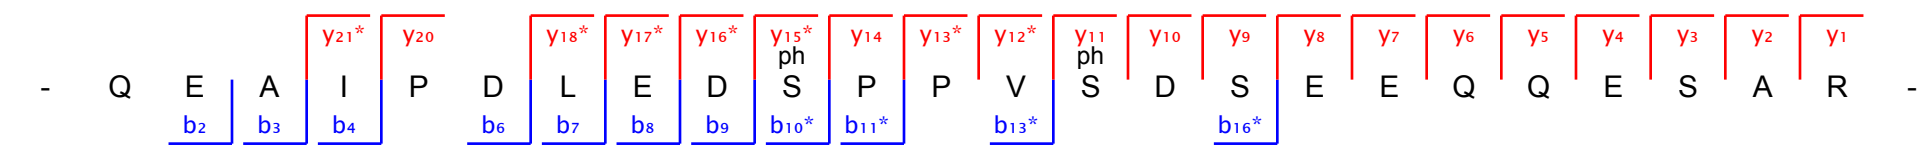

Raw file 20150812\_A375SR\_Phospho\_BR1\_03 Scan 20047 Method FTMS; HCD Score 66.15 m/z 749.31 Gene names ZBTB44

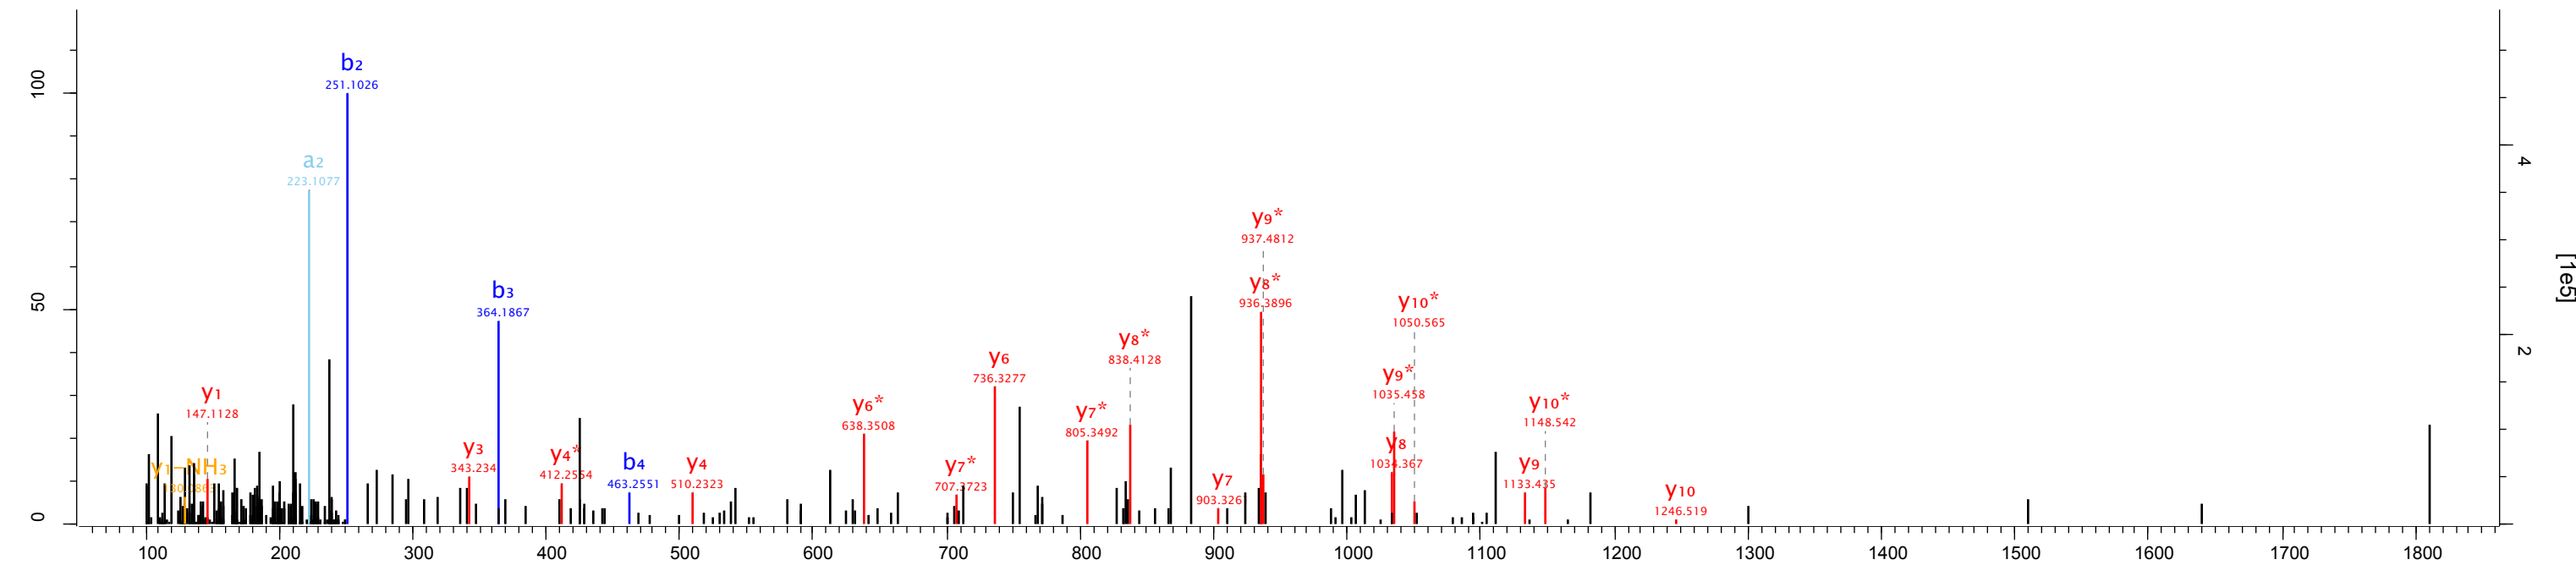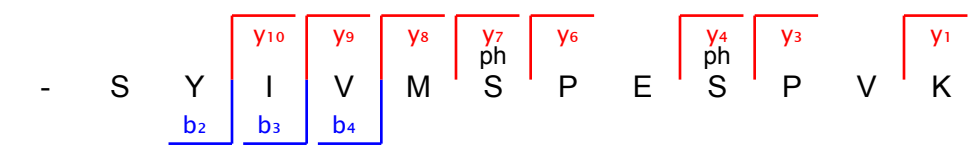

Raw file: 20150812\_A375SR\_Phospho\_BR1\_03  
 Scan: 20517 Method: FTMS; HCD Score: 111.33 m/z: 730.33 Gene names: DSN1

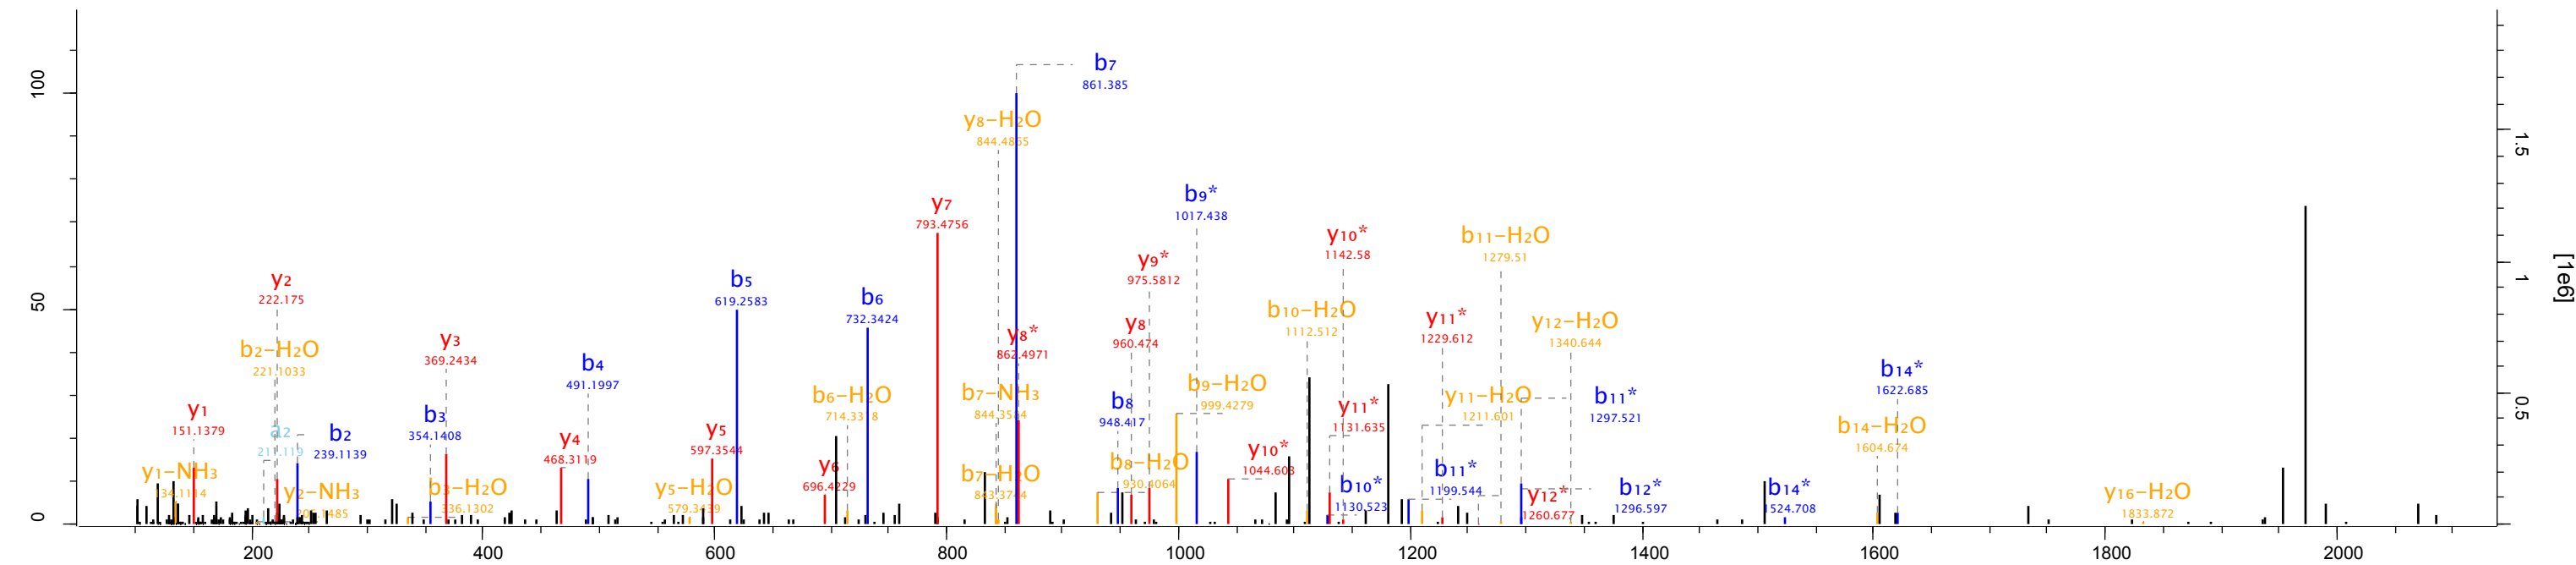

- T H D H Q L E S S L S P V E V F A K -  
 b<sub>2</sub> b<sub>3</sub> b<sub>4</sub> b<sub>5</sub> b<sub>6</sub> b<sub>7</sub> b<sub>8</sub> b<sub>9</sub>\* b<sub>10</sub>\* b<sub>11</sub>\* b<sub>12</sub>\* b<sub>14</sub>\*  
 y<sub>12</sub>\* y<sub>11</sub>\* y<sub>10</sub>\* ph S y<sub>9</sub>\* y<sub>8</sub> ph S y<sub>7</sub> y<sub>6</sub> y<sub>5</sub> y<sub>4</sub> y<sub>3</sub> y<sub>2</sub> y<sub>1</sub>

Raw file: 20150812\_A375SR\_Phospho\_BR1\_03  
 Scan: 20767 Method: FTMS; HCD Score: 222.46 m/z: 1097.93 Gene names: SETD2

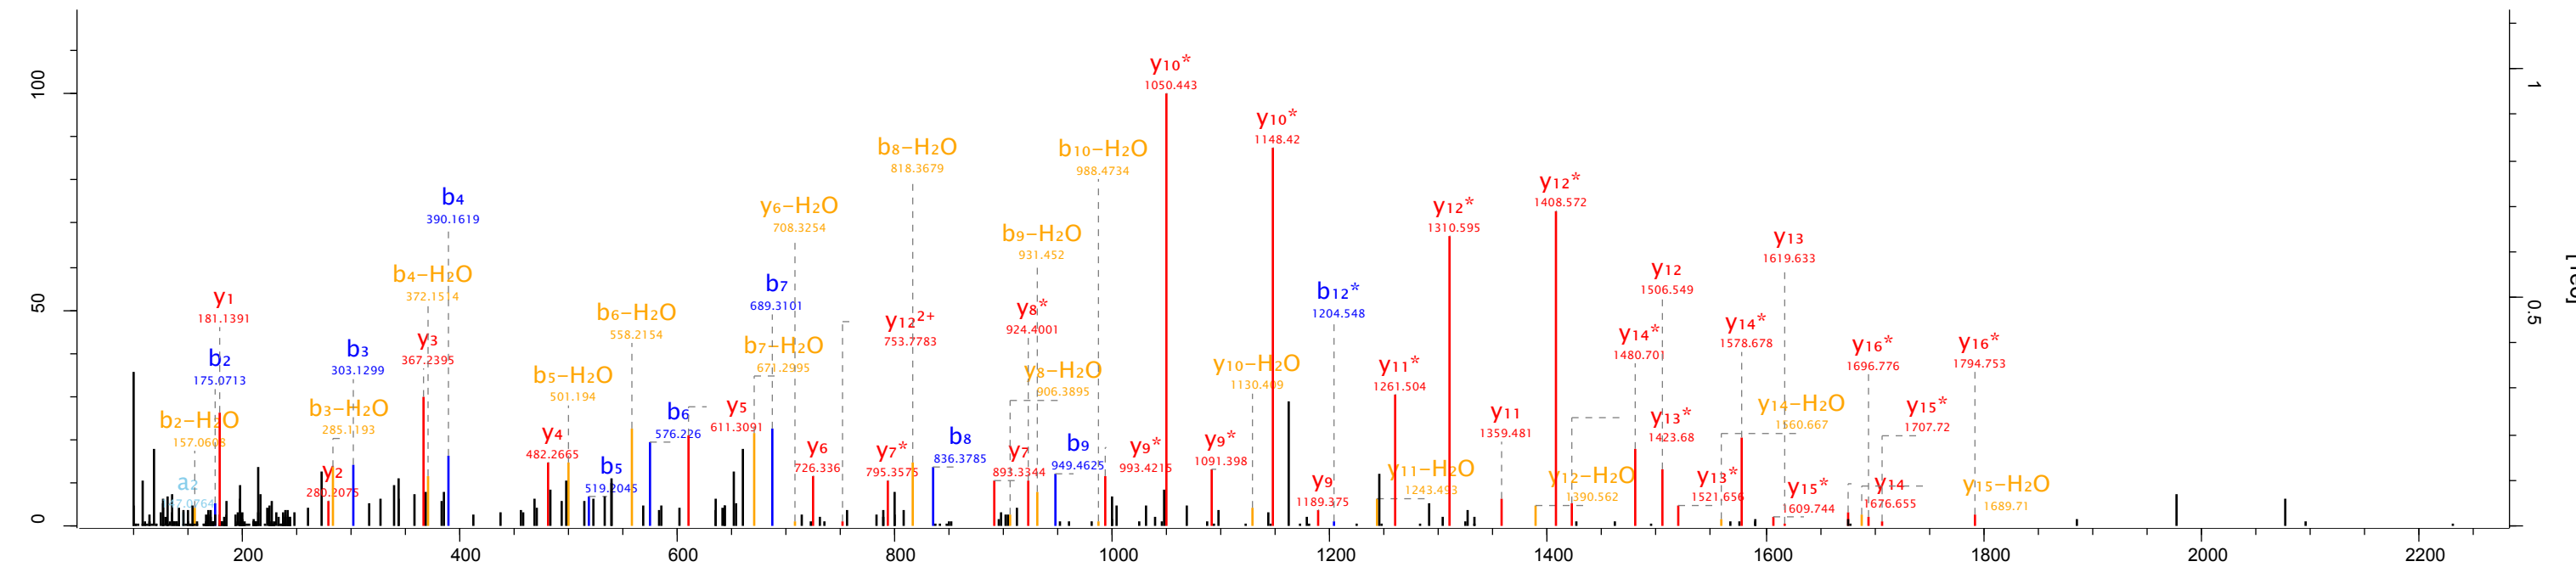

Sequence: - S S Q S E G I F L G S E S D E D S V R -

Fragmentation mapping (b and y ions):

- b2: S
- b3: S
- b4: S
- b5: E
- b6: G
- b7: I
- b8: F
- b9: L
- b12\*: E
- y1: R
- y2: V
- y3: S
- y4: D
- y5: E
- y6: D
- y7: S
- y8\*: E
- y9: S
- y10\*: G
- y11: L
- y12: F
- y13: I
- y14: G
- y15\*: E
- y16\*: S



Raw file 20150812\_A375SR\_Phospho\_BR1\_03 Scan 21217 Method FTMS; HCD Score 99.27 m/z 681.82 Gene names MAST4

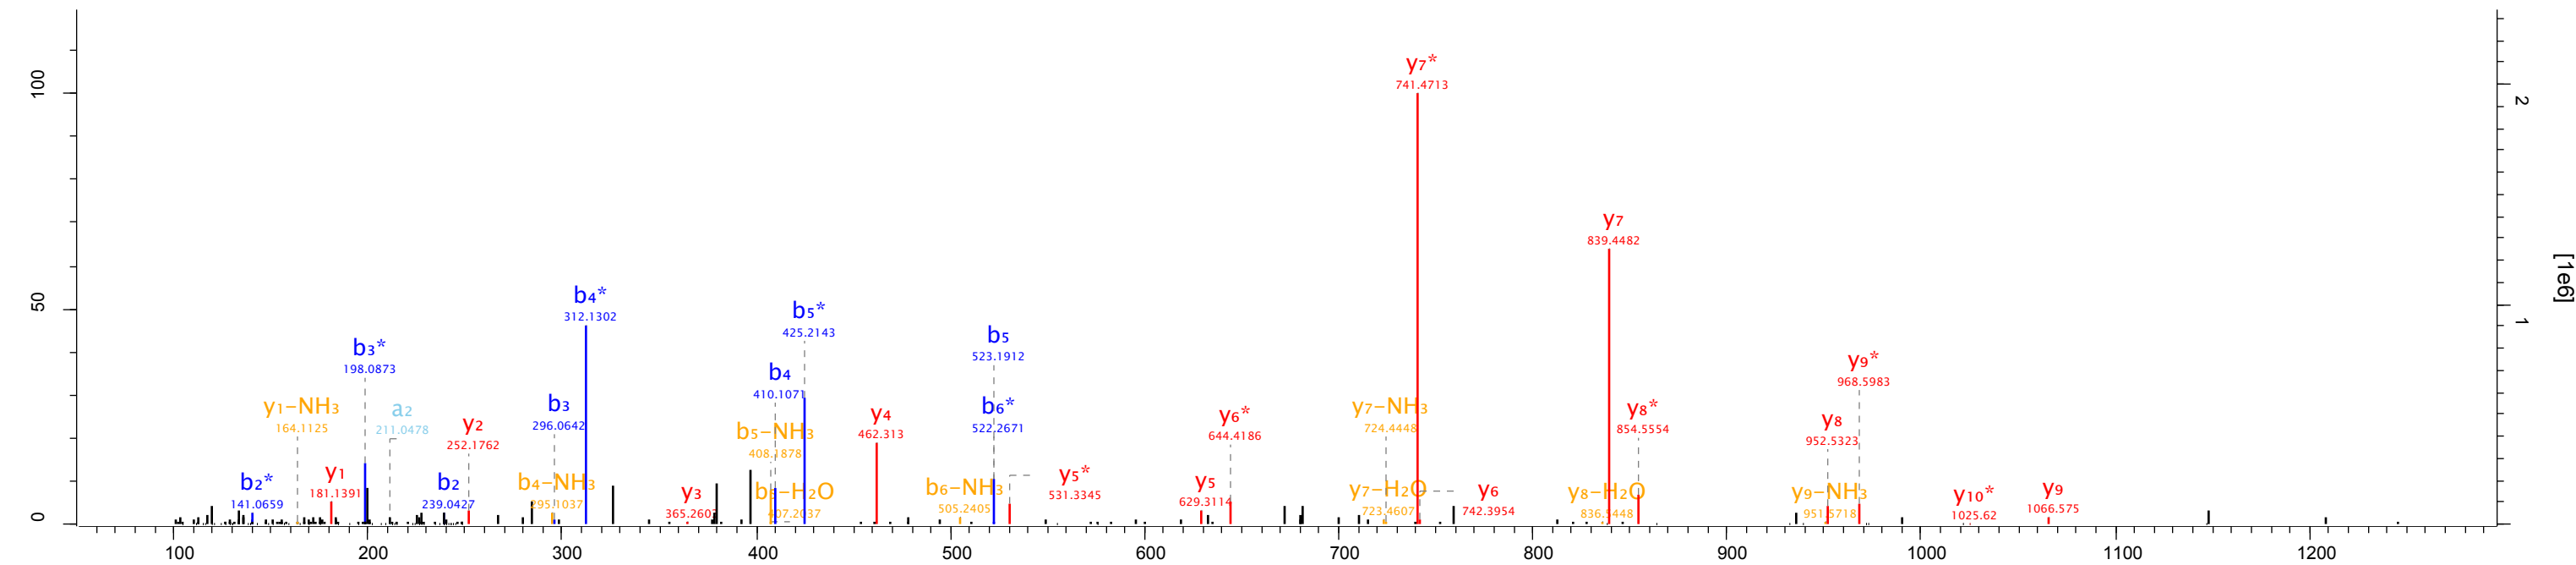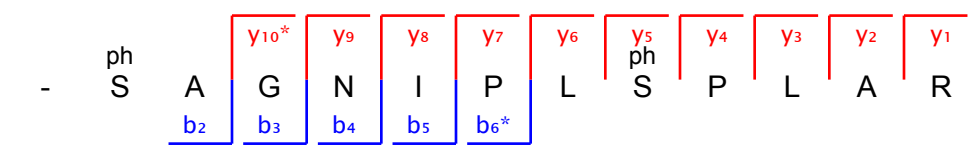

Raw file 20150812\_A375SR\_Phospho\_BR1\_03 Scan 21367 Method FTMS; HCD Score 239.32 m/z 1095.91 Gene names PPID

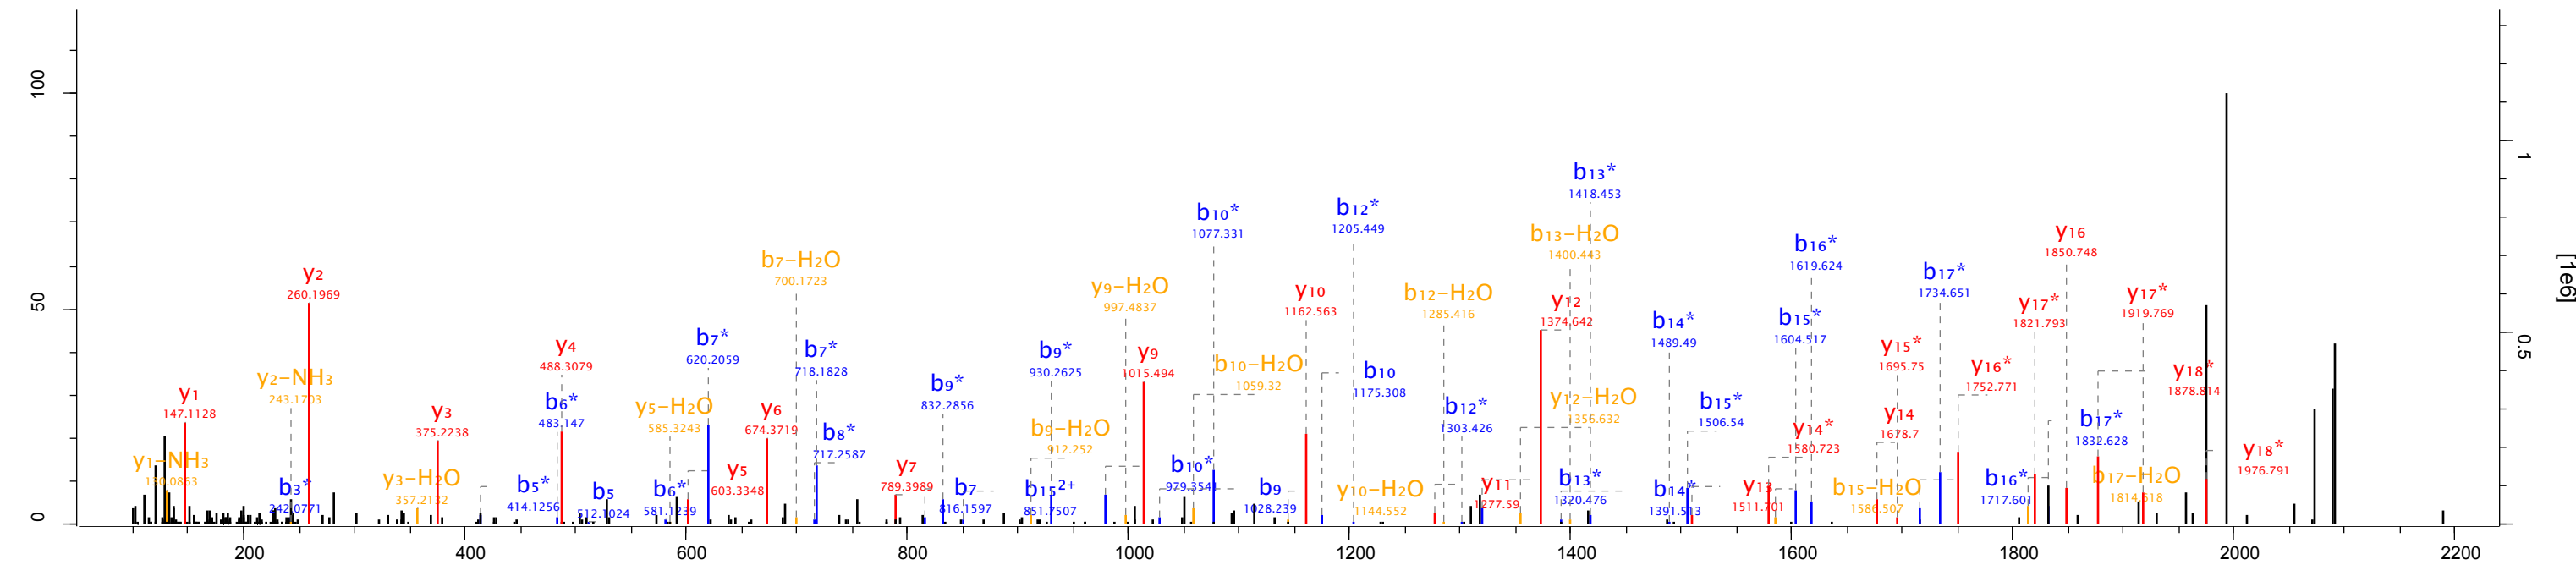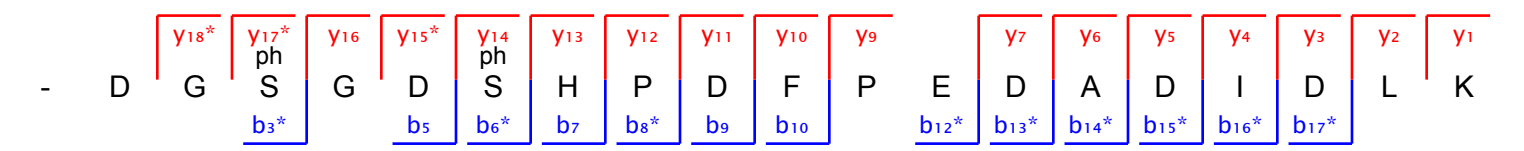

Raw file: 20150812\_A375SR\_Phospho\_BR1\_03  
 Scan: 21497 Method: FTMS; HCD Score: 265.52 m/z: 916.4 Gene names: MICALL1

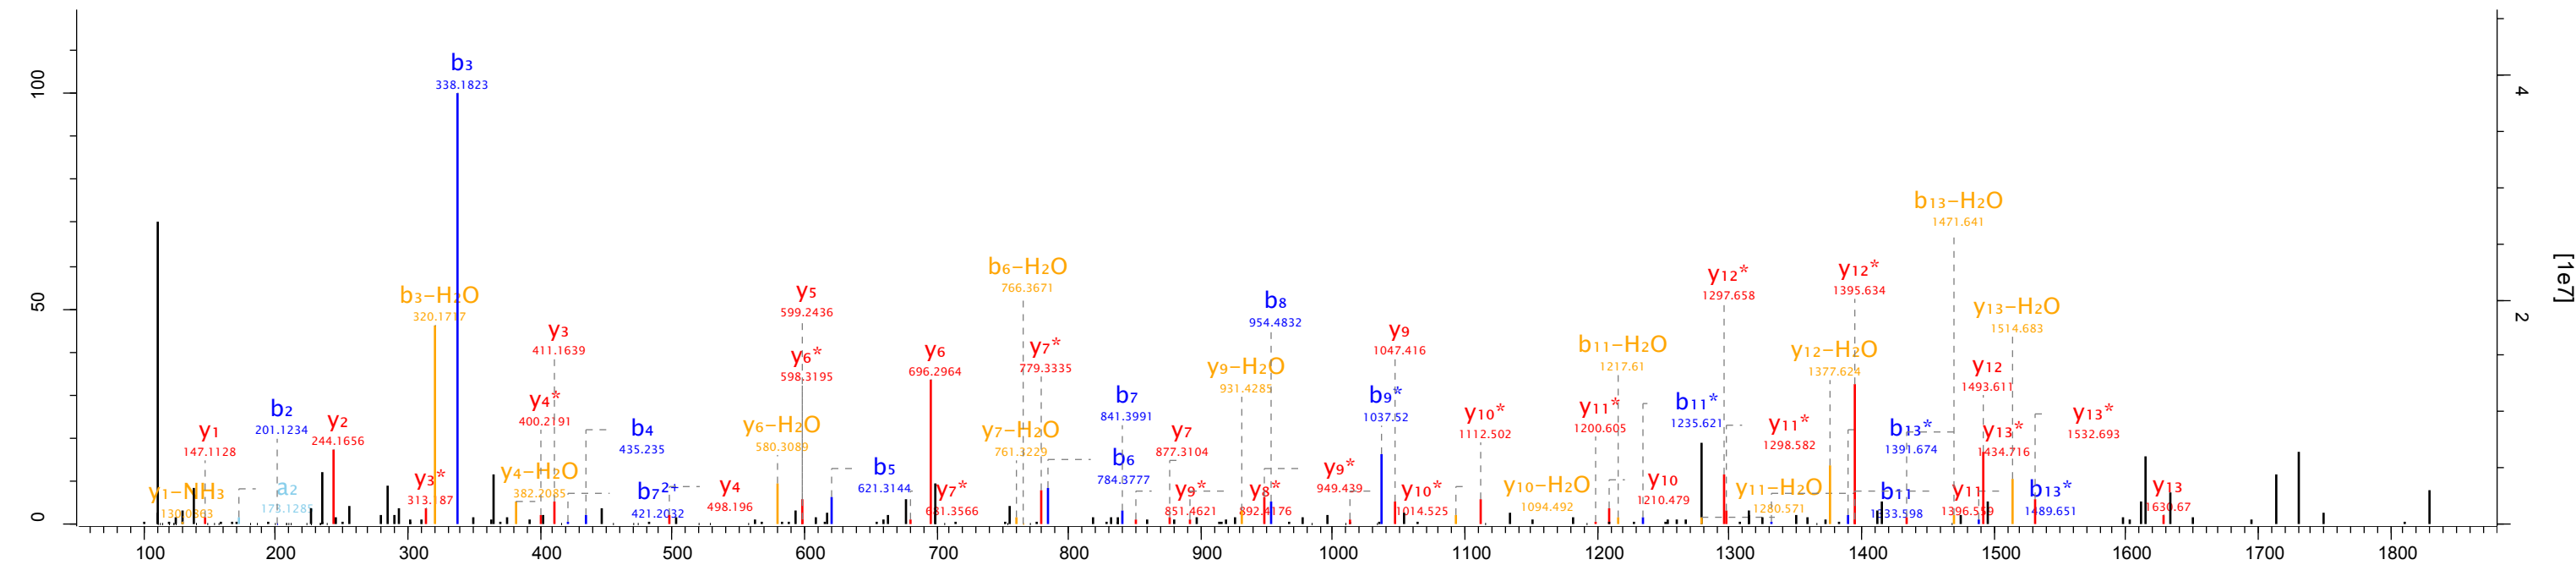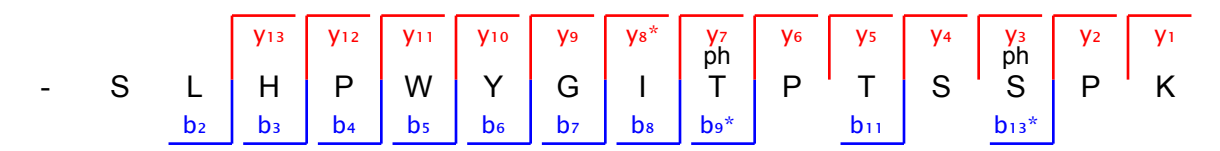

Raw file: 20150812\_A375SR\_Phospho\_BR1\_03  
 Scan: 21547 Method: FTMS; HCD Score: 95.52 m/z: 1207.02 Gene names: CRTC3

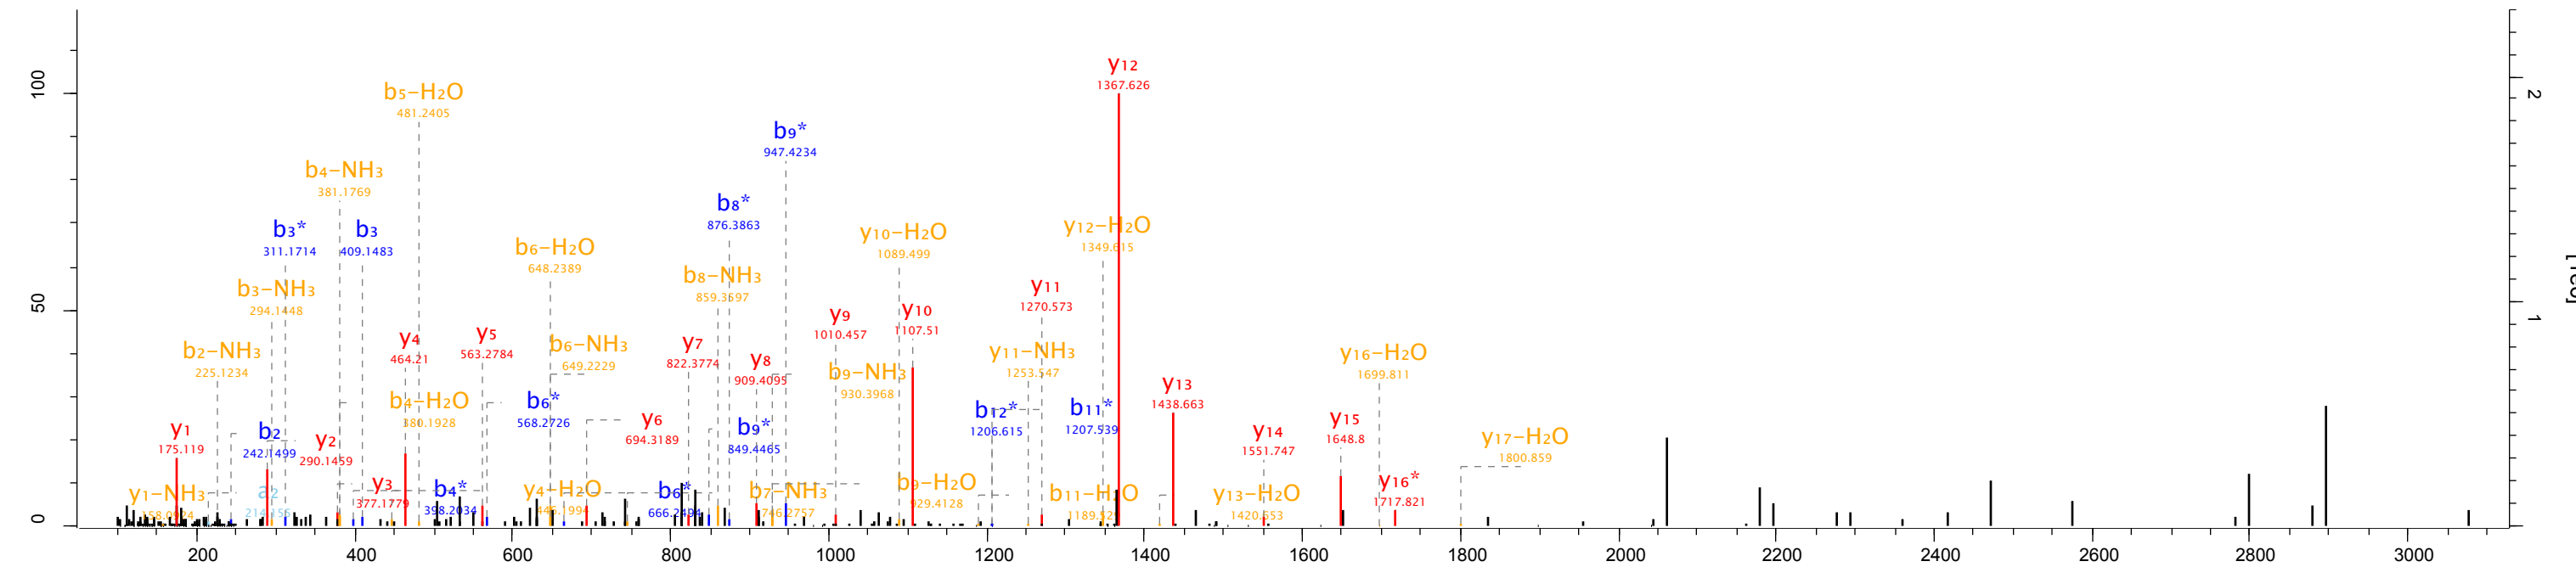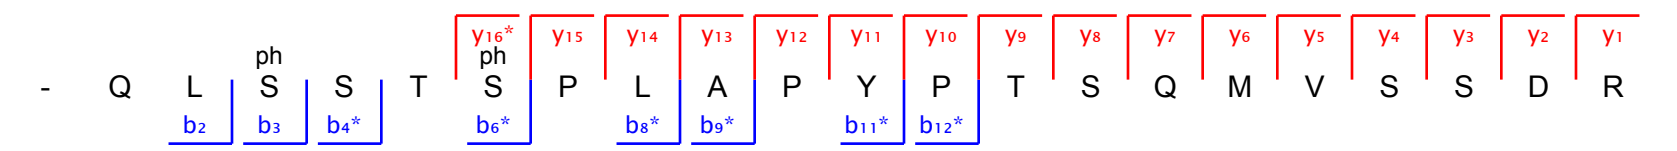

Raw file 20150812\_A375SR\_Phospho\_BR1\_03 Scan 21557 Method FTMS; HCD Score 68.66 m/z 807.02 Gene names CRTC3

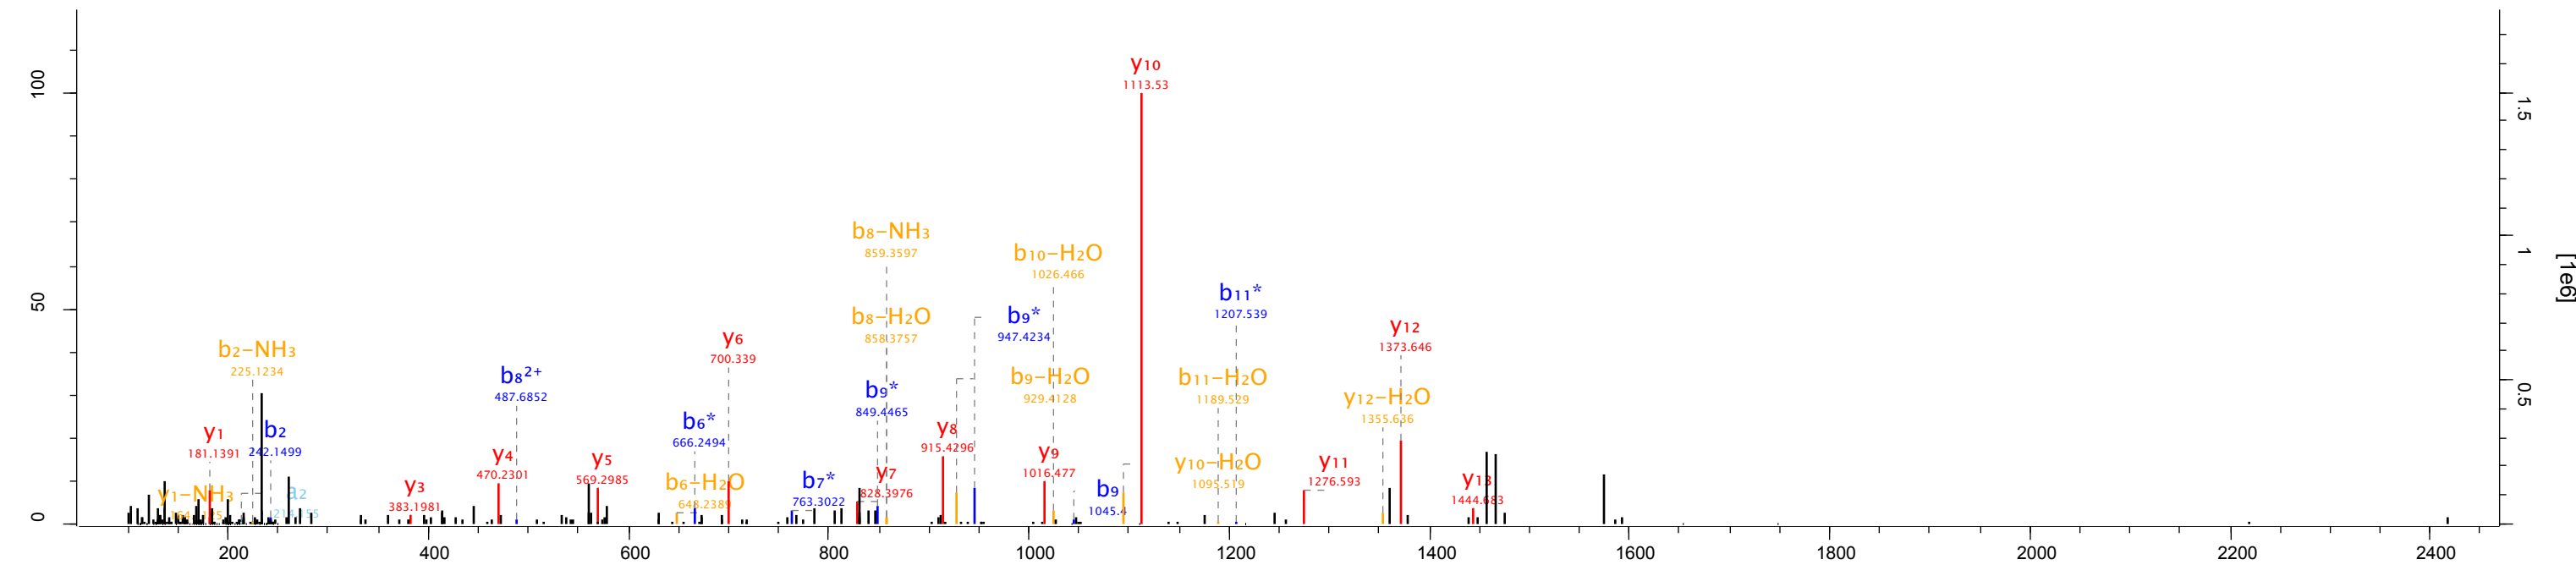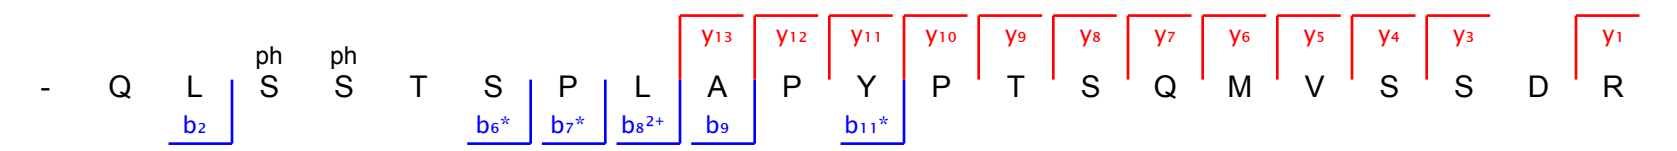

Raw file 20150812\_A375SR\_Phospho\_BR1\_03 Scan 21627 Method FTMS; HCD Score 120.59 m/z 1224.21 Gene names PDE12

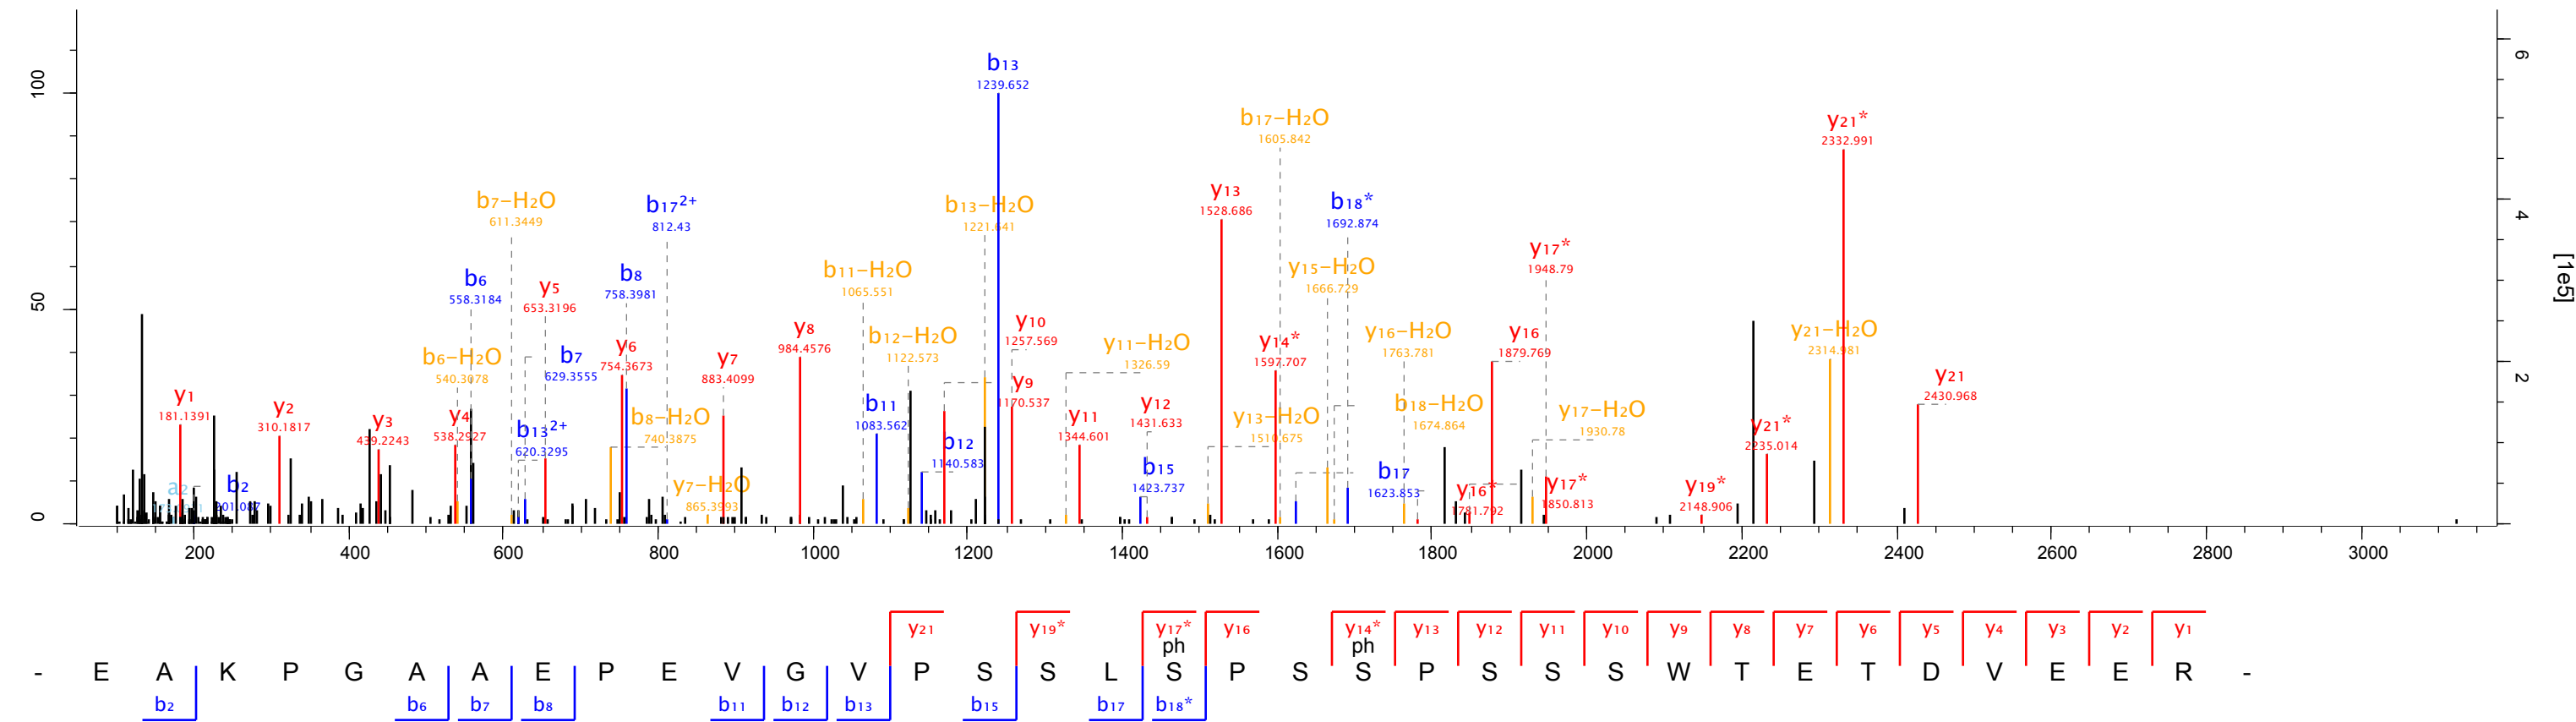

Raw file  
 20150812\_A375SR\_Phospho\_BR1\_03  
 Scan 21677 Method FTMS; HCD Score 64.38 m/z 924.94 Gene names BRD4

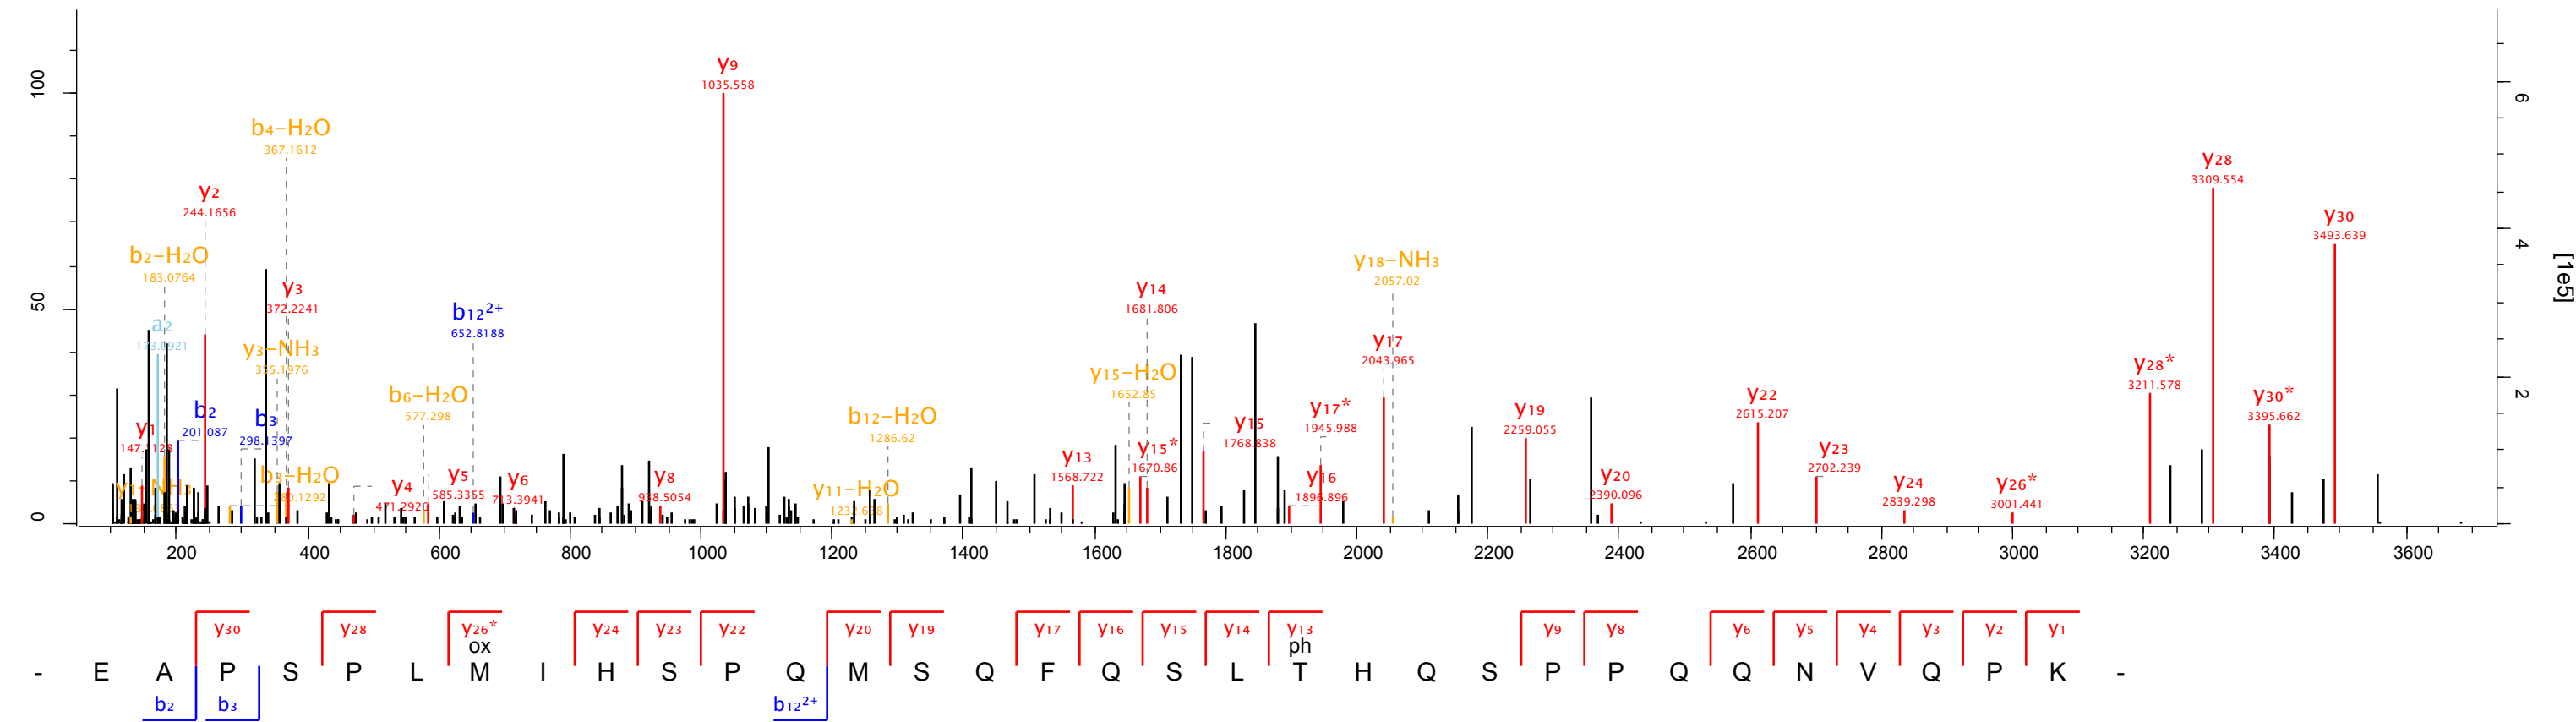

Raw file 20150812\_A375SR\_Phospho\_BR1\_03 Scan 22617 Method FTMS; HCD Score 284.2 m/z 1022.95 Gene names CDC42EP3

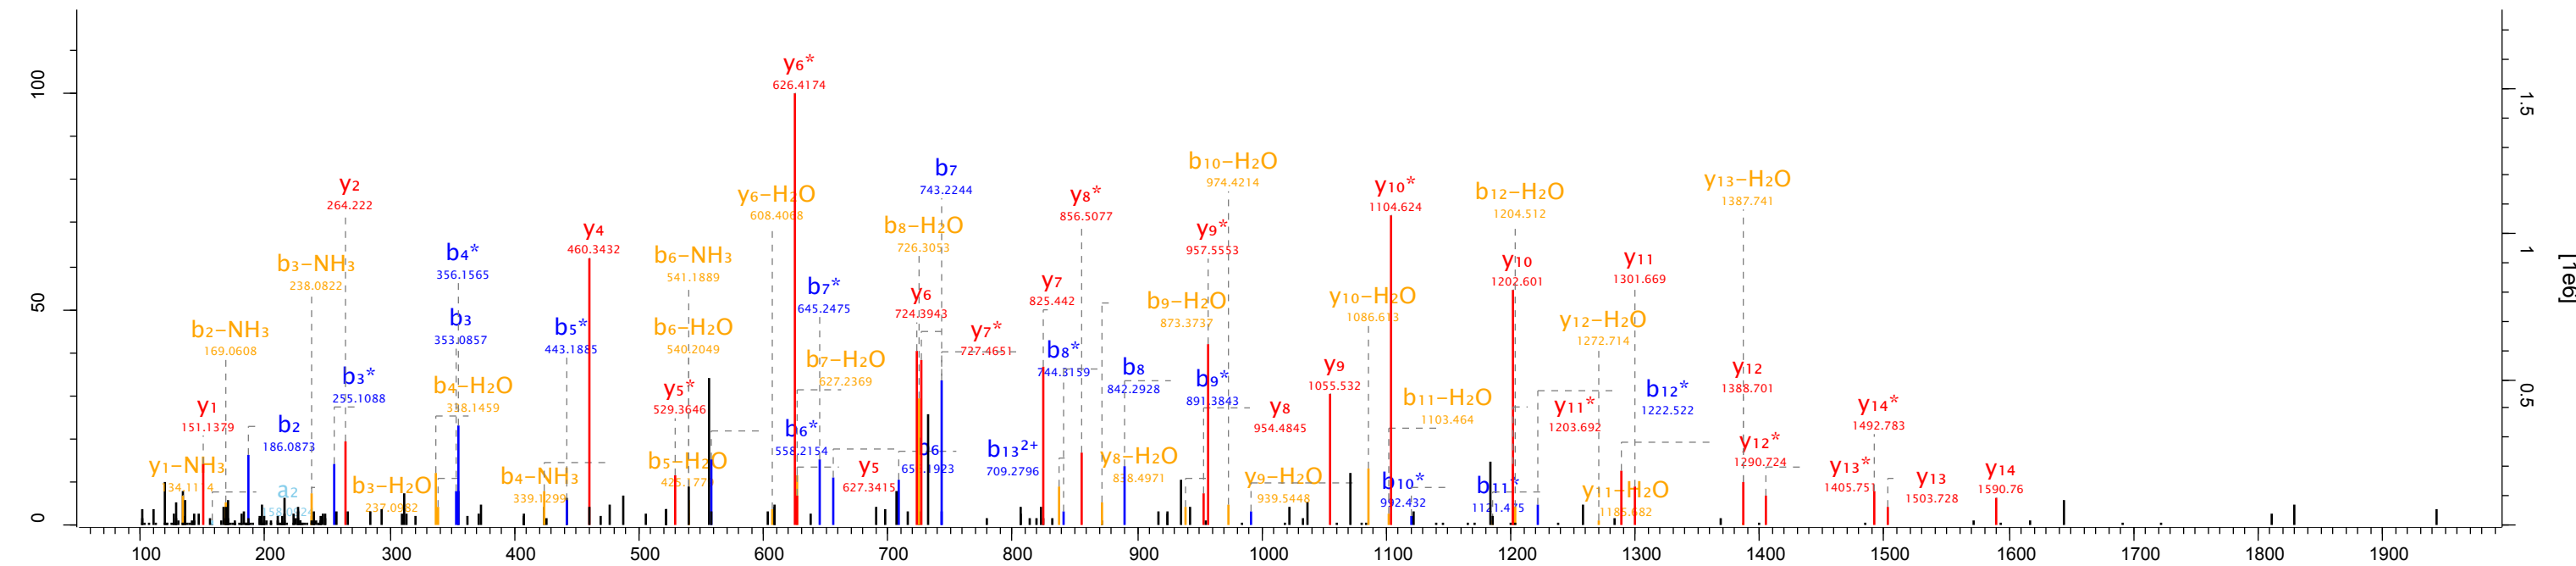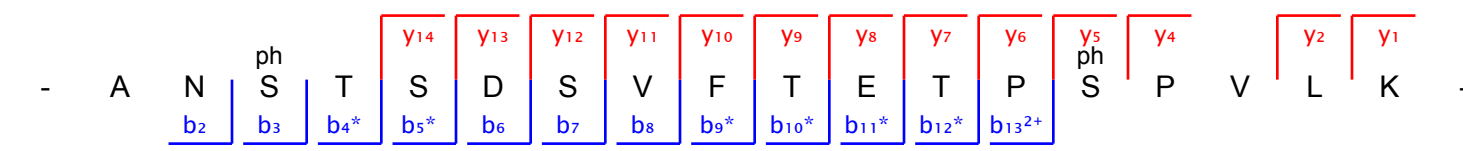



Raw file  
20150812\_A375SR\_Phospho\_BR1\_03

Scan 22817 FTMS; HCD Score 236.38 m/z 919.7 Gene names MPHOSPH10

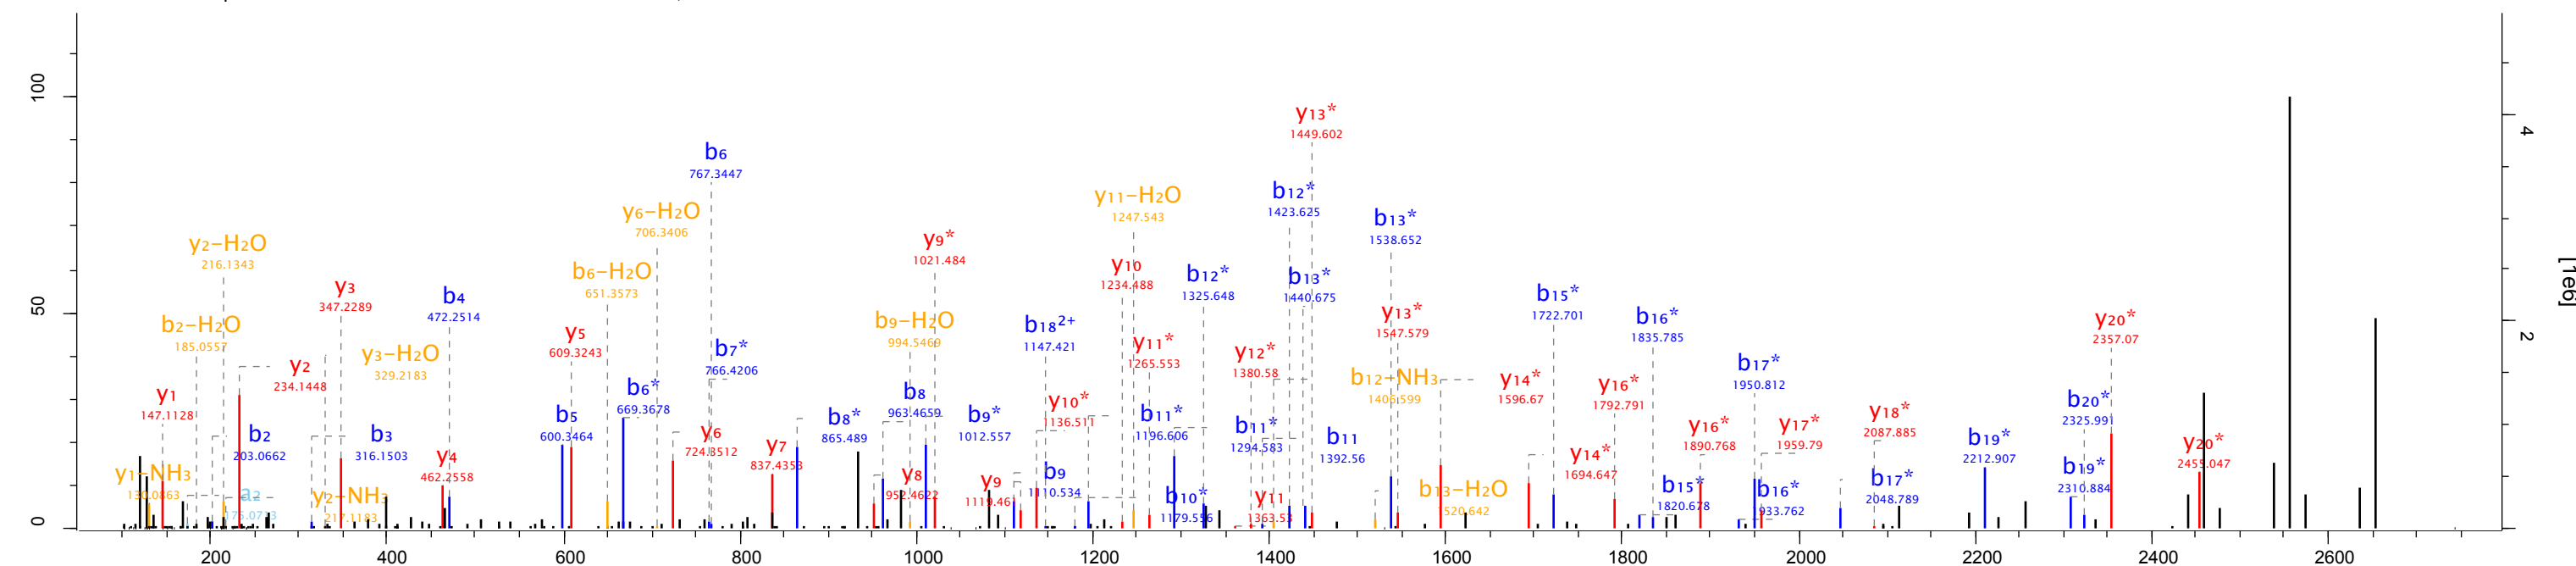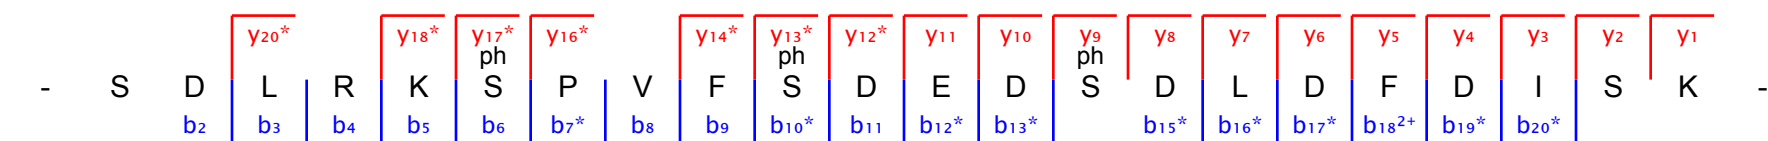

Raw file  
20150812\_A375SR\_Phospho\_BR1\_03

Scan 22947 Method FTMS; HCD Score 145.19 m/z 769.71 Gene names MTRF1

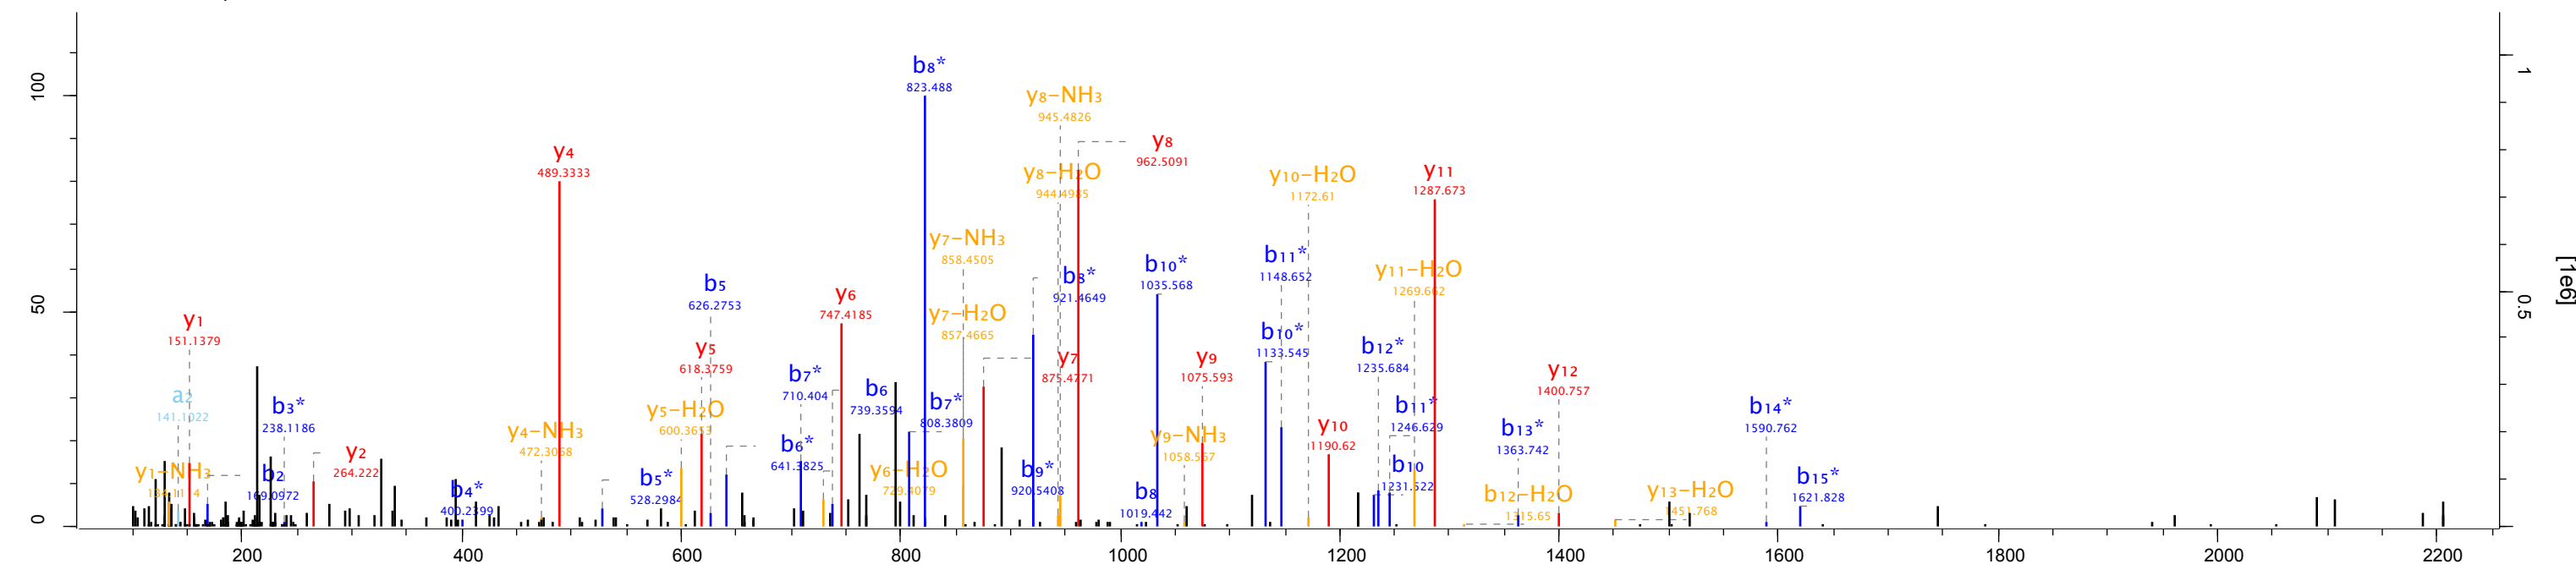

- A P S R Q I S L P D L S Q E E P Q L K -

ph ph

b2 b3\* b4\* b5 b6 b7\* b8 b9\* b10 b11\* b12\* b13\* b14\* b15\*

Raw file Scan Method Score m/z Gene names  
 20150812\_A375SR\_Phospho\_BR1\_03 23207 FTMS; HCD 122.57 847.71 EPB41L1

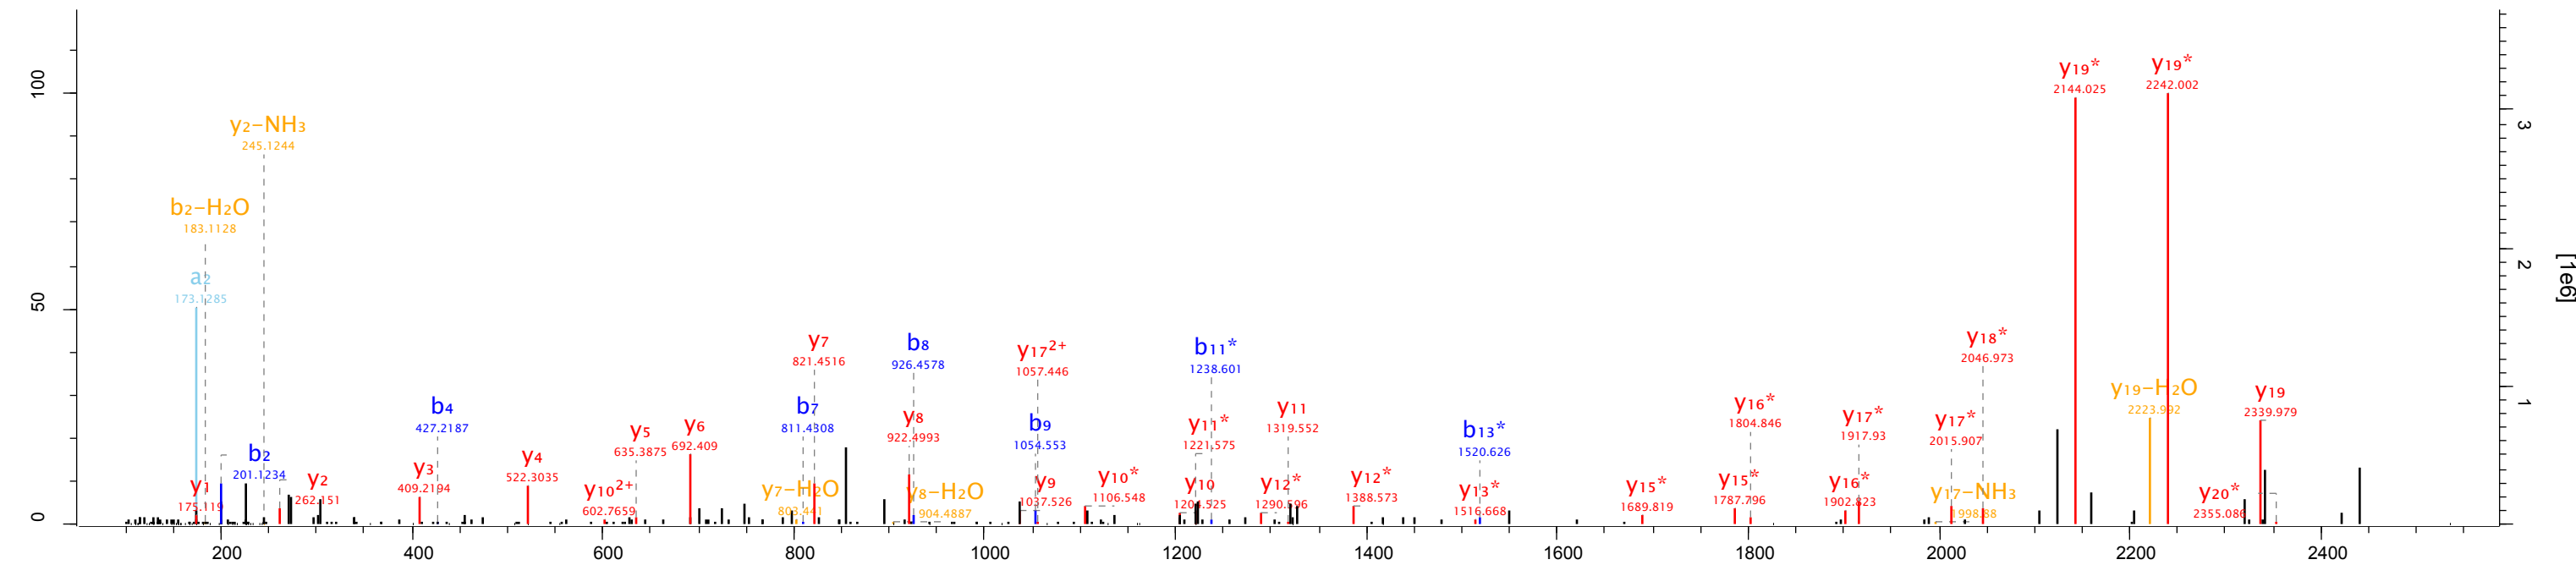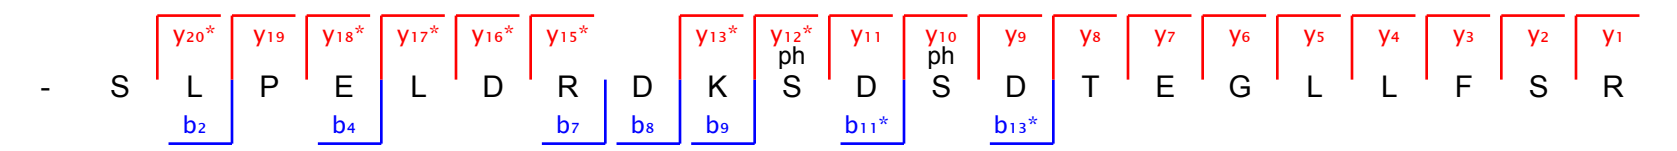

Raw file 20150812\_A375SR\_Phospho\_BR1\_03 Scan 23537 Method FTMS; HCD Score 121.38 m/z 902.44 Gene names SCML2

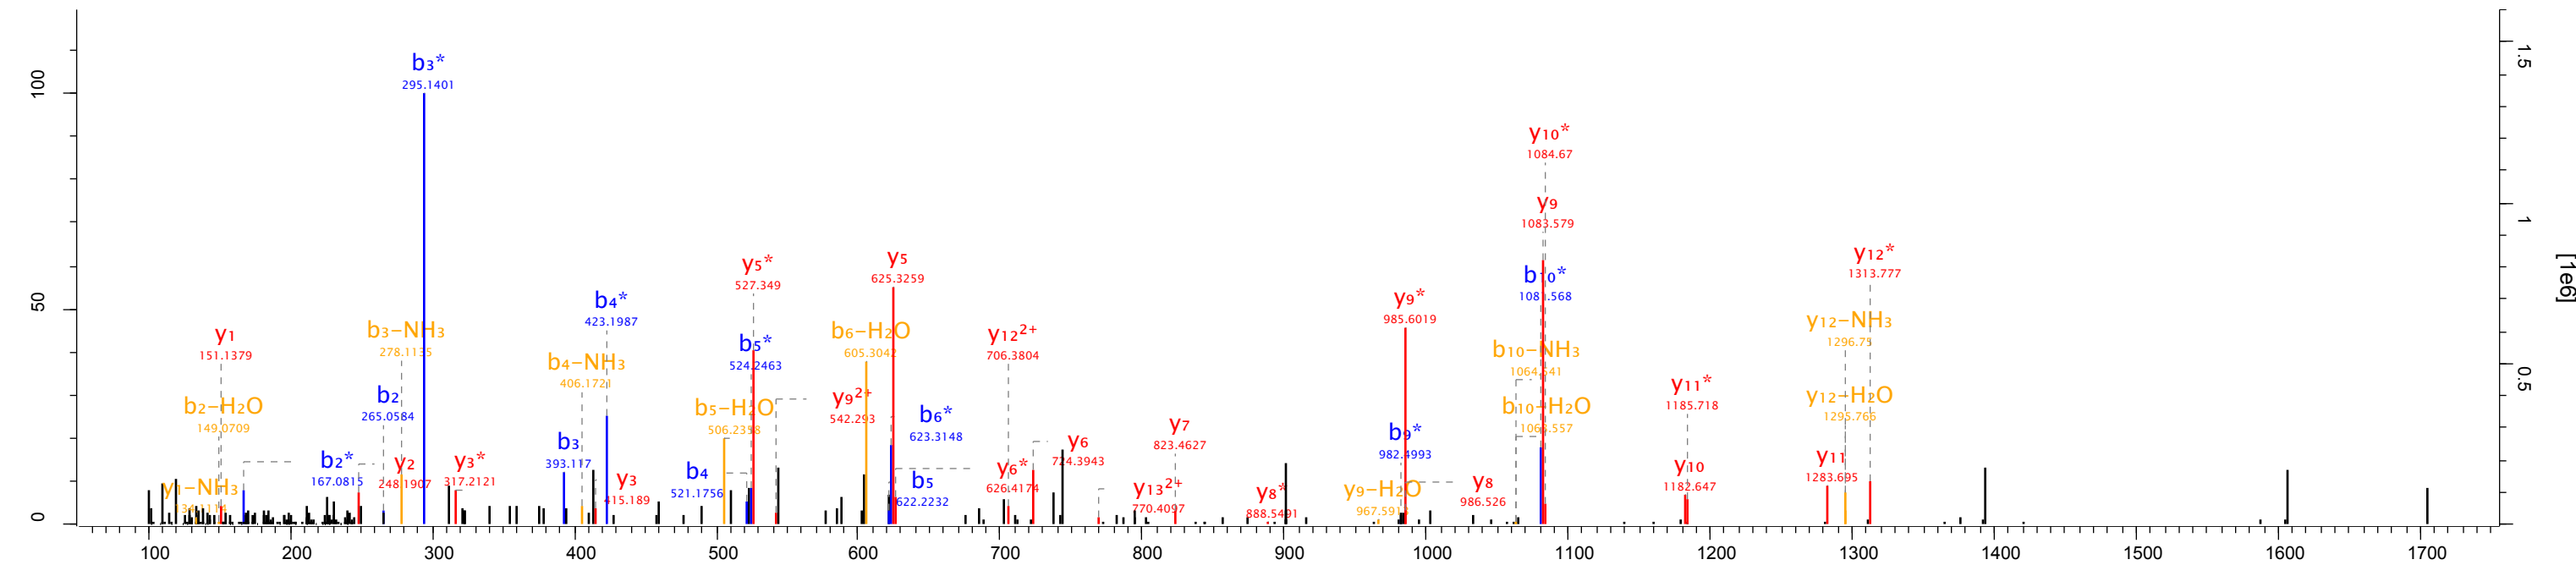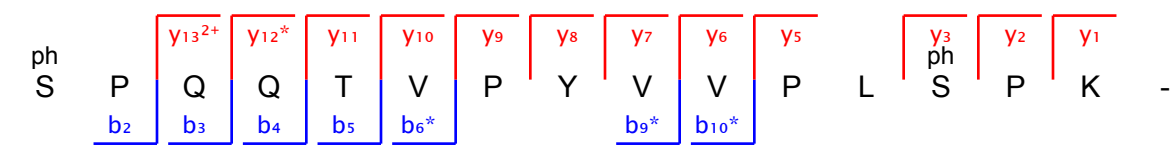

Raw file 20150812\_A375SR\_Phospho\_BR1\_03 Scan 23547 Method FTMS; HCD Score 295.01 m/z 1403.07 Gene names RNF113A

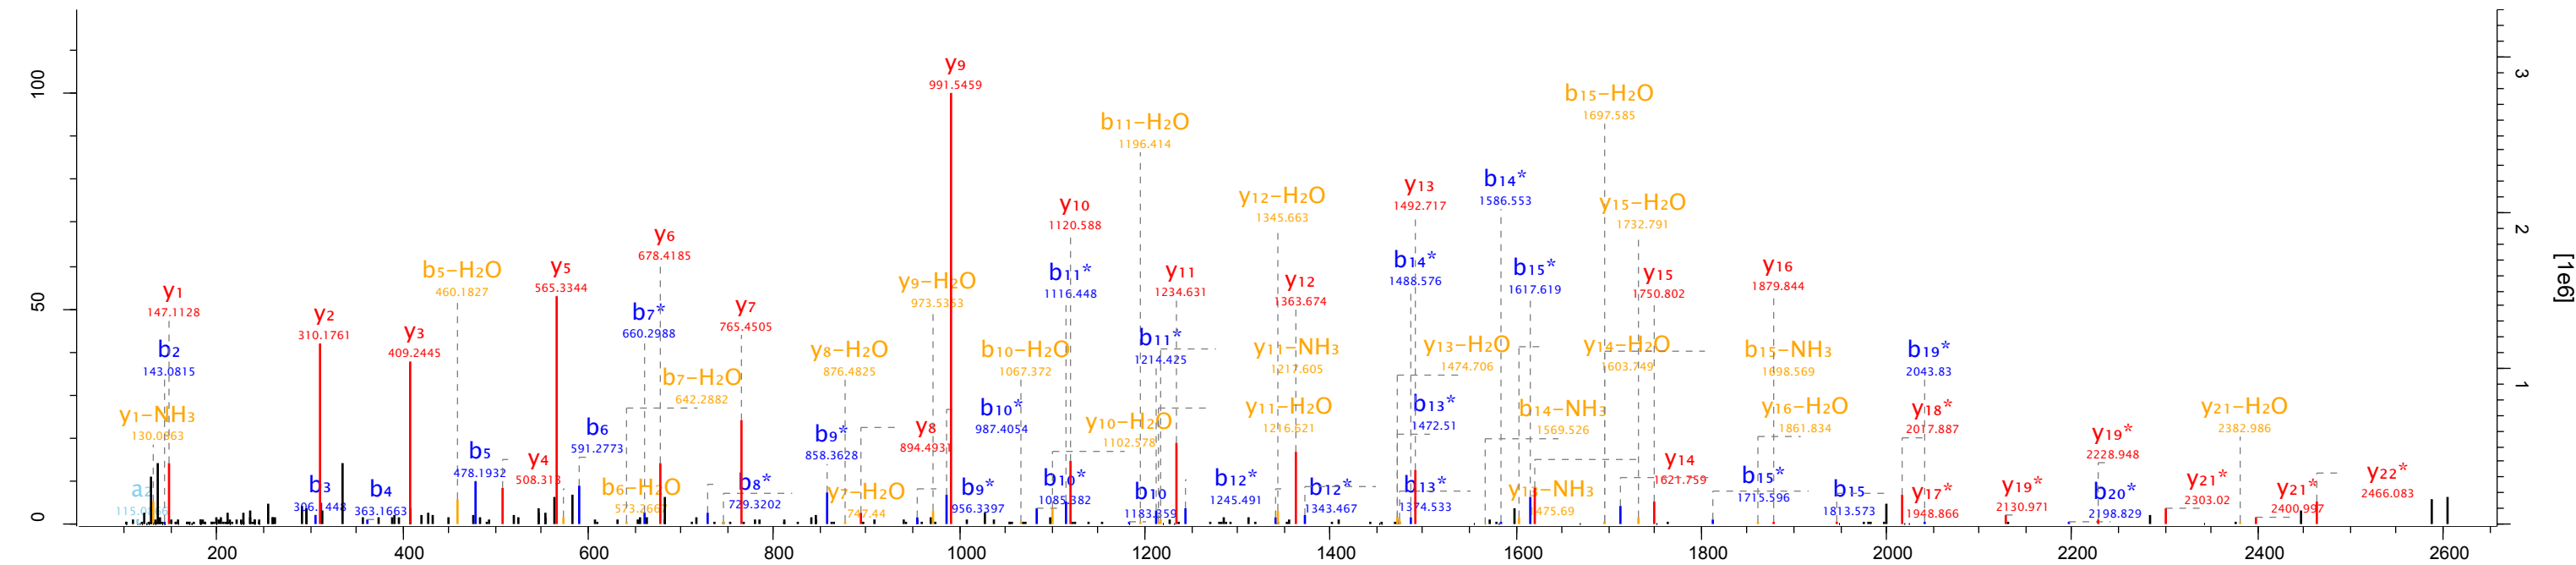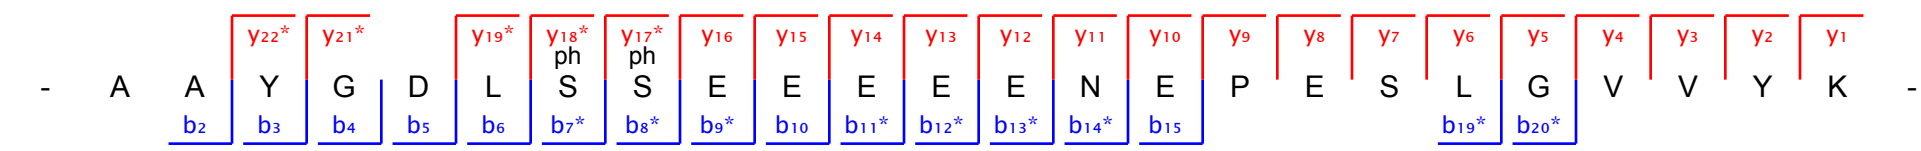

Raw file  
20150812\_A375SR\_Phospho\_BR1\_03

Scan 24087 Method FTMS; HCD Score 73.09 m/z 933.41 Gene names FRYL

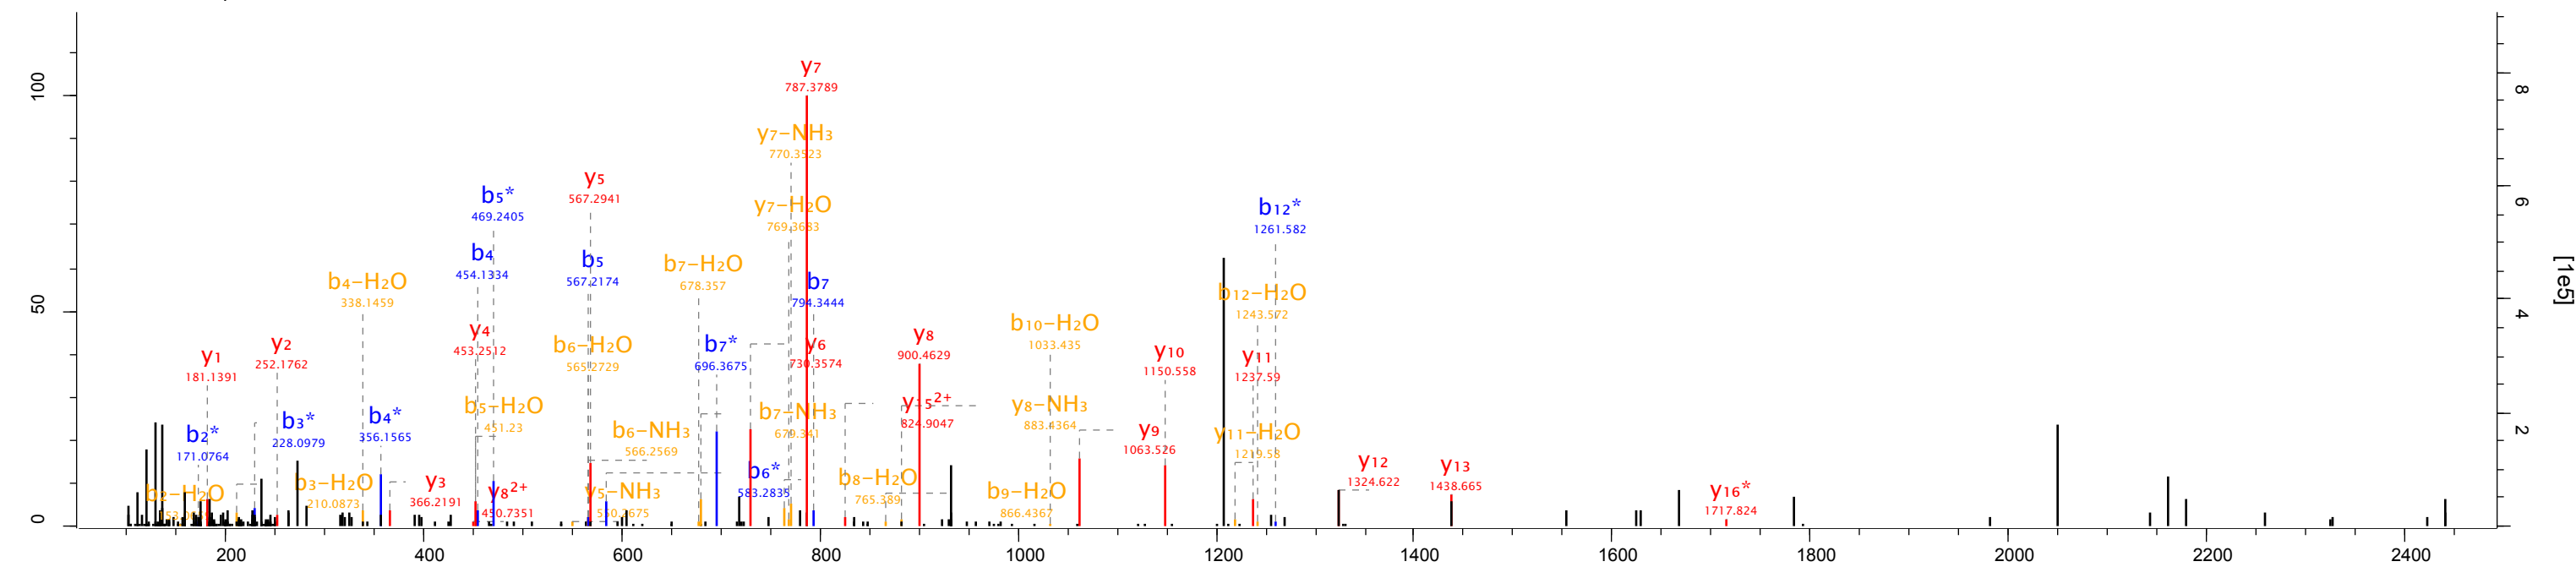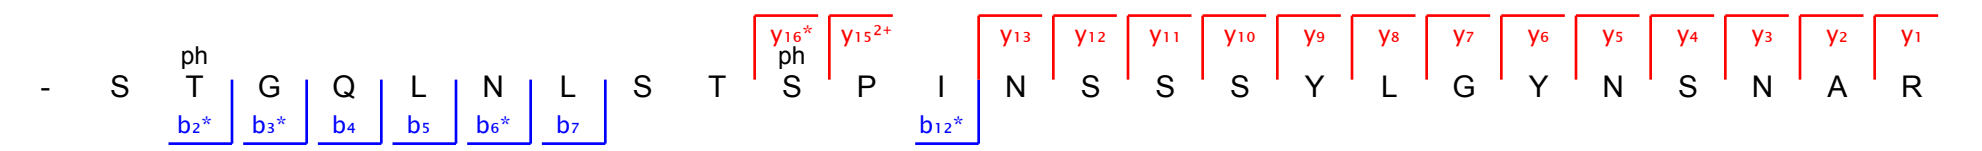

Raw file 20150812\_A375SR\_Phospho\_BR1\_03 Scan 24317 Method FTMS; HCD Score 120.64 m/z 769.69 Gene names RC3H1

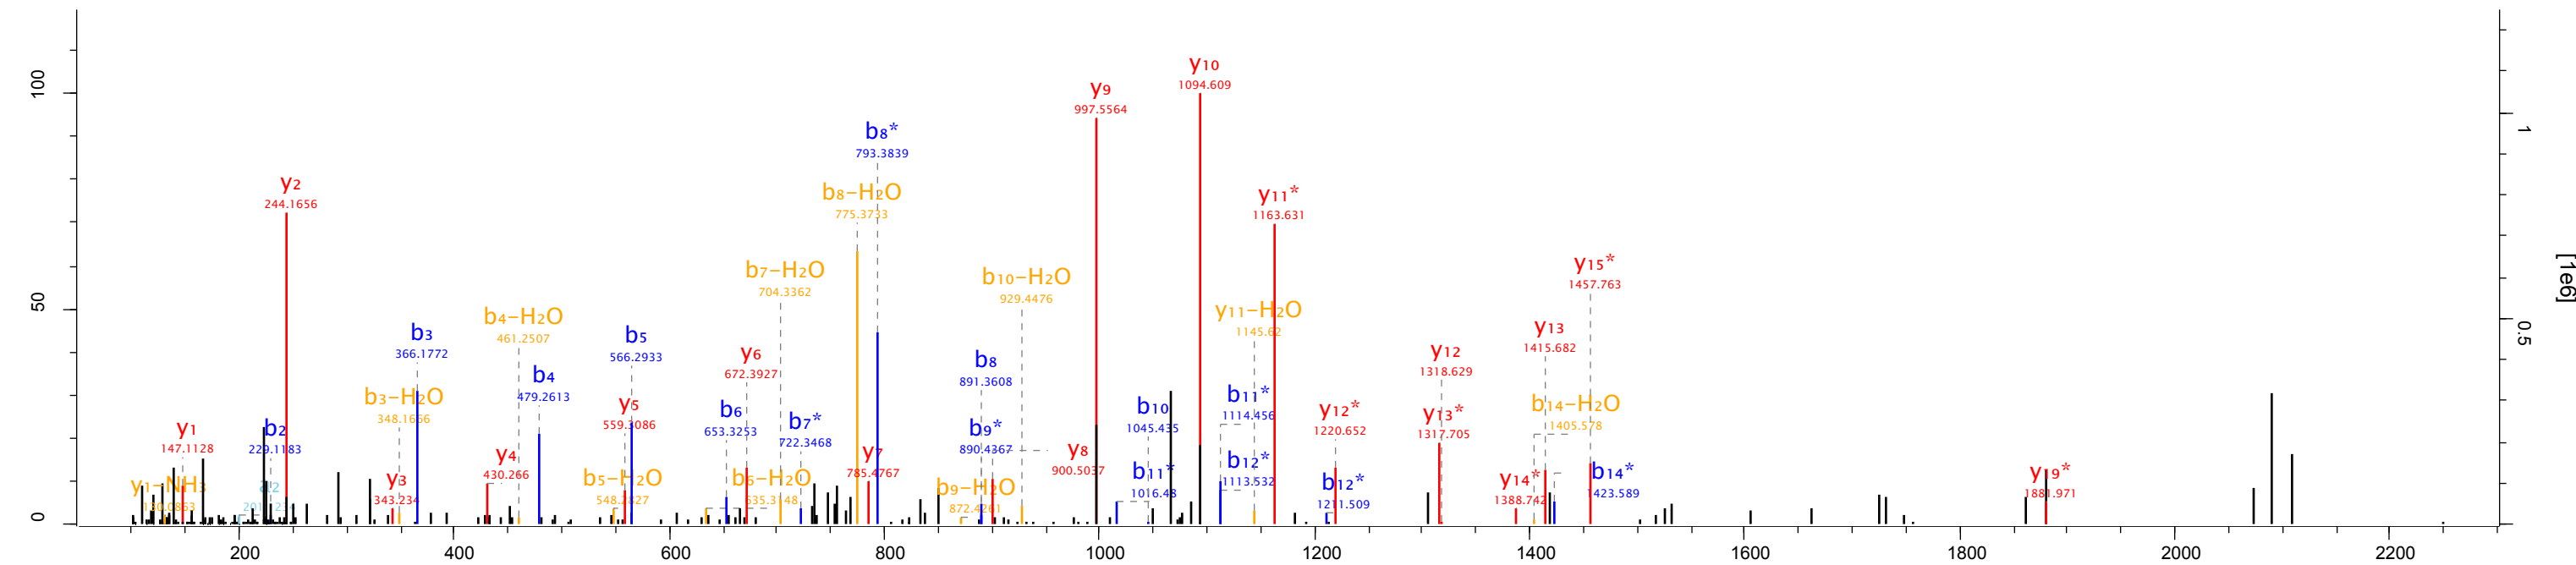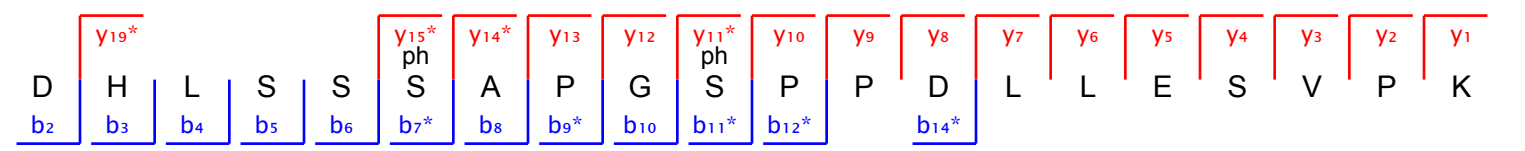

Raw file: 20150812\_A375SR\_Phospho\_BR1\_03  
 Scan: 2517 Method: FTMS; HCD Score: 102.06 m/z: 699.26 Gene names: CTR9

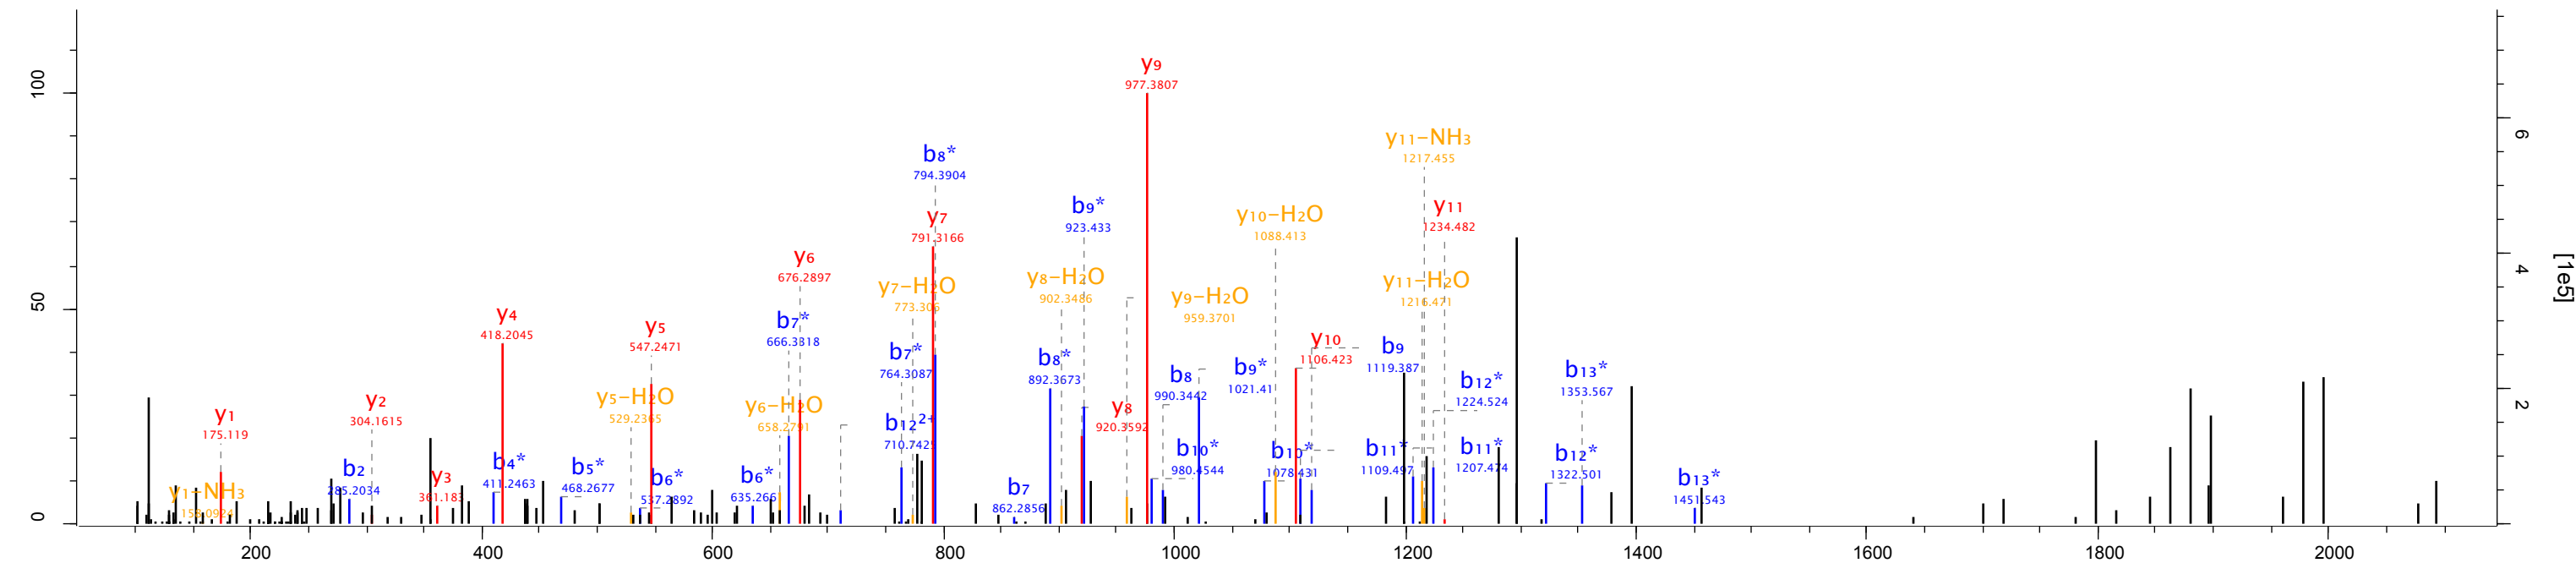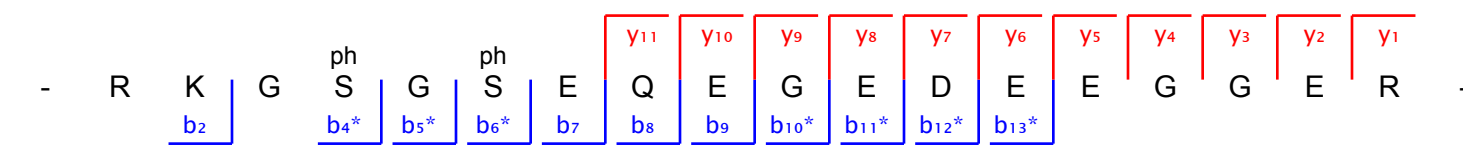



Raw file 20150812\_A375SR\_Phospho\_BR1\_03 Scan 25187 Method FTMS; HCD Score 120.44 m/z 974.1 Gene names ETV6

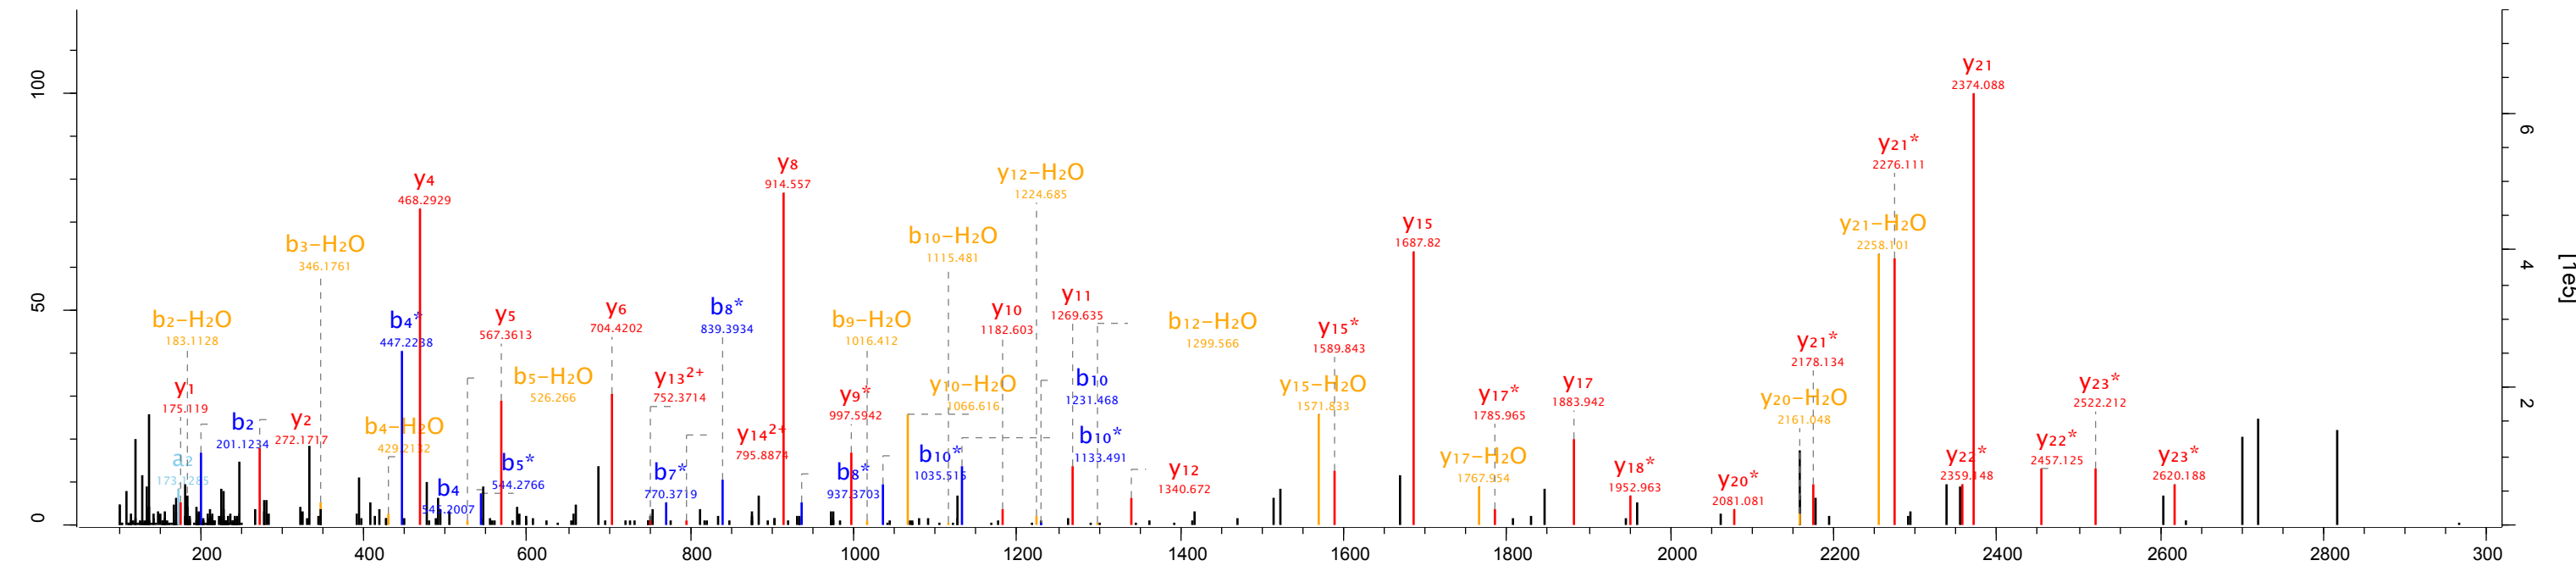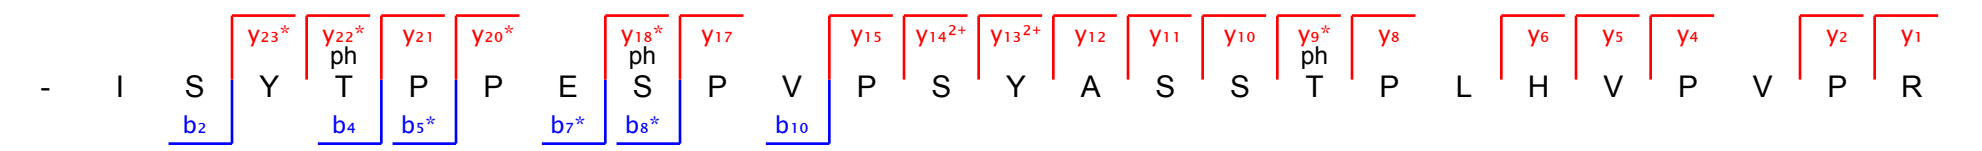

Raw file 20150812\_A375SR\_Phospho\_BR1\_03 Scan 2527 Method FTMS; HCD Score 198.69 m/z 752 Gene names LDB1

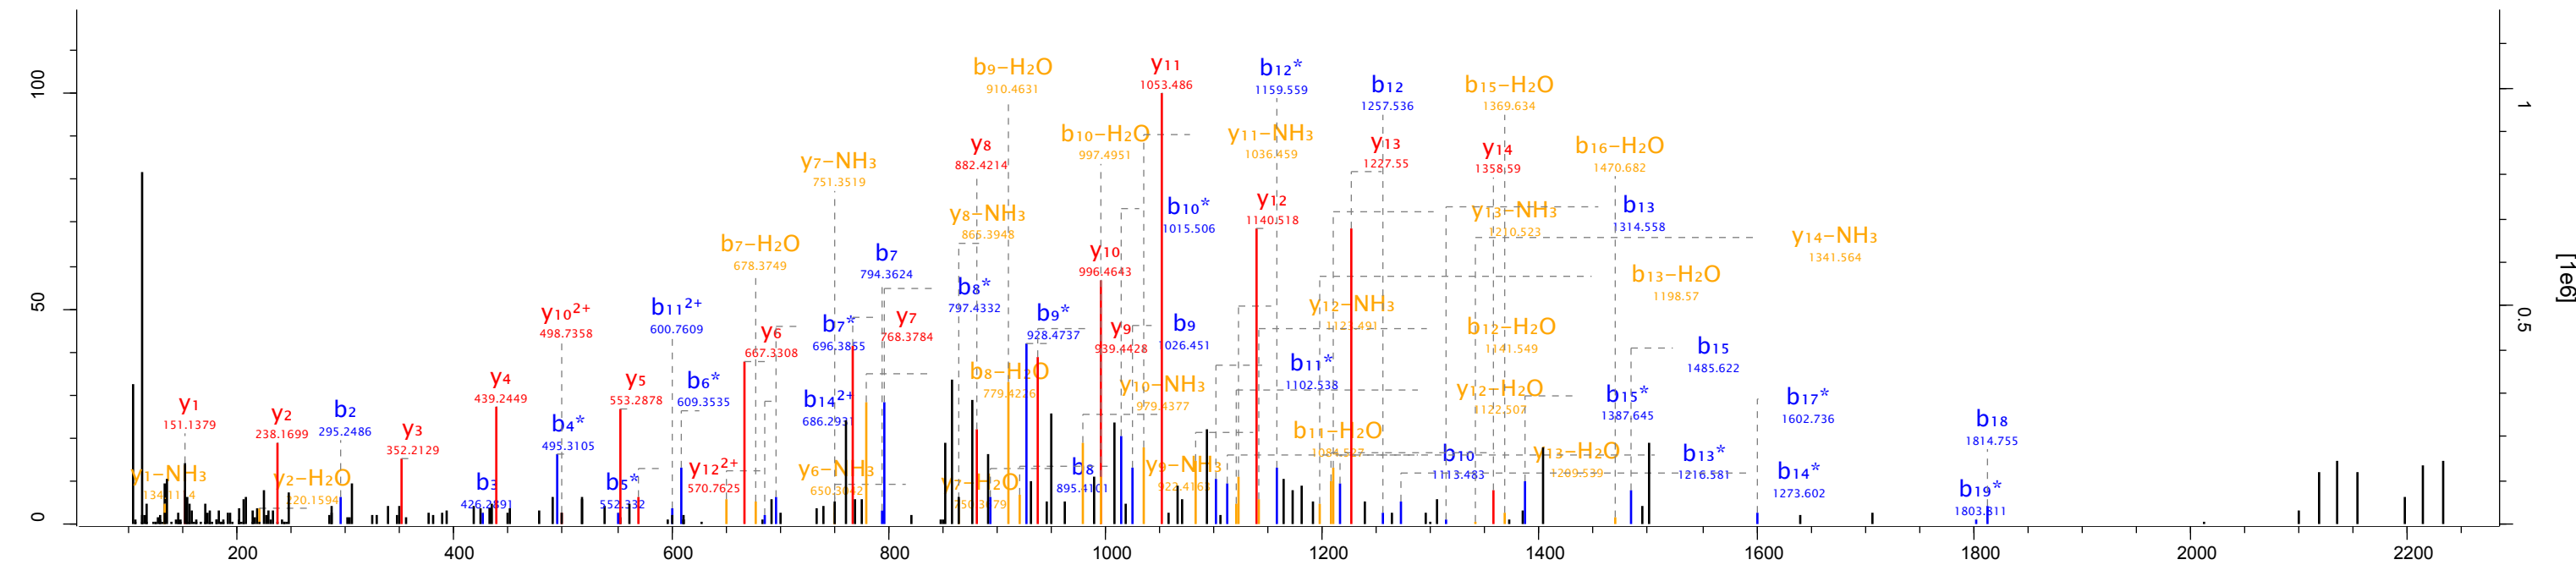

- R K M S G G S T M S S G G G N T N N S N S K -

ph

b<sub>2</sub> b<sub>3</sub> b<sub>4</sub>\* b<sub>5</sub>\* b<sub>6</sub>\* b<sub>7</sub> b<sub>8</sub> b<sub>9</sub> b<sub>10</sub> b<sub>11</sub>\* b<sub>12</sub> b<sub>13</sub> b<sub>14</sub>\* b<sub>15</sub> b<sub>17</sub>\* b<sub>18</sub> b<sub>19</sub>\*

y<sub>14</sub> y<sub>13</sub> y<sub>12</sub> y<sub>11</sub> y<sub>10</sub> y<sub>9</sub> y<sub>8</sub> y<sub>7</sub> y<sub>6</sub> y<sub>5</sub> y<sub>4</sub> y<sub>3</sub> y<sub>2</sub> y<sub>1</sub>

Raw file Scan Method Score m/z Gene names  
 20150812\_A375SR\_Phospho\_BR1\_03 25487 FTMS; HCD 162.58 1107.11 ATG2B

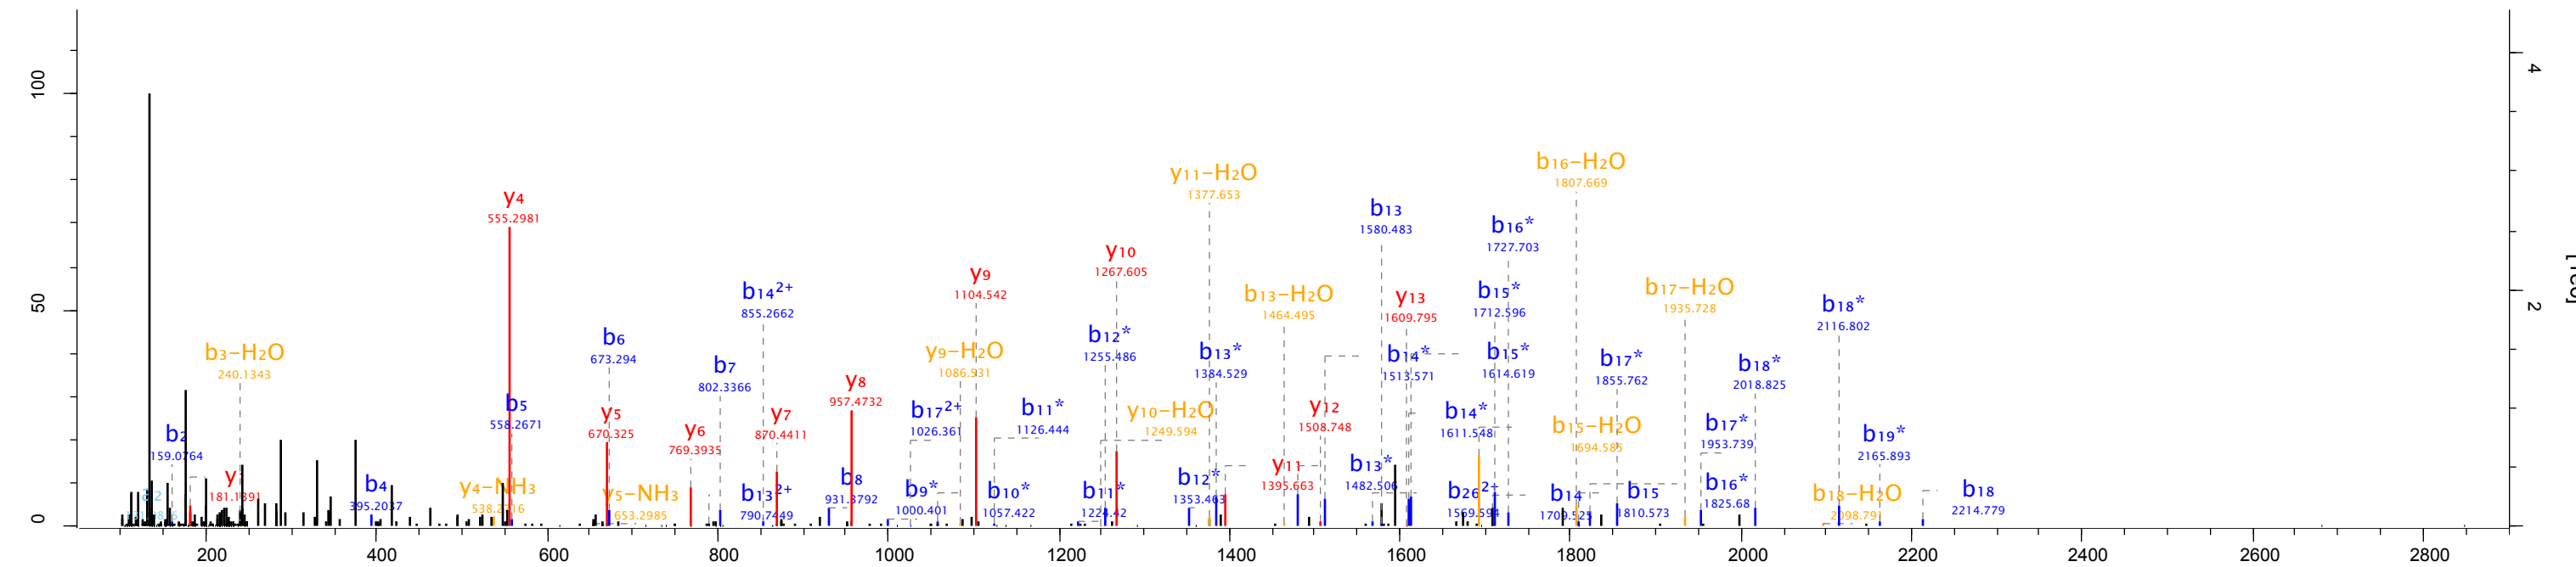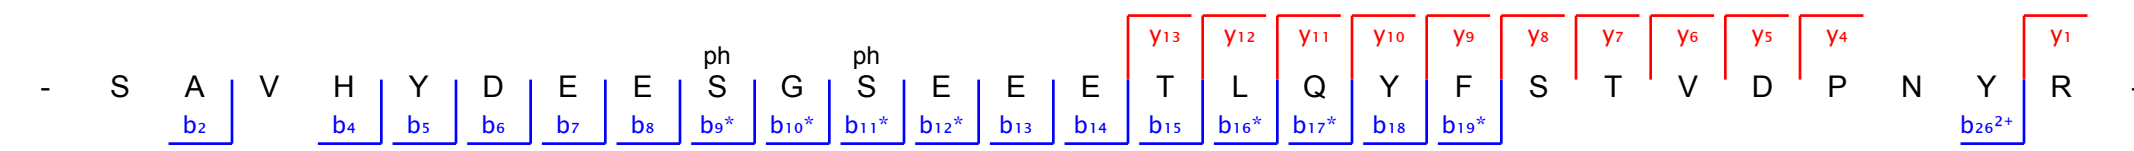

Raw file 20150812\_A375SR\_Phospho\_BR1\_03 Scan 2567 Method FTMS; HCD Score 233.31 m/z 901.35 Gene names PSIP1

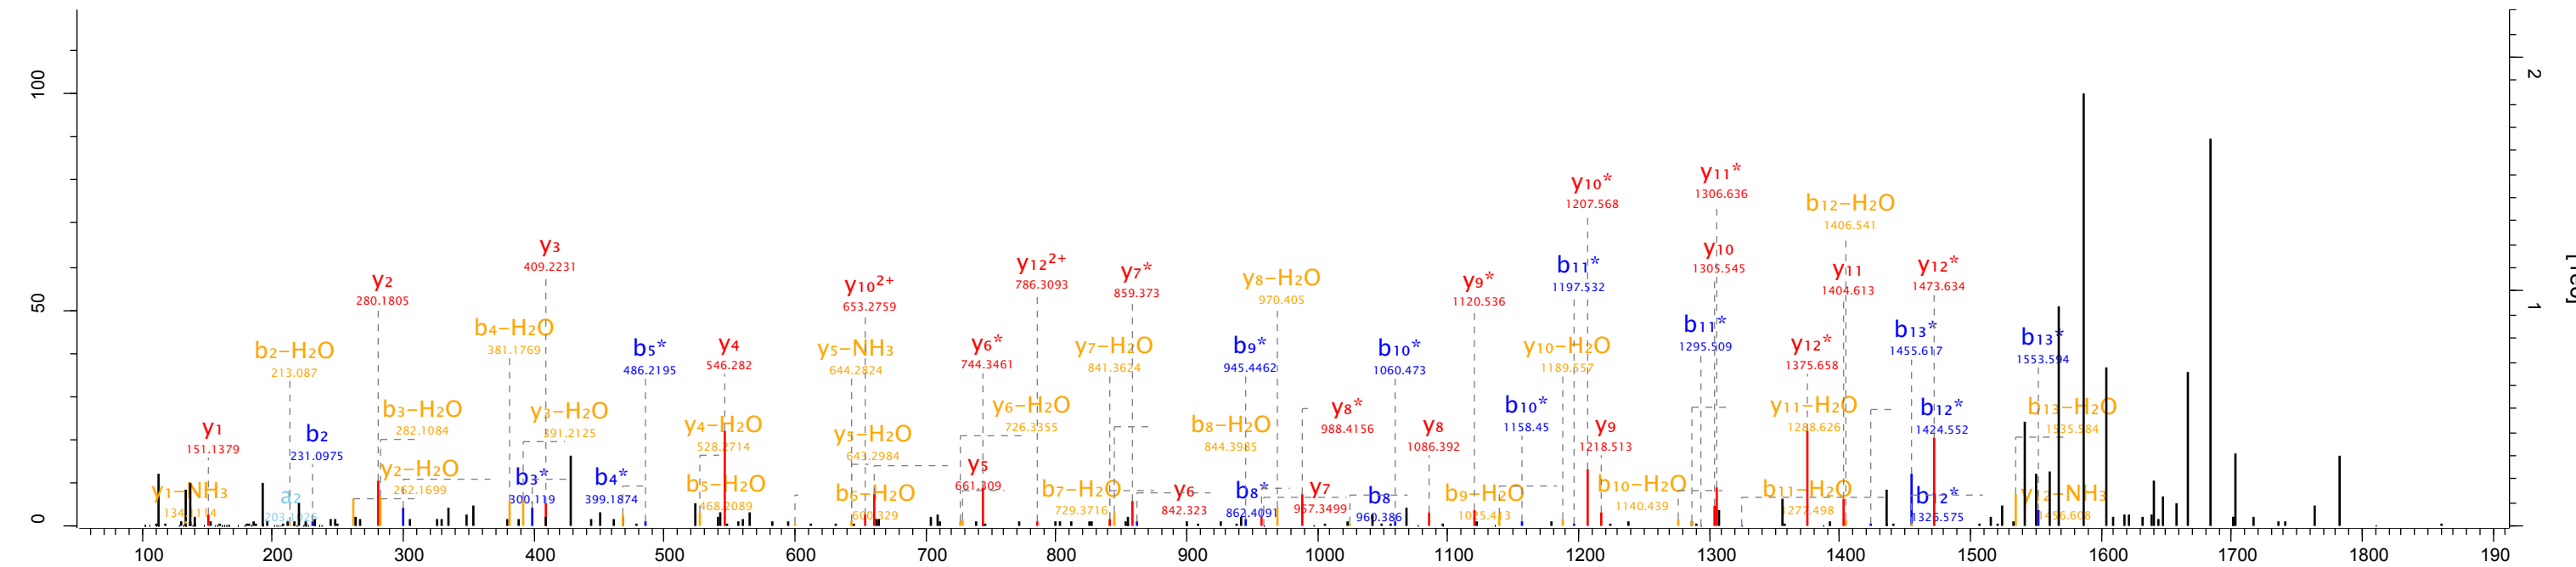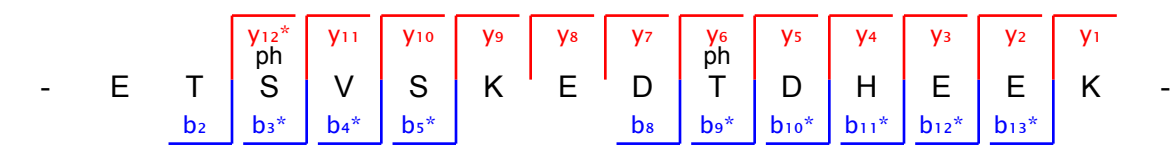

Raw file 20150812\_A375SR\_Phospho\_BR1\_03 Scan 25837 Method FTMS; HCD Score 205.96 m/z 891.91 Gene names SUPT5H

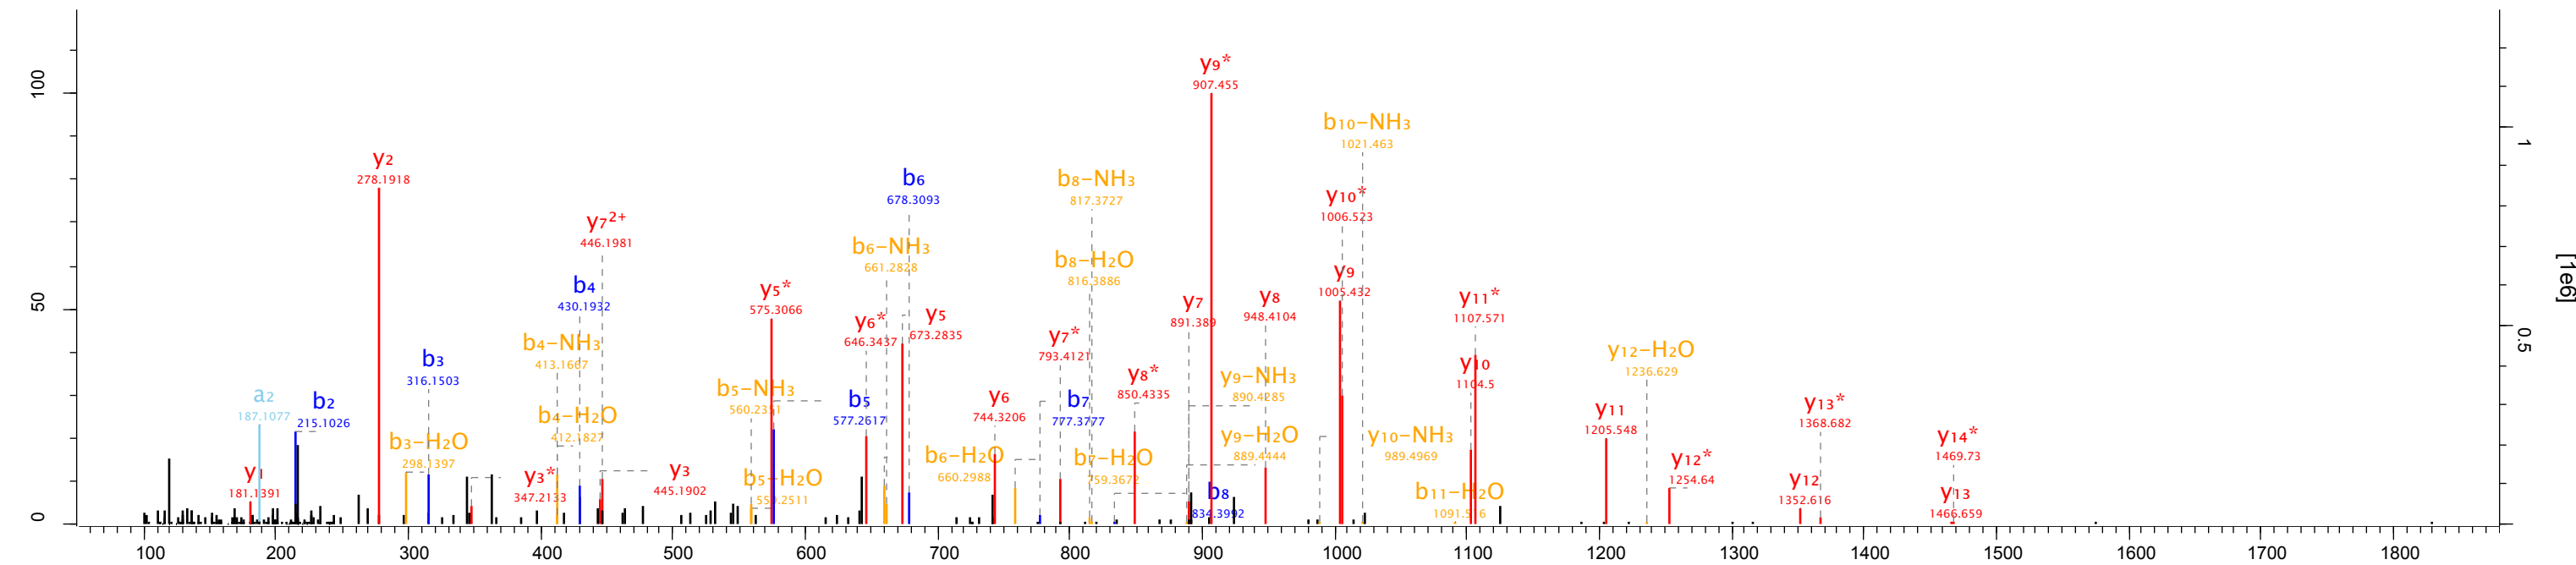

- D V T N F T V G G F A P M S P R -

b<sub>2</sub>
b<sub>3</sub>
b<sub>4</sub>
b<sub>5</sub>
b<sub>6</sub>
b<sub>7</sub>
b<sub>8</sub>
y<sub>14</sub>\*
y<sub>13</sub>
y<sub>12</sub>
y<sub>11</sub>
y<sub>10</sub>
y<sub>9</sub>
y<sub>8</sub>
y<sub>7</sub>
y<sub>6</sub>
y<sub>5</sub>
y<sub>3</sub>
y<sub>2</sub>
y<sub>1</sub>

Raw file  
 20150812\_A375SR\_Phospho\_BR1\_03  
 Scan 26327 Method FTMS; HCD Score 139.87 m/z 1125.48 Gene names ROCK2

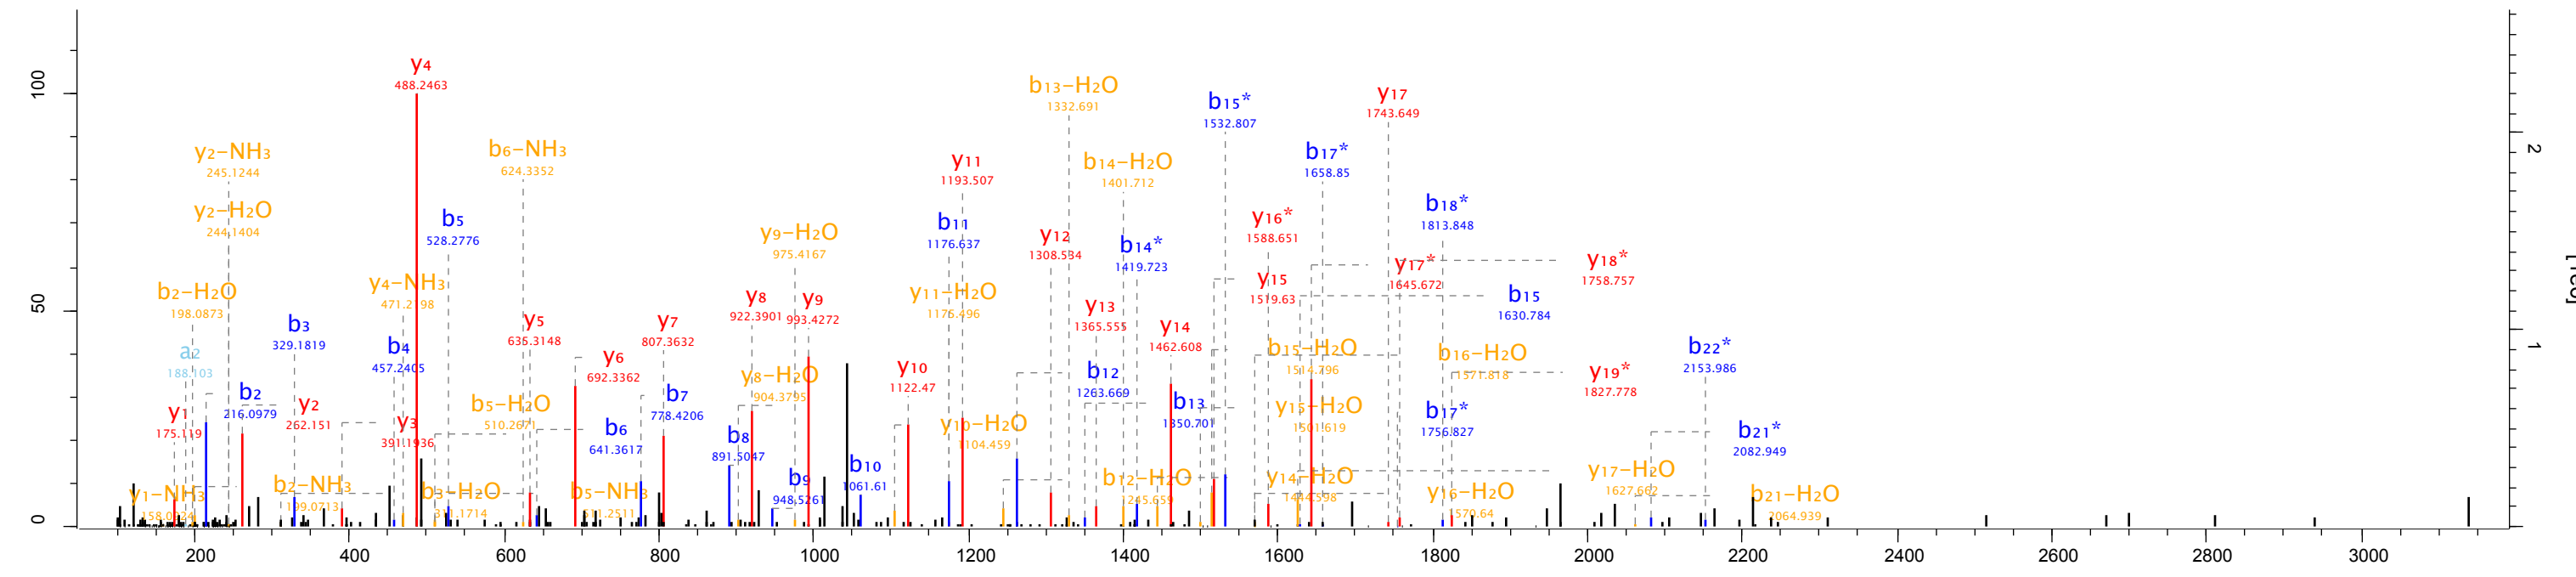

- S Q L Q A L H I G L D S S Y19\* ph S Y18\* I G Y17 Y16\* ph S Y15 G Y14 P G Y12 D Y11 A Y10 E A Y9 A Y8 D Y7 D Y6 G Y5 F Y4 P Y3 E Y2 S Y1 R -

b2 b3 b4 b5 b6 b7 b8 b9 b10 b11 b12 b13 b14\* b15 b17\* b18\* b21\* b22\*

20150812\_A375SR\_Phospho\_BR1\_03

27557 FTMS; HCD 174.36 1251.25 JUND

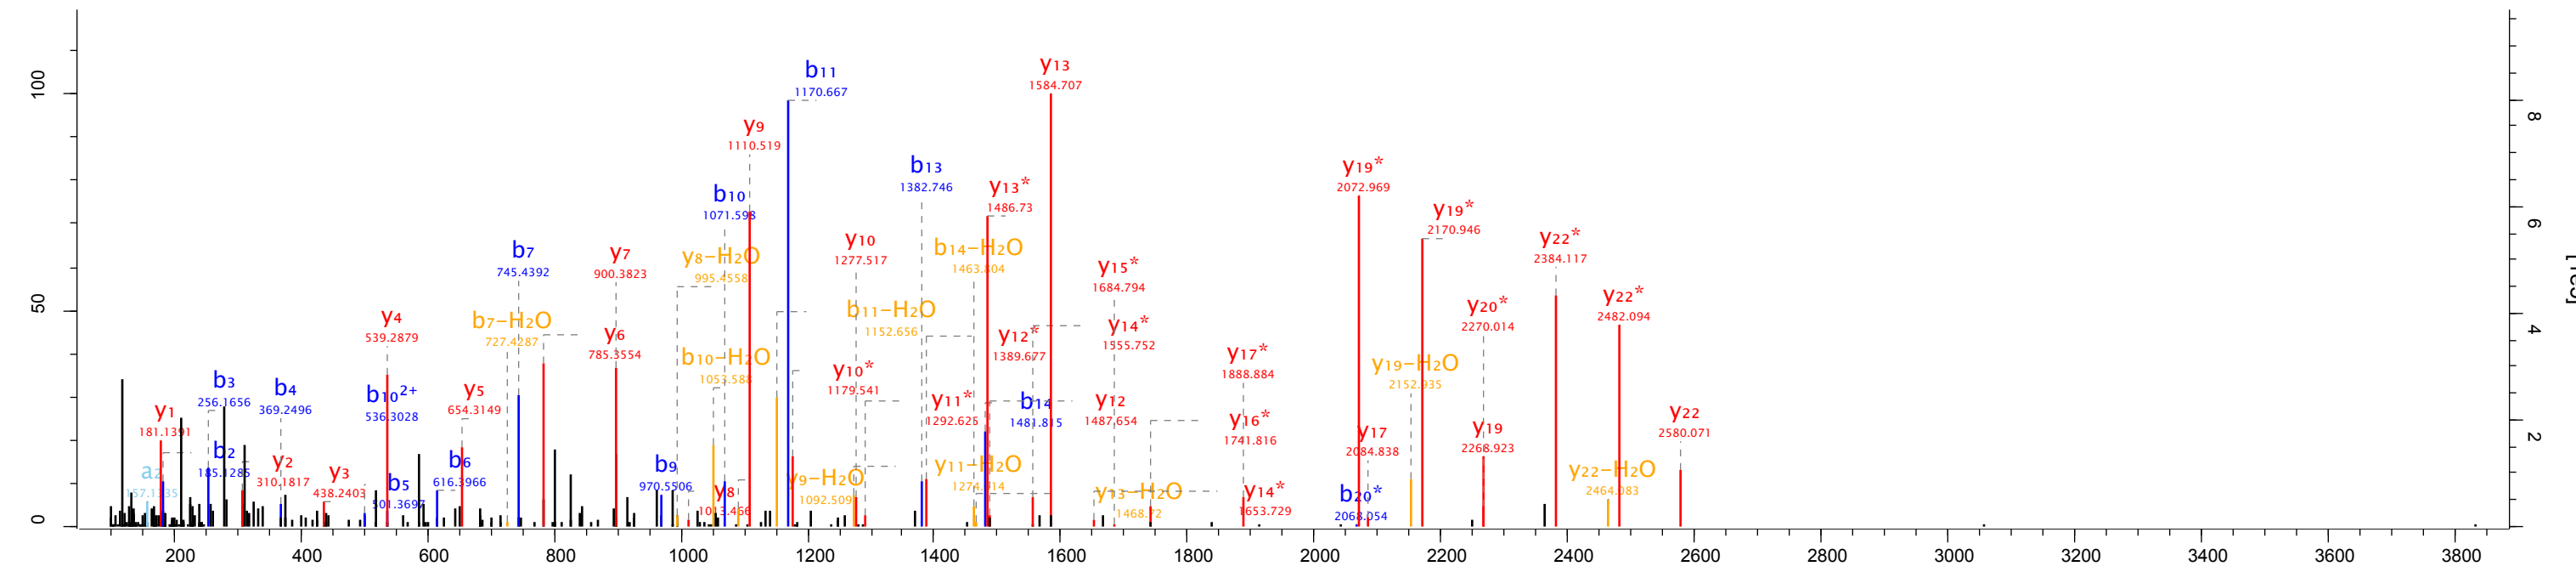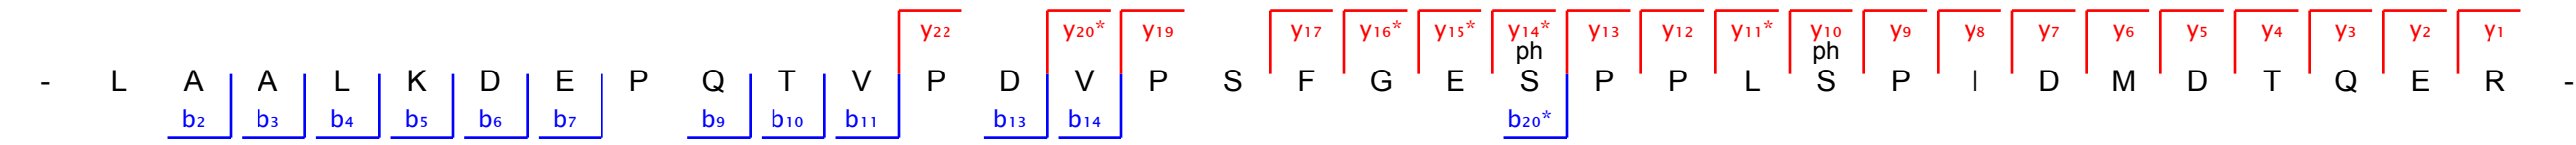

Raw file 20150812\_A375SR\_Phospho\_BR1\_03 Scan 27797 Method FTMS; HCD Score 171.49 m/z 843.09 Gene names CDCA3

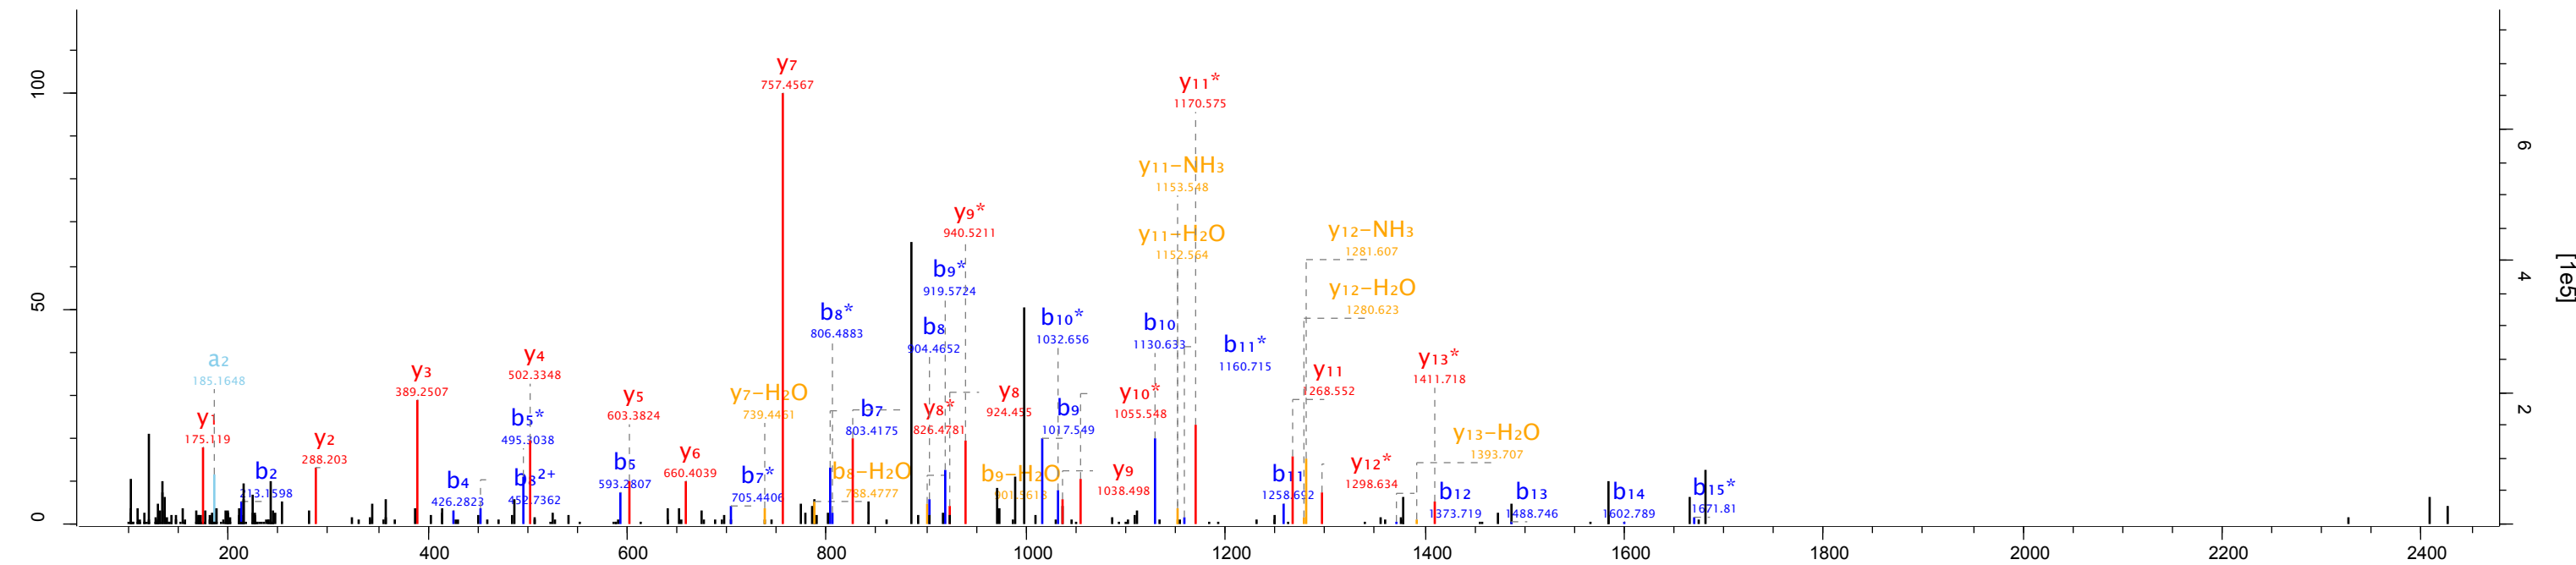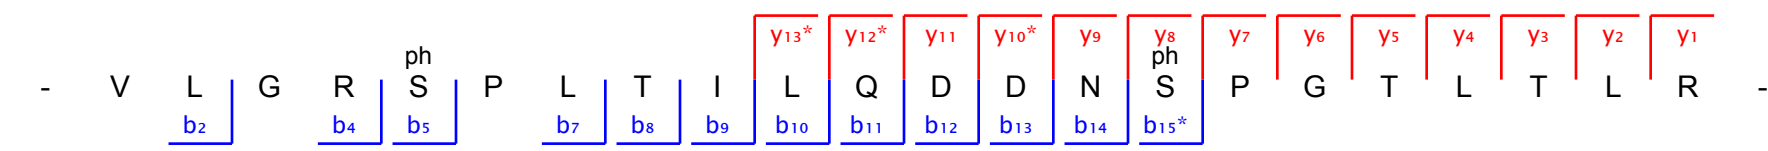



Raw file: 20150812\_A375SR\_Phospho\_BR1\_03  
 Scan: 2787 Method: FTMS; HCD Score: 113.23 m/z: 702.3 Gene names: IGF2BP3

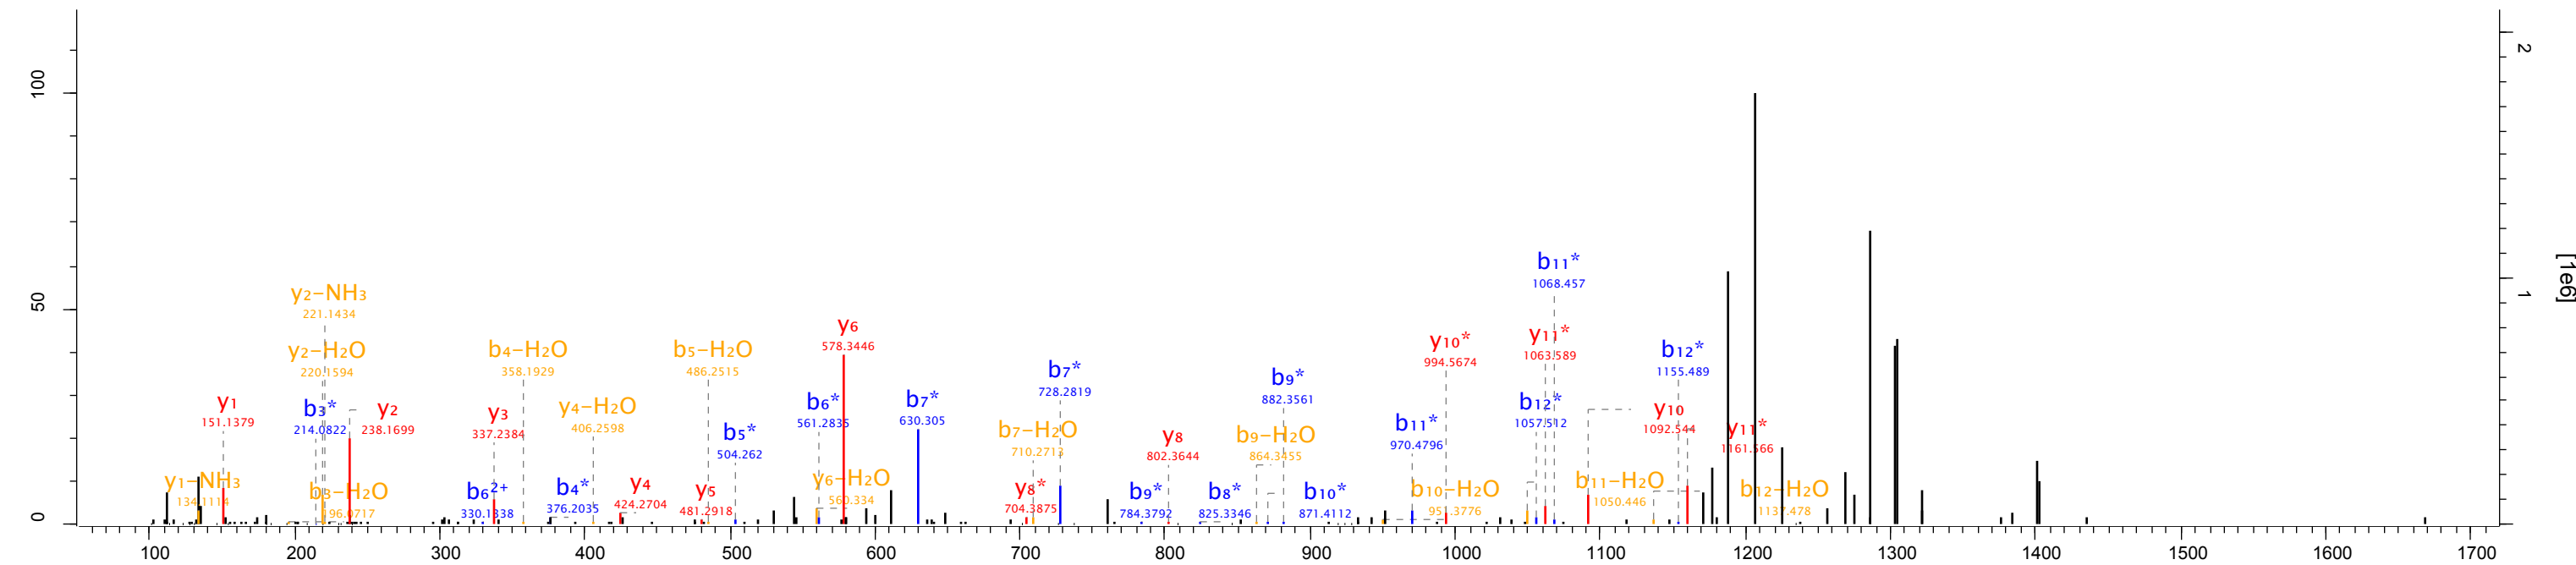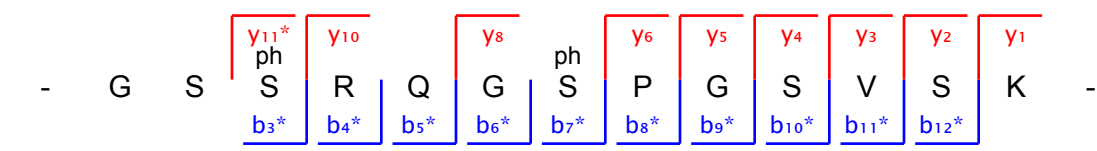

Raw file: 20150812\_A375SR\_Phospho\_BR1\_03  
 Scan: 28427 Method: FTMS; HCD Score: 45.11 m/z: 1000.25 Gene names: SRGAP2

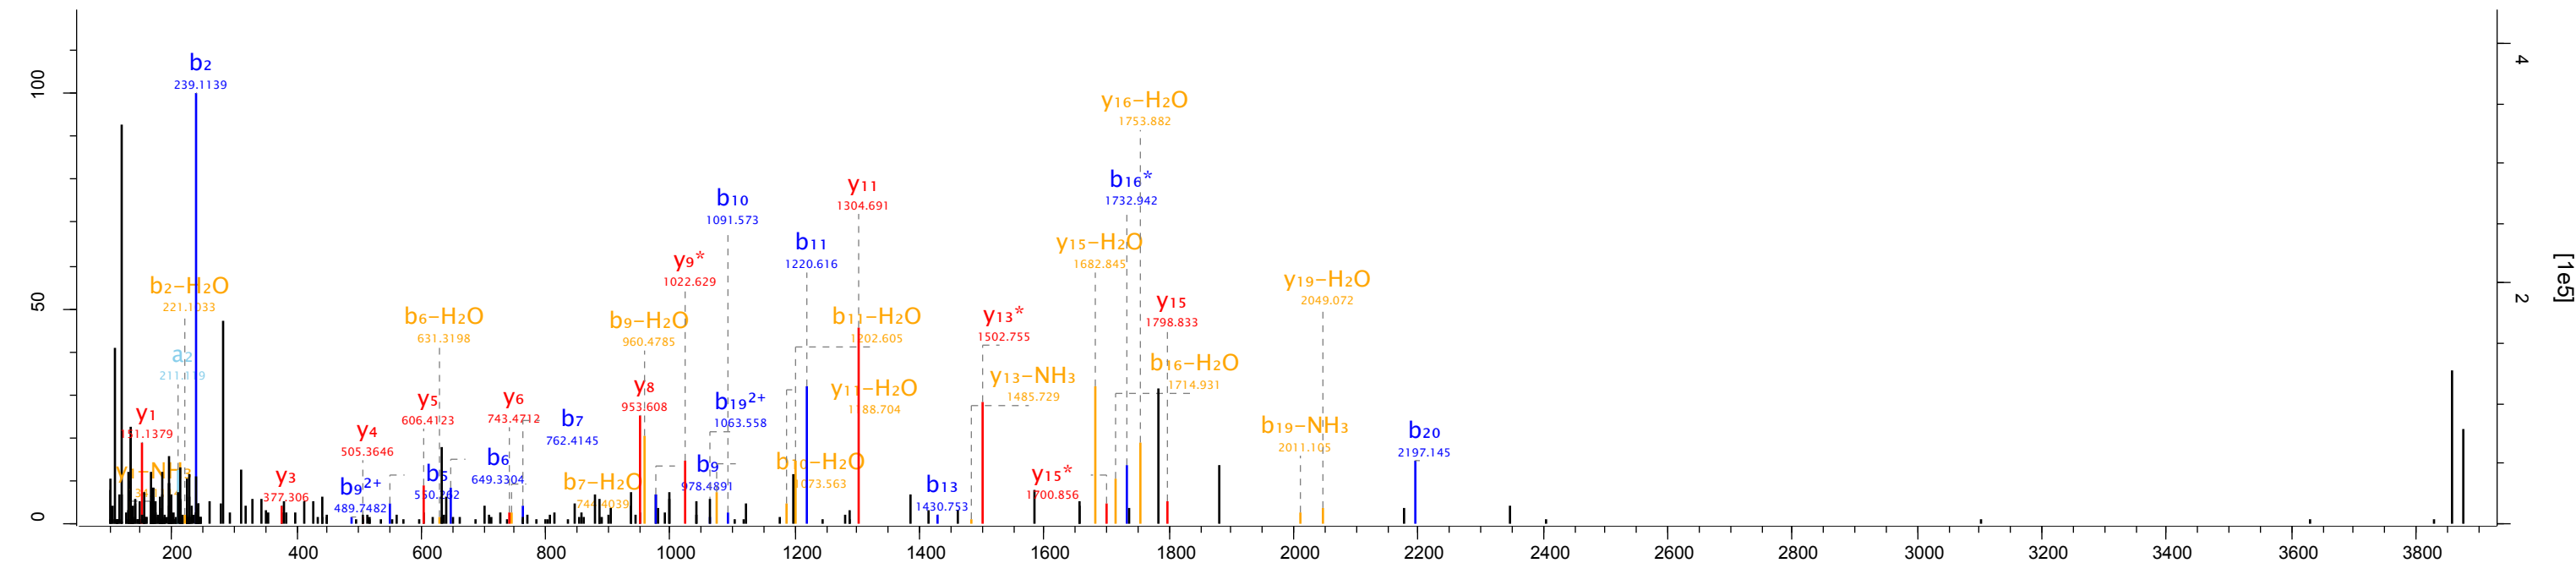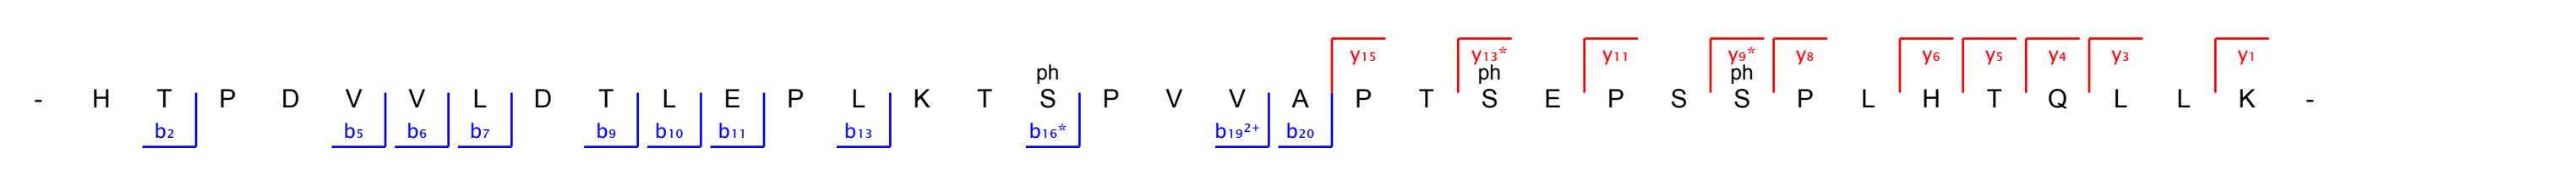

Raw file: 20150812\_A375SR\_Phospho\_BR1\_03  
 Scan: 2967 Method: FTMS; HCD Score: 59.79 m/z: 572.26 Gene names: AXIN1

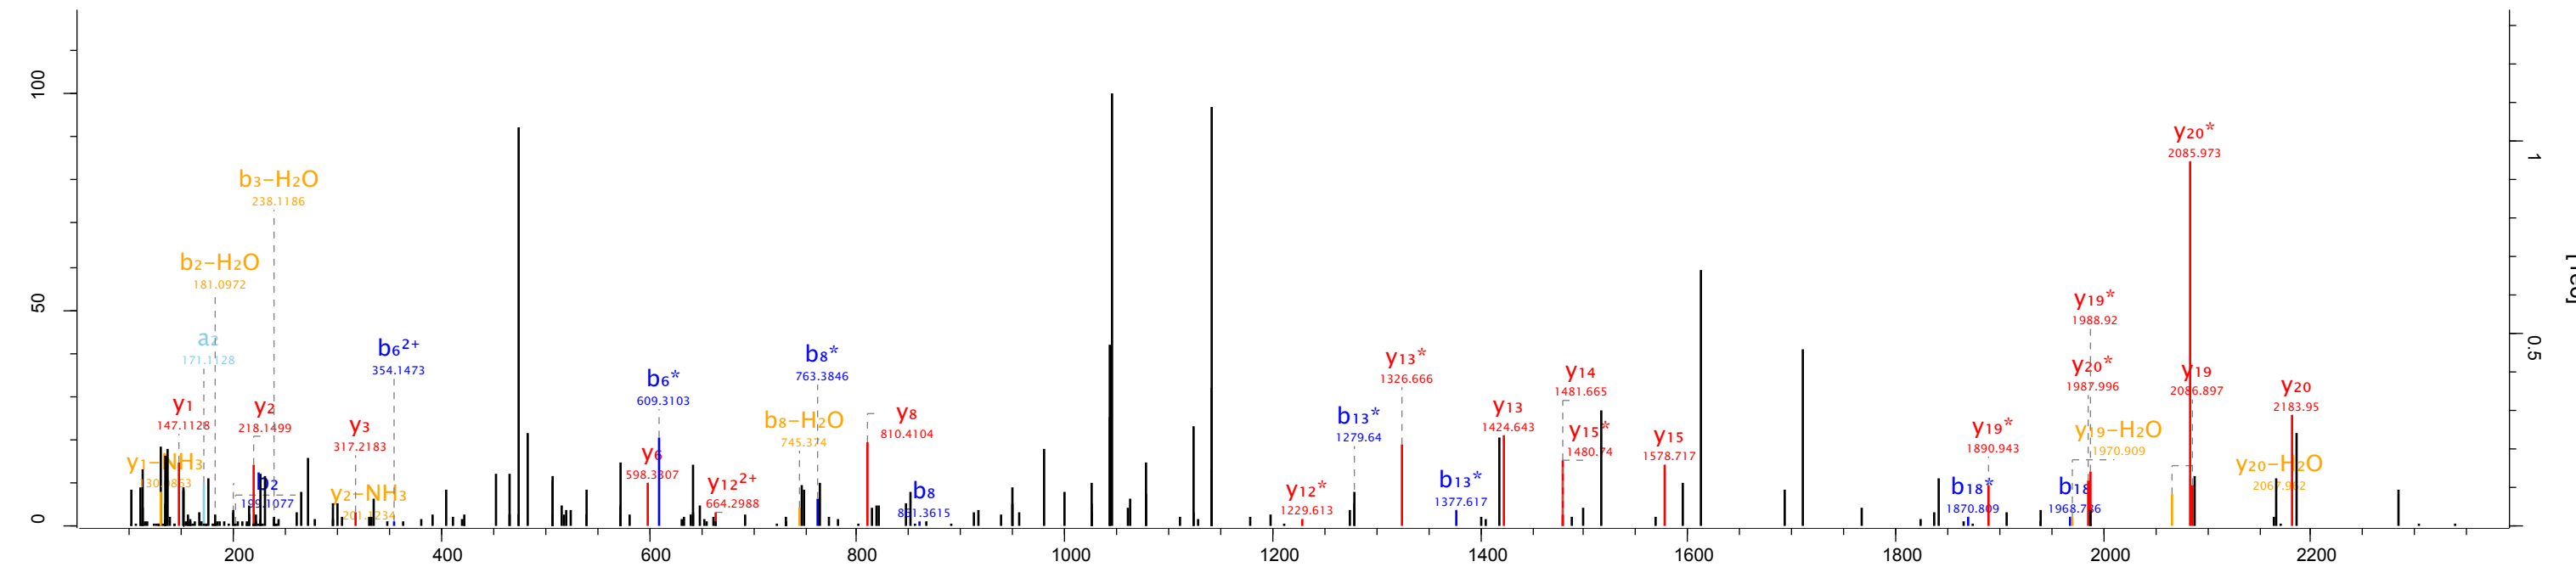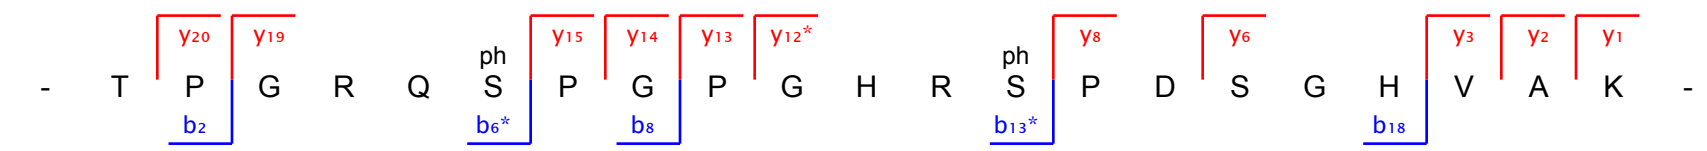

20150812\_A375SR\_Phospho\_BR1\_03 3407 FTMS; HCD 264.84 779.81 CD2AP

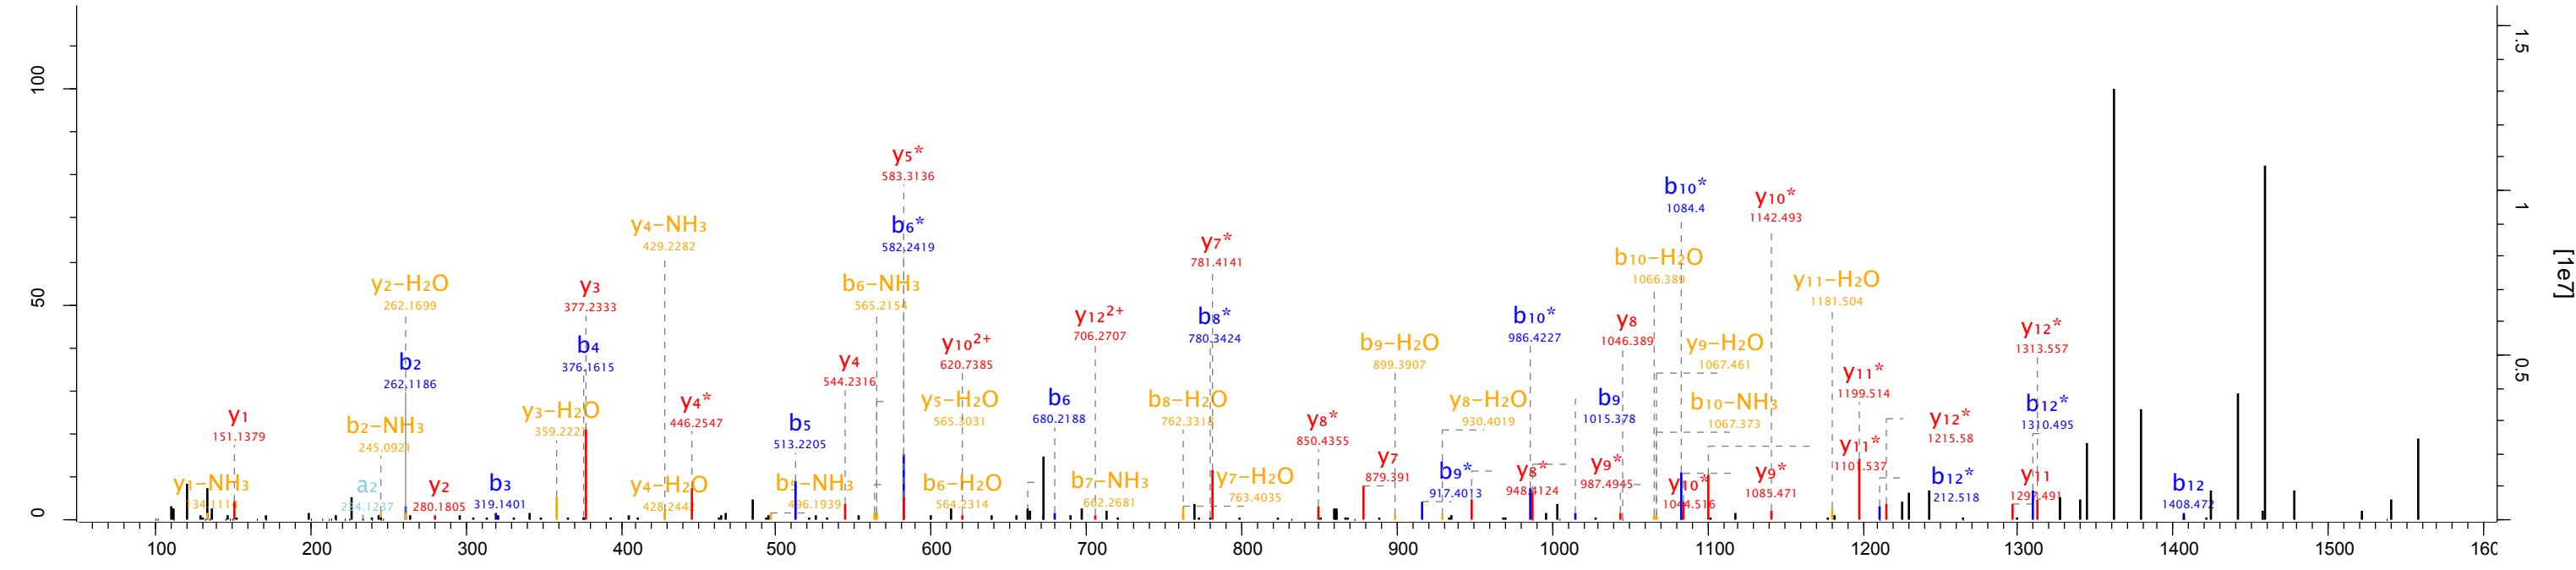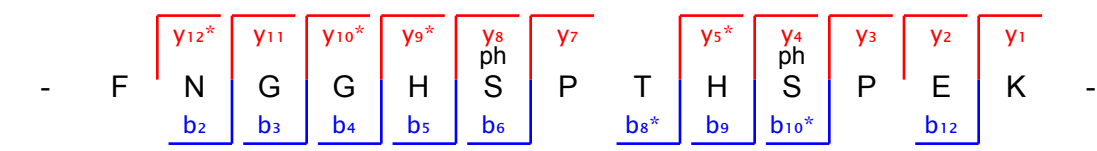

Raw file: 20150812\_A375SR\_Phospho\_BR1\_03  
 Scan: 3507 Method: FTMS; HCD Score: 47.62 m/z: 599.73 Gene names: CAP2

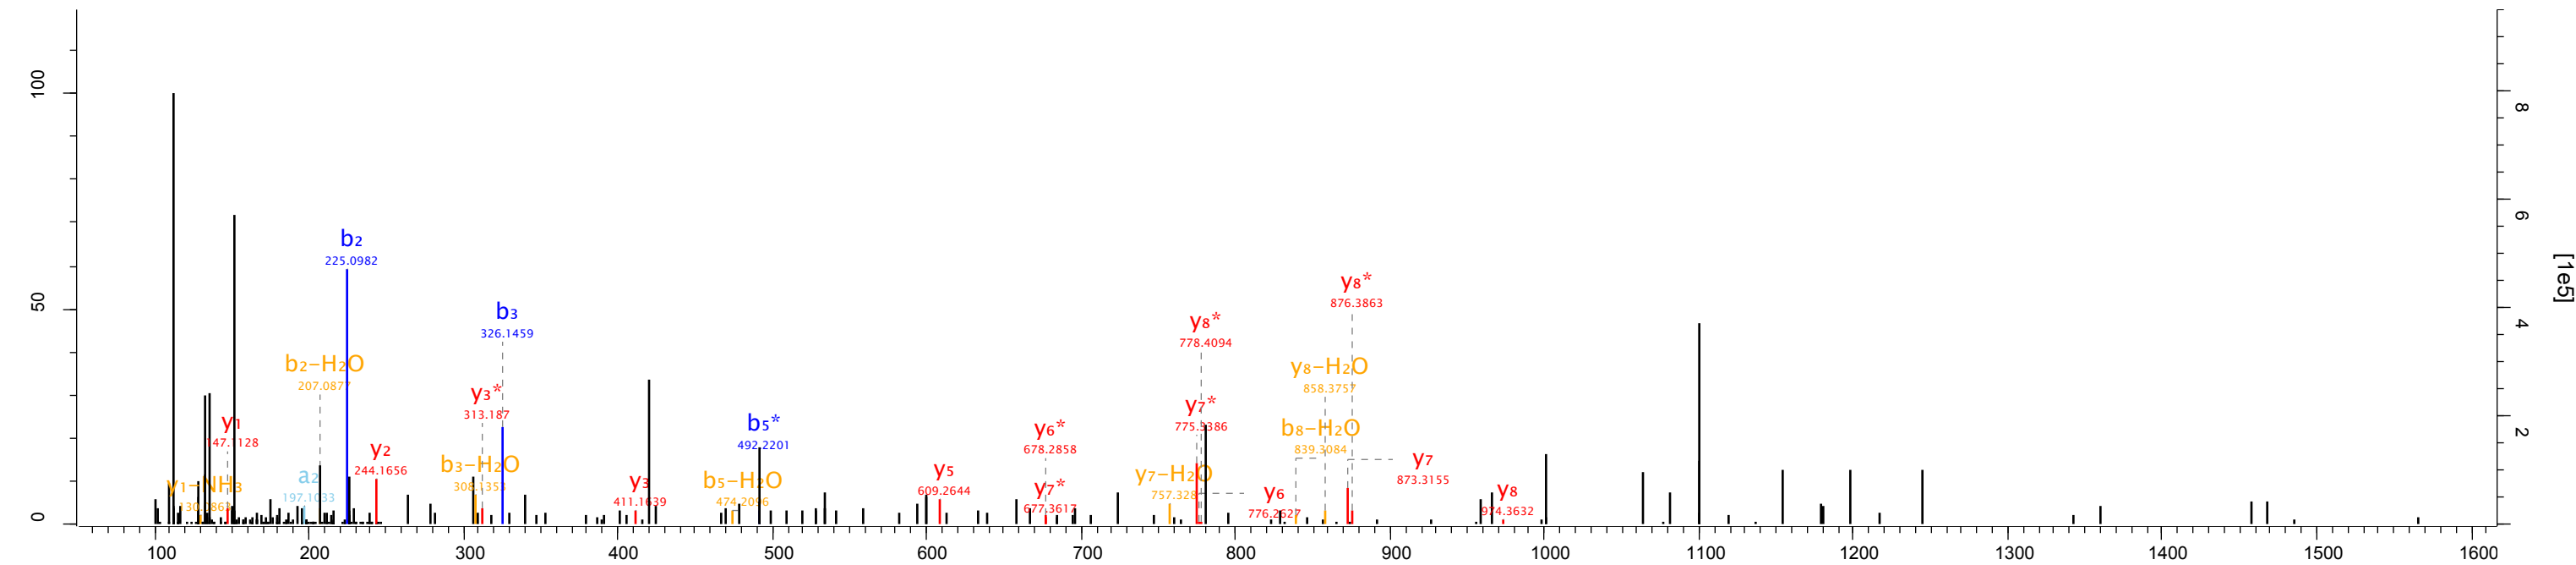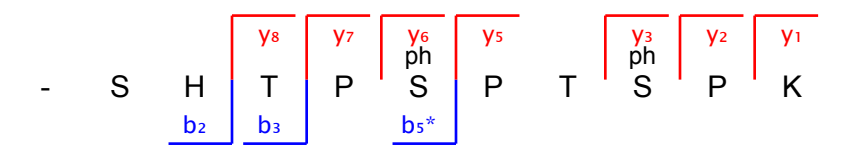

Raw file: 20150812\_A375SR\_Phospho\_BR1\_03  
 Scan: 3667 Method: FTMS; HCD Score: 66.02 m/z: 629.97 Gene names: MAPRE2

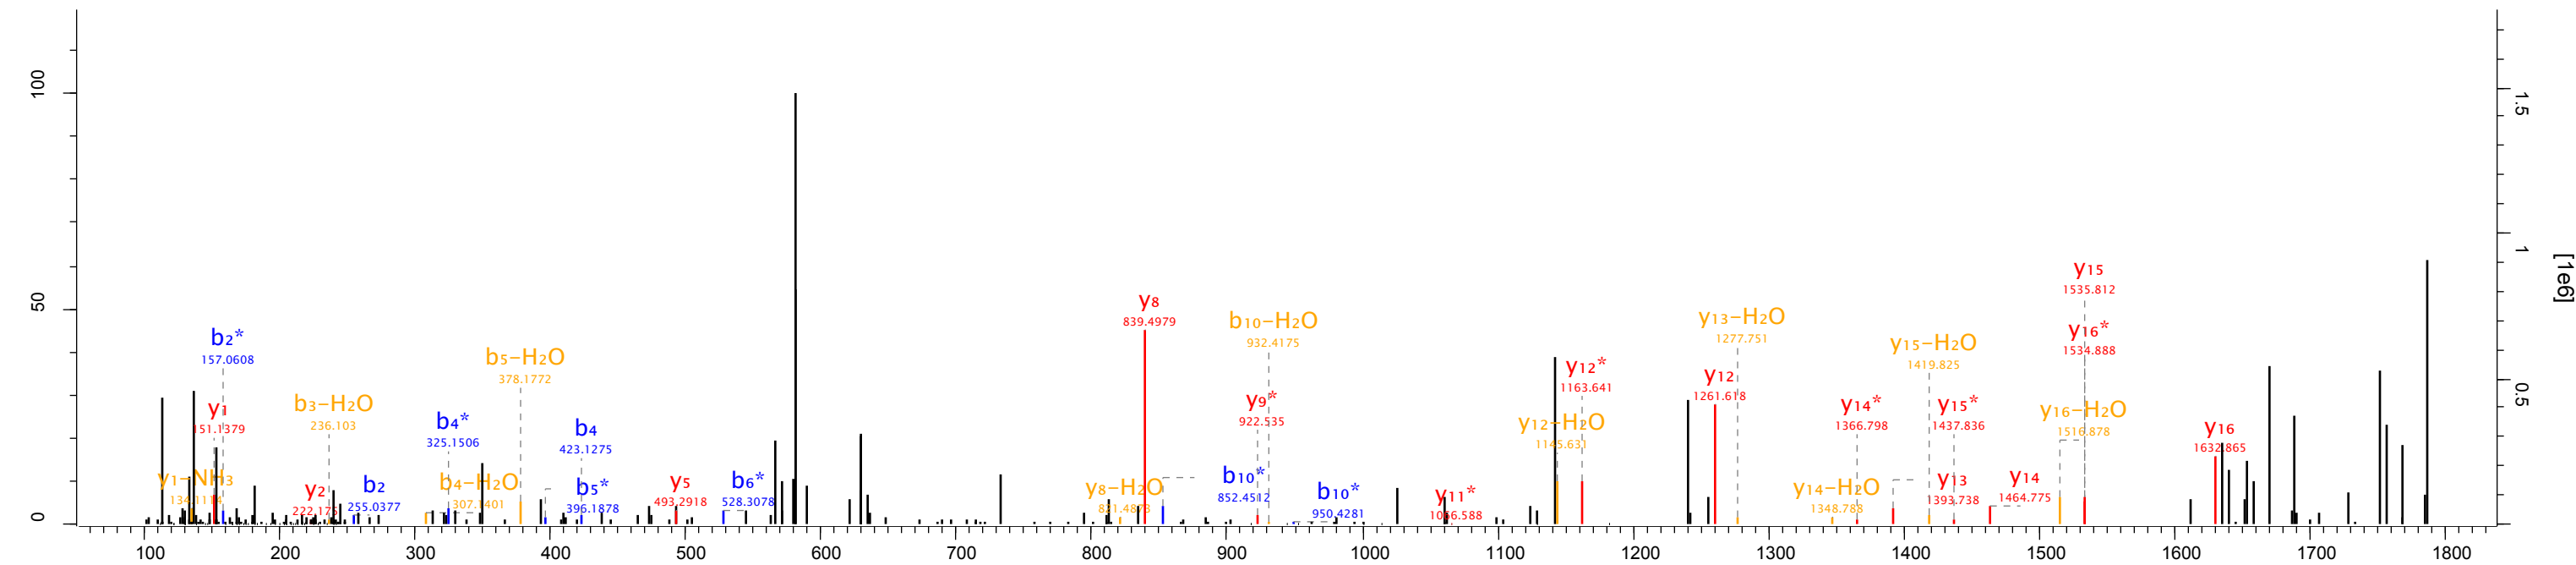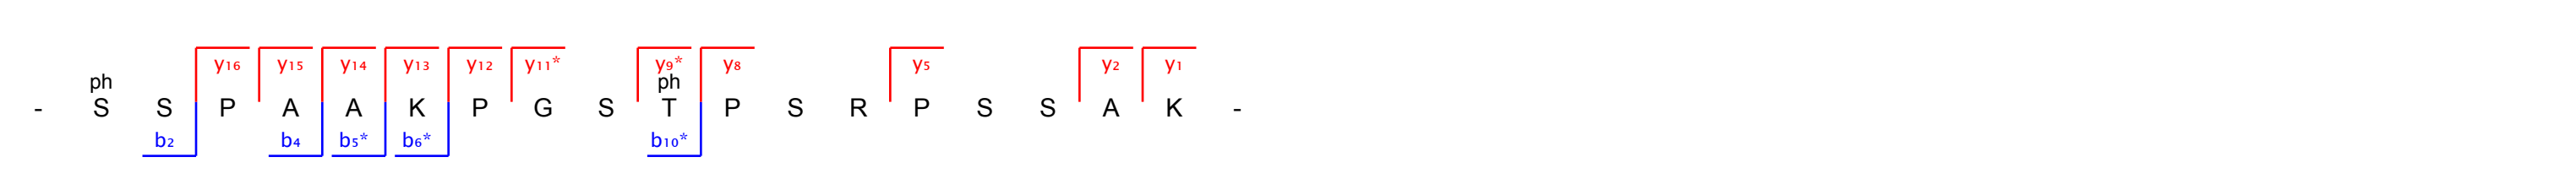

Raw file 20150812\_A375SR\_Phospho\_BR1\_03 Scan 3707 Method FTMS; HCD Score 78.96 m/z 577.74 Gene names SRRM1

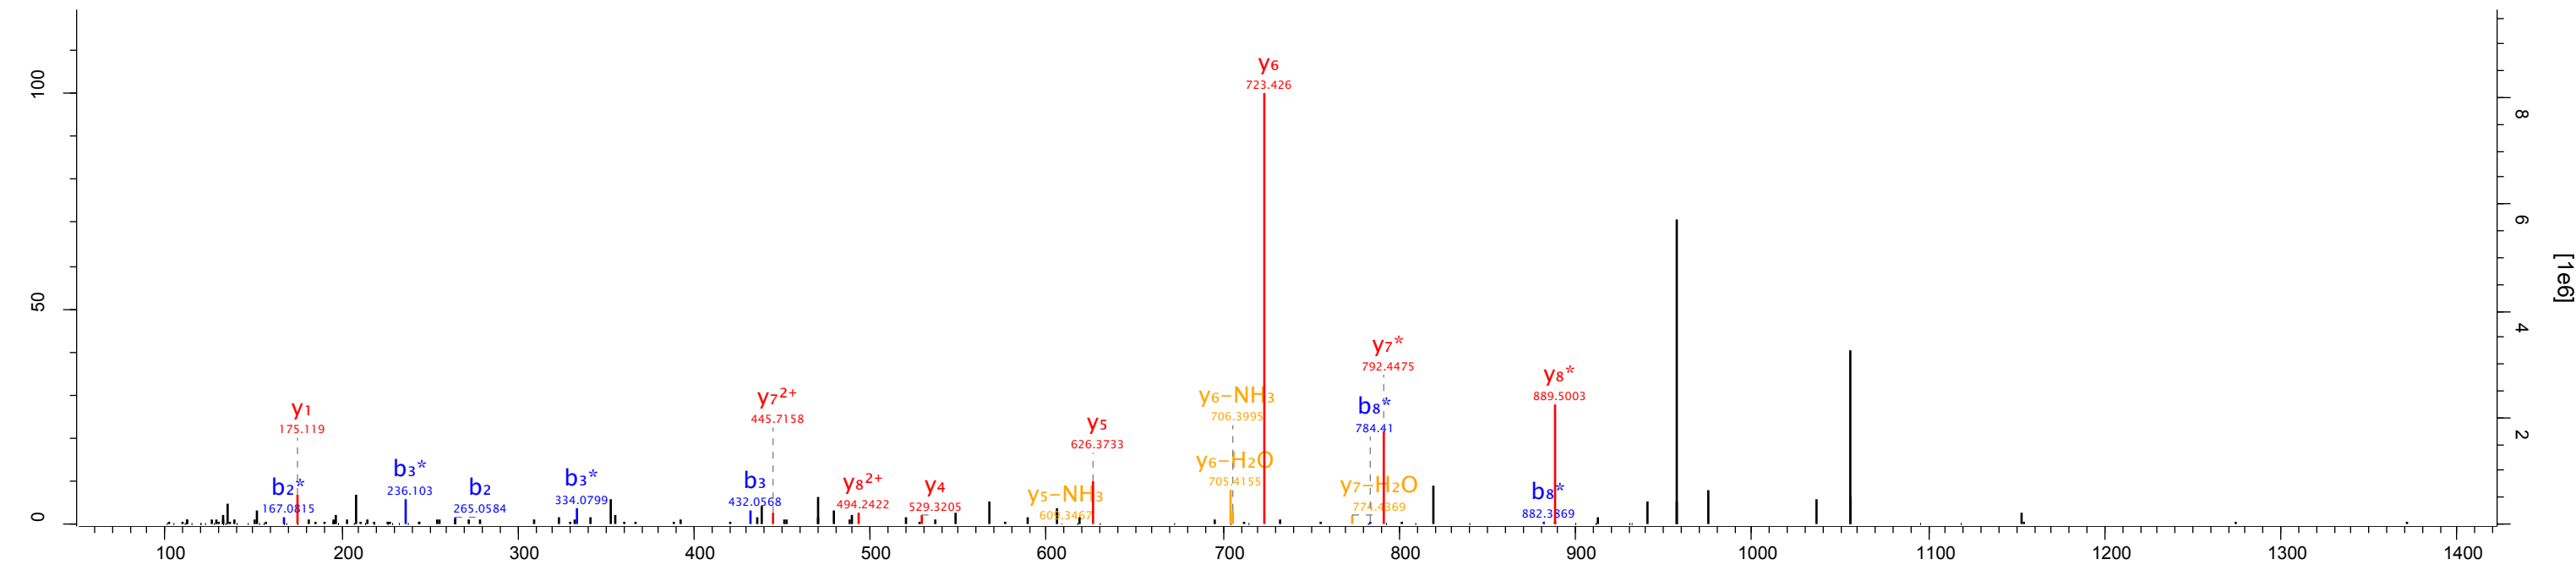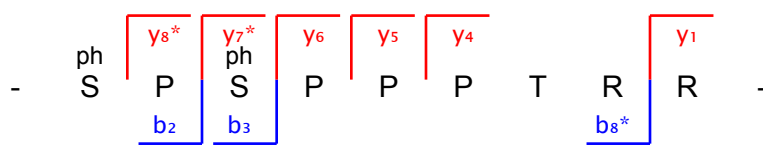

Raw file: 20150812\_A375SR\_Phospho\_BR1\_03  
 Scan: 4027 Method: FTMS; HCD Score: 145.73 m/z: 704.82 Gene names: RSL1D1

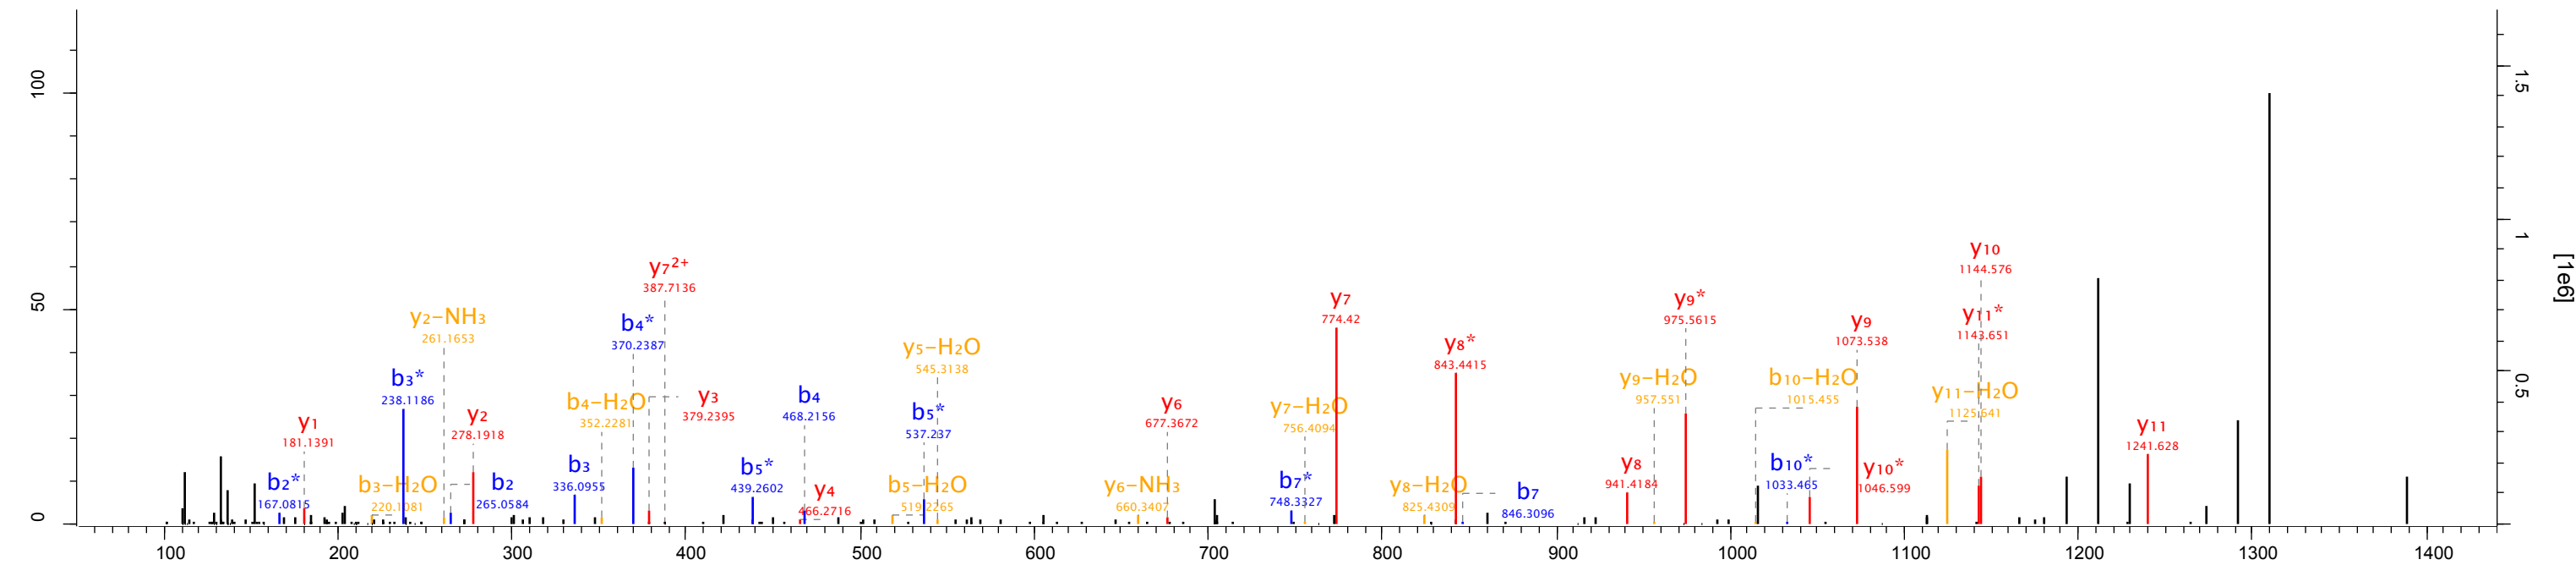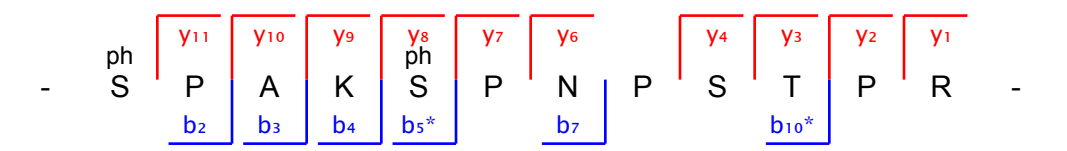



Raw file: 20150812\_A375SR\_Phospho\_BR1\_03  
 Scan: 4117 Method: FTMS; HCD Score: 44.6 m/z: 463.86 Gene names: DROSHA

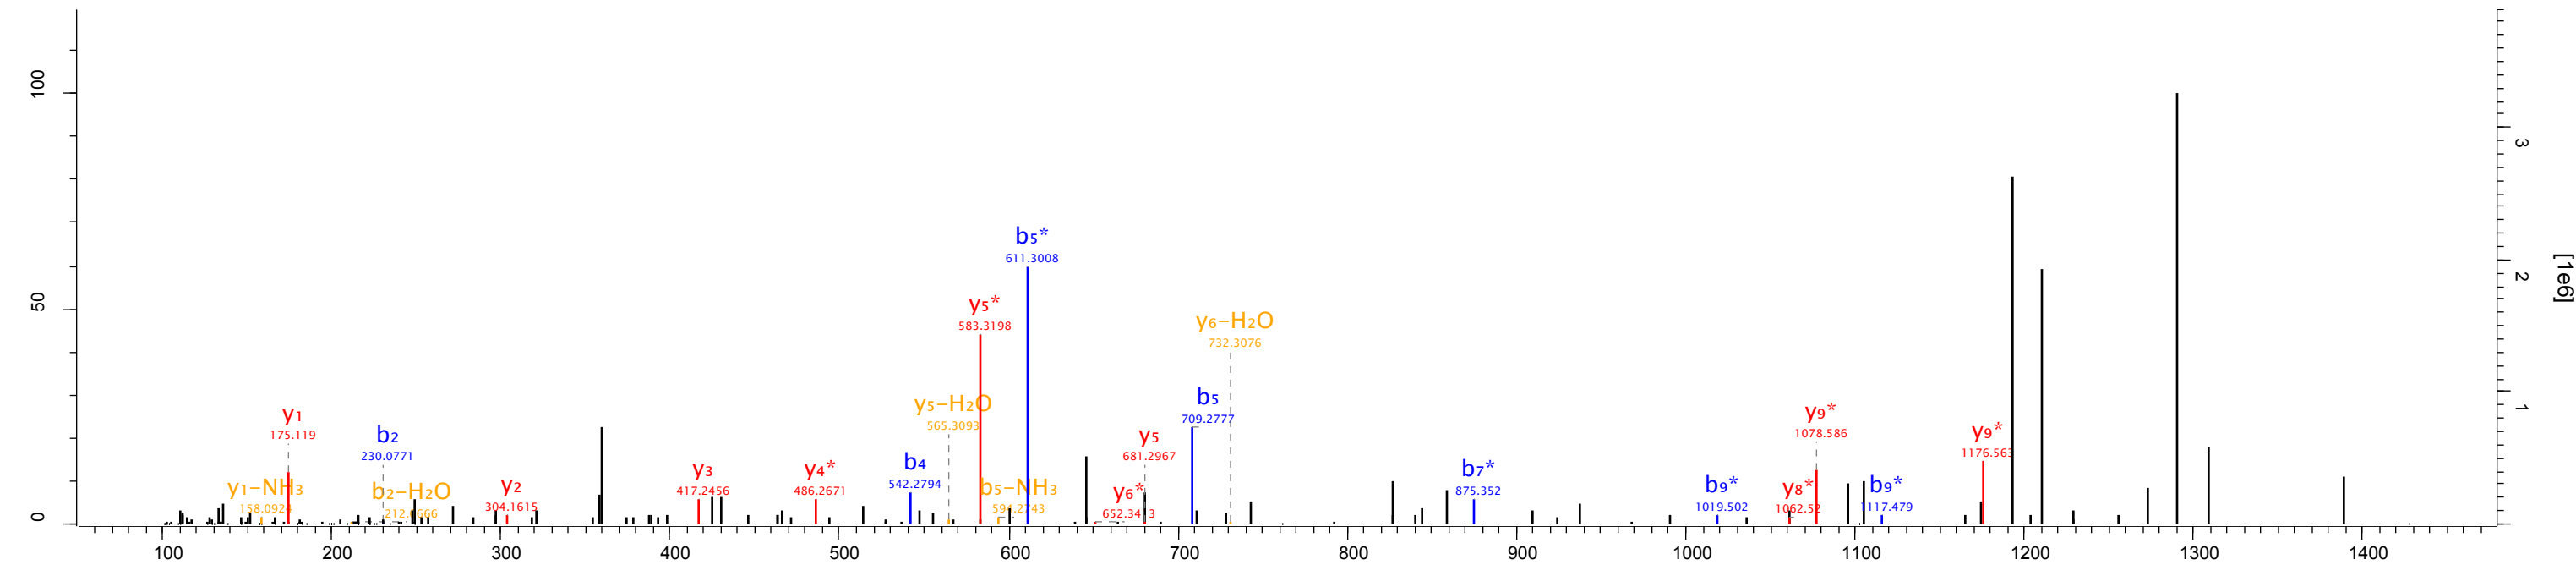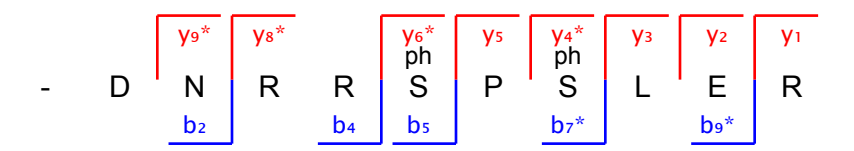

Raw file: 20150812\_A375SR\_Phospho\_BR1\_03  
 Scan: 4247 Method: FTMS; HCD Score: 236.15 m/z: 935.37 Gene names: LEO1

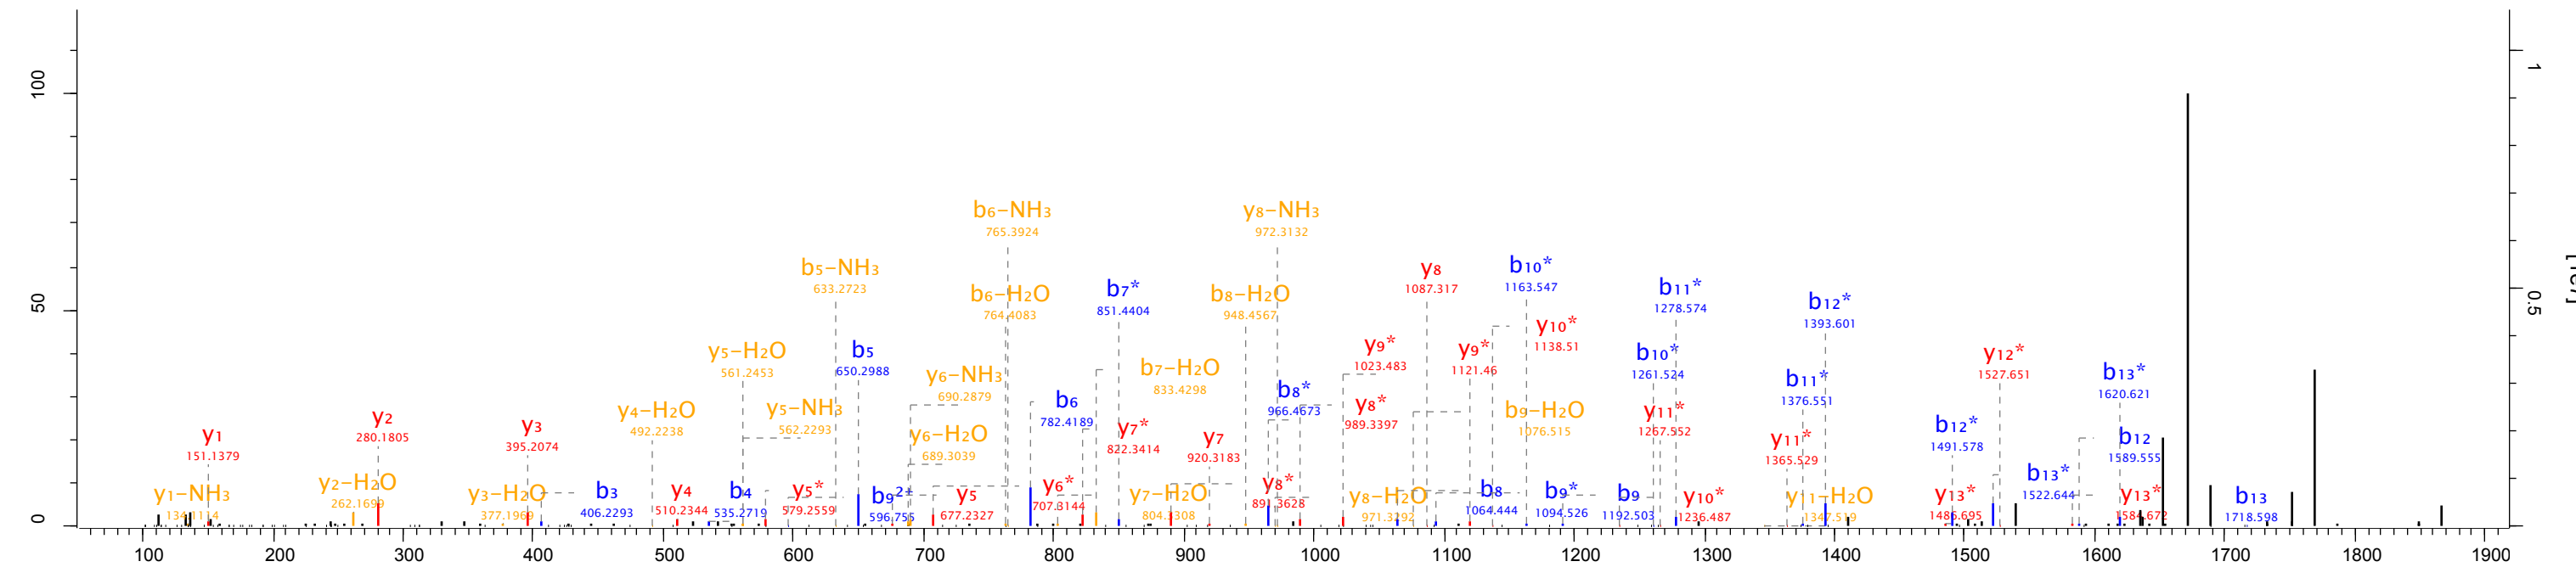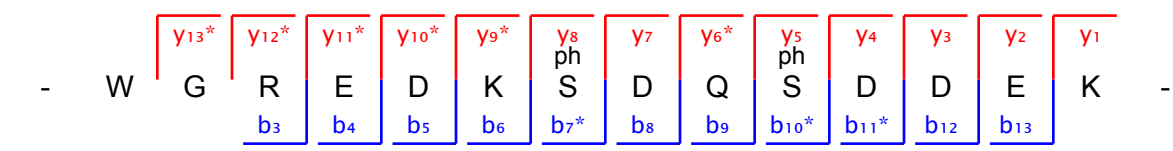

Raw file: 20150812\_A375SR\_Phospho\_BR1\_03  
 Scan: 4287 Method: FTMS; HCD Score: 115.83 m/z: 916.9 Gene names: CUL4B

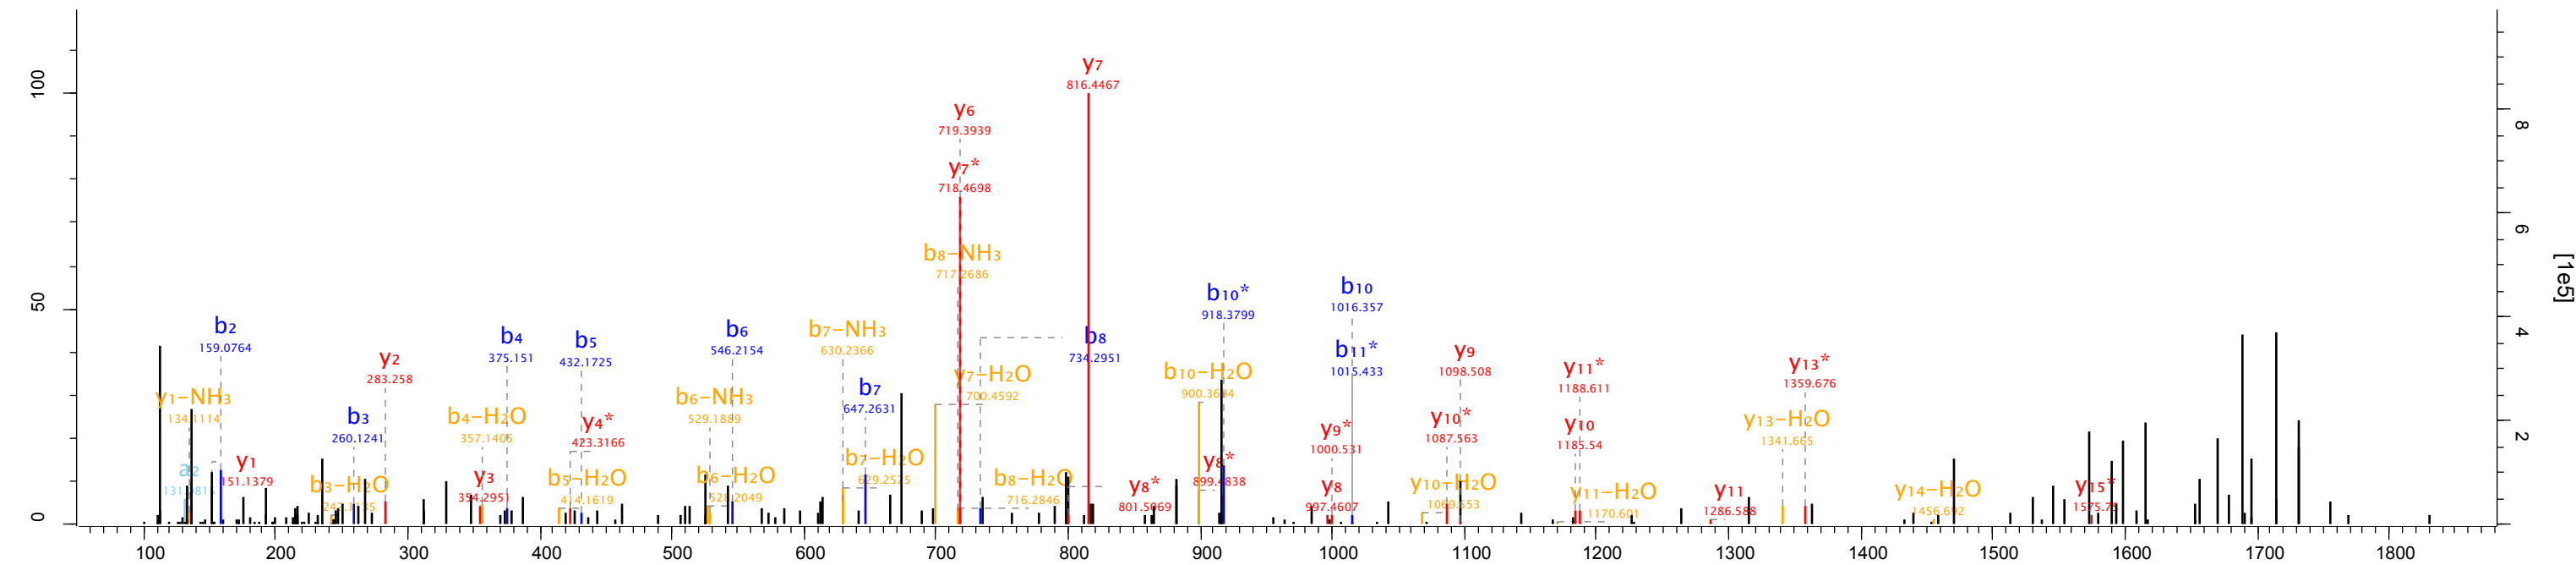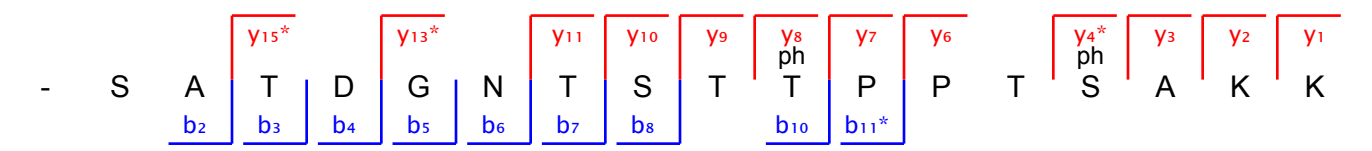

Raw file: 20150812\_A375SR\_Phospho\_BR1\_03  
 Scan: 4317 Method: FTMS; HCD Score: 188.91 m/z: 815.35 Gene names: IRS1

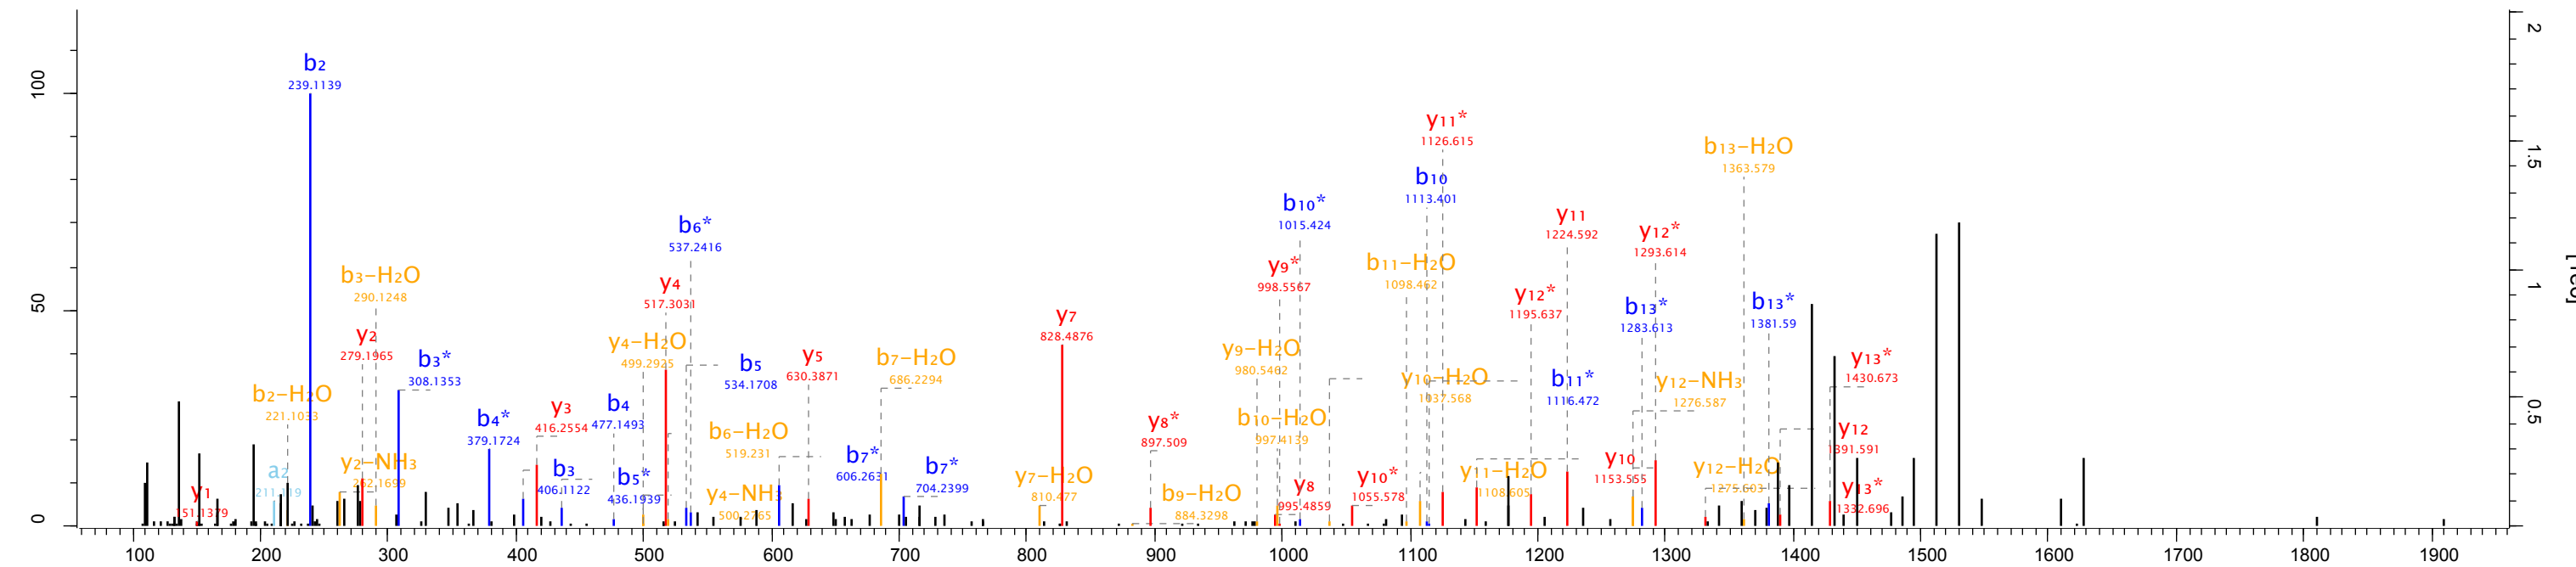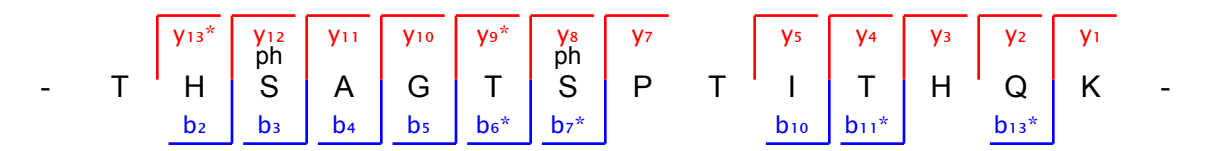

Raw file 20150812\_A375SR\_Phospho\_BR1\_03 Scan 4597 Method FTMS; HCD Score 102.37 m/z 640.25 Gene names CDK13

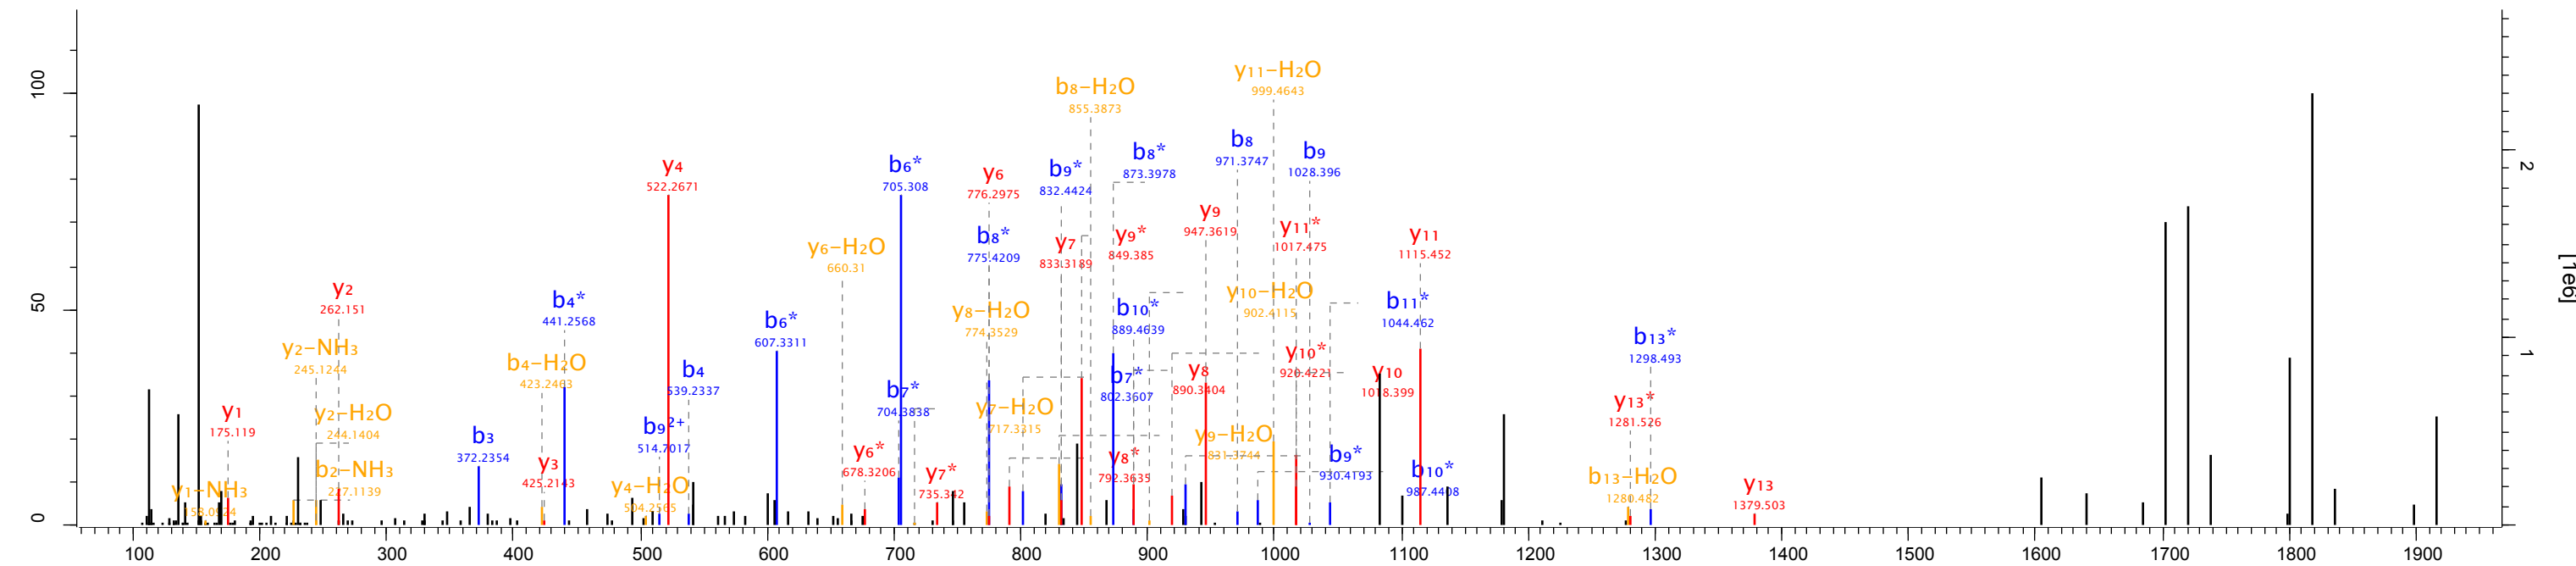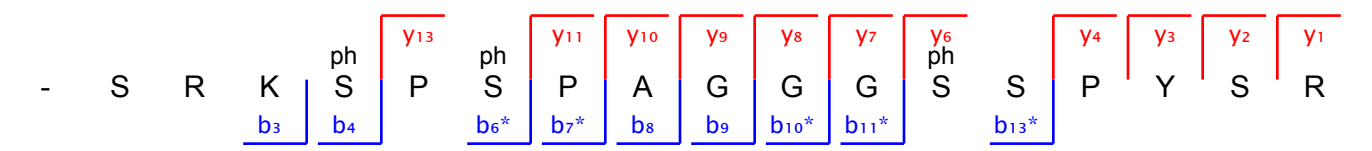

Raw file Scan Method Score m/z Gene names  
 20150812\_A375SR\_Phospho\_BR1\_03 4987 FTMS; HCD 220.15 1074.96 HTATSF1

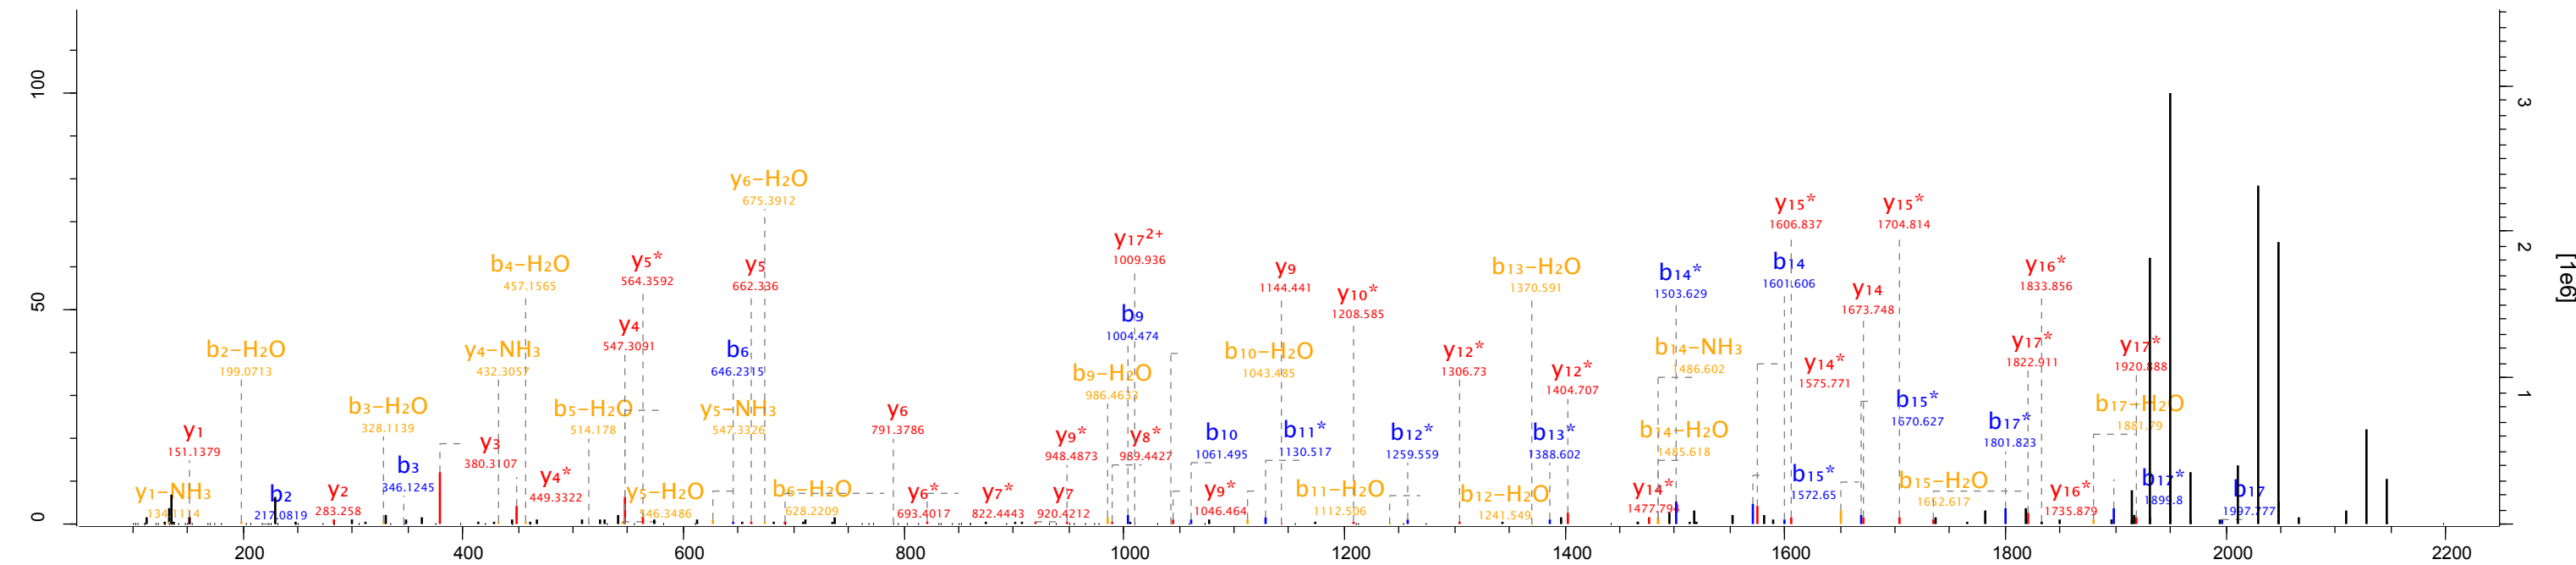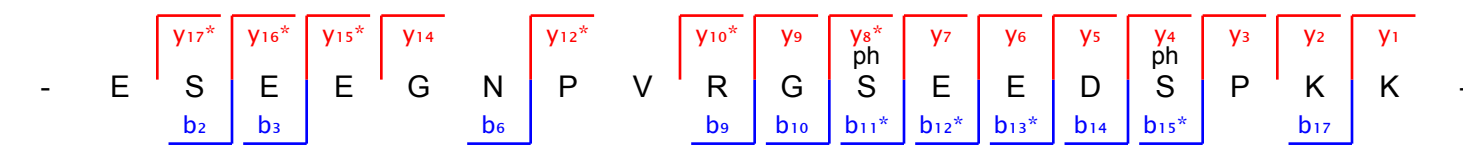

Raw file: 20150812\_A375SR\_Phospho\_BR1\_03  
 Scan: 6317 Method: FTMS; HCD Score: 299.85 m/z: 1005.39 Gene names: WNK1

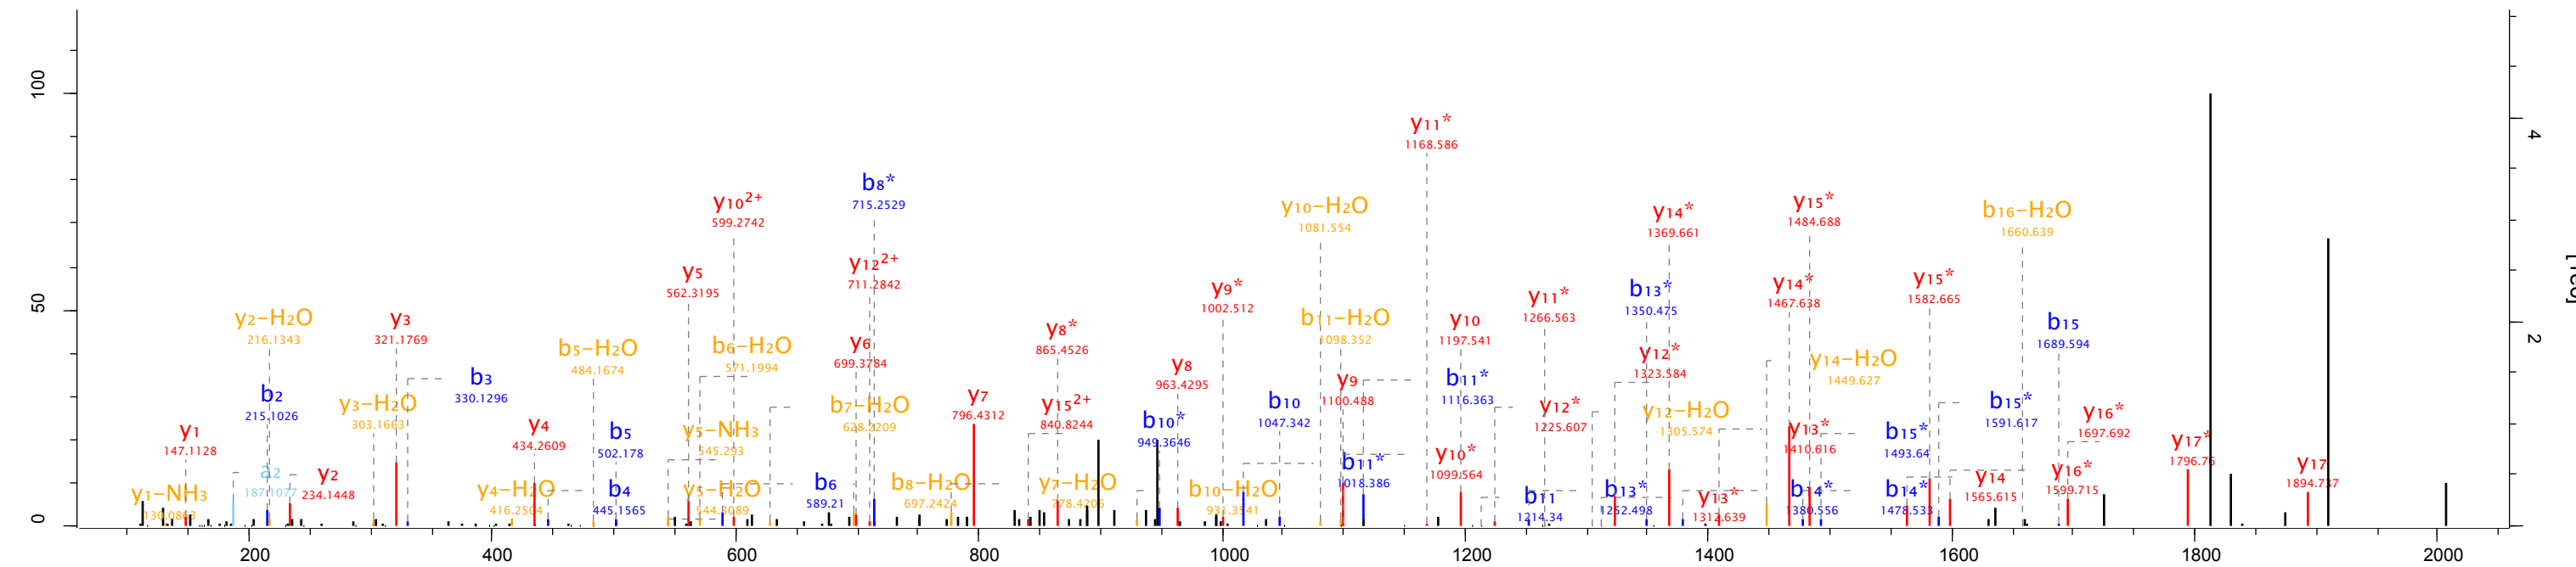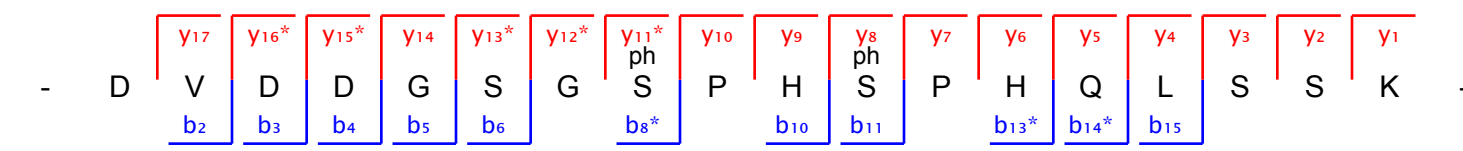

Raw file 20150812\_A375SR\_Phospho\_BR1\_03 Scan 6477 Method FTMS; HCD Score 130.53 m/z 503.7 Gene names SRSF9

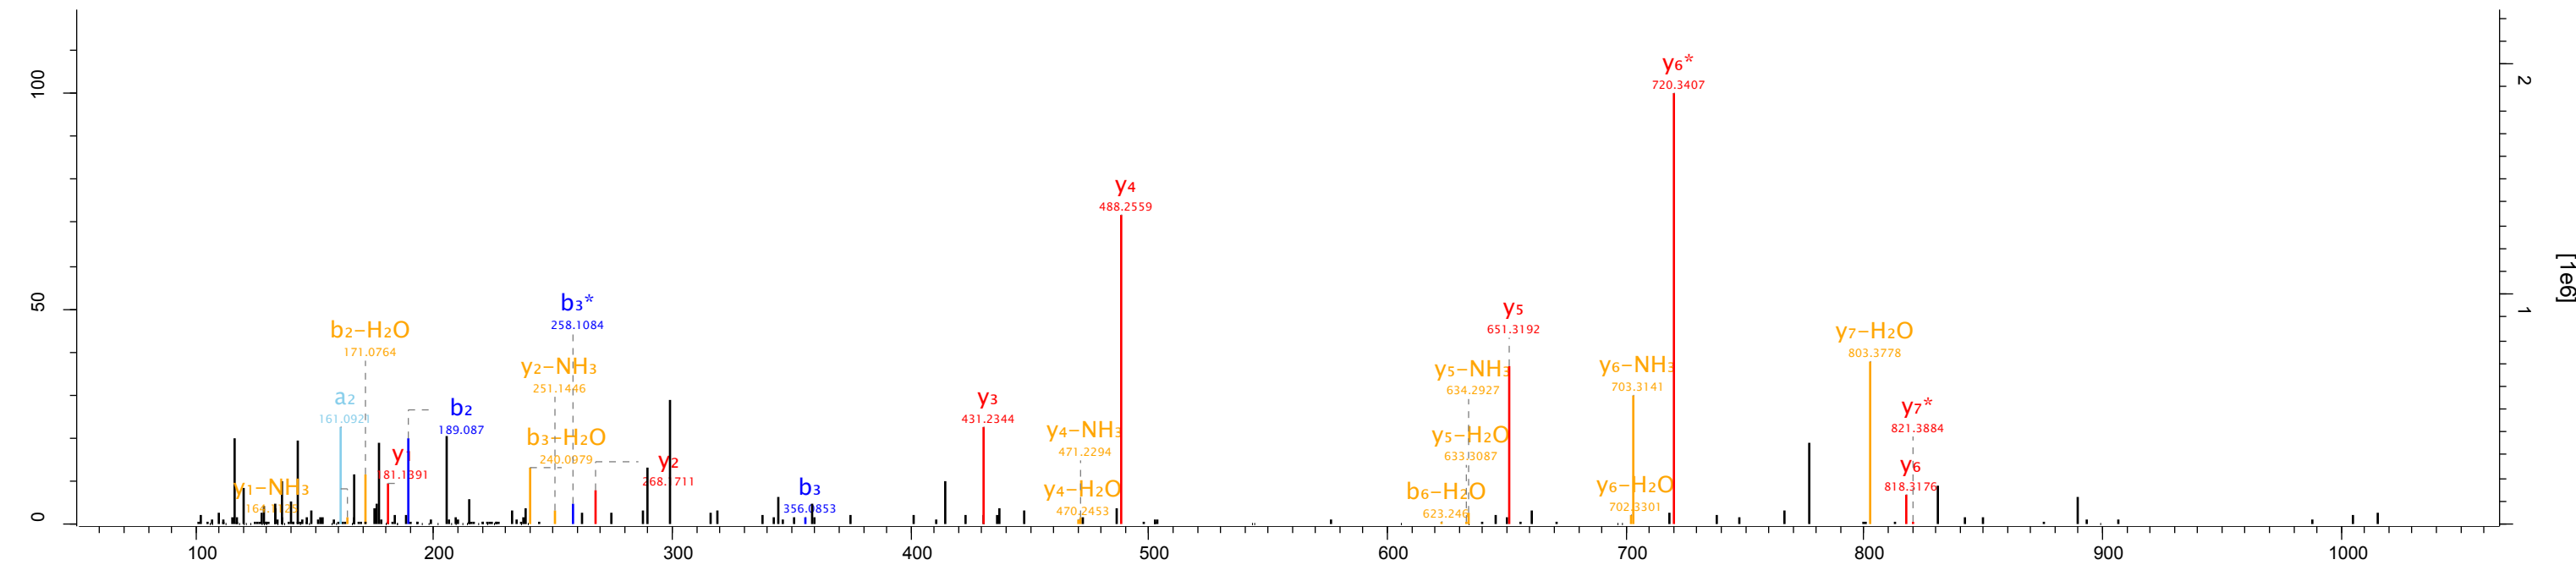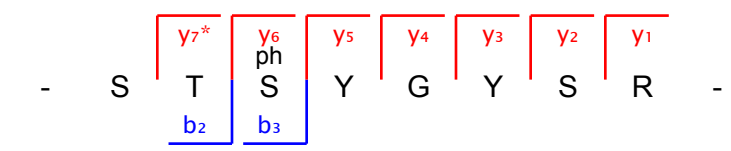



Raw file: 20150812\_A375SR\_Phospho\_BR1\_03  
 Scan: 6567 Method: FTMS; HCD Score: 167.02 m/z: 878.85 Gene names: MKI67

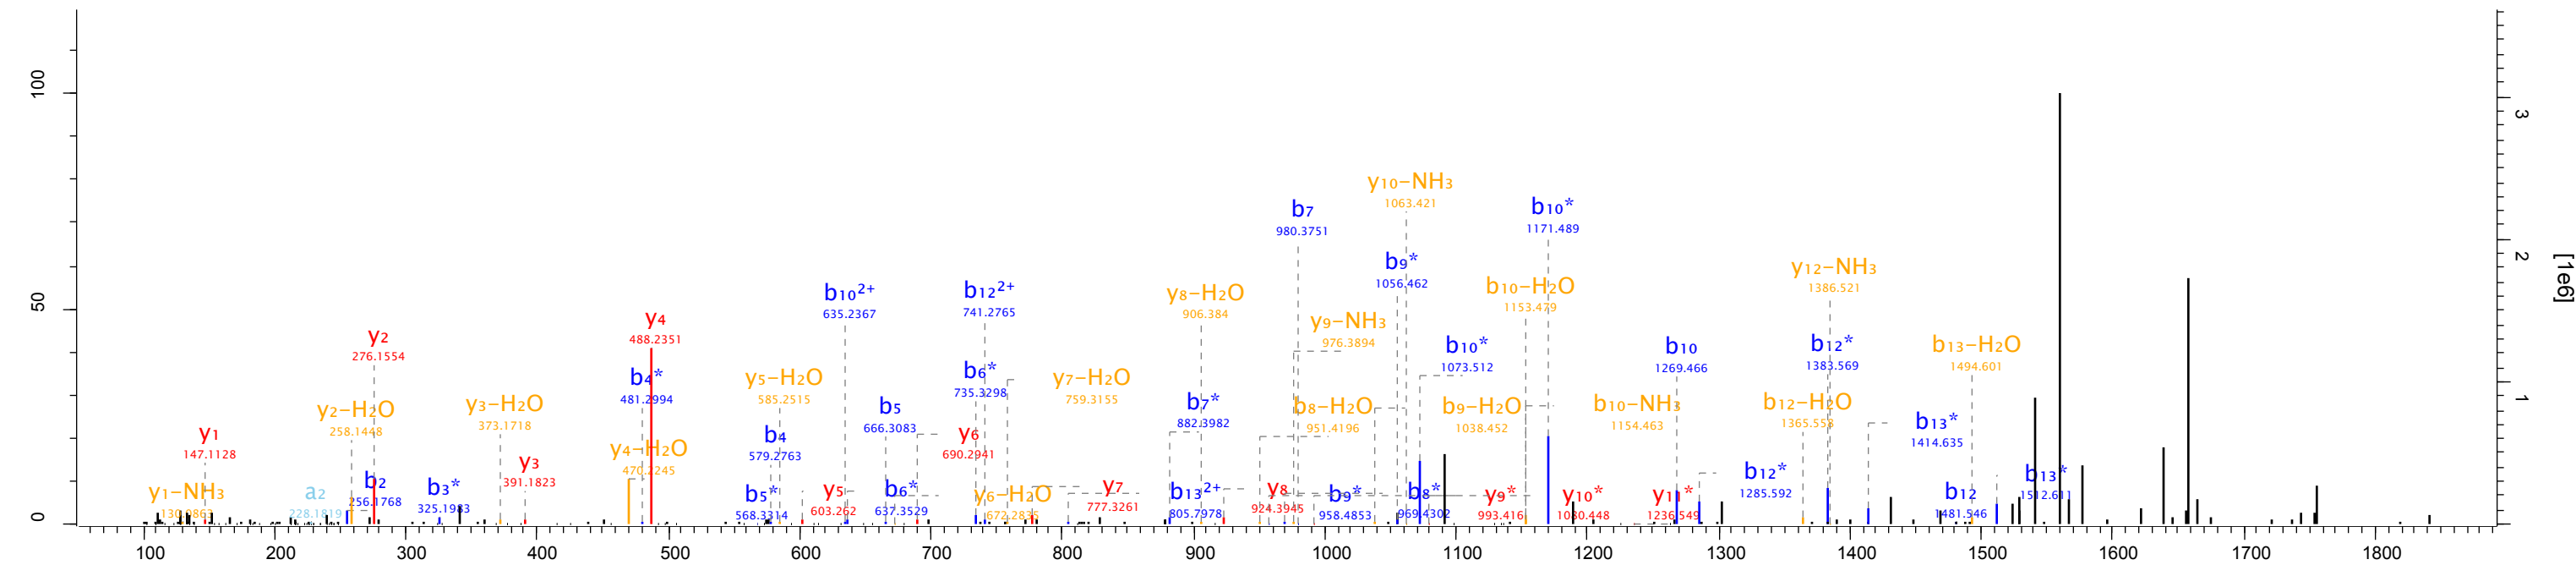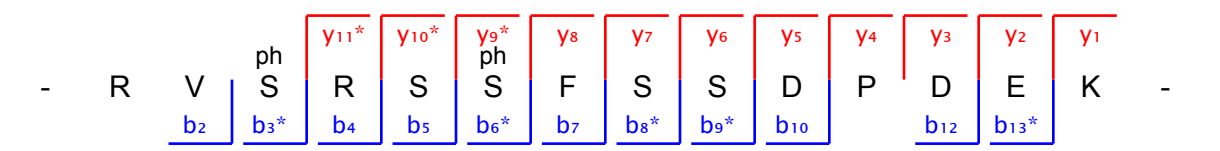

Raw file: 20150812\_A375SR\_Phospho\_BR1\_03  
 Scan: 7047 Method: FTMS; HCD Score: 165.49 m/z: 876.9 Gene names: NUP214

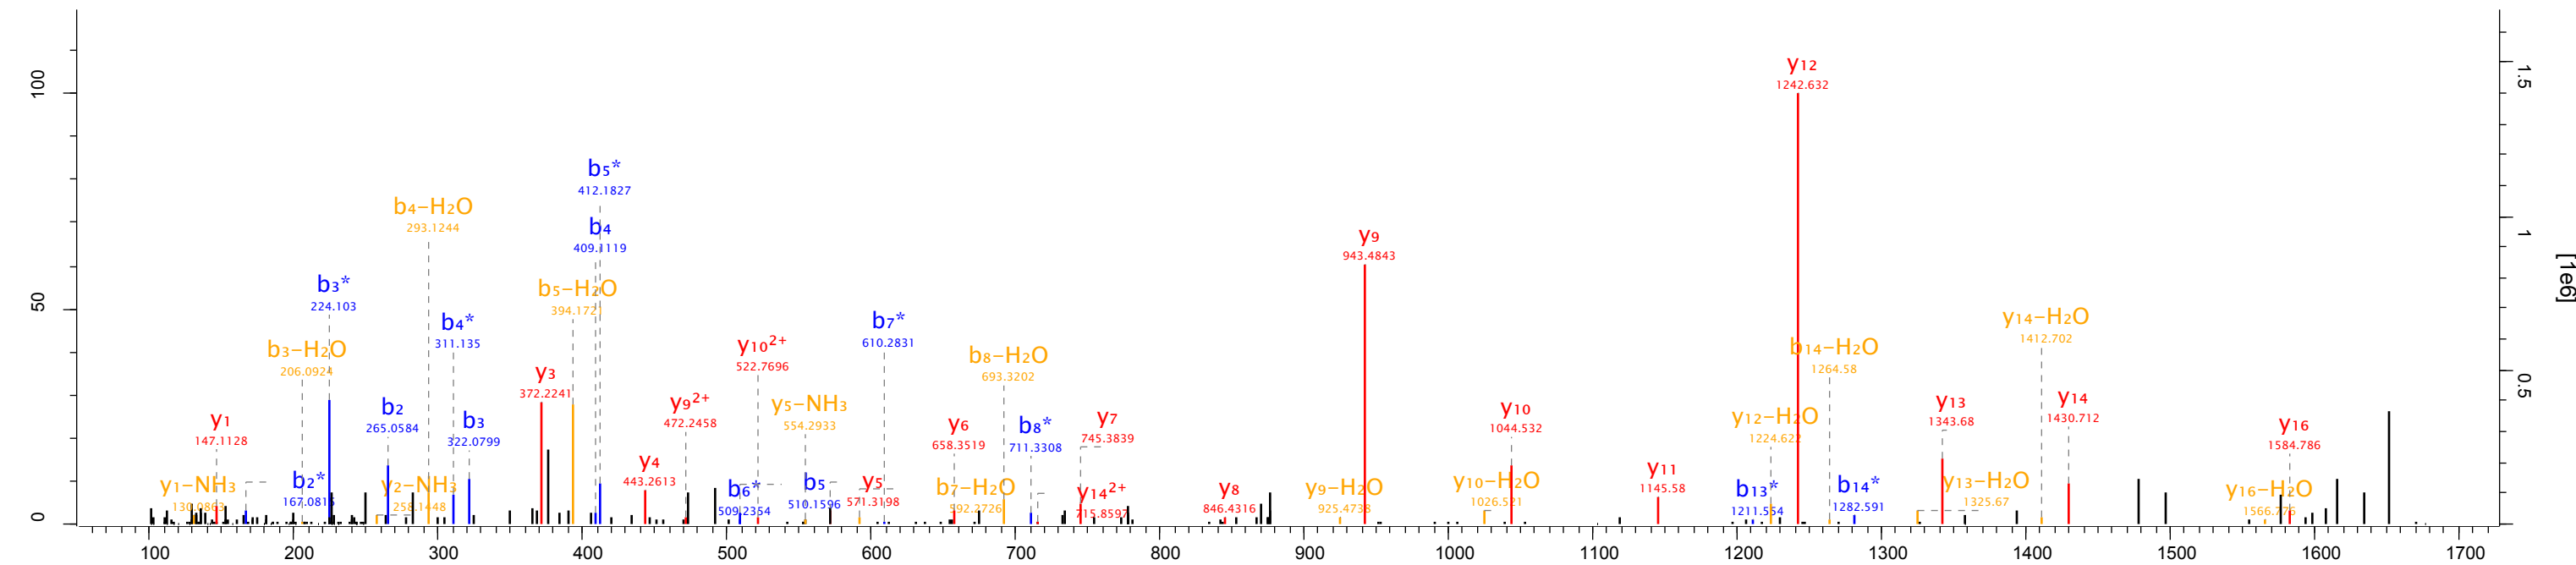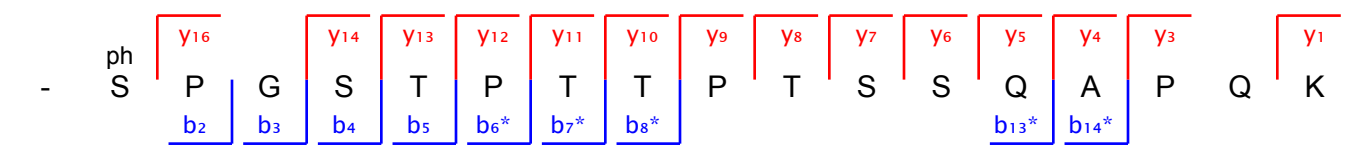

Raw file: 20150812\_A375SR\_Phospho\_BR1\_03  
 Scan: 7077 Method: FTMS; HCD Score: 114.9 m/z: 547.89 Gene names: TJP2

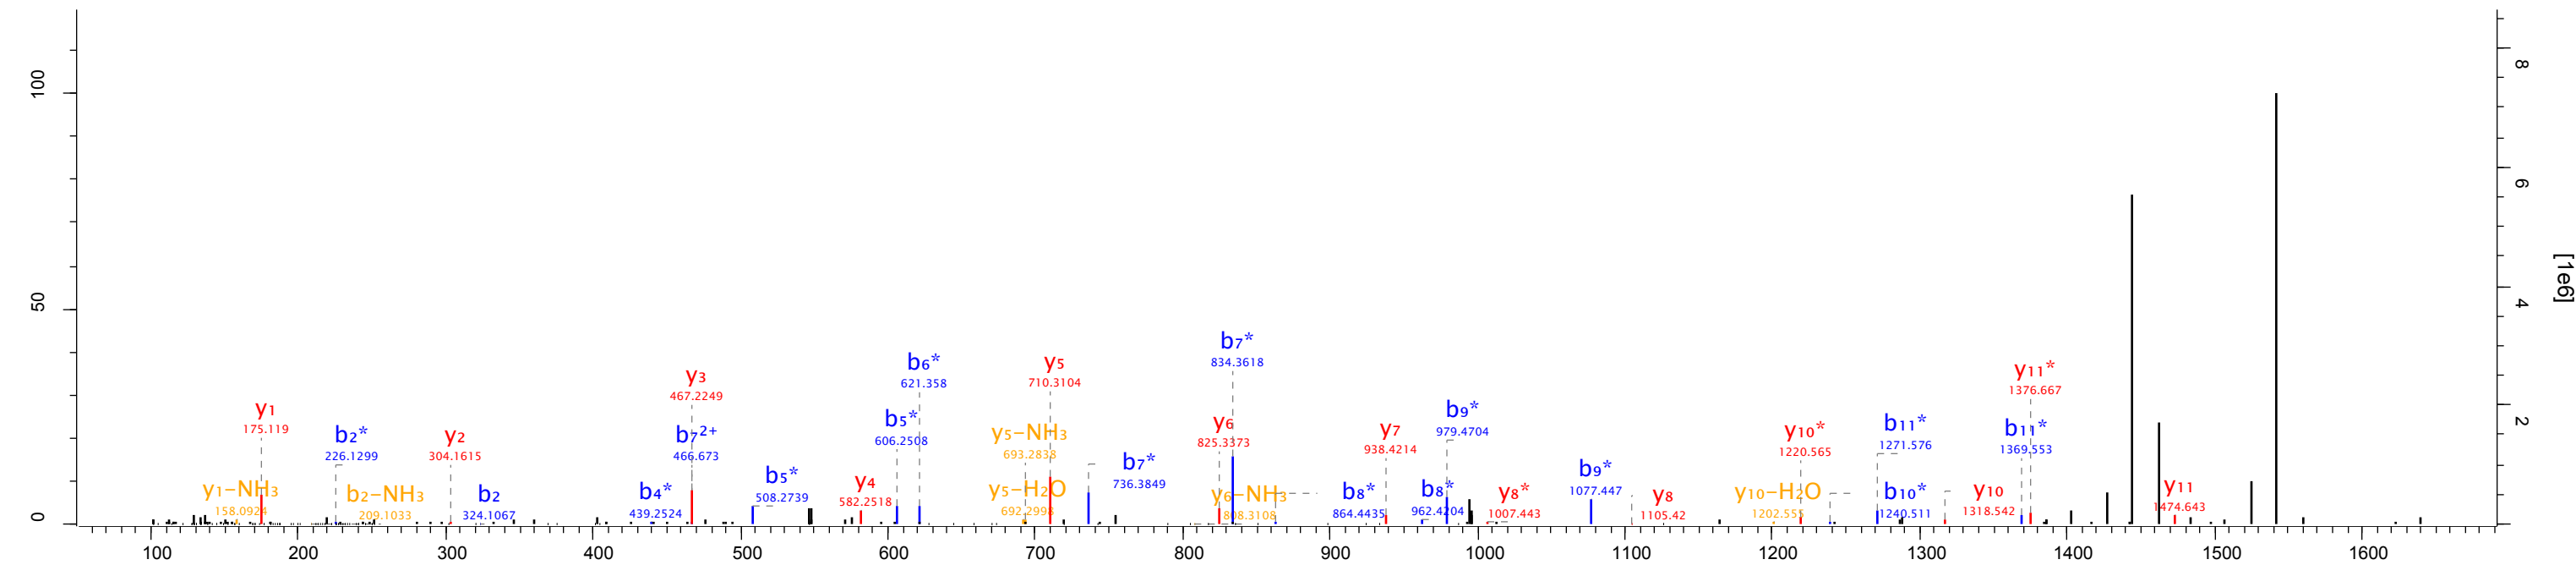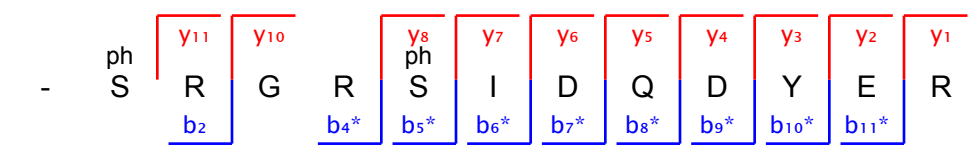

Raw file: 20150812\_A375SR\_Phospho\_BR1\_03  
 Scan: 7107 Method: FTMS; HCD Score: 204.42 m/z: 773.83 Gene names: ATRX

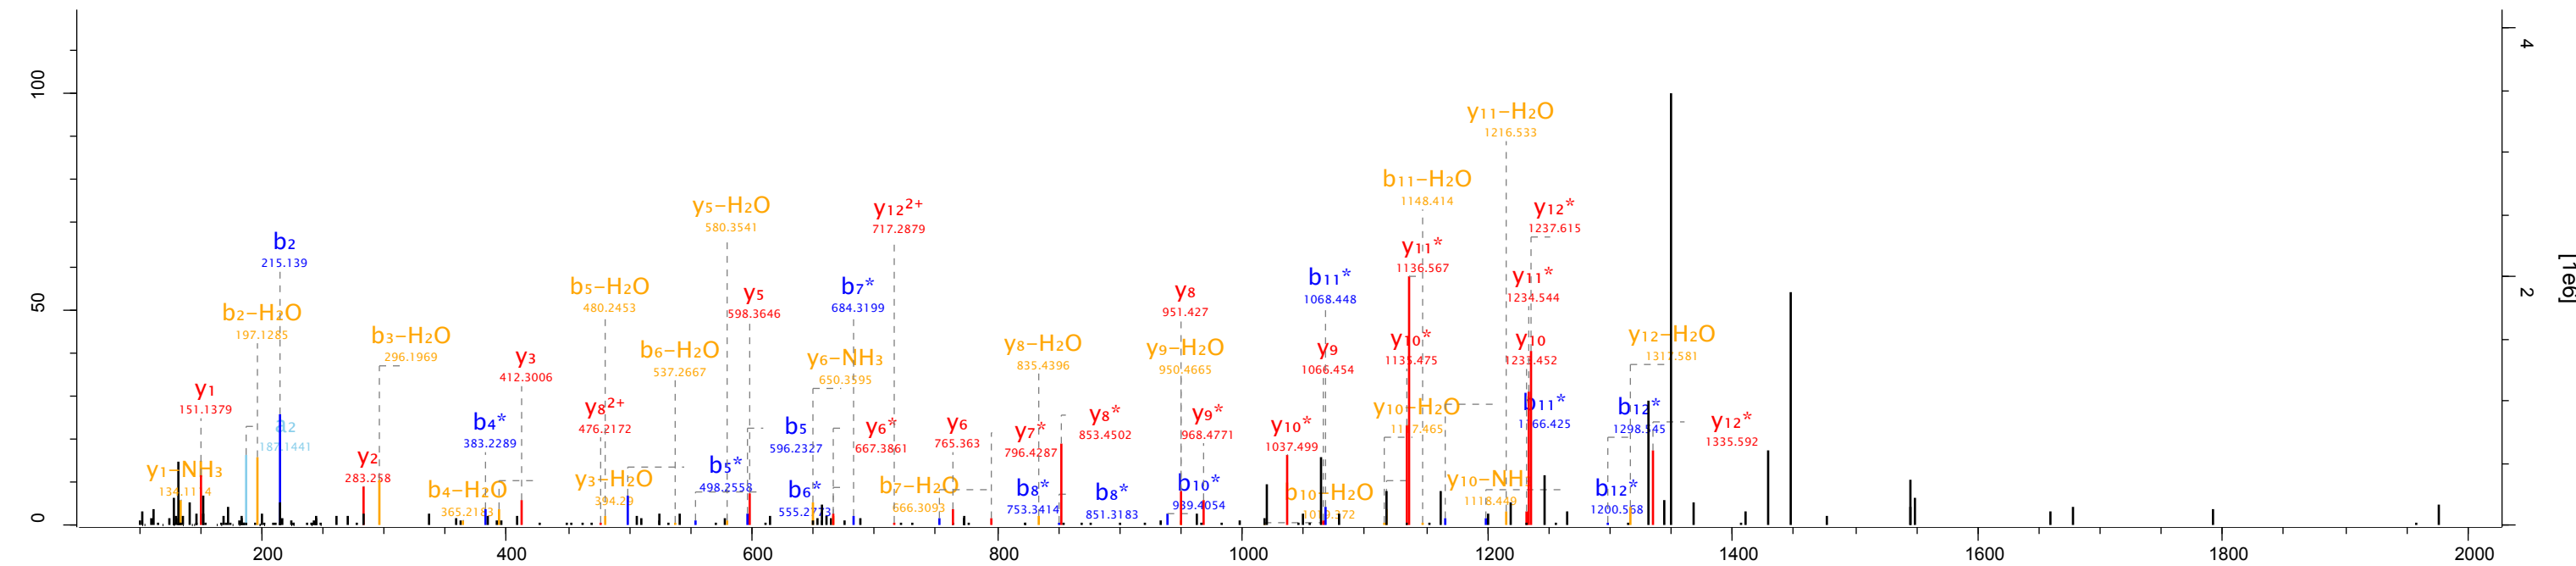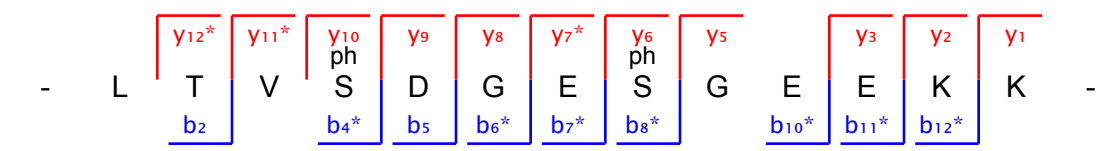

Raw file 20150812\_A375SR\_Phospho\_BR1\_03 Scan 7267 Method FTMS; HCD Score 53.95 m/z 607.74 Gene names RBM39

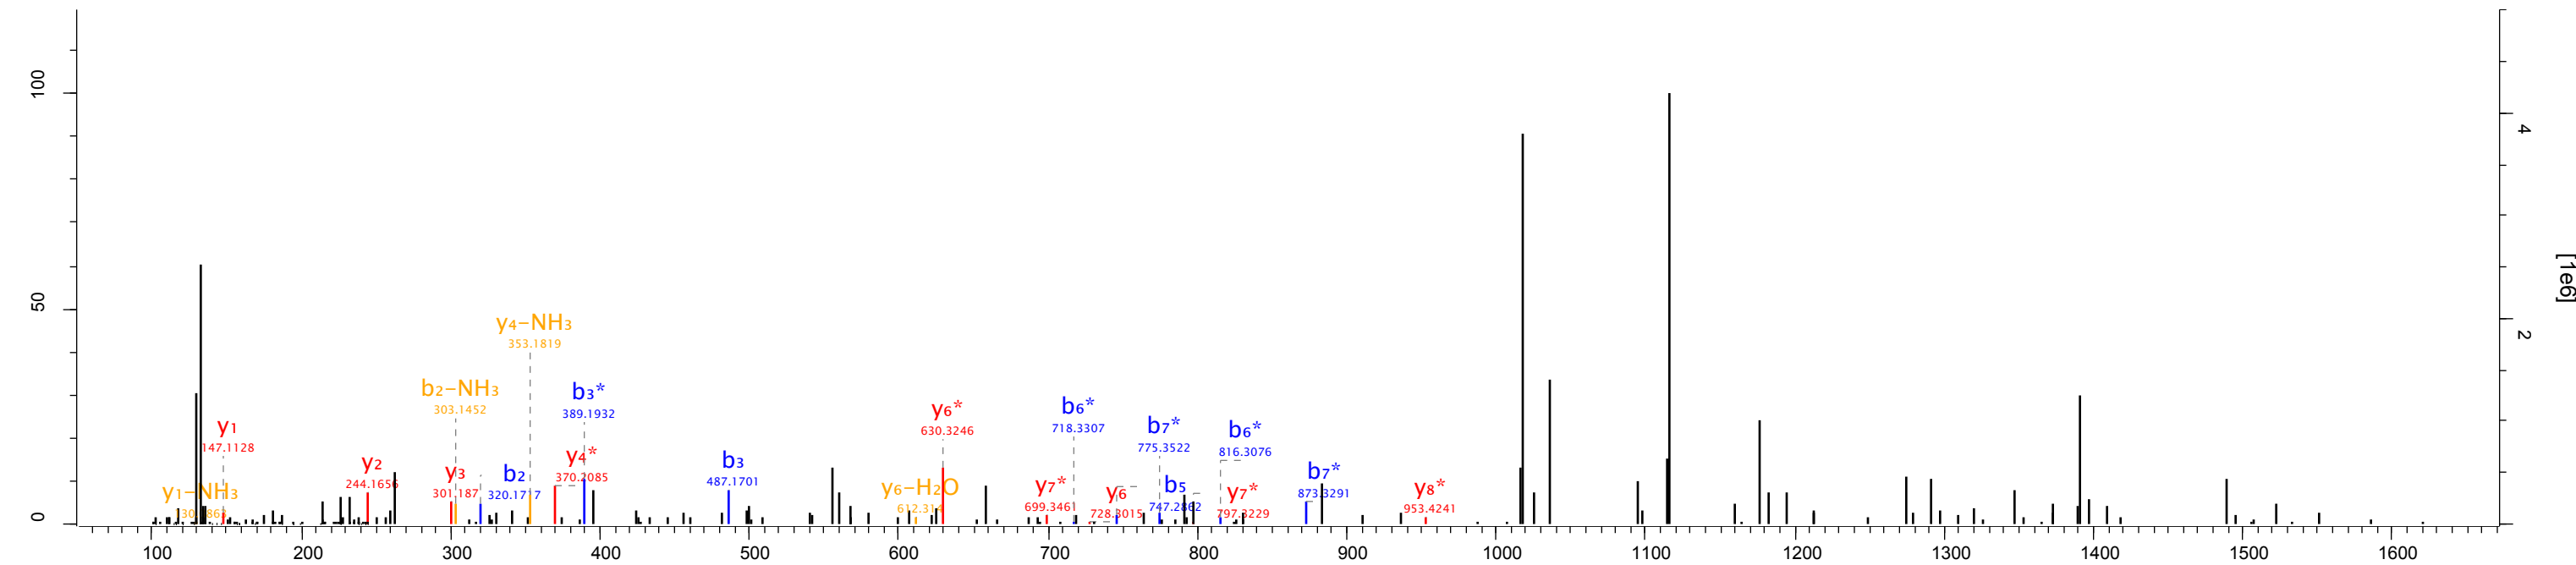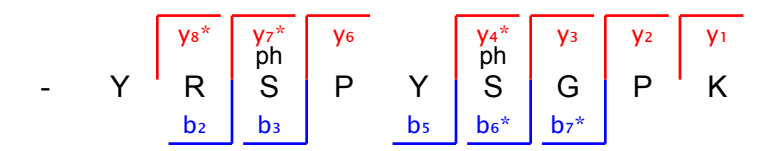

Raw file: 20150812\_A375SR\_Phospho\_BR1\_03  
 Scan: 7287 Method: FTMS; HCD Score: 119.28 m/z: 924.9 Gene names: IRF2BPL

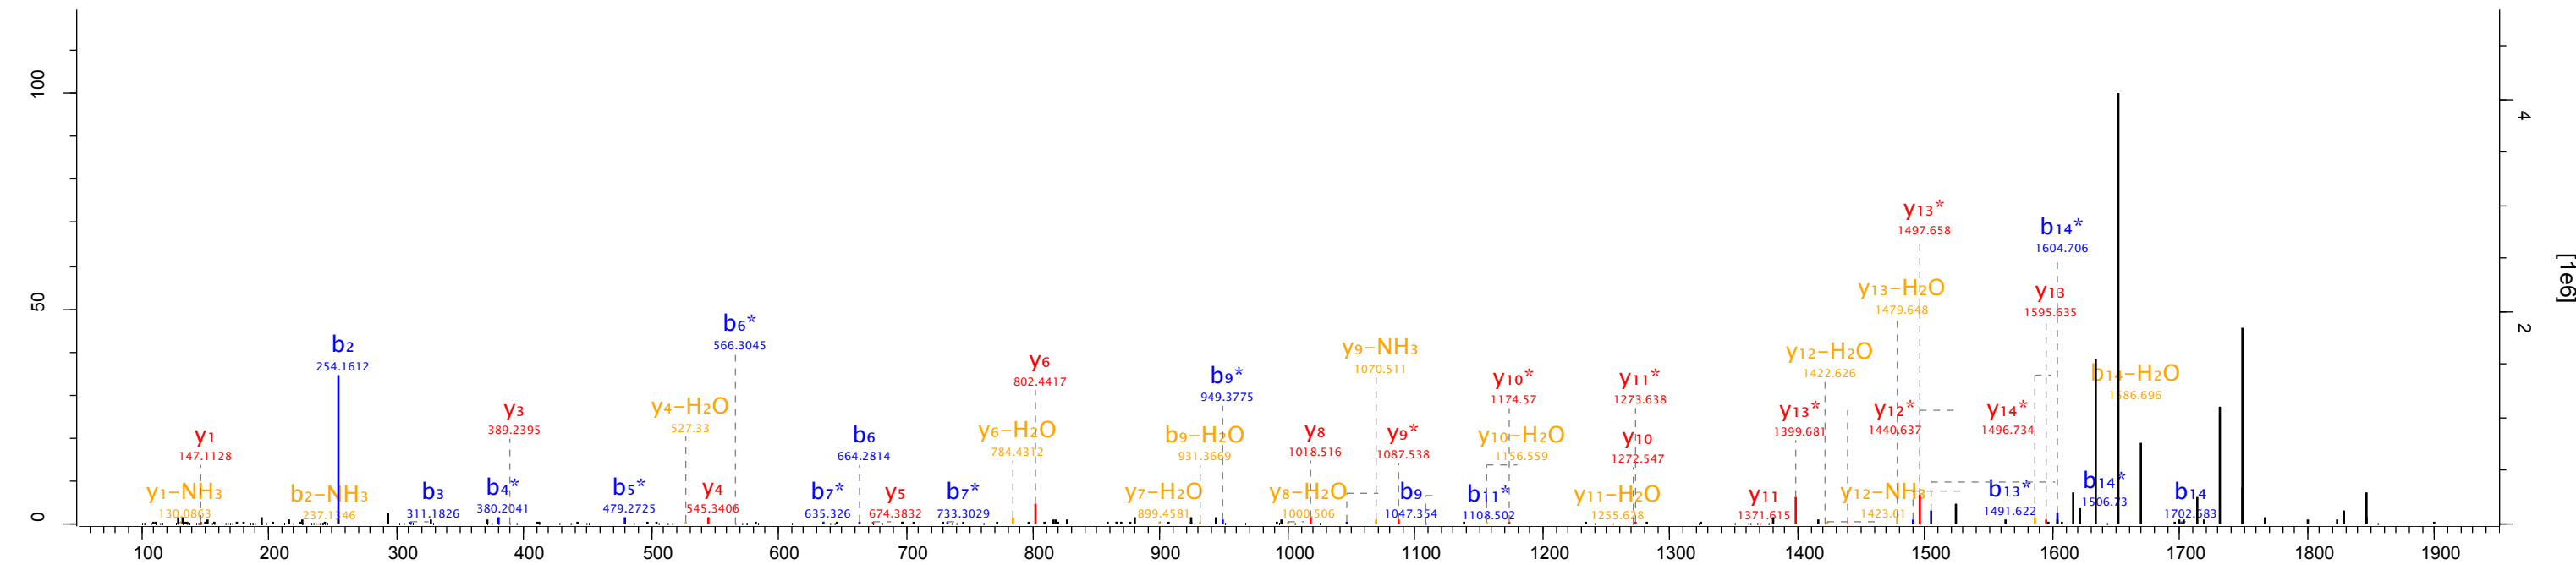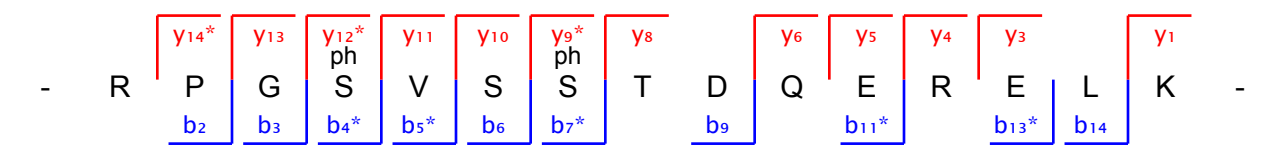

Raw file: 20150812\_A375SR\_Phospho\_BR1\_03  
 Scan: 7407 Method: FTMS; HCD Score: 132.99 m/z: 637.28 Gene names: KIF4A;KIF4B

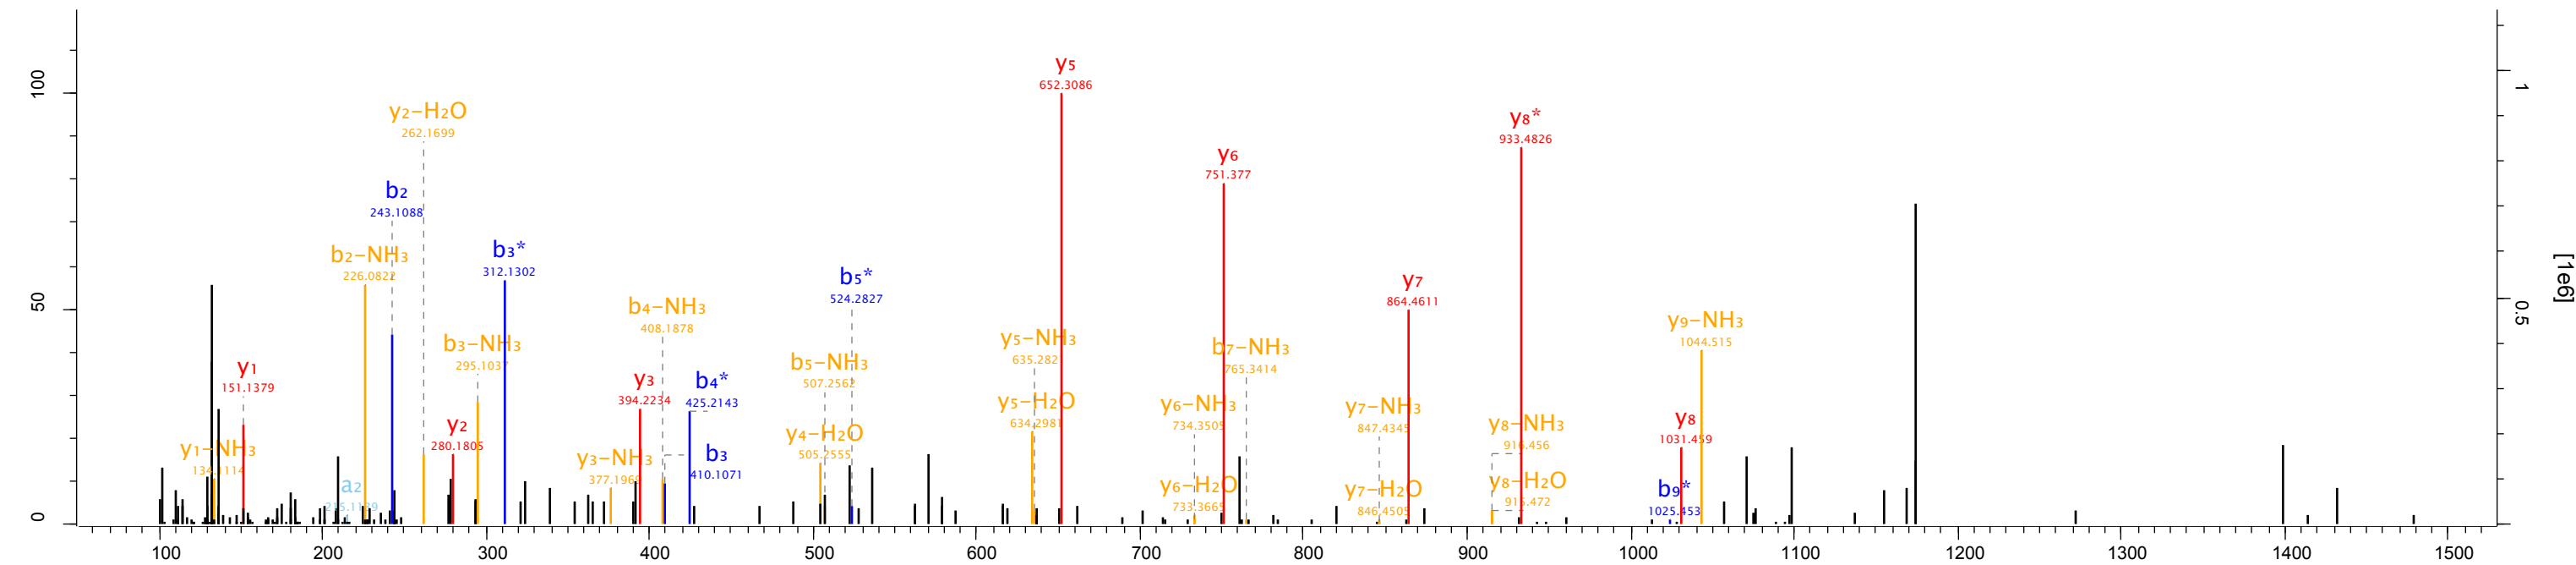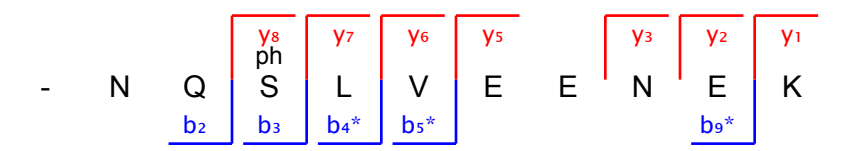

Raw file 20150812\_A375SR\_Phospho\_BR1\_03 Scan 8157 Method FTMS; HCD Score 180.21 m/z 963.45 Gene names SRRM2

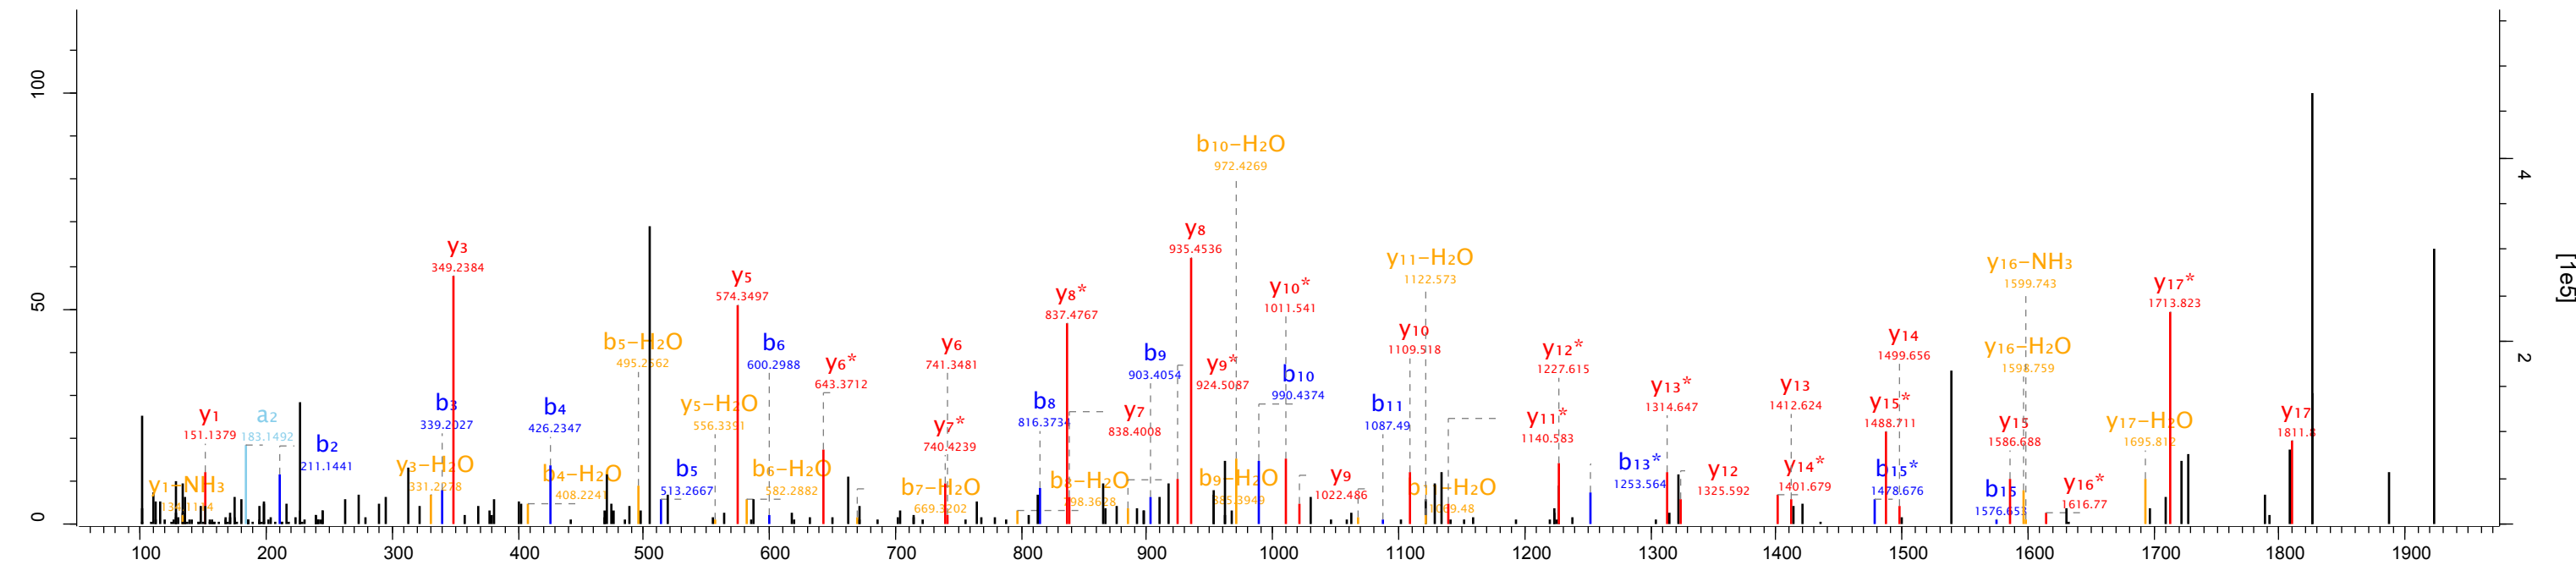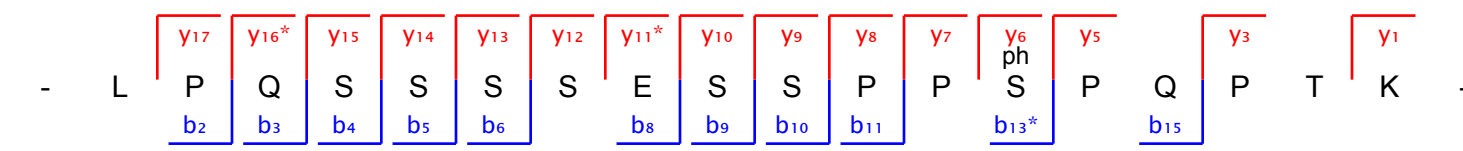



Raw file: 20150812\_A375SR\_Phospho\_BR1\_03  
 Scan: 8527 Method: FTMS; HCD Score: 133.48 m/z: 629.26 Gene names: KIAA1522

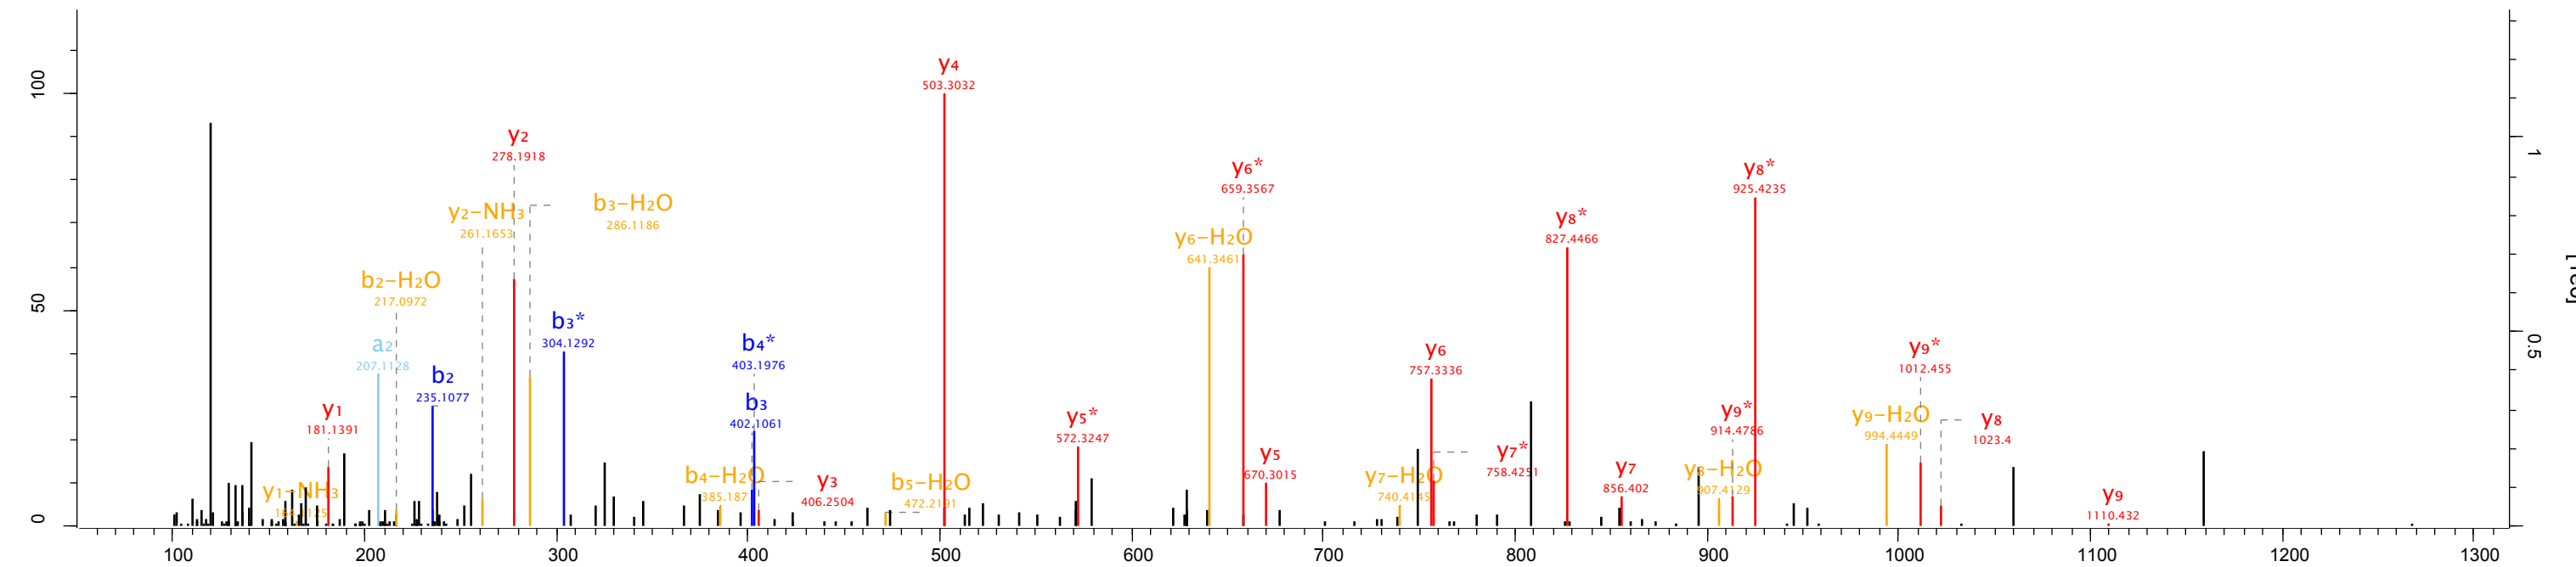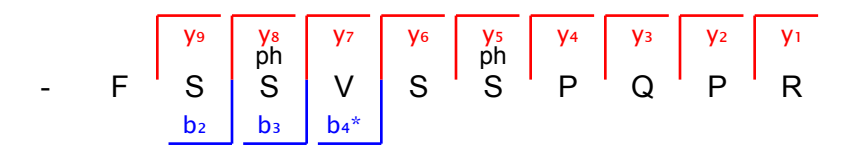

Raw file: 20150812\_A375SR\_Phospho\_BR1\_03  
 Scan: 8687 Method: FTMS; HCD Score: 160.66 m/z: 1230.18 Gene names: UBE2E3

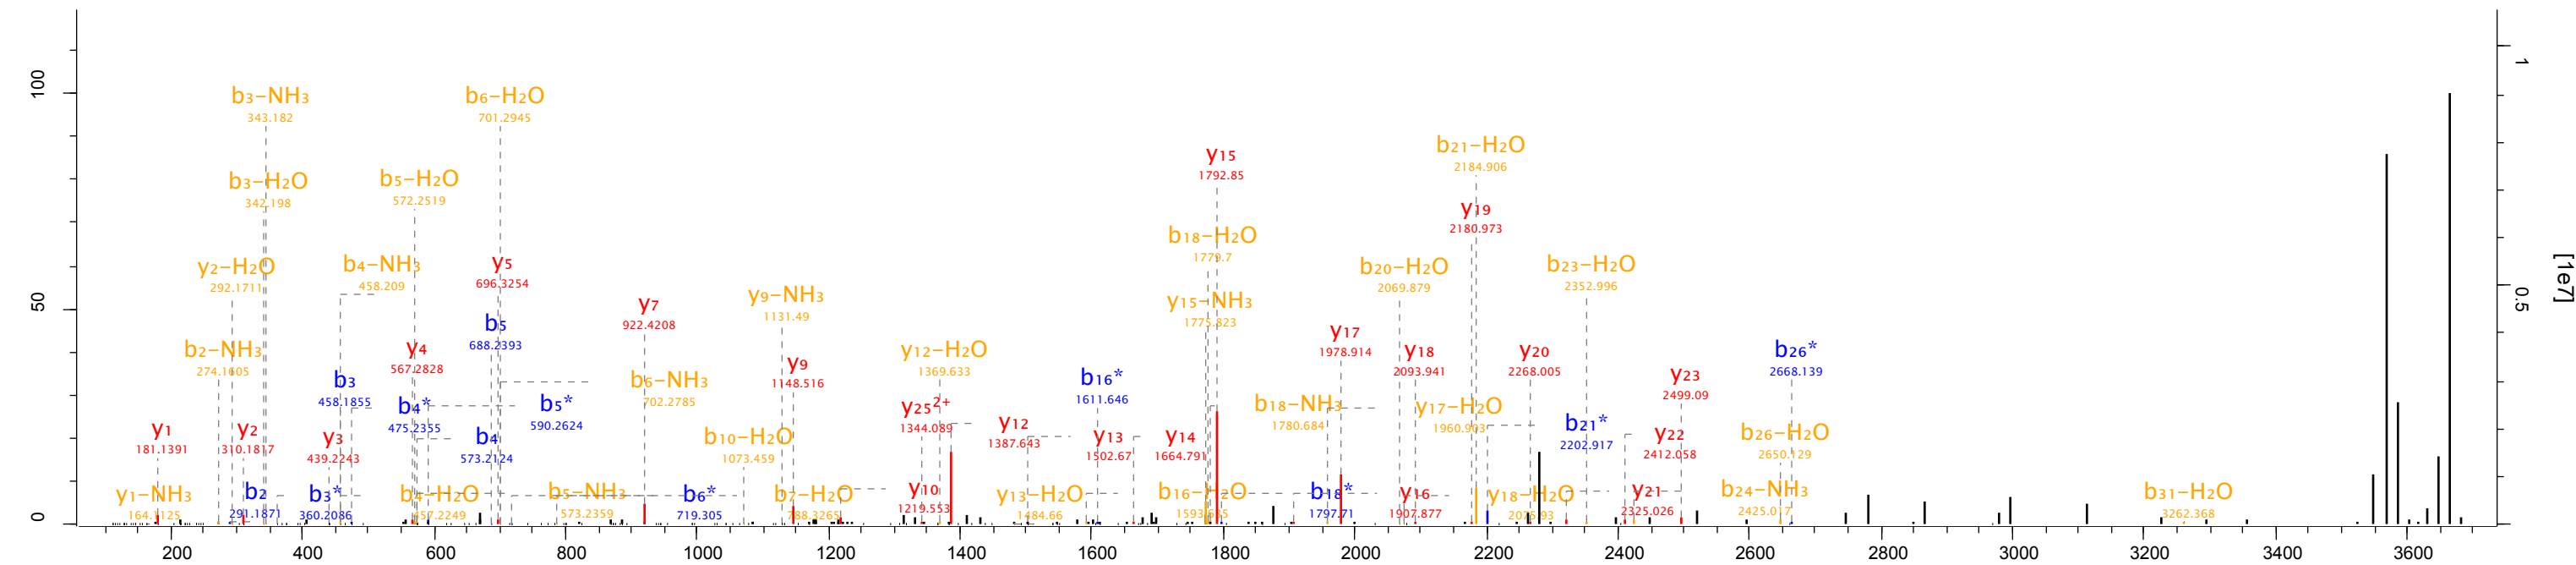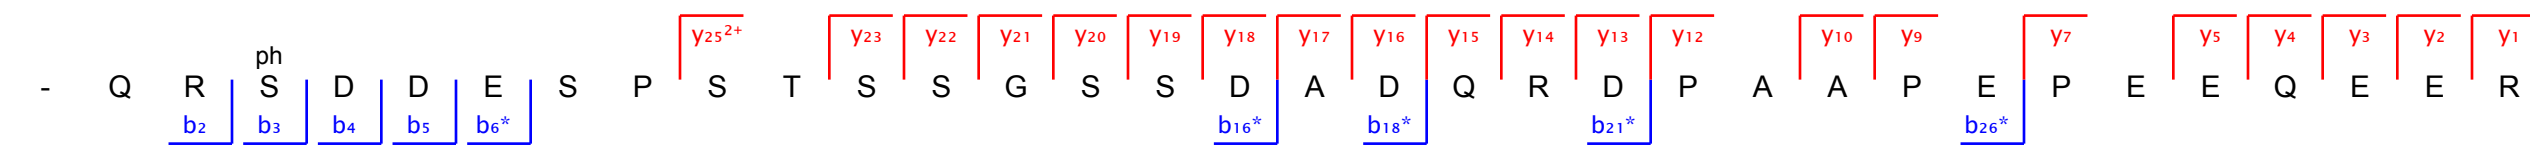



Raw file  
20150812\_A375SR\_Phospho\_BR1\_03

Scan: 8767  
Method: FTMS; HCD  
Score: 224.39  
m/z: 969.39  
Gene names: PNISR

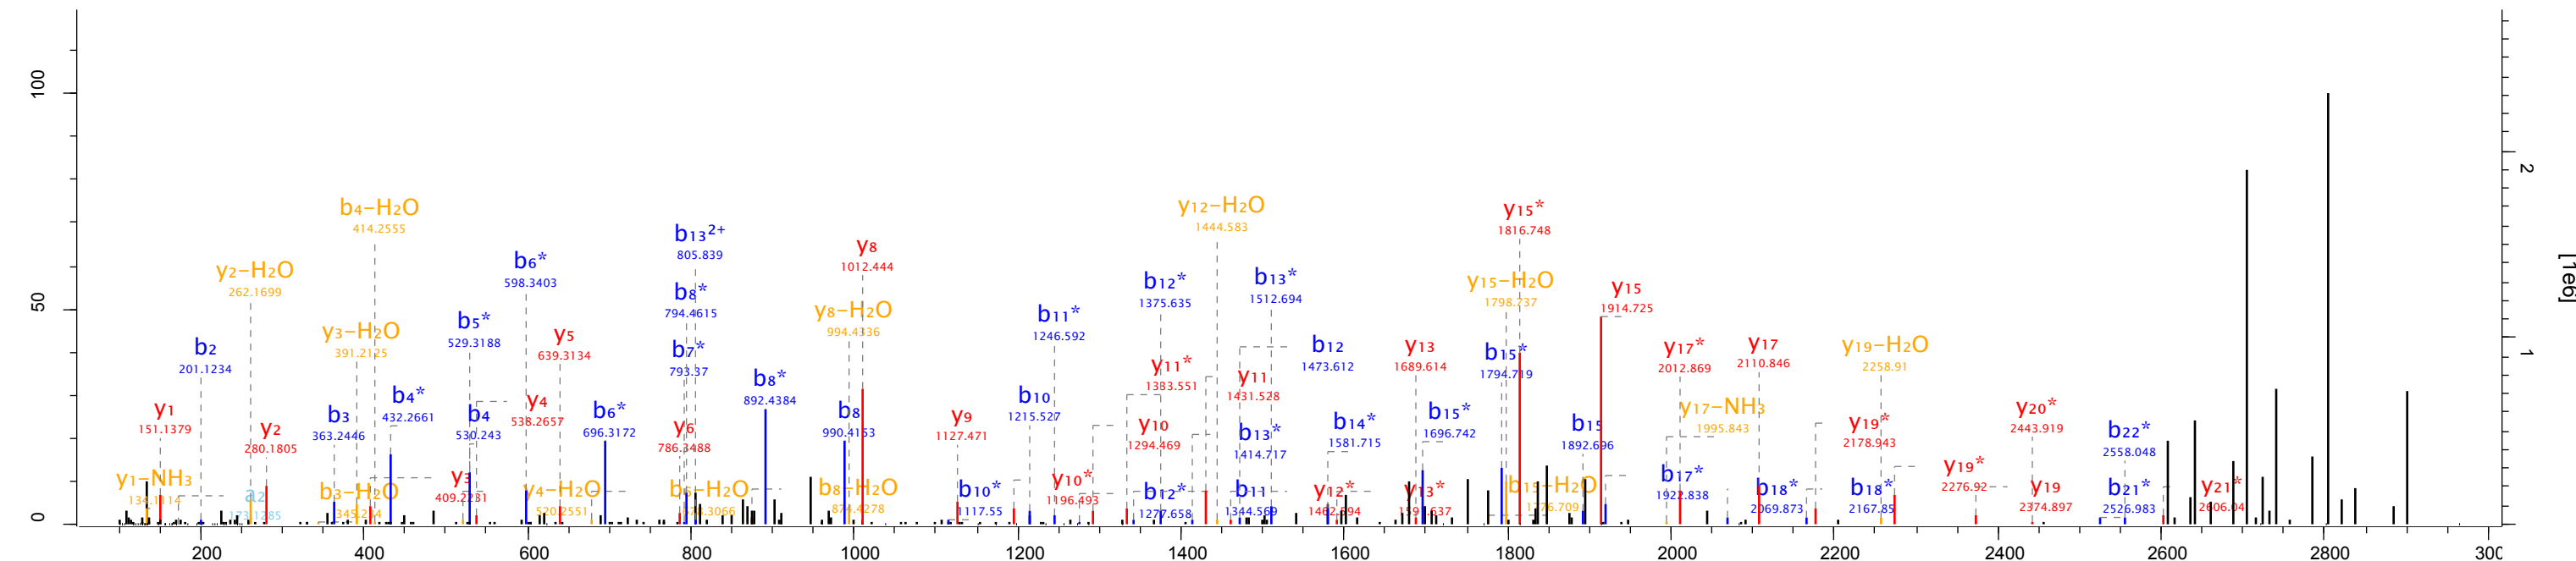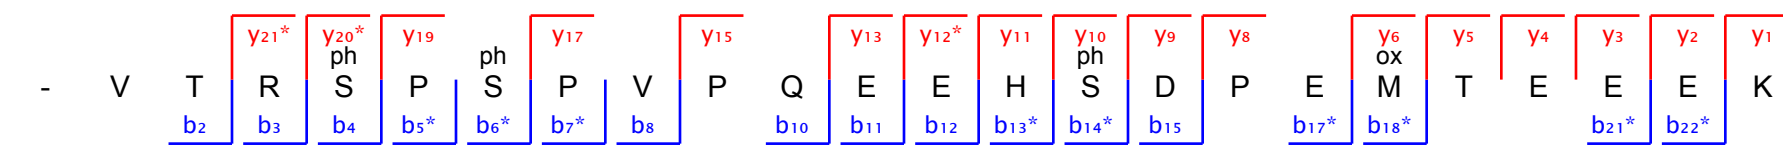

Raw file: 20150812\_A375SR\_Phospho\_BR1\_03  
 Scan: 8987 Method: FTMS; HCD Score: 42.72 m/z: 1055.43 Gene names: HPCA

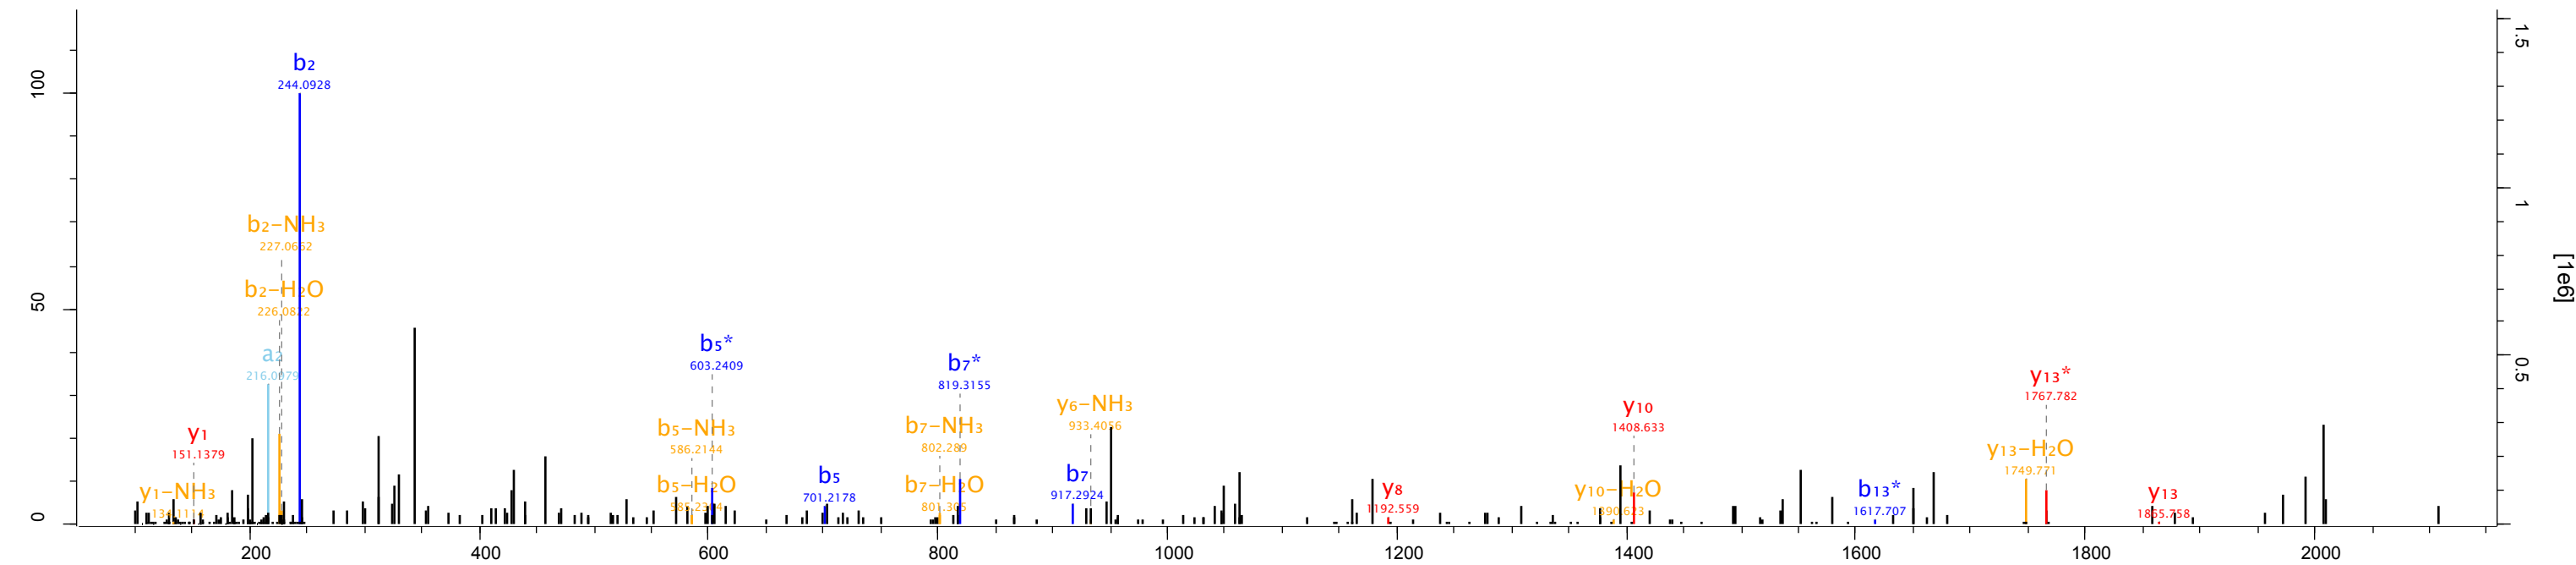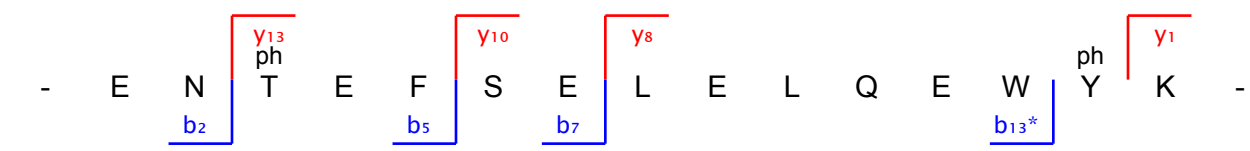

Raw file: 20150812\_A375SR\_Phospho\_BR1\_03  
 Scan: 9117 Method: FTMS; HCD Score: 118.44 m/z: 845.4 Gene names: ZNF609

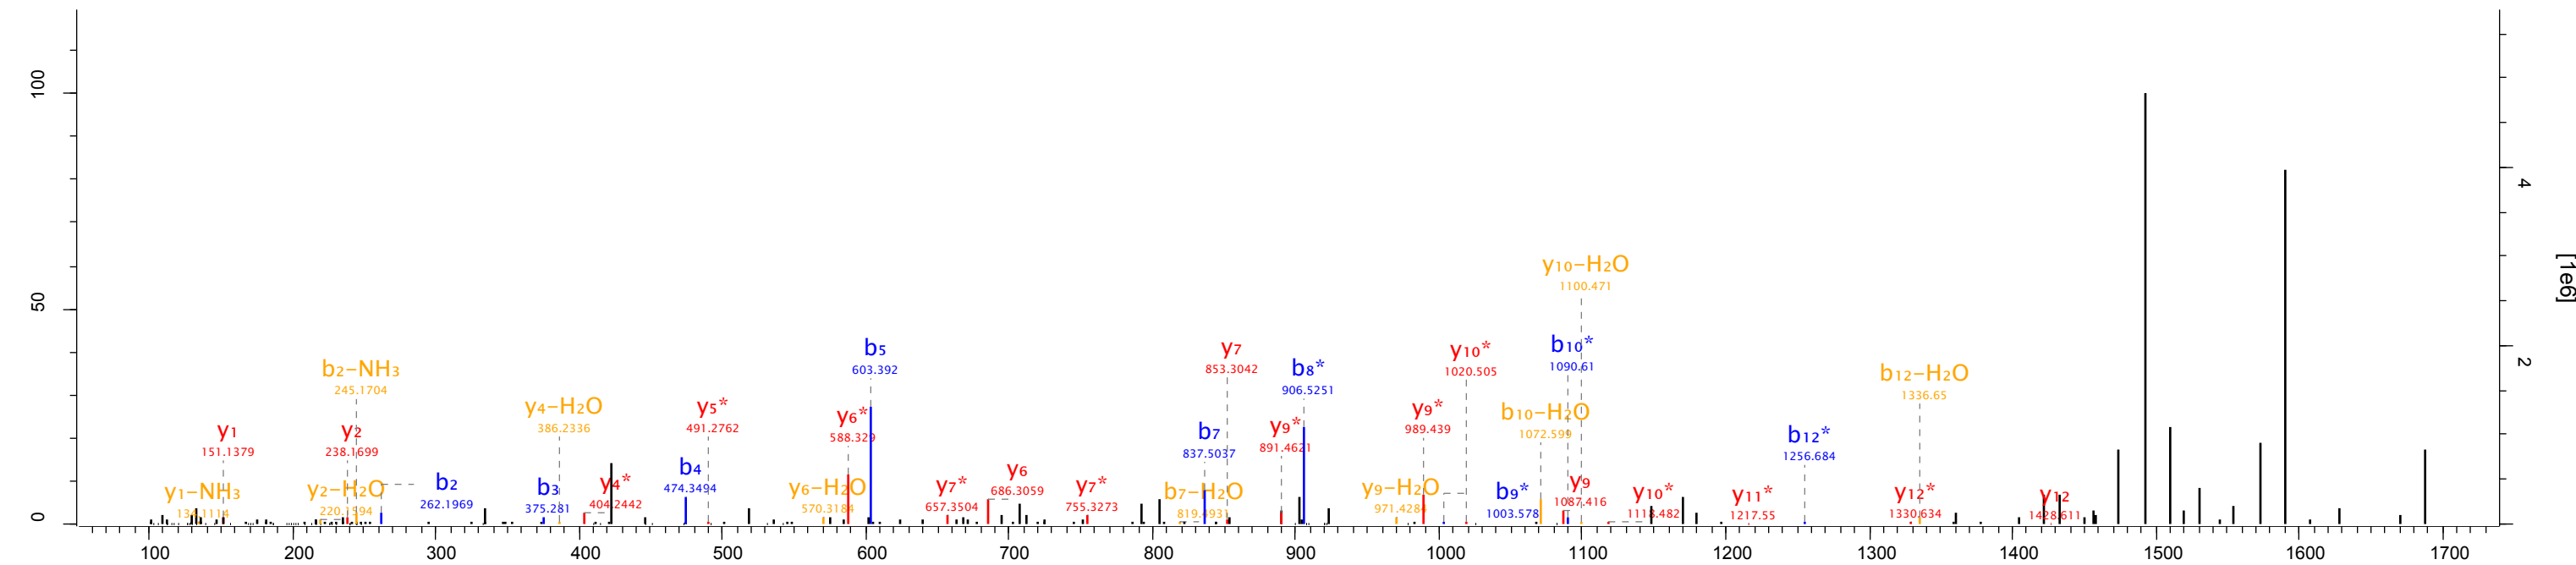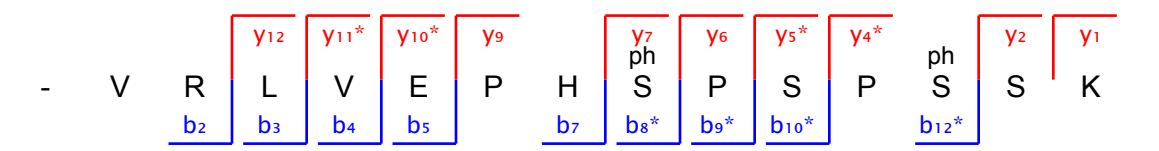

Raw file: 20150812\_A375SR\_Phospho\_BR1\_03  
 Scan: 9757 Method: FTMS; HCD Score: 95.96 m/z: 765.35 Gene names: TP53BP1

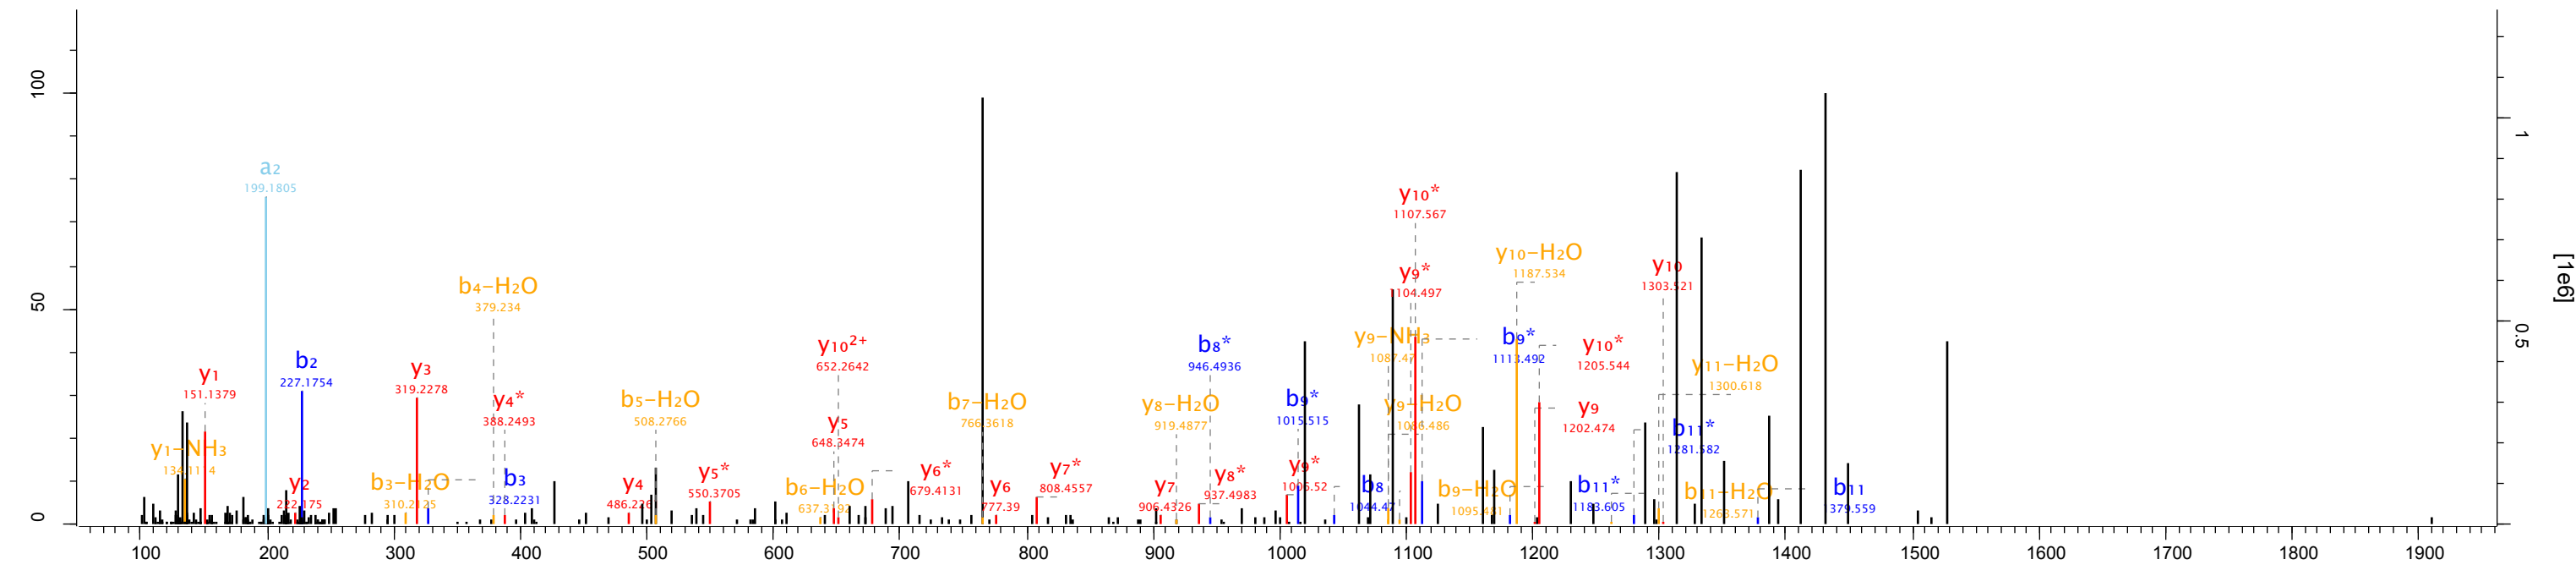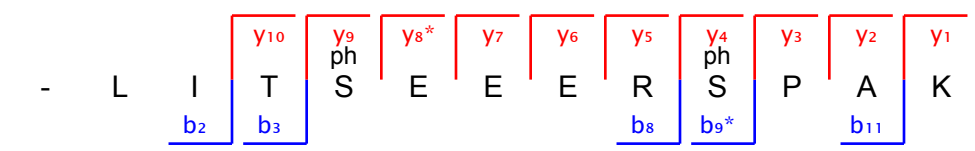

Raw file: 20150812\_A375SR\_Phospho\_BR1\_04  
 Scan: 10847  
 Method: FTMS; HCD  
 Score: 268.82  
 m/z: 1102.97  
 Gene names: AKAP12

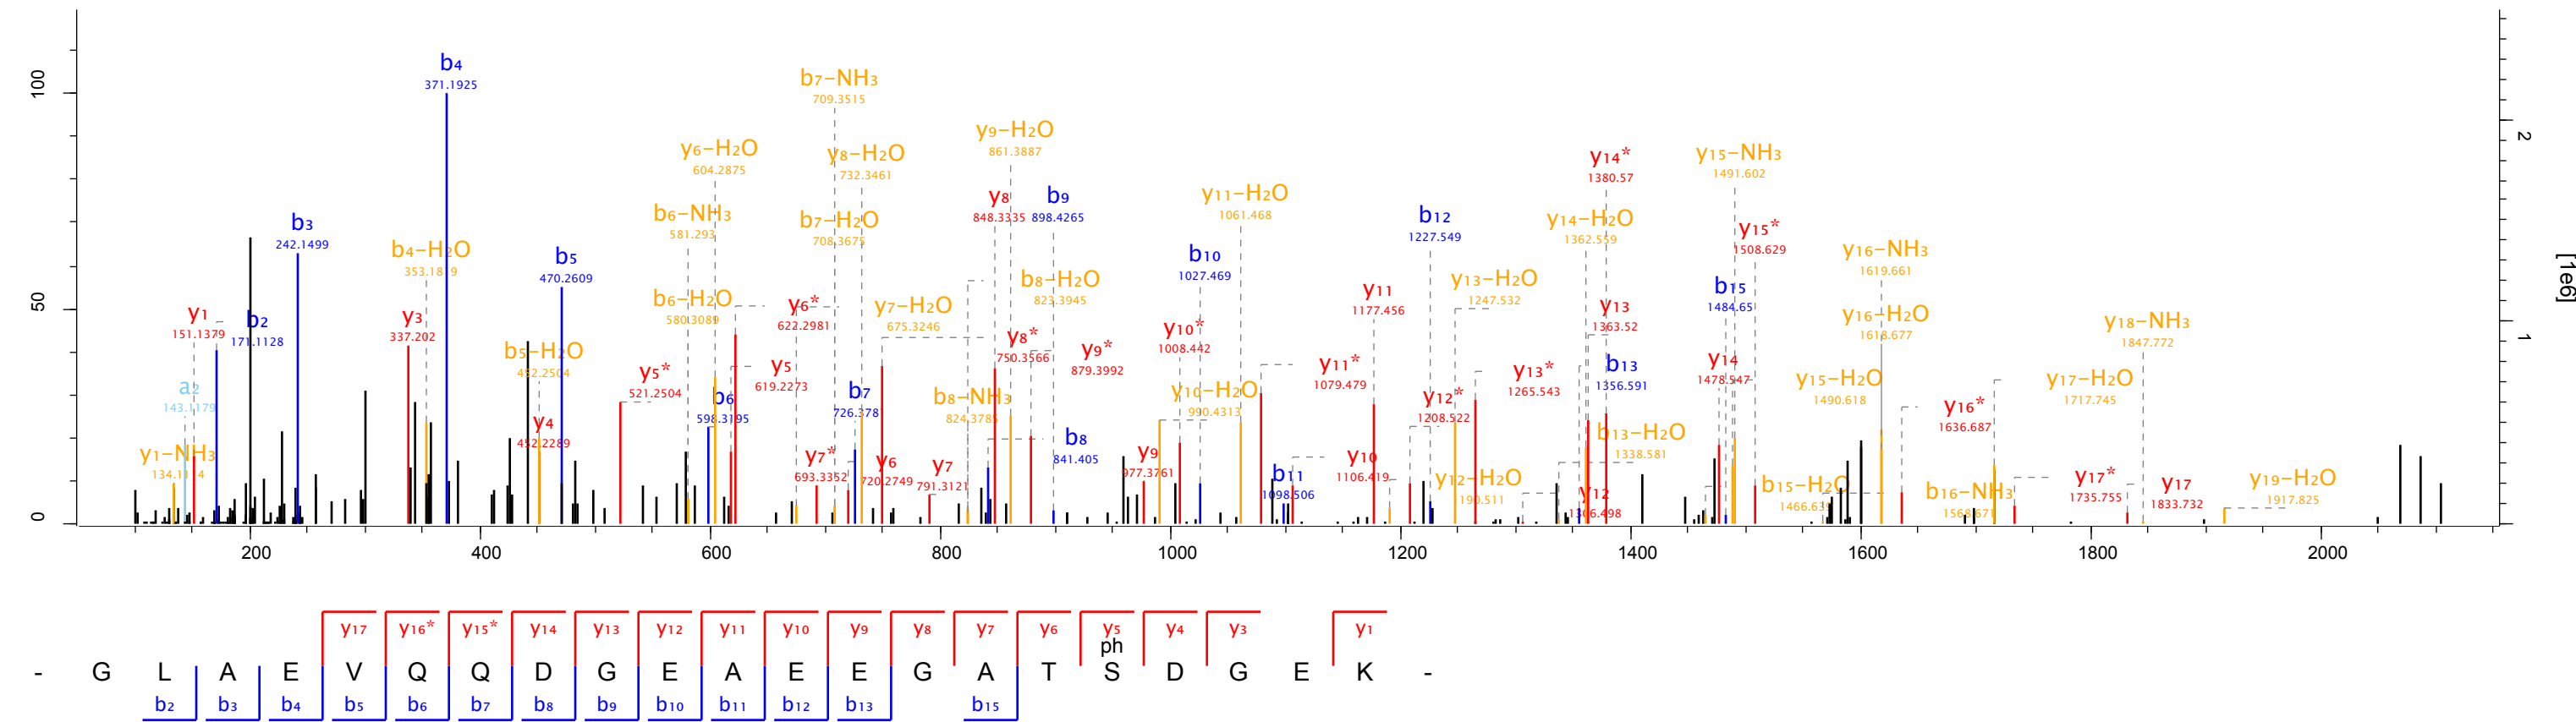



Raw file: 20150812\_A375SR\_Phospho\_BR1\_04  
 Scan: 11127 Method: FTMS; HCD Score: 315.24 m/z: 1118.46 Gene names: ZFAND5

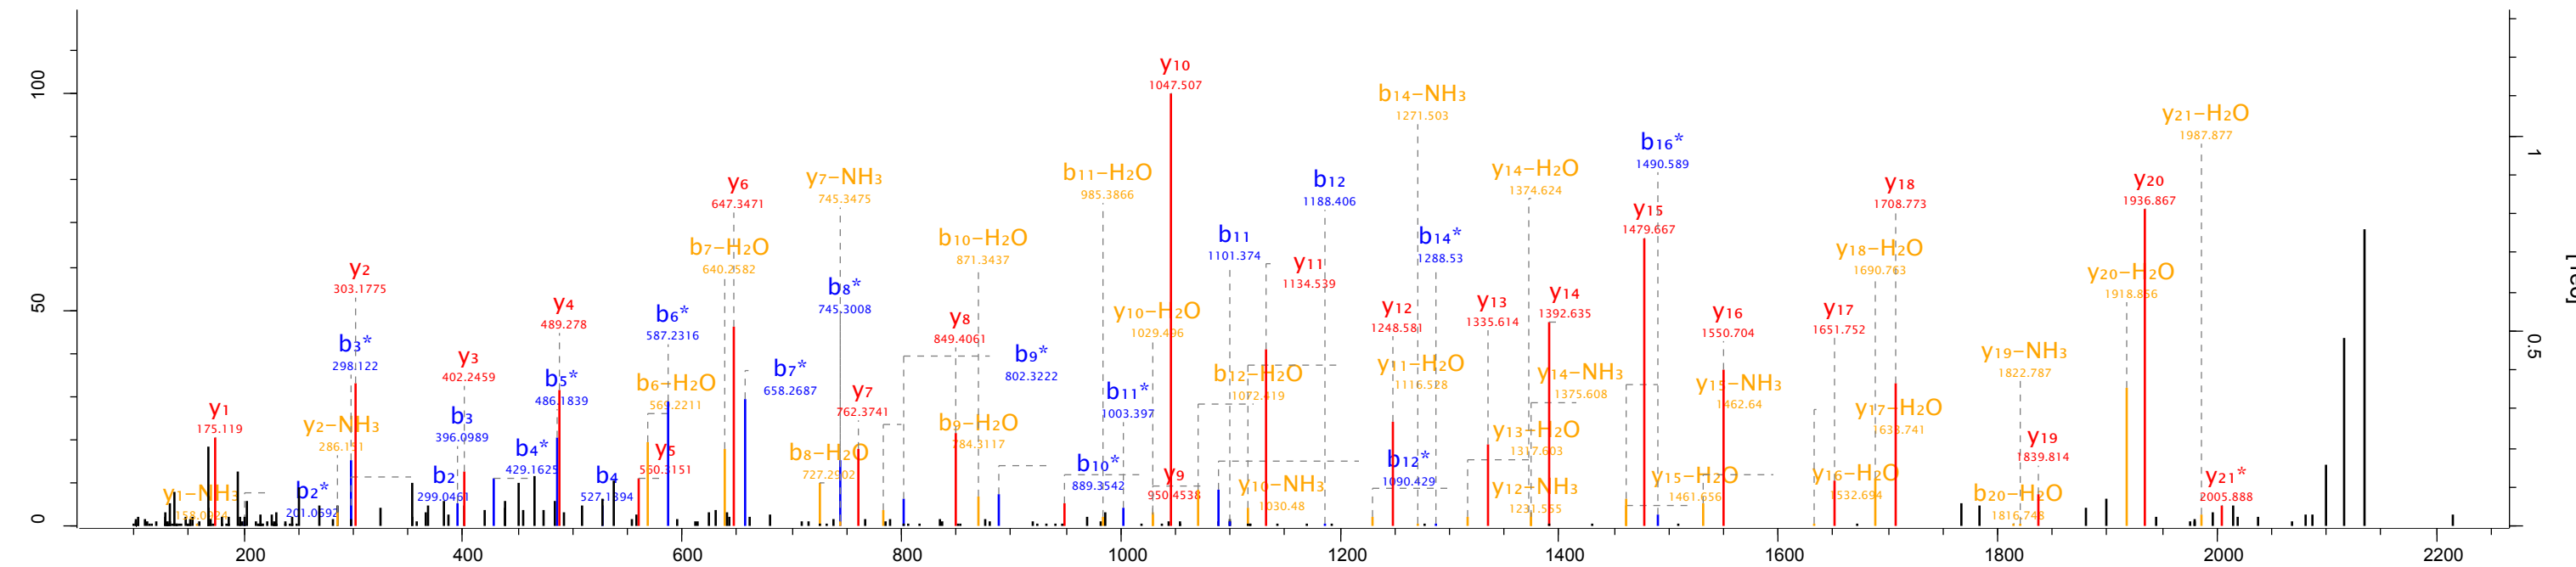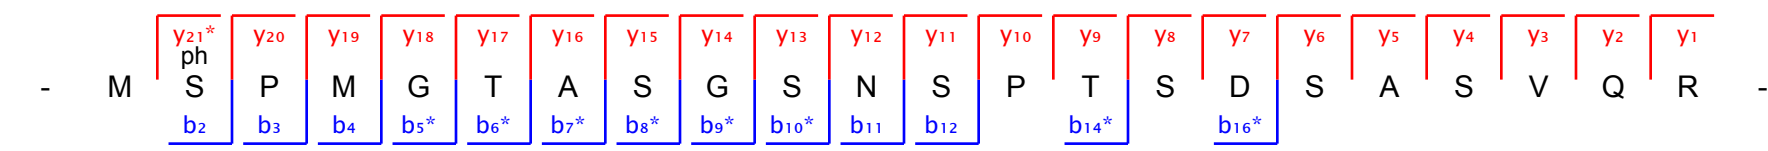

Raw file 20150812\_A375SR\_Phospho\_BR1\_04 Scan 11517 Method FTMS; HCD Score 81.39 m/z 812.82 Gene names ZNF148

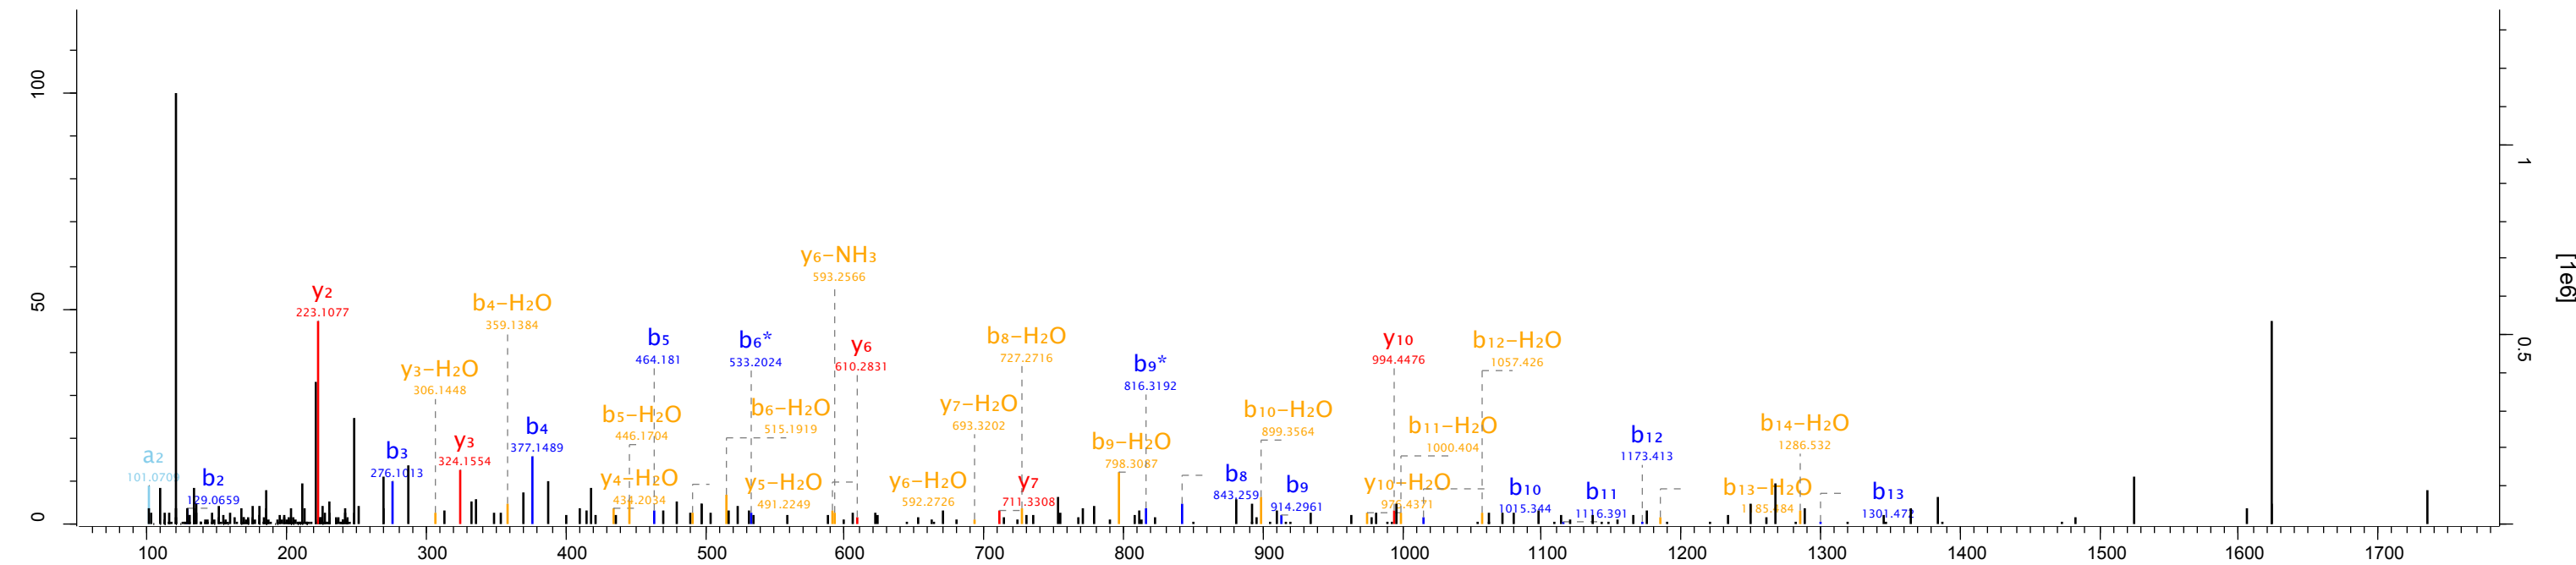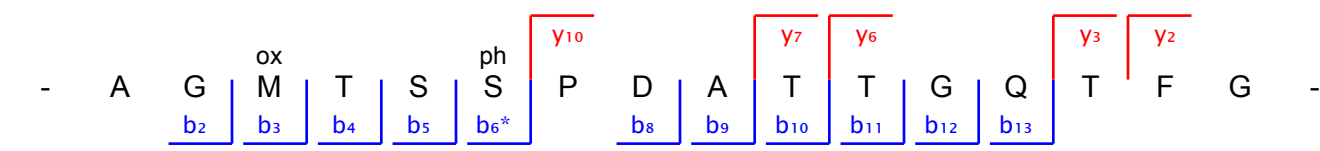

Raw file 20150812\_A375SR\_Phospho\_BR1\_04 Scan 12487 Method FTMS; HCD Score 156.96 m/z 843.84 Gene names POLR2A

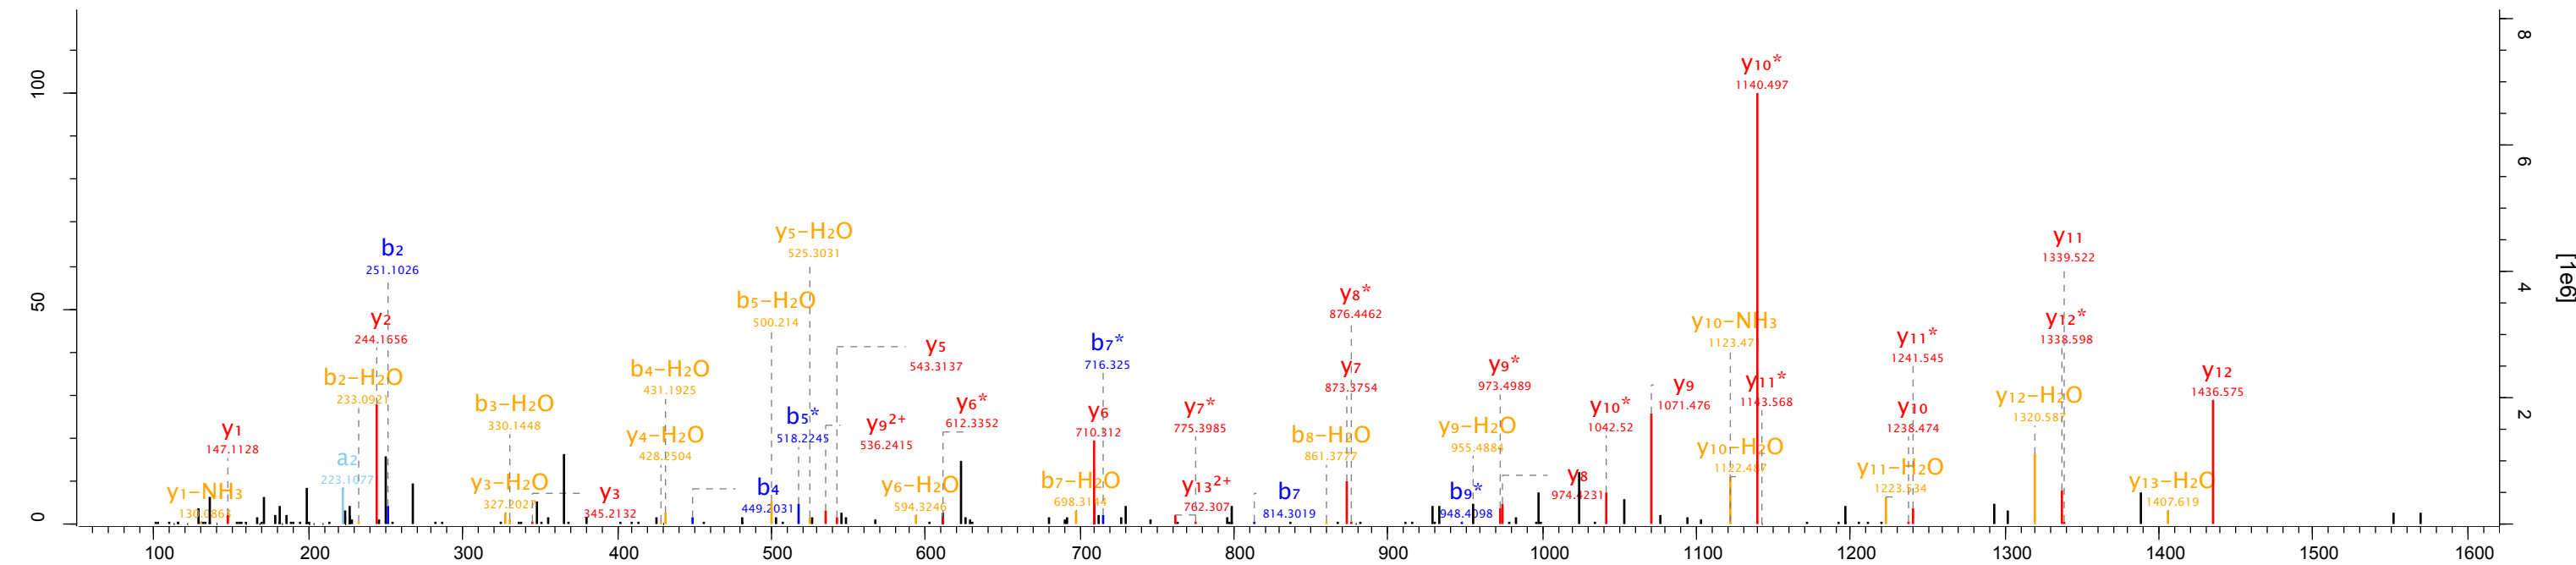

- Y y13 2+ y12 y11 y10  
ph  
S y9 y8 y7 y6  
ph  
S y5 T y3 y2 y1 -

b2 b4 b5\* b7 b9\*

Raw file 20150812\_A375SR\_Phospho\_BR1\_04 Scan 12727 Method FTMS; HCD Score 269.28 m/z 686.66 Gene names SLTM

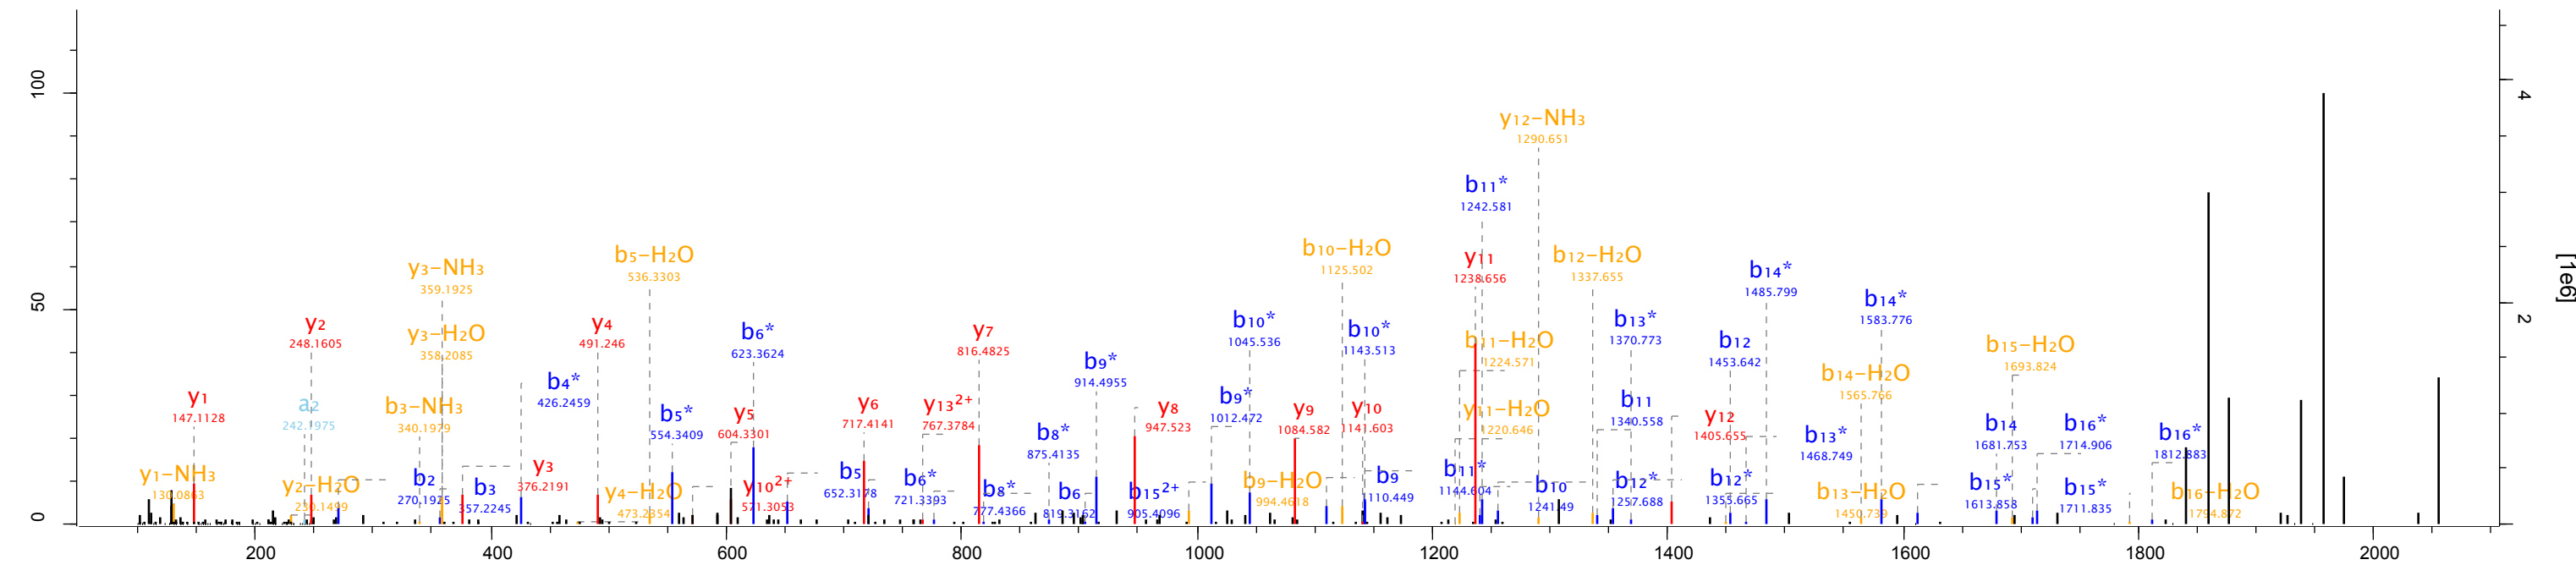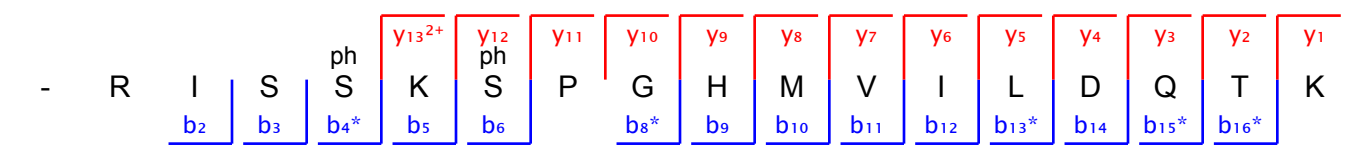

Raw file Scan Method Score m/z Gene names  
 20150812\_A375SR\_Phospho\_BR1\_04 12997 FTMS; HCD 47.62 801.72 TRIT1

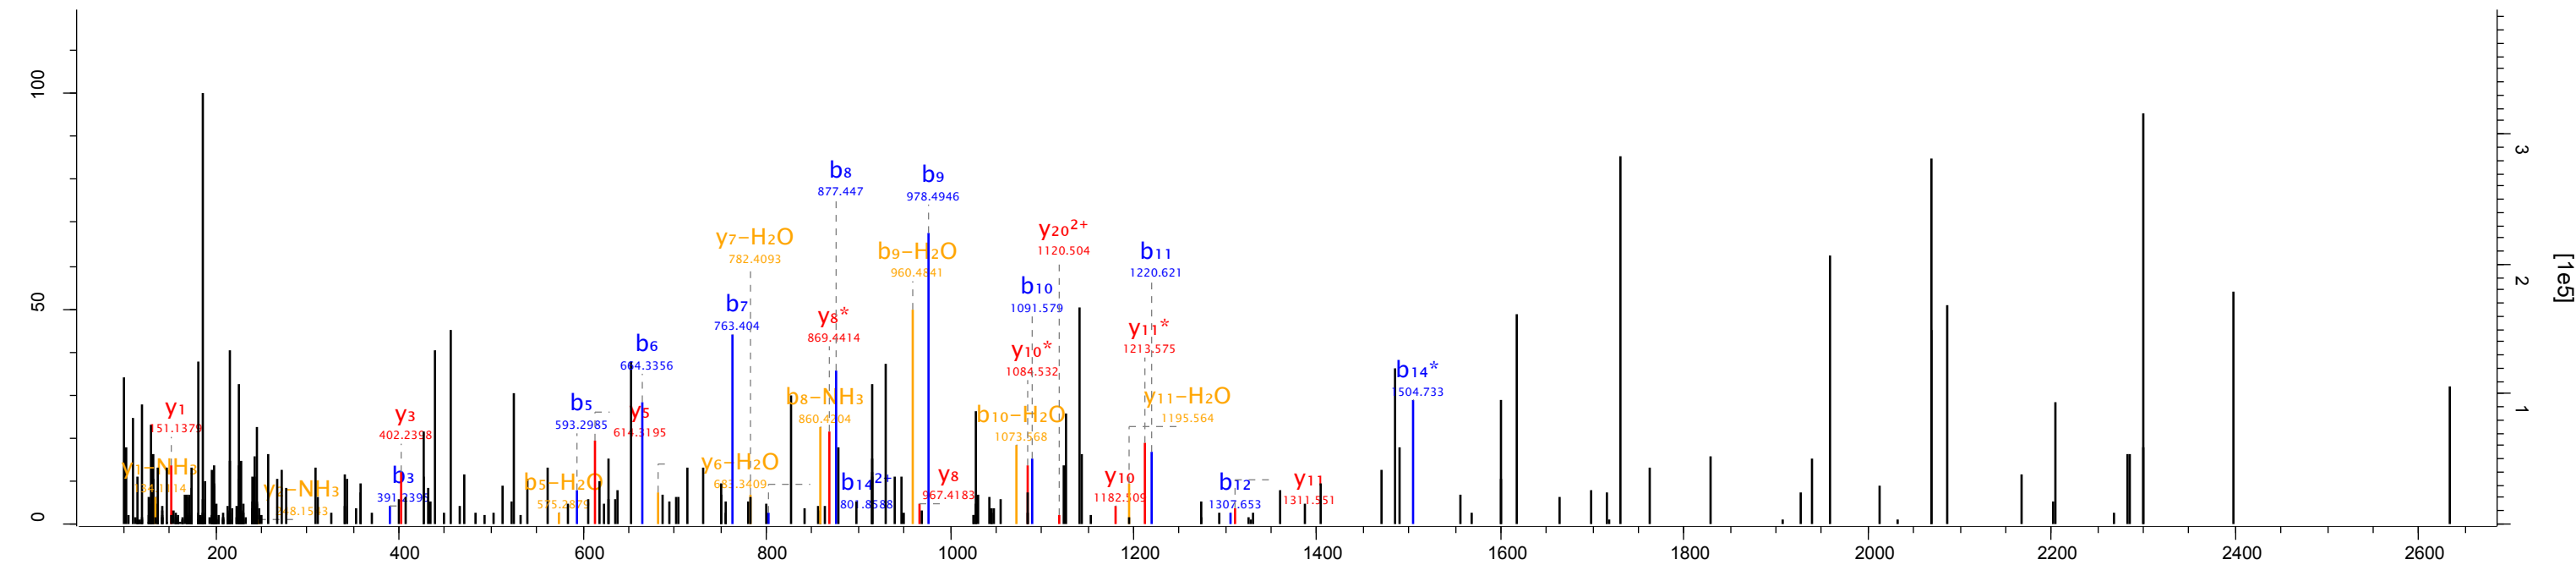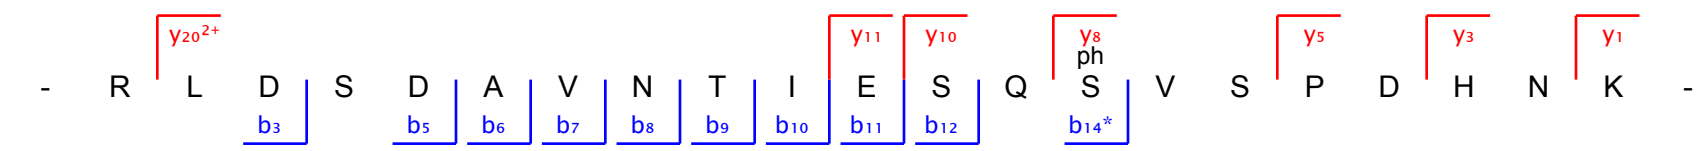

Raw file: 20150812\_A375SR\_Phospho\_BR1\_04  
 Scan: 13157 Method: FTMS; HCD Score: 131.97 m/z: 833.74 Gene names: CENPF

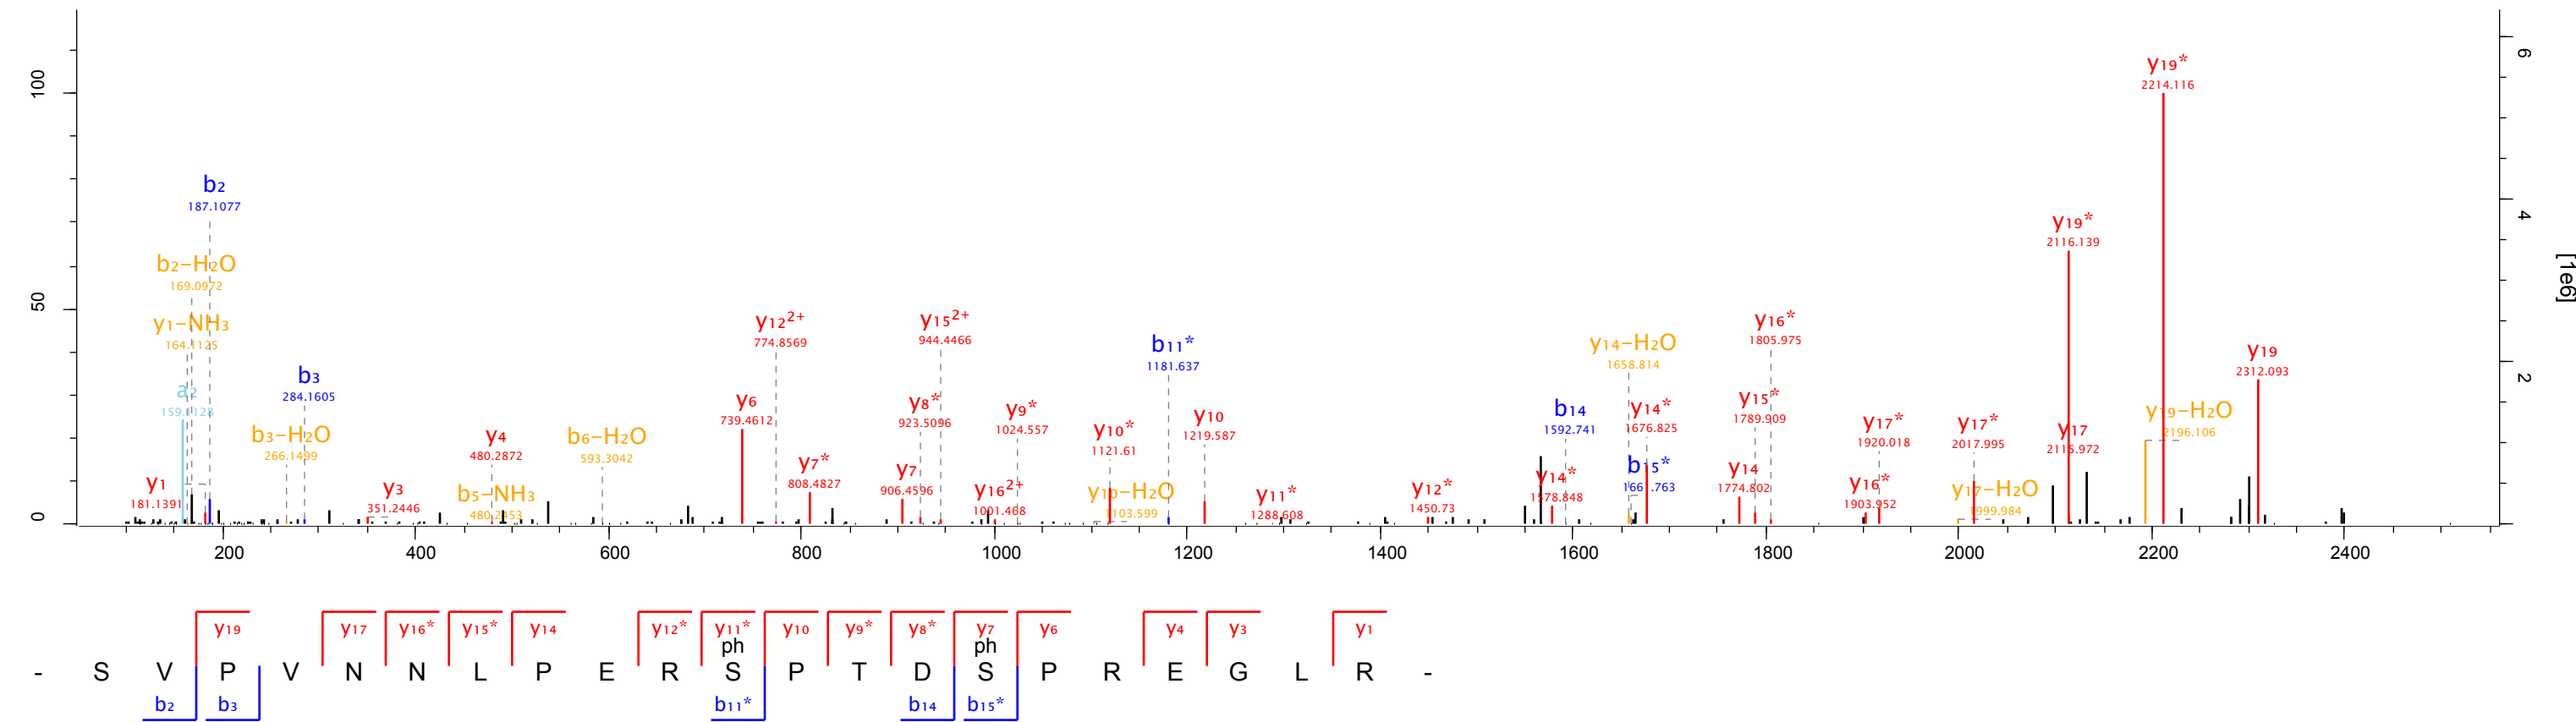

Raw file: 20150812\_A375SR\_Phospho\_BR1\_04  
 Scan: 13417  
 Method: FTMS; HCD  
 Score: 121.01  
 m/z: 729.3  
 Gene names: HNRNPA2B1

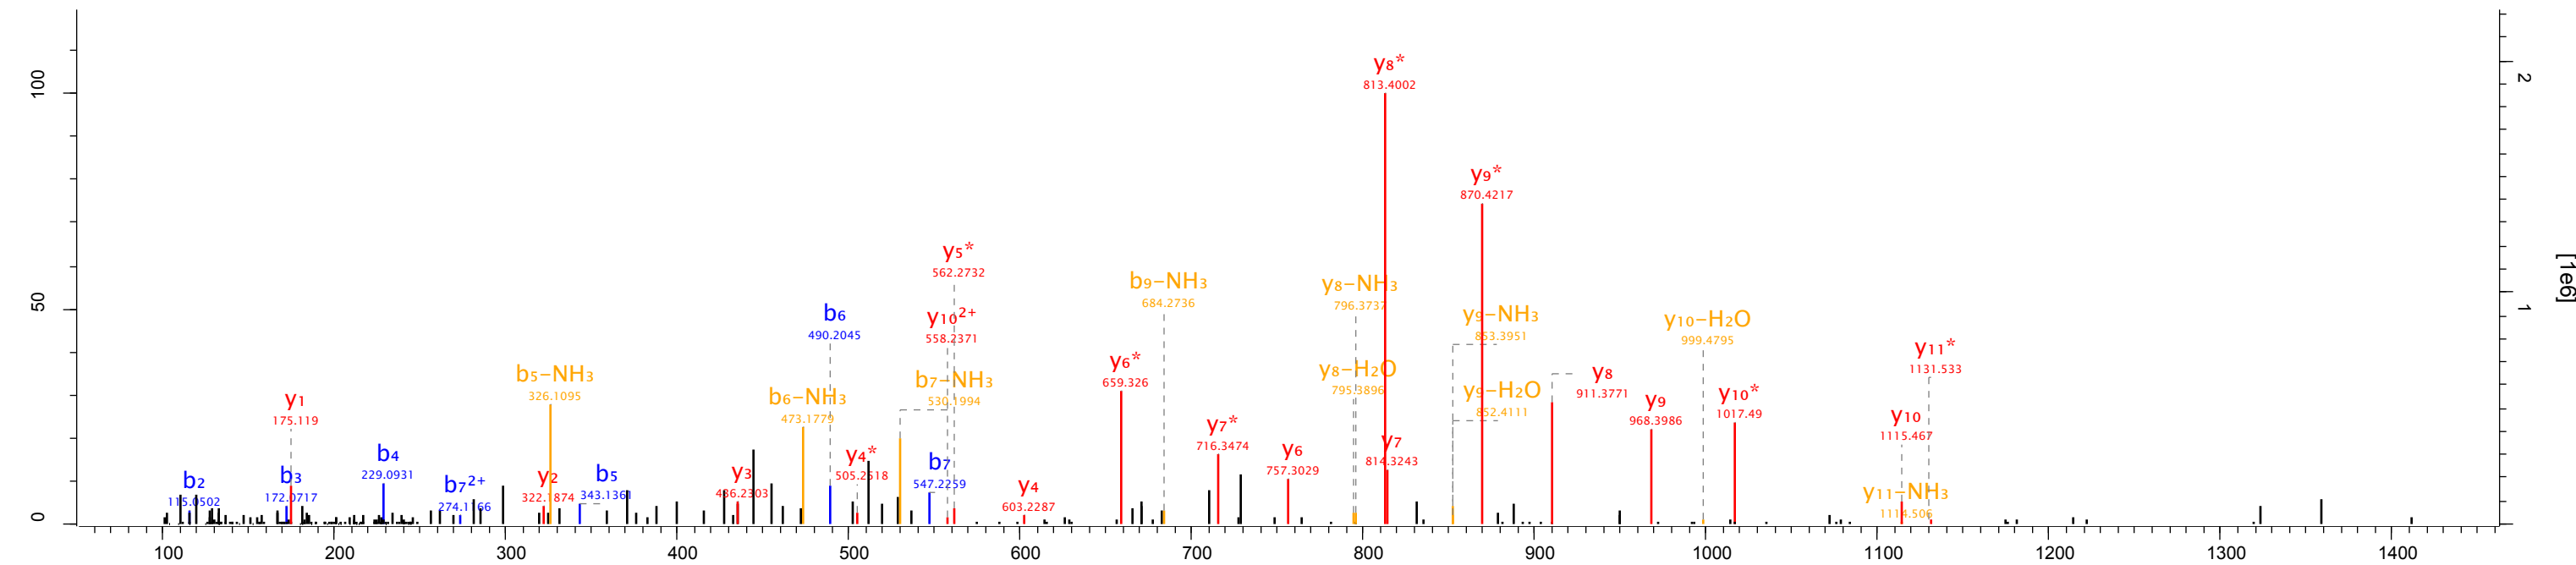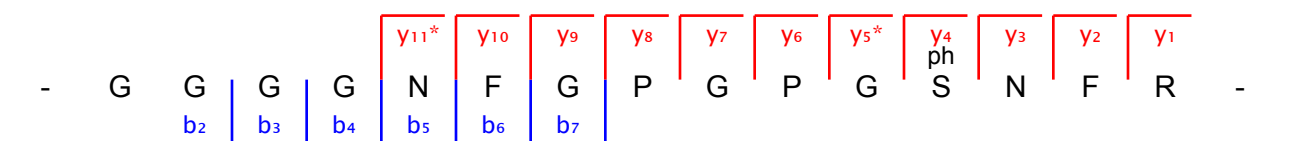

Raw file: 20150812\_A375SR\_Phospho\_BR1\_04  
 Scan: 13977 Method: FTMS; HCD Score: 174.26 m/z: 944.41 Gene names: RPAP3

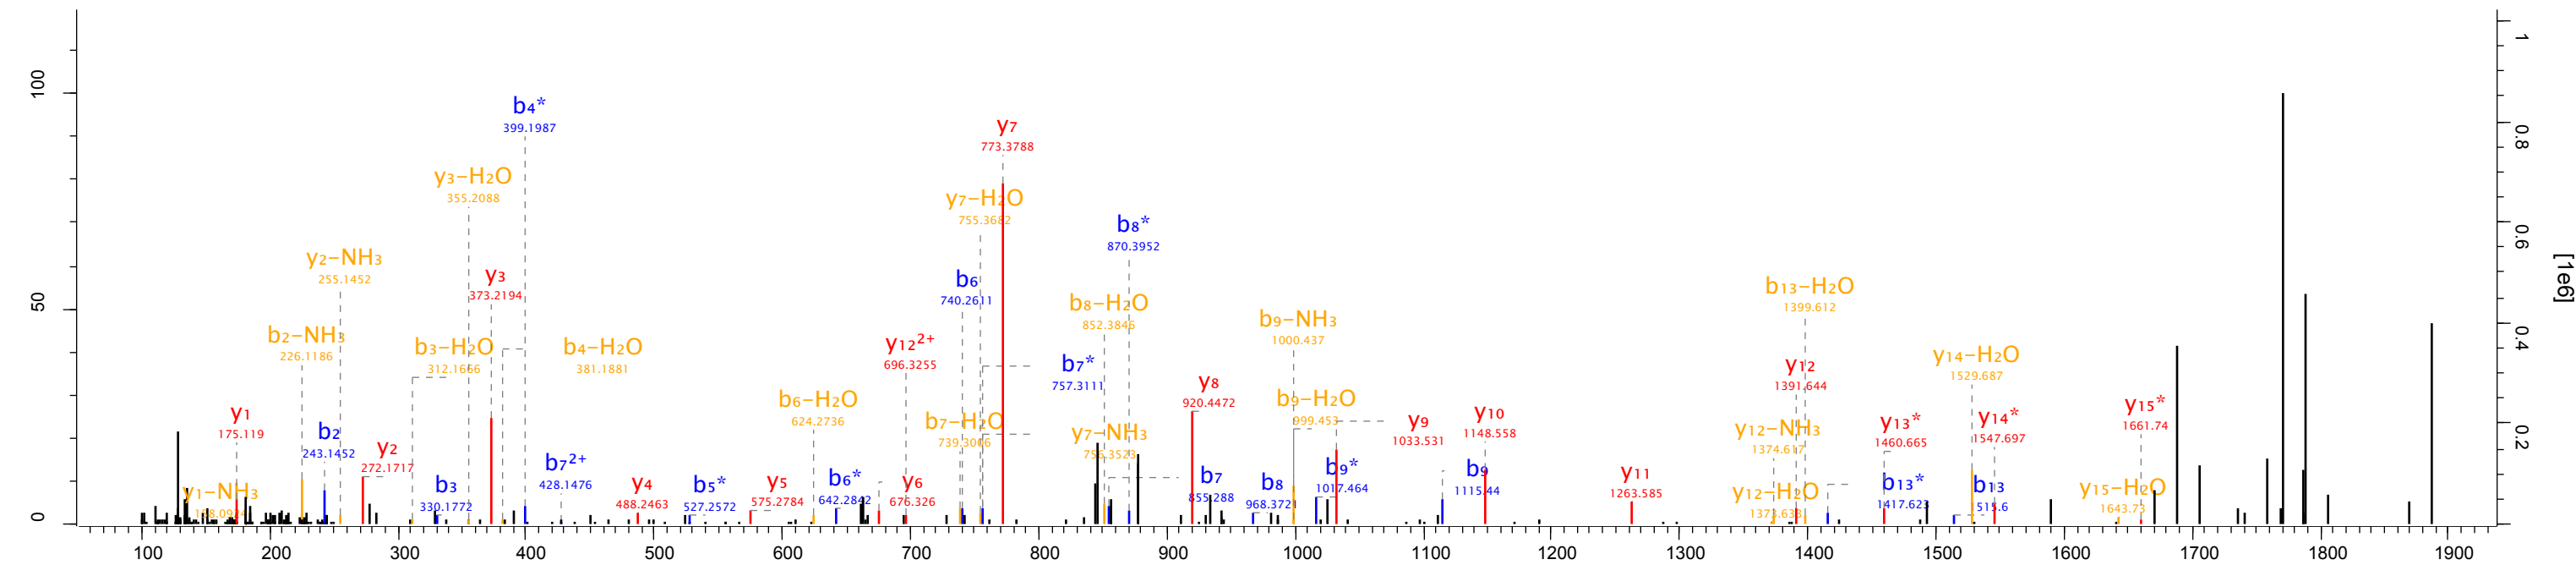

- K y15\* y14\* y13\*  
ph y12 y11 y10 y9 y8 y7 y6 y5 y4 y3 y2 y1 -

b2 b3 b4\* b5\* b6 b7 b8 b9 b13



Raw file: 20150812\_A375SR\_Phospho\_BR1\_04  
 Scan: 14237 Method: FTMS; HCD Score: 154.65 m/z: 1017.71 Gene names: TNS3

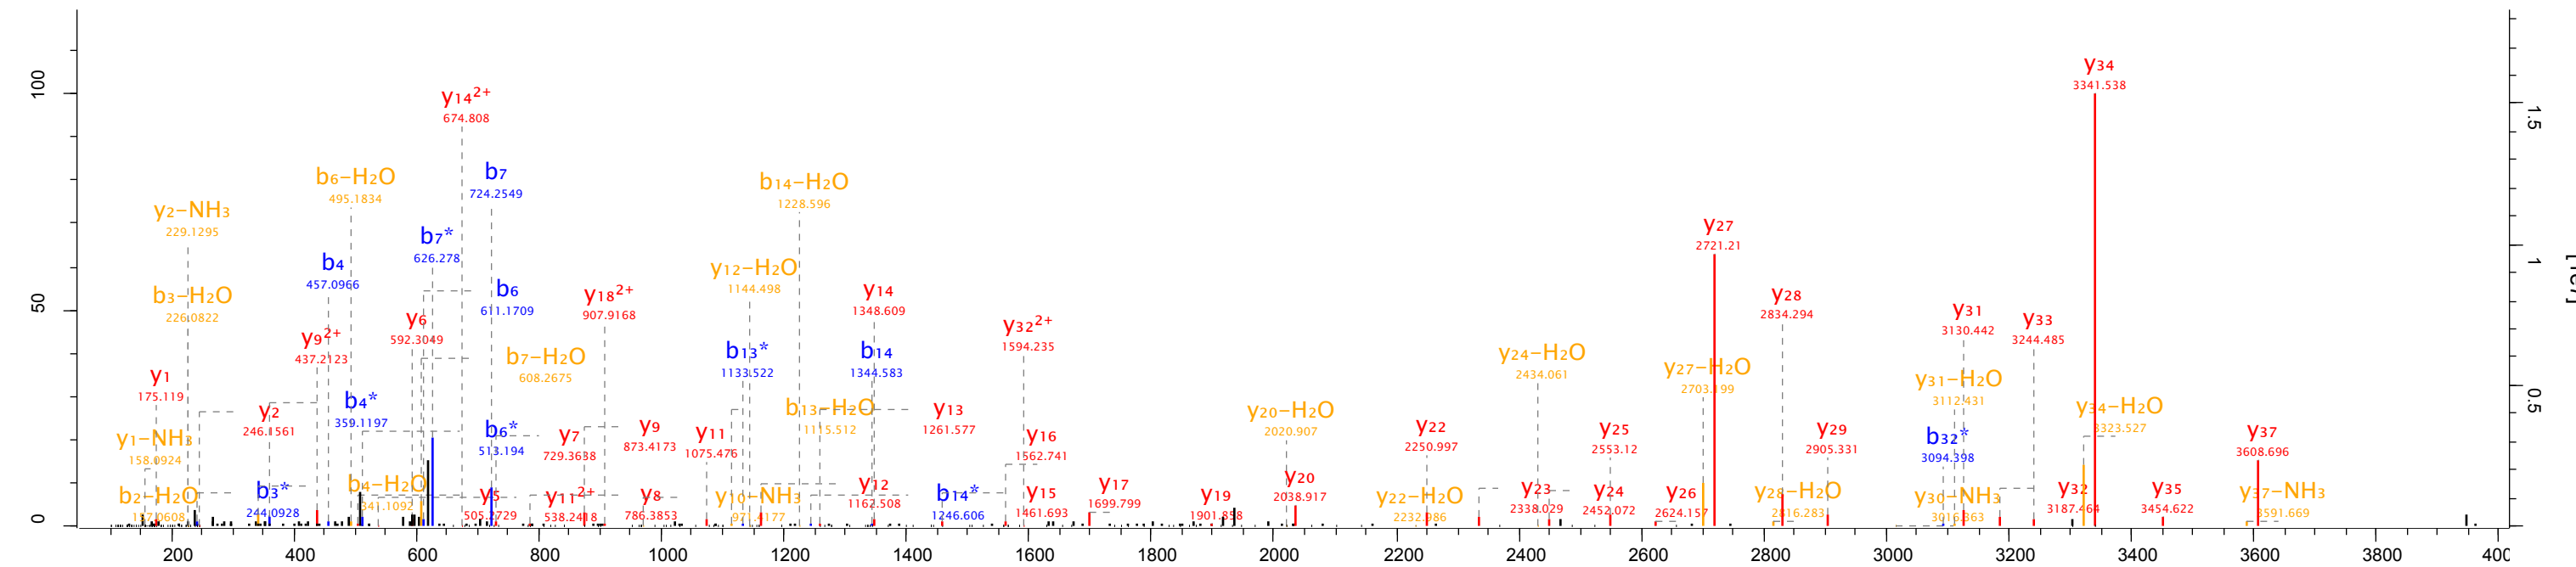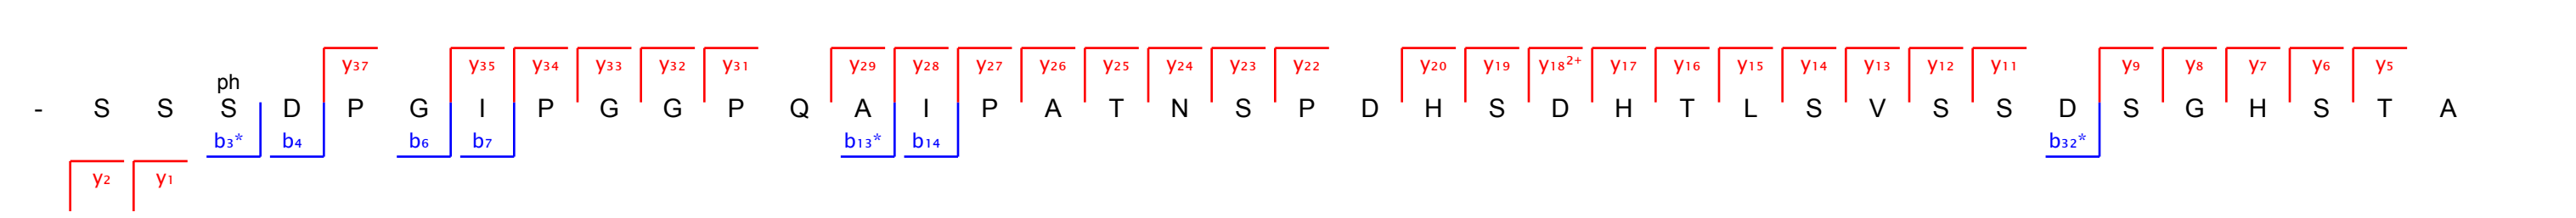

Raw file: 20150812\_A375SR\_Phospho\_BR1\_04  
 Scan: 1527 Method: FTMS; HCD Score: 226.35 m/z: 733.37 Gene names: PRCC

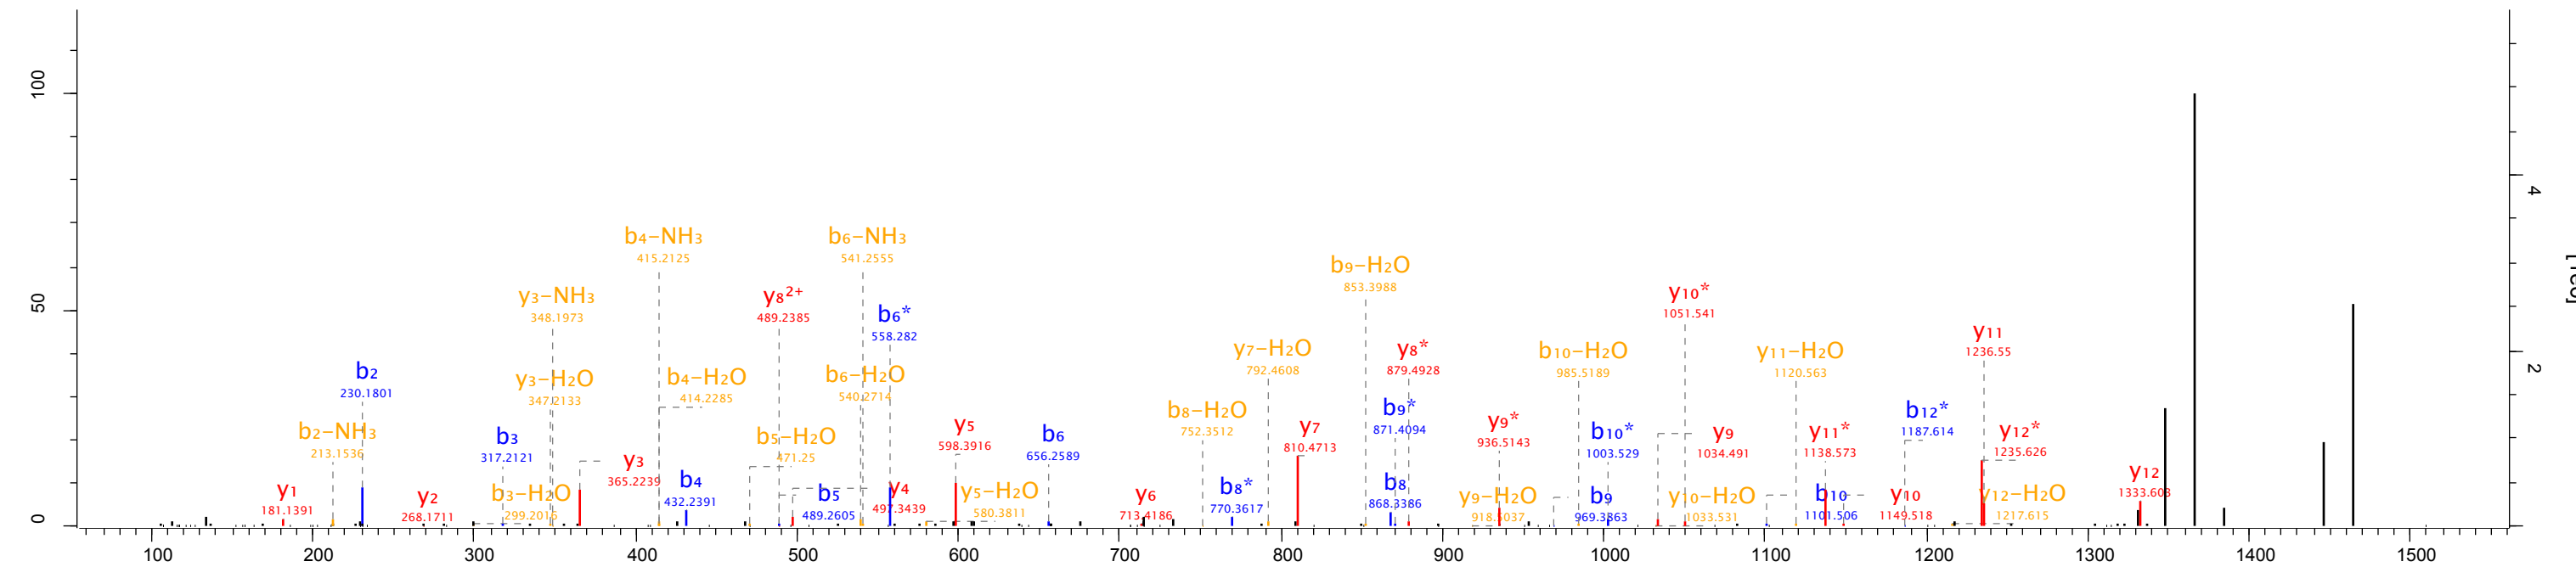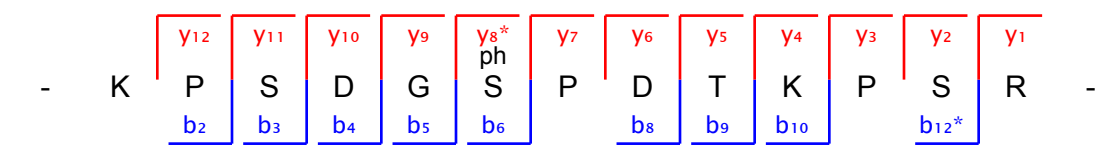

Raw file: 20150812\_A375SR\_Phospho\_BR1\_04  
 Scan: 1537 Method: FTMS; HCD Score: 401.73 m/z: 887.42 Gene names: HNRNPC

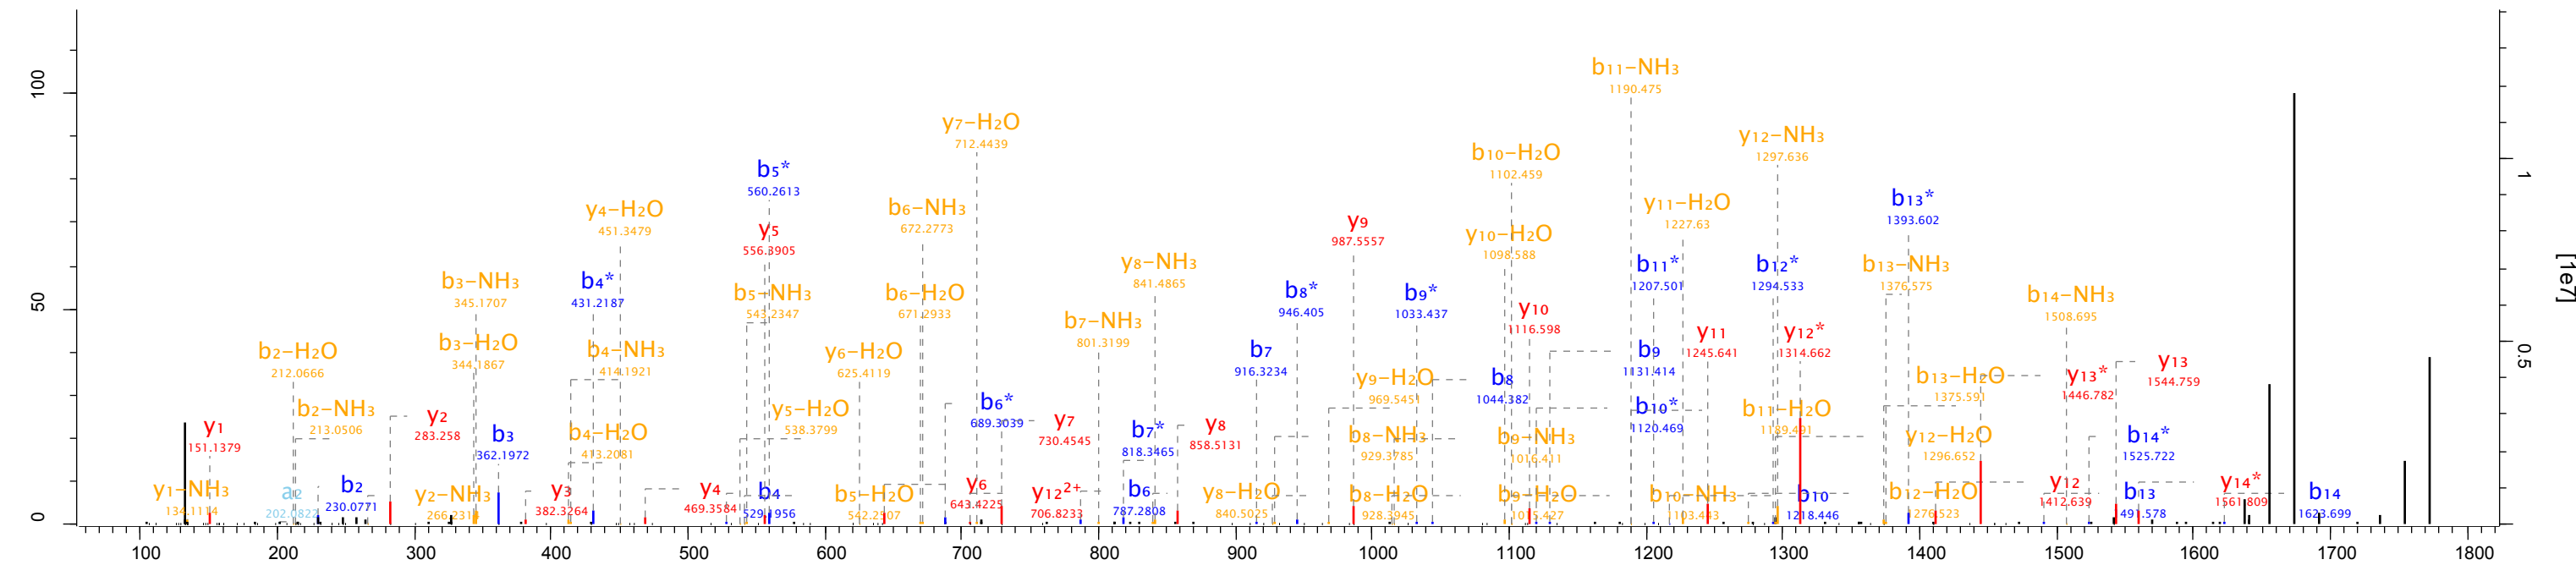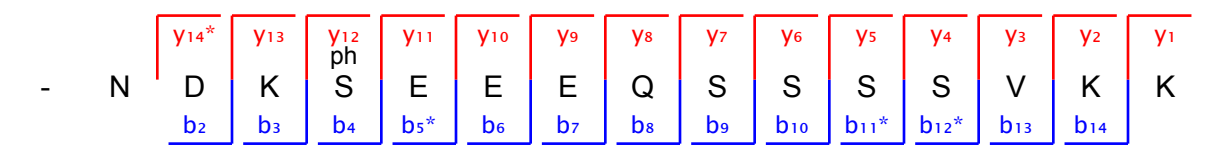

20150812\_A375SR\_Phospho\_BR1\_04 1597 FTMS; HCD 113.01 736.32 ATF7IP

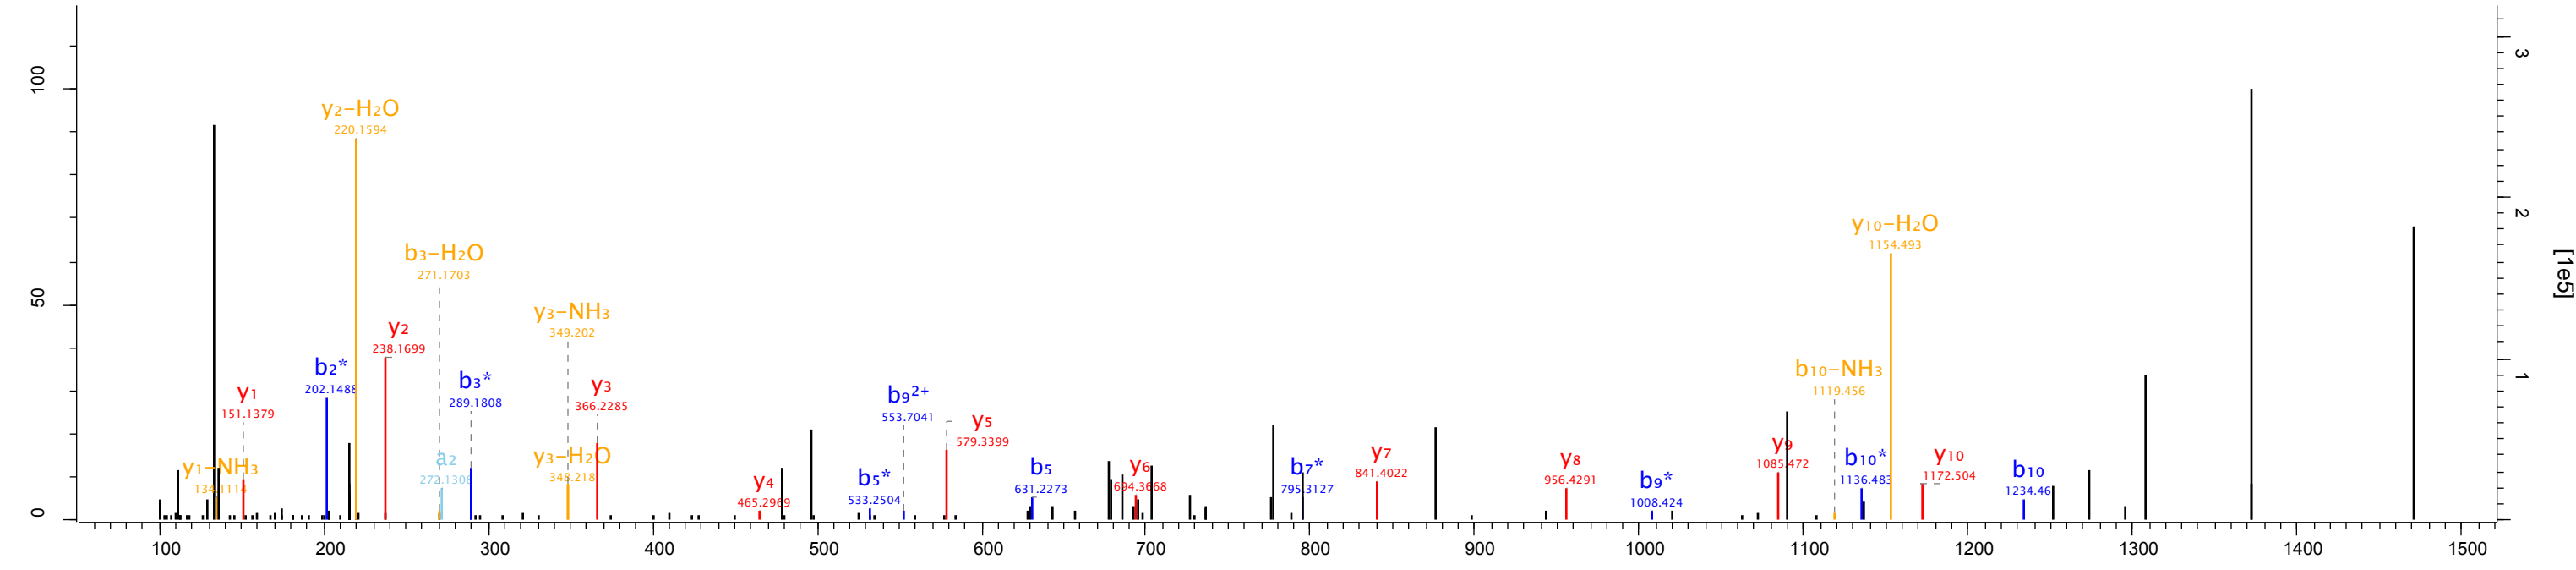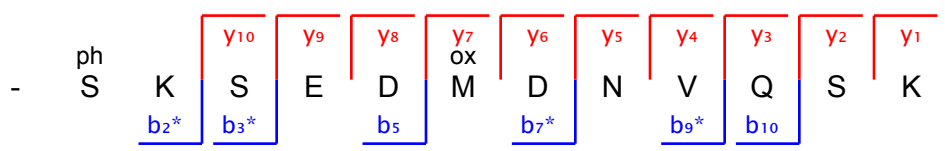

Raw file  
 20150812\_A375SR\_Phospho\_BR1\_04  
 Scan 16967 Method FTMS; HCD Score 268.13 m/z 1098.96 Gene names PPFIBP1

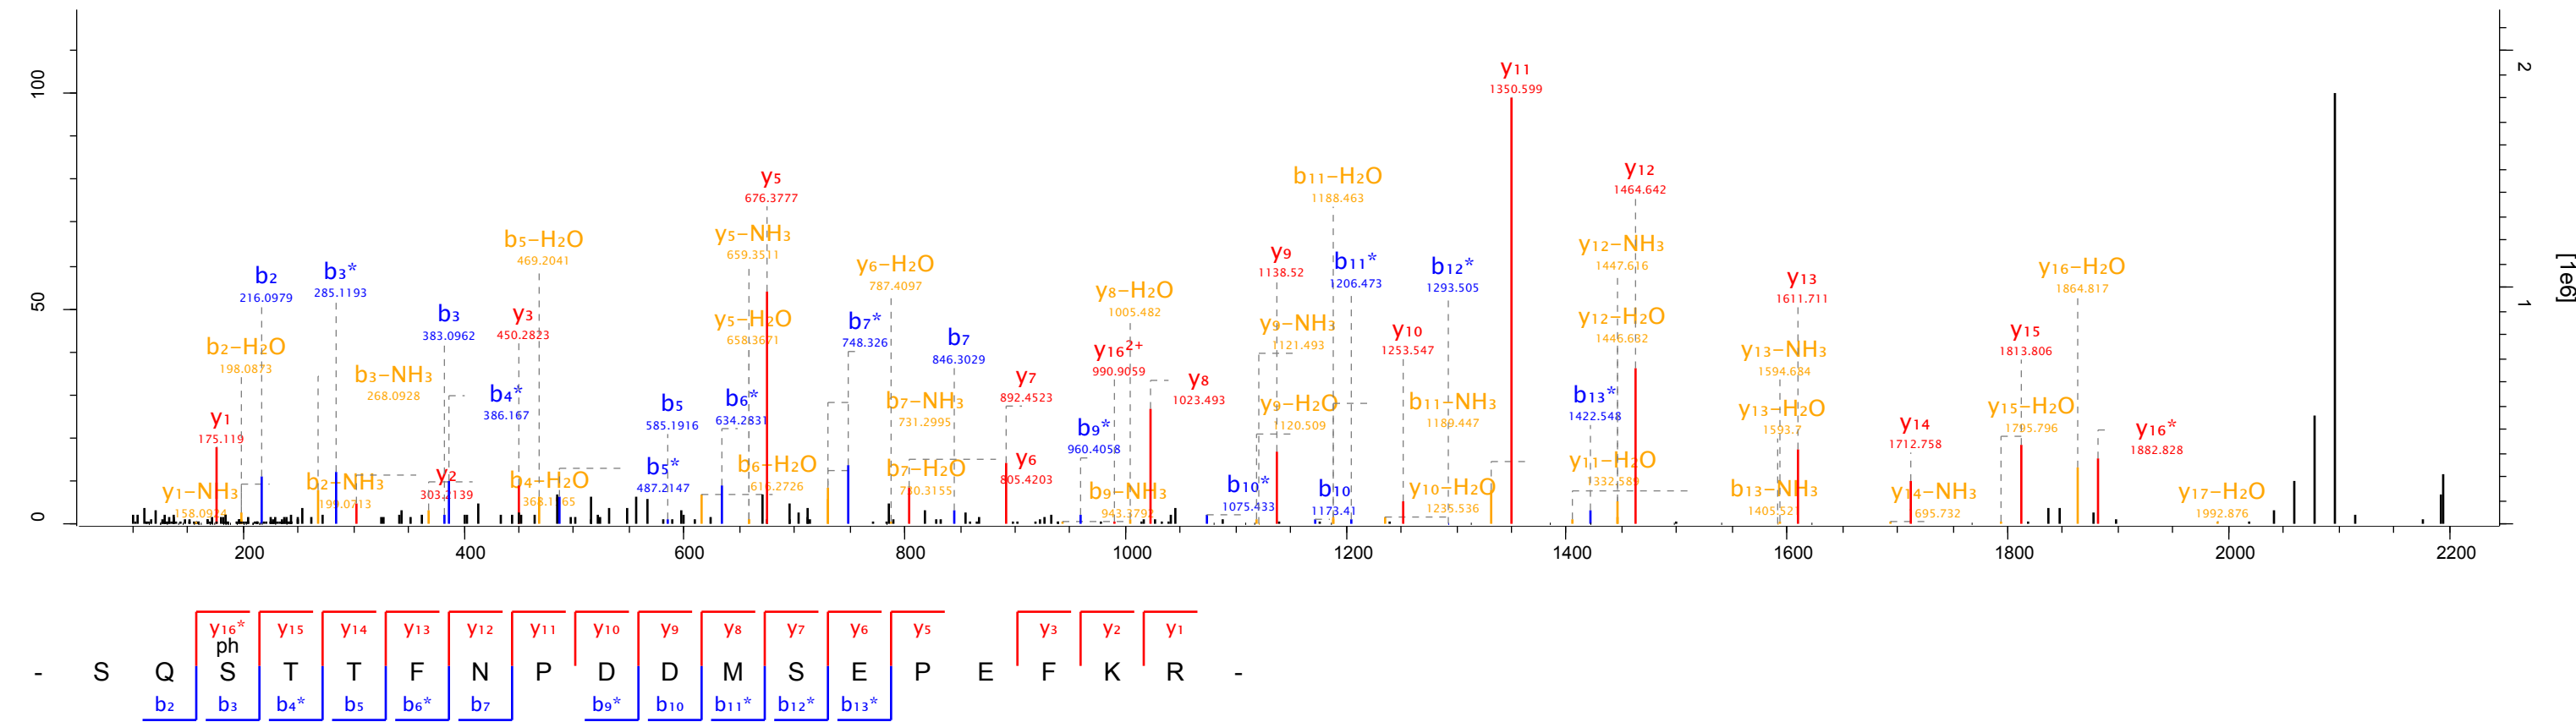

Raw file: 20150812\_A375SR\_Phospho\_BR1\_04  
 Scan: 17117 Method: FTMS; HCD Score: 238.79 m/z: 956.39 Gene names: MAP1B

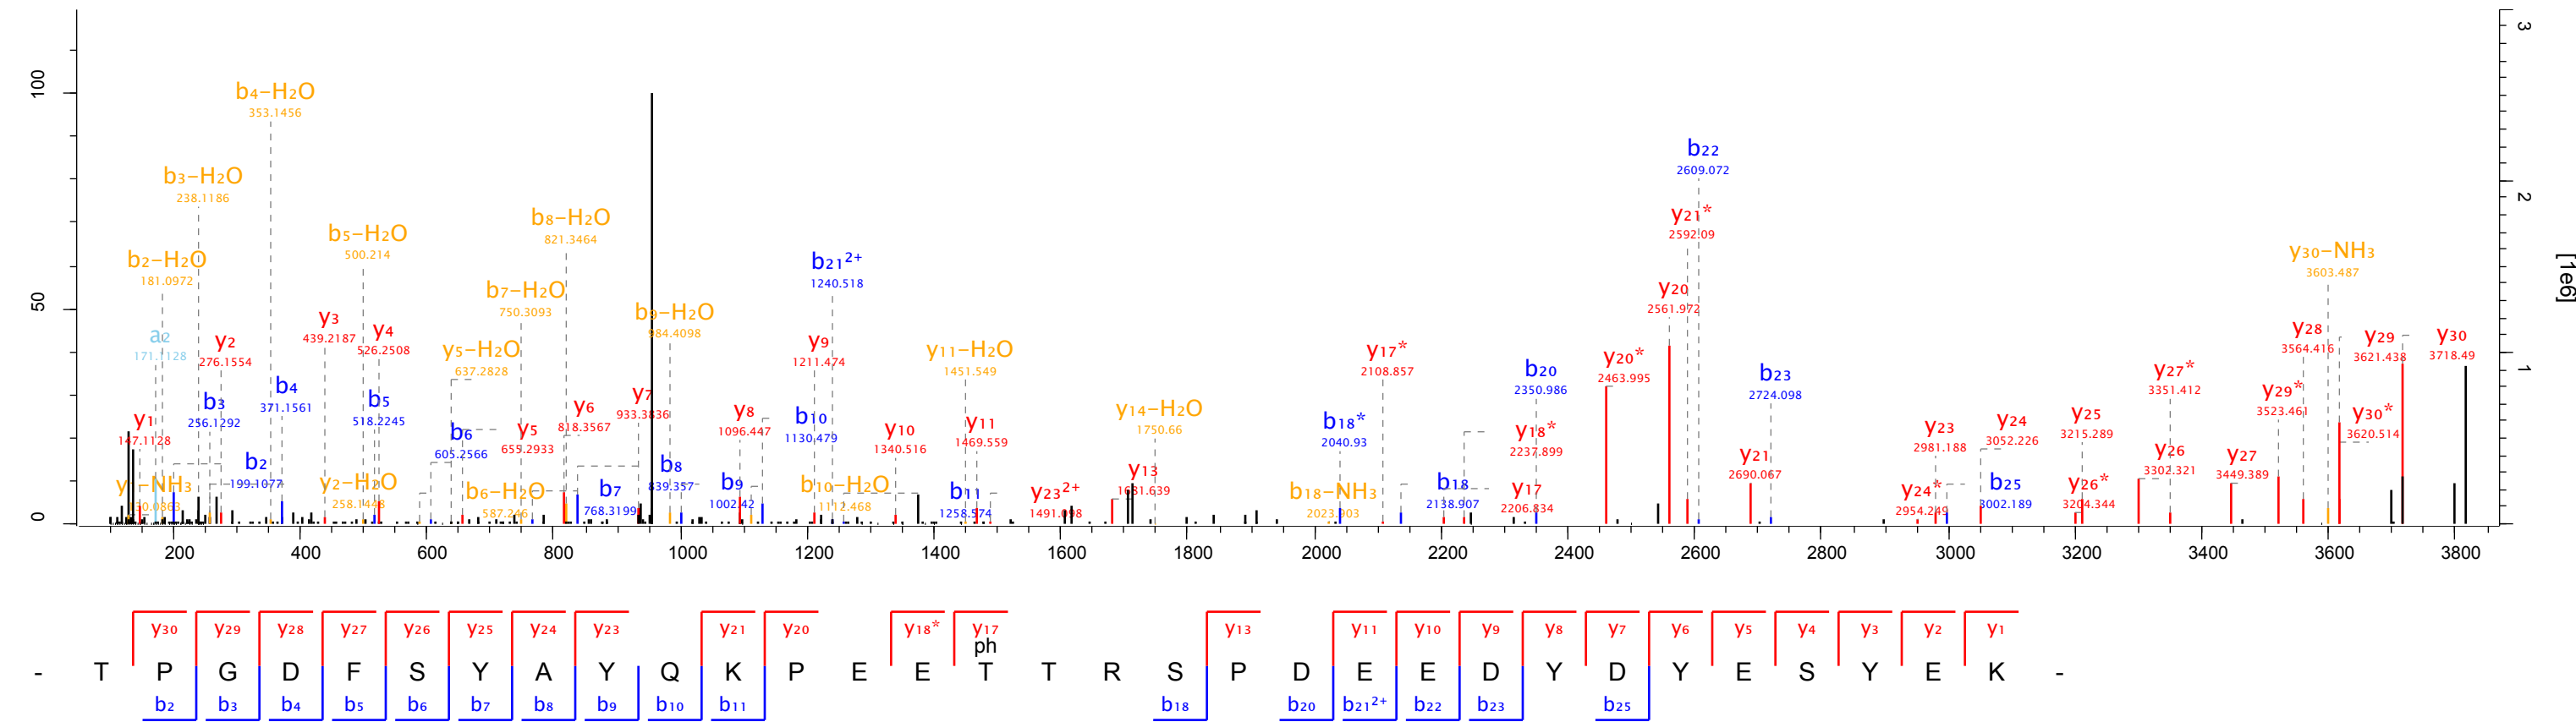

Raw file 20150812\_A375SR\_Phospho\_BR1\_04 Scan 18237 Method FTMS; HCD Score 220.97 m/z 864.32 Gene names GPATCH2

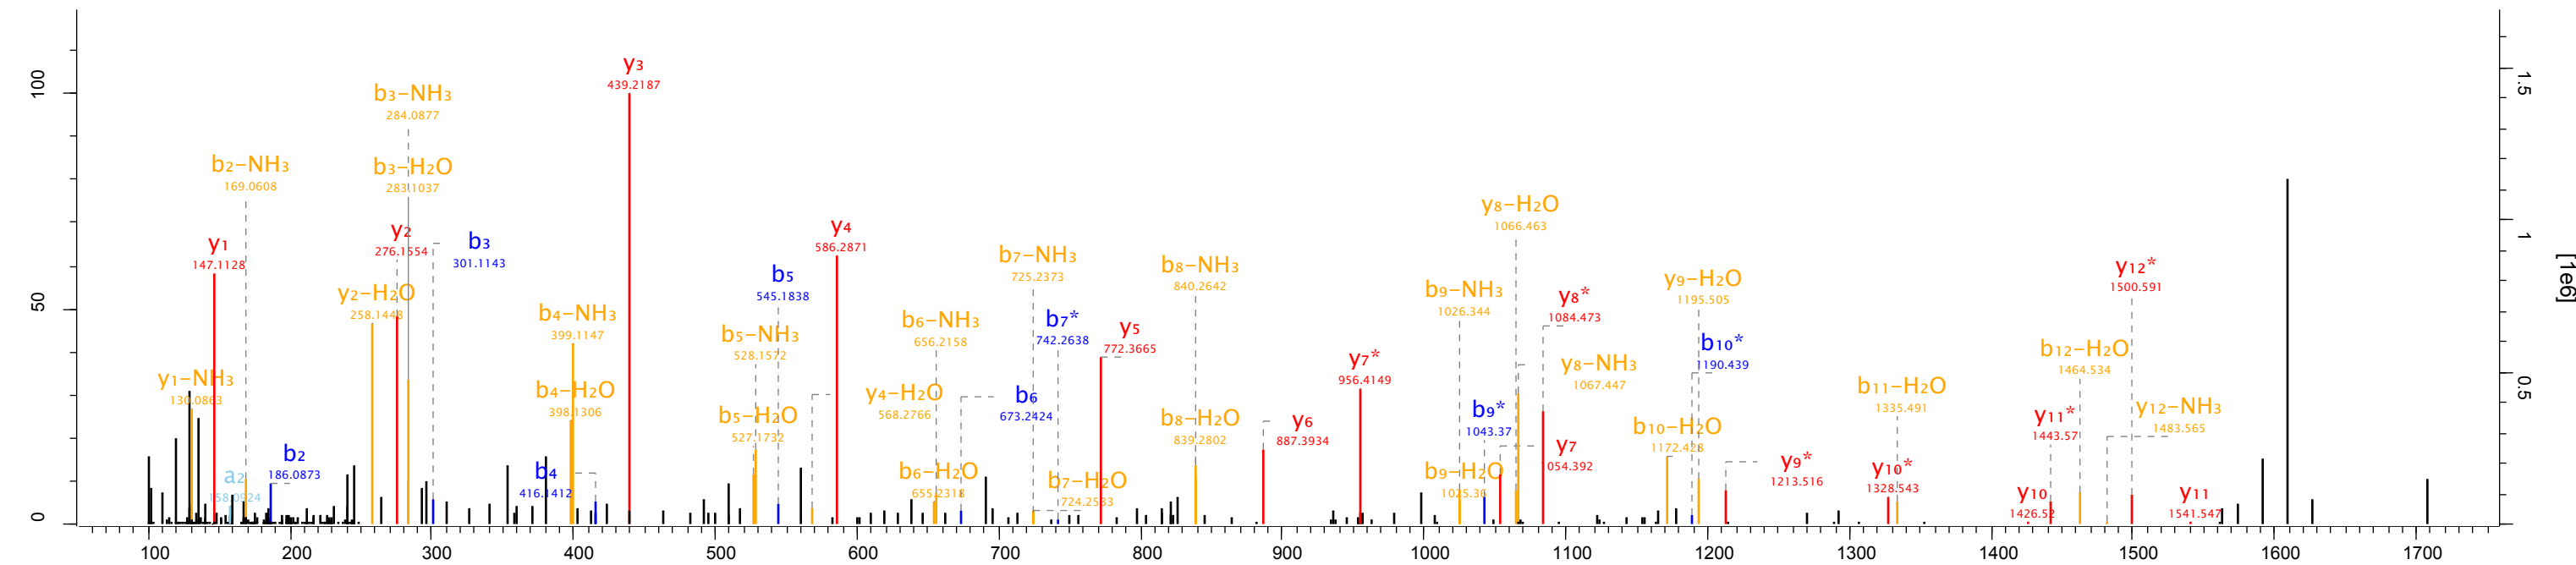

- Q y<sub>12</sub>\* y<sub>11</sub> y<sub>10</sub> y<sub>9</sub>\* y<sub>8</sub>\* y<sub>7</sub>ph y<sub>6</sub> y<sub>5</sub> y<sub>4</sub> y<sub>3</sub> y<sub>2</sub> y<sub>1</sub> b<sub>2</sub> b<sub>3</sub> b<sub>4</sub> b<sub>5</sub> b<sub>6</sub> b<sub>7</sub>\* b<sub>9</sub>\* b<sub>10</sub>\* D W F Y E K -

Raw file: 20150812\_A375SR\_Phospho\_BR1\_04  
 Scan: 1877 Method: FTMS; HCD Score: 72.43 m/z: 788.81 Gene names: TJP2

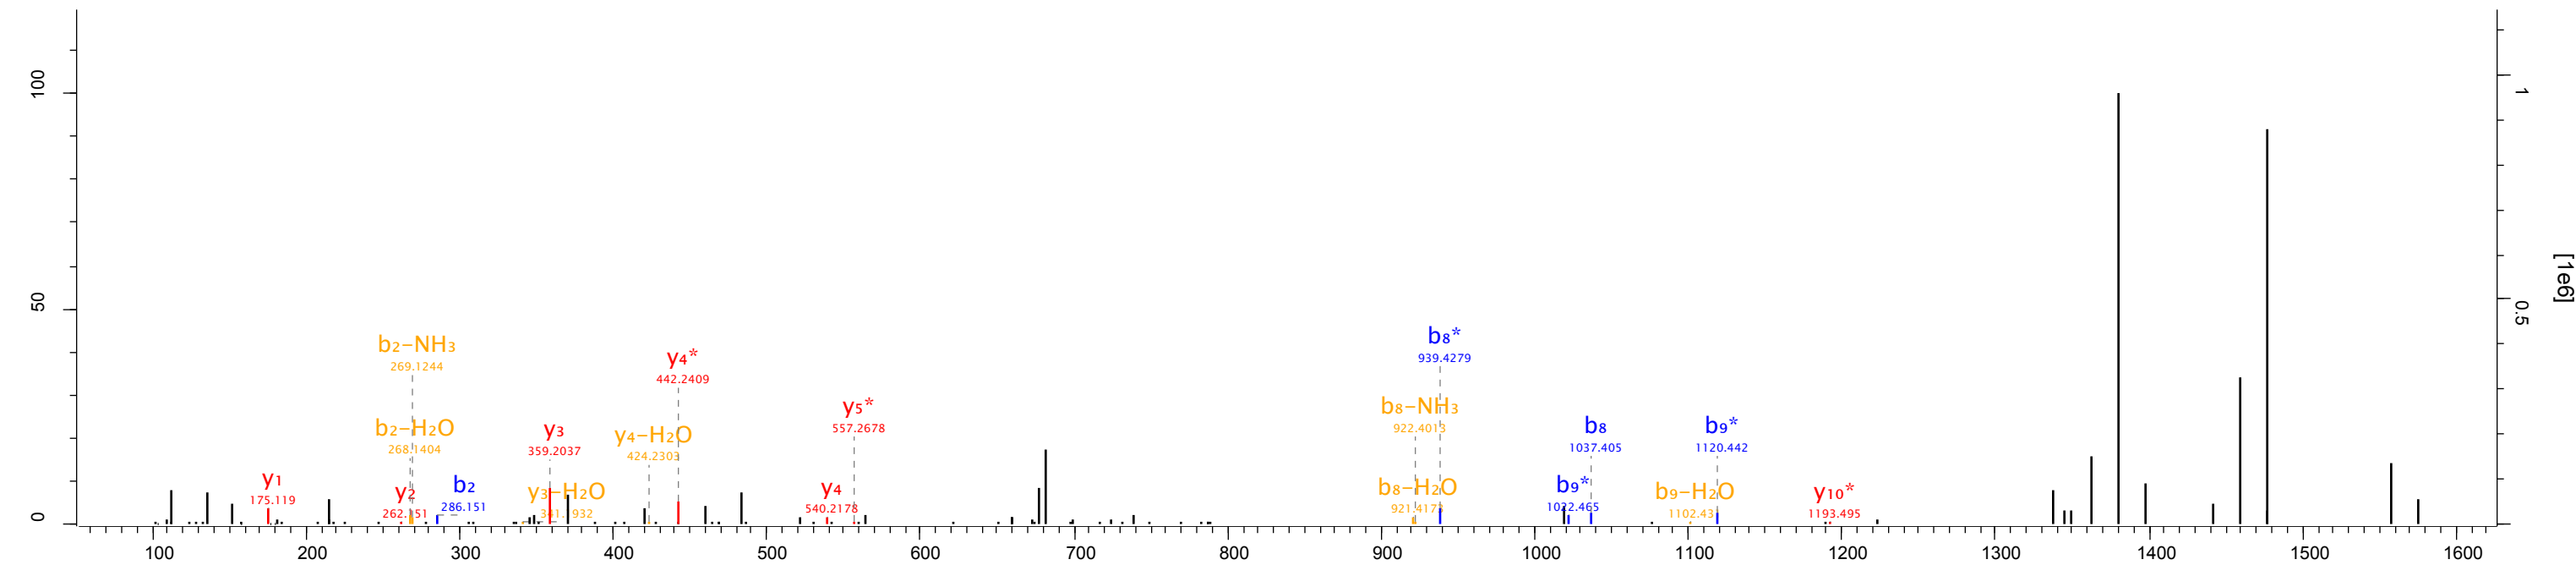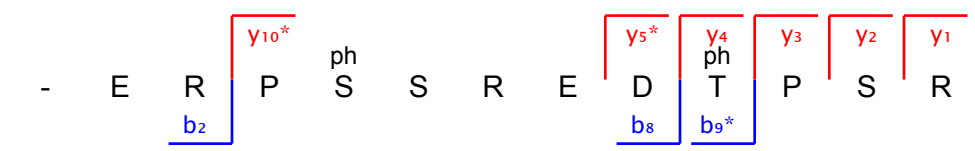



Raw file 20150812\_A375SR\_Phospho\_BR1\_04 Scan 19047 Method FTMS; HCD Score 100.07 m/z 900.45 Gene names SUFU

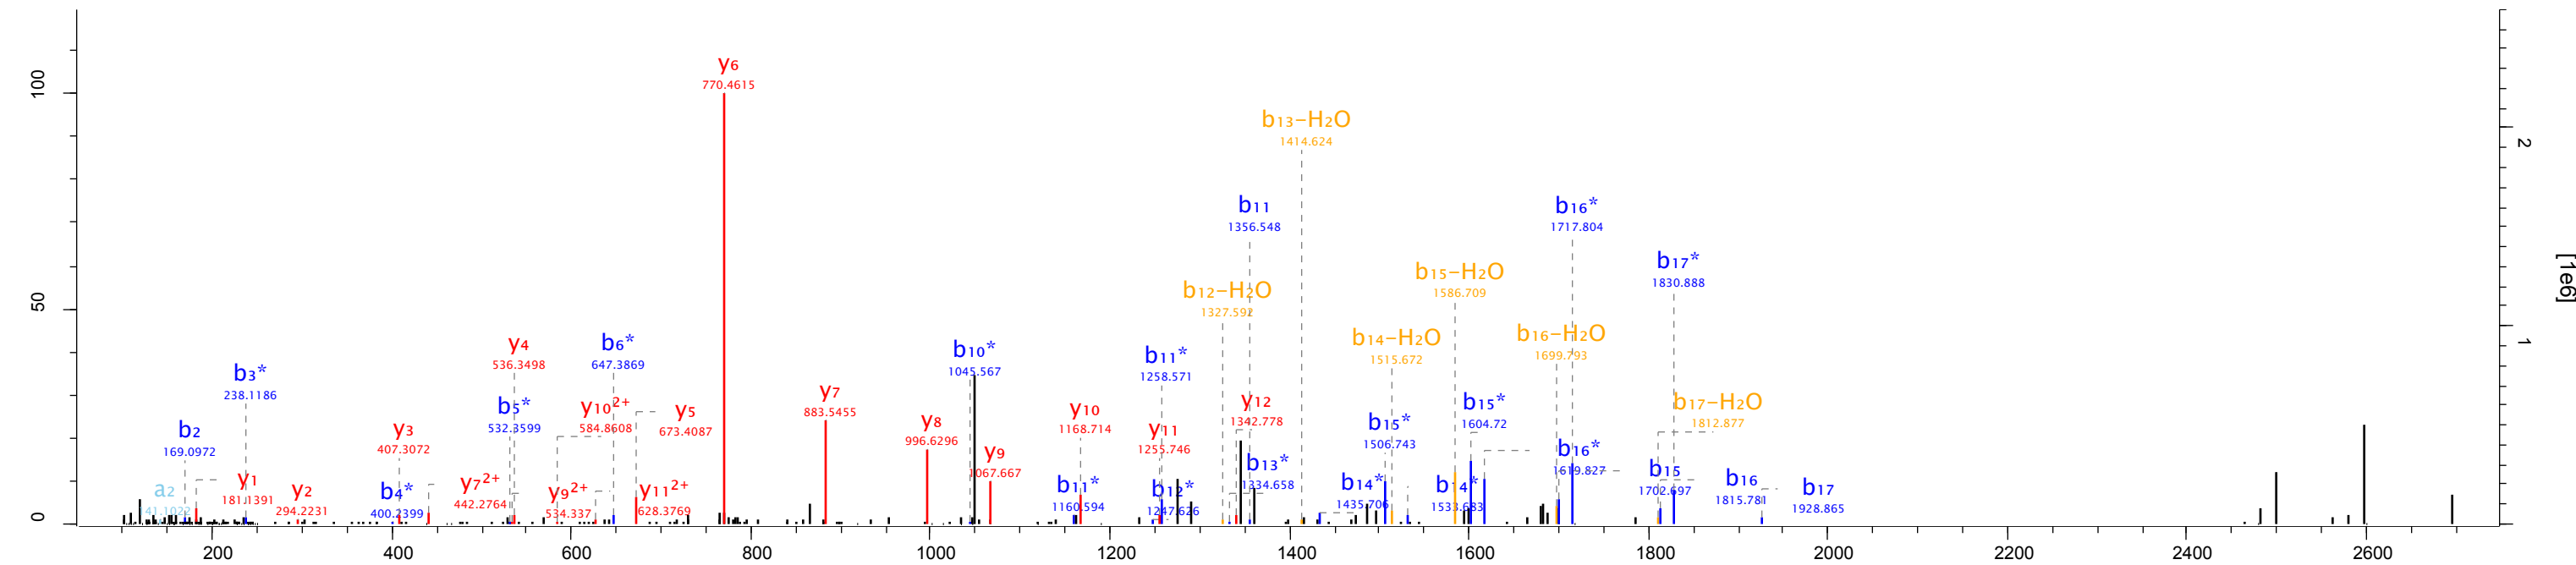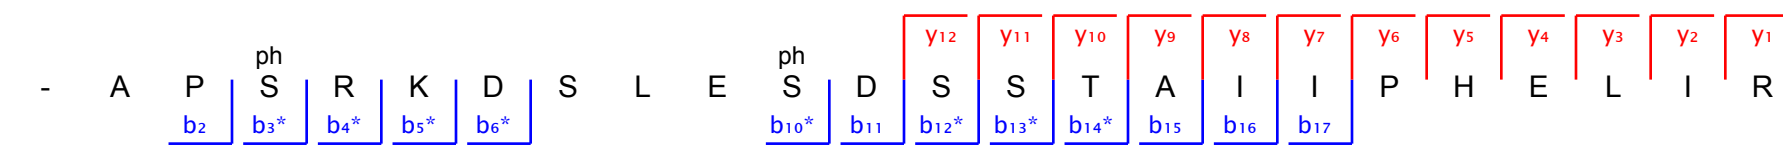

Raw file: 20150812\_A375SR\_Phospho\_BR1\_04  
 Scan: 1927 Method: FTMS; HCD Score: 81.12 m/z: 616.27 Gene names: CEBPZ

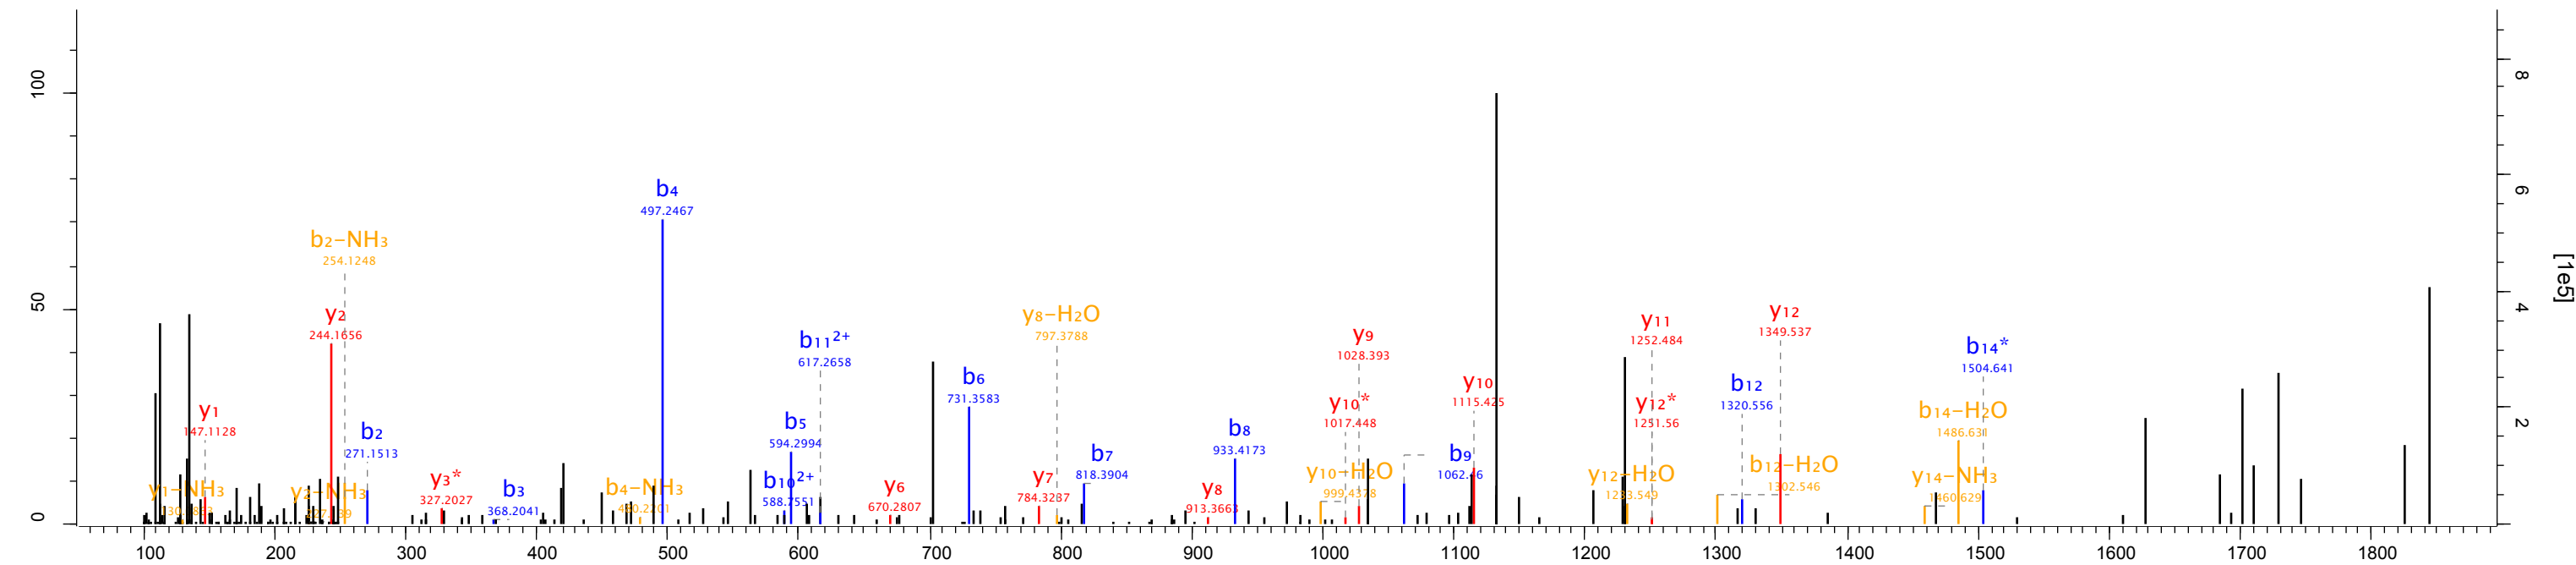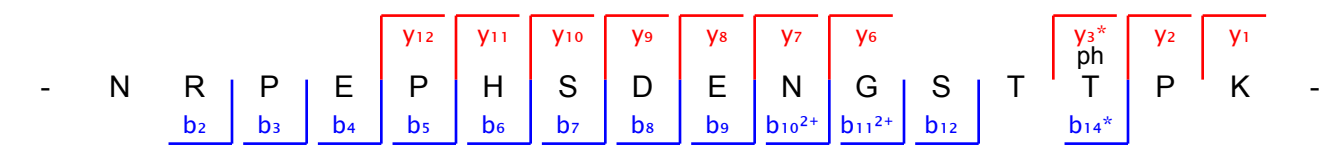

Raw file 20150812\_A375SR\_Phospho\_BR1\_04 Scan 20127 Method FTMS; HCD Score 104.7 m/z 782.04 Gene names MYO1E

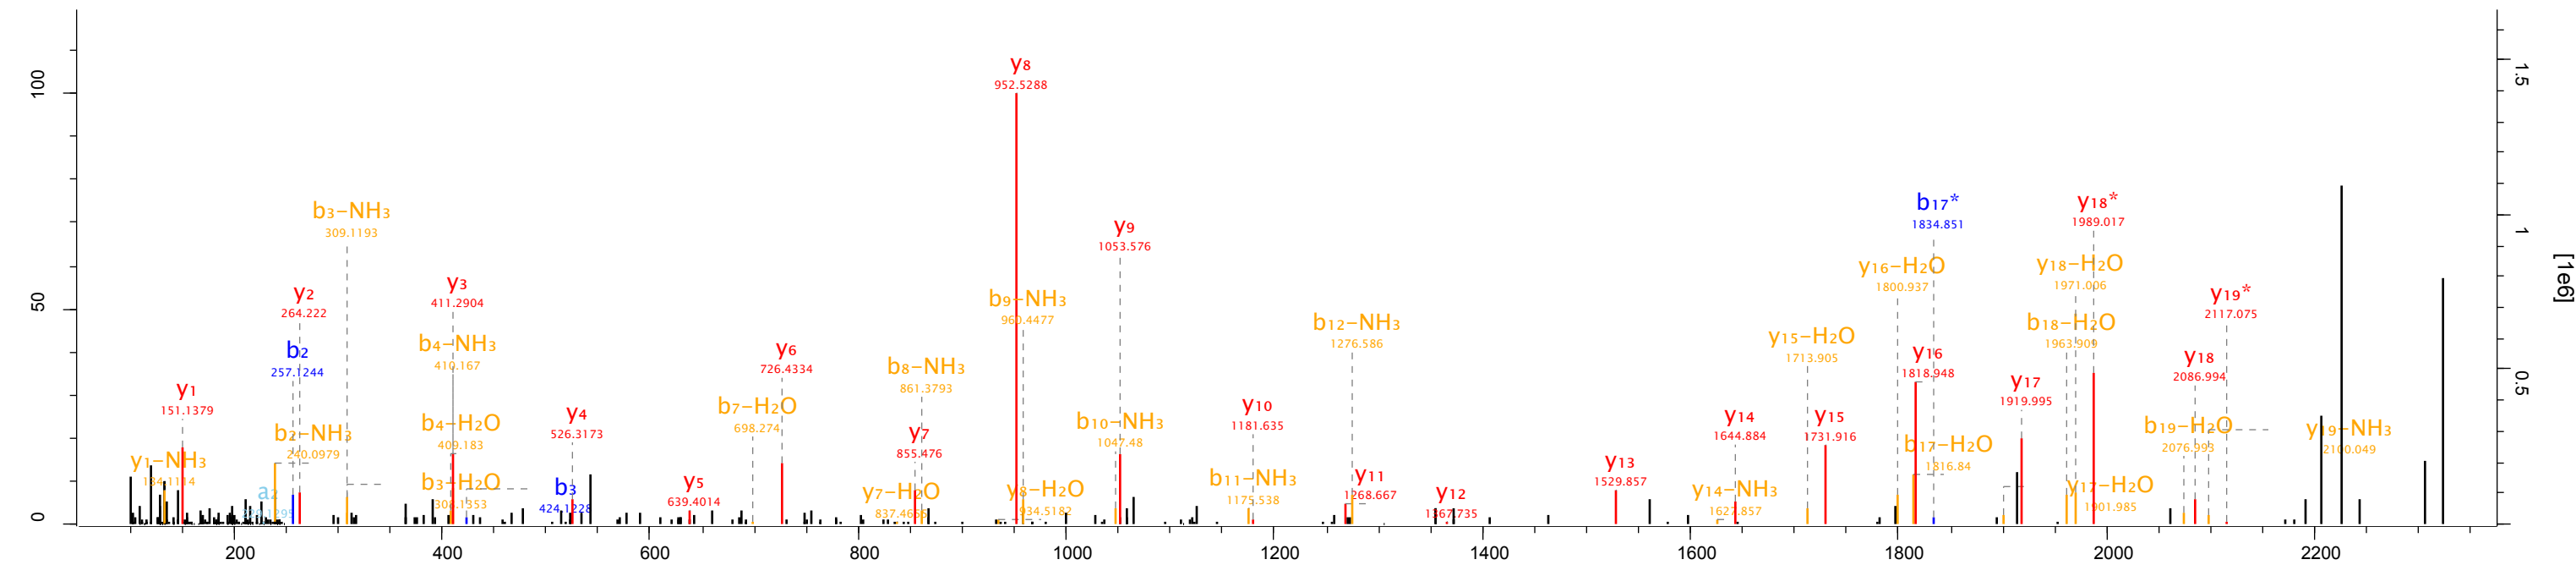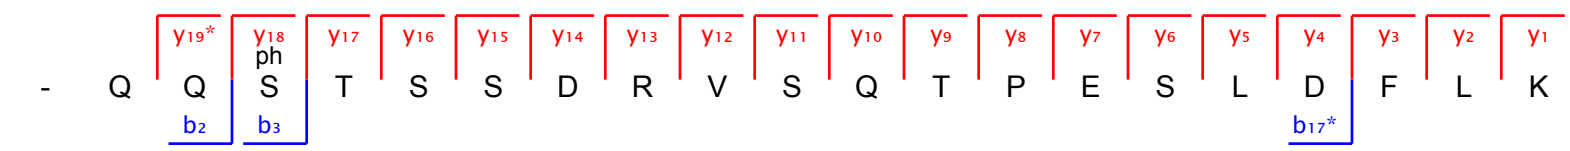

Raw file 20150812\_A375SR\_Phospho\_BR1\_04 Scan 20427 Method FTMS; HCD Score 143.95 m/z 1012.47 Gene names EIF4EBP1

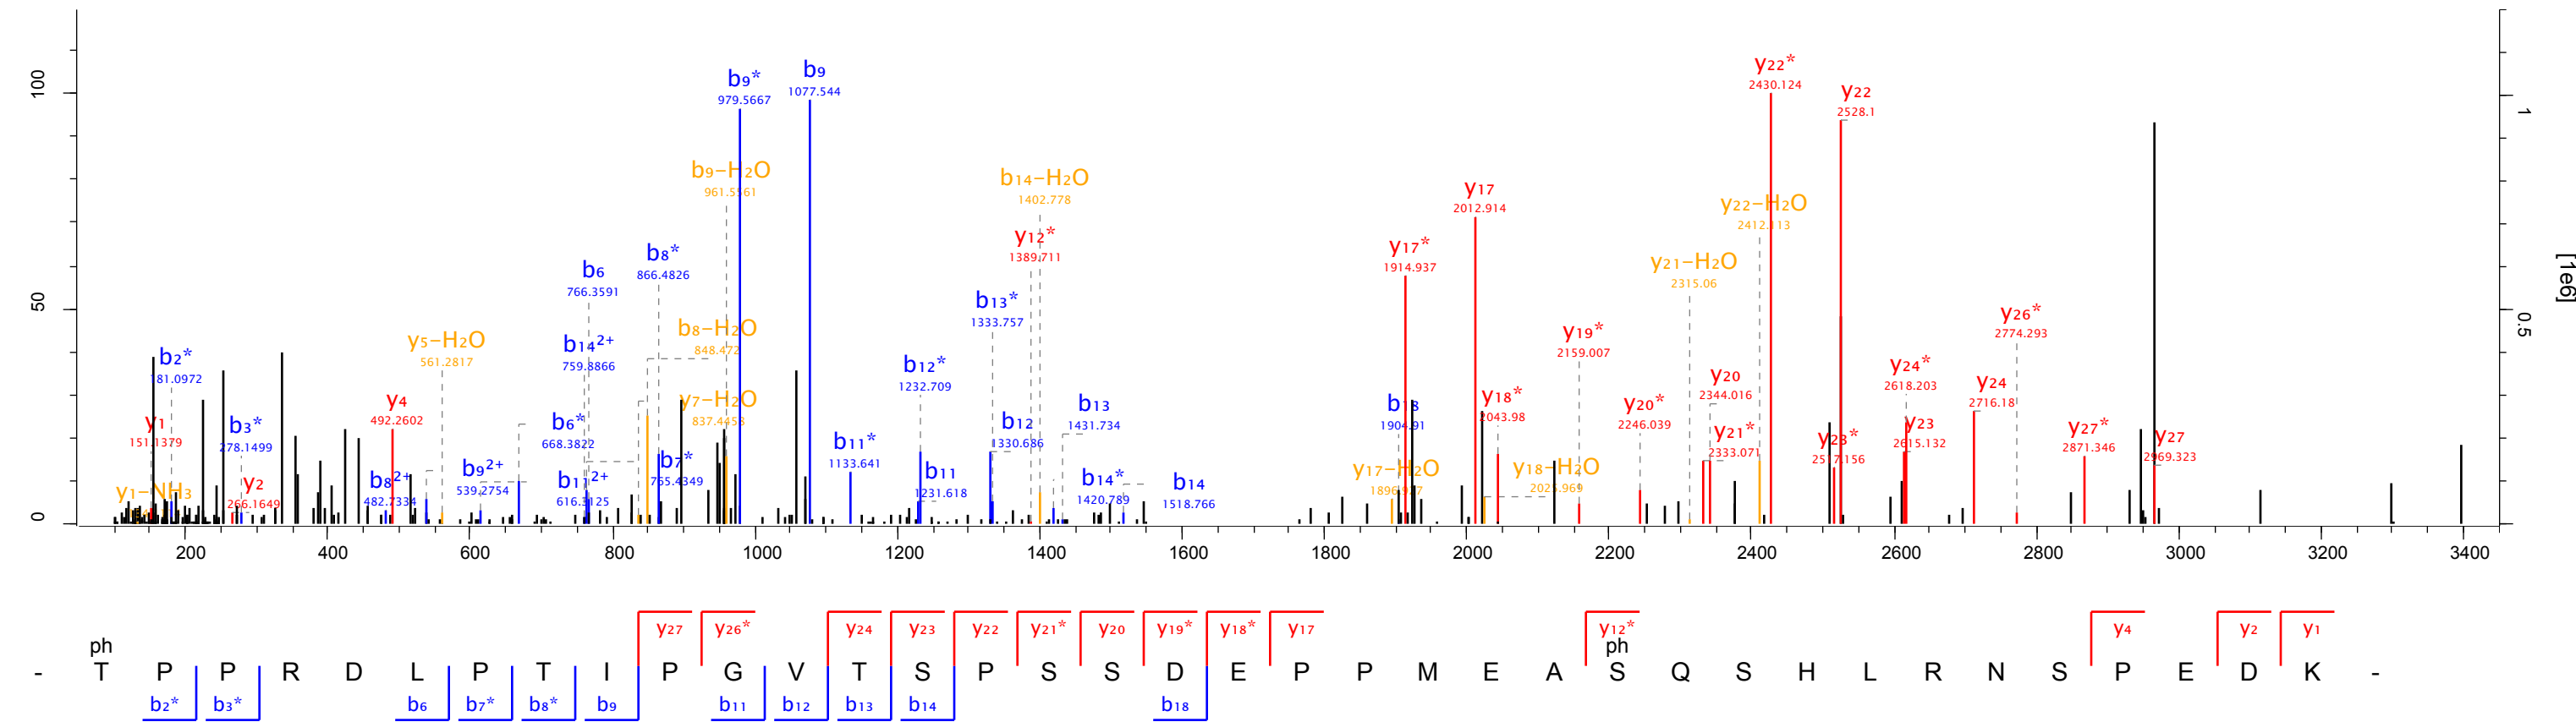

Raw file: 20150812\_A375SR\_Phospho\_BR1\_04  
 Scan: 20737 Method: FTMS; HCD Score: 49.16 m/z: 1041.77 Gene names: CNOT4

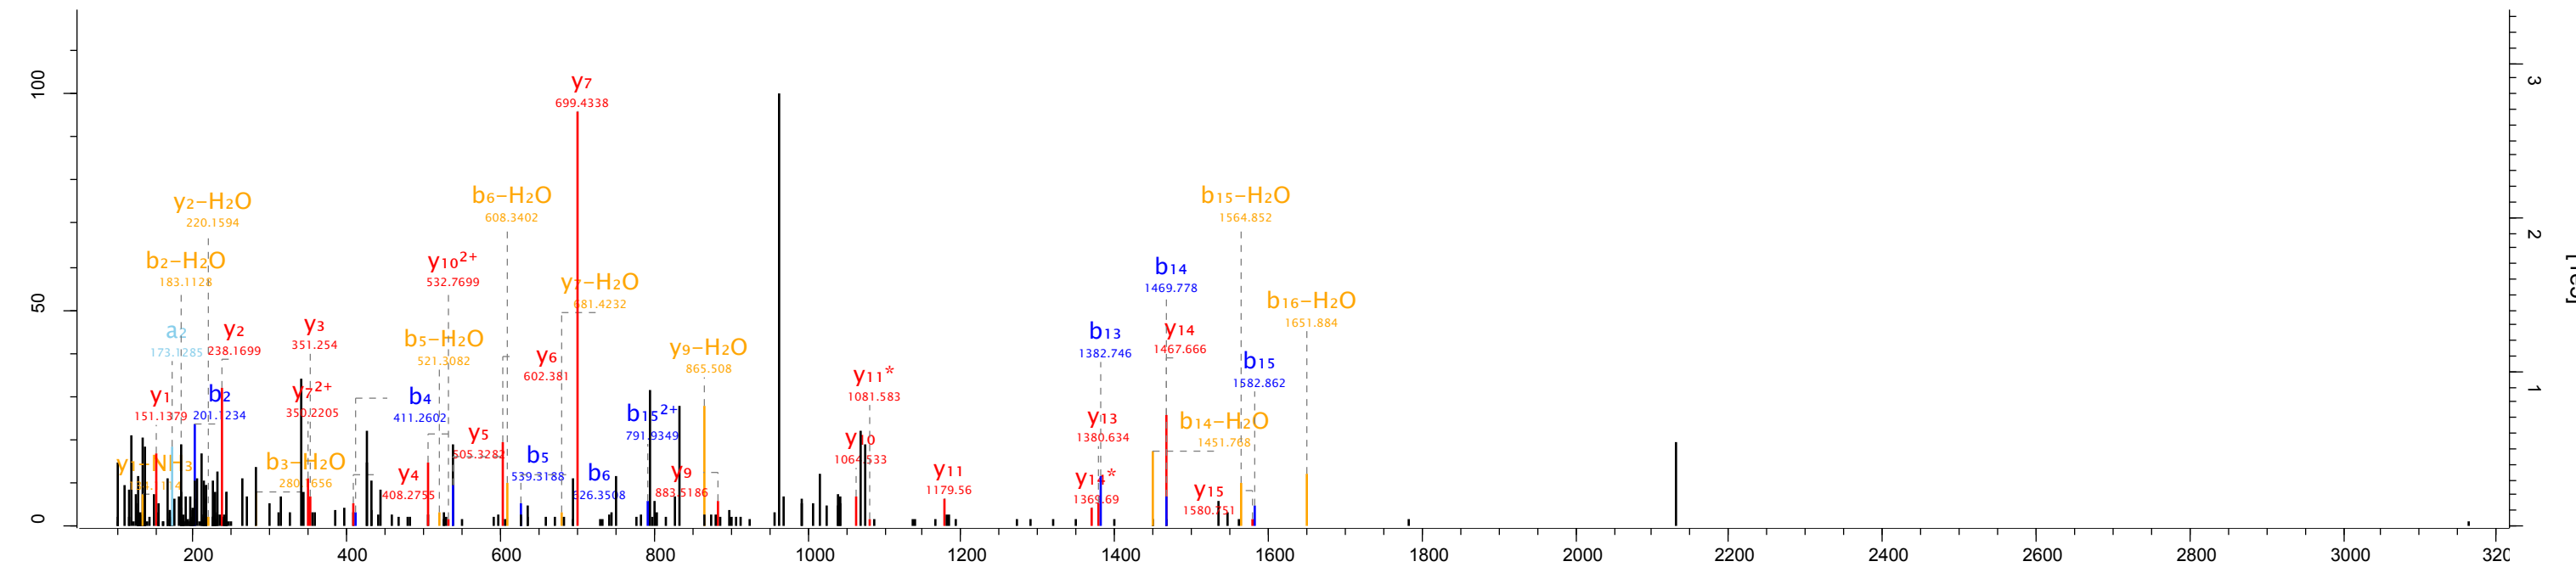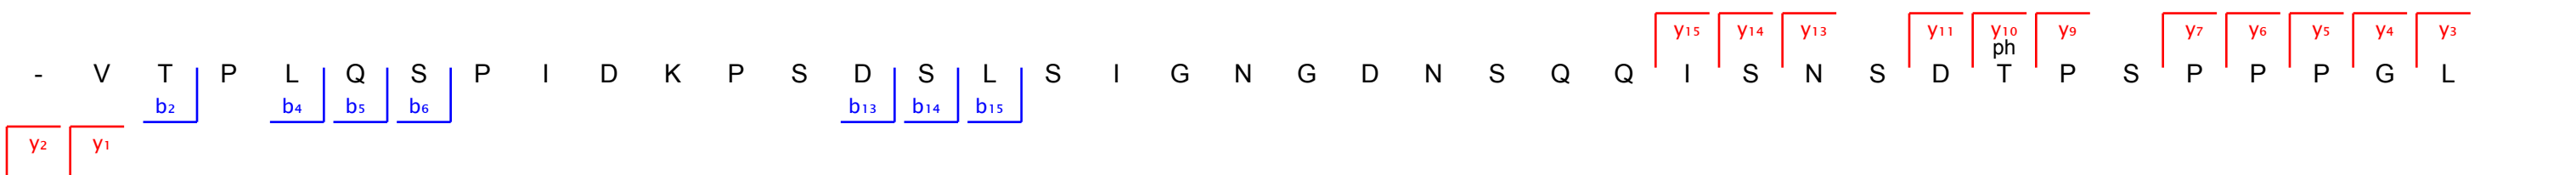

Raw file Scan Method Score m/z Gene names  
 20150812\_A375SR\_Phospho\_BR1\_04 20837 FTMS; HCD 133.56 902.77 TARS

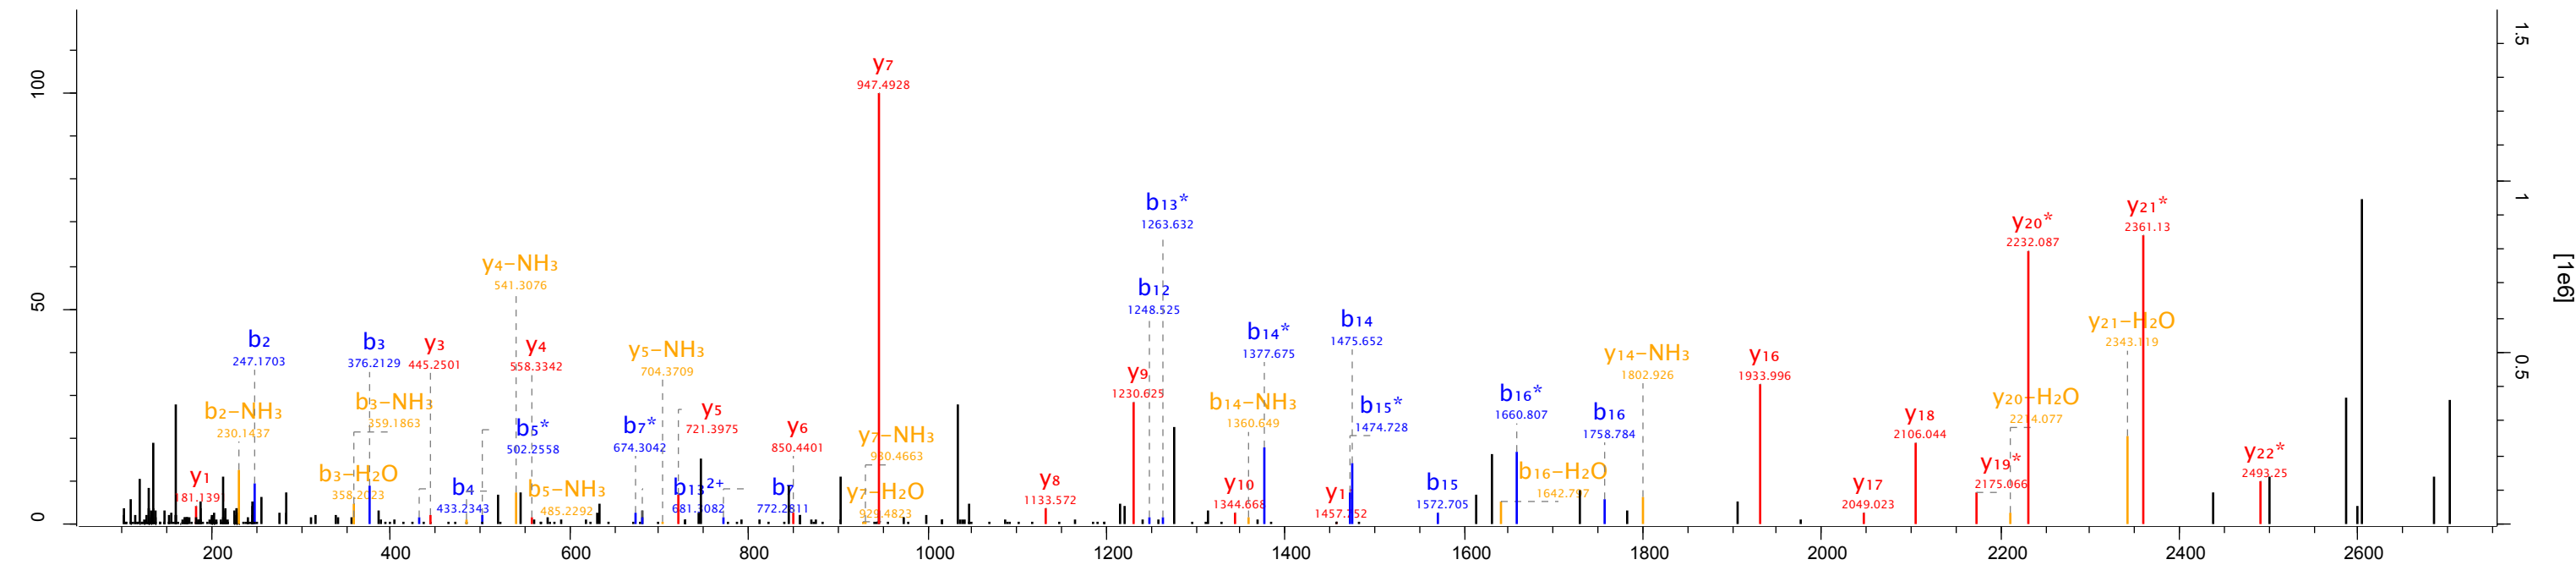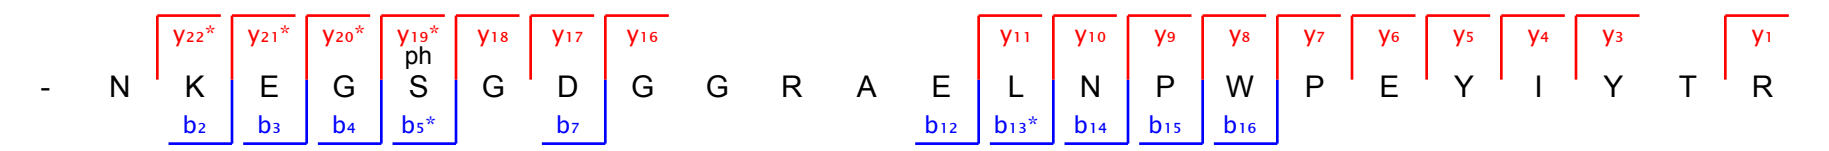

Raw file 20150812\_A375SR\_Phospho\_BR1\_04 Scan 23077 Method FTMS; HCD Score 88.5 m/z 726.71

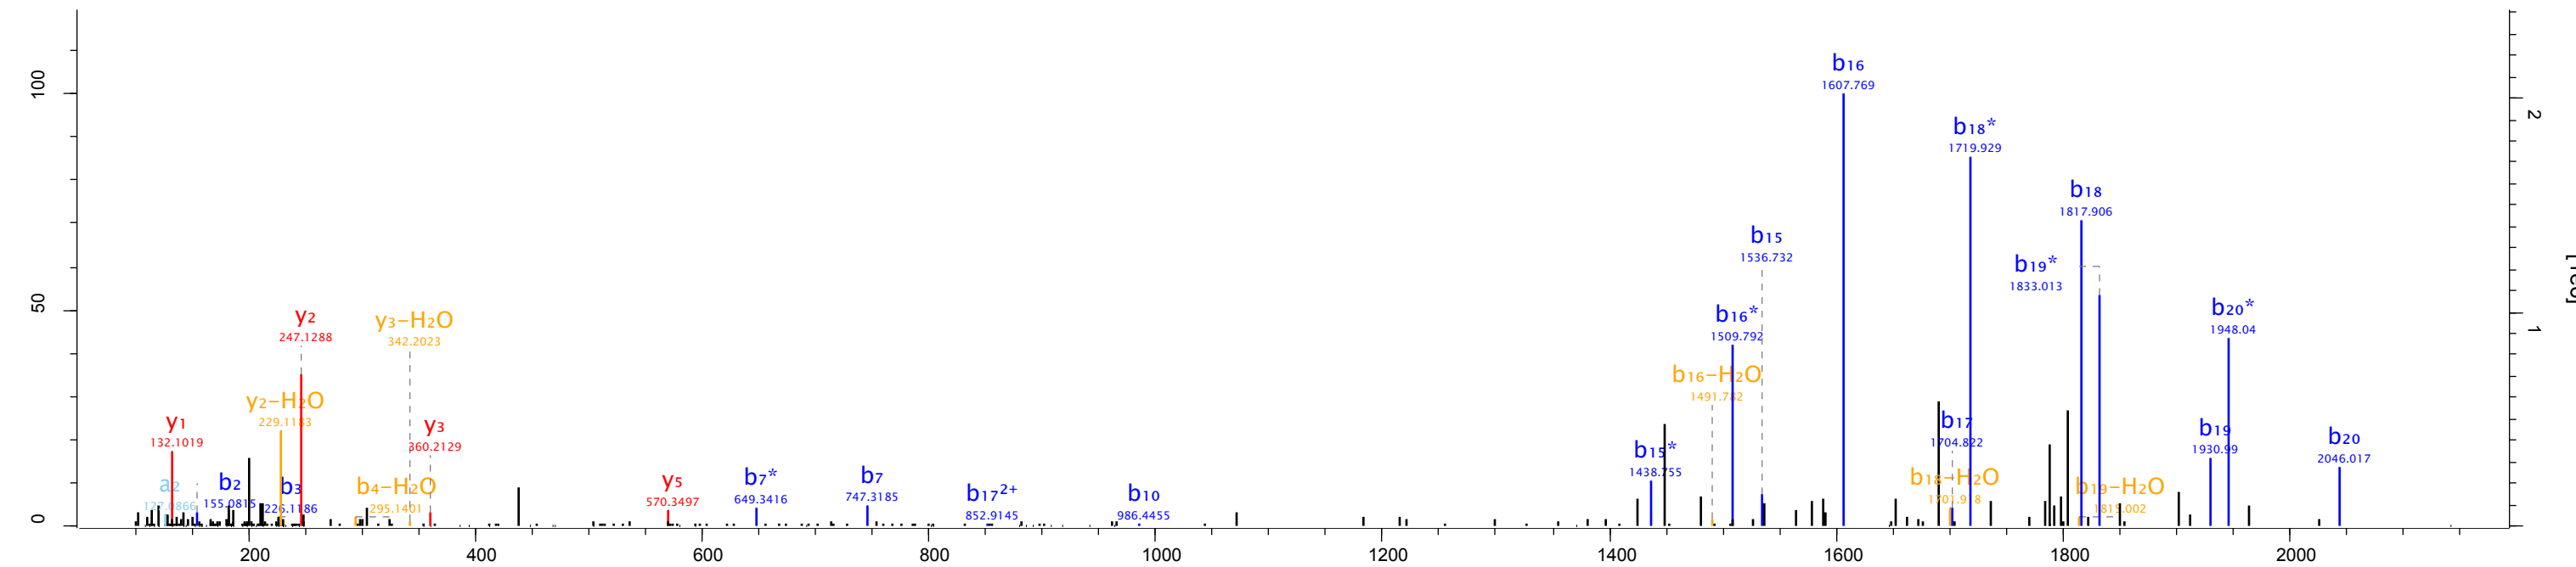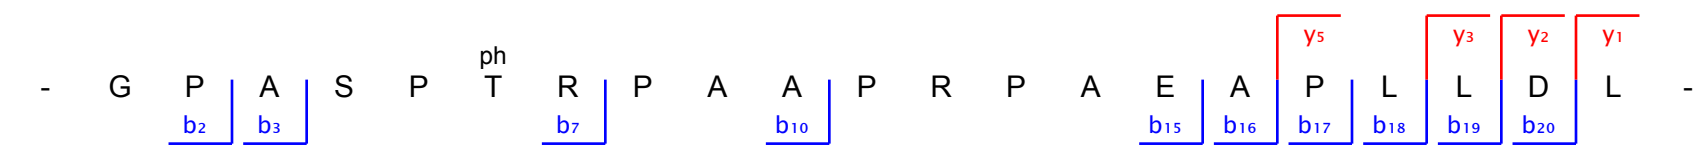

Raw file 20150812\_A375SR\_Phospho\_BR1\_04 Scan 25567 Method FTMS; HCD Score 69.7 m/z 1068.79 Gene names BTF3

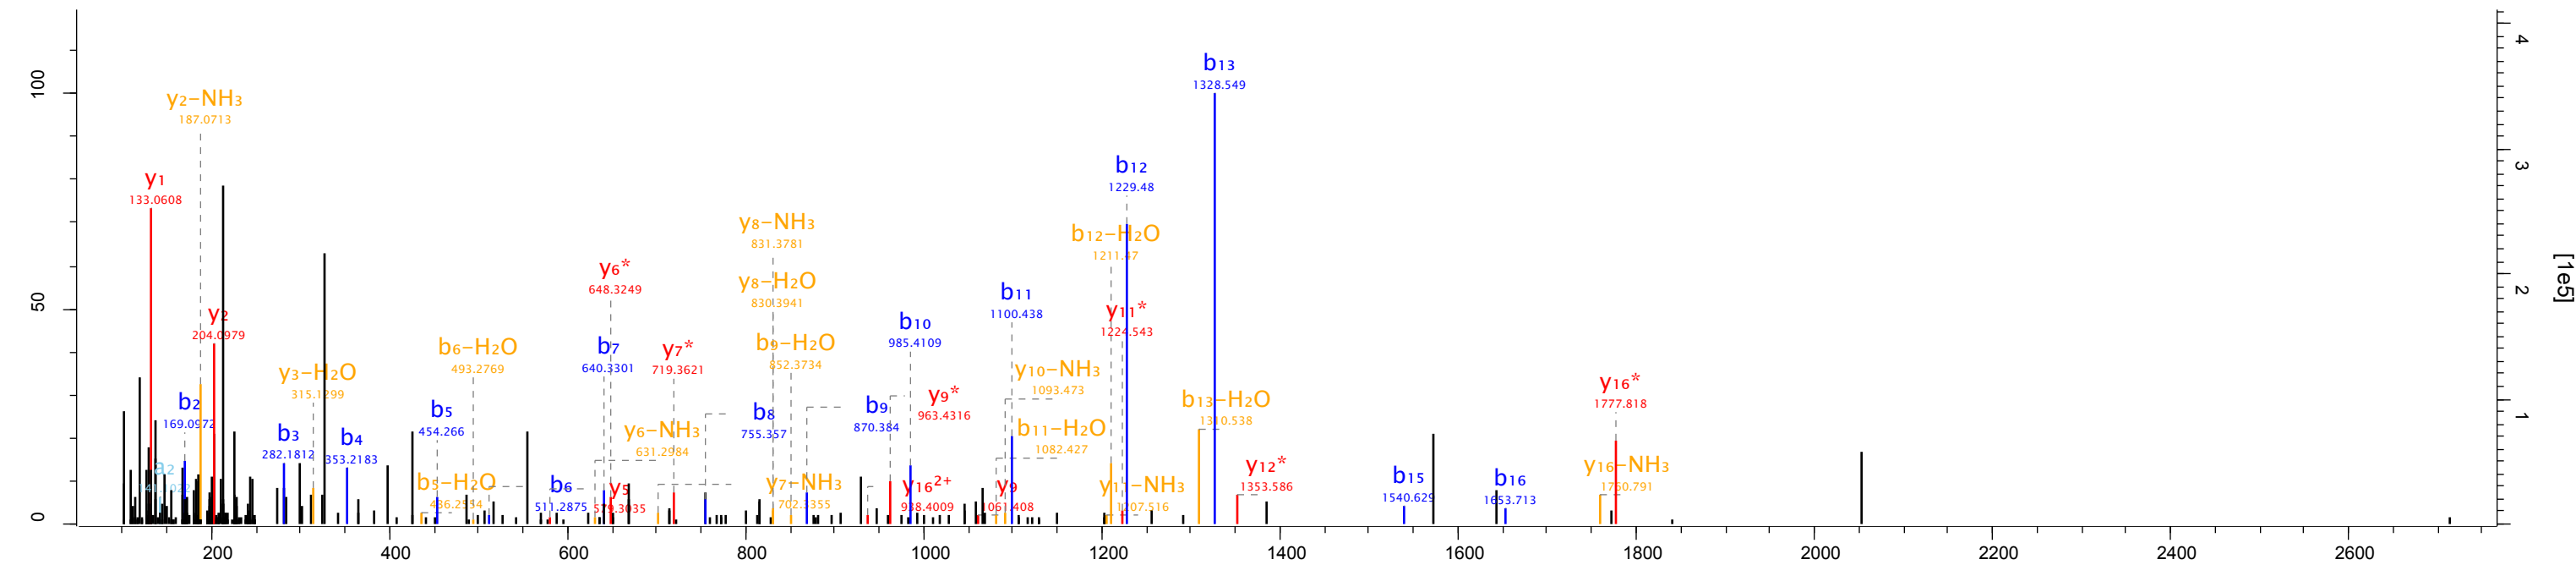

- A P L A T G E D D D D E V P D L V E N F D E A S K N E A N -

b<sub>2</sub>
b<sub>3</sub>
b<sub>4</sub>
b<sub>5</sub>
b<sub>6</sub>
b<sub>7</sub>
b<sub>8</sub>
b<sub>9</sub>
b<sub>10</sub>
b<sub>11</sub>
b<sub>12</sub>
b<sub>13</sub>
b<sub>15</sub>
b<sub>16</sub>
y<sub>16</sub>\*
y<sub>12</sub>\*
y<sub>11</sub>\*
y<sub>9</sub>
y<sub>7</sub>\*
y<sub>6</sub><sup>ph</sup>\*
y<sub>5</sub>
y<sub>2</sub>
y<sub>1</sub>



Raw file 20150812\_A375SR\_Phospho\_BR1\_04 Scan 26177 Method FTMS; HCD Score 164.11 m/z 1052.87 Gene names FCHO2

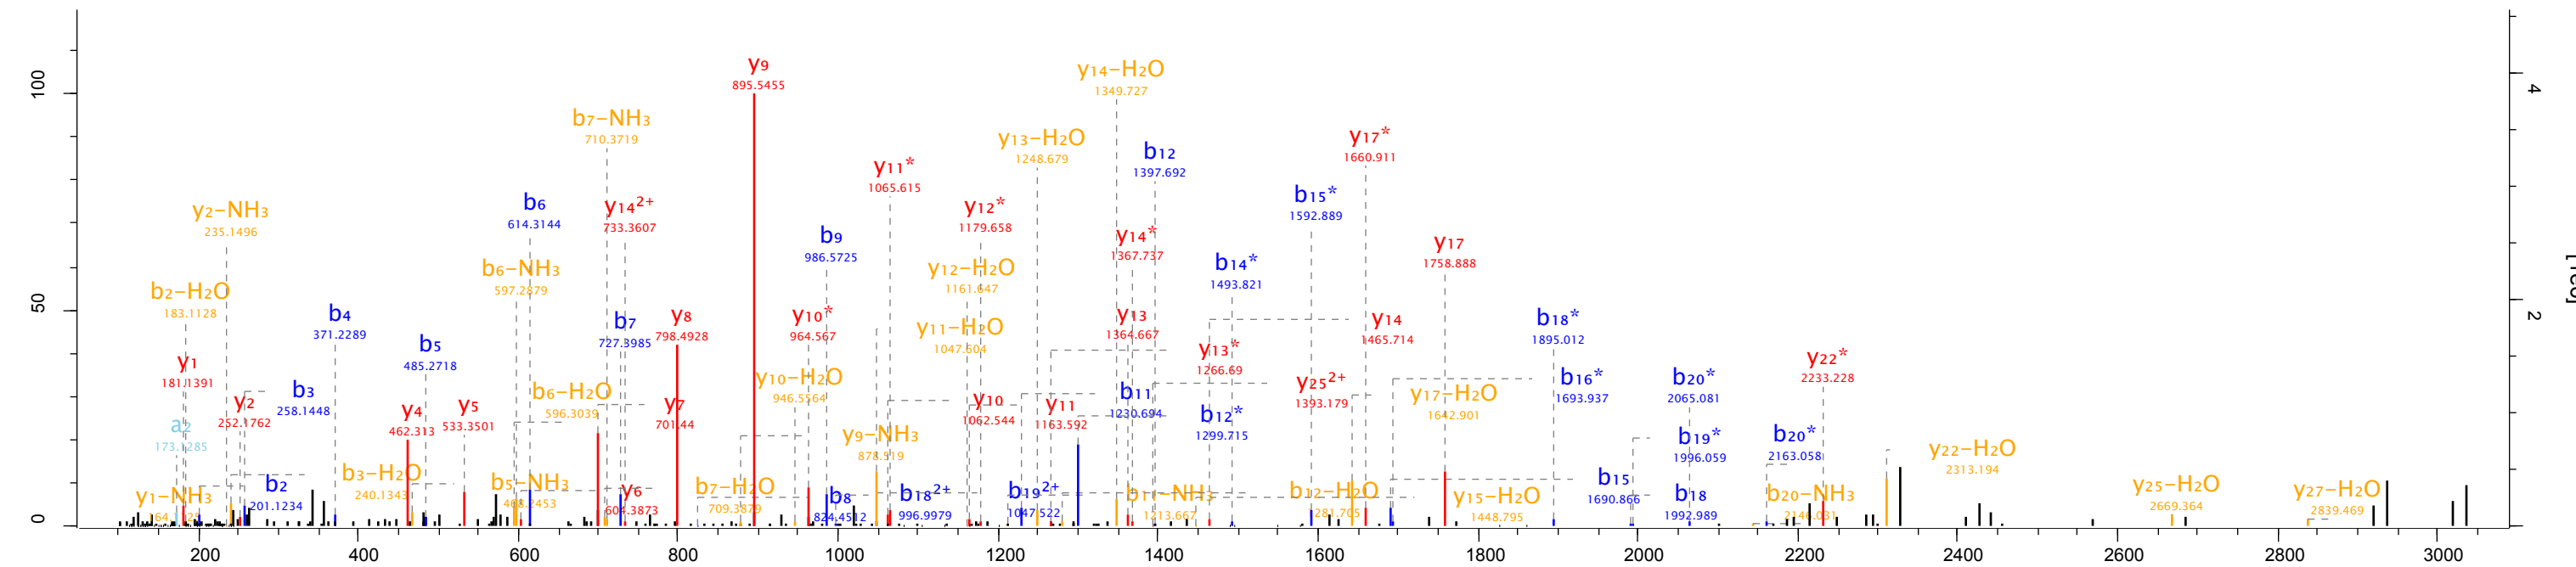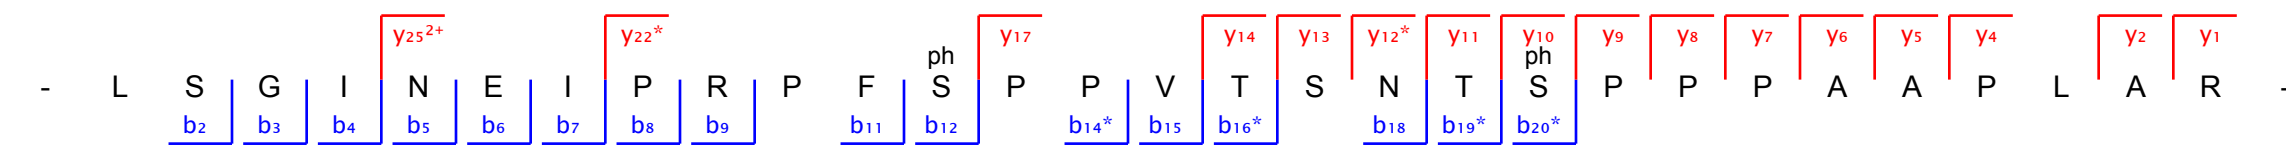

Raw file: 20150812\_A375SR\_Phospho\_BR1\_04  
 Scan: 2757 Method: FTMS; HCD Score: 196.48 m/z: 677.82 Gene names: PBRM1

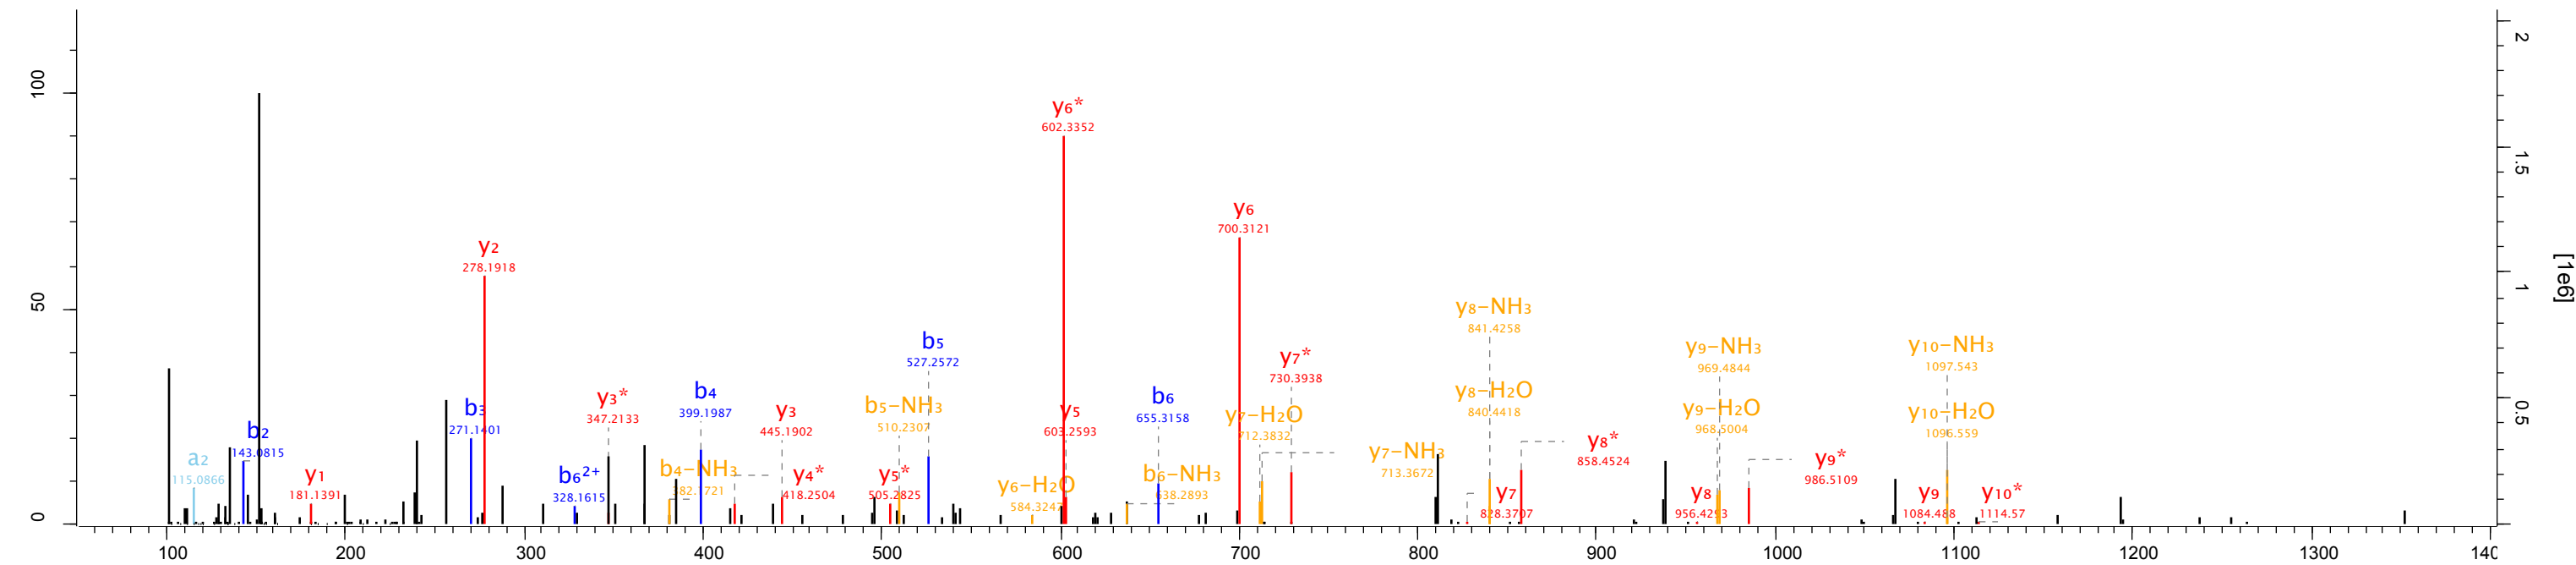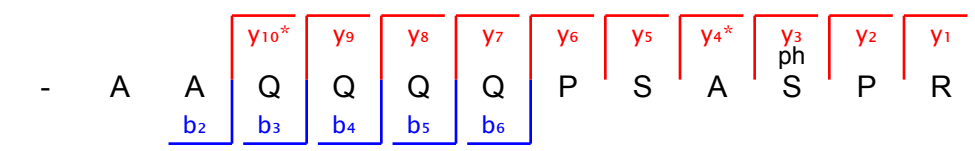

Raw file 20150812\_A375SR\_Phospho\_BR1\_04 Scan 27927 Method FTMS; HCD Score 200.48 m/z 1092.04 Gene names WDR44

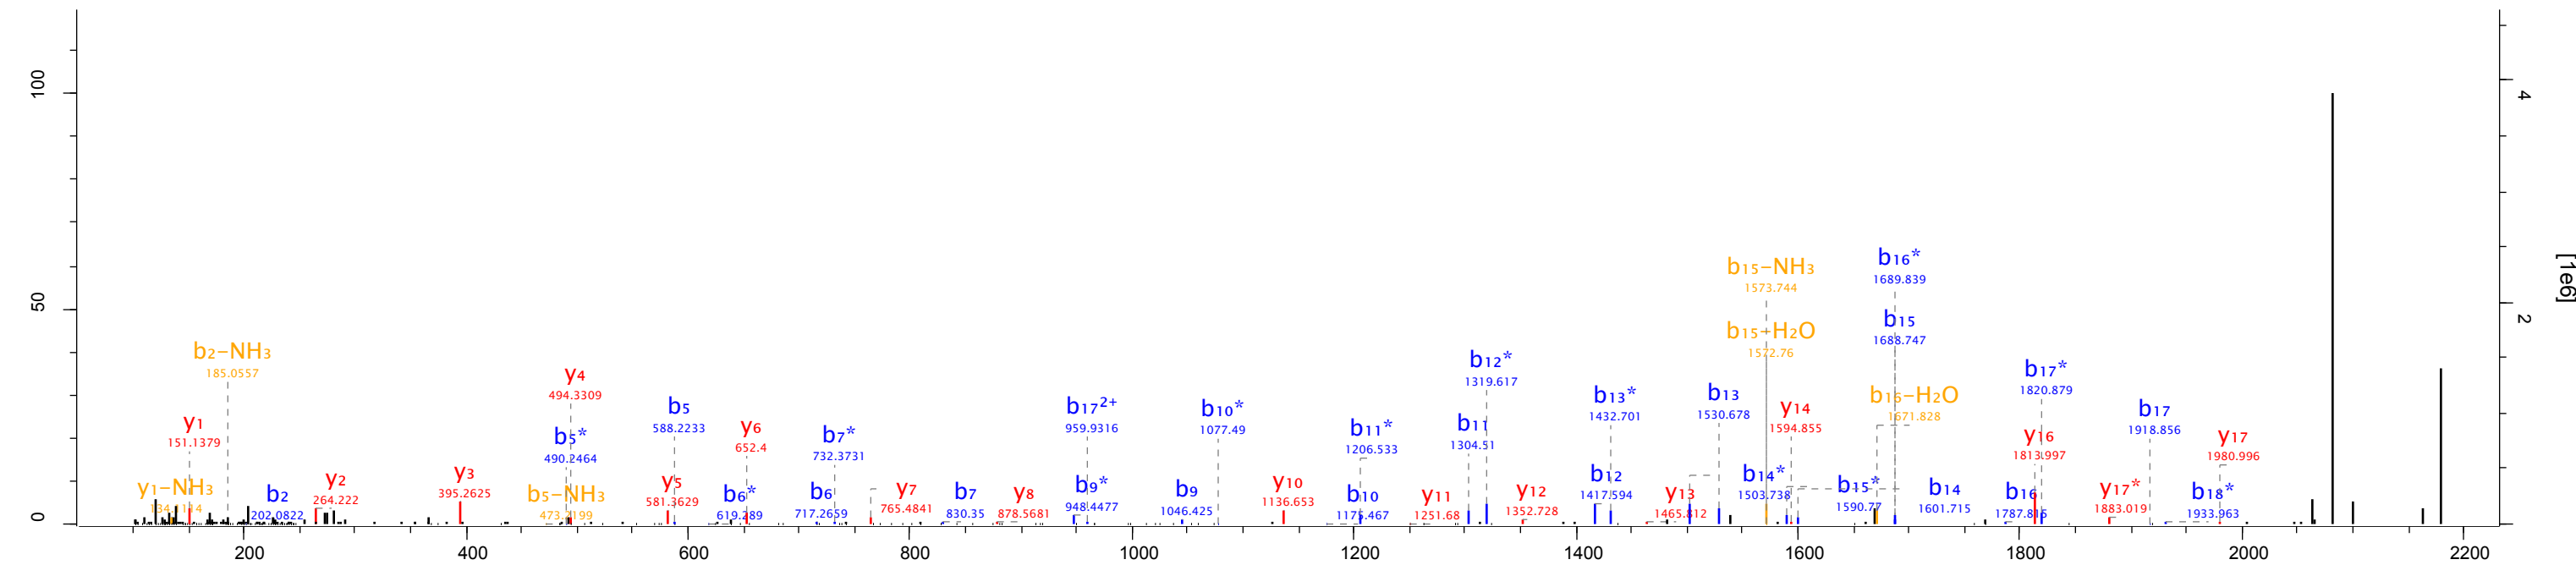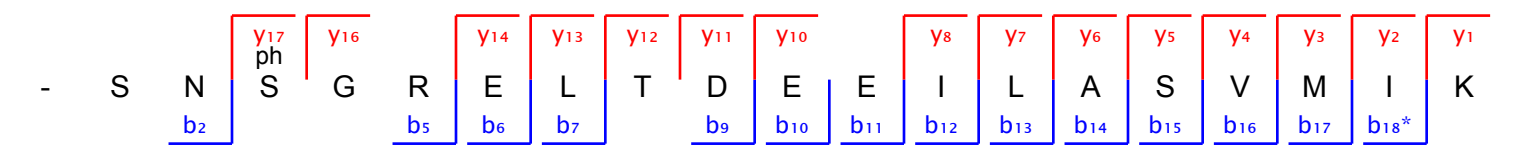

Raw file: 20150812\_A375SR\_Phospho\_BR1\_04  
 Scan: 3197 Method: FTMS; HCD Score: 139 m/z: 786.74 Gene names: DTL

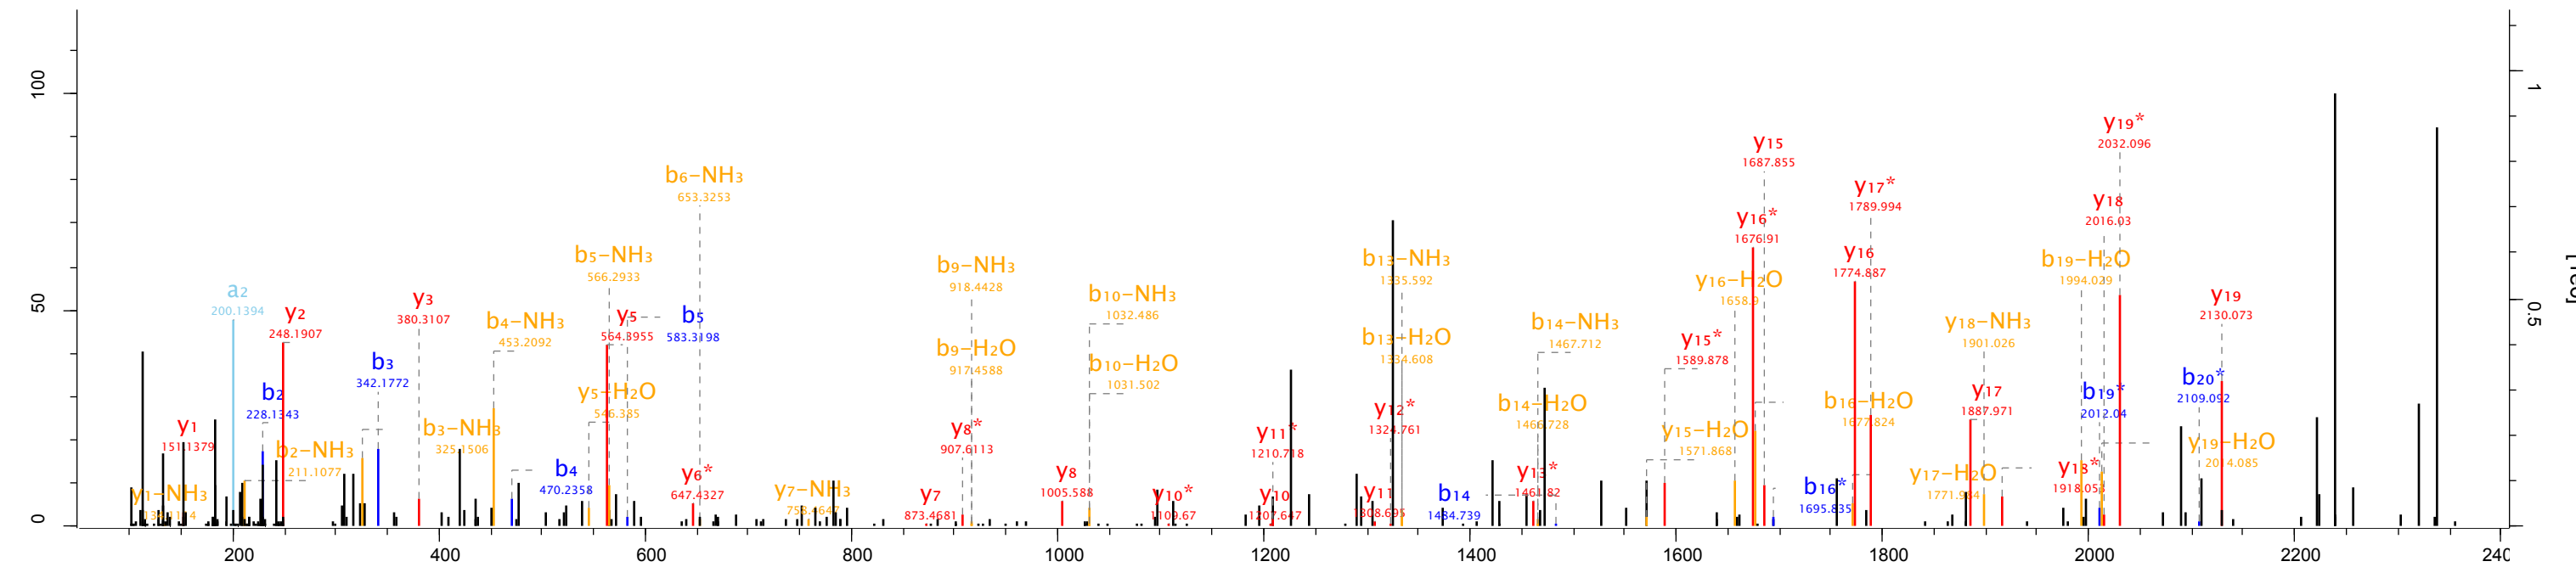

- Q V N Q I S G A H N T S D K Q T P S K P K -

Fragmentation boxes (b-ions in blue, y-ions in red):

- Blue boxes: b<sub>2</sub> (V), b<sub>3</sub> (N), b<sub>4</sub> (Q), b<sub>5</sub> (I), b<sub>14</sub> (K), b<sub>16</sub><sup>\*</sup> (T), b<sub>19</sub><sup>\*</sup> (K), b<sub>20</sub><sup>\*</sup> (P)
- Red boxes: y<sub>19</sub> (N), y<sub>18</sub> (Q), y<sub>17</sub> (I), y<sub>16</sub> (S), y<sub>15</sub> (G), y<sub>13</sub><sup>\*</sup> (H), y<sub>12</sub><sup>\*</sup> (N), y<sub>11</sub> (T), y<sub>10</sub> (S), y<sub>8</sub> (K), y<sub>7</sub> (Q), y<sub>6</sub><sup>\*</sup> (T), y<sub>5</sub> (P), y<sub>3</sub> (K), y<sub>2</sub> (P), y<sub>1</sub> (K)

Raw file Scan Method Score m/z Gene names

20150812\_A375SR\_Phospho\_BR1\_04 3457 FTMS; HCD 143.83 761.82 DBNL

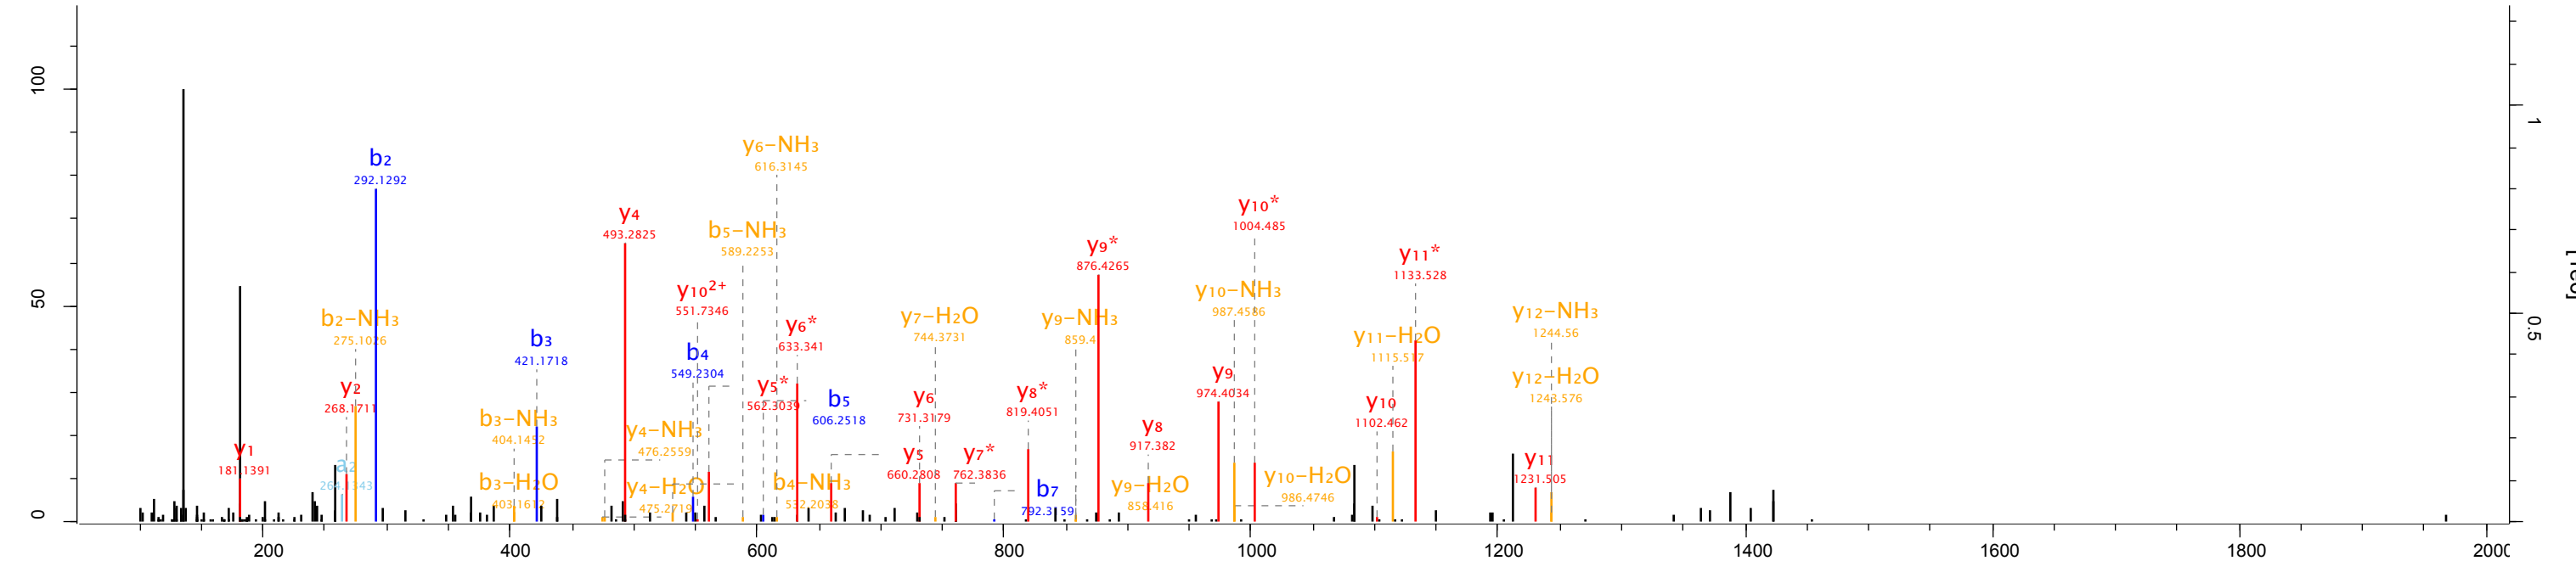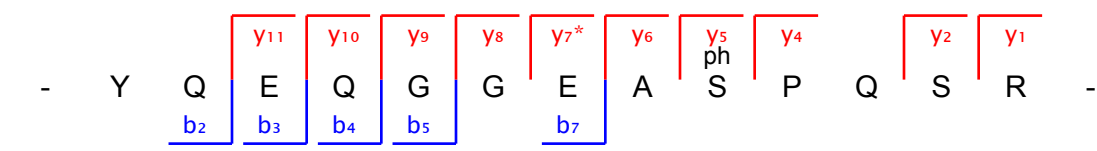

Raw file: 20150812\_A375SR\_Phospho\_BR1\_04  
 Scan: 3797 Method: FTMS; HCD Score: 87.03 m/z: 393.84 Gene names: ZNF608

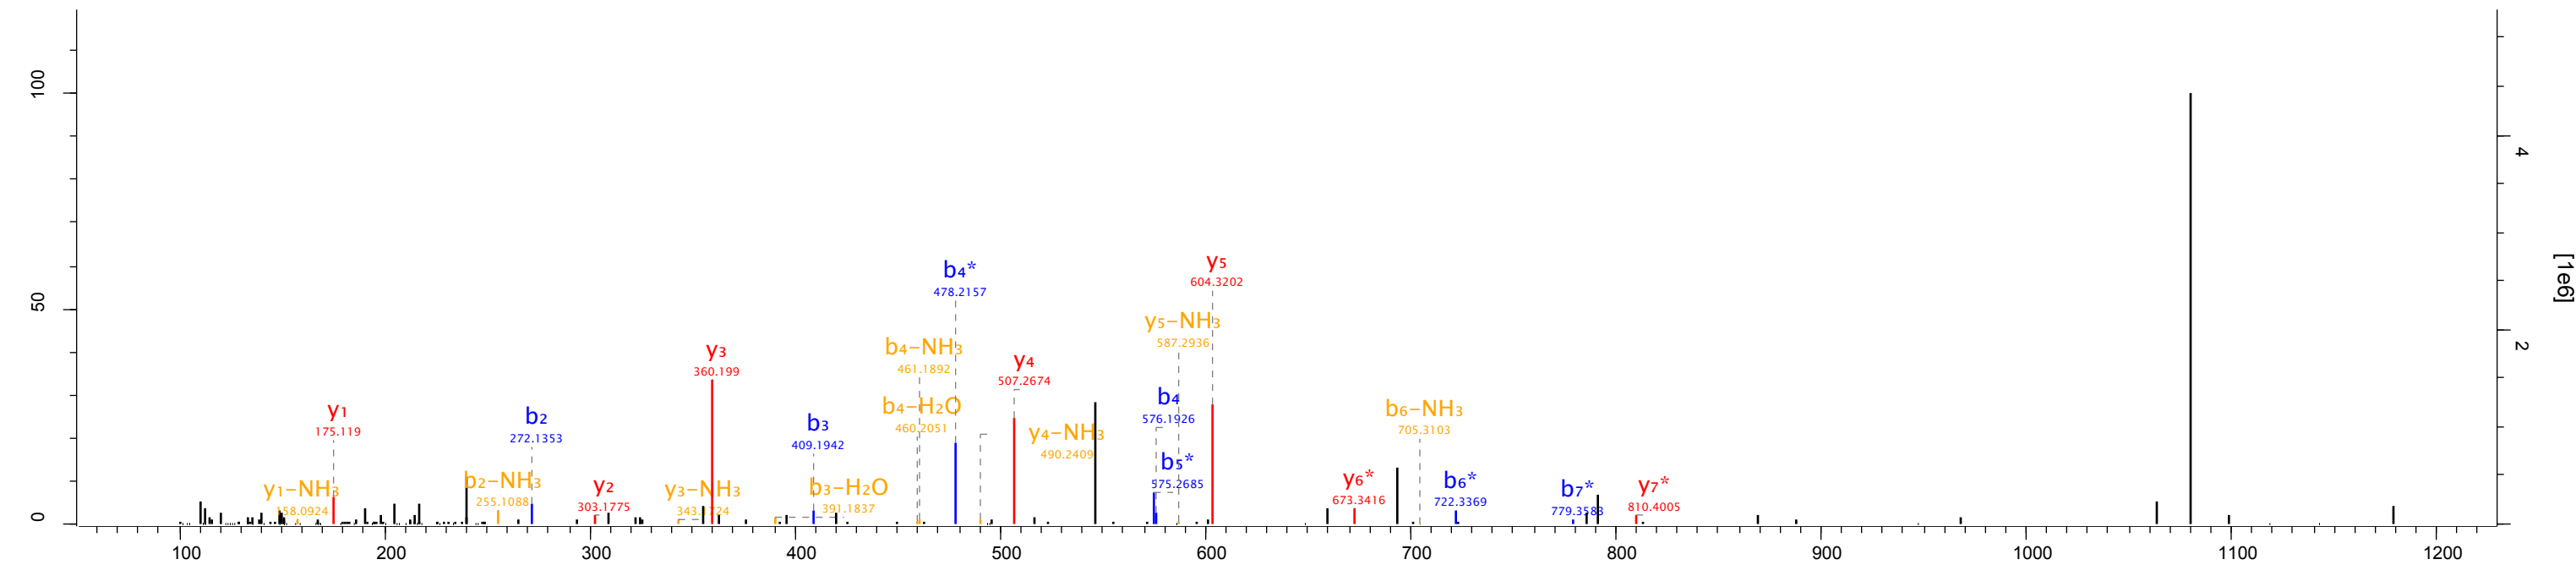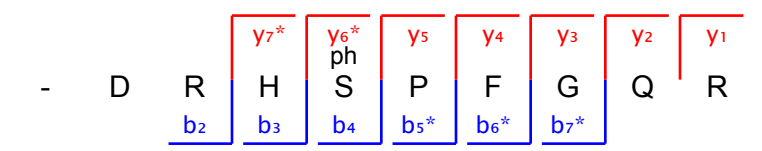

Raw file: 20150812\_A375SR\_Phospho\_BR1\_04  
 Scan: 3977 Method: FTMS; HCD Score: 203.78 m/z: 692.31 Gene names: MAP7D1

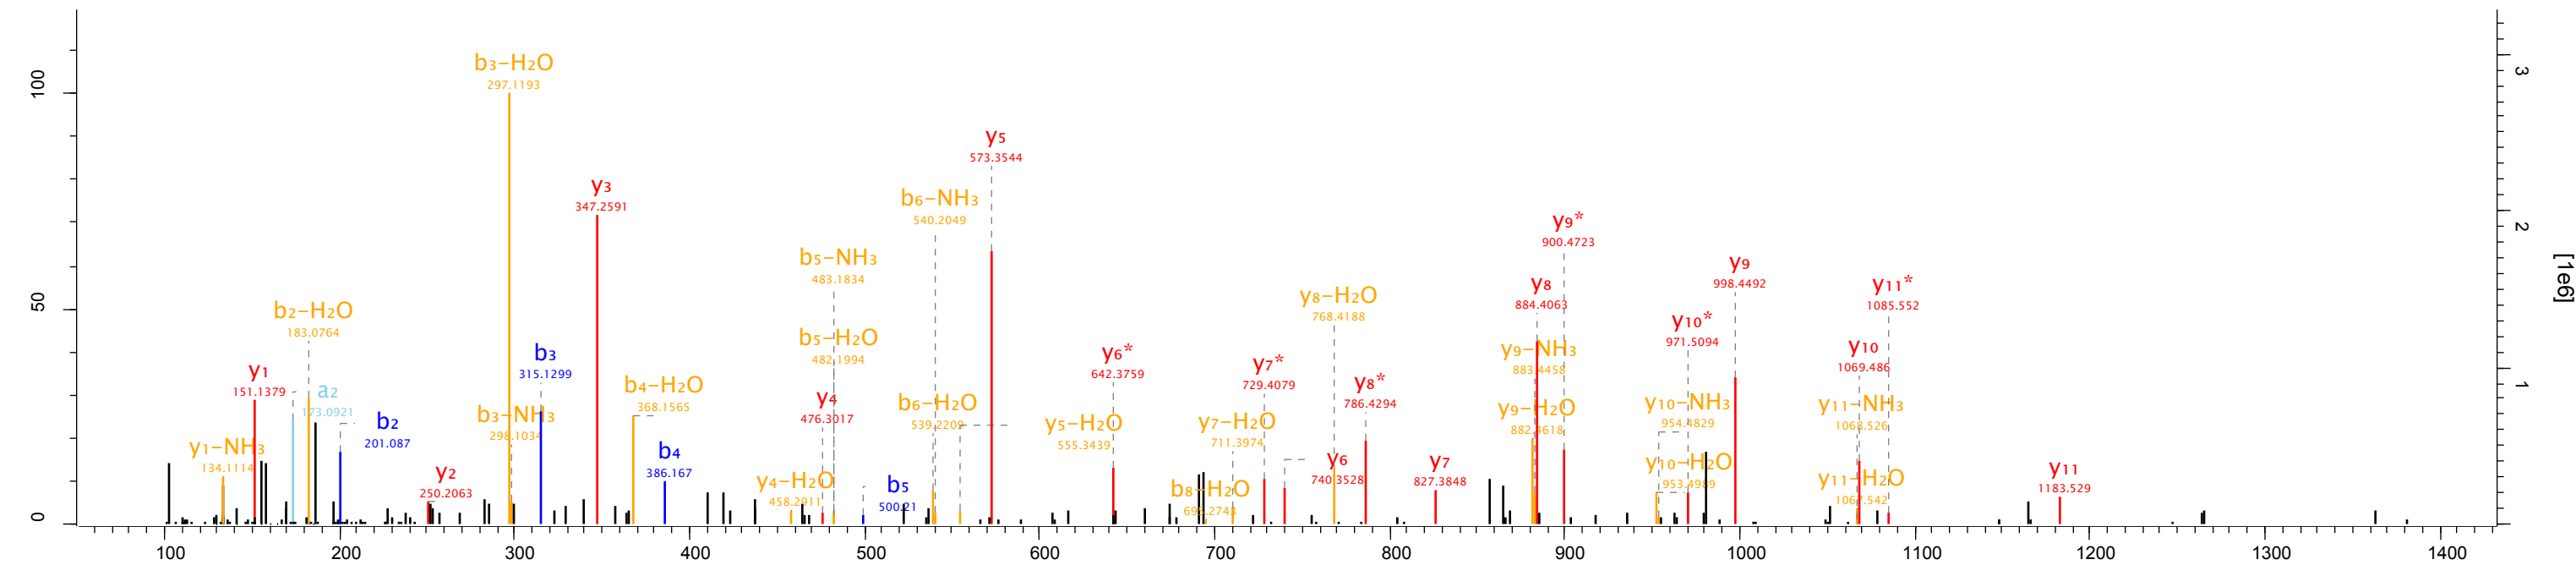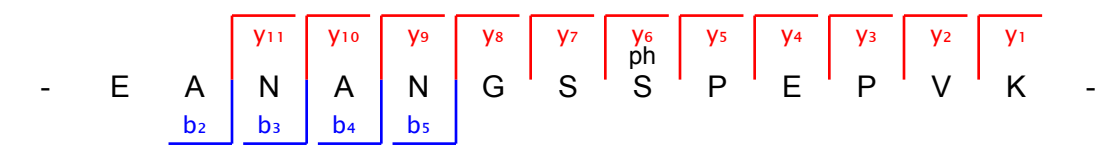

Raw file: 20150812\_A375SR\_Phospho\_BR1\_04  
 Scan: 4477 Method: FTMS; HCD Score: 474.76 m/z: 1286.01 Gene names: ABCF1

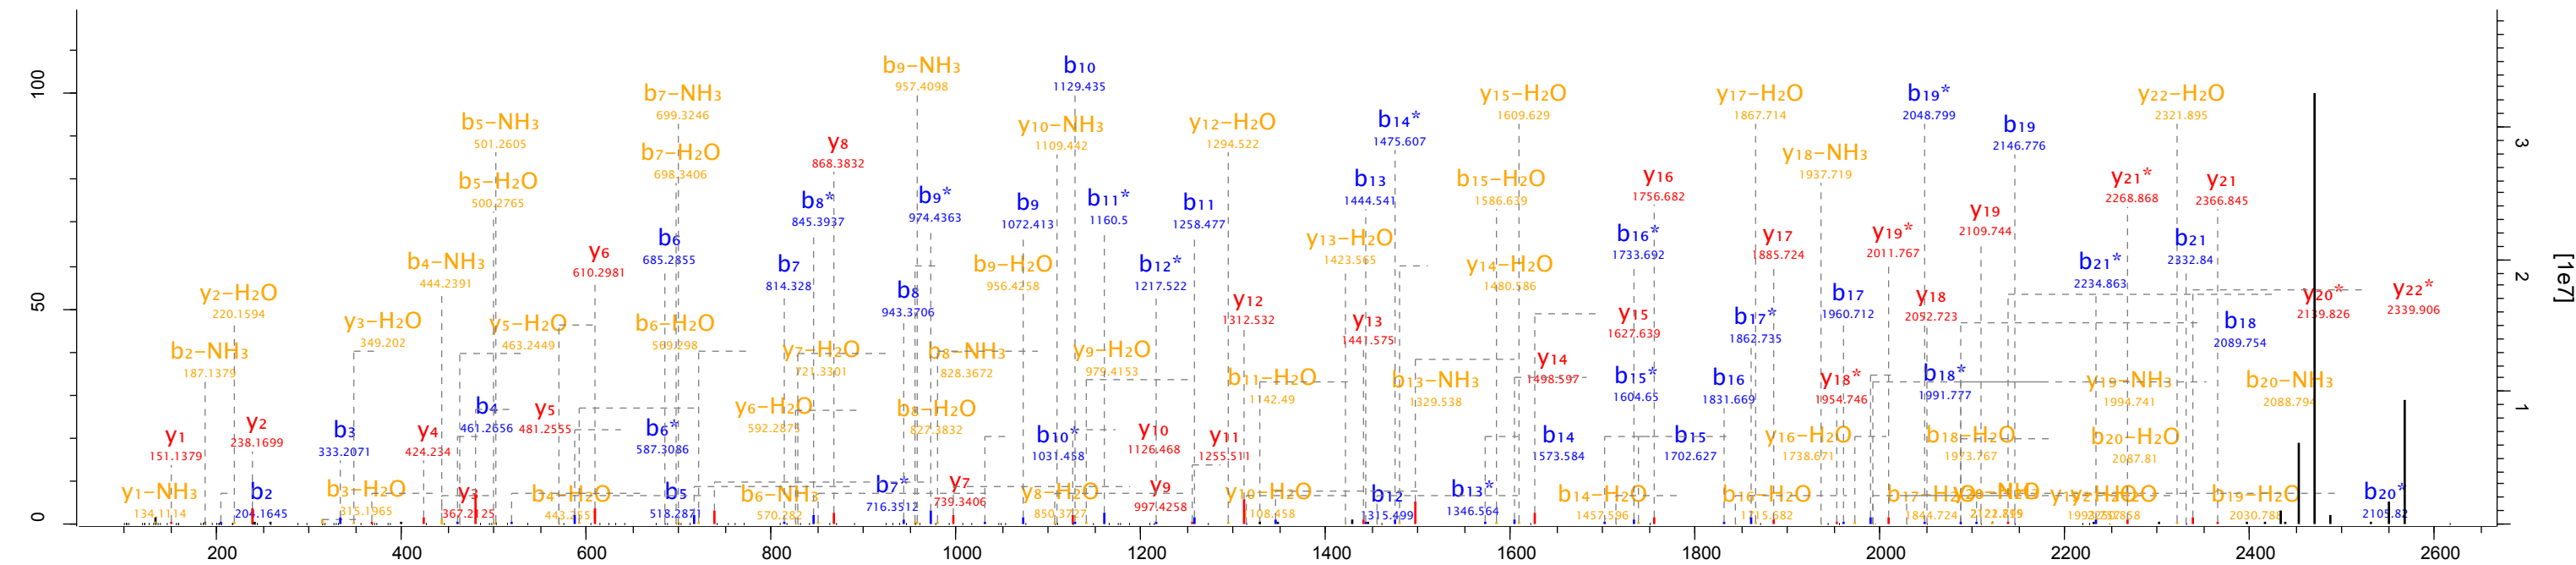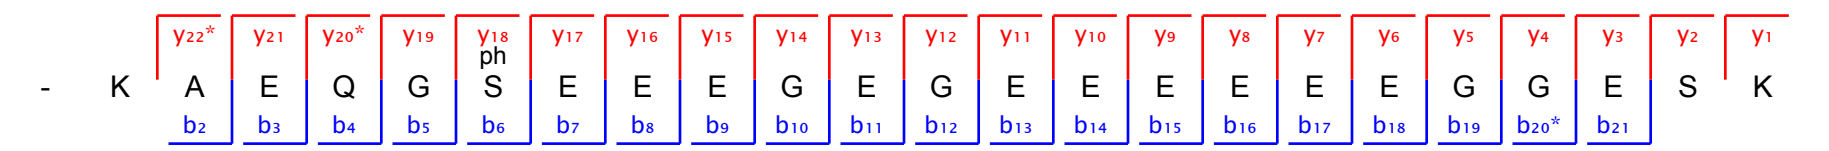



Raw file  
20150812\_A375SR\_Phospho\_BR1\_04

Scan 5057 Method FTMS; HCD Score 479.12 m/z 1078.47 Gene names LAS1L

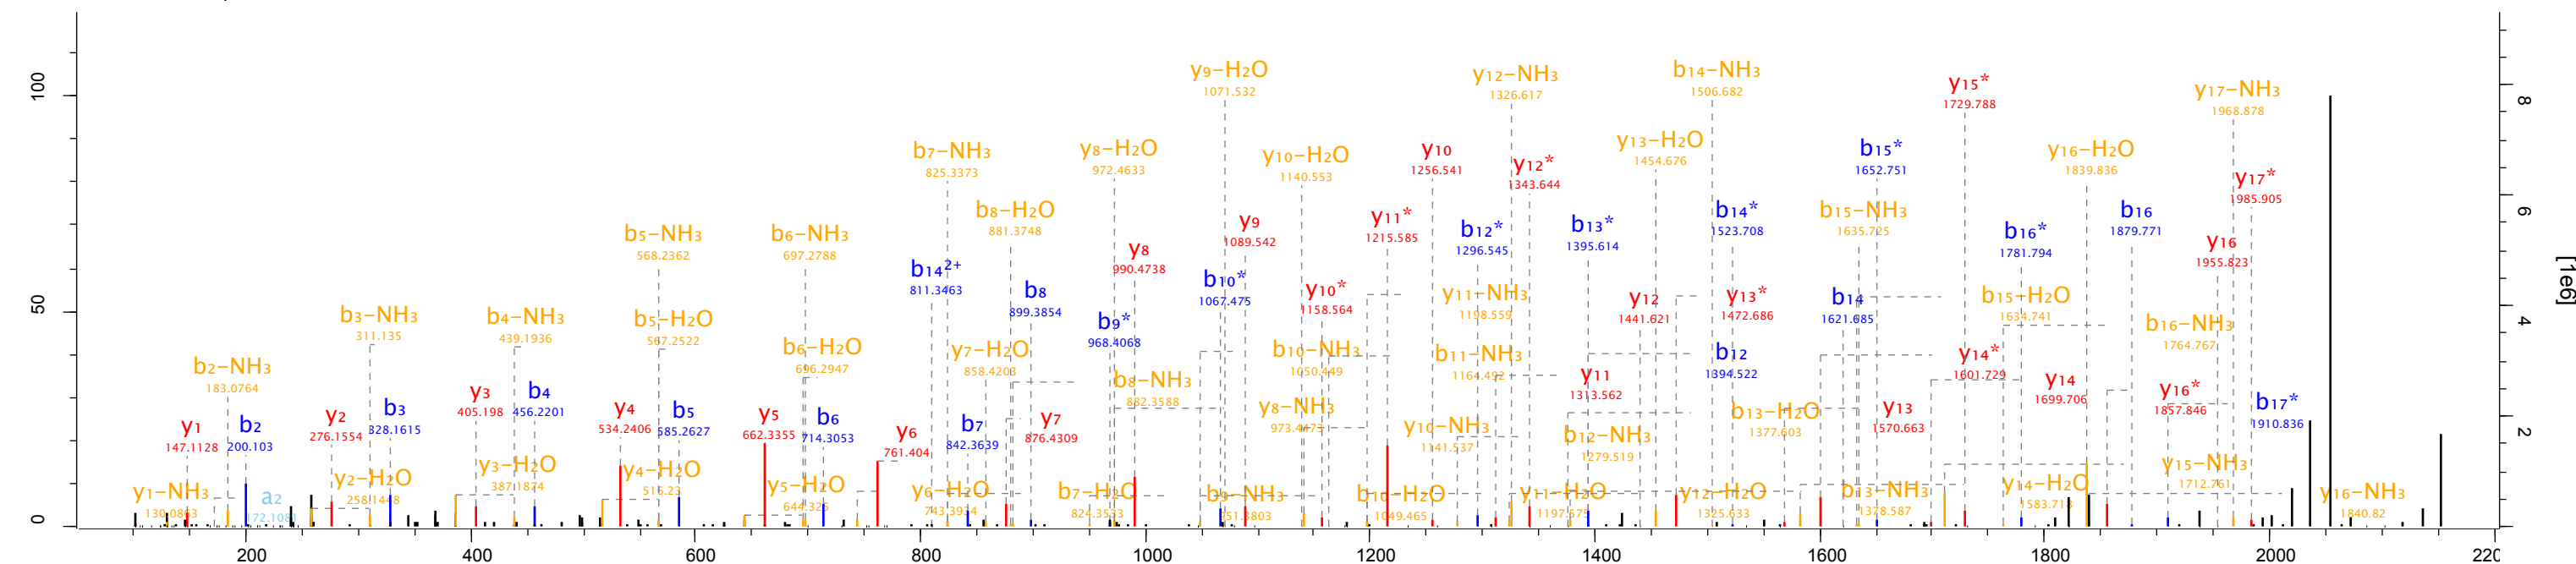

- A Q Q Q E E Q G S V N D V K E E E K -

y17\*
y16
y15\*
y14
y13
y12
y11
y10
y9
y8
y7
y6
y5
y4
y3
y2
y1

b2
b3
b4
b5
b6
b7
b8
b9\*
b10\*
b12
b13\*
b14
b15\*
b16
b17\*

Raw file: 20150812\_A375SR\_Phospho\_BR1\_04  
 Scan: 5117 Method: FTMS; HCD Score: 243.24 m/z: 890.85 Gene names: HNRNPA1

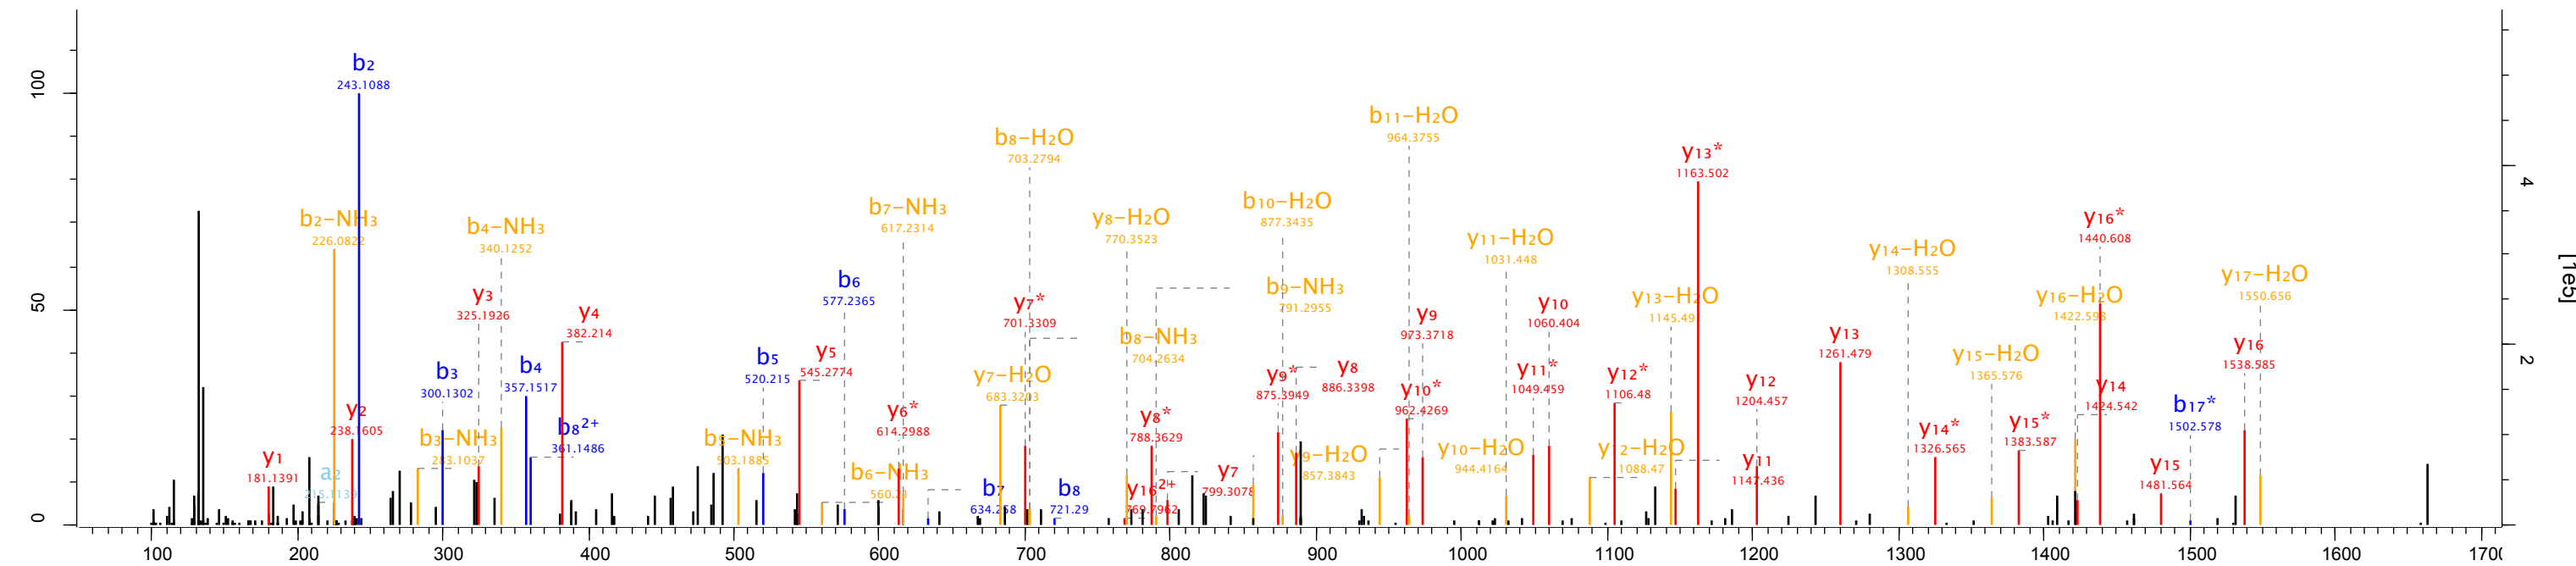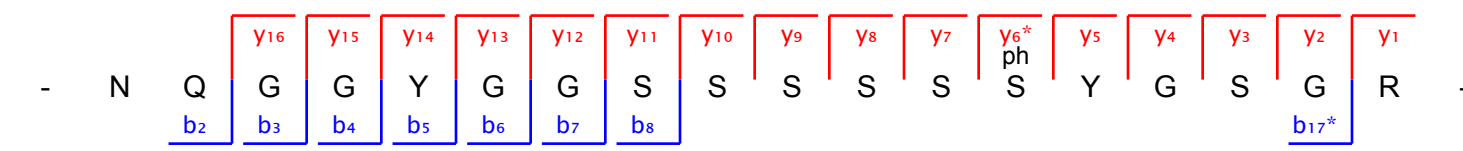



Raw file: 20150812\_A375SR\_Phospho\_BR1\_04  
 Scan: 6137 Method: FTMS; HCD Score: 143.54 m/z: 770 Gene names: TGOLN2

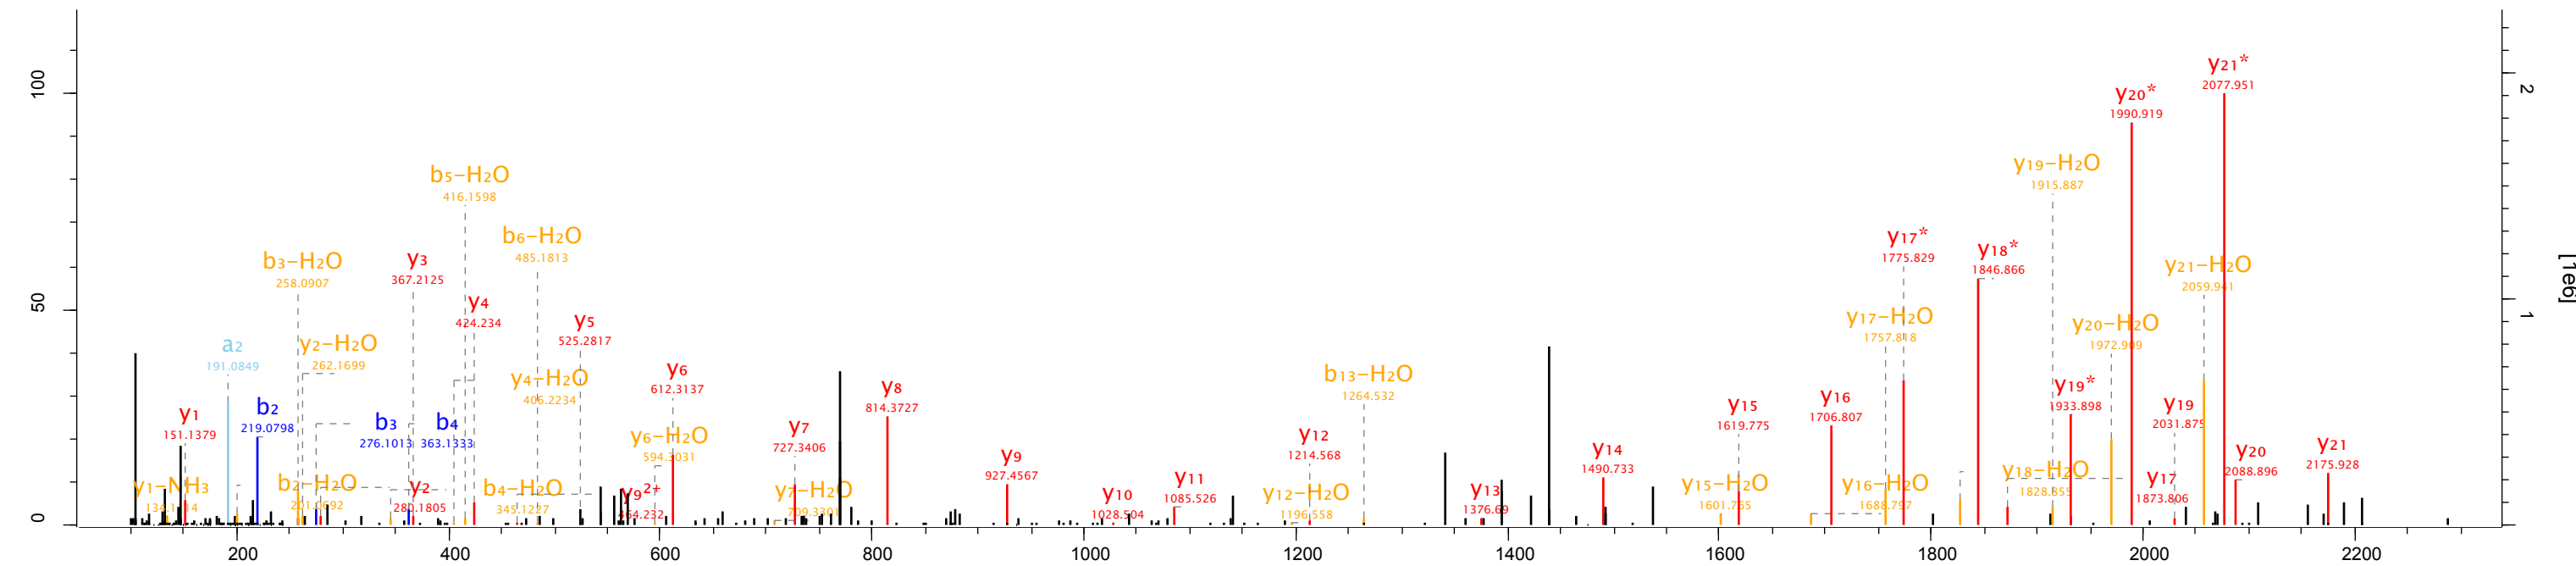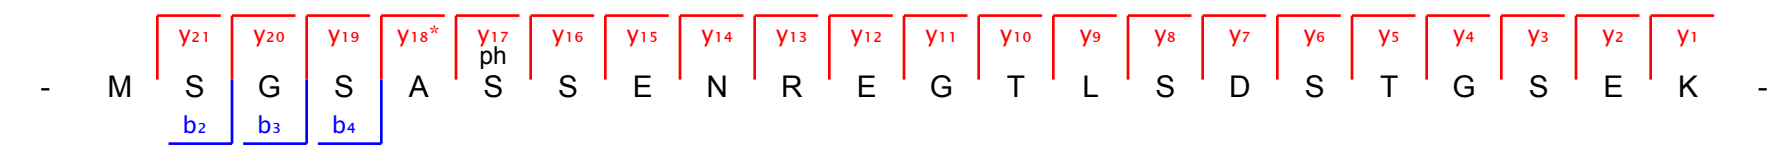

Raw file: 20150812\_A375SR\_Phospho\_BR1\_04  
 Scan: 6817 Method: FTMS; HCD Score: 124.62 m/z: 905.07 Gene names: EP300

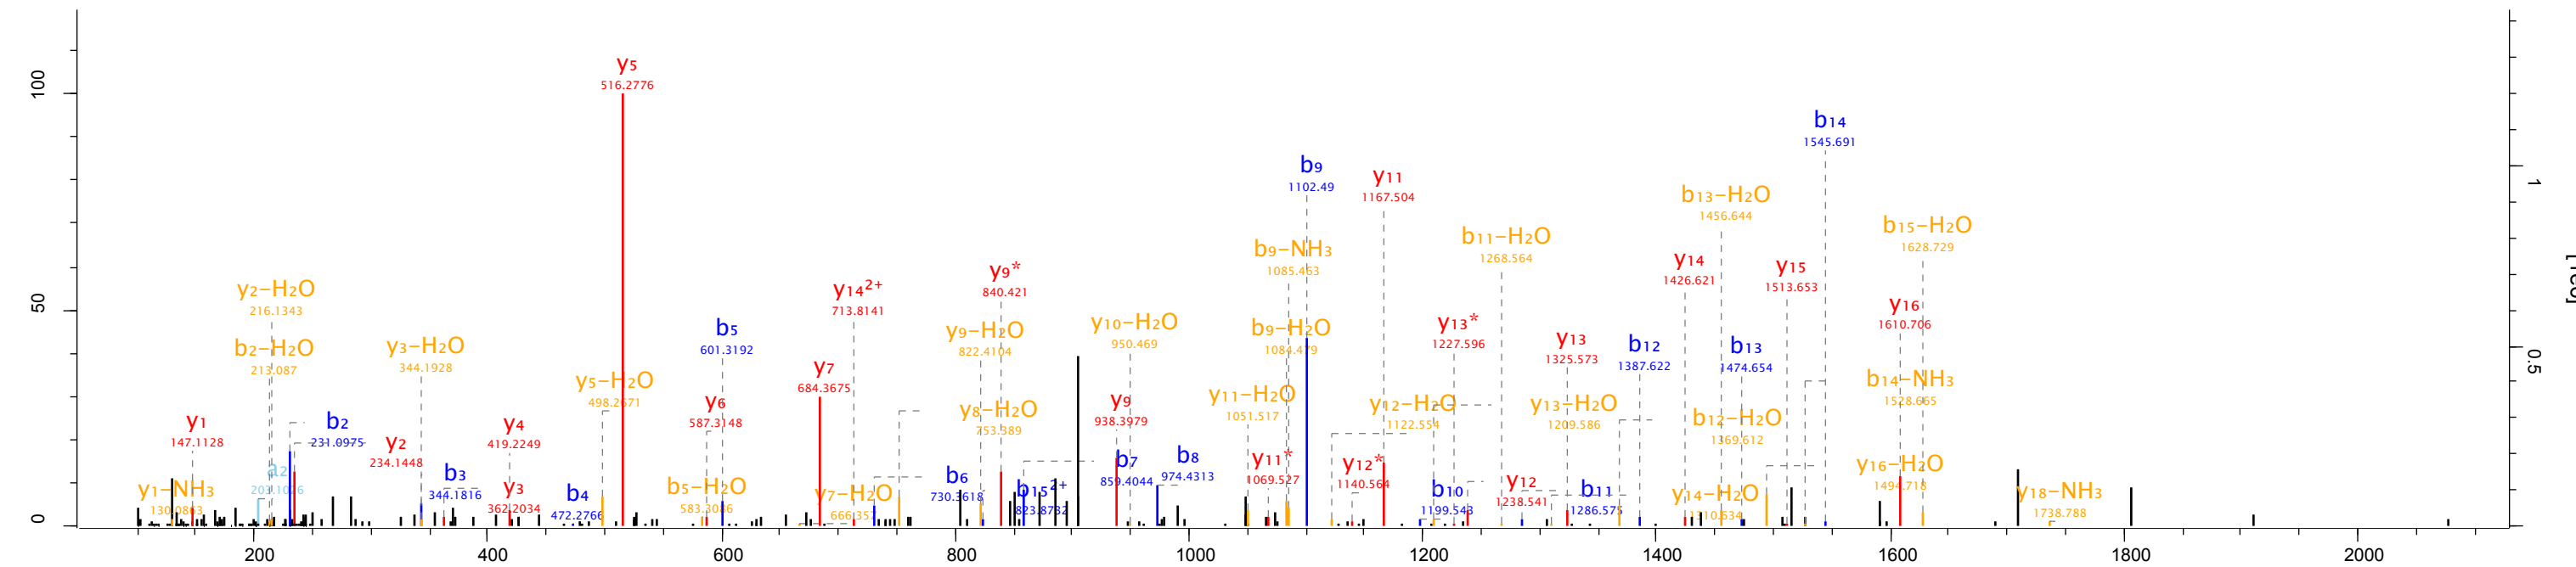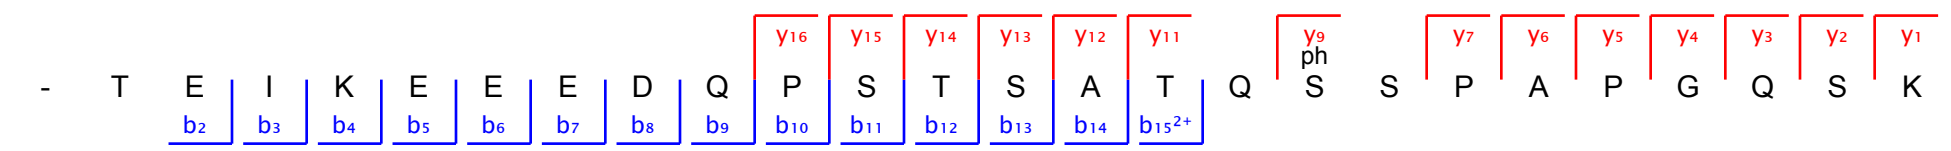

Raw file: 20150812\_A375SR\_Phospho\_BR1\_04  
 Scan: 6927 Method: FTMS; HCD Score: 155.14 m/z: 659.29 Gene names: CNOT2

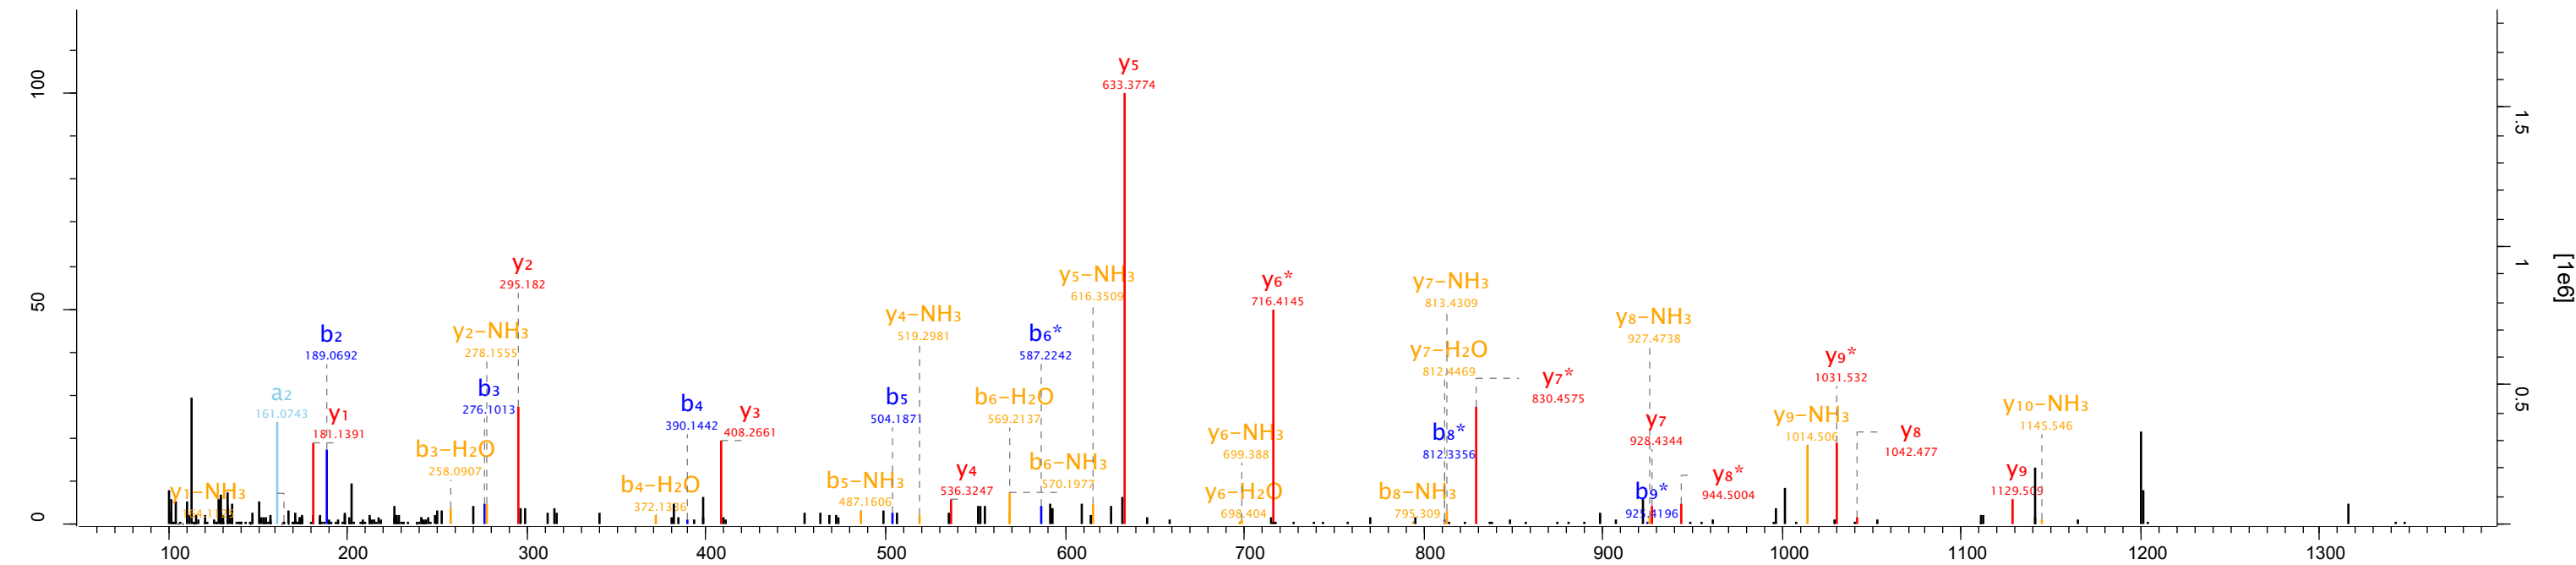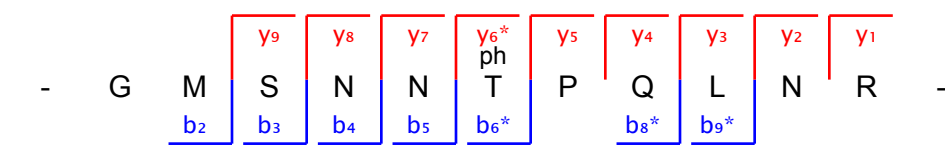

Raw file: 20150812\_A375SR\_Phospho\_BR1\_04  
 Scan: 7177 Method: FTMS; HCD Score: 101.34 m/z: 835.03 Gene names: INTS10

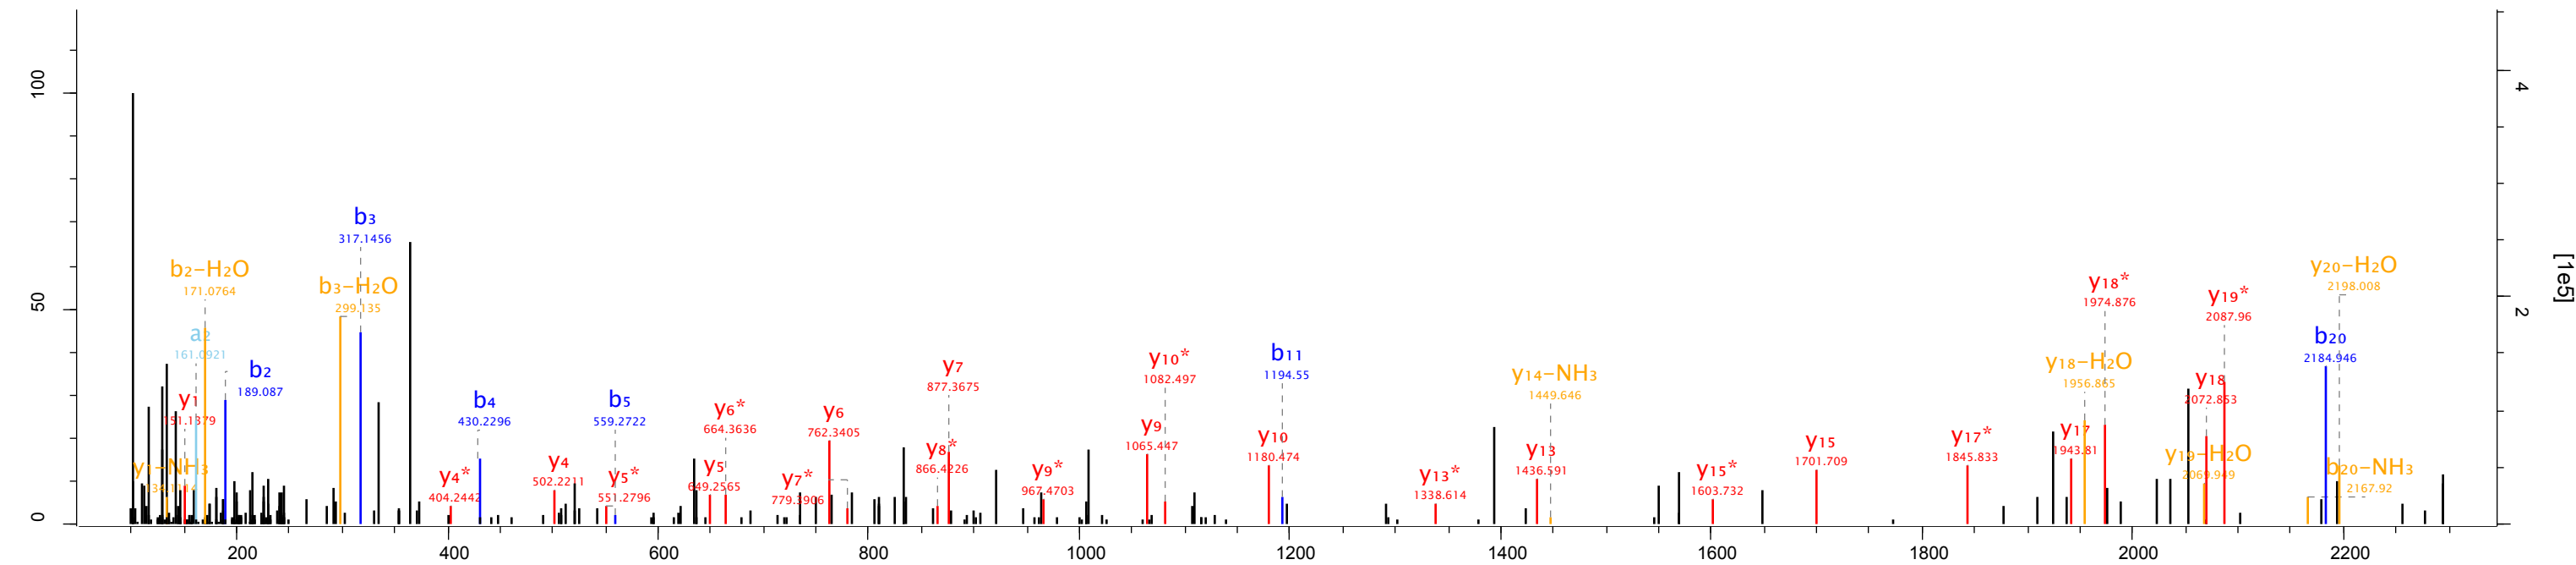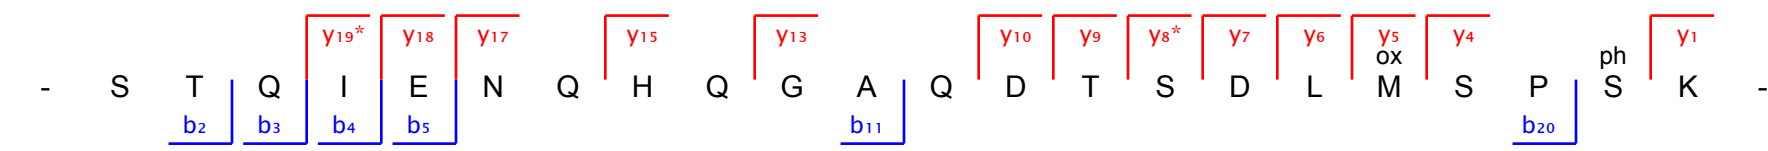

Raw file: 20150812\_A375SR\_Phospho\_BR1\_04  
 Scan: 7397 Method: FTMS; HCD Score: 138.49 m/z: 689.33 Gene names: SQSTM1

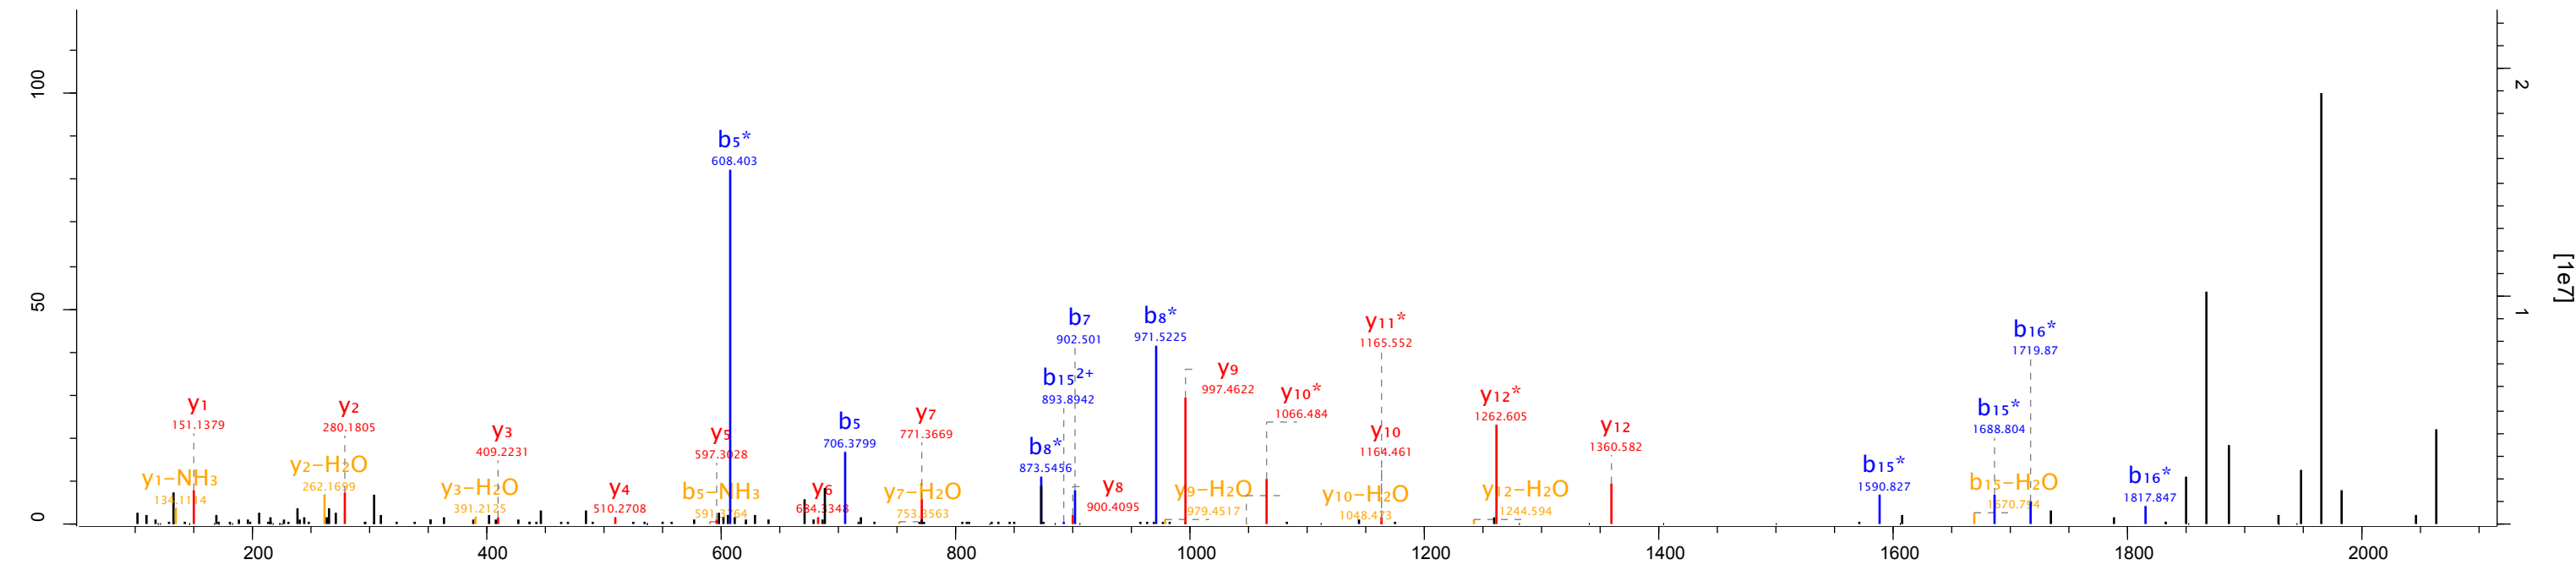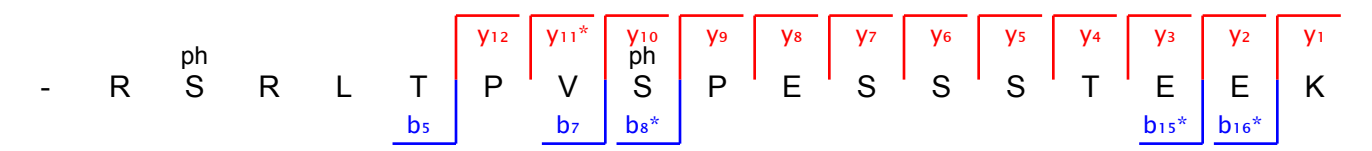



Raw file: 20150812\_A375SR\_Phospho\_BR1\_04  
 Scan: 7777 Method: FTMS; HCD Score: 233.31 m/z: 934.86 Gene names: HTATSF1

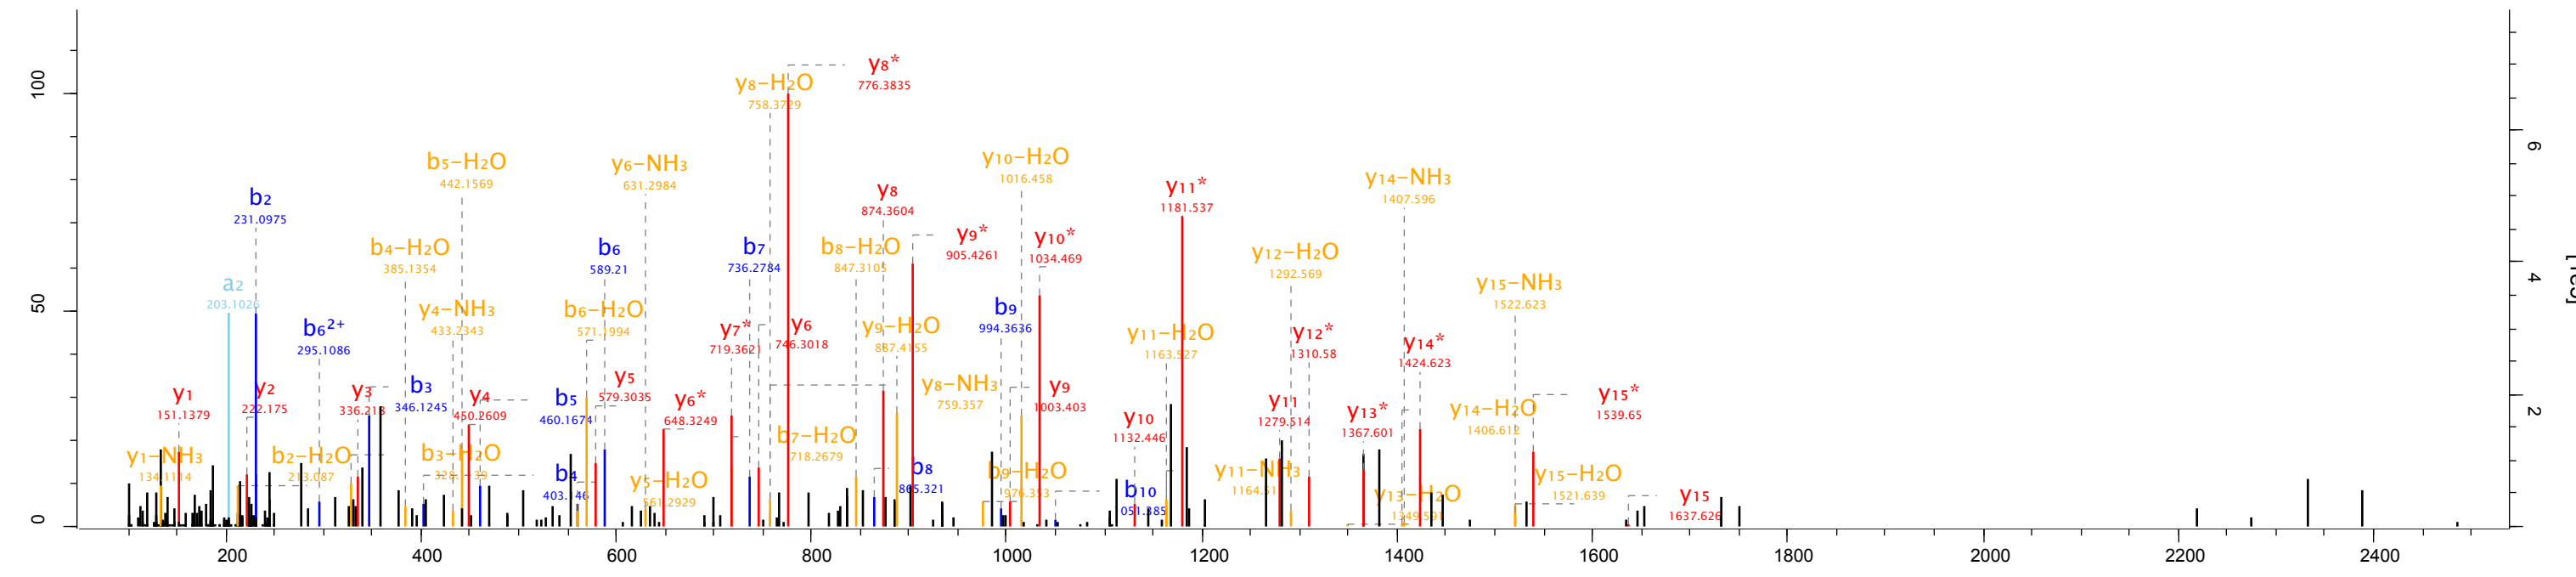

- T E D G G E F E G A S E N N A K -

b<sub>2</sub>
b<sub>3</sub>
b<sub>4</sub>
b<sub>5</sub>
b<sub>6</sub>
b<sub>7</sub>
b<sub>8</sub>
b<sub>9</sub>
b<sub>10</sub>
y<sub>15</sub>
y<sub>14</sub>\*
y<sub>13</sub>\*
y<sub>12</sub>\*
y<sub>11</sub>
y<sub>10</sub>
y<sub>9</sub>
y<sub>8</sub>
y<sub>7</sub>\*
y<sub>6</sub>ph
y<sub>5</sub>
y<sub>4</sub>
y<sub>3</sub>
y<sub>2</sub>
y<sub>1</sub>

Raw file: 20150812\_A375SR\_Phospho\_BR1\_04  
 Scan: 7937 Method: FTMS; HCD Score: 194.44 m/z: 745.34 Gene names: BAIAP2L2

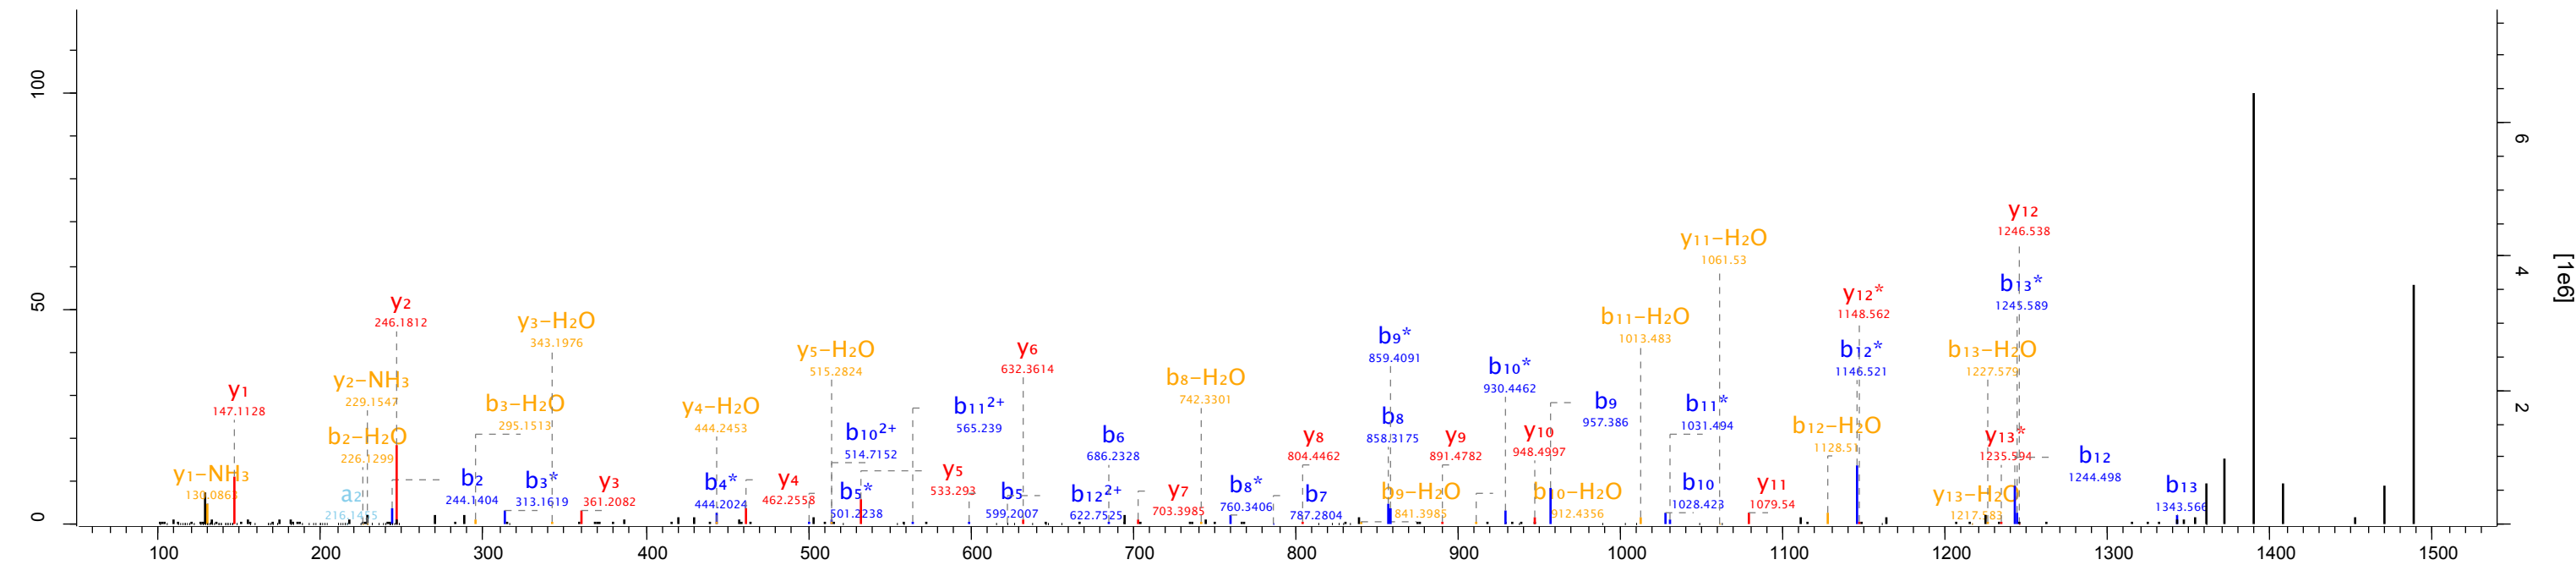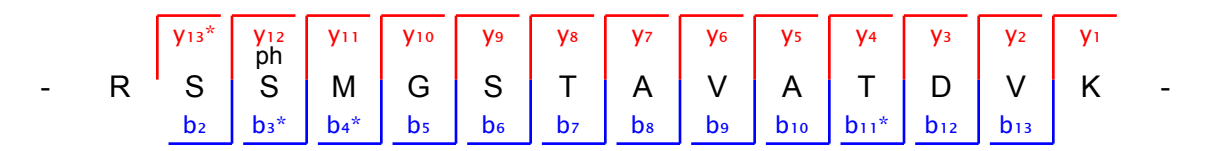

Raw file: 20150812\_A375SR\_Phospho\_BR1\_04  
 Scan: 8397 Method: FTMS; HCD Score: 95.5 m/z: 567.24 Gene names: KIAA1468

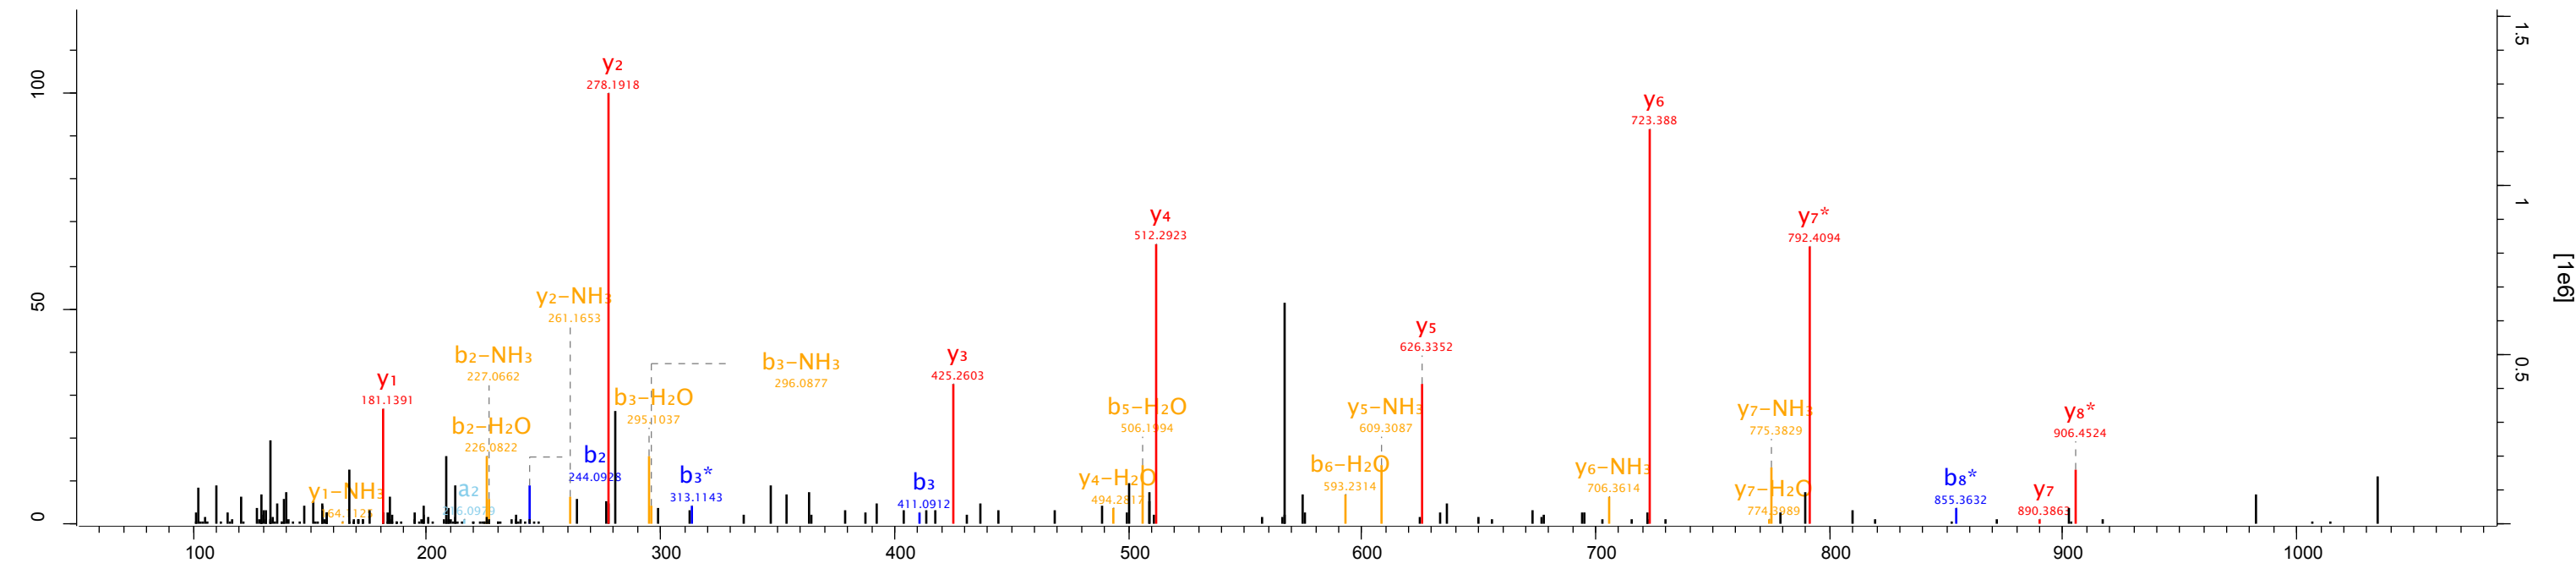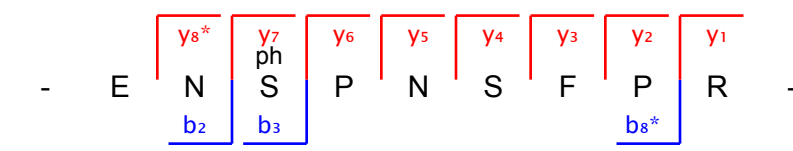

Raw file: 20150812\_A375SR\_Phospho\_BR1\_04  
 Scan: 9457 Method: FTMS; HCD Score: 67.95 m/z: 579.25 Gene names: ZCCHC17

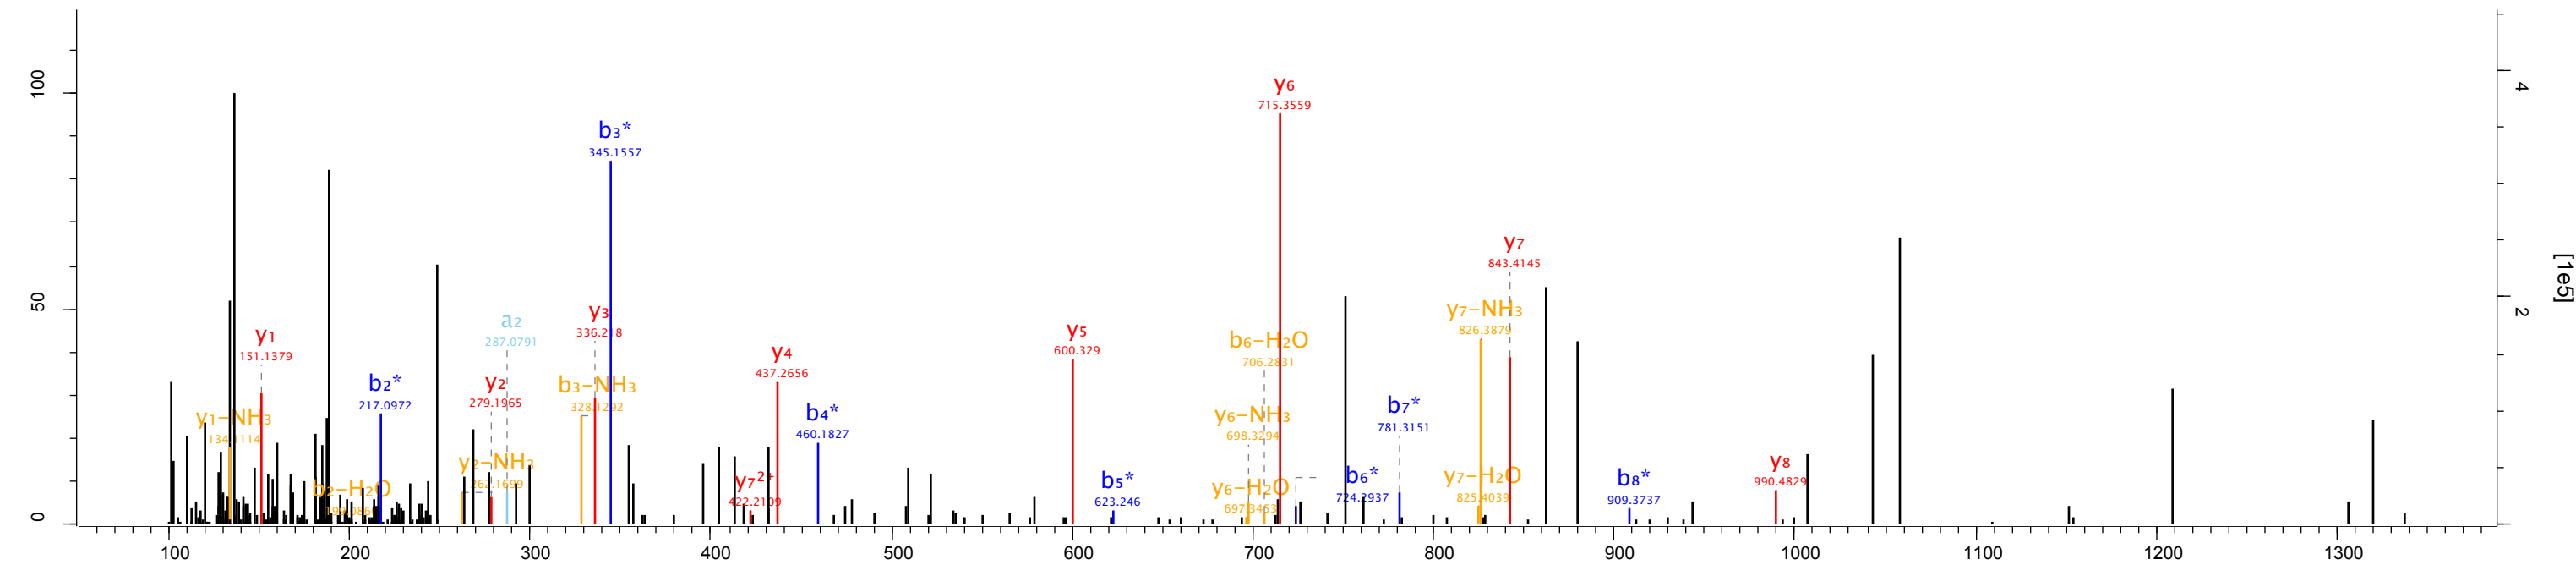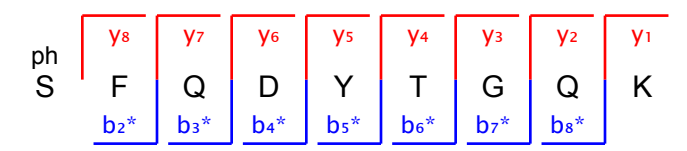

Raw file: 20150812\_A375SR\_Phospho\_BR1\_04  
 Scan: 9517 Method: FTMS; HCD Score: 91.73 m/z: 651.99 Gene names: LUZP1

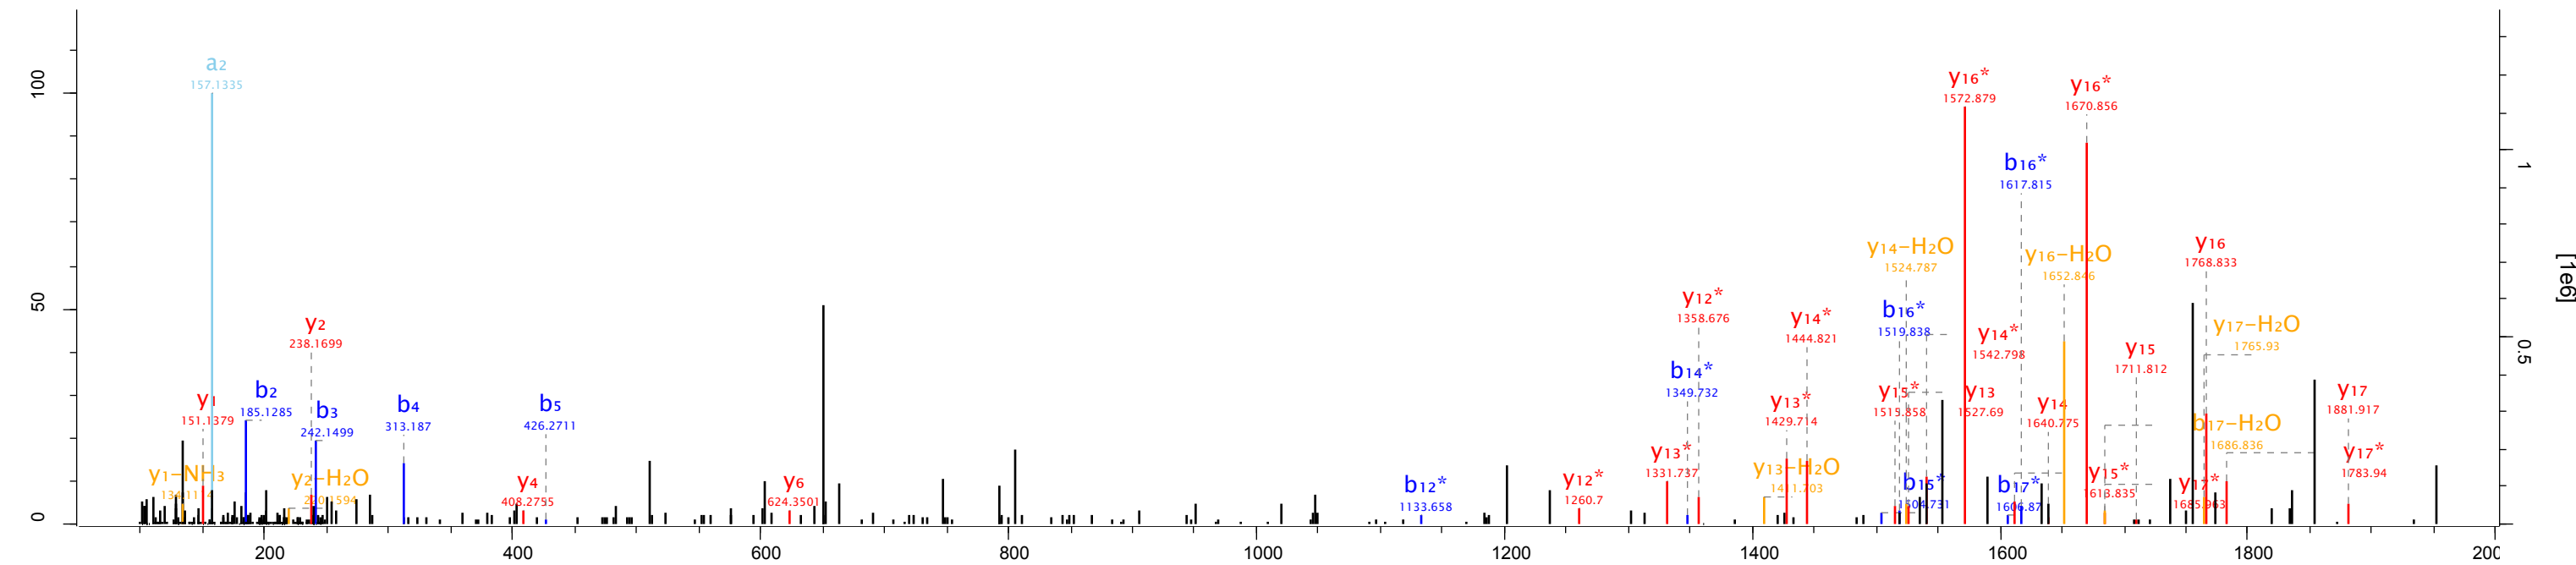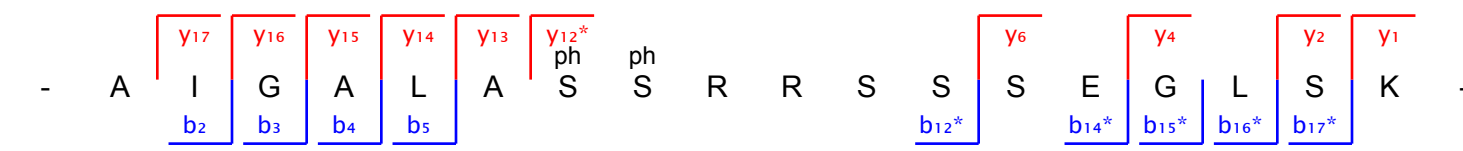

Raw file: 20150812\_A375SR\_Phospho\_BR1\_04  
 Scan: 9887 Method: FTMS; HCD Score: 171.74 m/z: 563.75 Gene names: NAV1

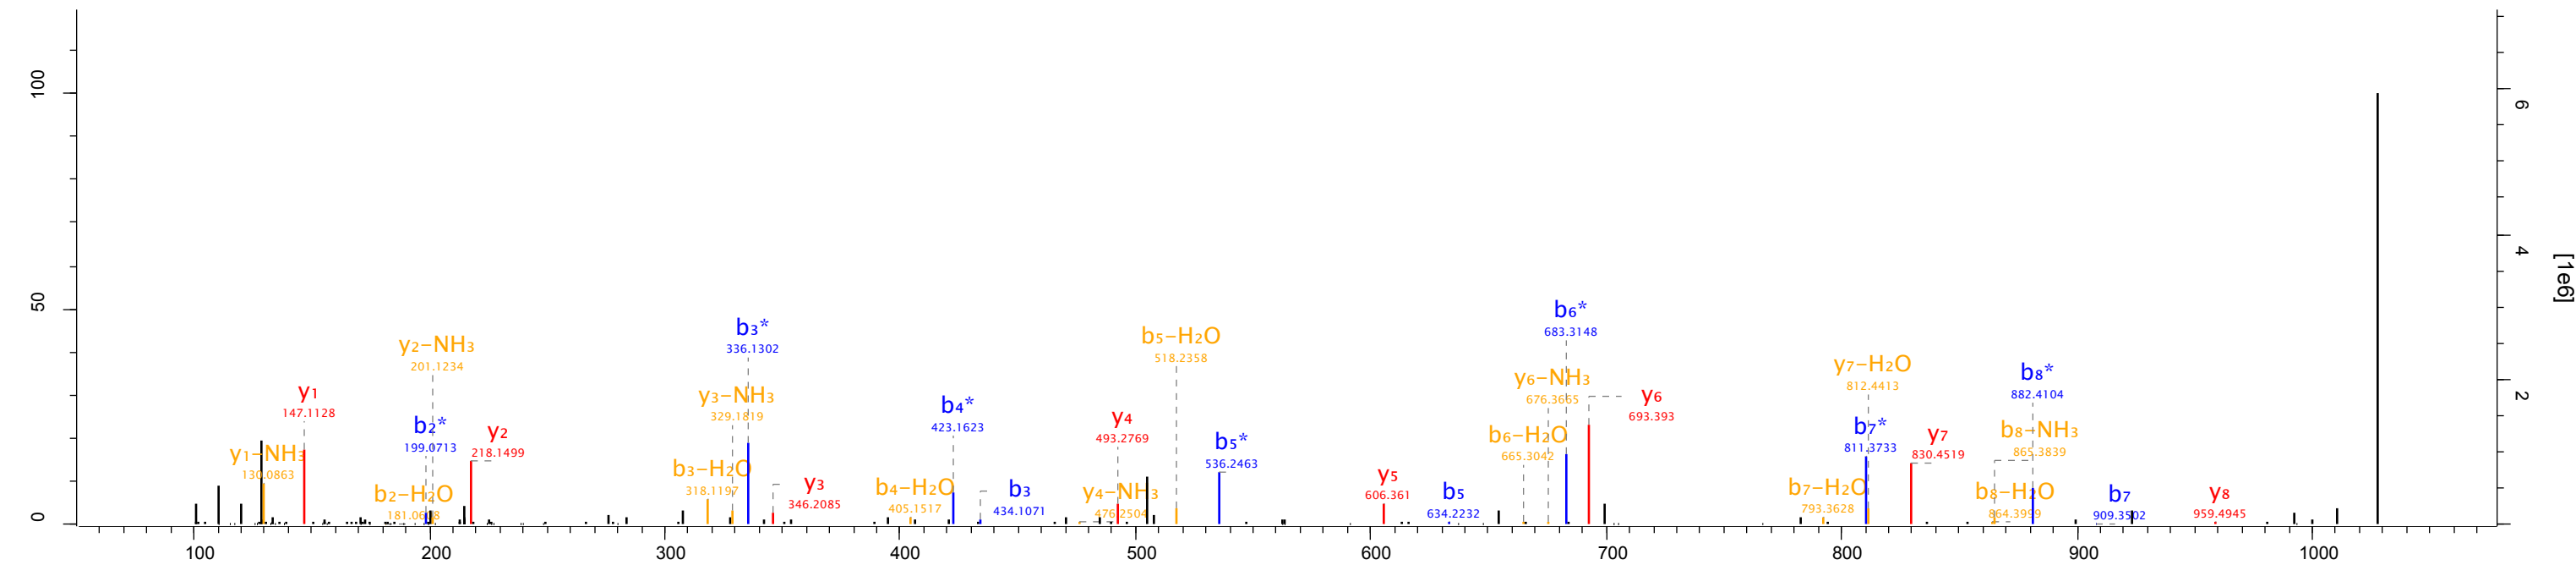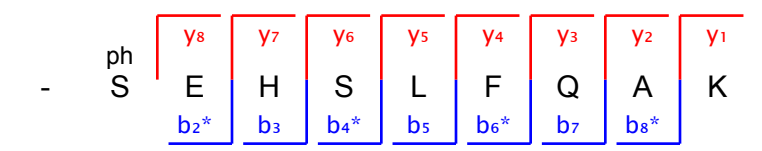

Raw file: 20150812\_A375SR\_Phospho\_BR1\_05  
 Scan: 10117 Method: FTMS; HCD Score: 236.4 m/z: 682.3 Gene names: TAGLN2

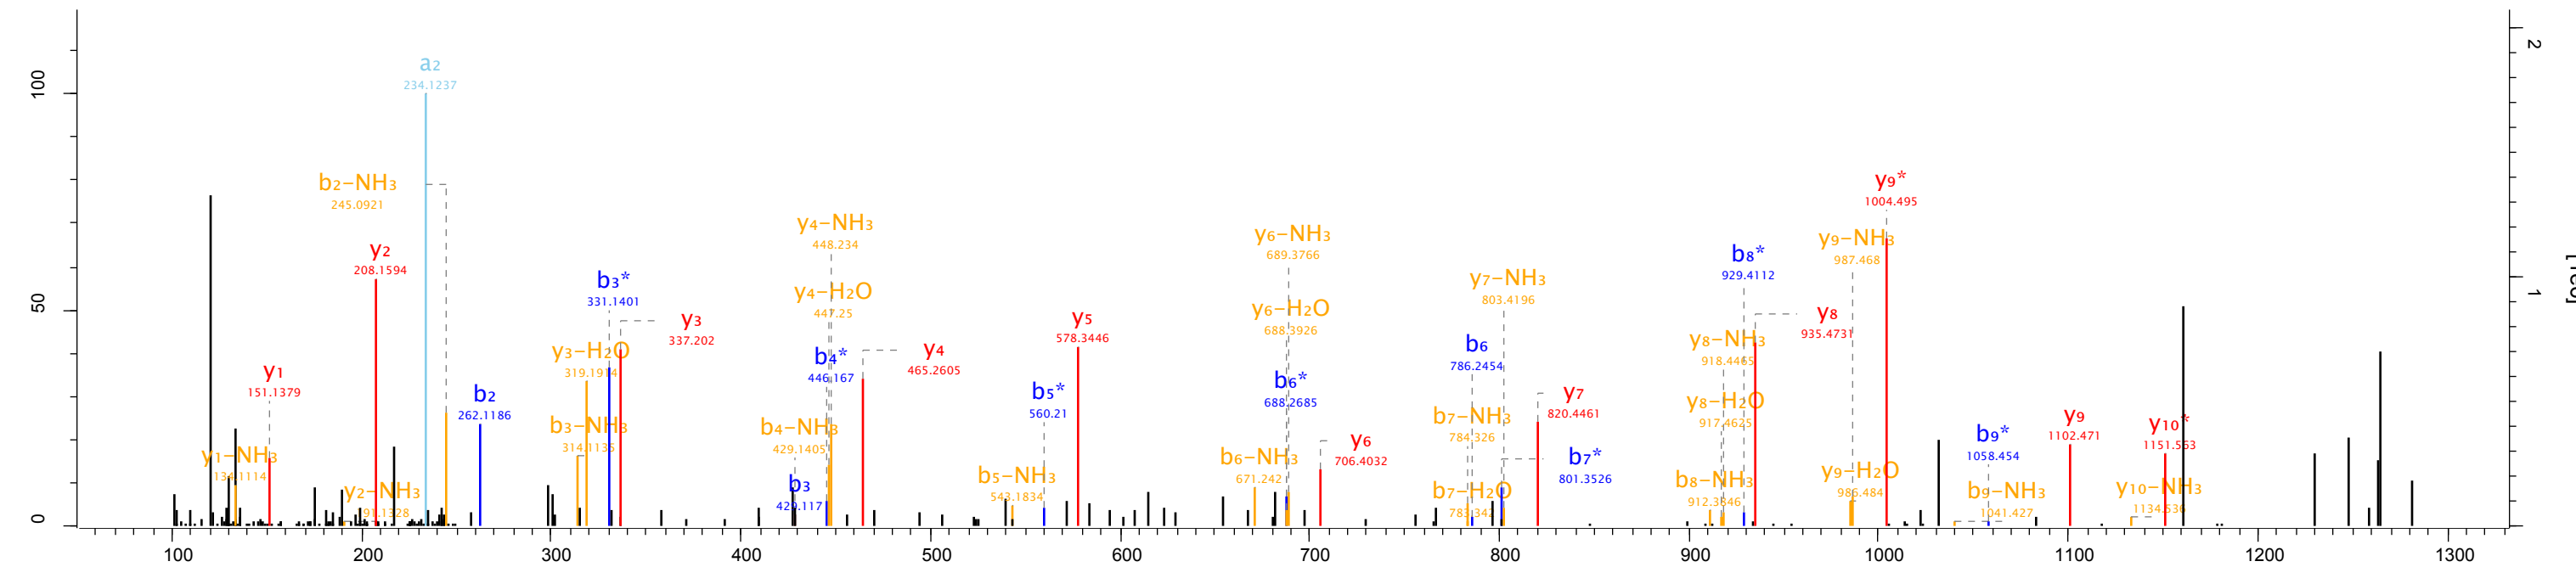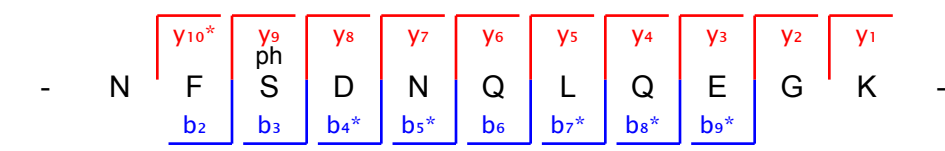

Raw file: 20150812\_A375SR\_Phospho\_BR1\_05  
 Scan: 10527 Method: FTMS; HCD Score: 165.49 m/z: 901.9 Gene names: KLC2

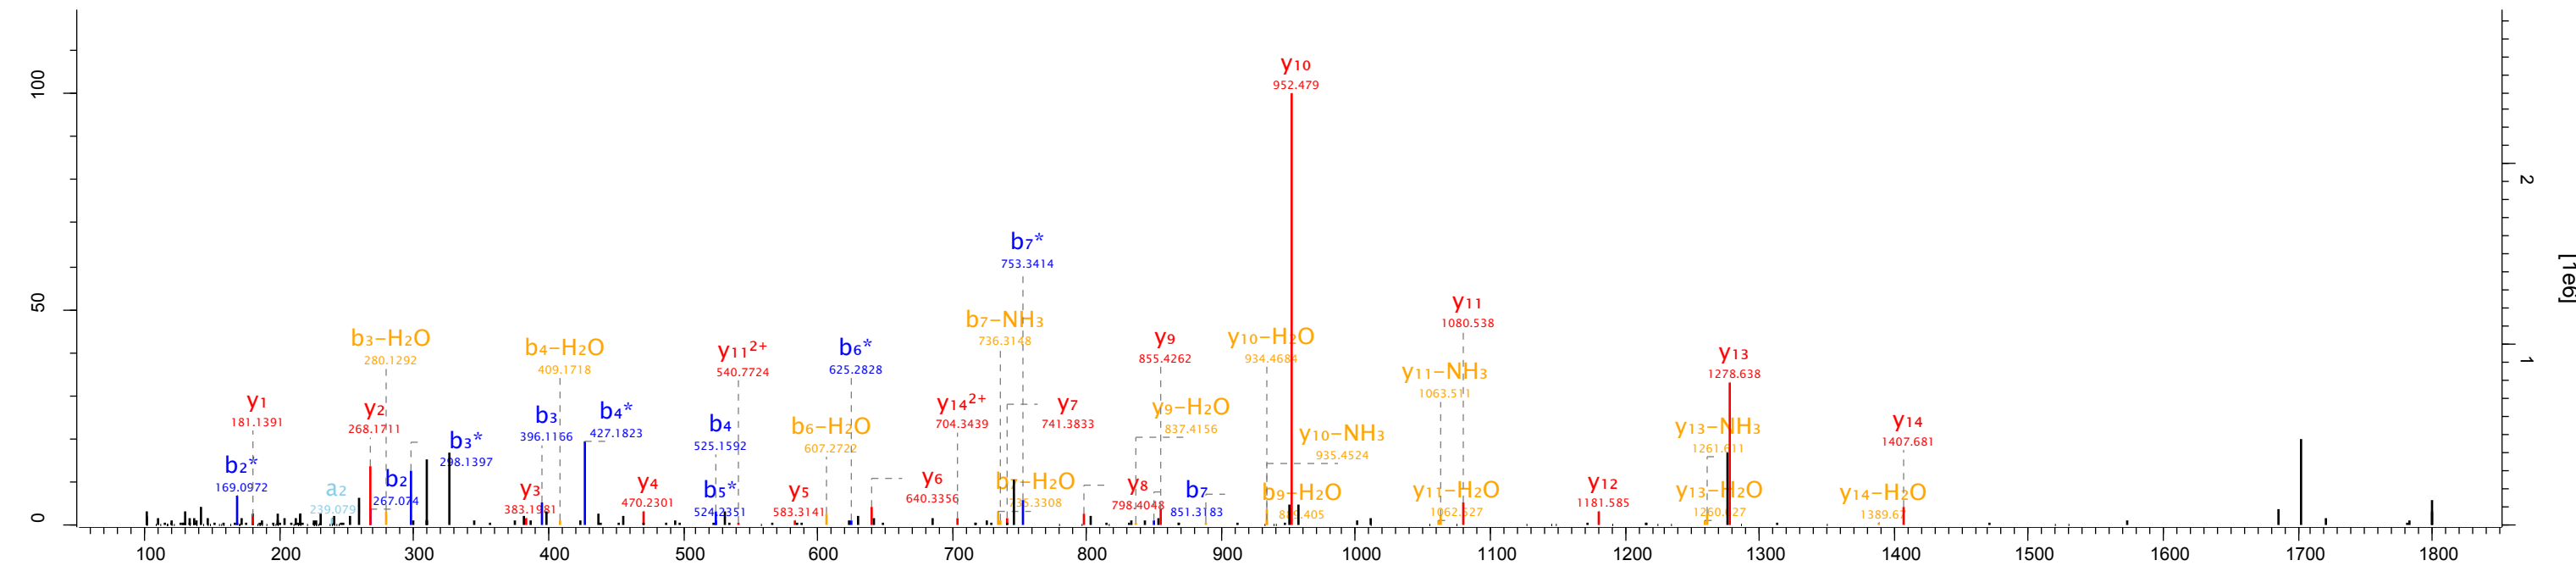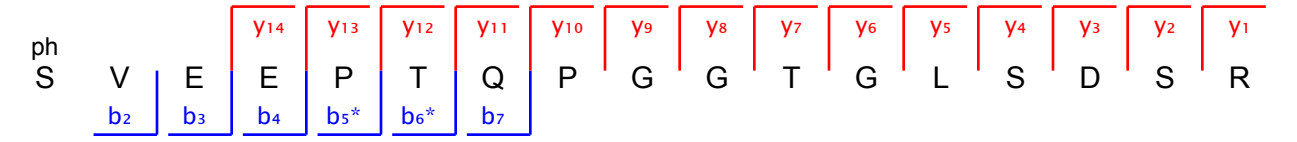



Raw file Scan Method Score m/z Gene names  
 20150812\_A375SR\_Phospho\_BR1\_05 10557 FTMS; HCD 236.78 869.9 CEP170

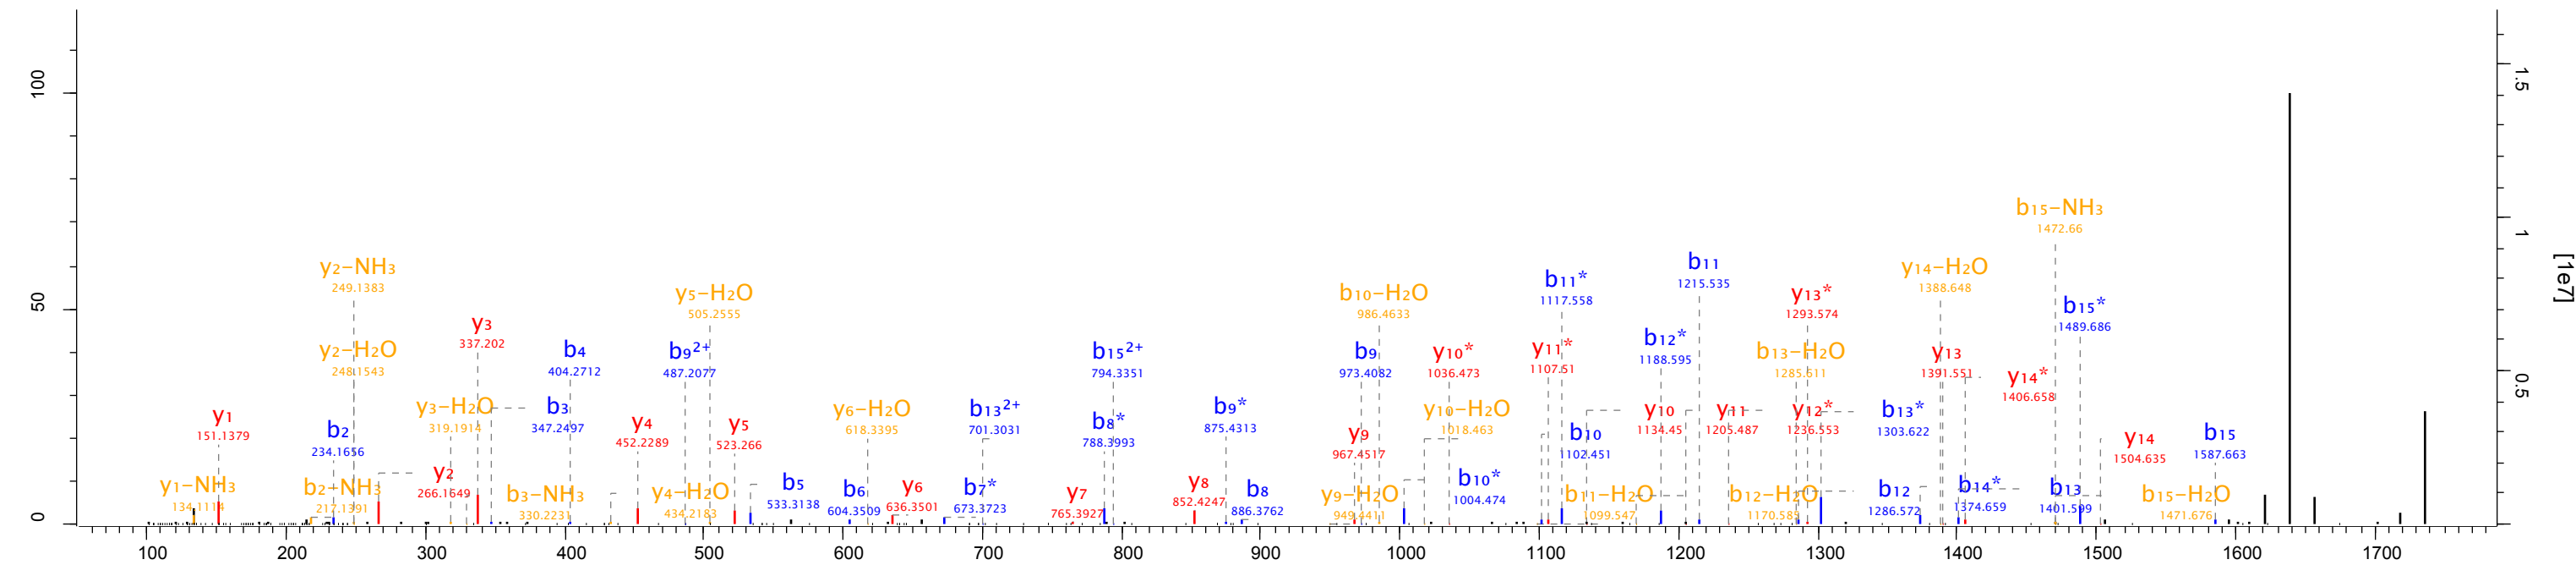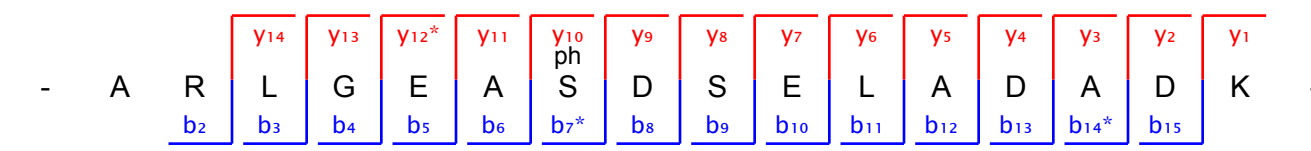

Raw file 20150812\_A375SR\_Phospho\_BR1\_05 Scan 11107 Method FTMS; HCD Score 180.23 m/z 831.4 Gene names KATNA1

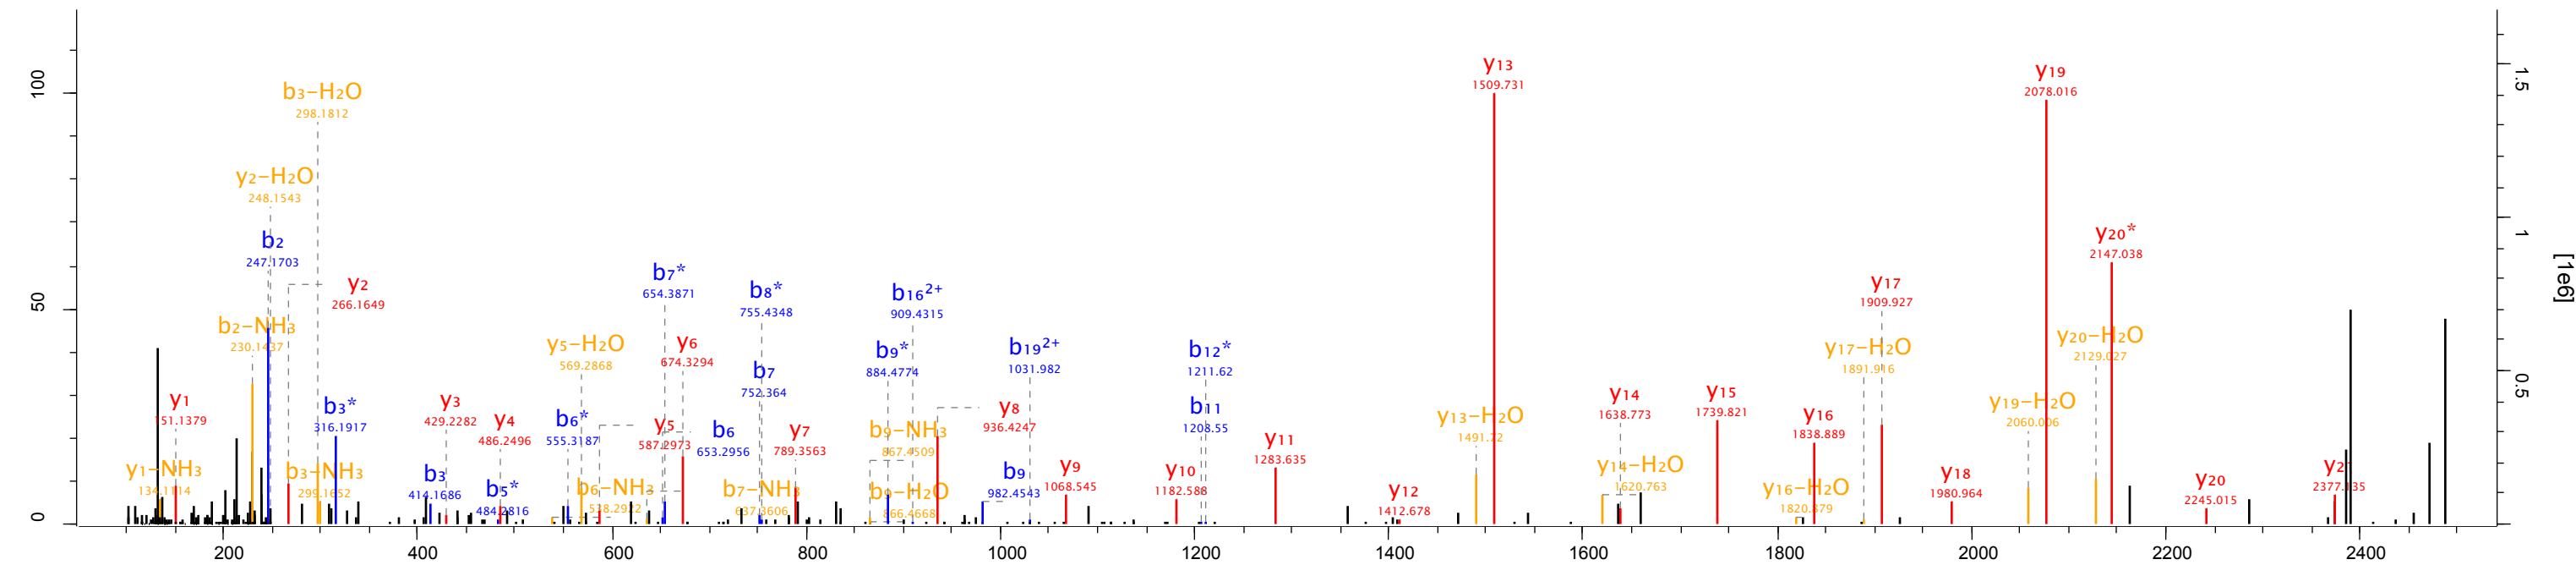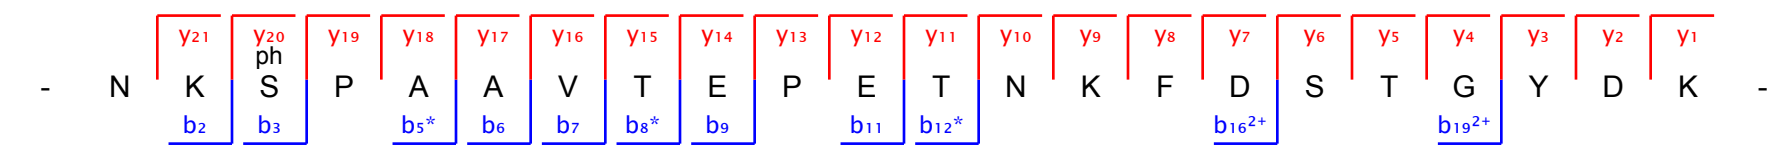

Raw file: 20150812\_A375SR\_Phospho\_BR1\_05  
 Scan: 11987 Method: FTMS; HCD Score: 86.54 m/z: 653.02 Gene names: ITSN1

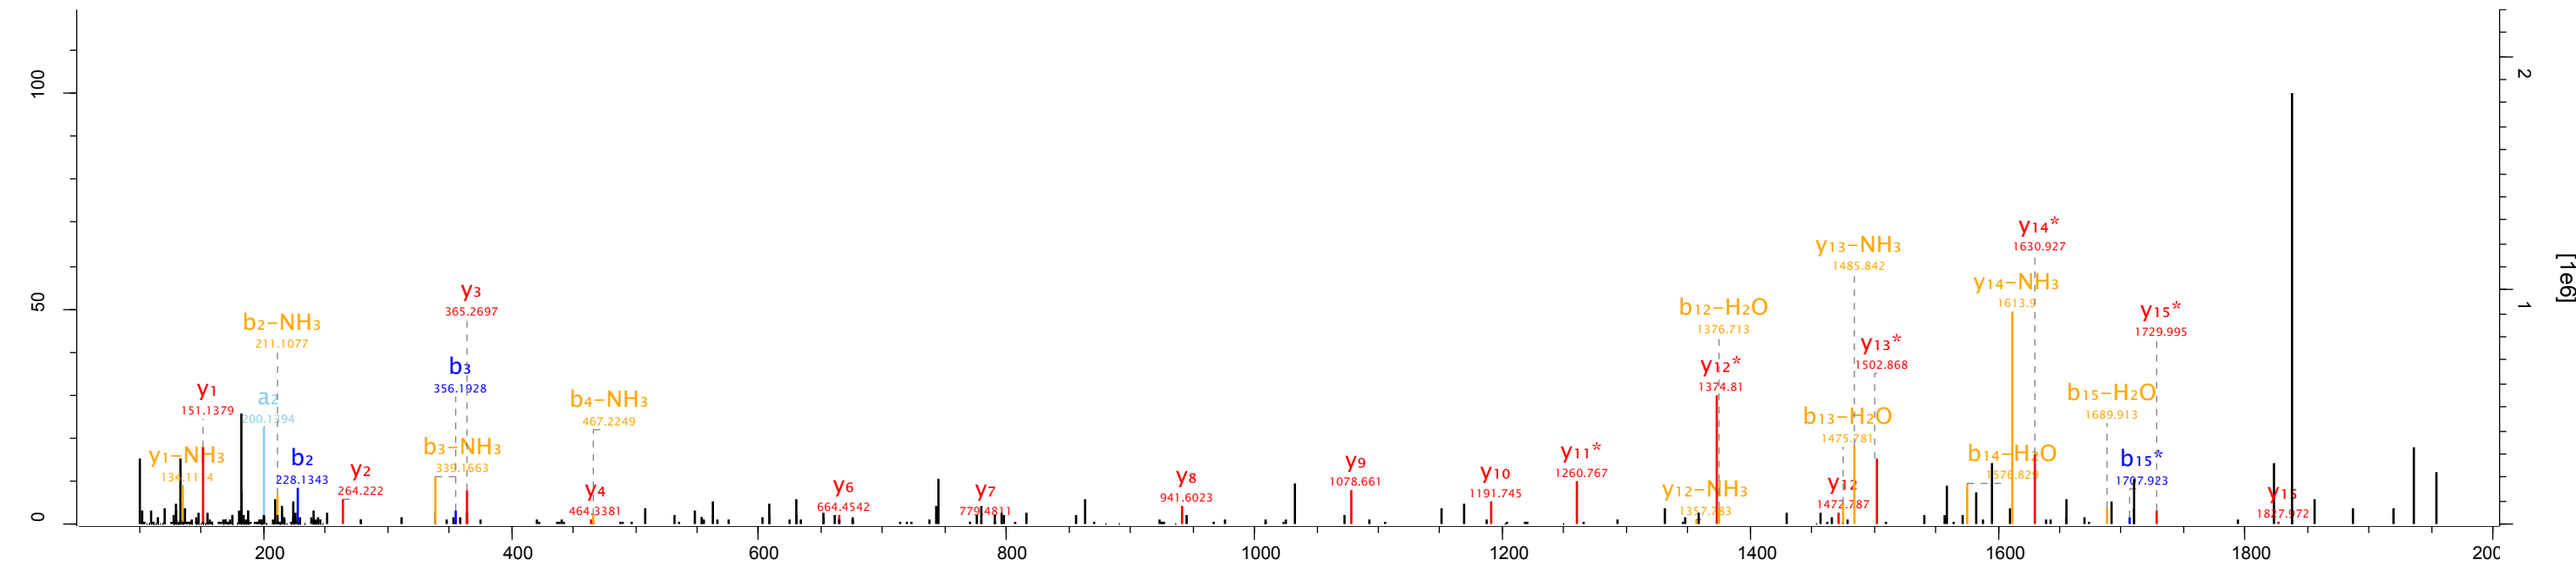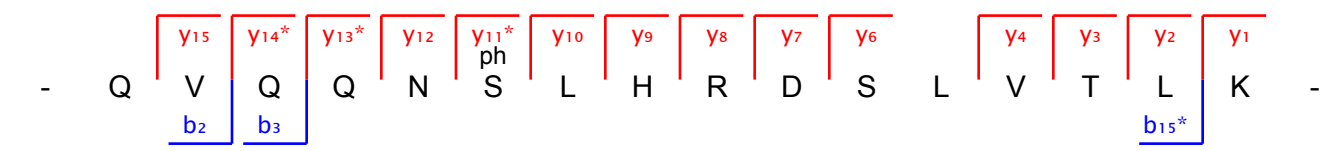

Raw file 20150812\_A375SR\_Phospho\_BR1\_05 Scan 13007 Method FTMS; HCD Score 242.05 m/z 1182.51 Gene names SEC16A

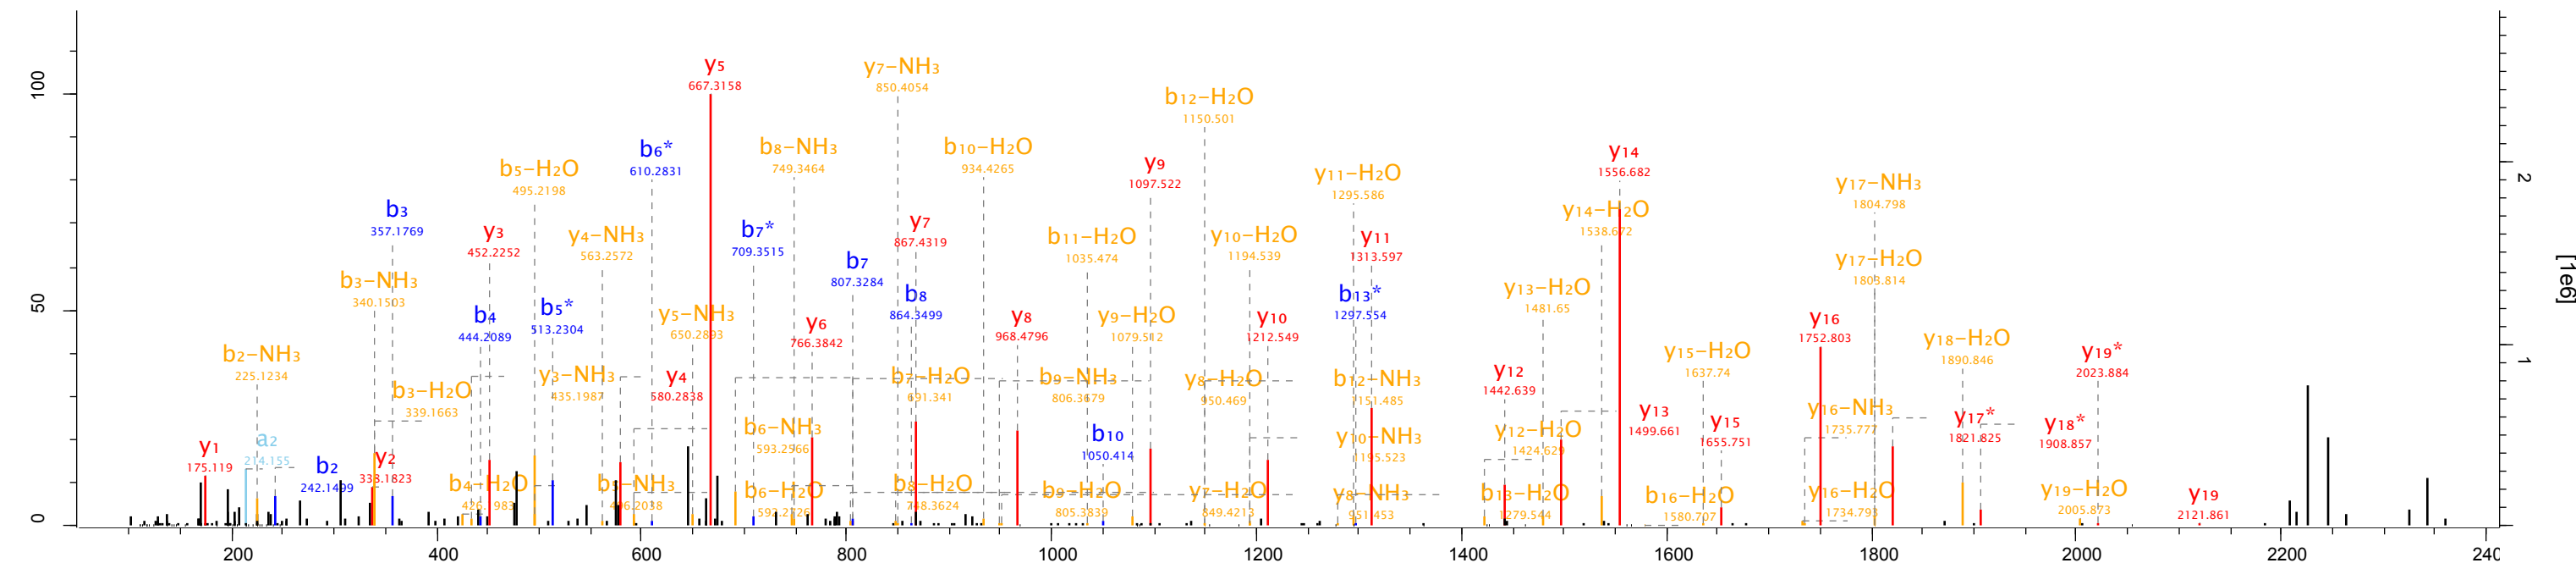

- Q I D S ph S P V G G E T D E T T V S Q N Y R -

b<sub>2</sub>
b<sub>3</sub>
b<sub>4</sub>
b<sub>5</sub><sup>\*</sup>
b<sub>6</sub><sup>\*</sup>
b<sub>7</sub>
b<sub>8</sub>
b<sub>10</sub>
b<sub>13</sub><sup>\*</sup>

Raw file: 20150812\_A375SR\_Phospho\_BR1\_05  
 Scan: 13077 Method: FTMS; HCD Score: 270 m/z: 692.67 Gene names: RBM39

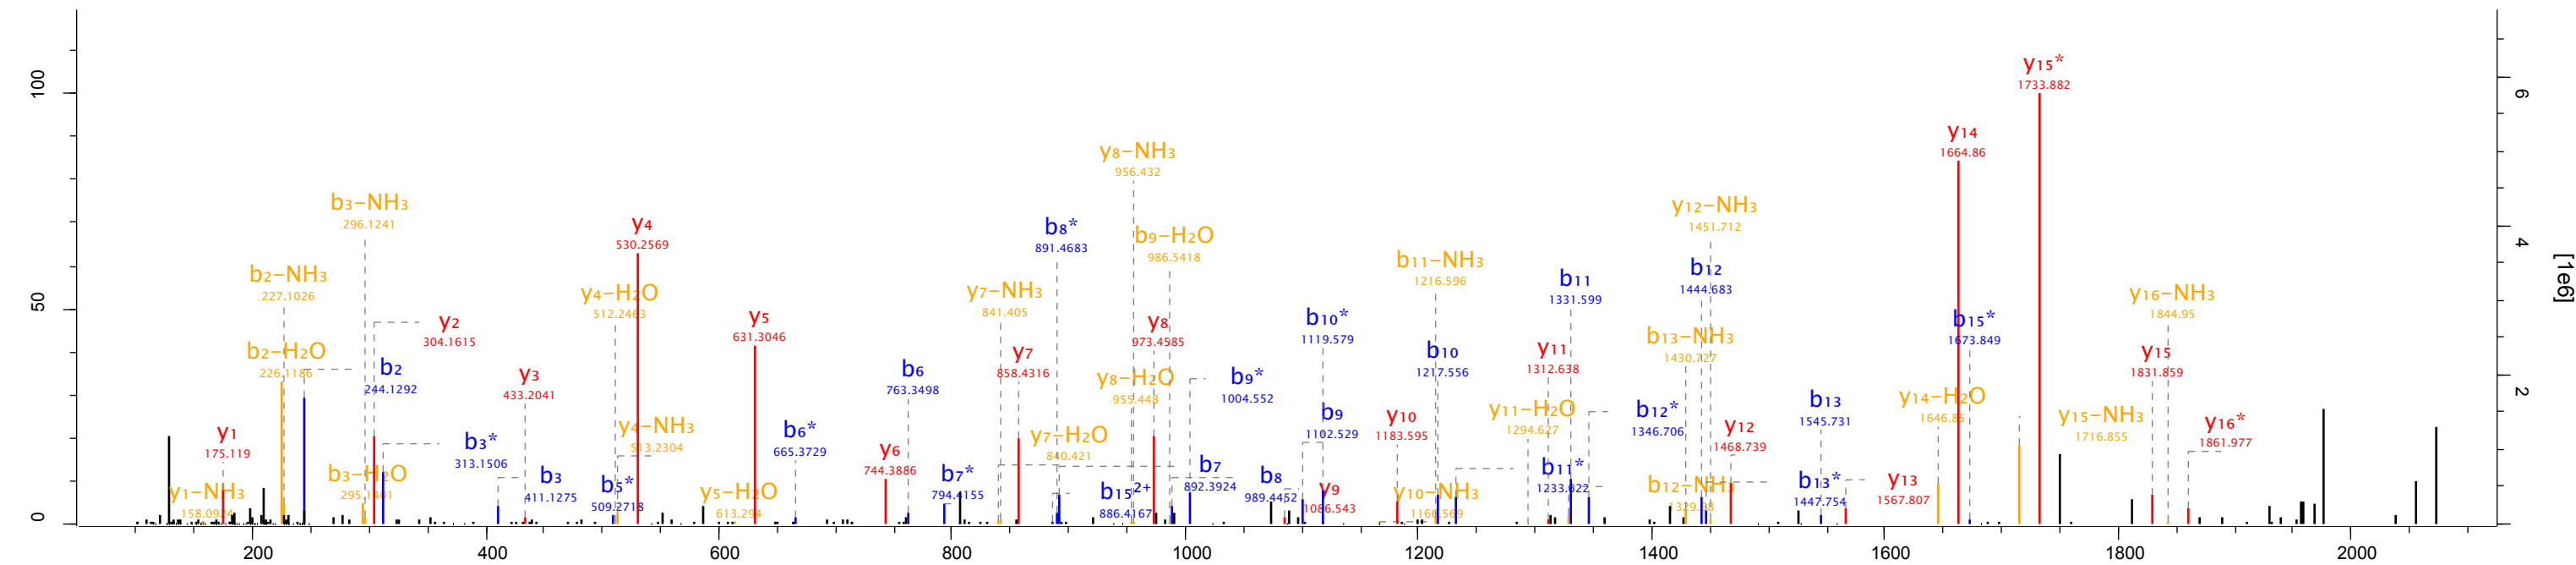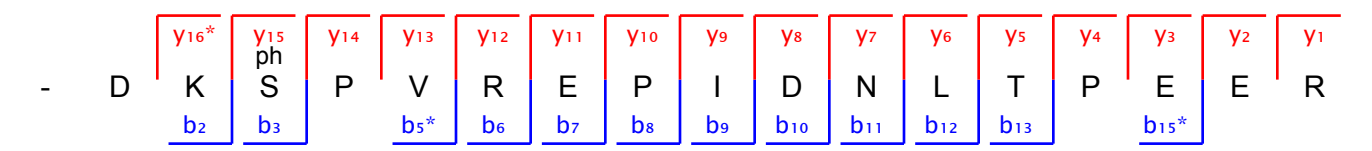

Raw file 20150812\_A375SR\_Phospho\_BR1\_05 Scan 14347 Method FTMS; HCD Score 87.46 m/z 647.97 Gene names SPECC1L;SPECC1L-ADORA2A

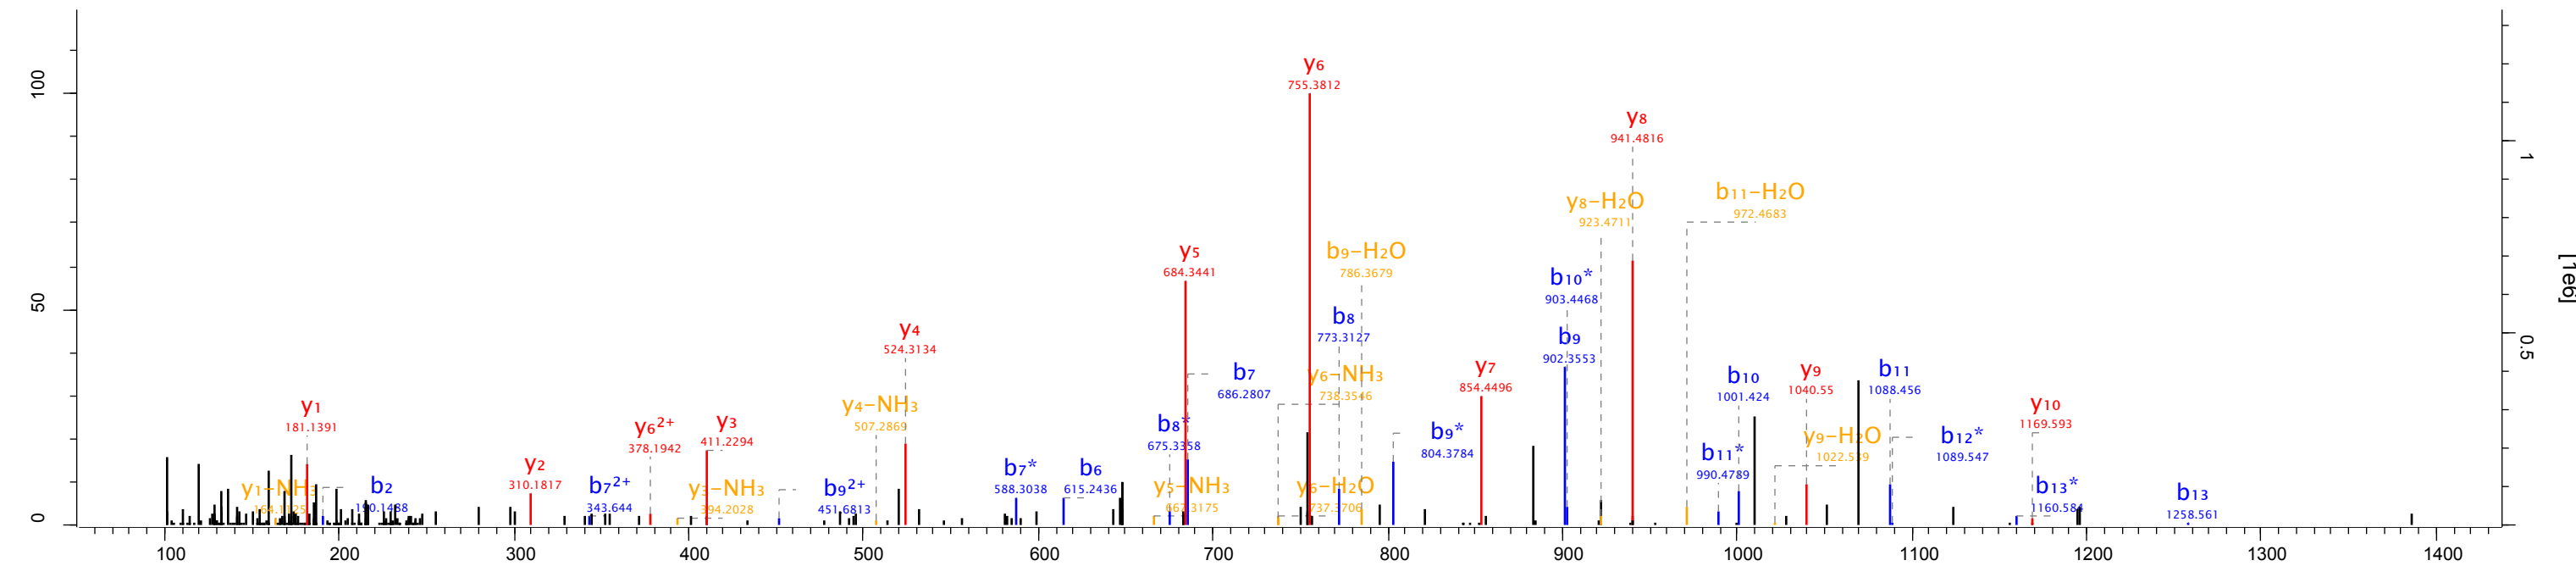

- K G<sub>b2</sub> S<sup>ph</sup> S G N<sub>b6</sub> A<sub>b7</sub> S<sub>b8</sub> E<sub>b9</sub> V<sub>b10</sub> S<sub>b11</sub> V<sub>b12\*</sub> A<sub>b13</sub> C Y<sub>10</sub> Y<sub>9</sub> Y<sub>8</sub> Y<sub>7</sub> Y<sub>6</sub> Y<sub>5</sub> Y<sub>4</sub> Y<sub>3</sub> Y<sub>2</sub> Y<sub>1</sub> -

Raw file: 20150812\_A375SR\_Phospho\_BR1\_05  
 Scan: 1487 Method: FTMS; HCD Score: 82.8 m/z: 644.27 Gene names: KDM2A

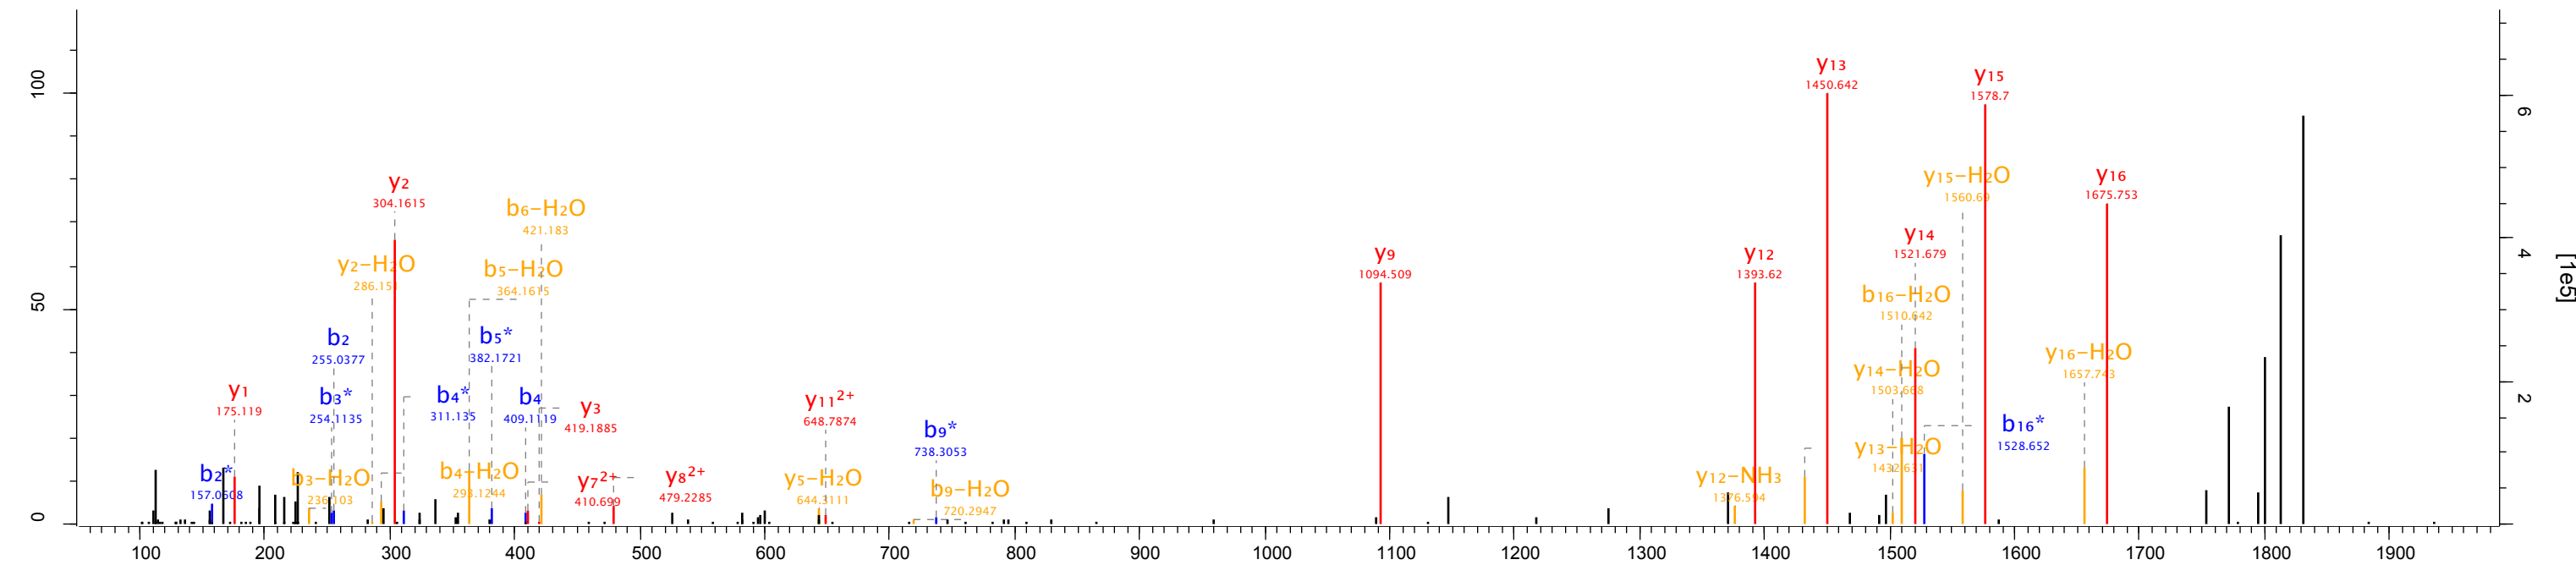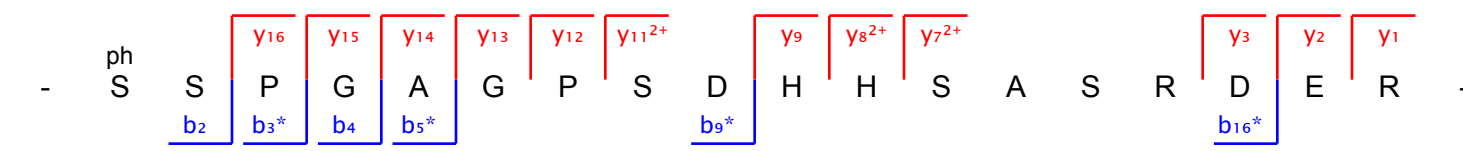

Raw file 20150812\_A375SR\_Phospho\_BR1\_05 Scan 15027 Method FTMS; HCD Score 142.39 m/z 727.87 Gene names NOLC1

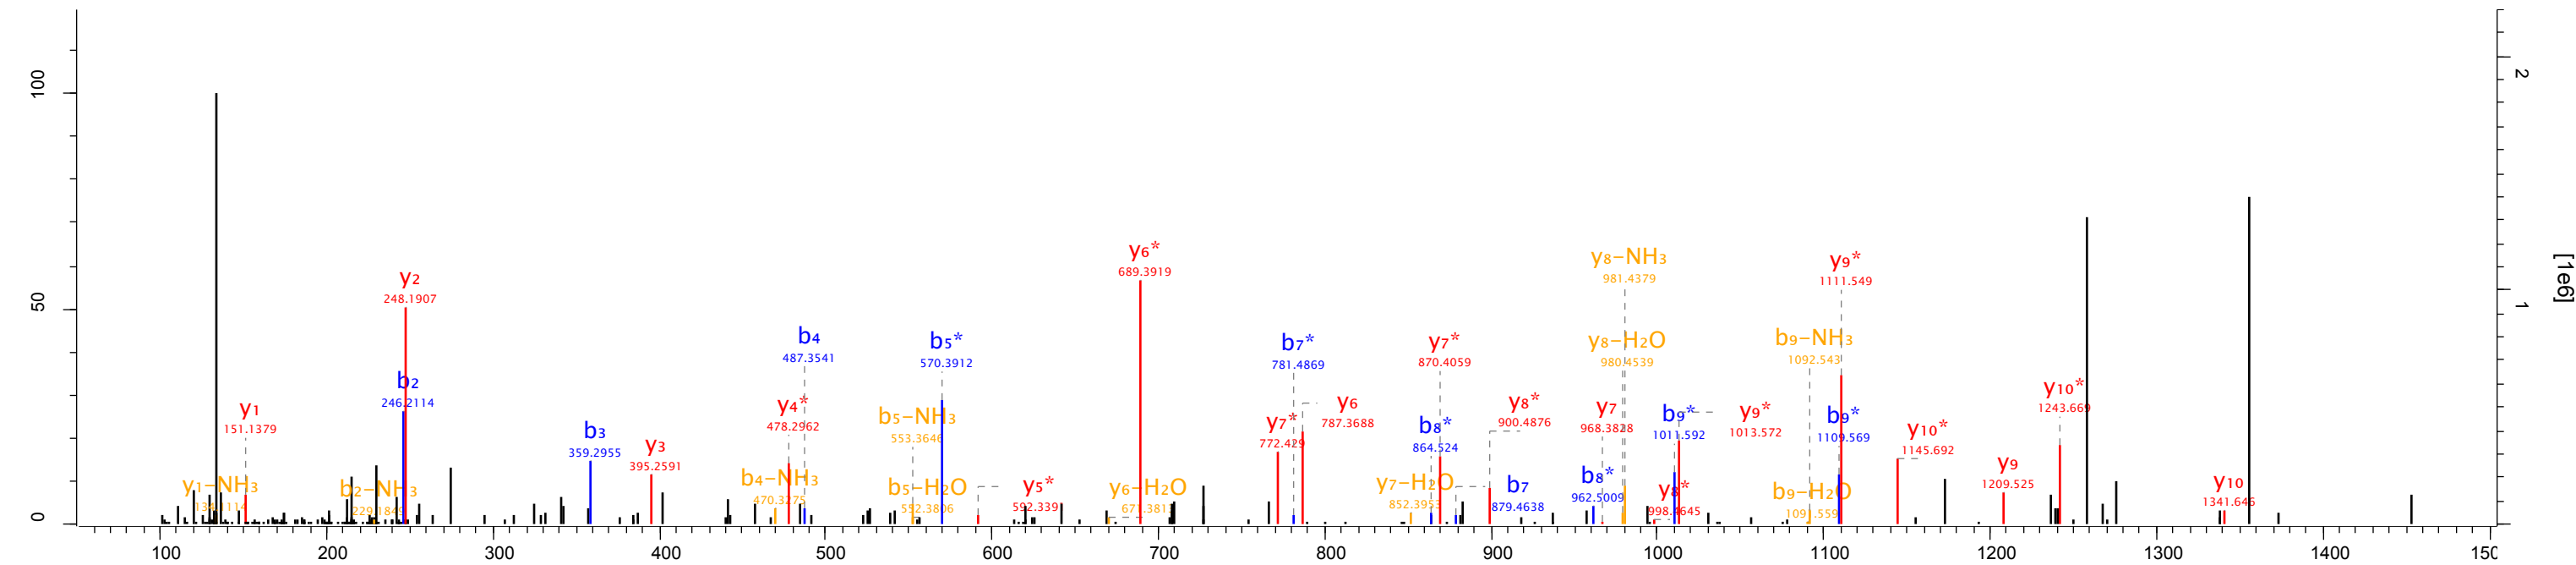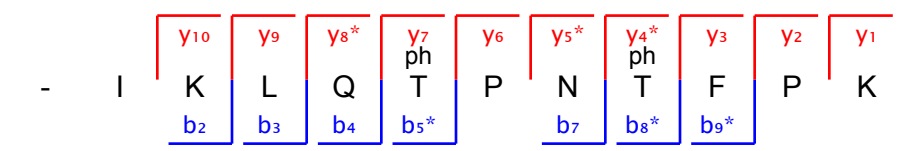



Raw file: 20150812\_A375SR\_Phospho\_BR1\_05  
 Scan: 15487 Method: FTMS; HCD Score: 64.55 m/z: 1018.48 Gene names: KIAA1598

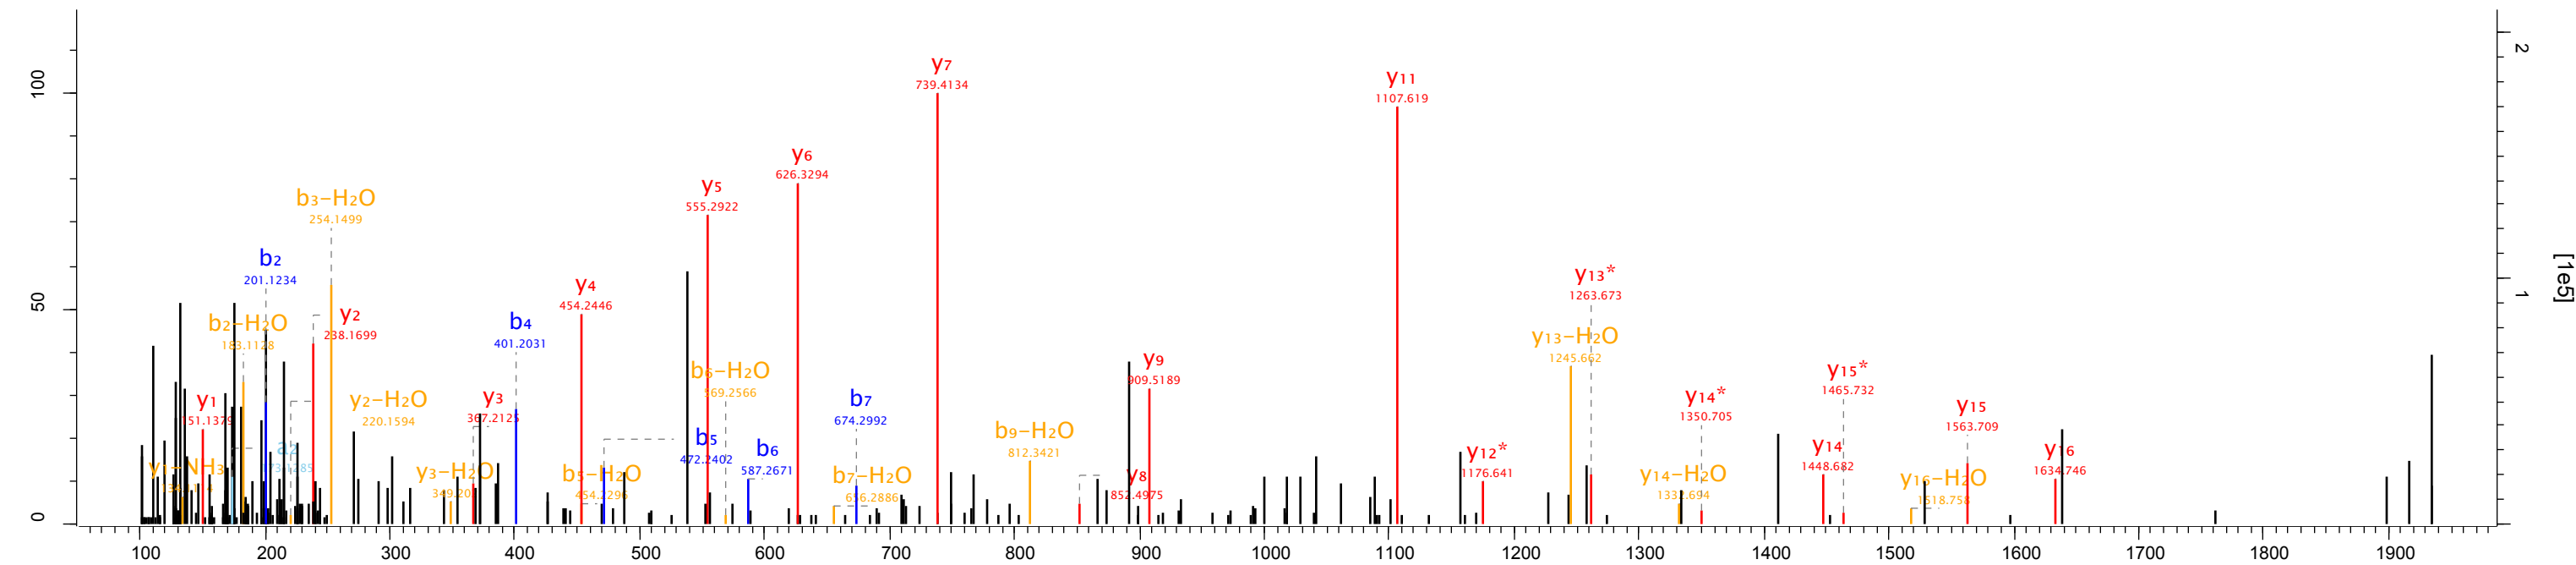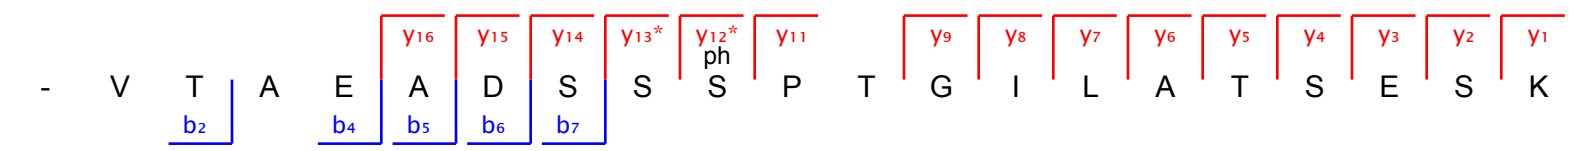

Raw file  
 20150812\_A375SR\_Phospho\_BR1\_05  
 Scan 15607 Method FTMS; HCD Score 247.51 m/z 909.41 Gene names TAF7

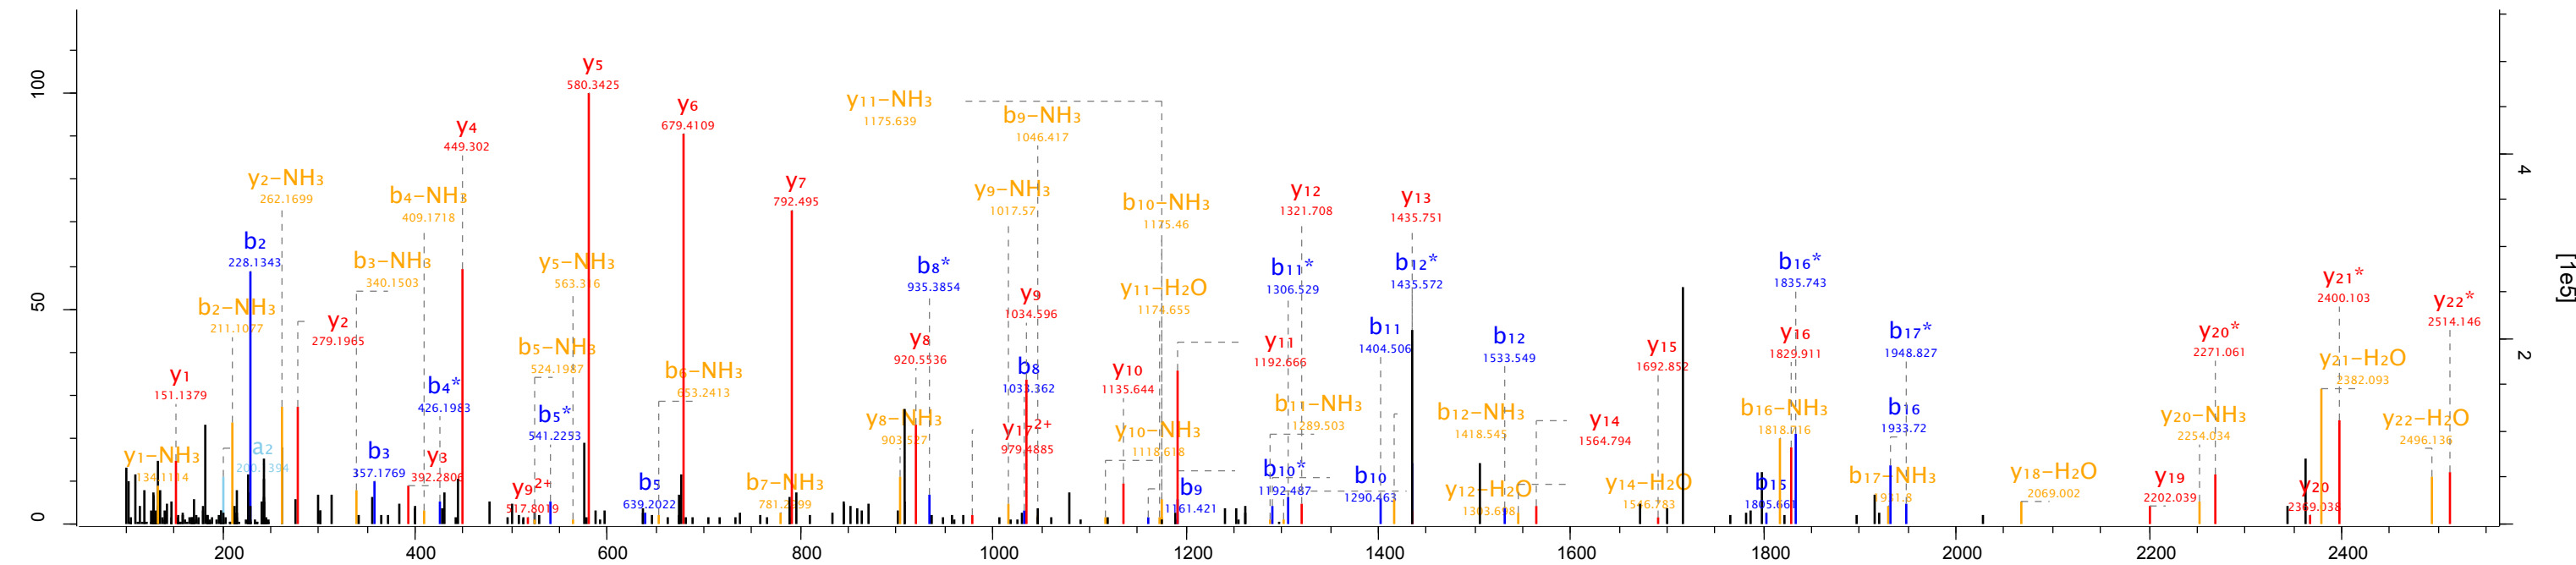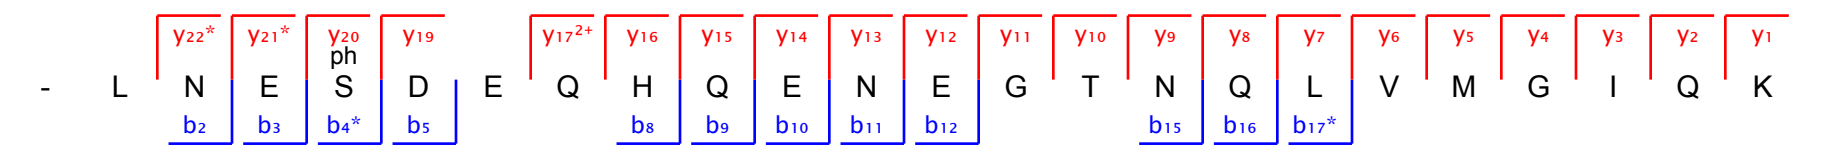

Raw file: 20150812\_A375SR\_Phospho\_BR1\_05  
 Scan: 15907 Method: FTMS; HCD Score: 121.12 m/z: 1061.51 Gene names: TJP2

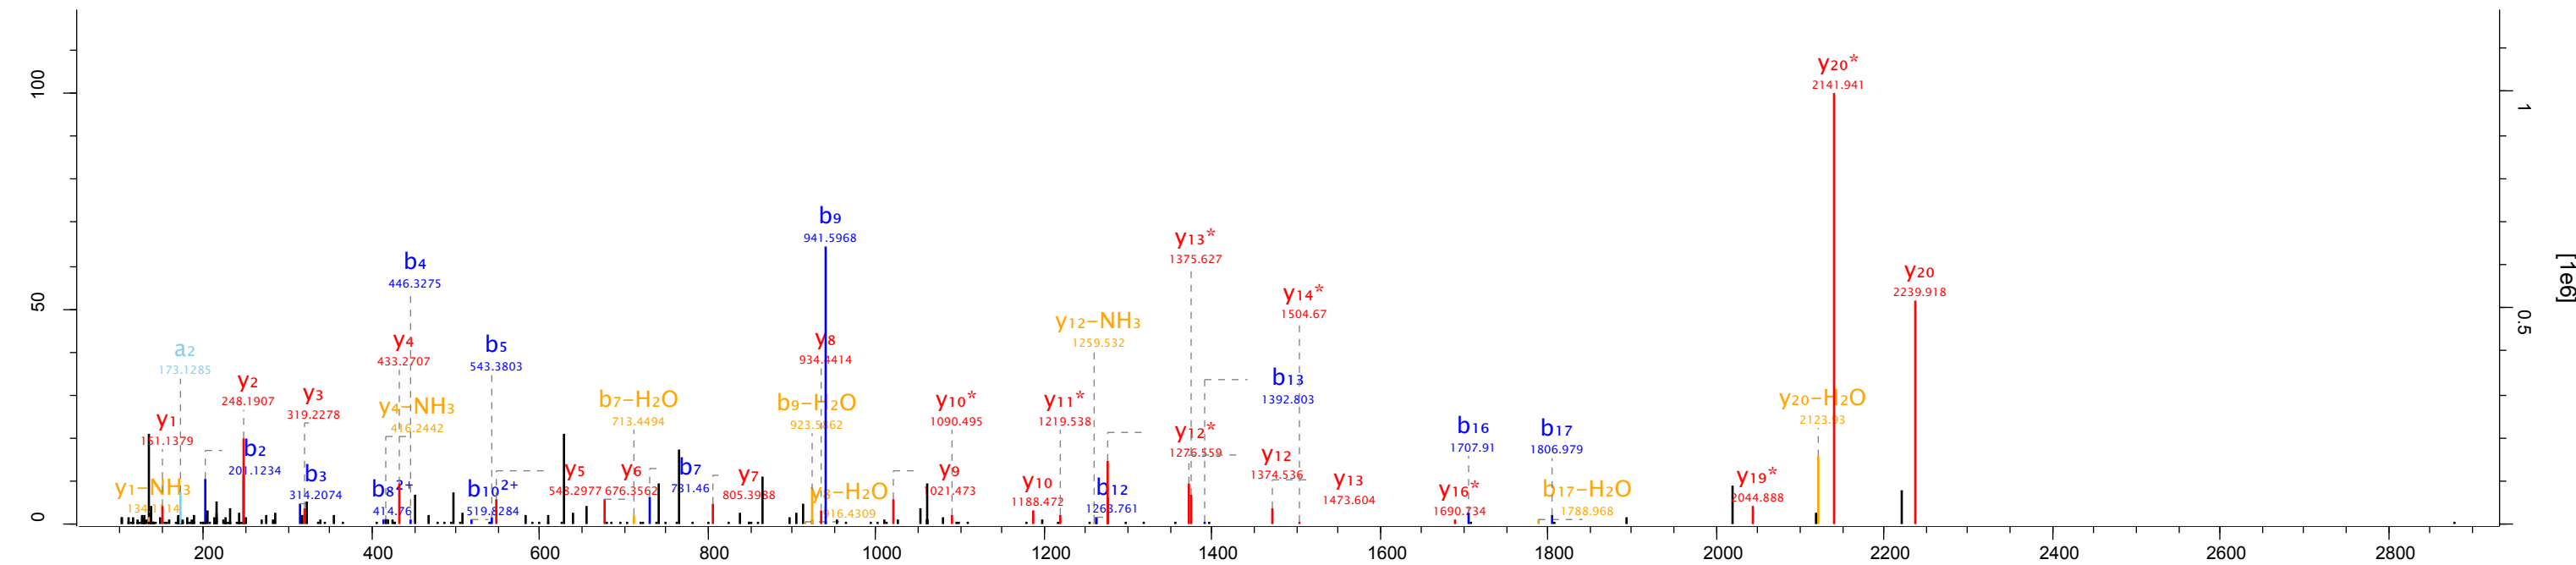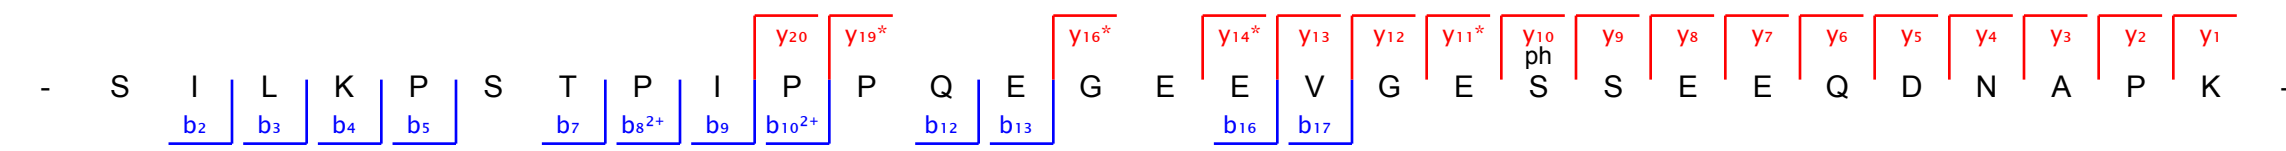

Raw file 20150812\_A375SR\_Phospho\_BR1\_05 Scan 15917 Method FTMS; HCD Score 171.36 m/z 667.31 Gene names SAFB2

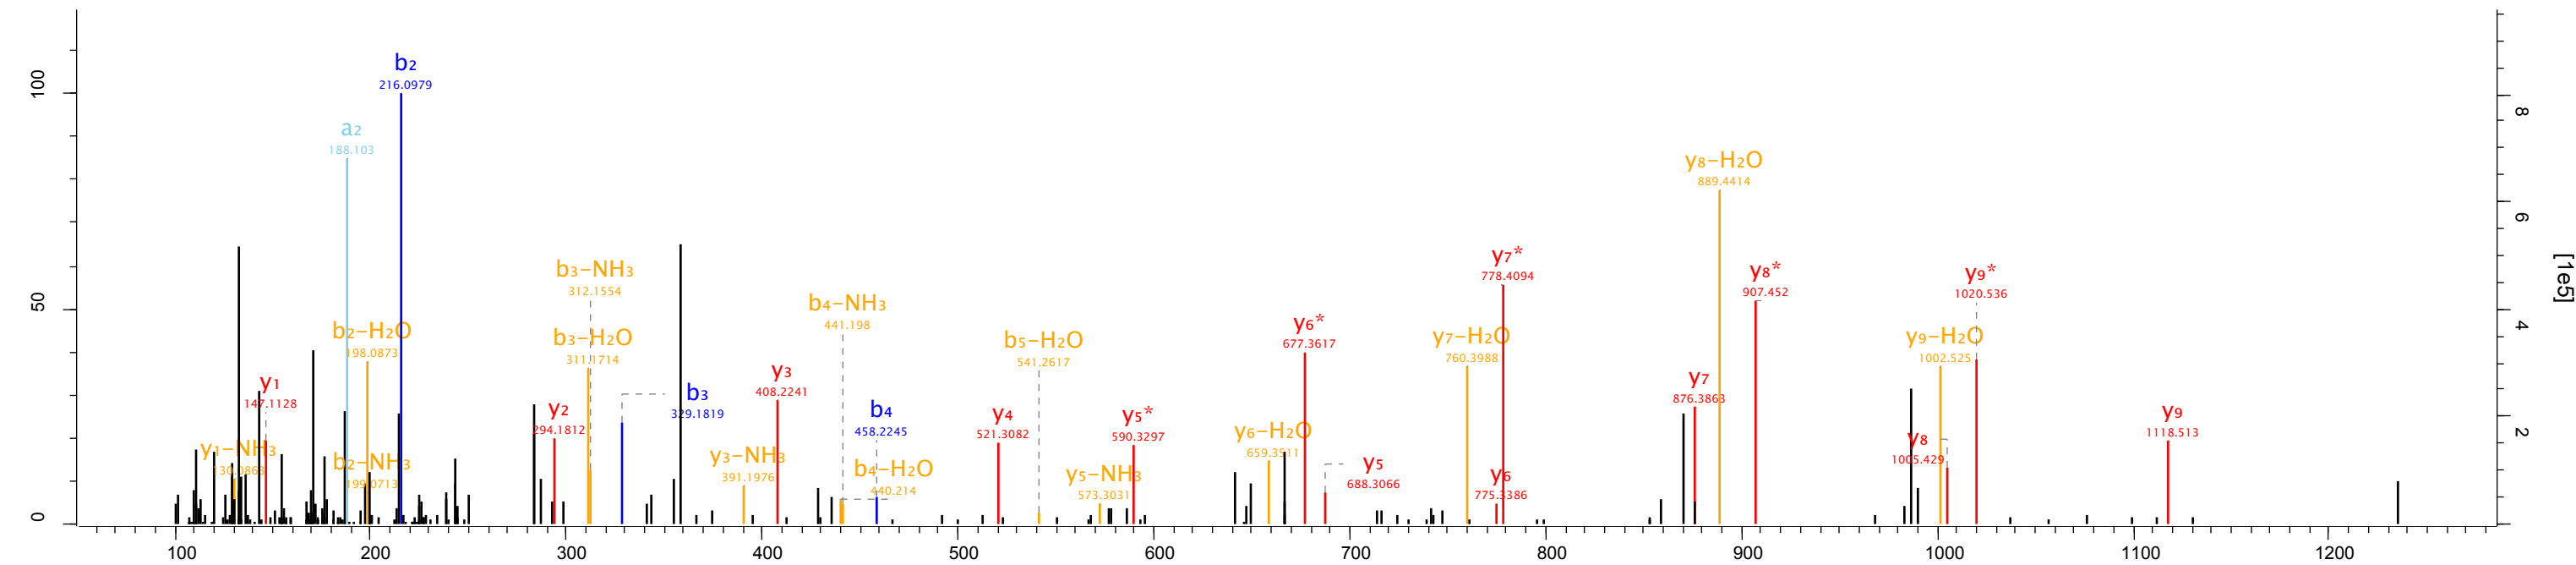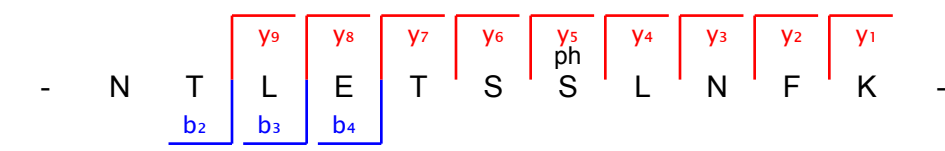

Raw file 20150812\_A375SR\_Phospho\_BR1\_05 Scan 17087 Method FTMS; HCD Score 91.34 m/z 938.42 Gene names SETD2

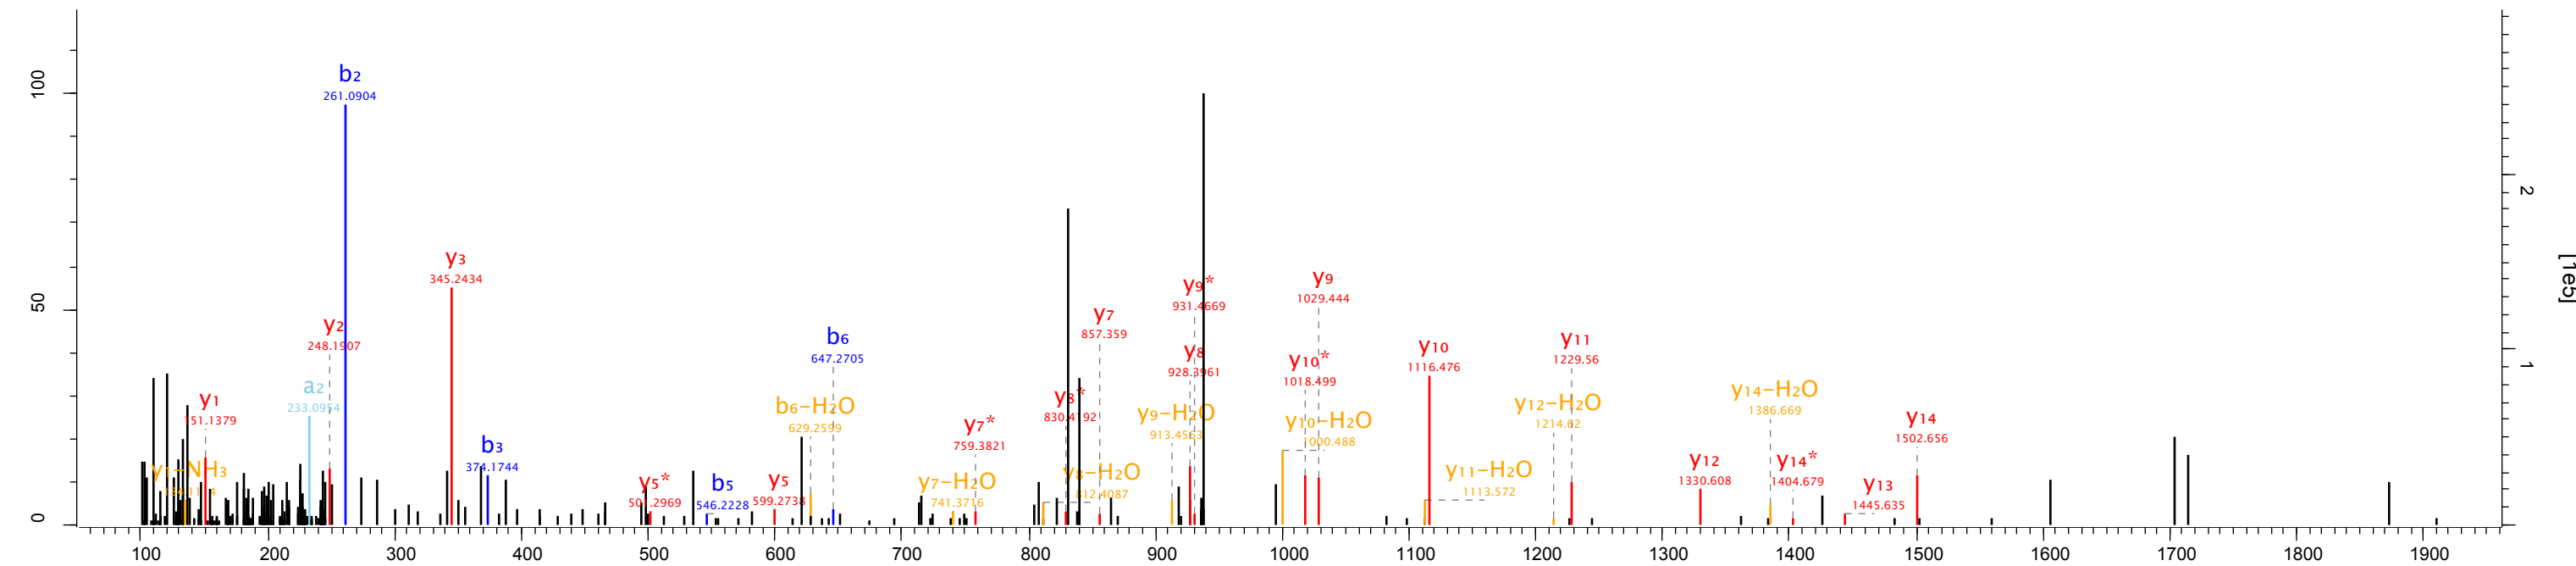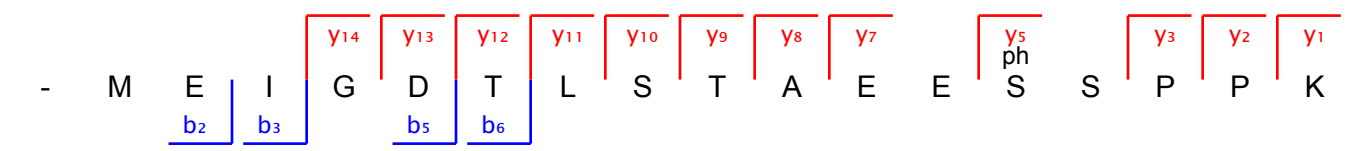

Raw file 20150812\_A375SR\_Phospho\_BR1\_05 Scan 17237 Method FTMS; HCD Score 206.81 m/z 759.85 Gene names HN1L

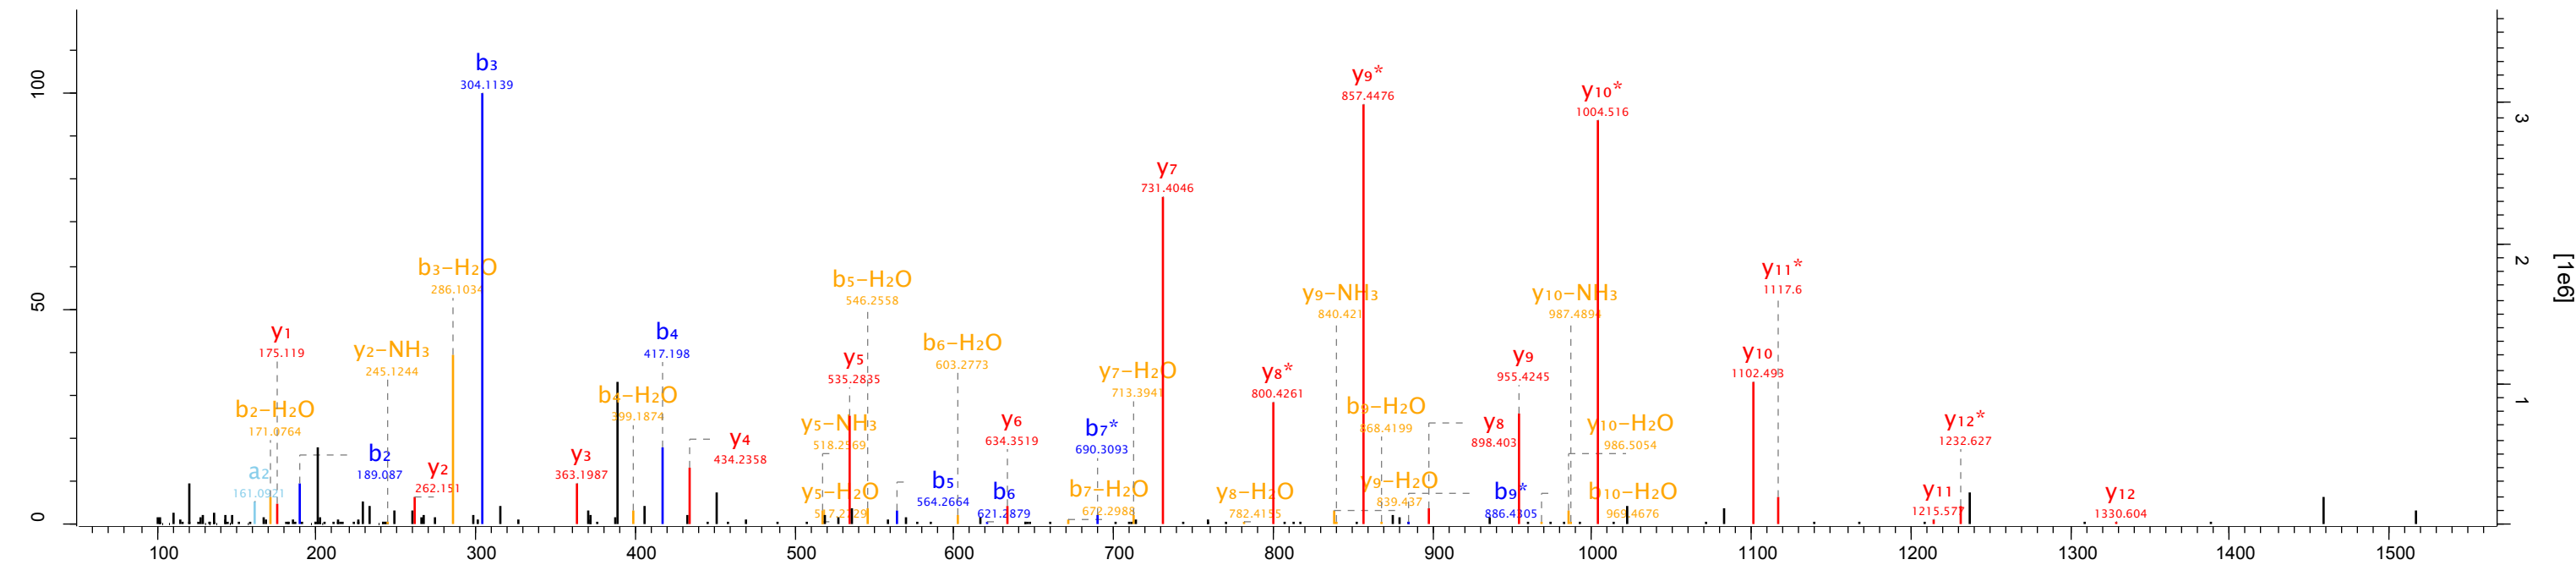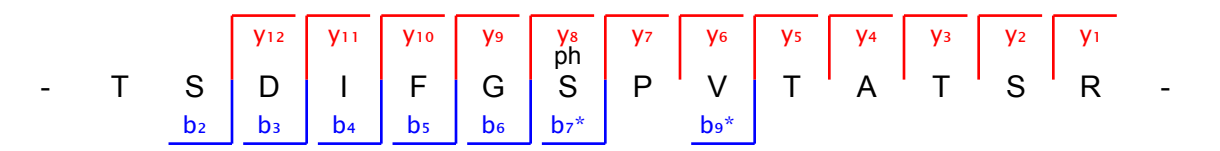

Raw file 20150812\_A375SR\_Phospho\_BR1\_05 Scan 17287 Method FTMS; HCD Score 146.34 m/z 972.41 Gene names DNP1

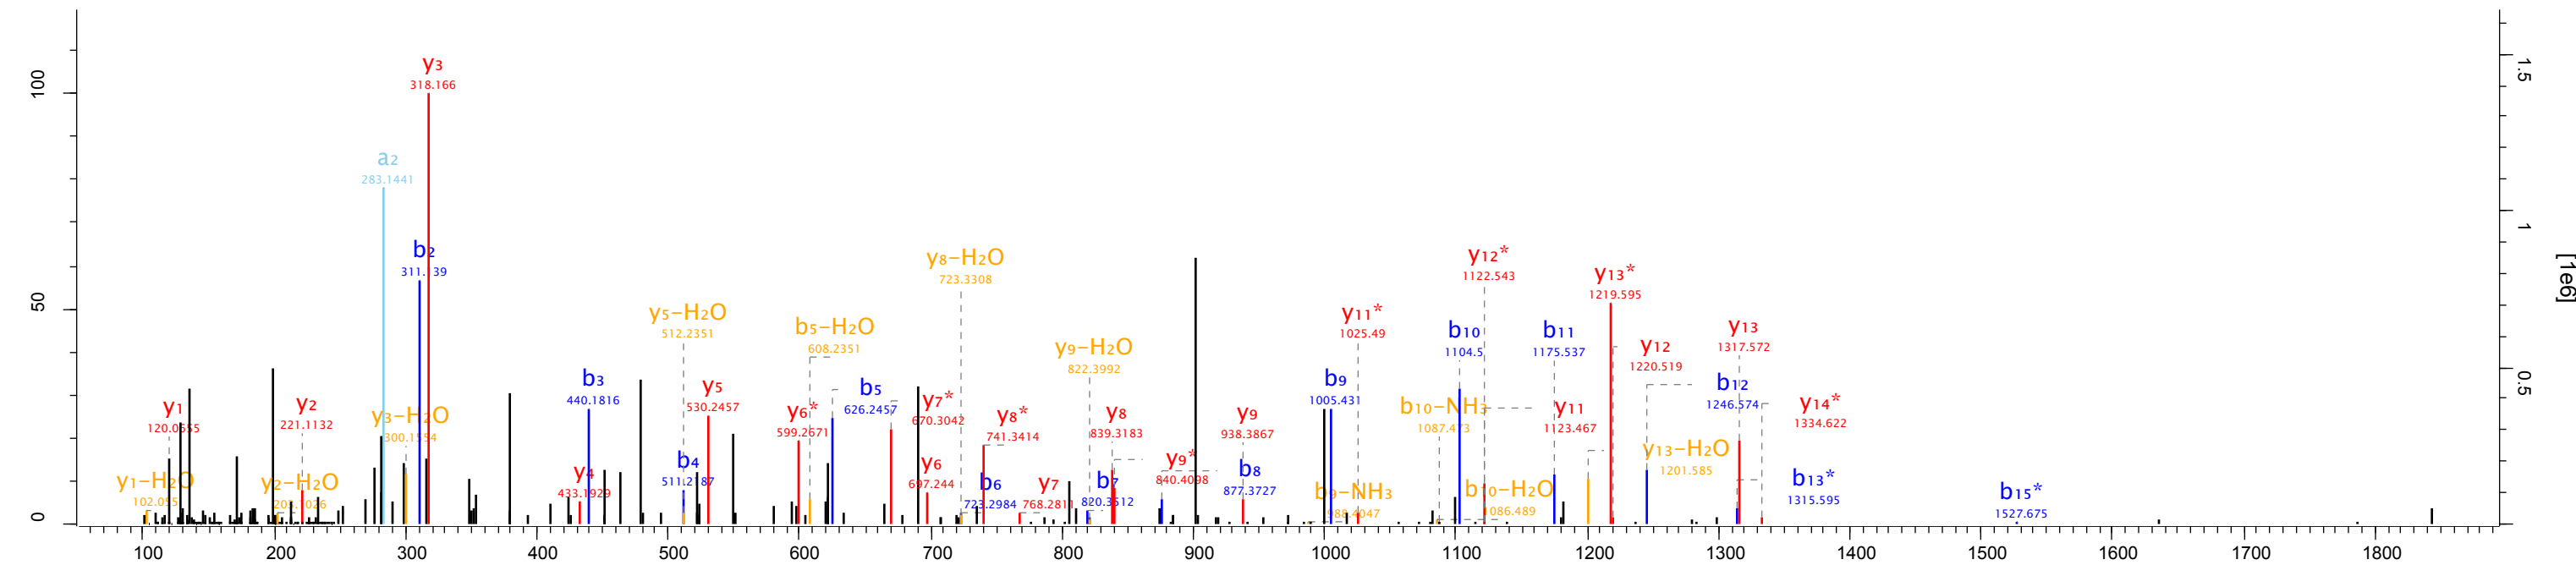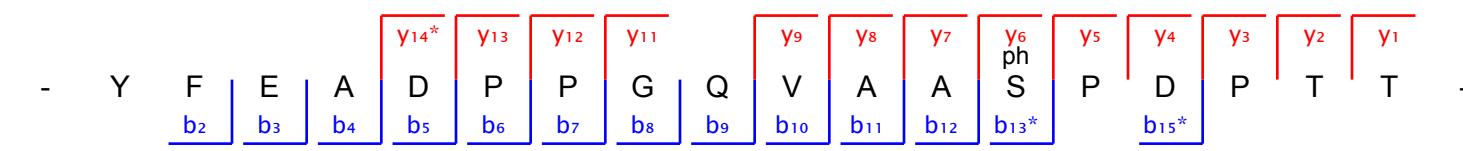

Raw file 20150812\_A375SR\_Phospho\_BR1\_05 Scan 17467 Method FTMS; HCD Score 191.08 m/z 981.93 Gene names TLK1

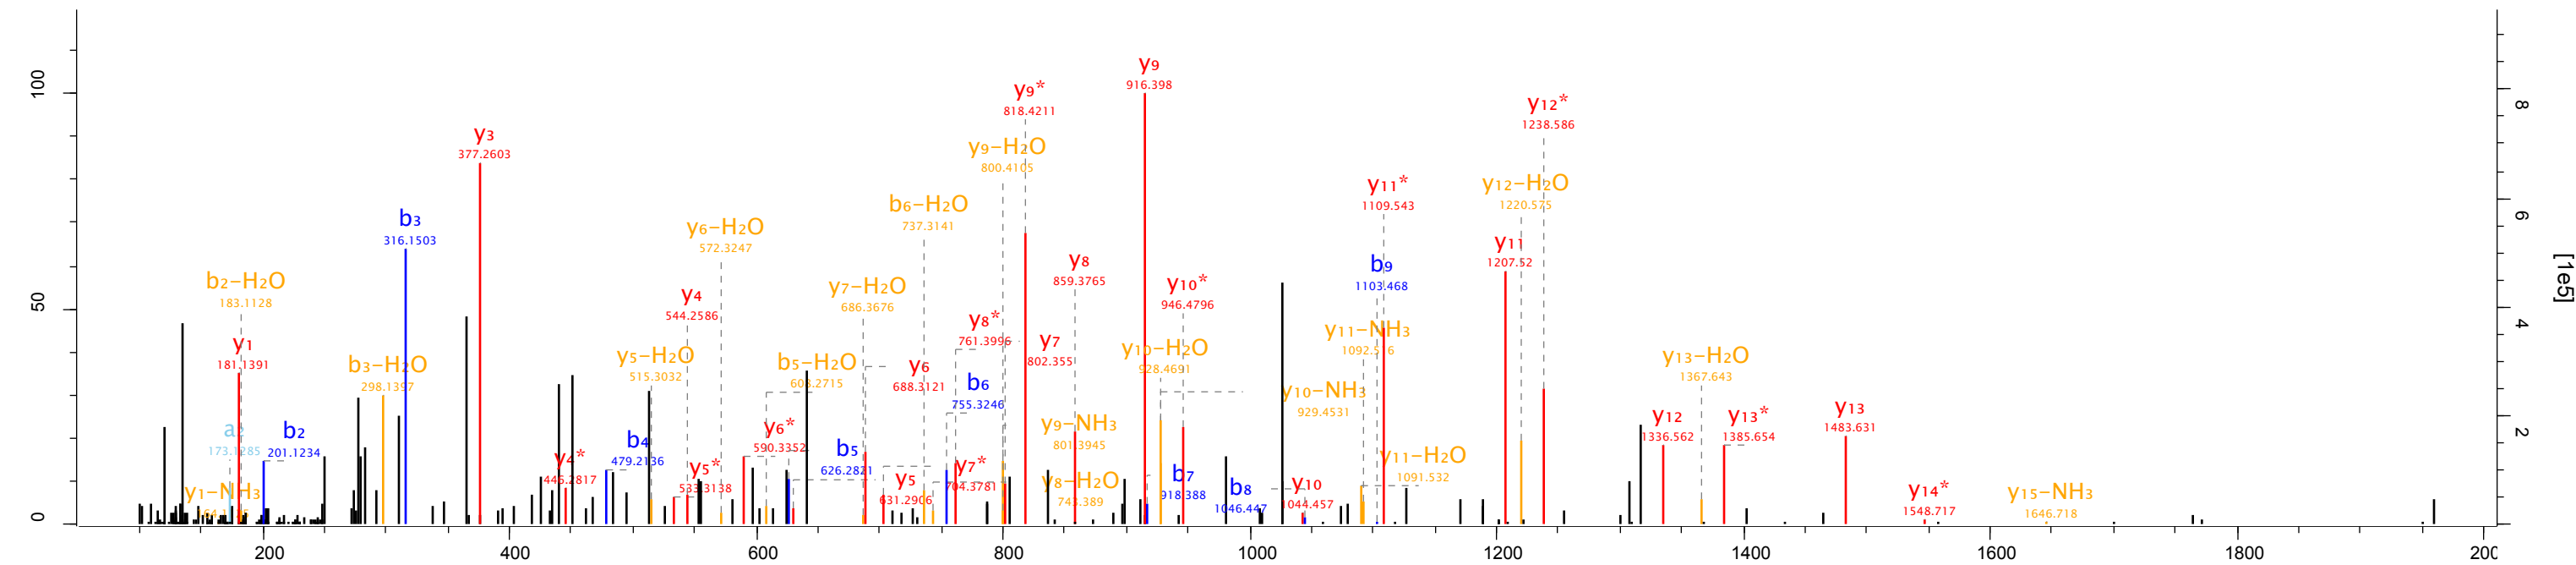

- I S D Y F E Y Q G G N G S S P V R -

Fragmentation scheme showing b and y ions for each amino acid residue:

- S: b<sub>2</sub>
- D: b<sub>3</sub>
- Y: b<sub>4</sub>, y<sub>14</sub>\*
- F: b<sub>5</sub>, y<sub>13</sub>
- E: b<sub>6</sub>, y<sub>12</sub>
- Y: b<sub>7</sub>, y<sub>11</sub>
- Q: b<sub>8</sub>, y<sub>10</sub>
- G: b<sub>9</sub>, y<sub>9</sub>
- G: y<sub>8</sub>
- N: y<sub>7</sub>
- G: y<sub>6</sub>
- S: y<sub>5</sub>
- S: y<sub>4</sub>, y<sub>3</sub>, y<sub>ph</sub>
- P: y<sub>1</sub>



Raw file: 20150812\_A375SR\_Phospho\_BR1\_05  
 Scan: 1747 Method: FTMS; HCD Score: 105.19 m/z: 669.82 Gene names: NUP93

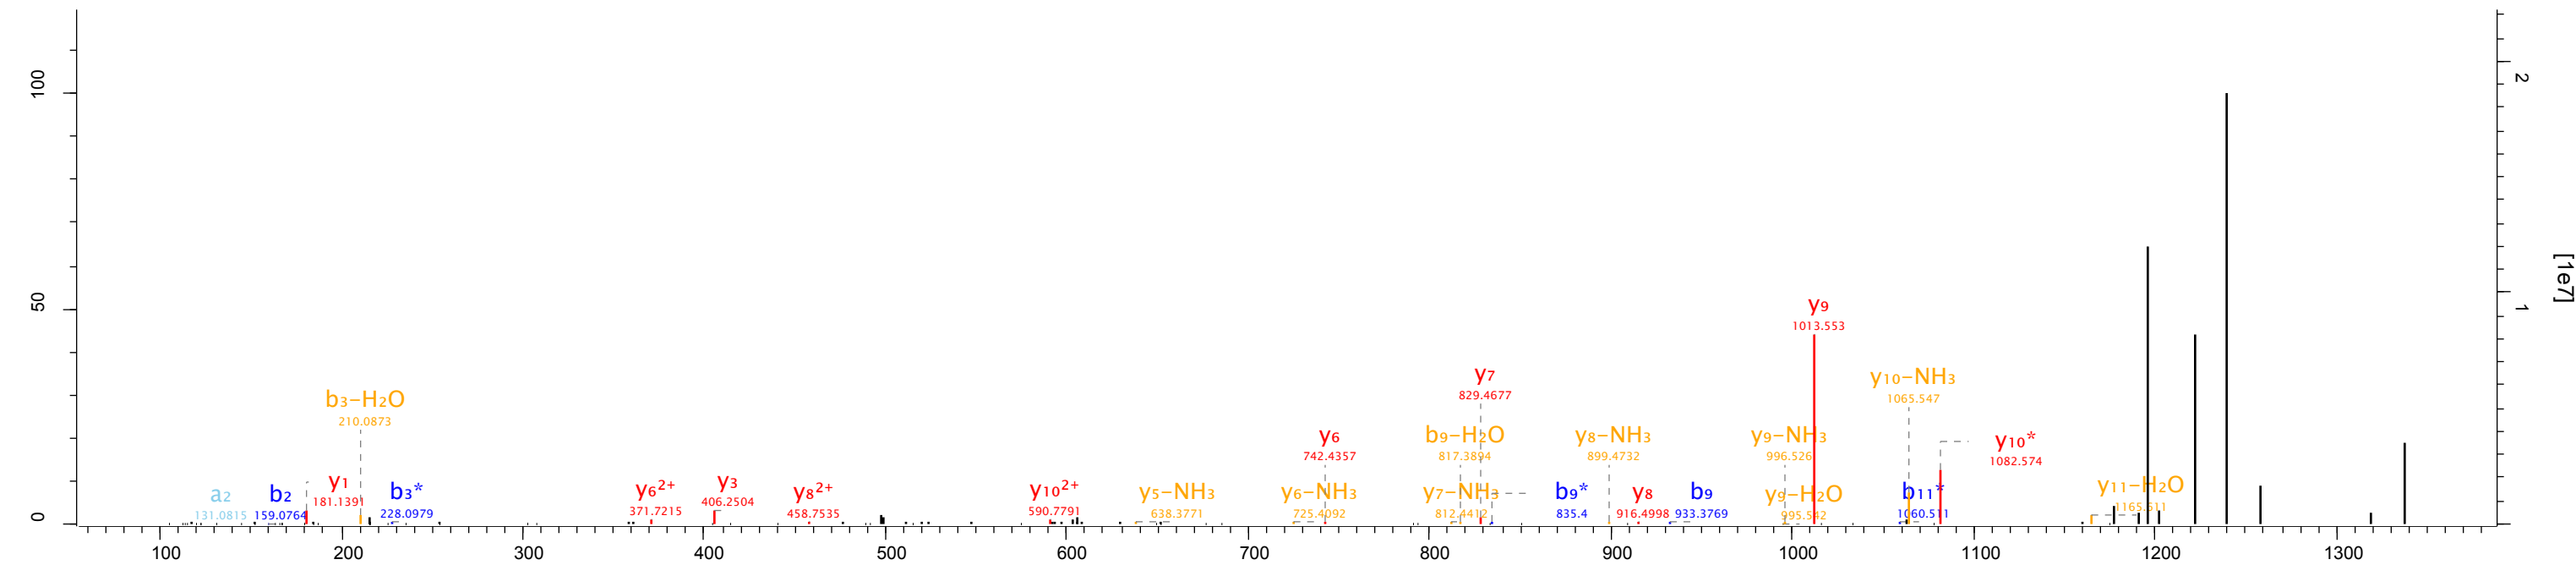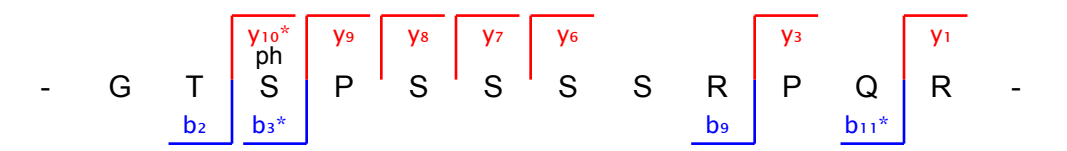



Raw file Scan Method Score m/z Gene names  
 20150812\_A375SR\_Phospho\_BR1\_05 17677 FTMS; HCD 197.73 922.95 PABPN1

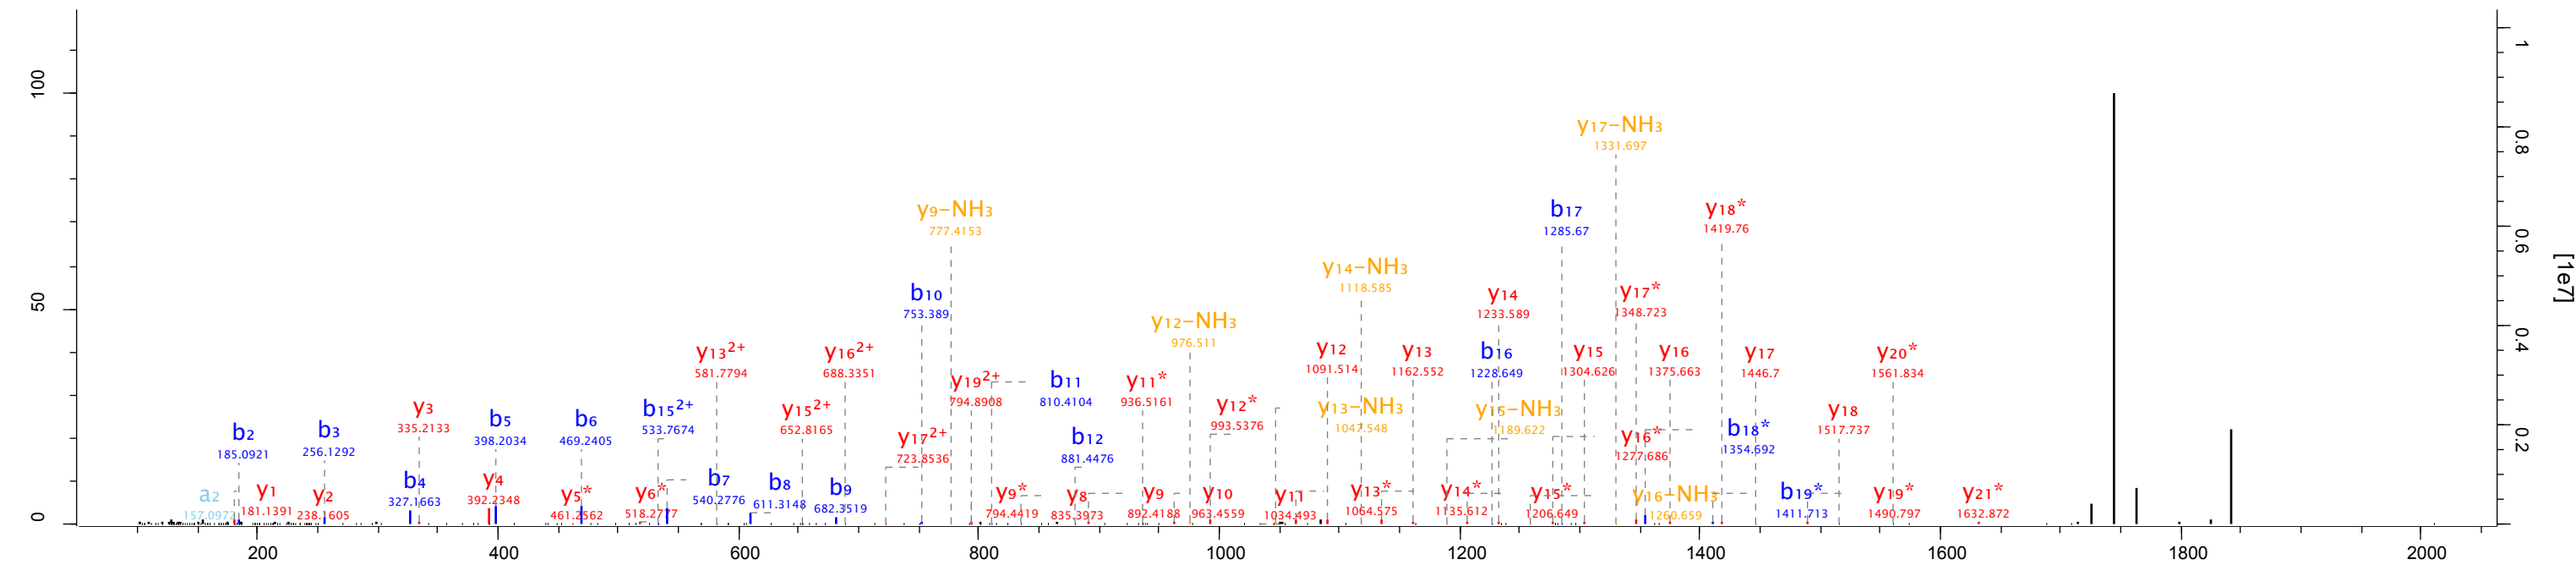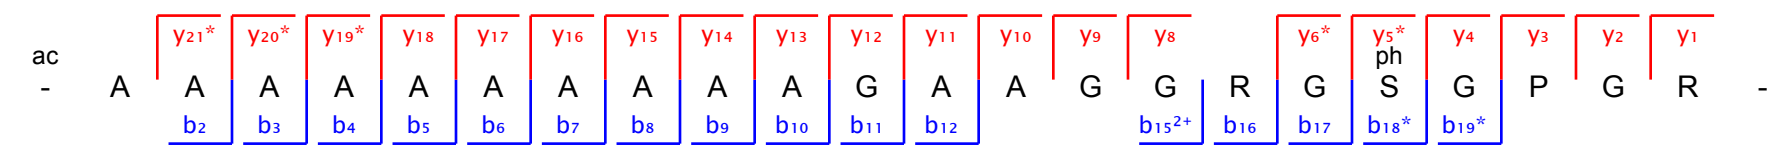

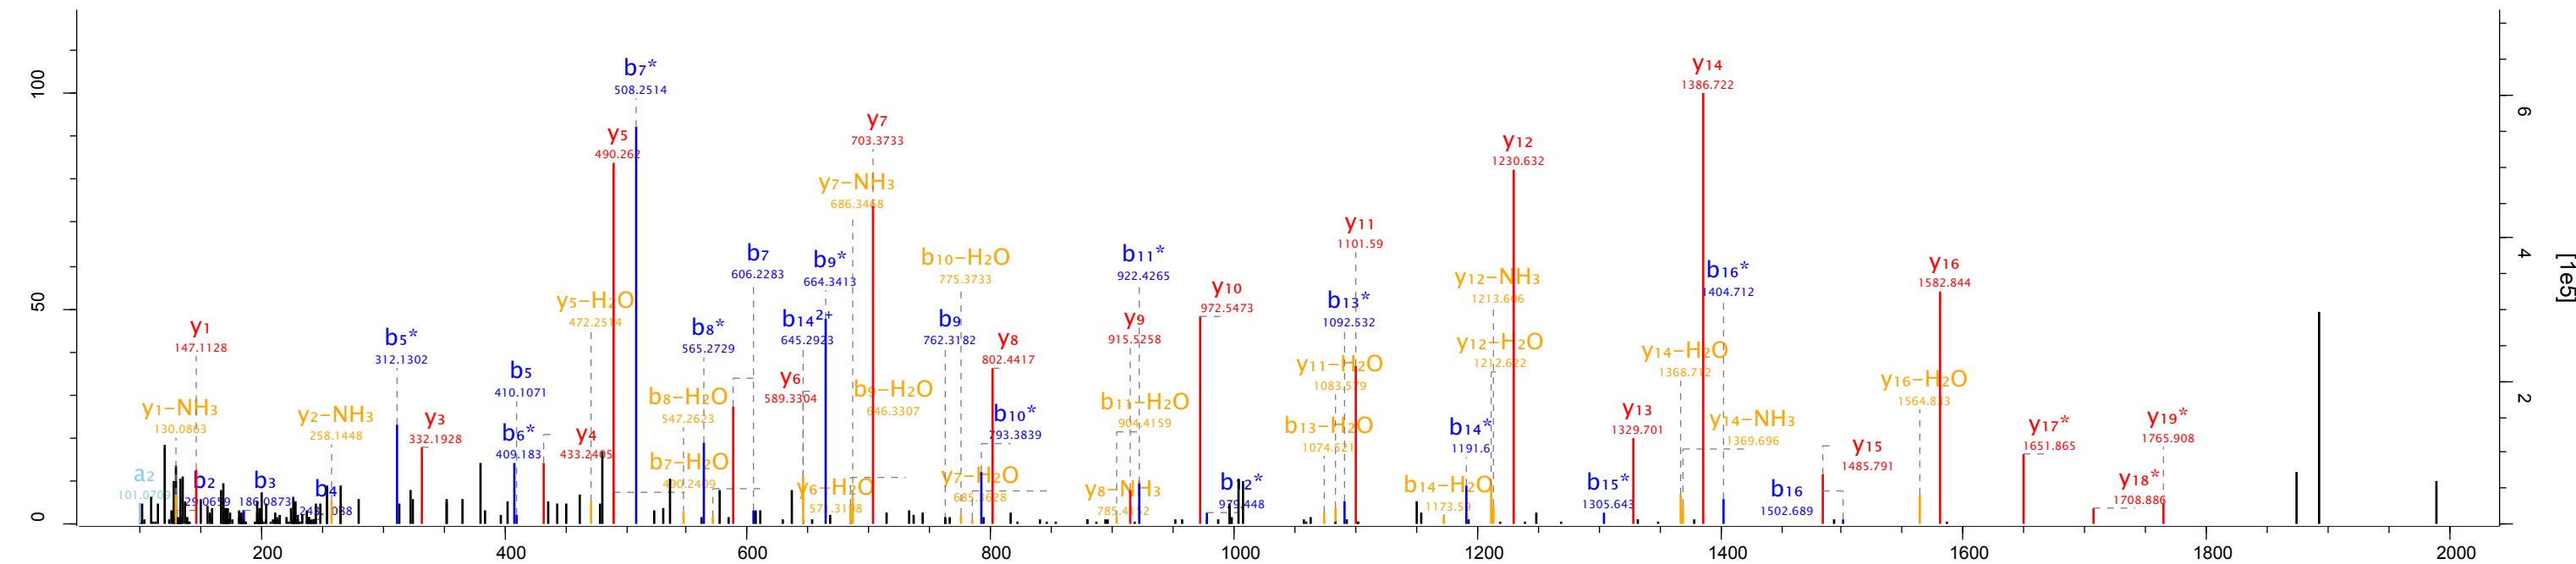

- G A G G S P V G V E E G L V N V G T G Q K -

b<sub>2</sub> b<sub>3</sub> b<sub>4</sub> b<sub>5</sub> b<sub>6</sub>\* b<sub>7</sub> b<sub>8</sub>\* b<sub>9</sub> b<sub>10</sub>\* b<sub>11</sub>\* b<sub>12</sub>\* b<sub>13</sub>\* b<sub>14</sub>\* b<sub>15</sub>\* b<sub>16</sub>

y<sub>1</sub> y<sub>3</sub> y<sub>4</sub> y<sub>5</sub> y<sub>6</sub> y<sub>7</sub> y<sub>8</sub> y<sub>9</sub> y<sub>10</sub> y<sub>11</sub> y<sub>12</sub> y<sub>13</sub> y<sub>14</sub> y<sub>15</sub> y<sub>16</sub> y<sub>17</sub>\* y<sub>18</sub>\* y<sub>19</sub>\*

Raw file: 20150812\_A375SR\_Phospho\_BR1\_05  
 Scan: 20427 Method: FTMS; HCD Score: 177.69 m/z: 810.9 Gene names: XRN2

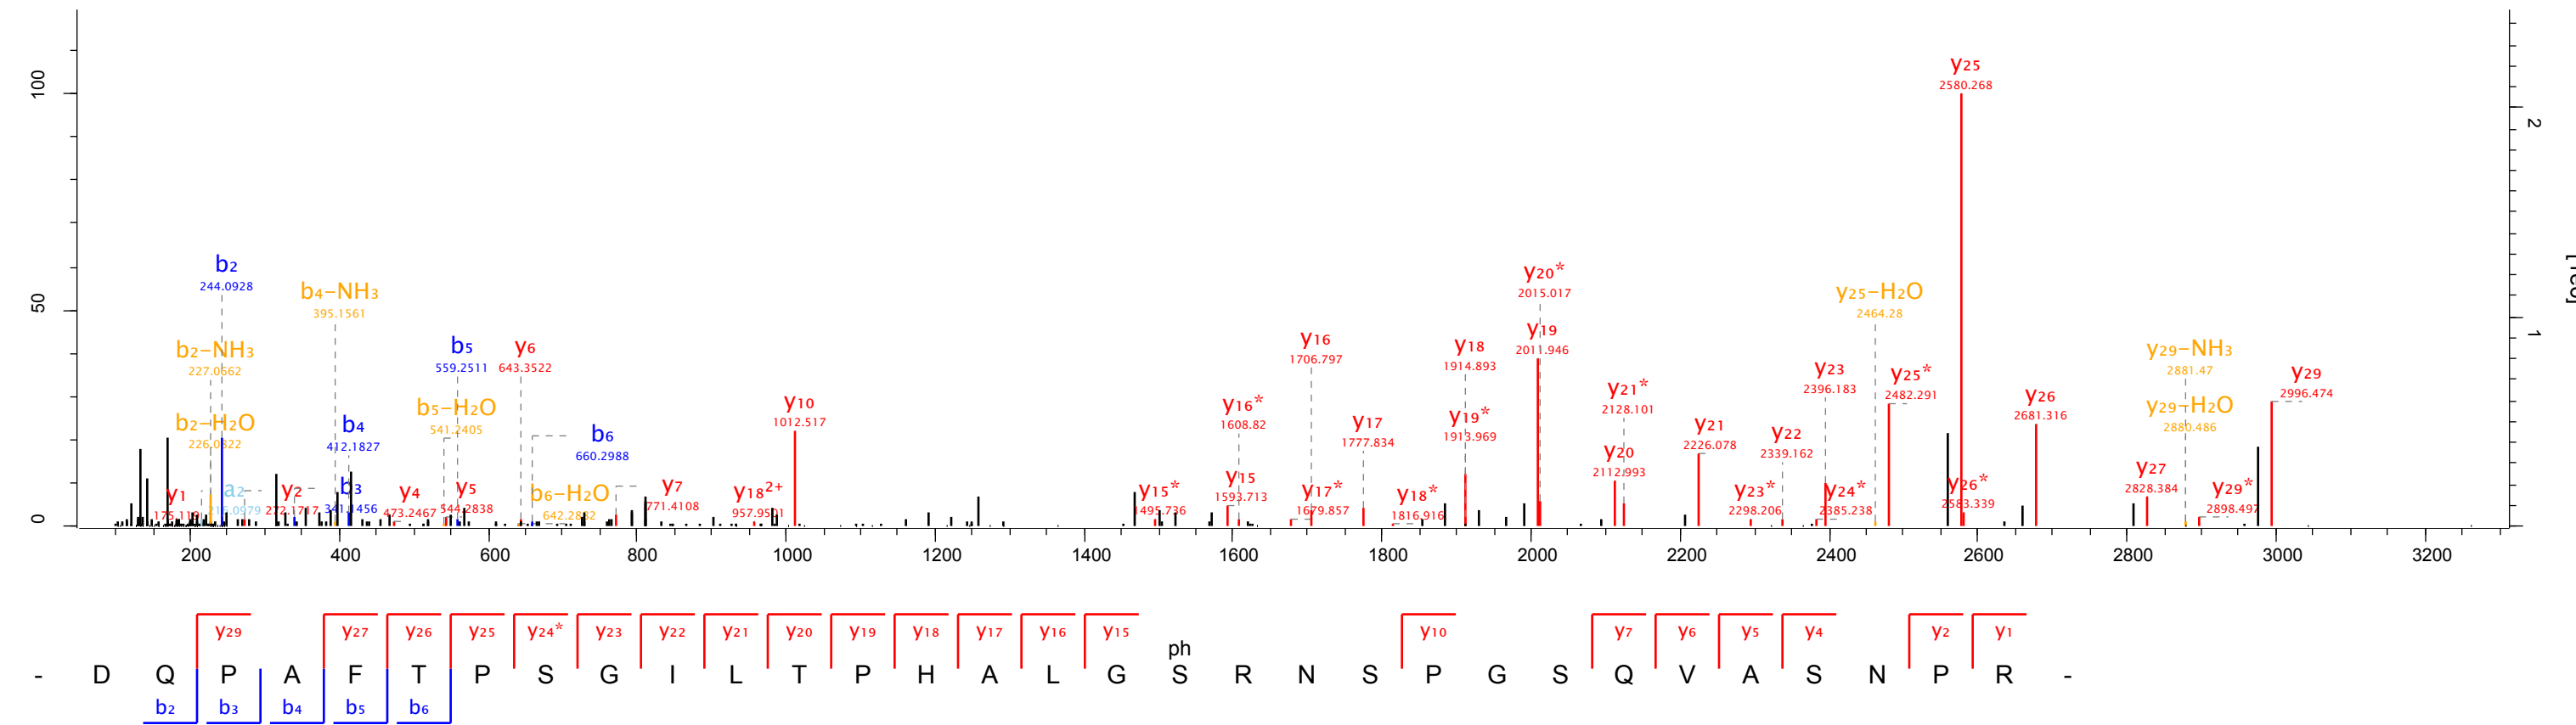

Raw file: 20150812\_A375SR\_Phospho\_BR1\_05  
 Scan: 20977 Method: FTMS; HCD Score: 93.18 m/z: 985.09 Gene names: FUBP3

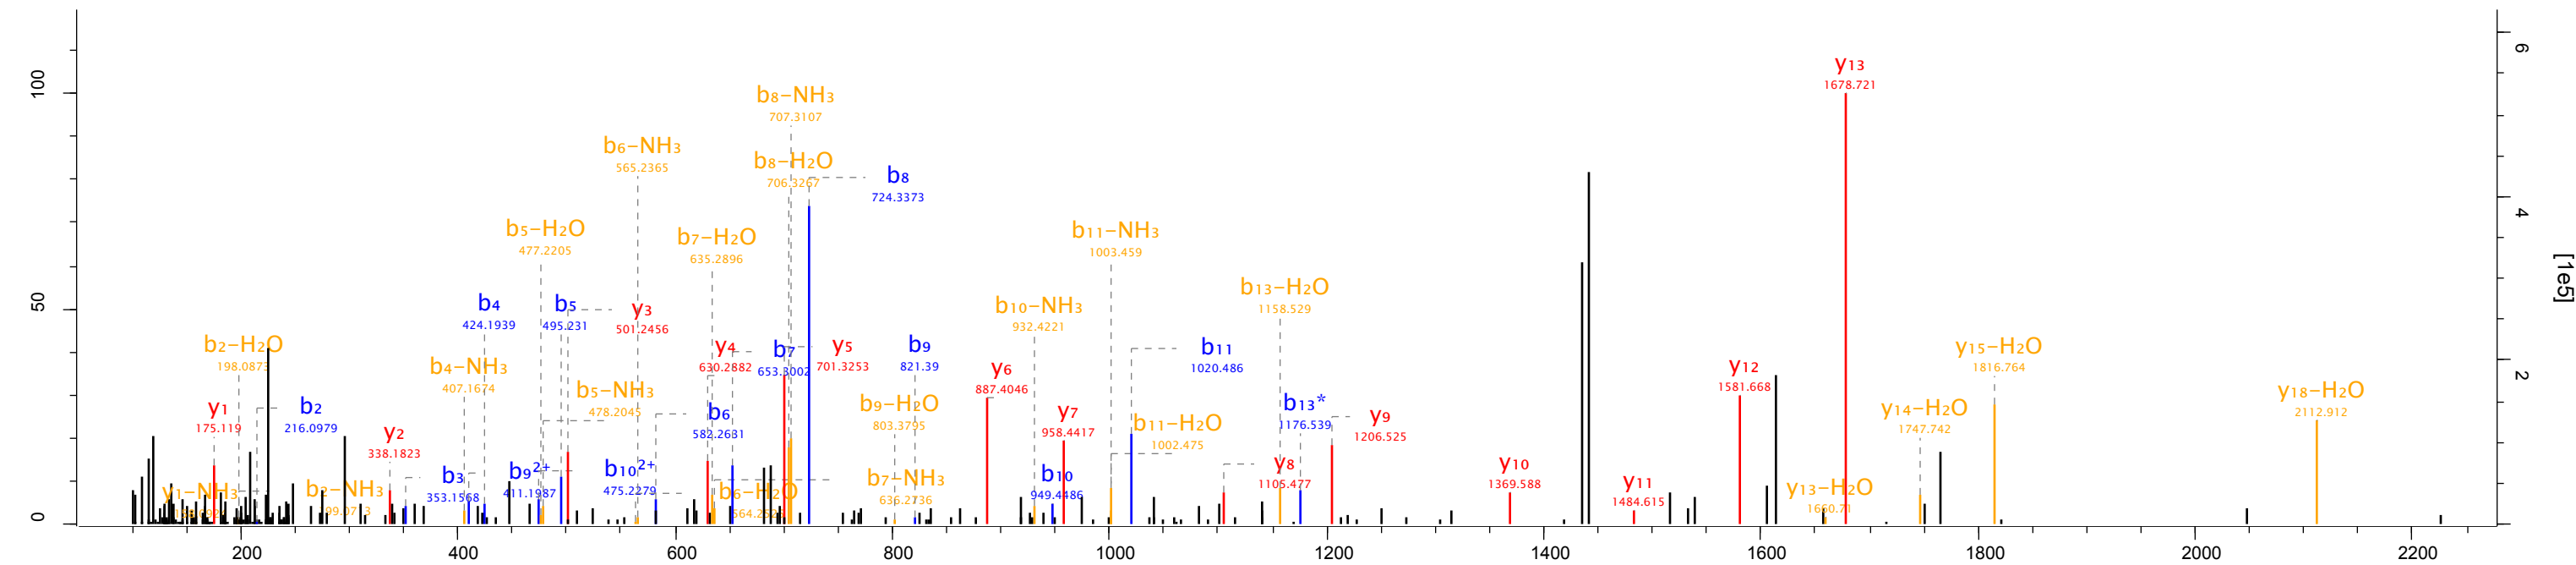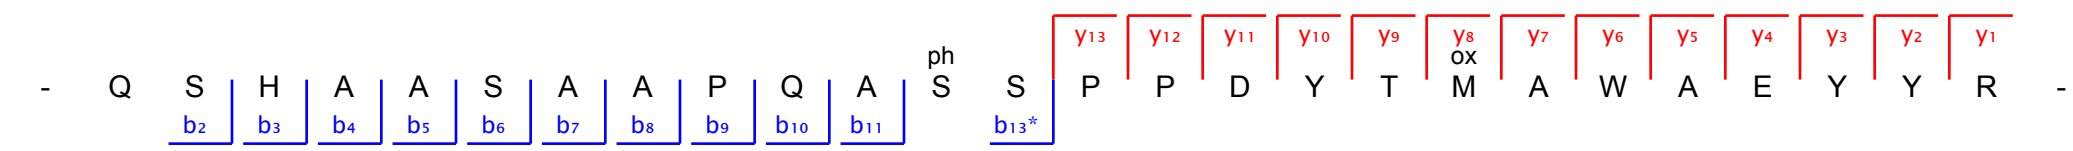

Raw file 20150812\_A375SR\_Phospho\_BR1\_05 Scan 23317 Method FTMS; HCD Score 166.99 m/z 1139.52 Gene names ZC3HAV1

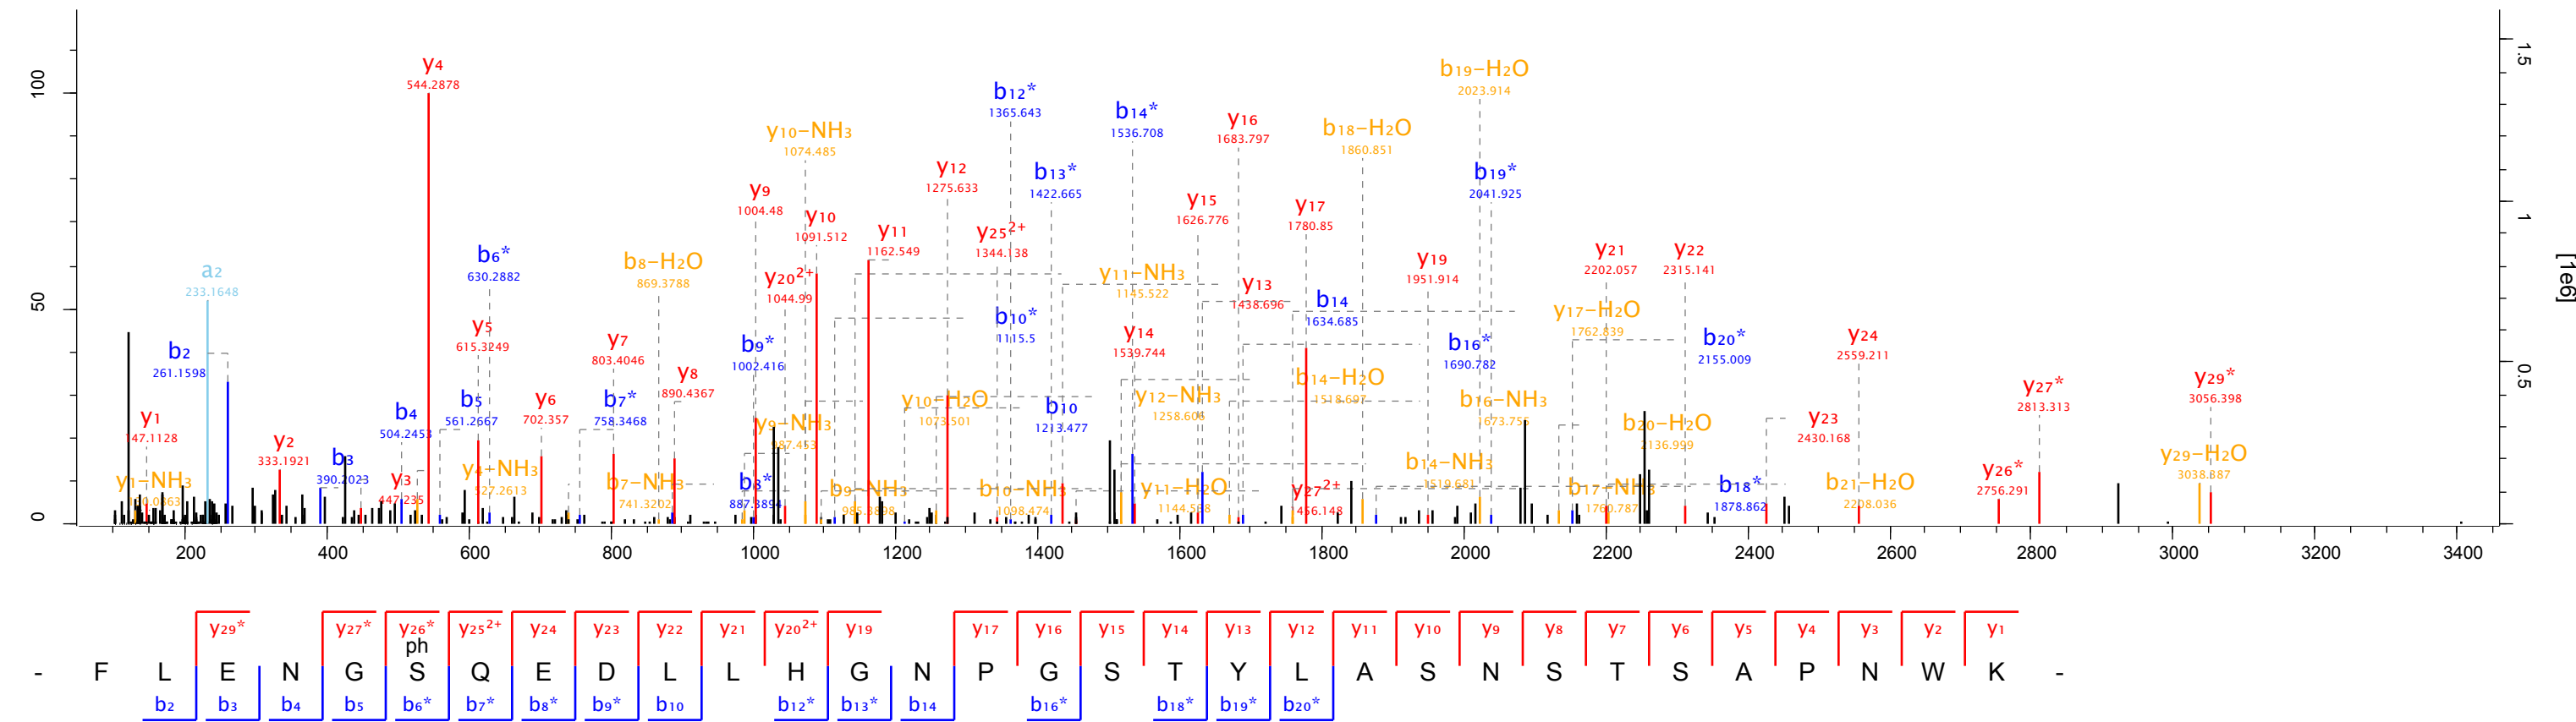

Raw file Scan Method Score m/z Gene names  
 20150812\_A375SR\_Phospho\_BR1\_05 24077 FTMS; HCD 374.92 1088.53 EHD1

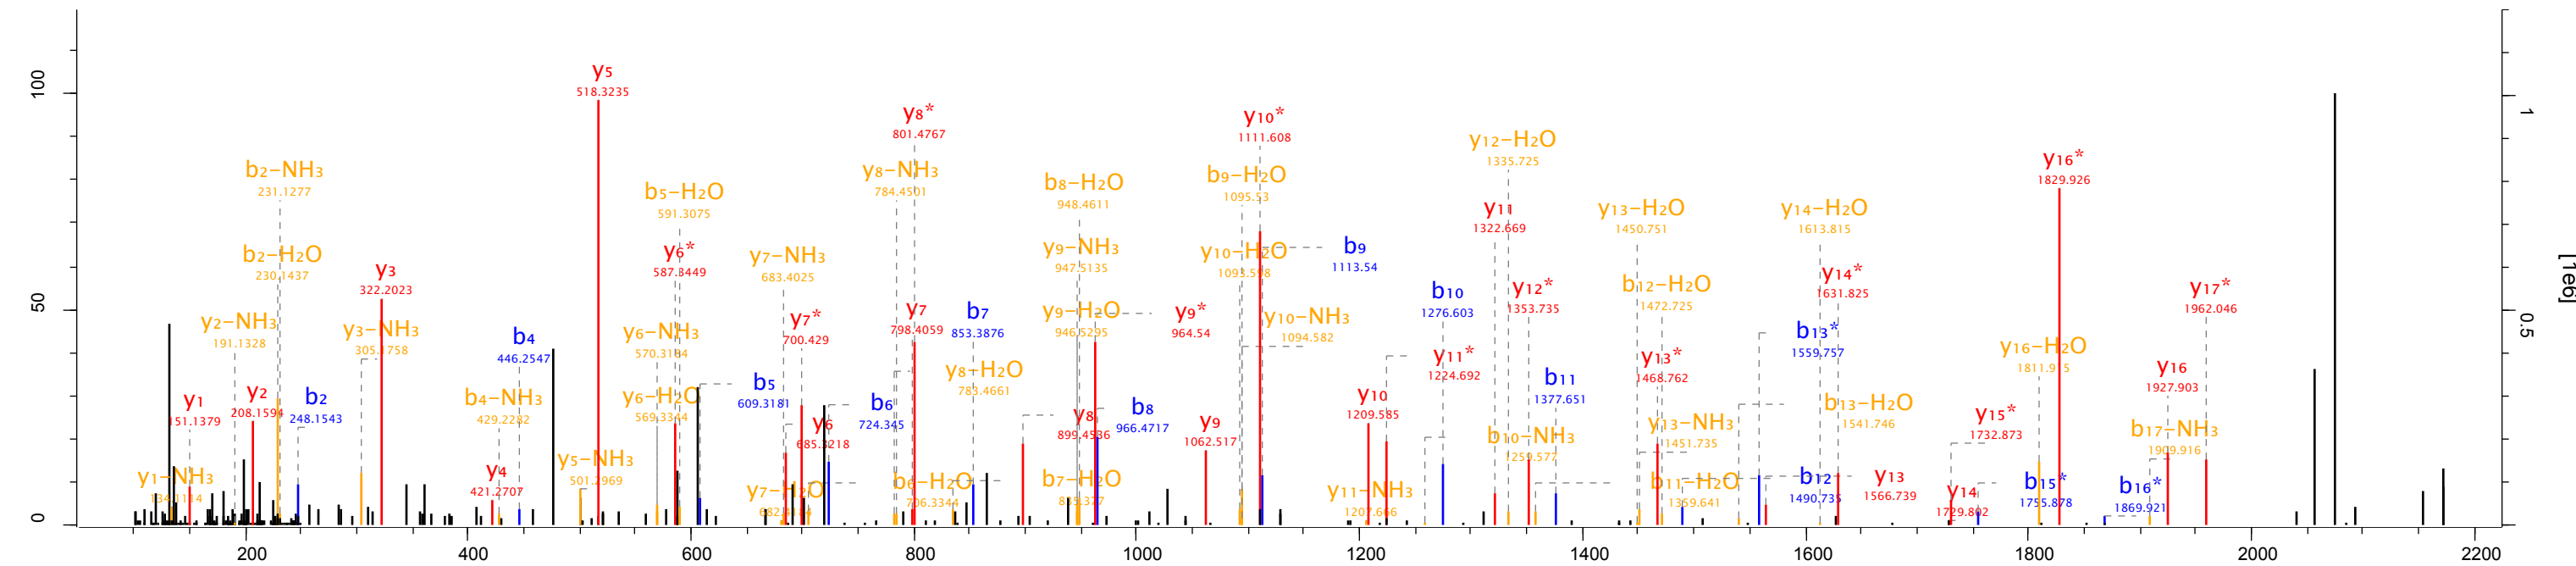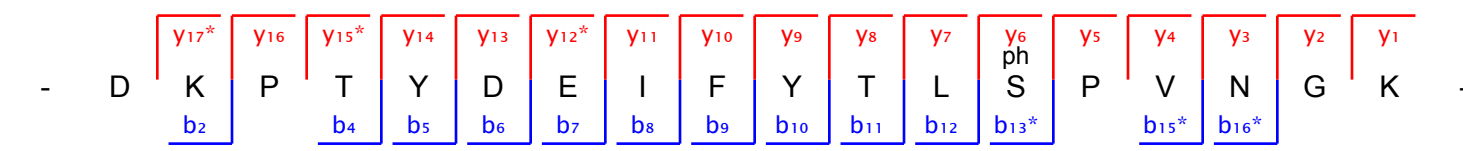



Raw file 20150812\_A375SR\_Phospho\_BR1\_05 Scan 26557 Method FTMS; HCD Score 190.83 m/z 1027.49 Gene names SPICE1

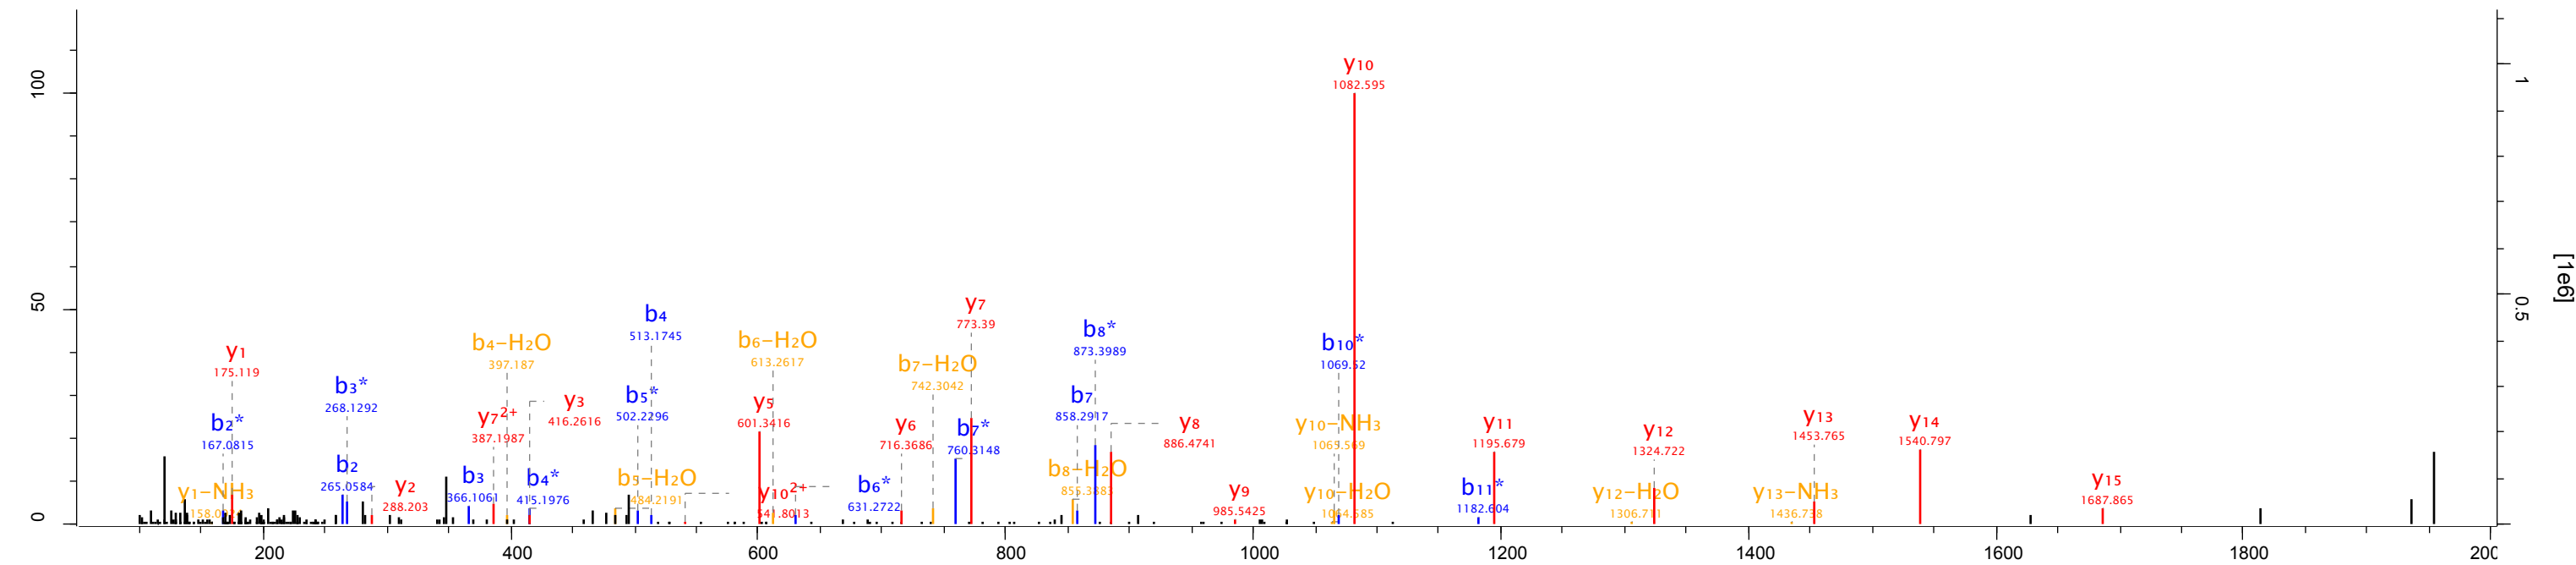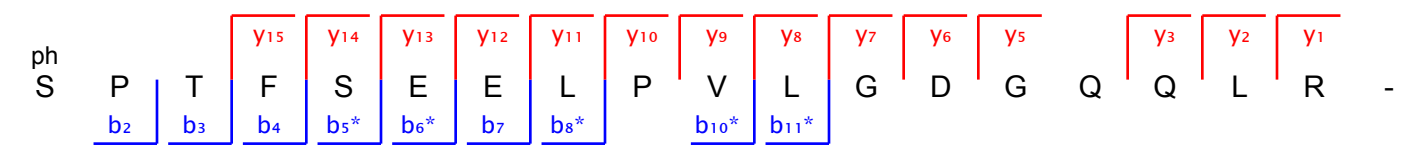

Raw file Scan Method Score m/z Gene names  
 20150812\_A375SR\_Phospho\_BR1\_05 27887 FTMS; HCD 57.35 958.14 EIF4ENIF1

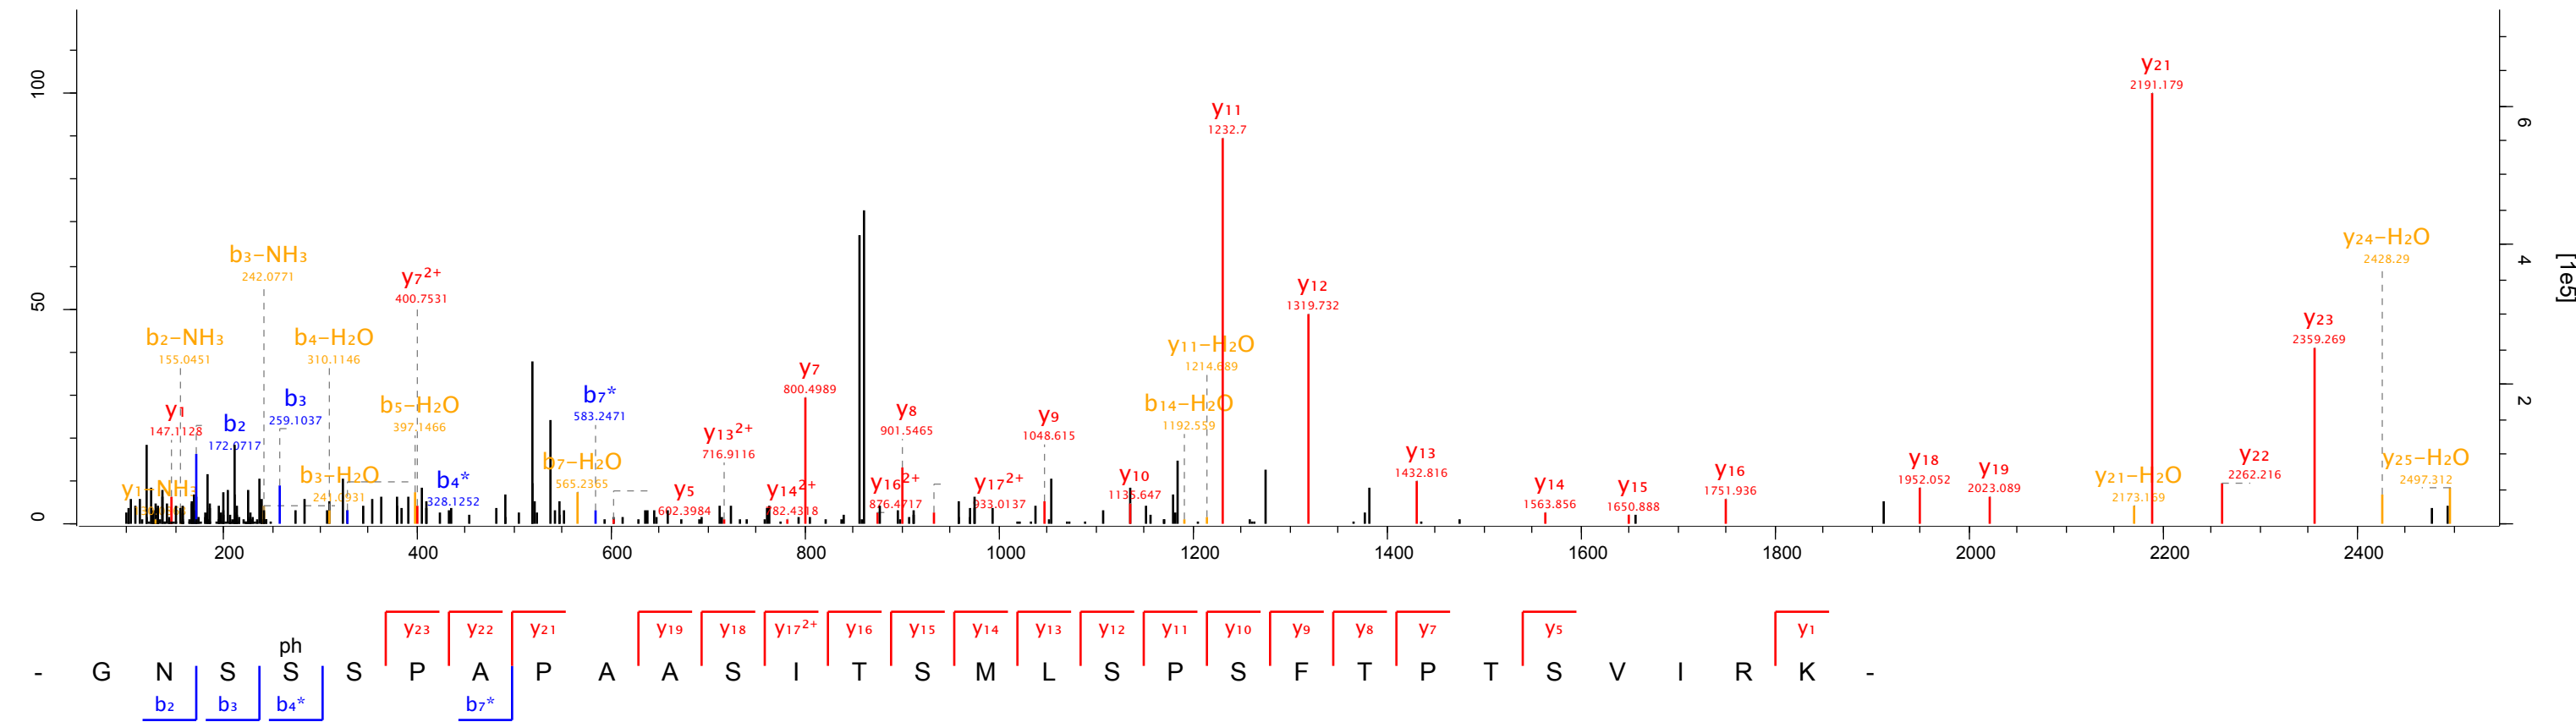

Raw file 20150812\_A375SR\_Phospho\_BR1\_05 Scan 3467 Method FTMS; HCD Score 103.02 m/z 1076.46 Gene names SRRM2

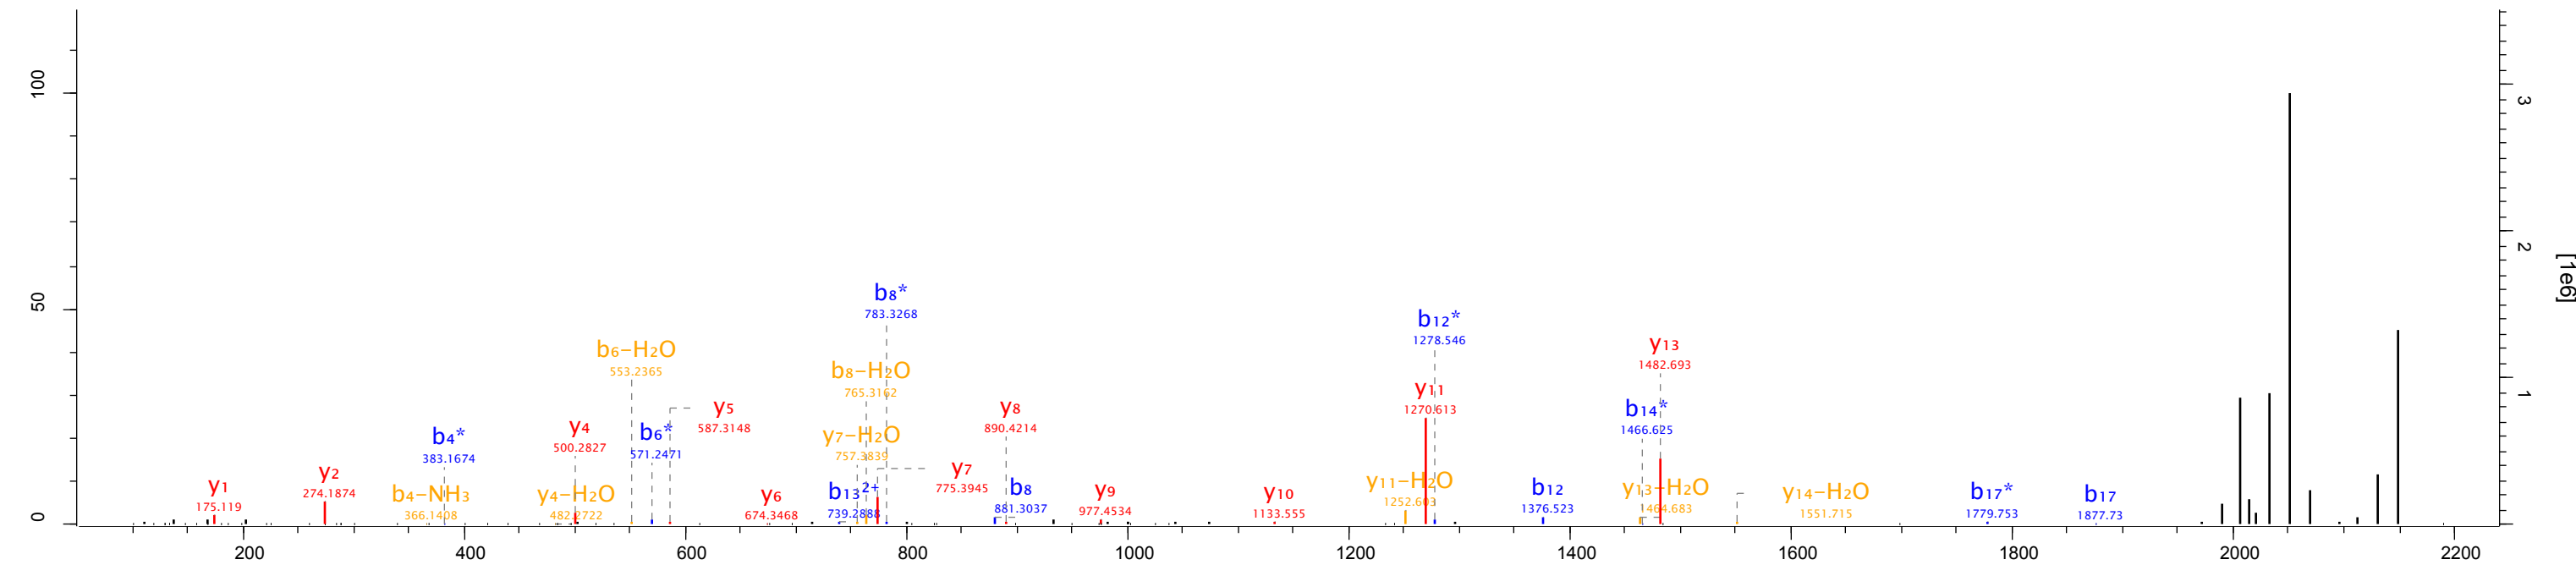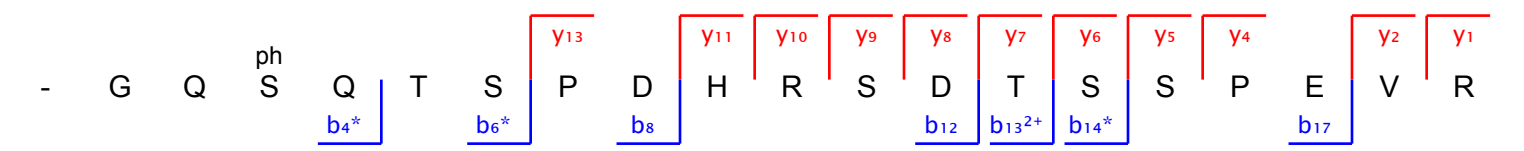

Raw file: 20150812\_A375SR\_Phospho\_BR1\_05  
 Scan: 4247 Method: FTMS; HCD Score: 86.21 m/z: 590.95 Gene names: MDC1

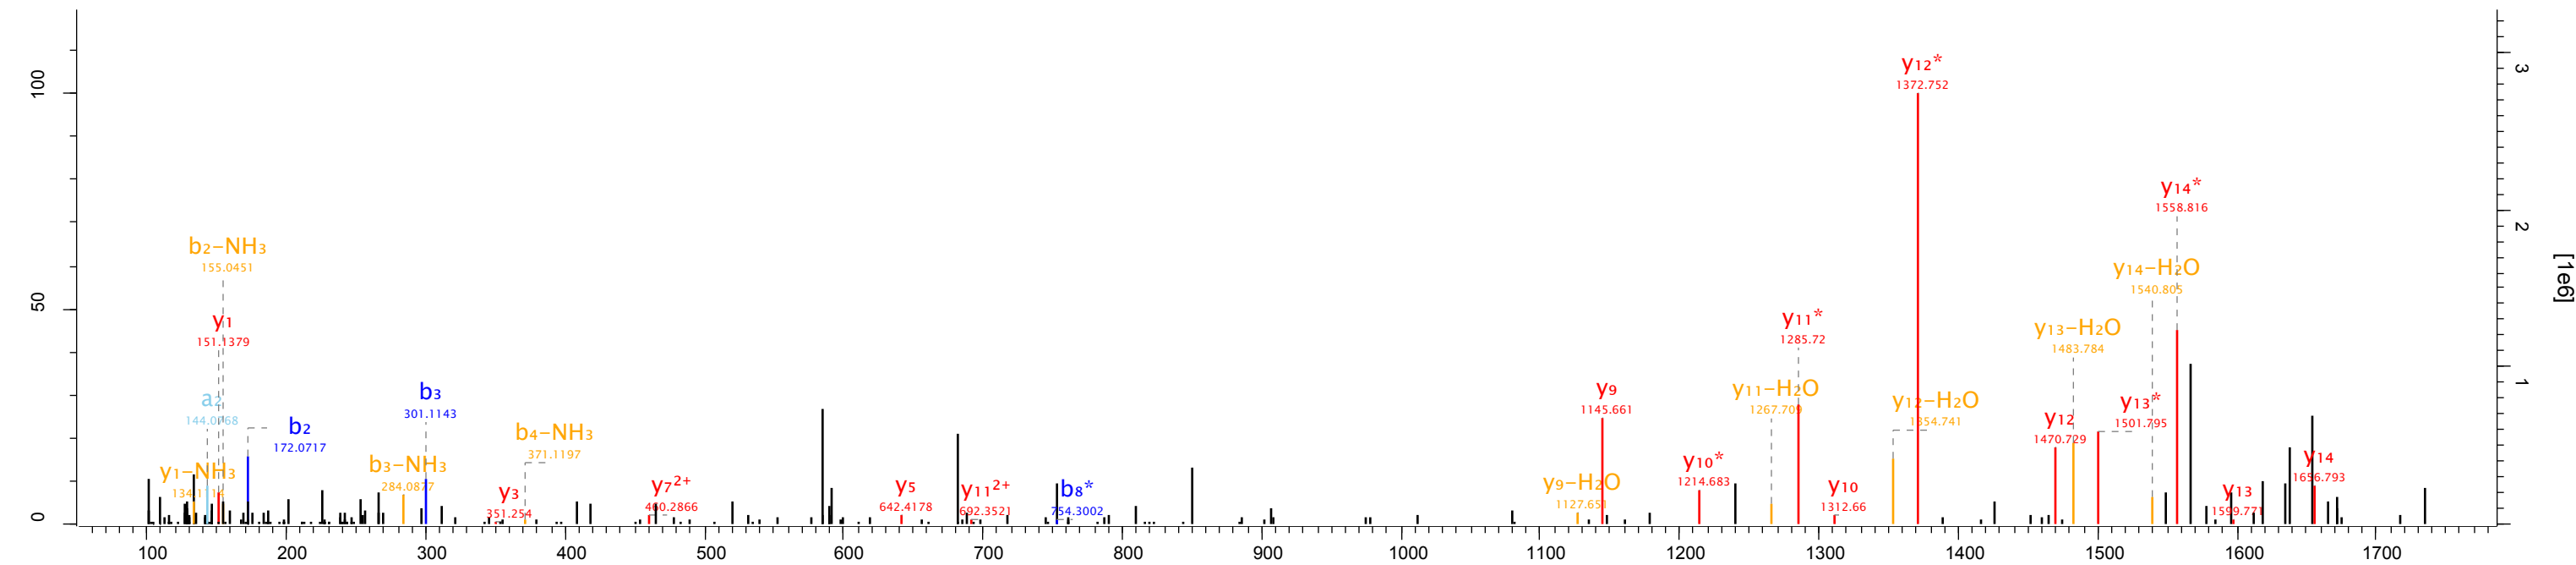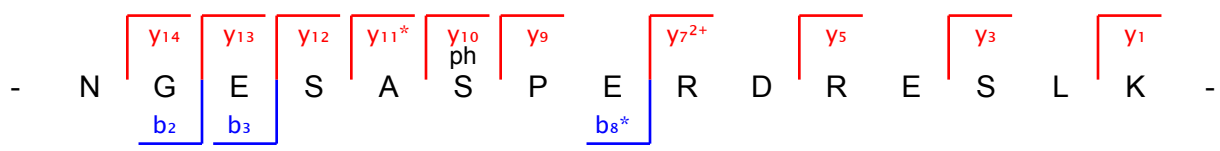

Raw file: 20150812\_A375SR\_Phospho\_BR1\_05  
 Scan: 5327 Method: FTMS; HCD Score: 262.37 m/z: 757.32 Gene names: GPKOW

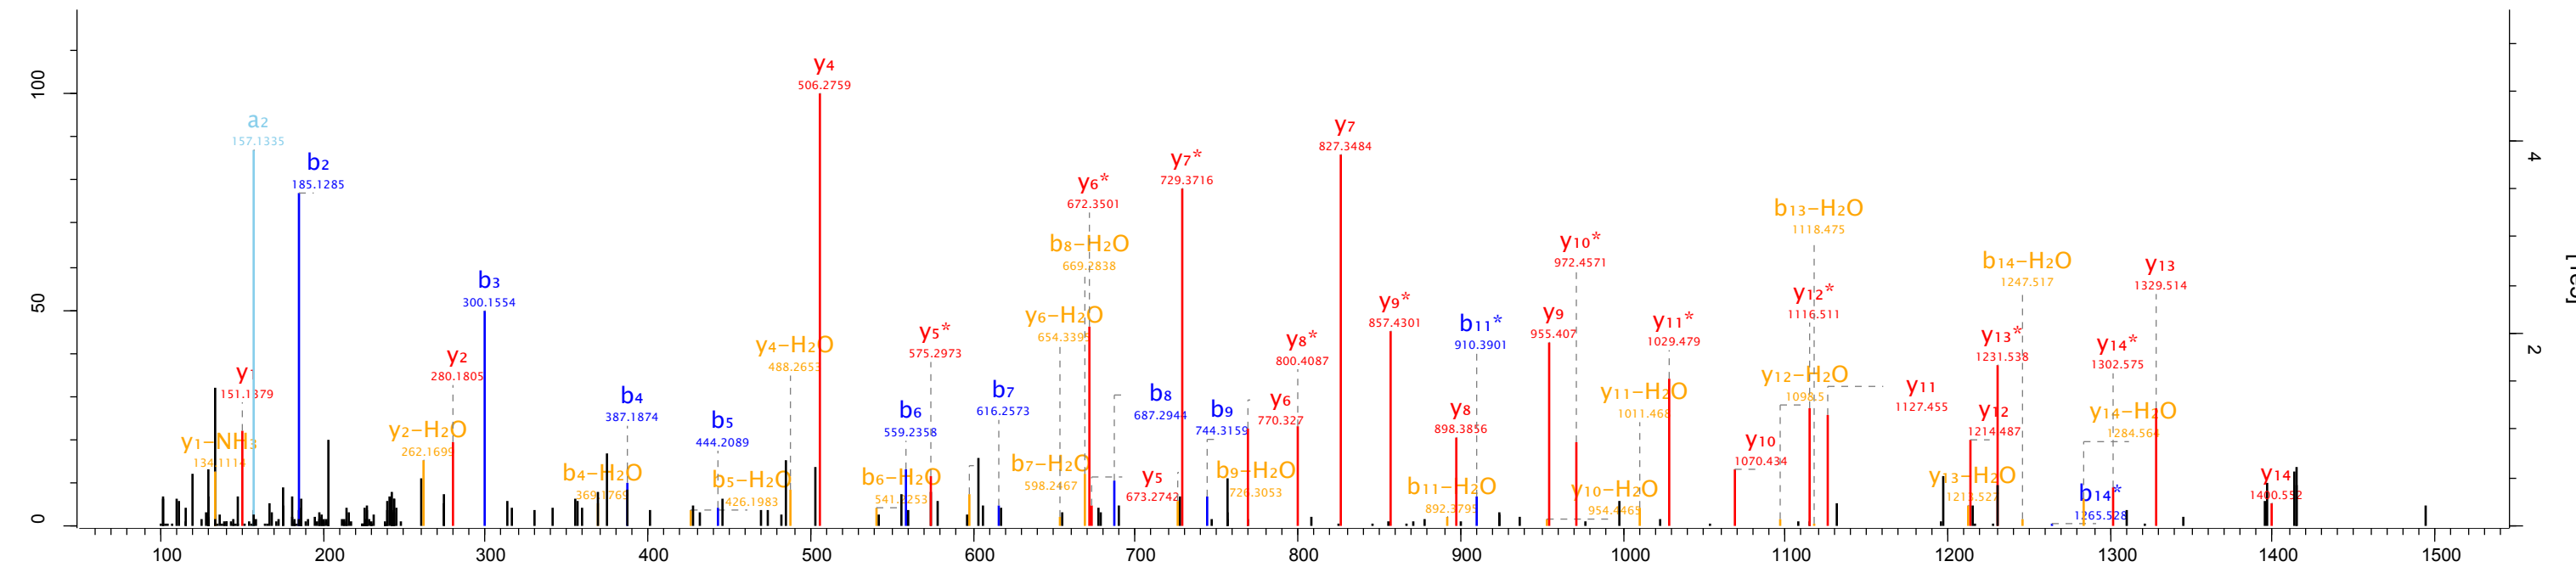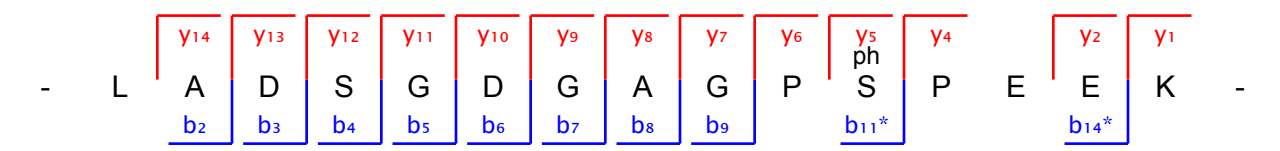

Raw file: 20150812\_A375SR\_Phospho\_BR1\_05  
 Scan: 5357 Method: FTMS; HCD Score: 184.58 m/z: 554.76 Gene names: SLC38A1

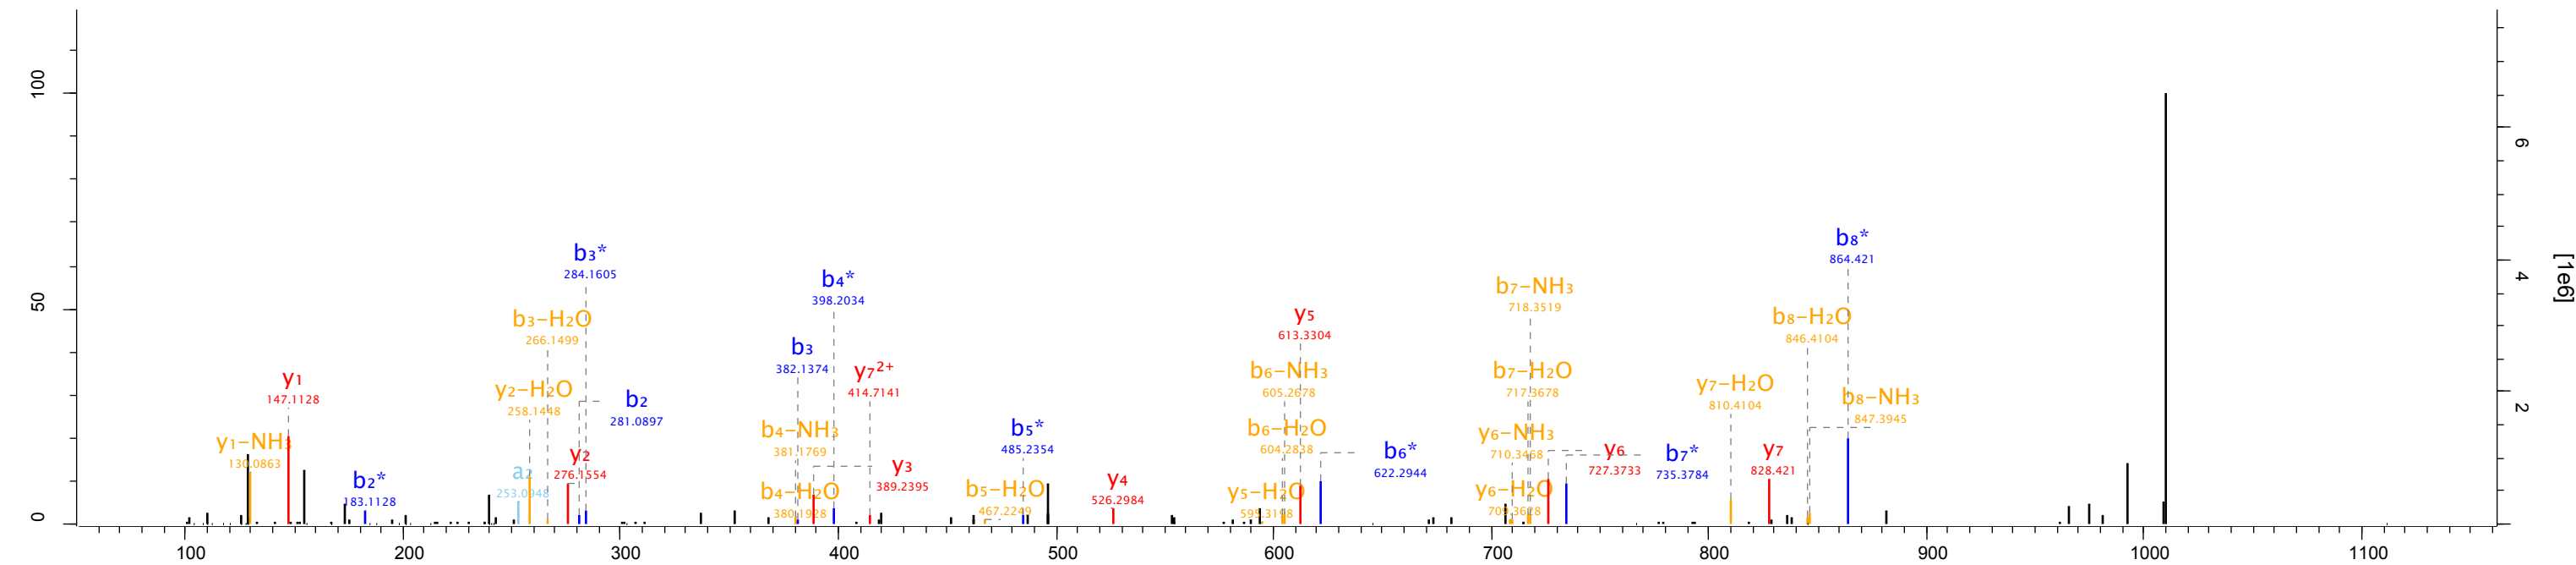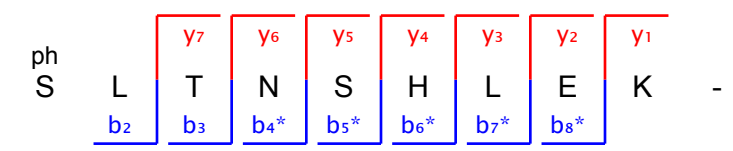

Raw file: 20150812\_A375SR\_Phospho\_BR1\_05  
 Scan: 6307 Method: FTMS; HCD Score: 235.45 m/z: 841.86 Gene names: TTYH3

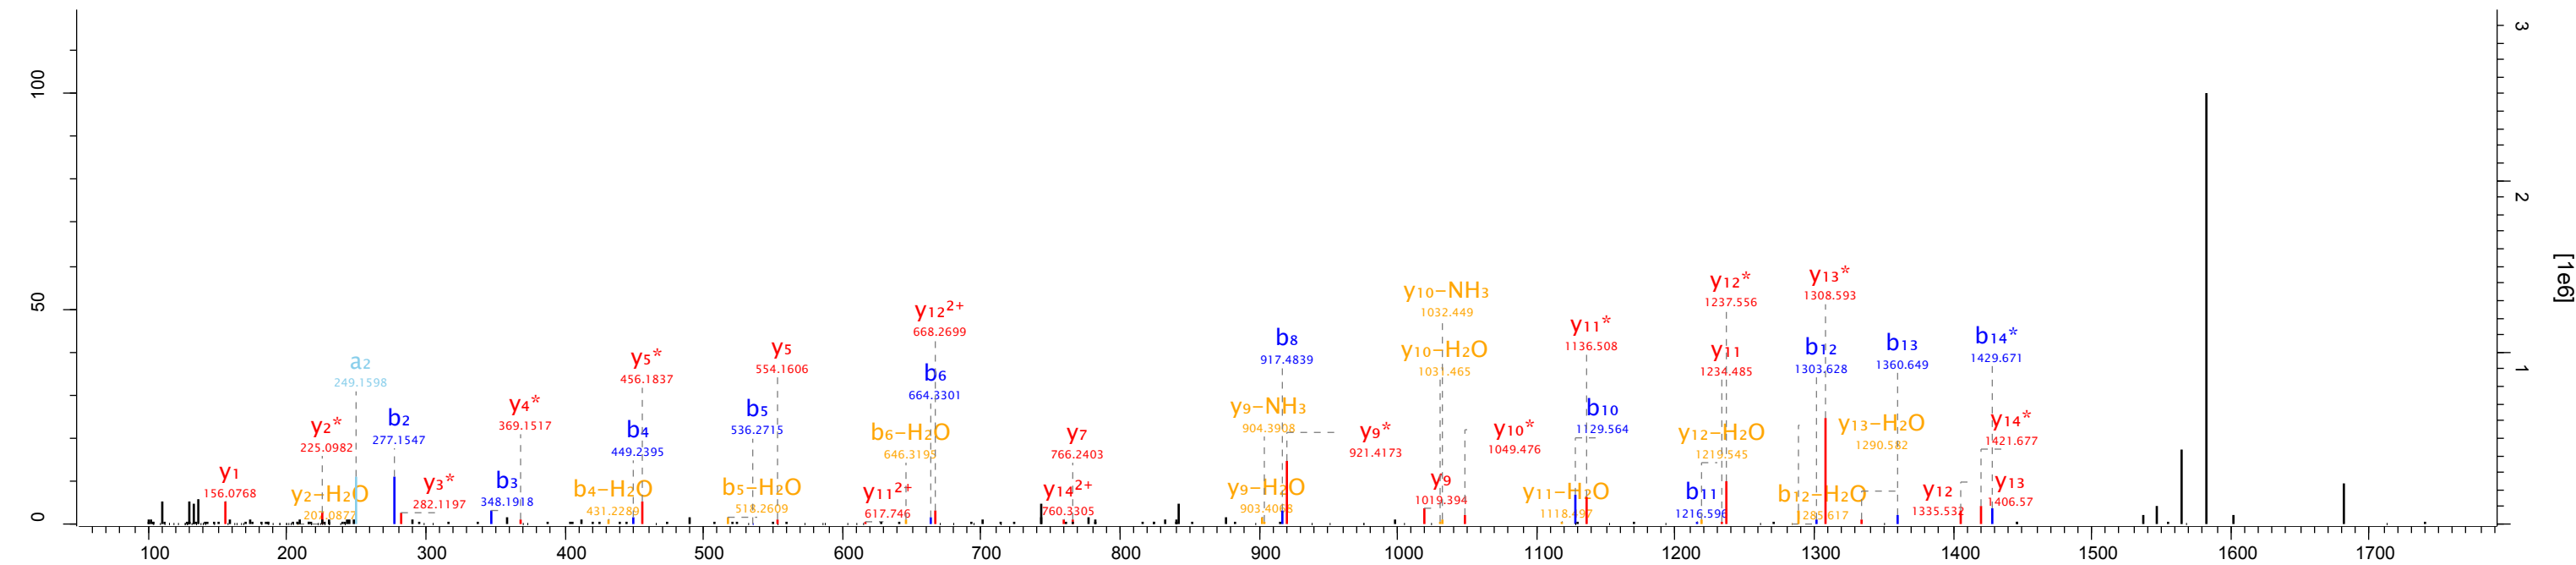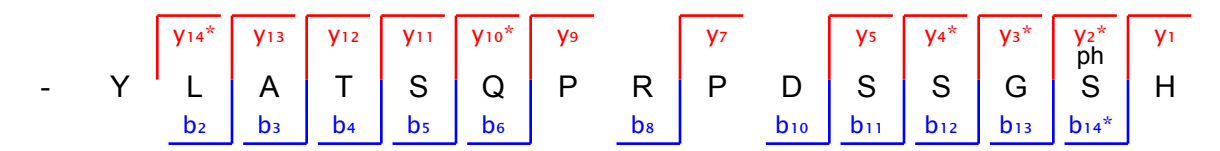

Raw file: 20150812\_A375SR\_Phospho\_BR1\_05  
 Scan: 6357 Method: FTMS; HCD Score: 150.19 m/z: 638.31 Gene names: RNF219

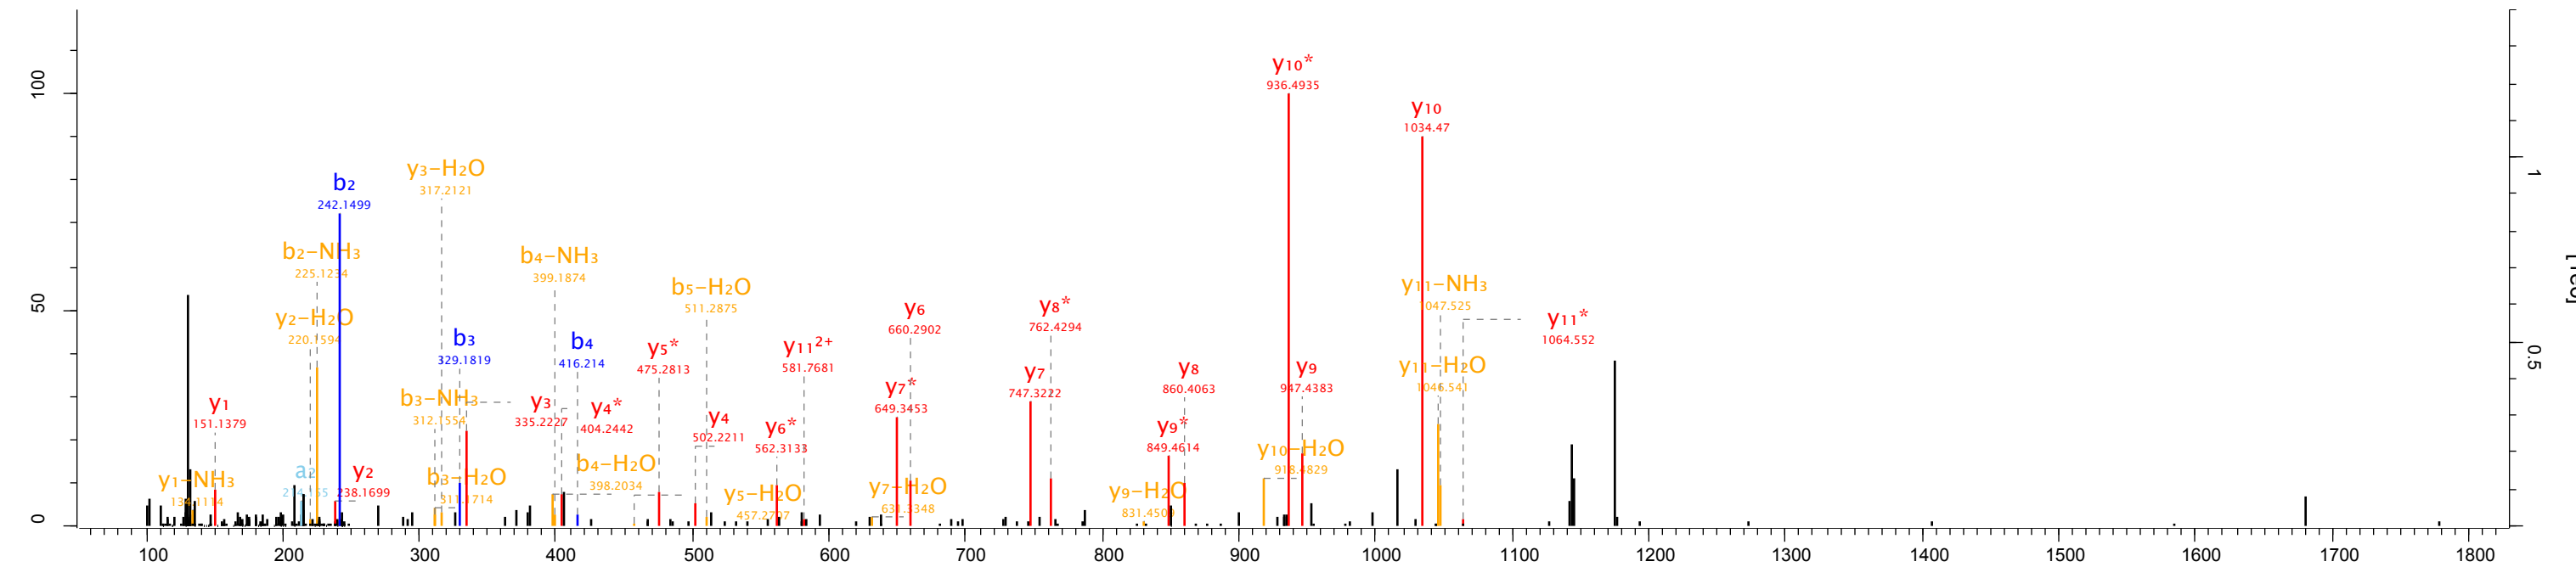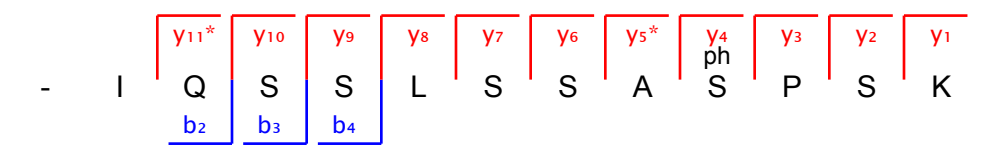



Raw file 20150812\_A375SR\_Phospho\_BR1\_05 Scan 6387 Method FTMS; HCD Score 110.31 m/z 517.76 Gene names AFF4

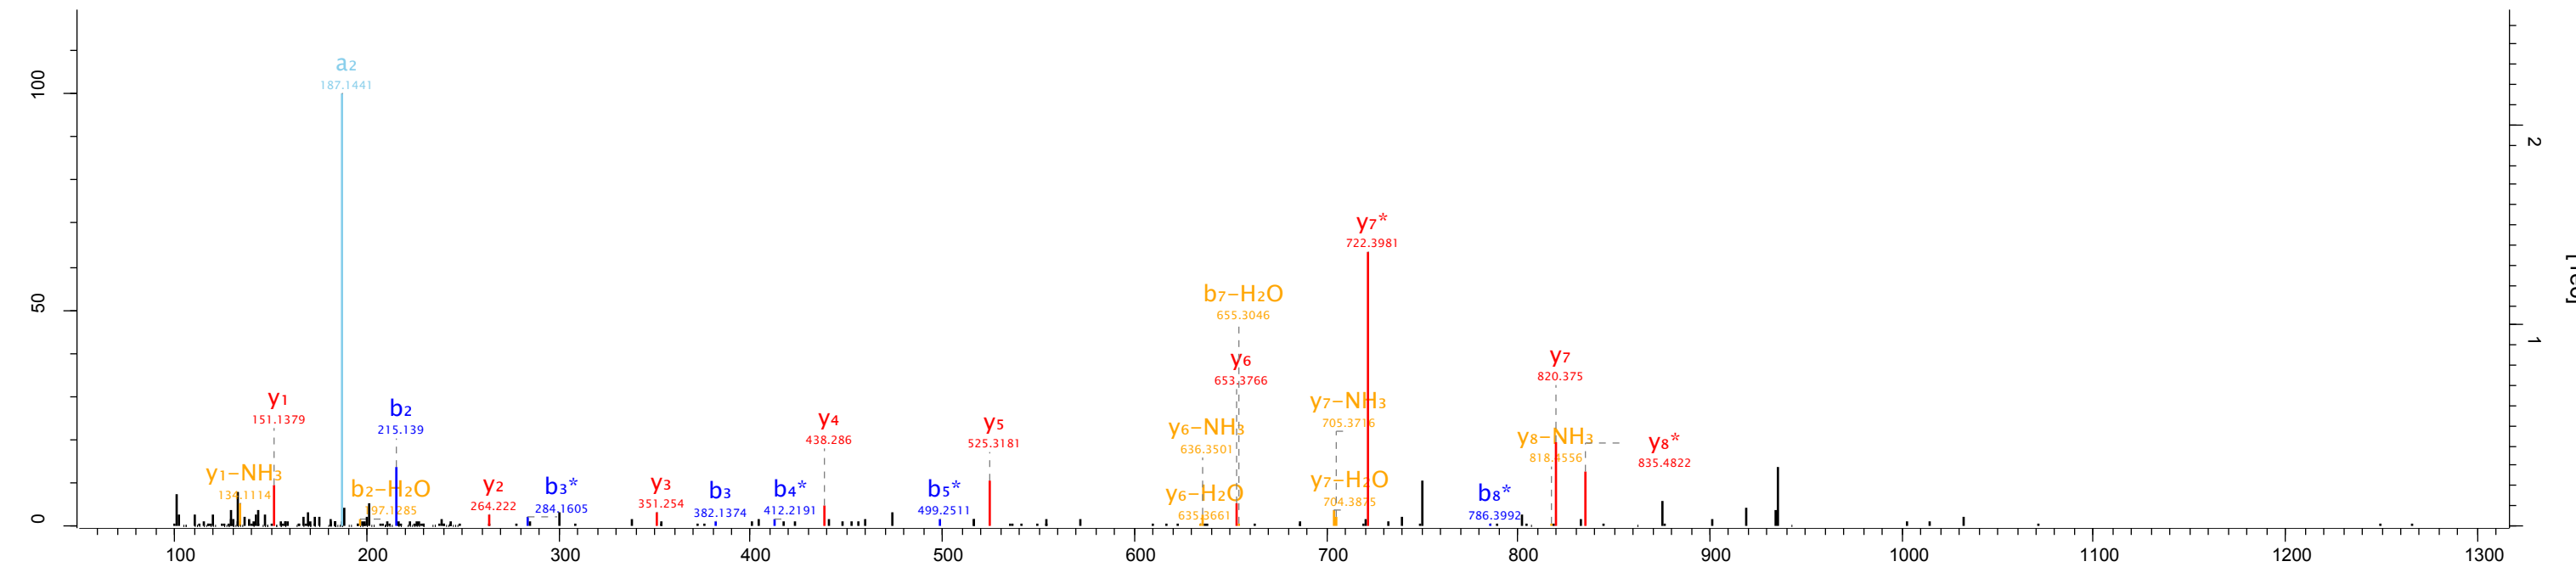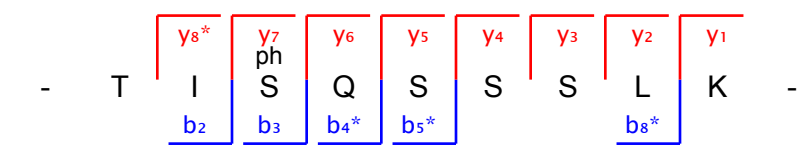

Raw file: 20150812\_A375SR\_Phospho\_BR1\_05  
 Scan: 6687 Method: FTMS; HCD Score: 101.48 m/z: 619.32 Gene names: BAP1

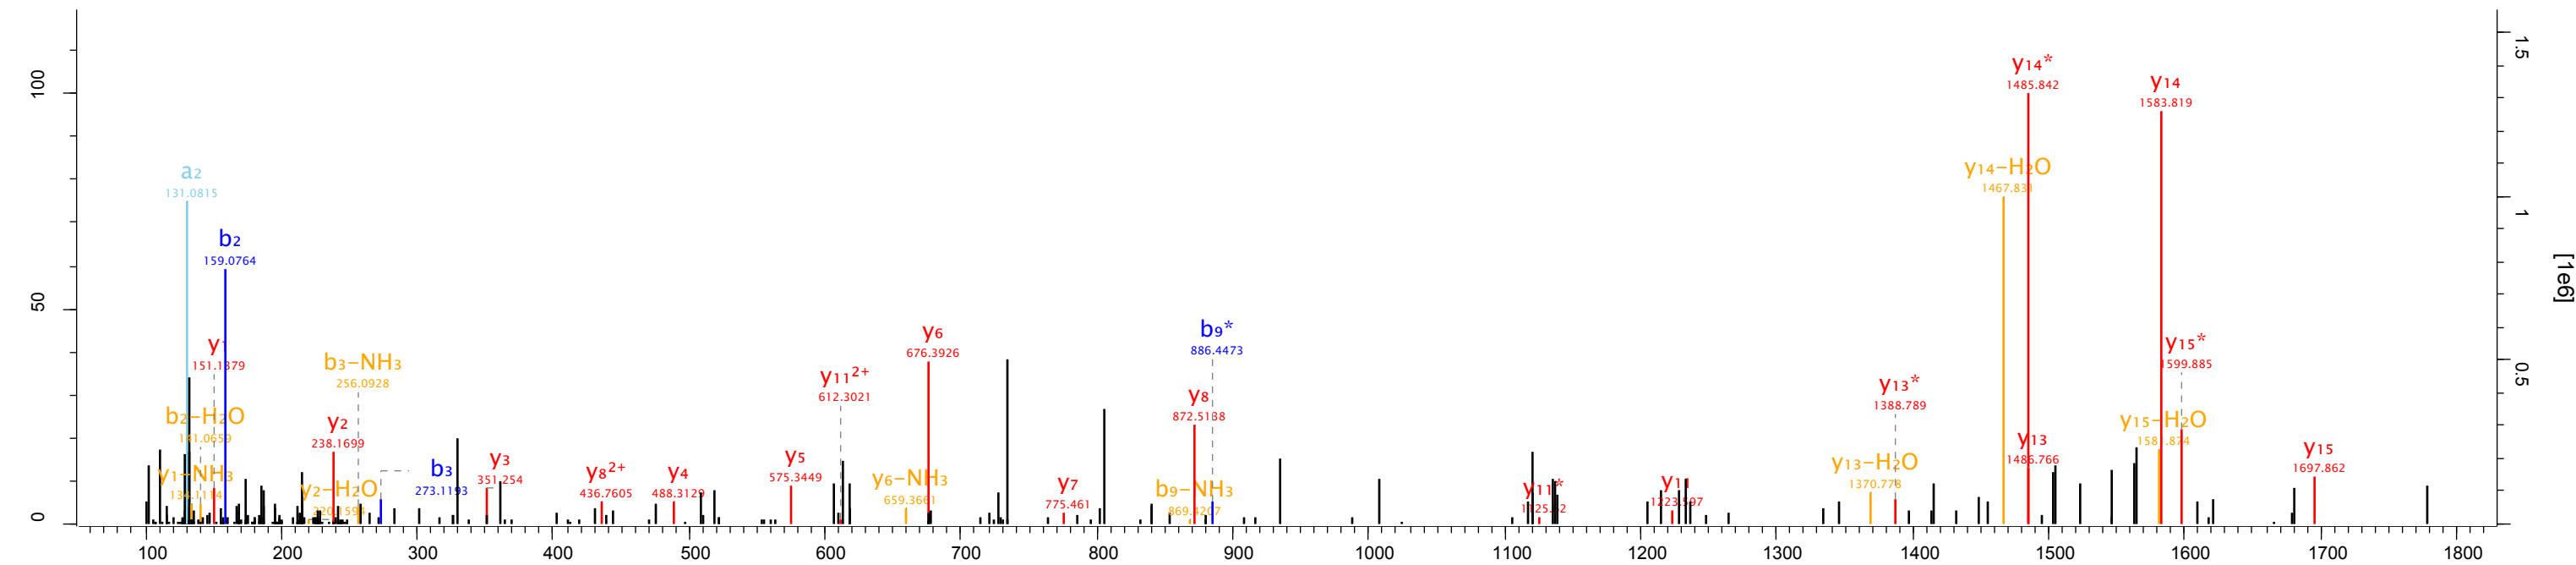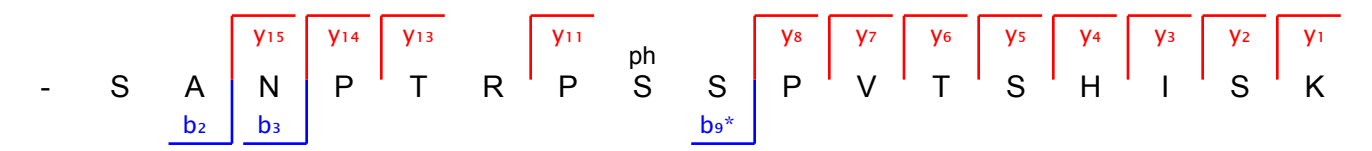

Raw file: 20150812\_A375SR\_Phospho\_BR1\_05  
 Scan: 7227 Method: FTMS; HCD Score: 116.27 m/z: 861.91 Gene names: FAM117B

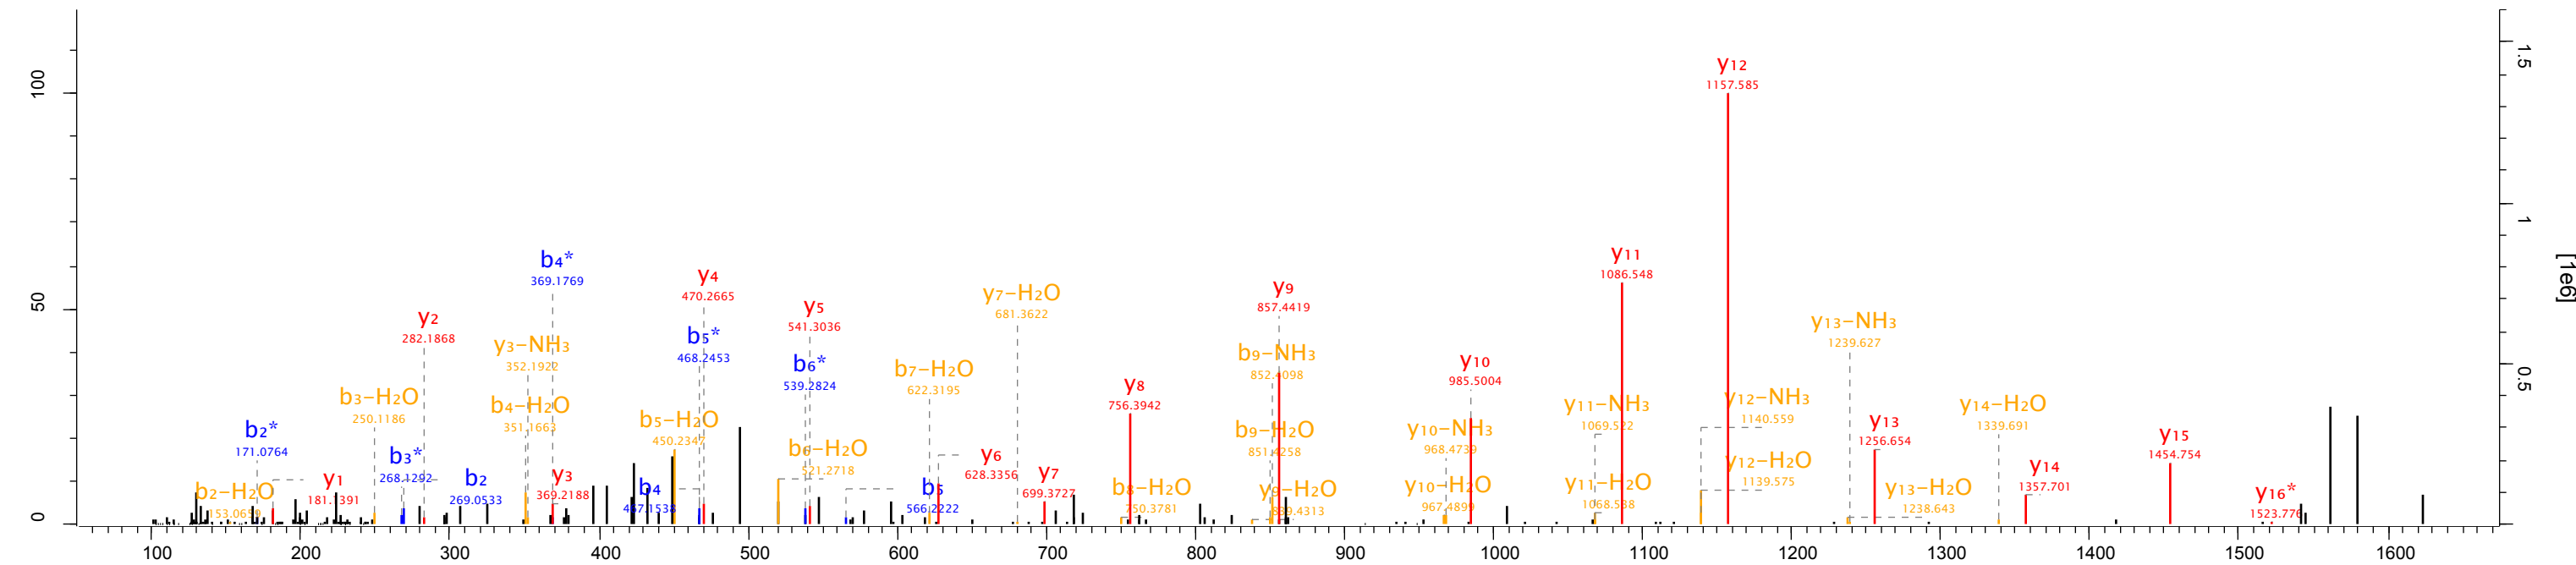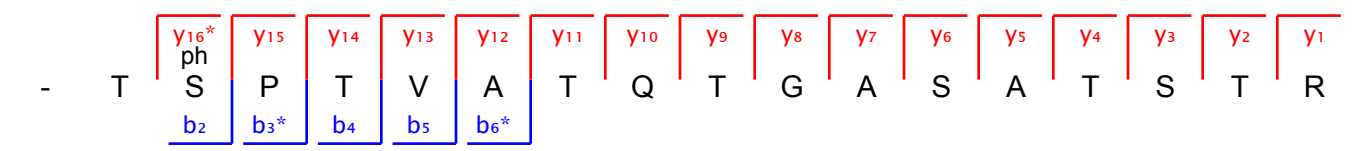

Raw file: 20150812\_A375SR\_Phospho\_BR1\_05  
 Scan: 8597 Method: FTMS; HCD Score: 129.77 m/z: 620.8 Gene names: PIKFYVE

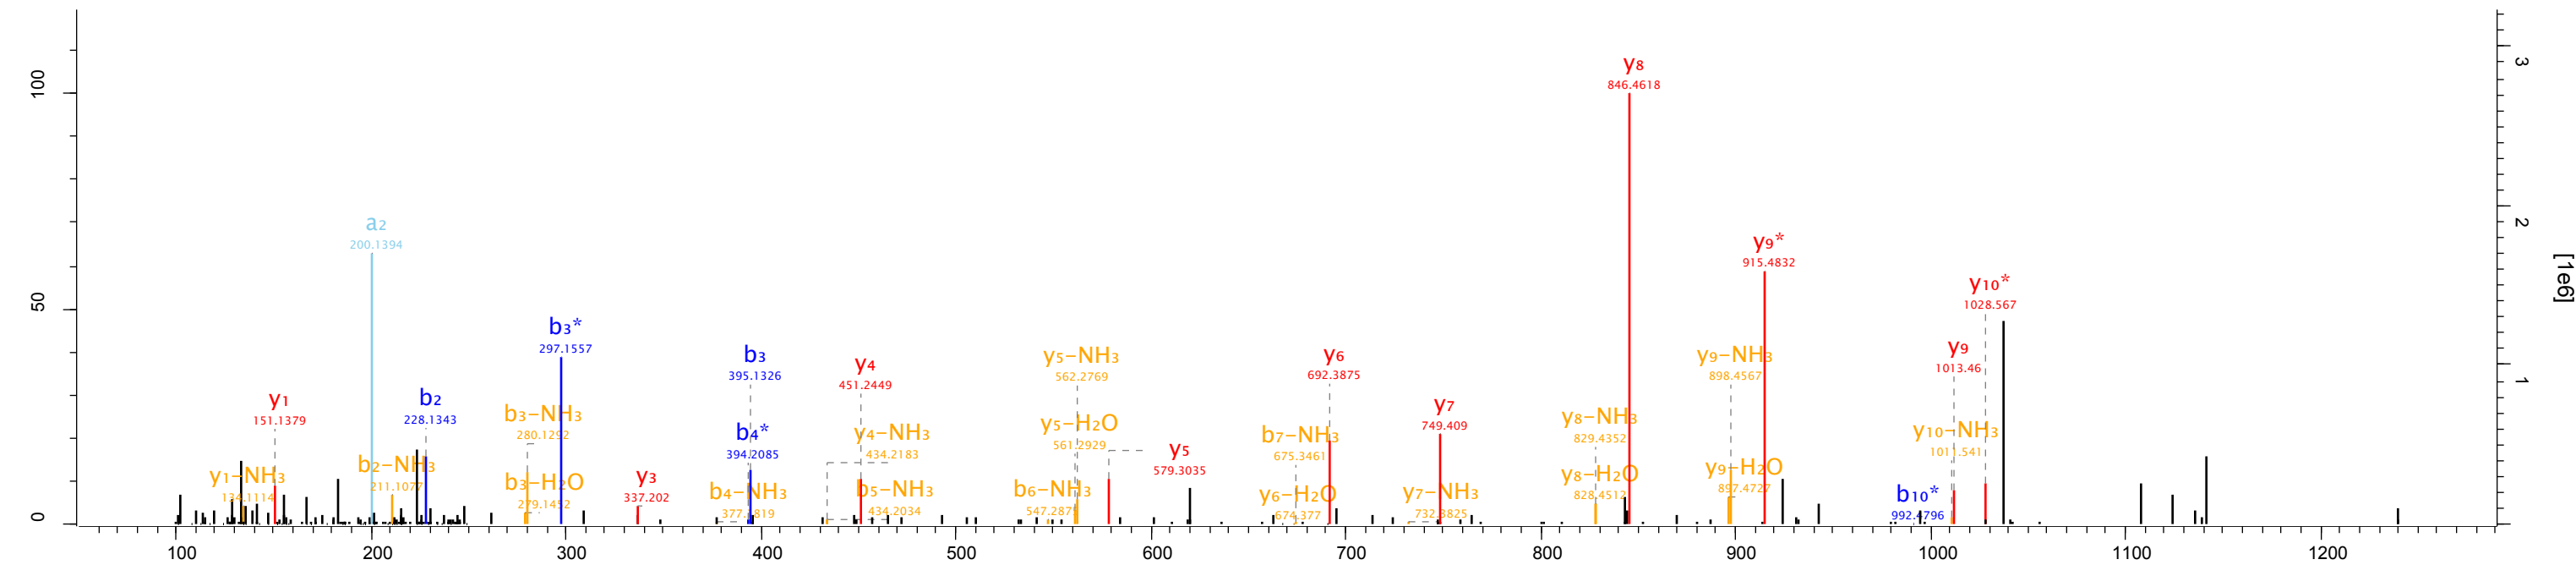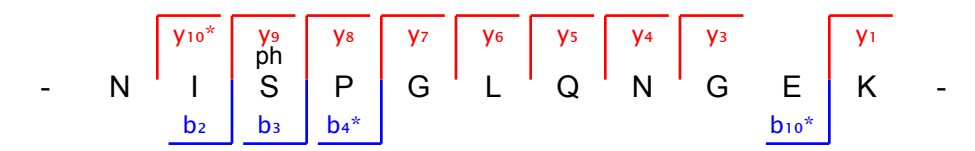

Raw file 20150812\_A375SR\_Phospho\_BR1\_05 Scan 8707 Method FTMS; HCD Score 84.48 m/z 499.22

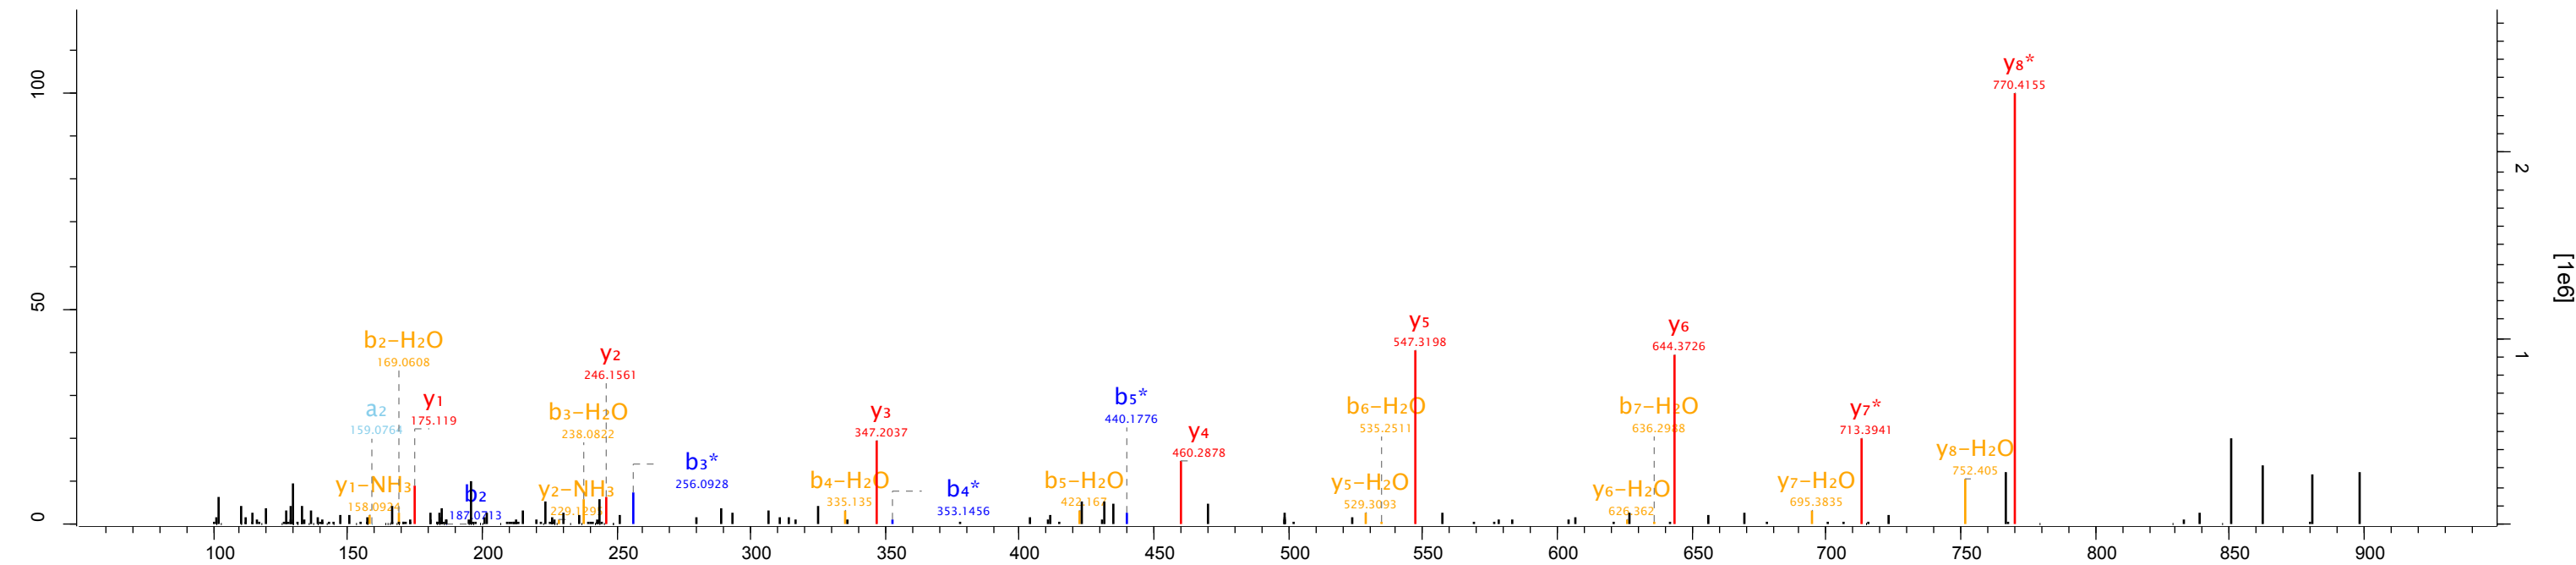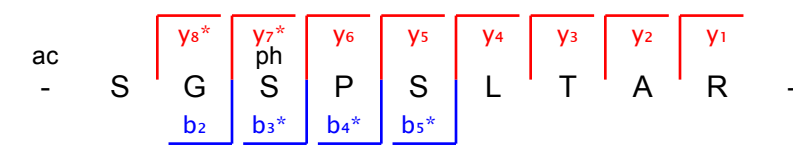

Raw file 20150812\_A375SR\_Phospho\_BR1\_05 Scan 8997 Method FTMS; HCD Score 99.16 m/z 617.28 Gene names BRD3

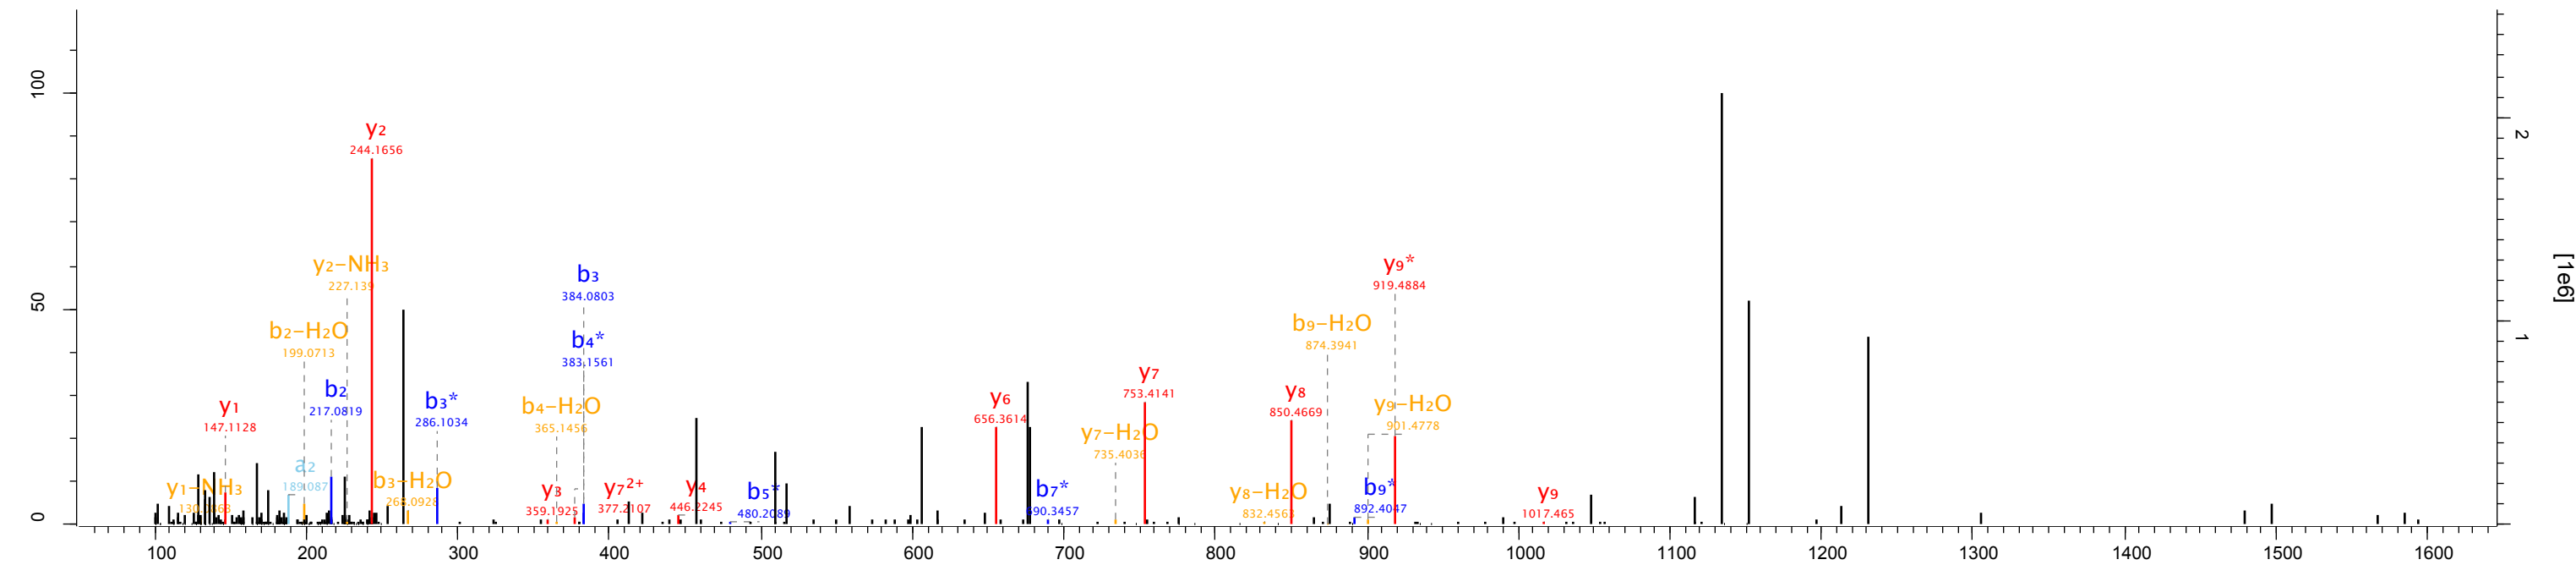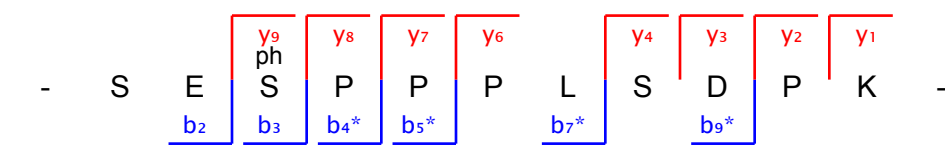

Raw file 20150812\_A375SR\_Phospho\_BR1\_06 Scan 10057 Method FTMS; HCD Score 171.11 m/z 641.27 Gene names CBX5

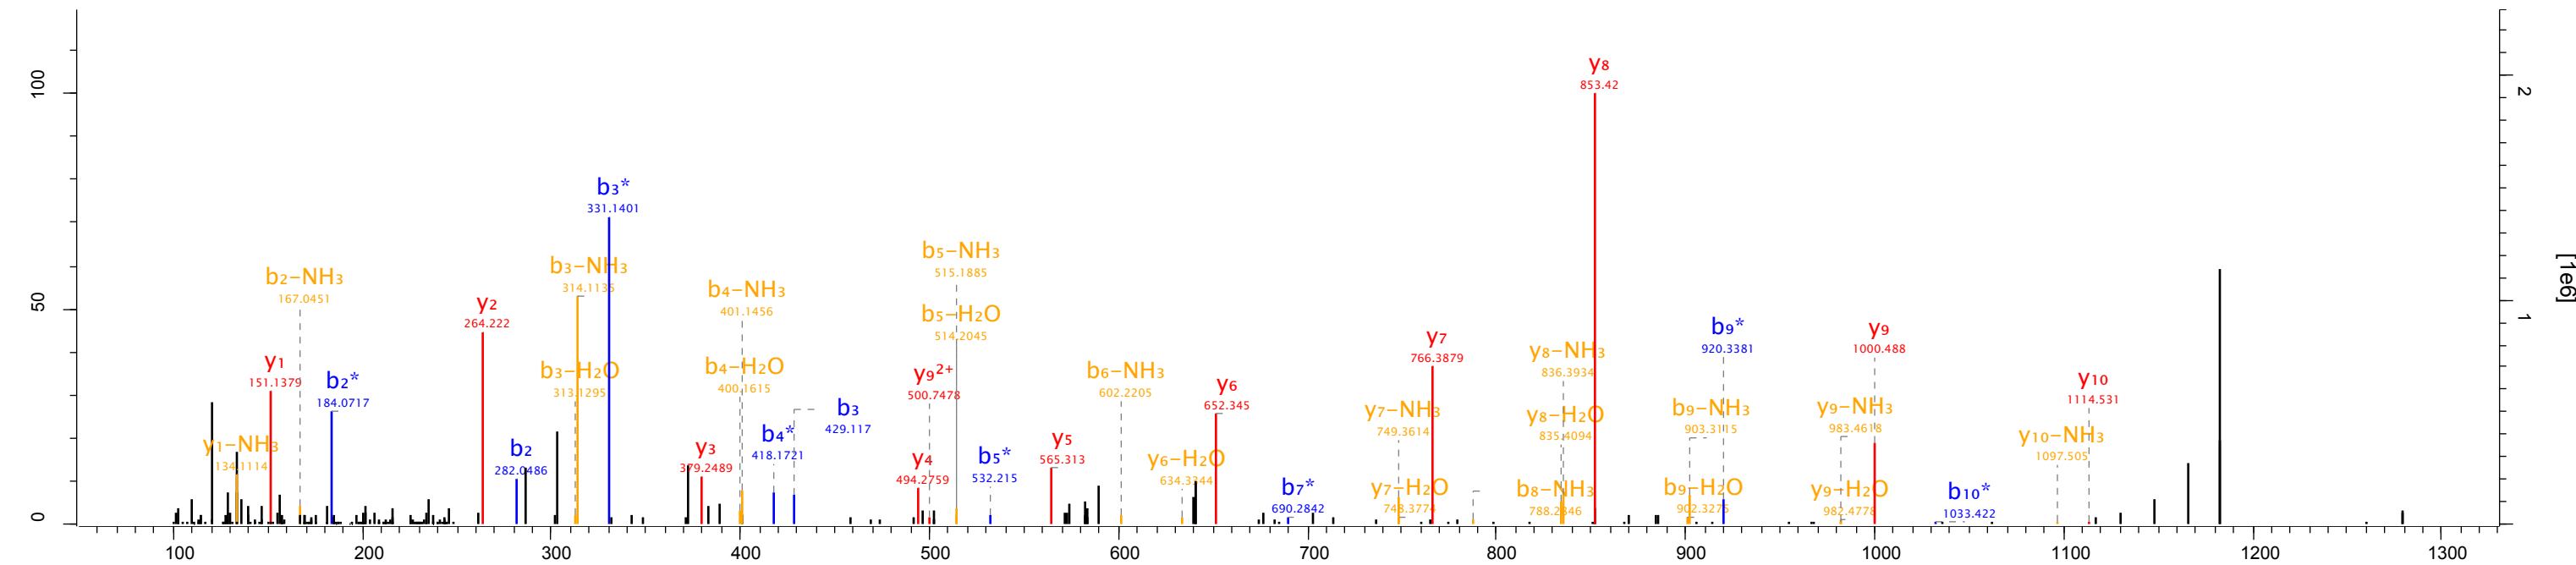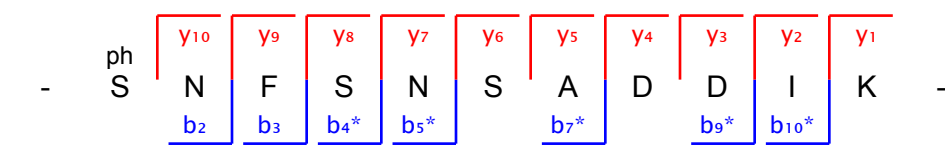

Raw file 20150812\_A375SR\_Phospho\_BR1\_06 Scan 10197 Method FTMS; HCD Score 110.93 m/z 539.81 Gene names DBNL

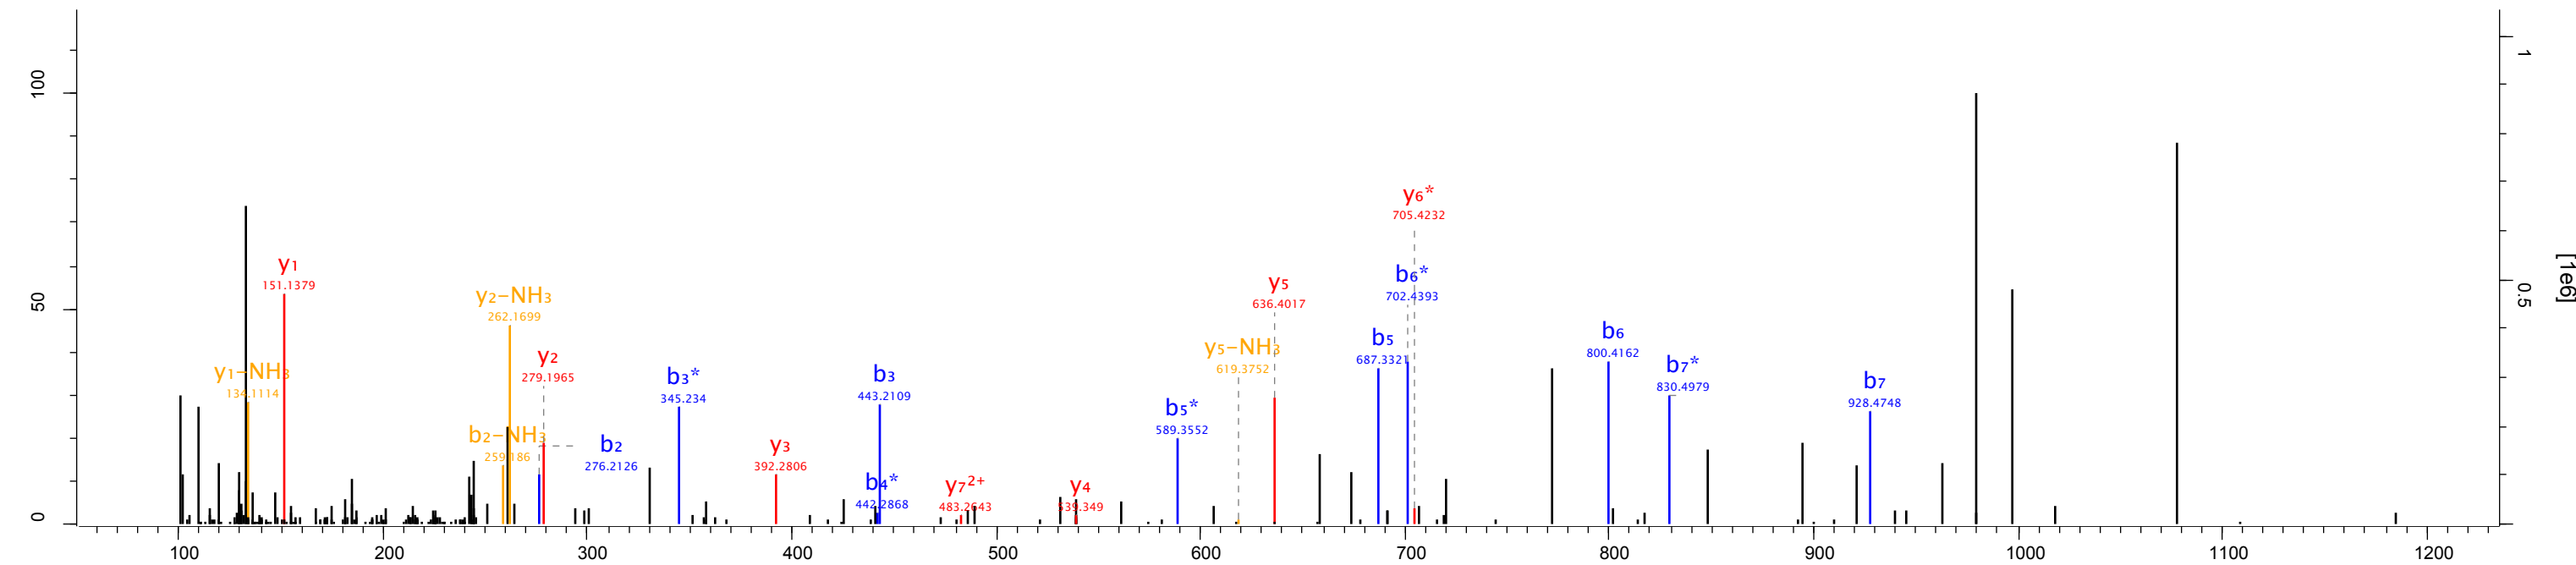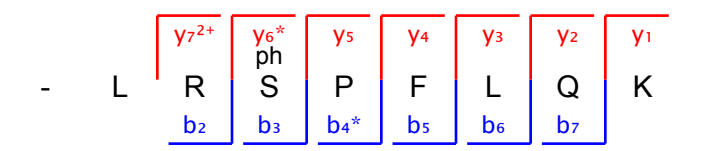



Raw file 20150812\_A375SR\_Phospho\_BR1\_06 Scan 10607 Method FTMS; HCD Score 276.12 m/z 917.95 Gene names MINK1

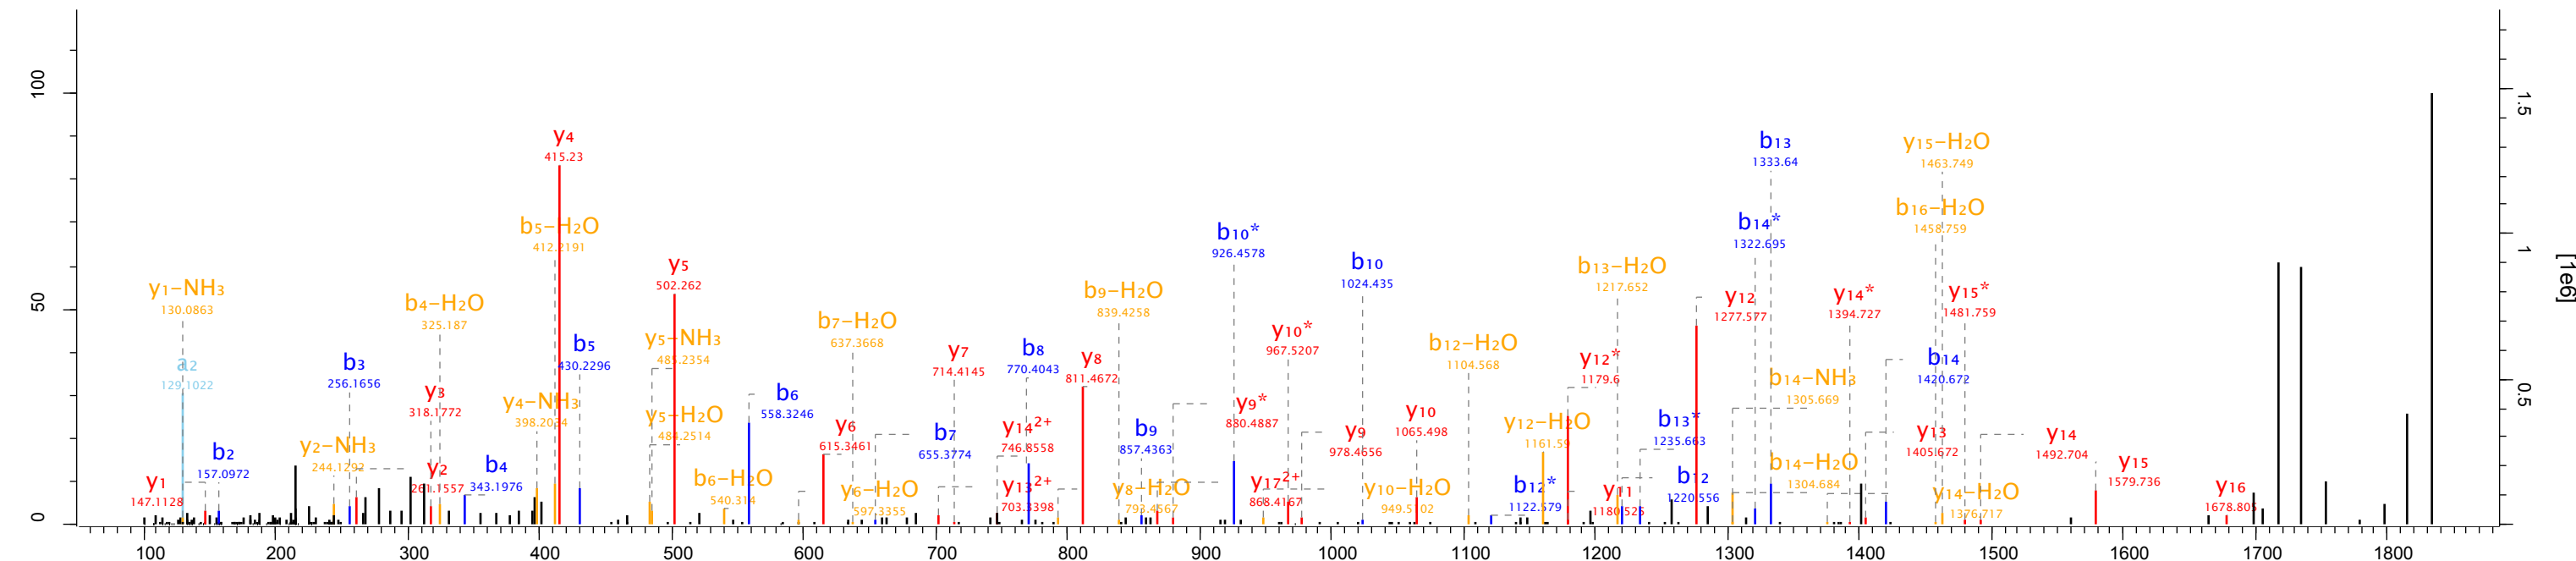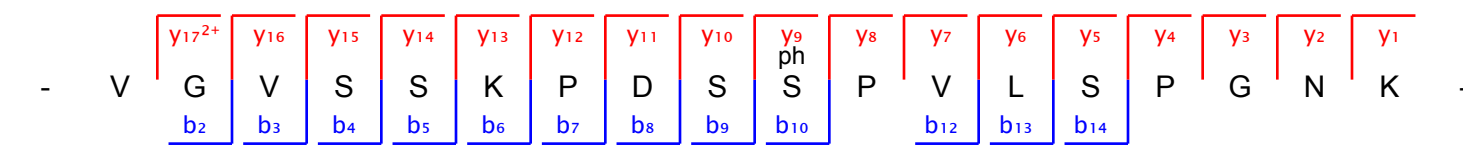

Raw file: 20150812\_A375SR\_Phospho\_BR1\_06  
 Scan: 10677 Method: FTMS; HCD Score: 79.68 m/z: 786.37 Gene names: LITAF;TLE3

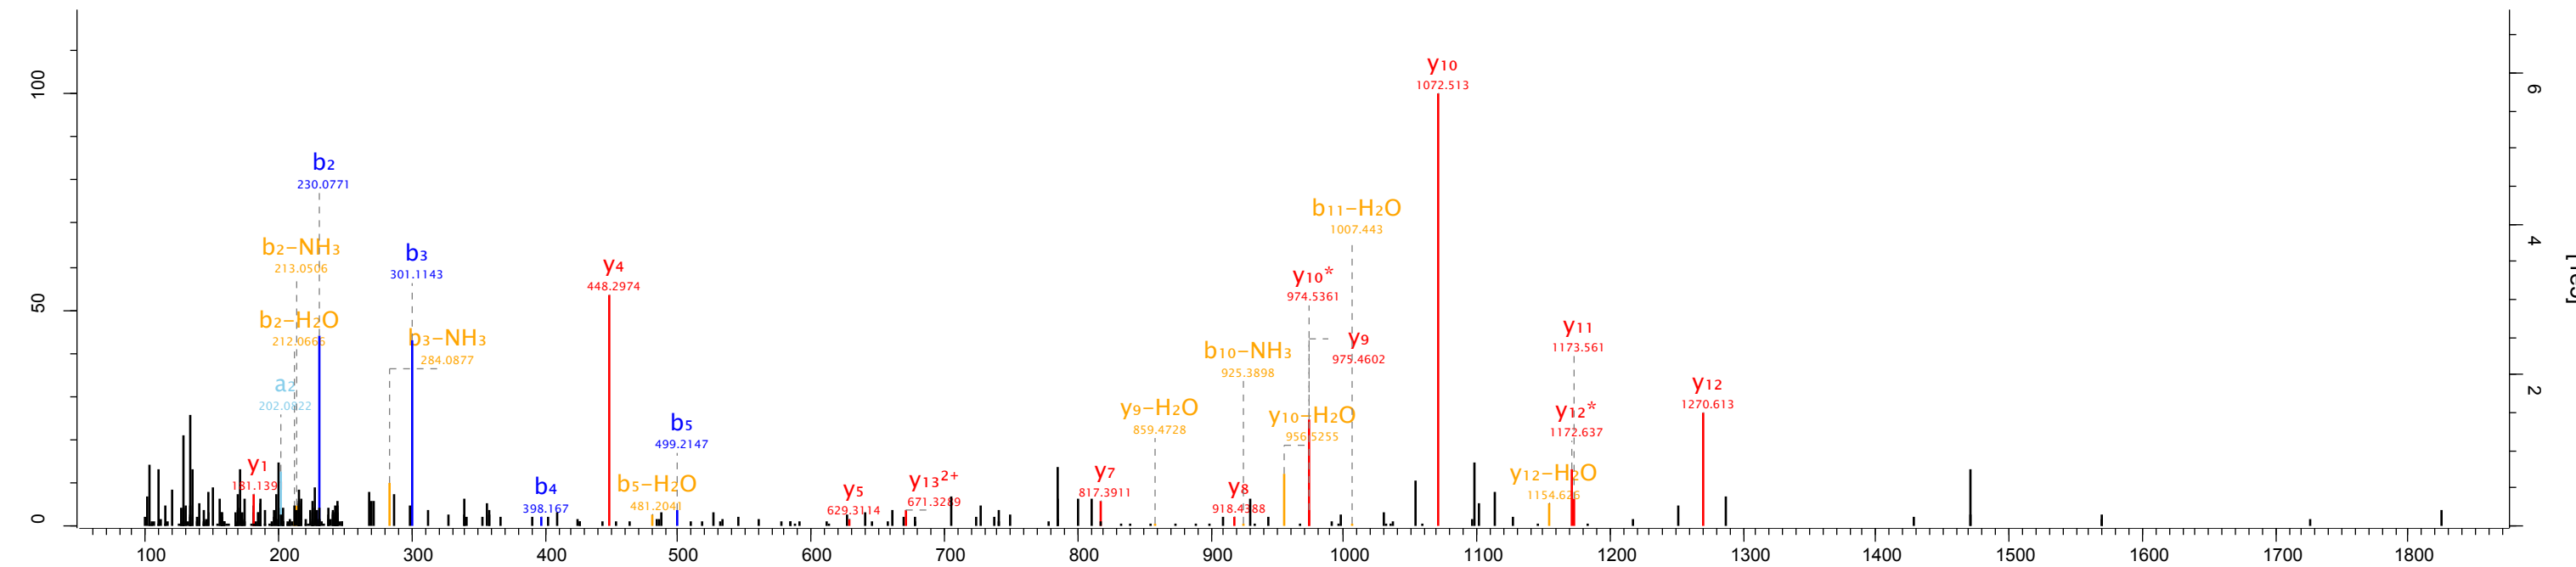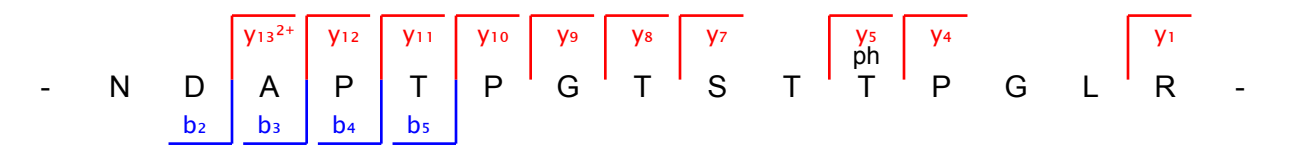

Raw file 20150812\_A375SR\_Phospho\_BR1\_06 Scan 11687 Method FTMS; HCD Score 419.97 m/z 1262.56 Gene names GIGYF2

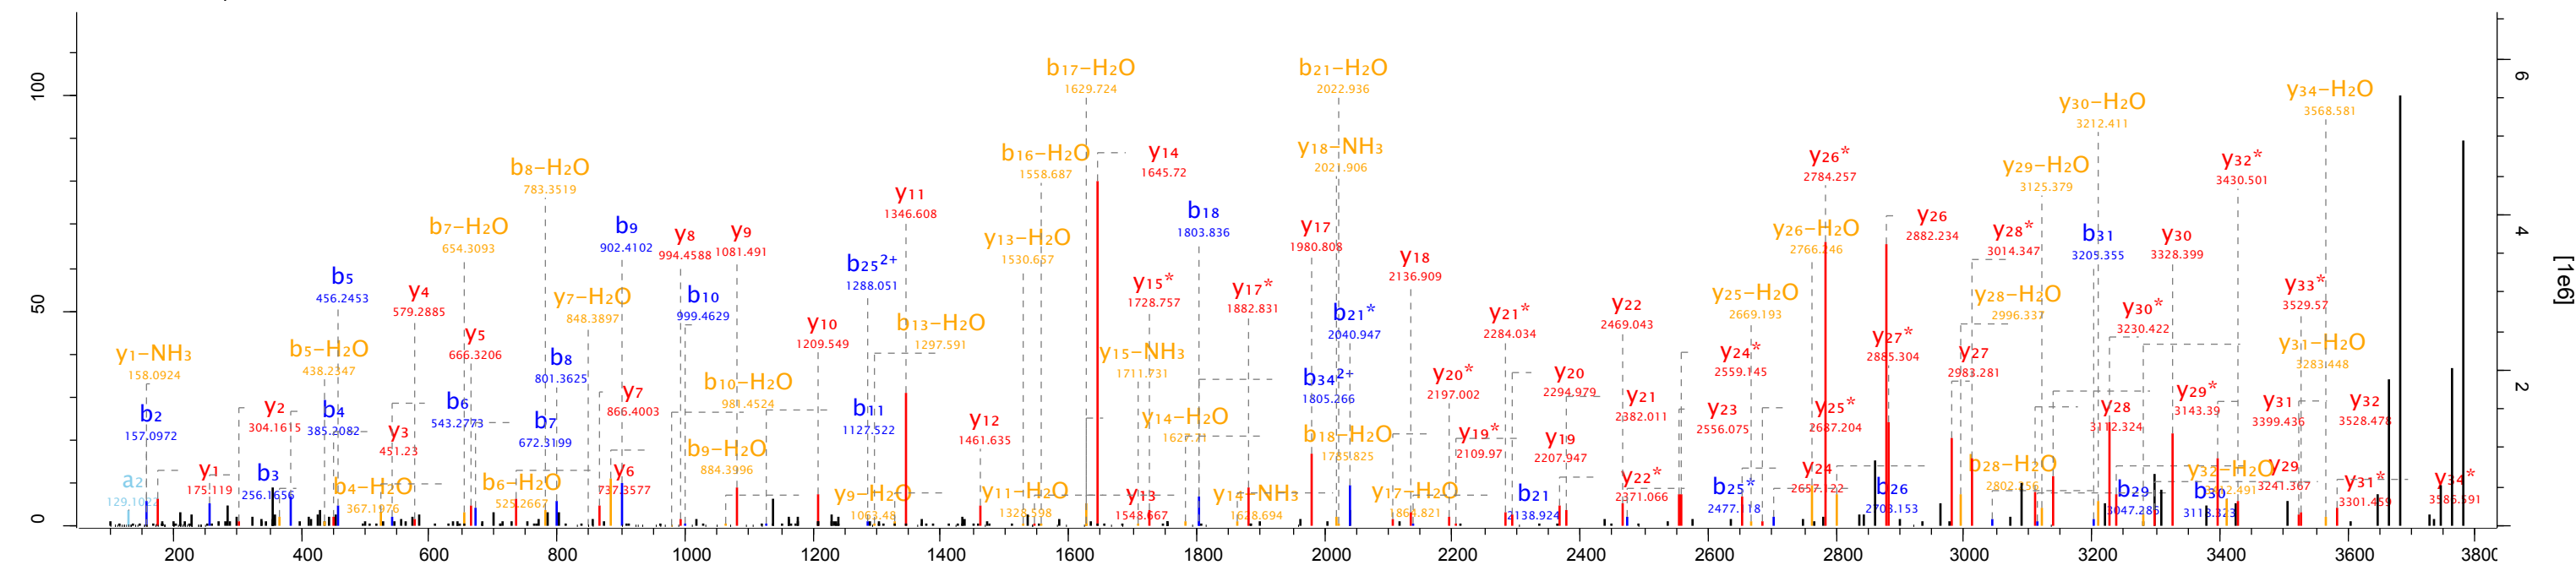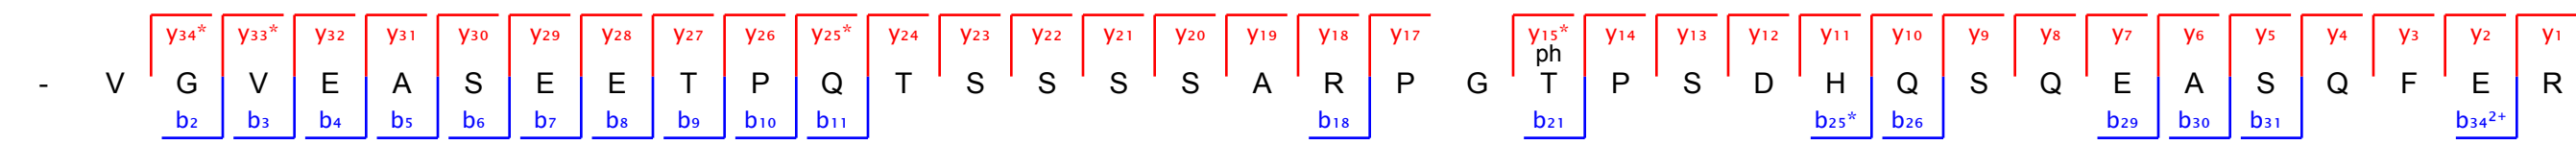

Raw file 20150812\_A375SR\_Phospho\_BR1\_06 Scan 13177 Method FTMS; HCD Score 222.19 m/z 845.9 Gene names MAP4K4

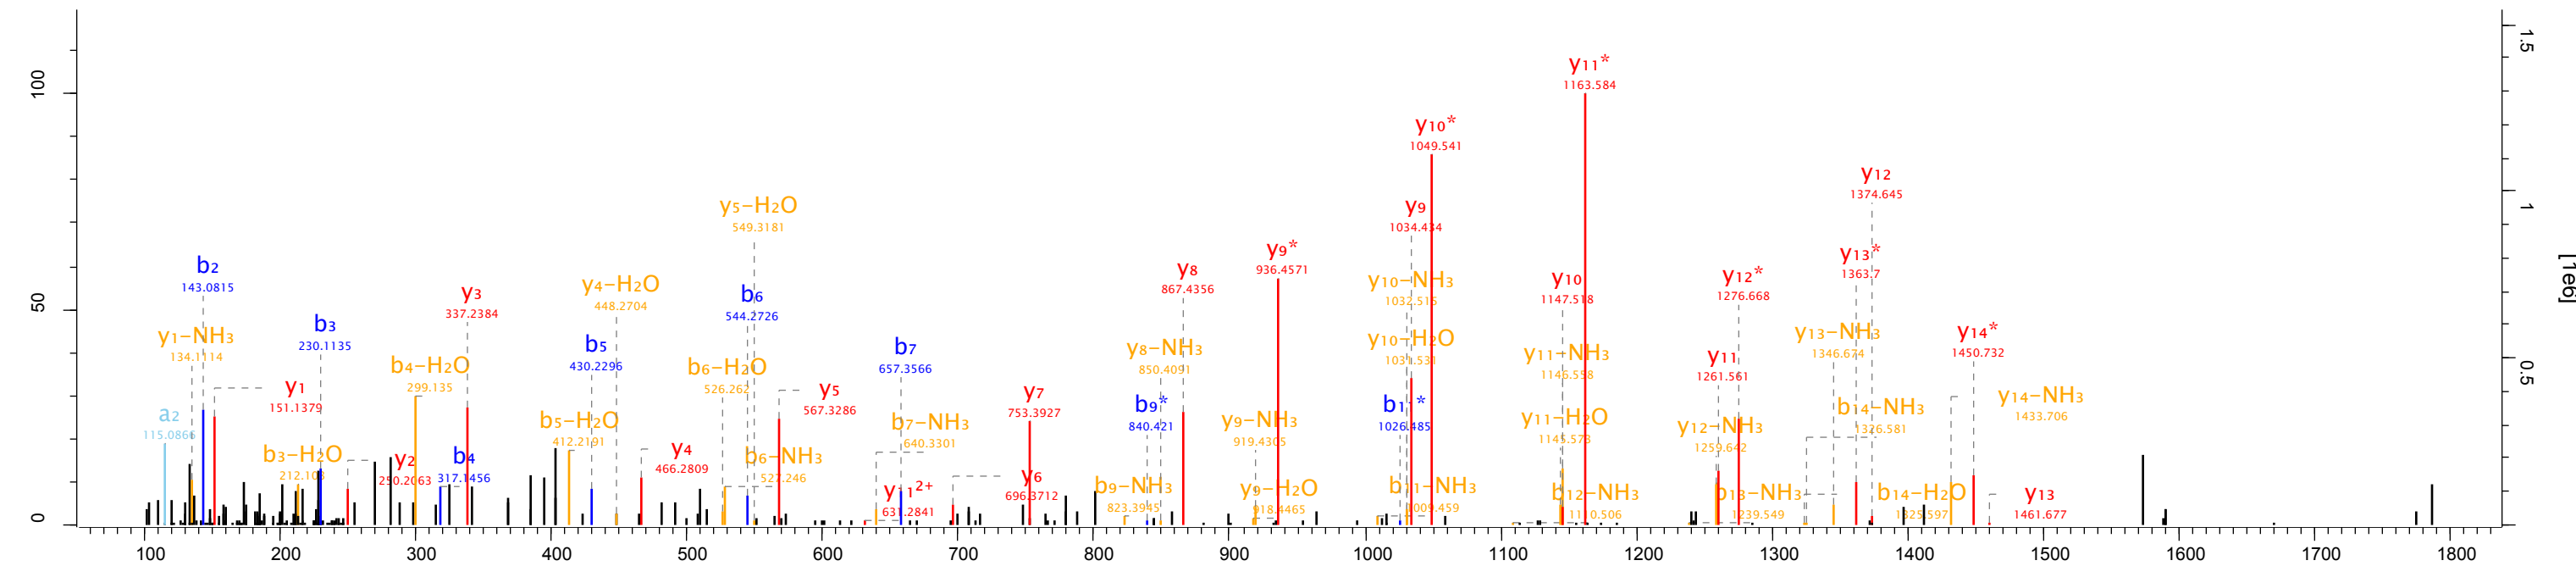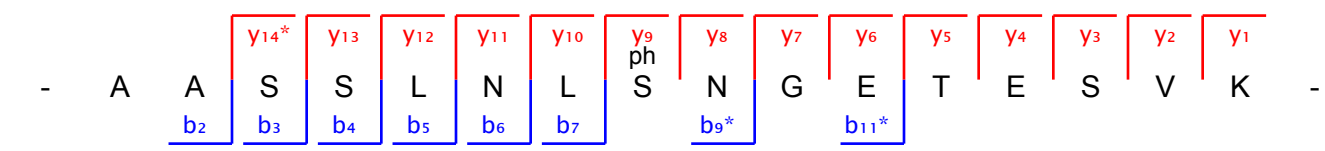

Raw file 20150812\_A375SR\_Phospho\_BR1\_06 Scan 13777 Method FTMS; HCD Score 85.41 m/z 731.37 Gene names RAB11FIP5

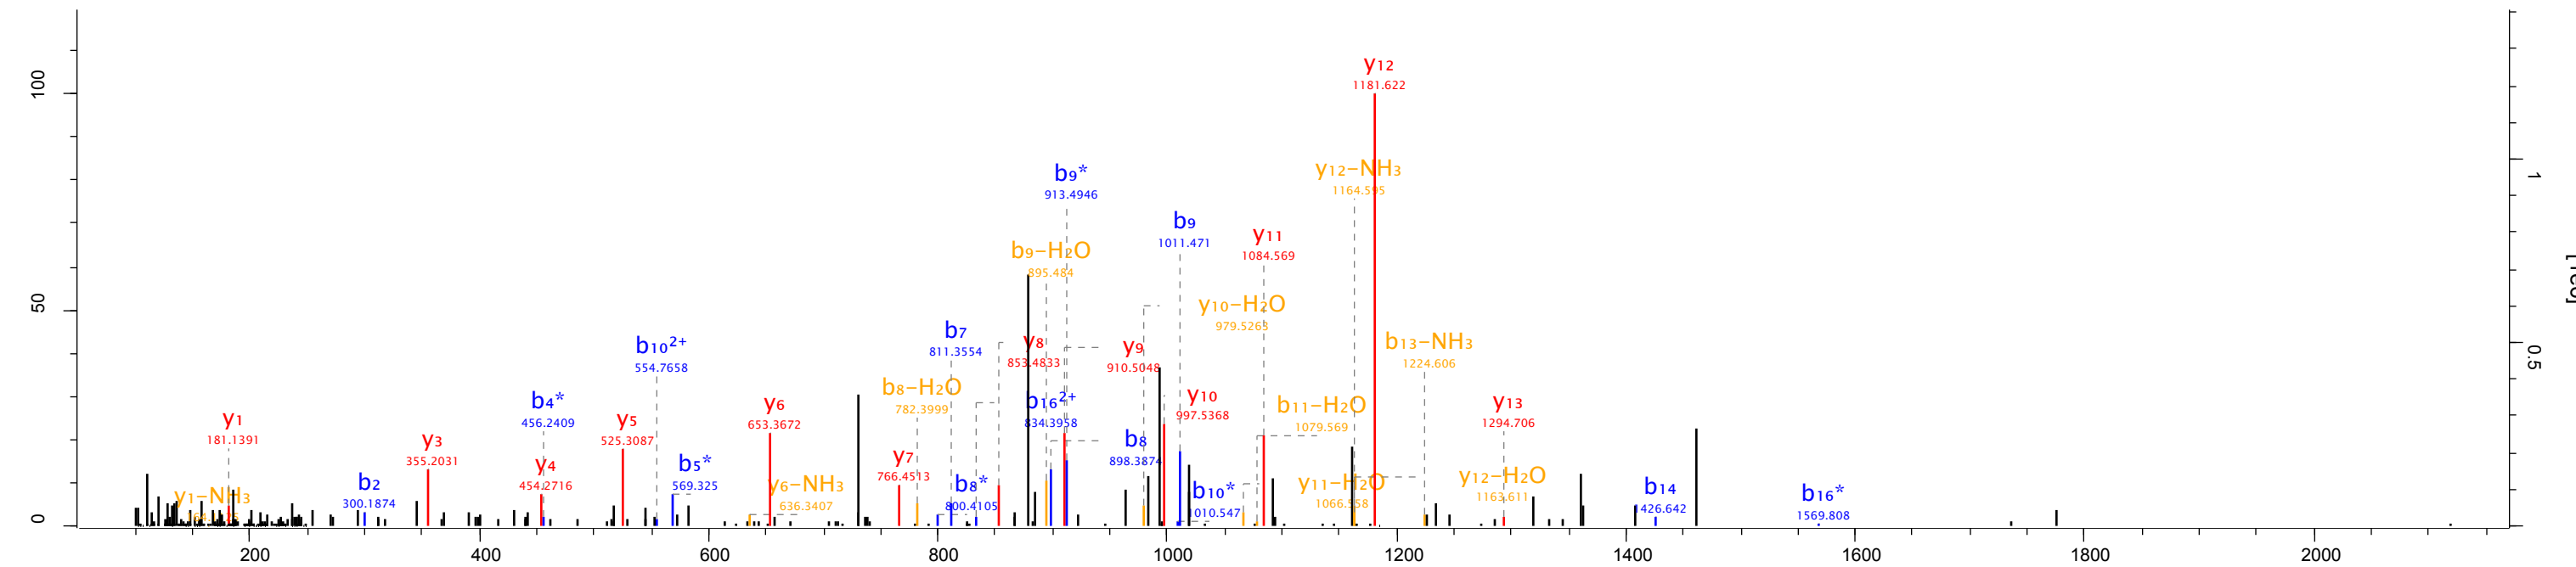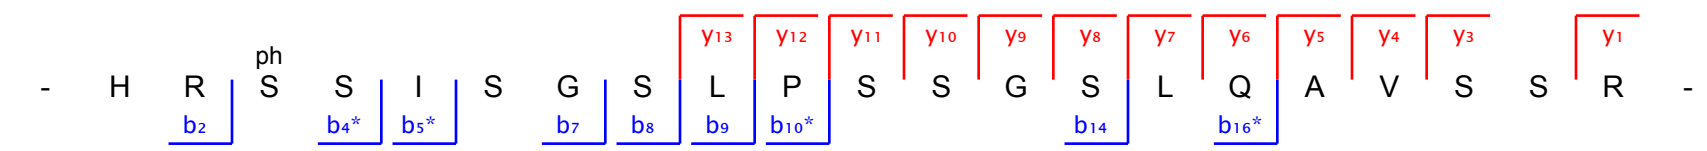

Raw file 20150812\_A375SR\_Phospho\_BR1\_06 Scan 13857 Method FTMS; HCD Score 74.25 m/z 650.31 Gene names SYMPK

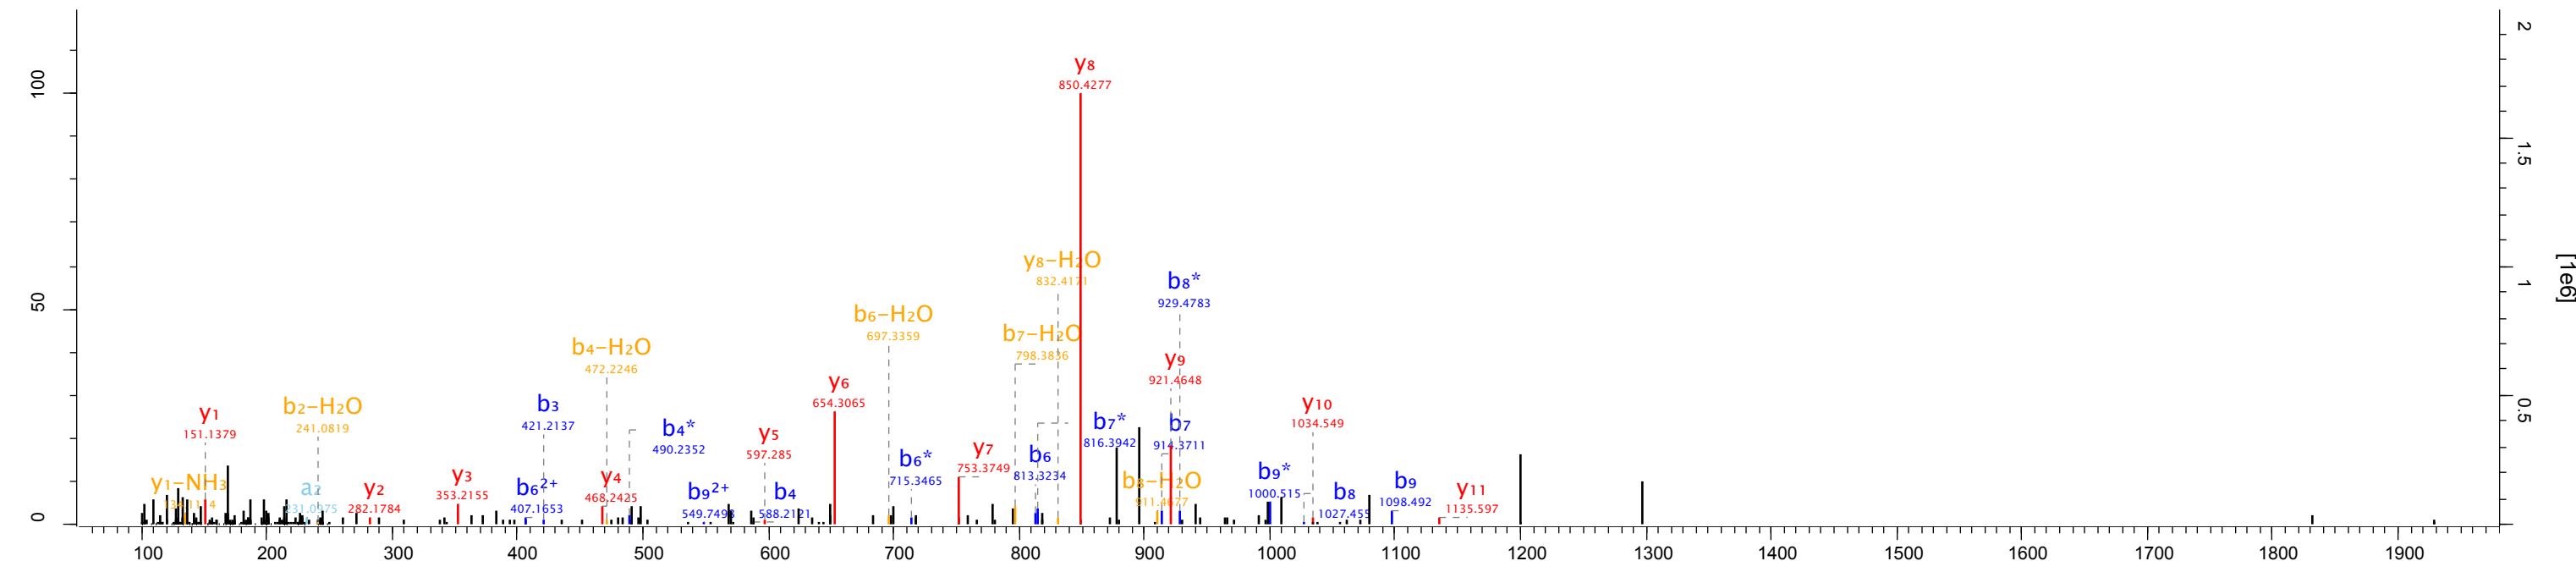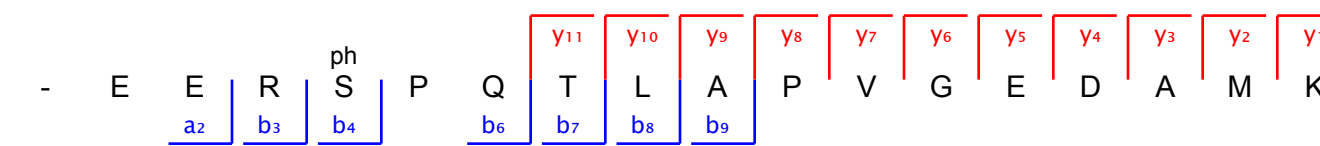

Raw file: 20150812\_A375SR\_Phospho\_BR1\_06  
 Scan: 13897 Method: FTMS; HCD Score: 86.57 m/z: 839.4 Gene names: PPP1R9B

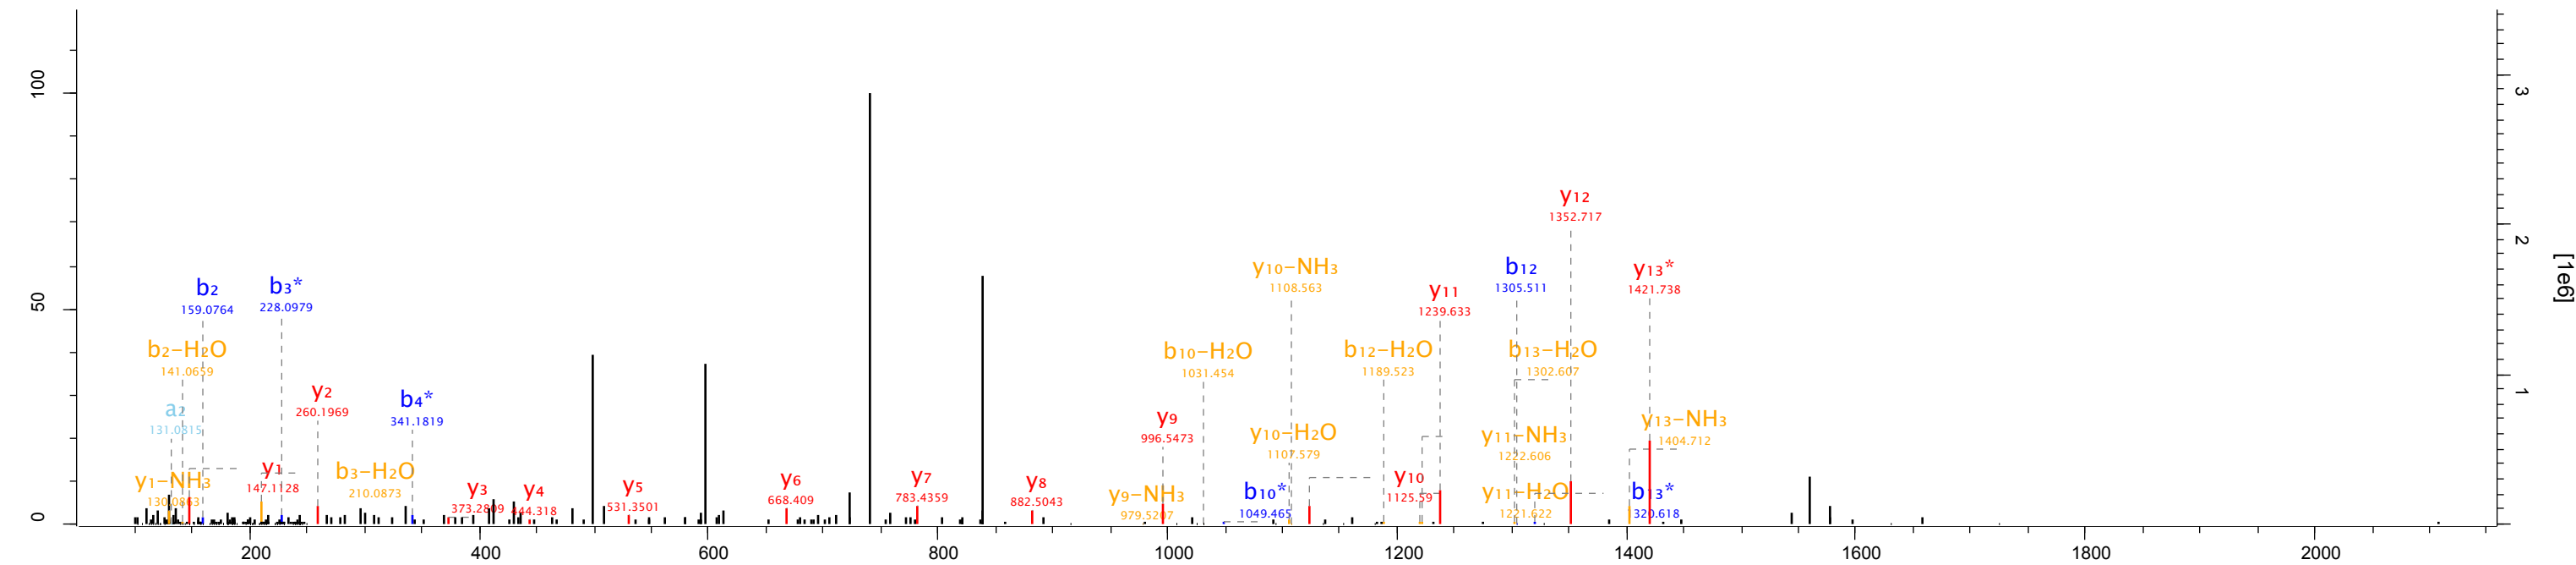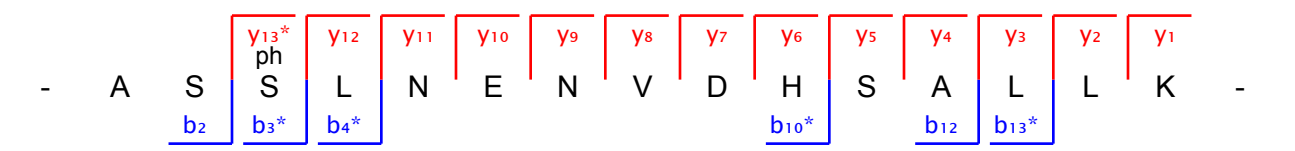

Raw file Scan Method m/z Gene names  
 20150812\_A375SR\_Phospho\_BR1\_06 14407 FTMS; HCD 281.55 986.44 FAM169A

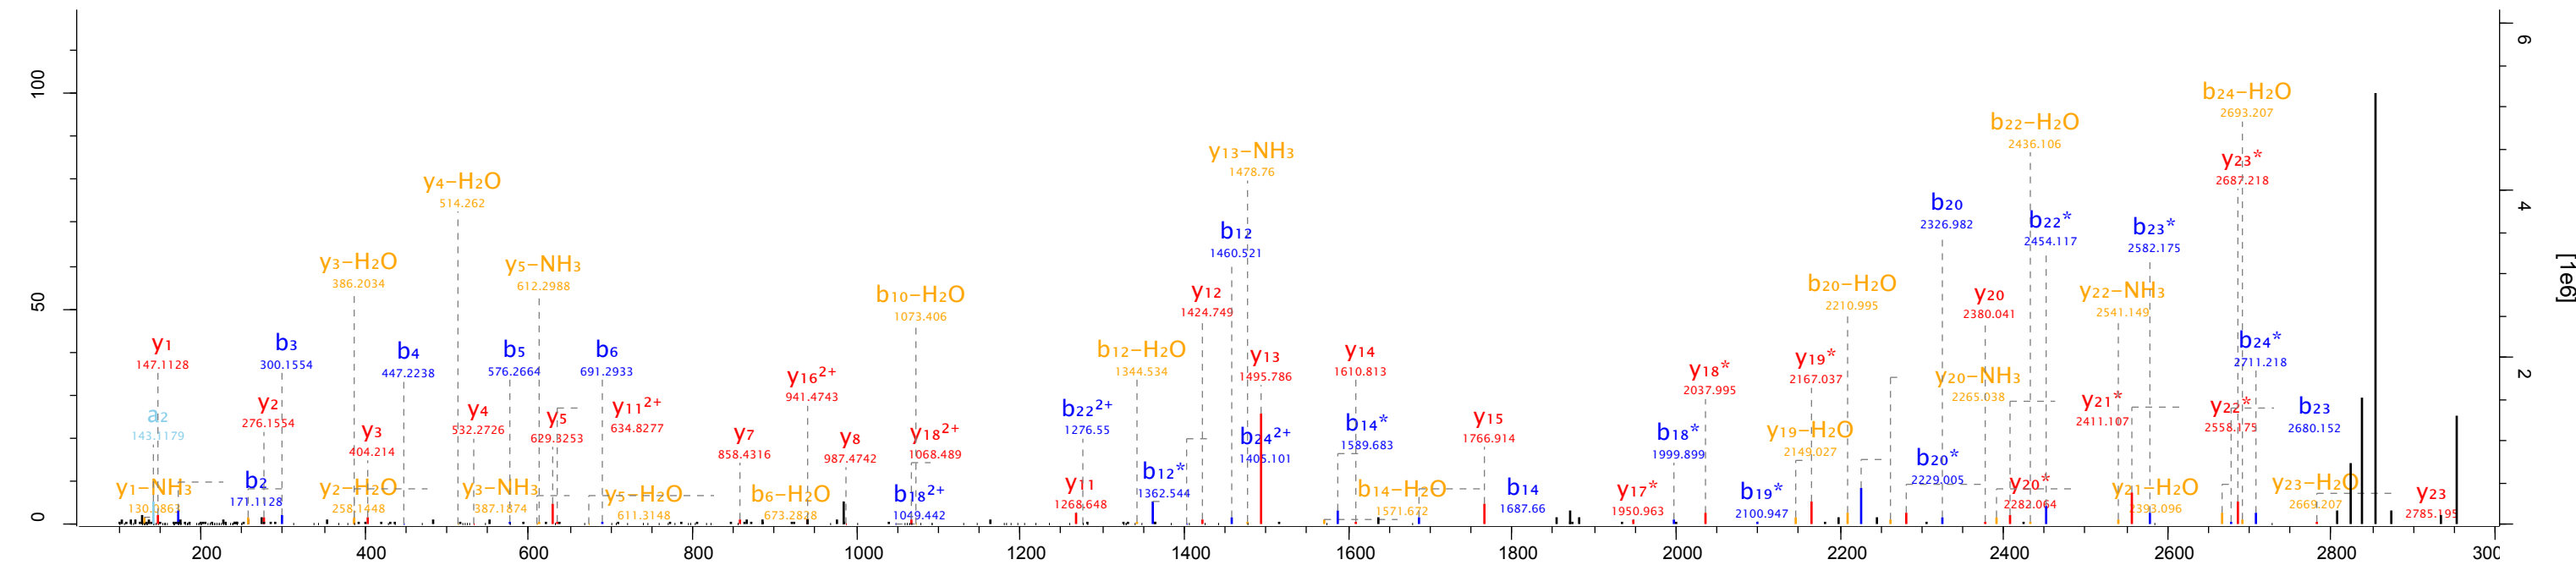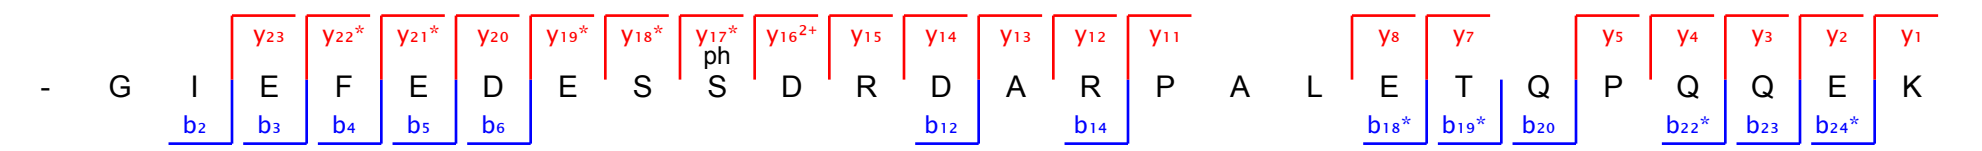



Raw file 20150812\_A375SR\_Phospho\_BR1\_06 Scan 14657 Method FTMS; HCD Score 276.75 m/z 777.8 Gene names PUS1

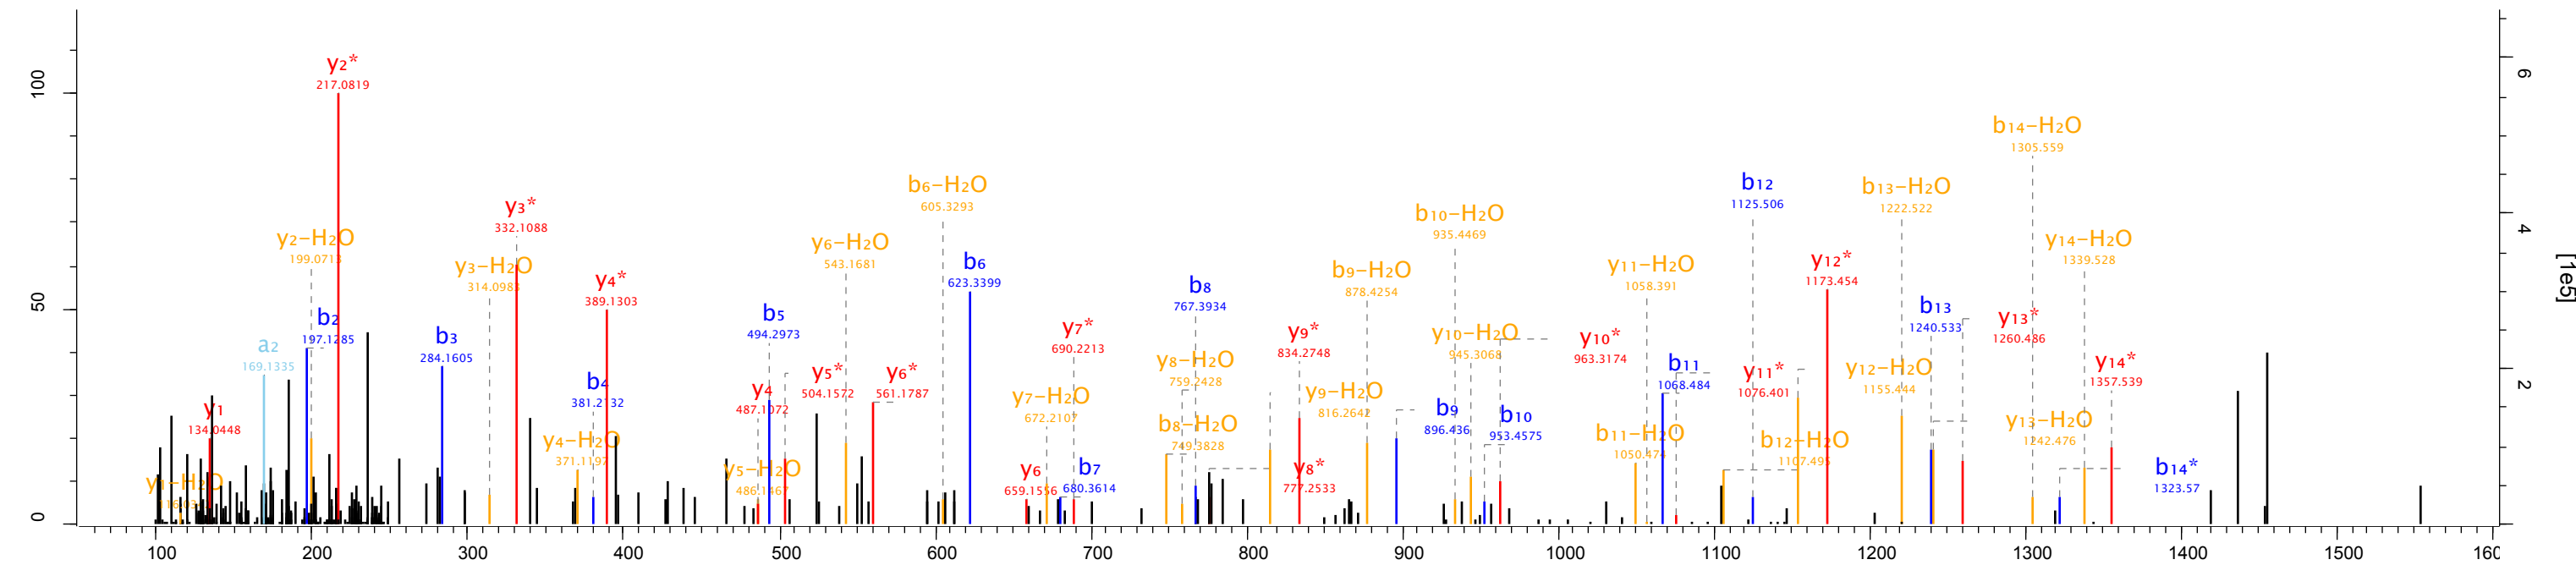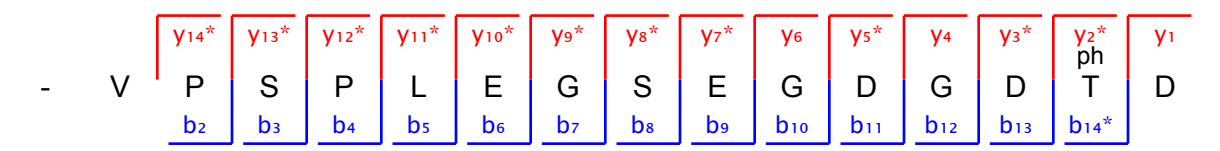

Raw file 20150812\_A375SR\_Phospho\_BR1\_06 Scan 15457 Method FTMS; HCD Score 95.43 m/z 626.81 Gene names CEP170

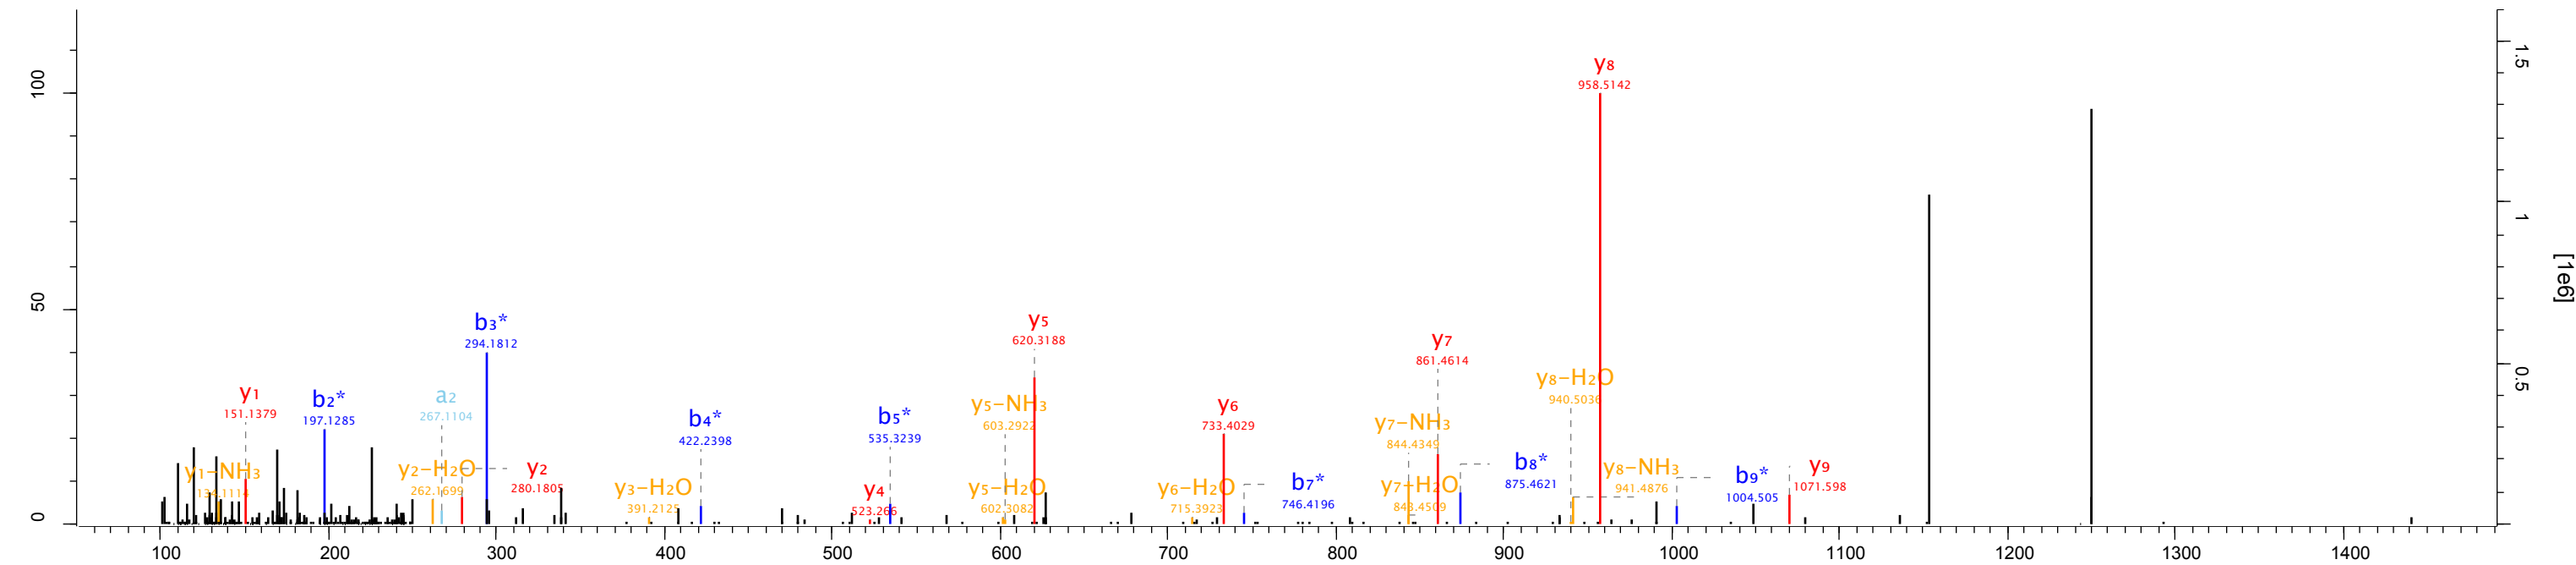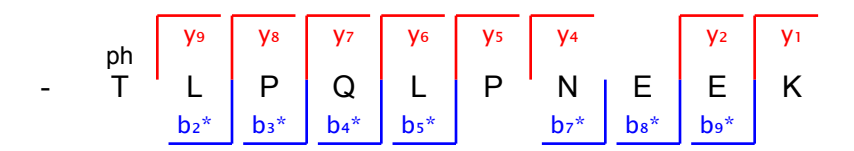

Raw file: 20150812\_A375SR\_Phospho\_BR1\_06  
 Scan: 16077 Method: FTMS; HCD Score: 158.44 m/z: 627.36 Gene names: PFKFB2

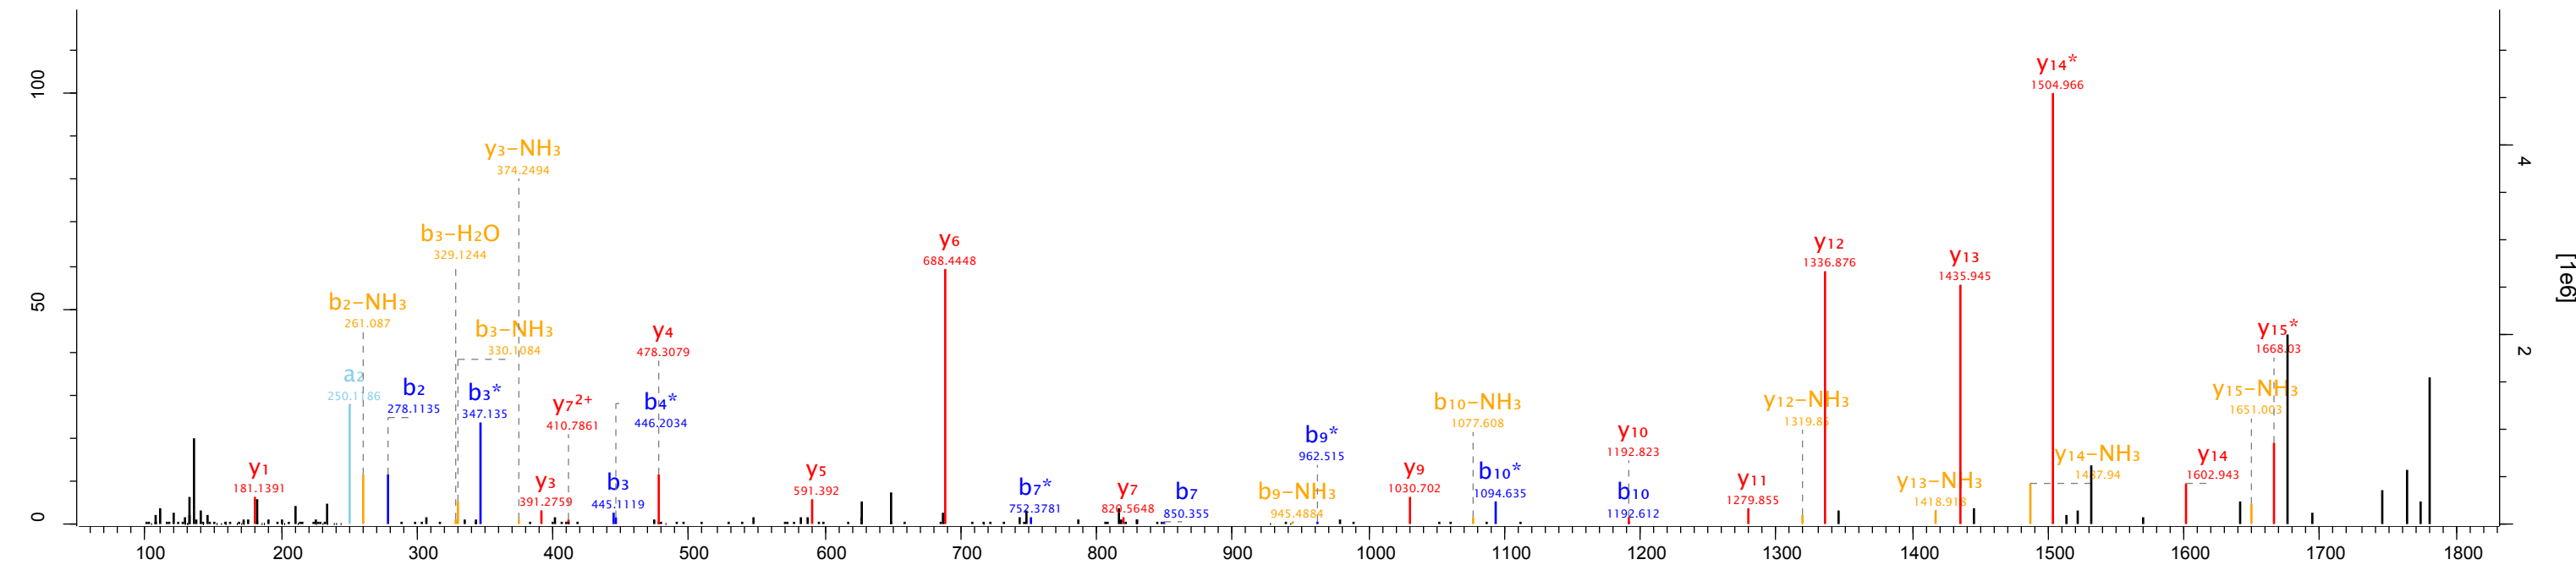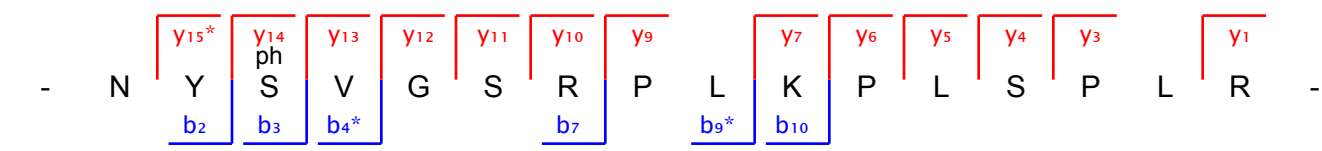

Raw file  
20150812\_A375SR\_Phospho\_BR1\_06

Scan 16717 Method FTMS; HCD Score 196.41 m/z 887.87 Gene names IBTK

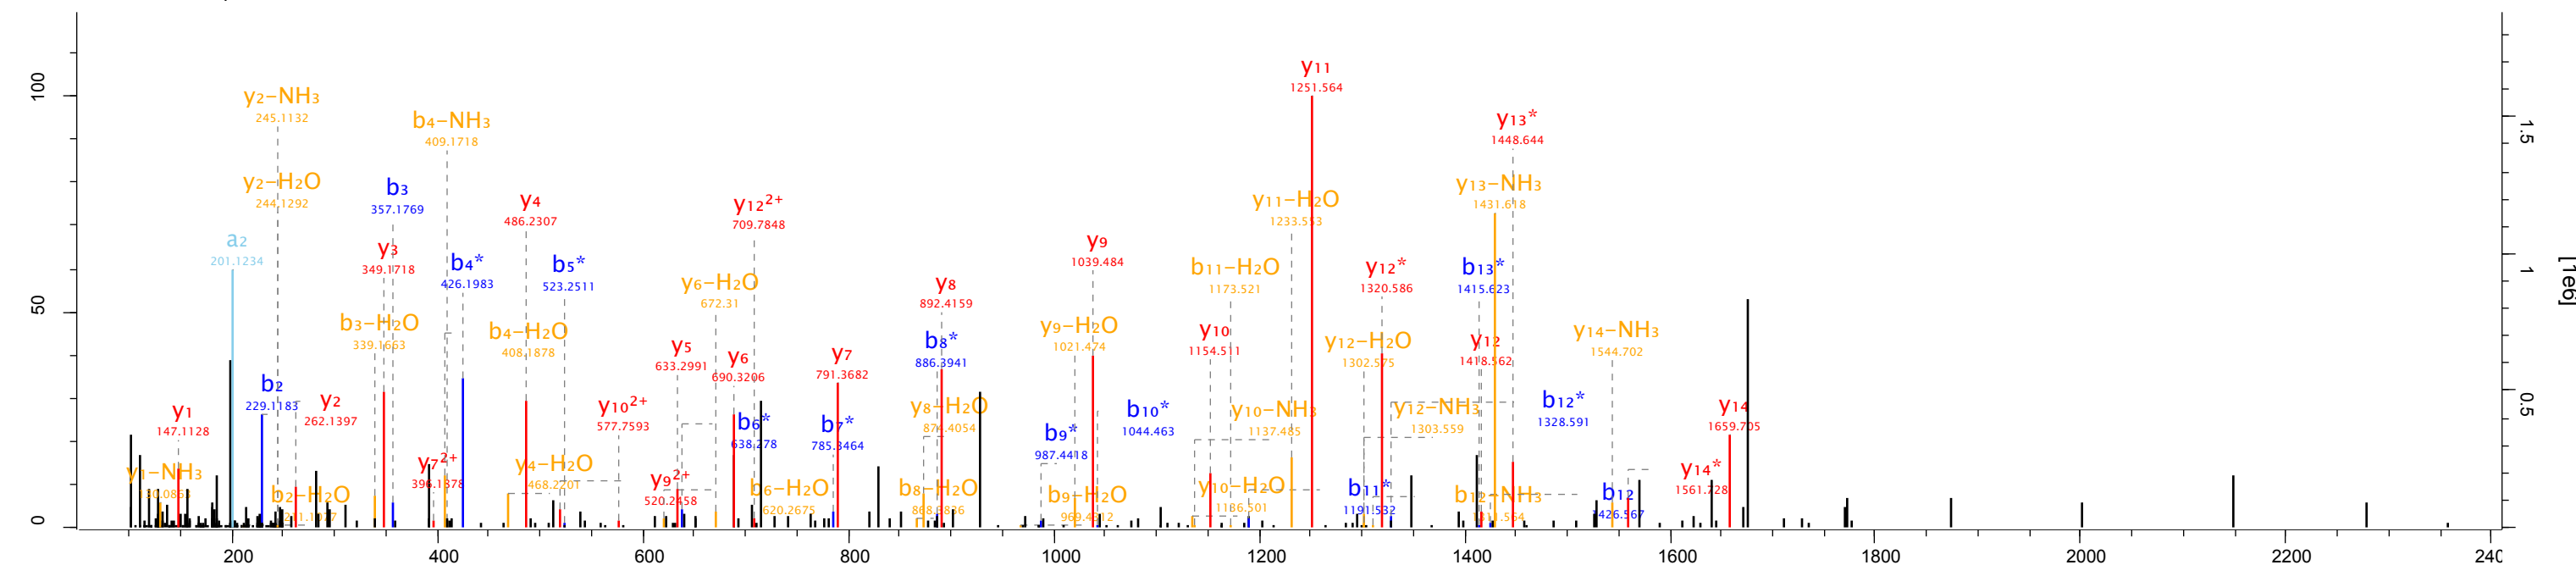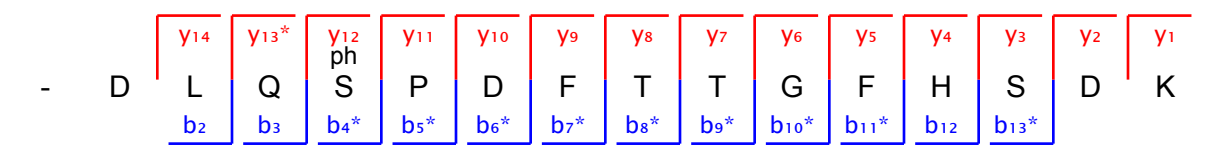

Raw file Scan Method Score m/z Gene names  
 20150812\_A375SR\_Phospho\_BR1\_06 17157 FTMS; HCD 180.34 706.03 PLEKHA5

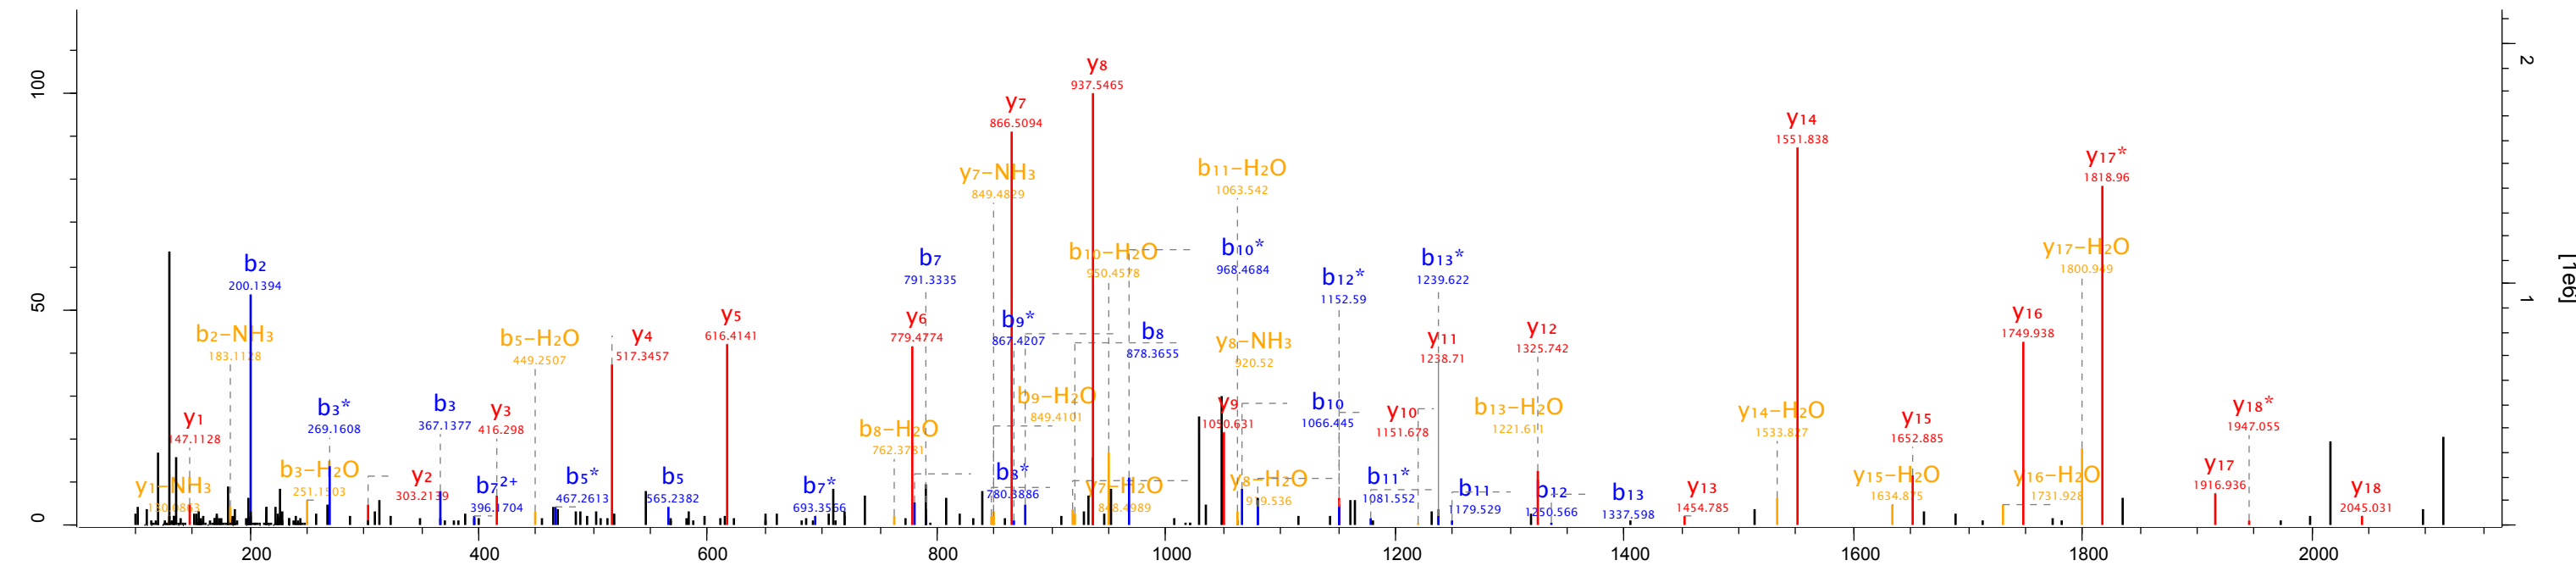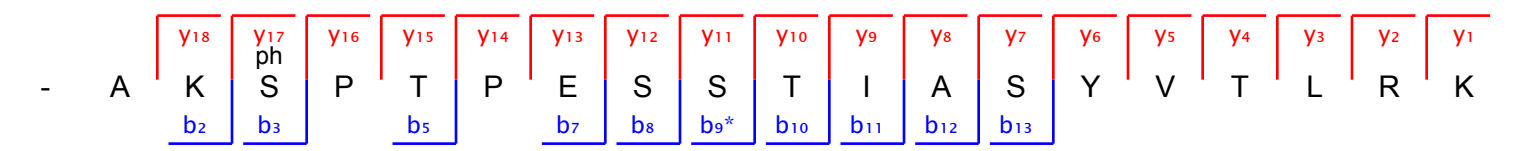

Raw file 20150812\_A375SR\_Phospho\_BR1\_06 Scan 17537 Method FTMS; HCD Score 151.67 m/z 1391.14 Gene names LARP1

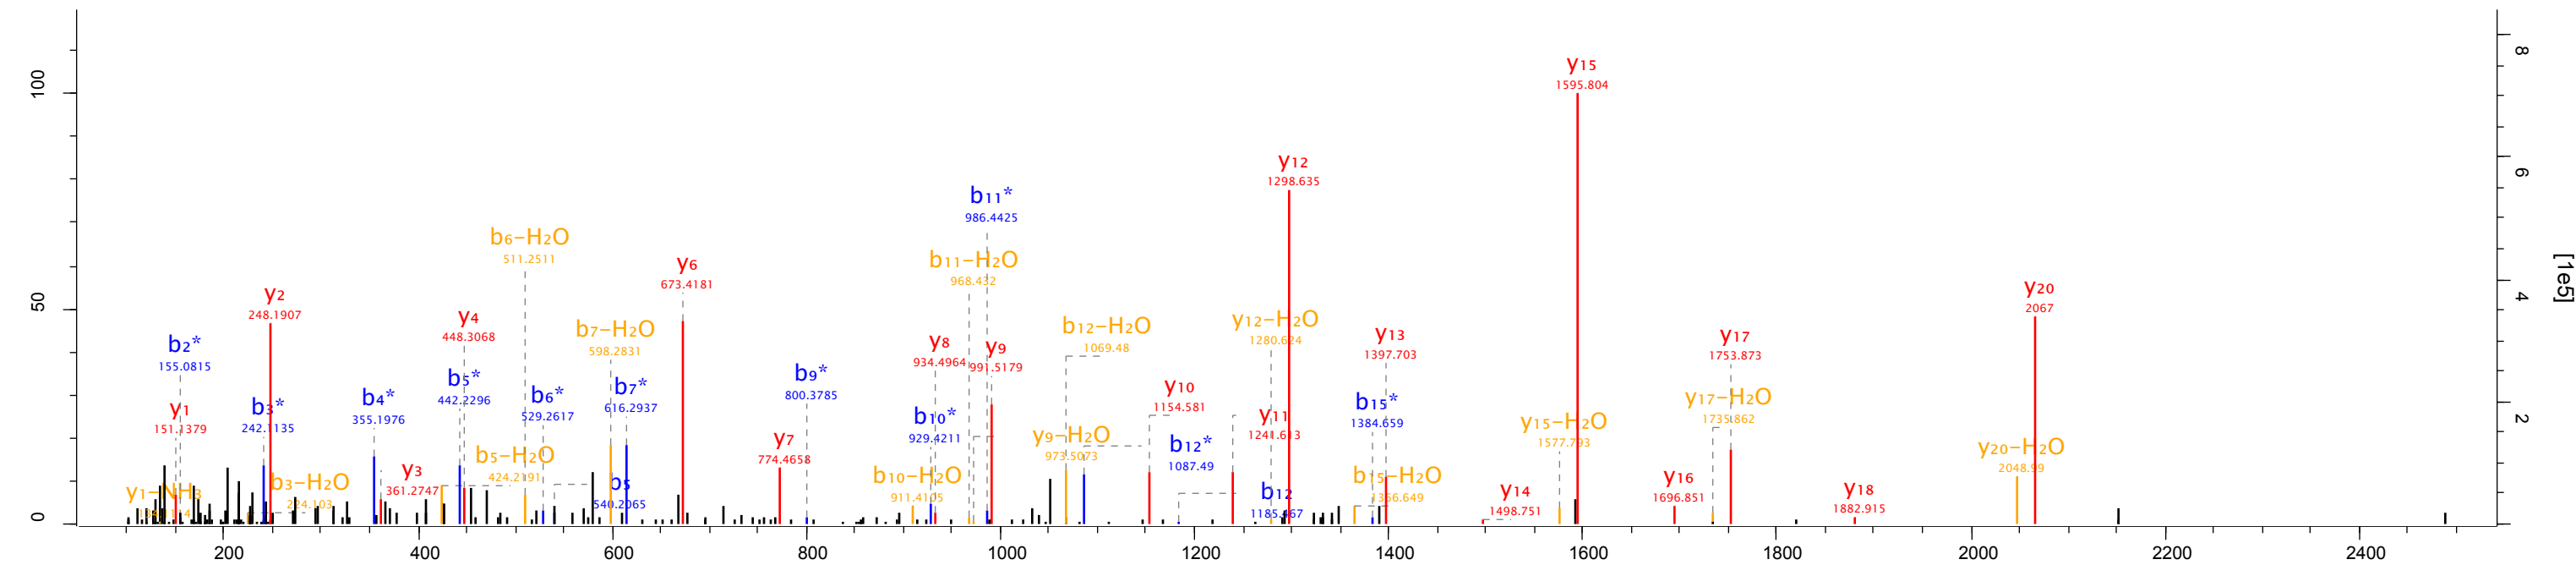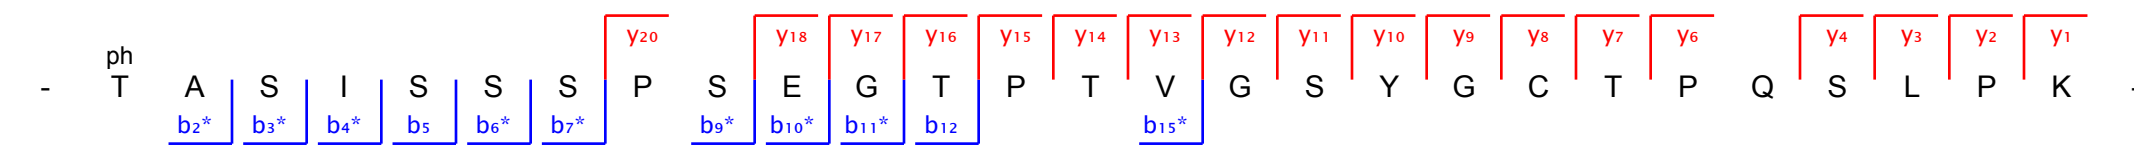

Raw file: 20150812\_A375SR\_Phospho\_BR1\_06  
 Scan: 18667 Method: FTMS; HCD Score: 98.66 m/z: 1075.85 Gene names: PTPN23

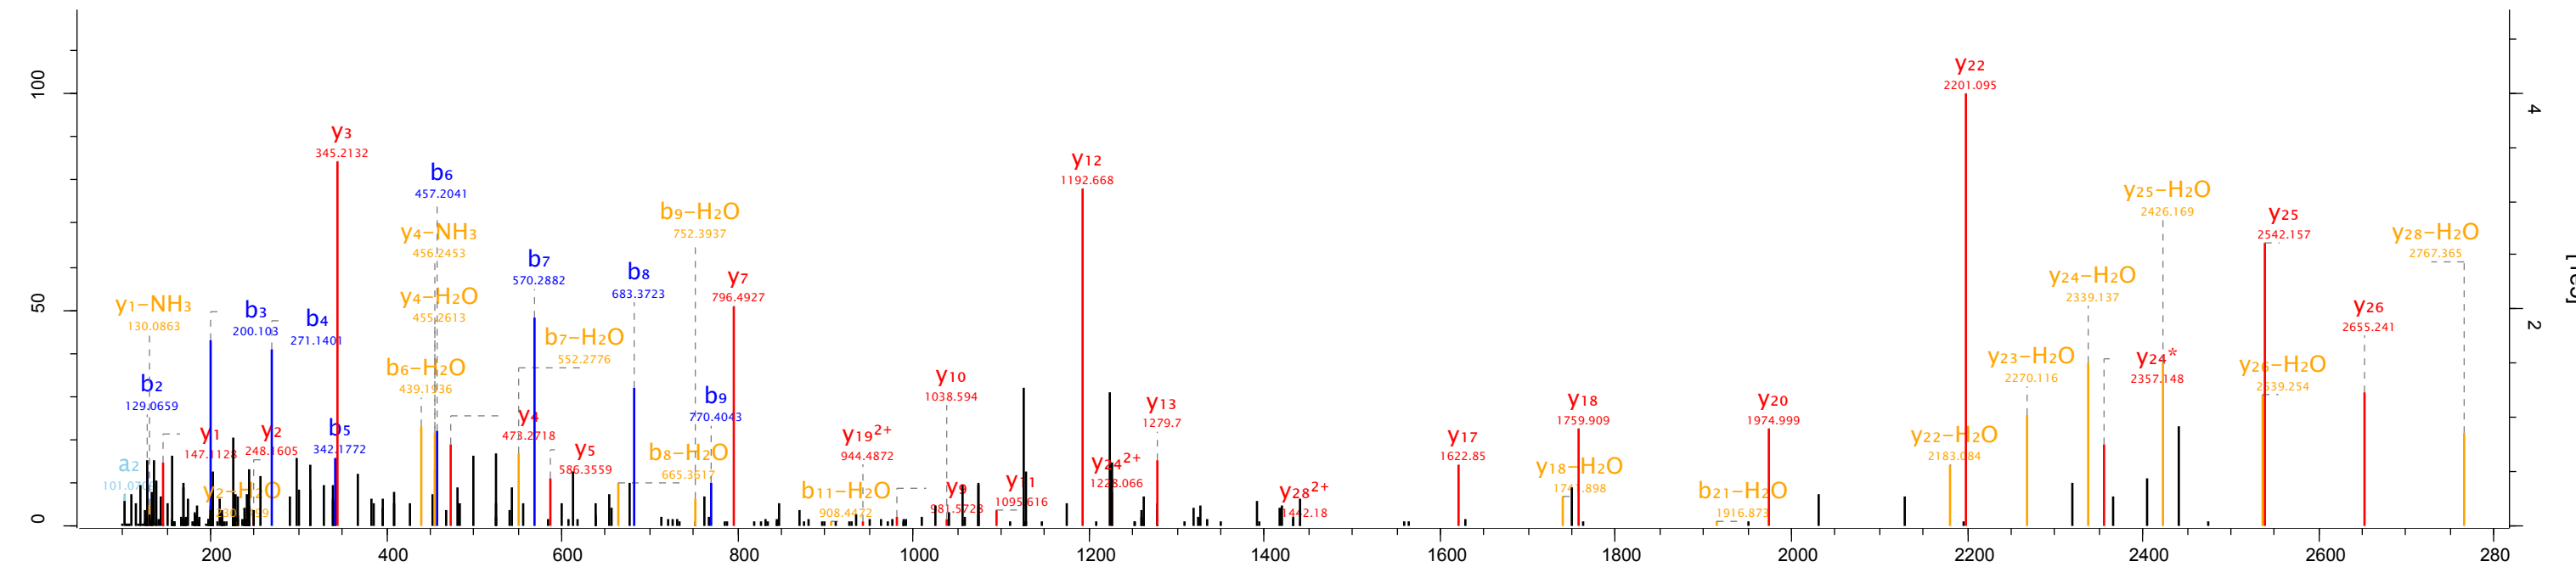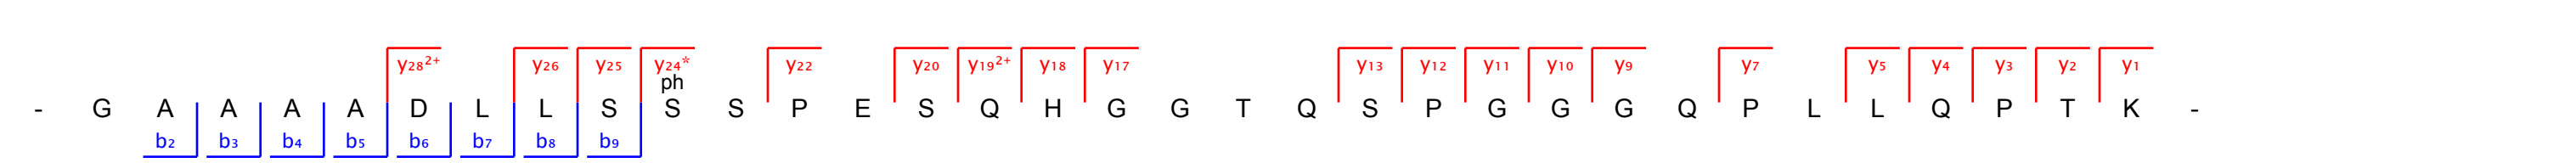

Raw file: 20150812\_A375SR\_Phospho\_BR1\_06  
 Scan: 20467 Method: FTMS; HCD Score: 159.01 m/z: 851.91 Gene names: CASC5

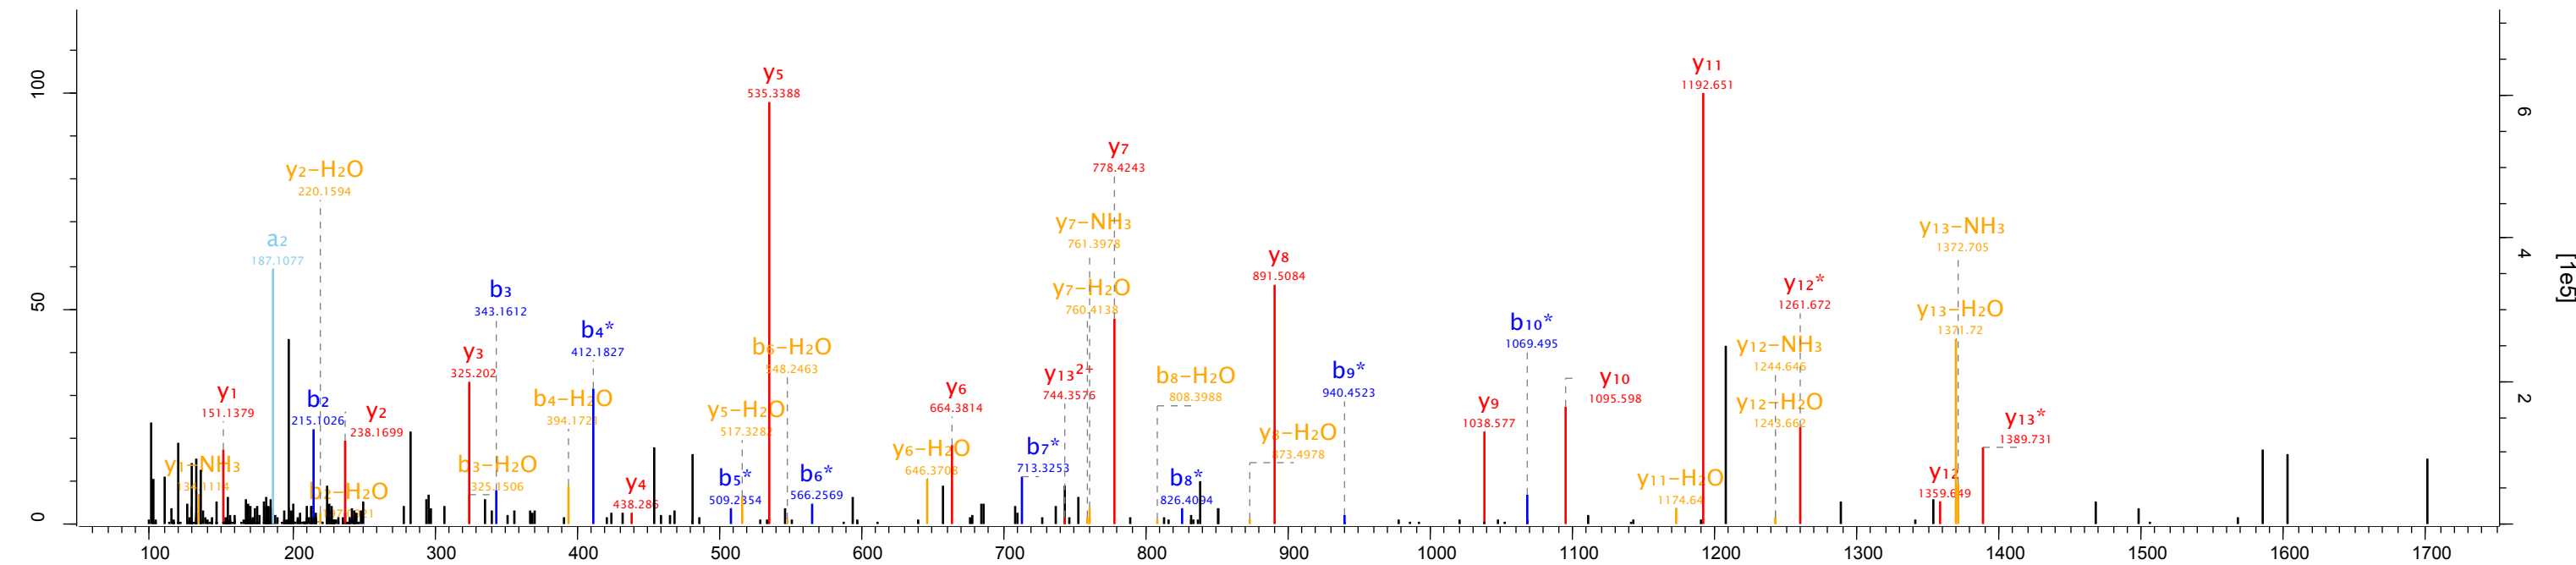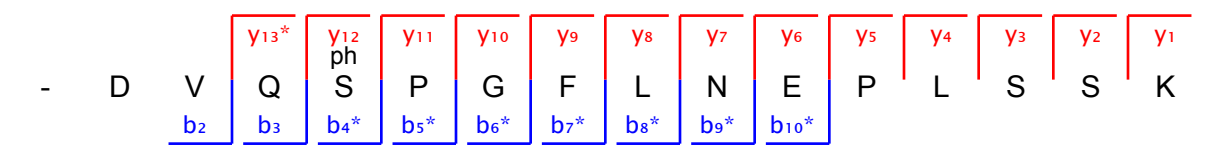



Raw file: 20150812\_A375SR\_Phospho\_BR1\_06  
 Scan: 2137 Method: FTMS; HCD Score: 86.78 m/z: 426.2 Gene names: PHC3

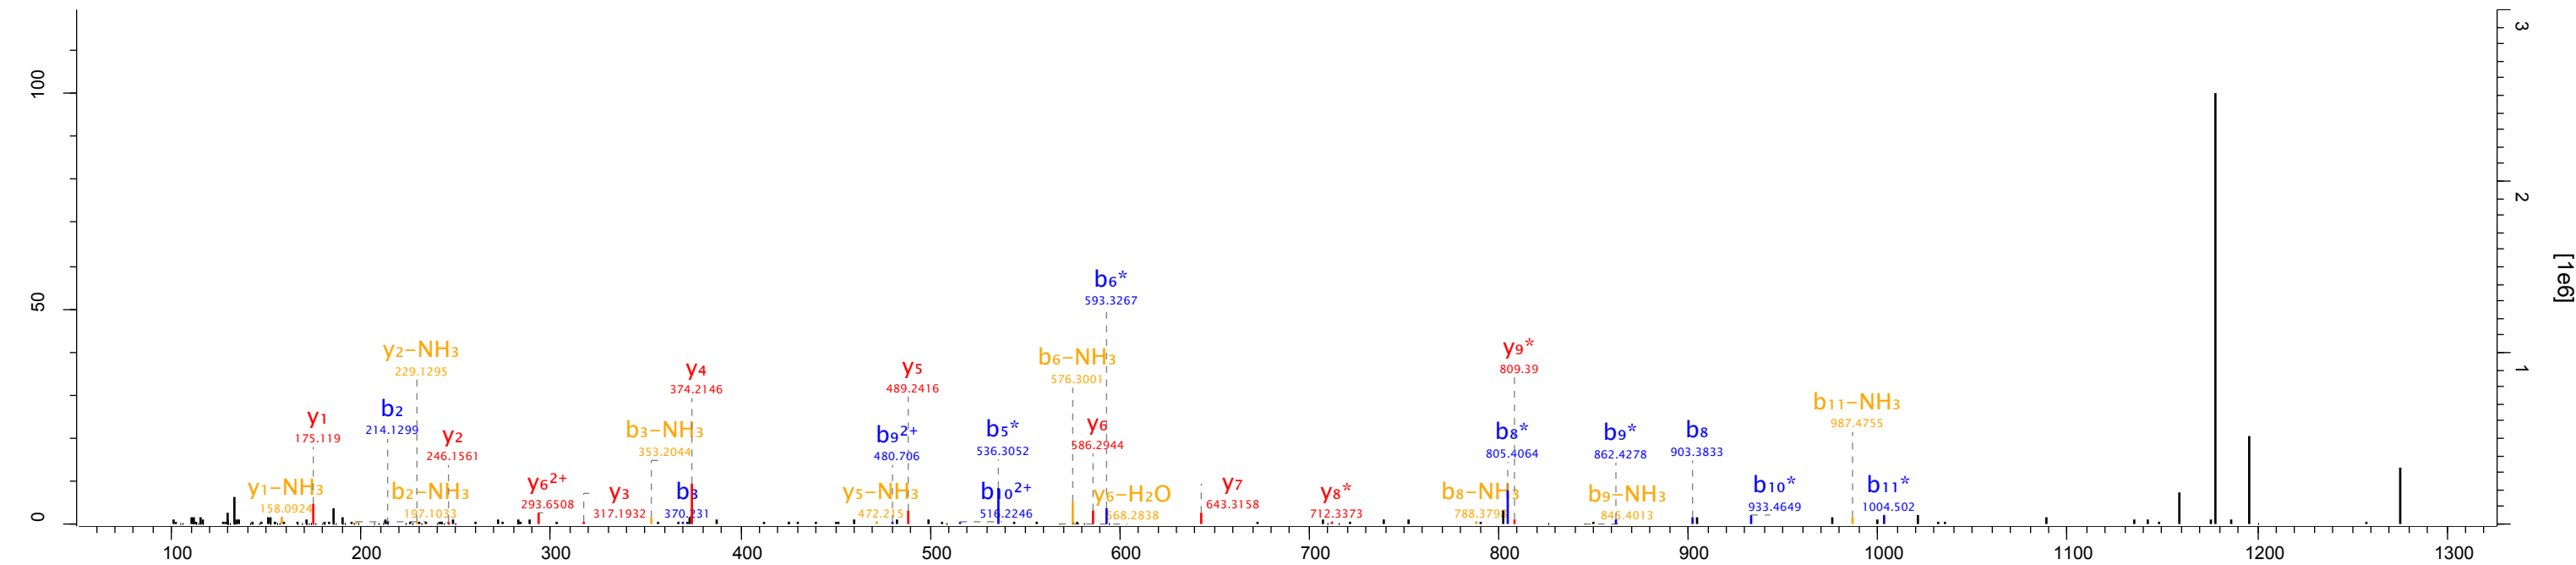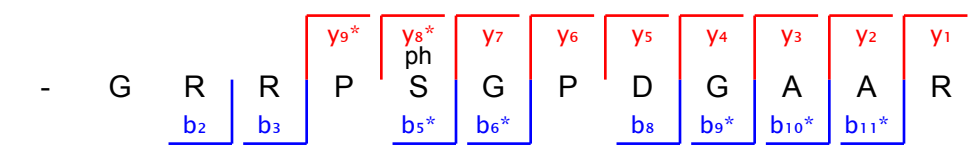

Raw file: 20150812\_A375SR\_Phospho\_BR1\_06  
 Scan: 2167 Method: FTMS; HCD Score: 176.04 m/z: 517.26 Gene names: BRD4

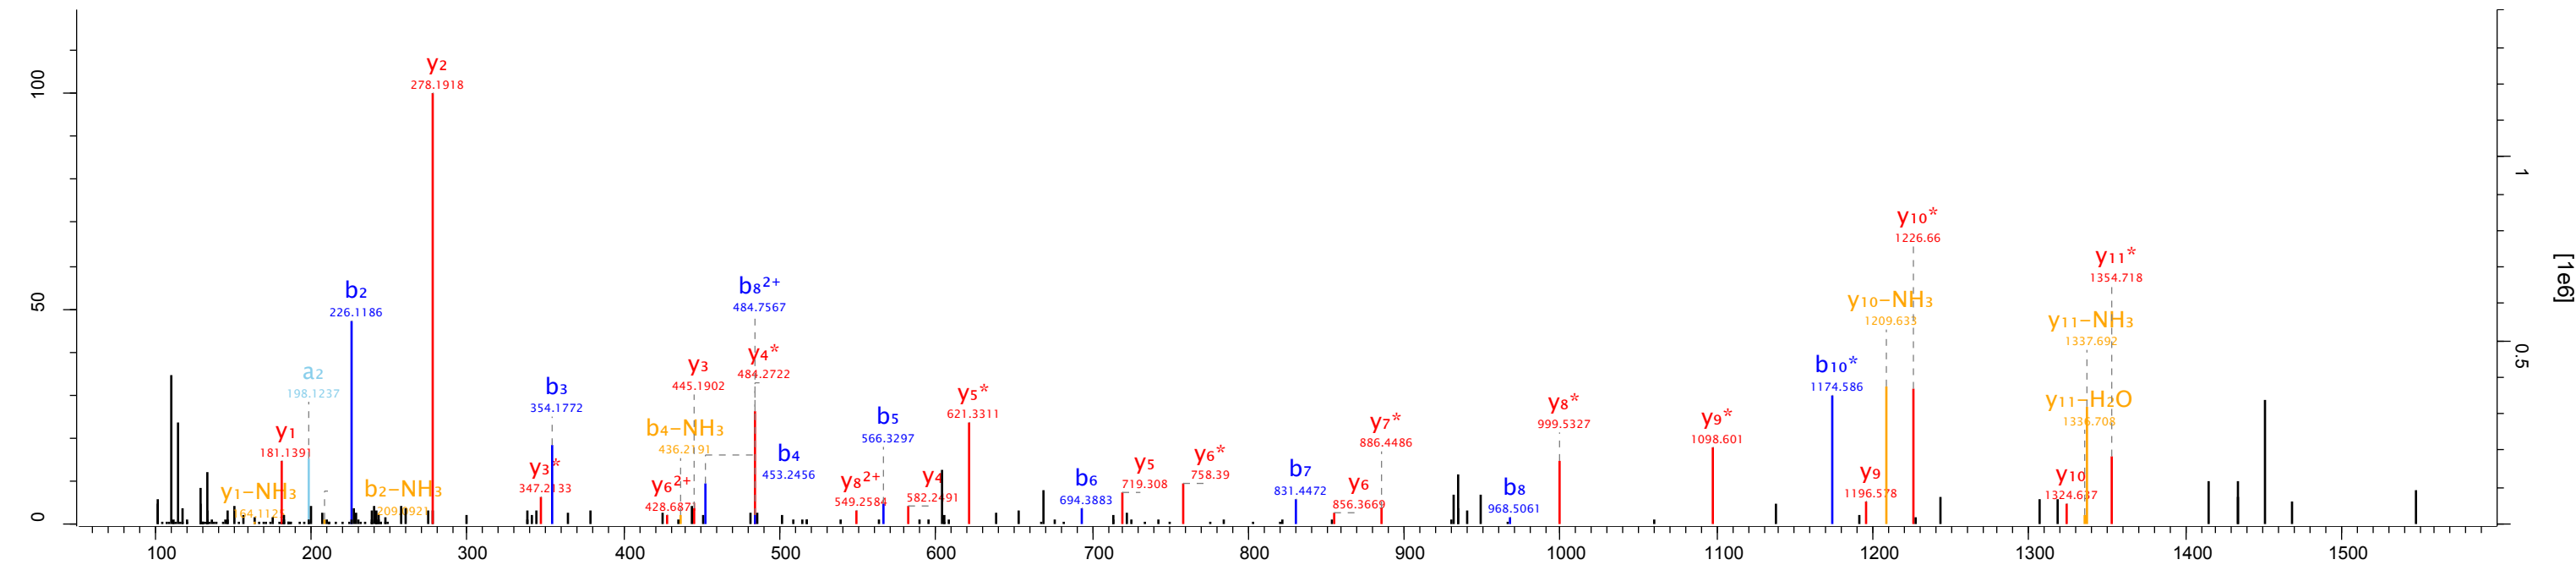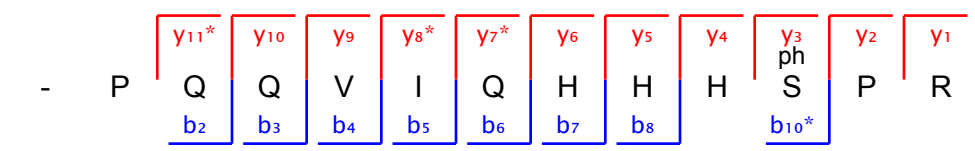

Raw file 20150812\_A375SR\_Phospho\_BR1\_06 Scan 22267 Method FTMS; HCD Score 96.13 m/z 684.69 Gene names FAM129B

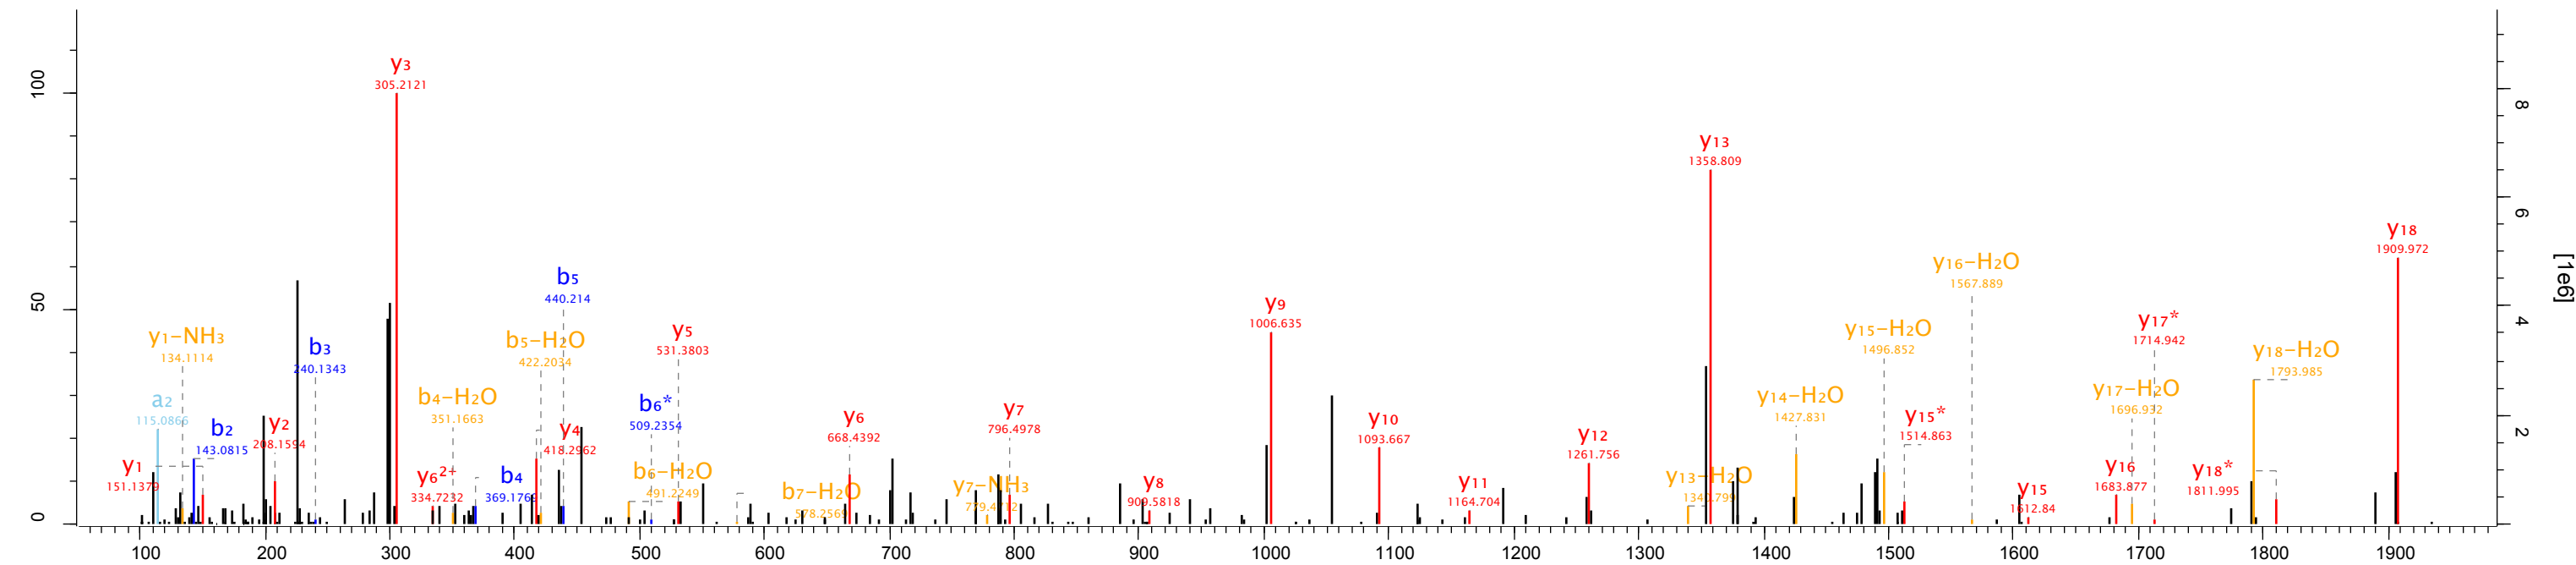

- A A P E A S S P P A S P L Q H L L P G K -

b<sub>2</sub>
b<sub>3</sub>
b<sub>4</sub>
b<sub>5</sub>
b<sub>6</sub><sup>\*</sup>
y<sub>18</sub>
y<sub>17</sub><sup>\*</sup>
y<sub>16</sub>
y<sub>15</sub><sup>ph</sup>
y<sub>13</sub>
y<sub>12</sub>
y<sub>11</sub>
y<sub>10</sub>
y<sub>9</sub>
y<sub>8</sub>
y<sub>7</sub>
y<sub>6</sub>
y<sub>5</sub>
y<sub>4</sub>
y<sub>3</sub>
y<sub>2</sub>
y<sub>1</sub>

Raw file: 20150812\_A375SR\_Phospho\_BR1\_06  
 Scan: 2277 Method: FTMS; HCD Score: 188.71 m/z: 699.8 Gene names: CBX8

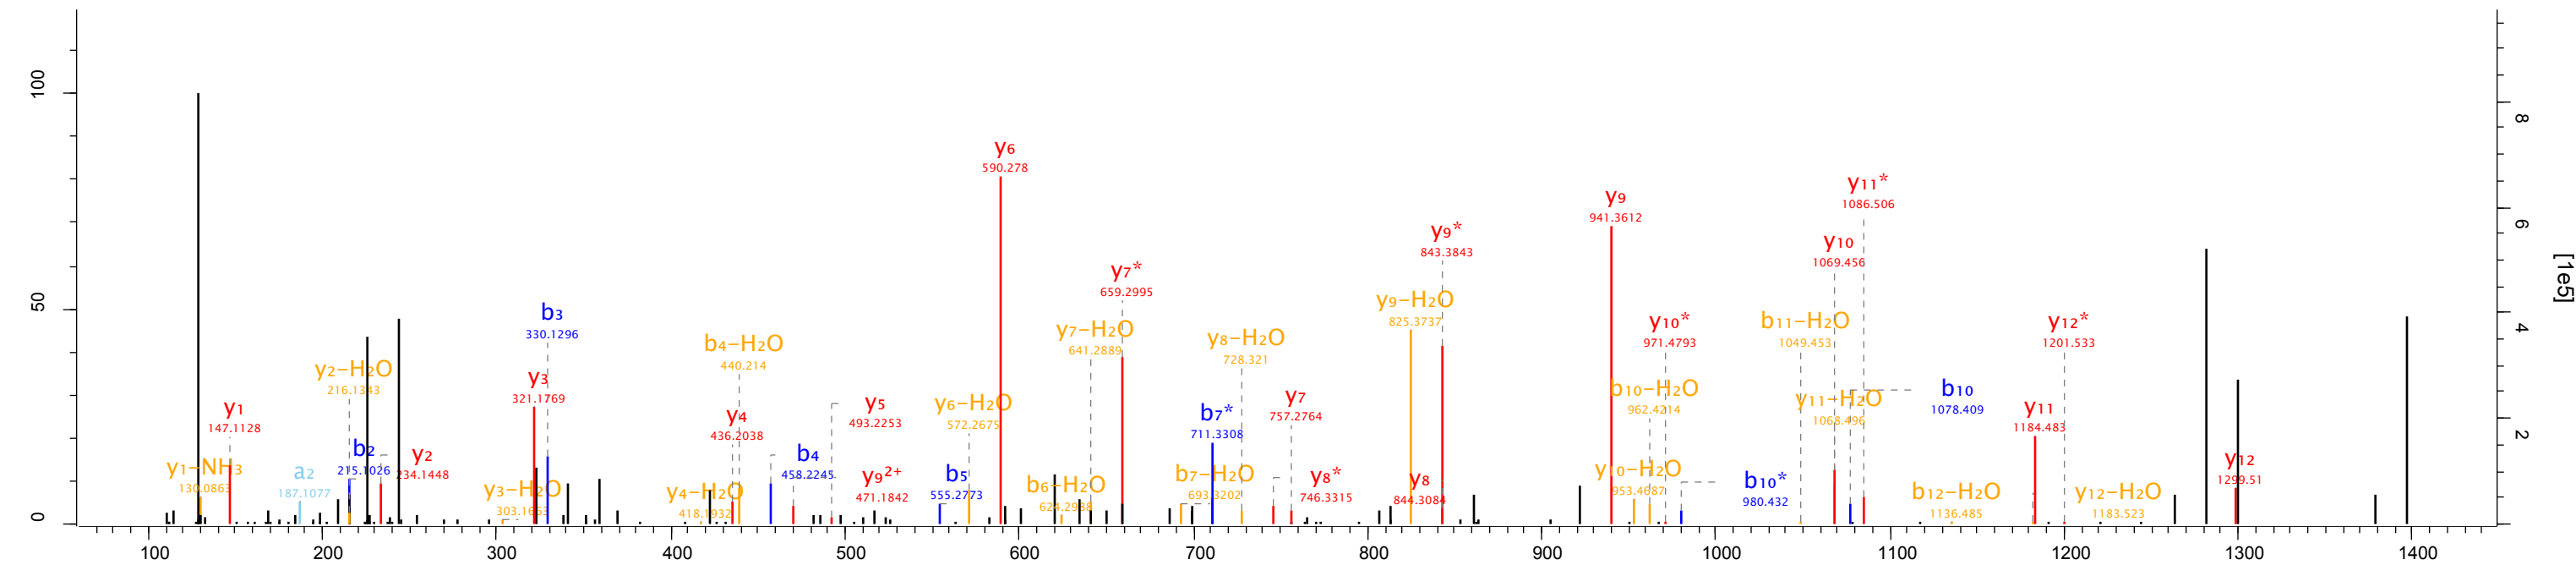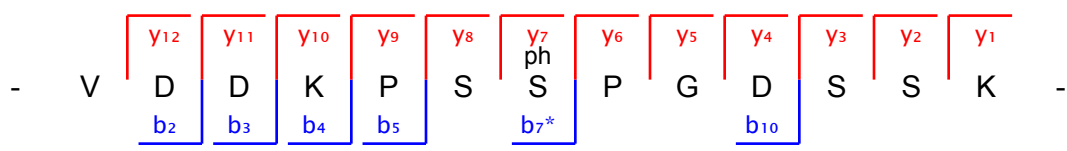

Raw file  
 20150812\_A375SR\_Phospho\_BR1\_06  
 Scan 23437 Method FTMS; HCD Score 128.29 m/z 1210 Gene names NFIX

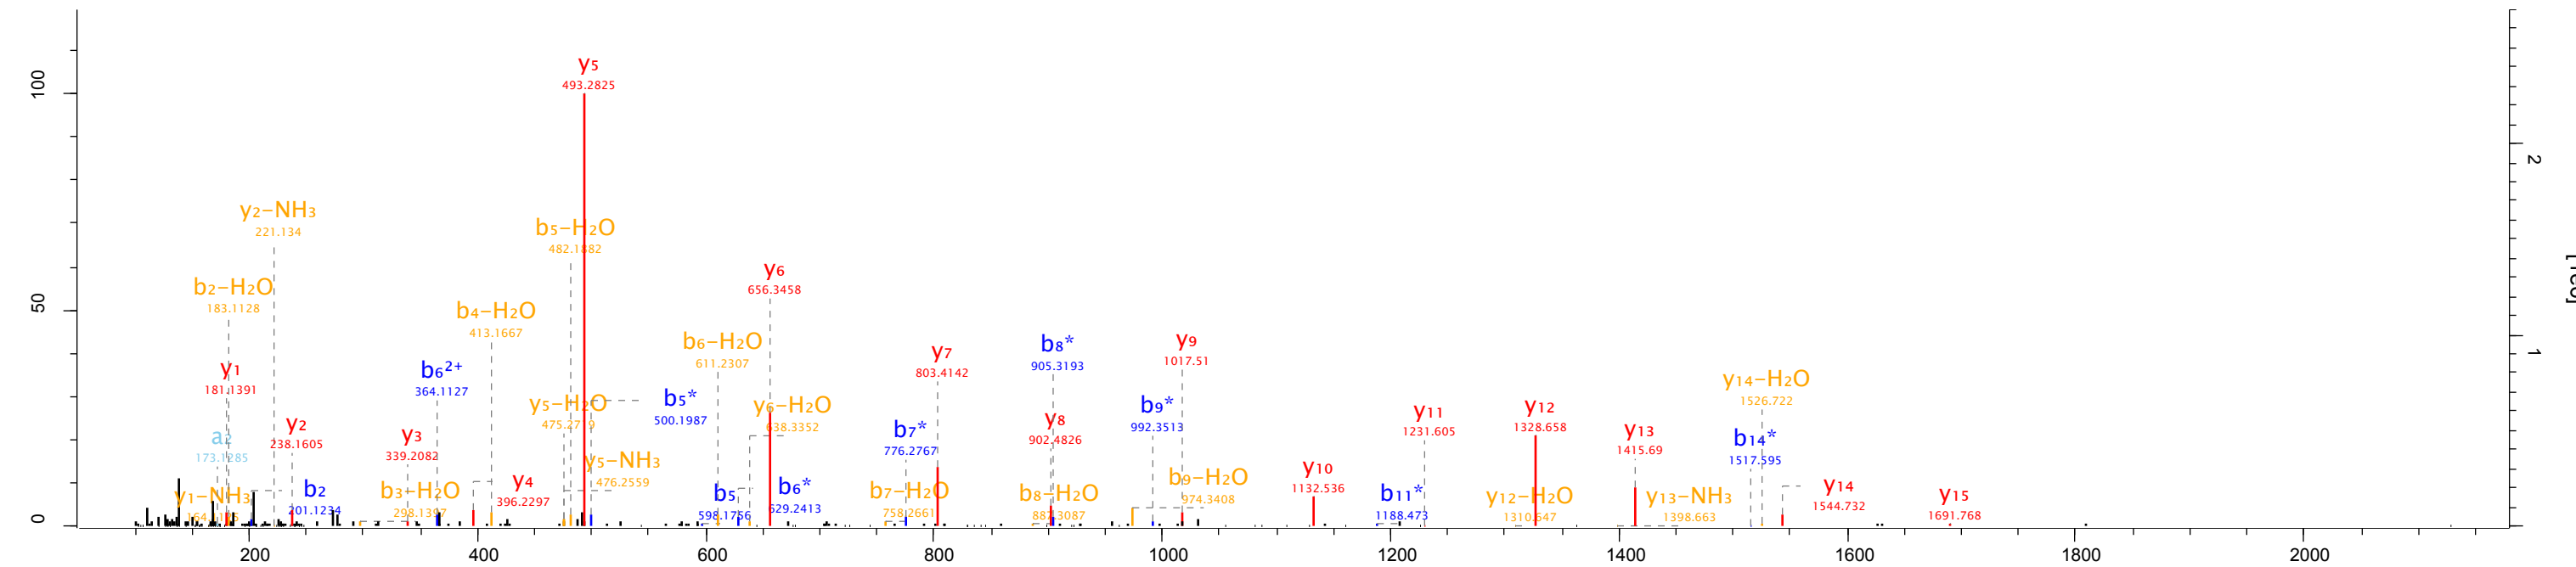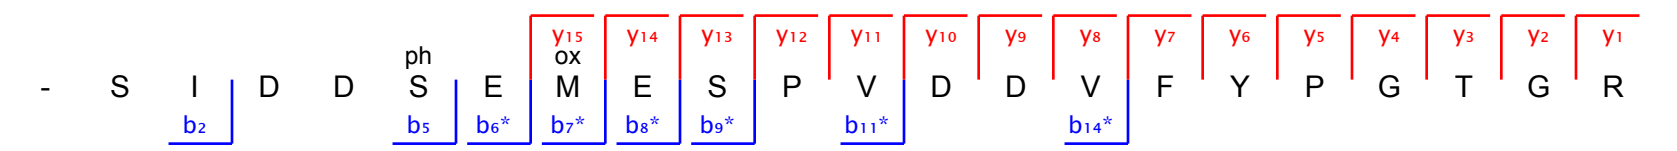

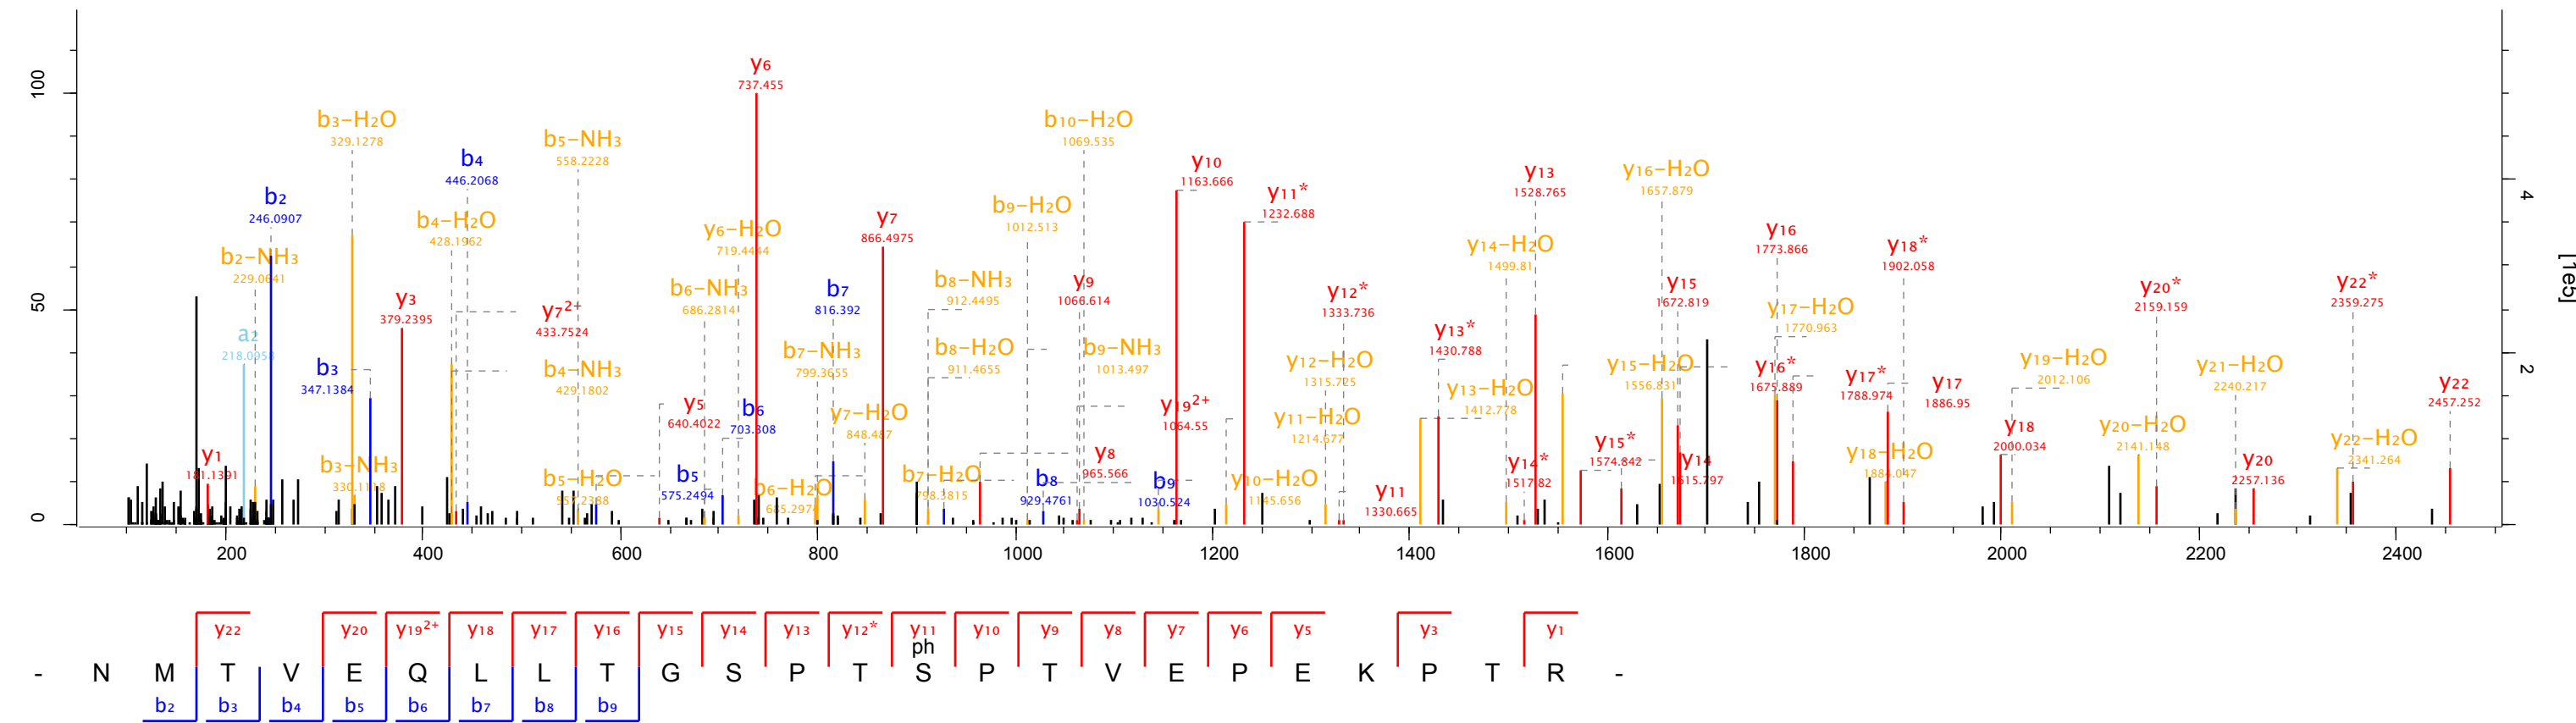

Raw file  
20150812\_A375SR\_Phospho\_BR1\_06

Scan 26297 Method FTMS; HCD Score 153.02 m/z 1017.15 Gene names GRIPAP1

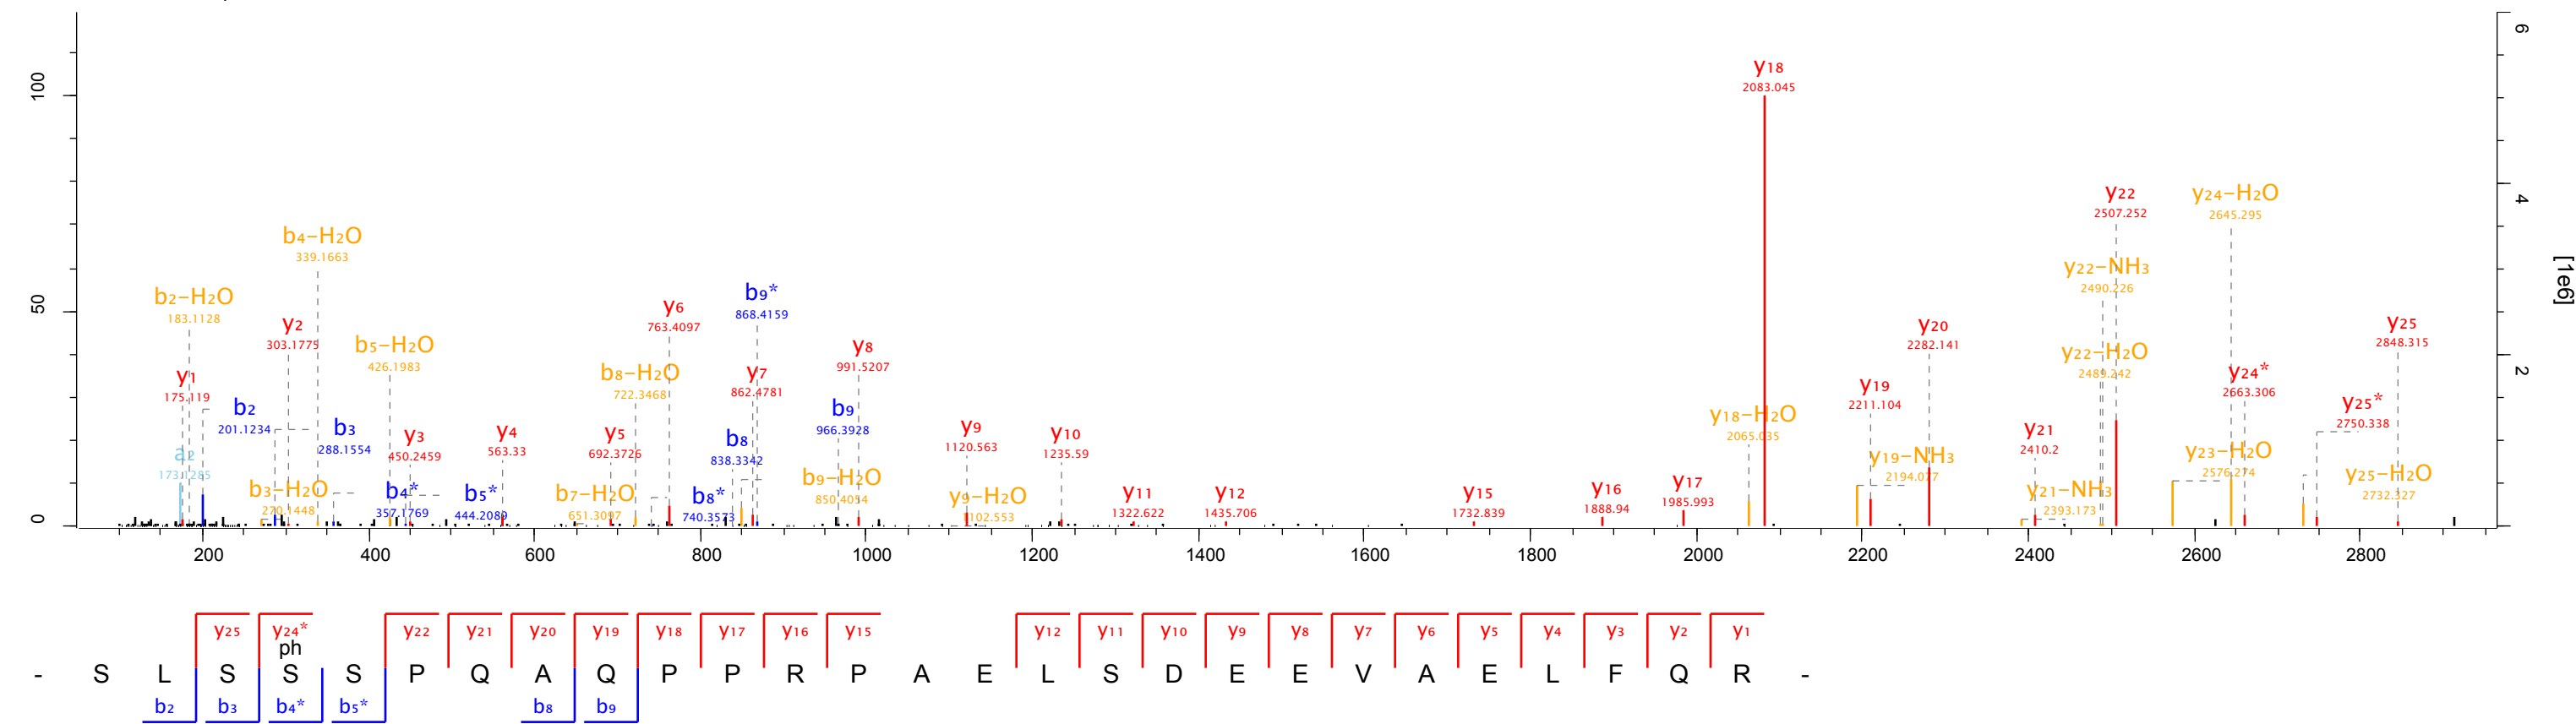

Raw file 20150812\_A375SR\_Phospho\_BR1\_06 Scan 27927 Method FTMS; HCD Score 53.26 m/z 977.15 Gene names FKBP15

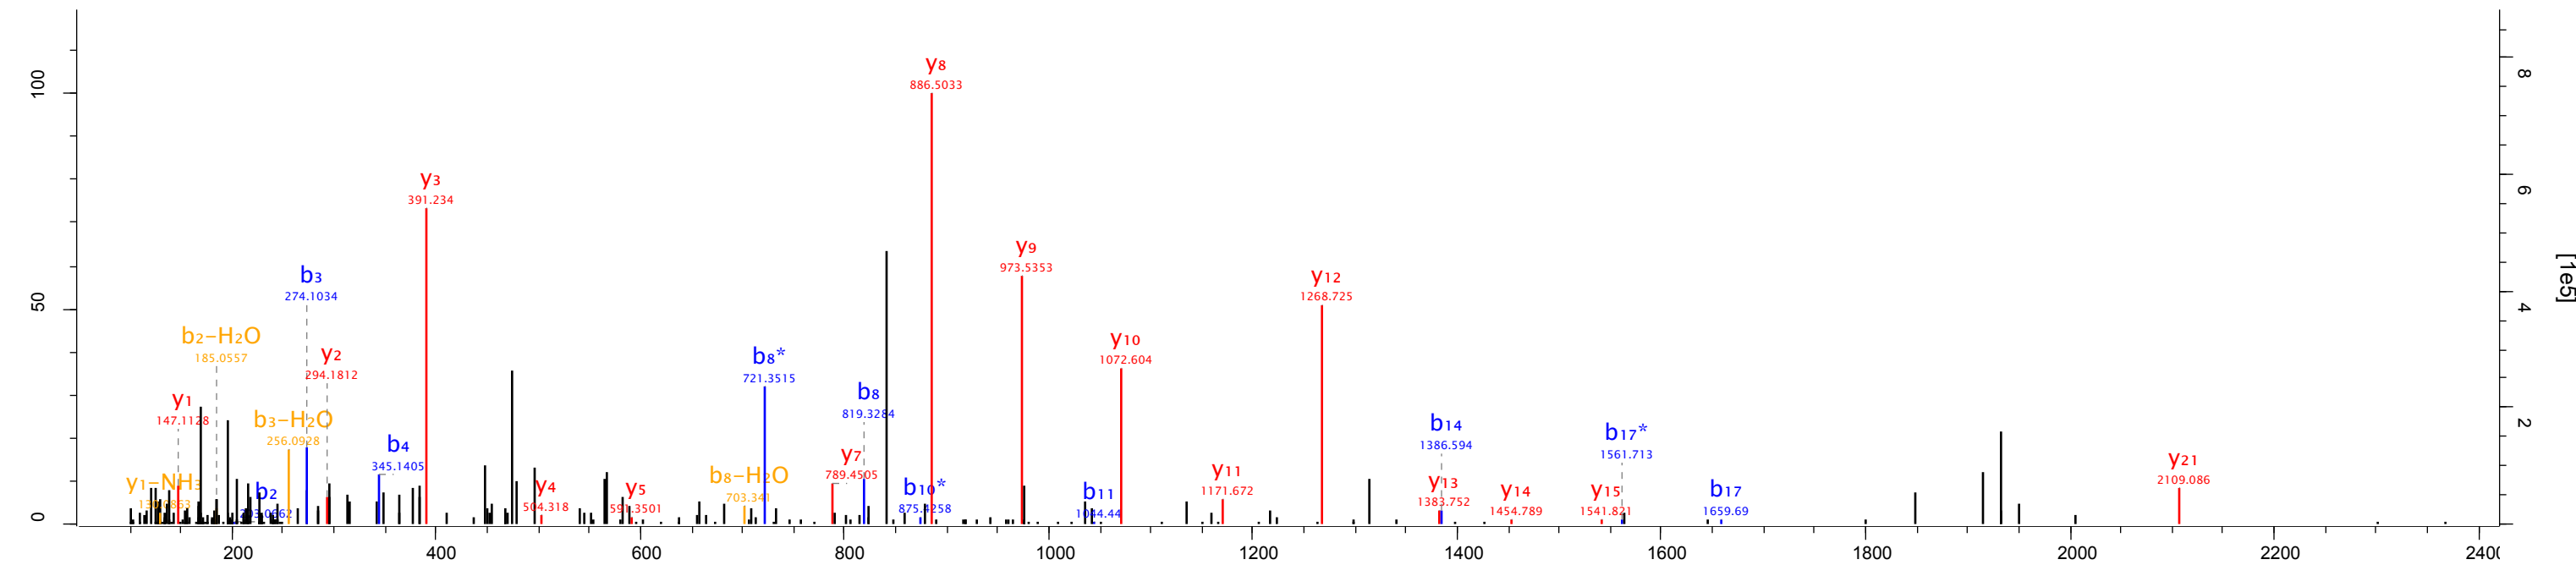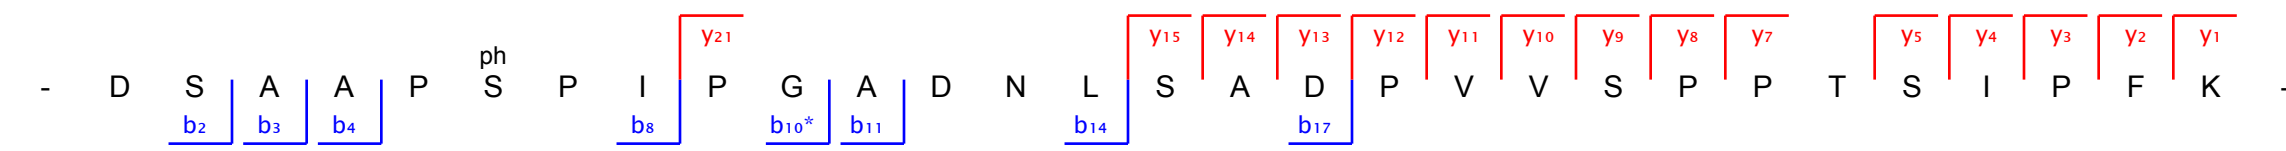



Raw file: 20150812\_A375SR\_Phospho\_BR1\_06  
 Scan: 3177 Method: FTMS; HCD Score: 145.31 m/z: 704.33 Gene names: ZNF318

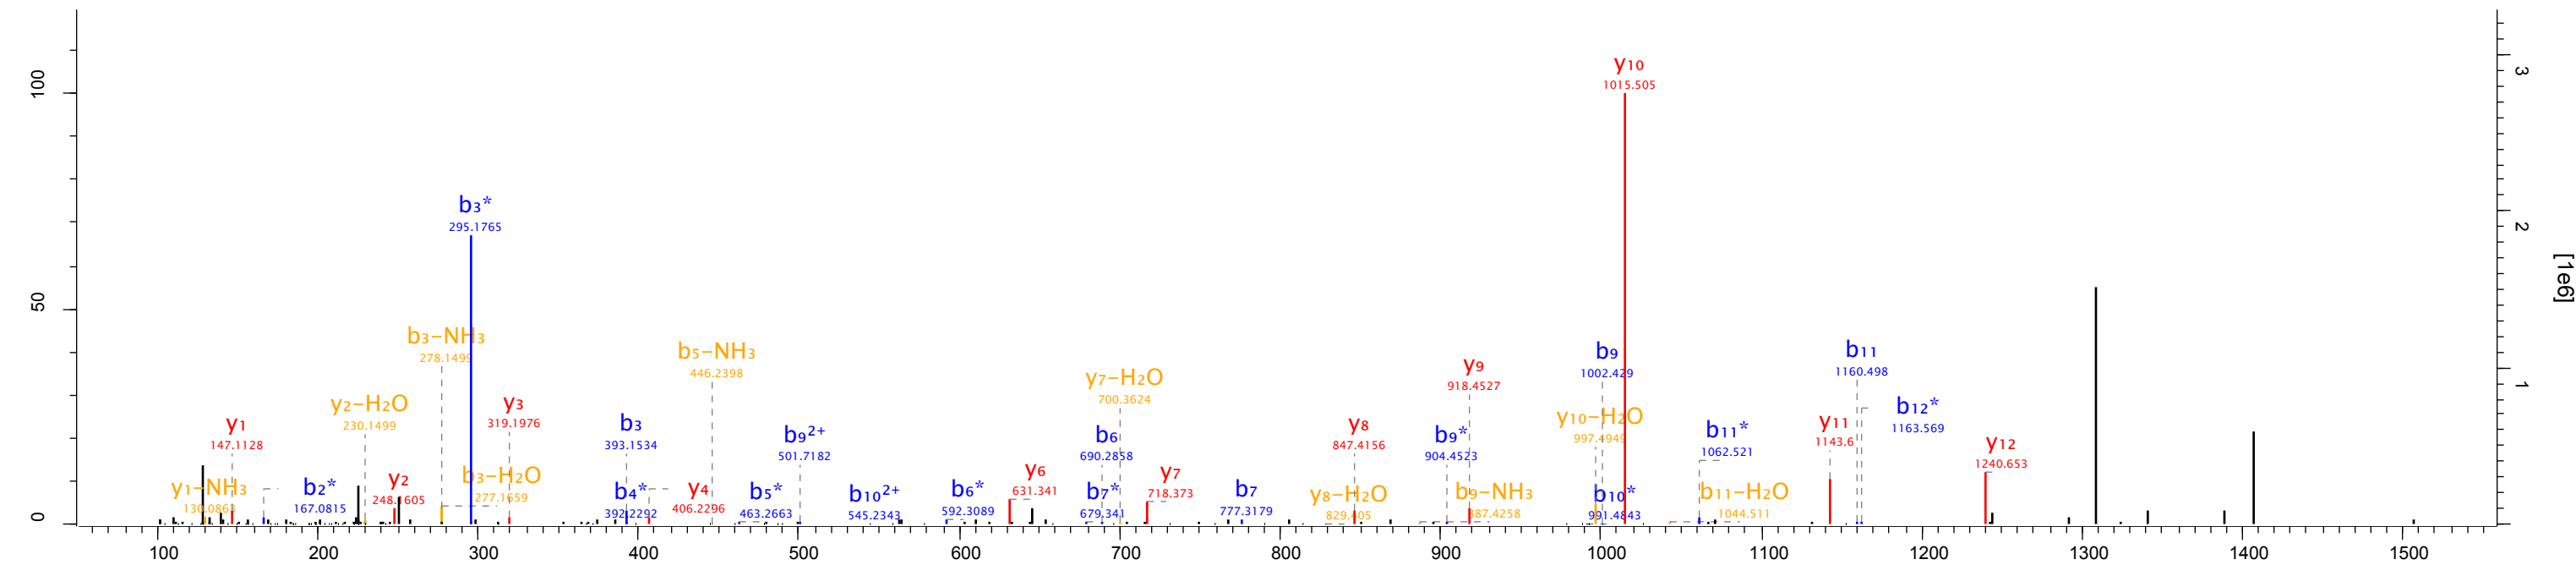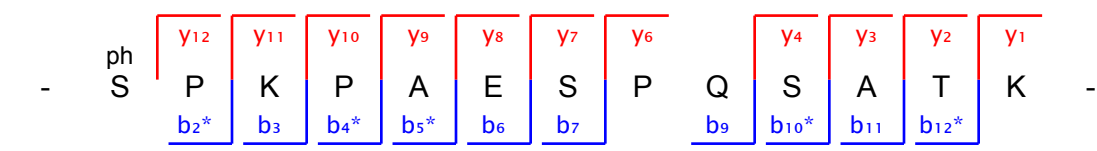

Raw file 20150812\_A375SR\_Phospho\_BR1\_06 Scan 7847 Method FTMS; HCD Score 87.95 m/z 618.55 Gene names ZFP36L2

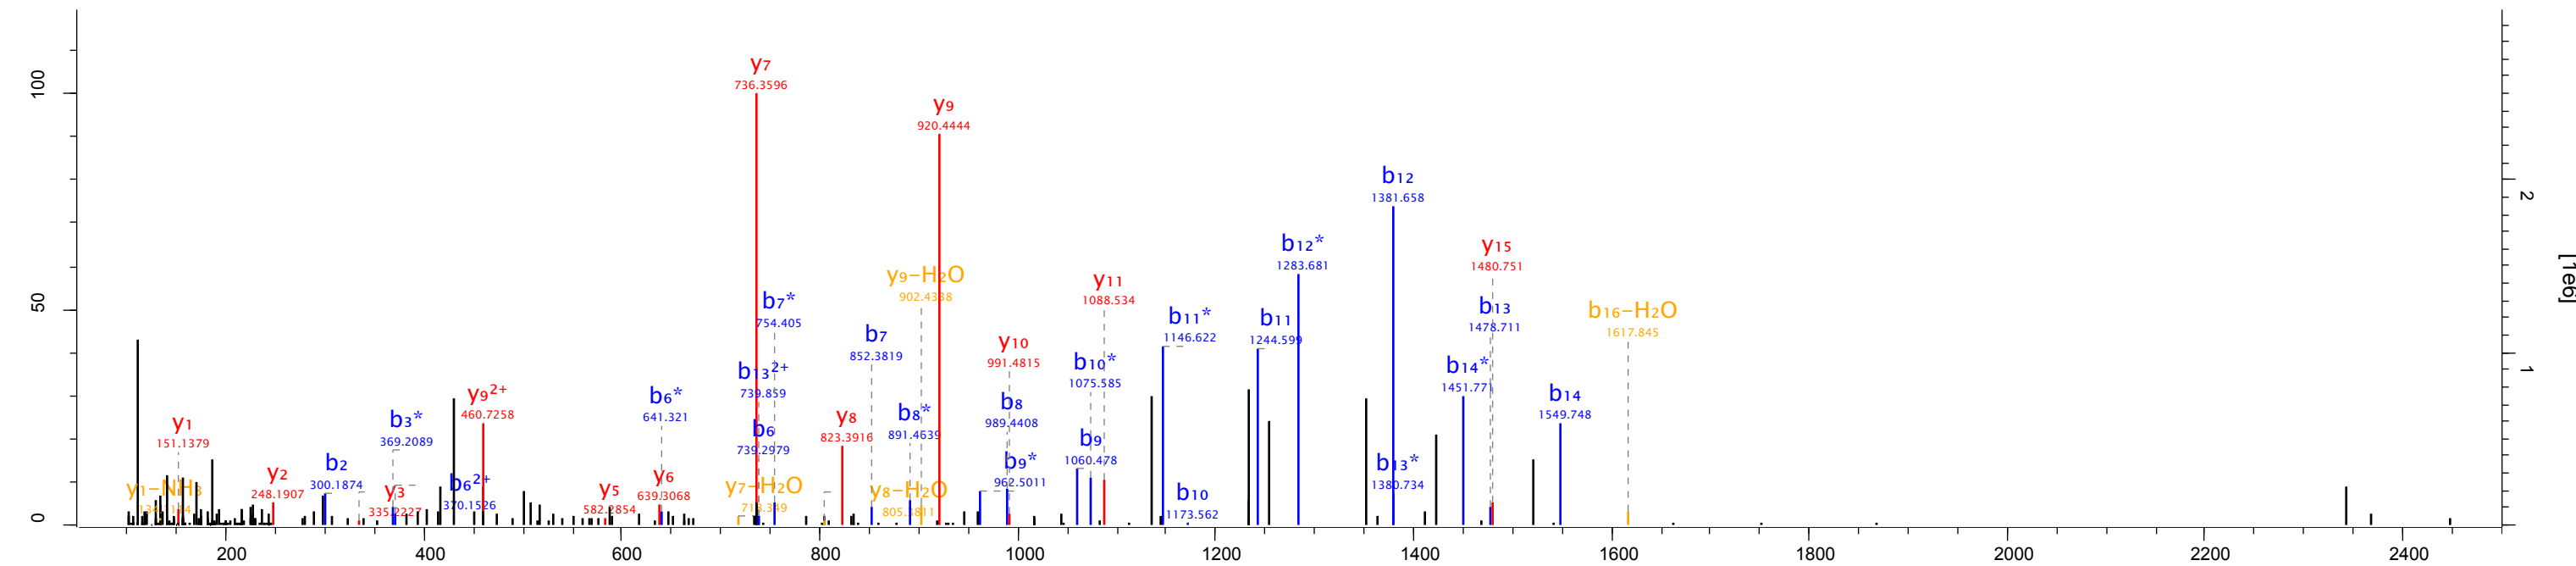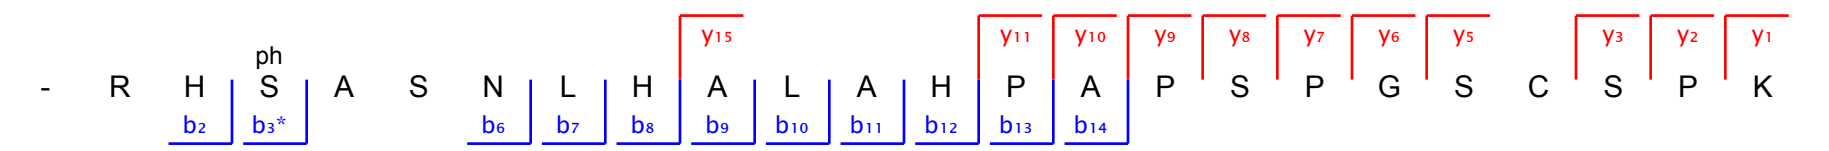

Raw file Scan Method Score m/z Gene names  
 20150812\_A375SR\_Phospho\_BR1\_06 7897 FTMS; HCD 113.73 859.4 FAM117B

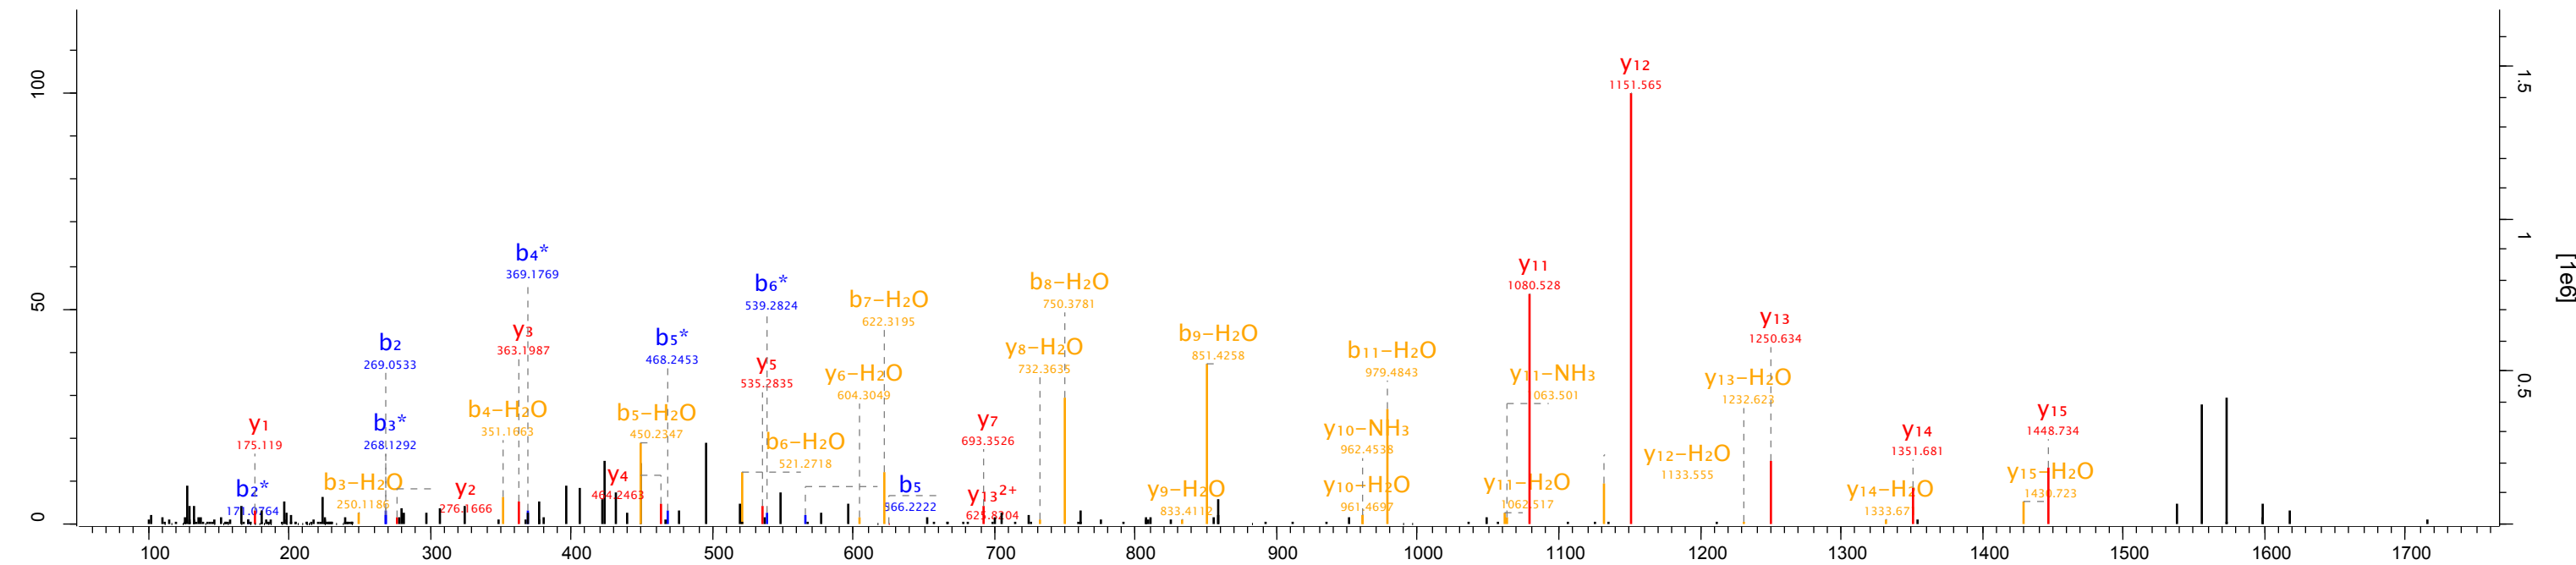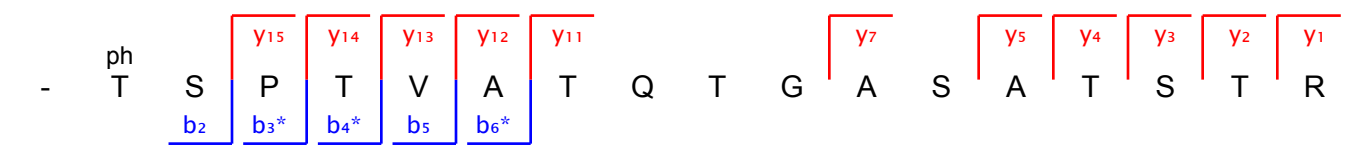



Raw file: 20150812\_A375SR\_Phospho\_BR1\_06  
 Scan: 8397 Method: FTMS; HCD Score: 74.29 m/z: 634.29 Gene names: MCMBP

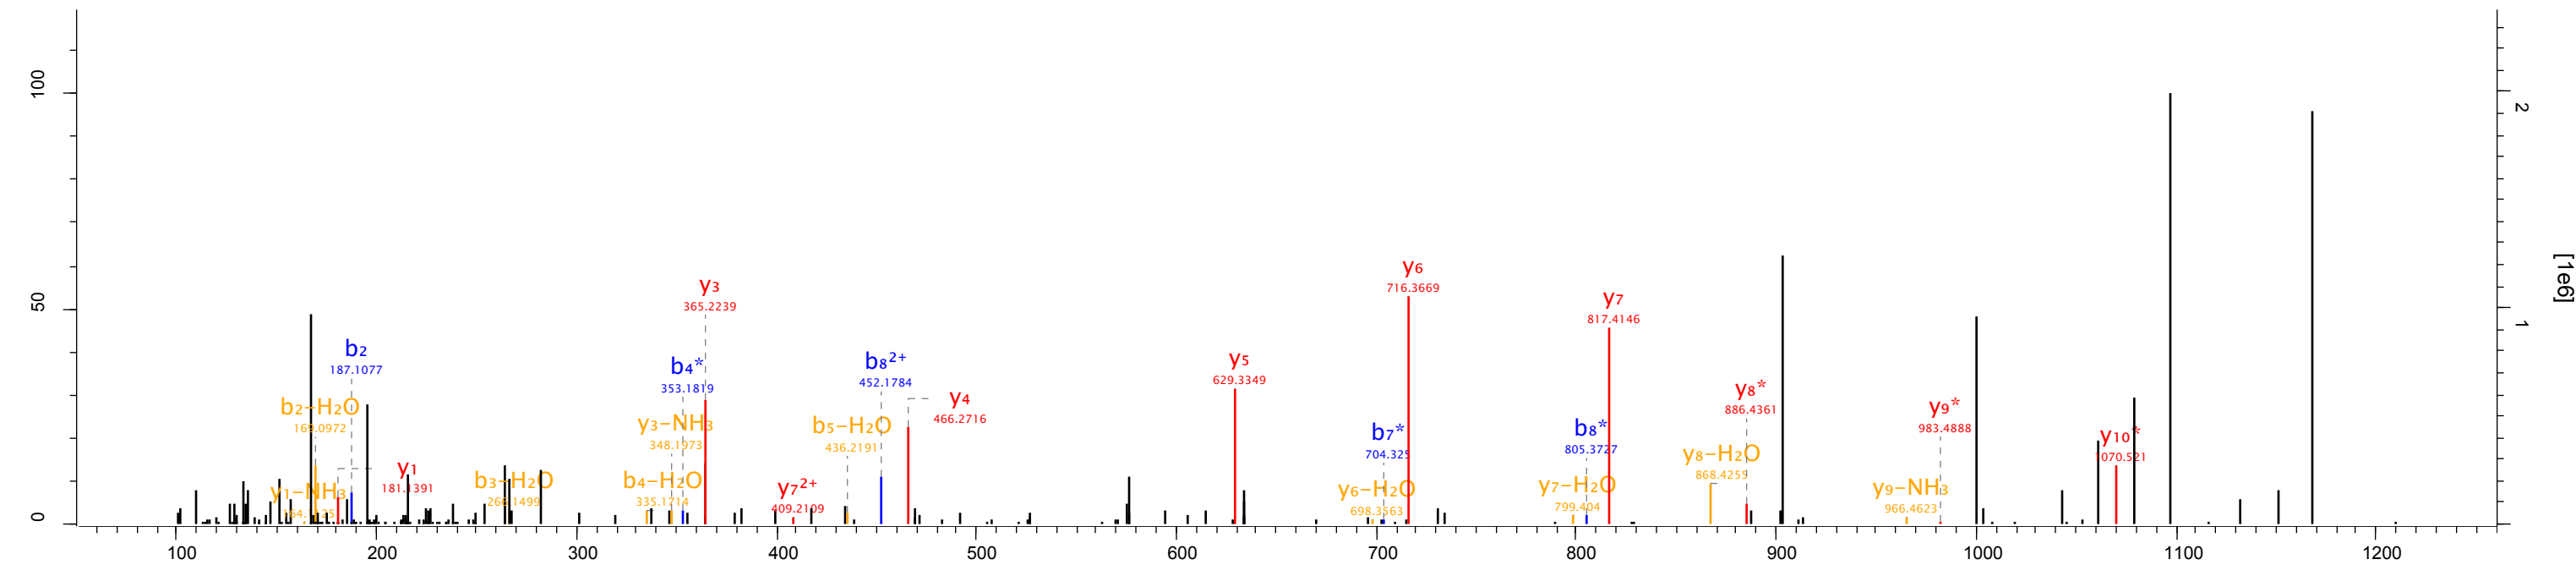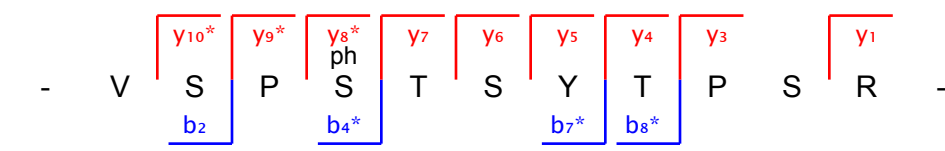

Raw file: 20150812\_A375SR\_Phospho\_BR1\_06  
 Scan: 9837 Method: FTMS; HCD Score: 176.46 m/z: 923.41 Gene names: EPB41L1

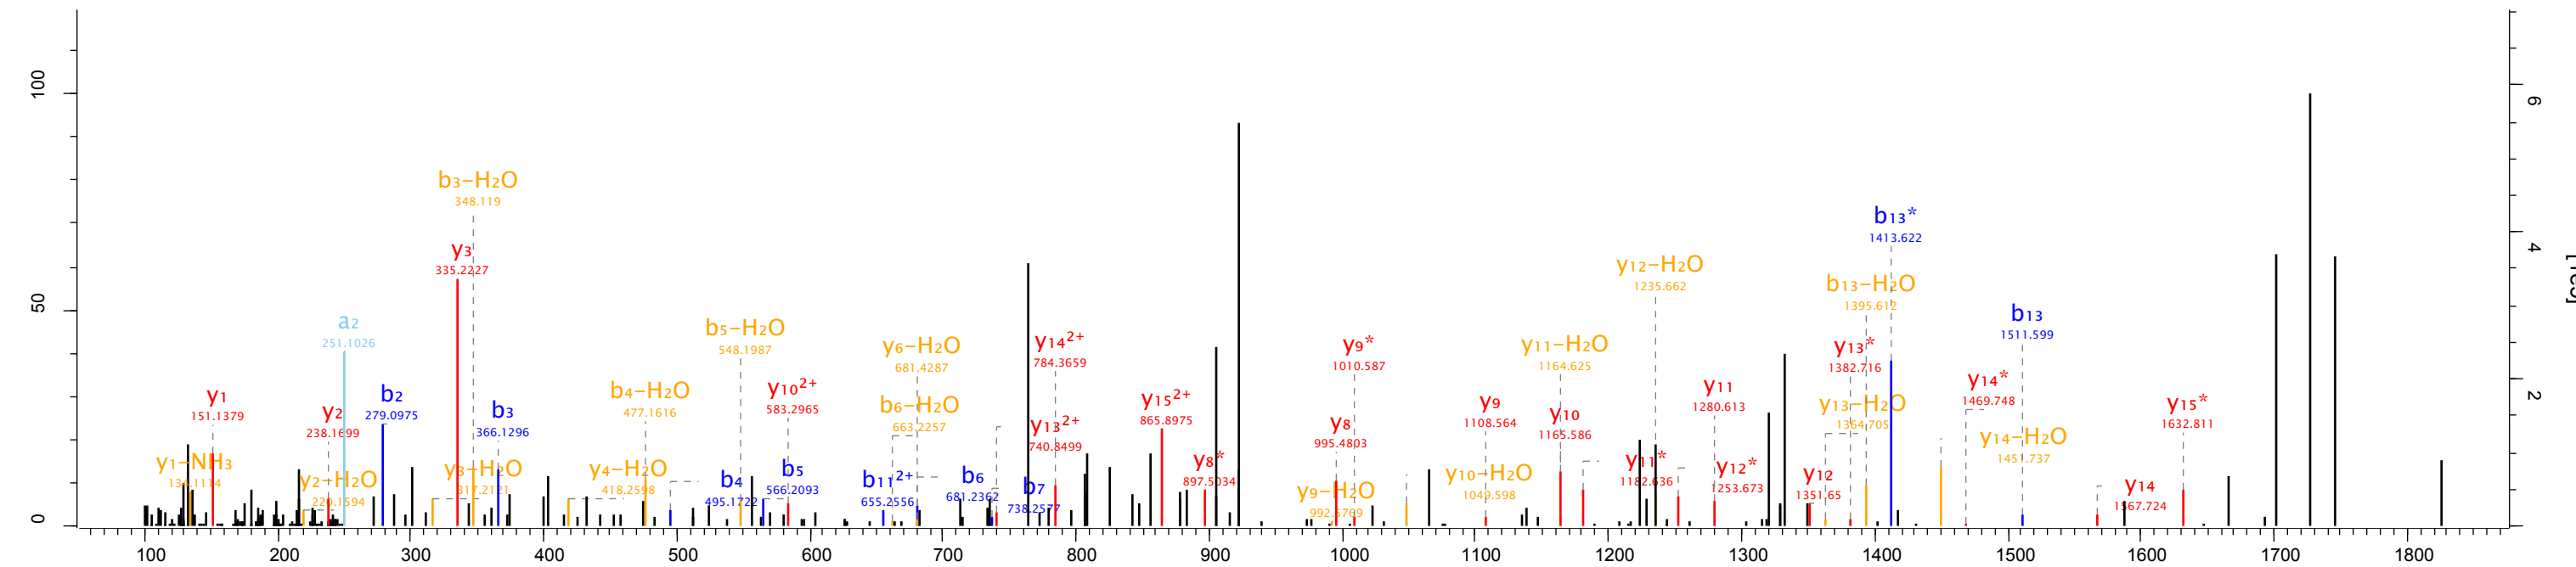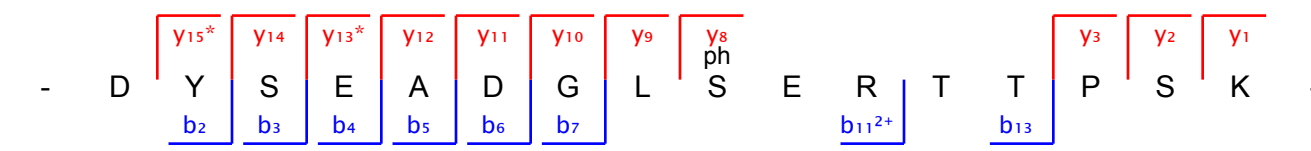

Raw file 20150812\_A375SR\_Phospho\_BR1\_07 Scan 10477 Method FTMS; HCD Score 118.61 m/z 534.75 Gene names PARN

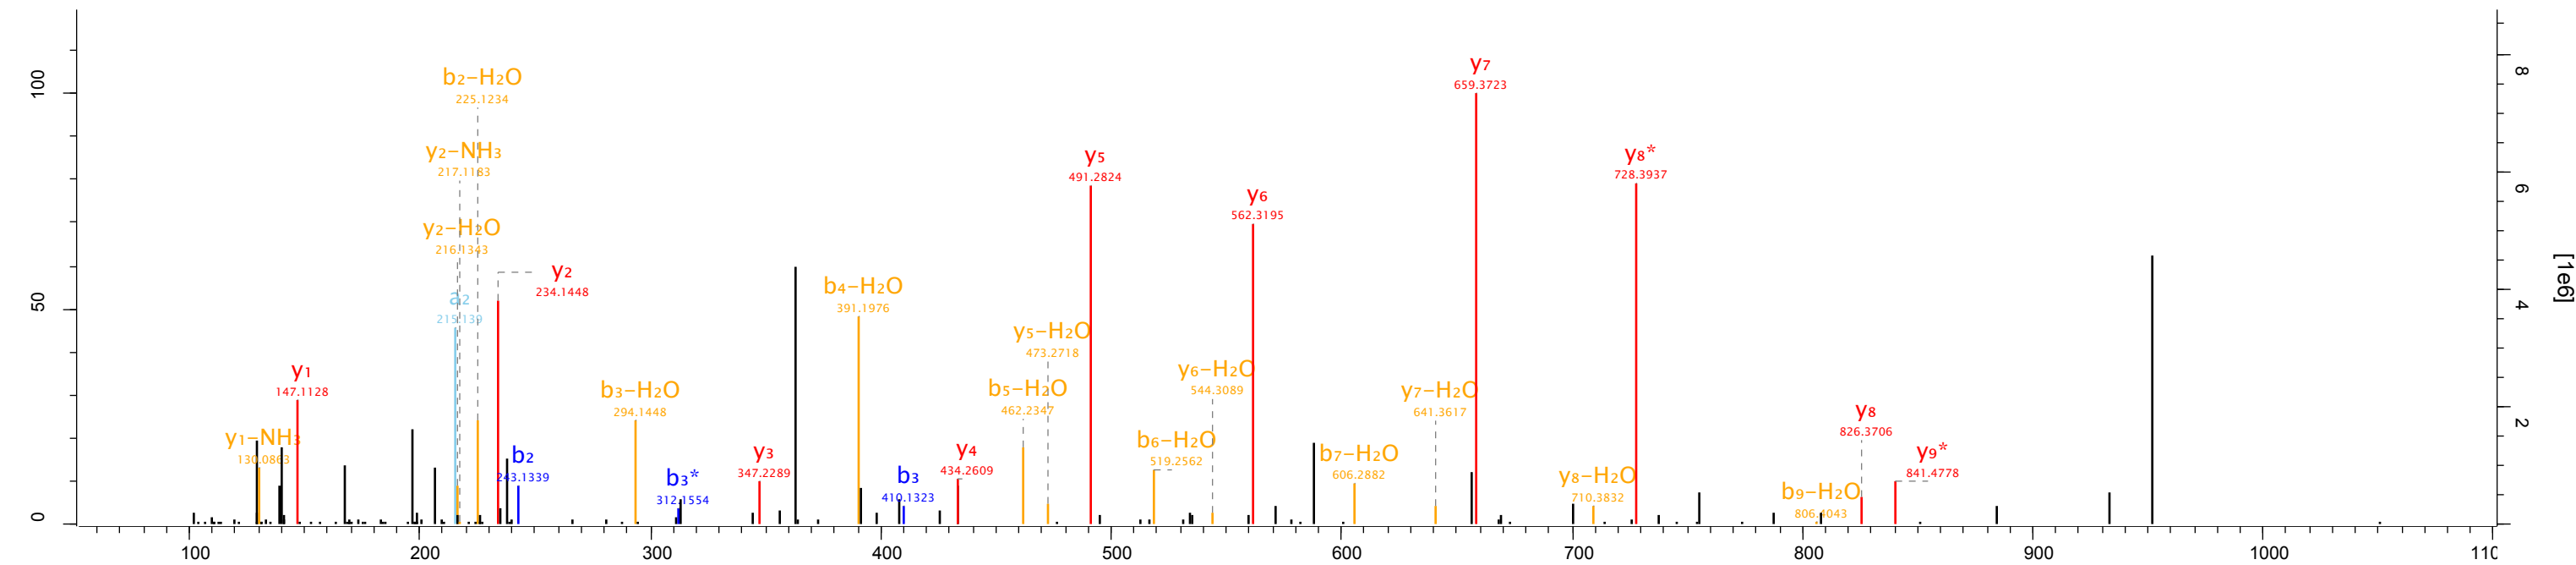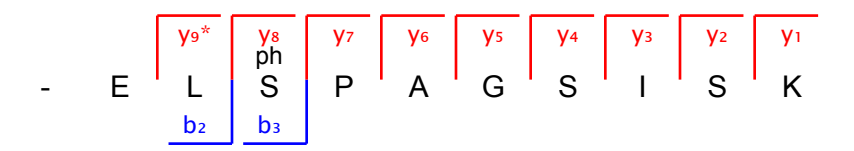

Raw file 20150812\_A375SR\_Phospho\_BR1\_07 Scan 11647 Method FTMS; HCD Score 398.97 m/z 1182.45 Gene names GPN1

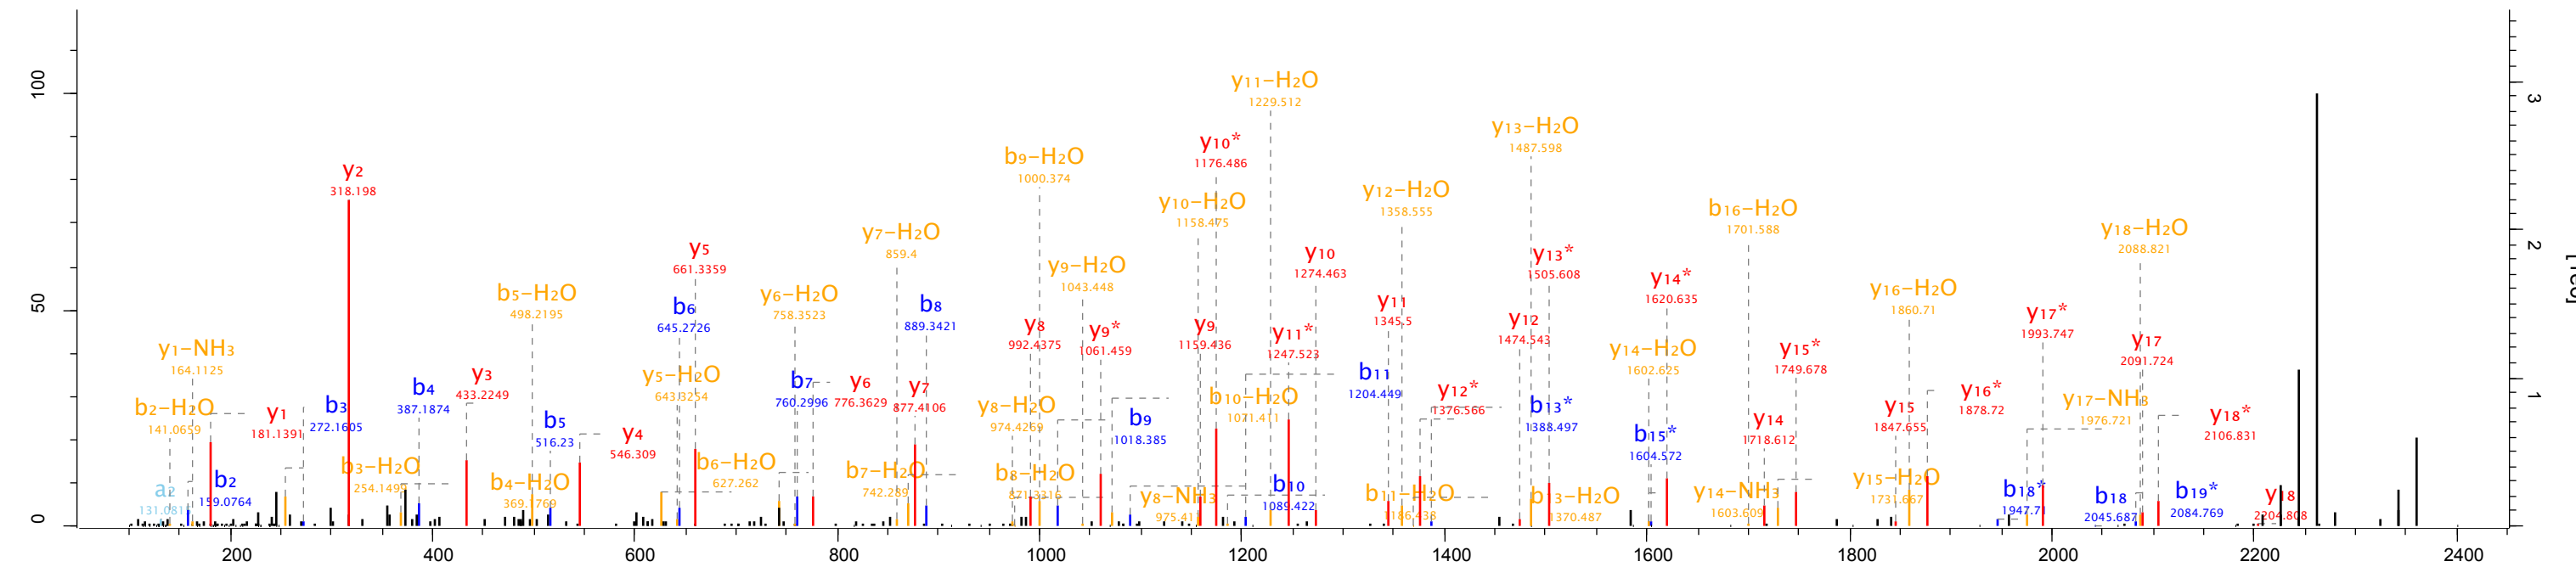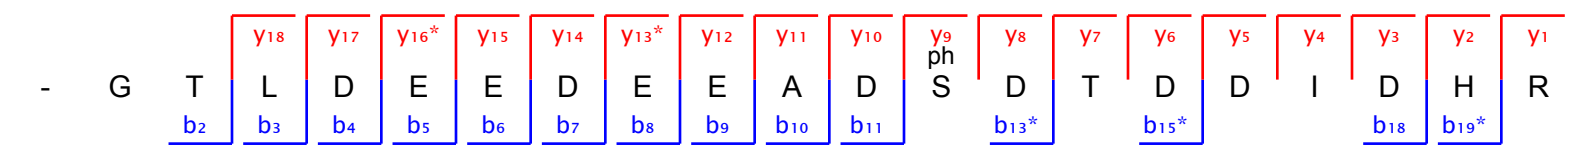



Raw file: 20150812\_A375SR\_Phospho\_BR1\_07  
 Scan: 11707 Method: FTMS; HCD Score: 147.41 m/z: 617.63 Gene names: ADD3

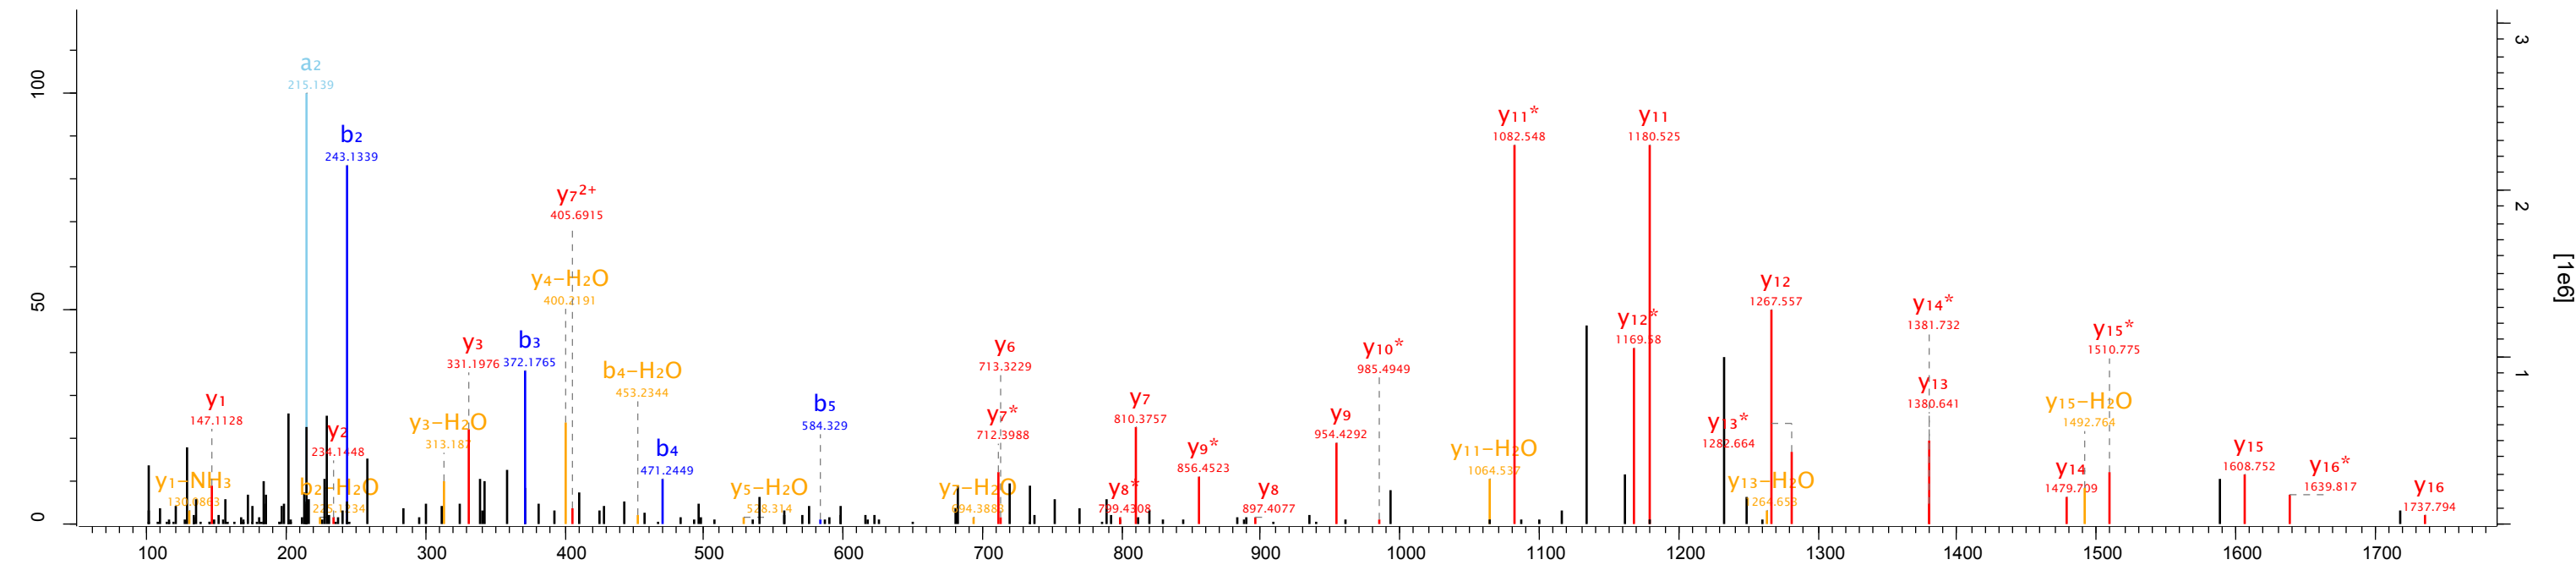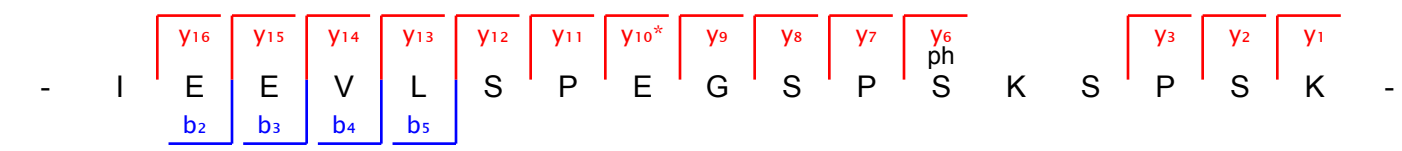

Raw file 20150812\_A375SR\_Phospho\_BR1\_07 Scan 12387 Method FTMS; HCD Score 148.18 m/z 570.76 Gene names GPRC5A

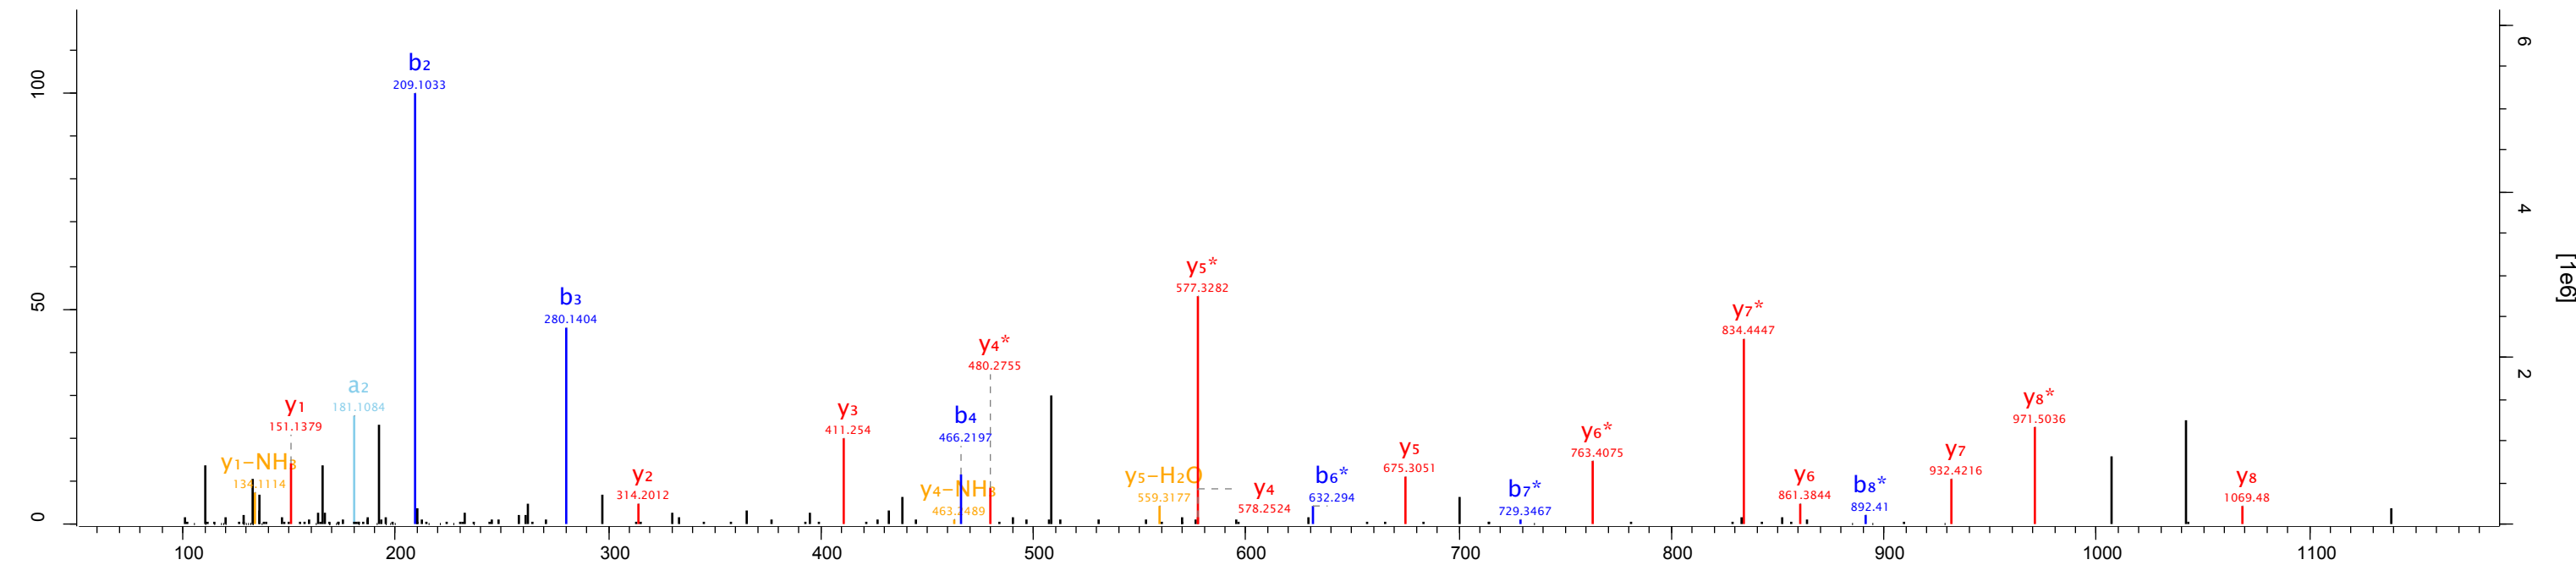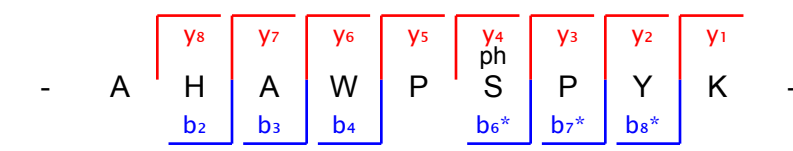

Raw file 20150812\_A375SR\_Phospho\_BR1\_07 Scan 12737 Method FTMS; HCD Score 244.88 m/z 923.84 Gene names SNRNP200

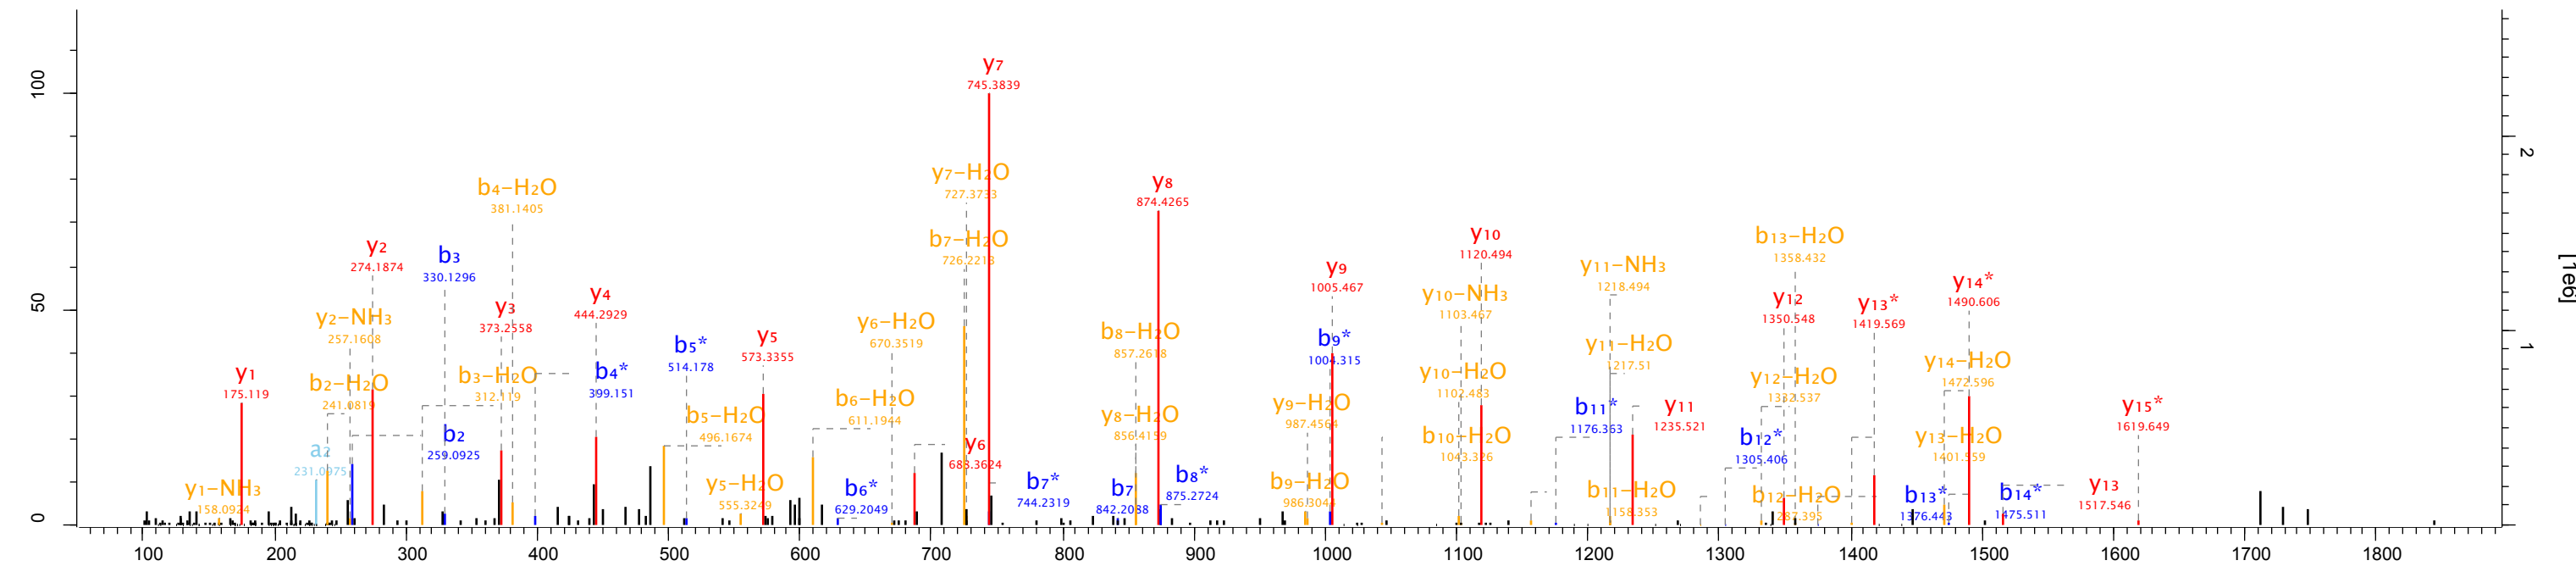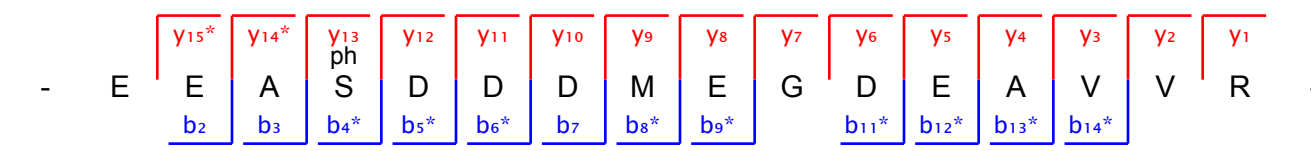

Raw file 20150812\_A375SR\_Phospho\_BR1\_07 Scan 15627 Method FTMS; HCD Score 140.2 m/z 795.87 Gene names SNAPIN

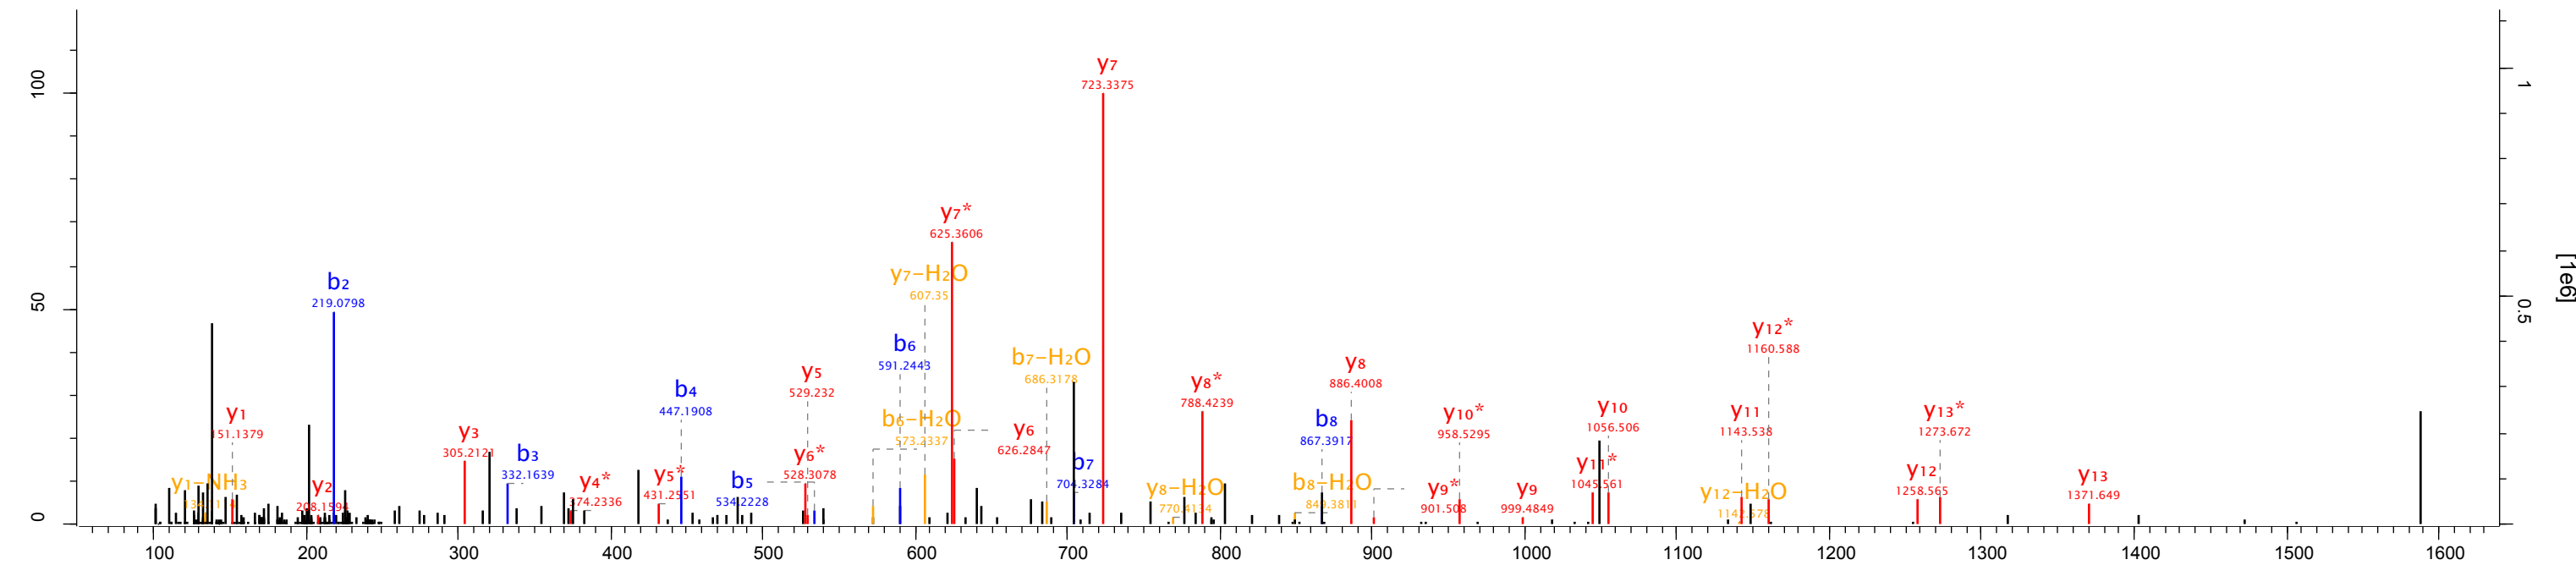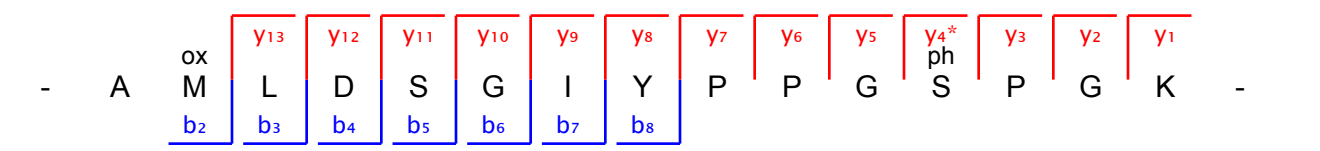

Raw file 20150812\_A375SR\_Phospho\_BR1\_07 Scan 22367 Method FTMS; HCD Score 190.33 m/z 768.71 Gene names SRRM2

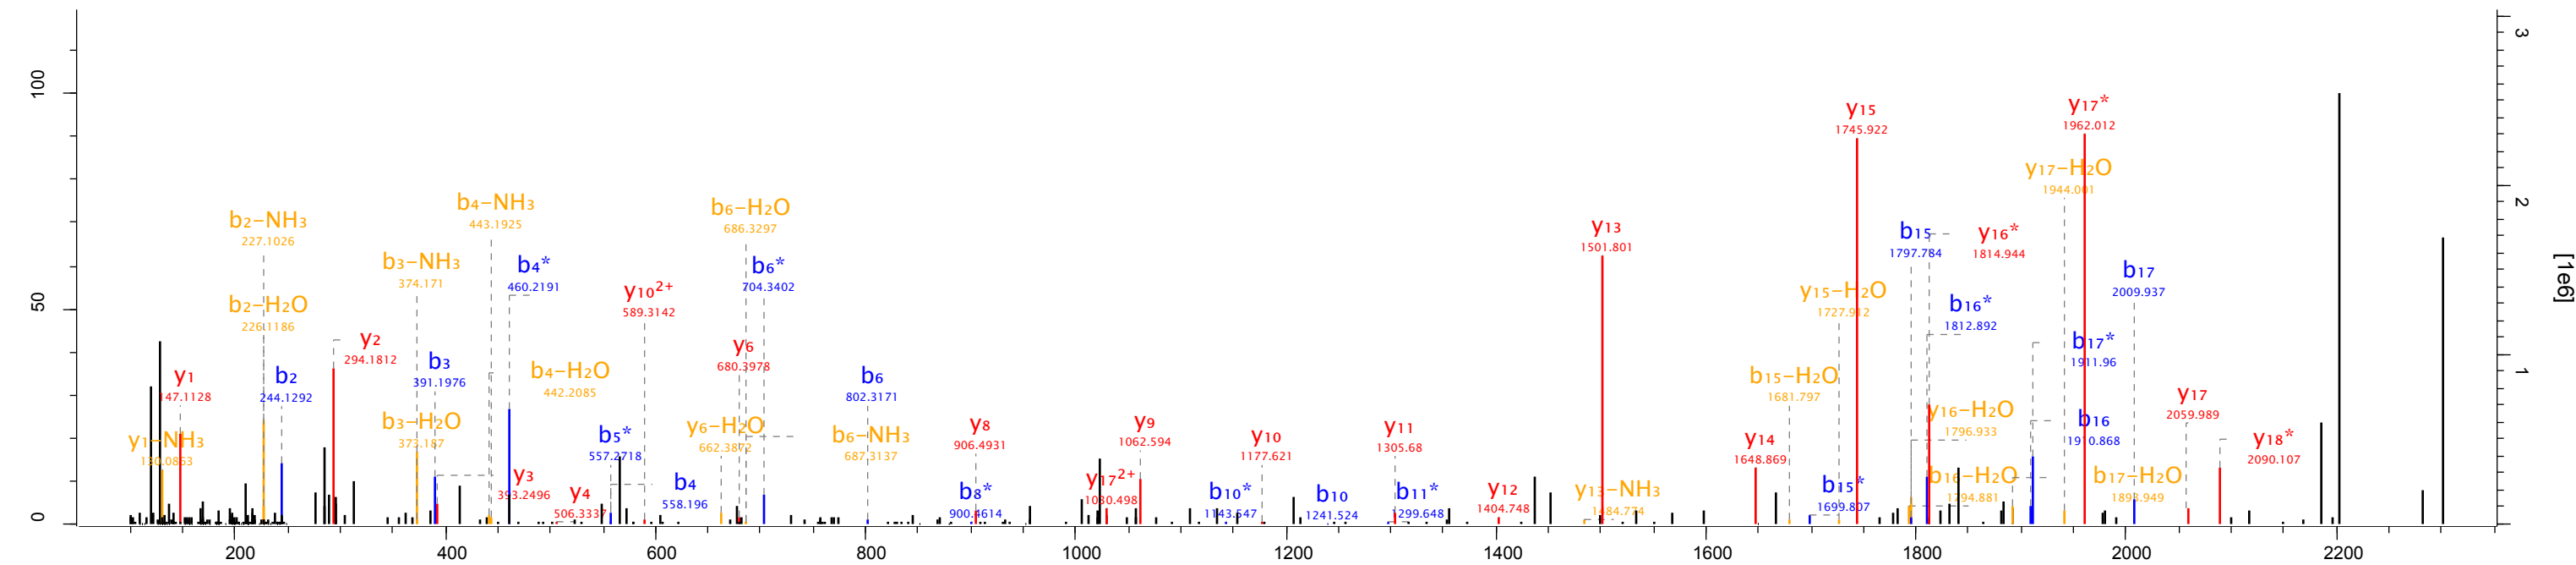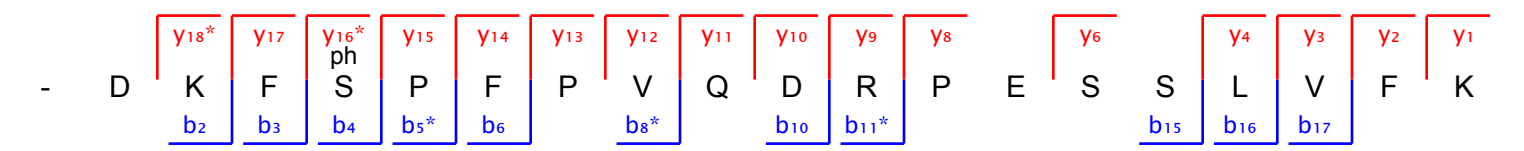

Raw file: 20150812\_A375SR\_Phospho\_BR1\_07  
 Scan: 4767 Method: FTMS; HCD Score: 110.97 m/z: 616.26 Gene names: ZFP36L1

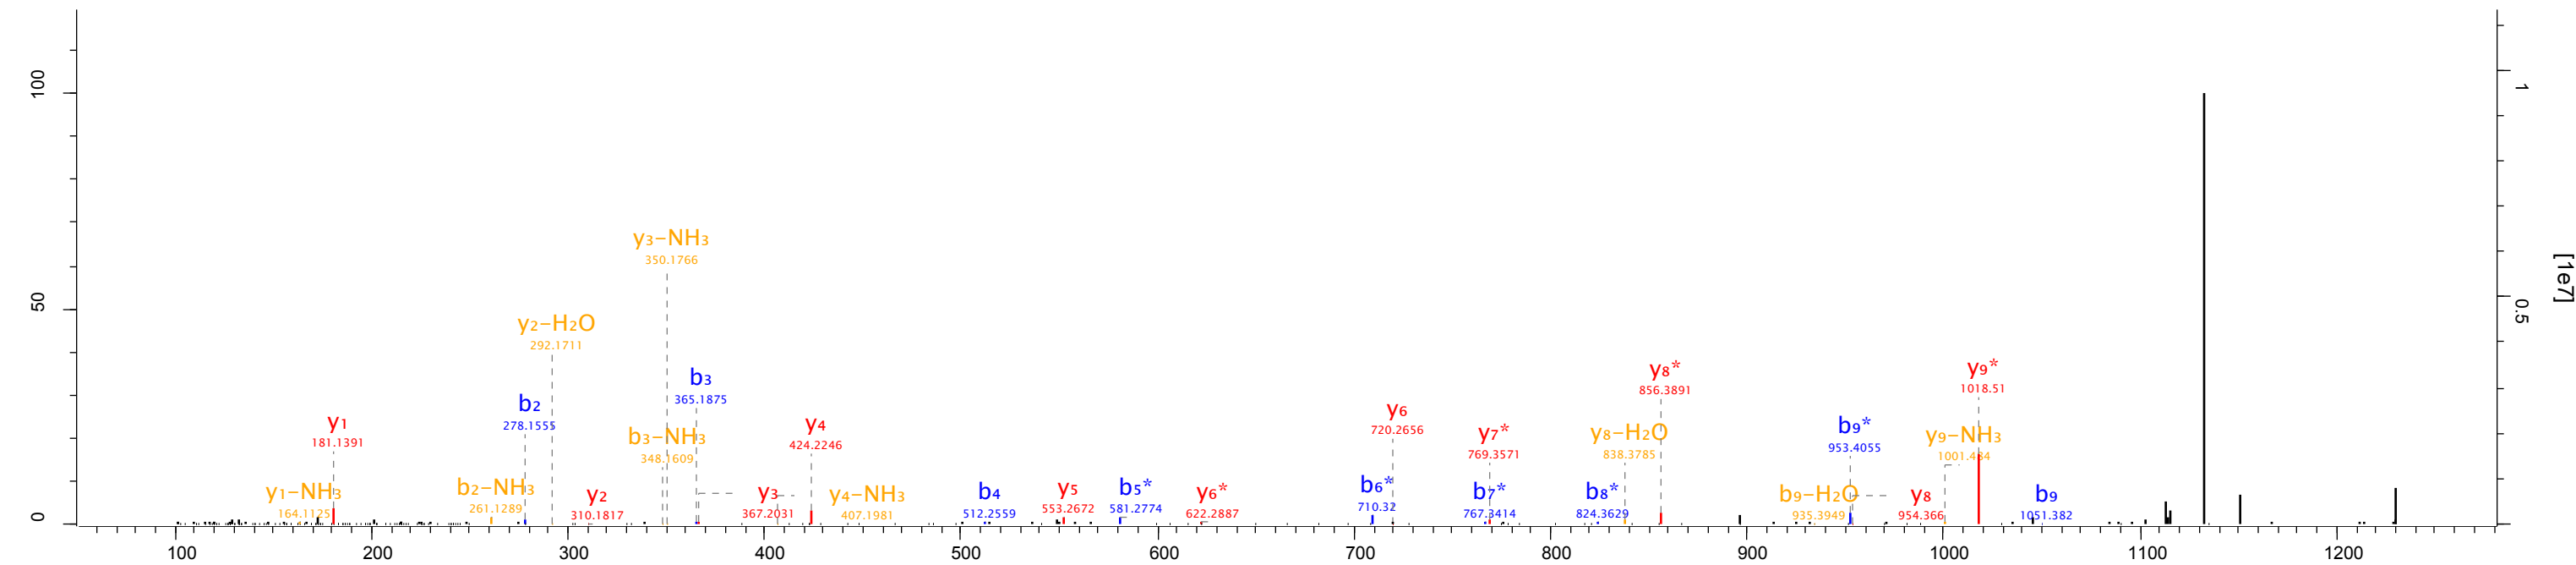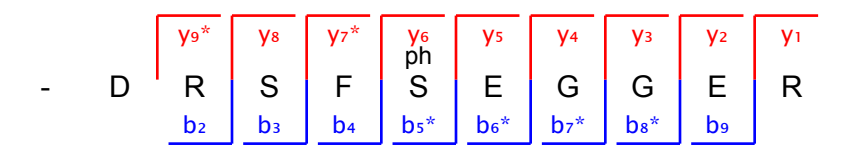

Raw file: 20150812\_A375SR\_Phospho\_BR1\_07  
 Scan: 8497 Method: FTMS; HCD Score: 156.51 m/z: 614.61 Gene names: SERBP1

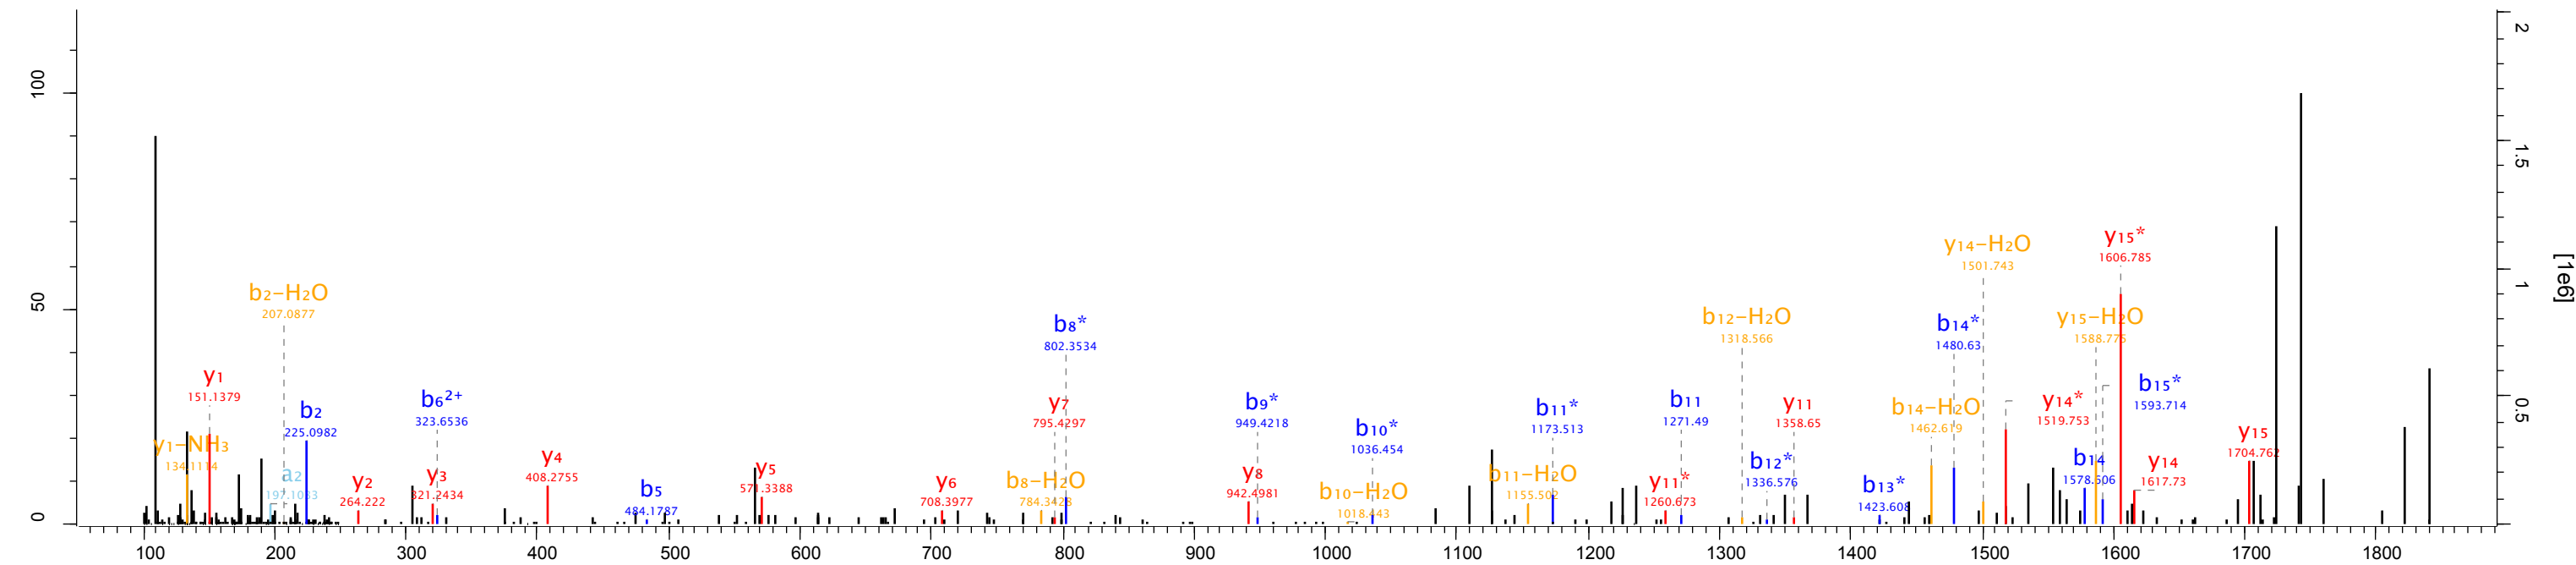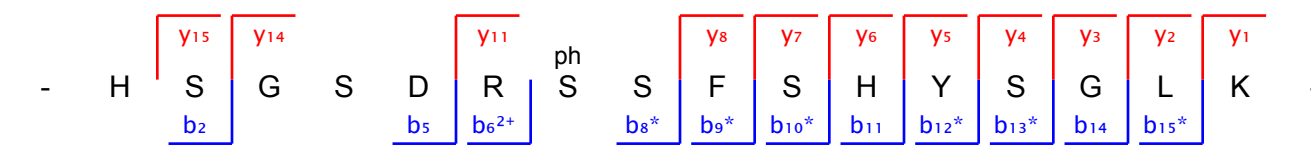

Raw file: 20150812\_A375SR\_Phospho\_BR1\_07  
 Scan: 9497 Method: FTMS; HCD Score: 263.14 m/z: 833.4 Gene names: ATXN2

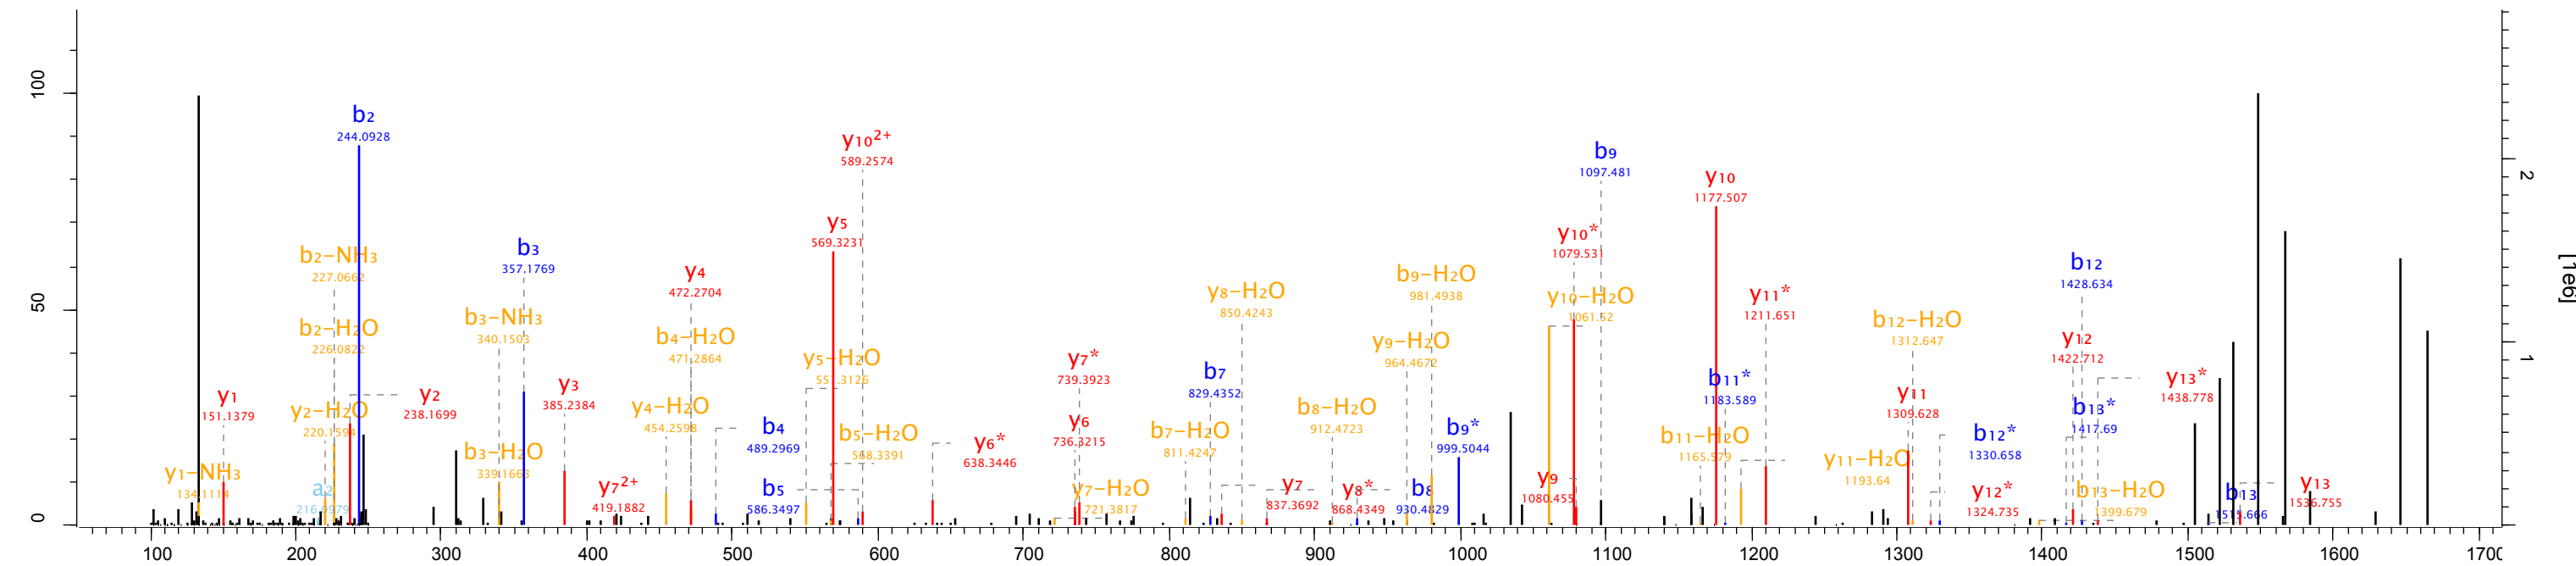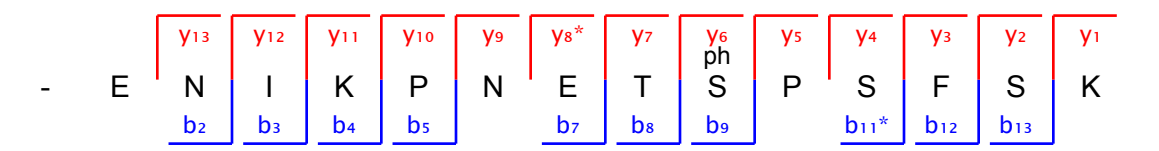



Raw file: 20150812\_A375SR\_Phospho\_BR1\_07  
 Scan: 9887 Method: FTMS; HCD Score: 179.08 m/z: 595.32 Gene names: BOD1L1

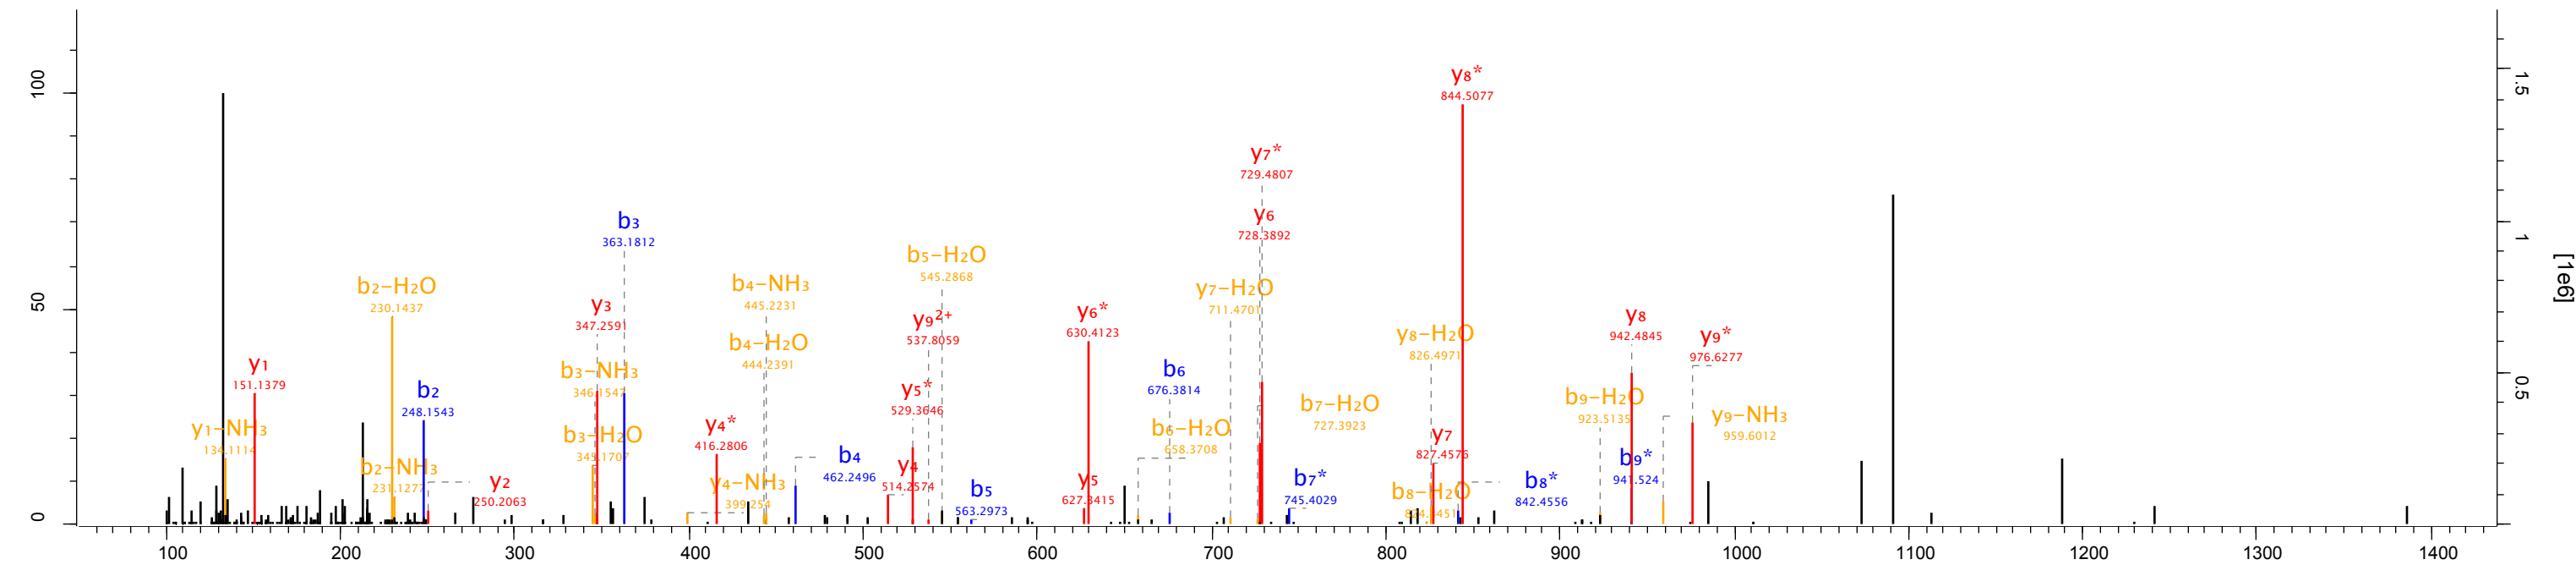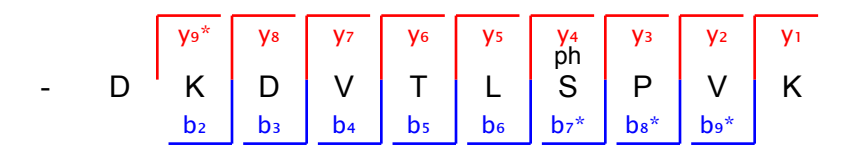

Raw file 20150812\_A375SR\_Phospho\_BR1\_08 Scan 12487 Method FTMS; HCD Score 270.21 m/z 1296.52 Gene names PRKAR2A

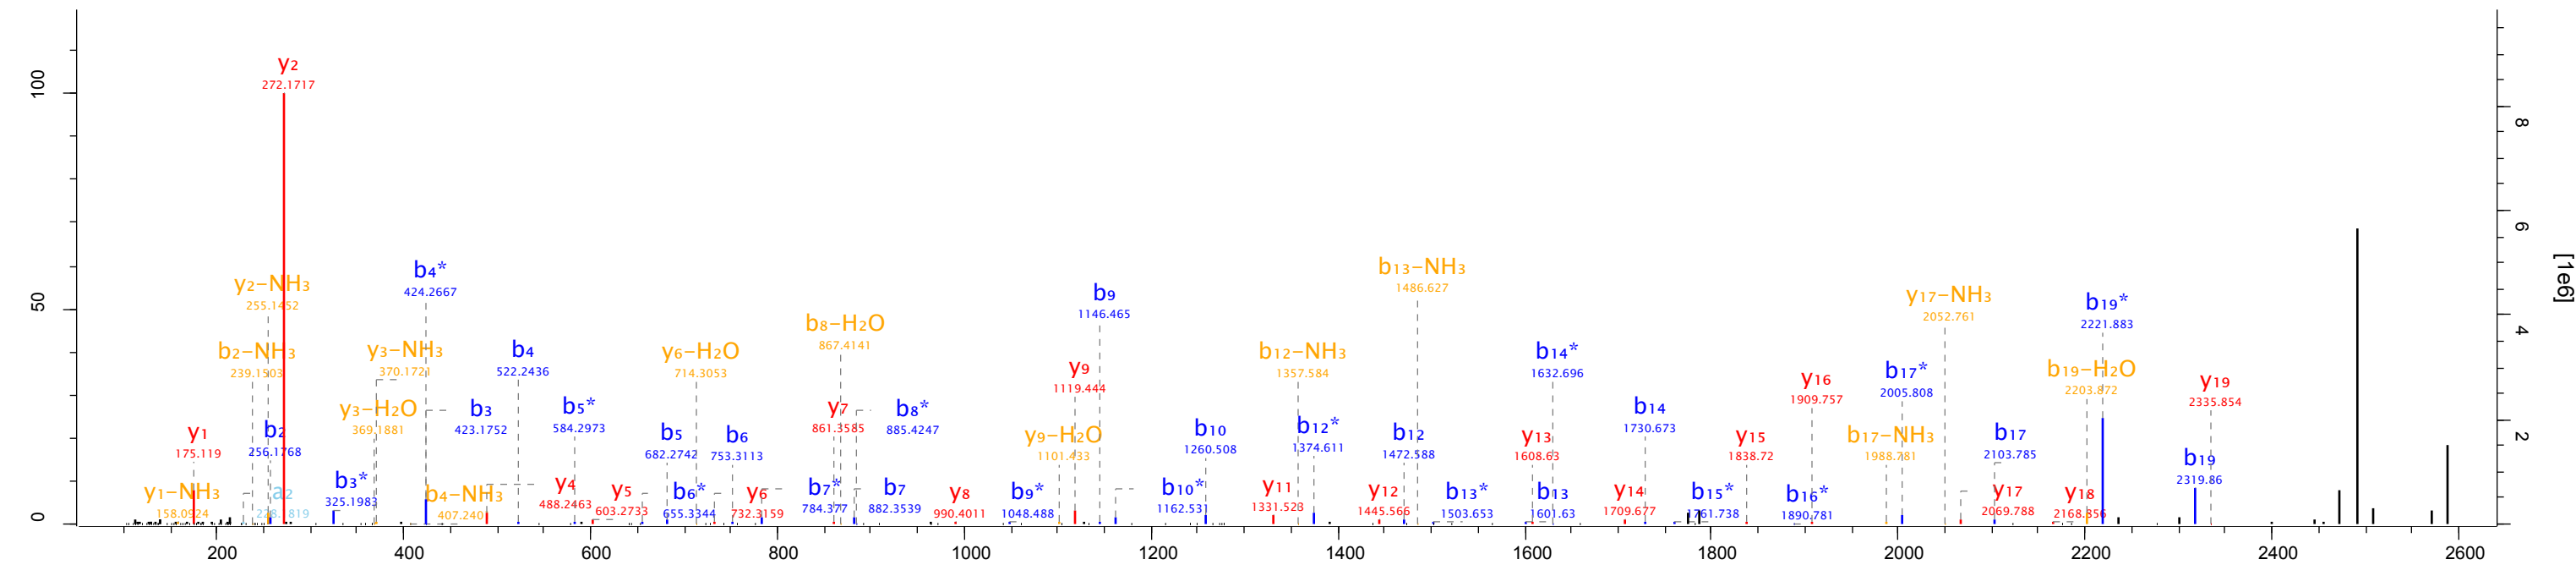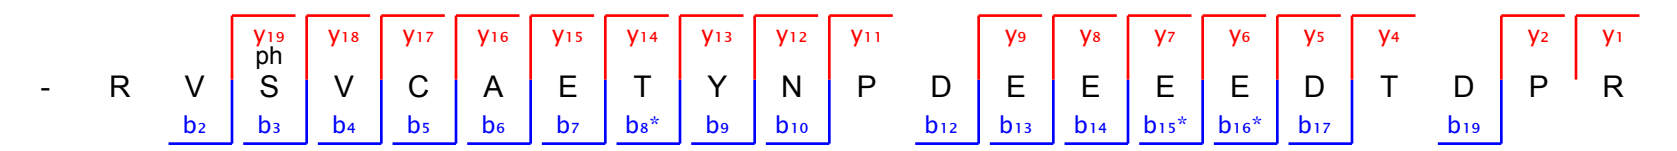

Raw file 20150812\_A375SR\_Phospho\_BR1\_08 Scan 13167 Method FTMS; HCD Score 147.84 m/z 820.47 Gene names PDLIM5

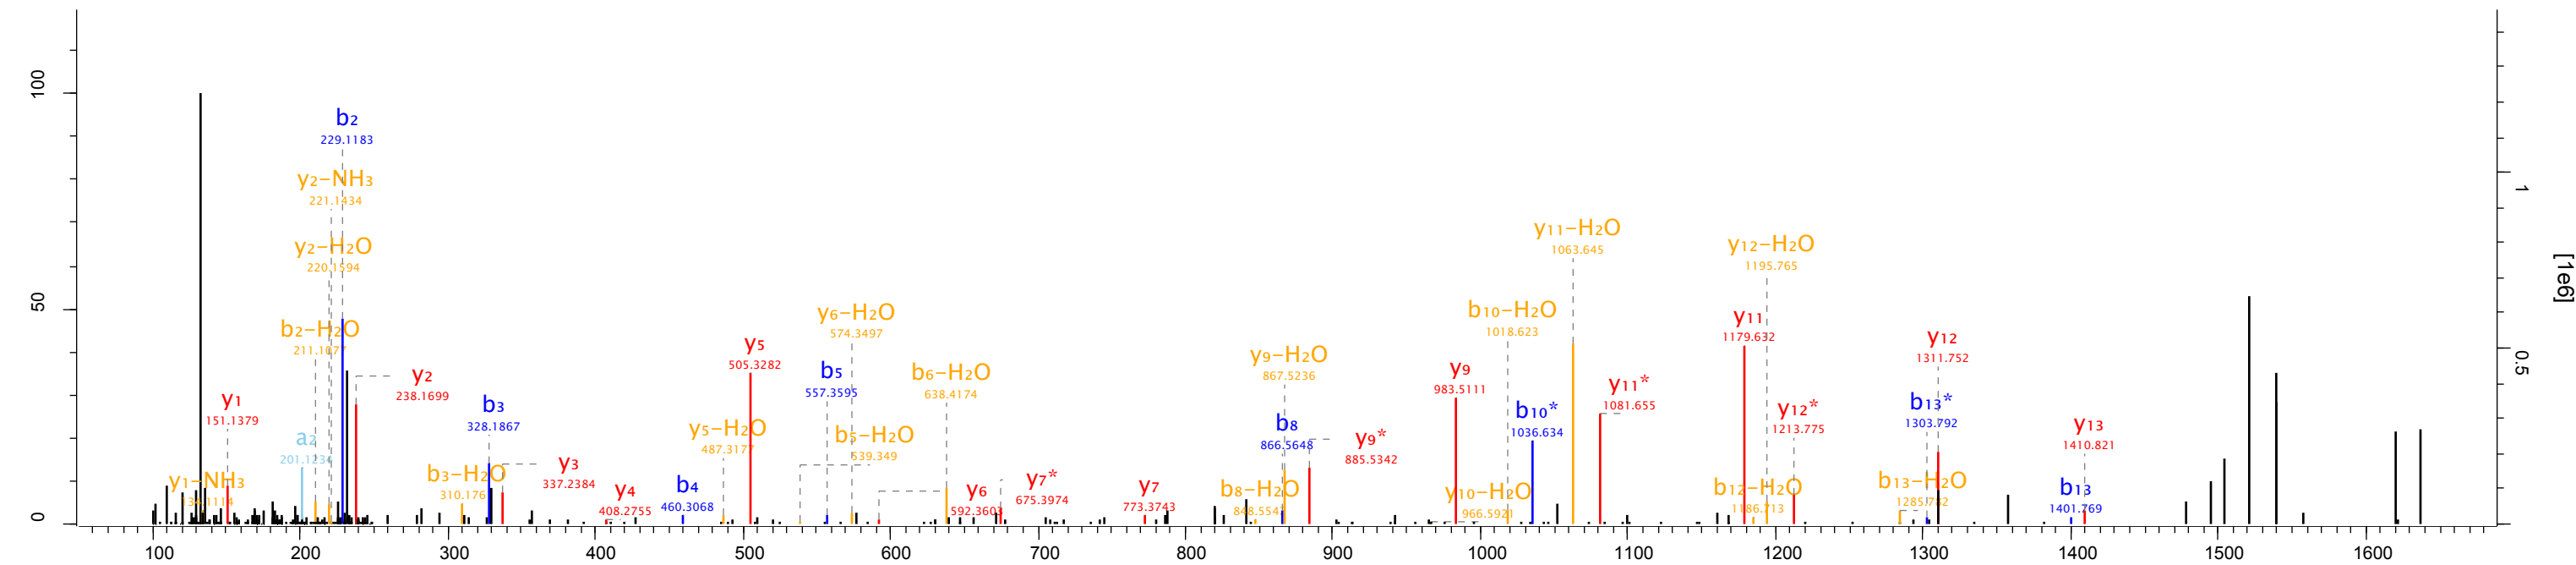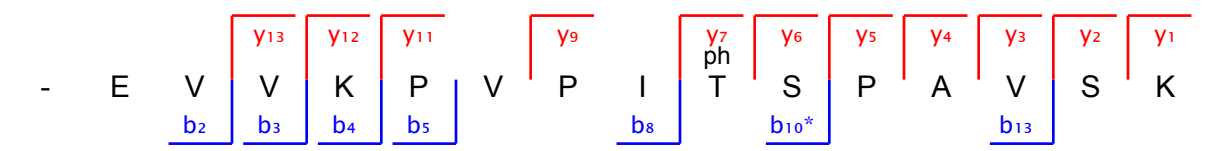

Raw file 20150812\_A375SR\_Phospho\_BR1\_08 Scan 13587 Method FTMS; HCD Score 197.84 m/z 560.62 Gene names PI4KB

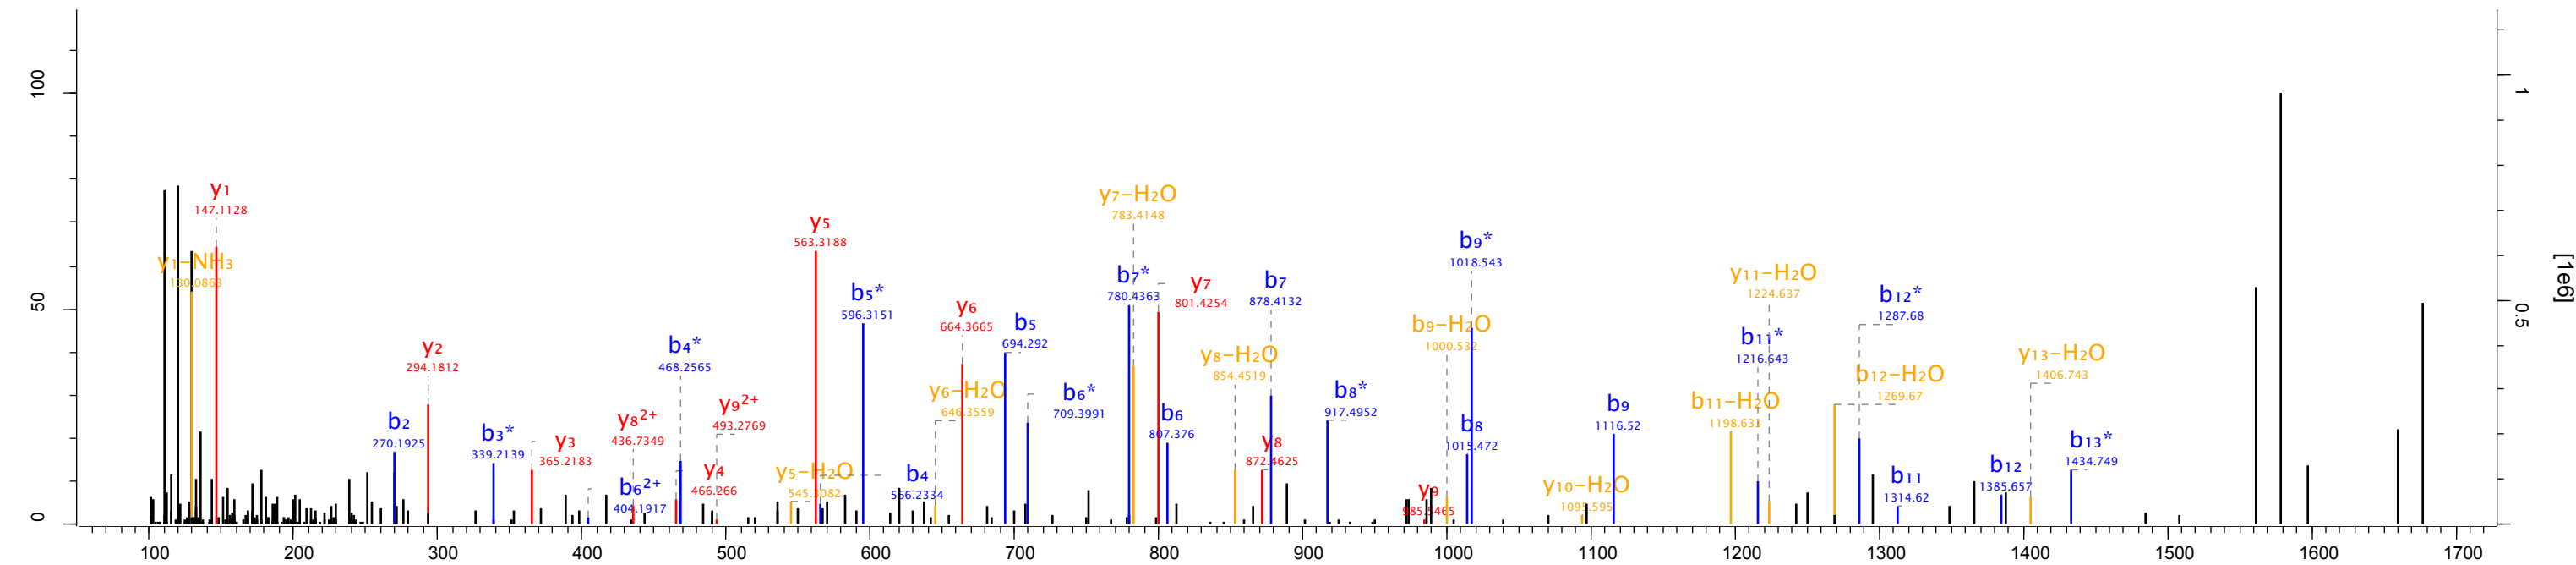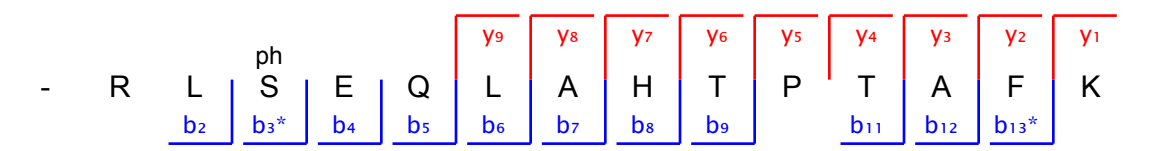

Raw file 20150812\_A375SR\_Phospho\_BR1\_08 Scan 14687 Method FTMS; HCD Score 132.14 m/z 790.86 Gene names NCOR1

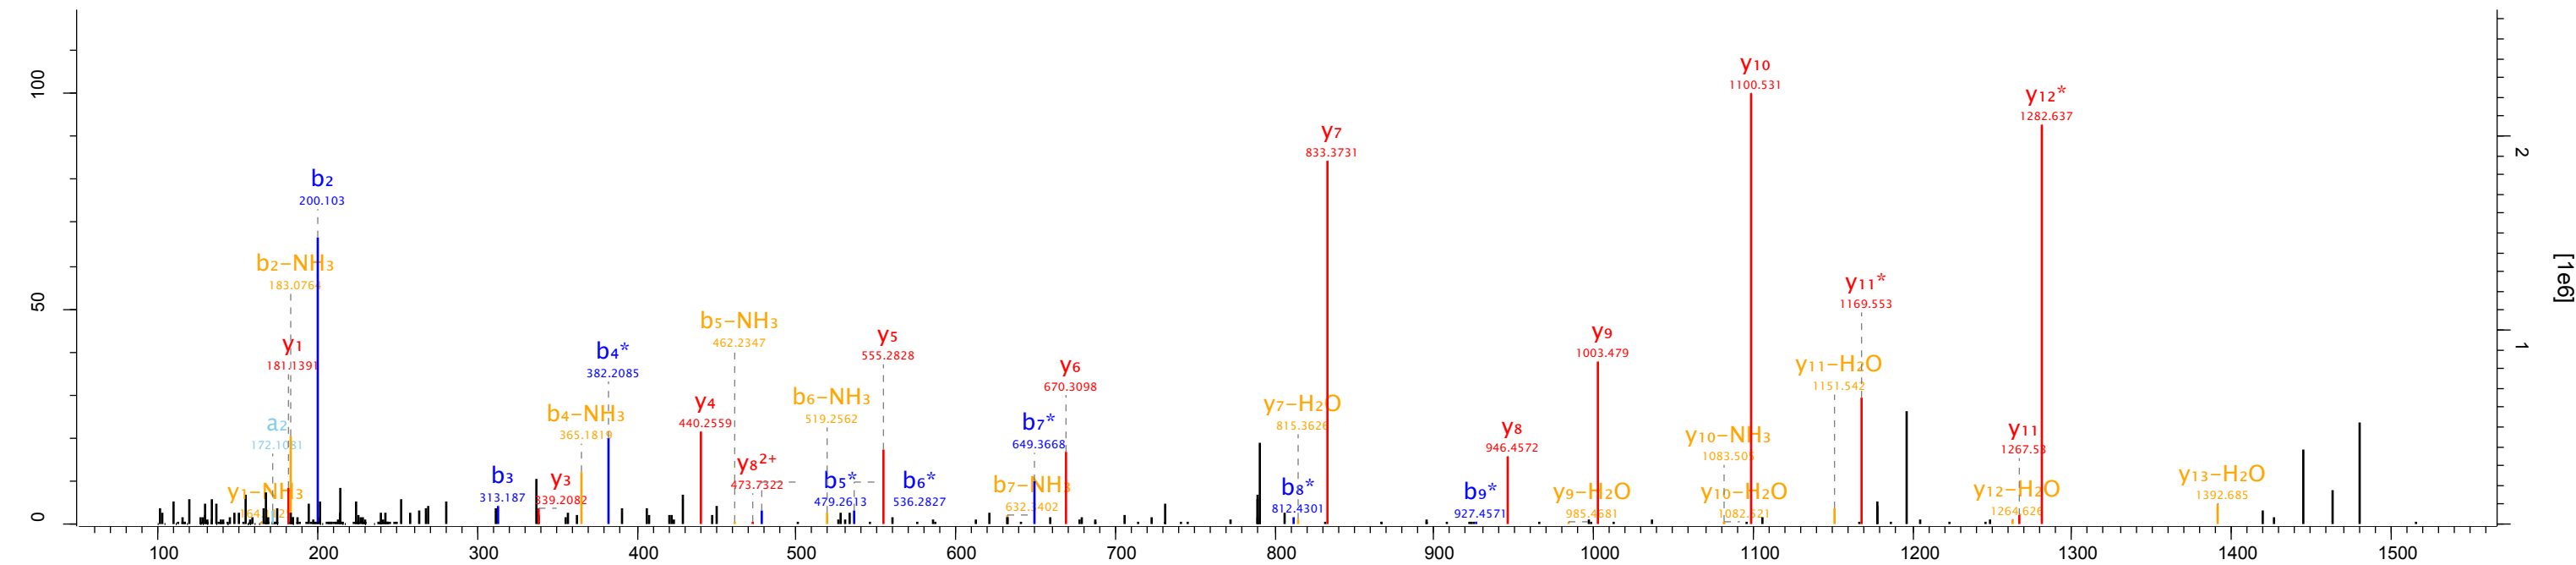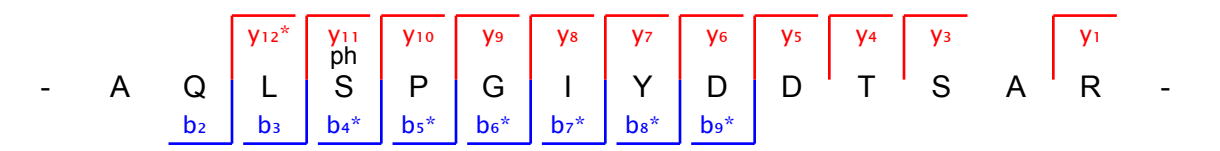

Raw file 20150812\_A375SR\_Phospho\_BR1\_08 Scan 1507 Method FTMS; HCD Score 260.09 m/z 714.35 Gene names TCOF1

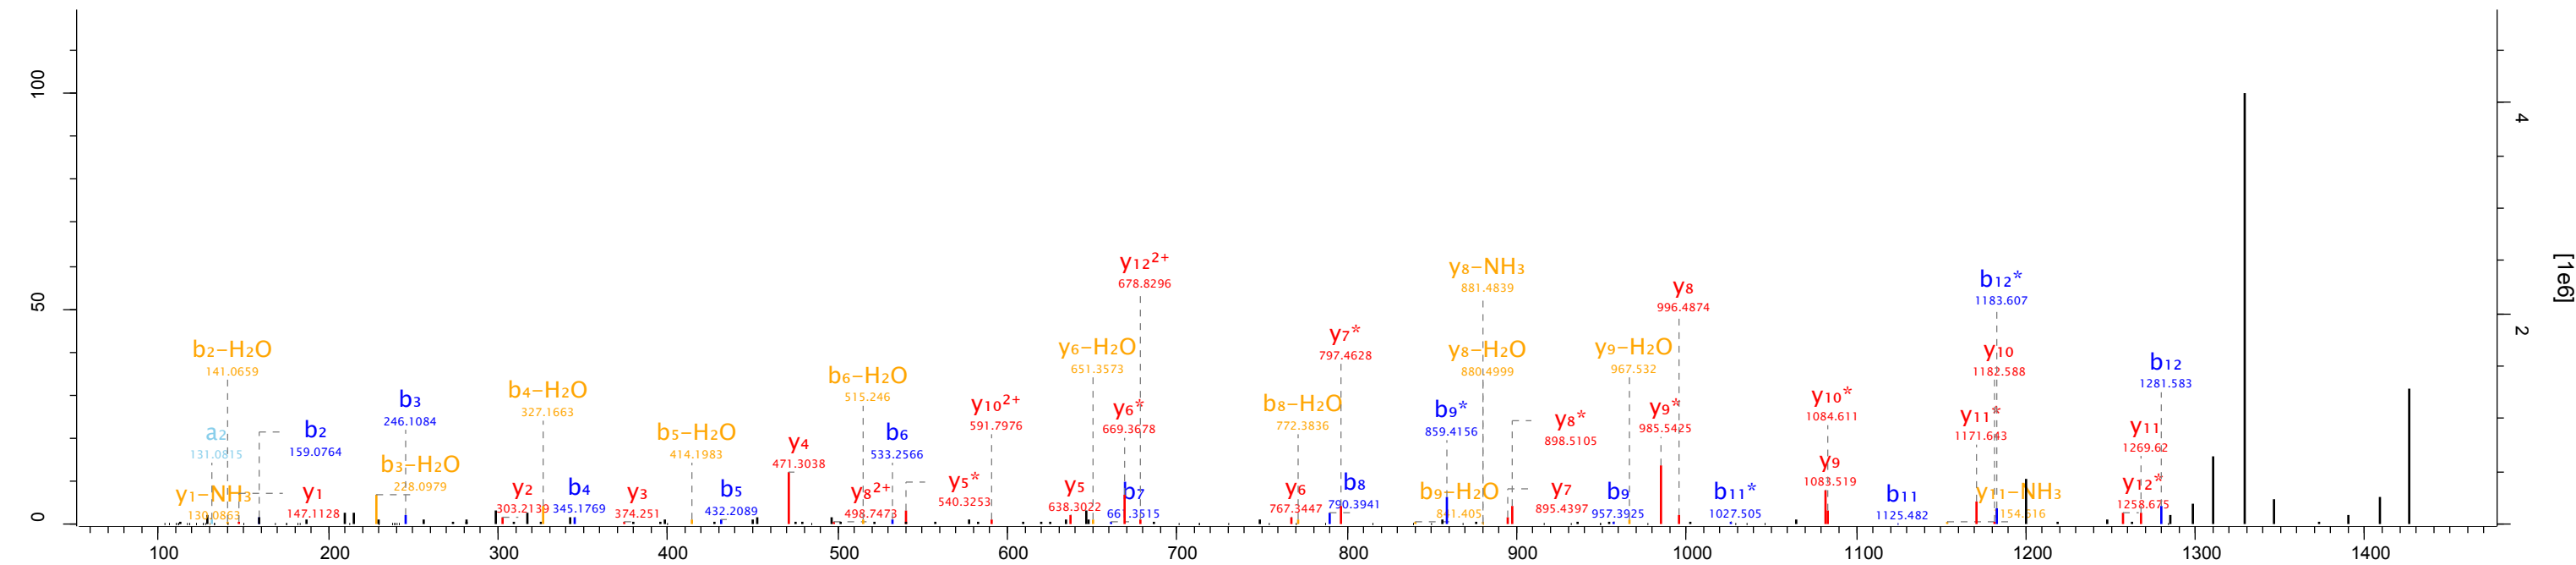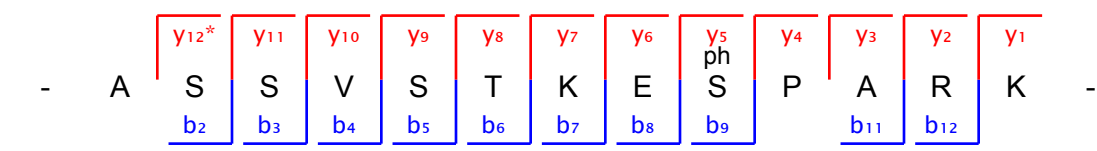

Raw file: 20150812\_A375SR\_Phospho\_BR1\_08  
 Scan: 1607 Method: FTMS; HCD Score: 77.32 m/z: 513.9 Gene names: CXorf23

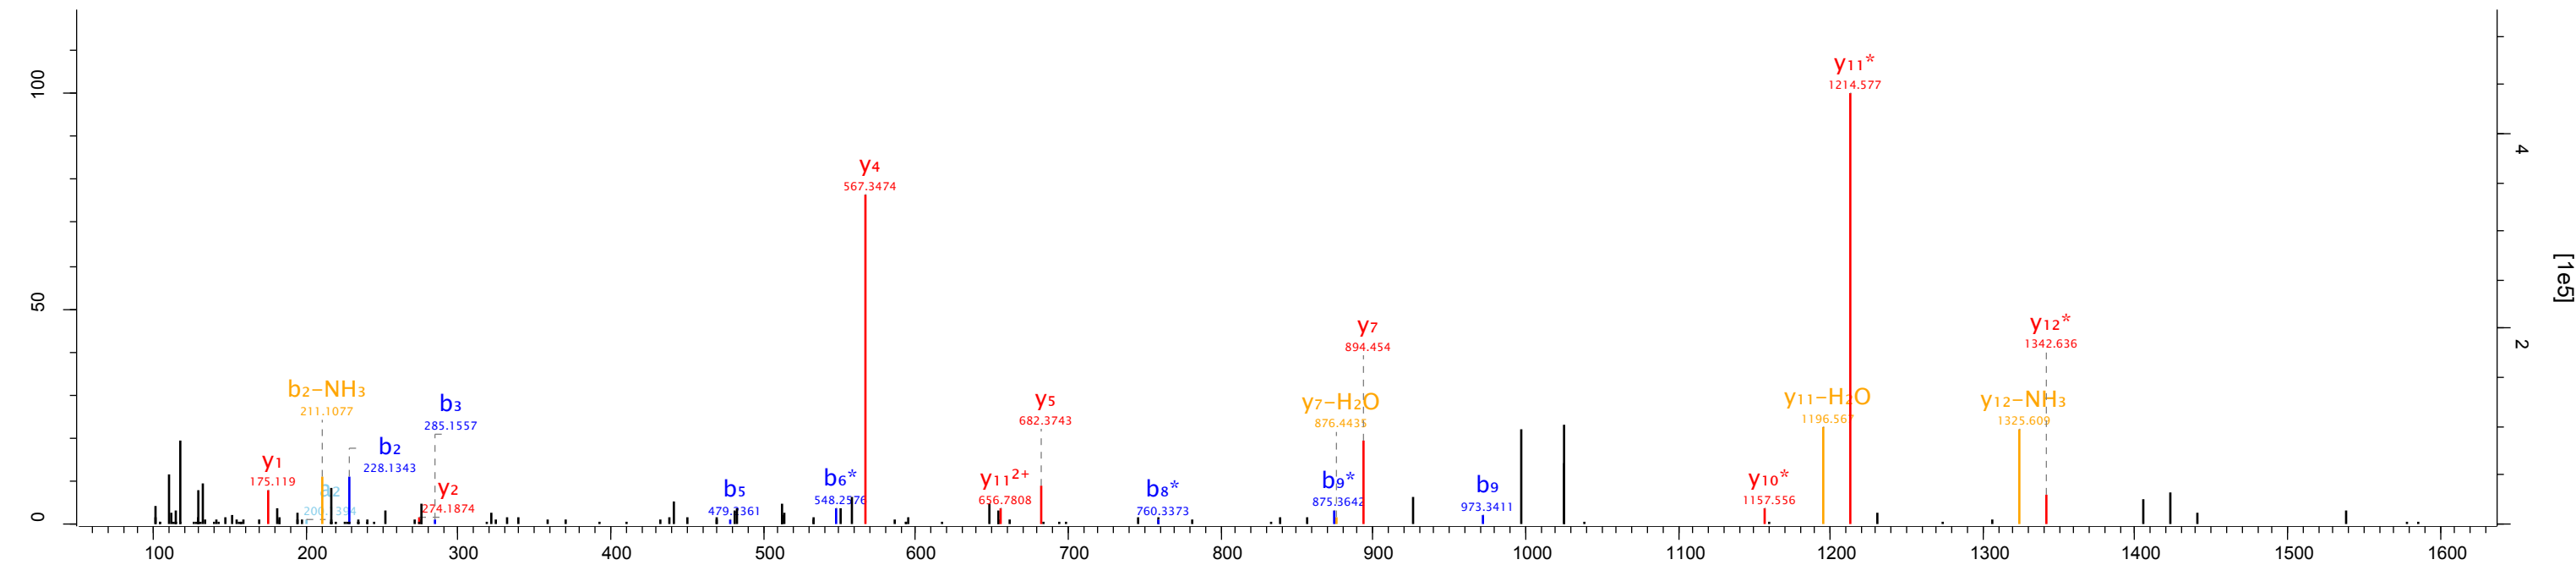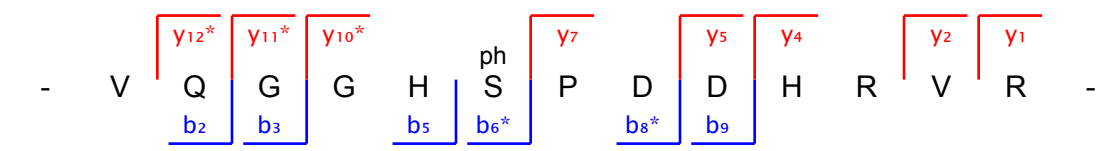

Raw file: 20150812\_A375SR\_Phospho\_BR1\_08  
 Scan: 16297 Method: FTMS; HCD Score: 215.42 m/z: 1081.96 Gene names: SVIL

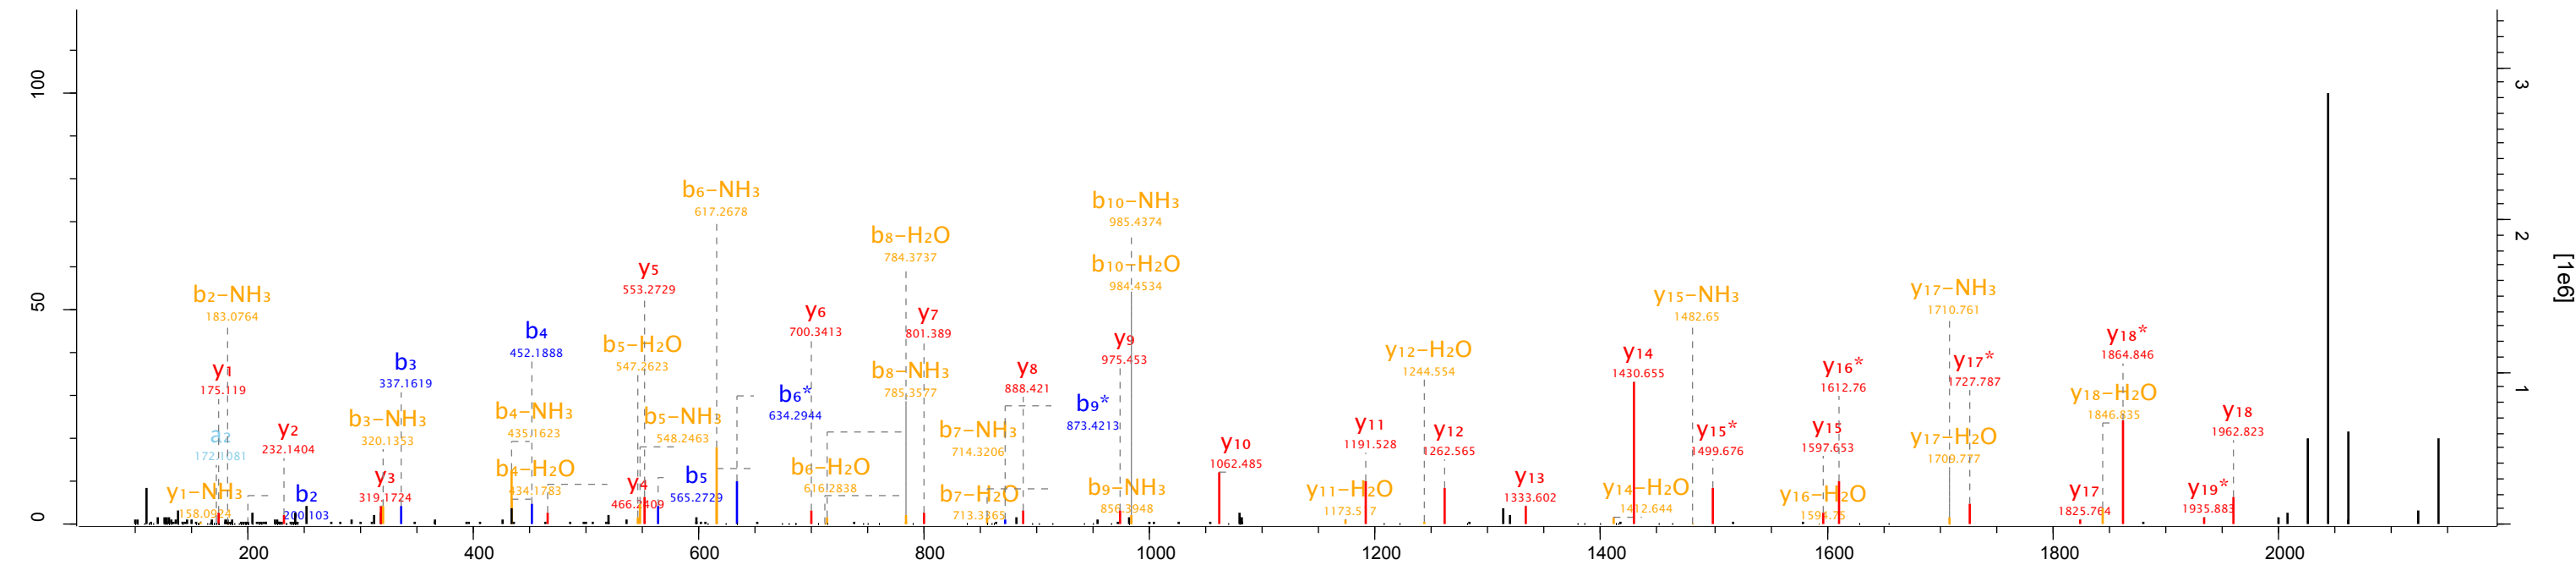

Peptide sequence: - Q A H D L S P A A E S S S T F S G R -

Fragmentation sites (b and y ions) are indicated by boxes below the sequence:

- Red boxes (y ions): y19\* (A), y18 (H), y17 (D), y16\* (L), y15 (S), y14 (P), y13 (A), y12 (A), y11 (E), y10 (S), y9 (S), y8 (S), y7 (T), y6 (F), y5 (S), y4 (F), y3 (S), y2 (G), y1 (R)
- Blue boxes (b ions): b2 (A), b3 (H), b4 (D), b5 (L), b6\* (S), b9\* (A)



Raw file: 20150812\_A375SR\_Phospho\_BR1\_08  
 Scan: 16337 Method: FTMS; HCD Score: 264.71 m/z: 1245.53 Gene names: MAP1B

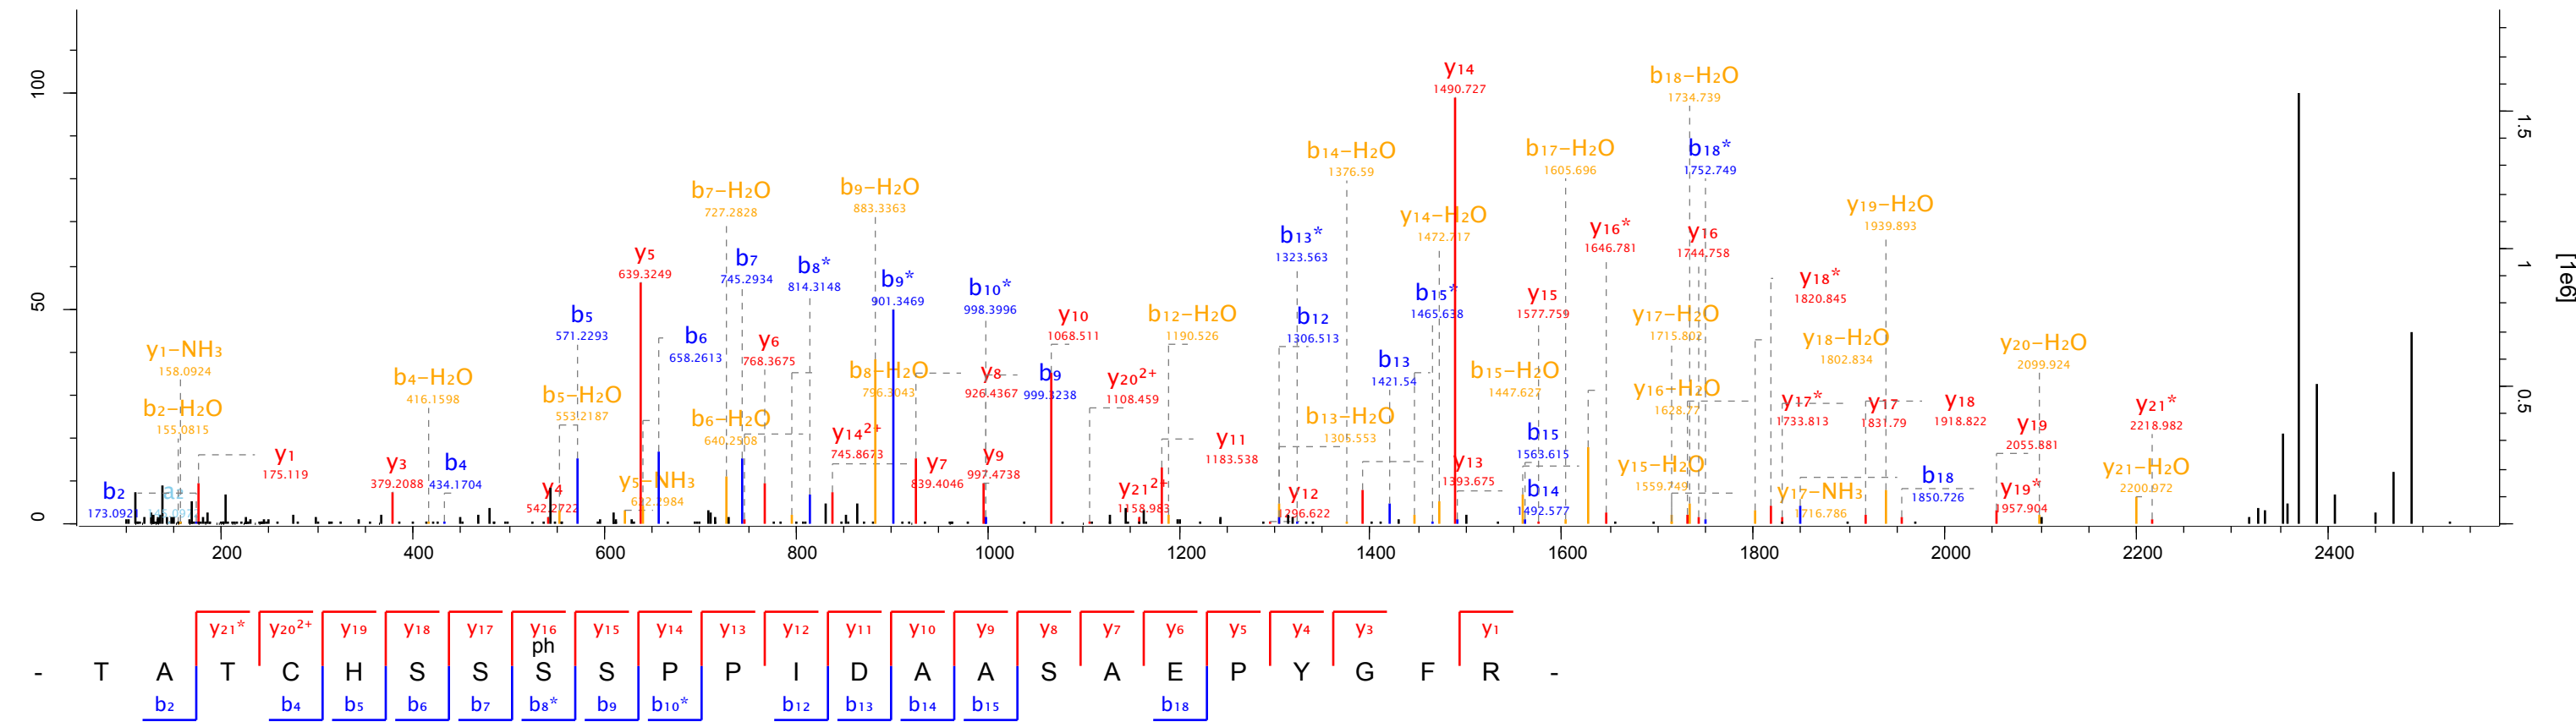

Raw file 20150812\_A375SR\_Phospho\_BR1\_08 Scan 16847 Method FTMS; HCD Score 93.18 m/z 776.05 Gene names NELFA

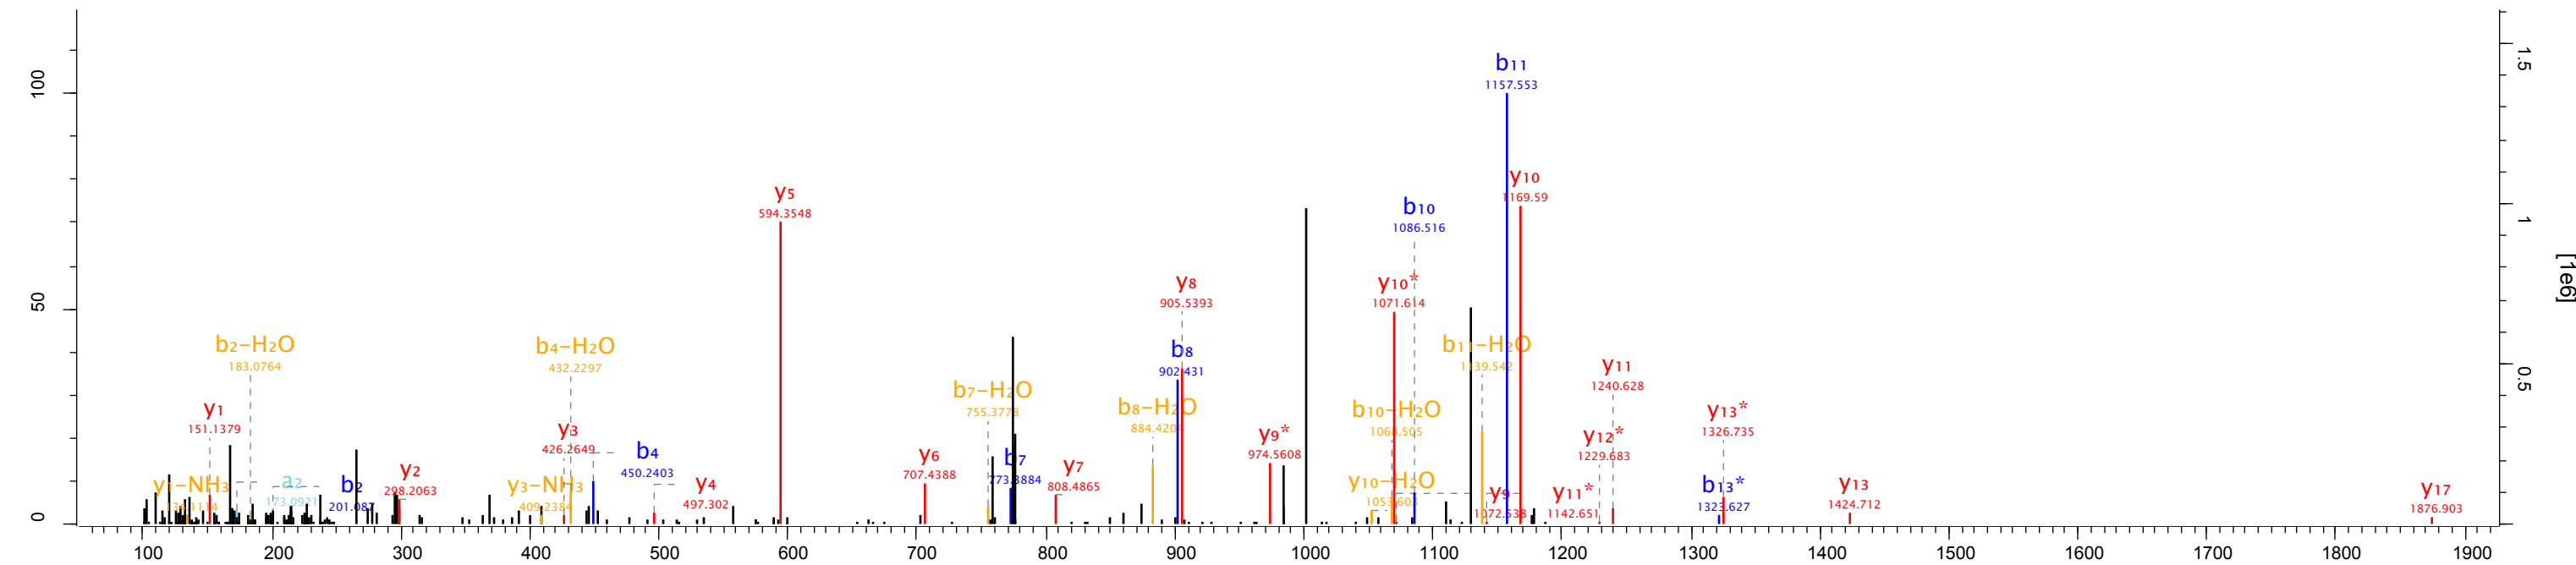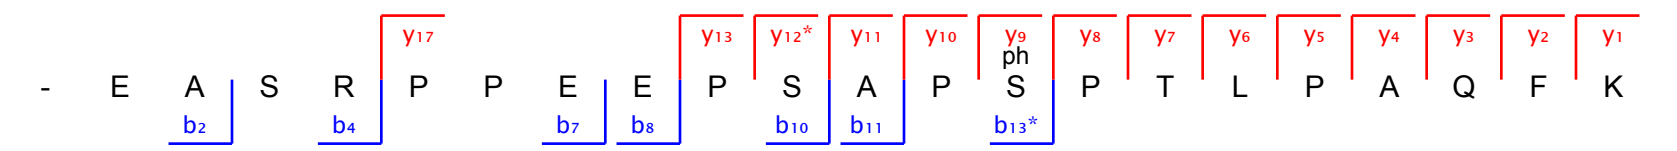

Raw file 20150812\_A375SR\_Phospho\_BR1\_08 Scan 17207 Method FTMS; HCD Score 52.4 m/z 802.72 Gene names ZBTB21

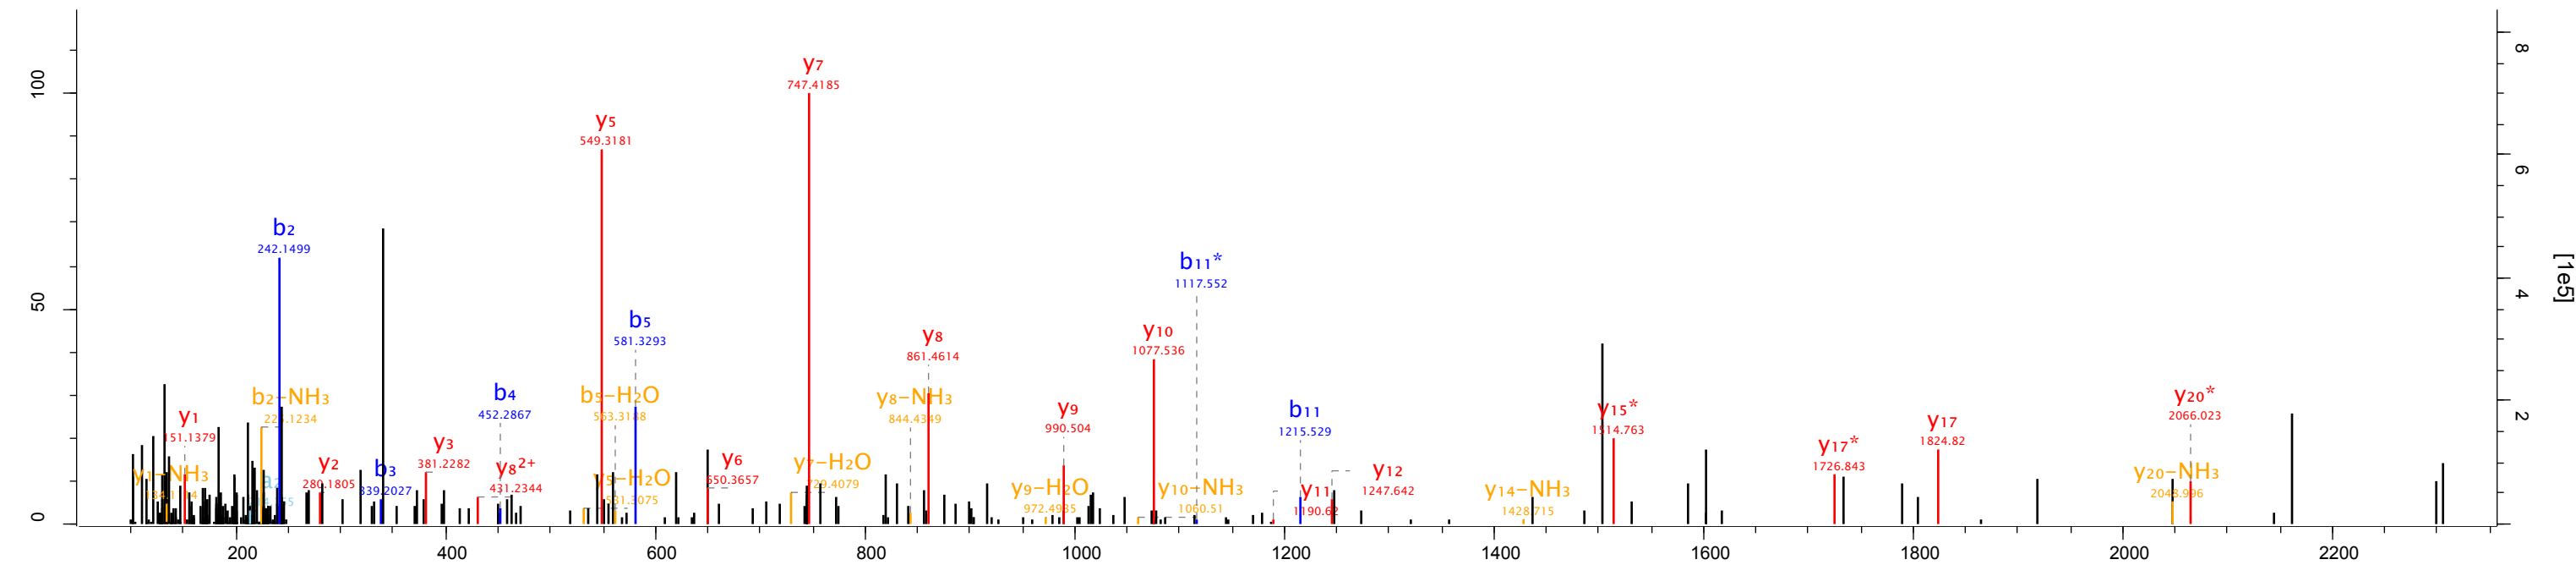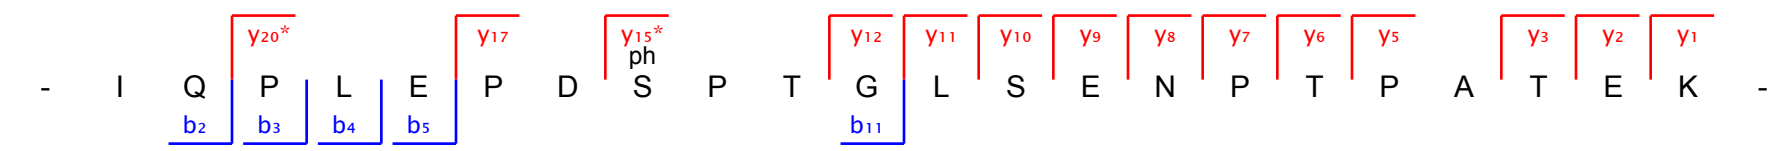

Raw file 20150812\_A375SR\_Phospho\_BR1\_08 Scan 20087 Method FTMS; HCD Score 181.34 m/z 849.45 Gene names SPDL1

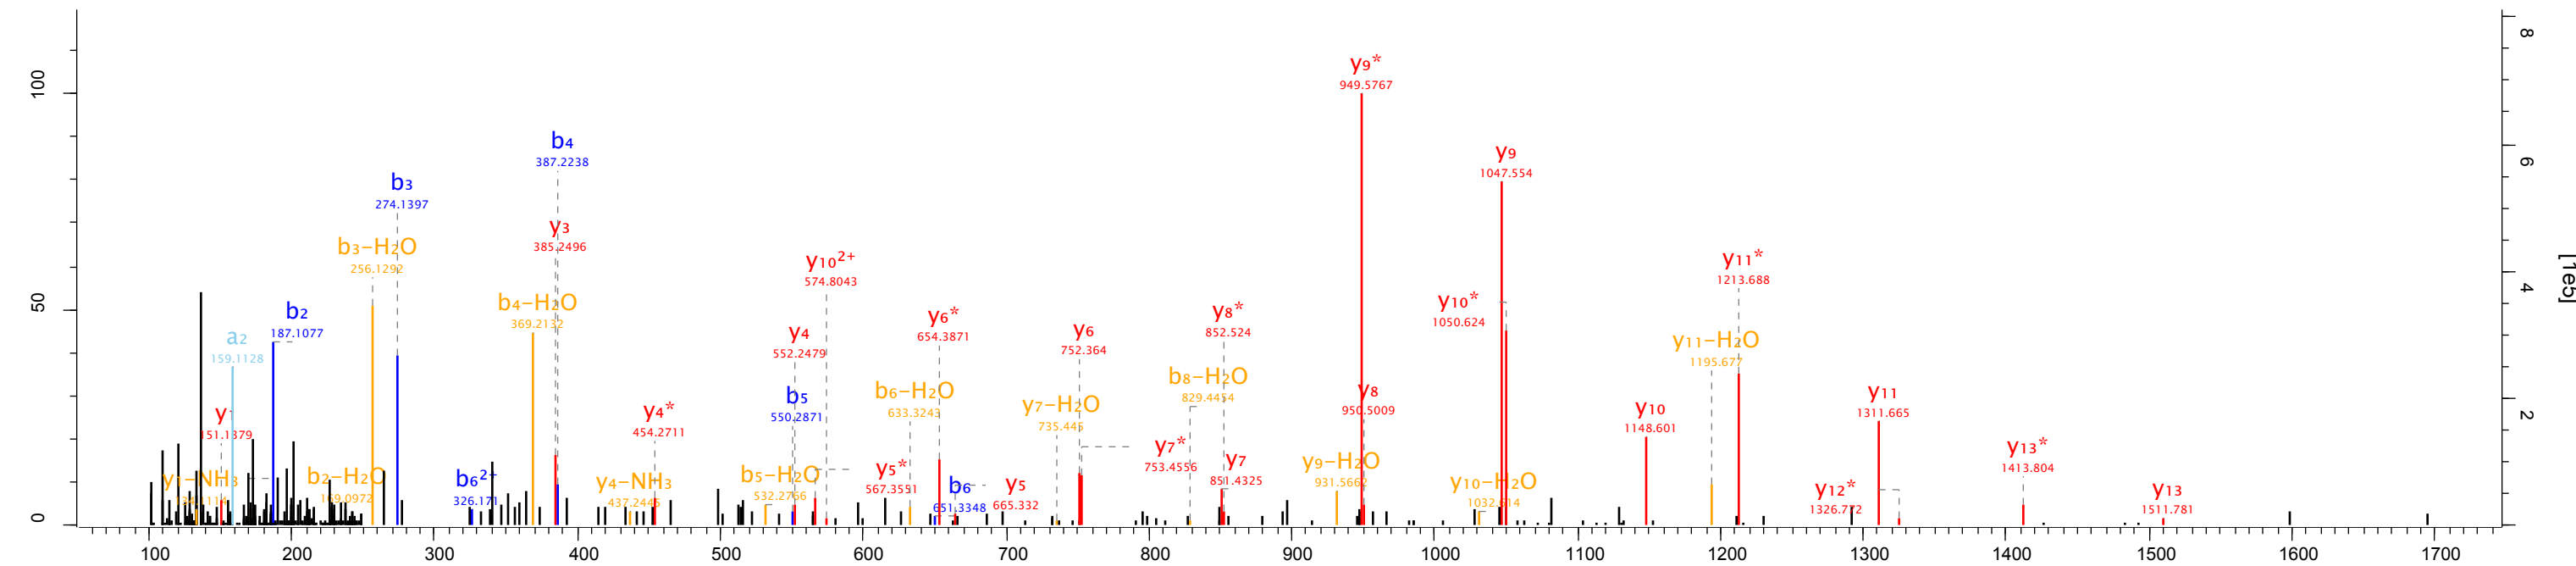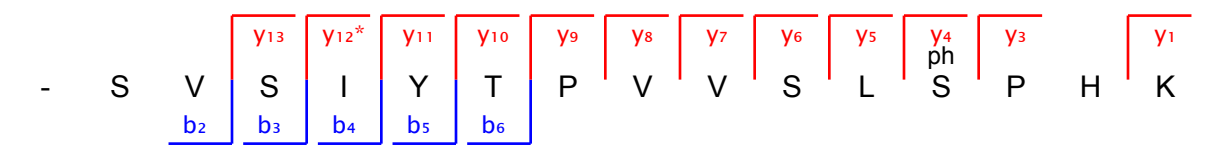

Raw file 20150812\_A375SR\_Phospho\_BR1\_08 Scan 2017 Method FTMS; HCD Score 51.29 m/z 423.87 Gene names MAP1B

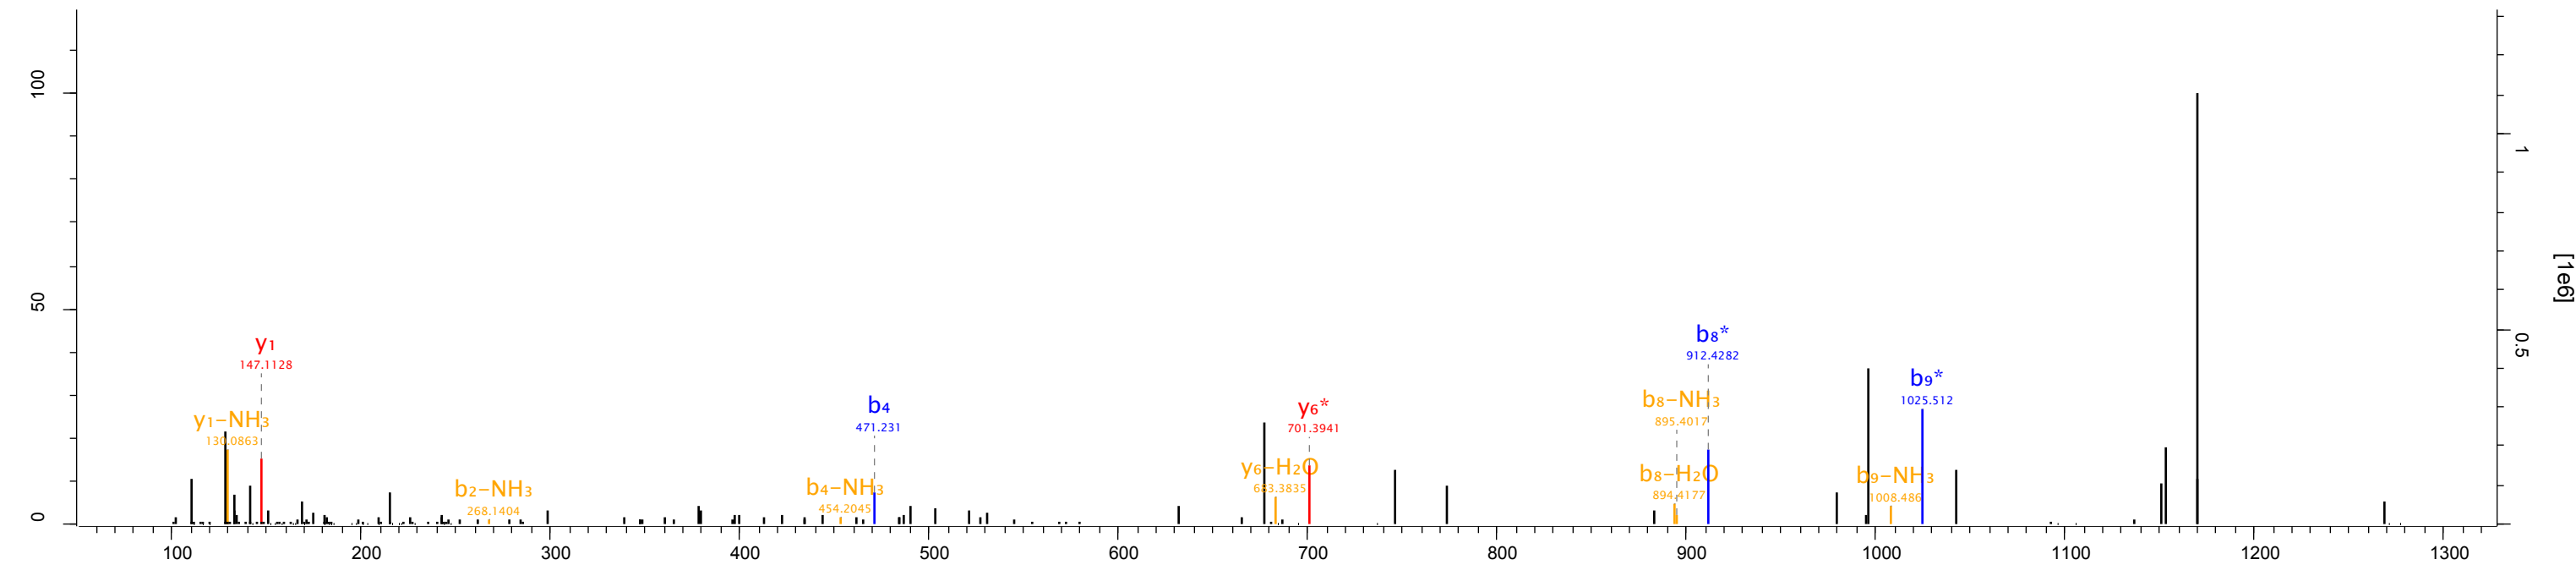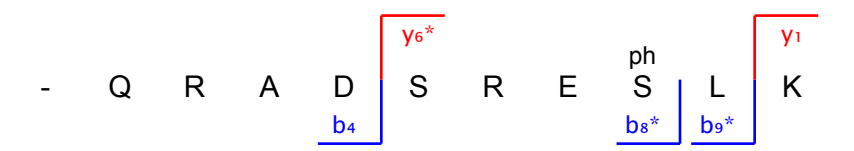



Raw file: 20150812\_A375SR\_Phospho\_BR1\_08  
 Scan: 2107 Method: FTMS; HCD Score: 68.65 m/z: 556.27 Gene names: SIN3B

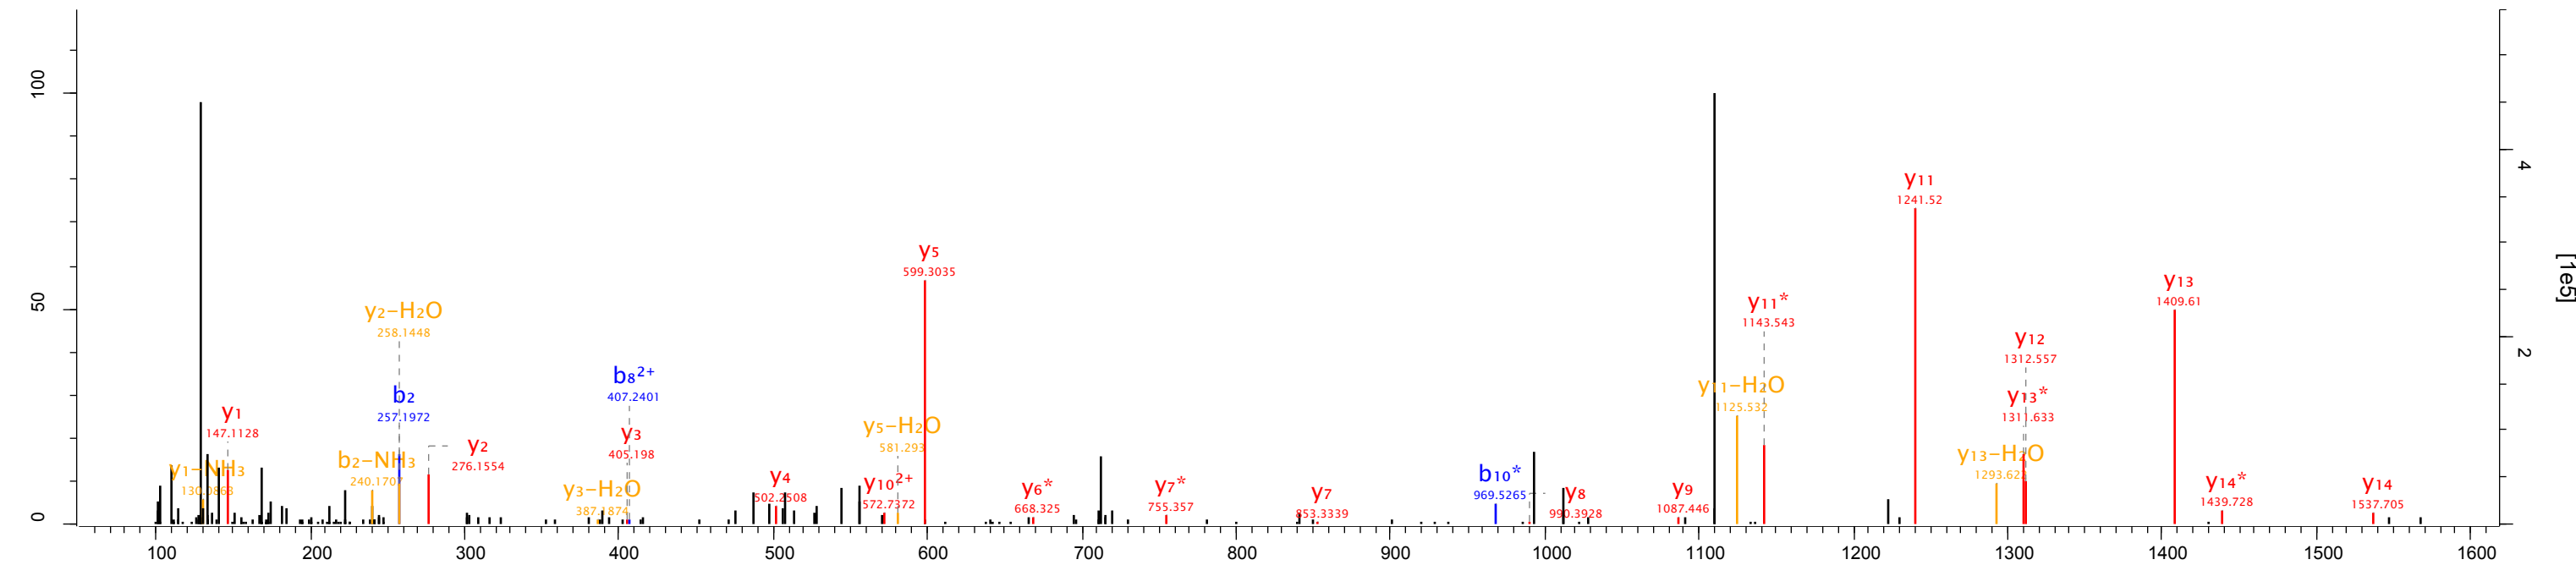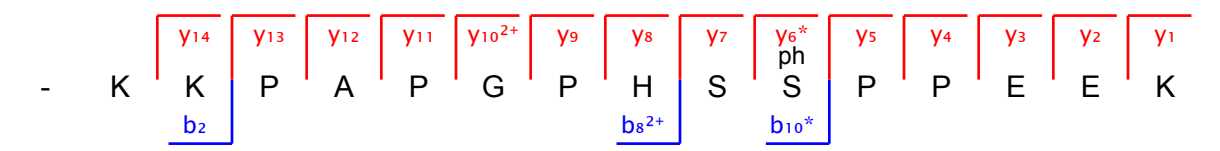

Raw file: 20150812\_A375SR\_Phospho\_BR1\_08  
 Scan: 2127 Method: FTMS; HCD Score: 72.9 m/z: 406.2 Gene names: TBC1D14

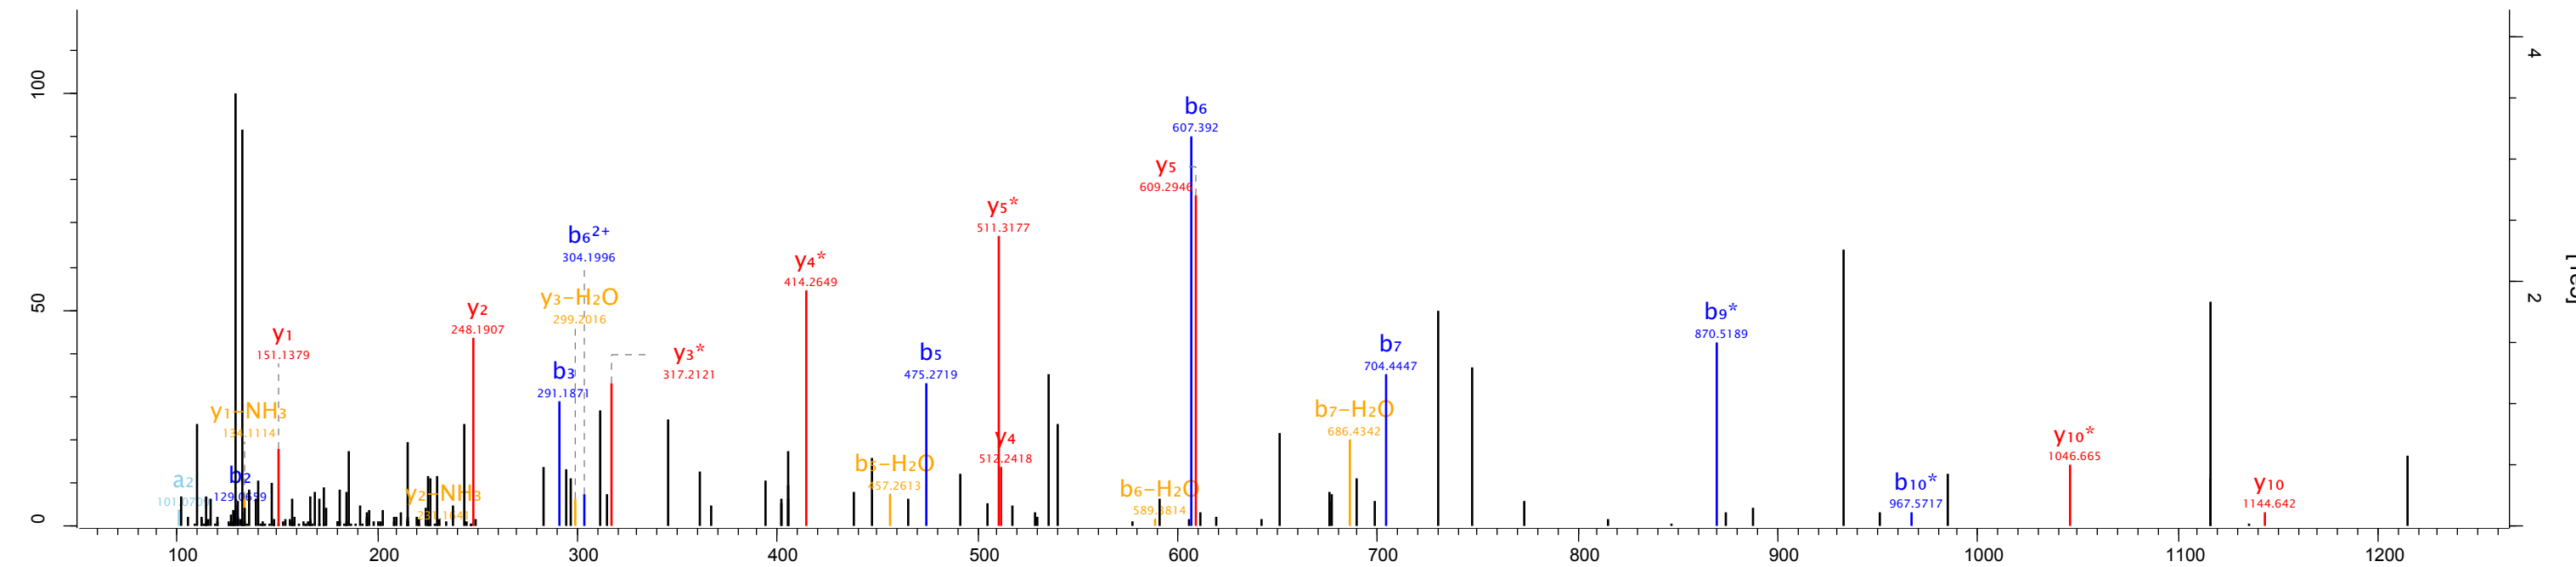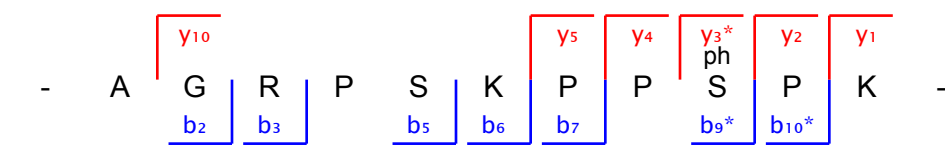



Raw file: 20150812\_A375SR\_Phospho\_BR1\_08  
 Scan: 22307 Method: FTMS; HCD Score: 253.76 m/z: 1031.17 Gene names: MAP1B

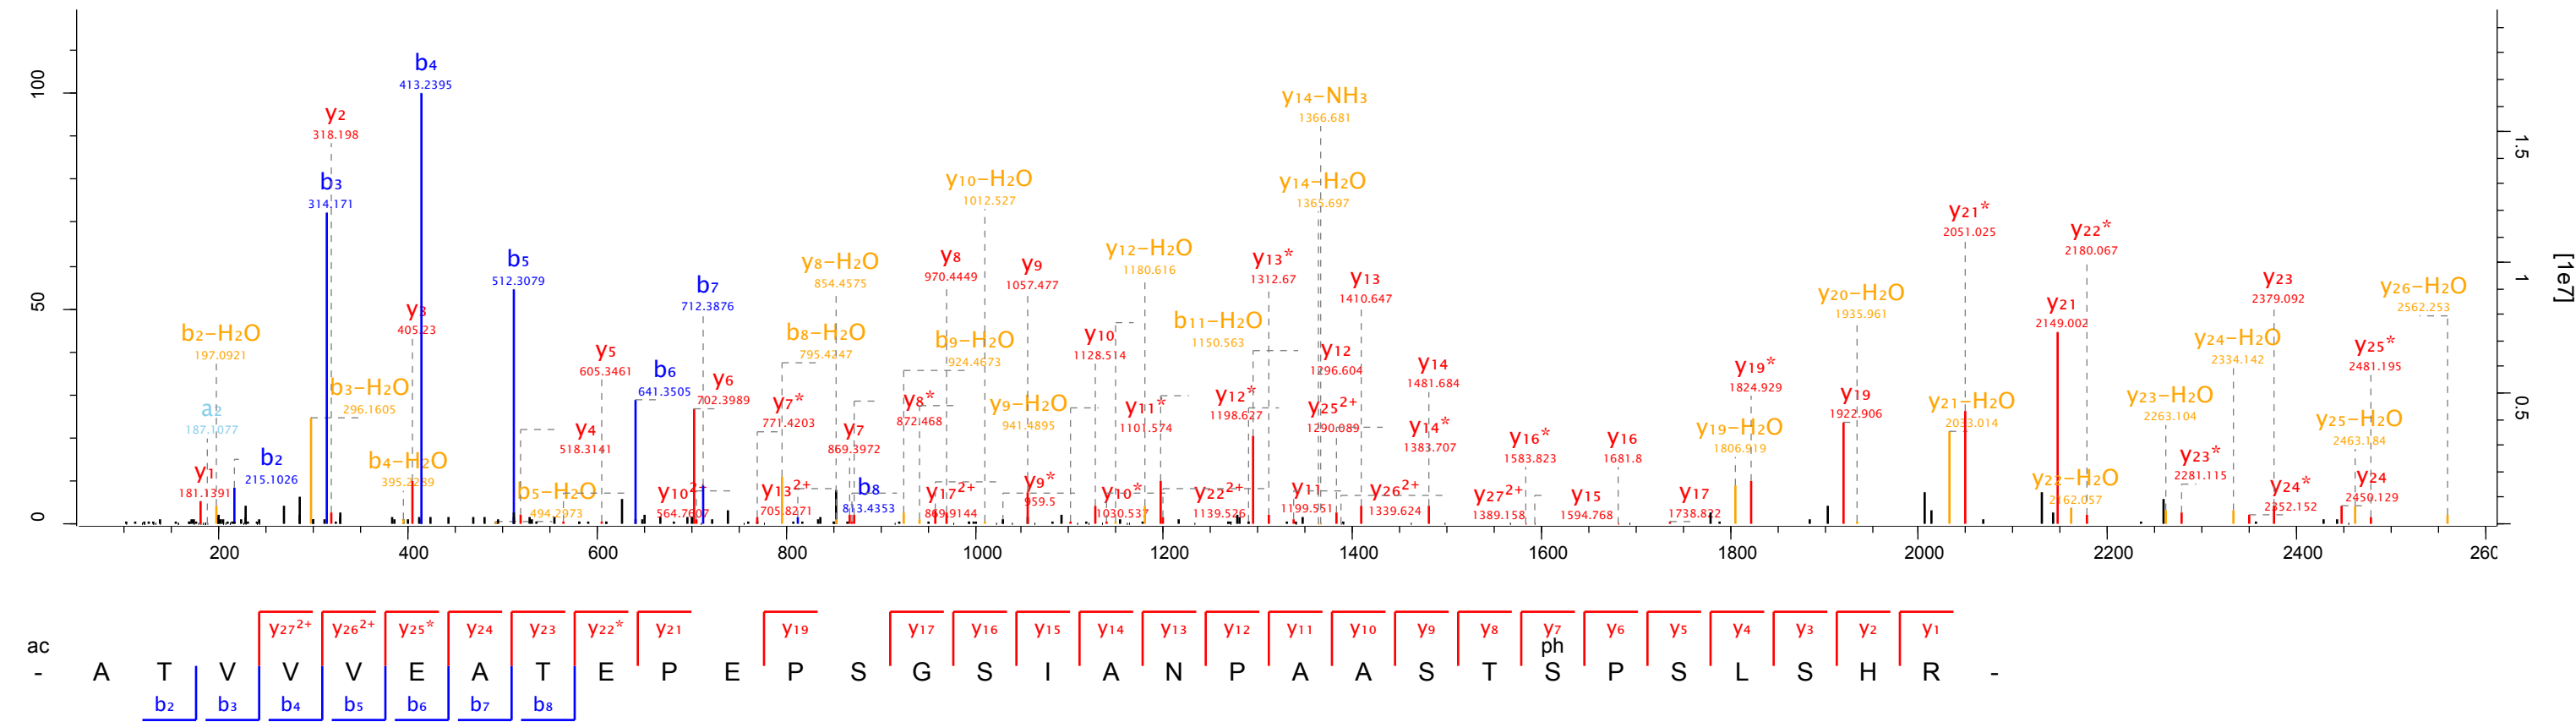

Raw file 20150812\_A375SR\_Phospho\_BR1\_08 Scan 3337 Method FTMS; HCD Score 161.25 m/z 584.31 Gene names RBBP5

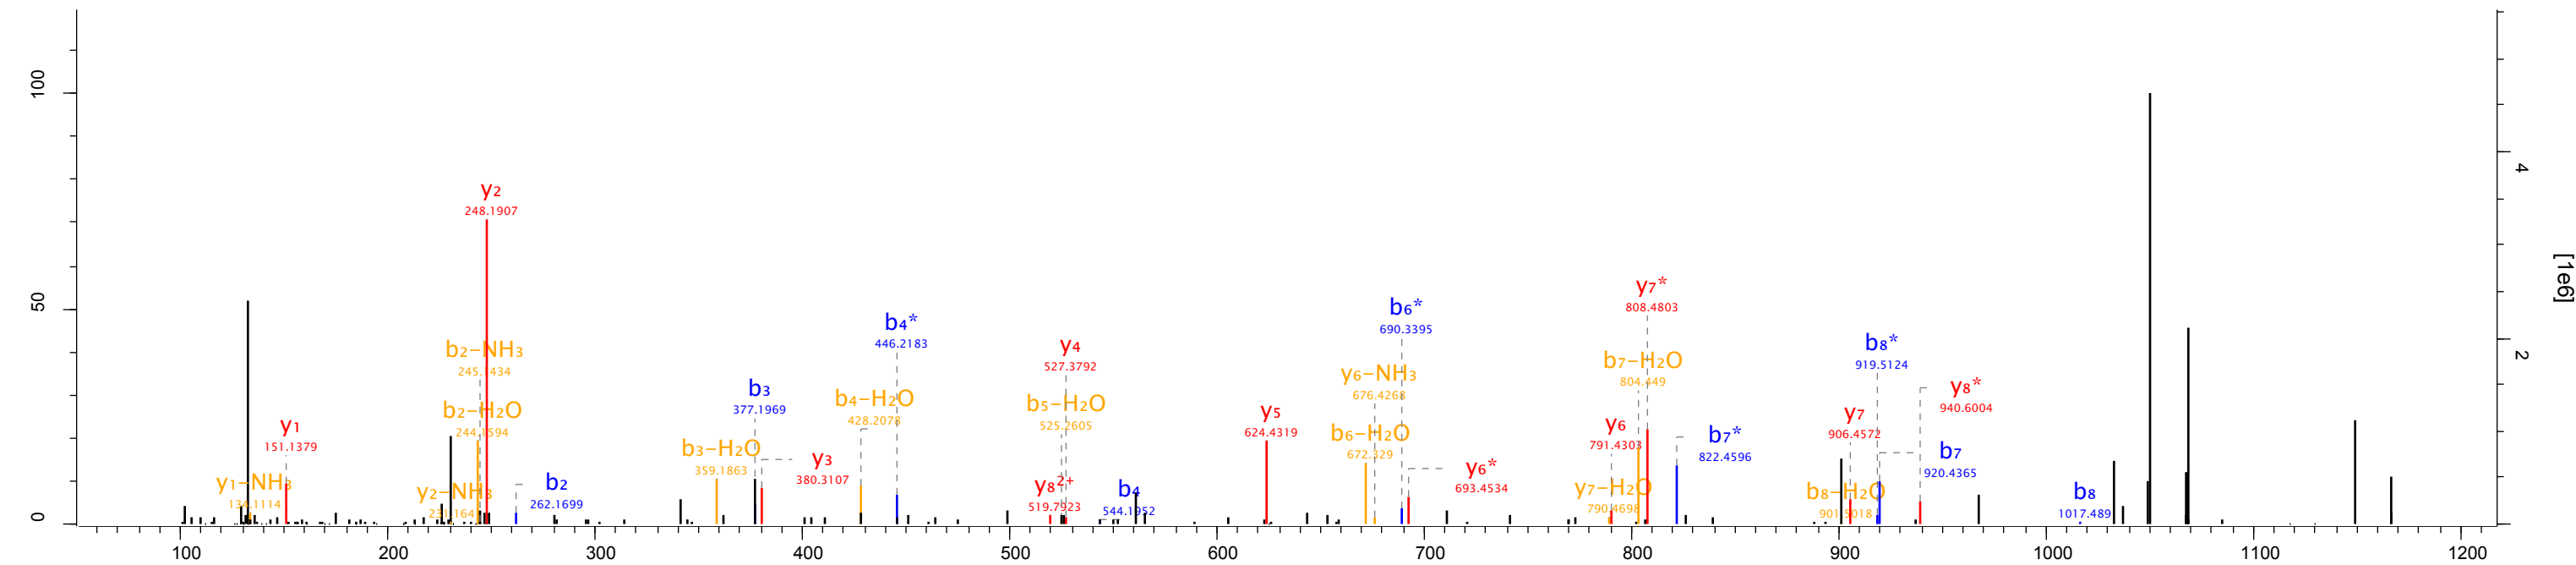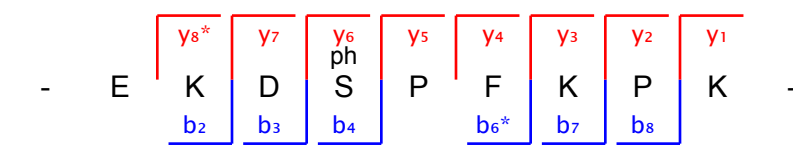

Raw file 20150812\_A375SR\_Phospho\_BR1\_08 Scan 3547 Method FTMS; HCD Score 138.19 m/z 470.56 Gene names OCIAD1

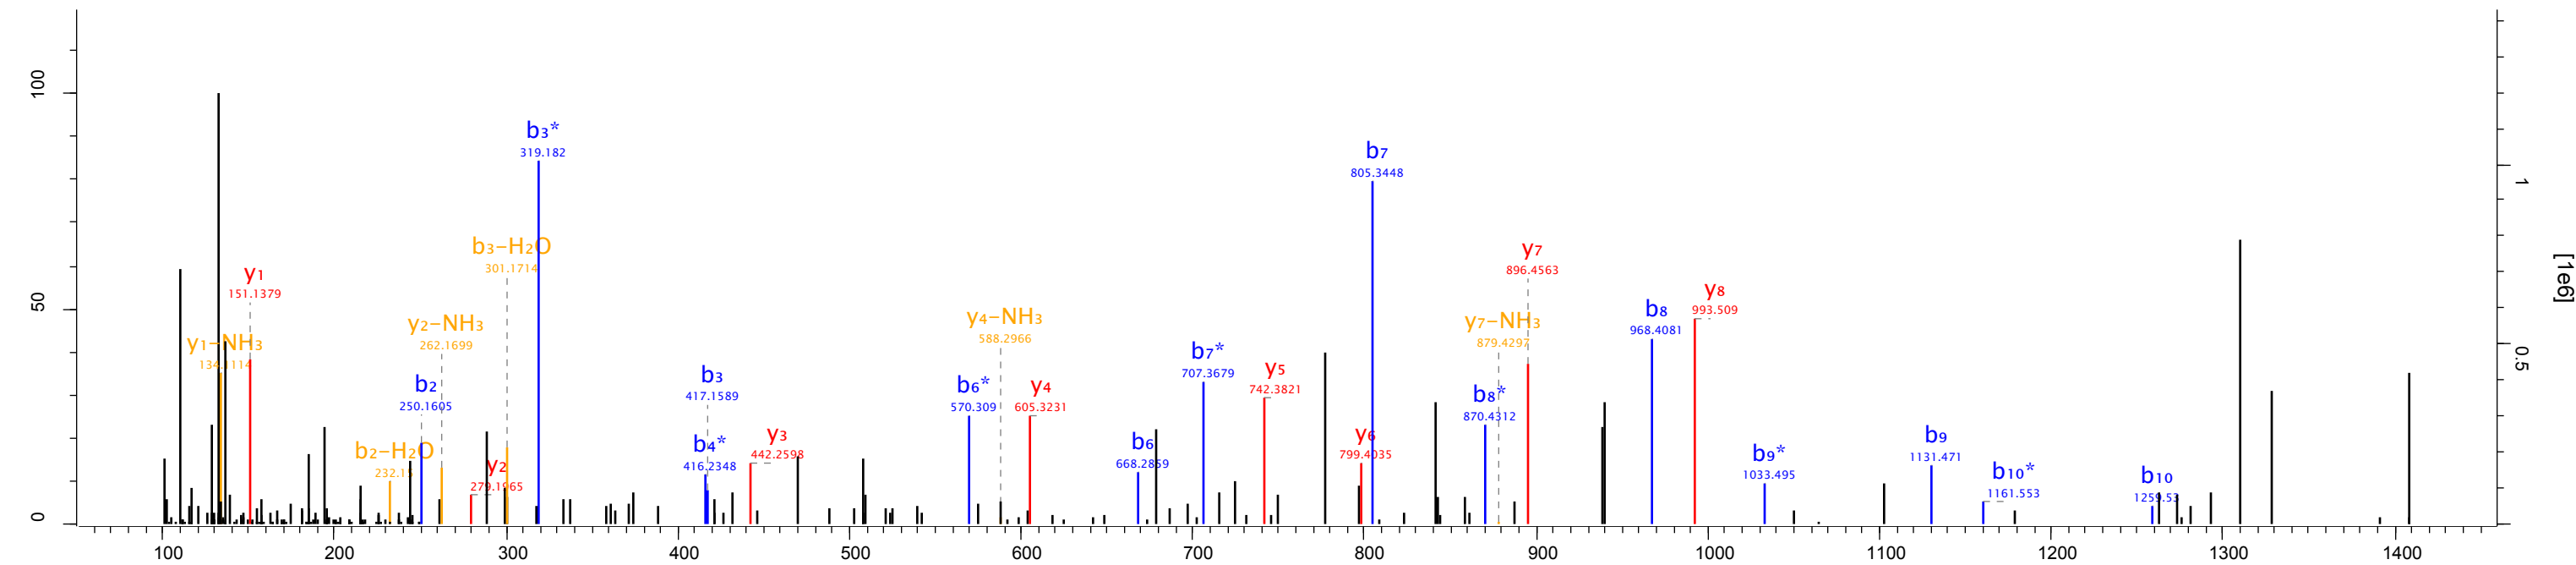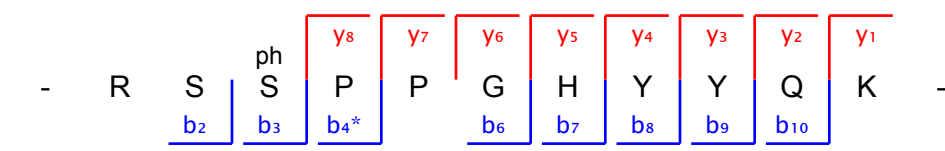

Raw file: 20150812\_A375SR\_Phospho\_BR1\_08  
 Scan: 3867 Method: FTMS; HCD Score: 211.15 m/z: 584.25 Gene names: SRRM2

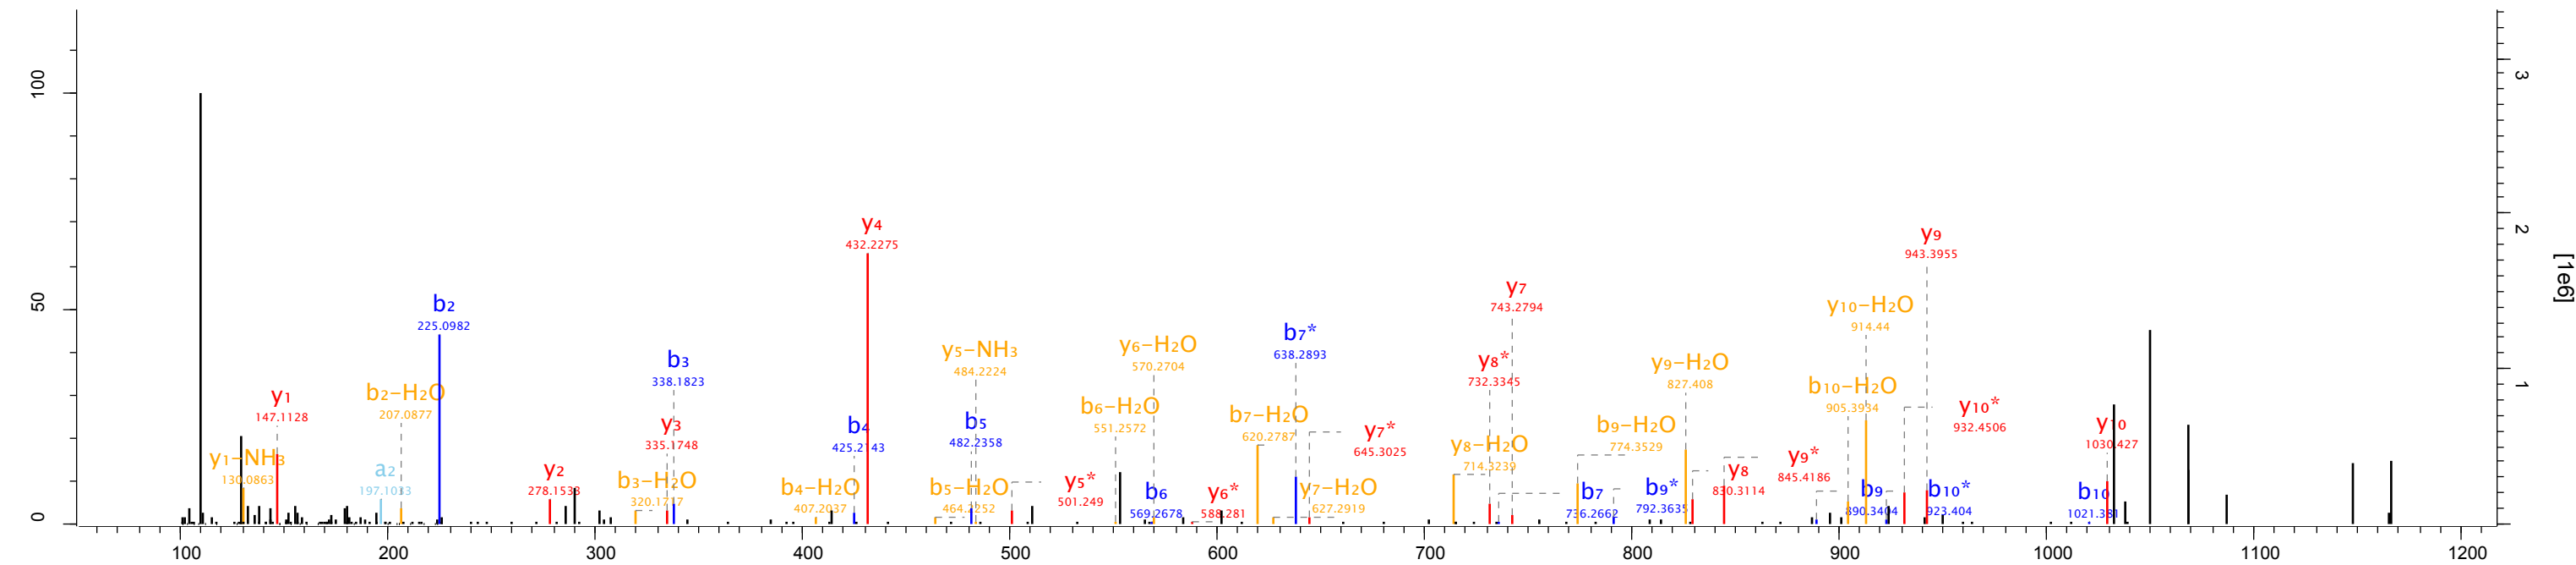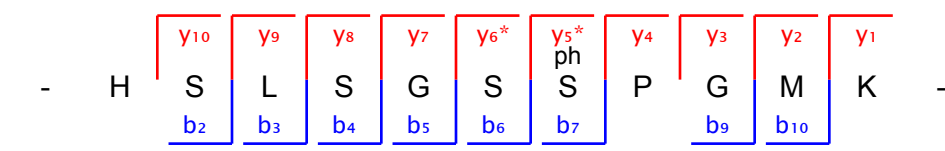

Raw file: 20150812\_A375SR\_Phospho\_BR1\_08  
 Scan: 5547 Method: FTMS; HCD Score: 113.42 m/z: 482.26 Gene names: DHX38

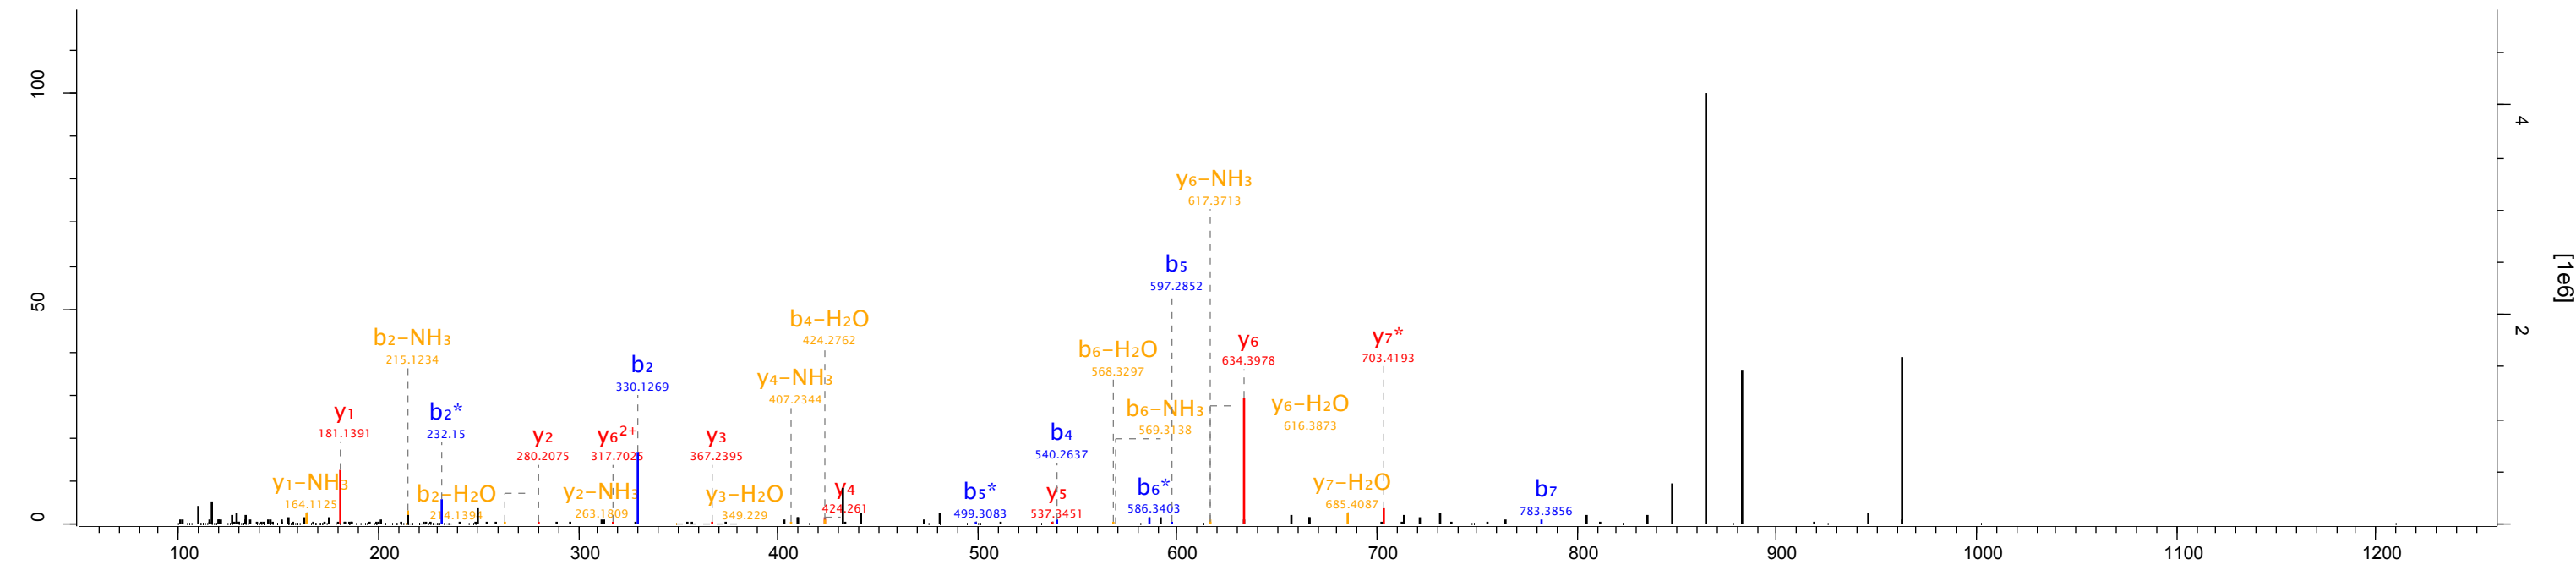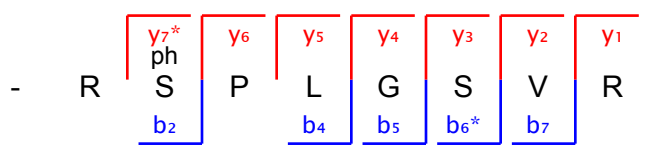

Raw file: 20150812\_A375SR\_Phospho\_BR1\_08  
 Scan: 6407 Method: FTMS; HCD Score: 79.49 m/z: 459.57 Gene names: CLASRP

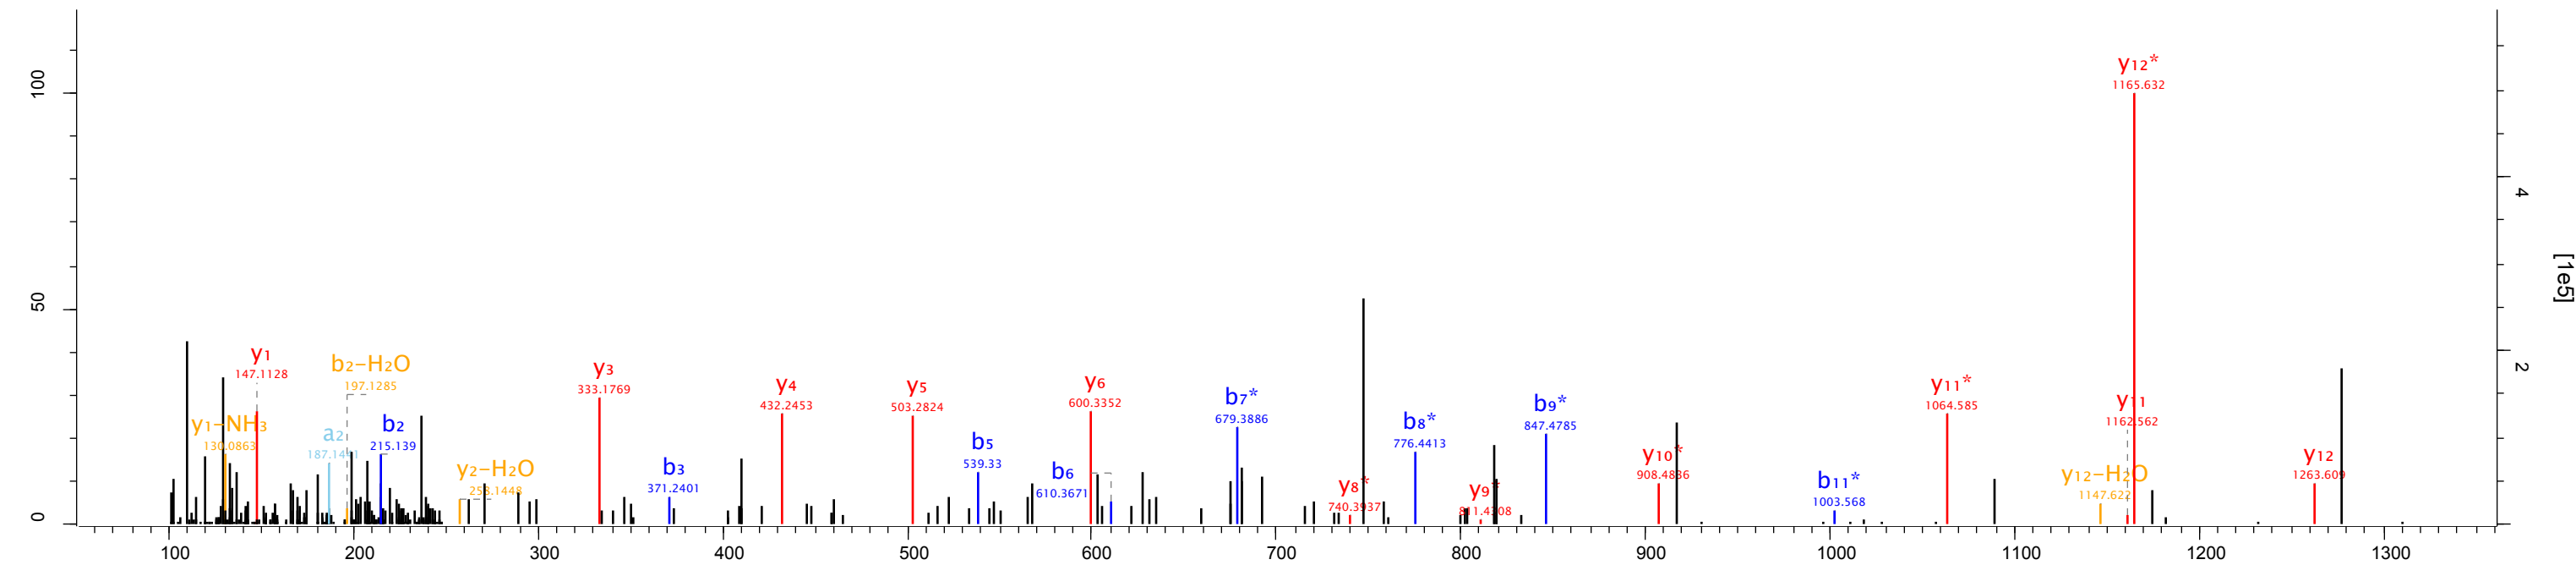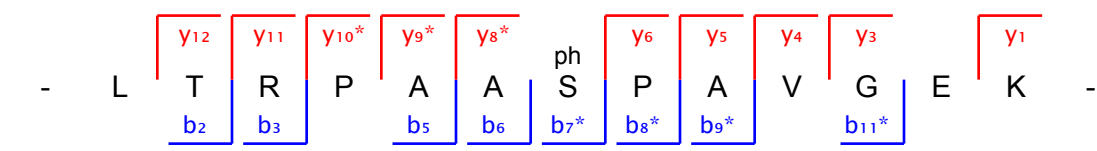

Raw file: 20150812\_A375SR\_Phospho\_BR1\_08  
 Scan: 7847 Method: FTMS; HCD Score: 62.79 m/z: 653.97 Gene names: PRPF38B

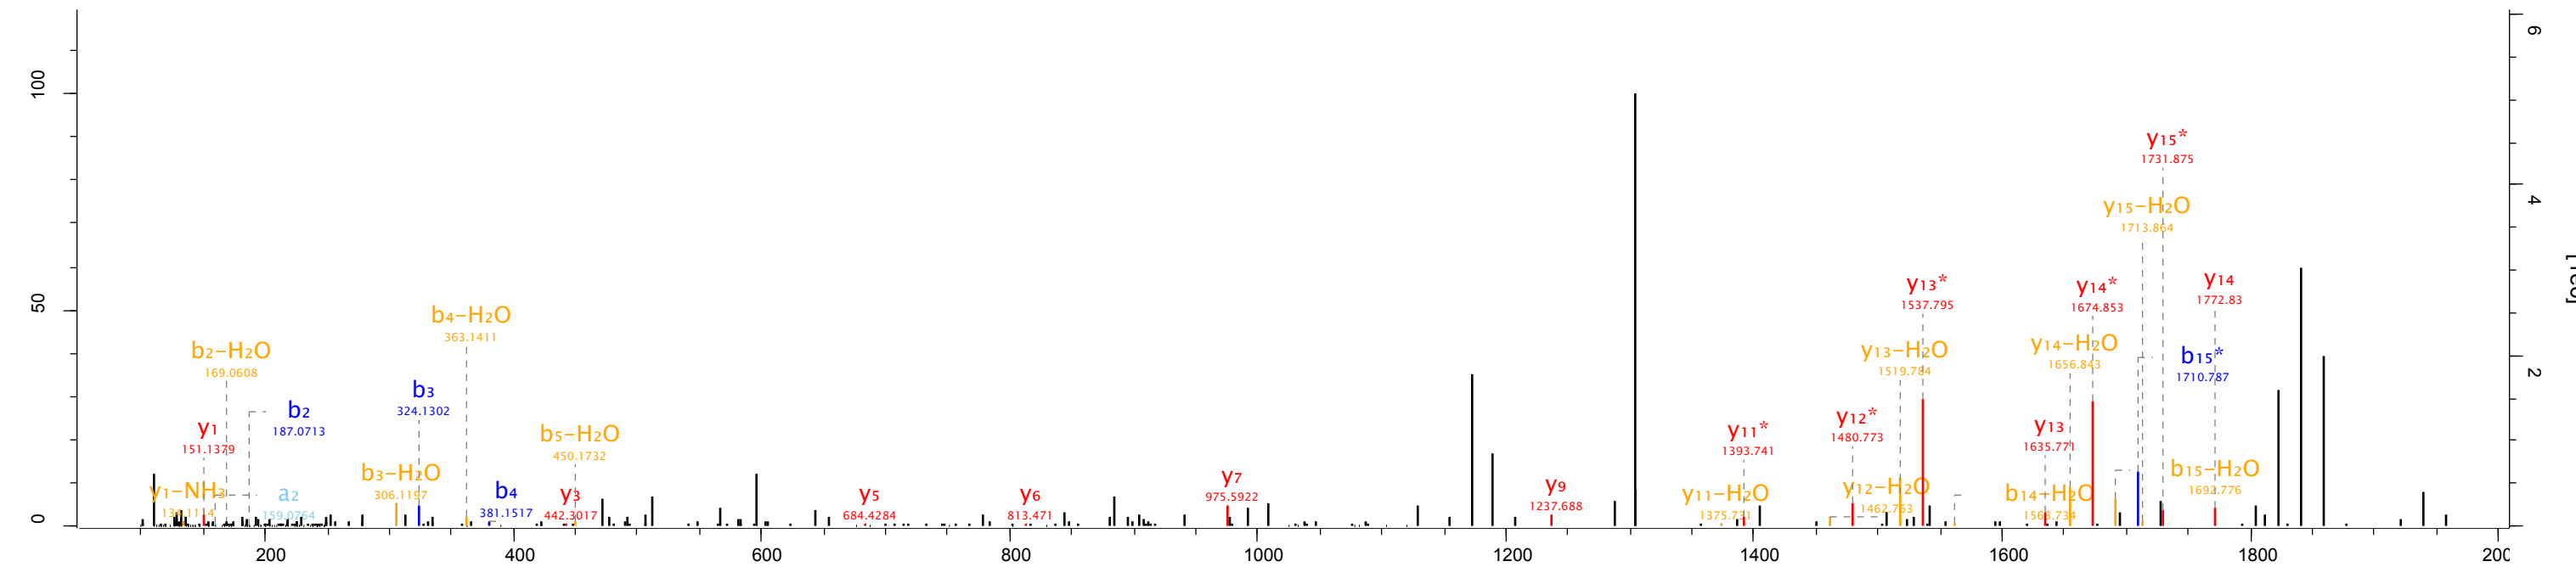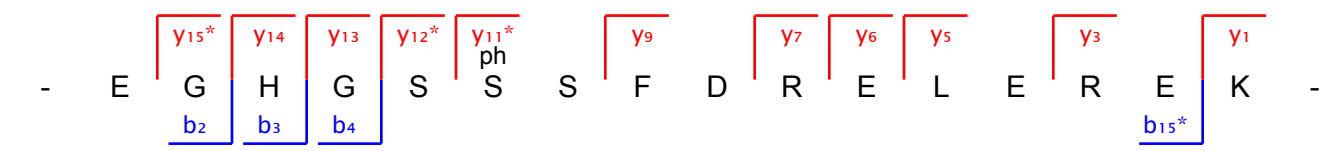

Raw file: 20150812\_A375SR\_Phospho\_BR1\_08  
 Scan: 8487 Method: FTMS; HCD Score: 174.35 m/z: 456.91 Gene names: SRRM2

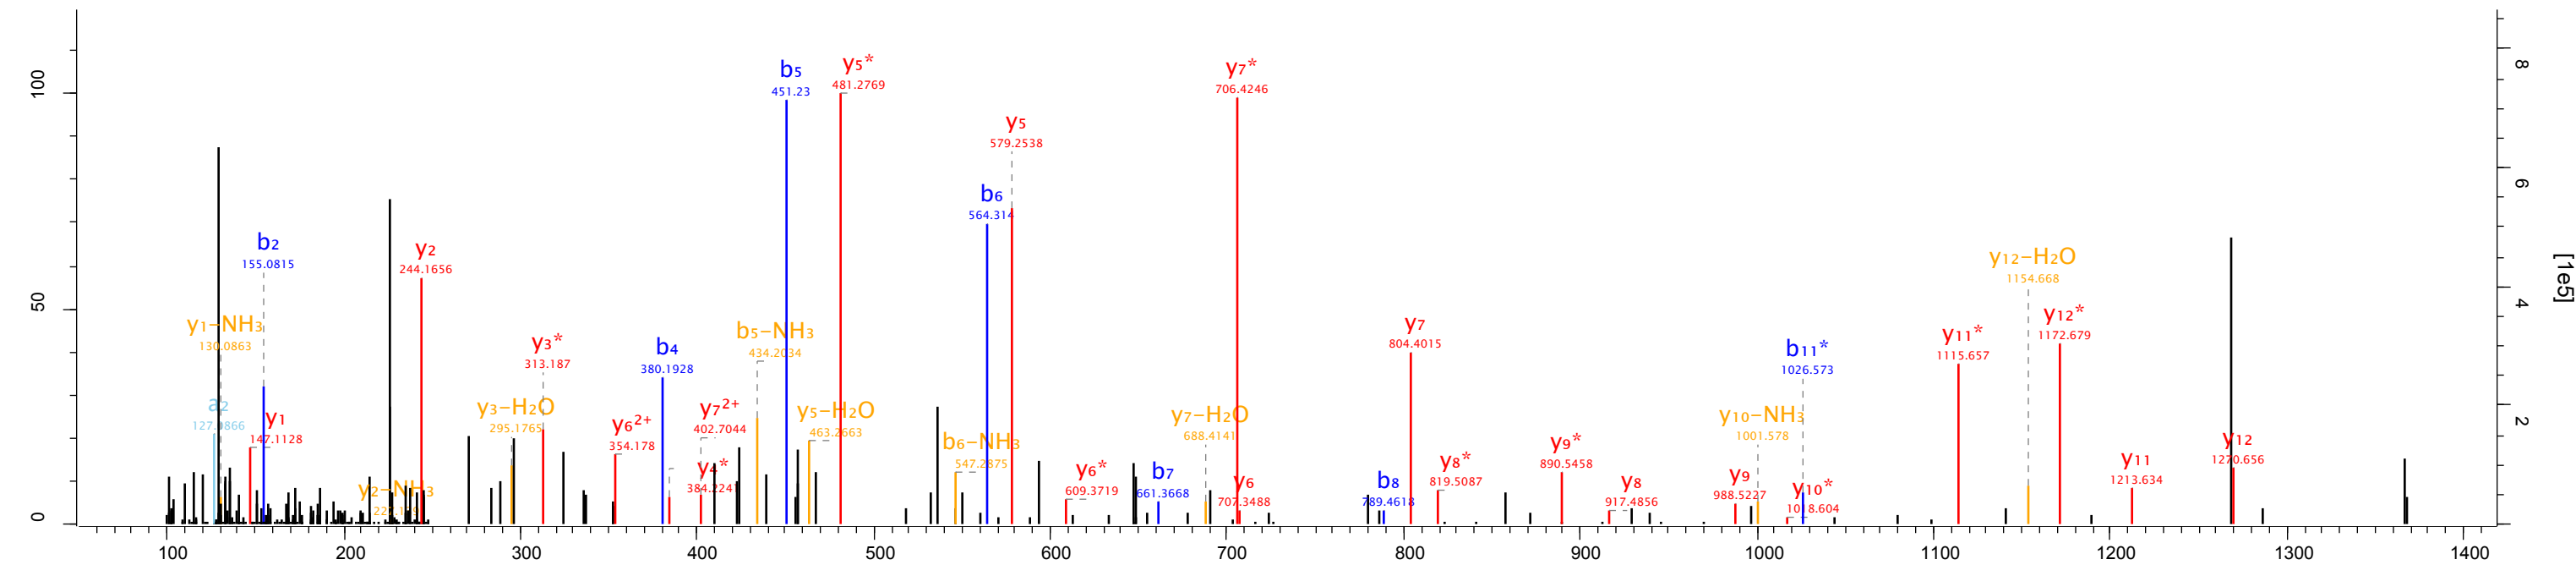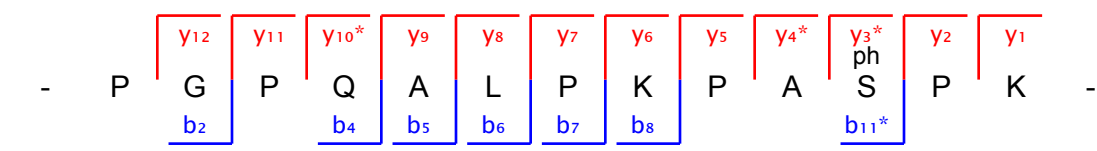



Raw file: 20150812\_A375SR\_Phospho\_BR1\_08  
 Scan: 8747 Method: FTMS; HCD Score: 131.79 m/z: 746.71 Gene names: ZC3H4

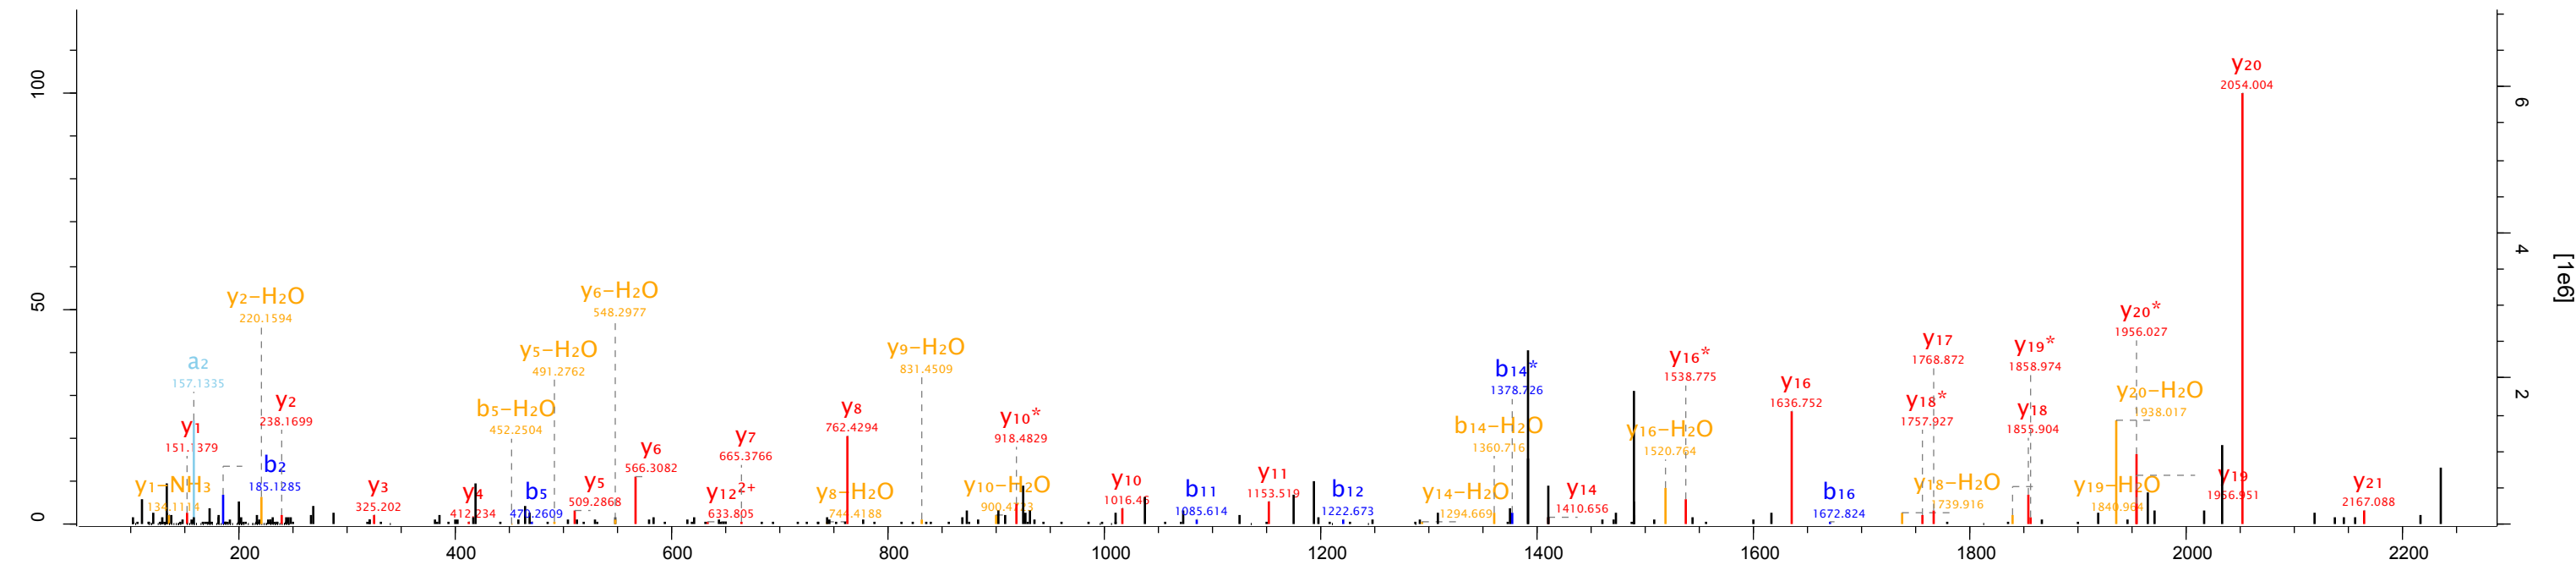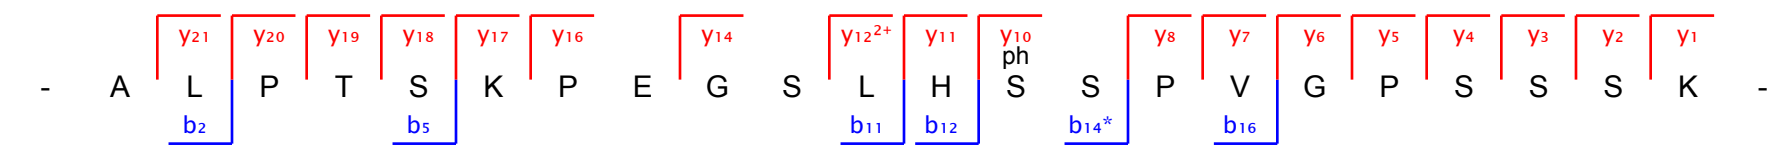

Raw file: 20150812\_A375SR\_Phospho\_BR1\_09  
 Scan: 10387 Method: FTMS; HCD Score: 275.63 m/z: 955.44 Gene names: MAP1B

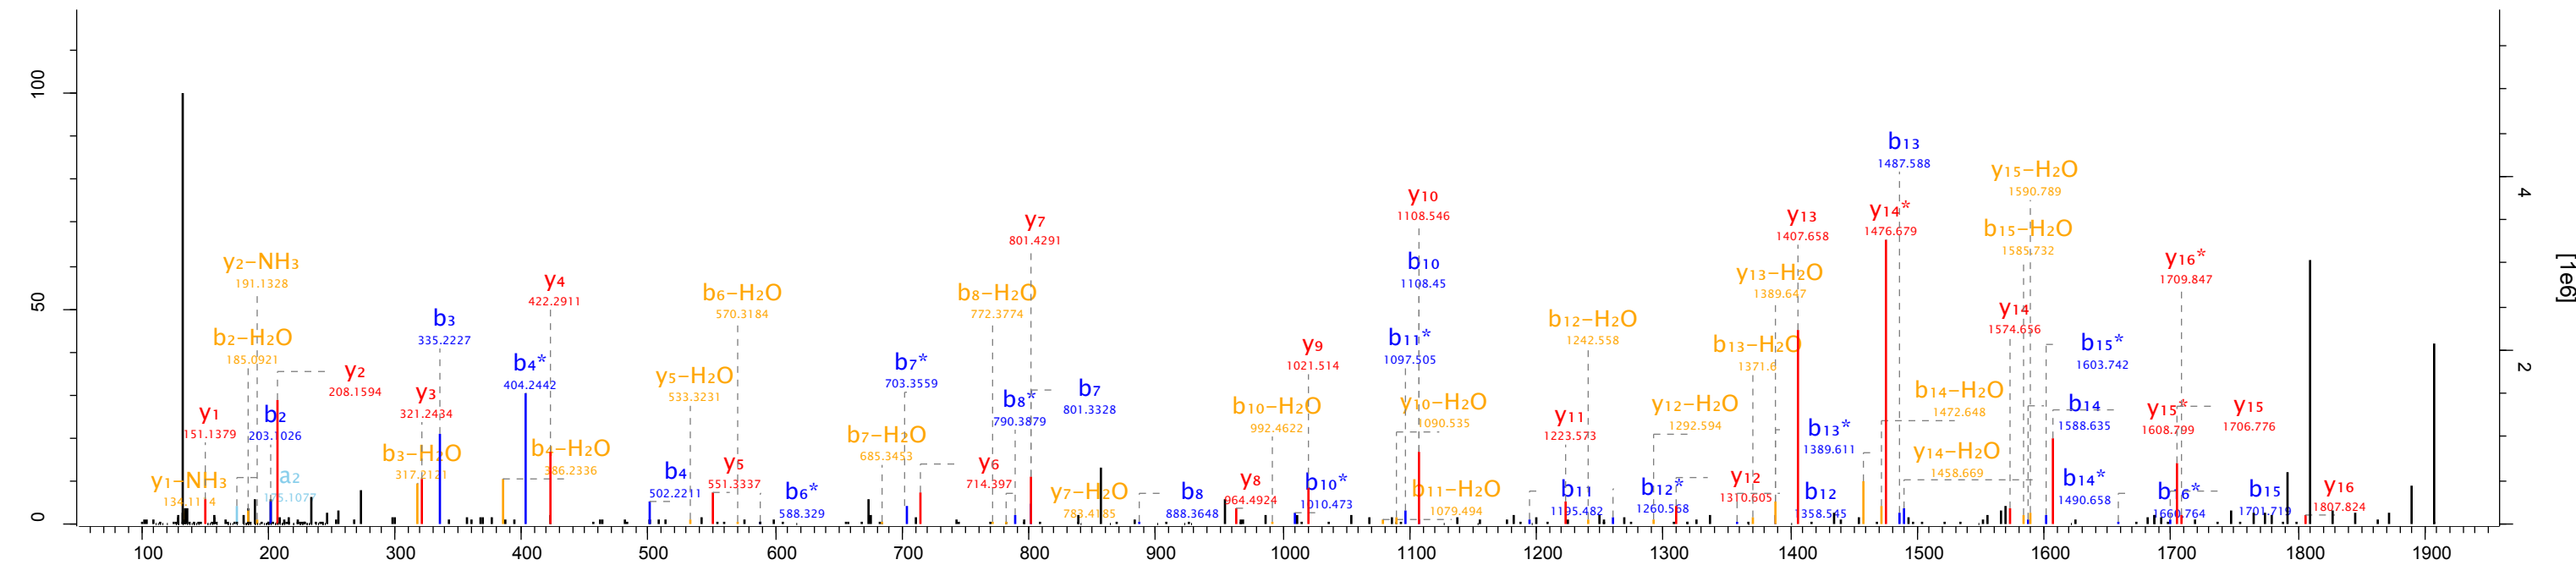

- T T K S P S D S G Y S Y E T I G K -

y<sub>16</sub>
y<sub>15</sub>
y<sub>14</sub>ph
y<sub>13</sub>
y<sub>12</sub>
y<sub>11</sub>
y<sub>10</sub>
y<sub>9</sub>
y<sub>8</sub>
y<sub>7</sub>
y<sub>6</sub>
y<sub>5</sub>
y<sub>4</sub>
y<sub>3</sub>
y<sub>2</sub>
y<sub>1</sub>

b<sub>2</sub>
b<sub>3</sub>
b<sub>4</sub>
b<sub>6</sub>\*
b<sub>7</sub>
b<sub>8</sub>
b<sub>10</sub>
b<sub>11</sub>
b<sub>12</sub>
b<sub>13</sub>
b<sub>14</sub>
b<sub>15</sub>
b<sub>16</sub>\*

Raw file Scan Method Score m/z Gene names  
 20150812\_A375SR\_Phospho\_BR1\_09 10467 FTMS; HCD 253.73 894.88 ARL6IP4

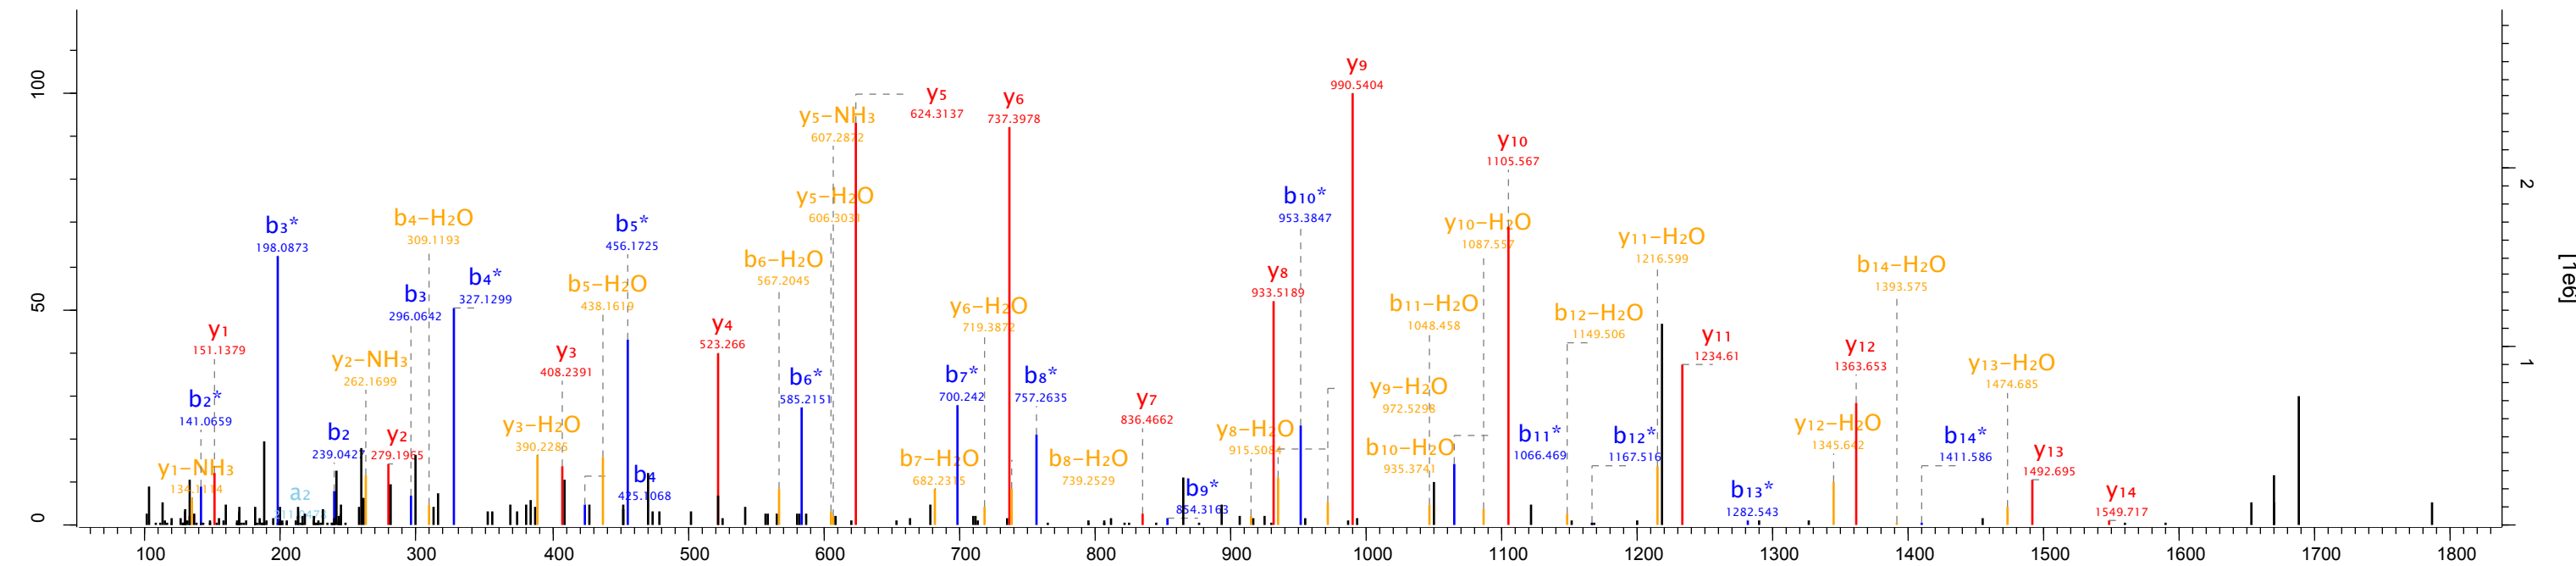

ph S A G E E E D G P V L T D E Q K -

b<sub>2</sub> b<sub>3</sub> b<sub>4</sub> b<sub>5</sub>\* b<sub>6</sub>\* b<sub>7</sub>\* b<sub>8</sub>\* b<sub>9</sub>\* b<sub>10</sub>\* b<sub>11</sub>\* b<sub>12</sub>\* b<sub>13</sub>\* b<sub>14</sub>\*

y<sub>1</sub> y<sub>2</sub> y<sub>3</sub> y<sub>4</sub> y<sub>5</sub> y<sub>6</sub> y<sub>7</sub> y<sub>8</sub> y<sub>9</sub> y<sub>10</sub> y<sub>11</sub> y<sub>12</sub> y<sub>13</sub> y<sub>14</sub>

Raw file: 20150812\_A375SR\_Phospho\_BR1\_09  
 Scan: 13547 Method: FTMS; HCD Score: 169.33 m/z: 571.27 Gene names: FRMD6

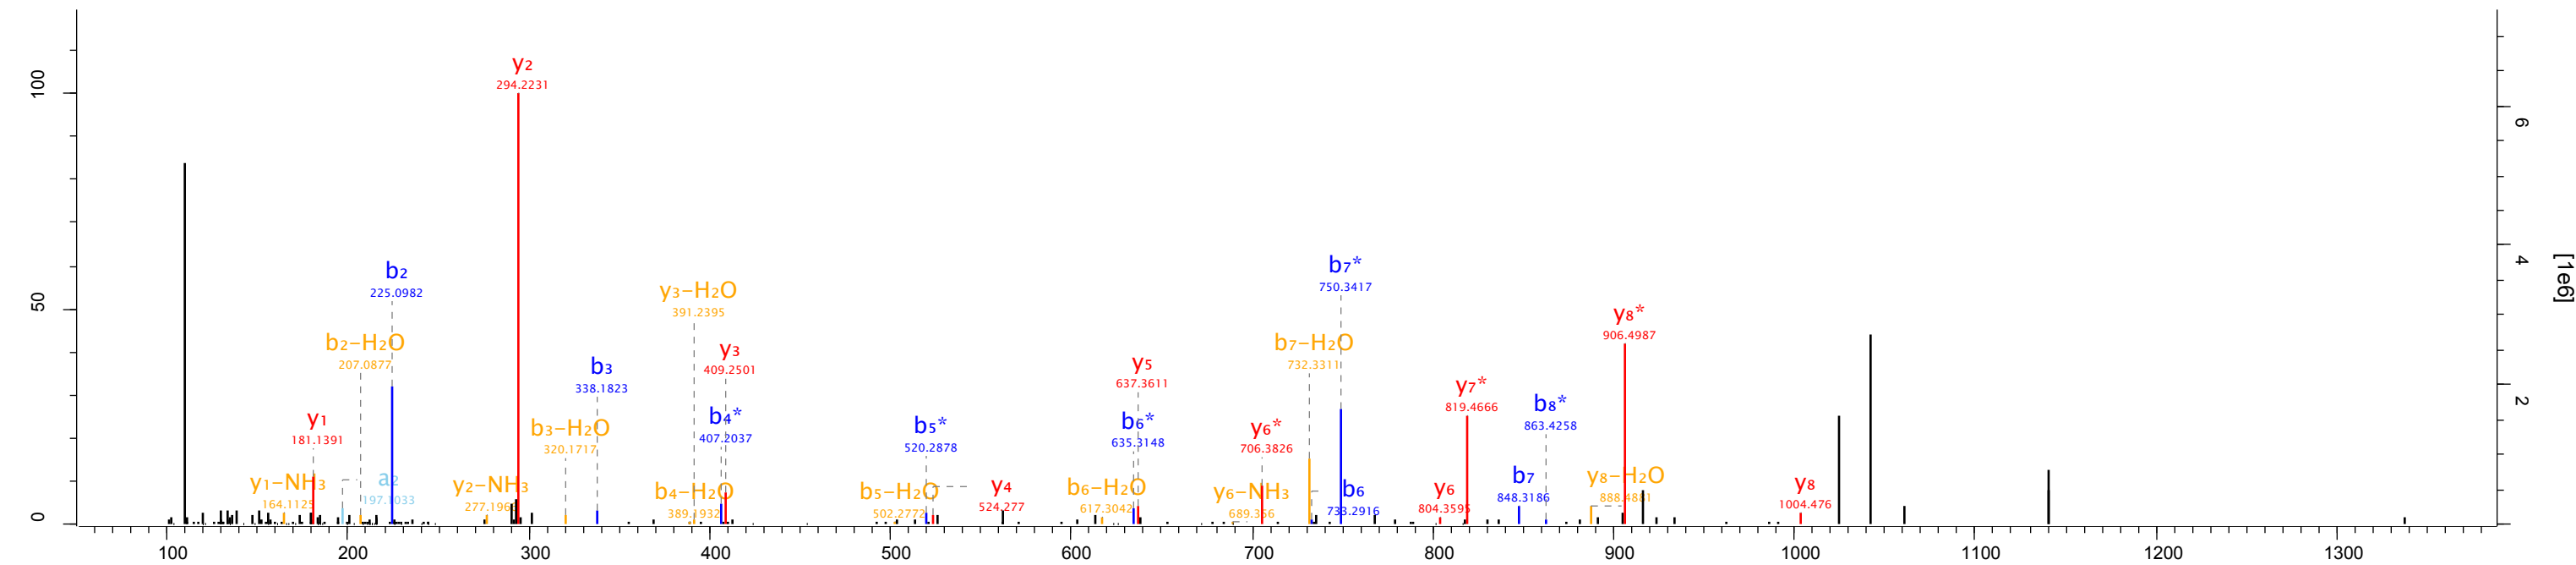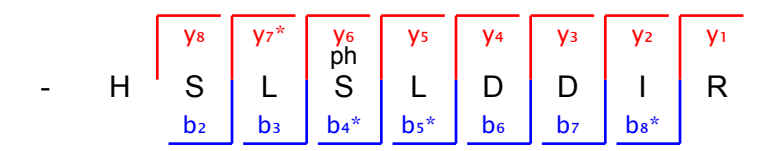

Raw file: 20150812\_A375SR\_Phospho\_BR1\_09  
 Scan: 17507 Method: FTMS; HCD Score: 113.67 m/z: 513.78 Gene names: ARHGEF18

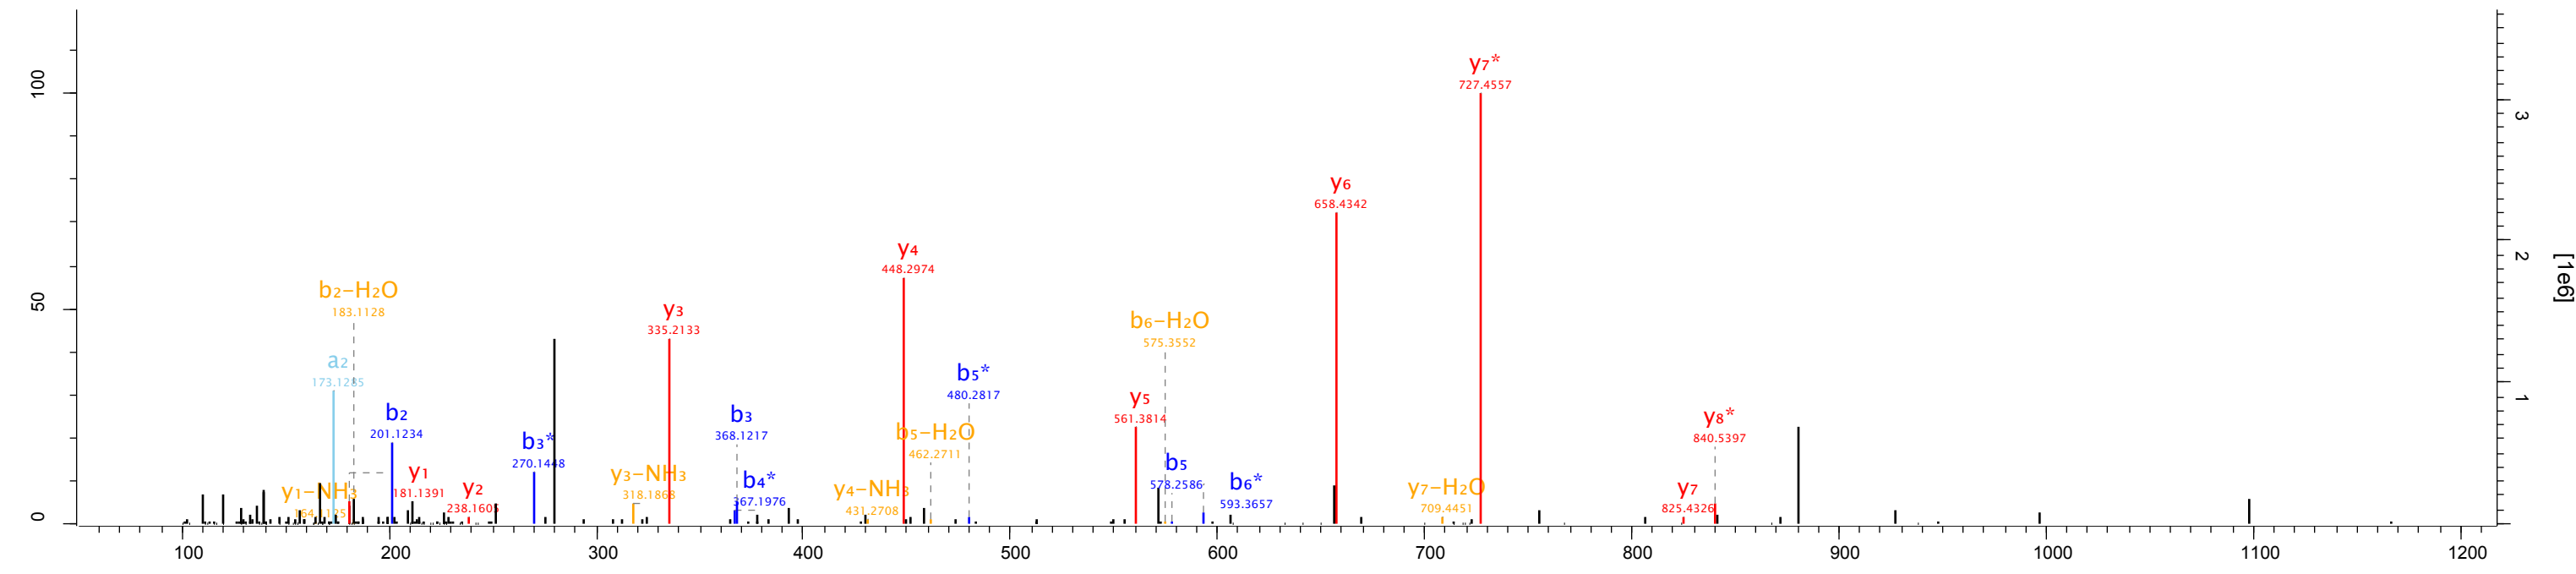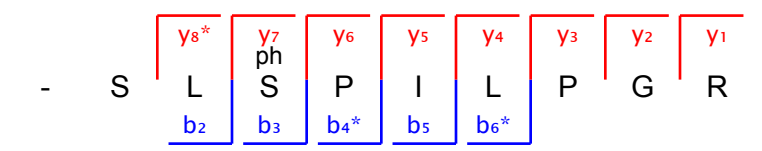

Raw file 20150812\_A375SR\_Phospho\_BR1\_09 Scan 22587 Method FTMS; HCD Score 250.35 m/z 815.41 Gene names SYNRC

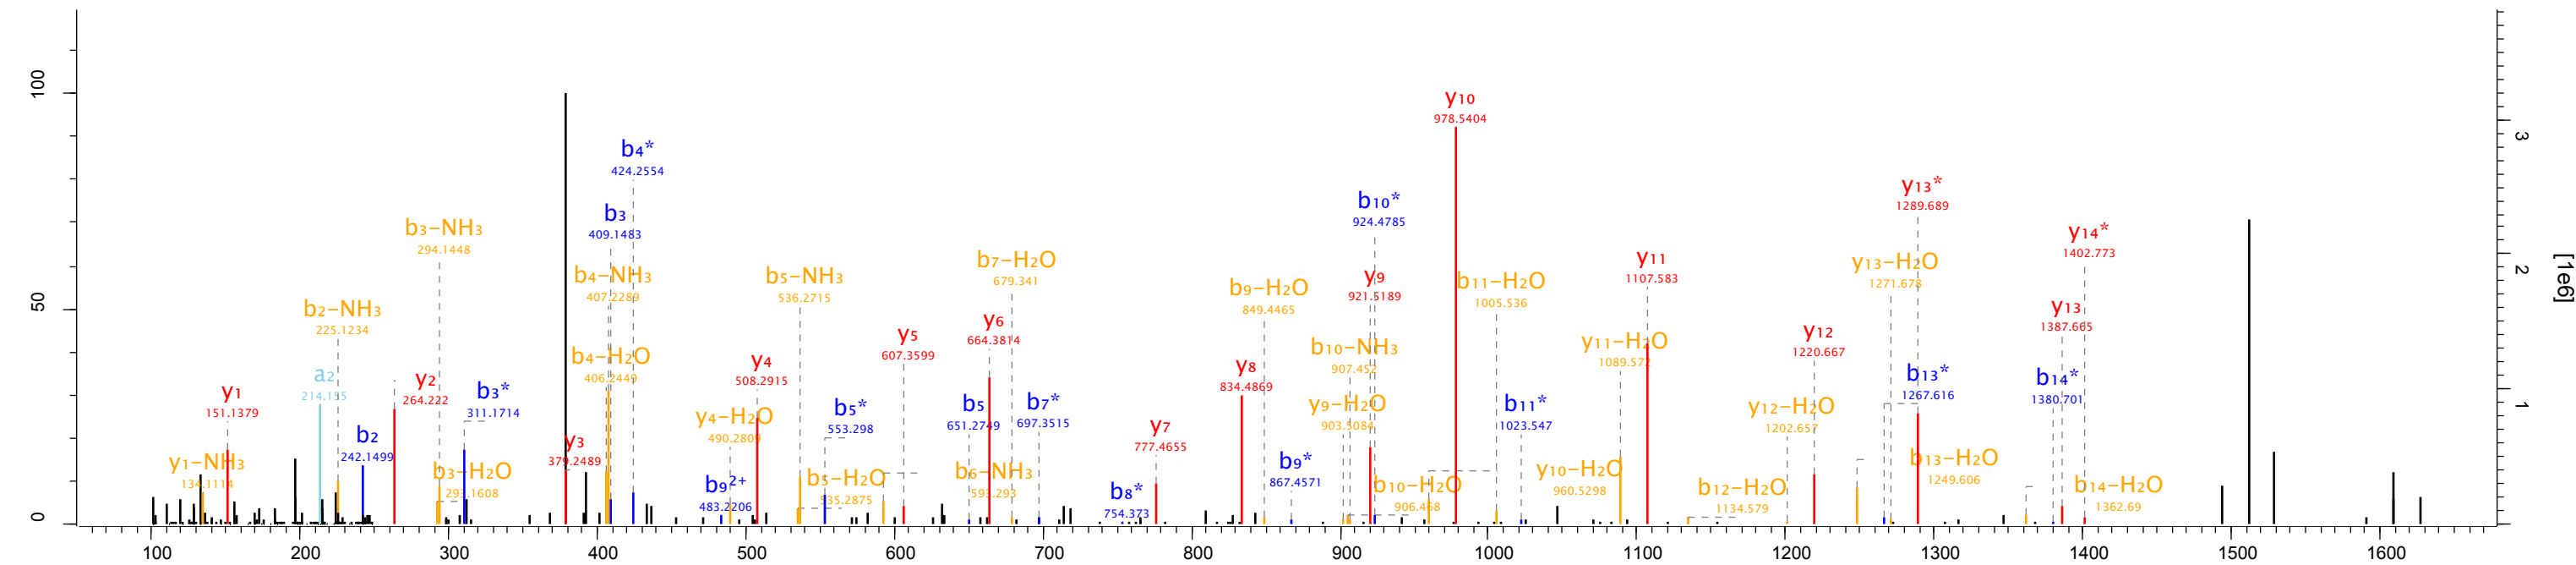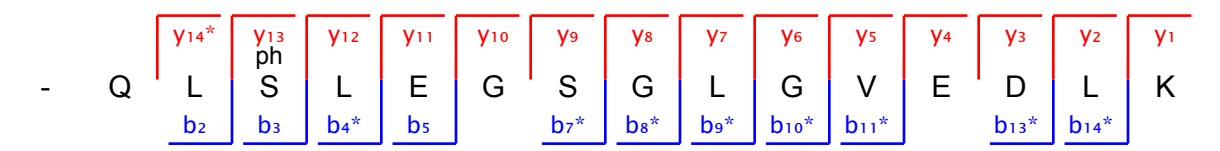

Raw file 20150812\_A375SR\_Phospho\_BR1\_09 Scan 22727 Method FTMS; HCD Score 203.59 m/z 1011.79 Gene names TNS3

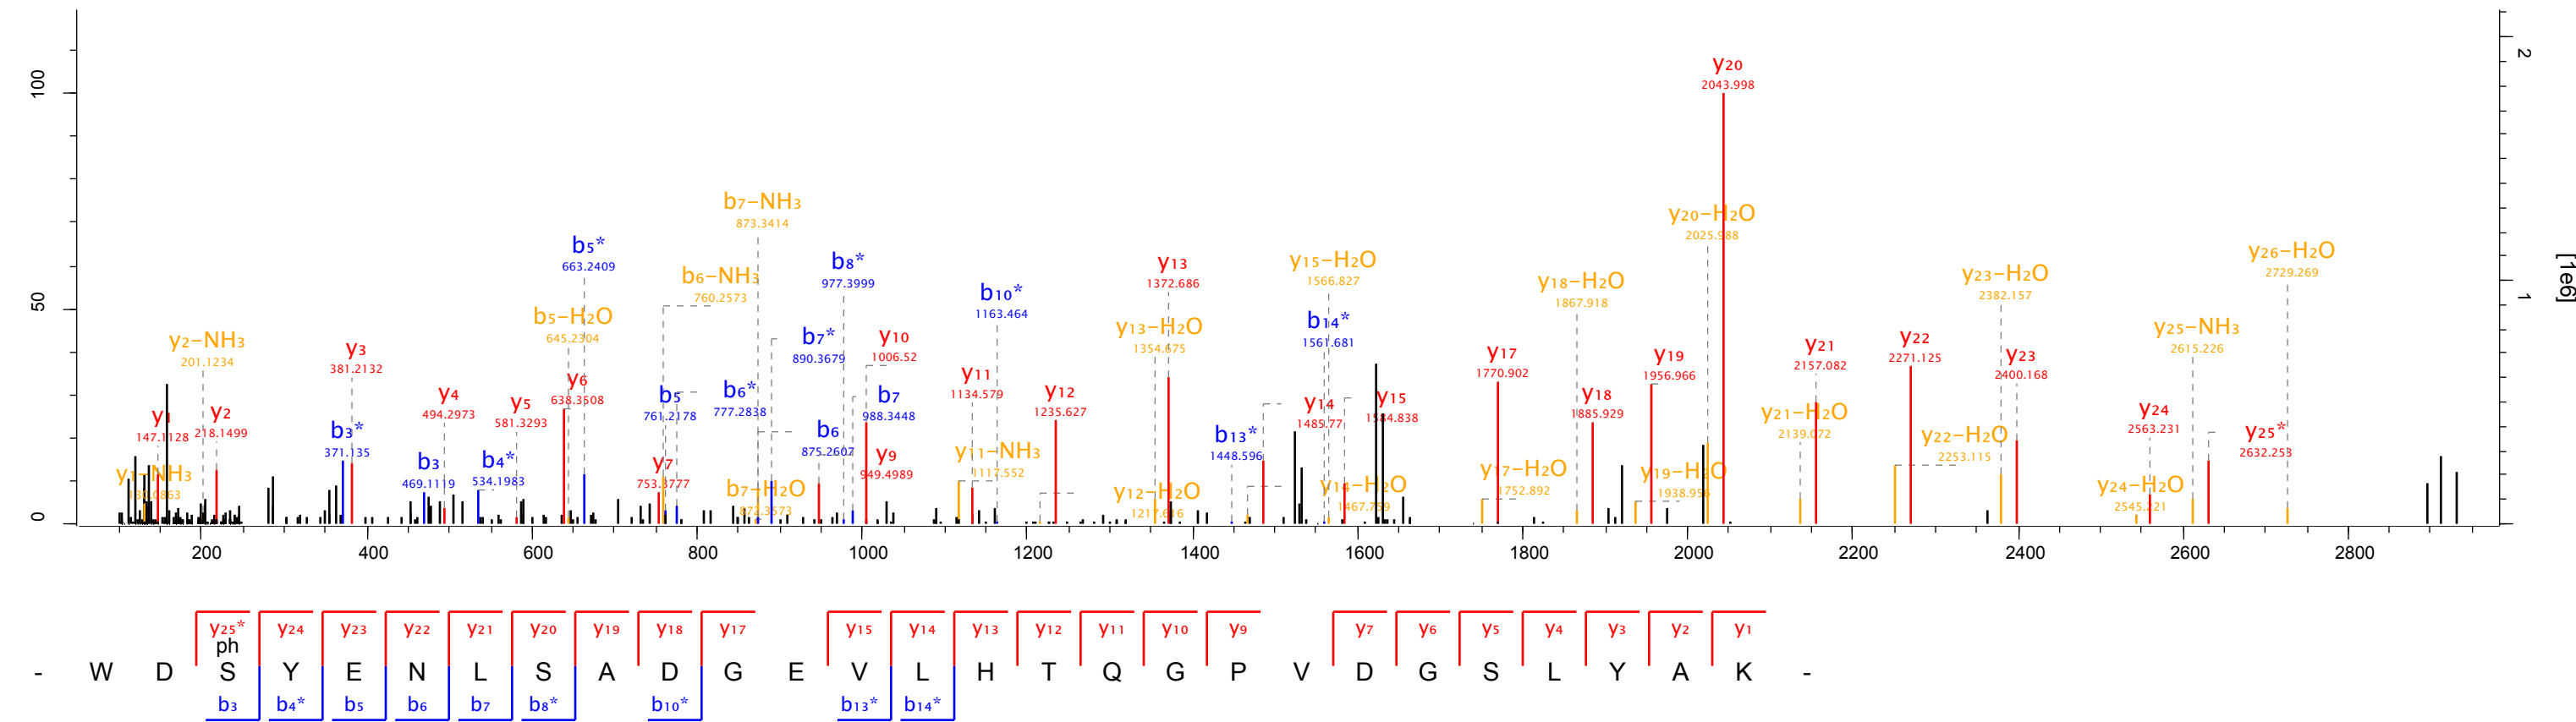

Raw file Scan Method Score m/z Gene names  
 20150812\_A375SR\_Phospho\_BR1\_09 23087 FTMS; HCD 149.96 596.3 AHNAK

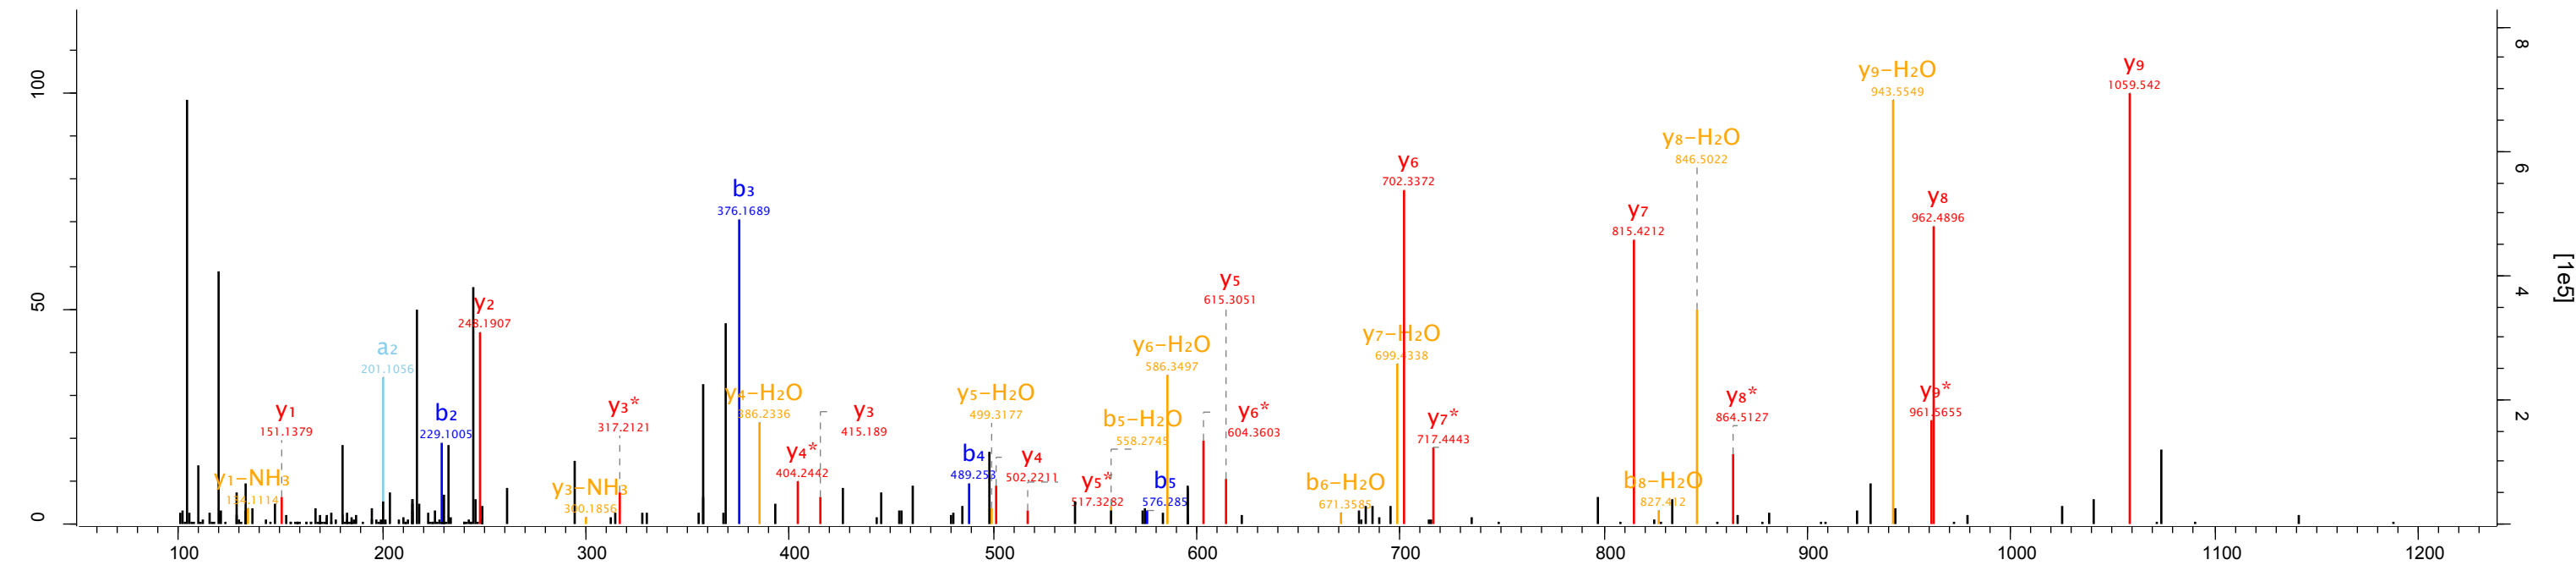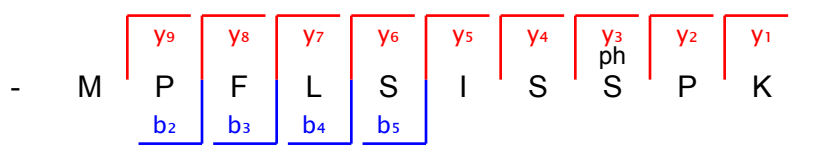



Raw file: 20150812\_A375SR\_Phospho\_BR1\_09  
 Scan: 24577 Method: FTMS; HCD Score: 109.72 m/z: 877.41 Gene names: RALGAPA1

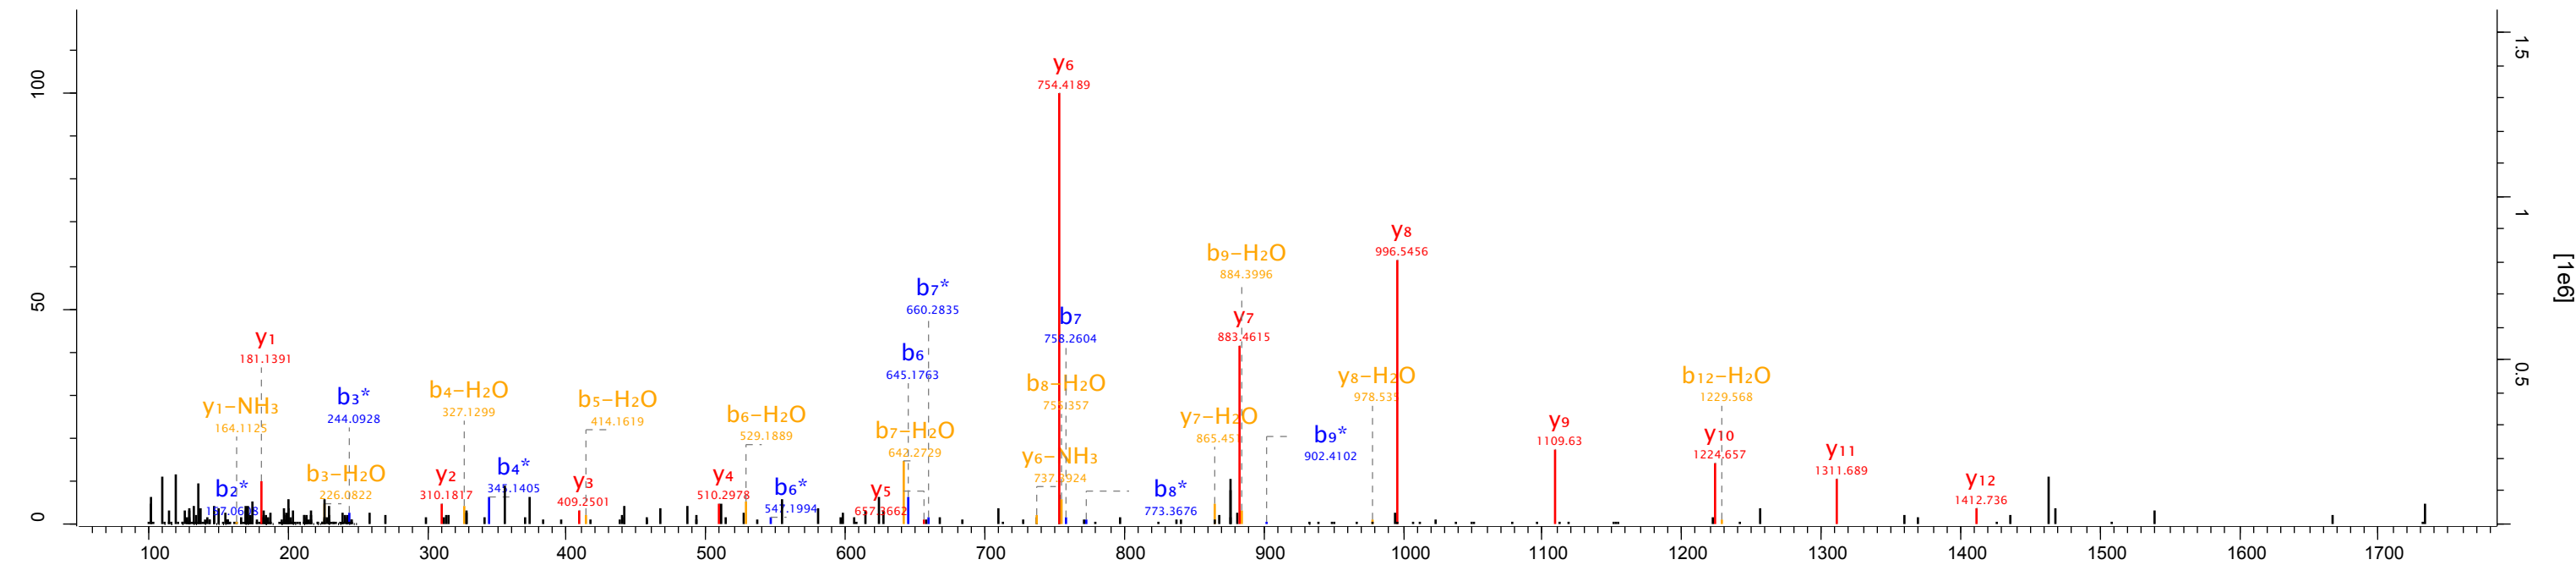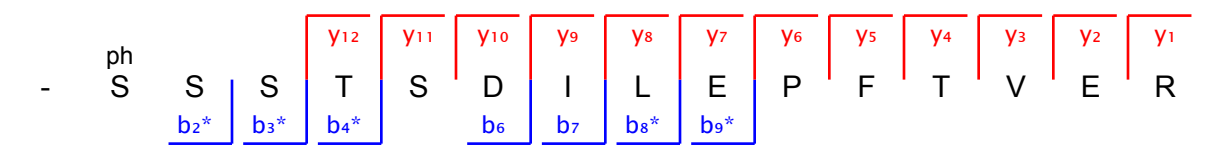

Raw file  
20150812\_A375SR\_Phospho\_BR1\_09

Scan 26447 Method FTMS; HCD Score 146.76 m/z 776.67 Gene names MARS

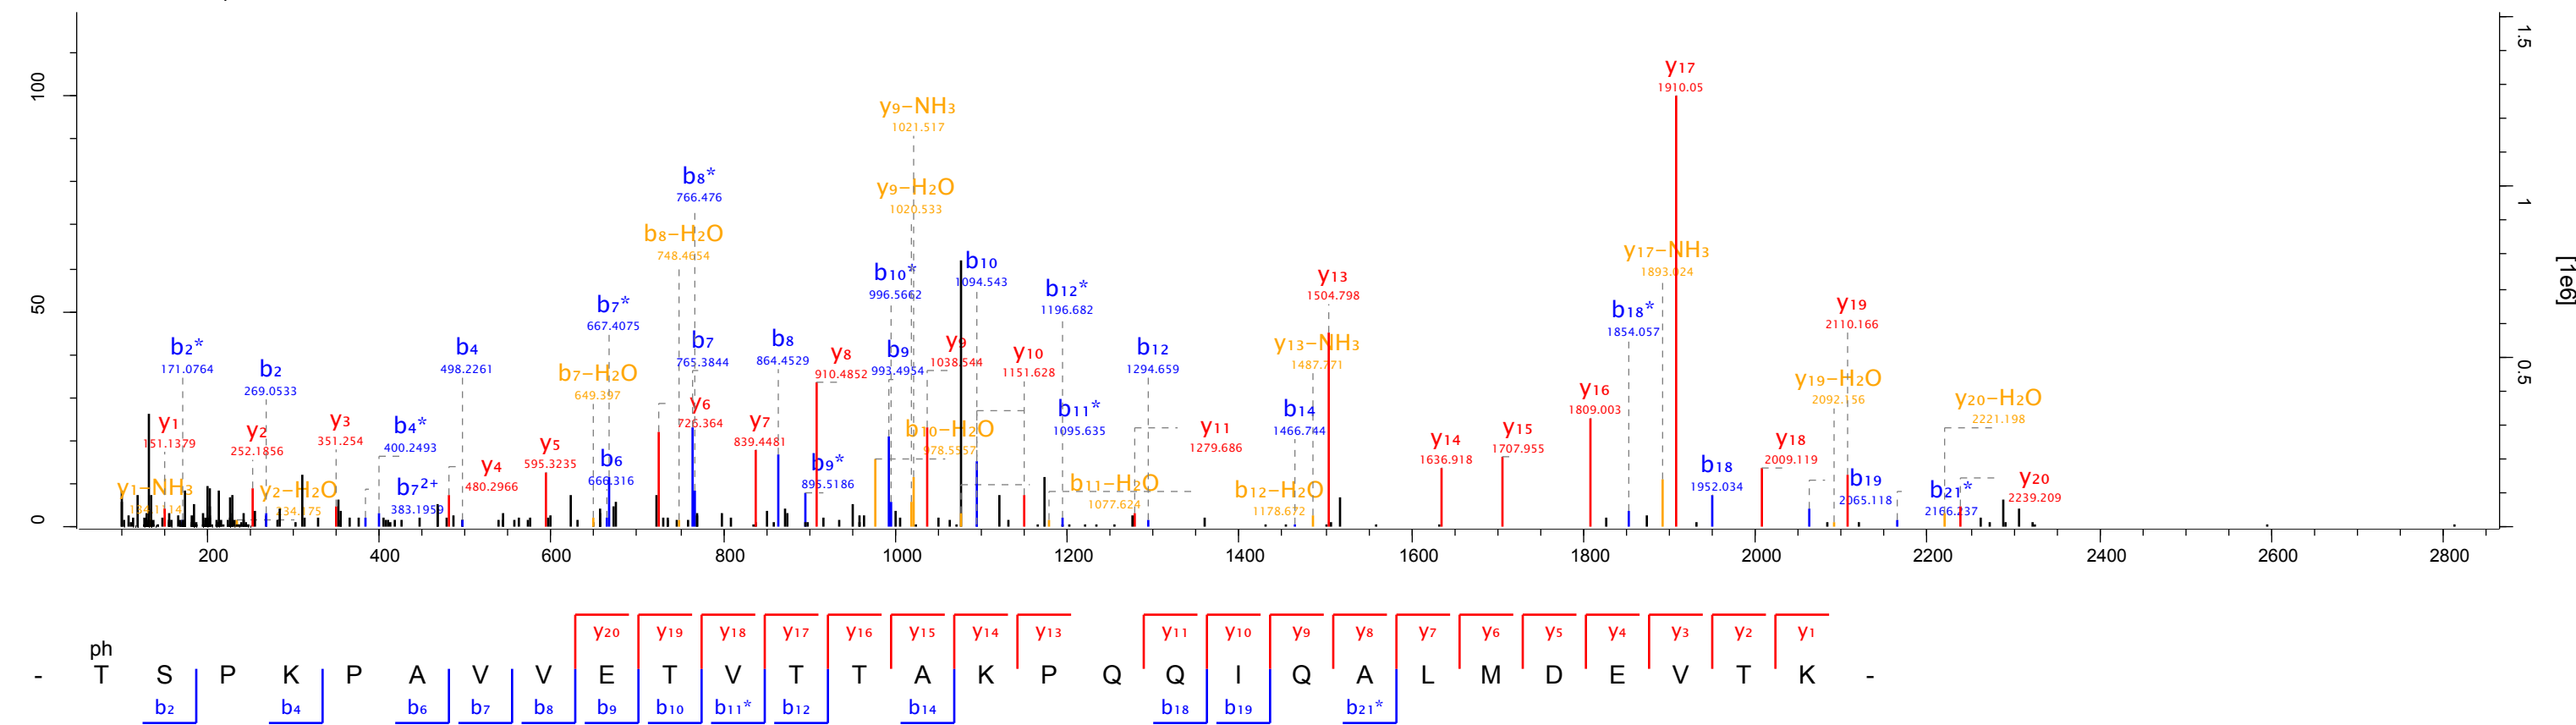

Raw file: 20150812\_A375SR\_Phospho\_BR1\_09  
 Scan: 3207 Method: FTMS; HCD Score: 148.96 m/z: 595.77 Gene names: RBM15

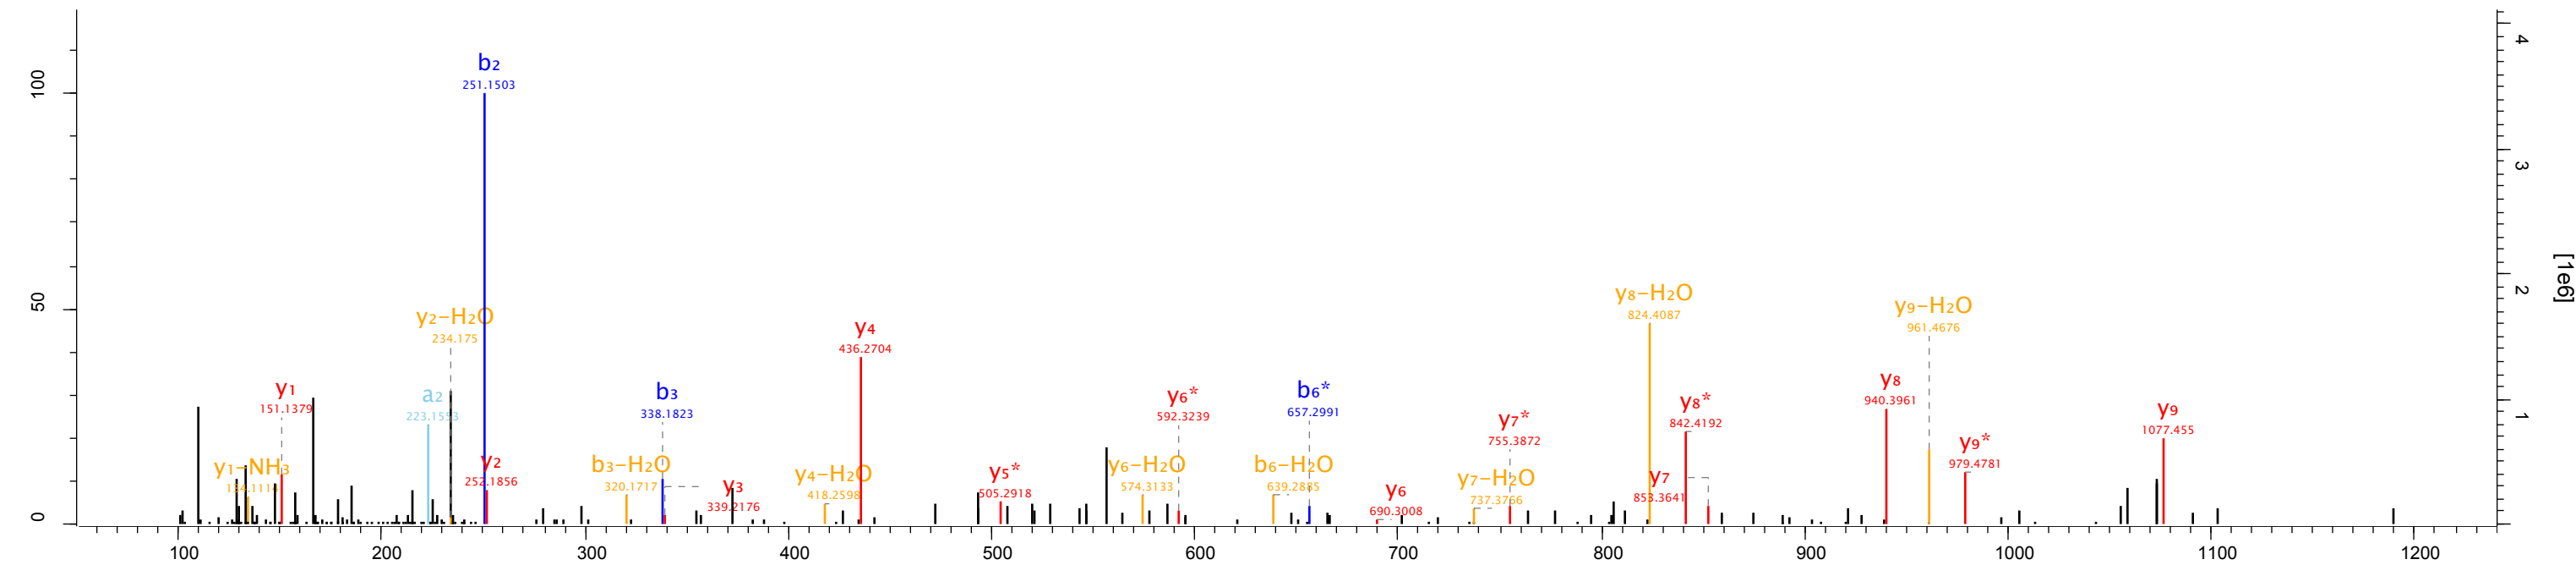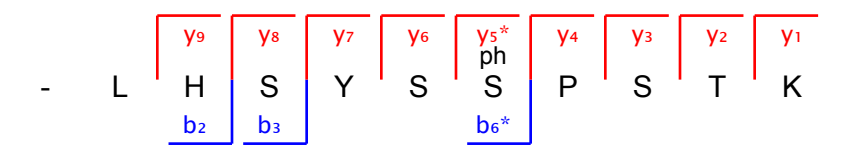

Raw file: 20150812\_A375SR\_Phospho\_BR1\_09  
 Scan: 5017 Method: FTMS; HCD Score: 174.02 m/z: 827.45 Gene names: HMGA1

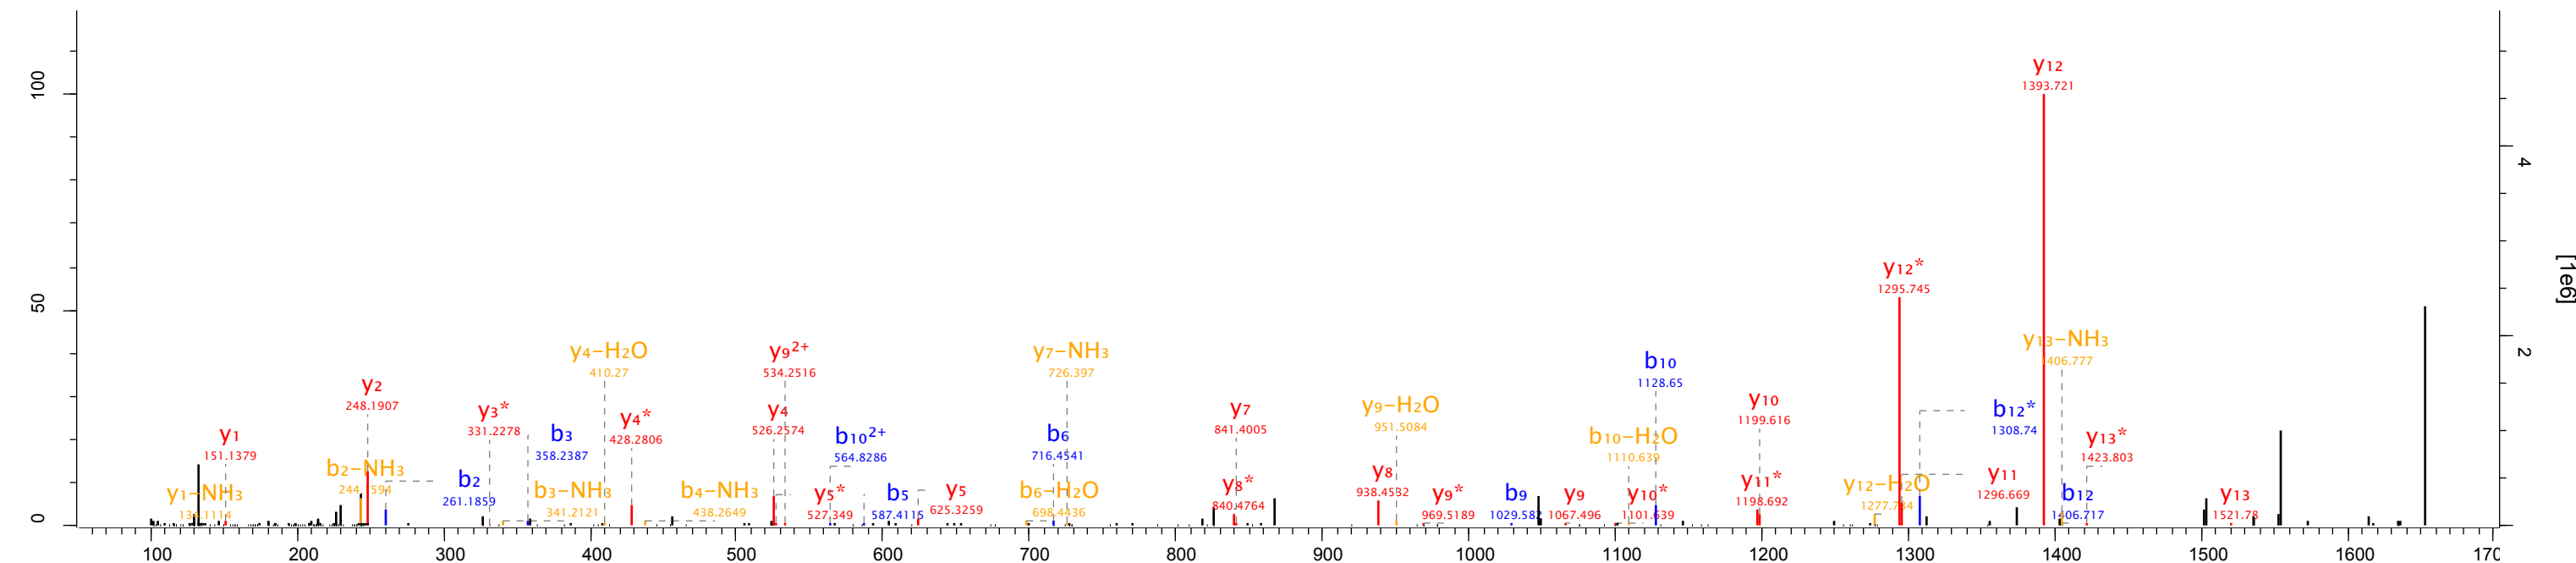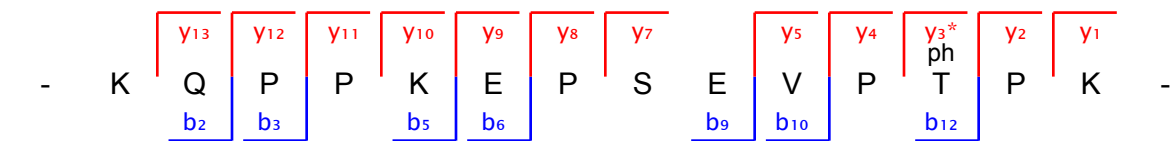

Raw file: 20150812\_A375SR\_Phospho\_BR1\_09  
 Scan: 5327 Method: FTMS; HCD Score: 293.89 m/z: 962.43 Gene names: DKC1

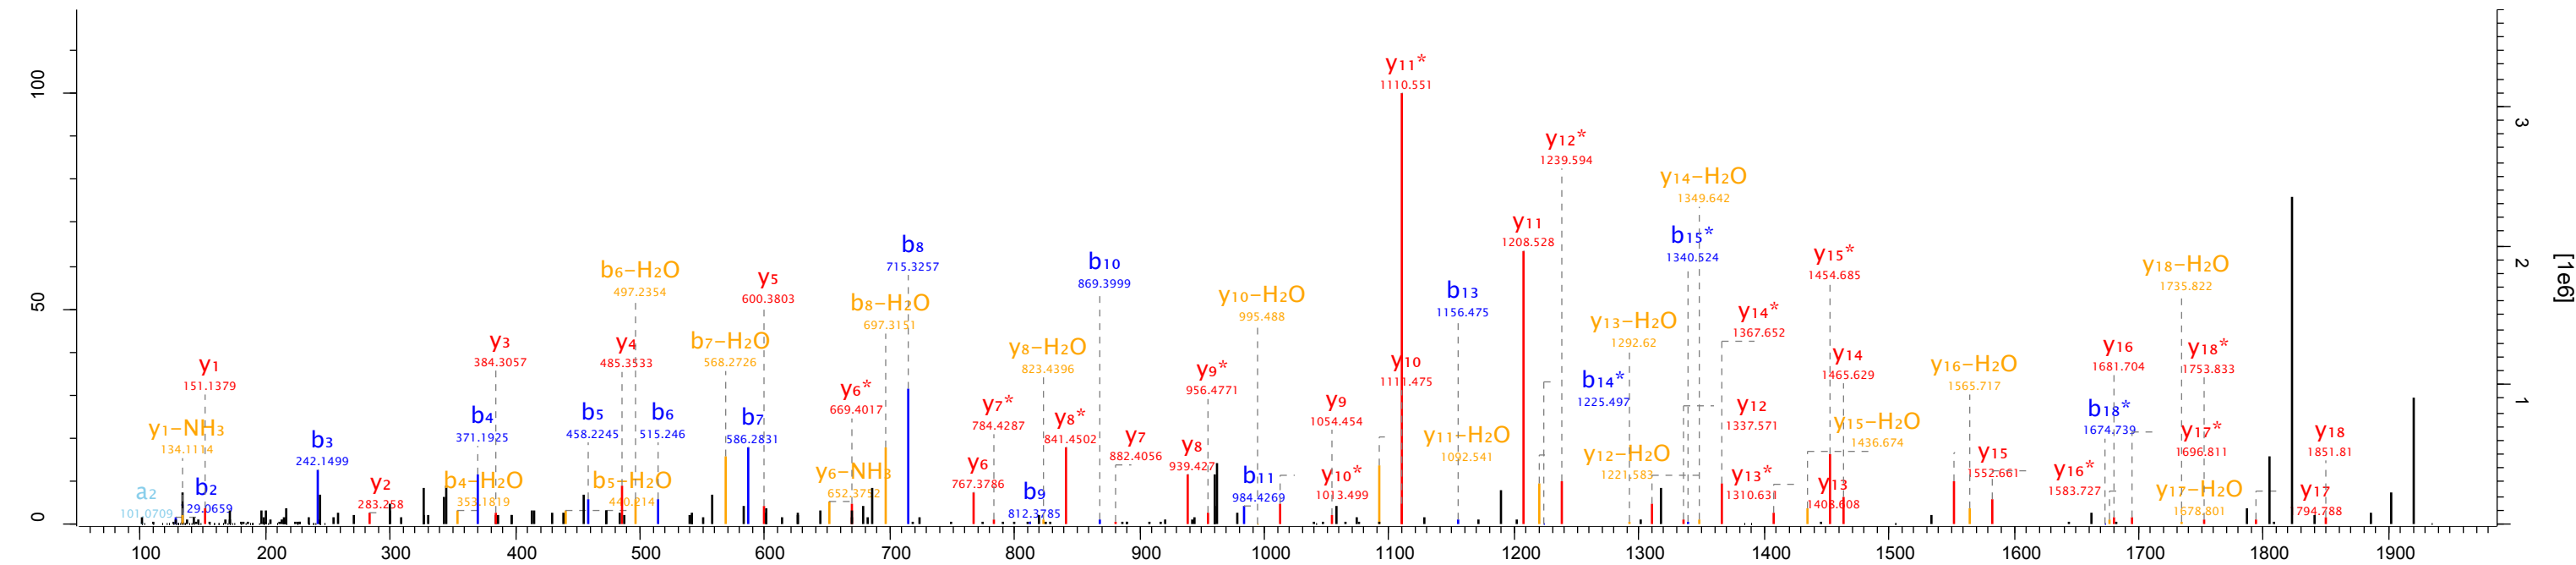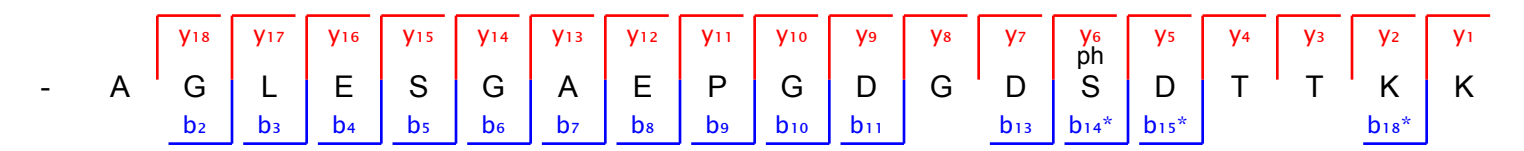

Raw file: 20150812\_A375SR\_Phospho\_BR1\_09  
 Scan: 6287 Method: FTMS; HCD Score: 272.63 m/z: 841.38 Gene names: ZNF318

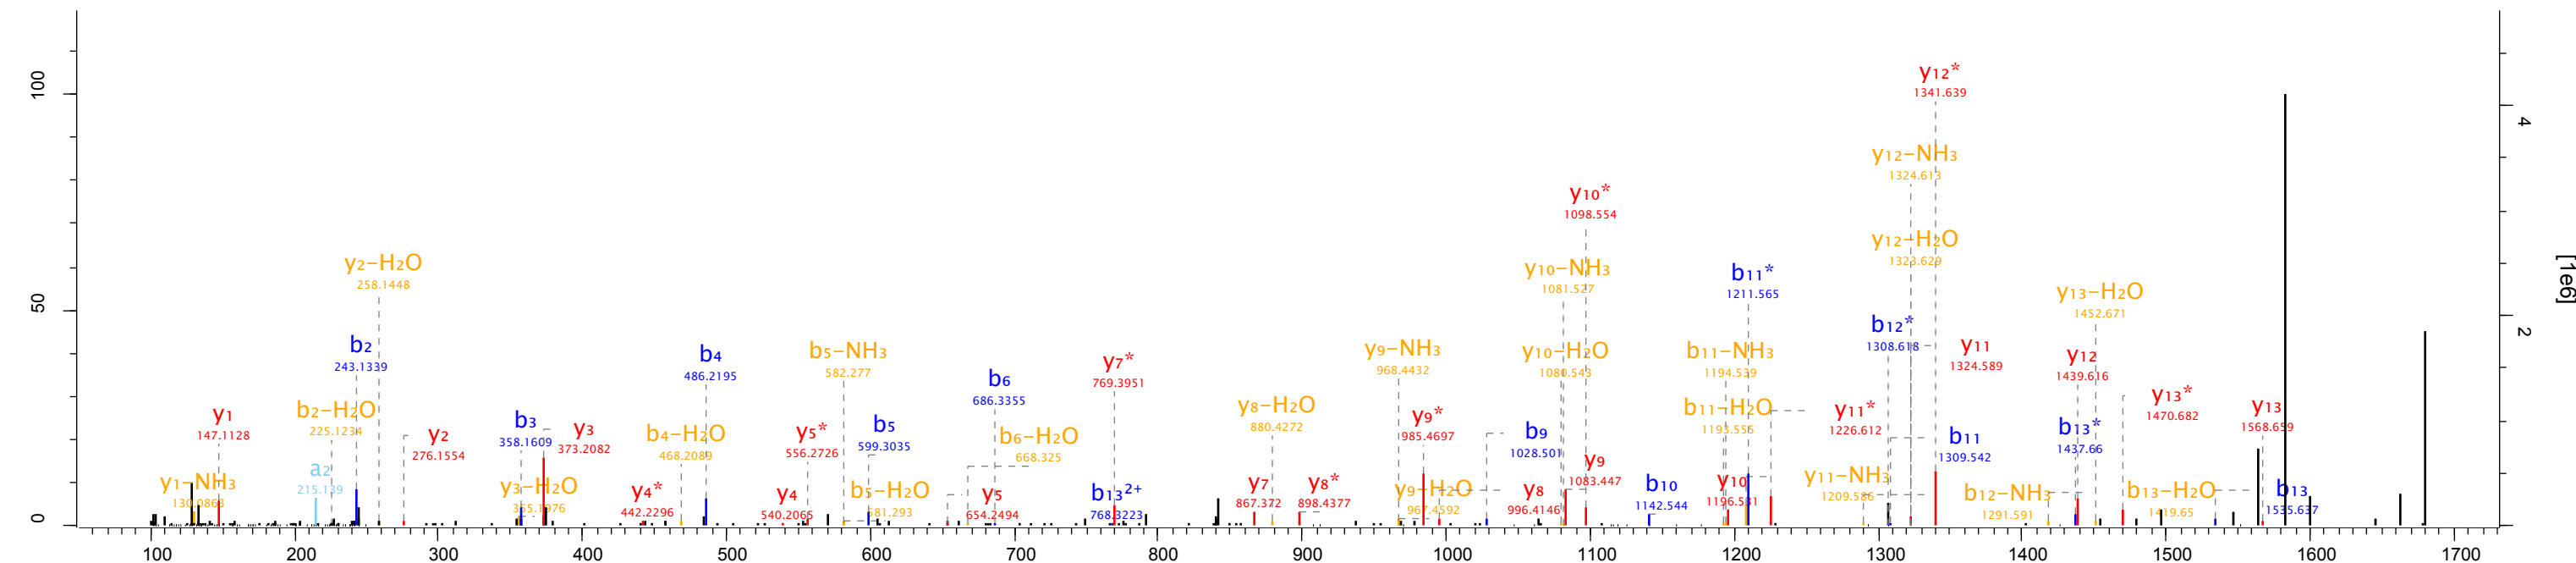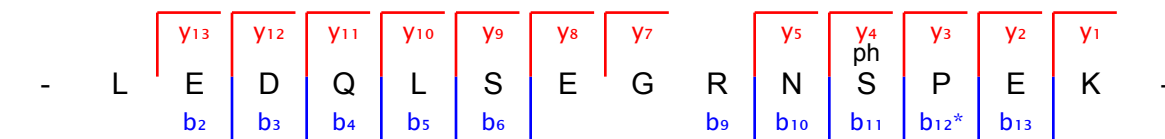

Raw file 20150812\_A375SR\_Phospho\_BR1\_09 Scan 9547 Method FTMS; HCD Score 122.18 m/z 580.75 Gene names PRRC2C

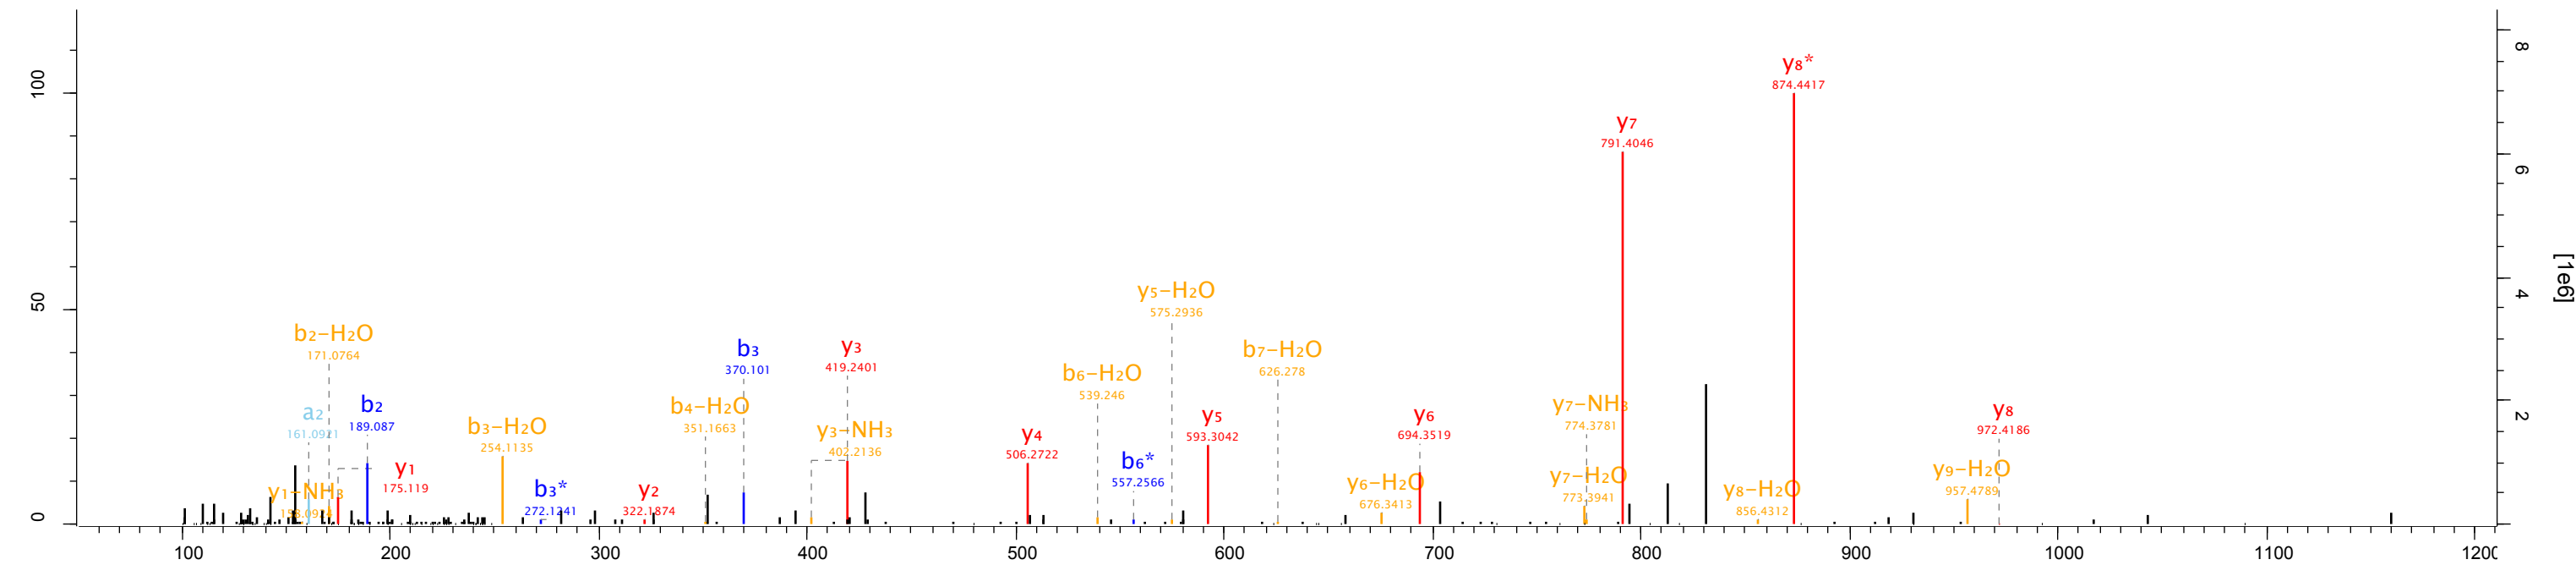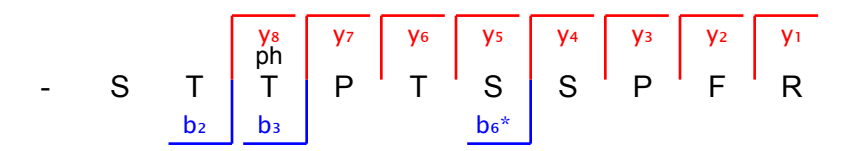

Raw file: 20150812\_A375SR\_Phospho\_BR1\_09  
 Scan: 9867 Method: FTMS; HCD Score: 223.09 m/z: 1013.5 Gene names: SEC31A

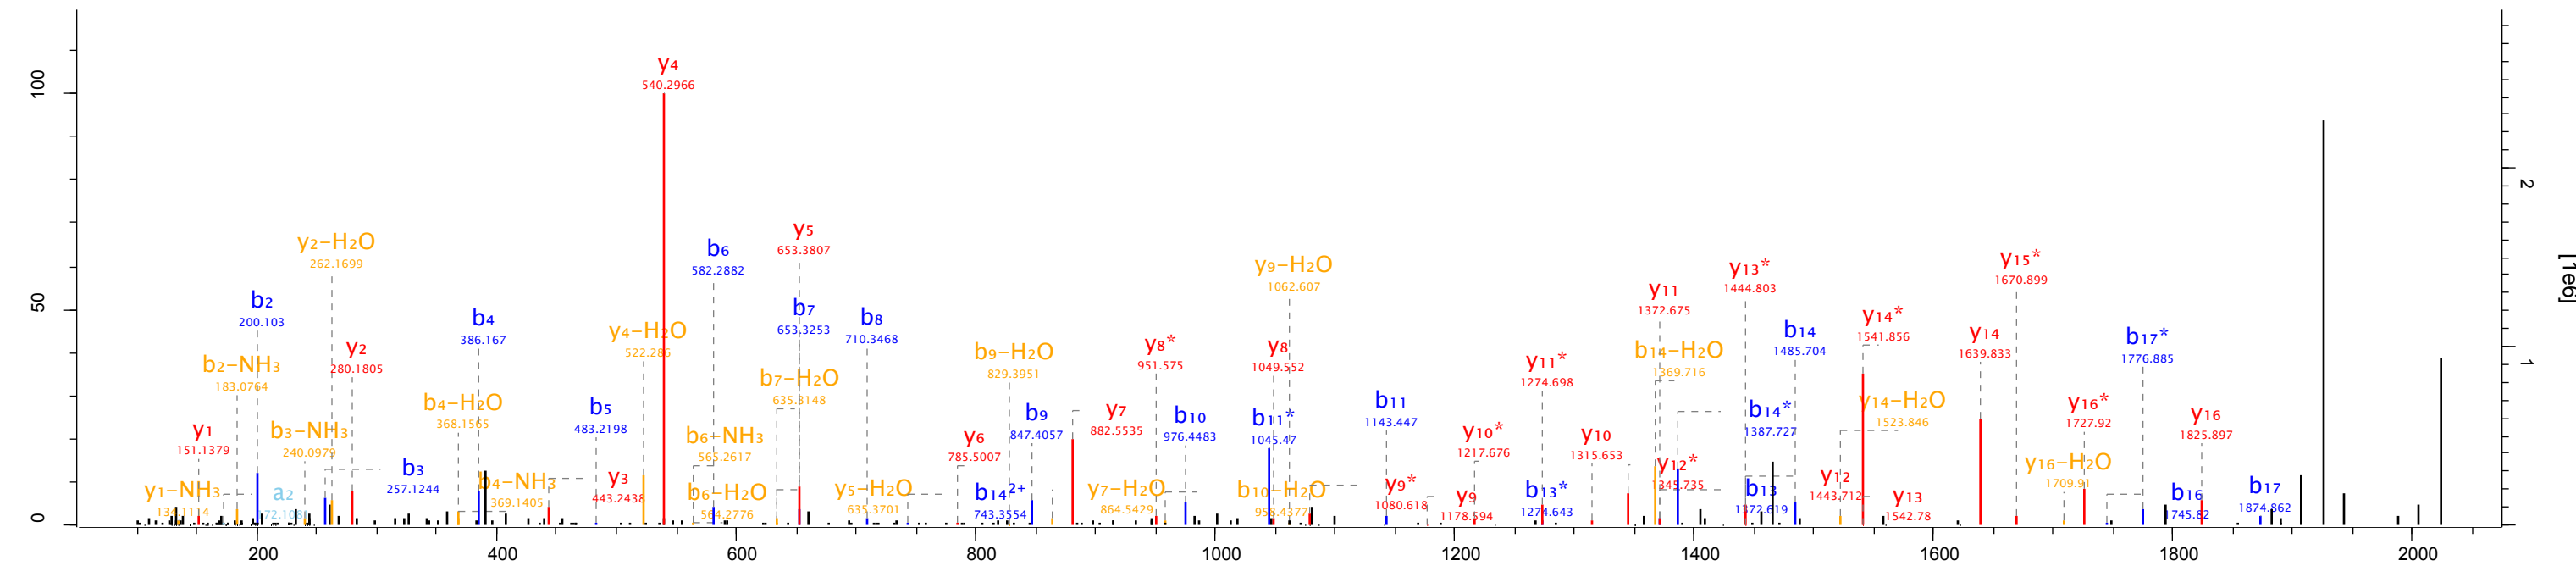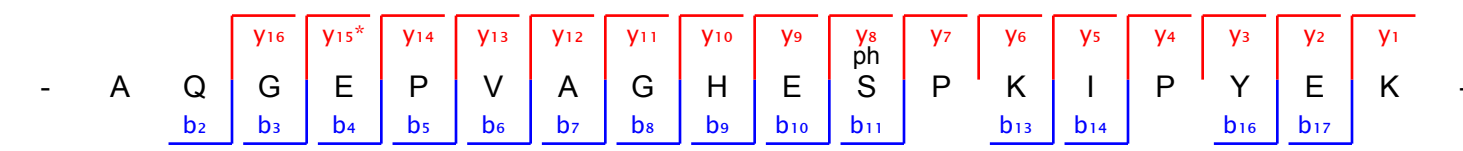



Raw file Scan Method Score m/z Gene names  
 20150812\_A375SR\_Phospho\_BR1\_10 10557 FTMS; HCD 120.9 842.87 PDLIM1

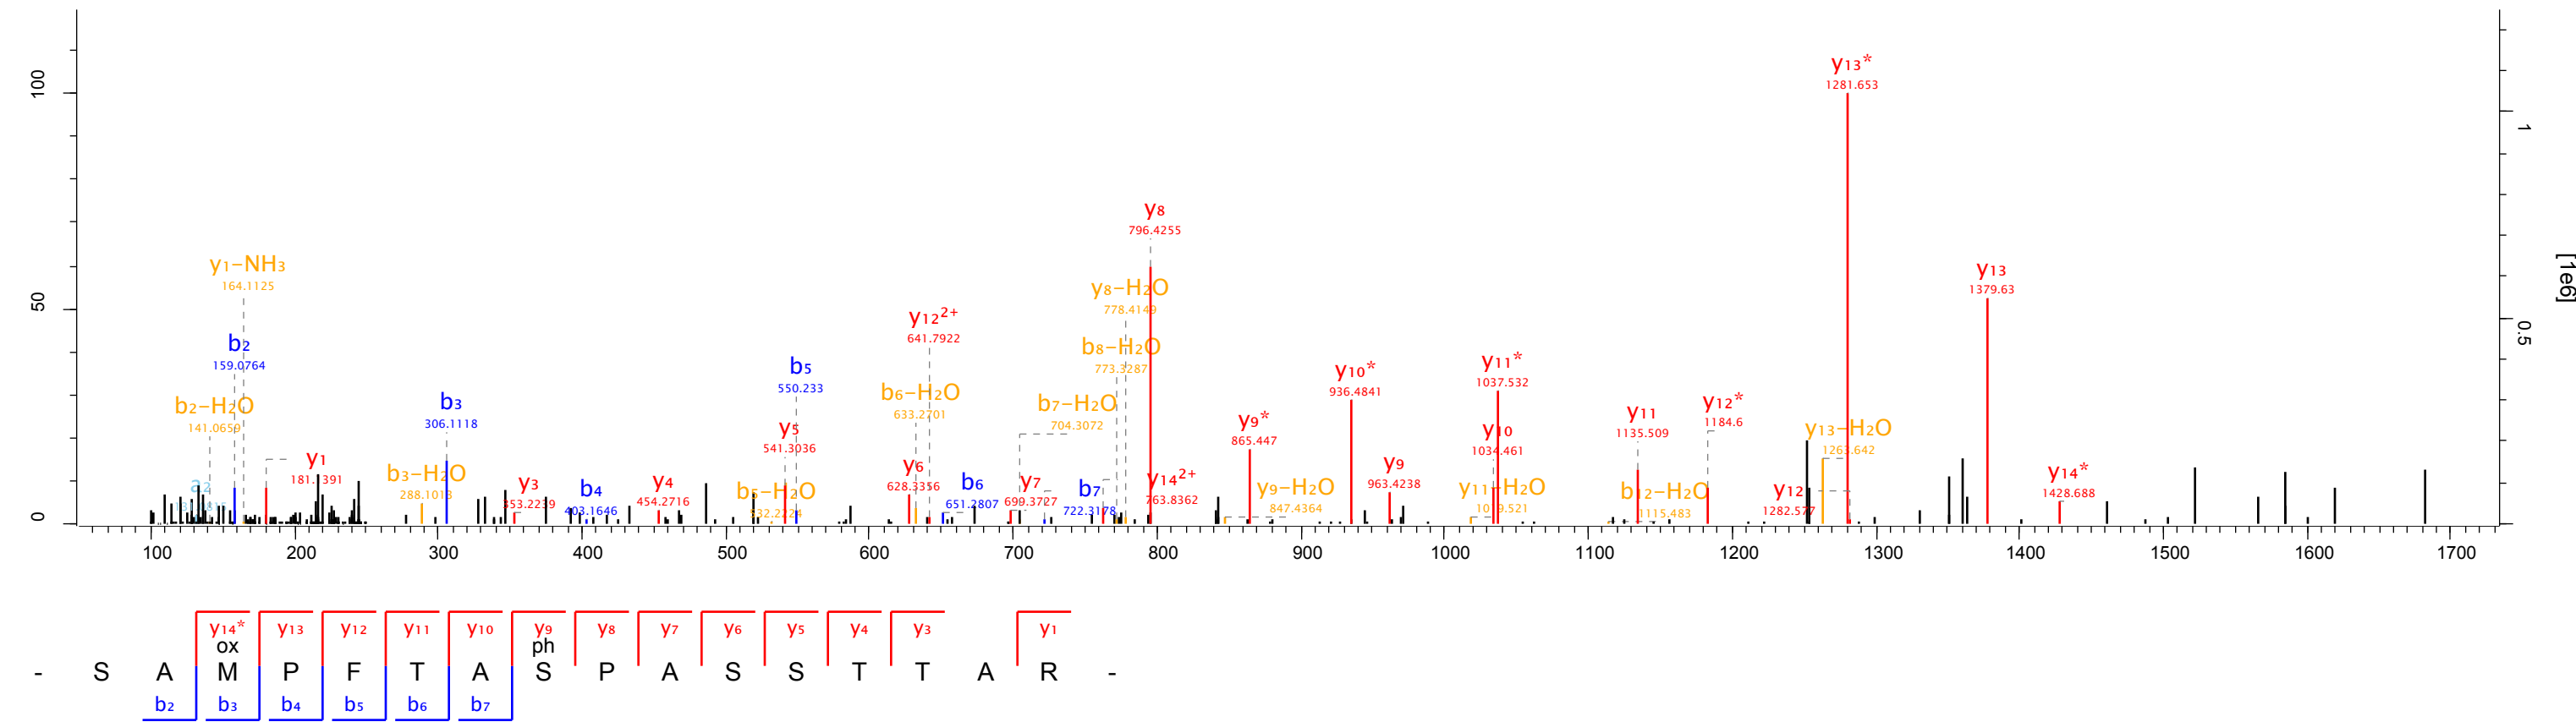

Raw file 20150812\_A375SR\_Phospho\_BR1\_10 Scan 10857 Method FTMS; HCD Score 81.33 m/z 573.77 Gene names SETD2

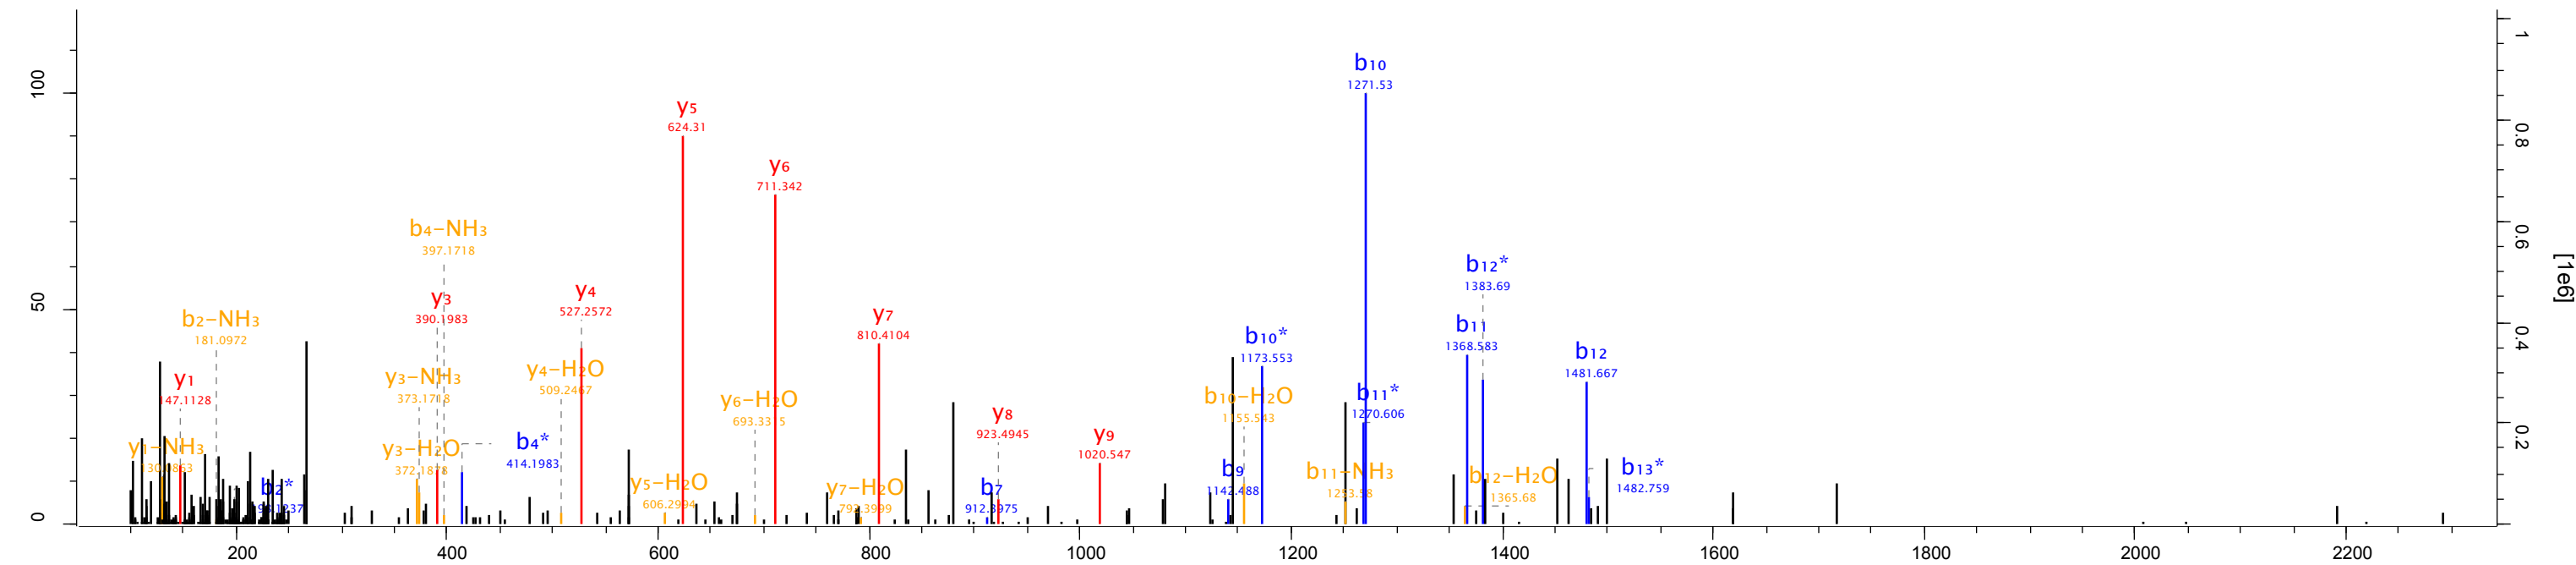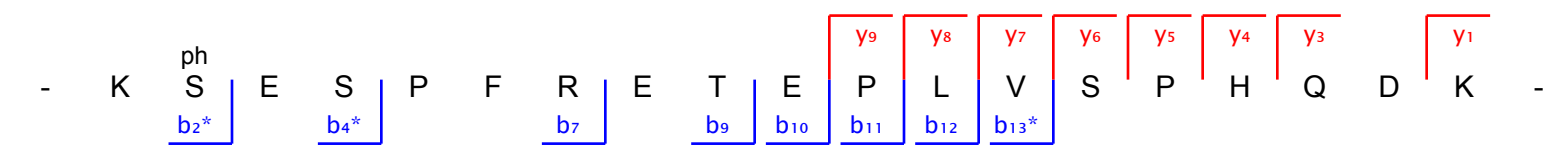

Raw file Scan Method Score m/z Gene names  
 20150812\_A375SR\_Phospho\_BR1\_10 11247 FTMS; HCD 171.62 518.79 PTRF

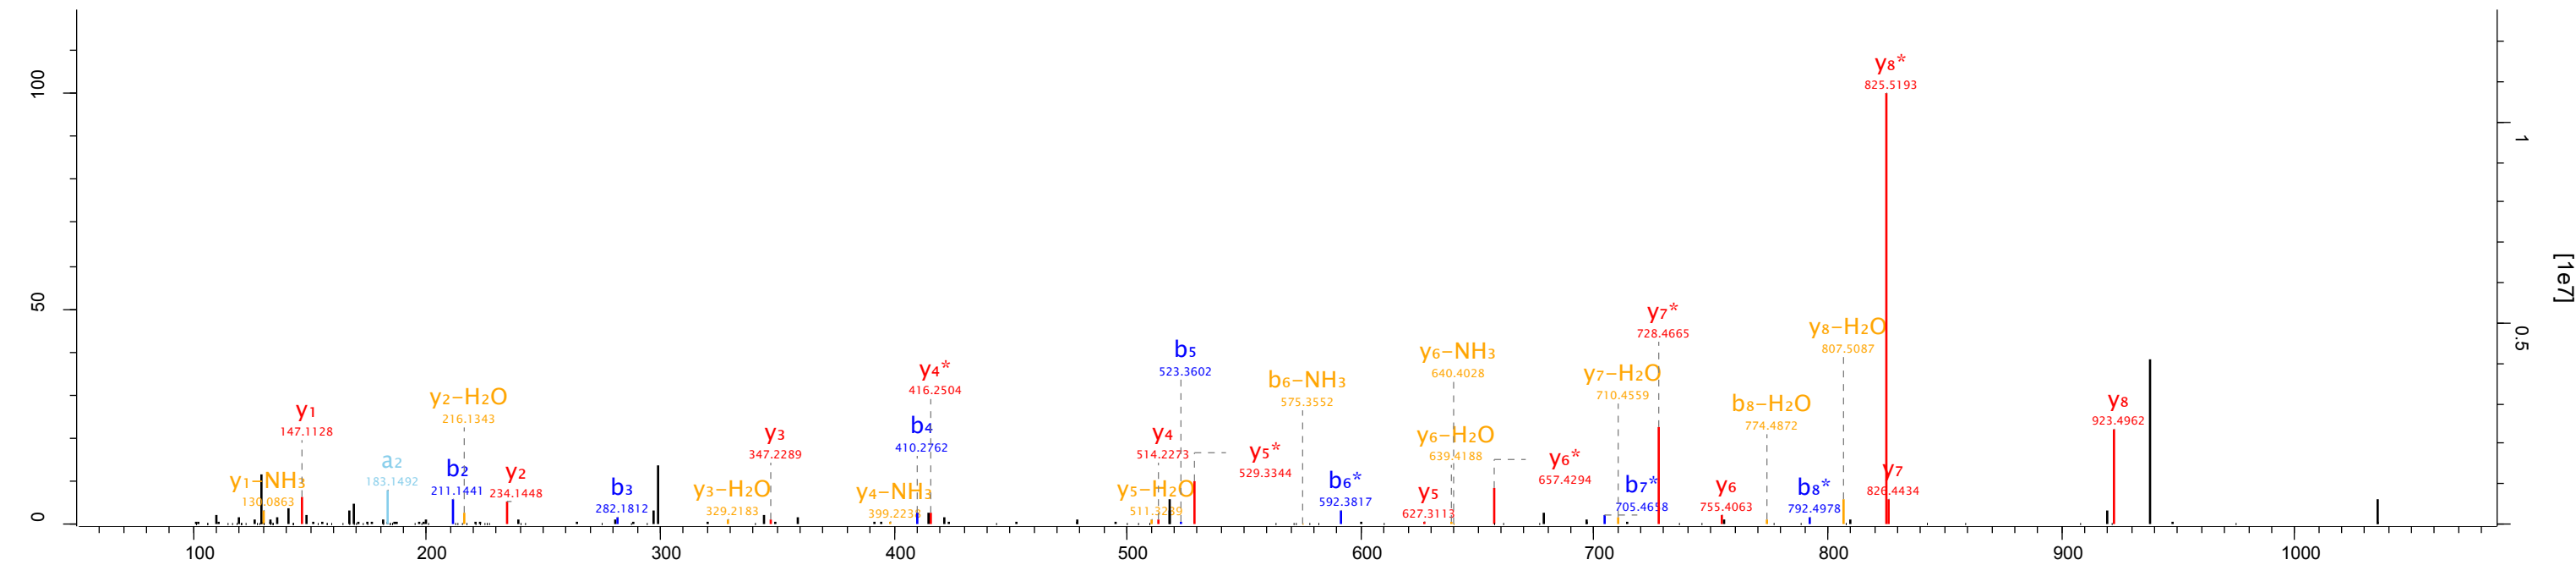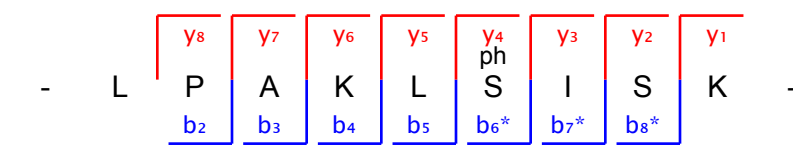

Raw file: 20150812\_A375SR\_Phospho\_BR1\_10  
 Scan: 11357 Method: FTMS; HCD Score: 198.87 m/z: 668.29 Gene names: ITGA4

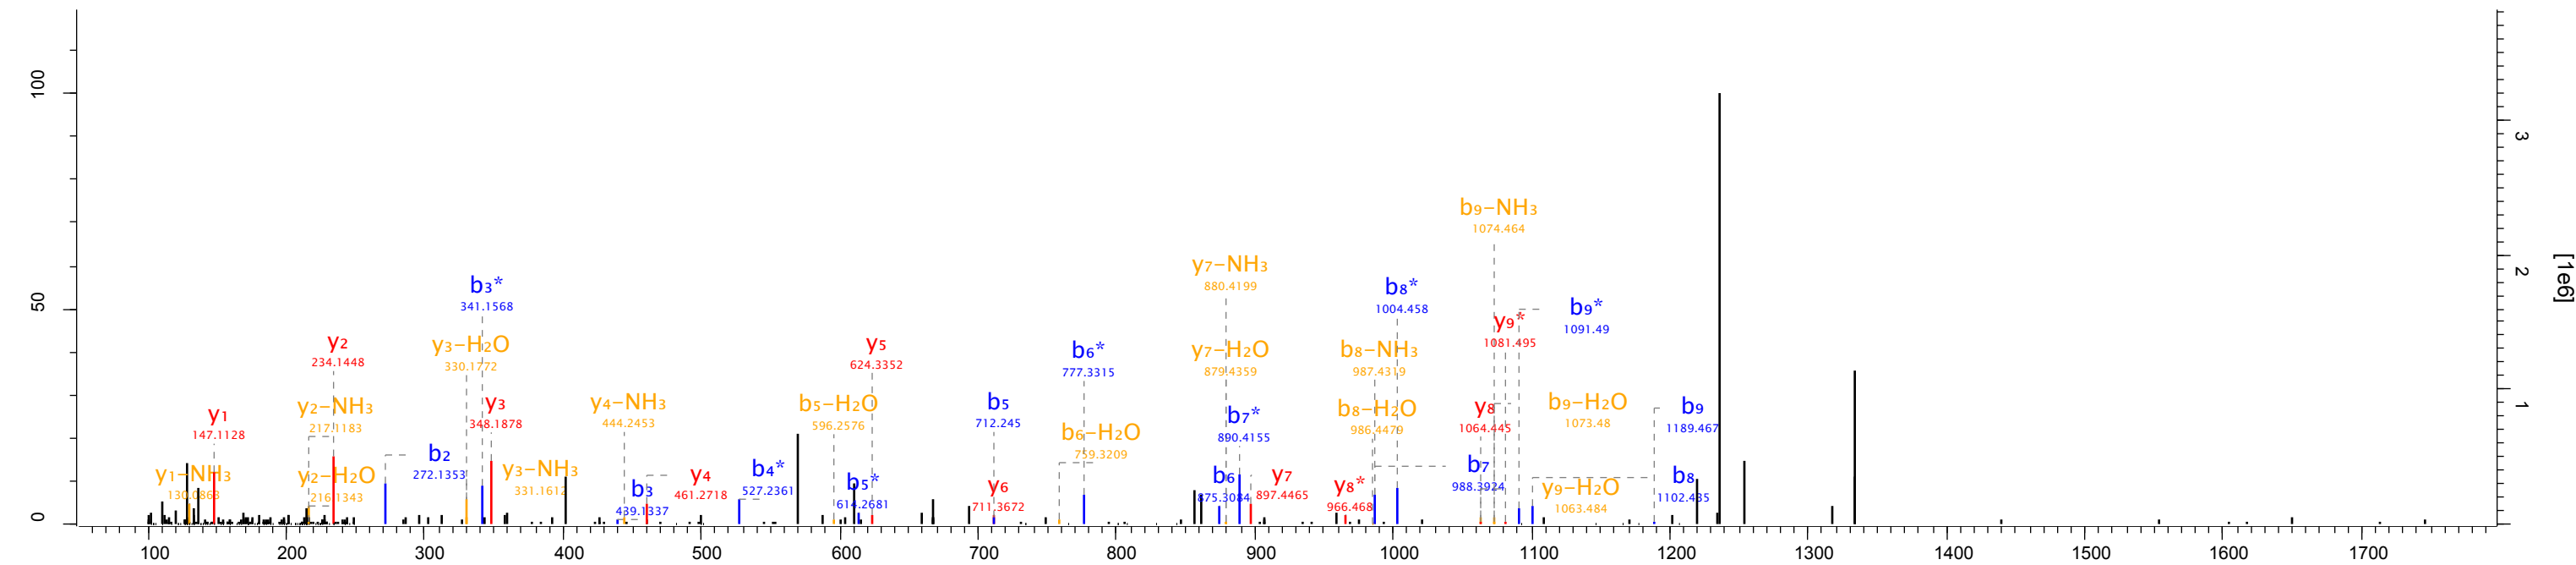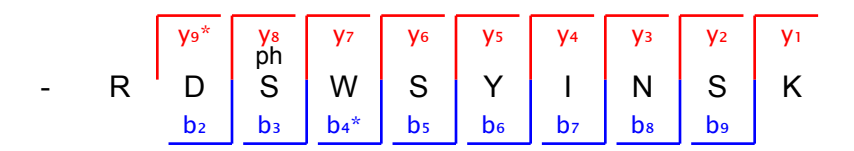

Raw file 20150812\_A375SR\_Phospho\_BR1\_10 Scan 11597 Method FTMS; HCD Score 174.39 m/z 699.31 Gene names SON

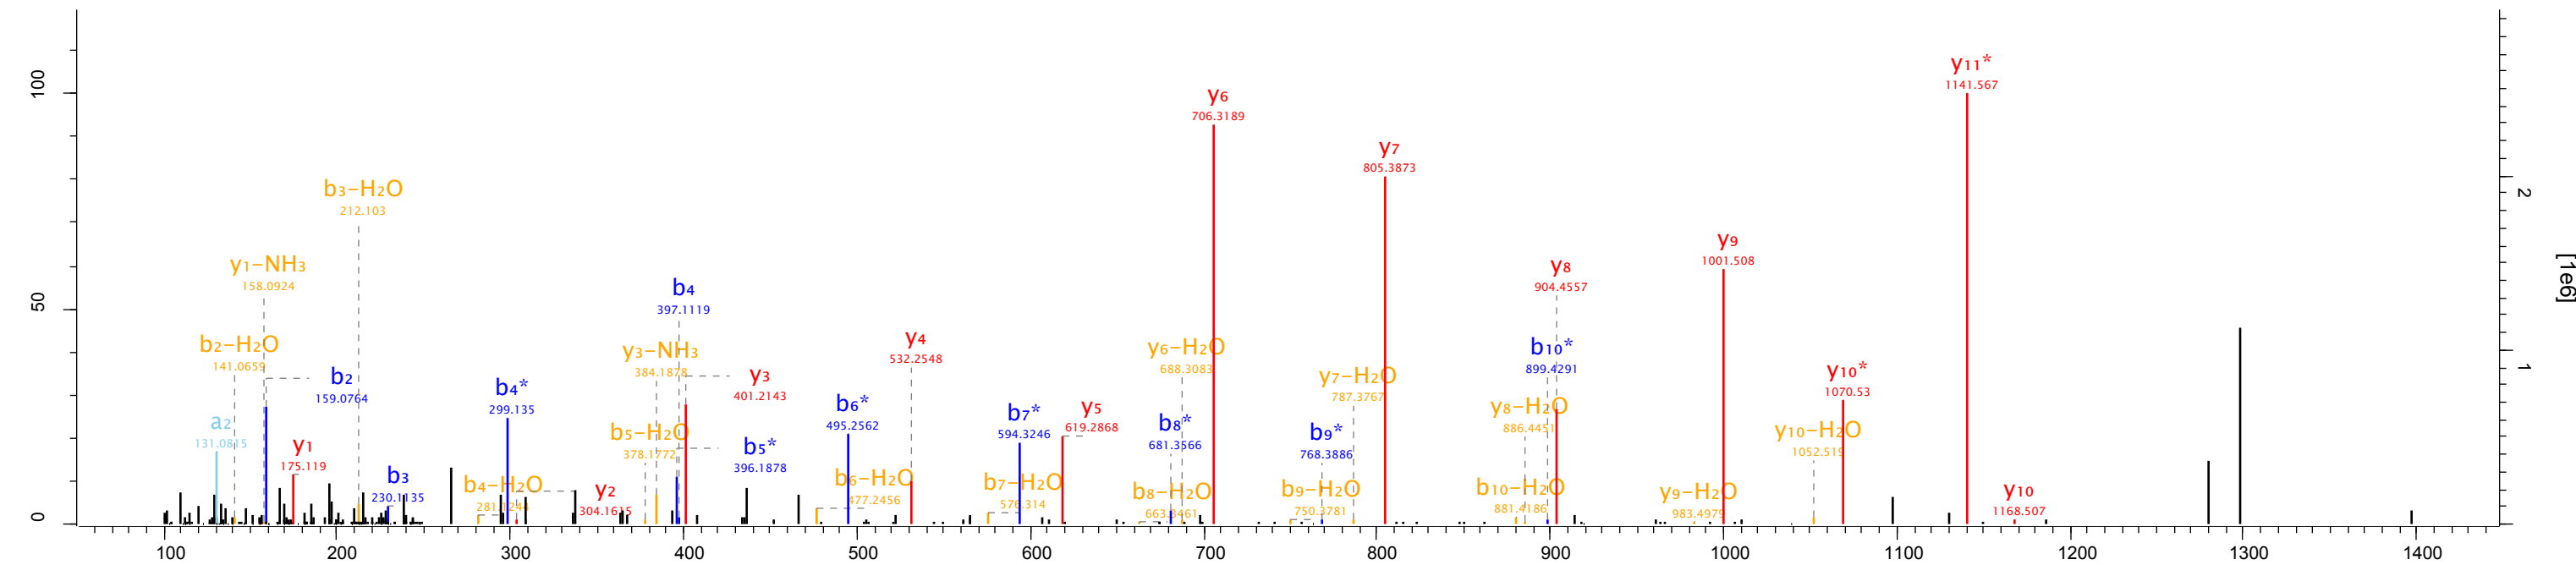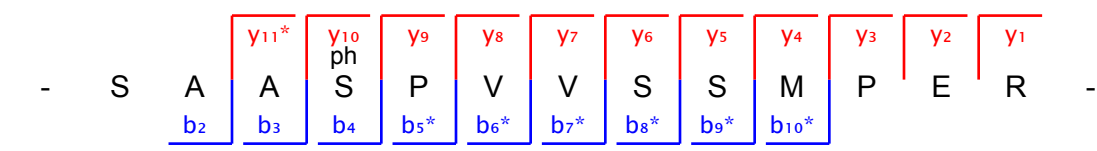

Raw file: 20150812\_A375SR\_Phospho\_BR1\_10  
 Scan: 14657 Method: FTMS; HCD Score: 141.23 m/z: 834.94 Gene names: RSF1

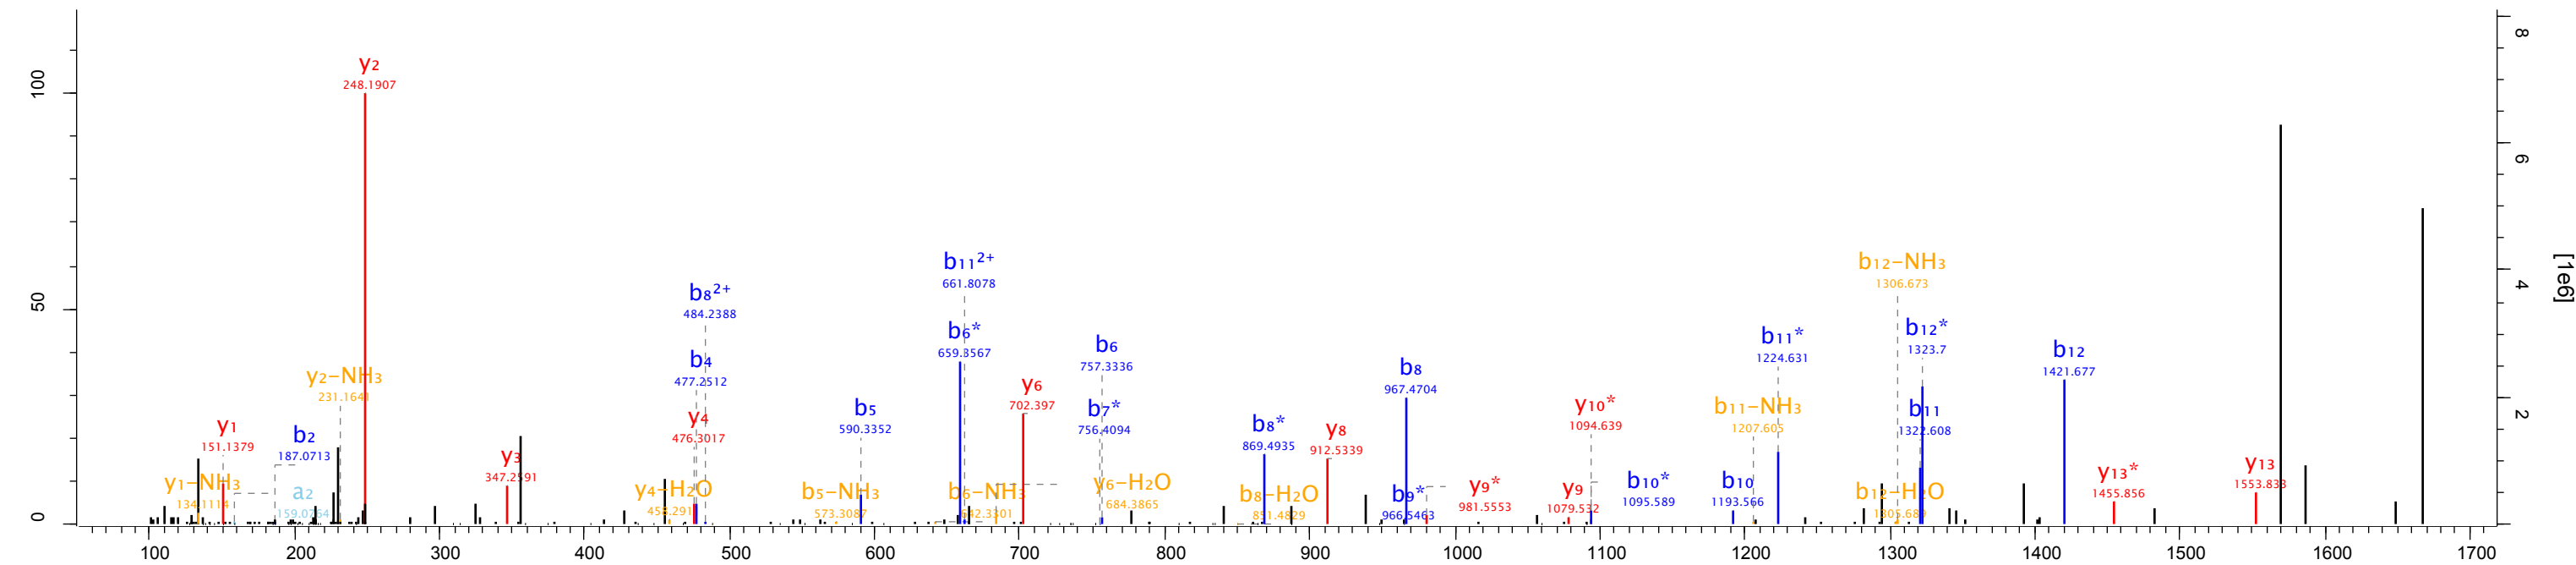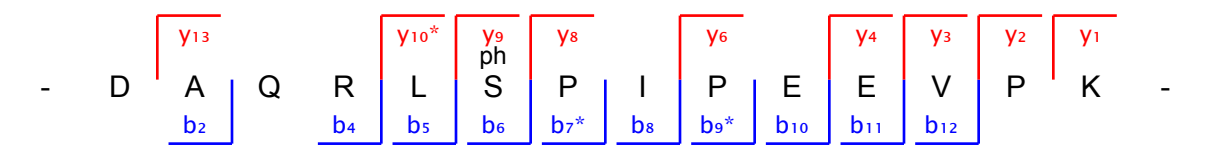

Raw file: 20150812\_A375SR\_Phospho\_BR1\_10  
 Scan: 1697 Method: FTMS; HCD Score: 99.09 m/z: 600.61 Gene names: SIPA1

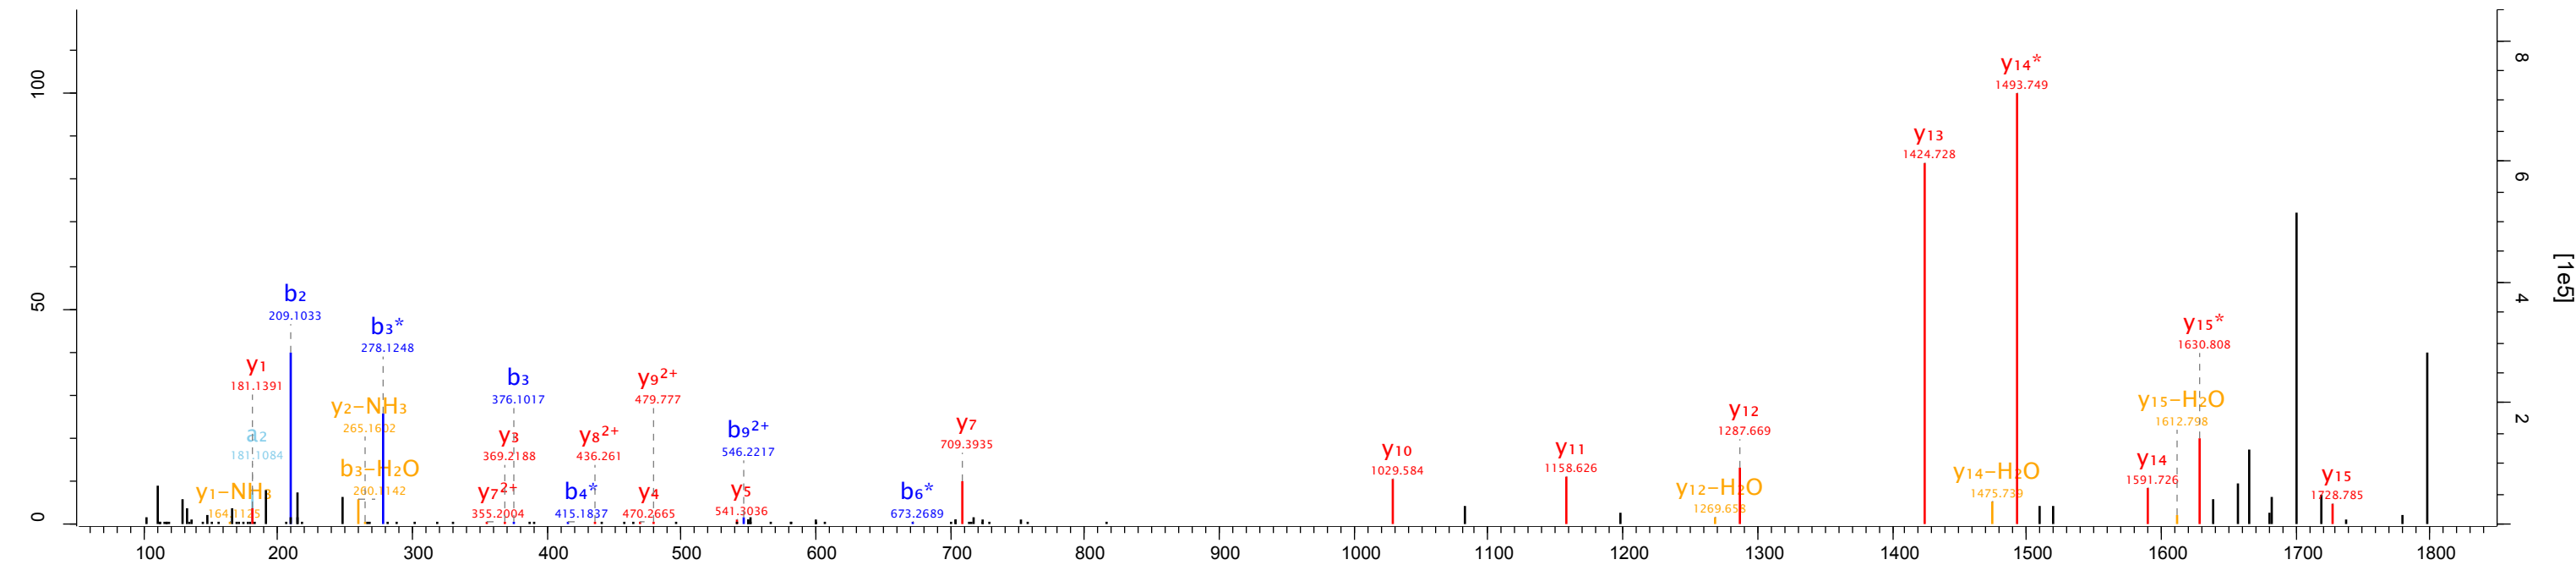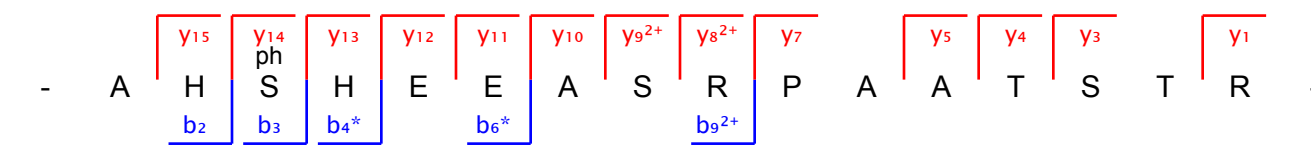

Raw file Scan Method Score m/z Gene names  
 20150812\_A375SR\_Phospho\_BR1\_10 17997 FTMS; HCD 256.93 1012.23 SH3KBP1

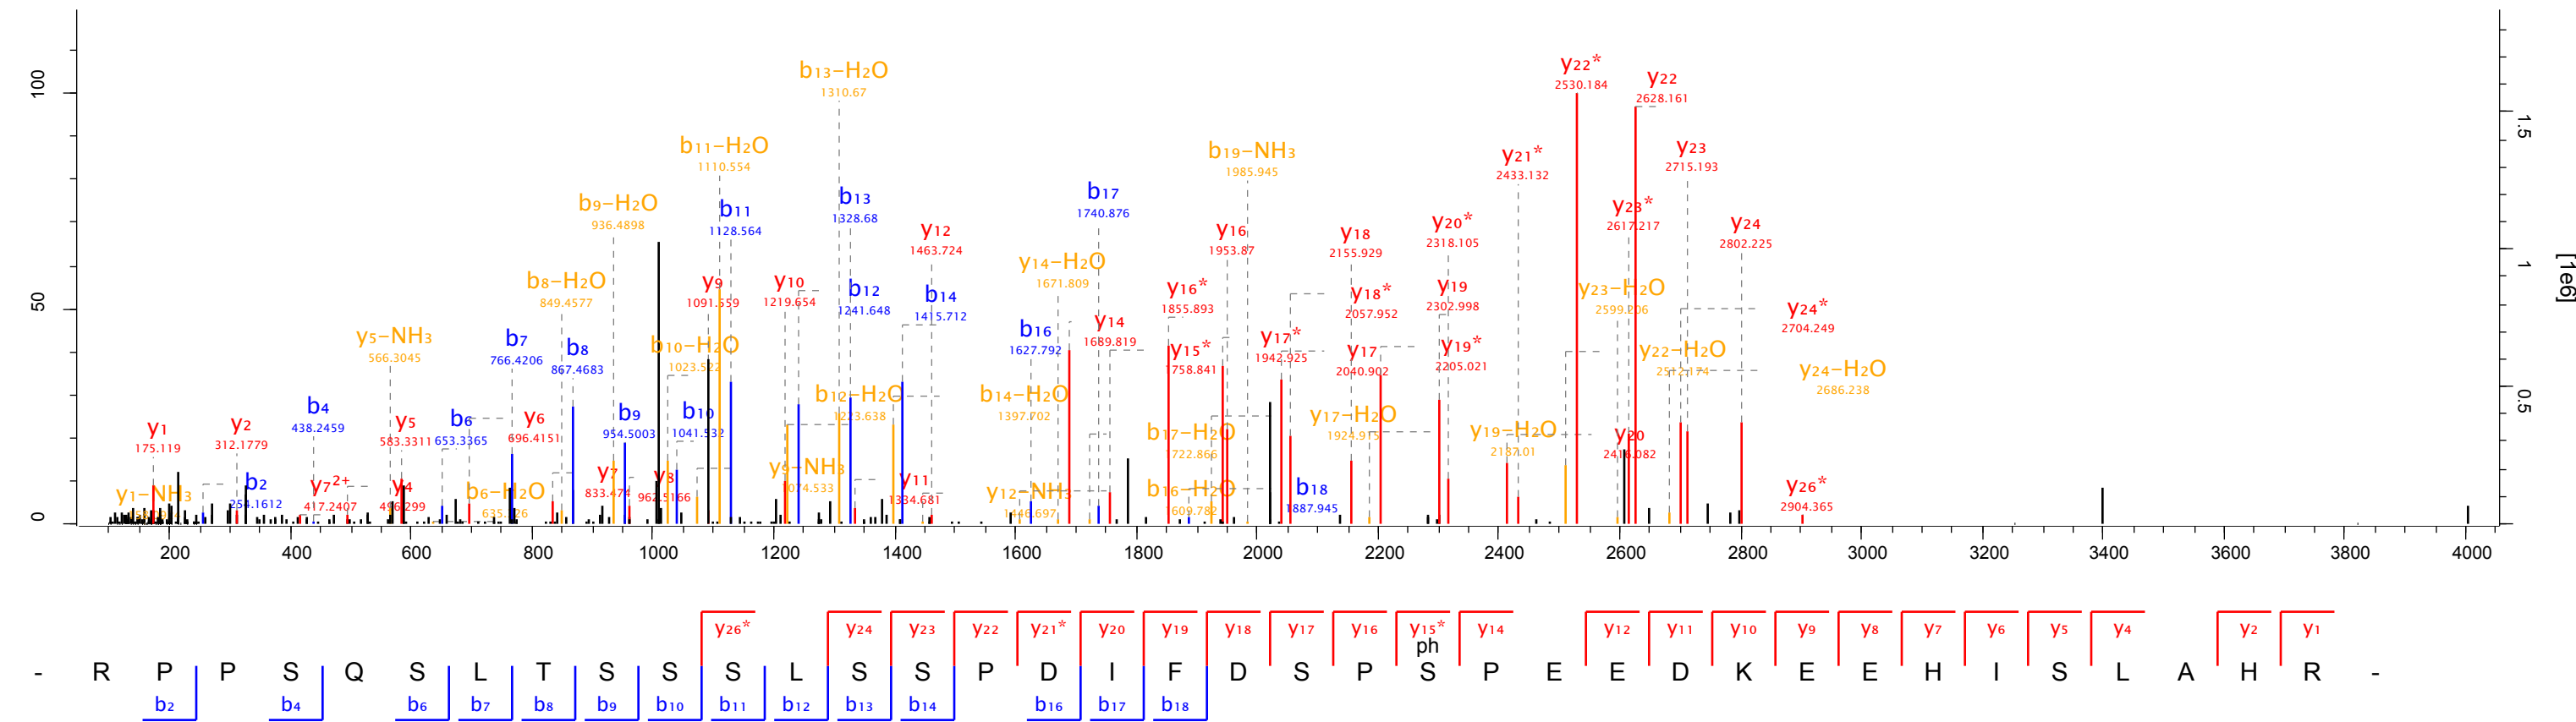



Raw file  
 20150812\_A375SR\_Phospho\_BR1\_10  
 Scan 18997 Method FTMS; HCD Score 262.75 m/z 971.09 Gene names TNKS1BP1

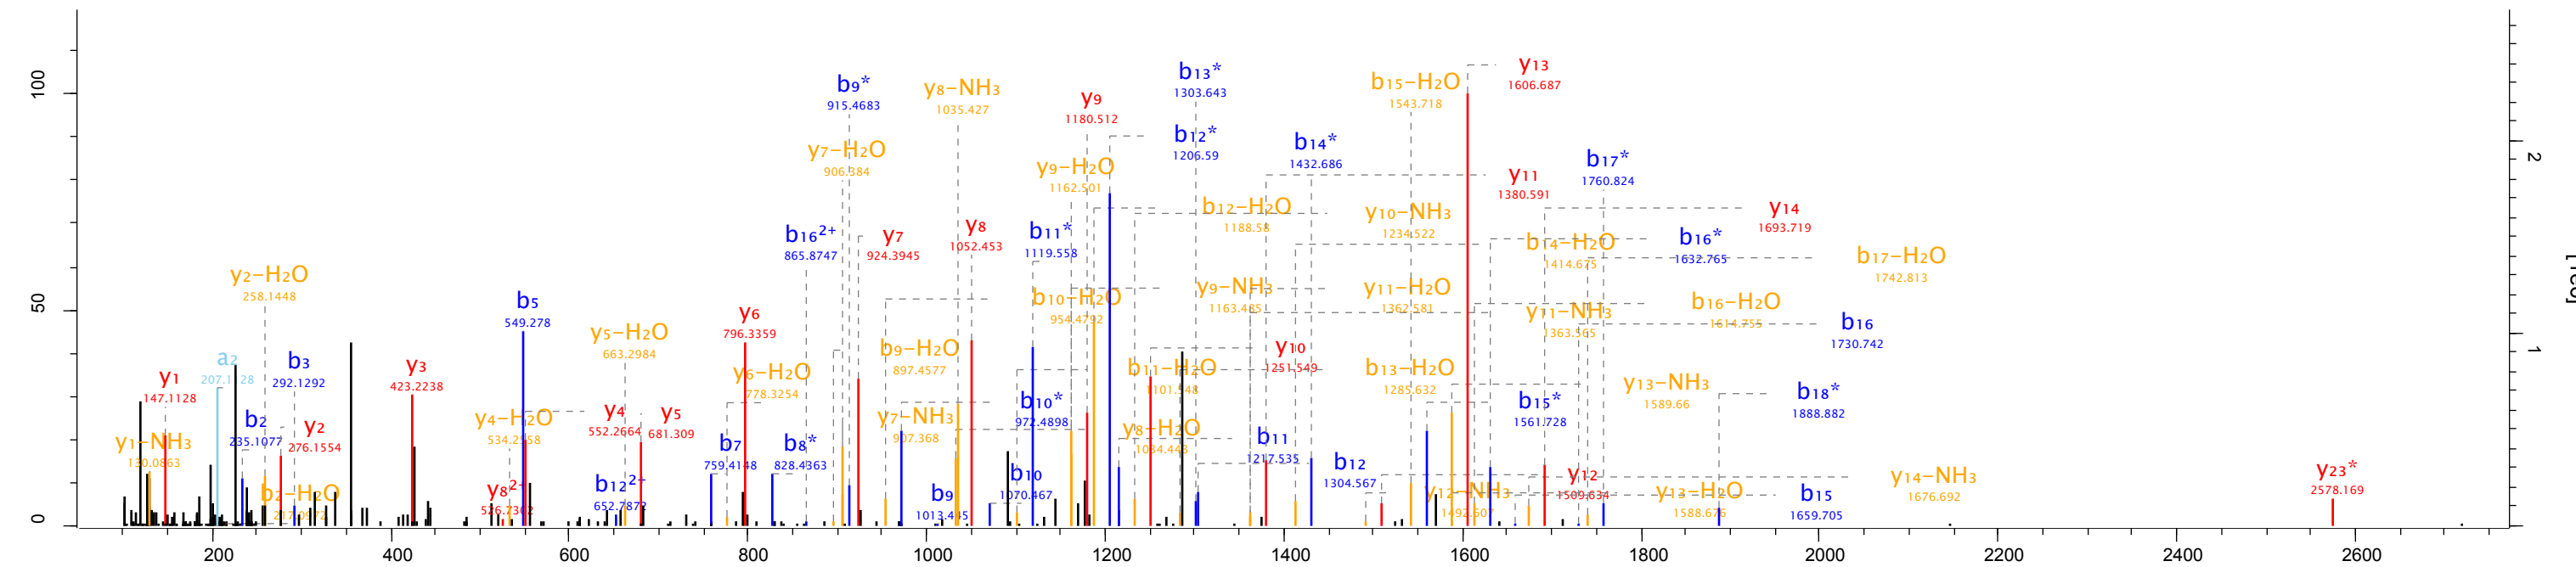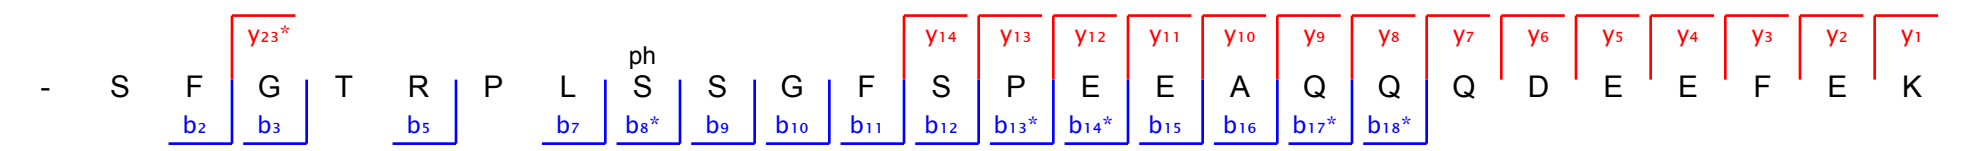

Raw file  
 20150812\_A375SR\_Phospho\_BR1\_10  
 Scan 19307 Method FTMS; HCD Score 171.63 m/z 1180.58 Gene names BAIAP2L1

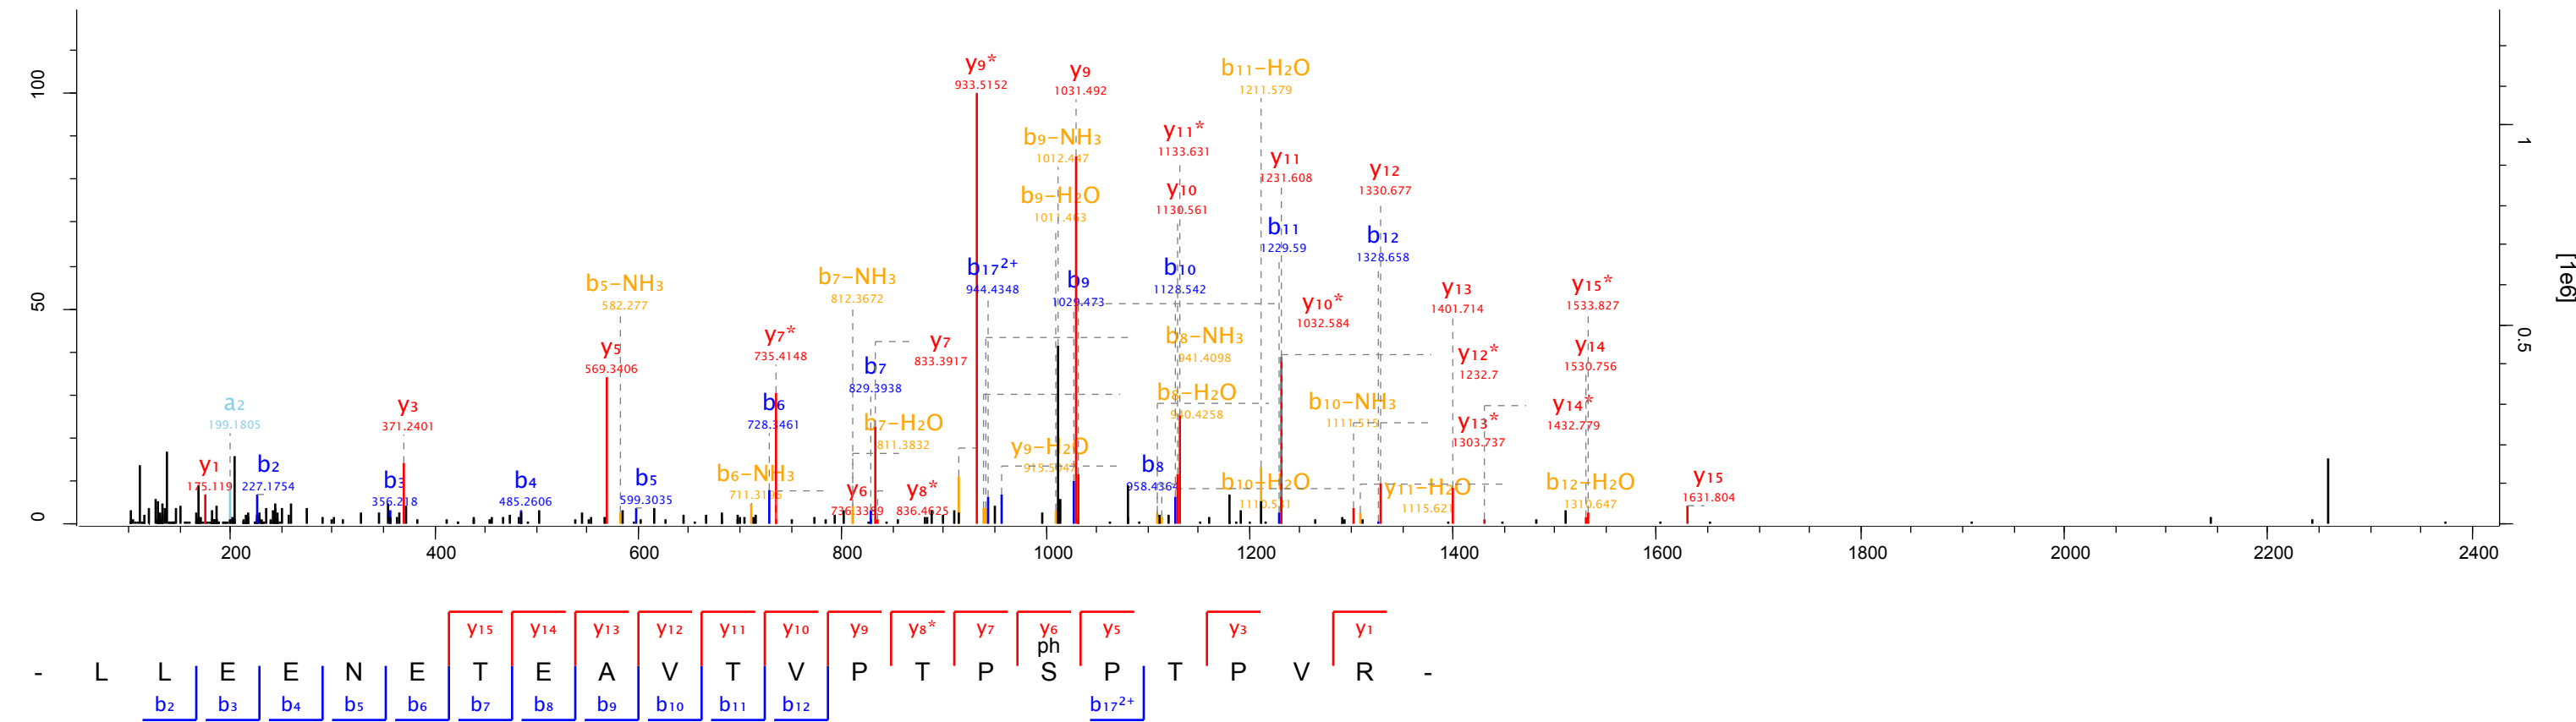

Raw file 20150812\_A375SR\_Phospho\_BR1\_10 Scan 19427 Method FTMS; HCD Score 85.56 m/z 773.4 Gene names KIFC1

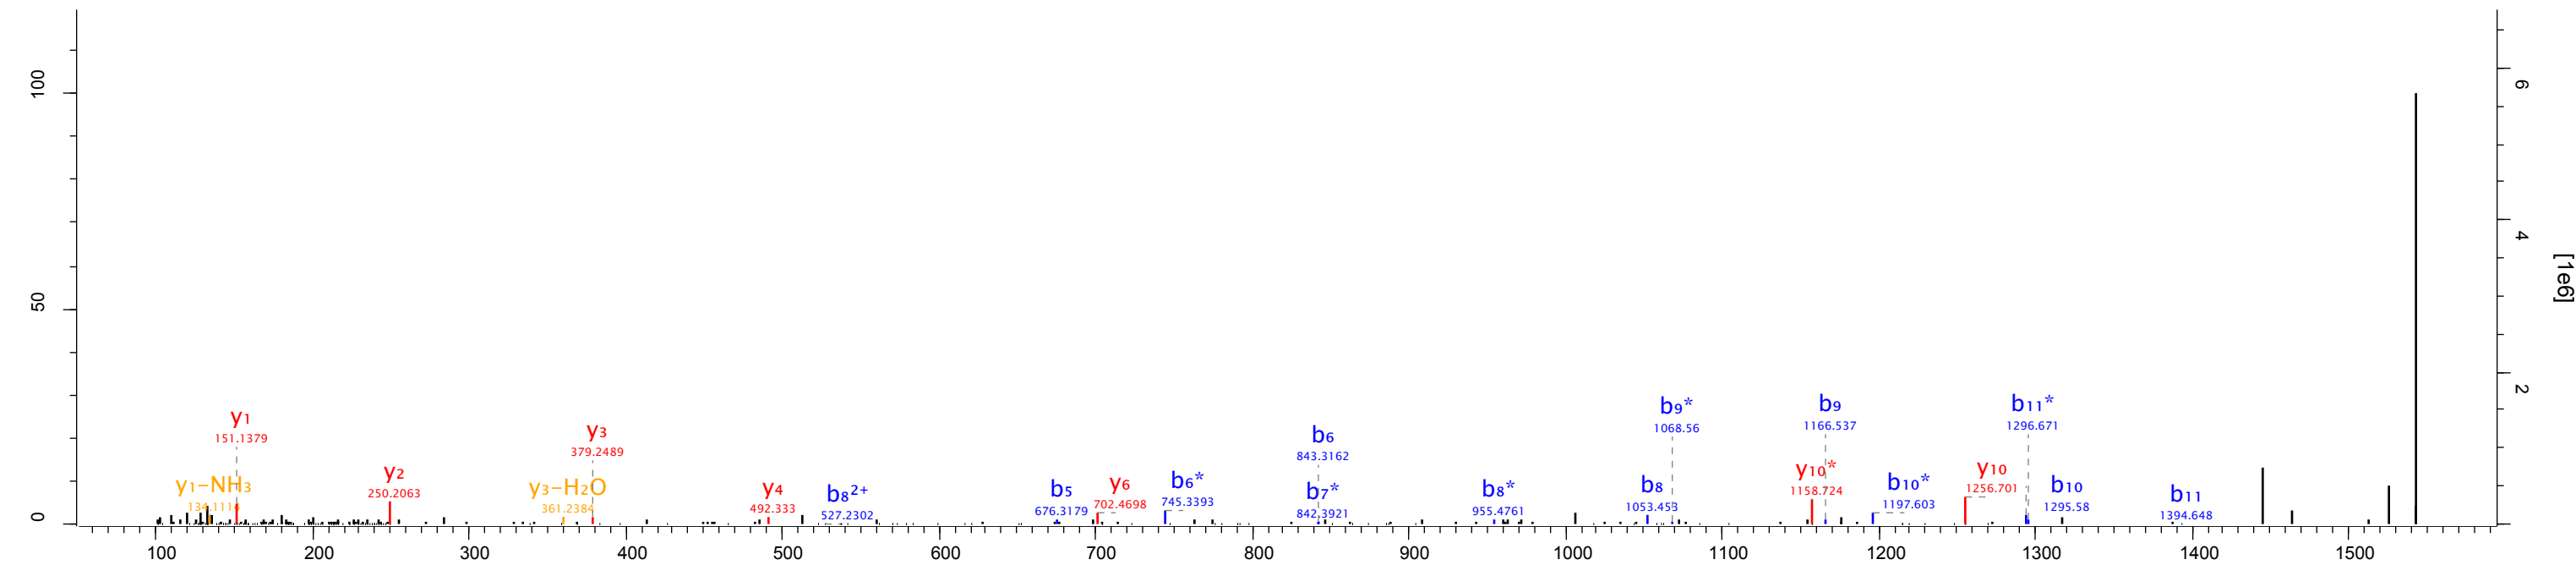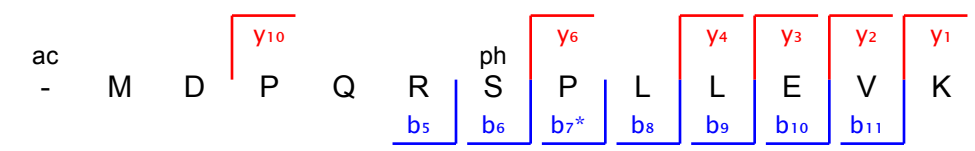

Raw file 20150812\_A375SR\_Phospho\_BR1\_10 Scan 20317 Method FTMS; HCD Score 99.42 m/z 800.04 Gene names RPRD2

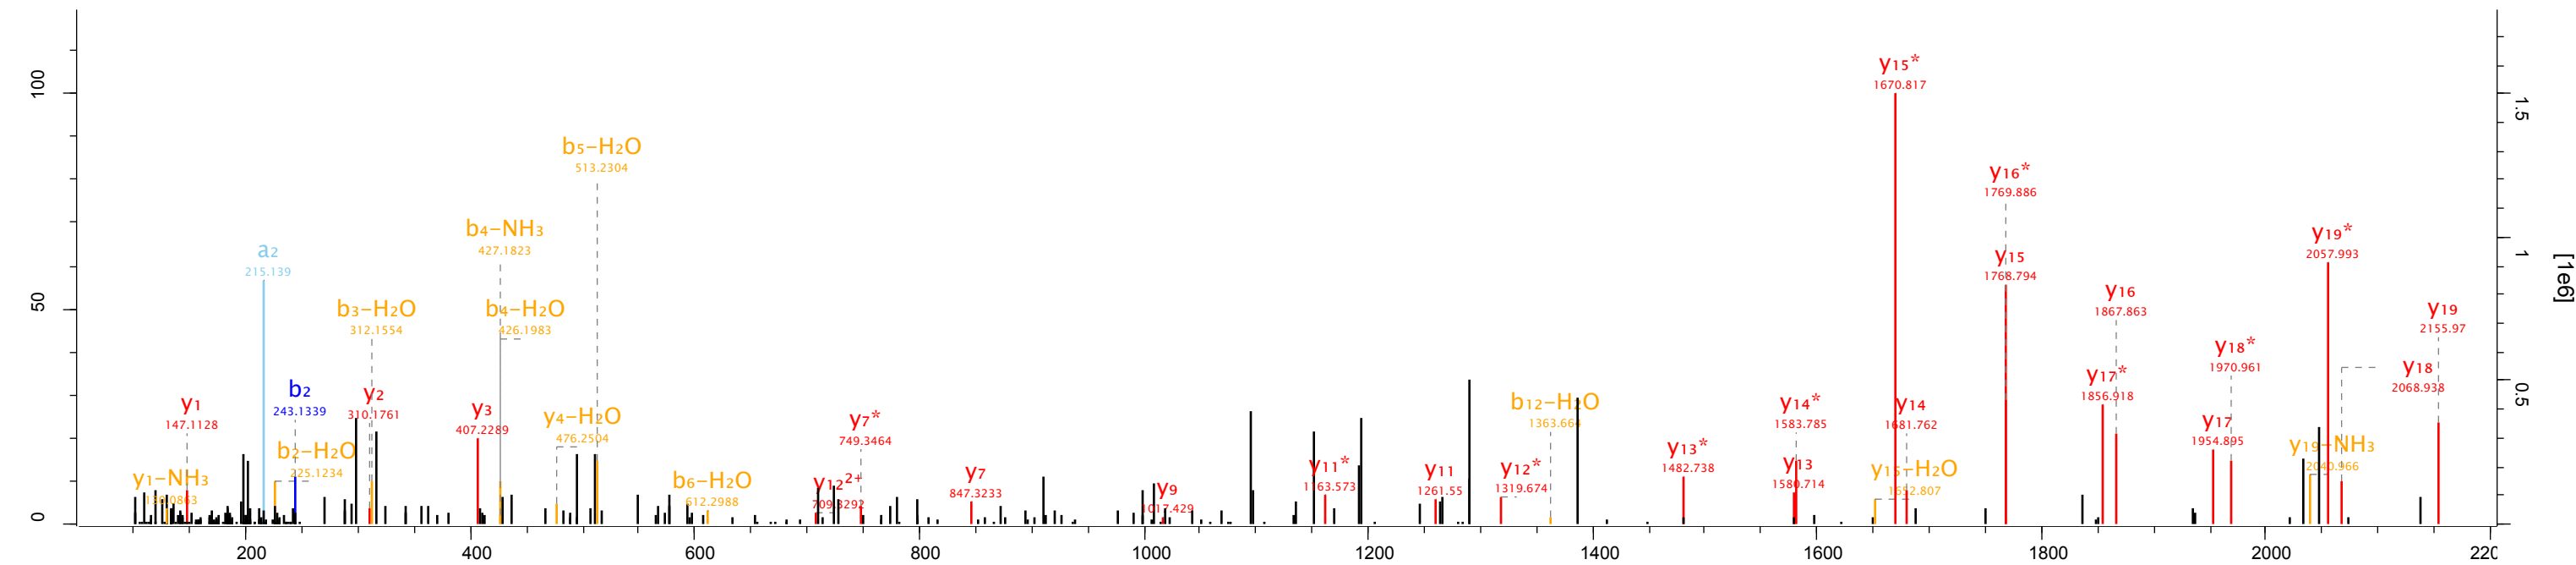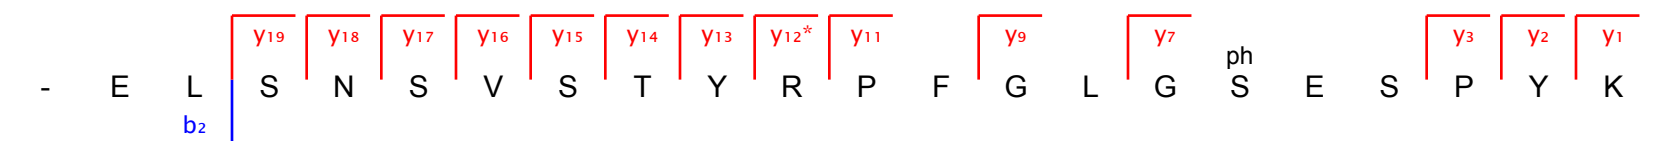

Raw file: 20150812\_A375SR\_Phospho\_BR1\_10  
 Scan: 20737 Method: FTMS; HCD Score: 174.85 m/z: 943.5 Gene names: SYNPO

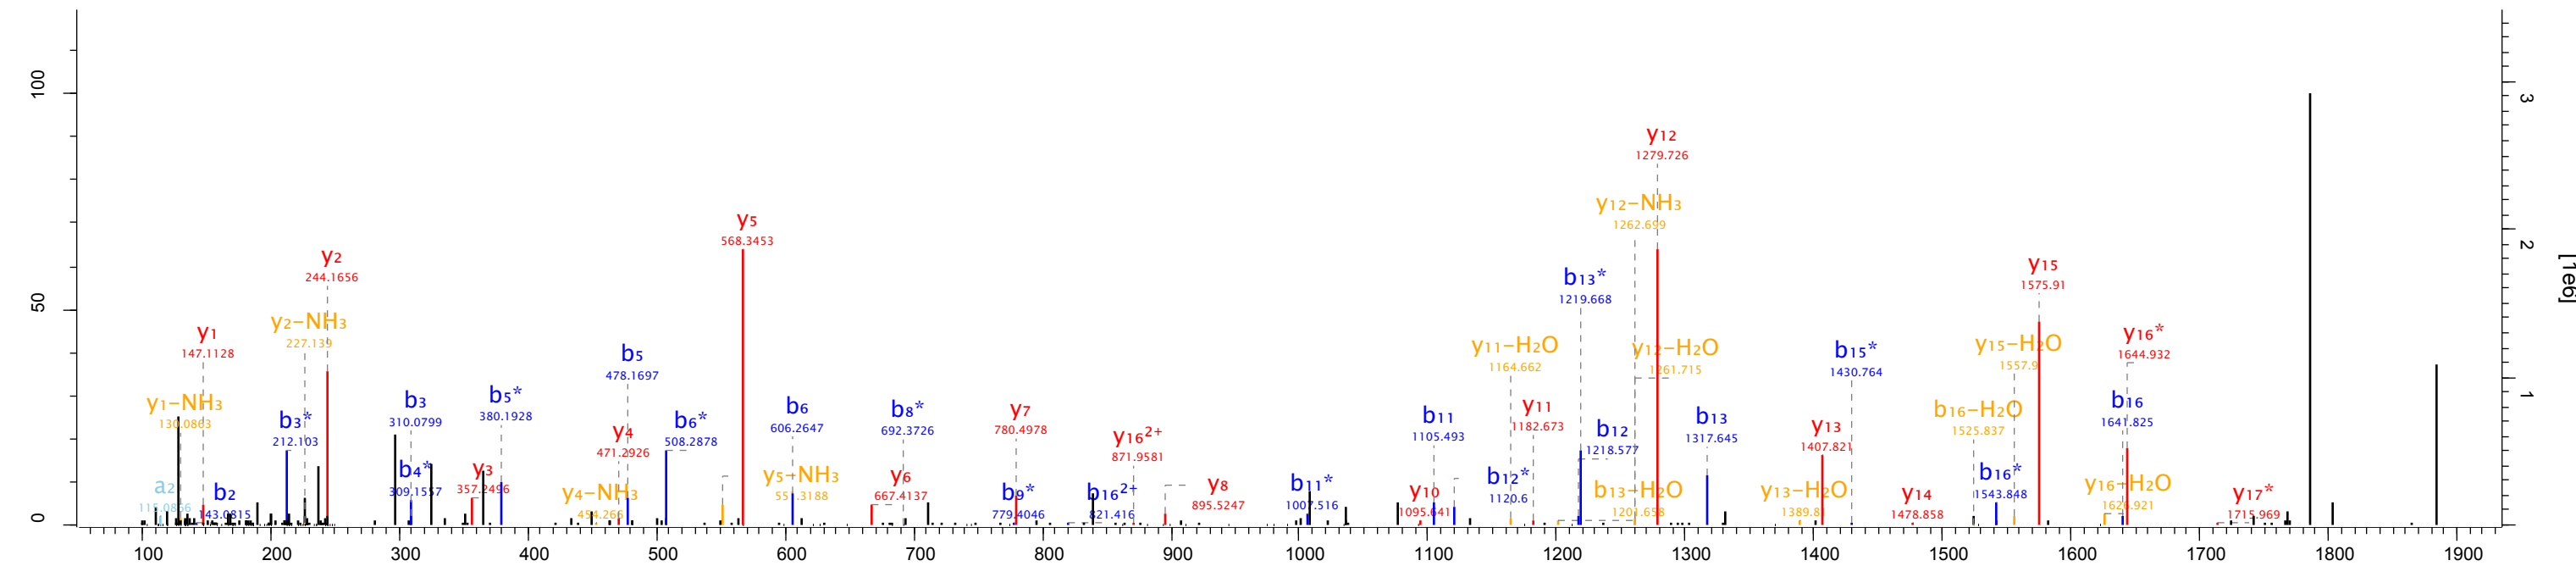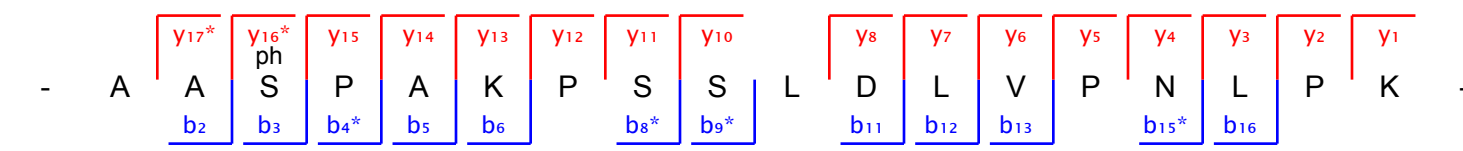

Raw file  
 20150812\_A375SR\_Phospho\_BR1\_10  
 Scan 20967 Method FTMS; HCD Score 40.95 m/z 813.38 Gene names ANXA1

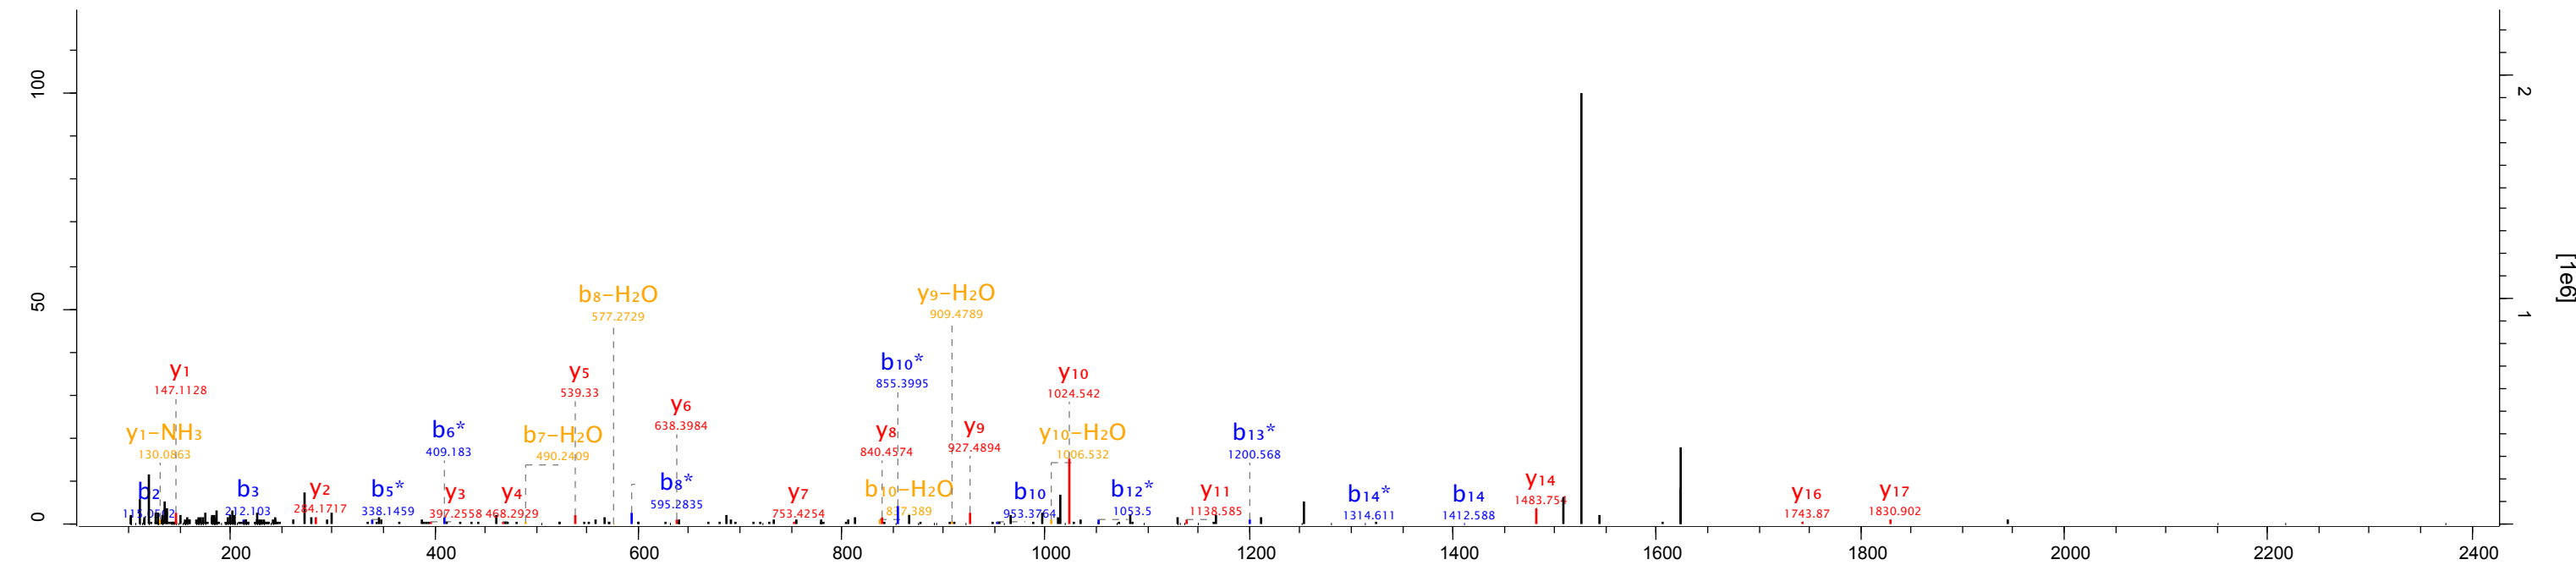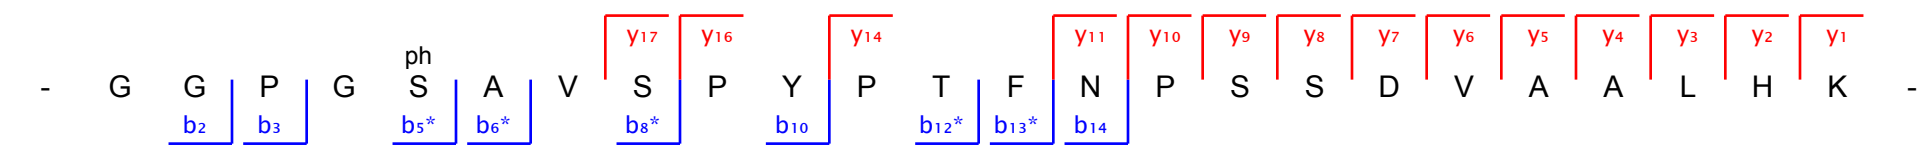

Raw file 20150812\_A375SR\_Phospho\_BR1\_10 Scan 23137 Method FTMS; HCD Score 82.3 m/z 924.13 Gene names LMO7

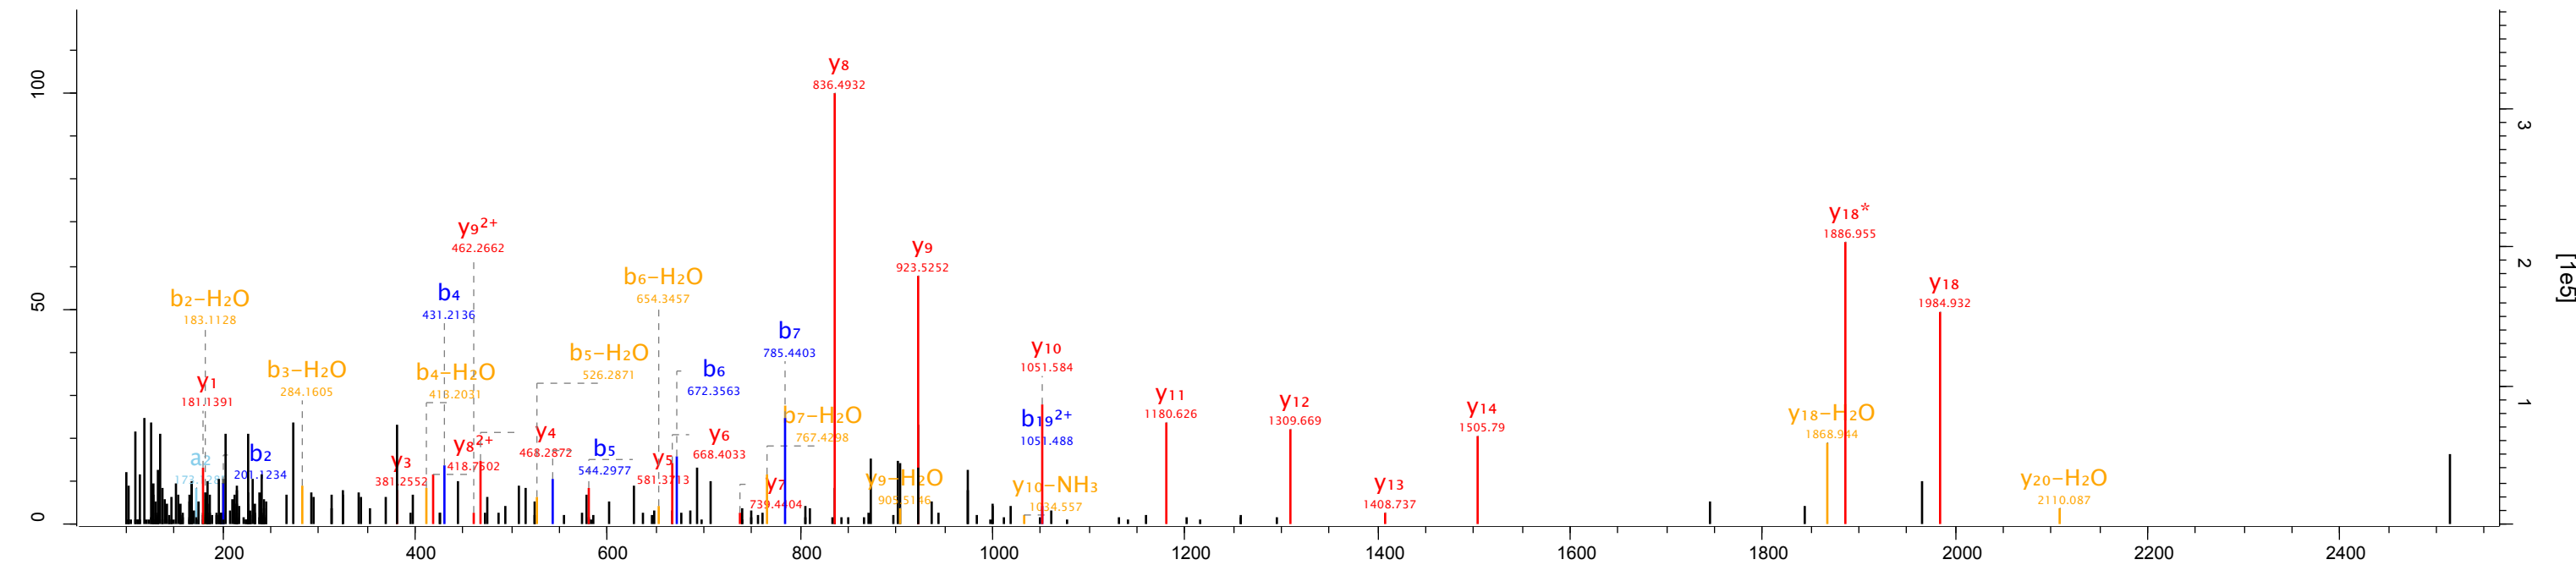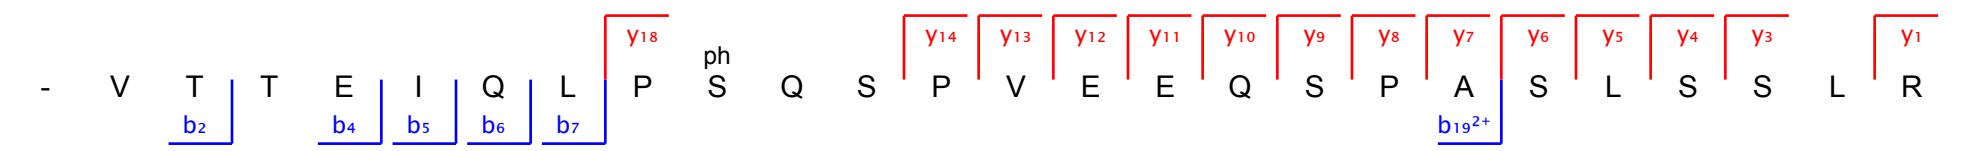

Raw file: 20150812\_A375SR\_Phospho\_BR1\_10  
 Scan: 6537 Method: FTMS; HCD Score: 164.22 m/z: 866.92 Gene names: IRF2BPL

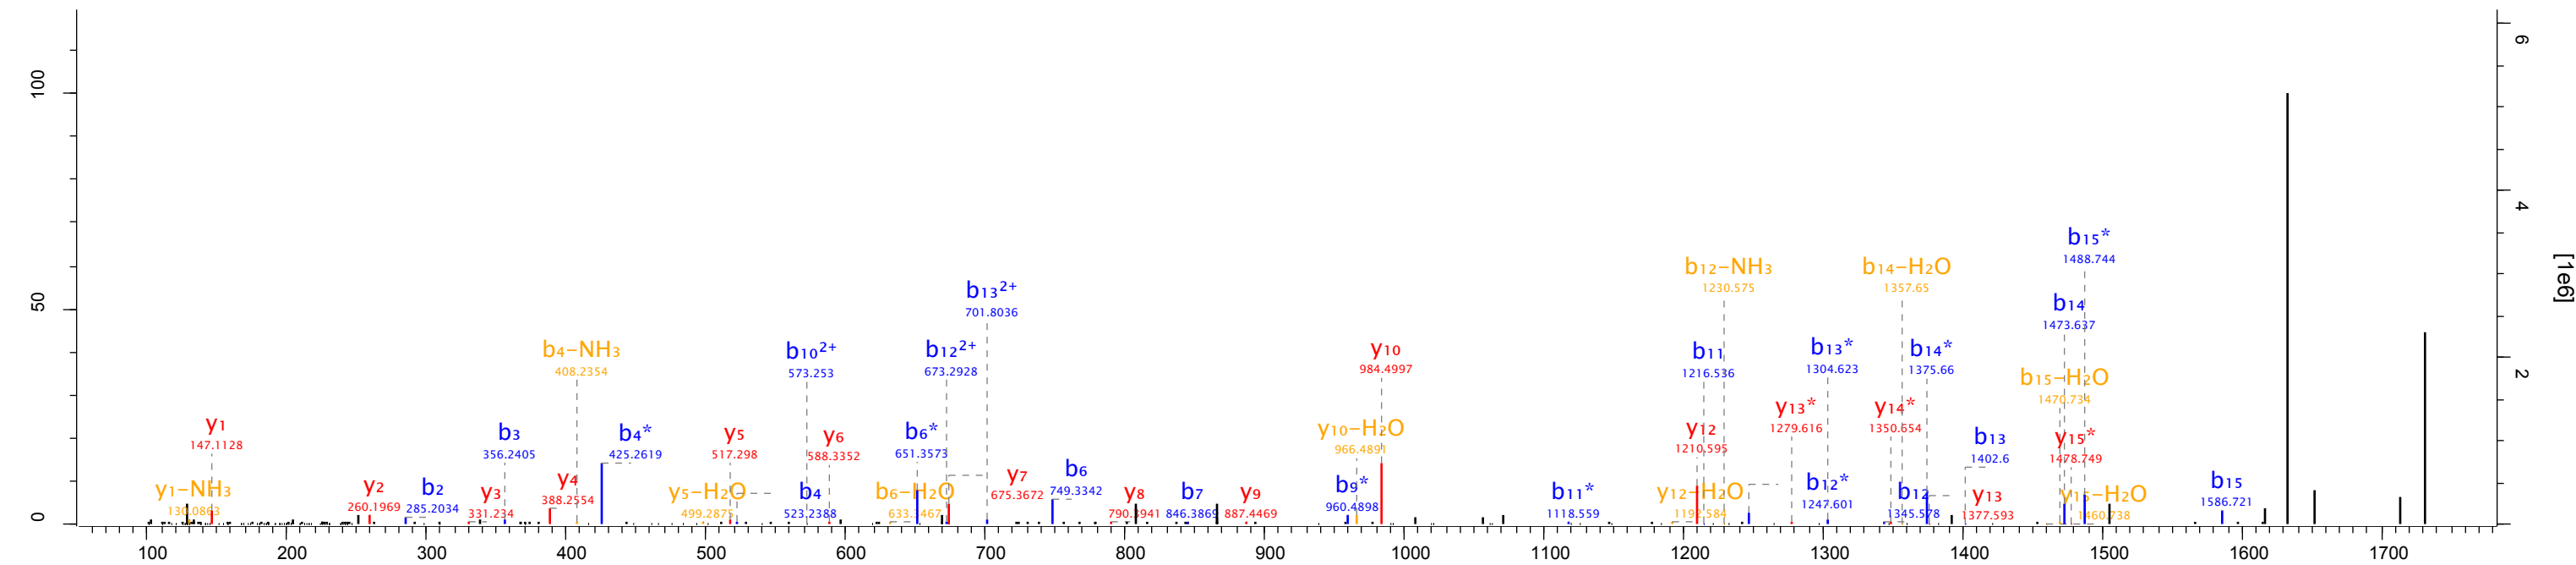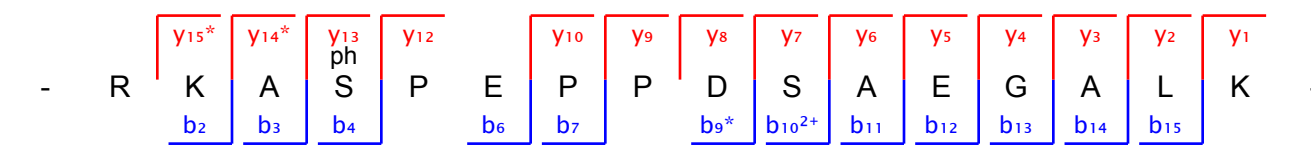



Raw file: 20150812\_A375SR\_Phospho\_BR1\_10  
 Scan: 6757 Method: FTMS; HCD Score: 67.68 m/z: 558.95 Gene names: POU2F1

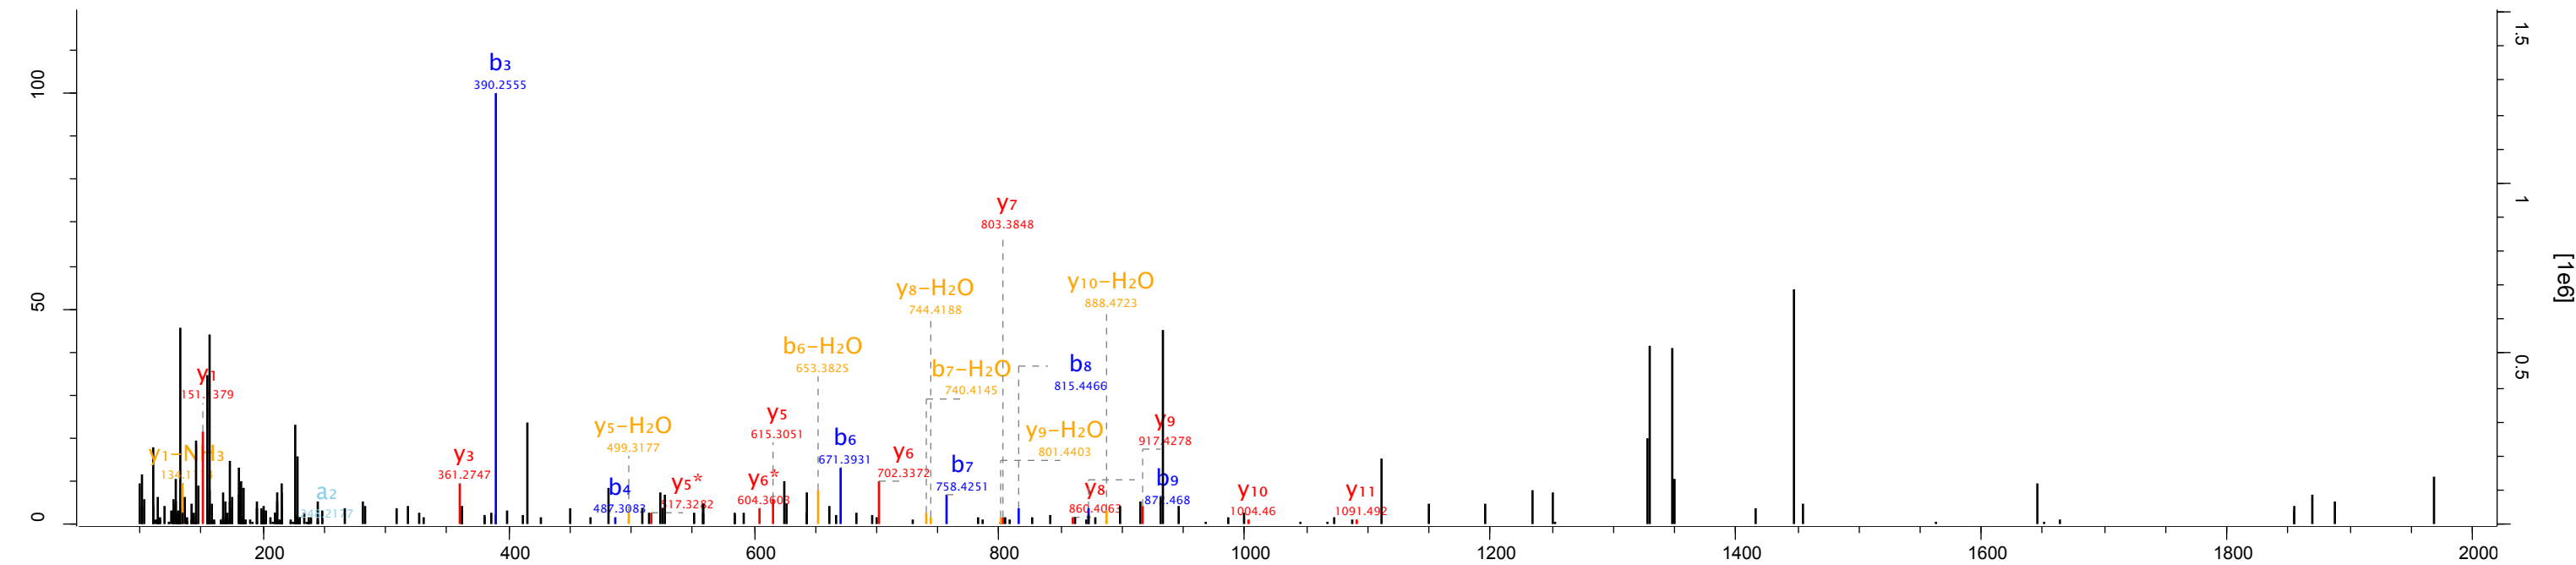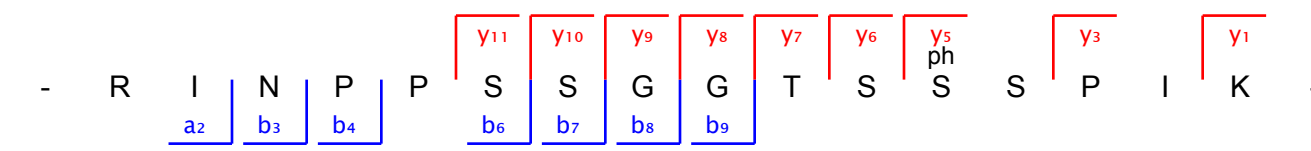

Raw file: 20150812\_A375SR\_Phospho\_BR1\_10  
 Scan: 7277 Method: FTMS; HCD Score: 105.79 m/z: 637.63 Gene names: ENAH

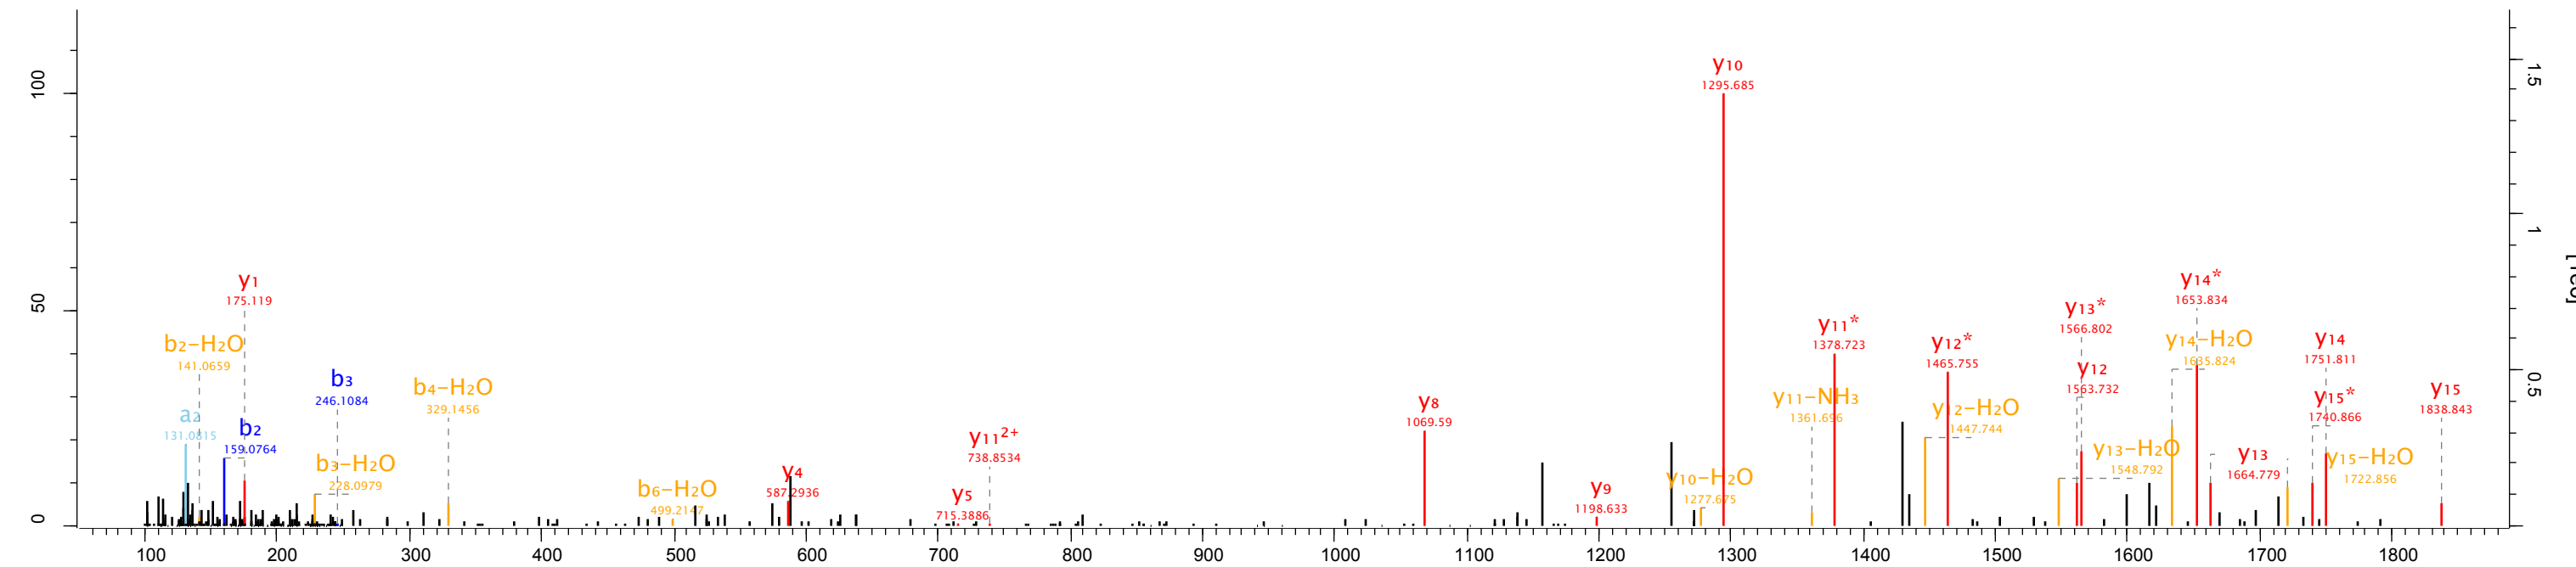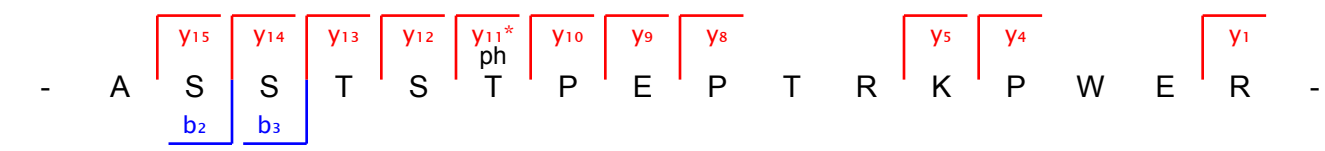

Raw file: 20150812\_A375SR\_Phospho\_BR1\_10  
 Scan: 8607 Method: FTMS; HCD Score: 187.49 m/z: 667.36 Gene names: LMNA

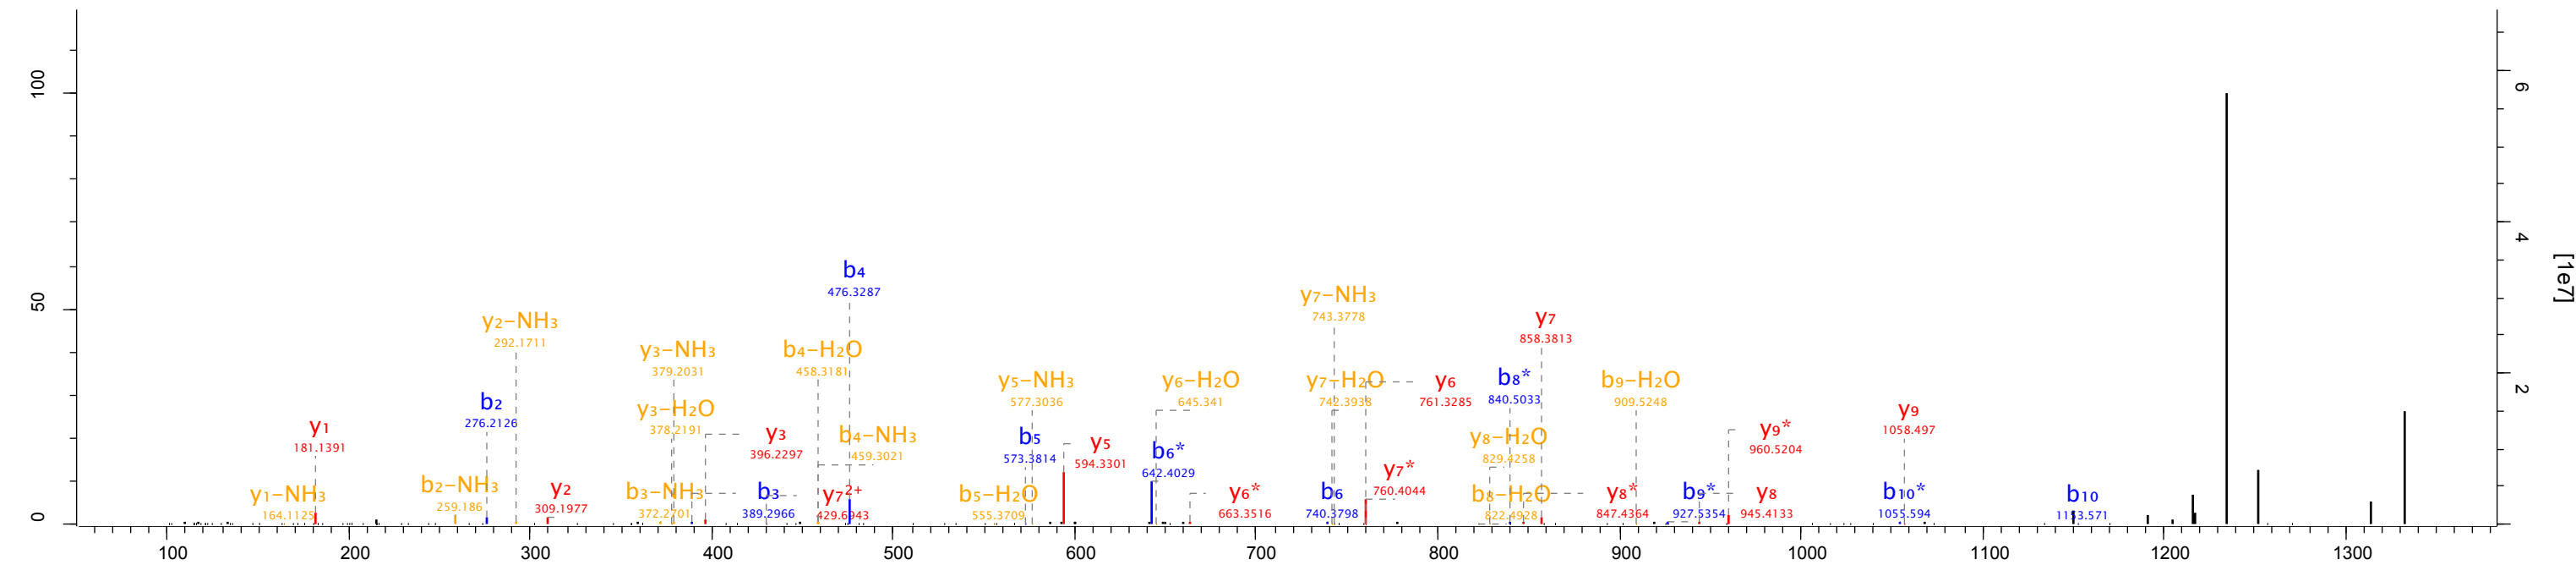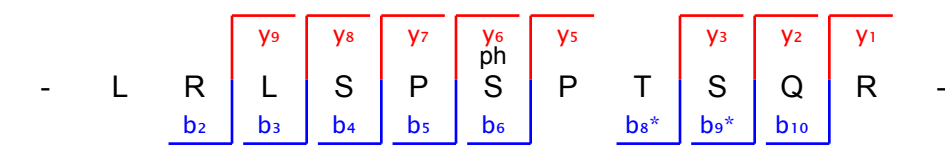

Raw file 20150812\_A375SR\_Phospho\_BR1\_10 Scan 9597 Method FTMS; HCD Score 82.45 m/z 433.71 Gene names NCOR2

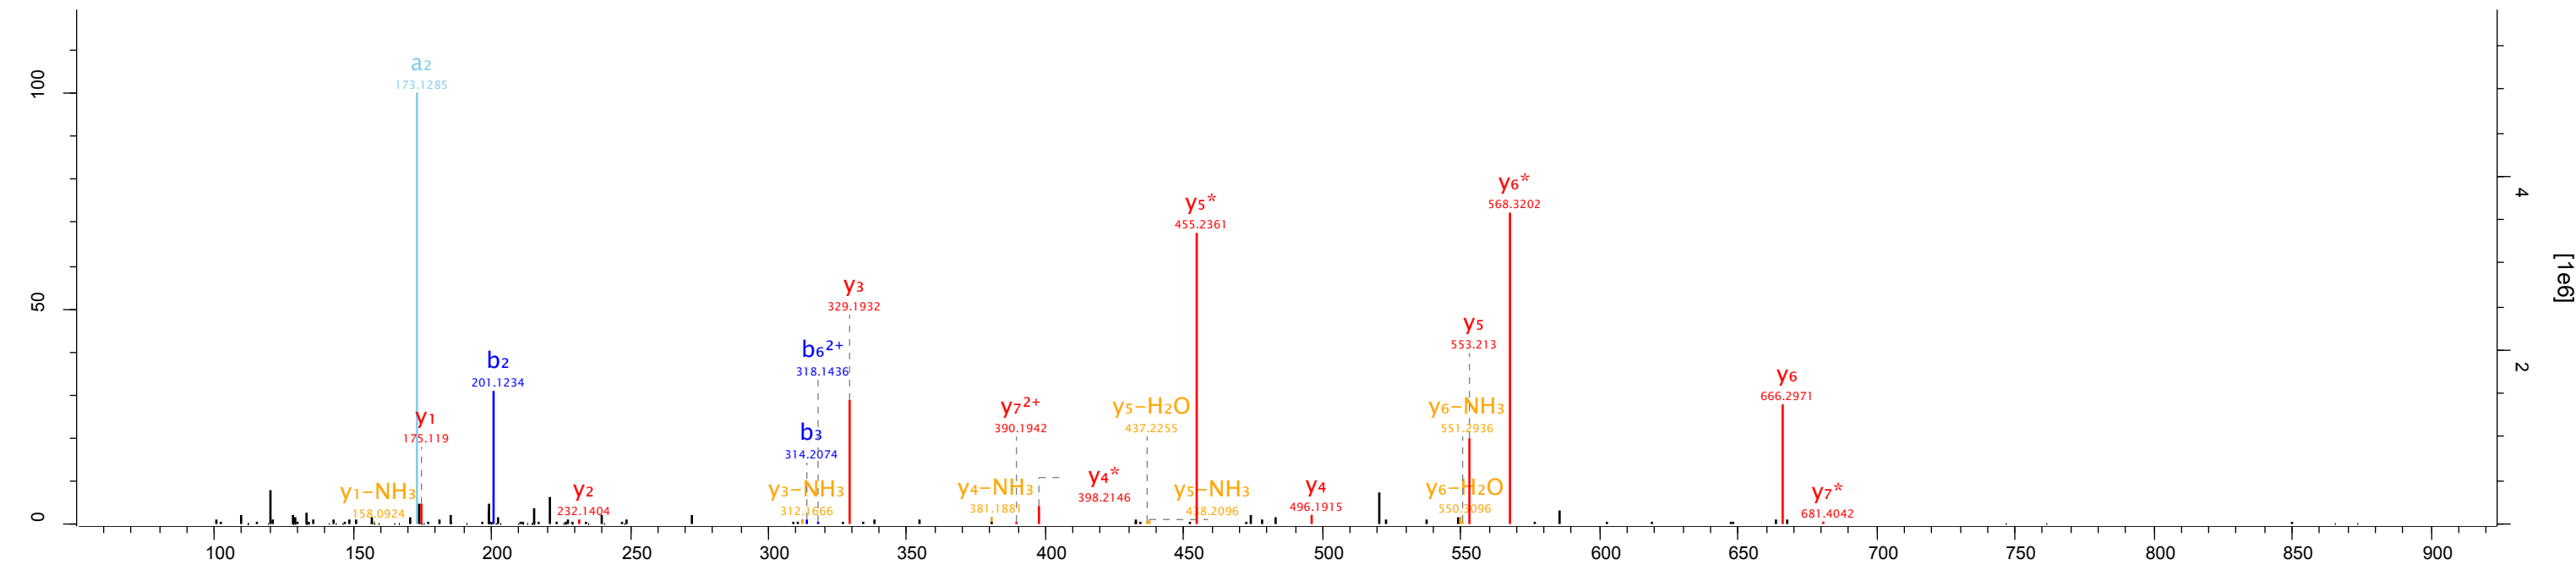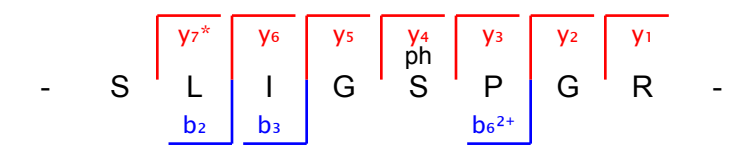

Raw file  
 20150812\_A375SR\_Phospho\_BR1\_01  
 Scan 11158 Method FTMS; HCD Score 72.3 m/z 784.6 Gene names NOL8

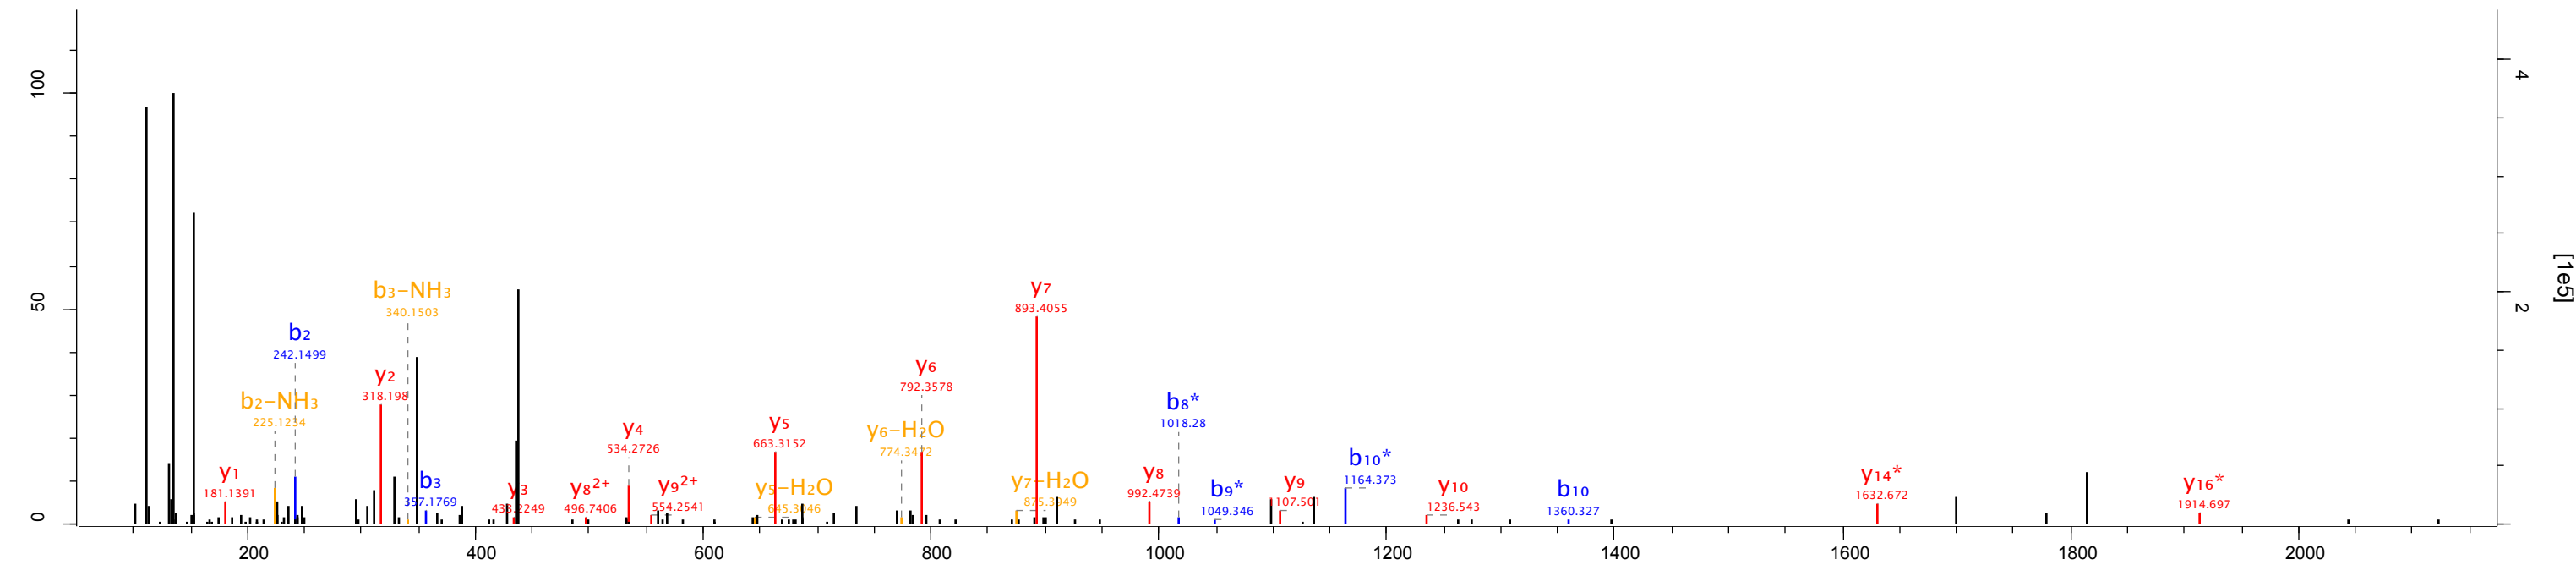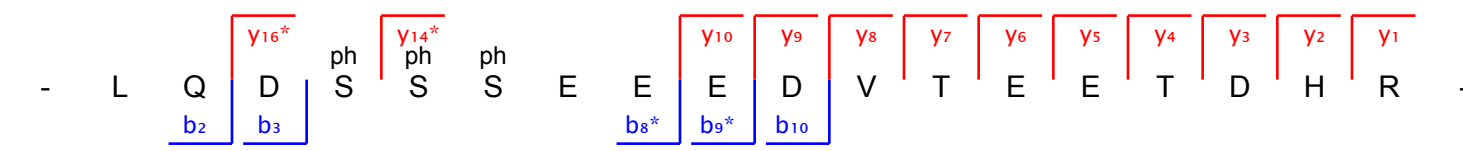

Raw file 20150812\_A375SR\_Phospho\_BR1\_01 Scan 15978 Method FTMS; HCD Score 73.07 m/z 975.42 Gene names UBE4B

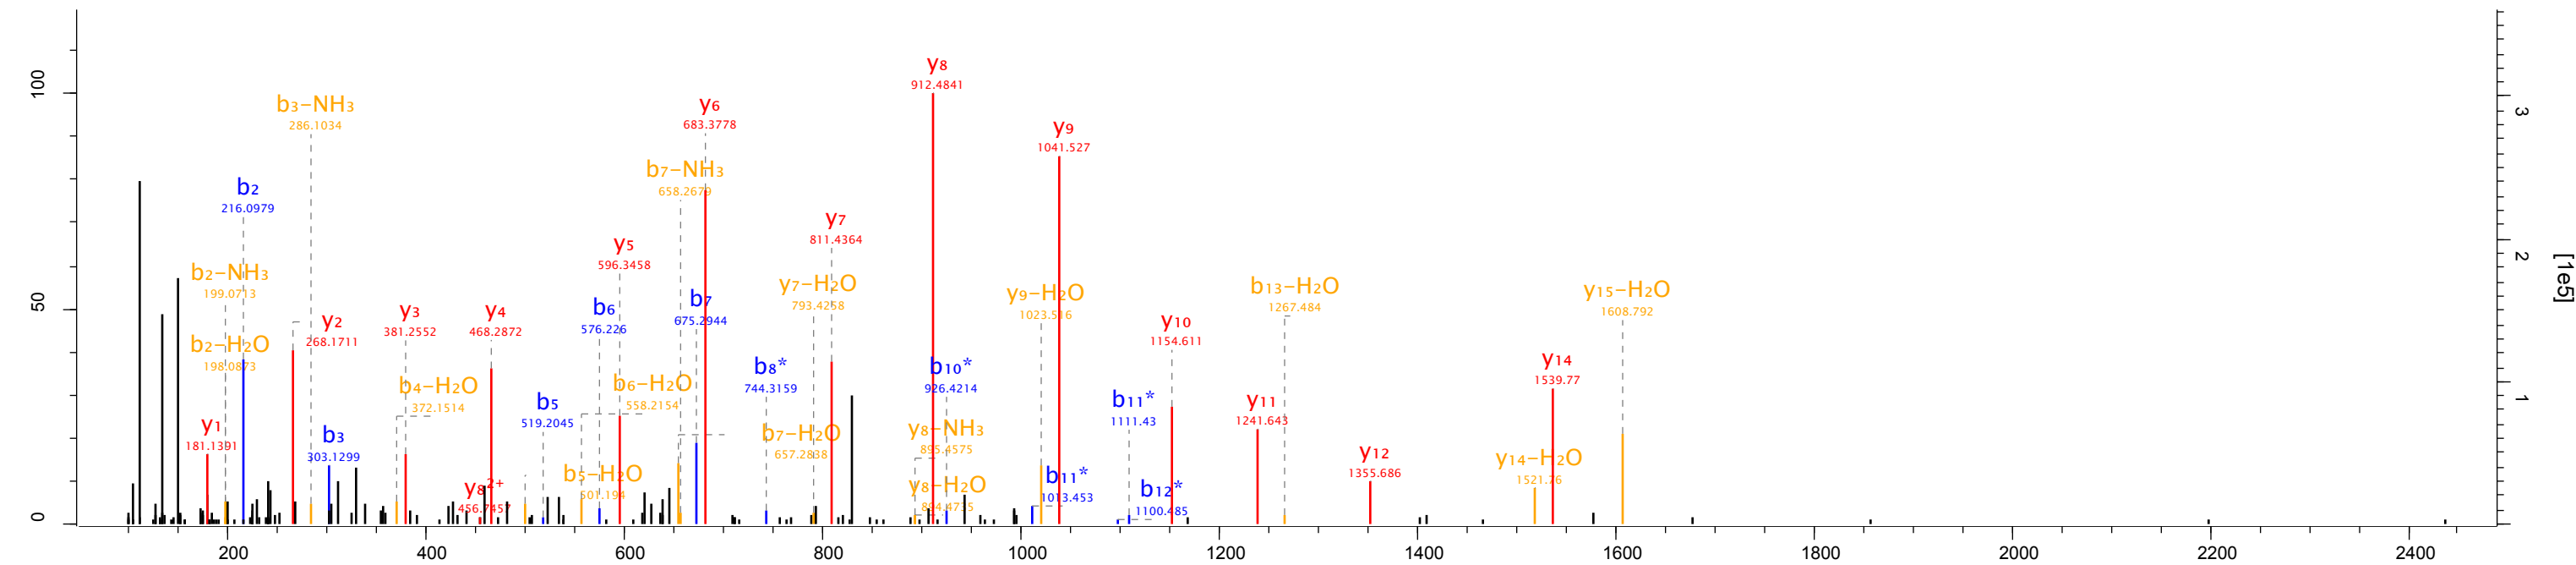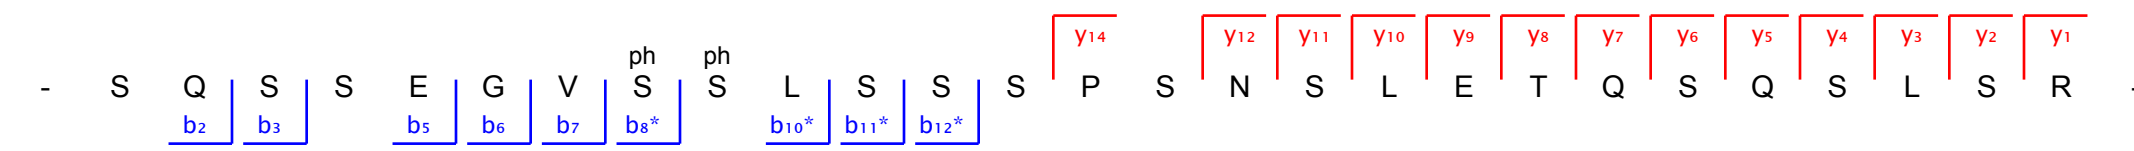

Raw file Scan Method Score m/z Gene names  
 20150812\_A375SR\_Phospho\_BR1\_01 17348 FTMS; HCD 45.65 995.74 RAF1

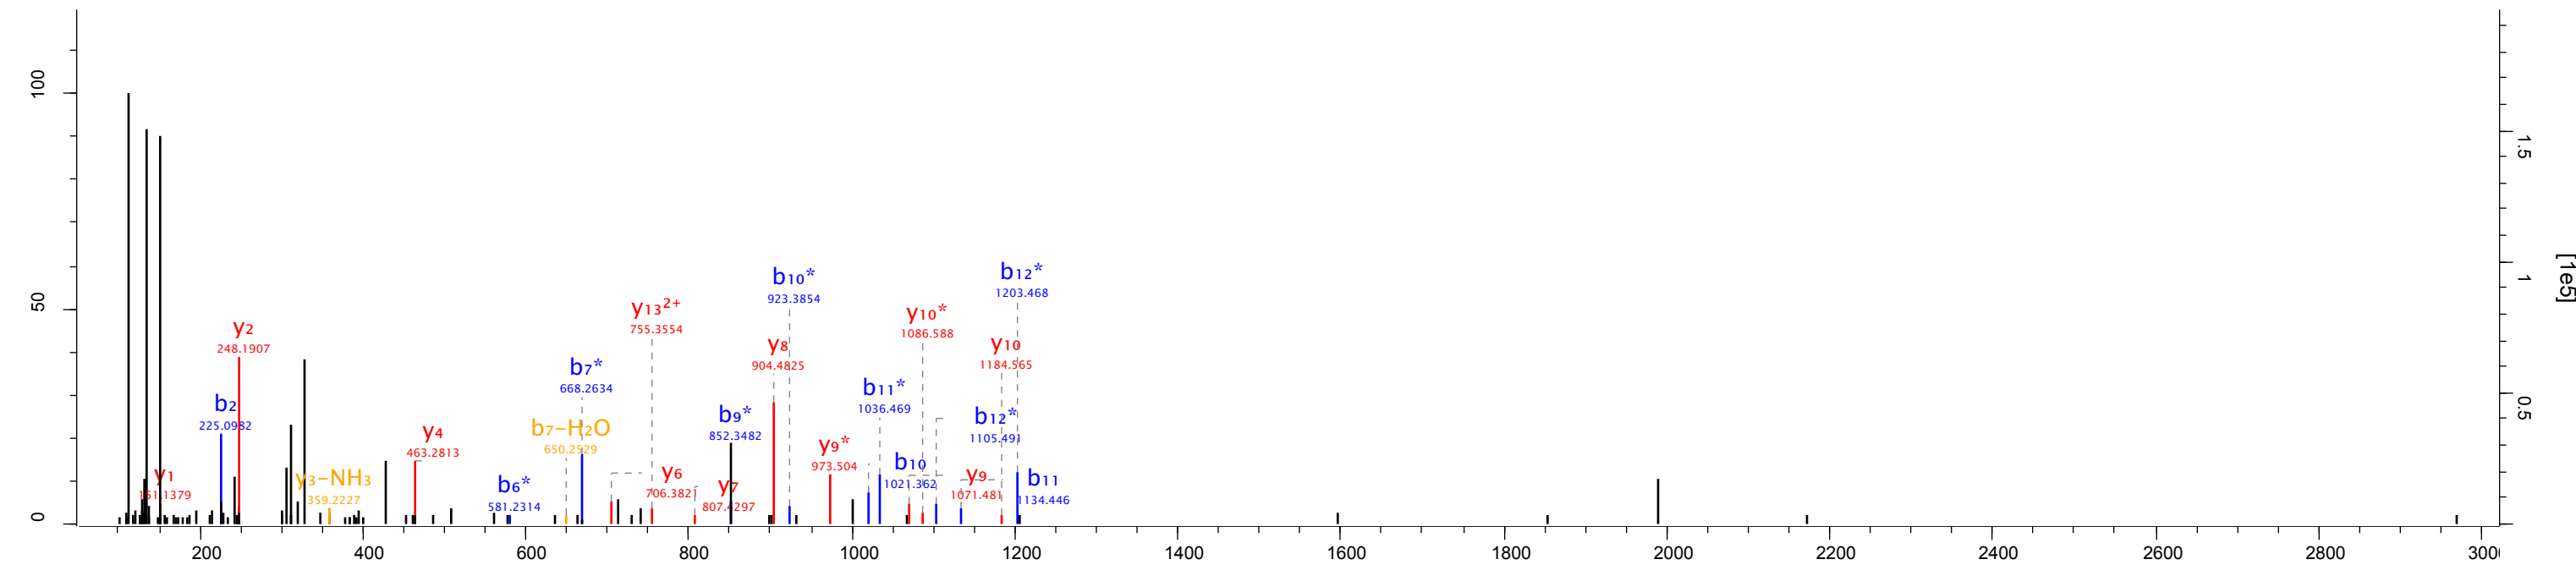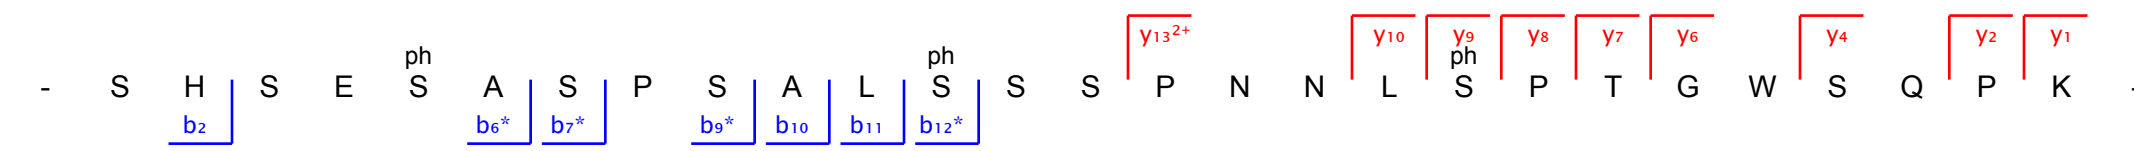

Raw file: 20150812\_A375SR\_Phospho\_BR1\_01  
 Scan: 4468 Method: FTMS; HCD Score: 45.22 m/z: 789.94 Gene names: HMGA2

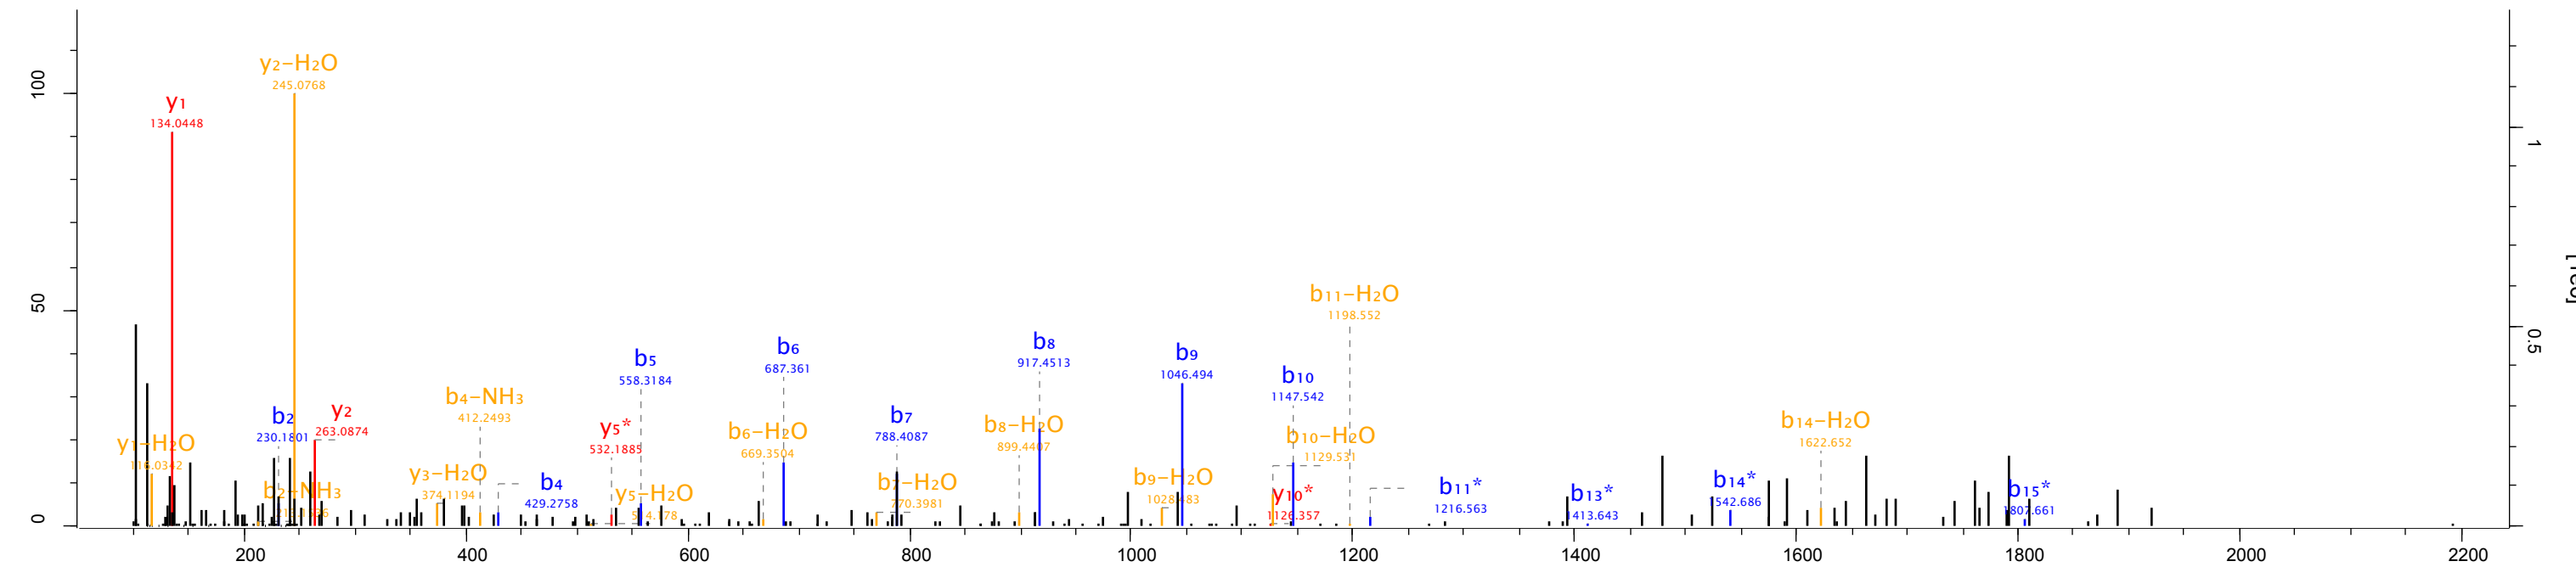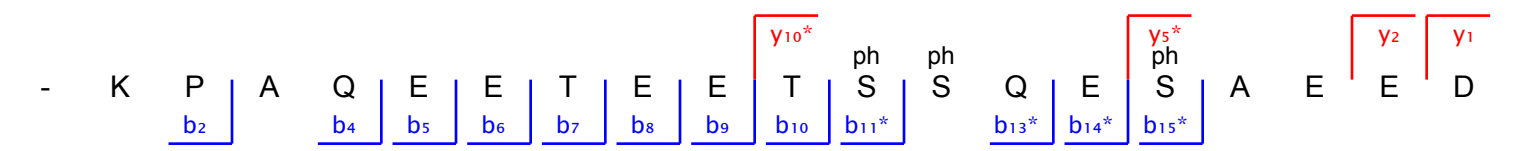



Raw file 20150812\_A375SR\_Phospho\_BR1\_01 Scan 5788 Method FTMS; HCD Score 193.5 m/z 1170.37 Gene names PSIP1

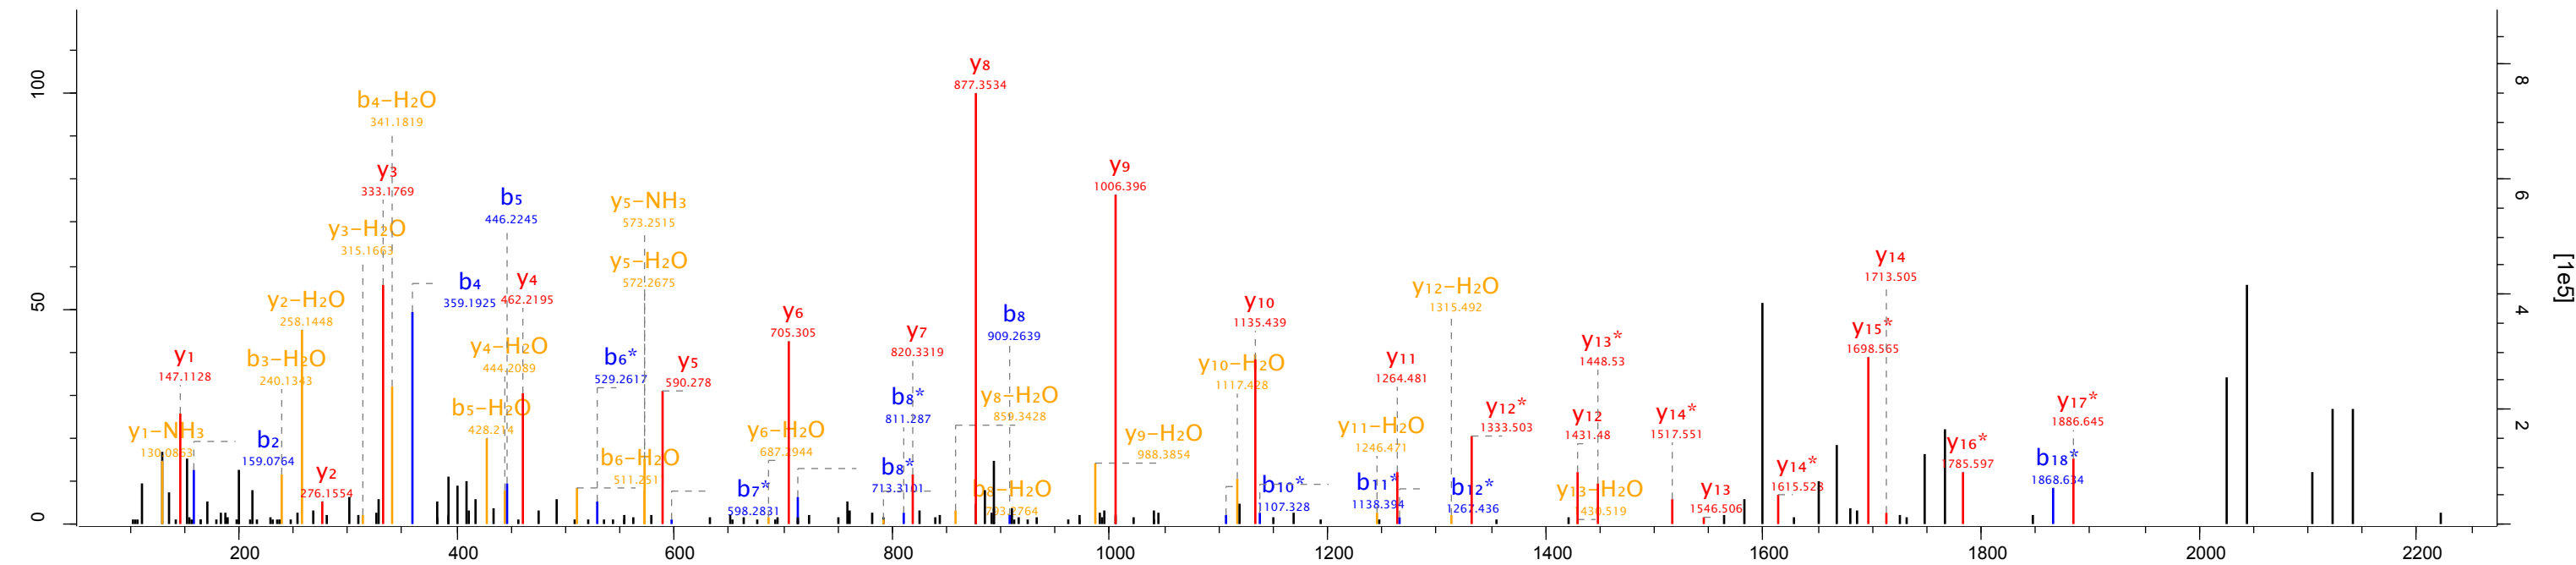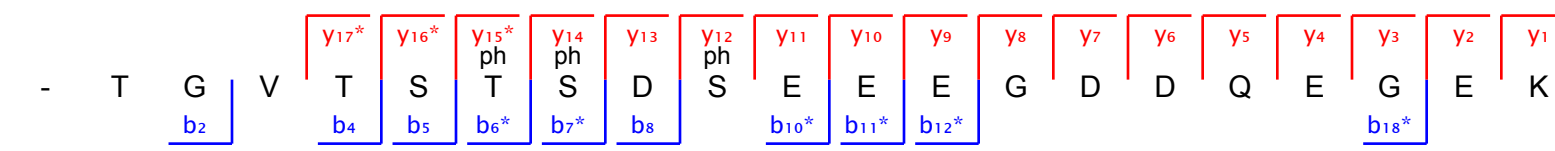

Raw file: 20150812\_A375SR\_Phospho\_BR1\_01  
 Scan: 6808 Method: FTMS; HCD Score: 57.17 m/z: 731.23 Gene names: SRRM2

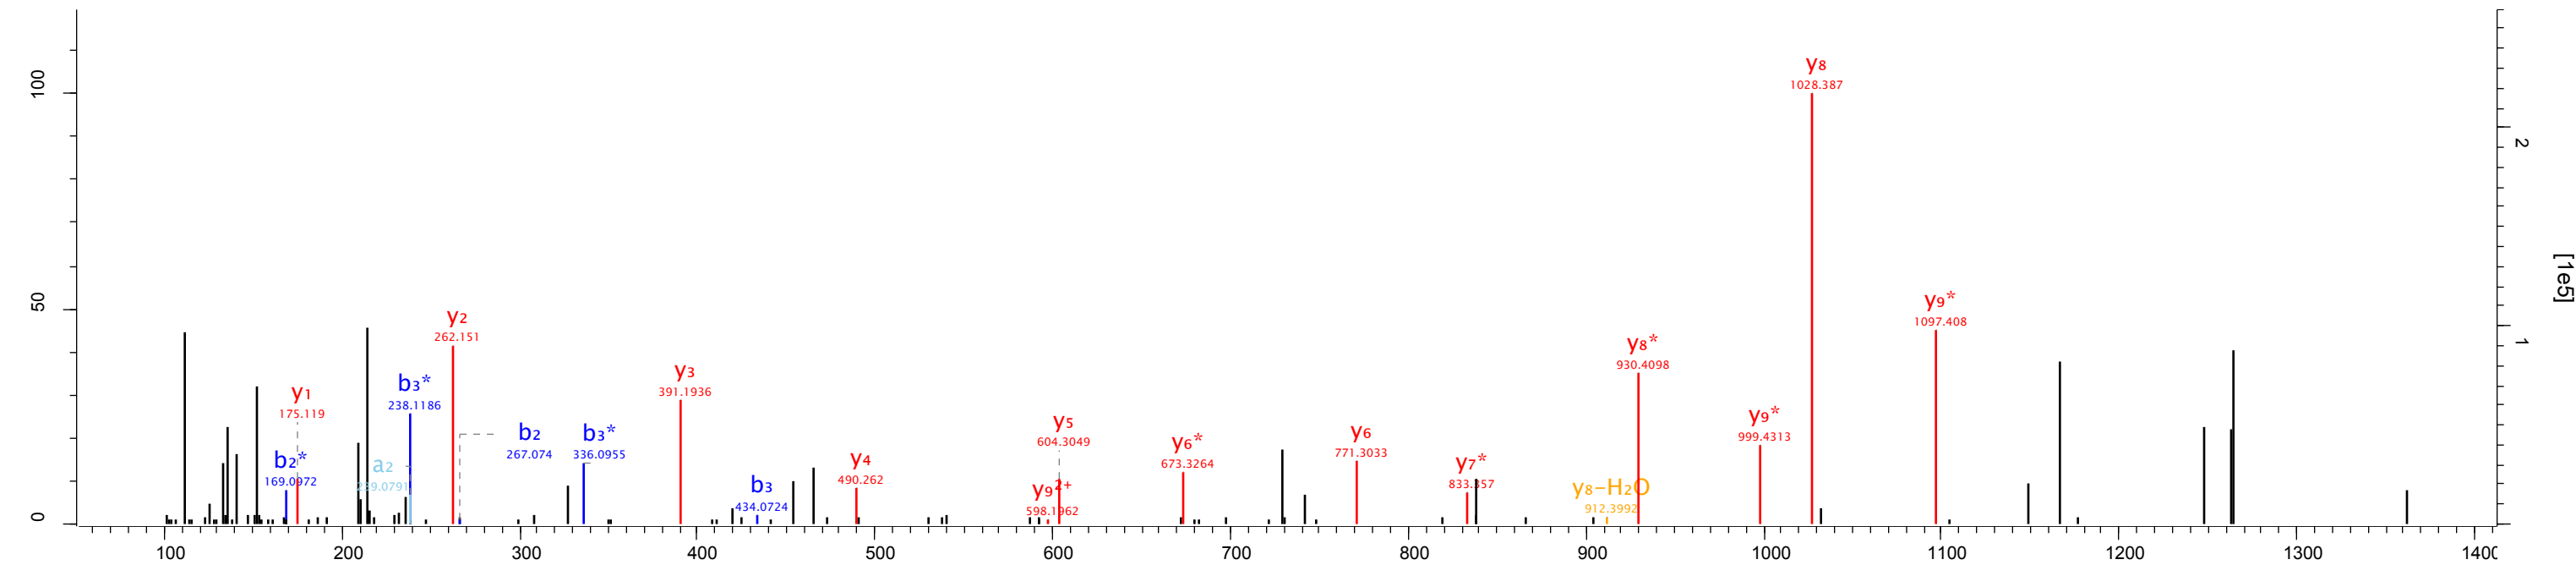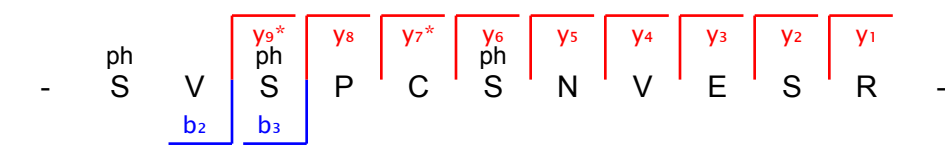

Raw file 20150812\_A375SR\_Phospho\_BR1\_01 Scan 7318 Method FTMS; HCD Score 117.79 m/z 899.7 Gene names UBAP2L

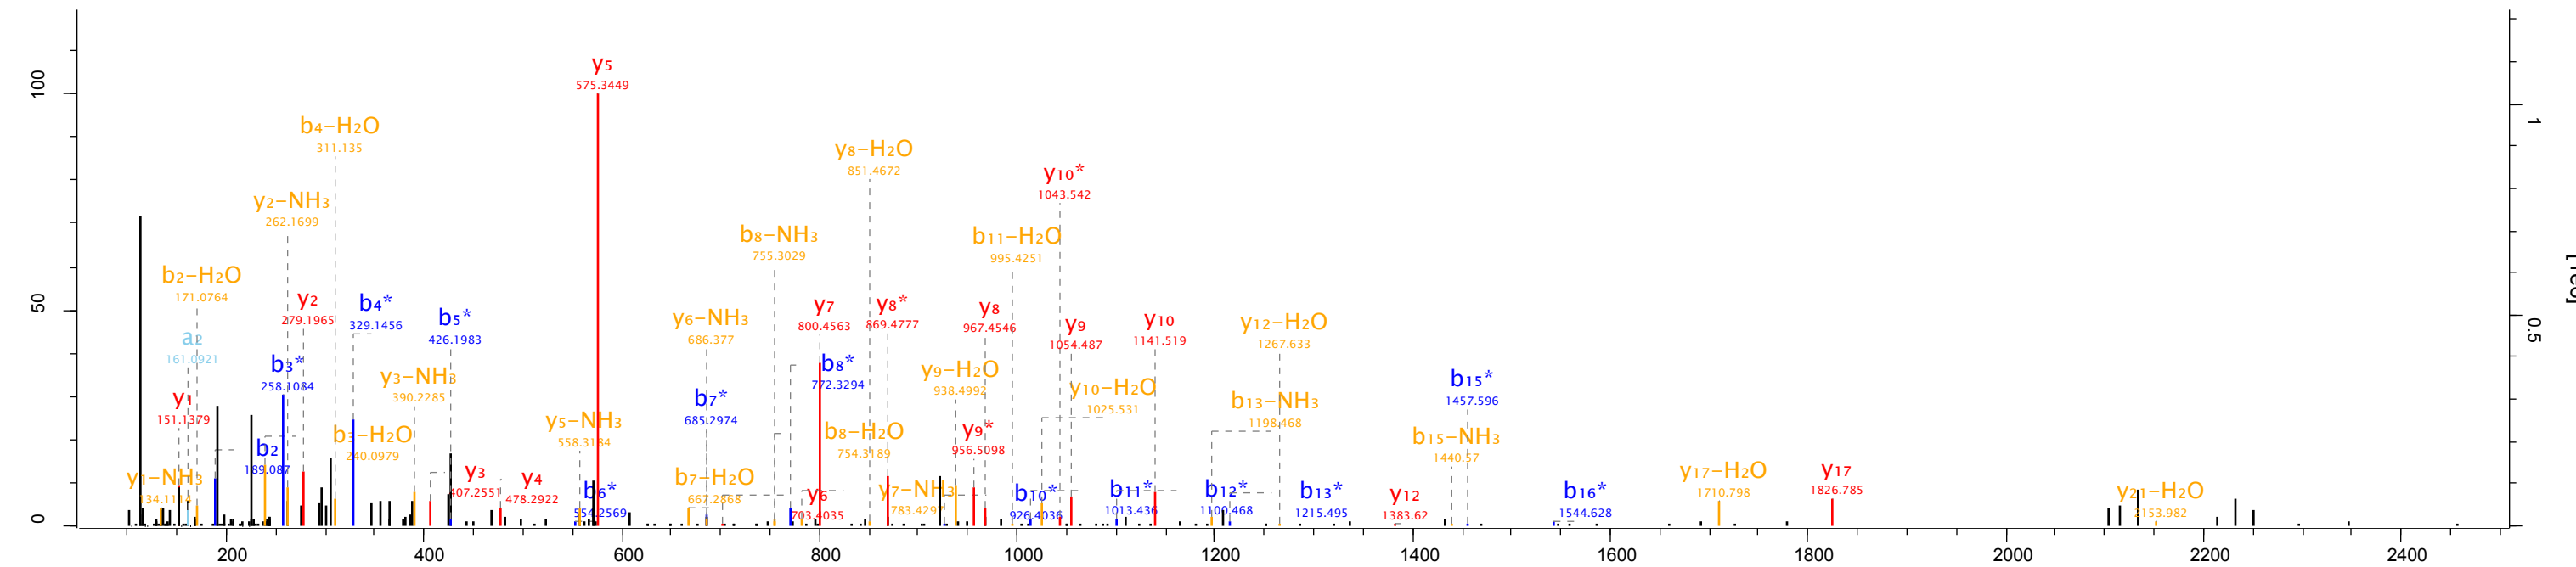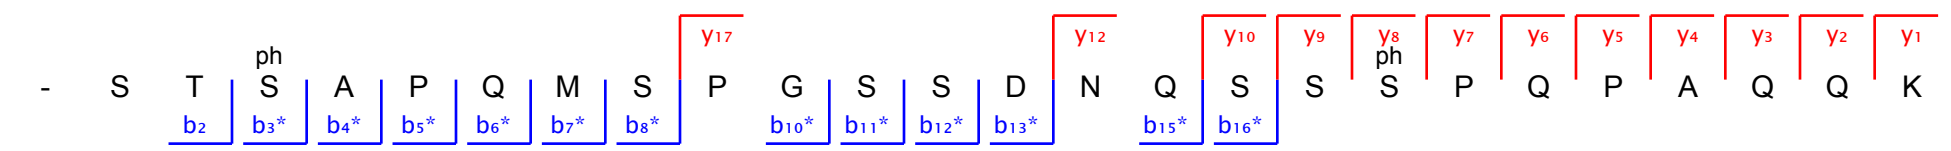

Raw file: 20150812\_A375SR\_Phospho\_BR1\_01  
 Scan: 9178 Method: FTMS; HCD Score: 49.22 m/z: 662.29 Gene names: PPP2R5D

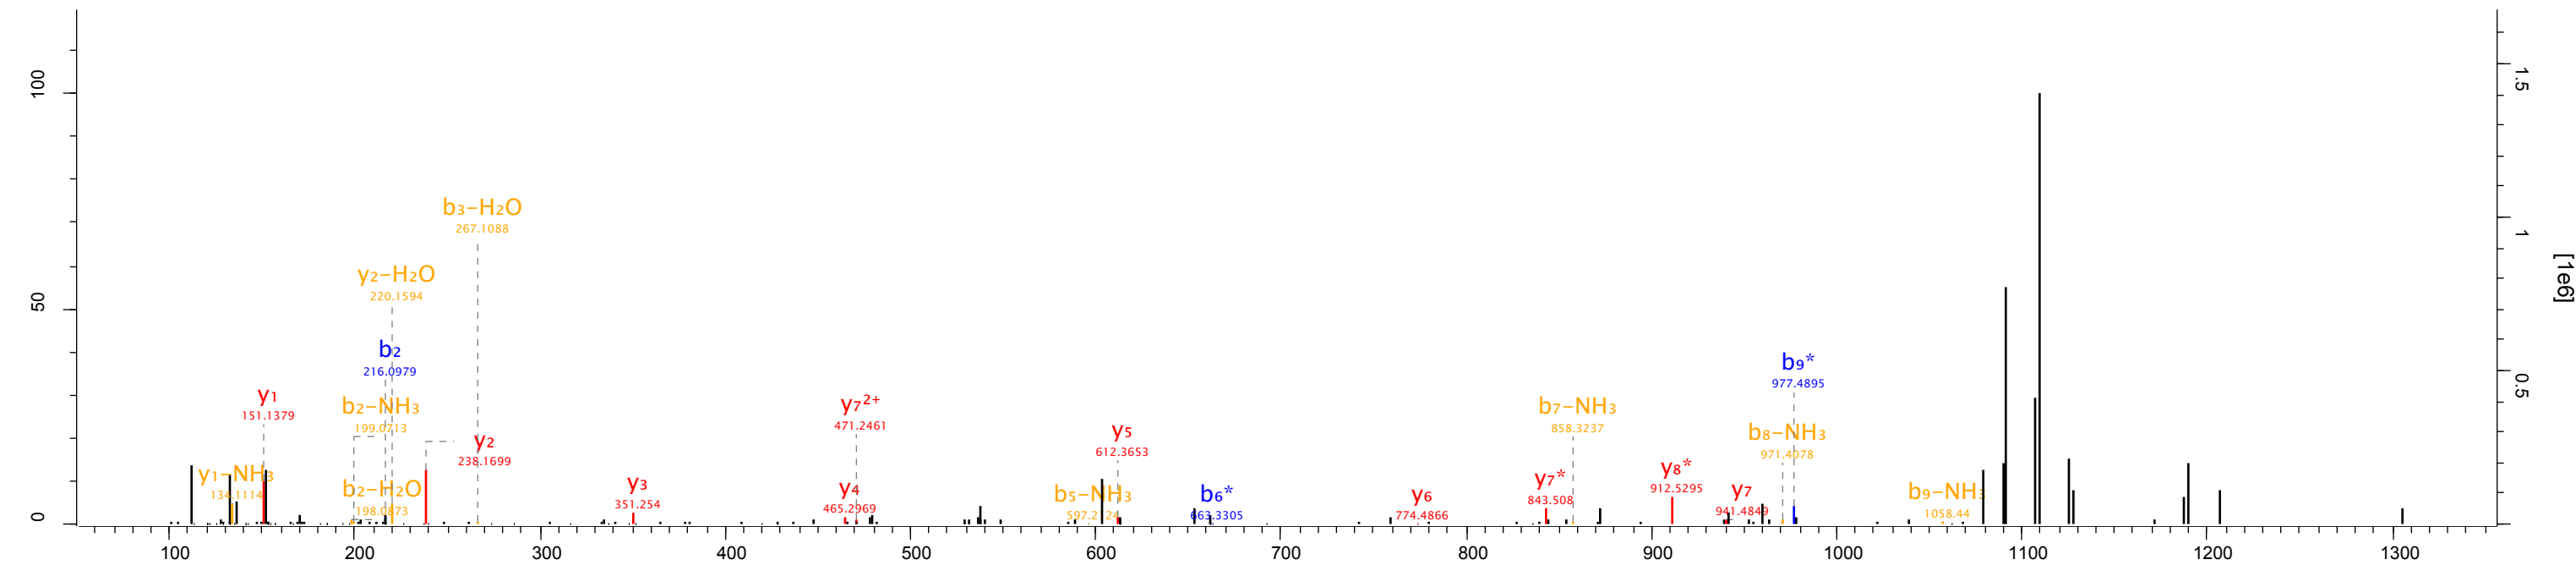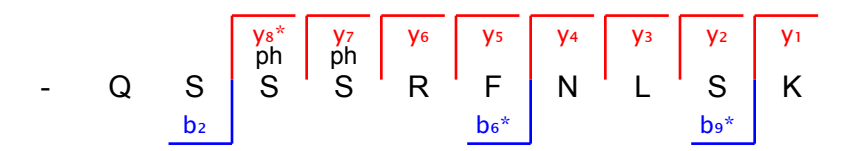

Raw file: 20150812\_A375SR\_Phospho\_BR1\_01  
 Scan: 9328 Method: FTMS; HCD Score: 46.25 m/z: 1134.36 Gene names: CHD9

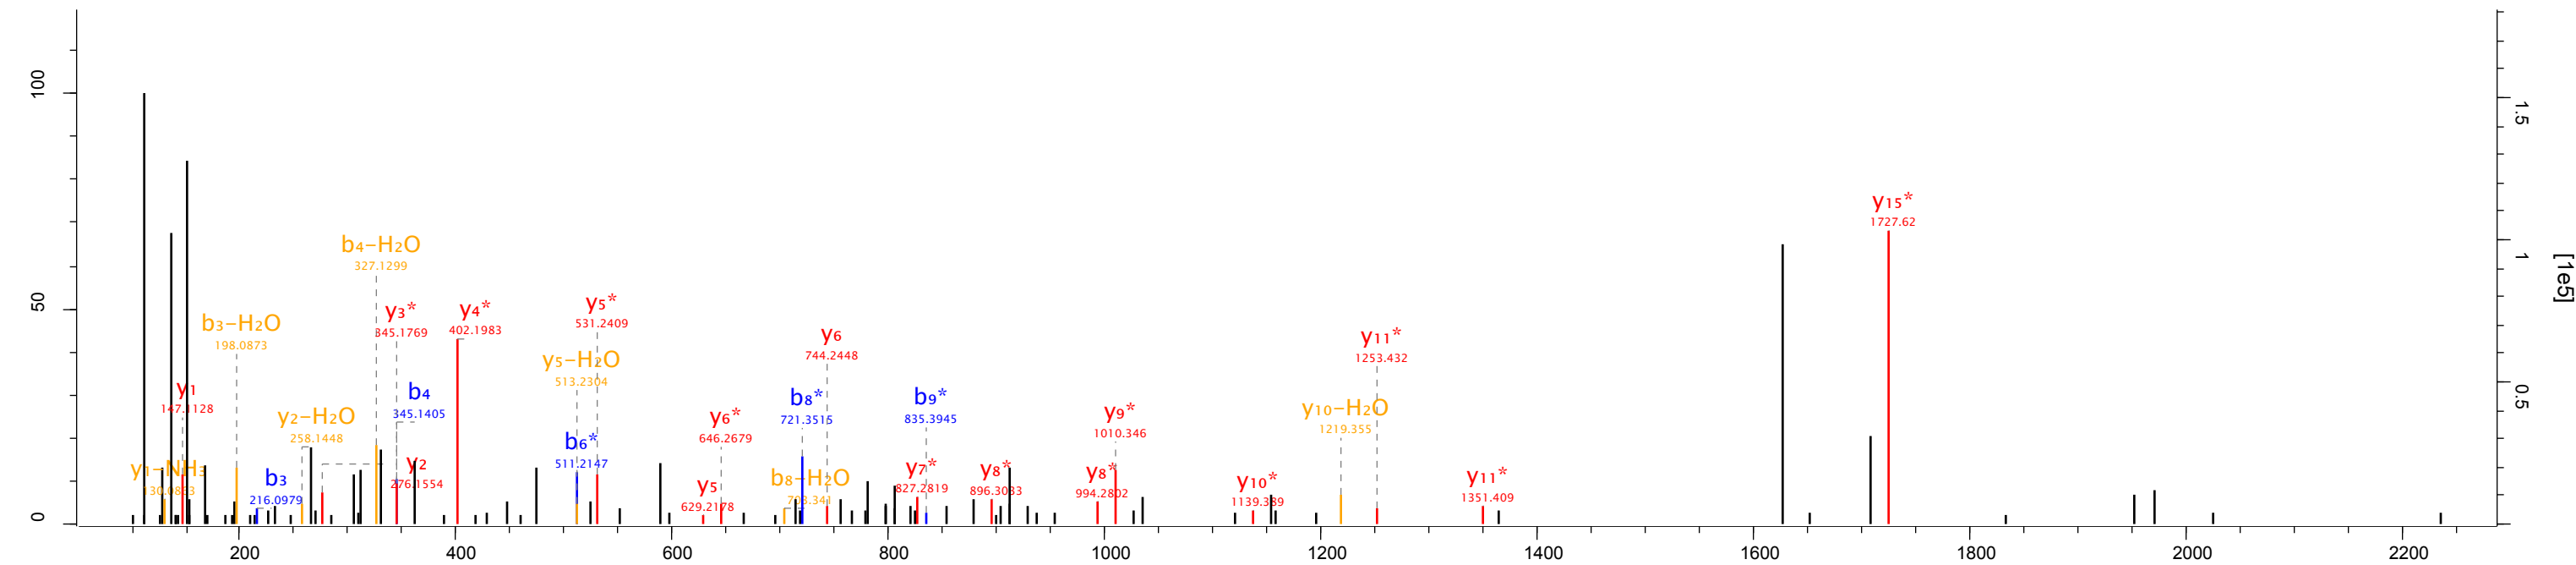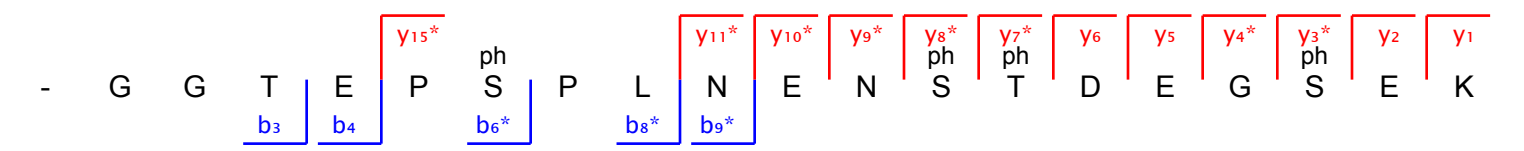

Raw file 20150812\_A375SR\_Phospho\_BR1\_02 Scan 10148 Method FTMS; HCD Score 145.42 m/z 1316.51 Gene names HDGFRP2

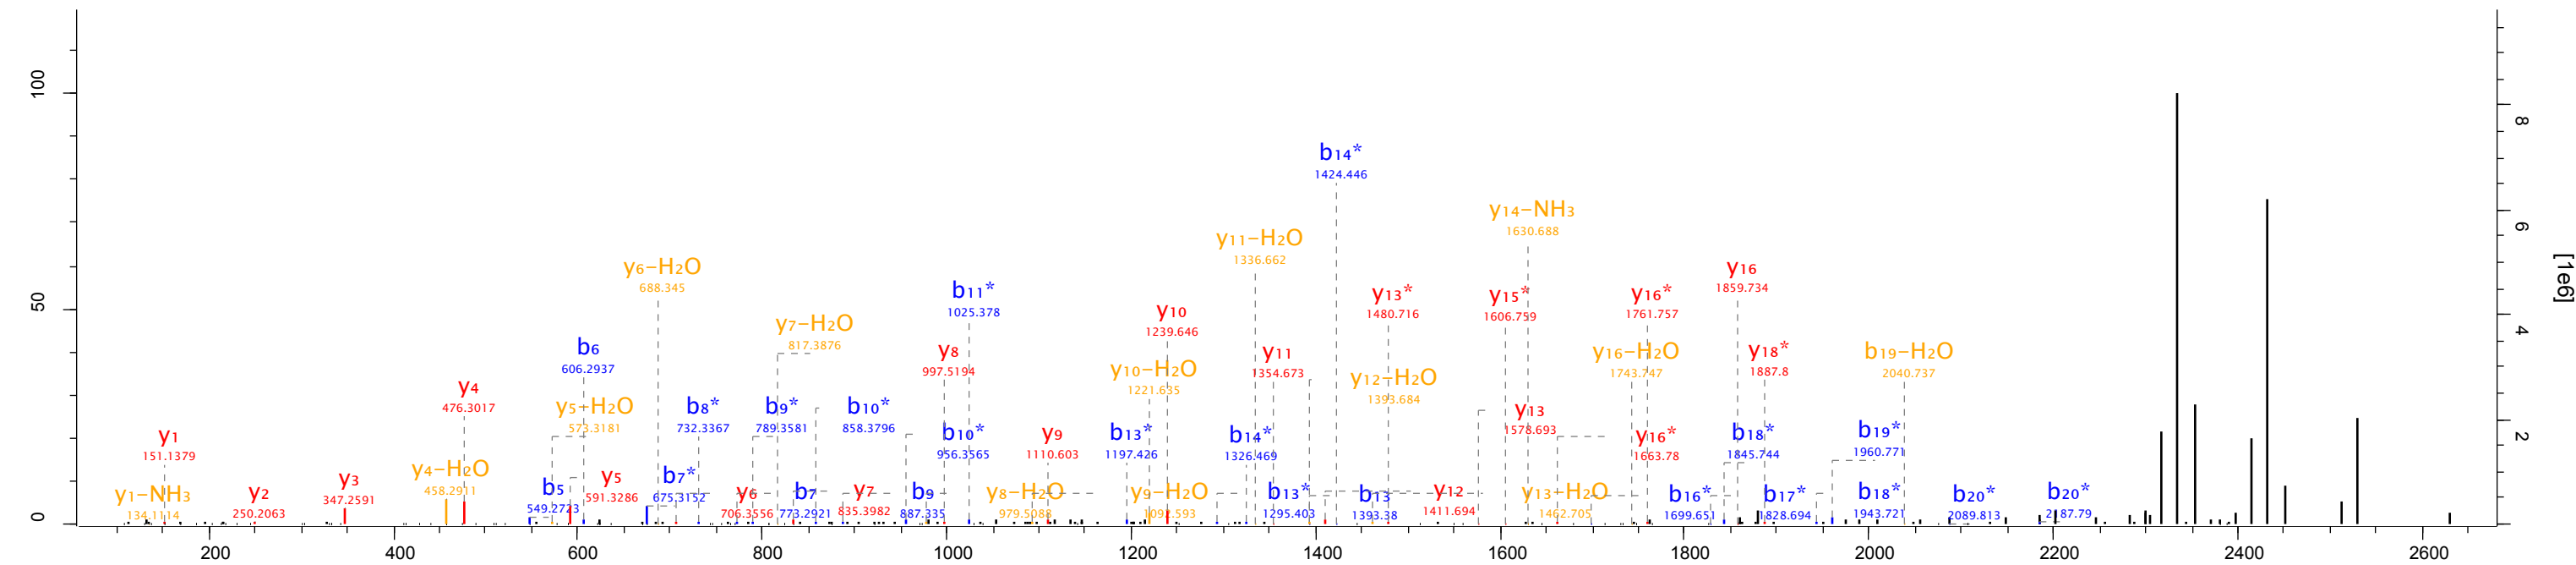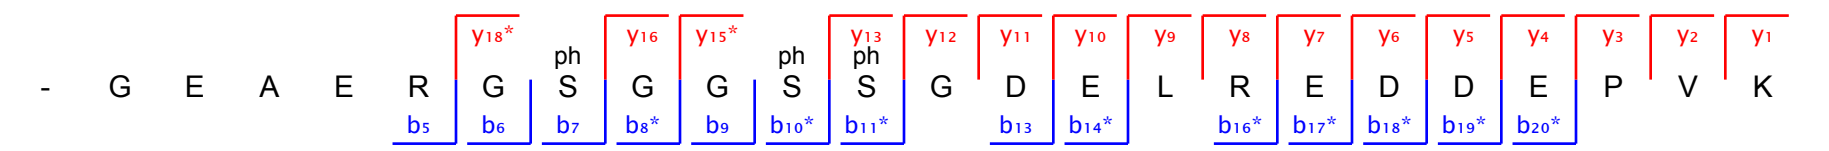

Raw file: 20150812\_A375SR\_Phospho\_BR1\_02  
 Scan: 10508 Method: FTMS; HCD Score: 88.97 m/z: 762.8 Gene names: BAG3

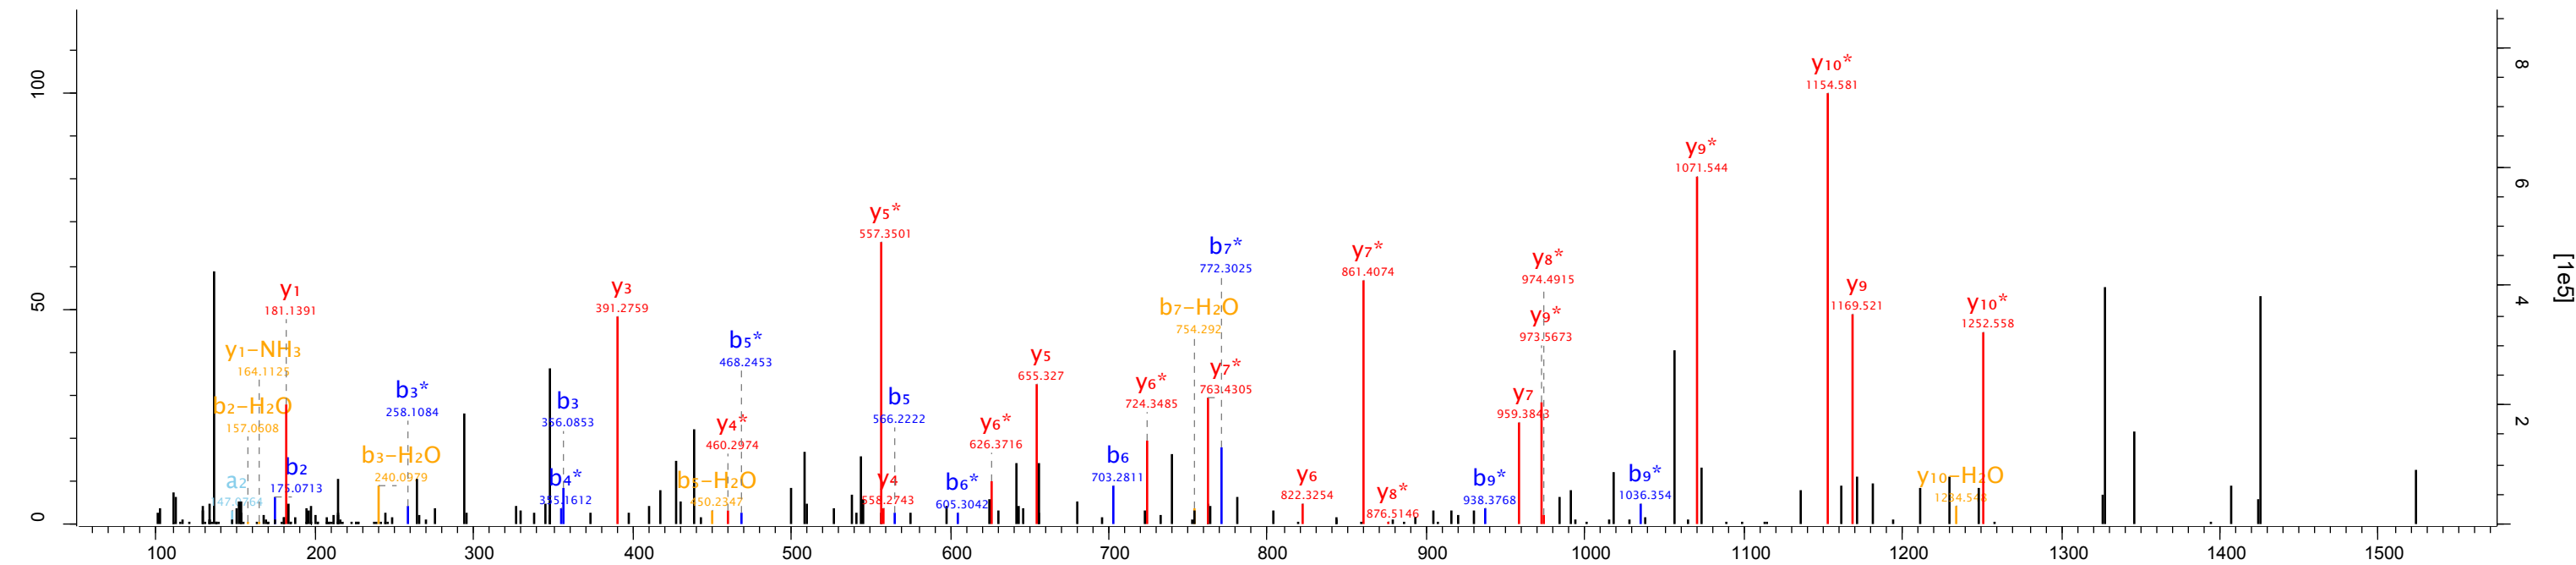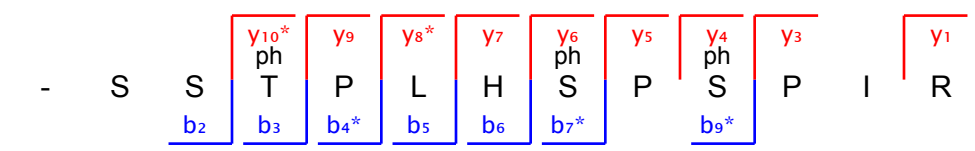

Raw file 20150812\_A375SR\_Phospho\_BR1\_02 Scan 10828 Method FTMS; HCD Score 130.88 m/z 905.37 Gene names HDGFRP2

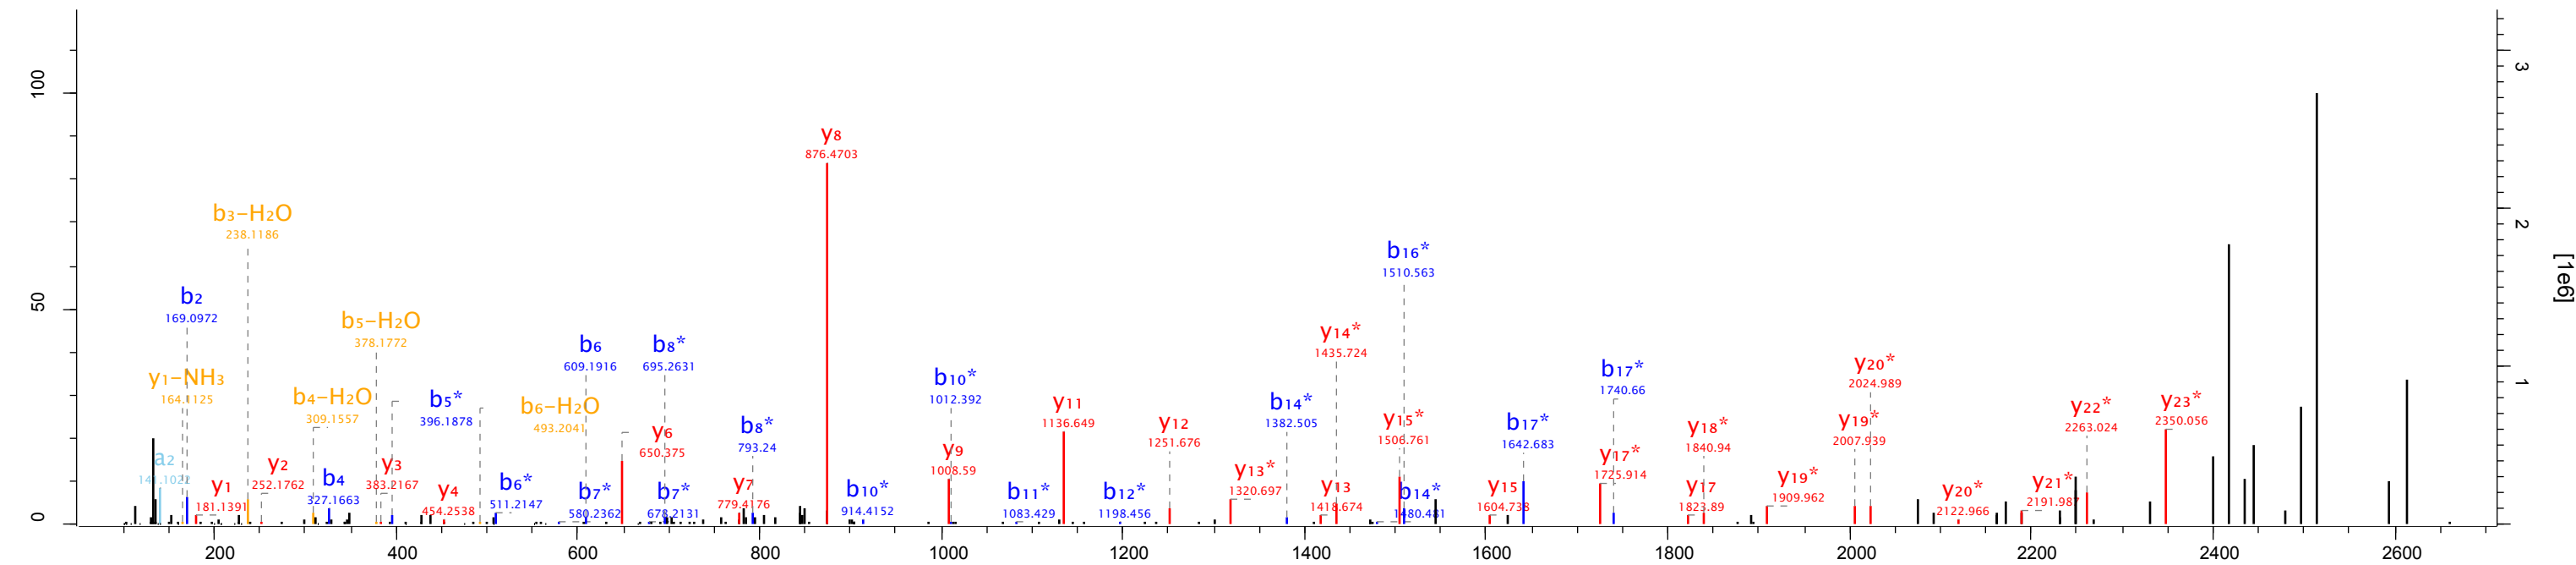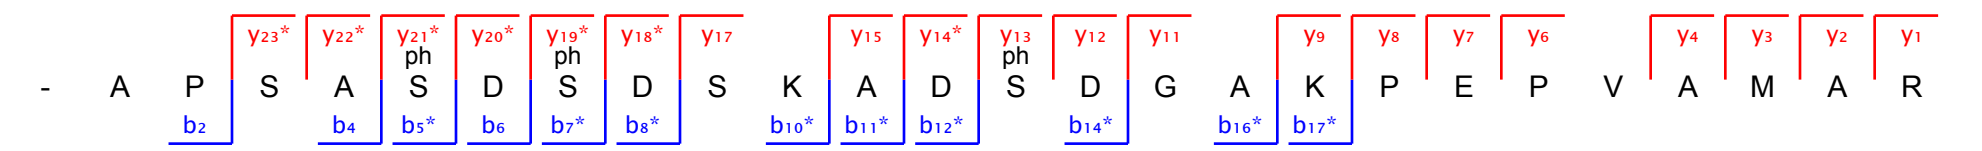



Raw file: 20150812\_A375SR\_Phospho\_BR1\_02  
 Scan: 10958 Method: FTMS; HCD Score: 113.86 m/z: 703.76 Gene names: SRPK2

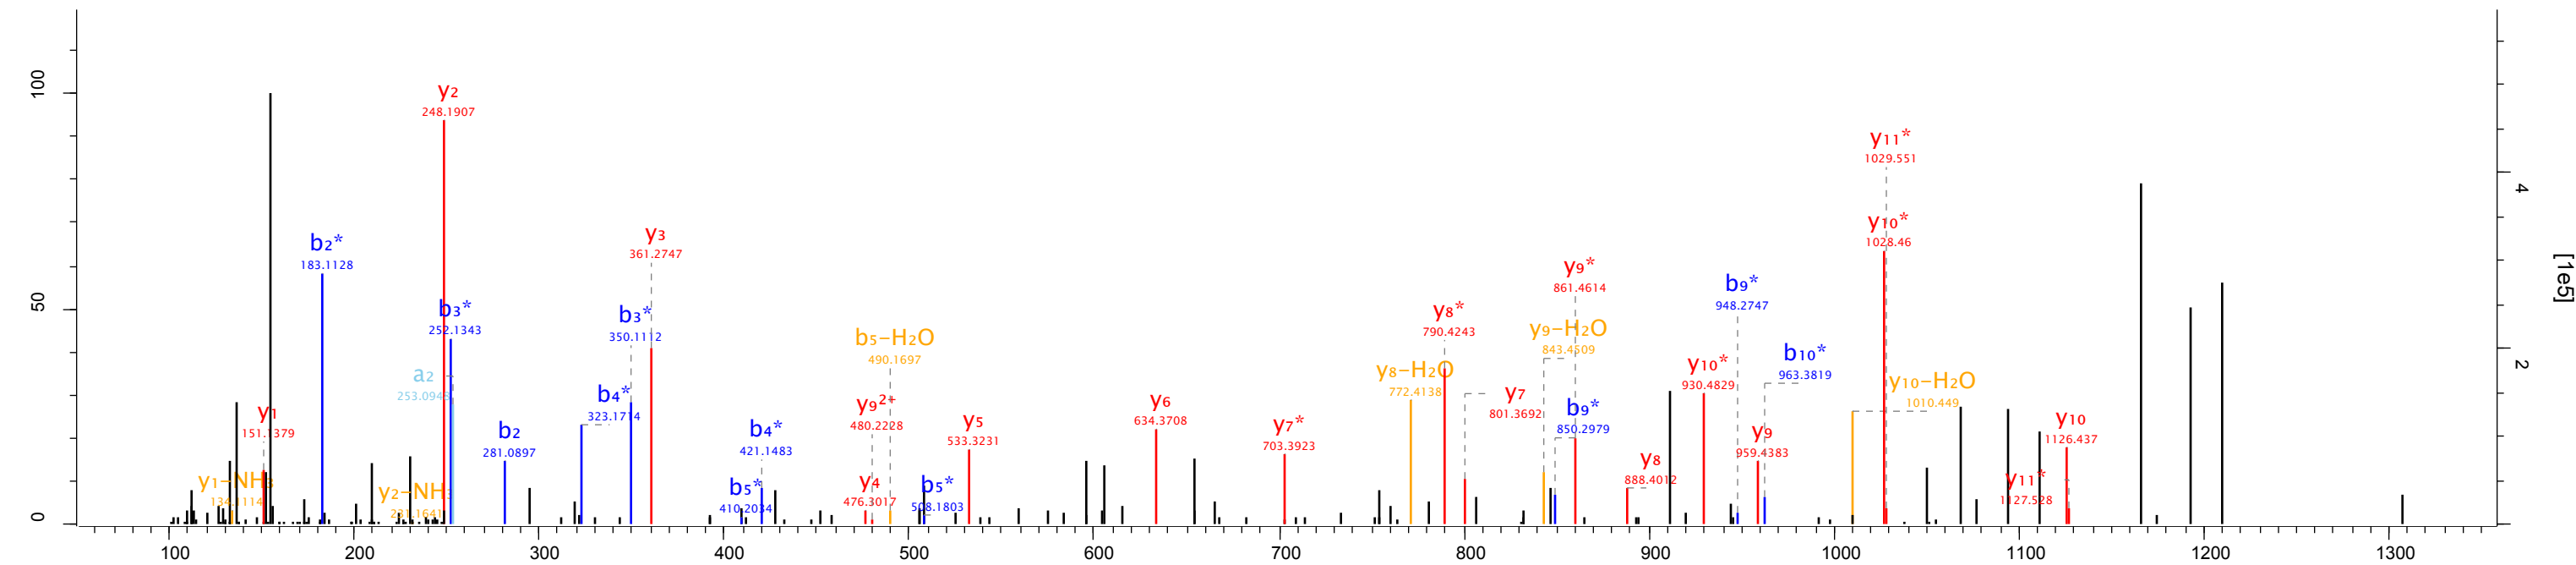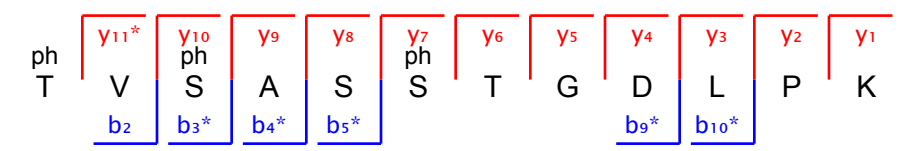

Raw file Scan Method Score m/z Gene names  
 20150812\_A375SR\_Phospho\_BR1\_02 11008 FTMS; HCD 70.94 711.32 MYBBP1A

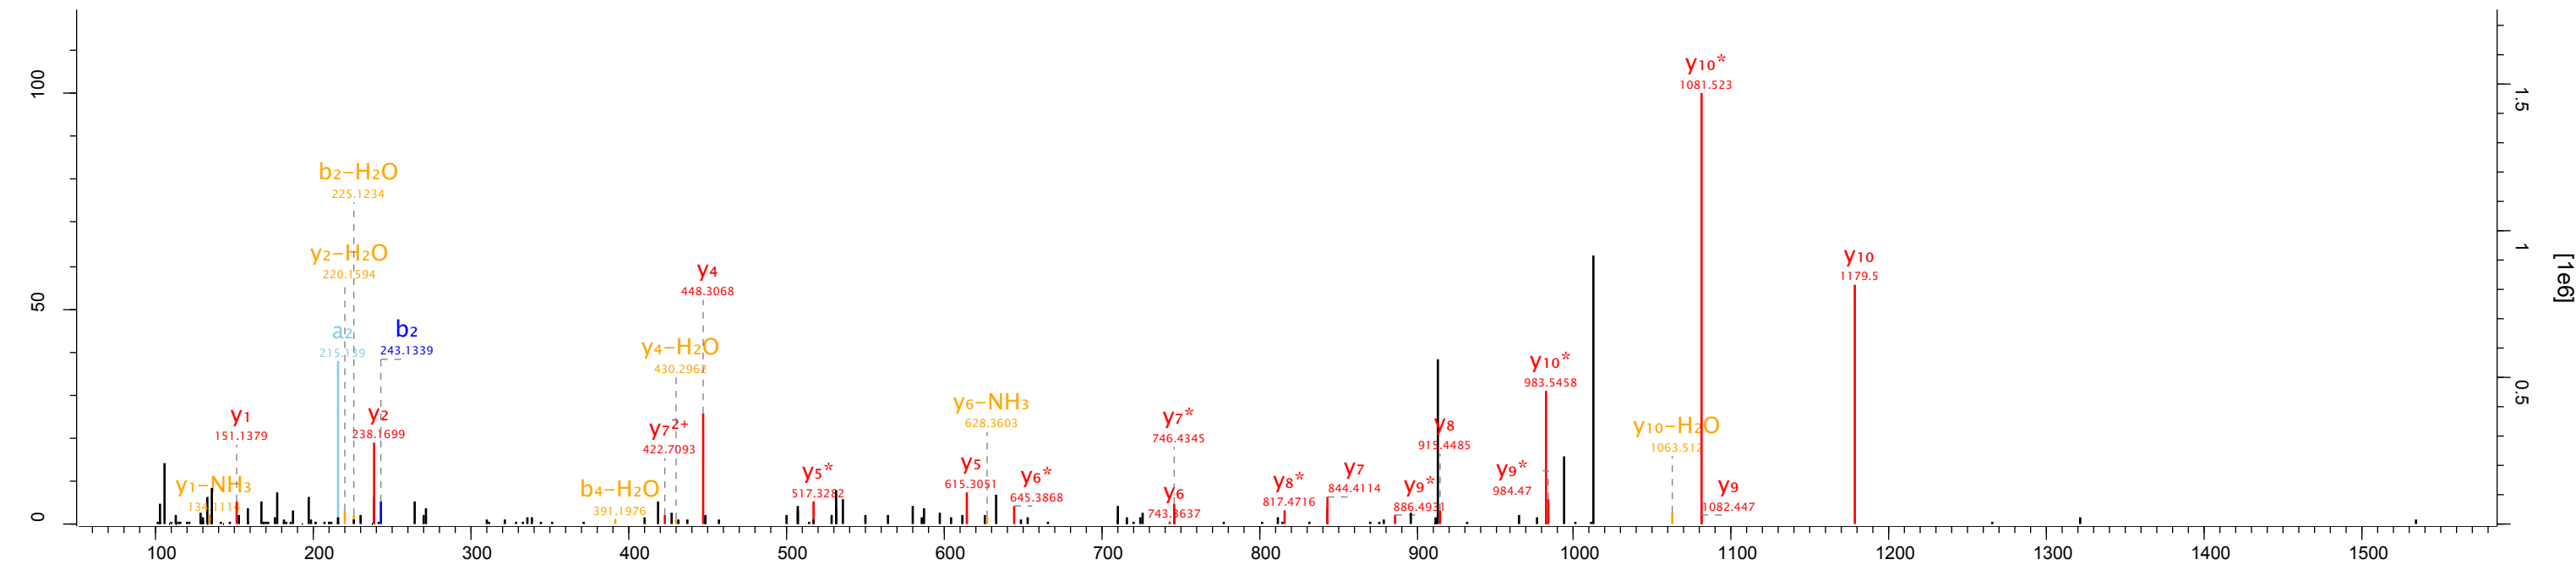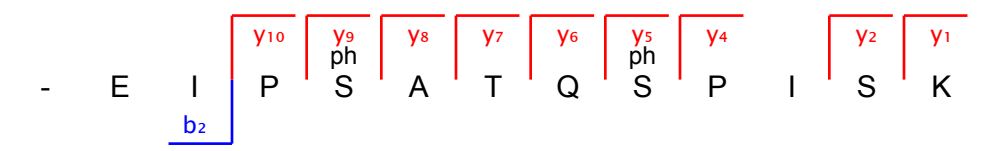

Raw file: 20150812\_A375SR\_Phospho\_BR1\_02  
 Scan: 11248  
 Method: FTMS; HCD  
 Score: 129.97  
 m/z: 1271.01  
 Gene names: KMT2A

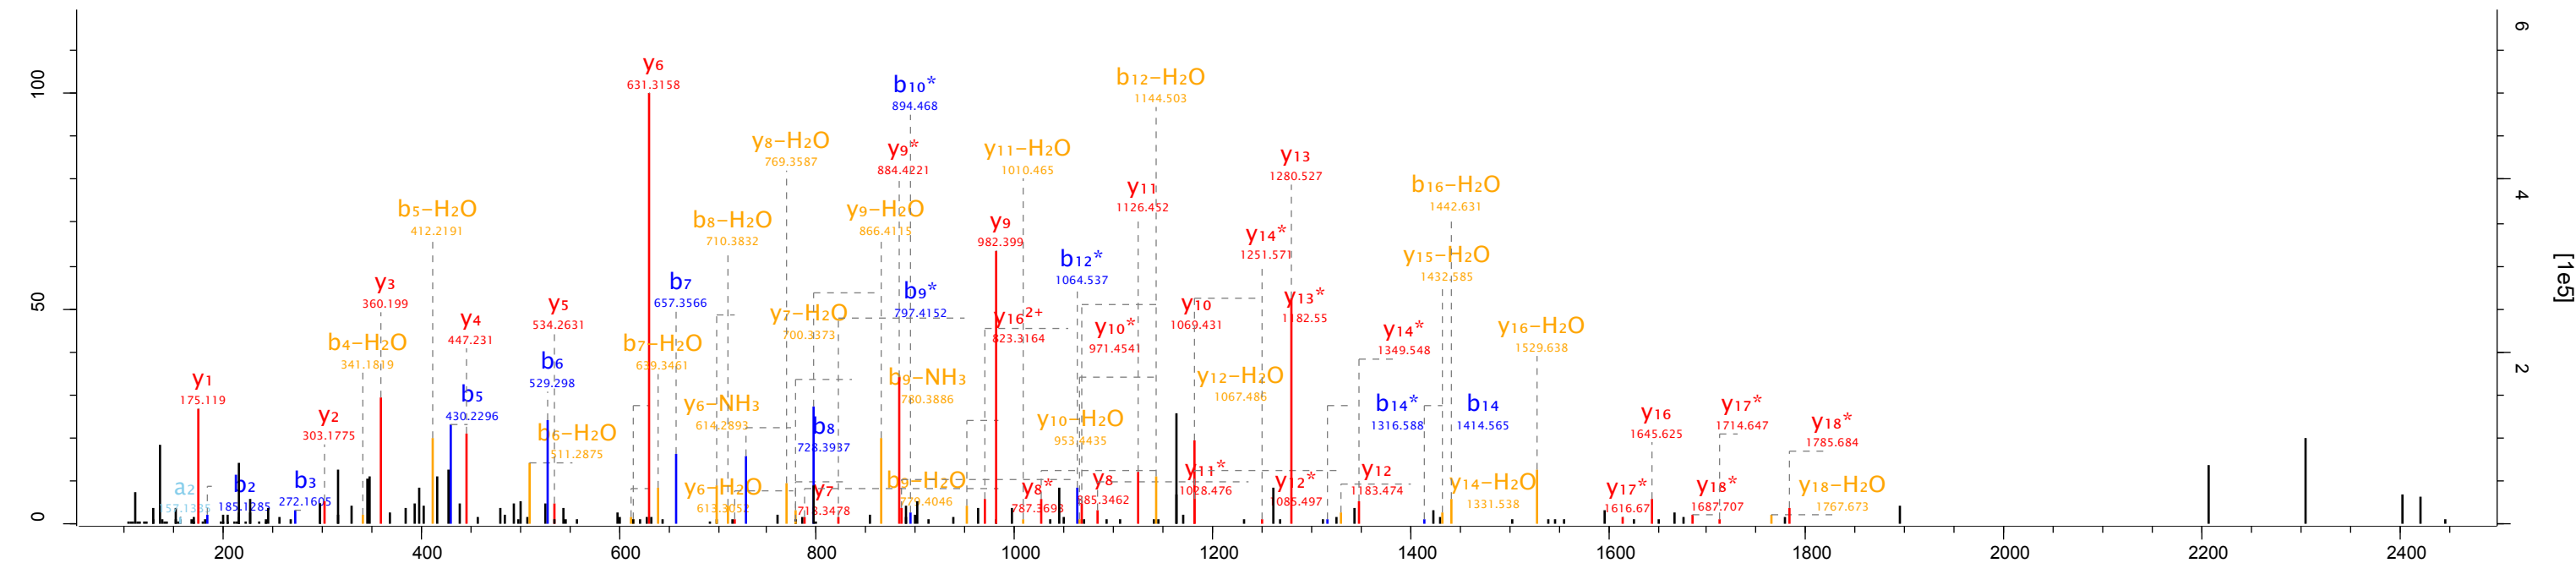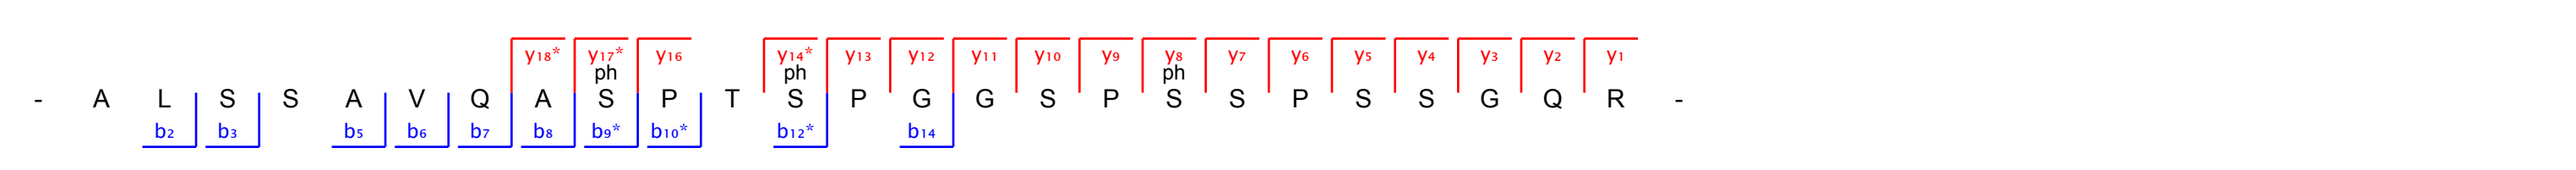

Raw file 20150812\_A375SR\_Phospho\_BR1\_02 Scan 11518 Method FTMS; HCD Score 112.42 m/z 676.75 Gene names LARP7

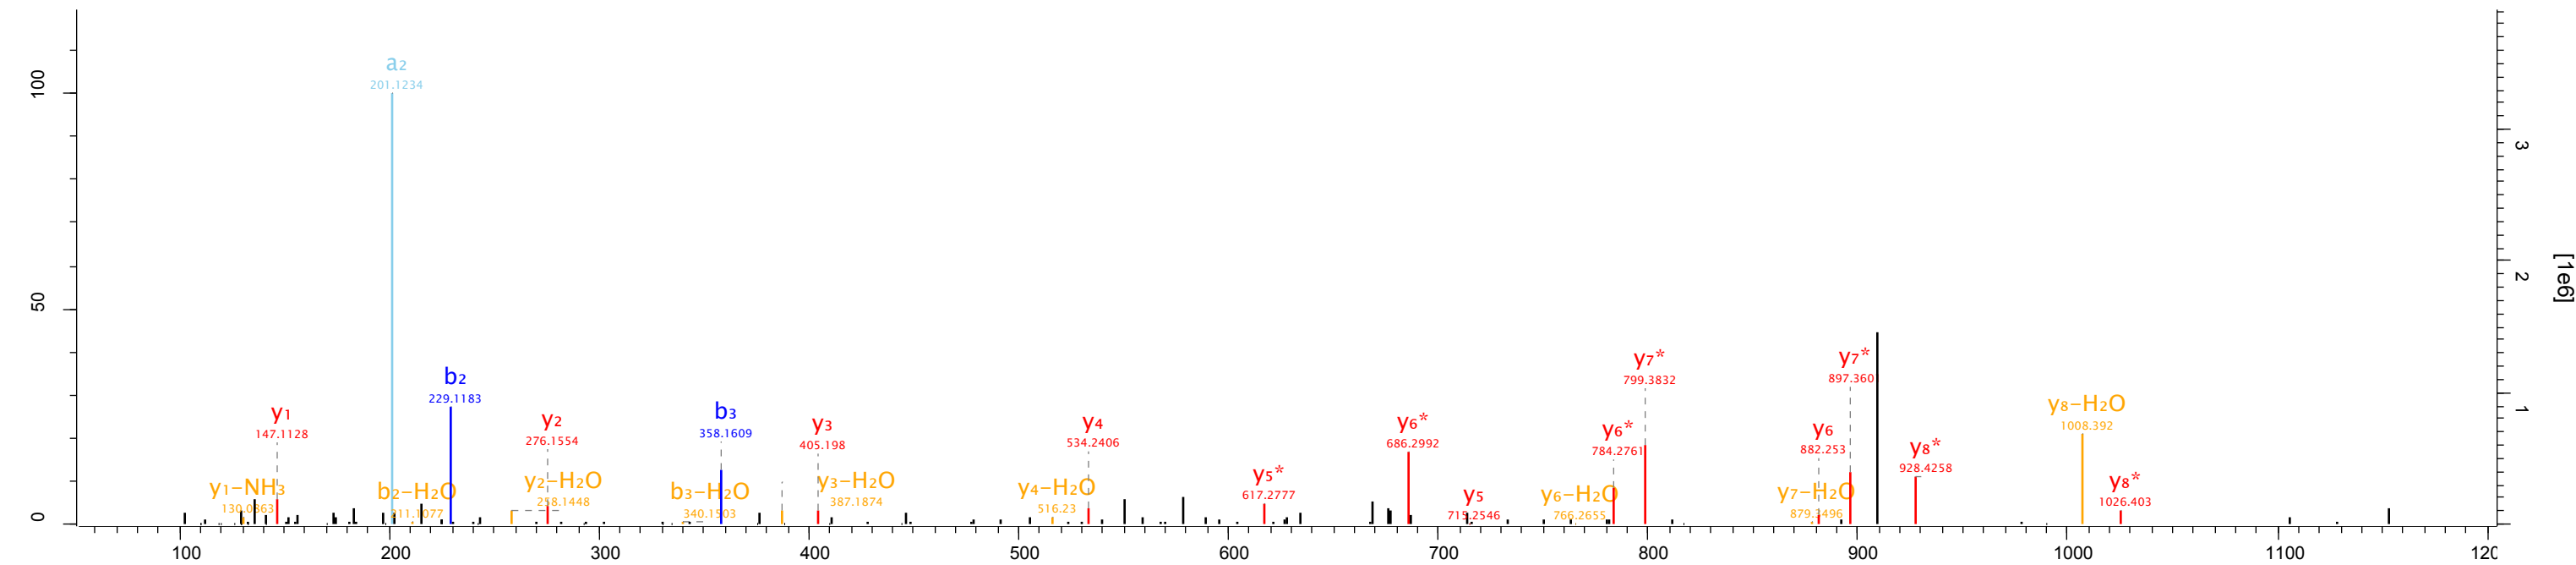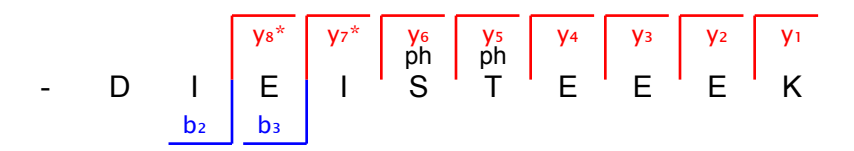

Raw file 20150812\_A375SR\_Phospho\_BR1\_02 Scan 11848 Method FTMS; HCD Score 110.16 m/z 857.29 Gene names ABCC1

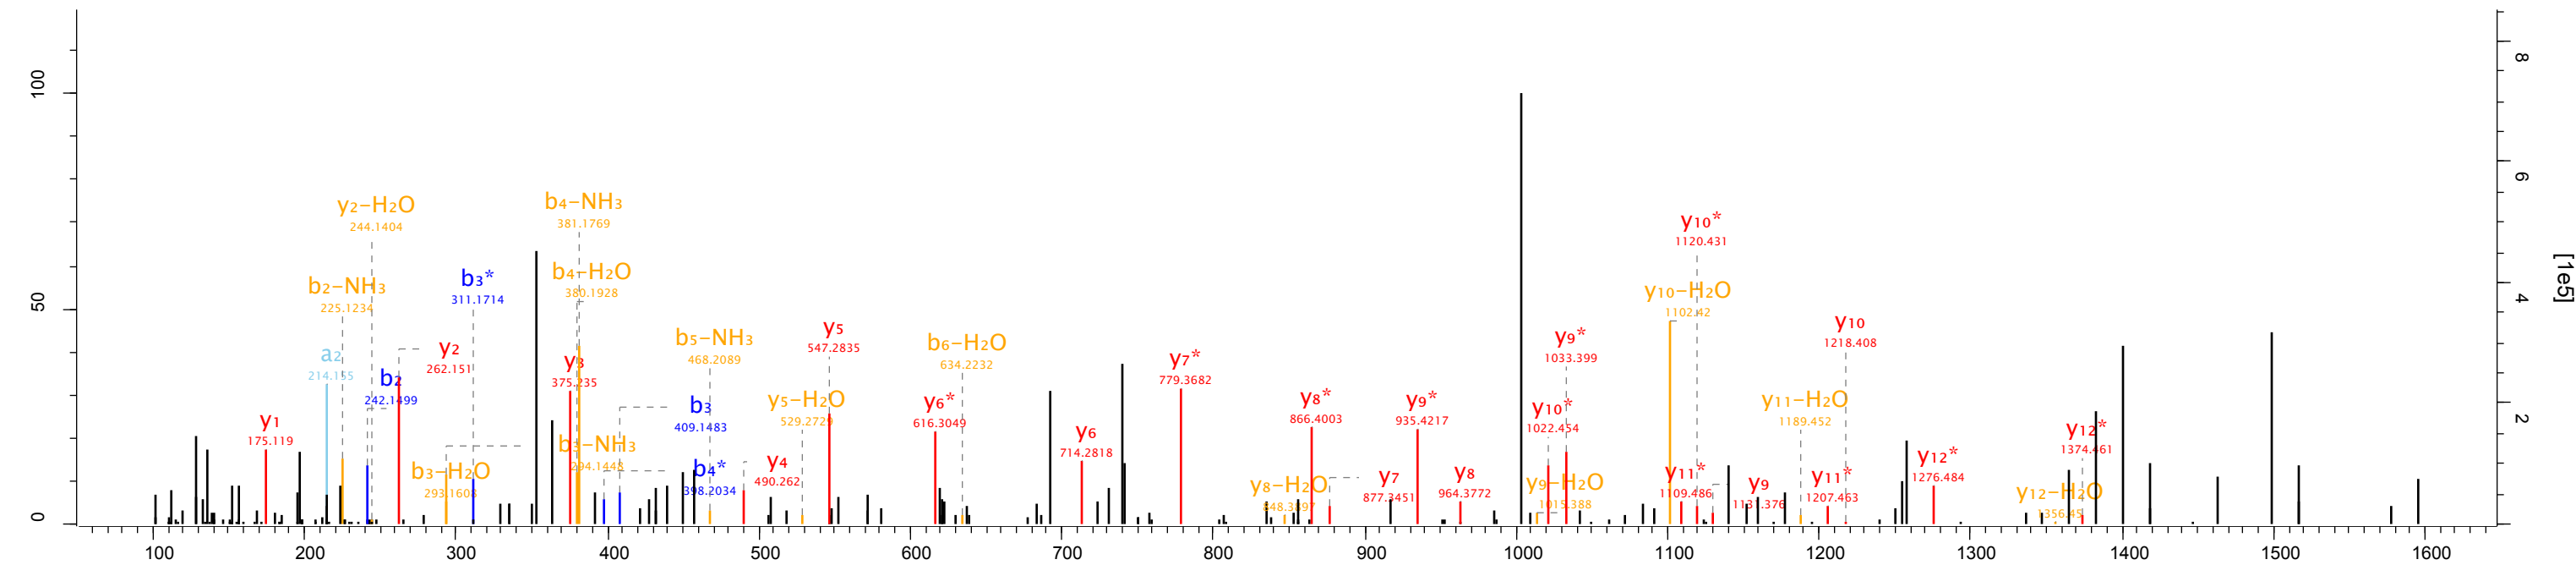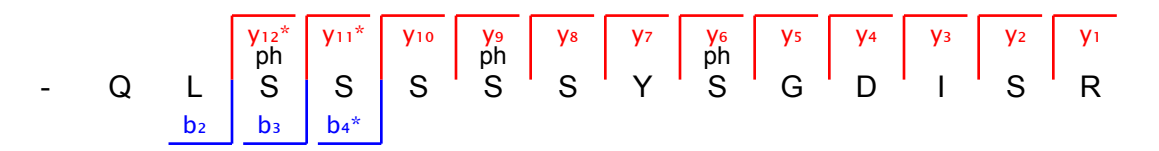

Raw file: 20150812\_A375SR\_Phospho\_BR1\_02  
 Scan: 12078 Method: FTMS; HCD Score: 243.34 m/z: 1200.93 Gene names: ZFAND5

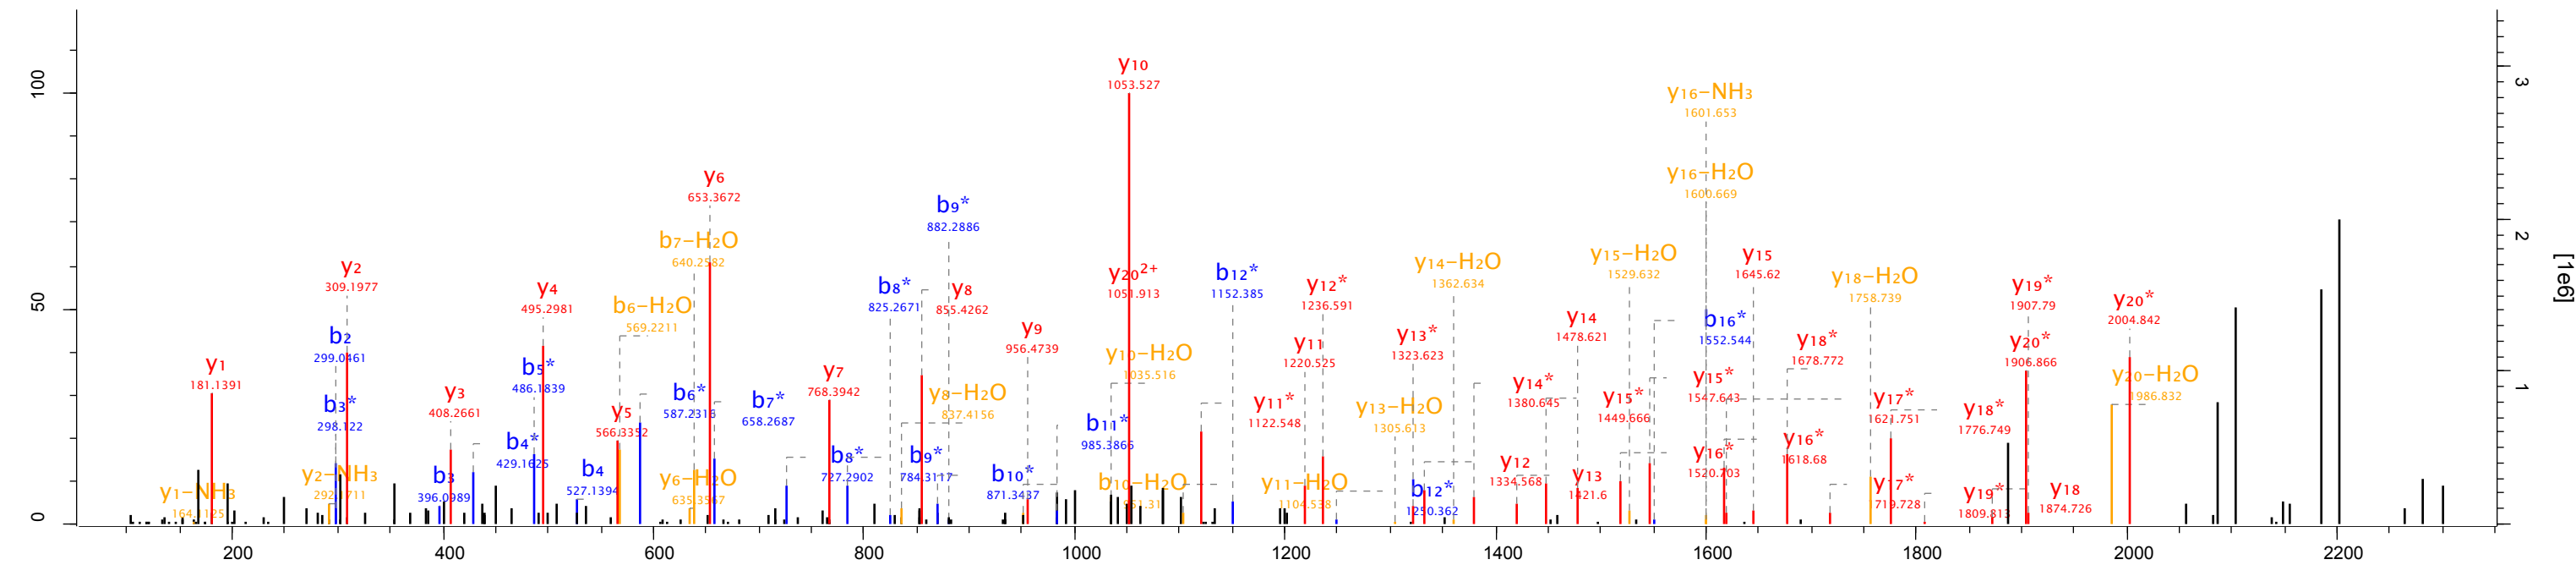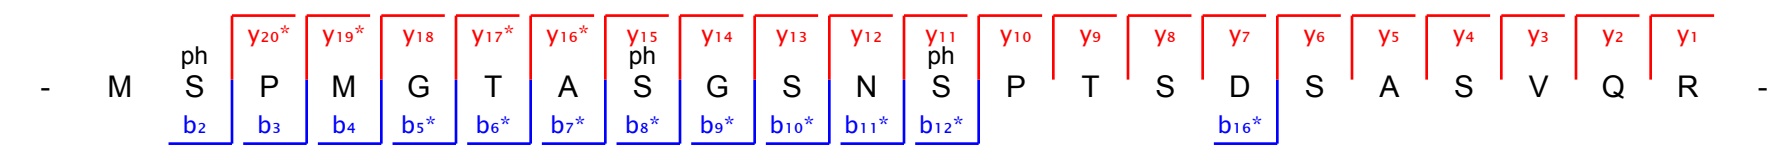

Raw file  
20150812\_A375SR\_Phospho\_BR1\_02

Scan 12718 Method FTMS; HCD Score 126.03 m/z 887.85 Gene names NDE1

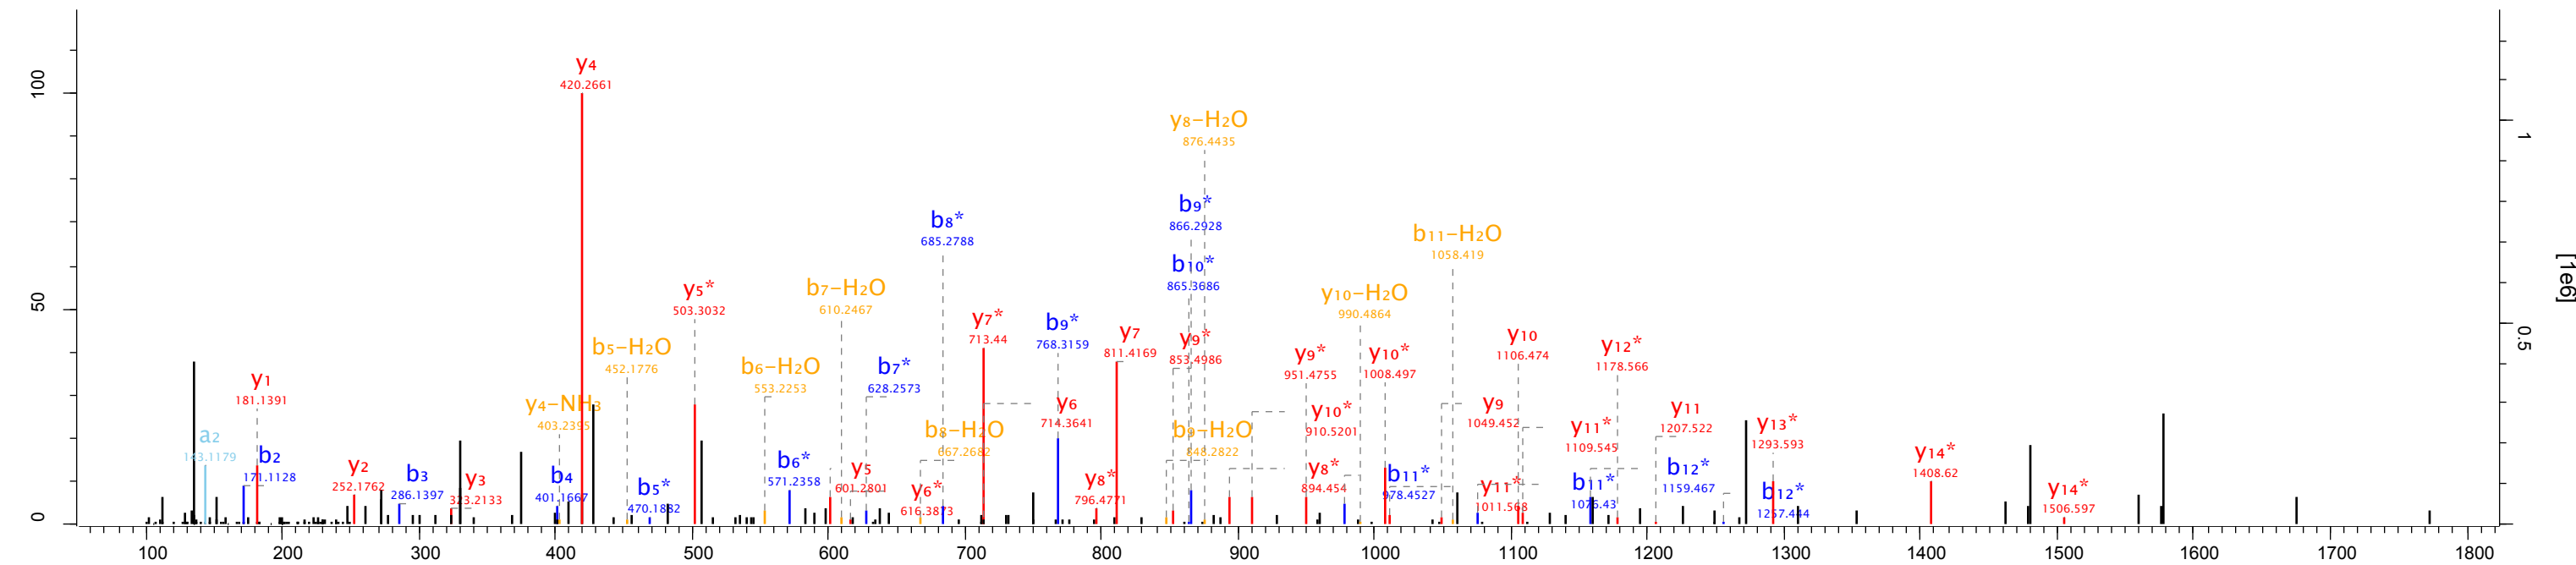

- G L D D S T G G T P L T P A A R -  
b2 b3 b4 b5\* b6\* b7\* b8\* b9\* b10\* b11\* b12\* y14\* y13\* y12\* ph y11 y10 y9 y8\* ph y7 y6 y5 ph y4 y3 y2 y1

Raw file: 20150812\_A375SR\_Phospho\_BR1\_02  
 Scan: 12958 Method: FTMS; HCD Score: 53.48 m/z: 676.31 Gene names: ABCC3

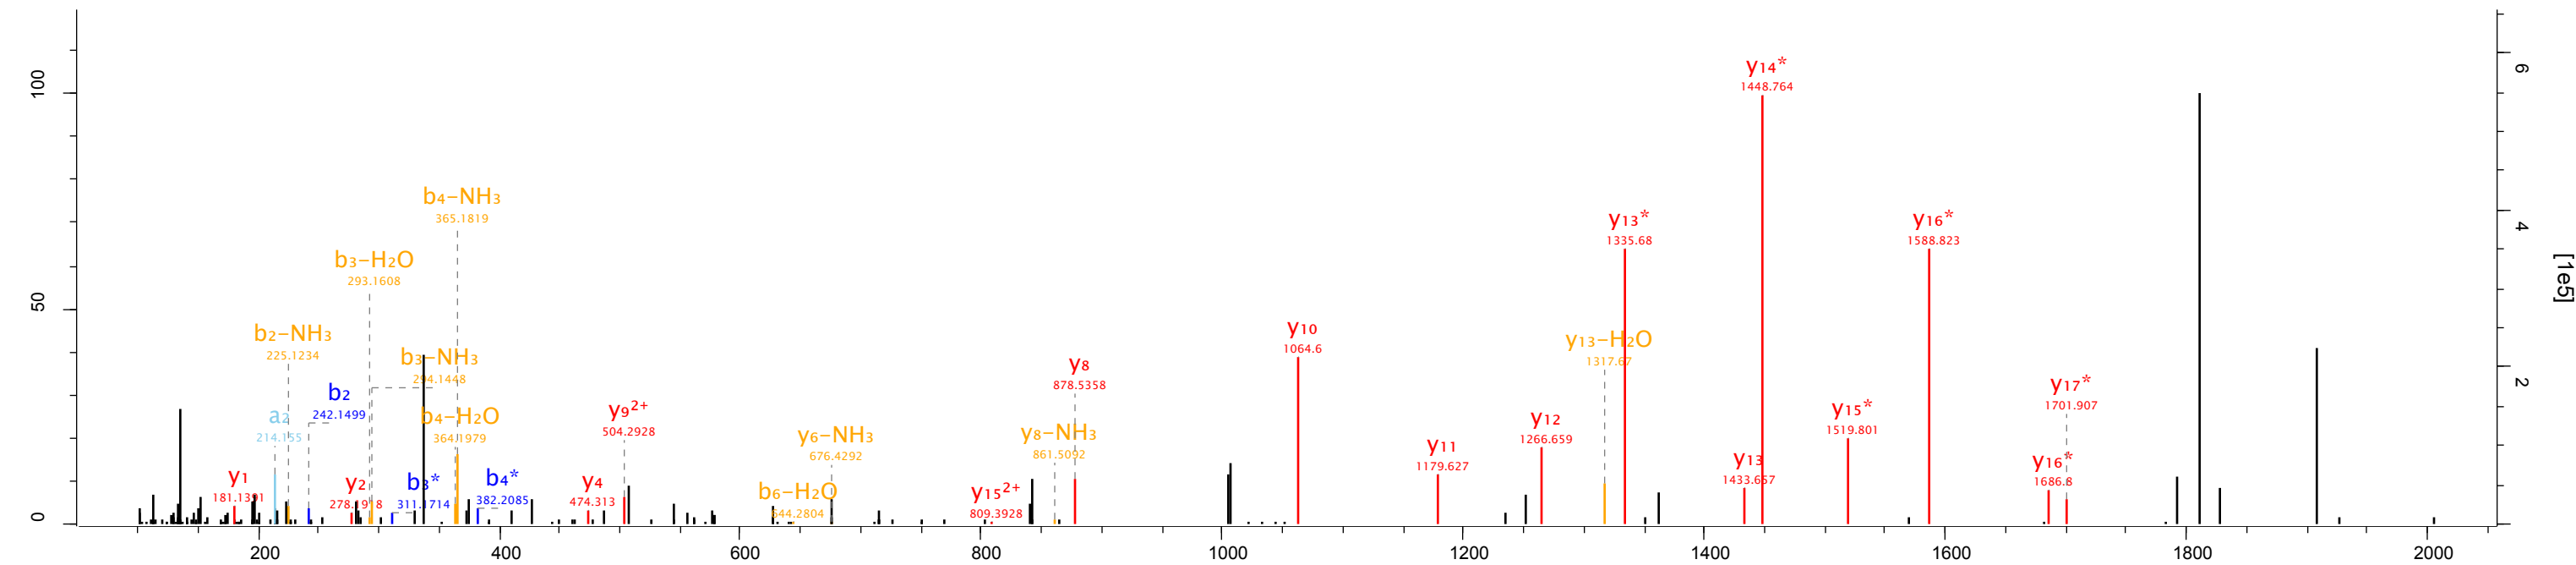

Protein sequence: - Q L S A L S S D G E G Q G R P V P R -

Fragmentation sites (b and y ions) are indicated by brackets below the sequence:

- Red brackets (y ions): y17\* (L-S), y16\* (S-A), y15\* (A-L), y14\* (L-S), y13 (S-S), y12 (S-D), y11 (D-G), y10 (G-E), y9<sup>2+</sup> (E-G), y8 (G-Q)
- Blue brackets (b ions): b2 (L-S), b3\* (S-A), b4\* (A-L)



Raw file: 20150812\_A375SR\_Phospho\_BR1\_02  
 Scan: 13848 Method: FTMS; HCD Score: 147.6 m/z: 694.31 Gene names: RALGAPA1

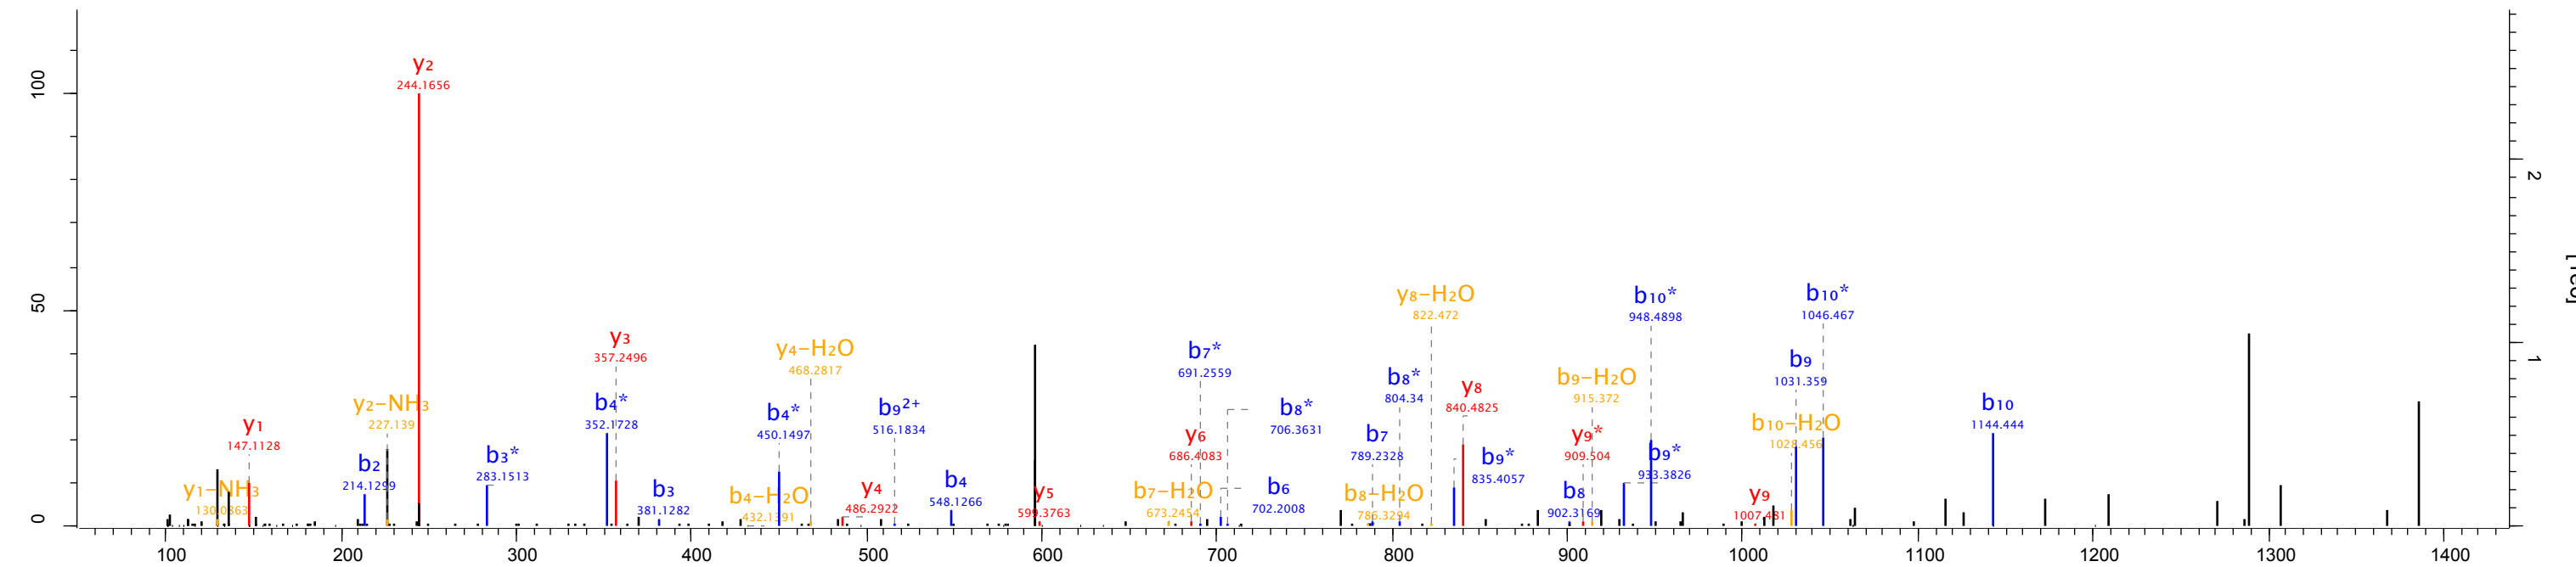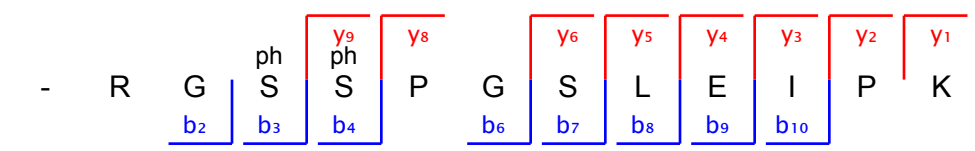

Raw file: 20150812\_A375SR\_Phospho\_BR1\_02  
 Scan: 13968 Method: FTMS; HCD Score: 88.57 m/z: 943.84 Gene names: MDC1

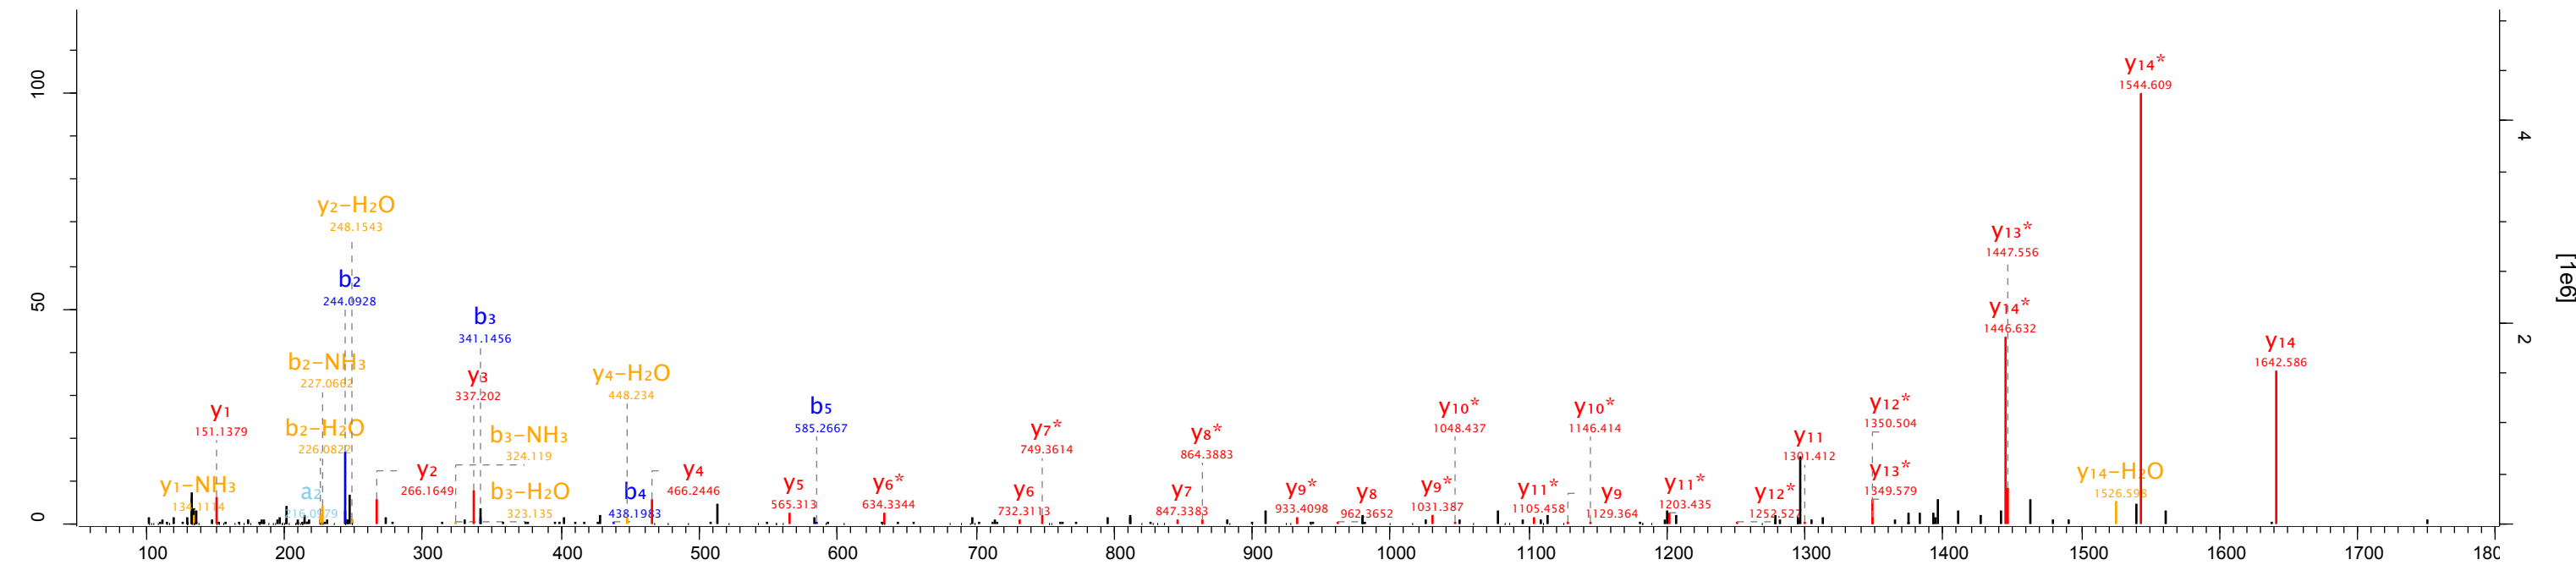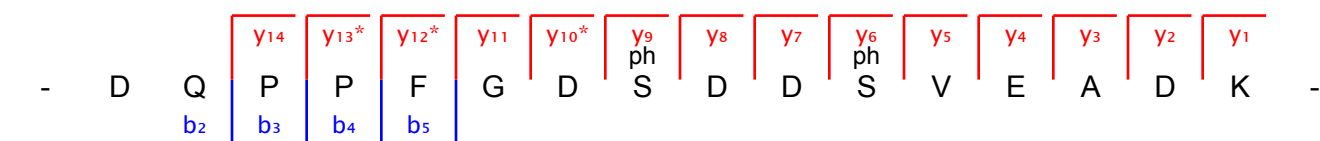

Raw file: 20150812\_A375SR\_Phospho\_BR1\_02  
 Scan: 14138 Method: FTMS; HCD Score: 114.55 m/z: 800.33 Gene names: MAP7D1

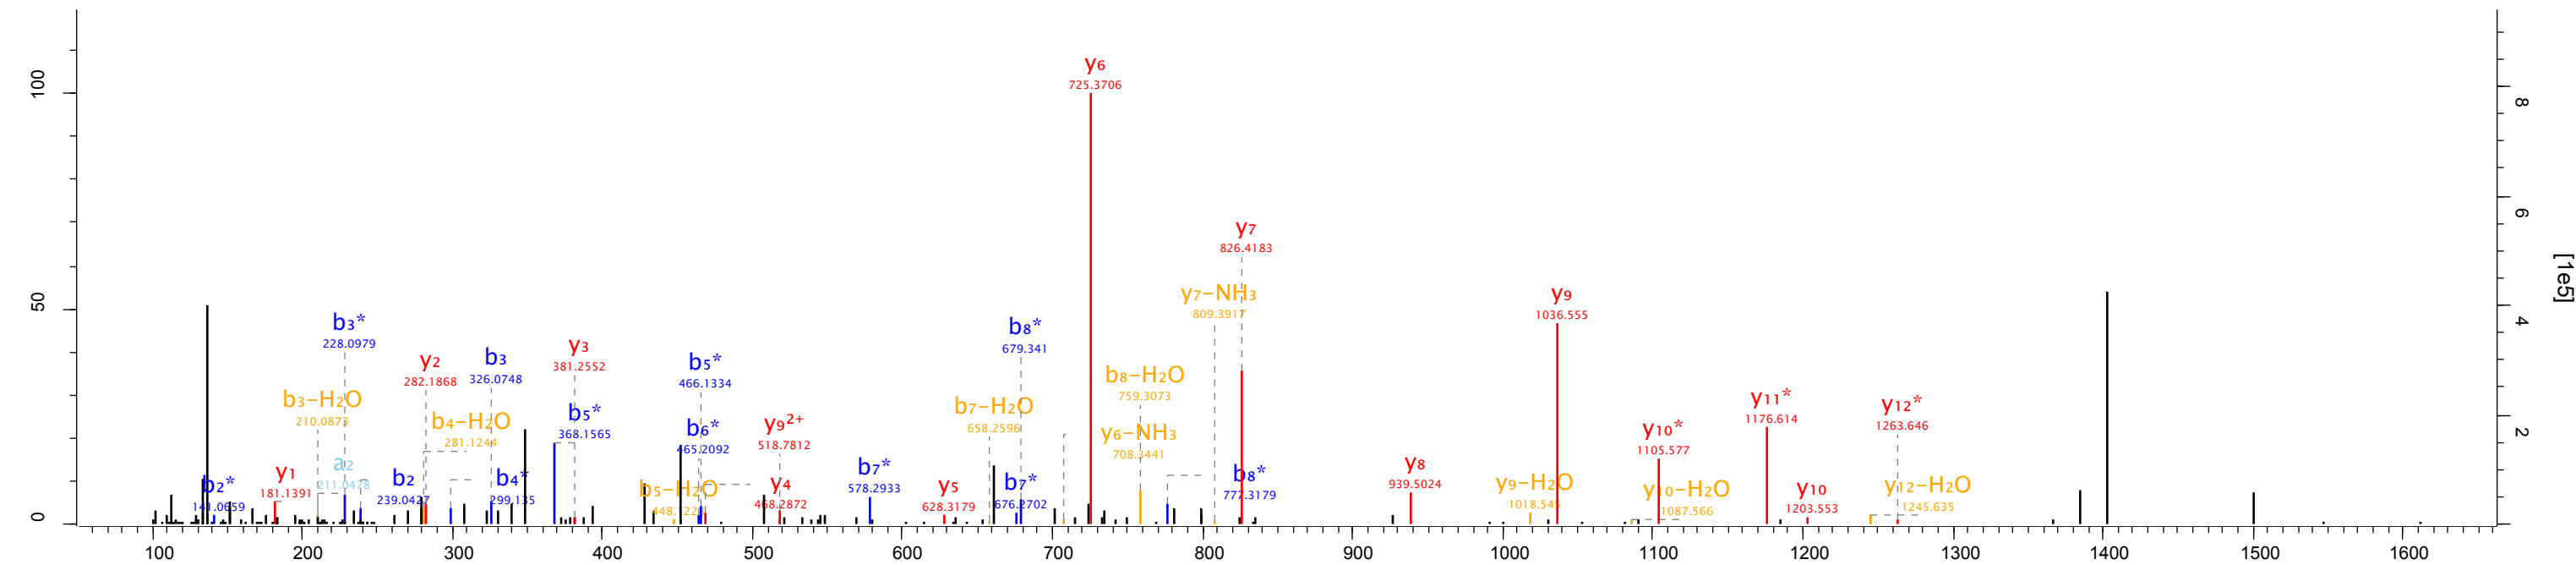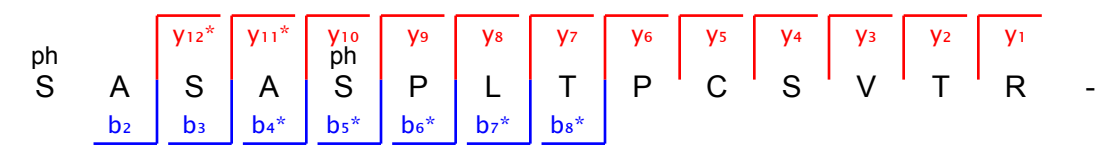

Raw file: 20150812\_A375SR\_Phospho\_BR1\_02  
 Scan: 14248 Method: FTMS; HCD Score: 227.6 m/z: 1065.9 Gene names: EIF5B

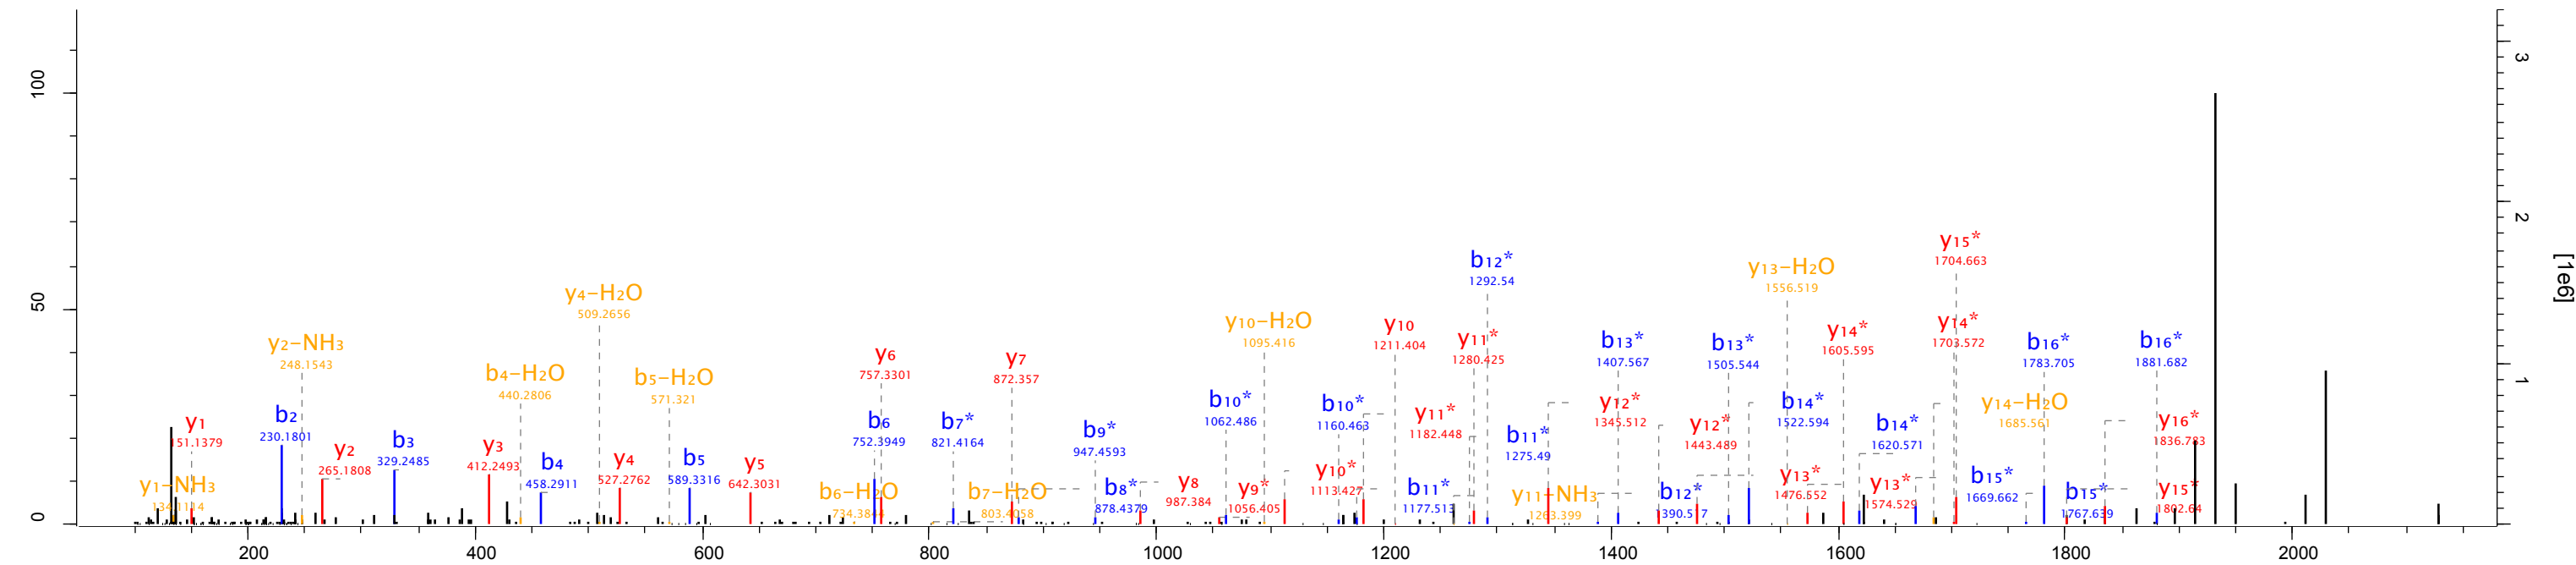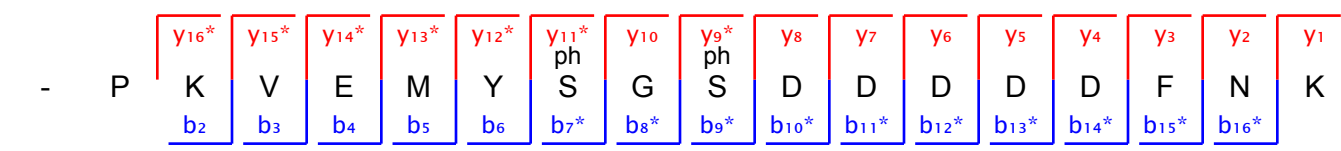

Raw file: 20150812\_A375SR\_Phospho\_BR1\_02  
 Scan: 14288 Method: FTMS; HCD Score: 153.24 m/z: 1186.97 Gene names: TLK2

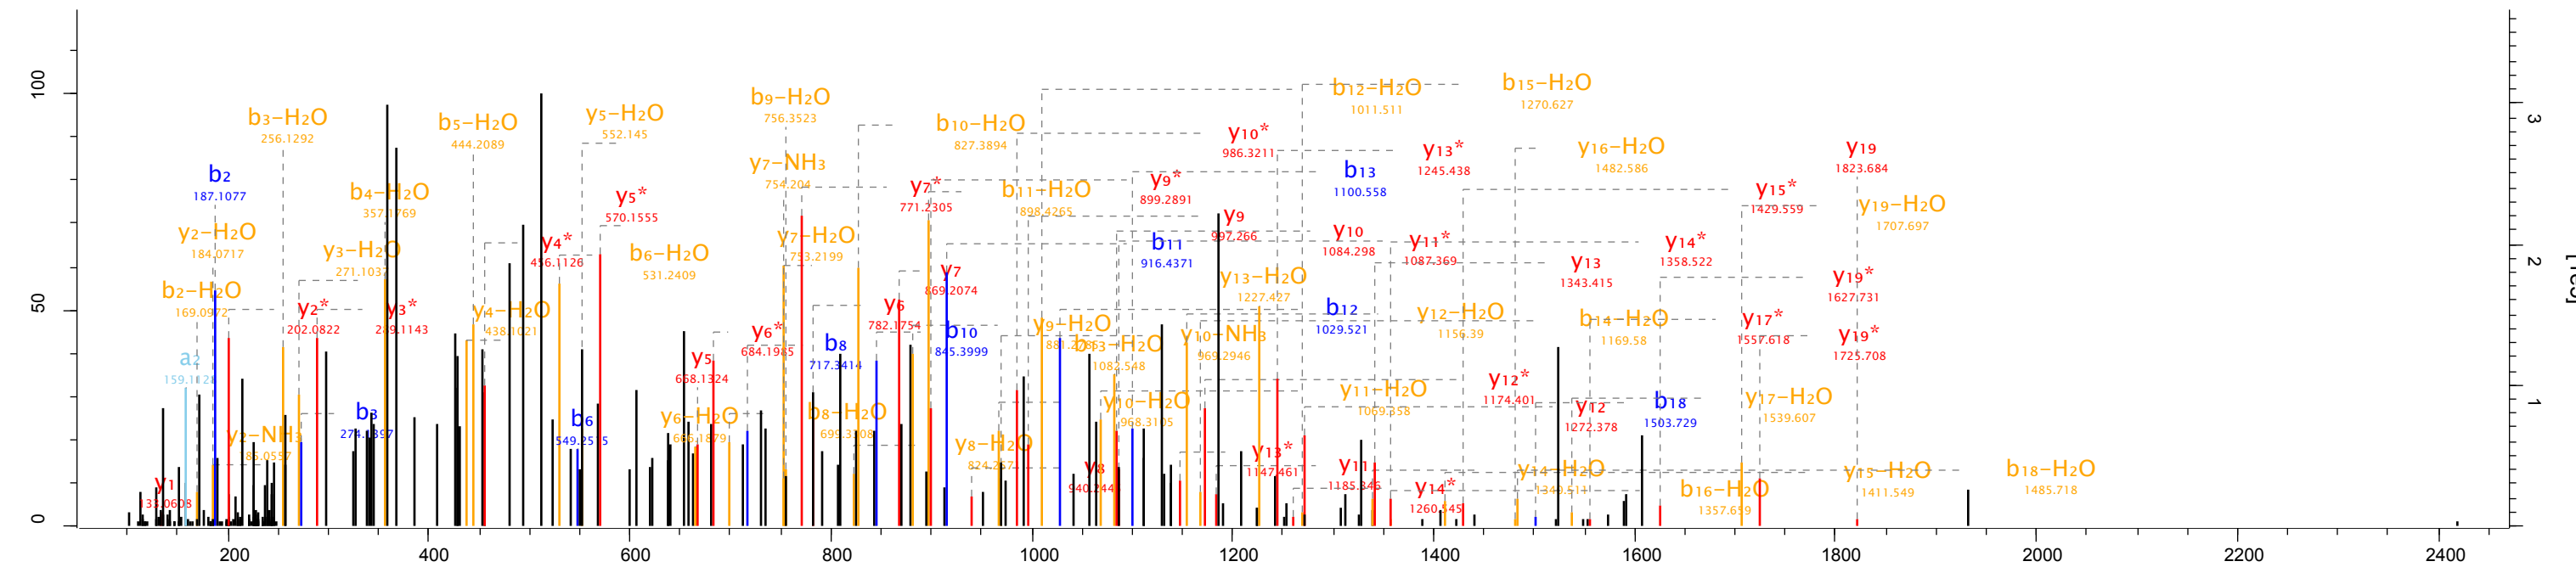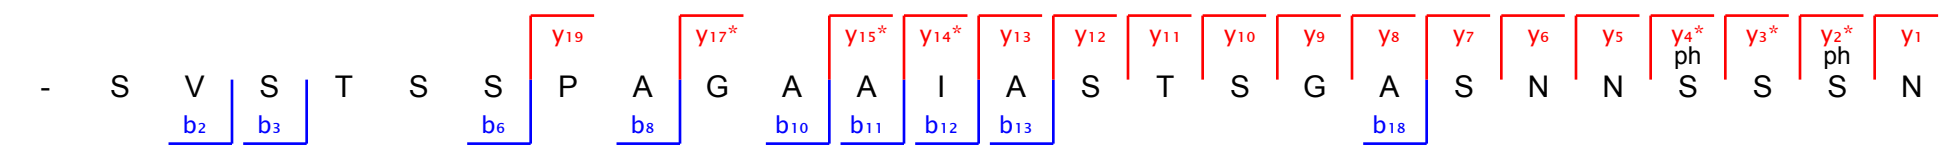

Raw file 20150812\_A375SR\_Phospho\_BR1\_02 Scan 14298 Method FTMS; HCD Score 112.63 m/z 780.28 Gene names OSTM1

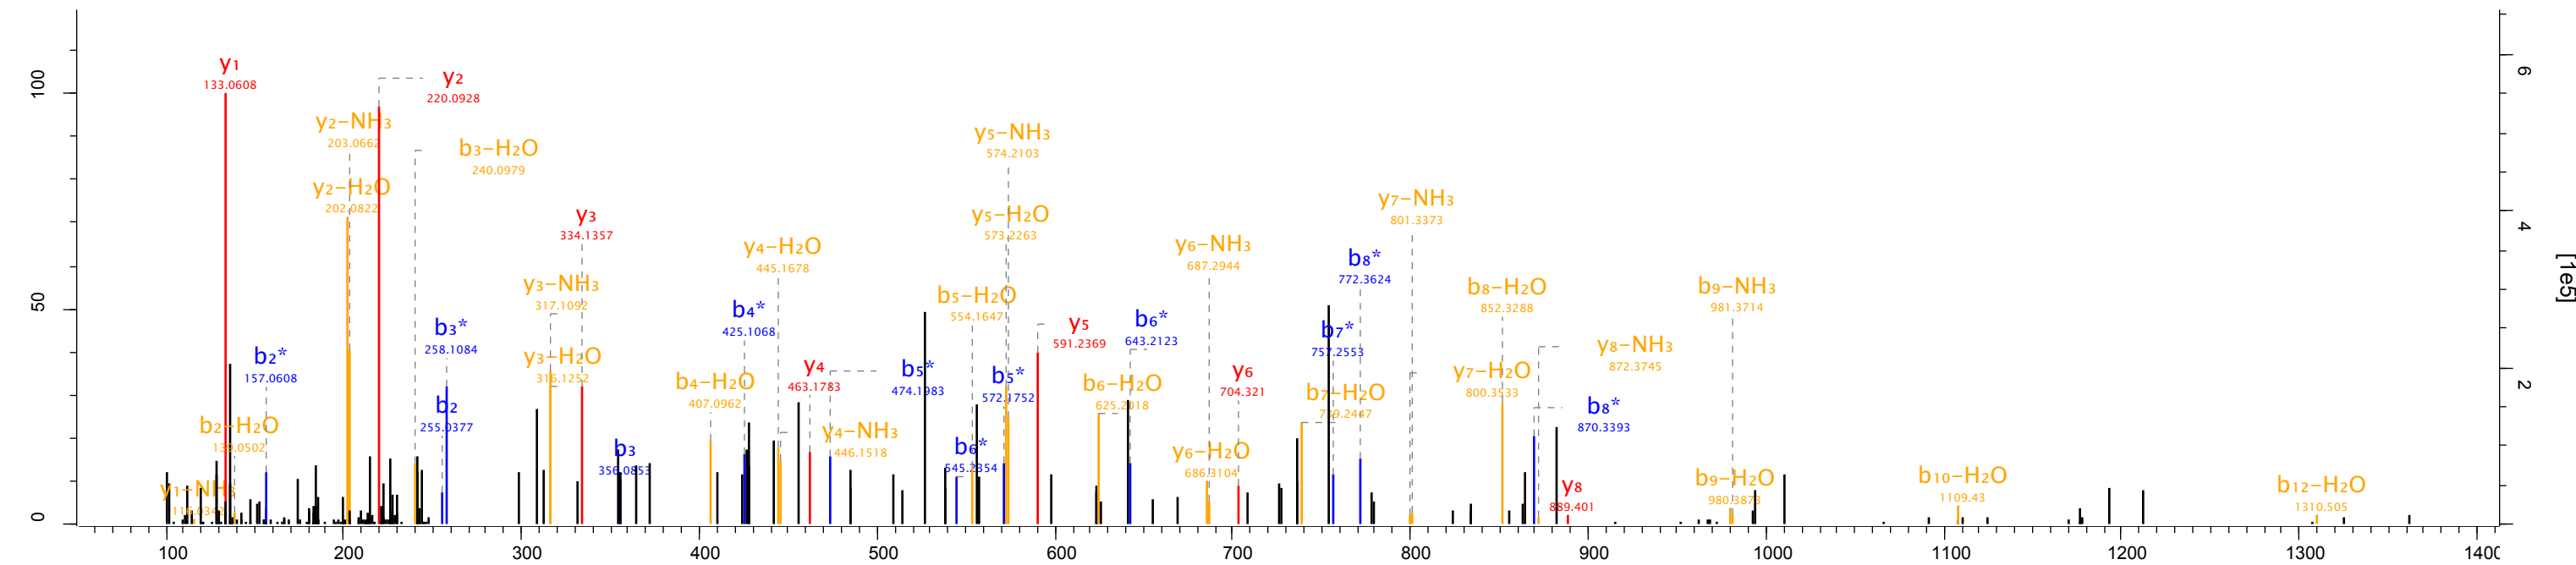

- S S T S F A N I Q E N S N -  
 b<sub>2</sub> b<sub>3</sub> b<sub>4</sub>\* b<sub>5</sub>\* b<sub>6</sub>\* b<sub>7</sub>\* b<sub>8</sub>\* y<sub>8</sub> y<sub>6</sub> y<sub>5</sub> y<sub>4</sub> y<sub>3</sub> y<sub>2</sub> y<sub>1</sub>

Raw file  
20150812\_A375SR\_Phospho\_BR1\_02

Scan Method Score m/z Gene names  
14438 FTMS; HCD 150.17 827.32 PRRC2C

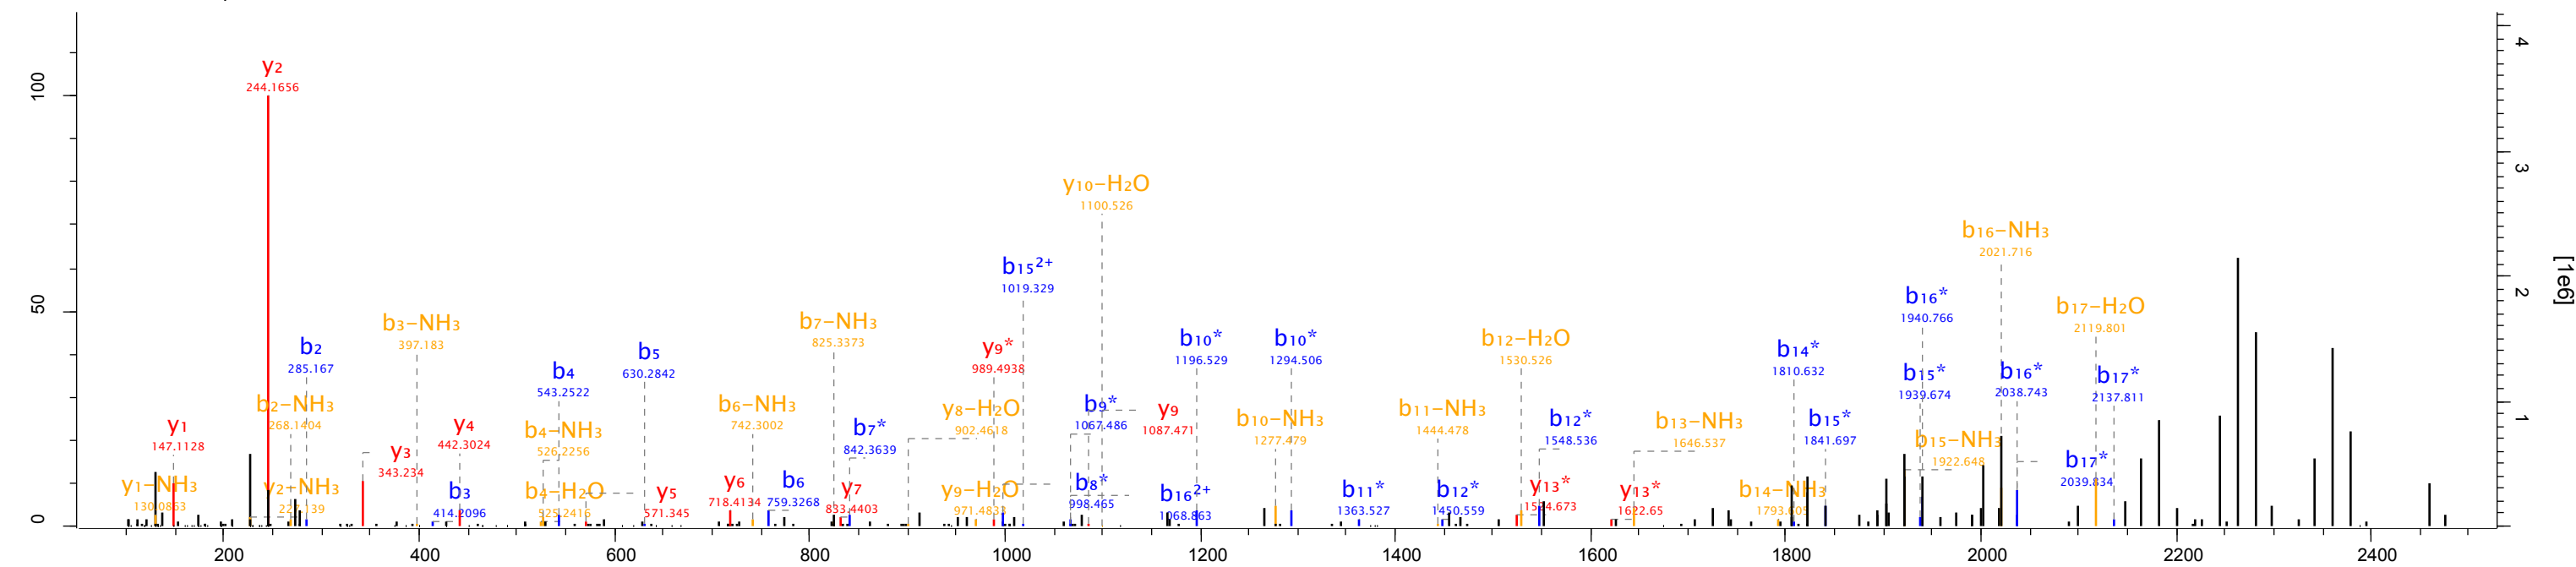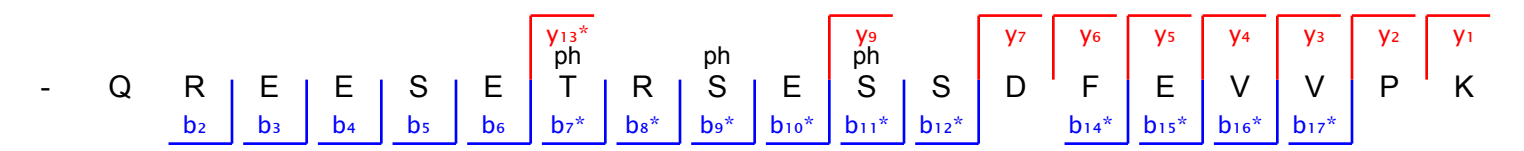

Raw file 20150812\_A375SR\_Phospho\_BR1\_02 Scan 15308 Method FTMS; HCD Score 42.91 m/z 957.9 Gene names PLEC

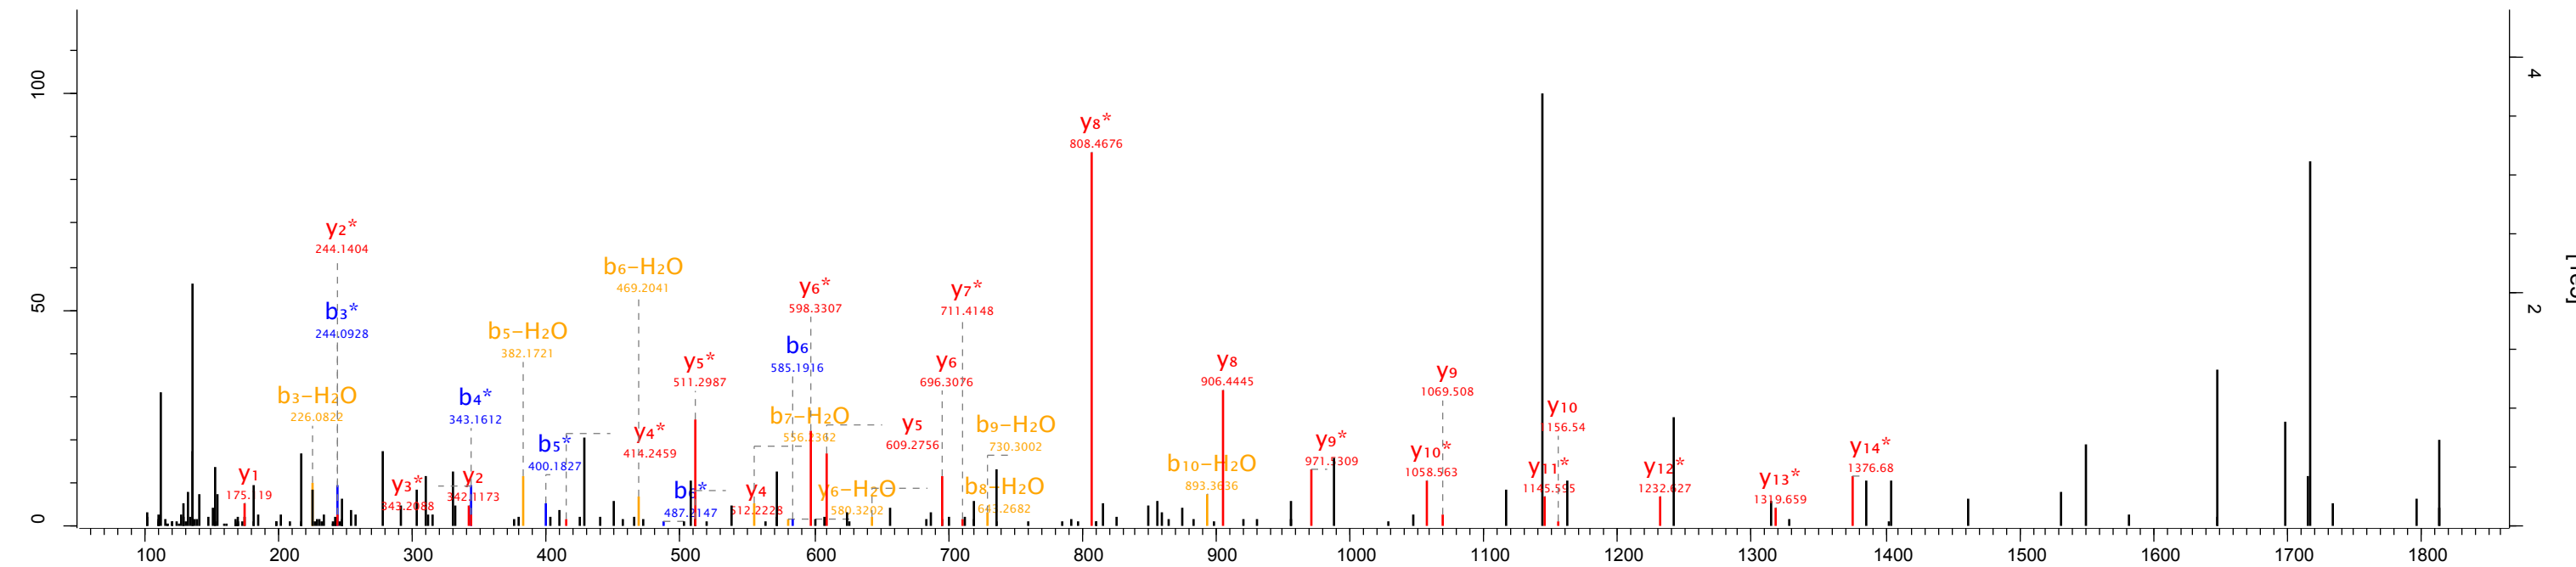

- S ph S S V G S S S S Y P I S P A V S R -  
 b3\* b4\* b5\* b6



Raw file: 20150812\_A375SR\_Phospho\_BR1\_02  
 Scan: 15428 Method: FTMS; HCD Score: 152.2 m/z: 842.99 Gene names: CHD9

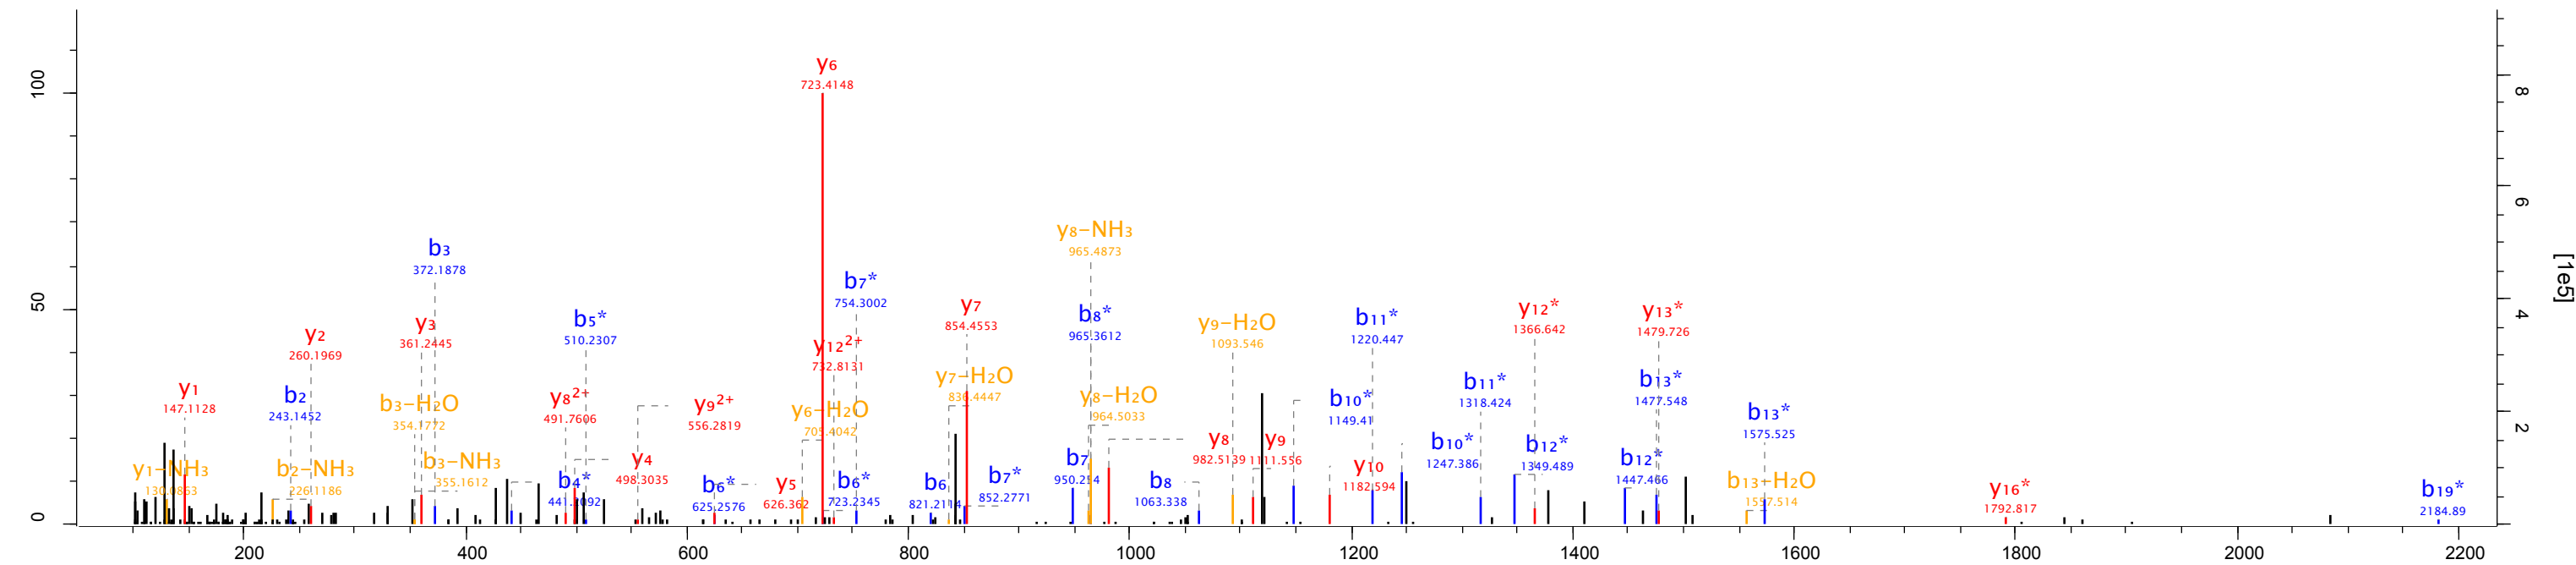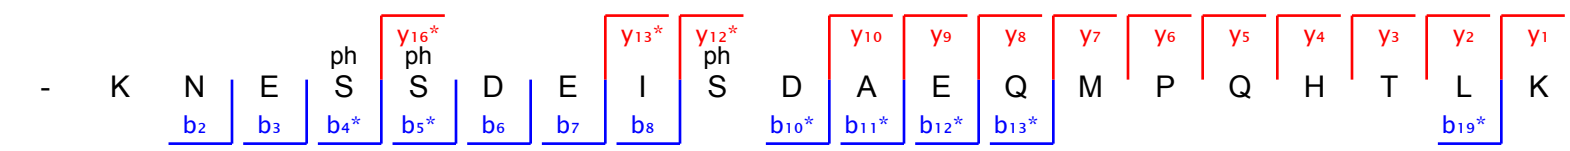

Raw file: 20150812\_A375SR\_Phospho\_BR1\_02  
 Scan: 15438 Method: FTMS; HCD Score: 87.96 m/z: 957.34 Gene names: CLIP1

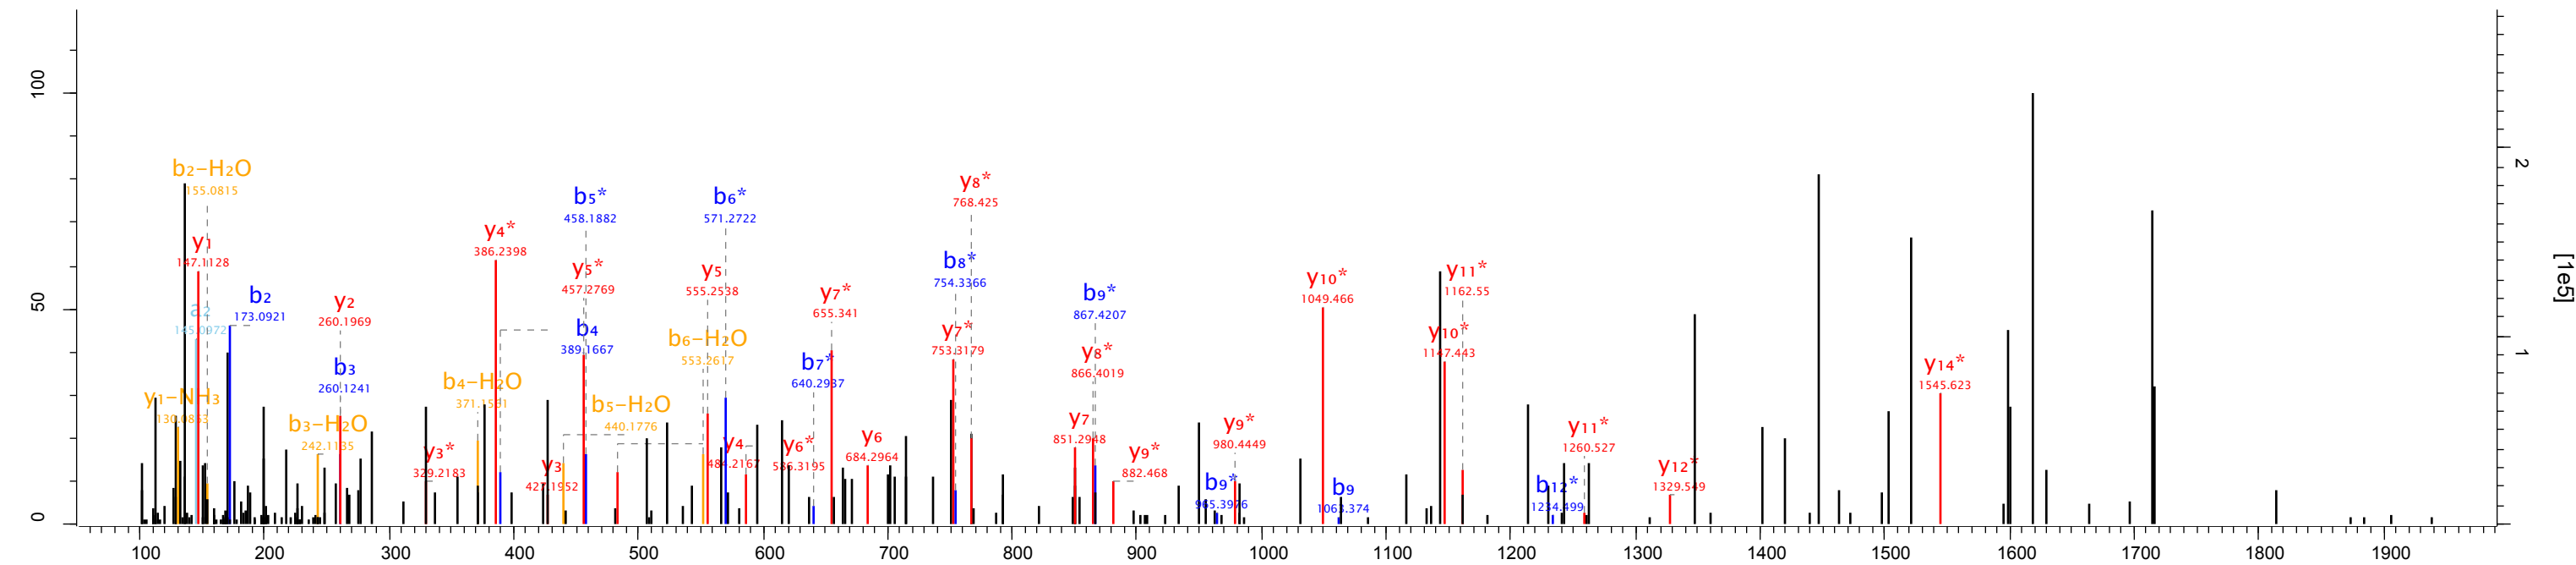

Sequence: - T A S E S I S N L S E A G S I K -

Fragmentation mapping (b and y ions):

- b ions (blue boxes):** b<sub>2</sub> (A), b<sub>3</sub> (S), b<sub>4</sub> (E), b<sub>5</sub><sup>\*</sup> (S), b<sub>6</sub><sup>\*</sup> (I), b<sub>7</sub><sup>\*</sup> (S), b<sub>8</sub><sup>\*</sup> (N), b<sub>9</sub> (L), b<sub>12</sub><sup>\*</sup> (A).
- y ions (red boxes):** y<sub>14</sub><sup>\*</sup> (S), y<sub>12</sub><sup>\*</sup> (ph S), y<sub>11</sub><sup>\*</sup> (I), y<sub>10</sub><sup>\*</sup> (ph S), y<sub>9</sub><sup>\*</sup> (N), y<sub>8</sub><sup>\*</sup> (L), y<sub>7</sub> (ph S), y<sub>6</sub> (E), y<sub>5</sub> (A), y<sub>4</sub> (G), y<sub>3</sub> (ph S), y<sub>2</sub> (I), y<sub>1</sub> (K).



Raw file  
20150812\_A375SR\_Phospho\_BR1\_02

Scan 15698 Method FTMS; HCD Score 109.55 m/z 938.96 Gene names PAF1

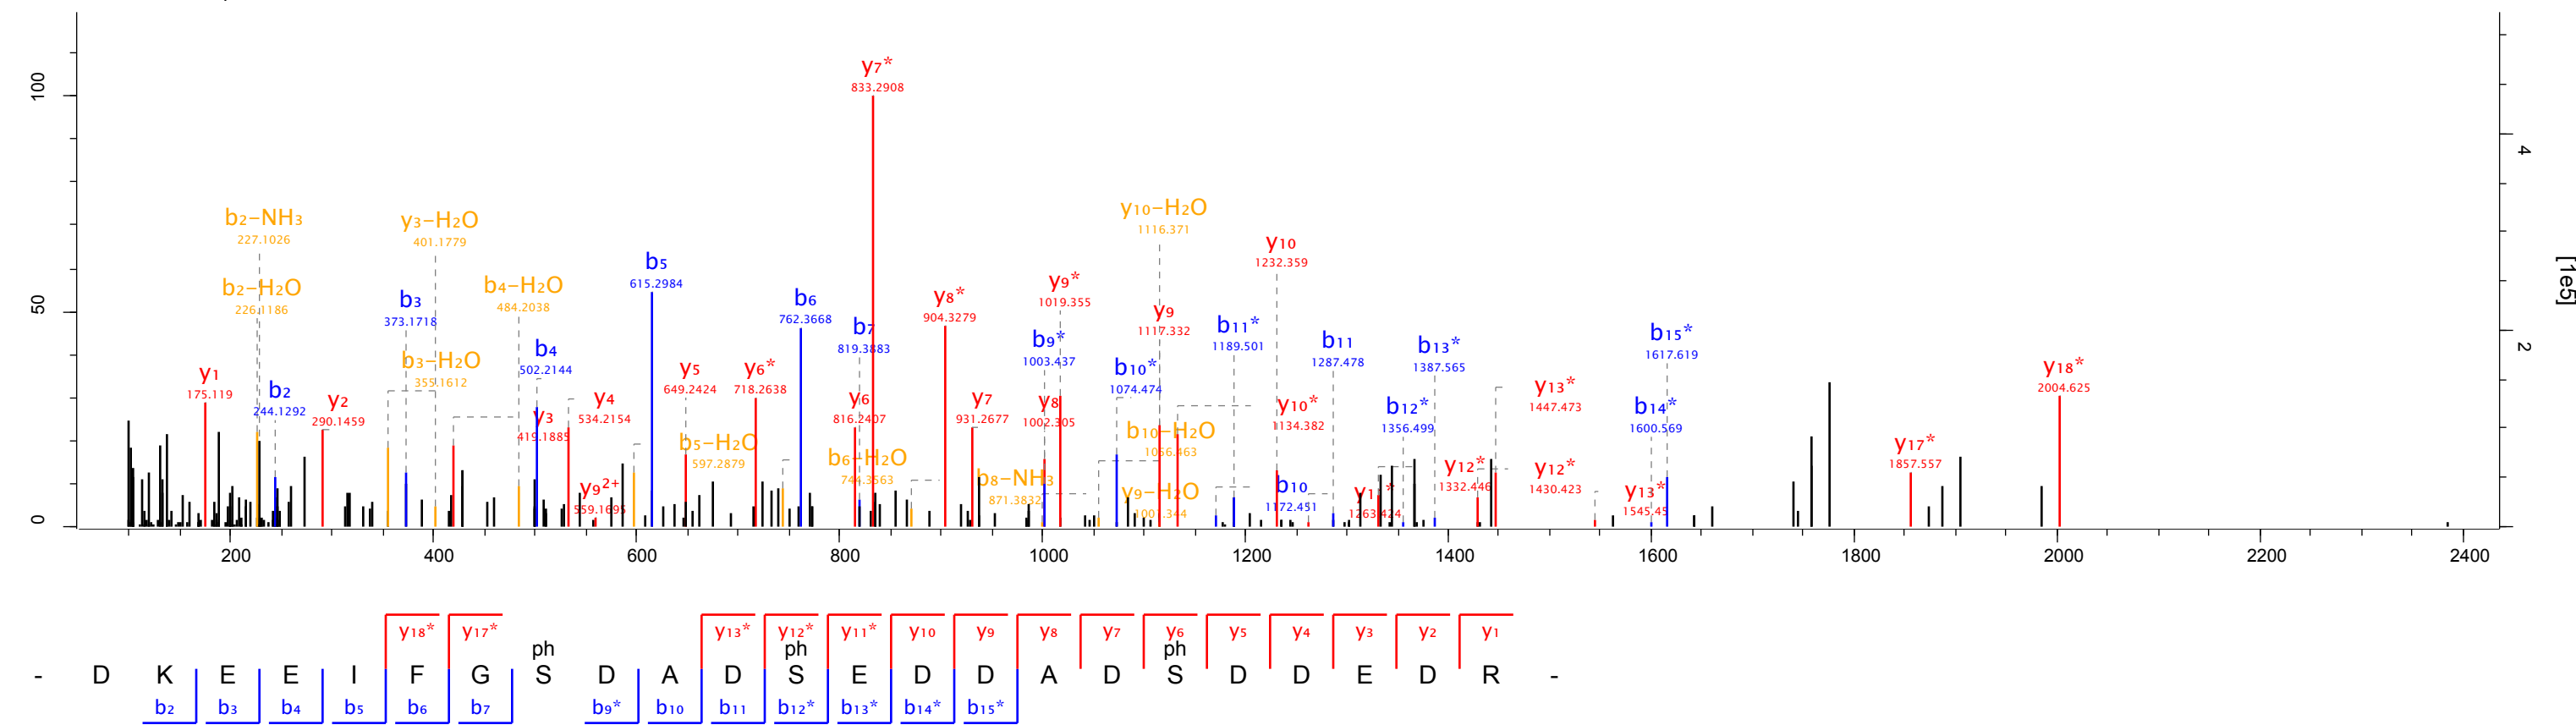

Raw file: 20150812\_A375SR\_Phospho\_BR1\_02  
 Scan: 15738 Method: FTMS; HCD Score: 117.73 m/z: 910.41 Gene names: ELF2

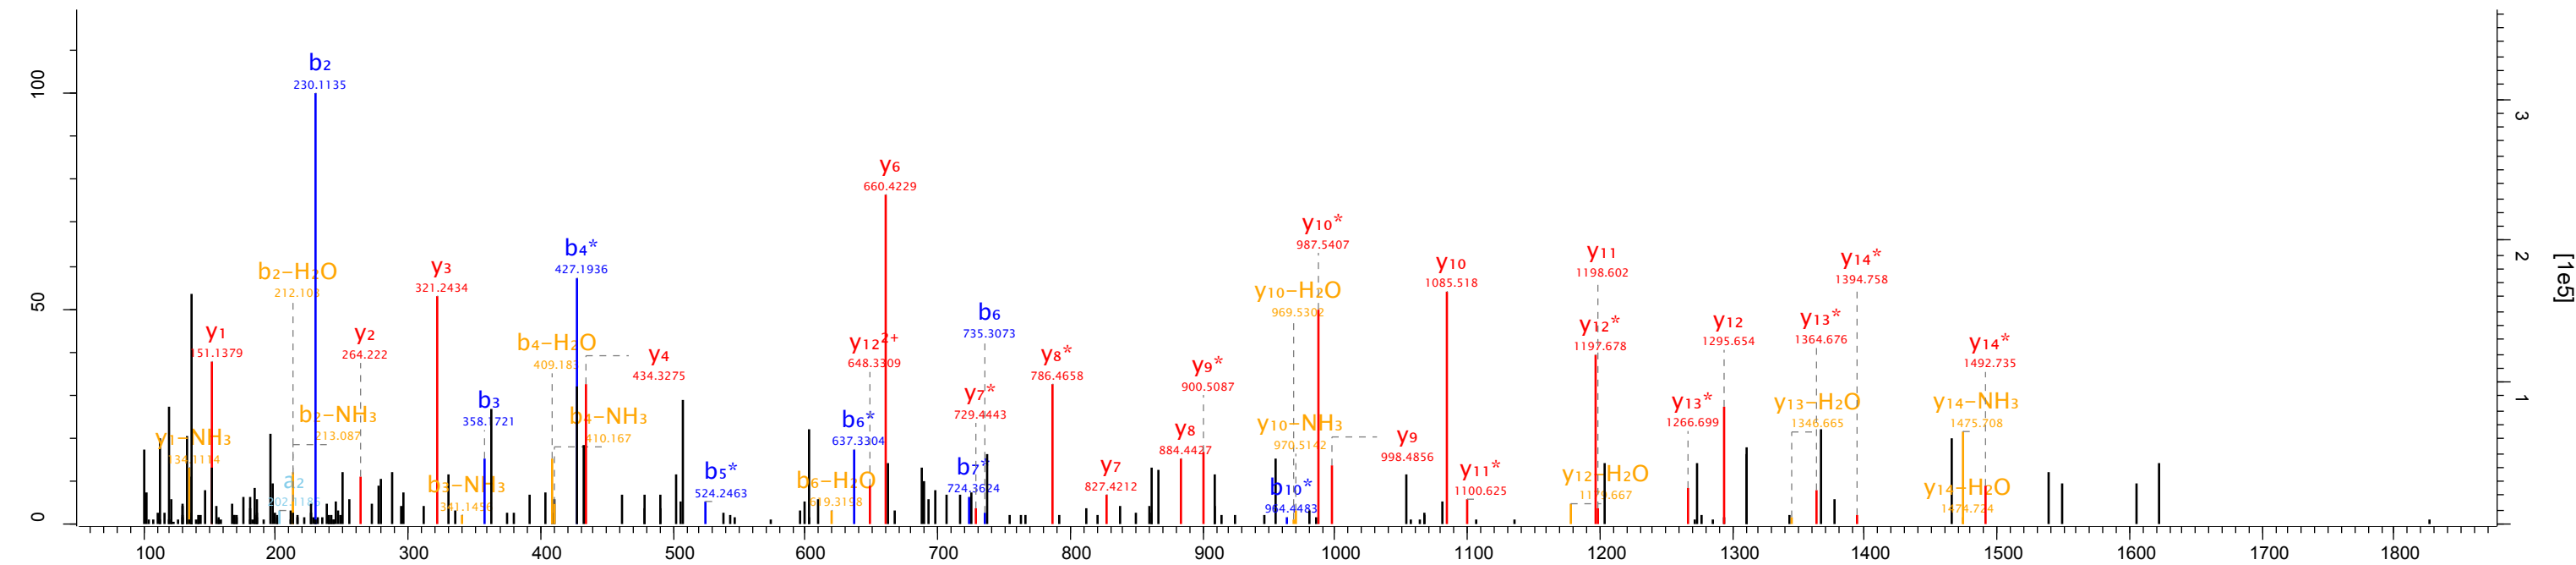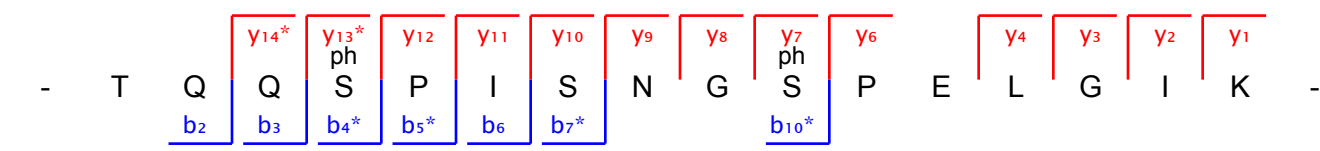

Raw file 20150812\_A375SR\_Phospho\_BR1\_02 Scan 15968 Method FTMS; HCD Score 114.55 m/z 950.84 Gene names NCOA7

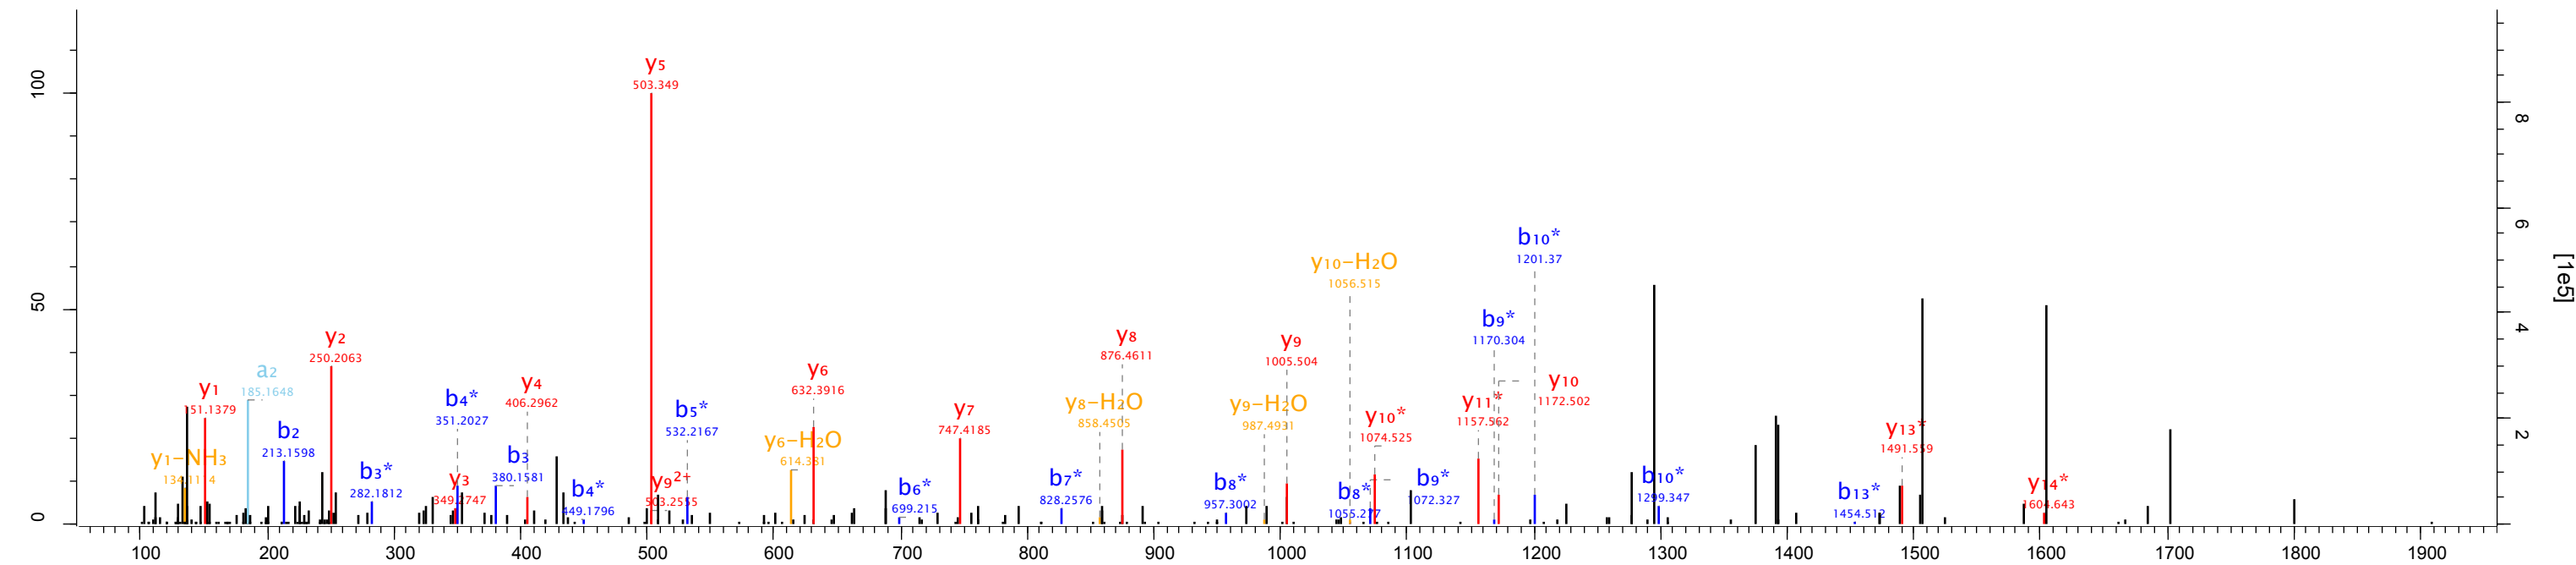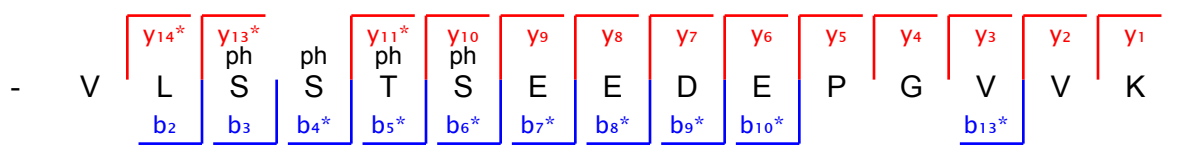

Raw file: 20150812\_A375SR\_Phospho\_BR1\_02  
 Scan: 15978 Method: FTMS; HCD Score: 121.69 m/z: 1062.43 Gene names: REPS1

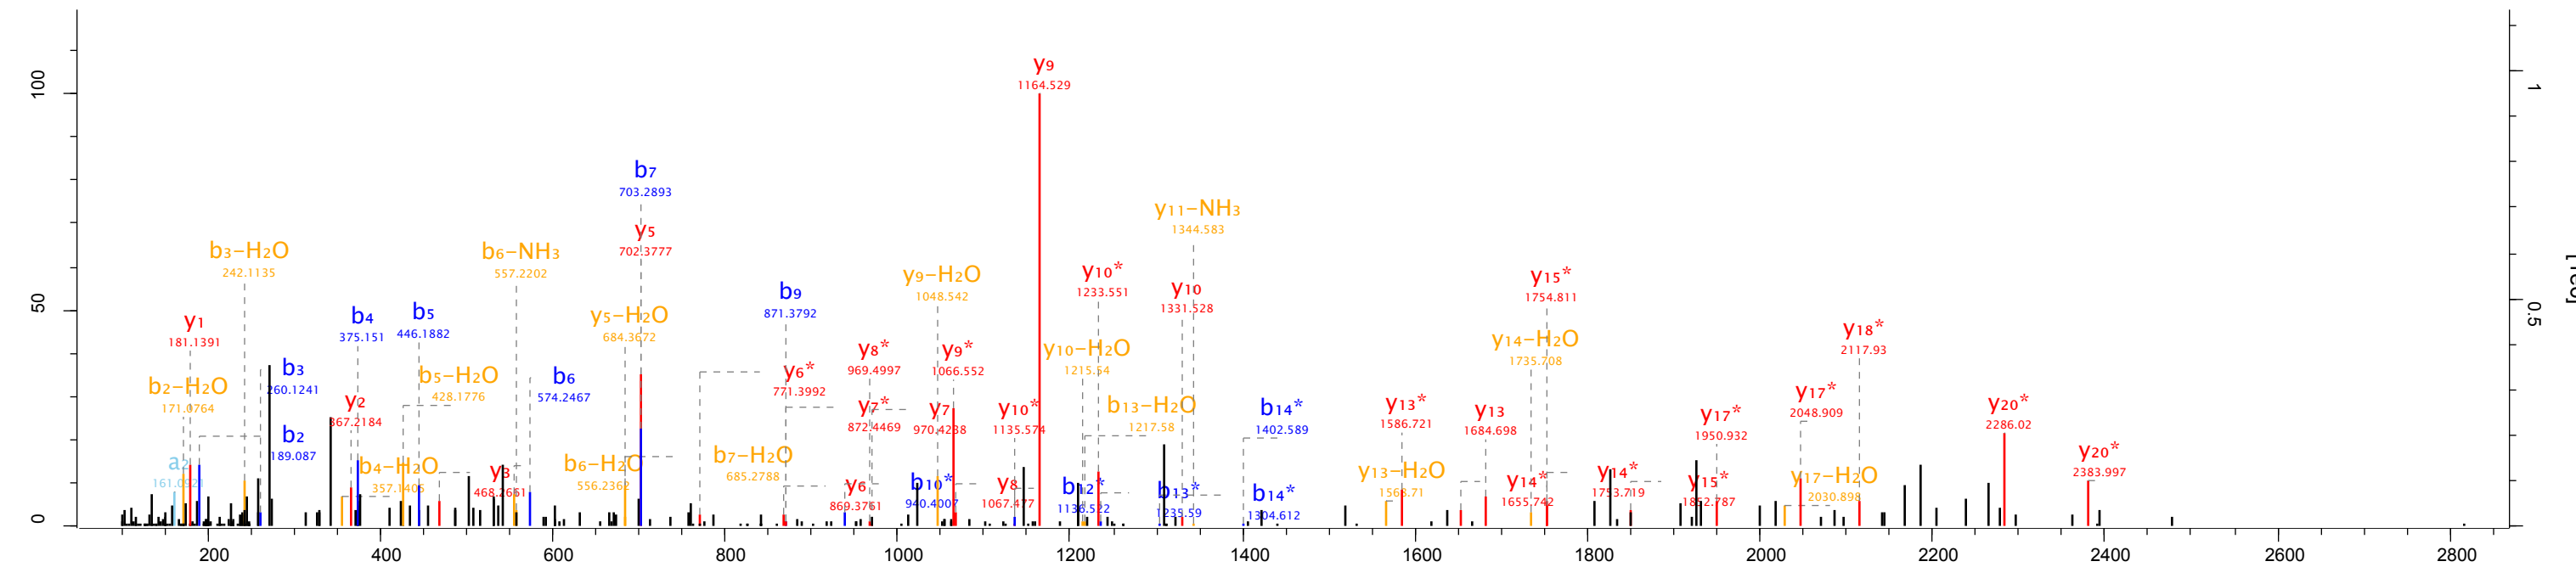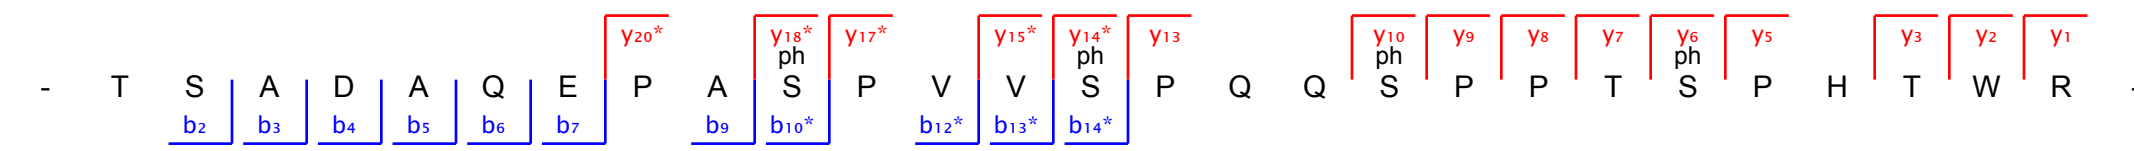

20150812\_A375SR\_Phospho\_BR1\_02 16038 FTMS; HCD 99.55 784.64 ARHGEF11

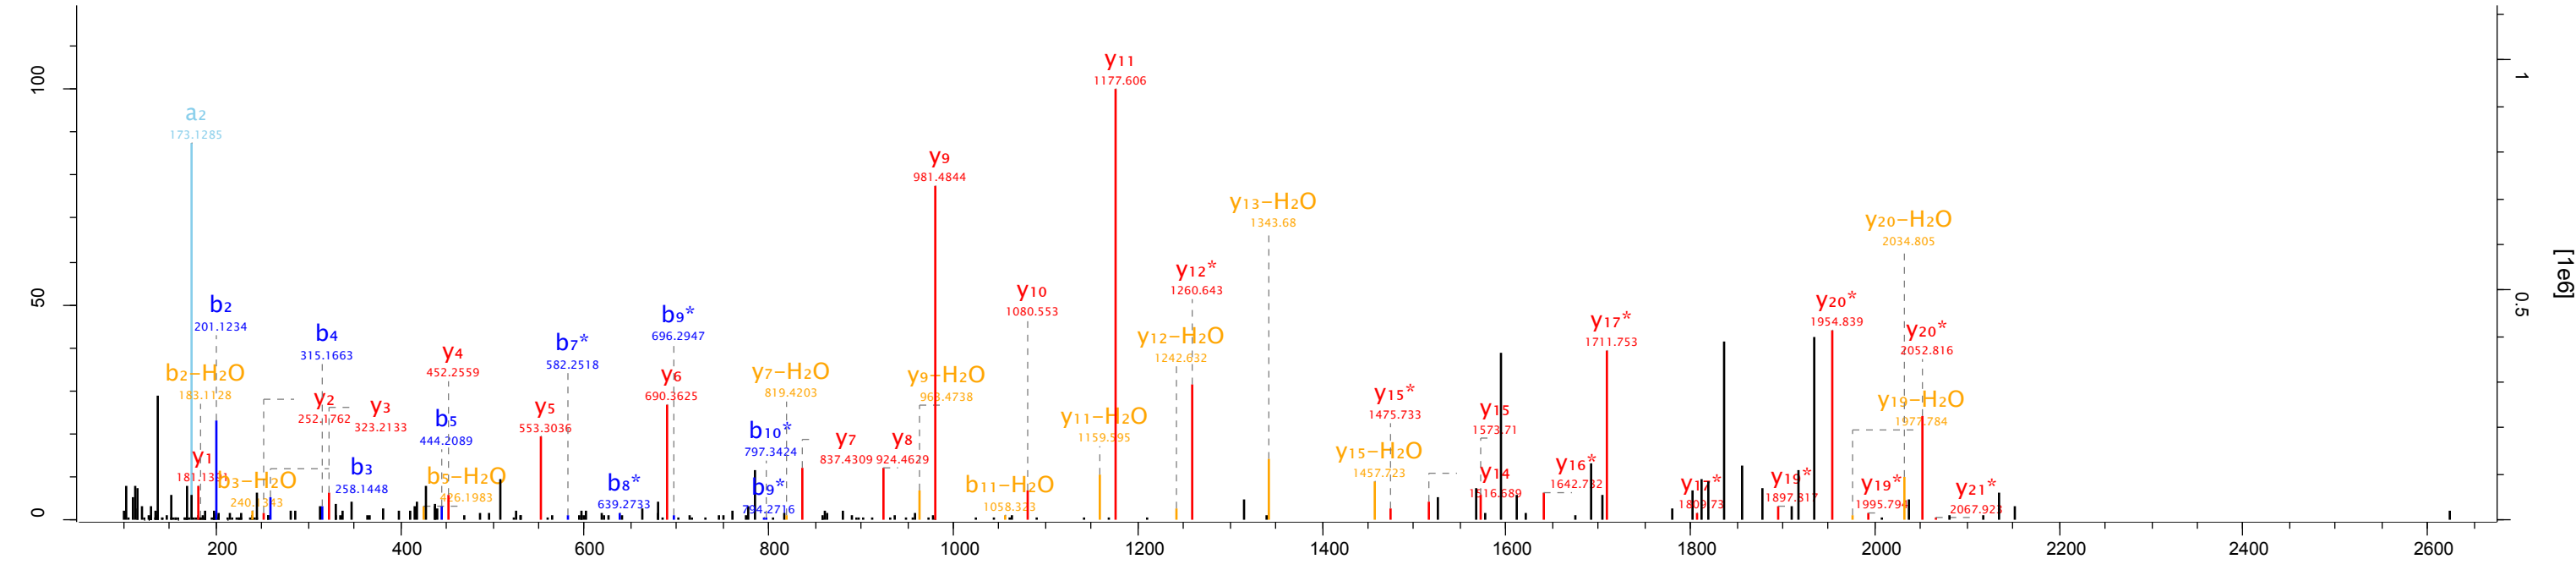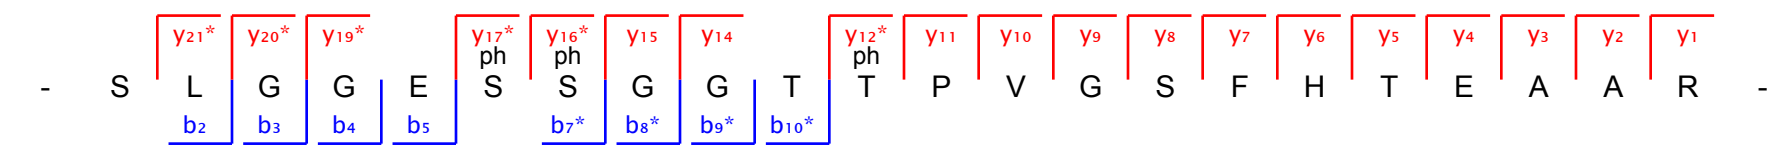



Raw file 20150812\_A375SR\_Phospho\_BR1\_02 Scan 16088 Method FTMS; HCD Score 159.36 m/z 1135.95

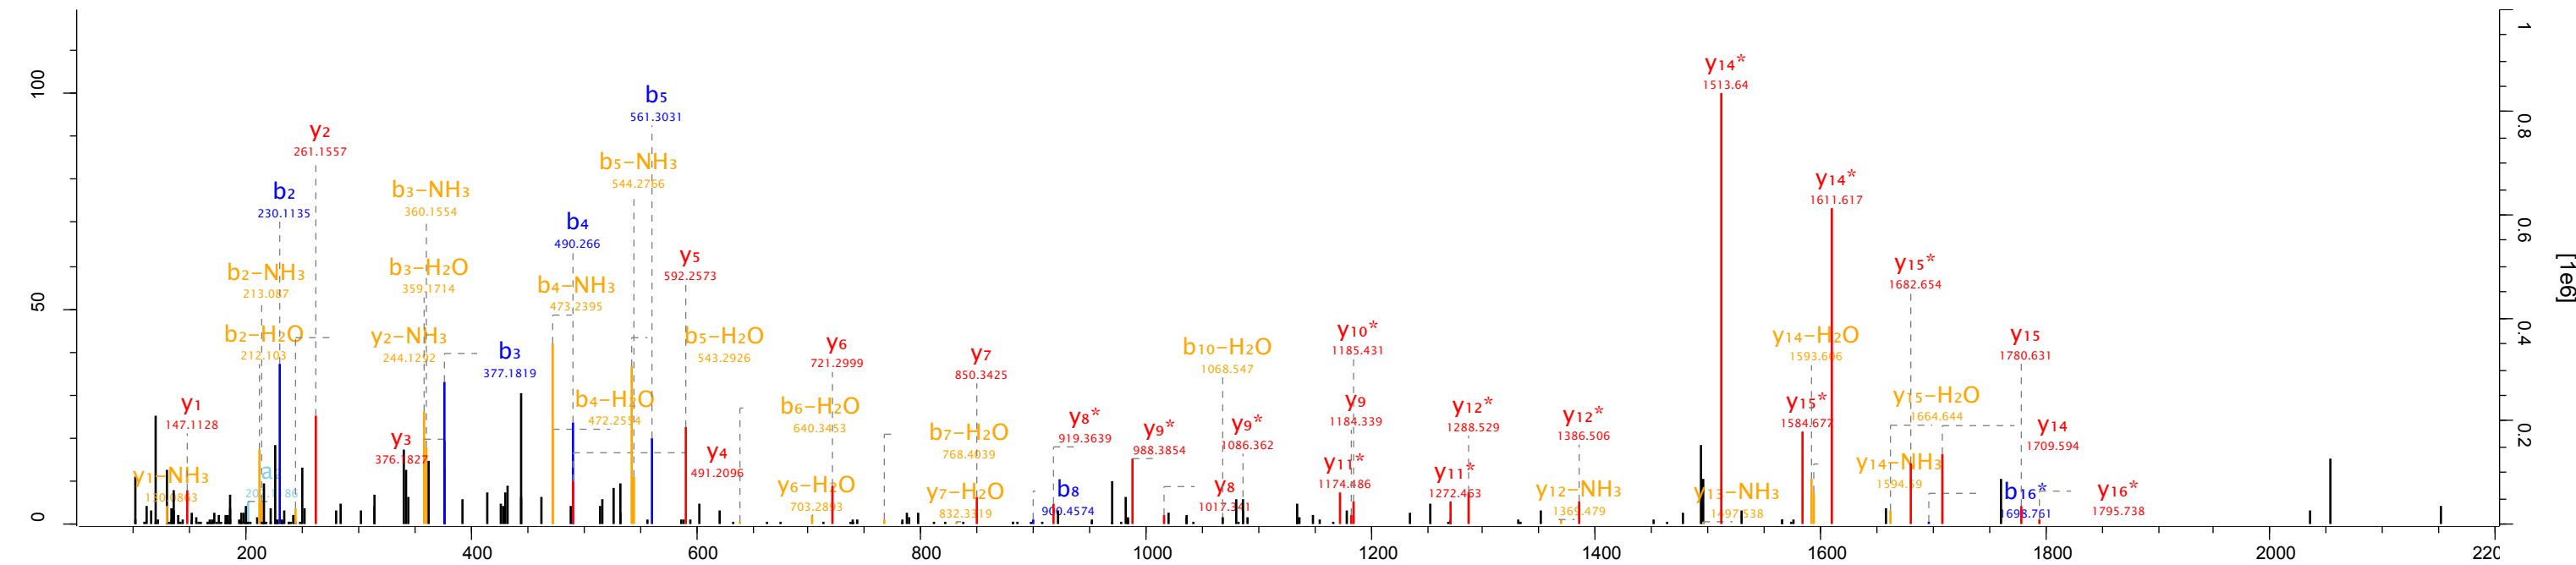

- Q T F L A P Q N S V S S E E T D D N K -

b2 b3 b4 b5 b8 b16\*

y16\* y15 y14 y12\* y11\* y10\* y9 y8 y7 y6 y5 y4 y3 y2 y1

Raw file: 20150812\_A375SR\_Phospho\_BR1\_02  
 Scan: 16458 Method: FTMS; HCD Score: 190.33 m/z: 1096.91 Gene names: C2CD5

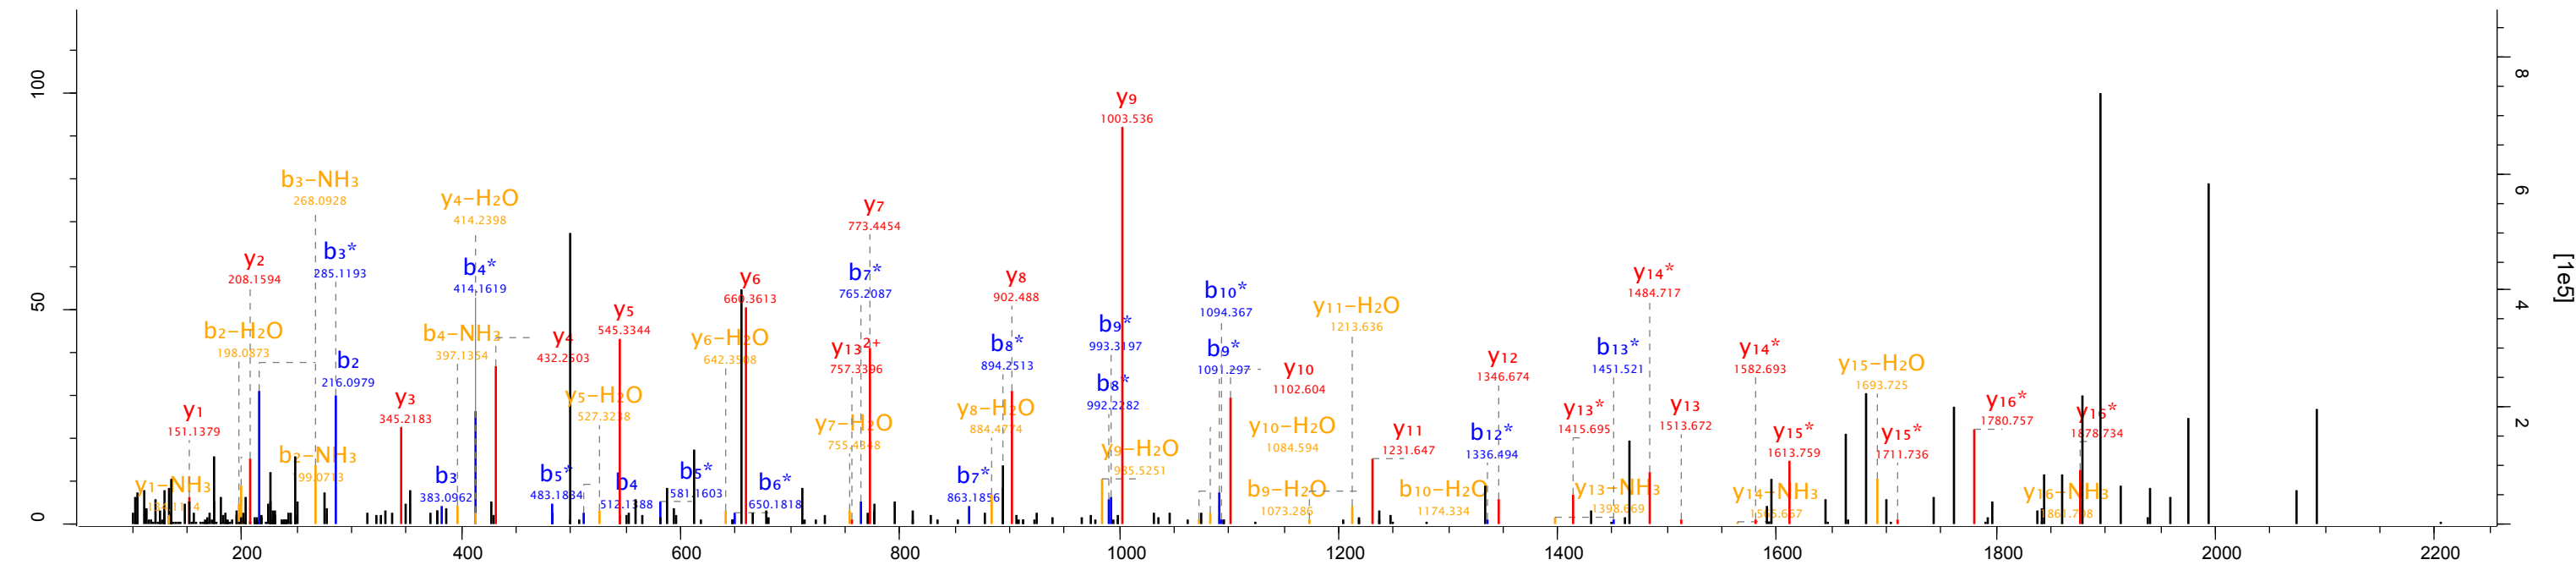

- S Q y16\*  
ph  
S y15\*  
E y14\*  
ph  
S y13  
ph  
S y12  
D y11  
E y10  
V y9  
T y8  
E y7  
L y6  
D y5  
L y4  
S y3  
H y2  
G y1  
K -  
b2 b3 b4 b5\* b6\* b7\* b8\* b9\* b10\* b12\* b13\*

Raw file Scan Method Score m/z Gene names  
 20150812\_A375SR\_Phospho\_BR1\_02 16558 FTMS; HCD 101.84 885.38 CASKIN2

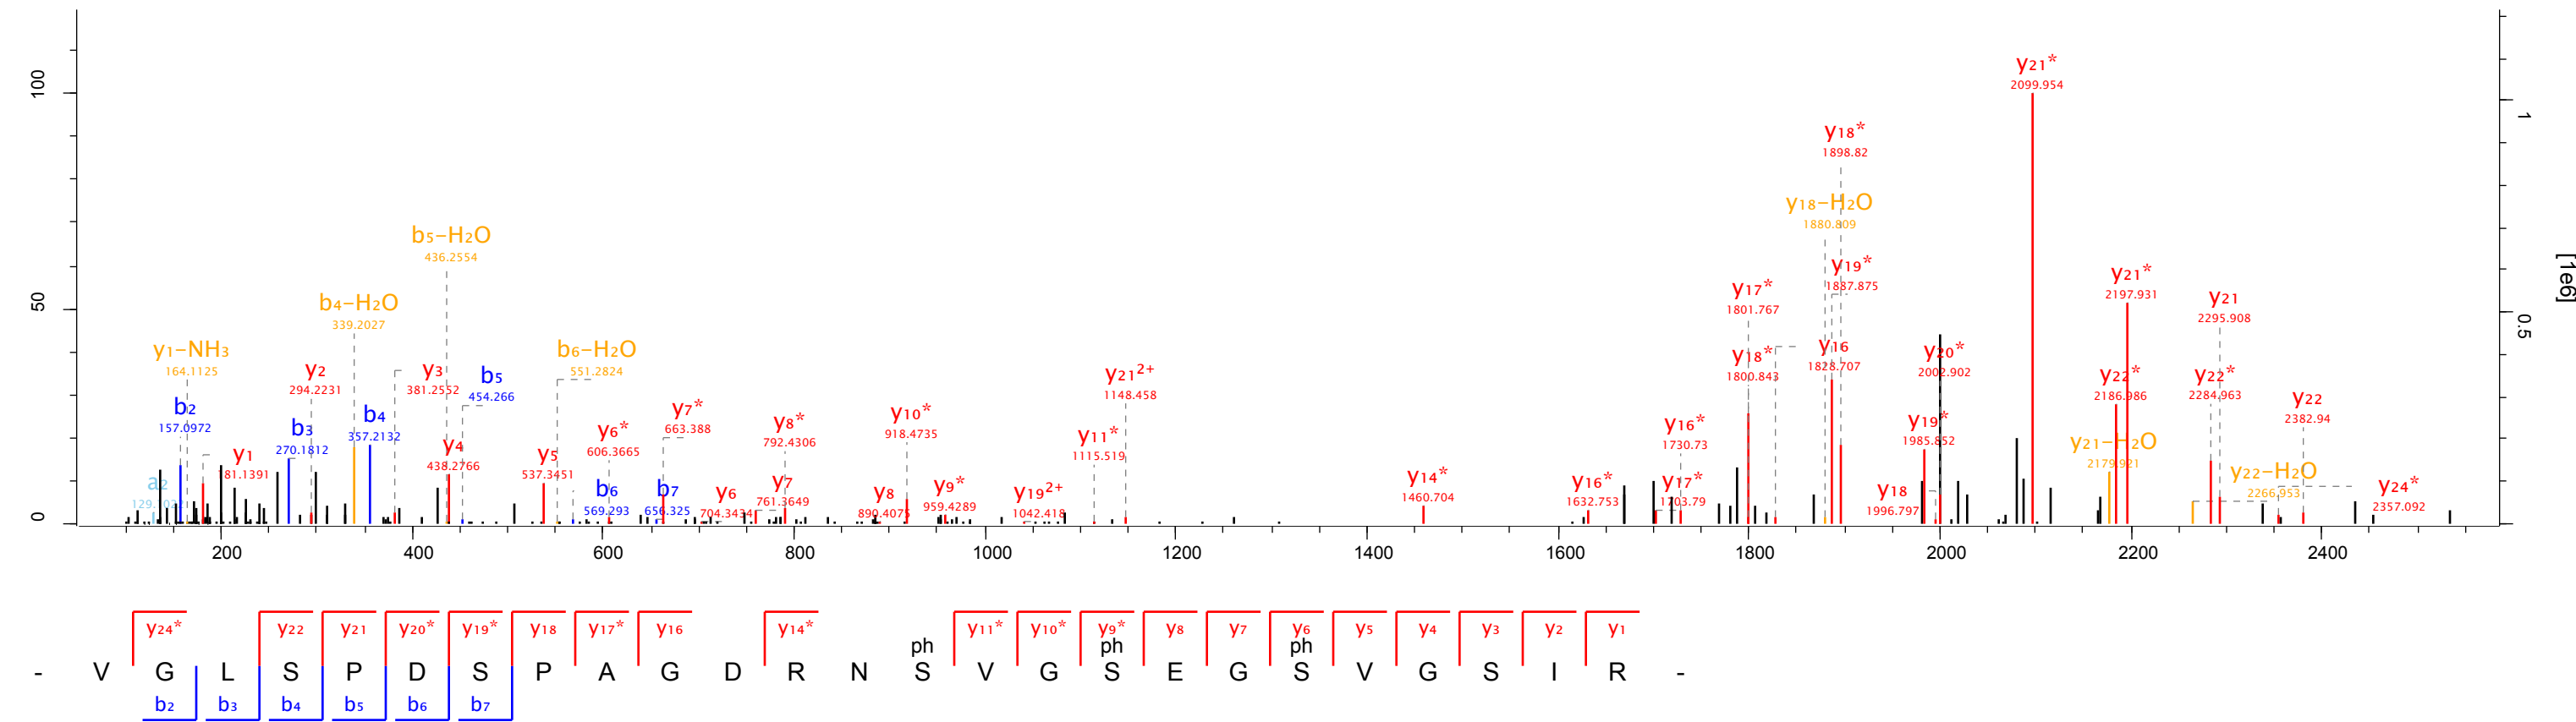

Raw file  
 20150812\_A375SR\_Phospho\_BR1\_02  
 Scan 16588 Method FTMS; HCD Score 111.55 m/z 1125.96 Gene names BCAR3

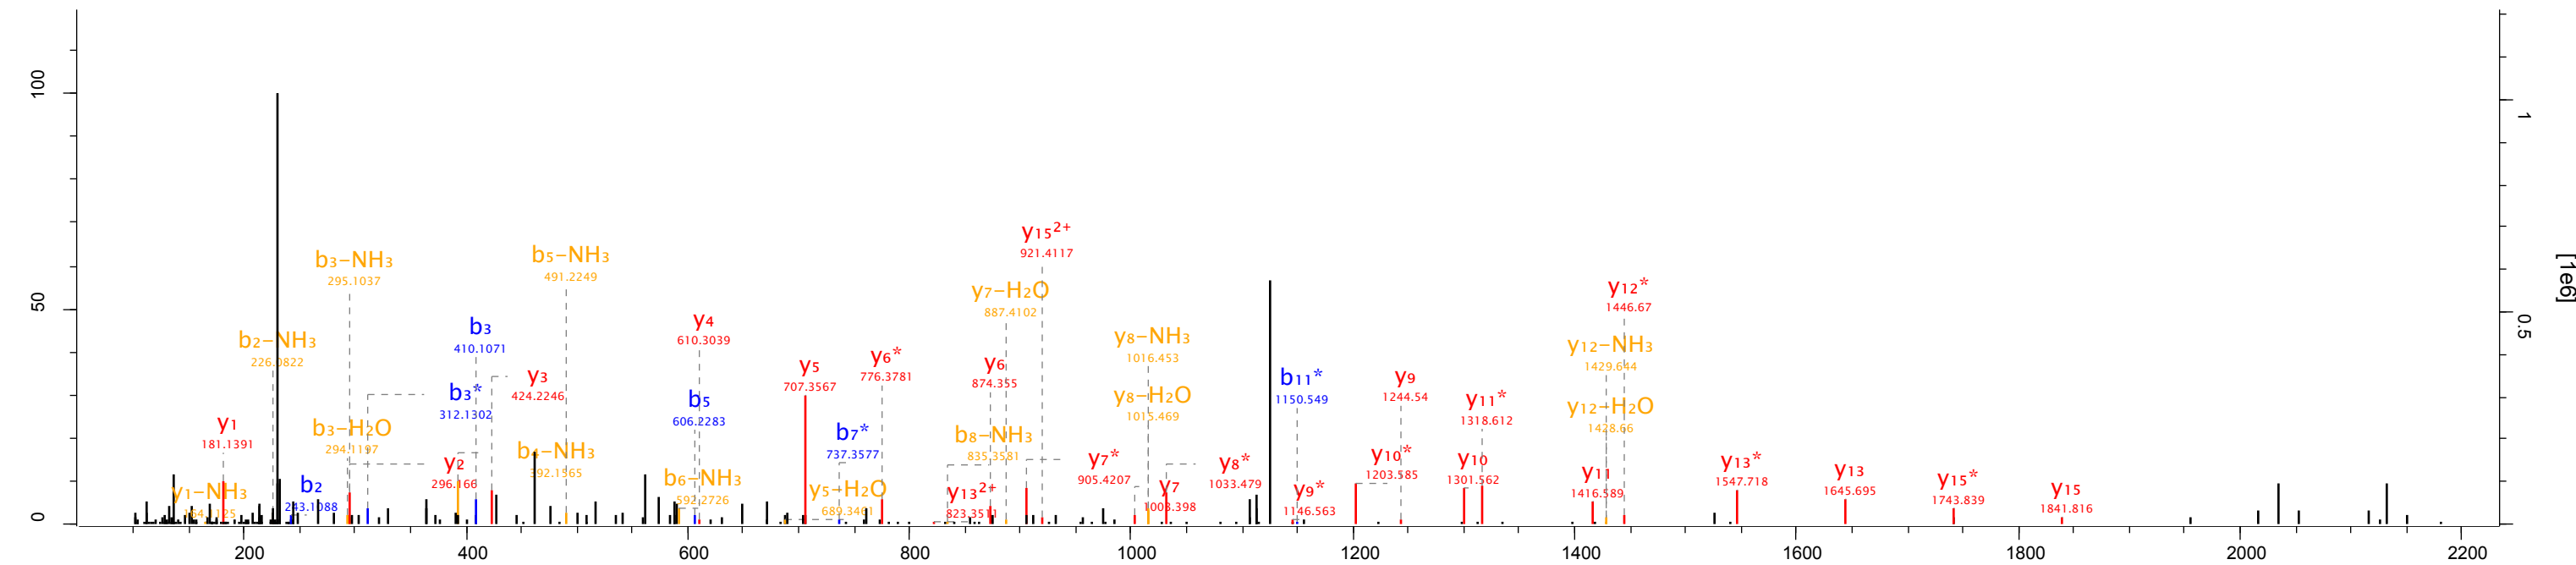

- Q N S P V T Q D G I Q E S P W Q D R -  
 b<sub>2</sub> b<sub>3</sub> b<sub>5</sub> b<sub>7</sub>\* b<sub>11</sub>\*

Raw file: 20150812\_A375SR\_Phospho\_BR1\_02  
 Scan: 16598 Method: FTMS; HCD Score: 128.98 m/z: 1138.89 Gene names: KANSL2

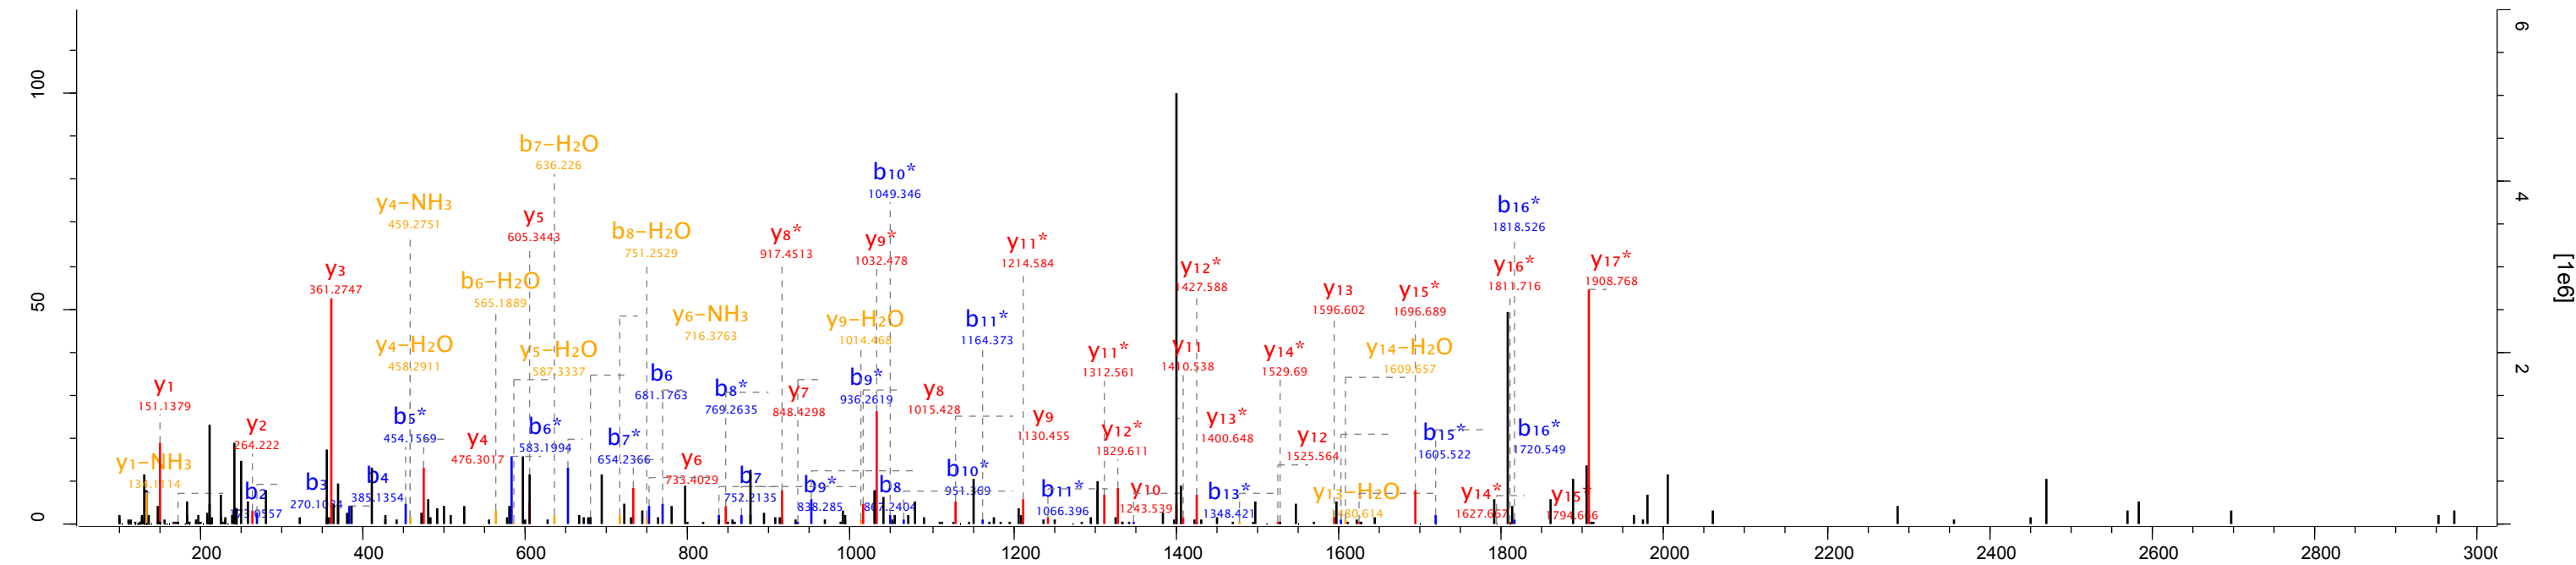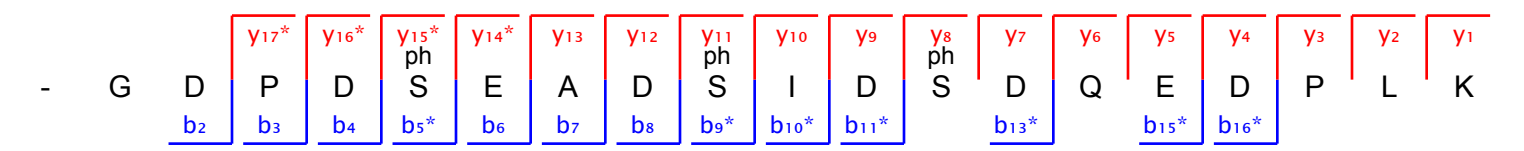

Raw file 20150812\_A375SR\_Phospho\_BR1\_02 Scan 17198 Method FTMS; HCD Score 103.35 m/z 1237.5 Gene names MSH6

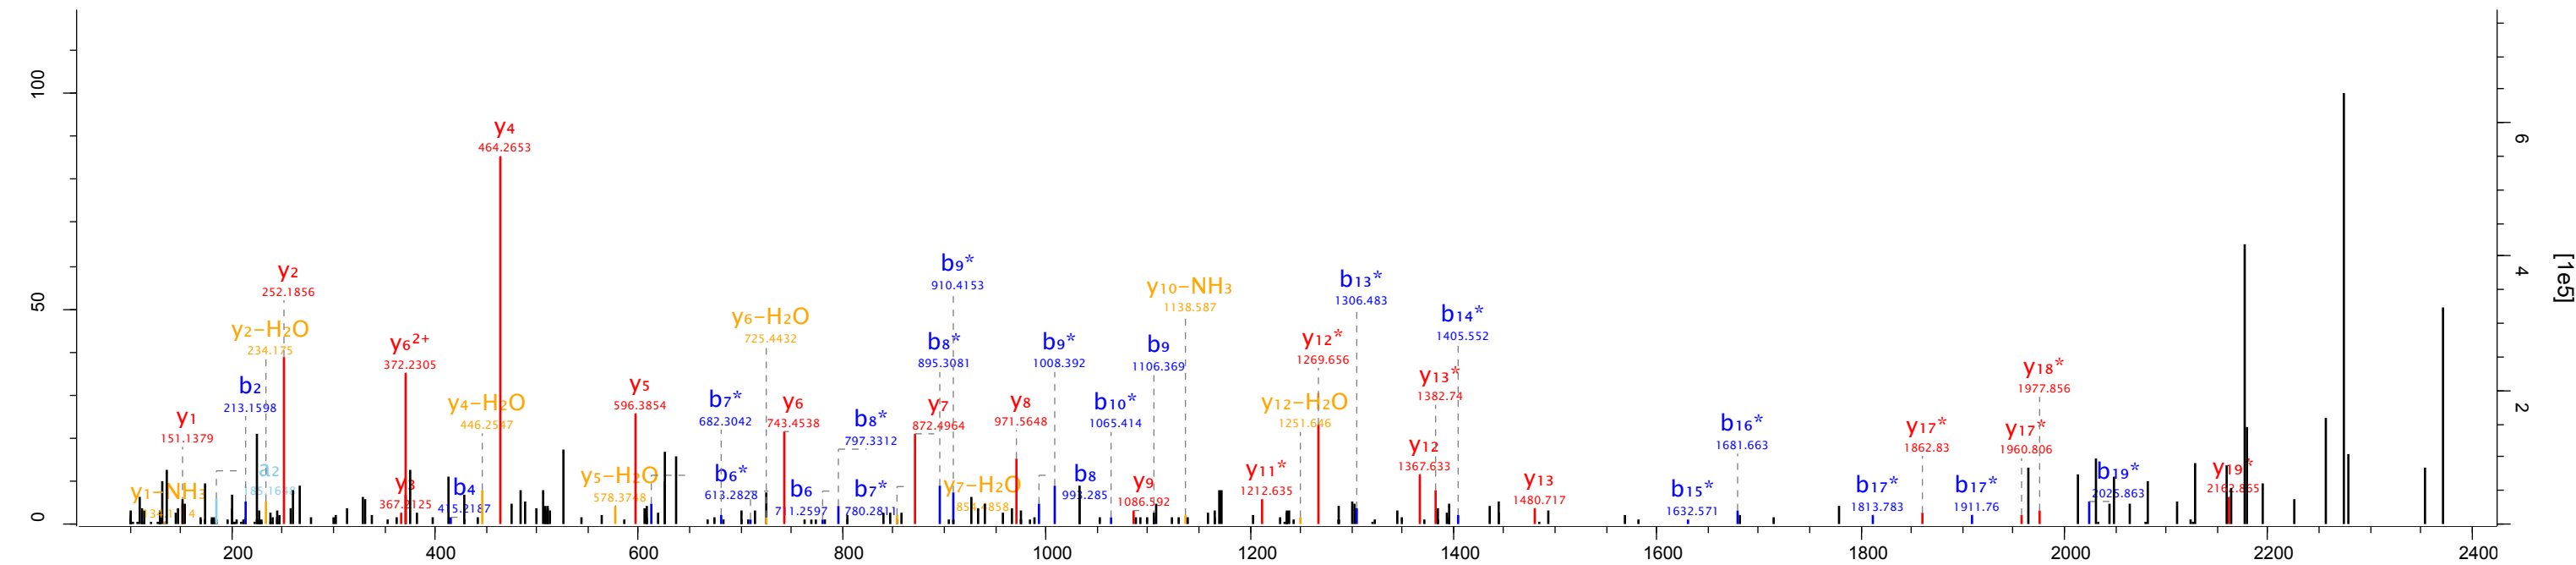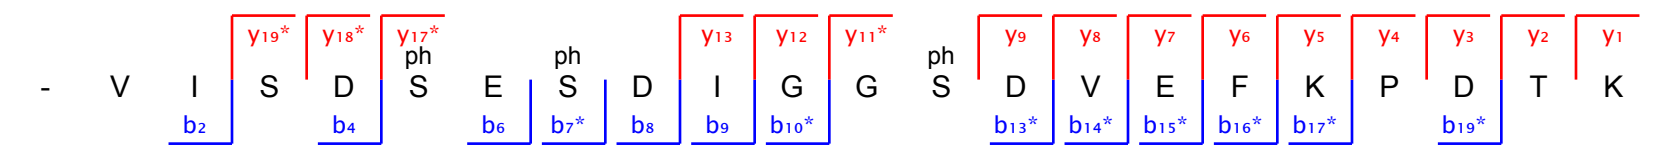

Raw file 20150812\_A375SR\_Phospho\_BR1\_02 Scan 17348 Method FTMS; HCD Score 58.12 m/z 860.8 Gene names C11orf96

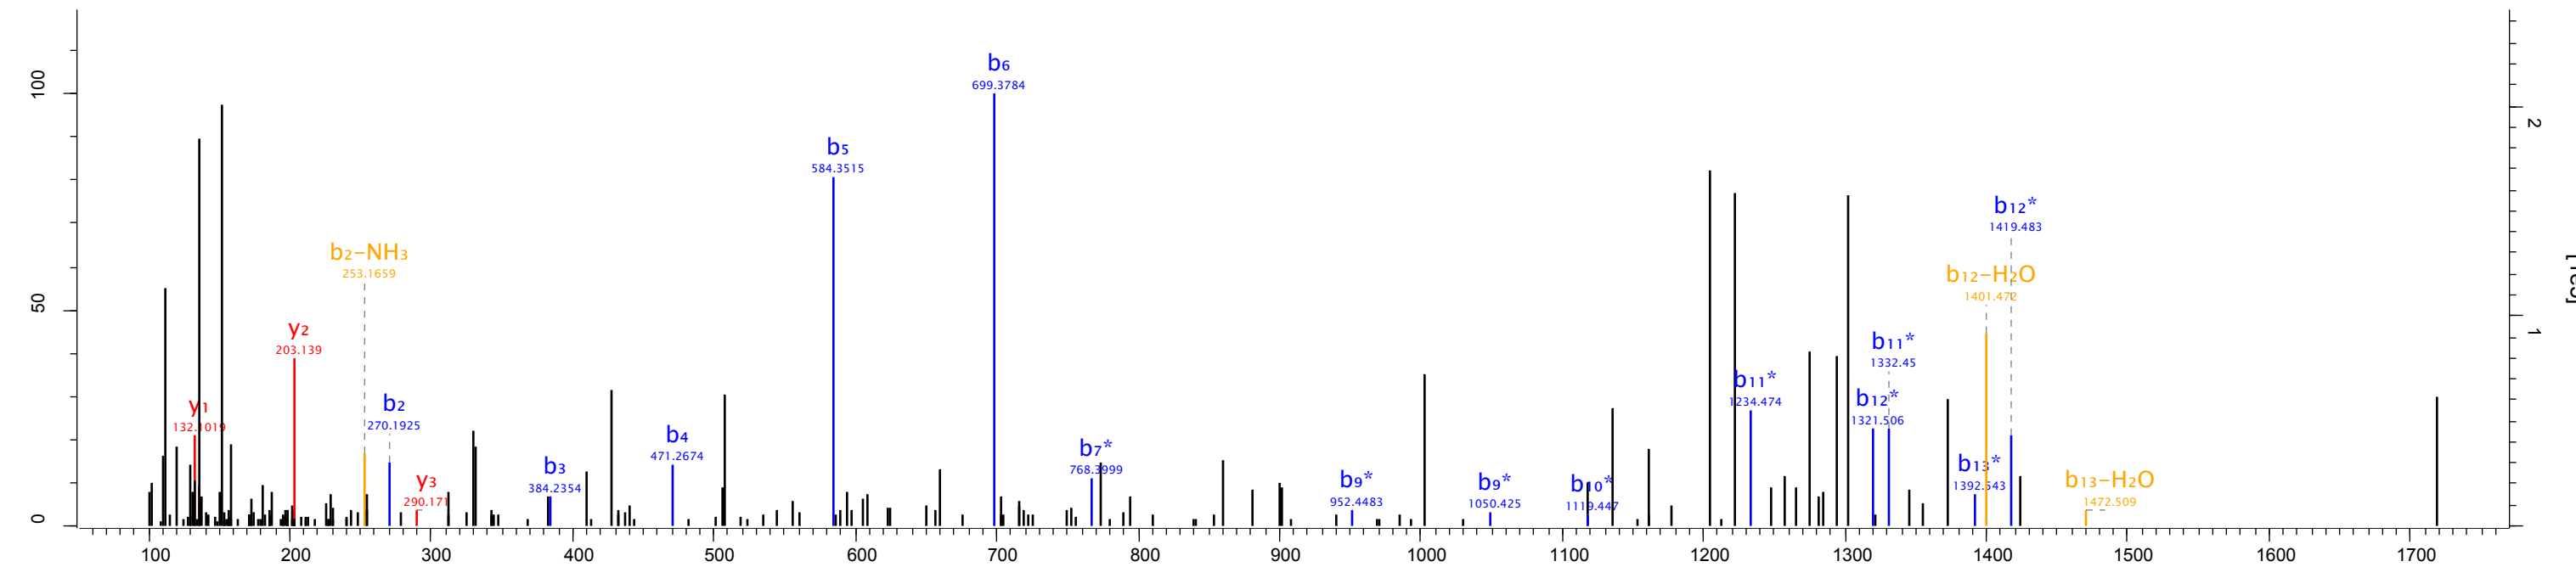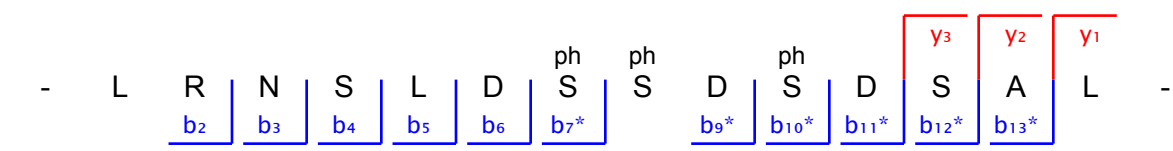

Raw file  
 20150812\_A375SR\_Phospho\_BR1\_02  
 Scan 17538 Method FTMS; HCD Score 245.44 m/z 1297.55 Gene names TRIM28

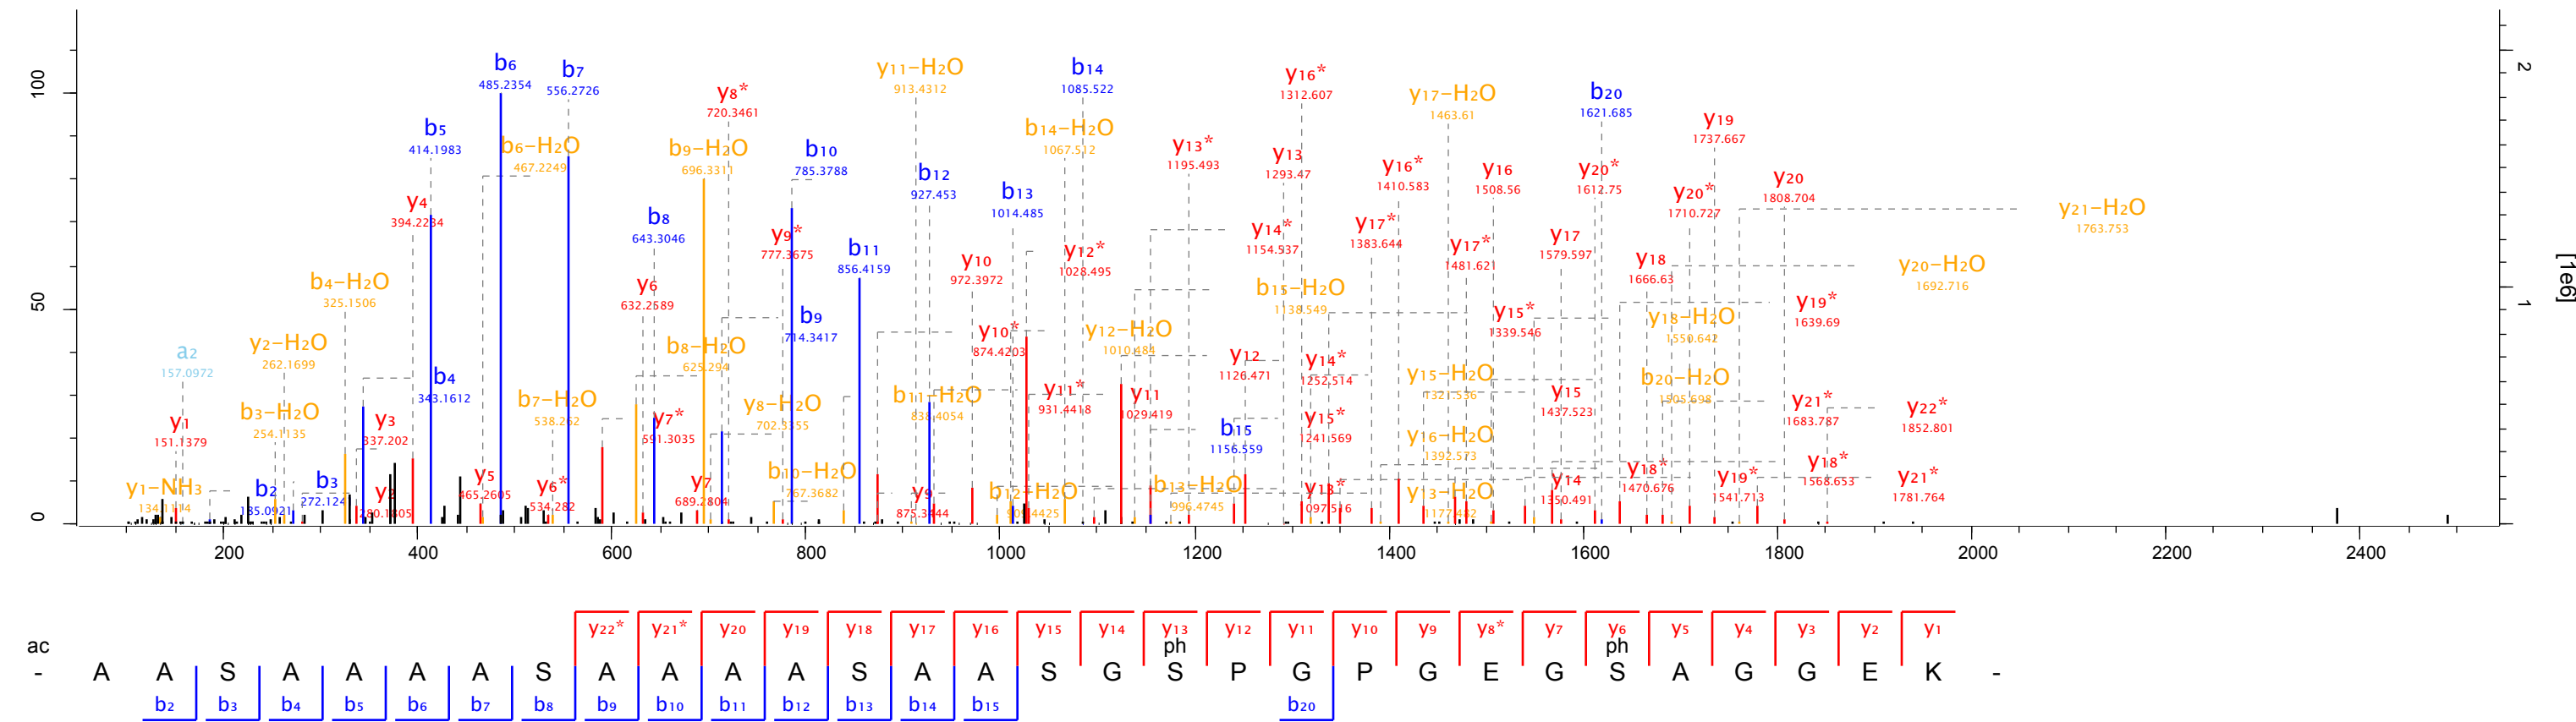



Raw file: 20150812\_A375SR\_Phospho\_BR1\_02  
 Scan: 17698 Method: FTMS; HCD Score: 103.62 m/z: 1011.78 Gene names: SRRM1

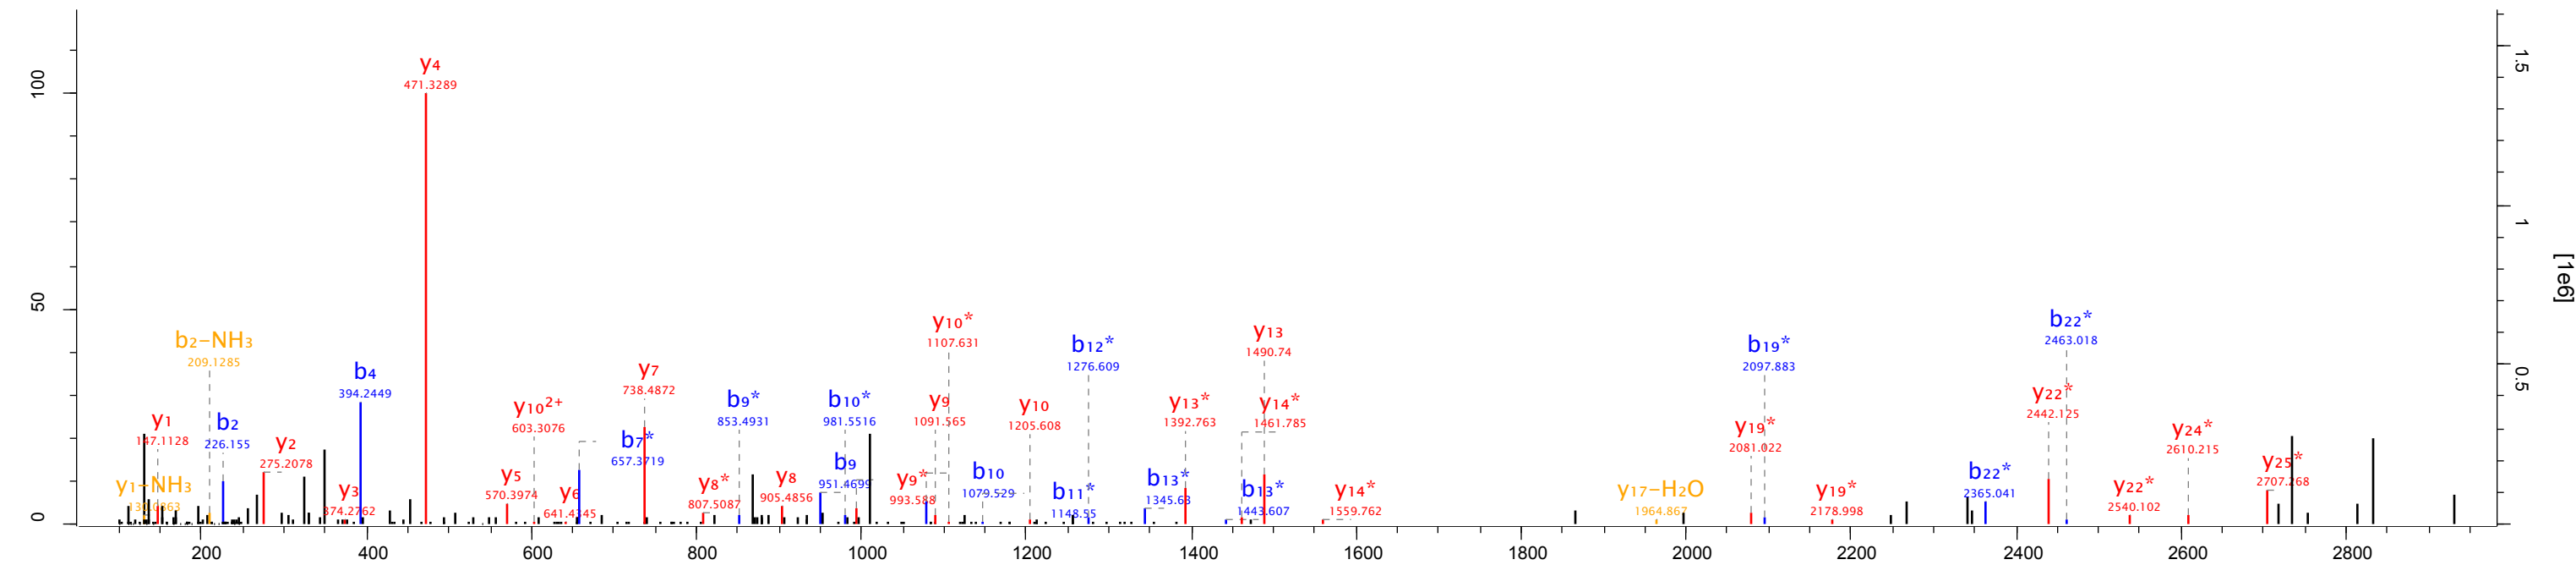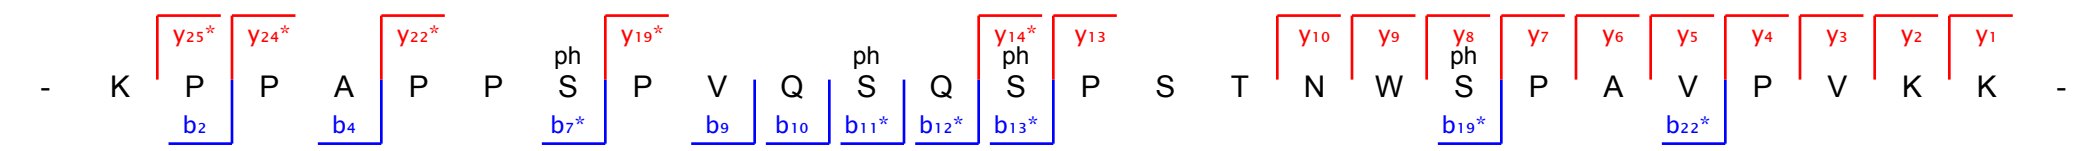

Raw file 20150812\_A375SR\_Phospho\_BR1\_02 Scan 17948 Method FTMS; HCD Score 214.62 m/z 1020.95 Gene names MAP3K7;DKFZp586F0420

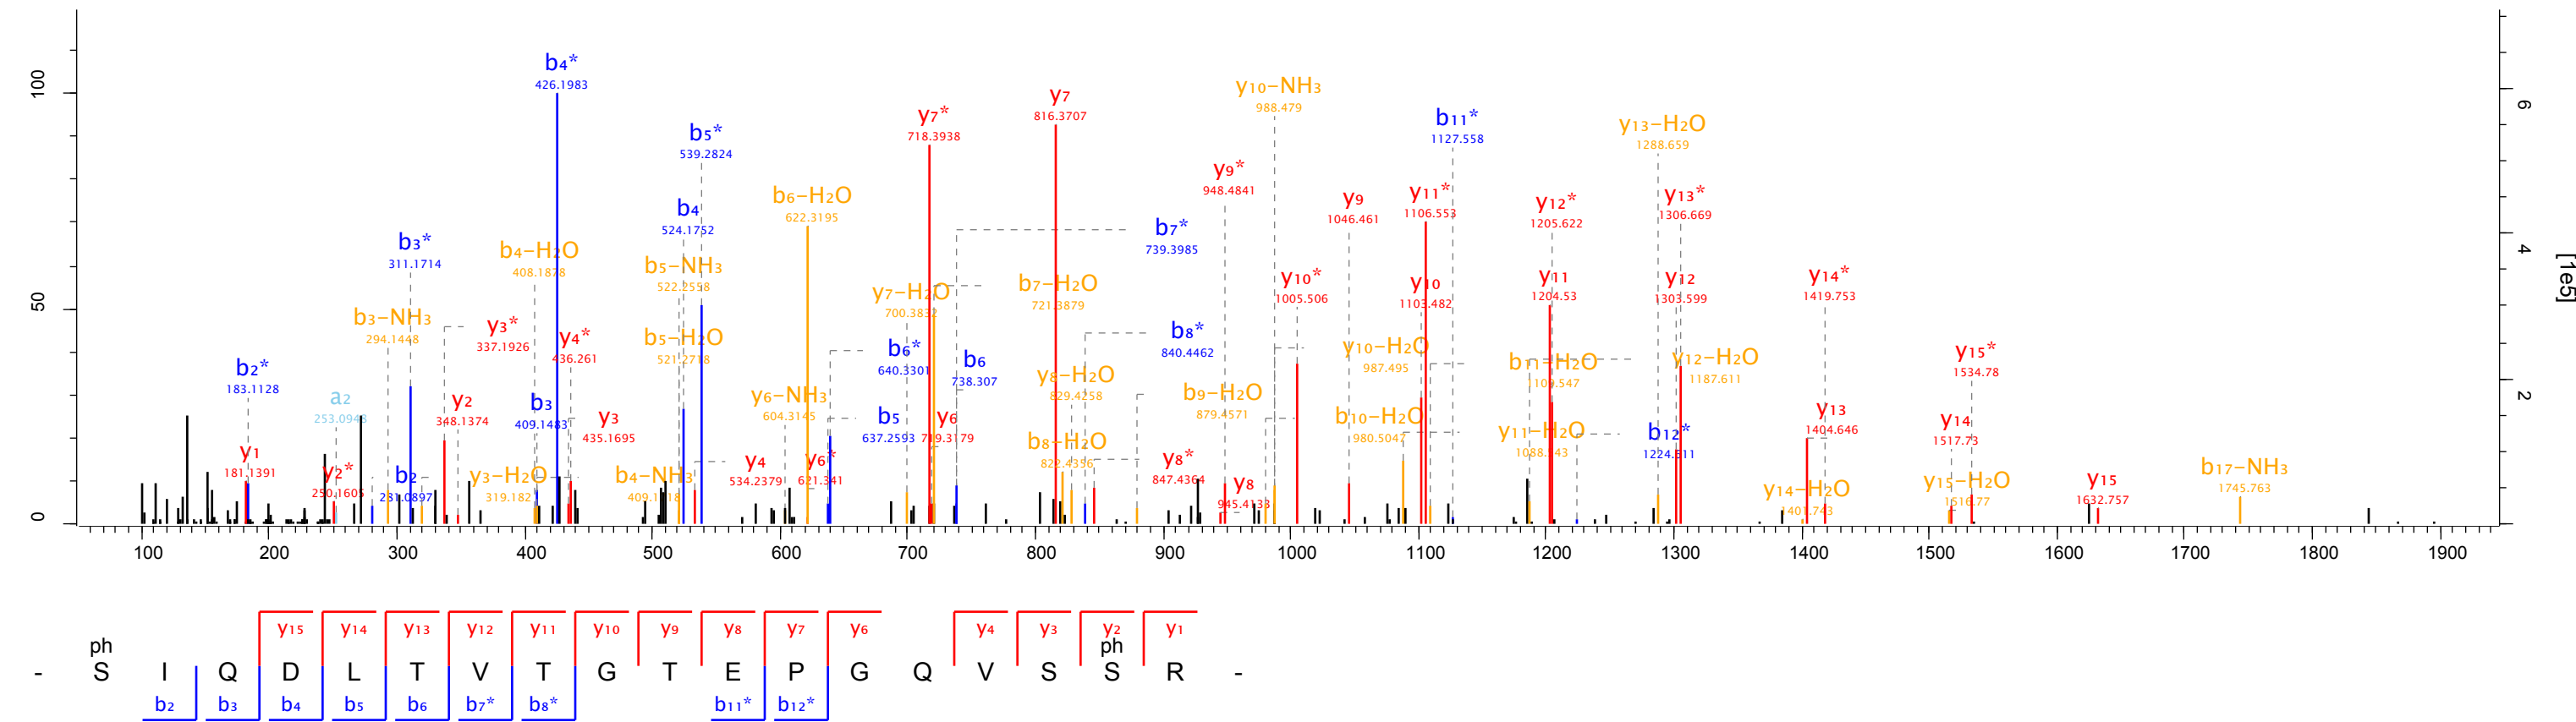

Raw file 20150812\_A375SR\_Phospho\_BR1\_02 Scan 18528 Method FTMS; HCD Score 78.27 m/z 802.69 Gene names MLLT10

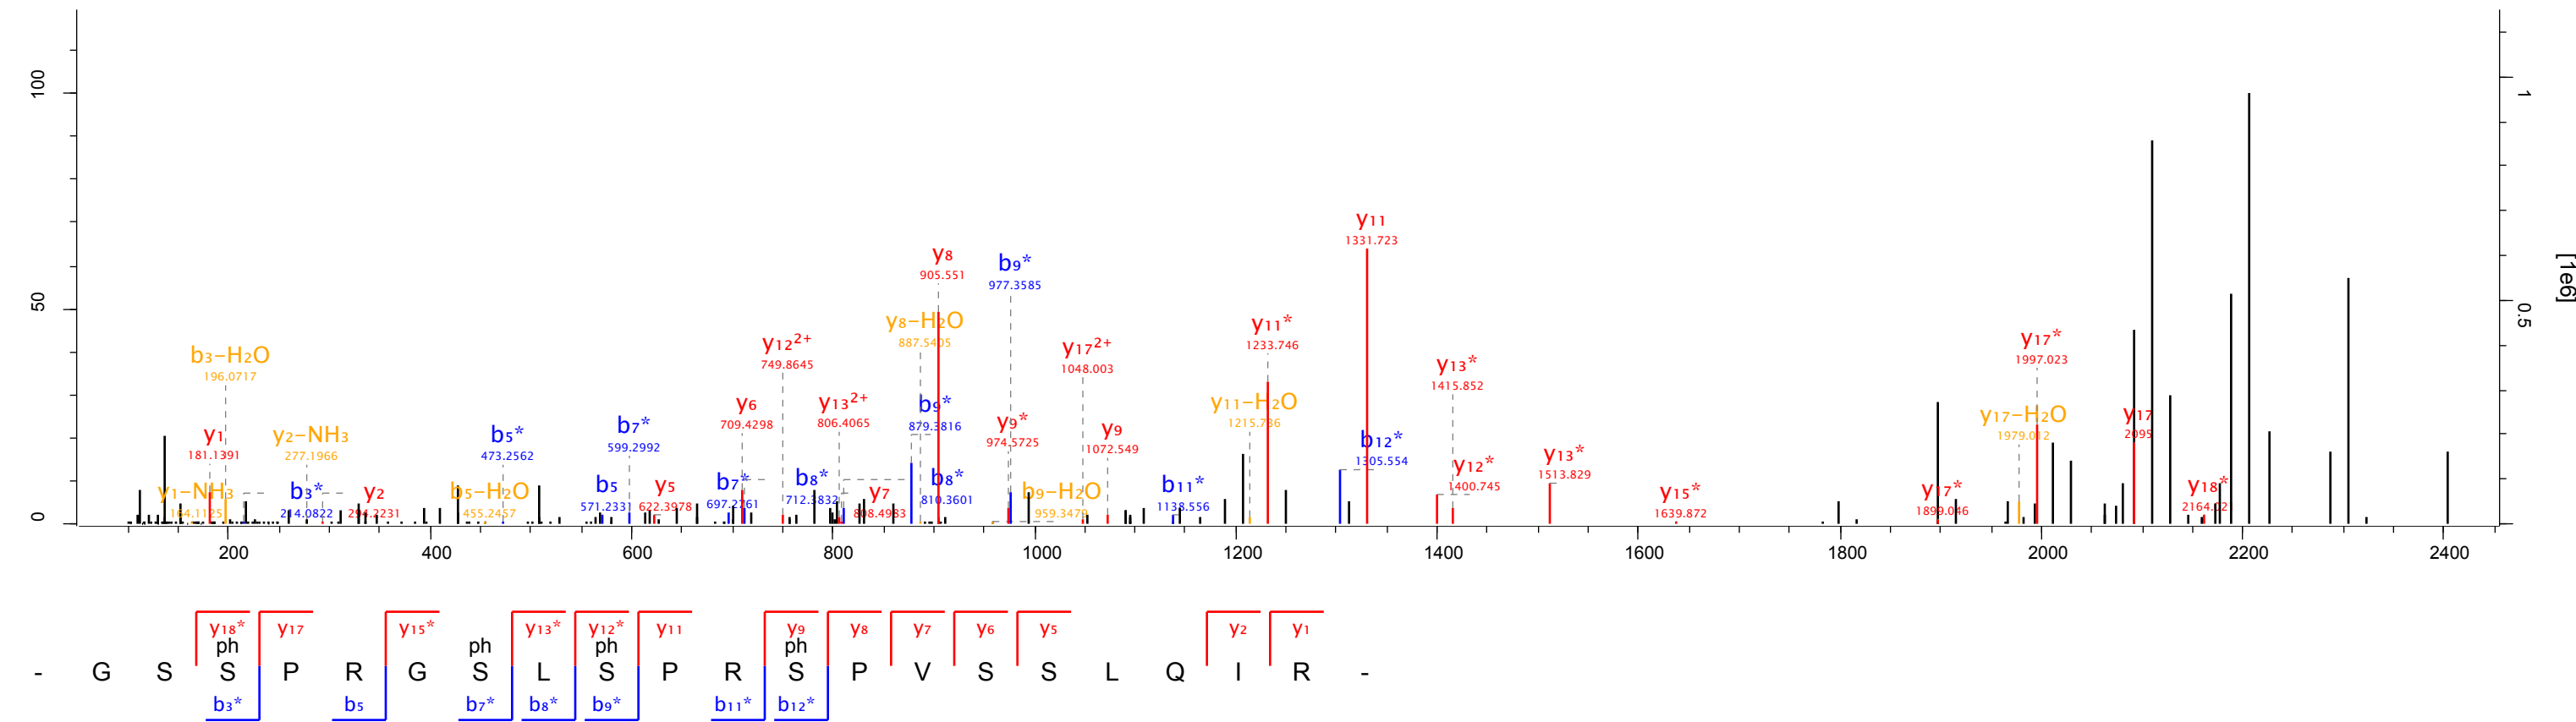

Raw file 20150812\_A375SR\_Phospho\_BR1\_02 Scan 18548 Method FTMS; HCD Score 63.18 m/z 673.73 Gene names TERF1

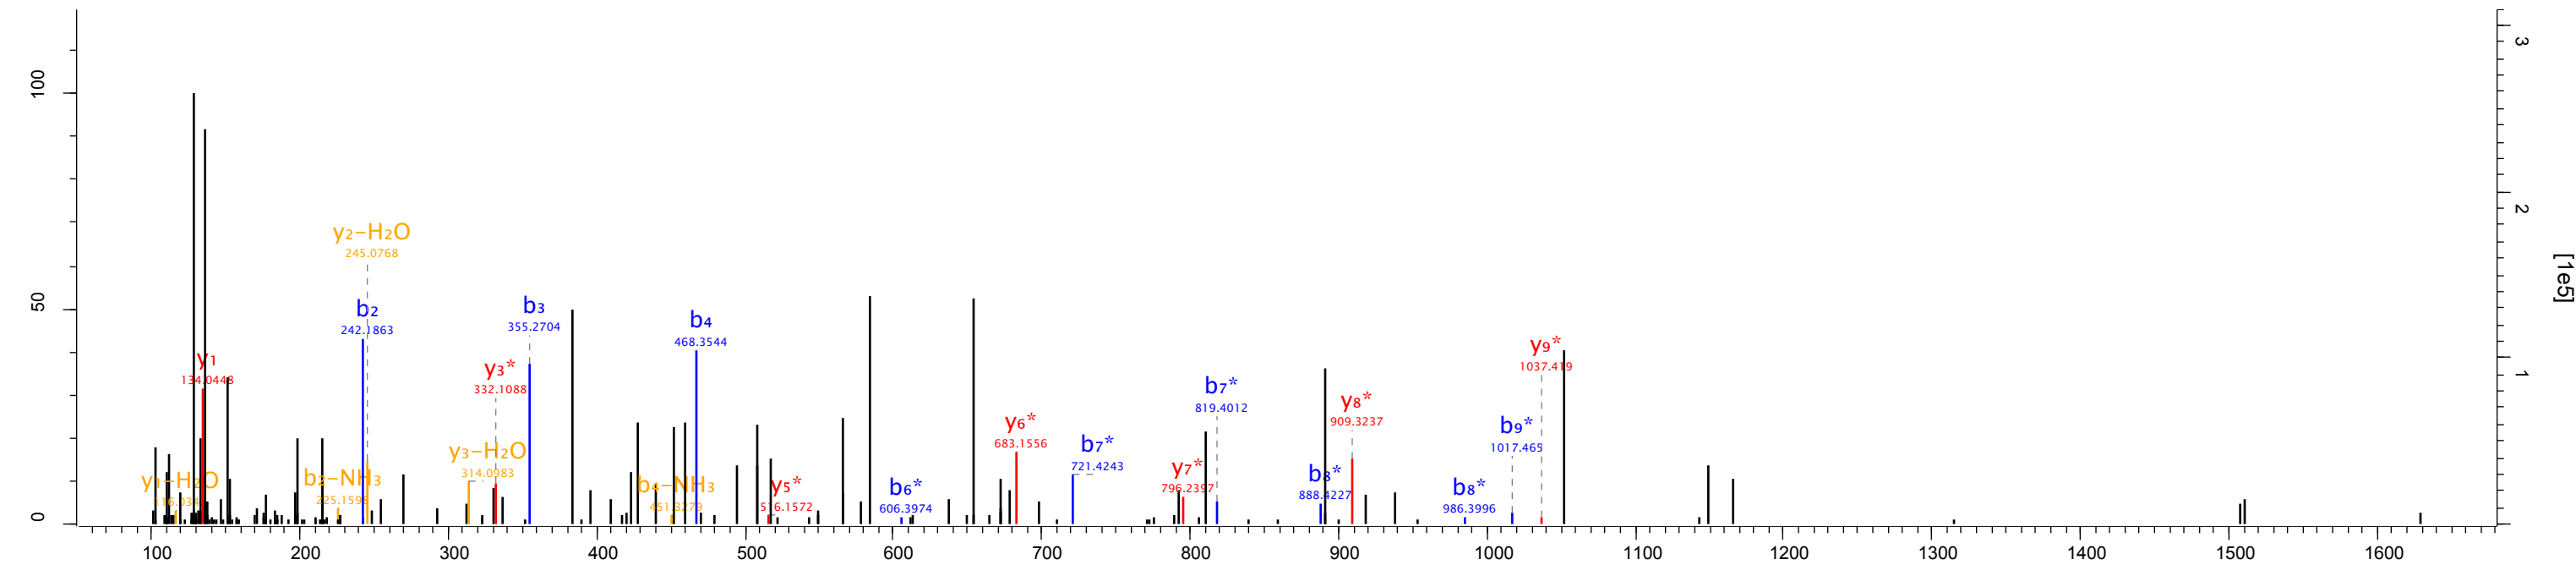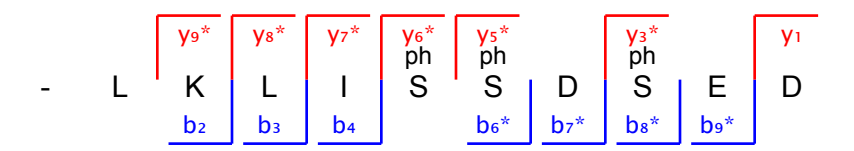

Raw file  
 20150812\_A375SR\_Phospho\_BR1\_02  
 Scan 18648 Method FTMS; HCD Score 111.98 m/z 1042.8 Gene names SRRM2

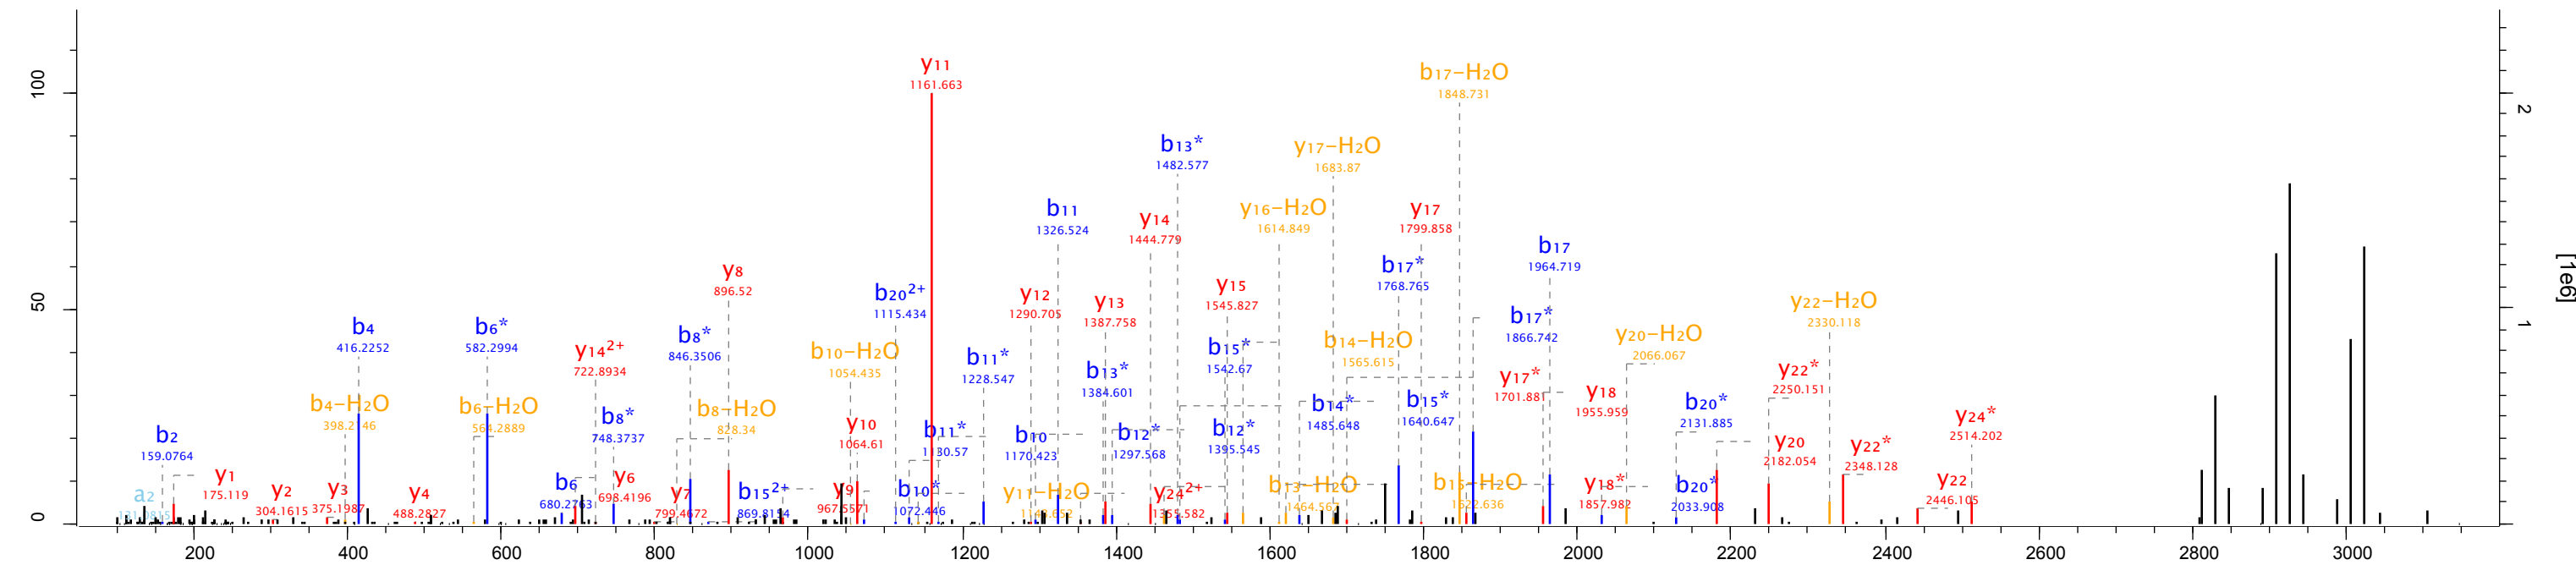

- S A T R P ph S P ph S P E R S S T G P E P P A P T P L L A E R -

b<sub>2</sub>
b<sub>4</sub>
b<sub>6</sub>\*
b<sub>8</sub>\*
b<sub>10</sub>
b<sub>11</sub>
b<sub>12</sub>\*
b<sub>13</sub>\*
b<sub>14</sub>\*
b<sub>15</sub>\*
b<sub>17</sub>
b<sub>20</sub>\*

y<sub>24</sub>\*
y<sub>22</sub>
y<sub>20</sub>
y<sub>18</sub>
y<sub>17</sub>
y<sub>15</sub>
y<sub>14</sub>
y<sub>13</sub>
y<sub>12</sub>
y<sub>11</sub>
y<sub>10</sub>
y<sub>9</sub>
y<sub>8</sub>
y<sub>7</sub>
y<sub>6</sub>
y<sub>4</sub>
y<sub>3</sub>
y<sub>2</sub>
y<sub>1</sub>

Raw file: 20150812\_A375SR\_Phospho\_BR1\_02  
 Scan: 18768 Method: FTMS; HCD Score: 183.63 m/z: 1061.36 Gene names: ERCC6

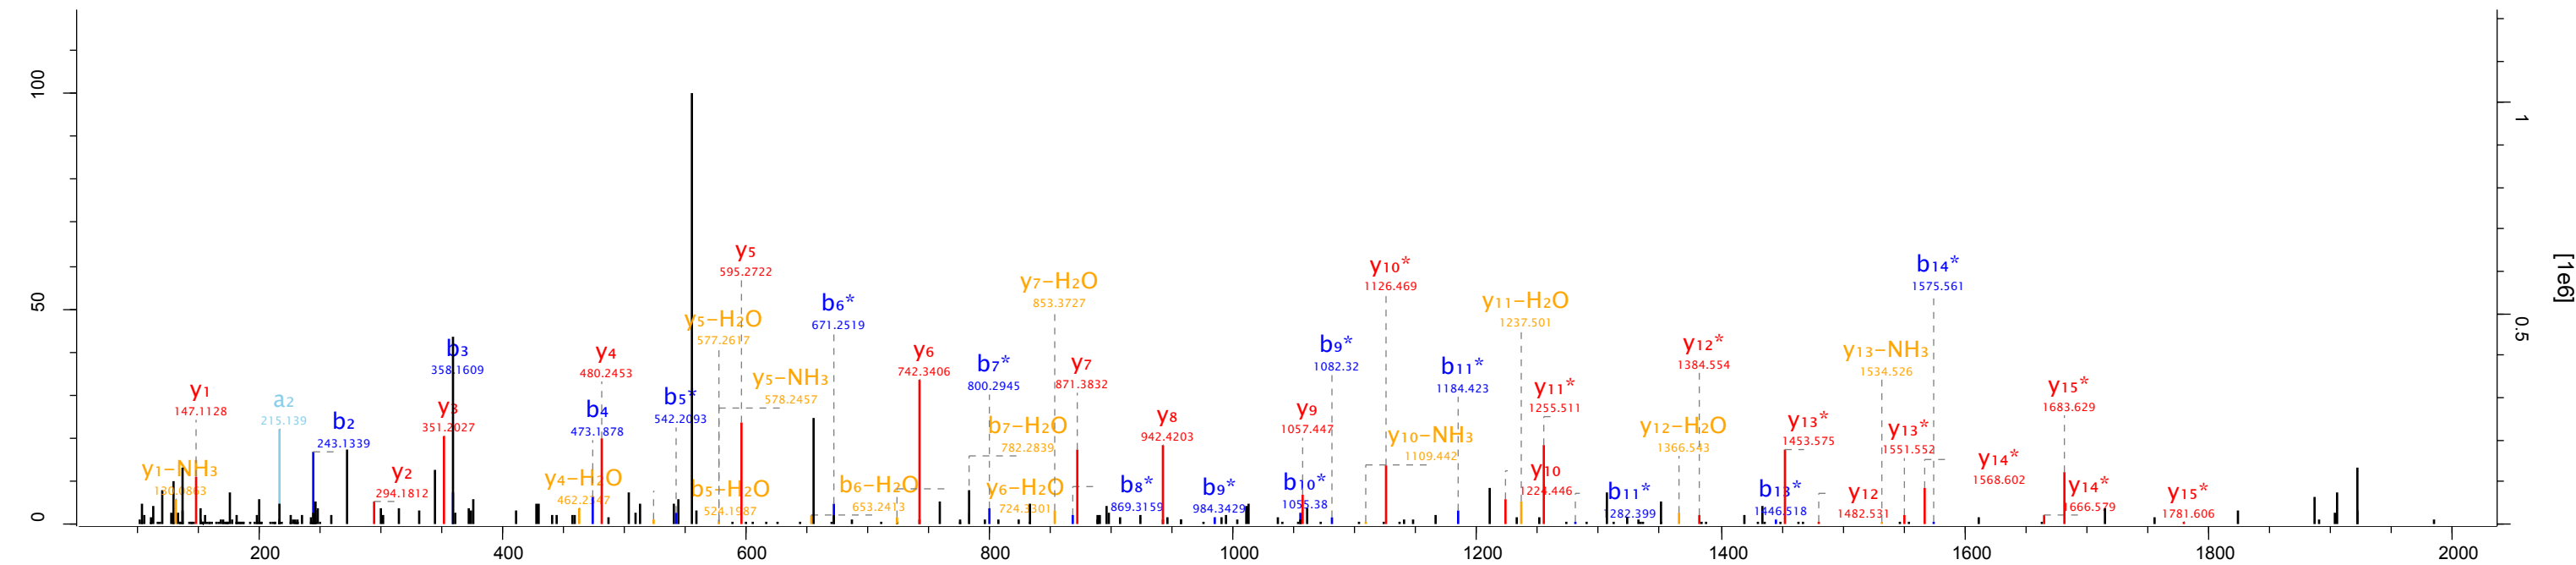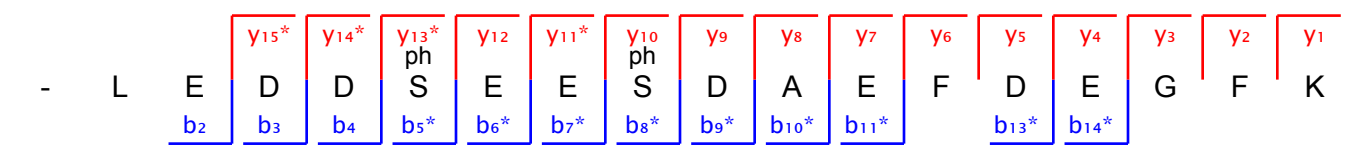

Raw file: 20150812\_A375SR\_Phospho\_BR1\_02  
 Scan: 18918 Method: FTMS; HCD Score: 96.5 m/z: 1127.46 Gene names: PCM1

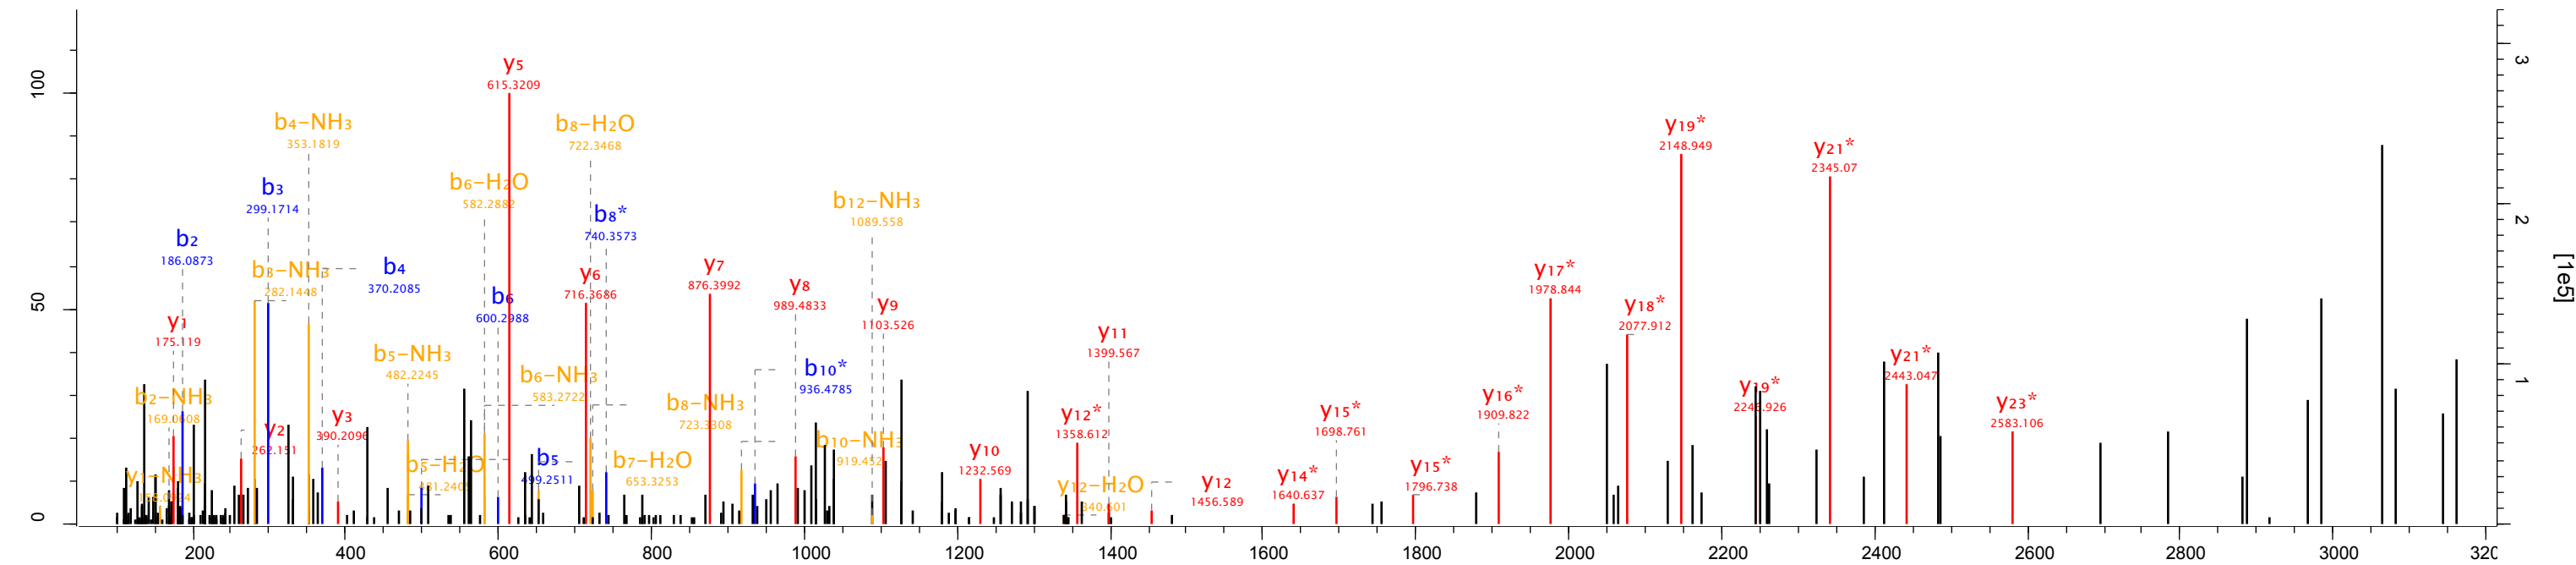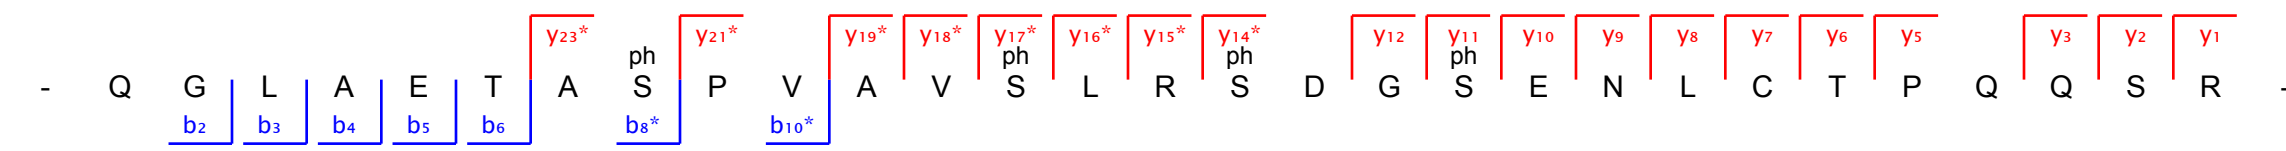

Raw file: 20150812\_A375SR\_Phospho\_BR1\_02  
 Scan: 19308 Method: FTMS; HCD Score: 91.42 m/z: 986.36 Gene names: STARD3NL

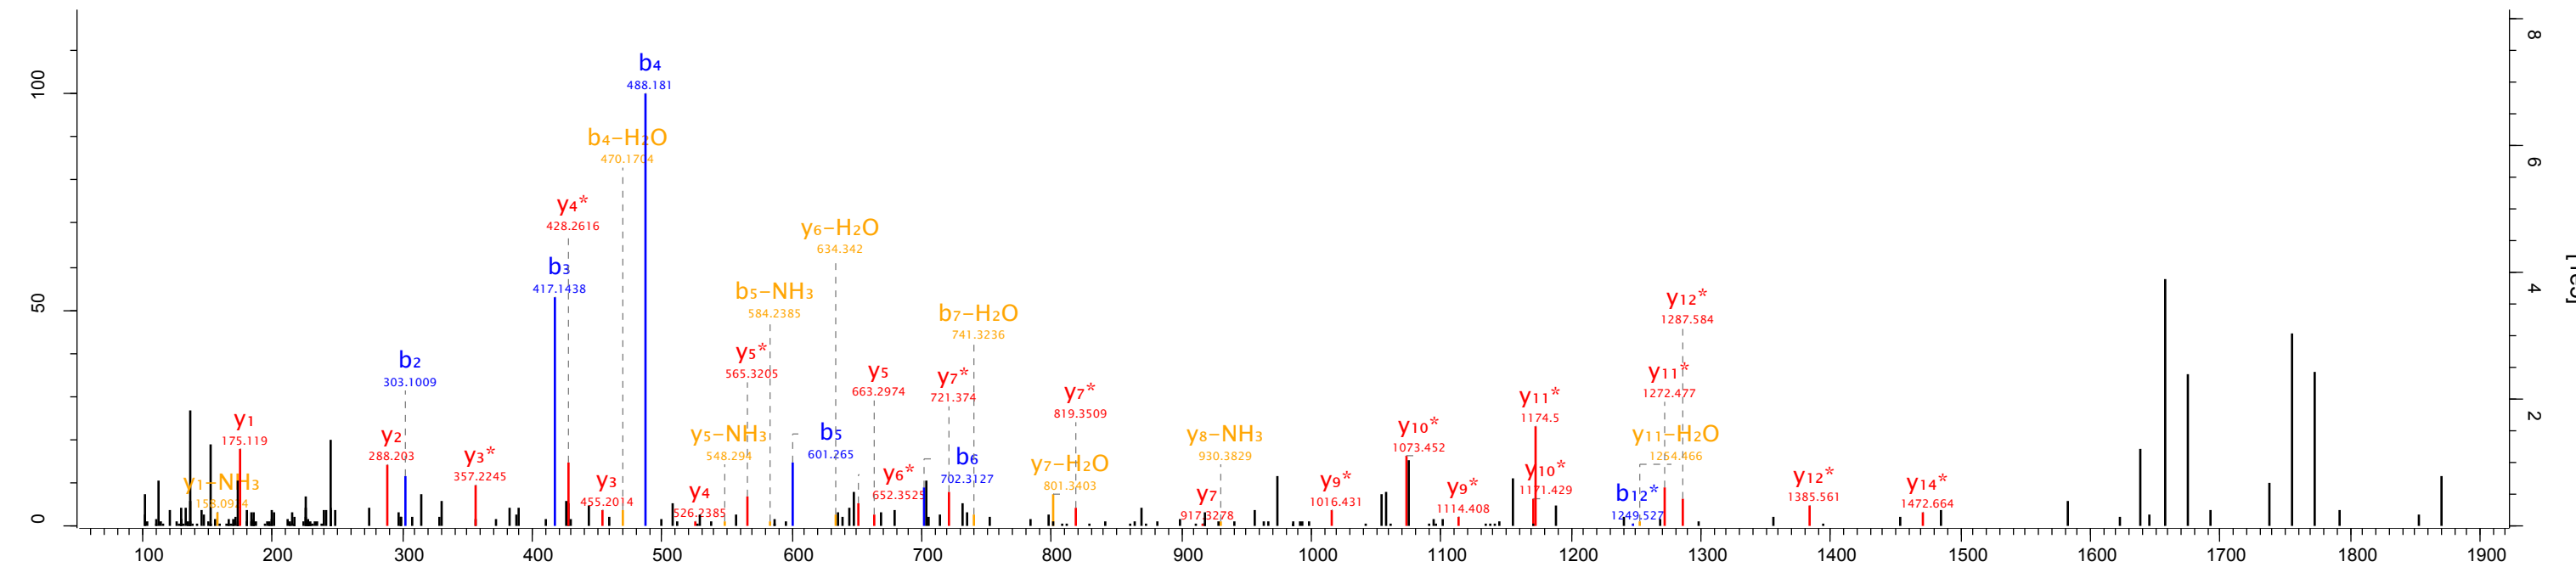

ac - M E N A L T G S Q S S H A S L R -

Fragmentation mapping (b and y ions):

- b2: M-E
- b3: M-E-N
- b4: M-E-N-A
- b5: M-E-N-A-L
- b6: M-E-N-A-L-T
- b12\*: M-E-N-A-L-T-G-S-Q-S-S-H-A-S-L-R
- y1: A
- y2: N
- y3: E
- y4: M
- y5: E-N
- y6: E-N-A
- y7: E-N-A-L
- y8: E-N-A-L-T
- y9: E-N-A-L-T-G
- y10: E-N-A-L-T-G-S
- y11: E-N-A-L-T-G-S-Q
- y12: E-N-A-L-T-G-S-Q-S
- y14: E-N-A-L-T-G-S-Q-S-S-H



Raw file: 20150812\_A375SR\_Phospho\_BR1\_02  
 Scan: 20048 Method: FTMS; HCD Score: 53.86 m/z: 1030.77 Gene names: SOX10

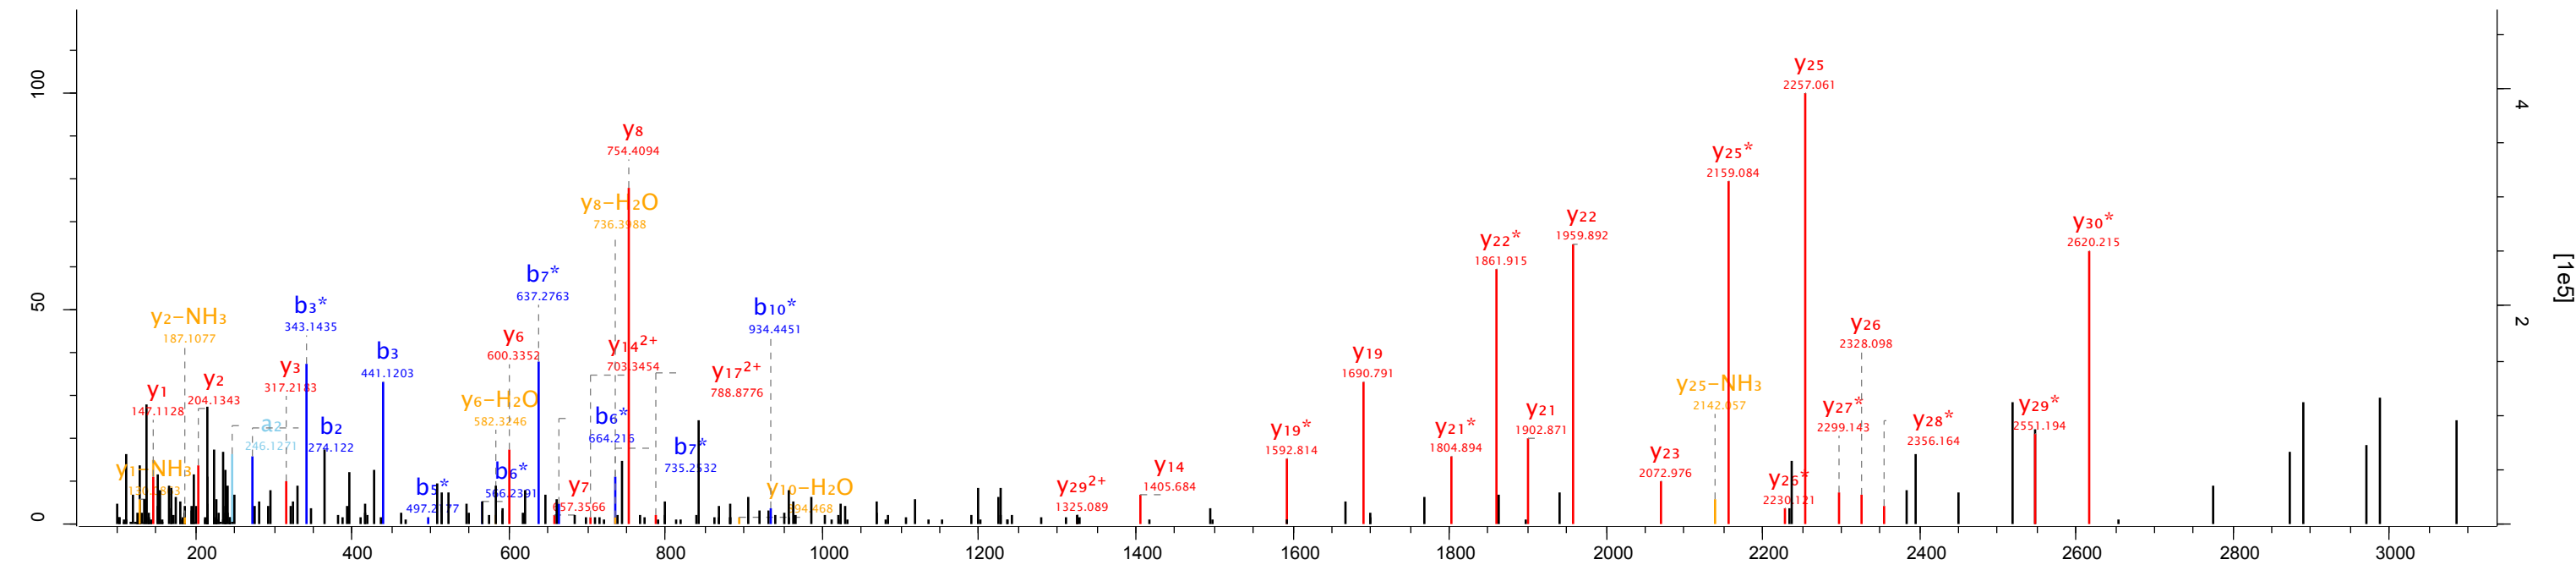

Sequence: - C L S P G S A P S L G P D G G G S G L R A S P G P G E L G K -

Fragmentation mapping (b-ions in blue, y-ions in red):

- b<sub>2</sub> (L), b<sub>3</sub> (S), b<sub>5</sub>\* (G), b<sub>6</sub>\* (S), b<sub>7</sub>\* (A)
- y<sub>1</sub> (K), y<sub>2</sub> (G), y<sub>3</sub> (L), y<sub>6</sub> (P), y<sub>7</sub> (G), y<sub>8</sub> (P), y<sub>14</sub> (S), y<sub>17</sub><sup>2+</sup> (G), y<sub>19</sub> (G), y<sub>21</sub> (P), y<sub>22</sub> (G), y<sub>23</sub> (L), y<sub>25</sub> (P), y<sub>26</sub> (A), y<sub>27</sub>\* (S), y<sub>28</sub>\* (G), y<sub>29</sub>\* (P), y<sub>30</sub>\* (L)

Raw file 20150812\_A375SR\_Phospho\_BR1\_02 Scan 20078 Method FTMS; HCD Score 42.71 m/z 911.42 Gene names KIAA0753

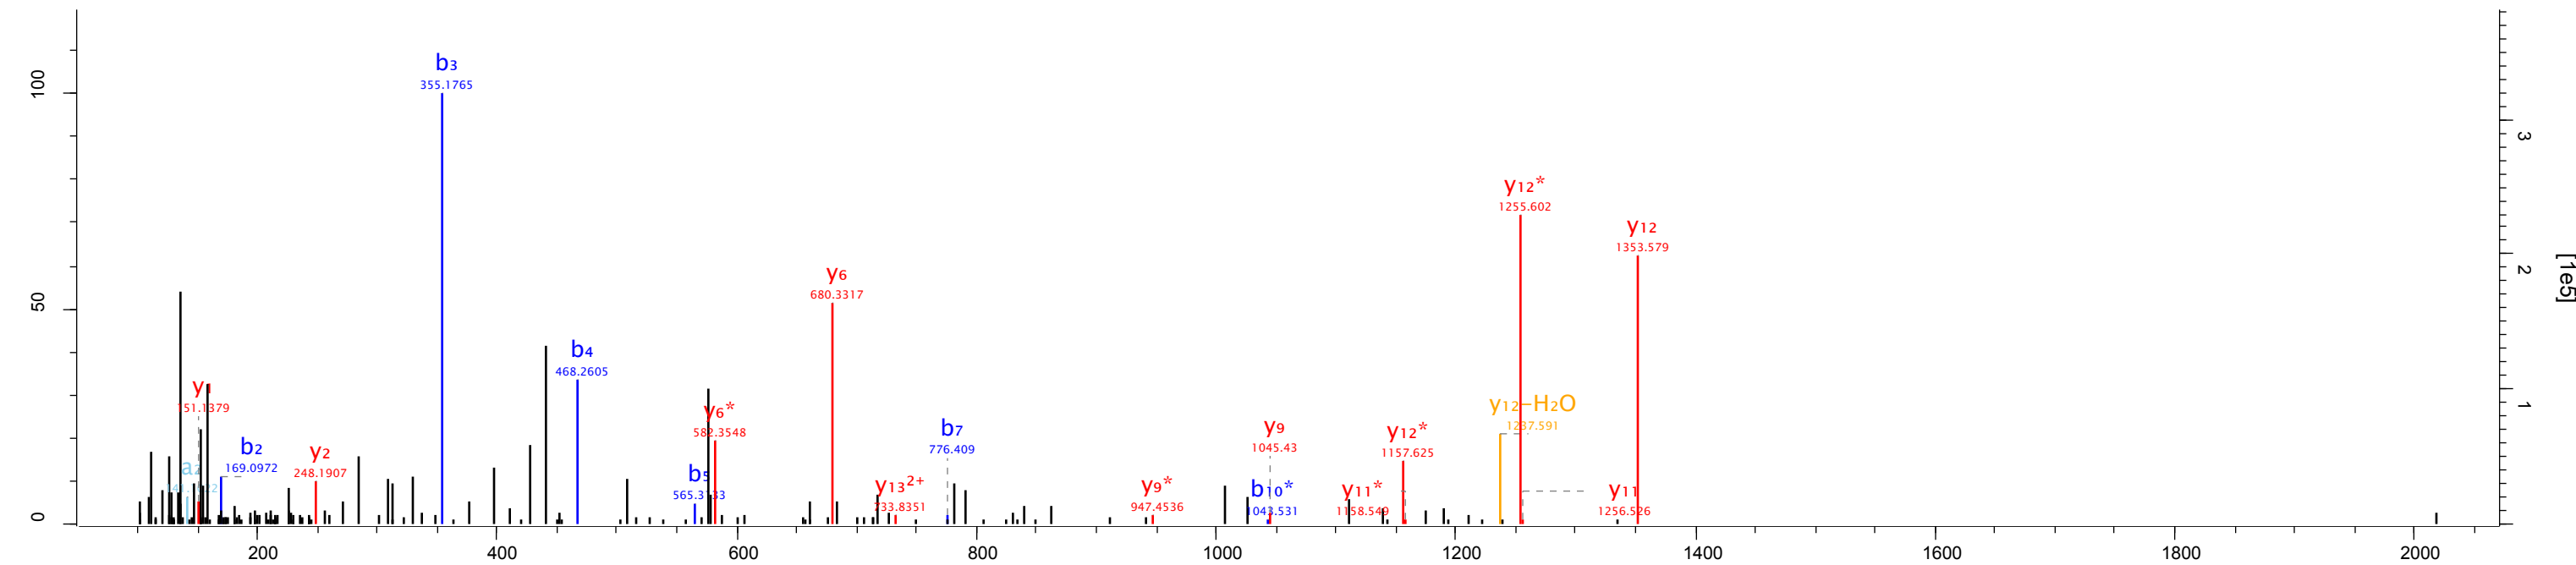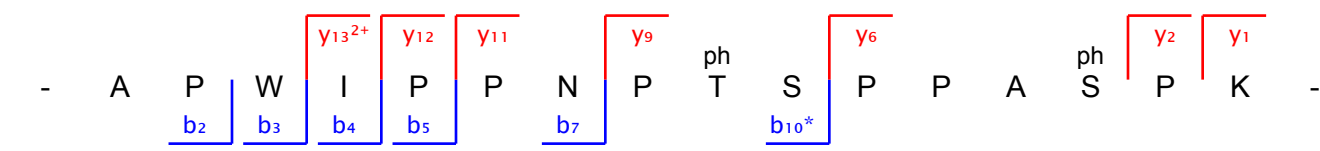

Raw file: 20150812\_A375SR\_Phospho\_BR1\_02  
 Scan: 20108  
 Method: FTMS; HCD  
 Score: 49.73  
 m/z: 998.08  
 Gene names: MYO18A

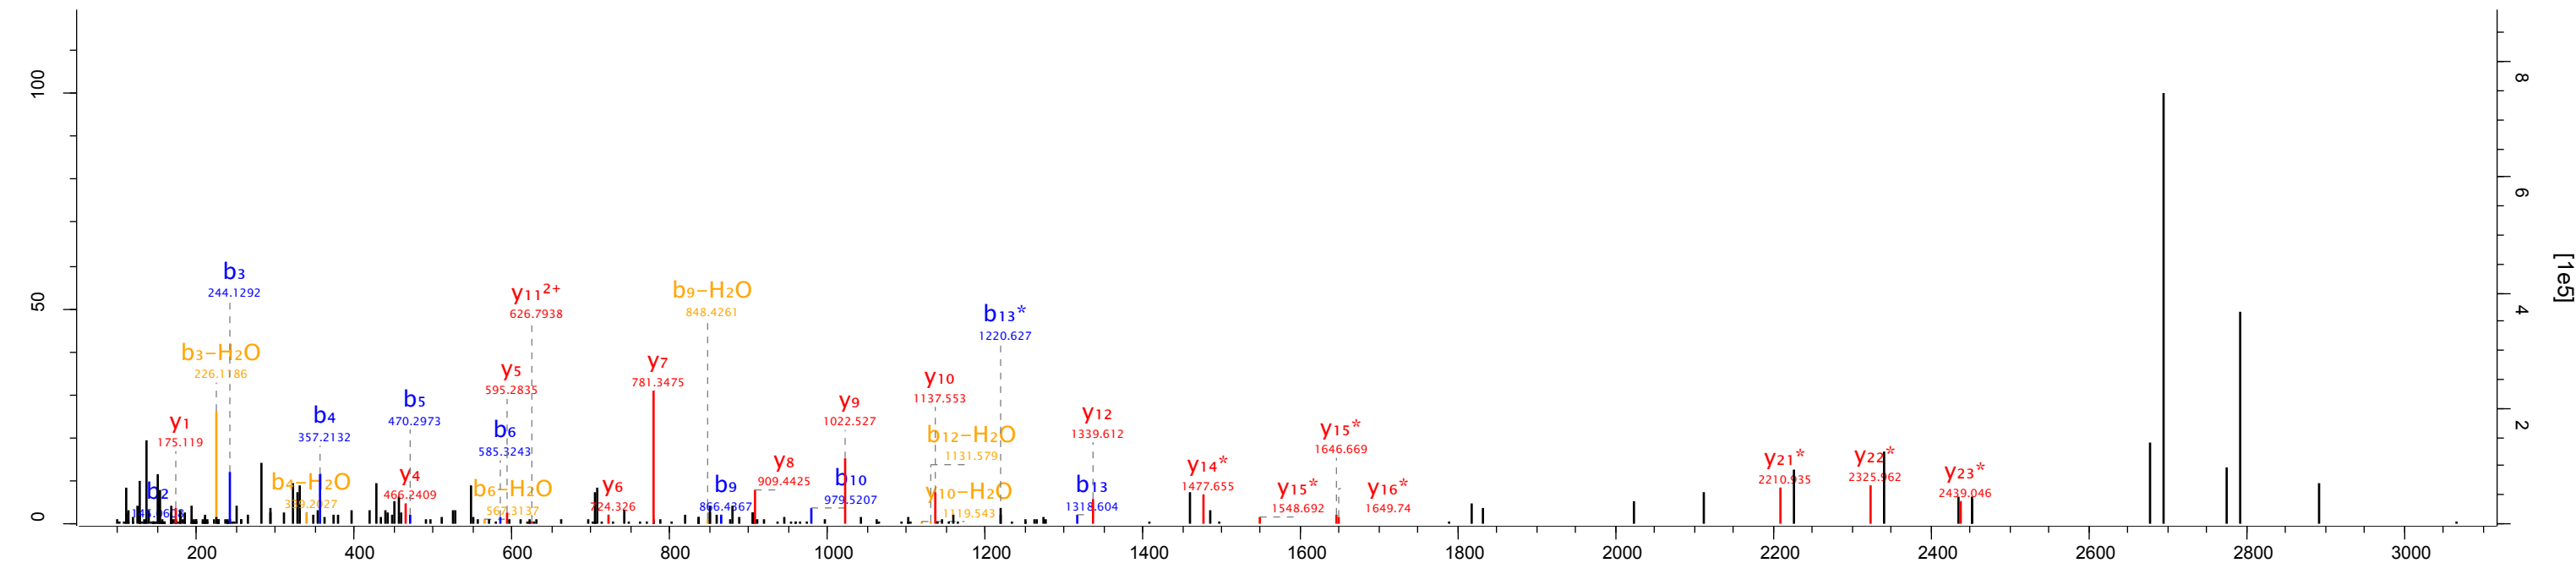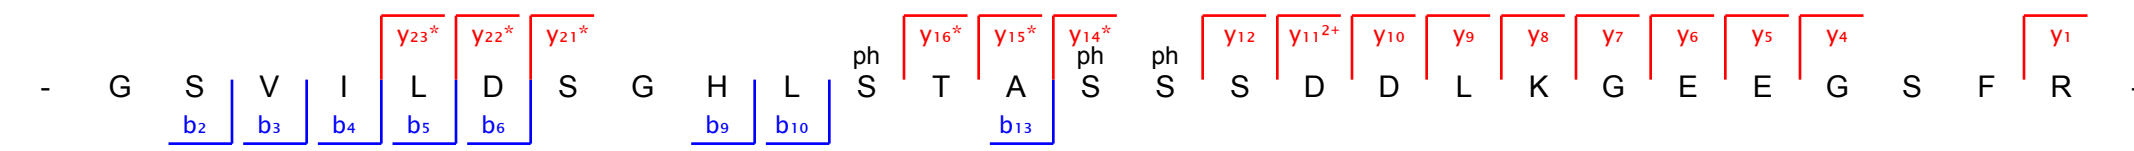

Raw file  
20150812\_A375SR\_Phospho\_BR1\_02

Scan 21988 Method FTMS; HCD Score 103.18 m/z 913.4 Gene names CAMKK2

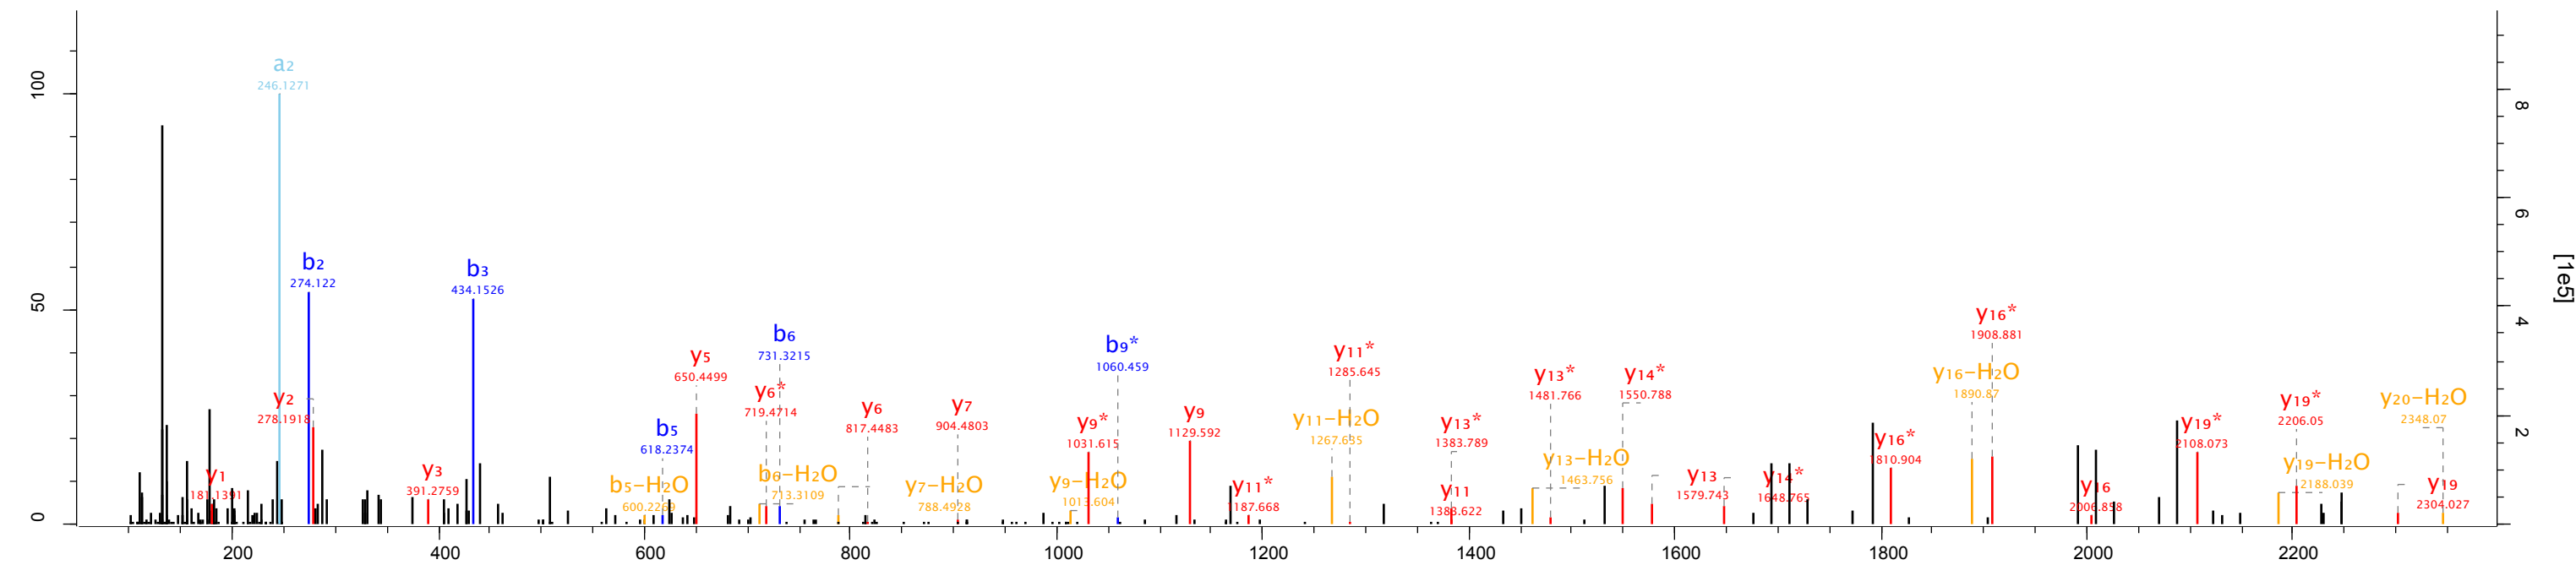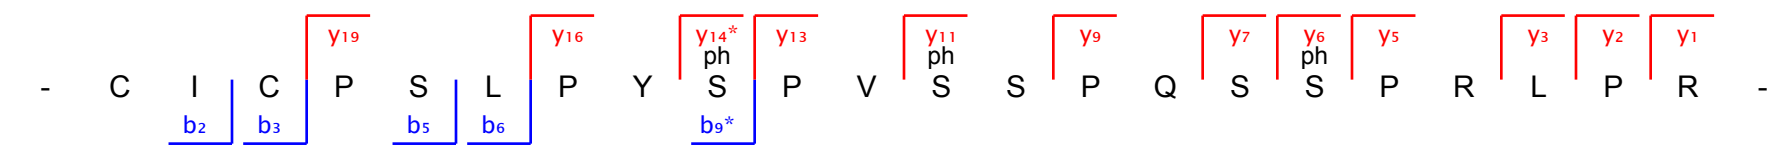

Raw file 20150812\_A375SR\_Phospho\_BR1\_02 Scan 2288 Method FTMS; HCD Score 81.36 m/z 762.27 Gene names ZC3H13

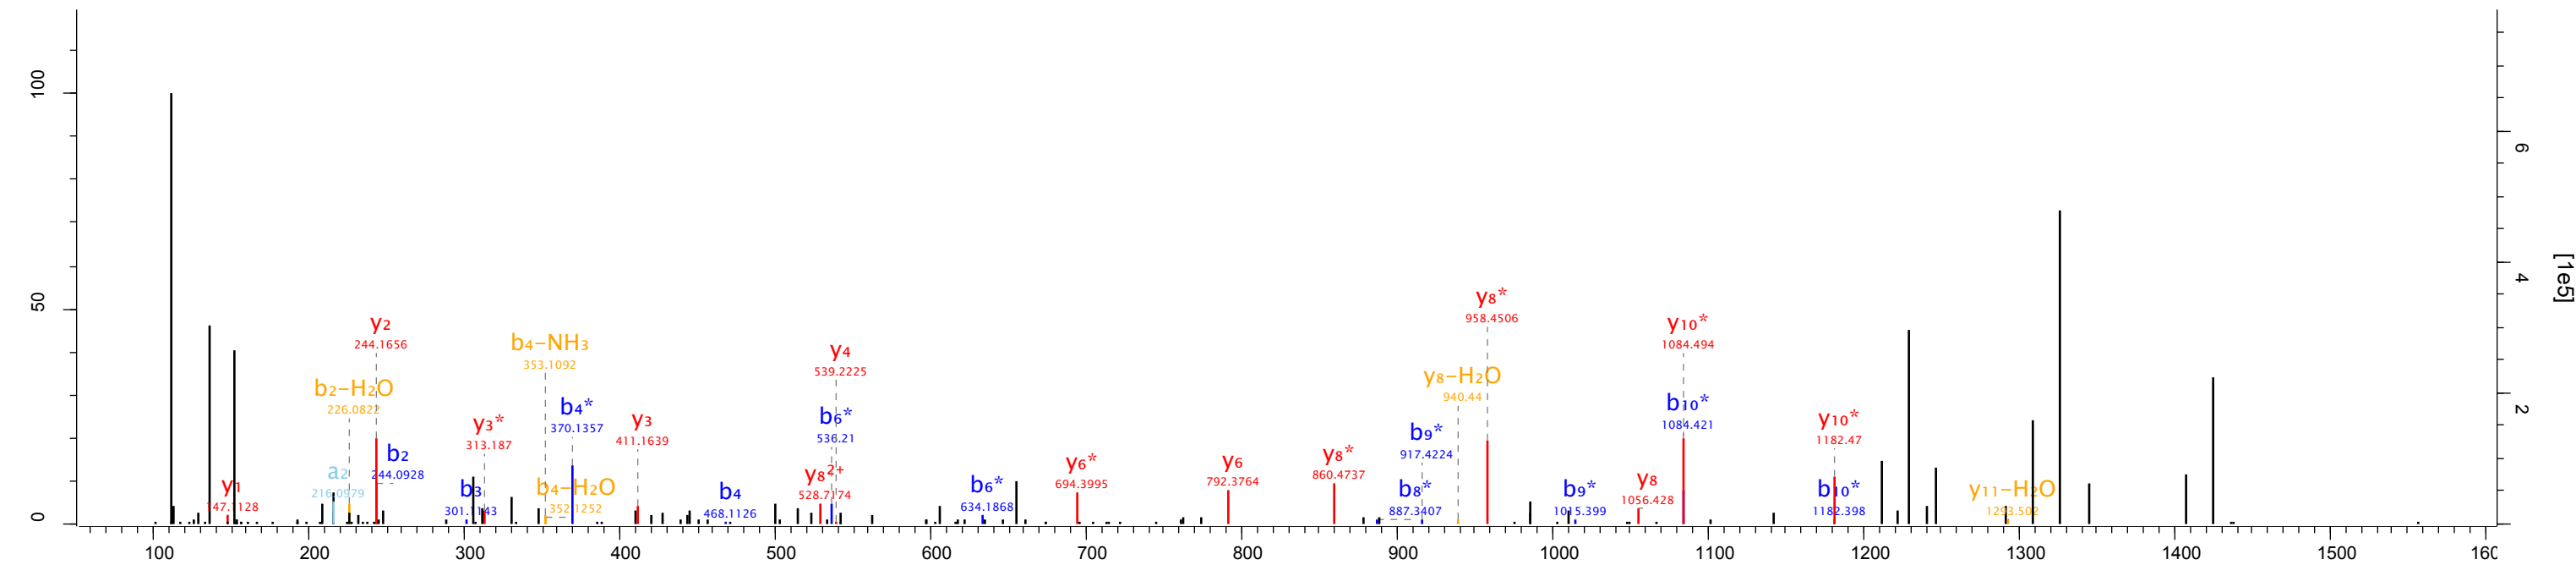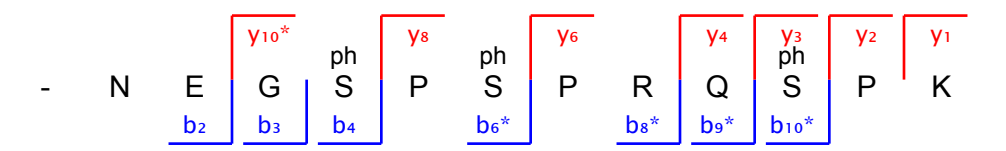

Raw file 20150812\_A375SR\_Phospho\_BR1\_02 Scan 23508 Method FTMS; HCD Score 59.96 m/z 1053.12 Gene names KRI1

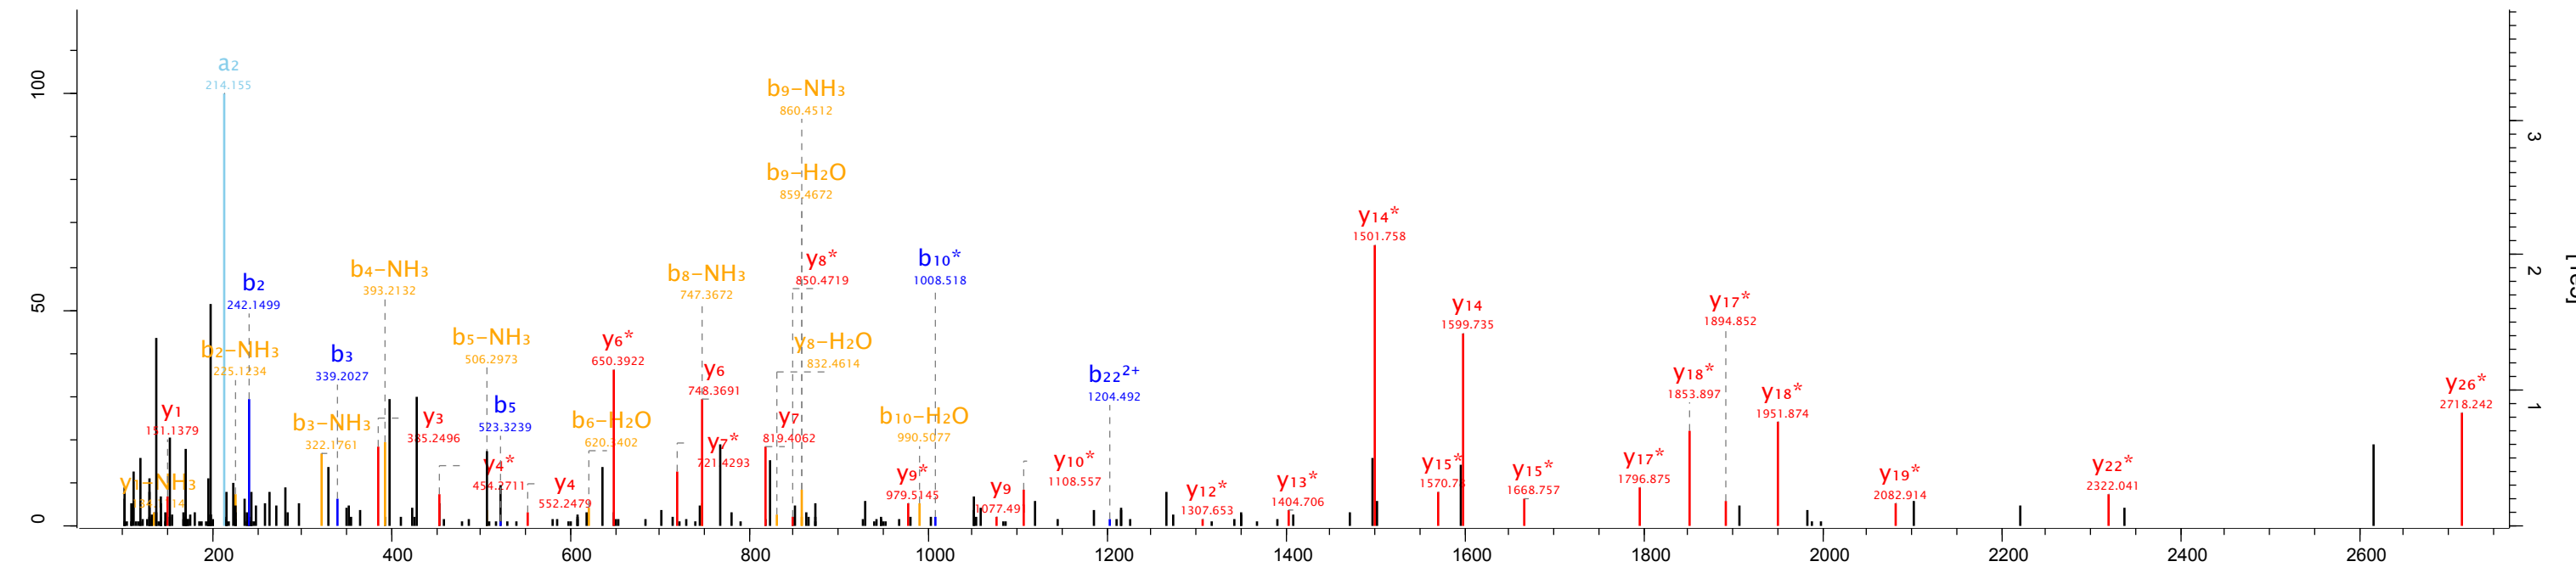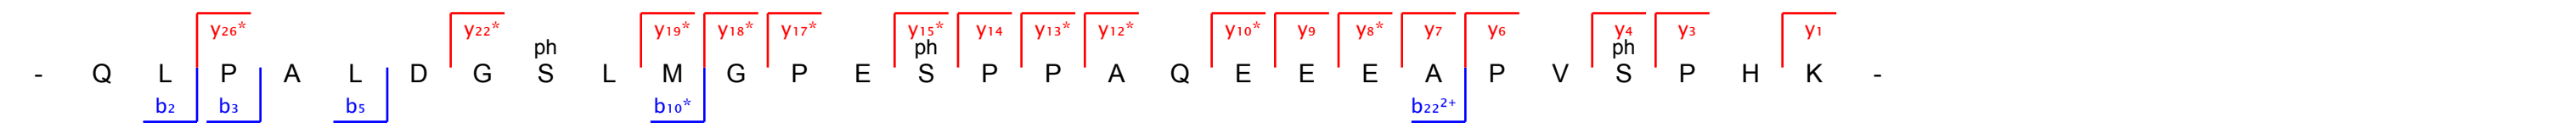

Raw file 20150812\_A375SR\_Phospho\_BR1\_02 Scan 24468 Method FTMS; HCD Score 98.64 m/z 817.7 Gene names SUPT6H

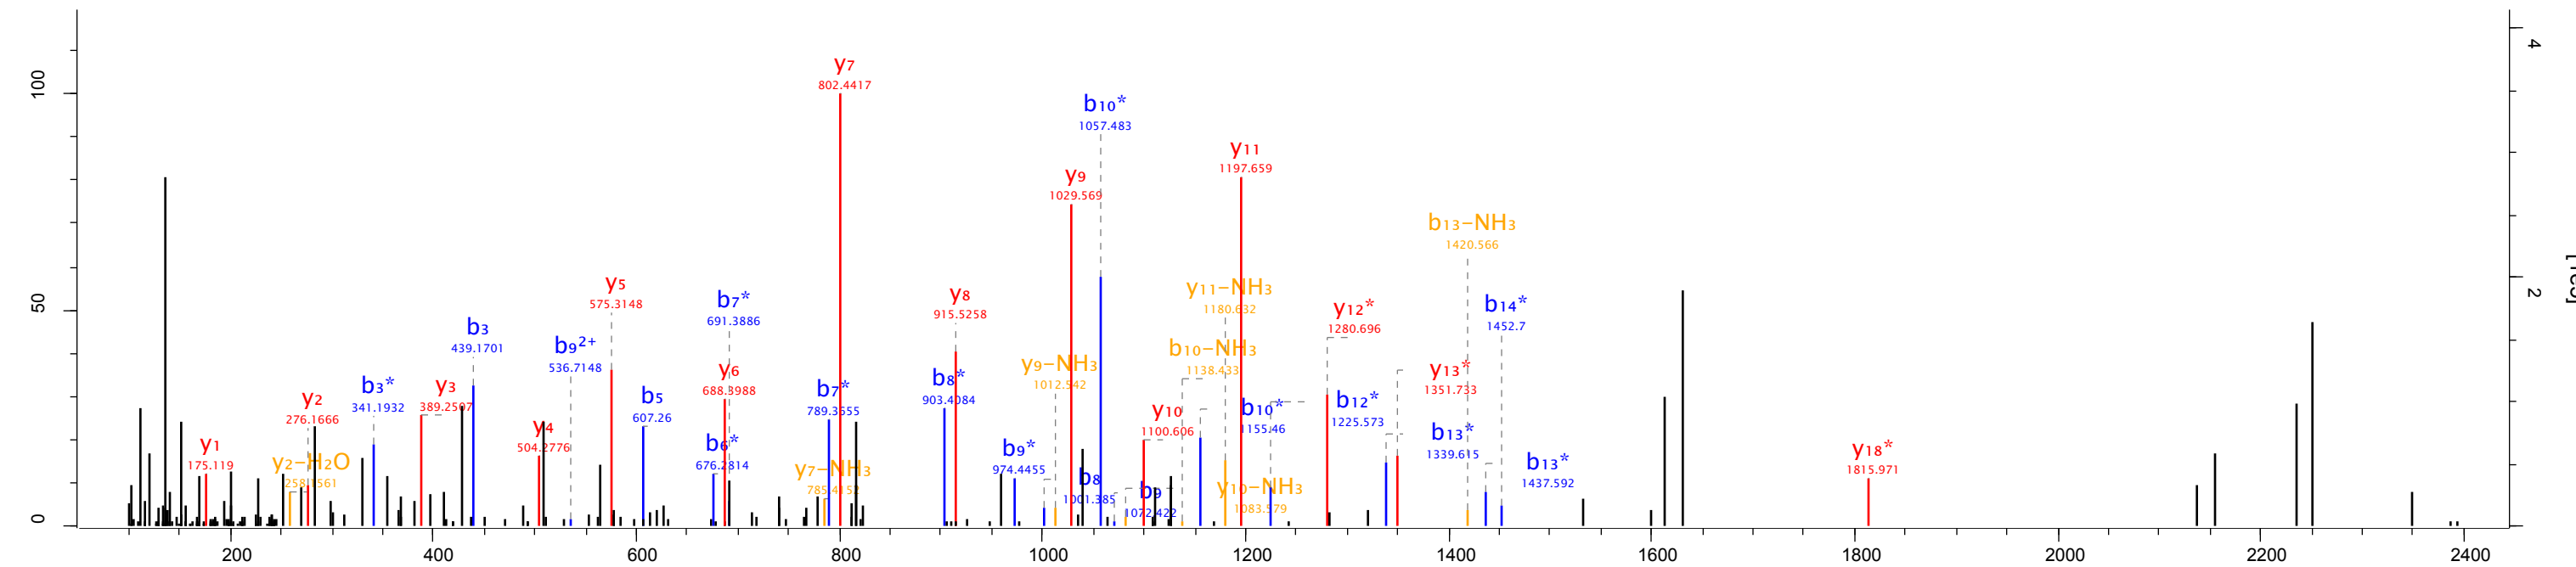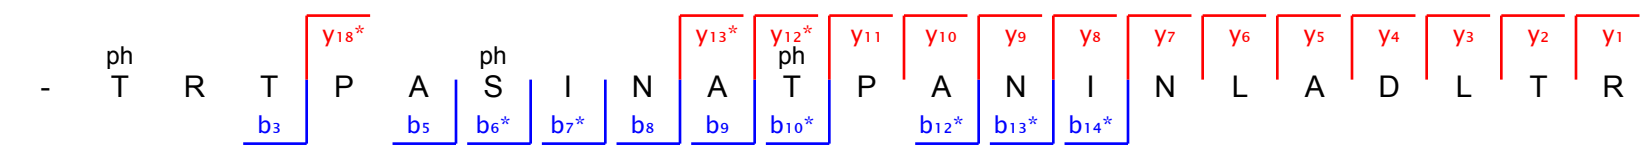

Raw file 20150812\_A375SR\_Phospho\_BR1\_02 Scan 27598 Method FTMS; HCD Score 123.32 m/z 1034.25 Gene names FAM117B

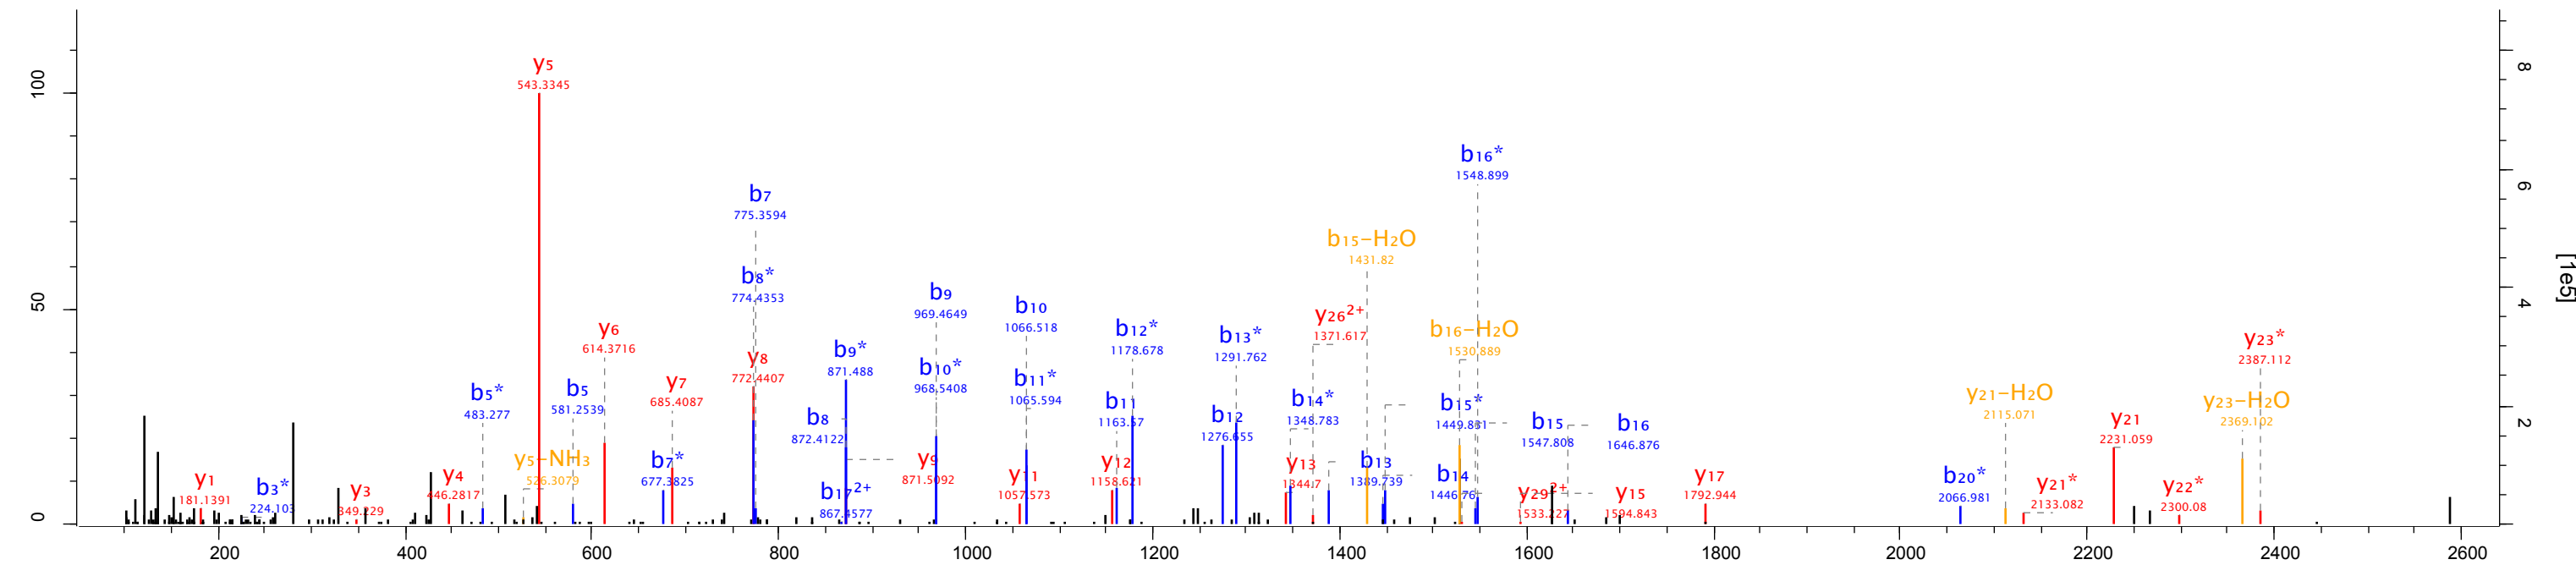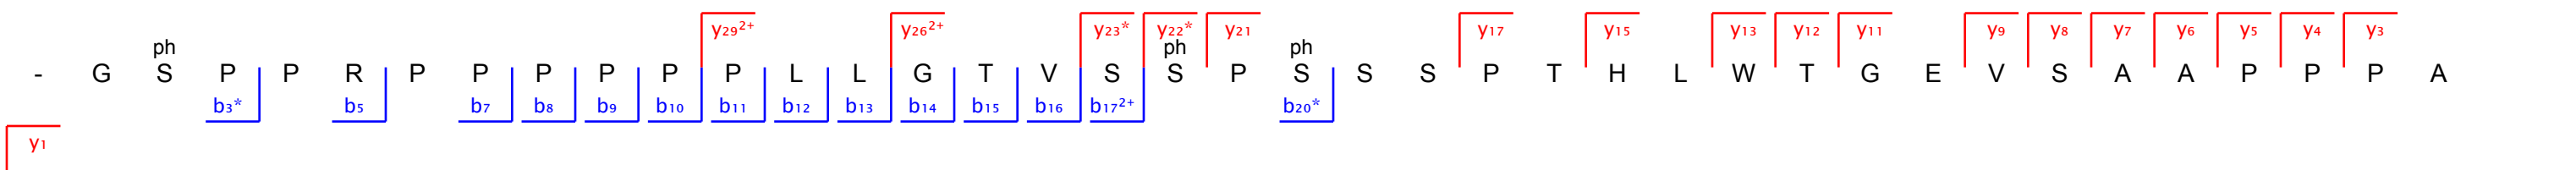



Raw file: 20150812\_A375SR\_Phospho\_BR1\_02  
 Scan: 2958 Method: FTMS; HCD Score: 80.34 m/z: 867.32 Gene names: PRPF38B

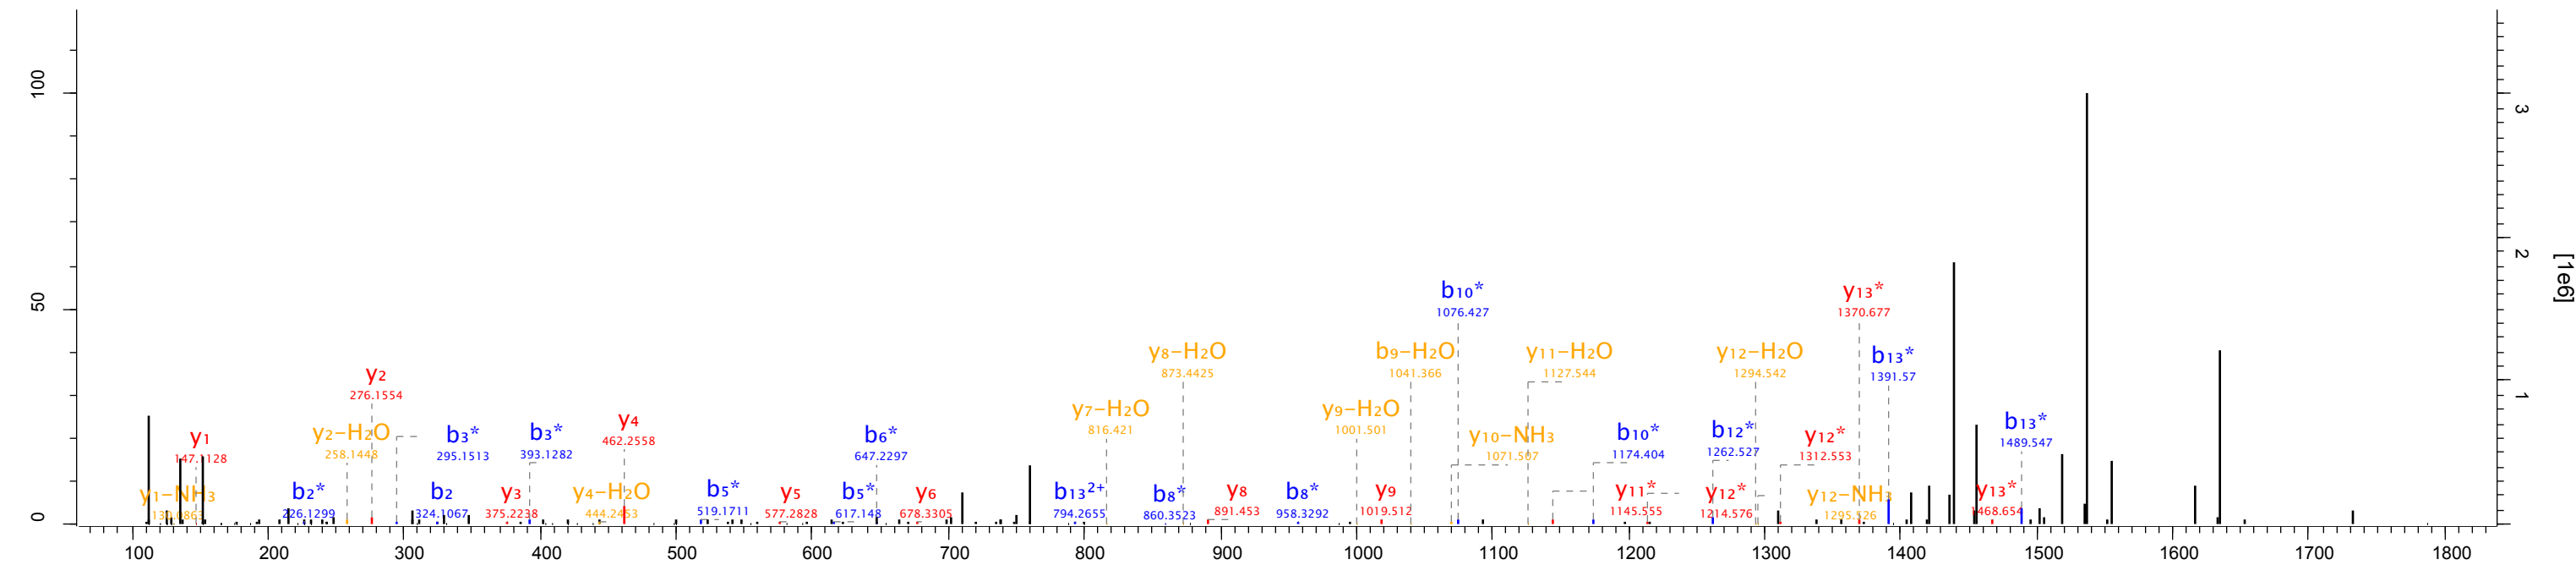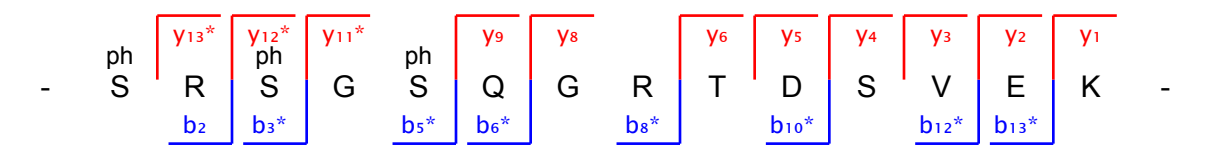



Raw file: 20150812\_A375SR\_Phospho\_BR1\_02  
 Scan: 4078 Method: FTMS; HCD Score: 86.88 m/z: 474.7 Gene names: PRPF4B

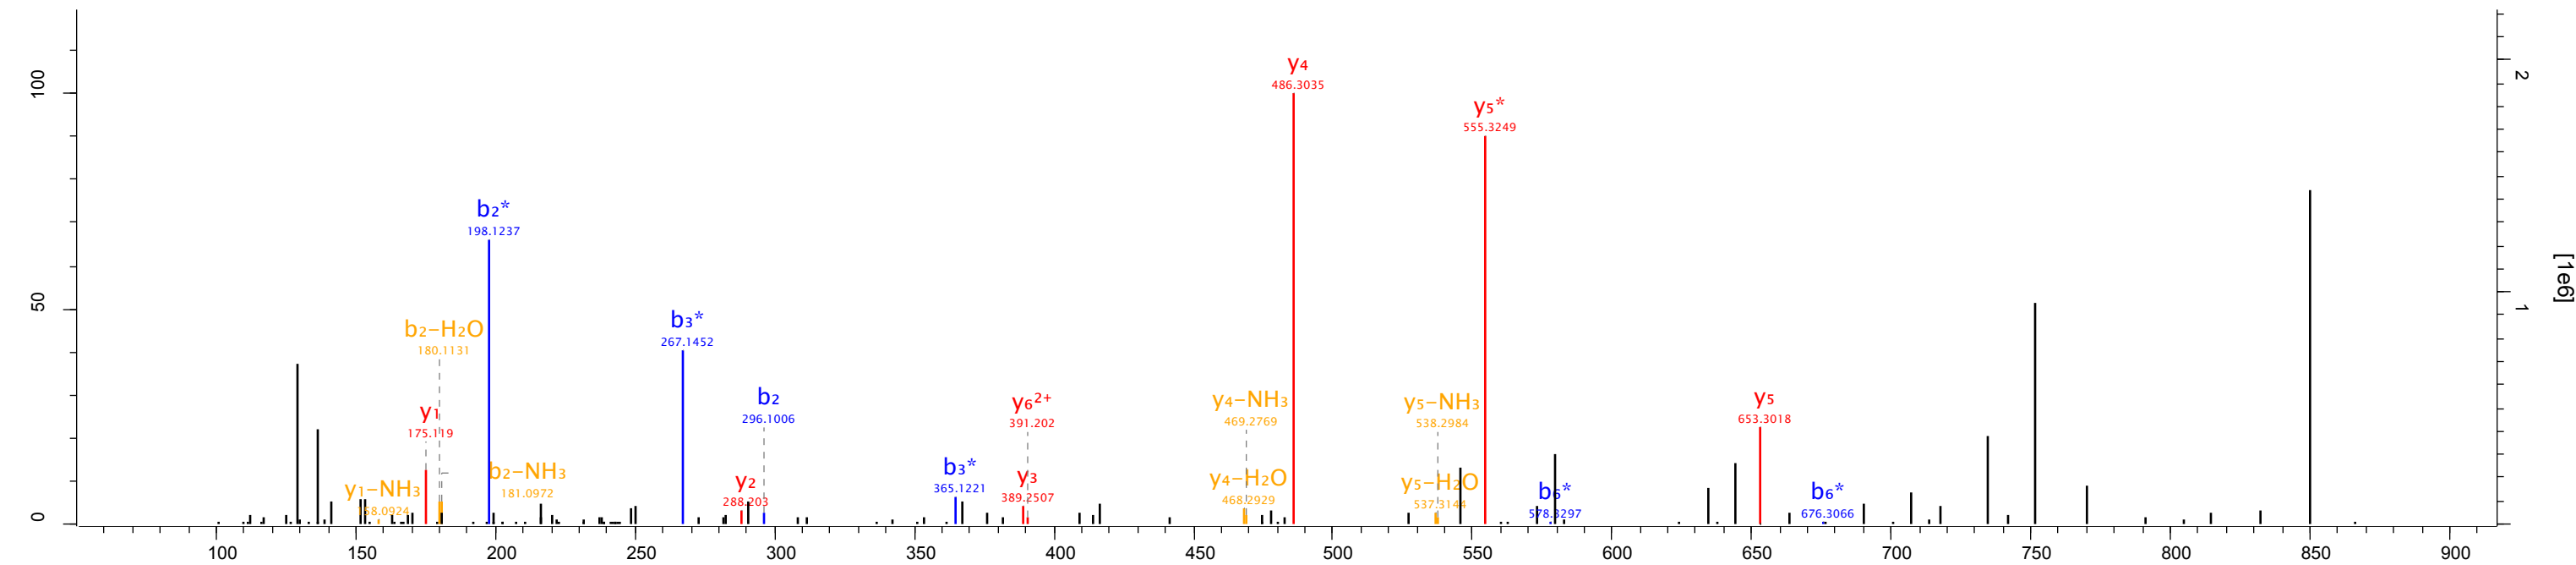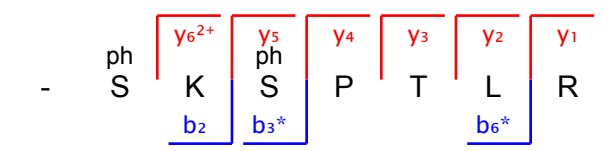

Raw file: 20150812\_A375SR\_Phospho\_BR1\_02  
 Scan: 4558 Method: FTMS; HCD Score: 62.74 m/z: 598.9 Gene names: ZC3H13

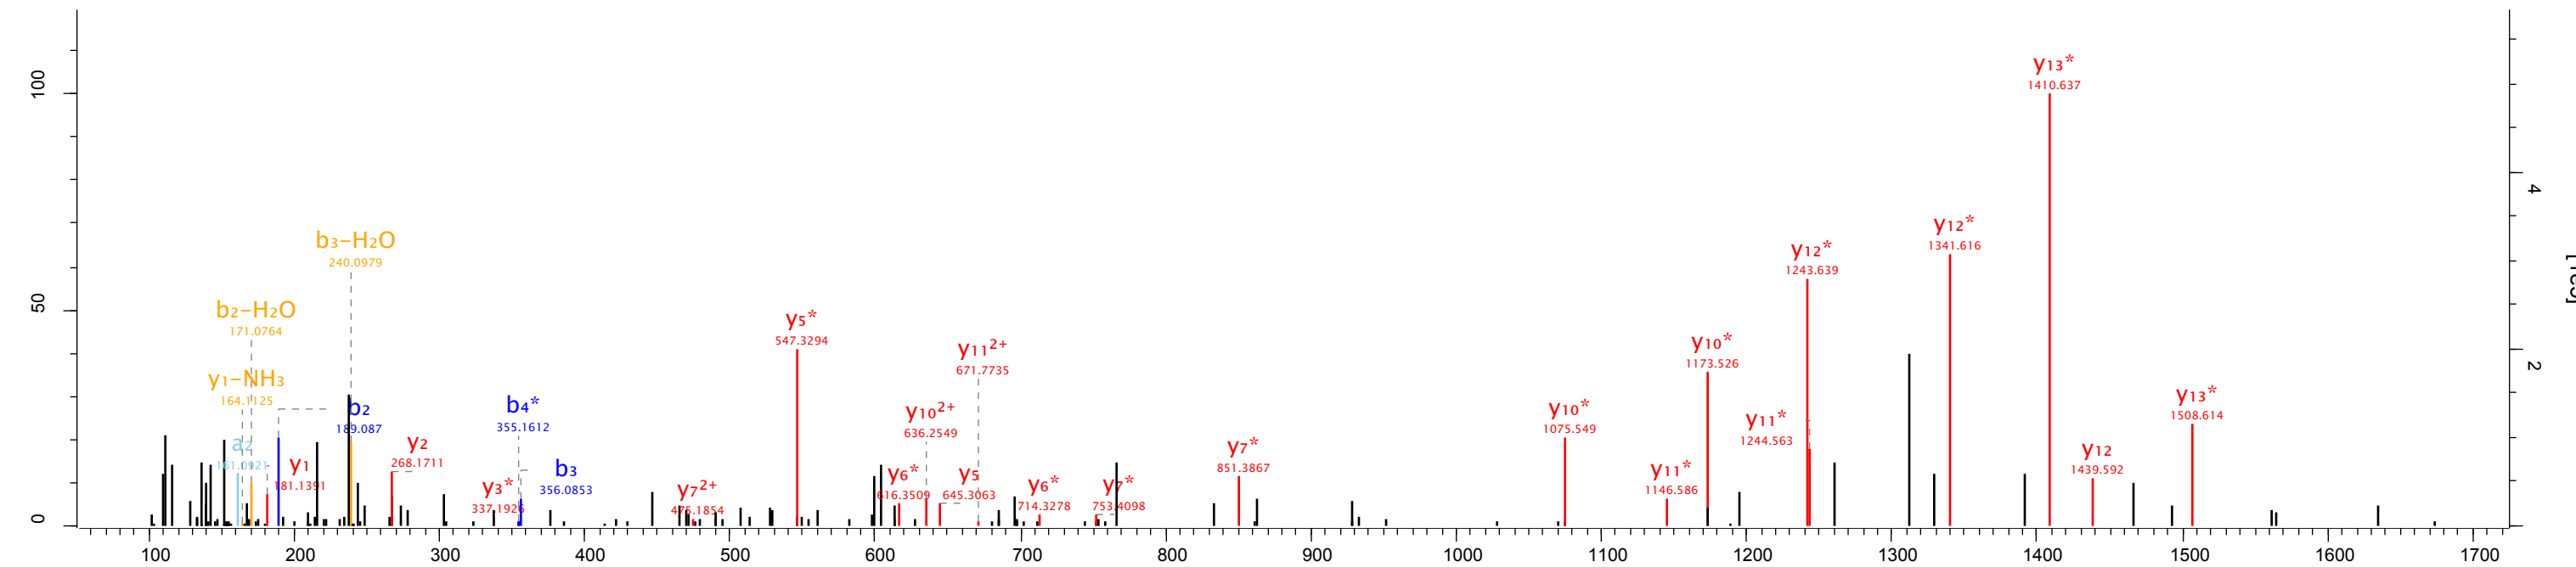

Sequence: - S T S P A G Q H H S P I S S R -

Fragmentation sites (b-ions in blue, y-ions in red):

- b<sub>2</sub> (between T and S)
- b<sub>3</sub> (between S and P)
- b<sub>4</sub>\* (between P and A)
- y<sub>13</sub>\* (between S and P)
- y<sub>12</sub> (between P and A)
- y<sub>11</sub>\* (between A and G)
- y<sub>10</sub>\* (between G and Q)
- y<sub>7</sub>\* (between H and H)
- y<sub>6</sub>\* (between S and P)
- y<sub>5</sub> (between P and I)
- y<sub>3</sub>\* (between S and S)
- y<sub>2</sub> (between S and P)
- y<sub>1</sub> (between P and R)

Raw file: 20150812\_A375SR\_Phospho\_BR1\_02  
 Scan: 4888 Method: FTMS; HCD Score: 54.86 m/z: 787.35 Gene names: SRRM1

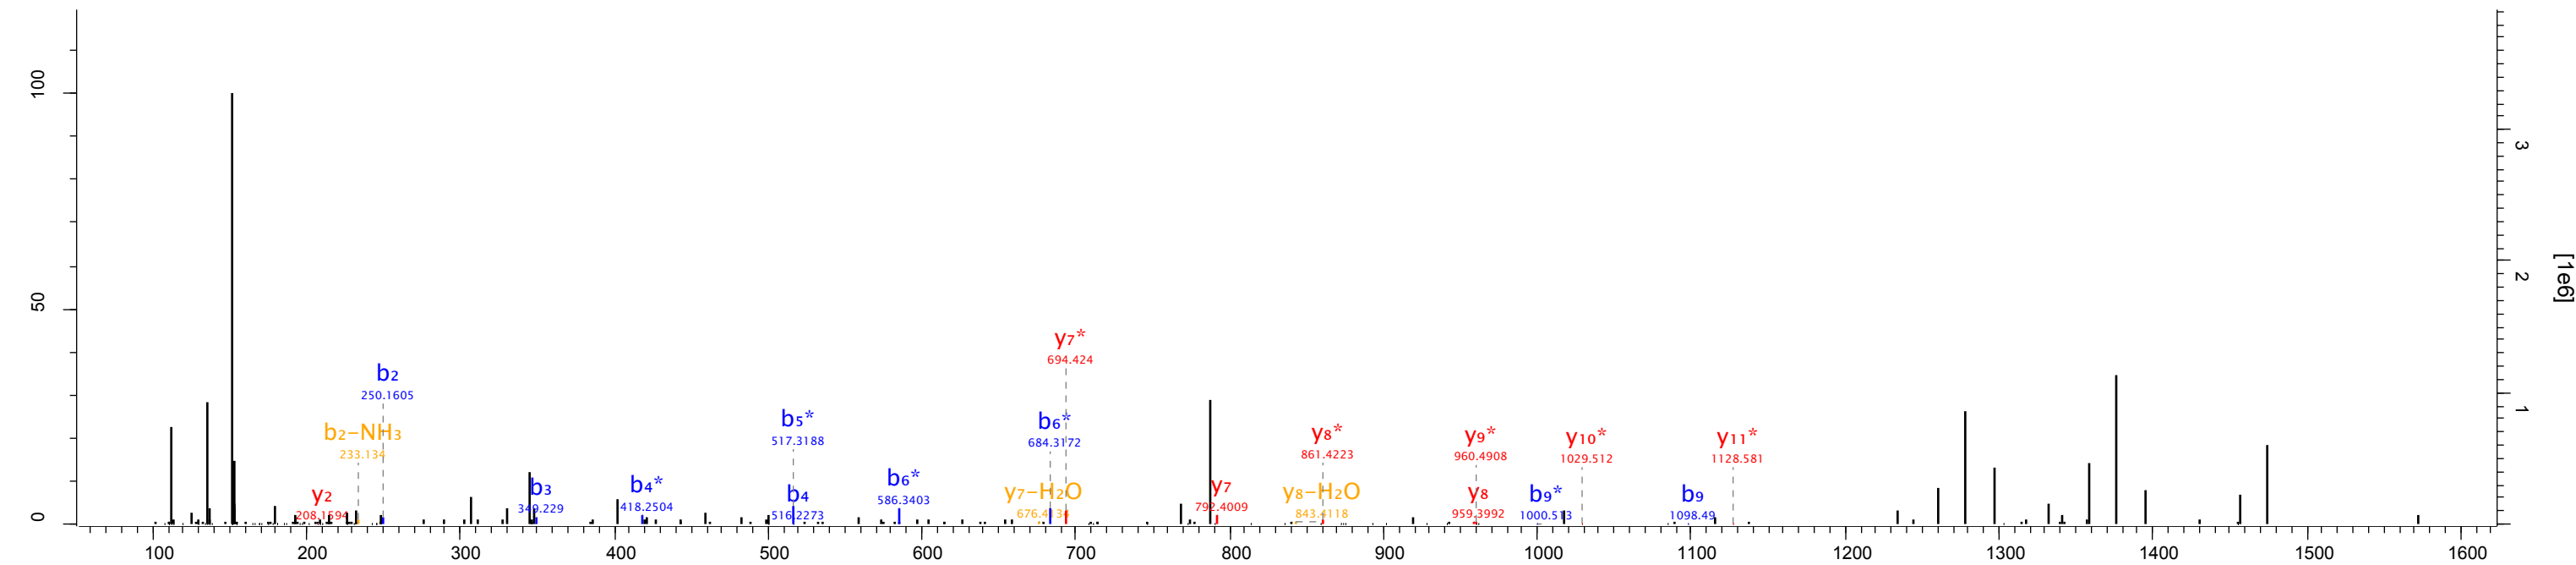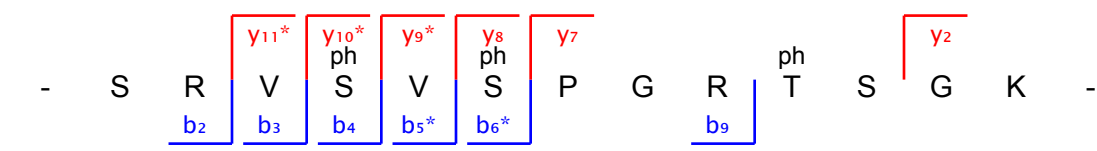

Raw file: 20150812\_A375SR\_Phospho\_BR1\_02  
 Scan: 5428 Method: FTMS; HCD Score: 70.45 m/z: 1036.89 Gene names: SNIP1

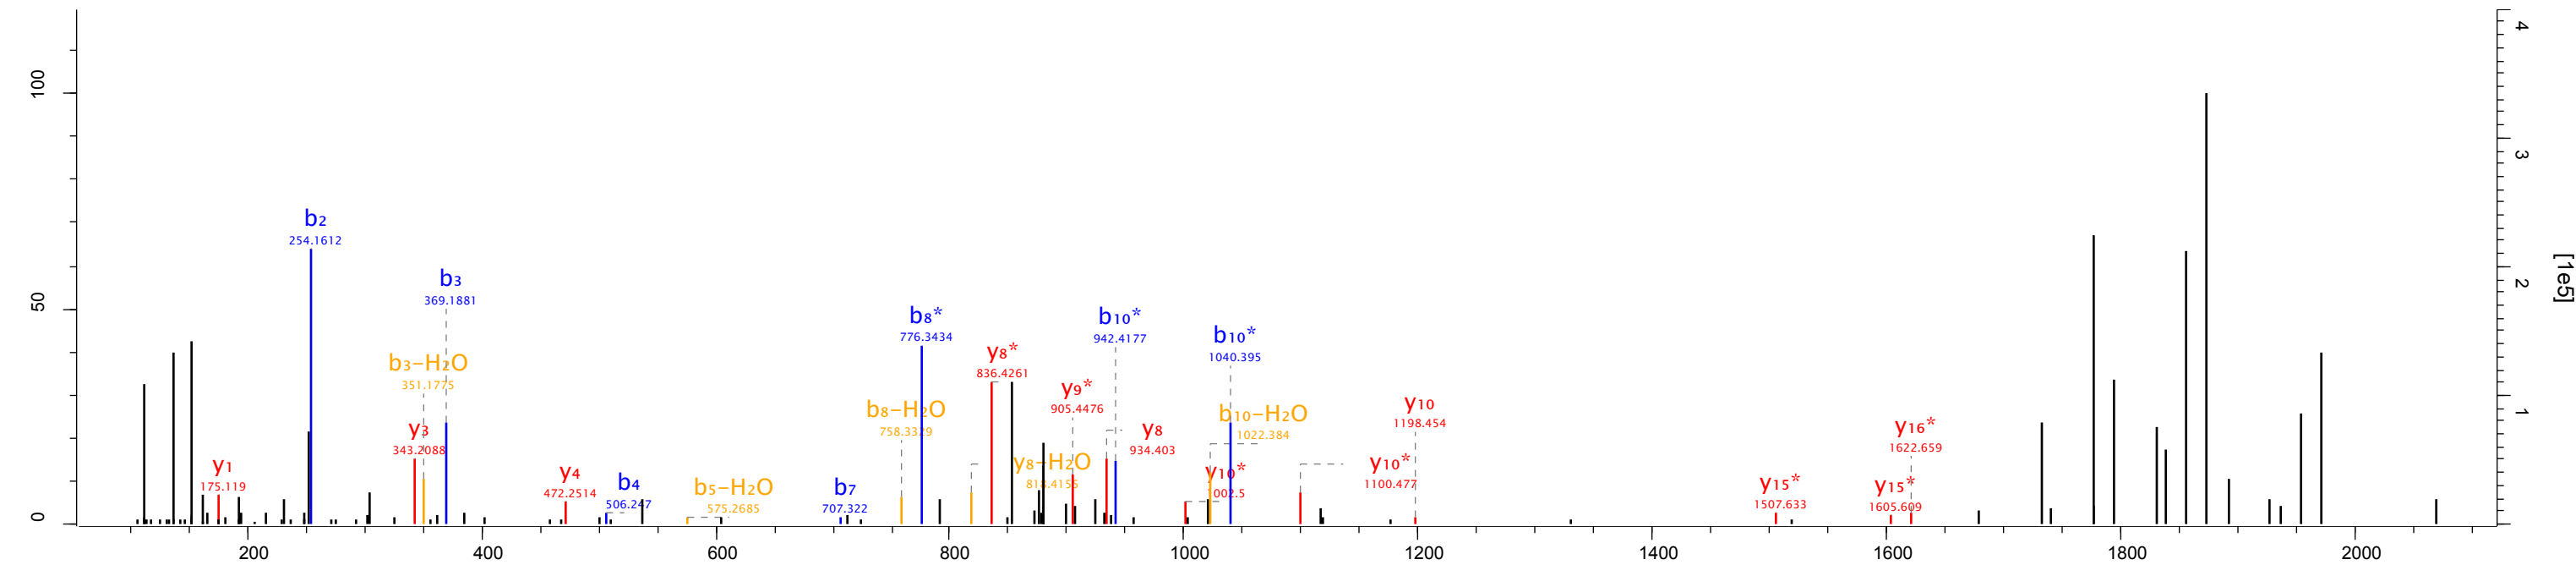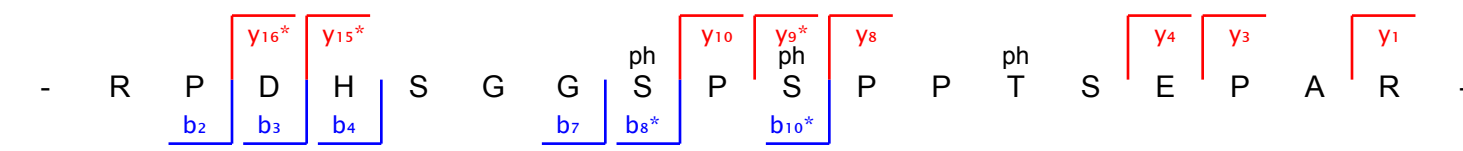

Raw file: 20150812\_A375SR\_Phospho\_BR1\_02  
 Scan: 5758 Method: FTMS; HCD Score: 56.77 m/z: 702.23 Gene names: SRSF9

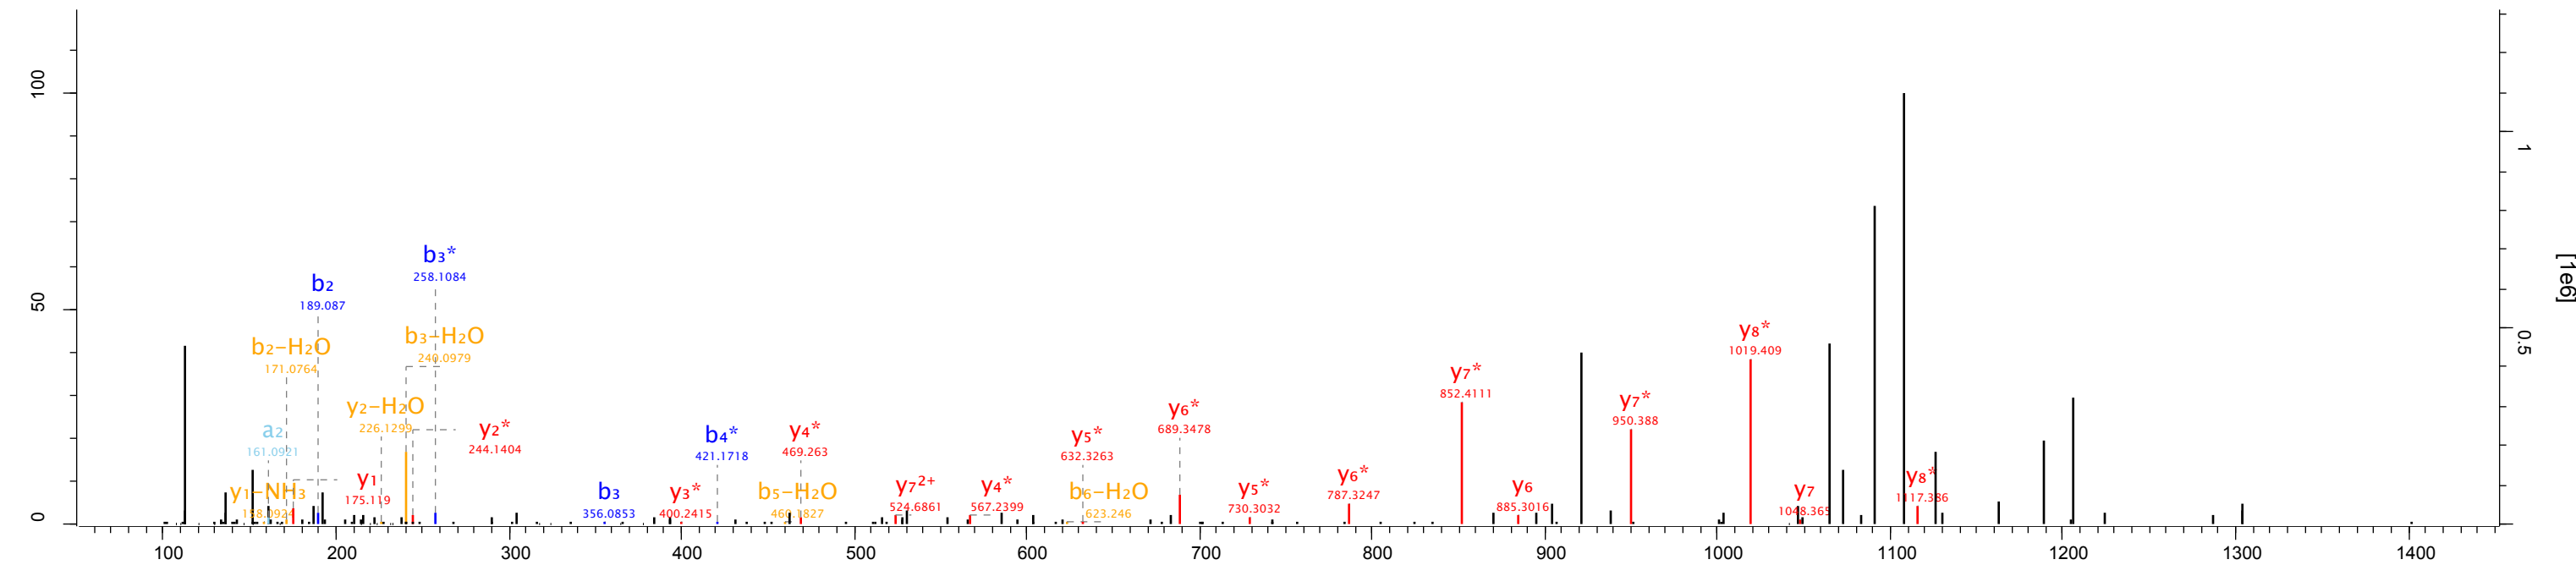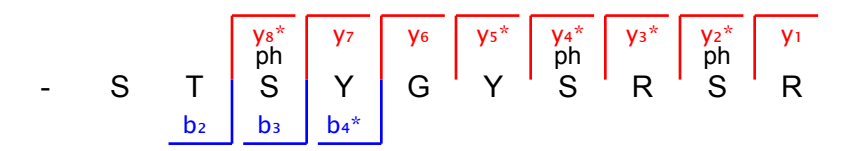

Raw file: 20150812\_A375SR\_Phospho\_BR1\_02  
 Scan: 5888 Method: FTMS; HCD Score: 45.89 m/z: 567.92 Gene names: PRR12

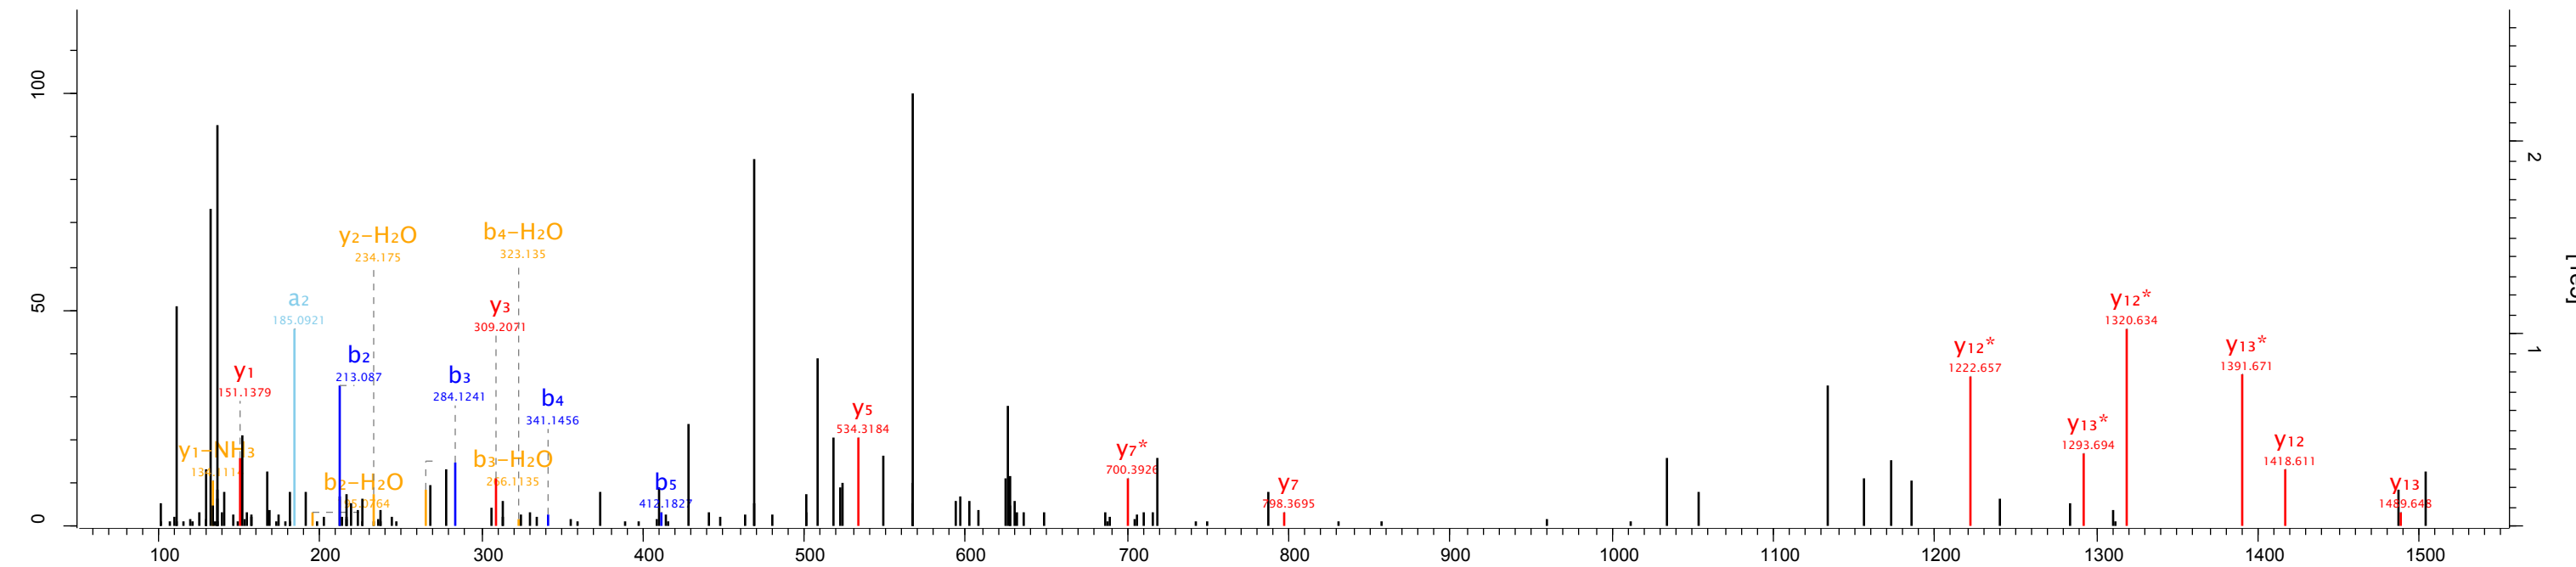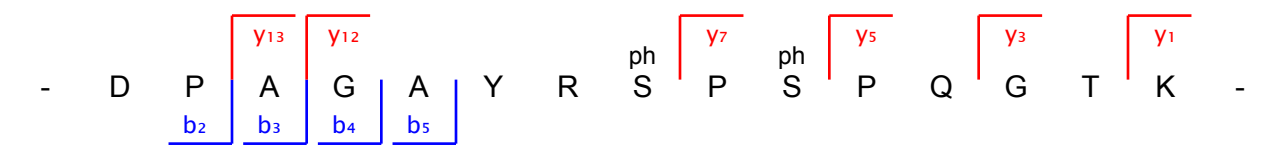



Raw file: 20150812\_A375SR\_Phospho\_BR1\_02  
 Scan: 5998 Method: FTMS; HCD Score: 170.23 m/z: 729.76 Gene names: SRRM2

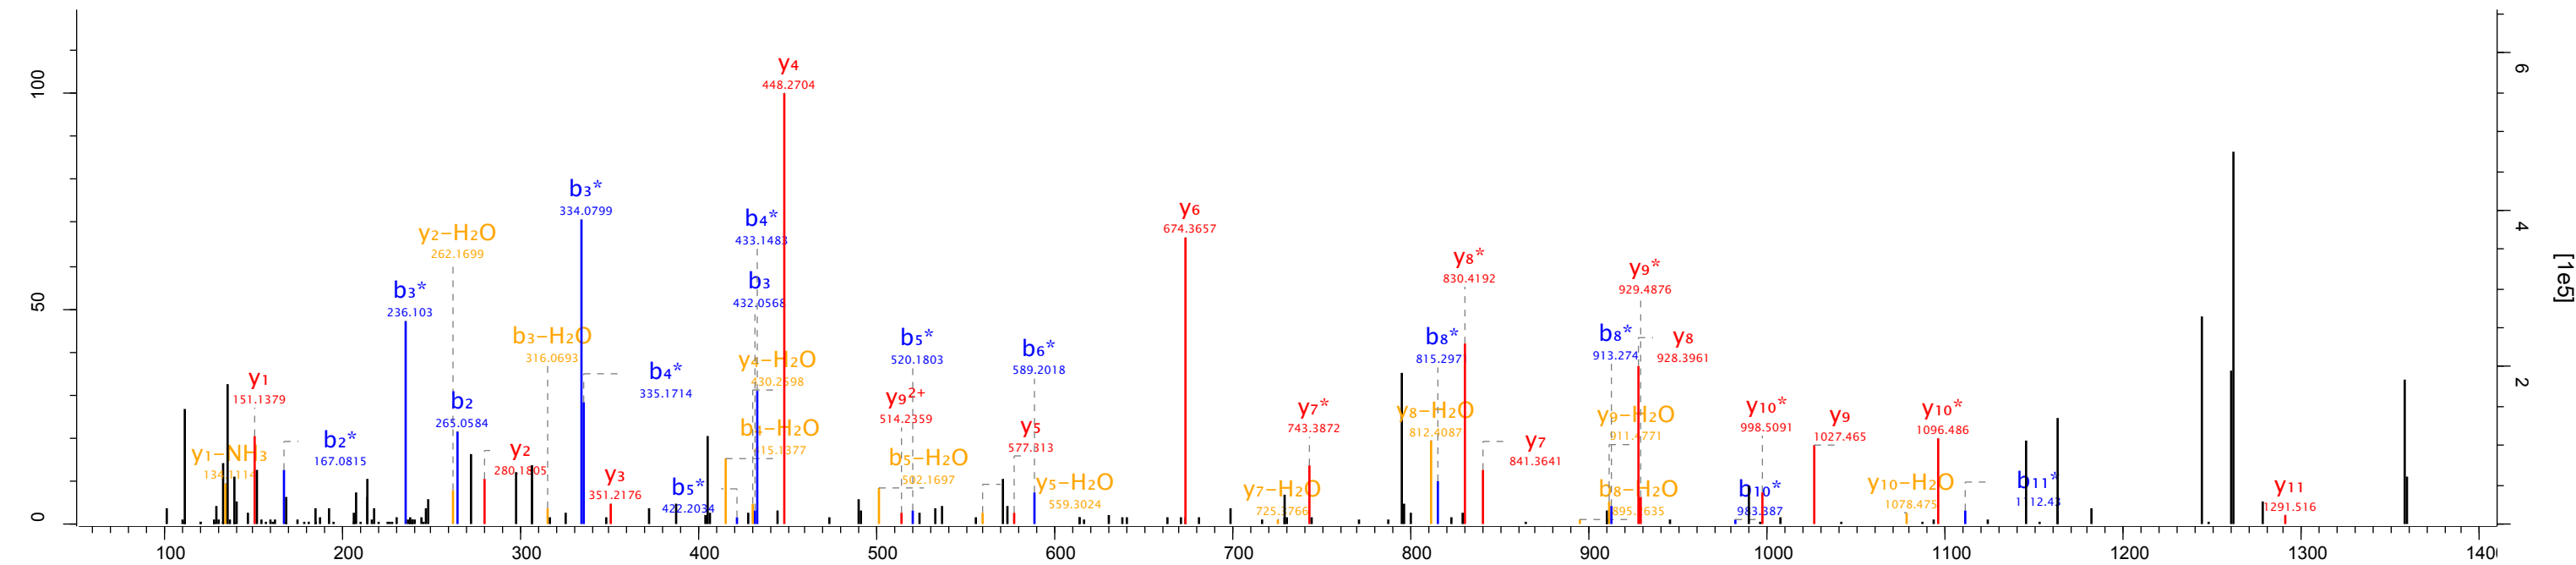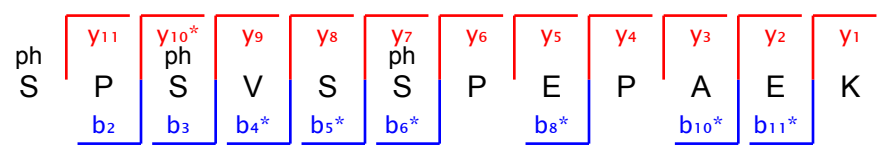

Raw file: 20150812\_A375SR\_Phospho\_BR1\_02  
 Scan: 6648 Method: FTMS; HCD Score: 224.43 m/z: 823.3 Gene names: SRSF2

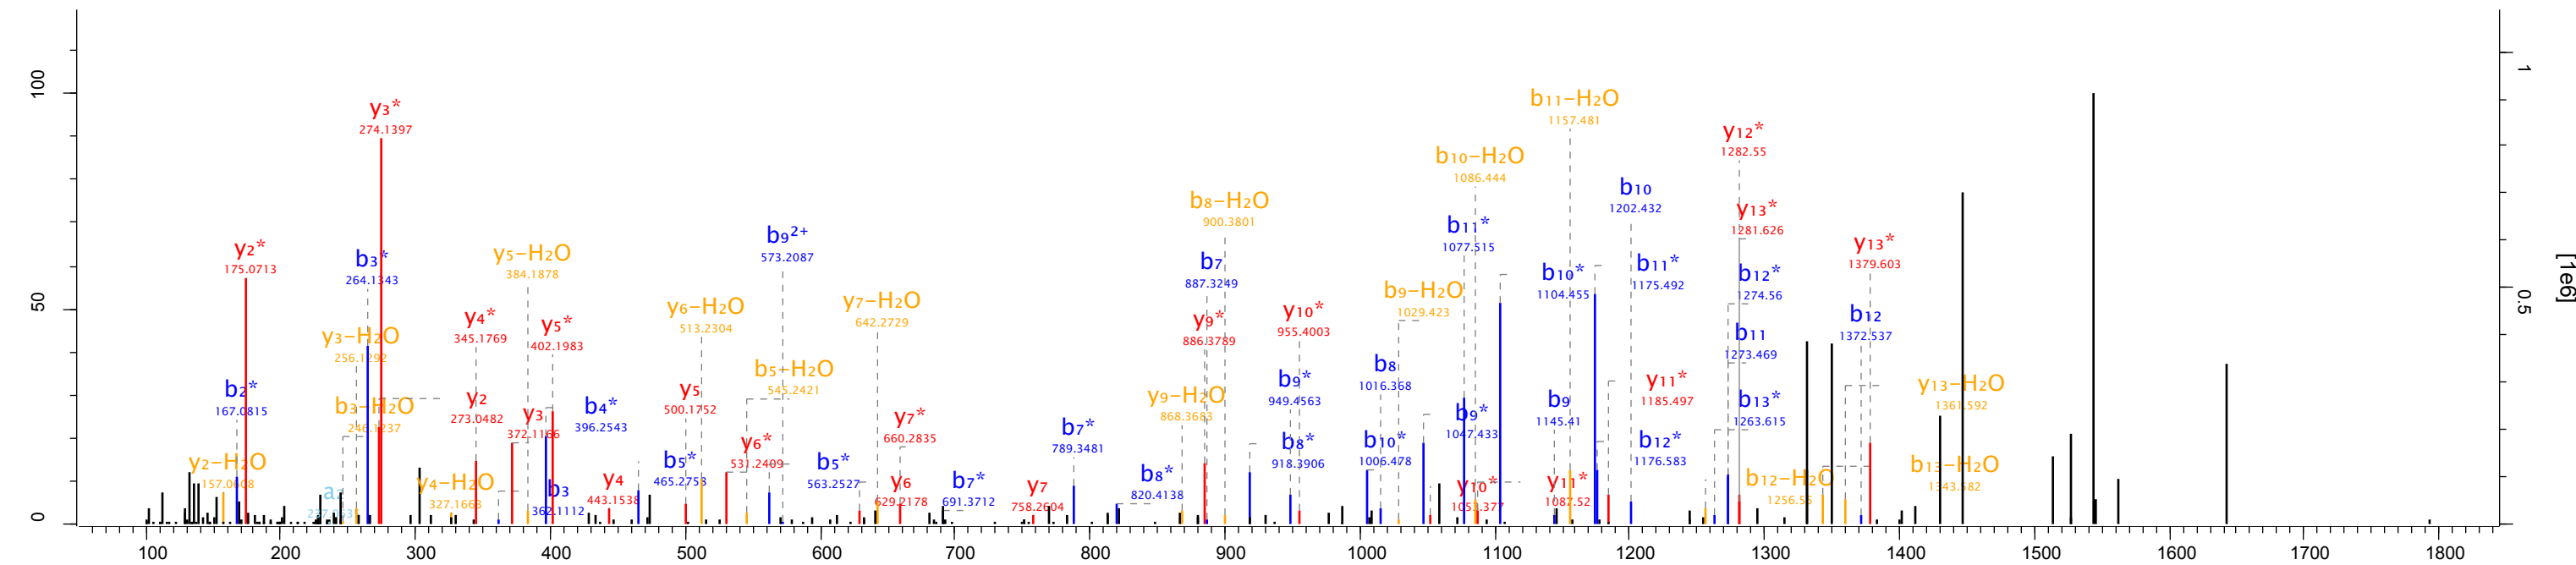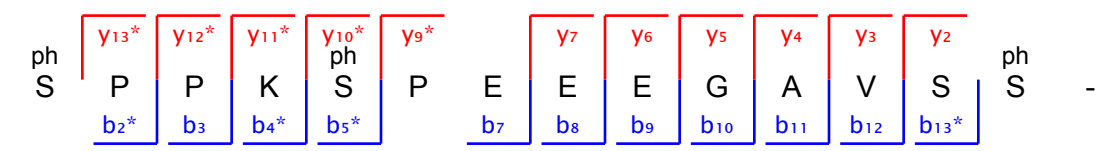

Raw file: 20150812\_A375SR\_Phospho\_BR1\_02  
 Scan: 6918 Method: FTMS; HCD Score: 64.53 m/z: 606.74 Gene names: KIF4A

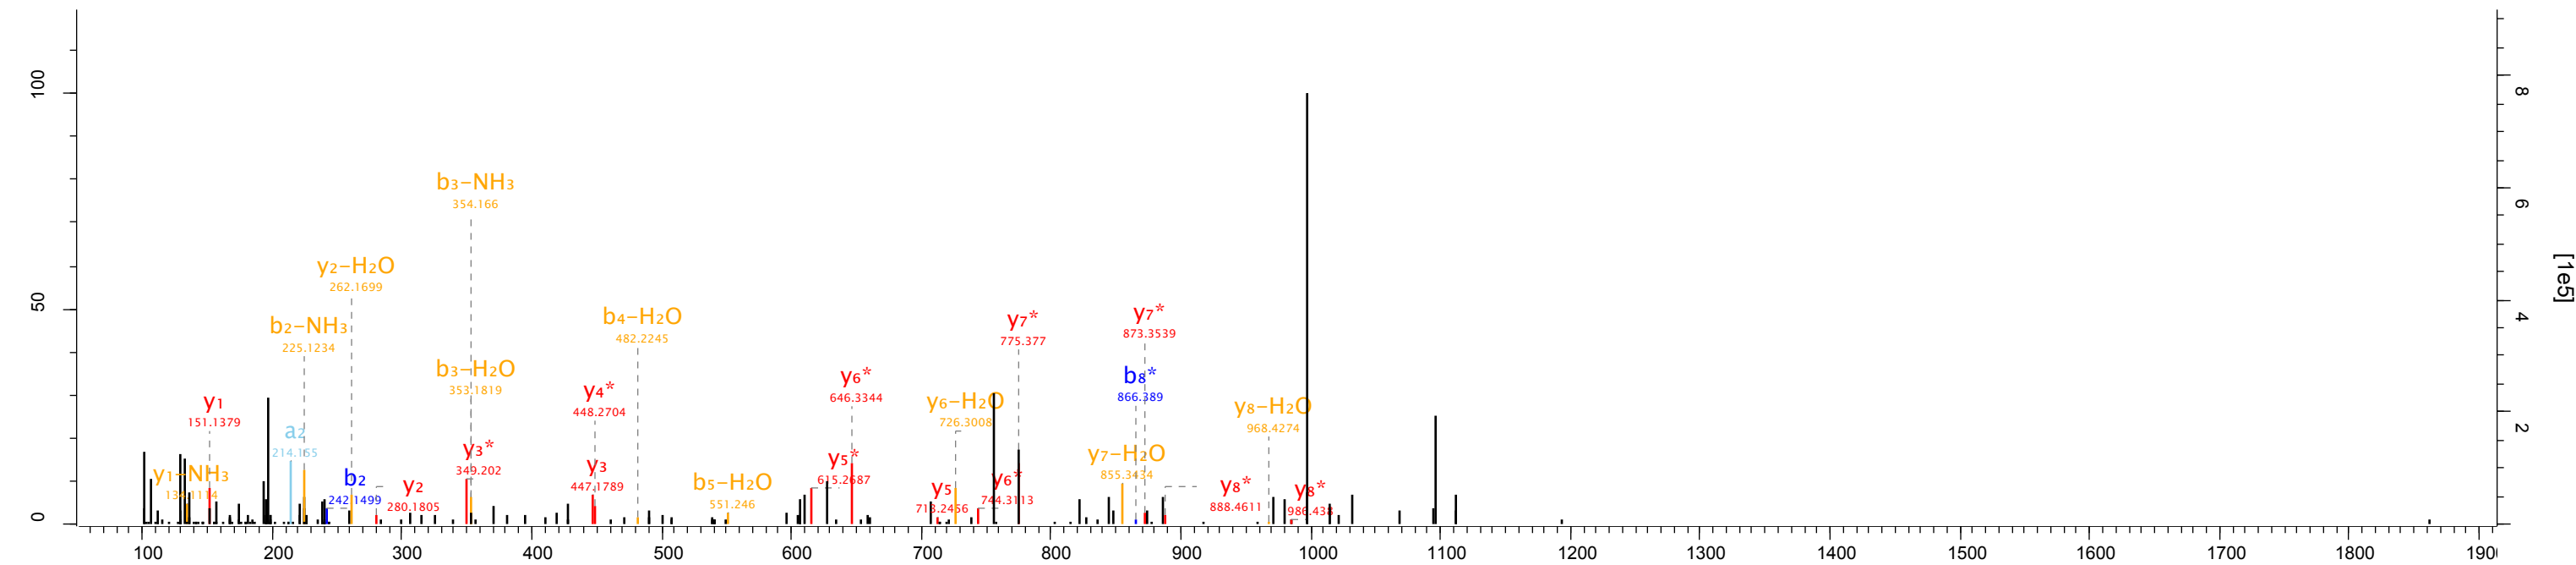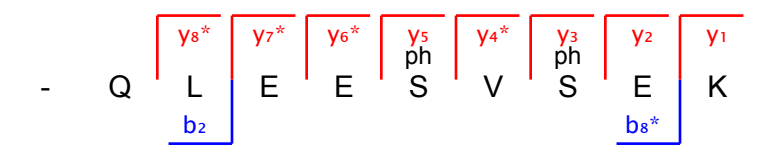

Raw file: 20150812\_A375SR\_Phospho\_BR1\_02  
 Scan: 7108 Method: FTMS; HCD Score: 141.74 m/z: 858.82 Gene names: SRRM2

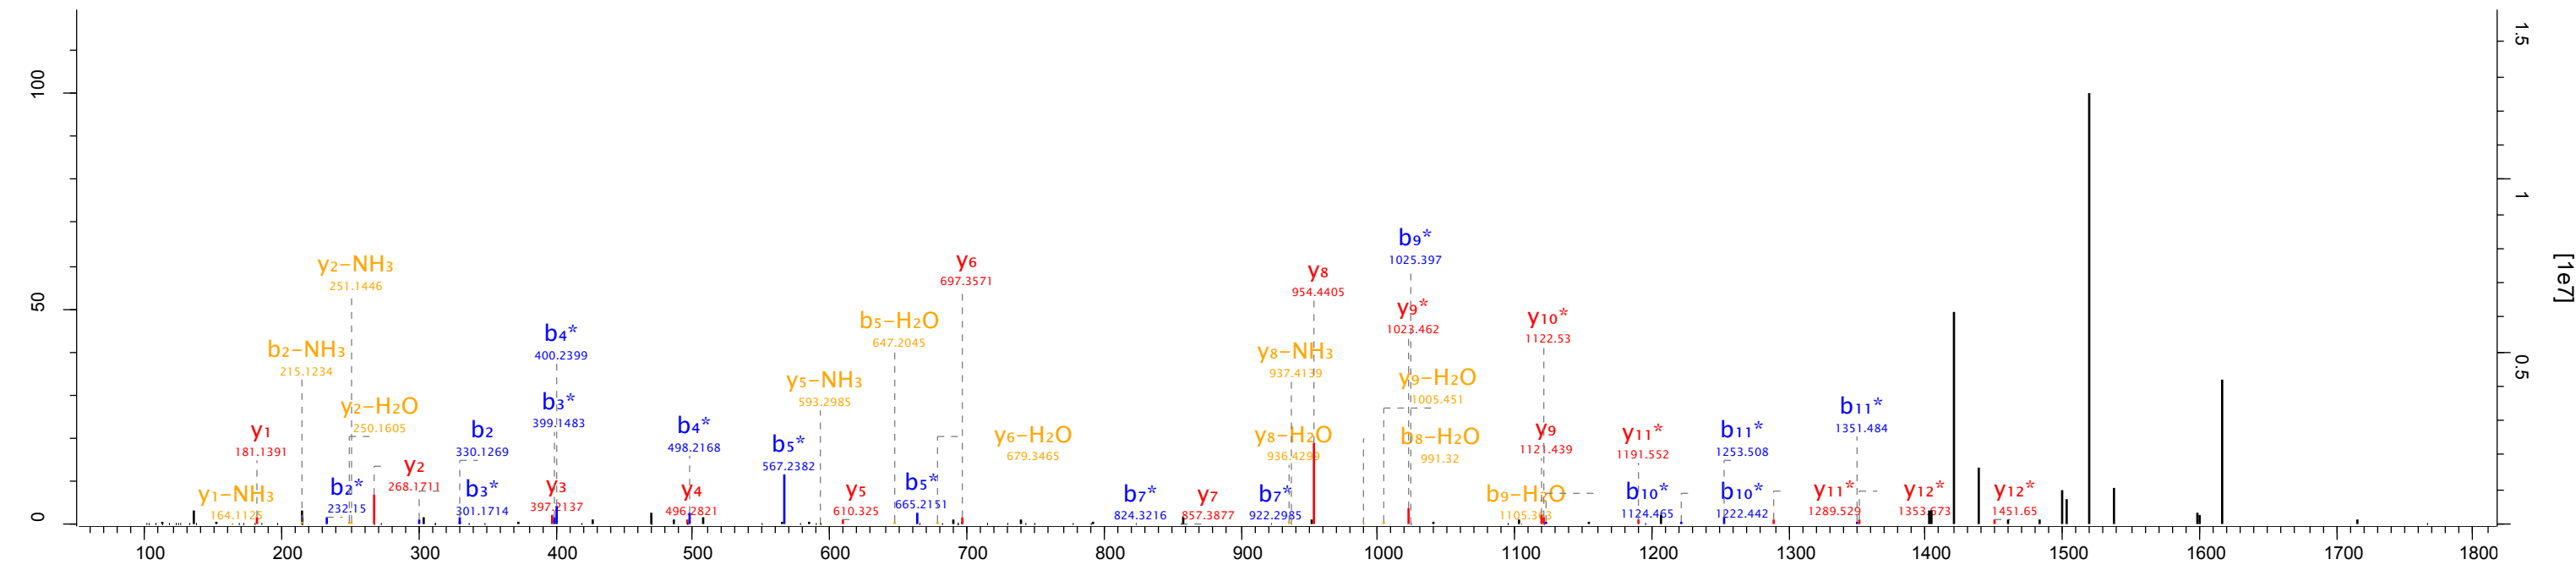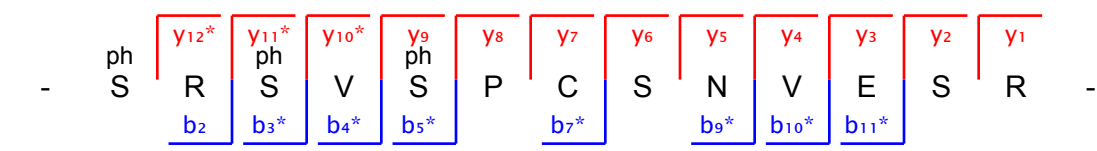

Raw file 20150812\_A375SR\_Phospho\_BR1\_02 Scan 7368 Method FTMS; HCD Score 55.57 m/z 562.52 Gene names BUD13

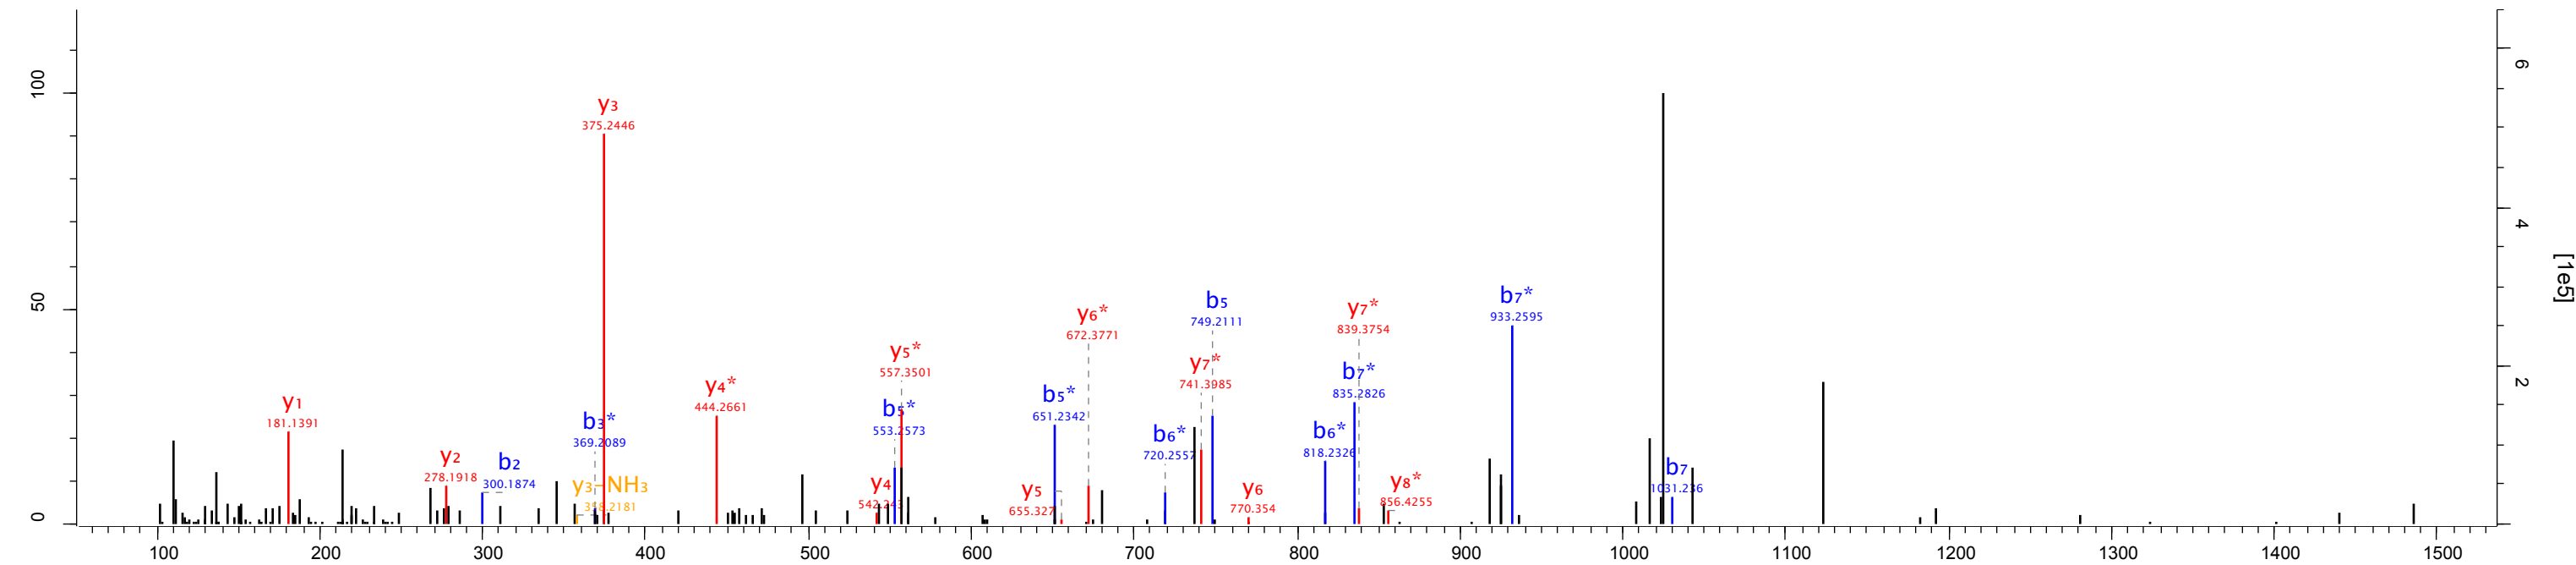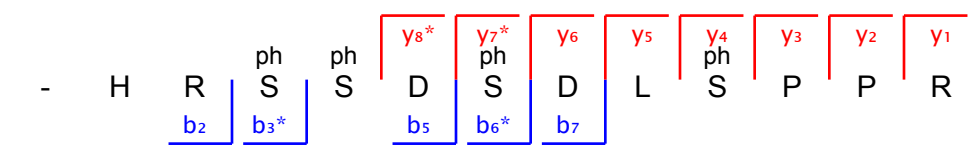

Raw file  
20150812\_A375SR\_Phospho\_BR1\_02

Scan 7648 Method FTMS; HCD Score 380.65 m/z 1092.91 Gene names LUC7L3

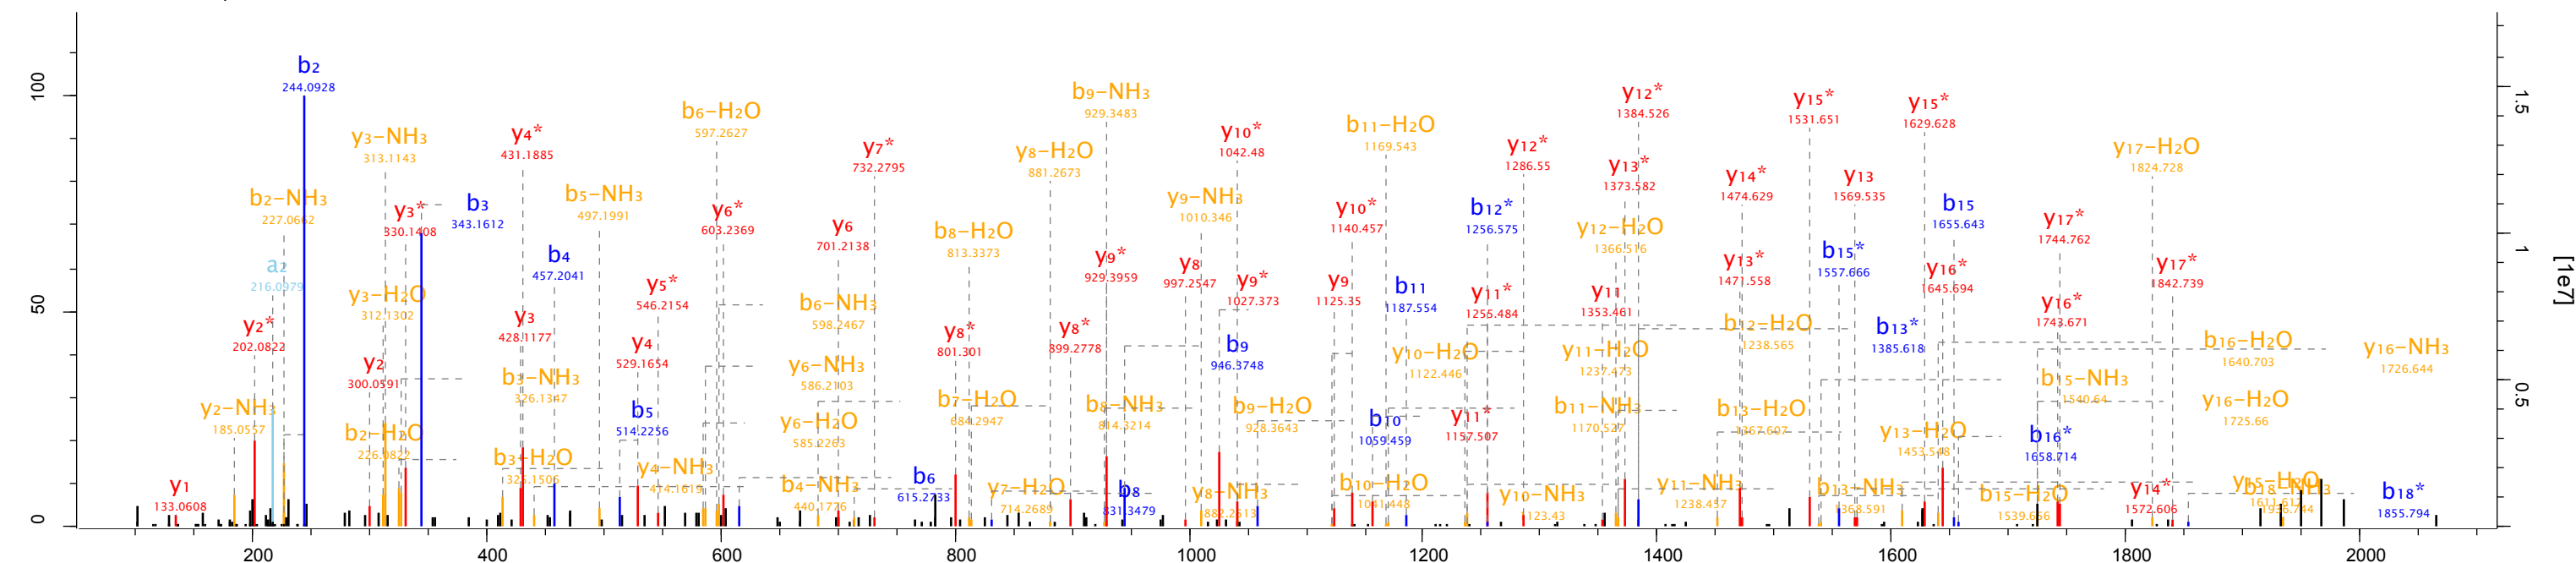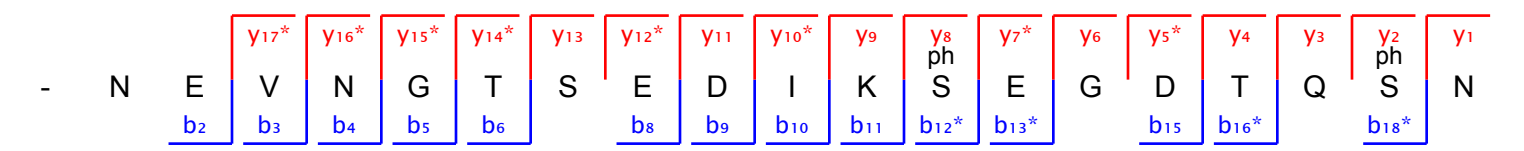

Raw file 20150812\_A375SR\_Phospho\_BR1\_02 Scan 7988 Method FTMS; HCD Score 217.01 m/z 1162.92 Gene names PHF23

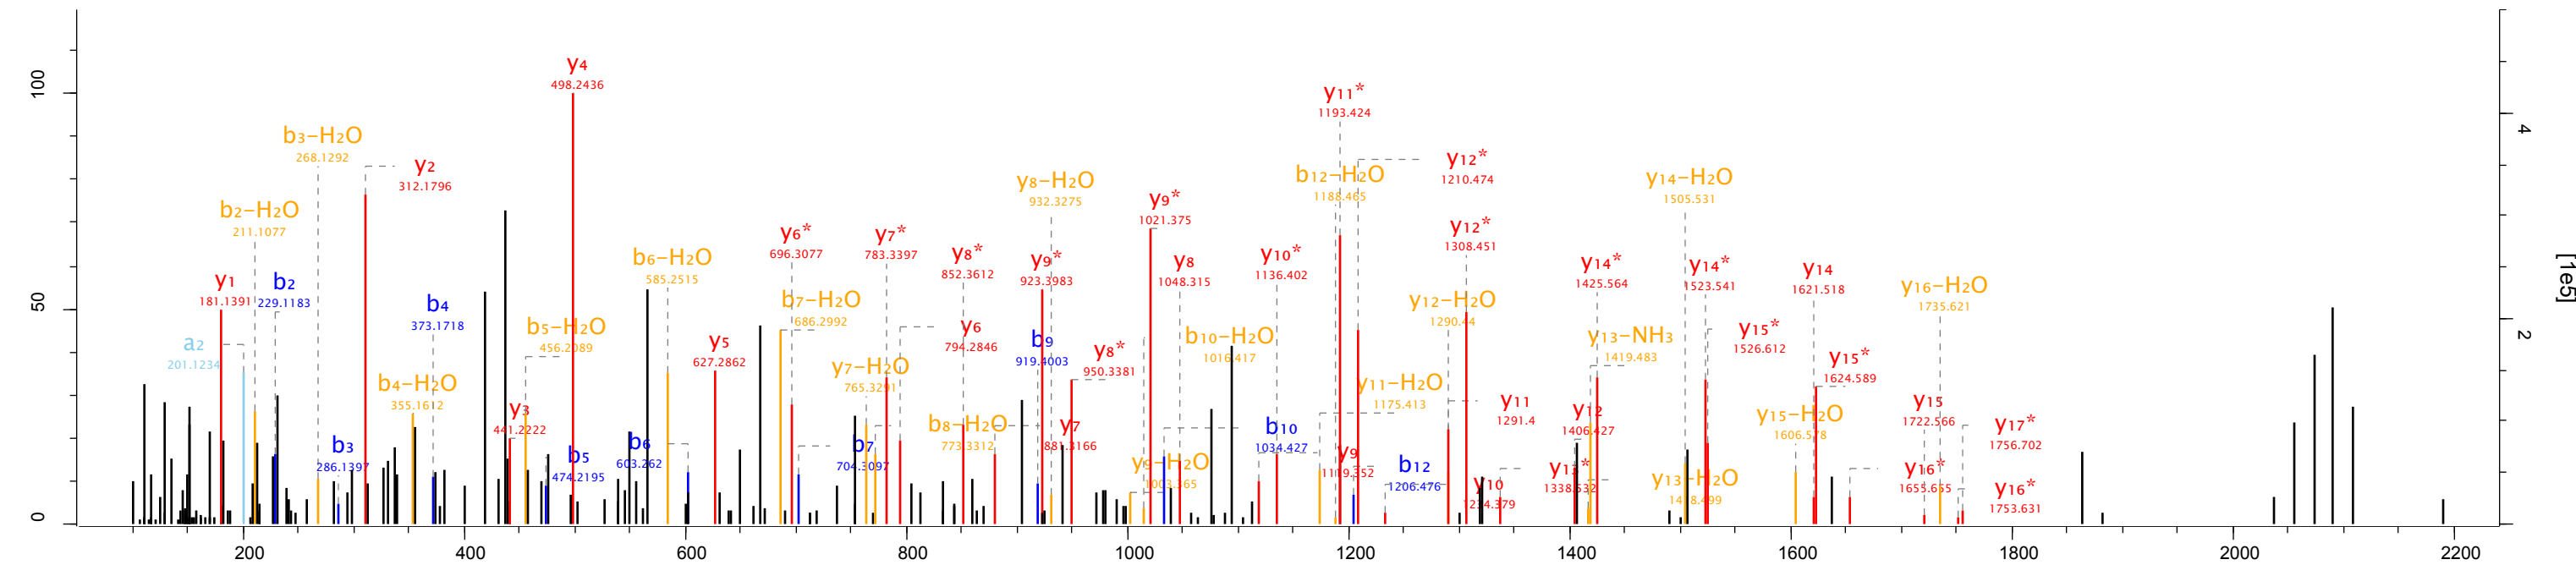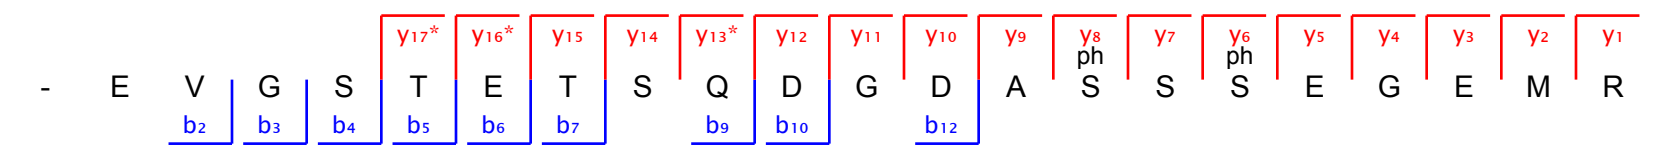

Raw file 20150812\_A375SR\_Phospho\_BR1\_02 Scan 8318 Method FTMS; HCD Score 46.68 m/z 466.22 Gene names CDK12

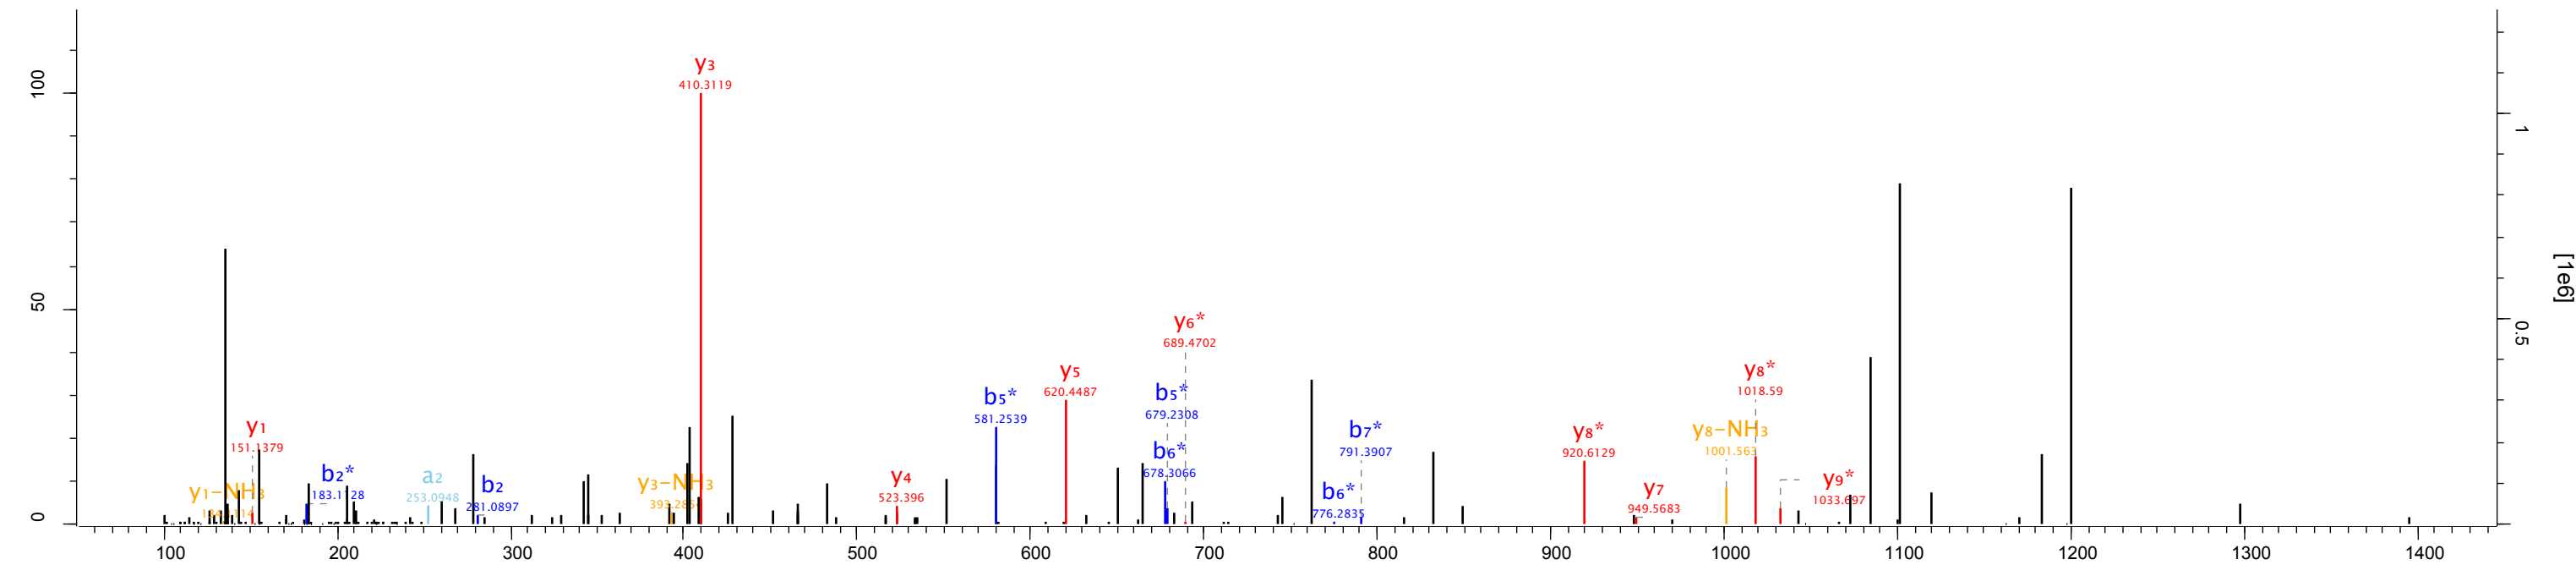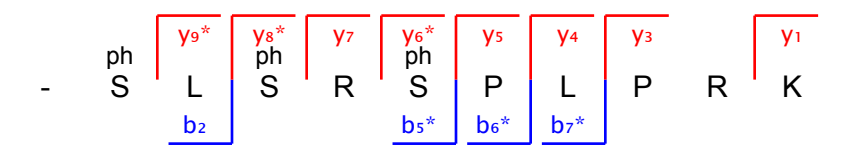



Raw file: 20150812\_A375SR\_Phospho\_BR1\_02  
 Scan: 8328 Method: FTMS; HCD Score: 40.43 m/z: 707.28 Gene names: ICE1

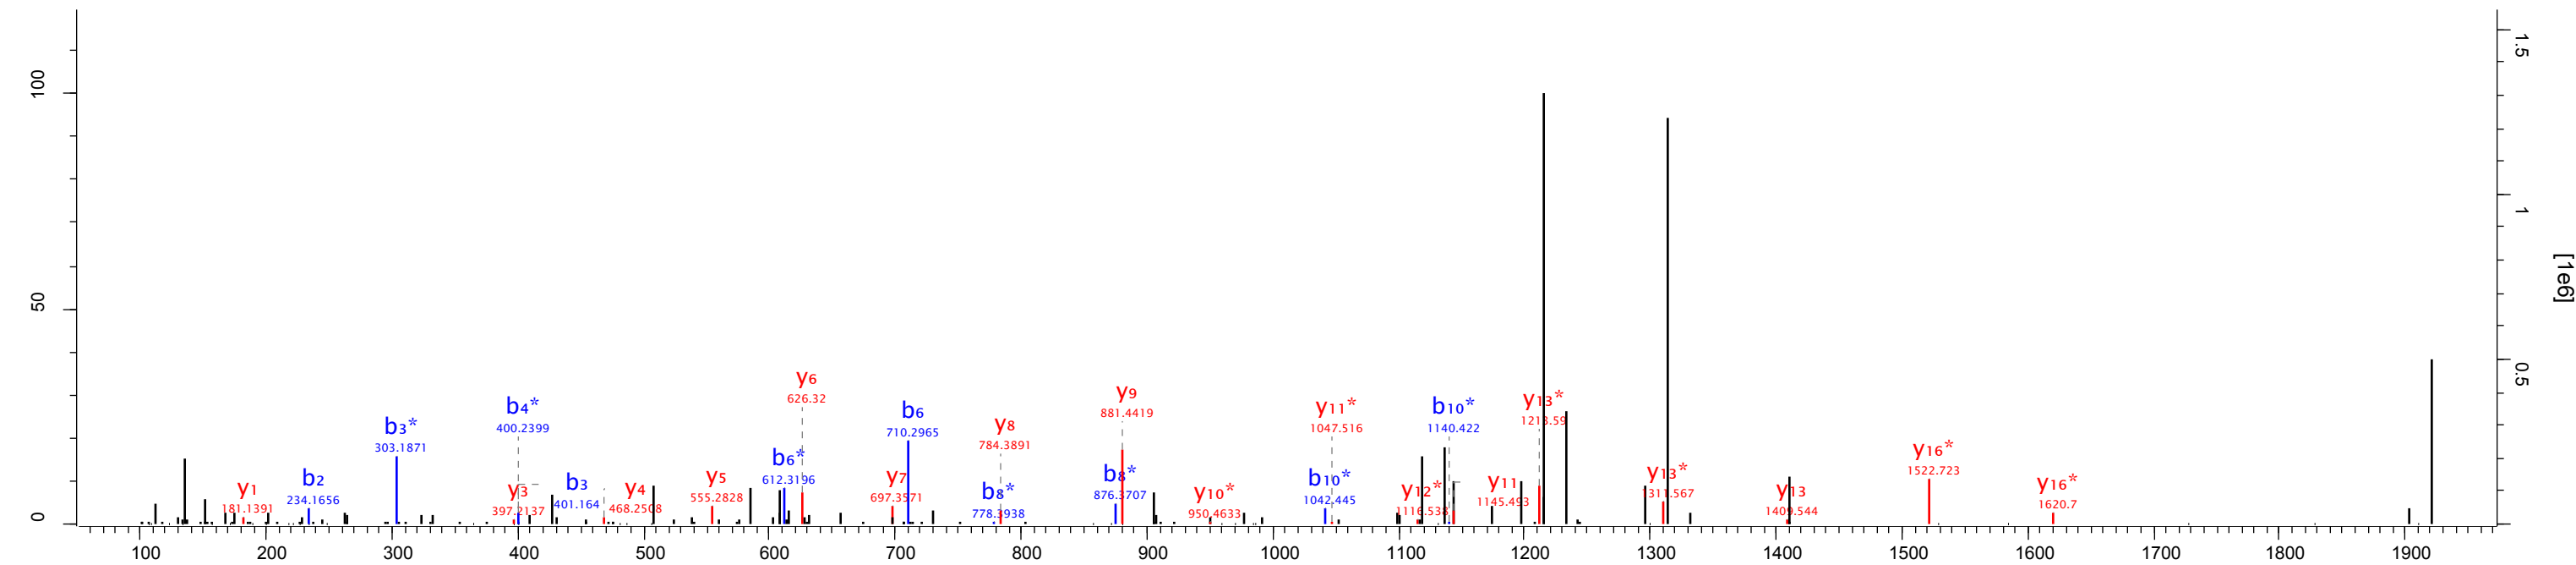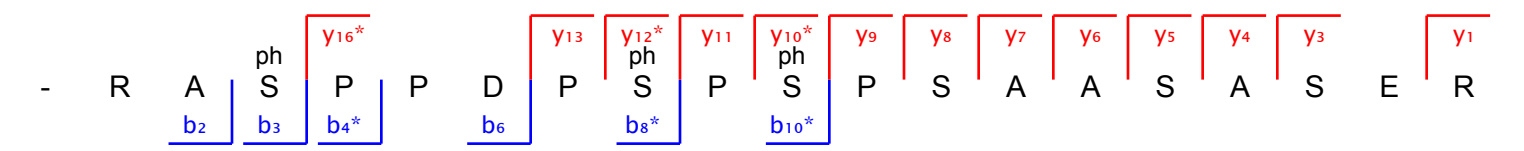

Raw file 20150812\_A375SR\_Phospho\_BR1\_02 Scan 8368 Method FTMS; HCD Score 83.09 m/z 616.28 Gene names CDK12

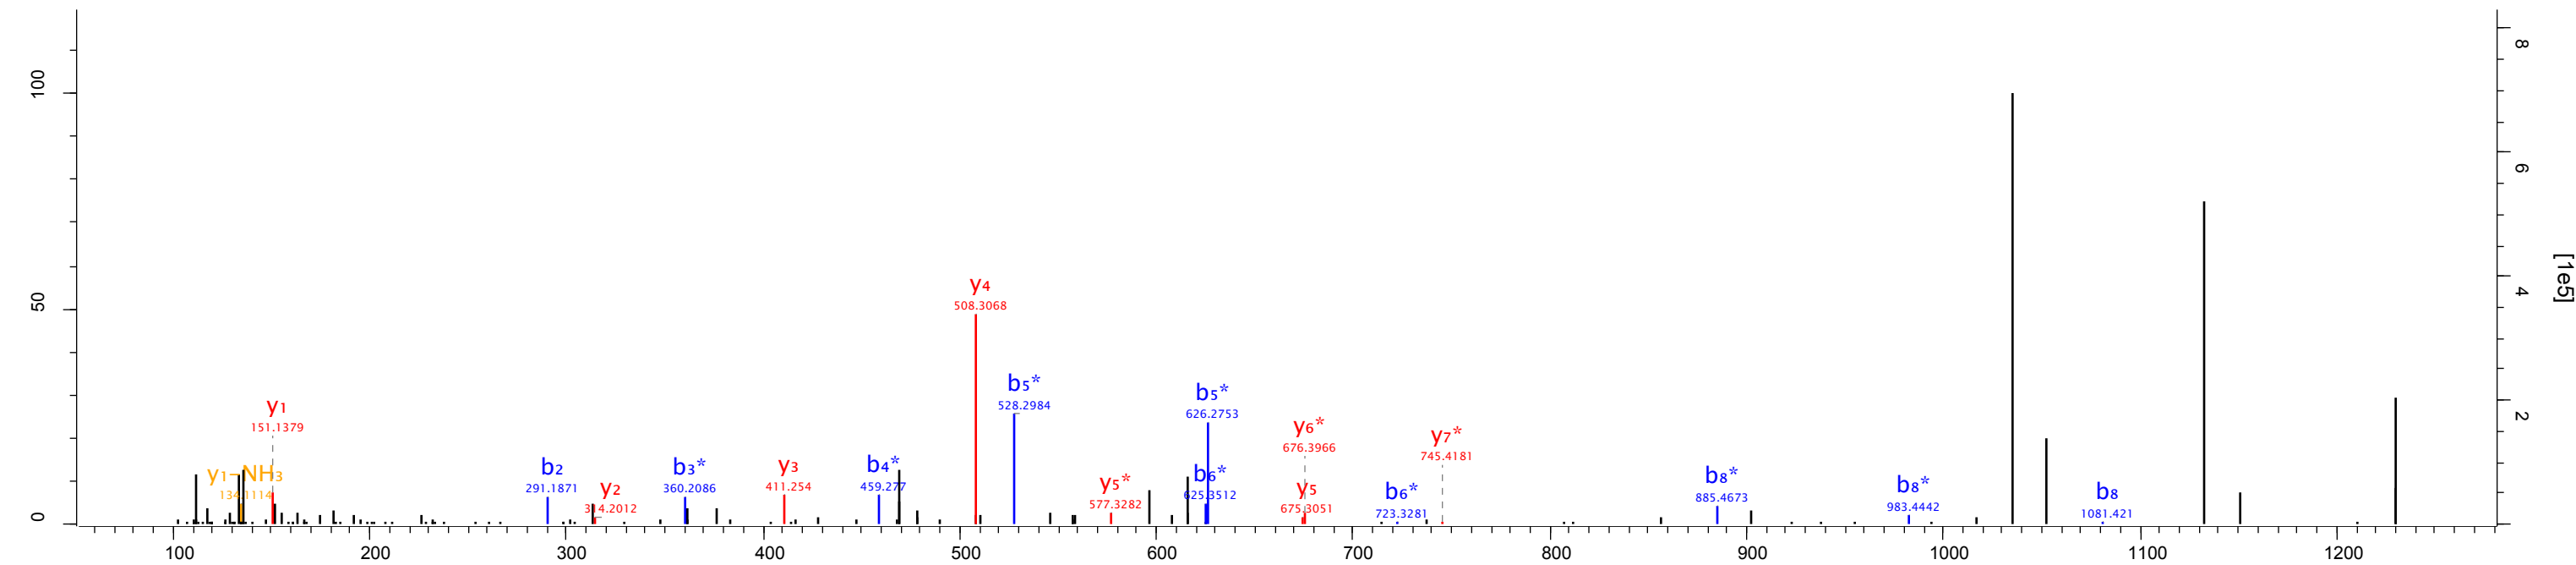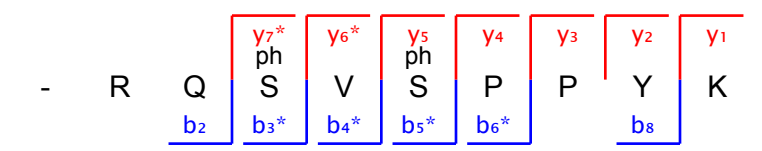

Raw file  
20150812\_A375SR\_Phospho\_BR1\_02

Scan 8768 Method FTMS; HCD Score 183.07 m/z 776.32 Gene names TCOF1

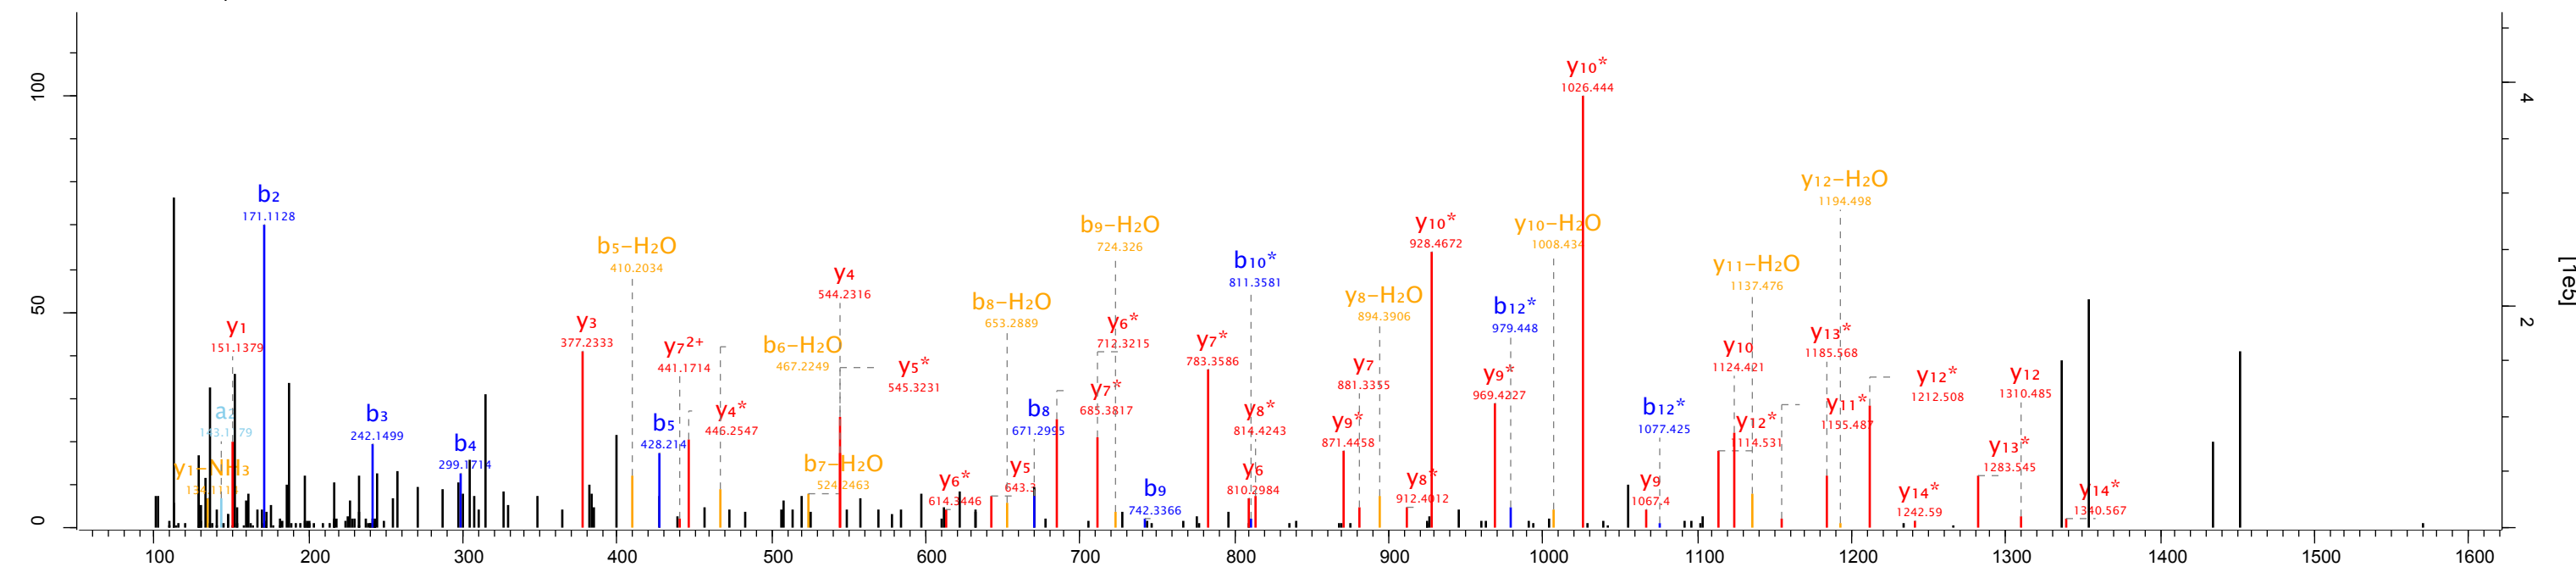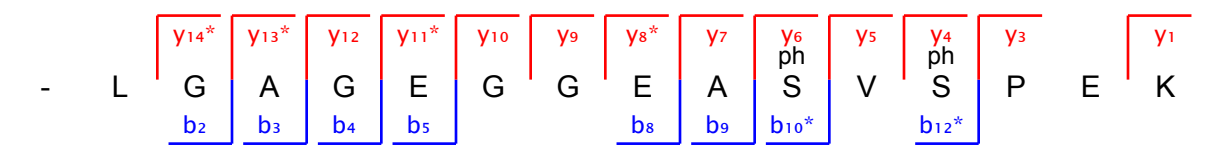

Raw file: 20150812\_A375SR\_Phospho\_BR1\_02  
 Scan: 9048 Method: FTMS; HCD Score: 150.5 m/z: 657.26 Gene names: ZC3H13

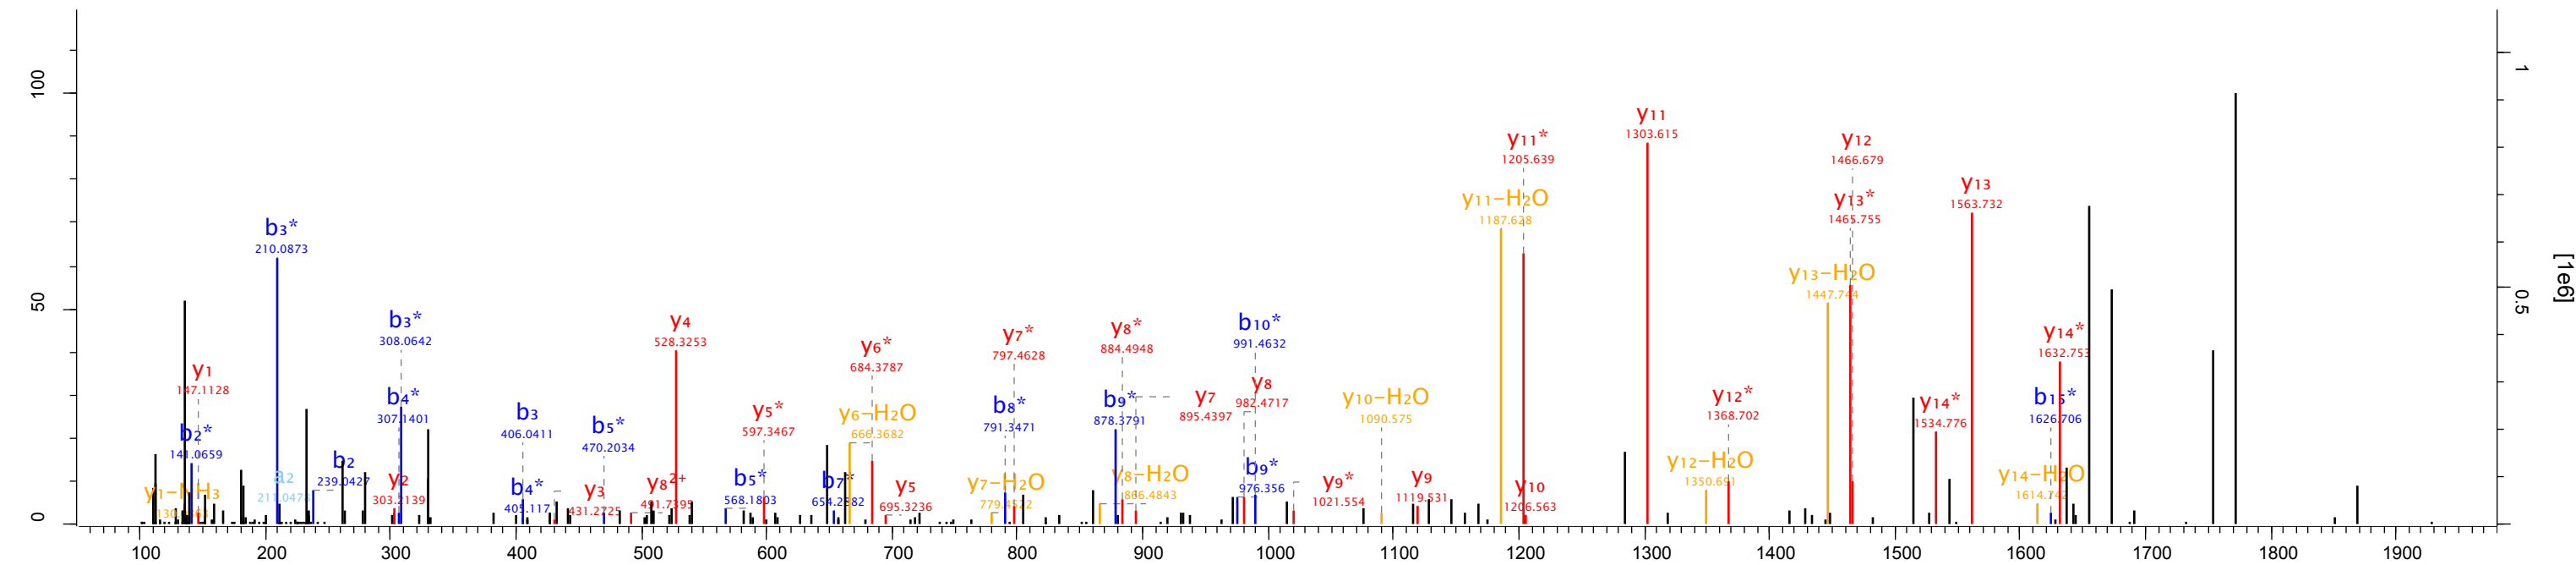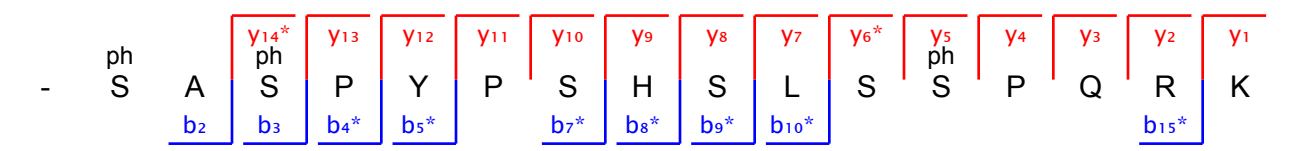

Raw file: 20150812\_A375SR\_Phospho\_BR1\_02  
 Scan: 9068 Method: FTMS; HCD Score: 337.8 m/z: 858.36 Gene names: ADD2

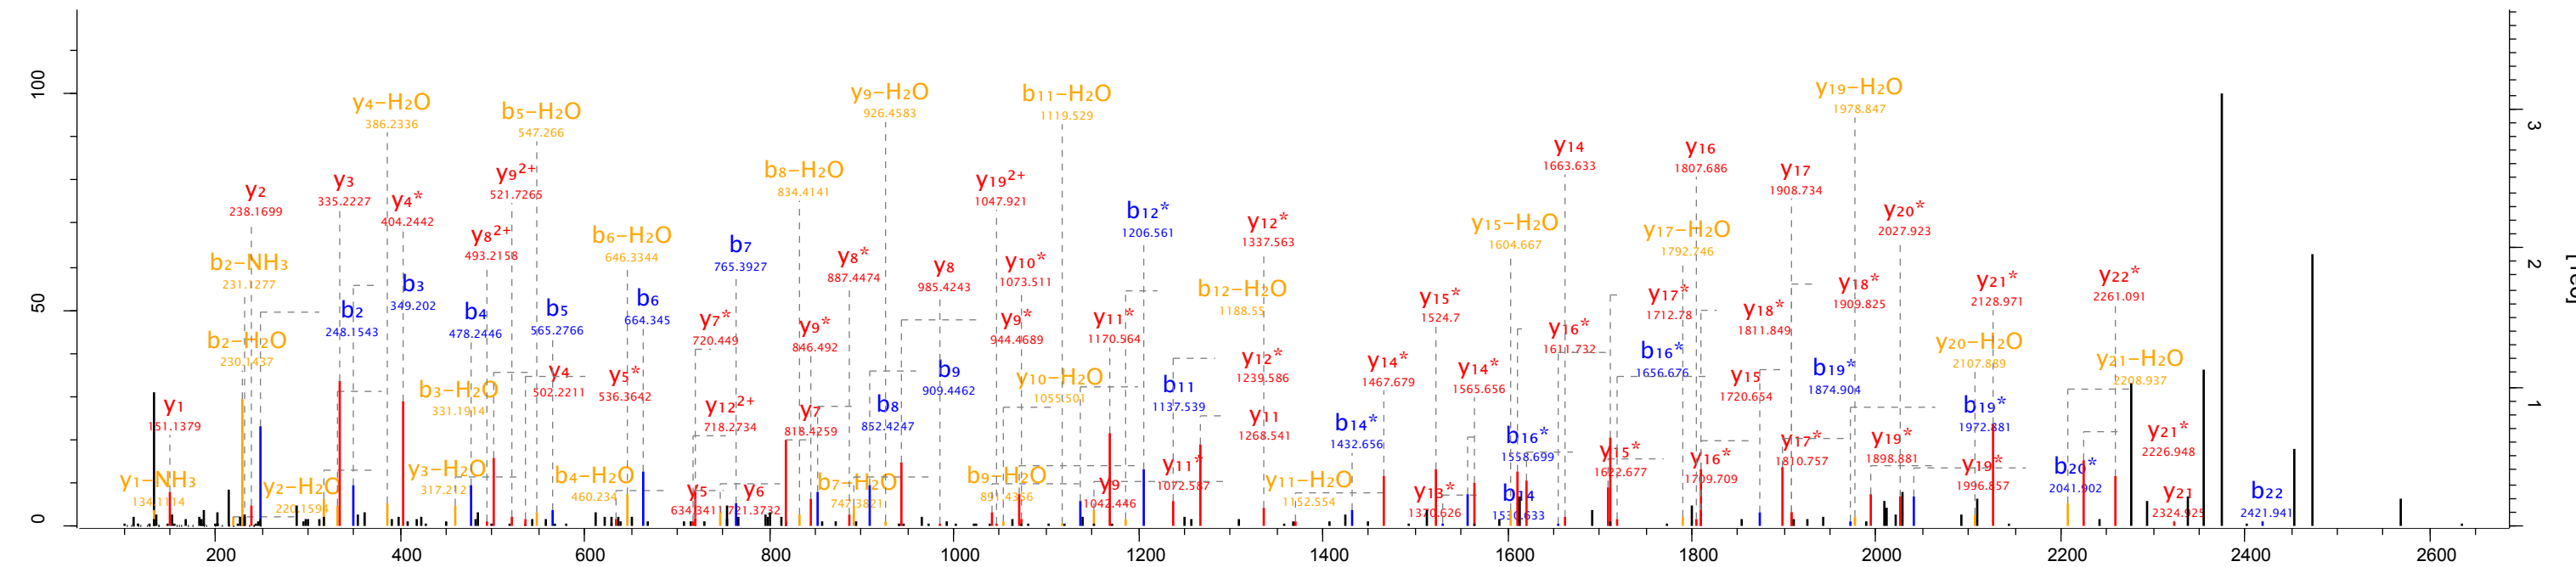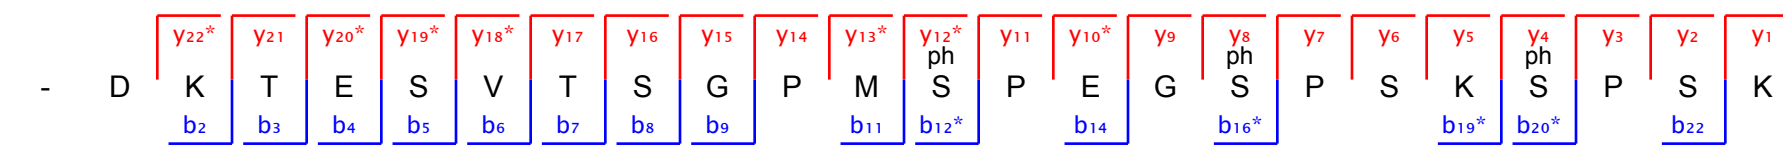

Raw file: 20150812\_A375SR\_Phospho\_BR1\_02  
 Scan: 9078 Method: FTMS; HCD Score: 172.3 m/z: 987.88 Gene names: SQSTM1

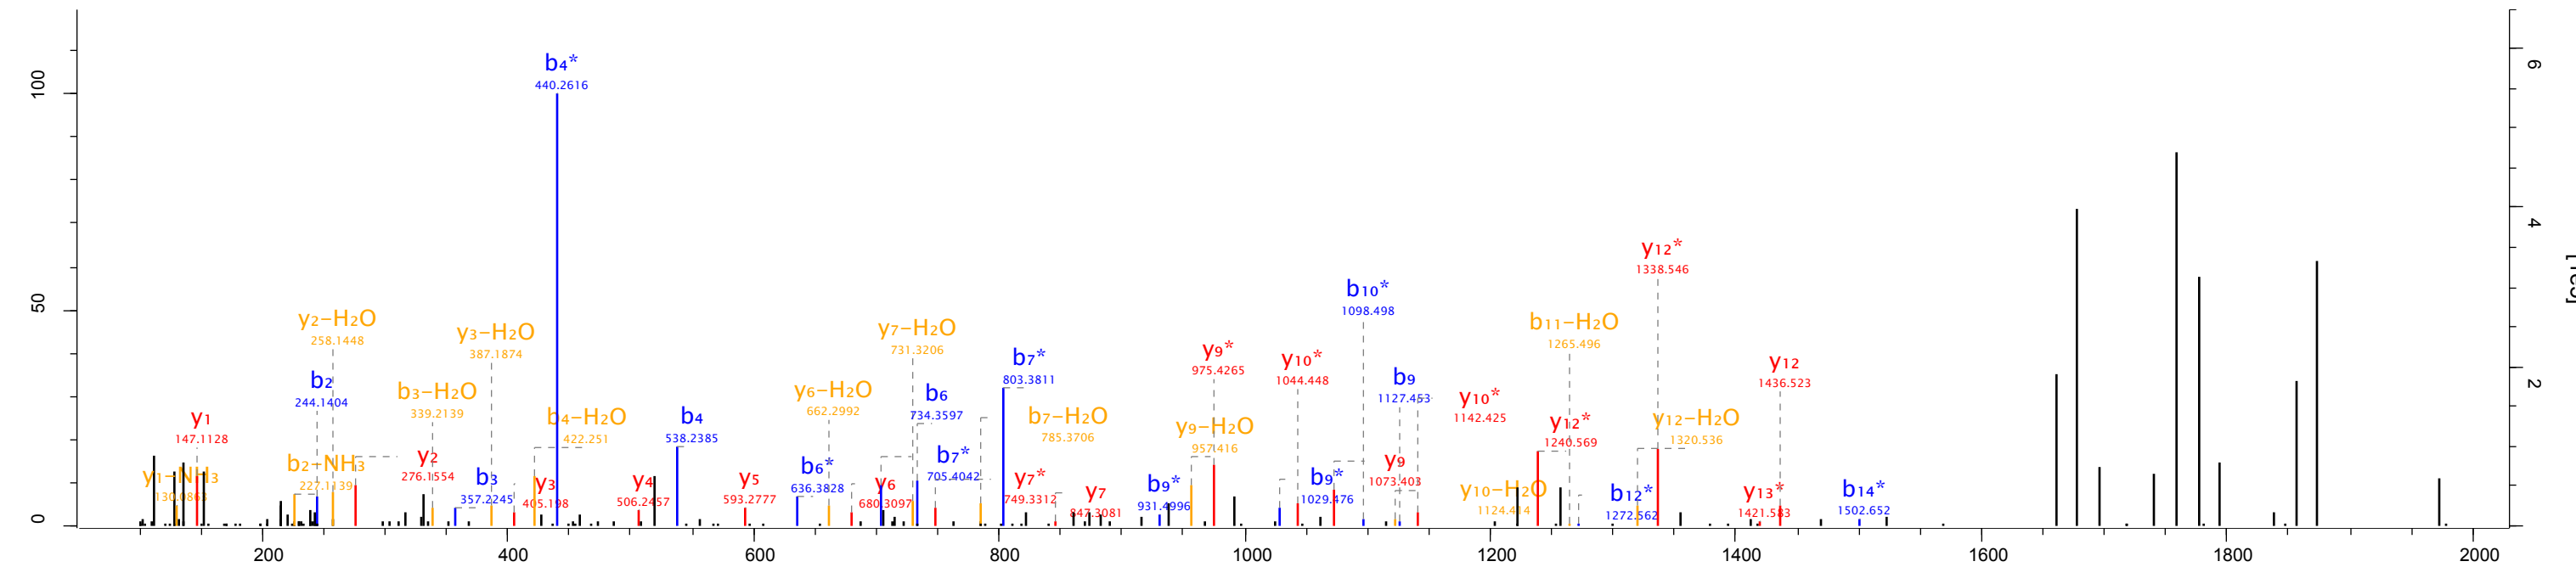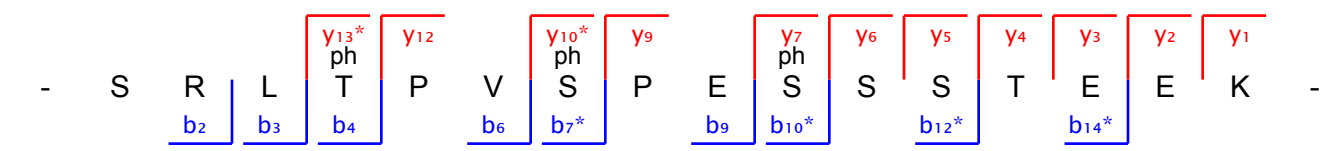

Raw file 20150812\_A375SR\_Phospho\_BR1\_02 Scan 9168 Method FTMS; HCD Score 118.58 m/z 749 Gene names SRRM2

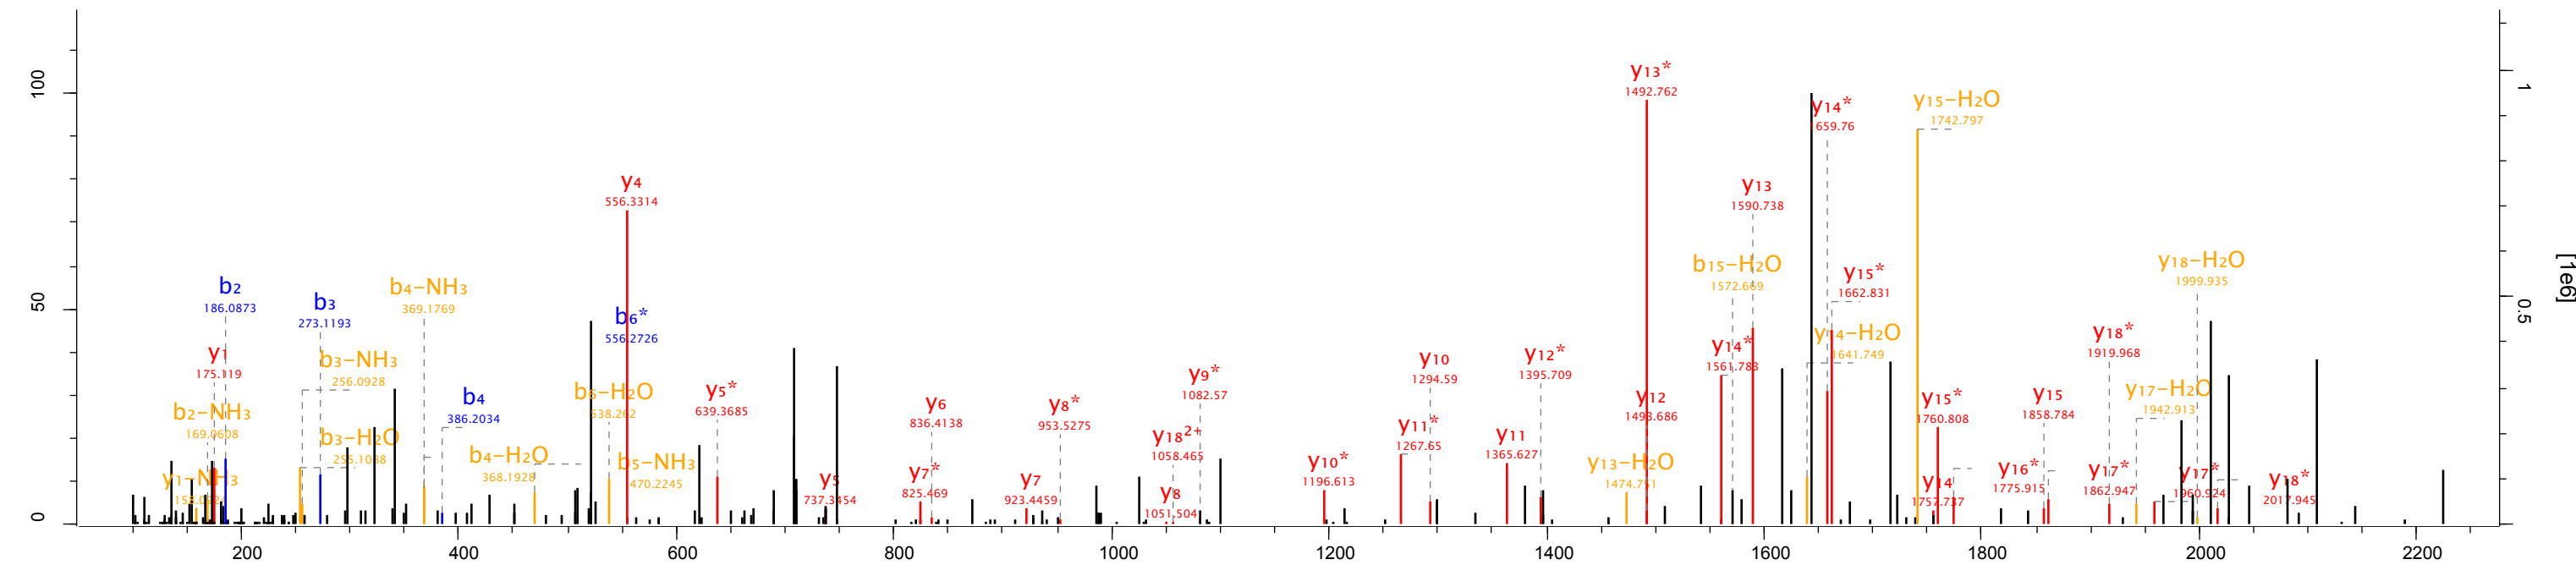

- Q y18\* y17\* y16\* y15 y14  
ph y13 y12 y11 y10 y9\* y8 y7 y6 y5  
ph y4 Q R y1 -

b2 b3 b4 b6\*

Raw file 20150812\_A375SR\_Phospho\_BR1\_02 Scan 9268 Method FTMS; HCD Score 82.41 m/z 814.82 Gene names GNL1

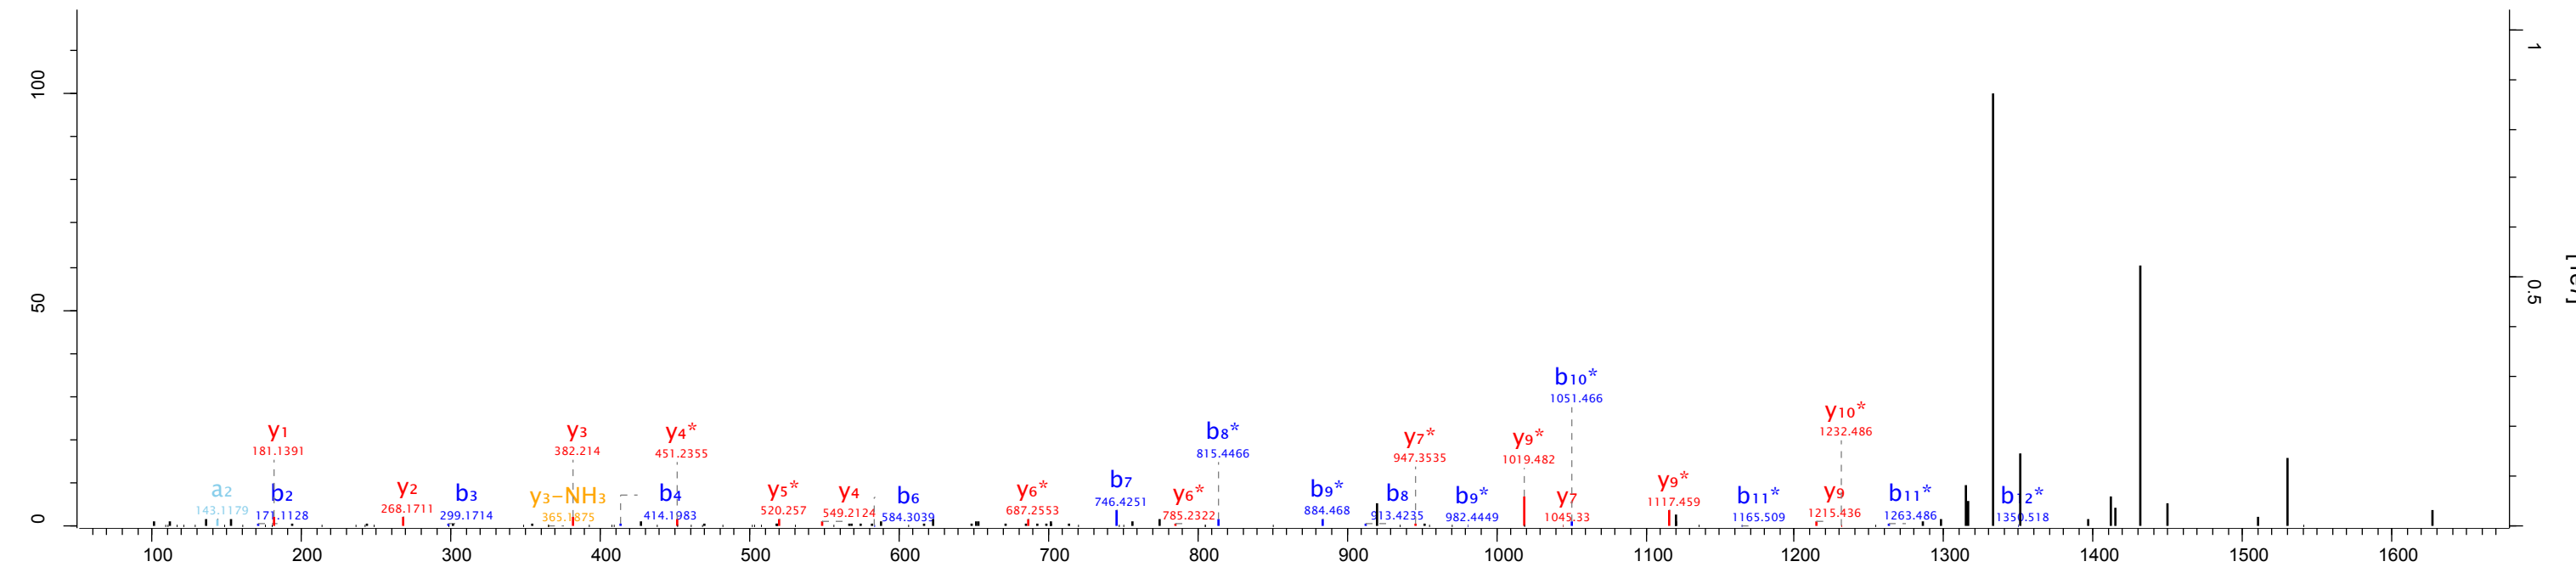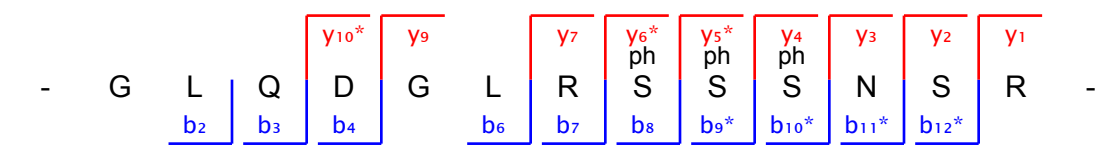



Raw file: 20150812\_A375SR\_Phospho\_BR1\_02  
 Scan: 9438 Method: FTMS; HCD Score: 189.07 m/z: 760.82 Gene names: LMNA

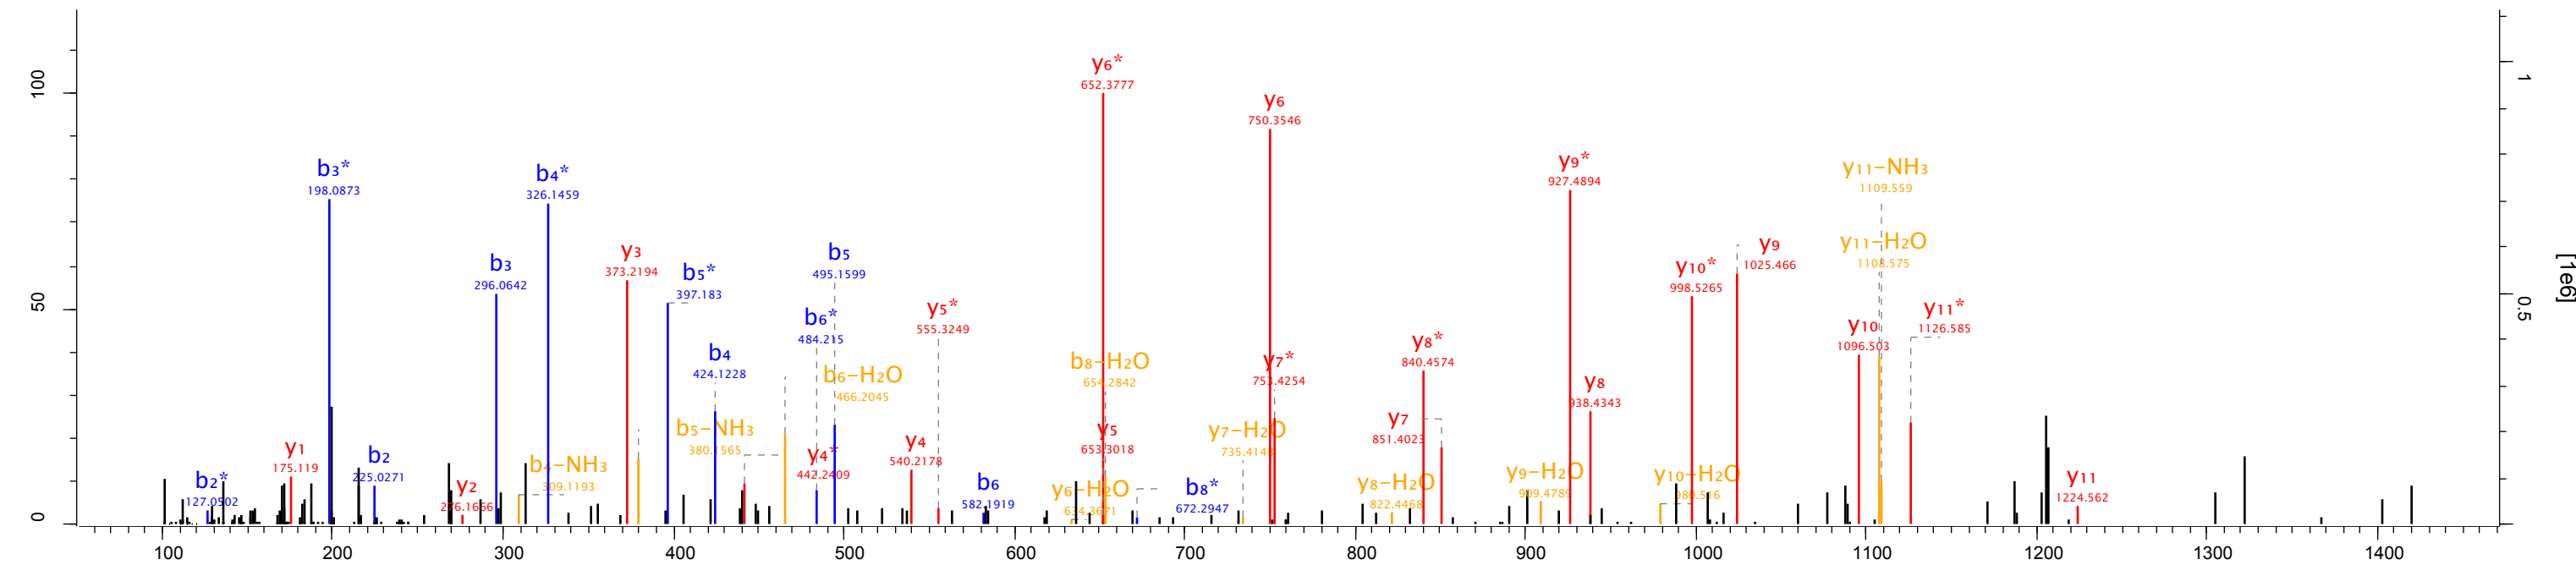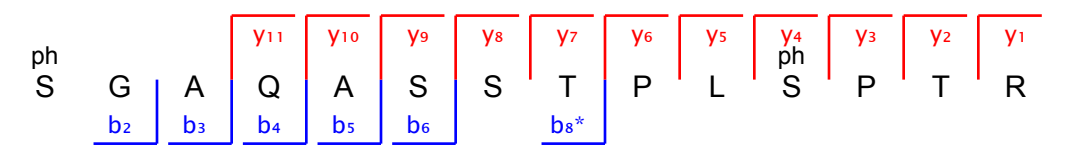

Raw file  
20150812\_A375SR\_Phospho\_BR1\_02

Scan 9968 Method FTMS; HCD Score 178.74 m/z 710.33 Gene names SCAF1

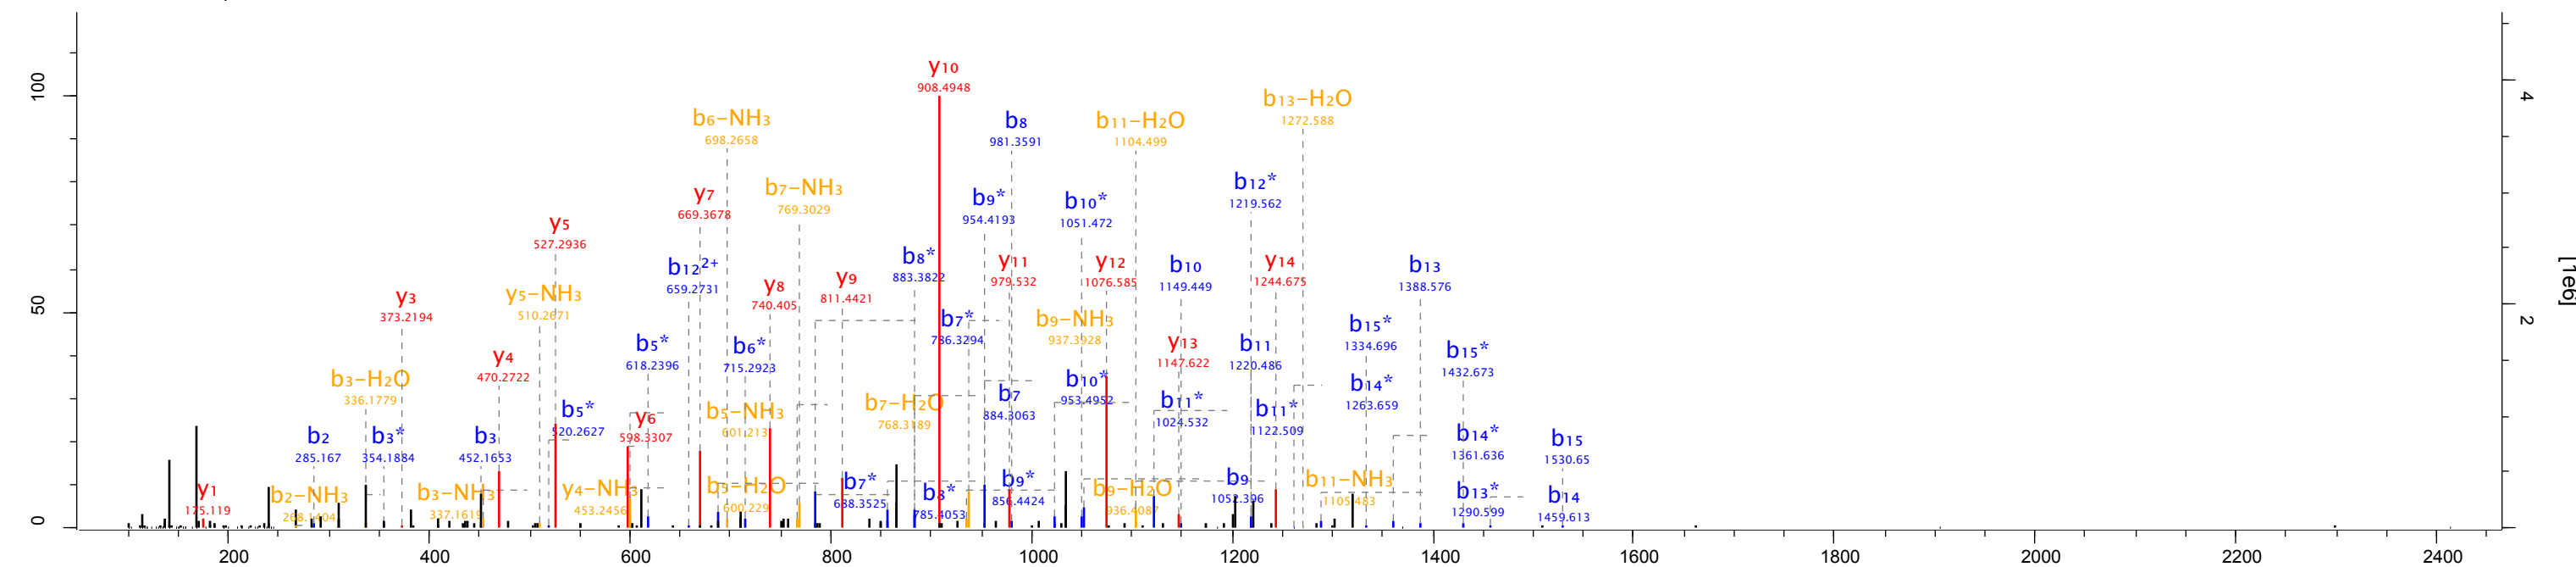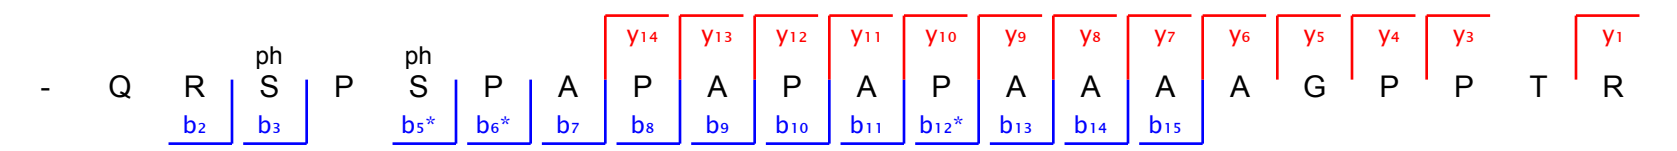

Raw file: 20150812\_A375SR\_Phospho\_BR1\_03  
 Scan: 10058 Method: FTMS; HCD Score: 138.04 m/z: 937.37 Gene names: IWS1

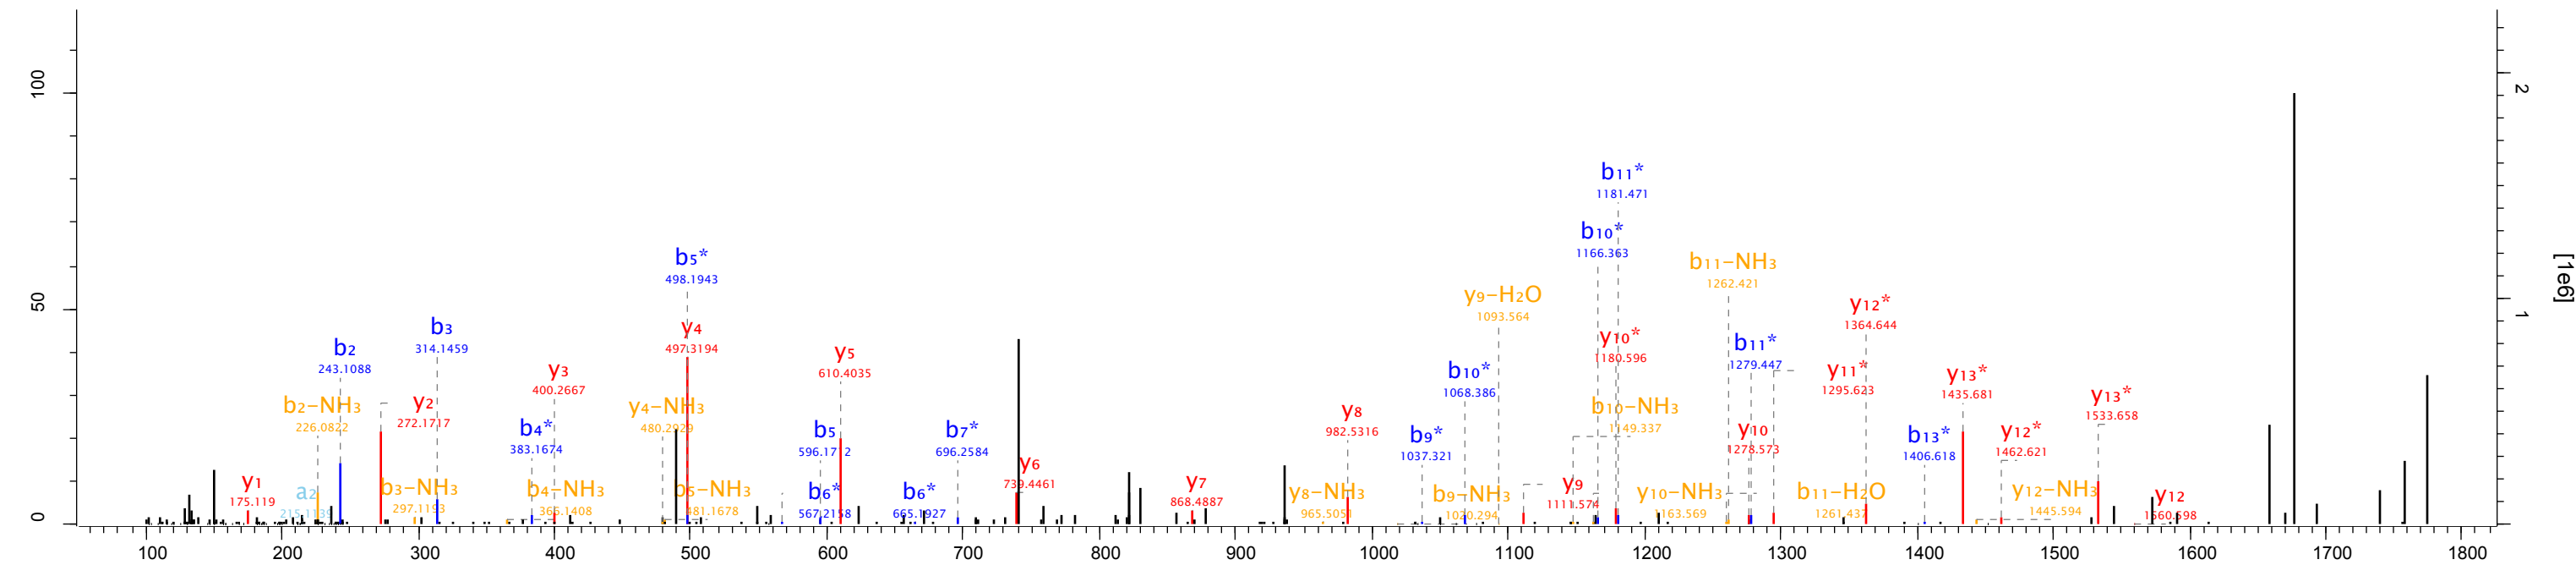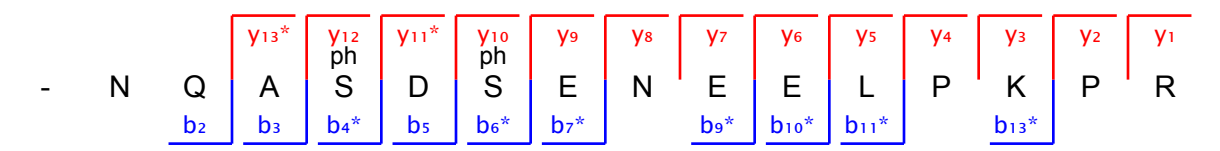

Raw file 20150812\_A375SR\_Phospho\_BR1\_03 Scan 10108 Method FTMS; HCD Score 242.29 m/z 838.35 Gene names HIRIP3

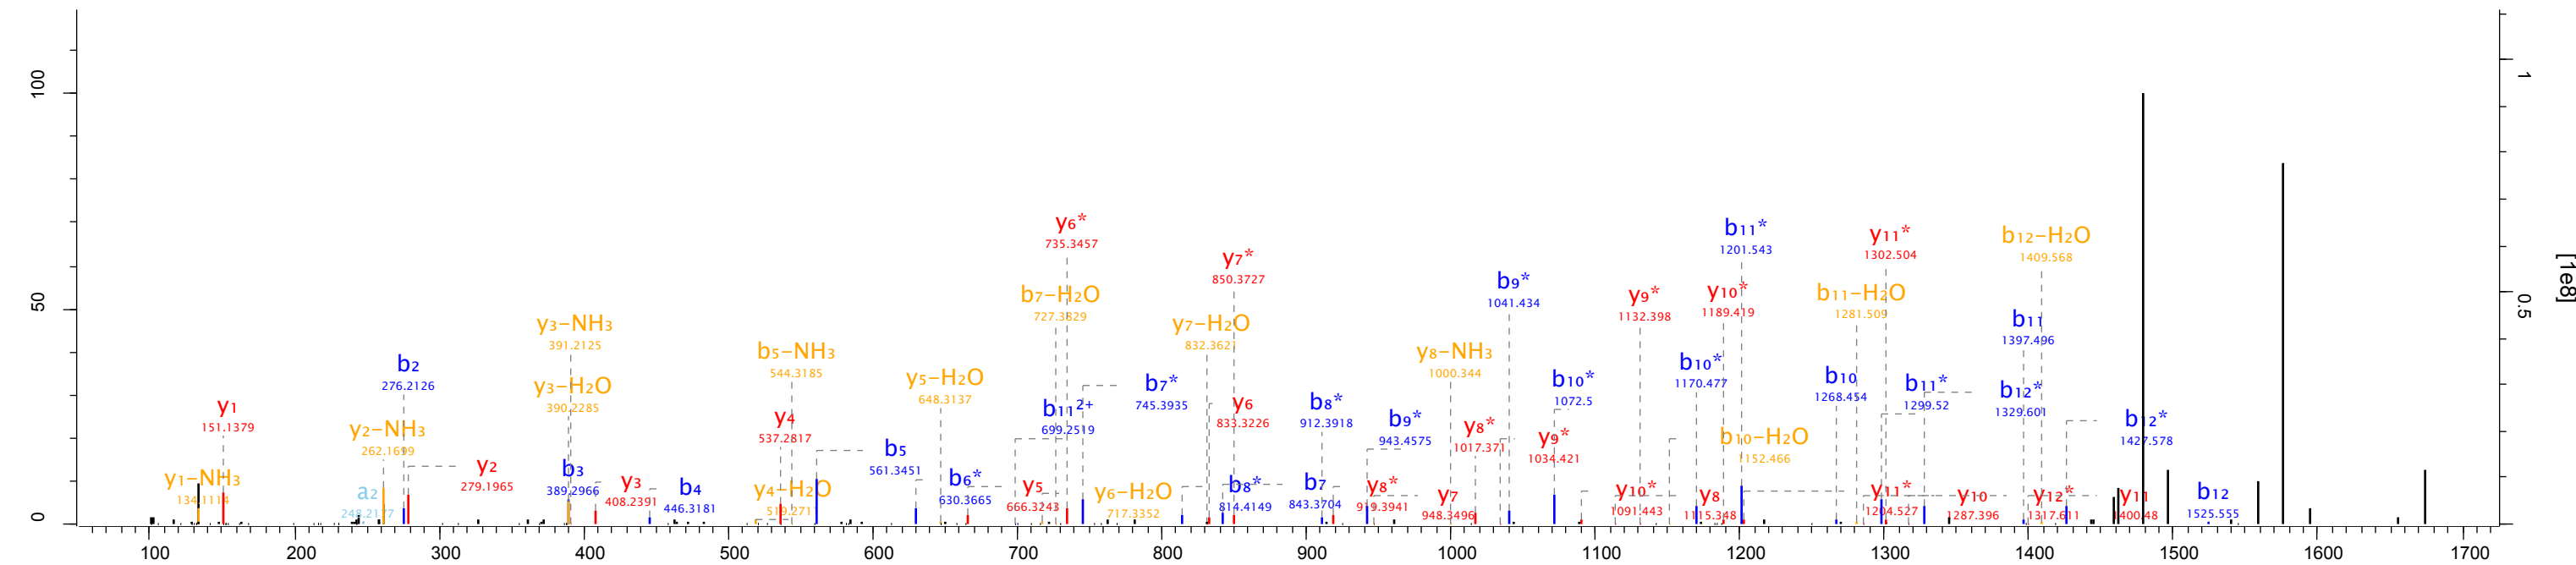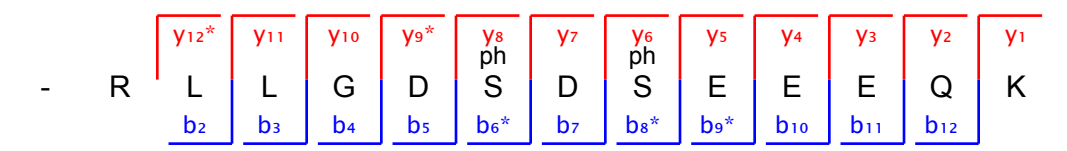

Raw file 20150812\_A375SR\_Phospho\_BR1\_03 Scan 10148 Method FTMS; HCD Score 198.03 m/z 799.98 Gene names C9orf78

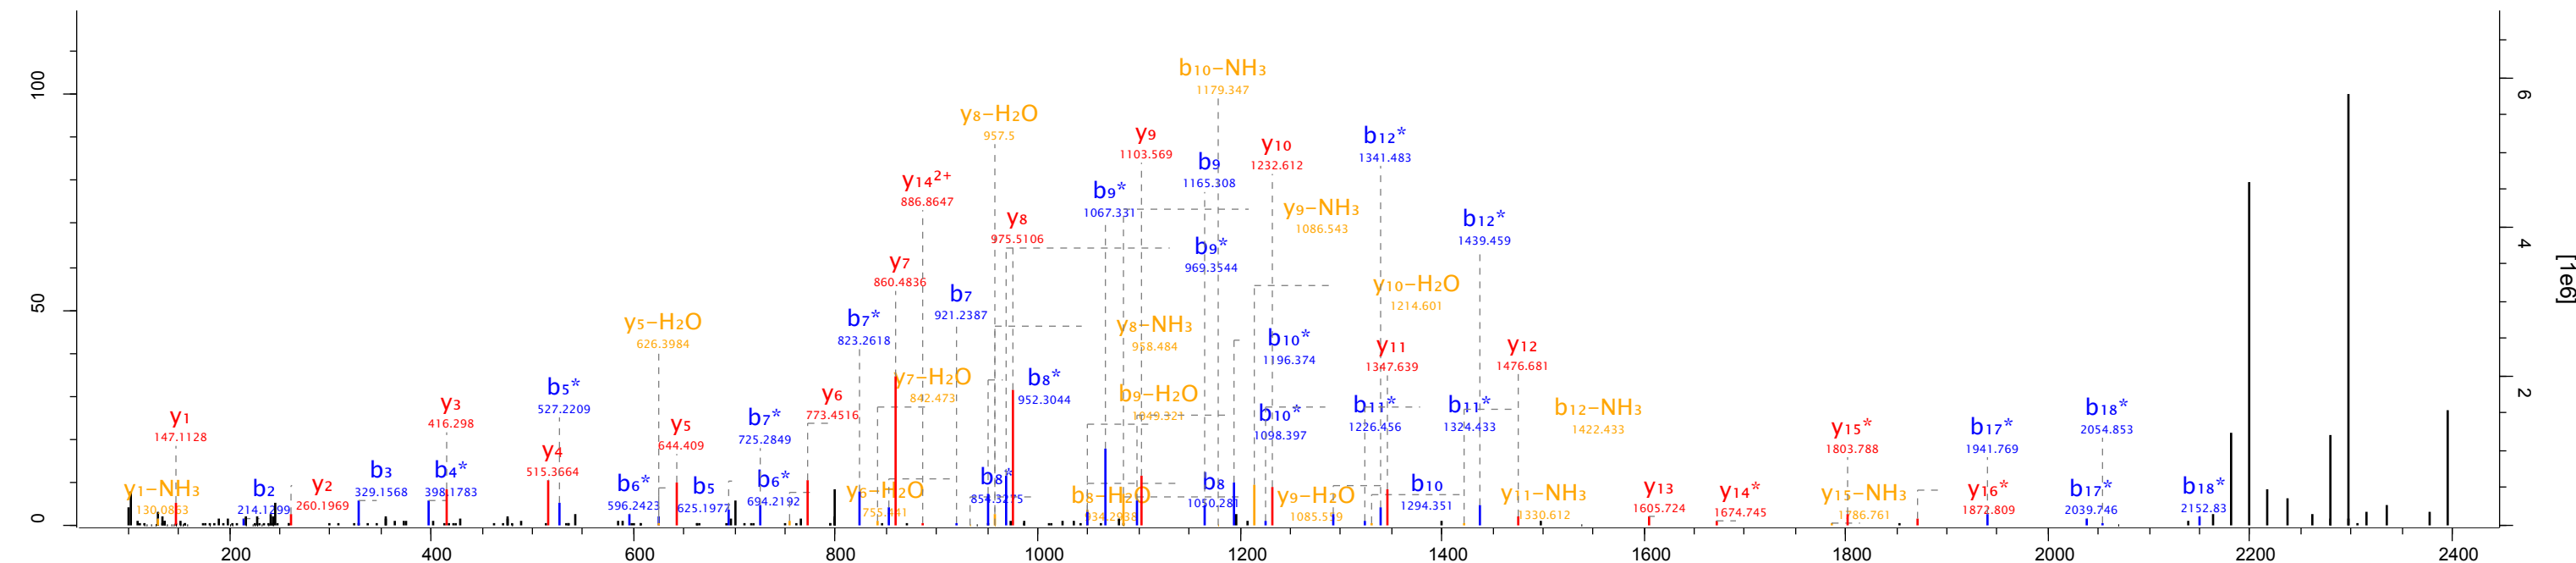

- R G D y<sub>16</sub><sup>\*</sup>  
ph  
S y<sub>15</sub><sup>\*</sup>  
E y<sub>14</sub><sup>\*</sup>  
ph  
S y<sub>13</sub>  
E y<sub>12</sub>  
E y<sub>11</sub>  
D y<sub>10</sub>  
E y<sub>9</sub>  
Q y<sub>8</sub>  
D y<sub>7</sub>  
S y<sub>6</sub>  
E y<sub>5</sub>  
E y<sub>4</sub>  
V y<sub>3</sub>  
R y<sub>2</sub>  
L y<sub>1</sub>  
K -

b<sub>2</sub> b<sub>3</sub> b<sub>4</sub><sup>\*</sup> b<sub>5</sub> b<sub>6</sub><sup>\*</sup> b<sub>7</sub> b<sub>8</sub> b<sub>9</sub> b<sub>10</sub> b<sub>11</sub><sup>\*</sup> b<sub>12</sub><sup>\*</sup> b<sub>17</sub><sup>\*</sup> b<sub>18</sub><sup>\*</sup>

Raw file: 20150812\_A375SR\_Phospho\_BR1\_03  
 Scan: 10168 Method: FTMS; HCD Score: 327.14 m/z: 1280.03 Gene names: ACIN1

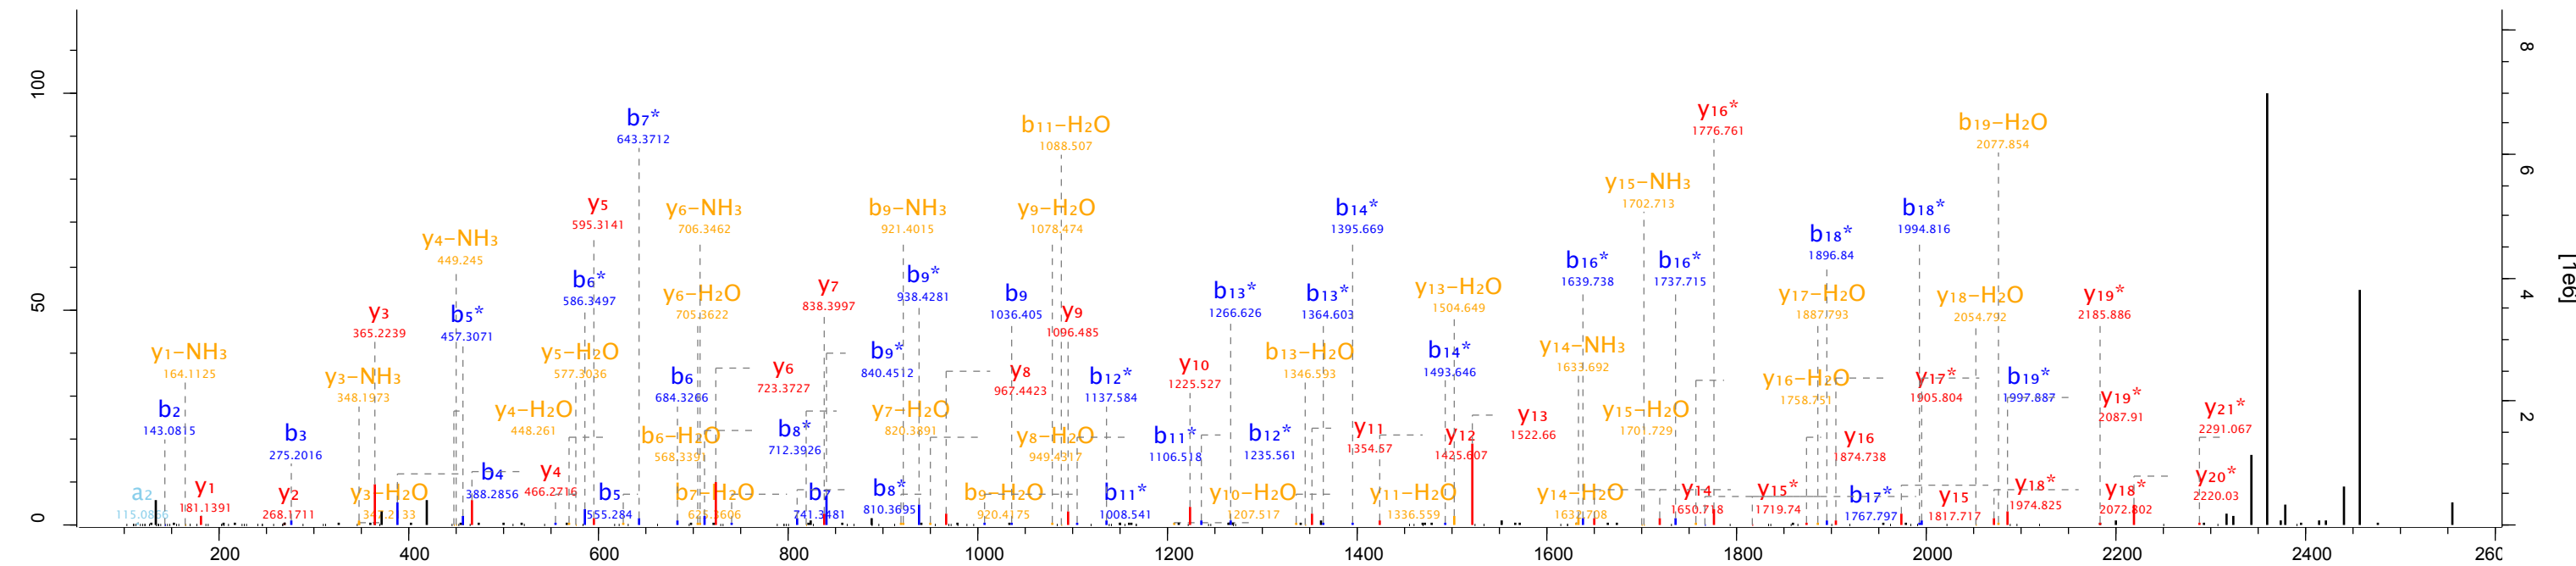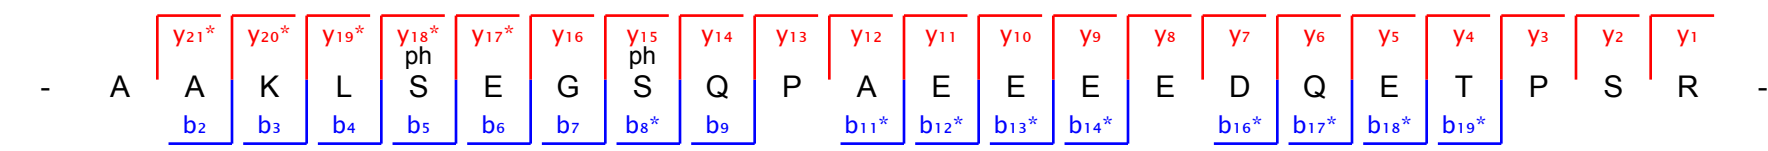

Raw file Scan Method Score m/z Gene names  
 20150812\_A375SR\_Phospho\_BR1\_03 10248 FTMS; HCD 196.14 1239.54 CEP170

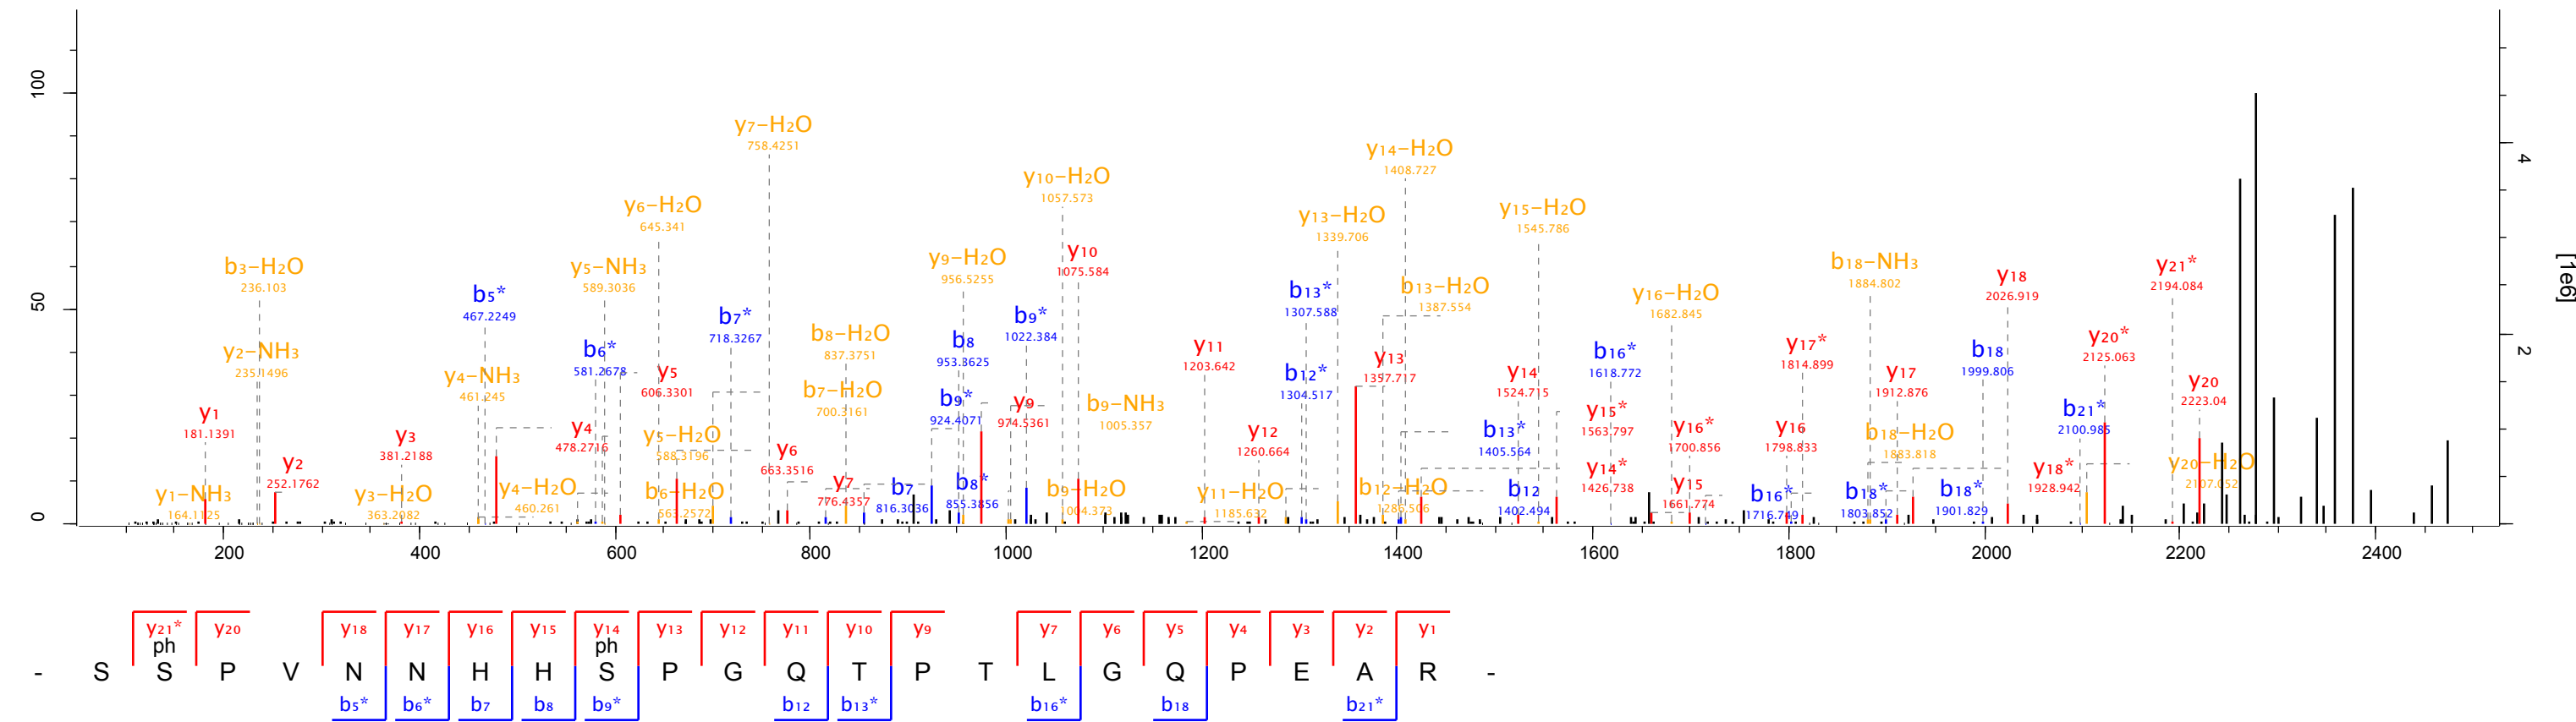

Raw file 20150812\_A375SR\_Phospho\_BR1\_03 Scan 10398 Method FTMS; HCD Score 182.21 m/z 908.41 Gene names RANBP2

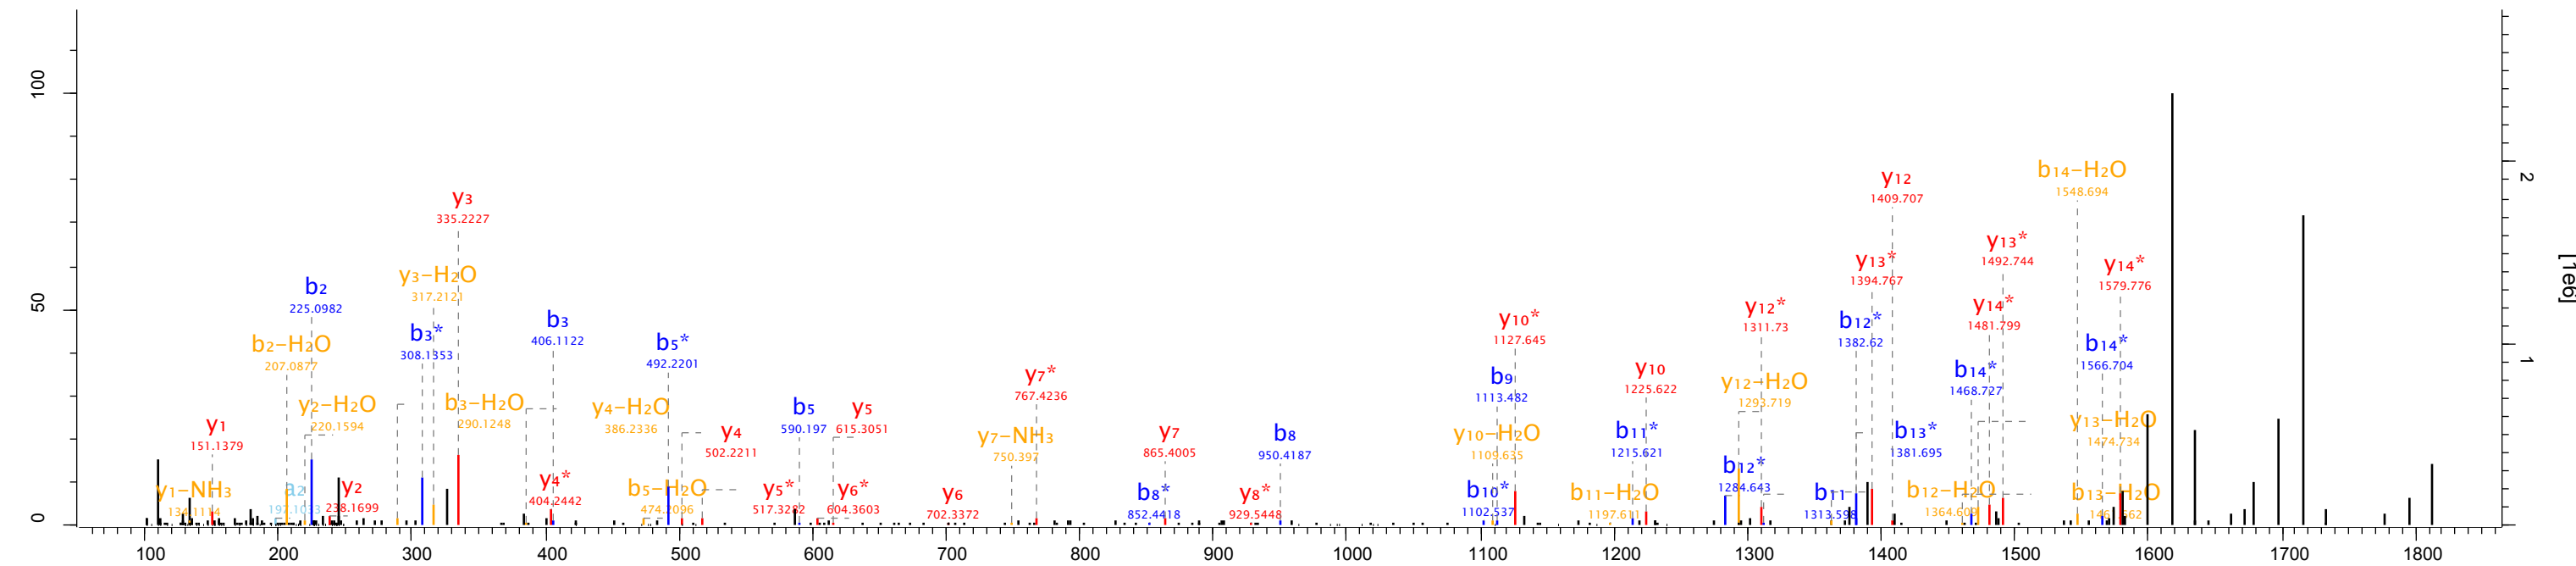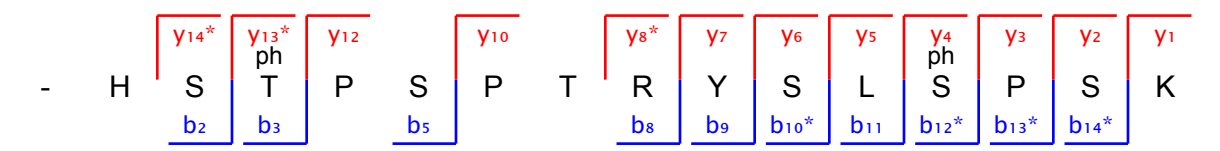



Raw file 20150812\_A375SR\_Phospho\_BR1\_03 Scan 10408 Method FTMS; HCD Score 304.59 m/z 941.44 Gene names STUB1

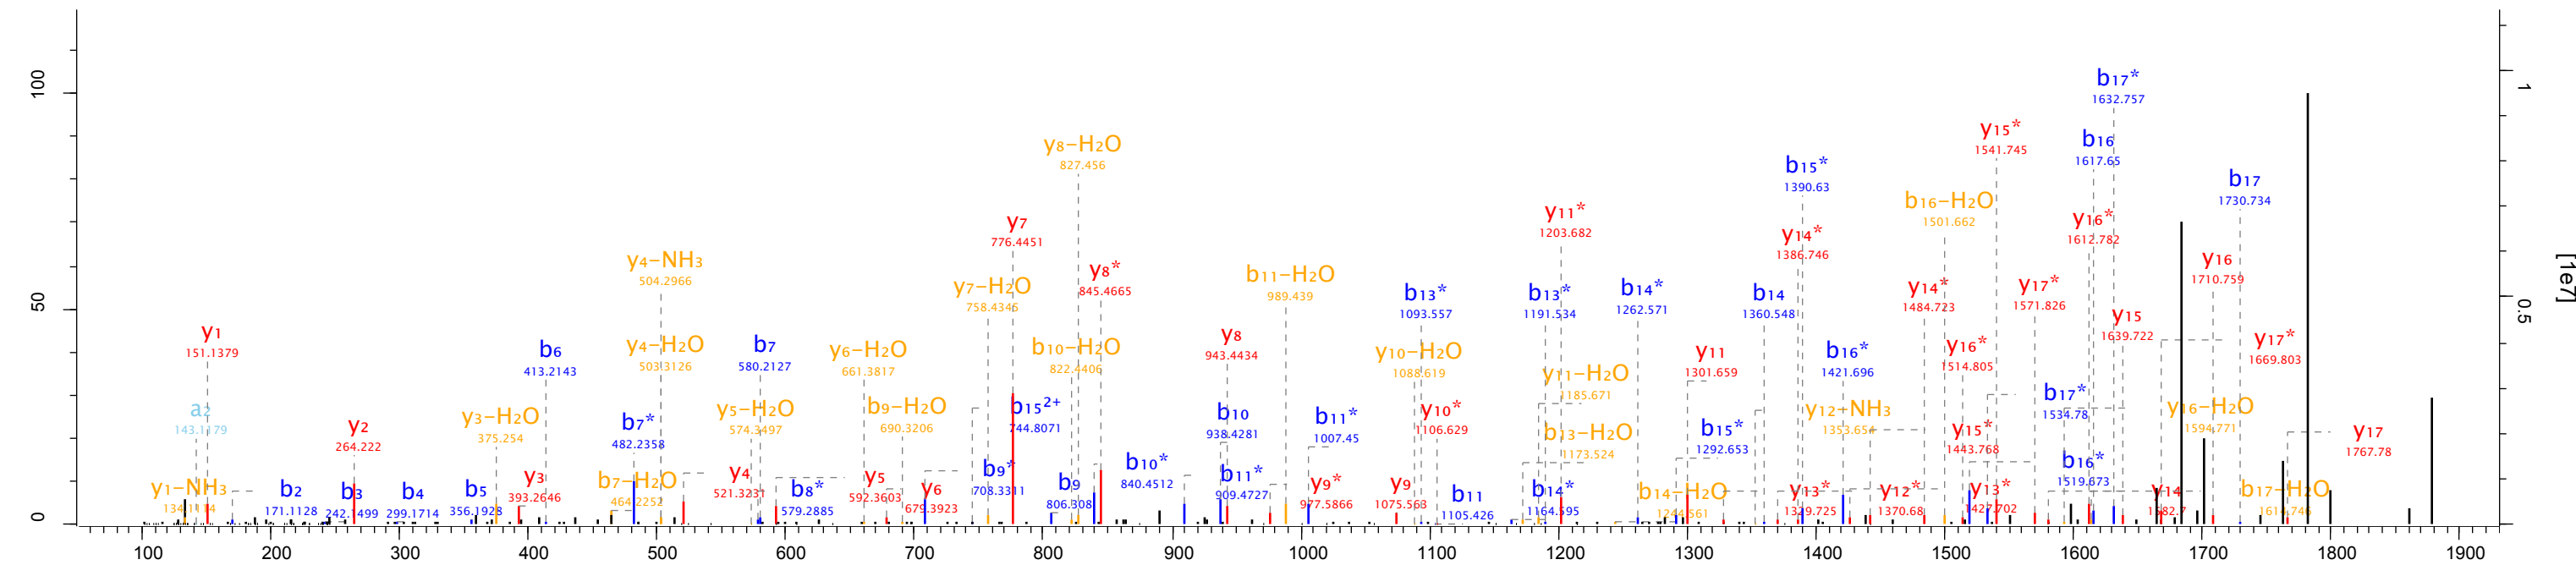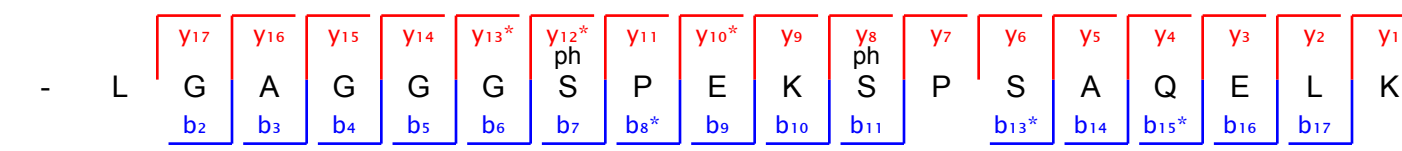

Raw file: 20150812\_A375SR\_Phospho\_BR1\_03  
 Scan: 10598 Method: FTMS; HCD Score: 77.14 m/z: 722.27 Gene names: ZNF217

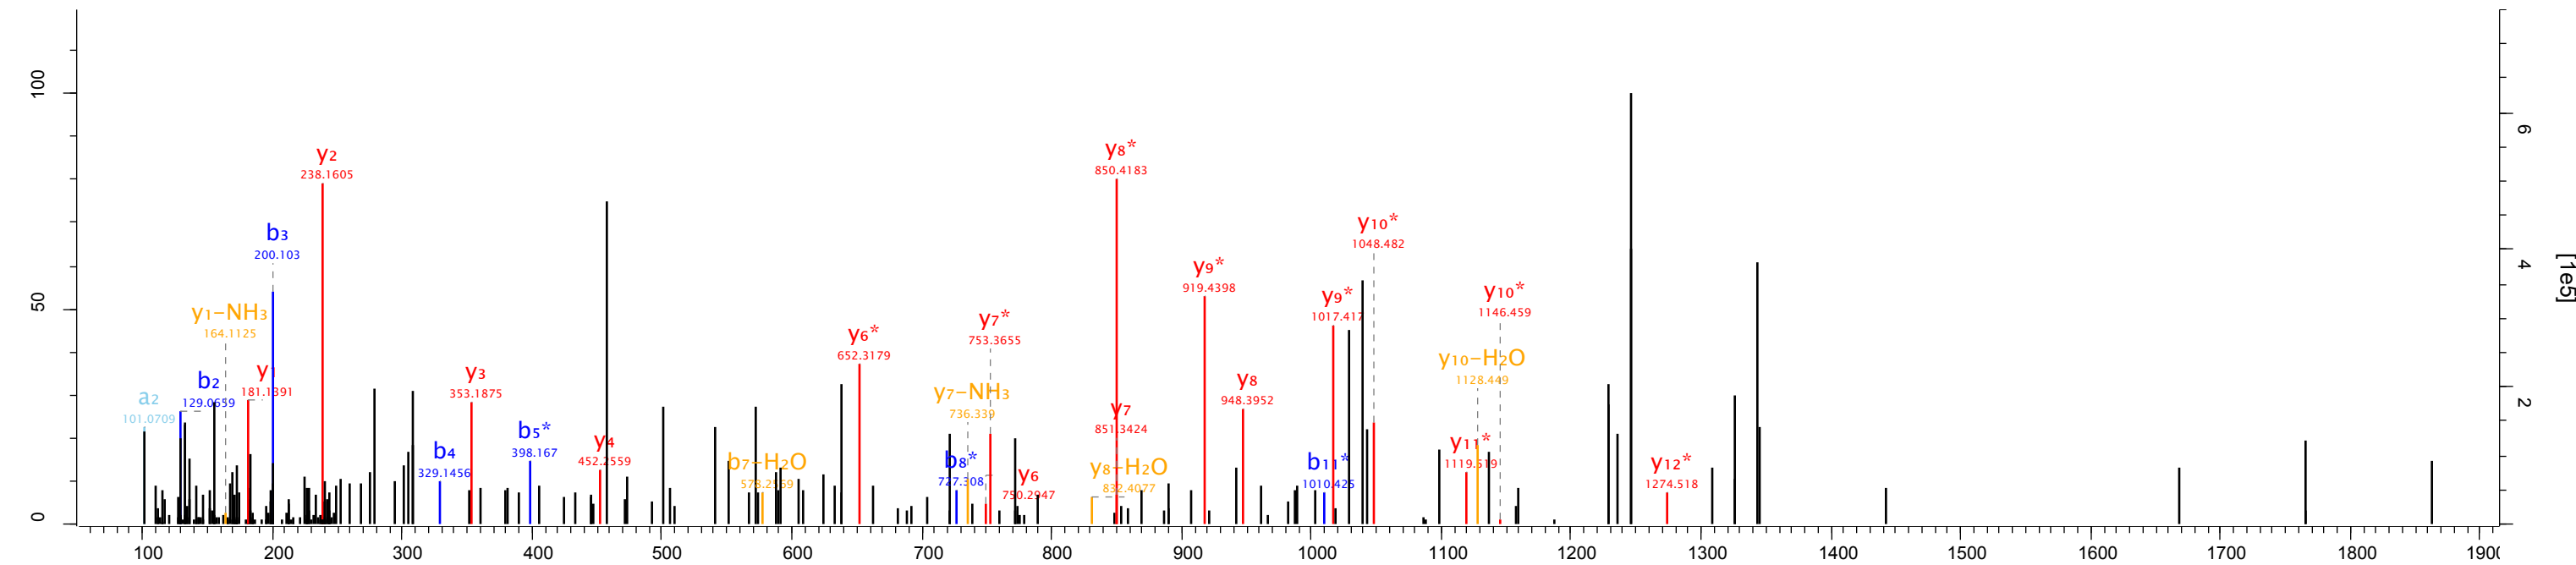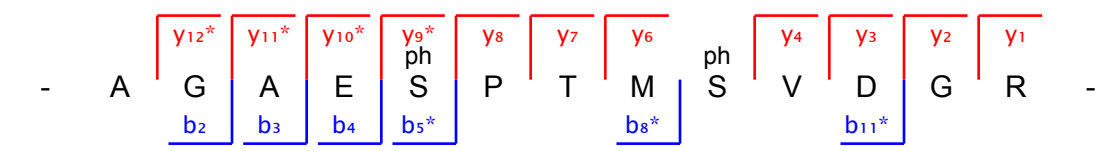

Raw file: 20150812\_A375SR\_Phospho\_BR1\_03  
 Scan: 10778 Method: FTMS; HCD Score: 52.37 m/z: 651.66 Gene names: LUZP1

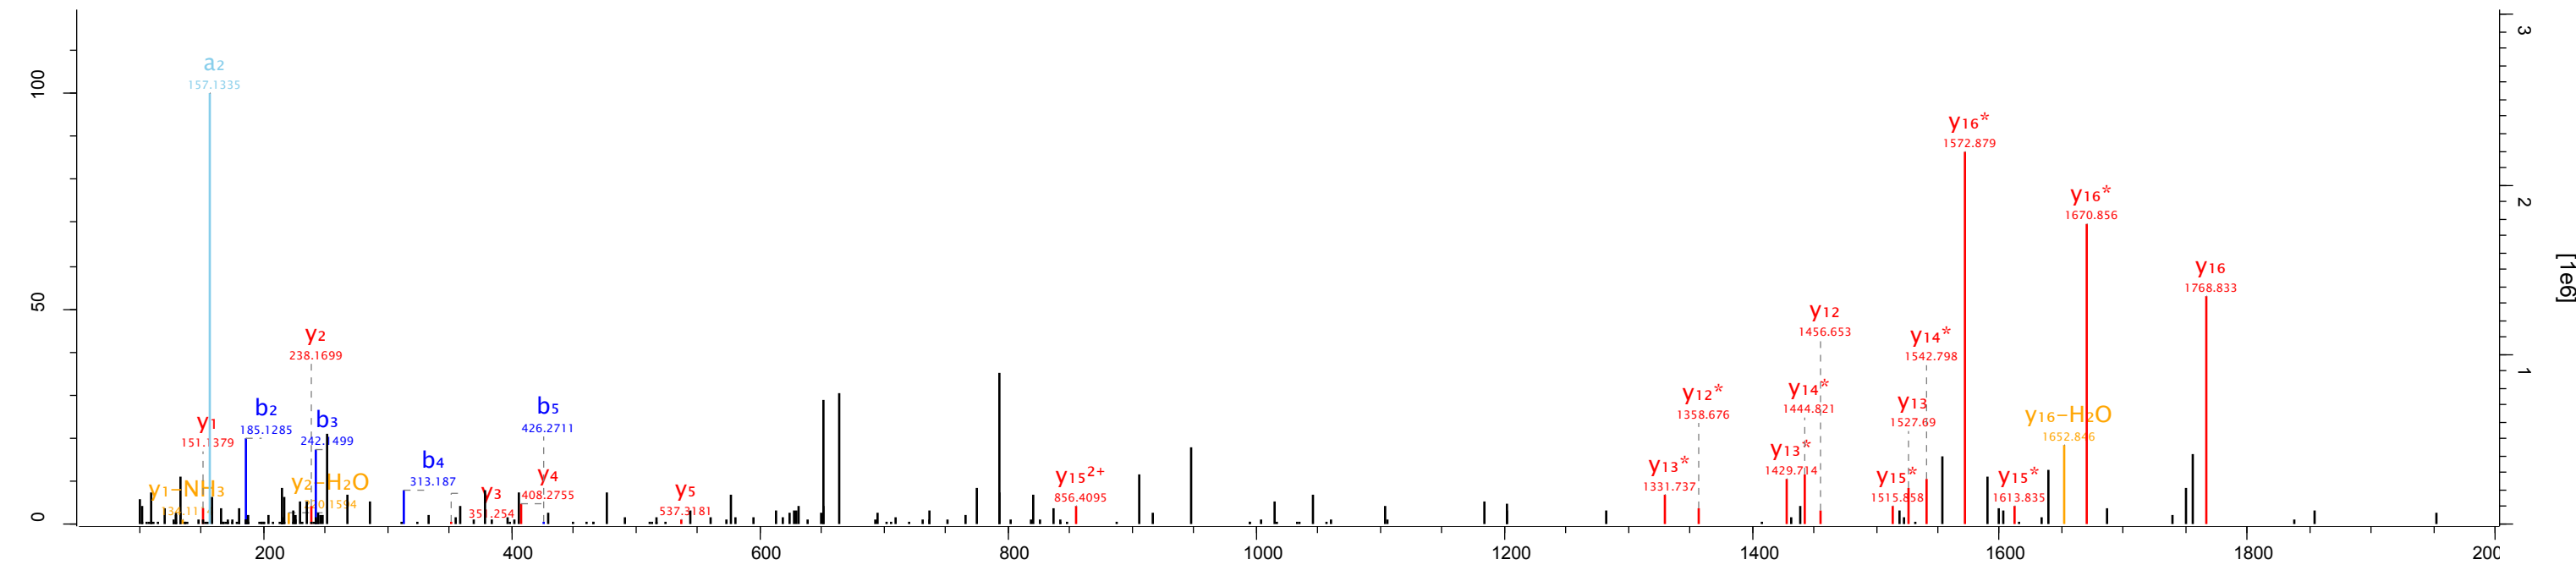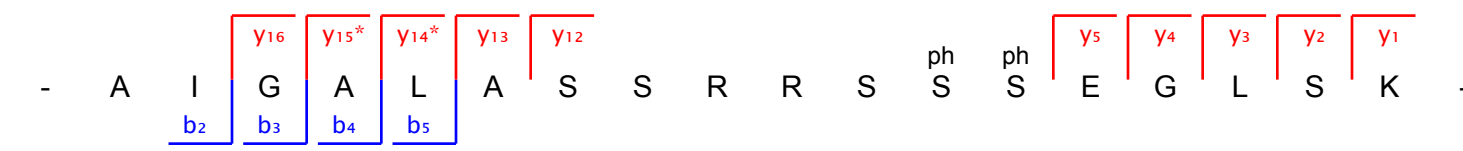

Raw file: 20150812\_A375SR\_Phospho\_BR1\_03  
 Scan: 11158 Method: FTMS; HCD Score: 131.37 m/z: 890.37 Gene names: SLC35A5

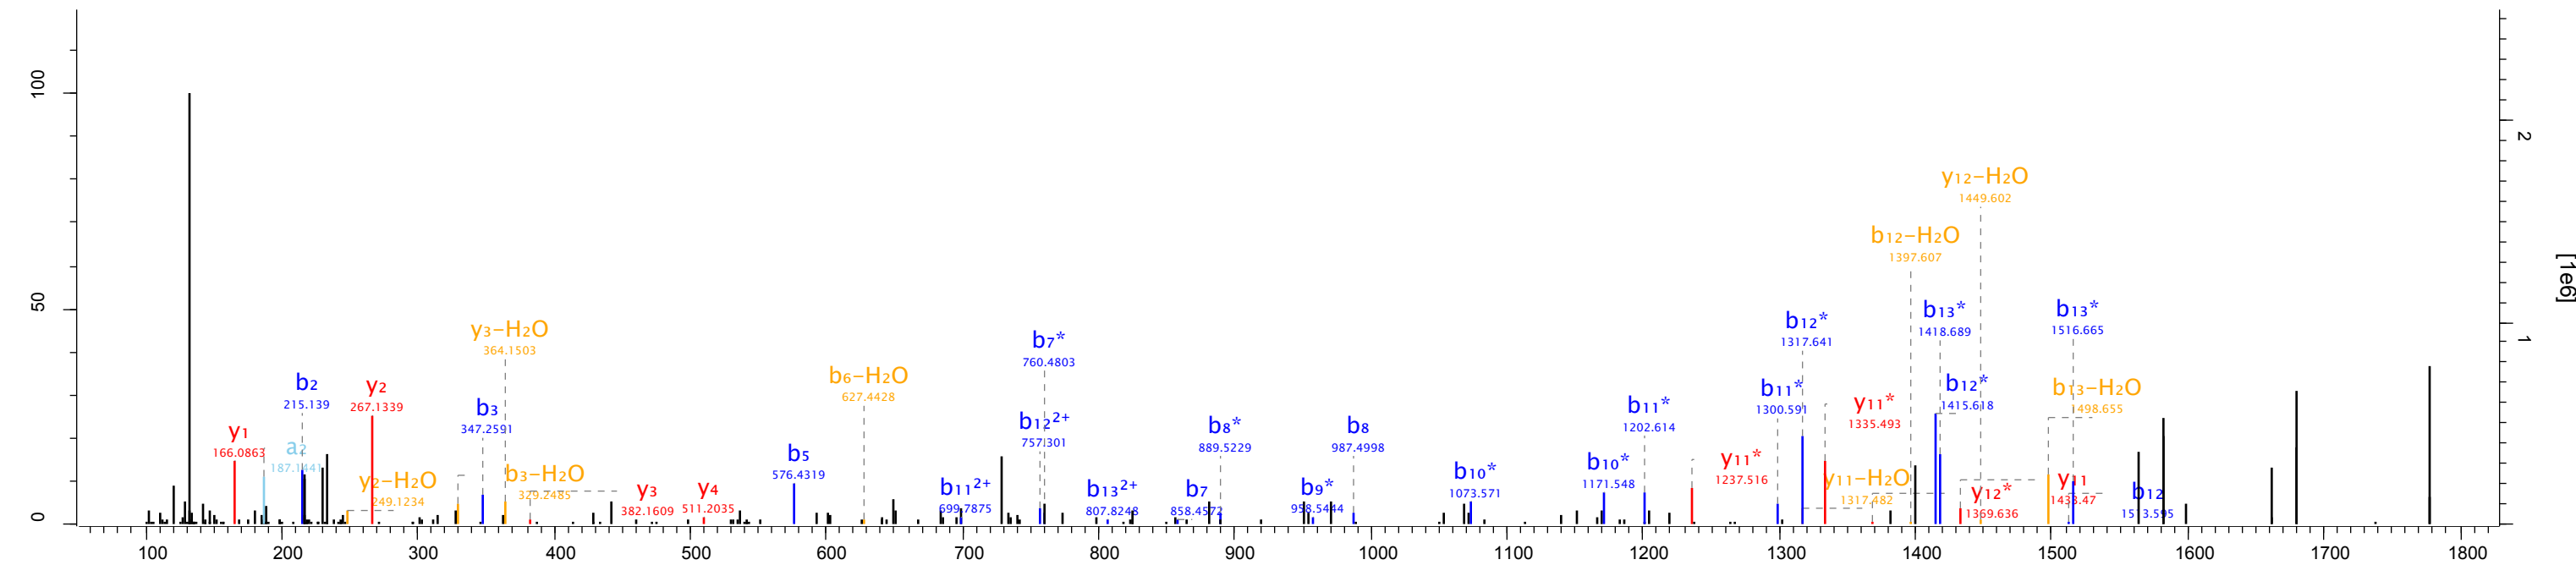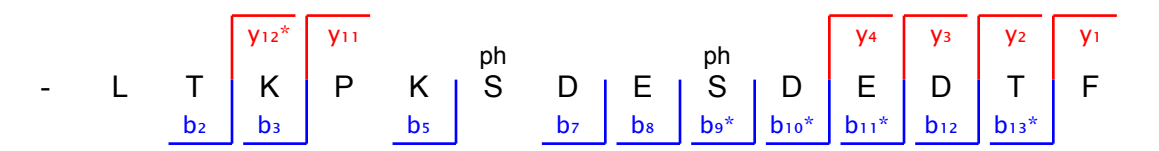

Raw file: 20150812\_A375SR\_Phospho\_BR1\_03  
 Scan: 11228 Method: FTMS; HCD Score: 131.17 m/z: 536.26 Gene names: SRRM2

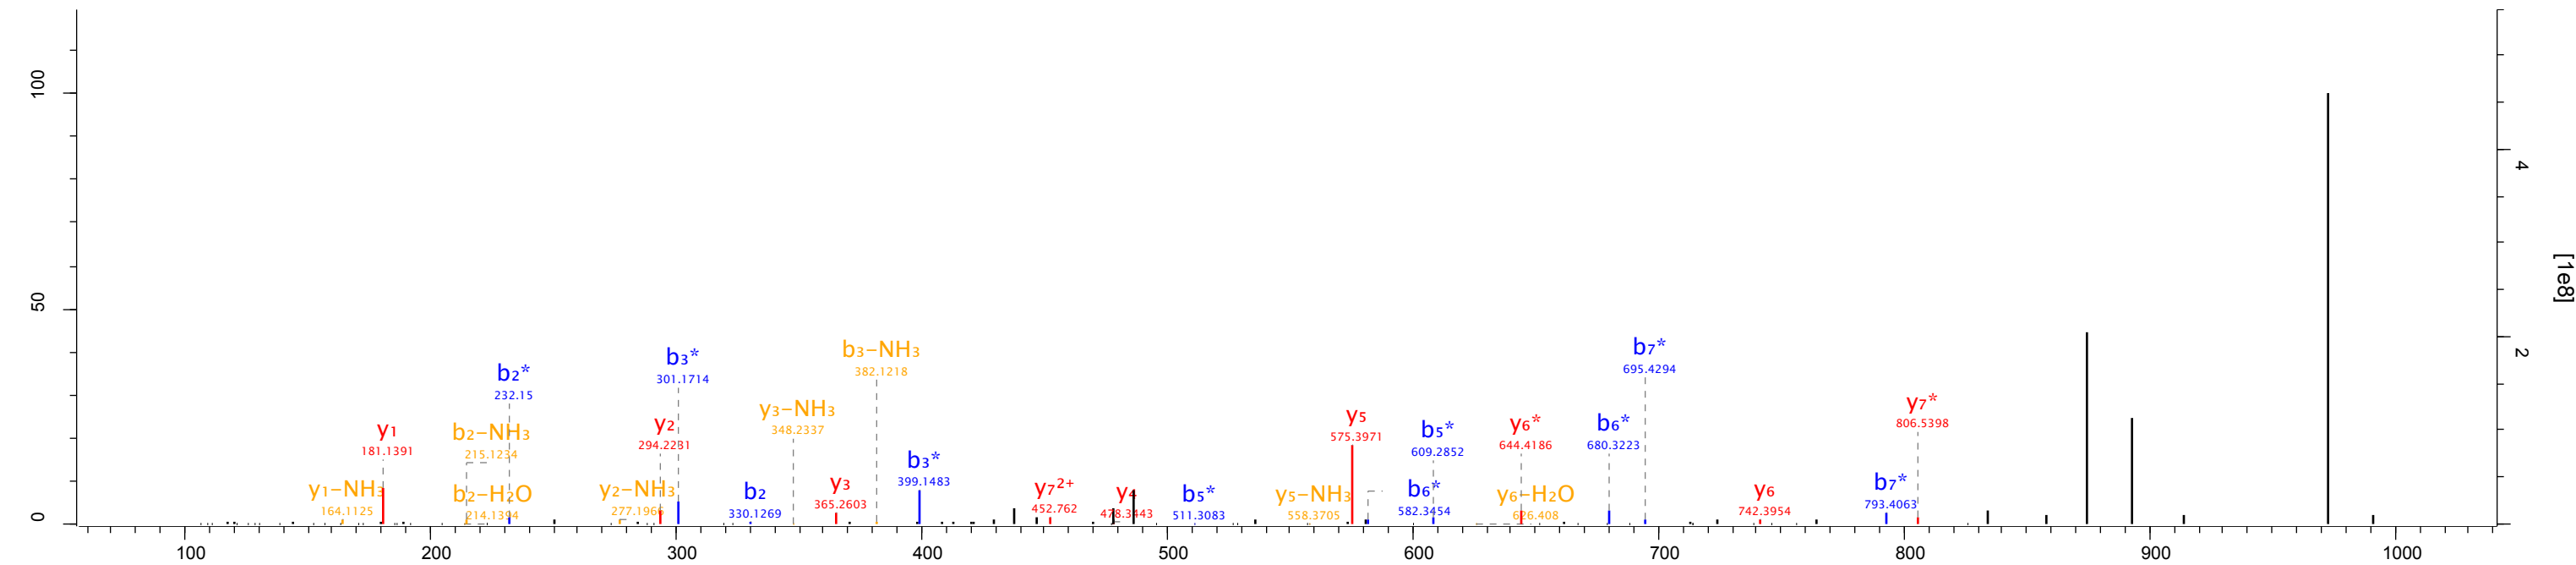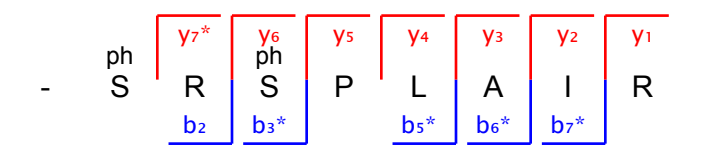

Raw file 20150812\_A375SR\_Phospho\_BR1\_03 Scan 11328 Method FTMS; HCD Score 74.85 m/z 448.55 Gene names SRRM2

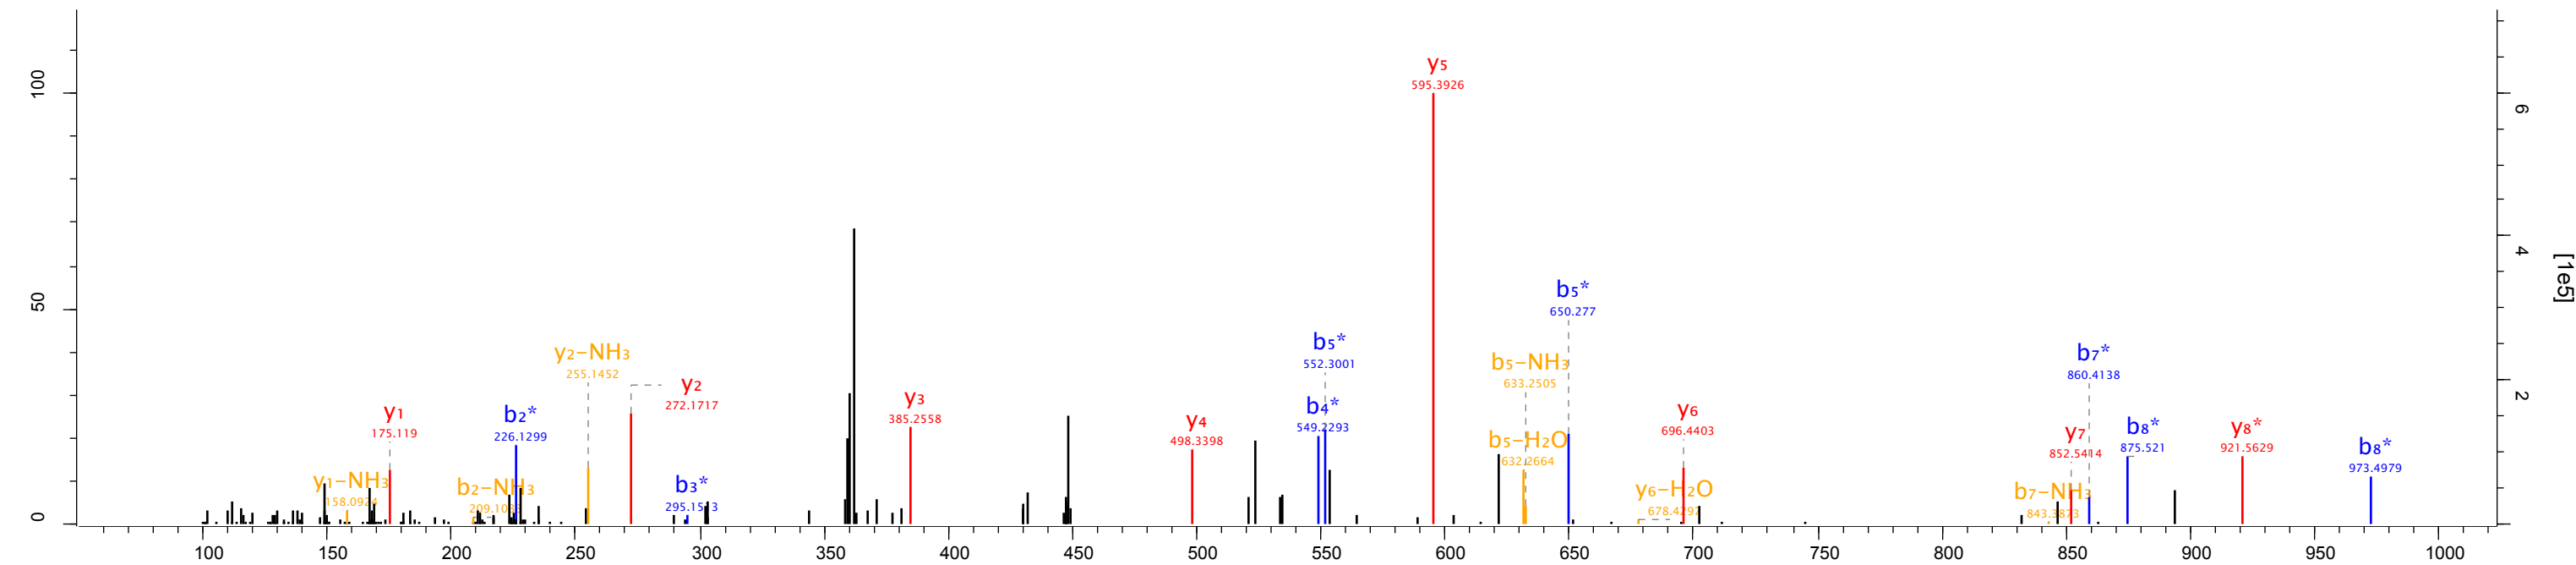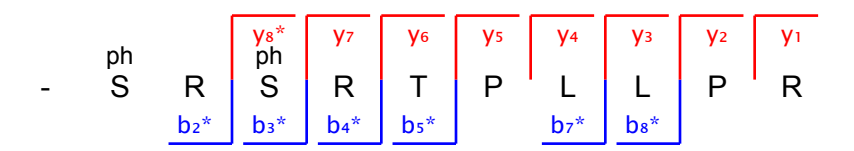

Raw file 20150812\_A375SR\_Phospho\_BR1\_03 Scan 11868 Method FTMS; HCD Score 75.42 m/z 788.71 Gene names RPP25

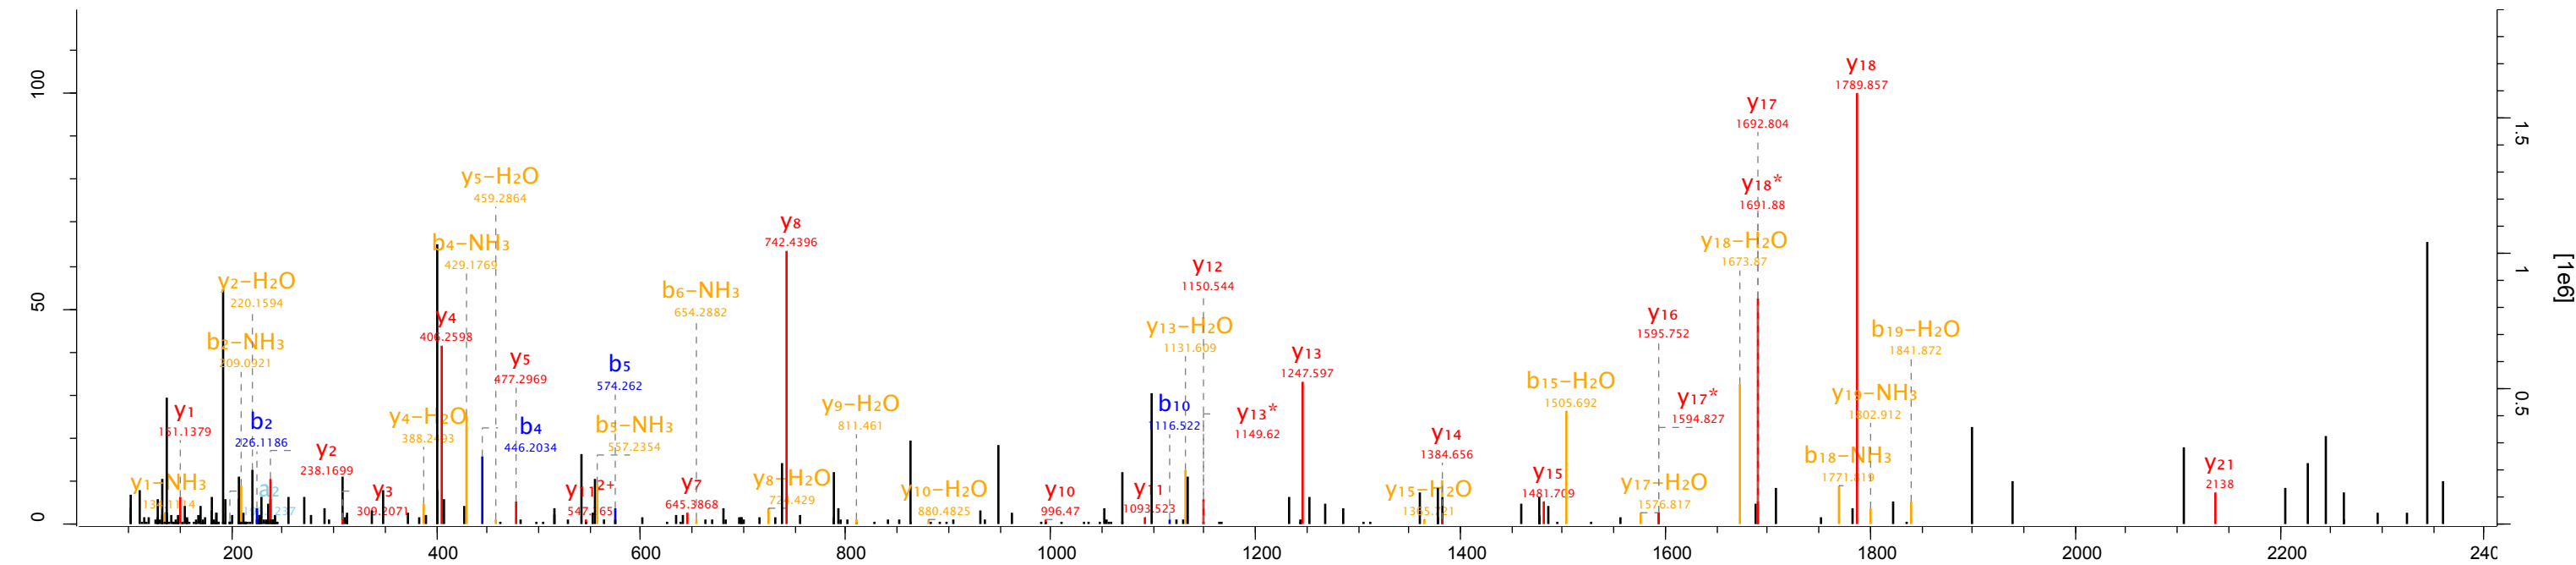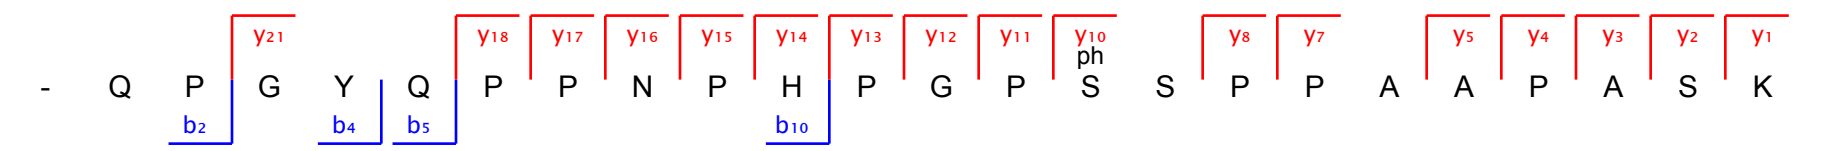

Raw file: 20150812\_A375SR\_Phospho\_BR1\_03  
 Scan: 11948 Method: FTMS; HCD Score: 177.71 m/z: 1060.39 Gene names: SPEN

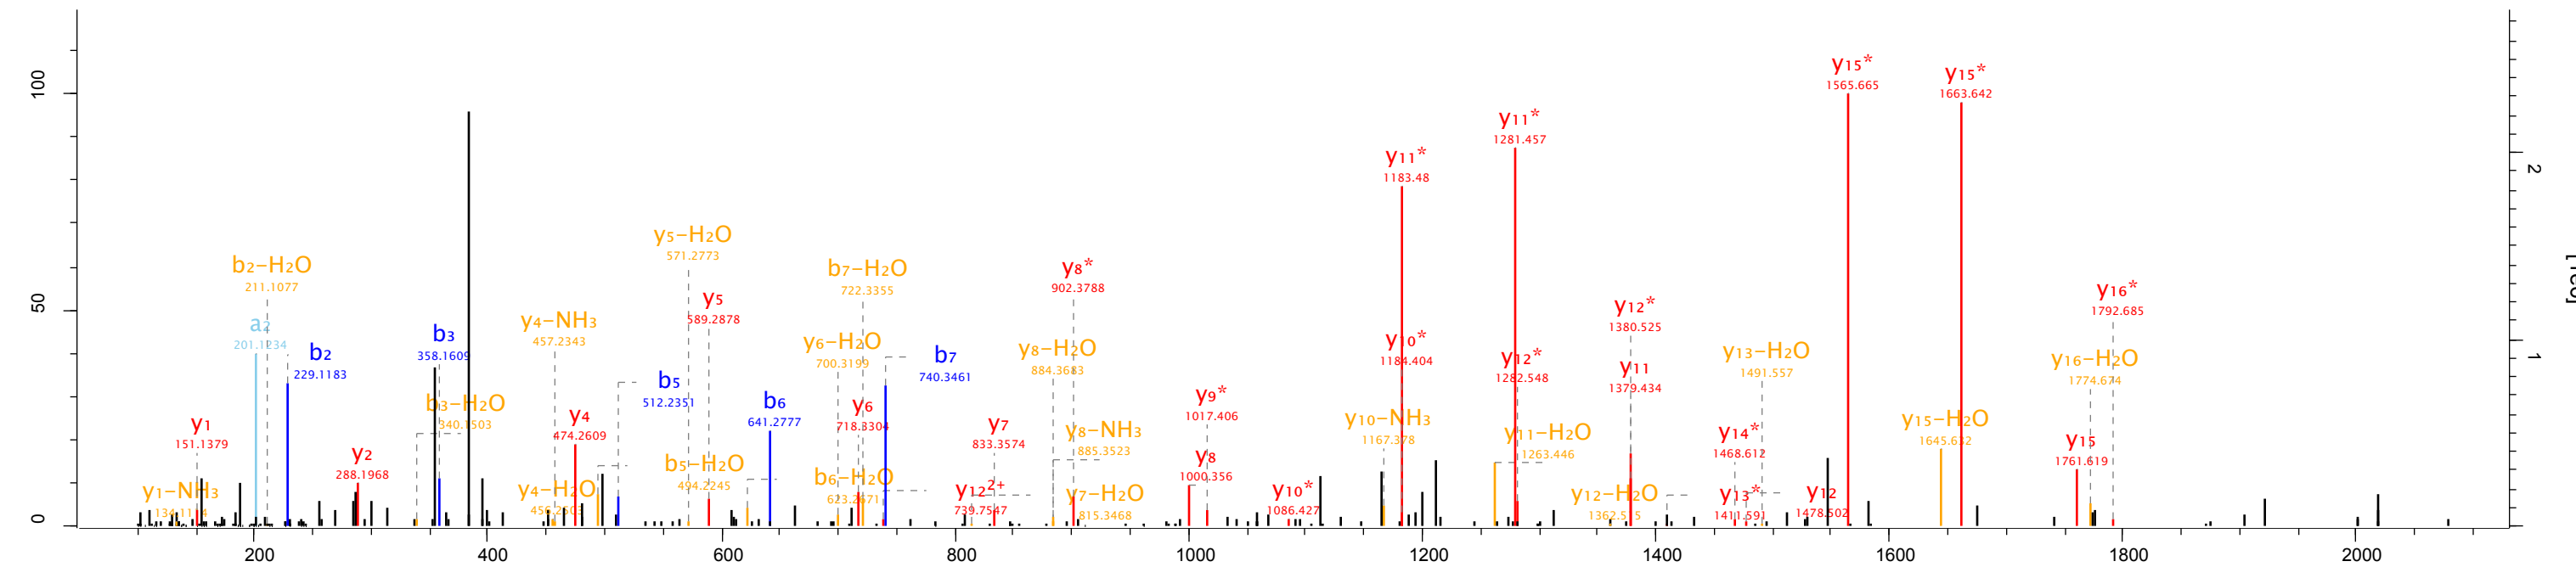

- D L E P G E V P S D S D E D G E H K -

Fragmentation mapping (b and y ions):

- b<sub>2</sub>: L
- b<sub>3</sub>: E
- b<sub>5</sub>: G
- b<sub>6</sub>: E
- b<sub>7</sub>: V
- y<sub>1</sub>: K
- y<sub>2</sub>: H
- y<sub>4</sub>: D
- y<sub>5</sub>: D
- y<sub>6</sub>: E
- y<sub>7</sub>: D
- y<sub>8</sub>: S
- y<sub>9</sub>: D
- y<sub>10</sub>: S
- y<sub>11</sub>: P
- y<sub>12</sub>: V
- y<sub>13</sub>: E
- y<sub>14</sub>: G
- y<sub>15</sub>: P
- y<sub>16</sub>: E



Raw file 20150812\_A375SR\_Phospho\_BR1\_03 Scan 12228 Method FTMS; HCD Score 119.8 m/z 830.37 Gene names CSTF2T

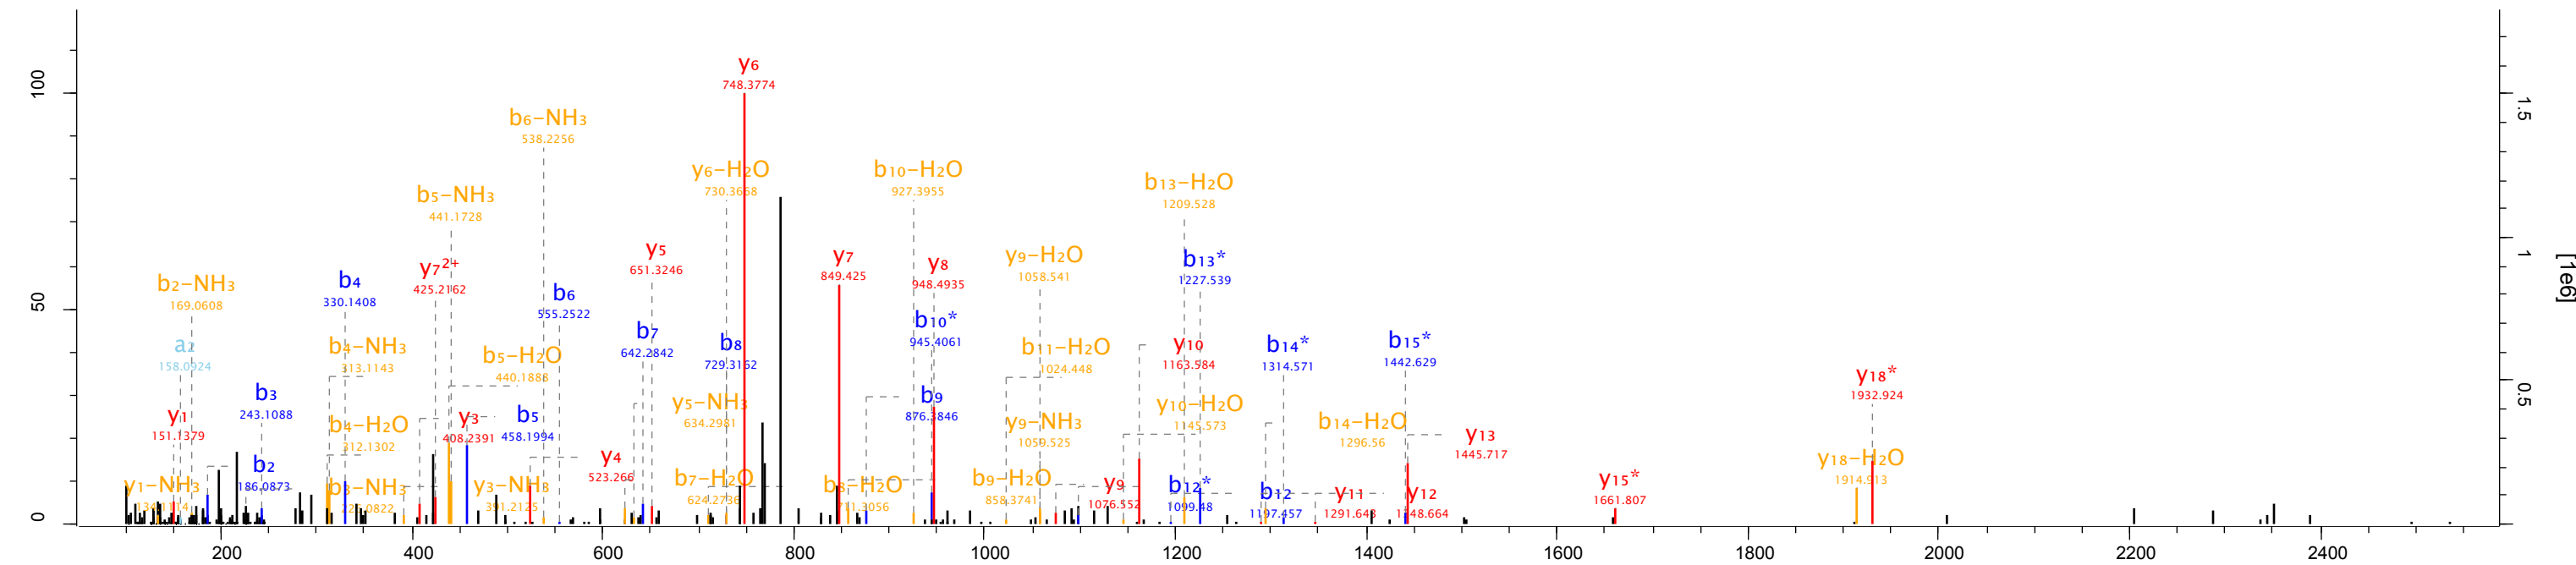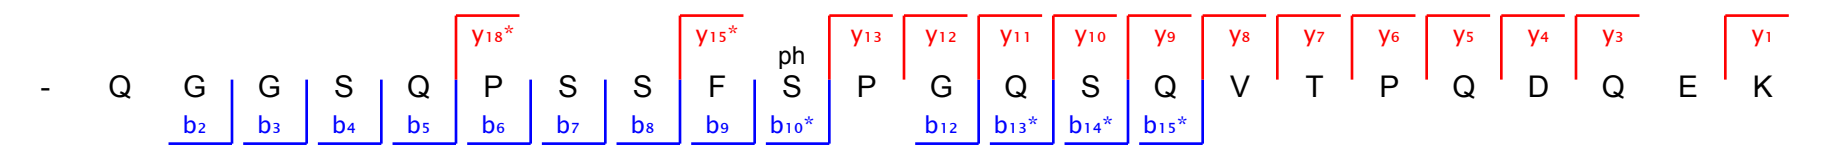



Raw file: 20150812\_A375SR\_Phospho\_BR1\_03  
 Scan: 1278 Method: FTMS; HCD Score: 129.27 m/z: 704.95 Gene names: NSRP1;CCDC55

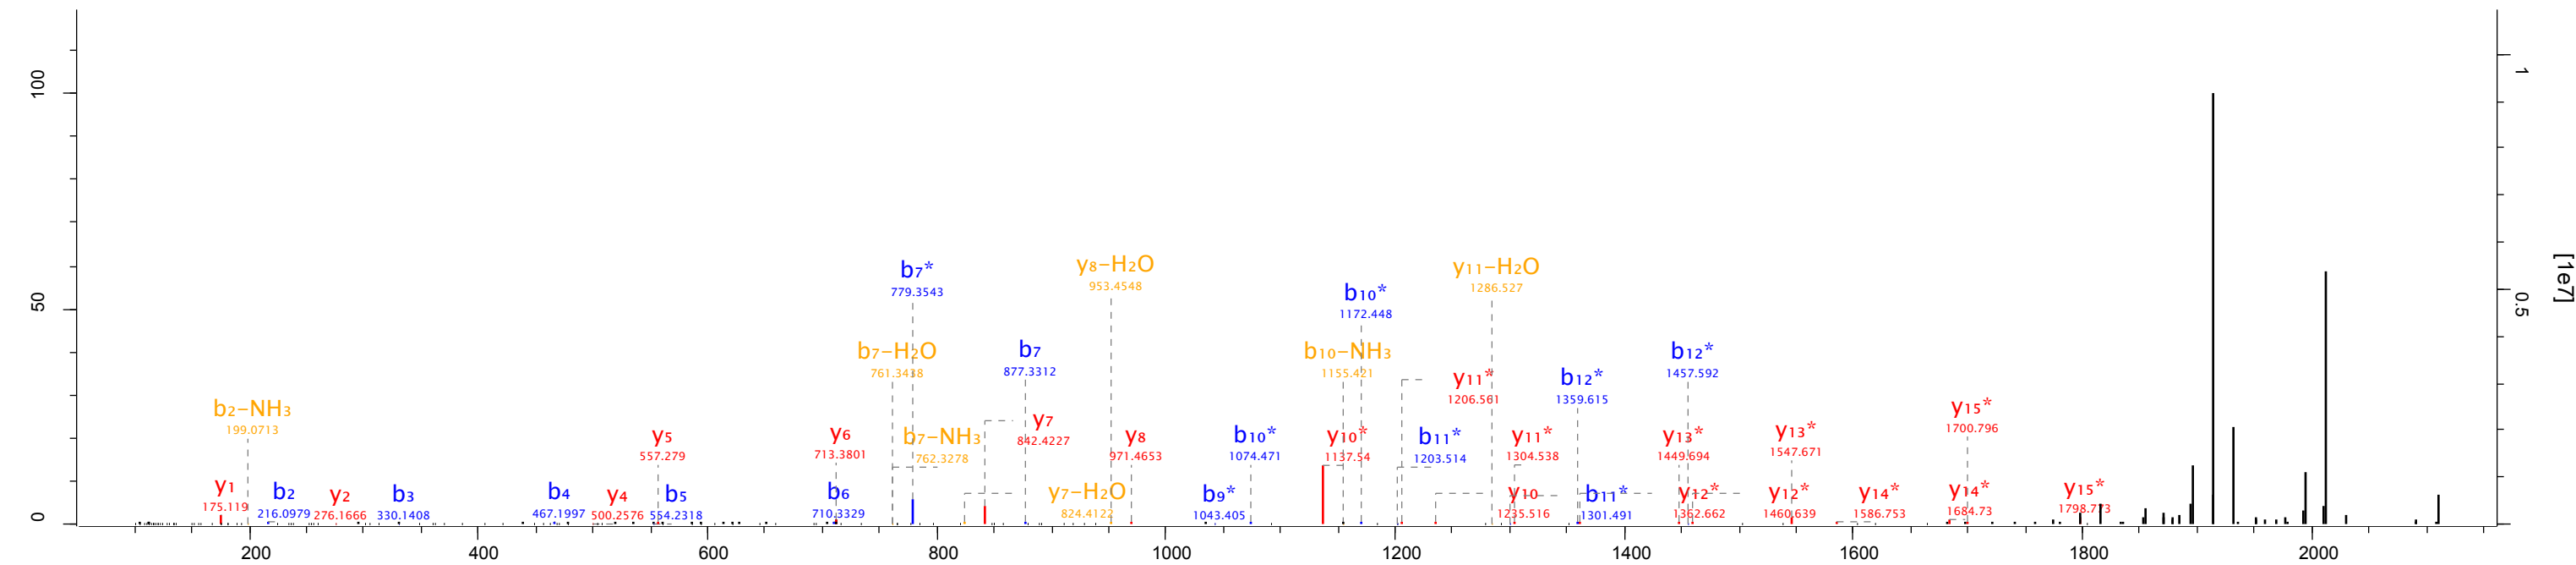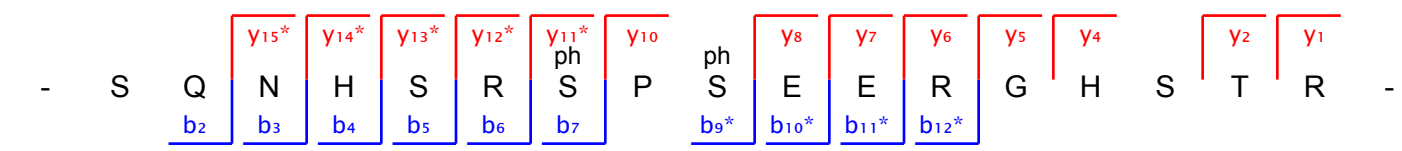

Raw file: 20150812\_A375SR\_Phospho\_BR1\_03  
 Scan: 12828 Method: FTMS; HCD Score: 144.07 m/z: 844.81 Gene names: ABLIM3

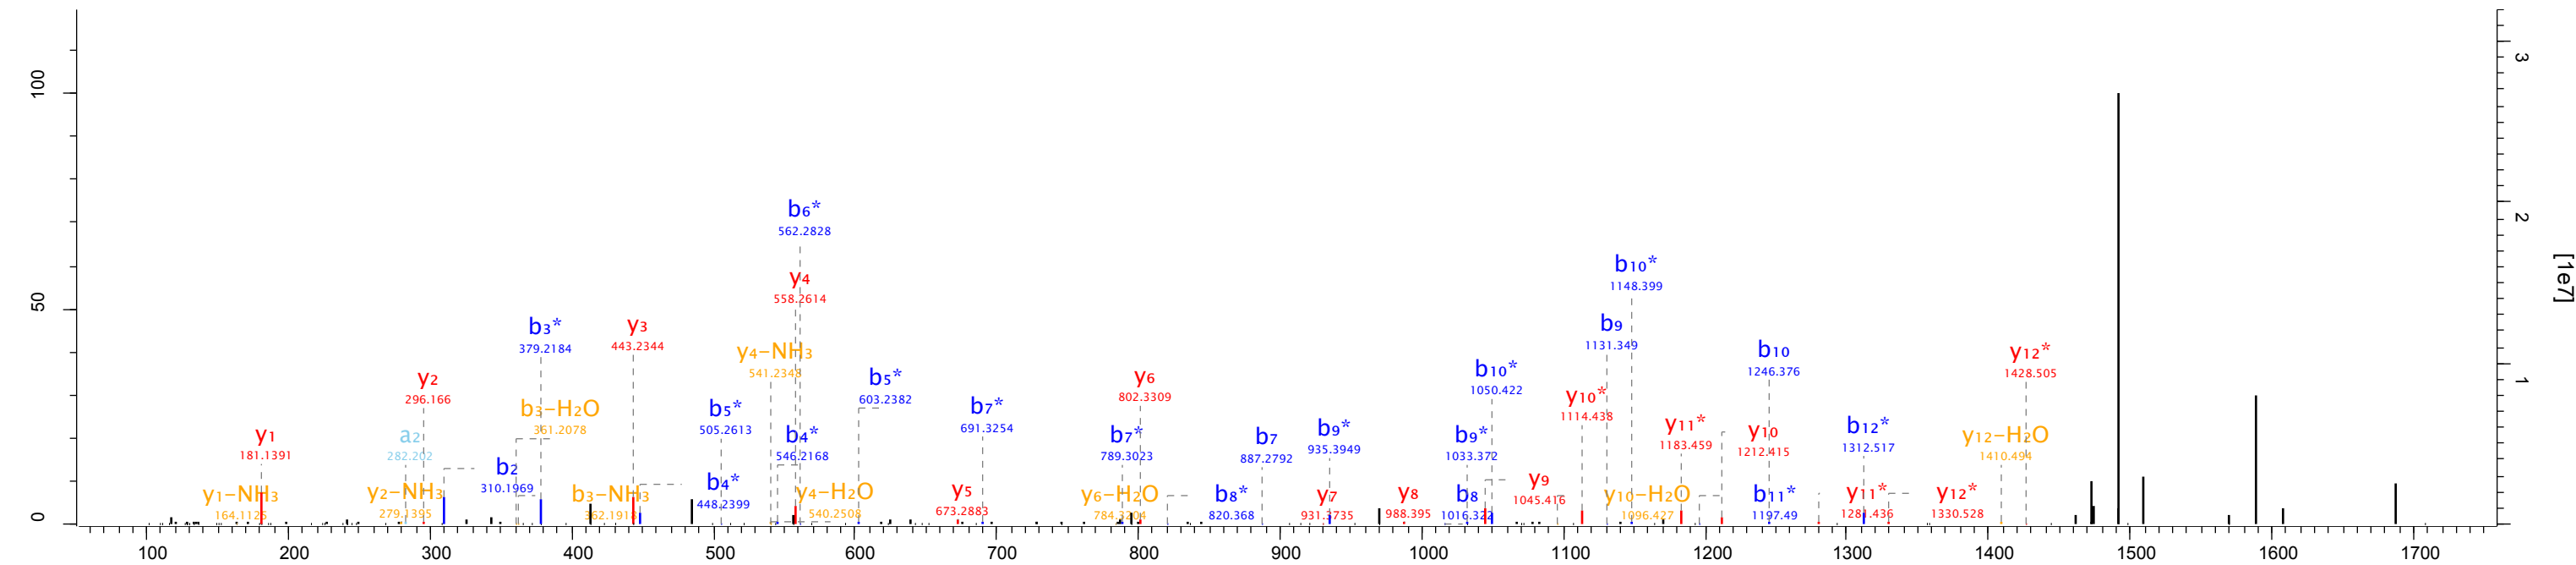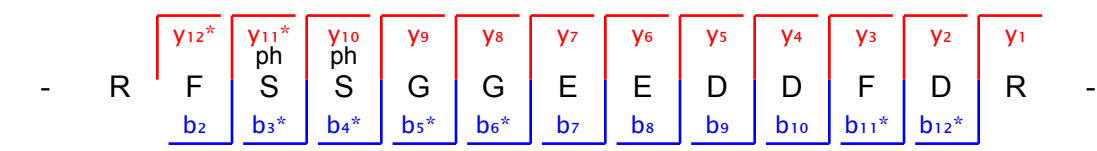

Raw file: 20150812\_A375SR\_Phospho\_BR1\_03  
 Scan: 13168 Method: FTMS; HCD Score: 84.48 m/z: 886.38 Gene names: BAT3;BAG6

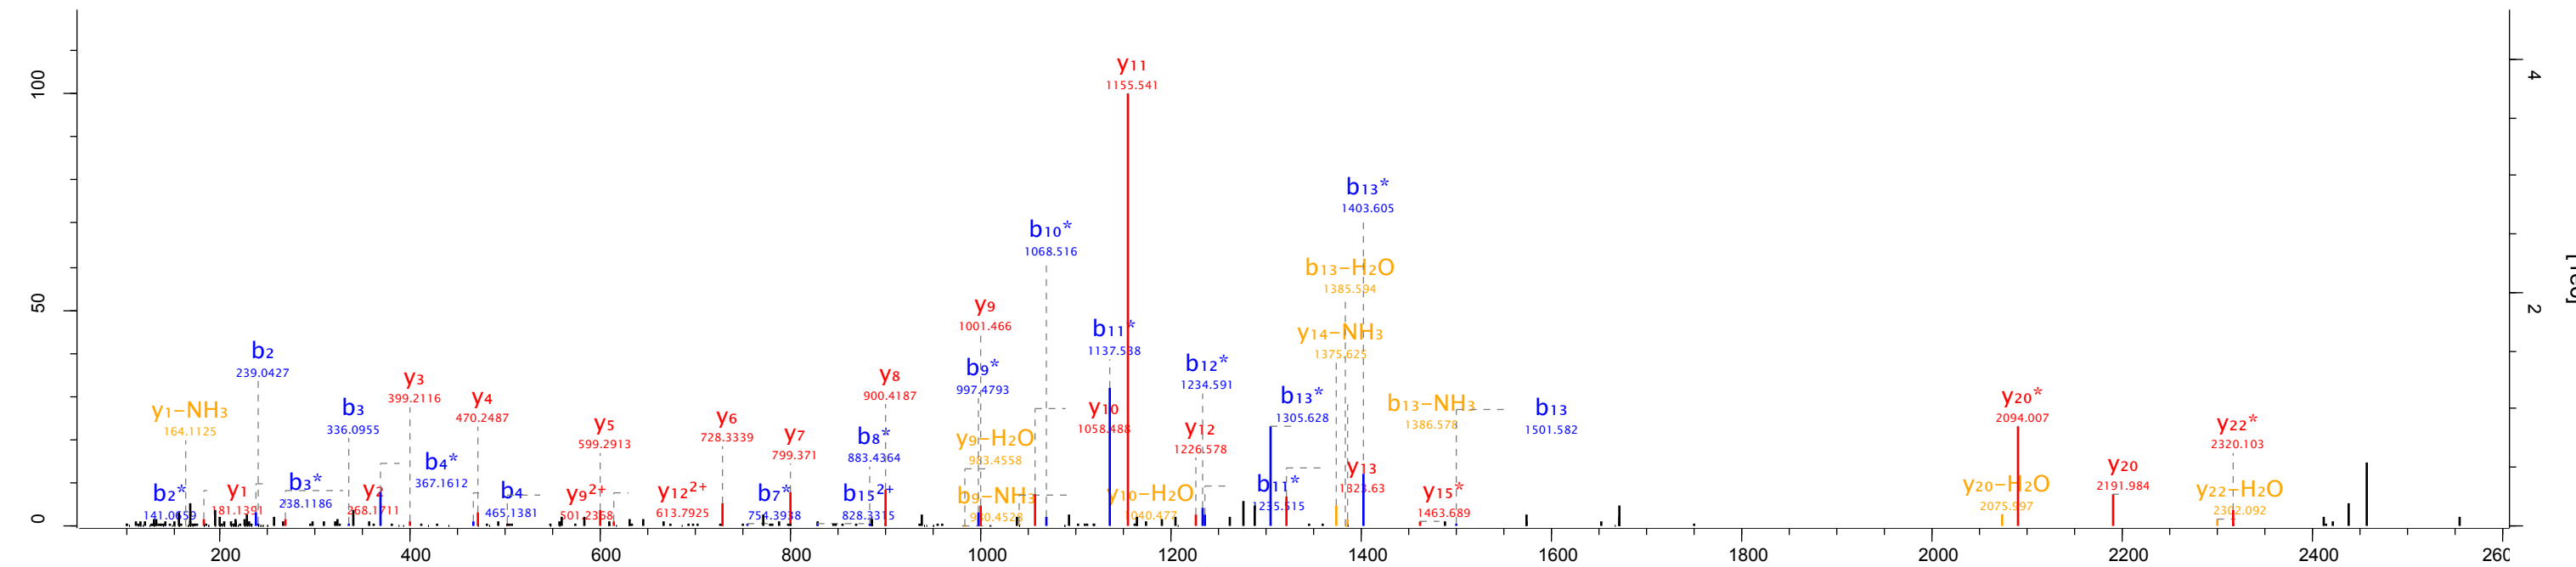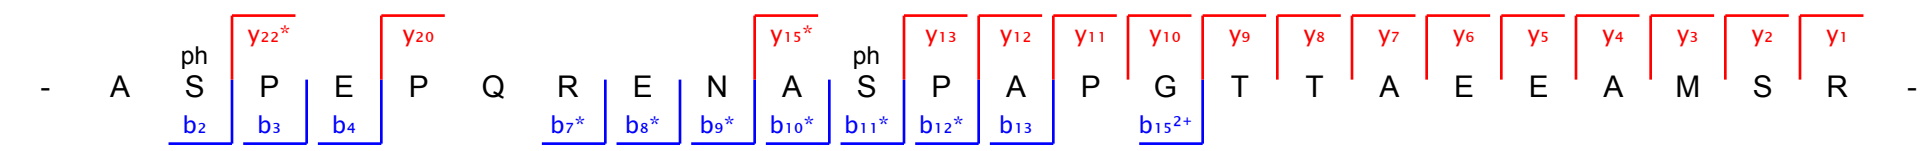

Raw file 20150812\_A375SR\_Phospho\_BR1\_03 Scan 13178 Method FTMS; HCD Score 131.86 m/z 633.62 Gene names ARHGAP1

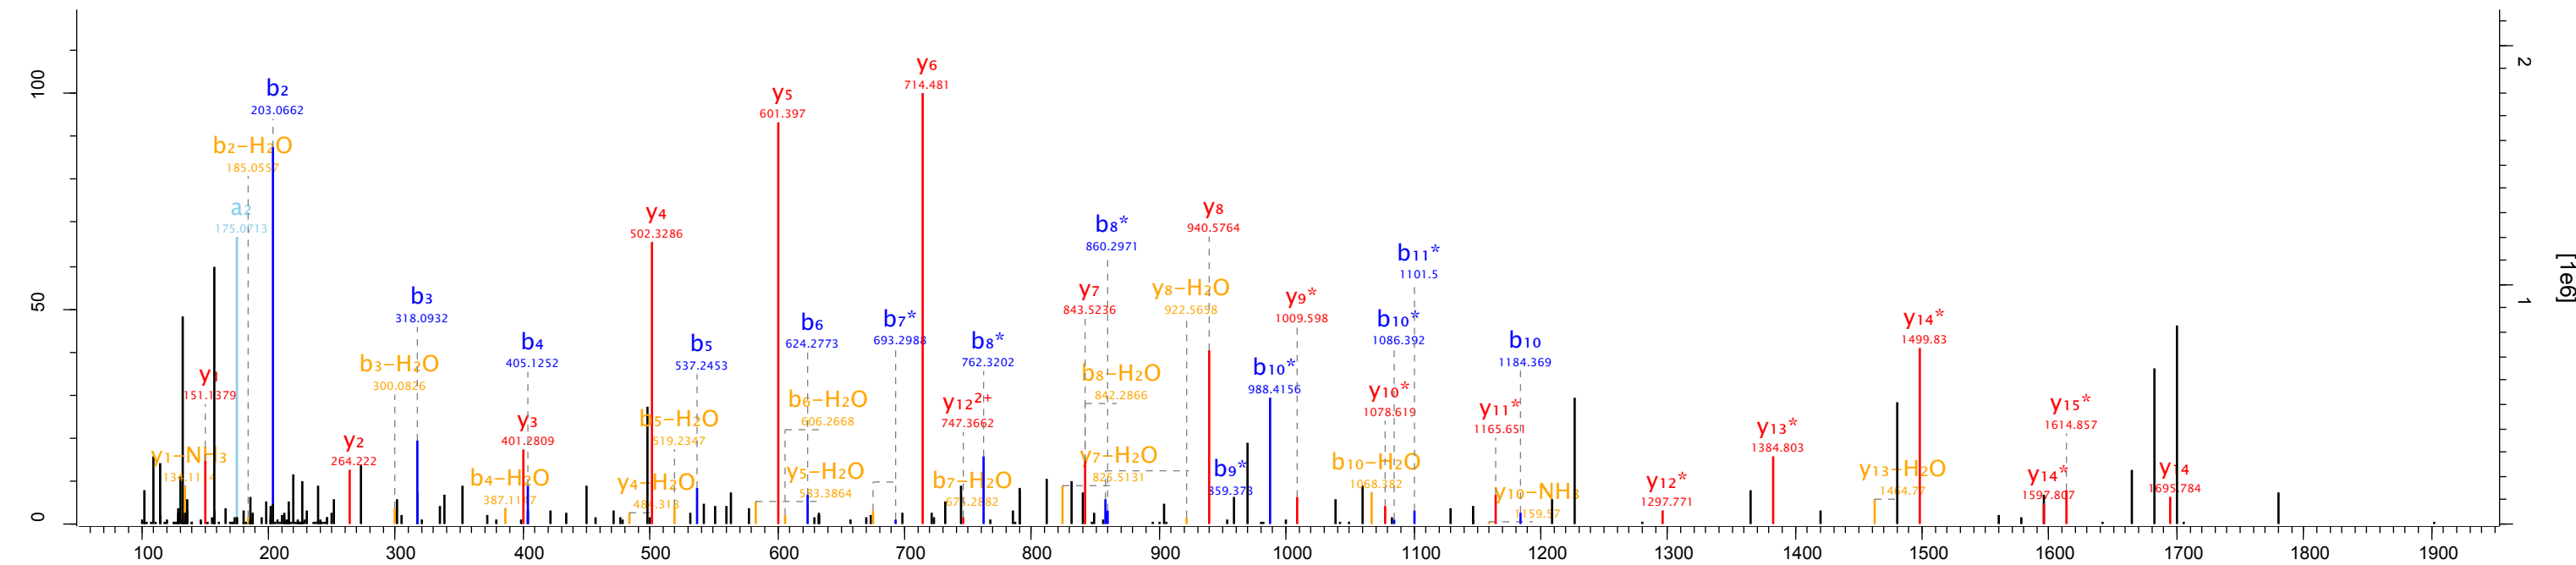

- S D D S K S S P E L V T H L K -

y15\*
y14
y13\*
y12\*
y11\*
y10\*  
ph
y9\*  
ph
y8
y7
y6
y5
y4
y3
y2
y1

b2
b3
b4
b5
b6
b7\*
b8\*
b9\*
b10
b11\*

Raw file Scan Method Score m/z Gene names  
 20150812\_A375SR\_Phospho\_BR1\_03 13188 FTMS; HCD 175 949.93 ARHGAP1

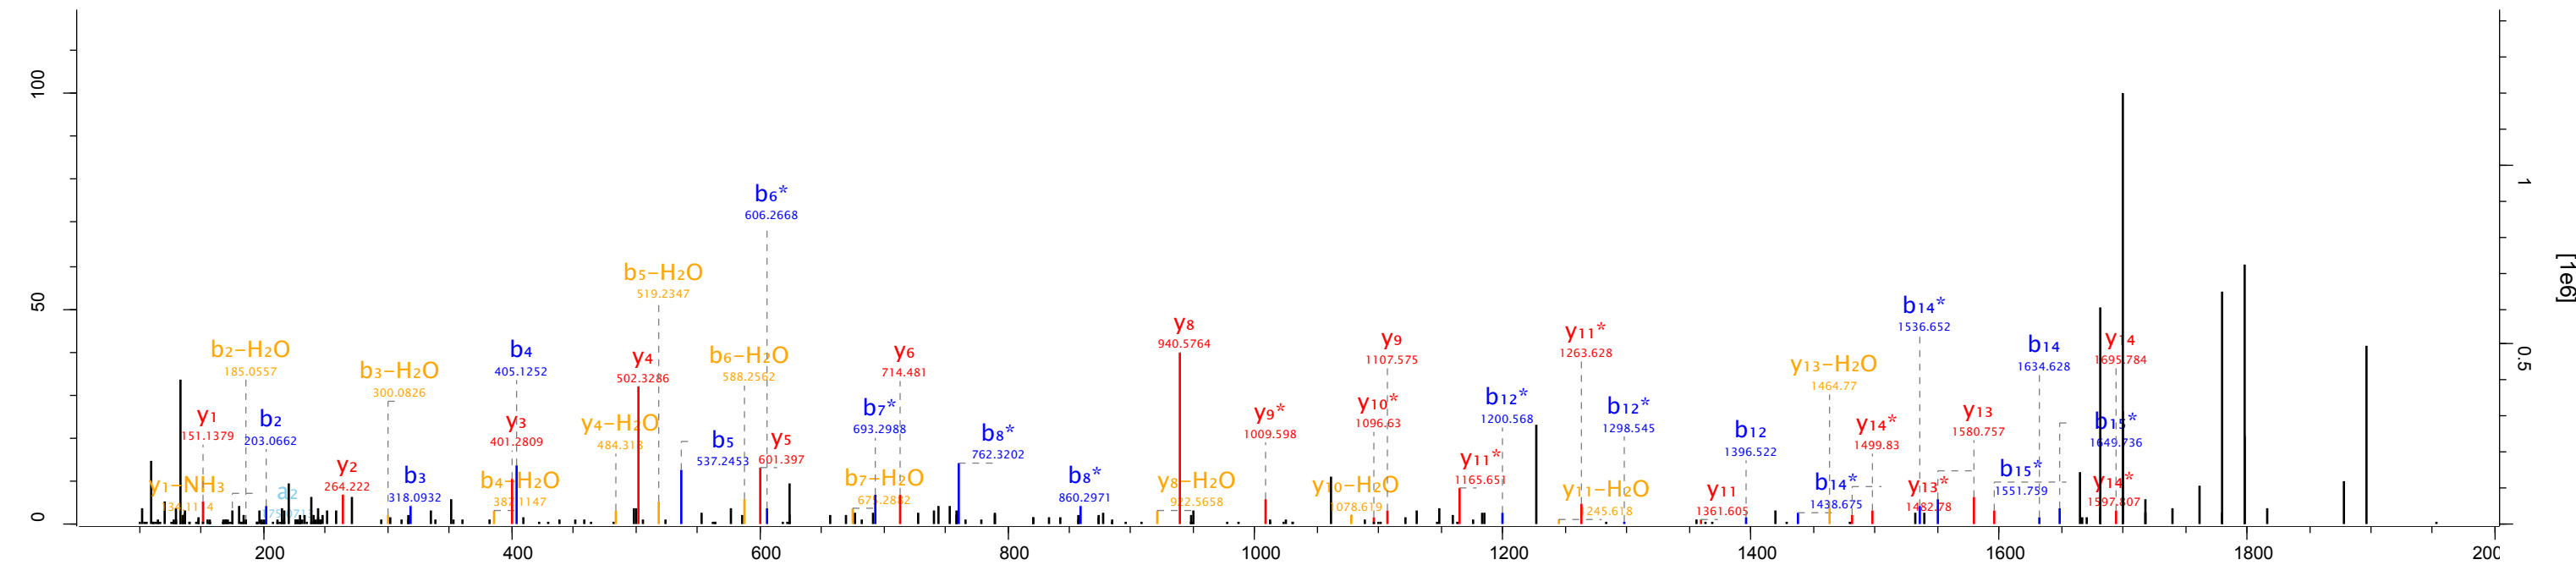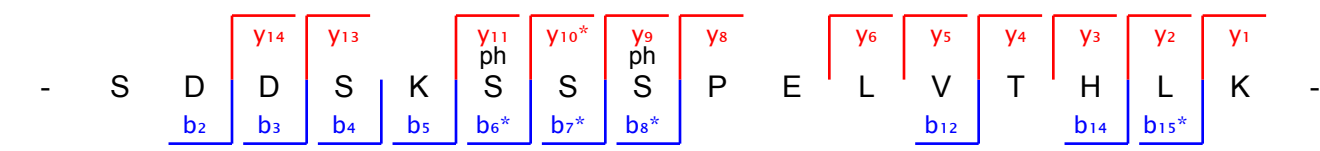

Raw file 20150812\_A375SR\_Phospho\_BR1\_03 Scan 13668 Method FTMS; HCD Score 120.32 m/z 837.34 Gene names PRKAR1B

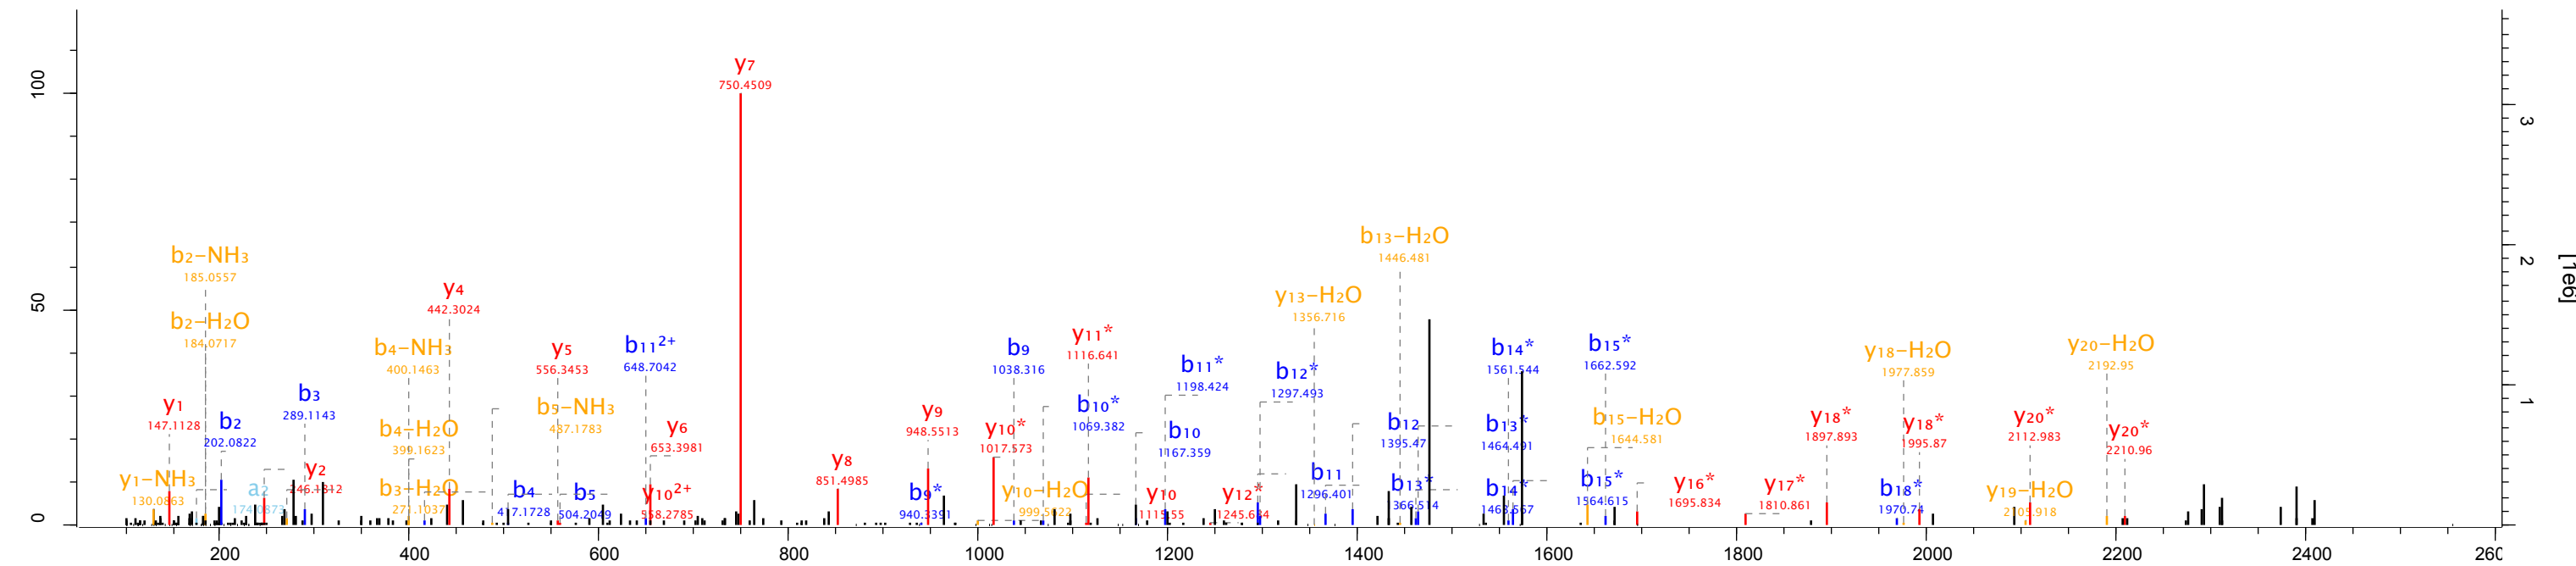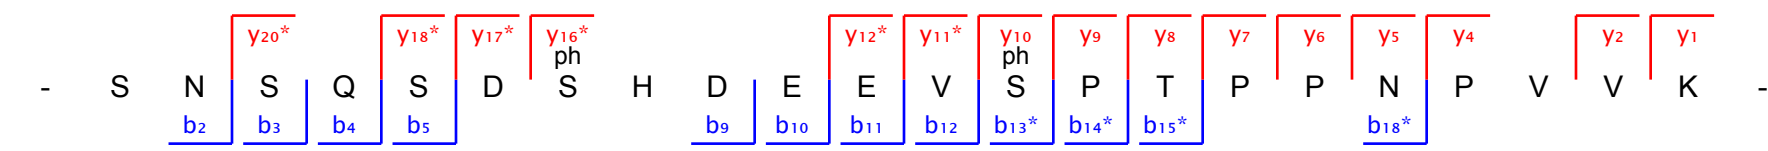



Raw file: 20150812\_A375SR\_Phospho\_BR1\_03  
 Scan: 13698 Method: FTMS; HCD Score: 181.05 m/z: 751.31 Gene names: MORC2

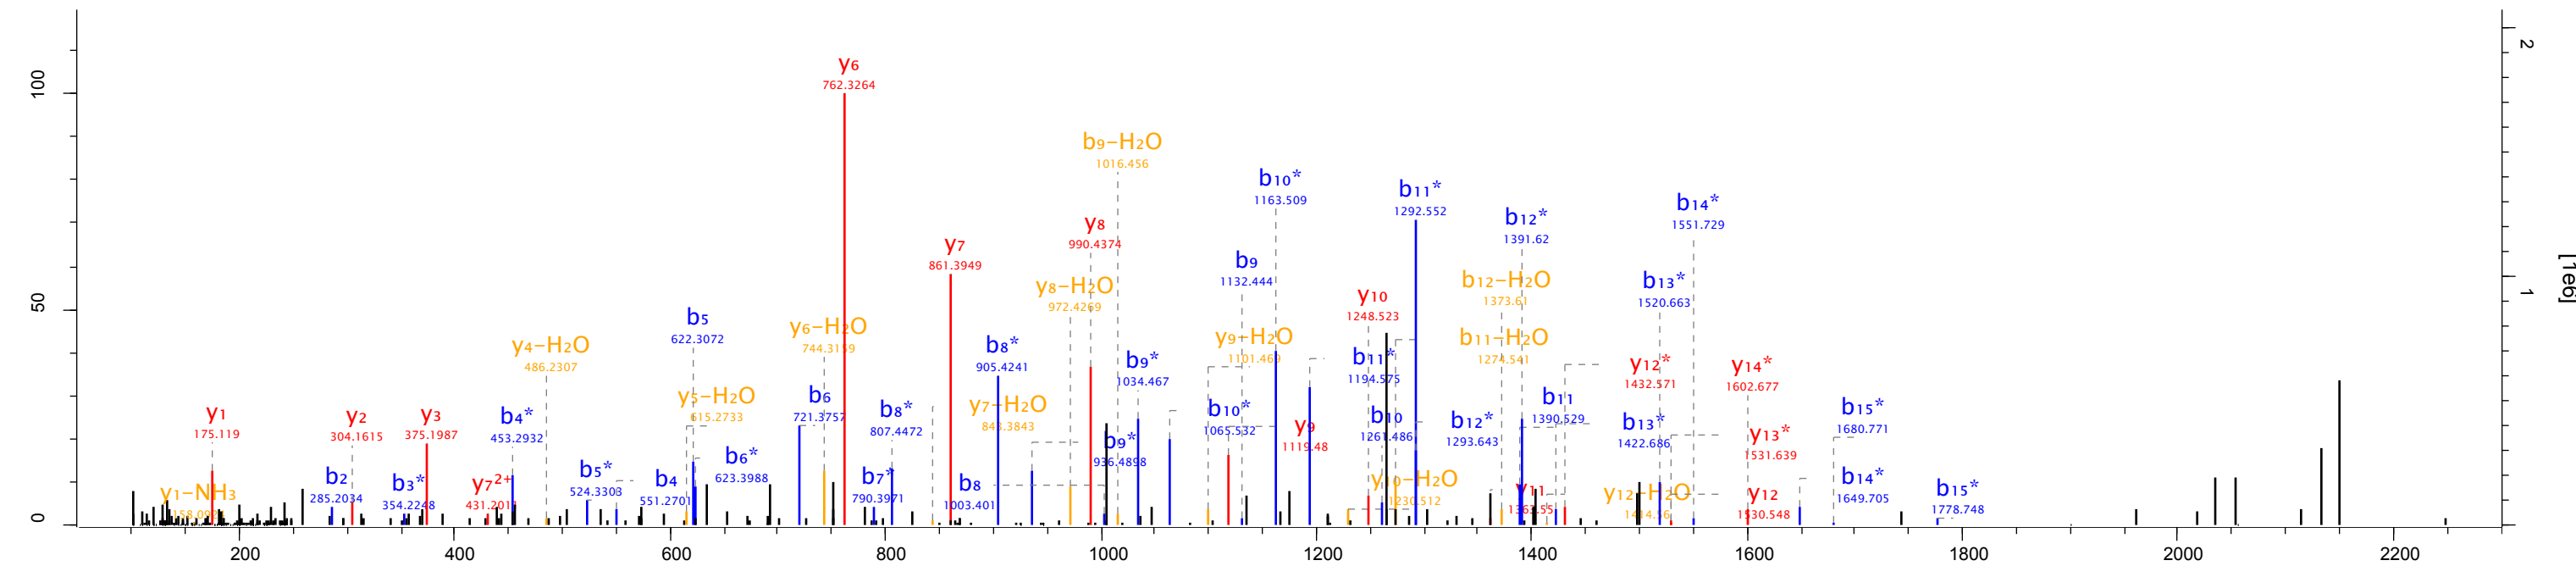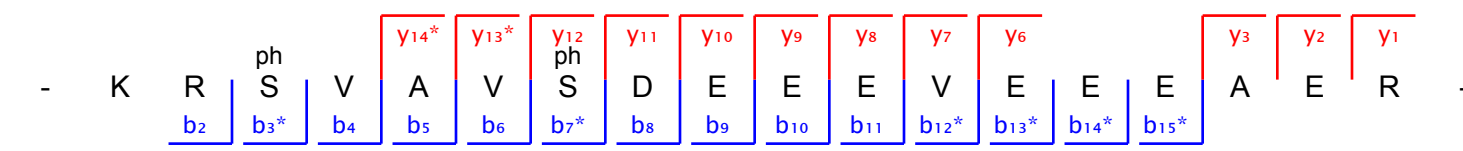

Raw file: 20150812\_A375SR\_Phospho\_BR1\_03  
 Scan: 13848 Method: FTMS; HCD Score: 112.39 m/z: 853.35 Gene names: SPTBN1

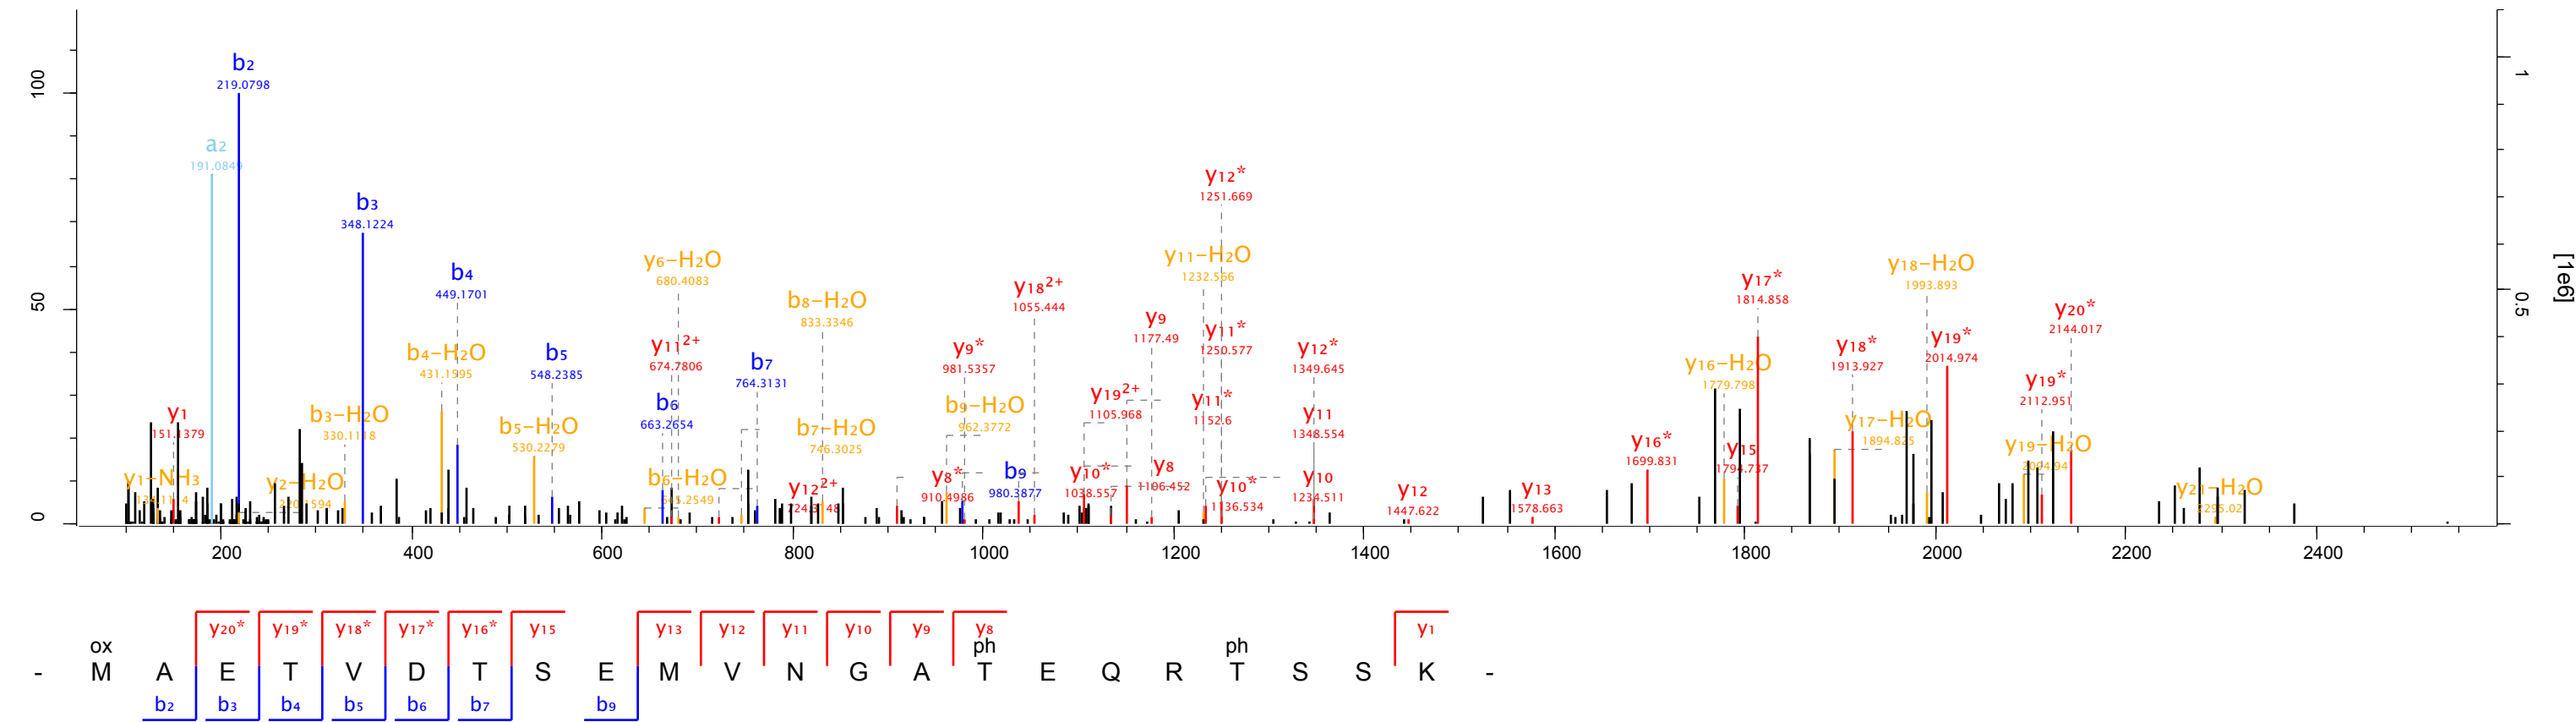

Raw file: 20150812\_A375SR\_Phospho\_BR1\_03  
 Scan: 14208 Method: FTMS; HCD Score: 156.58 m/z: 868.37 Gene names: PHF12

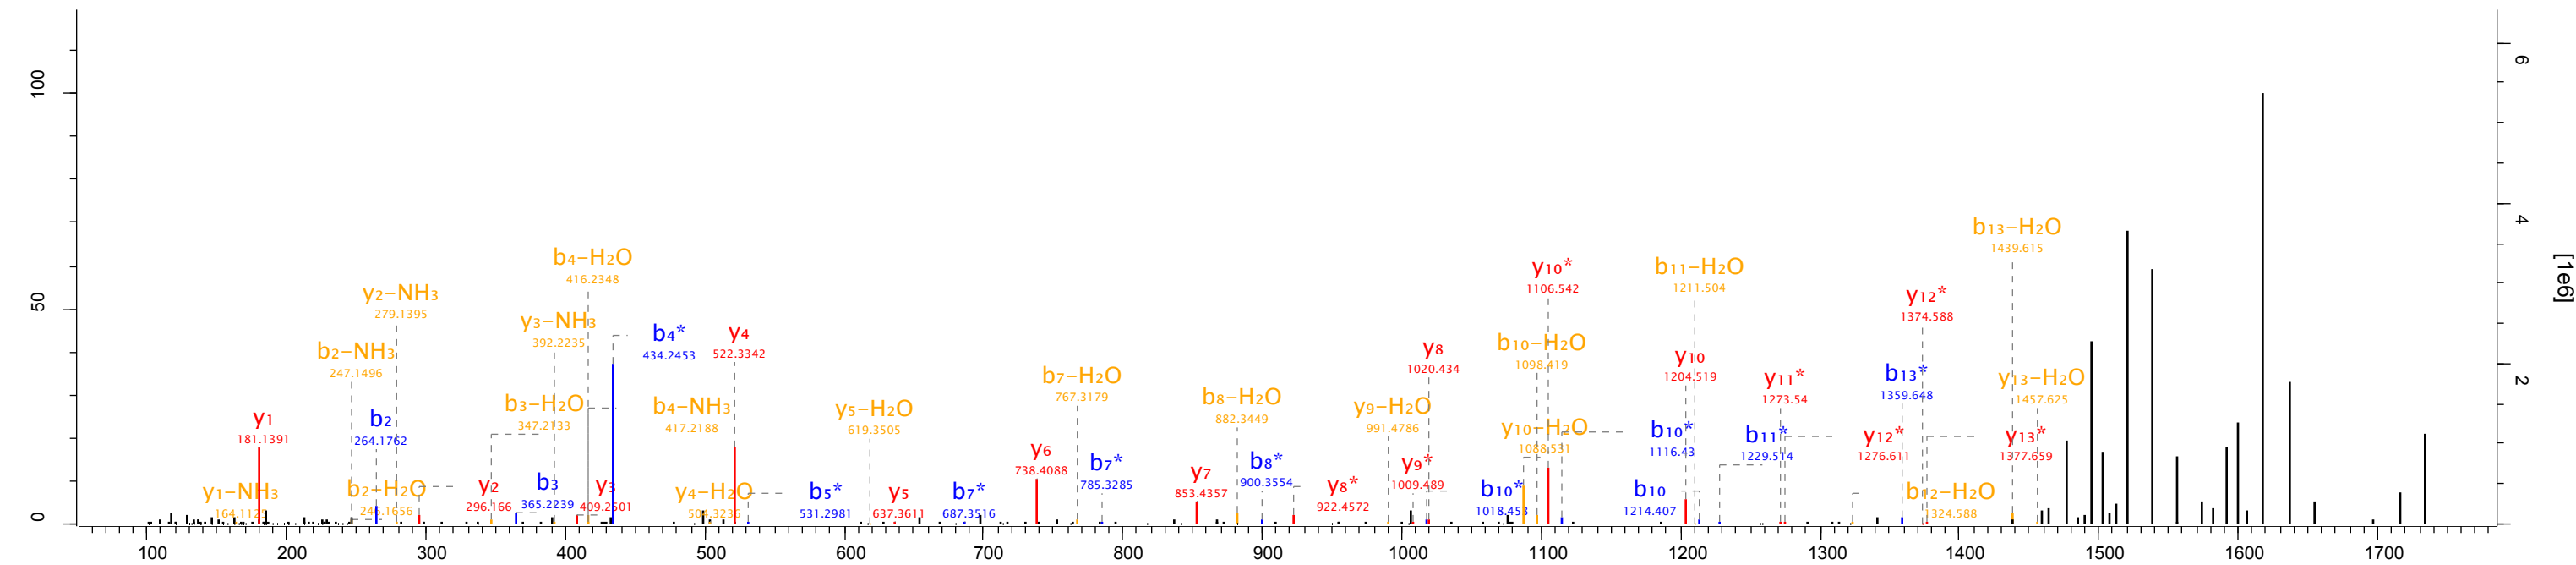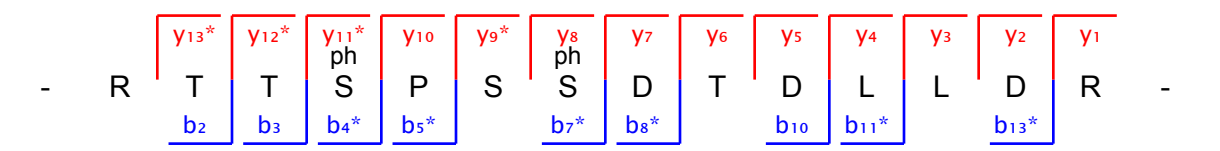

Raw file  
20150812\_A375SR\_Phospho\_BR1\_03

Scan 14218 Method FTMS; HCD Score 115.63 m/z 717.32 Gene names BAIAP2L2

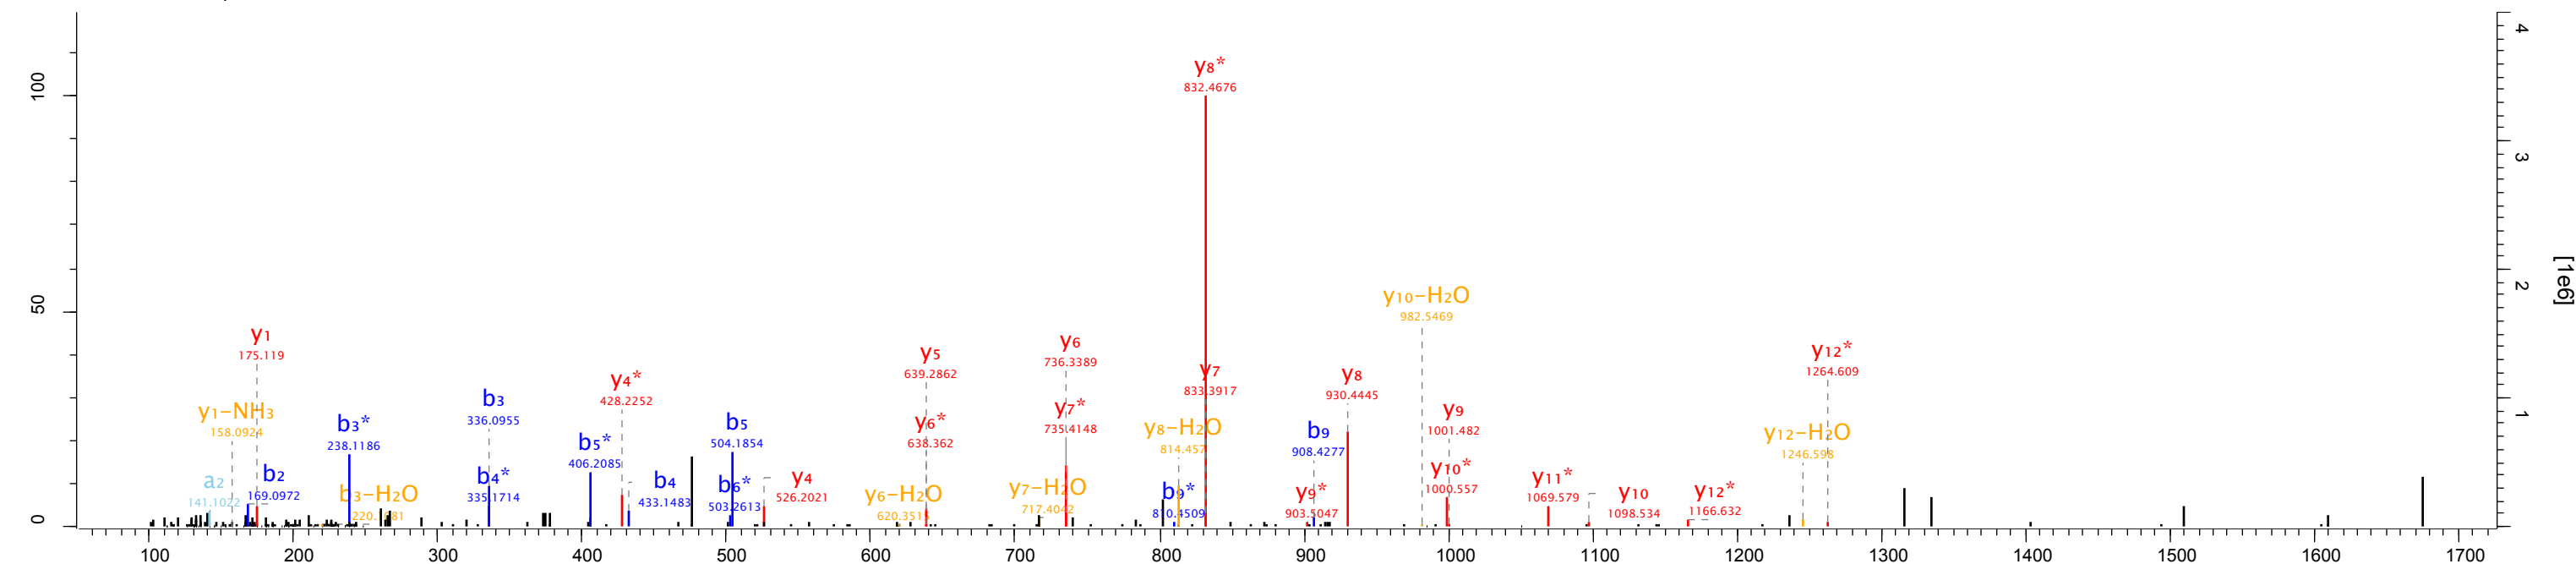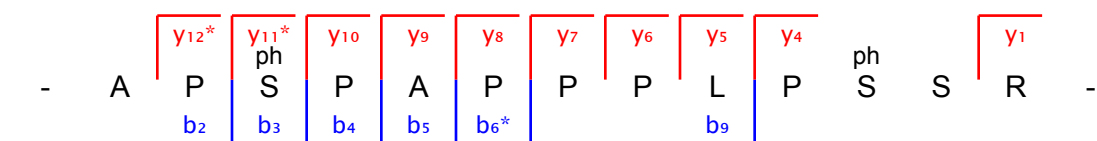

Raw file: 20150812\_A375SR\_Phospho\_BR1\_03  
 Scan: 14588 Method: FTMS; HCD Score: 85.47 m/z: 615.26 Gene names: AFF4

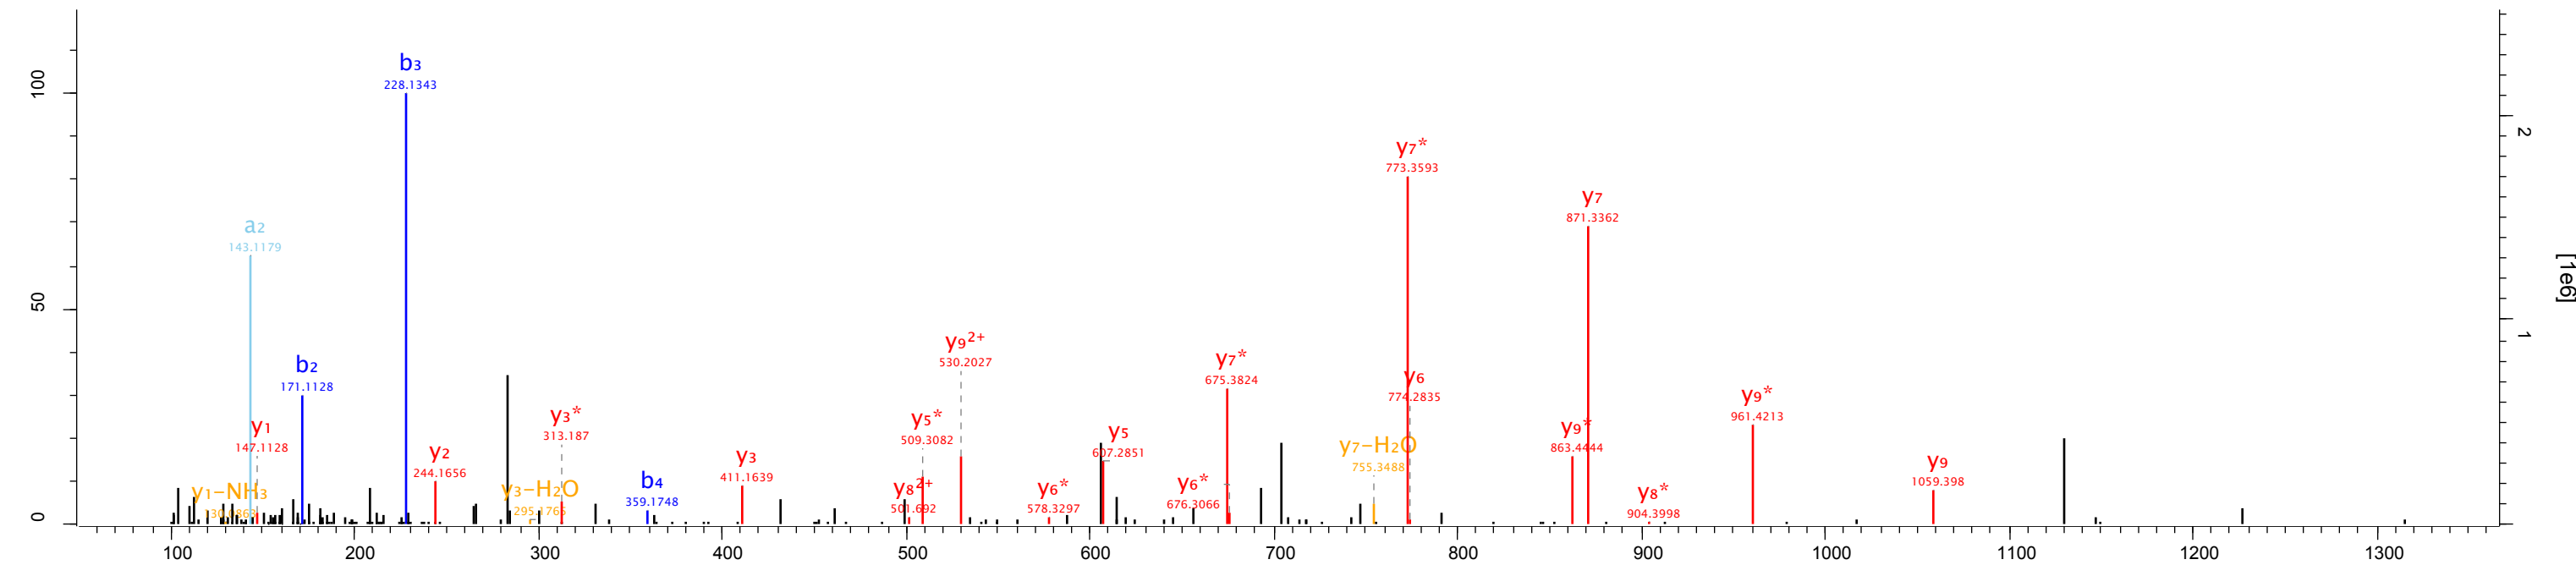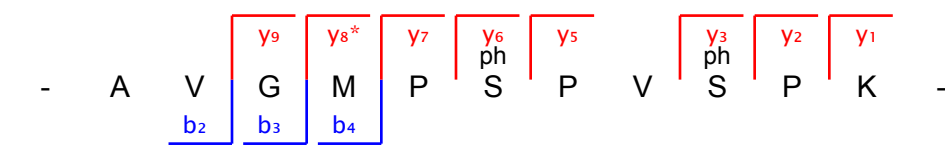

Raw file 20150812\_A375SR\_Phospho\_BR1\_03 Scan 14958 Method FTMS; HCD Score 205.03 m/z 842.07 Gene names TJP2

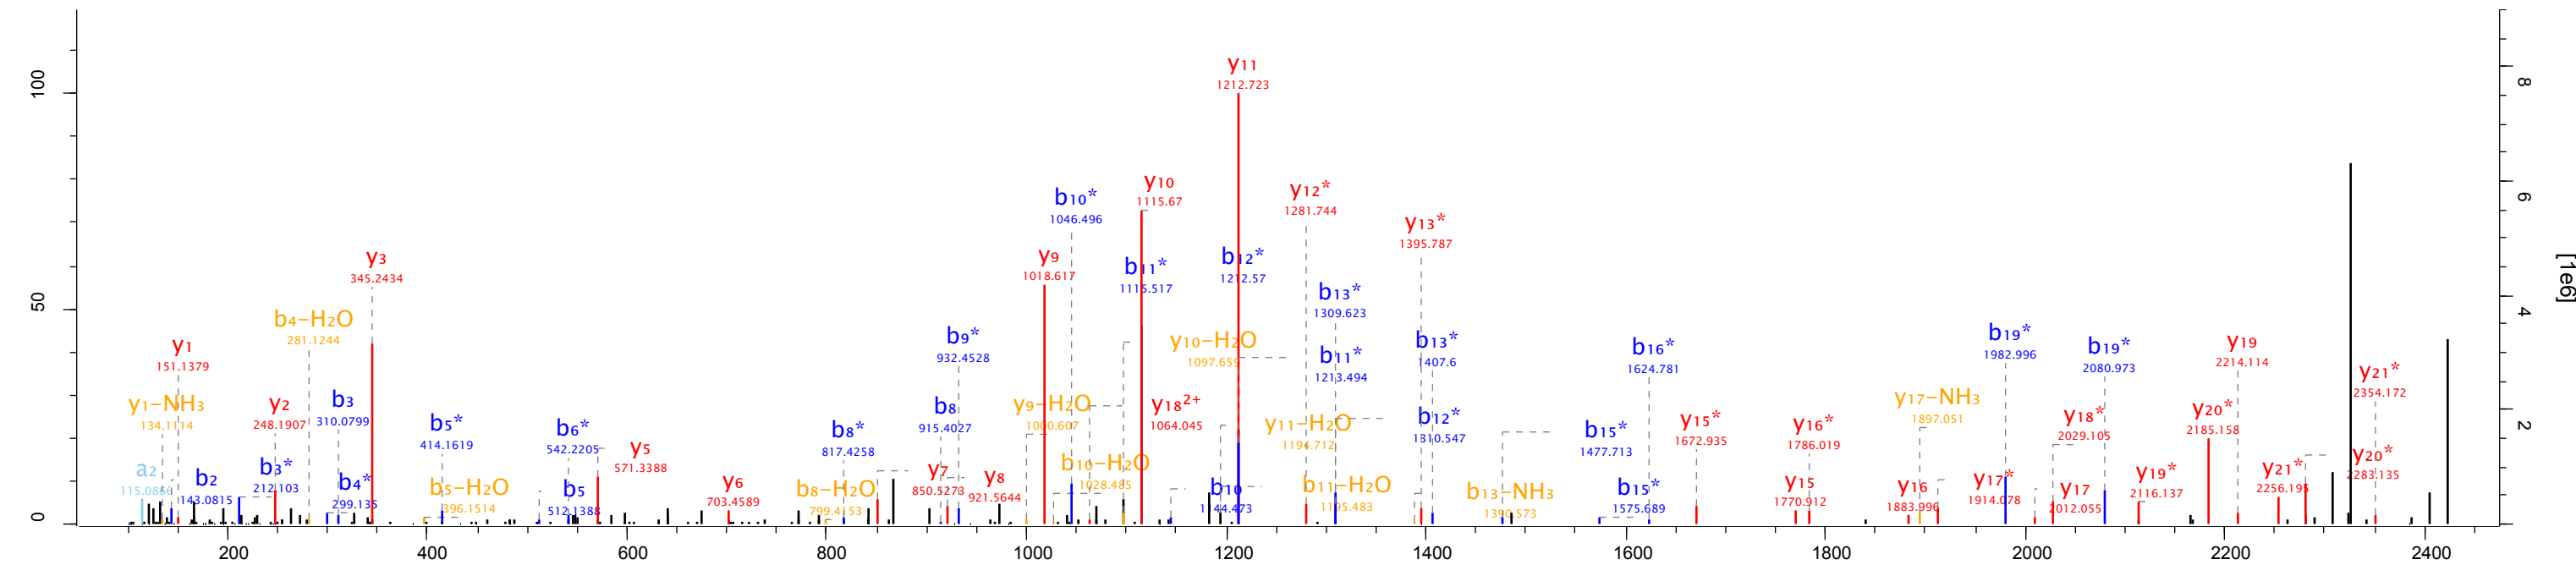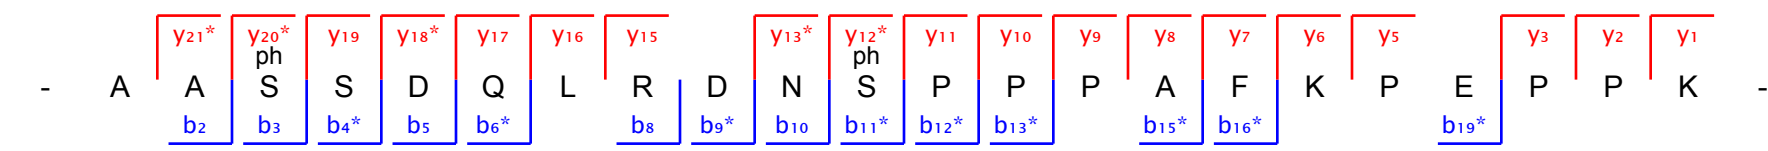

Raw file 20150812\_A375SR\_Phospho\_BR1\_03 Scan 15038 Method FTMS; HCD Score 78.67 m/z 708.33 Gene names KLC1

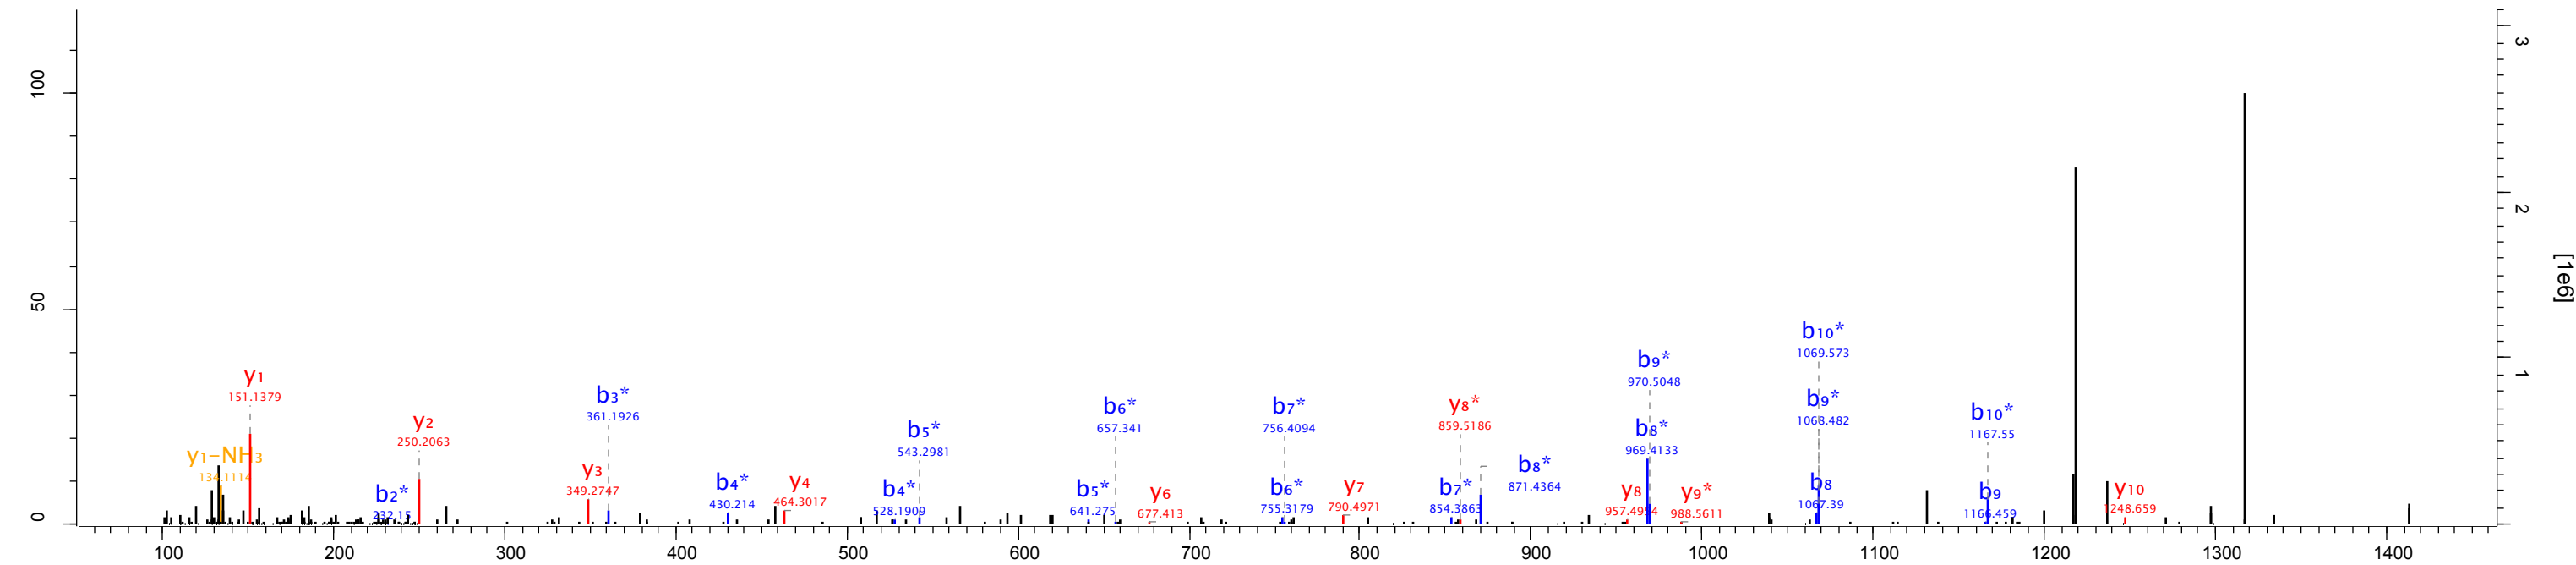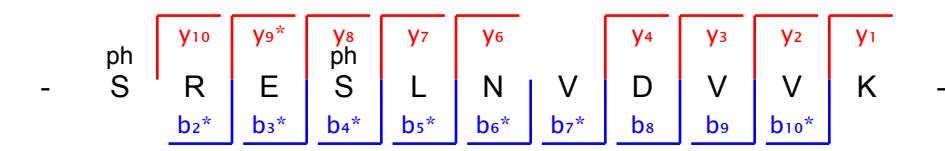





Raw file 20150812\_A375SR\_Phospho\_BR1\_03 Scan 15598 Method FTMS; HCD Score 184.48 m/z 667.8 Gene names GATAD2A

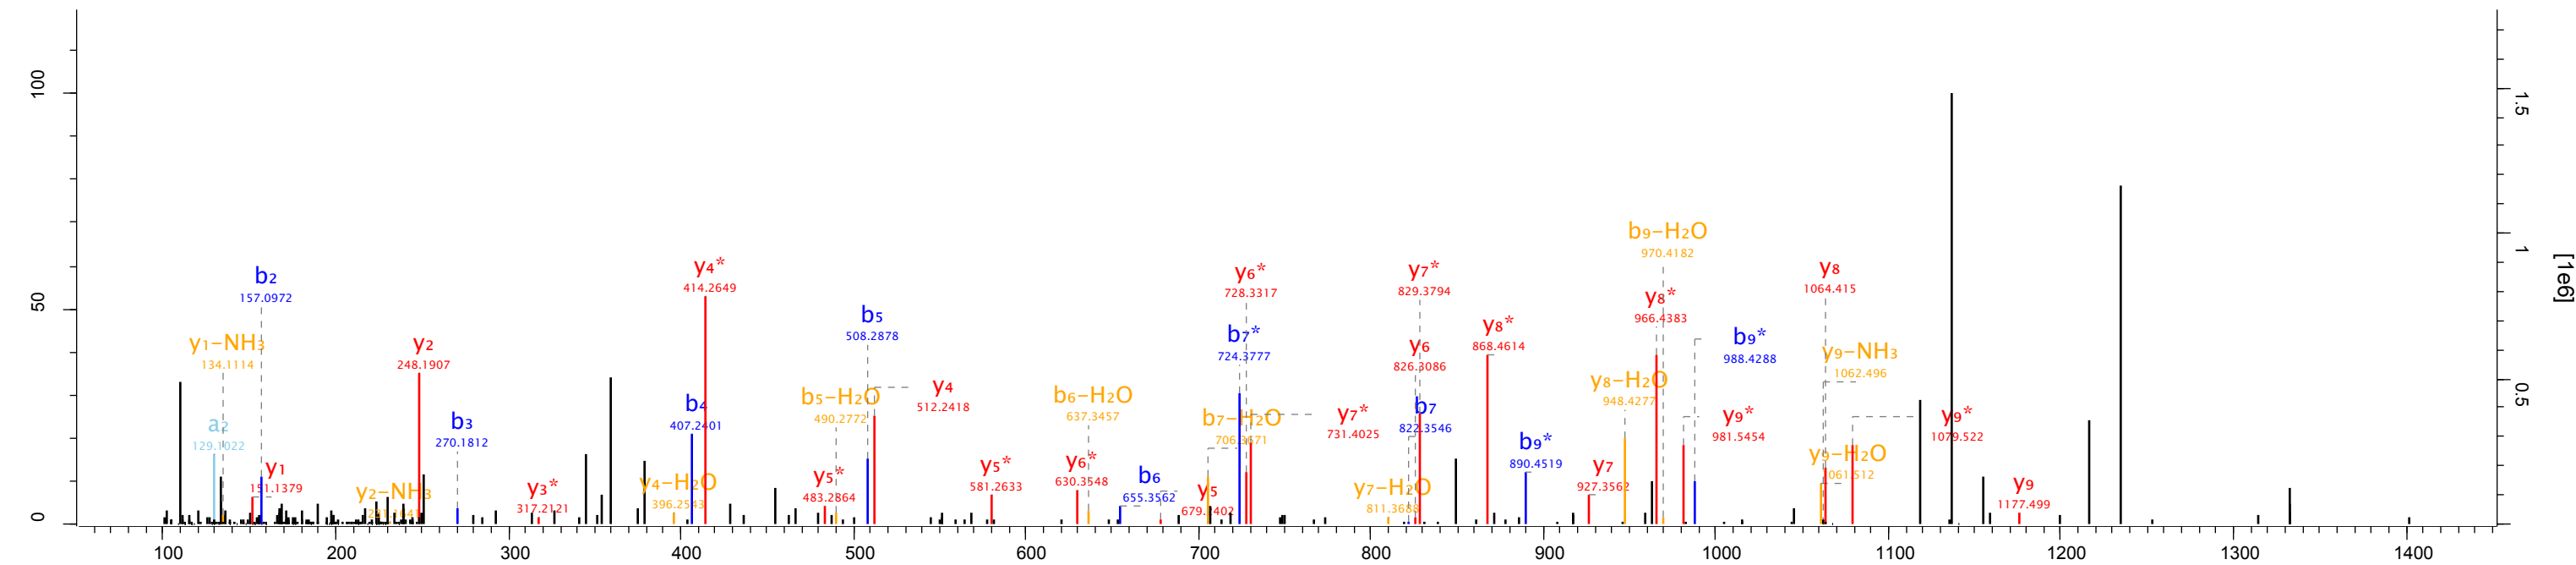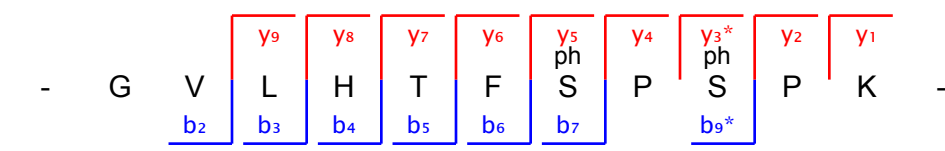

Raw file 20150812\_A375SR\_Phospho\_BR1\_03 Scan 15638 Method FTMS; HCD Score 210.98 m/z 955.91 Gene names USP15

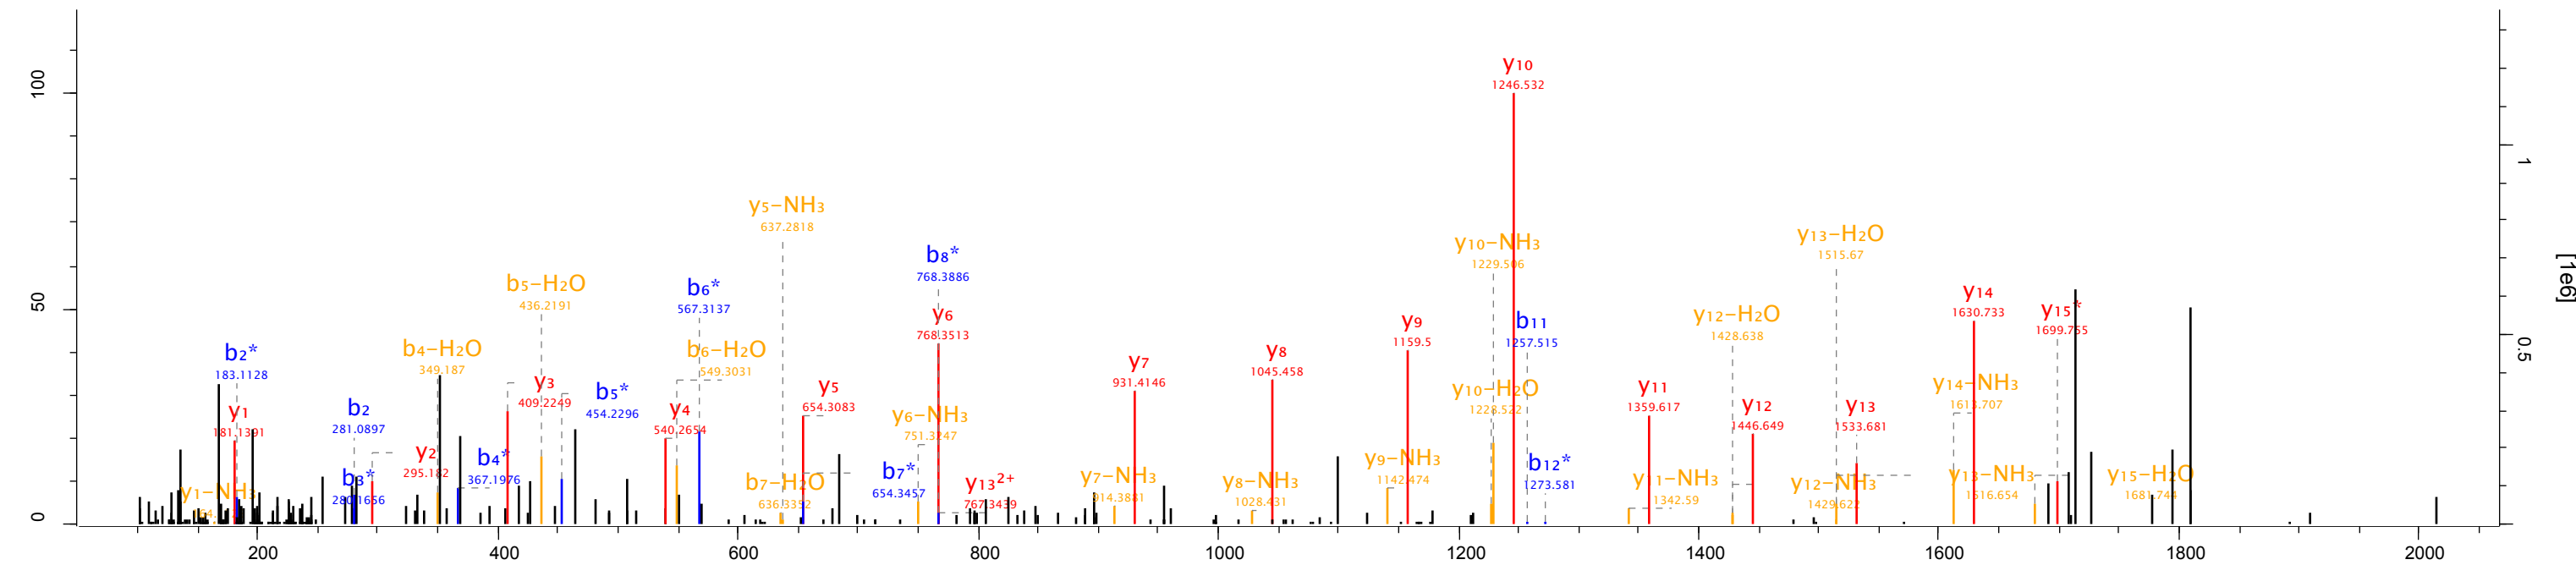

Sequence: - I y15\* y14 y13 y12 y11 y10 y9 y8 y7 y6 y5 y4 y3 y2 y1 -  
 S P S S L S N N Y N N M N N R  
b2 b3\* b4\* b5\* b6\* b7\* b8\* b11 b12\*

Raw file 20150812\_A375SR\_Phospho\_BR1\_03 Scan 16348 Method FTMS; HCD Score 148.72 m/z 1033.9 Gene names CHAMP1

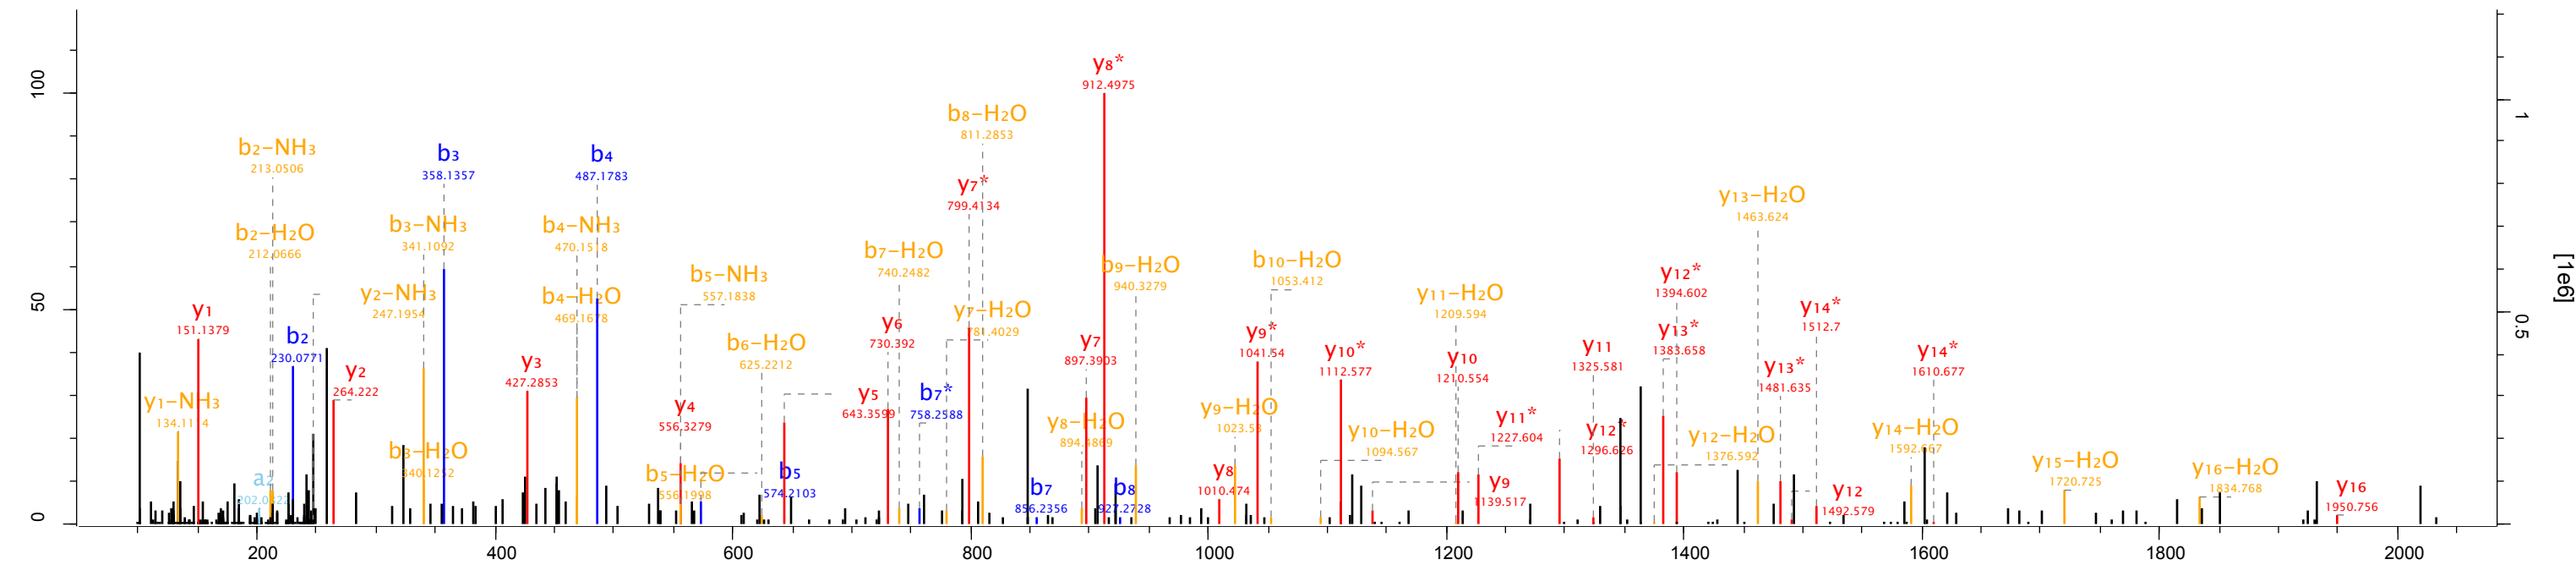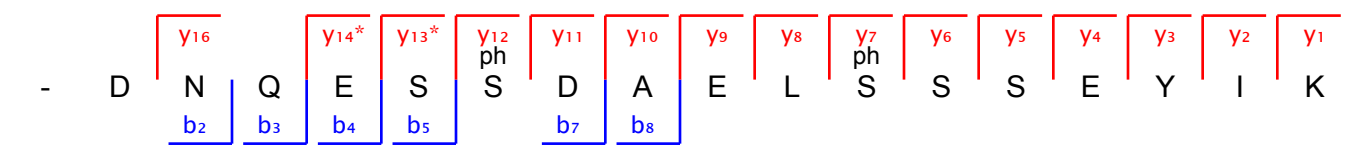

Raw file Scan Method Score m/z Gene names  
 20150812\_A375SR\_Phospho\_BR1\_03 16398 FTMS; HCD 165.17 973.45 AMOTL1

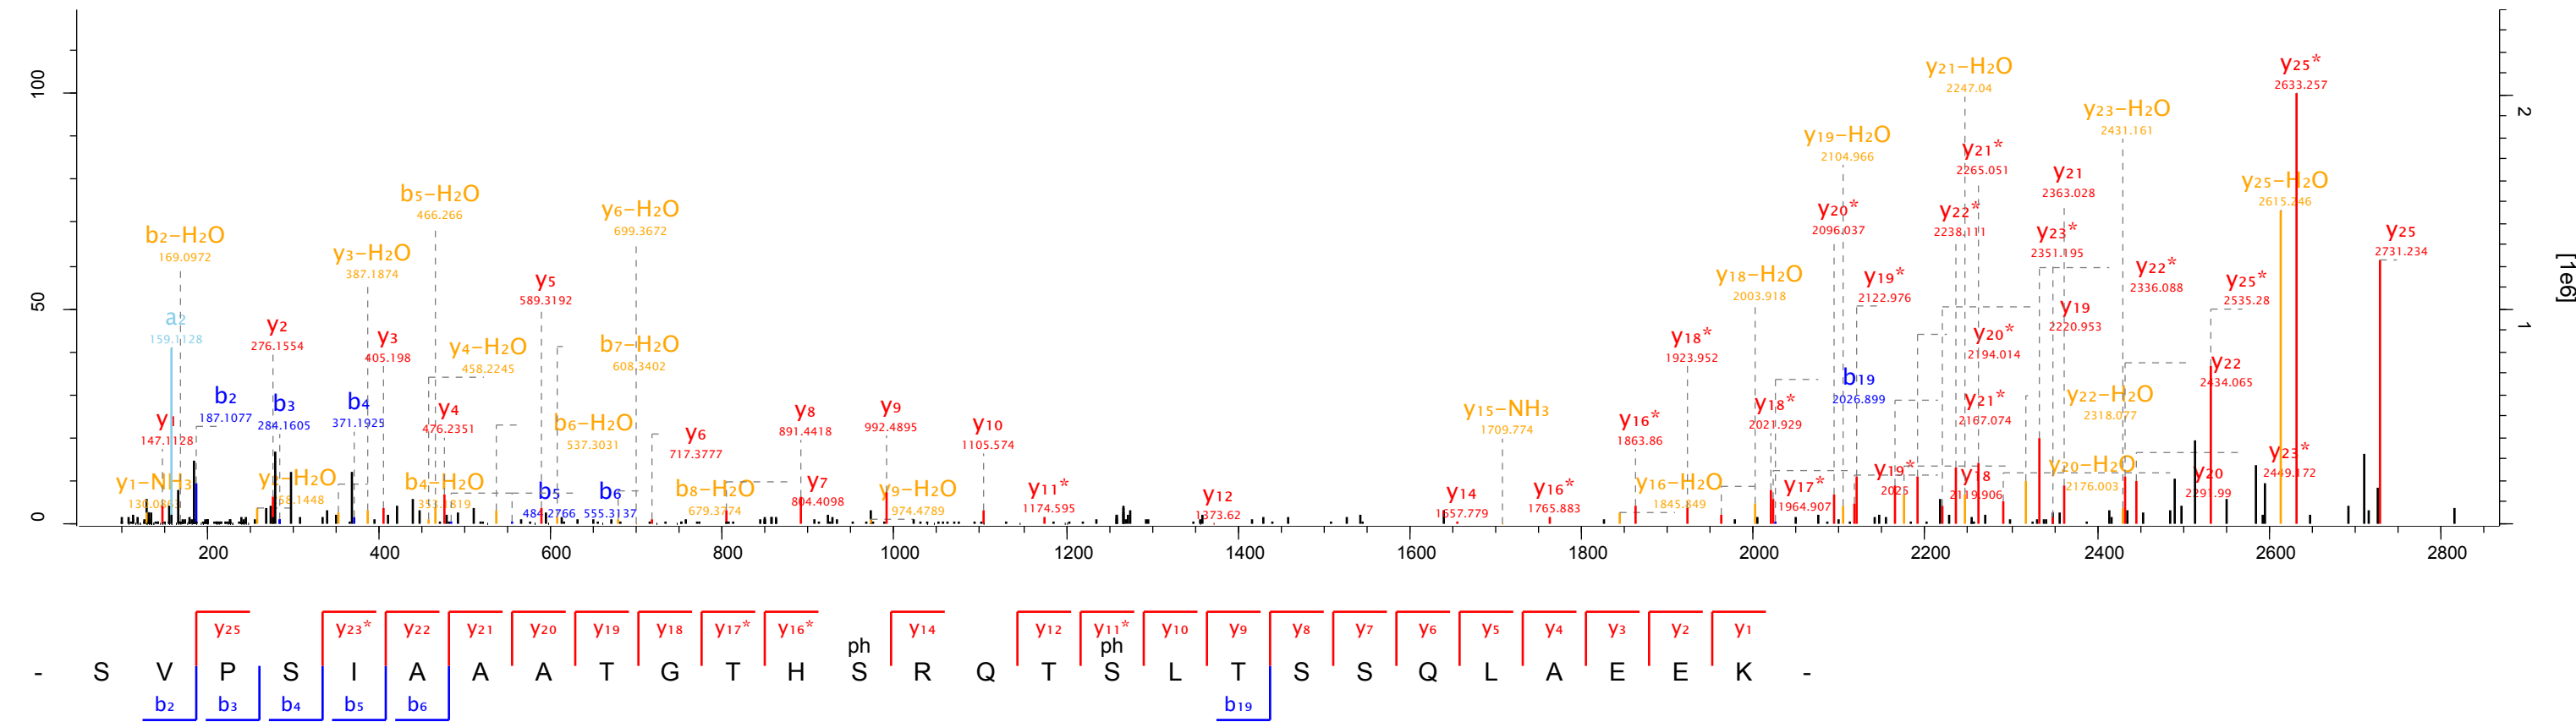

Raw file 20150812\_A375SR\_Phospho\_BR1\_03 Scan 16558 Method FTMS; HCD Score 65.74 m/z 758.34 Gene names TCF4

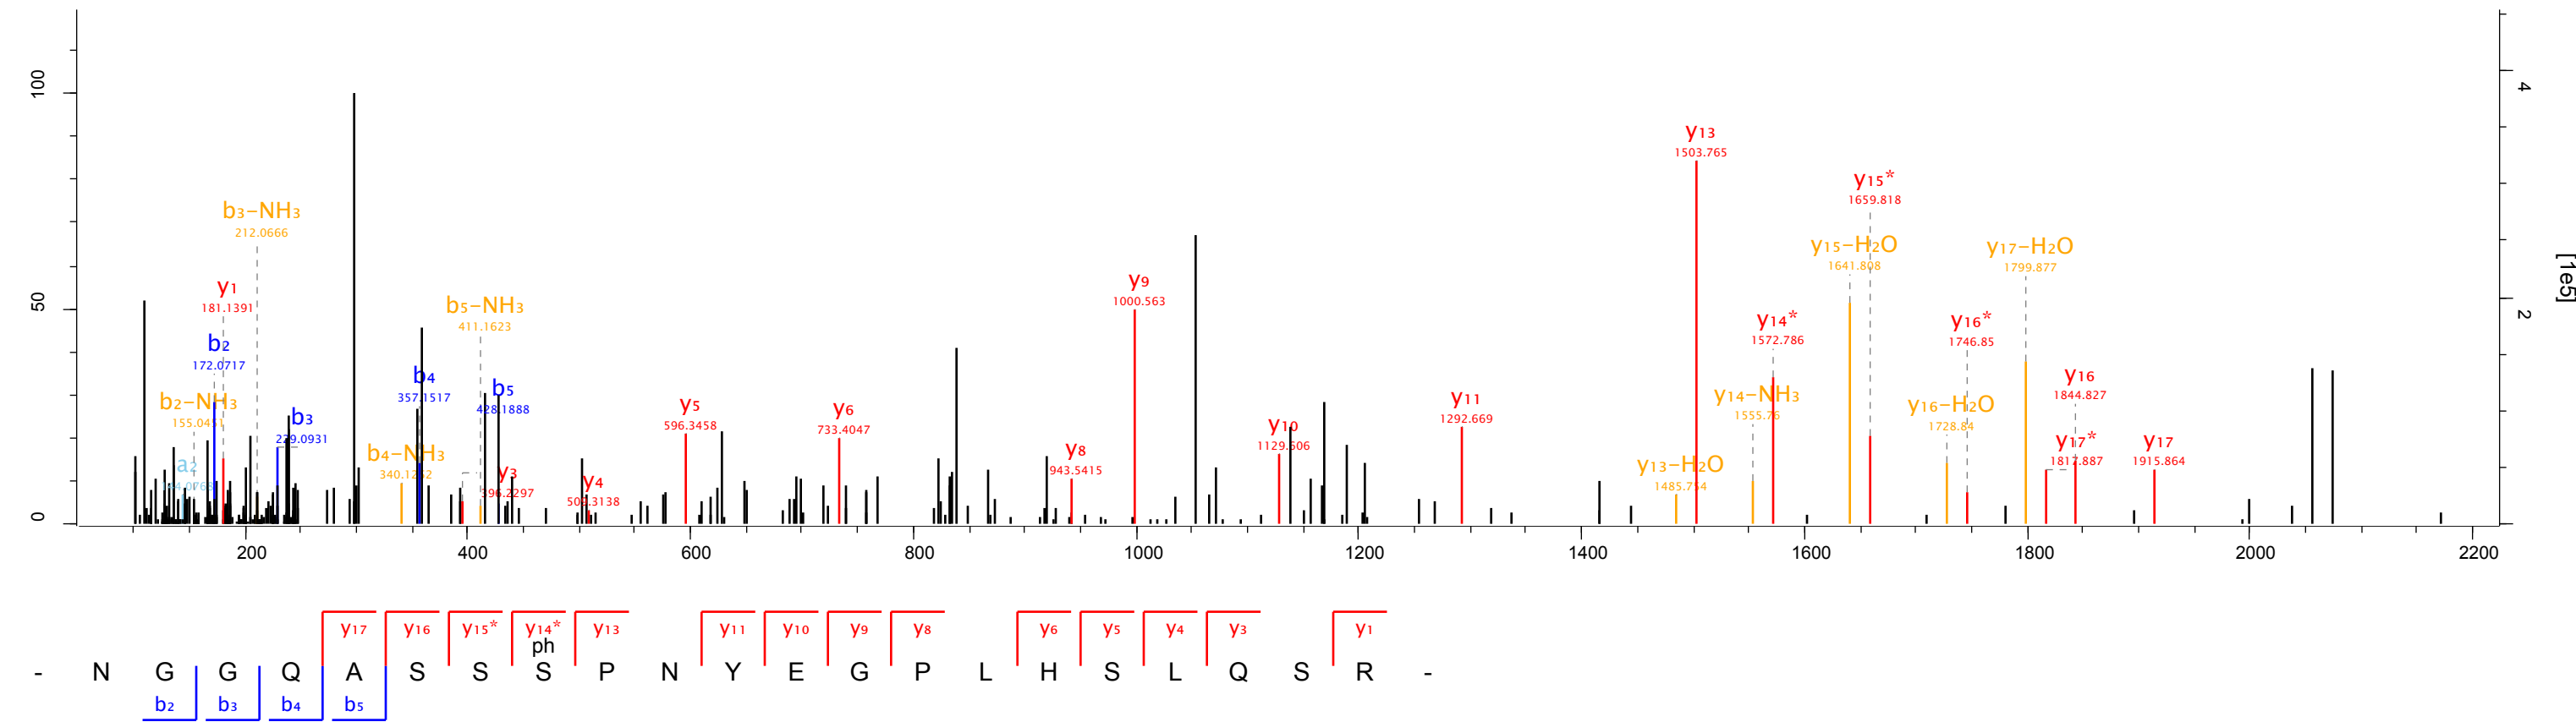

Raw file 20150812\_A375SR\_Phospho\_BR1\_03 Scan 16658 Method FTMS; HCD Score 320.94 m/z 1397.64 Gene names ZEB1

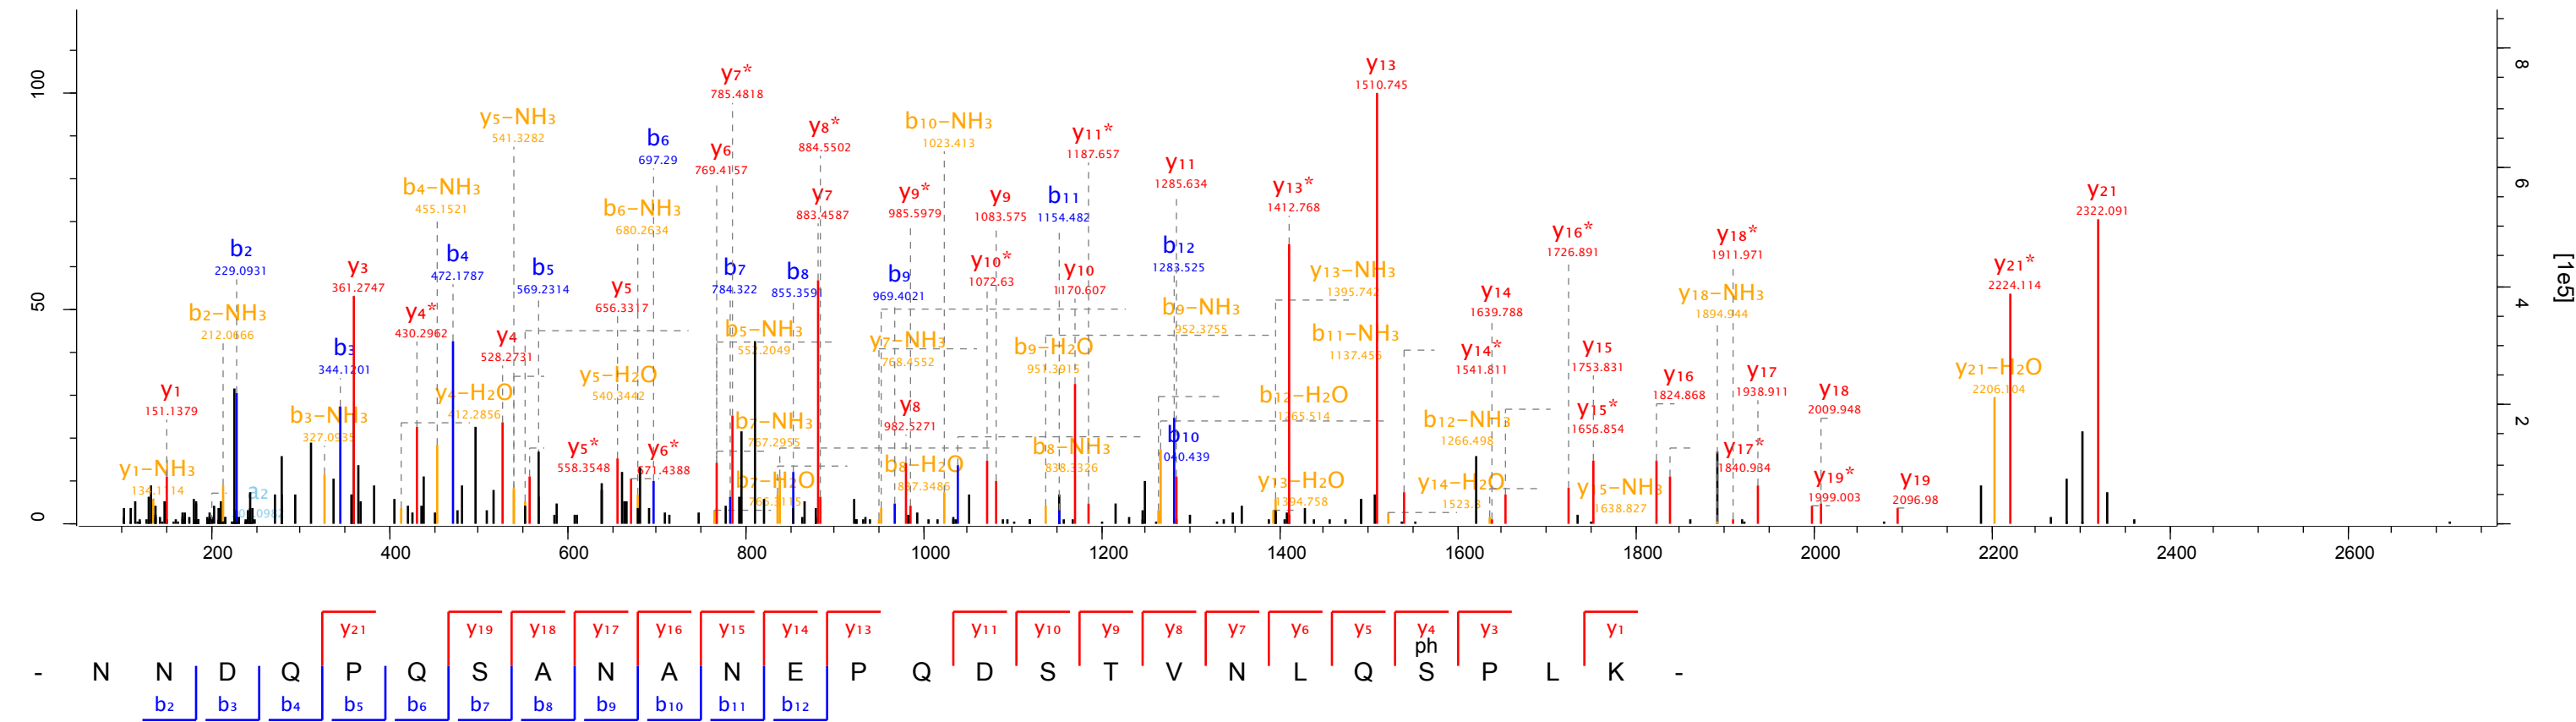

Raw file Scan Method Score m/z Gene names  
 20150812\_A375SR\_Phospho\_BR1\_03 17158 FTMS; HCD 81.06 936.92 PNN

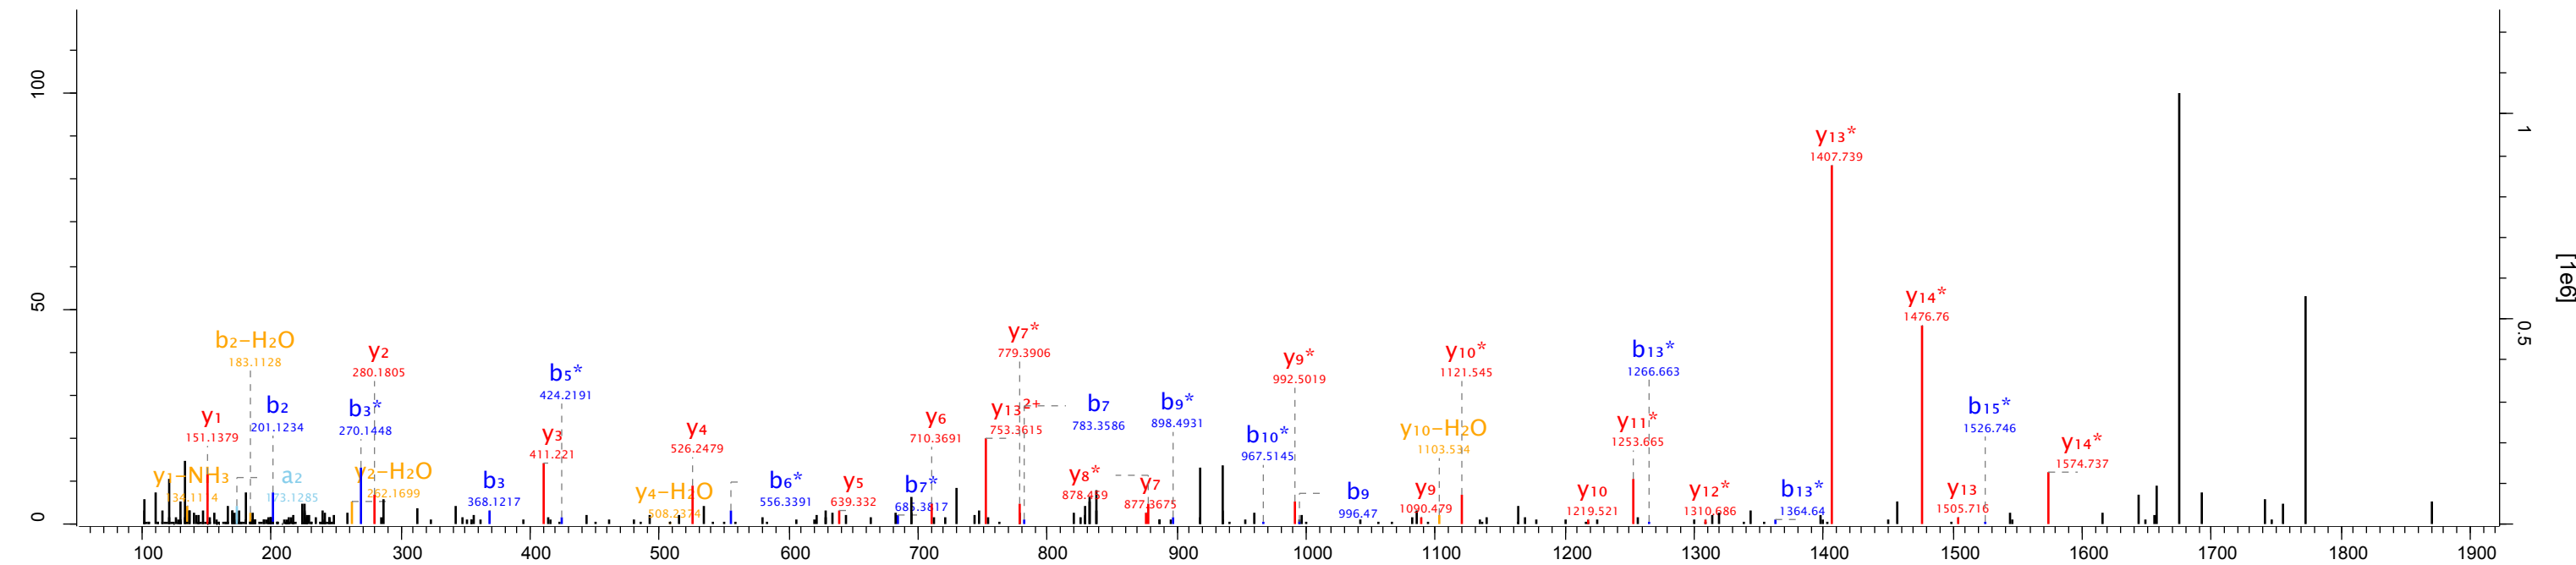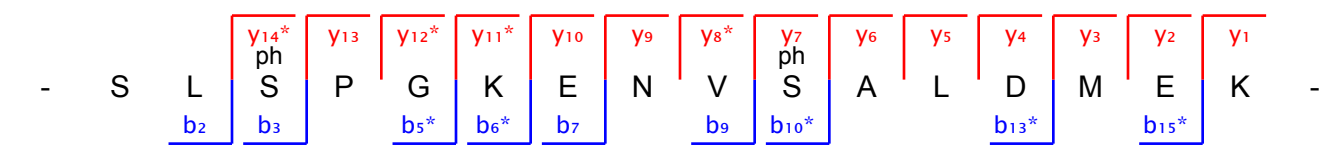

Raw file 20150812\_A375SR\_Phospho\_BR1\_03 Scan 17438 Method FTMS; HCD Score 69.7 m/z 886.4 Gene names KLF3

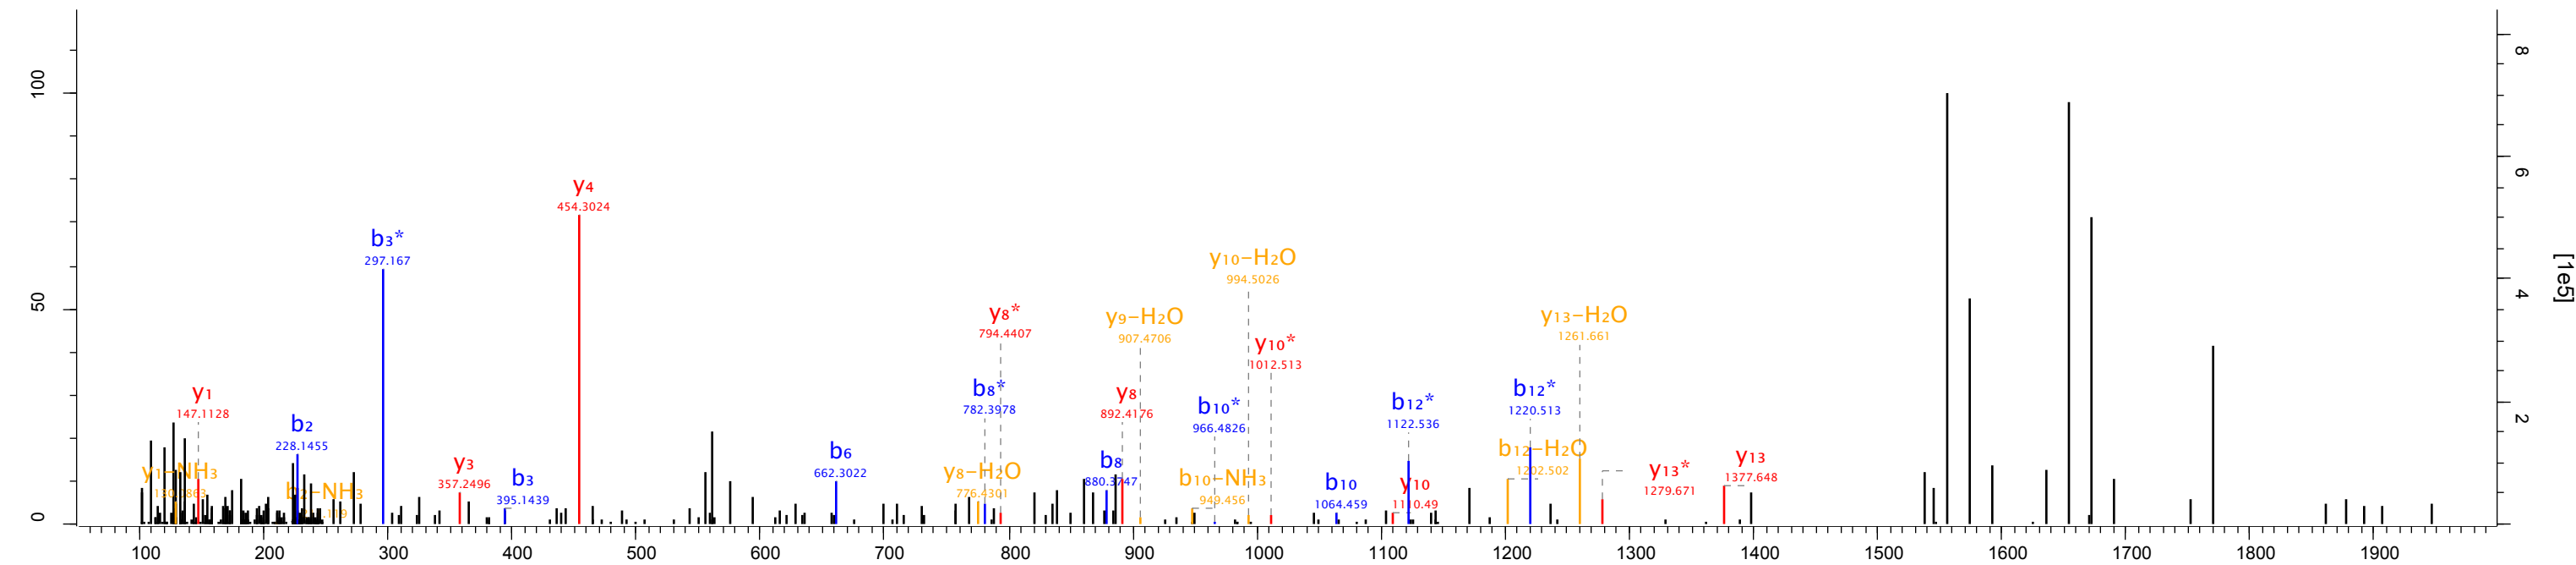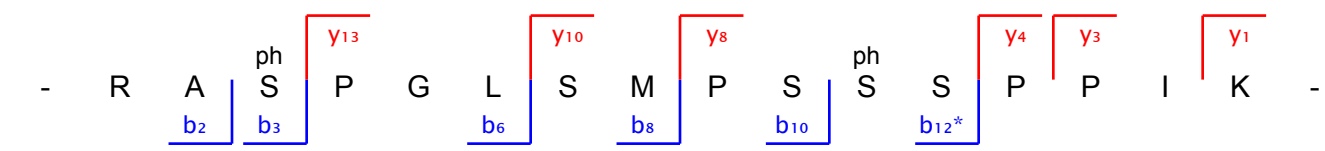



Raw file: 20150812\_A375SR\_Phospho\_BR1\_03  
 Scan: 17468 Method: FTMS; HCD Score: 116.52 m/z: 814.03 Gene names: MPRIP

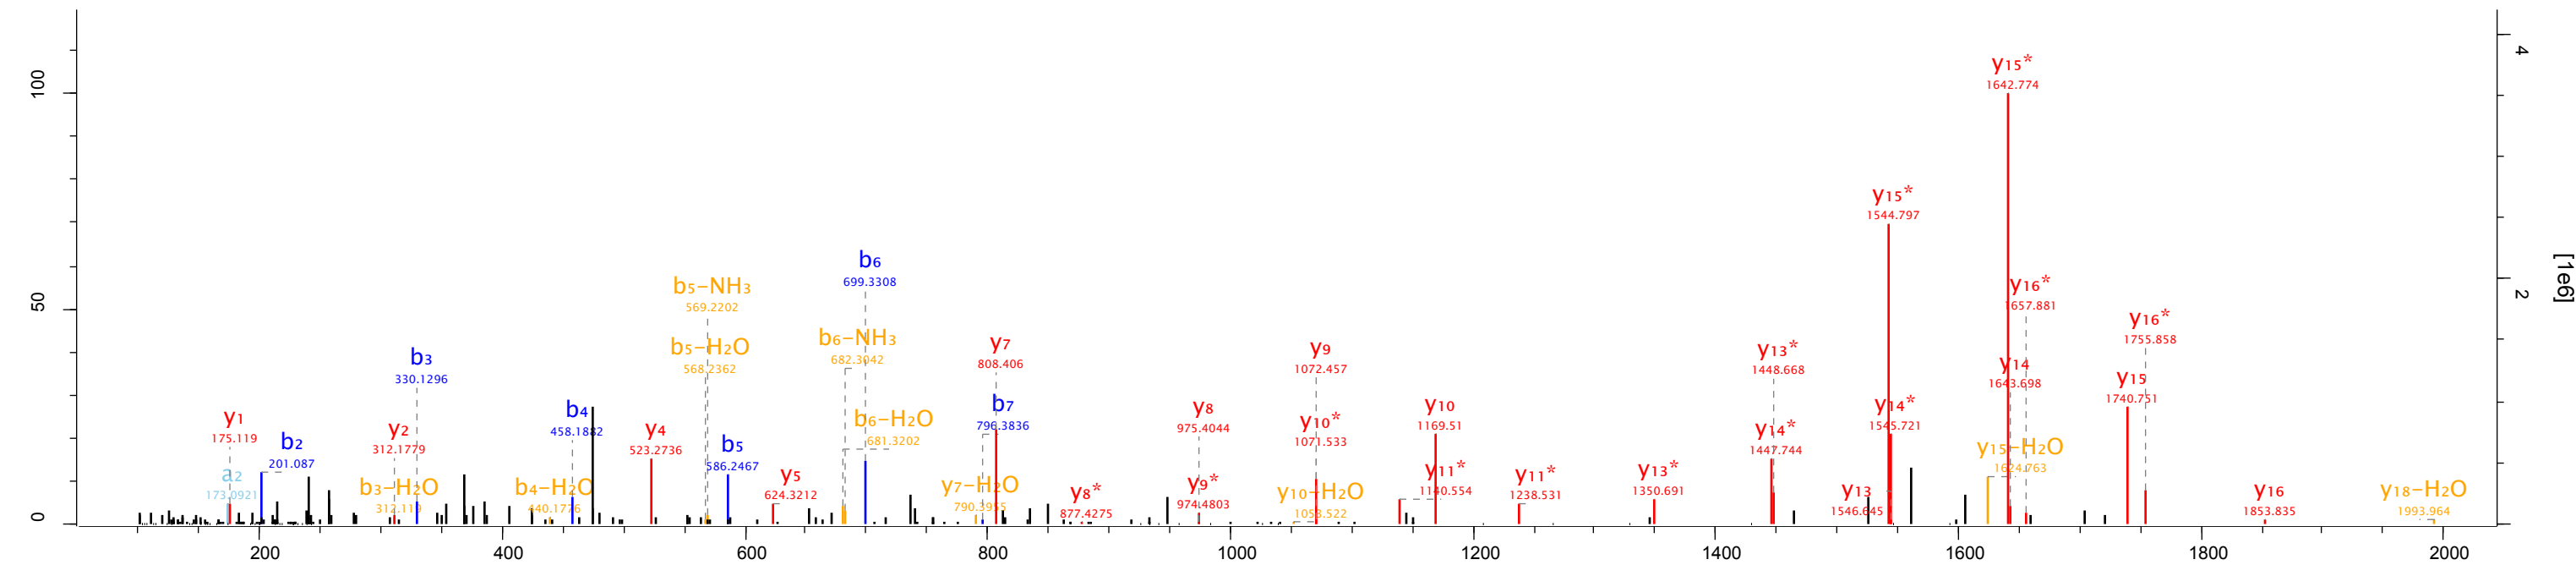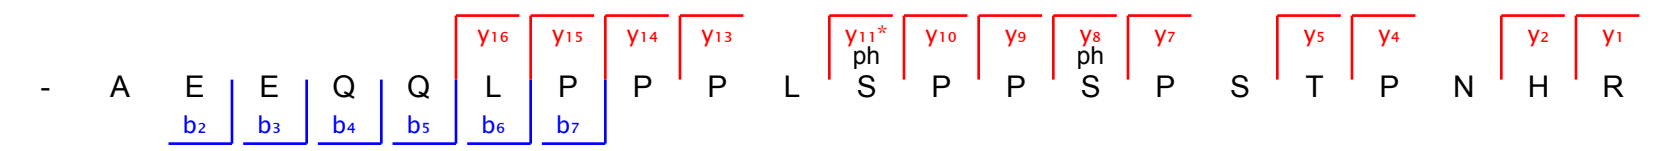

Raw file 20150812\_A375SR\_Phospho\_BR1\_03 Scan 1748 Method FTMS; HCD Score 78.36 m/z 537.89 Gene names PHF6

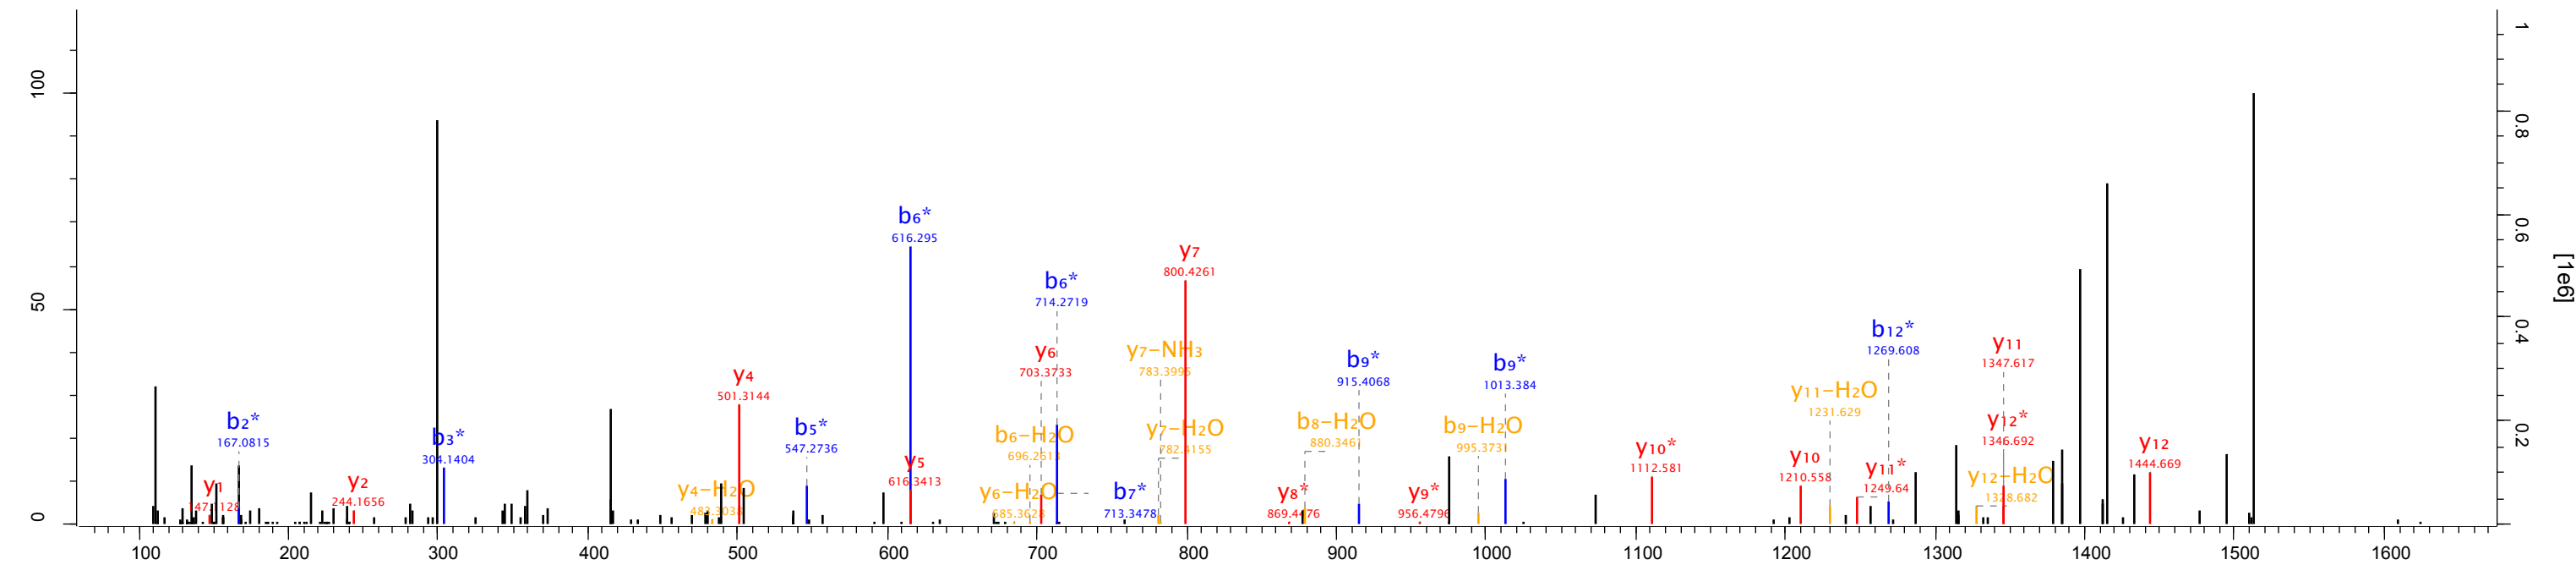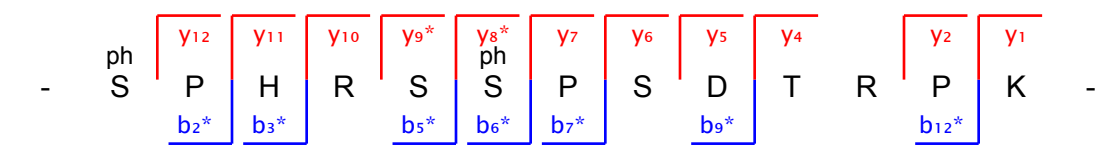

Raw file 20150812\_A375SR\_Phospho\_BR1\_03 Scan 18338 Method FTMS; HCD Score 207.6 m/z 860.75 Gene names ENAH

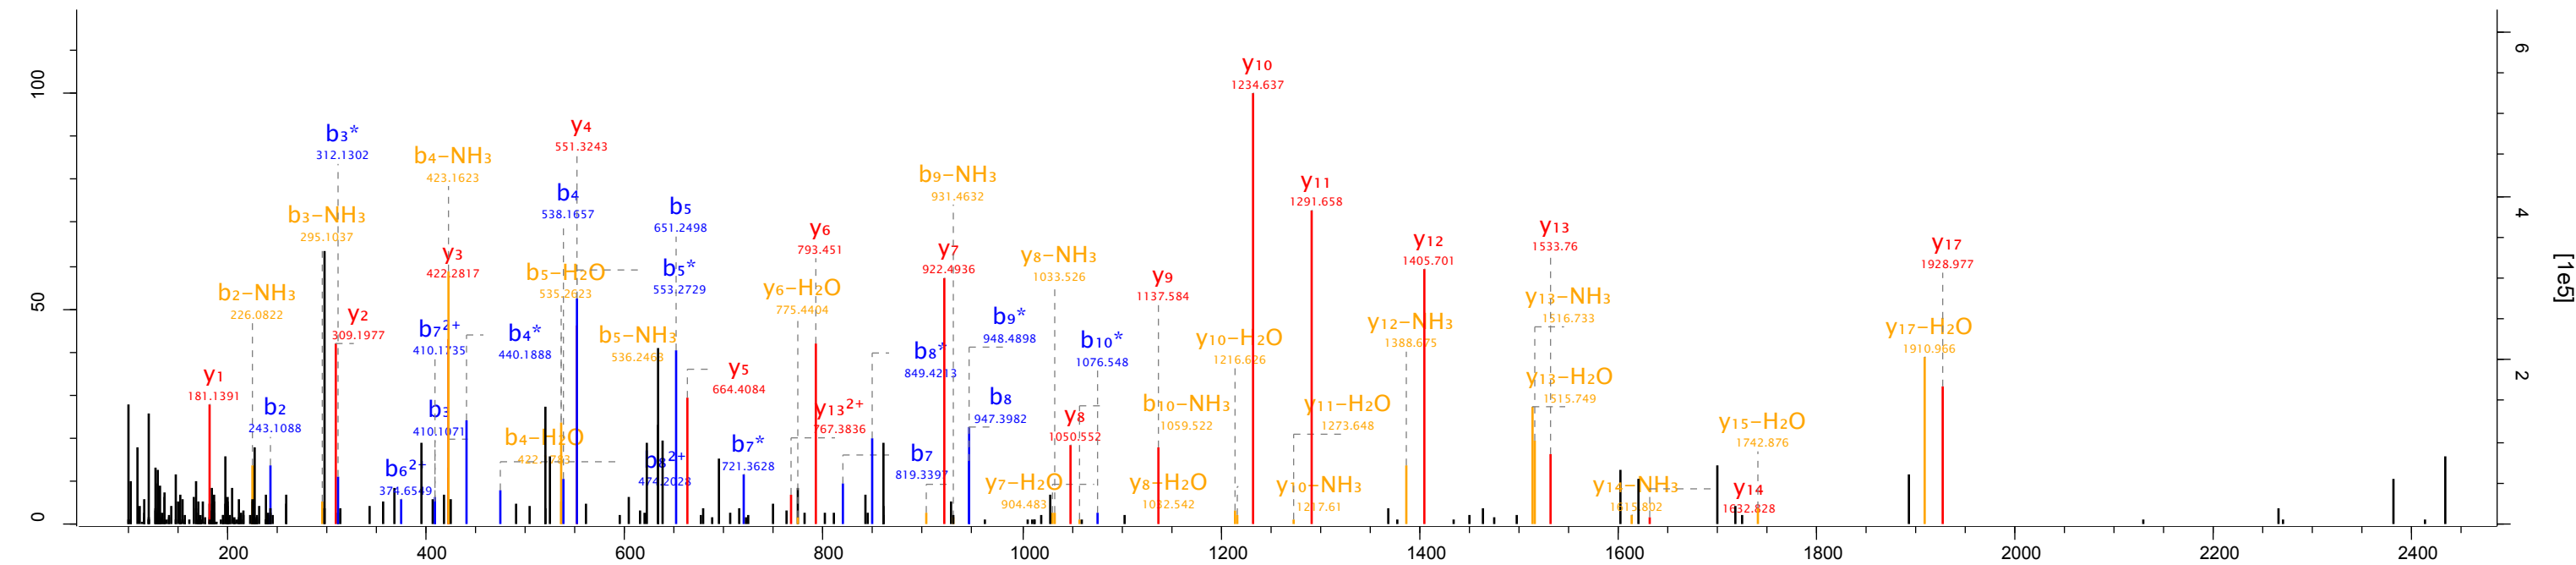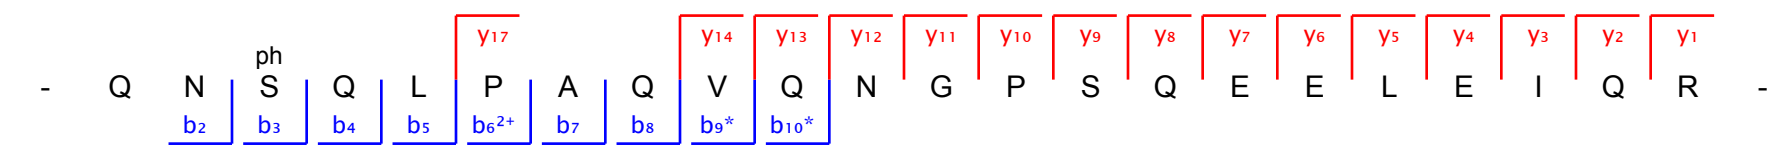

Raw file Scan Method Score m/z Gene names  
 20150812\_A375SR\_Phospho\_BR1\_03 18858 FTMS; HCD 220.74 942.08 ITGB4

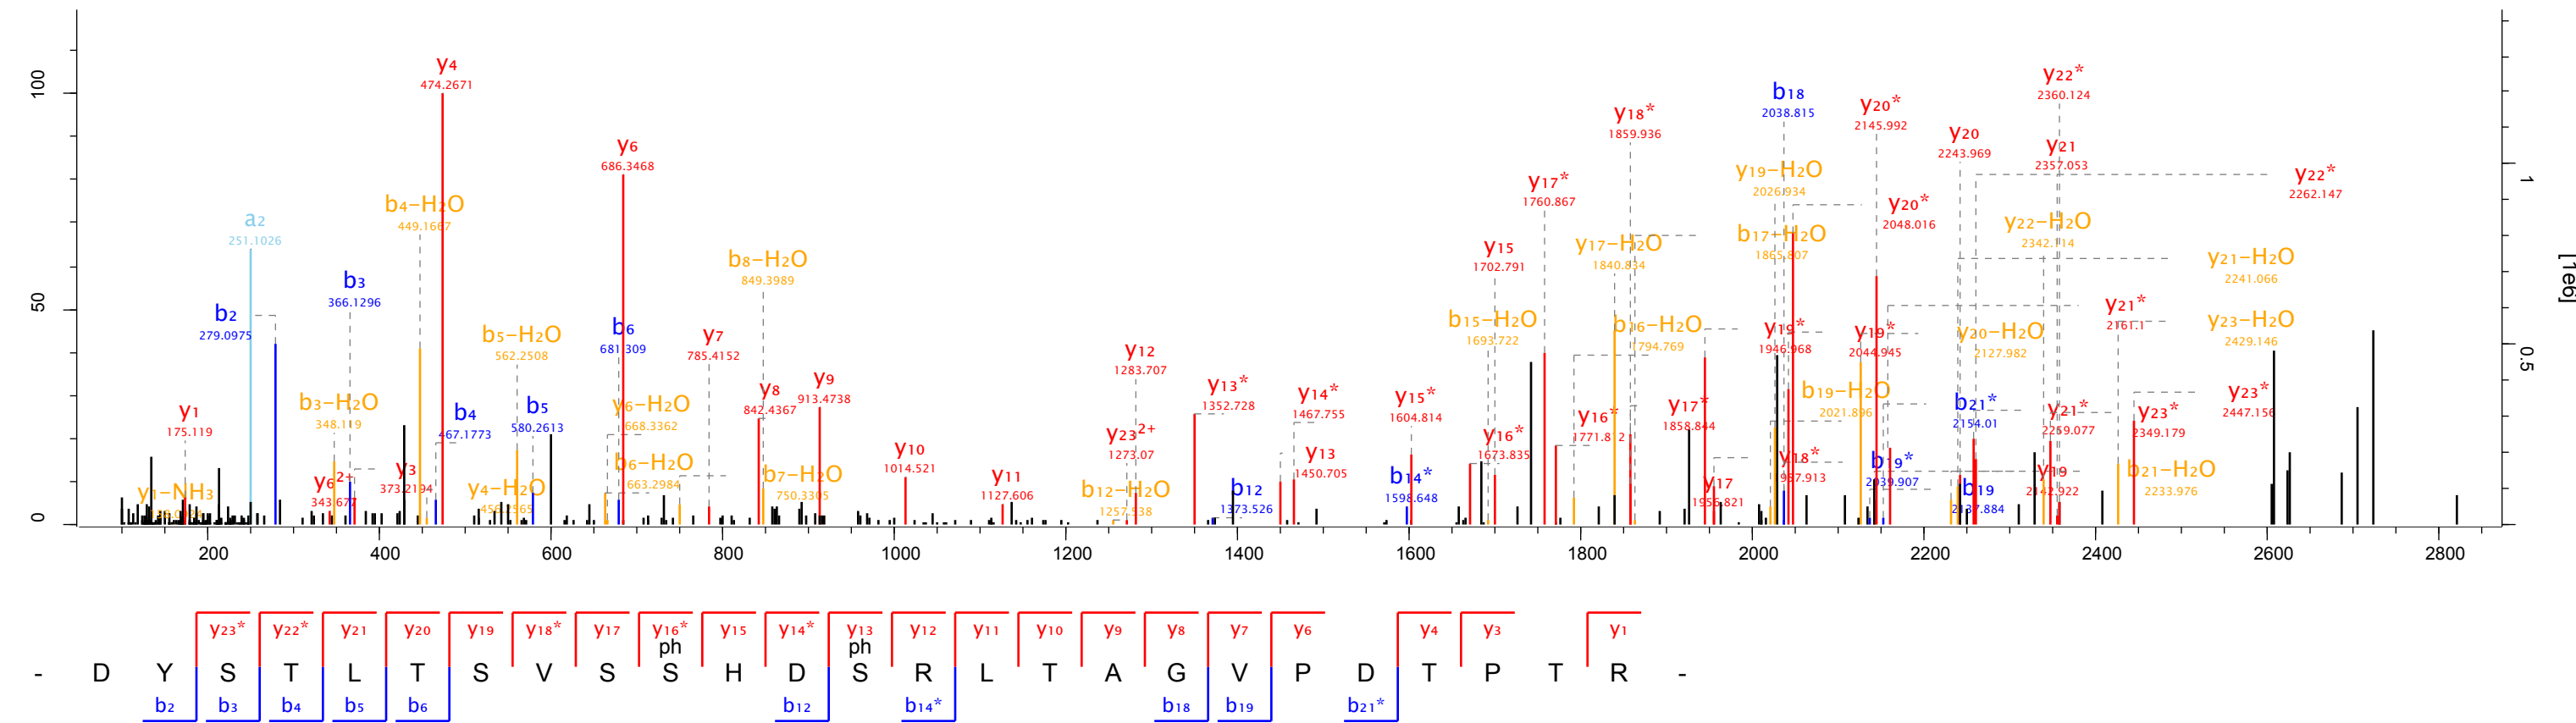

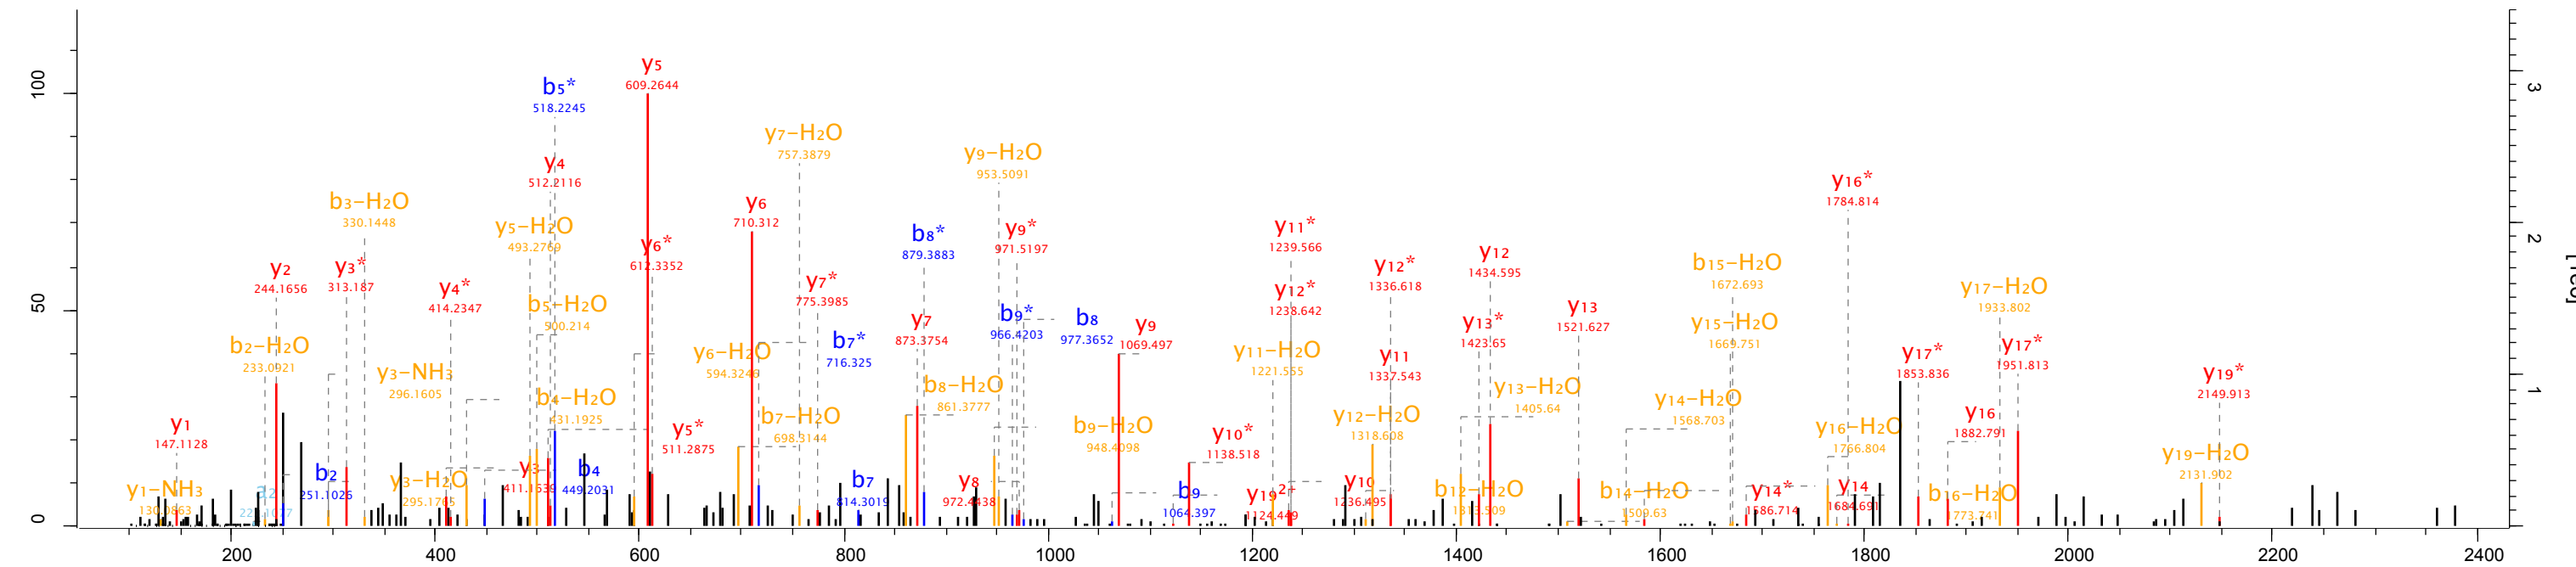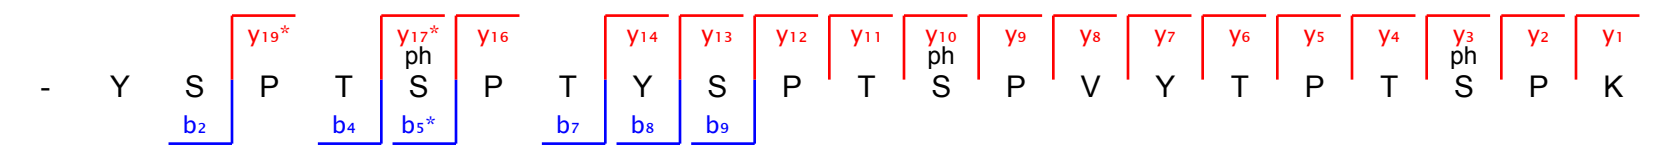

Raw file 20150812\_A375SR\_Phospho\_BR1\_03 Scan 19868 Method FTMS; HCD Score 128.06 m/z 686.8 Gene names TBC1D1

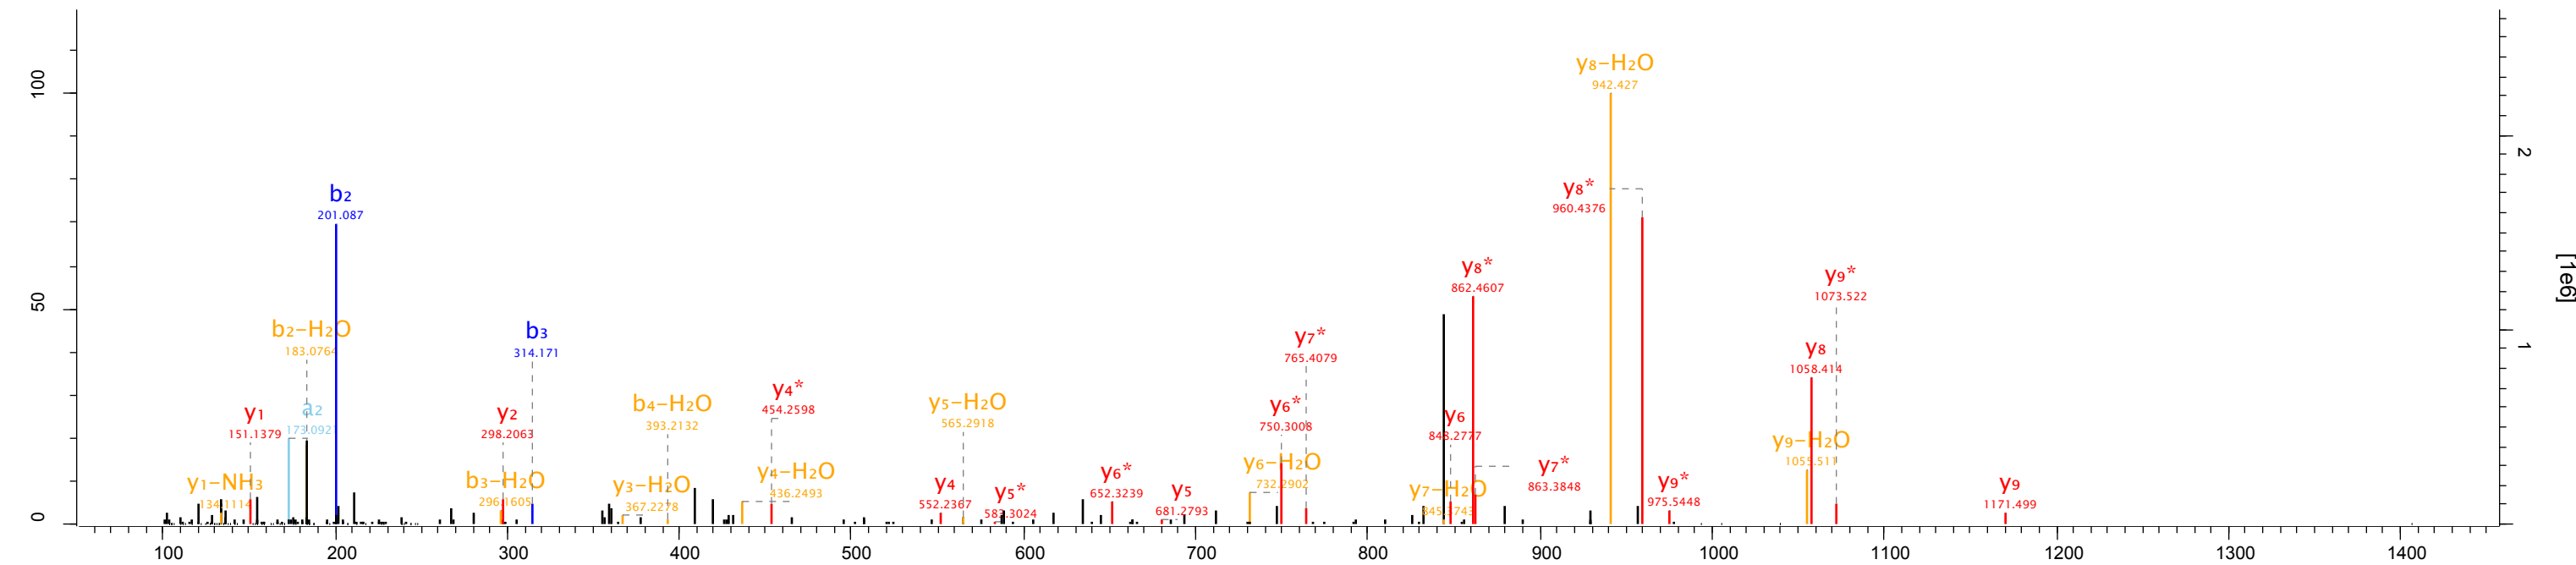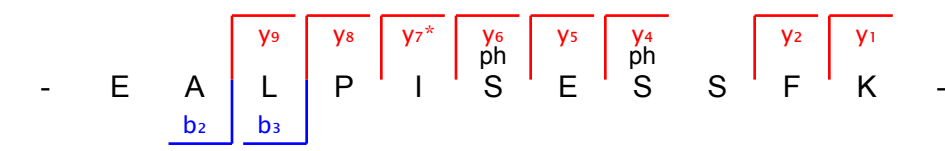

Raw file 20150812\_A375SR\_Phospho\_BR1\_03 Scan 19918 Method FTMS; HCD Score 116.13 m/z 864.38 Gene names FAM53C

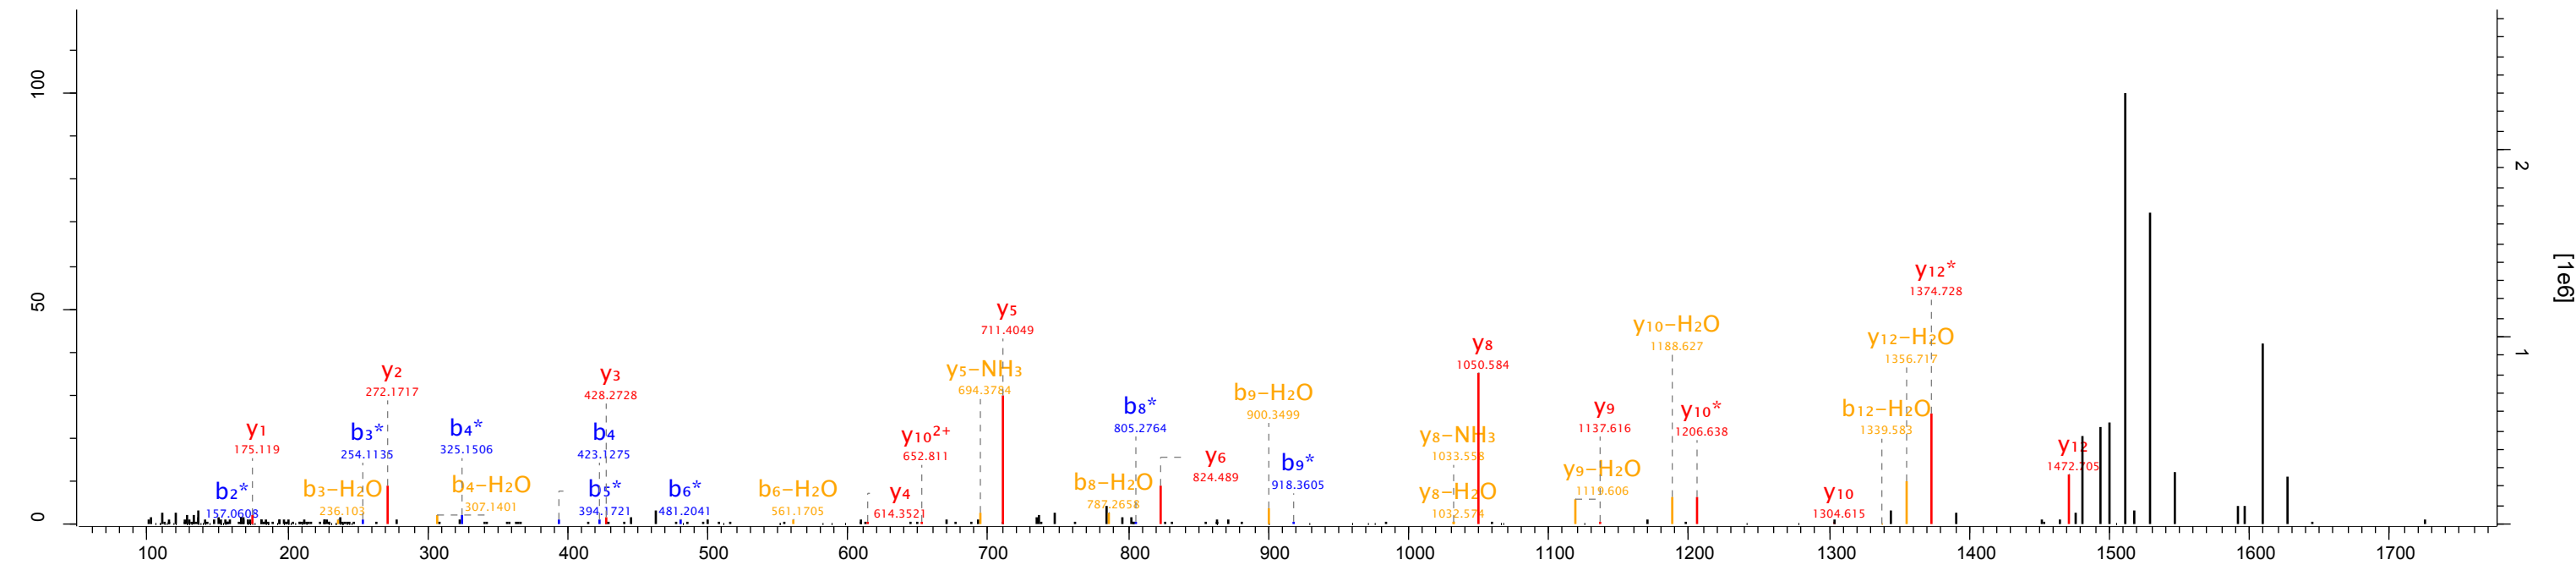

Sequence: S P A S P E L P W R P R -

Fragmentation sites (b ions): b2\*, b3\*, b4, b5\*, b6\*, b8\*, b9\*

Fragmentation sites (y ions): y1, y2, y3, y4, y5, y6, y8, y9, y10, y10<sup>2+</sup>, y12

Raw file: 20150812\_A375SR\_Phospho\_BR1\_03  
 Scan: 20428 Method: FTMS; HCD Score: 193.81 m/z: 1044.43 Gene names: CTNND1

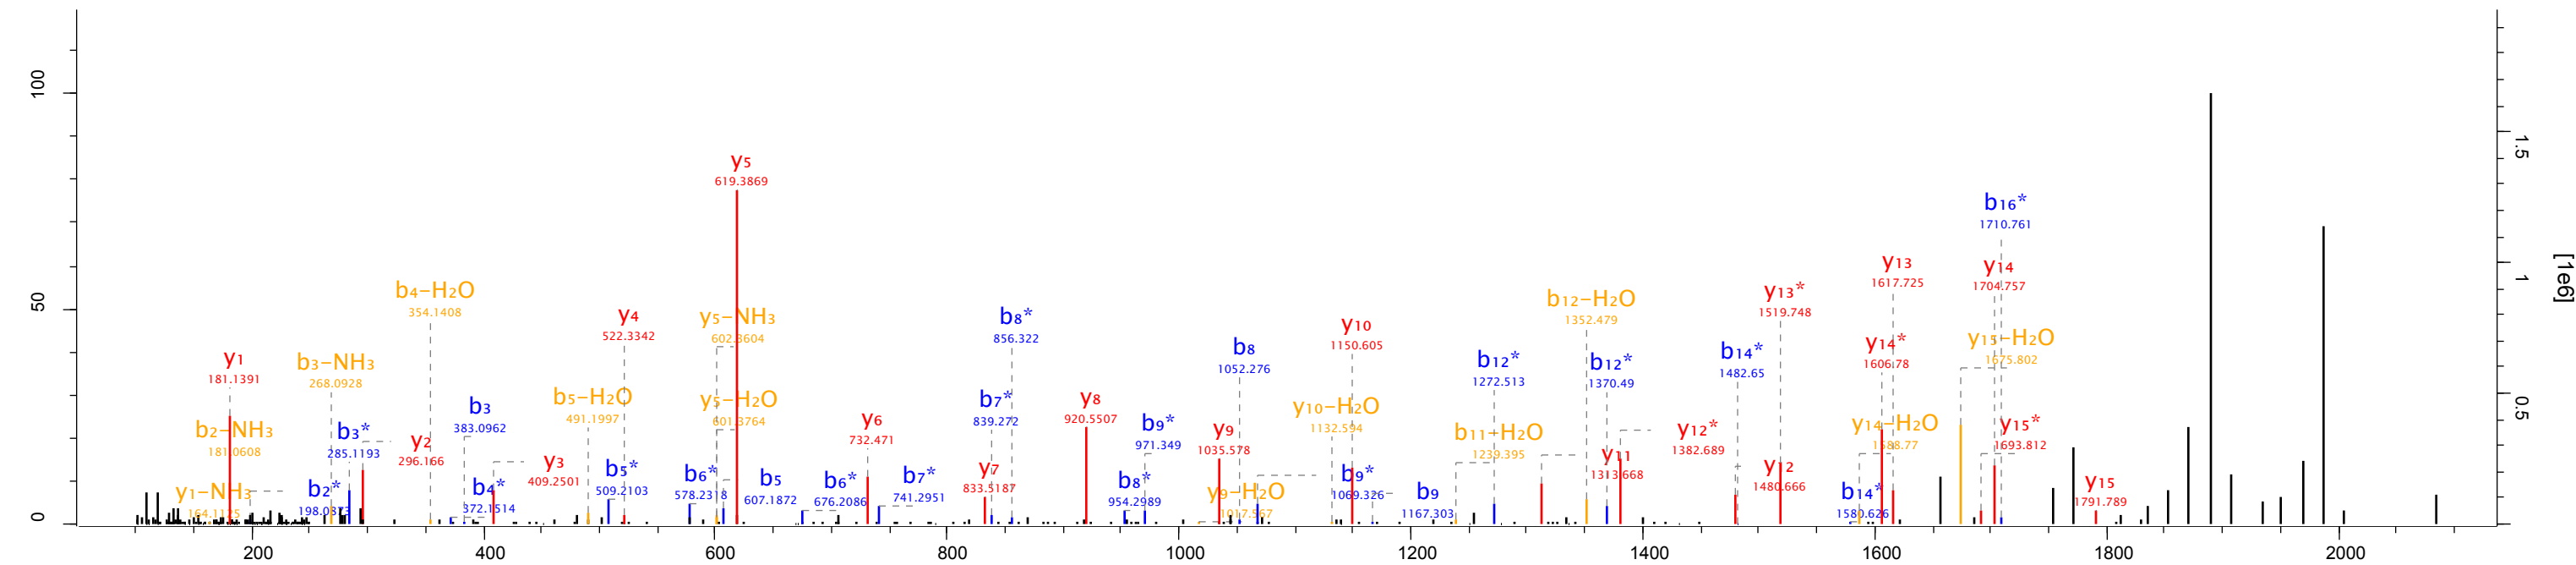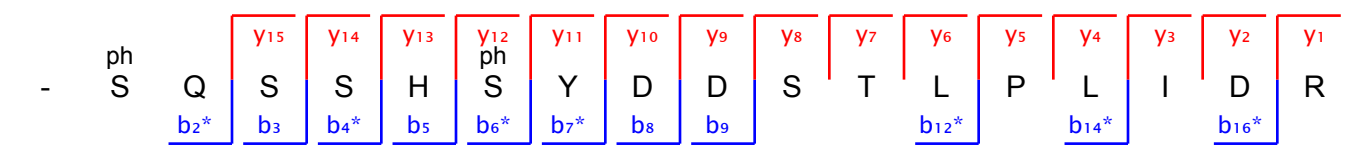



20150812\_A375SR\_Phospho\_BR1\_03 21048 FTMS; HCD 44.16 1019.12 TPD52L2

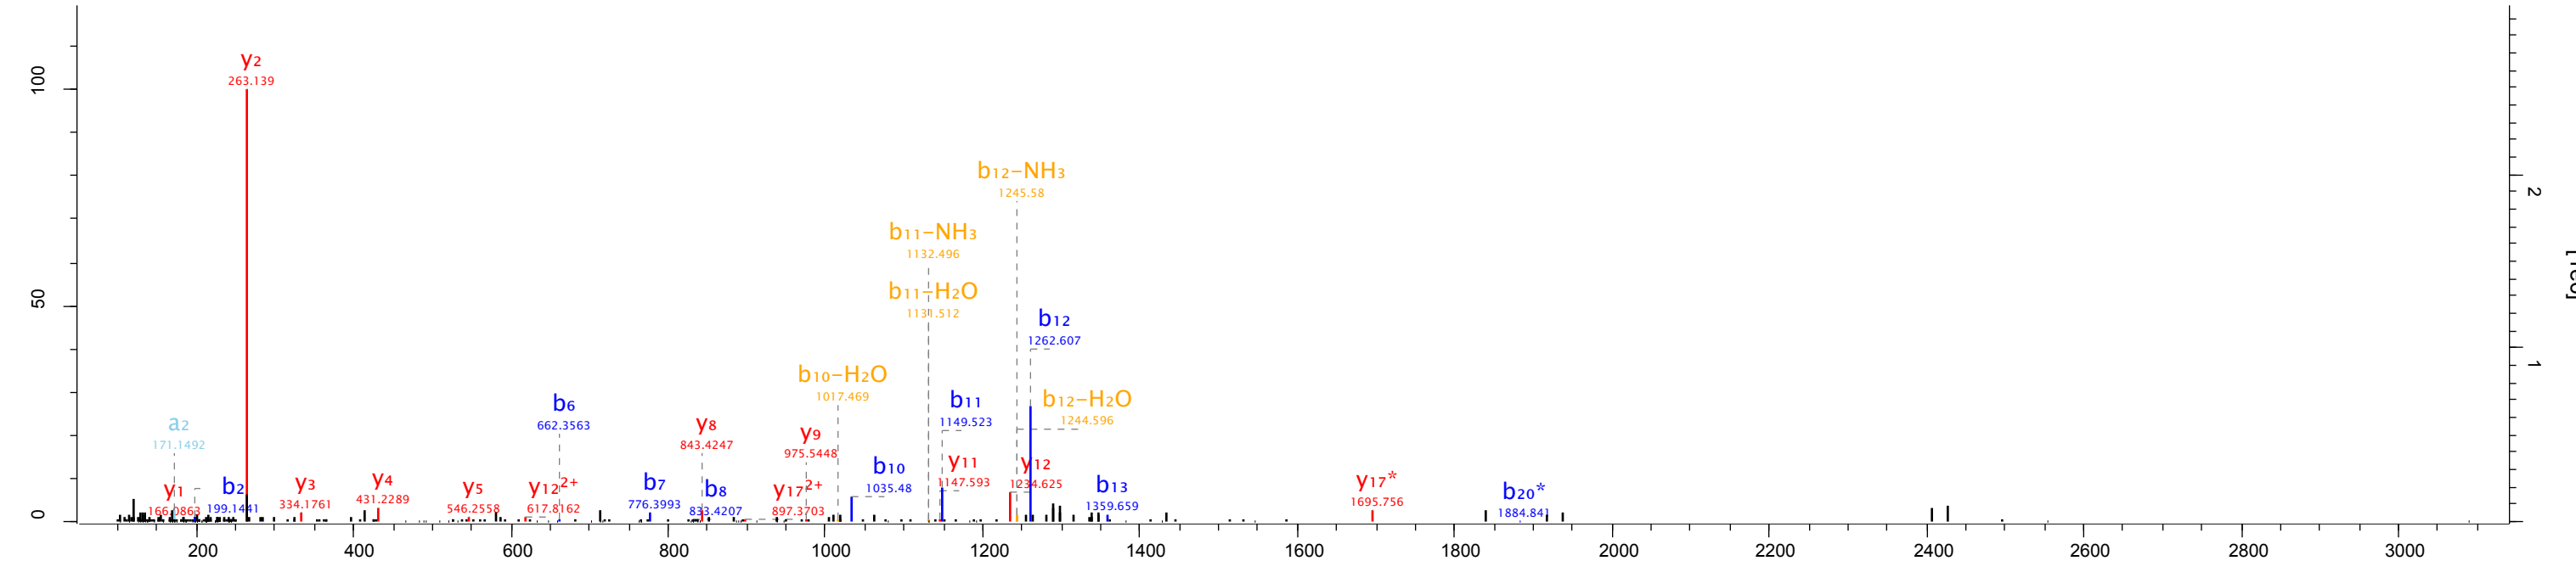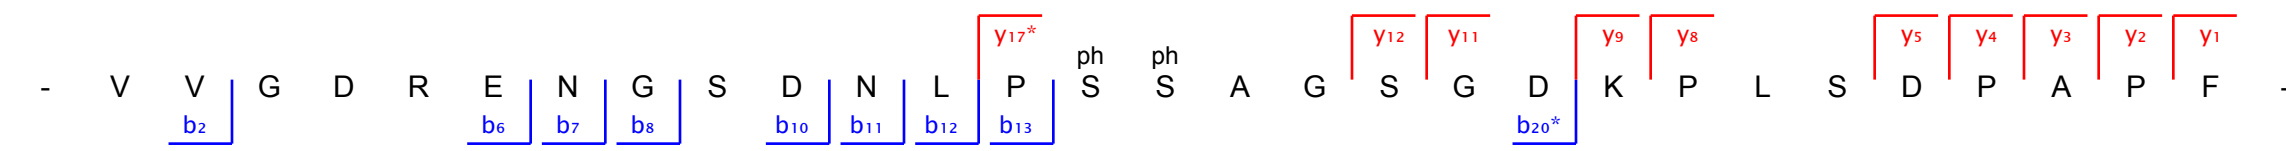

Raw file: 20150812\_A375SR\_Phospho\_BR1\_03  
 Scan: 21268  
 Method: FTMS; HCD  
 Score: 420.69  
 m/z: 1410.56  
 Gene names: LARP1

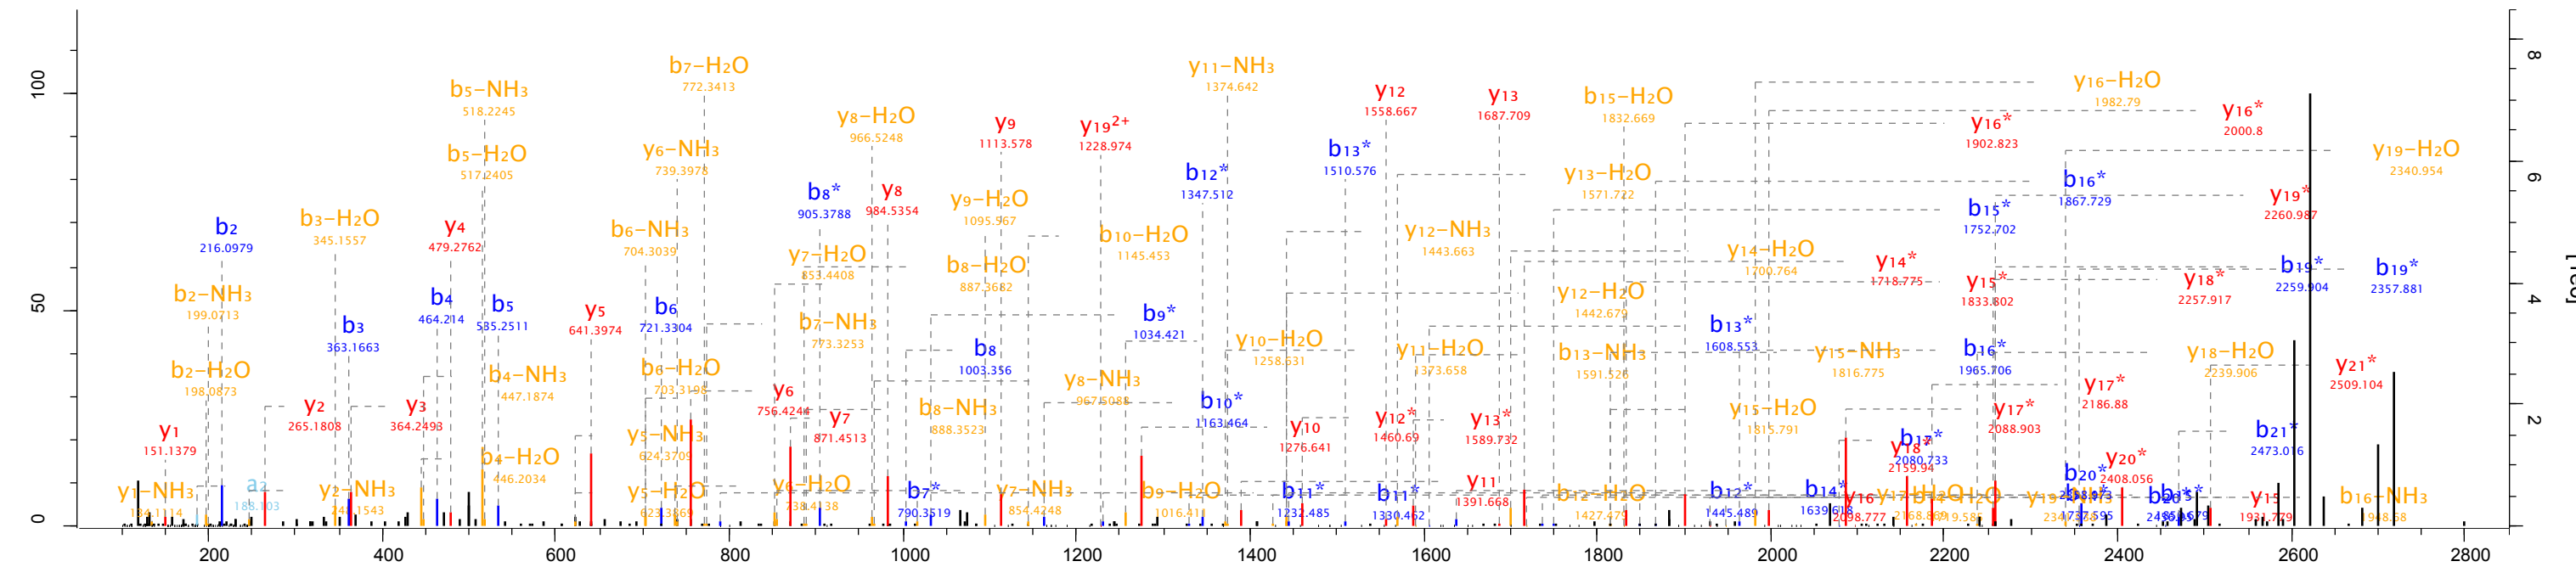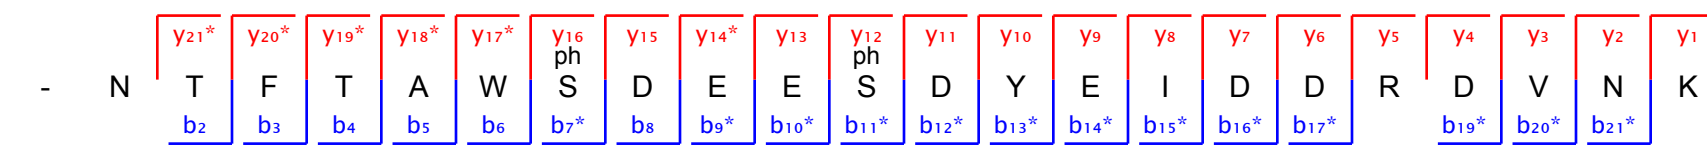

Raw file: 20150812\_A375SR\_Phospho\_BR1\_03  
 Scan: 21288 Method: FTMS; HCD Score: 279.93 m/z: 1142.98 Gene names: PRR12

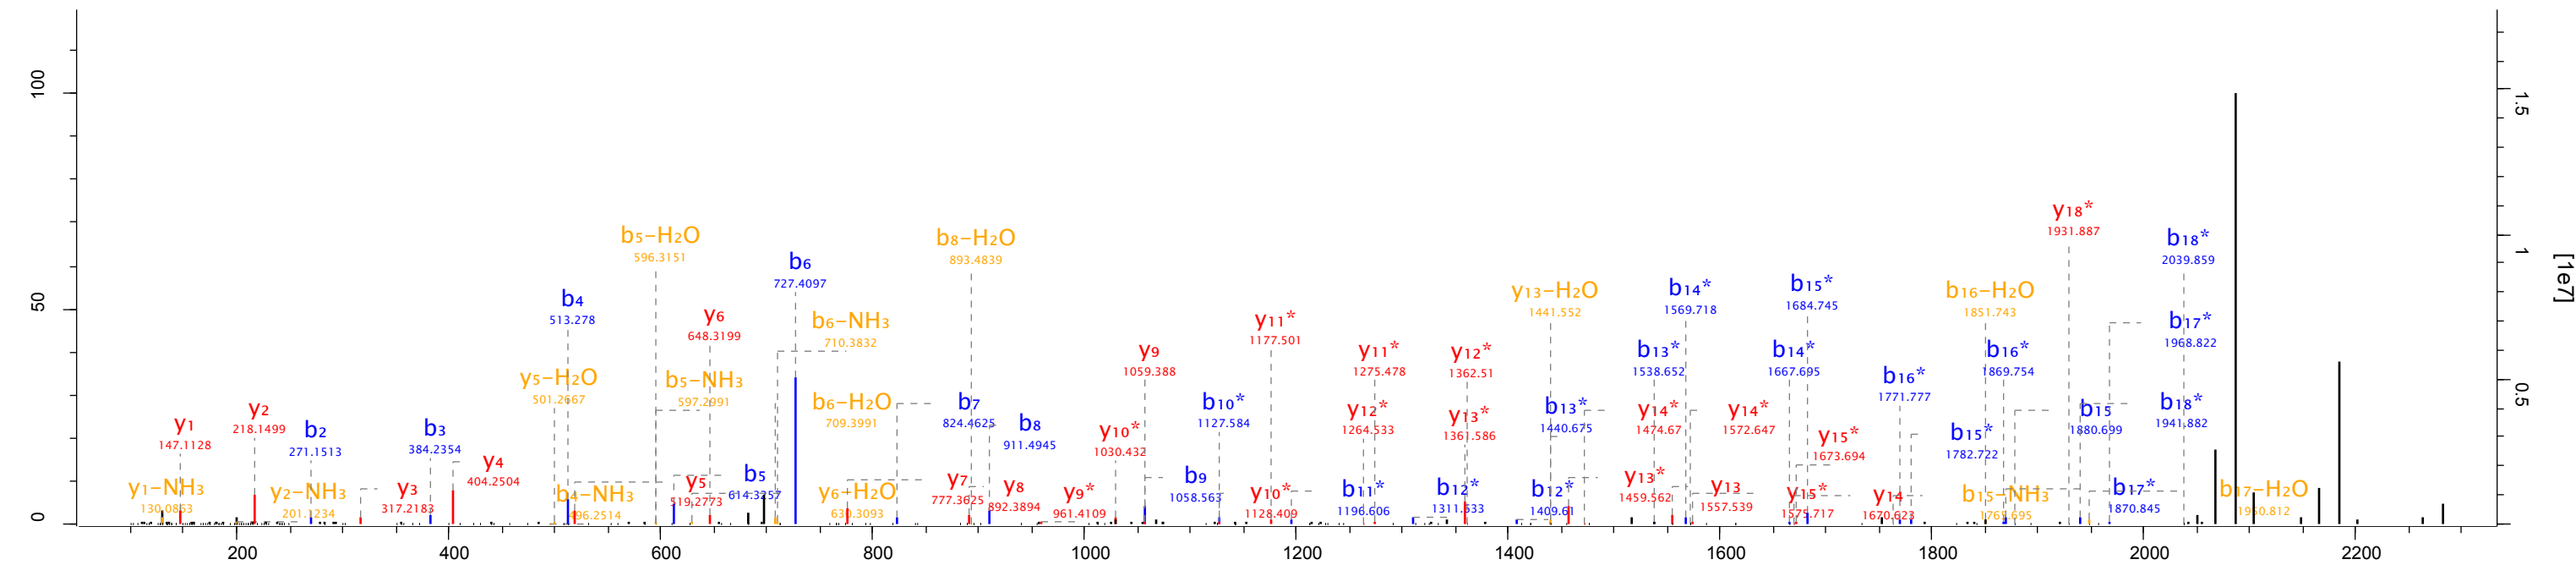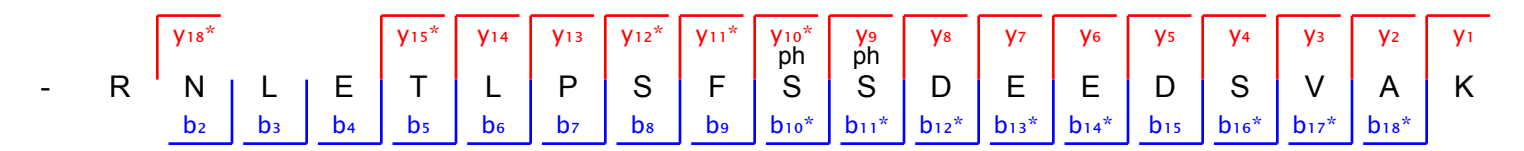

Raw file 20150812\_A375SR\_Phospho\_BR1\_03 Scan 21838 Method FTMS; HCD Score 116.1 m/z 896.62 Gene names UBR5

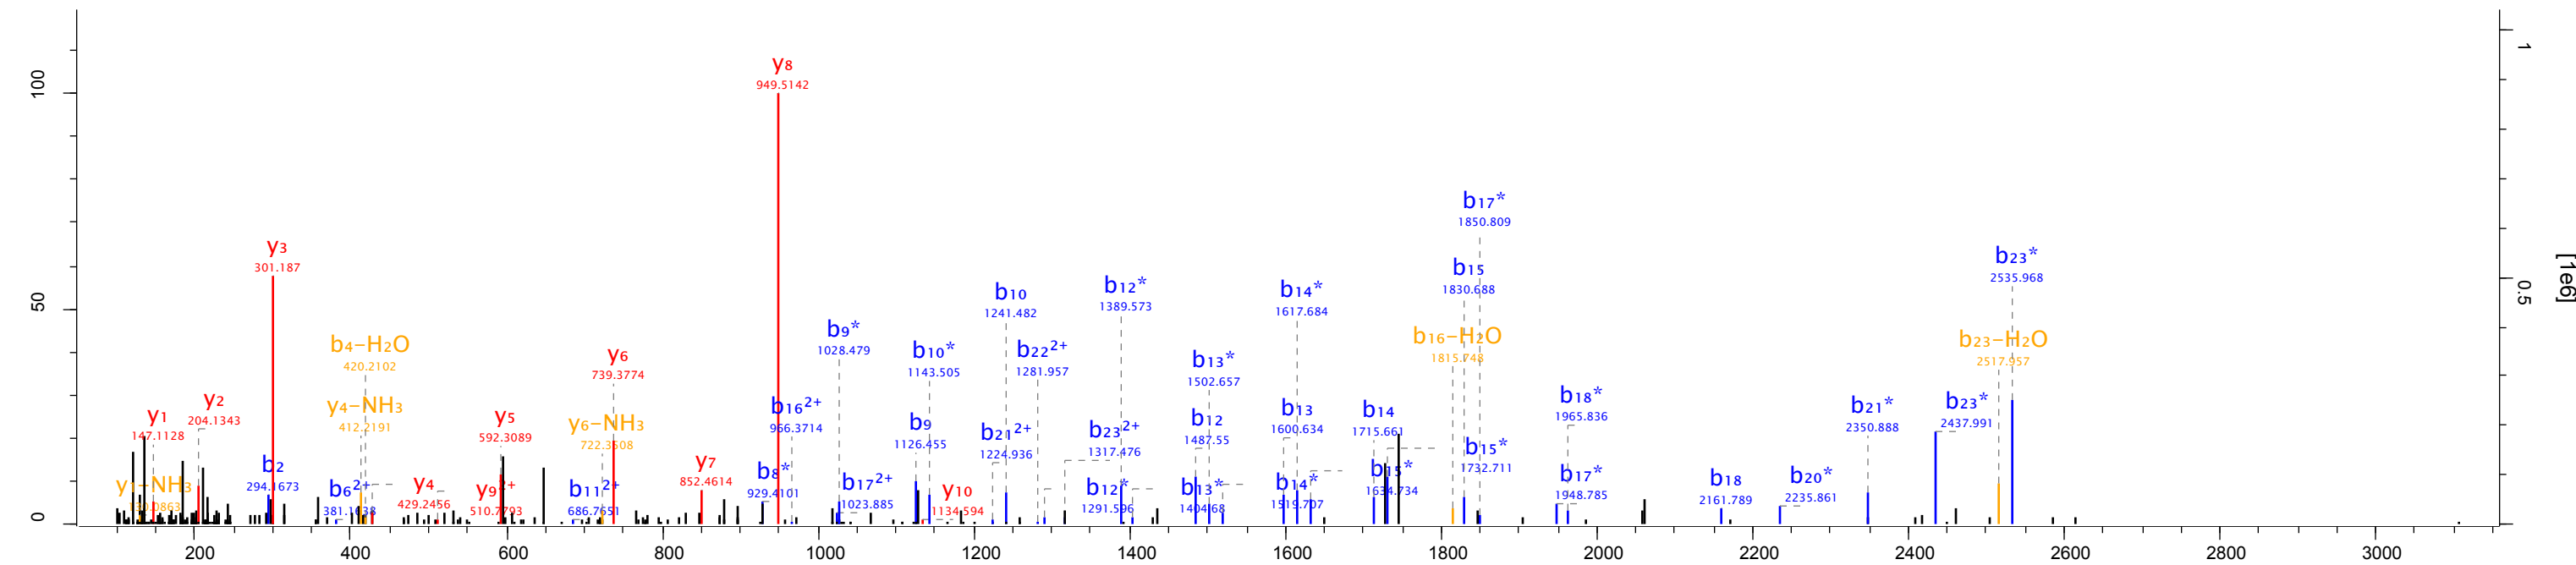

- R H G S ph S R ph S V V D M D L D D T D D G D D N A P L F Y Q P G K -

b<sub>2</sub> b<sub>6</sub><sup>2+</sup> b<sub>8</sub><sup>\*</sup> b<sub>9</sub> b<sub>10</sub> b<sub>11</sub><sup>2+</sup> b<sub>12</sub> b<sub>13</sub> b<sub>14</sub> b<sub>15</sub> b<sub>16</sub><sup>2+</sup> b<sub>17</sub><sup>\*</sup> b<sub>18</sub> b<sub>20</sub><sup>\*</sup> b<sub>21</sub><sup>\*</sup> b<sub>22</sub><sup>2+</sup> b<sub>23</sub><sup>\*</sup> y<sub>10</sub> y<sub>9</sub><sup>2+</sup> y<sub>8</sub> y<sub>7</sub> y<sub>6</sub> y<sub>5</sub> y<sub>4</sub> y<sub>3</sub> y<sub>2</sub> y<sub>1</sub>

Raw file: 20150812\_A375SR\_Phospho\_BR1\_03  
 Scan: 21888 Method: FTMS; HCD Score: 58.09 m/z: 1017.44 Gene names: TNKS1BP1

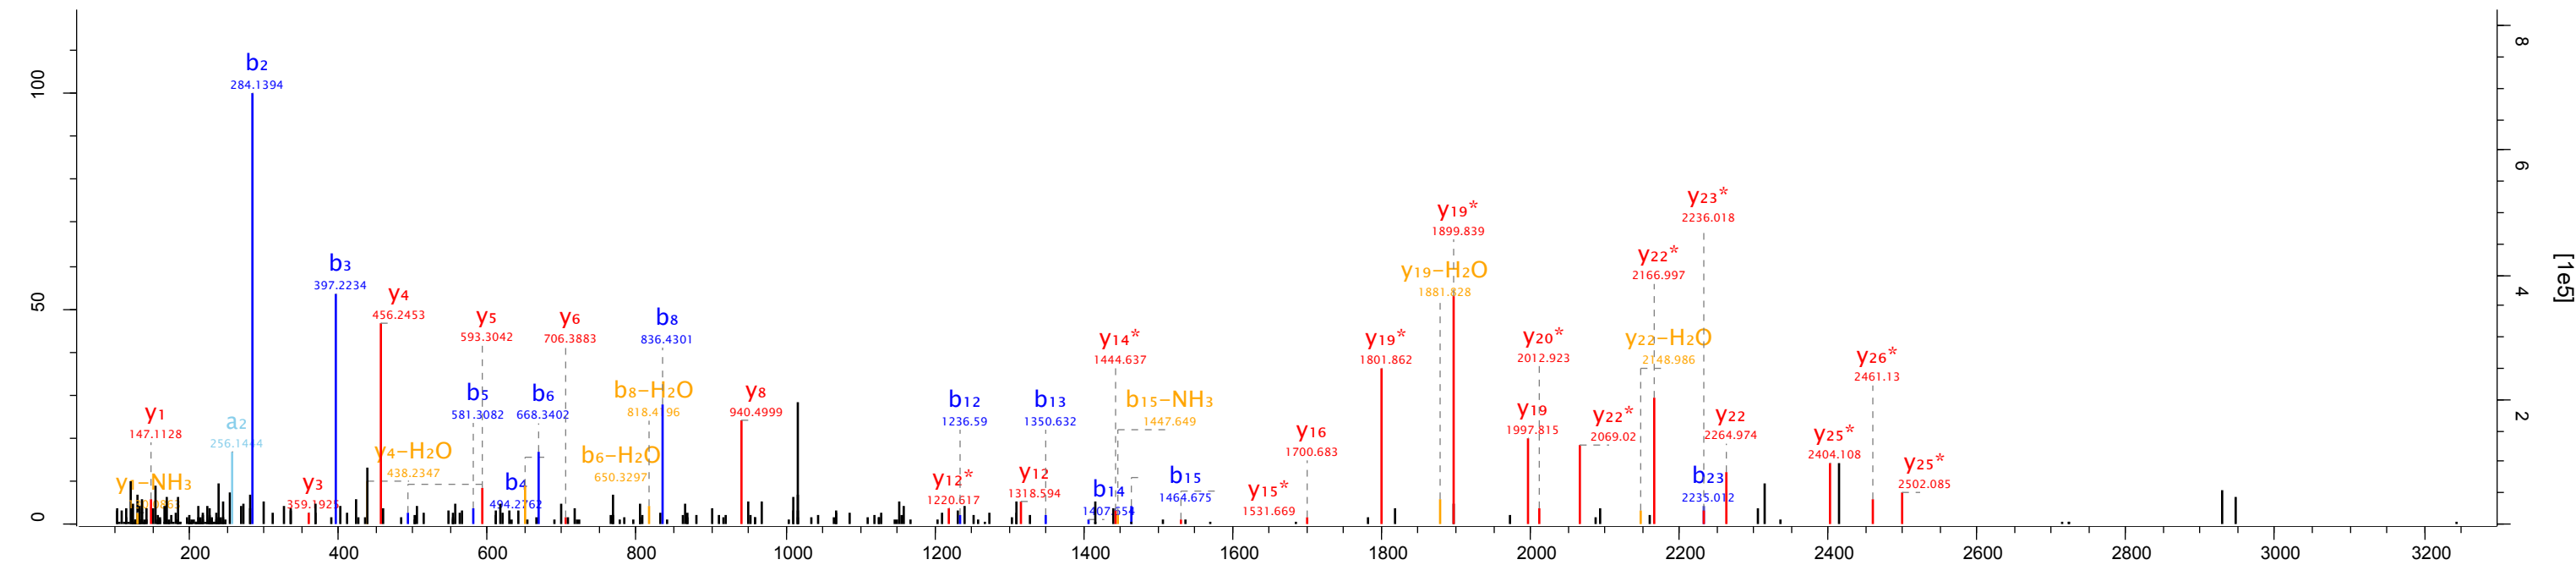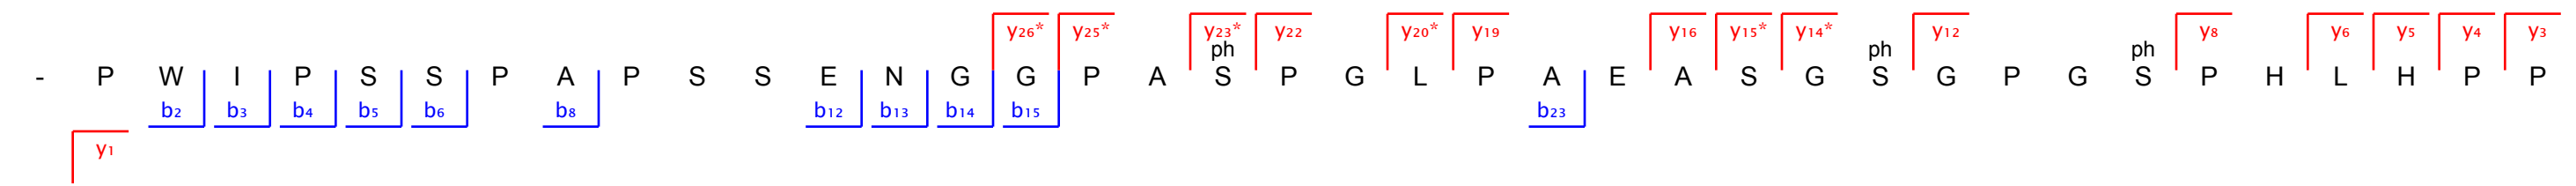

Raw file  
 20150812\_A375SR\_Phospho\_BR1\_03  
 Scan 21928 Method FTMS; HCD Score 52.59 m/z 867.18 Gene names TBC1D10B

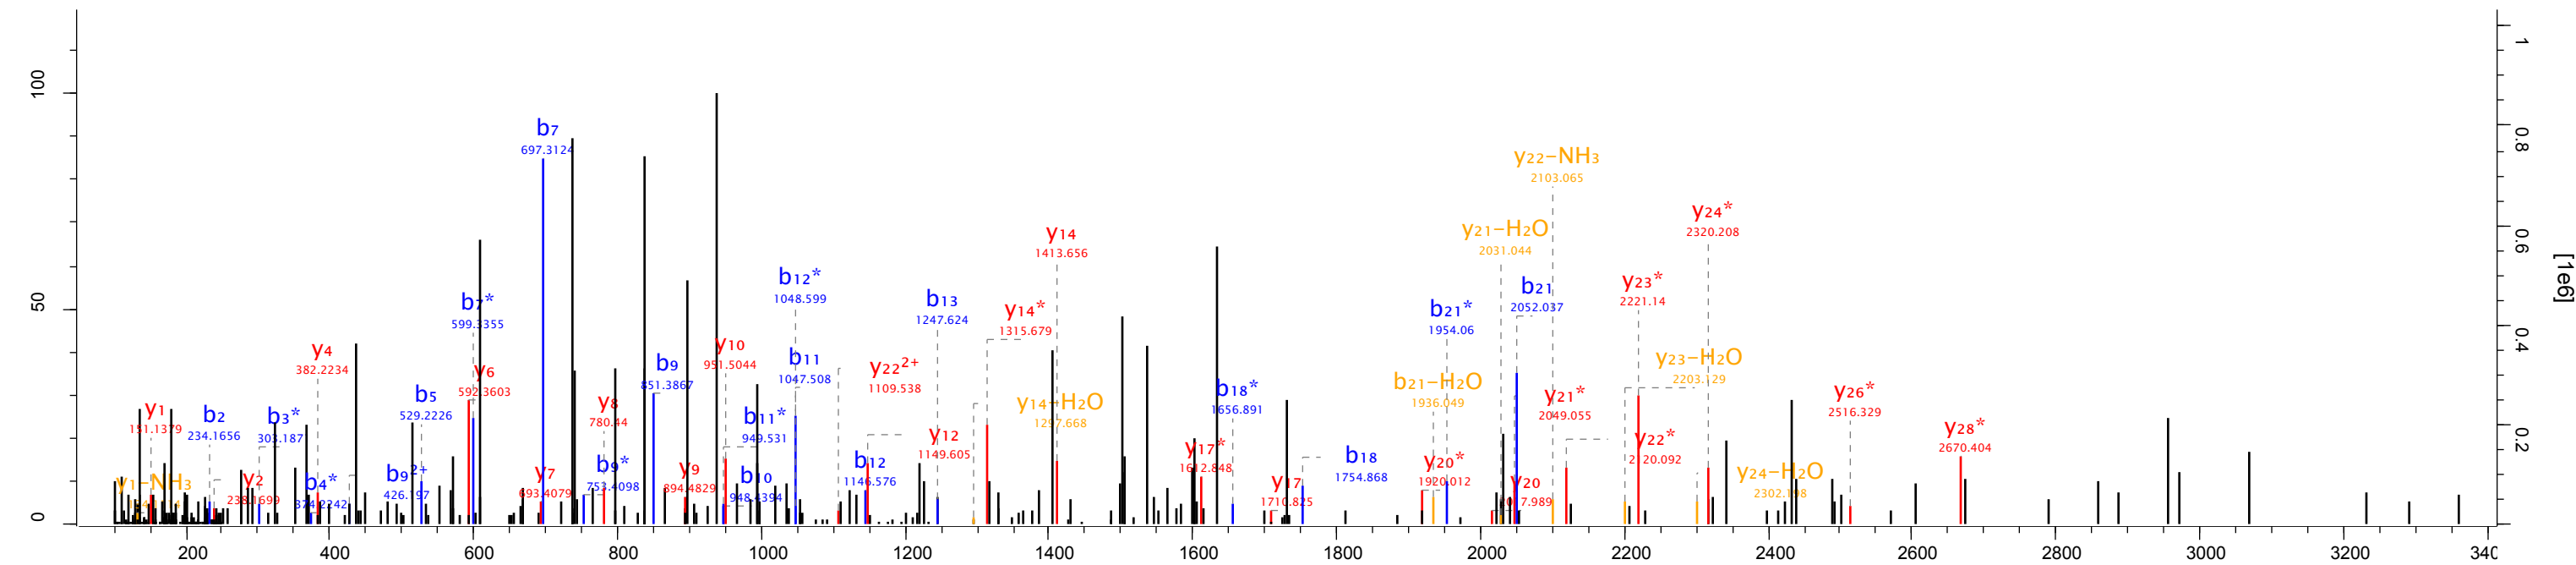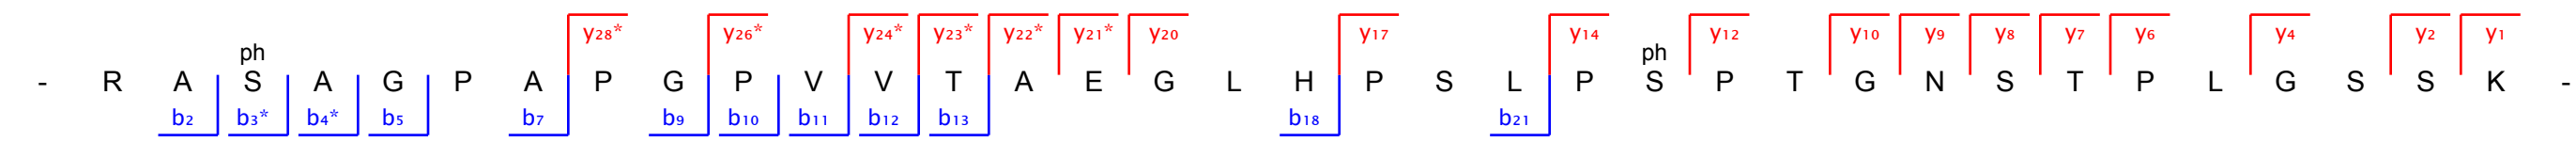

Raw file Scan Method Score m/z Gene names  
 20150812\_A375SR\_Phospho\_BR1\_03 22068 FTMS; HCD 151.48 1263.22 SMARCAD1

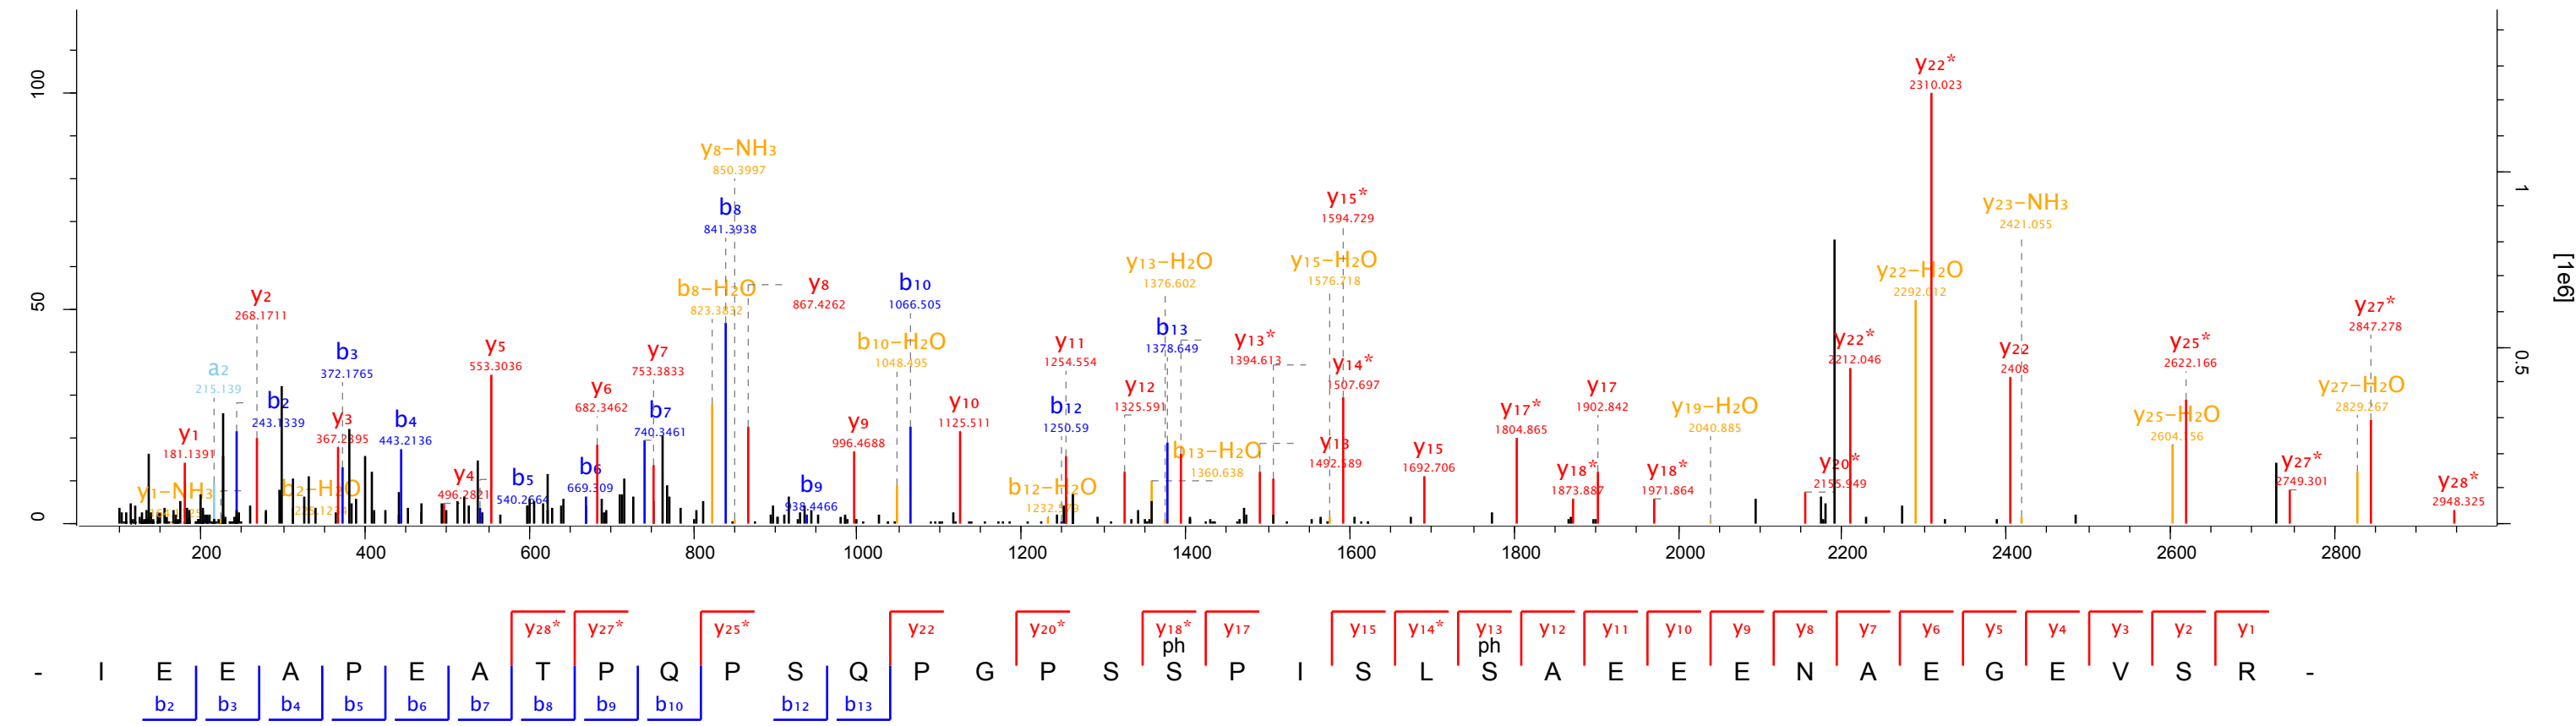

Raw file: 20150812\_A375SR\_Phospho\_BR1\_03  
 Scan: 2218 Method: FTMS; HCD Score: 62.17 m/z: 554.59 Gene names: JPH1

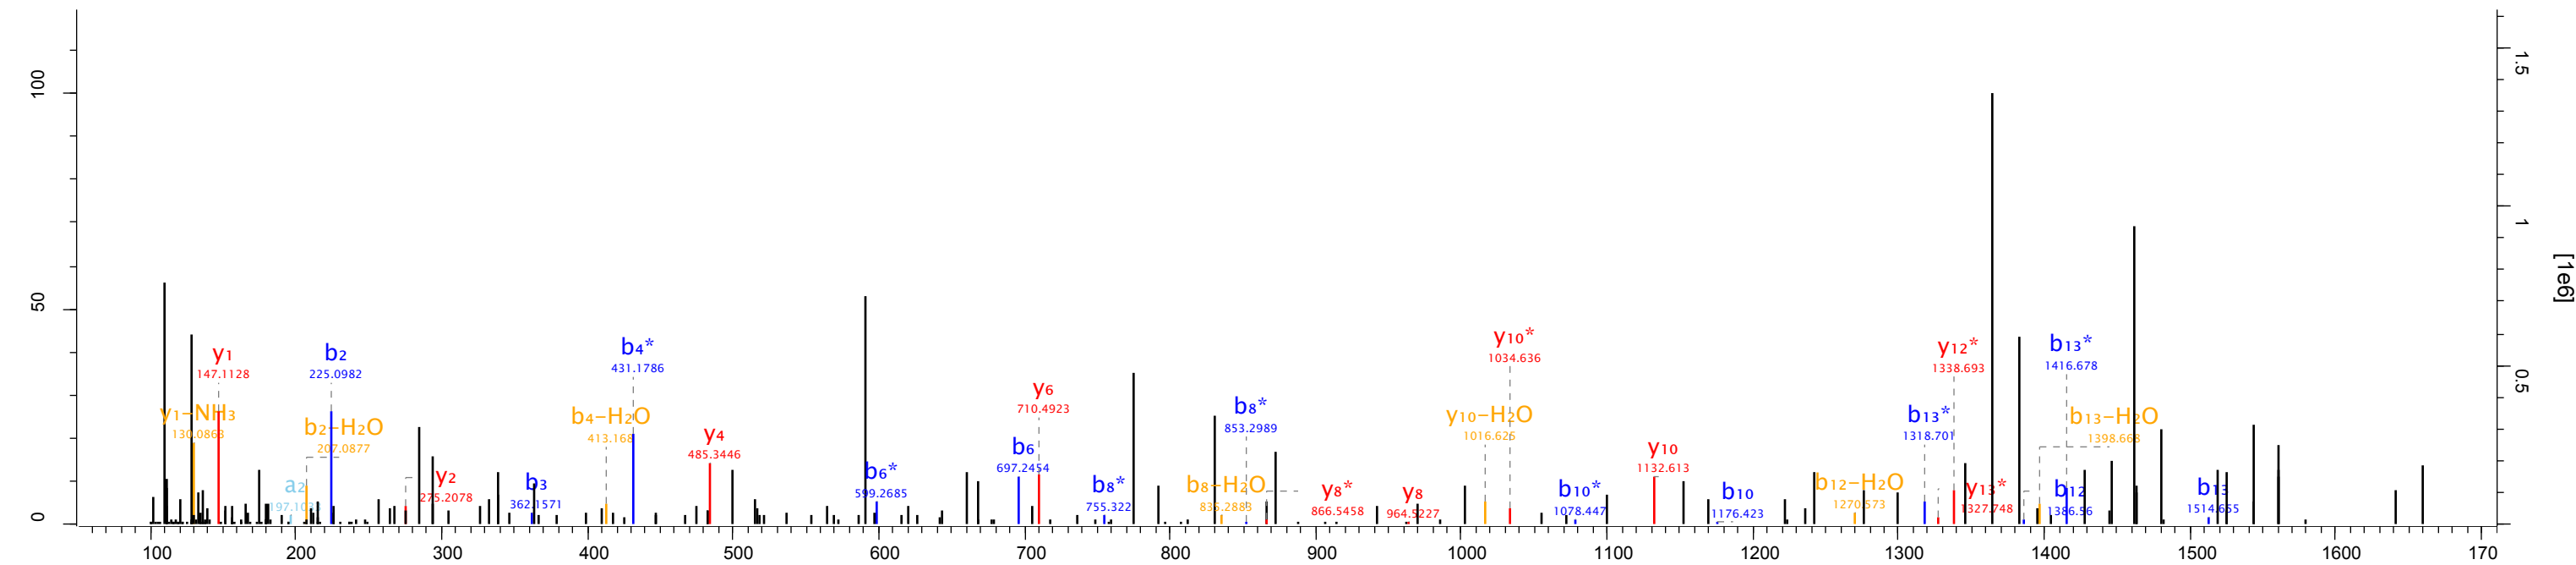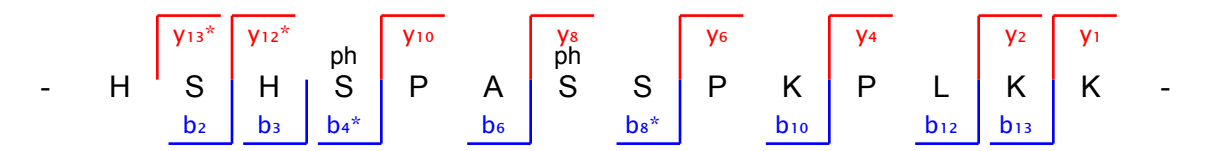



Raw file: 20150812\_A375SR\_Phospho\_BR1\_03  
 Scan: 22388 Method: FTMS; HCD Score: 64.85 m/z: 661.34 Gene names: CDK12

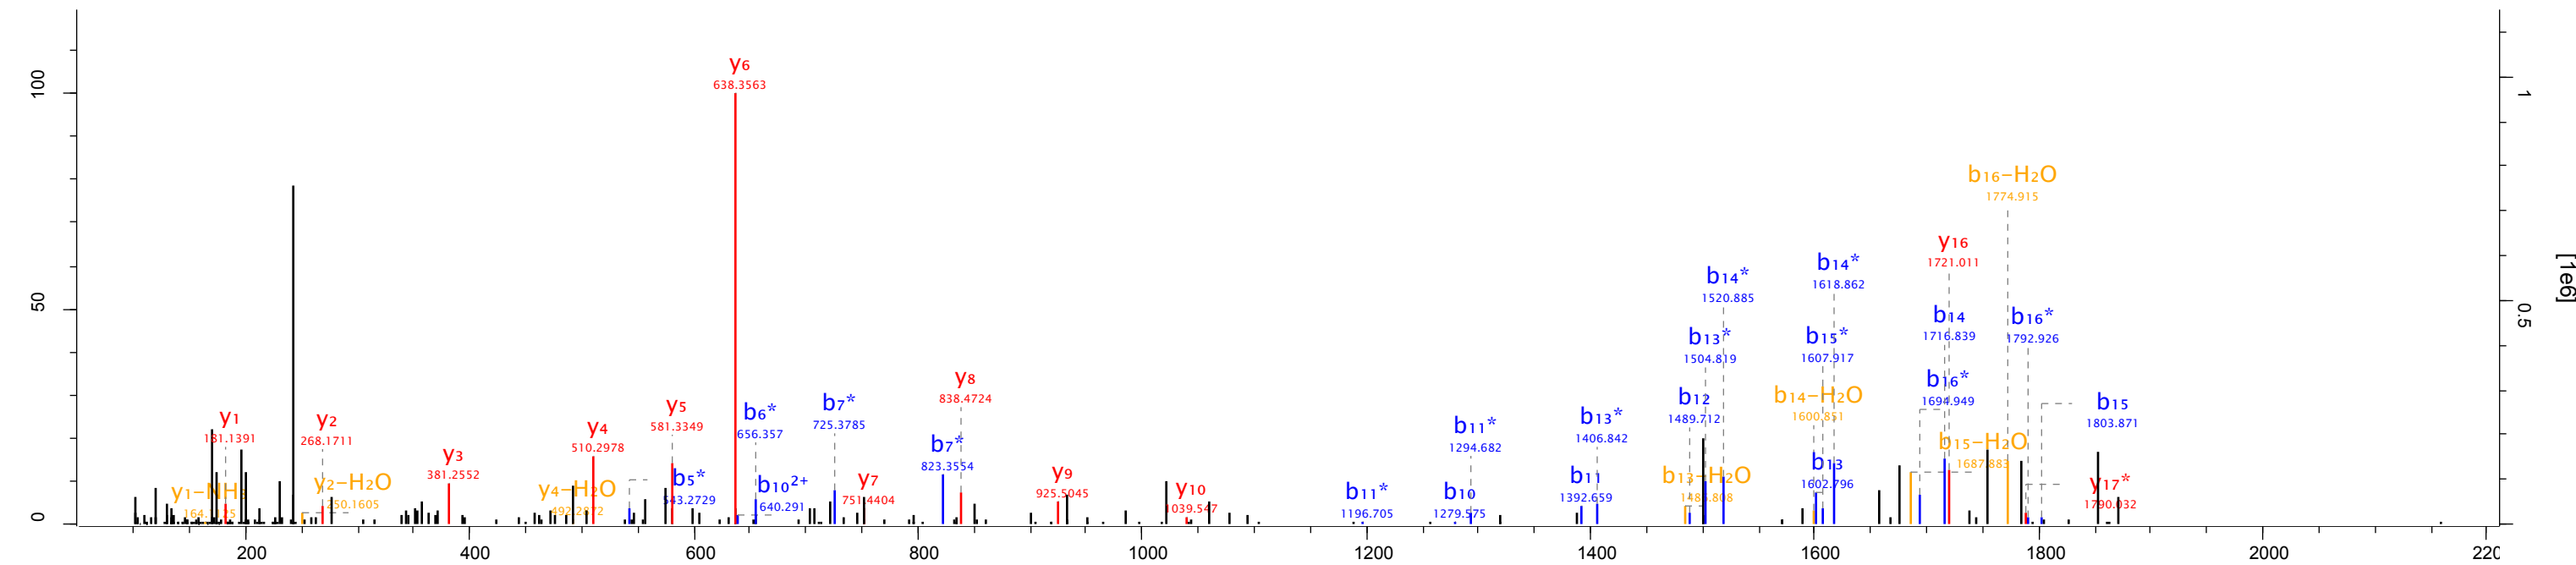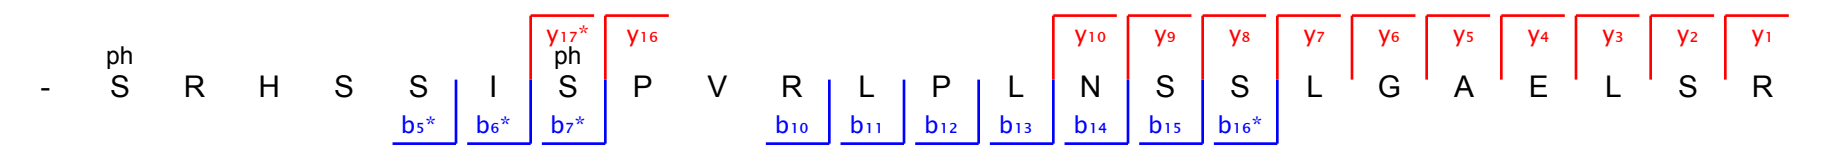

Raw file 20150812\_A375SR\_Phospho\_BR1\_03 Scan 22718 Method FTMS; HCD Score 126.27 m/z 1184.51 Gene names FAM169A

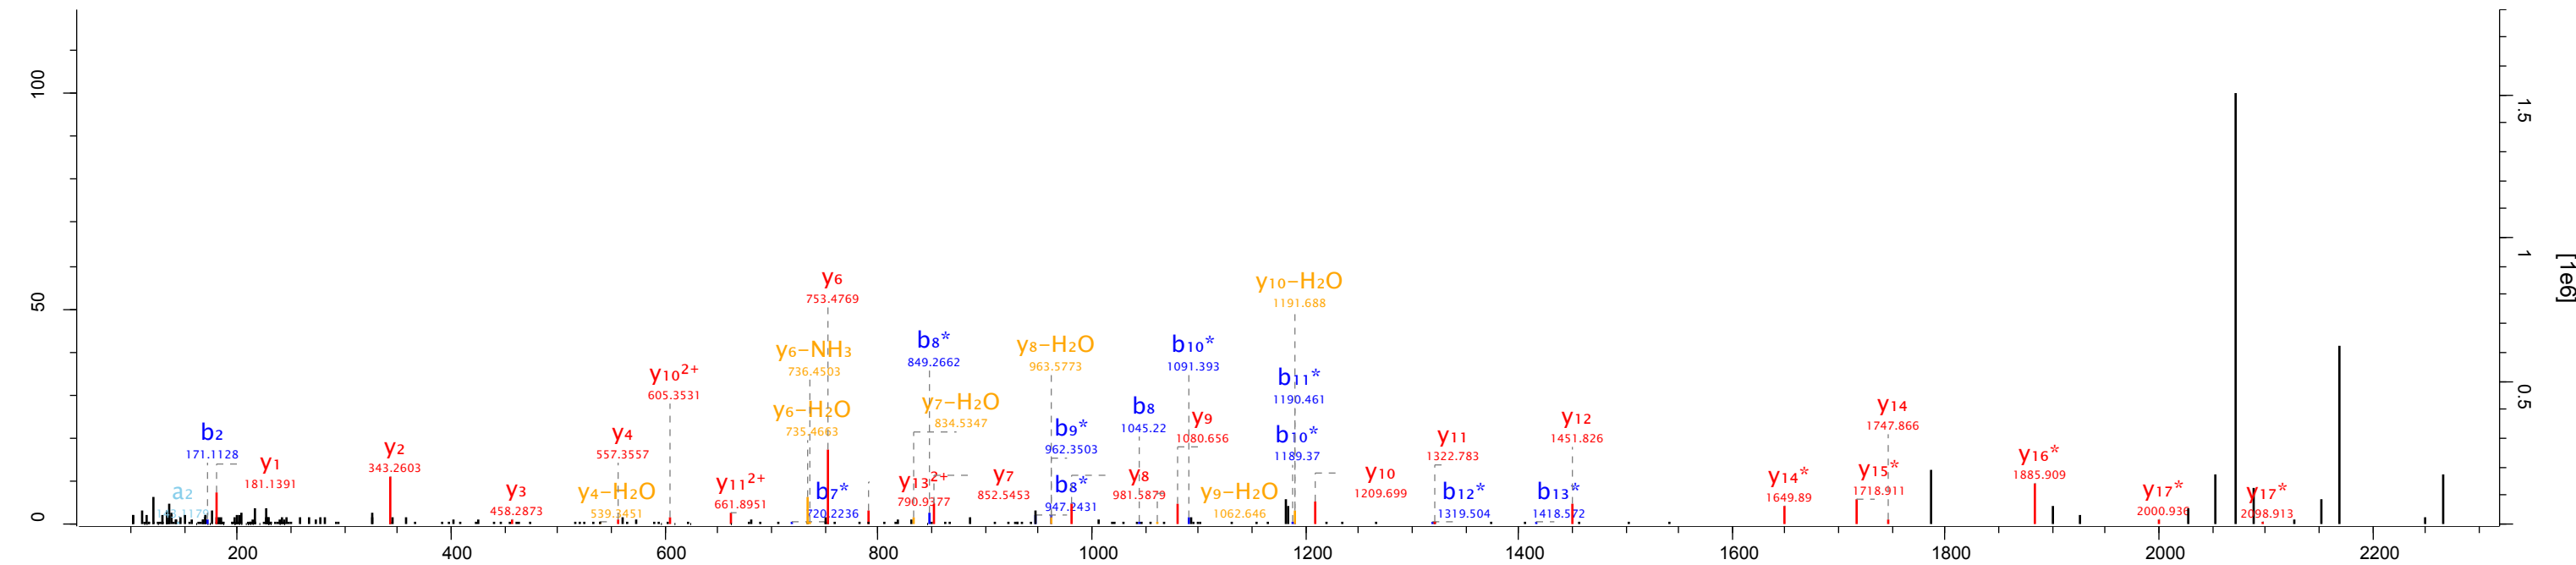

- A V D S S S E E I E V E V P V V D R R -

b<sub>2</sub> b<sub>7</sub>\* b<sub>8</sub> b<sub>9</sub>\* b<sub>10</sub>\* b<sub>11</sub>\* b<sub>12</sub>\* b<sub>13</sub>\* y<sub>17</sub>\* y<sub>16</sub>\* ph y<sub>15</sub>\* ph y<sub>14</sub> ph y<sub>13</sub><sup>2+</sup> y<sub>12</sub> y<sub>11</sub> y<sub>10</sub> y<sub>9</sub> y<sub>8</sub> y<sub>7</sub> y<sub>6</sub> y<sub>4</sub> y<sub>3</sub> y<sub>2</sub> y<sub>1</sub>

Raw file: 20150812\_A375SR\_Phospho\_BR1\_03  
 Scan: 2288 Method: FTMS; HCD Score: 254.36 m/z: 1007.89 Gene names: MCM3

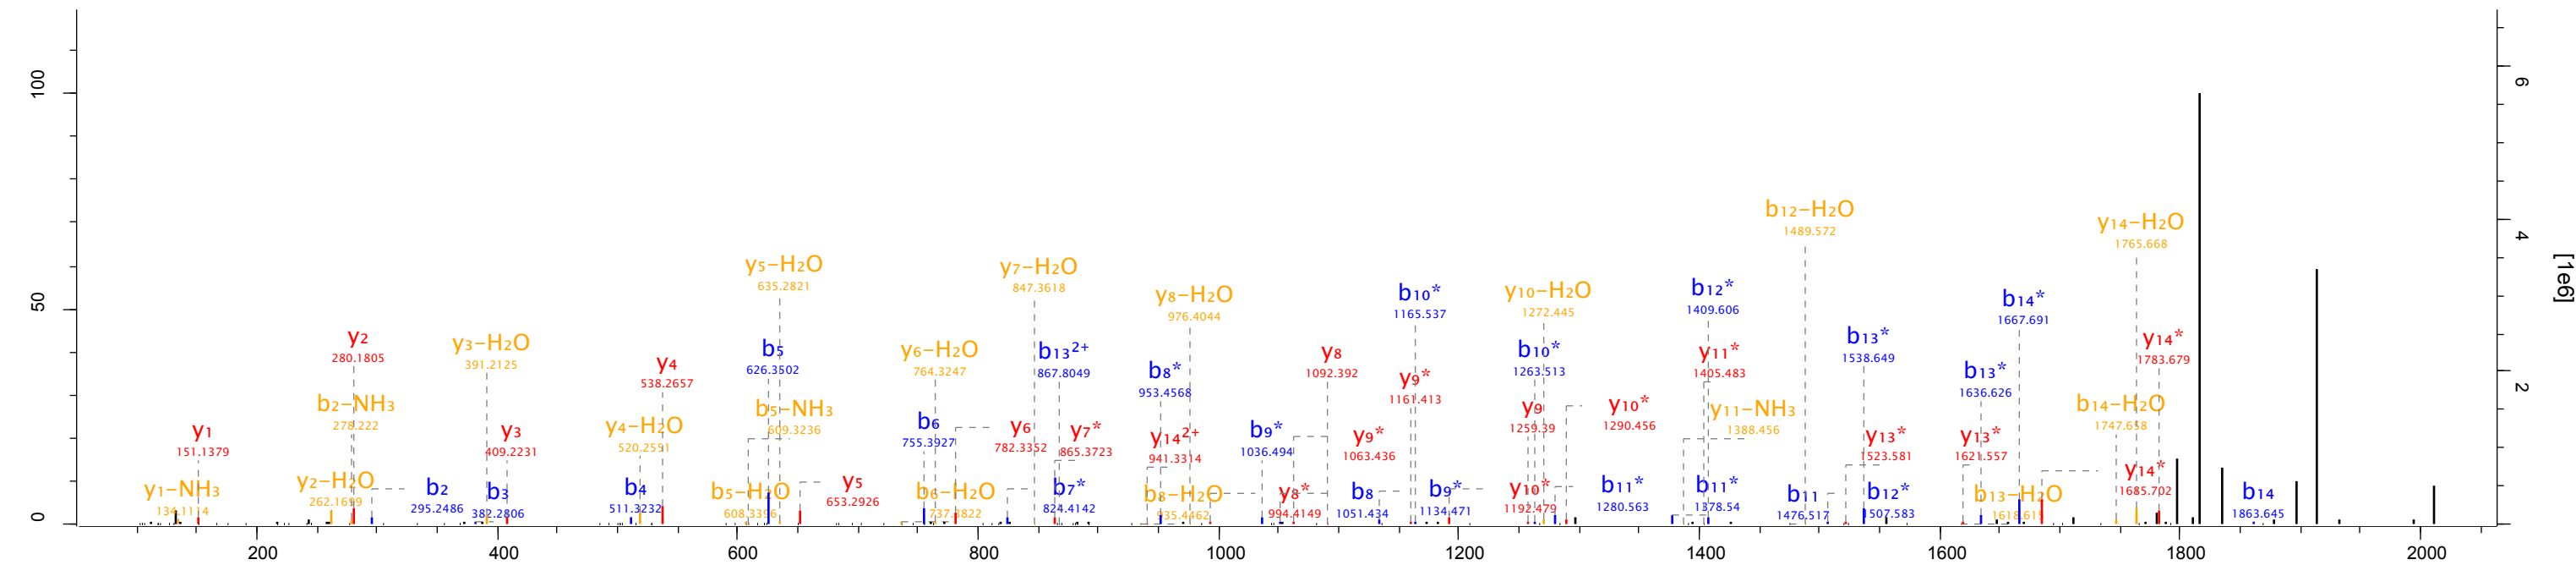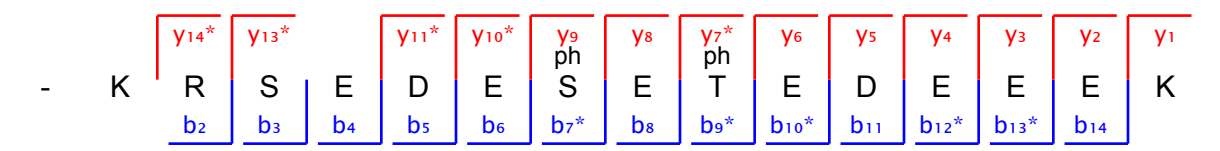

Raw file 20150812\_A375SR\_Phospho\_BR1\_03 Scan 23288 Method FTMS; HCD Score 154 m/z 1455.96 Gene names PARN

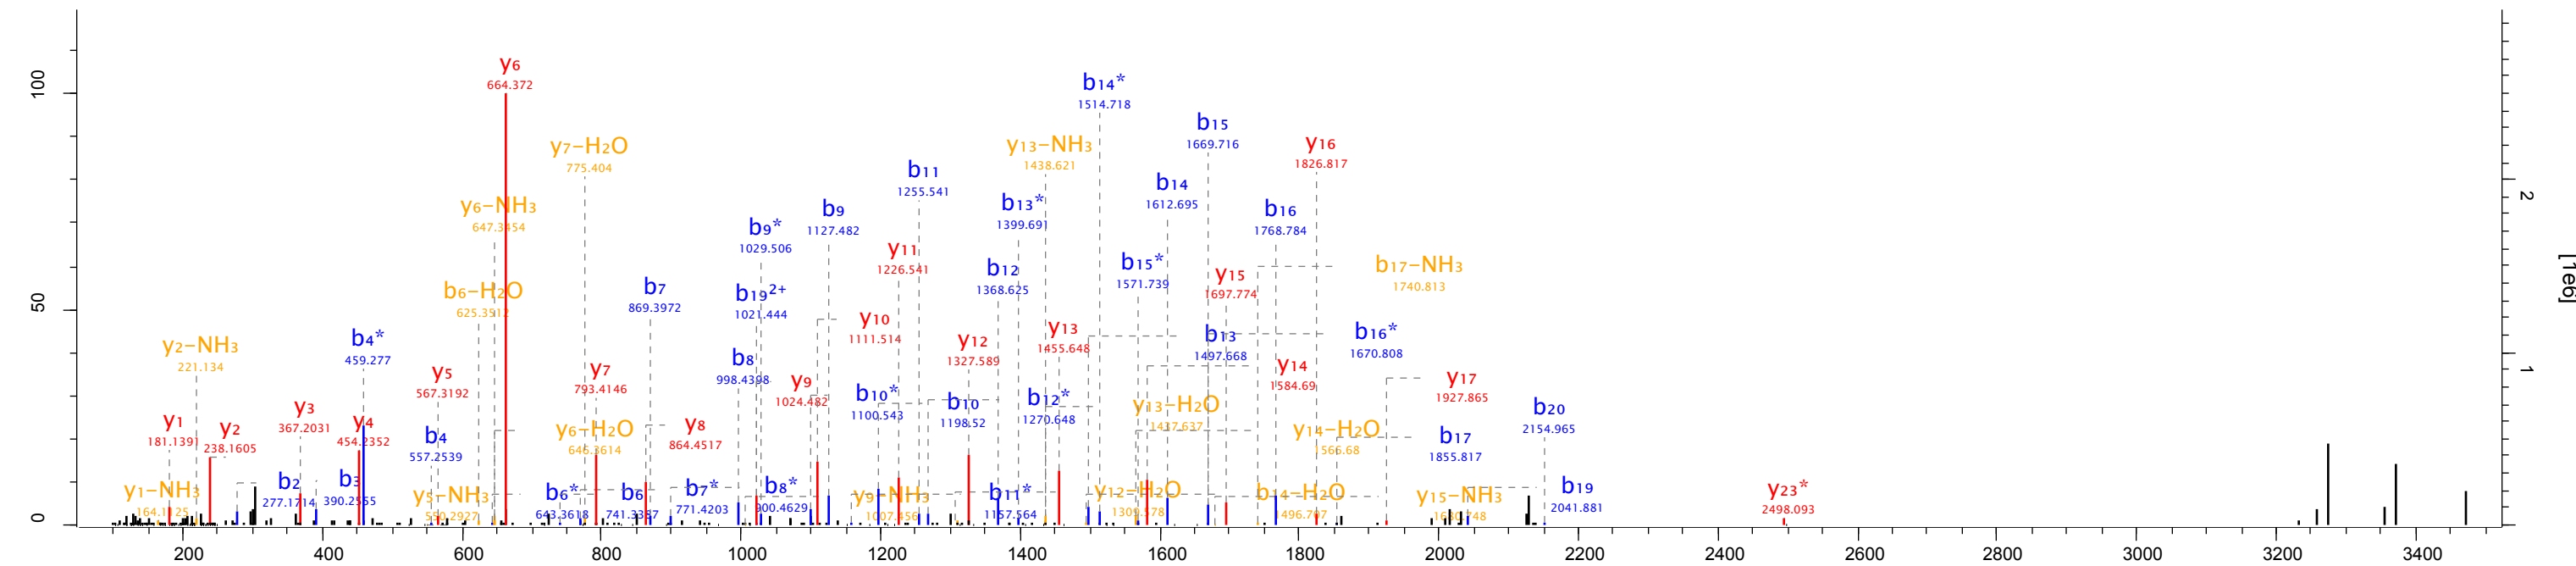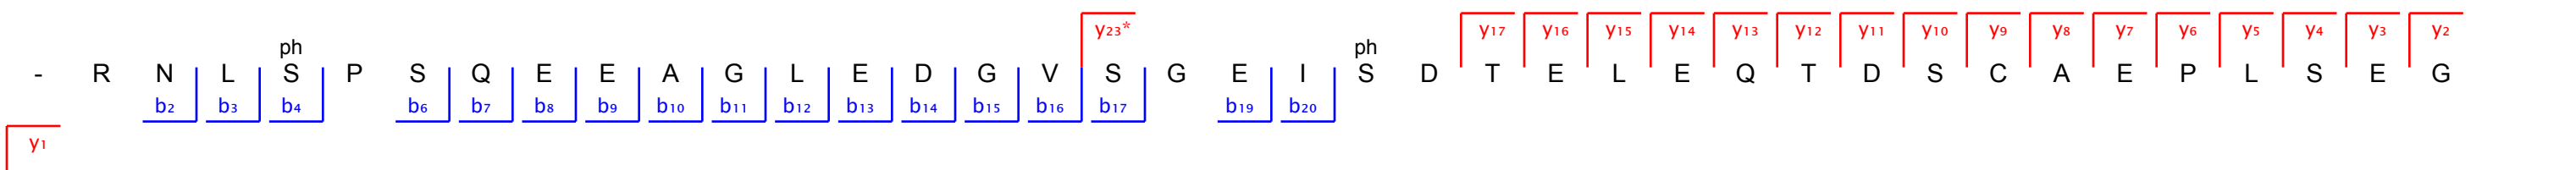

Raw file 20150812\_A375SR\_Phospho\_BR1\_03 Scan 23748 Method FTMS; HCD Score 77.44 m/z 1089.26 Gene names SEC16A

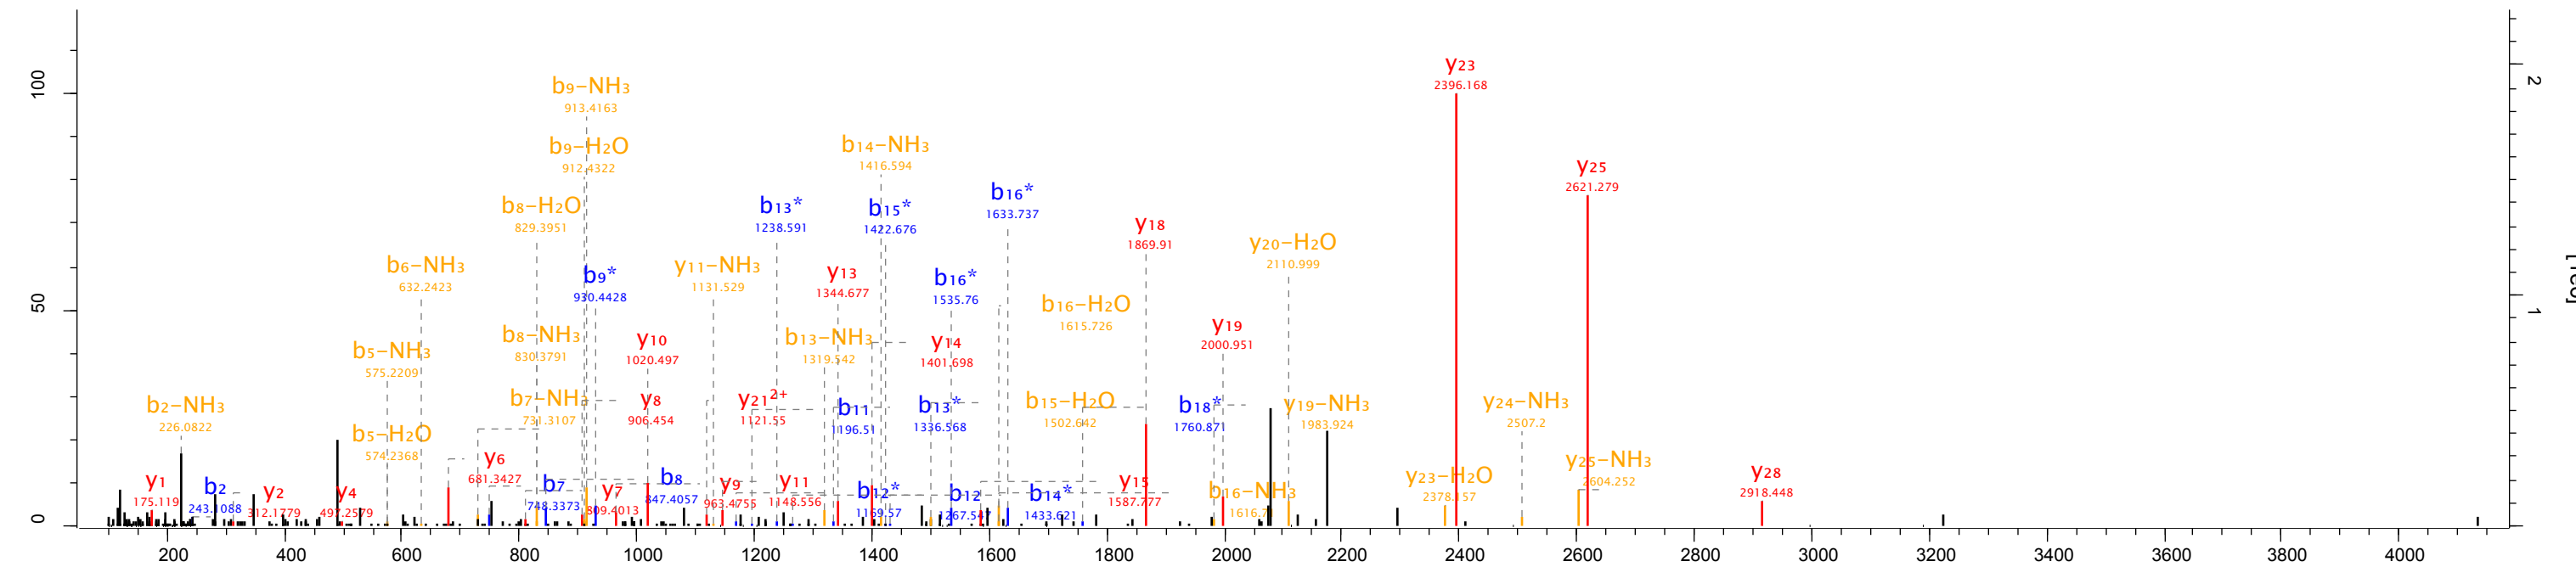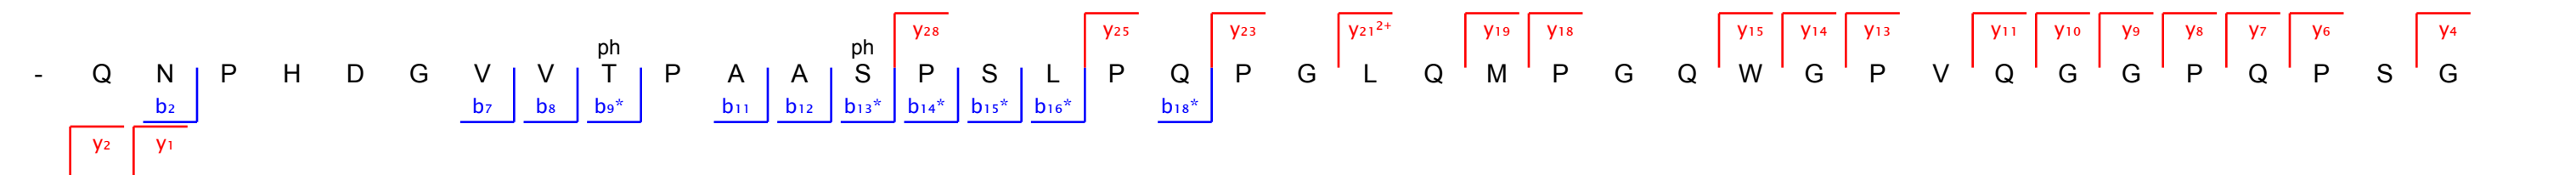

Raw file: 20150812\_A375SR\_Phospho\_BR1\_03  
 Scan: 24148 Method: FTMS; HCD Score: 152.06 m/z: 782.88 Gene names: SSFA2

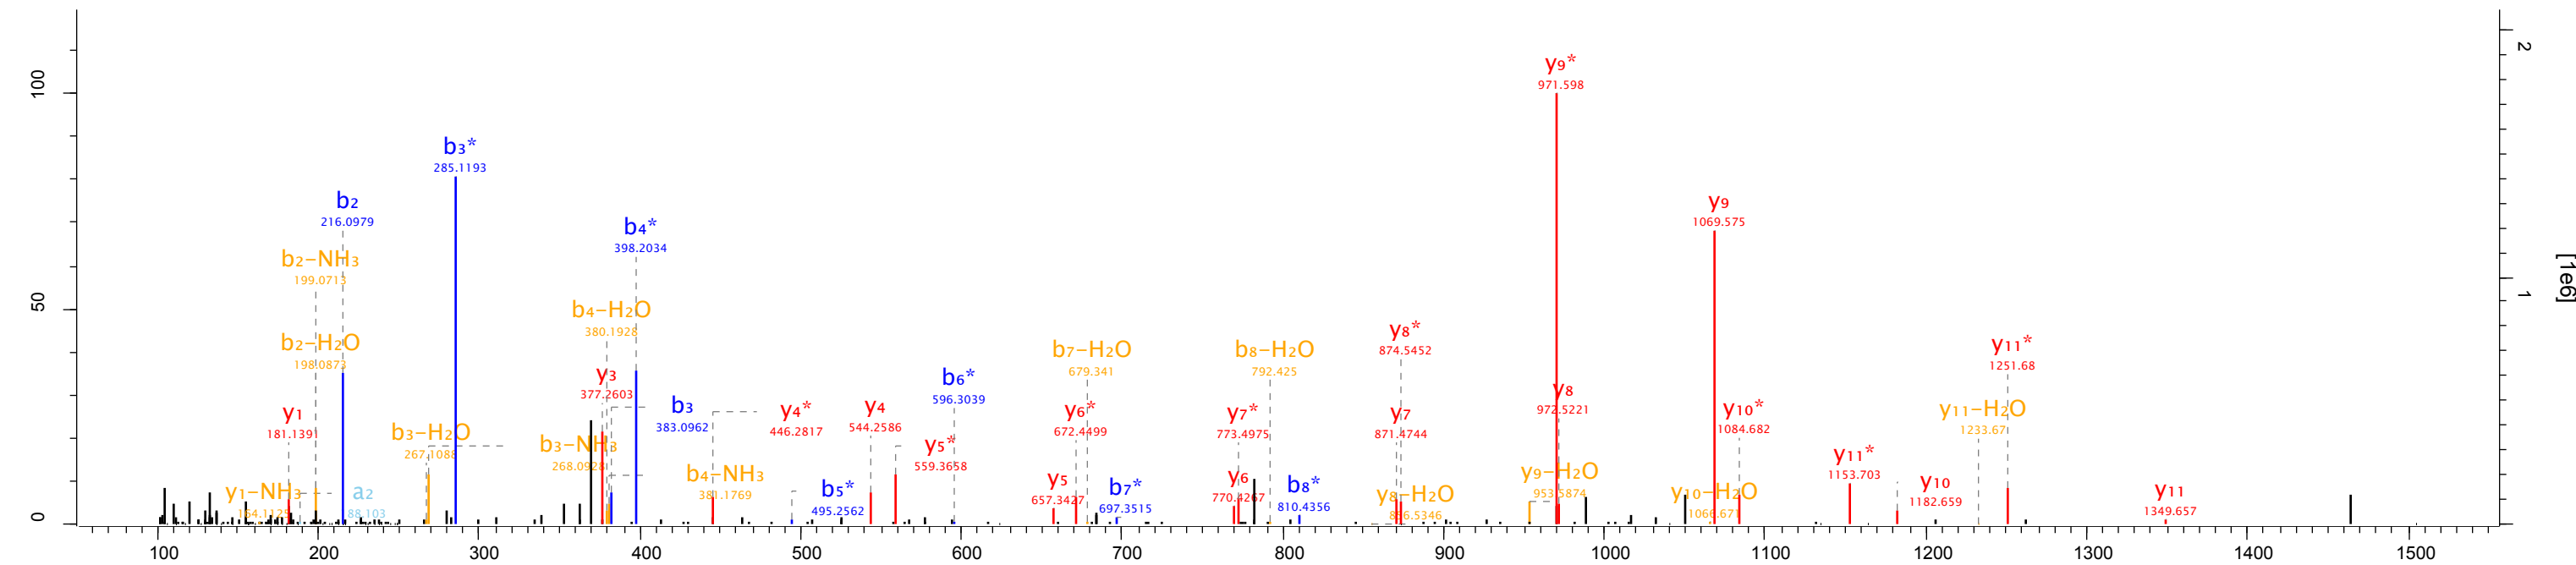

Sequence: - S Q S L P T T L L S P V R -  
 Fragmentation sites: b2 (under Q), b3 (under S), b4\* (under L), b5\* (under P), b6\* (under T), b7\* (under T), b8\* (under L), y1 (under R)

Raw file 20150812\_A375SR\_Phospho\_BR1\_03 Scan 25198 Method FTMS; HCD Score 147.78 m/z 1036.89 Gene names FAM219A

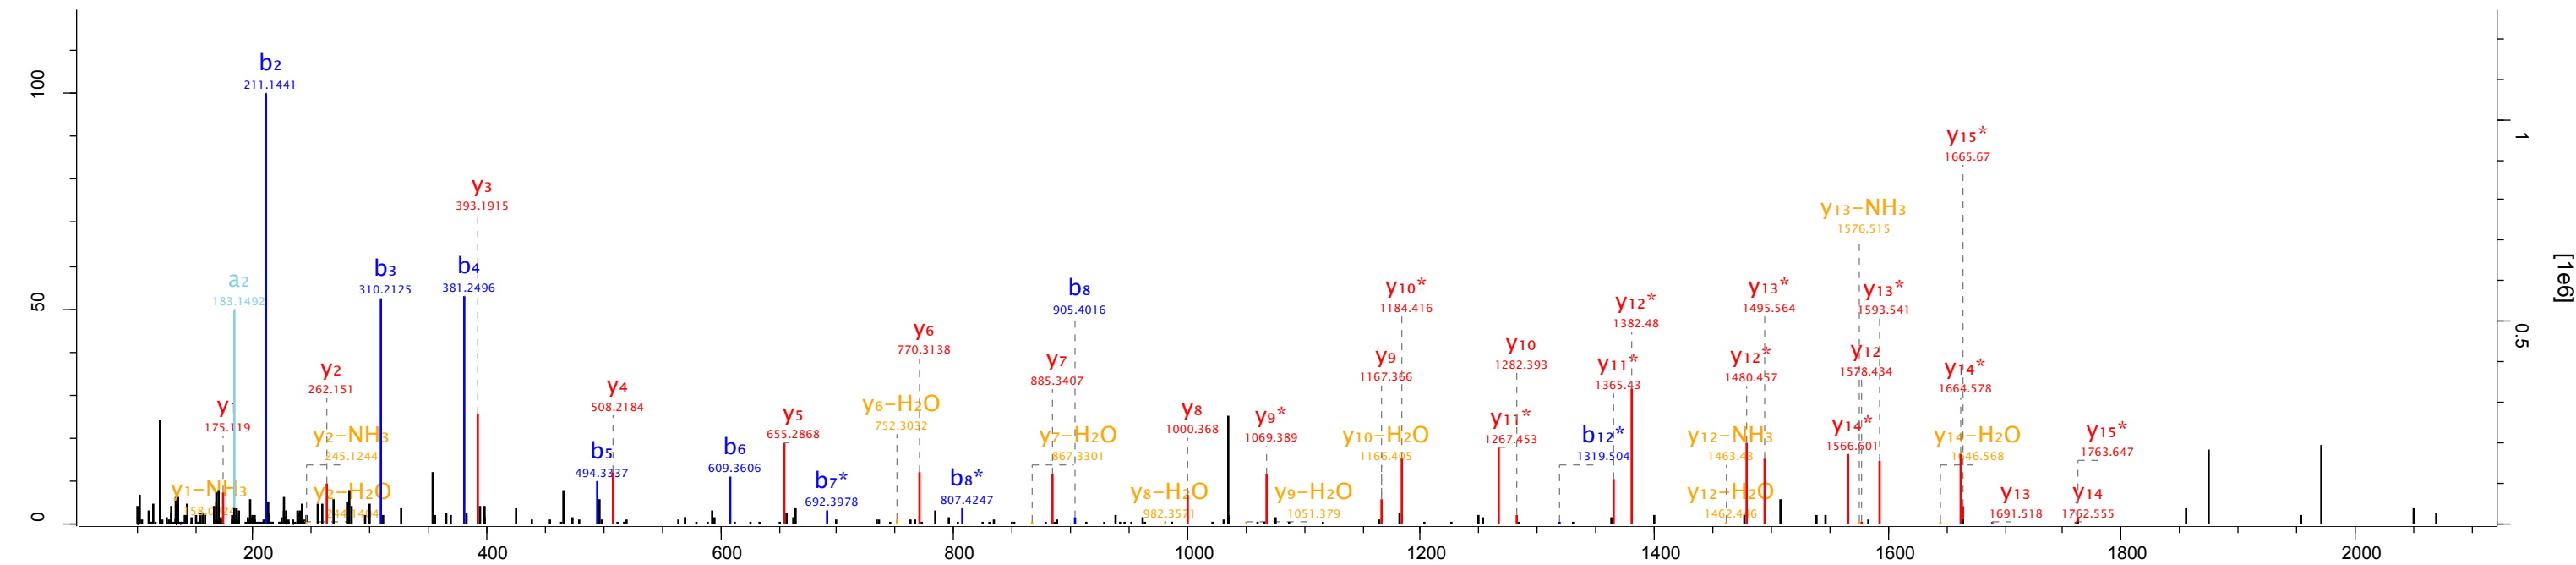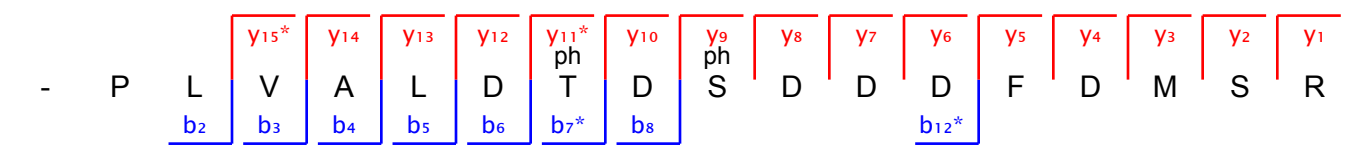

Raw file 20150812\_A375SR\_Phospho\_BR1\_03 Scan 25328 Method FTMS; HCD Score 120.3 m/z 929.12 Gene names IBTK

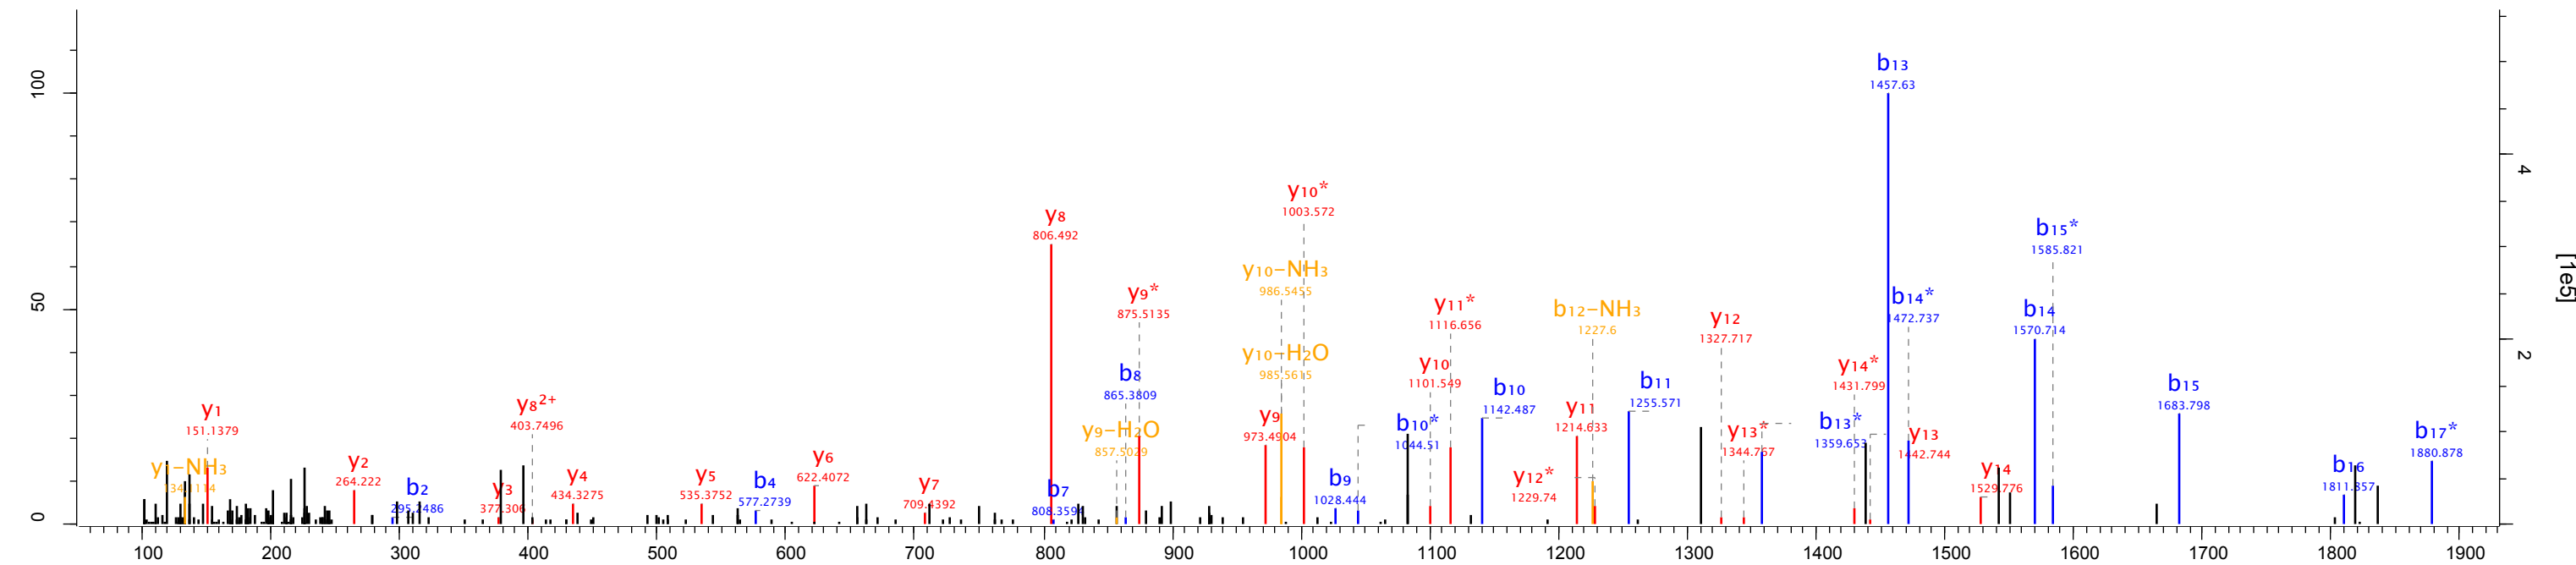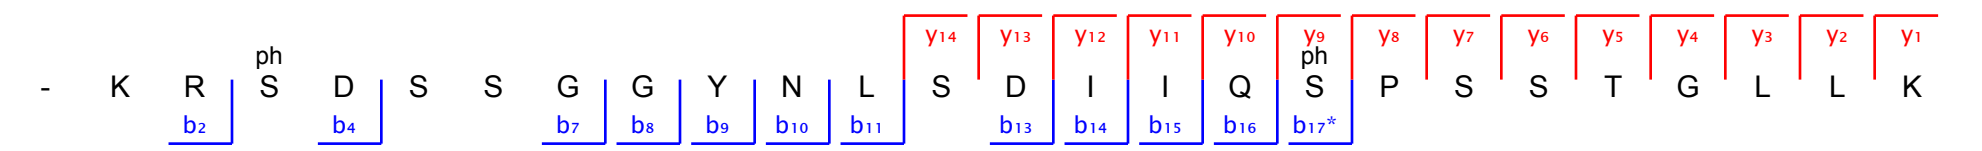



Raw file Scan Method Score m/z Gene names  
 20150812\_A375SR\_Phospho\_BR1\_03 25358 FTMS; HCD 99.14 1287.21 SART1

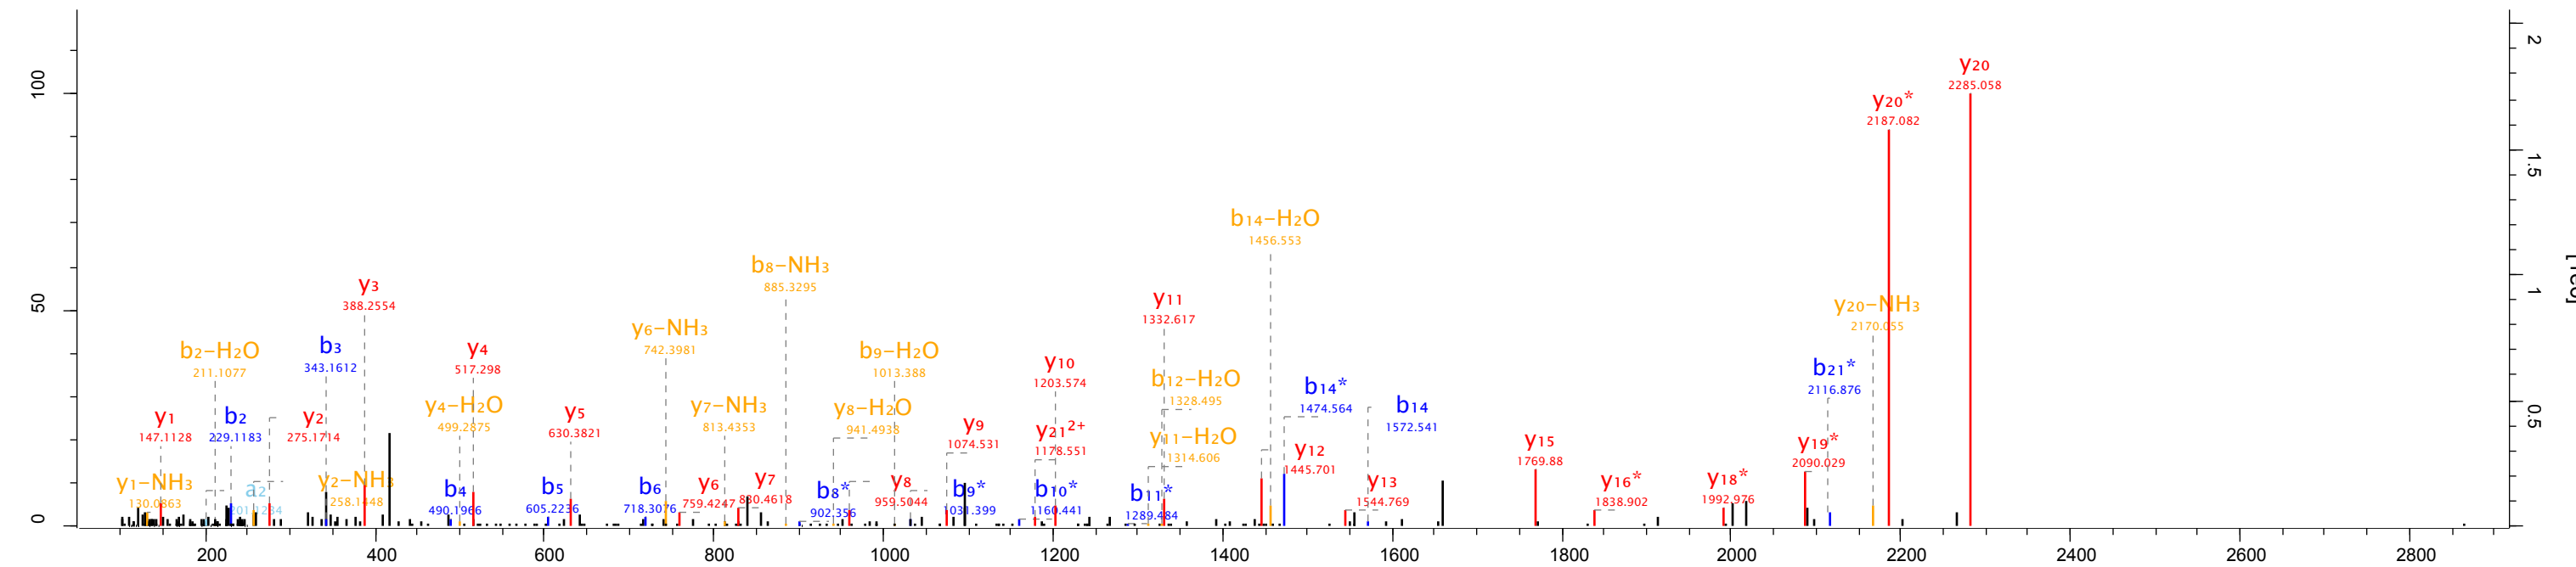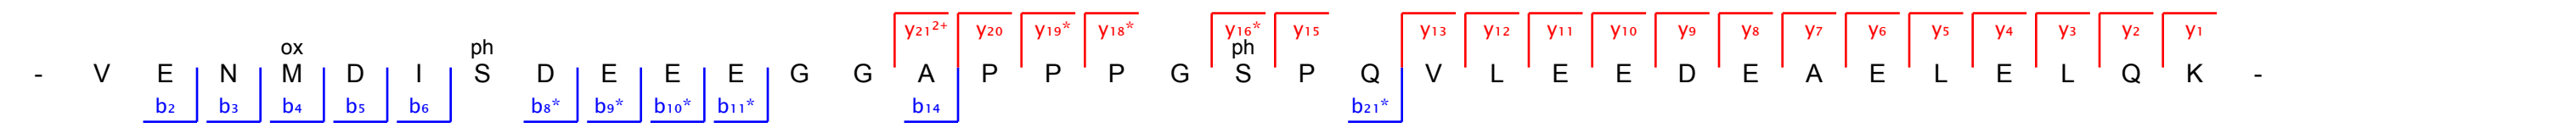

Raw file 20150812\_A375SR\_Phospho\_BR1\_03 Scan 25388 Method FTMS; HCD Score 171.39 m/z 933.4 Gene names INO80B;INO80B-WBP1

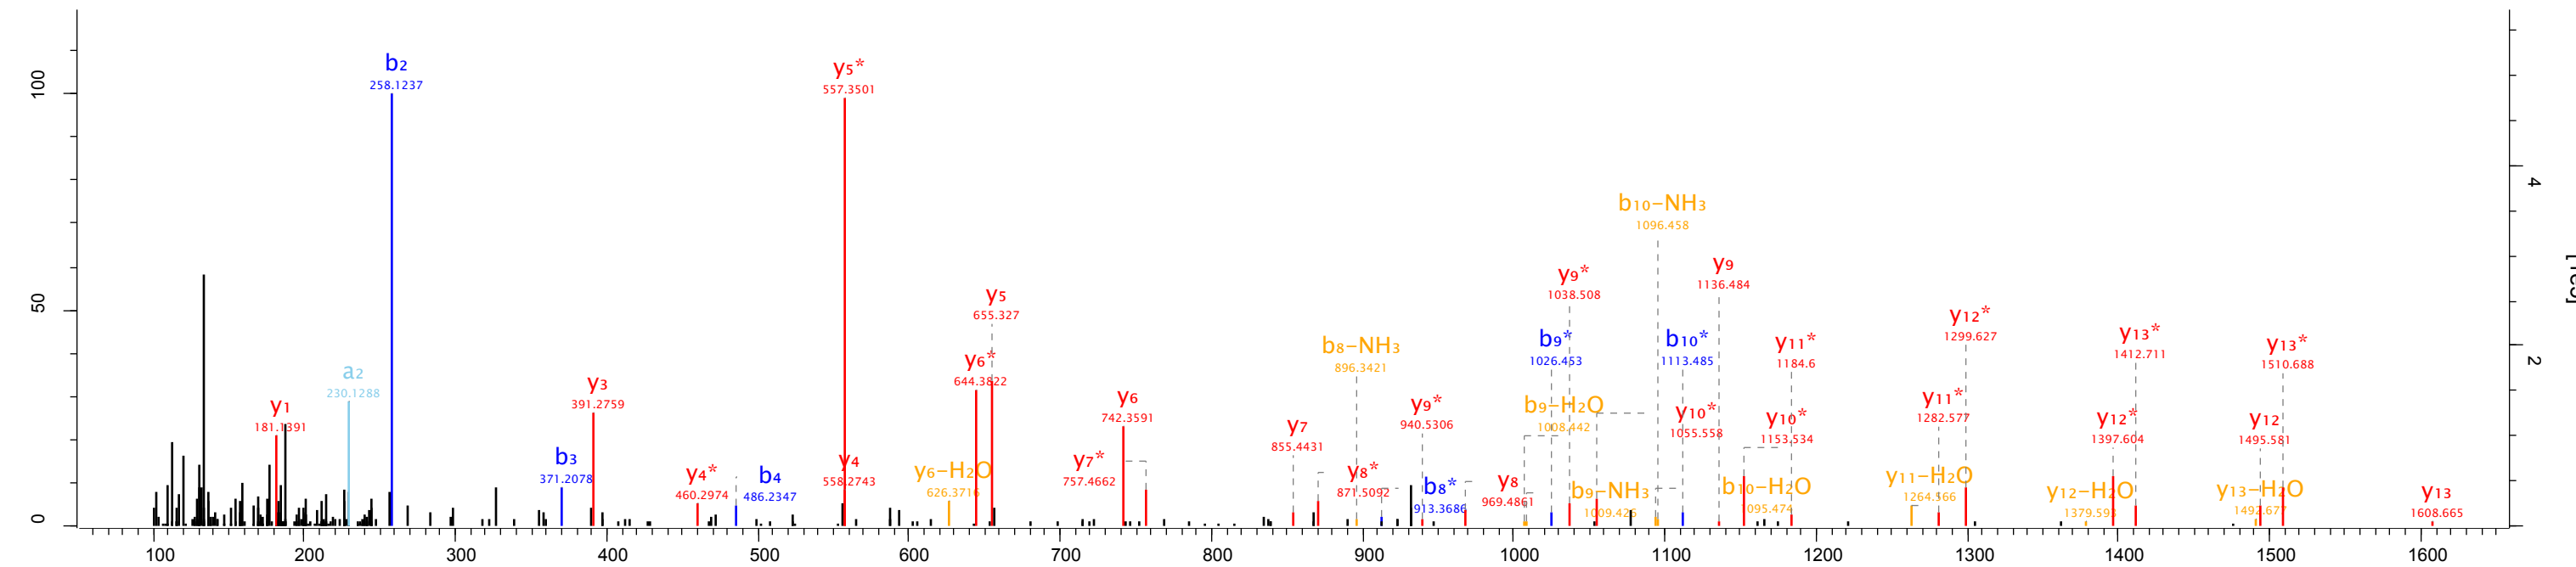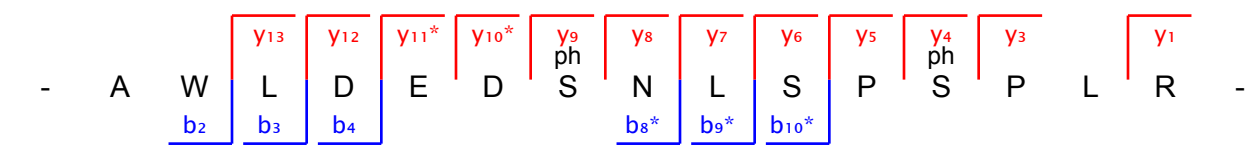



Raw file 20150812\_A375SR\_Phospho\_BR1\_03 Scan 26358 Method FTMS; HCD Score 90.06 m/z 995.76 Gene names ROCK1

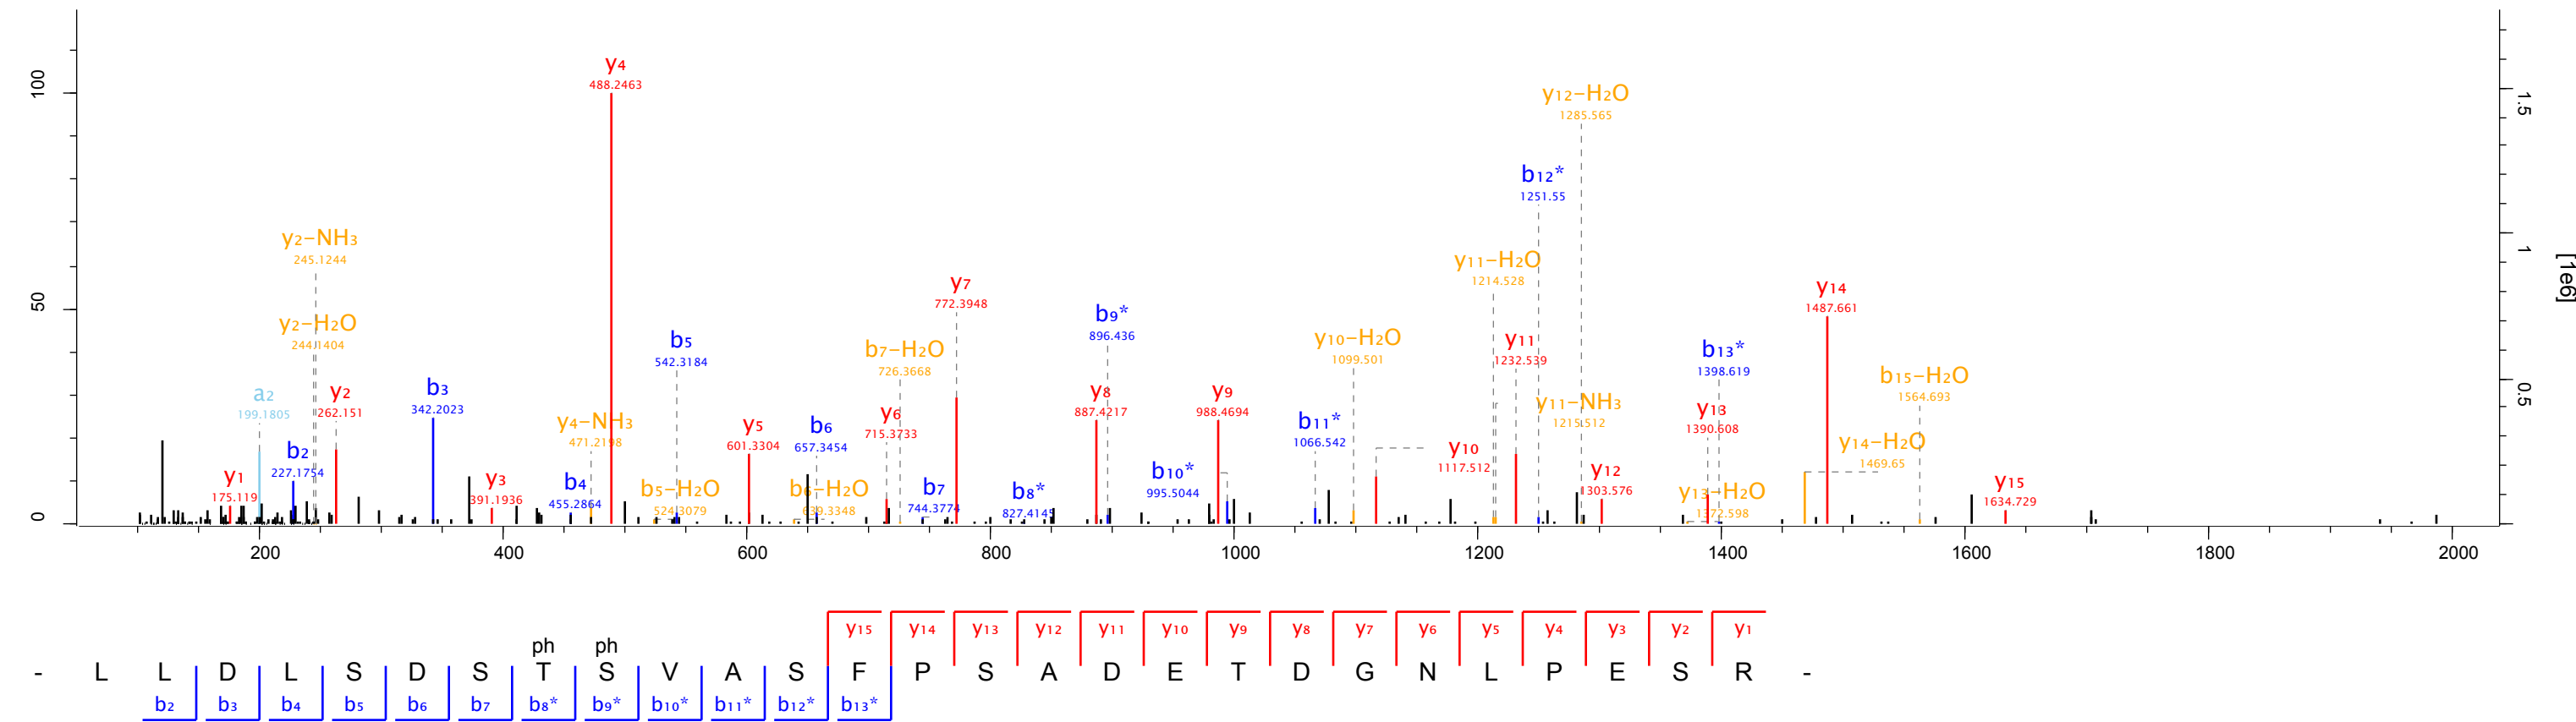

Raw file Scan Method Score m/z Gene names

20150812\_A375SR\_Phospho\_BR1\_03 2638 FTMS; HCD 79.64 393.18 SRRM1

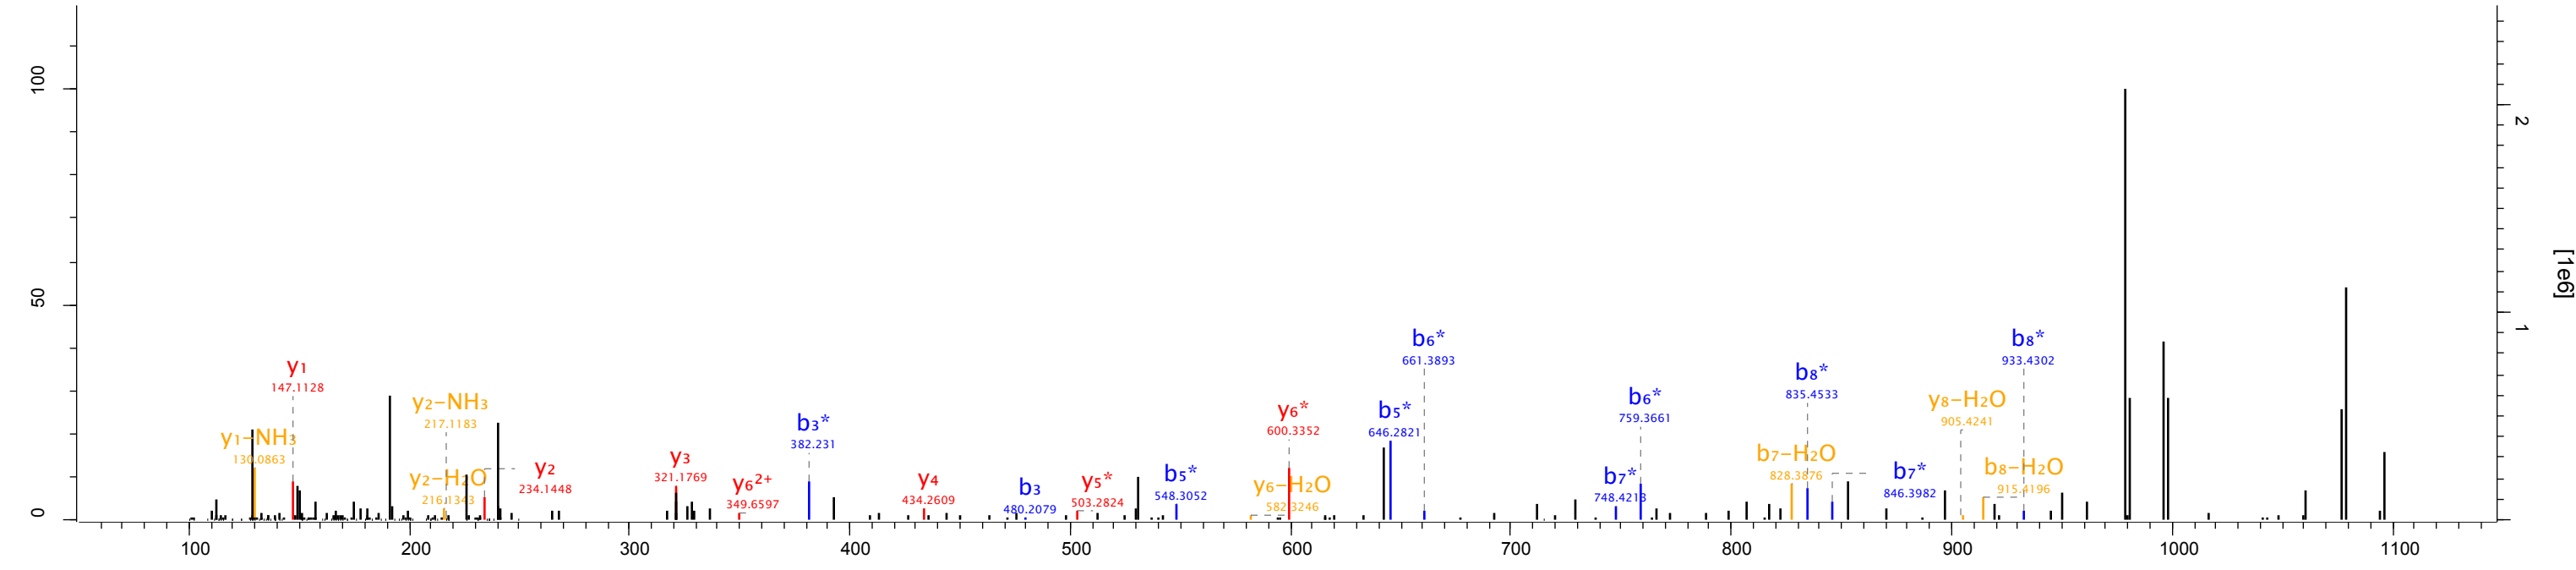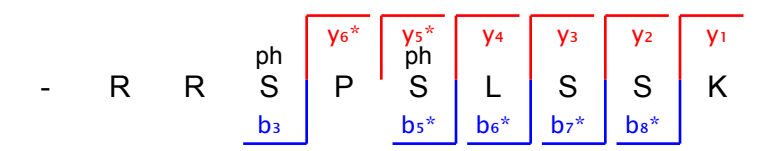

Raw file 20150812\_A375SR\_Phospho\_BR1\_03 Scan 26508 Method FTMS; HCD Score 254.71 m/z 795.37 Gene names PLEKHA5

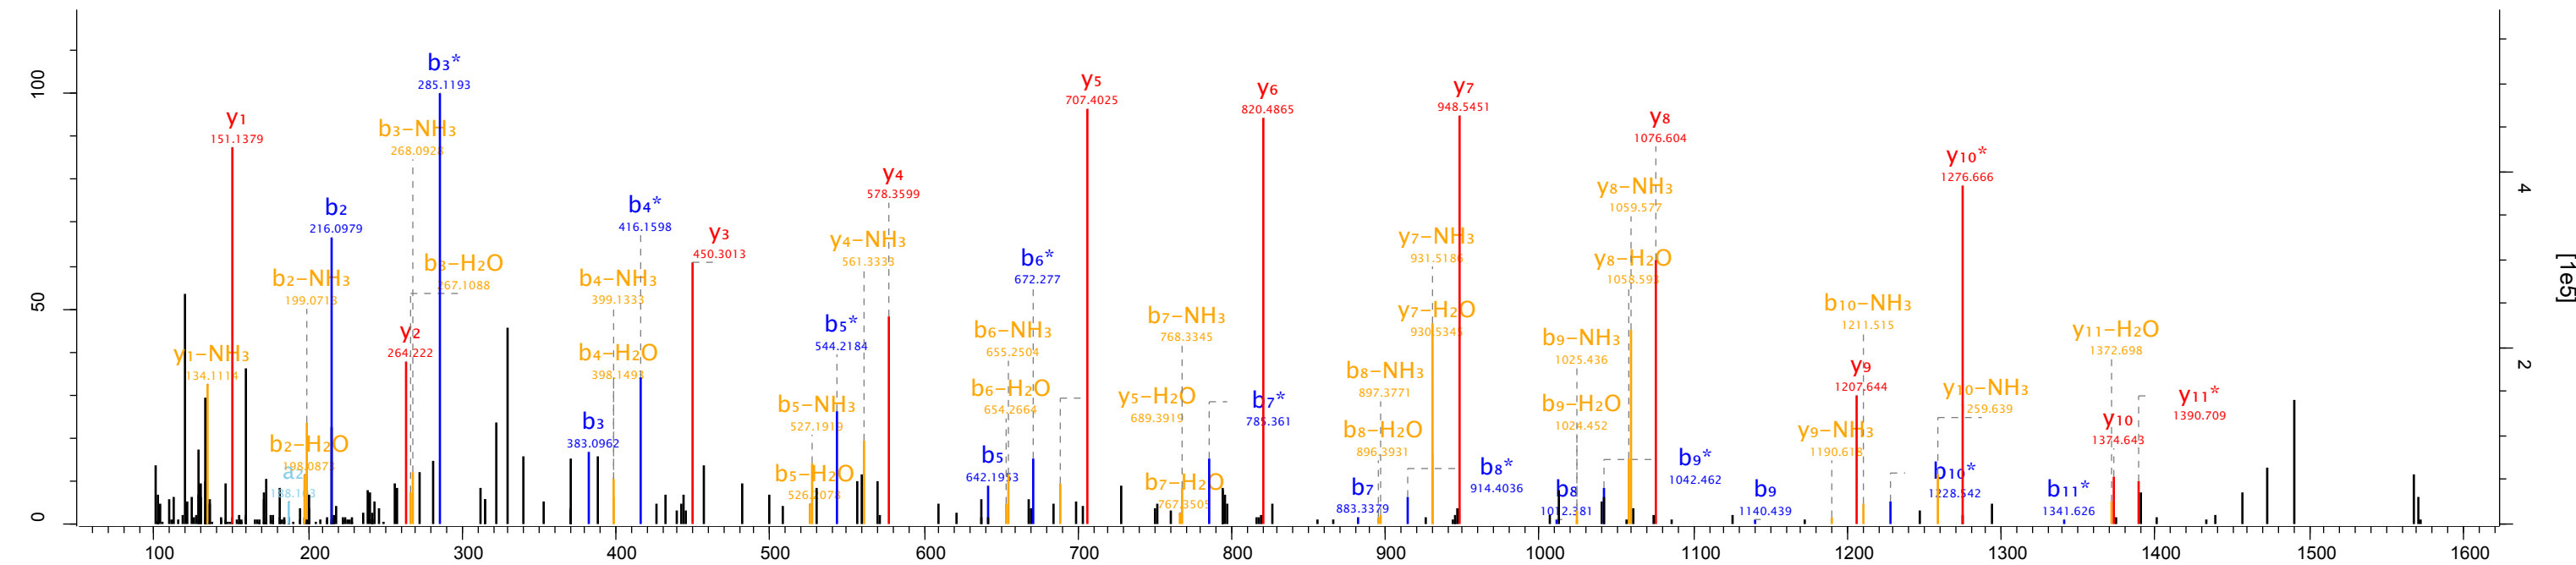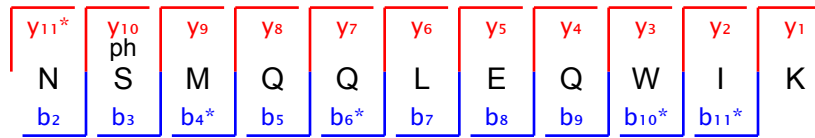

Raw file: 20150812\_A375SR\_Phospho\_BR1\_03  
 Scan: 2698 Method: FTMS; HCD Score: 194.99 m/z: 787.8 Gene names: RPRD2

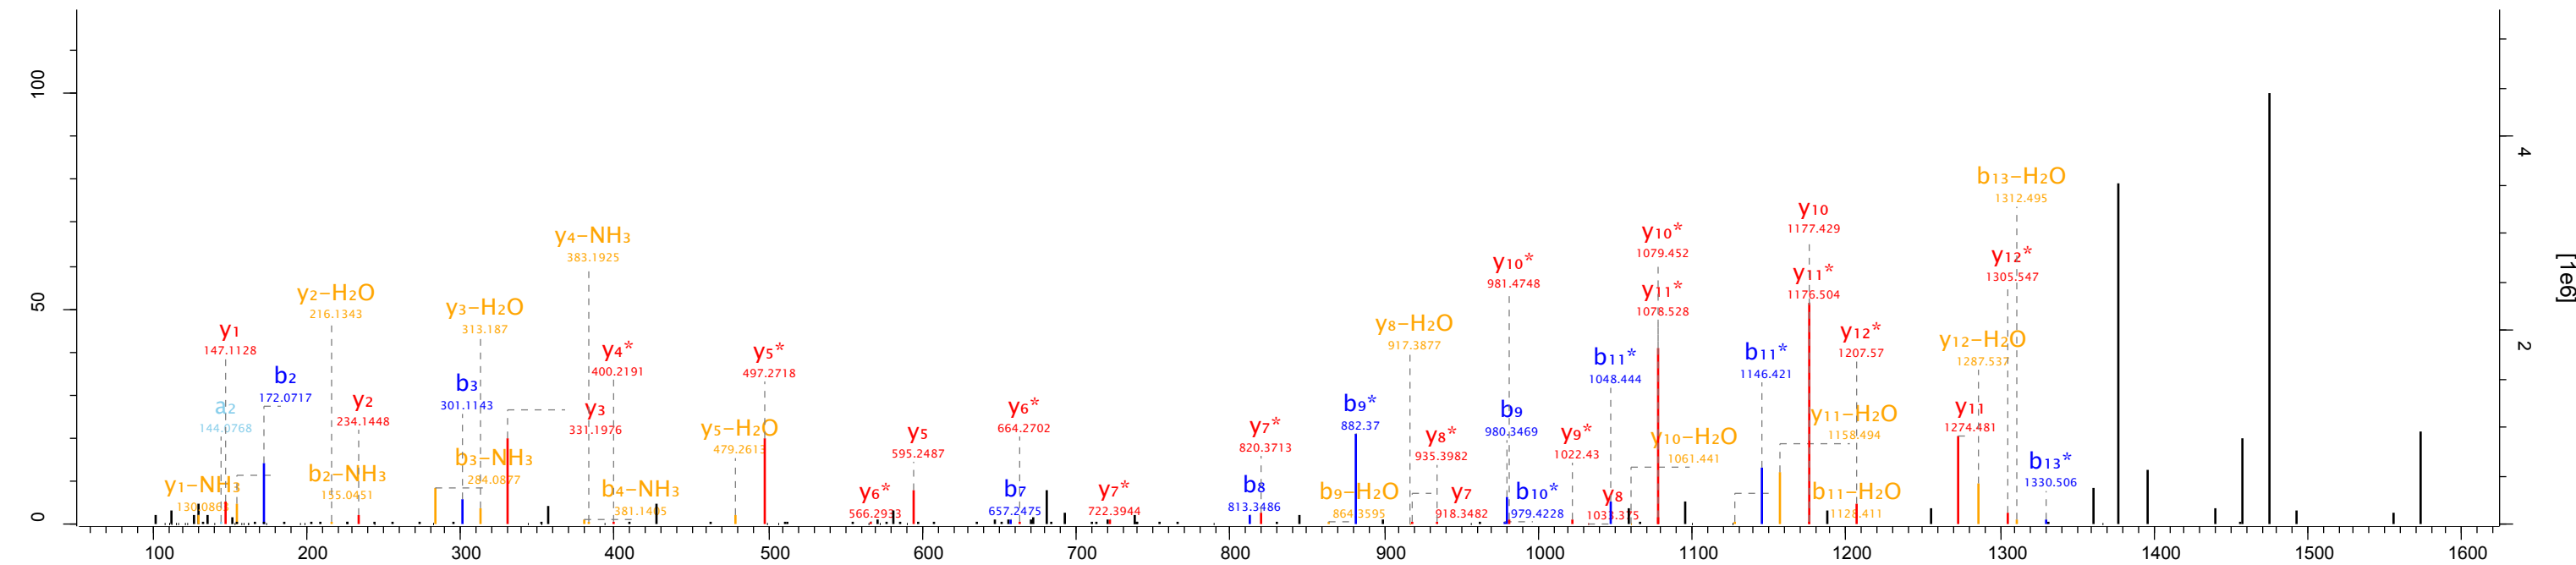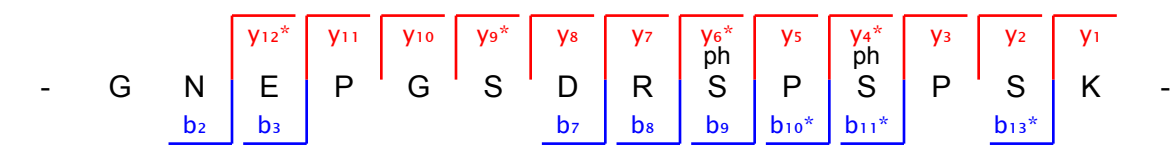

Raw file: 20150812\_A375SR\_Phospho\_BR1\_03  
 Scan: 27568 Method: FTMS; HCD Score: 89.36 m/z: 1168.23 Gene names: GAPVD1

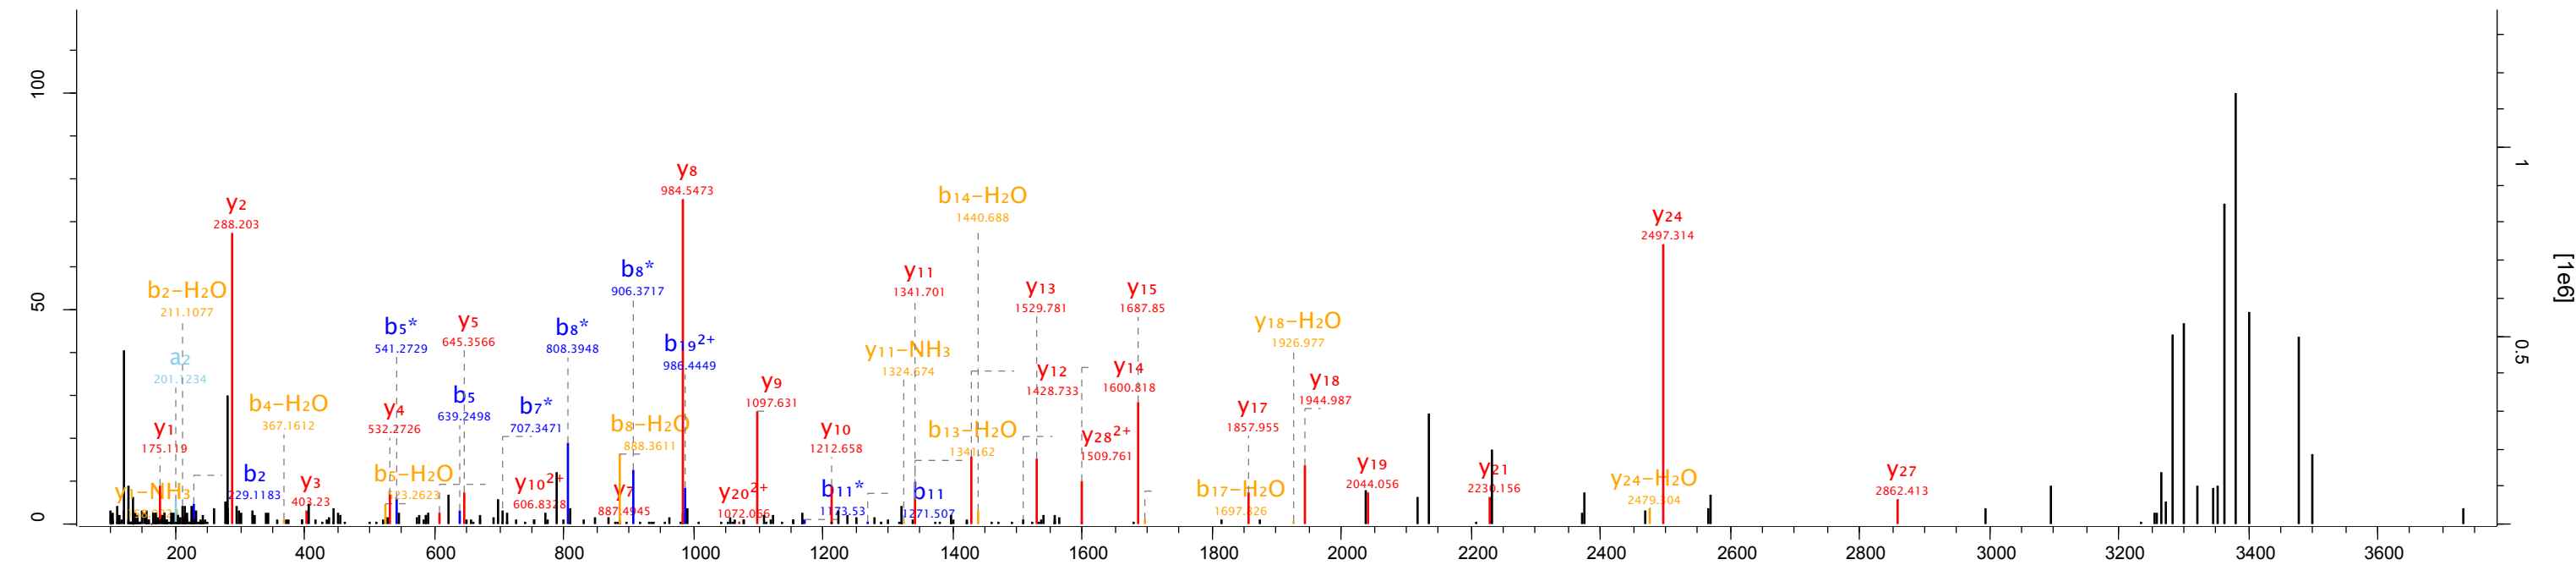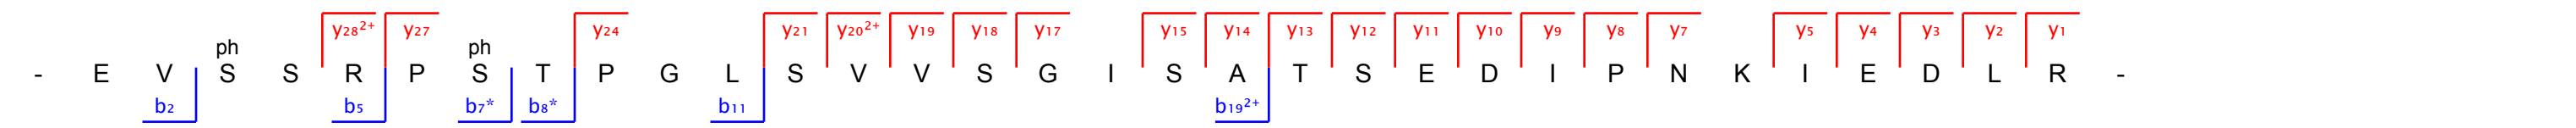



Raw file  
 20150812\_A375SR\_Phospho\_BR1\_03  
 Scan 27808 Method FTMS; HCD Score 248.82 m/z 921.12 Gene names RICTOR

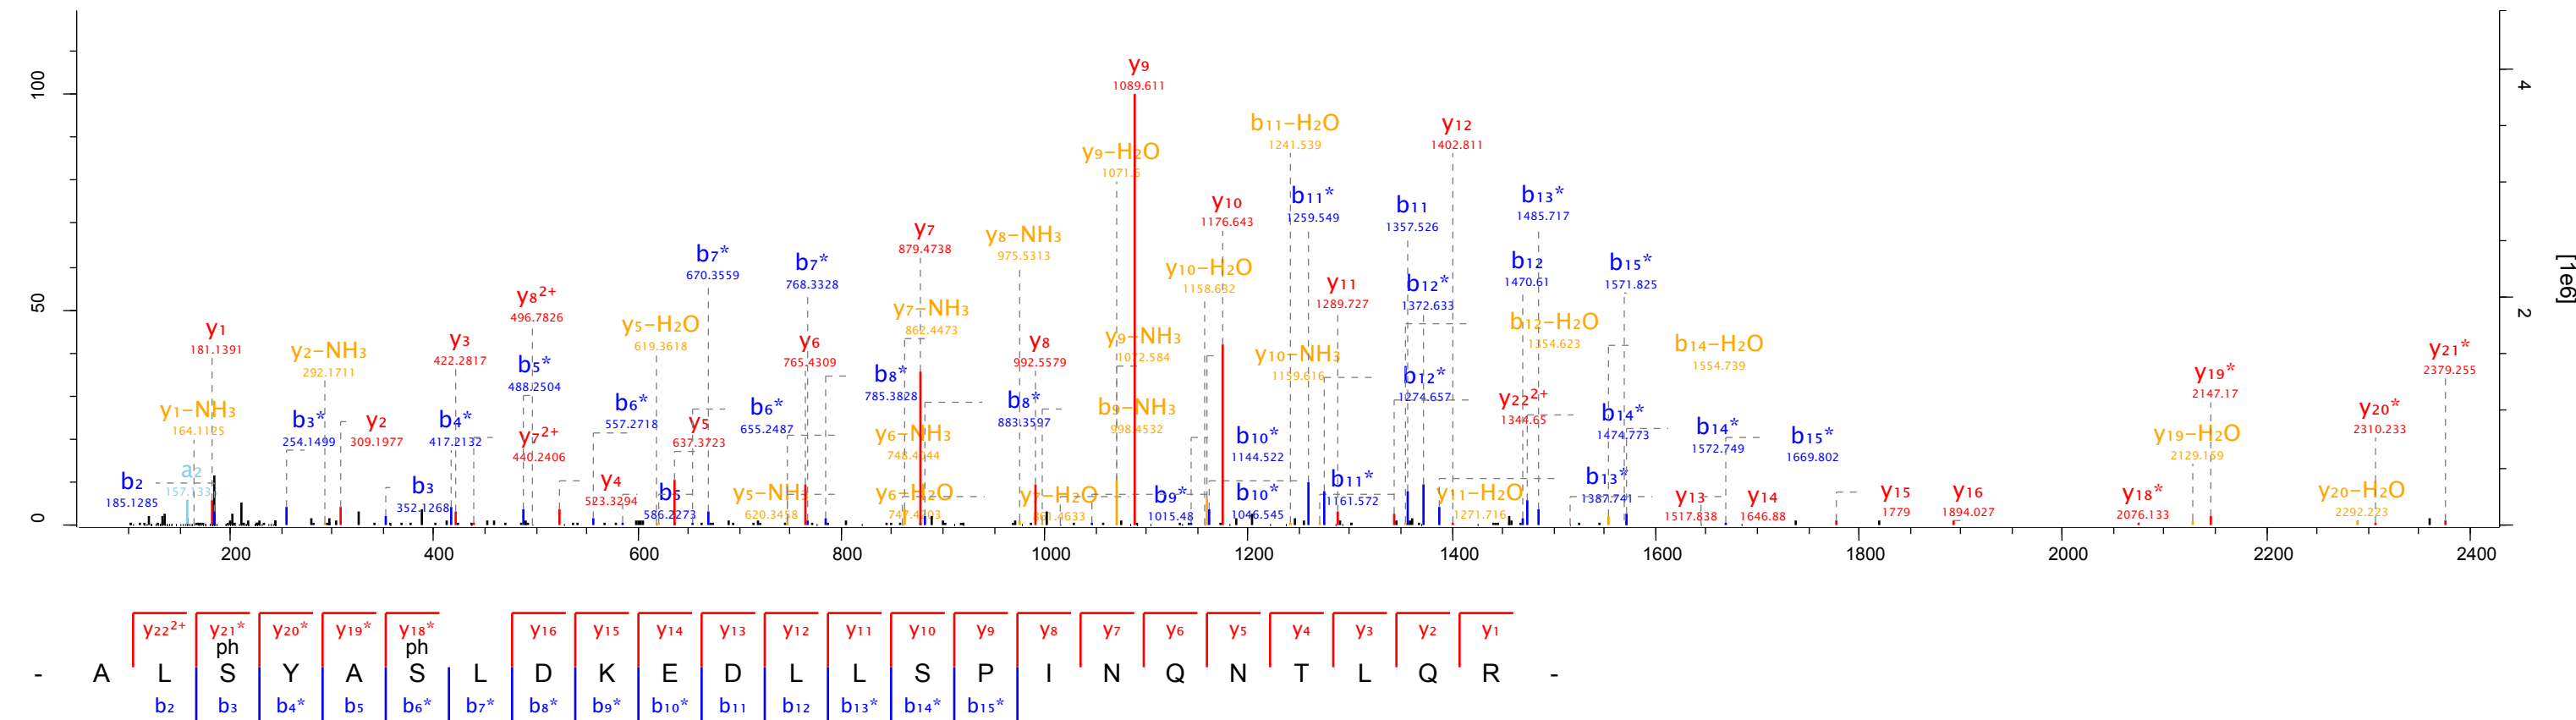

Raw file Scan Method m/z Gene names  
 20150812\_A375SR\_Phospho\_BR1\_03 28048 FTMS; HCD 222.06 1118.43 PHLDB2

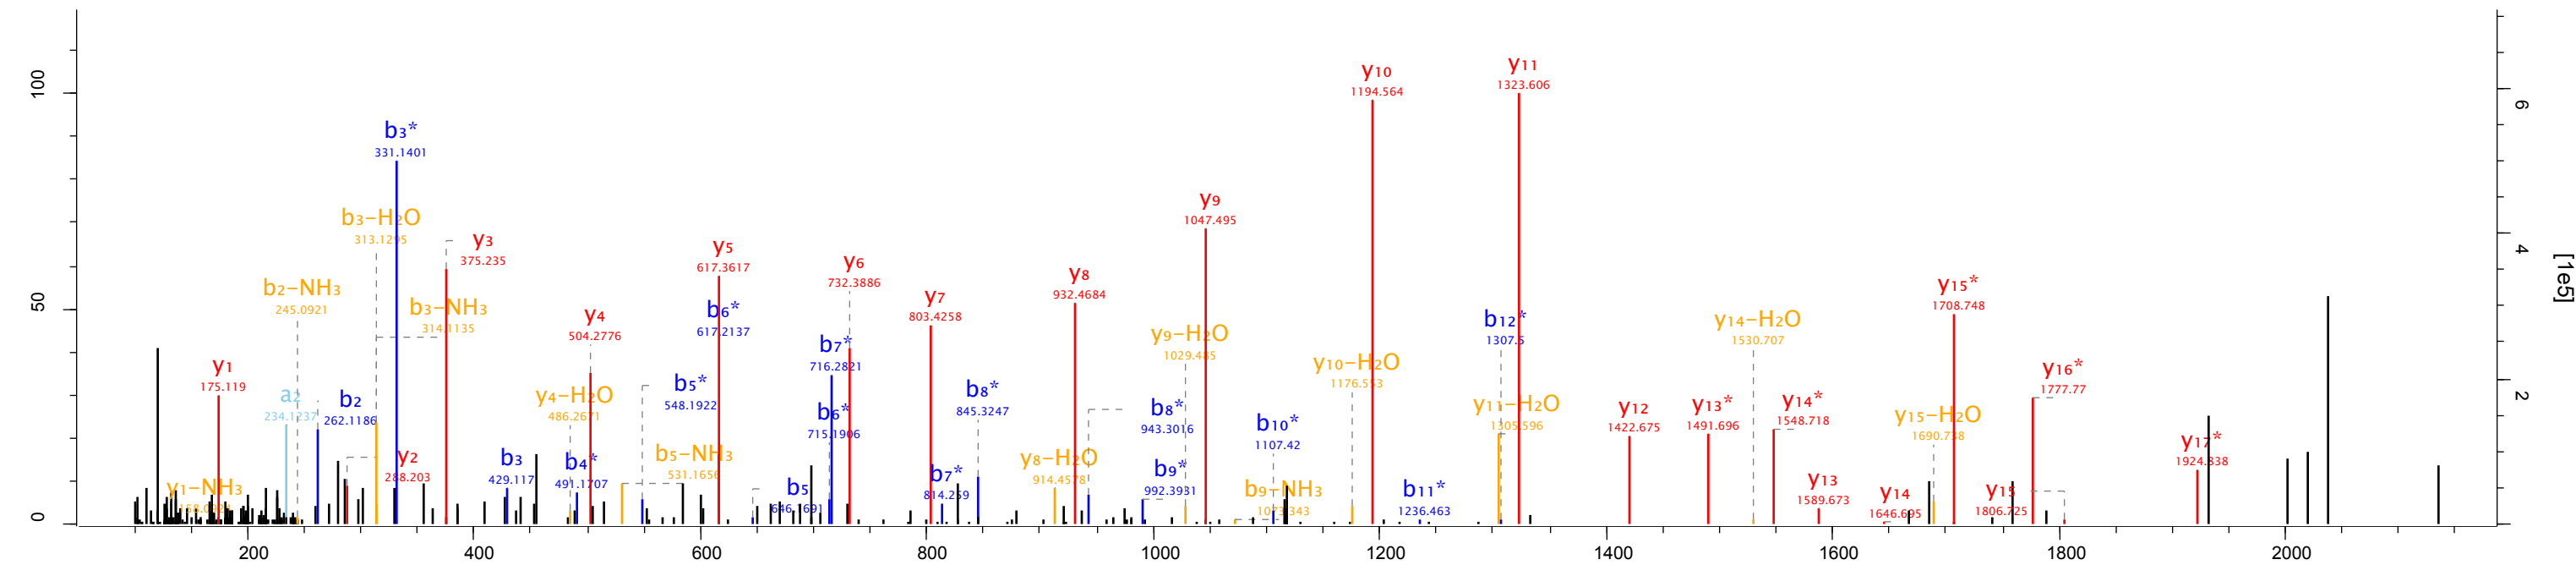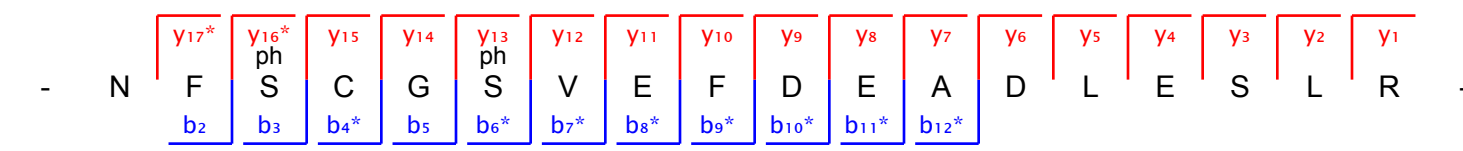

Raw file: 20150812\_A375SR\_Phospho\_BR1\_03  
 Scan: 28078 Method: FTMS; HCD Score: 58.52 m/z: 982.48 Gene names: TRIP11

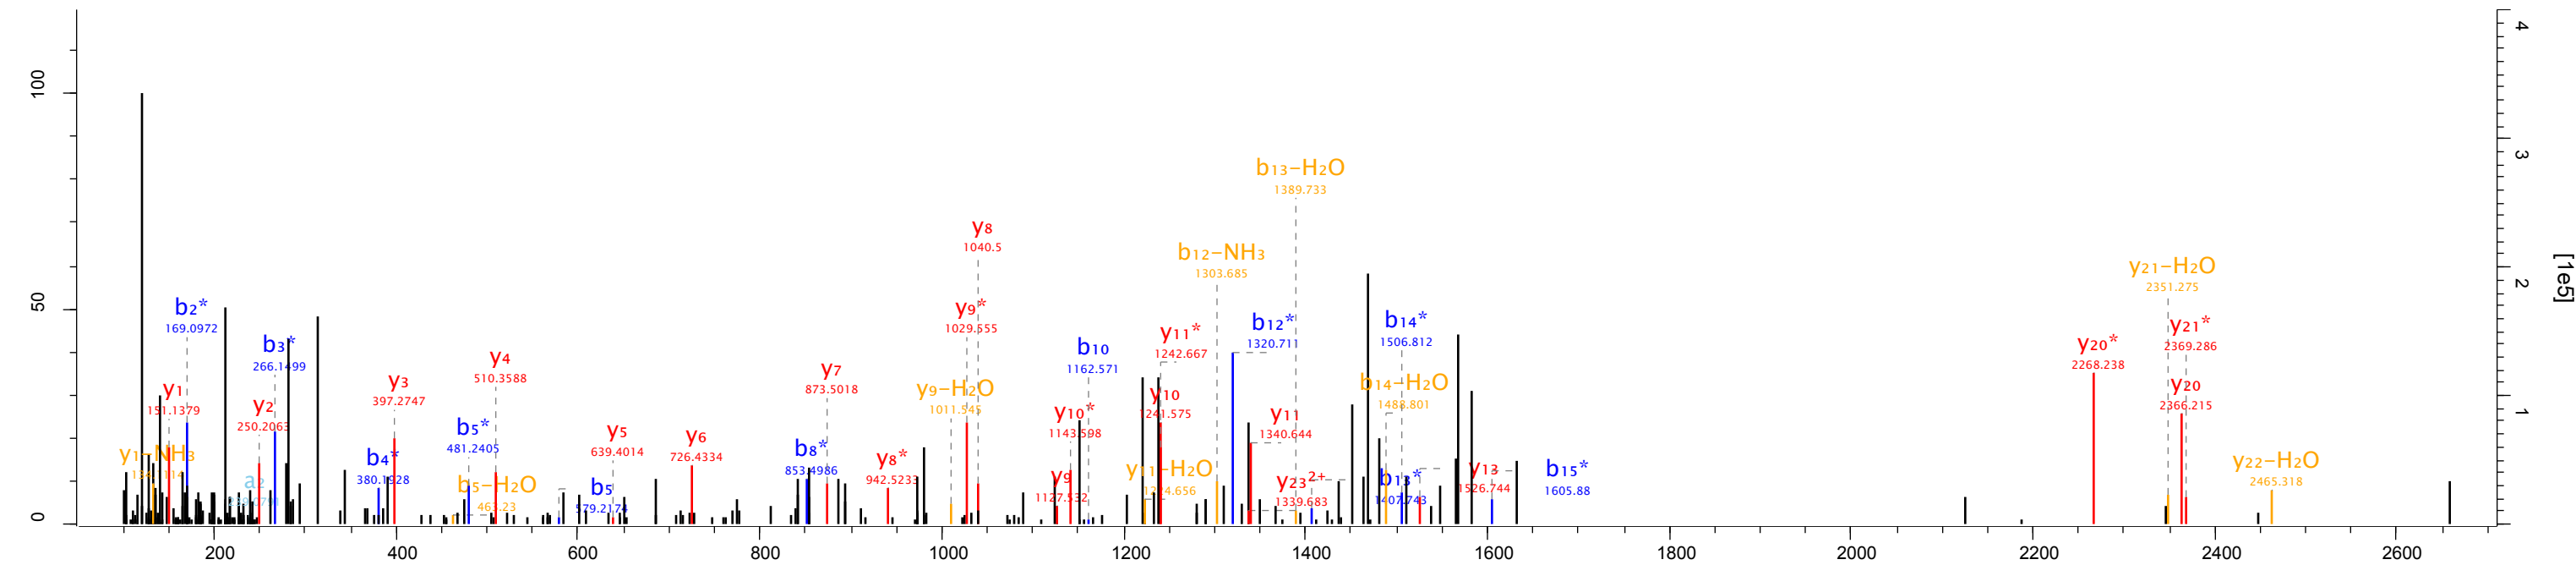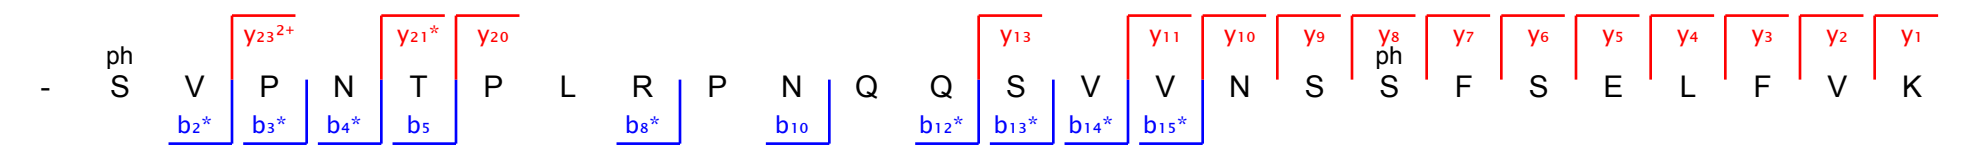

Raw file Scan Method Score m/z Gene names  
 20150812\_A375SR\_Phospho\_BR1\_03 2858 FTMS; HCD 126.29 749.31 RPRD2

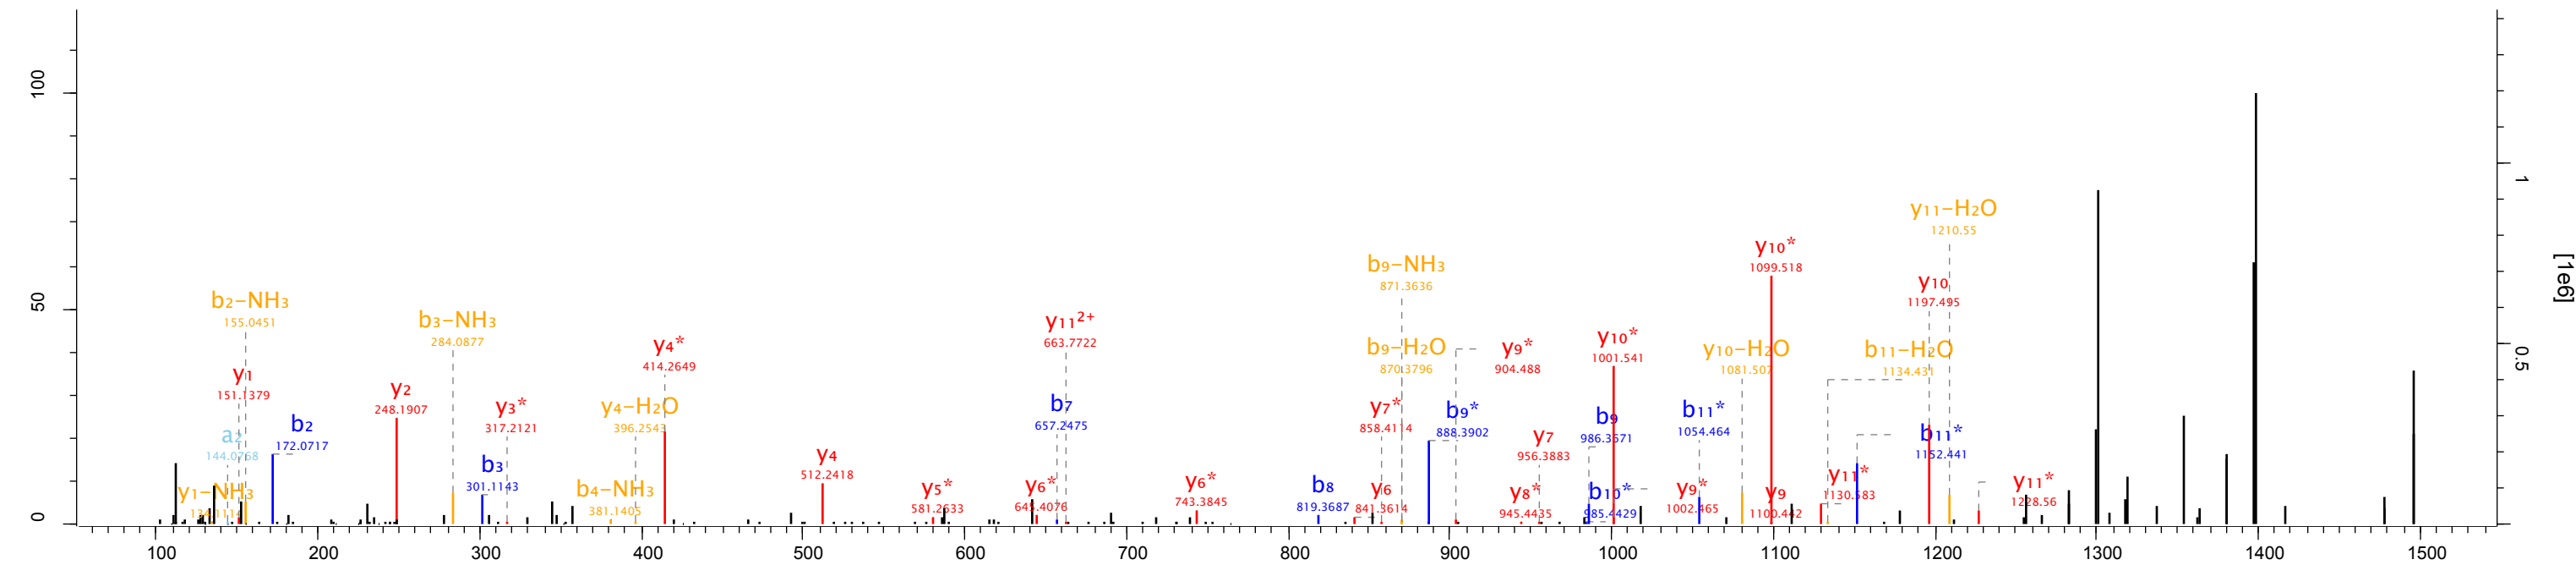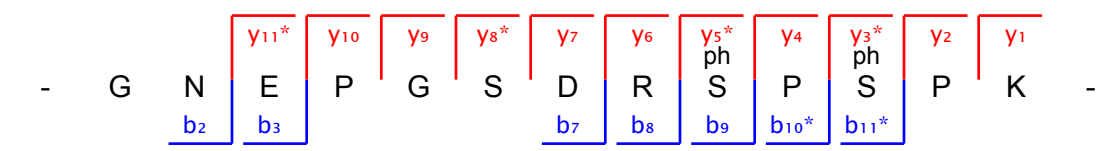

Raw file  
 20150812\_A375SR\_Phospho\_BR1\_03  
 Scan 3008 Method FTMS; HCD Score 185.85 m/z 882.87 Gene names EIF4B

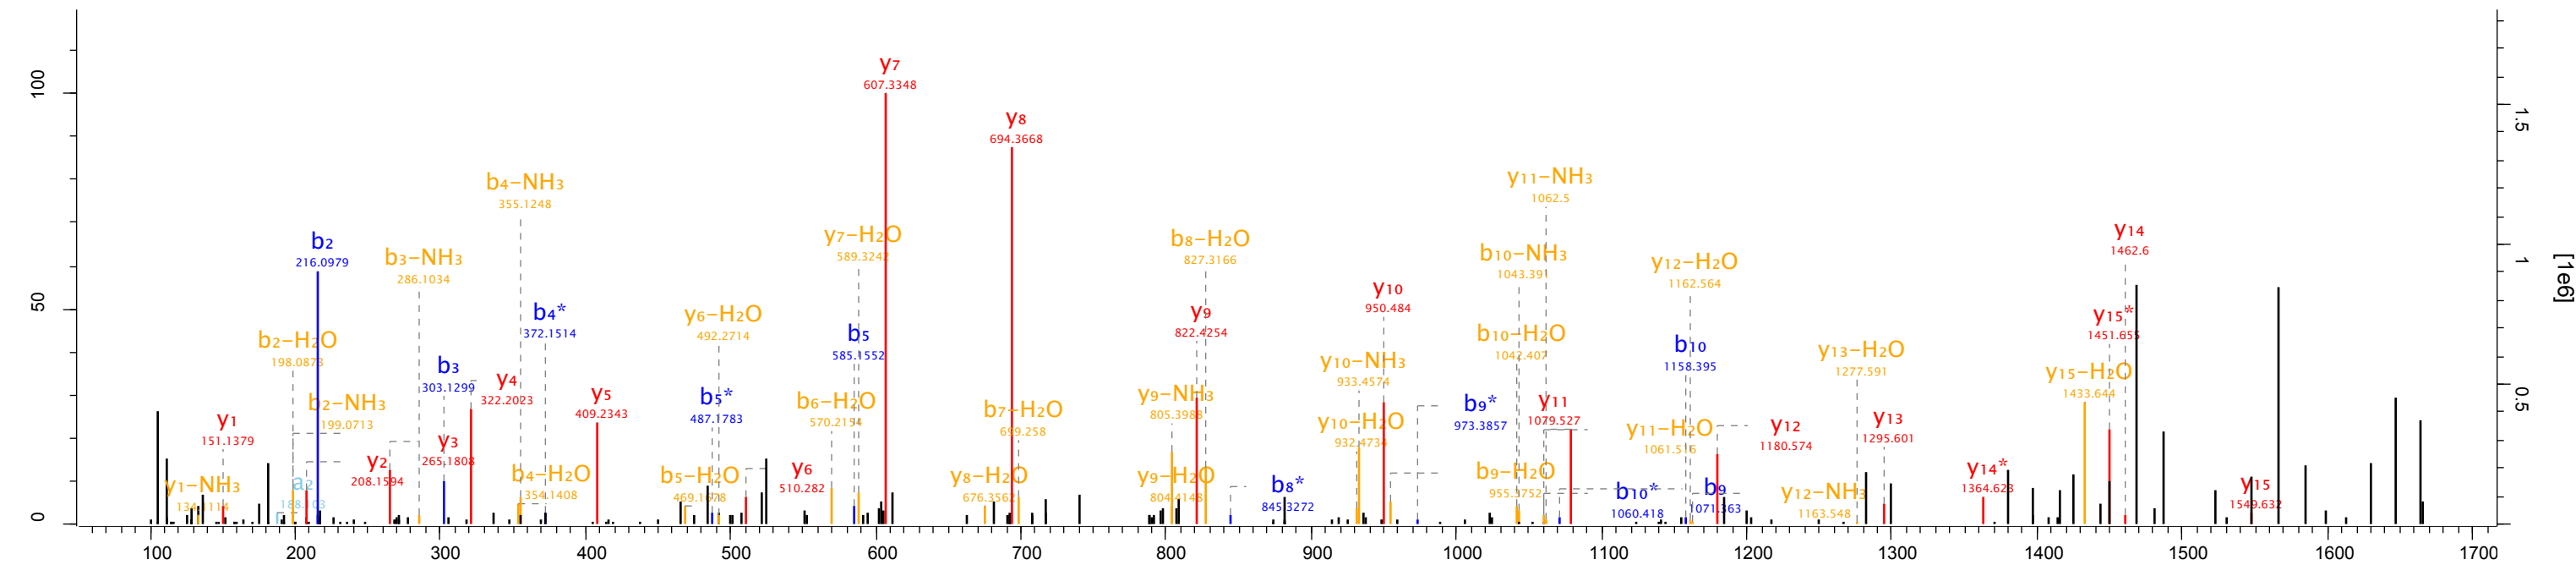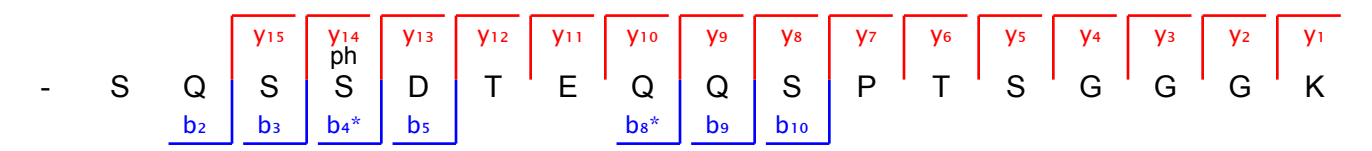

Raw file Scan Method Score m/z Gene names

20150812\_A375SR\_Phospho\_BR1\_03 3138 FTMS; HCD 62.74 770.29 SRSF1

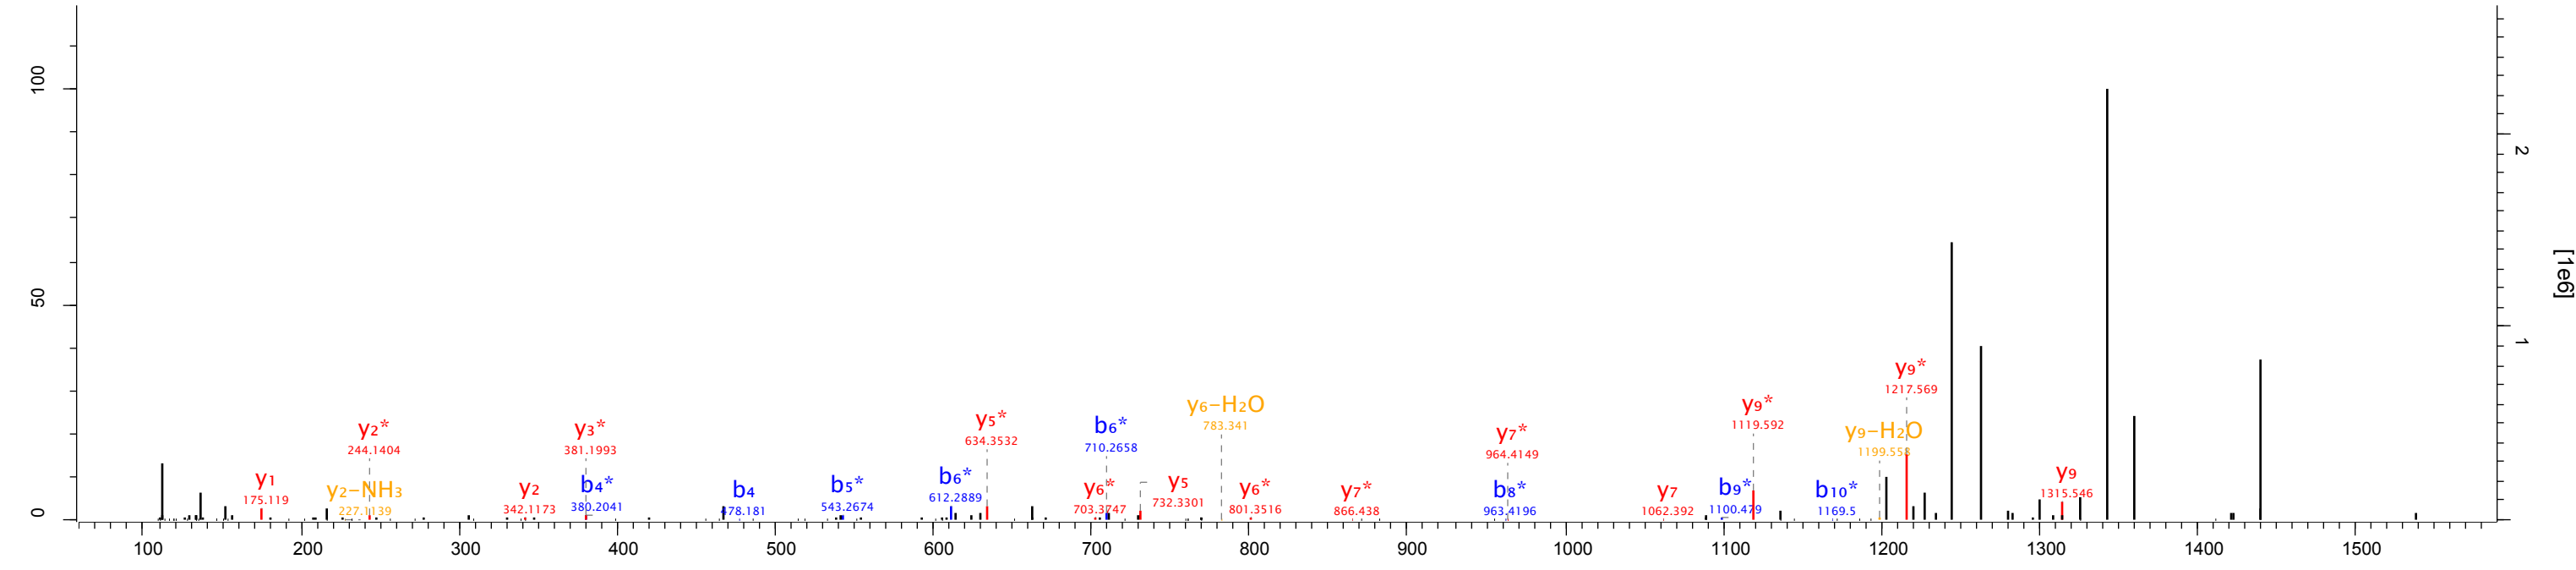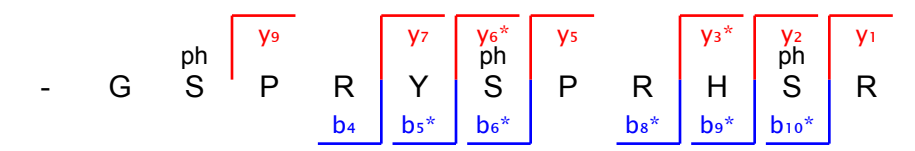

Raw file: 20150812\_A375SR\_Phospho\_BR1\_03  
 Scan: 3338 Method: FTMS; HCD Score: 90.9 m/z: 833.3 Gene names: KIF1B

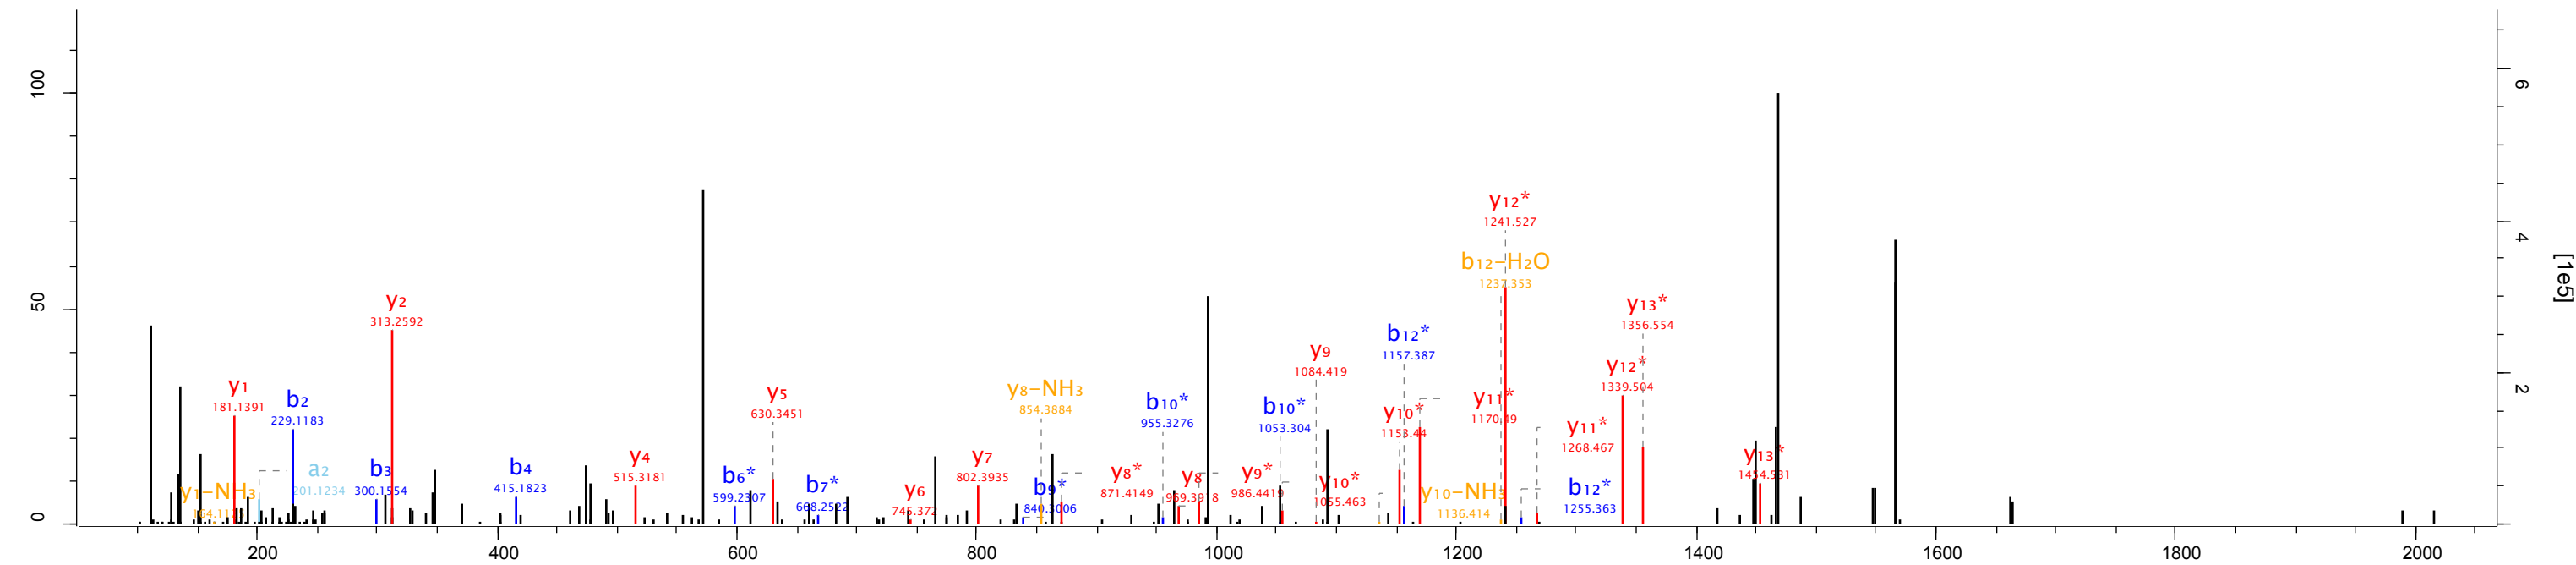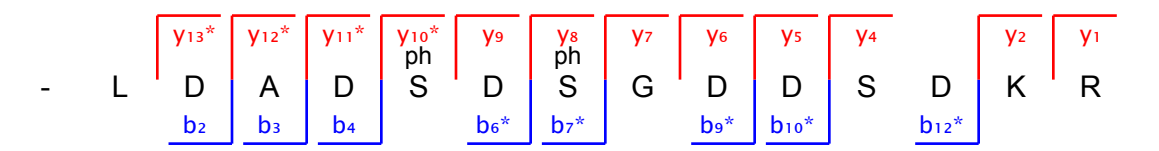

Raw file: 20150812\_A375SR\_Phospho\_BR1\_03  
 Scan: 3398 Method: FTMS; HCD Score: 118.98 m/z: 834.87 Gene names: SF3B2

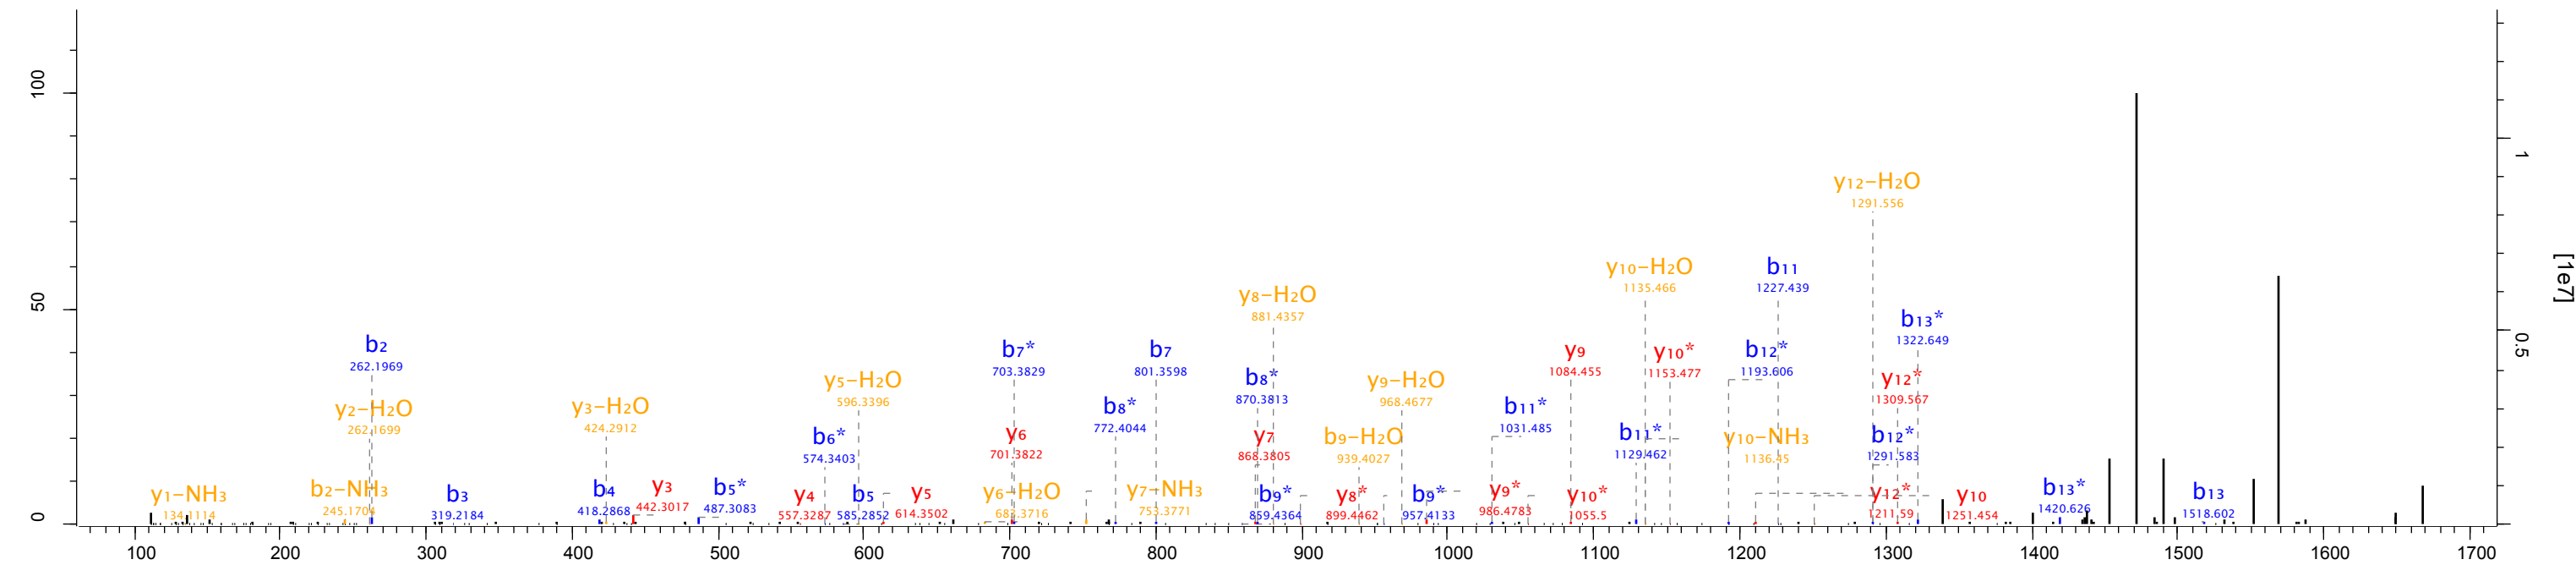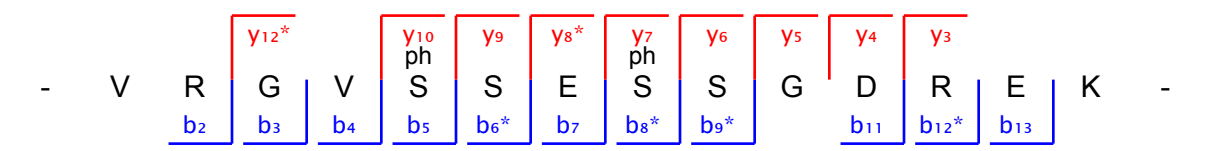



Raw file: 20150812\_A375SR\_Phospho\_BR1\_03  
 Scan: 3458 Method: FTMS; HCD Score: 137.85 m/z: 804.87 Gene names: LRRFIP1

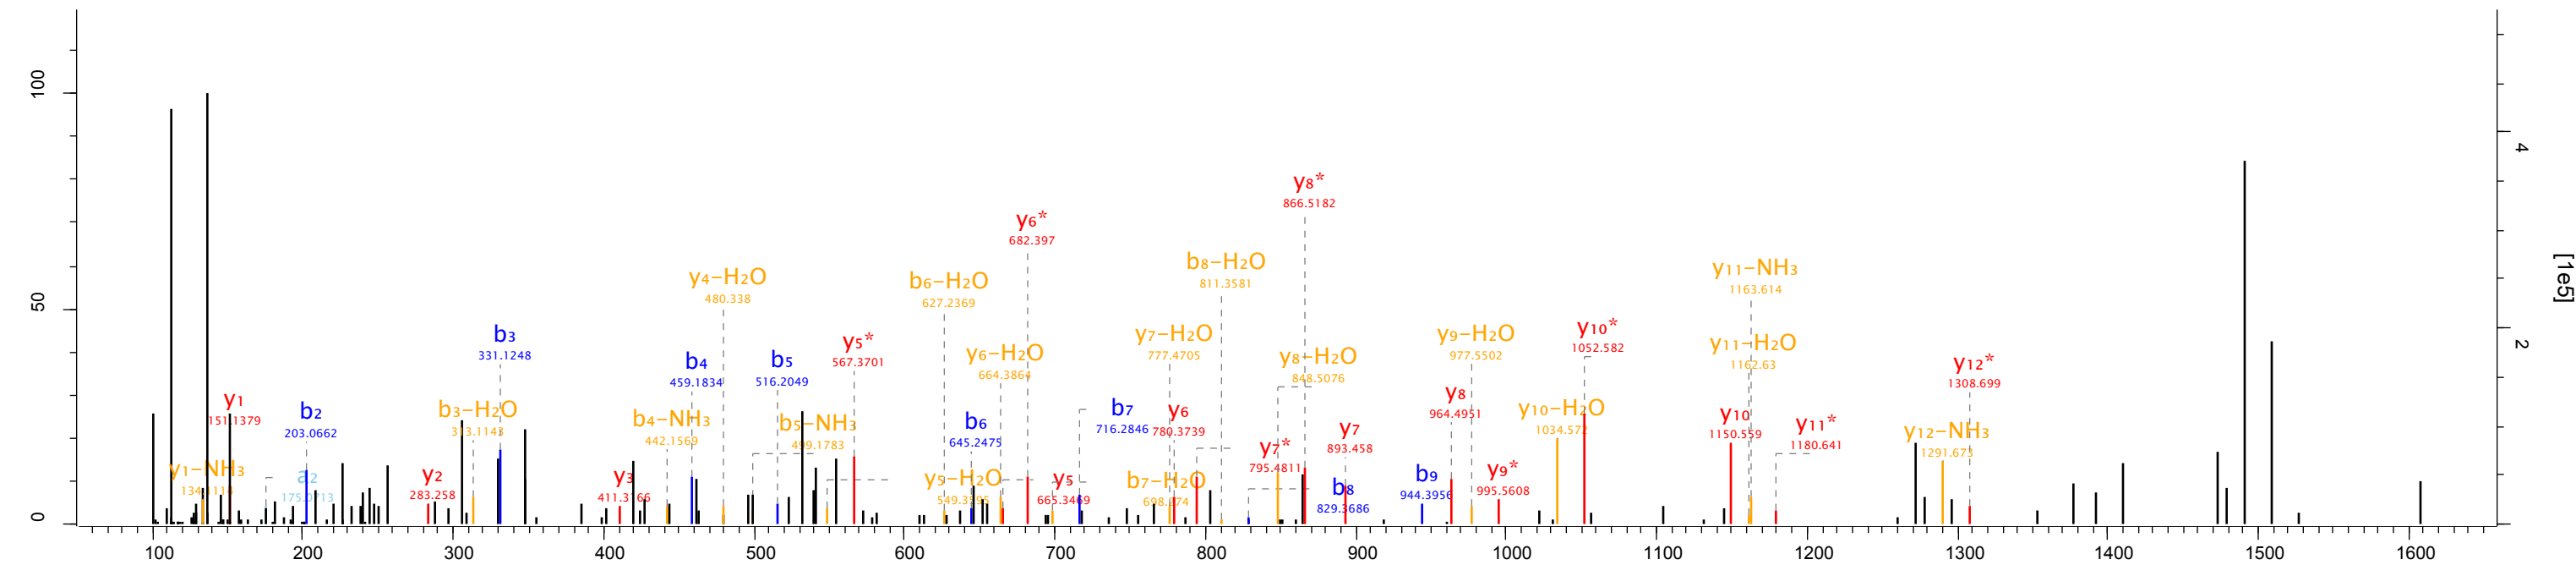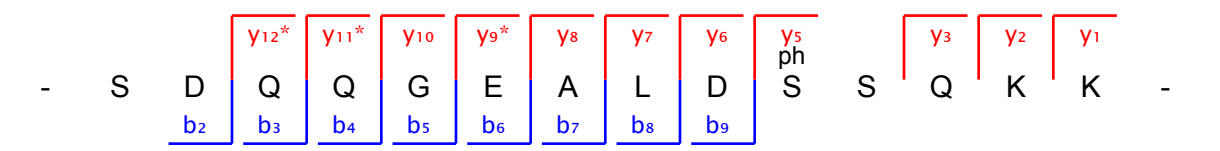

Raw file: 20150812\_A375SR\_Phospho\_BR1\_03  
 Scan: 3898 Method: FTMS; HCD Score: 40.19 m/z: 537.55 Gene names: PPIG

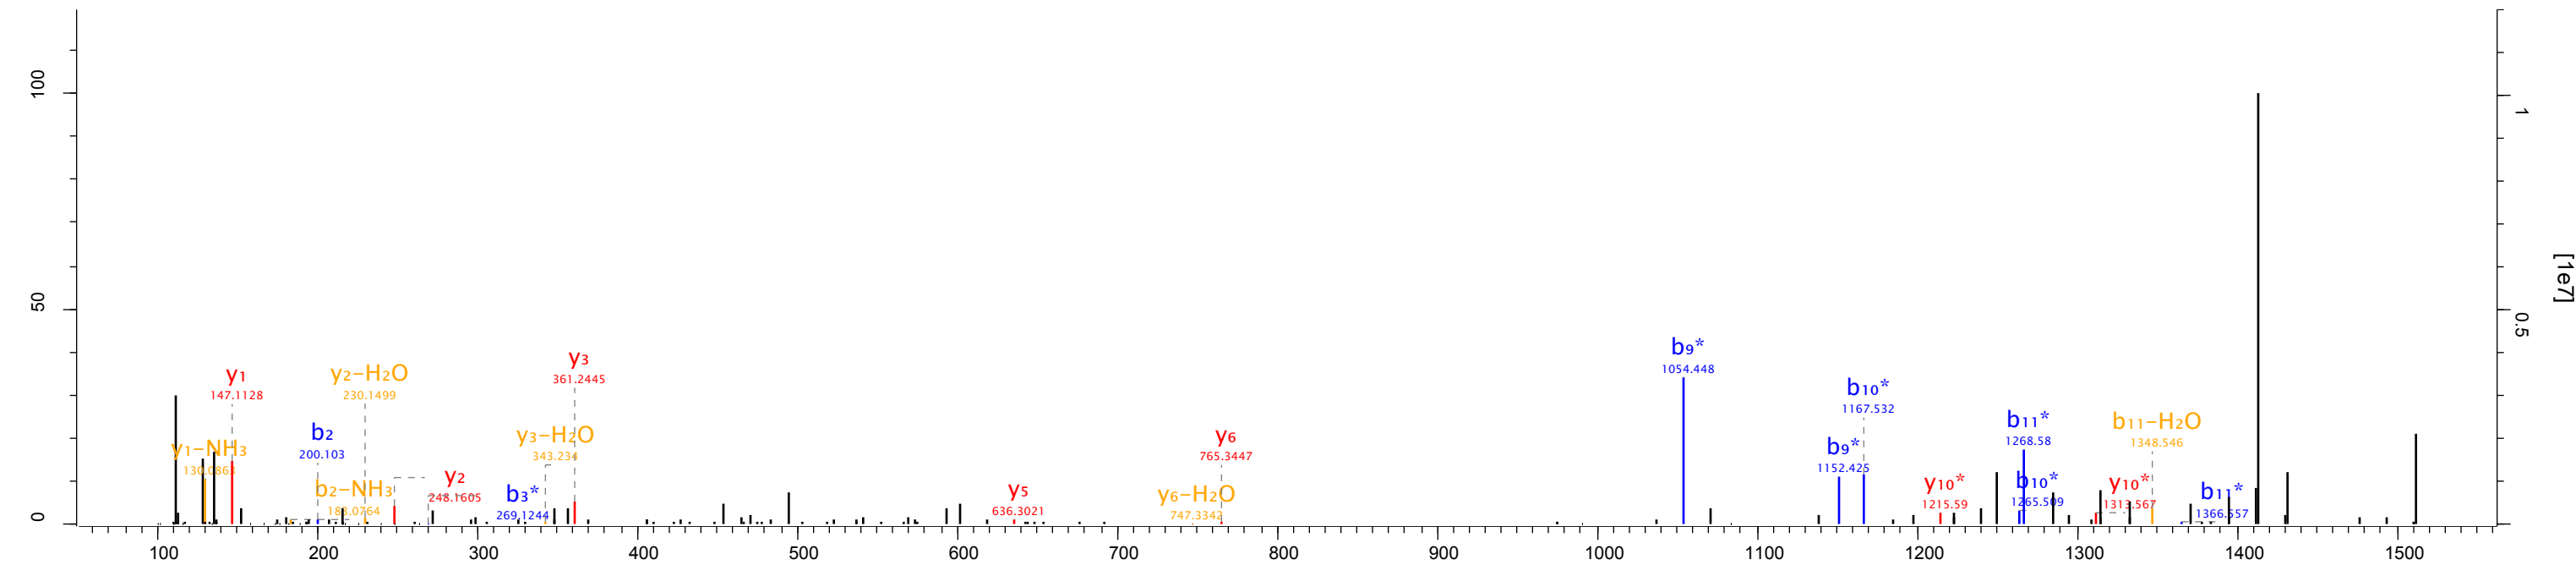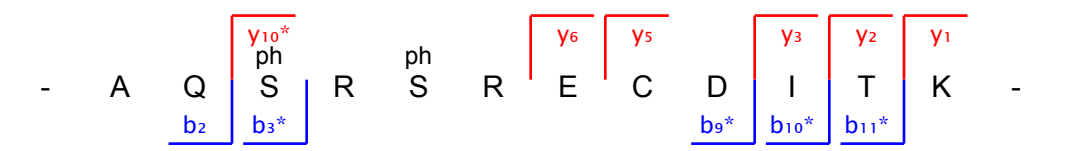

Raw file Scan Method Score m/z Gene names

20150812\_A375SR\_Phospho\_BR1\_03 3908 FTMS; HCD 48.29 515.22 ERC1

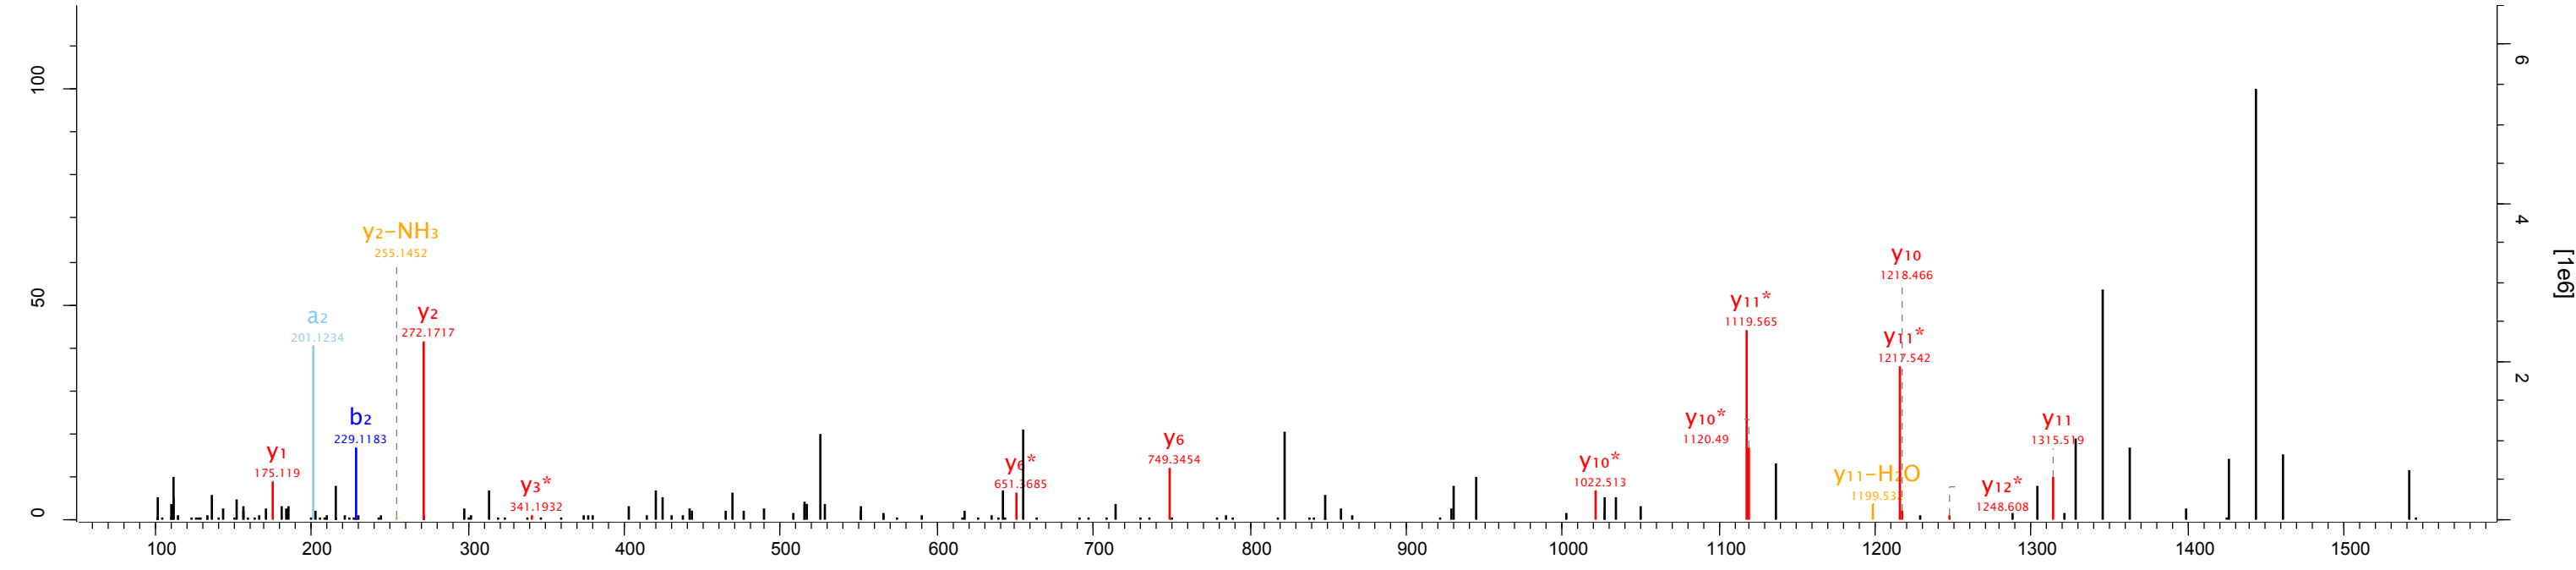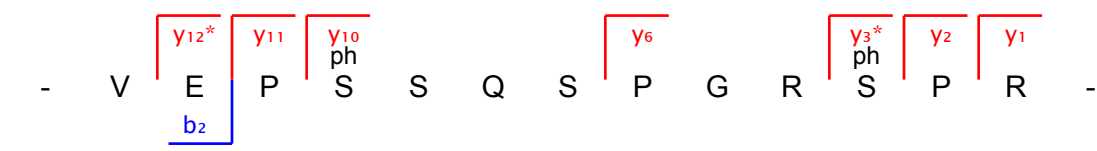

Raw file 20150812\_A375SR\_Phospho\_BR1\_03 Scan 3918 Method FTMS; HCD Score 154.7 m/z 762.65 Gene names ZC3H13

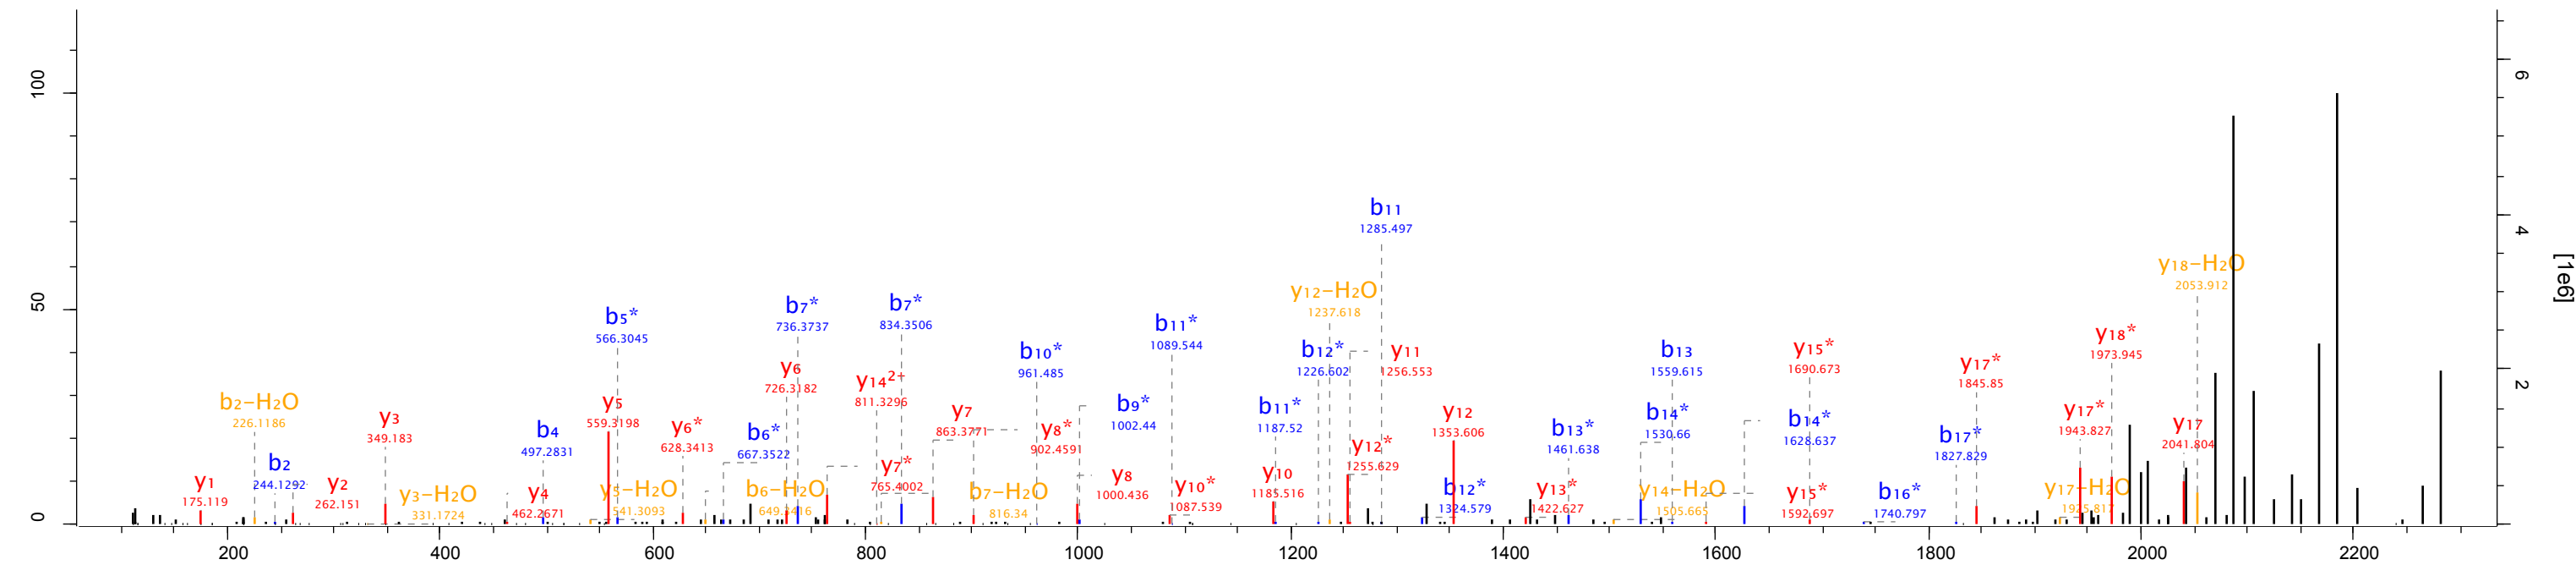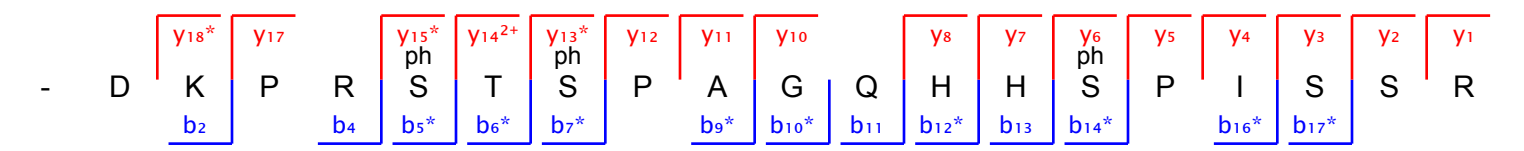

Raw file  
20150812\_A375SR\_Phospho\_BR1\_03

Scan 4588 Method FTMS; HCD Score 431.63 m/z 880.36 Gene names PSIP1

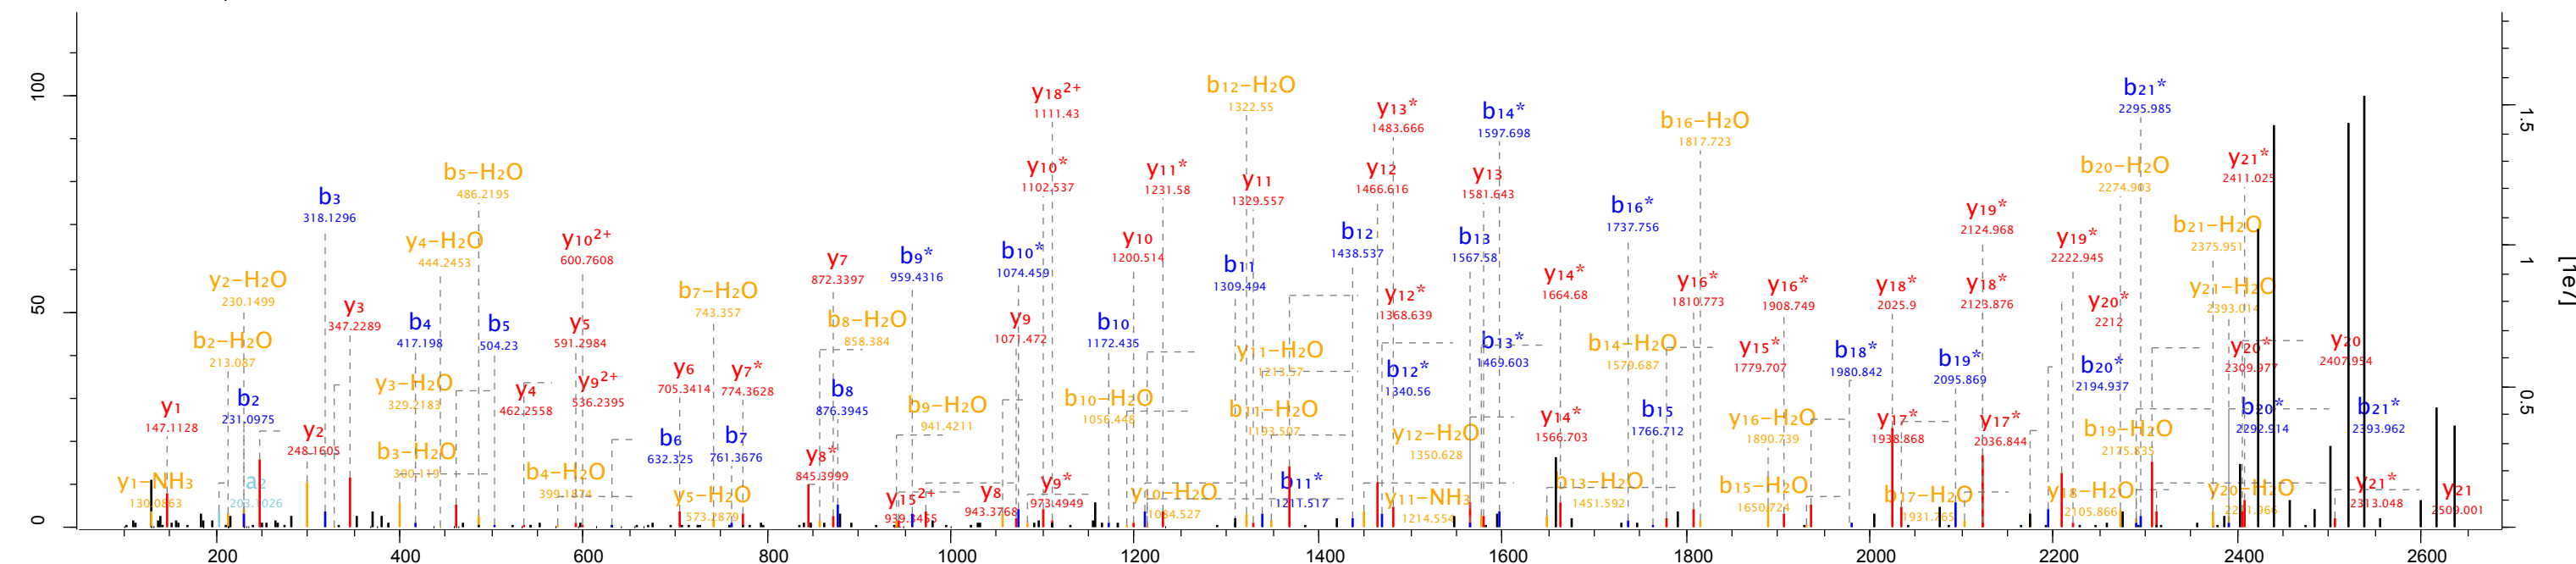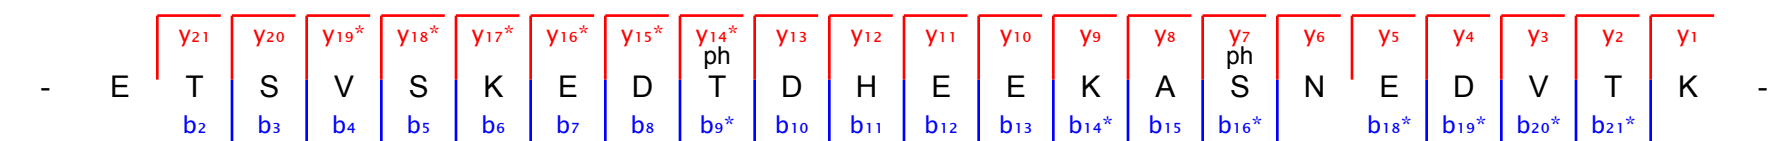

Raw file 20150812\_A375SR\_Phospho\_BR1\_03 Scan 4598 Method FTMS; HCD Score 168.12 m/z 669.65 Gene names MAP4K4

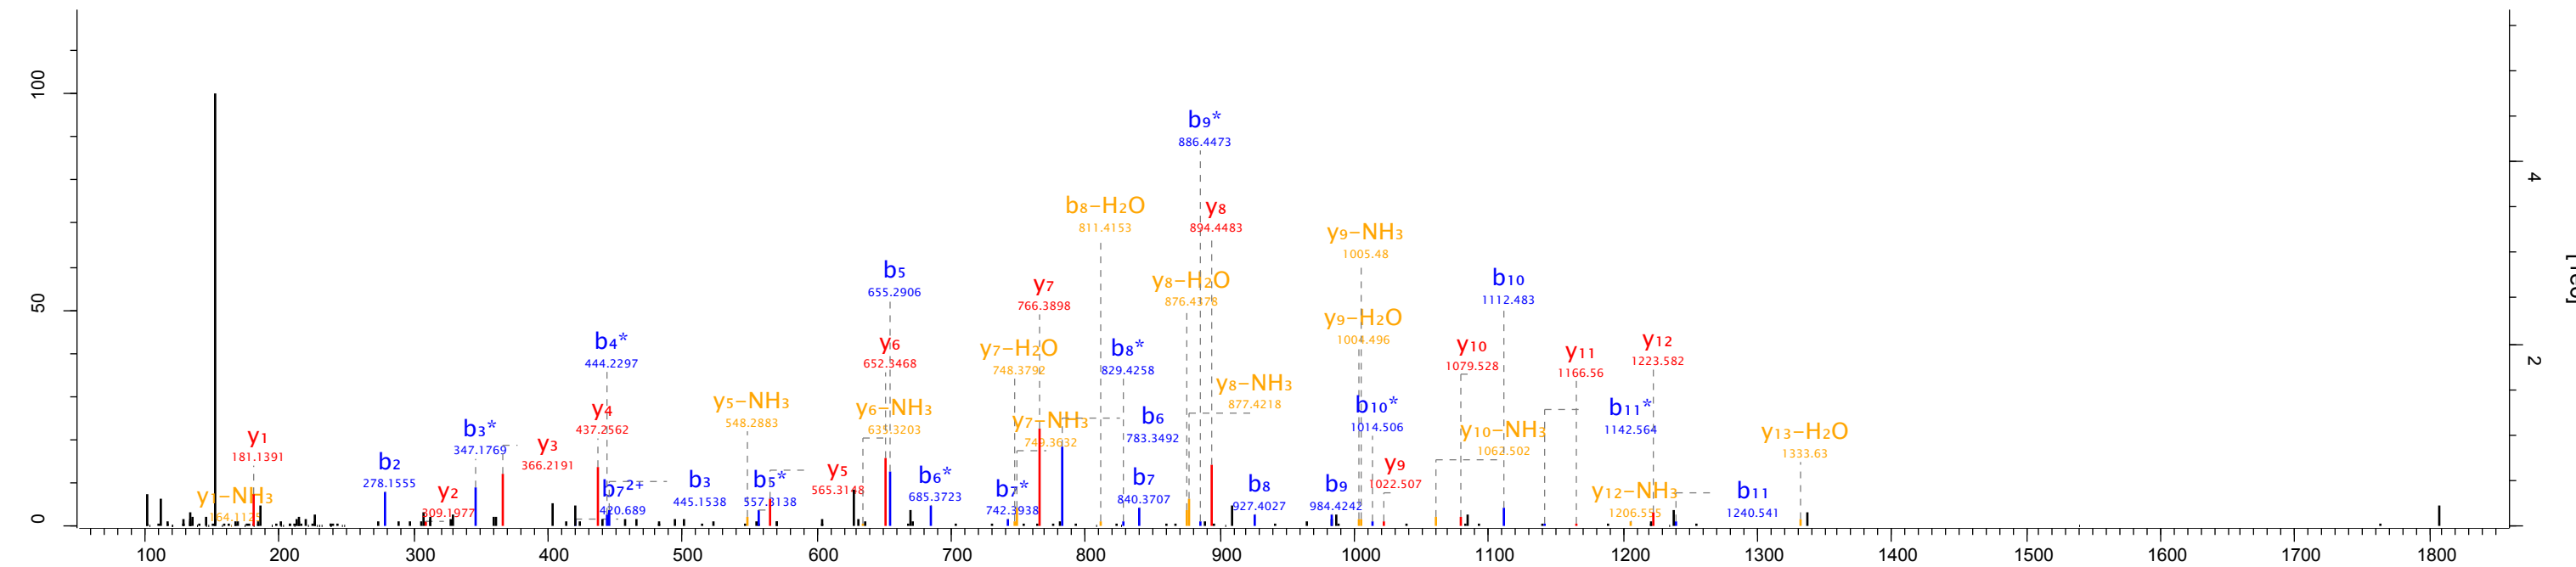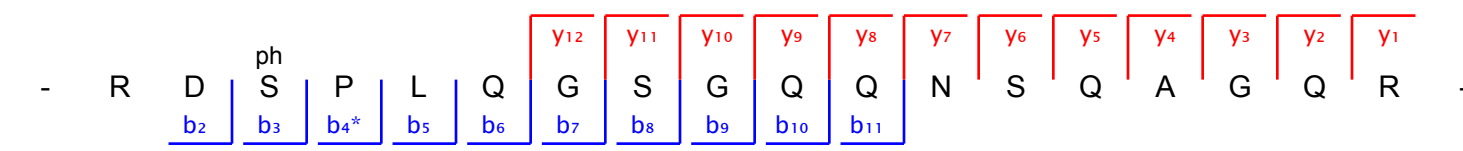

Raw file: 20150812\_A375SR\_Phospho\_BR1\_03  
 Scan: 5218 Method: FTMS; HCD Score: 99.04 m/z: 751.25 Gene names: IWS1

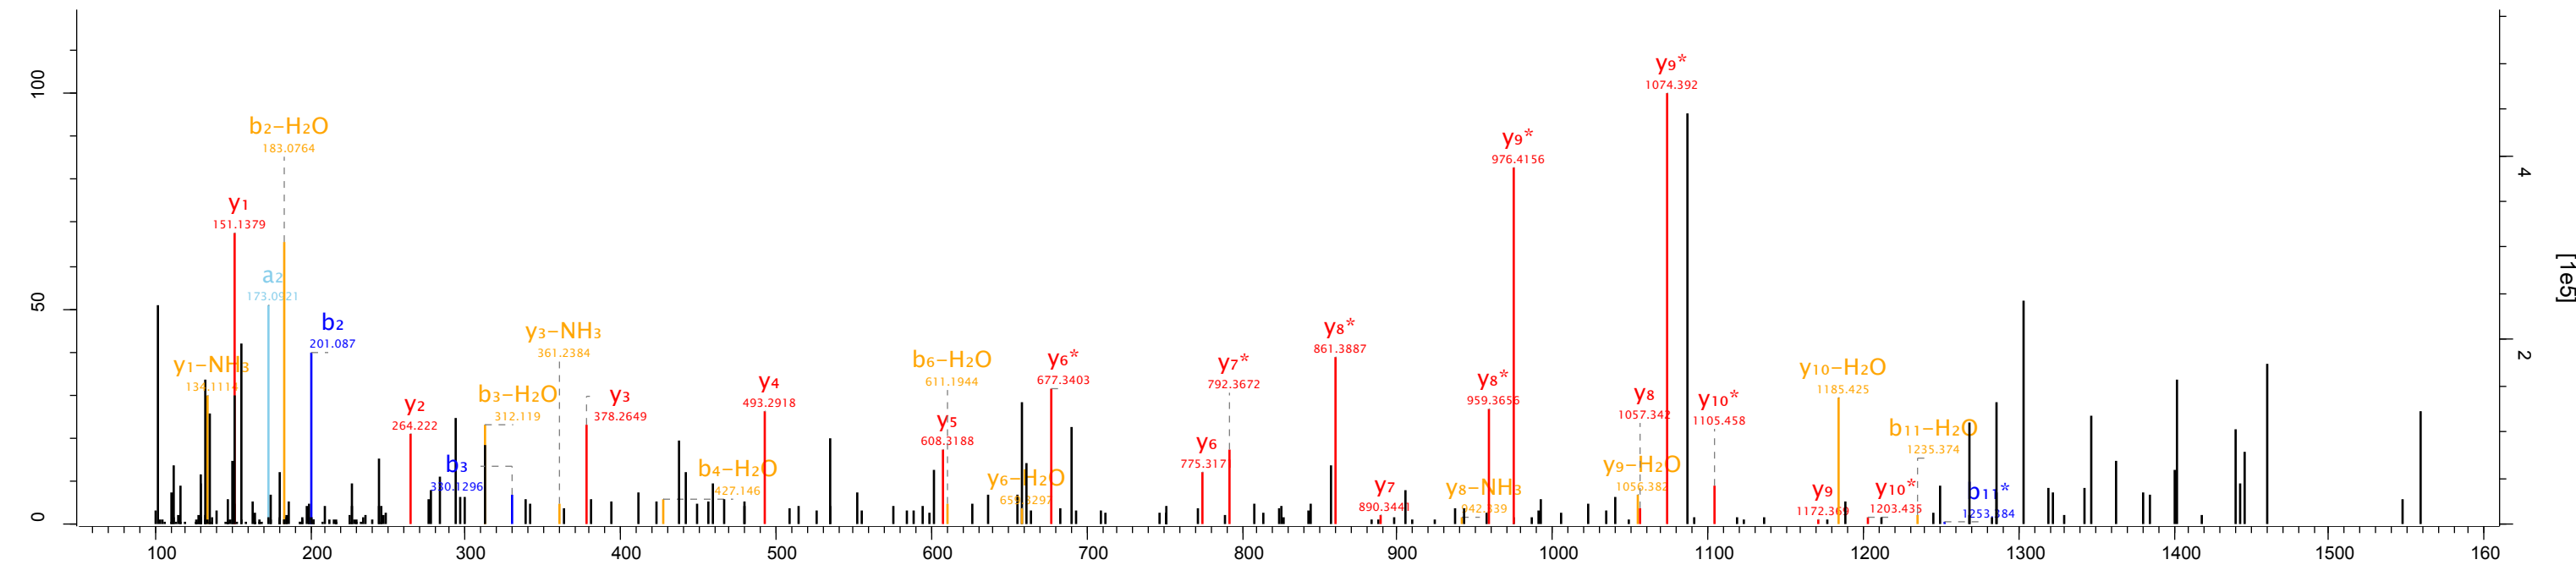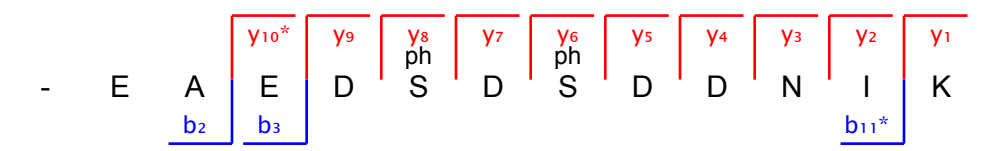

Raw file: 20150812\_A375SR\_Phospho\_BR1\_03  
 Scan: 5318 Method: FTMS; HCD Score: 126.31 m/z: 657.79 Gene names: ACIN1

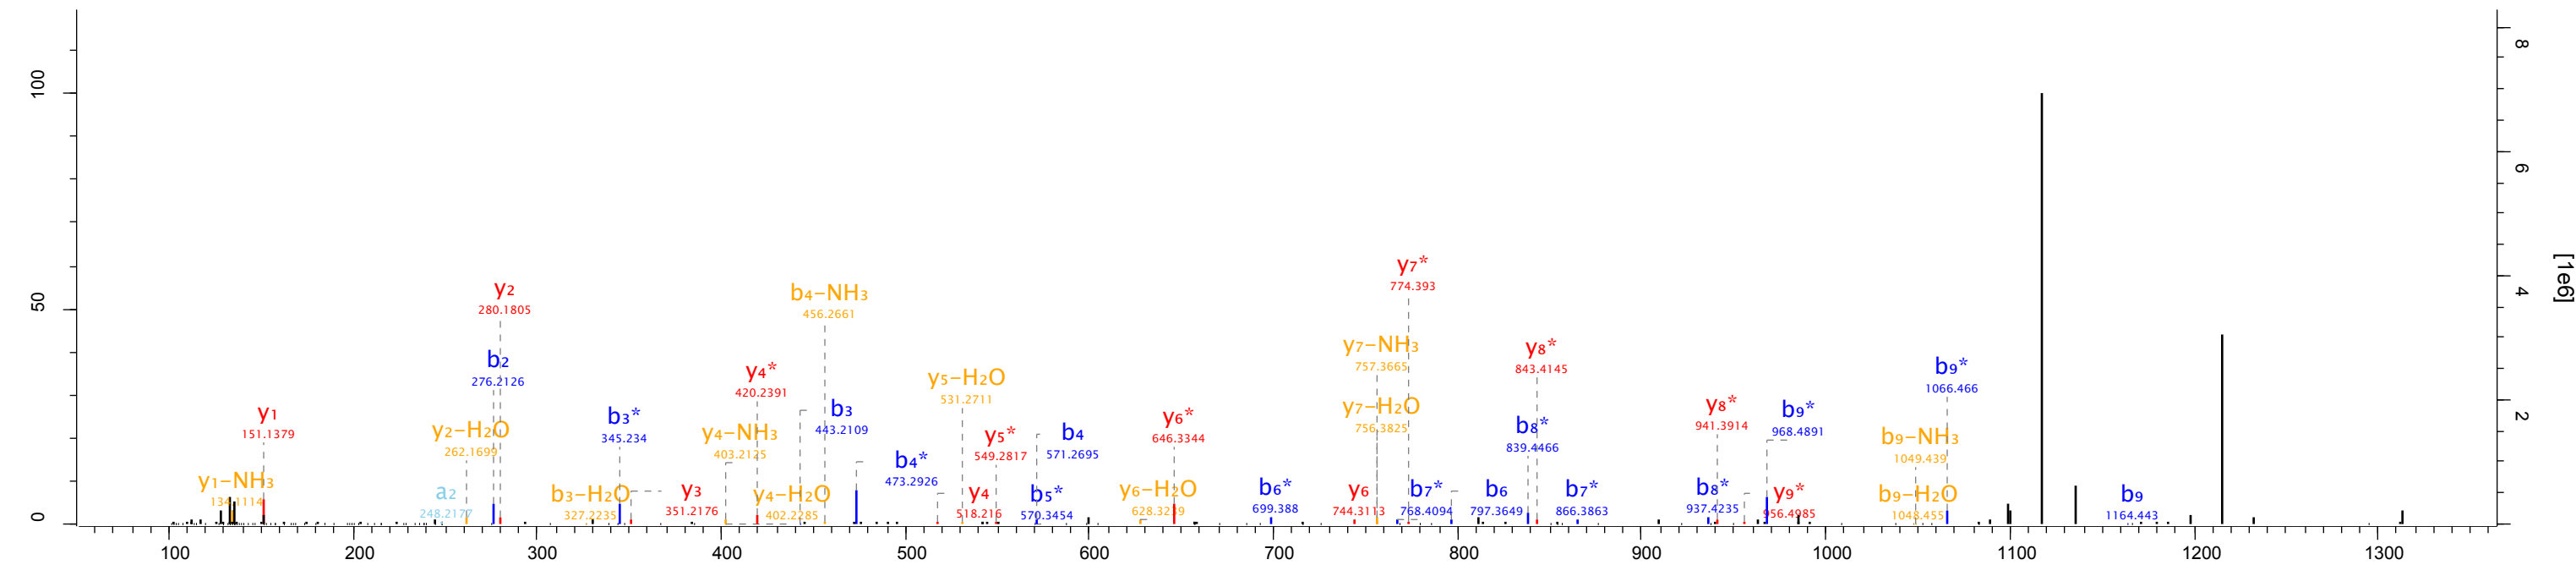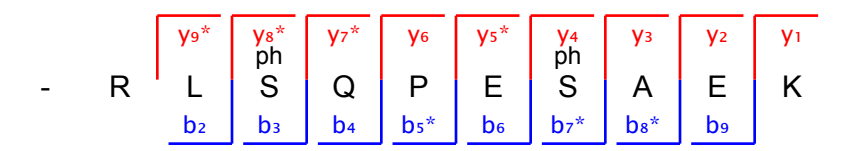



Raw file 20150812\_A375SR\_Phospho\_BR1\_03 Scan 5498 Method FTMS; HCD Score 400.19 m/z 1035.44 Gene names TGOLN2

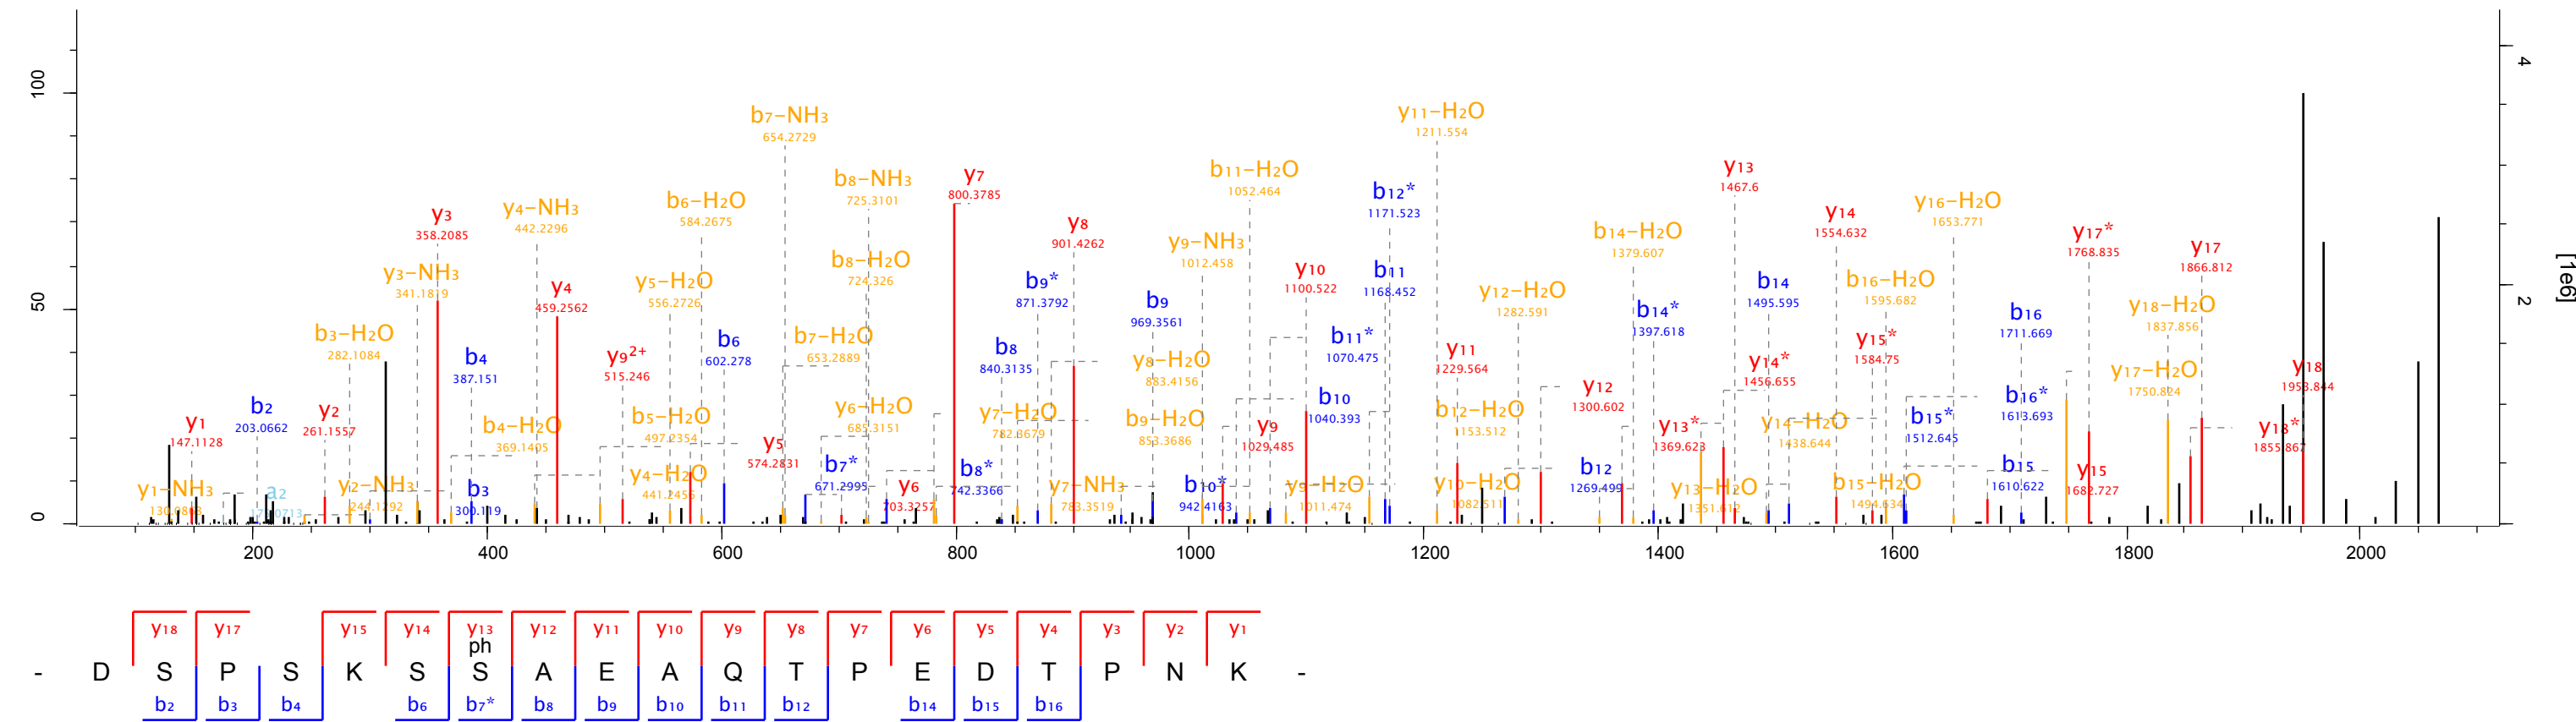

Raw file  
20150812\_A375SR\_Phospho\_BR1\_03

Scan 5638 Method FTMS; HCD Score 209.33 m/z 878.31 Gene names PSMA3

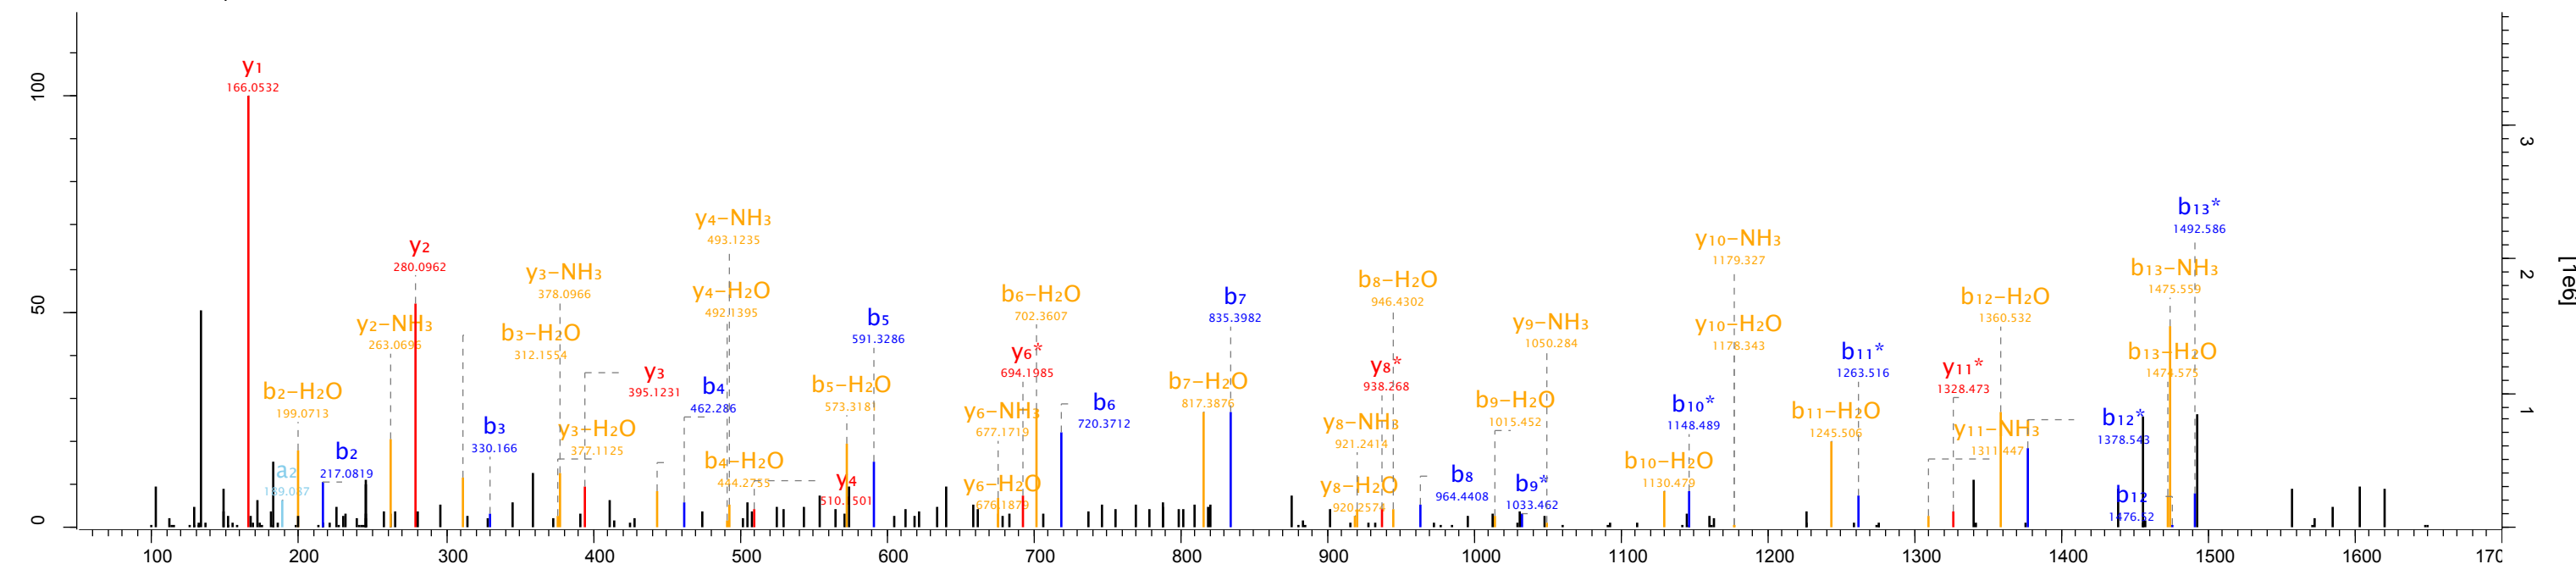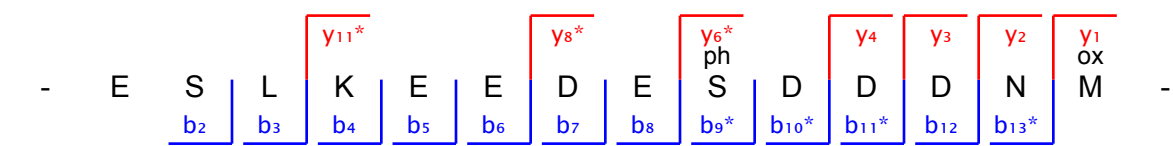

Raw file: 20150812\_A375SR\_Phospho\_BR1\_03  
 Scan: 5788 Method: FTMS; HCD Score: 104.55 m/z: 666.78 Gene names: ZFC3H1

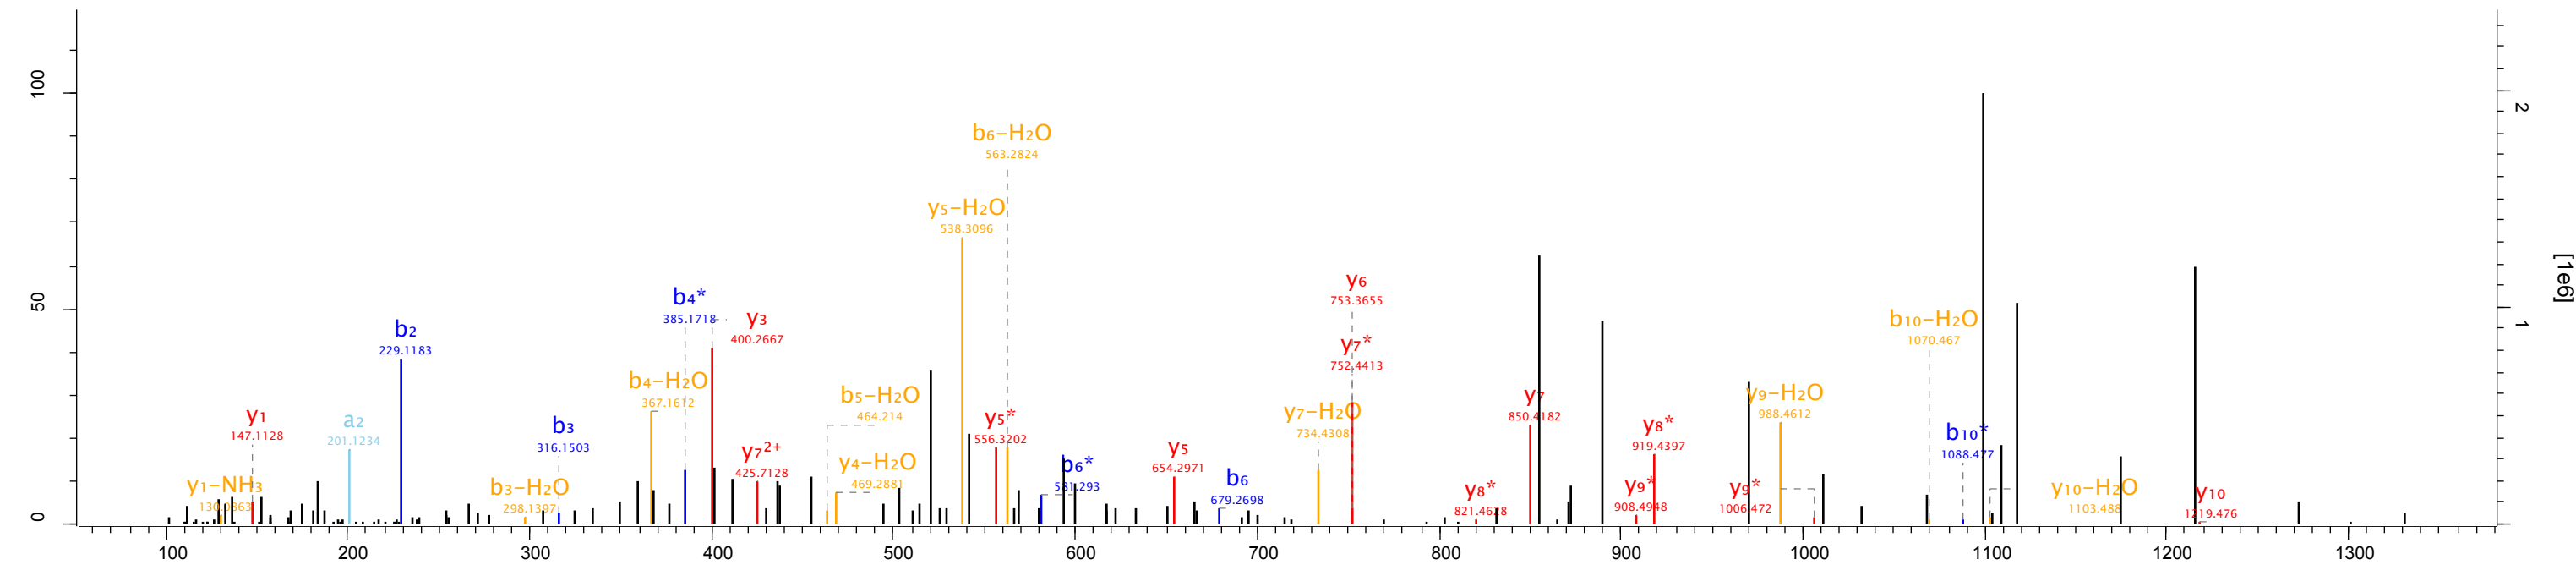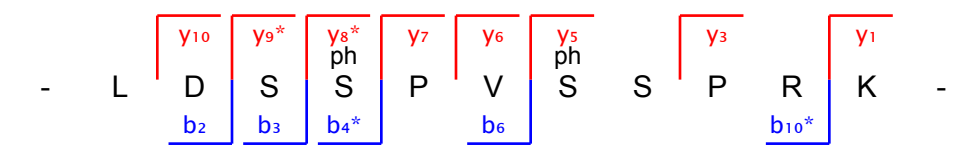

Raw file: 20150812\_A375SR\_Phospho\_BR1\_03  
 Scan: 5938 Method: FTMS; HCD Score: 65.06 m/z: 559.89 Gene names: SRRM2

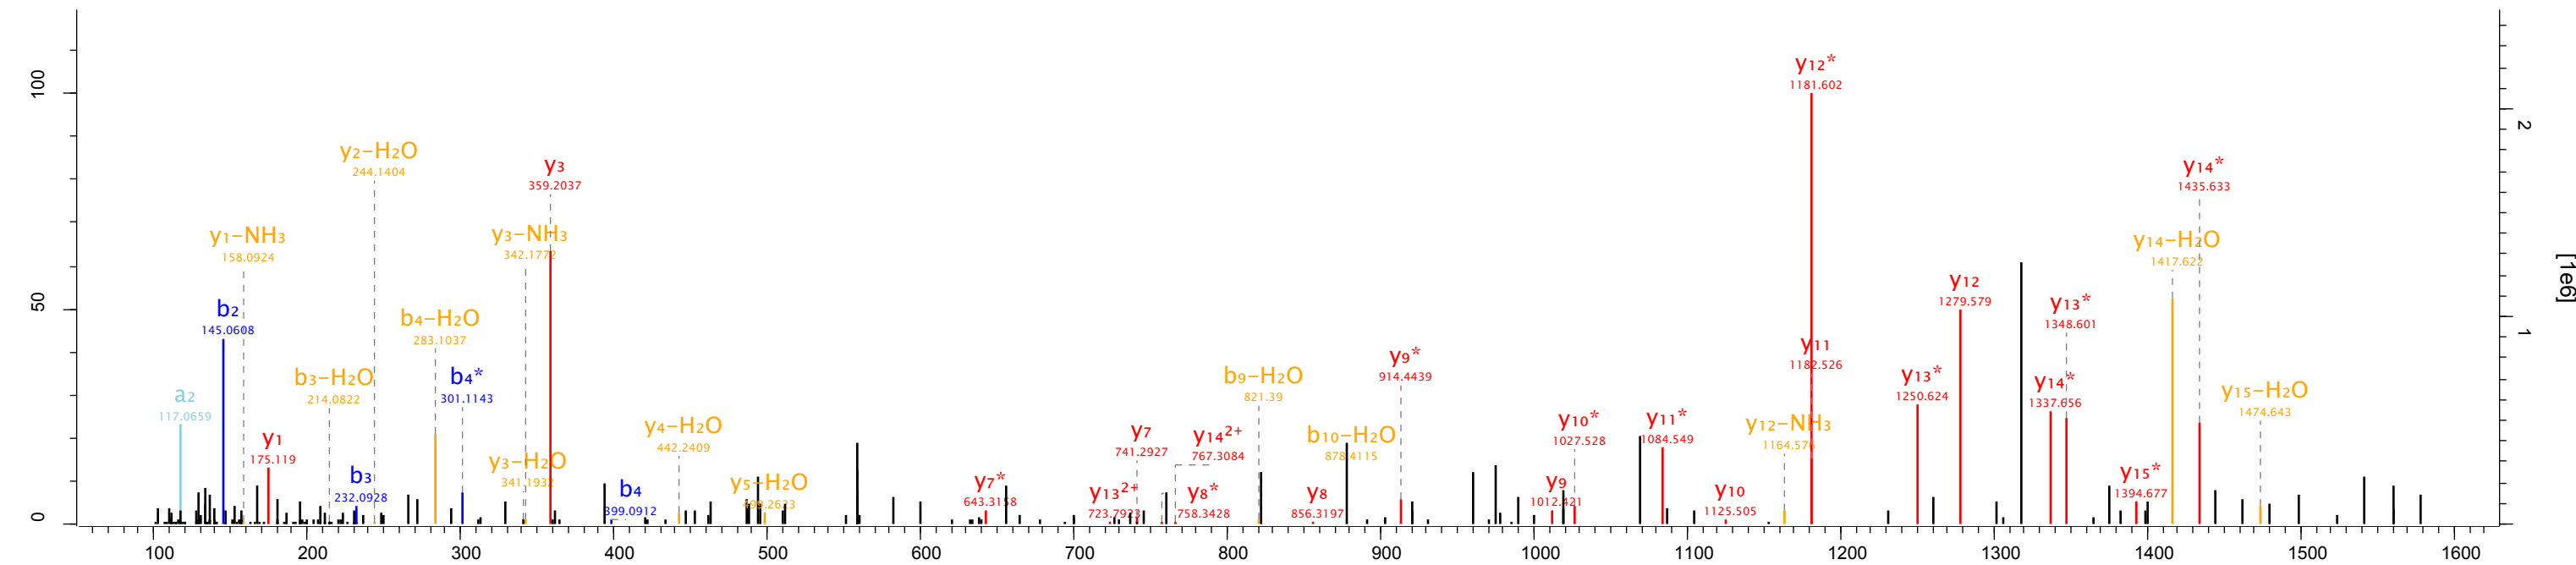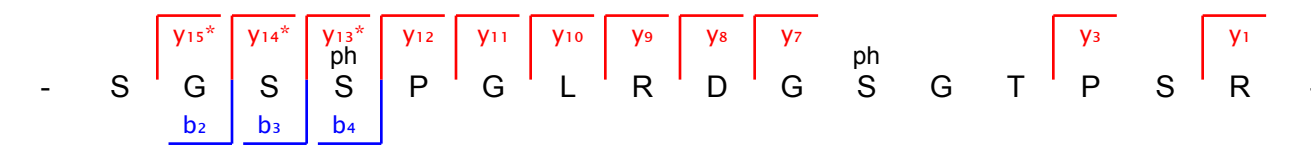

Raw file: 20150812\_A375SR\_Phospho\_BR1\_03  
 Scan: 6648 Method: FTMS; HCD Score: 183.12 m/z: 1070.98 Gene names: THRAP3

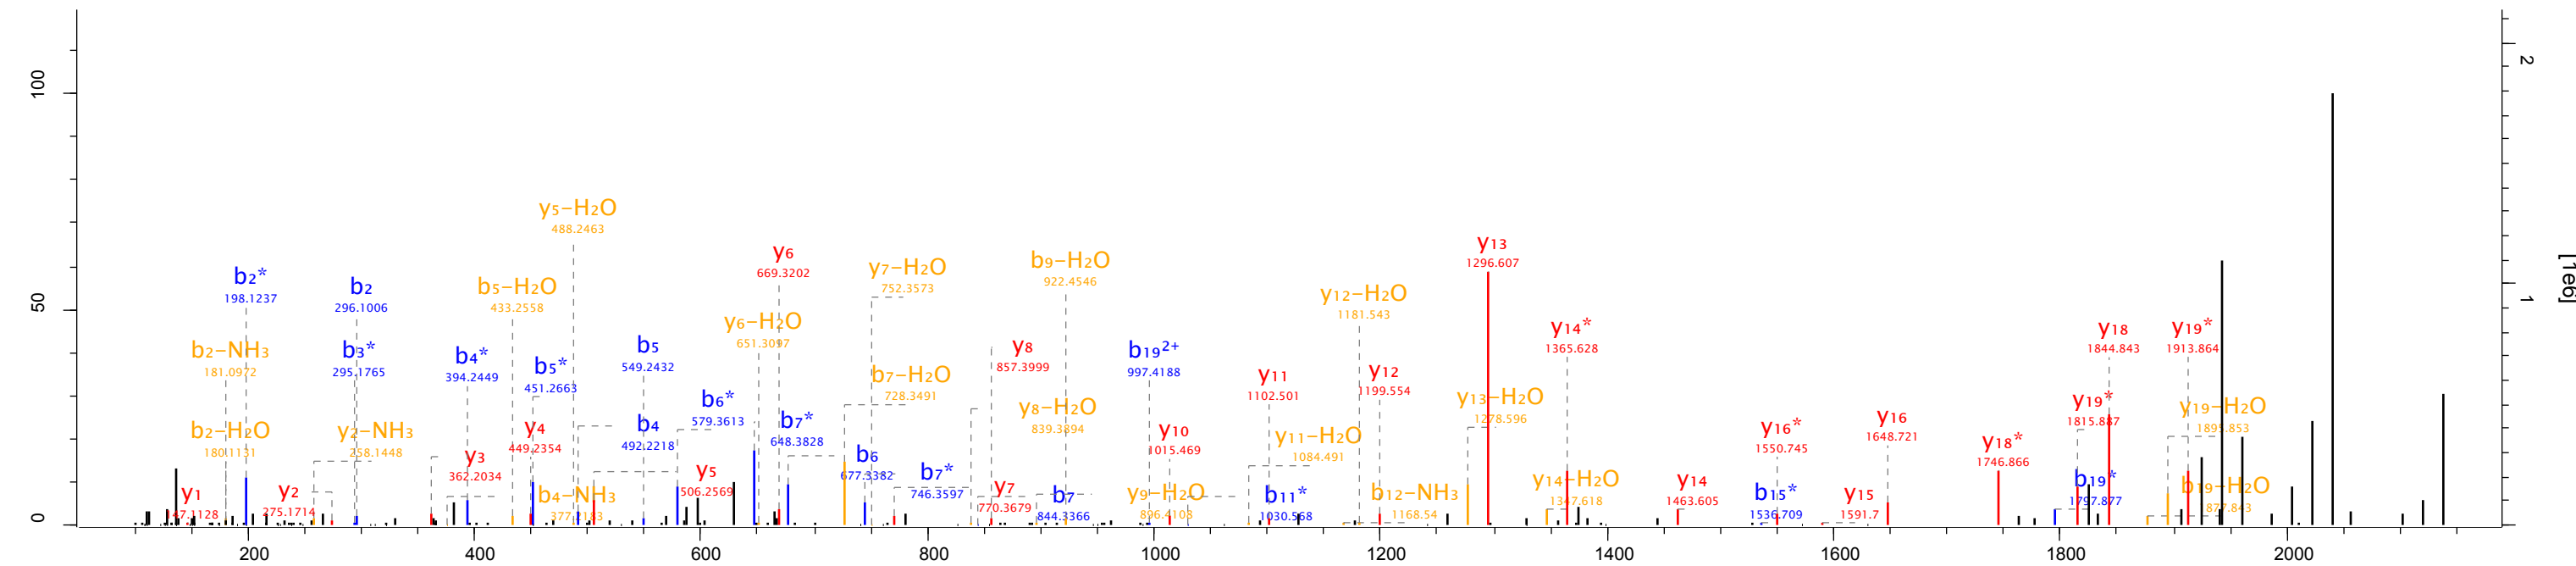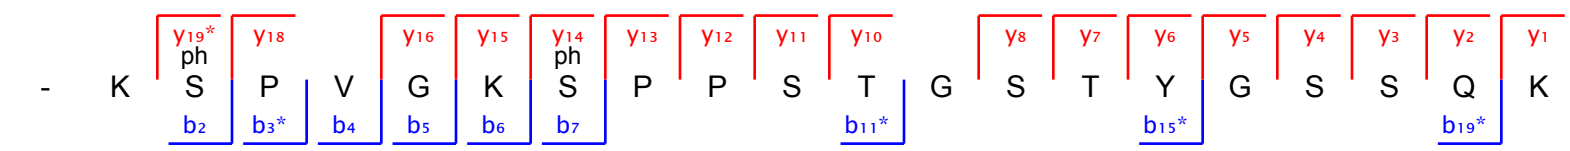

Raw file 20150812\_A375SR\_Phospho\_BR1\_03 Scan 6828 Method FTMS; HCD Score 113.49 m/z 809.31 Gene names CDK12

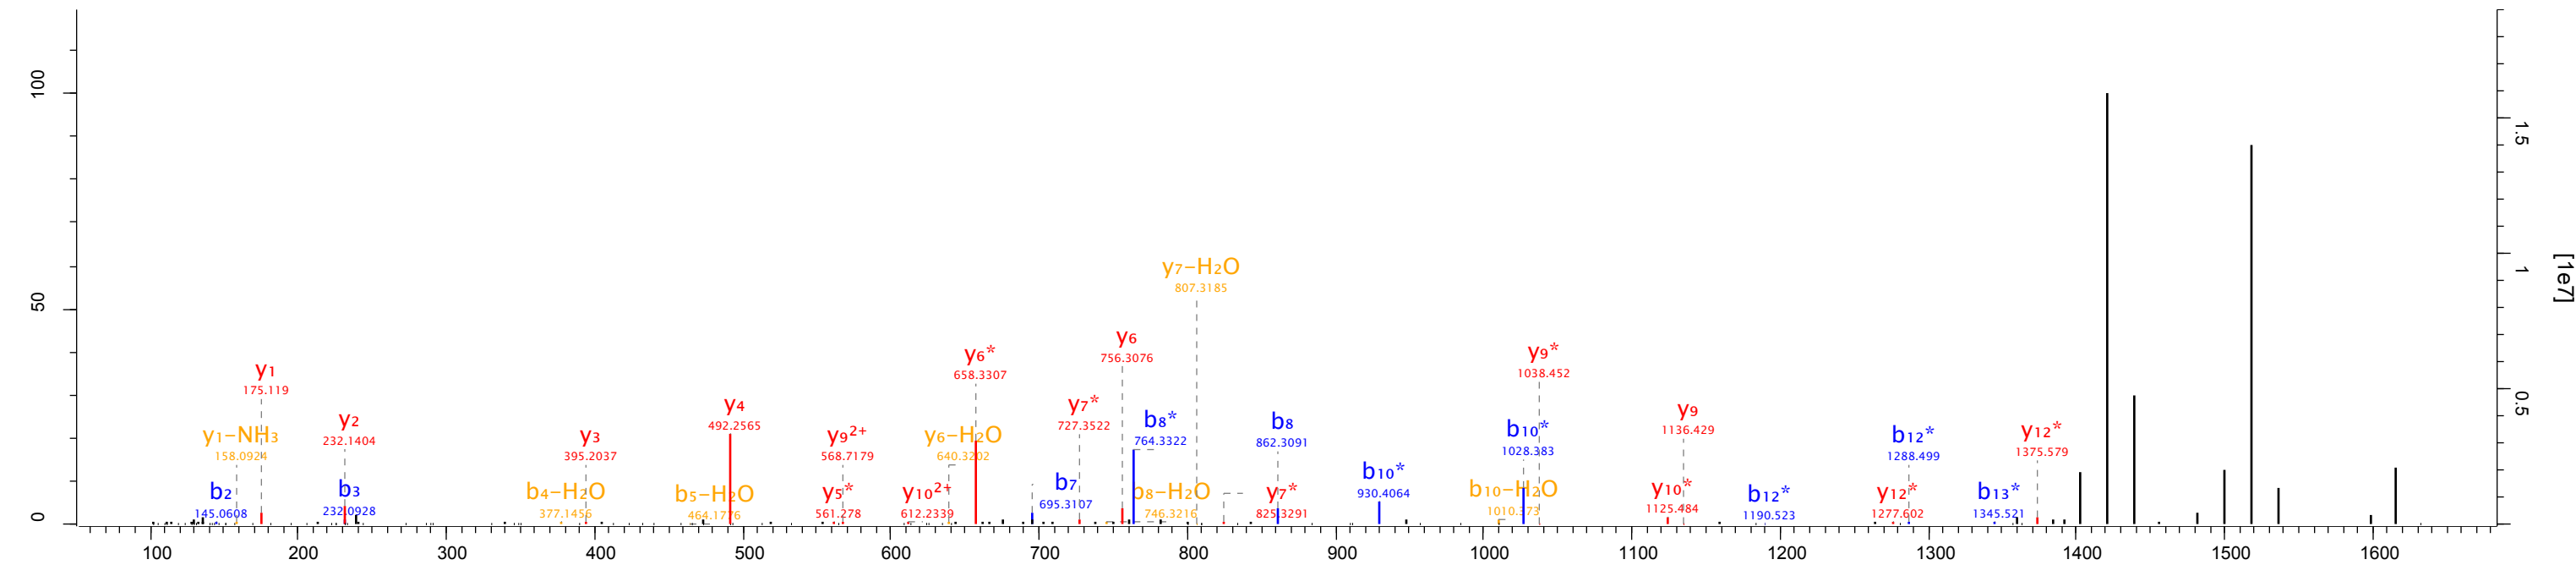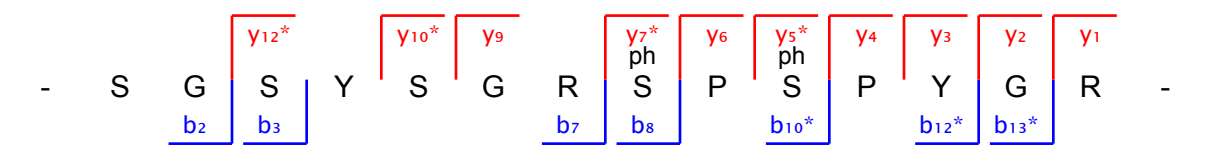

Raw file: 20150812\_A375SR\_Phospho\_BR1\_03  
 Scan: 7238 Method: FTMS; HCD Score: 174.26 m/z: 877.37 Gene names: CCDC132

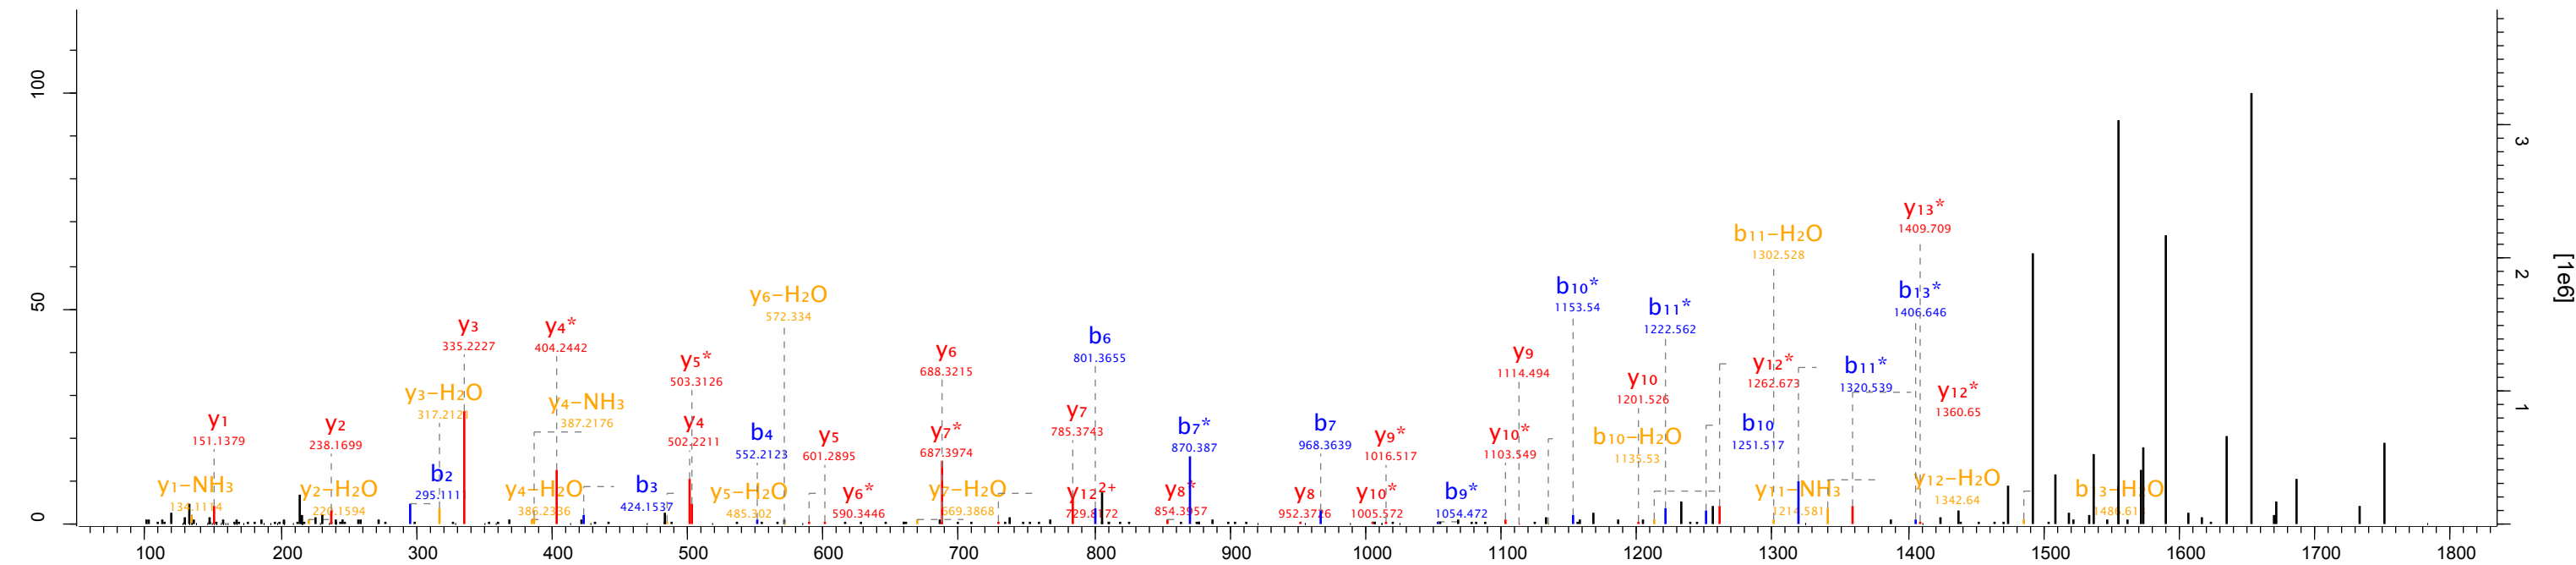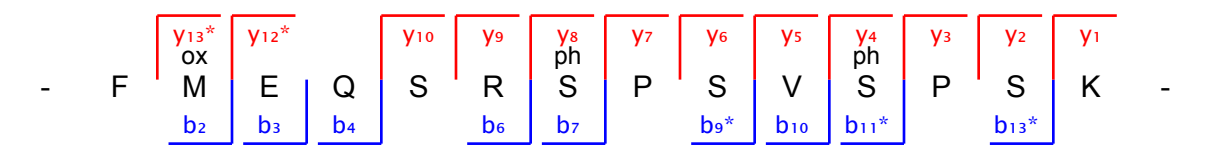

Raw file: 20150812\_A375SR\_Phospho\_BR1\_03  
 Scan: 7408 Method: FTMS; HCD Score: 290.47 m/z: 960.34 Gene names: UBE2O

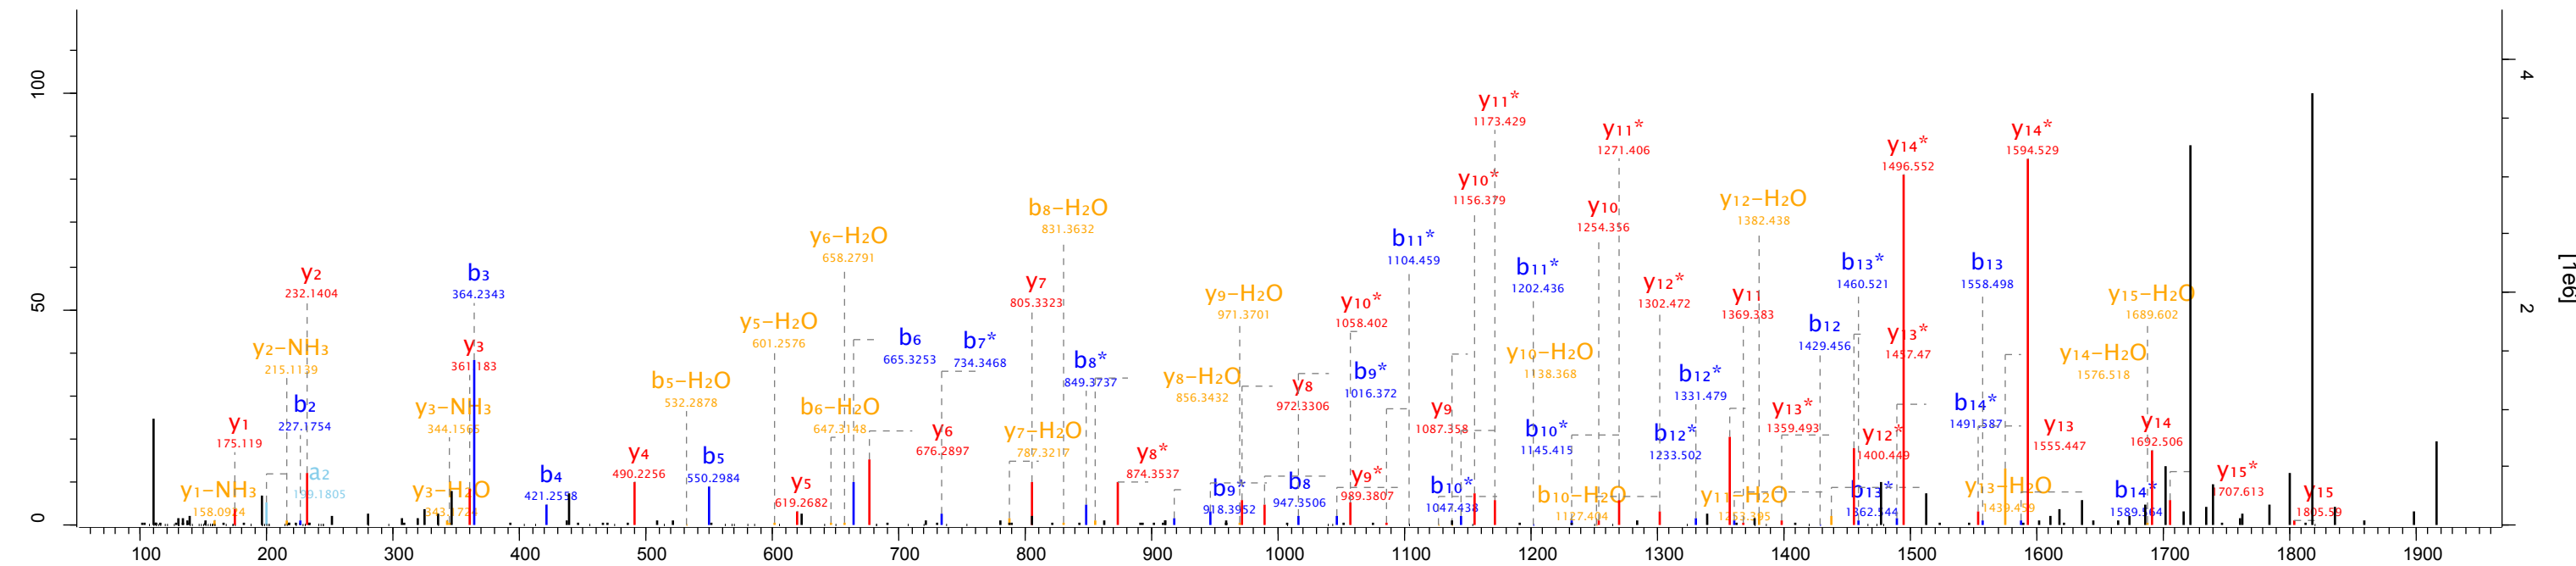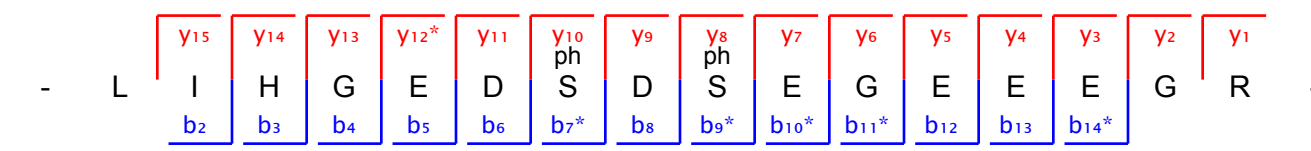



Raw file: 20150812\_A375SR\_Phospho\_BR1\_03  
 Scan: 8158 Method: FTMS; HCD Score: 219.65 m/z: 1070.37 Gene names: POLR3E

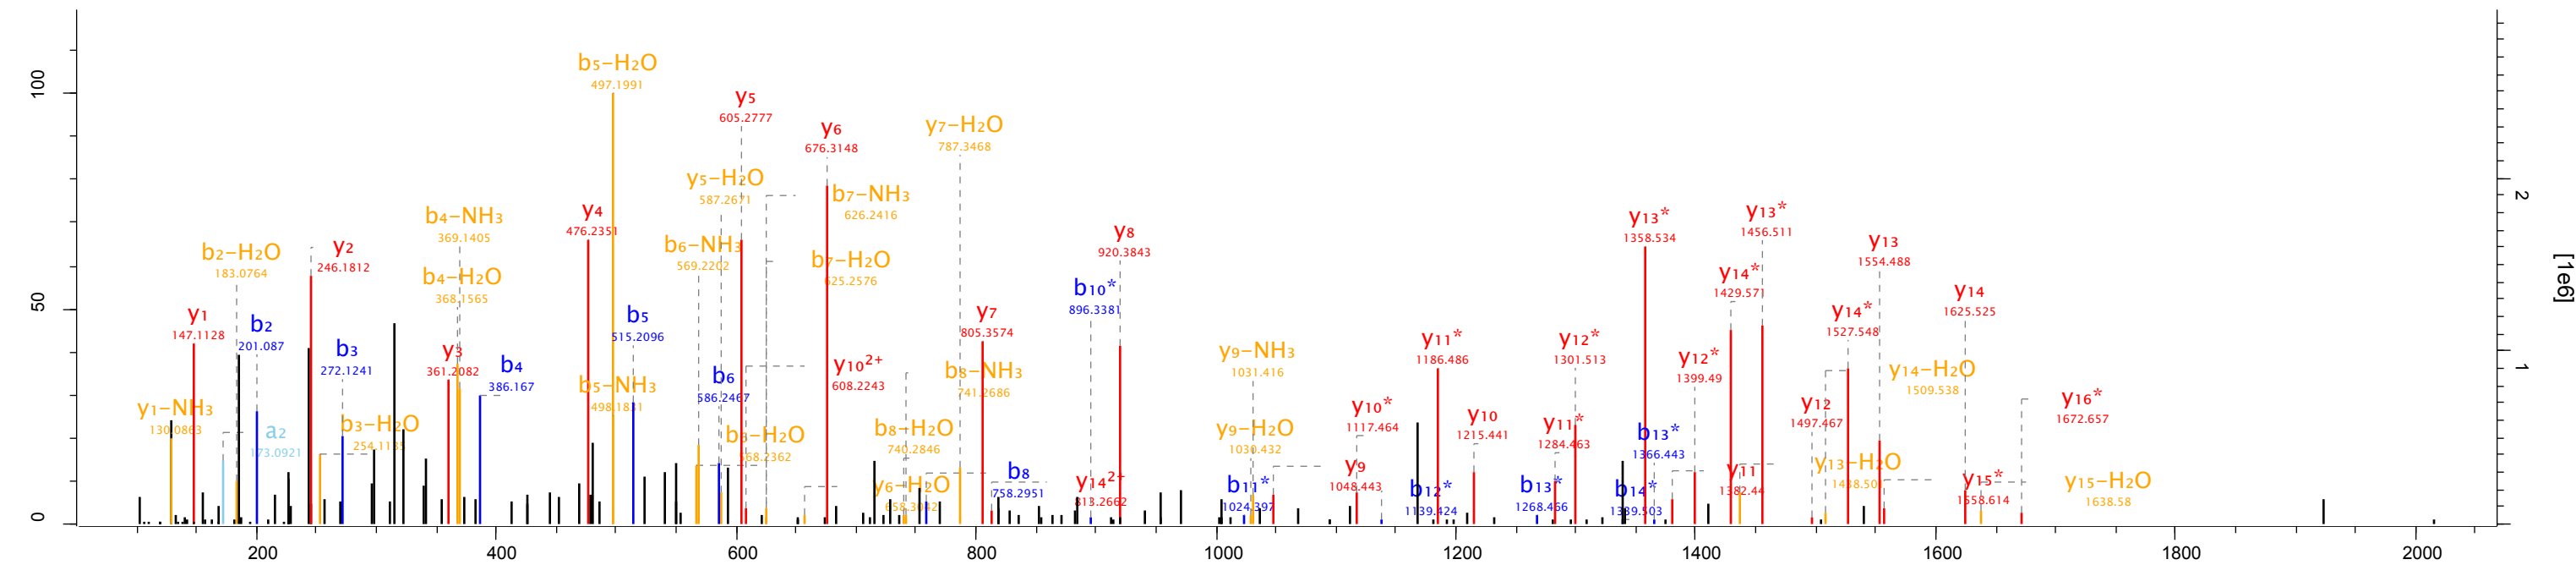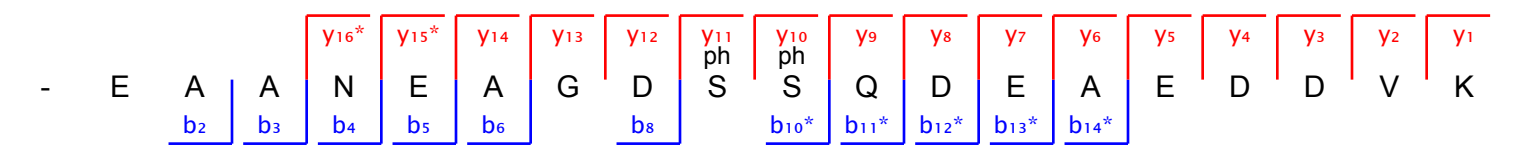

Raw file: 20150812\_A375SR\_Phospho\_BR1\_03  
 Scan: 8308 Method: FTMS; HCD Score: 86.76 m/z: 649.24 Gene names: ZNF638

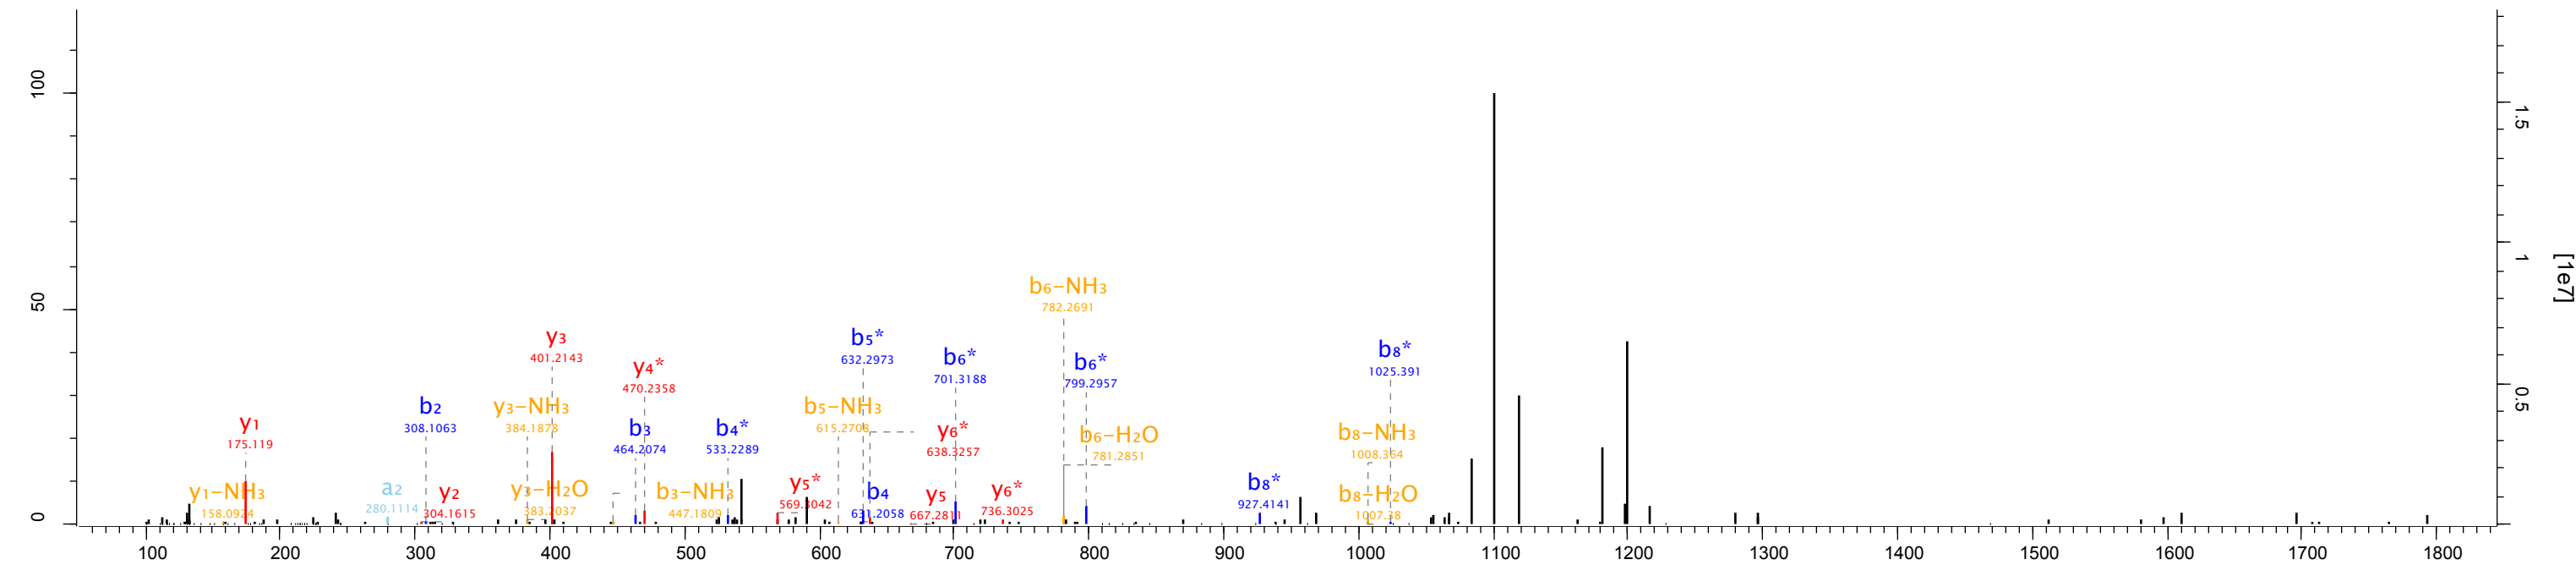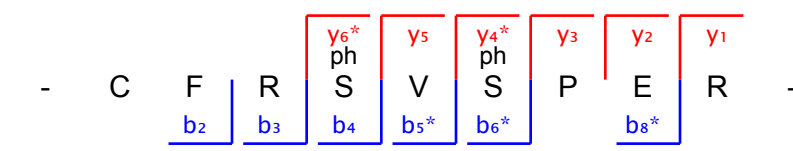

Raw file: 20150812\_A375SR\_Phospho\_BR1\_03  
 Scan: 8598 Method: FTMS; HCD Score: 85.86 m/z: 858.37 Gene names: PRDM2

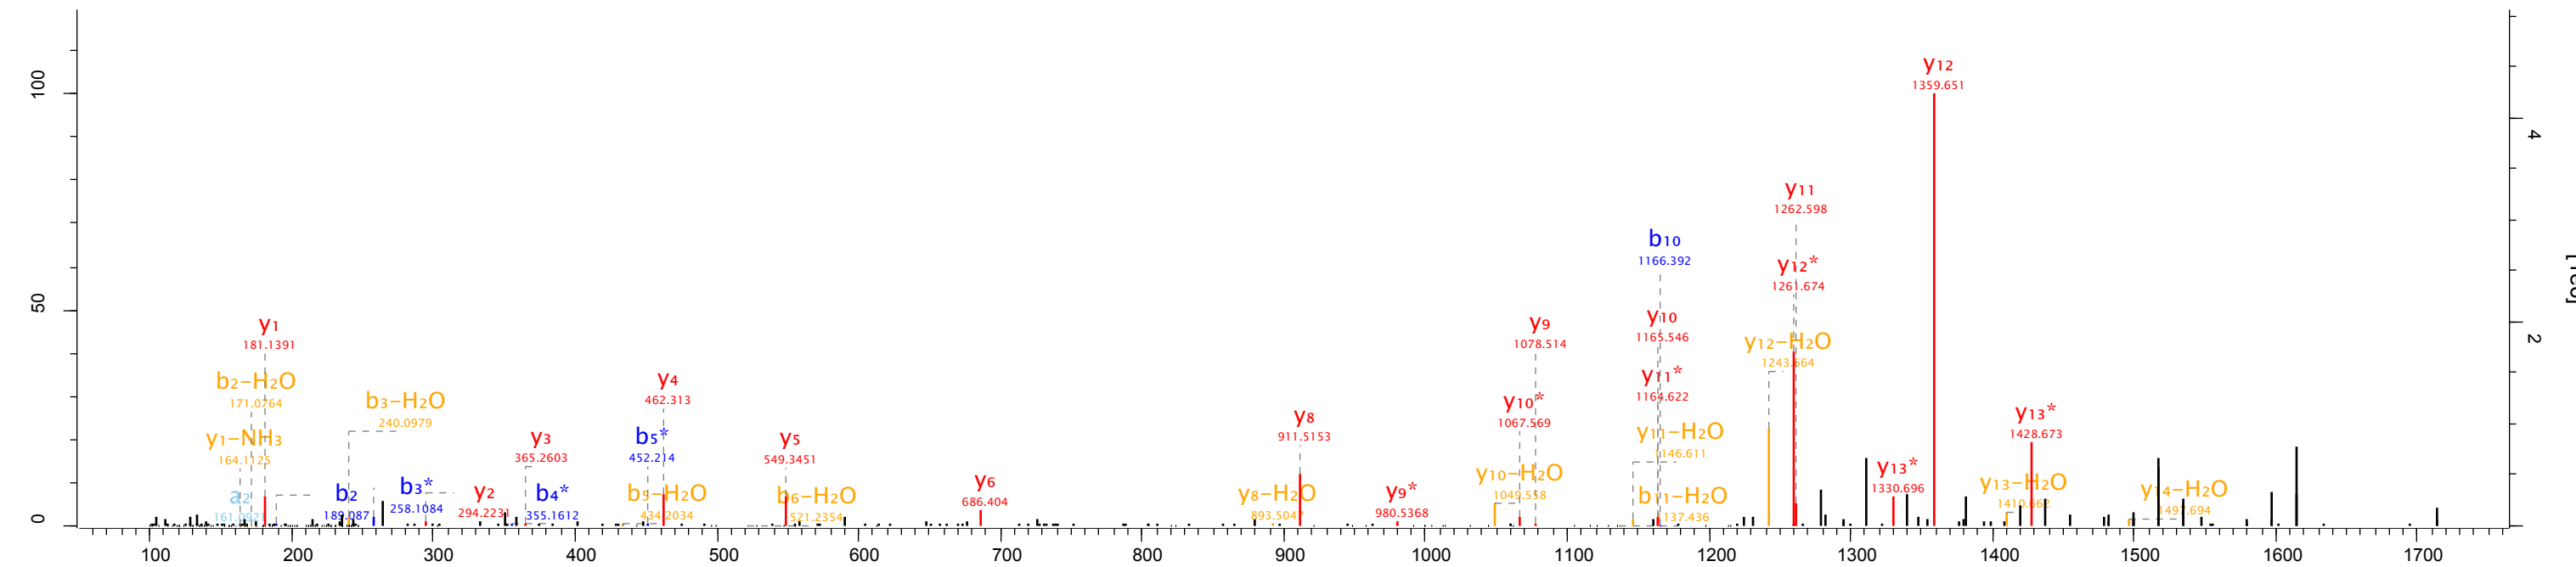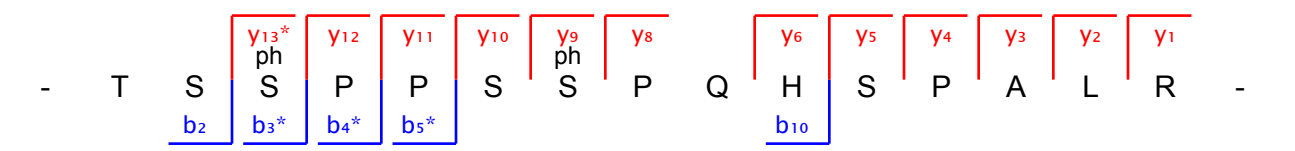

Raw file: 20150812\_A375SR\_Phospho\_BR1\_03  
 Scan: 8928 Method: FTMS; HCD Score: 177.71 m/z: 1051.4 Gene names: GNLI

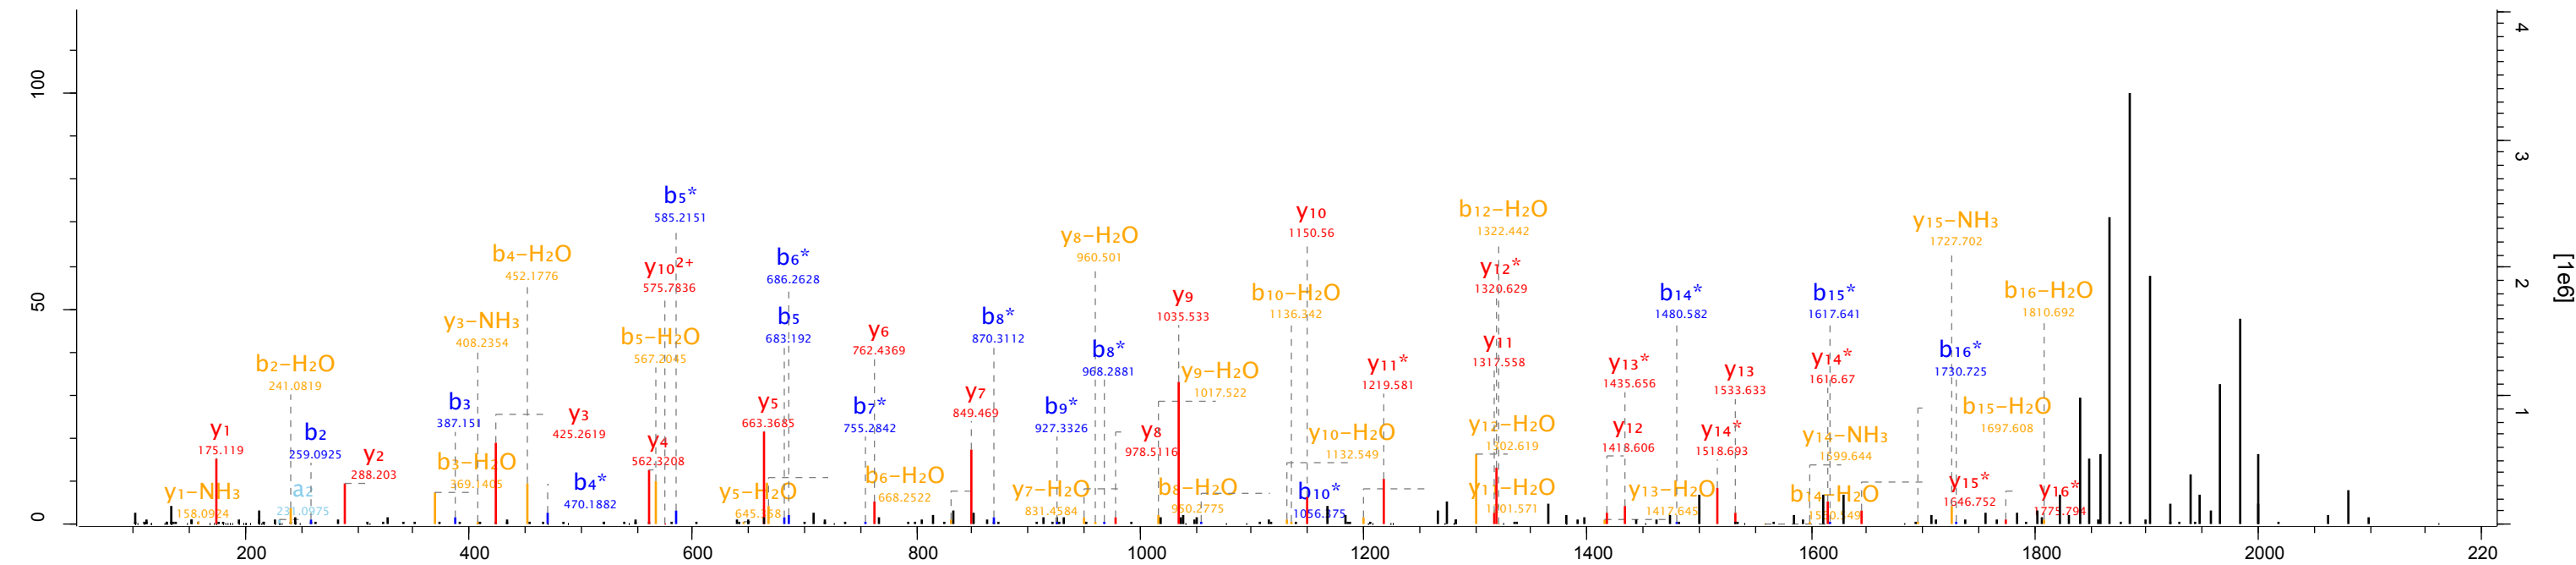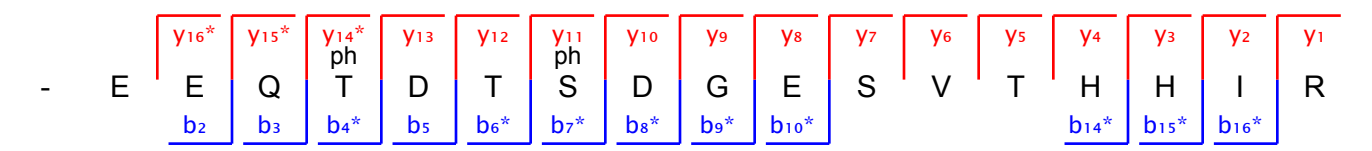

Raw file: 20150812\_A375SR\_Phospho\_BR1\_03  
 Scan: 9178 Method: FTMS; HCD Score: 133.86 m/z: 671.8 Gene names: ANKRD11

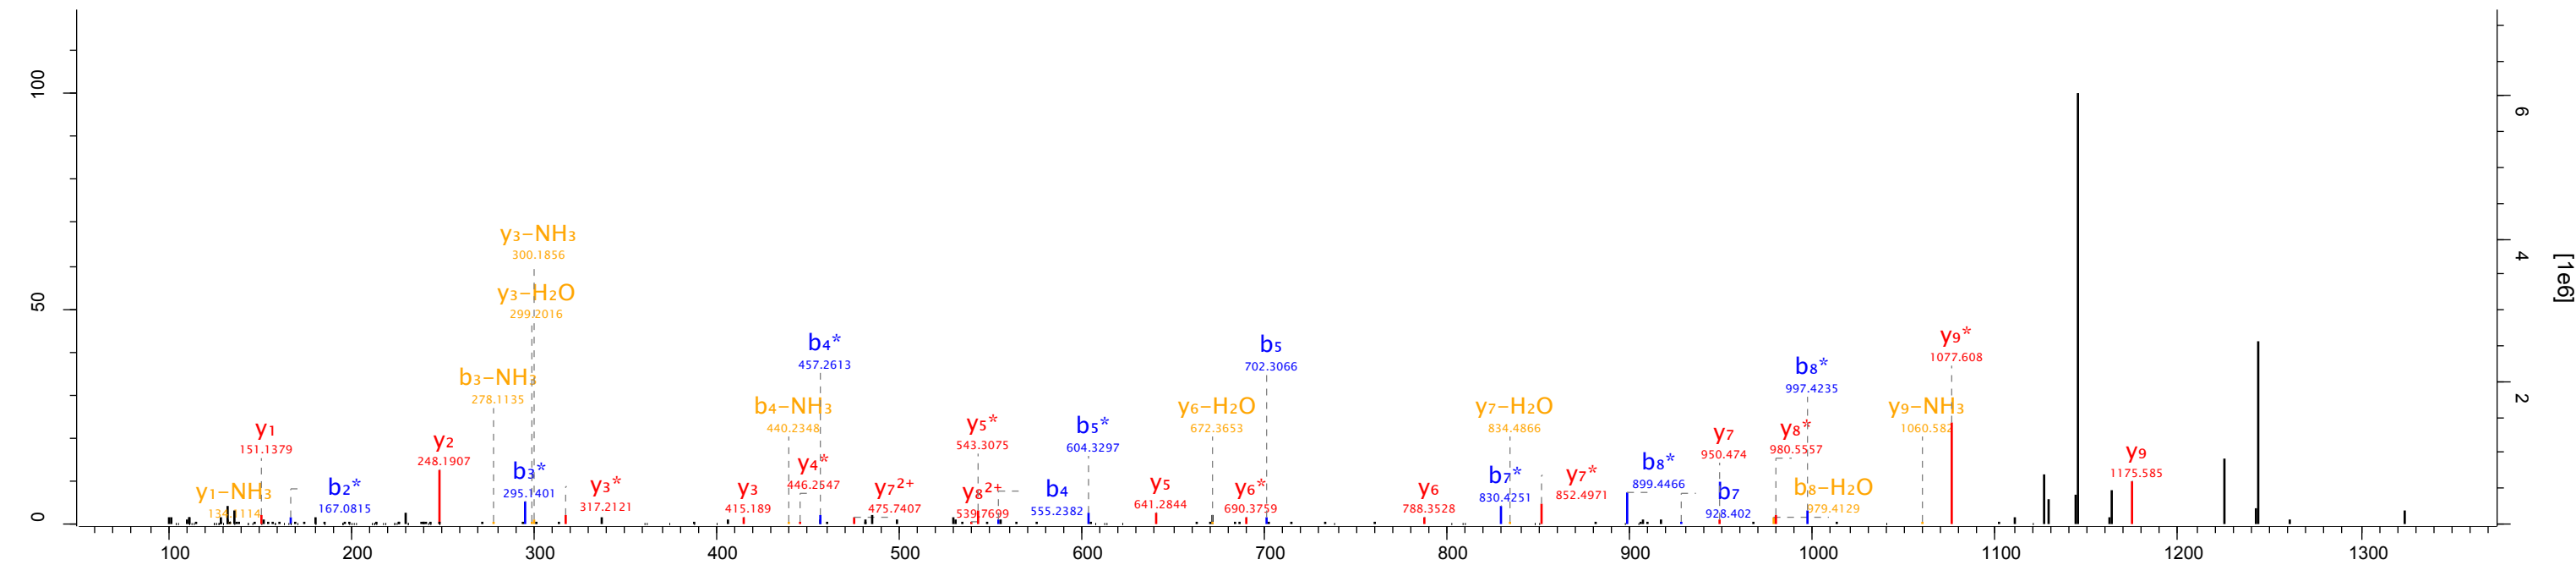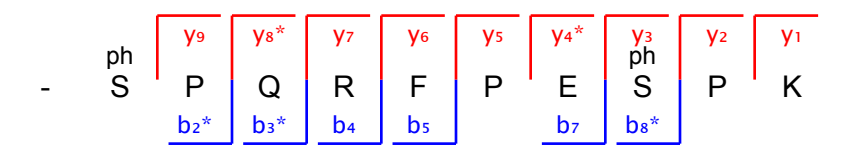

Raw file: 20150812\_A375SR\_Phospho\_BR1\_03  
 Scan: 9298 Method: FTMS; HCD Score: 198.4 m/z: 916.7 Gene names: RSF1

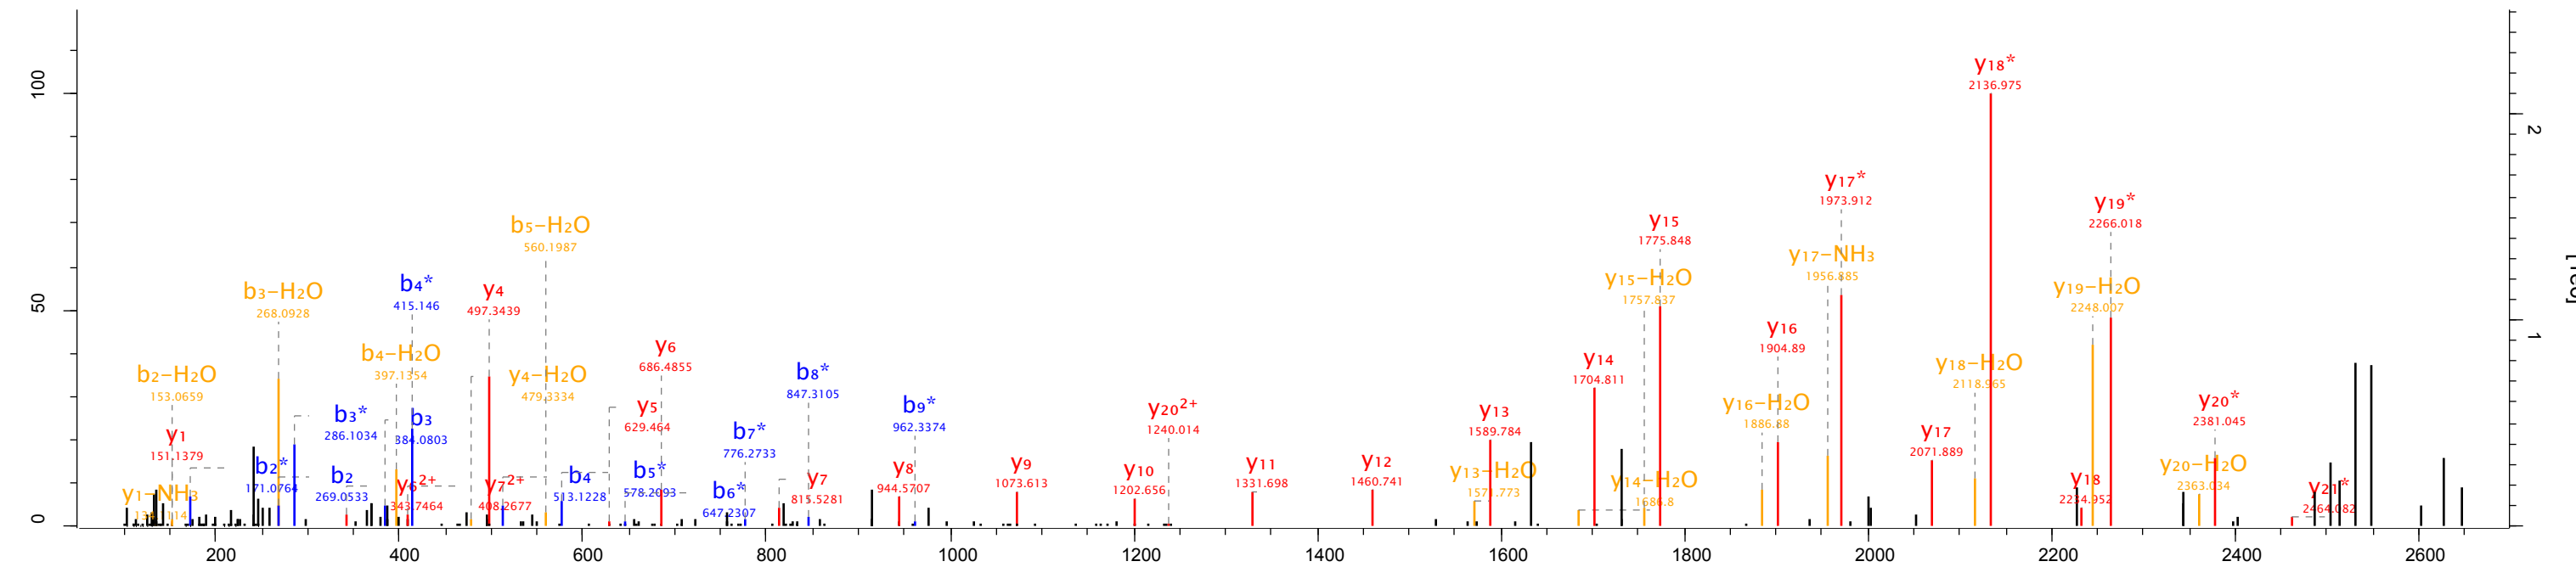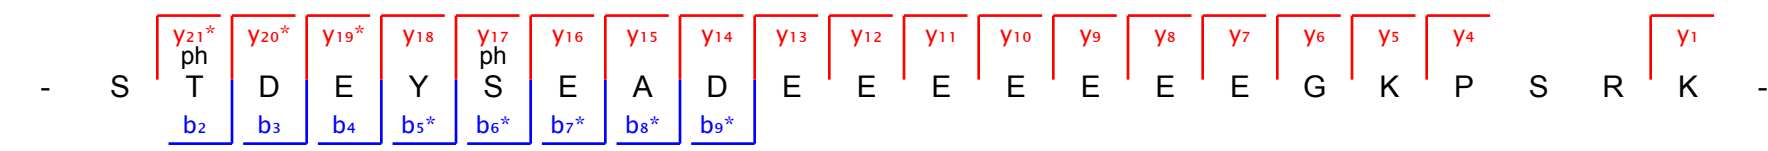

Raw file Scan Method Score m/z Gene names

20150812\_A375SR\_Phospho\_BR1\_03 9308 FTMS; HCD 117.83 583.75 MIEF1

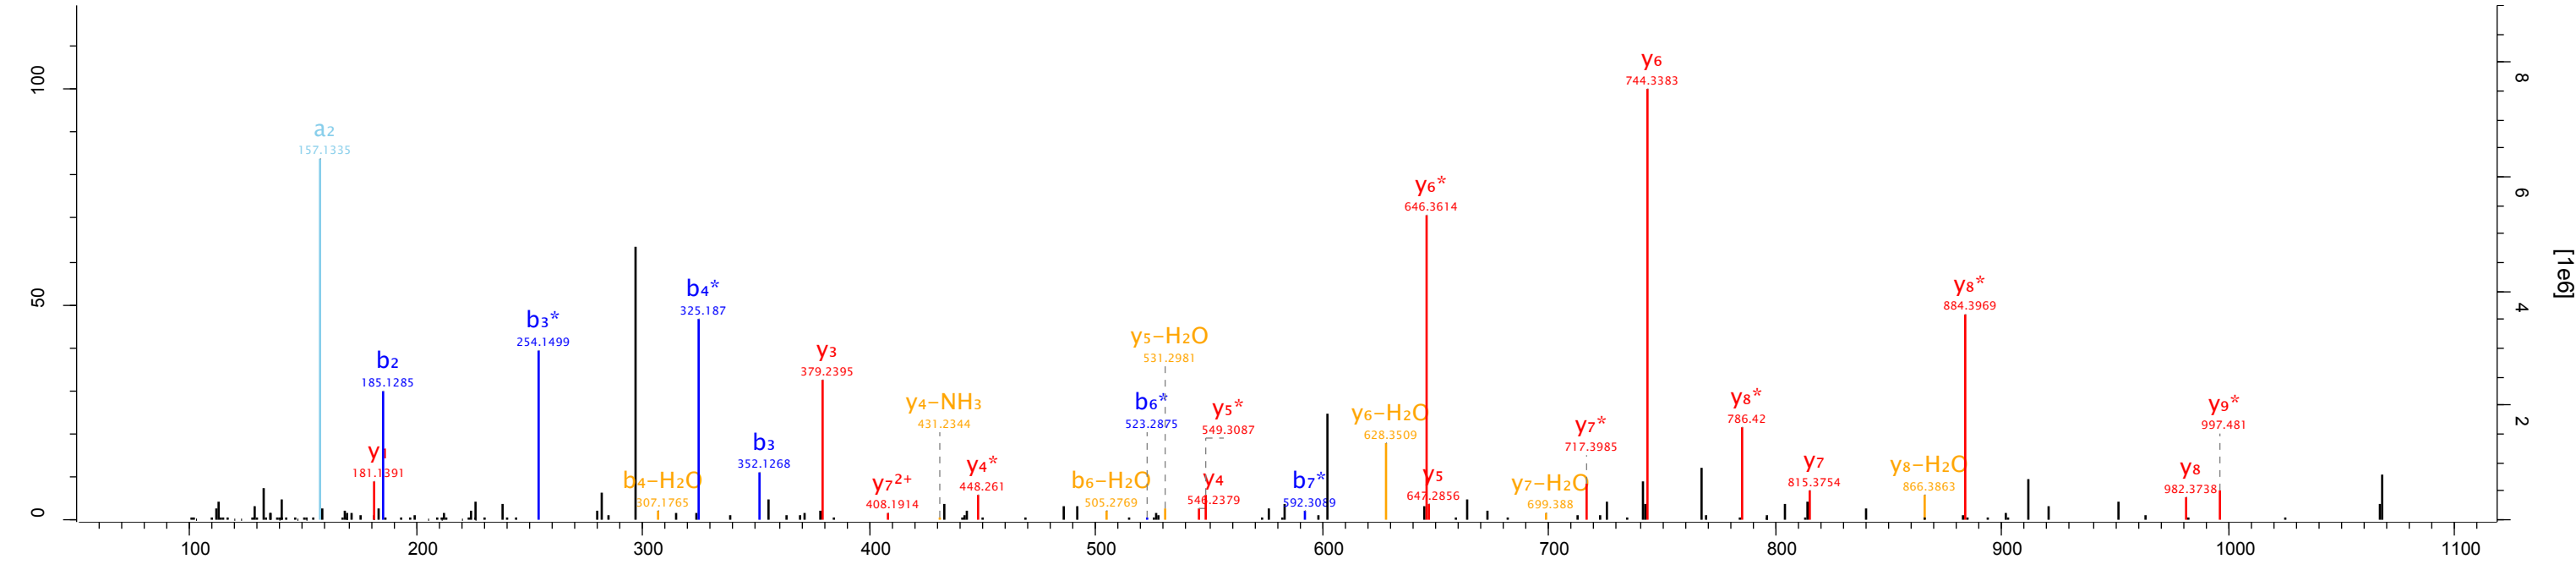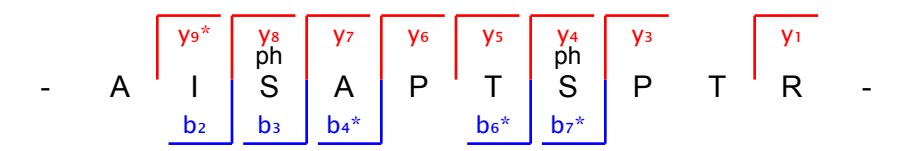

Raw file: 20150812\_A375SR\_Phospho\_BR1\_03  
 Scan: 9538 Method: FTMS; HCD Score: 217.07 m/z: 888.38 Gene names: METAP2

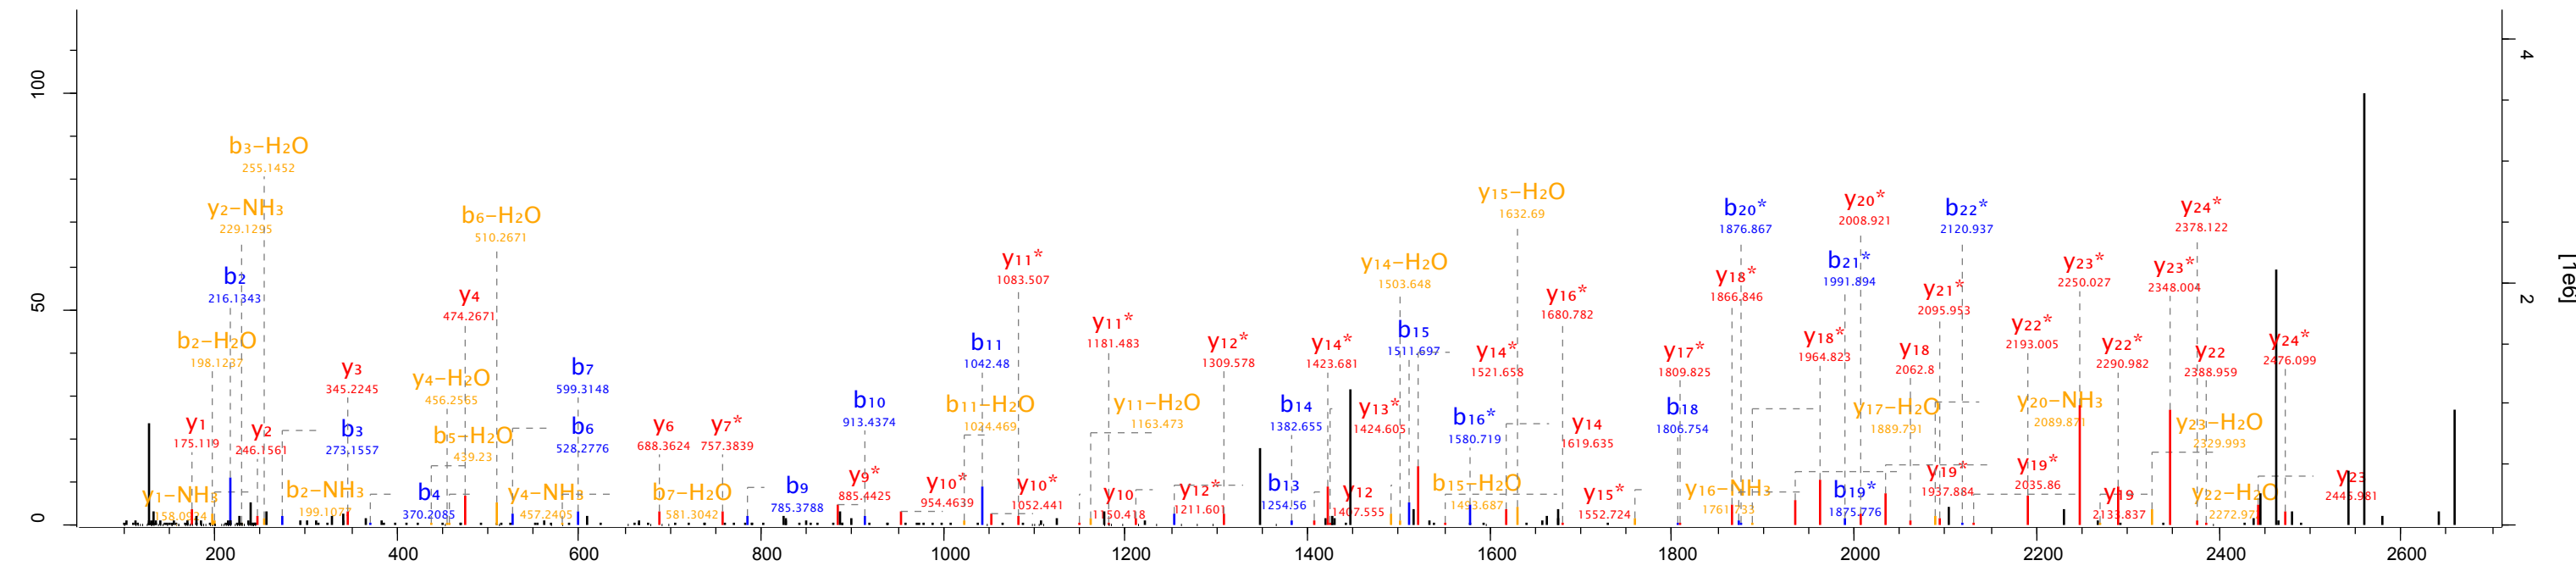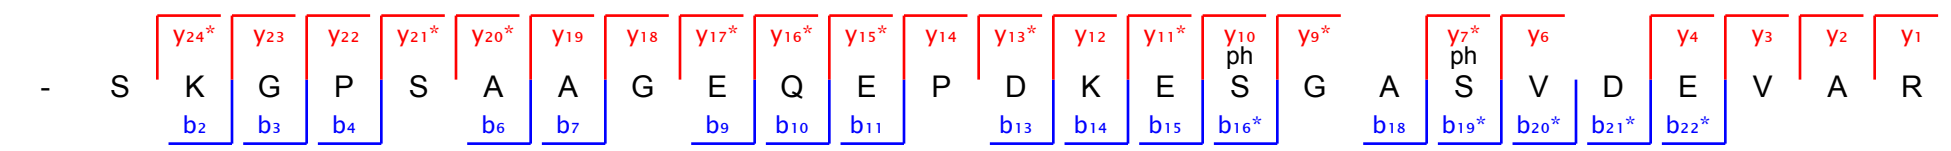



Raw file 20150812\_A375SR\_Phospho\_BR1\_03 Scan 9838 Method FTMS; HCD Score 58 m/z 868.06 Gene names PRRC2B

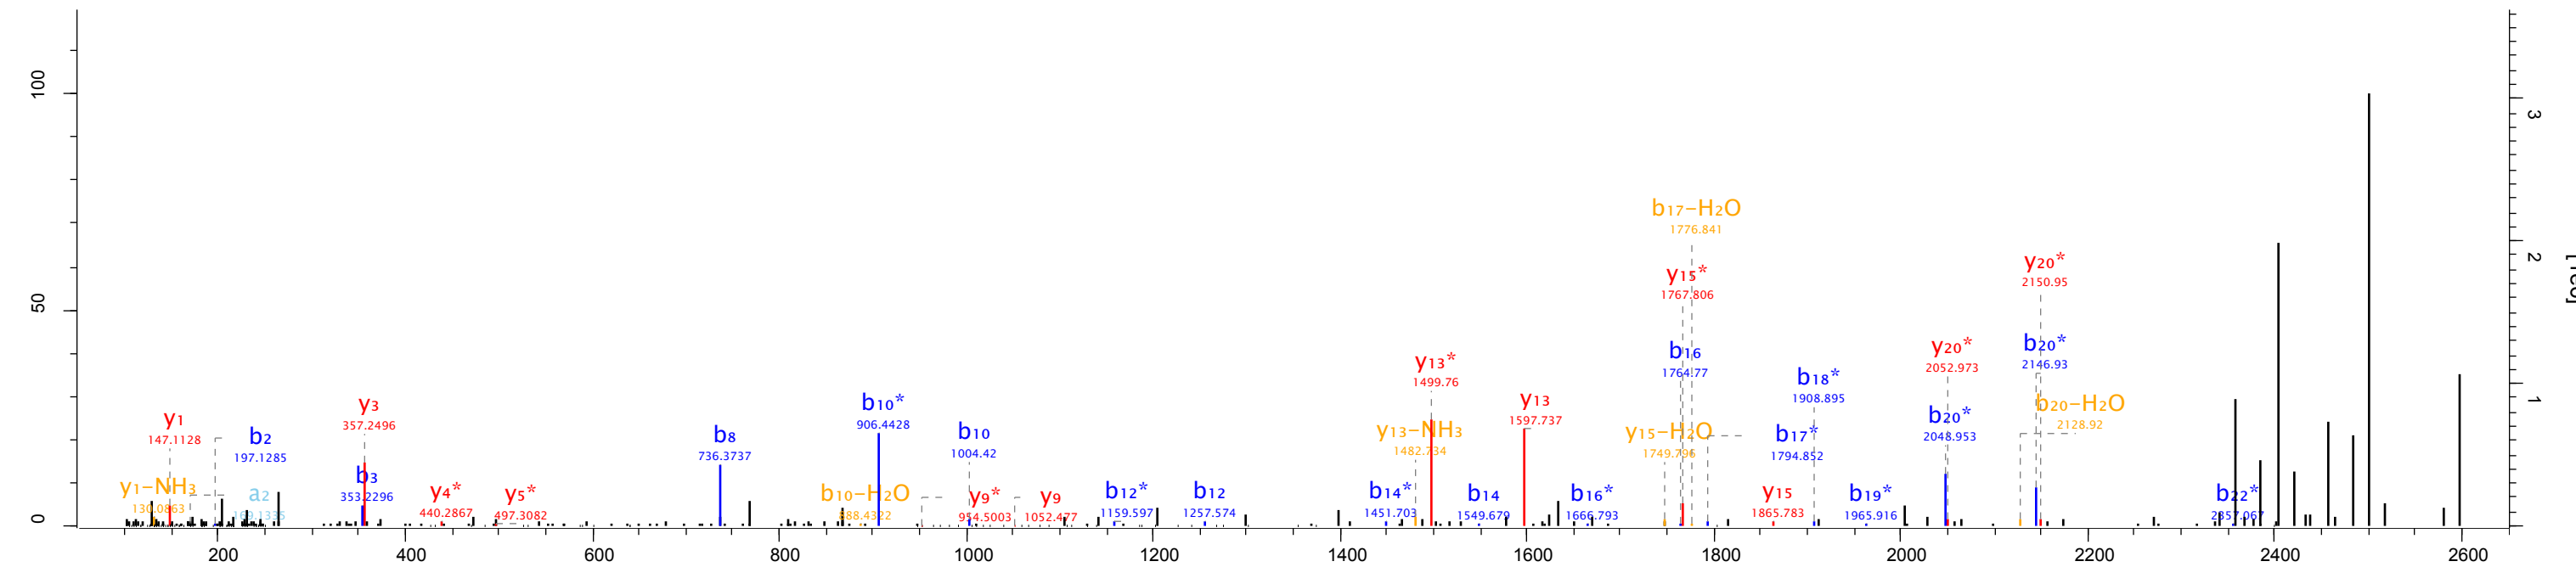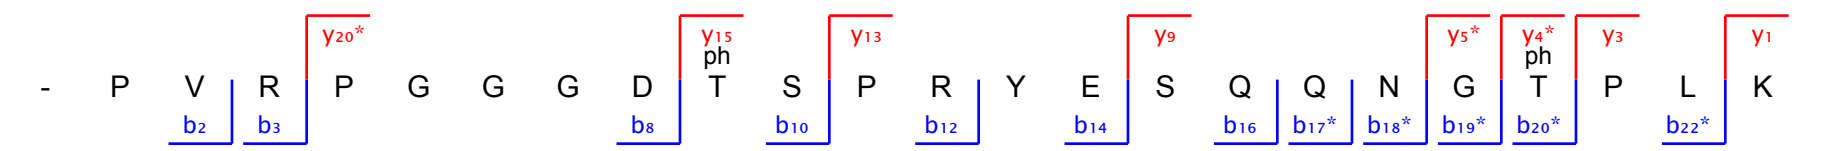

Raw file: 20150812\_A375SR\_Phospho\_BR1\_04  
 Scan: 10408 Method: FTMS; HCD Score: 81.02 m/z: 783.36 Gene names: LITAF;TLE3

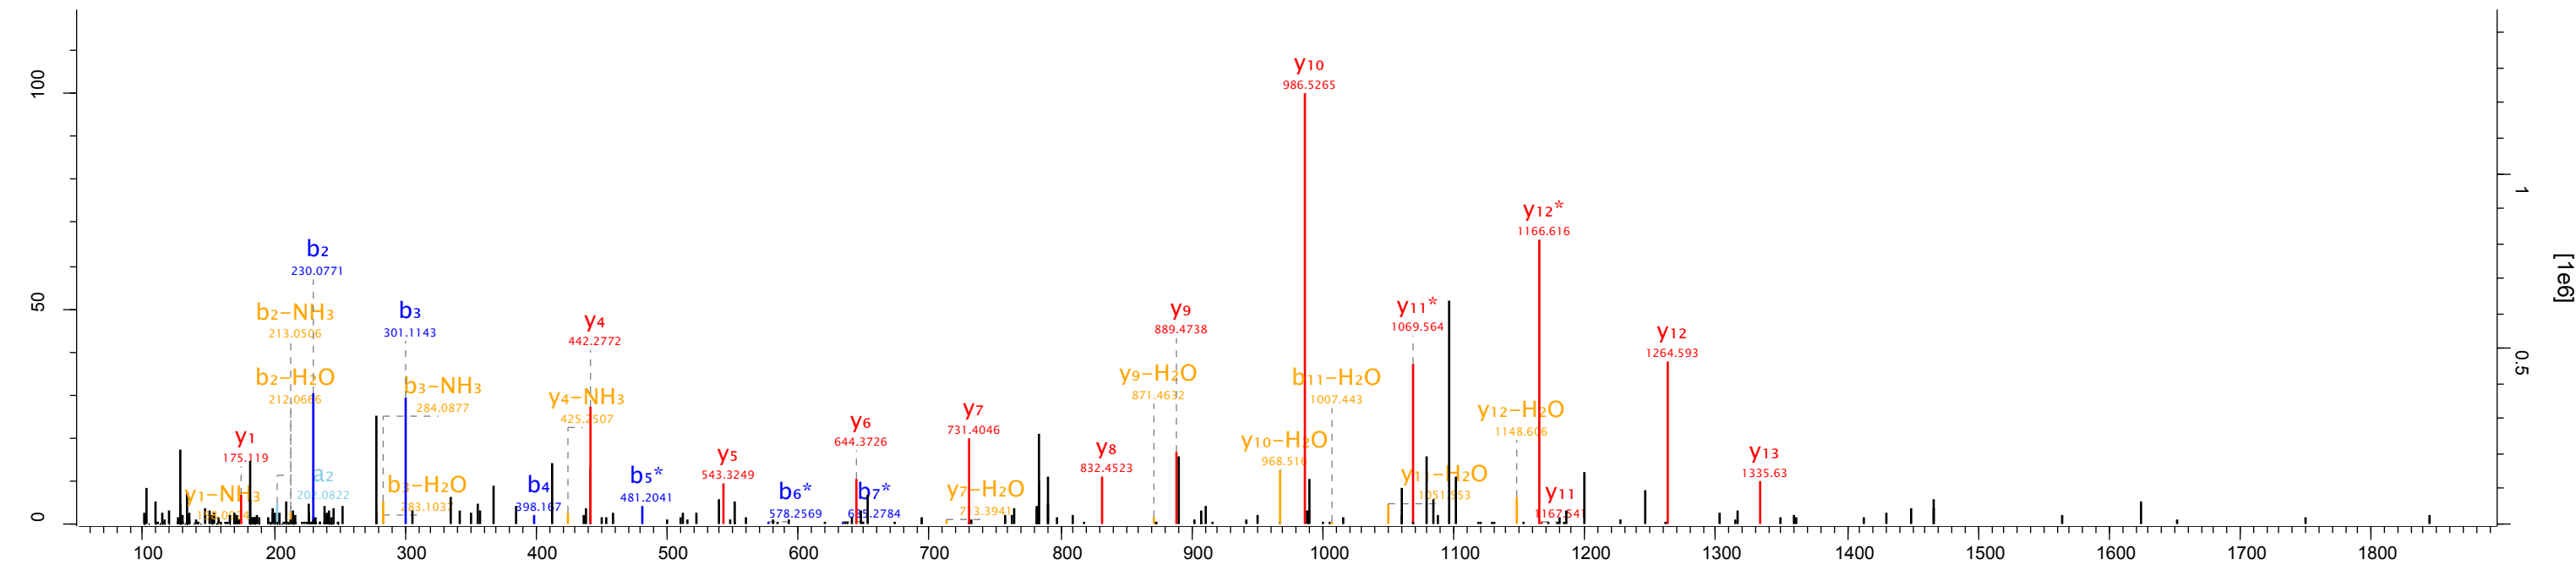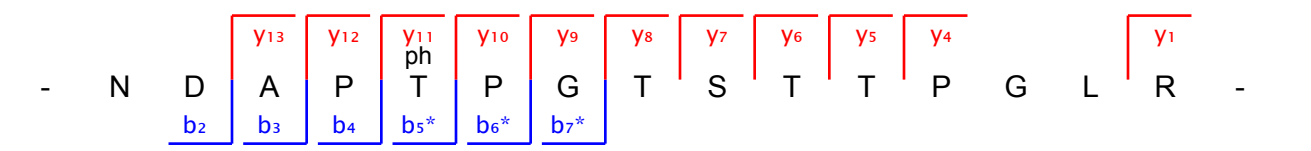

Raw file Scan Method Score m/z Gene names  
 20150812\_A375SR\_Phospho\_BR1\_04 10608 FTMS; HCD 154.85 624.78 CHMP2B

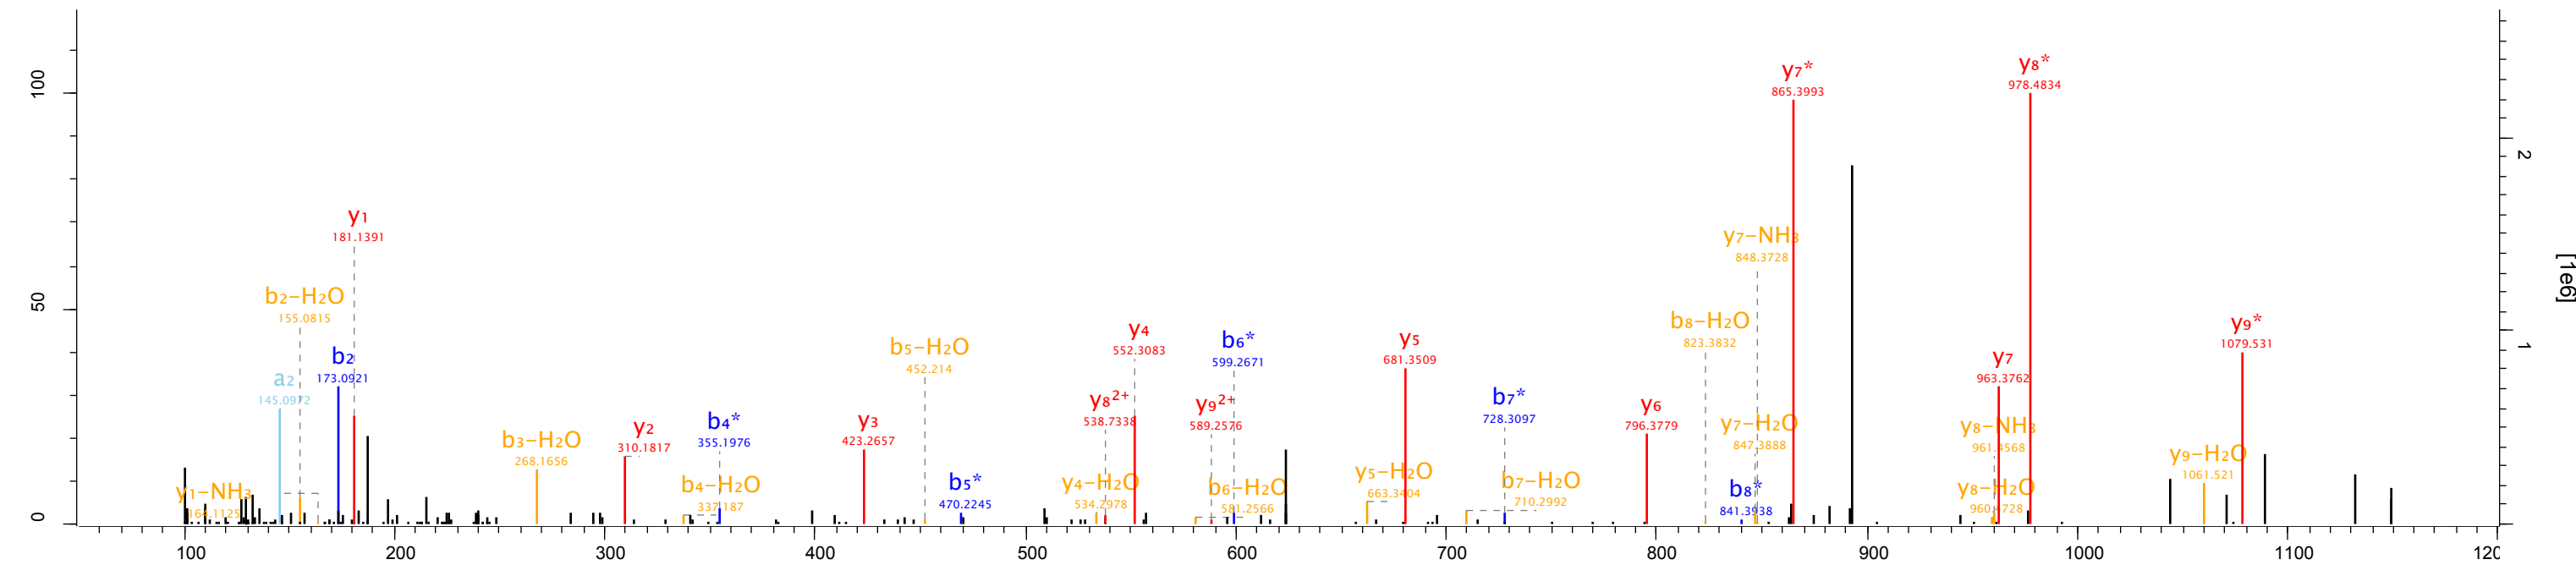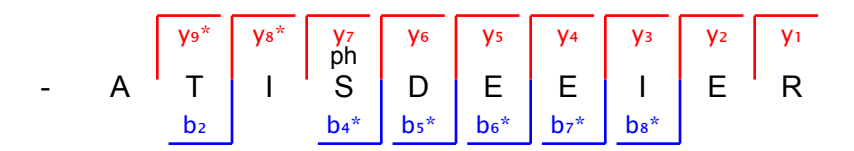

Raw file: 20150812\_A375SR\_Phospho\_BR1\_04  
 Scan: 10858 Method: FTMS; HCD Score: 141.64 m/z: 851.88 Gene names: KANK1

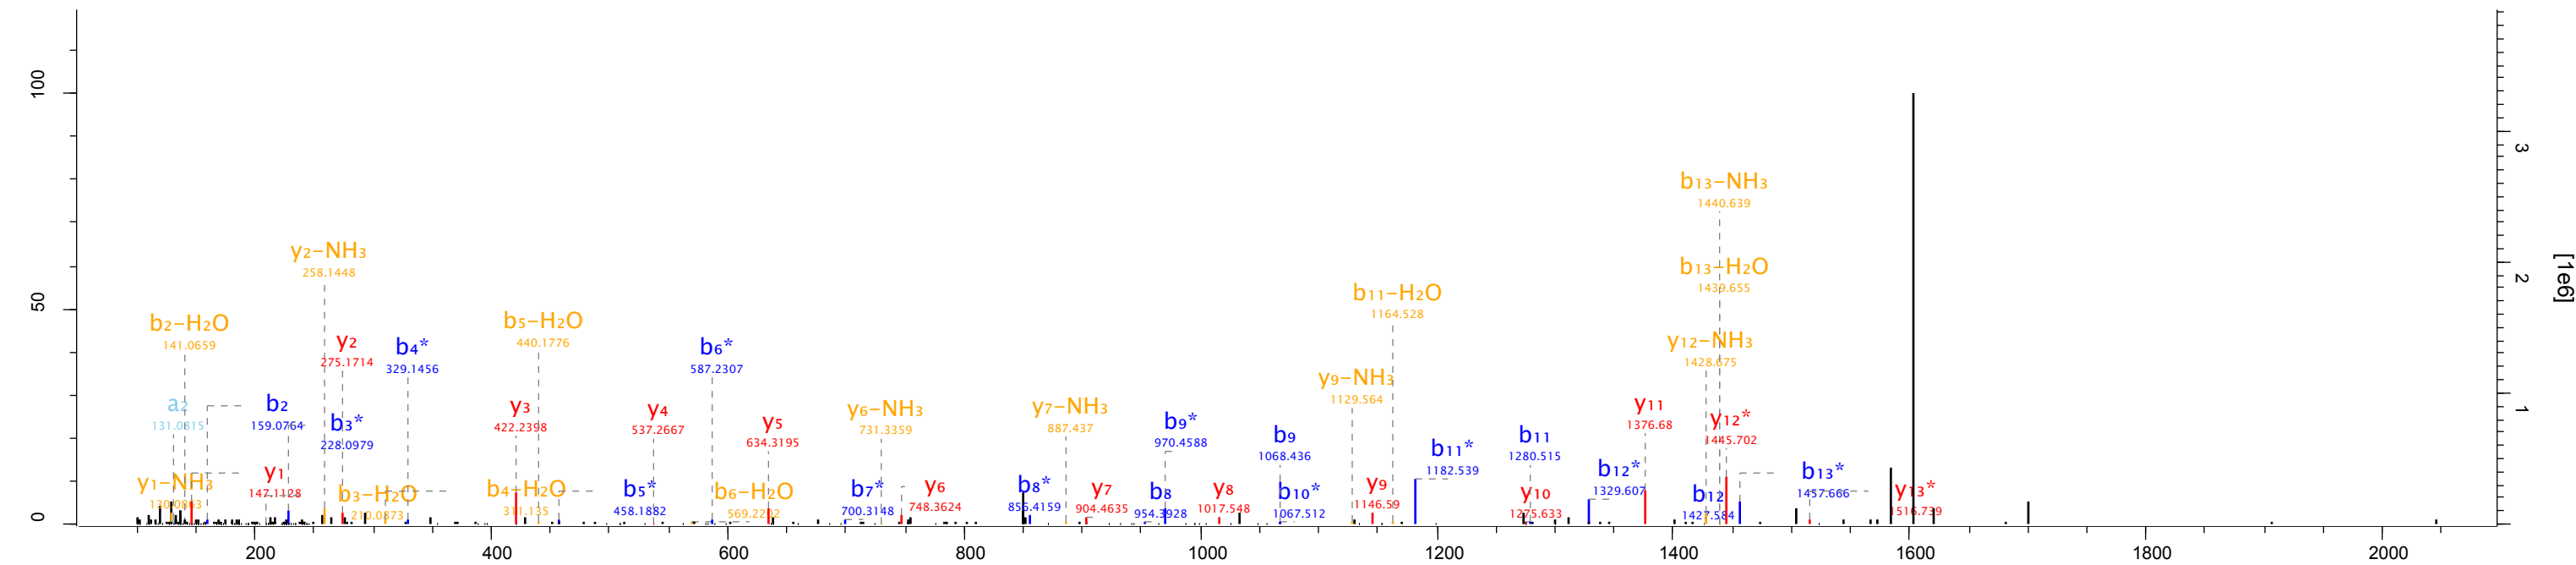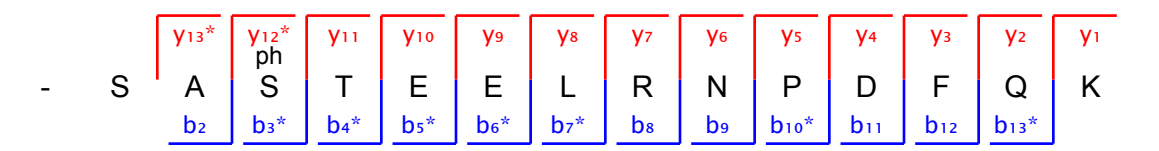

Raw file: 20150812\_A375SR\_Phospho\_BR1\_04  
 Scan: 11038 Method: FTMS; HCD Score: 258.8 m/z: 814.37 Gene names: KIF7

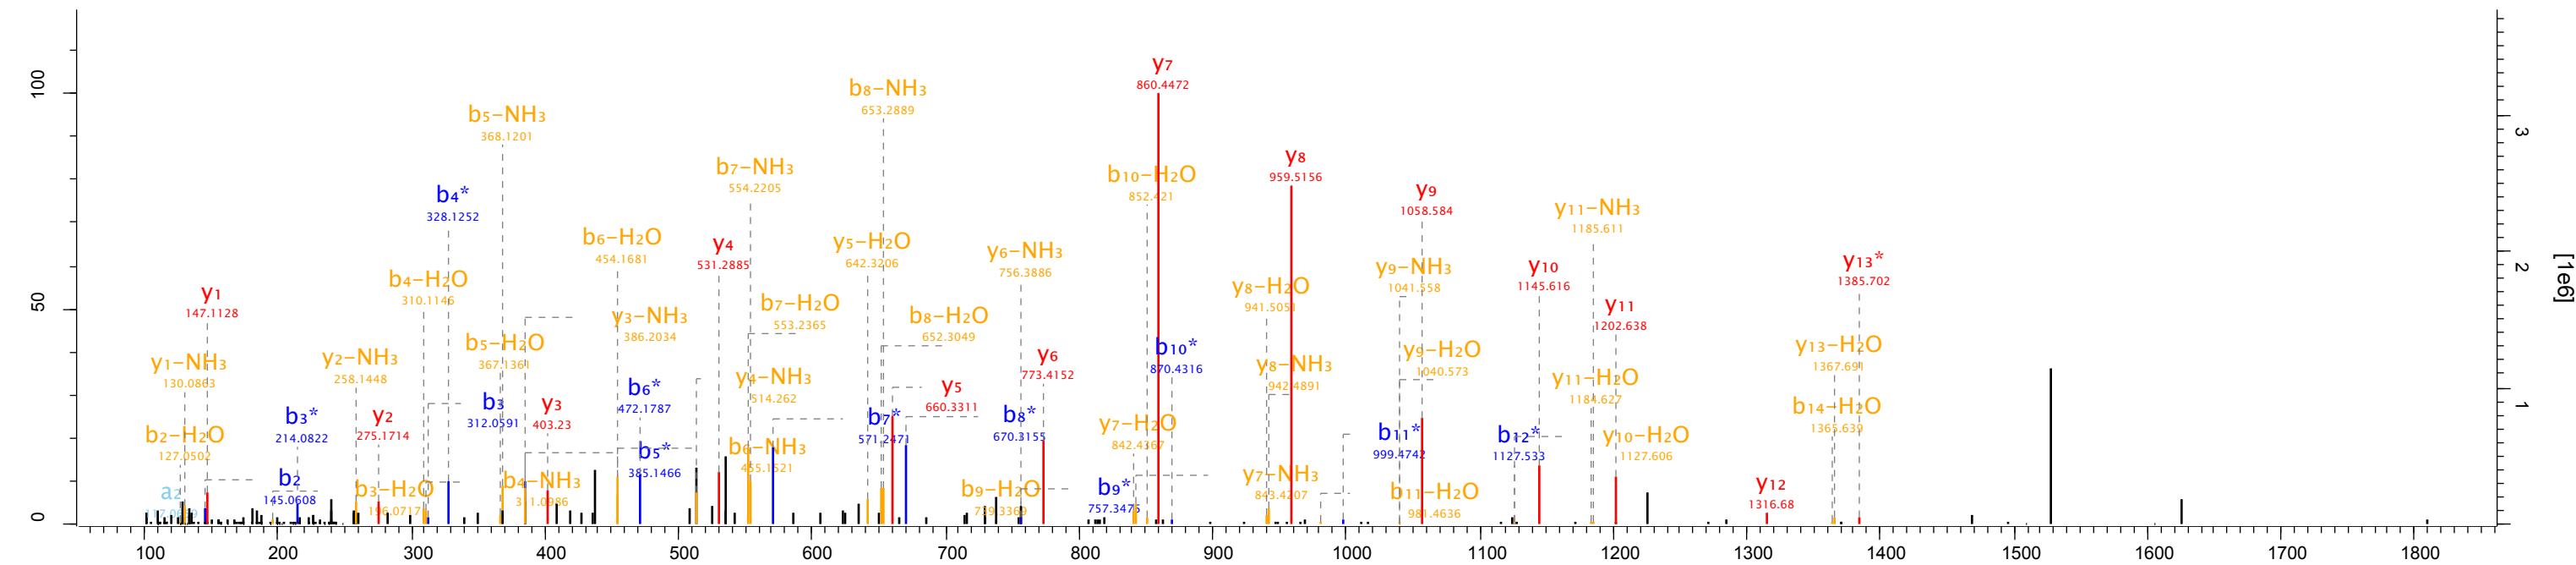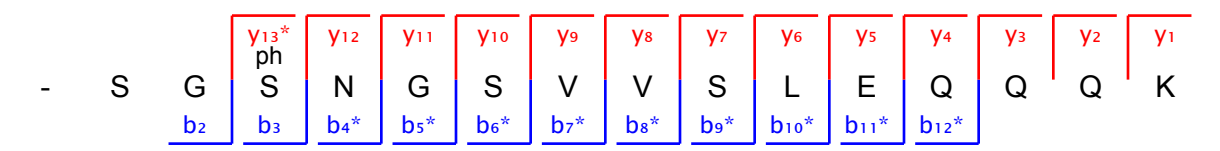

Raw file Scan Method Score m/z Gene names  
 20150812\_A375SR\_Phospho\_BR1\_04 11158 FTMS; HCD 298.2 1146.95 HNRNPA2B1

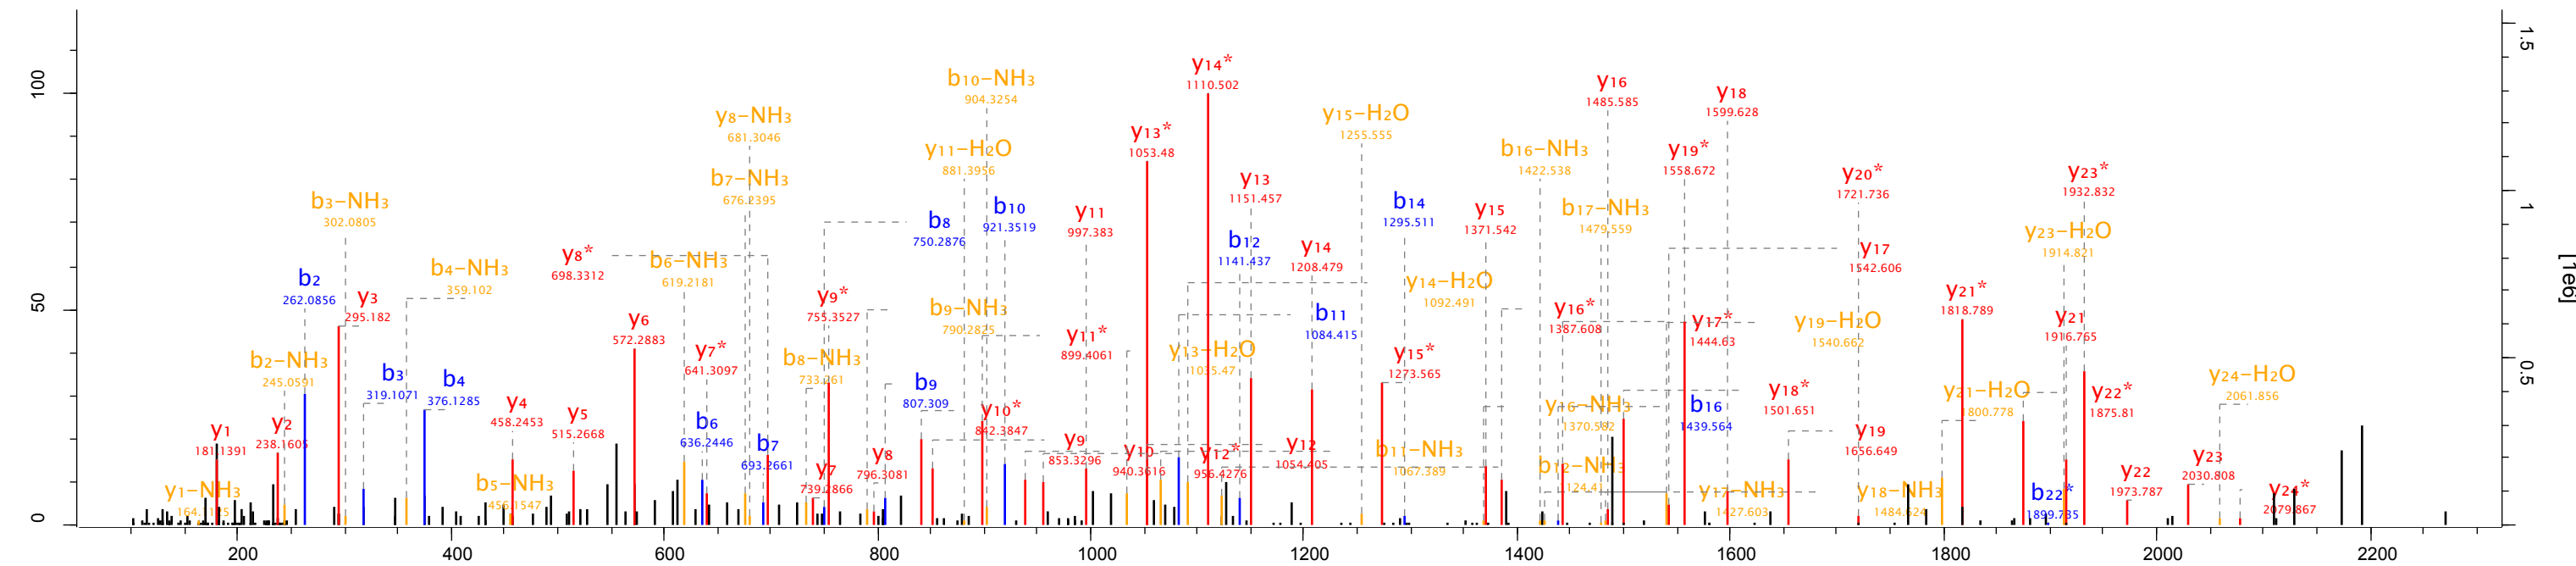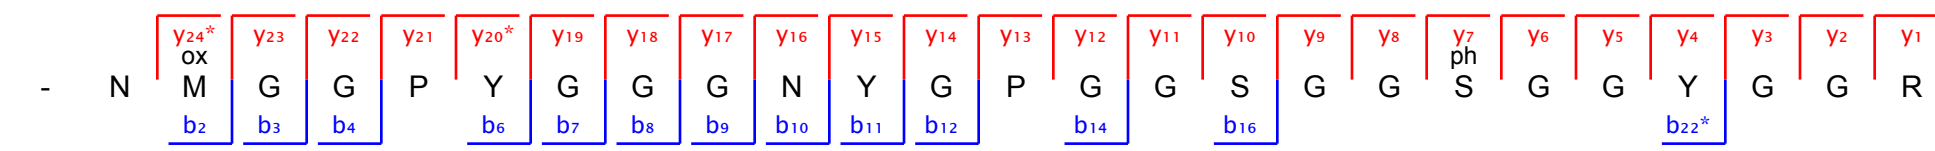

Raw file 20150812\_A375SR\_Phospho\_BR1\_04 Scan 11178 Method FTMS; HCD Score 126.39 m/z 531.22 Gene names MYO1C

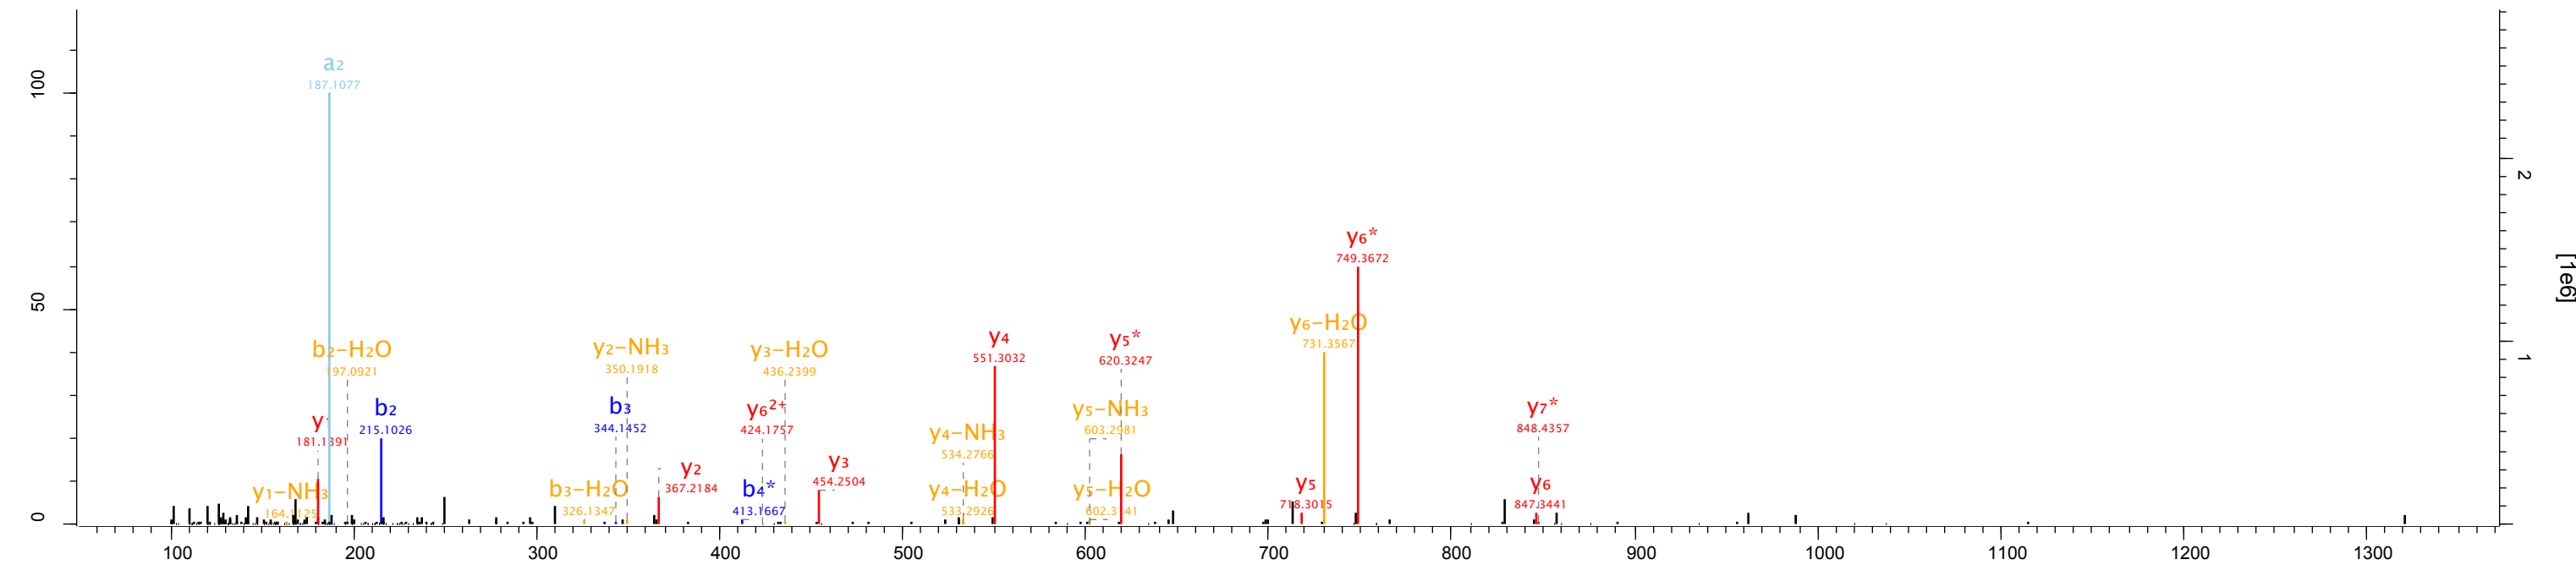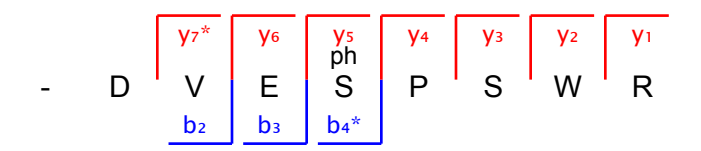

Raw file 20150812\_A375SR\_Phospho\_BR1\_04 Scan 11438 Method FTMS; HCD Score 233.31 m/z 860.91 Gene names BOD1L1

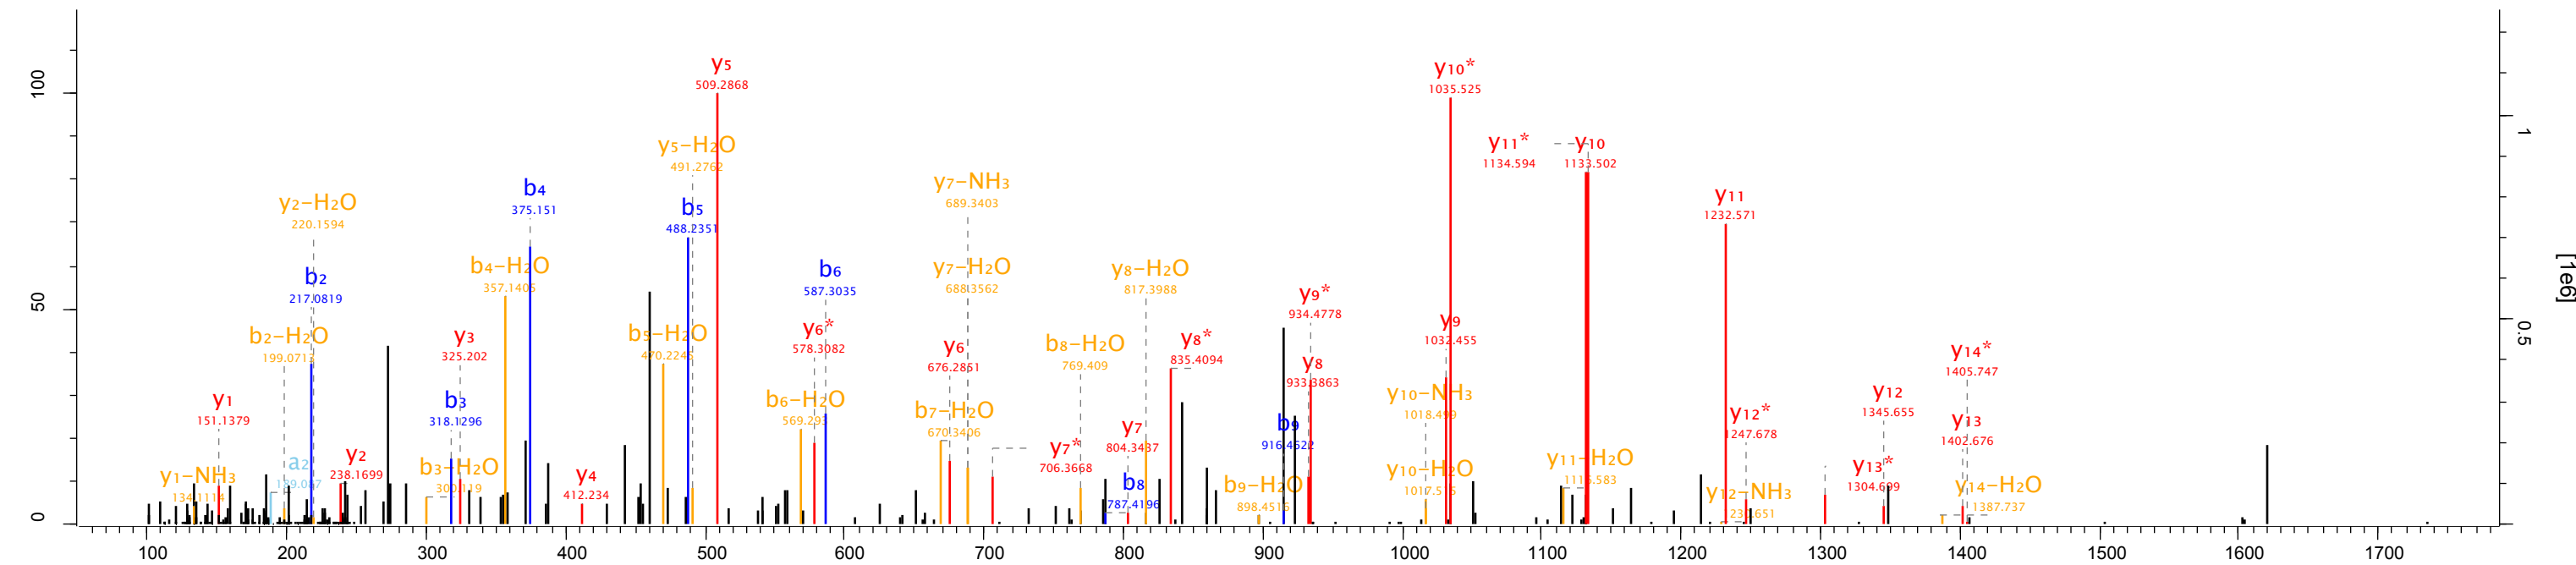

- T D T G I V T V E Q S P S S S K -

Peptide sequence: T D T G I V T V E Q S P S S S K

Fragmentation sites (b ions): b2 (D), b3 (T), b4 (G), b5 (I), b6 (V), b8 (V), b9 (E)

Fragmentation sites (y ions): y14\* (K), y13 (S), y12 (S), y11 (S), y10 (T), y9 (V), y8 (E), y7 (Q), y6 (S), y5 (P), y4 (S), y3 (S), y2 (S), y1 (K)



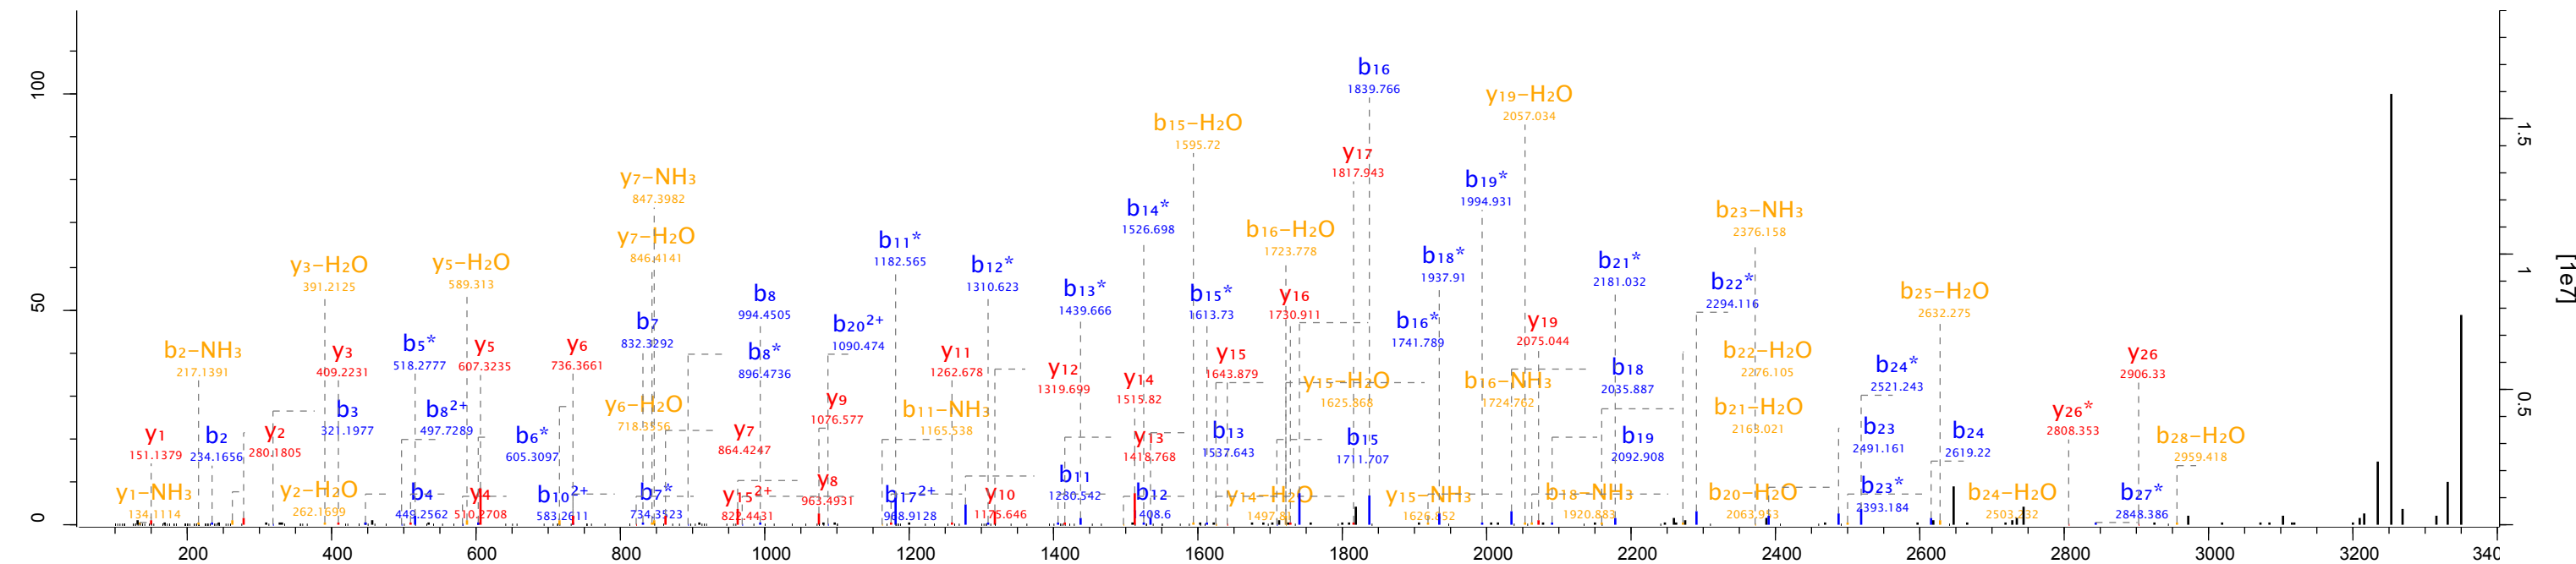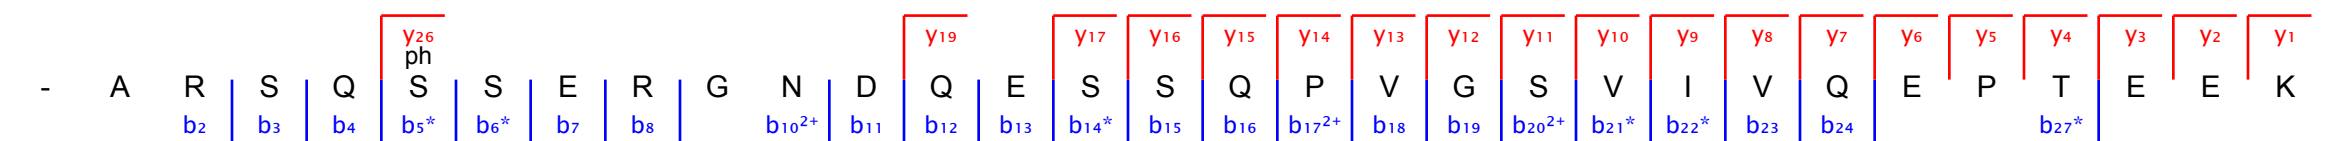

Raw file 20150812\_A375SR\_Phospho\_BR1\_04 Scan 12088 Method FTMS; HCD Score 353.78 m/z 964.88 Gene names ZFYVE19

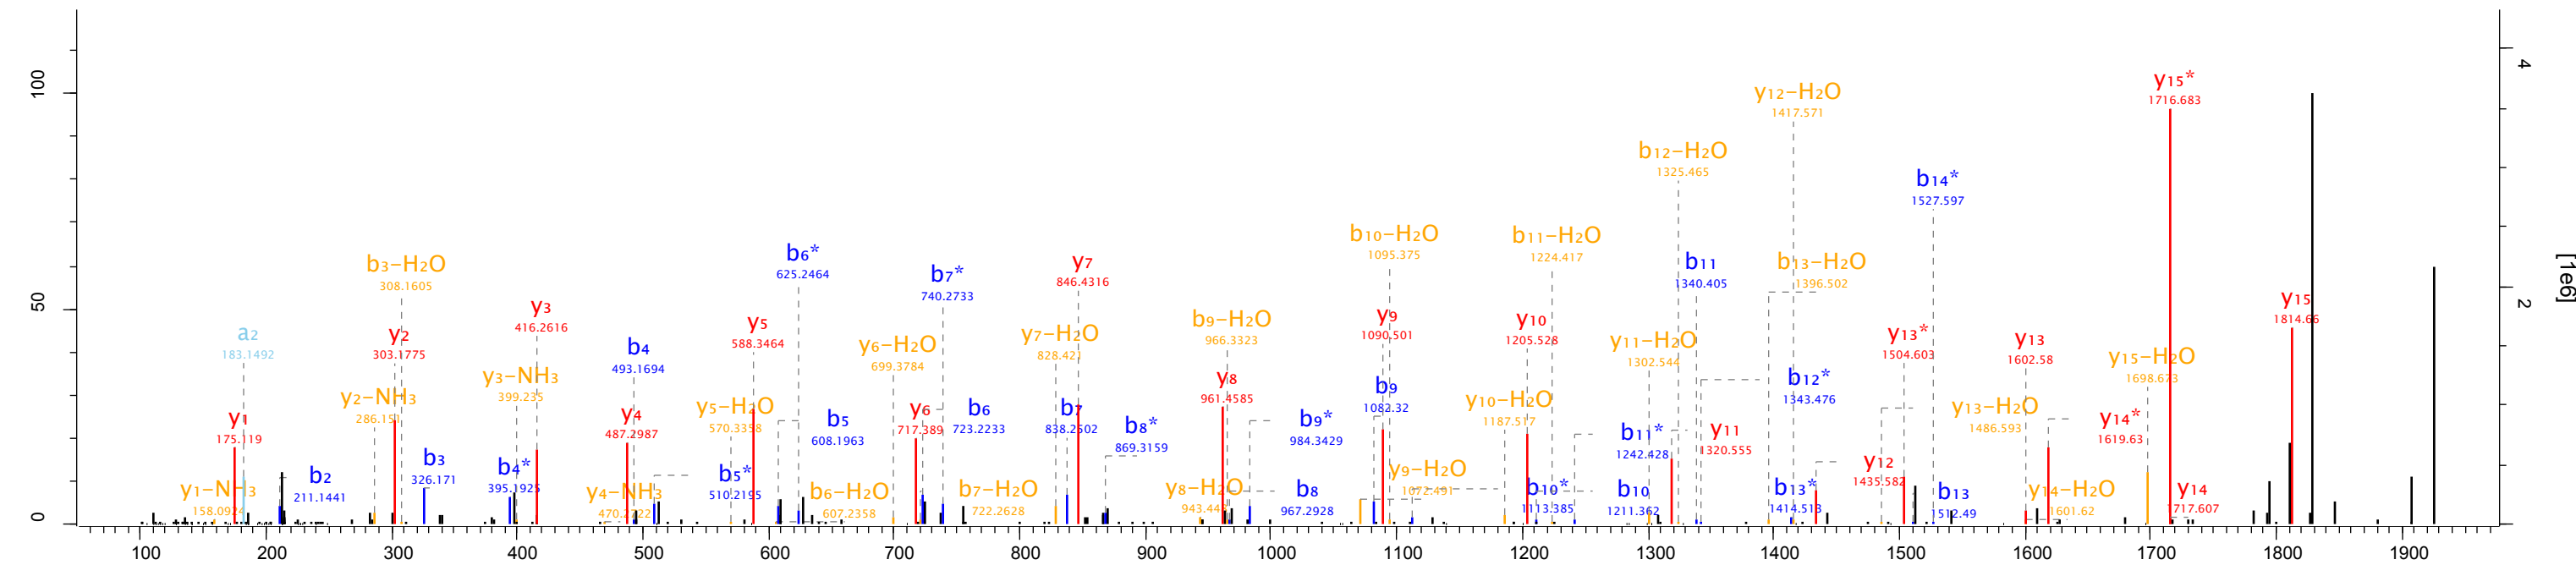

- L P D S D D D E D E E T A I Q R -

b<sub>2</sub> b<sub>3</sub> b<sub>4</sub> b<sub>5</sub> b<sub>6</sub> b<sub>7</sub> b<sub>8</sub> b<sub>9</sub> b<sub>10</sub> b<sub>11</sub> b<sub>12</sub>\* b<sub>13</sub> b<sub>14</sub>\*

Raw file 20150812\_A375SR\_Phospho\_BR1\_04 Scan 12968 Method FTMS; HCD Score 60.06 m/z 586.98 Gene names EPB41L2

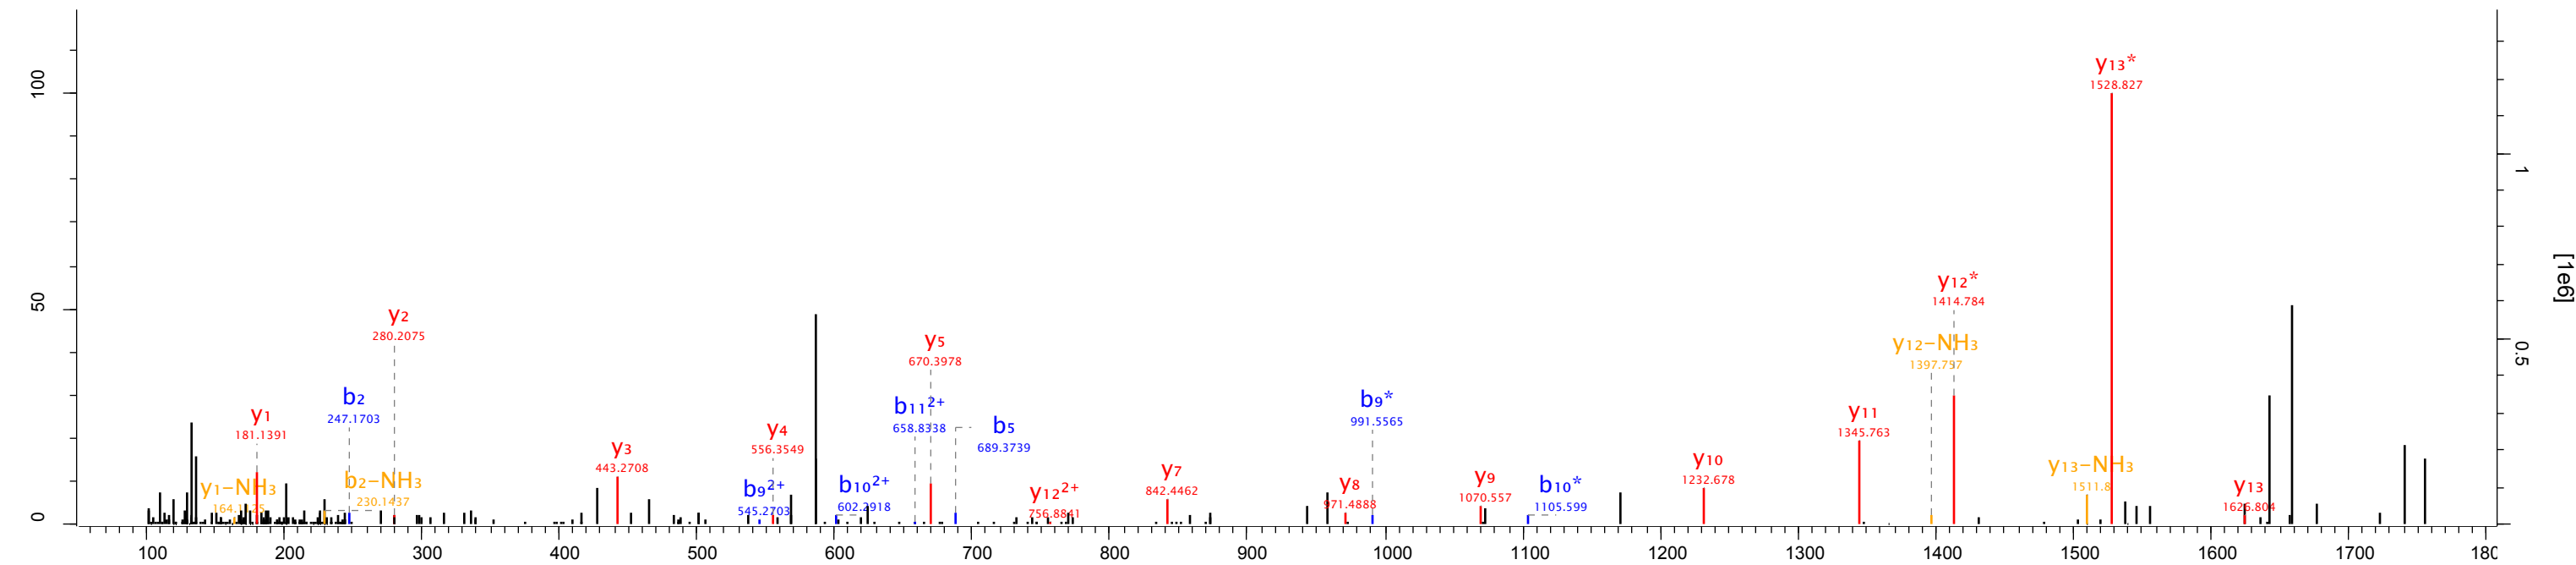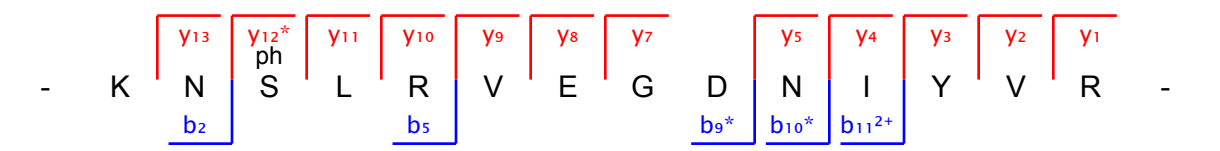

Raw file Scan Method Score m/z Gene names  
 20150812\_A375SR\_Phospho\_BR1\_04 13248 FTMS; HCD 179.11 929.66 ZNF592

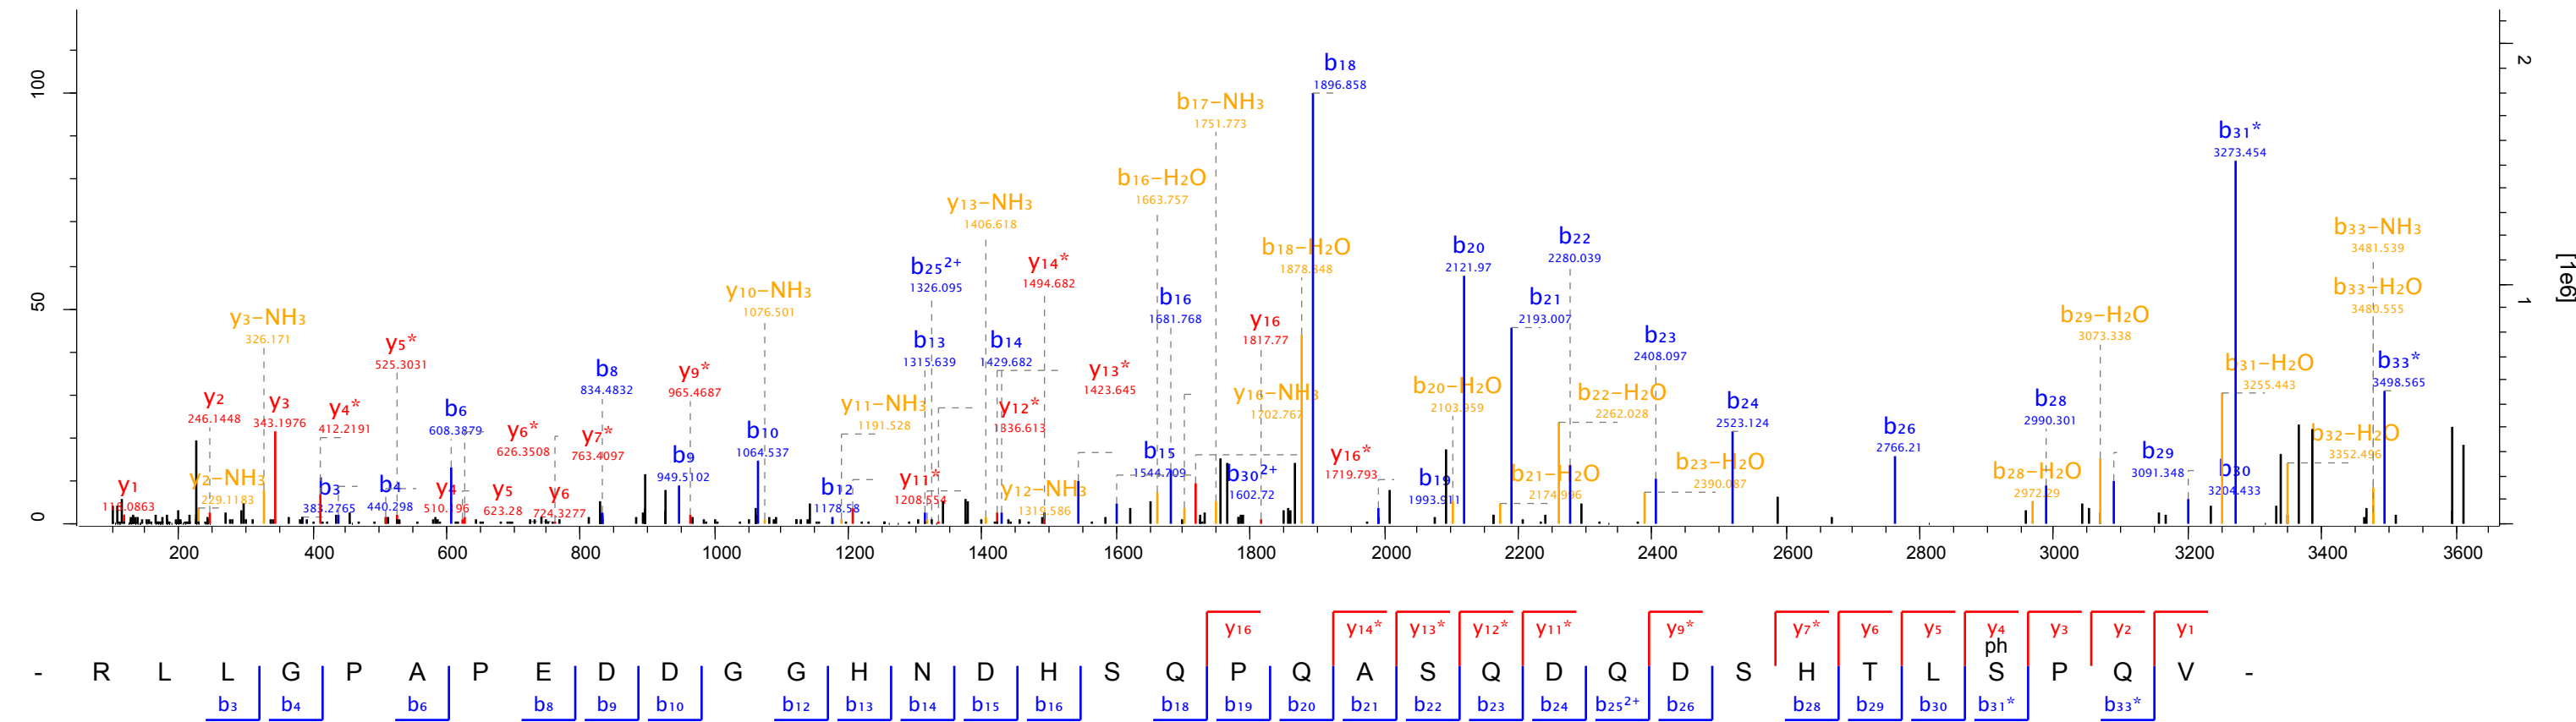

Raw file Scan Method Score m/z Gene names  
 20150812\_A375SR\_Phospho\_BR1\_04 1328 FTMS; HCD 42.24 481.88 ZC3H13

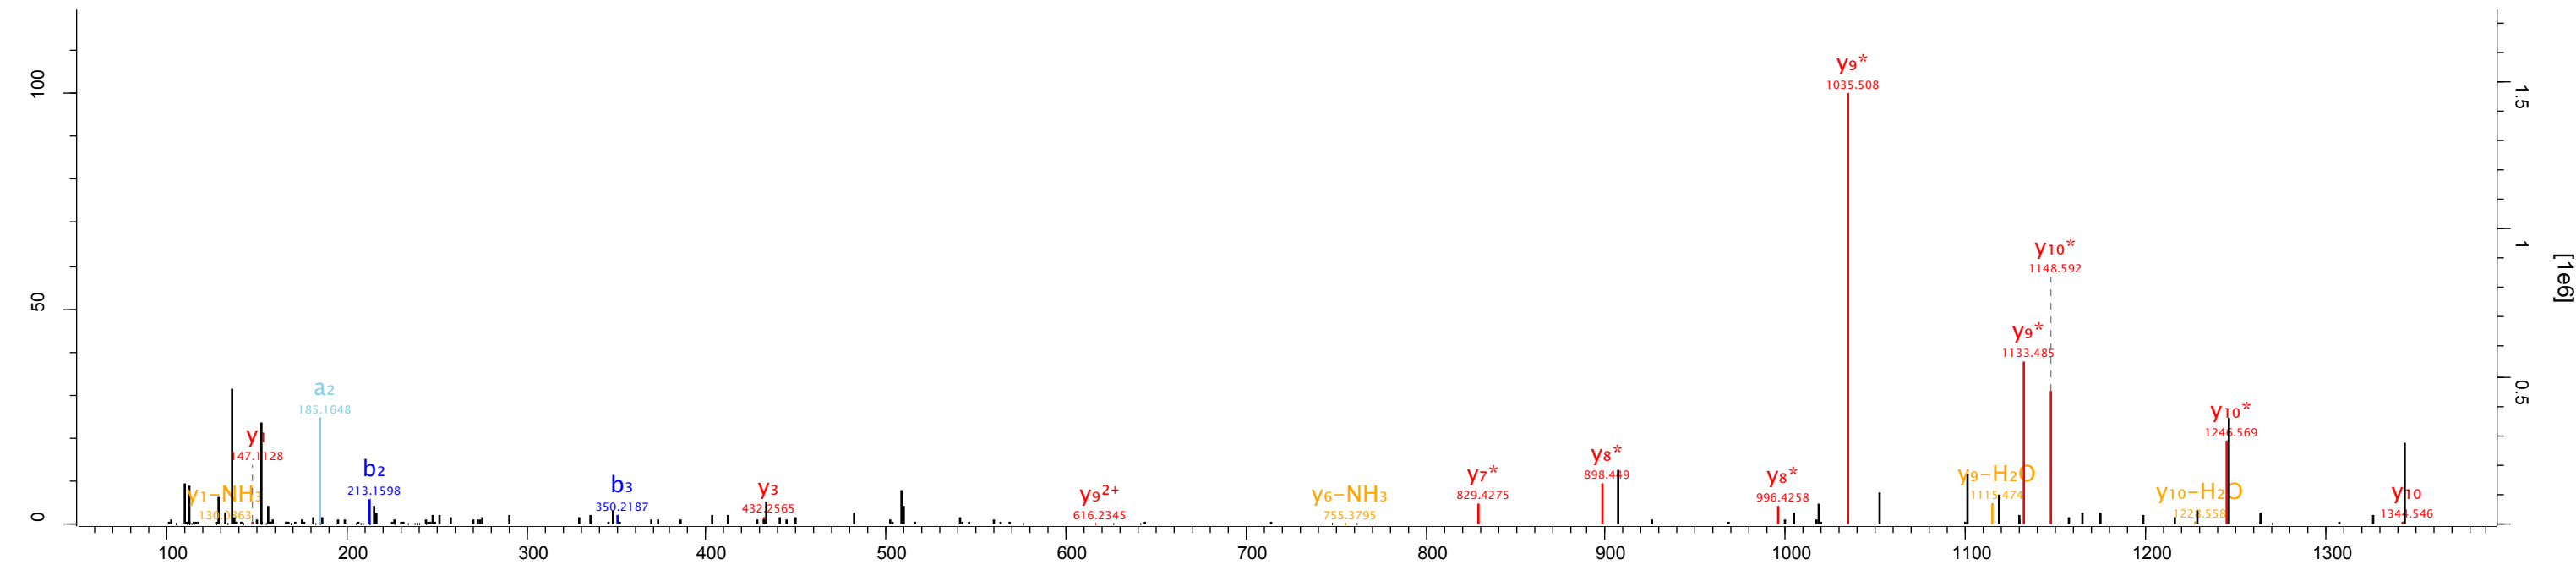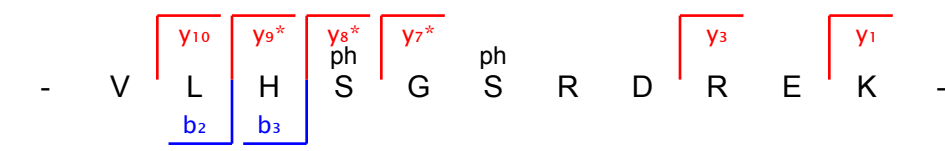

Raw file: 20150812\_A375SR\_Phospho\_BR1\_04  
 Scan: 13438 Method: FTMS; HCD Score: 221.46 m/z: 785.82 Gene names: MAP1B

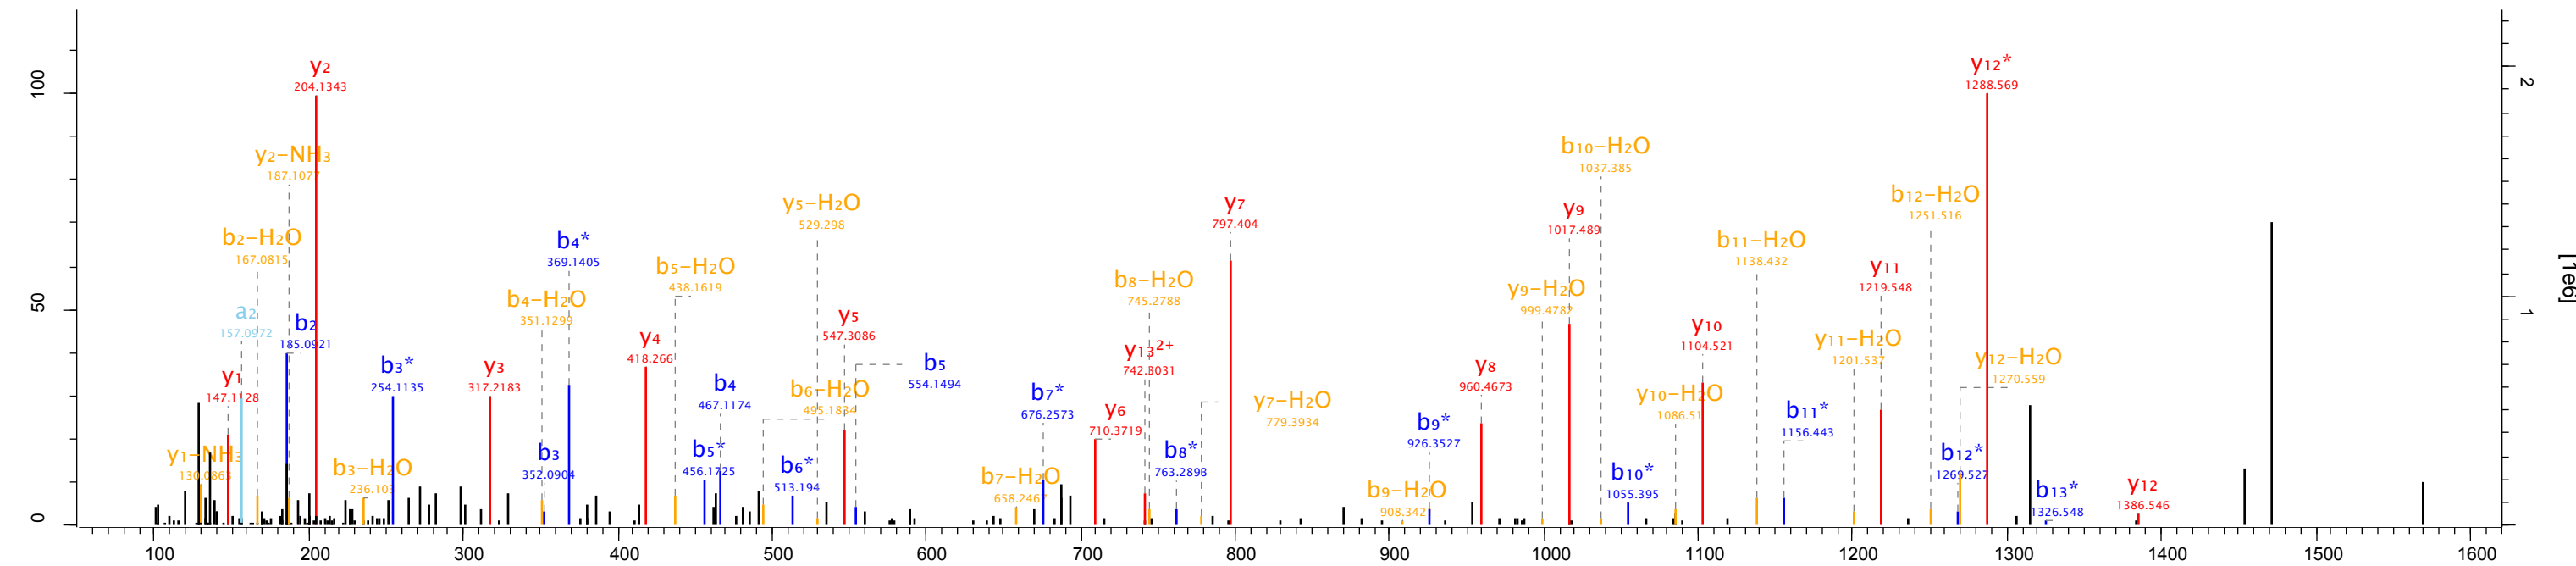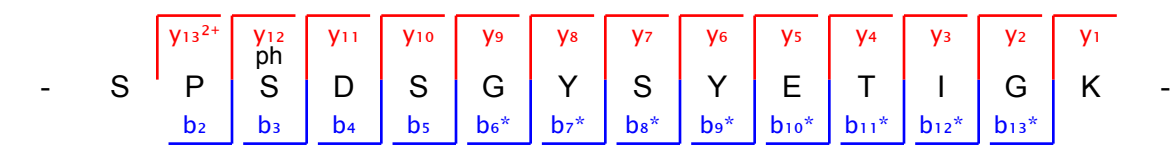

Raw file 20150812\_A375SR\_Phospho\_BR1\_04 Scan 13488 Method FTMS; HCD Score 161.41 m/z 1038.98 Gene names FAM117B

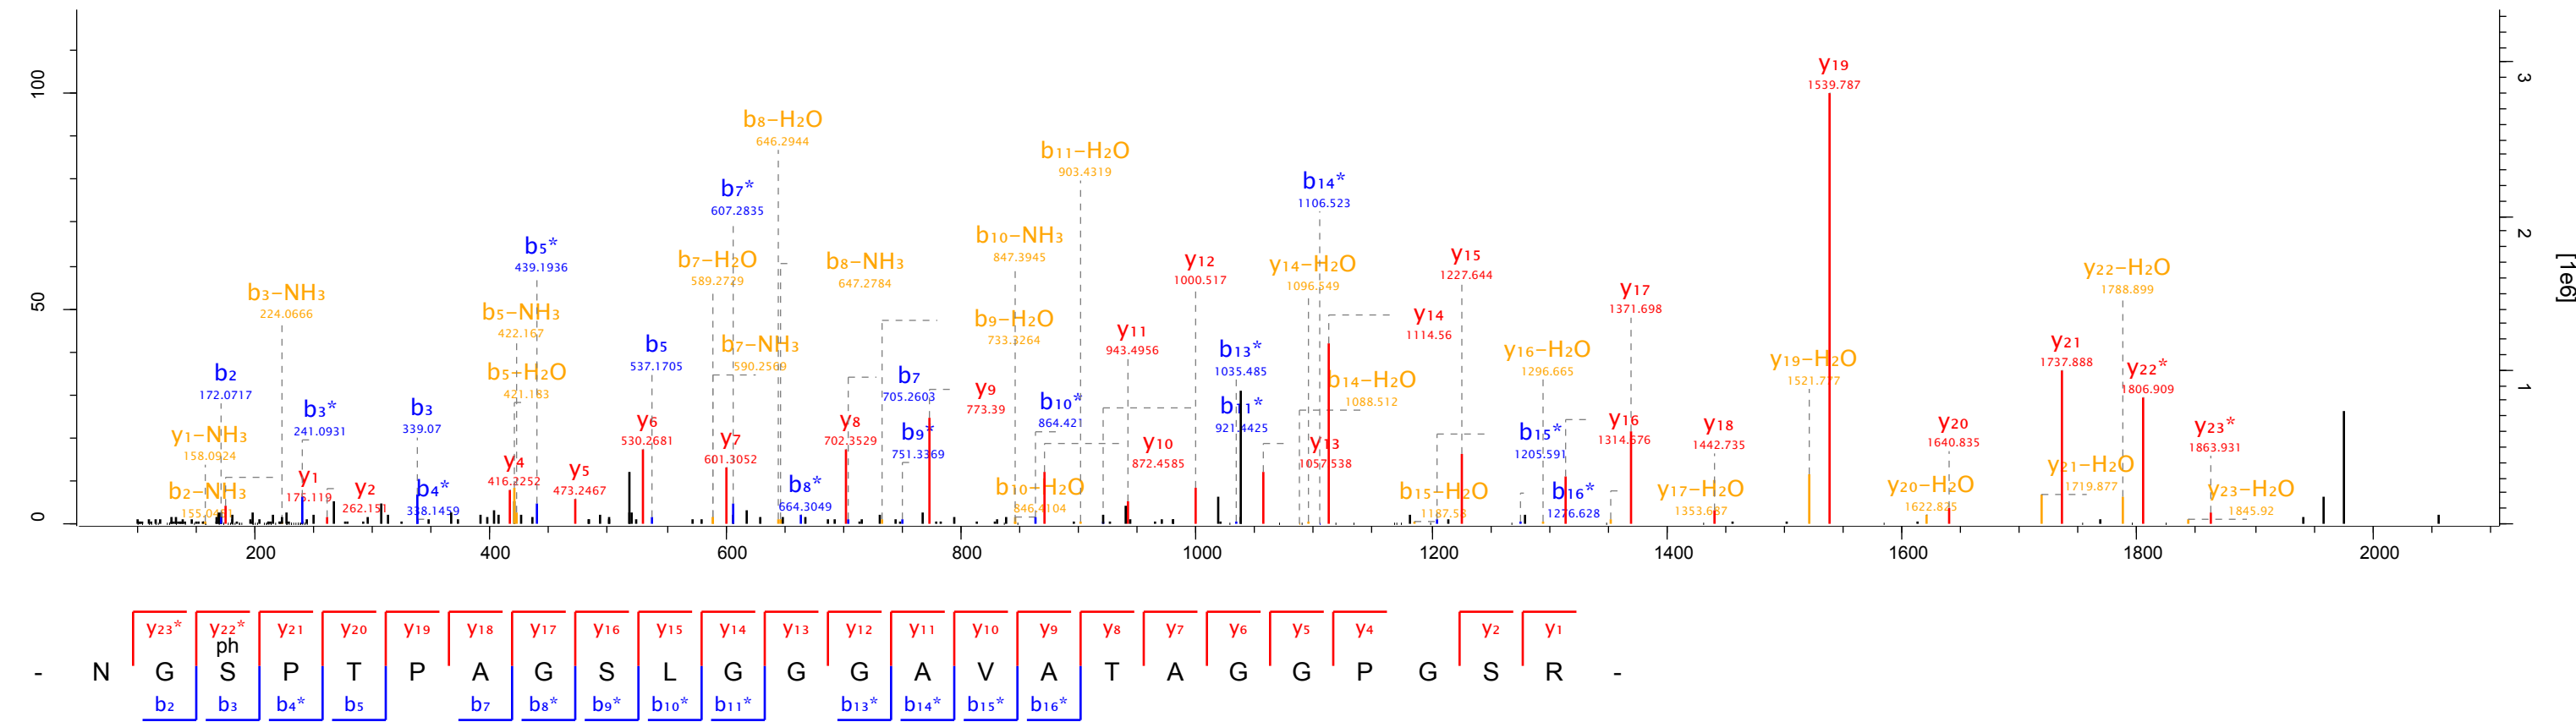

Raw file 20150812\_A375SR\_Phospho\_BR1\_04 Scan 13858 Method FTMS; HCD Score 115.7 m/z 472.22 Gene names CHAMP1

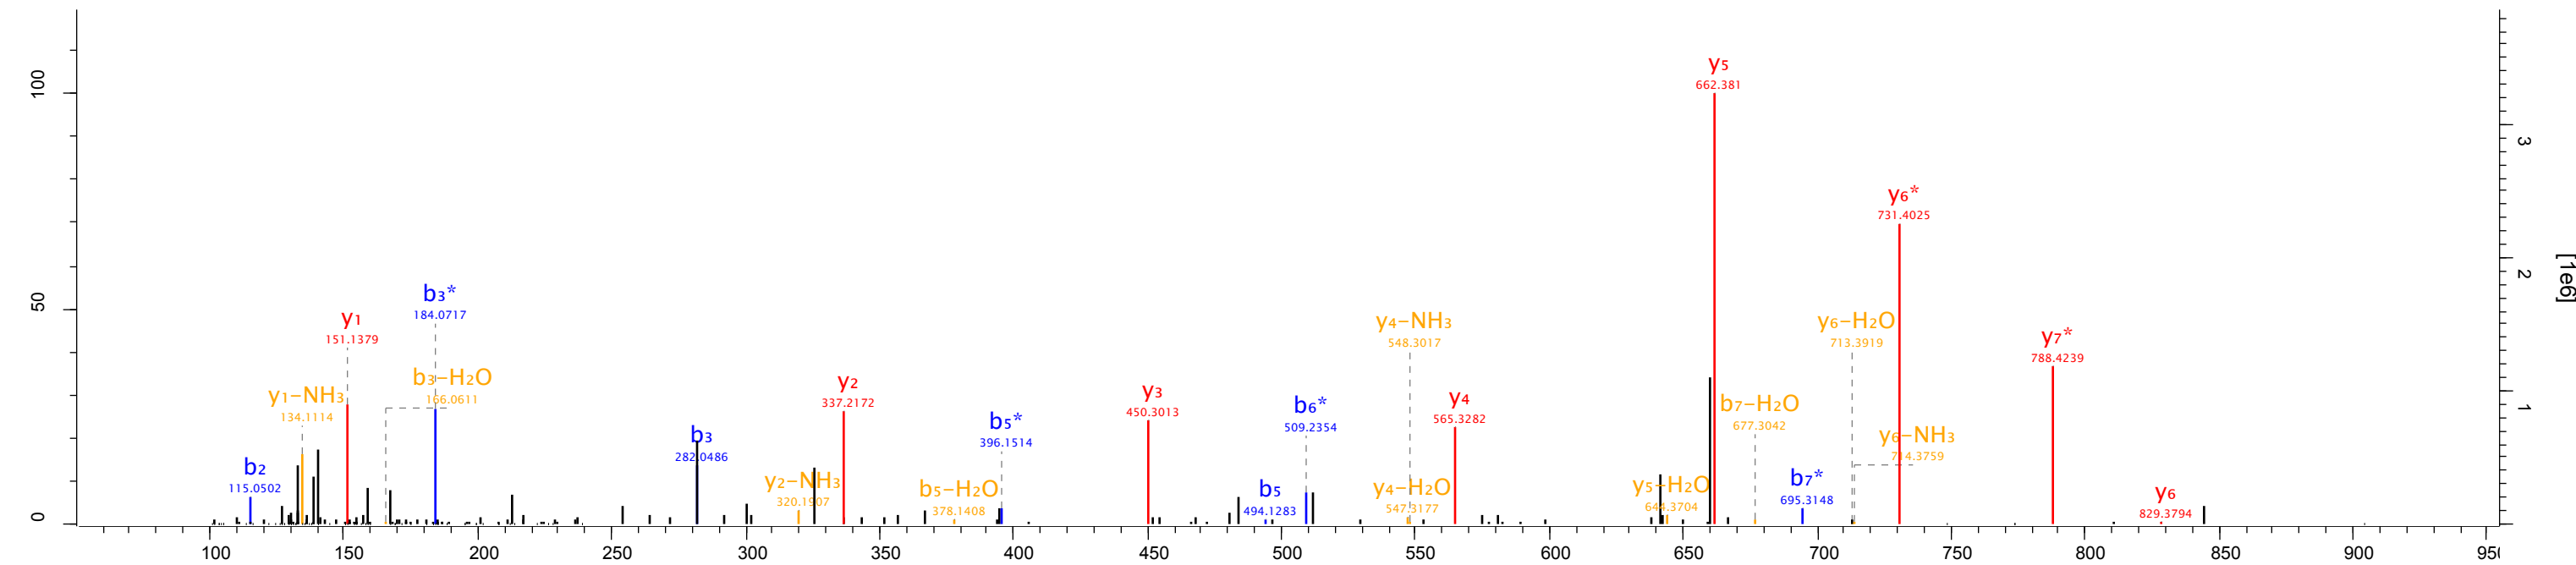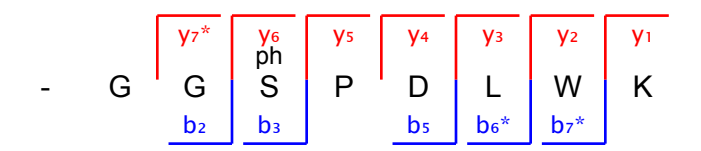



Raw file  
20150812\_A375SR\_Phospho\_BR1\_04

Scan Method Score m/z Gene names  
14158 FTMS; HCD 238.98 968.75 BCLAF1

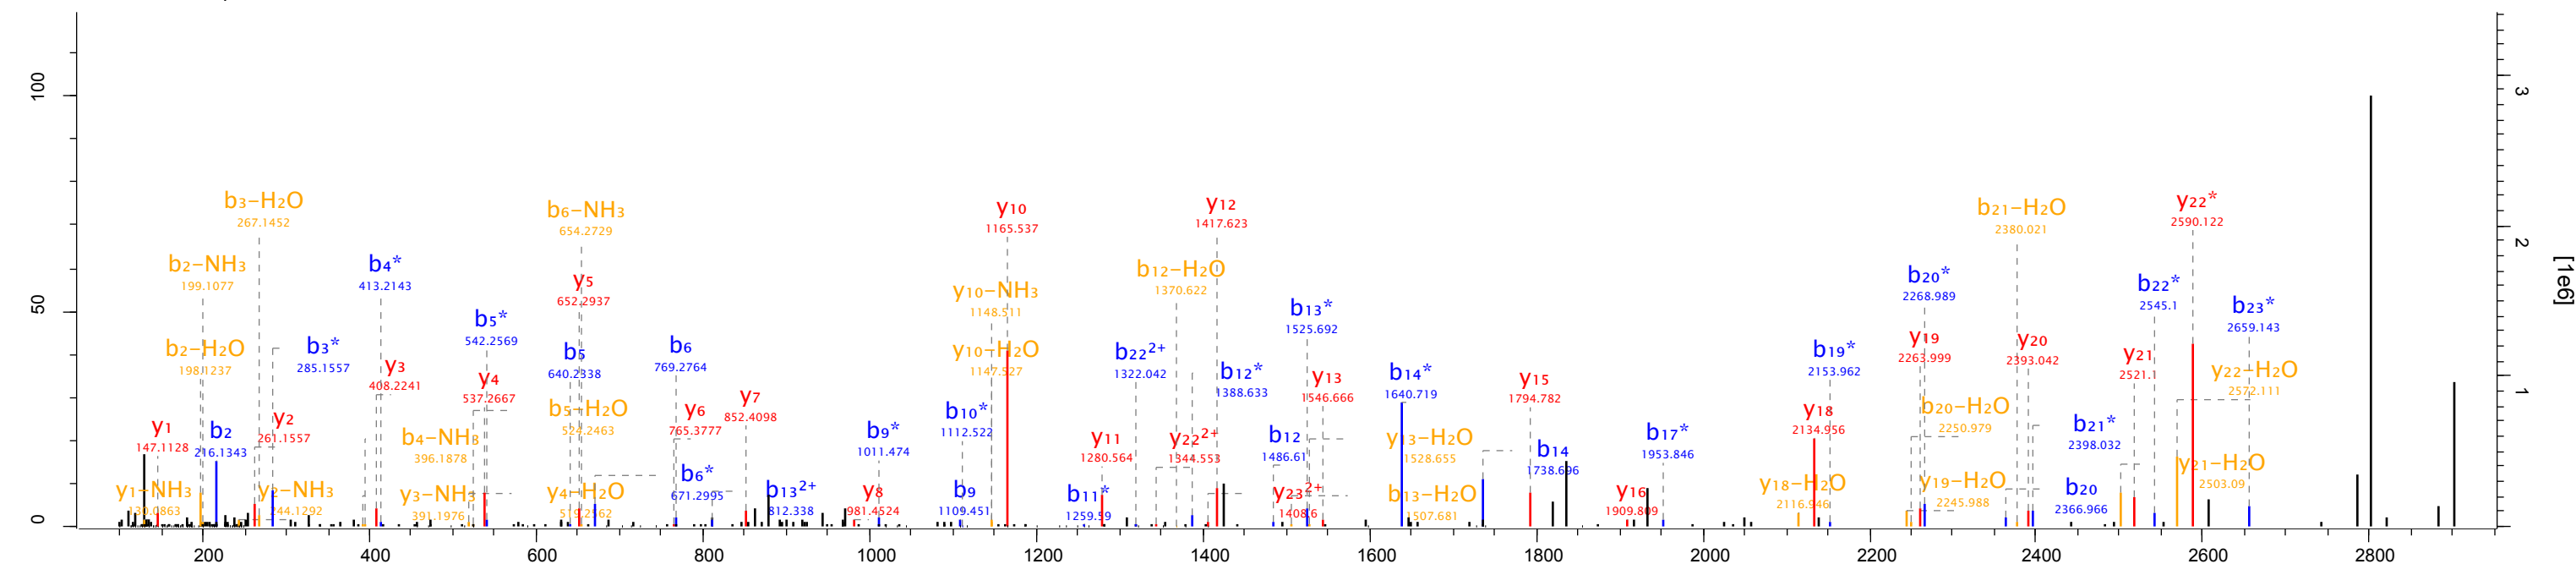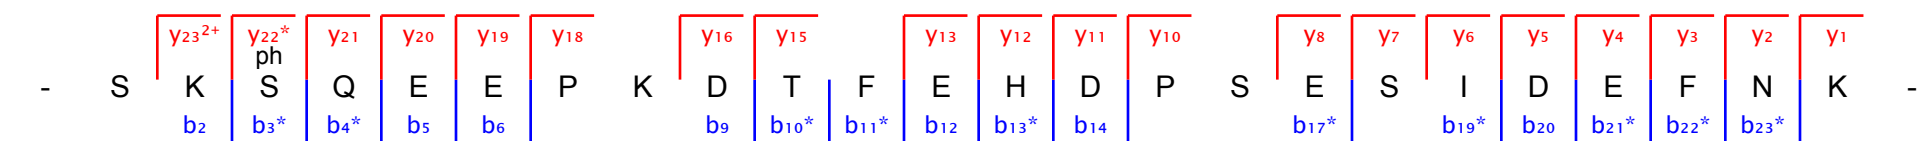

Raw file 20150812\_A375SR\_Phospho\_BR1\_04 Scan 15028 Method FTMS; HCD Score 65.88 m/z 946.11 Gene names ATF7IP

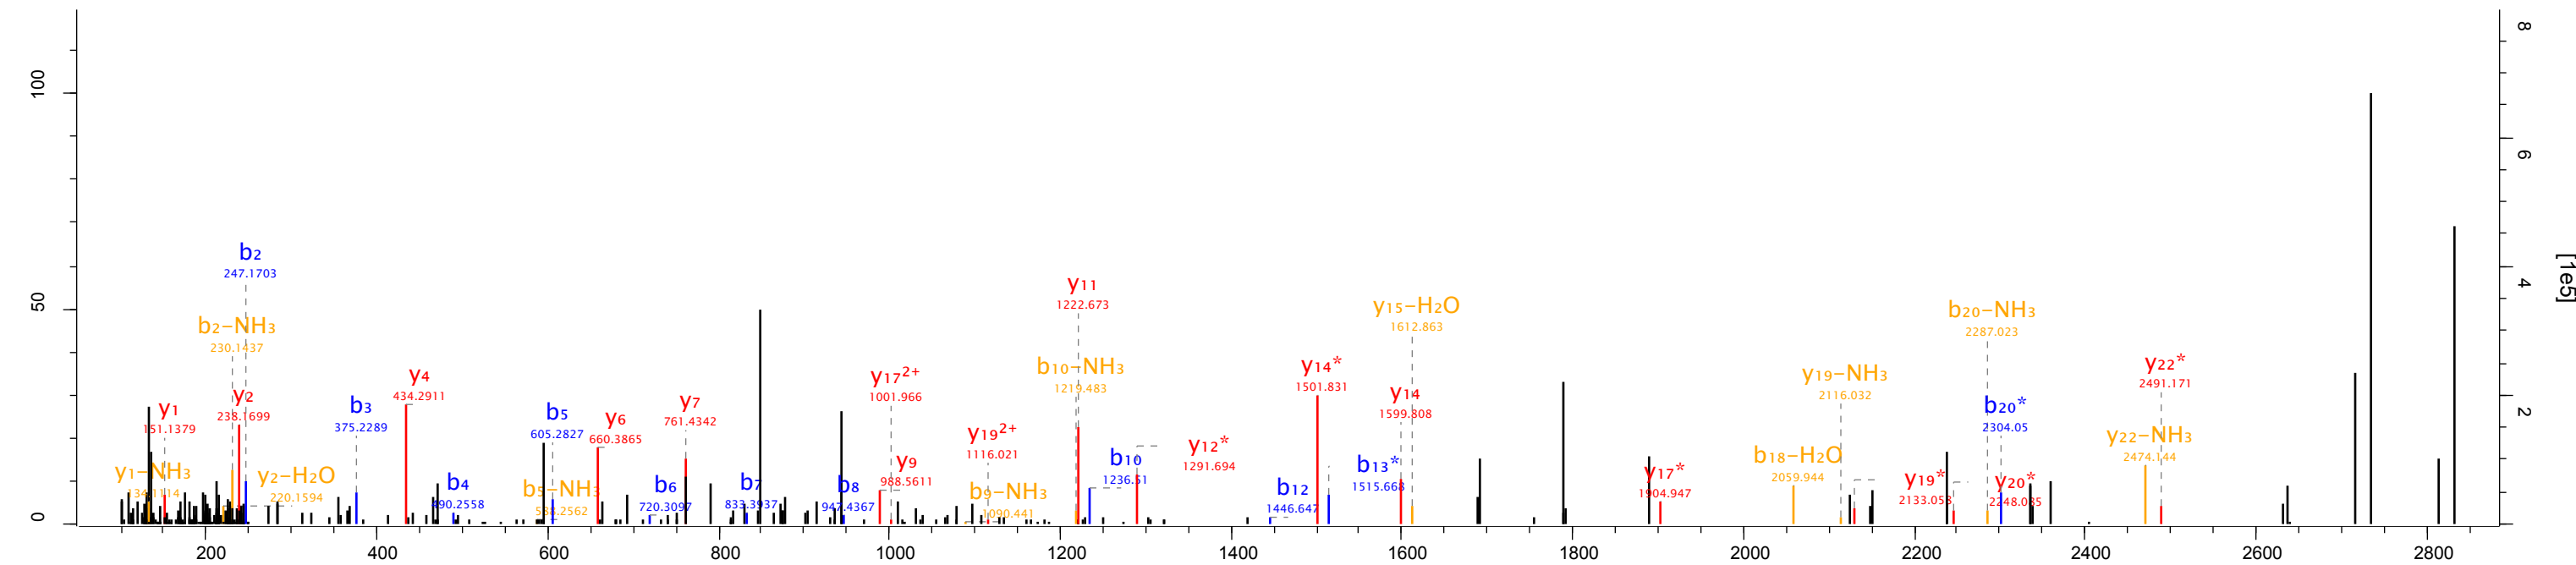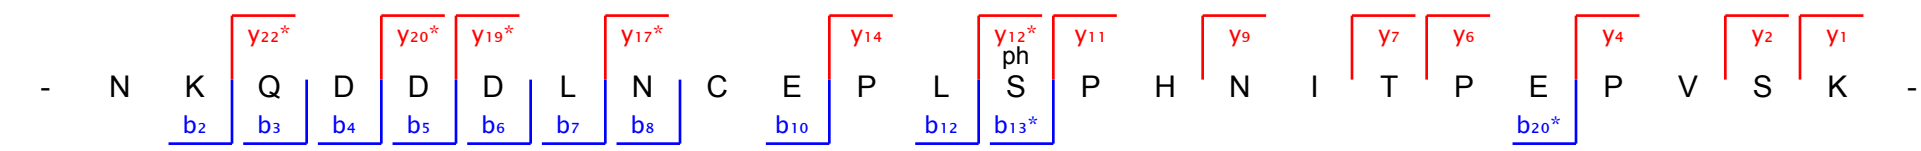

Raw file Scan Method Score m/z Gene names  
 20150812\_A375SR\_Phospho\_BR1\_04 1508 FTMS; HCD 102.83 660.8 SRRM1

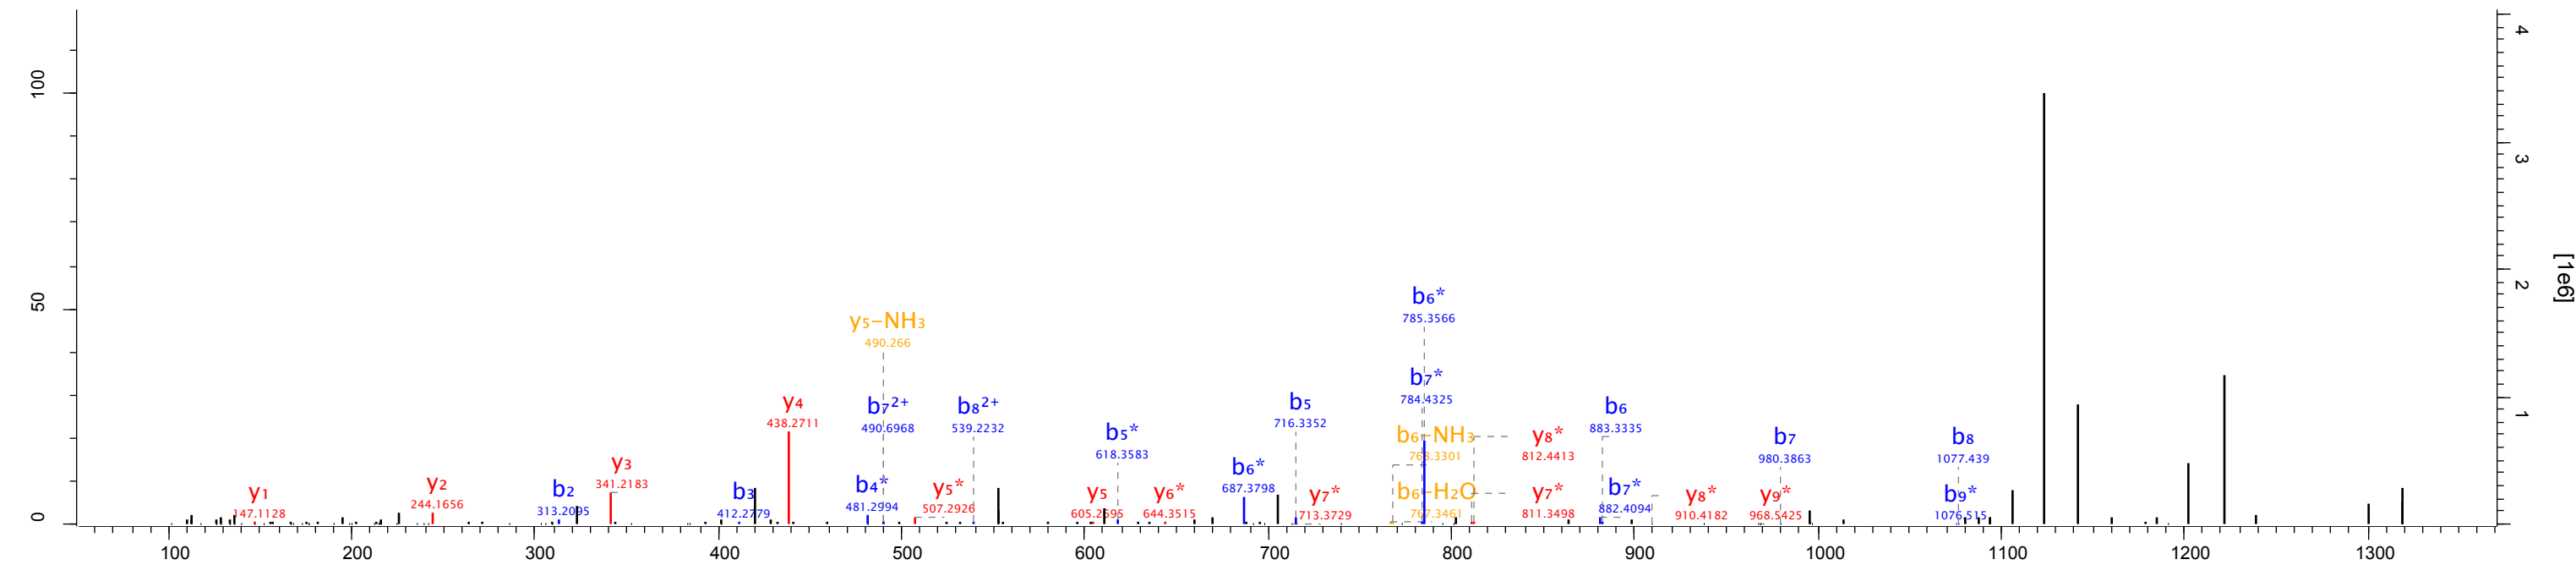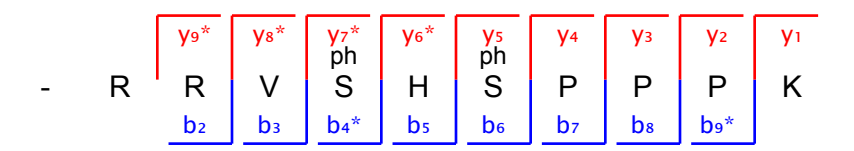

Raw file Scan Method Score m/z Gene names  
 20150812\_A375SR\_Phospho\_BR1\_04 15178 FTMS; HCD 169.73 977.39 BCKDHA

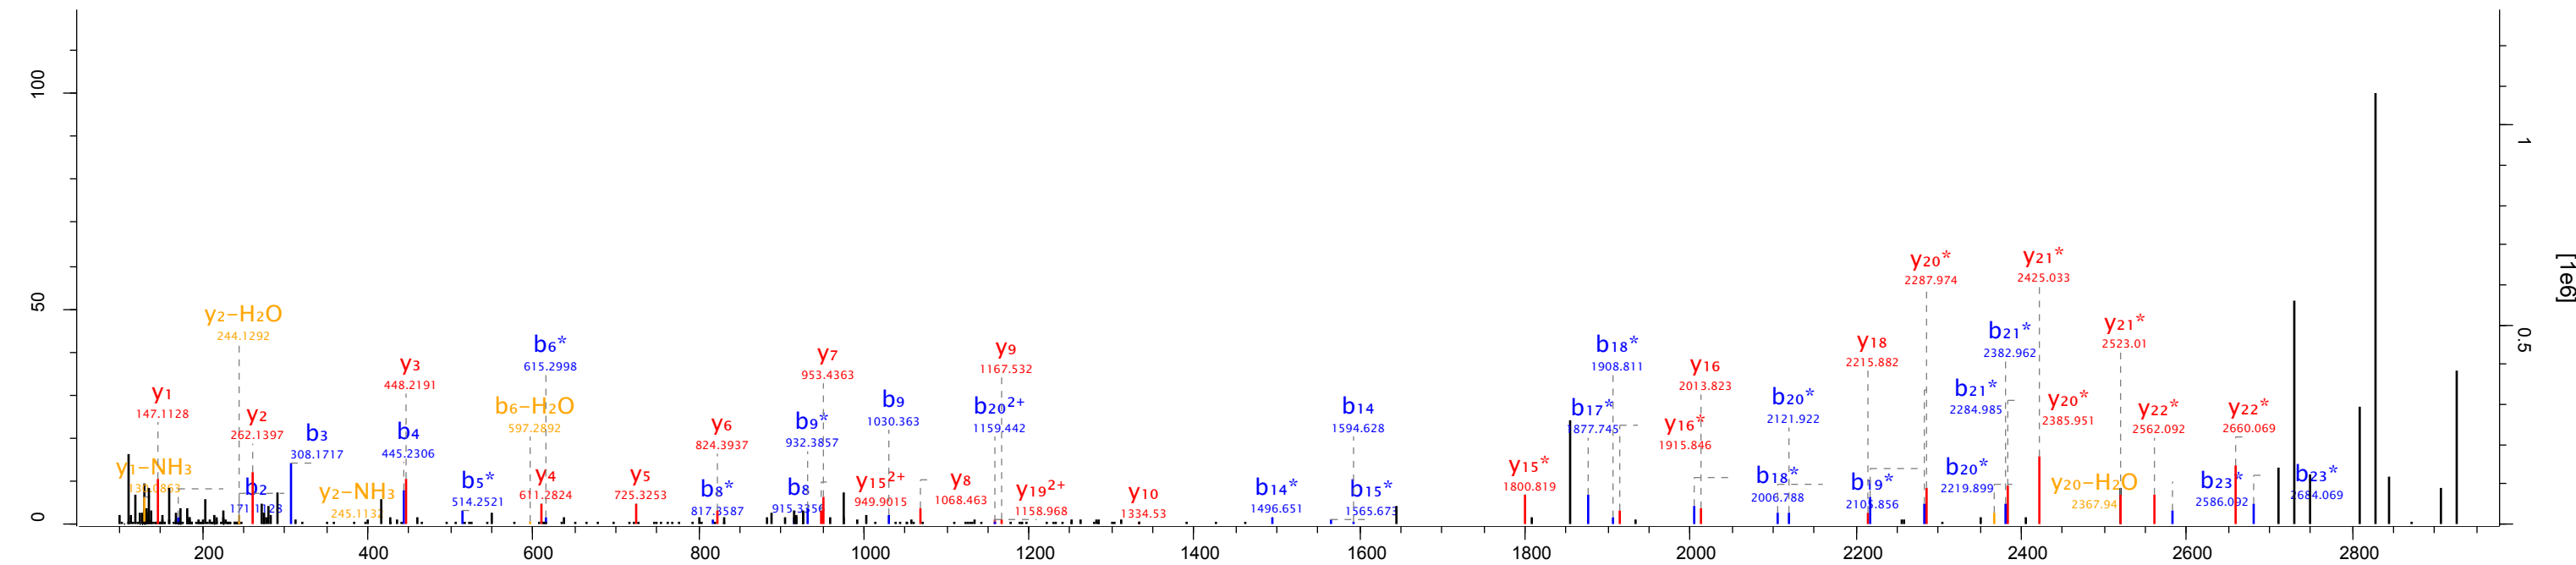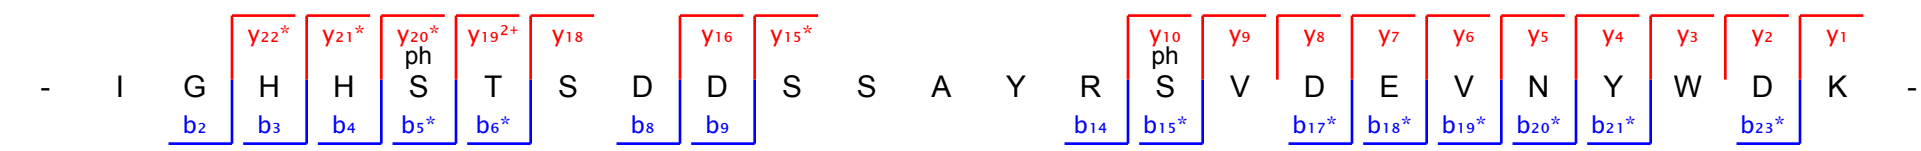

Raw file: 20150812\_A375SR\_Phospho\_BR1\_04  
 Scan: 15328 Method: FTMS; HCD Score: 168.35 m/z: 1222.08 Gene names: WIPF2

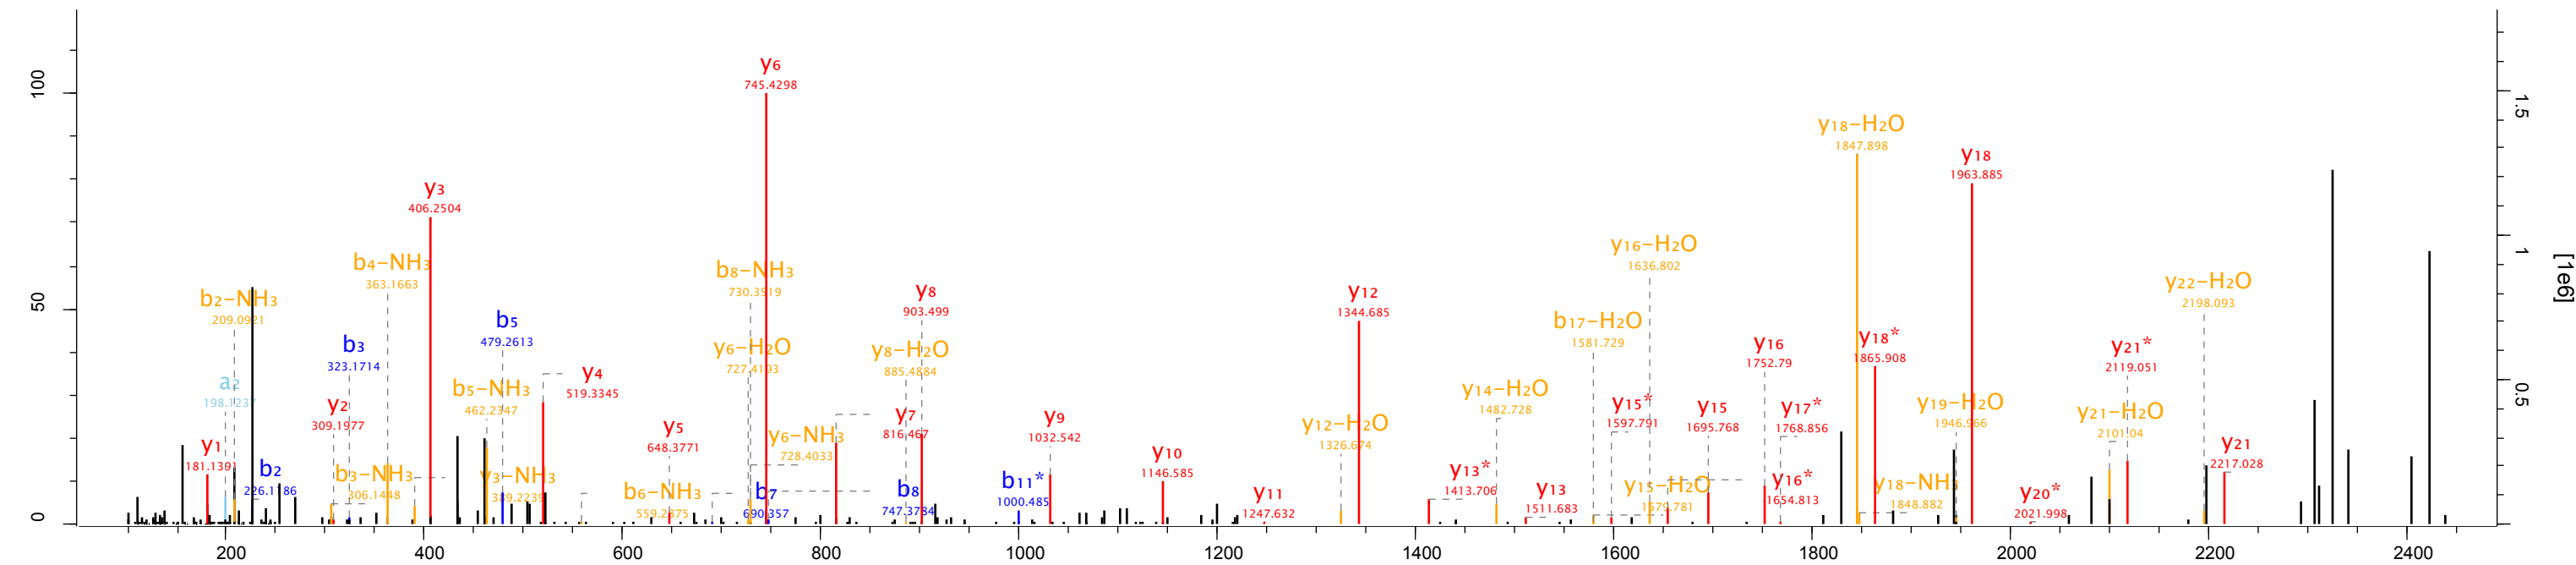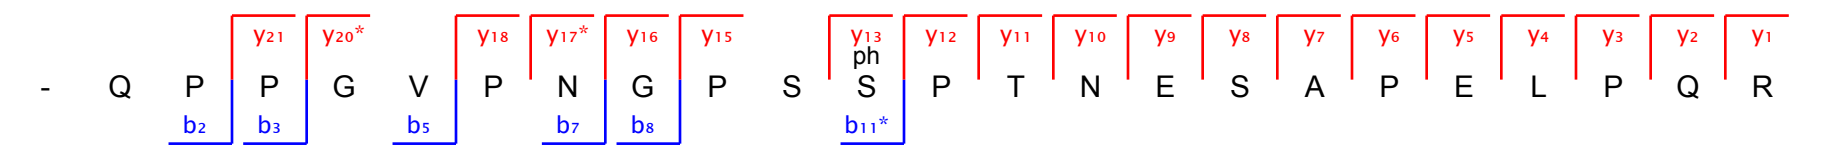

Raw file 20150812\_A375SR\_Phospho\_BR1\_04 Scan 15898 Method FTMS; HCD Score 268.25 m/z 955.06 Gene names PHF6

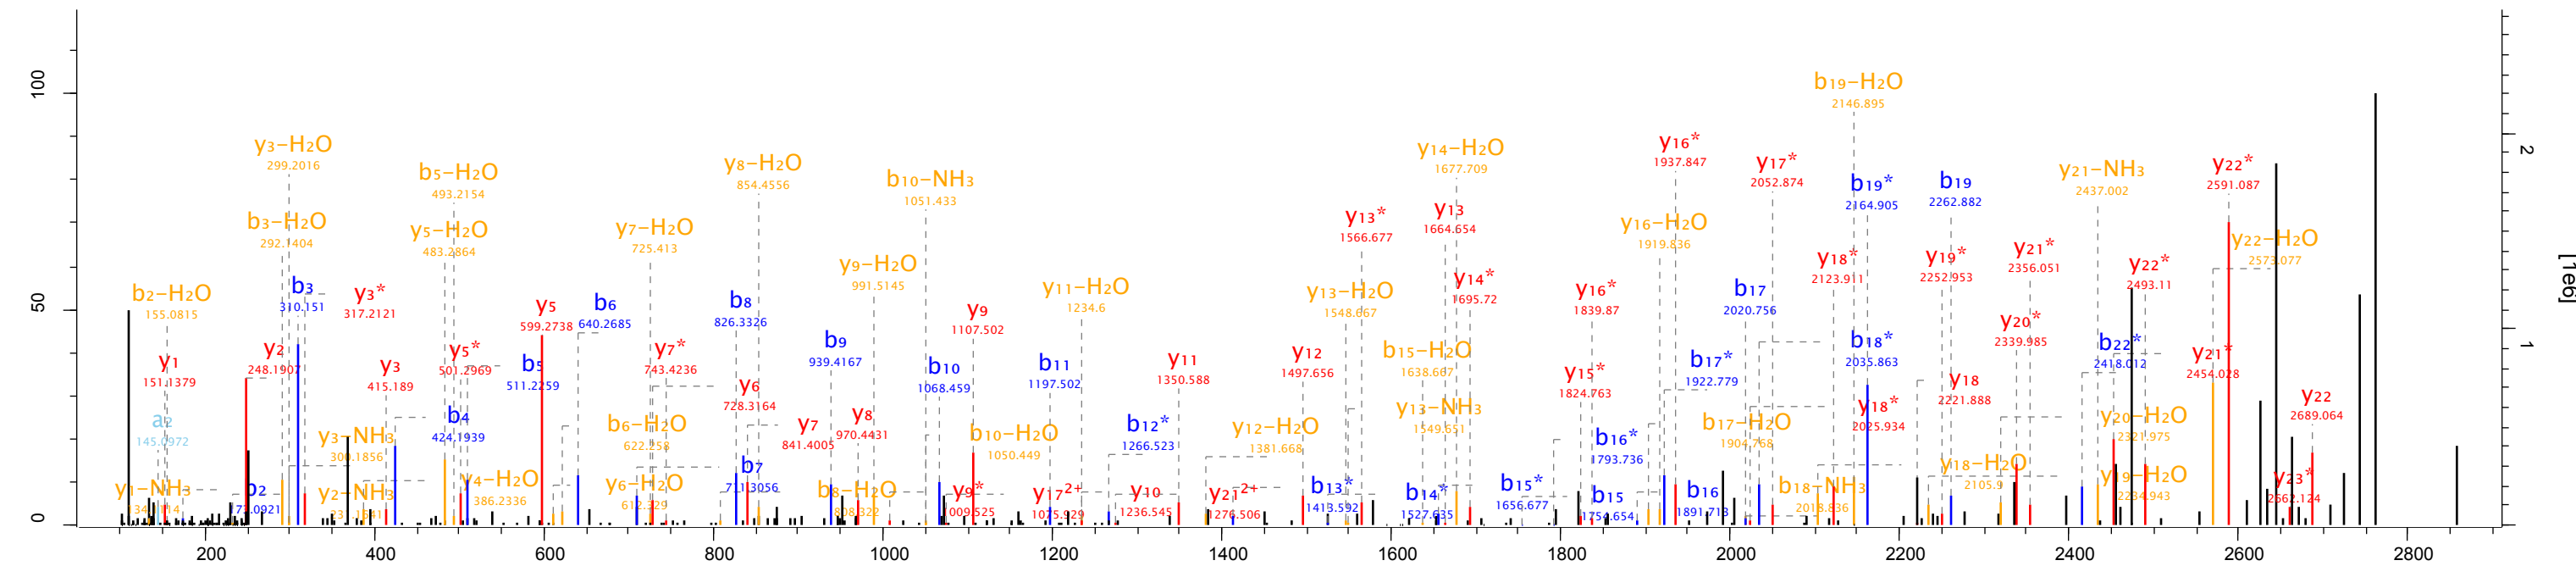

- T A H N S E A D L E E S F N E H E L E P S S P K -

y23\*
y22
y21\*
y20\*
y19\*
y18
y17\*
y16\*
y15\*
y14\*
y13 ph
y12
y11
y10
y9
y8
y7
y6
y5
y3 ph
y2
y1

b2
b3
b4
b5
b6
b7
b8
b9
b10
b11
b12\*
b13\*
b14\*
b15
b16
b17
b18\*
b19
b22\*

Raw file: 20150812\_A375SR\_Phospho\_BR1\_04  
 Scan: 16028 Method: FTMS; HCD Score: 111.42 m/z: 1298.59 Gene names: DDX42

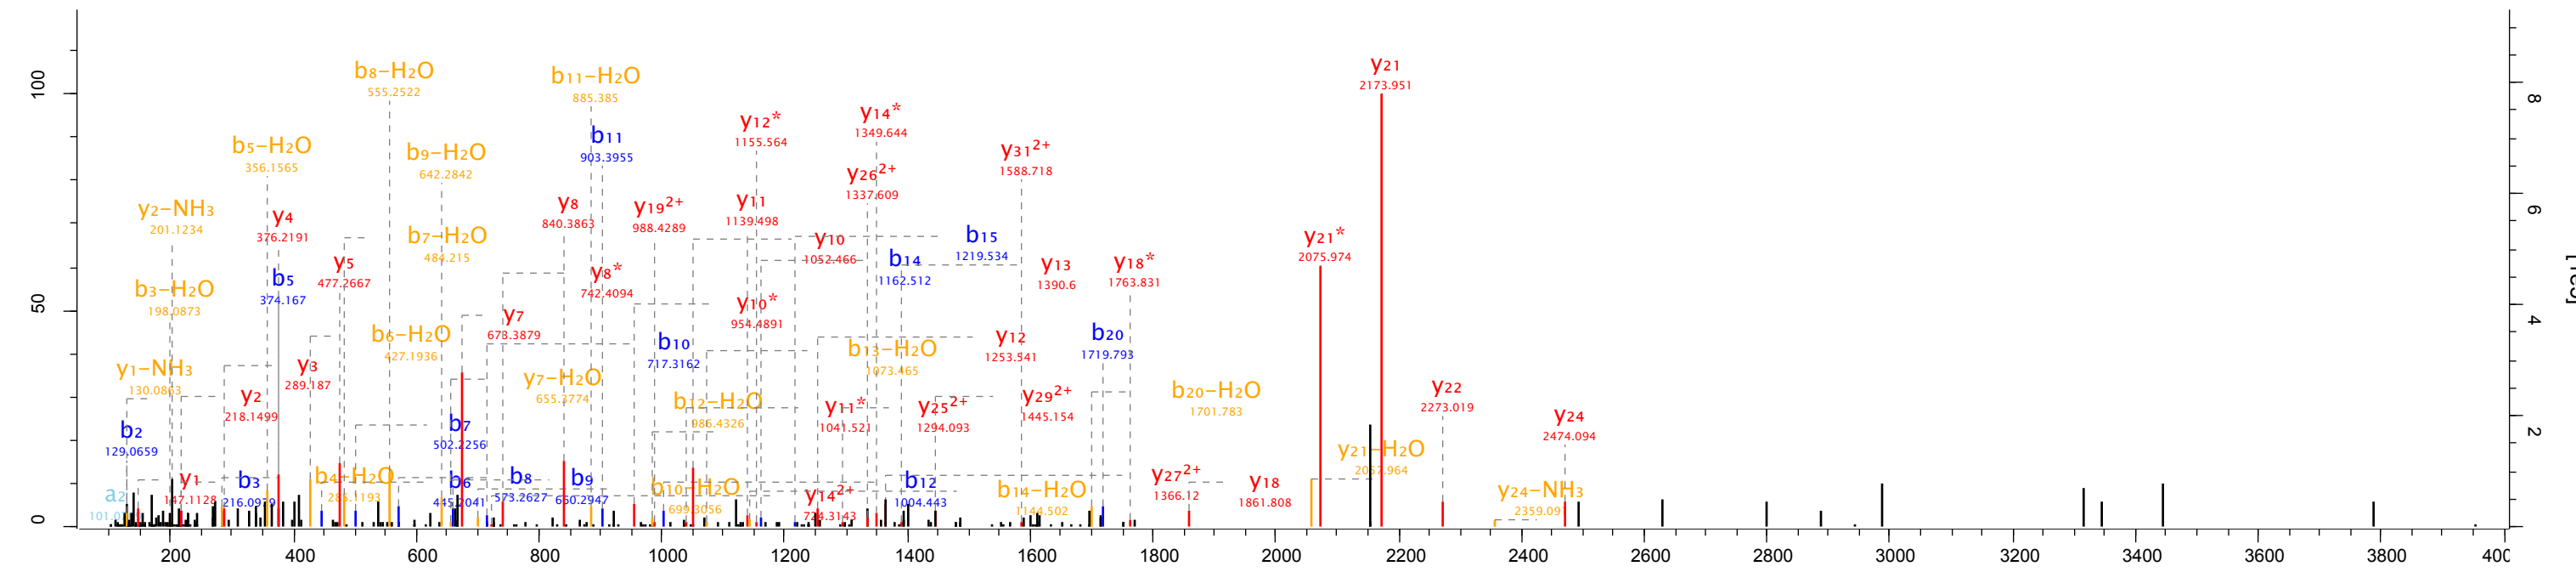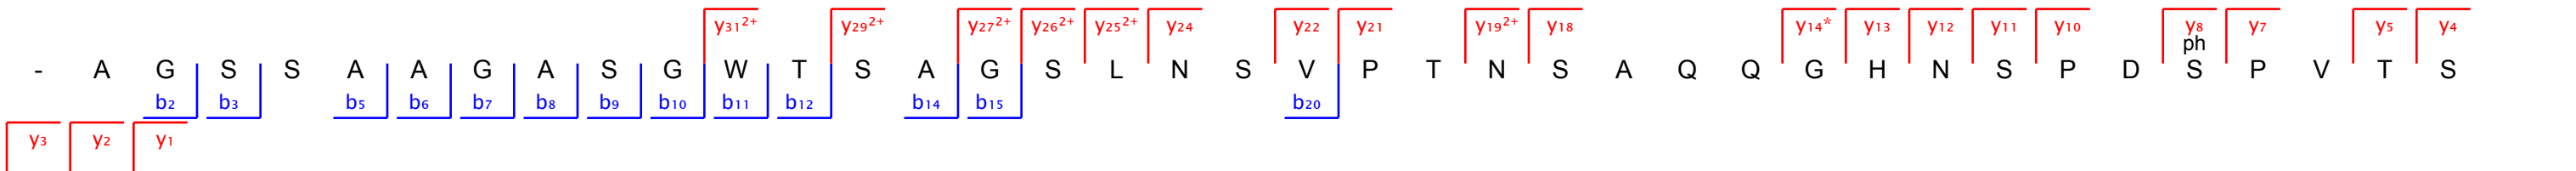

Raw file: 20150812\_A375SR\_Phospho\_BR1\_04  
 Scan: 1628 Method: FTMS; HCD Score: 68.97 m/z: 648.29 Gene names: FRMD4A

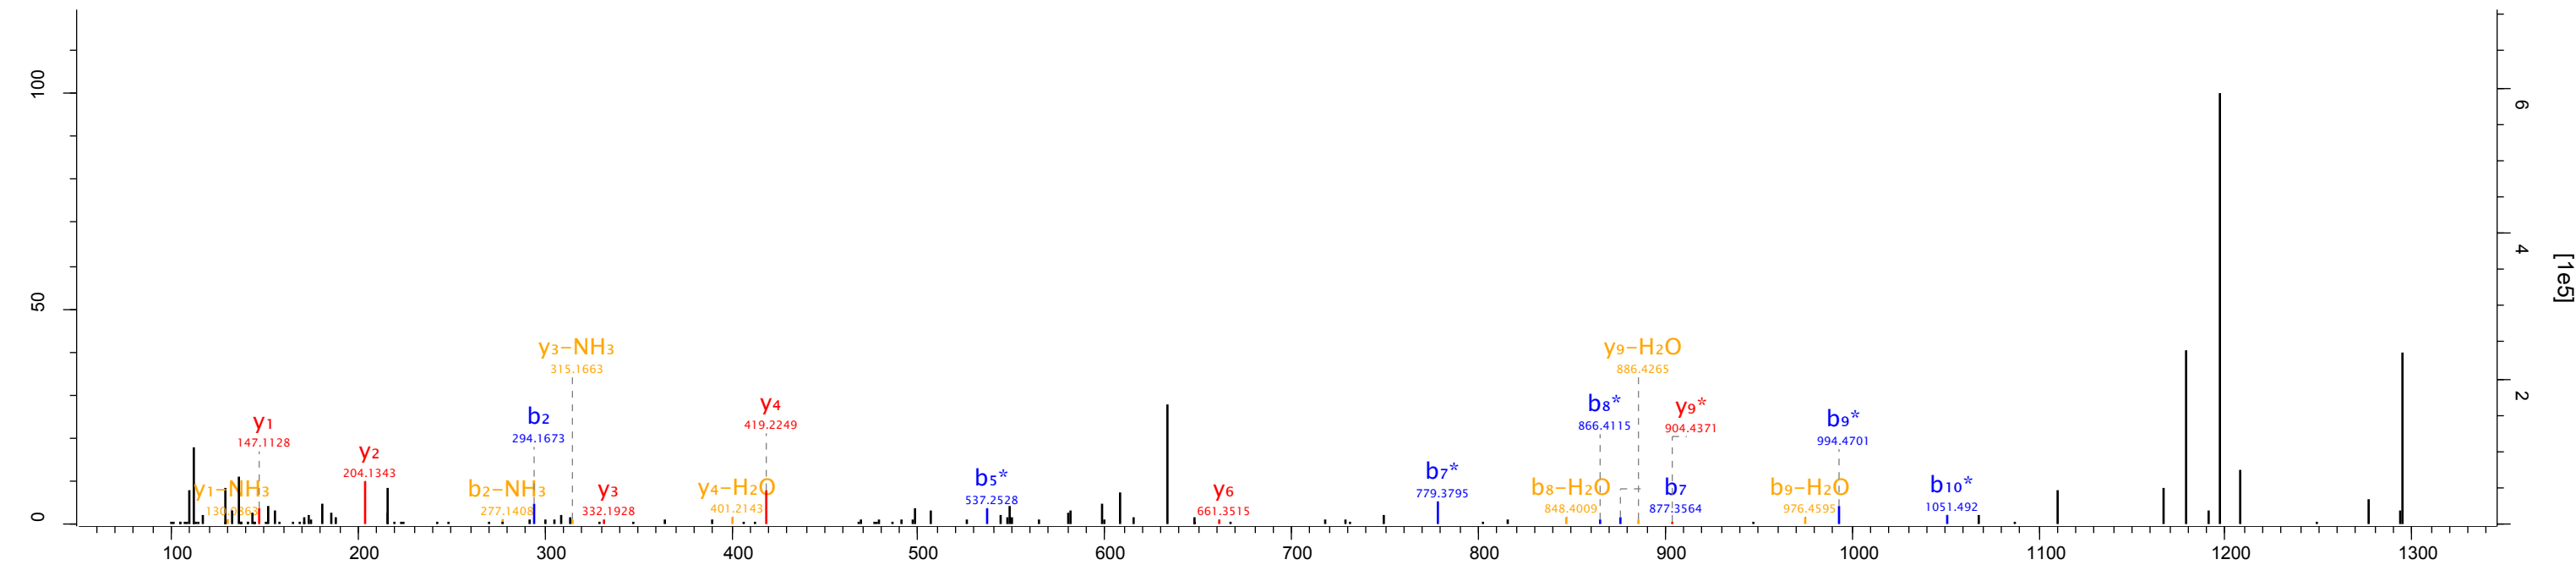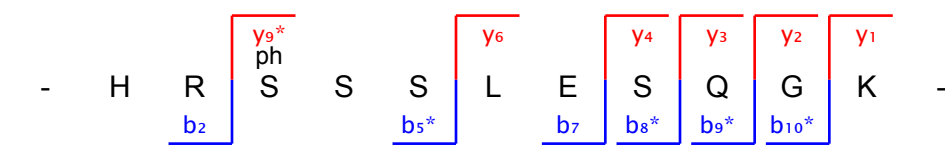



Raw file: 20150812\_A375SR\_Phospho\_BR1\_04  
 Scan: 17018 Method: FTMS; HCD Score: 53.22 m/z: 715.31 Gene names: WWTR1

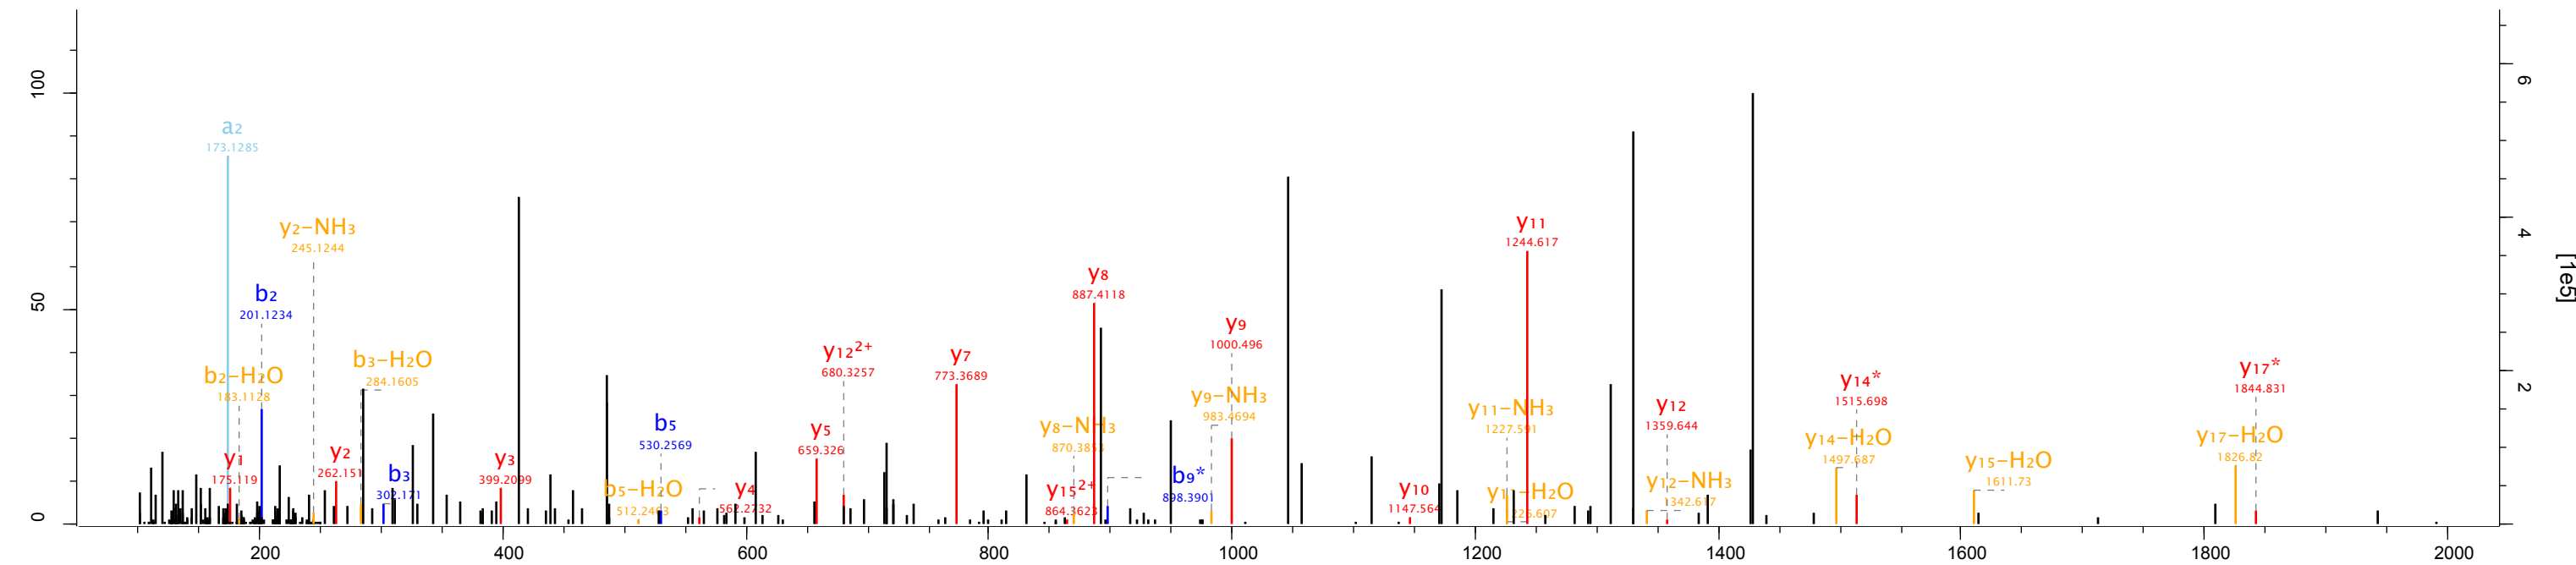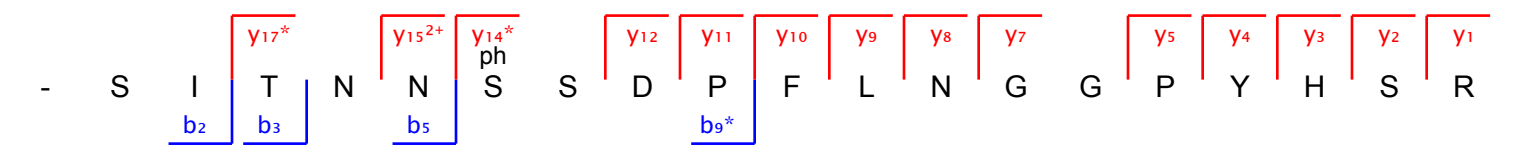

Raw file 20150812\_A375SR\_Phospho\_BR1\_04 Scan 17248 Method FTMS; HCD Score 207.16 m/z 1150.52 Gene names FUBP3

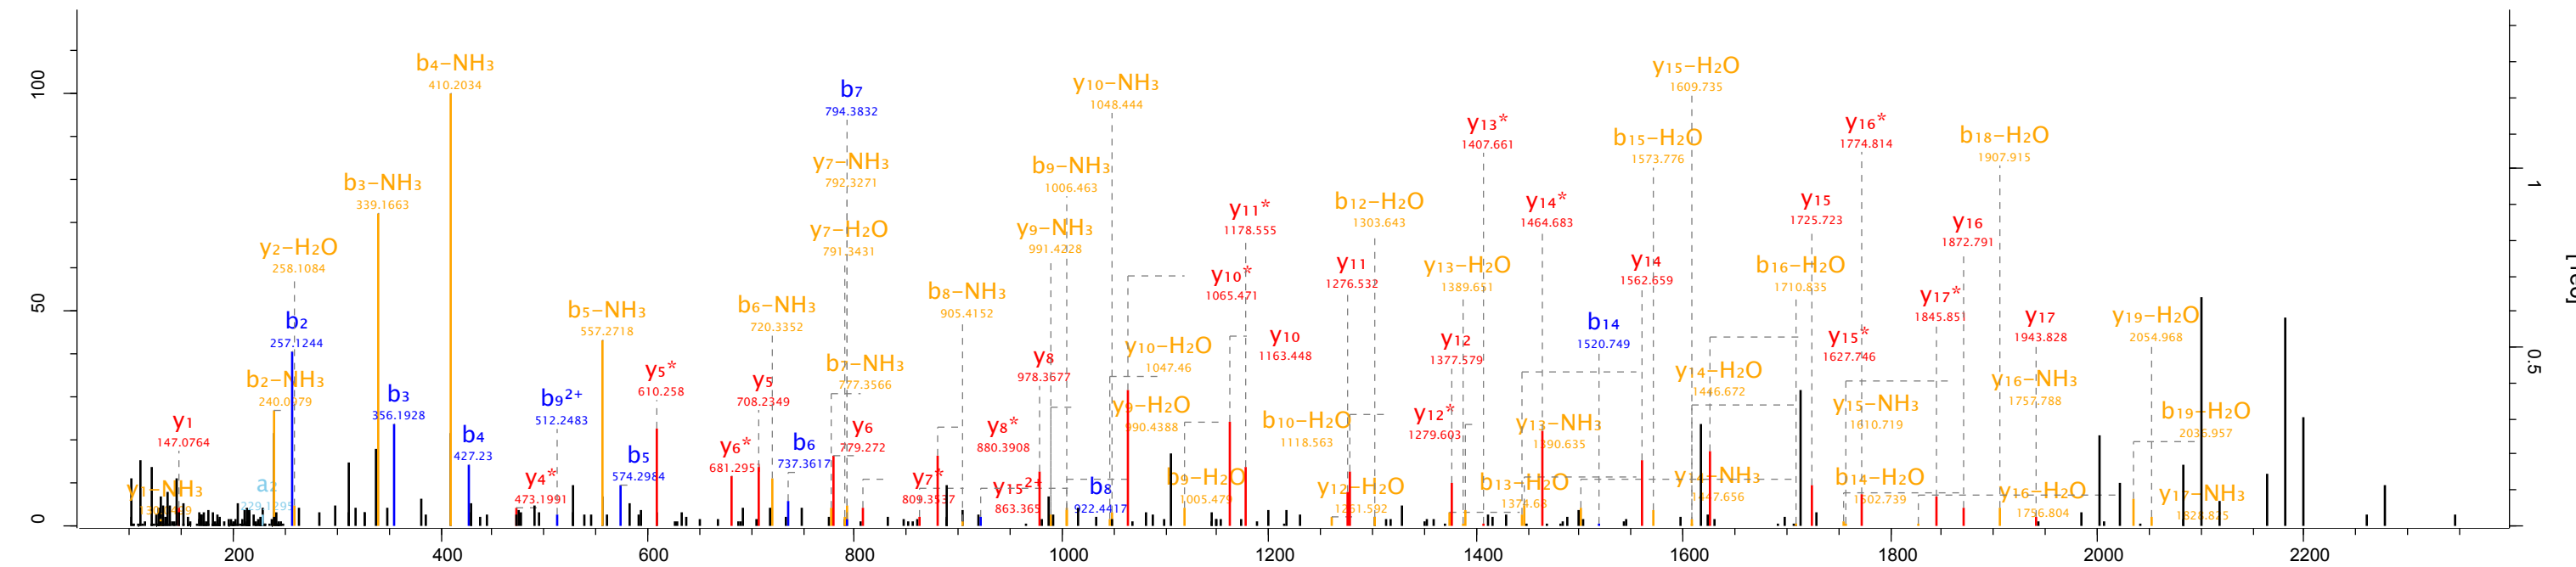

- Q Q V A F Y G Q T L G Q A Q A H S Q E Q -

b<sub>2</sub>
b<sub>3</sub>
b<sub>4</sub>
b<sub>5</sub>
b<sub>6</sub>
b<sub>7</sub>
b<sub>8</sub>
b<sub>9</sub><sup>2+</sup>
b<sub>14</sub>

y<sub>17</sub>
y<sub>16</sub>
y<sub>15</sub>
y<sub>14</sub>
y<sub>13</sub><sup>\*</sup>
y<sub>12</sub>
y<sub>11</sub>
y<sub>10</sub>
y<sub>8</sub>
y<sub>7</sub><sup>\*</sup>
y<sub>6</sub>
y<sub>5</sub>
y<sub>4</sub><sup>ph</sup>
y<sub>1</sub>

Raw file 20150812\_A375SR\_Phospho\_BR1\_04 Scan 17368 Method FTMS; HCD Score 166.74 m/z 1190.83 Gene names SQSTM1

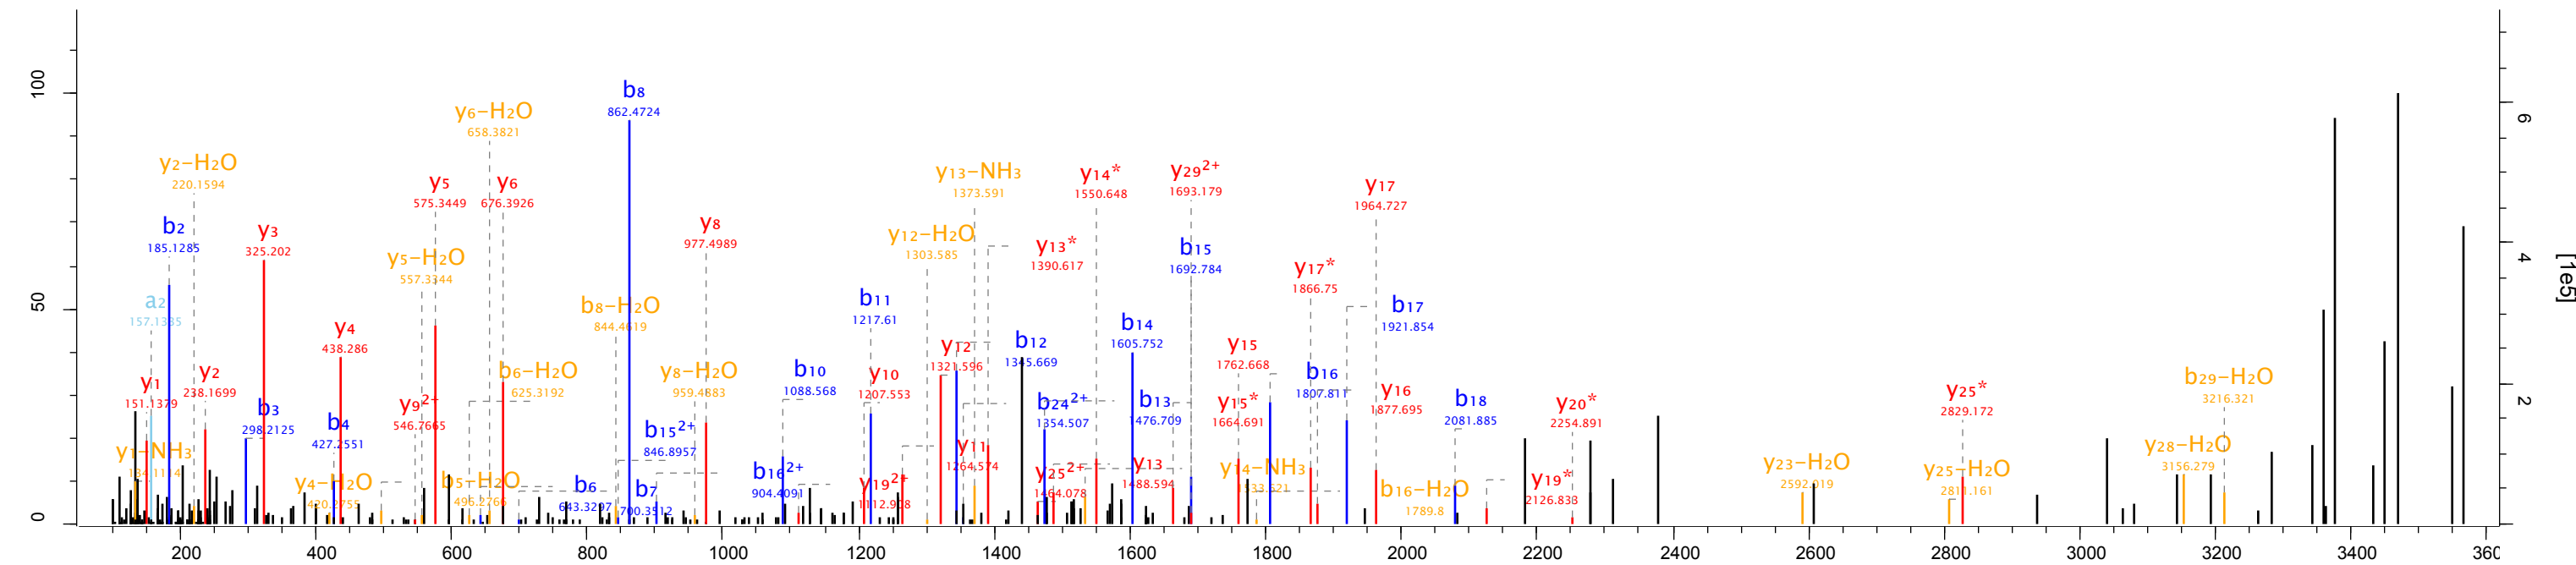

- I A L E S E G R P E E Q M E S D N C S G G S D D W T H L S S K -

Fragmentation labels below the sequence:

- Blue boxes: b<sub>2</sub>, b<sub>3</sub>, b<sub>4</sub>, b<sub>6</sub>, b<sub>7</sub>, b<sub>8</sub>, b<sub>10</sub>, b<sub>11</sub>, b<sub>12</sub>, b<sub>13</sub>, b<sub>14</sub>, b<sub>15</sub>, b<sub>16</sub>, b<sub>17</sub>, b<sub>18</sub>, b<sub>24</sub><sup>2+</sup>
- Red boxes: y<sub>29</sub><sup>2+</sup>, y<sub>25</sub><sup>\*</sup>, y<sub>20</sub><sup>\*</sup>, y<sub>19</sub><sup>\*</sup>, y<sub>17</sub>, y<sub>16</sub>, y<sub>15</sub>, y<sub>14</sub><sup>\*</sup>, y<sub>13</sub><sup>ph</sup>, y<sub>12</sub>, y<sub>11</sub>, y<sub>10</sub>, y<sub>9</sub><sup>2+</sup>, y<sub>8</sub>, y<sub>6</sub>, y<sub>5</sub>, y<sub>4</sub>, y<sub>3</sub>, y<sub>2</sub>, y<sub>1</sub>

Raw file: 20150812\_A375SR\_Phospho\_BR1\_04  
 Scan: 17498 Method: FTMS; HCD Score: 178.93 m/z: 1049.43 Gene names: ZHX3

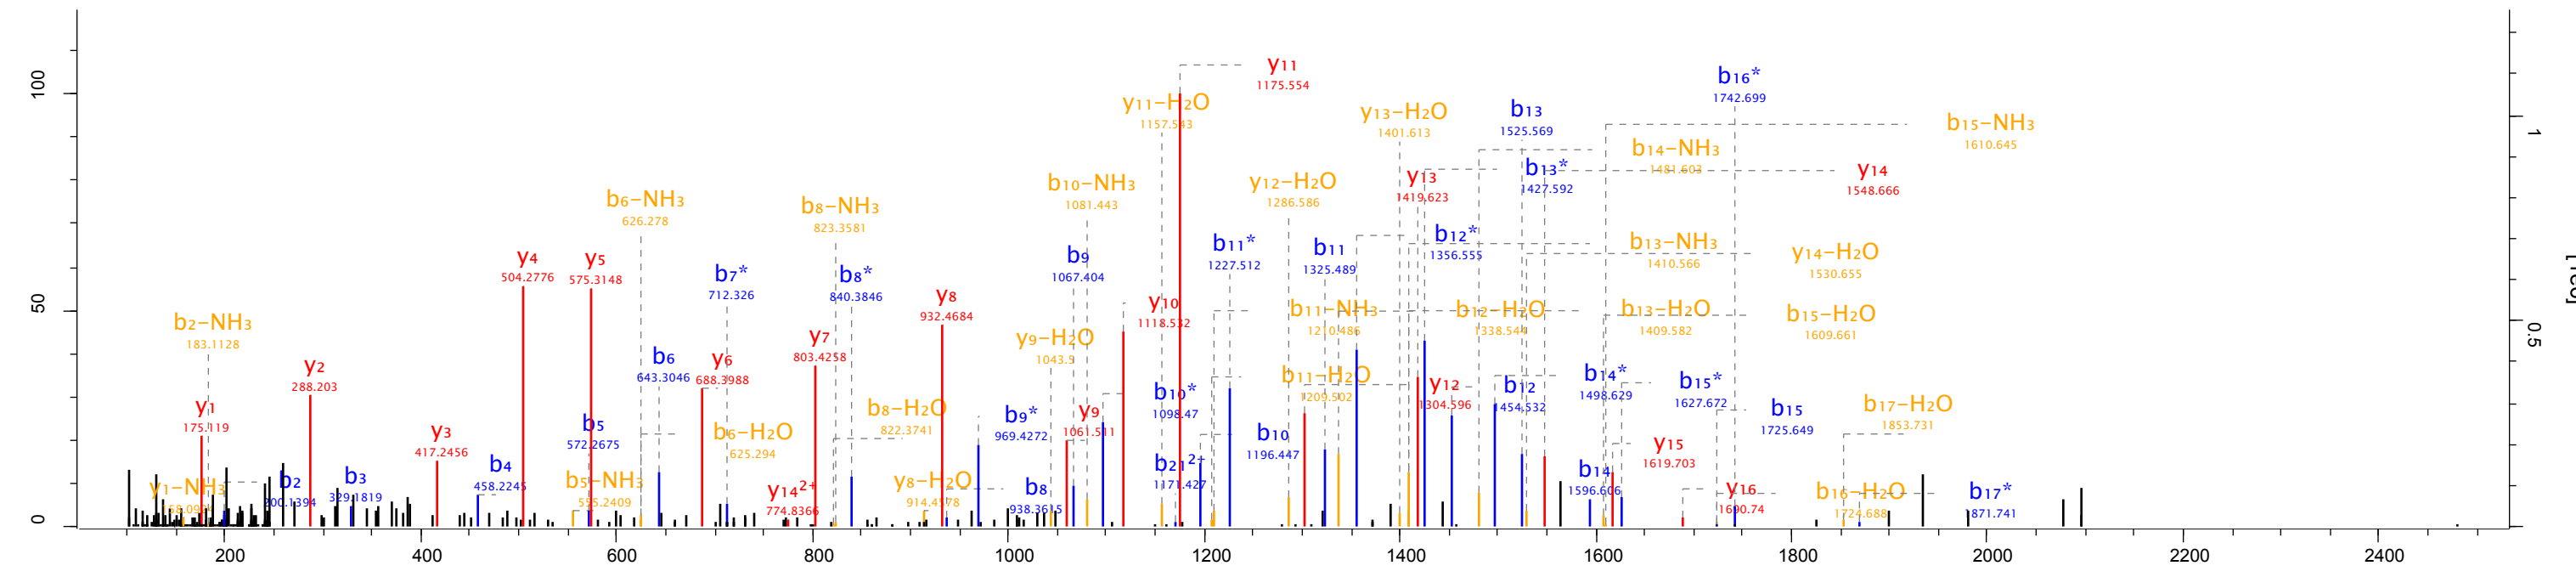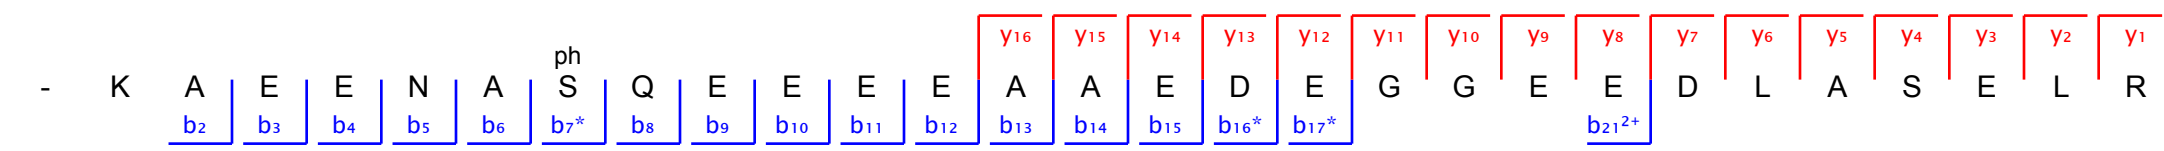

Raw file: 20150812\_A375SR\_Phospho\_BR1\_04  
 Scan: 17968 Method: FTMS; HCD Score: 57.96 m/z: 725.11 Gene names: EPB41L2

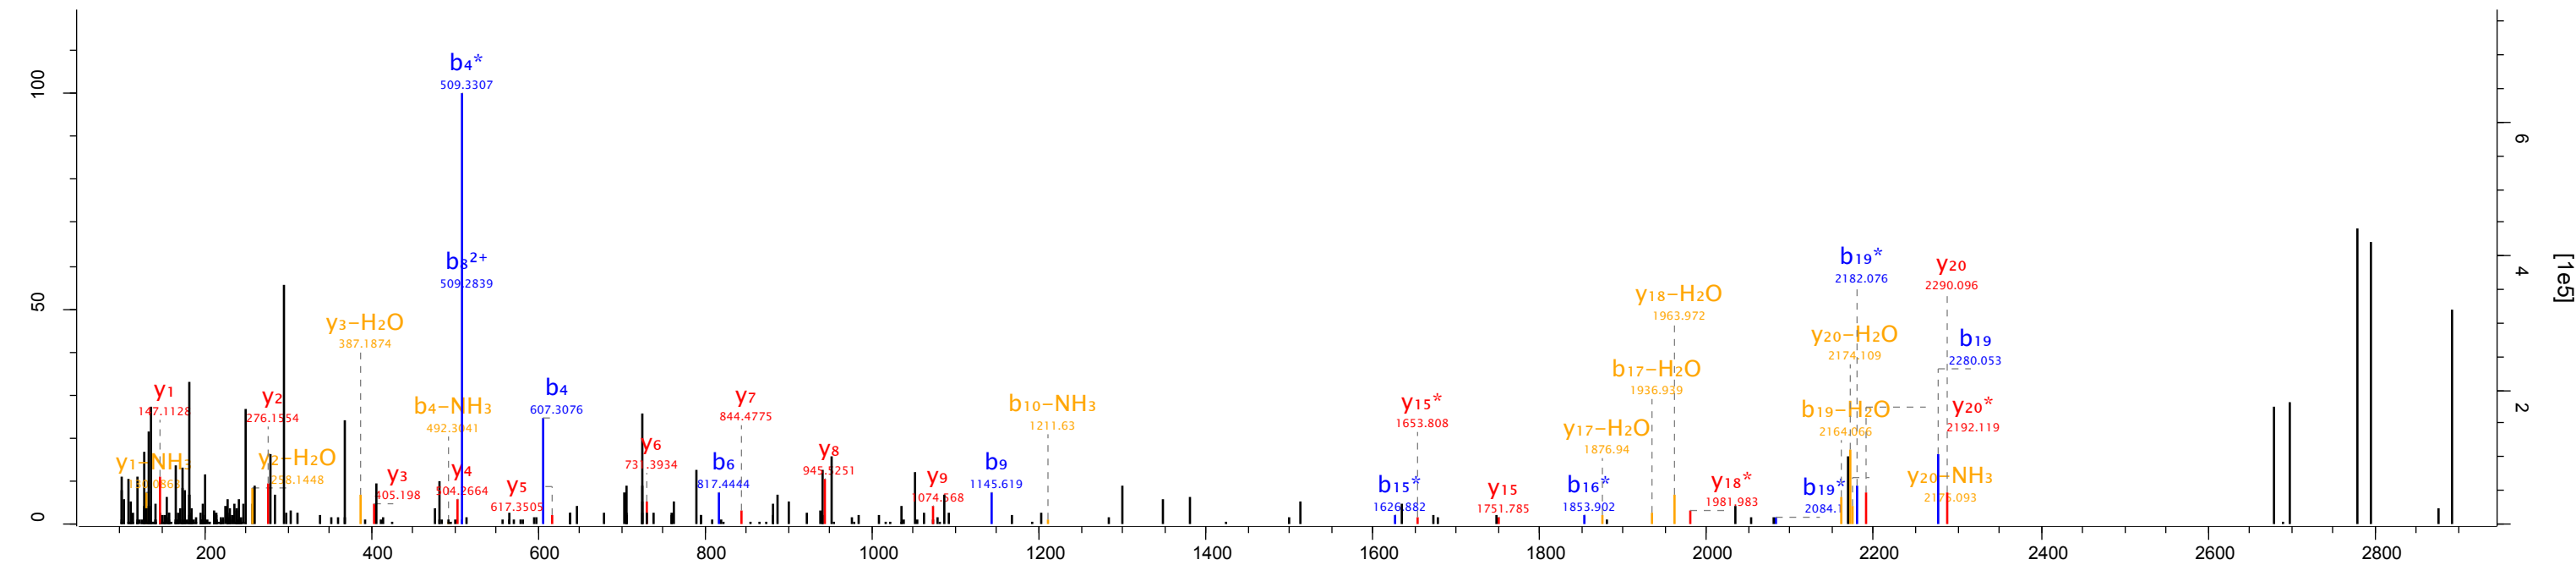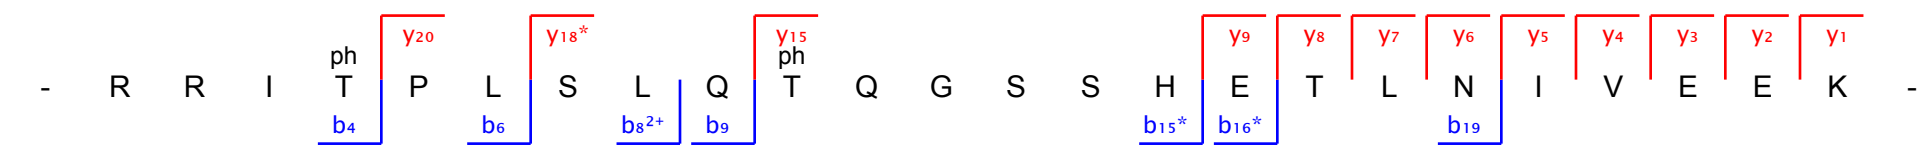

Raw file Scan Method Score m/z Gene names  
 20150812\_A375SR\_Phospho\_BR1\_04 18388 FTMS; HCD 176.86 1034.44 MAP1B

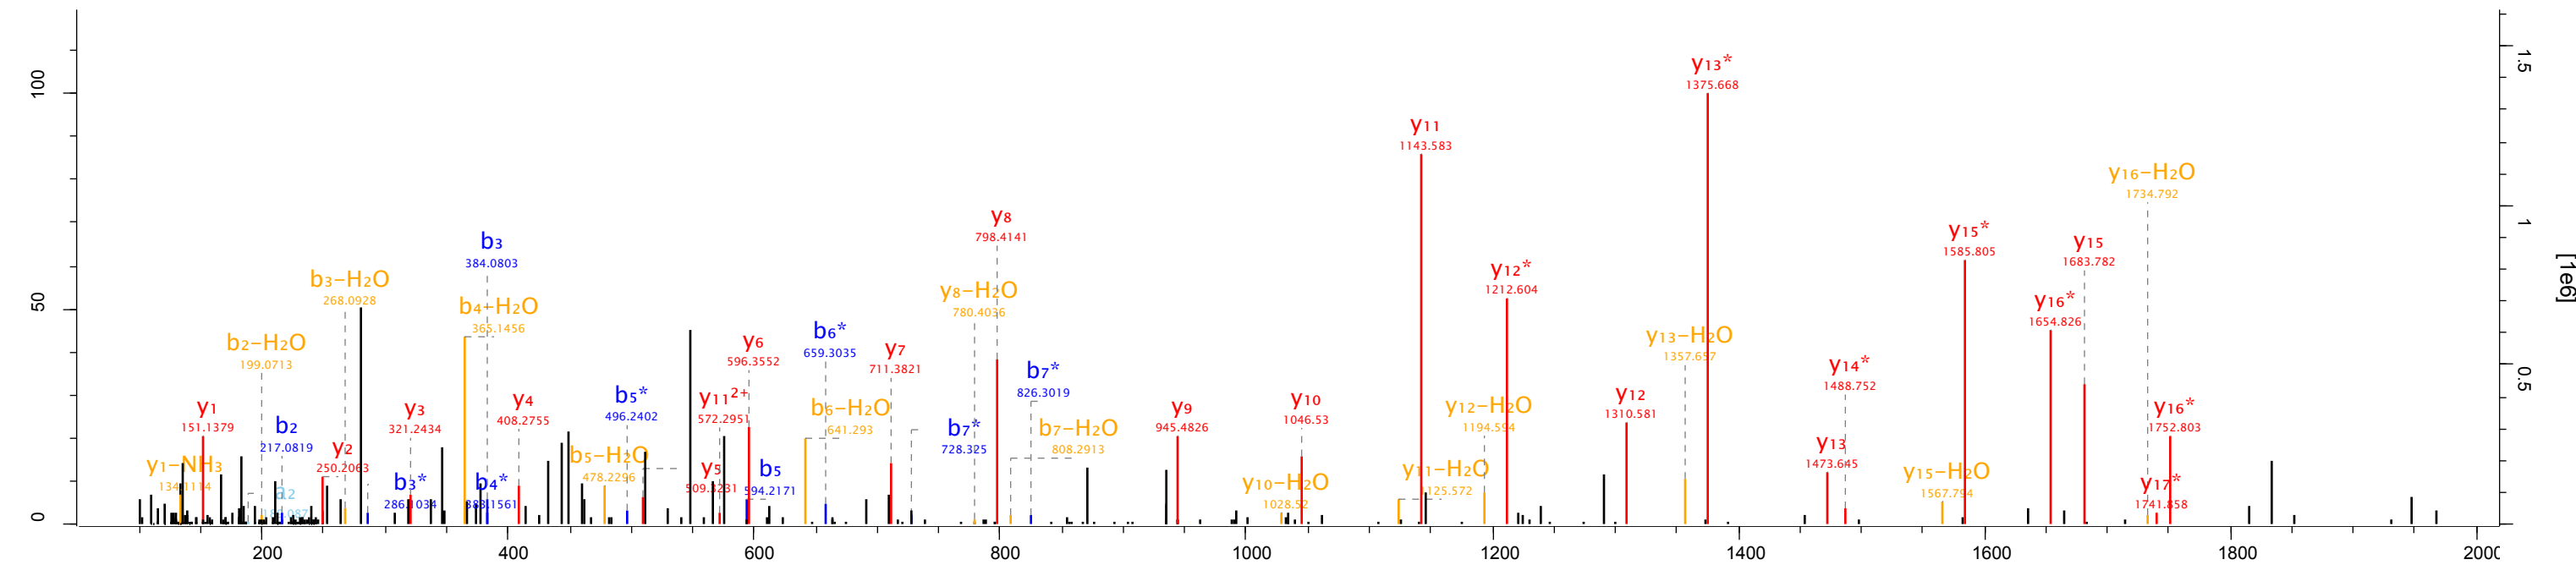

- E S S P L Y S P T F S D S T S A V K -

Fragmentation mapping (b and y ions):

- b2 (S)
- b3 (S)
- b4\* (P)
- b5 (L)
- b6\* (Y)
- b7\* (S)

Raw file 20150812\_A375SR\_Phospho\_BR1\_04 Scan 19358 Method FTMS; HCD Score 66.57 m/z 1200.58 Gene names ATXN2L

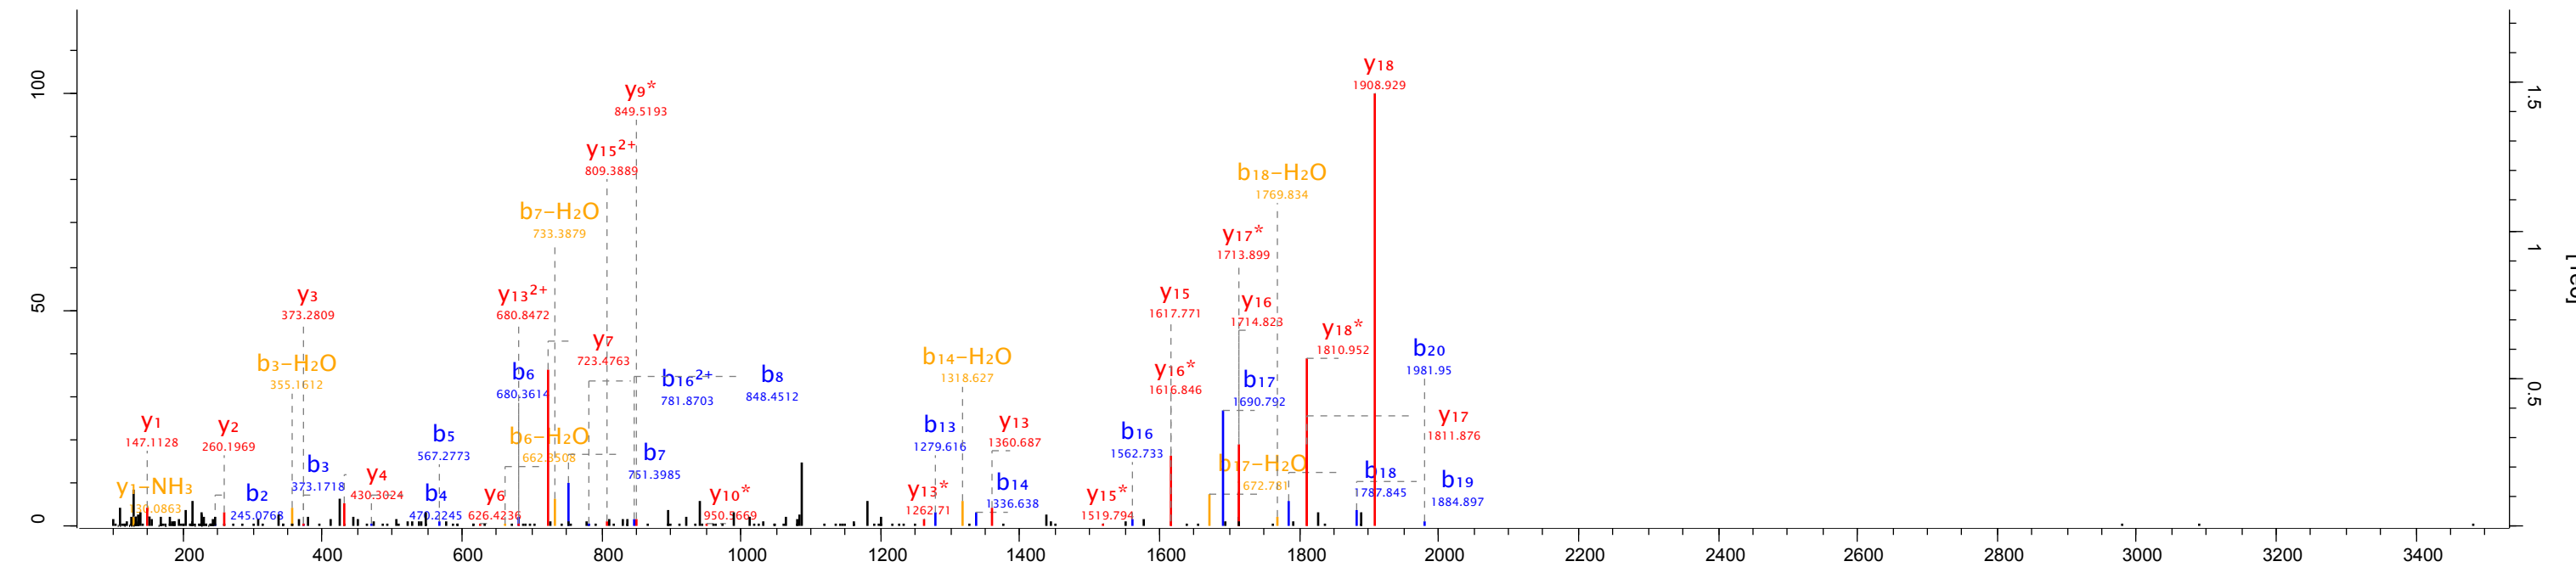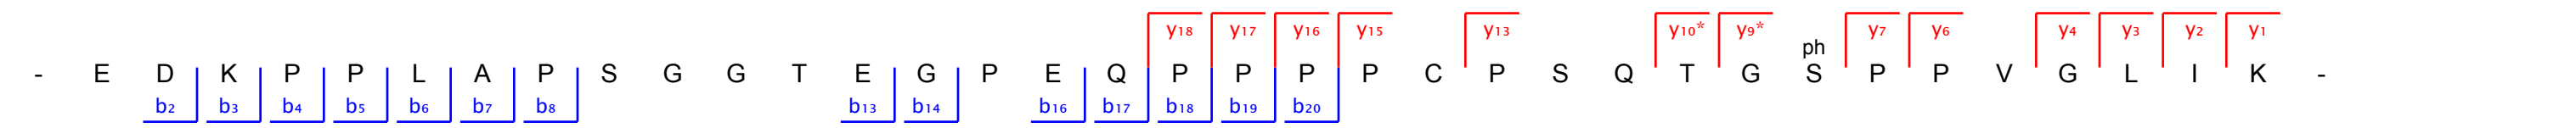

Raw file 20150812\_A375SR\_Phospho\_BR1\_04 Scan 19868 Method FTMS; HCD Score 96.77 m/z 965.12 Gene names RAB11FIP1

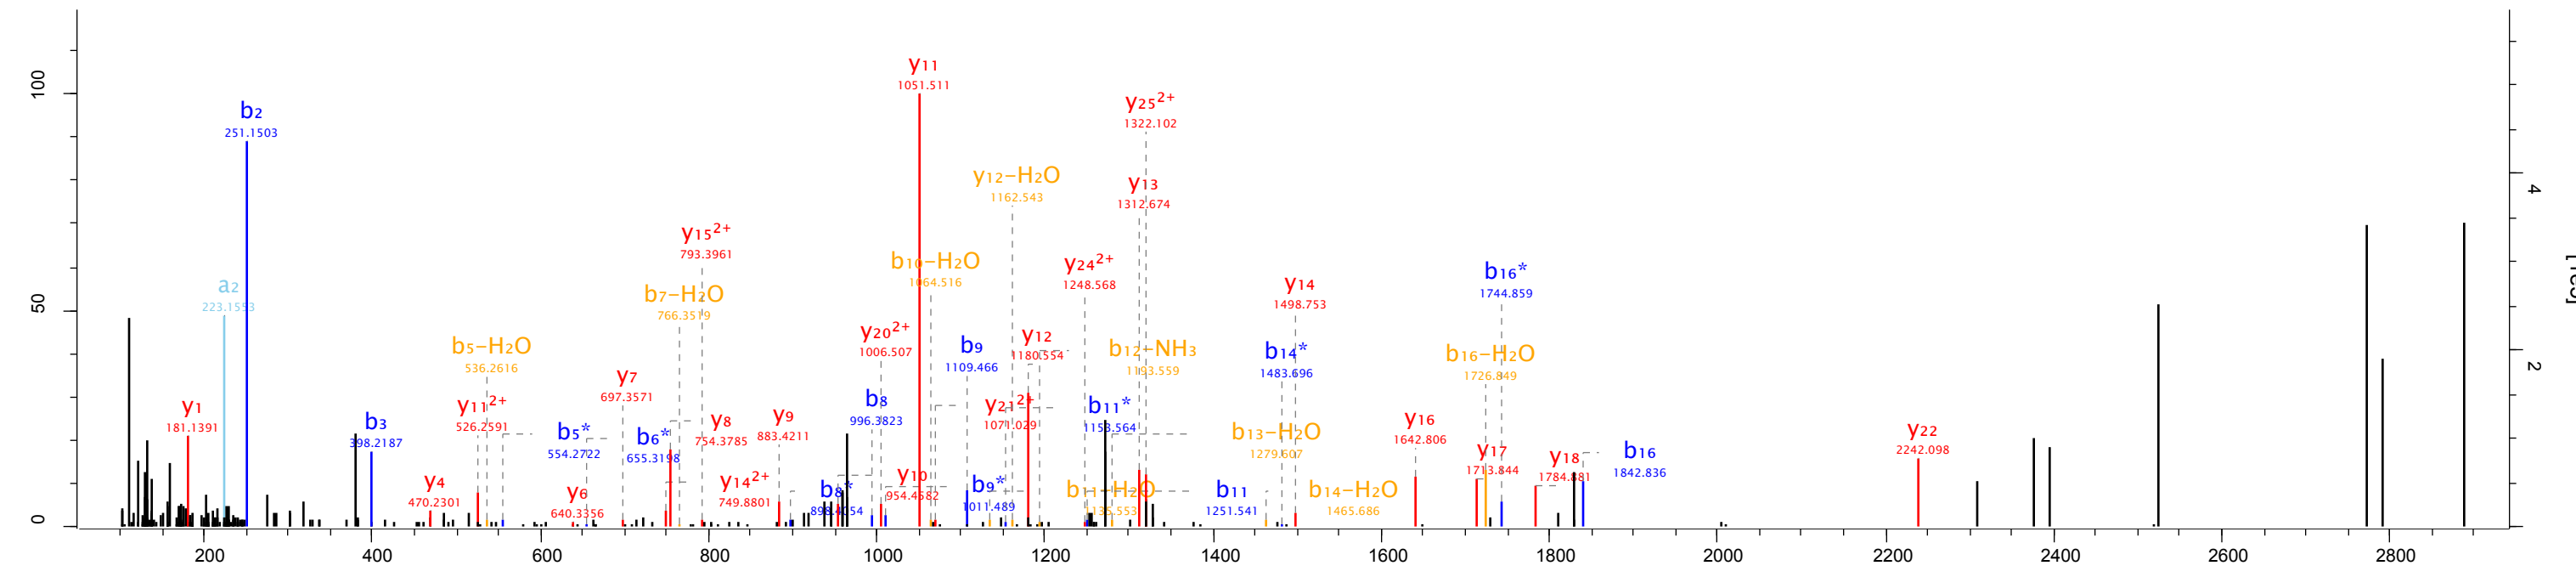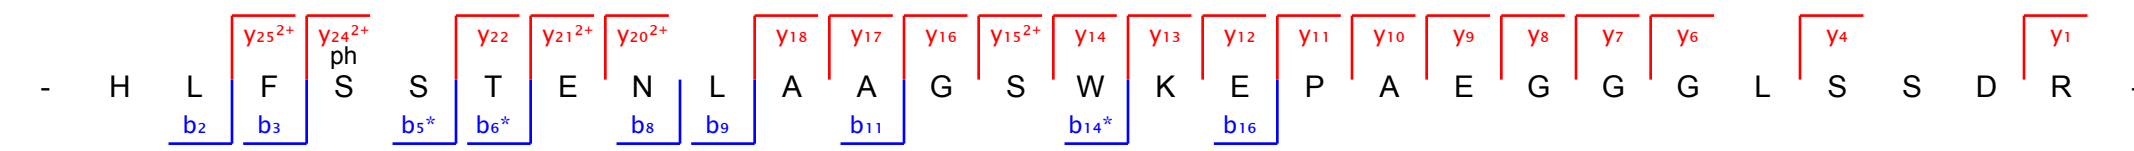



Raw file: 20150812\_A375SR\_Phospho\_BR1\_04  
 Scan: 20648 Method: FTMS; HCD Score: 149.99 m/z: 726.33 Gene names: RBM15B

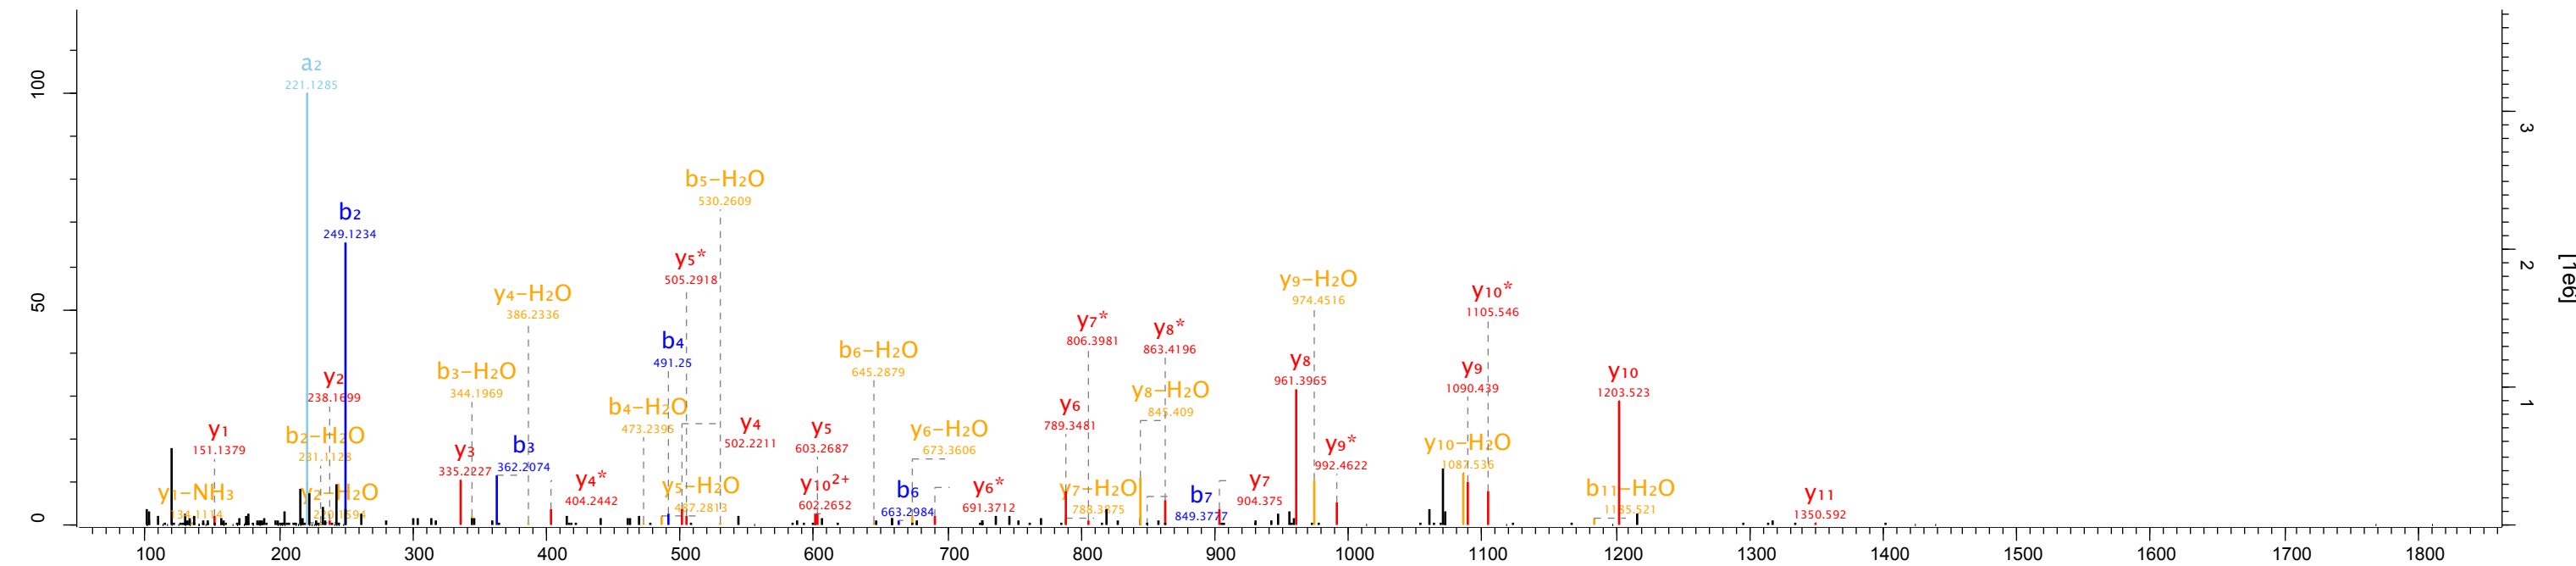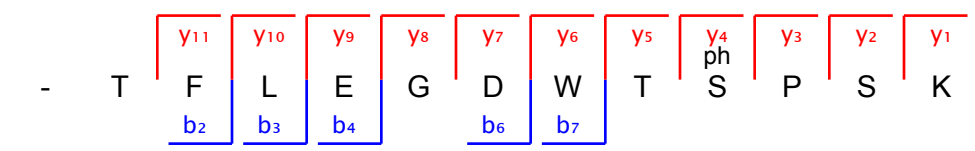

Raw file: 20150812\_A375SR\_Phospho\_BR1\_04  
 Scan: 21228 Method: FTMS; HCD Score: 104.61 m/z: 1032.98 Gene names: HN1

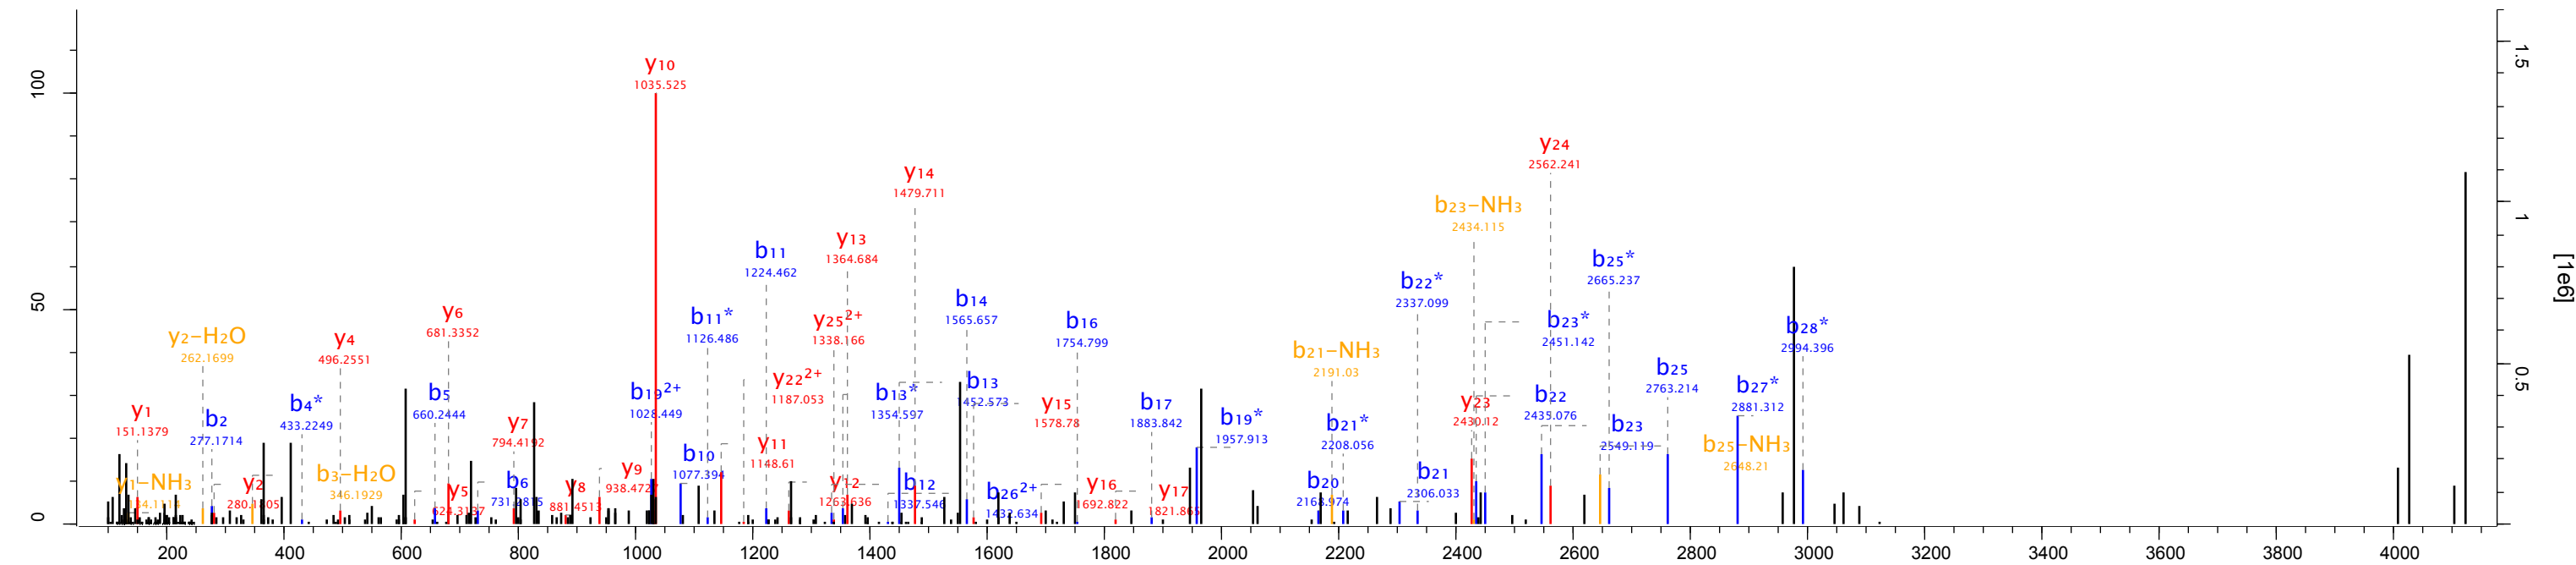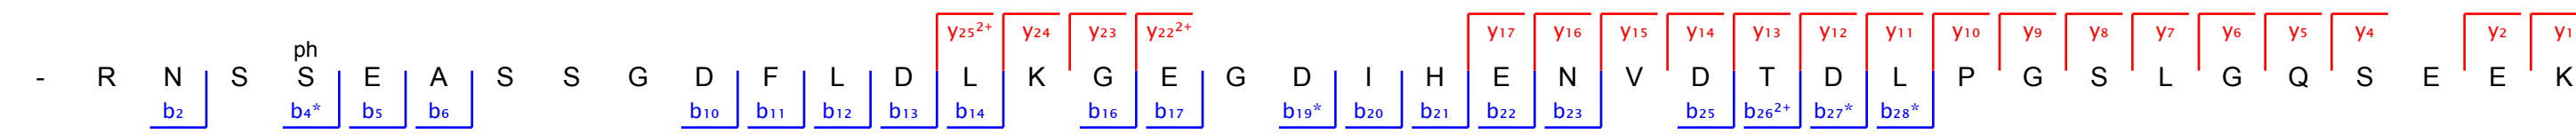

Raw file 20150812\_A375SR\_Phospho\_BR1\_04 Scan 21328 Method FTMS; HCD Score 42.71 m/z 752.35 Gene names KIAA2026

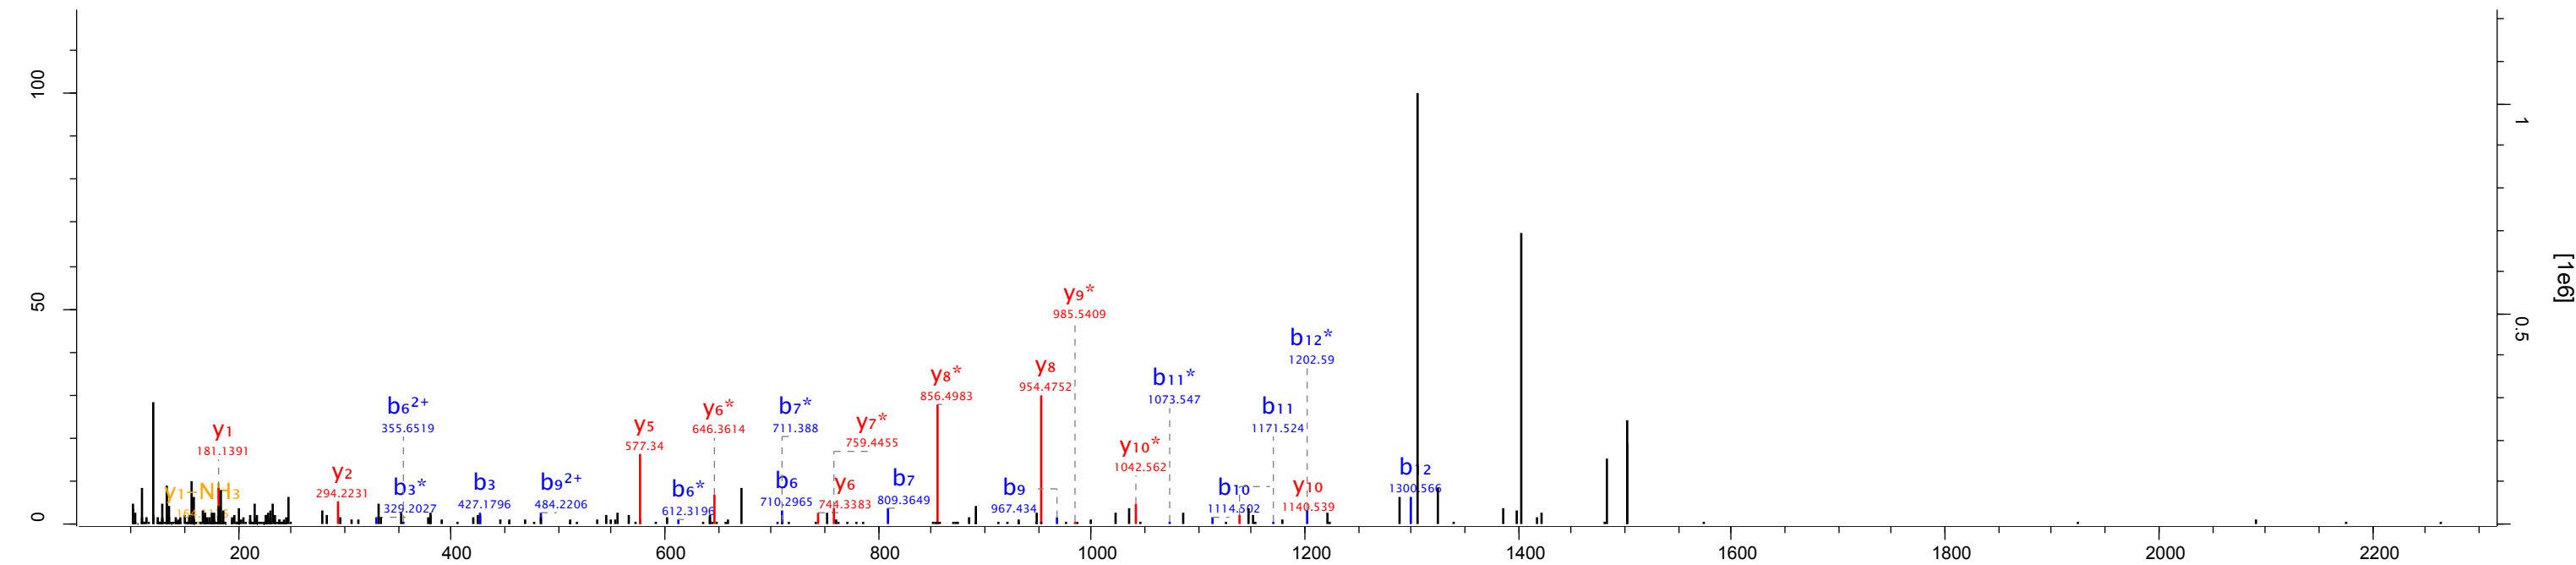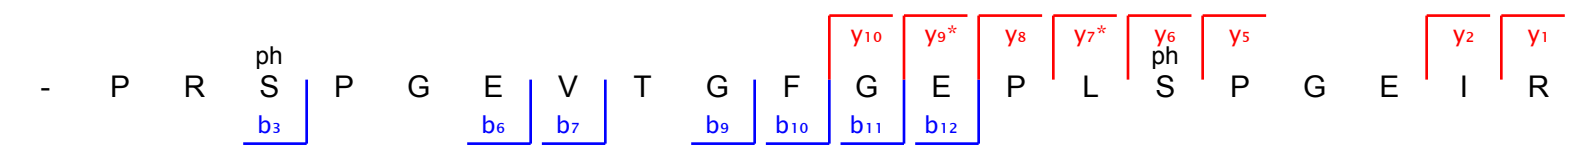

Raw file Scan Method Score m/z Gene names  
 20150812\_A375SR\_Phospho\_BR1\_04 22788 FTMS; HCD 121.92 912.95 FAM122A

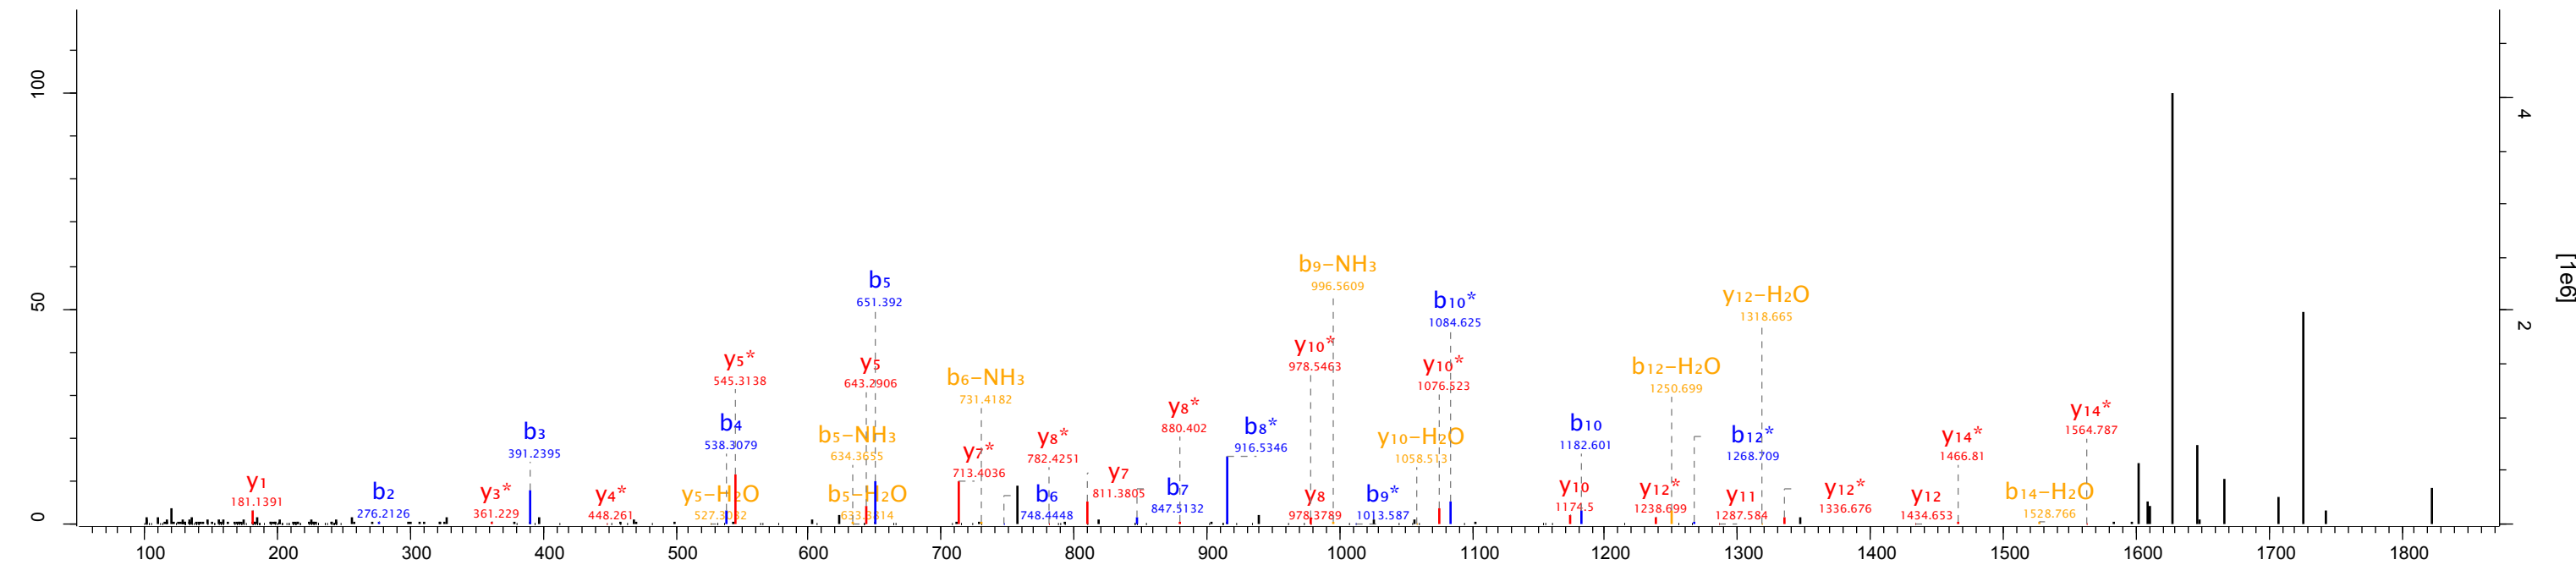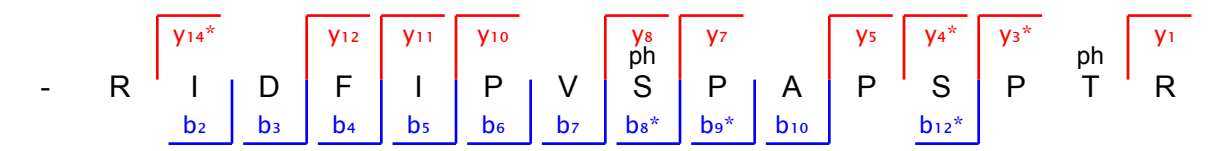

Raw file 20150812\_A375SR\_Phospho\_BR1\_04 Scan 23648 Method FTMS; HCD Score 110.25 m/z 905.44 Gene names AKAP12

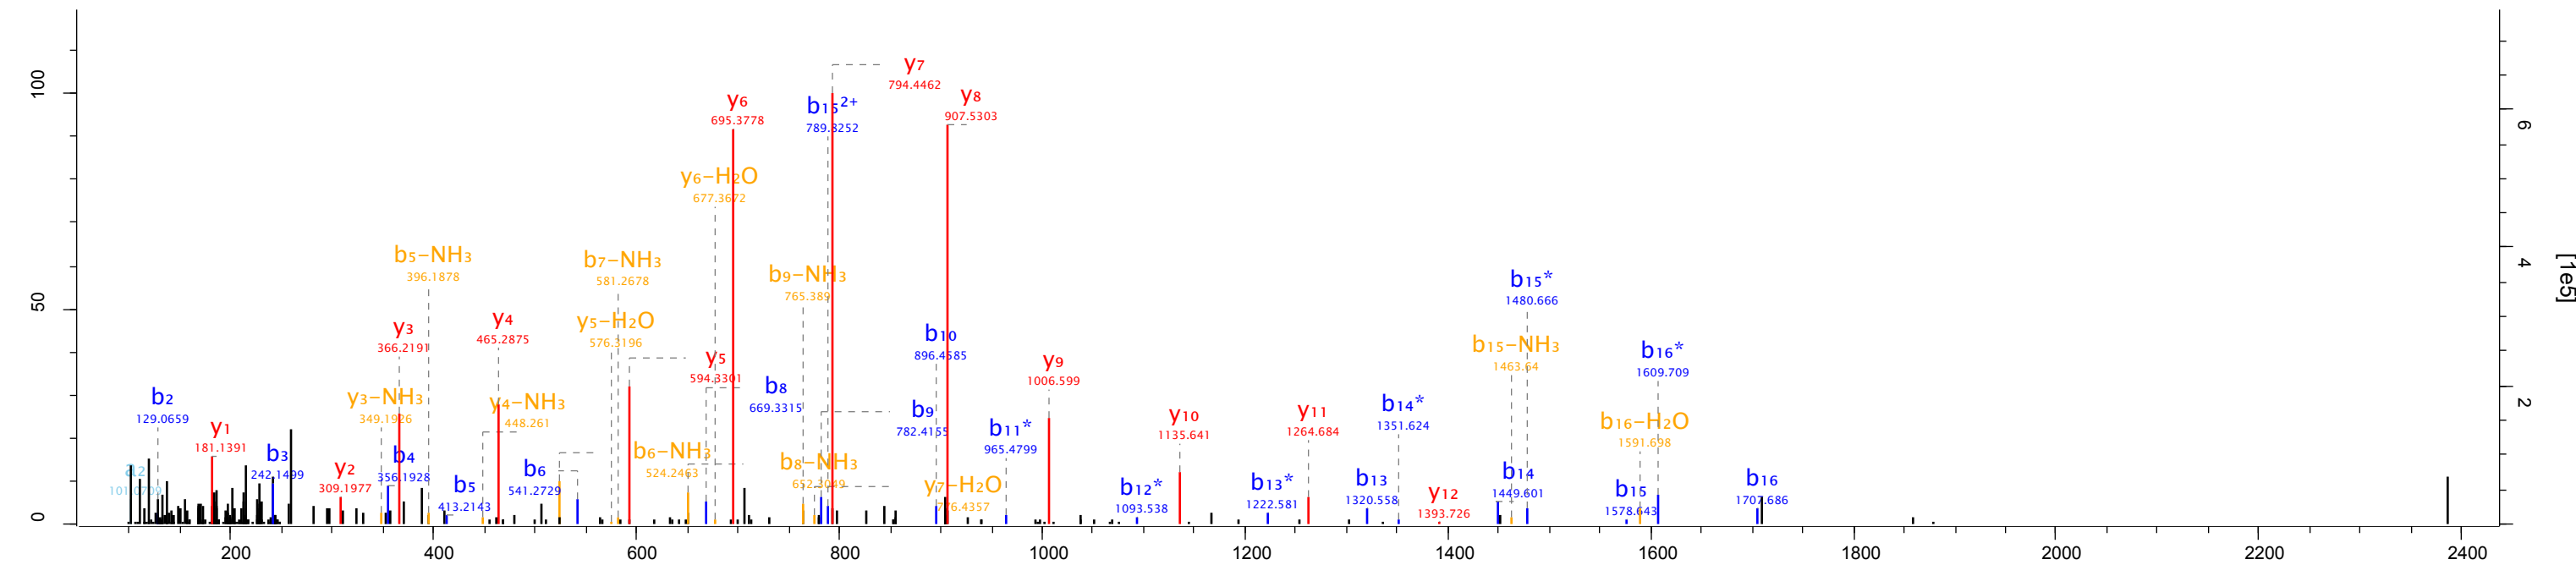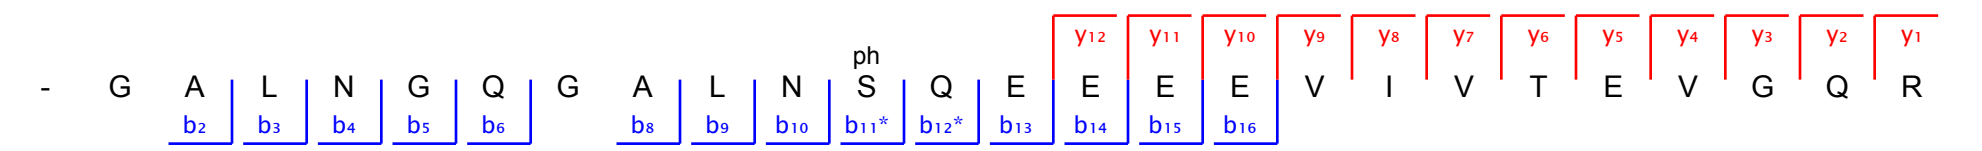

Raw file: 20150812\_A375SR\_Phospho\_BR1\_04  
 Scan: 24148 Method: FTMS; HCD Score: 127.05 m/z: 1261.25 Gene names: NUP214

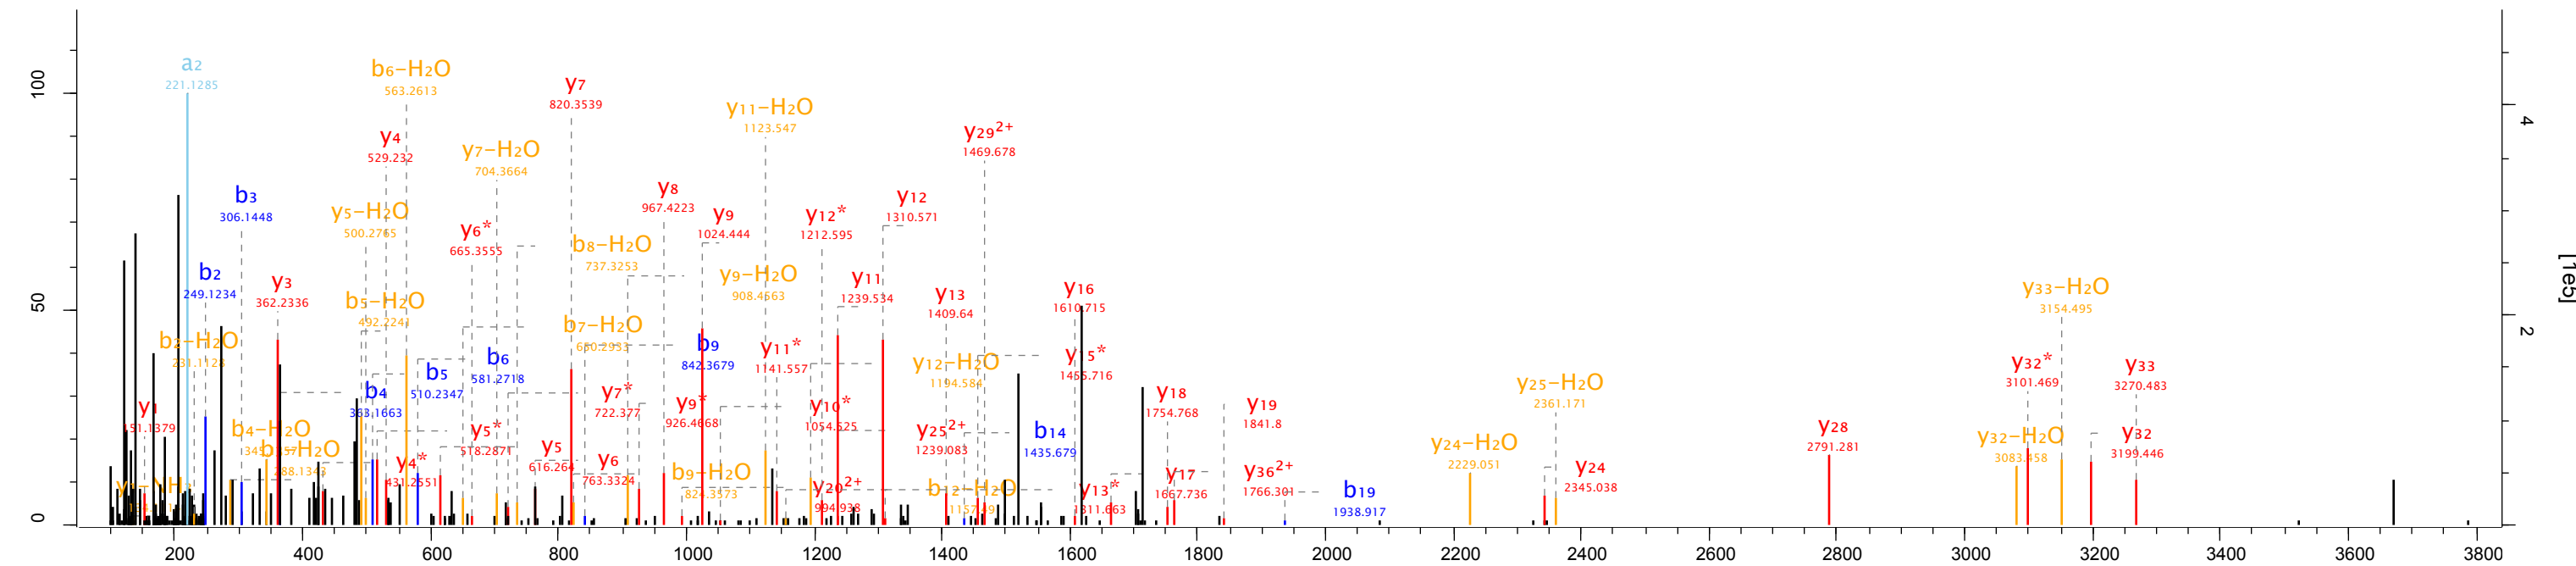

- T F G G F A S S S F G E Q K P T G T F S S G G G S V A S Q G F G F S S P N K

Fragmentation labels below the sequence:

- Red boxes: y<sub>36</sub><sup>2+</sup>, y<sub>33</sub>, y<sub>32</sub>, y<sub>29</sub><sup>2+</sup>, y<sub>28</sub>, y<sub>25</sub><sup>2+</sup>, y<sub>24</sub>, y<sub>20</sub><sup>2+</sup>, y<sub>19</sub>, y<sub>18</sub>, y<sub>17</sub>, y<sub>16</sub>, y<sub>15</sub><sup>\*</sup>, y<sub>13</sub>, y<sub>12</sub>, y<sub>11</sub>, y<sub>10</sub><sup>\*</sup>, y<sub>9</sub>, y<sub>8</sub>, y<sub>7</sub>, y<sub>6</sub>, y<sub>5</sub>, y<sub>4</sub><sup>ph</sup>, y<sub>3</sub>, y<sub>1</sub>
- Blue boxes: b<sub>2</sub>, b<sub>3</sub>, b<sub>4</sub>, b<sub>5</sub>, b<sub>6</sub>, b<sub>9</sub>, b<sub>14</sub>, b<sub>19</sub>

Raw file 20150812\_A375SR\_Phospho\_BR1\_04 Scan 24838 Method FTMS; HCD Score 141.6 m/z 877.91 Gene names RALGAPA1

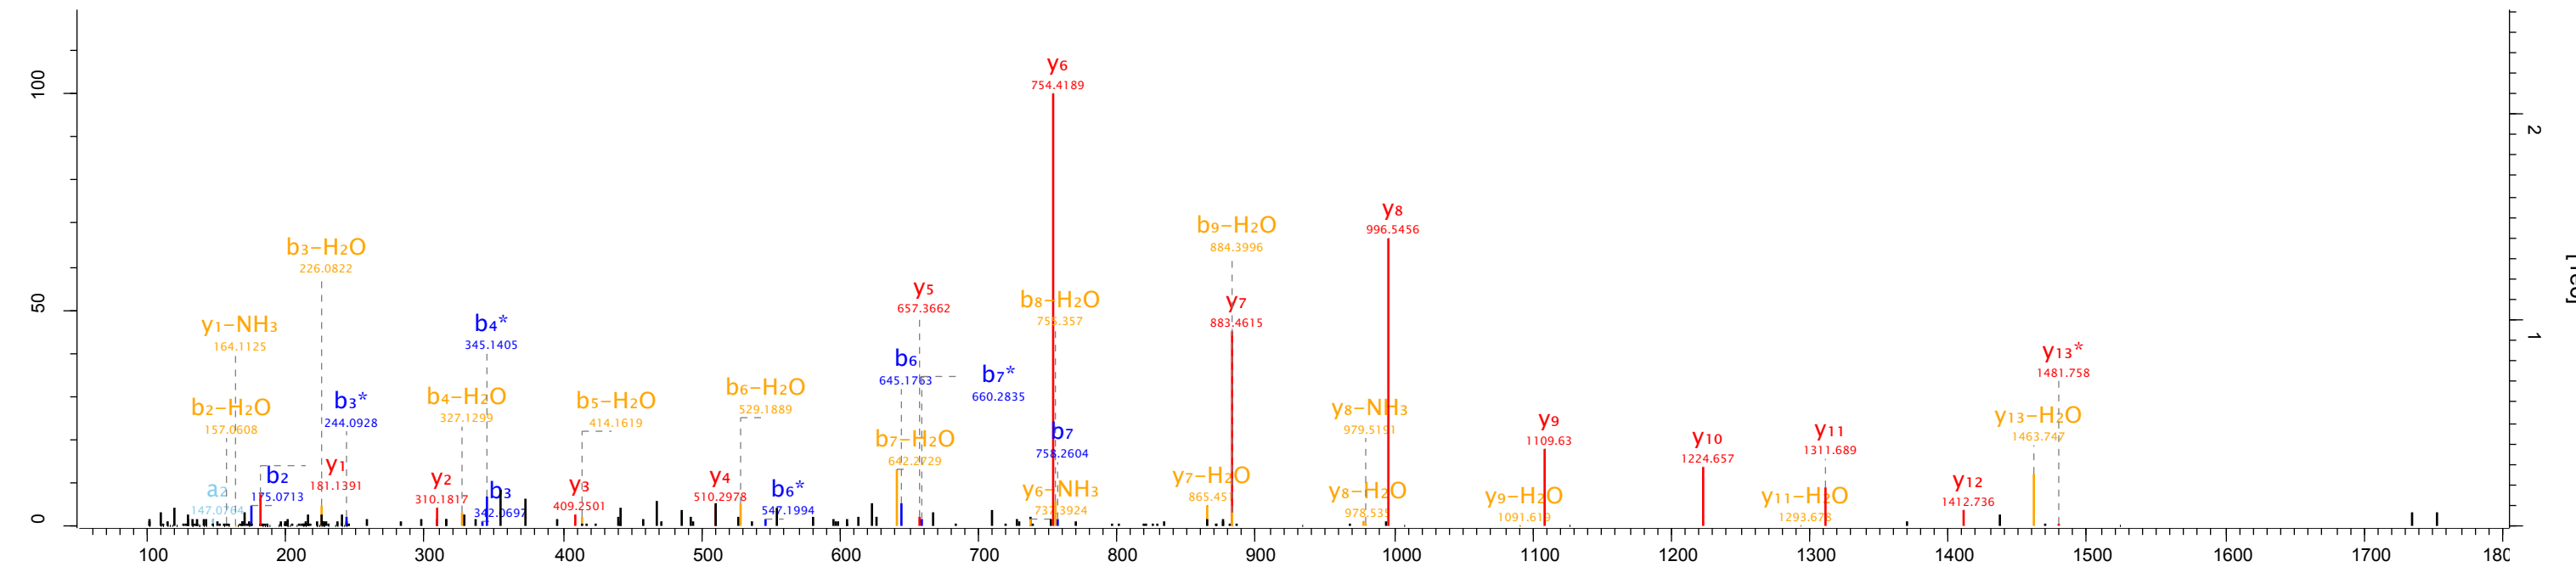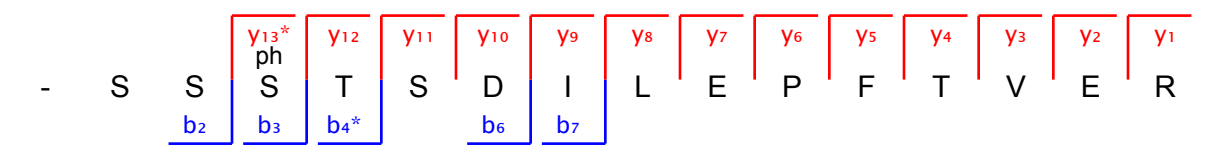





Raw file: 20150812\_A375SR\_Phospho\_BR1\_04  
 Scan: 2698 Method: FTMS; HCD Score: 154.84 m/z: 820.32 Gene names: RBM15

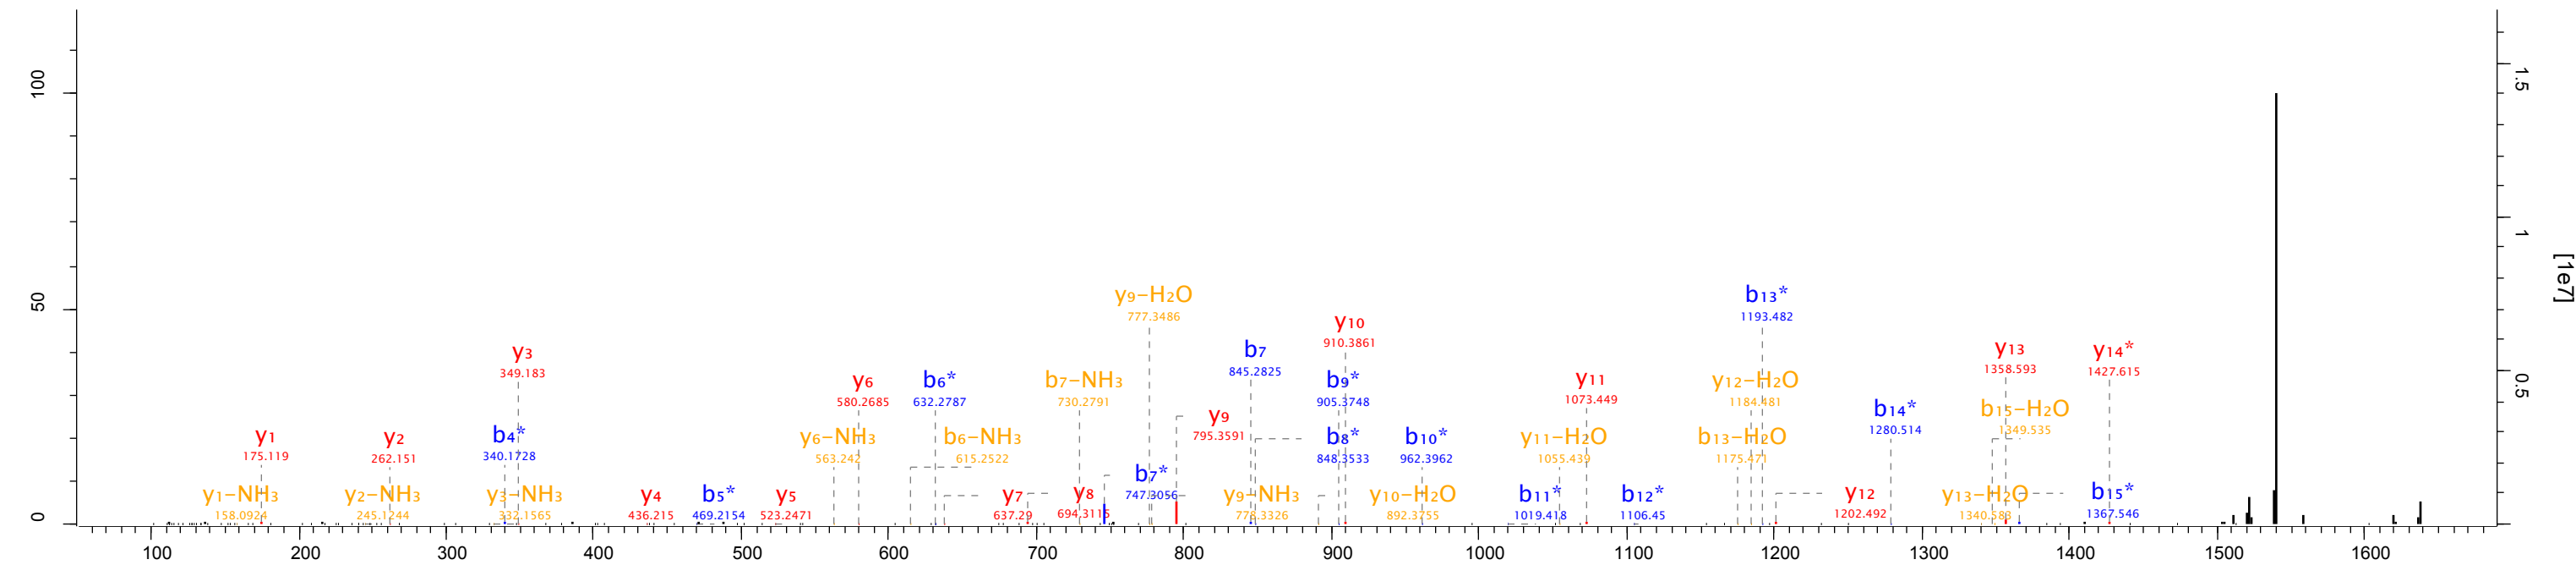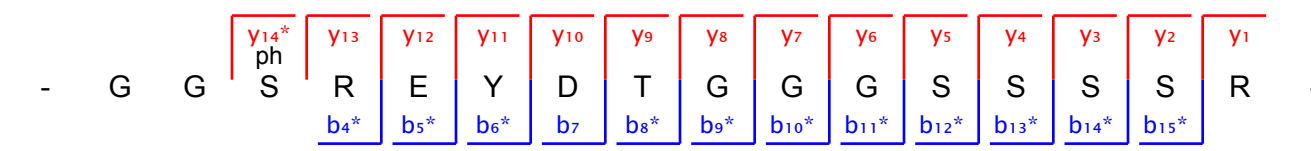

Raw file Scan Method Score m/z Gene names  
 20150812\_A375SR\_Phospho\_BR1\_04 28658 FTMS; HCD 189.21 1166.86 LMNB1

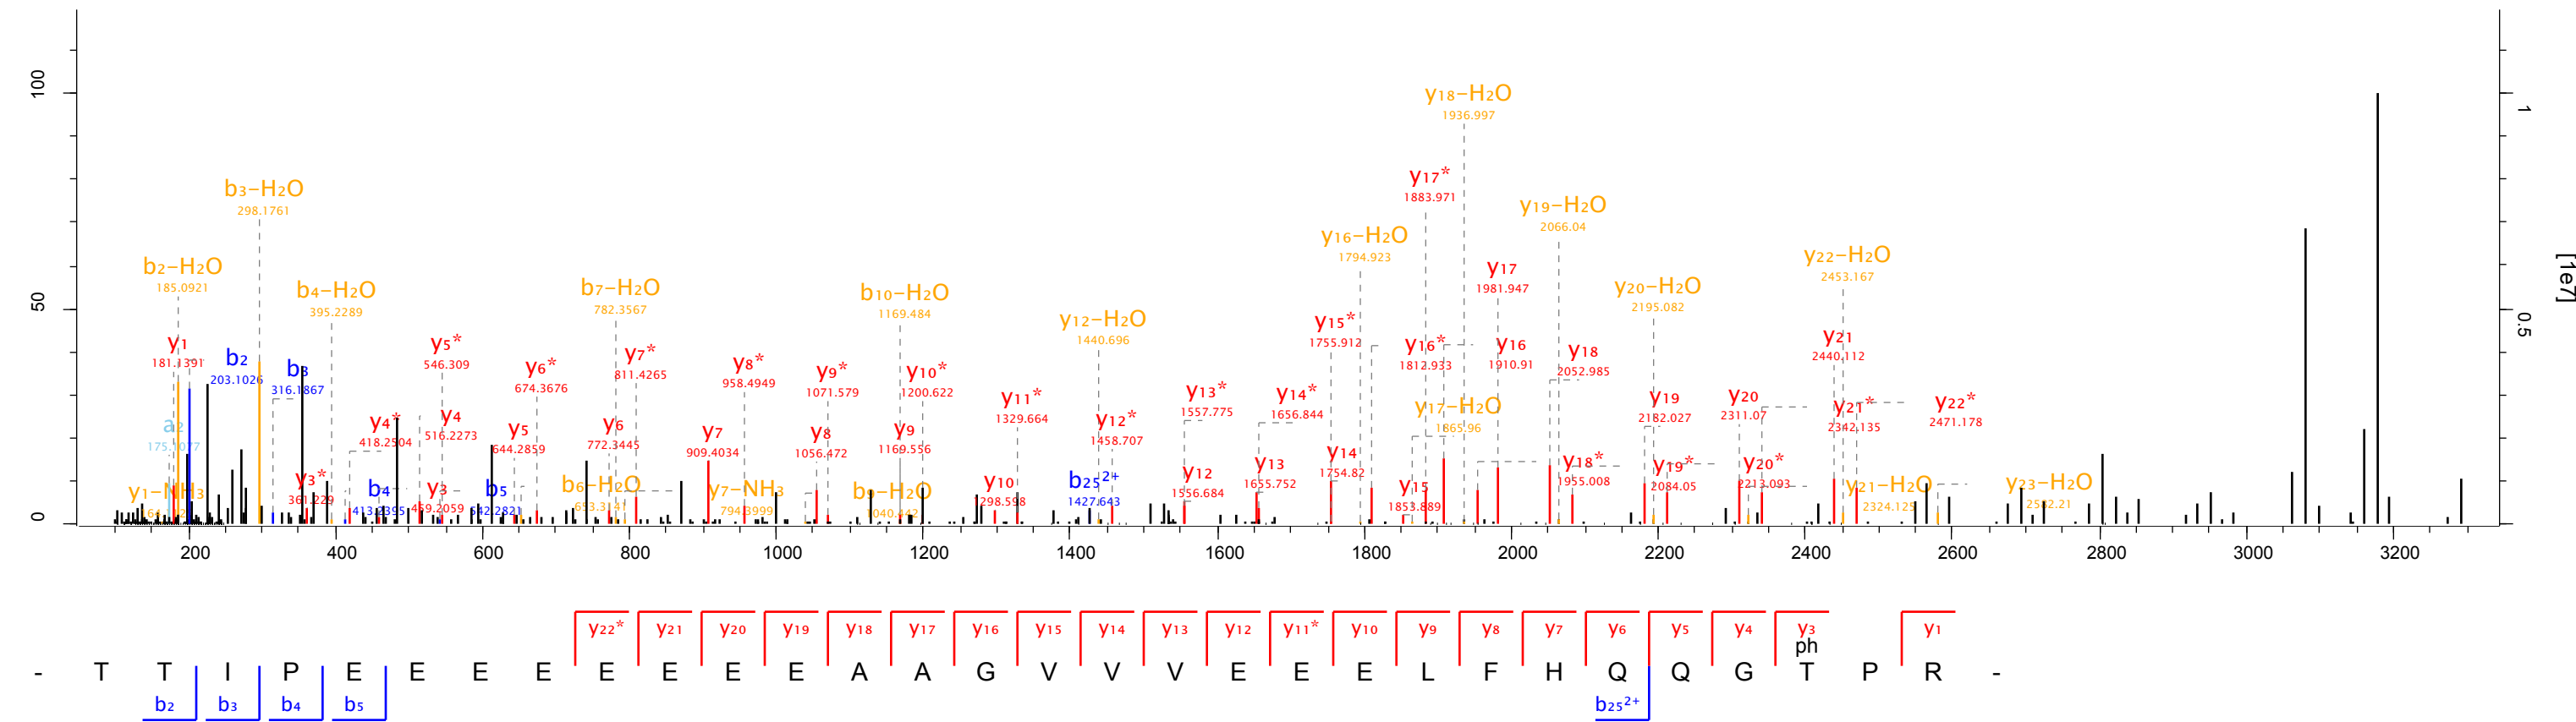

Raw file 20150812\_A375SR\_Phospho\_BR1\_04 Scan 28718 Method FTMS; HCD Score 291.25 m/z 1000.45 Gene names TNKS1BP1

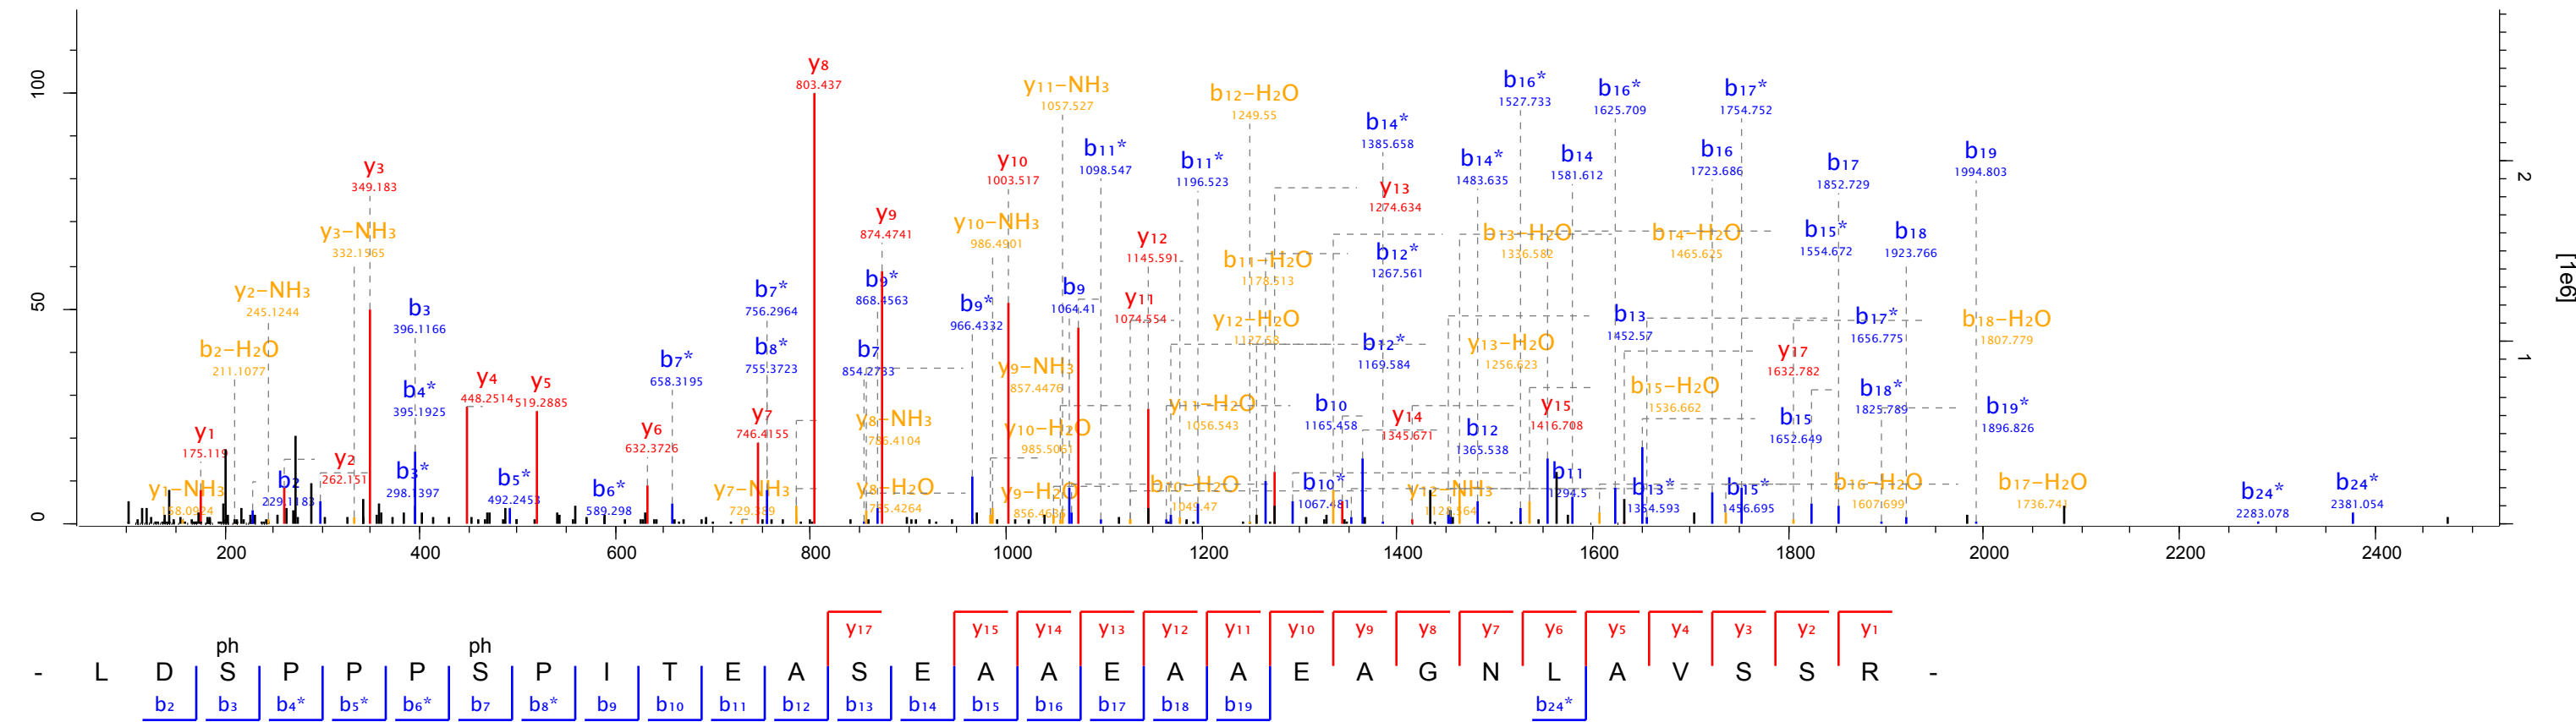

Raw file: 20150812\_A375SR\_Phospho\_BR1\_04  
 Scan: 3068 Method: FTMS; HCD Score: 116.96 m/z: 690.8 Gene names: PPHLN1

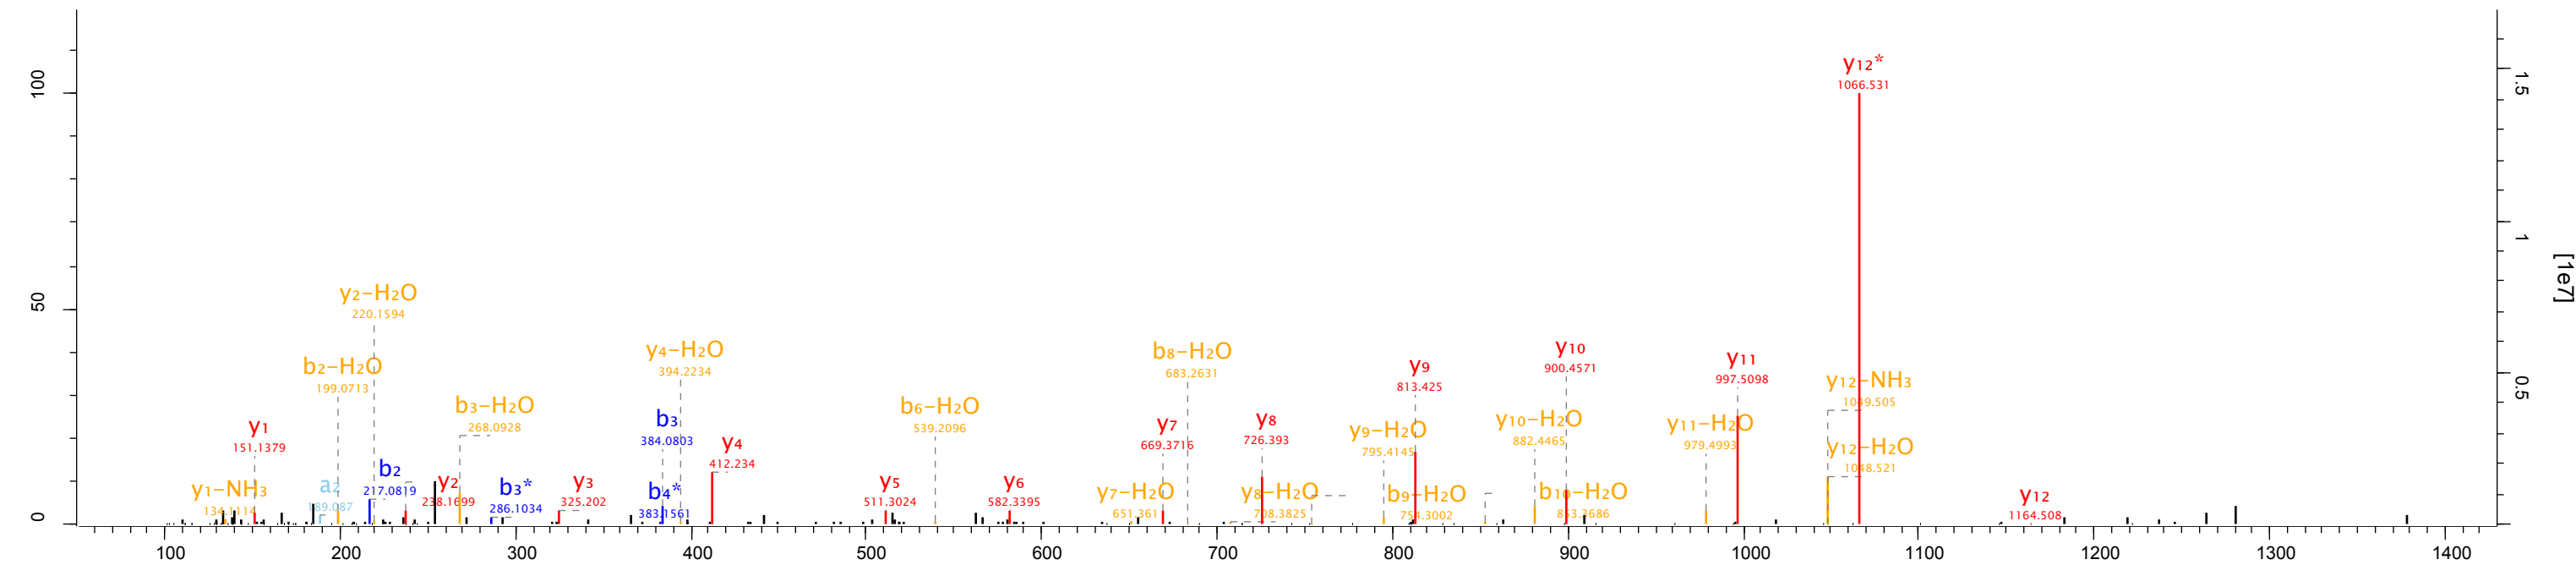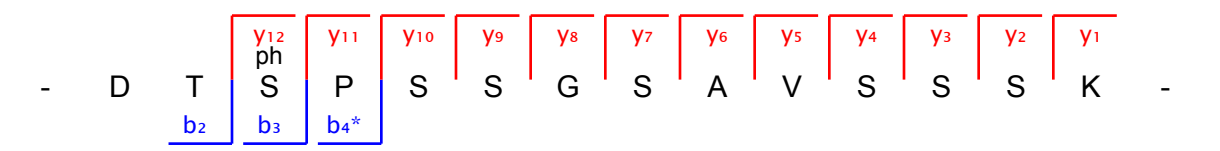

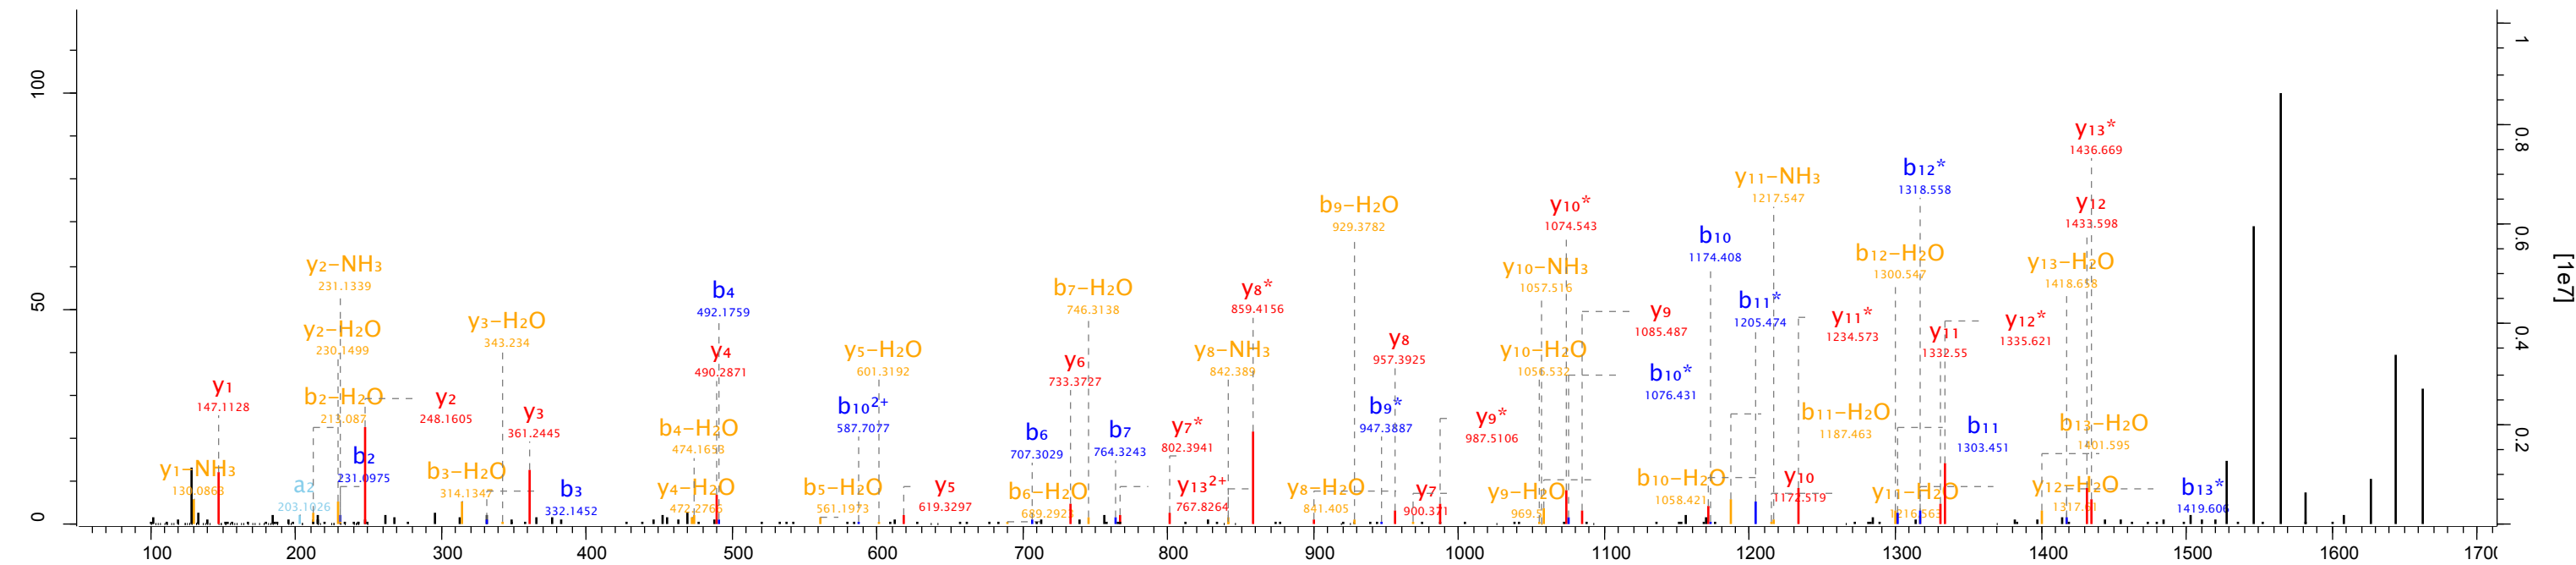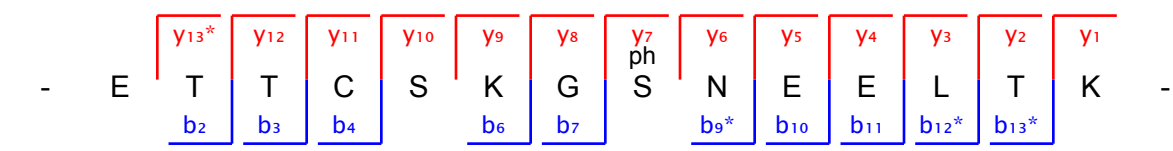

Raw file 20150812\_A375SR\_Phospho\_BR1\_04 Scan 3608 Method FTMS; HCD Score 149.6 m/z 768.8 Gene names FNTA

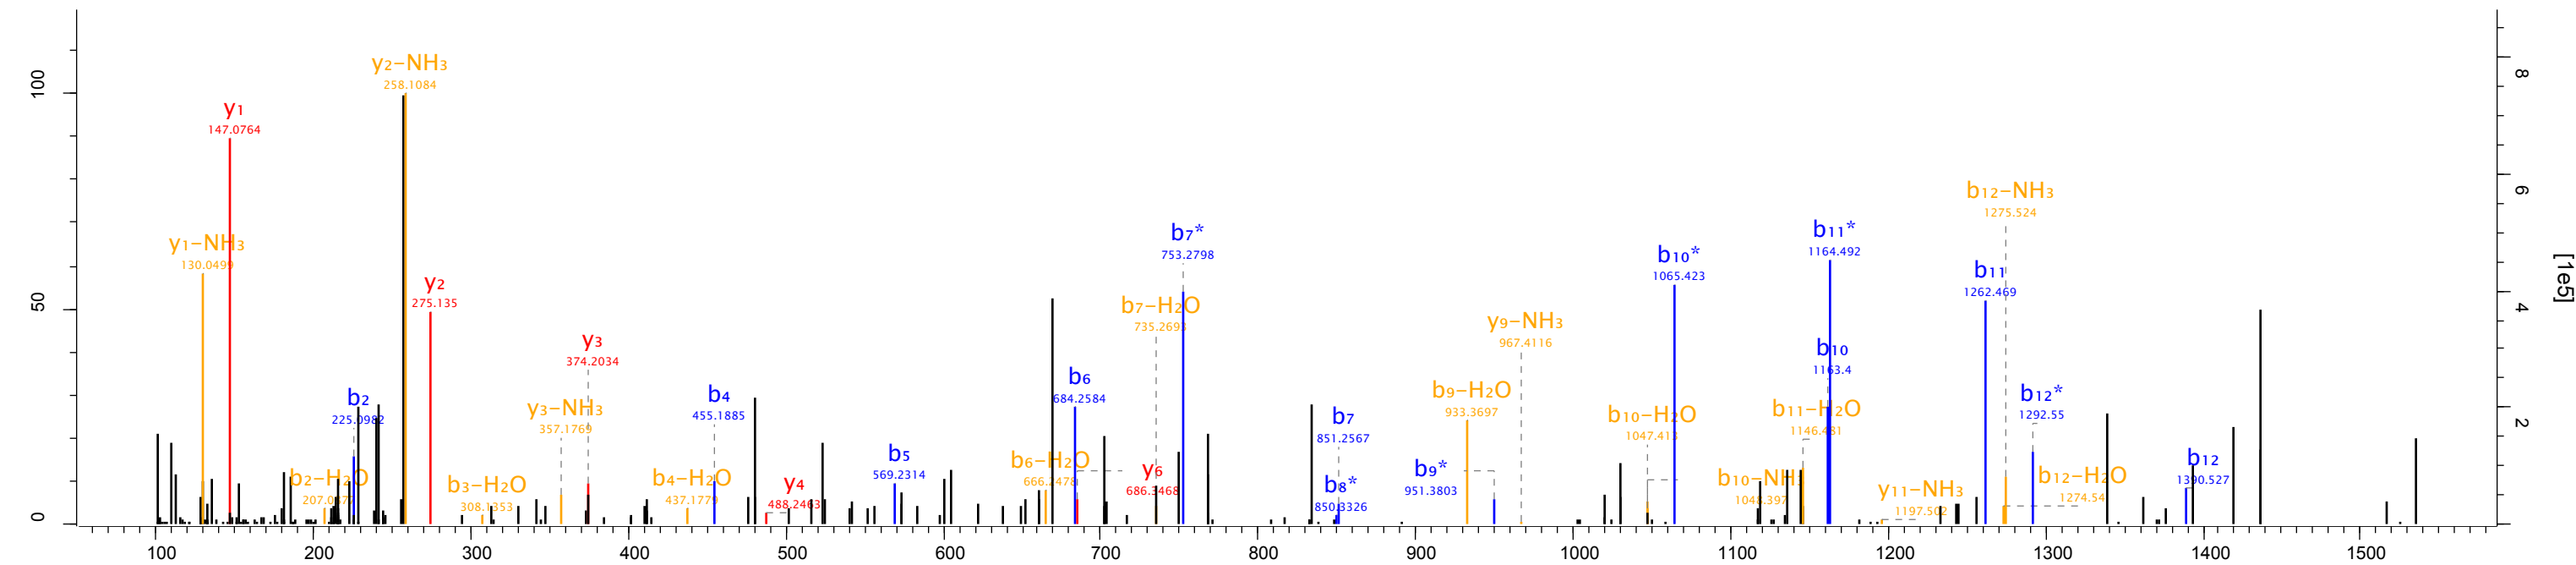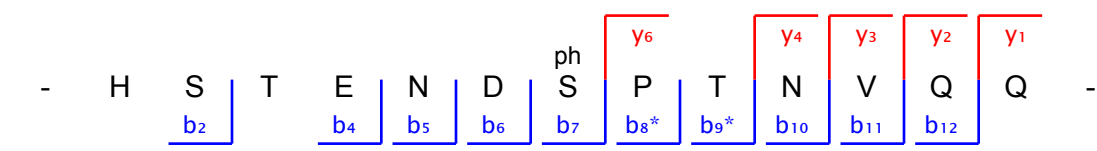

Raw file: 20150812\_A375SR\_Phospho\_BR1\_04  
 Scan: 3728 Method: FTMS; HCD Score: 78.95 m/z: 709.79 Gene names: SRSF8

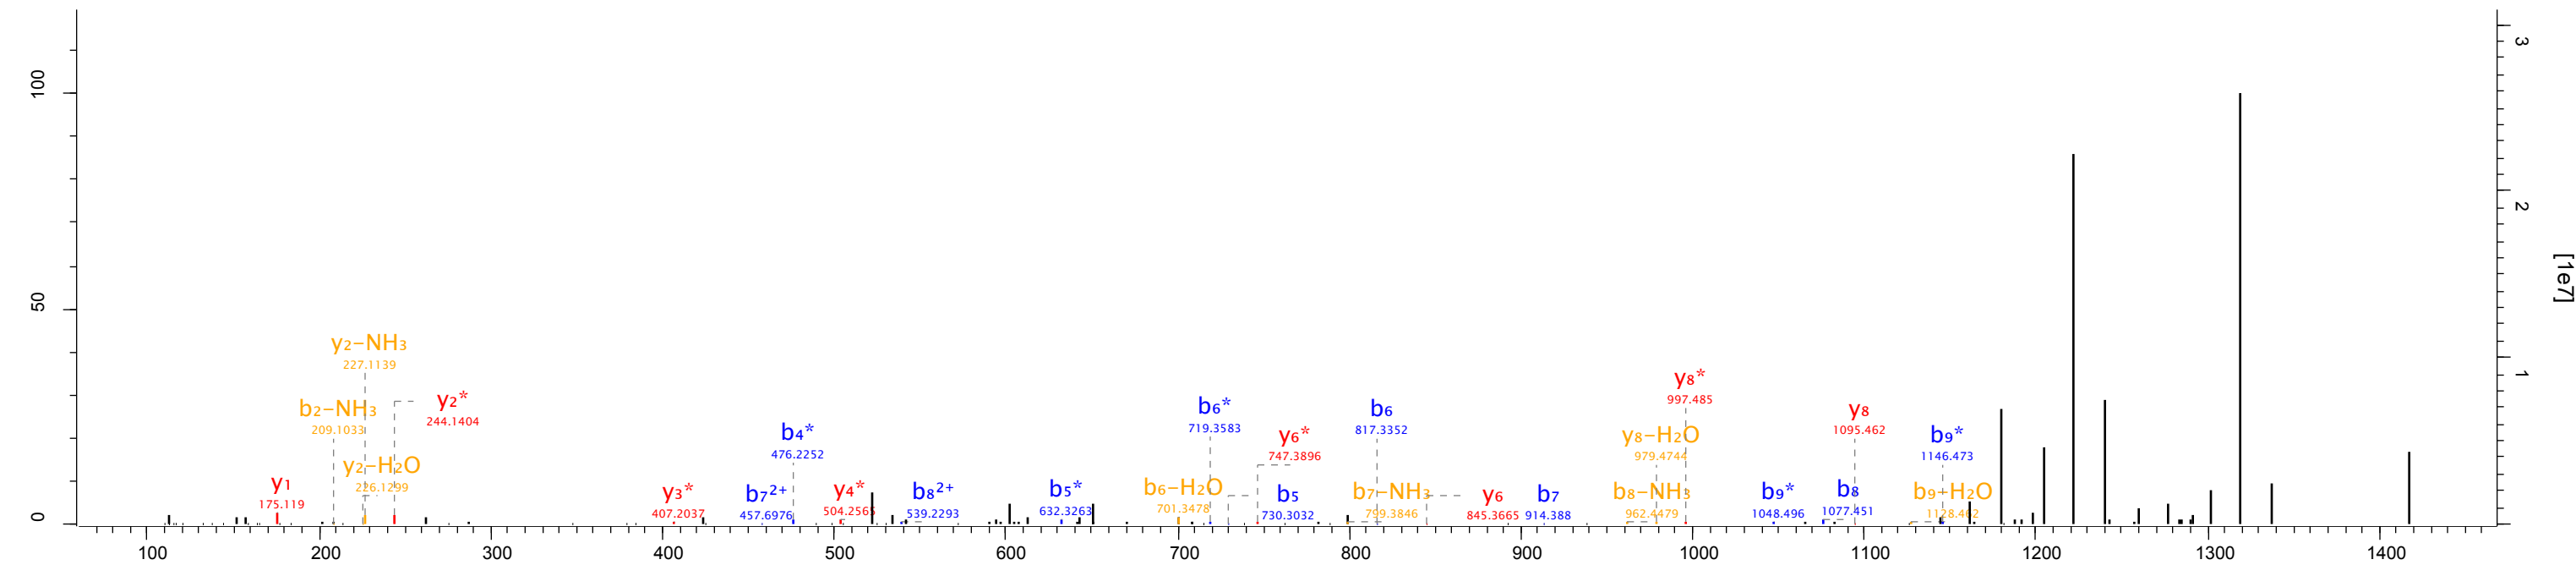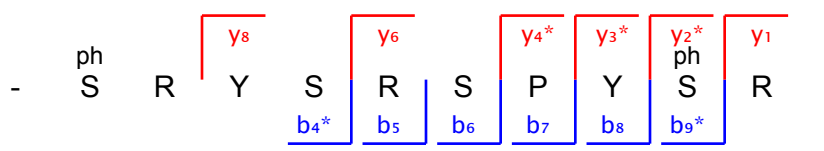

Raw file: 20150812\_A375SR\_Phospho\_BR1\_04  
 Scan: 3748 Method: FTMS; HCD Score: 93.41 m/z: 965.93 Gene names: SMARCC1

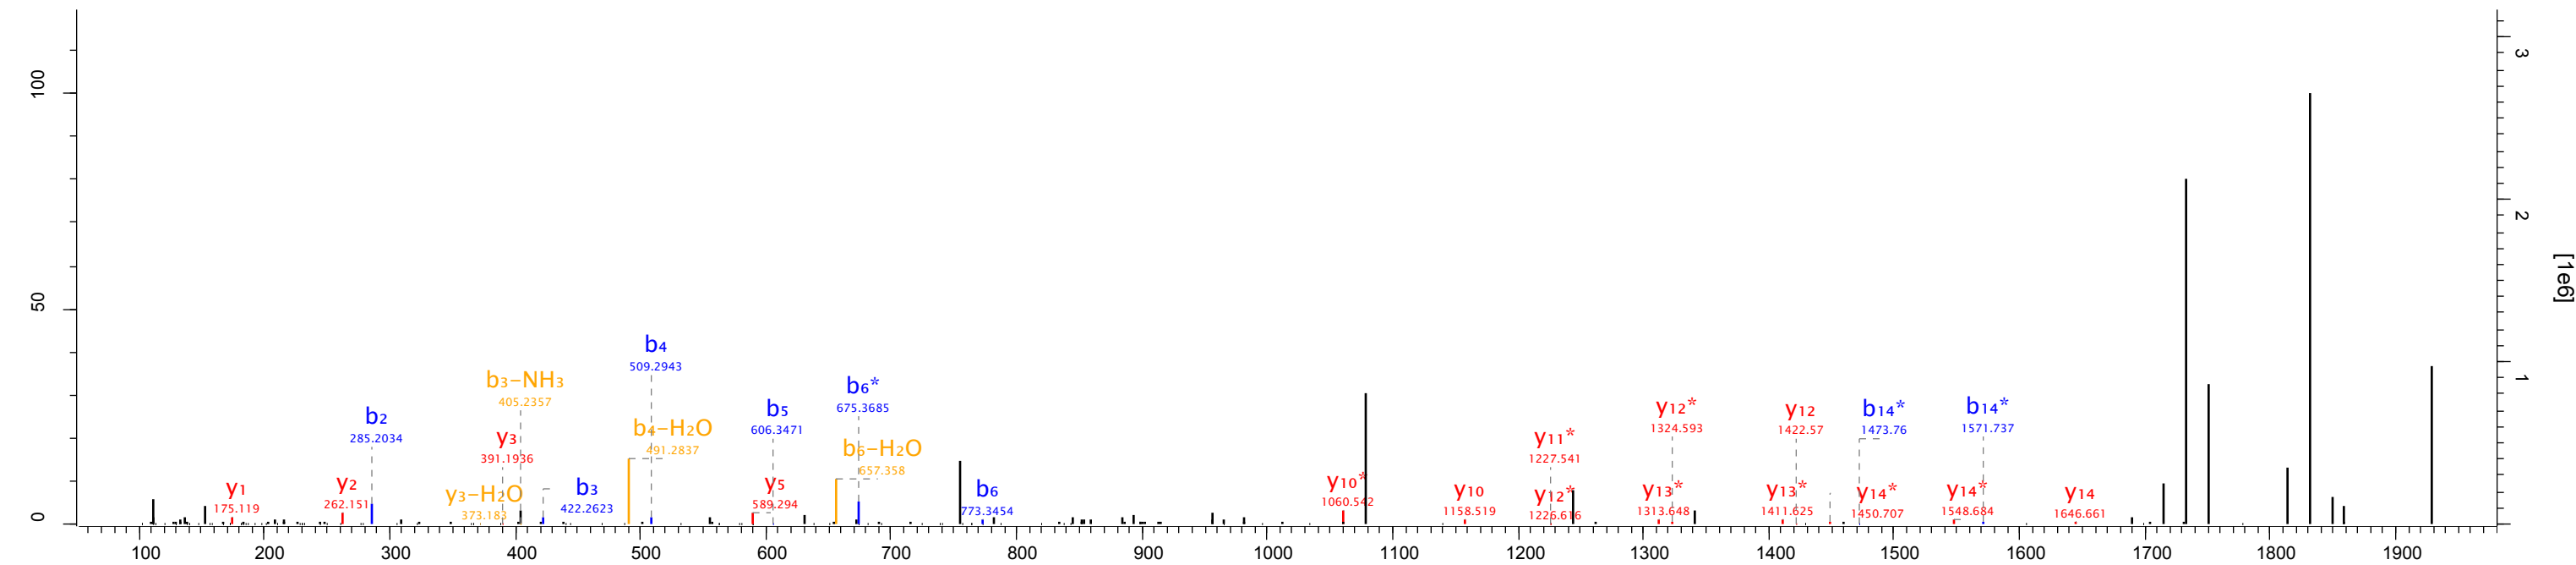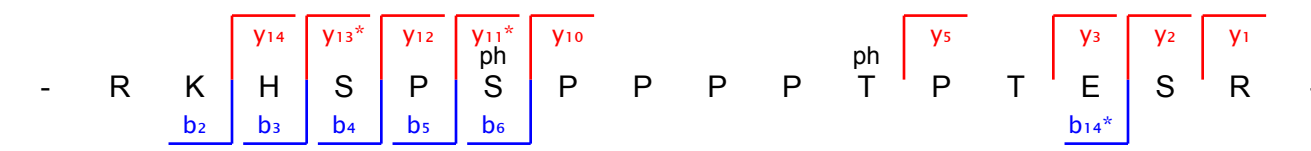



Raw file: 20150812\_A375SR\_Phospho\_BR1\_04  
 Scan: 3778 Method: FTMS; HCD Score: 131.42 m/z: 496.76 Gene names: BRIP1

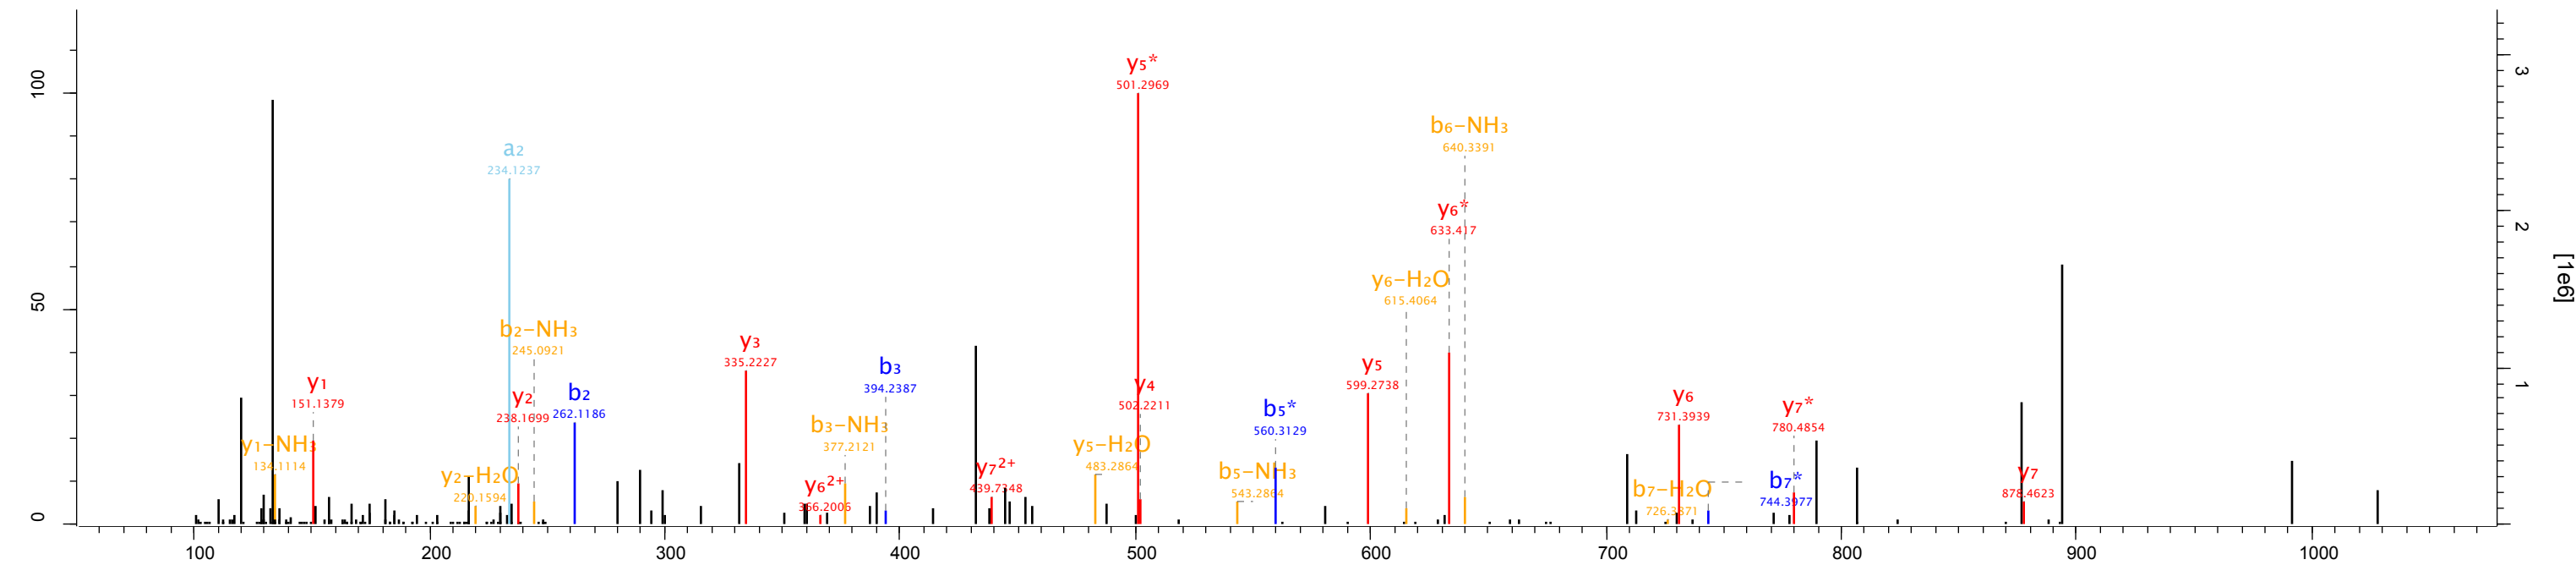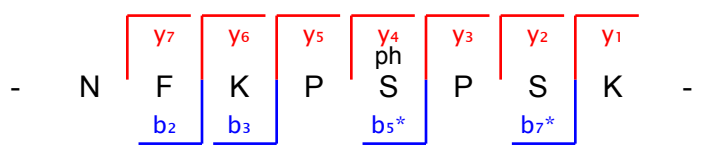

Raw file: 20150812\_A375SR\_Phospho\_BR1\_04  
 Scan: 3968 Method: FTMS; HCD Score: 102.15 m/z: 587.77 Gene names: PACS1

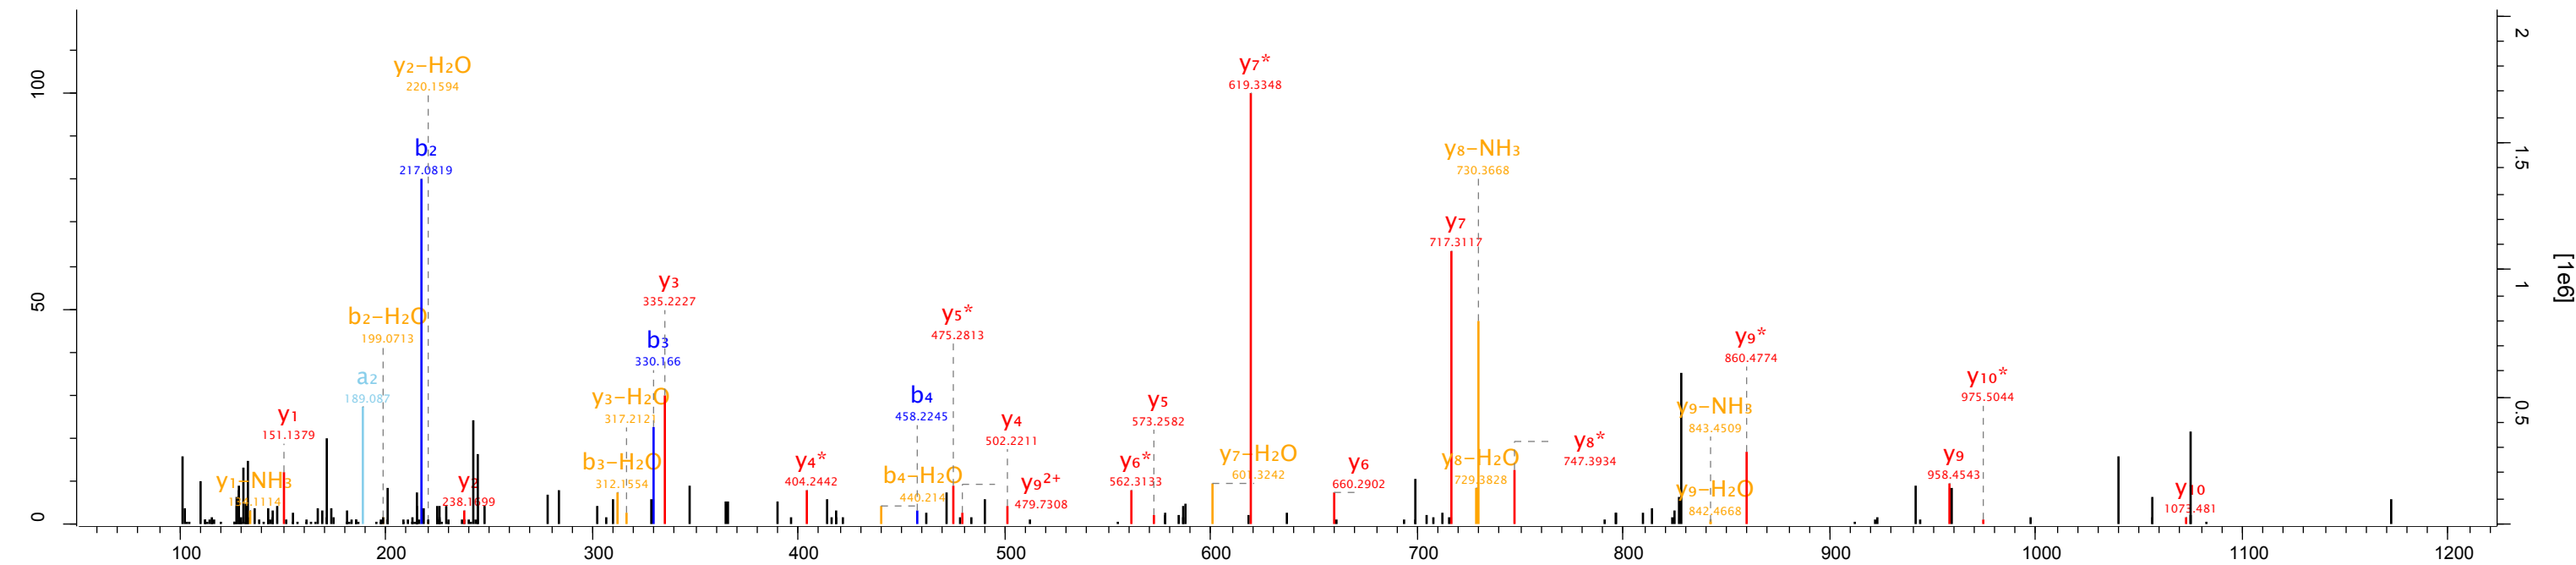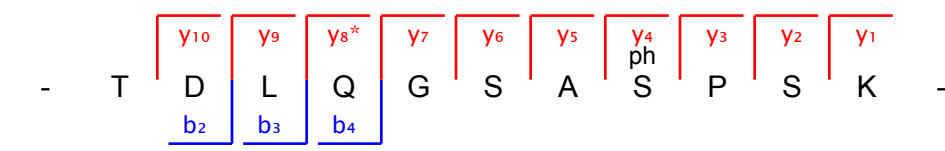

Raw file Scan Method Score m/z Gene names

20150812\_A375SR\_Phospho\_BR1\_04 3998 FTMS; HCD 112.02 707.83 CCNL1

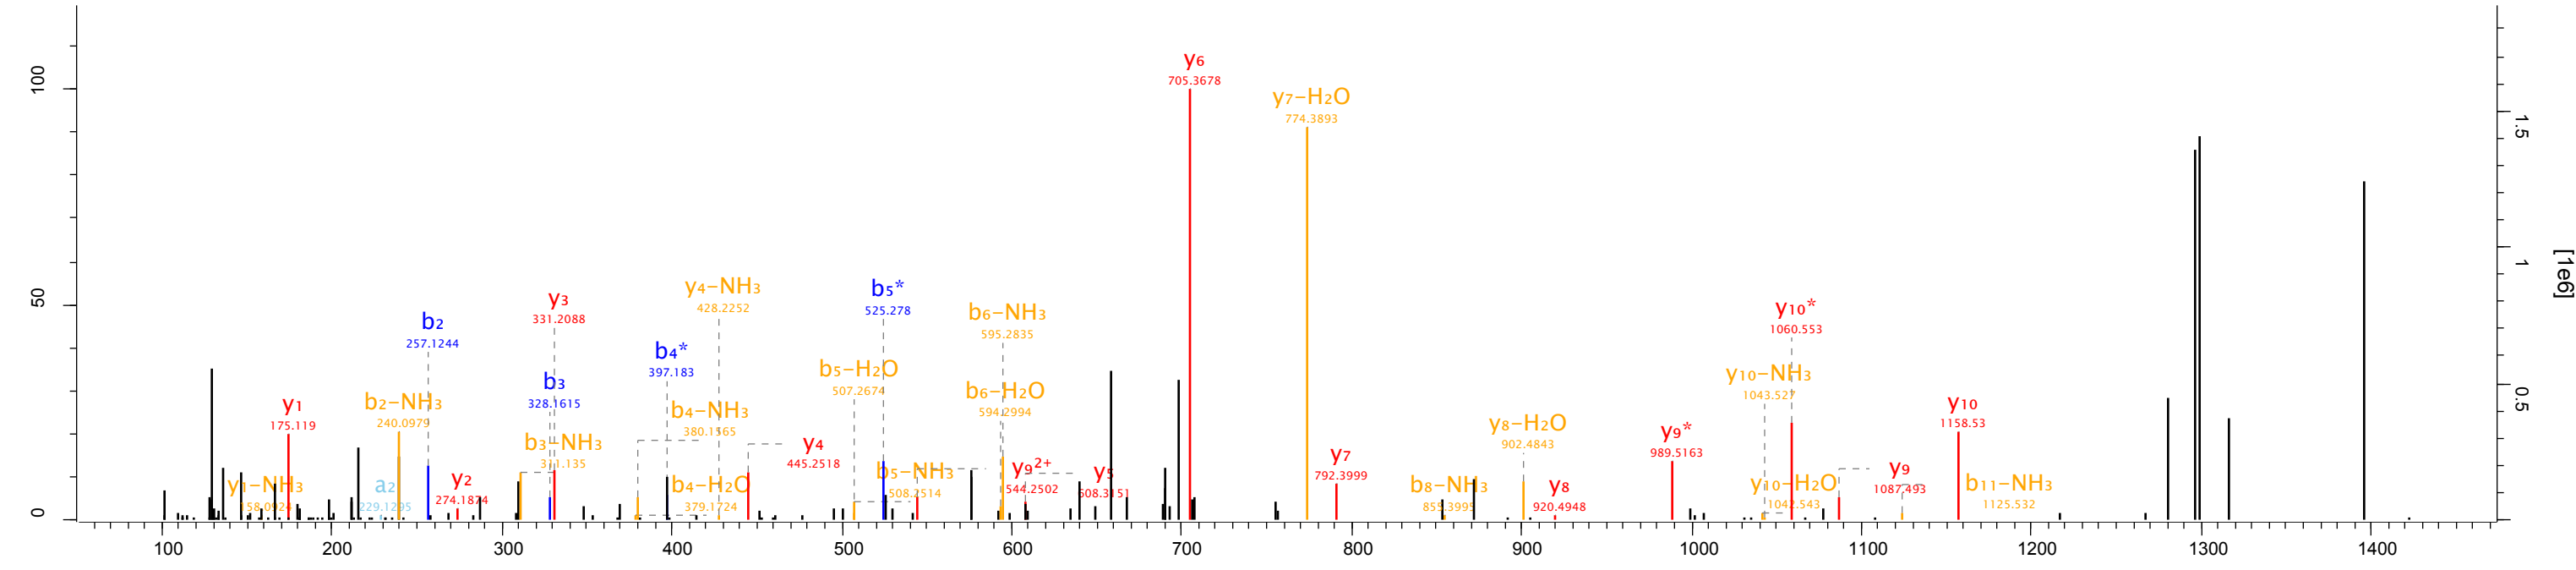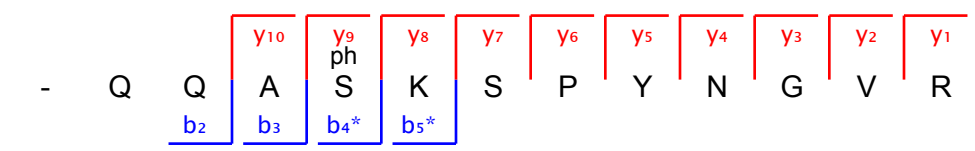

Raw file: 20150812\_A375SR\_Phospho\_BR1\_04  
 Scan: 4148 Method: FTMS; HCD Score: 126.84 m/z: 484.57 Gene names: SRRM1

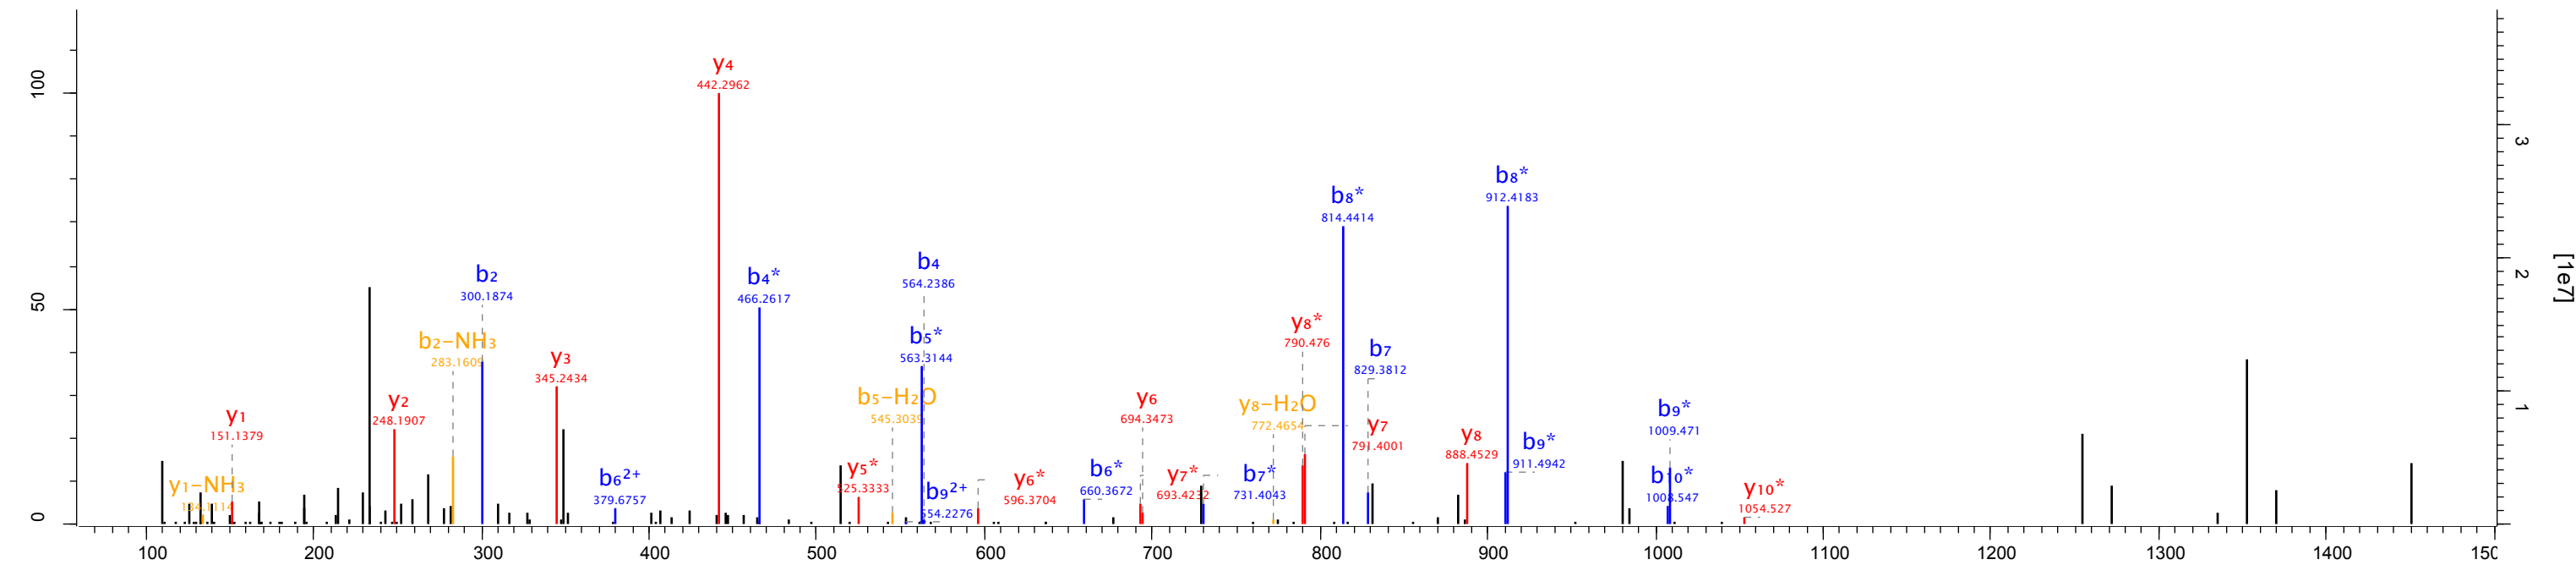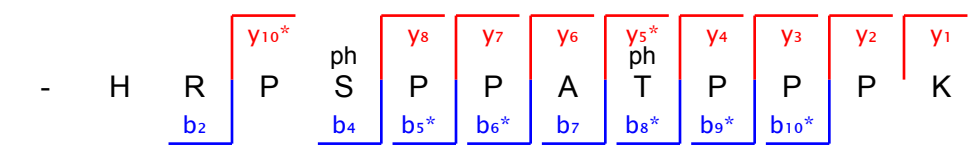

Raw file: 20150812\_A375SR\_Phospho\_BR1\_04  
 Scan: 4518 Method: FTMS; HCD Score: 139.25 m/z: 693.32 Gene names: TGOLN2

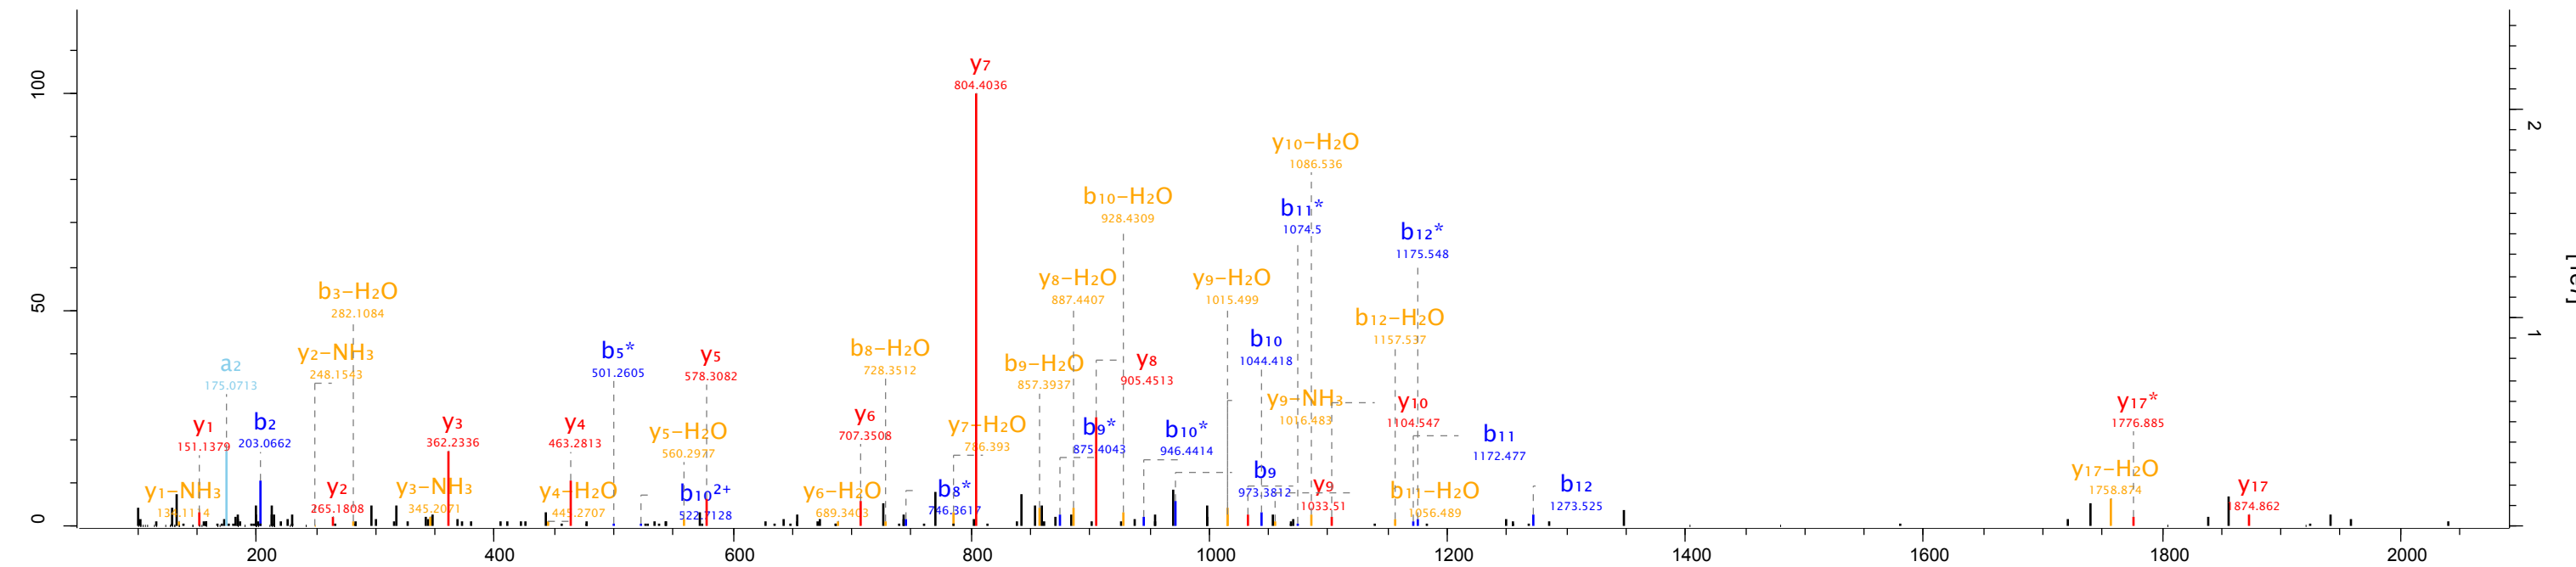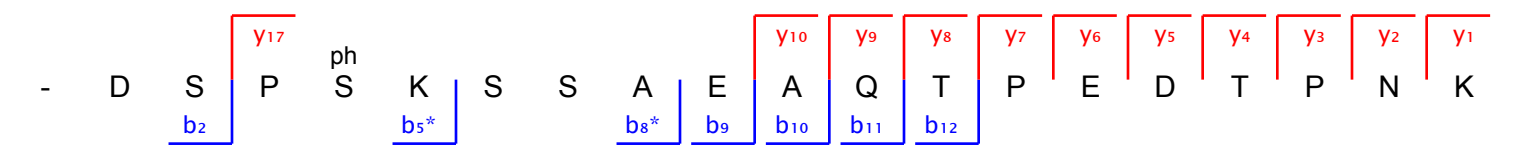

Raw file 20150812\_A375SR\_Phospho\_BR1\_04 Scan 4578 Method FTMS; HCD Score 98.23 m/z 677.8 Gene names LMNB2

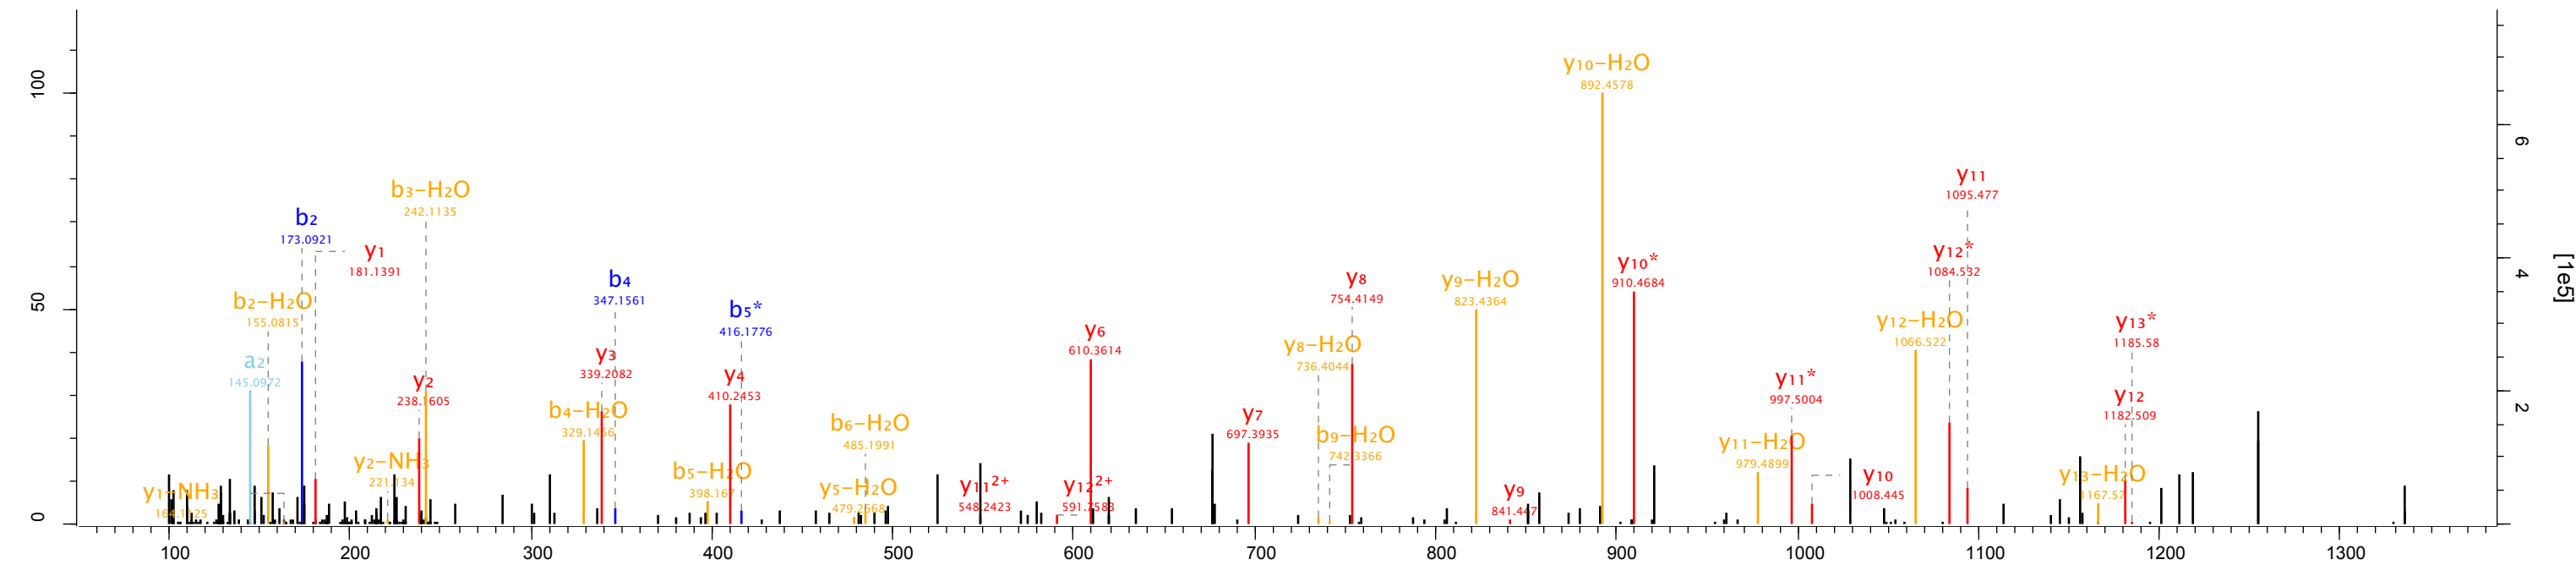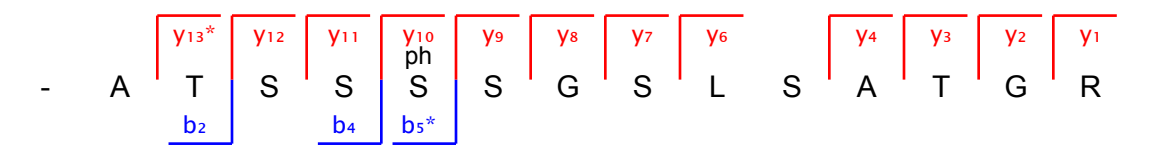

Raw file: 20150812\_A375SR\_Phospho\_BR1\_04  
 Scan: 5008 Method: FTMS; HCD Score: 376.17 m/z: 1168.49 Gene names: TOP2A

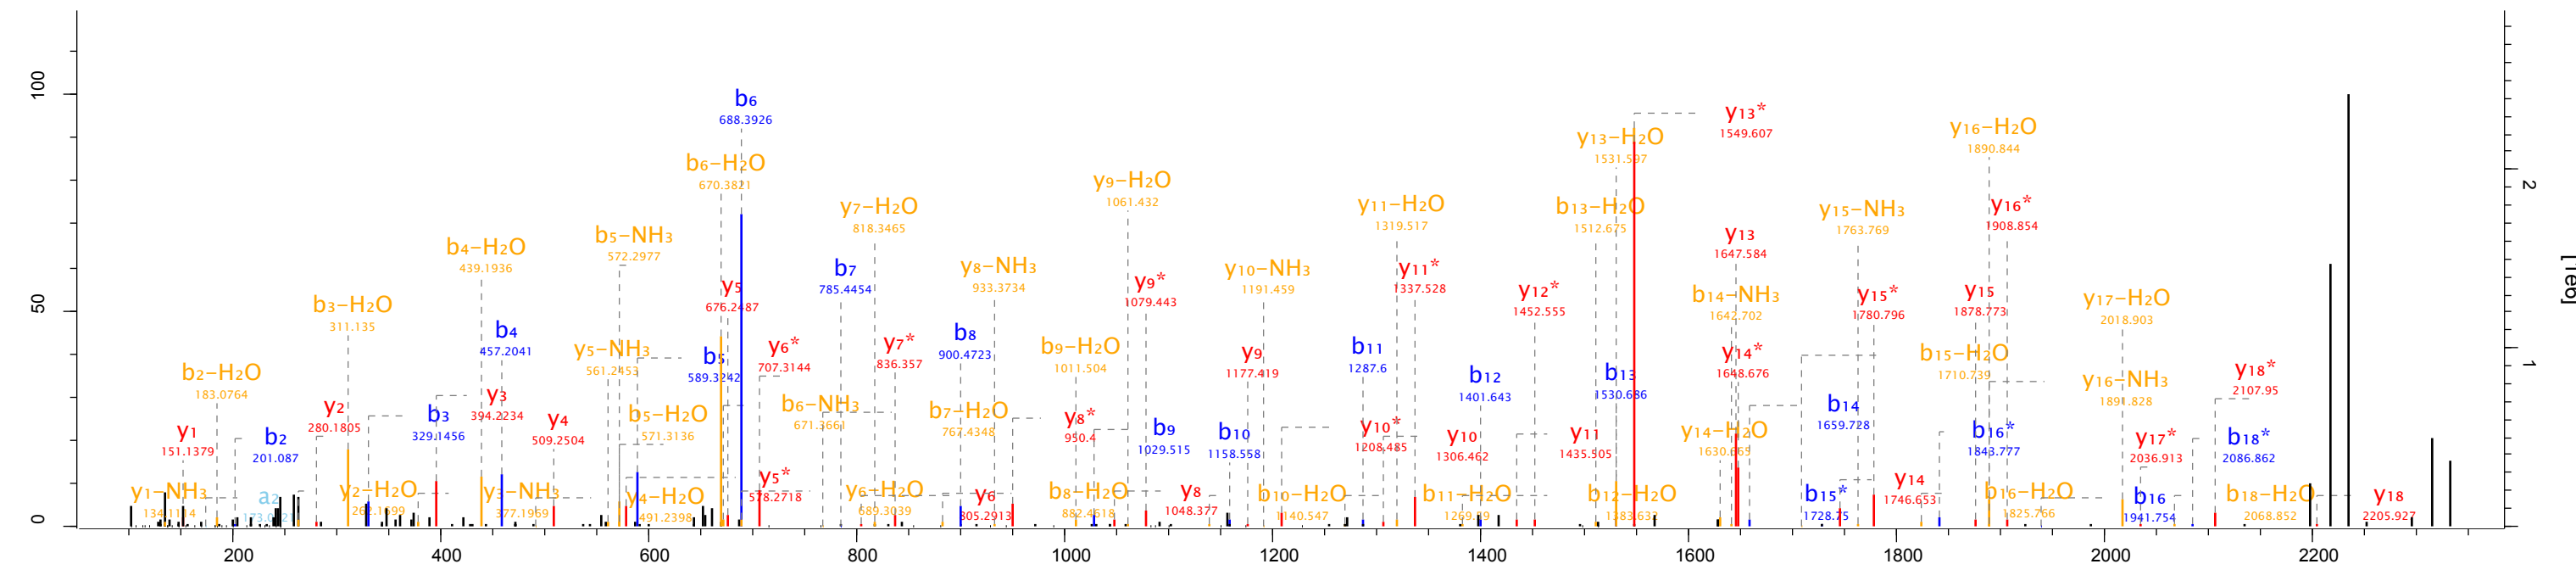

- E -  
 A Q Q K V P D E E E N E E S D N E K -  
 b<sub>2</sub> b<sub>3</sub> b<sub>4</sub> b<sub>5</sub> b<sub>6</sub> b<sub>7</sub> b<sub>8</sub> b<sub>9</sub> b<sub>10</sub> b<sub>11</sub> b<sub>12</sub> b<sub>13</sub> b<sub>14</sub> b<sub>15</sub>\* b<sub>16</sub> b<sub>18</sub>\*

Raw file: 20150812\_A375SR\_Phospho\_BR1\_04  
 Scan: 5538 Method: FTMS; HCD Score: 203.2 m/z: 671.84 Gene names: U2AF2

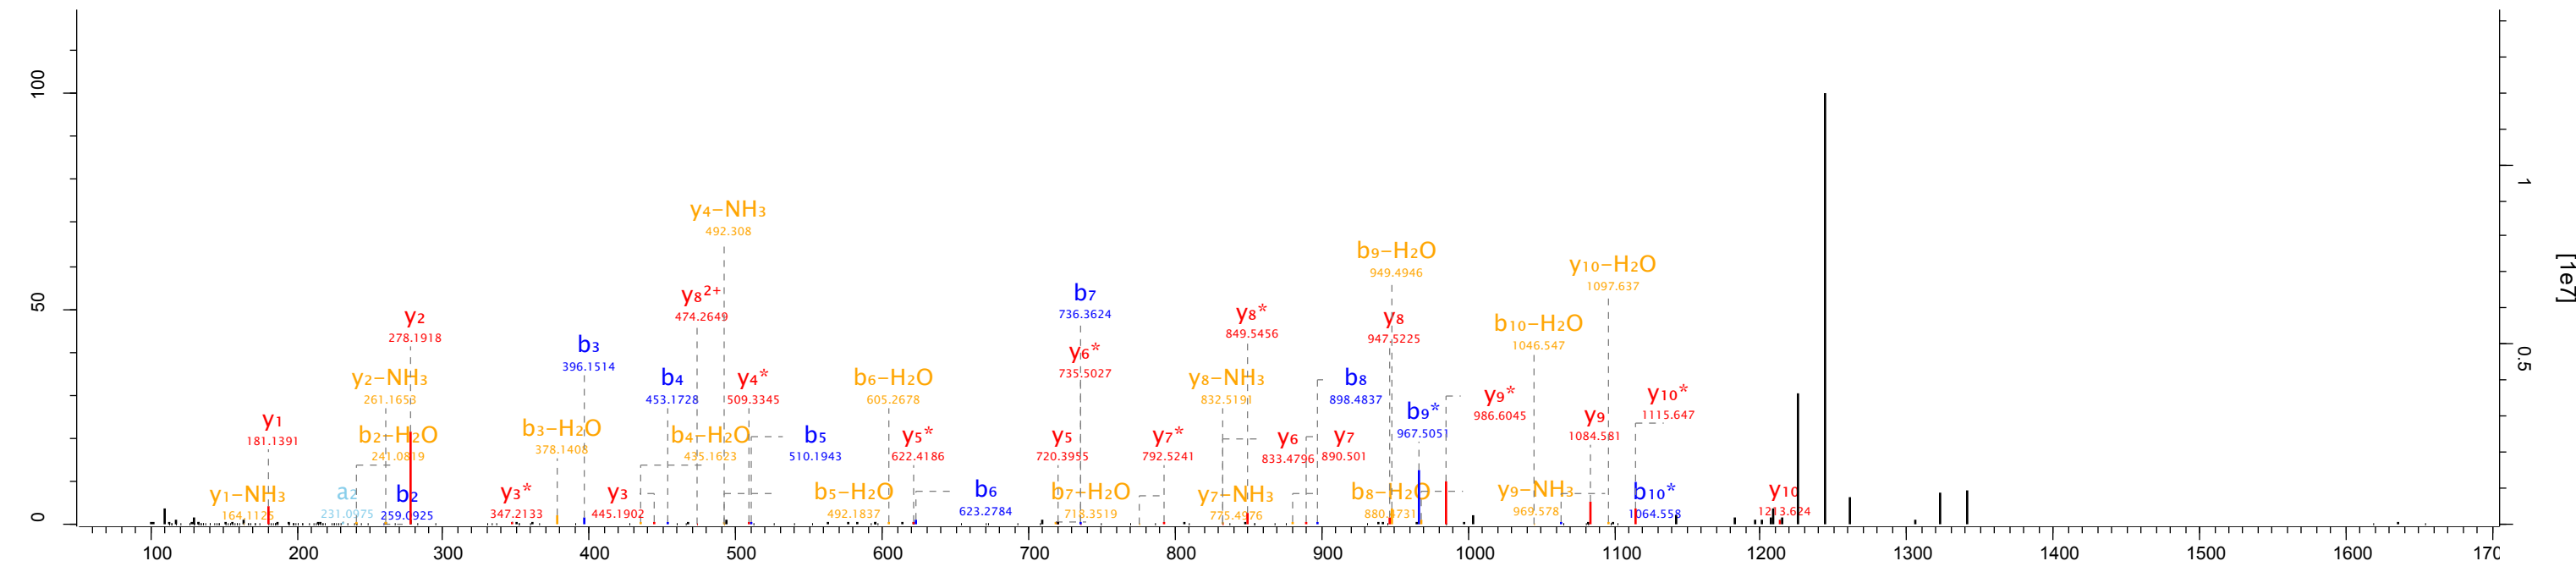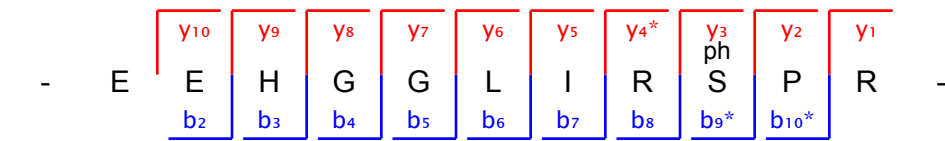



Raw file: 20150812\_A375SR\_Phospho\_BR1\_04  
 Scan: 5858 Method: FTMS; HCD Score: 91.41 m/z: 555.25 Gene names: ZBTB38

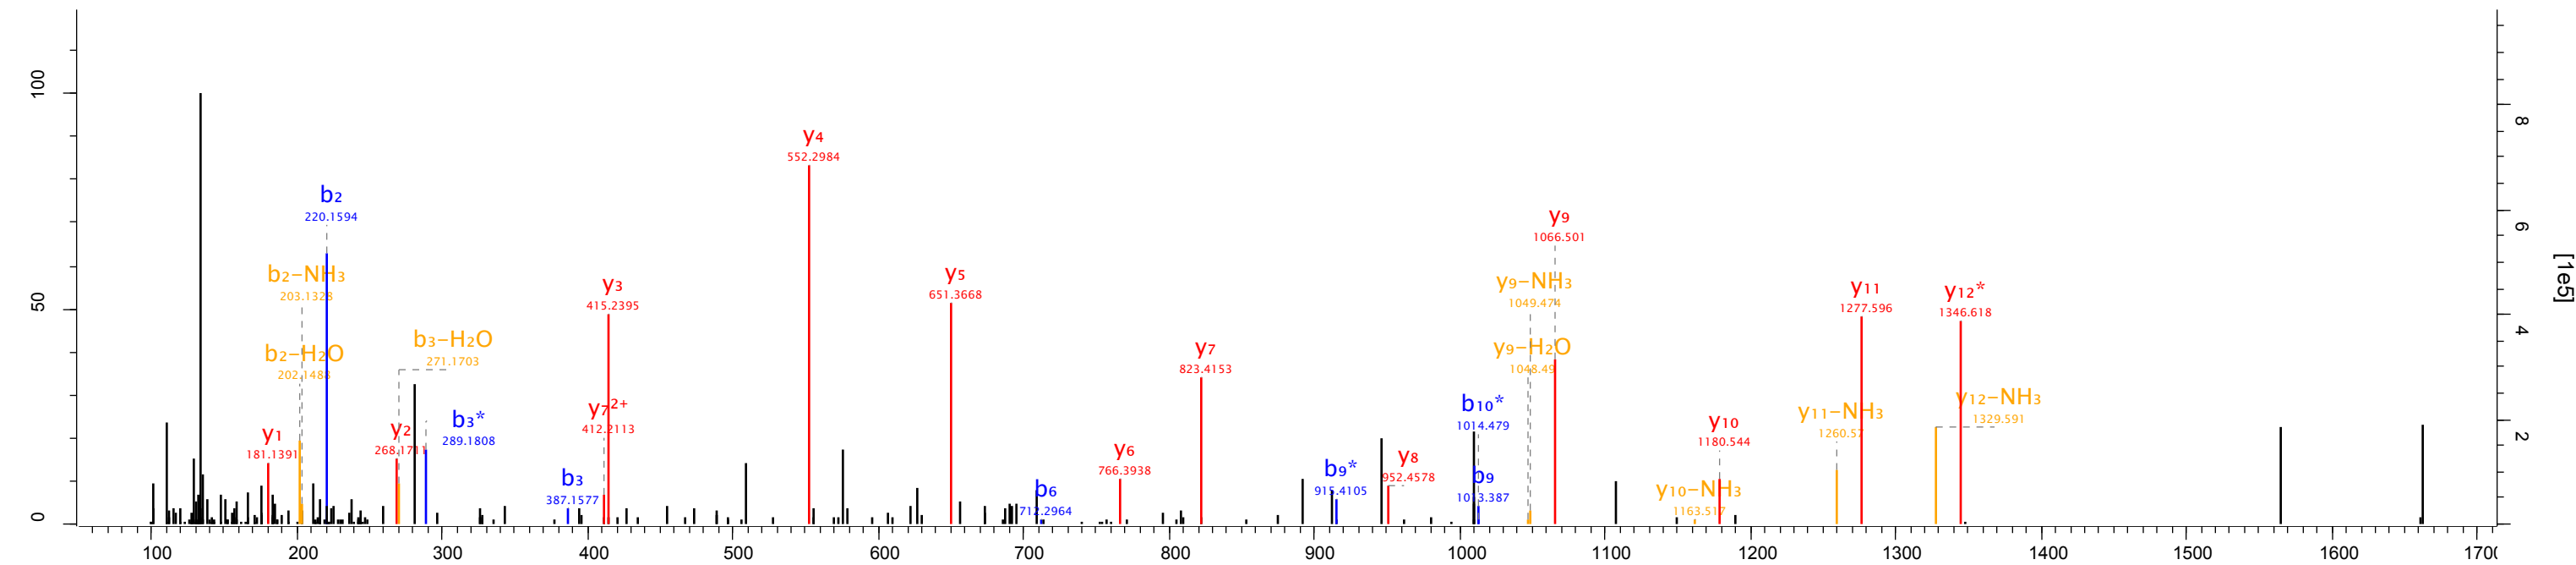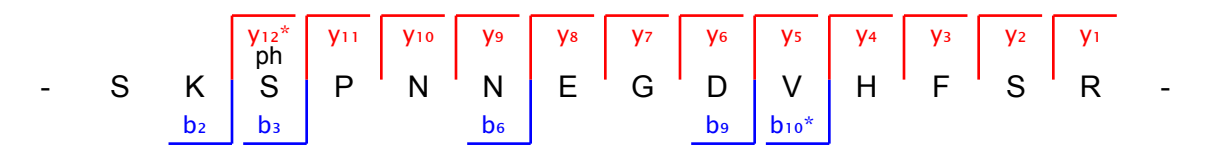

Raw file: 20150812\_A375SR\_Phospho\_BR1\_04  
 Scan: 6738 Method: FTMS; HCD Score: 96.9 m/z: 795.87 Gene names: DIAPH1

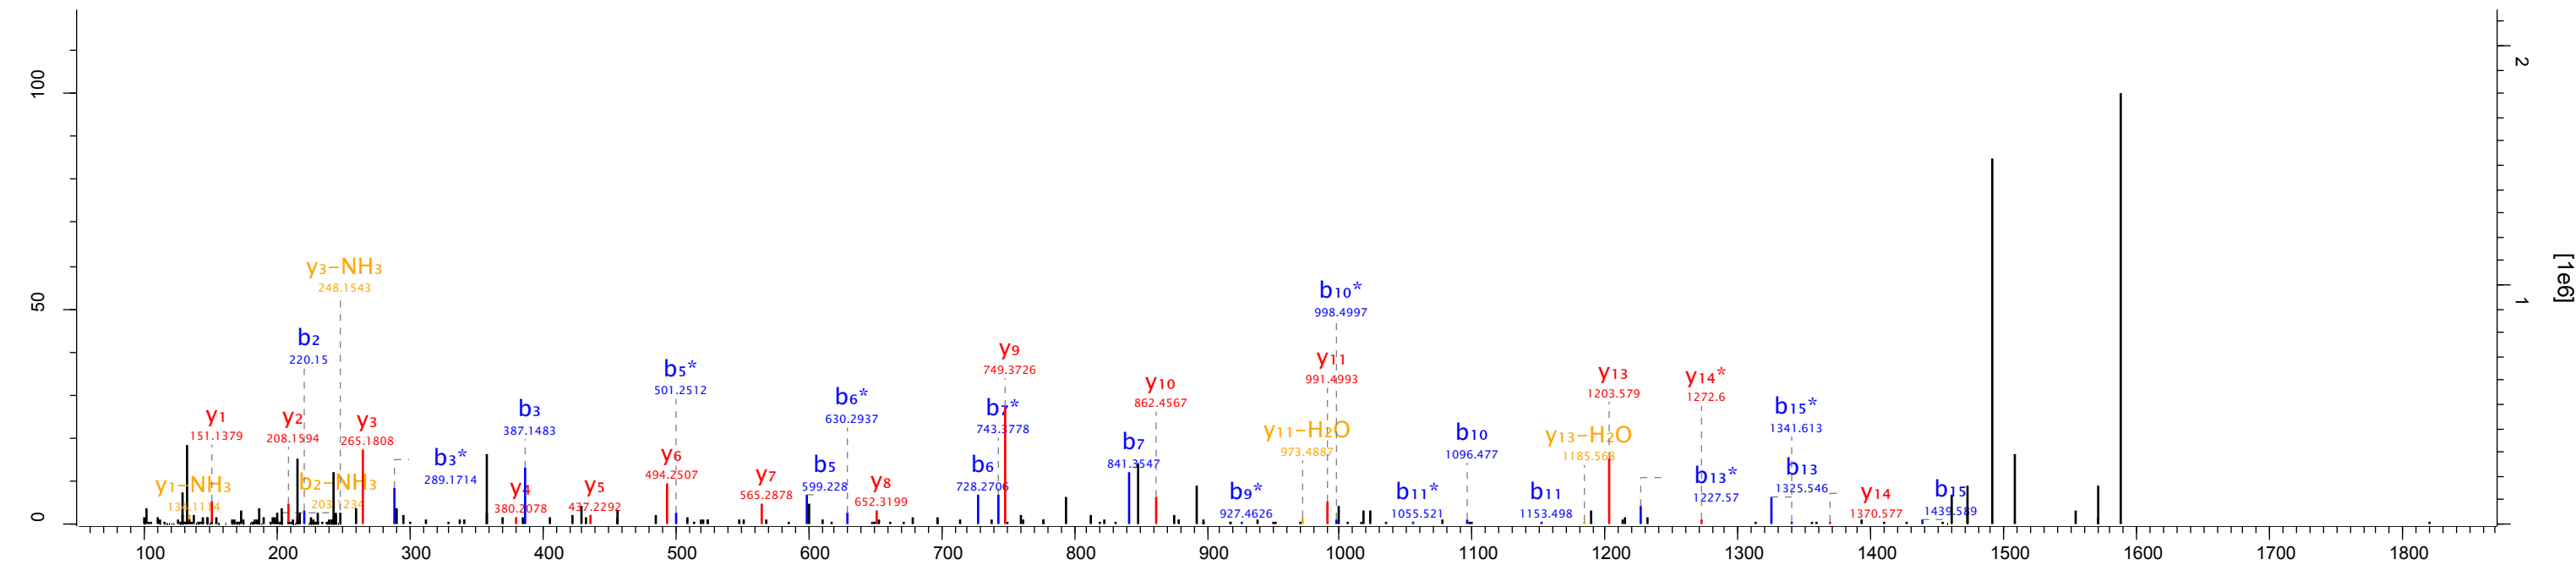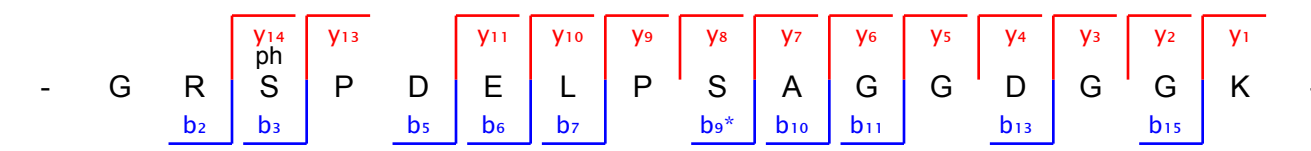

Raw file 20150812\_A375SR\_Phospho\_BR1\_04 Scan 6978 Method FTMS; HCD Score 170 m/z 698.96 Gene names PDS5B

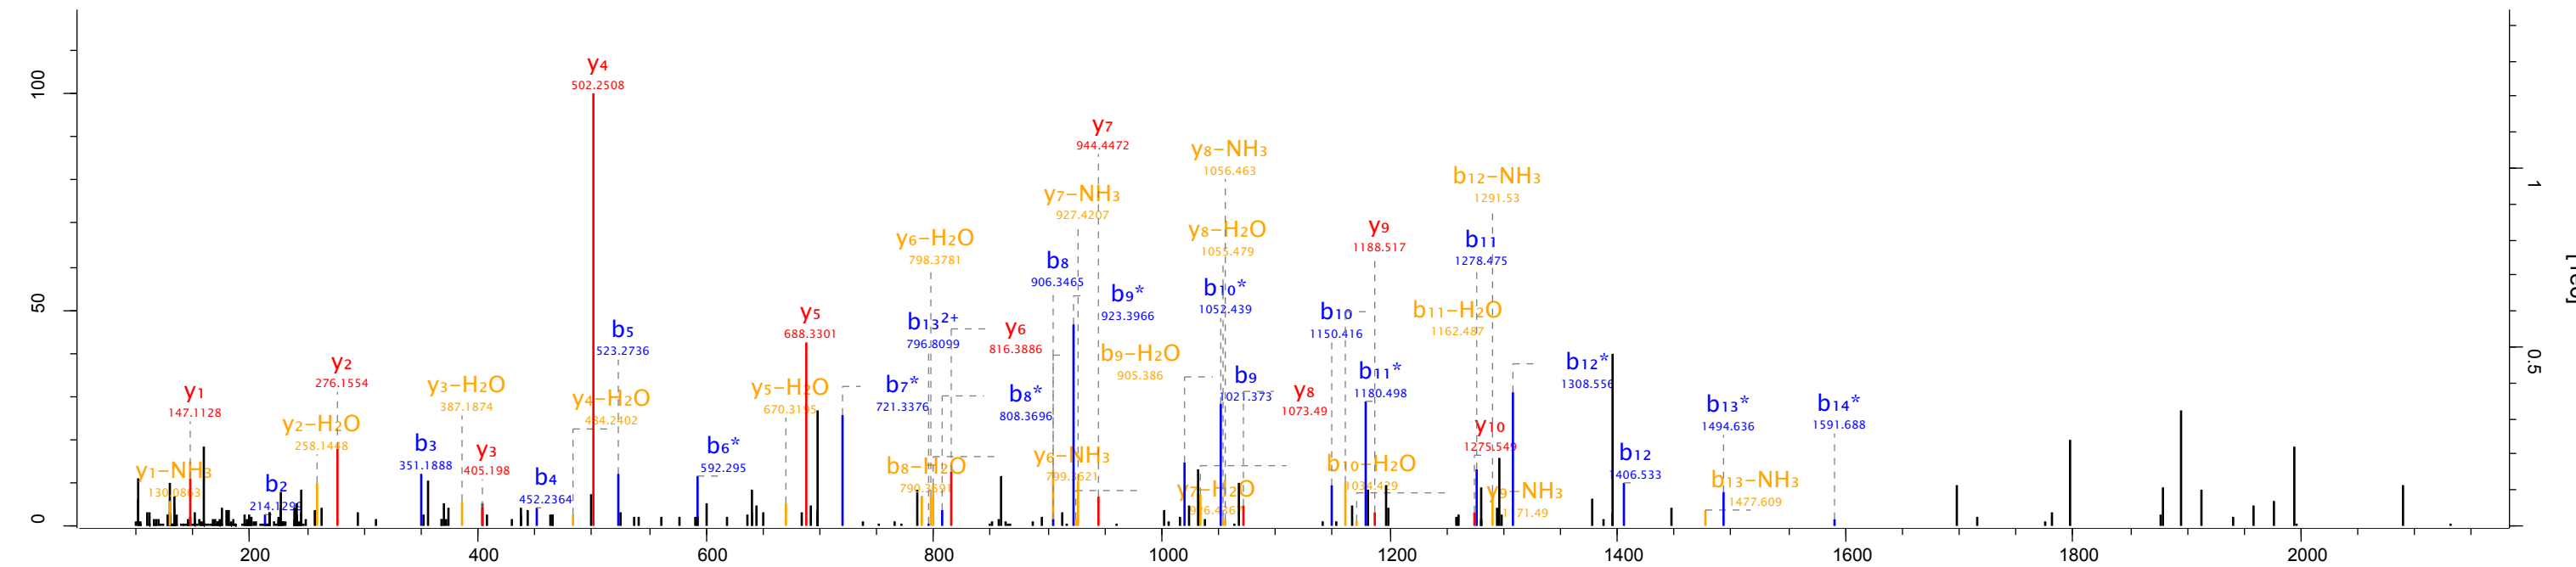

- R G H T A S<sup>ph</sup> E S<sup>y10</sup> D<sup>y9</sup> E<sup>y8</sup> Q<sup>y7</sup> Q<sup>y6</sup> W<sup>y5</sup> P<sup>y4</sup> E<sup>y3</sup> E<sup>y2</sup> K<sup>y1</sup> -

b<sub>2</sub> b<sub>3</sub> b<sub>4</sub> b<sub>5</sub> b<sub>6</sub><sup>\*</sup> b<sub>7</sub><sup>\*</sup> b<sub>8</sub> b<sub>9</sub> b<sub>10</sub> b<sub>11</sub> b<sub>12</sub> b<sub>13</sub><sup>\*</sup> b<sub>14</sub><sup>\*</sup>

Raw file Scan Method Score m/z Gene names

20150812\_A375SR\_Phospho\_BR1\_04 7228 FTMS; HCD 149.64 785.32 NAA11

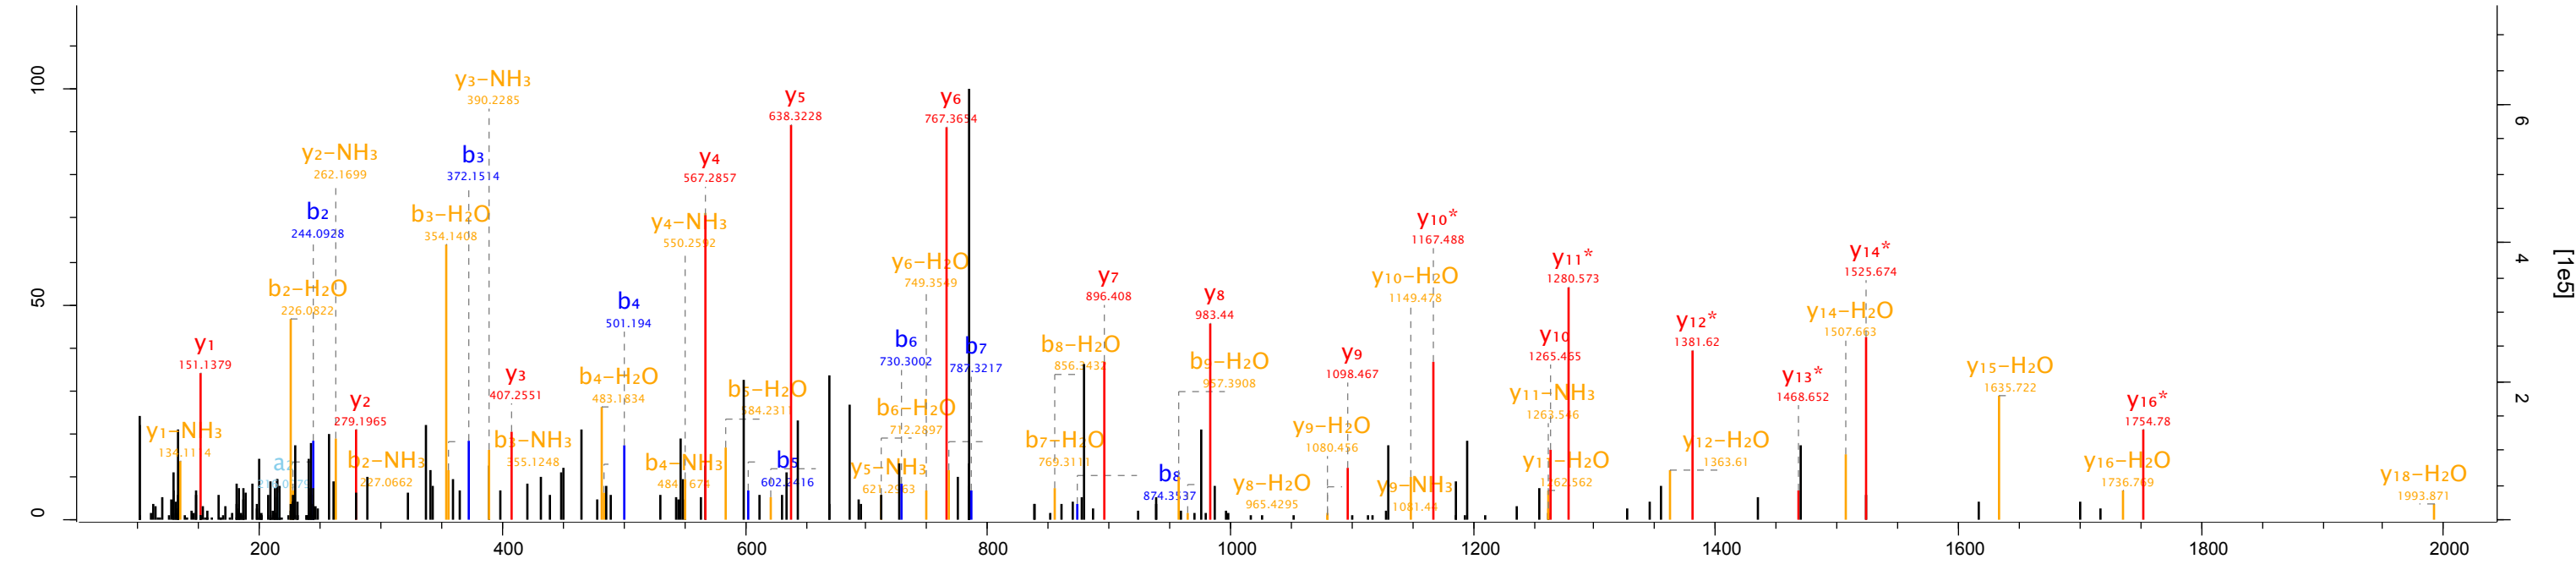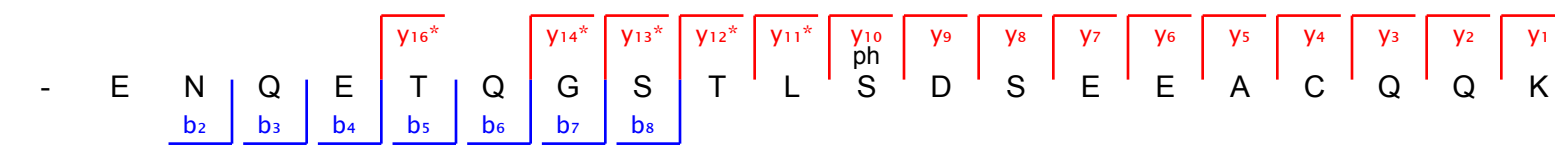

Raw file: 20150812\_A375SR\_Phospho\_BR1\_04  
 Scan: 7418 Method: FTMS; HCD Score: 126.71 m/z: 551.23 Gene names: GPATCH8

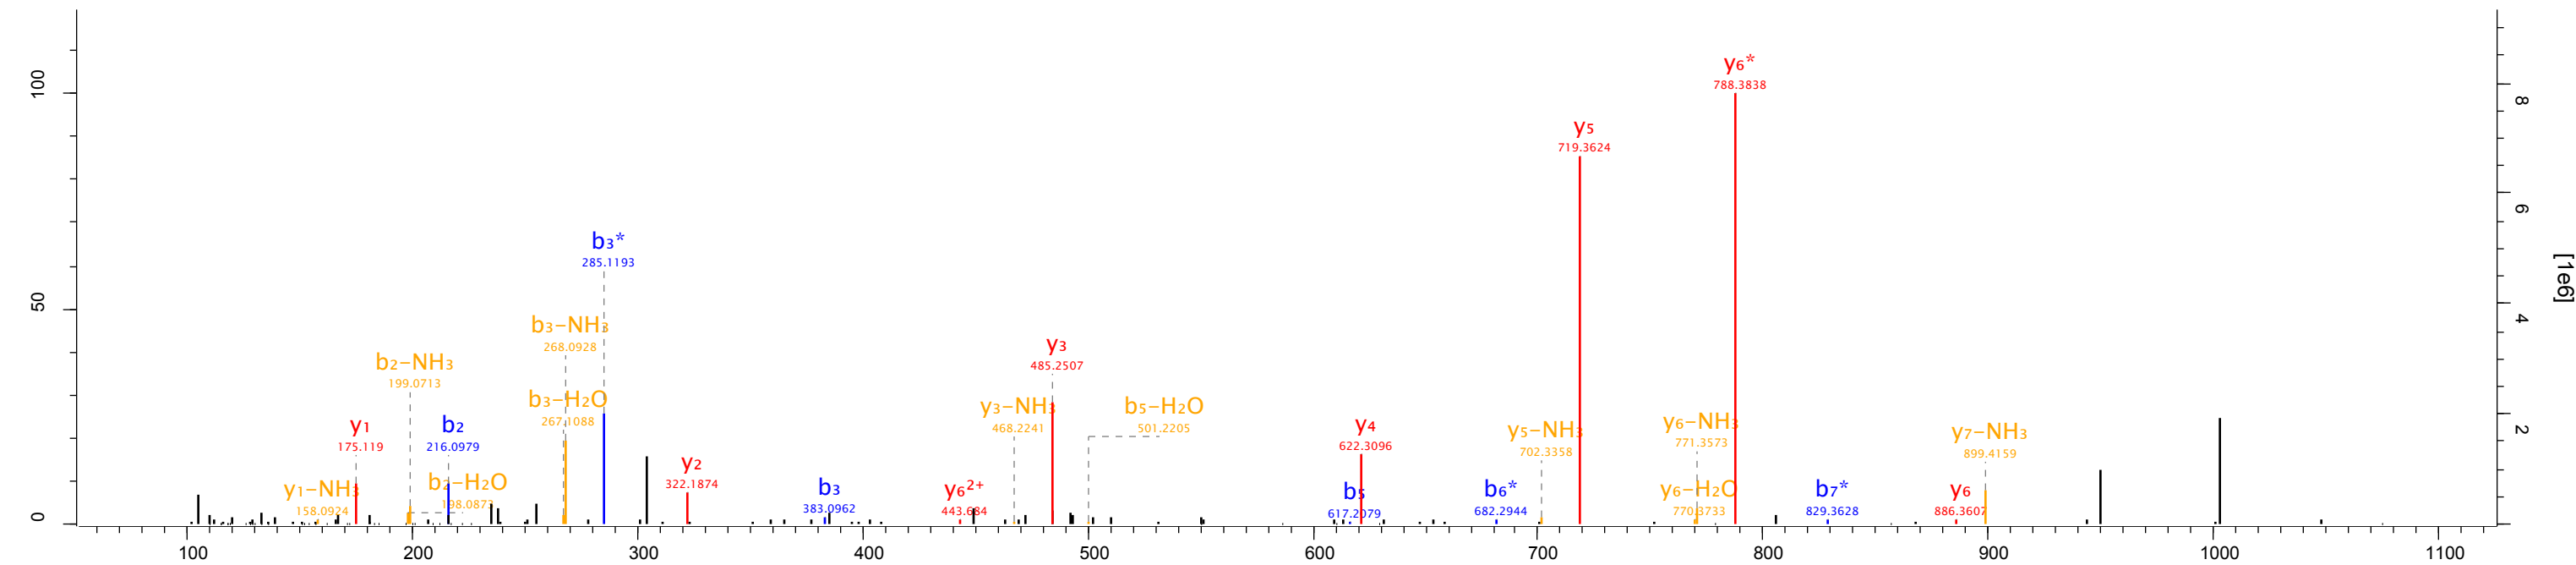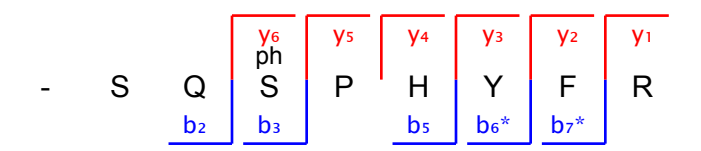

Raw file: 20150812\_A375SR\_Phospho\_BR1\_04  
 Scan: 8298 Method: FTMS; HCD Score: 156 m/z: 608.76 Gene names: NCOR1

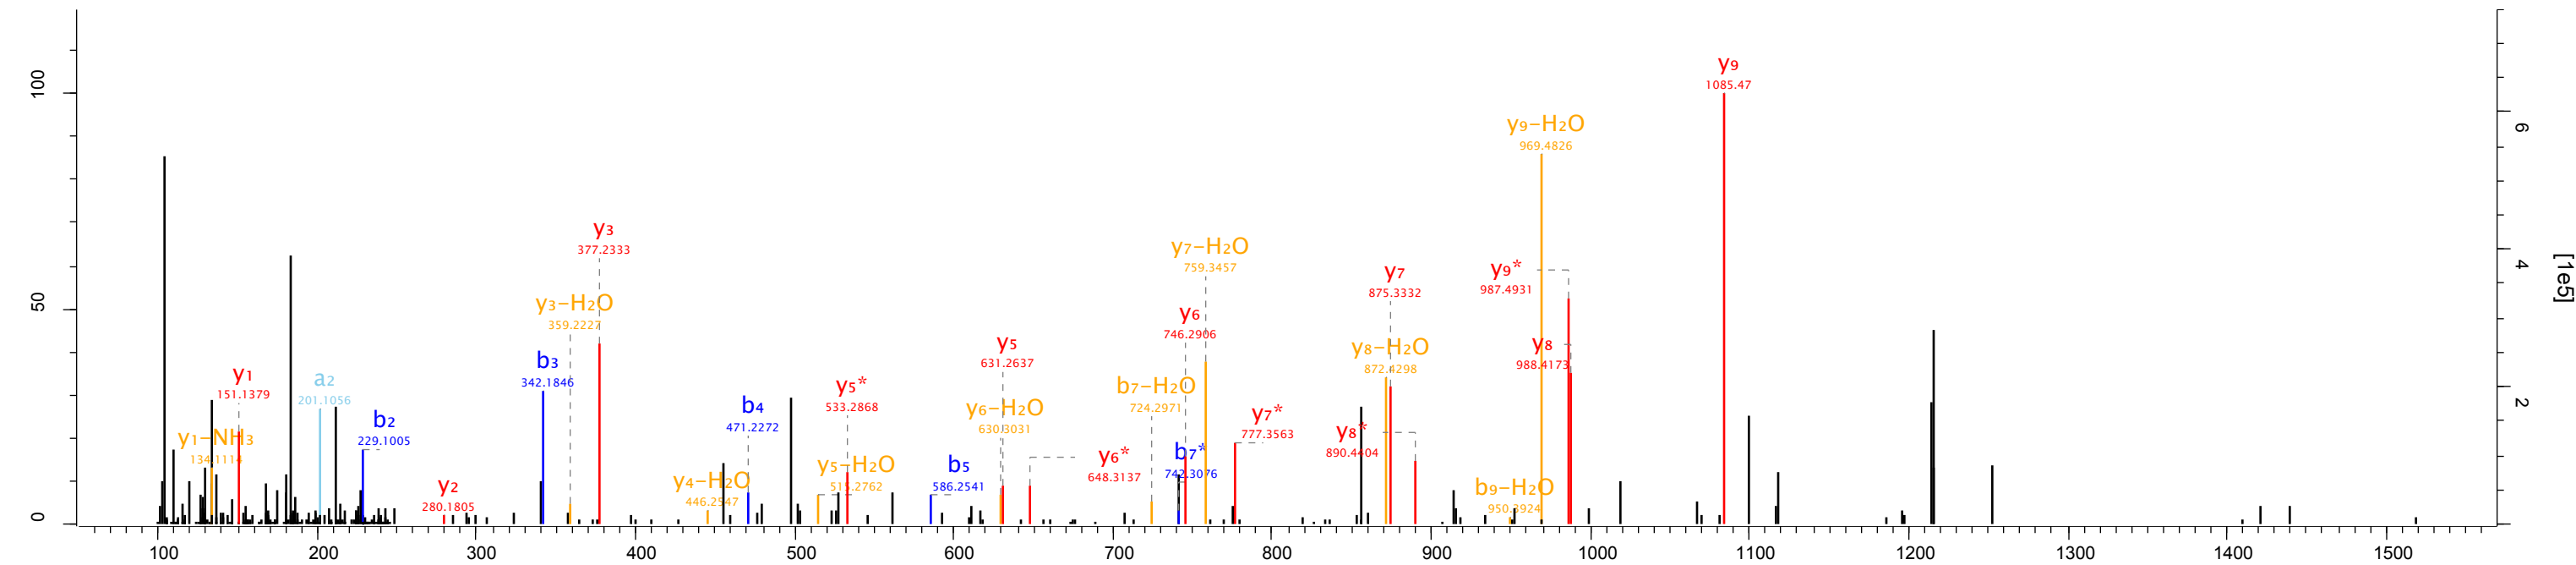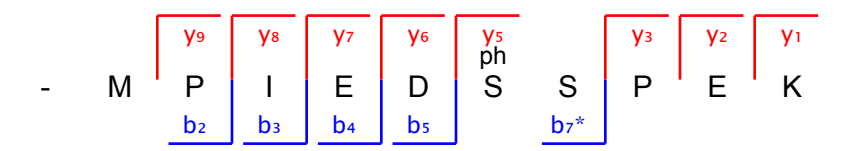

Raw file: 20150812\_A375SR\_Phospho\_BR1\_04  
 Scan: 8528 Method: FTMS; HCD Score: 141.64 m/z: 571.62 Gene names: PRPF40B

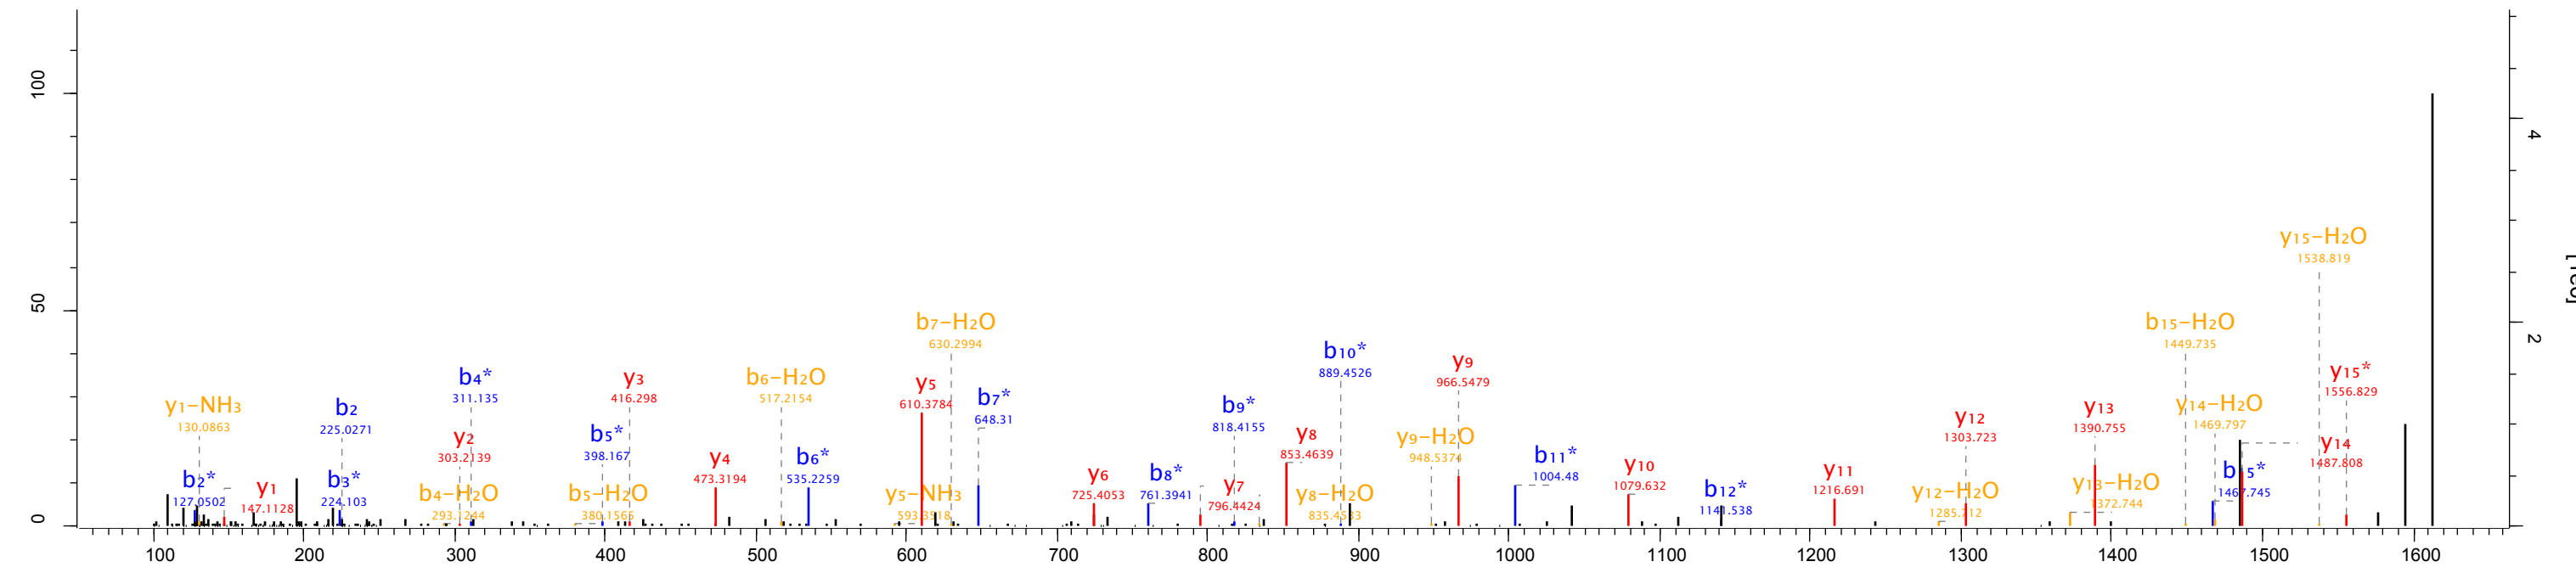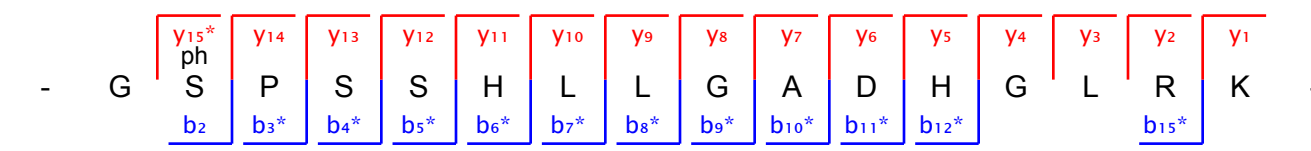





Raw file: 20150812\_A375SR\_Phospho\_BR1\_04  
 Scan: 9088 Method: FTMS; HCD Score: 136.34 m/z: 695.98 Gene names: DCP1B

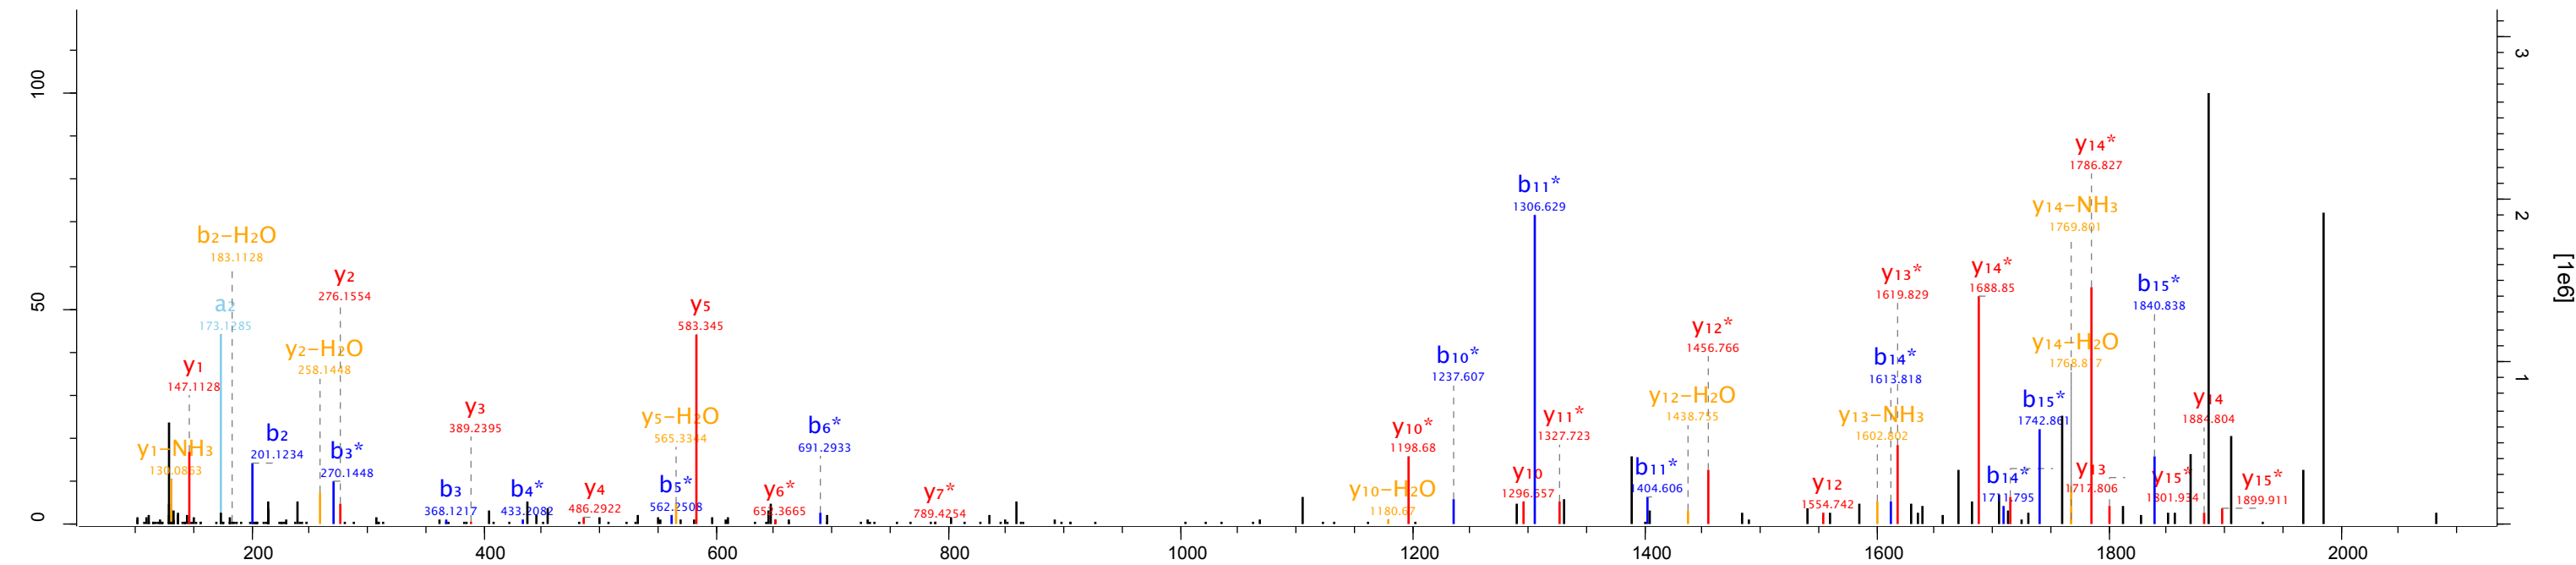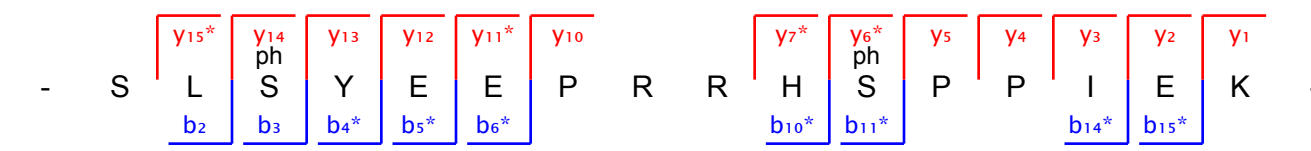

Raw file: 20150812\_A375SR\_Phospho\_BR1\_04  
 Scan: 9178 Method: FTMS; HCD Score: 224.57 m/z: 904.9 Gene names: CLASP2

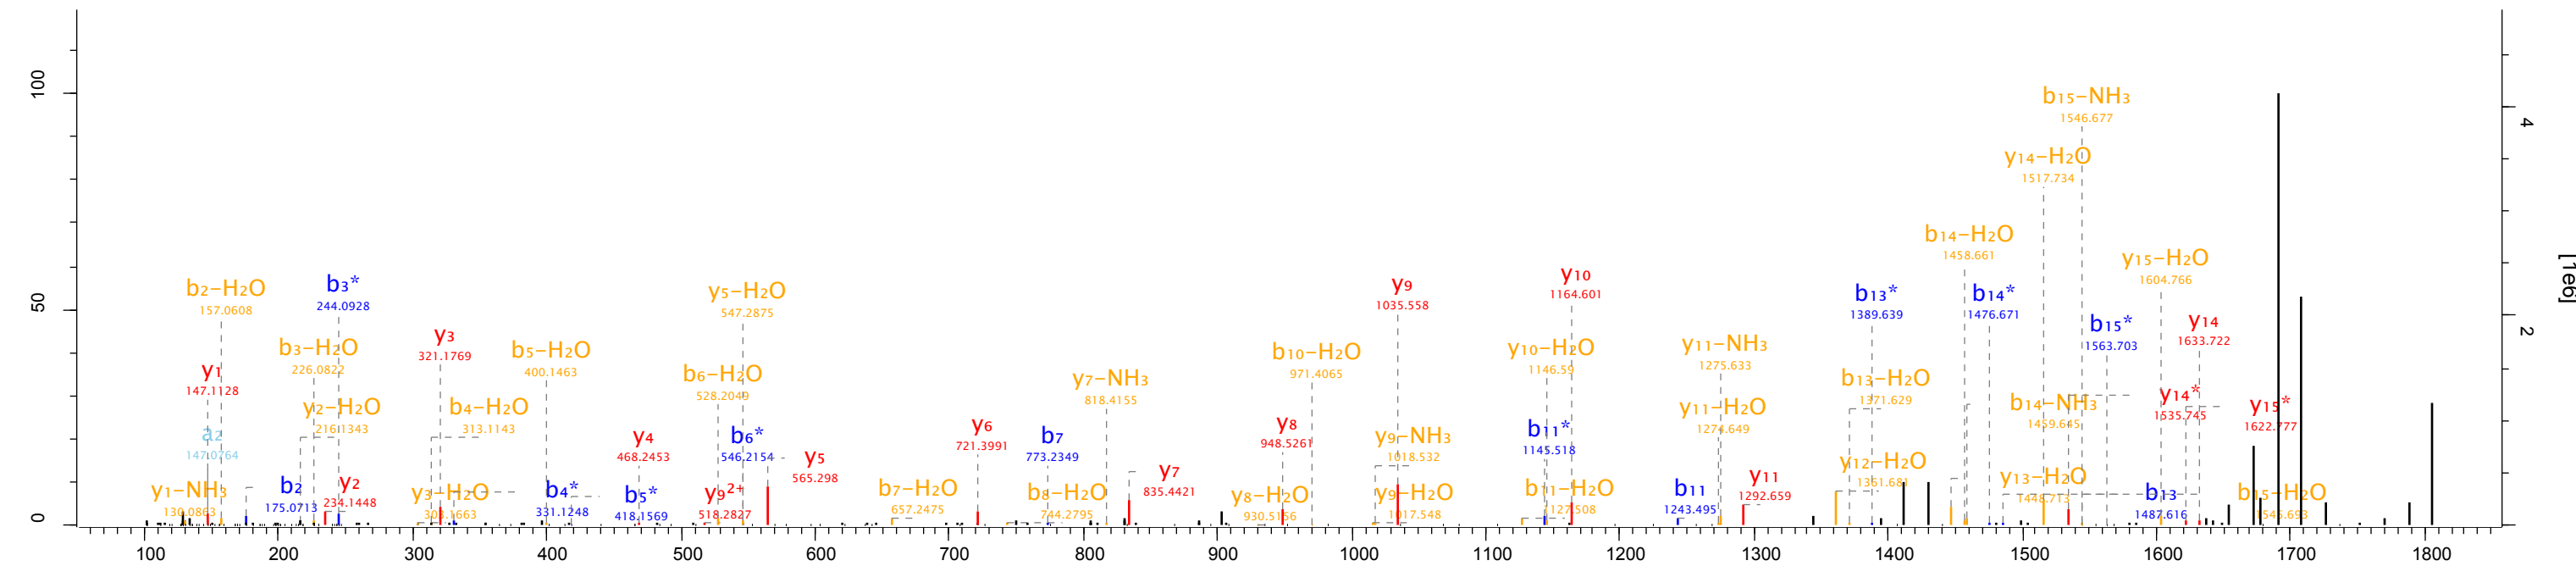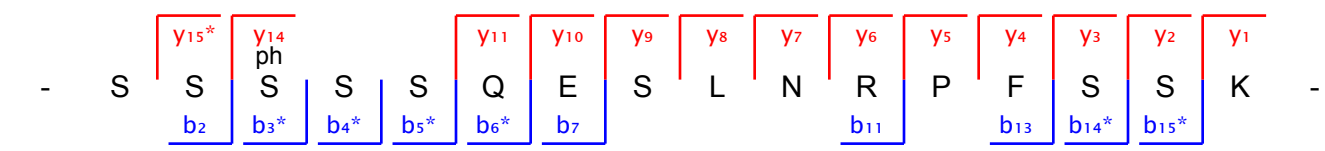

Raw file: 20150812\_A375SR\_Phospho\_BR1\_04  
 Scan: 9688 Method: FTMS; HCD Score: 223.31 m/z: 857.4 Gene names: MEPCE

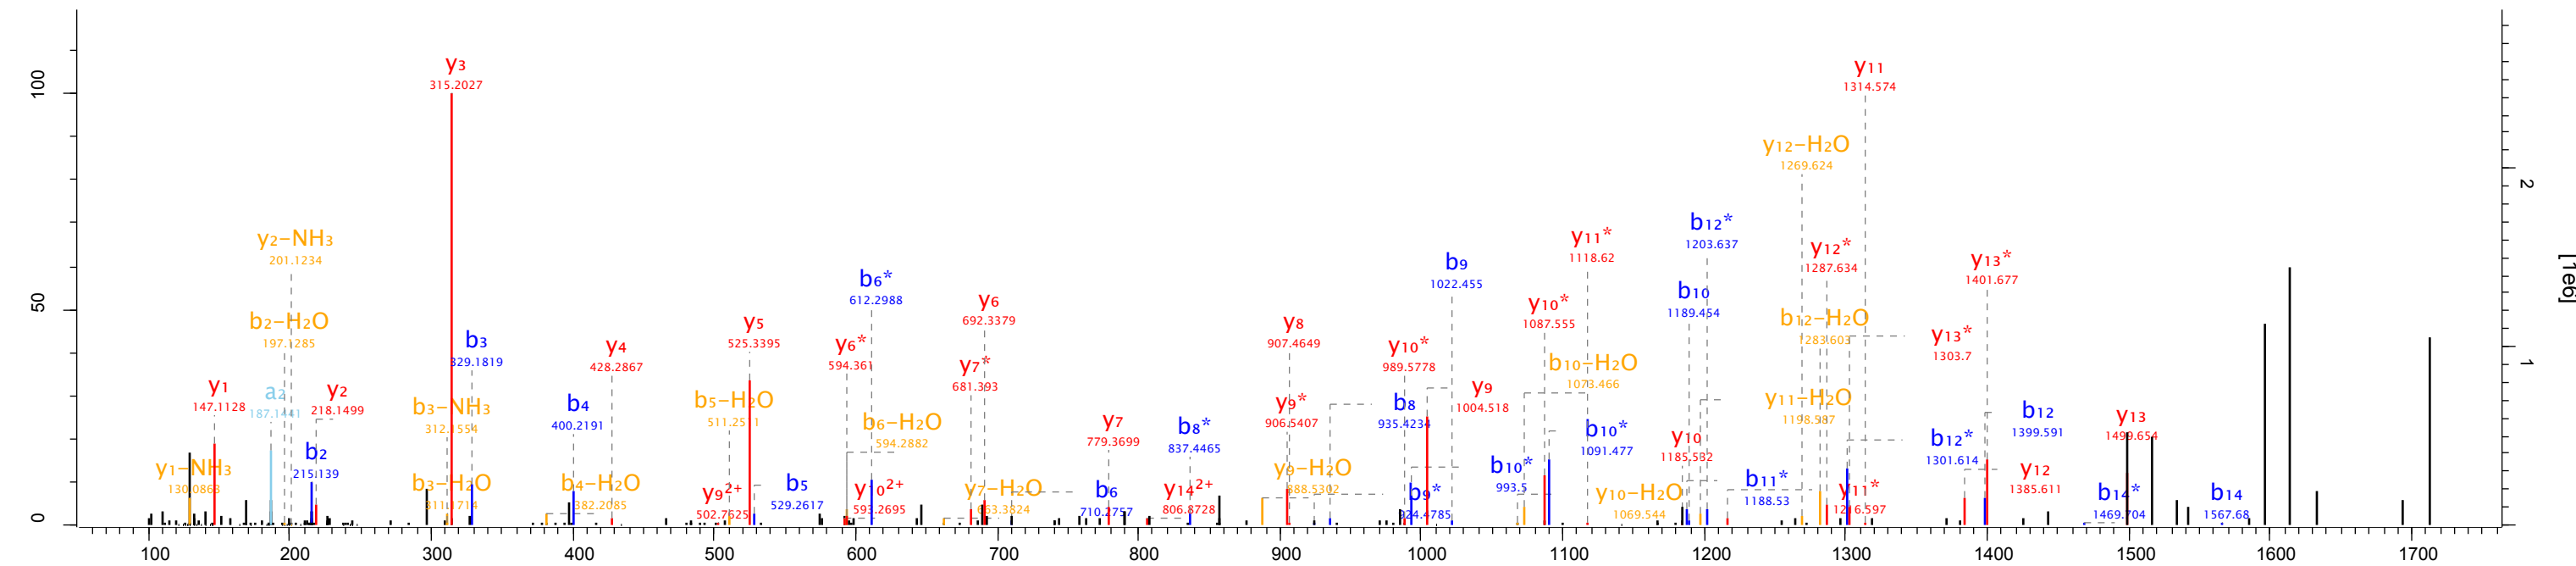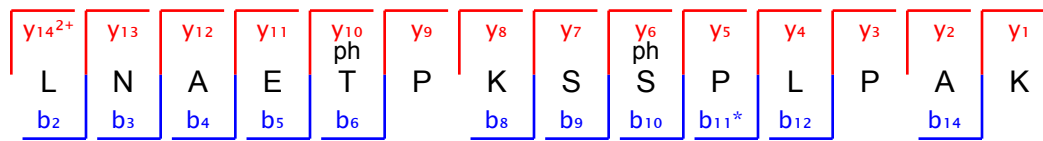

Raw file: 20150812\_A375SR\_Phospho\_BR1\_04  
 Scan: 9998 Method: FTMS; HCD Score: 242.93 m/z: 754.82 Gene names: NELFE

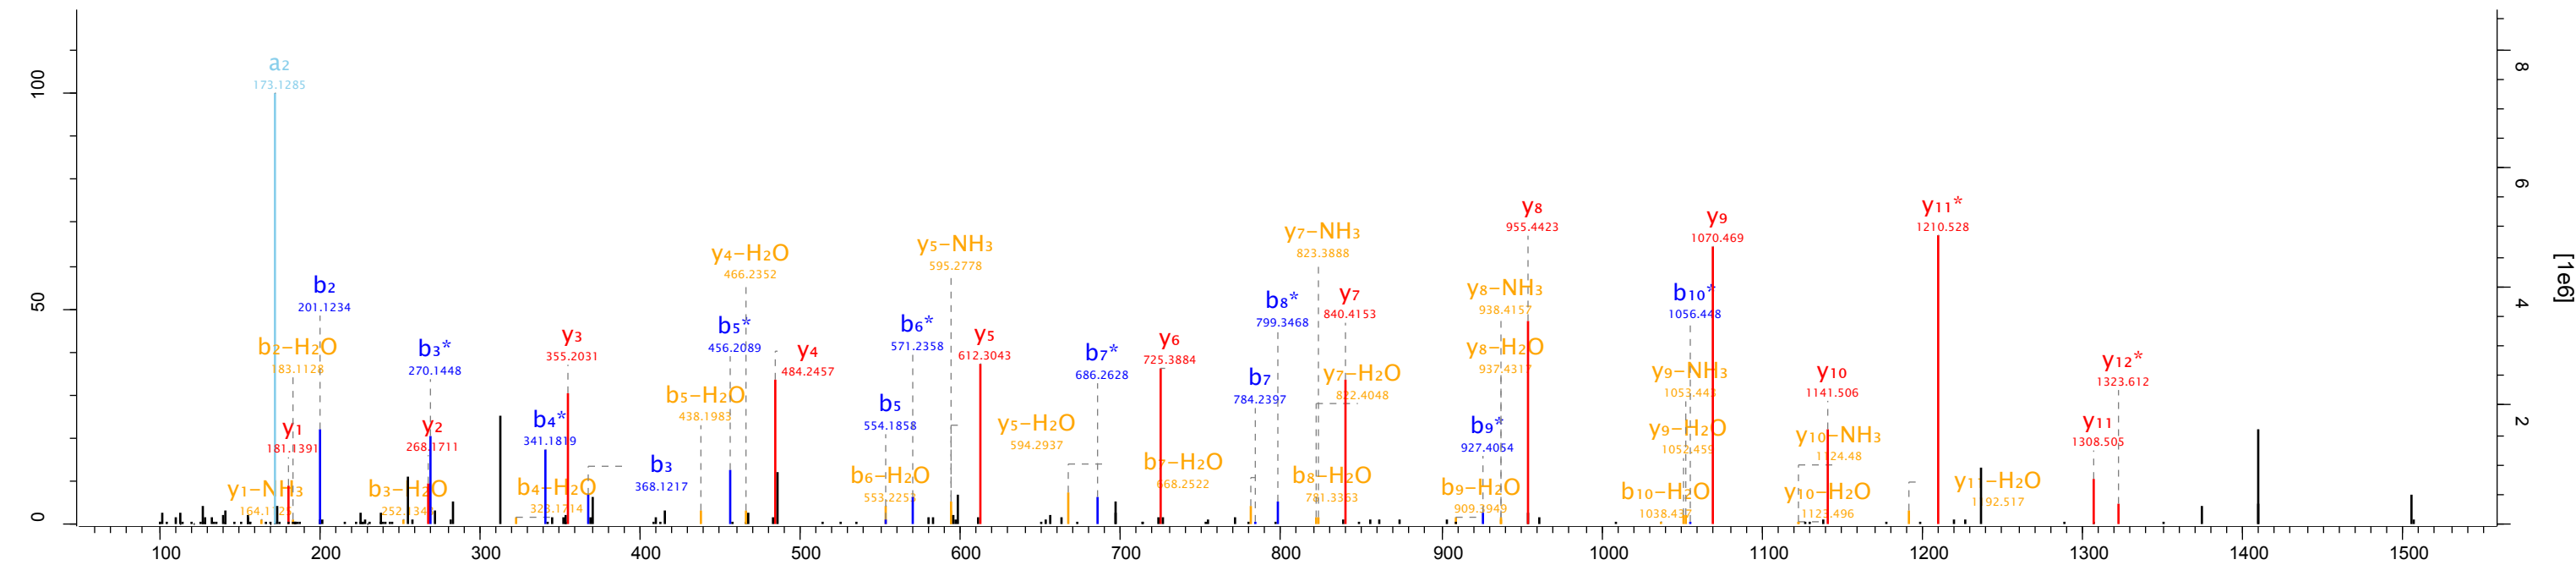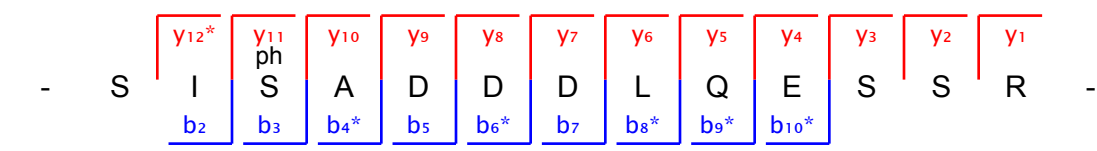

Raw file: 20150812\_A375SR\_Phospho\_BR1\_05  
 Scan: 10268 Method: FTMS; HCD Score: 128.22 m/z: 582.27 Gene names: AMOTL2

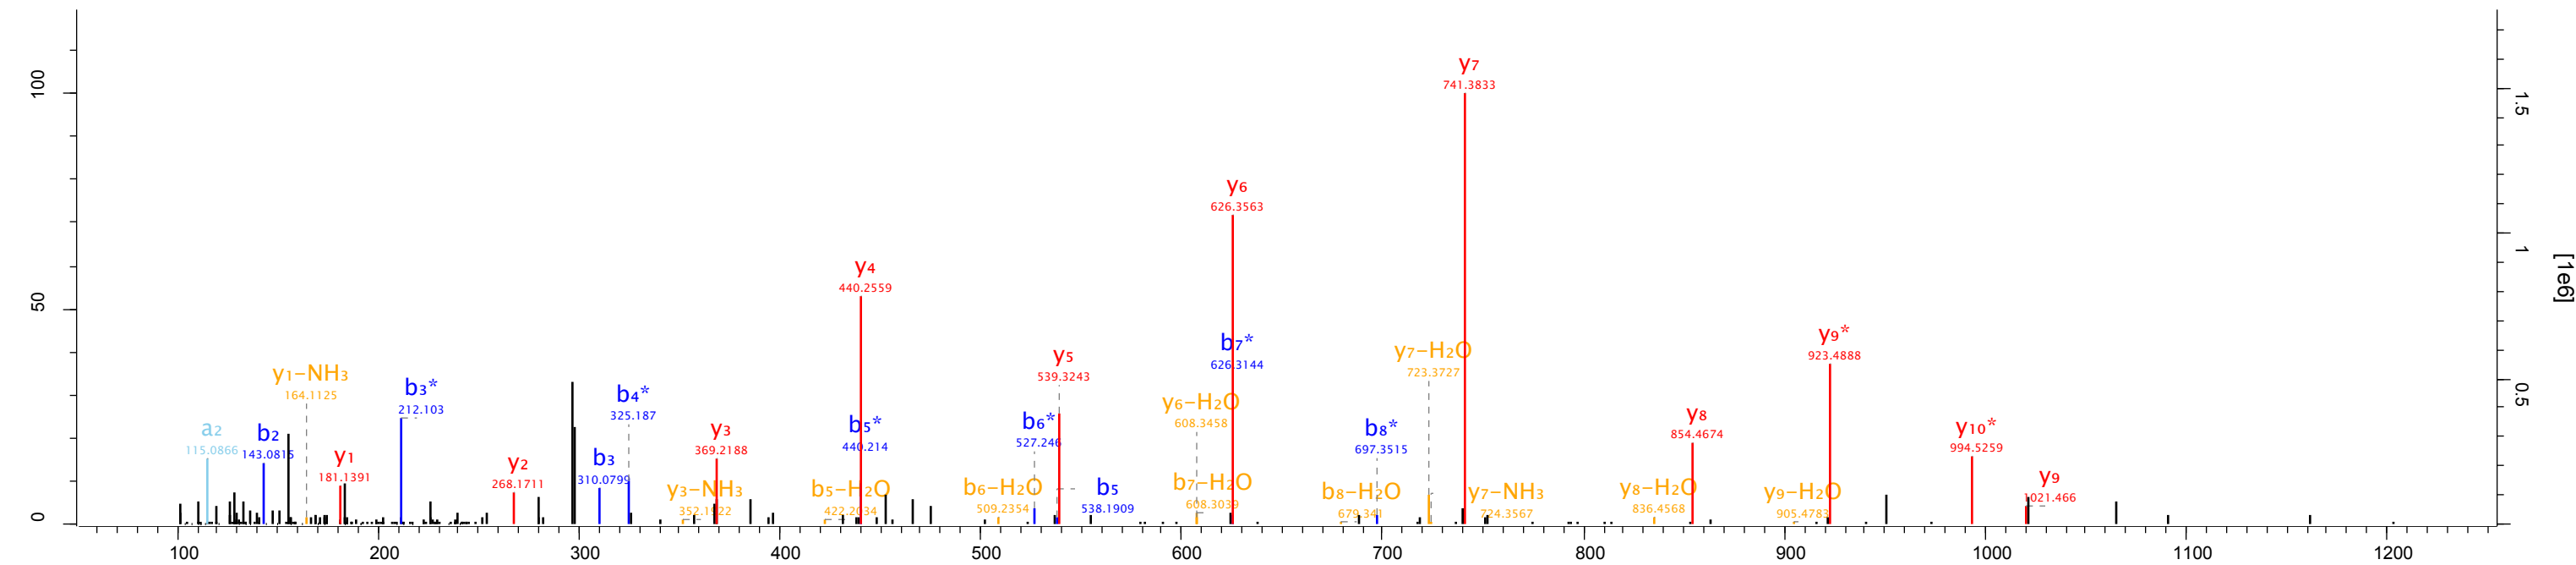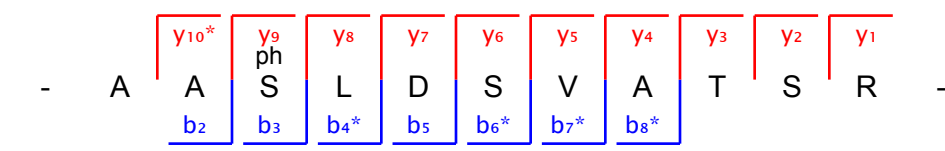

Raw file: 20150812\_A375SR\_Phospho\_BR1\_05  
 Scan: 11018  
 Method: FTMS; HCD  
 Score: 169.58  
 m/z: 621.31  
 Gene names: TPD52L2

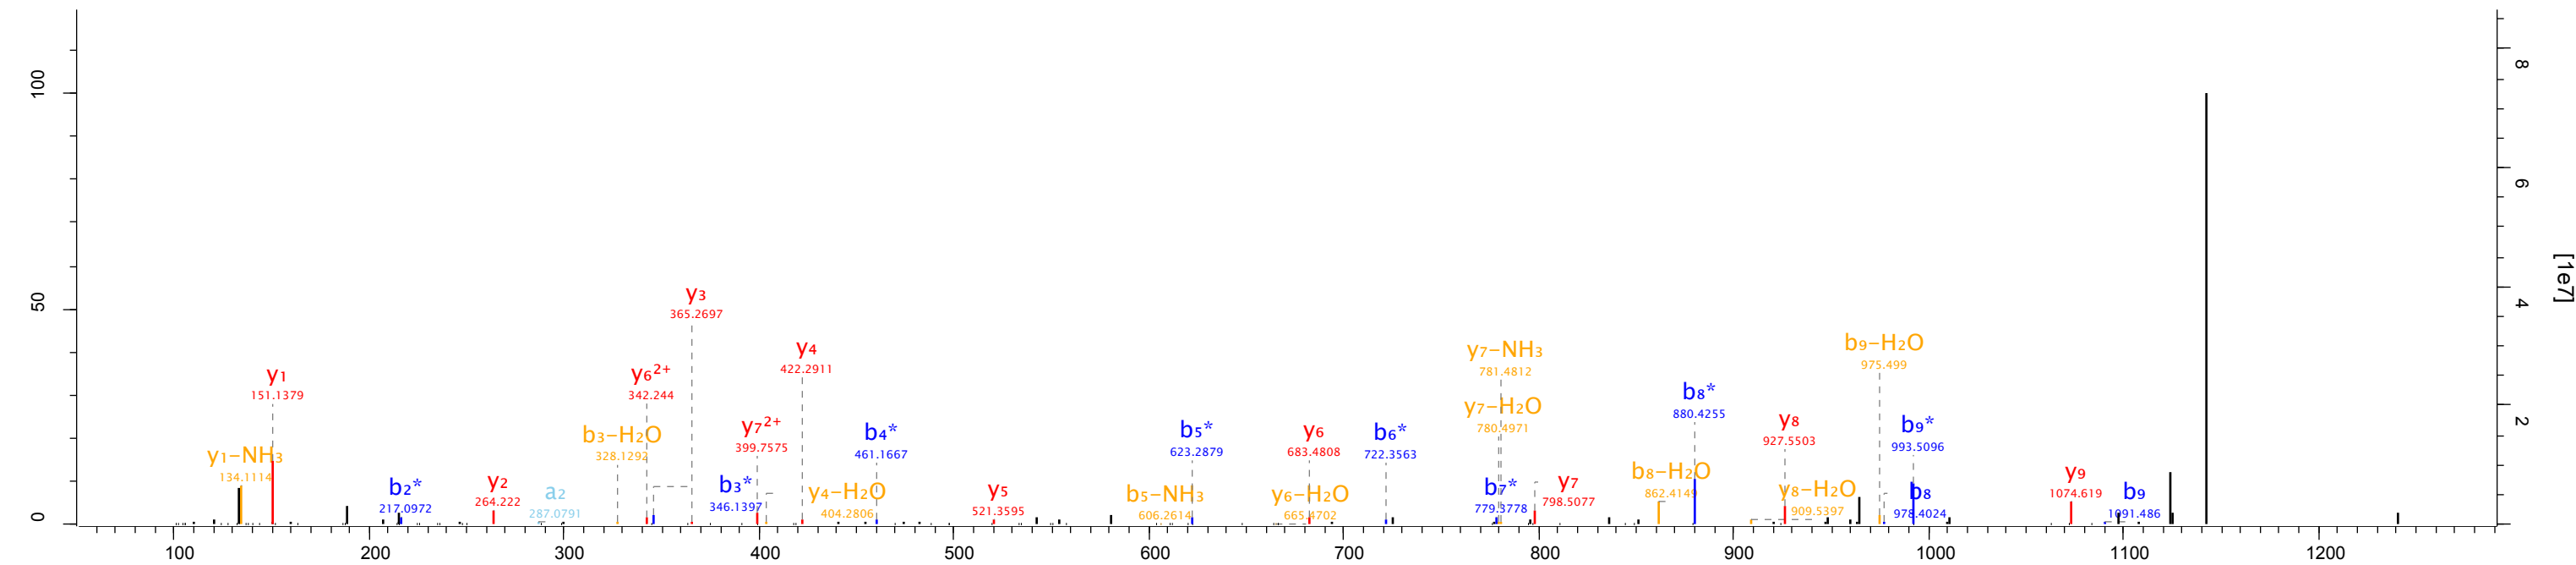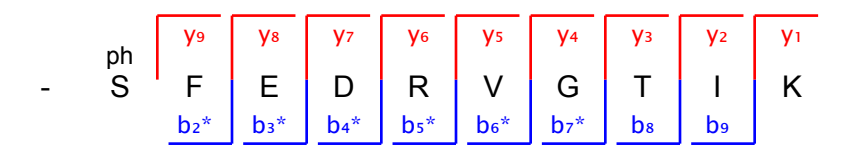

Raw file Scan Method m/z Gene names  
 20150812\_A375SR\_Phospho\_BR1\_05 11638 FTMS; HCD 169.88 674.96 ADSL

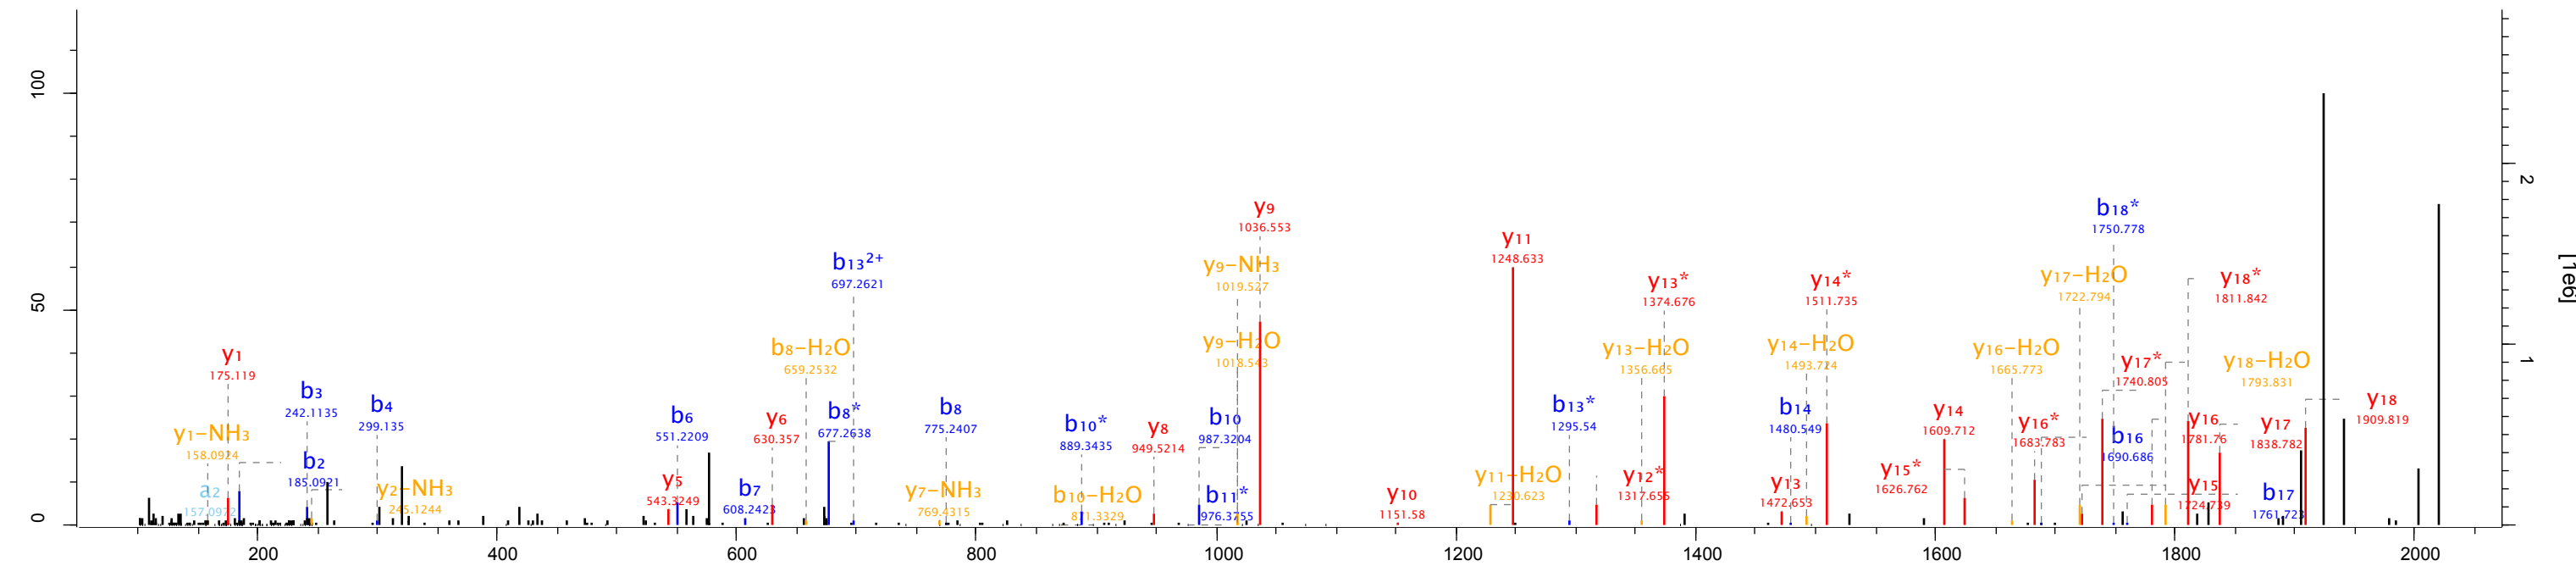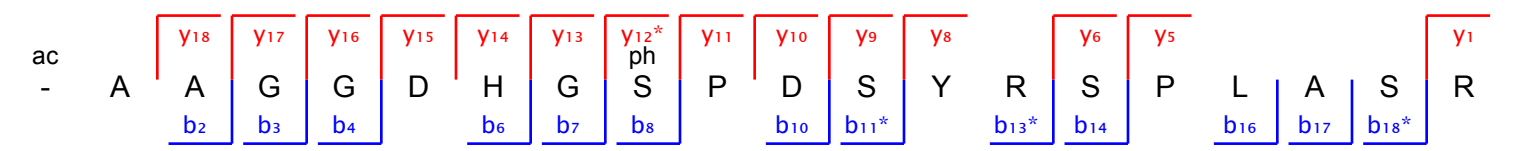

Raw file: 20150812\_A375SR\_Phospho\_BR1\_05  
 Scan: 11818 Method: FTMS; HCD Score: 102.47 m/z: 829.41 Gene names: YEATS2

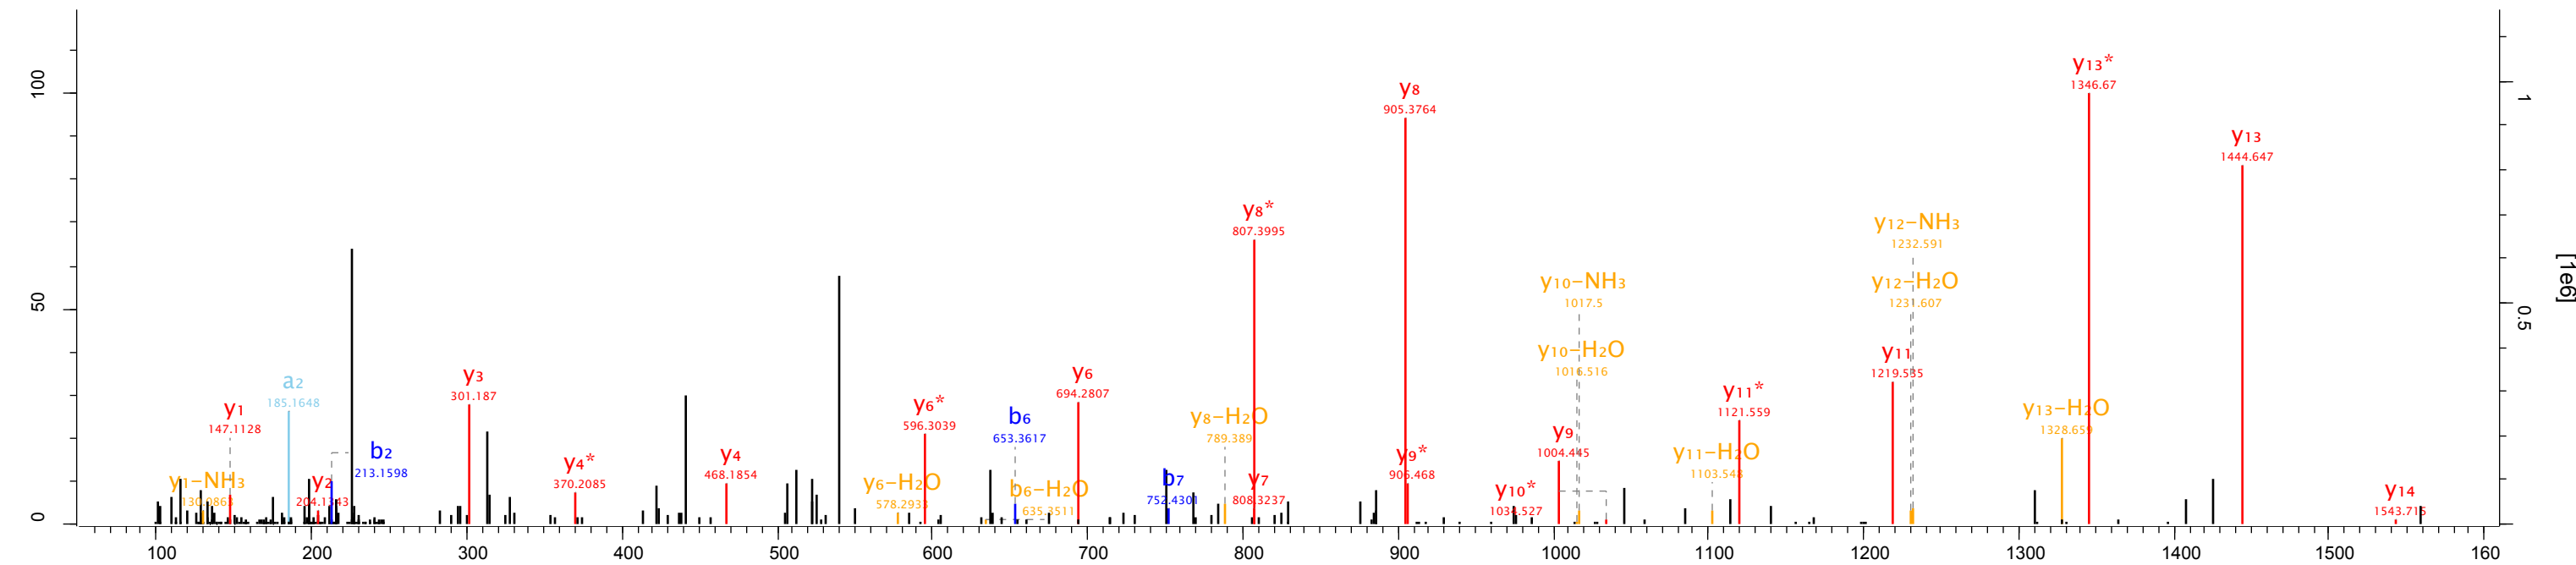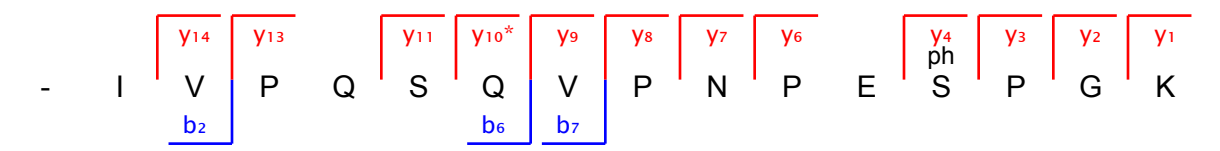



Raw file: 20150812\_A375SR\_Phospho\_BR1\_05  
 Scan: 12688 Method: FTMS; HCD Score: 243.97 m/z: 1014.44 Gene names: CHCHD3

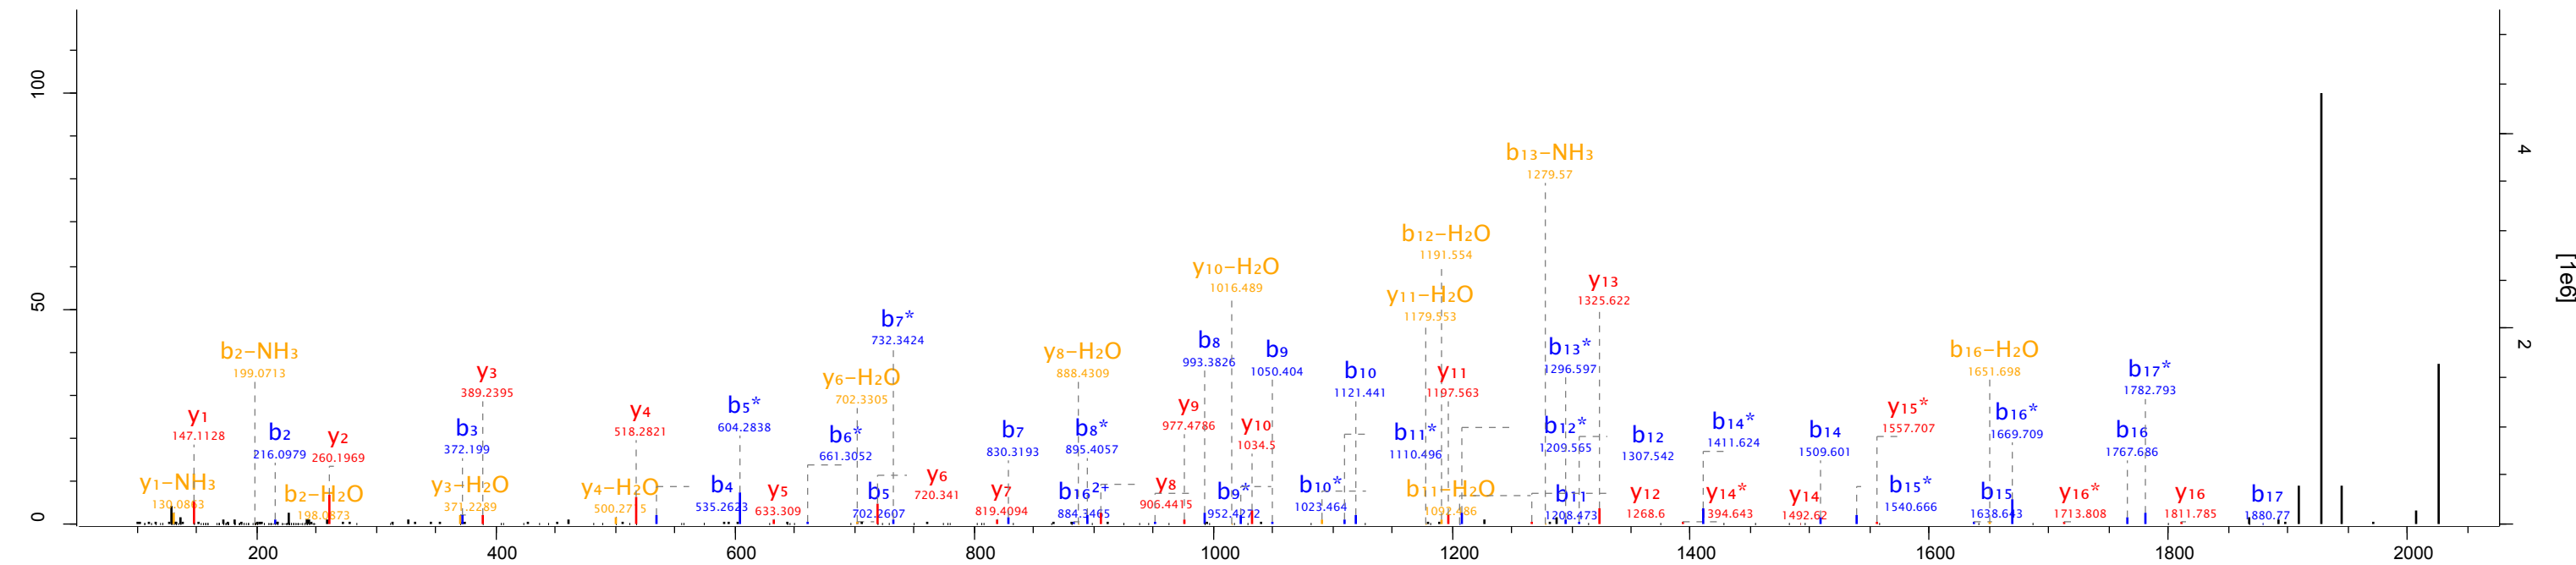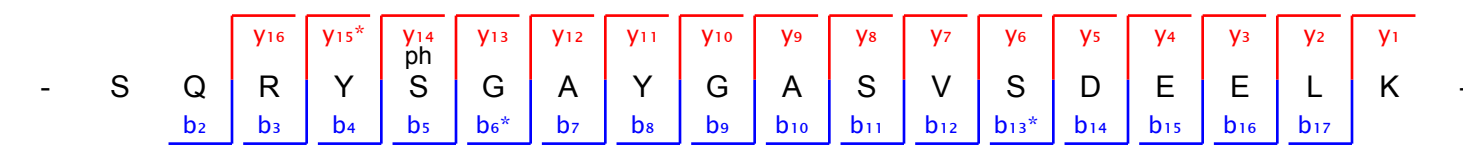

Raw file: 20150812\_A375SR\_Phospho\_BR1\_05  
 Scan: 1338  
 Method: FTMS; HCD  
 Score: 214.14  
 m/z: 949.44  
 Gene names: PRRC2C

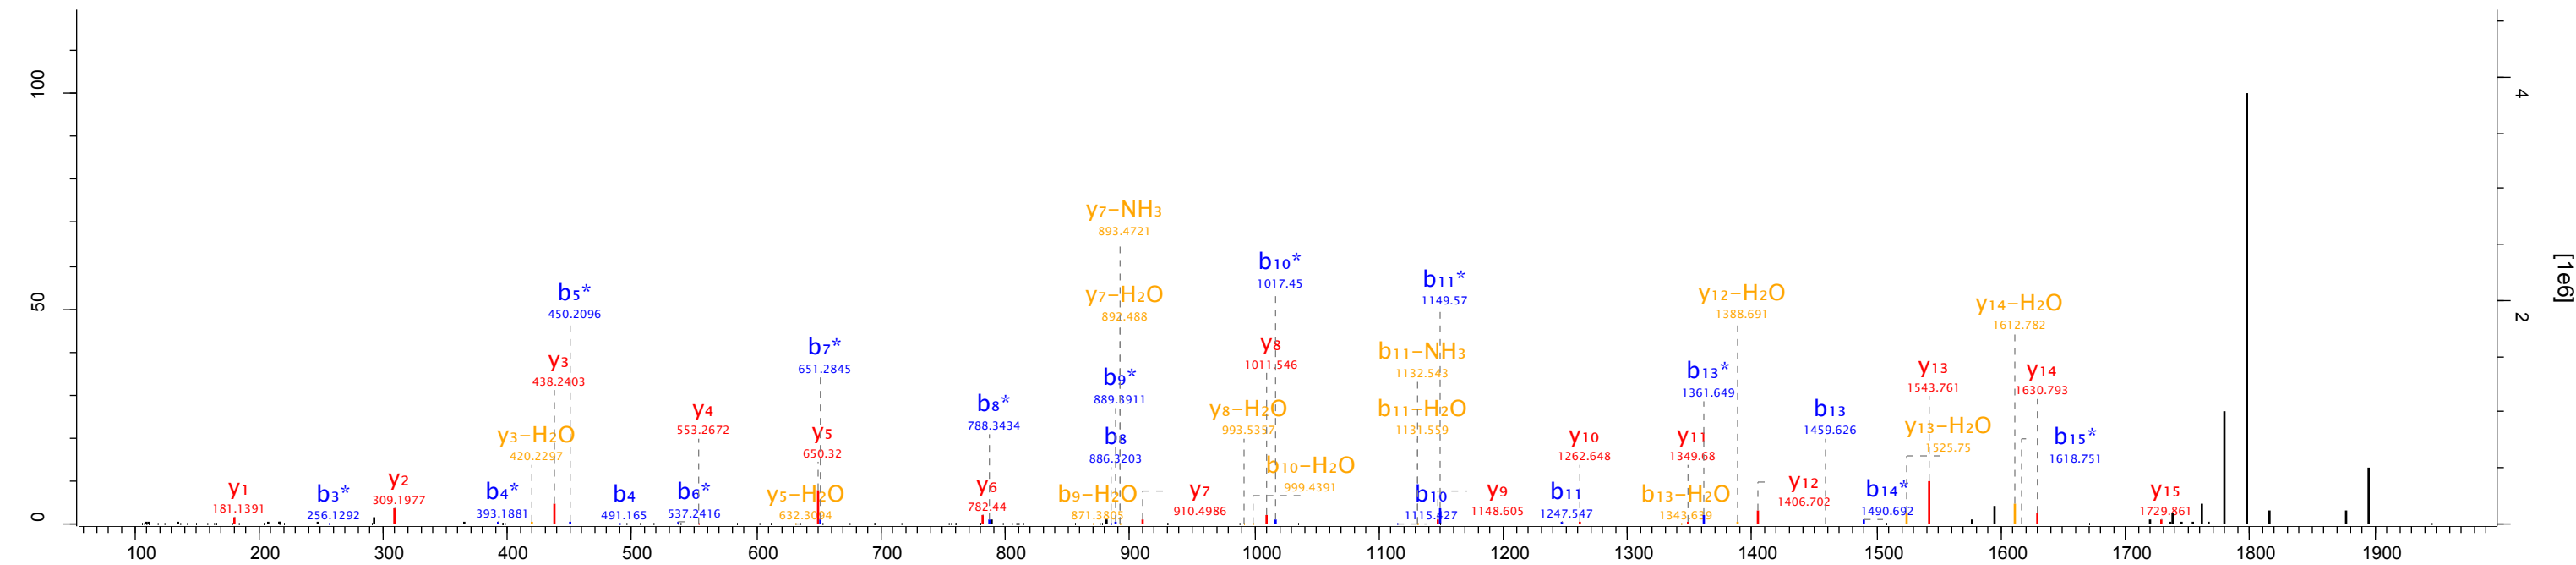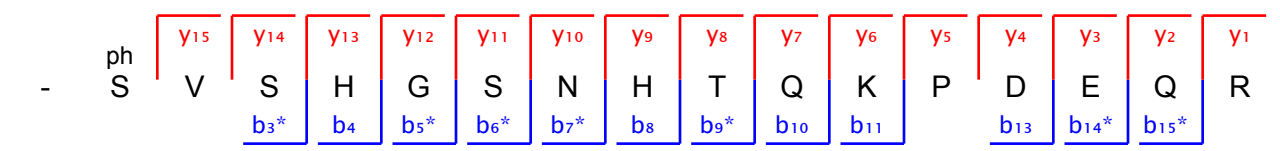

Raw file 20150812\_A375SR\_Phospho\_BR1\_05 Scan 13458 Method FTMS; HCD Score 71.88 m/z 580.78 Gene names ENO1

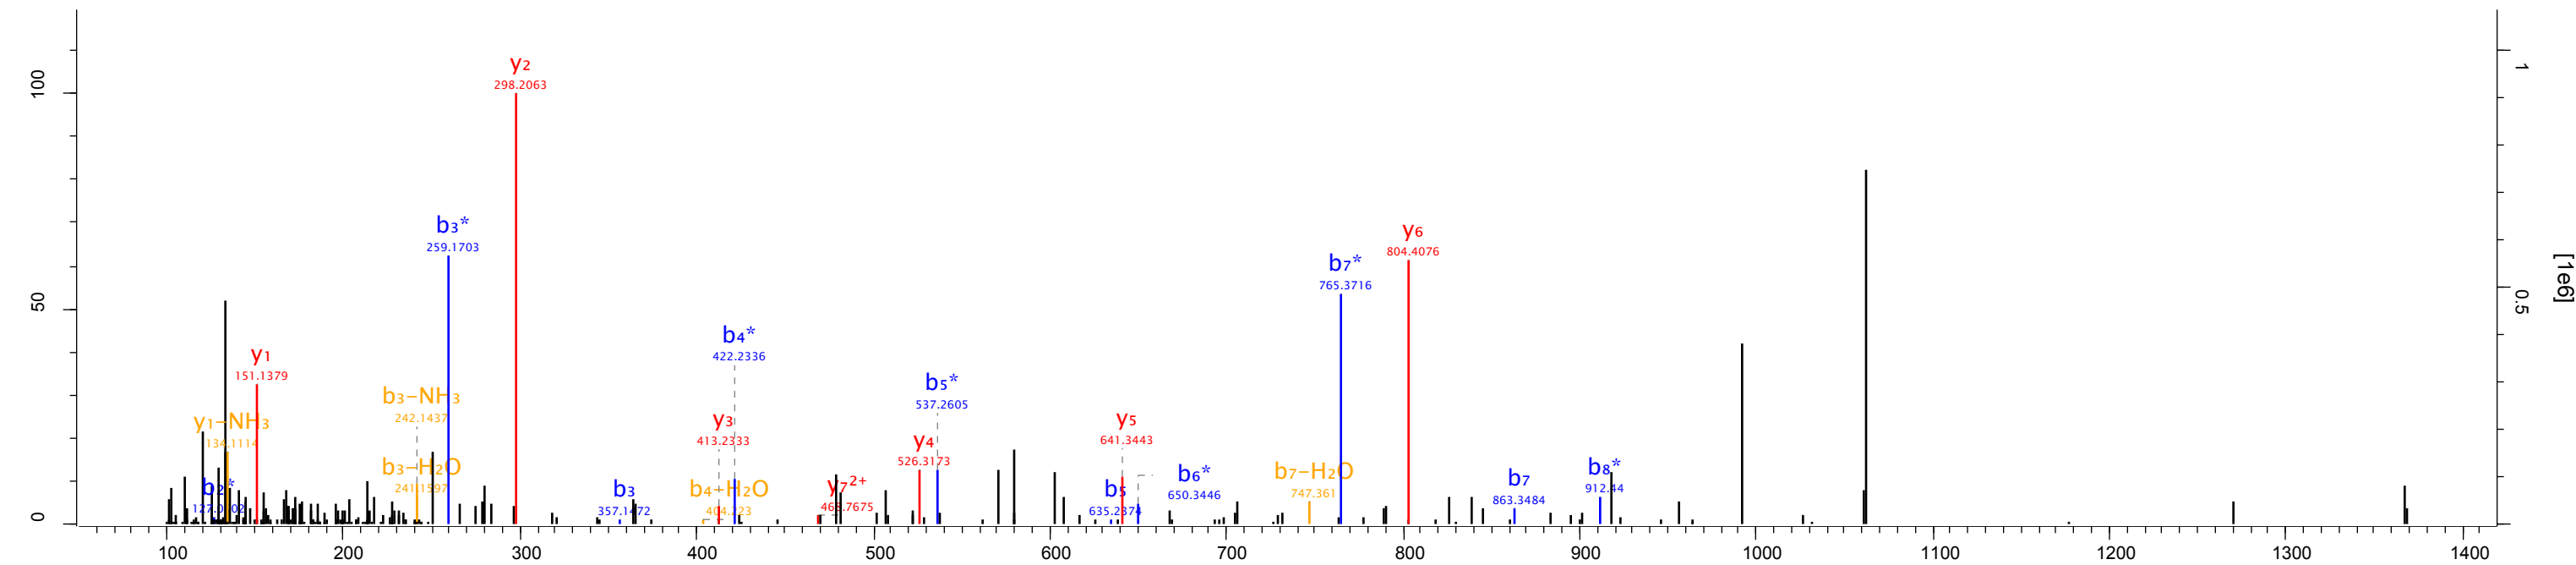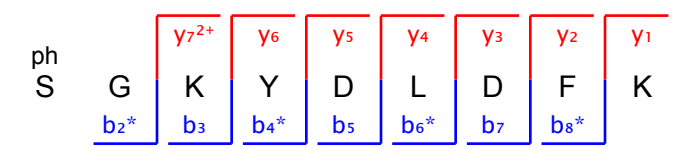

Raw file  
20150812\_A375SR\_Phospho\_BR1\_05

Scan Method Score m/z Gene names  
1358 FTMS; HCD 319.2 911.93 LMNA

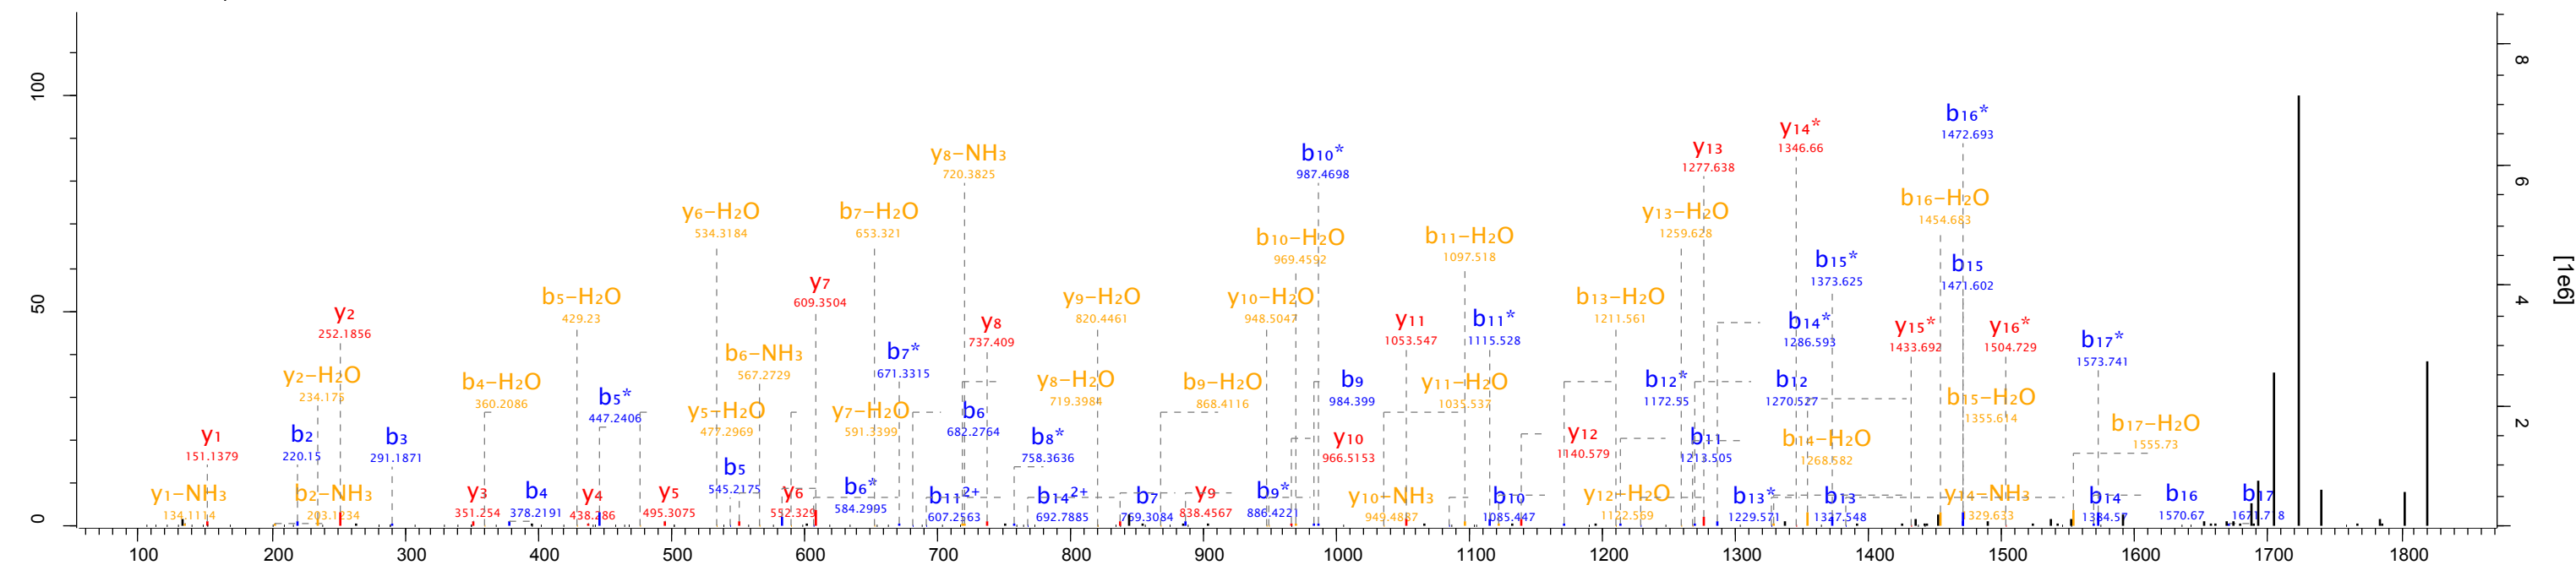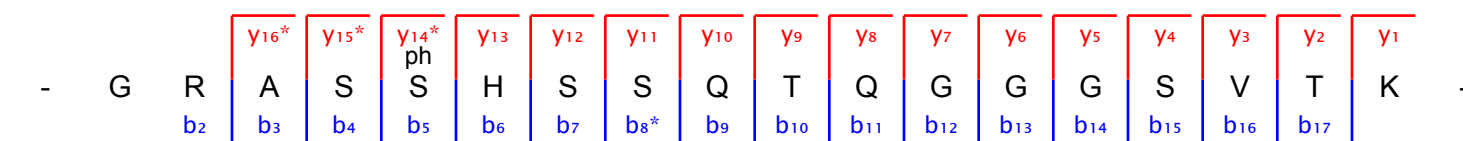

Raw file  
20150812\_A375SR\_Phospho\_BR1\_05

Scan 13788 Method FTMS; HCD Score 256.89 m/z 781.36 Gene names NFIB

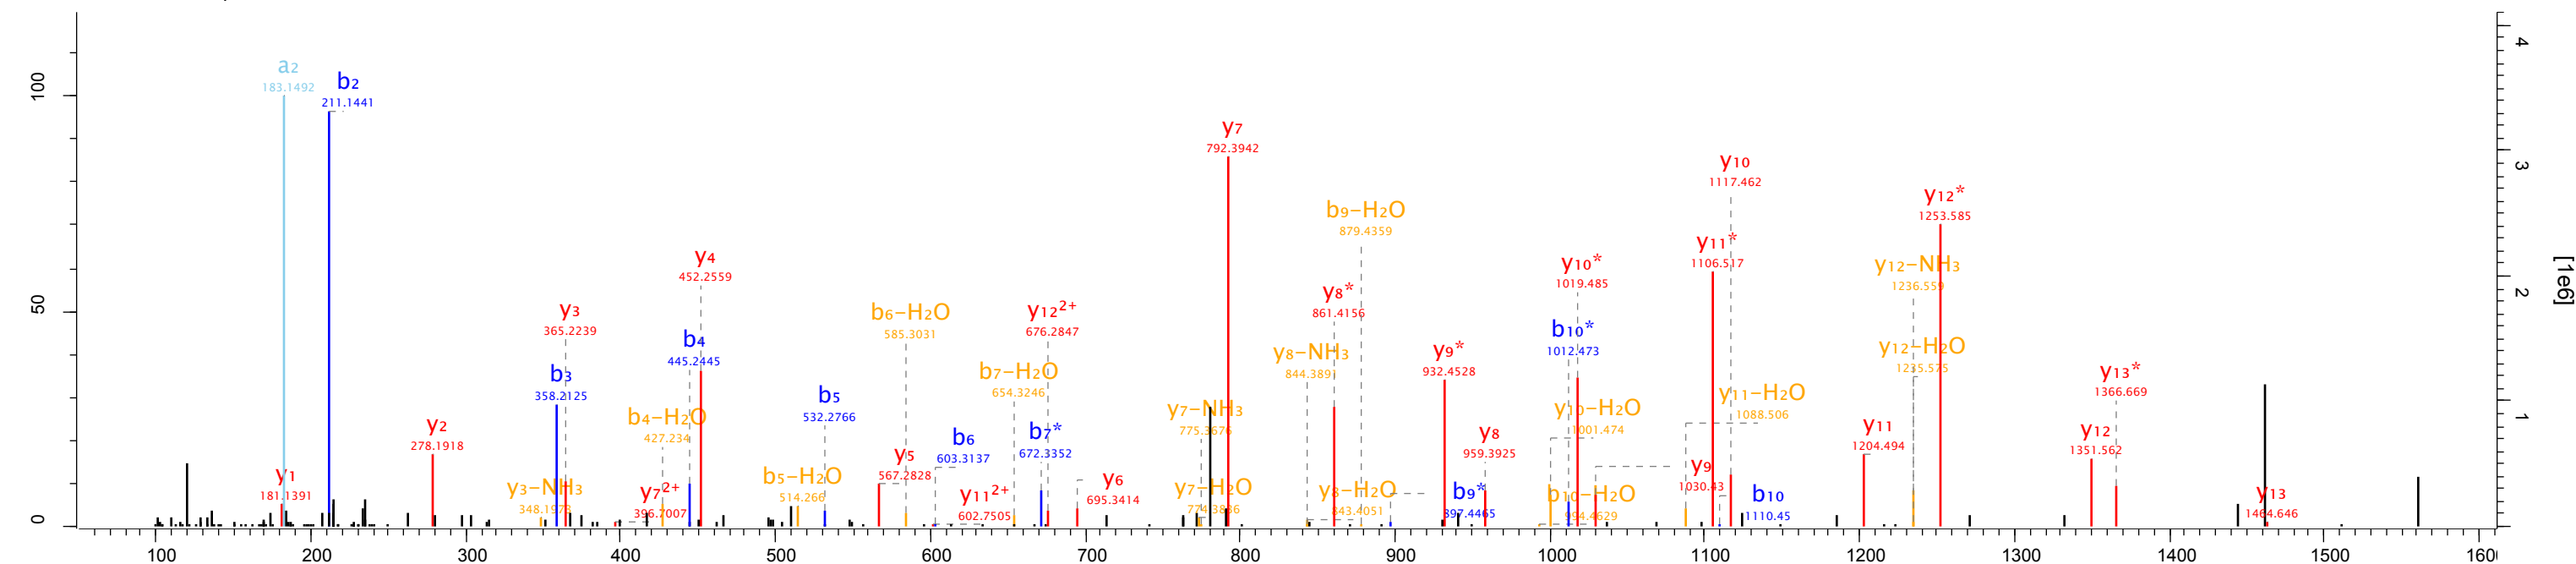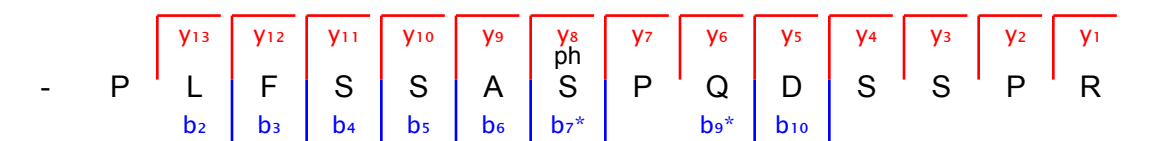

Raw file 20150812\_A375SR\_Phospho\_BR1\_05 Scan 14208 Method FTMS; HCD Score 90.93 m/z 682.79 Gene names AMPD2

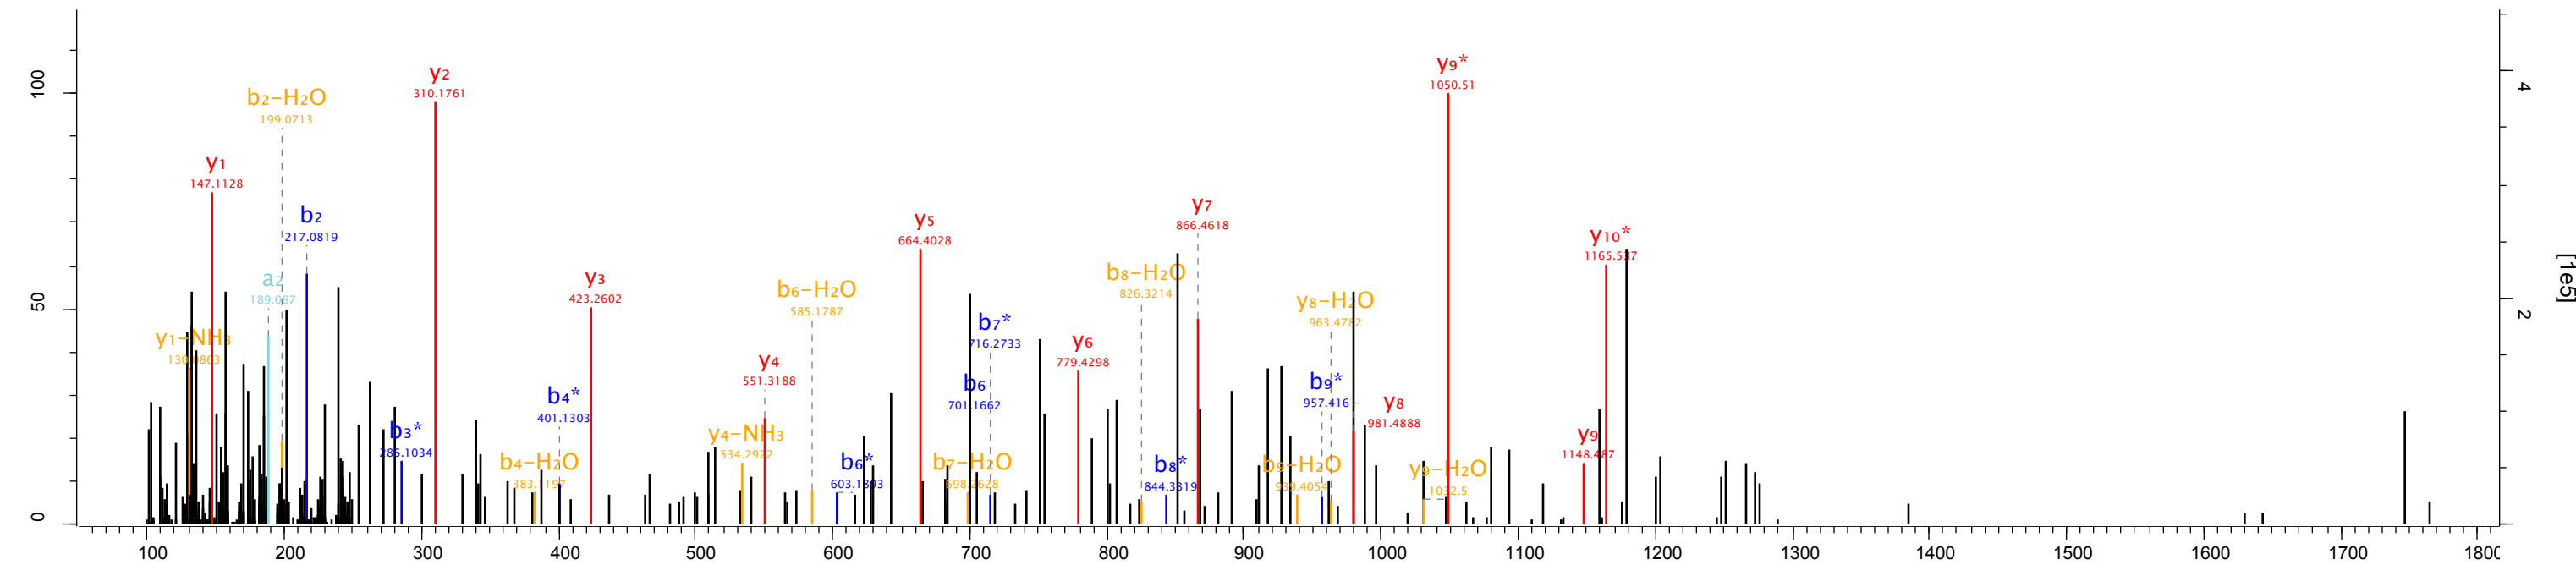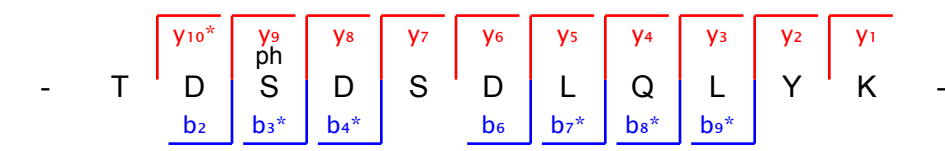

Raw file 20150812\_A375SR\_Phospho\_BR1\_05 Scan 14468 Method FTMS; HCD Score 82.63 m/z 948.91 Gene names NOL4L

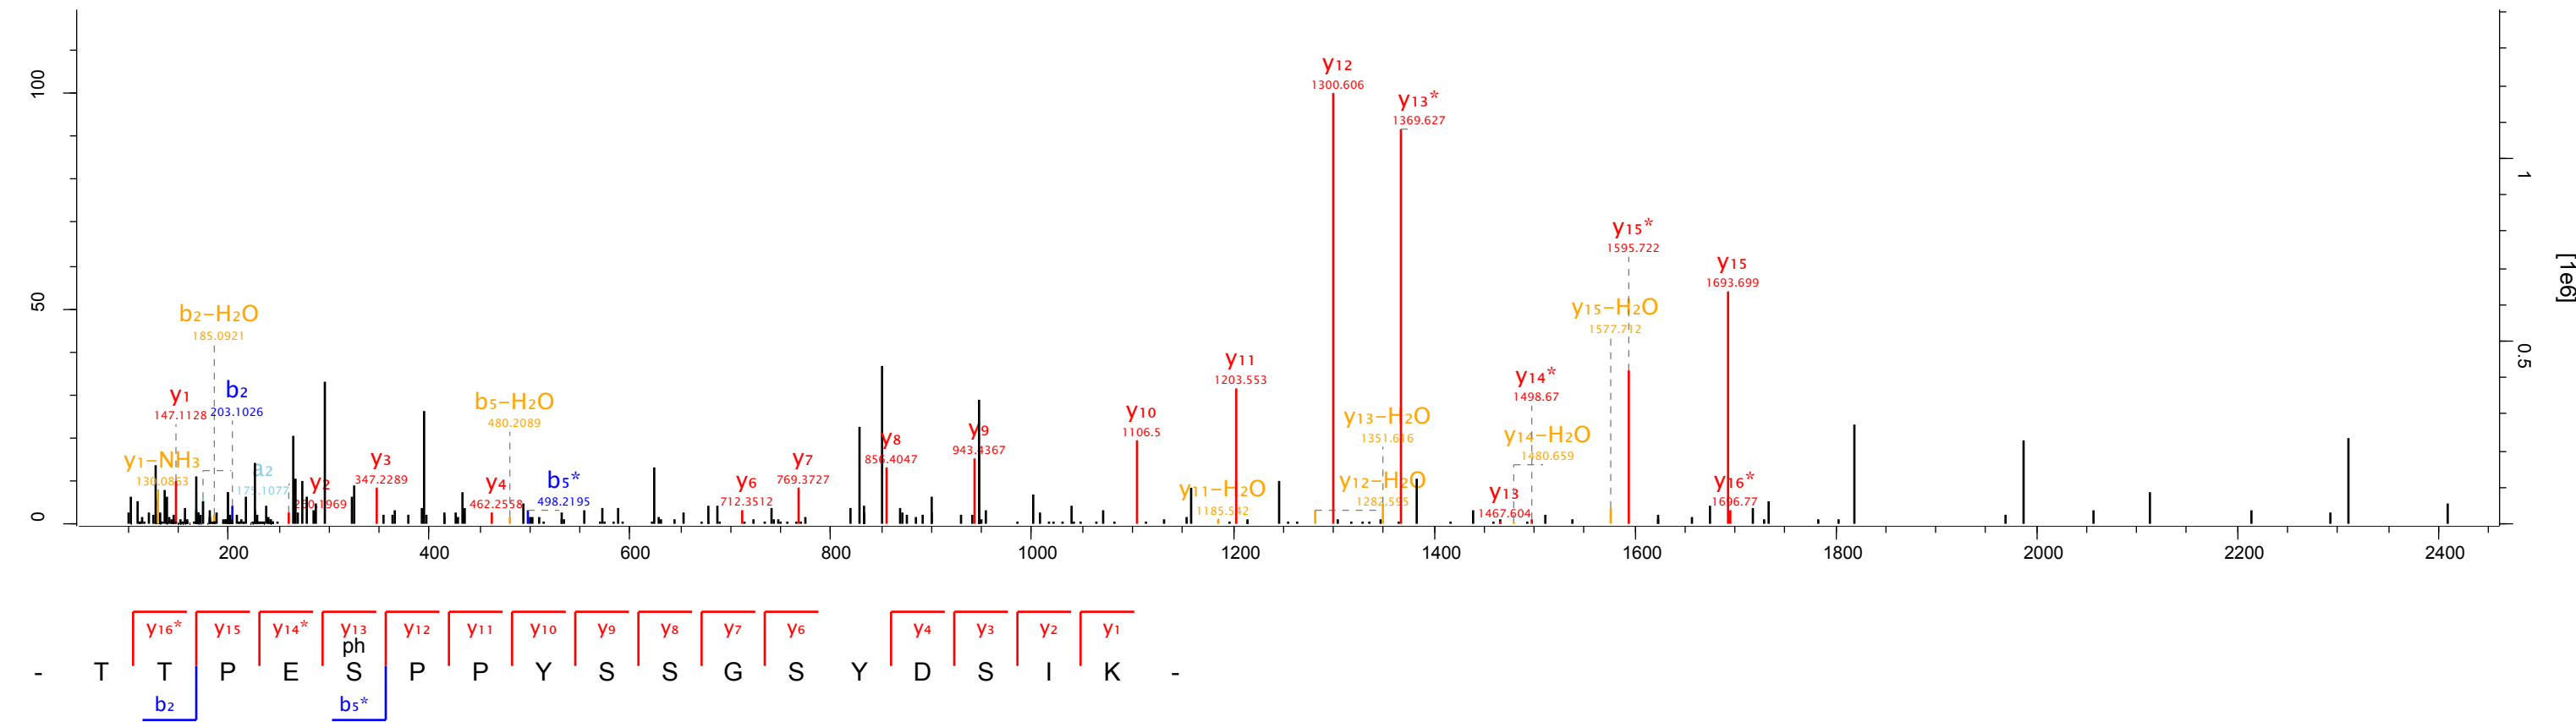

Raw file 20150812\_A375SR\_Phospho\_BR1\_05 Scan 14928 Method FTMS; HCD Score 93.73 m/z 632.65 Gene names TNS1

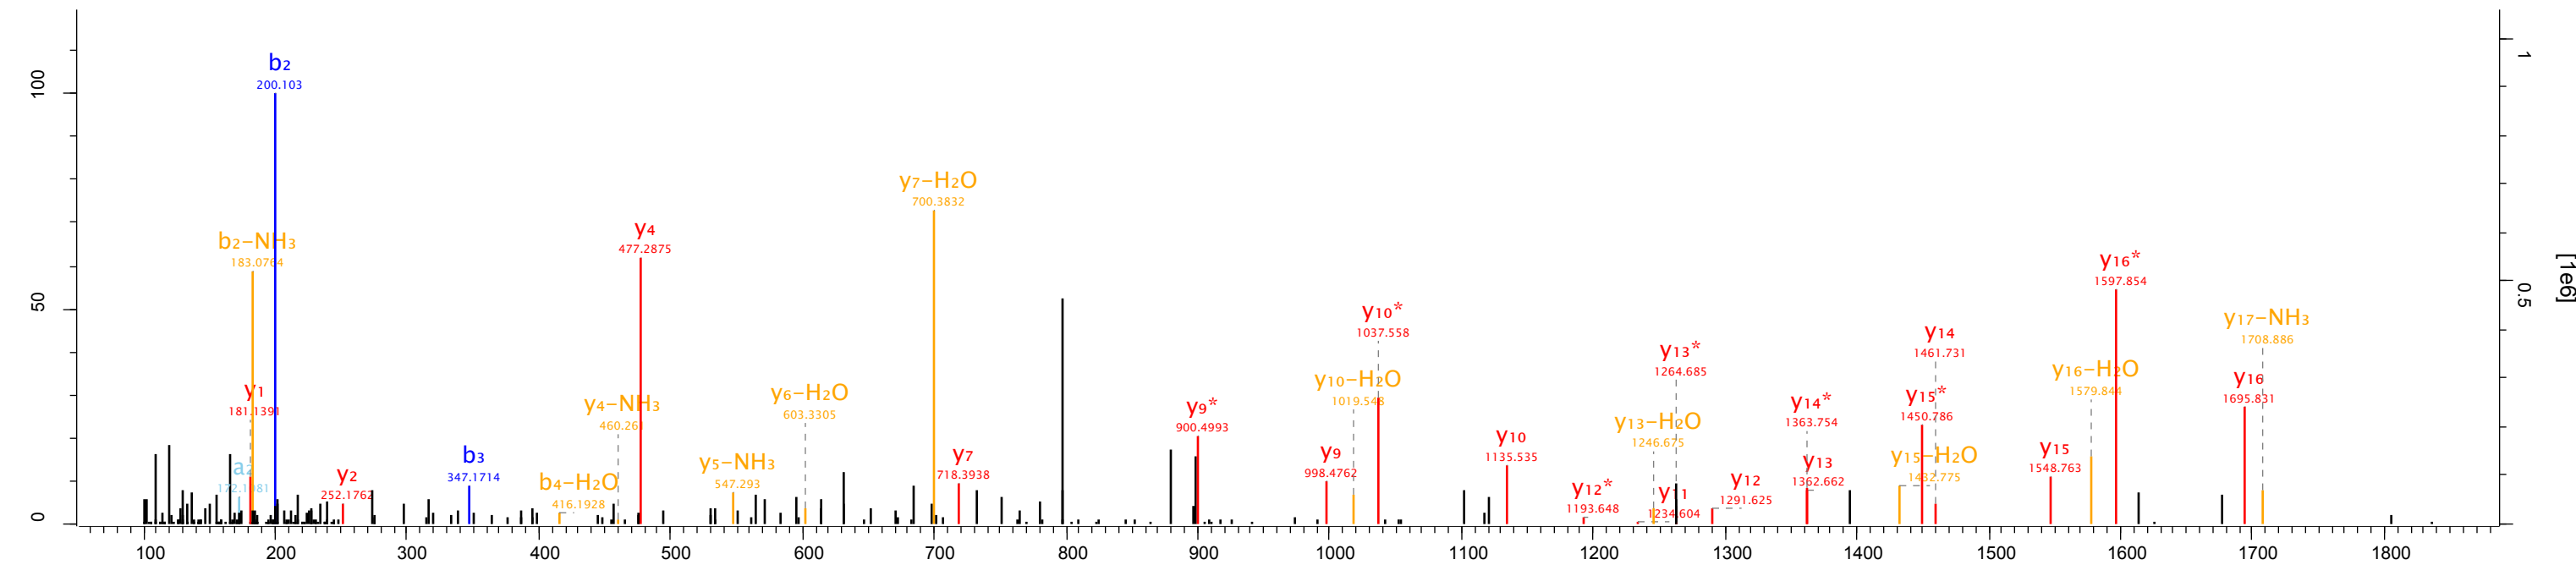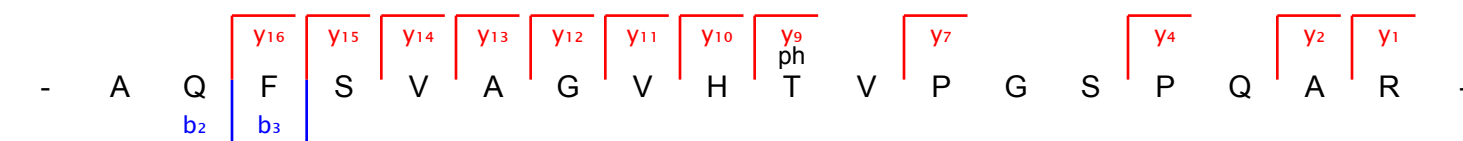



Raw file: 20150812\_A375SR\_Phospho\_BR1\_05  
 Scan: 16278 Method: FTMS; HCD Score: 240.24 m/z: 1088.02 Gene names: ITSN1

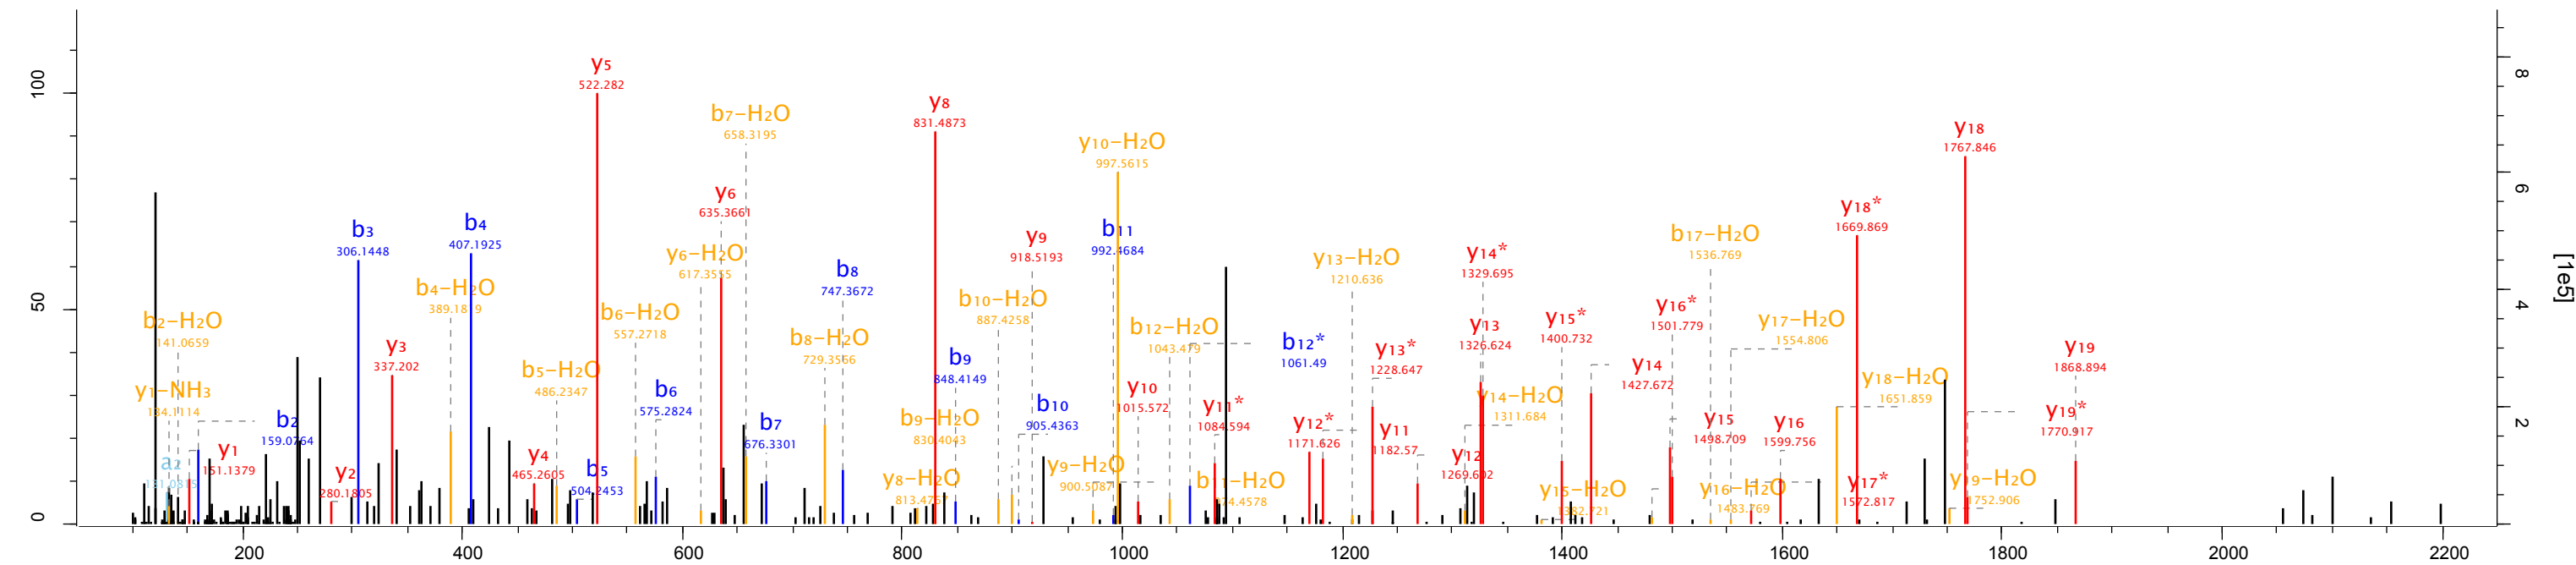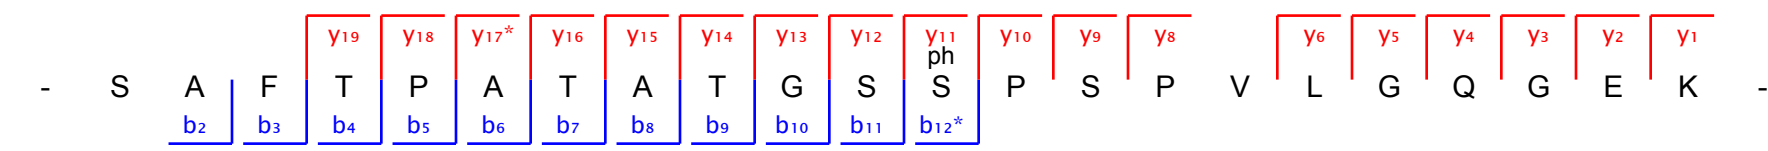

Raw file: 20150812\_A375SR\_Phospho\_BR1\_05  
 Scan: 16538 Method: FTMS; HCD Score: 146.81 m/z: 821.4 Gene names: ZDHHC5

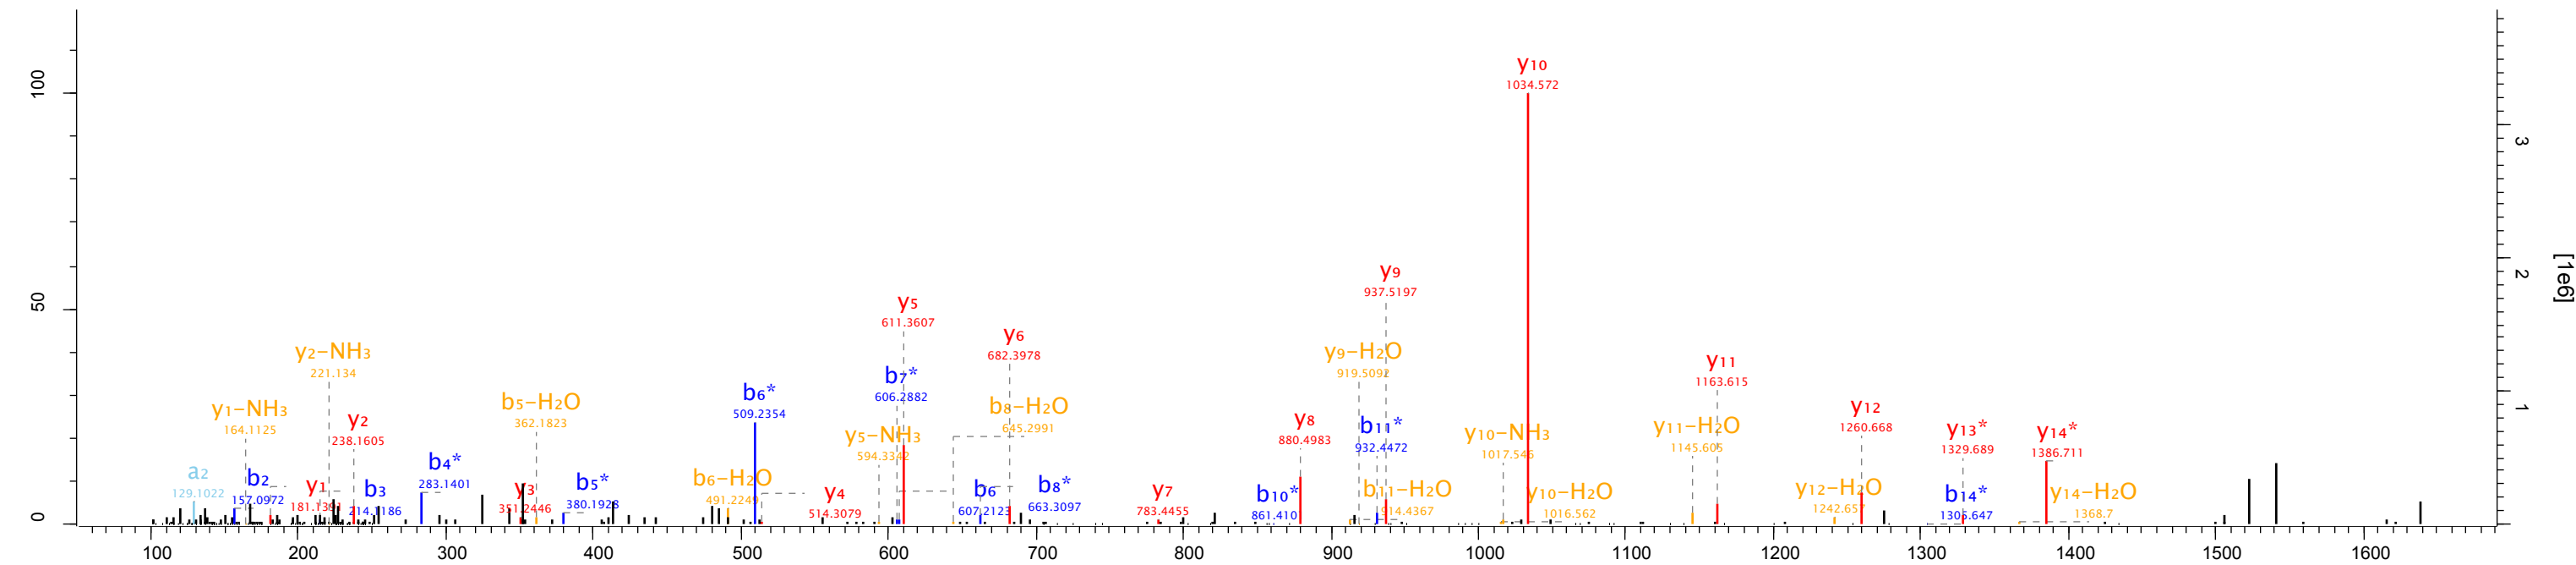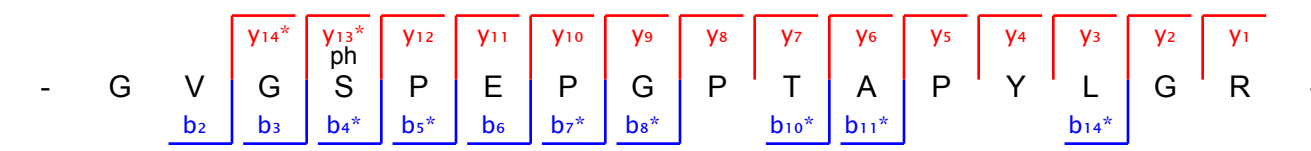

Raw file: 20150812\_A375SR\_Phospho\_BR1\_05  
 Scan: 16688 Method: FTMS; HCD Score: 60 m/z: 1040.01 Gene names: PRRC2A

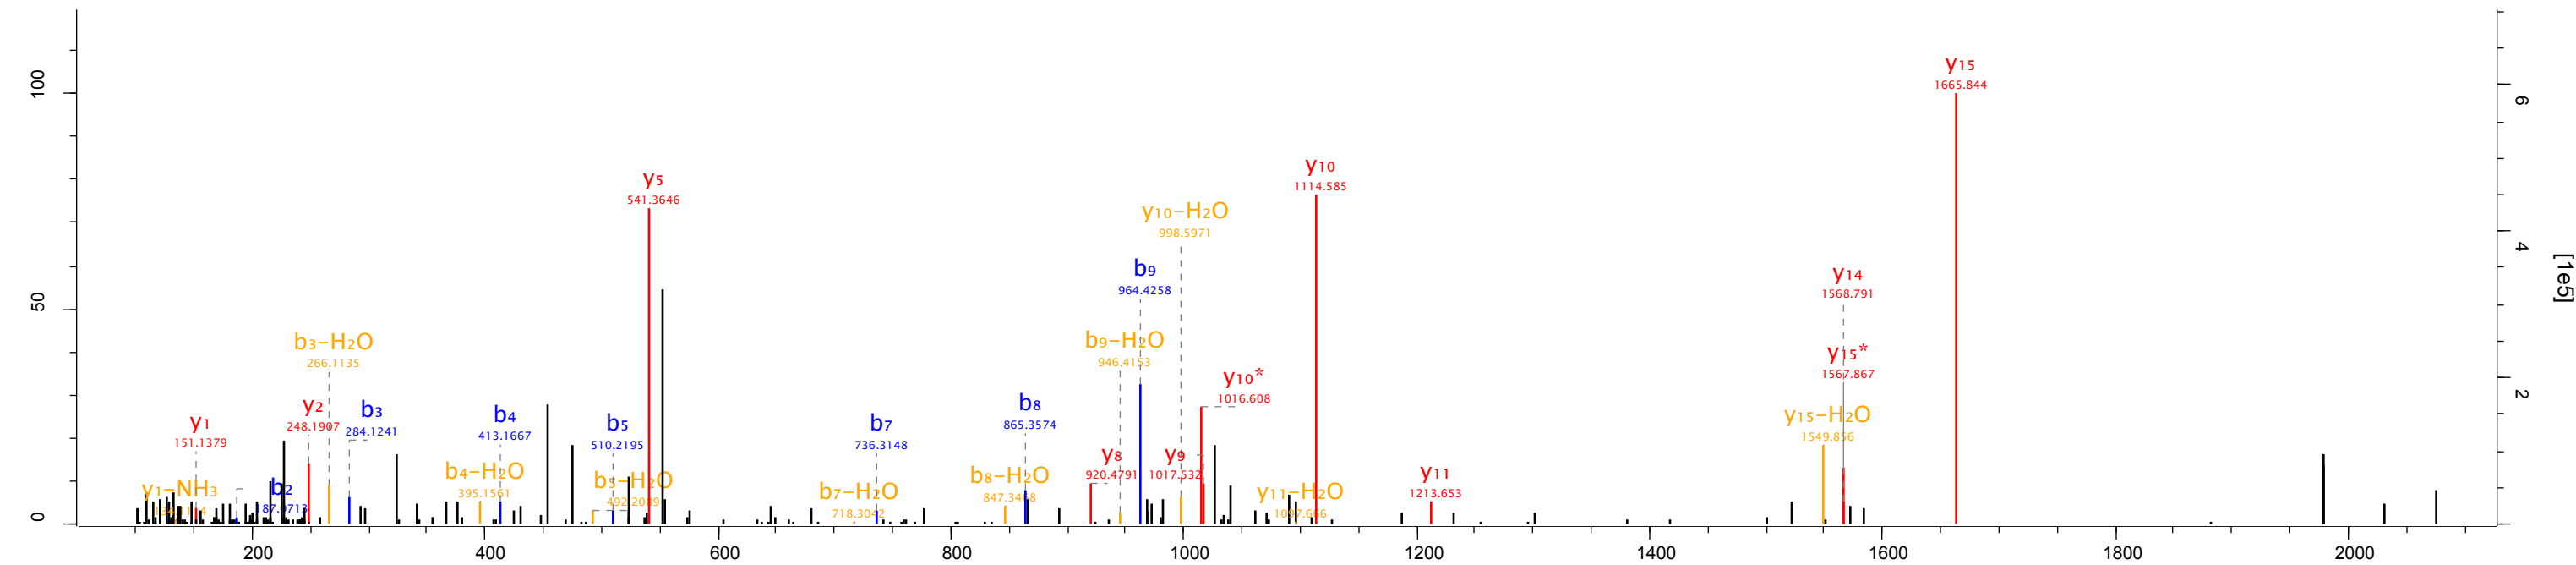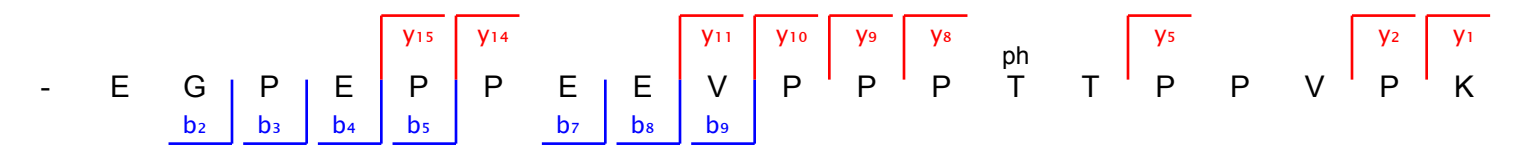

Raw file: 20150812\_A375SR\_Phospho\_BR1\_05  
 Scan: 1678 Method: FTMS; HCD Score: 162.93 m/z: 527.27 Gene names: RSL1D1

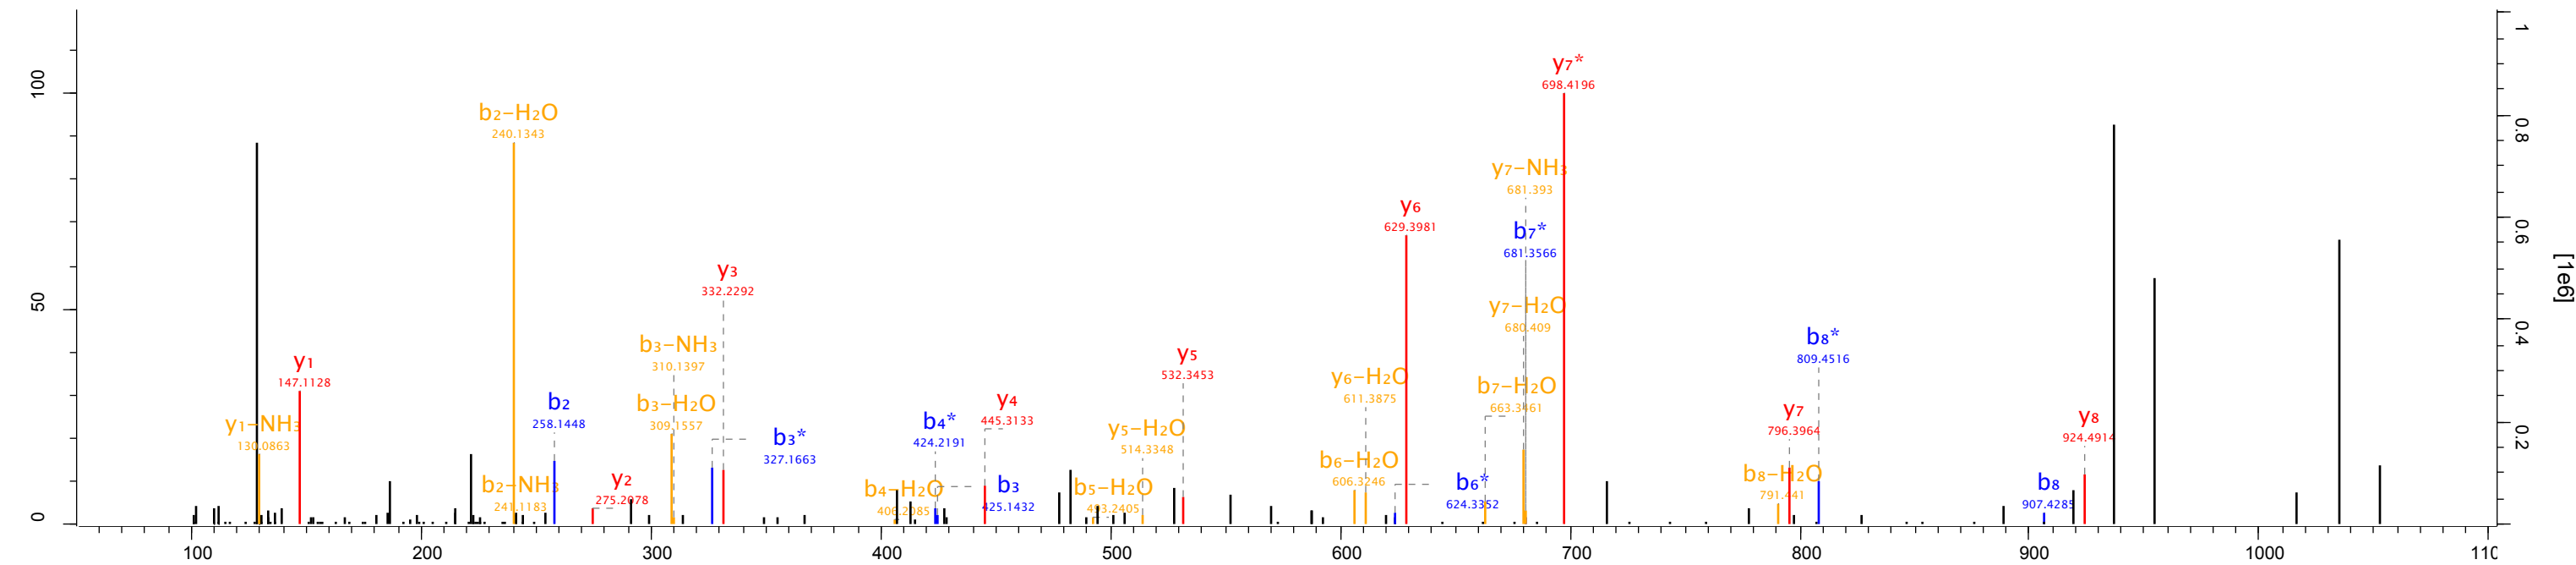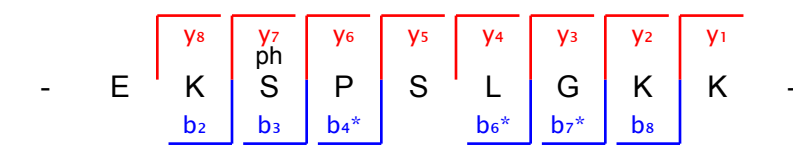

Raw file 20150812\_A375SR\_Phospho\_BR1\_05 Scan 17508 Method FTMS; HCD Score 82.36 m/z 639.95 Gene names ARFGAP1

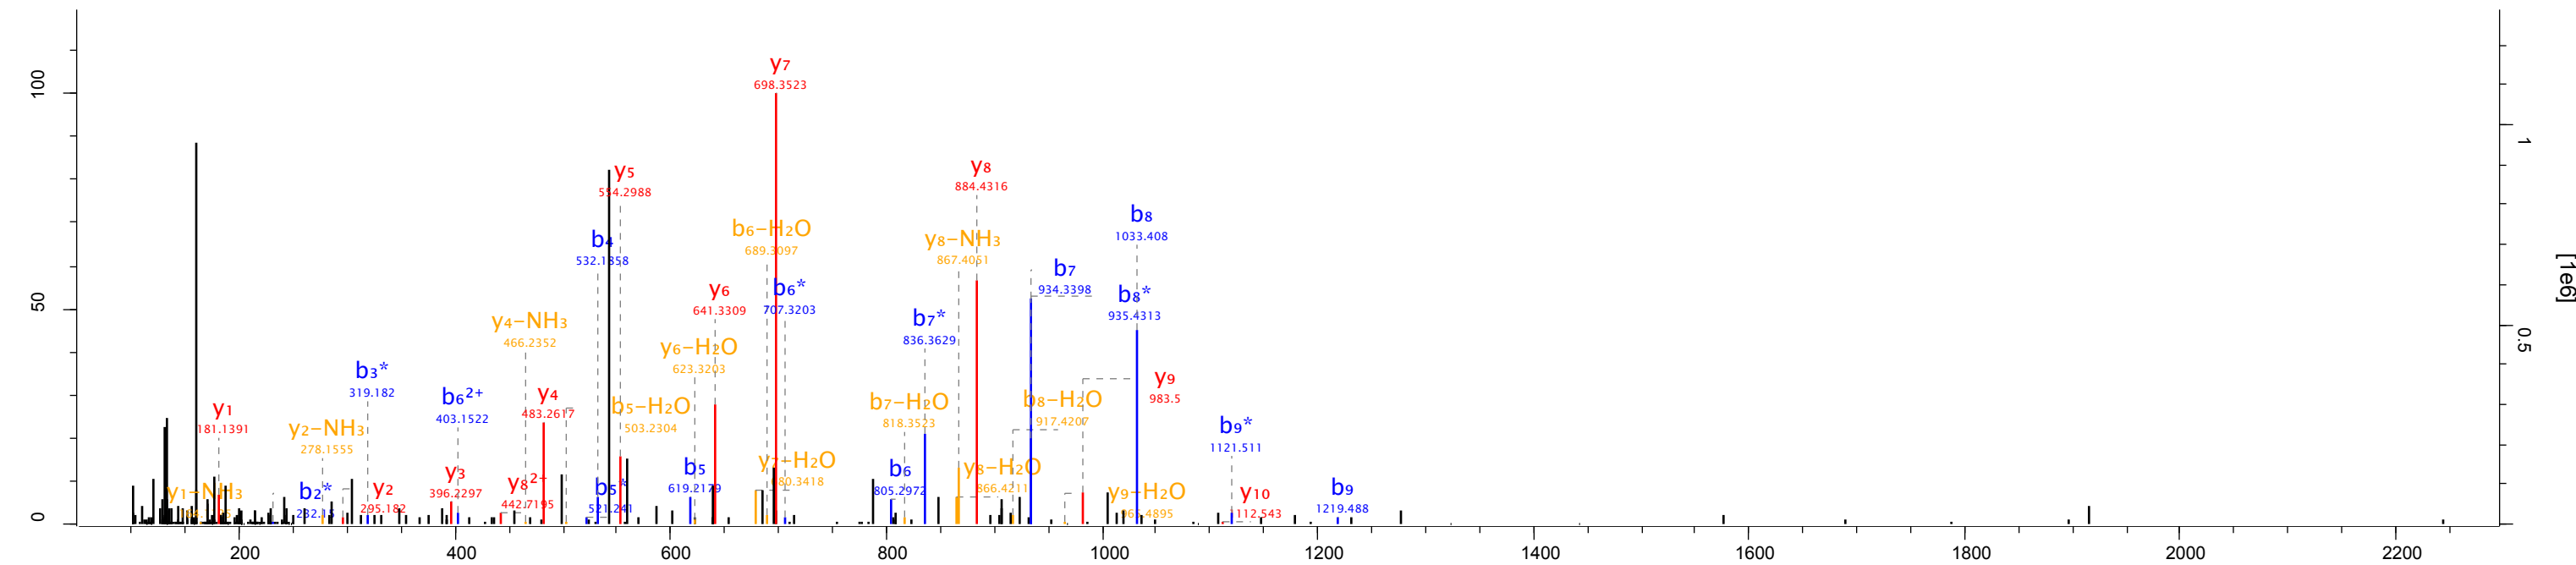

- R ph S S D S W E V W G S A S T N R -  
 b2\* b3\* b4 b5 b6 b7 b8 b9

Raw file 20150812\_A375SR\_Phospho\_BR1\_05 Scan 17658 Method FTMS; HCD Score 94.45 m/z 669.36 Gene names SLAIN2

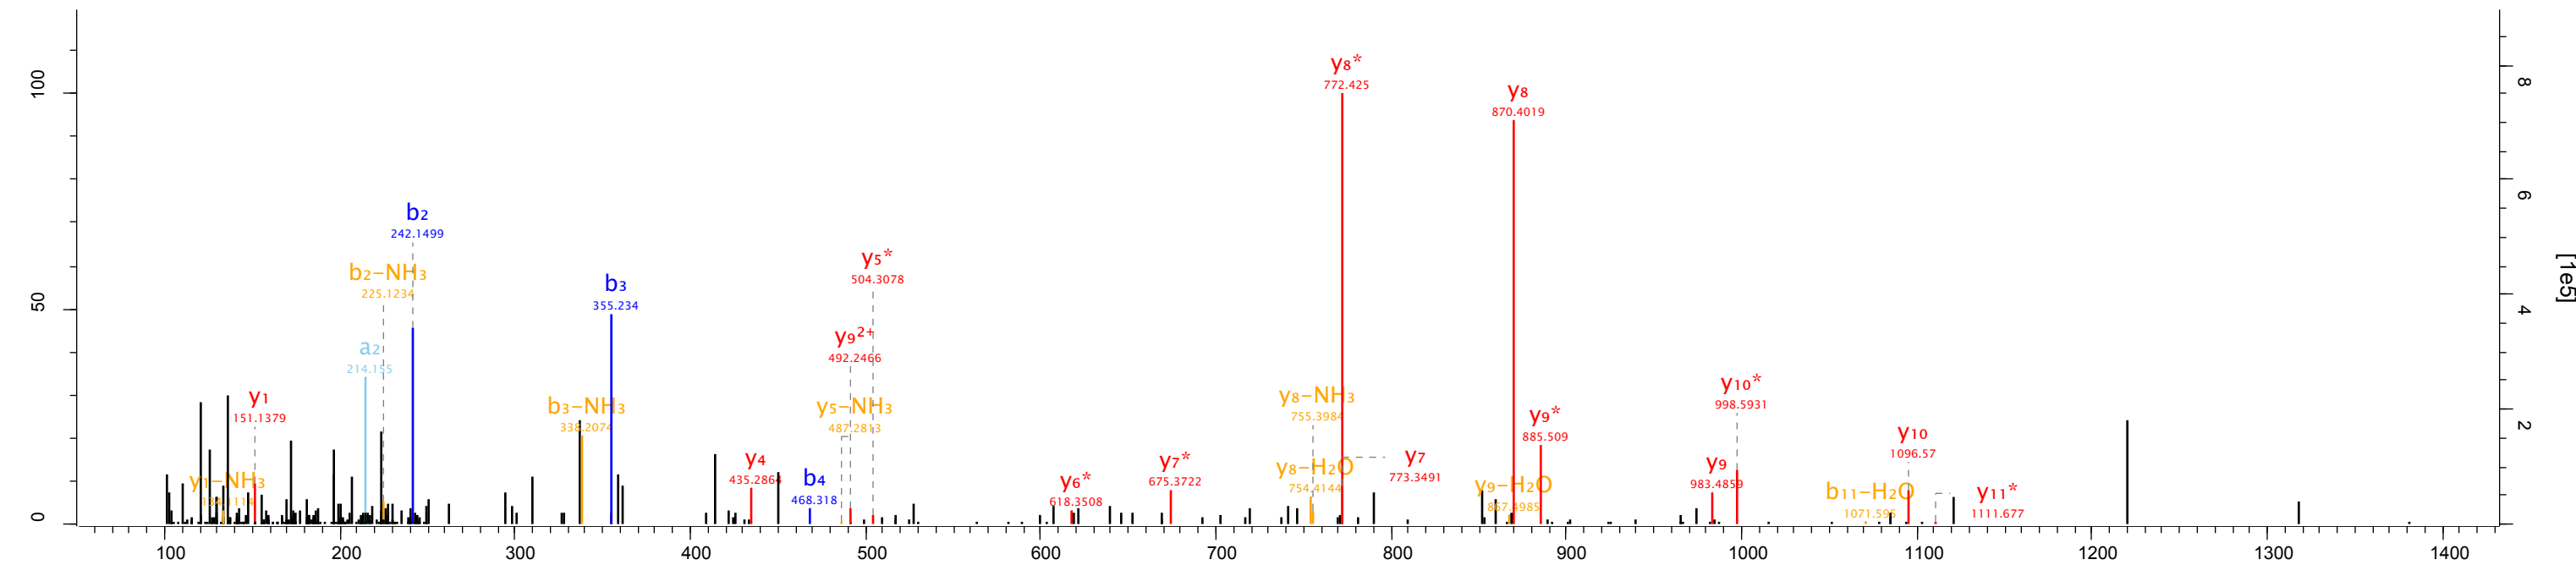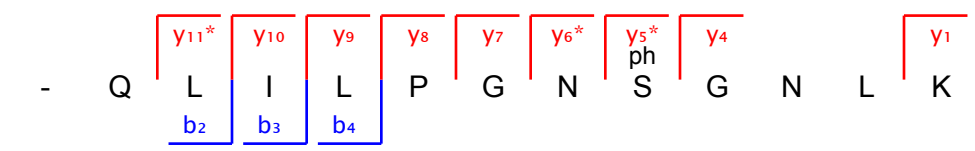

Raw file: 20150812\_A375SR\_Phospho\_BR1\_05  
 Scan: 17828 Method: FTMS; HCD Score: 153.17 m/z: 906.92 Gene names: TP53BP1

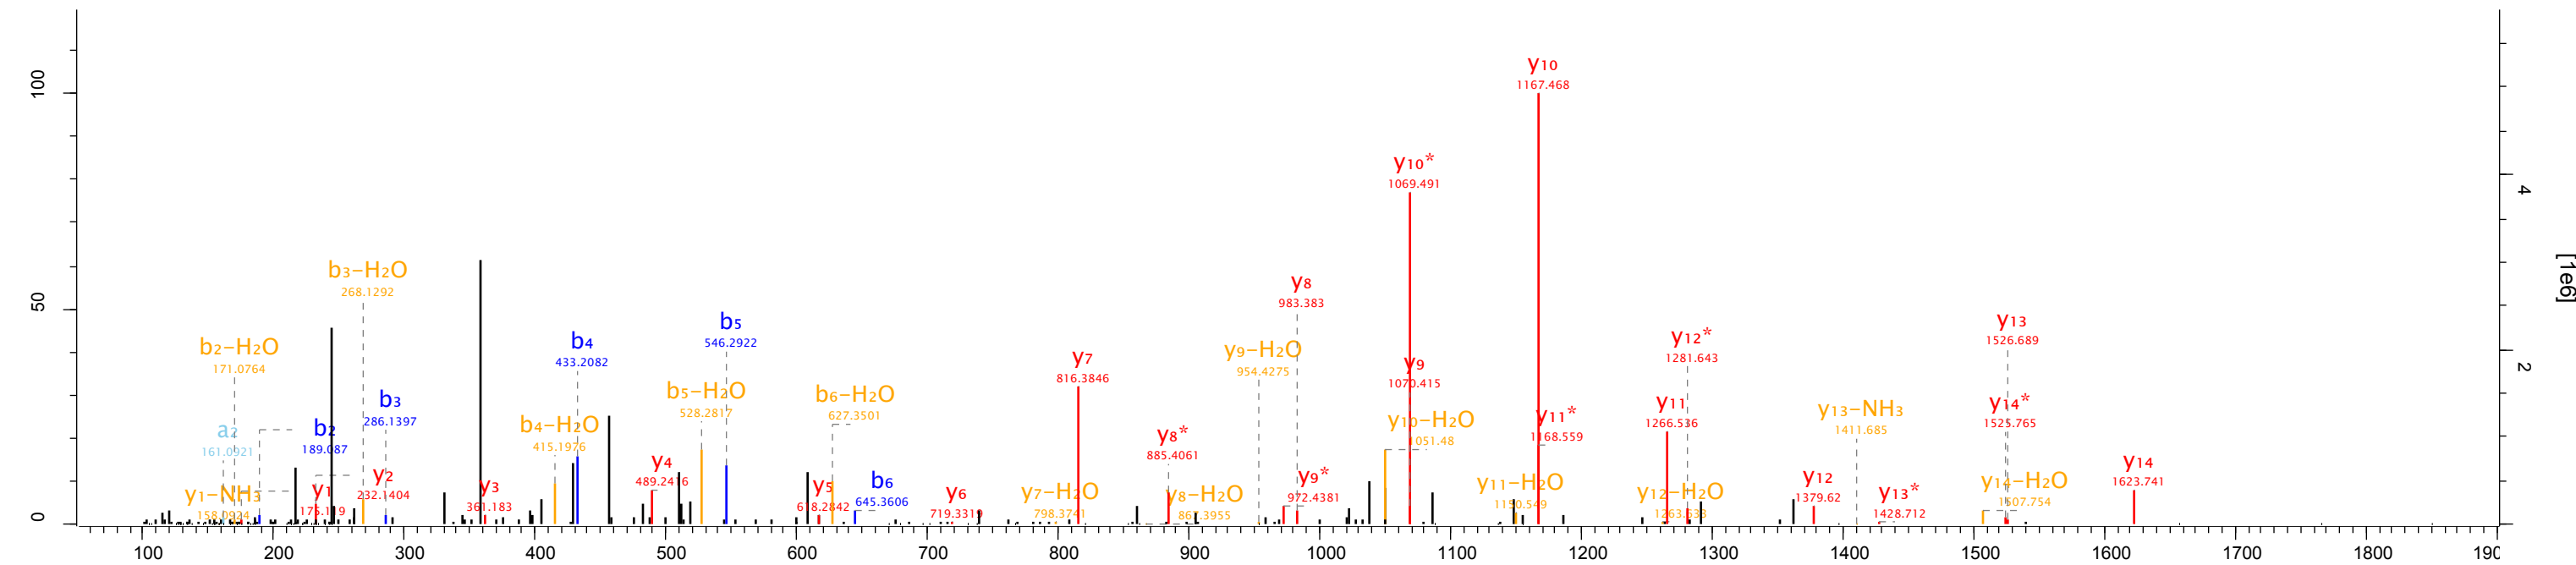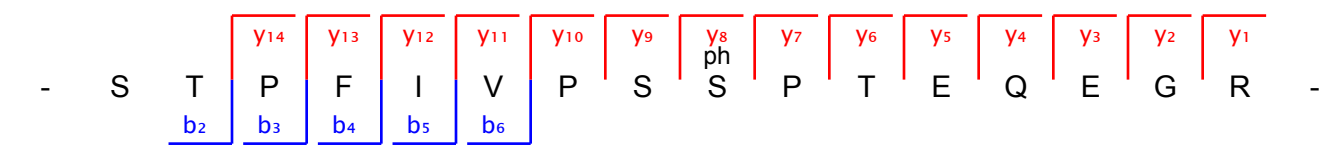

Raw file 20150812\_A375SR\_Phospho\_BR1\_05 Scan 18598 Method FTMS; HCD Score 150.39 m/z 774.86 Gene names RPS2

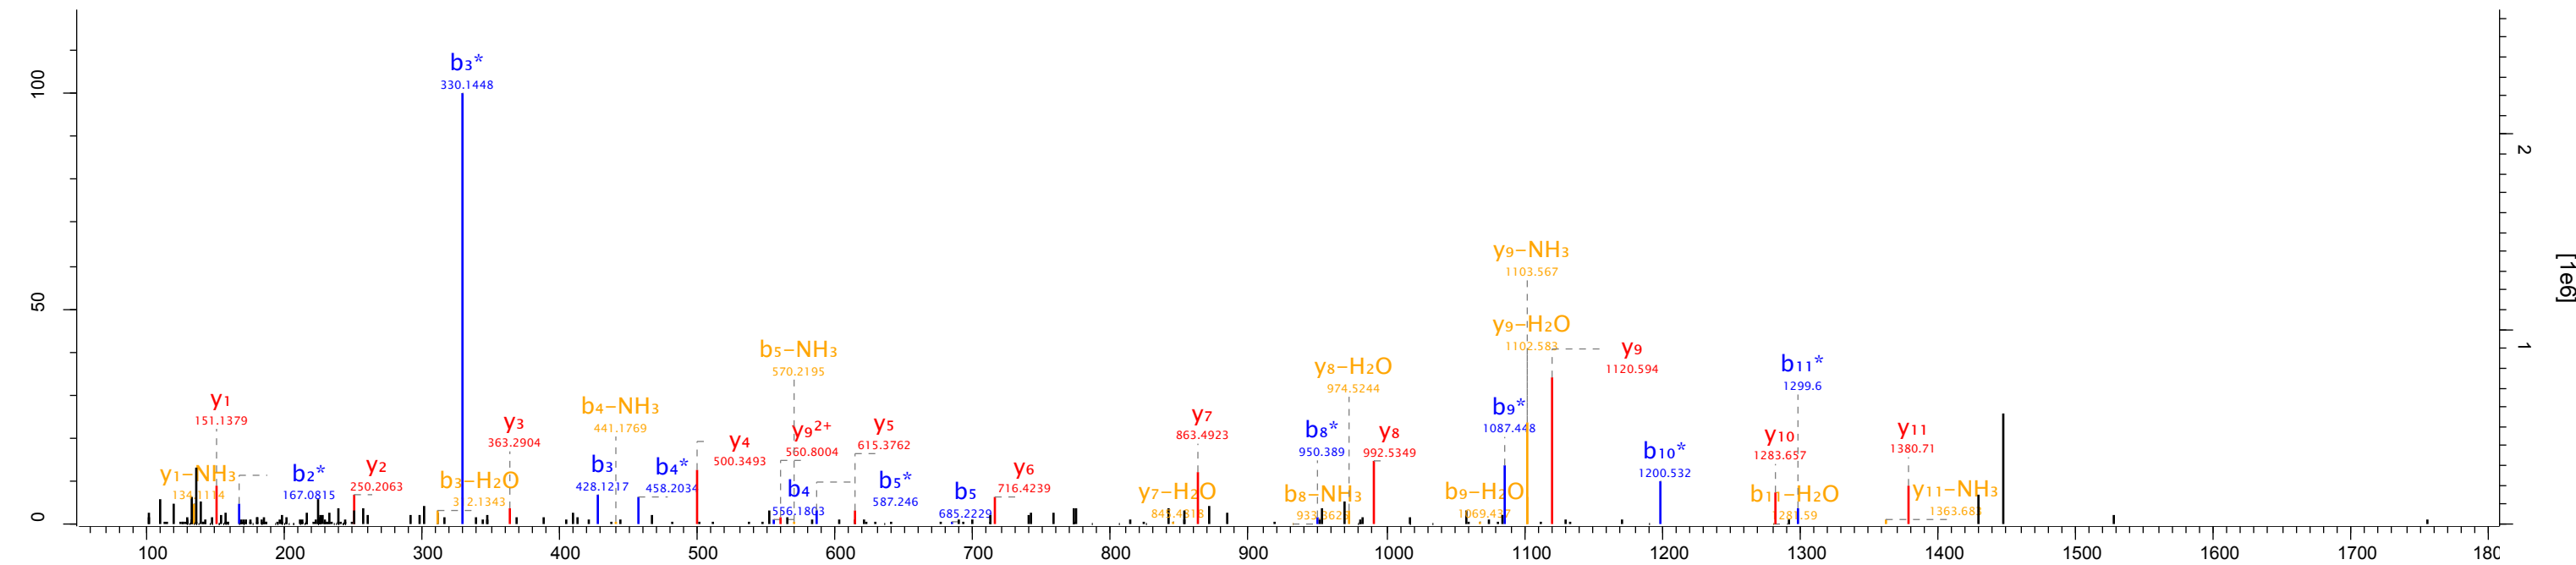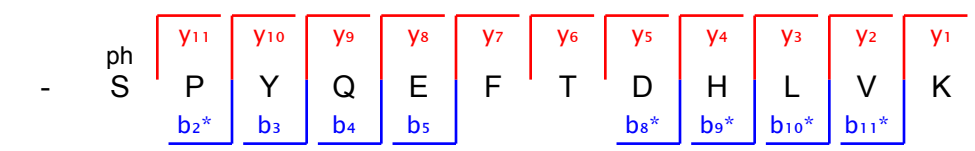



Raw file 20150812\_A375SR\_Phospho\_BR1\_05 Scan 1878 Method FTMS; HCD Score 65.23 m/z 528.24 Gene names PNISR

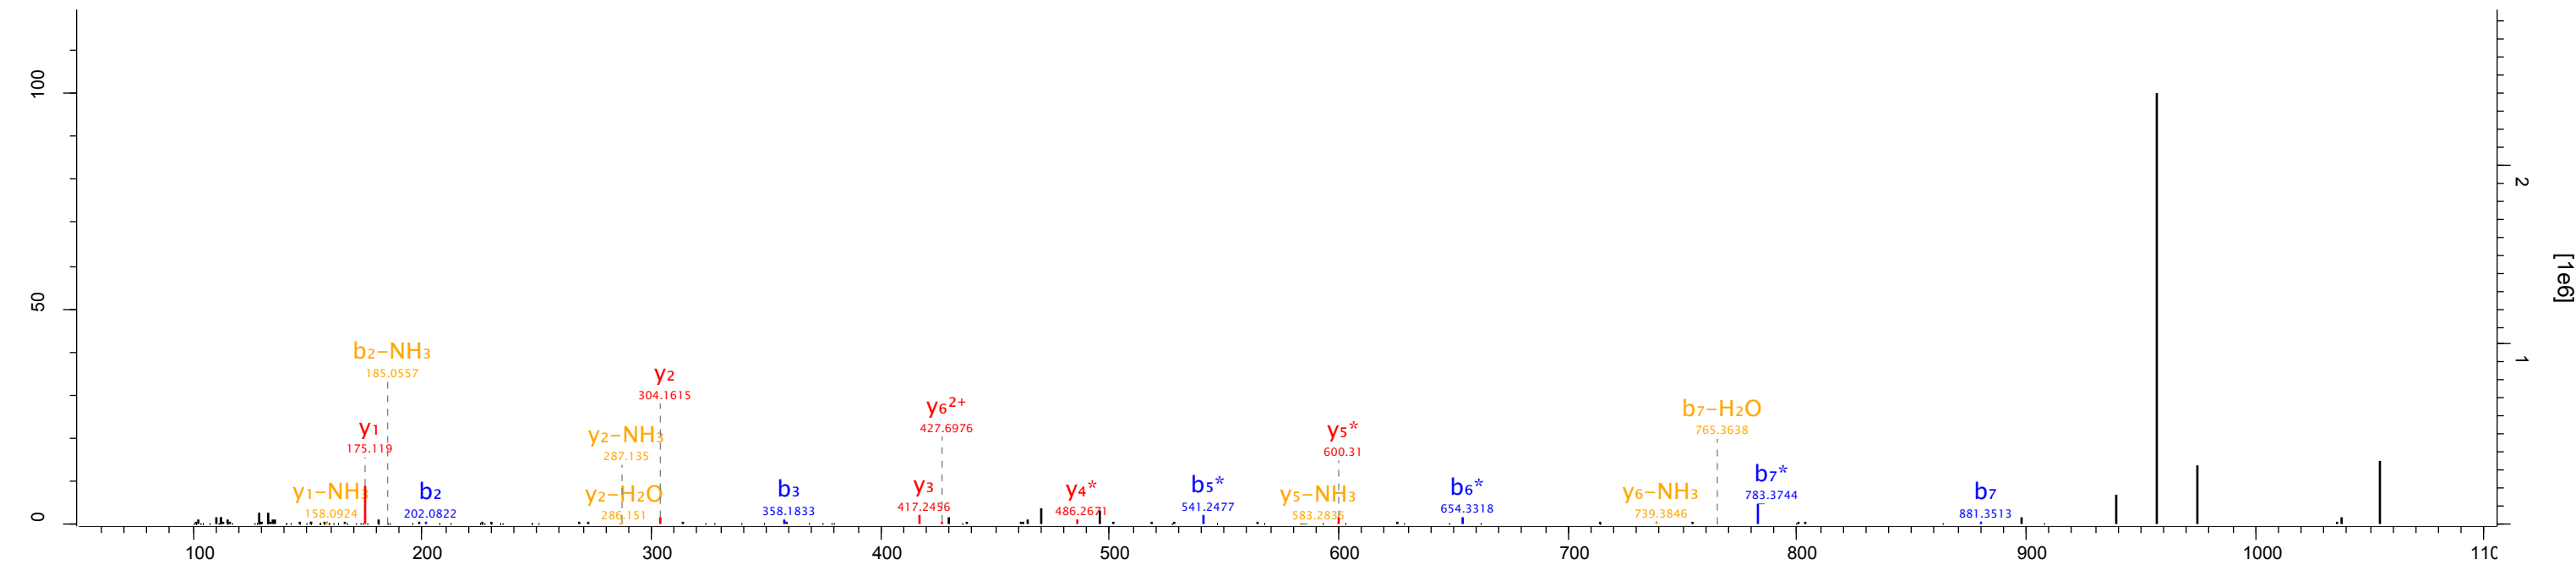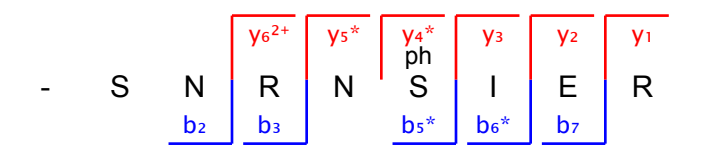

Raw file: 20150812\_A375SR\_Phospho\_BR1\_05  
 Scan: 1928 Method: FTMS; HCD Score: 49.45 m/z: 515.92 Gene names: ANLN

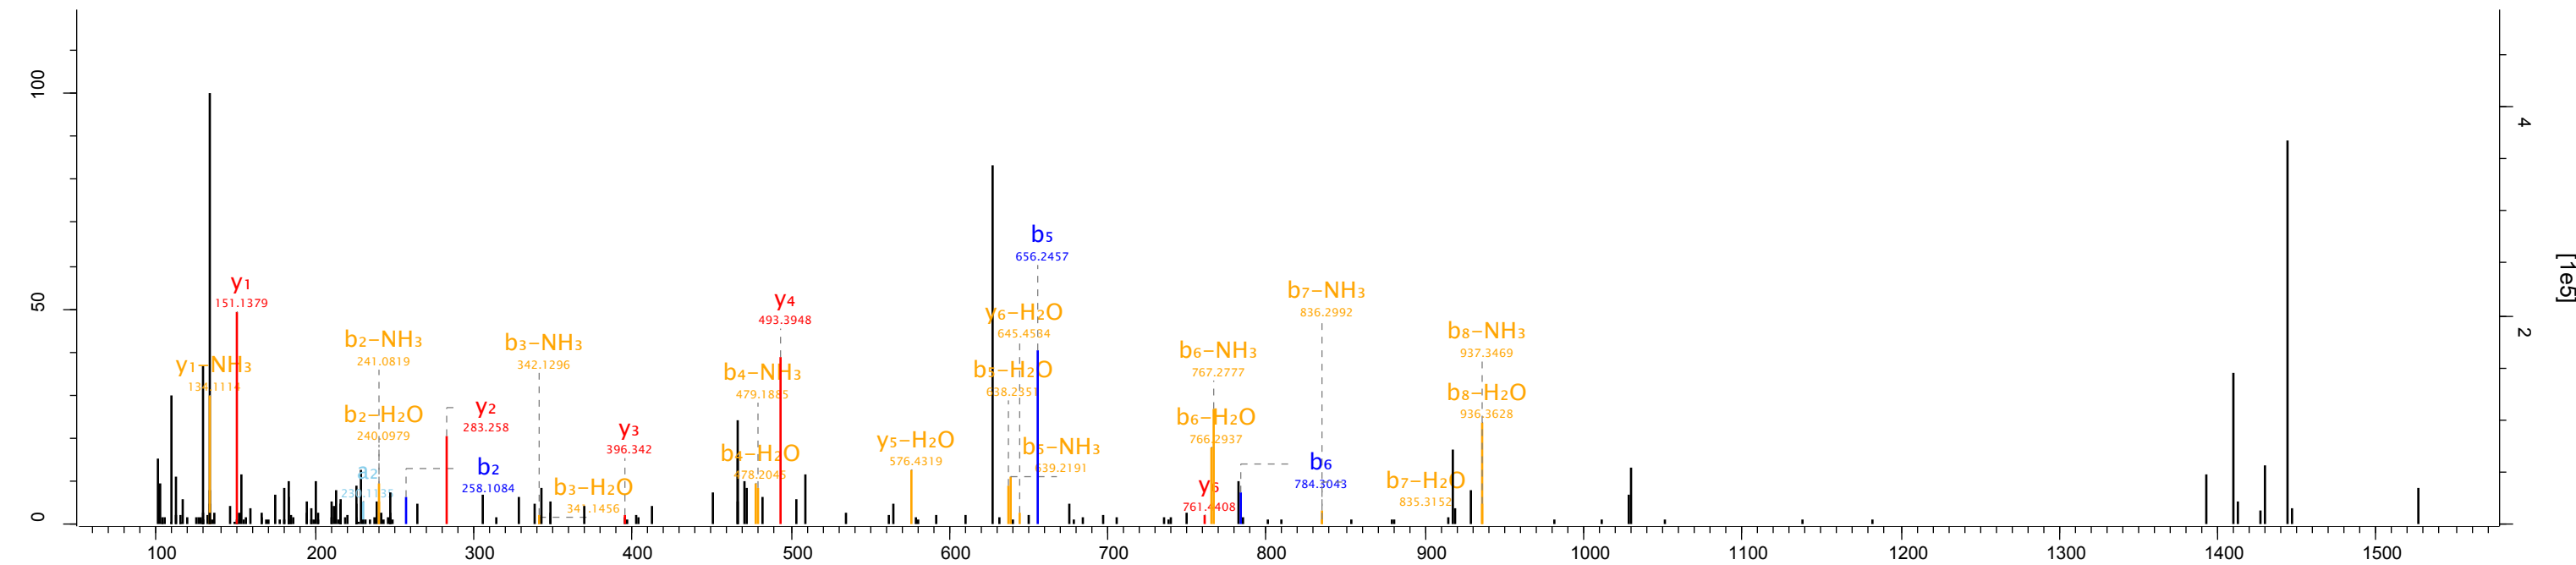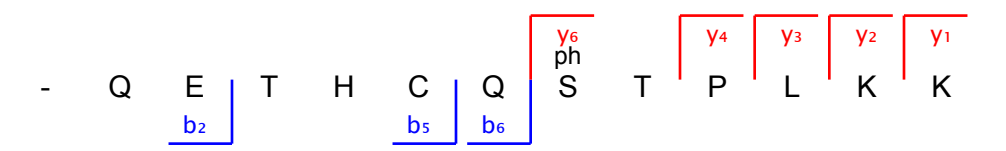

Raw file 20150812\_A375SR\_Phospho\_BR1\_05 Scan 19328 Method FTMS; HCD Score 169.84 m/z 1050.83 Gene names FOXH1;XRCC1

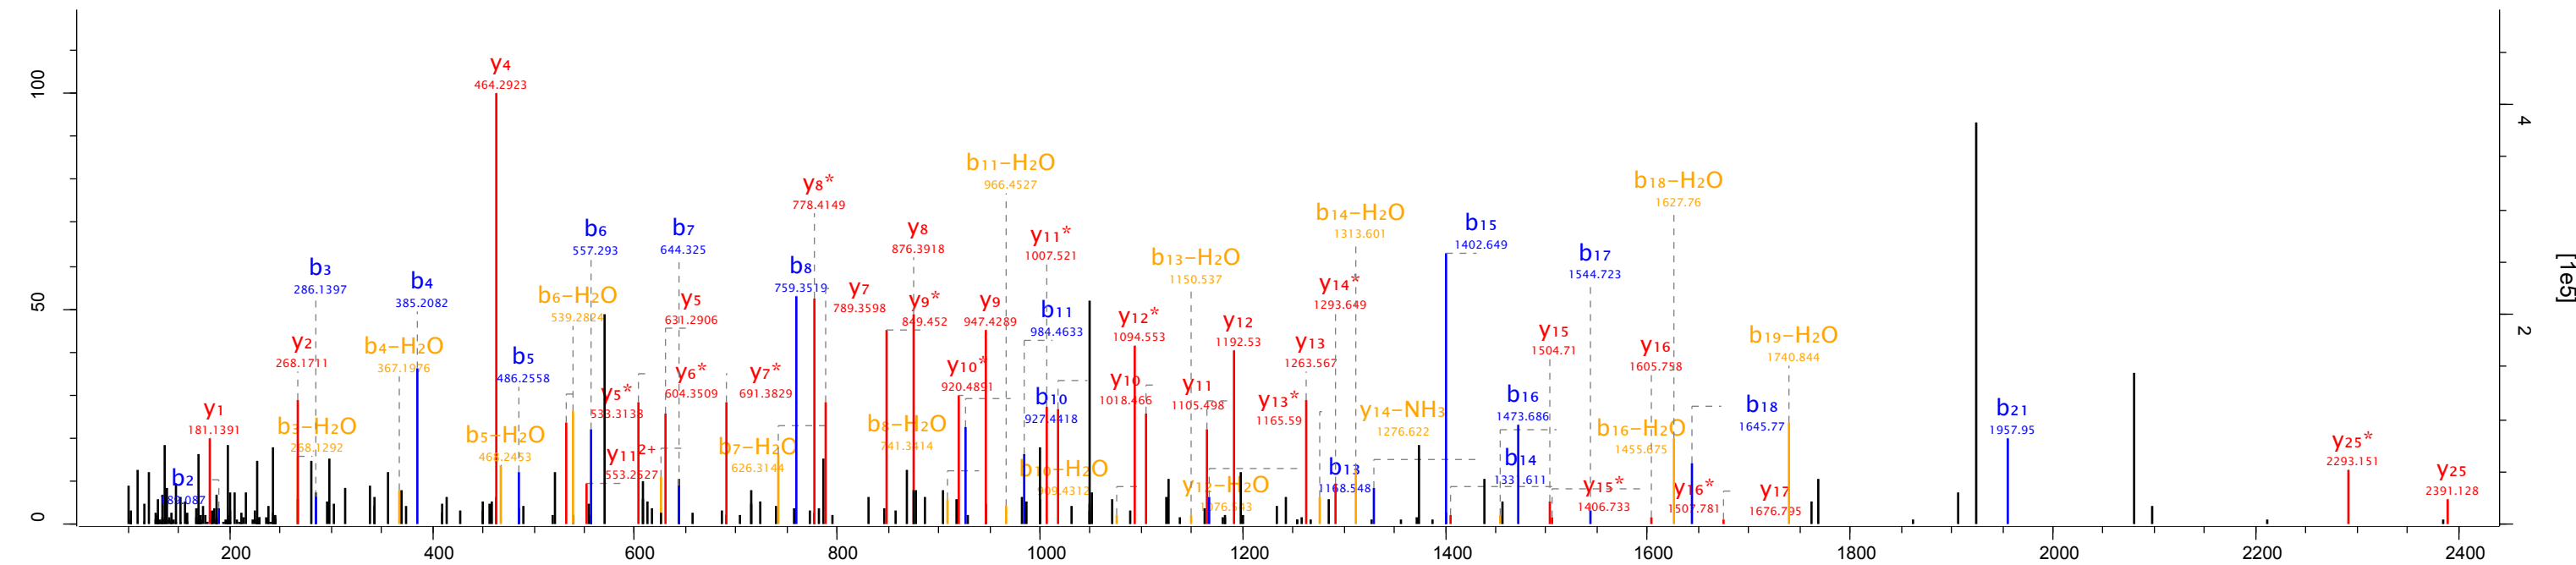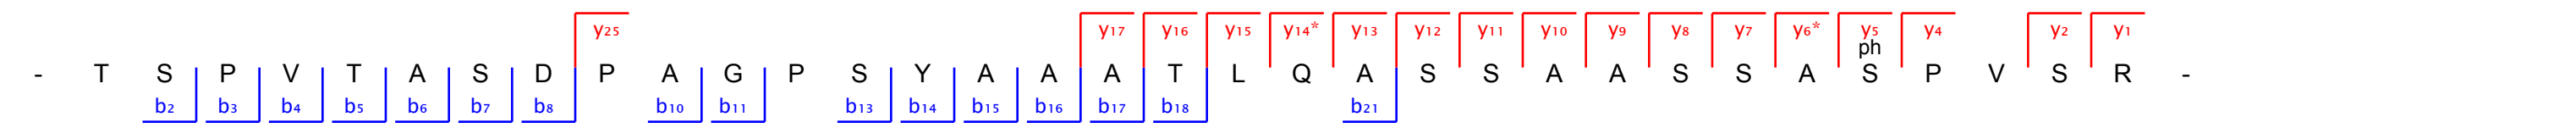

Raw file 20150812\_A375SR\_Phospho\_BR1\_05 Scan 19378 Method FTMS; HCD Score 89.91 m/z 583.61 Gene names VIM

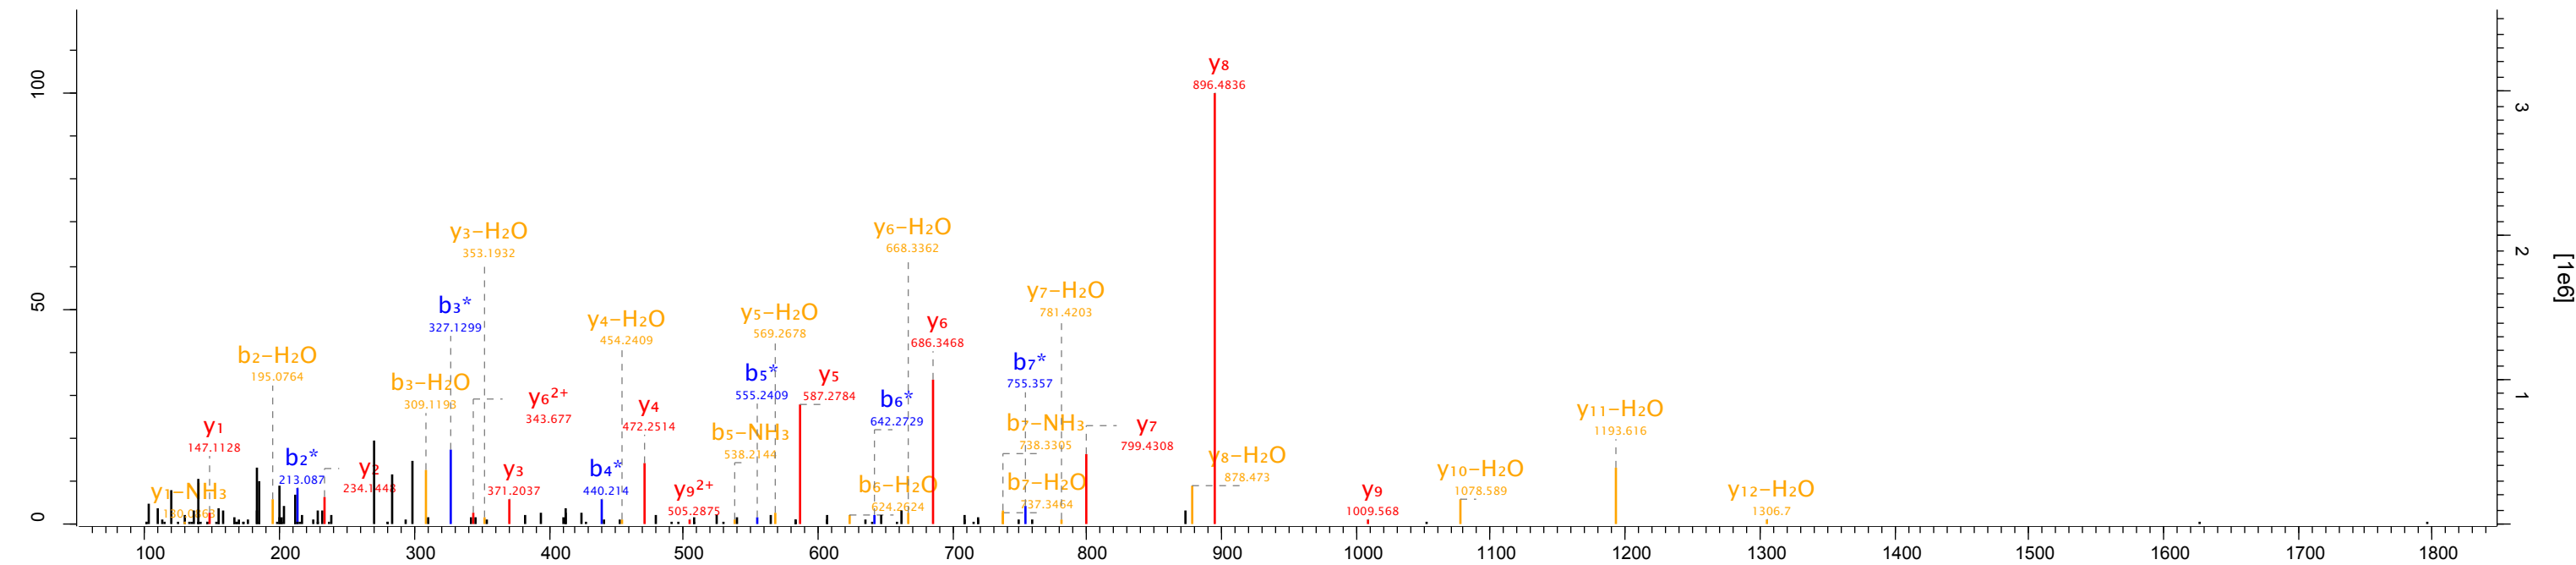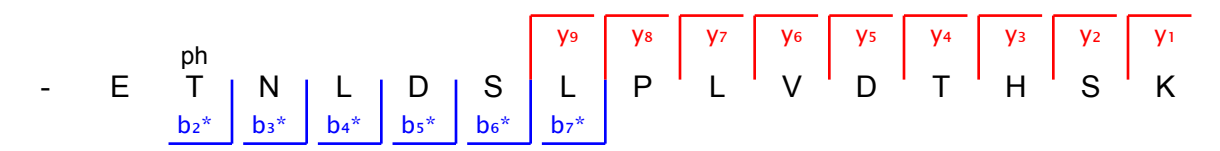

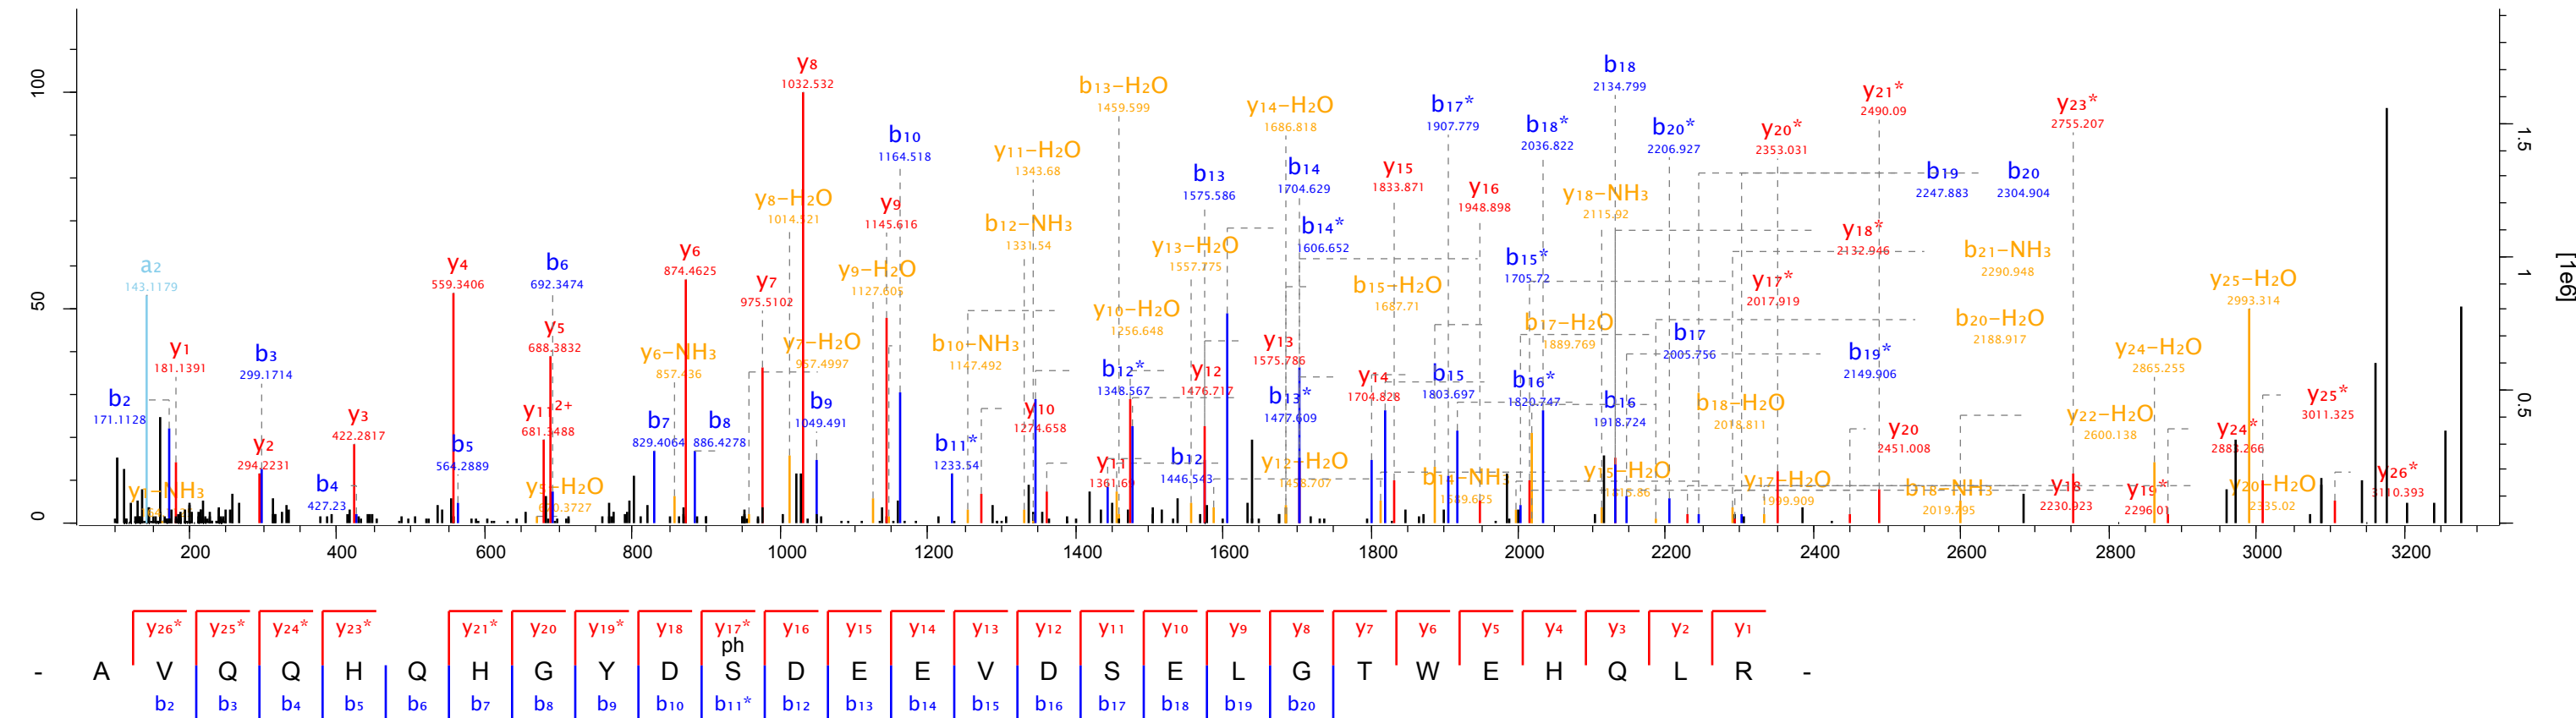

Raw file: 20150812\_A375SR\_Phospho\_BR1\_05  
 Scan: 19958 Method: FTMS; HCD Score: 135.2 m/z: 946.82 Gene names: CIZ1

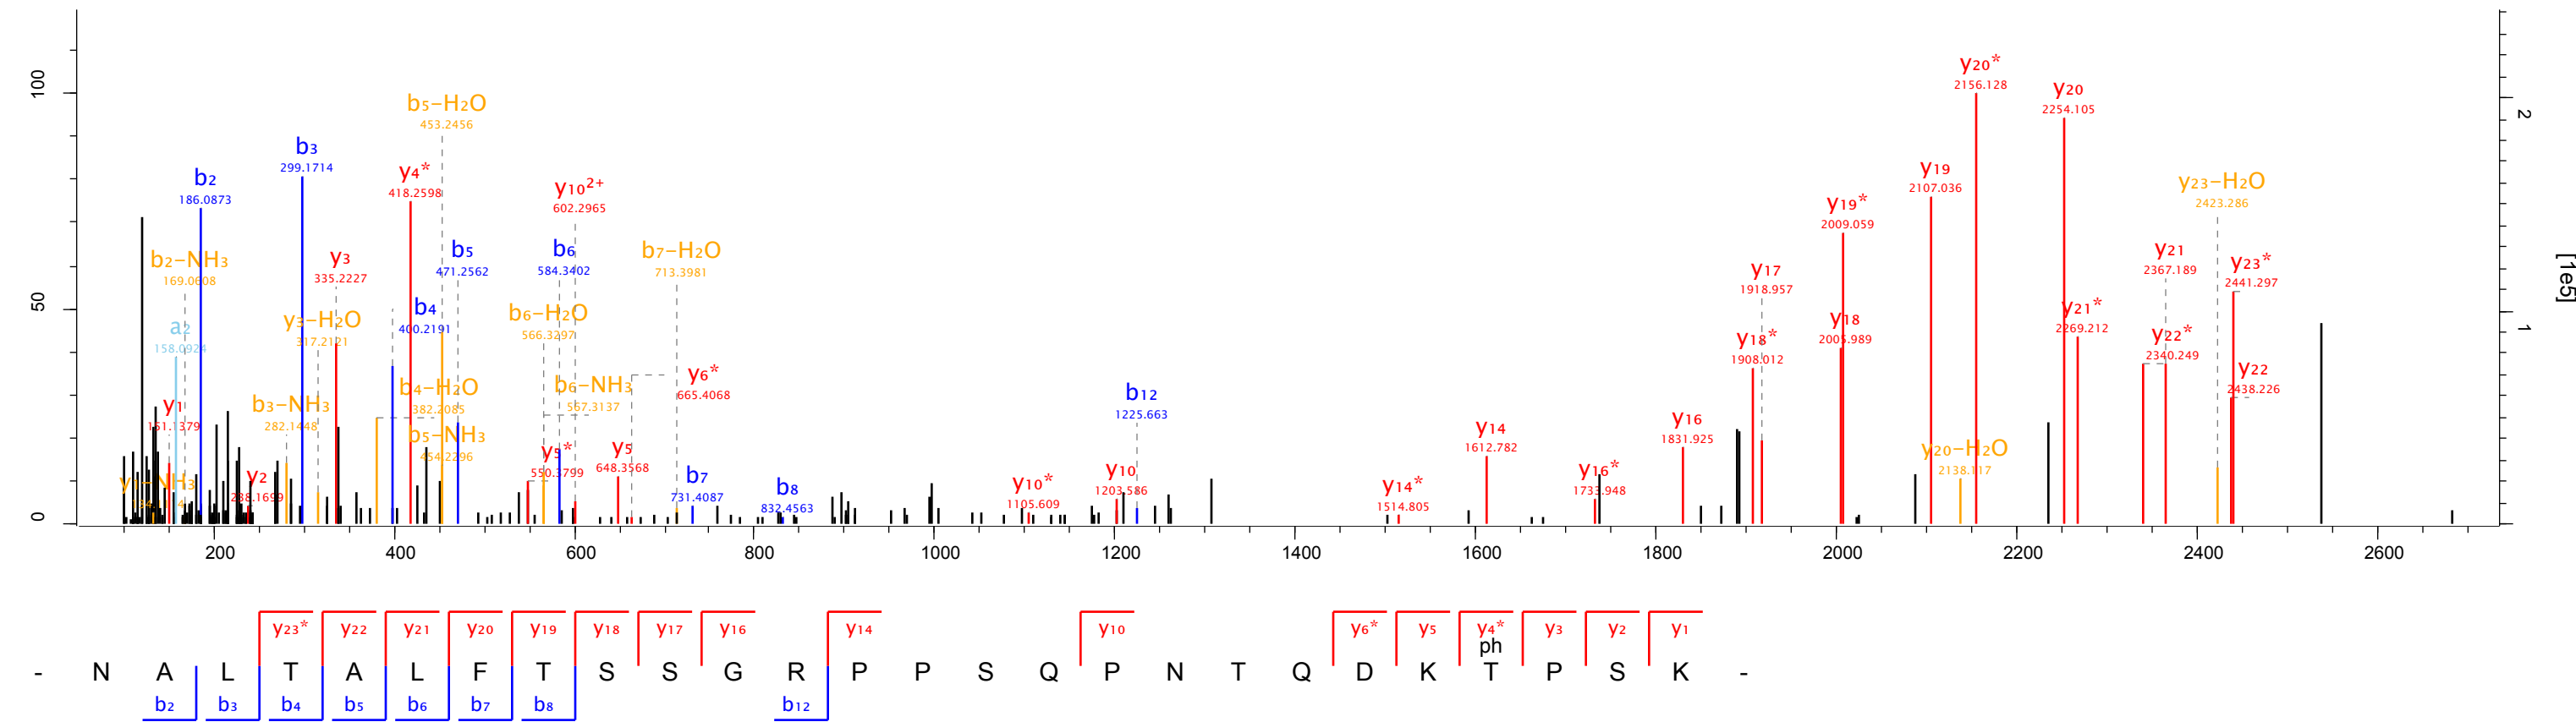

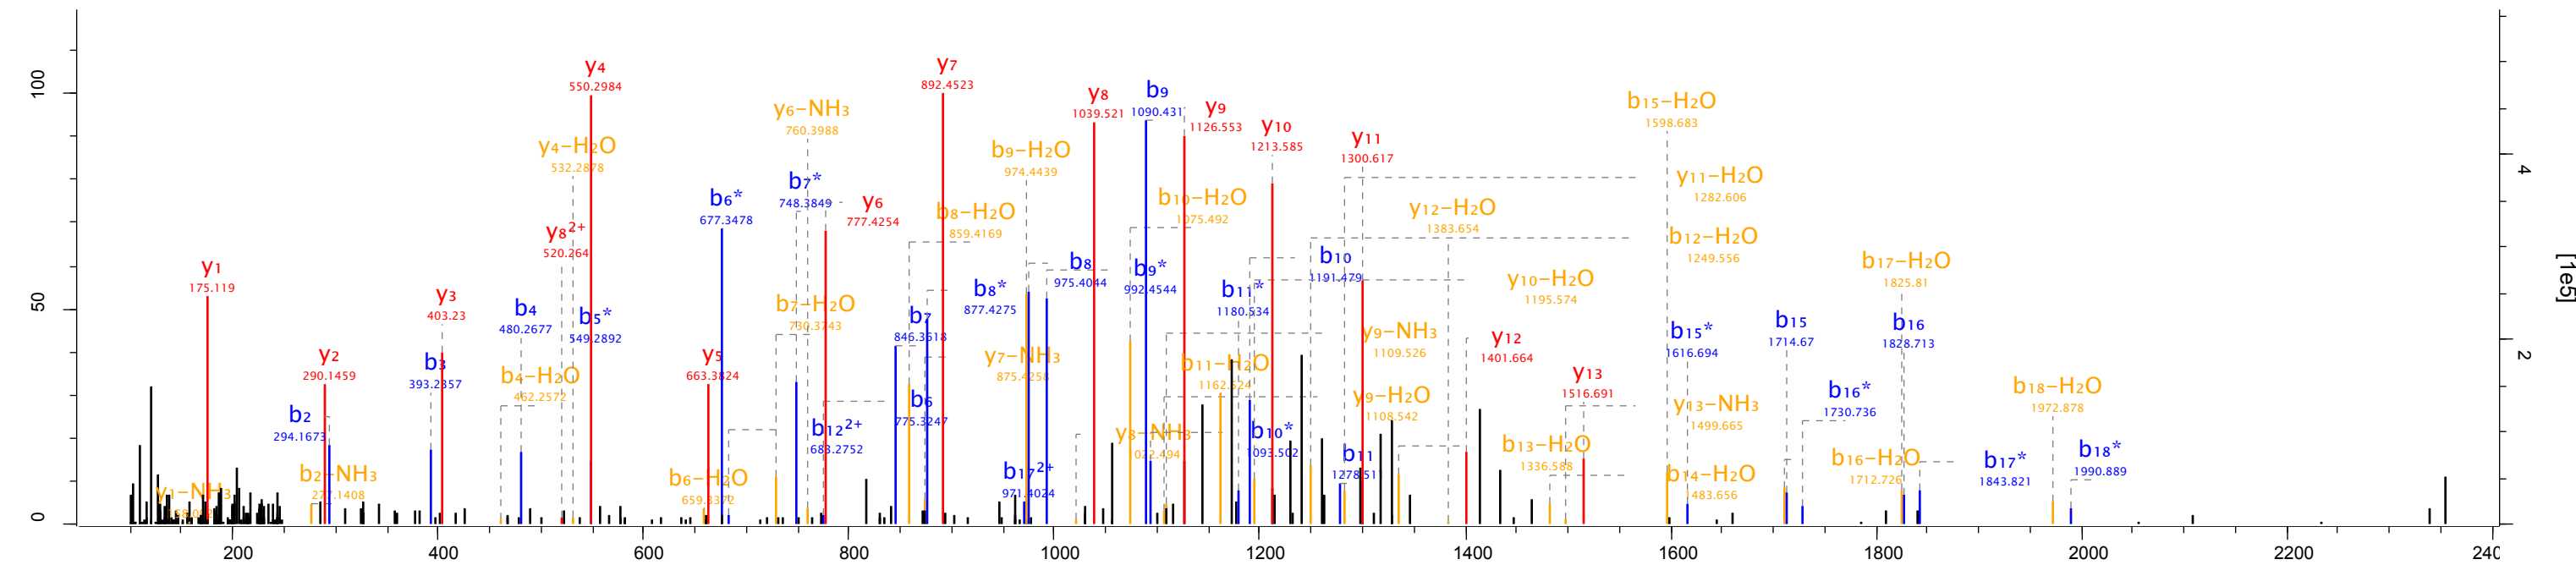

- H R V S S<sup>ph</sup> Q A E D T S S S F D N L F I D R -

b<sub>2</sub>
b<sub>3</sub>
b<sub>4</sub>
b<sub>5</sub>\*
b<sub>6</sub>
b<sub>7</sub>
b<sub>8</sub>
b<sub>9</sub>
b<sub>10</sub>
b<sub>11</sub>
b<sub>12</sub><sup>2+</sup>
b<sub>15</sub>
b<sub>16</sub>
b<sub>17</sub>\*
b<sub>18</sub>\*

y<sub>13</sub>
y<sub>12</sub>
y<sub>11</sub>
y<sub>10</sub>
y<sub>9</sub>
y<sub>8</sub>
y<sub>7</sub>
y<sub>6</sub>
y<sub>5</sub>
y<sub>4</sub>
y<sub>3</sub>
y<sub>2</sub>
y<sub>1</sub>

Raw file: 20150812\_A375SR\_Phospho\_BR1\_05  
 Scan: 20788 Method: FTMS; HCD Score: 103.41 m/z: 629.34 Gene names: HAUS6

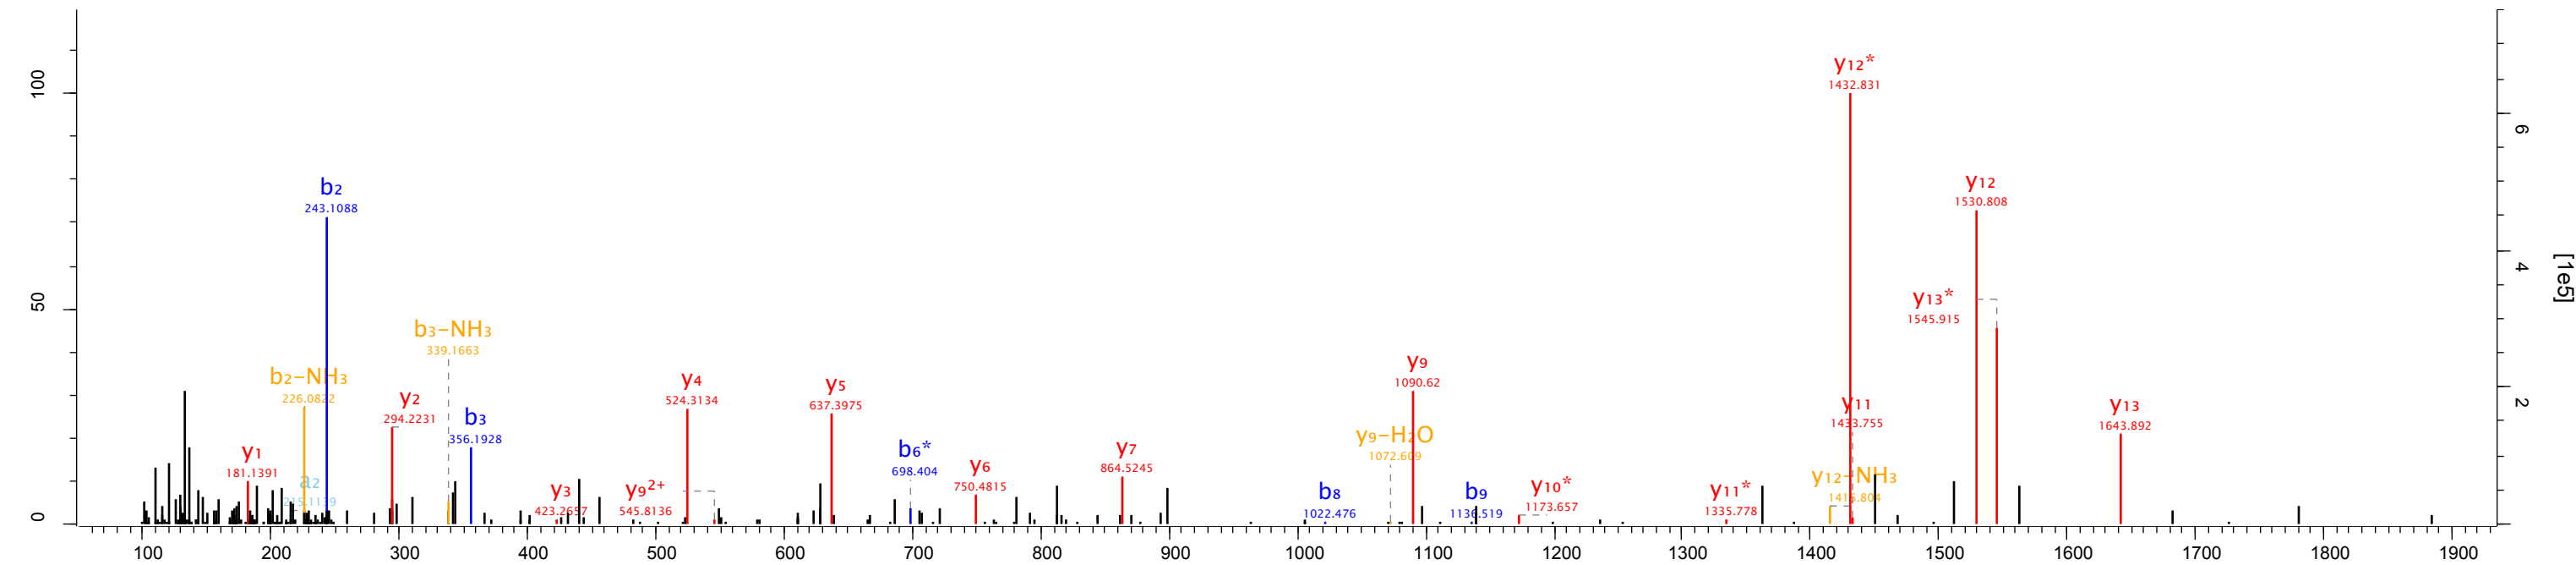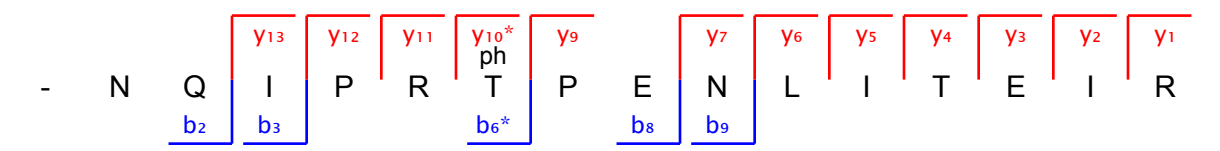



Raw file: 20150812\_A375SR\_Phospho\_BR1\_05  
 Scan: 2118 Method: FTMS; HCD Score: 228.15 m/z: 914.39 Gene names: SRSF4

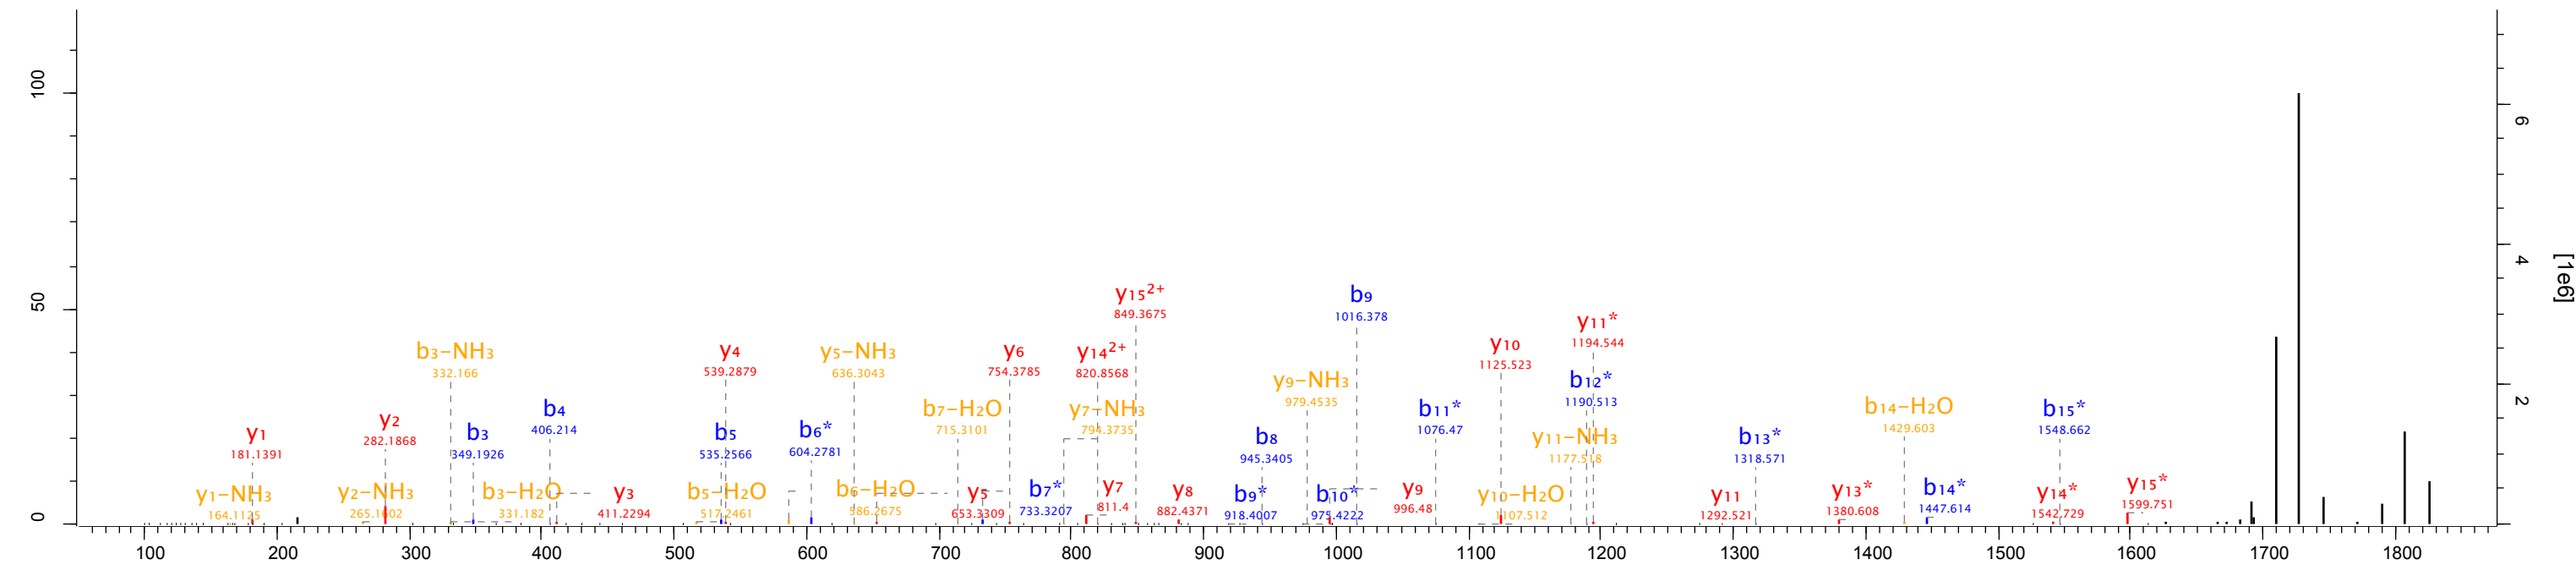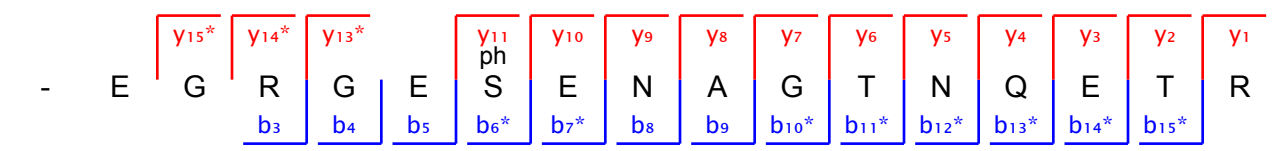

Raw file: 20150812\_A375SR\_Phospho\_BR1\_05  
 Scan: 2328 Method: FTMS; HCD Score: 61.48 m/z: 731.83 Gene names: TTC39B

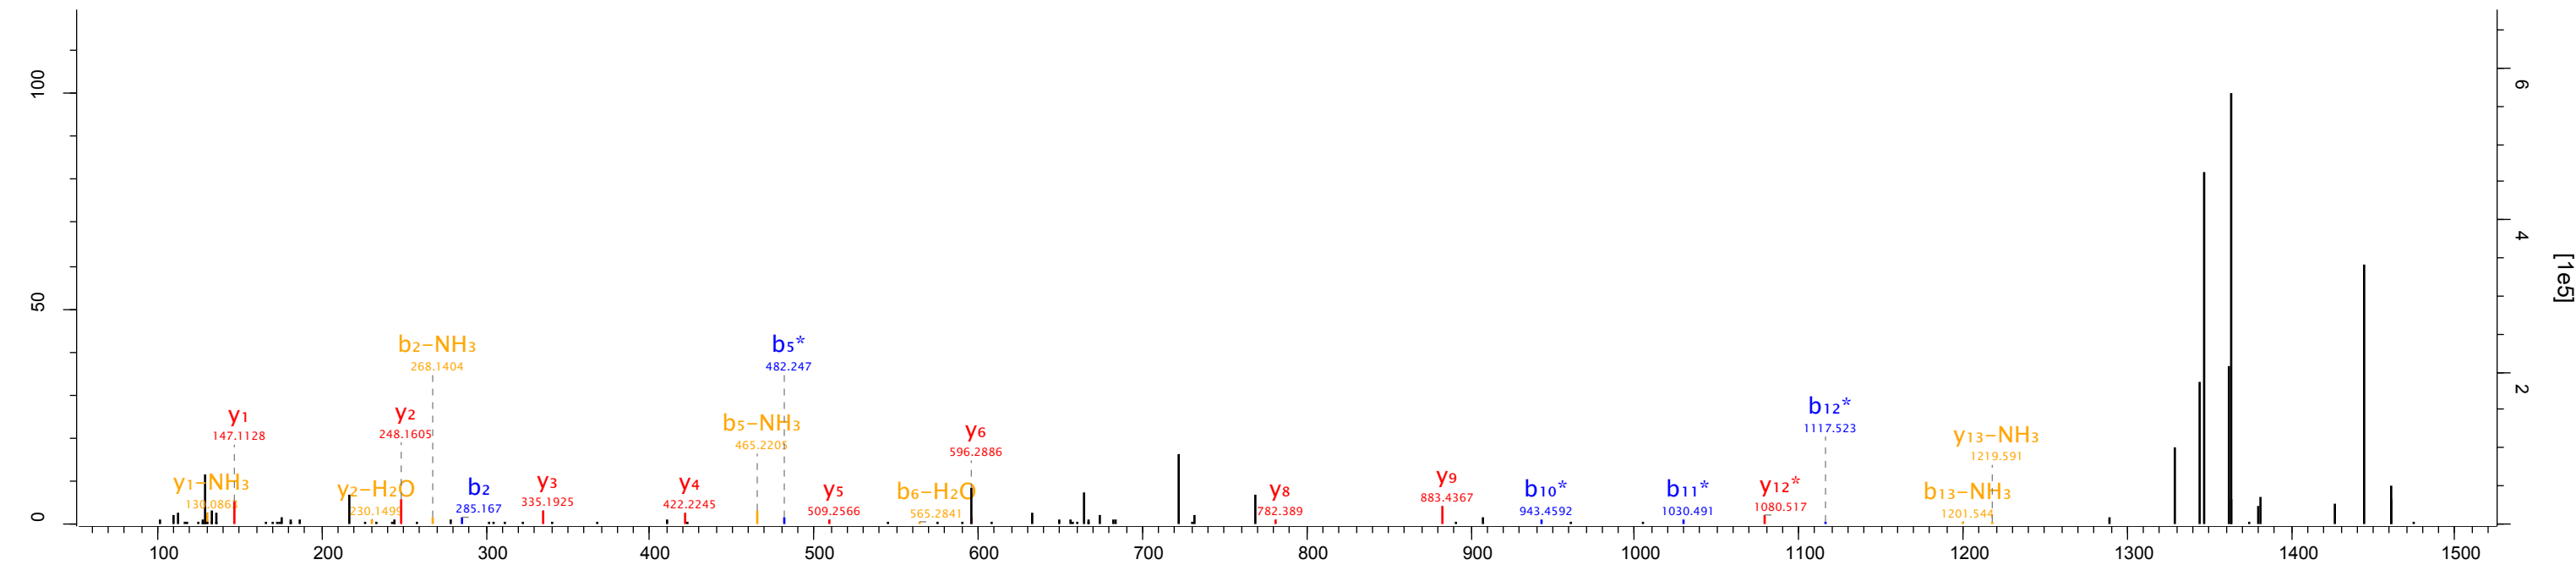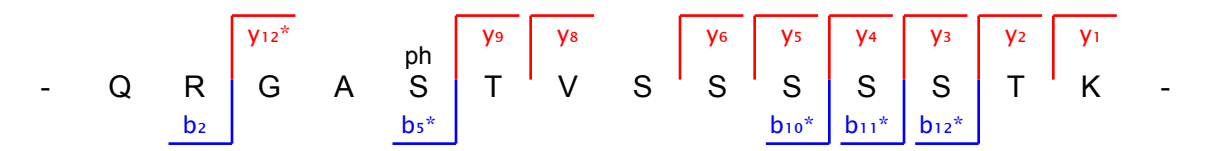

Raw file: 20150812\_A375SR\_Phospho\_BR1\_05  
 Scan: 2438 Method: FTMS; HCD Score: 158.93 m/z: 430.91 Gene names: STMN1

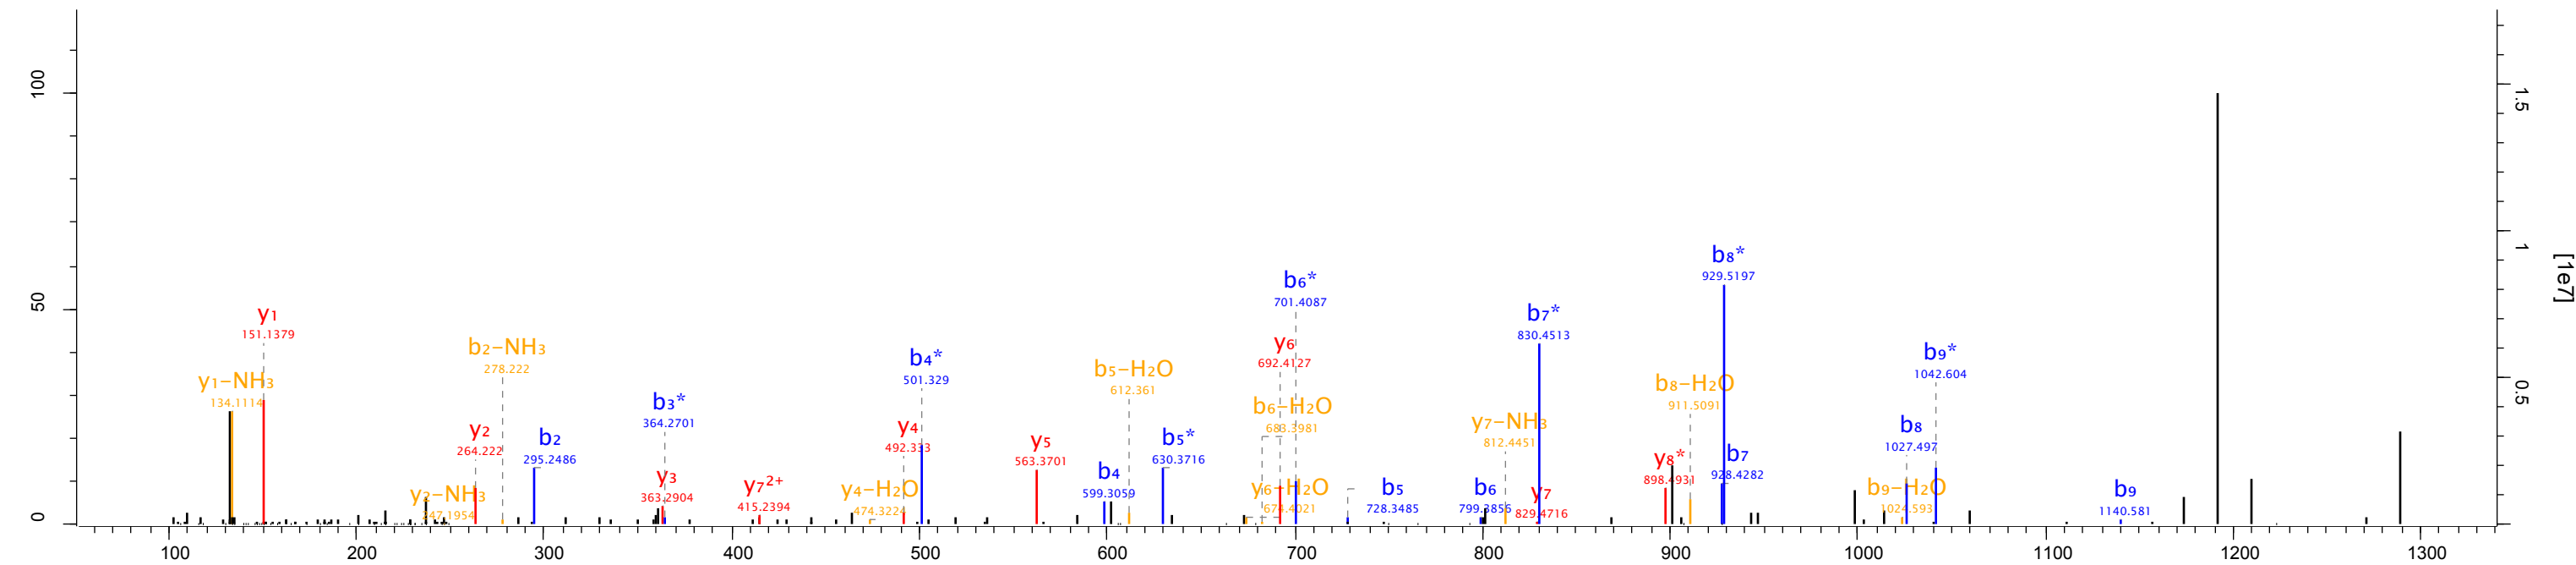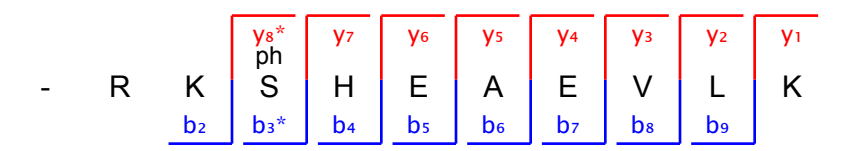

Raw file 20150812\_A375SR\_Phospho\_BR1\_05 Scan 25218 Method FTMS; HCD Score 43.87 m/z 1214.91 Gene names PACS1

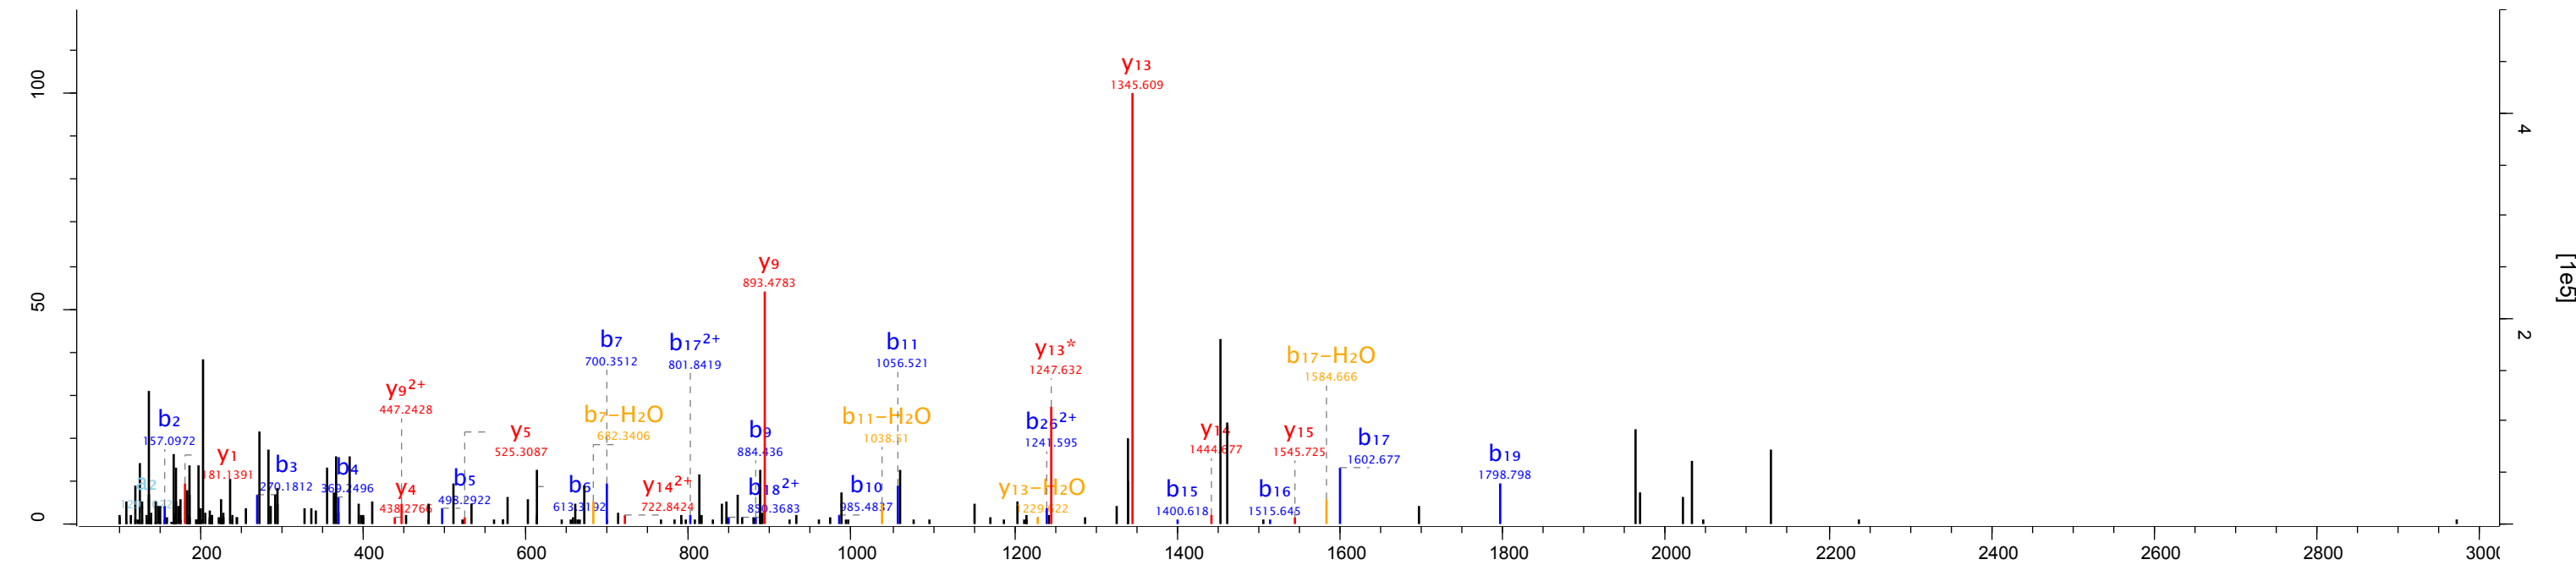

- V G L V E D S P S T A G D G D D S P V V S L T V P S T S P P S S S G L S R -

b<sub>2</sub> b<sub>3</sub> b<sub>4</sub> b<sub>5</sub> b<sub>6</sub> b<sub>7</sub>
b<sub>9</sub> b<sub>10</sub> b<sub>11</sub>
b<sub>15</sub> b<sub>16</sub> b<sub>17</sub> b<sub>18</sub><sup>2+</sup> b<sub>19</sub>
b<sub>26</sub><sup>2+</sup>
y<sub>15</sub> y<sub>14</sub> y<sub>13</sub>
y<sub>9</sub>
y<sub>5</sub> y<sub>4</sub>
y<sub>1</sub>

Raw file 20150812\_A375SR\_Phospho\_BR1\_05 Scan 26268 Method FTMS; HCD Score 77.23 m/z 891.77 Gene names ASF1A

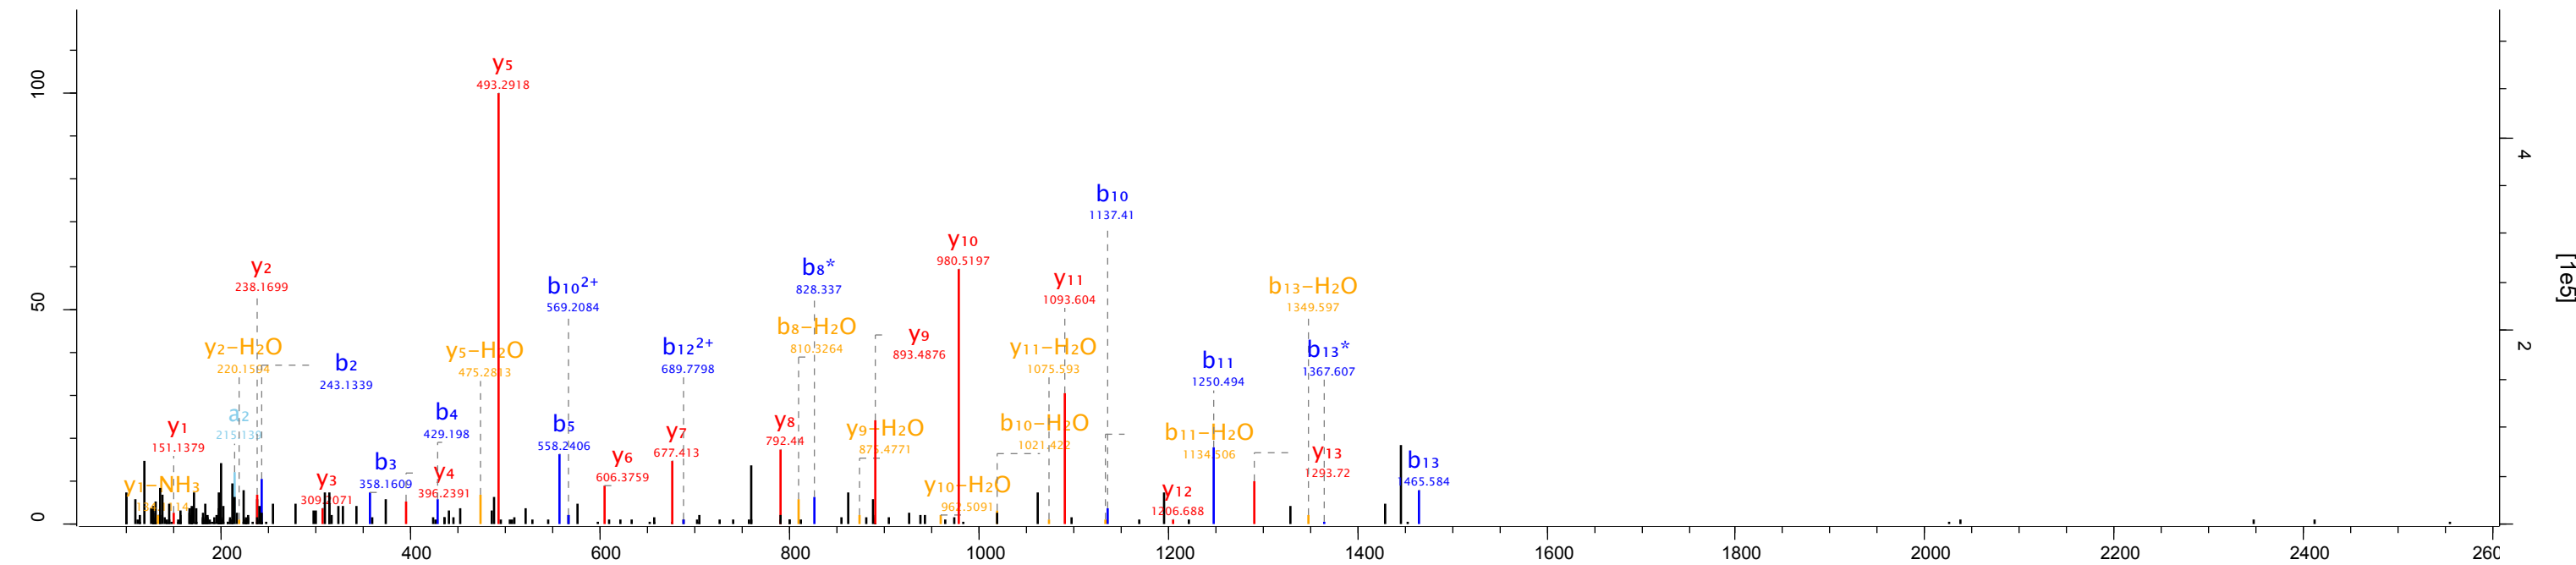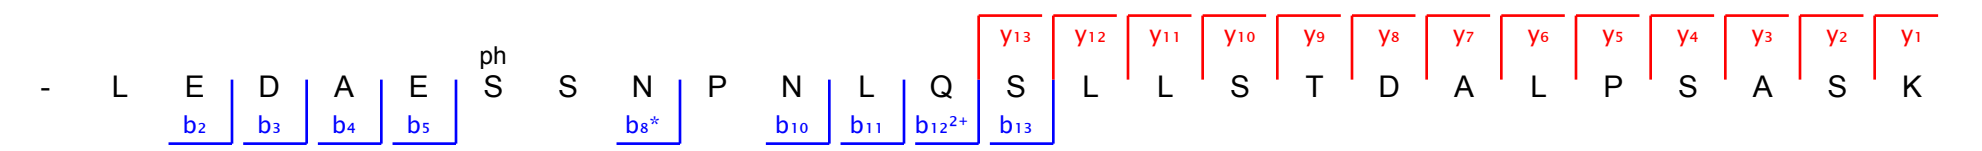

Raw file Scan Method Score m/z Gene names  
 20150812\_A375SR\_Phospho\_BR1\_05 26398 FTMS; HCD 140.45 1036.57 ARHGAP35;GRLF1

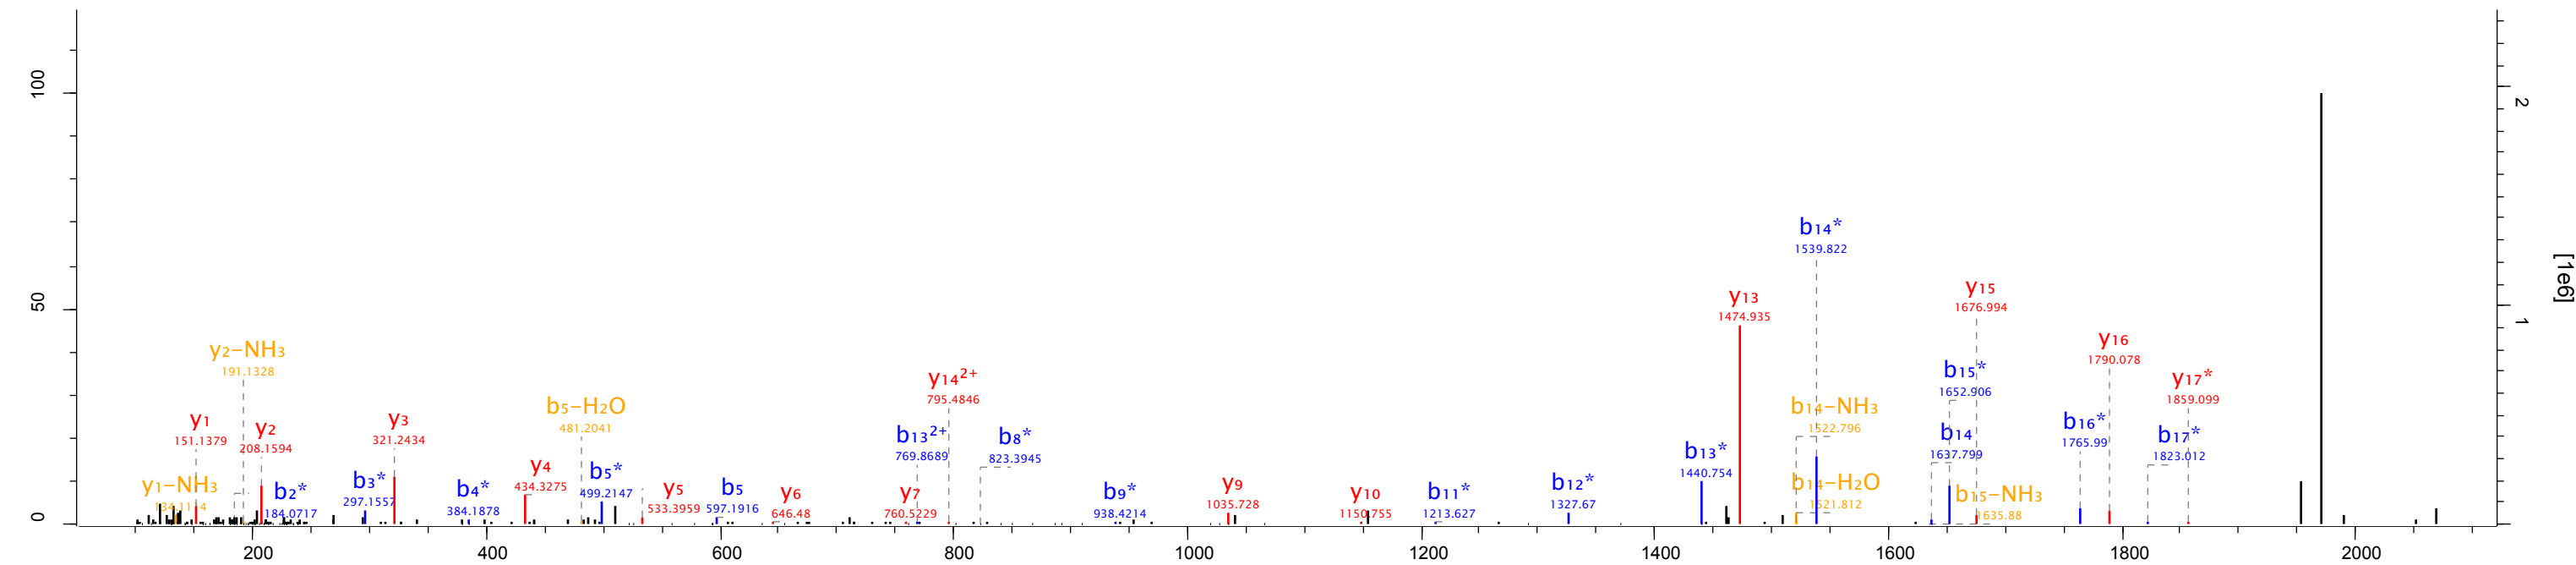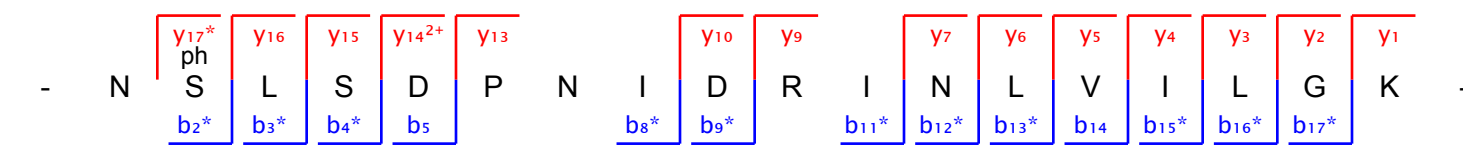

Raw file: 20150812\_A375SR\_Phospho\_BR1\_05  
 Scan: 2968 Method: FTMS; HCD Score: 105.65 m/z: 590.28 Gene names: MCM4

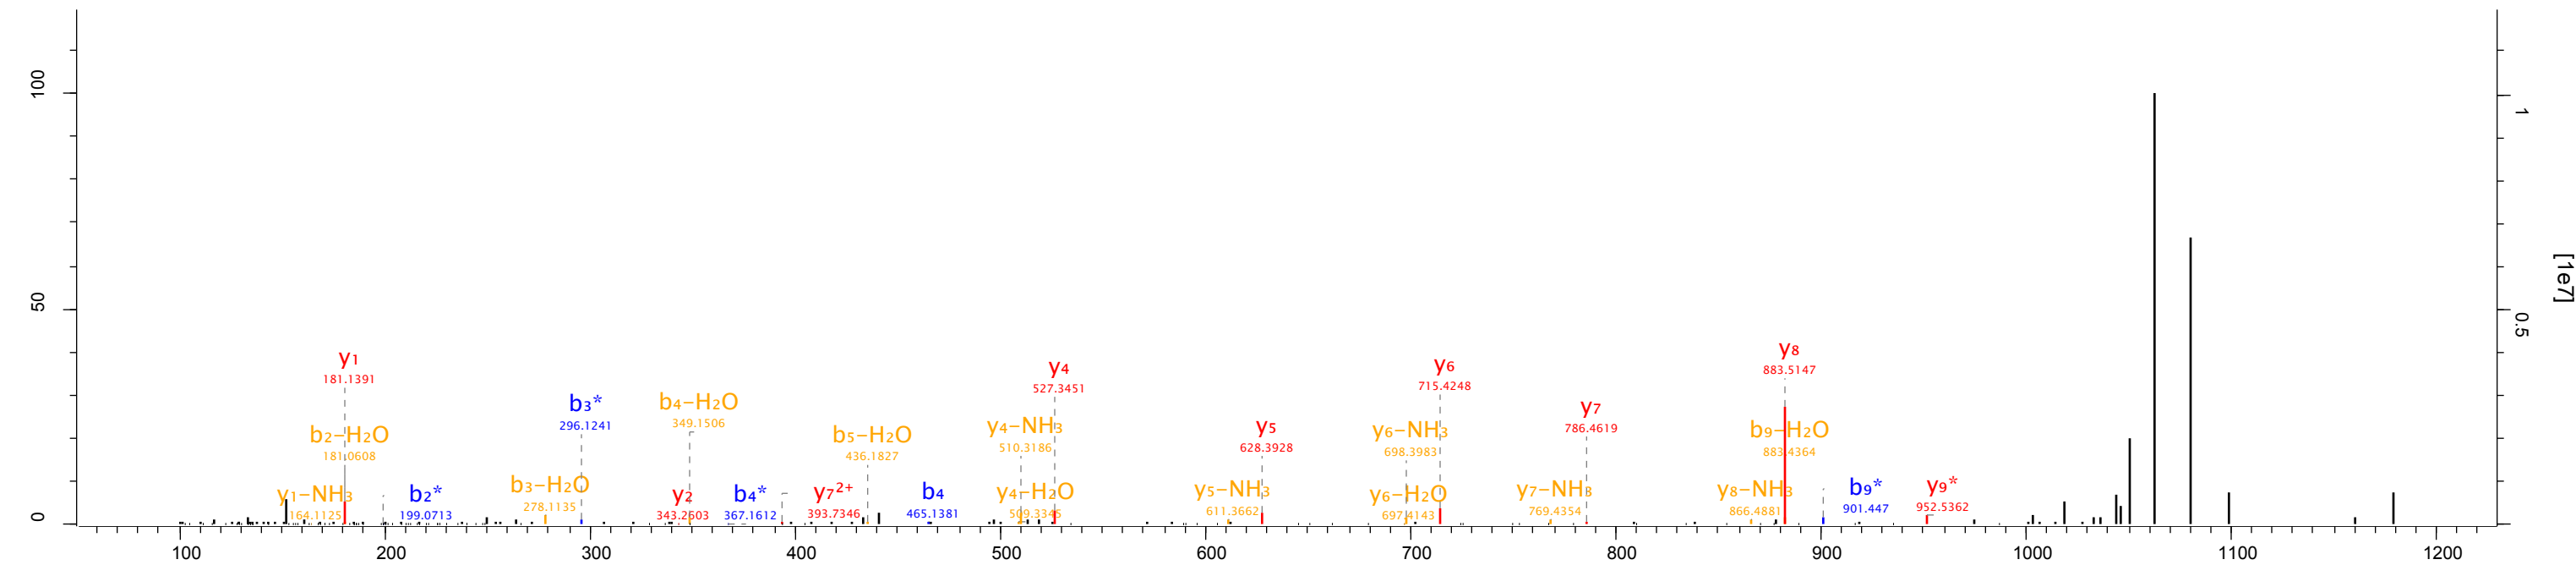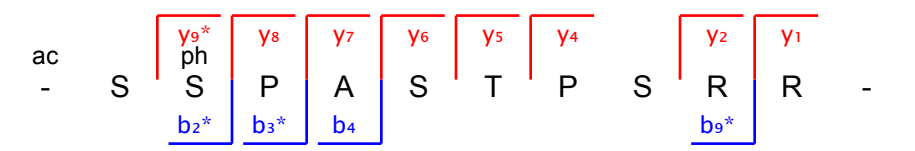

Raw file: 20150812\_A375SR\_Phospho\_BR1\_05  
 Scan: 3118 Method: FTMS; HCD Score: 60.76 m/z: 664.66 Gene names: GRM8

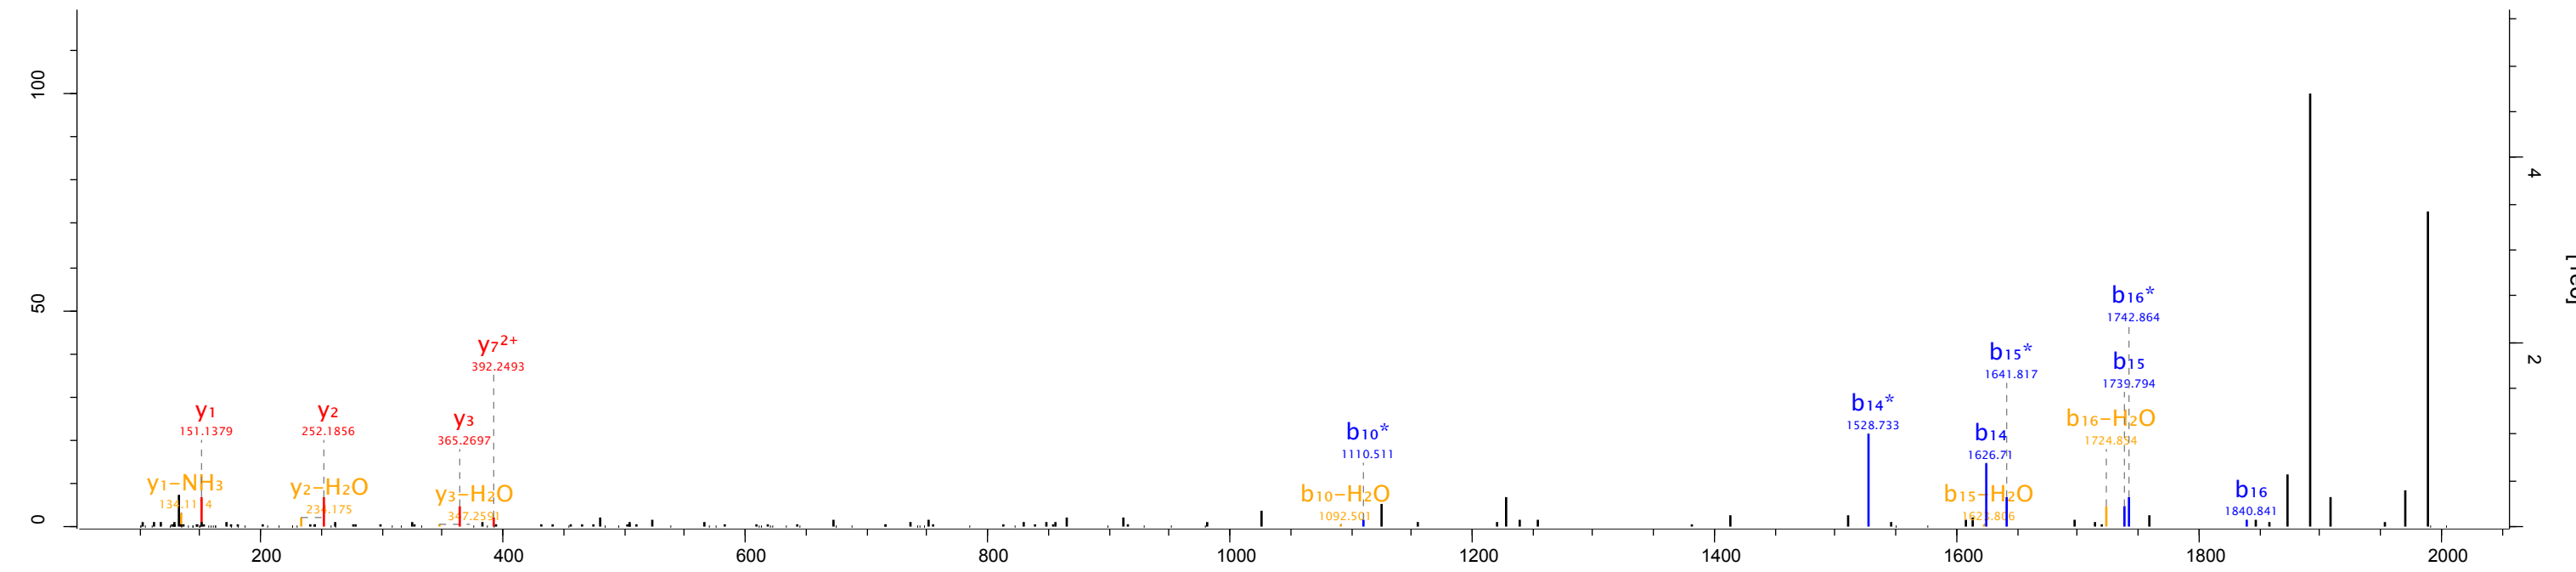

- V F L G L G M C F S Y A A L L T K -

y7<sup>2+</sup> (above Y)  
y3 (above L)  
y2 (above T)  
y1 (above K)  
b10\* (below S)  
b14 (below L)  
b15 (below L)  
b16 (below T)



Raw file 20150812\_A375SR\_Phospho\_BR1\_05 Scan 3298 Method FTMS; HCD Score 121.19 m/z 893.03 Gene names SMARCC1

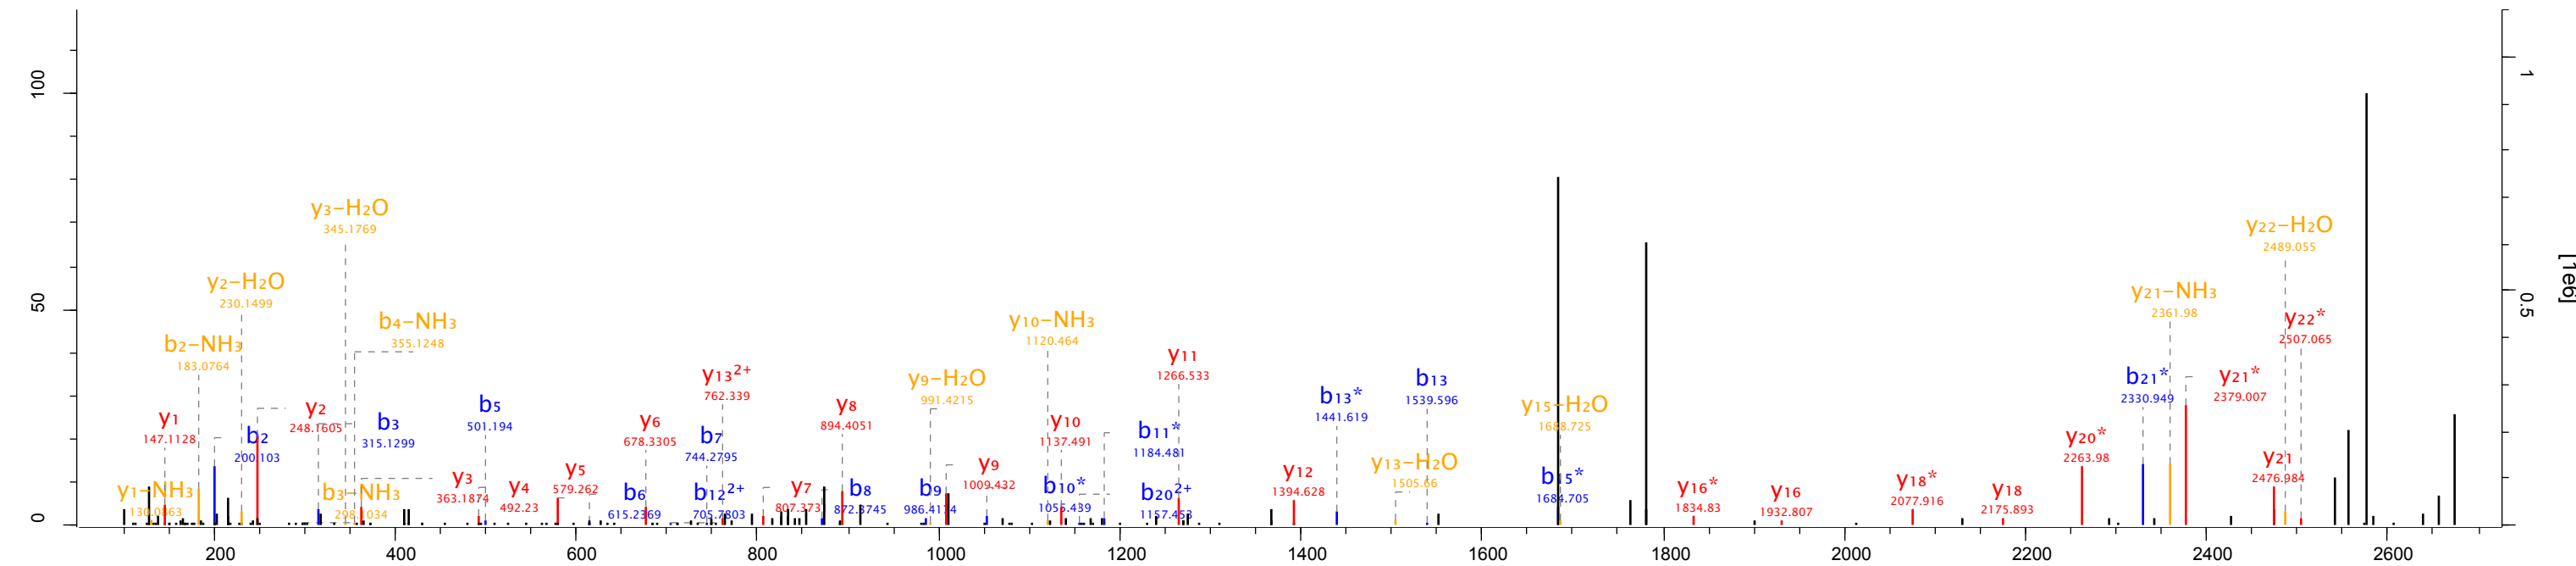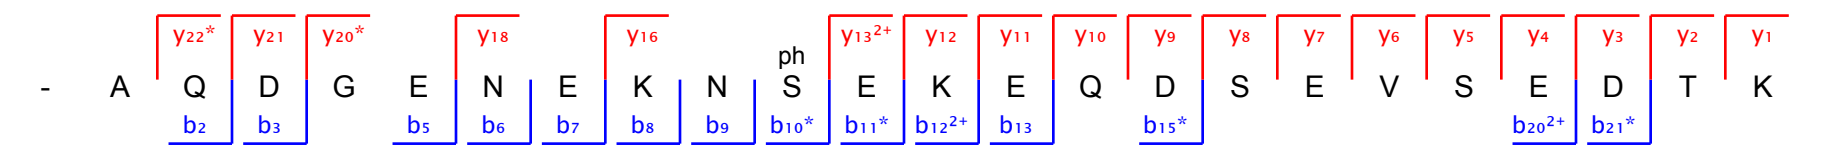

Raw file: 20150812\_A375SR\_Phospho\_BR1\_05  
 Scan: 3318 Method: FTMS; HCD Score: 99.5 m/z: 577.71 Gene names: FTH1

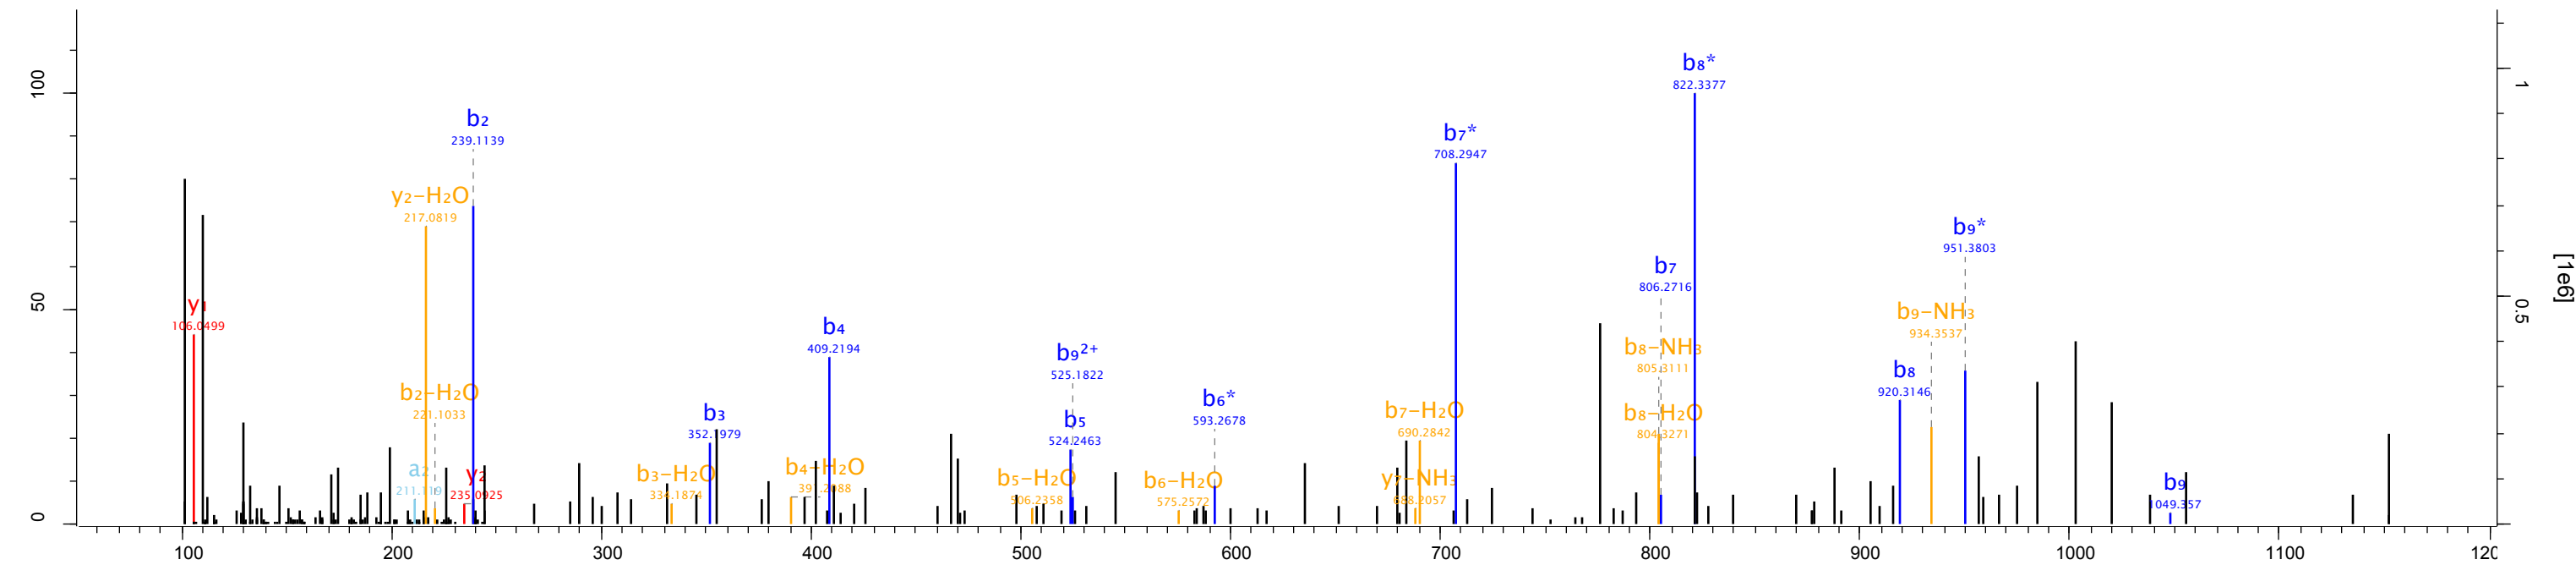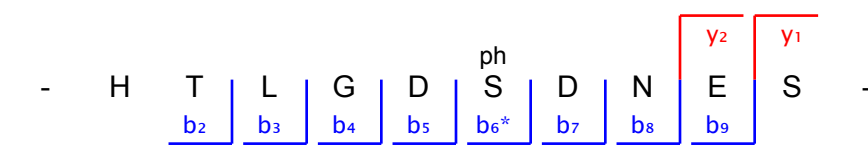

Raw file: 20150812\_A375SR\_Phospho\_BR1\_05  
 Scan: 3478 Method: FTMS; HCD Score: 162.32 m/z: 587.77 Gene names: BAG4

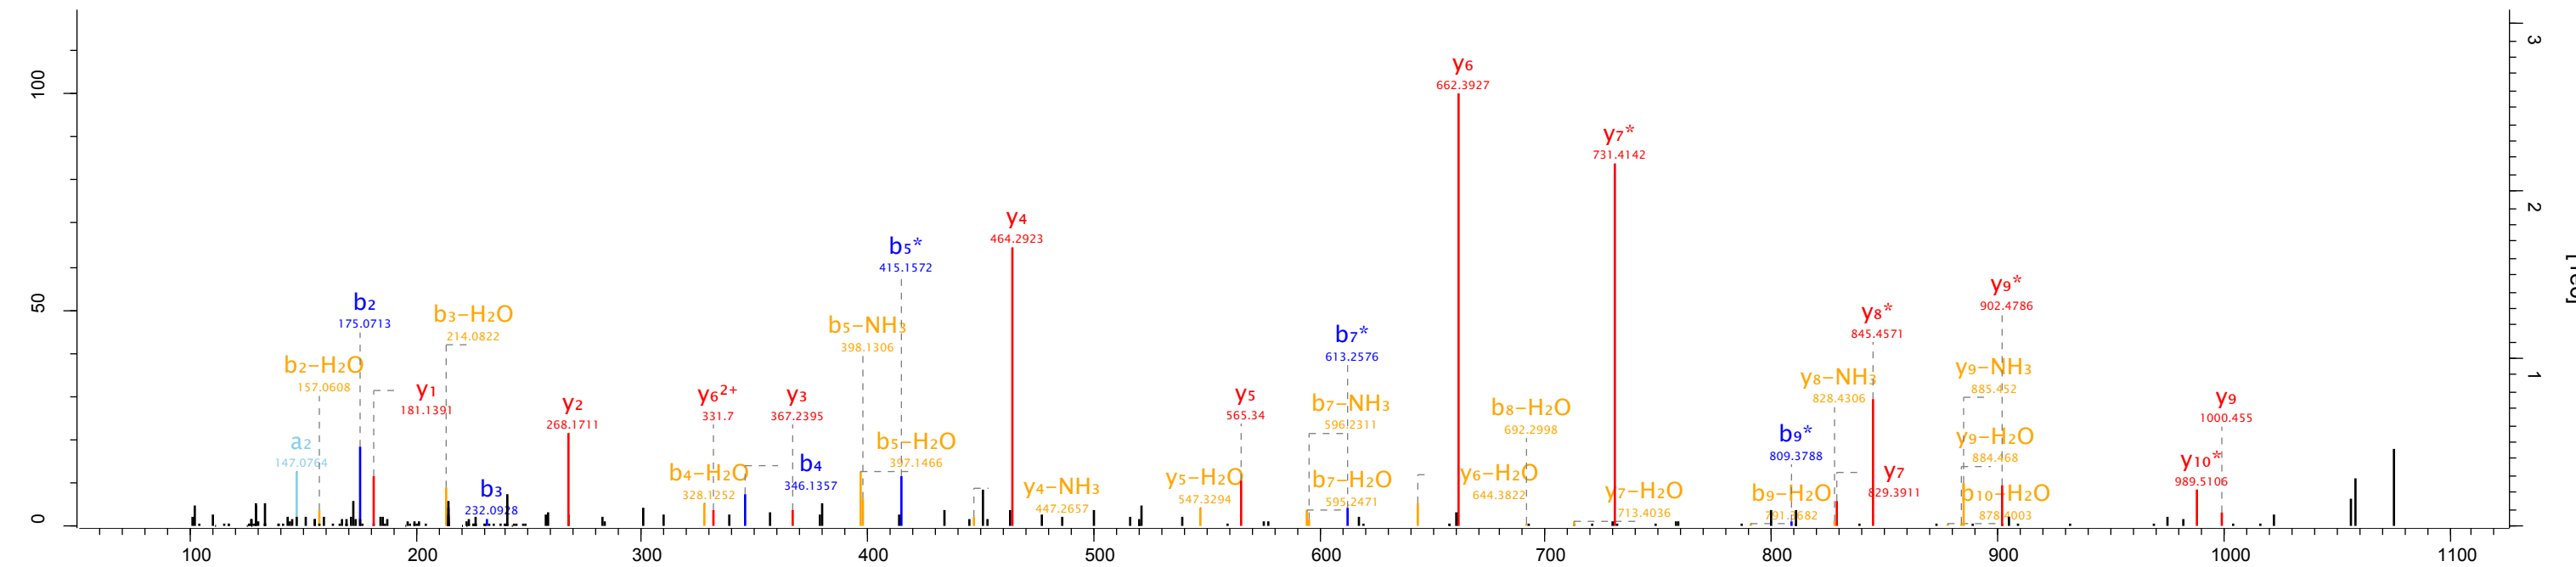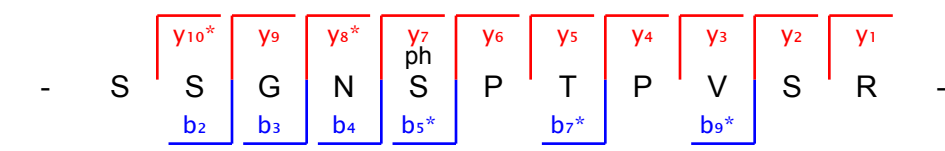

Raw file 20150812\_A375SR\_Phospho\_BR1\_05 Scan 4208 Method FTMS; HCD Score 114.3 m/z 669.64 Gene names BCL9

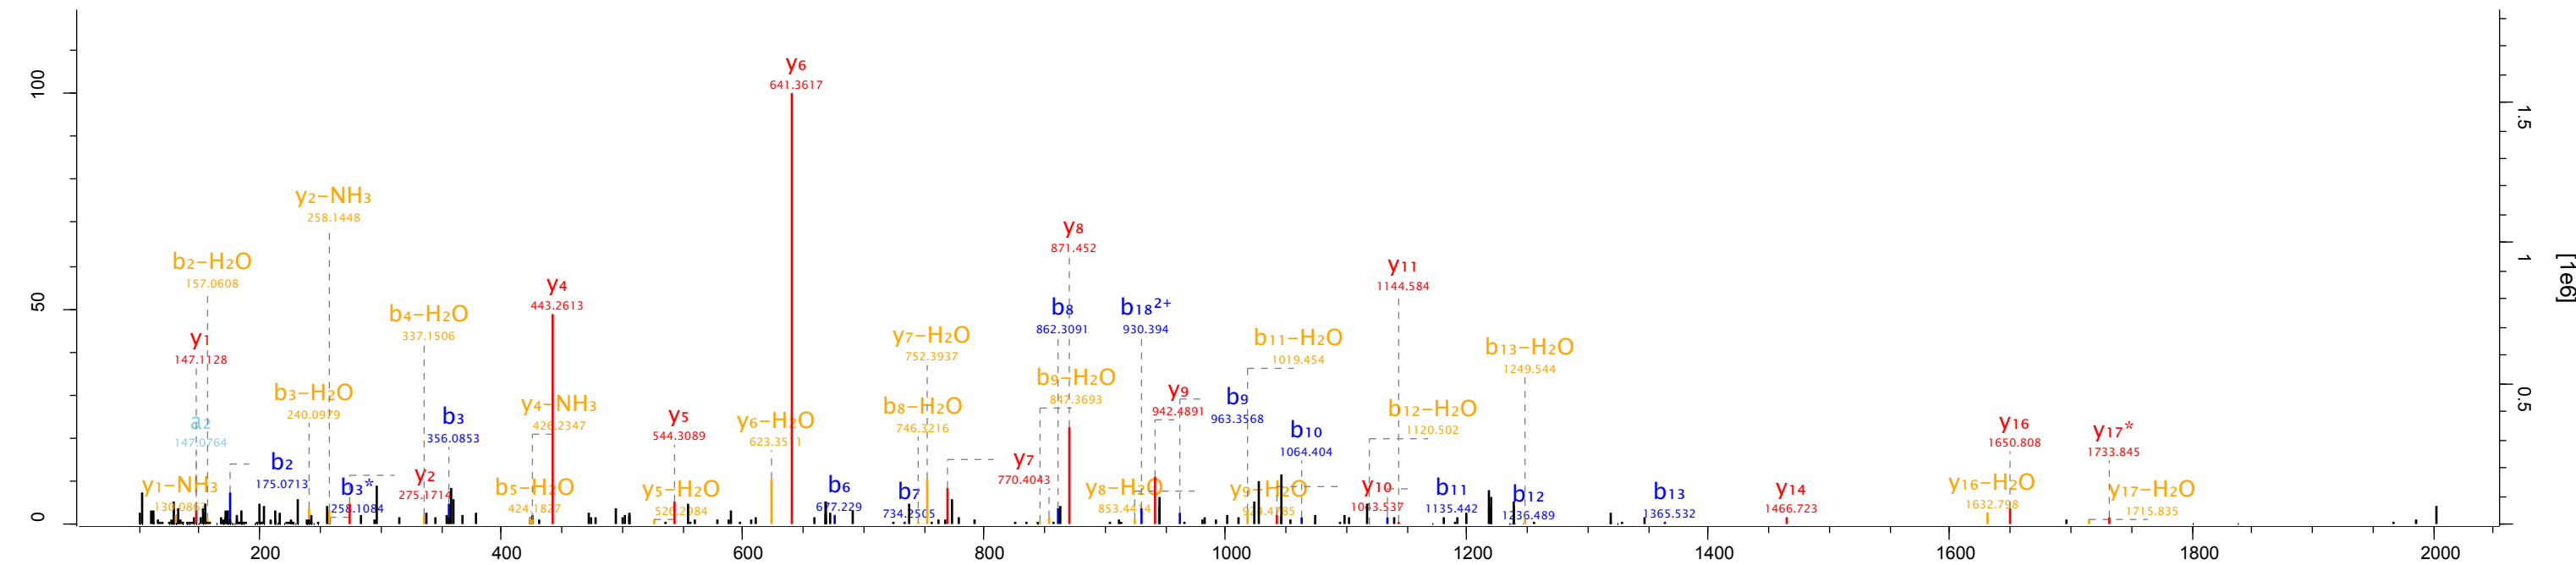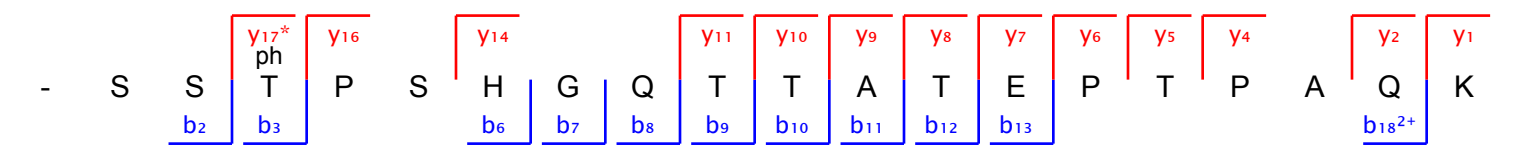



Raw file: 20150812\_A375SR\_Phospho\_BR1\_05  
 Scan: 4298 Method: FTMS; HCD Score: 144.4 m/z: 616.3 Gene names: CCDC9

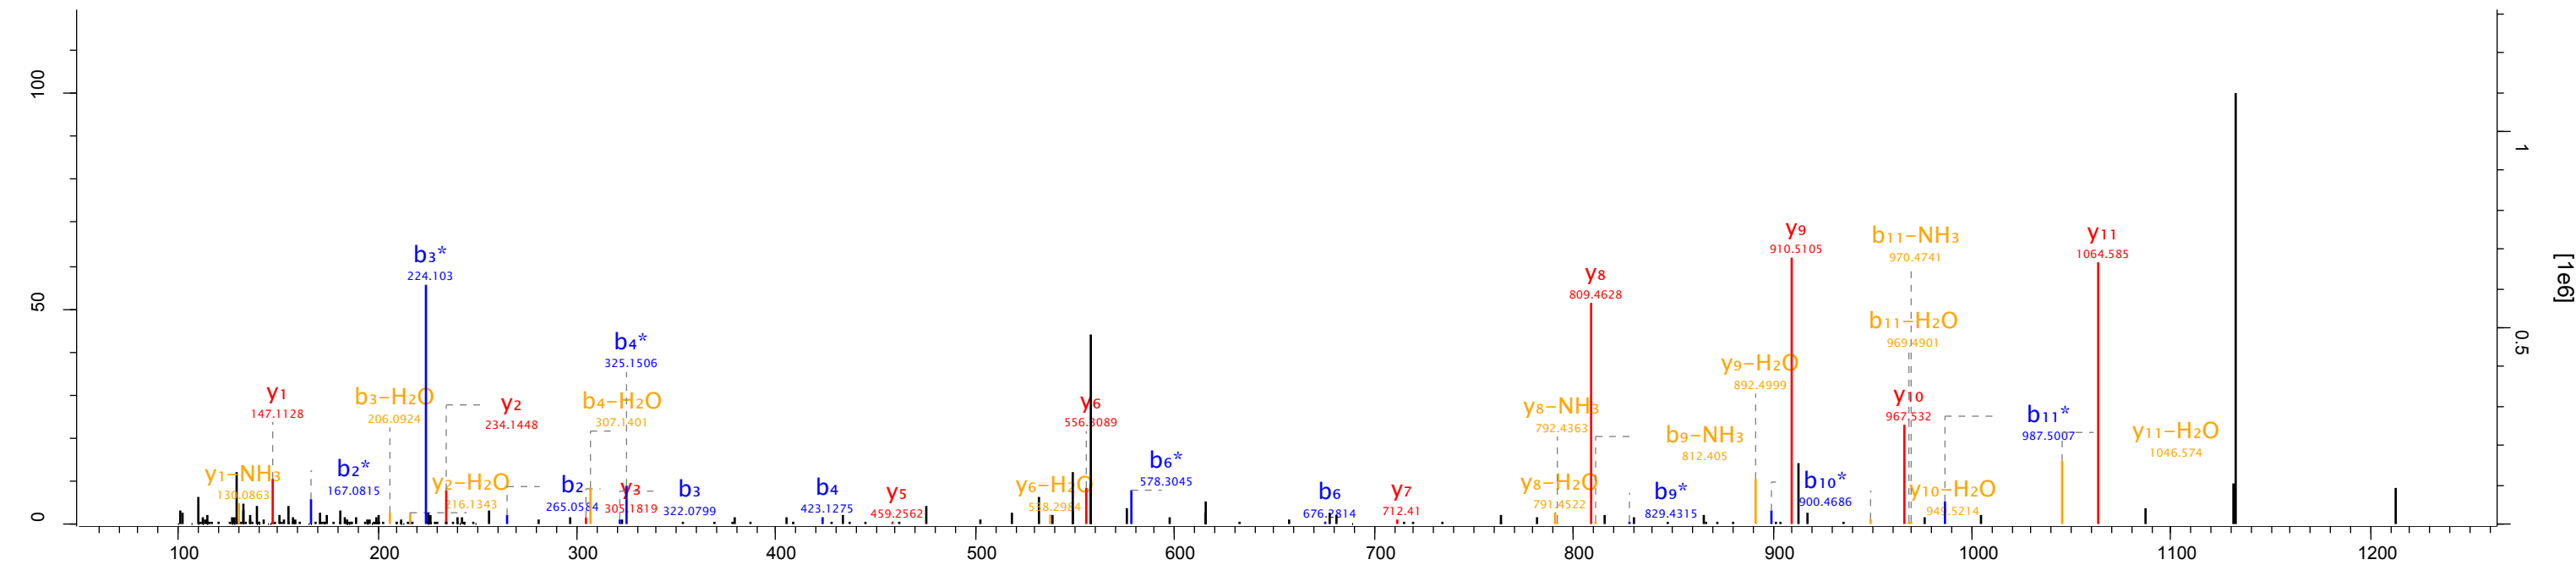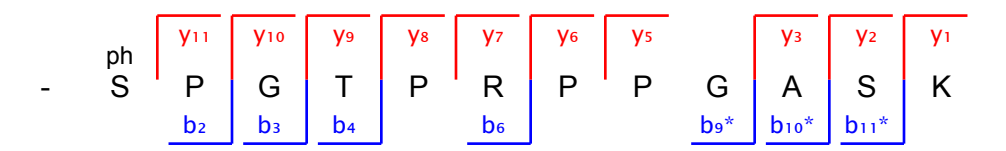

Raw file: 20150812\_A375SR\_Phospho\_BR1\_05  
 Scan: 4988 Method: FTMS; HCD Score: 173.06 m/z: 671.29 Gene names: GIGYF2

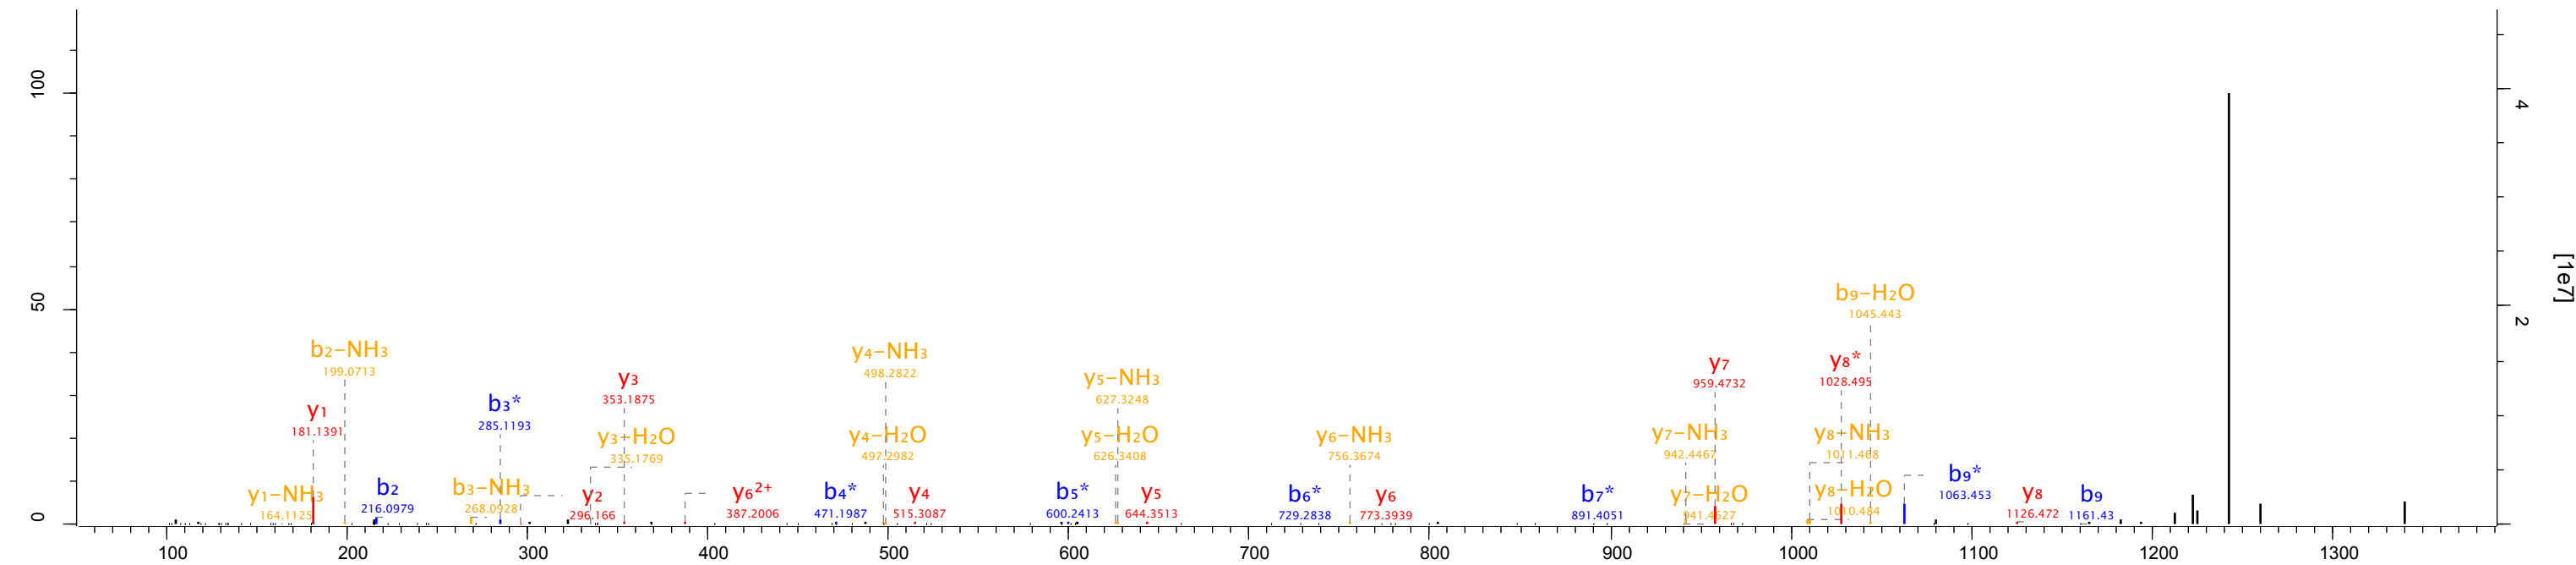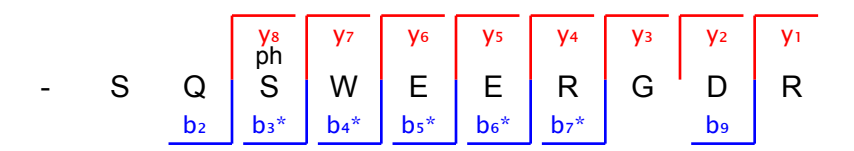

Raw file: 20150812\_A375SR\_Phospho\_BR1\_05  
 Scan: 5258 Method: FTMS; HCD Score: 61.96 m/z: 629.3 Gene names: MAP3K1

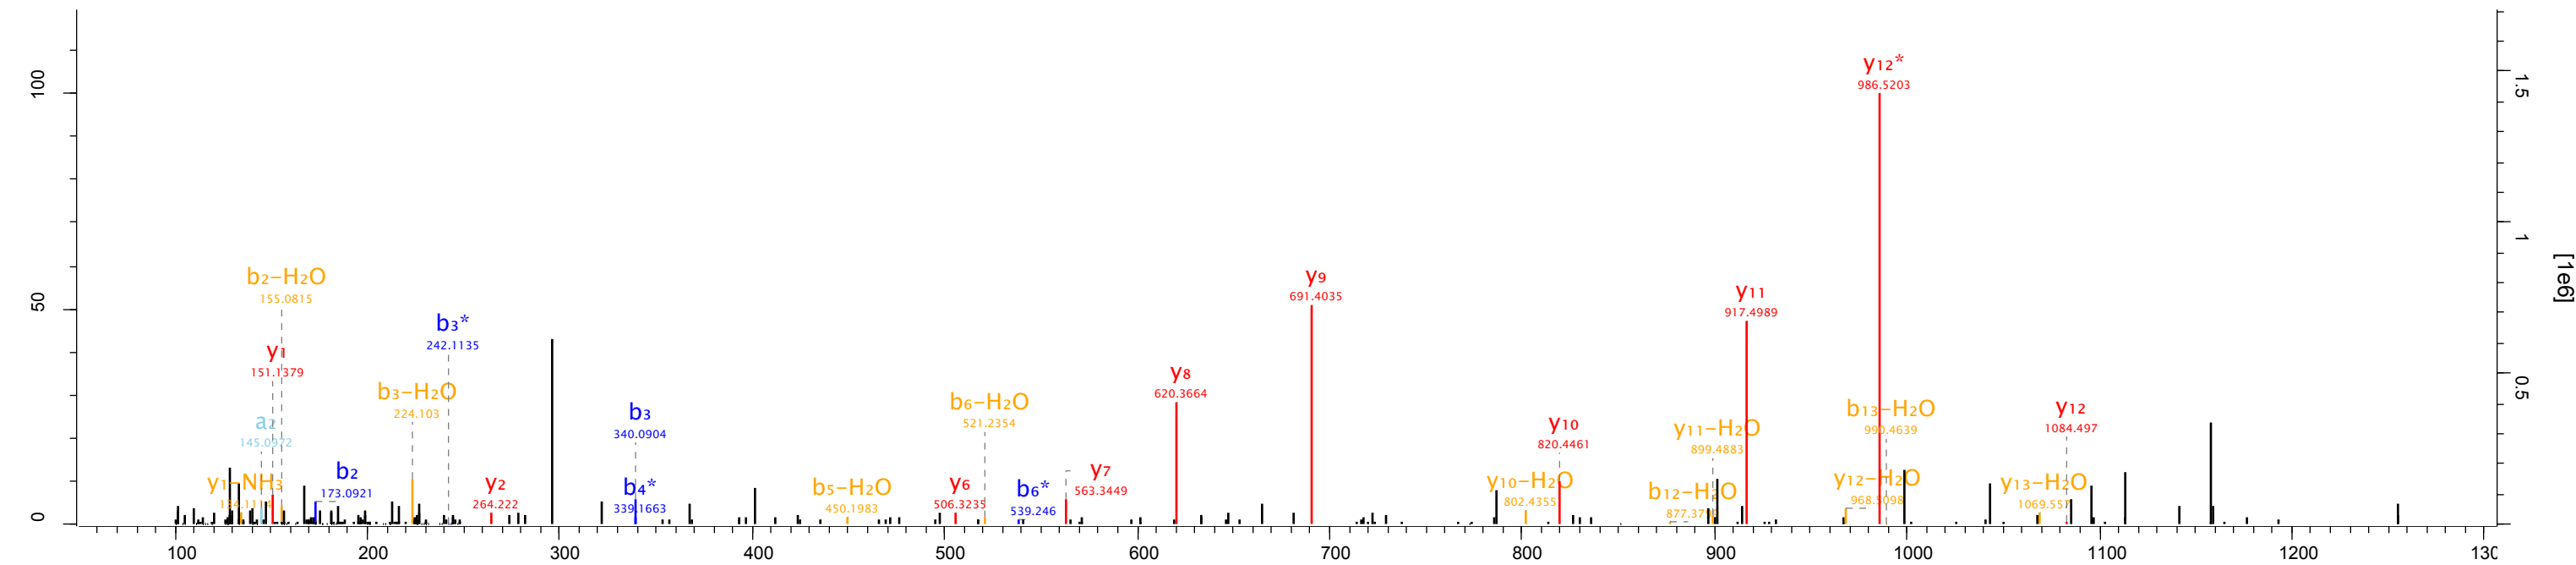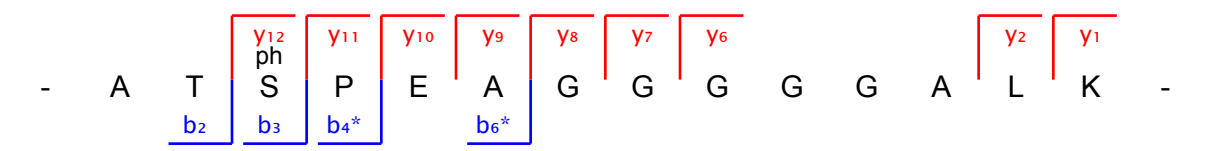



Raw file 20150812\_A375SR\_Phospho\_BR1\_05 Scan 5548 Method FTMS; HCD Score 192.16 m/z 757.3 Gene names DHX57

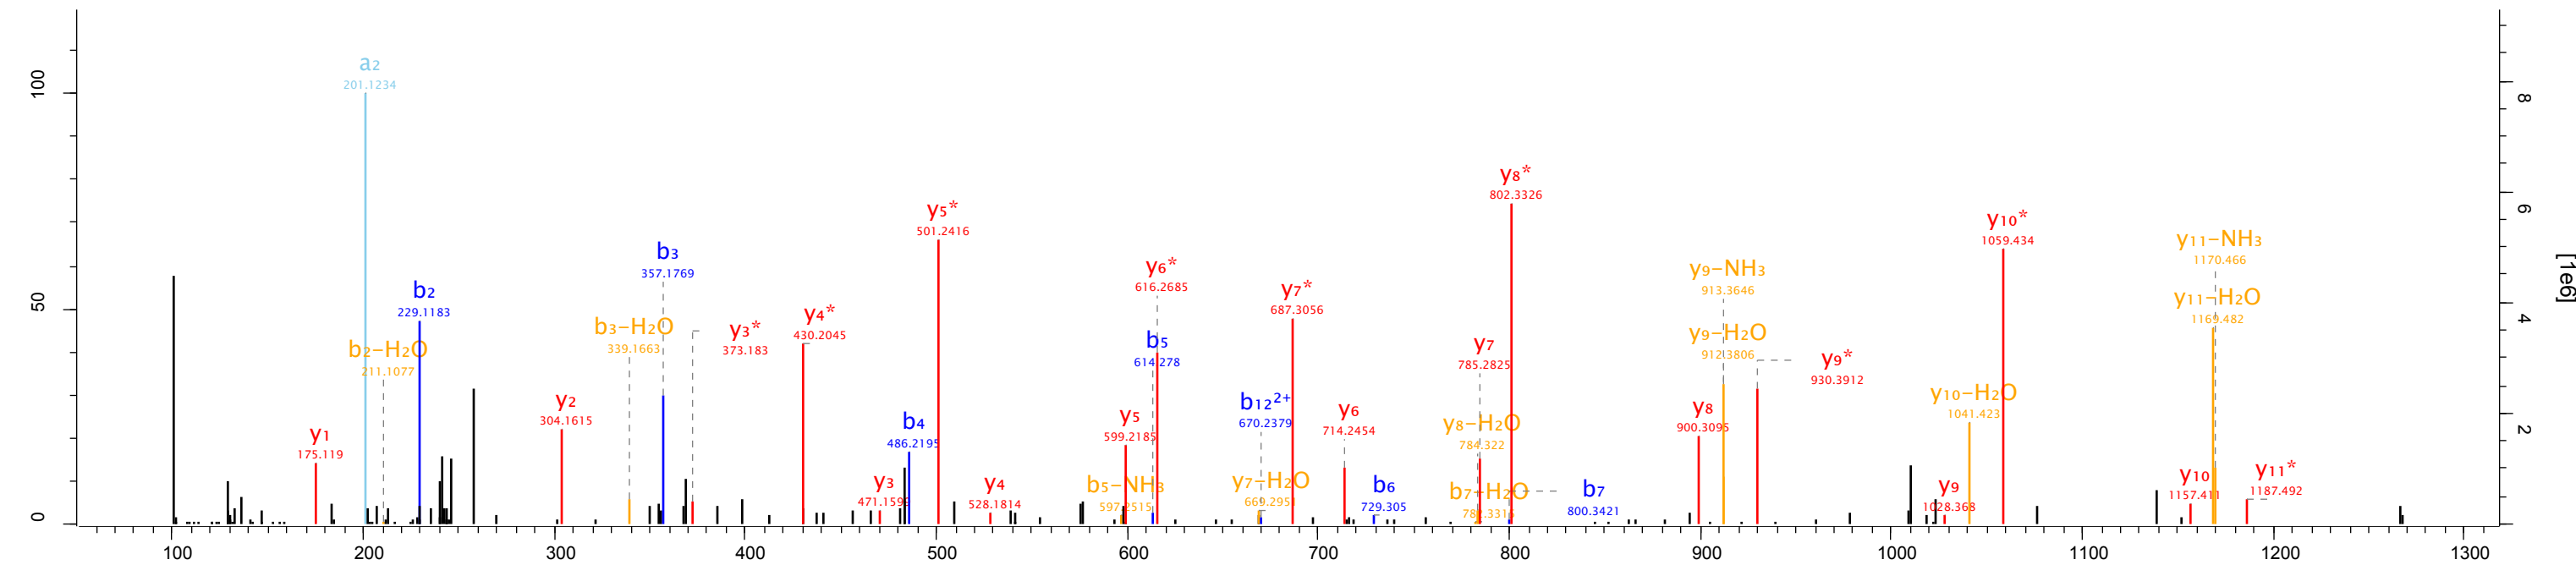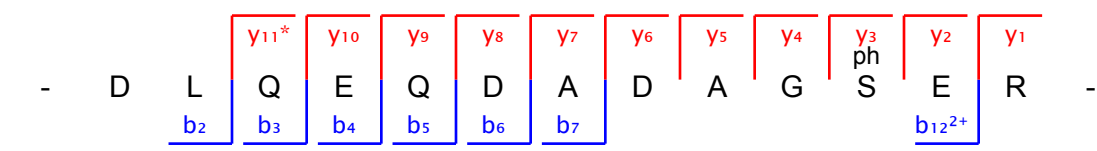

Raw file: 20150812\_A375SR\_Phospho\_BR1\_05  
 Scan: 5588 Method: FTMS; HCD Score: 195.72 m/z: 615.3 Gene names: AKAP2

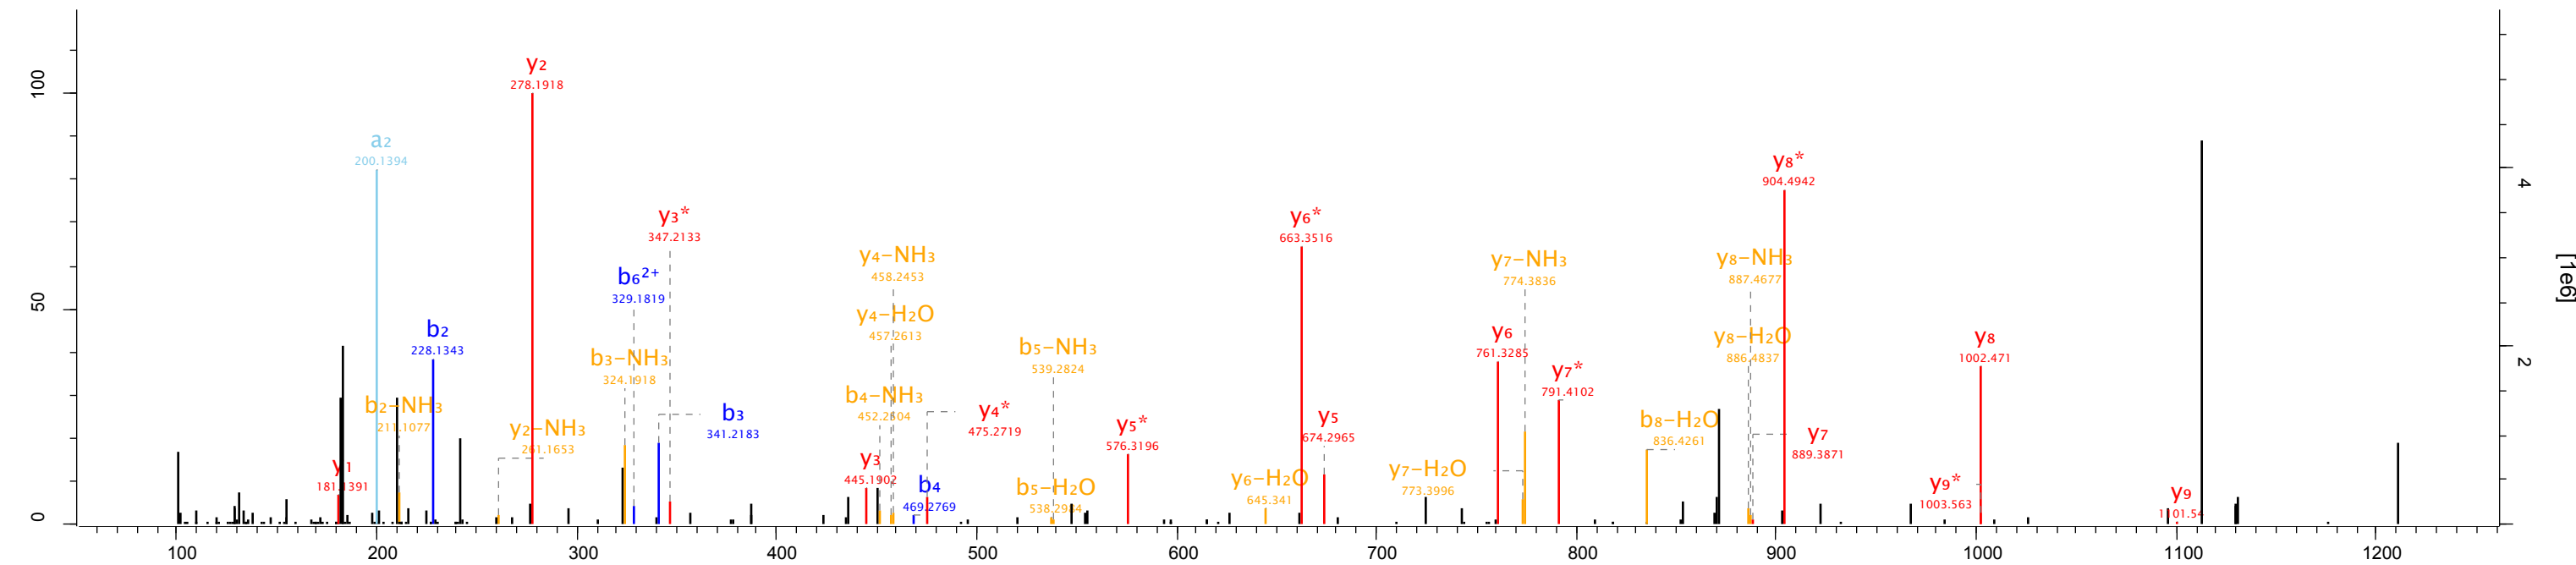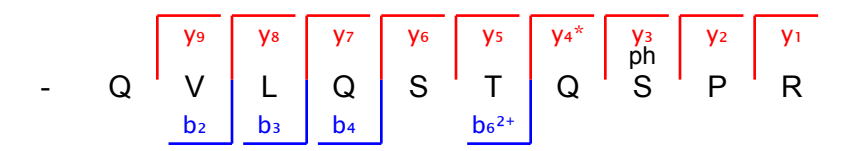

Raw file  
20150812\_A375SR\_Phospho\_BR1\_05

Scan 5848 Method FTMS; HCD Score 476.95 m/z 1216.47 Gene names NUDC

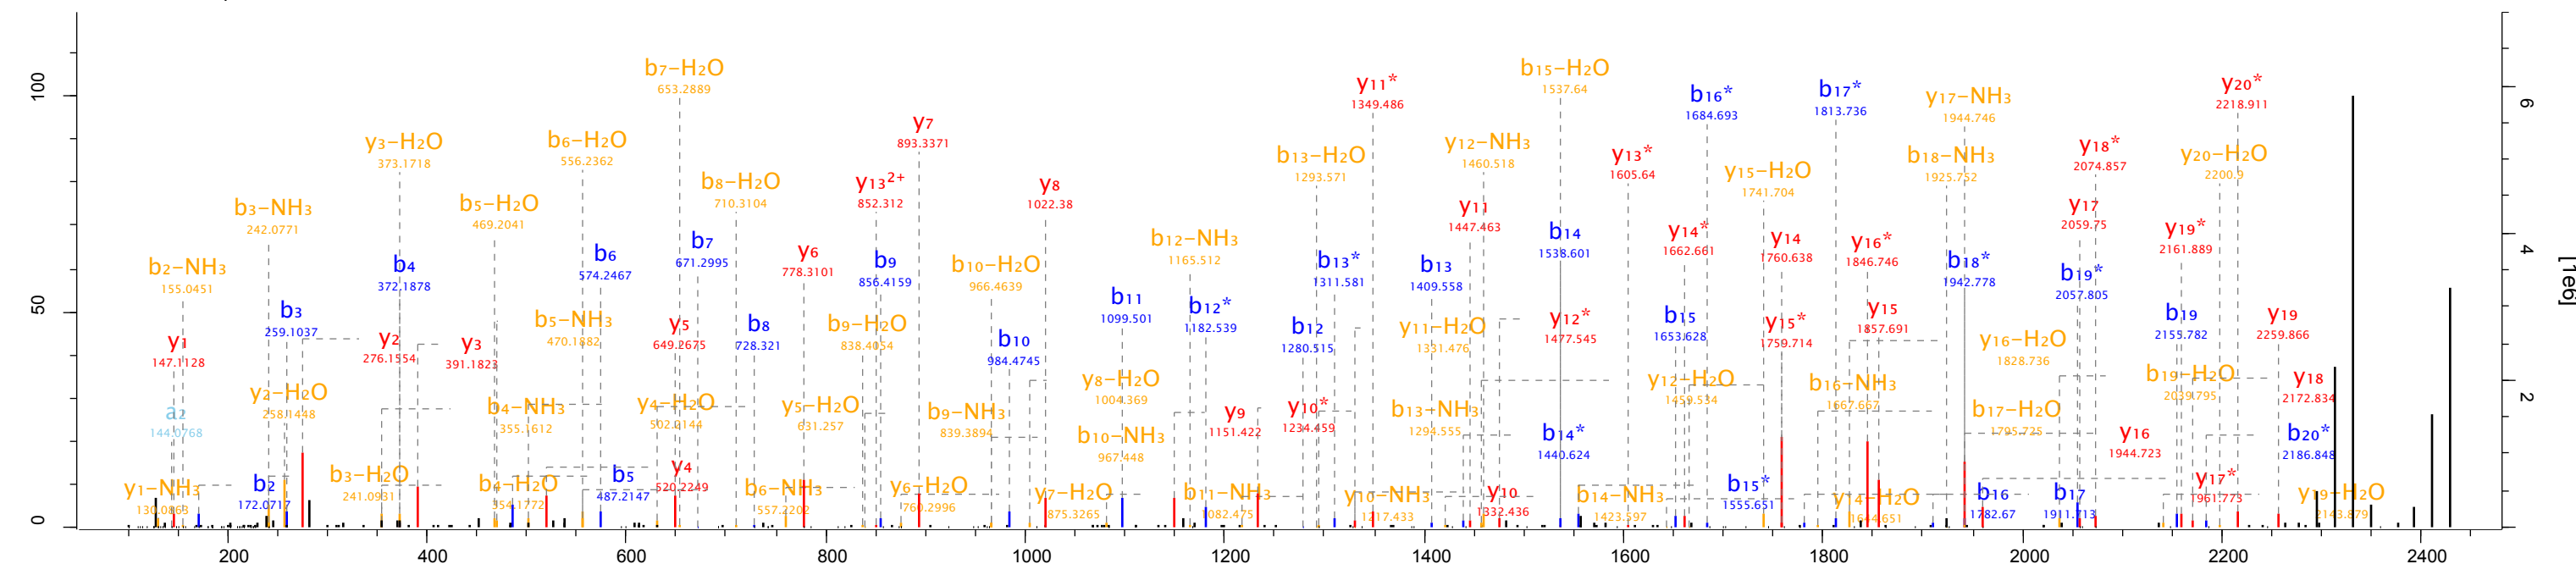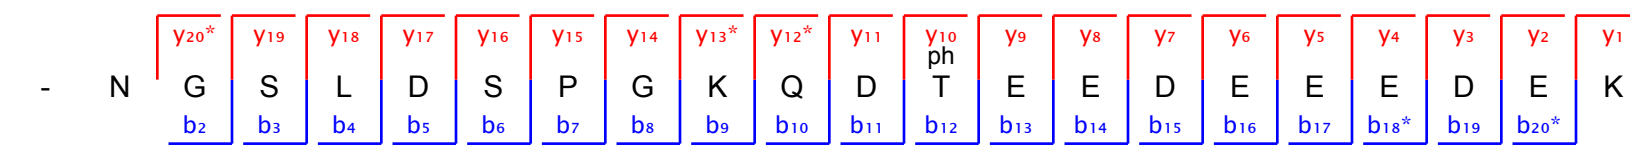

Raw file: 20150812\_A375SR\_Phospho\_BR1\_05  
 Scan: 5878 Method: FTMS; HCD Score: 62.16 m/z: 430.87 Gene names: RBM10

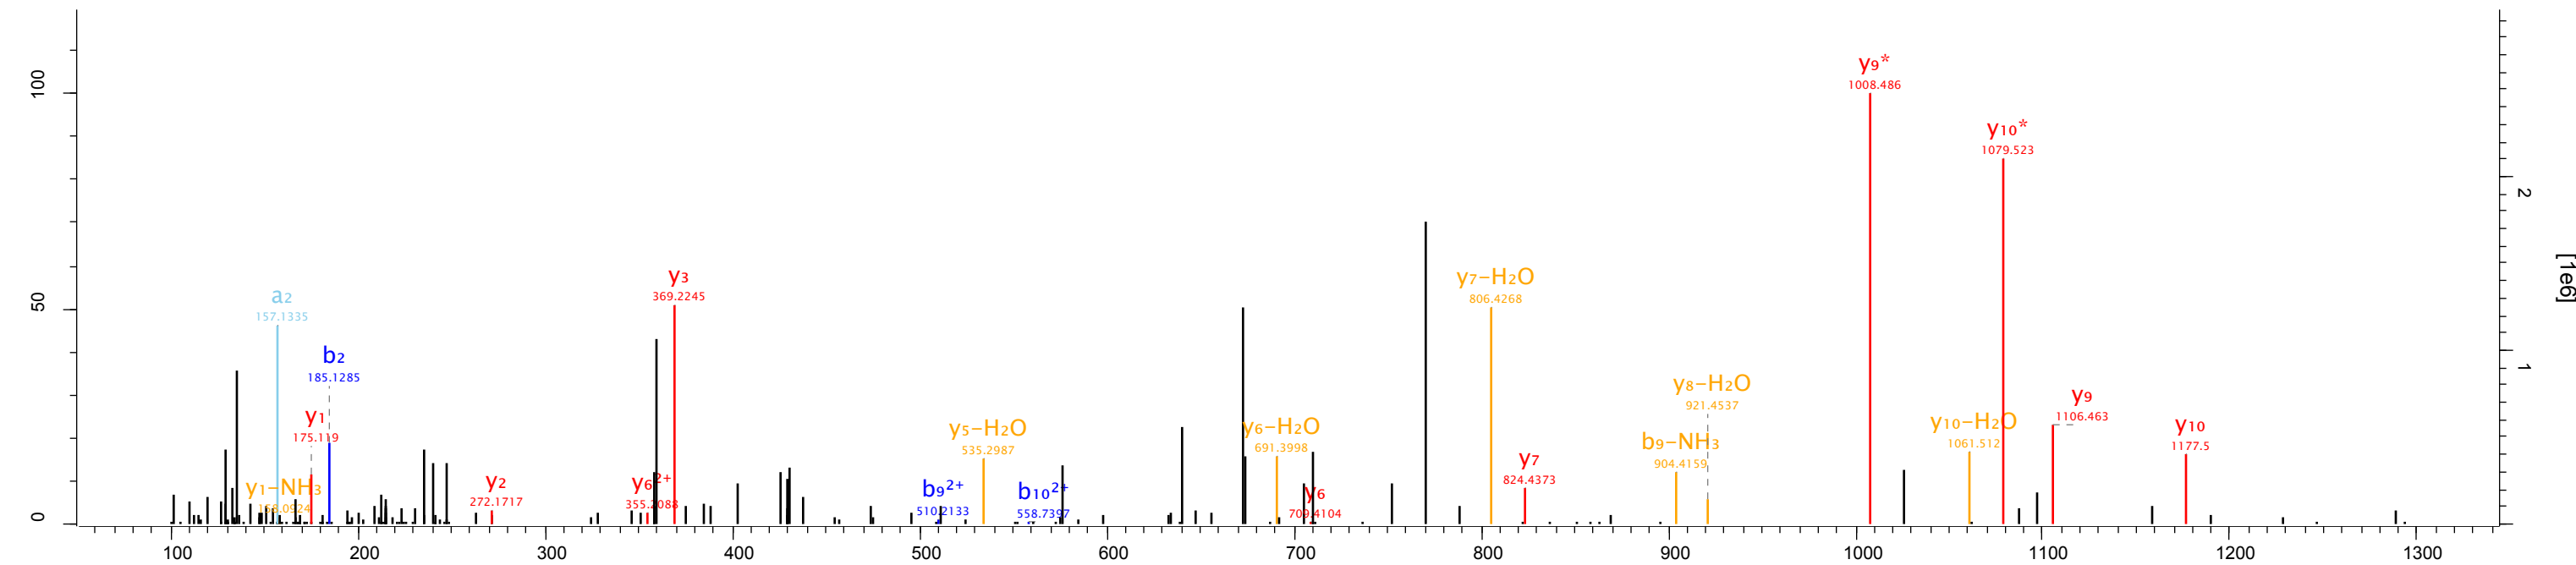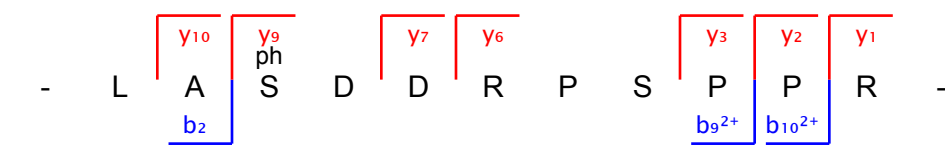

Raw file: 20150812\_A375SR\_Phospho\_BR1\_05  
 Scan: 6428 Method: FTMS; HCD Score: 127.68 m/z: 475.21 Gene names: FMNL2

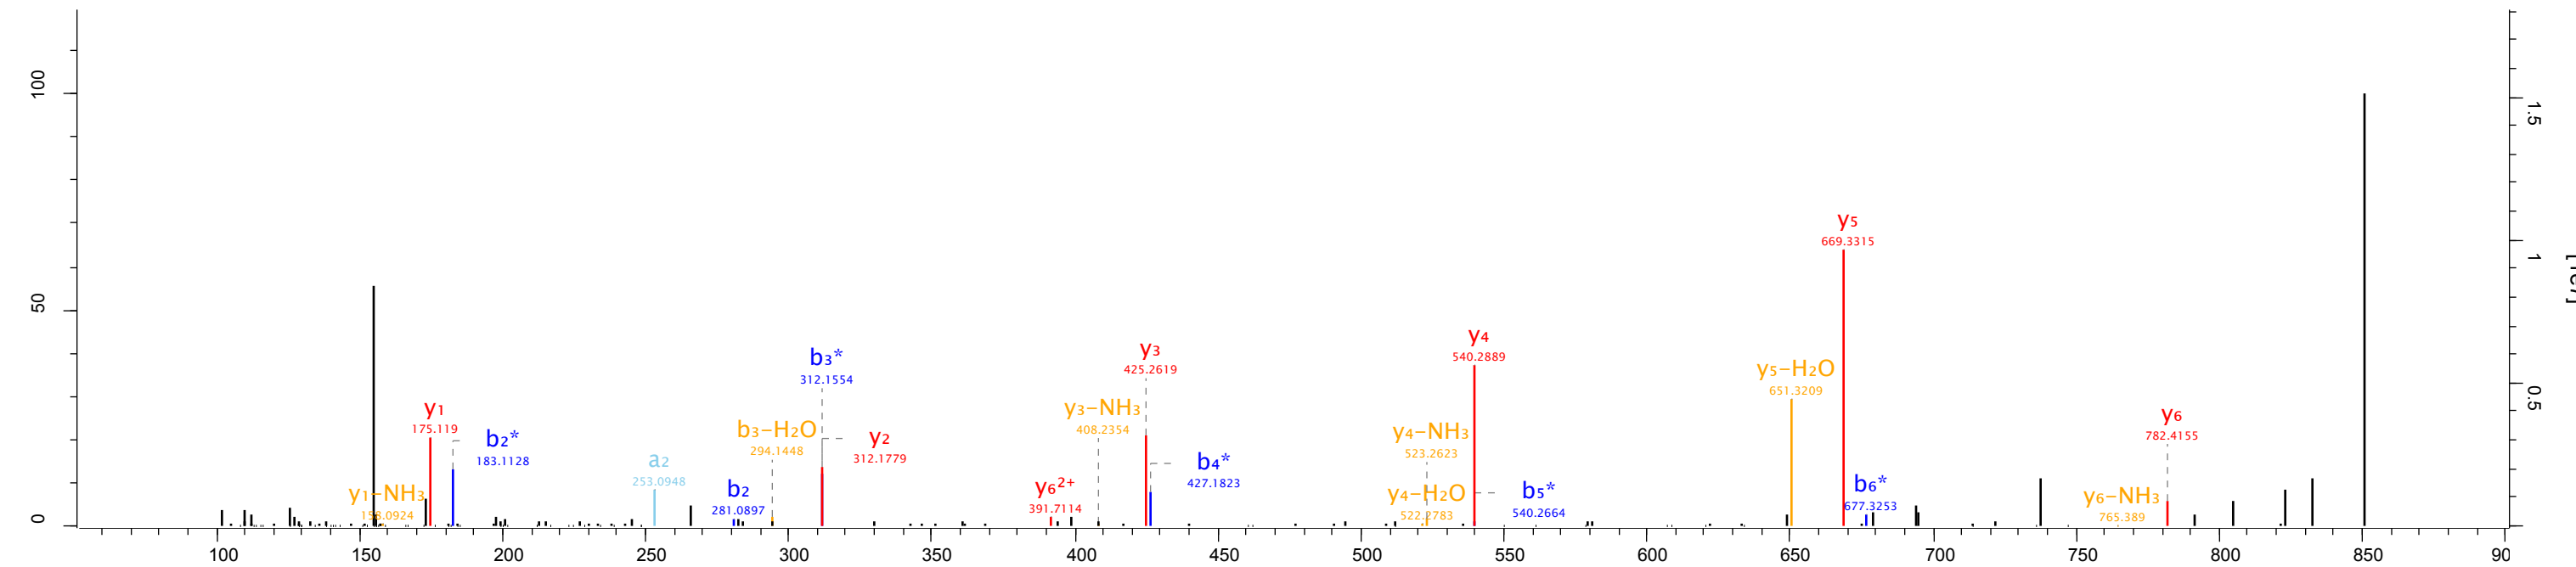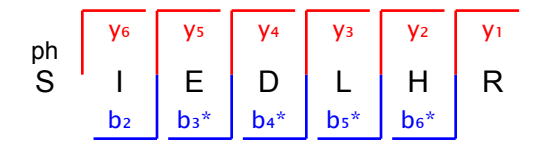

Raw file: 20150812\_A375SR\_Phospho\_BR1\_05  
 Scan: 7198 Method: FTMS; HCD Score: 62.81 m/z: 558.96 Gene names: POU2F1

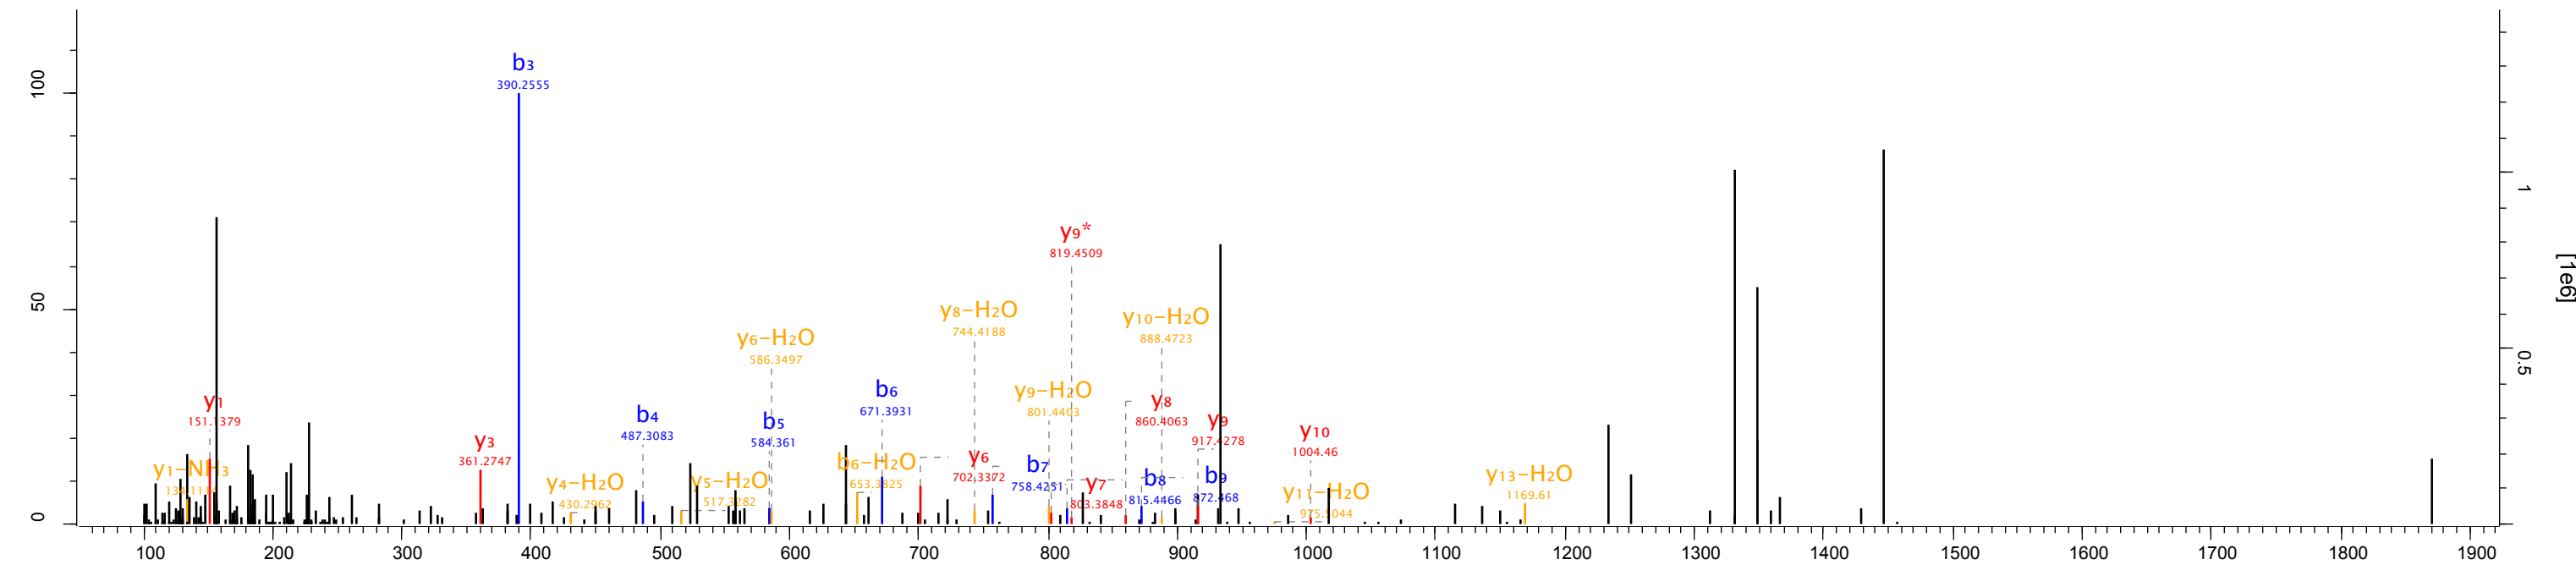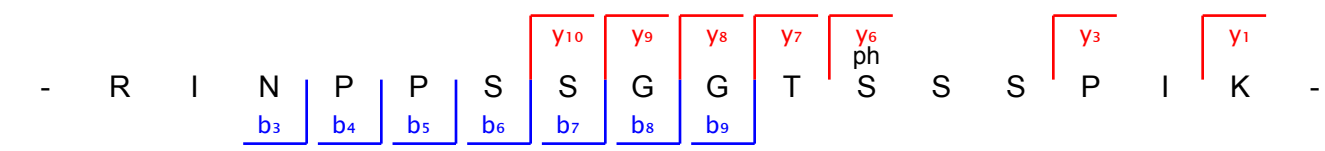

Raw file  
20150812\_A375SR\_Phospho\_BR1\_05

Scan 7248 Method FTMS; HCD Score 193.71 m/z 658.97 Gene names ARID1A

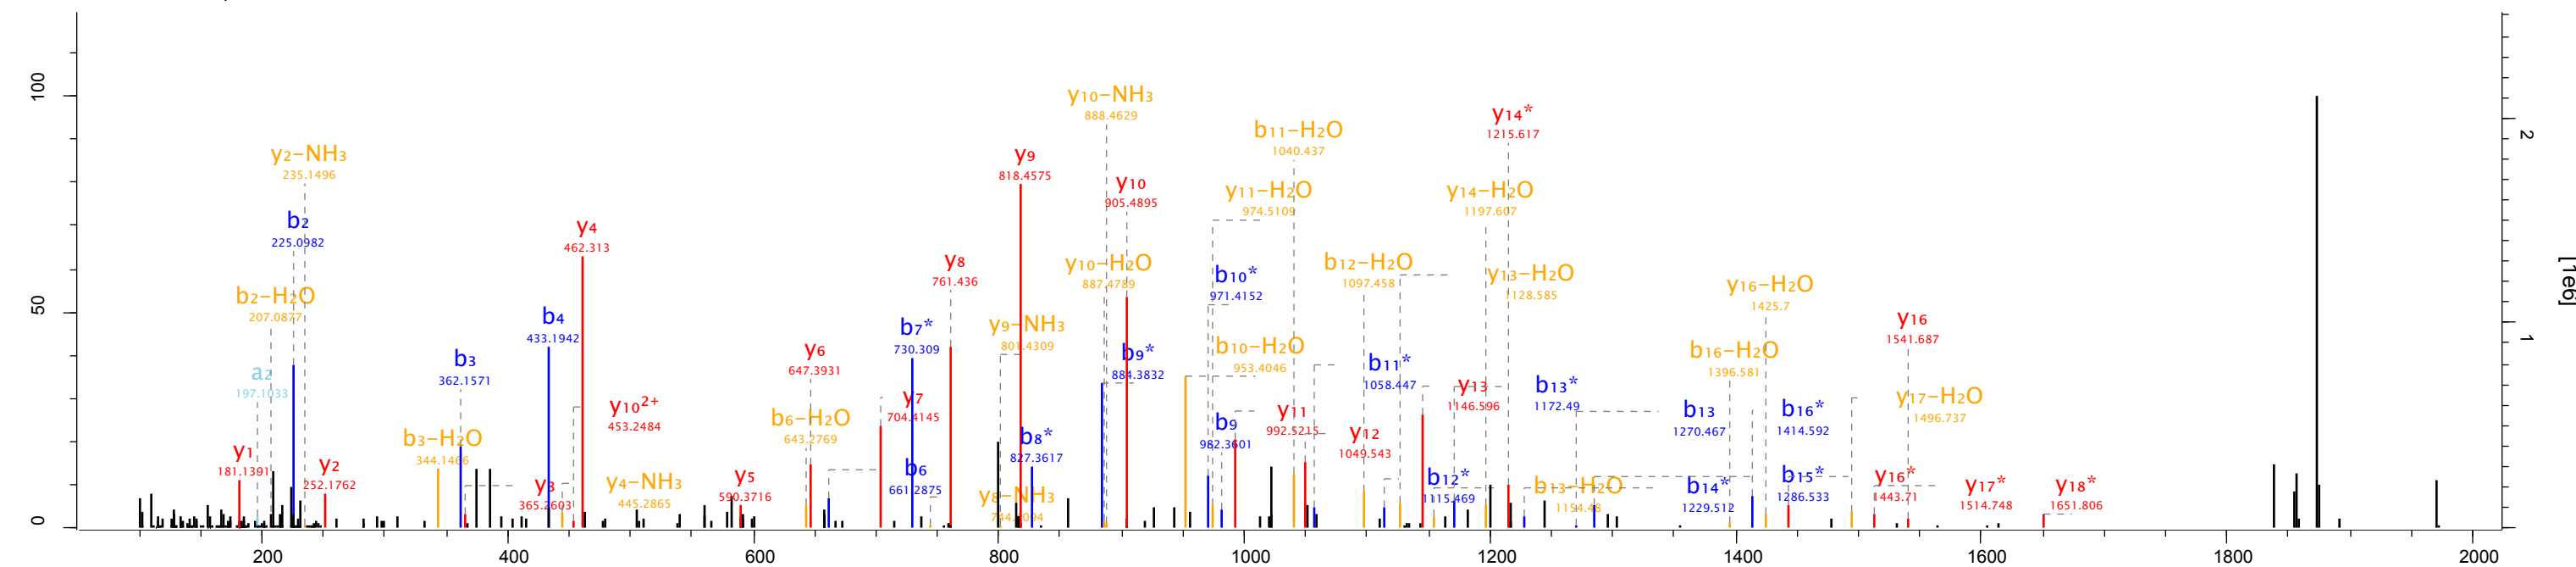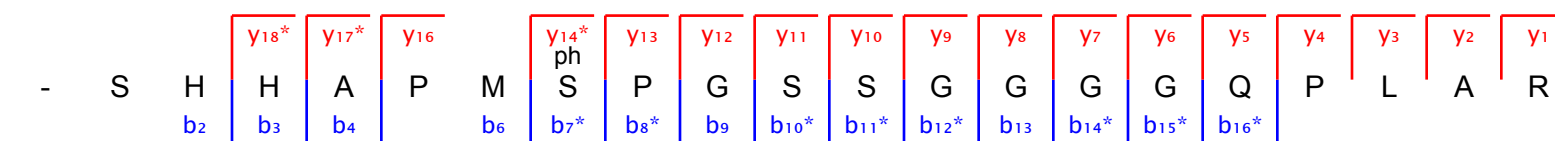

Raw file: 20150812\_A375SR\_Phospho\_BR1\_05  
 Scan: 7388 Method: FTMS; HCD Score: 154.74 m/z: 734.35 Gene names: PPF1BP1

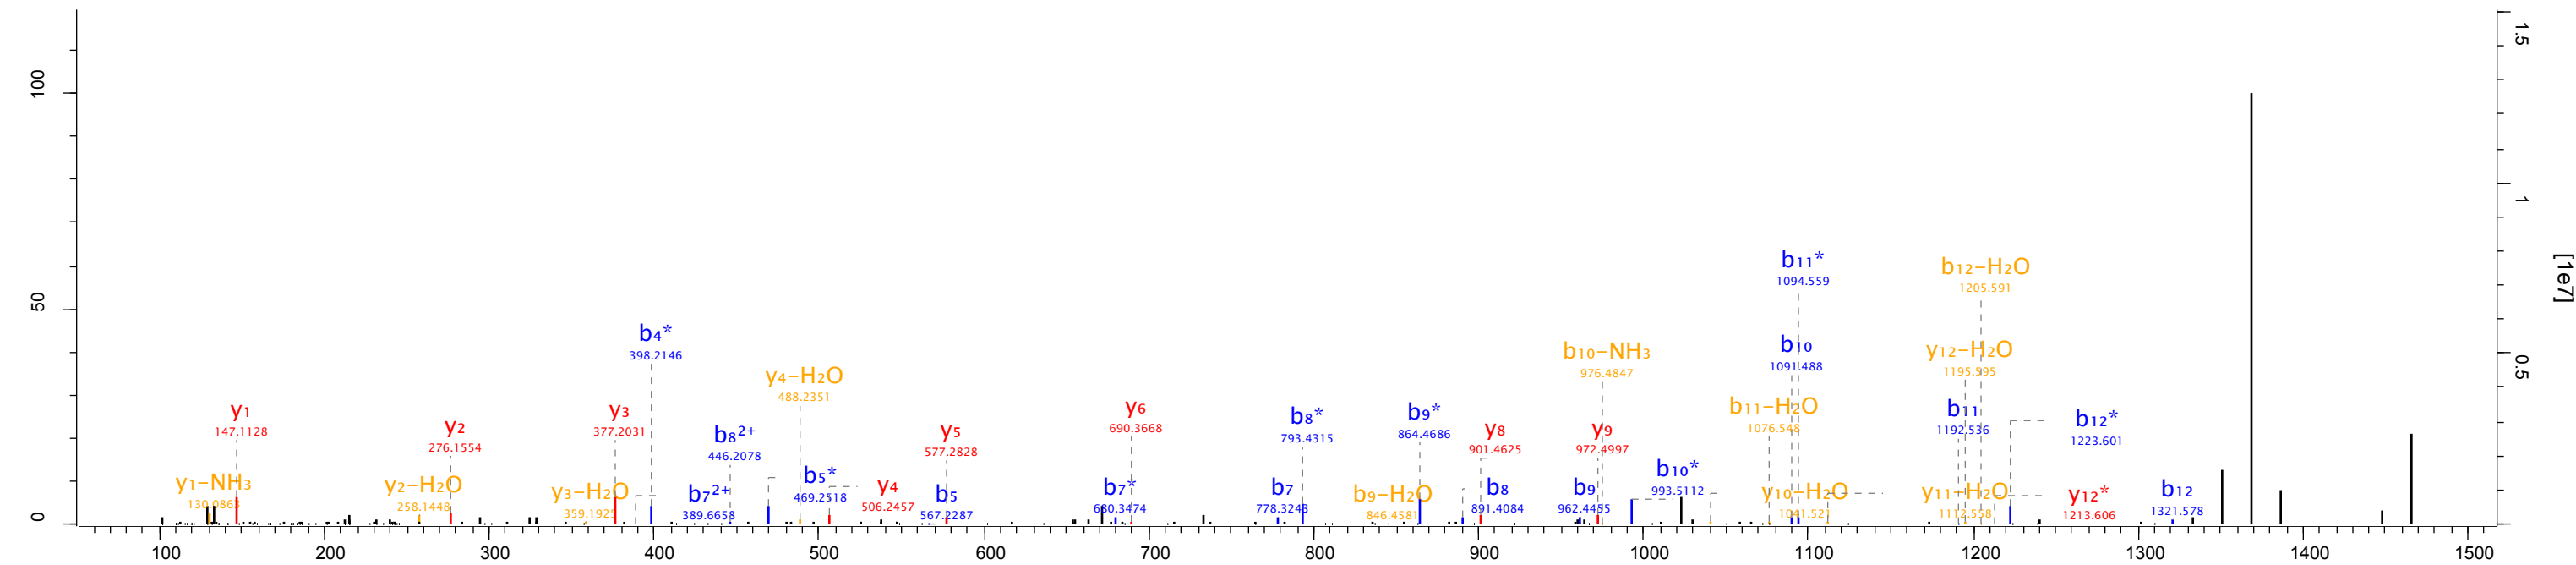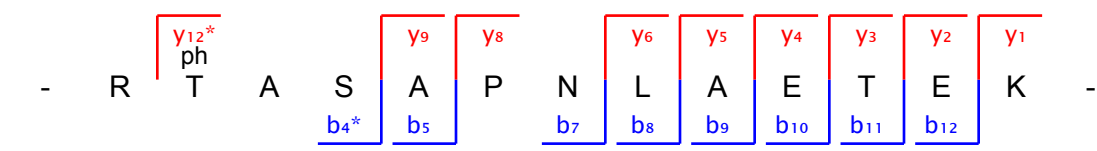



Raw file: 20150812\_A375SR\_Phospho\_BR1\_05  
 Scan: 7938 Method: FTMS; HCD Score: 112.83 m/z: 436.73 Gene names: BAZ1B

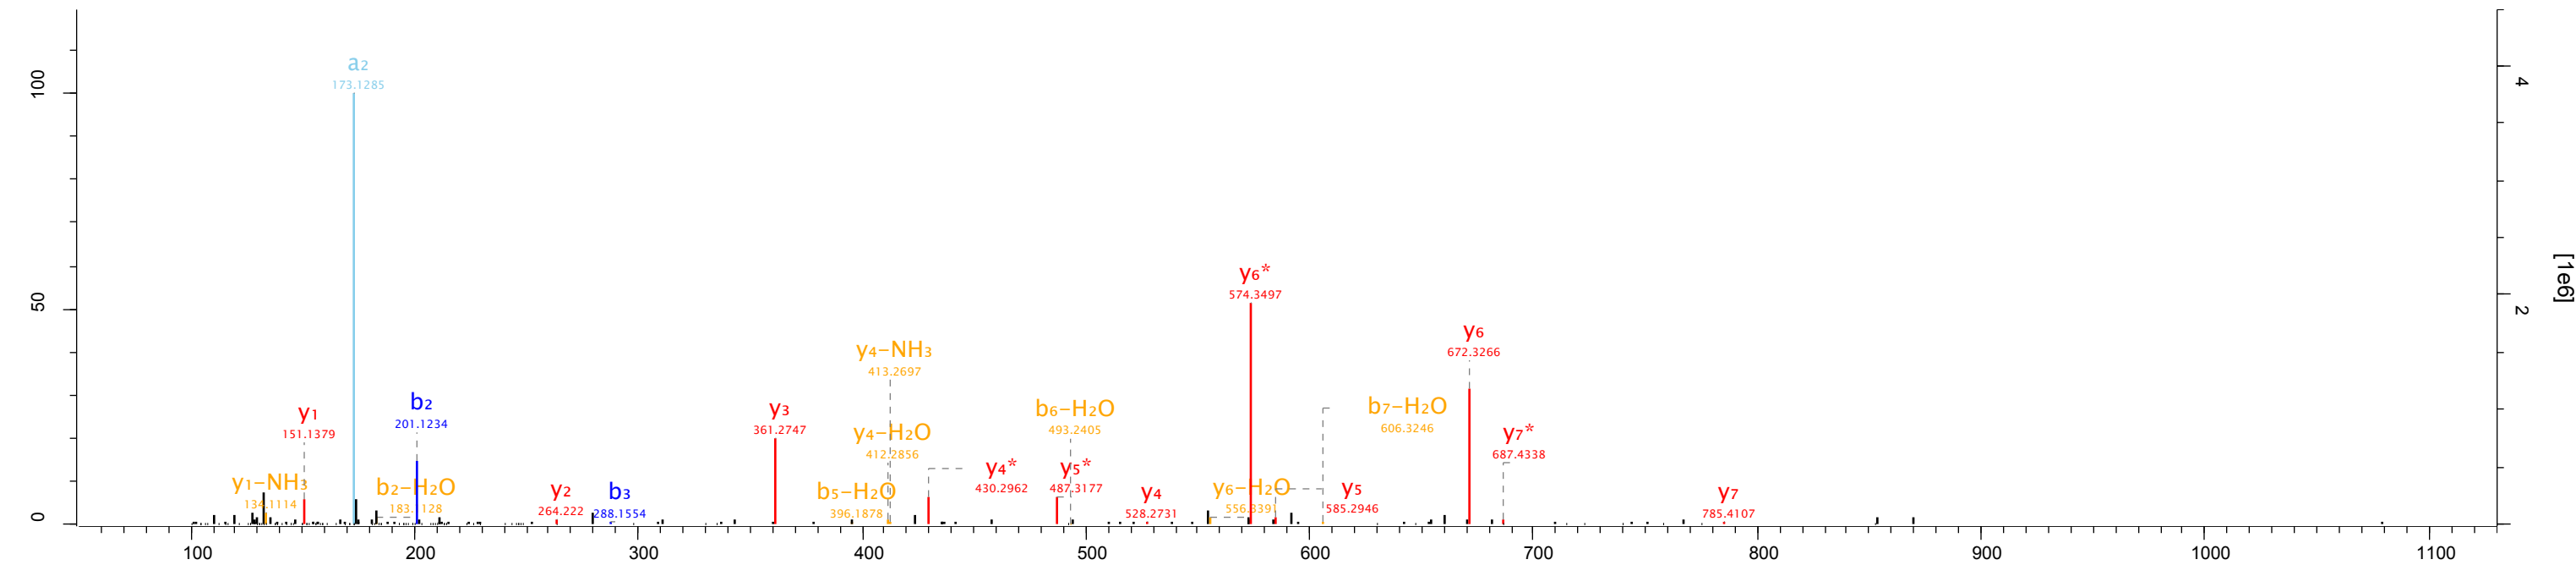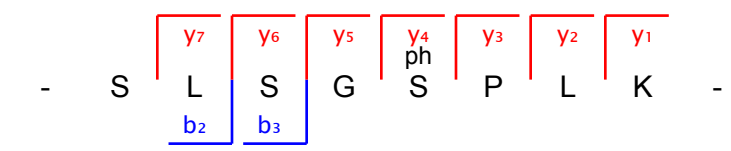

Raw file: 20150812\_A375SR\_Phospho\_BR1\_05  
 Scan: 7968 Method: FTMS; HCD Score: 101.2 m/z: 642.78 Gene names: RAPH1

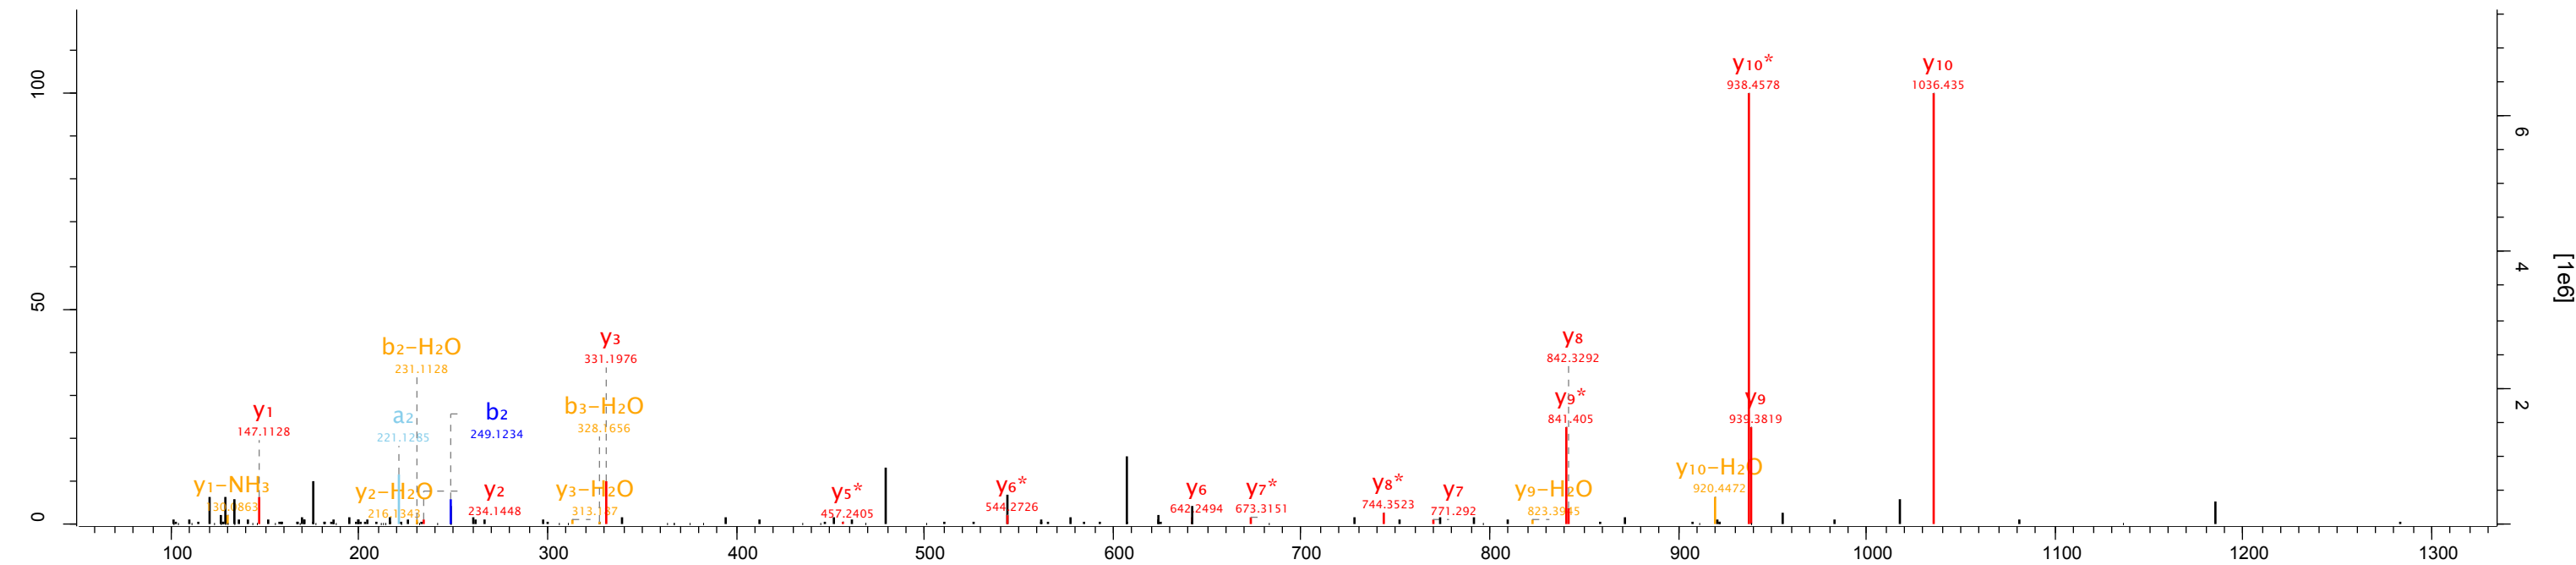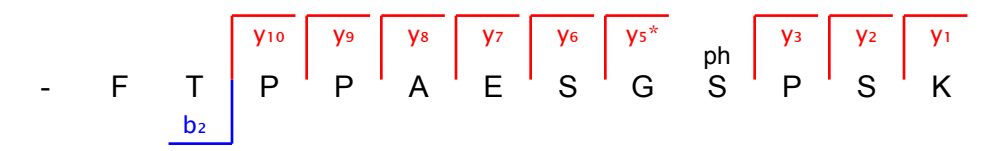

Raw file 20150812\_A375SR\_Phospho\_BR1\_05 Scan 8178 Method FTMS; HCD Score 56.17 m/z 601.77 Gene names LUZP1

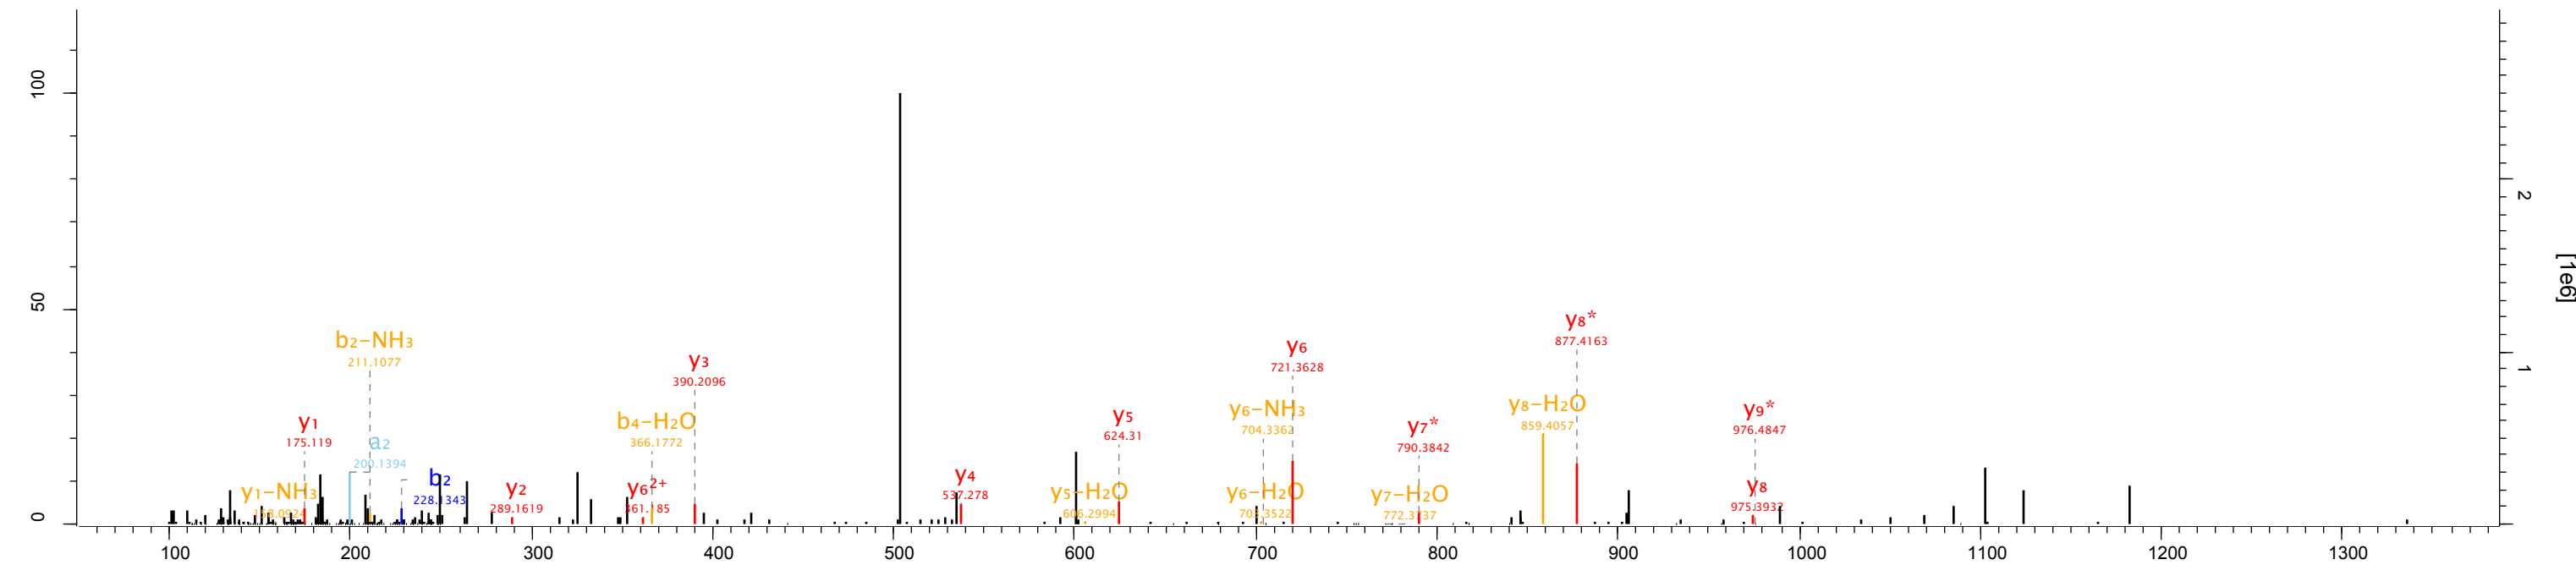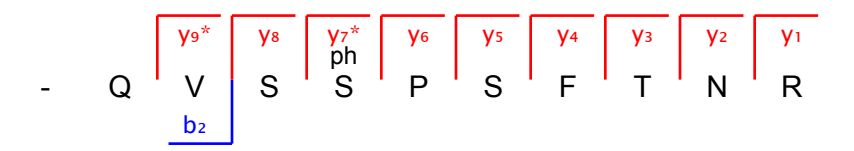

Raw file: 20150812\_A375SR\_Phospho\_BR1\_05  
 Scan: 8518 Method: FTMS; HCD Score: 209.54 m/z: 858.9 Gene names: KIAA1429

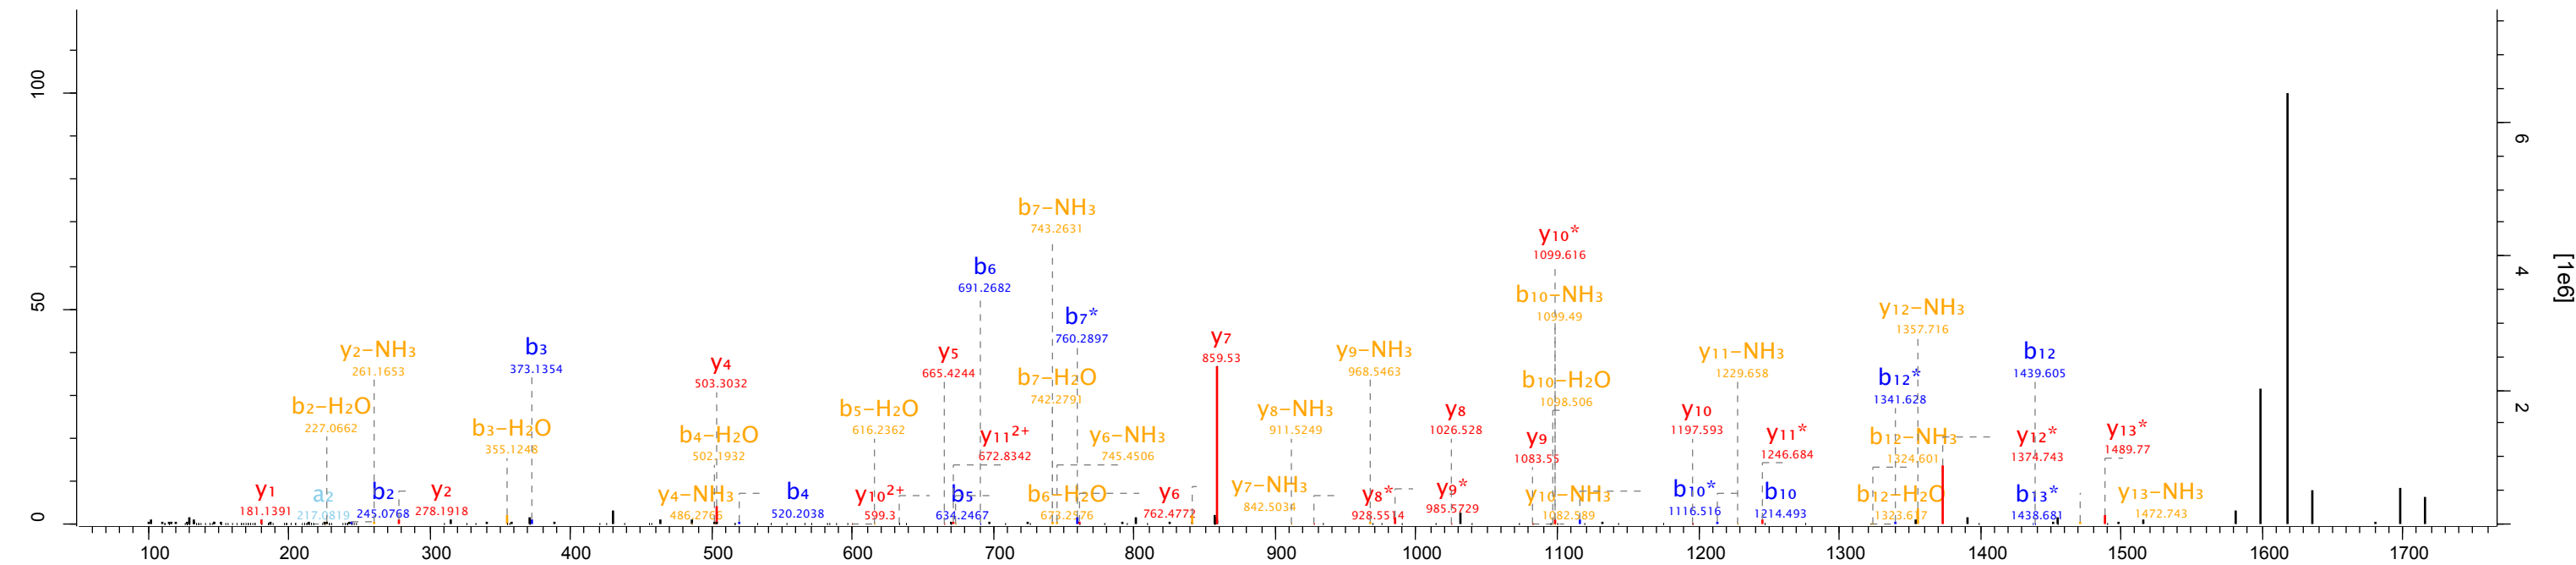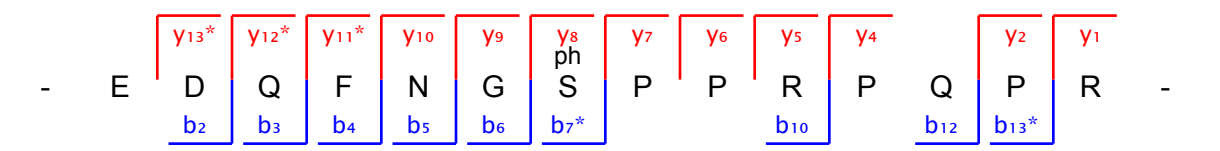

Raw file 20150812\_A375SR\_Phospho\_BR1\_05 Scan 8558 Method FTMS; HCD Score 101.38 m/z 534.76 Gene names GTPBP4

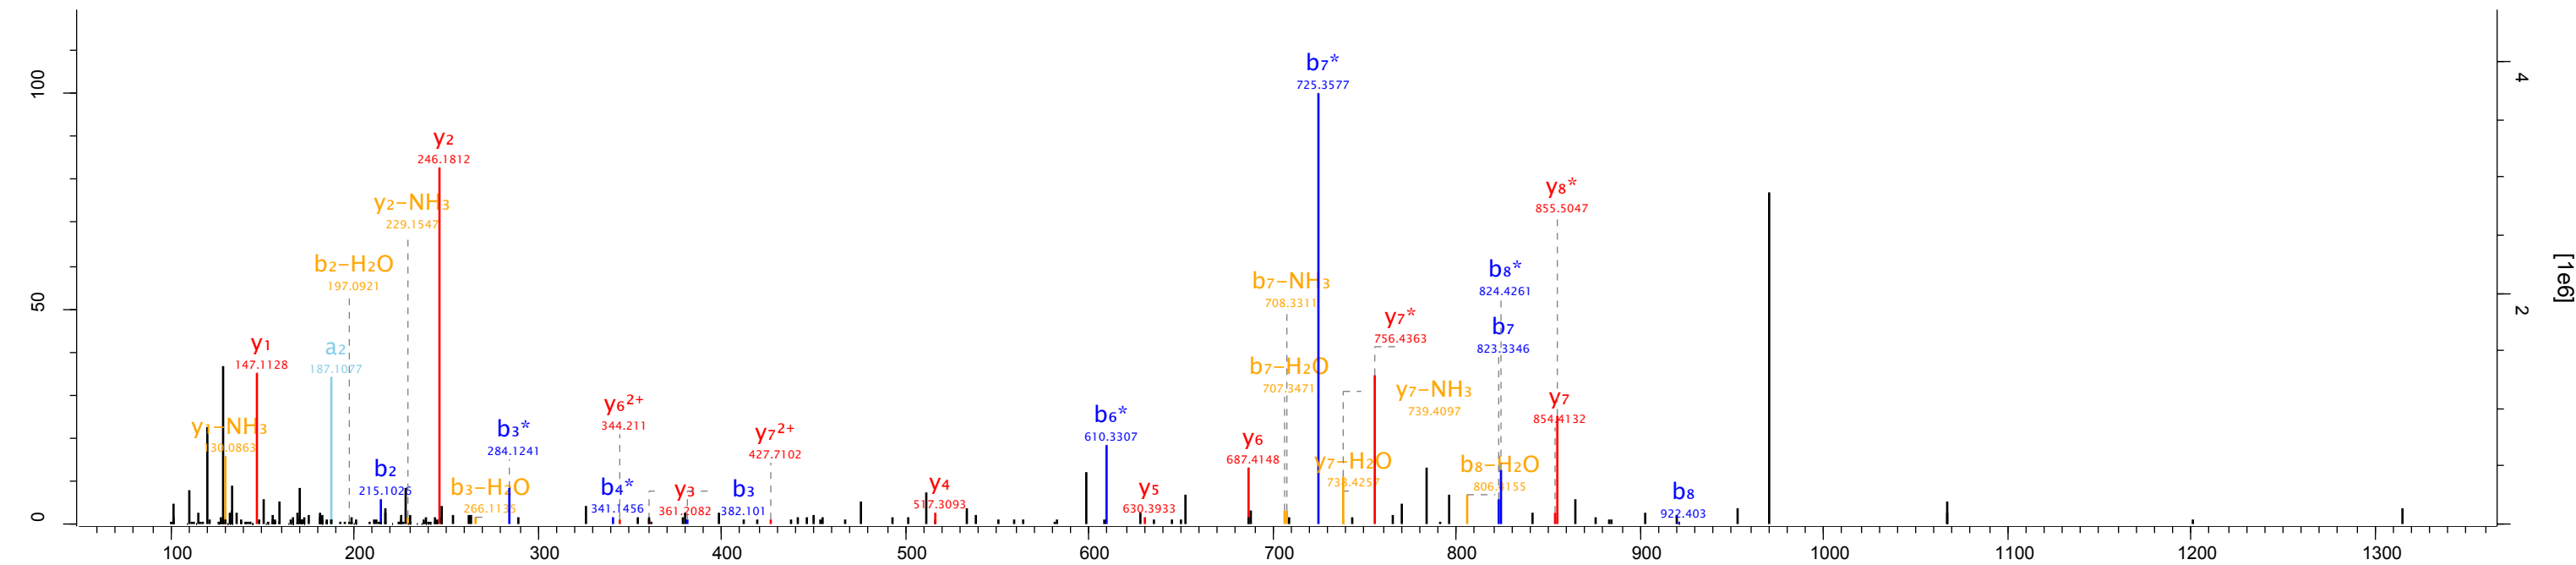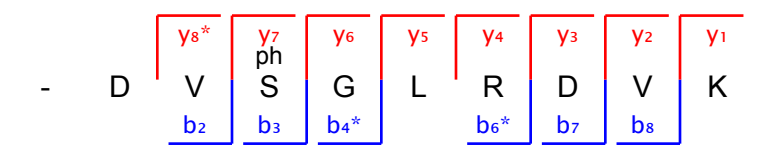

Raw file: 20150812\_A375SR\_Phospho\_BR1\_05  
 Scan: 8898 Method: FTMS; HCD Score: 118.08 m/z: 640.28 Gene names: MAP3K1

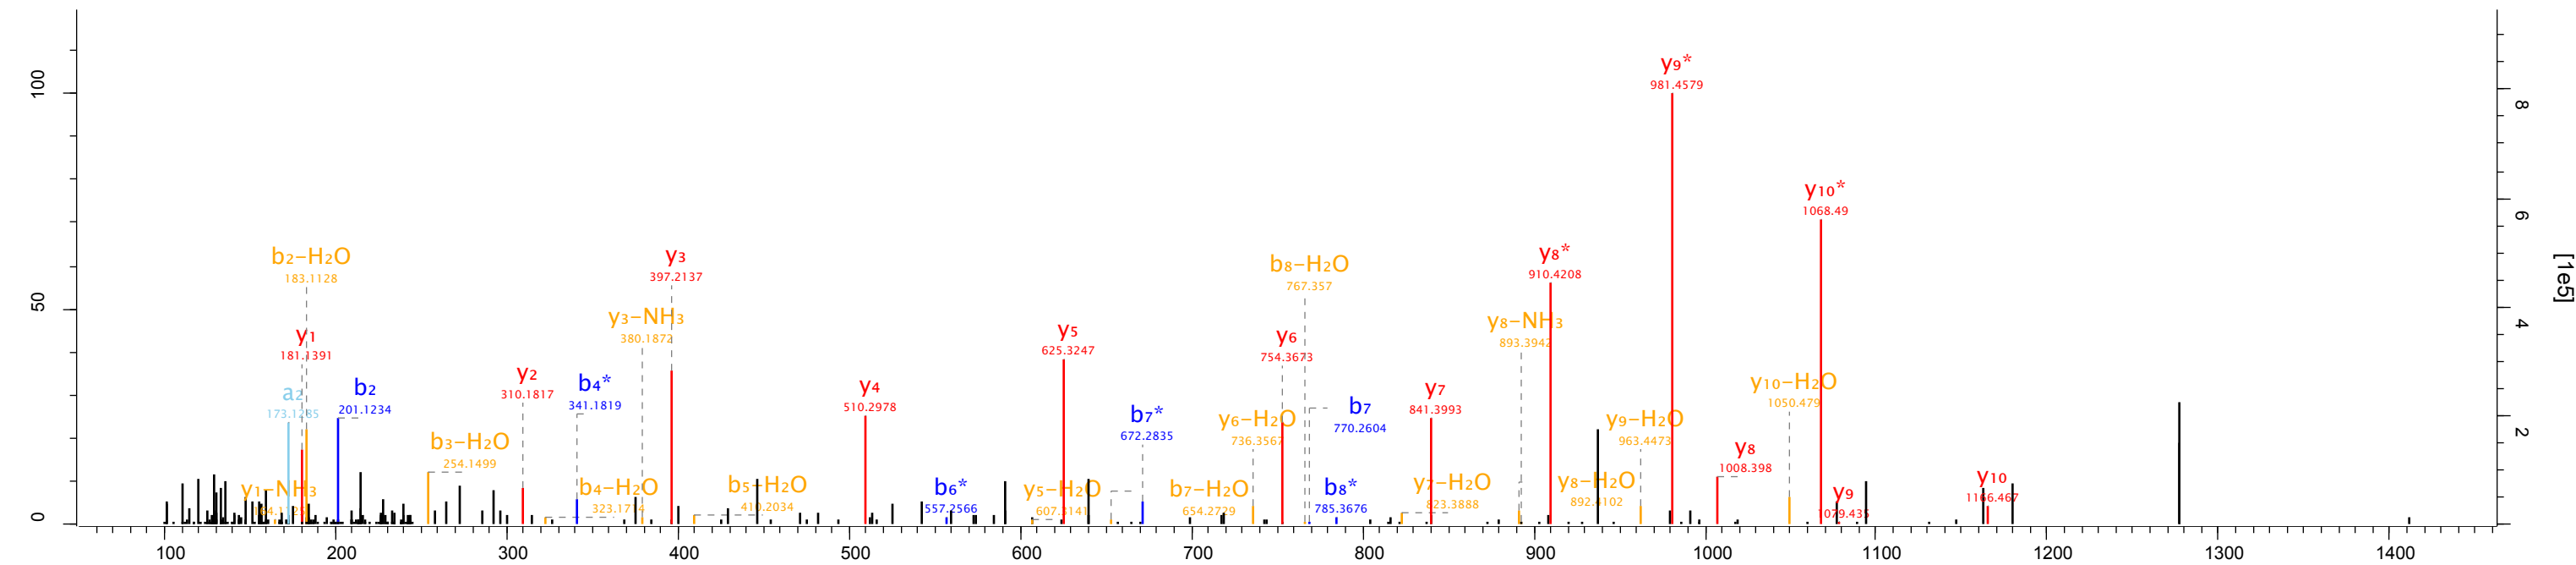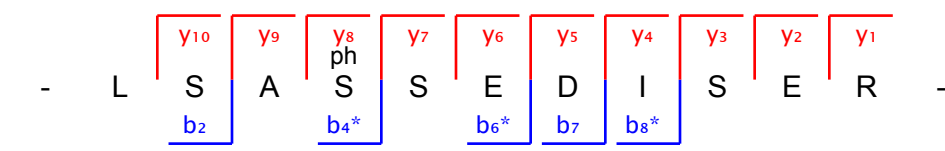

Raw file: 20150812\_A375SR\_Phospho\_BR1\_05  
 Scan: 8978 Method: FTMS; HCD Score: 100.27 m/z: 775.34 Gene names: GLI4

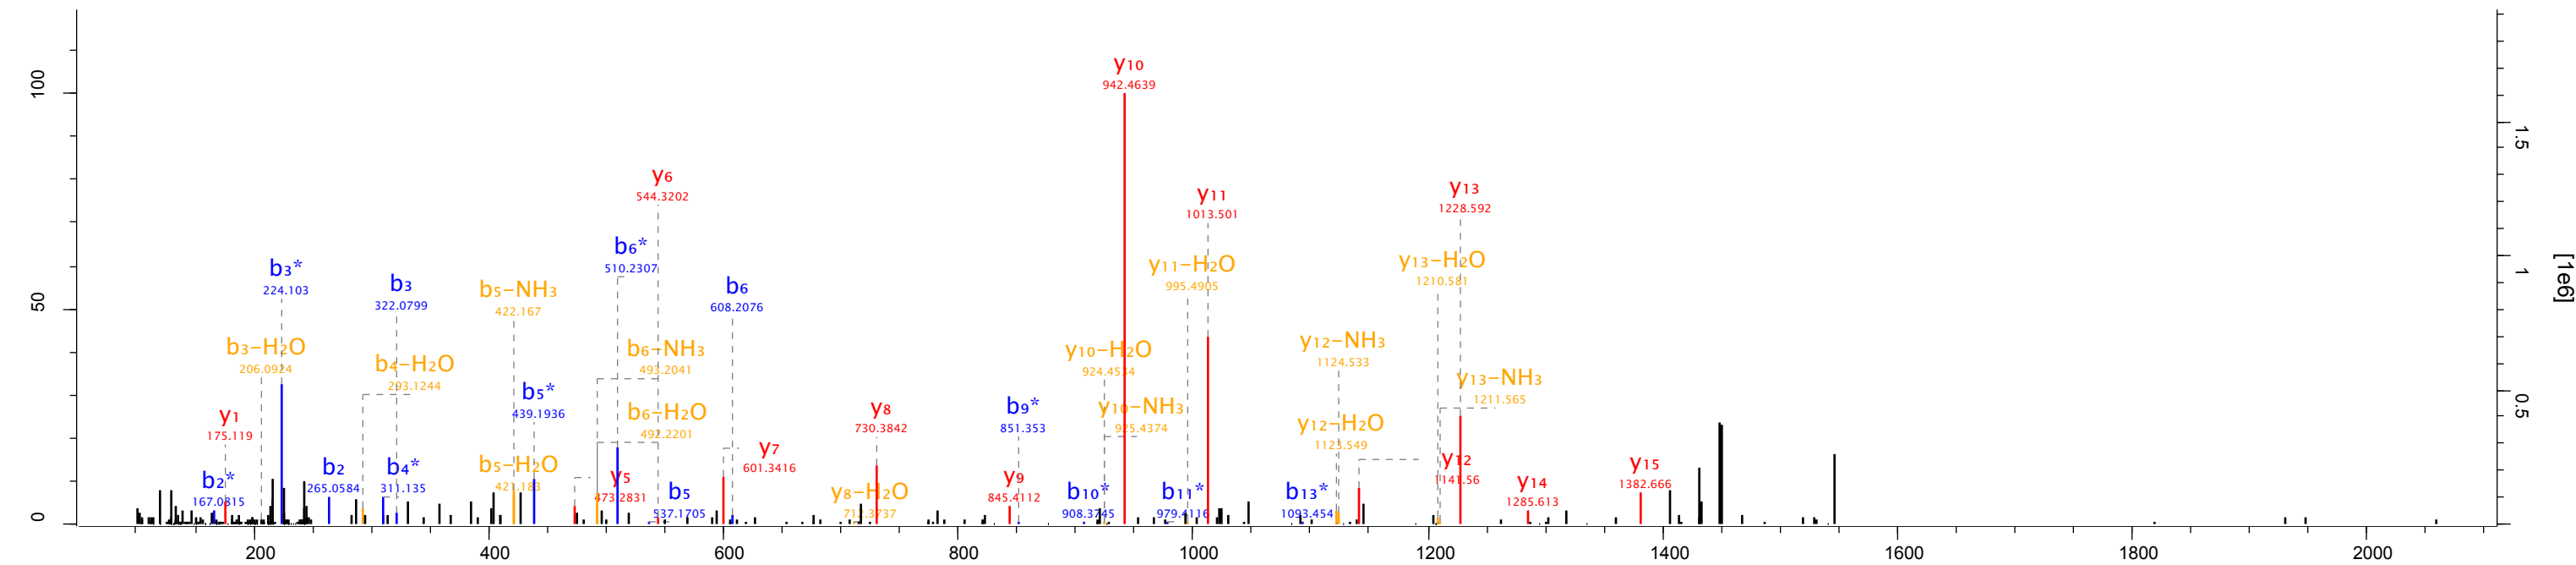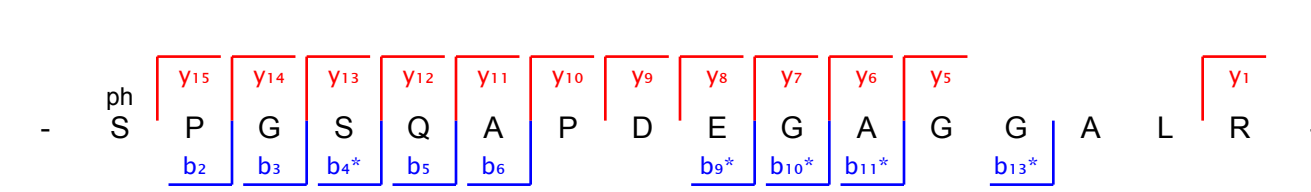

Raw file  
20150812\_A375SR\_Phospho\_BR1\_05

Scan 9138 Method FTMS; HCD Score 490.98 m/z 1045.43 Gene names EIF5B

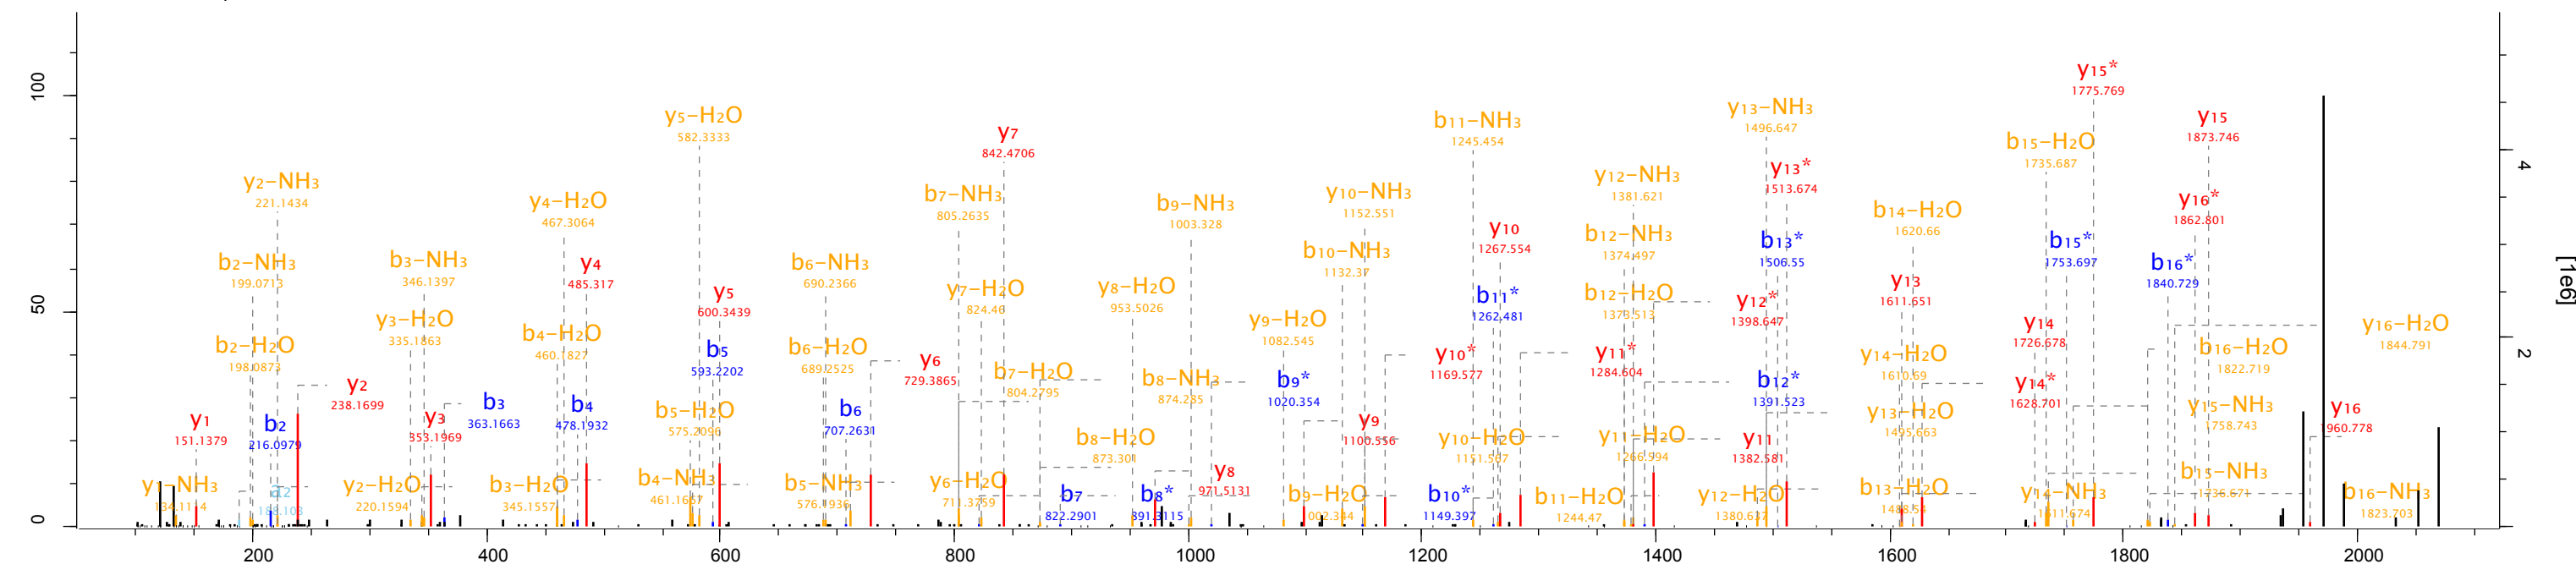

- Q S F D D N D S E E L E D K D S K -

y16
y15
y14
y13
y12\*
y11
y10  
ph
y9
y8
y7
y6
y5
y4
y3
y2
y1

b2
b3
b4
b5
b6
b7
b8\*
b9\*
b10\*
b11\*
b12\*
b13\*
b15\*
b16\*



Raw file: 20150812\_A375SR\_Phospho\_BR1\_05  
 Scan: 9378 Method: FTMS; HCD Score: 142.67 m/z: 707.33 Gene names: ZAK

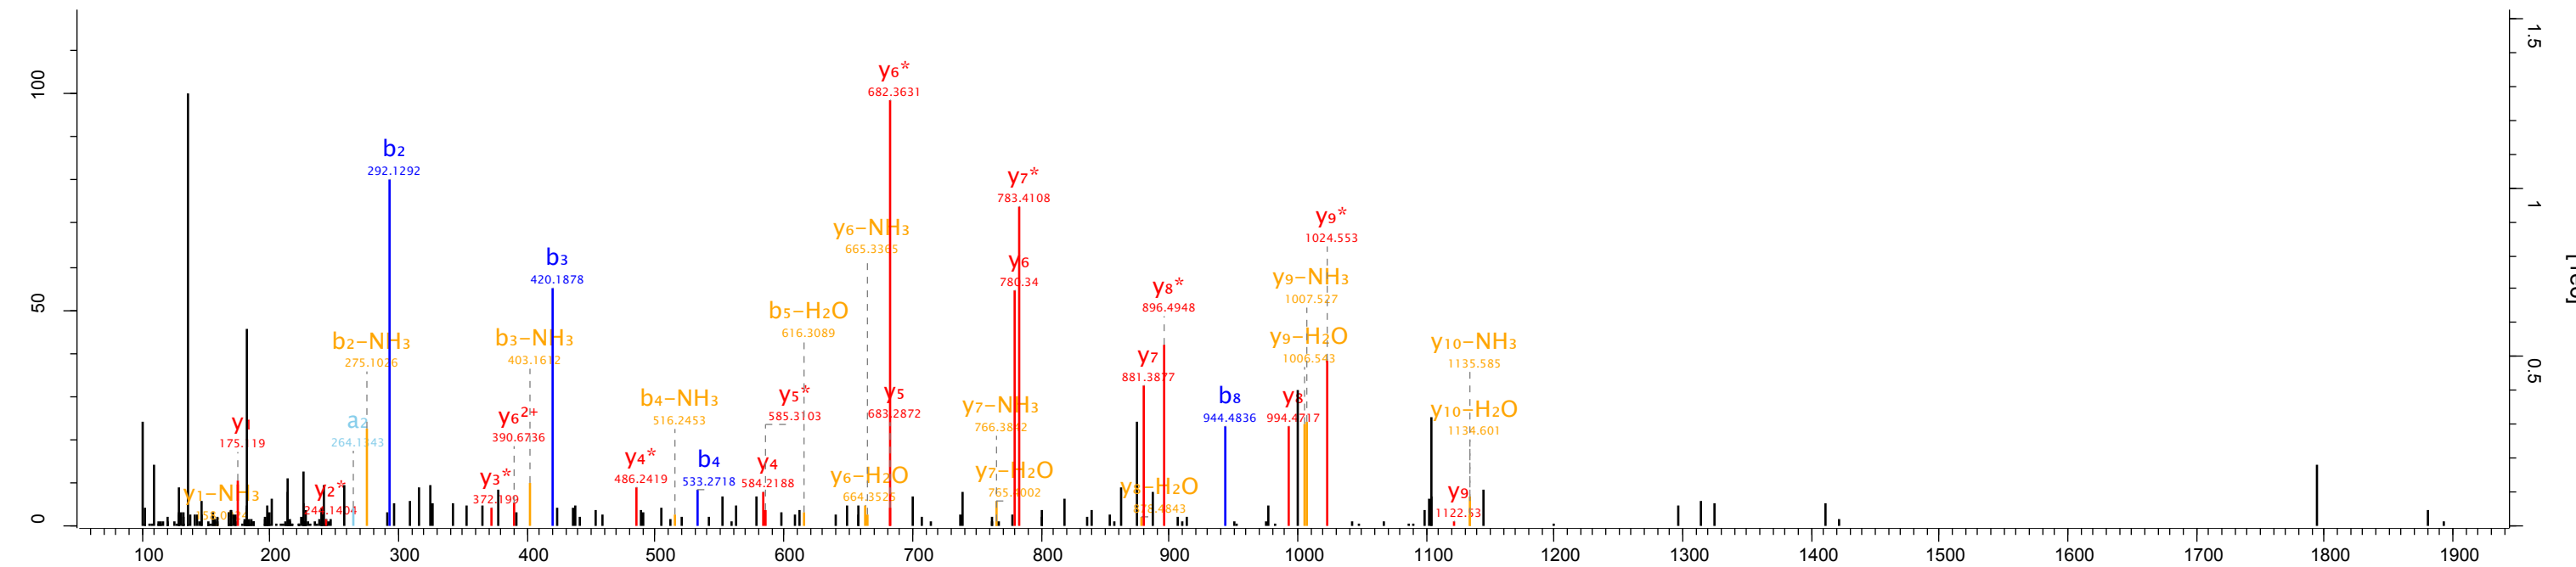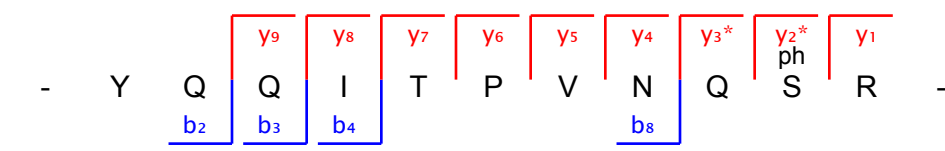

Raw file: 20150812\_A375SR\_Phospho\_BR1\_05  
 Scan: 9418 Method: FTMS; HCD Score: 210.22 m/z: 860.67 Gene names: RBMX;RBMXL1

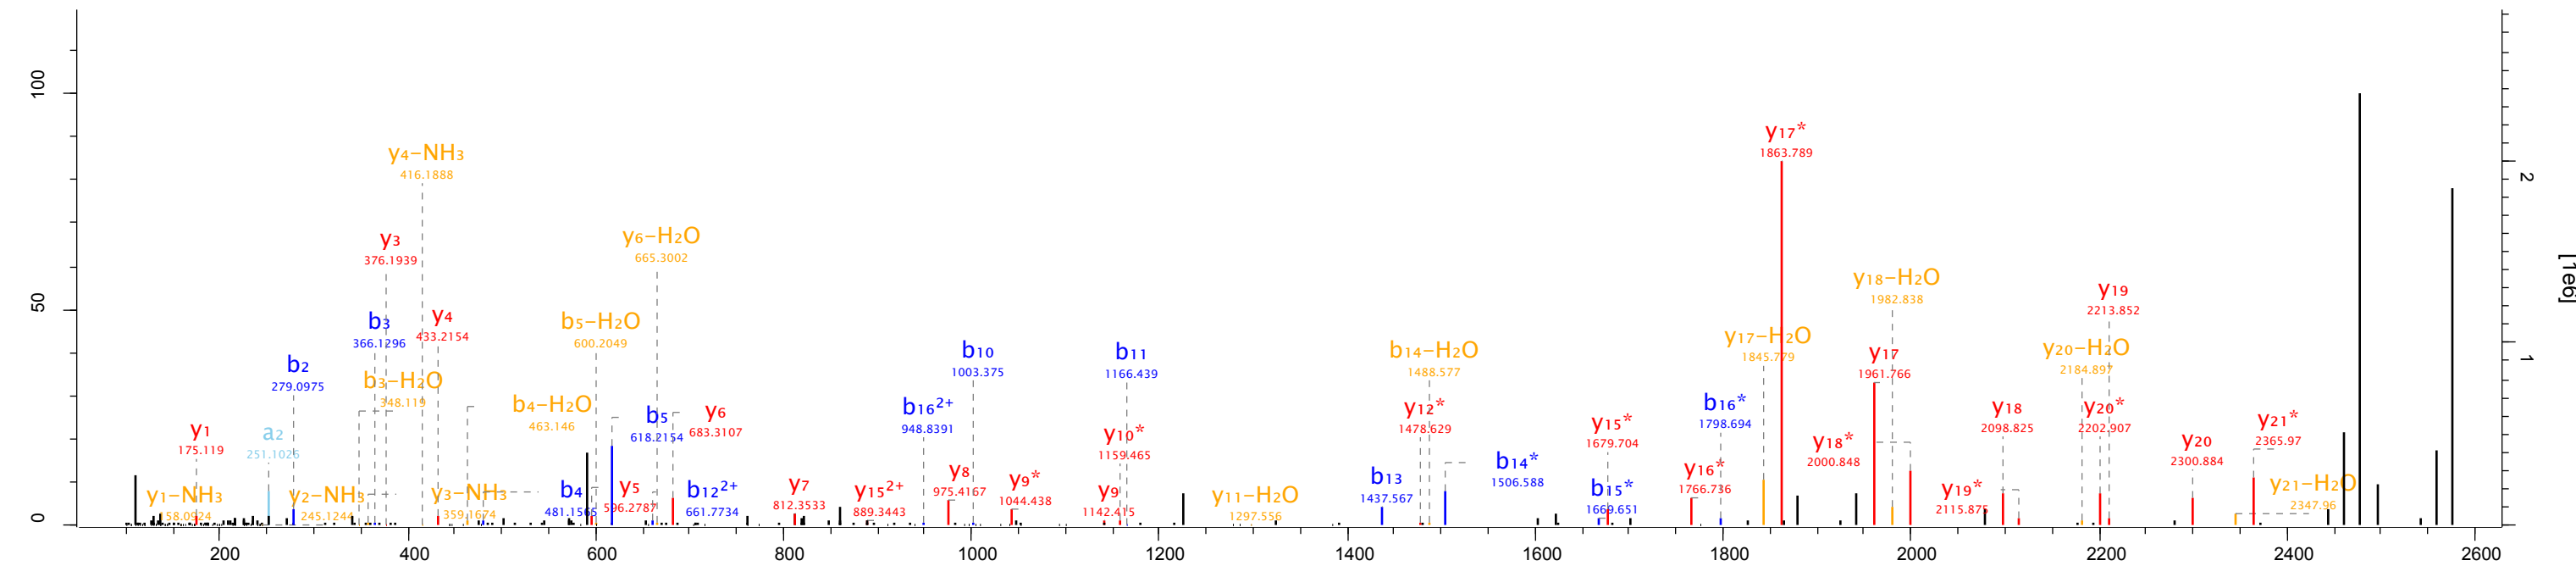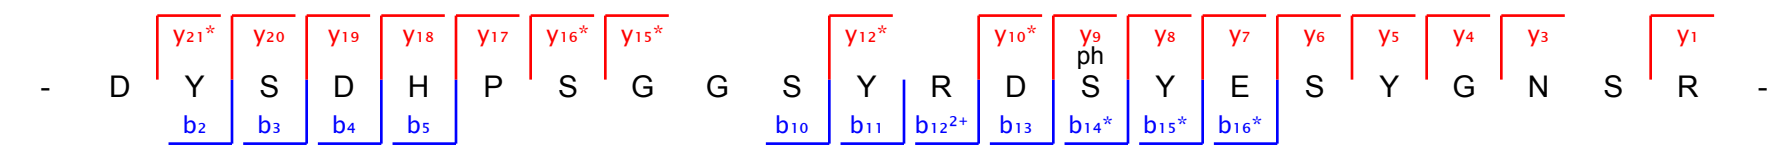

Raw file 20150812\_A375SR\_Phospho\_BR1\_05 Scan 9488 Method FTMS; HCD Score 277.62 m/z 1087.93 Gene names FARP1

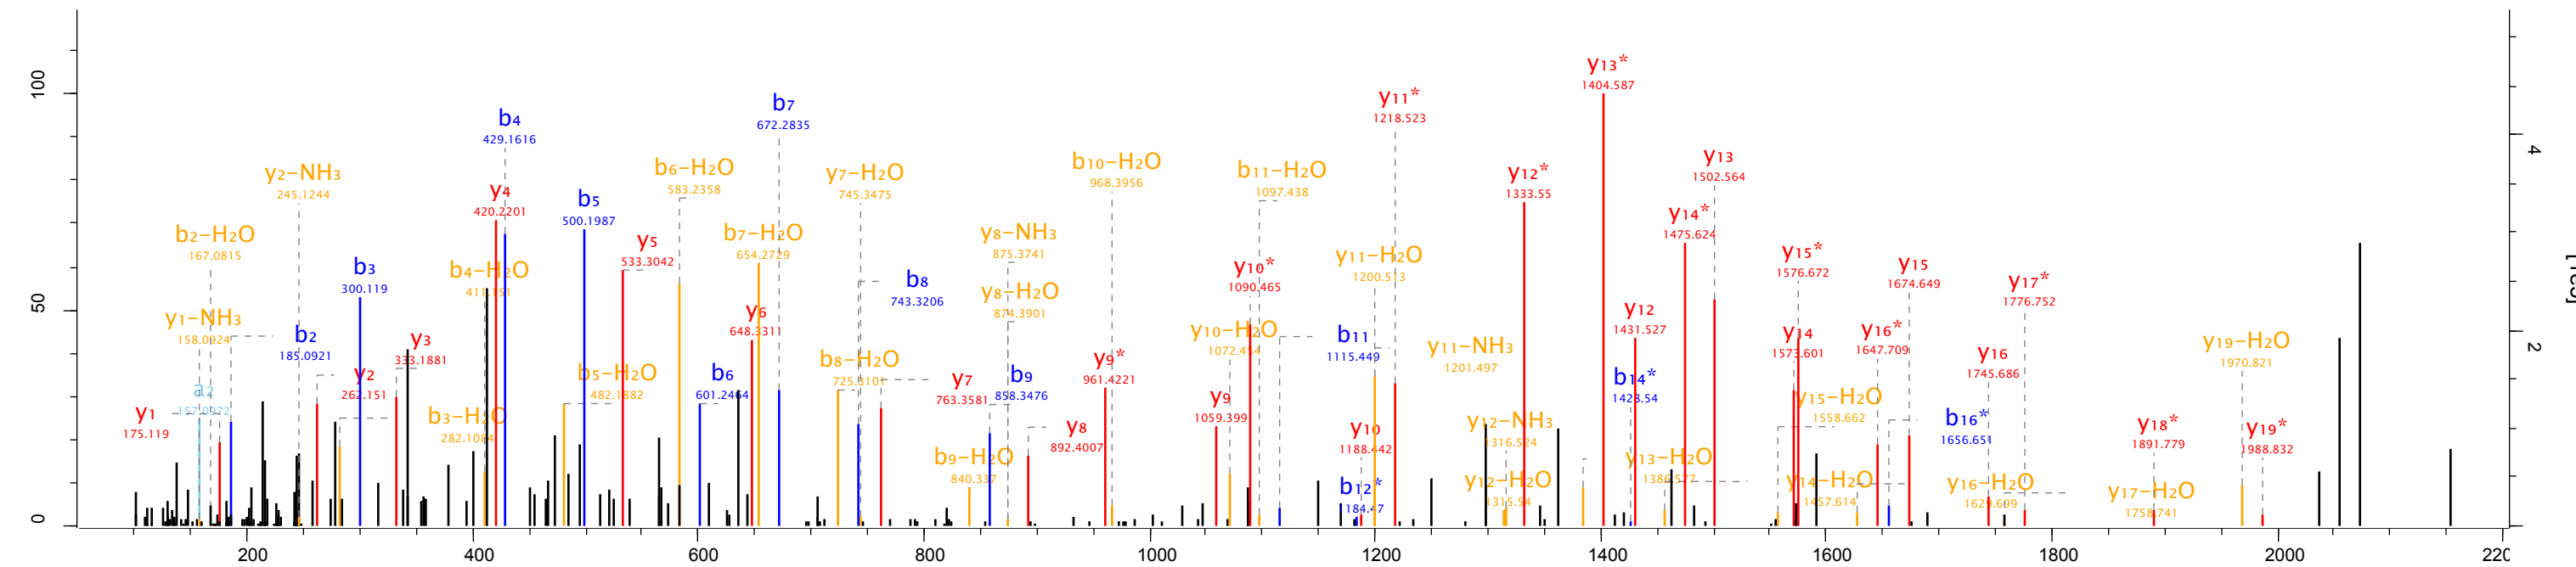

- S P D E A T A A D Q E S E D D L S A S R -

y19\*
y18\*
y17\*
y16
y15
y14
y13
y12
y11\*
y10
y9
y8
y7
y6
y5
y4
y3
y2
y1

b2
b3
b4
b5
b6
b7
b8
b9
b11
b12\*
b14\*
b16\*

Raw file 20150812\_A375SR\_Phospho\_BR1\_05 Scan 9498 Method FTMS; HCD Score 188.97 m/z 872.39 Gene names CRTCI

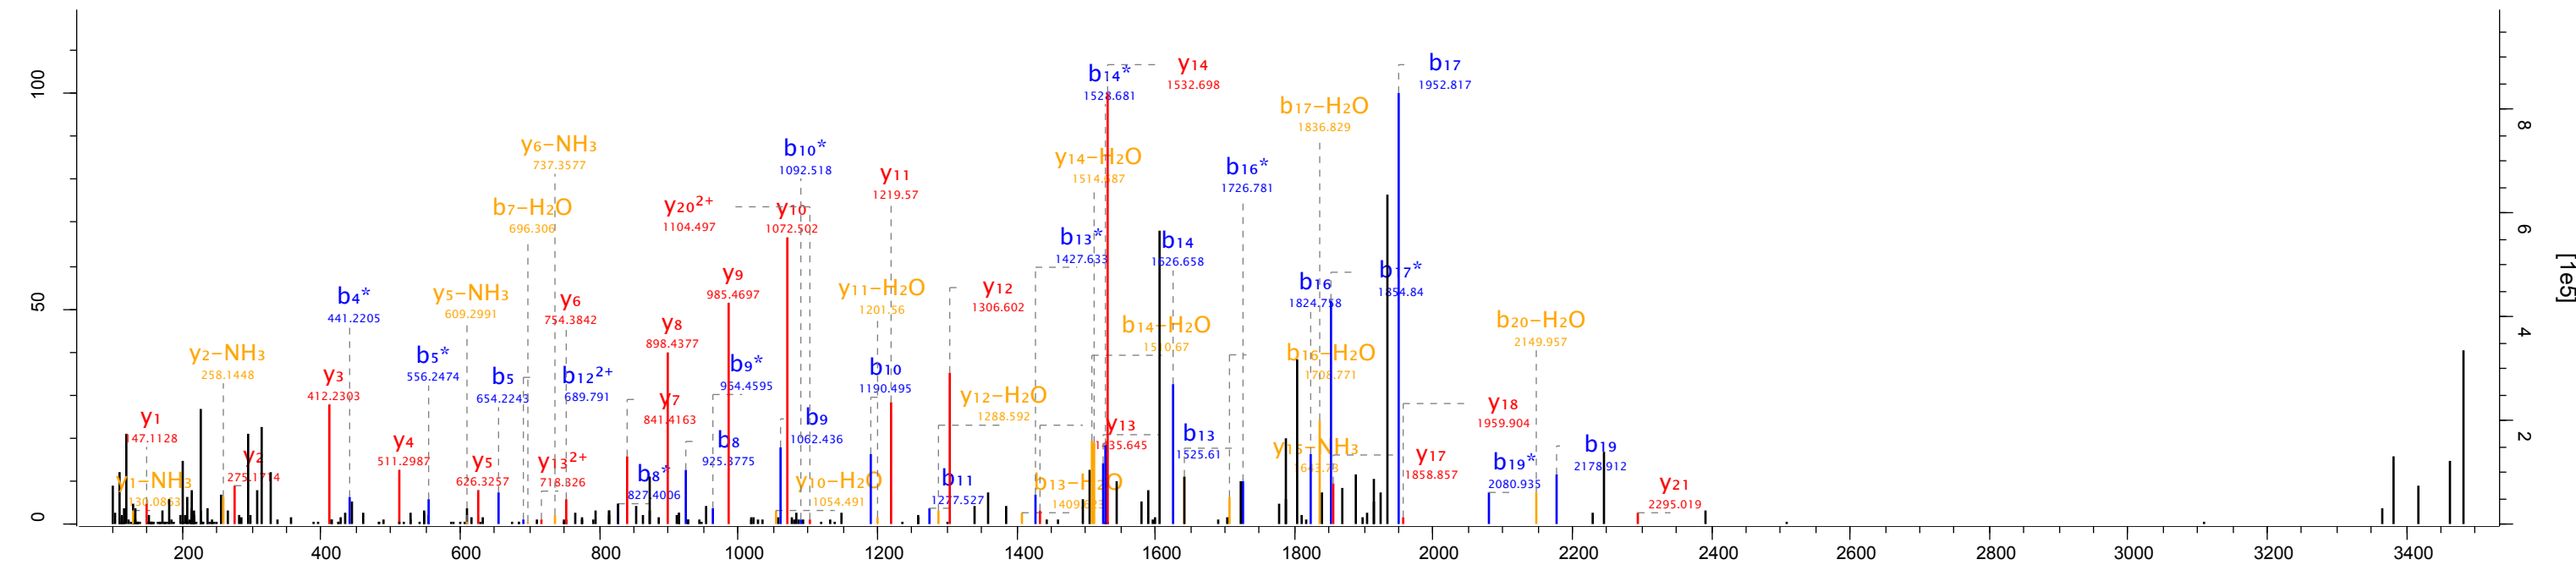

- R T N S D S A L H Q S T M ox T P T Q P E S F S S G S Q D V H Q K -

Fragmentation mapping: b4\* (S), b5 (D), b8 (L), b9 (H), b10 (Q), b11 (S), b12<sup>2+</sup> (T), b13 (M), b14 (T), b16 (T), b17 (Q), b19 (E), b14 (P), b13 (E), b12 (S), b11 (F), b10 (S), b9 (S), b8 (G), b7 (S), b6 (Q), b5 (D), b4 (V), b3 (H), b2 (Q), b1 (K)

Raw file: 20150812\_A375SR\_Phospho\_BR1\_05  
 Scan: 9578 Method: FTMS; HCD Score: 267.54 m/z: 842.89 Gene names: SLK

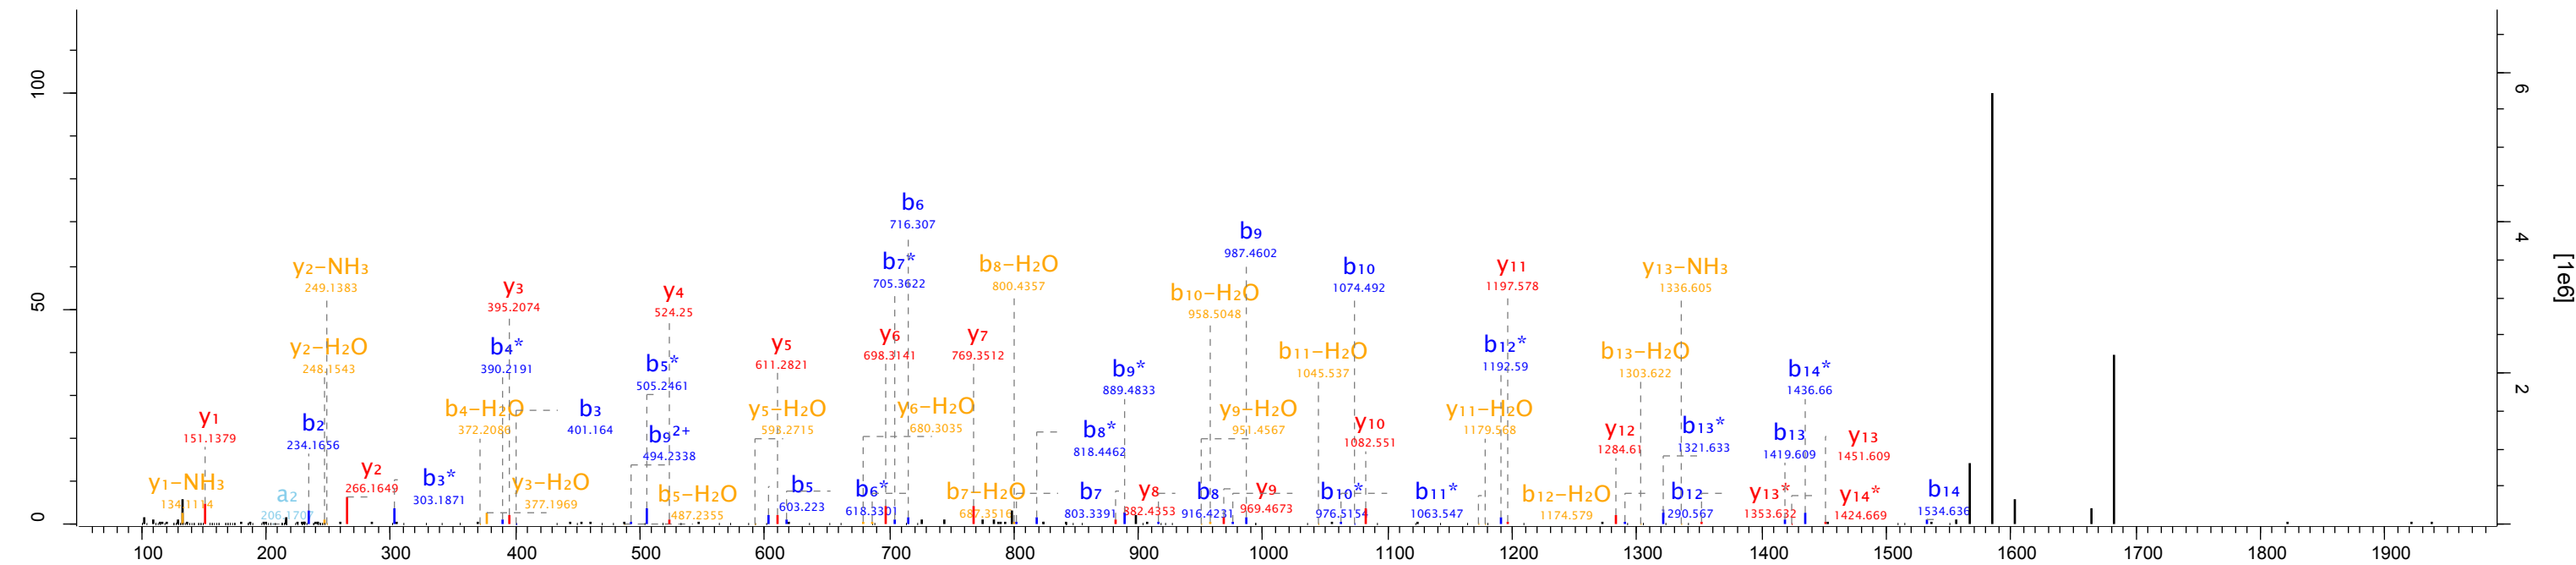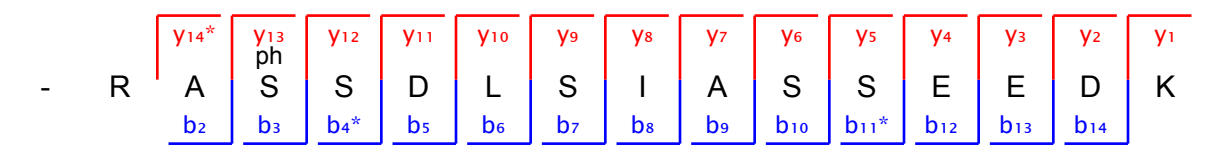

Raw file: 20150812\_A375SR\_Phospho\_BR1\_06  
 Scan: 10108 Method: FTMS; HCD Score: 296.91 m/z: 996.43 Gene names: KTN1

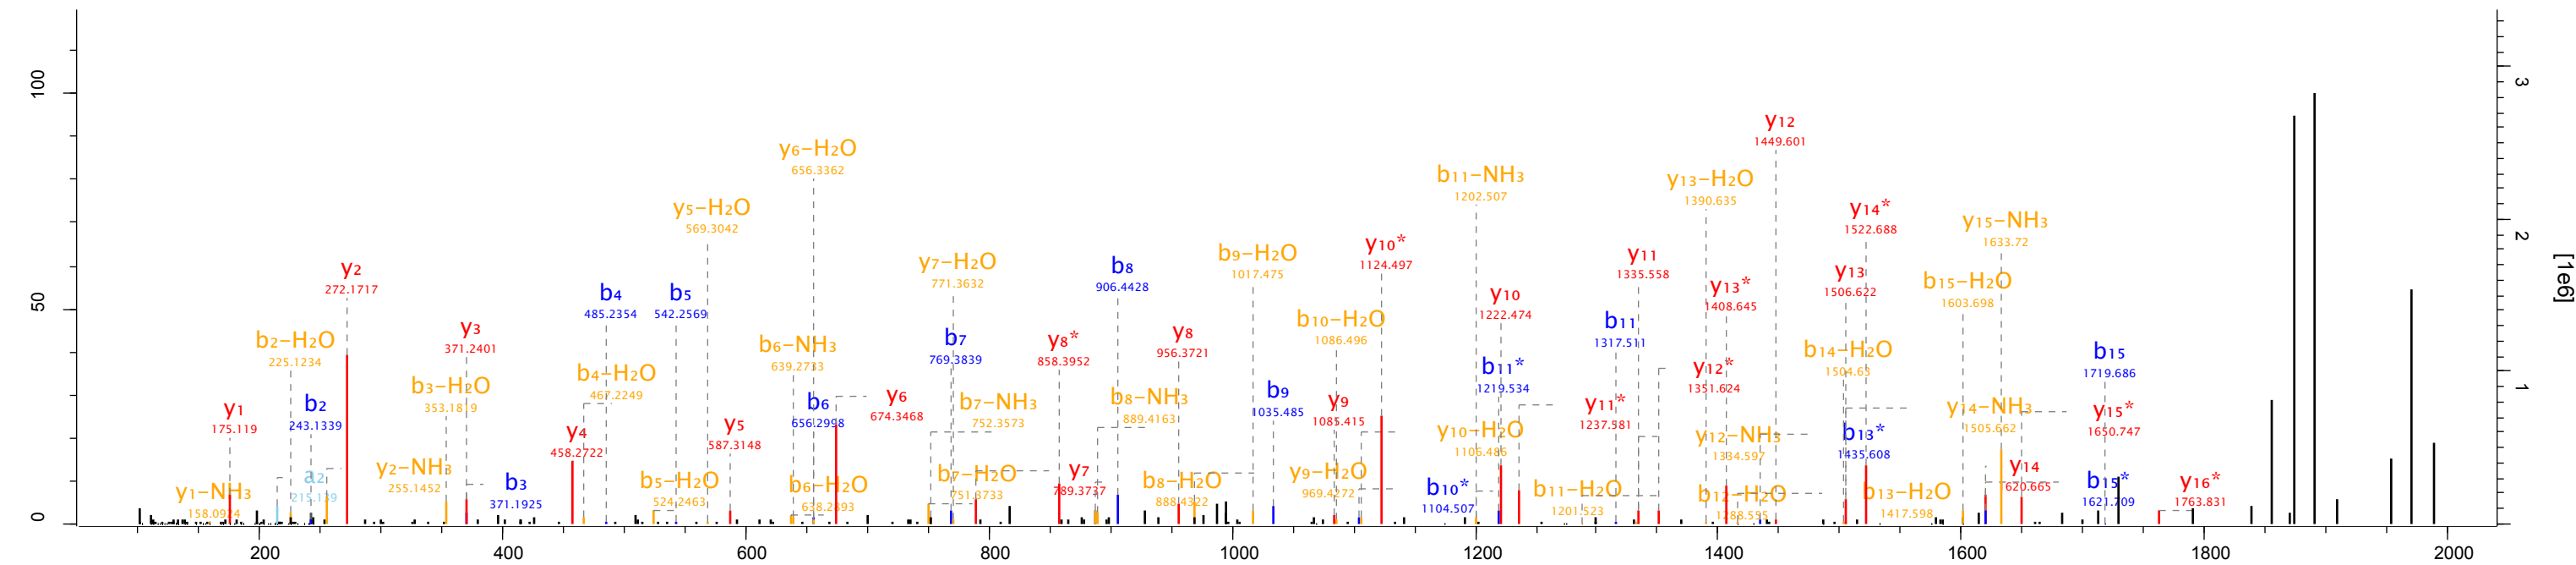

- E I Q N G N L H E S D S E S V P R -

Fragmentation mapping (b and y ions):

- b2: I
- b3: Q
- b4: N
- b5: G
- b6: N
- b7: L
- b8: H
- b9: E
- b10\*: S
- b11: D
- b13\*: S
- b15: V

Fragmentation mapping (y ions):

- y1: R
- y2: P
- y3: V
- y4: S
- y5: E
- y6: S
- y7: D
- y8: S
- y9: E
- y10: H
- y11: L
- y12: N
- y13: G
- y14: N
- y15: Q
- y16\*: I

Raw file 20150812\_A375SR\_Phospho\_BR1\_06 Scan 10658 Method FTMS; HCD Score 248.65 m/z 816.88 Gene names OTUD4

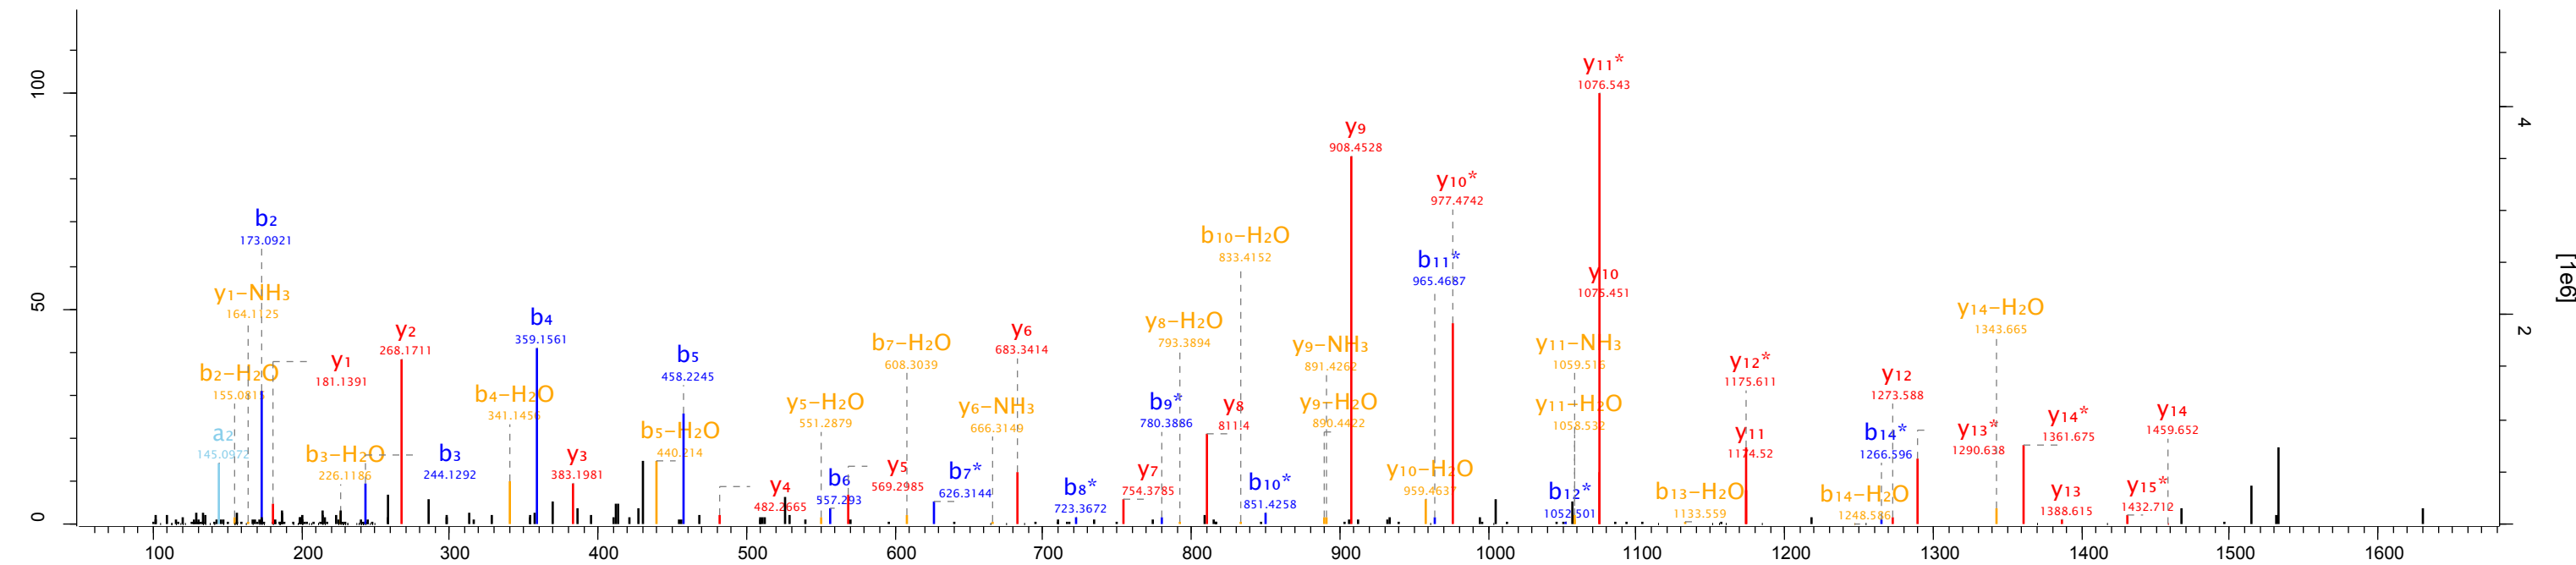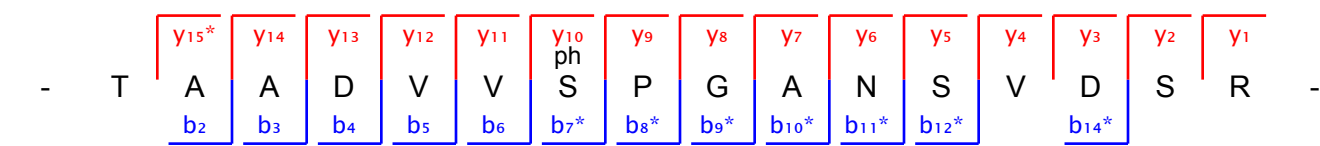

Raw file Scan Method Score m/z Gene names  
 20150812\_A375SR\_Phospho\_BR1\_06 10878 FTMS; HCD 226.23 871.89 POP1

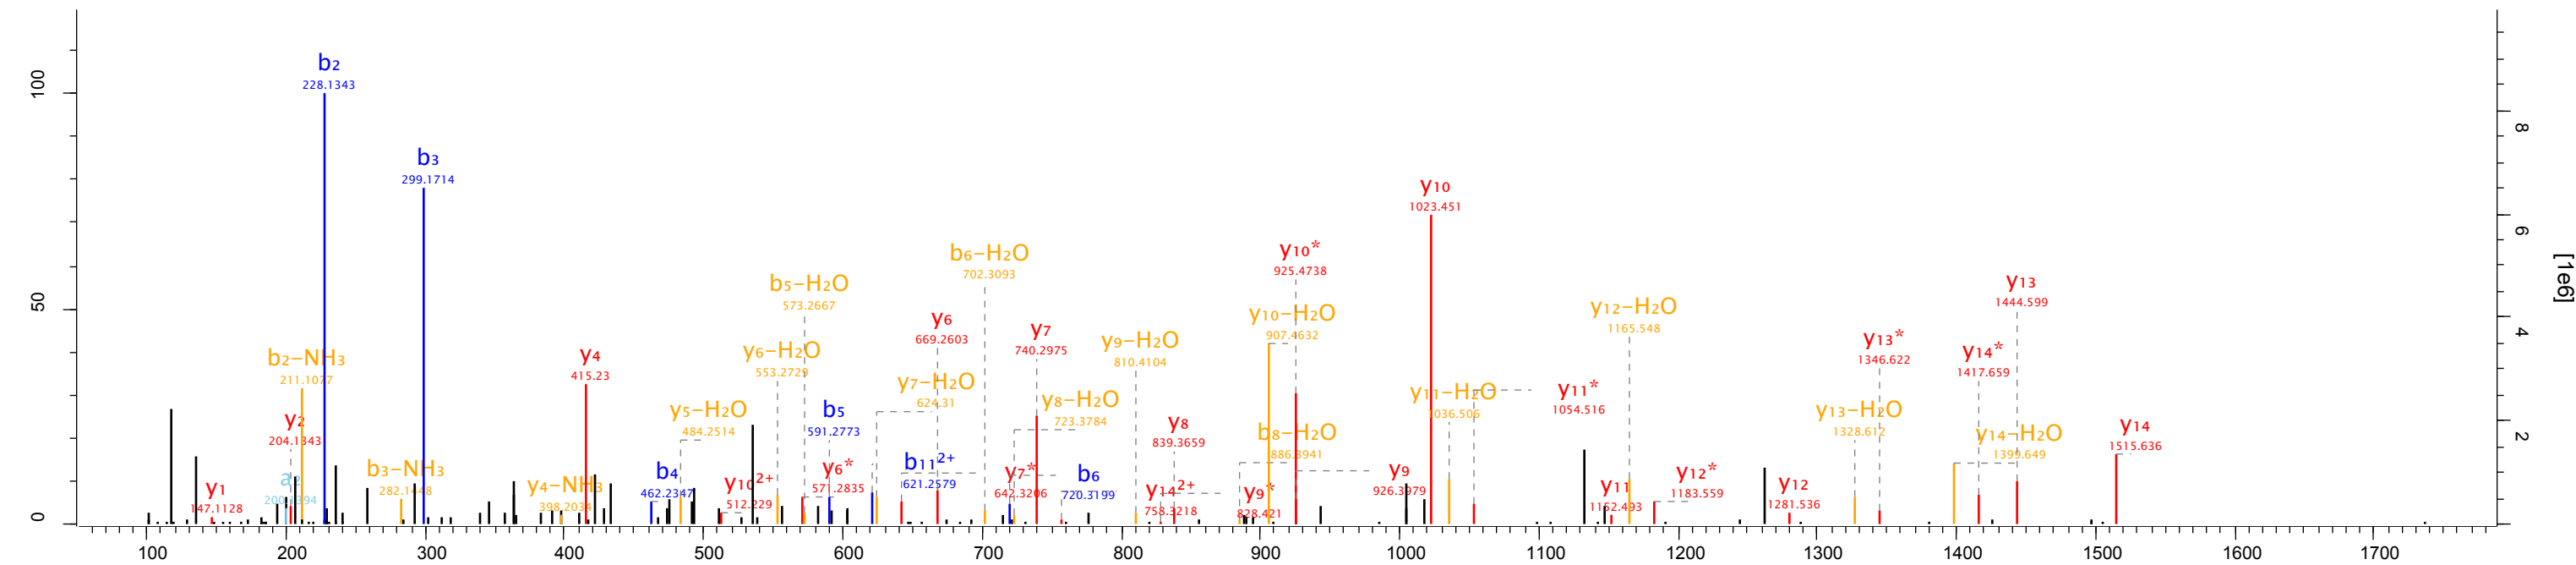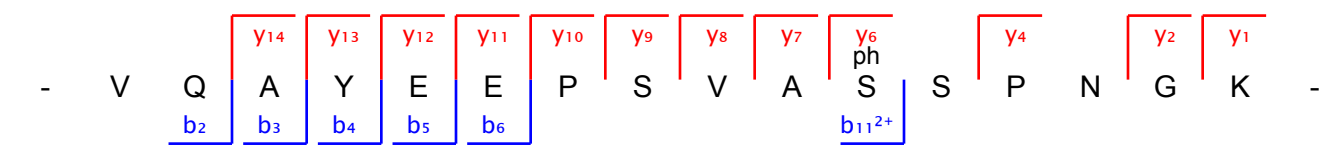



Raw file: 20150812\_A375SR\_Phospho\_BR1\_06  
 Scan: 1208 Method: FTMS; HCD Score: 132.67 m/z: 581.93 Gene names: NCOR2

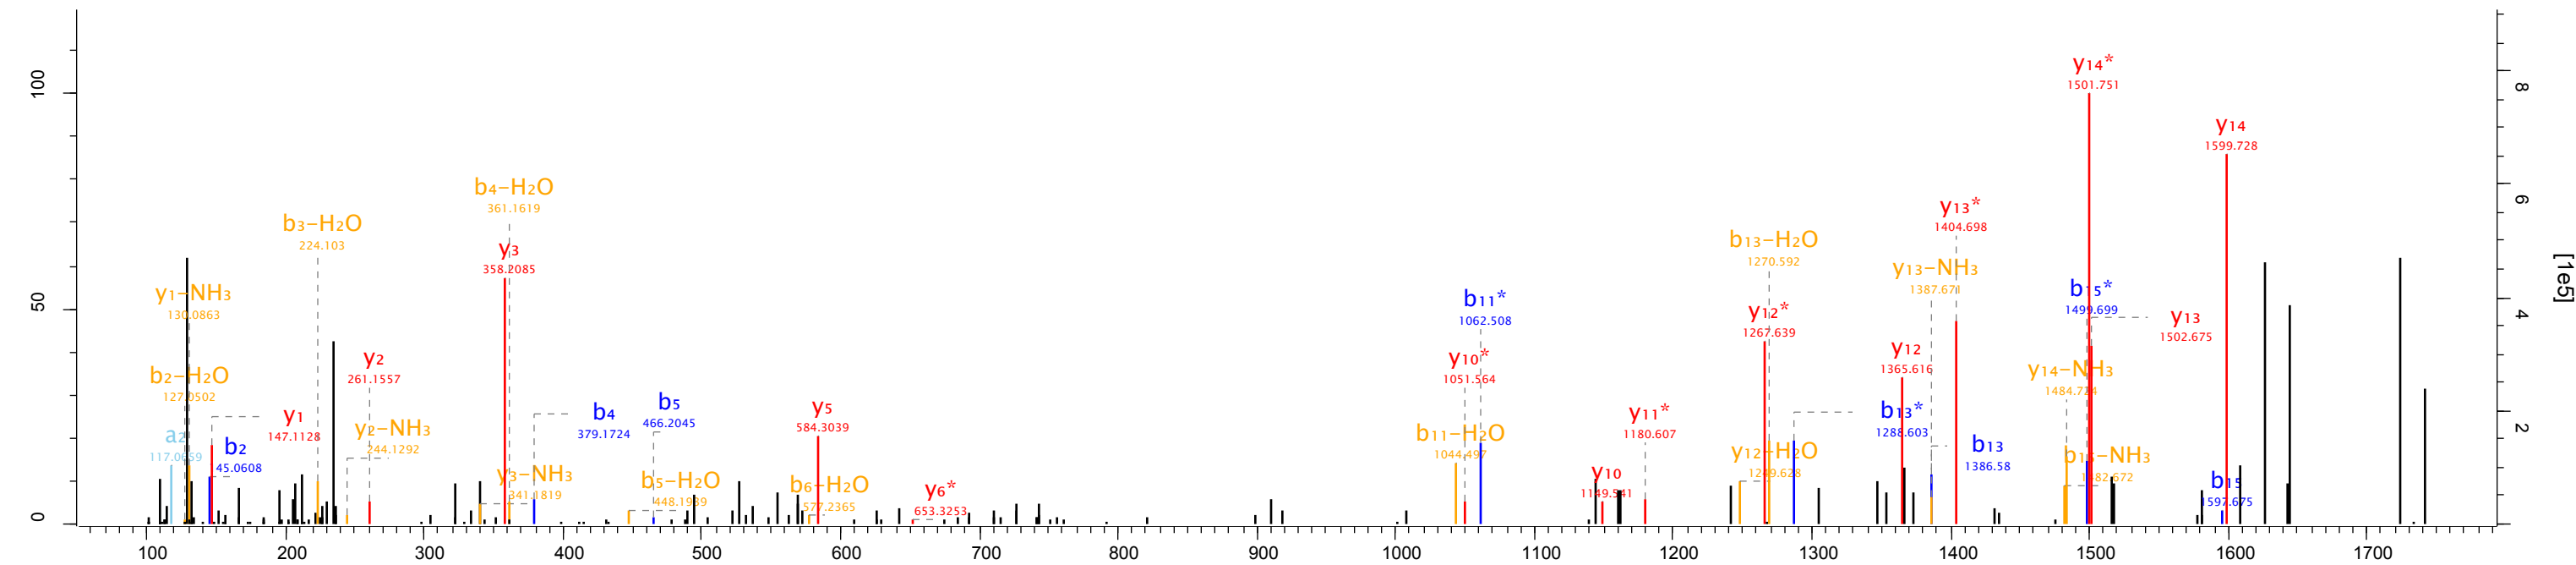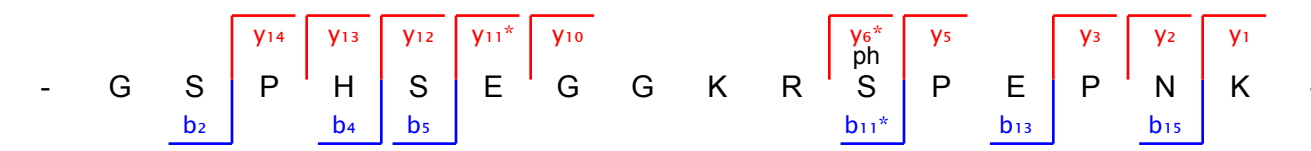

Raw file 20150812\_A375SR\_Phospho\_BR1\_06 Scan 12248 Method FTMS; HCD Score 210.11 m/z 946.39 Gene names TOR1AIP1

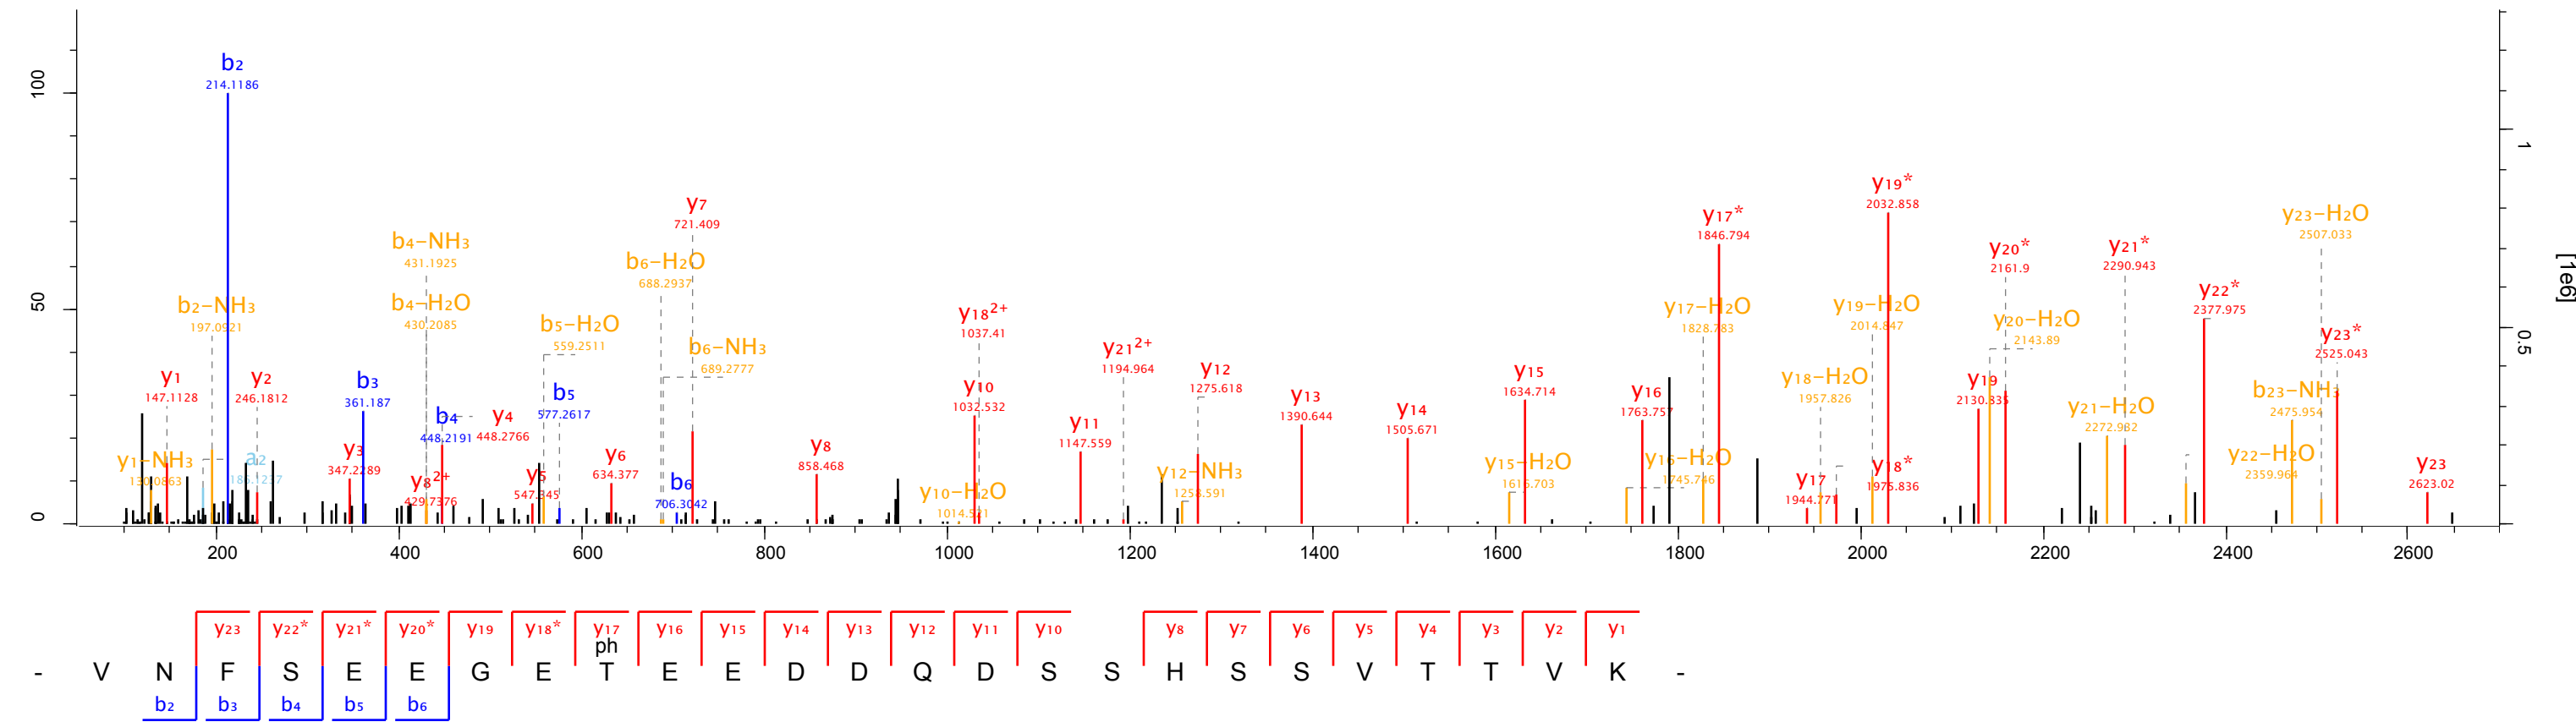

Raw file 20150812\_A375SR\_Phospho\_BR1\_06 Scan 12688 Method FTMS; HCD Score 85.18 m/z 861.4 Gene names GLCC11

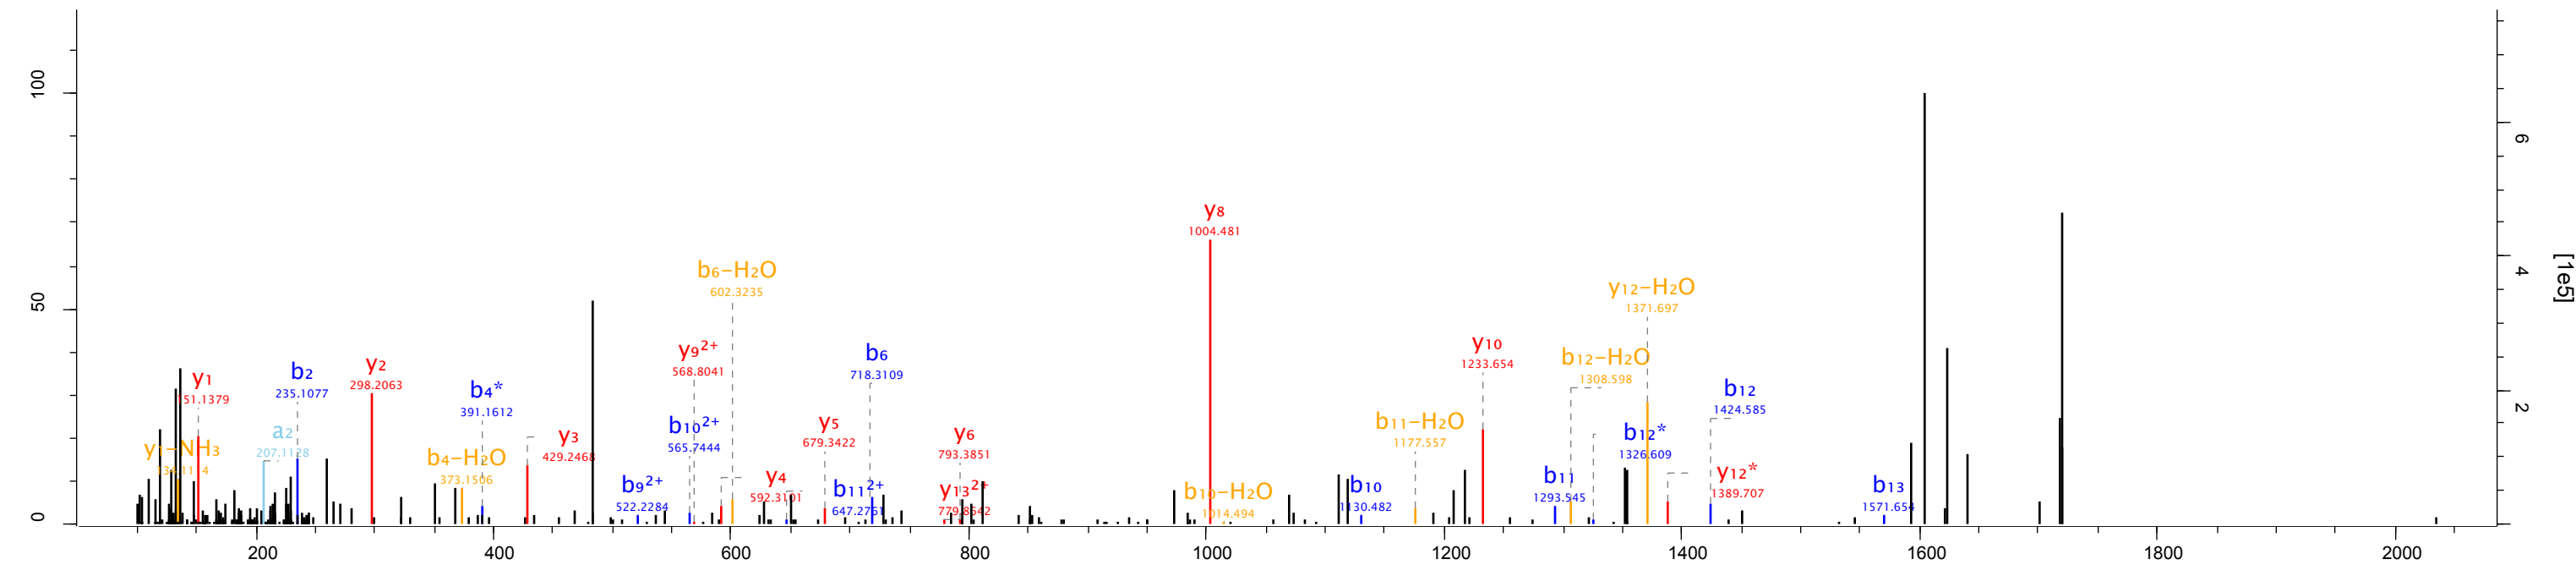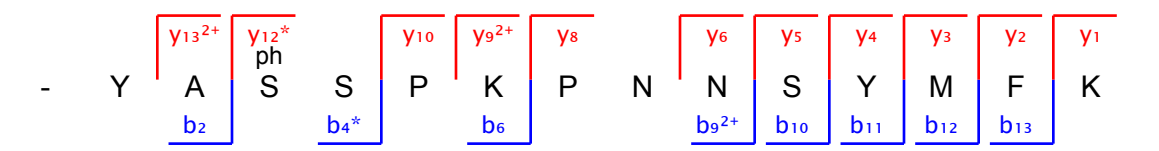

Raw file 20150812\_A375SR\_Phospho\_BR1\_06 Scan 12988 Method FTMS; HCD Score 167.35 m/z 772.38 Gene names WDR44

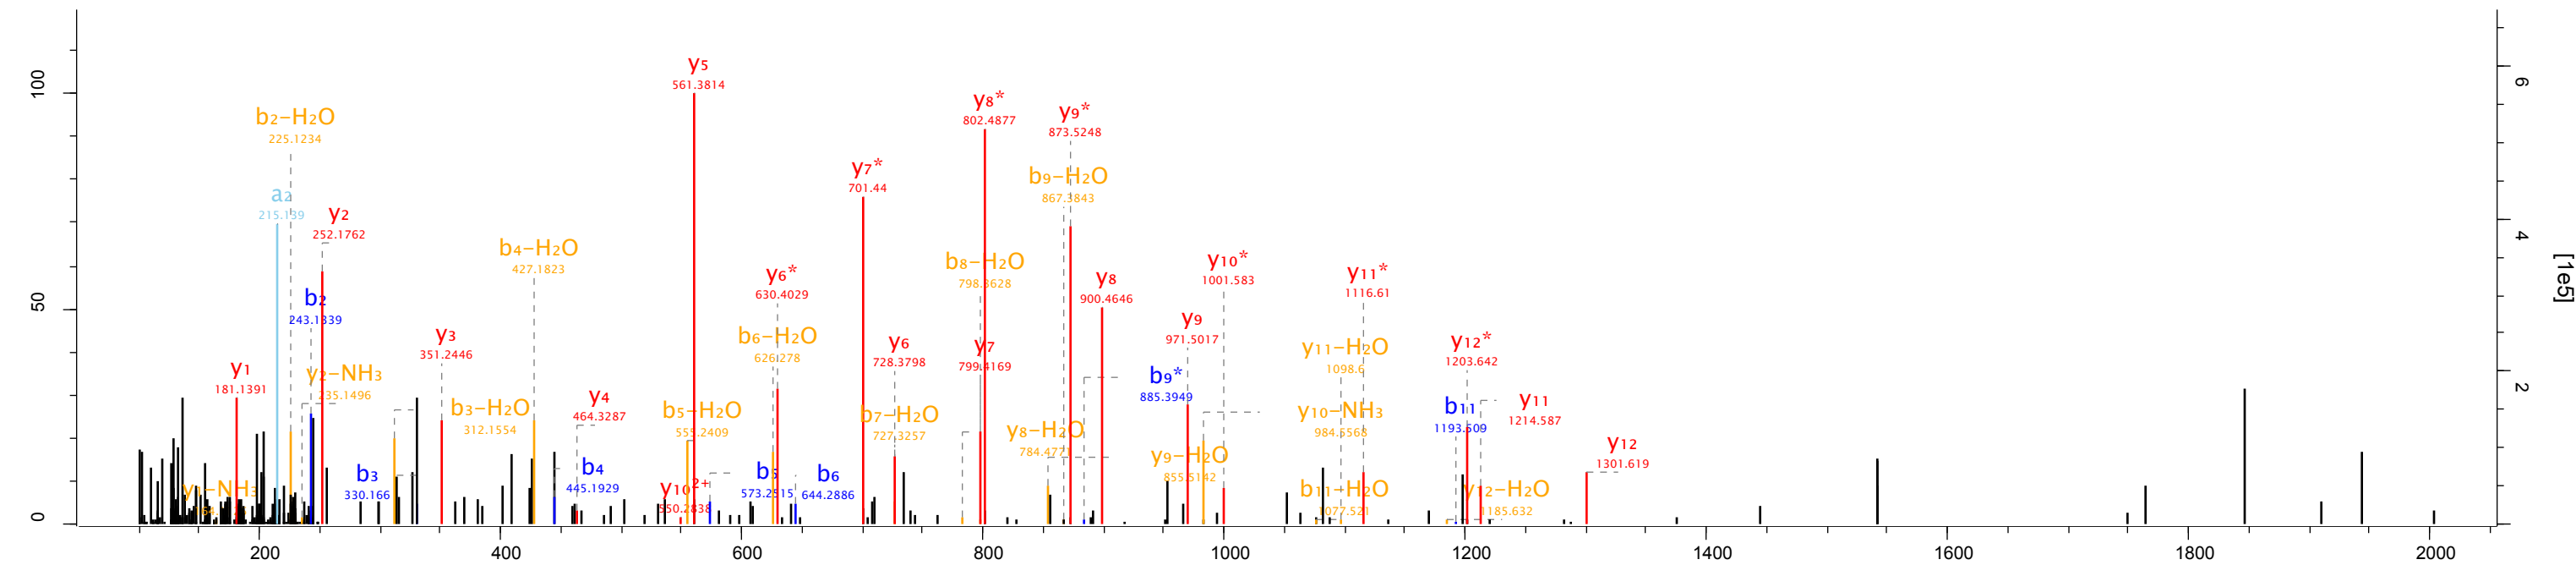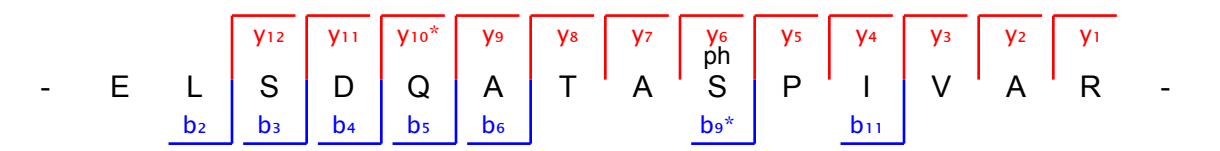

Raw file 20150812\_A375SR\_Phospho\_BR1\_06 Scan 13018 Method FTMS; HCD Score 73.17 m/z 680.34 Gene names BAIAP2L2

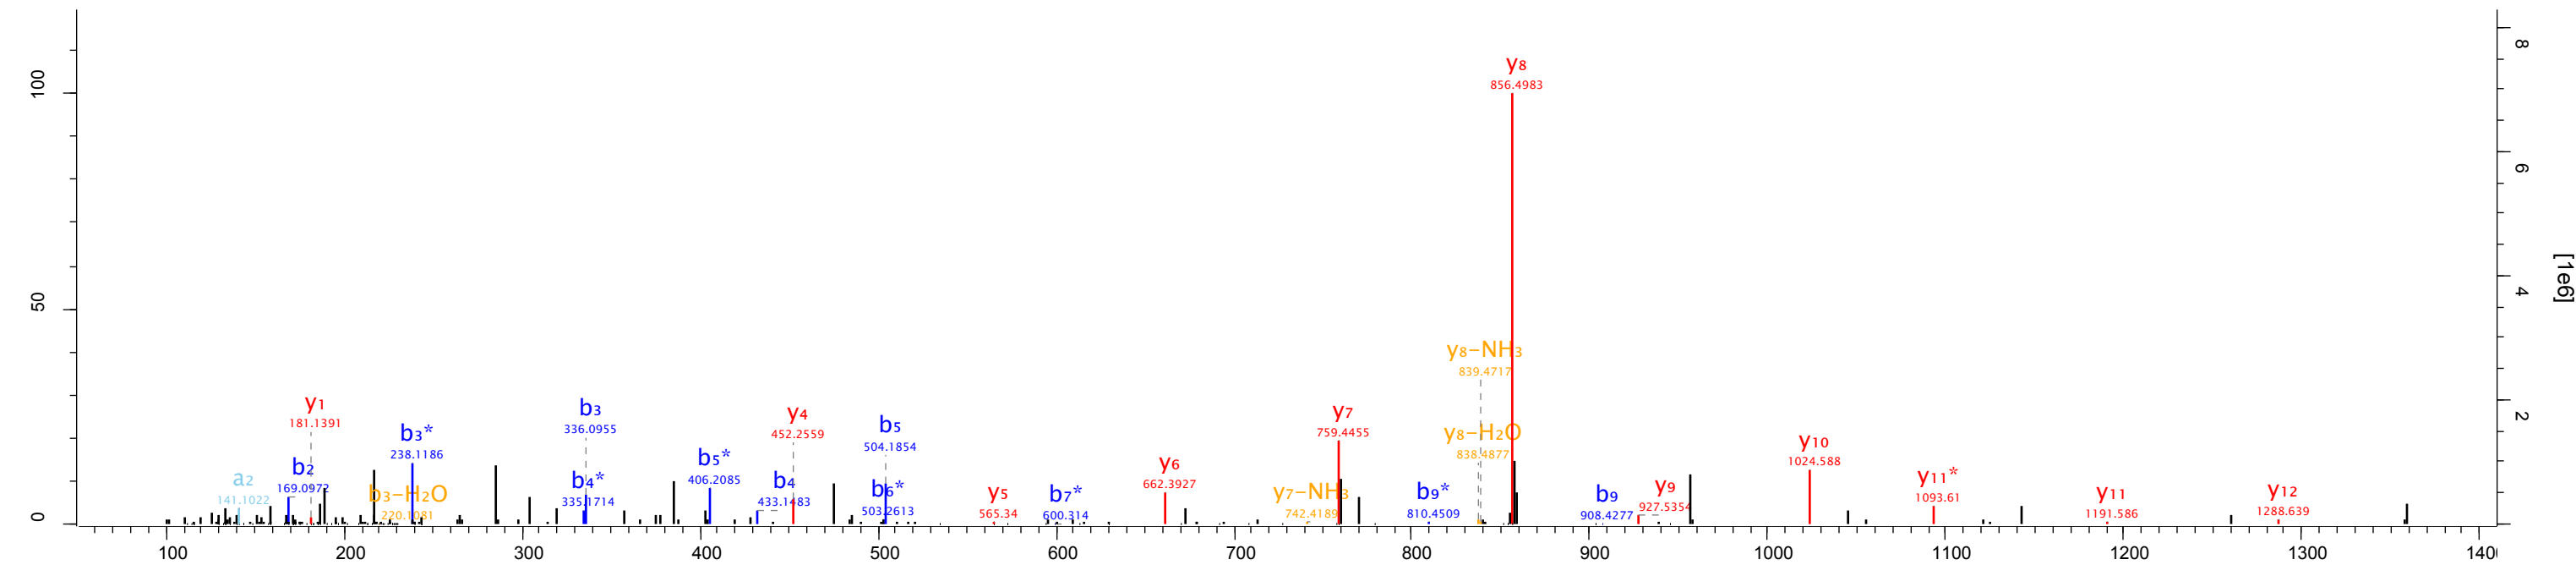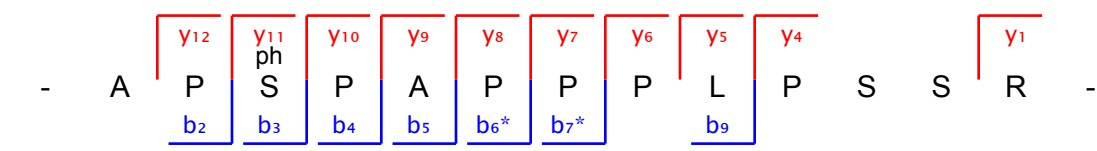

Raw file 20150812\_A375SR\_Phospho\_BR1\_06 Scan 13478 Method FTMS; HCD Score 71.08 m/z 556.27

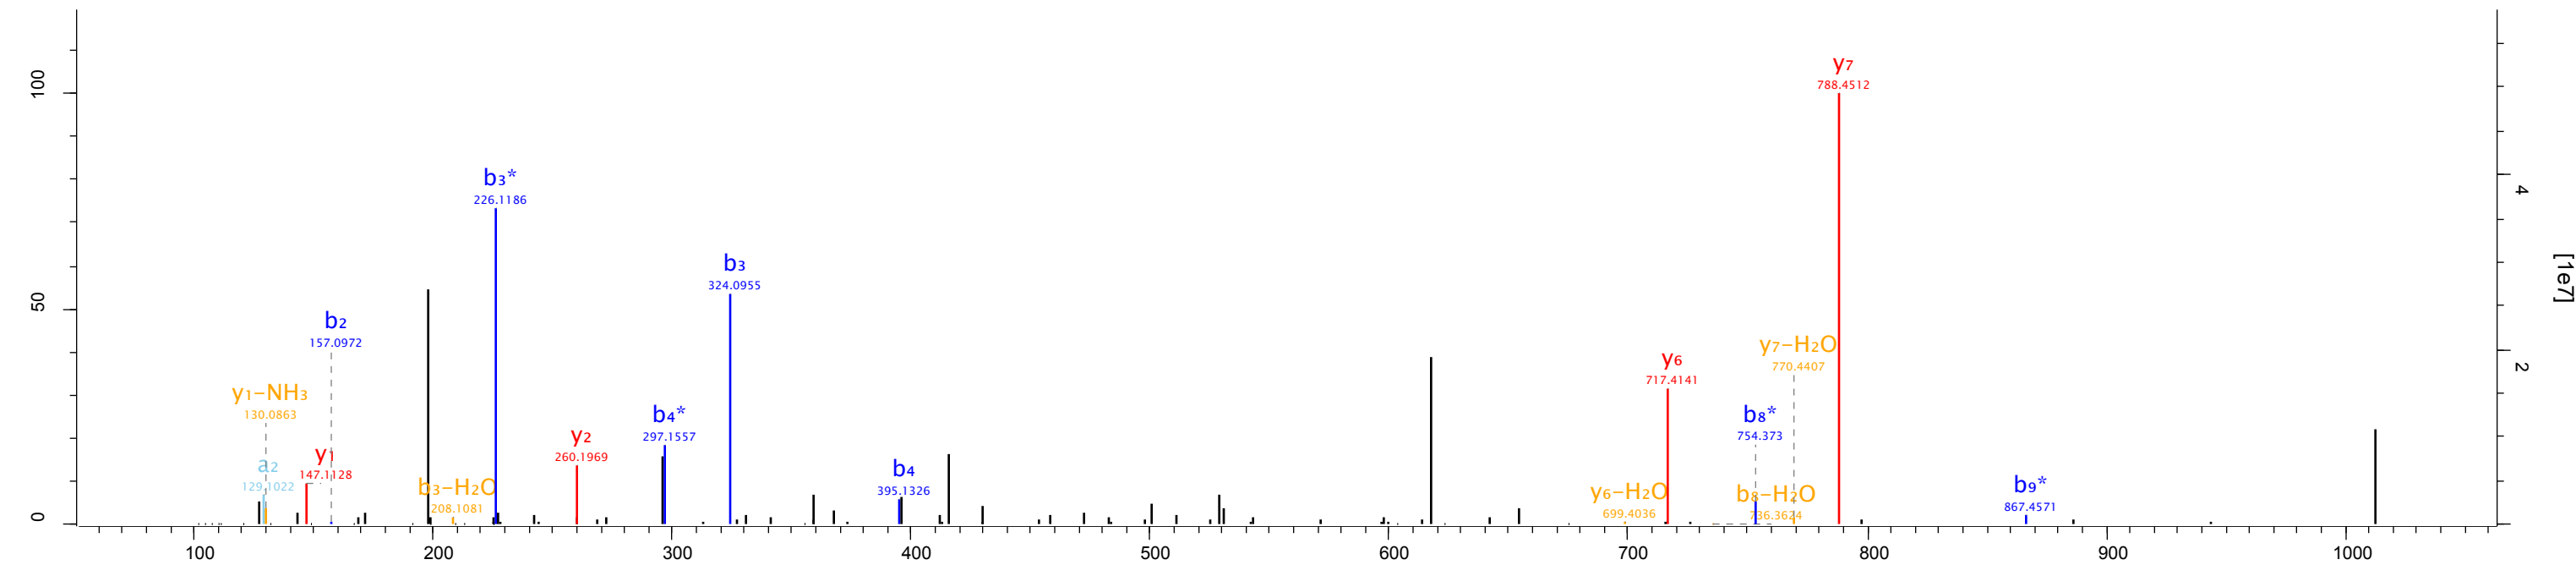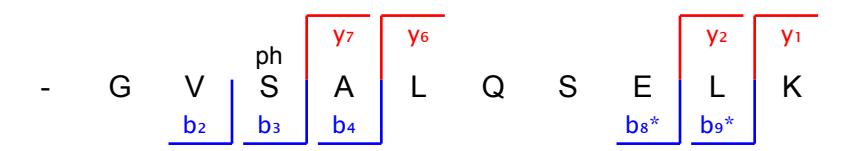

Raw file: 20150812\_A375SR\_Phospho\_BR1\_06  
 Scan: 13798 Method: FTMS; HCD Score: 162.59 m/z: 773.83 Gene names: PTMA

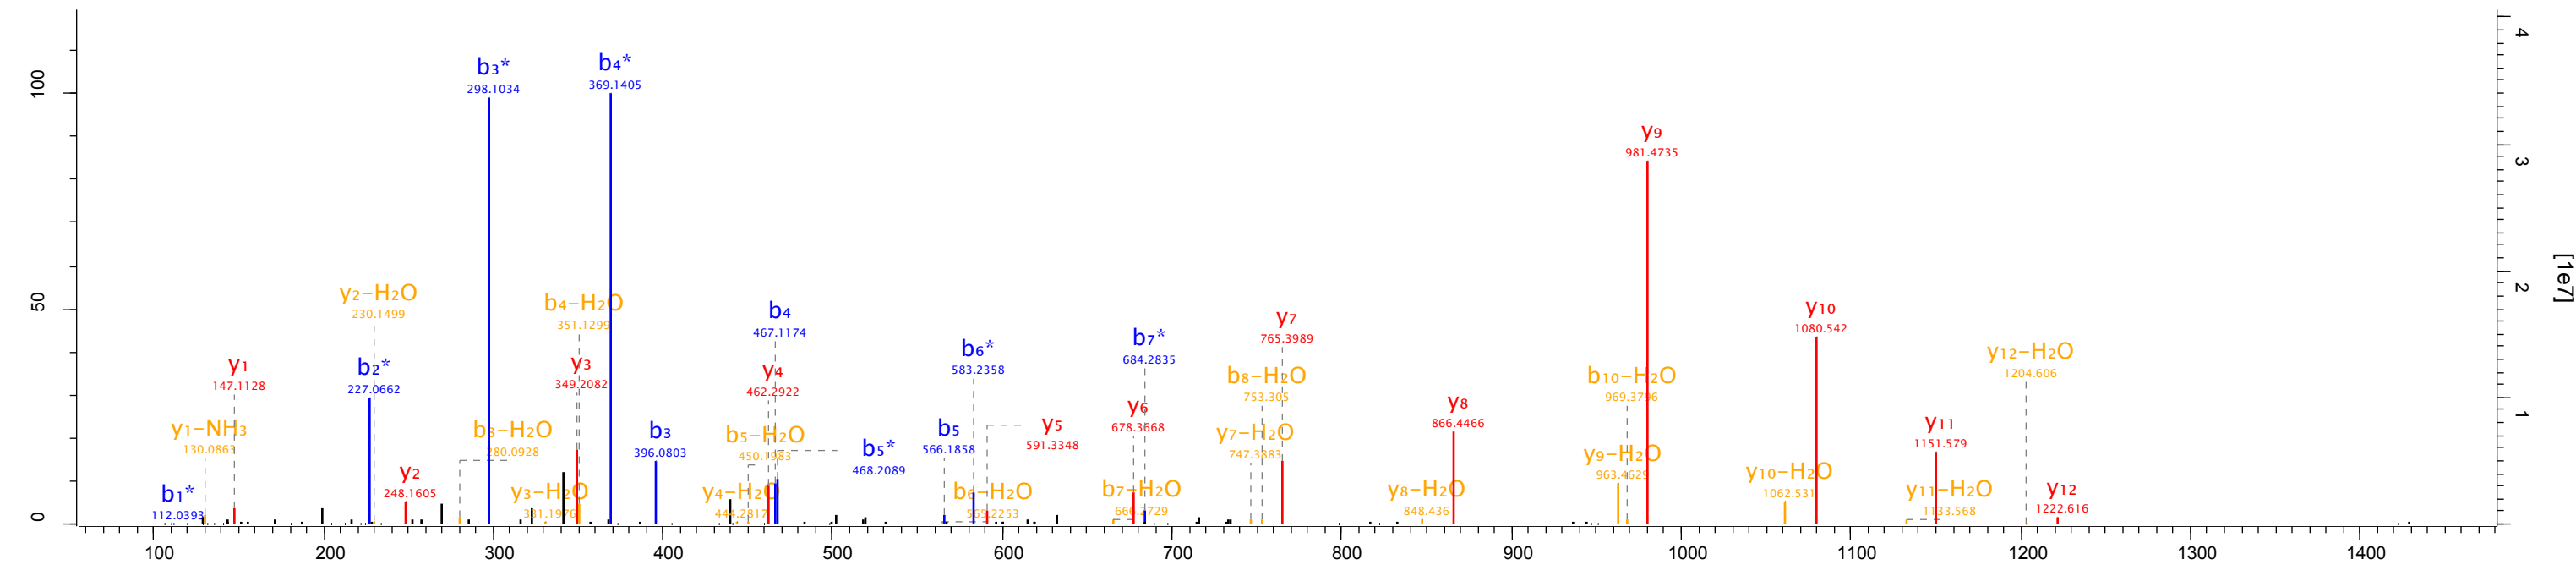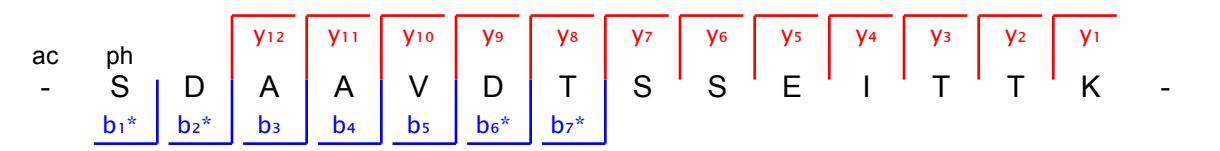

Raw file 20150812\_A375SR\_Phospho\_BR1\_06 Scan 13938 Method FTMS; HCD Score 55.34 m/z 799.38 Gene names NUP98

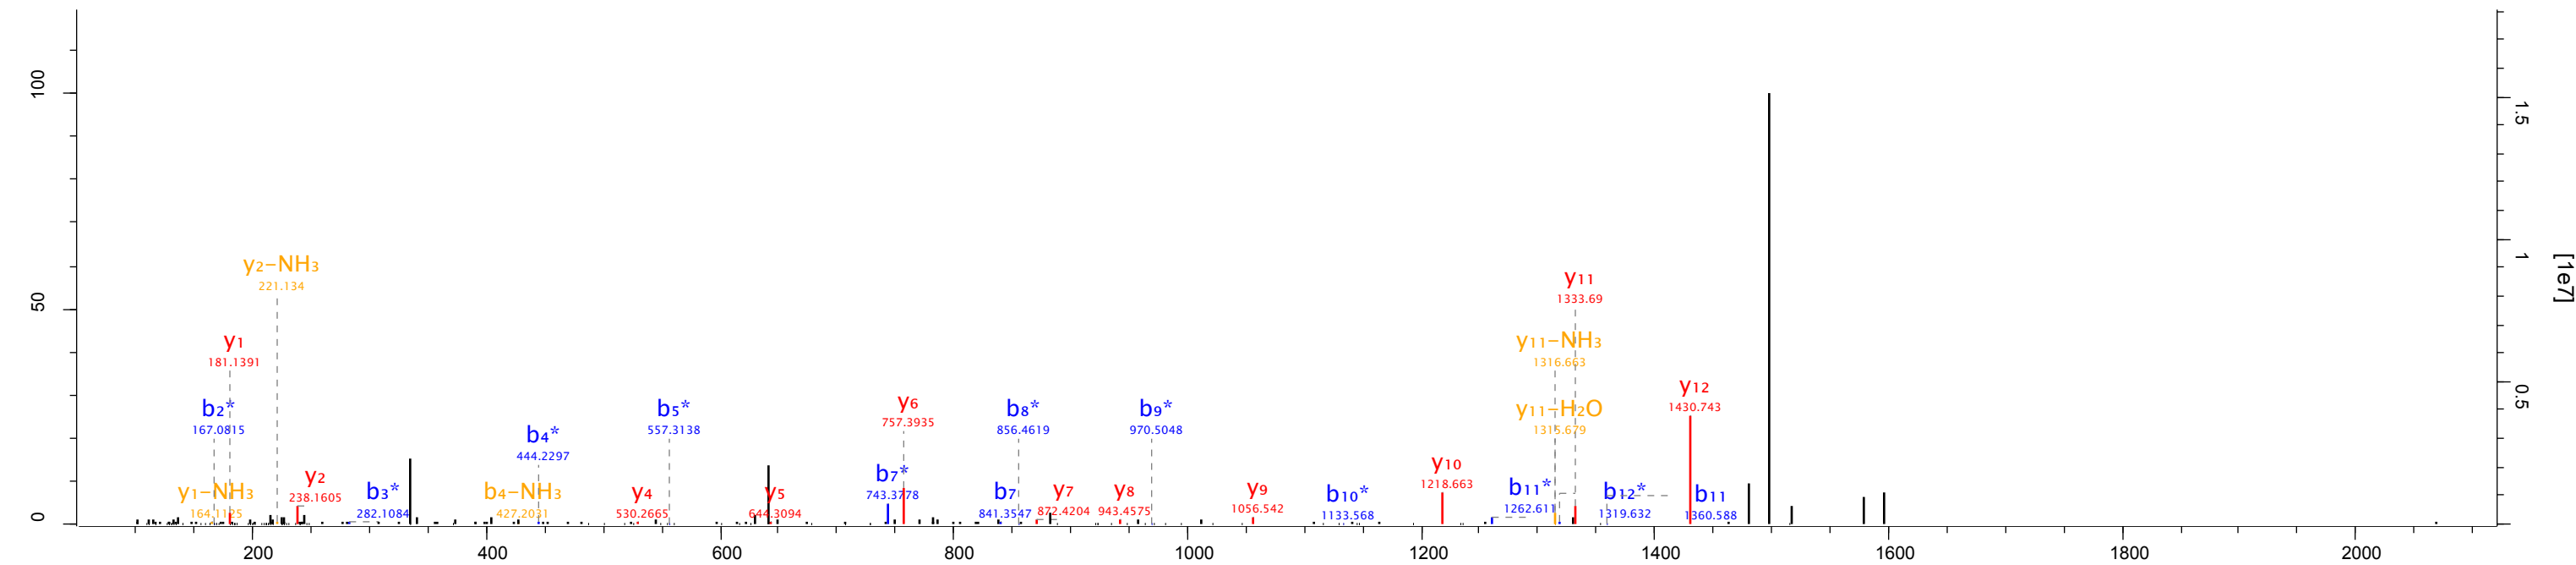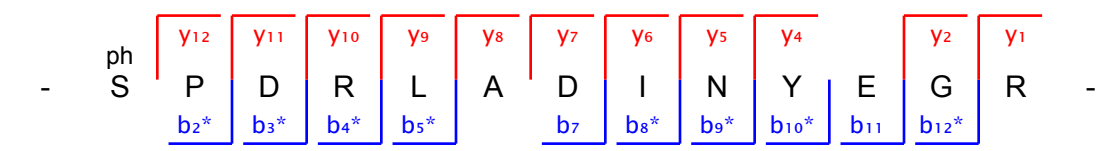



Raw file Scan Method Score m/z Gene names  
 20150812\_A375SR\_Phospho\_BR1\_06 14348 FTMS; HCD 157.63 899.45 SORBS2

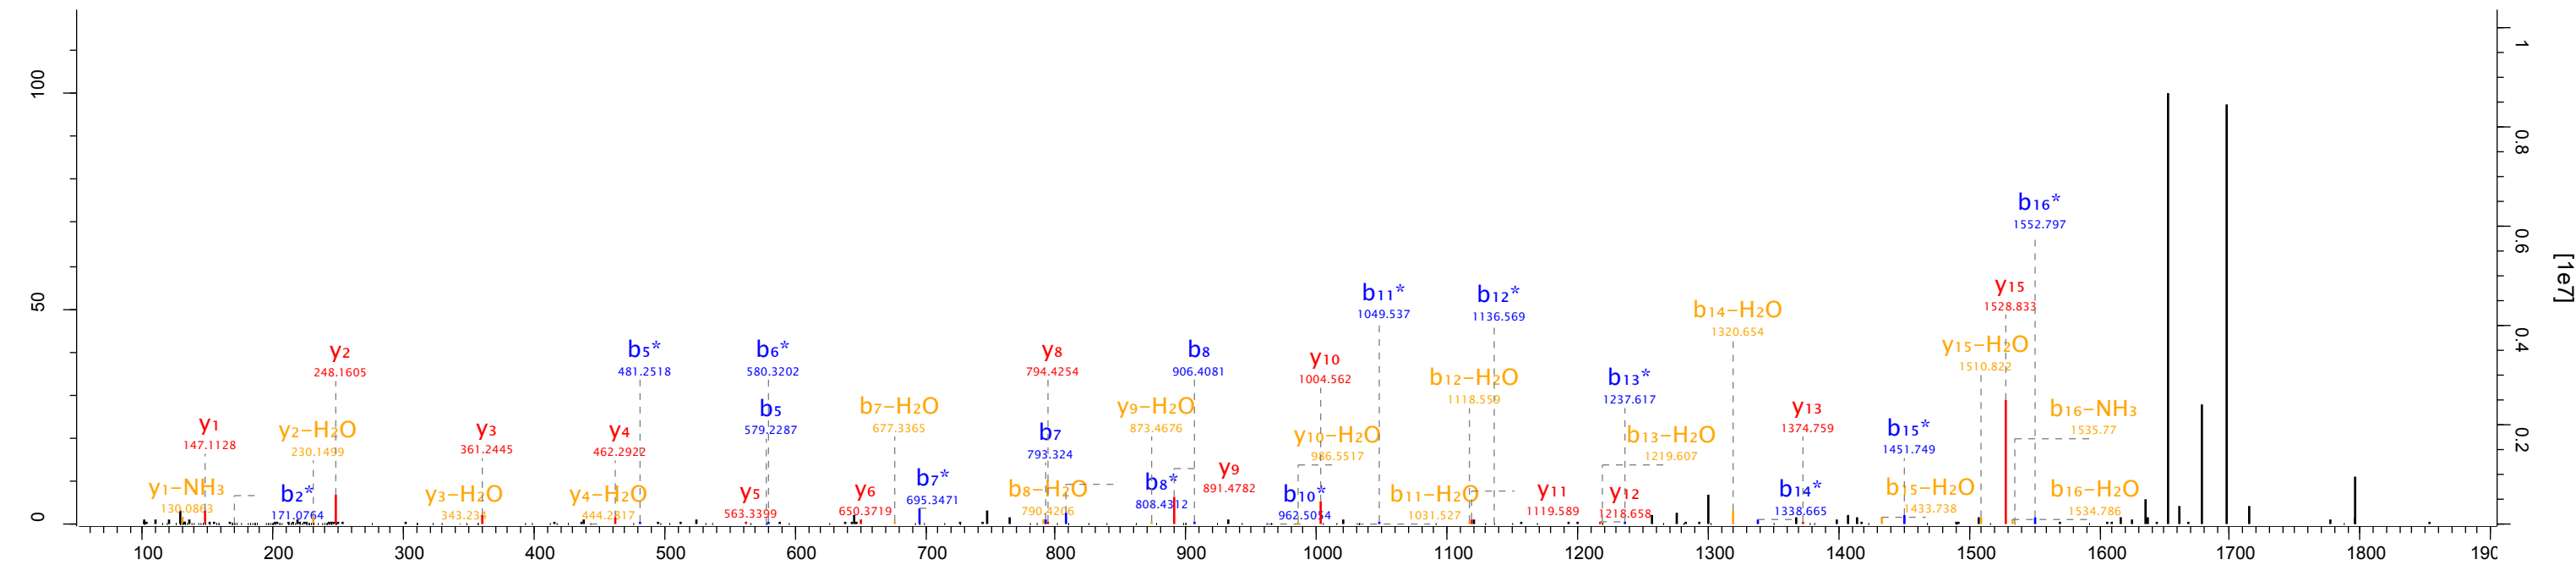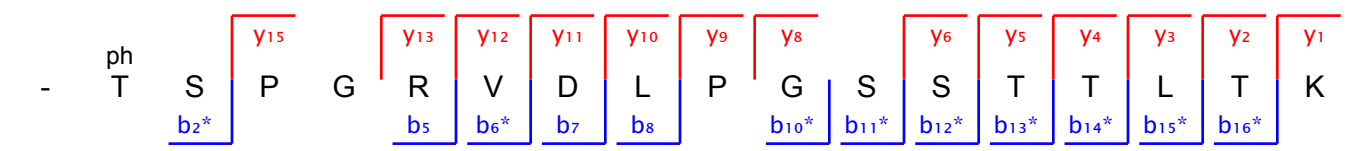

Raw file: 20150812\_A375SR\_Phospho\_BR1\_06  
 Scan: 1528 Method: FTMS; HCD Score: 59.67 m/z: 592.3 Gene names: HMGN1

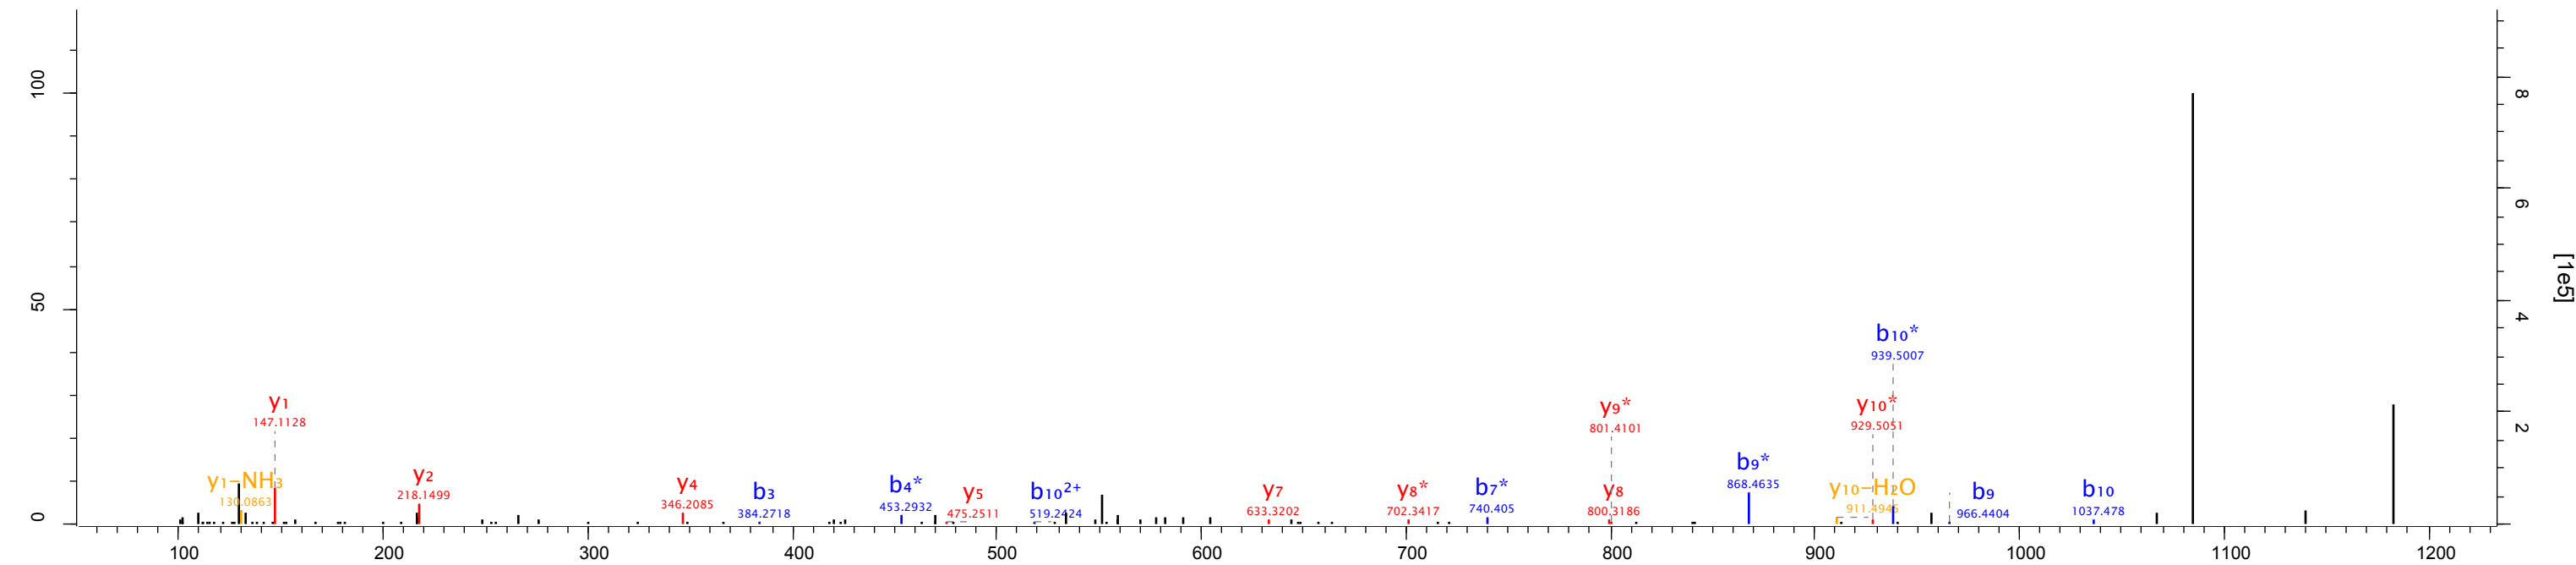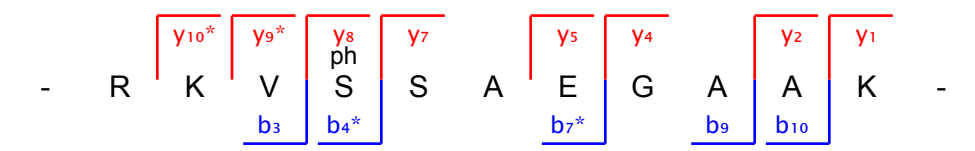

Raw file: 20150812\_A375SR\_Phospho\_BR1\_06  
 Scan: 15298 Method: FTMS; HCD Score: 207.47 m/z: 1035.04 Gene names: GATAD2B

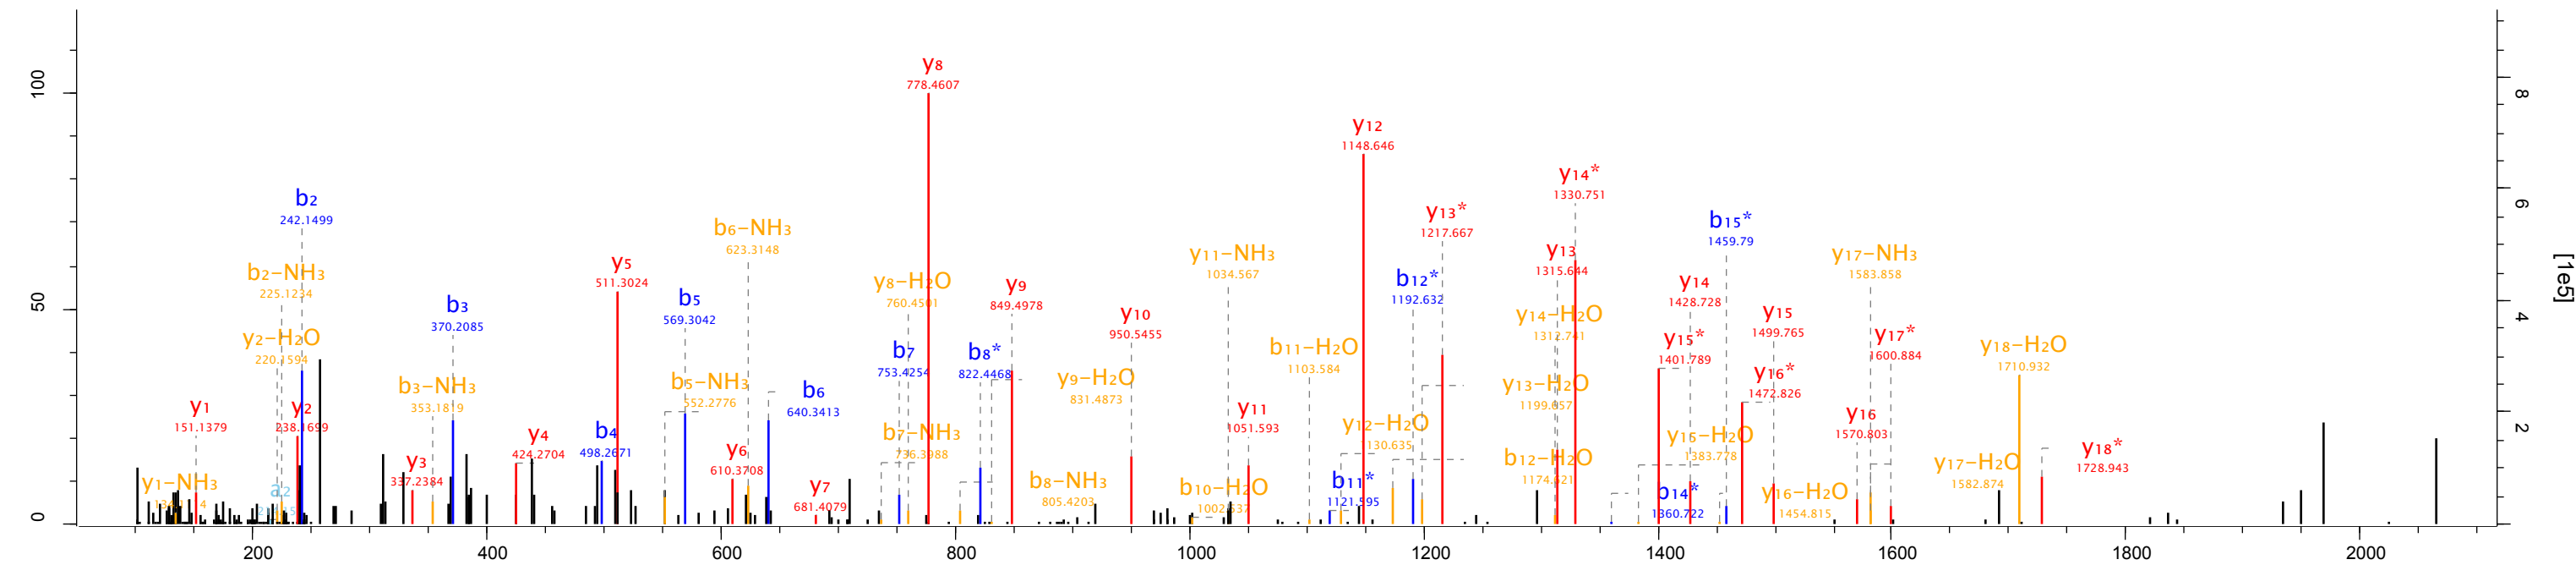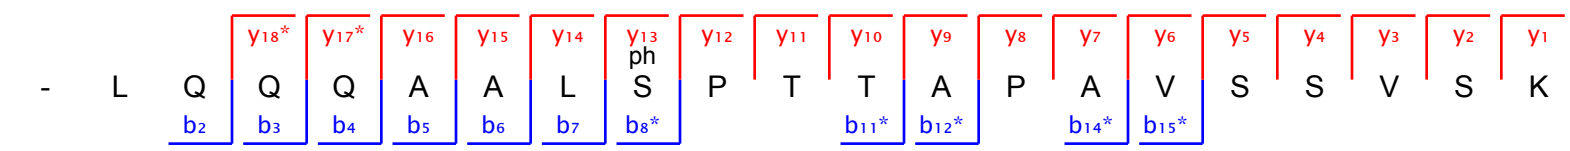

Raw file  
 20150812\_A375SR\_Phospho\_BR1\_06  
 Scan 15358 Method FTMS; HCD Score 225.07 m/z 1019.8 Gene names SAFB2;SAFB

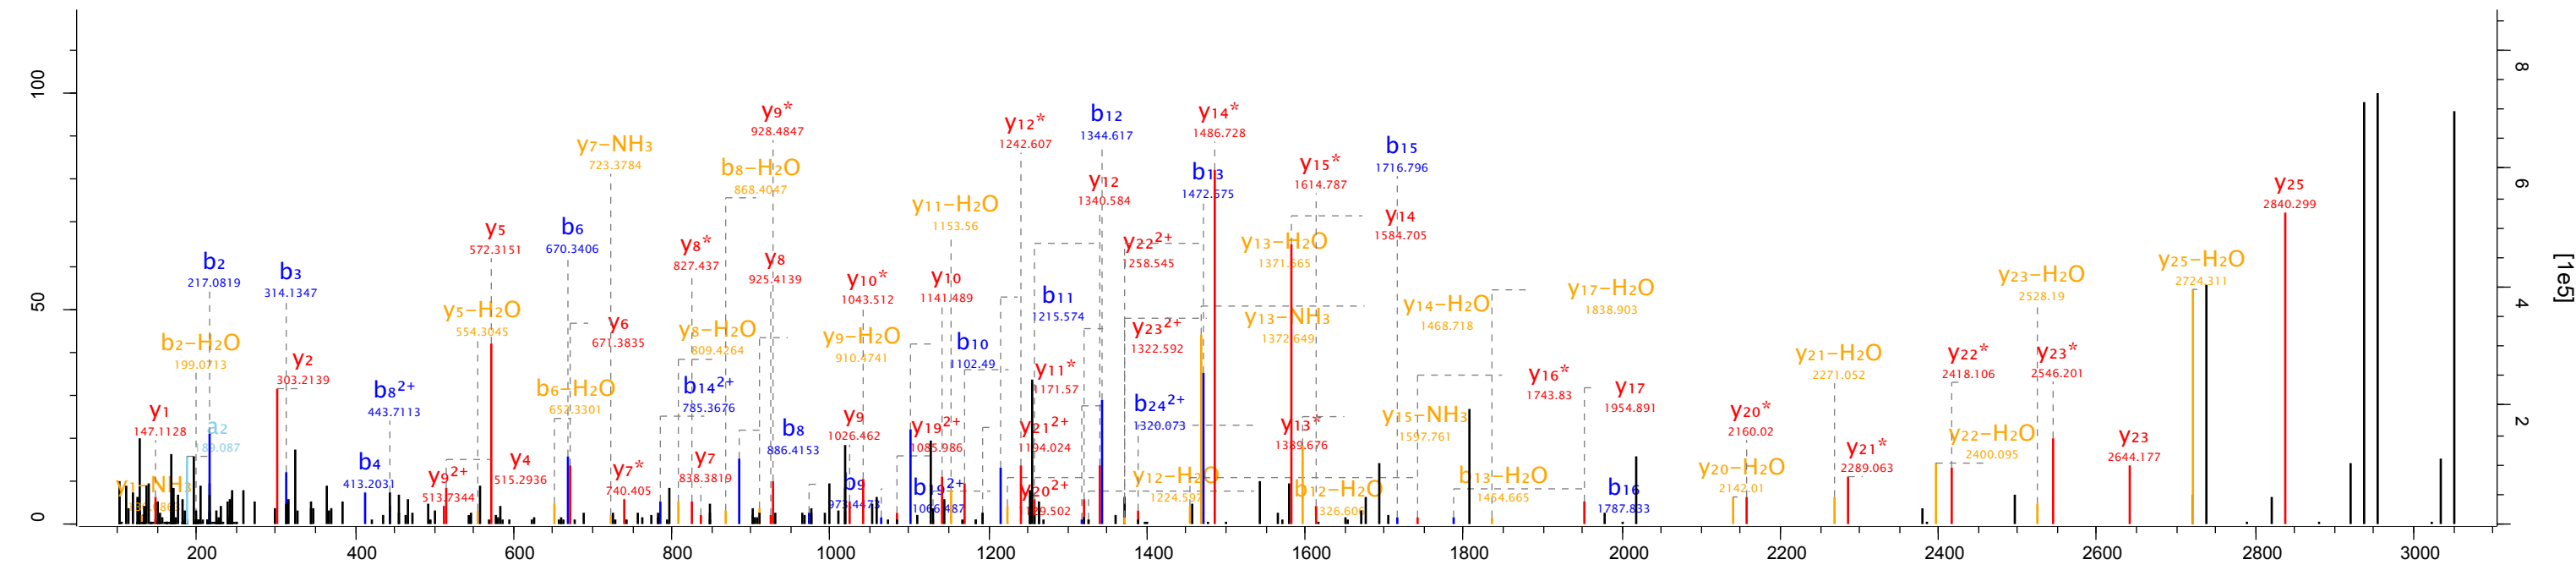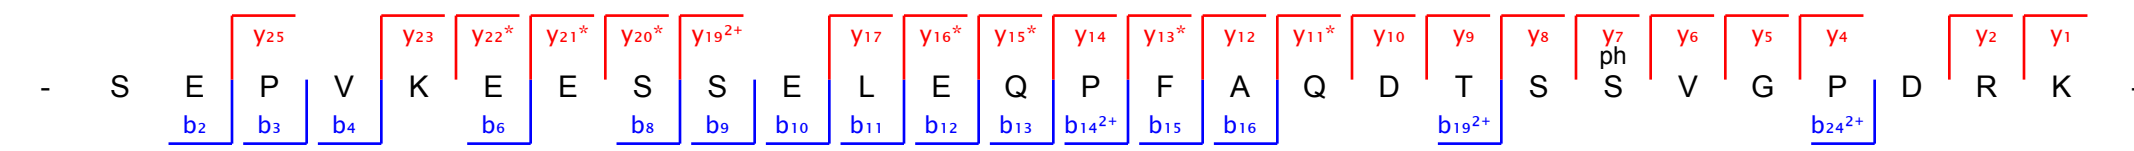

Raw file Scan Method Score m/z Gene names  
 20150812\_A375SR\_Phospho\_BR1\_06 15678 FTMS; HCD 190.25 913.44 STRIP1

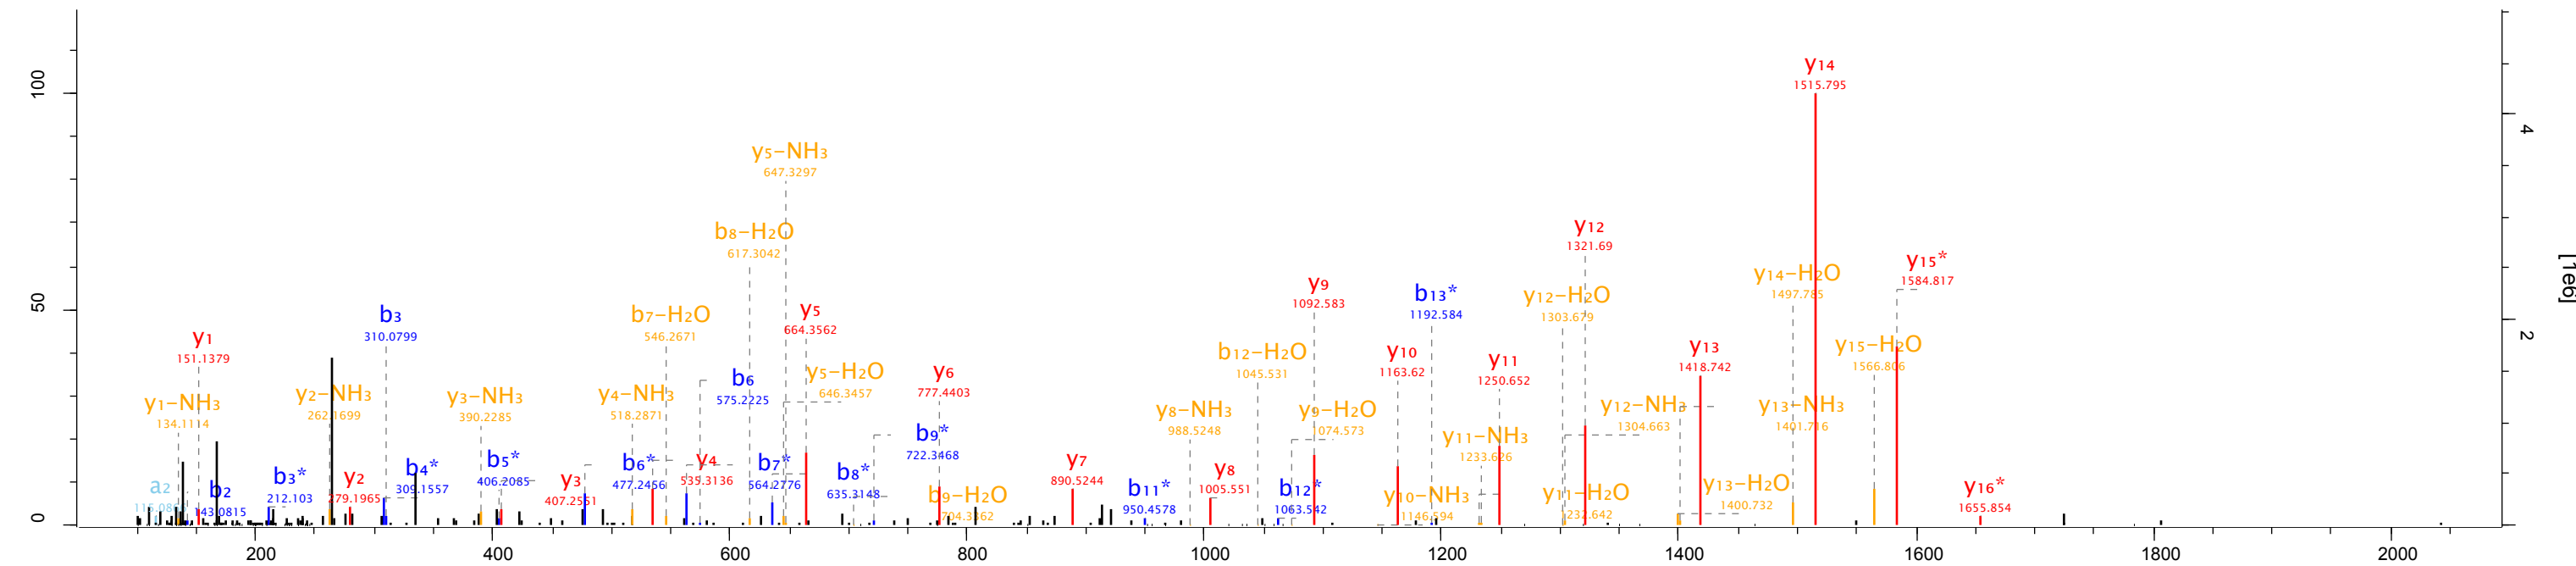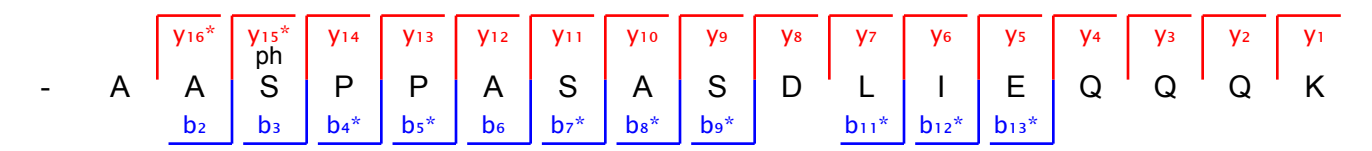

Raw file Scan Method Score m/z Gene names  
 20150812\_A375SR\_Phospho\_BR1\_06 16268 FTMS; HCD 122.59 762.36 CHAF1A

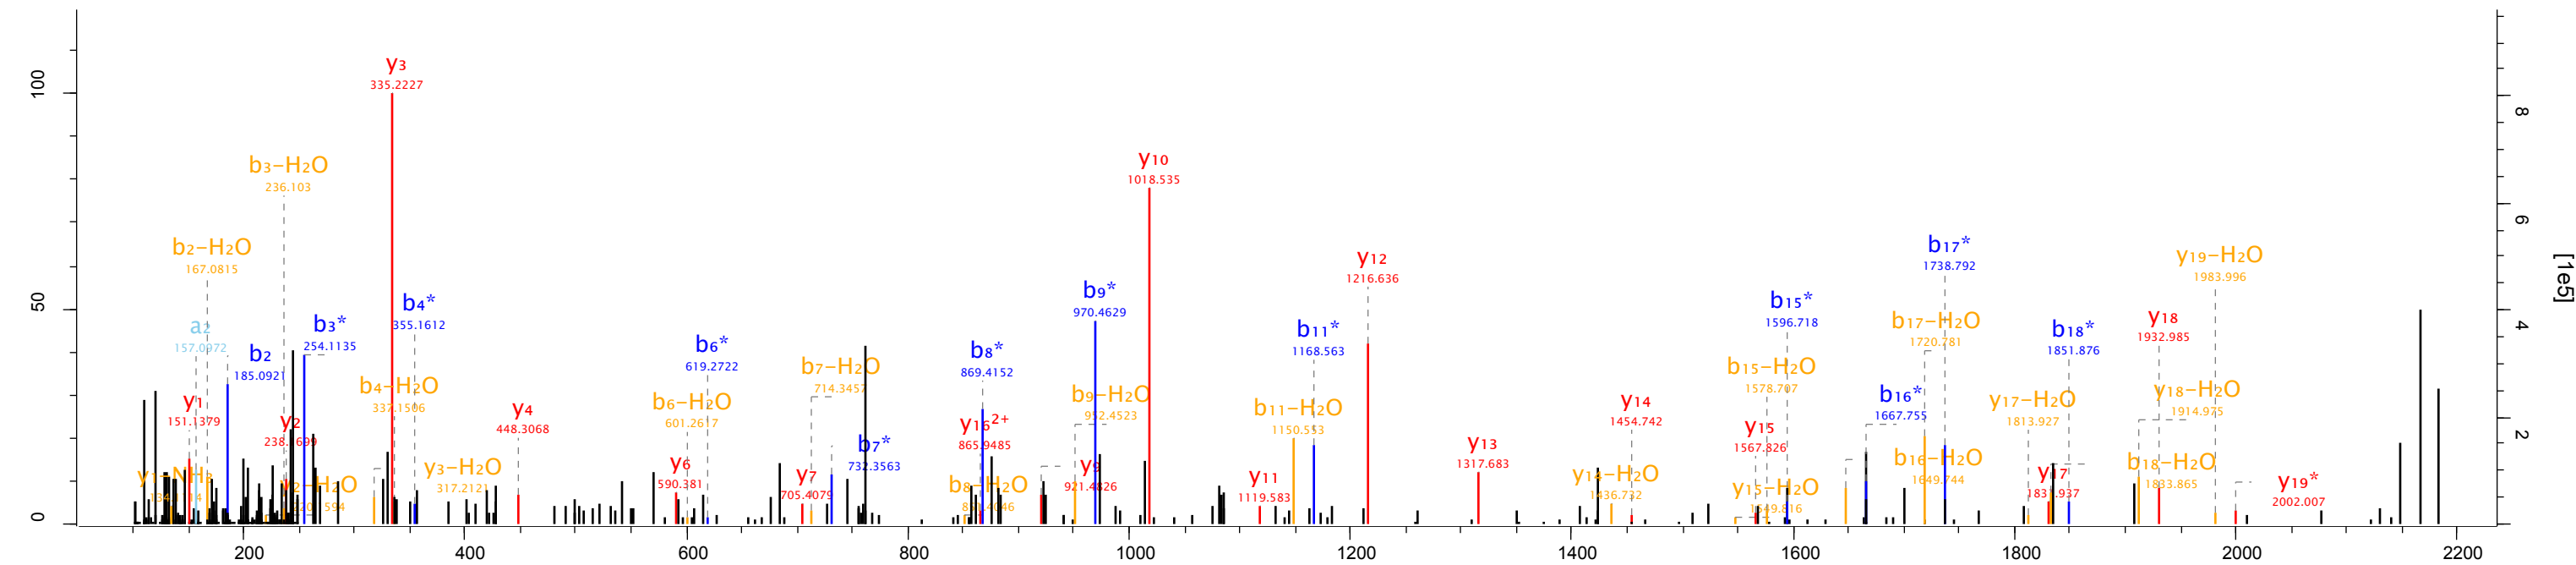

- S P S T T Y L H T P T P S E D A A I P S K -

b<sub>2</sub>
b<sub>3</sub><sup>\*</sup>
b<sub>4</sub><sup>\*</sup>
b<sub>6</sub><sup>\*</sup>
b<sub>7</sub><sup>\*</sup>
b<sub>8</sub><sup>\*</sup>
b<sub>9</sub><sup>\*</sup>
b<sub>11</sub><sup>\*</sup>
b<sub>15</sub><sup>\*</sup>
b<sub>16</sub><sup>\*</sup>
b<sub>17</sub><sup>\*</sup>
b<sub>18</sub><sup>\*</sup>
y<sub>19</sub><sup>\*</sup>
ph
y<sub>18</sub>
y<sub>17</sub>
y<sub>16</sub><sup>2+</sup>
y<sub>15</sub>
y<sub>14</sub>
y<sub>13</sub>
y<sub>12</sub>
y<sub>11</sub>
y<sub>10</sub>
y<sub>9</sub>
y<sub>7</sub>
y<sub>6</sub>
y<sub>4</sub>
y<sub>3</sub>
y<sub>2</sub>
y<sub>1</sub>

Raw file 20150812\_A375SR\_Phospho\_BR1\_06 Scan 17868 Method FTMS; HCD Score 280.62 m/z 917.42 Gene names ATXN2L

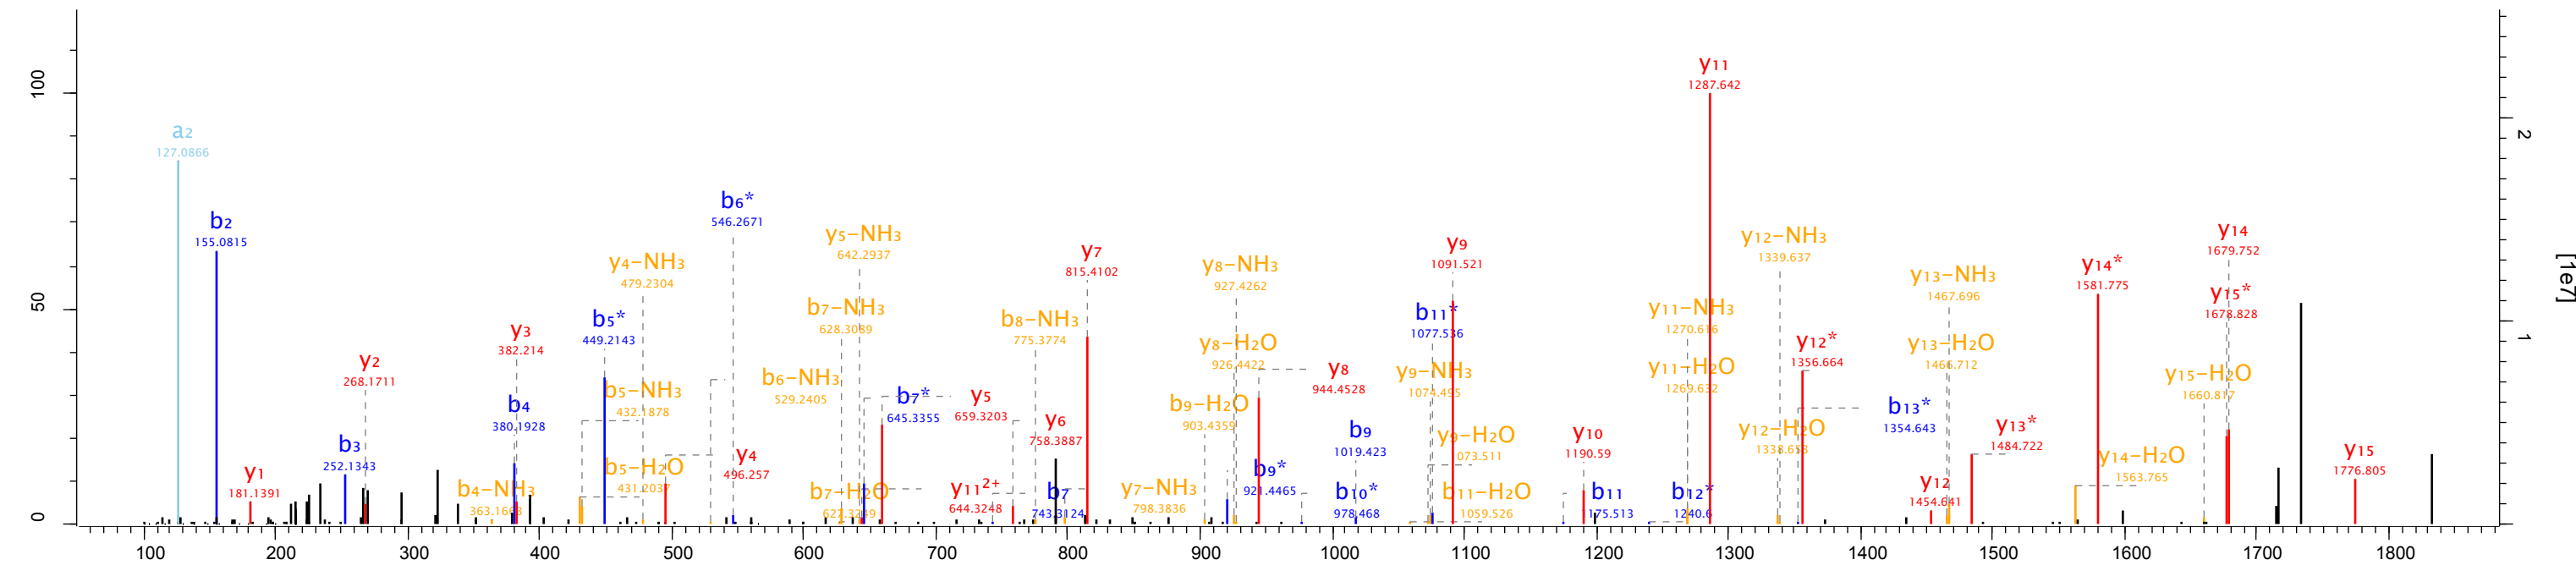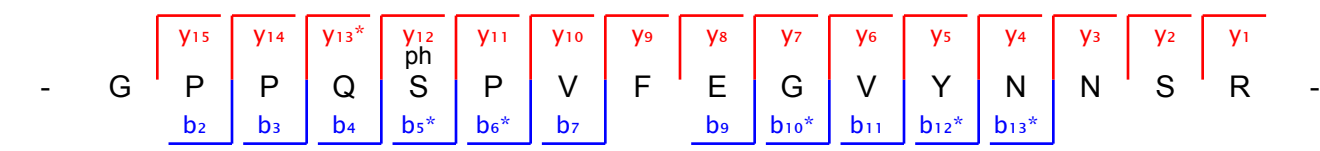

Raw file: 20150812\_A375SR\_Phospho\_BR1\_06  
 Scan: 18738 Method: FTMS; HCD Score: 132.6 m/z: 862.23 Gene names: PTPN14

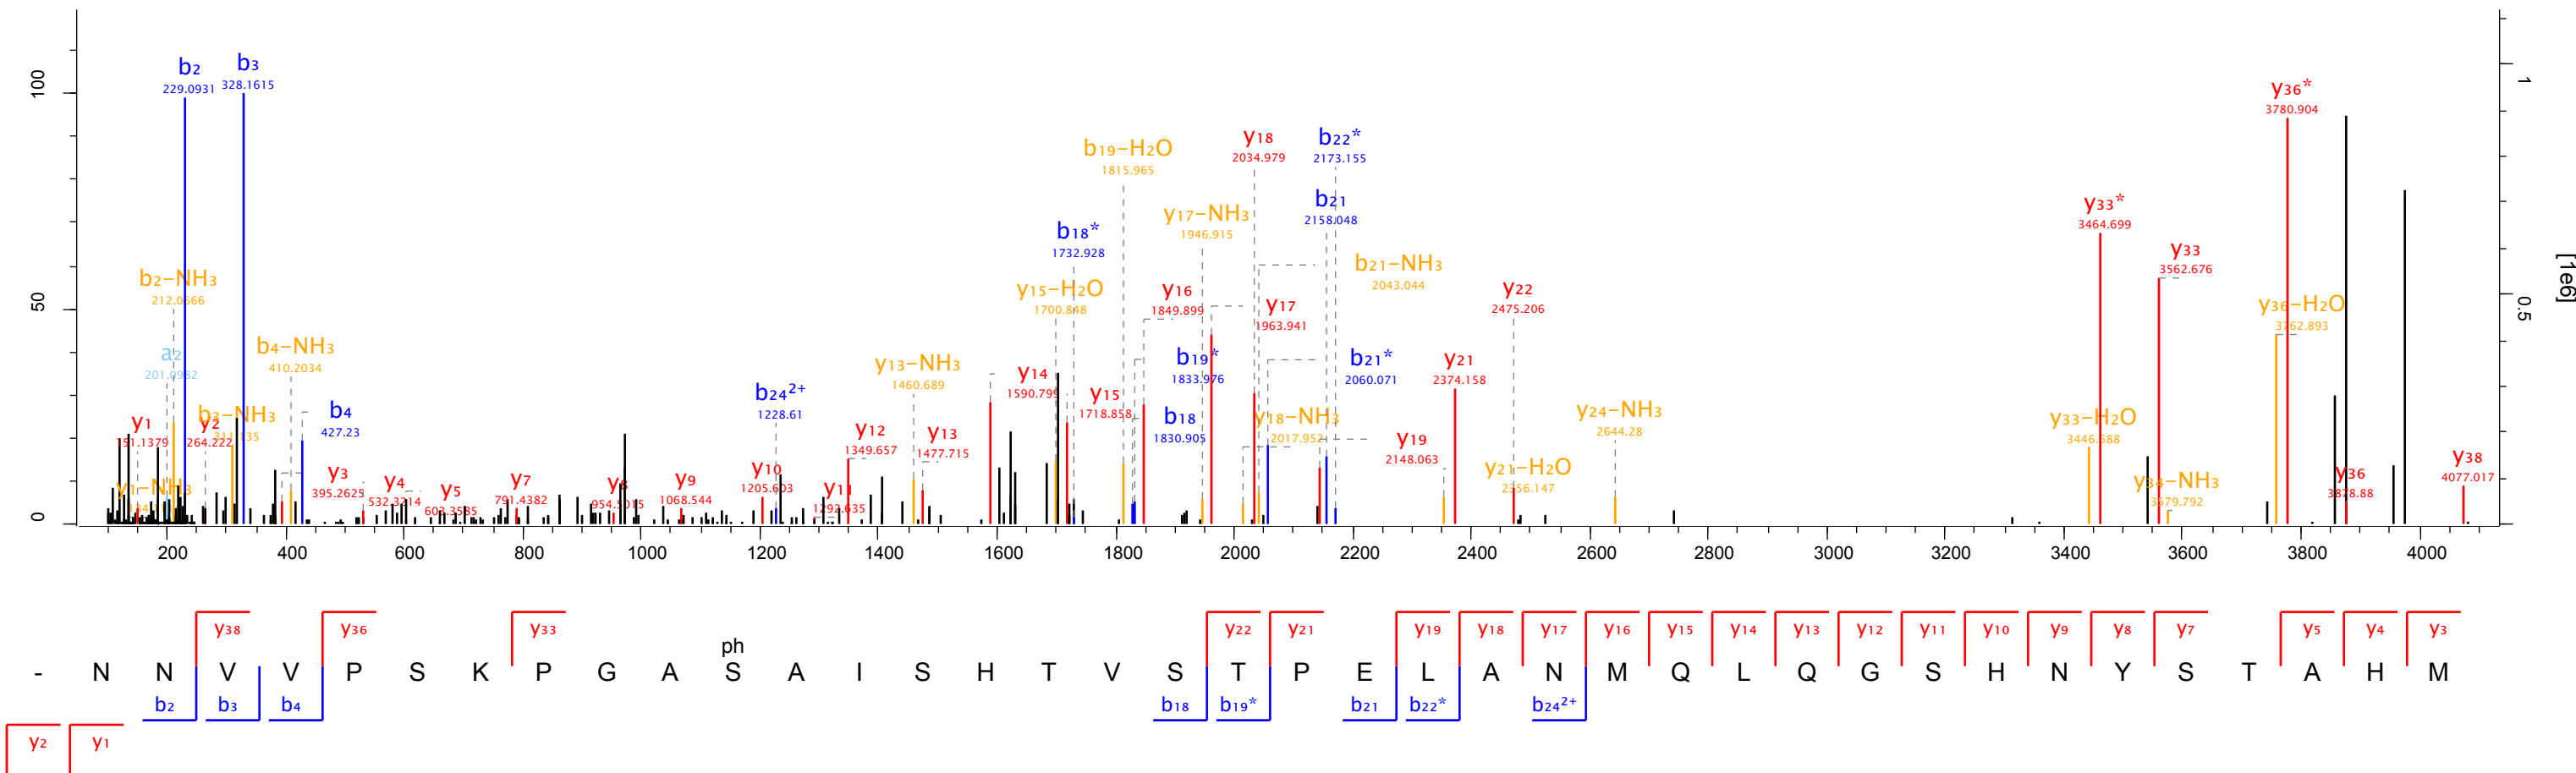



Raw file 20150812\_A375SR\_Phospho\_BR1\_06 Scan 18828 Method FTMS; HCD Score 139.38 m/z 805.4 Gene names TFE3

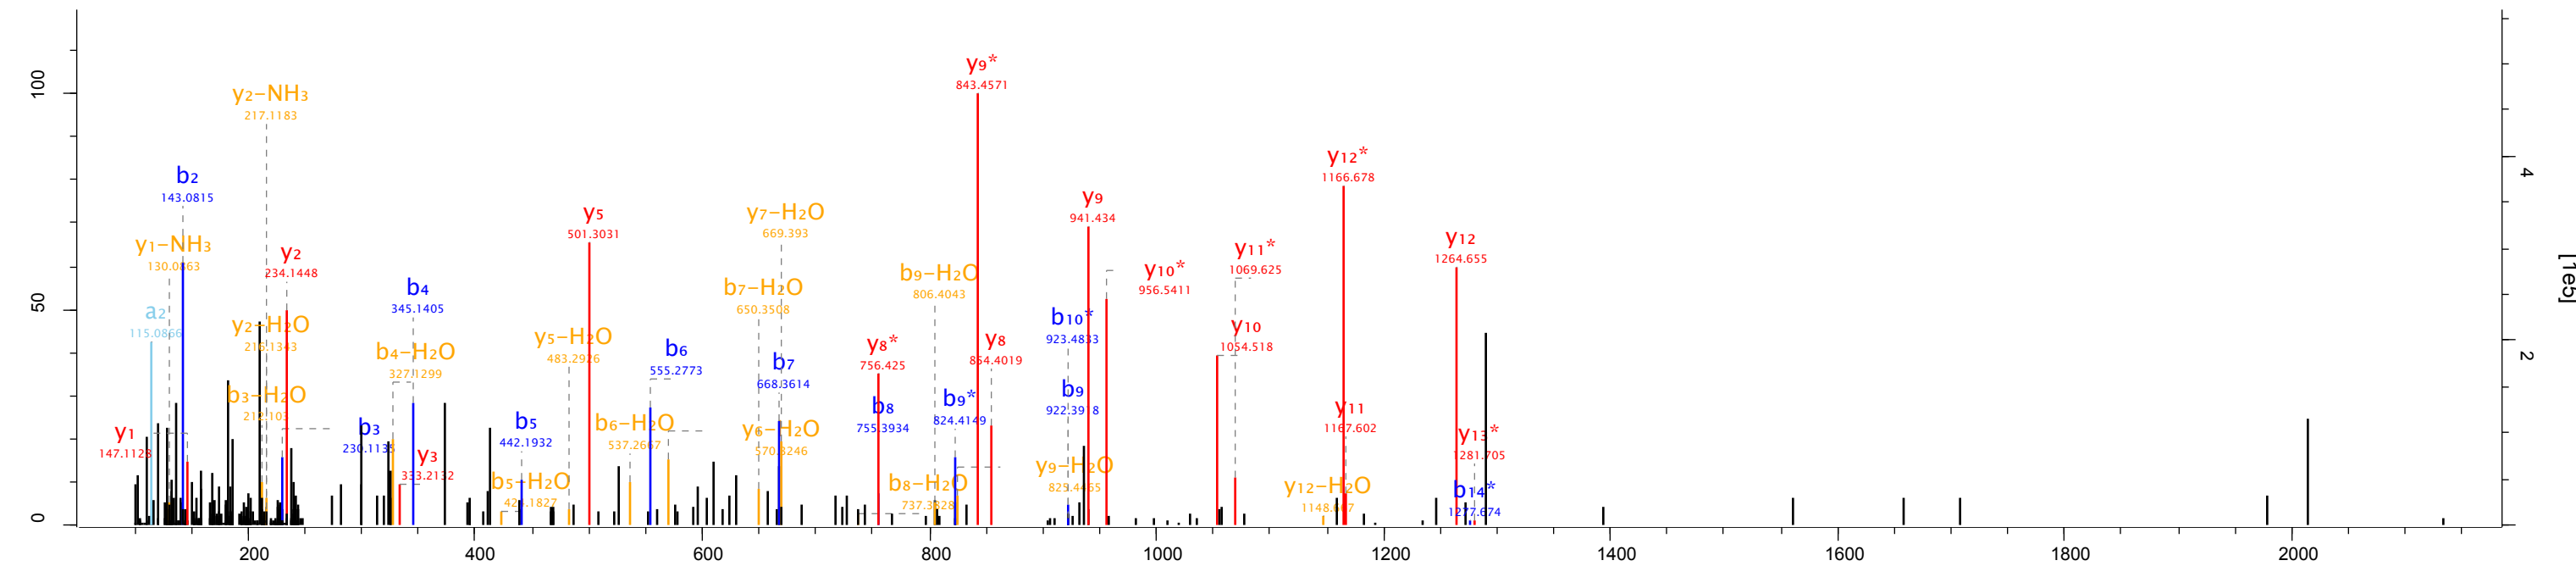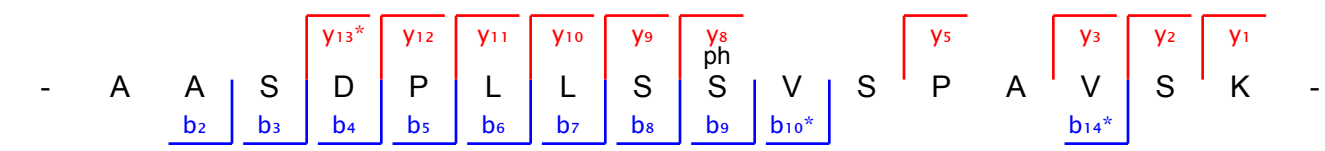

Raw file: 20150812\_A375SR\_Phospho\_BR1\_06  
 Scan: 20078 Method: FTMS; HCD Score: 169.37 m/z: 708.86 Gene names: MKI67

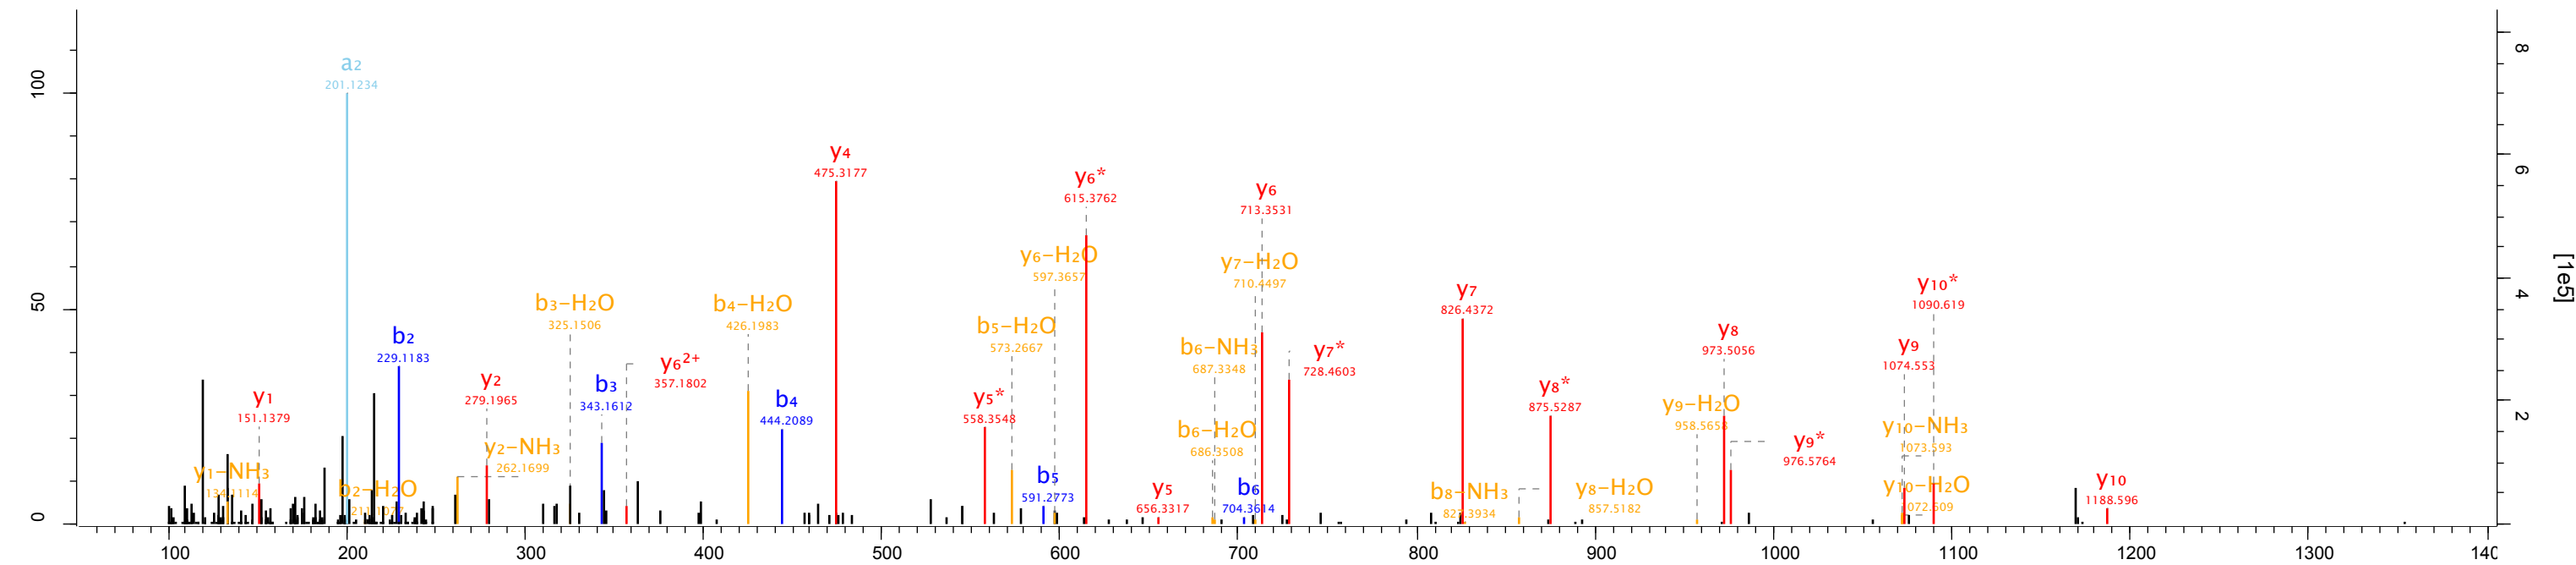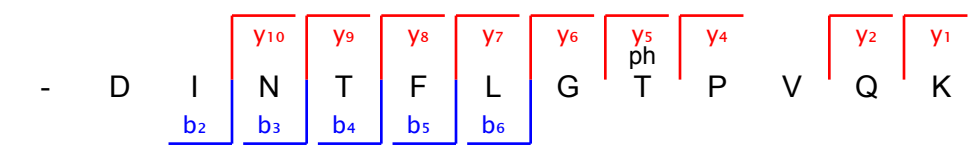

Raw file 20150812\_A375SR\_Phospho\_BR1\_06 Scan 20878 Method FTMS; HCD Score 56.91 m/z 822.95

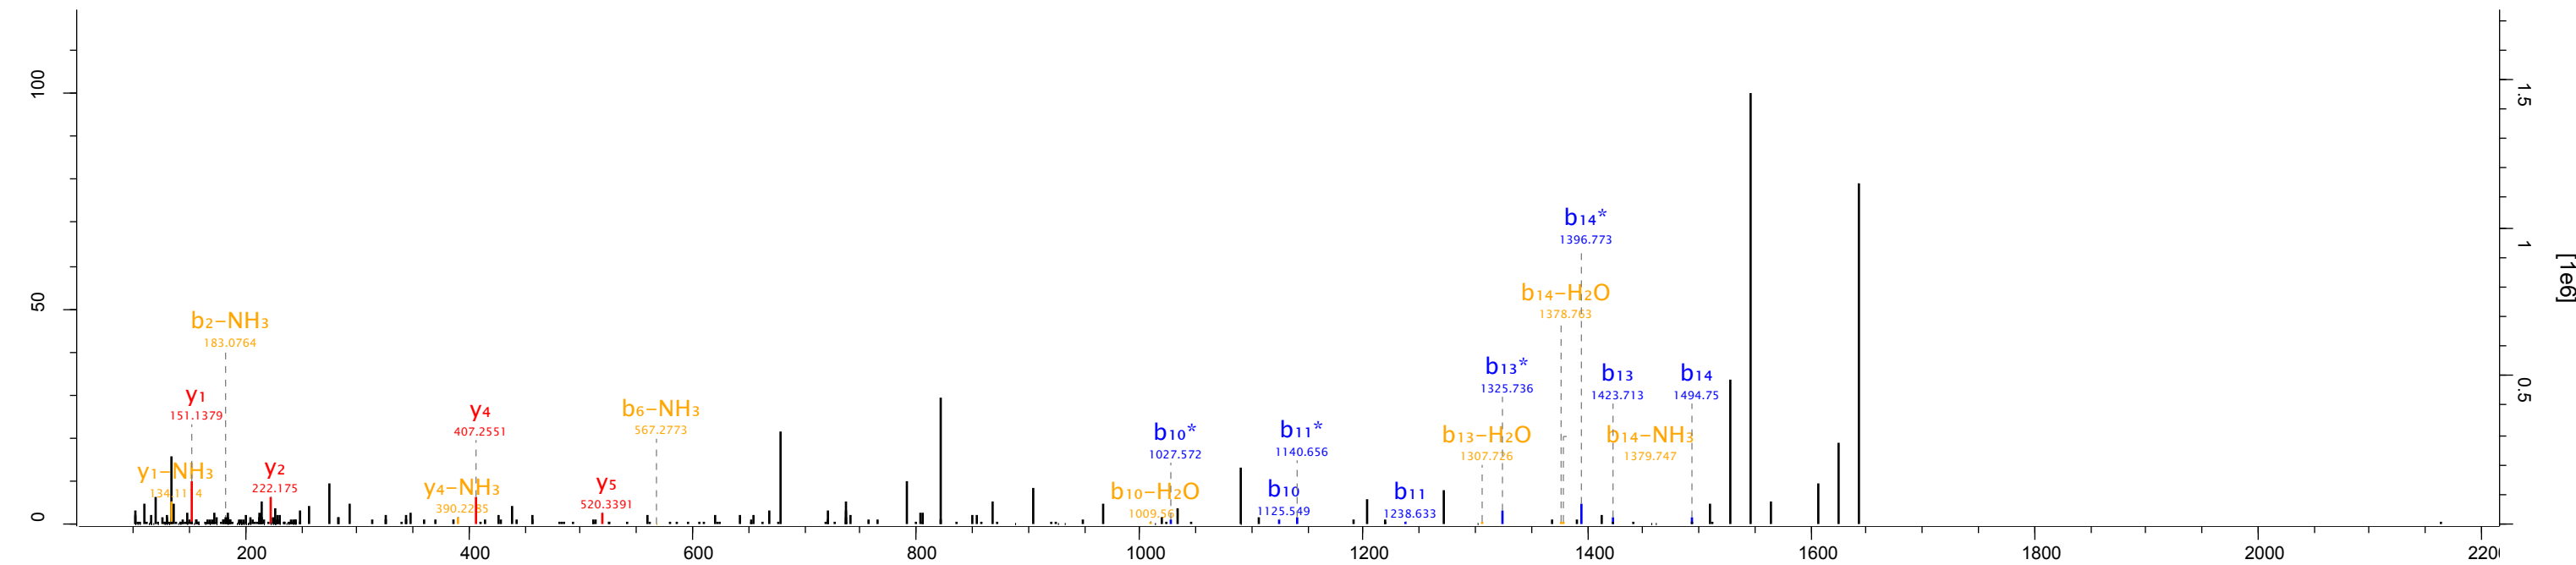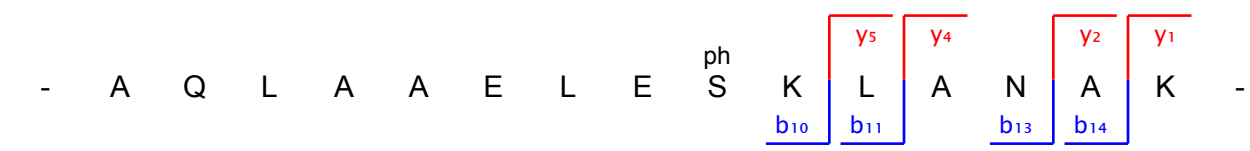

Raw file 20150812\_A375SR\_Phospho\_BR1\_06 Scan 20948 Method FTMS; HCD Score 179.42 m/z 1003.52 Gene names RPS6KC1

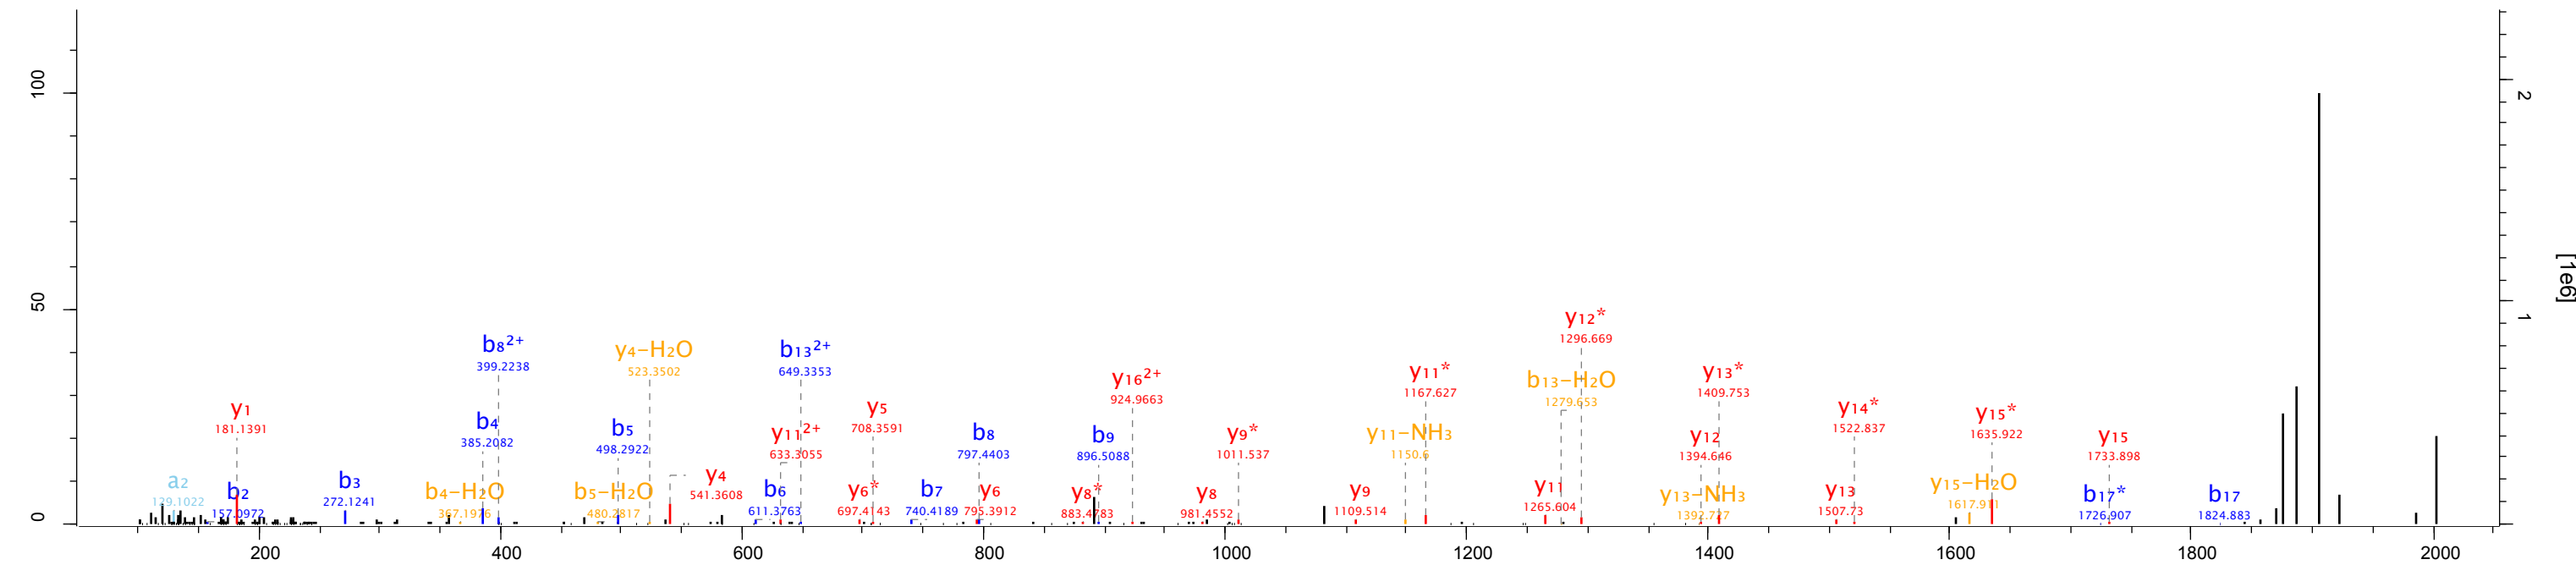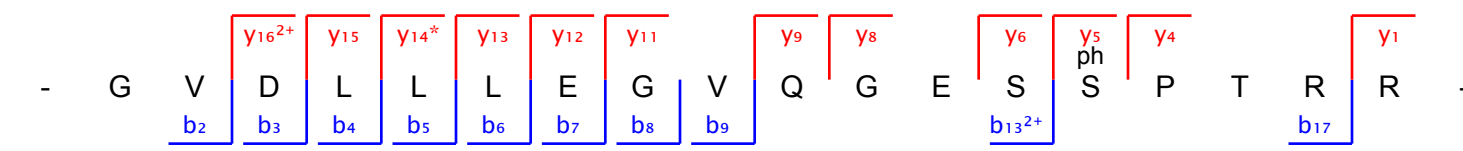

Raw file: 20150812\_A375SR\_Phospho\_BR1\_06  
 Scan: 21438 Method: FTMS; HCD Score: 199.28 m/z: 933 Gene names: GIGYF2

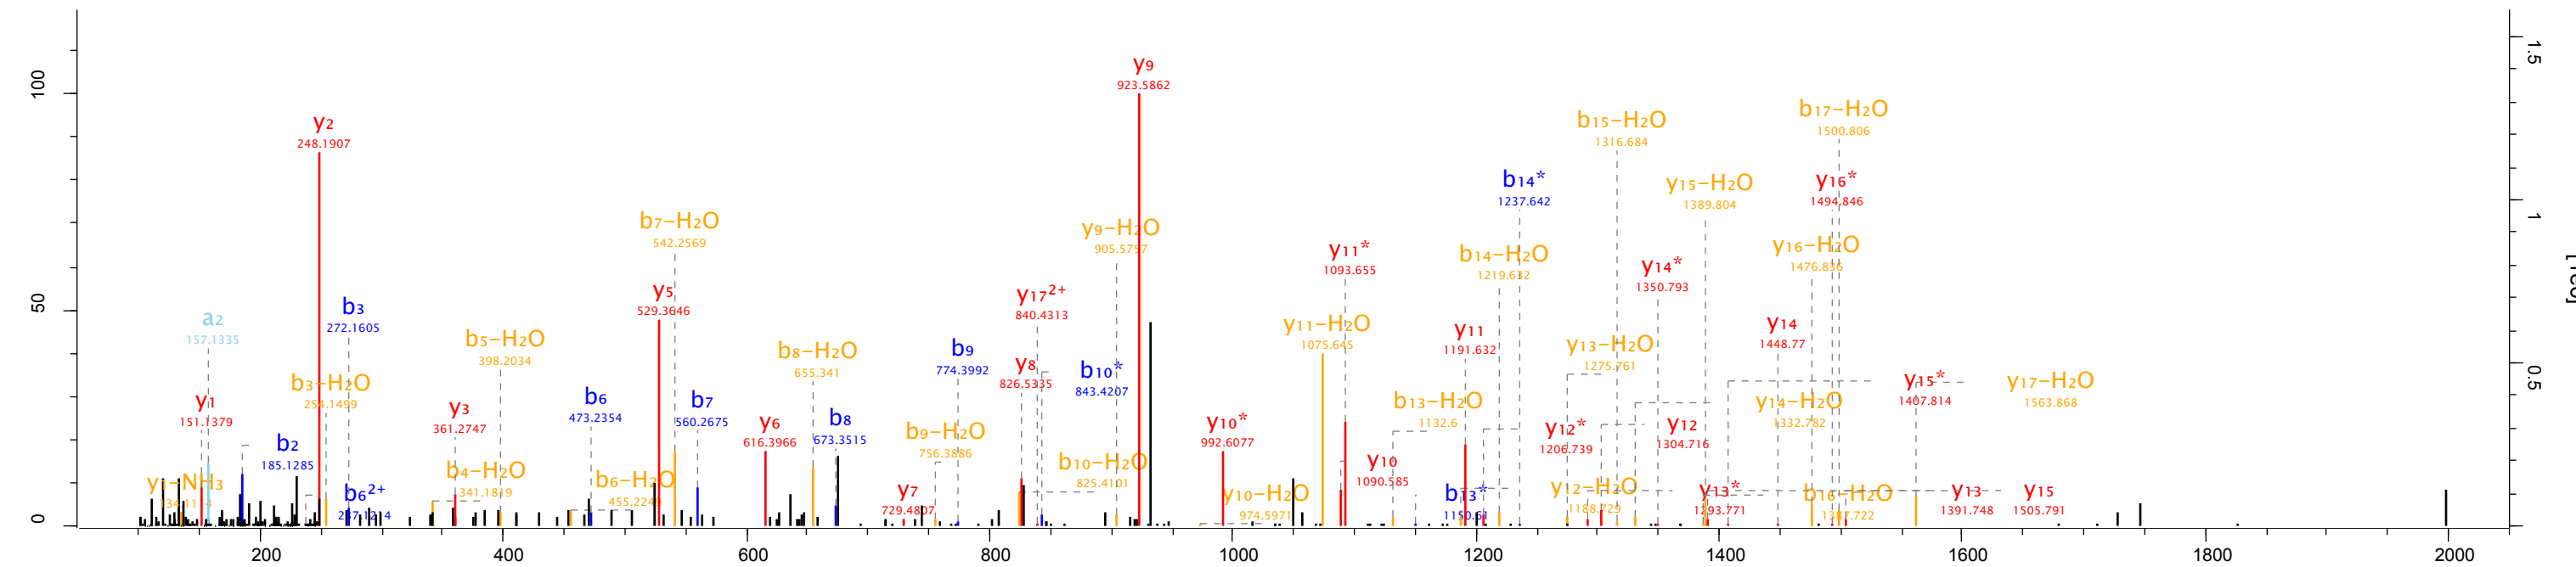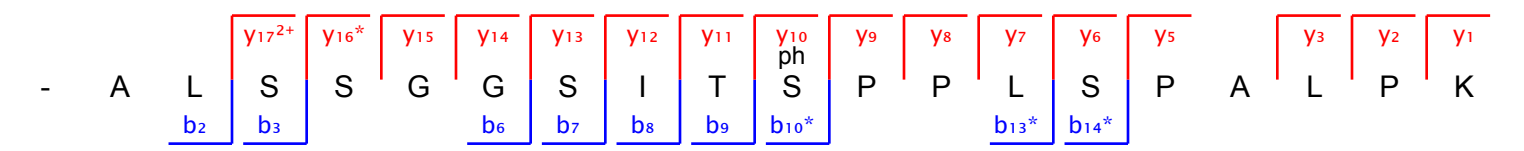

Raw file 20150812\_A375SR\_Phospho\_BR1\_06 Scan 2368 Method FTMS; HCD Score 86.24 m/z 493.76 Gene names SYTL2

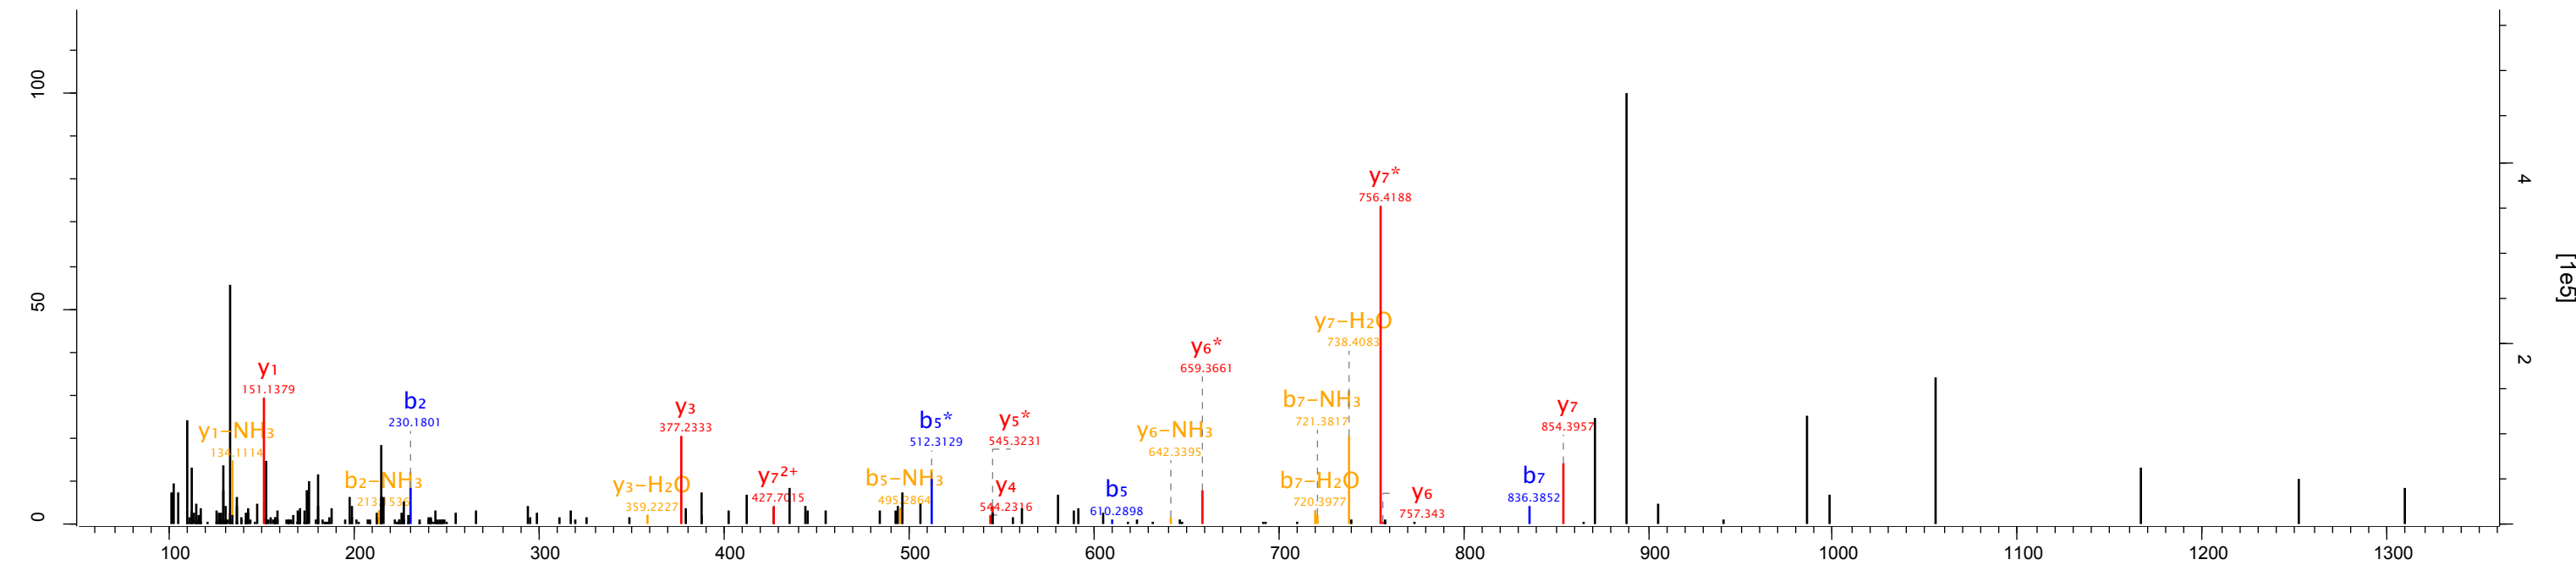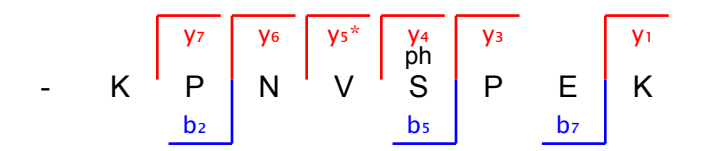

Raw file: 20150812\_A375SR\_Phospho\_BR1\_06  
 Scan: 2458 Method: FTMS; HCD Score: 91.66 m/z: 509.22 Gene names: THRAP3

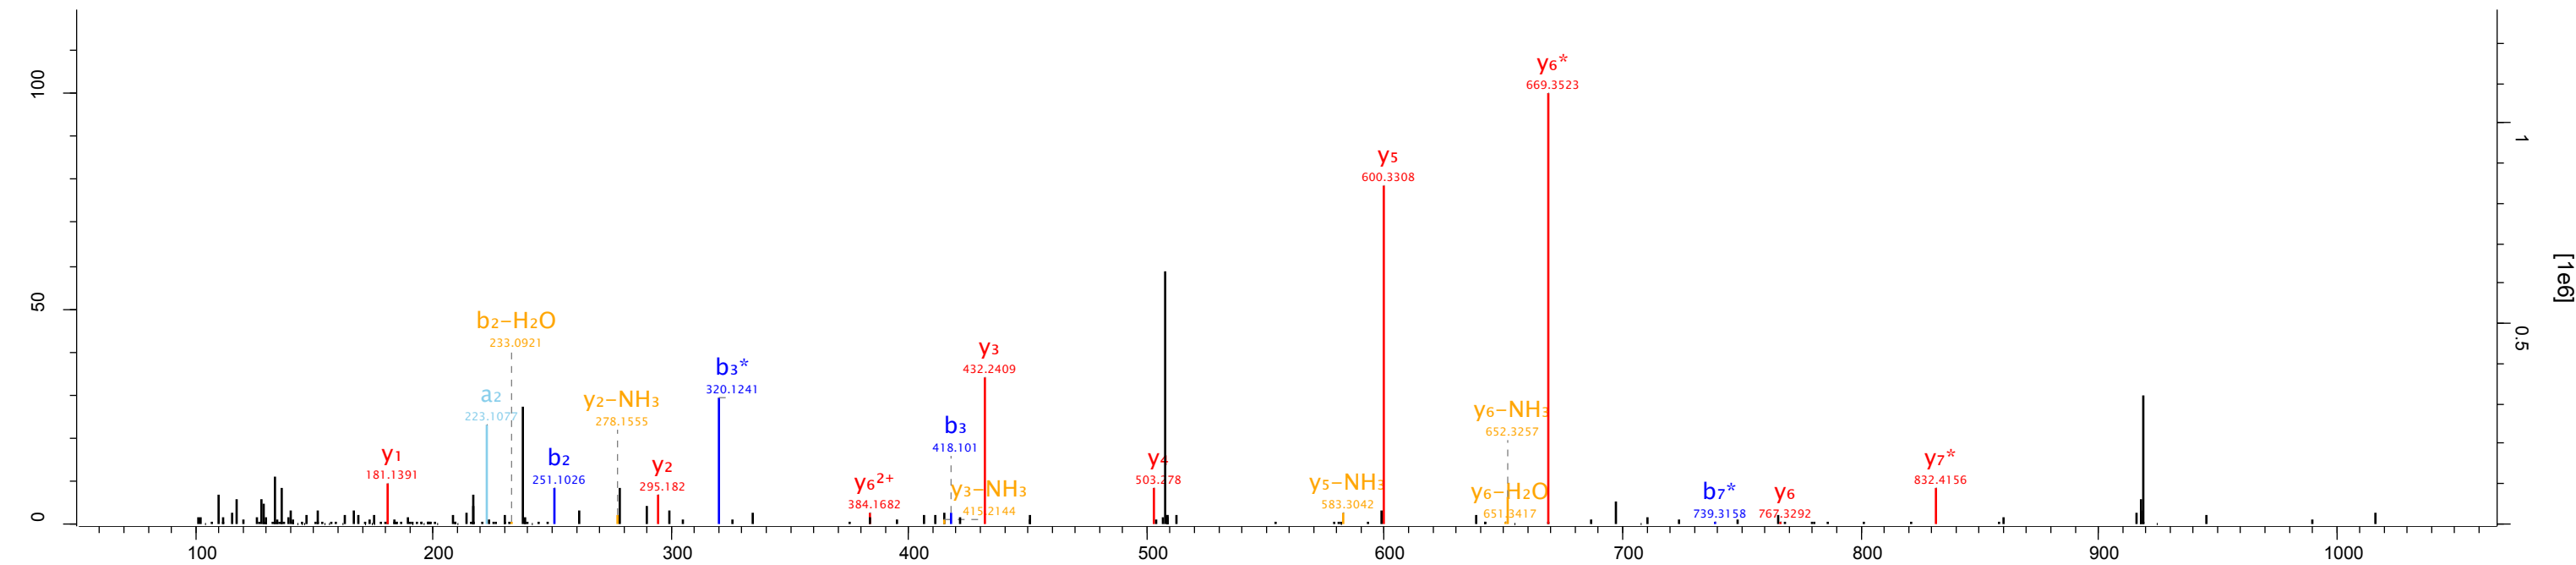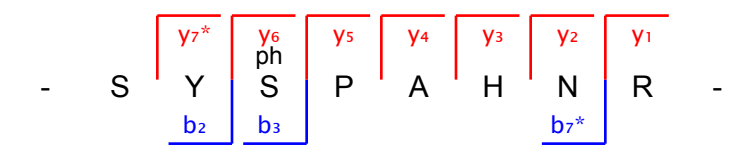

Raw file 20150812\_A375SR\_Phospho\_BR1\_06 Scan 26138 Method FTMS; HCD Score 175.9 m/z 1036.82 Gene names DUT

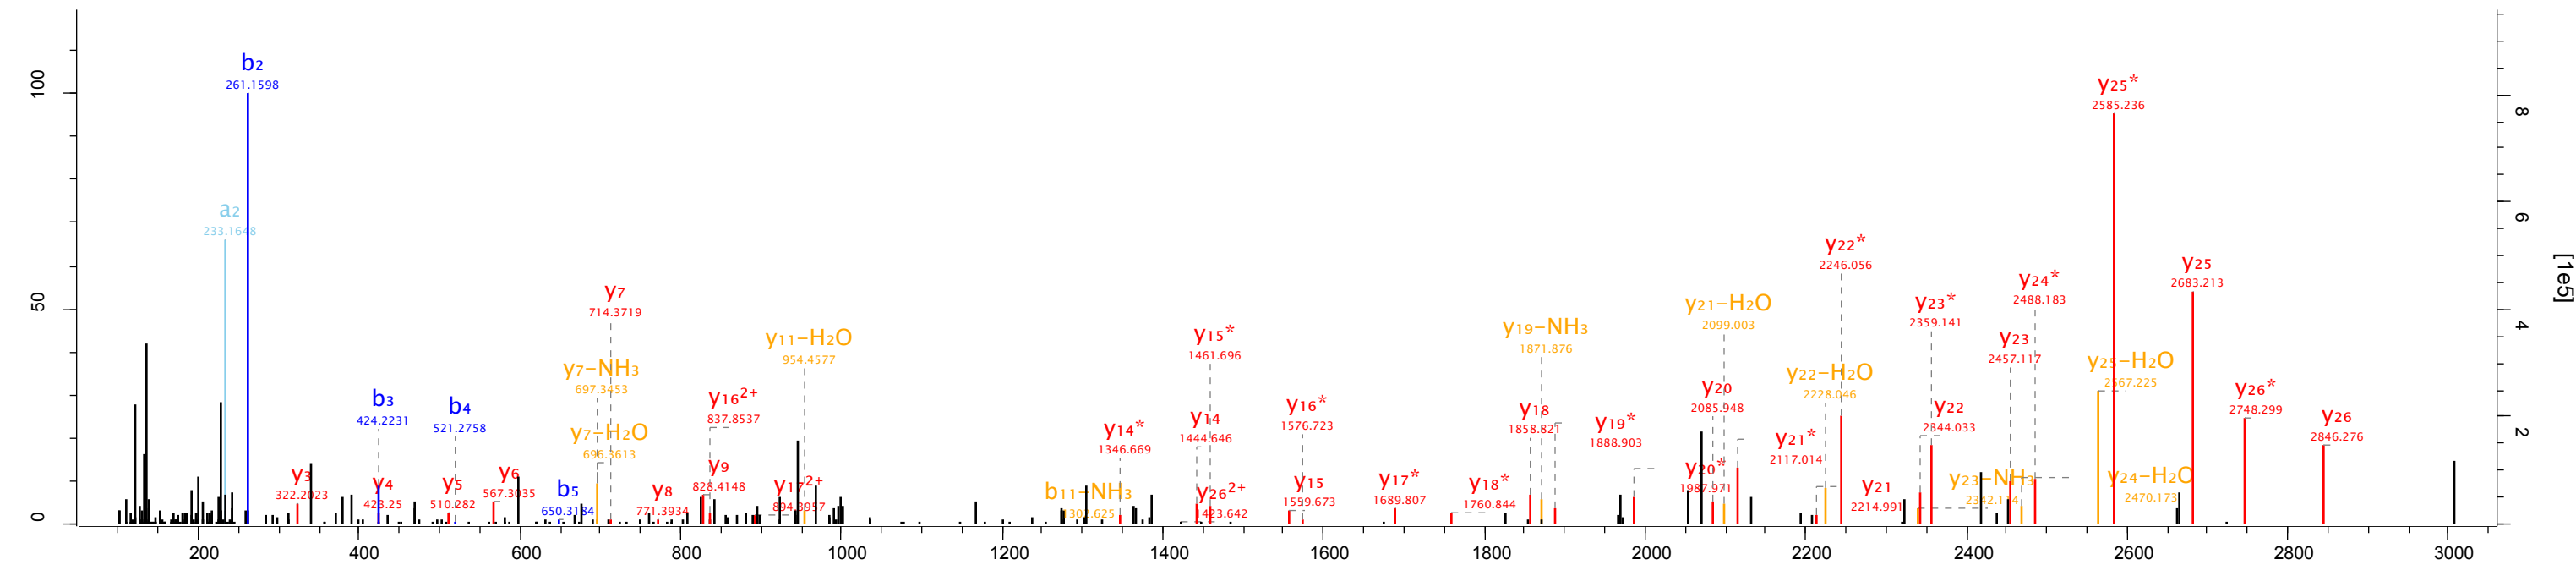

- I F Y P E I E E V Q A L D D T E R G S G G F G S T G K N -

b<sub>2</sub>
b<sub>3</sub>
b<sub>4</sub>
b<sub>5</sub>
y<sub>26</sub>
y<sub>25</sub>
y<sub>24</sub>\*
y<sub>23</sub>
y<sub>22</sub>
y<sub>21</sub>
y<sub>20</sub>
y<sub>19</sub>\*
y<sub>18</sub>
y<sub>17</sub>\*
y<sub>16</sub>\*
y<sub>15</sub>
y<sub>14</sub><sup>ph</sup>
y<sub>9</sub>
y<sub>8</sub>
y<sub>7</sub>
y<sub>6</sub>
y<sub>5</sub>
y<sub>4</sub>
y<sub>3</sub>



Raw file Scan Method Score m/z Gene names  
 20150812\_A375SR\_Phospho\_BR1\_06 26368 FTMS; HCD 205.02 1034.49 NCOR1

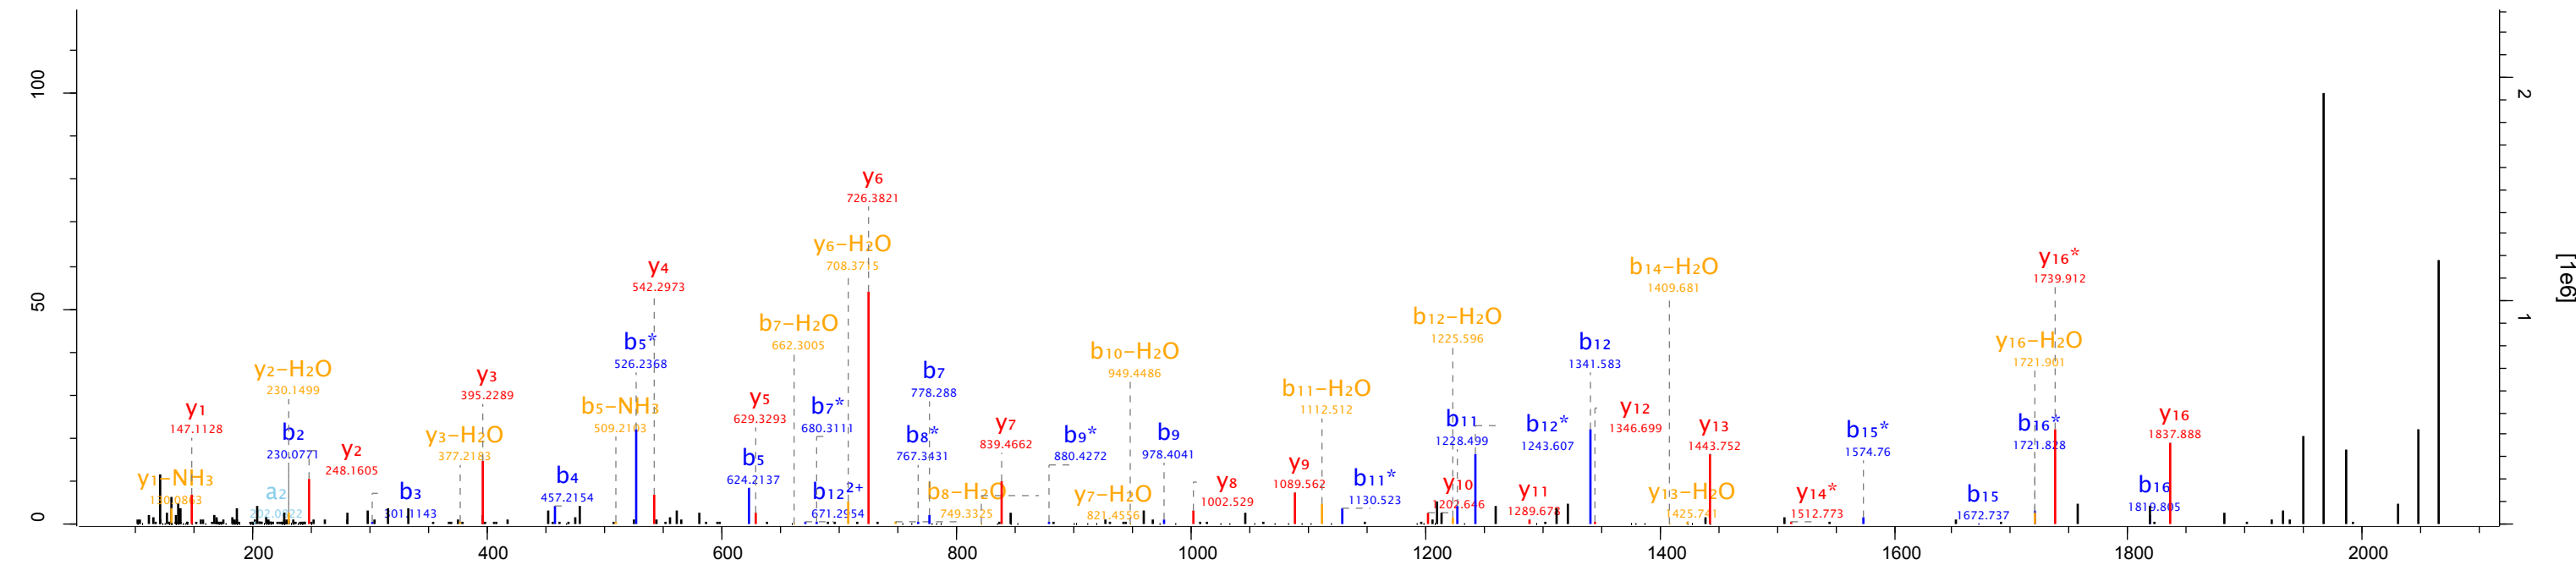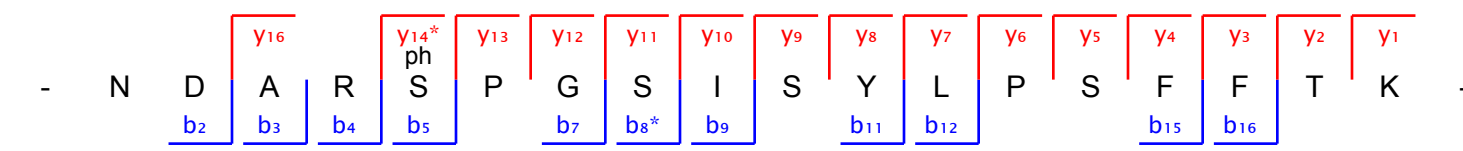

Raw file: 20150812\_A375SR\_Phospho\_BR1\_06  
 Scan: 2658 Method: FTMS; HCD Score: 81.45 m/z: 405.18 Gene names: BRD9

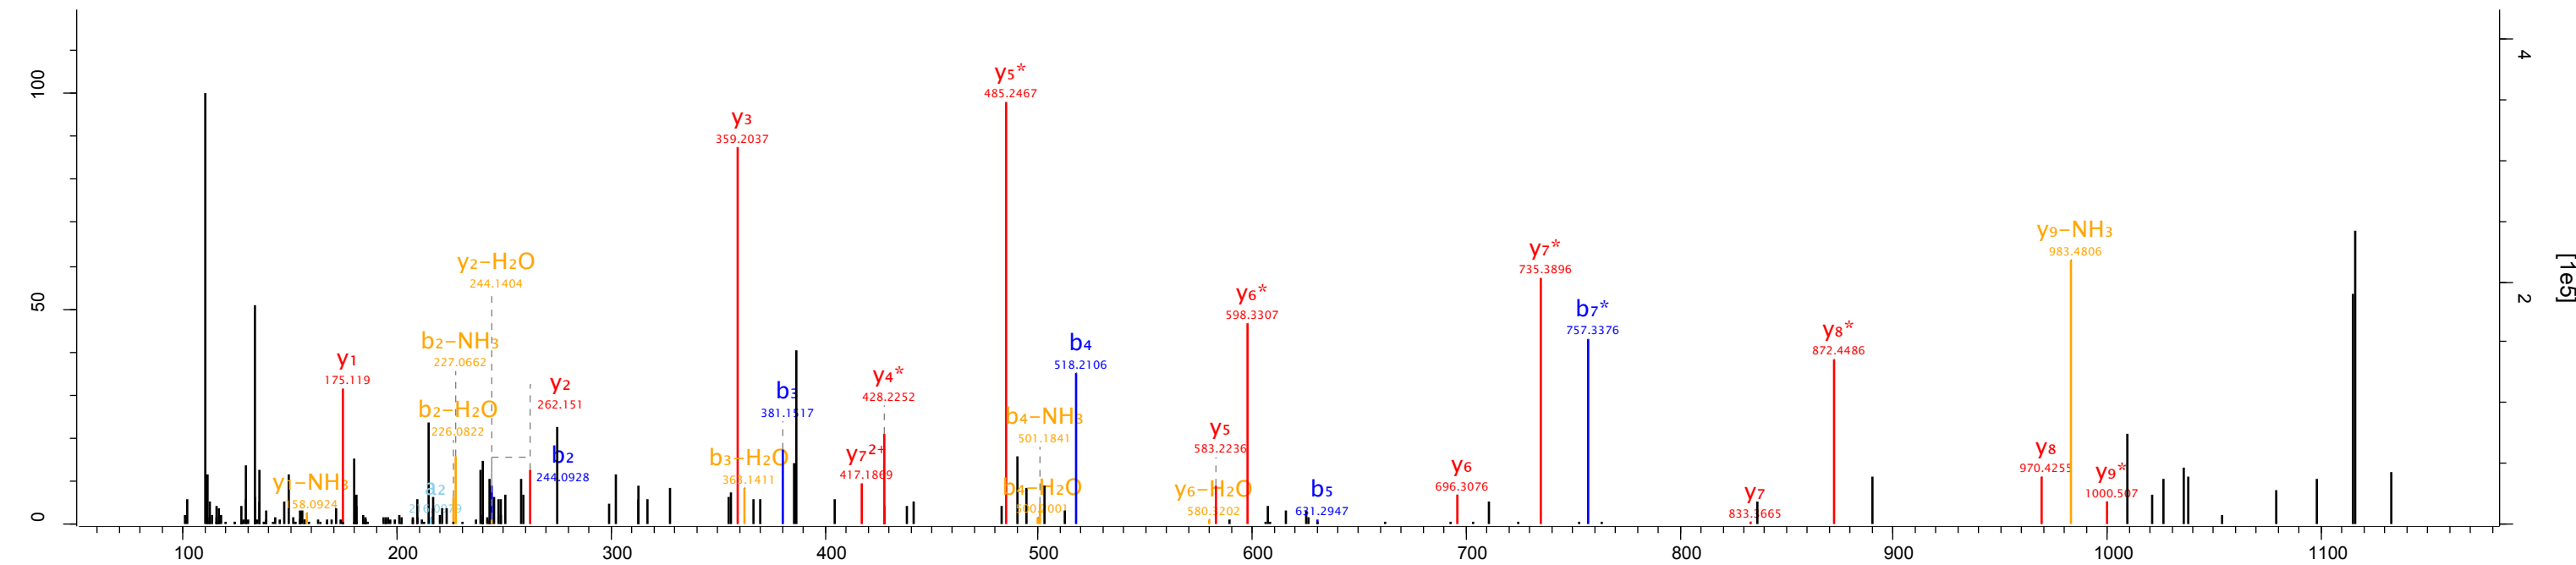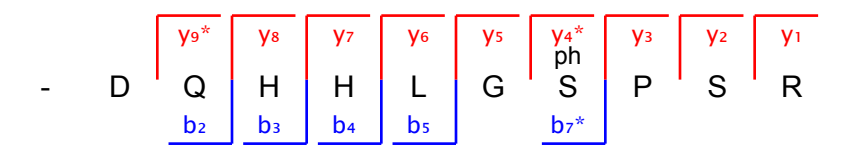

Raw file: 20150812\_A375SR\_Phospho\_BR1\_06  
 Scan: 27978 Method: FTMS; HCD Score: 66.88 m/z: 958.48 Gene names: EIF4ENIF1

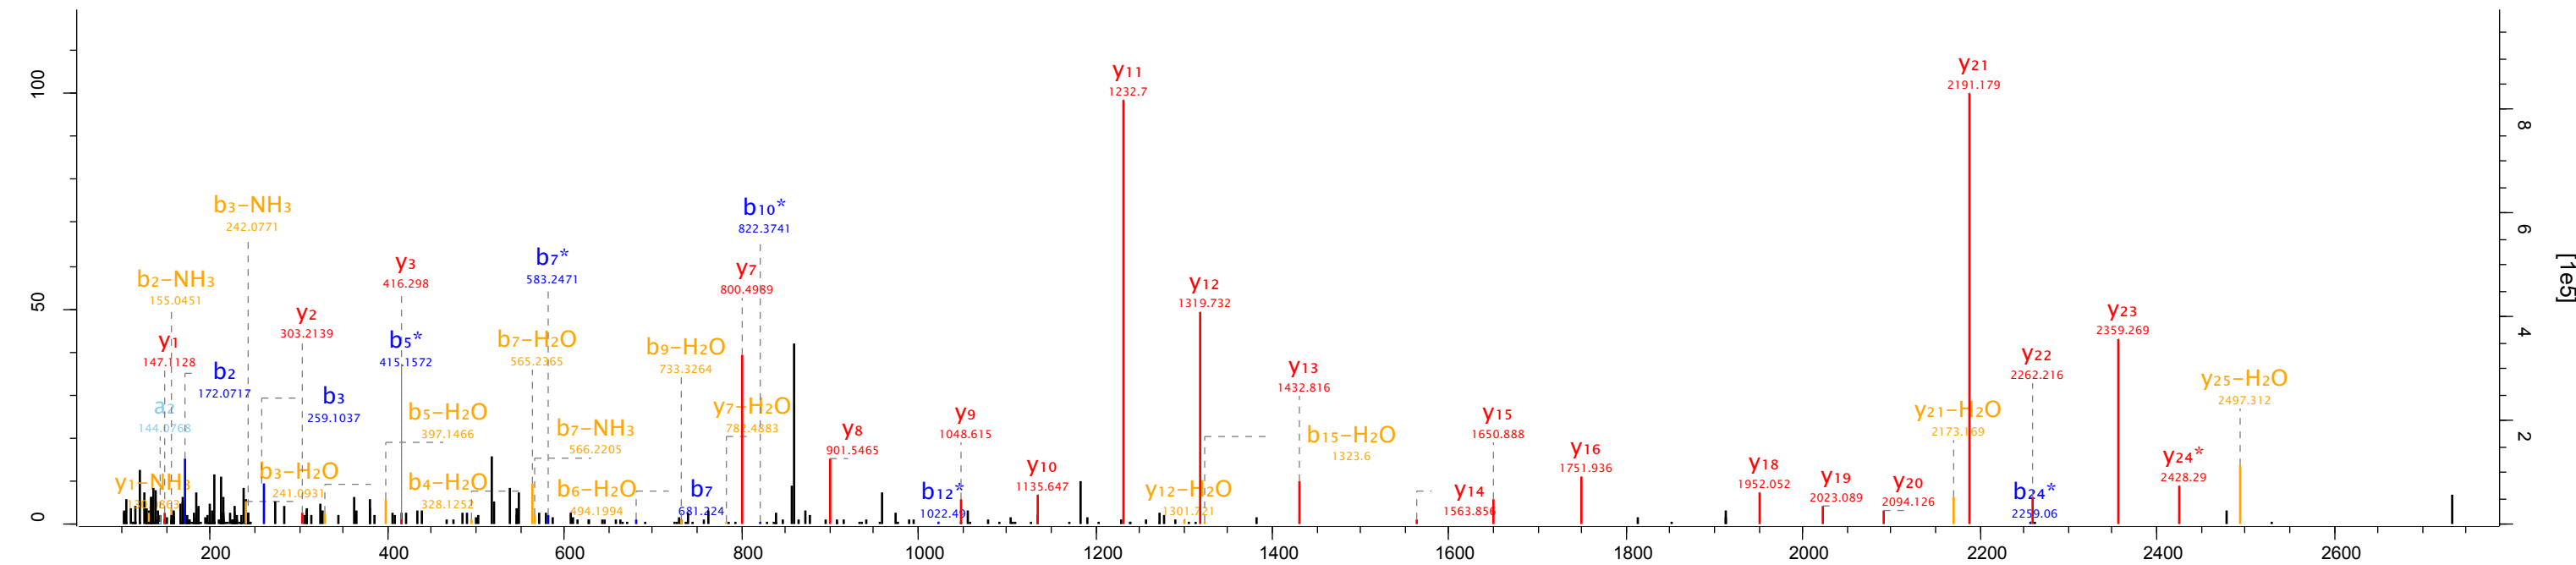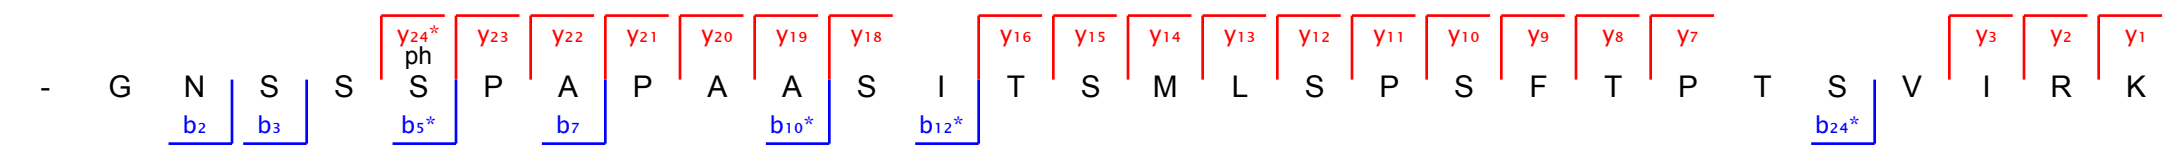

Raw file: 20150812\_A375SR\_Phospho\_BR1\_06  
 Scan: 2828 Method: FTMS; HCD Score: 108.97 m/z: 422.22 Gene names: STK39

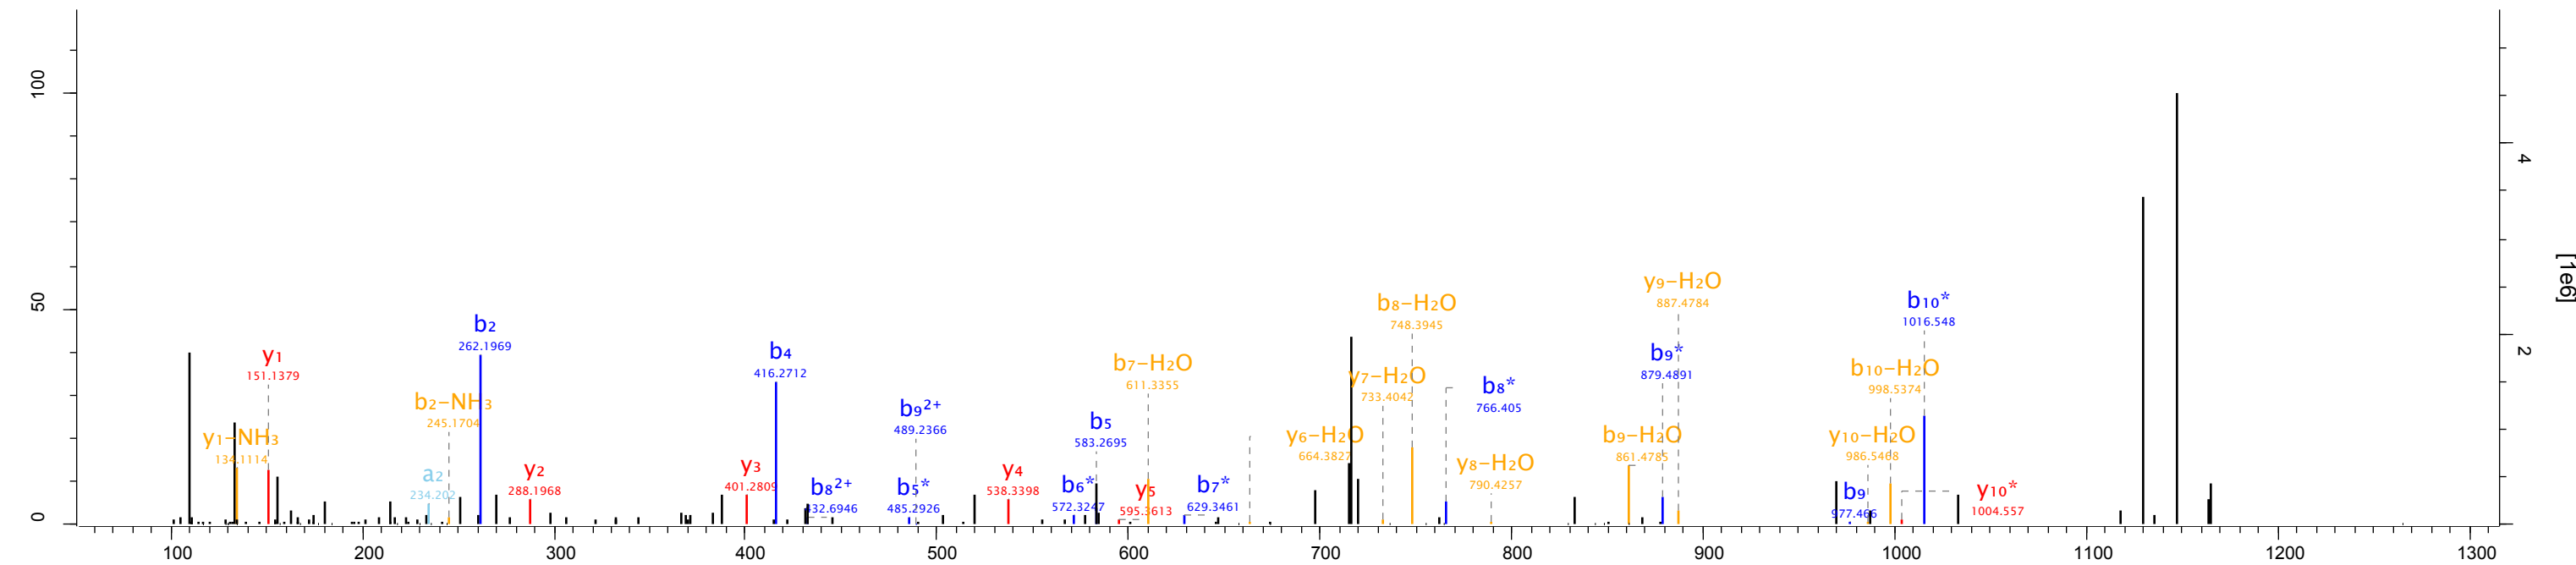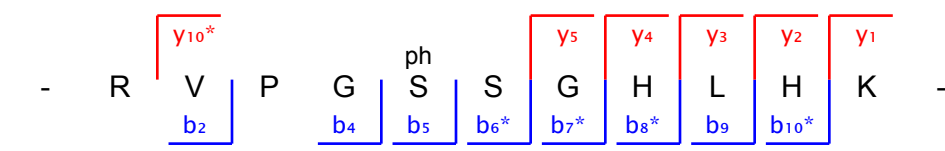

Raw file: 20150812\_A375SR\_Phospho\_BR1\_06  
 Scan: 3008 Method: FTMS; HCD Score: 109.32 m/z: 720.63 Gene names: GPATCH4

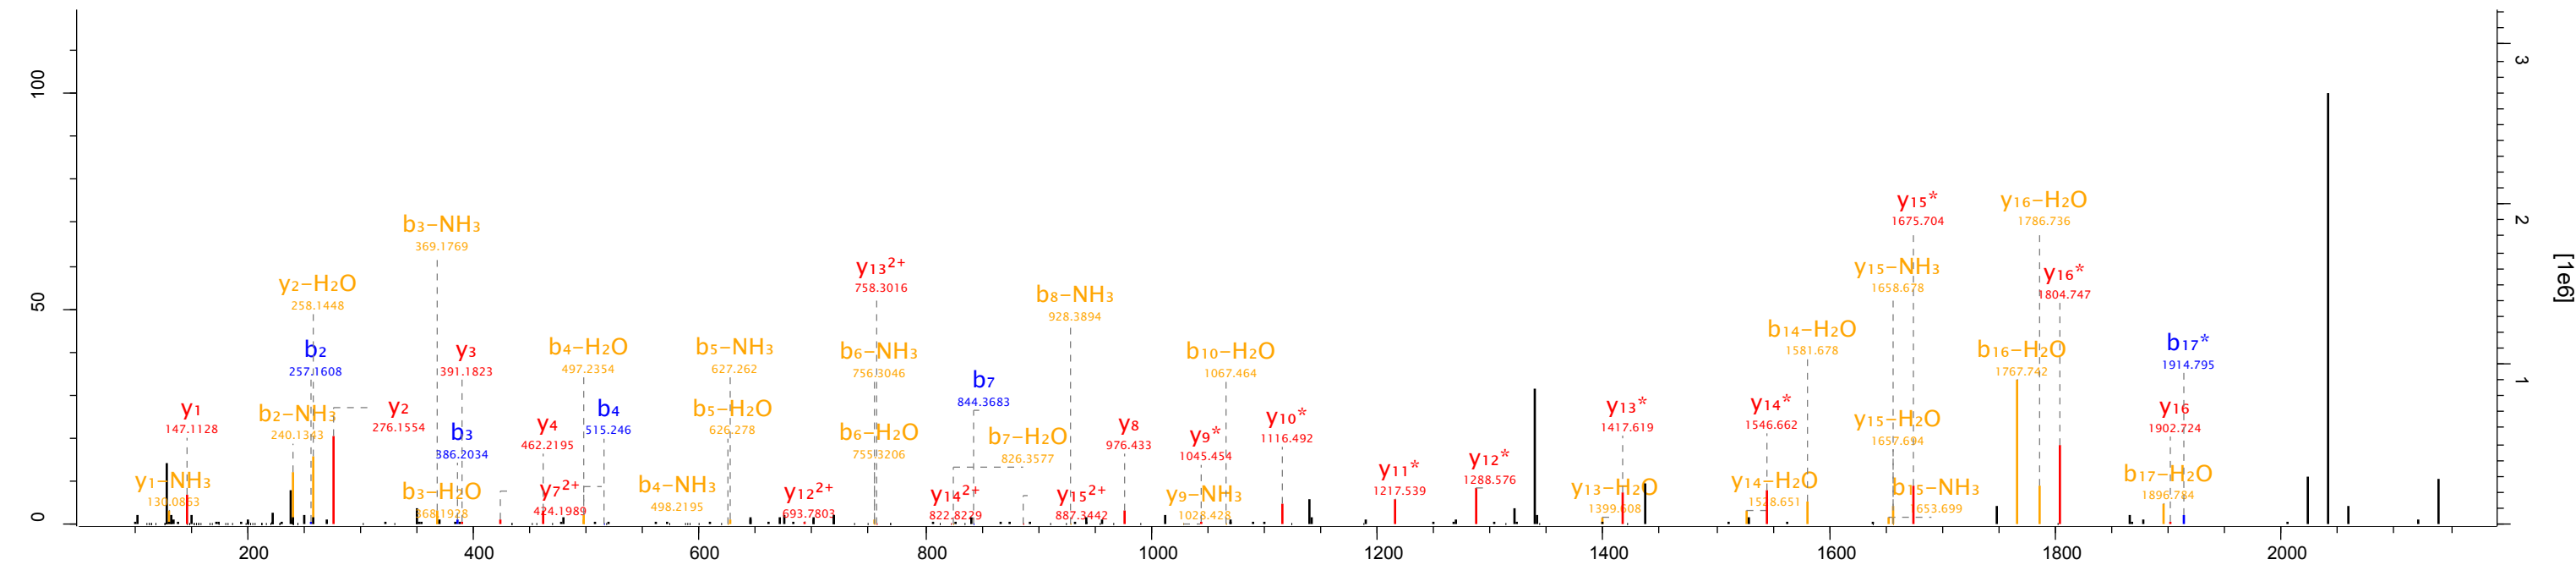

- Q K E E E E A T A S E R N D A D E K -

Fragmentation labels below the sequence:

- b<sub>2</sub> (under K)
- b<sub>3</sub> (under E)
- b<sub>4</sub> (under E)
- b<sub>7</sub> (under A)
- b<sub>17</sub><sup>\*</sup> (under E)
- y<sub>16</sub> (over E)
- y<sub>15</sub><sup>\*</sup> (over E)
- y<sub>14</sub><sup>\*</sup> (over E)
- y<sub>13</sub><sup>\*</sup> (over E)
- y<sub>12</sub><sup>\*</sup> (over A)
- y<sub>11</sub><sup>\*</sup> (over T)
- y<sub>10</sub><sup>\*</sup> (over A)
- y<sub>9</sub><sup>\*</sup> (over S)
- y<sub>8</sub> (over E)
- y<sub>7</sub><sup>2+</sup> (over R)
- y<sub>4</sub> (over A)
- y<sub>3</sub> (over D)
- y<sub>2</sub> (over E)
- y<sub>1</sub> (over K)

Raw file 20150812\_A375SR\_Phospho\_BR1\_06 Scan 3498 Method FTMS; HCD Score 249.49 m/z 796.41 Gene names DDX21

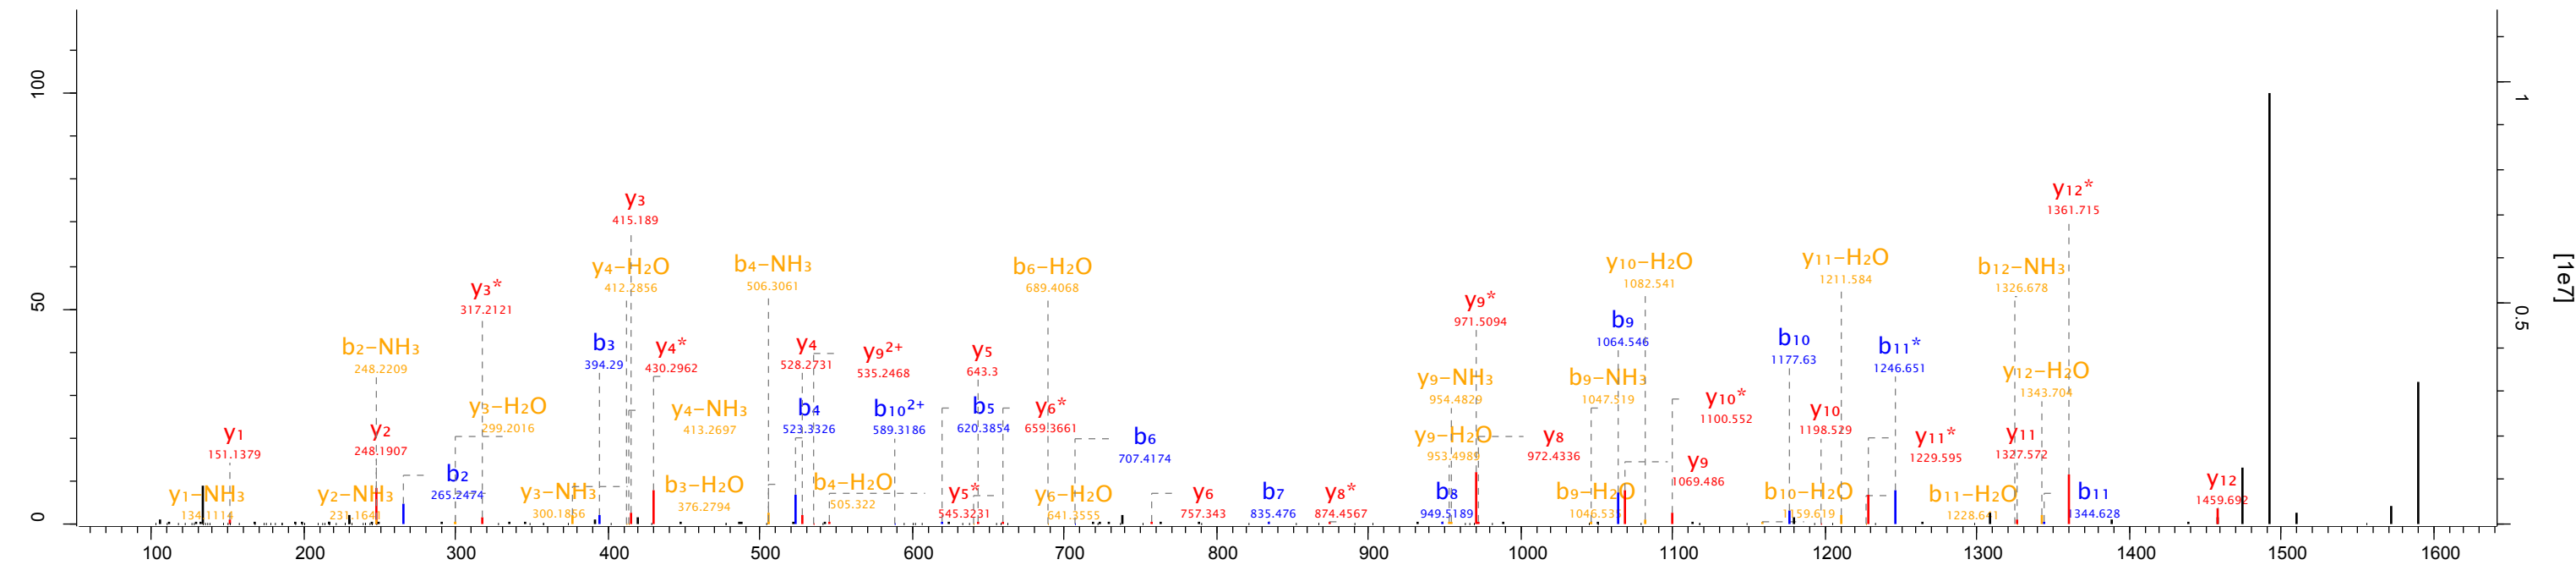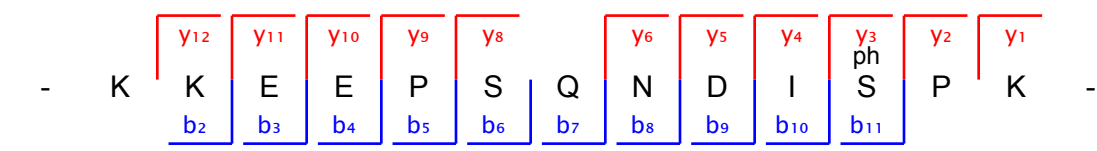

Raw file 20150812\_A375SR\_Phospho\_BR1\_06 Scan 4138 Method FTMS; HCD Score 111.33 m/z 502.76 Gene names KIF1C

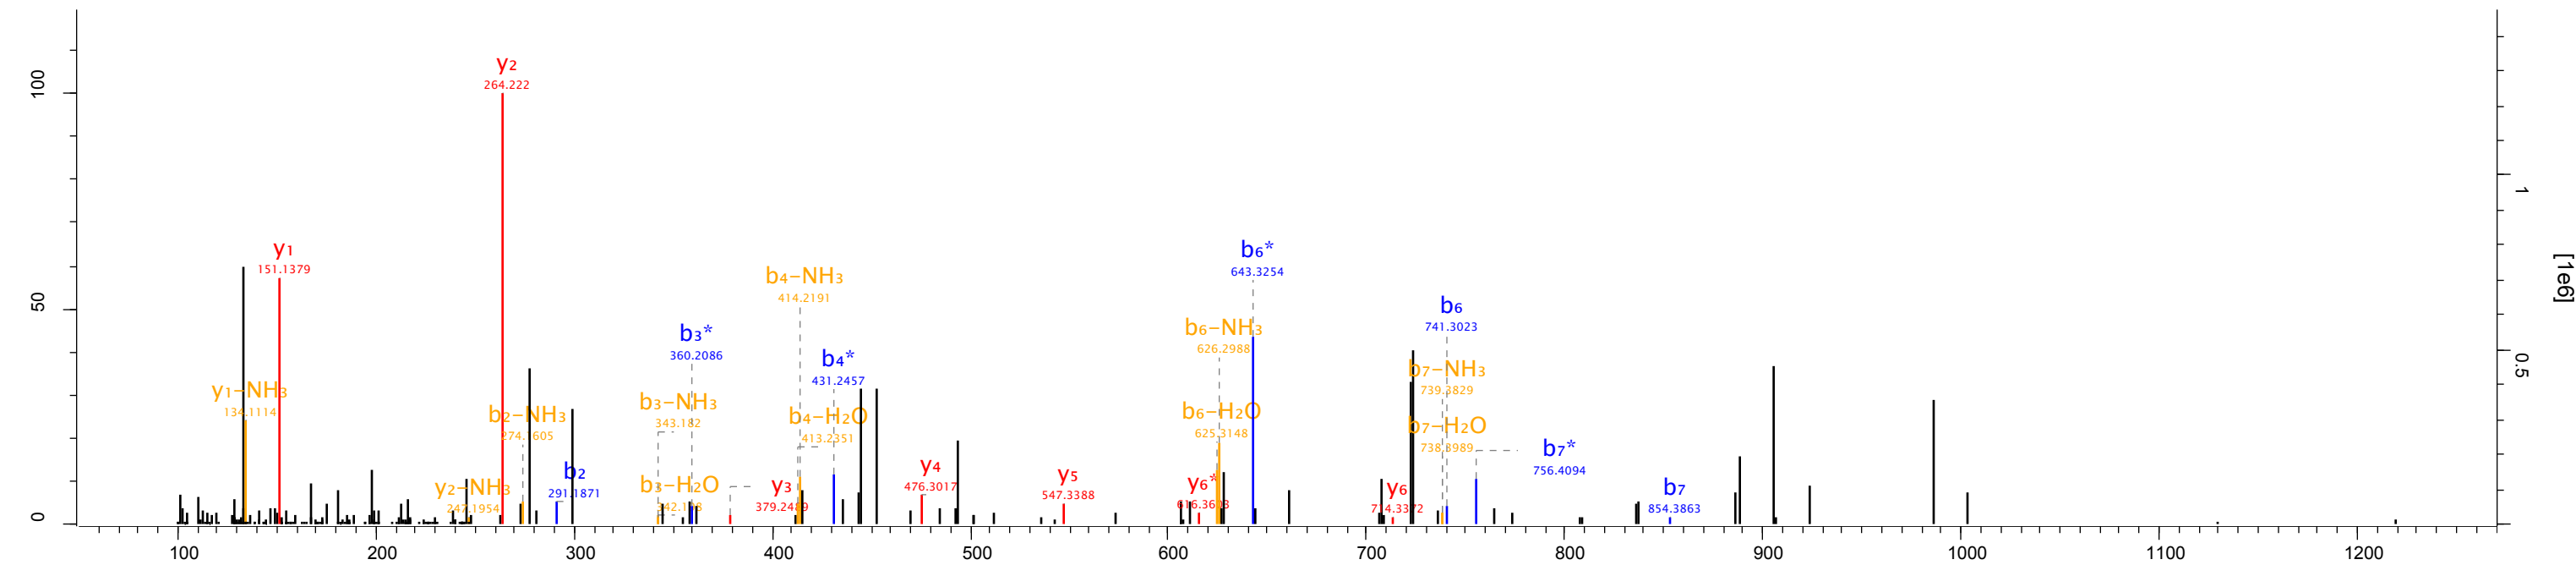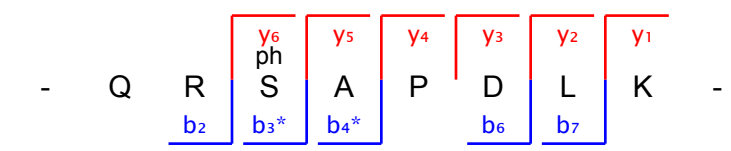

Raw file: 20150812\_A375SR\_Phospho\_BR1\_06  
 Scan: 4208 Method: FTMS; HCD Score: 134.25 m/z: 693.3 Gene names: SRRM2

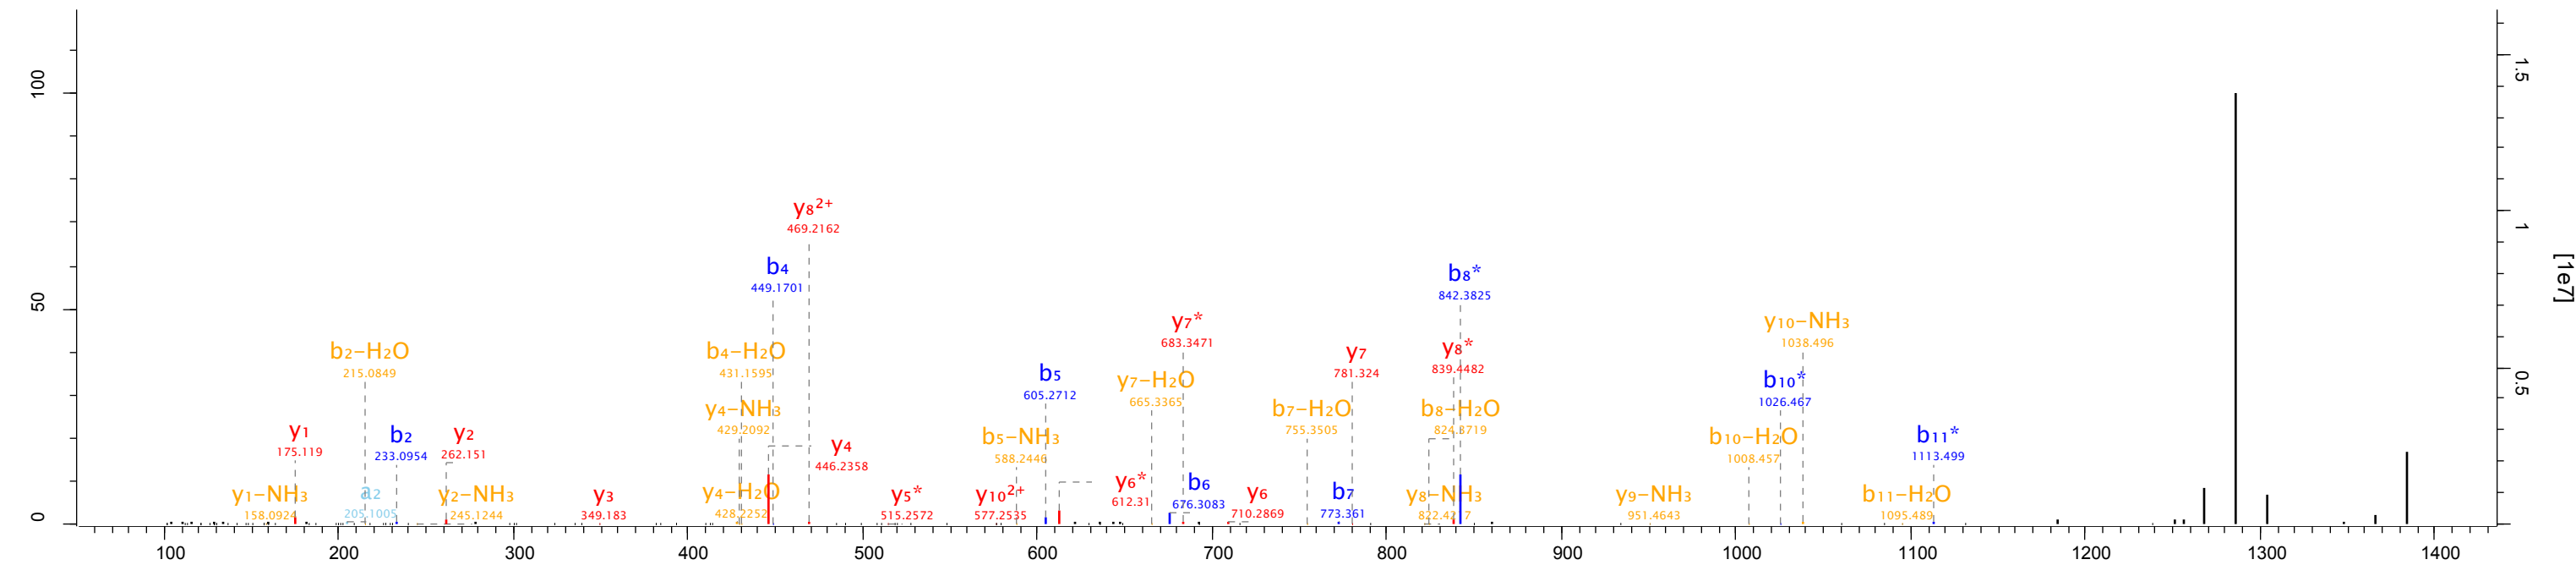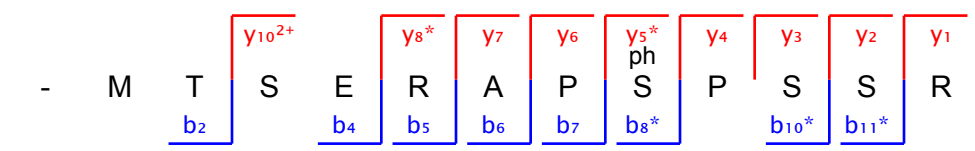



Raw file Scan Method Score m/z Gene names  
 20150812\_A375SR\_Phospho\_BR1\_06 4348 FTMS; HCD 153.7 588.31 RERE

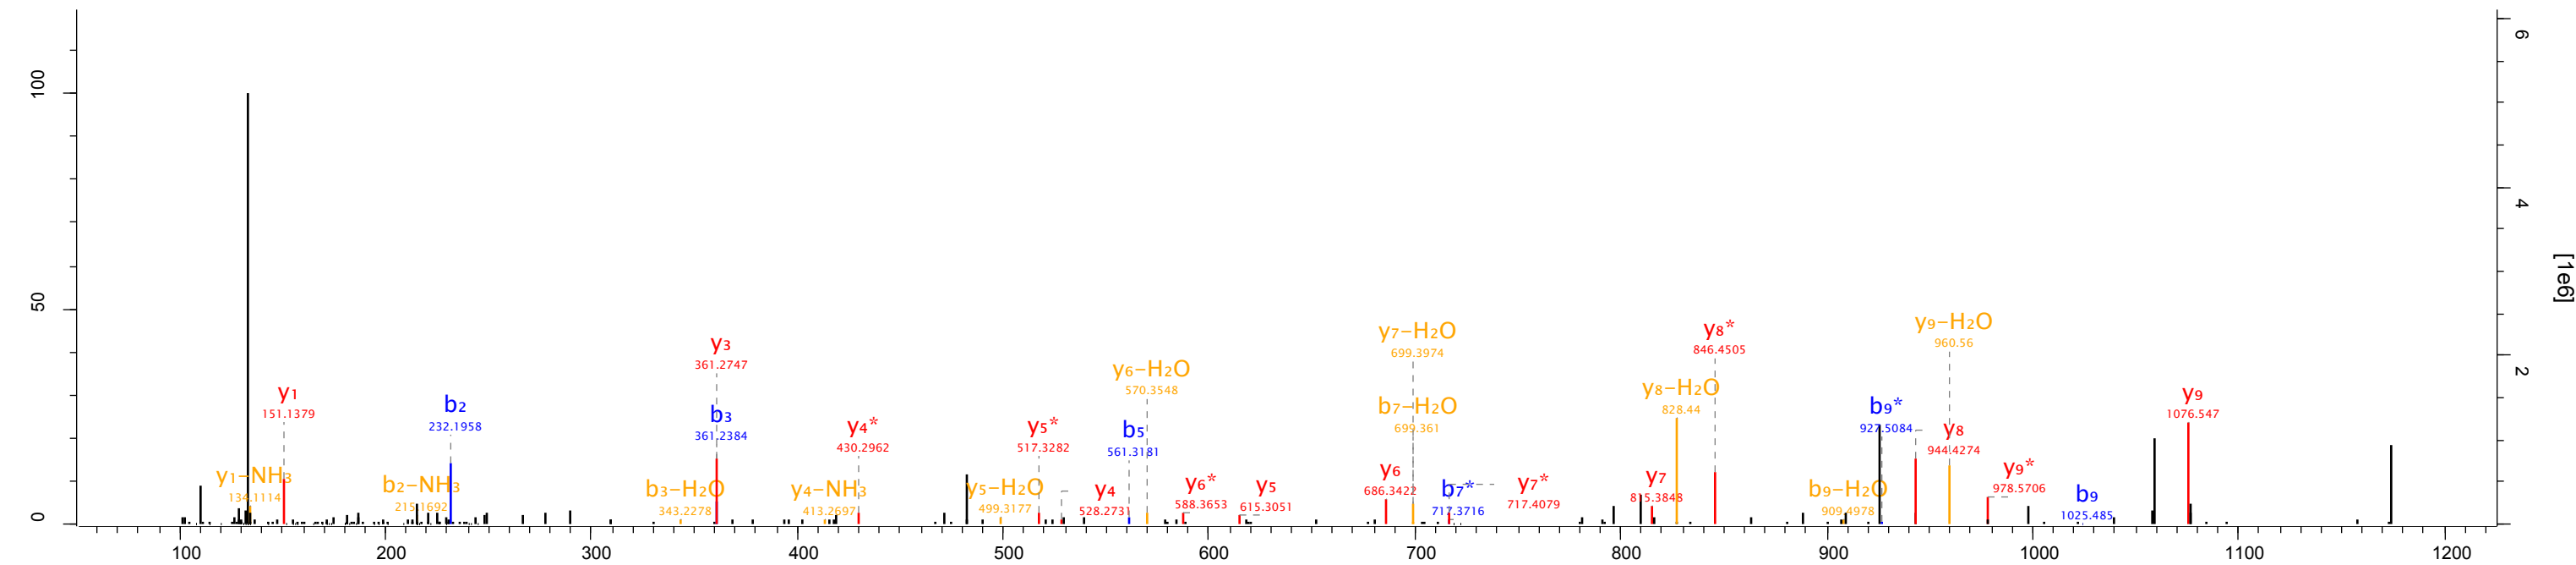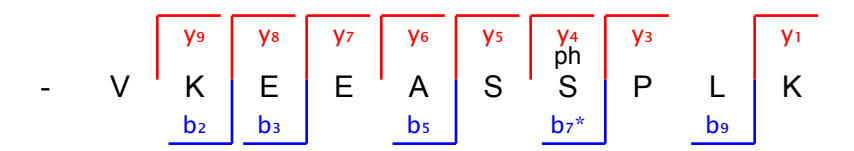

Raw file 20150812\_A375SR\_Phospho\_BR1\_06 Scan 4508 Method FTMS; HCD Score 79.68 m/z 409.69 Gene names SPEN

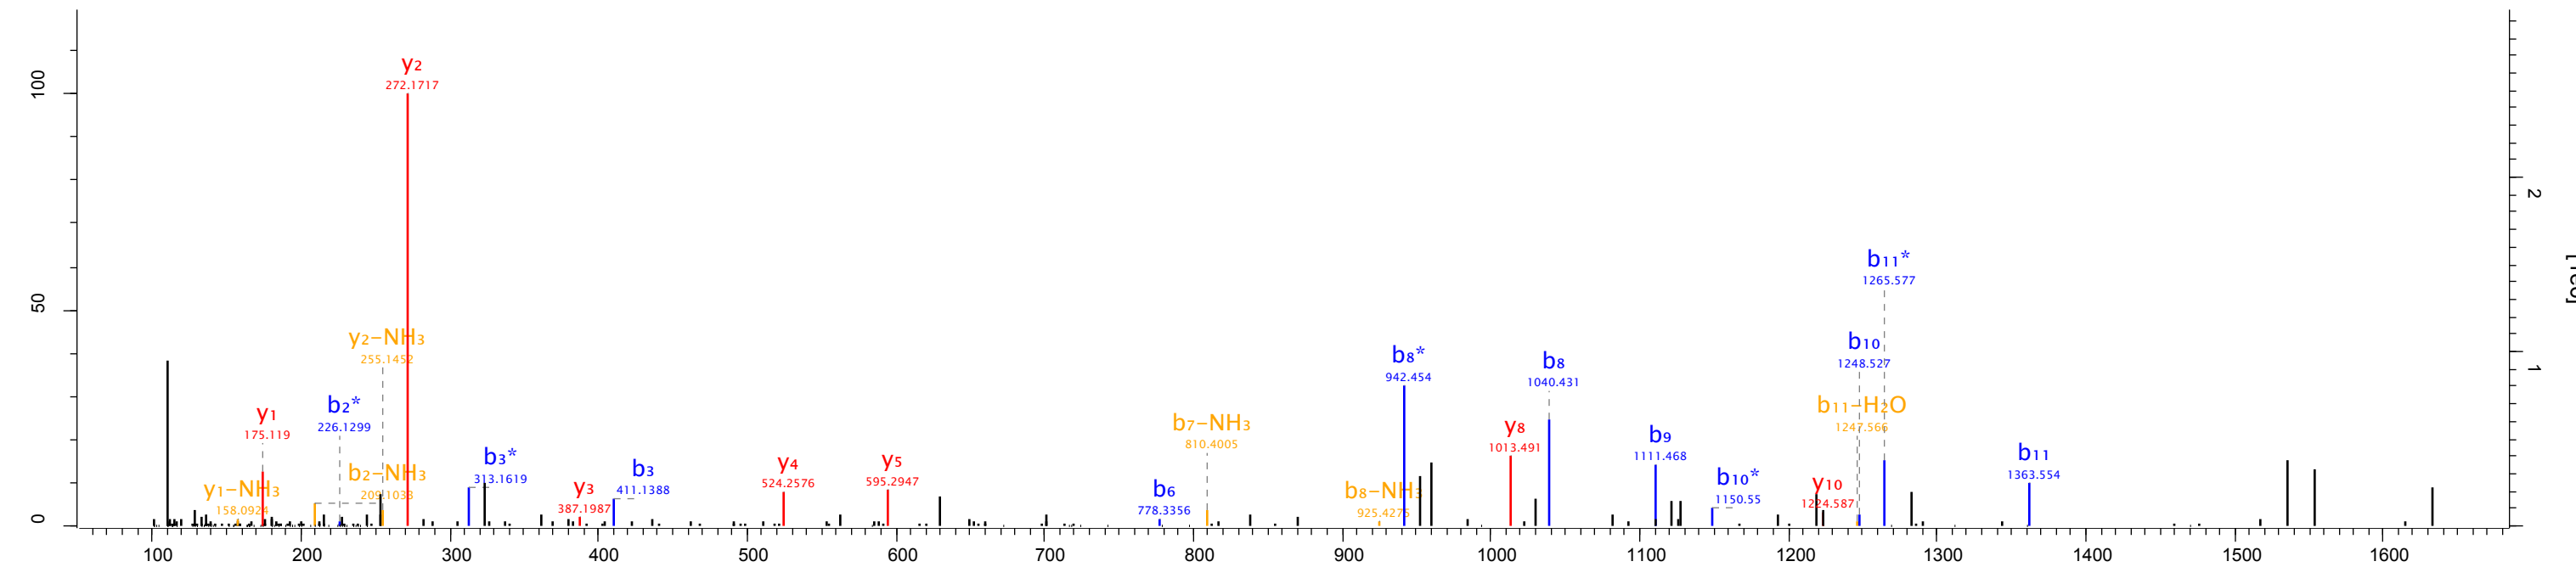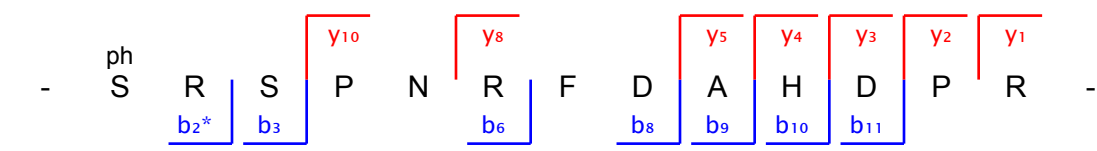

Raw file 20150812\_A375SR\_Phospho\_BR1\_06 Scan 4608 Method FTMS; HCD Score 139.54 m/z 452.72 Gene names EHBP1

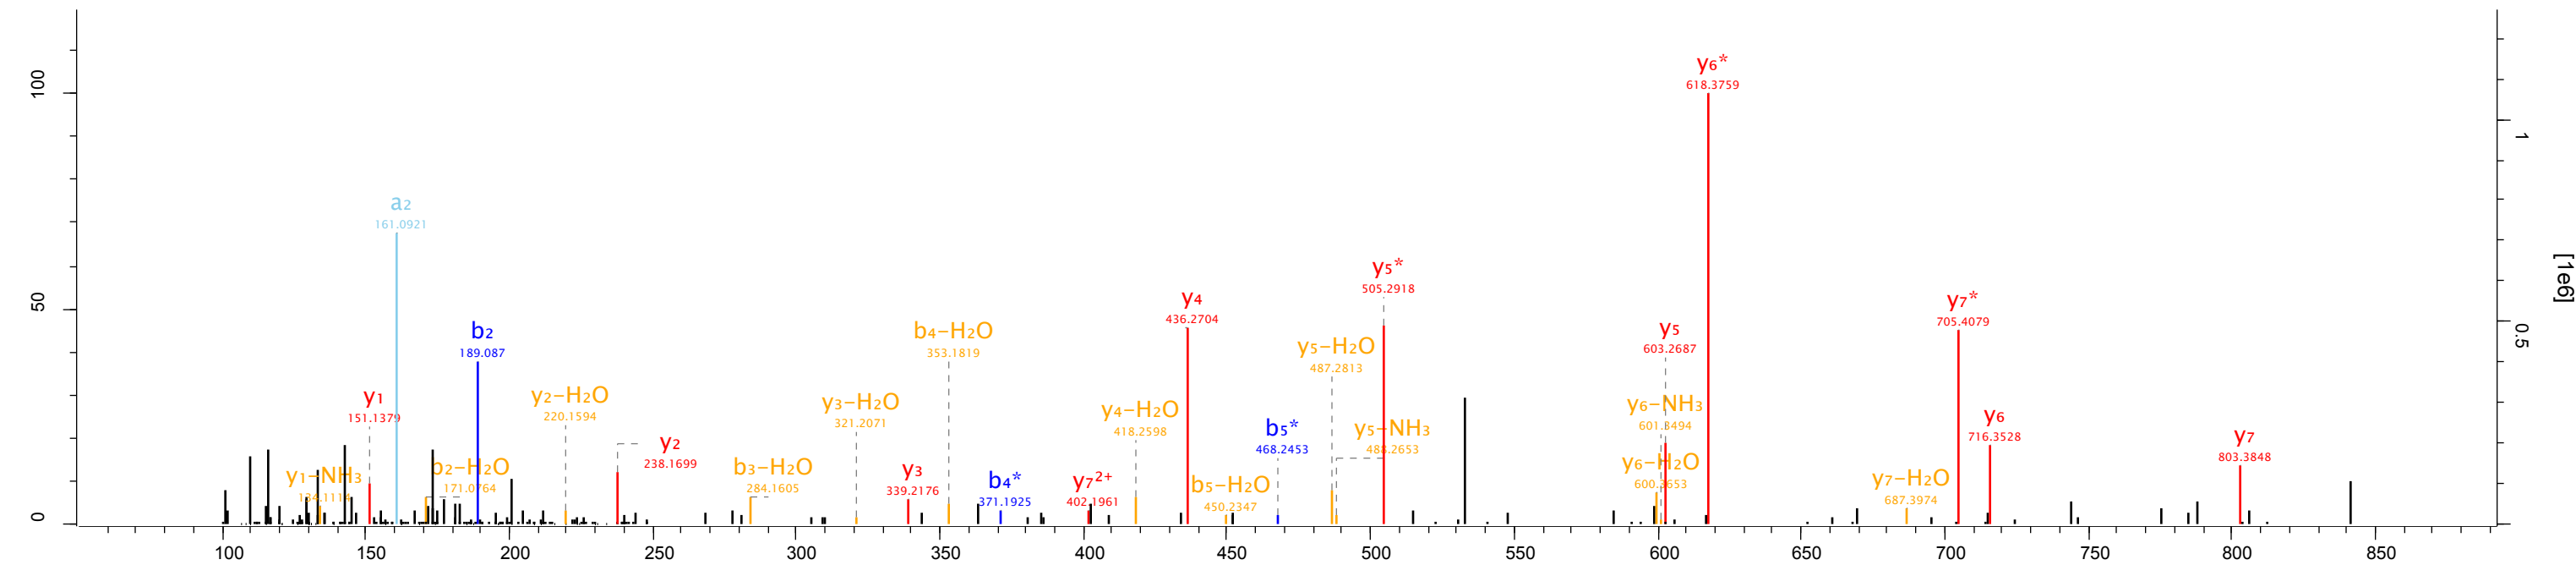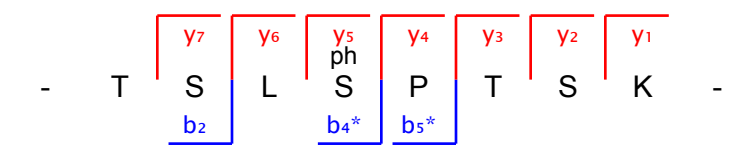

20150812\_A375SR\_Phospho\_BR1\_06 5378 FTMS; HCD 89.66 592.27 BOD1L1

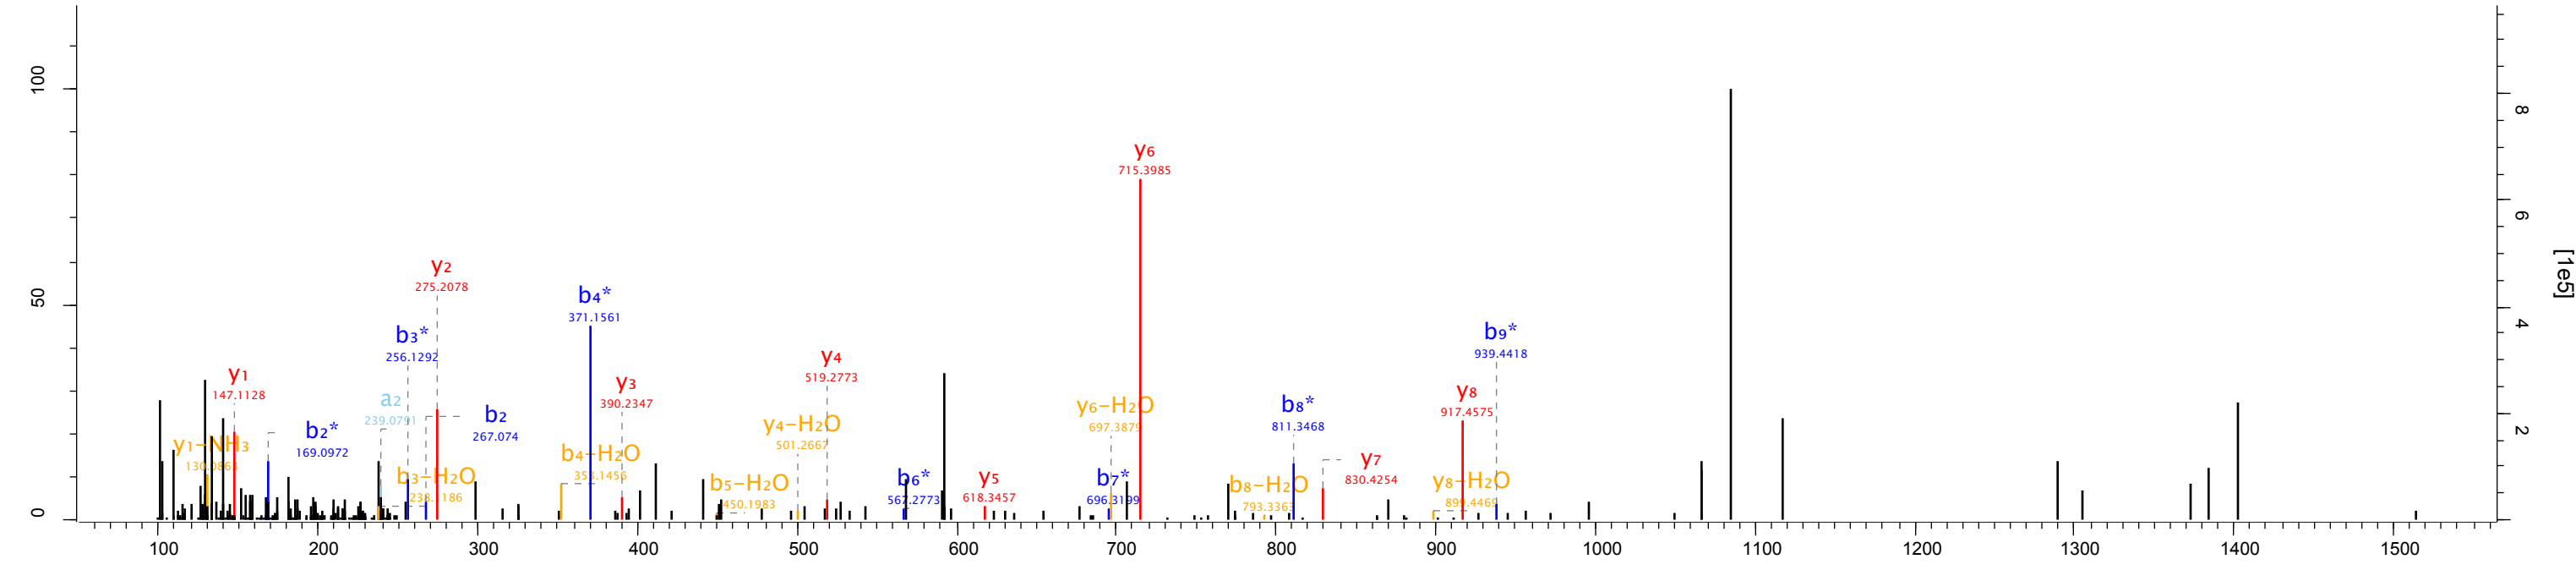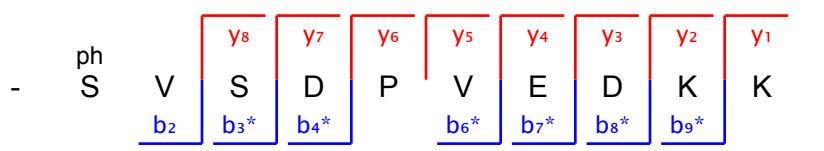

Raw file: 20150812\_A375SR\_Phospho\_BR1\_06  
 Scan: 5628 Method: FTMS; HCD Score: 89.92 m/z: 627.94 Gene names: ZFYVE19

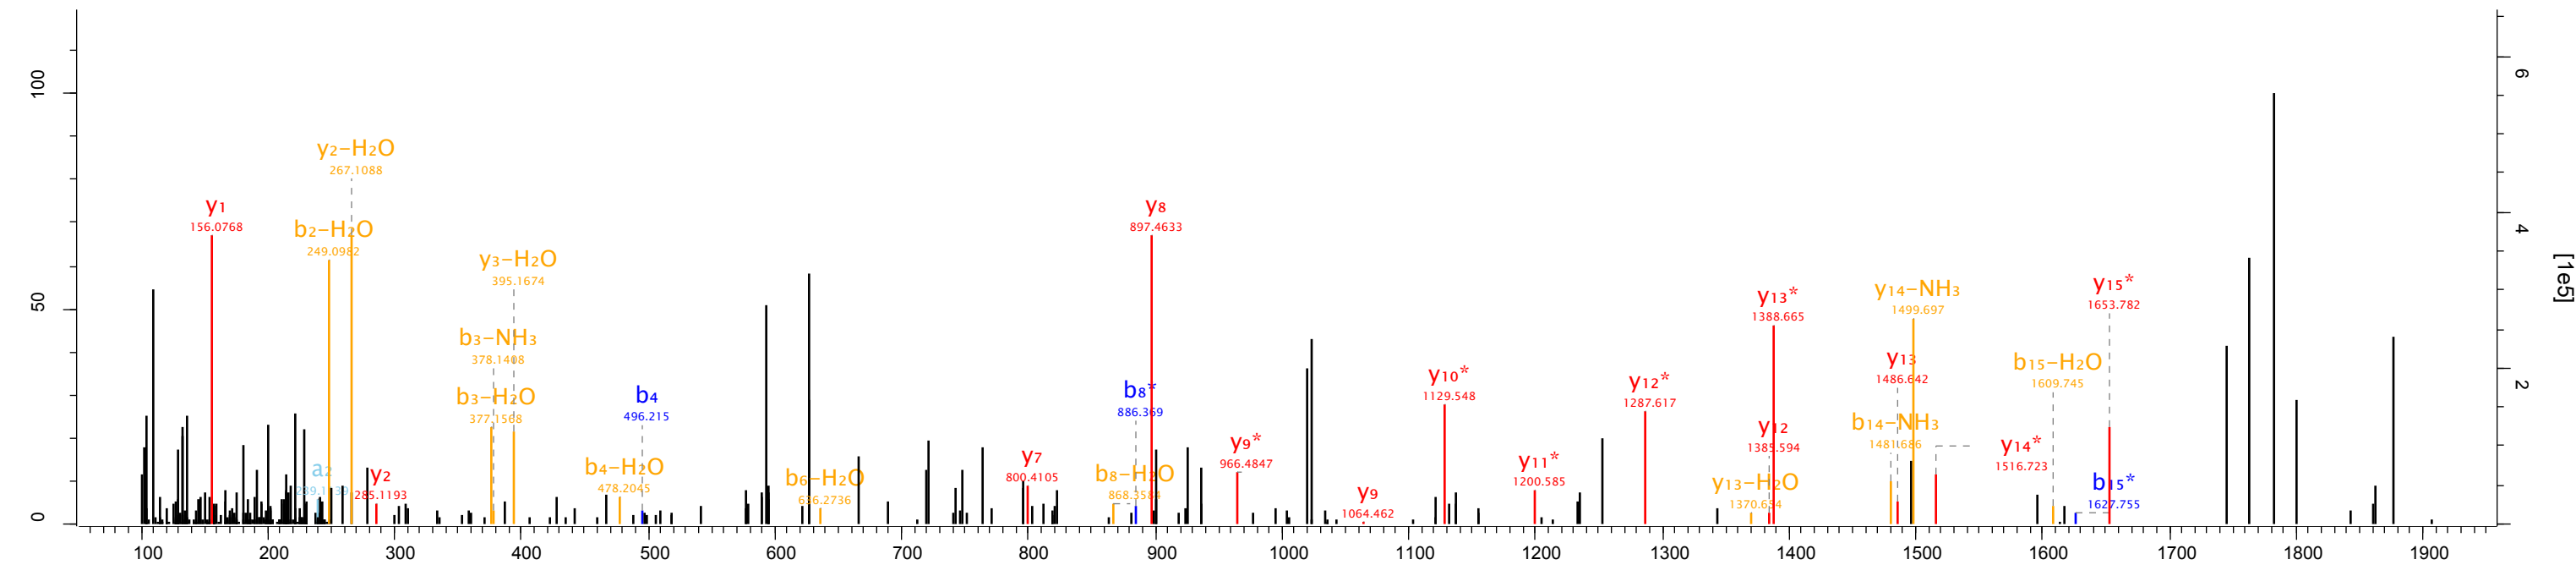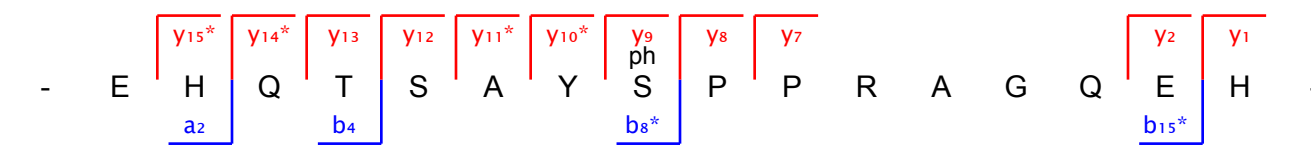

Raw file: 20150812\_A375SR\_Phospho\_BR1\_06  
 Scan: 5728 Method: FTMS; HCD Score: 140.53 m/z: 568.3 Gene names: CDK16

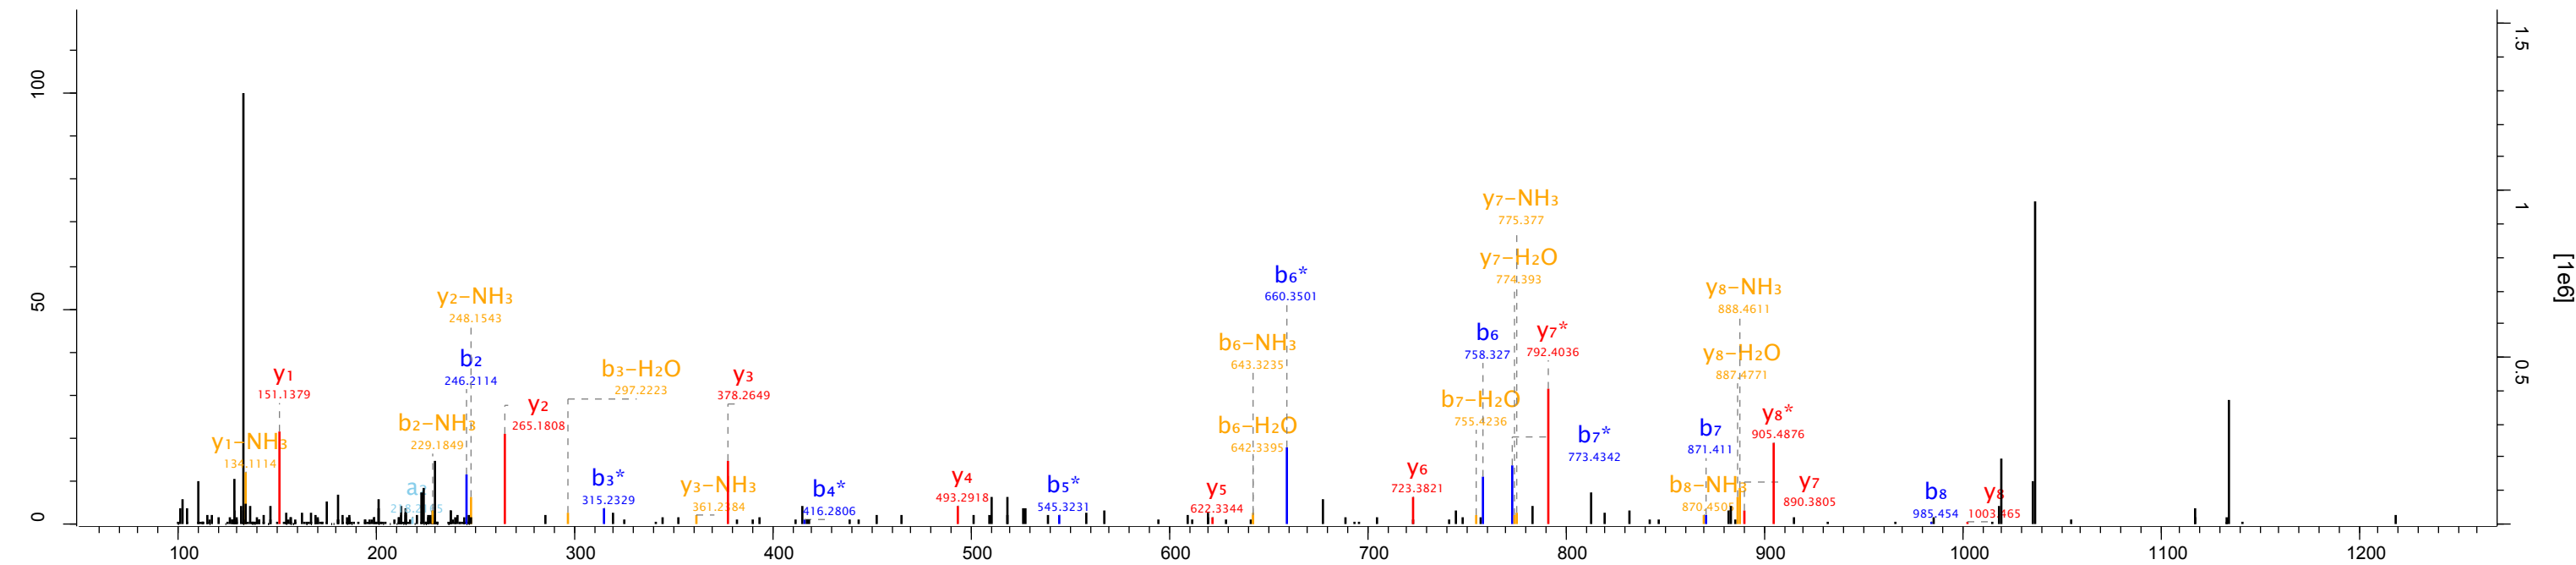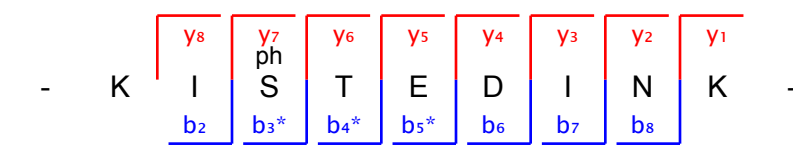

Raw file: 20150812\_A375SR\_Phospho\_BR1\_06  
 Scan: 6488 Method: FTMS; HCD Score: 208.24 m/z: 700.38 Gene names: USP24

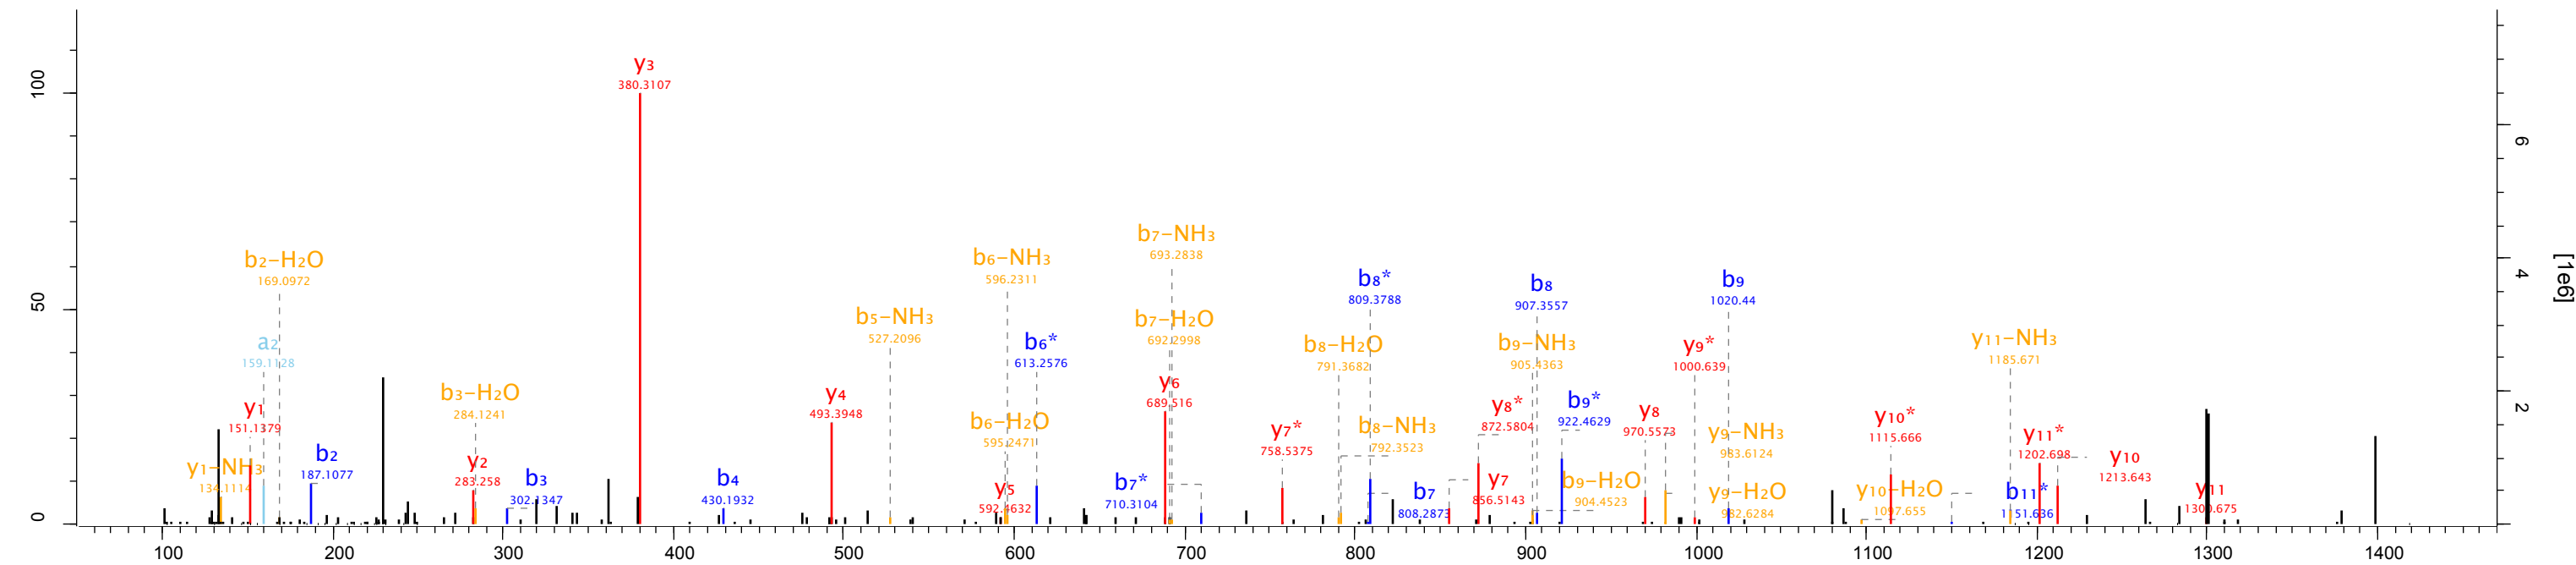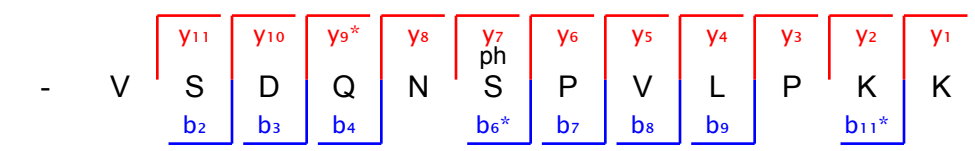

Raw file: 20150812\_A375SR\_Phospho\_BR1\_06  
 Scan: 9978 Method: FTMS; HCD Score: 203.81 m/z: 527.48 Gene names: RBM12B

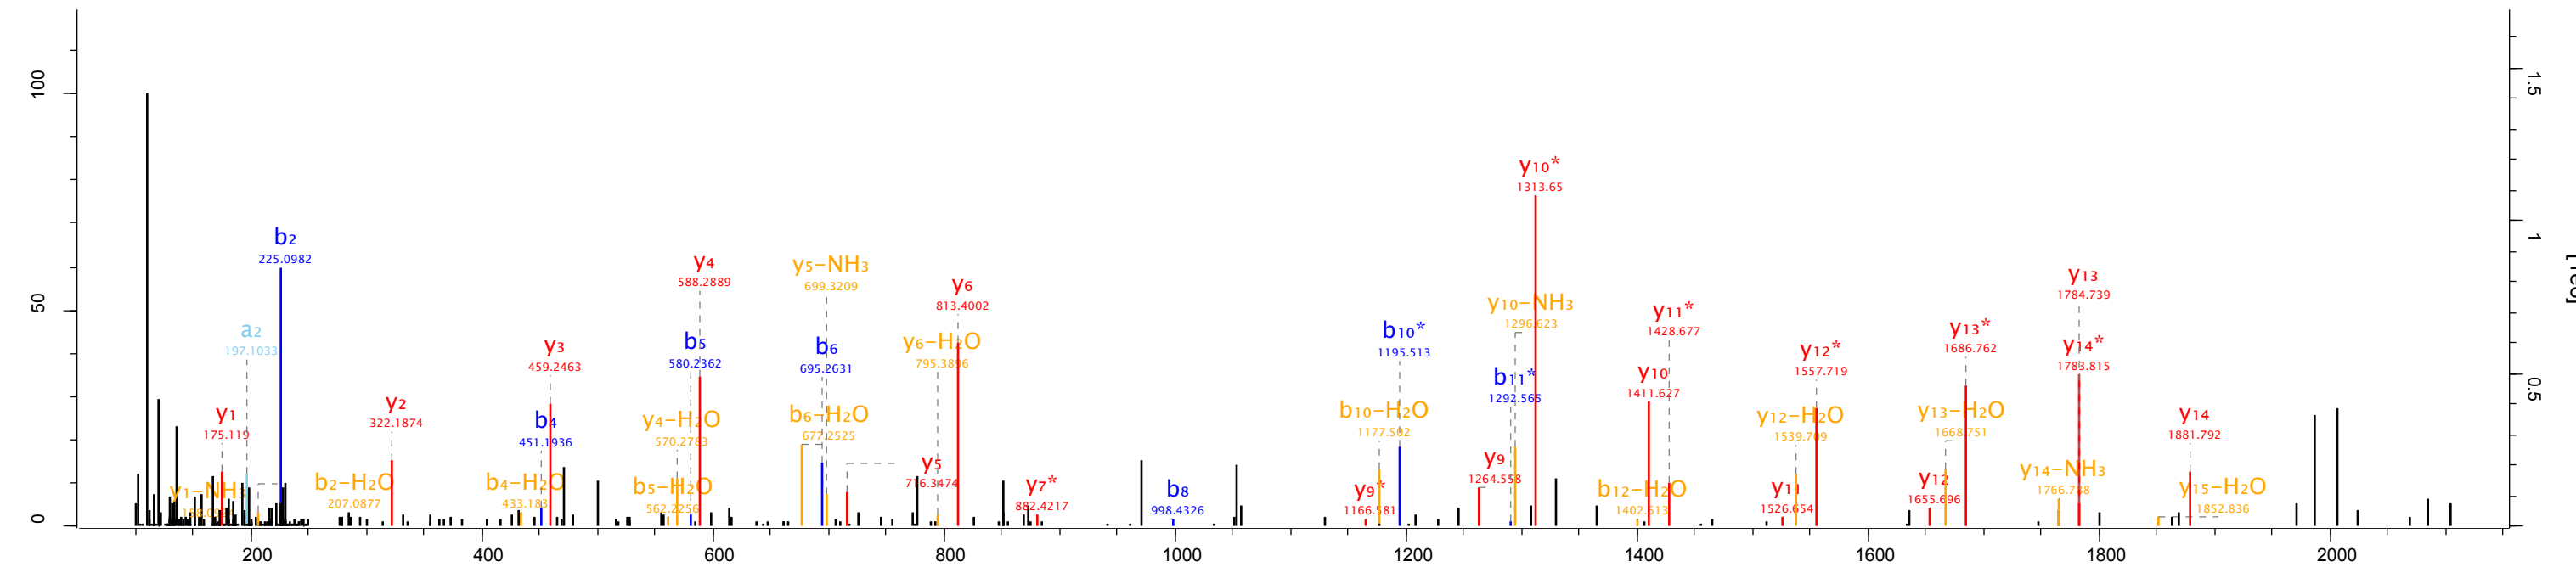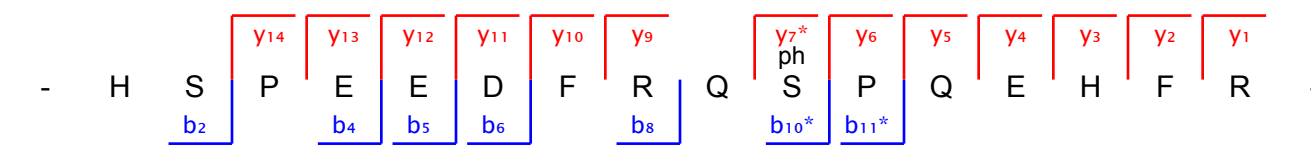





Raw file: 20150812\_A375SR\_Phospho\_BR1\_07  
 Scan: 2208 Method: FTMS; HCD Score: 129.77 m/z: 429.17 Gene names: SERBP1

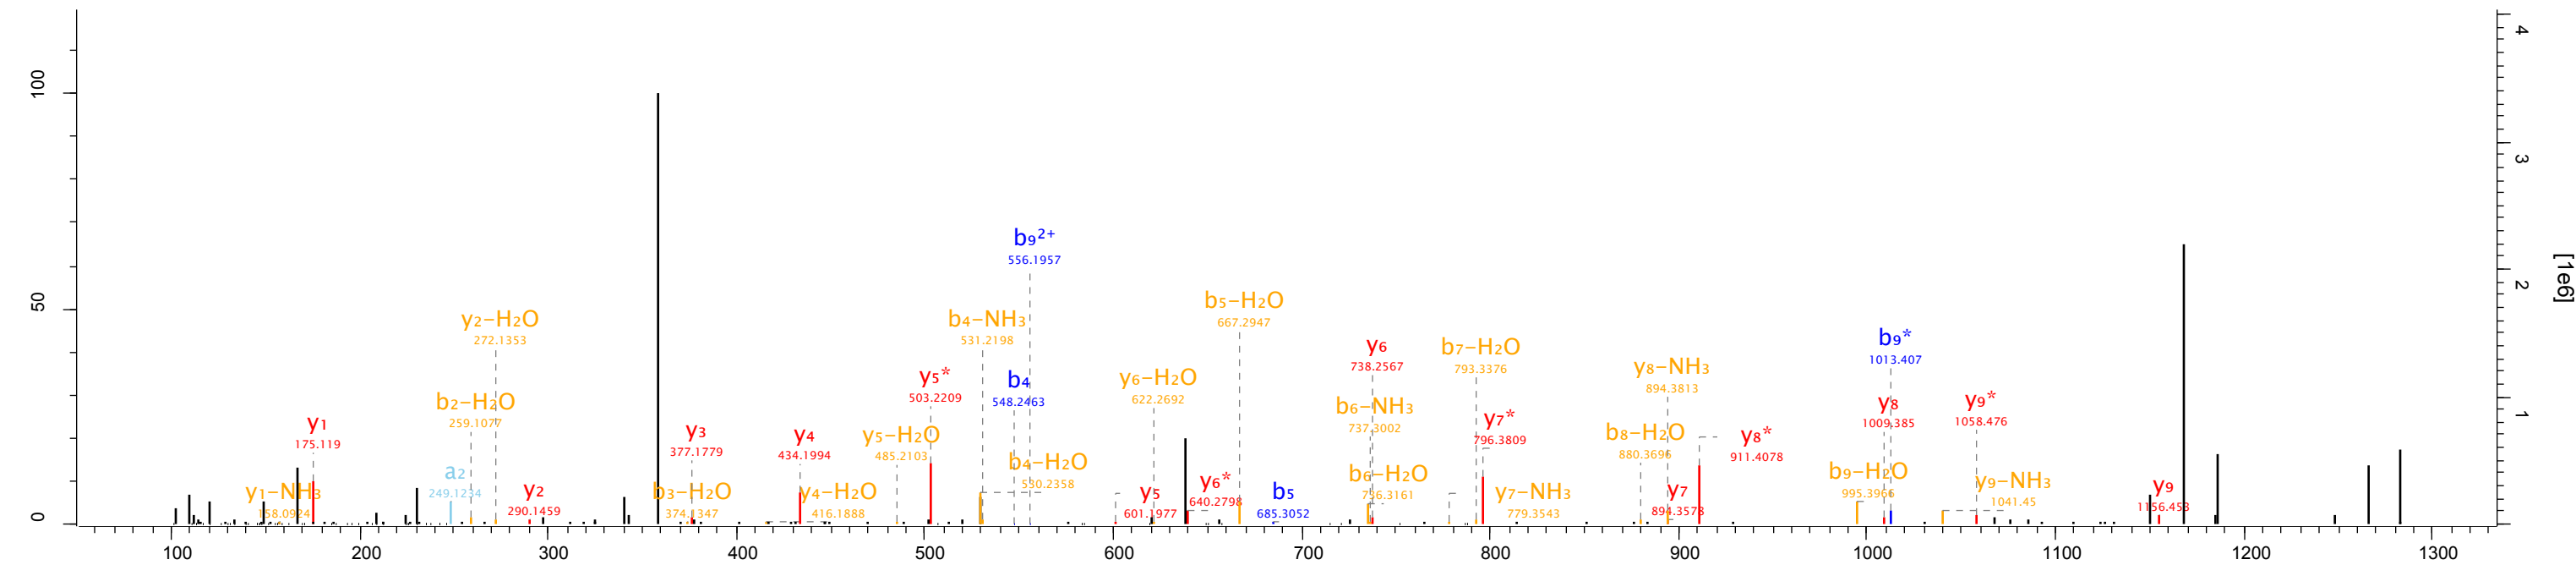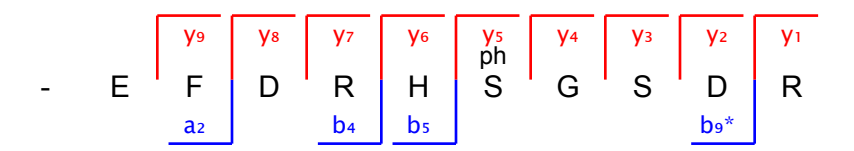

Raw file: 20150812\_A375SR\_Phospho\_BR1\_07  
 Scan: 3158 Method: FTMS; HCD Score: 164.31 m/z: 637.29 Gene names: NKAP

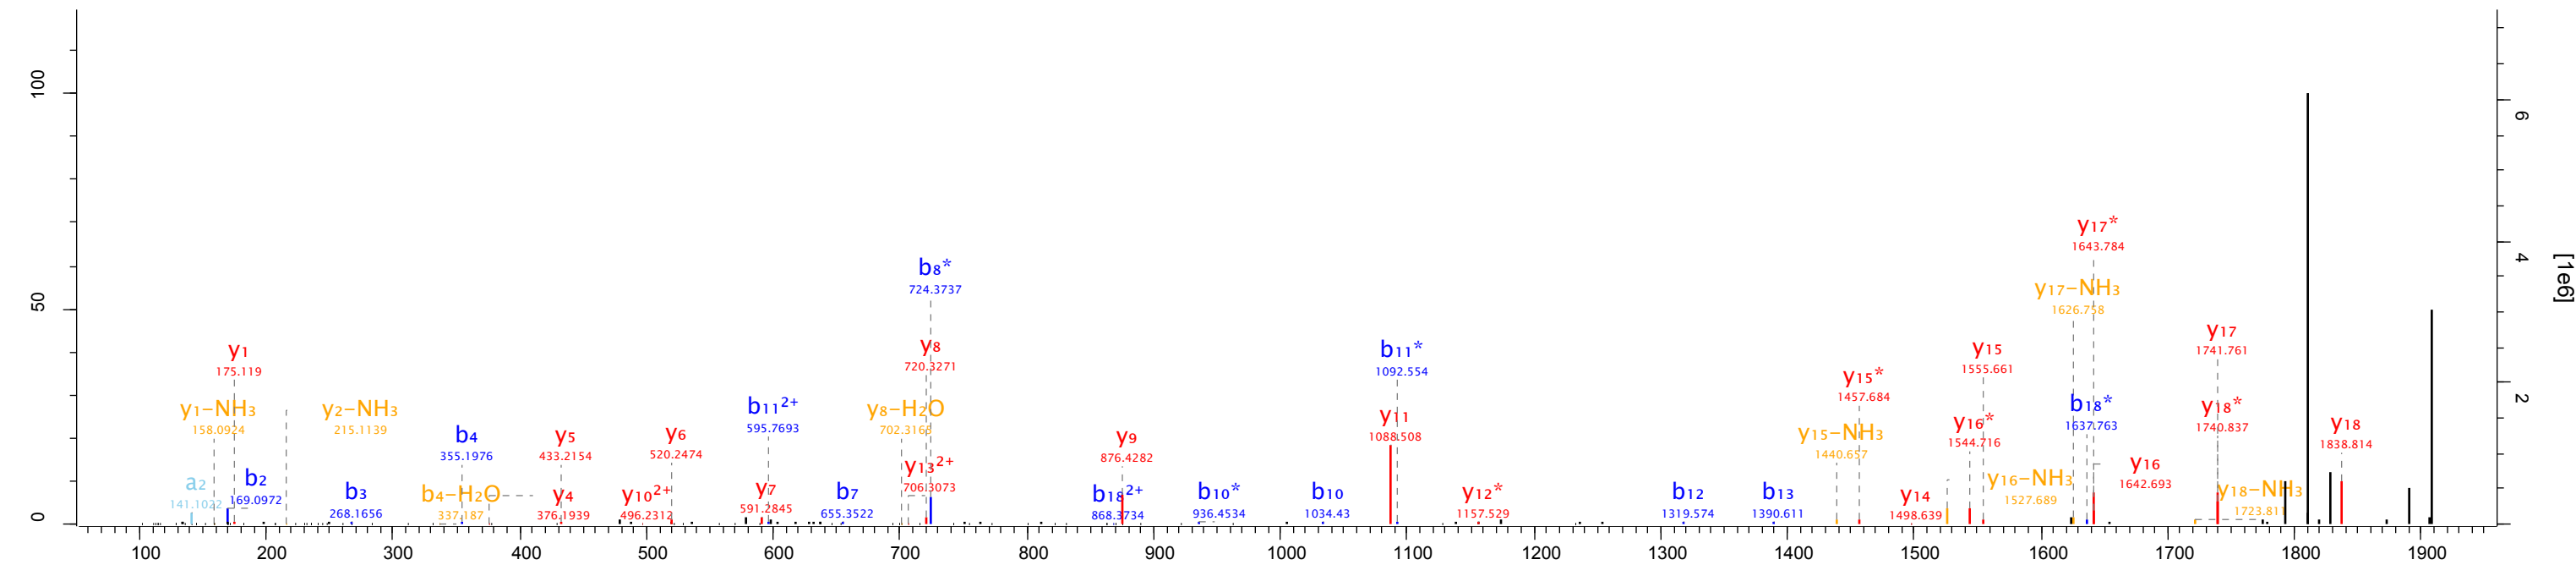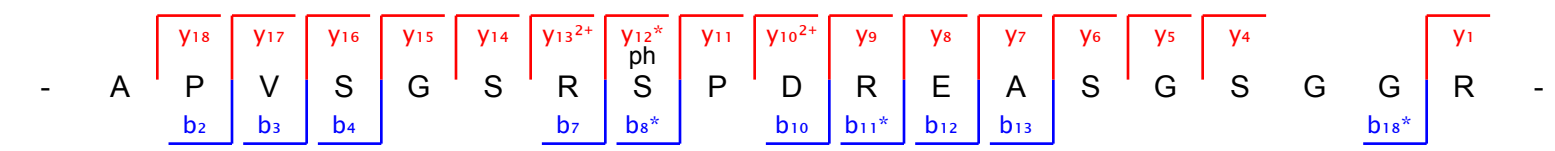

Raw file: 20150812\_A375SR\_Phospho\_BR1\_07  
 Scan: 4168 Method: FTMS; HCD Score: 120.77 m/z: 523.77 Gene names: DSN1

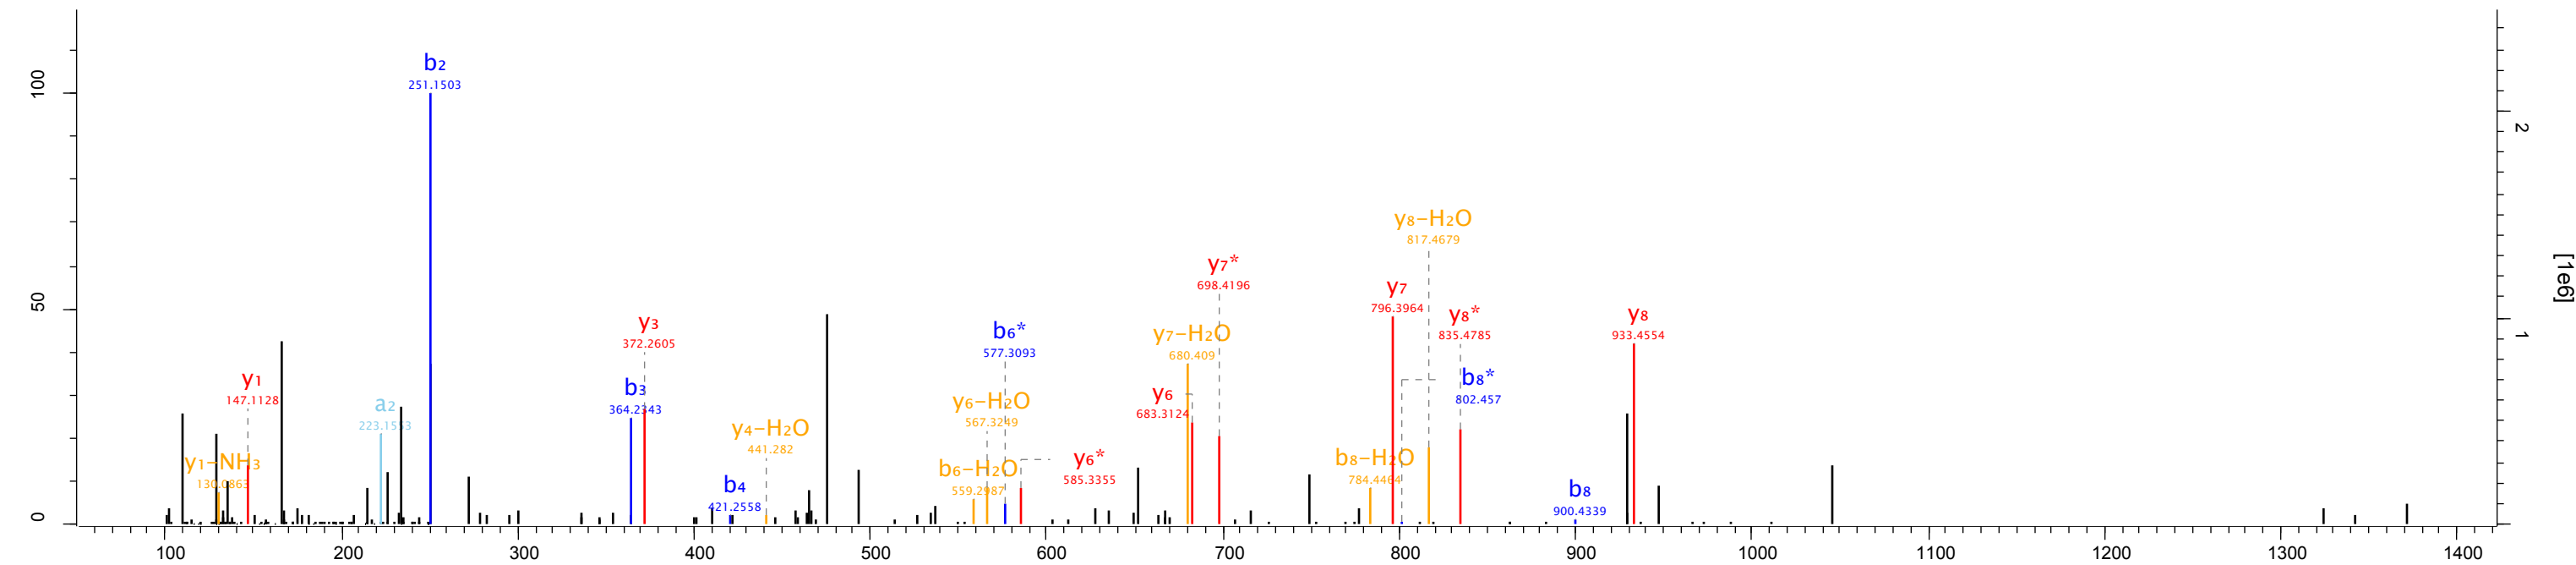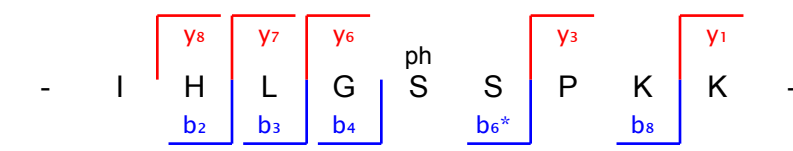

Raw file 20150812\_A375SR\_Phospho\_BR1\_07 Scan 4198 Method FTMS; HCD Score 306.88 m/z 1027.94 Gene names HTATSF1

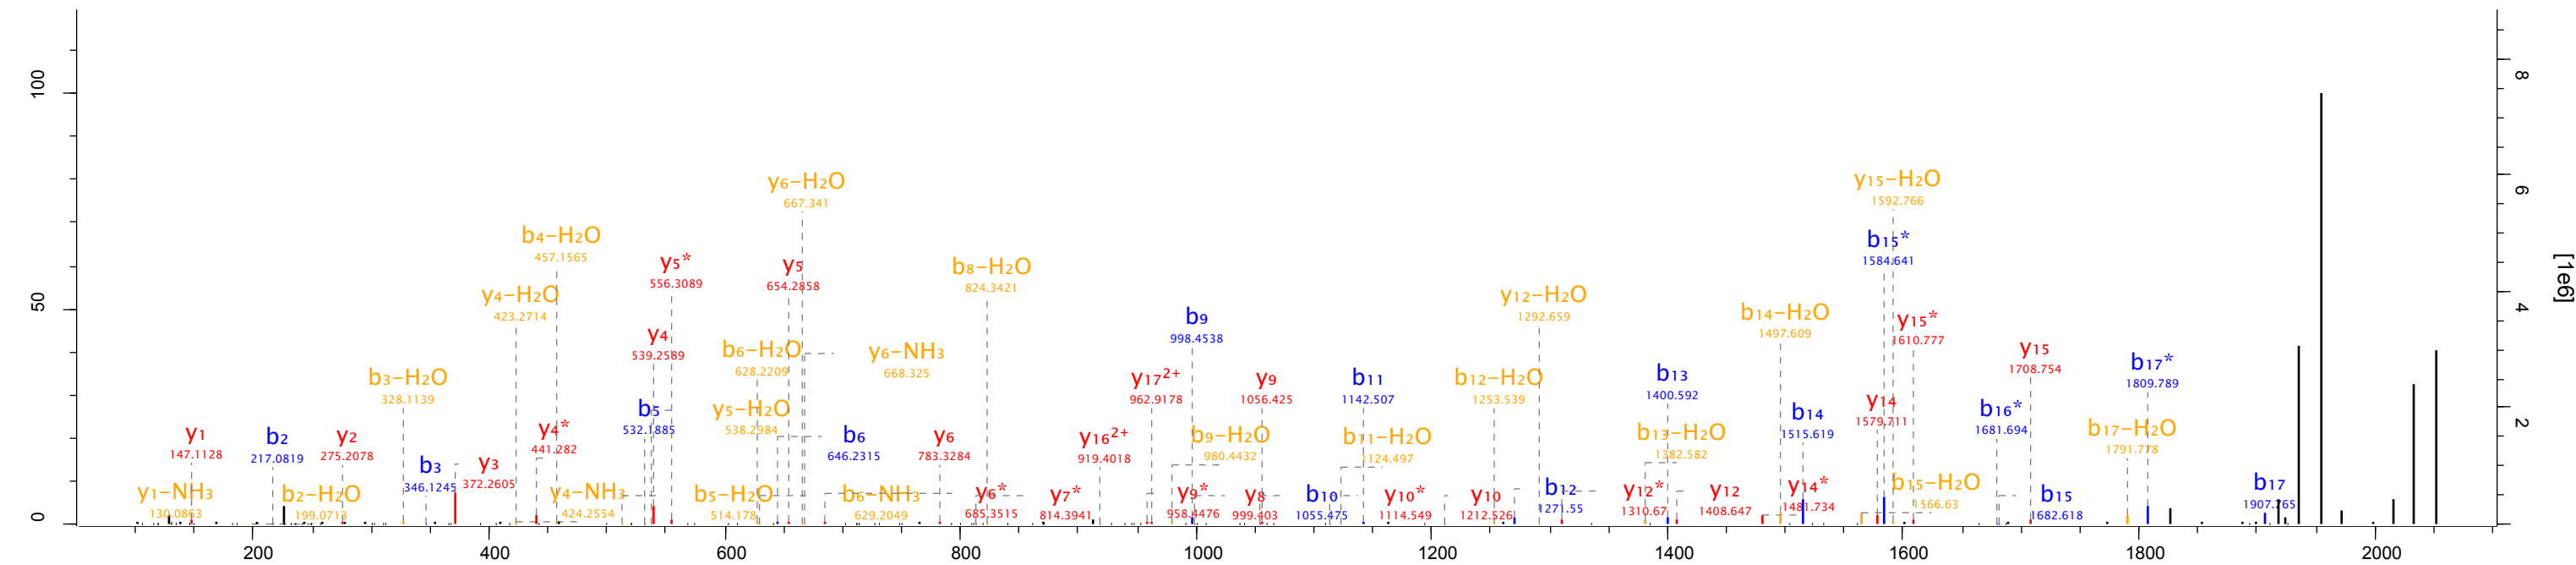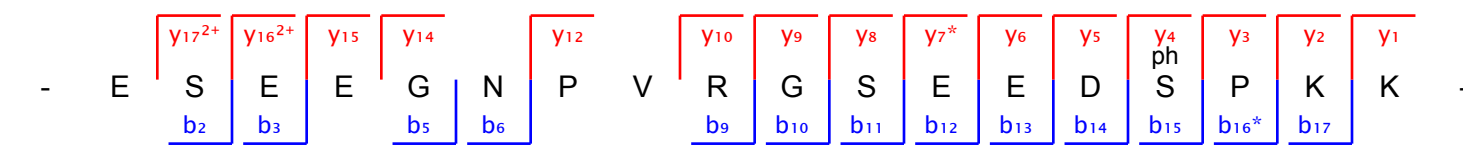

Raw file

20150812\_A375SR\_Phospho\_BR1\_07

Scan 5678 Method FTMS; HCD Score 72.32 m/z 544.9 Gene names FLG

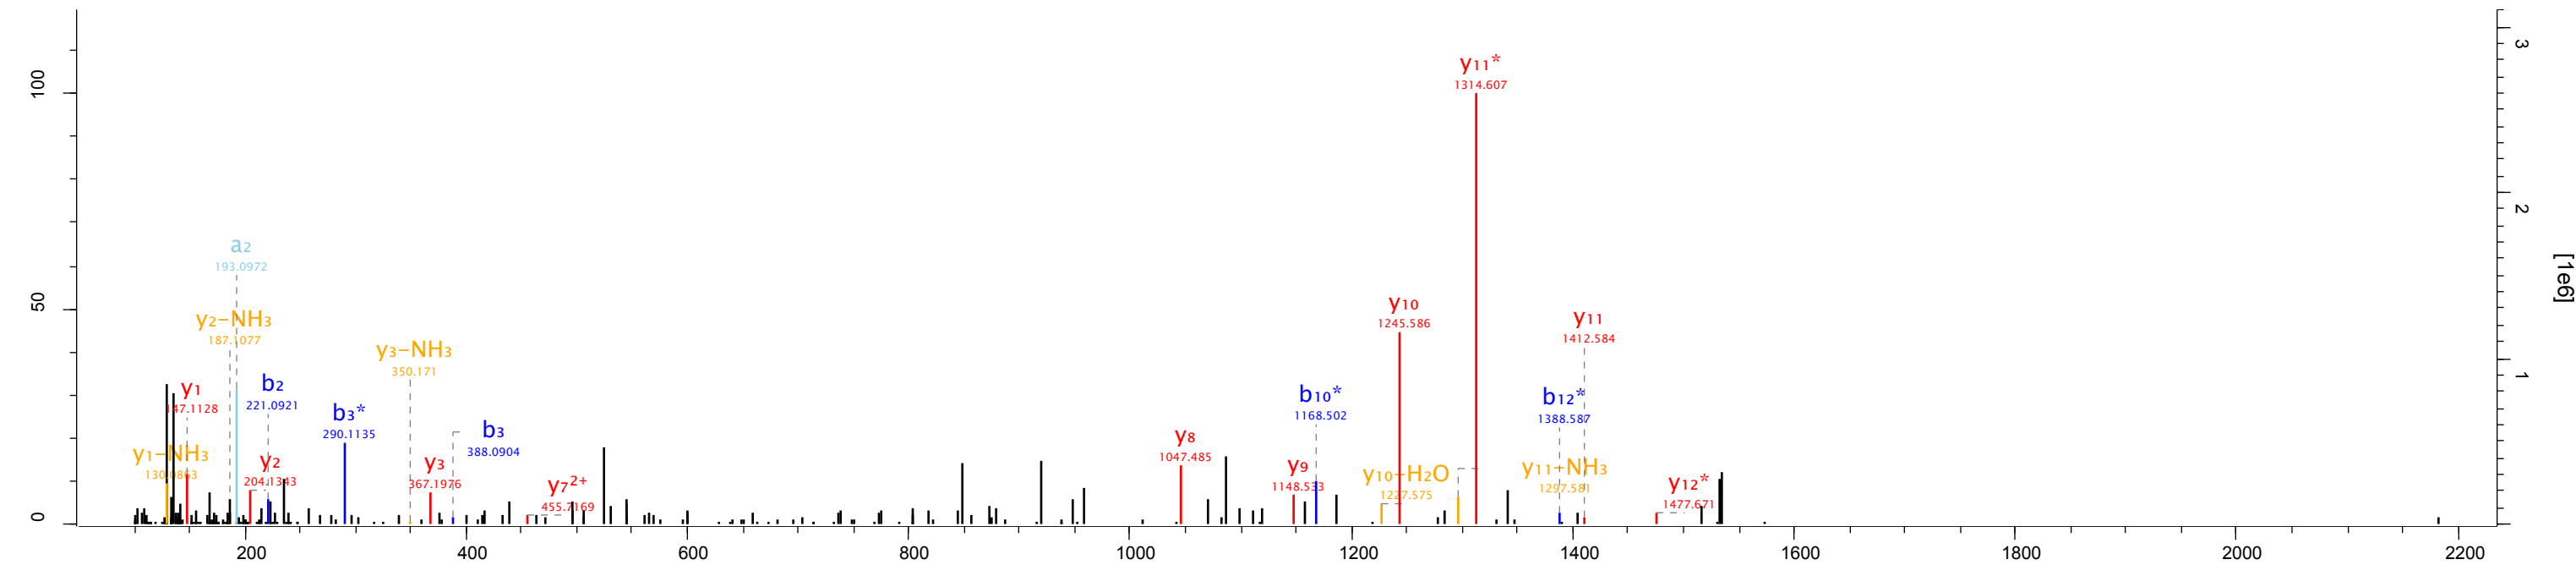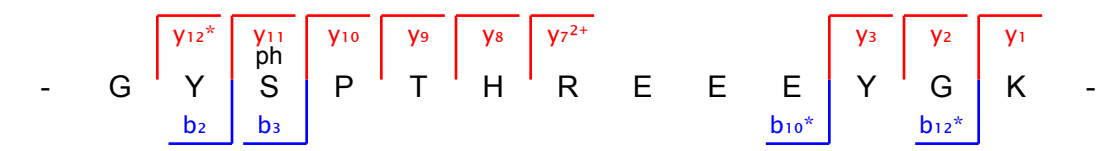

Raw file 20150812\_A375SR\_Phospho\_BR1\_08 Scan 10098 Method FTMS; HCD Score 93.1 m/z 518.75

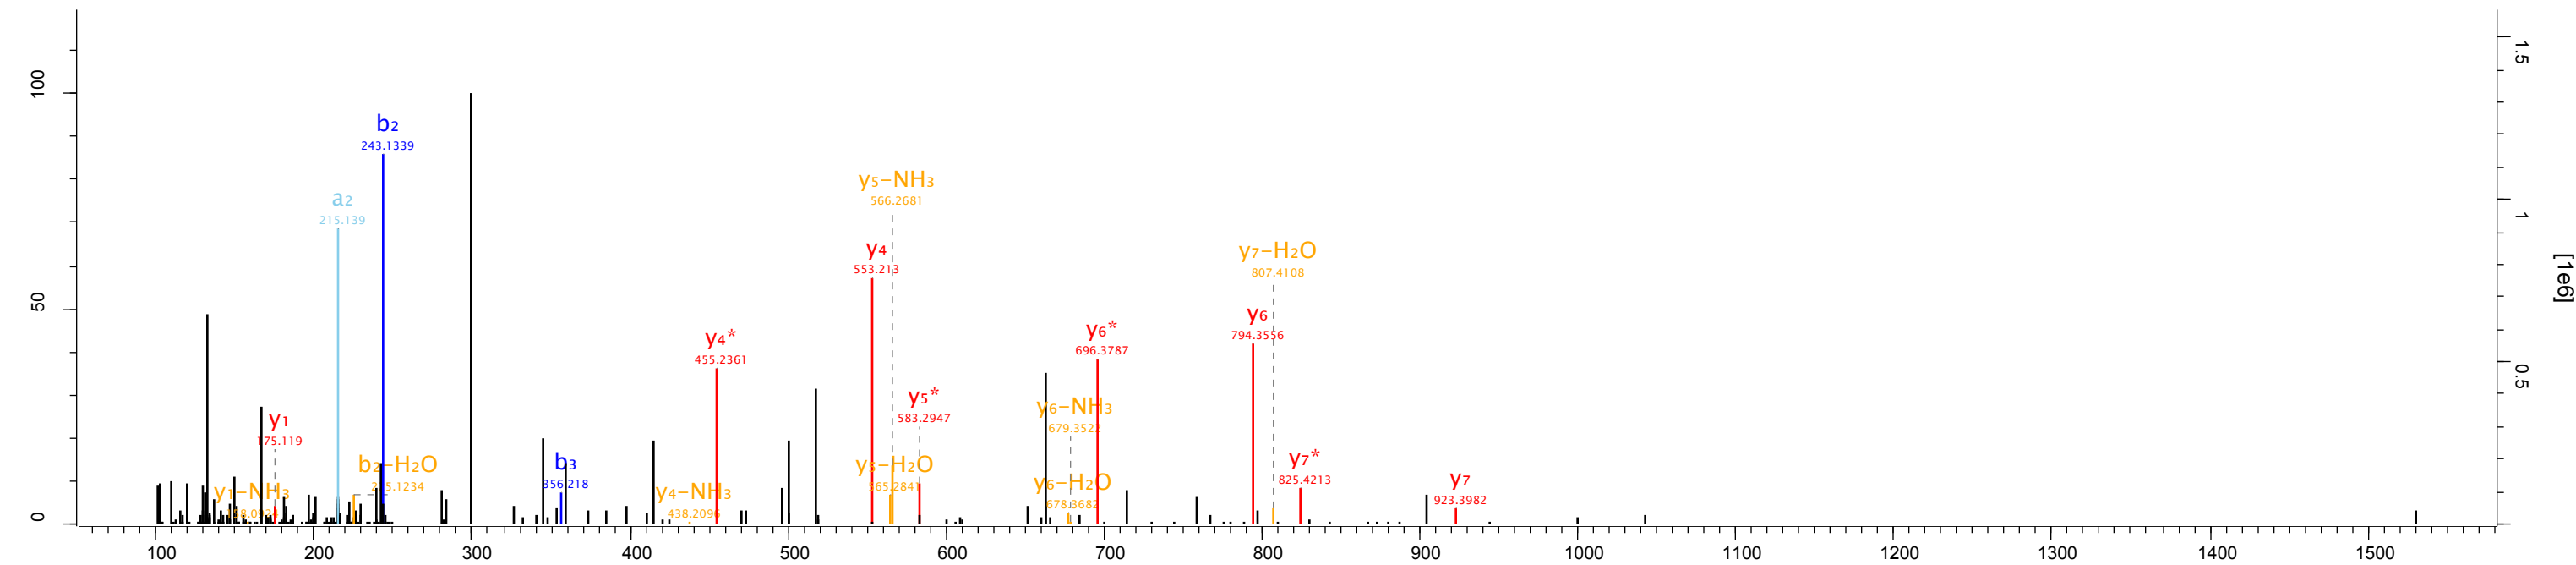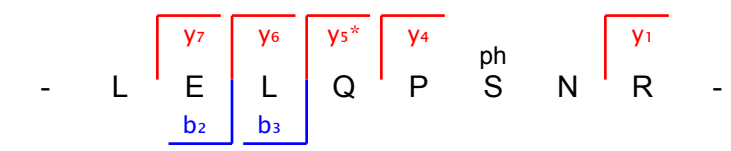

Raw file: 20150812\_A375SR\_Phospho\_BR1\_08  
 Scan: 10548 Method: FTMS; HCD Score: 158.05 m/z: 741.32 Gene names: ZBTB7A

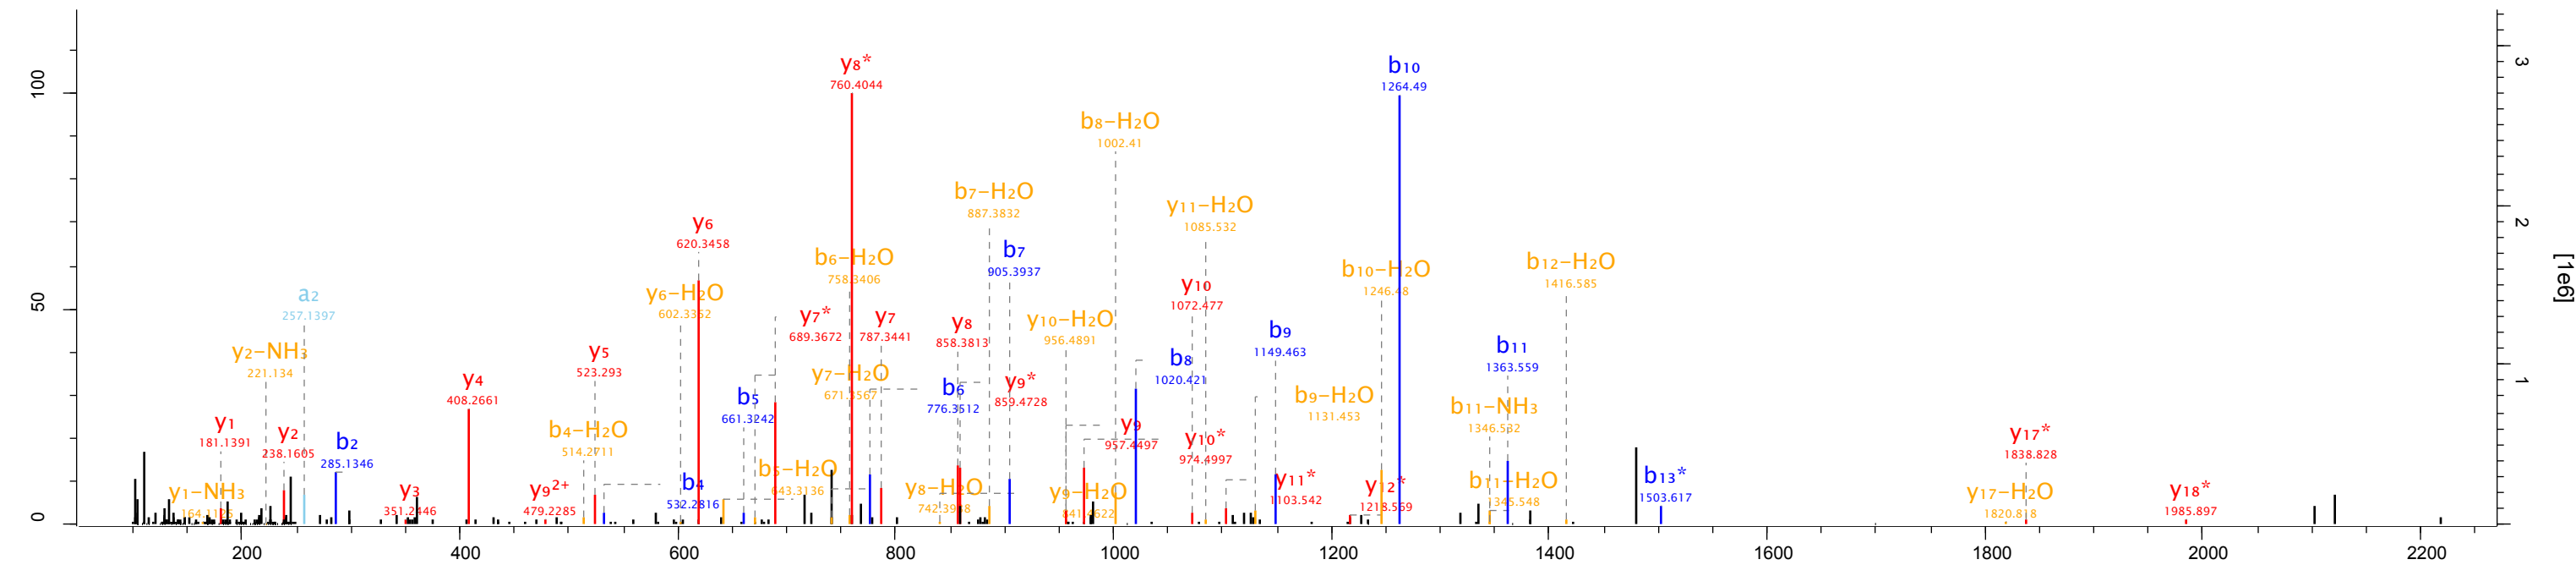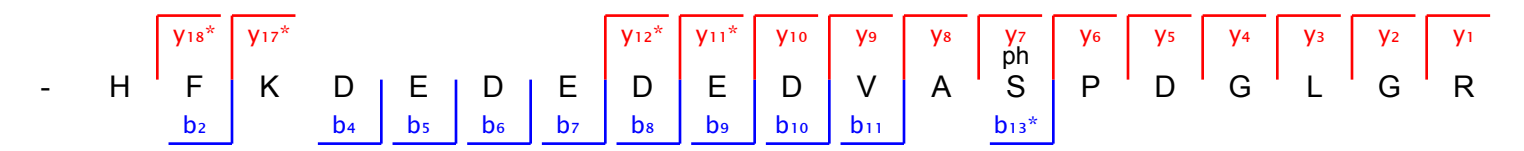



Raw file 20150812\_A375SR\_Phospho\_BR1\_08 Scan 10708 Method FTMS; HCD Score 151.05 m/z 991.94 Gene names IRS2

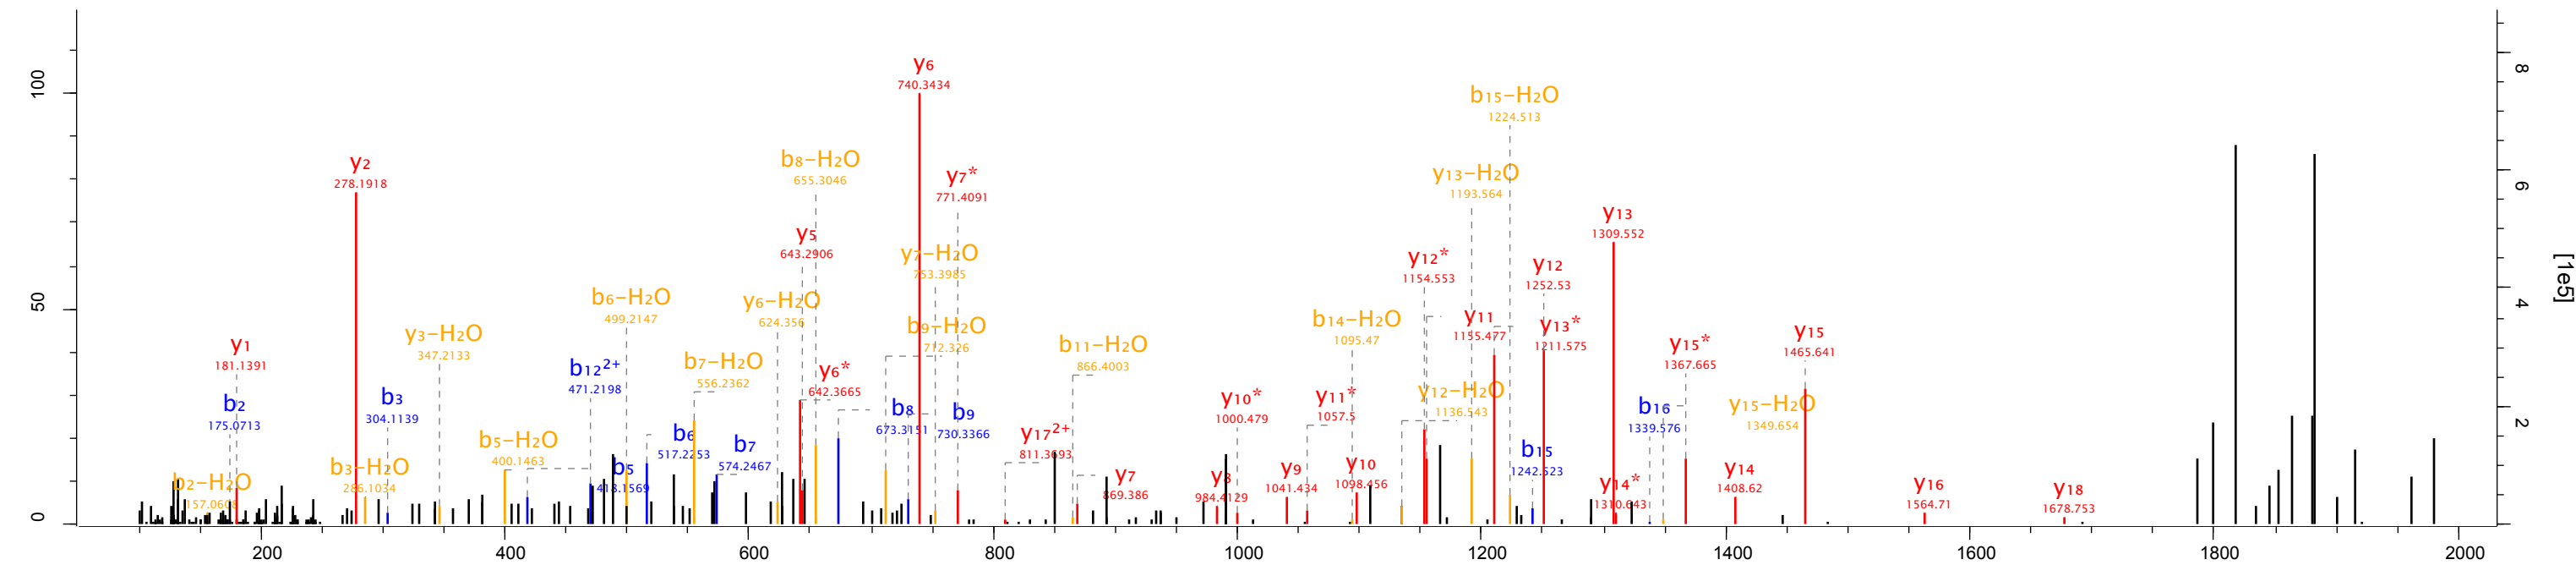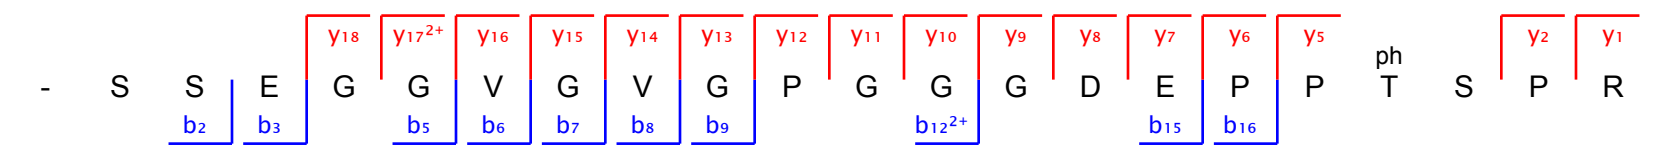

Raw file 20150812\_A375SR\_Phospho\_BR1\_08 Scan 10978 Method FTMS; HCD Score 100.45 m/z 581.32 Gene names SH3PXD2A

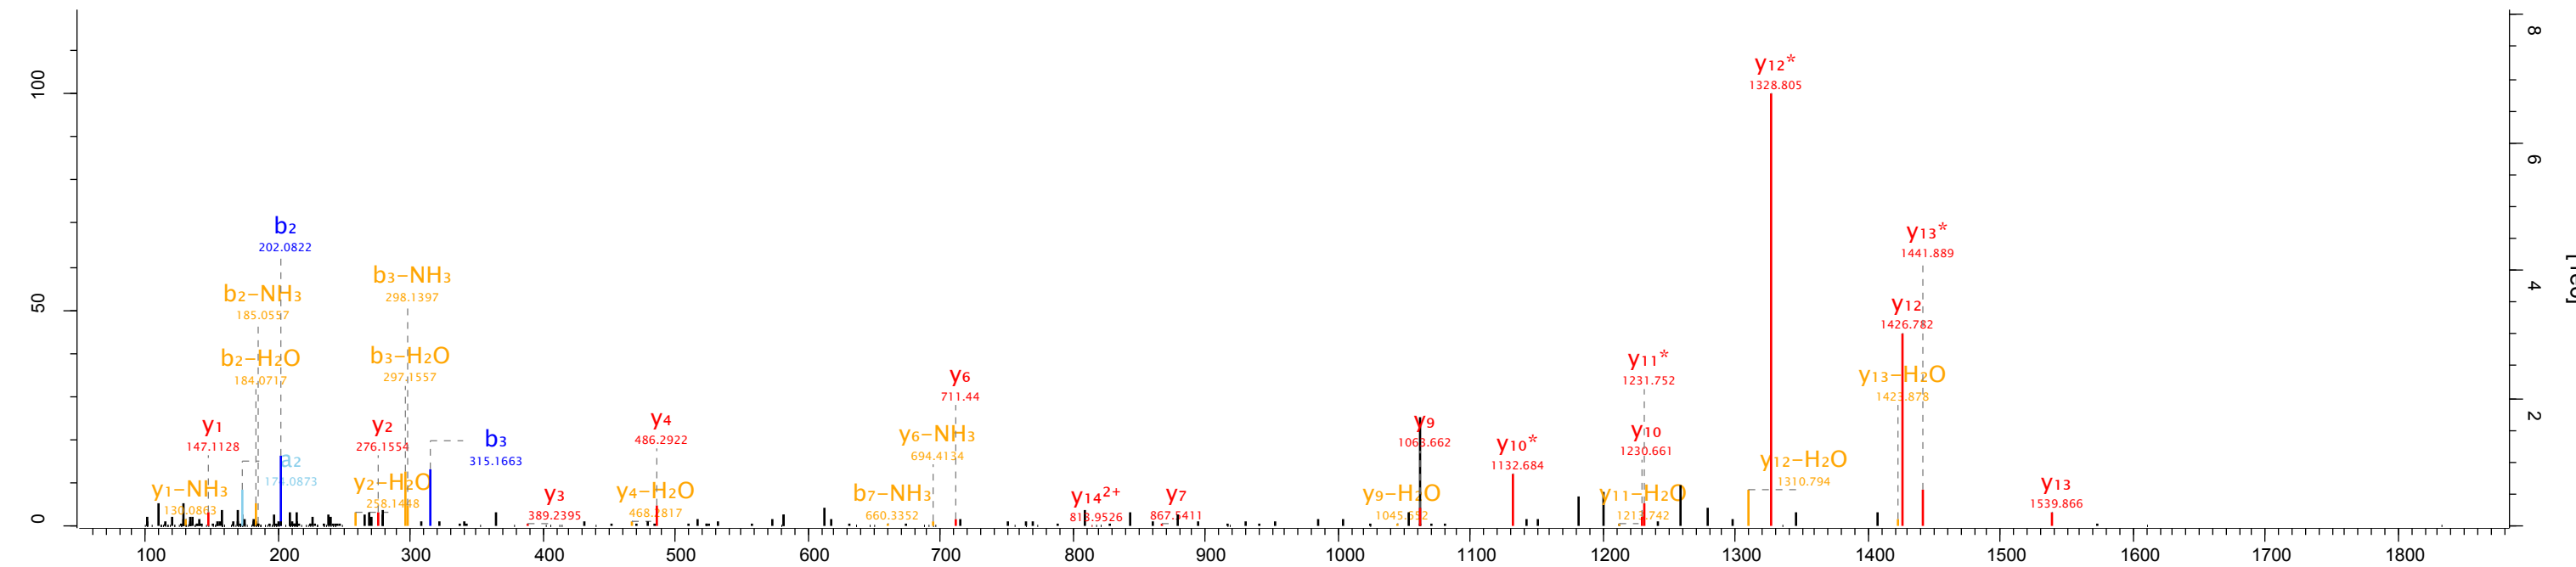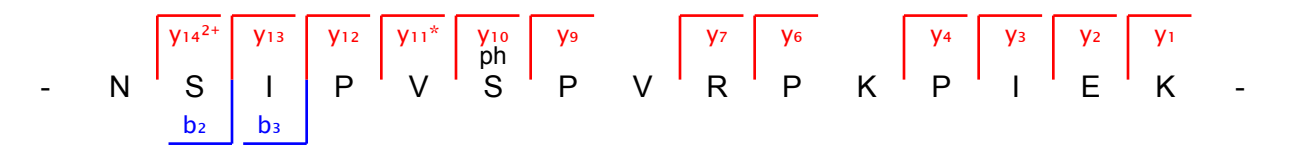

Raw file: 20150812\_A375SR\_Phospho\_BR1\_08  
 Scan: 11658 Method: FTMS; HCD Score: 268.13 m/z: 1101.91 Gene names: FBXW9

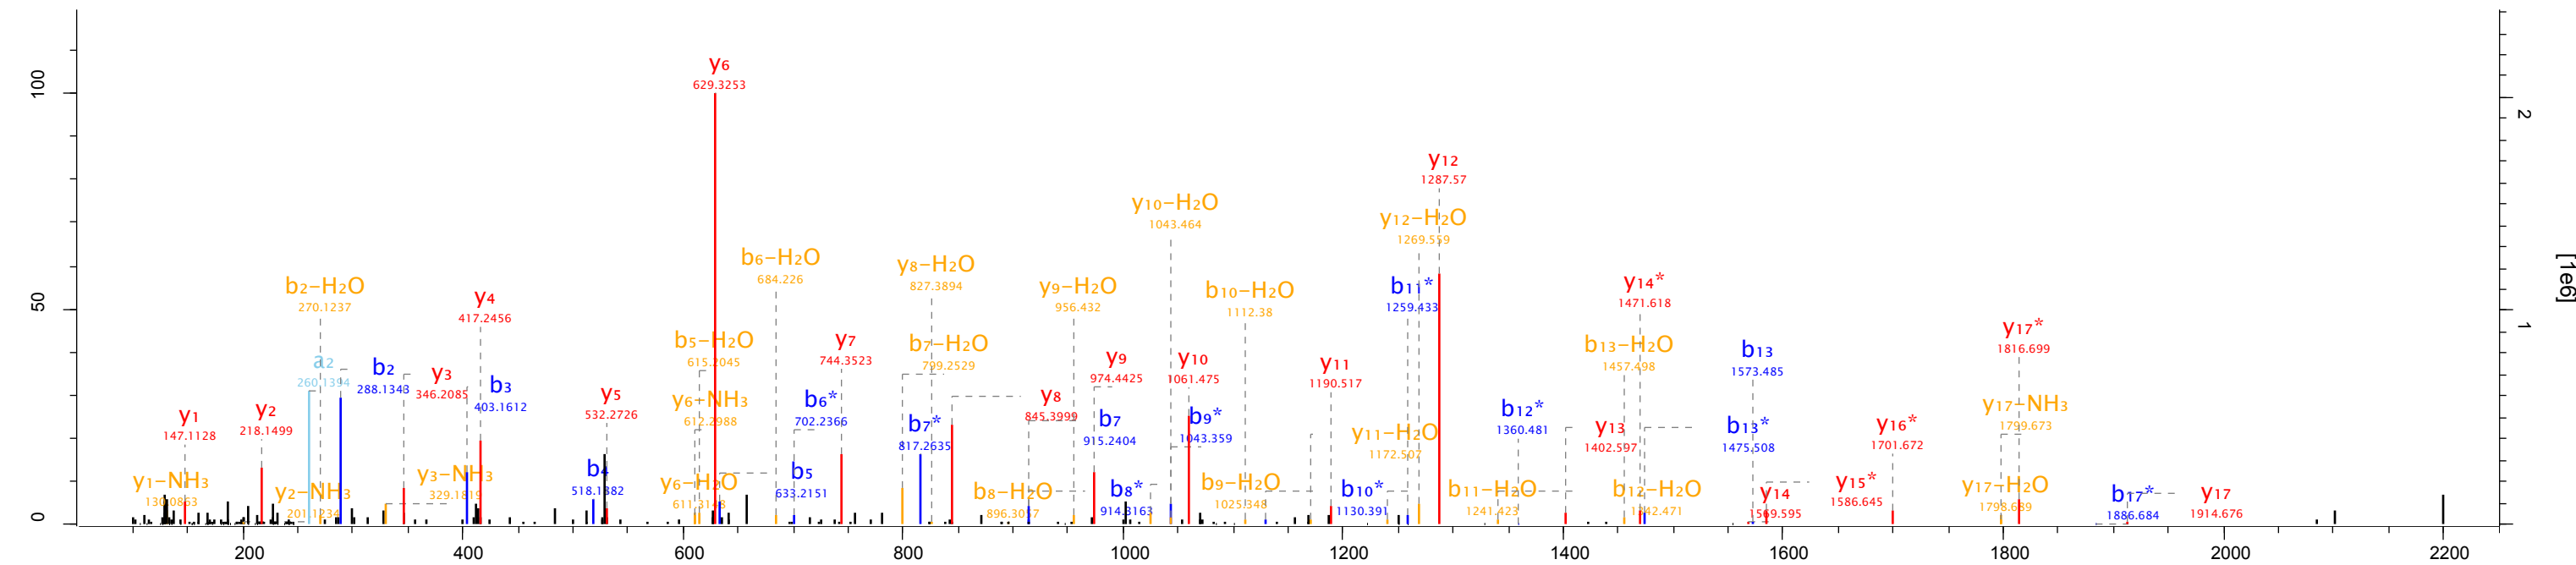

- T W D D D S D P E S E T D P D A Q A K -

Fragmentation mapping (b-ions in blue, y-ions in red):

- b2: W
- b3: D
- b4: D
- b5: D
- b6\*: S
- b7: D
- b8\*: P
- b9\*: E
- b10\*: S
- b11\*: E
- b12\*: T
- b13: D
- b17\*: -
- y1: K
- y2: A
- y3: Q
- y4: A
- y5: D
- y6: P
- y7: D
- y8: T
- y9: E
- y10: S
- y11: E
- y12: P
- y13: D
- y14: S
- y15: D
- y16: D
- y17: D

Raw file 20150812\_A375SR\_Phospho\_BR1\_08 Scan 12028 Method FTMS; HCD Score 92.95 m/z 452.91 Gene names ANK3

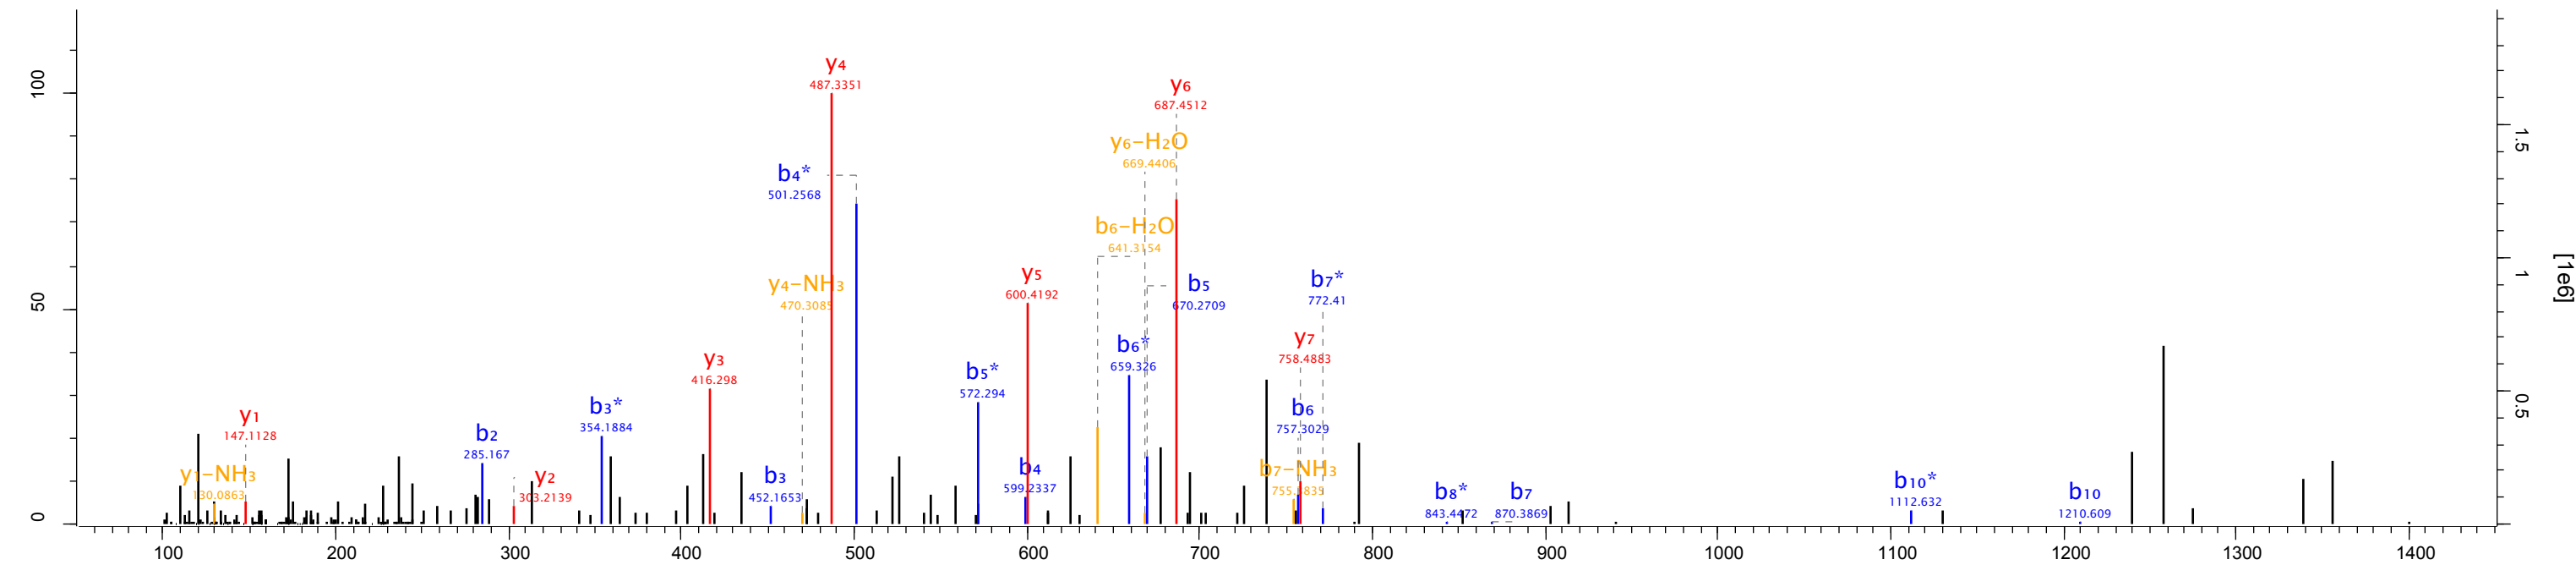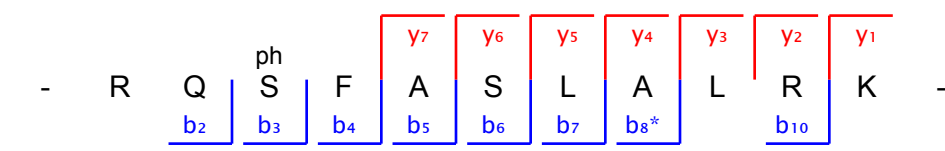

Raw file: 20150812\_A375SR\_Phospho\_BR1\_08  
 Scan: 1308 Method: FTMS; HCD Score: 75.14 m/z: 405.94 Gene names: ZC3H13

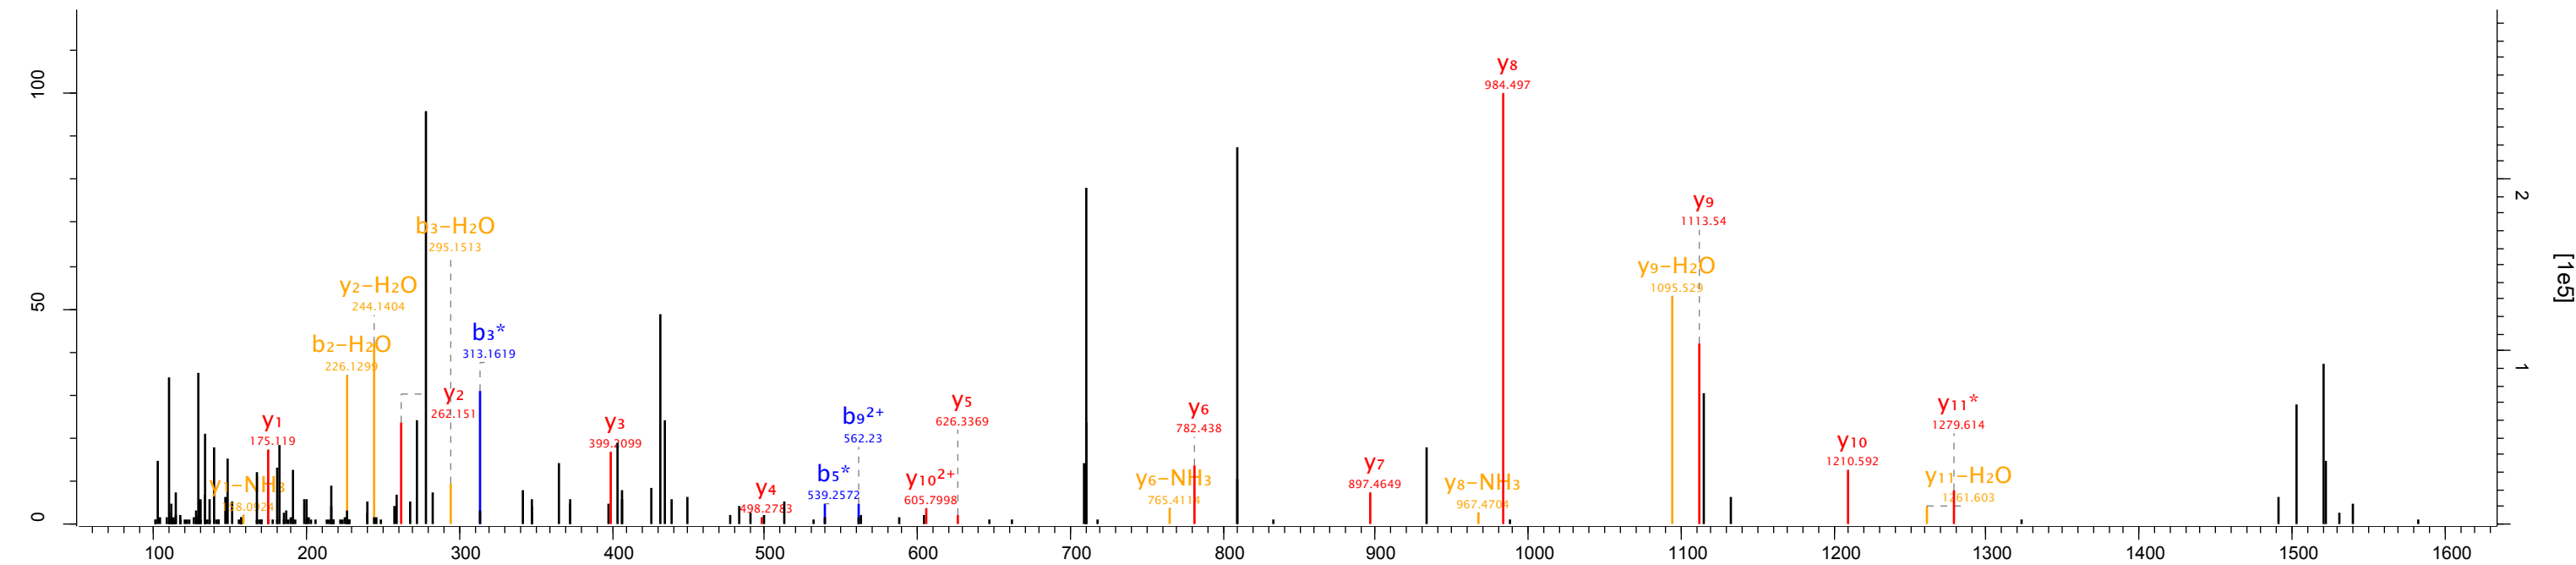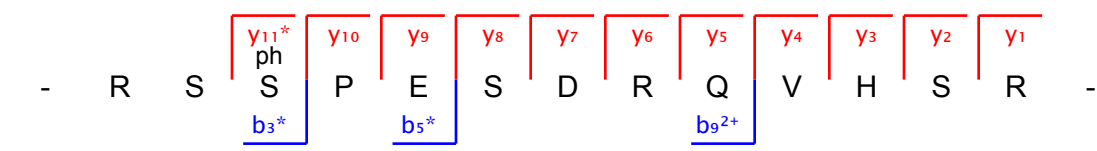

Raw file 20150812\_A375SR\_Phospho\_BR1\_08 Scan 13118 Method FTMS; HCD Score 47.9 m/z 727.39 Gene names WDR77

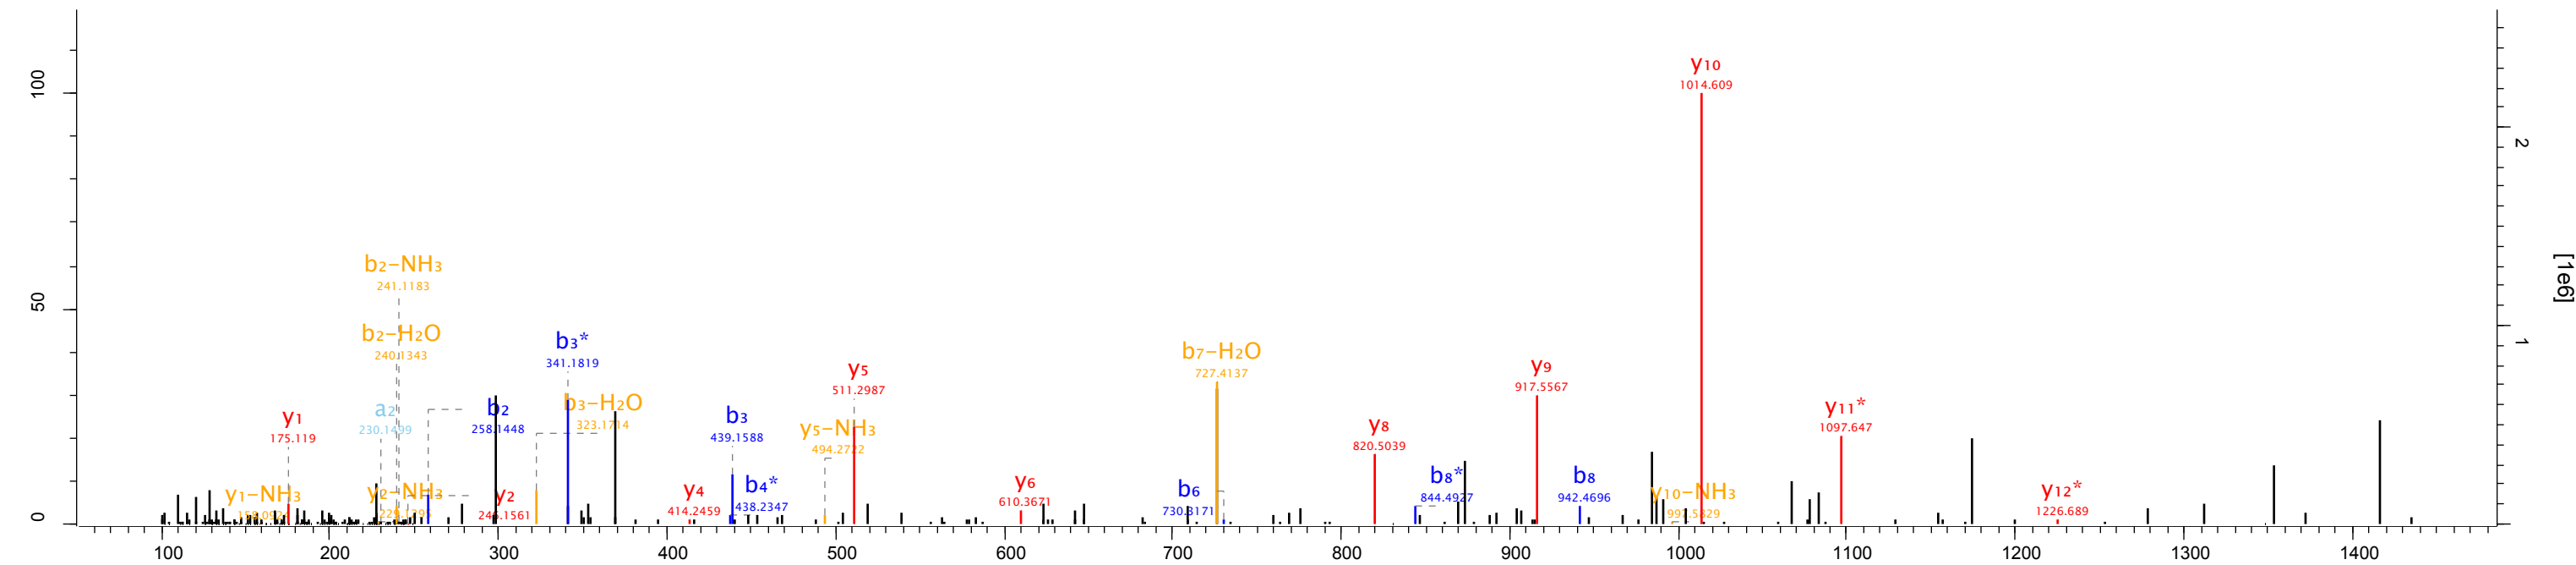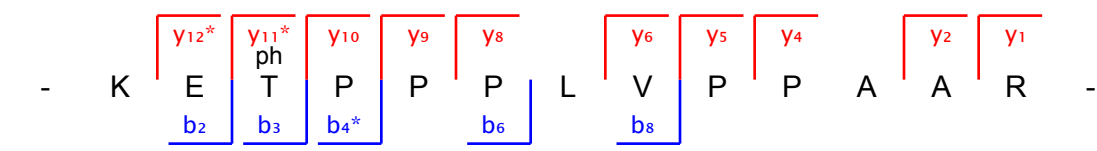

Raw file: 20150812\_A375SR\_Phospho\_BR1\_08  
 Scan: 14738 Method: FTMS; HCD Score: 238.05 m/z: 973.41 Gene names: NAP1L4

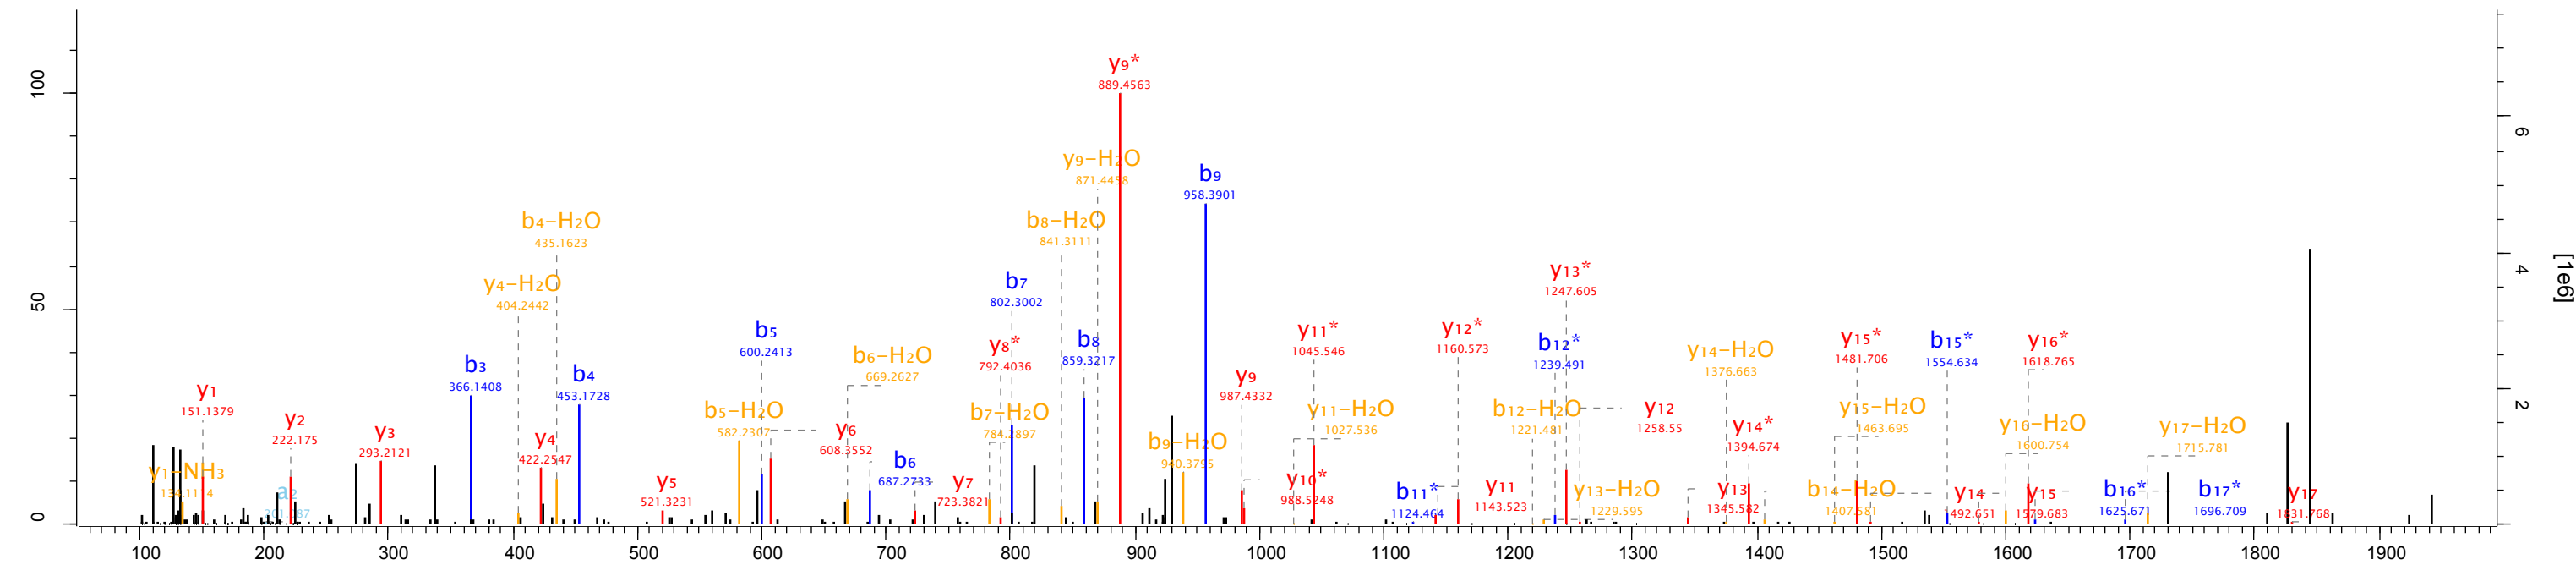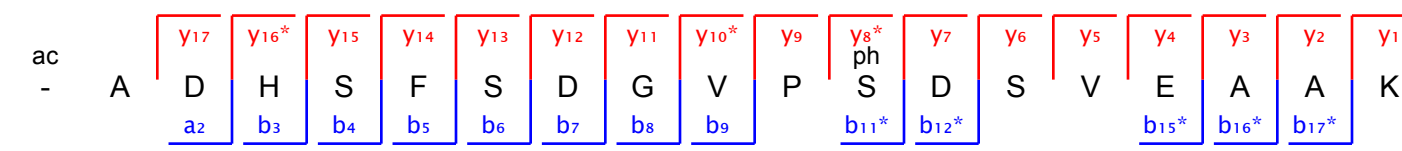

Raw file 20150812\_A375SR\_Phospho\_BR1\_08 Scan 14938 Method FTMS; HCD Score 398.8 m/z 1323.57 Gene names DDX47

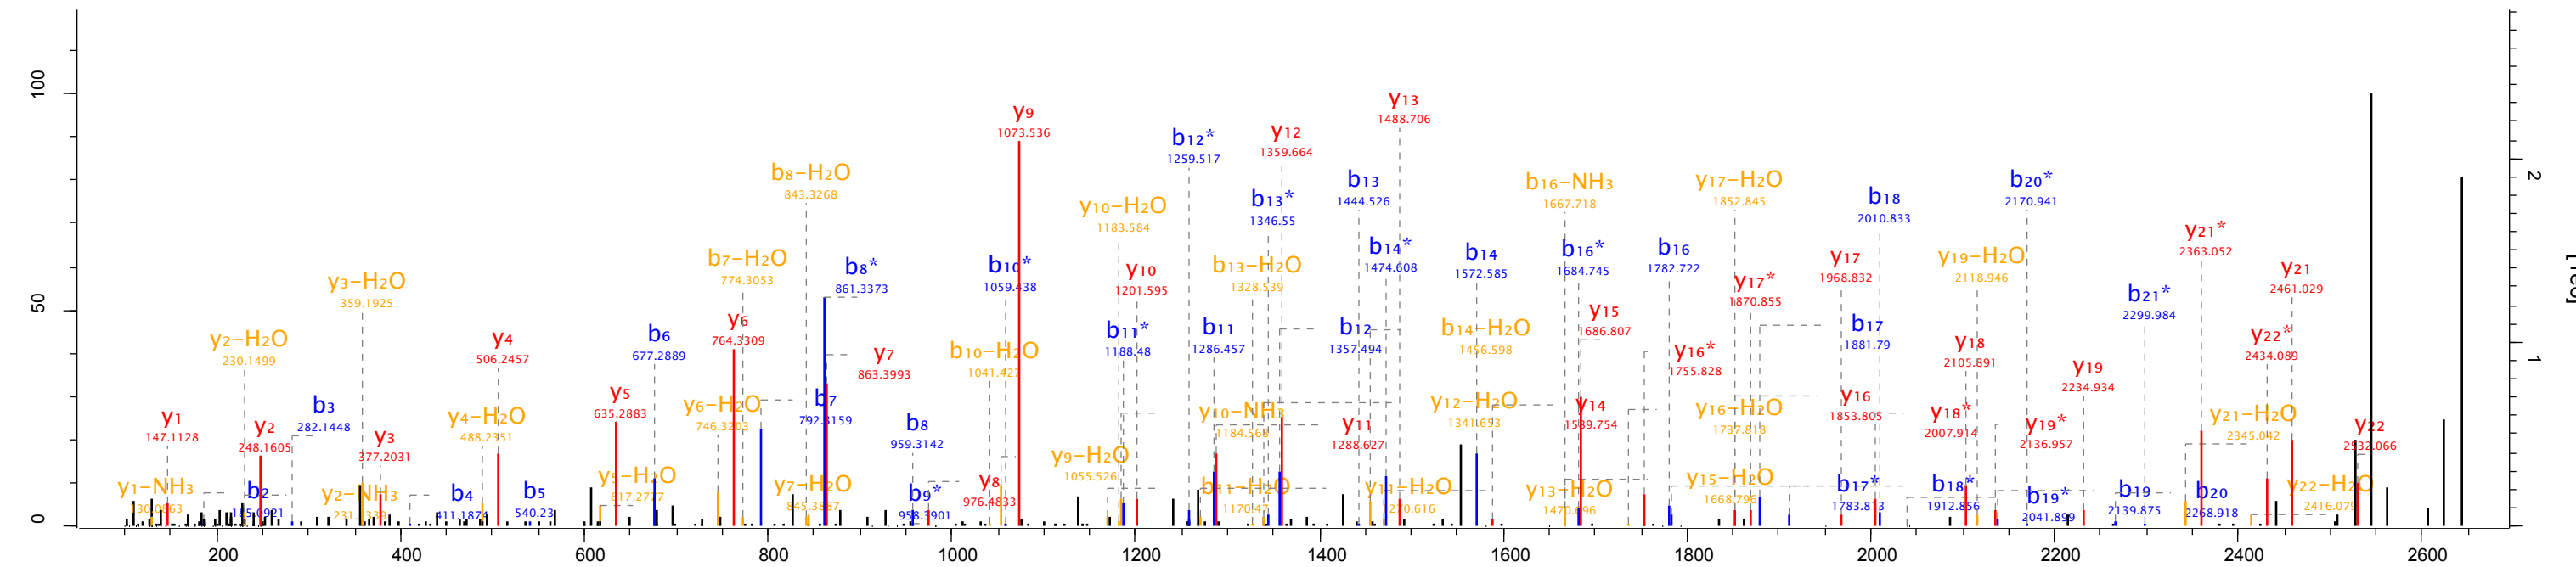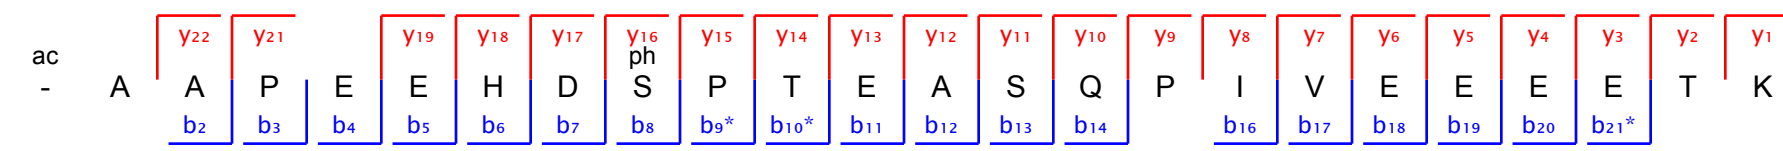



Raw file 20150812\_A375SR\_Phospho\_BR1\_08 Scan 15618 Method FTMS; HCD Score 291.8 m/z 1107.55 Gene names ITSN2

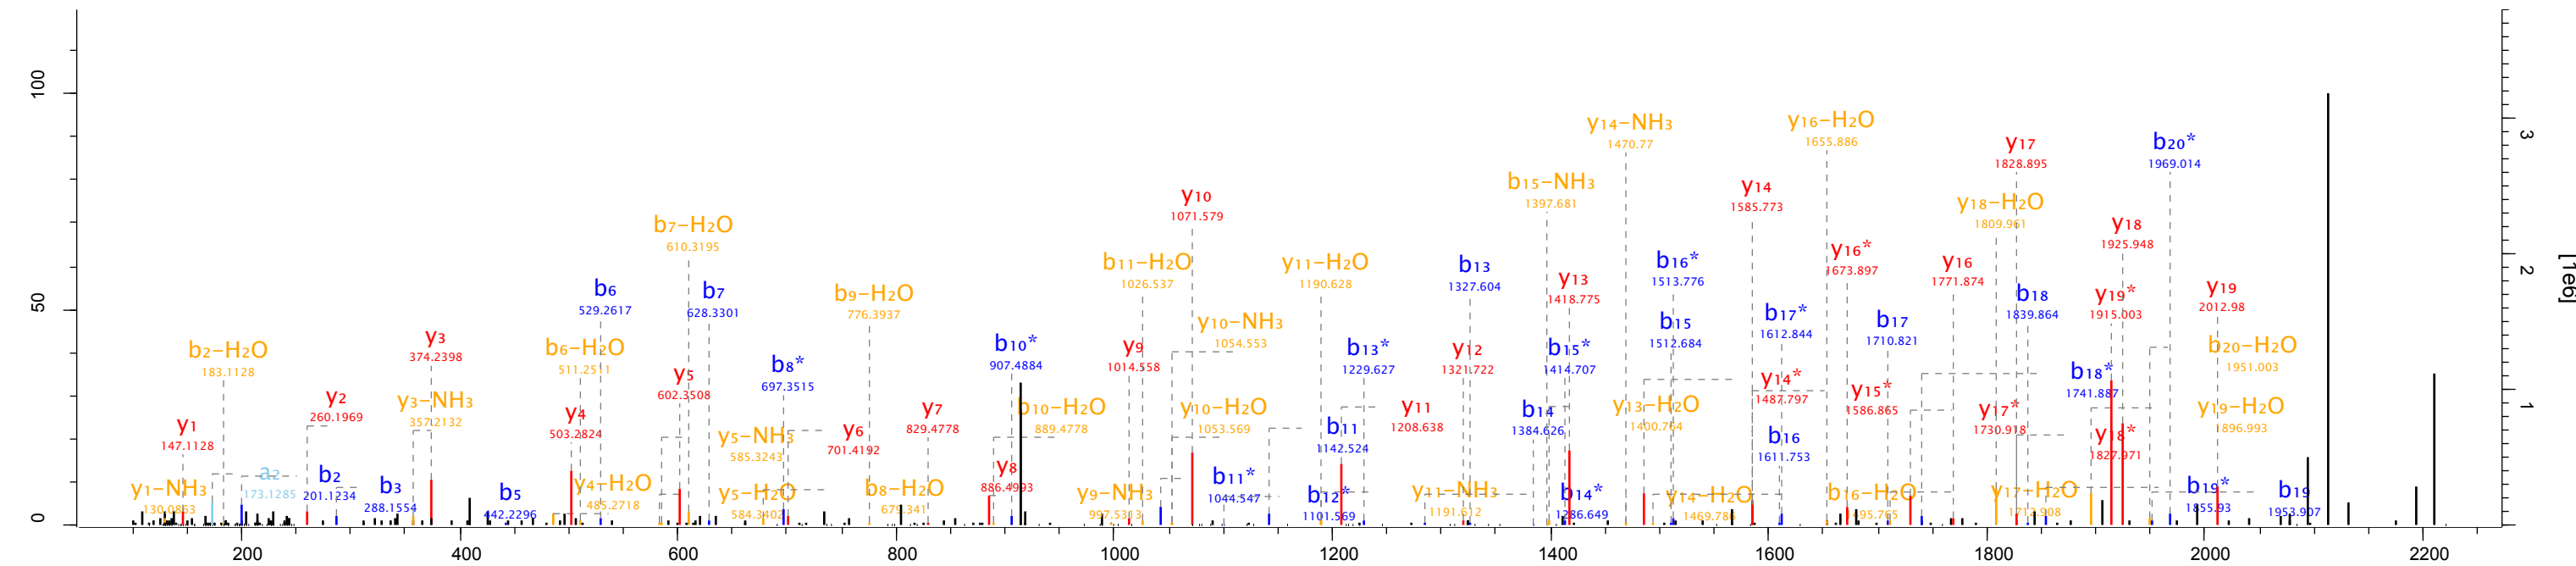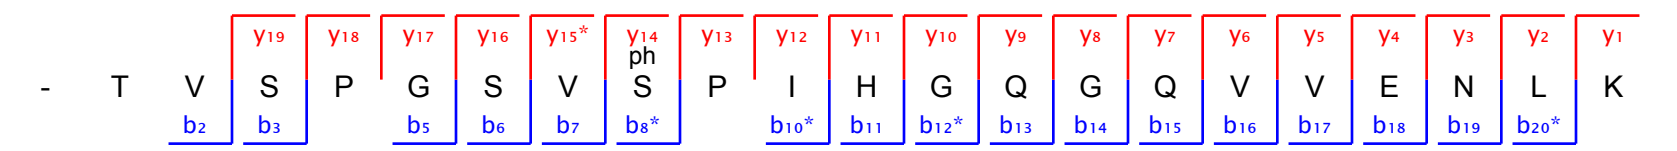

Raw file 20150812\_A375SR\_Phospho\_BR1\_08 Scan 15958 Method FTMS; HCD Score 130.29 m/z 736.36 Gene names ACD

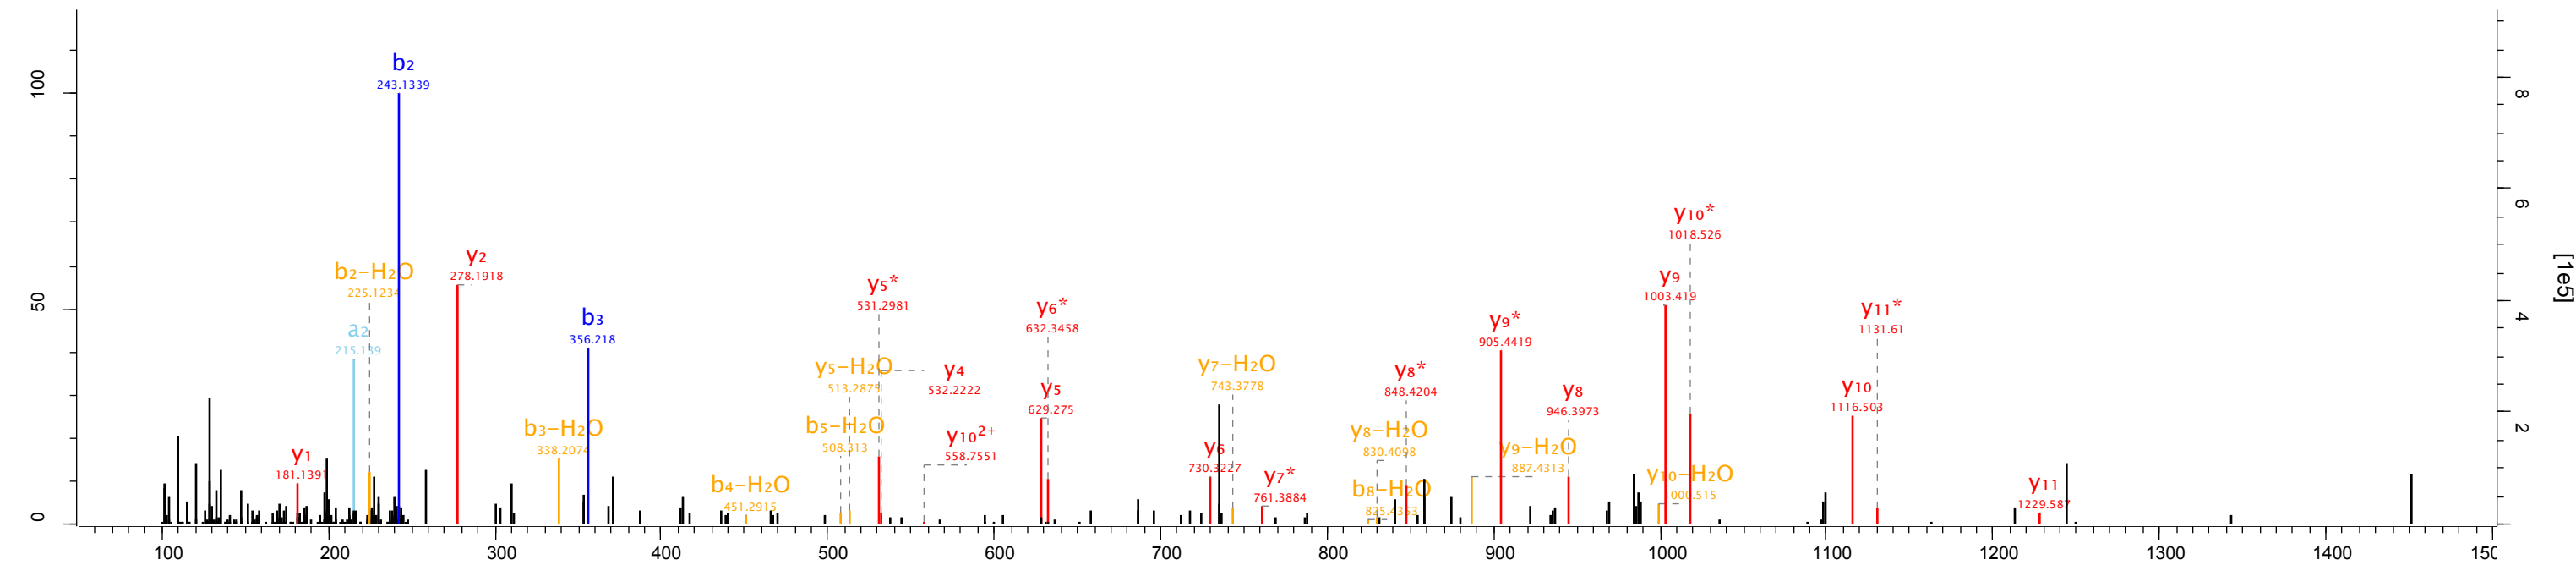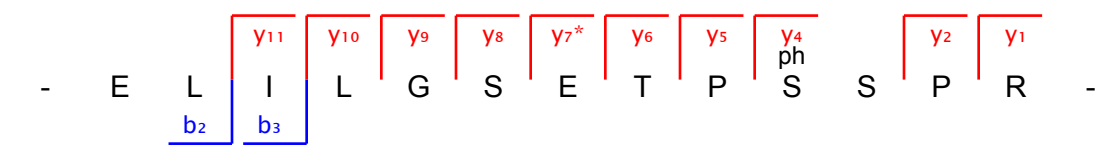

Raw file: 20150812\_A375SR\_Phospho\_BR1\_08  
 Scan: 16478 Method: FTMS; HCD Score: 49.77 m/z: 798.36 Gene names: SDCCAG3

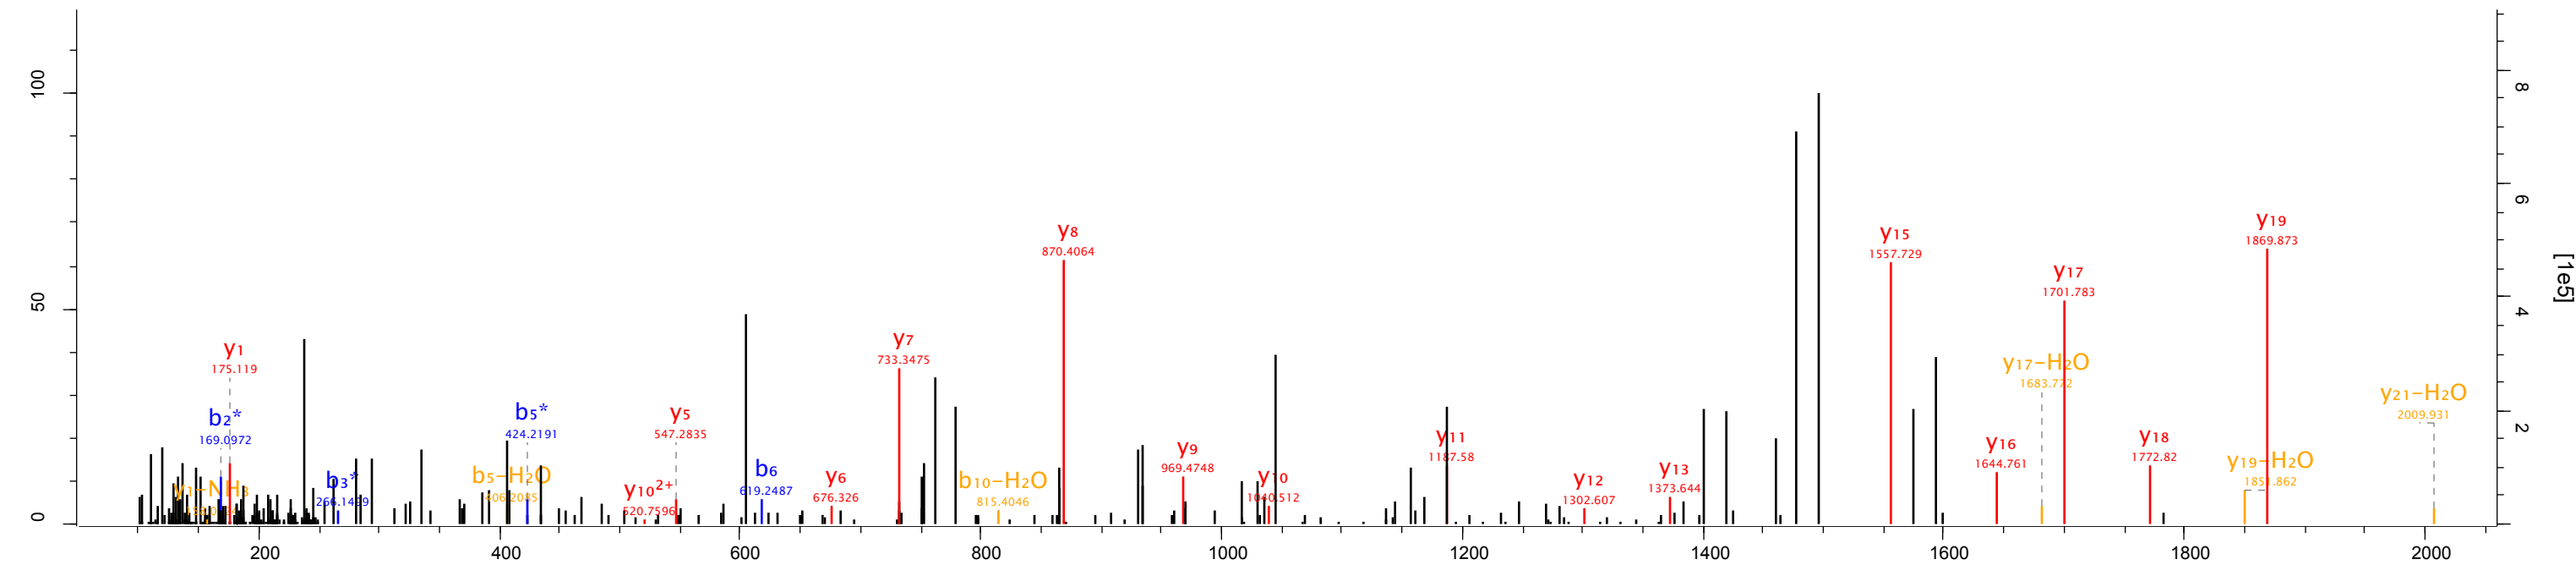

- V ph S b2\* P b3\* A S b5\* P y19 A y18 G y17 S y16 P y15 S A y13 D y12 F y11 A y10 V y9 H y8 G y7 E y6 S y5 L G D y1 -  
b2\* b3\* b5\* b6

Raw file 20150812\_A375SR\_Phospho\_BR1\_08 Scan 16678 Method FTMS; HCD Score 153.39 m/z 969.79 Gene names DBN1

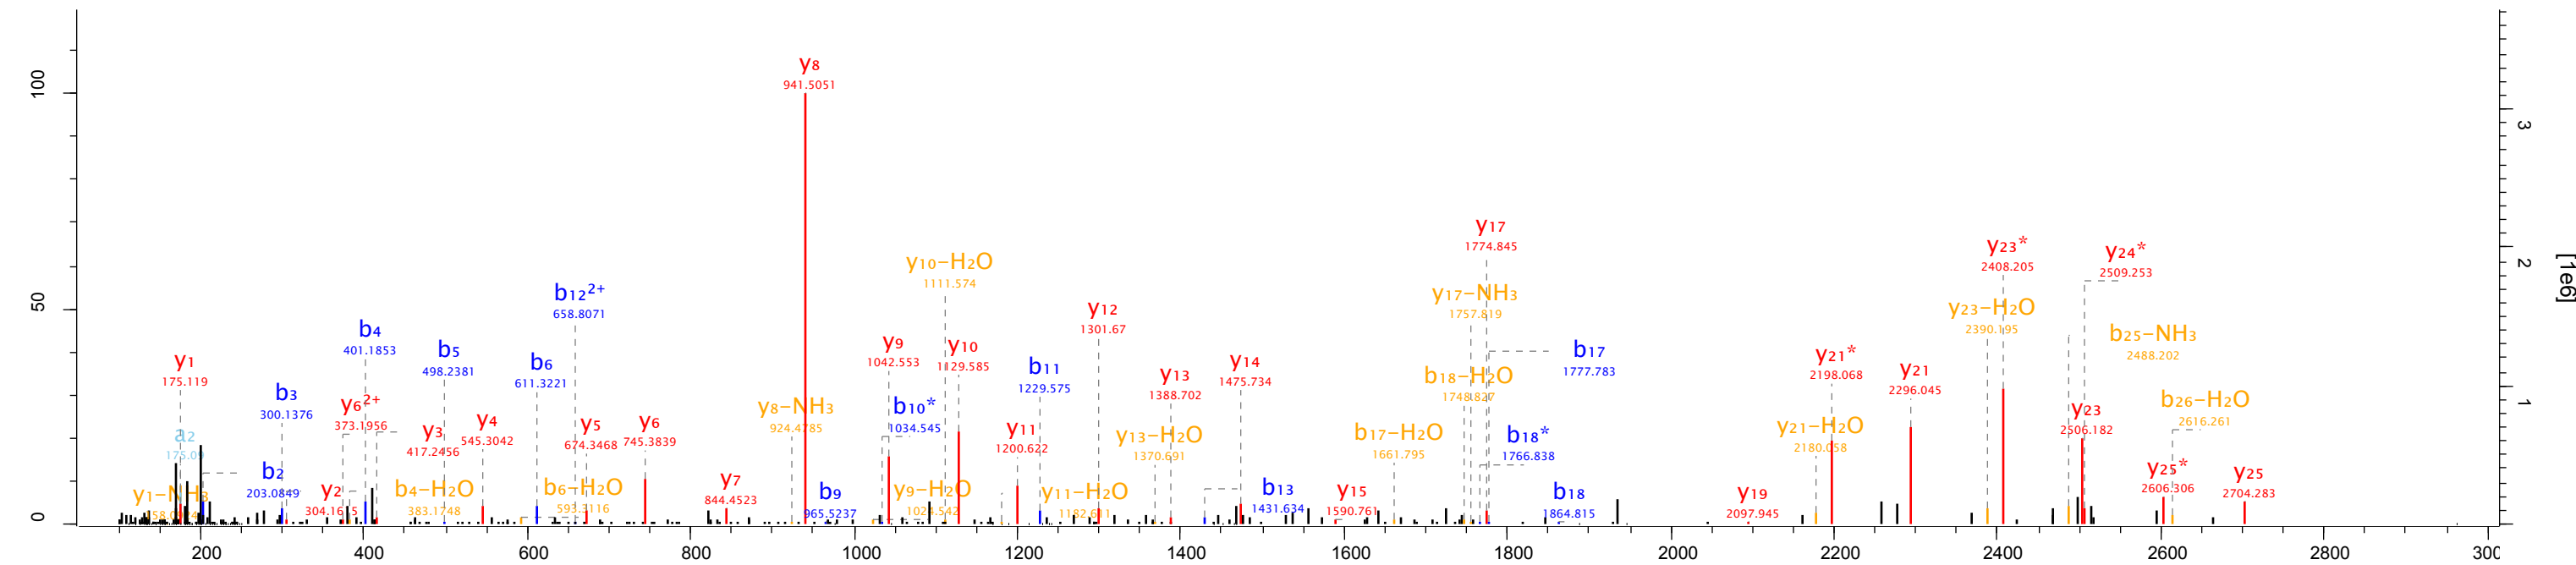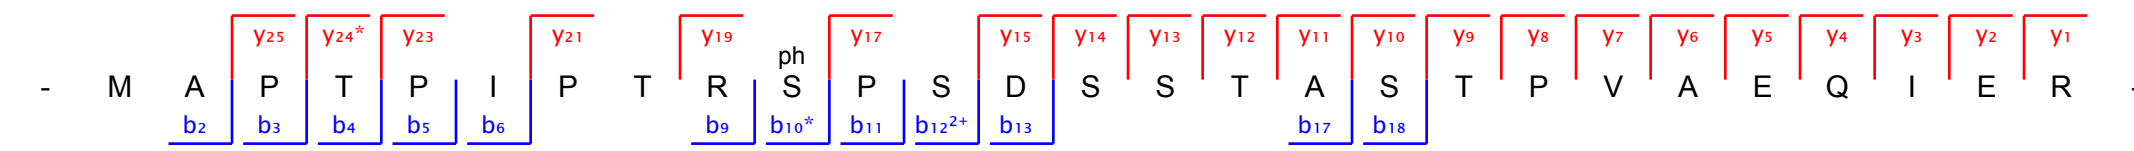

Raw file  
 20150812\_A375SR\_Phospho\_BR1\_08  
 Scan 16898 Method FTMS; HCD Score 285.62 m/z 1279.54 Gene names MAP1B

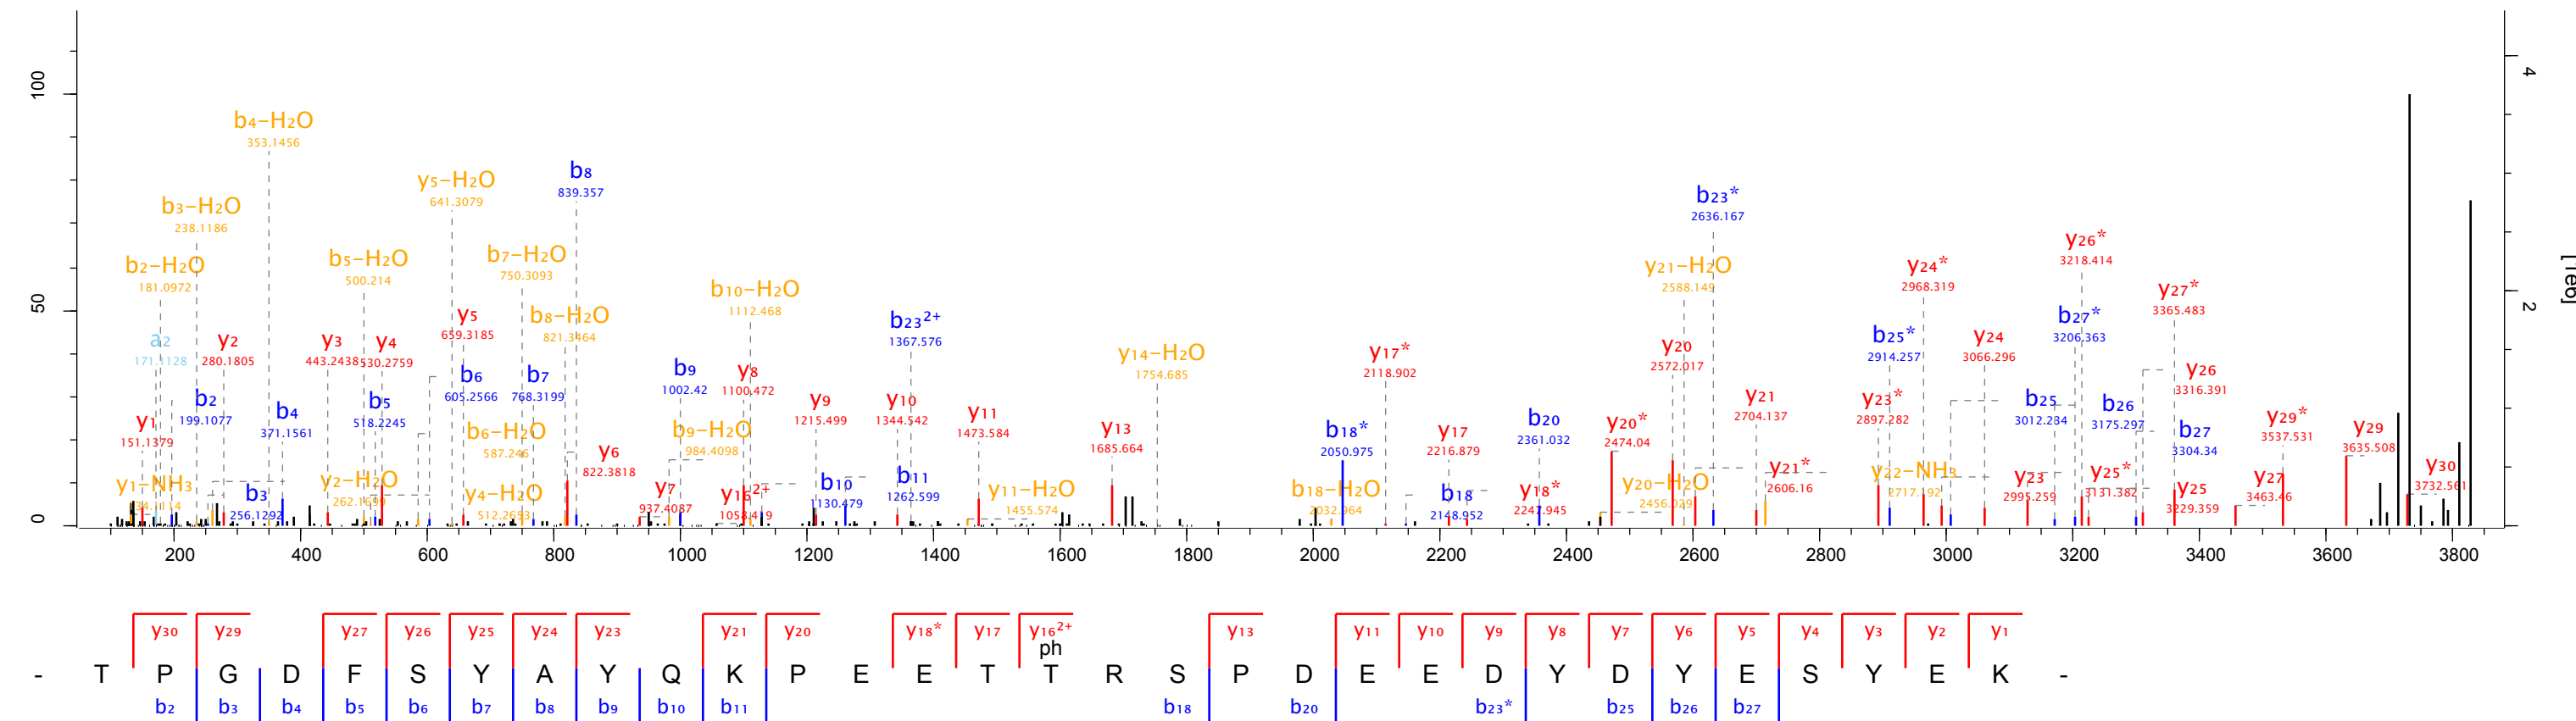

Raw file: 20150812\_A375SR\_Phospho\_BR1\_08  
 Scan: 18388 Method: FTMS; HCD Score: 149.59 m/z: 590.8 Gene names: NIPBL

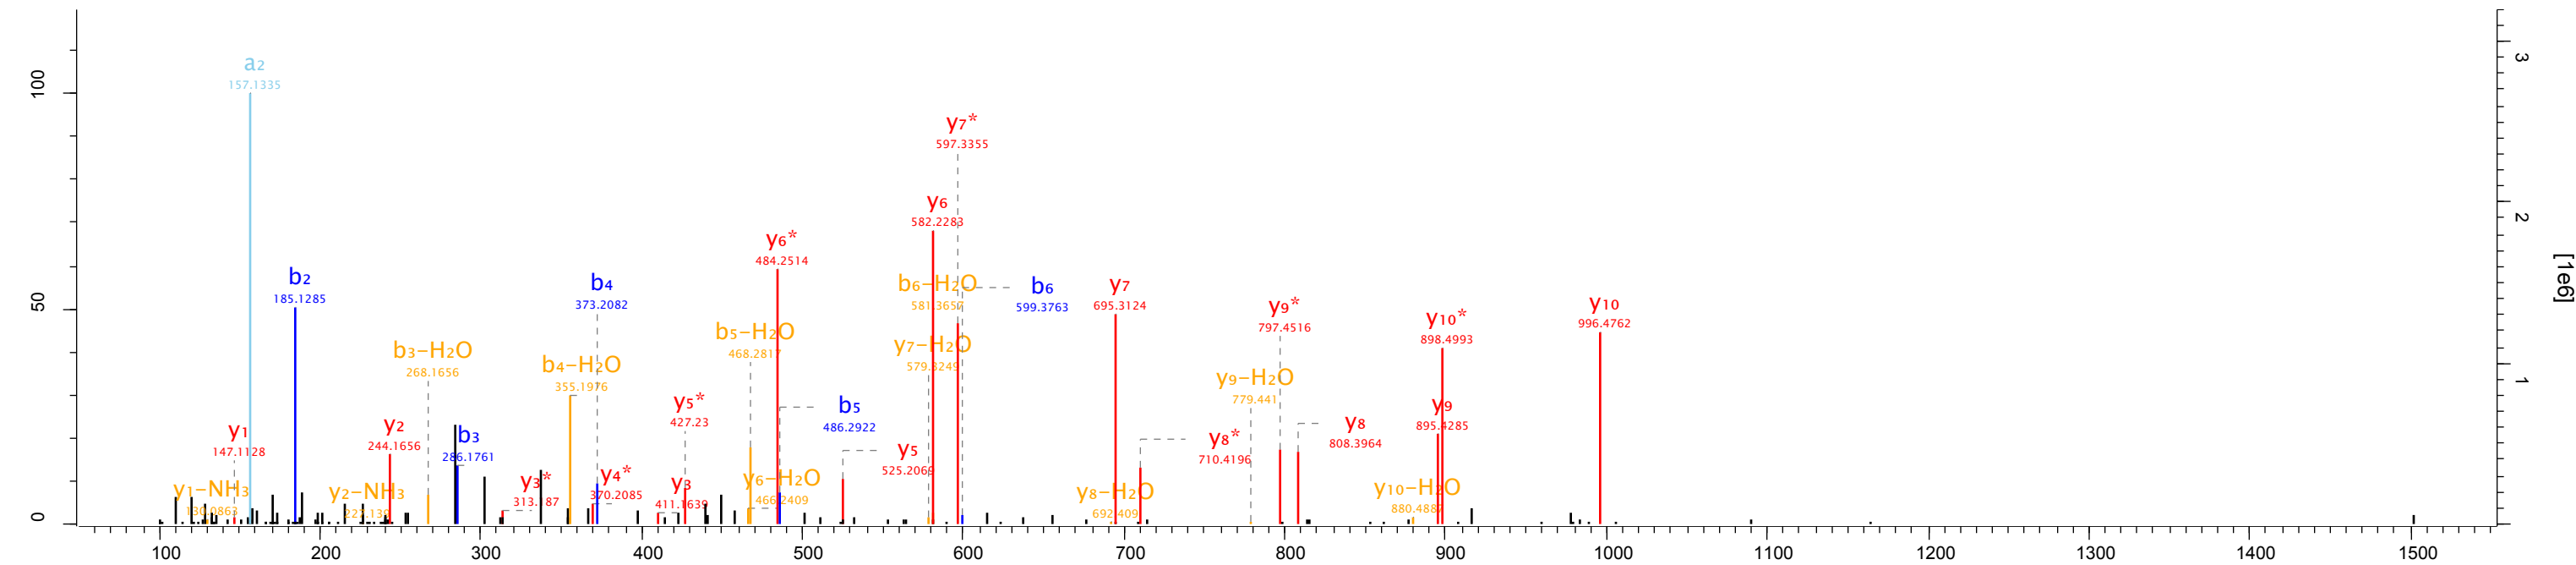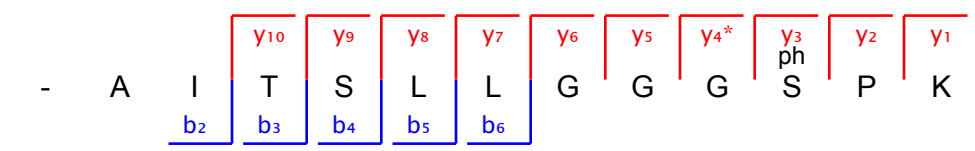

Raw file: 20150812\_A375SR\_Phospho\_BR1\_08  
 Scan: 19188 Method: FTMS; HCD Score: 133.16 m/z: 687.8 Gene names: EVA1A

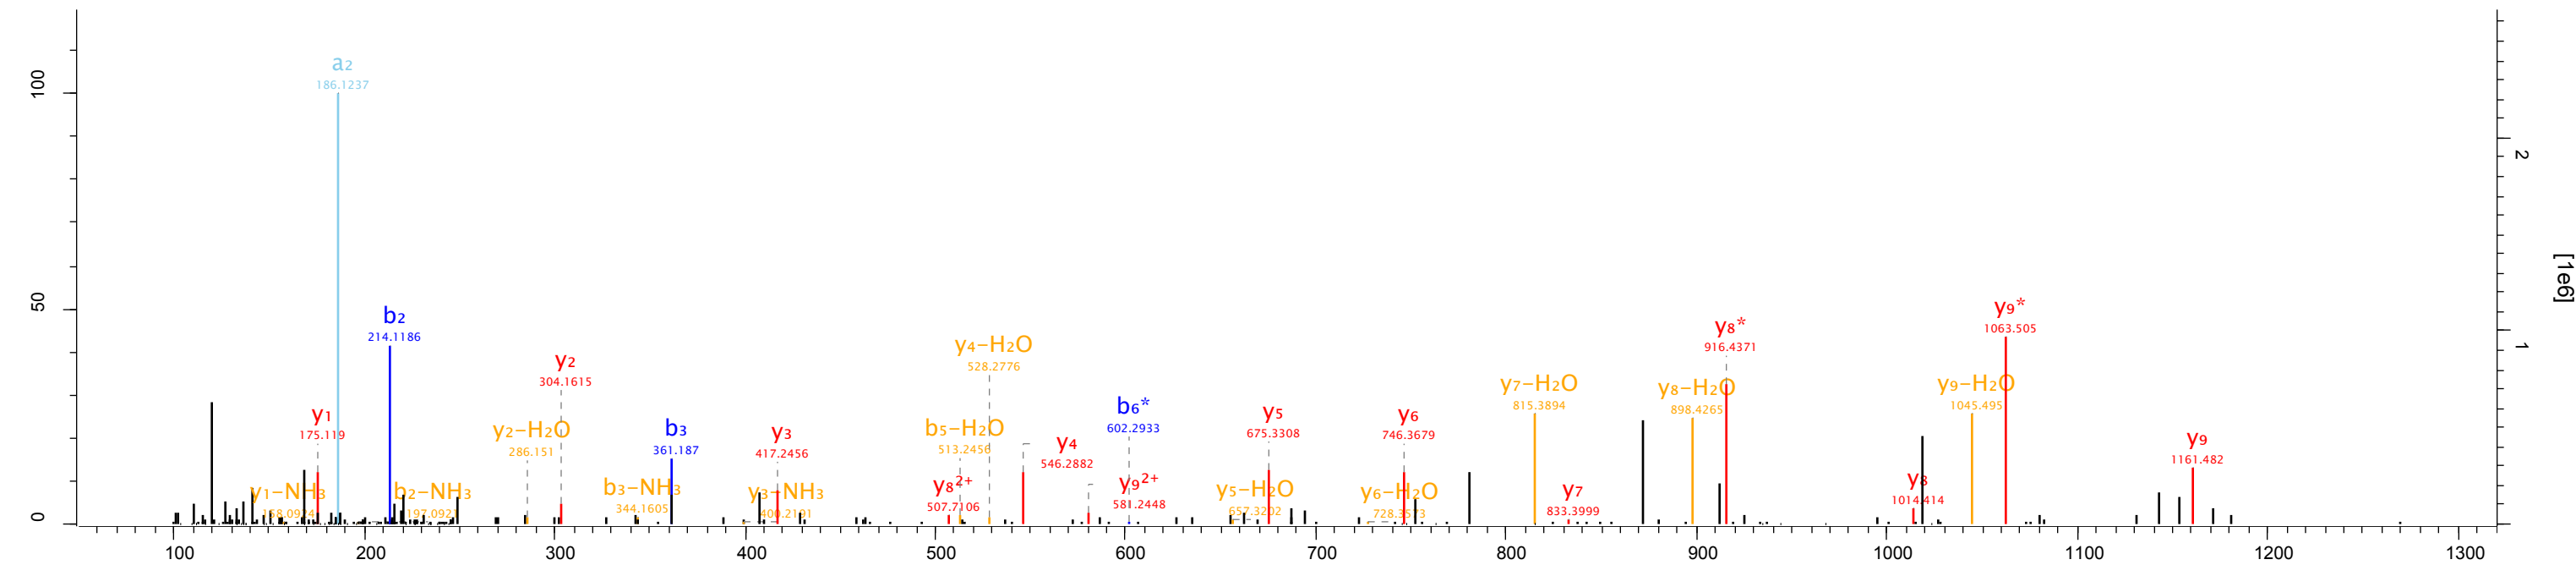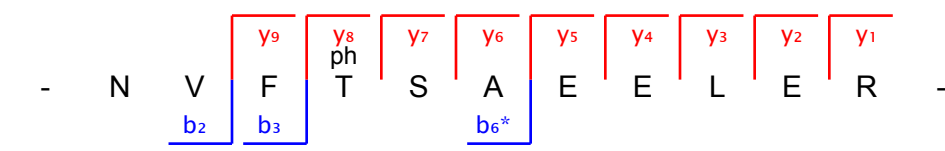

Raw file: 20150812\_A375SR\_Phospho\_BR1\_08  
 Scan: 1938 Method: FTMS; HCD Score: 140.49 m/z: 542.78 Gene names: BCLAF1

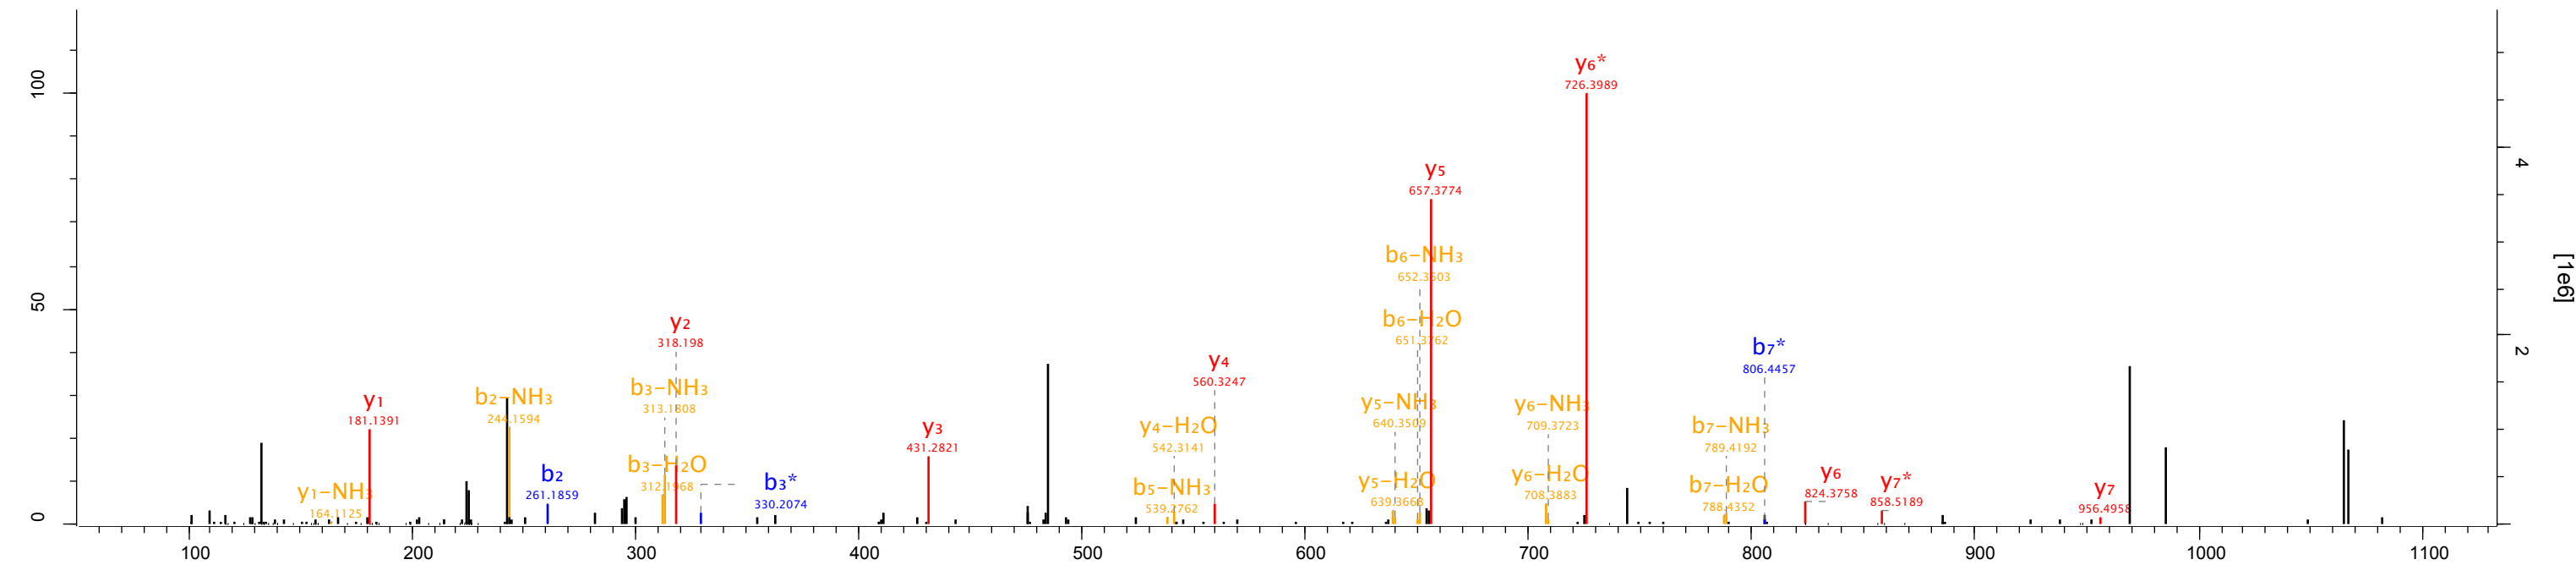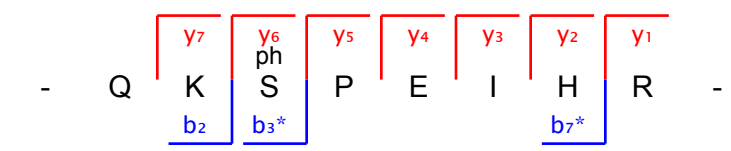



Raw file 20150812\_A375SR\_Phospho\_BR1\_08 Scan 19588 Method FTMS; HCD Score 230.97 m/z 724.84 Gene names PPP1R12A

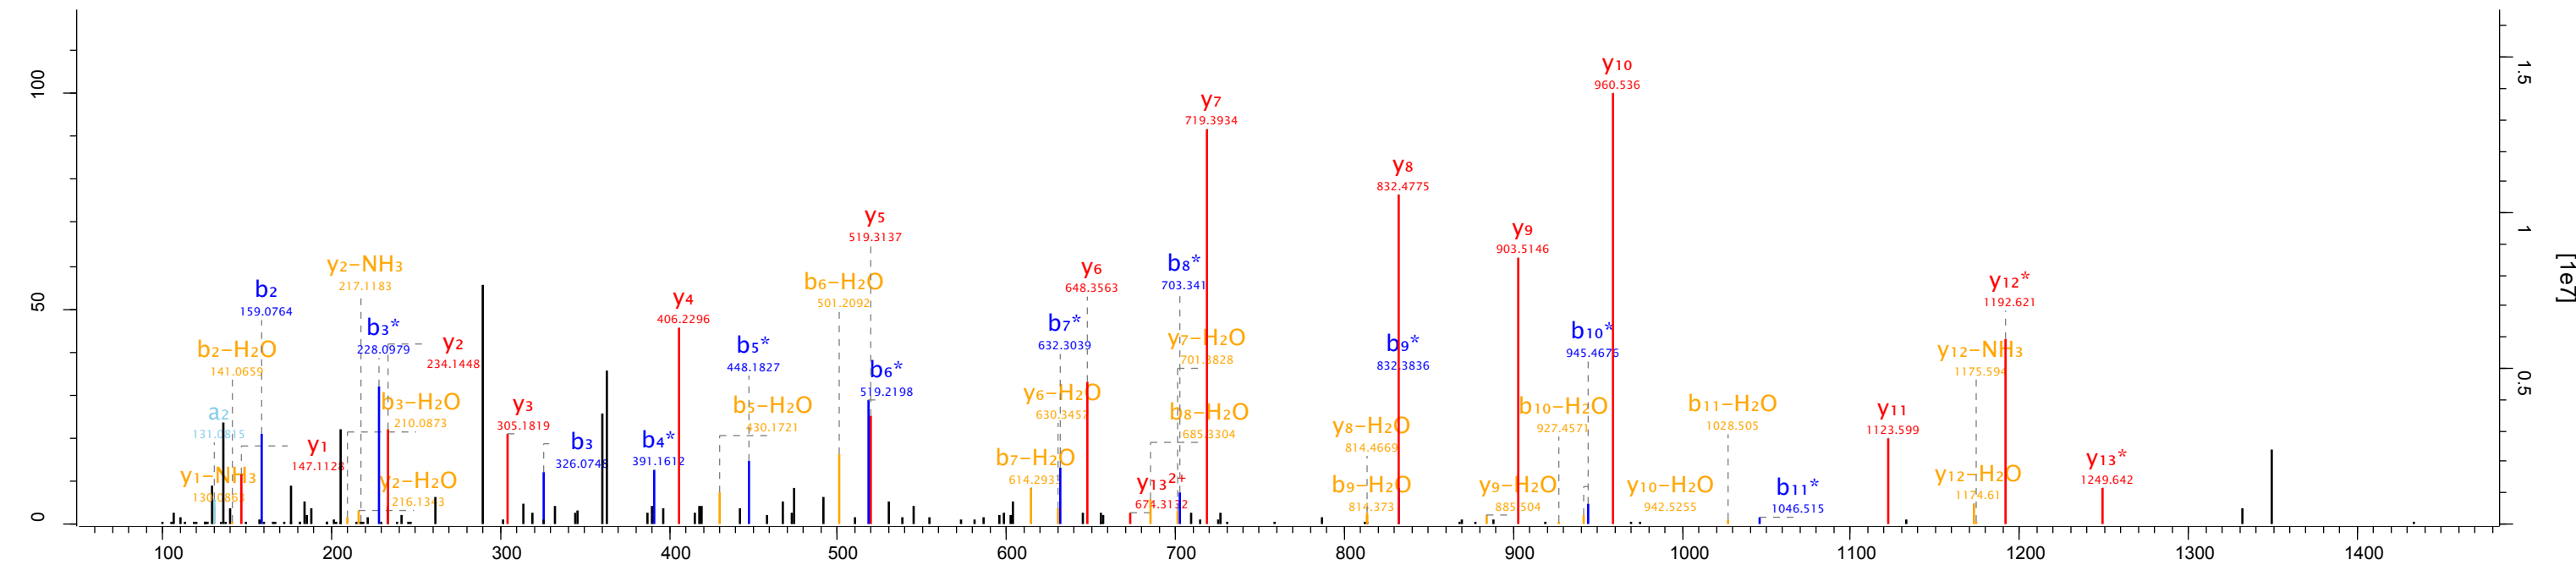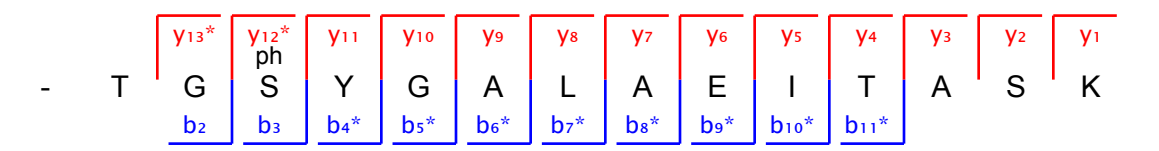

Raw file 20150812\_A375SR\_Phospho\_BR1\_08 Scan 22868 Method FTMS; HCD Score 241.71 m/z 1069.98 Gene names MADD

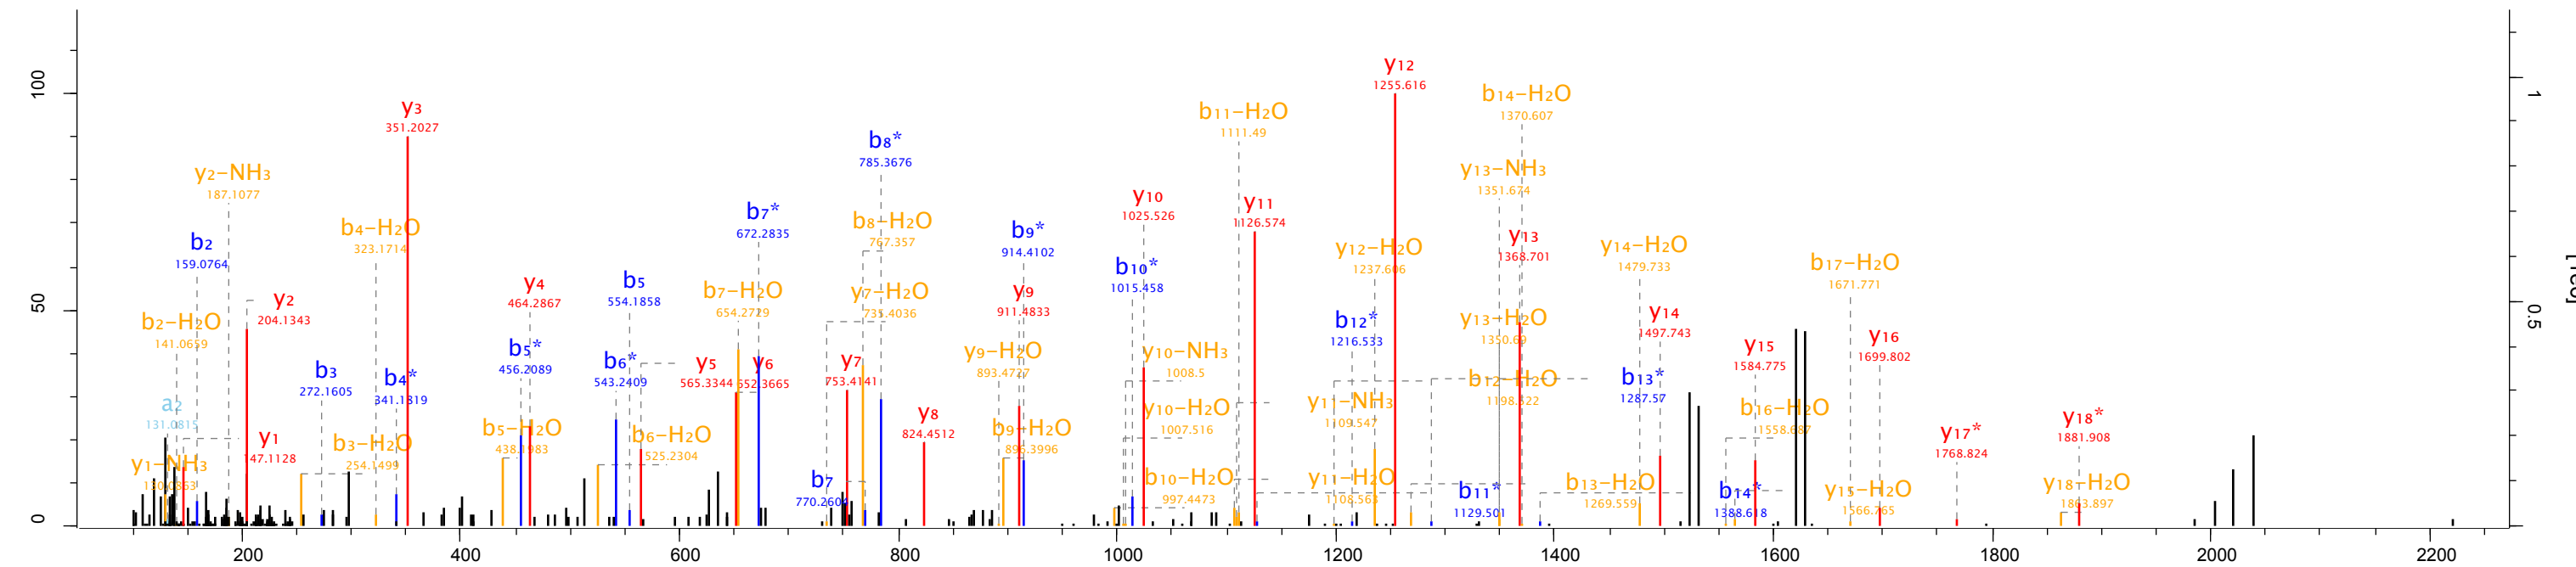

- G T L S D S E I E T N S A T S T I F G K -  
 b<sub>2</sub> b<sub>3</sub> b<sub>4</sub>\* b<sub>5</sub> b<sub>6</sub>\* b<sub>7</sub> b<sub>8</sub>\* b<sub>9</sub>\* b<sub>10</sub>\* b<sub>11</sub>\* b<sub>12</sub>\* b<sub>13</sub>\* b<sub>14</sub>\*  
 y<sub>18</sub>\* y<sub>17</sub>\* ph y<sub>16</sub> y<sub>15</sub> y<sub>14</sub> y<sub>13</sub> y<sub>12</sub> y<sub>11</sub> y<sub>10</sub> y<sub>9</sub> y<sub>8</sub> y<sub>7</sub> y<sub>6</sub> y<sub>5</sub> y<sub>4</sub> y<sub>3</sub> y<sub>2</sub> y<sub>1</sub>

Raw file: 20150812\_A375SR\_Phospho\_BR1\_08  
 Scan: 3068 Method: FTMS; HCD Score: 69.19 m/z: 522.62 Gene names: VPRBP

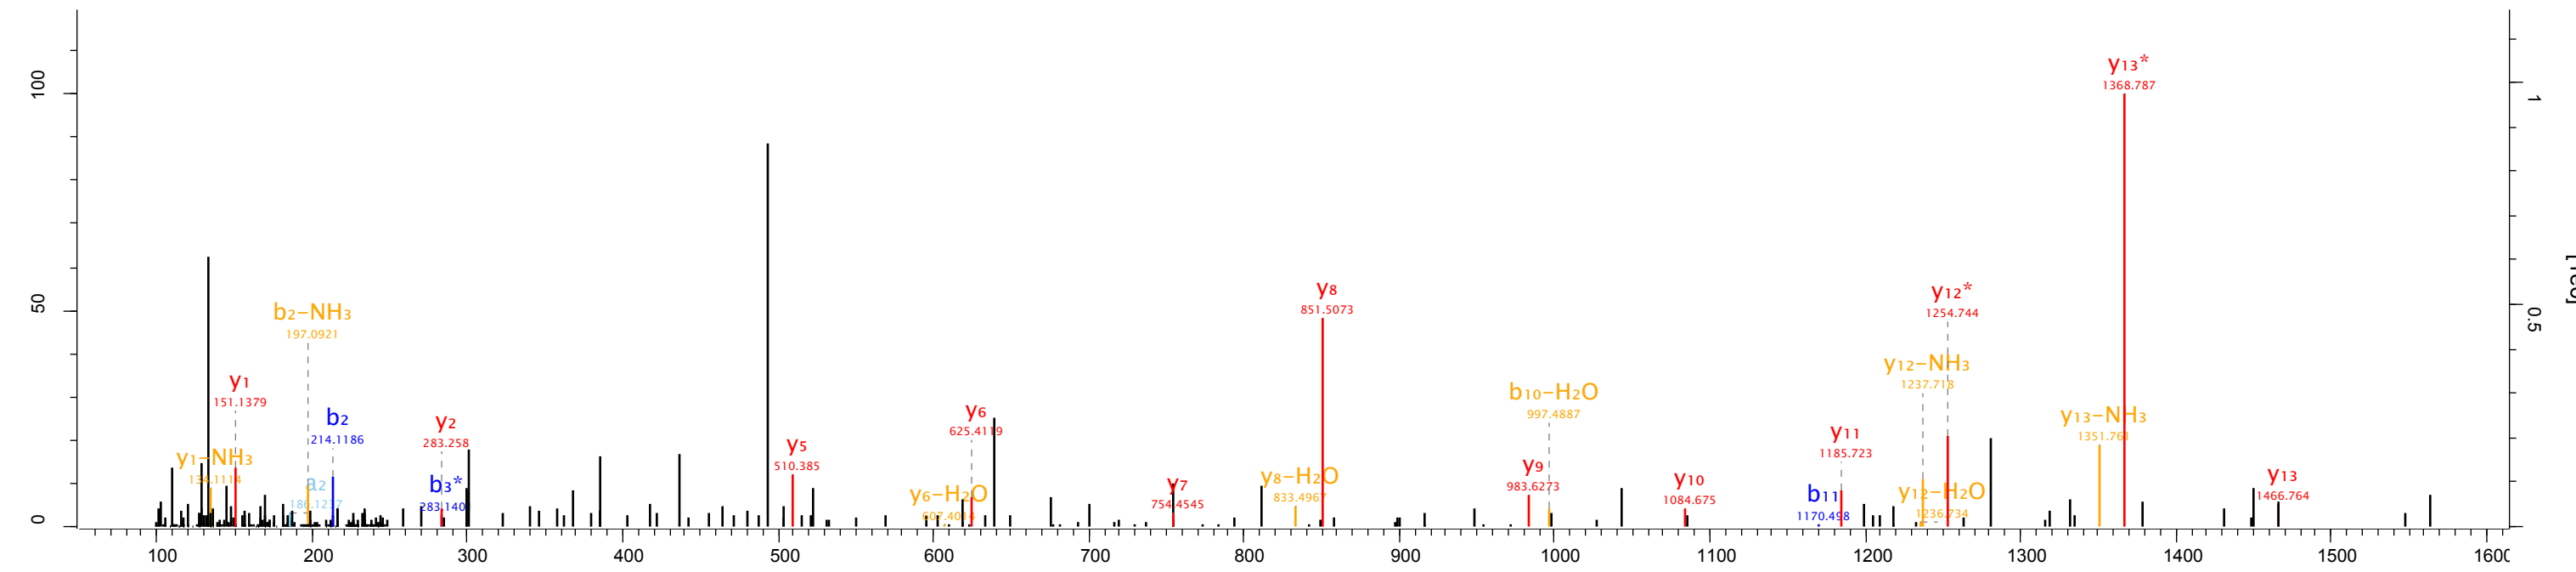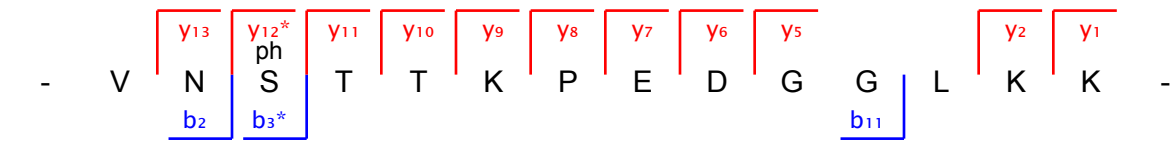

Raw file: 20150812\_A375SR\_Phospho\_BR1\_08  
 Scan: 3148 Method: FTMS; HCD Score: 114.01 m/z: 675.81 Gene names: SRRM2

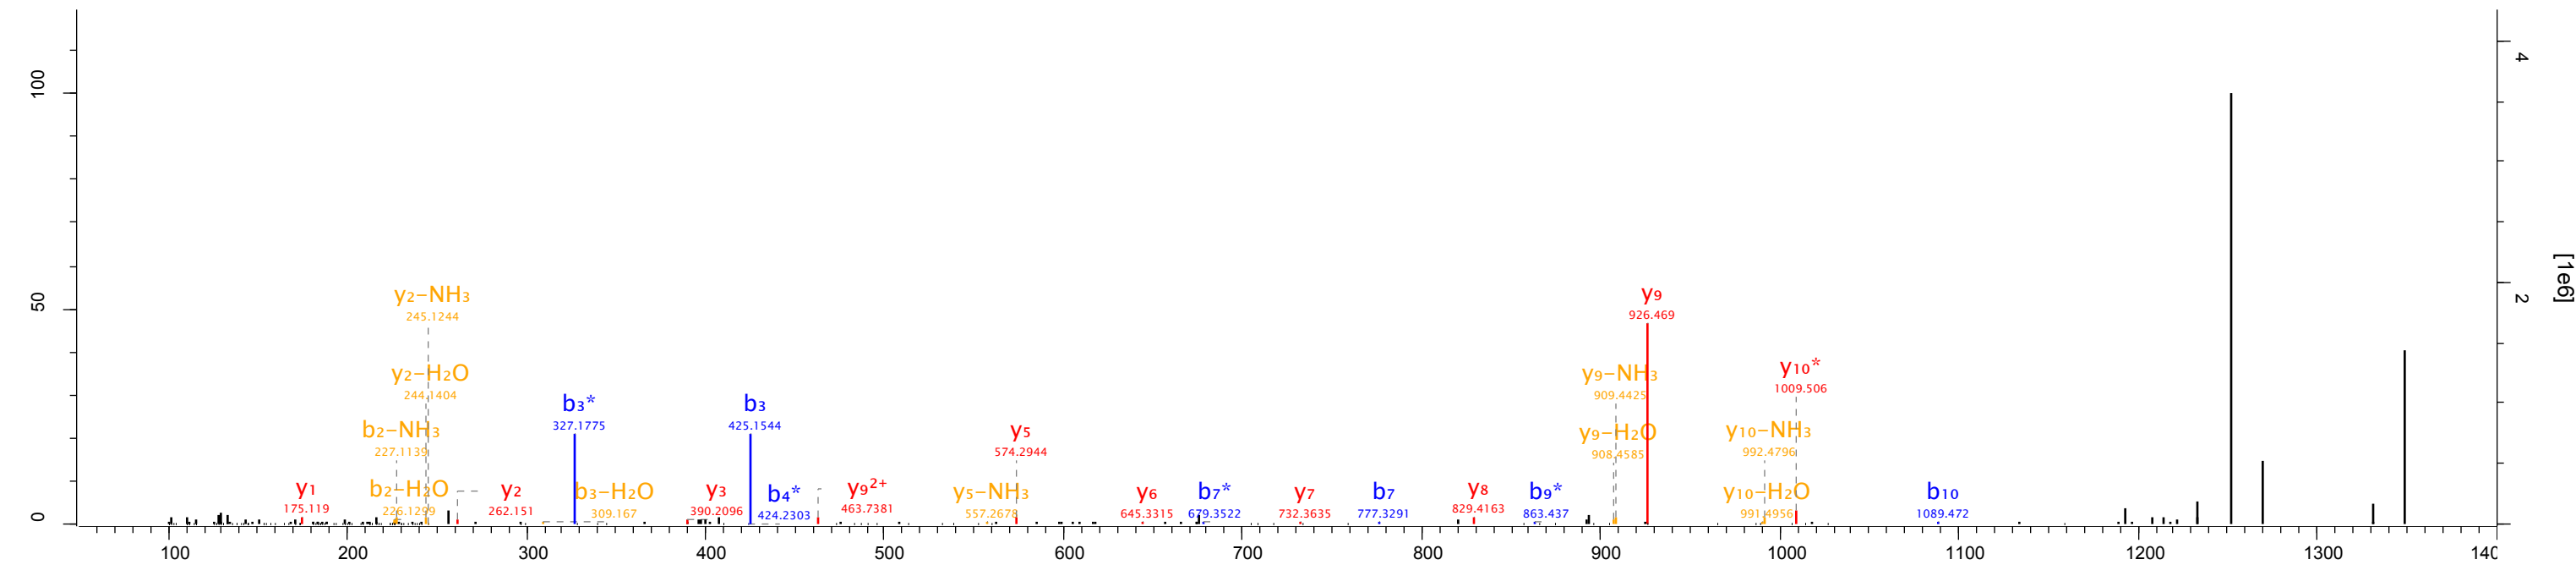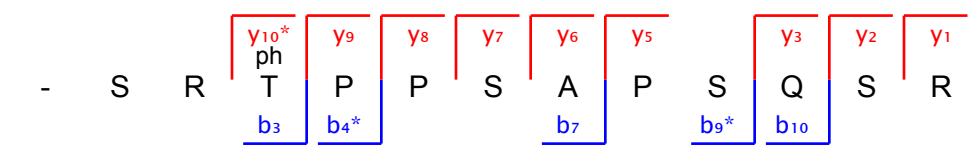

Raw file: 20150812\_A375SR\_Phospho\_BR1\_08  
 Scan: 3248 Method: FTMS; HCD Score: 248.01 m/z: 709.36 Gene names: FOXH1;XRCC1

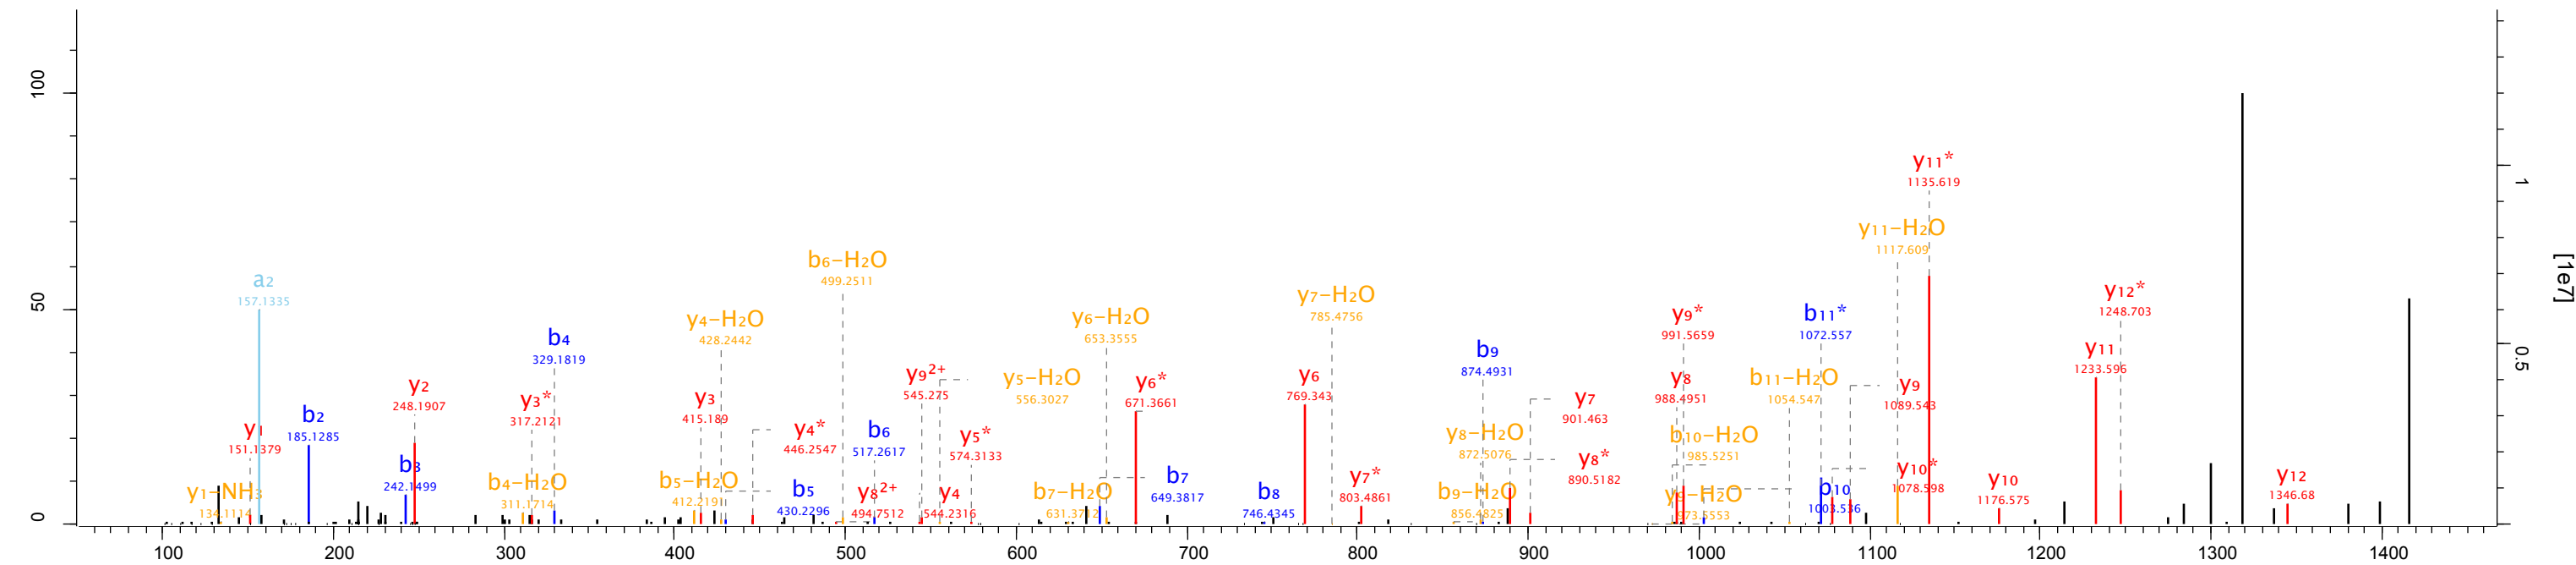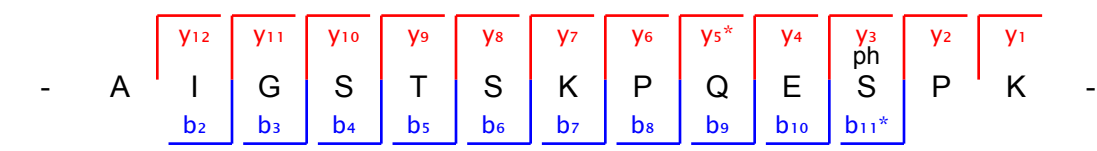

Raw file: 20150812\_A375SR\_Phospho\_BR1\_08  
 Scan: 6058 Method: FTMS; HCD Score: 158.35 m/z: 636.29 Gene names: ZNF609

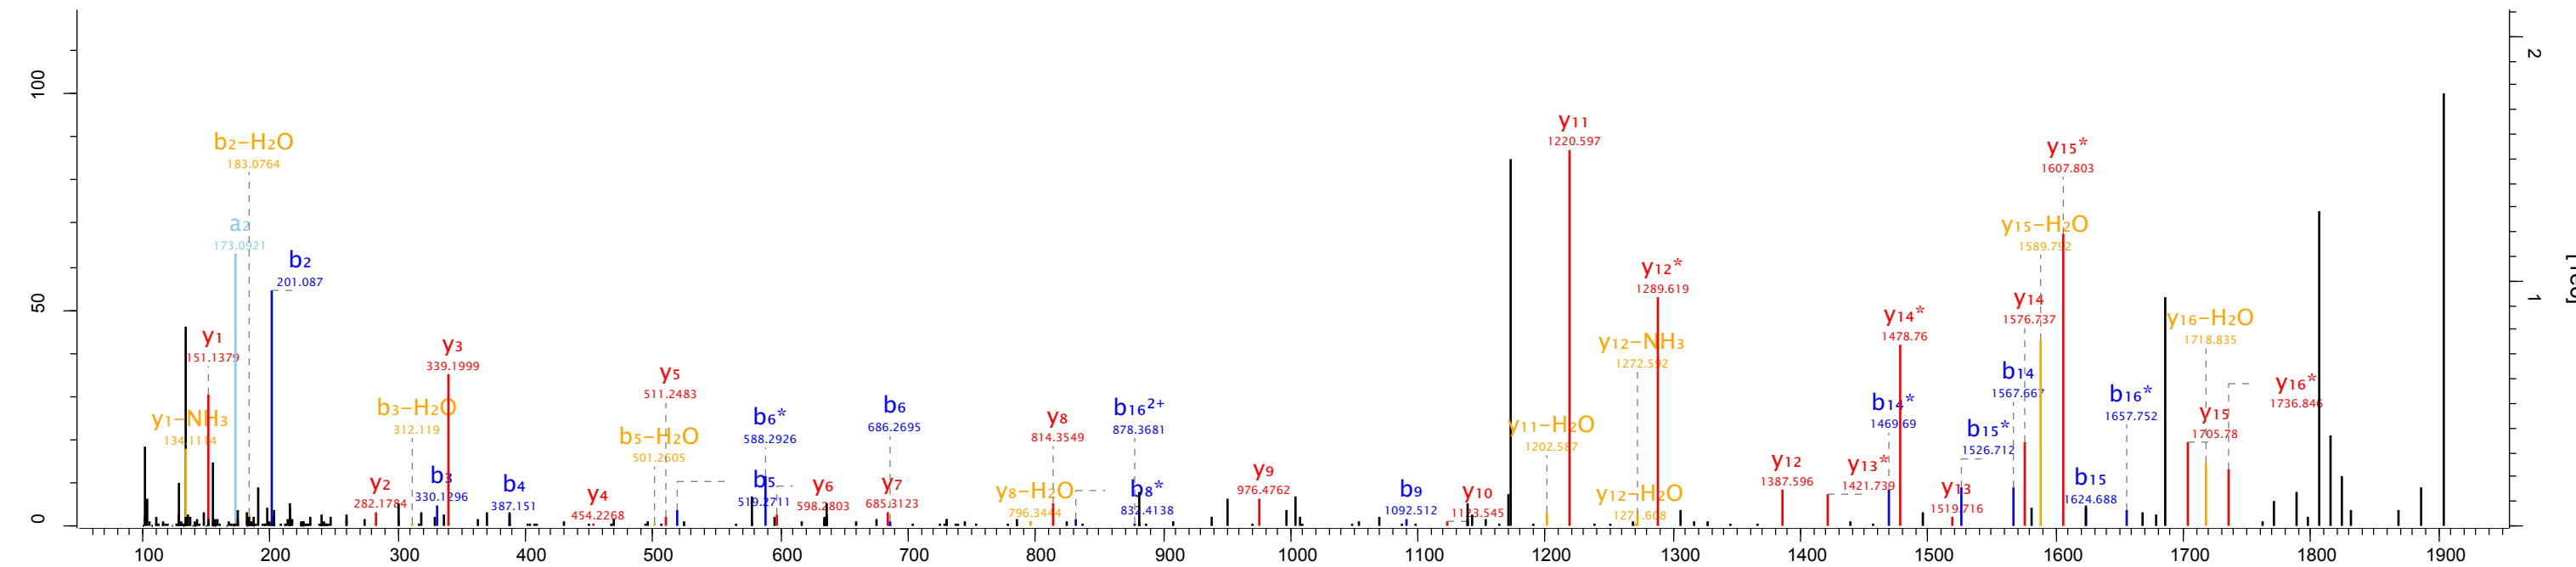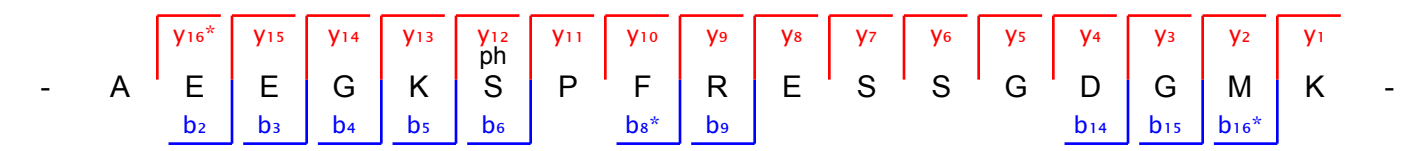

Raw file: 20150812\_A375SR\_Phospho\_BR1\_08  
 Scan: 6178 Method: FTMS; HCD Score: 90.44 m/z: 565.94 Gene names: TAOK1

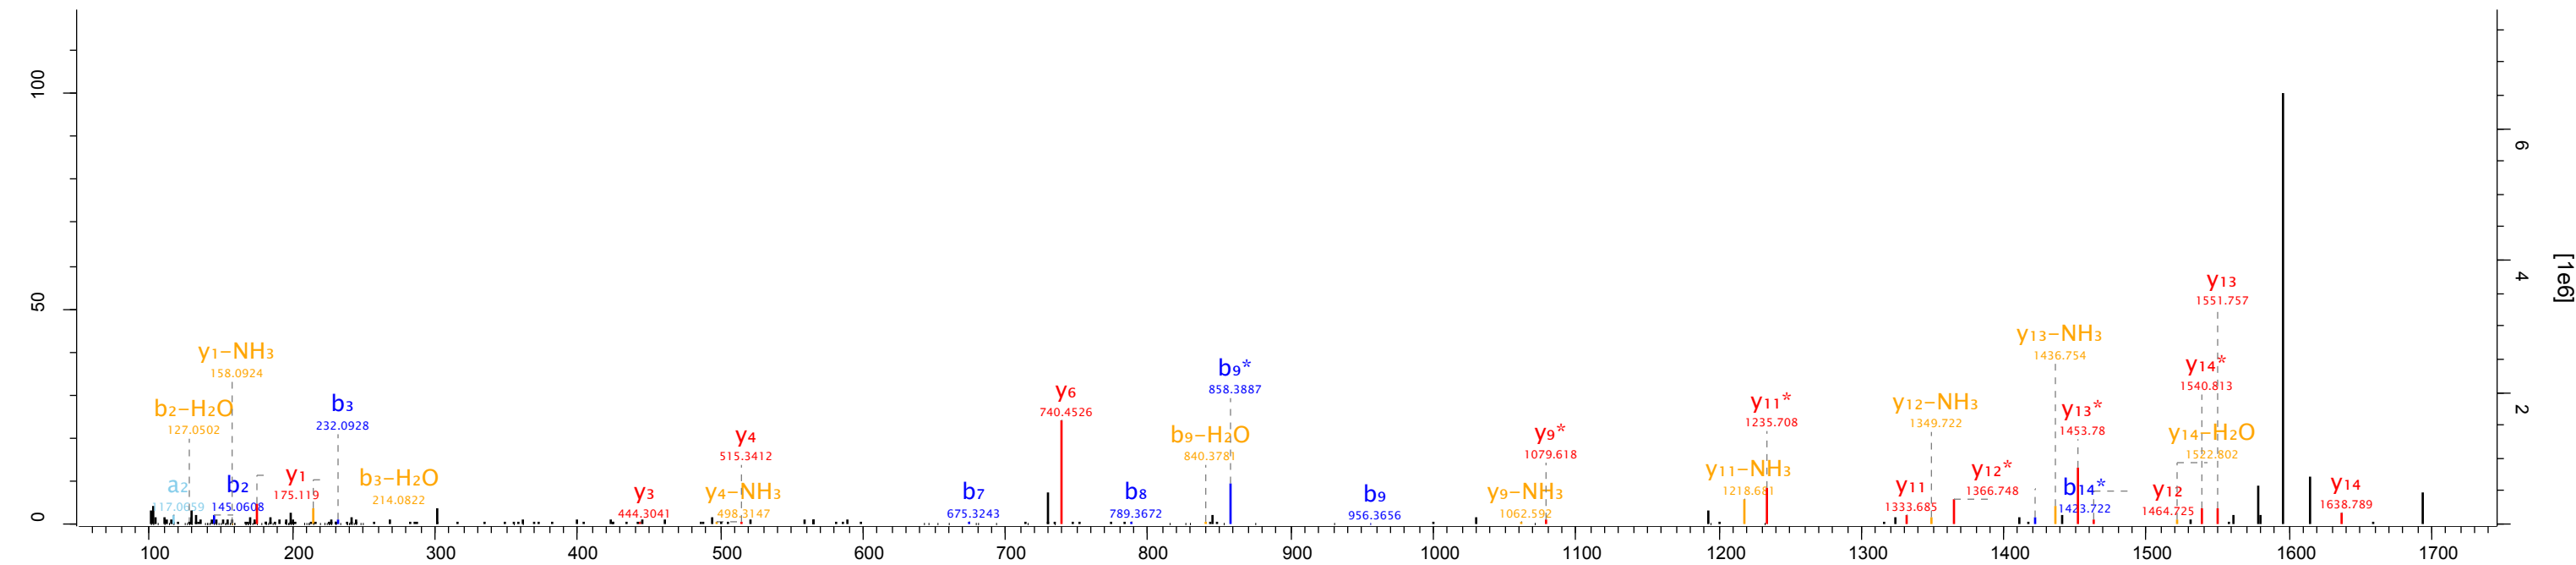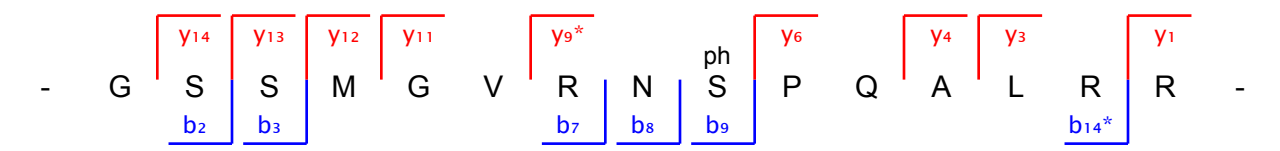

Raw file: 20150812\_A375SR\_Phospho\_BR1\_08  
 Scan: 6748 Method: FTMS; HCD Score: 172.09 m/z: 686.32 Gene names: RBMXL1

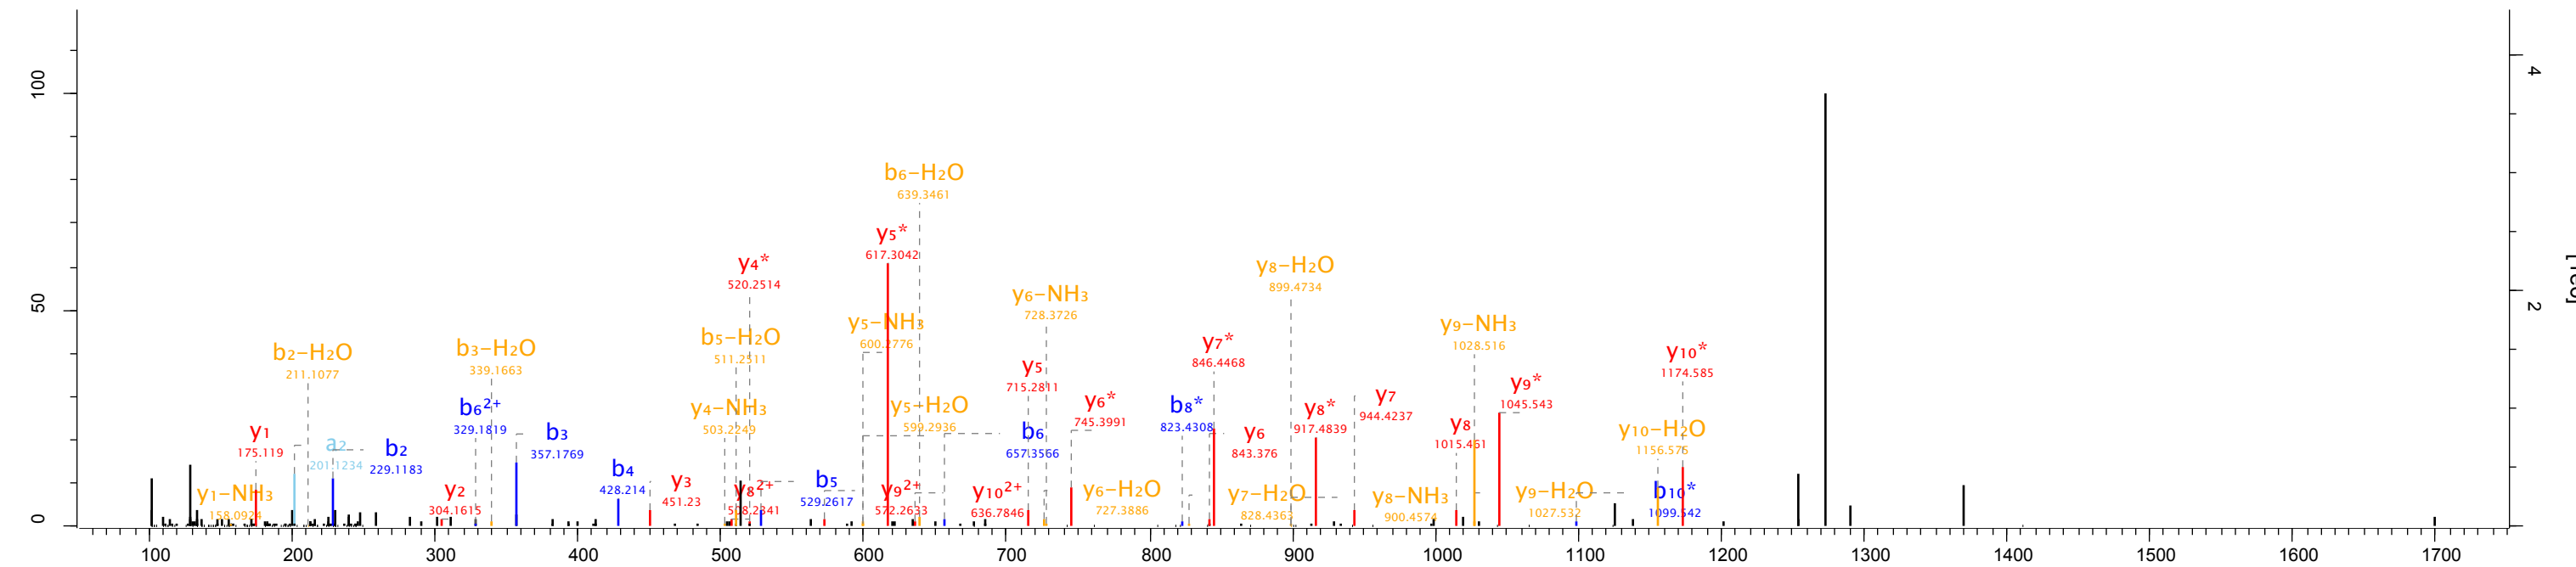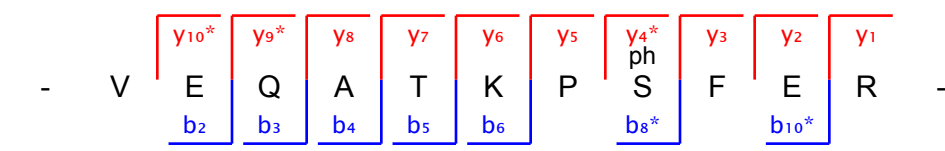



Raw file: 20150812\_A375SR\_Phospho\_BR1\_08  
 Scan: 7178 Method: FTMS; HCD Score: 137.45 m/z: 500.28 Gene names: TPD52

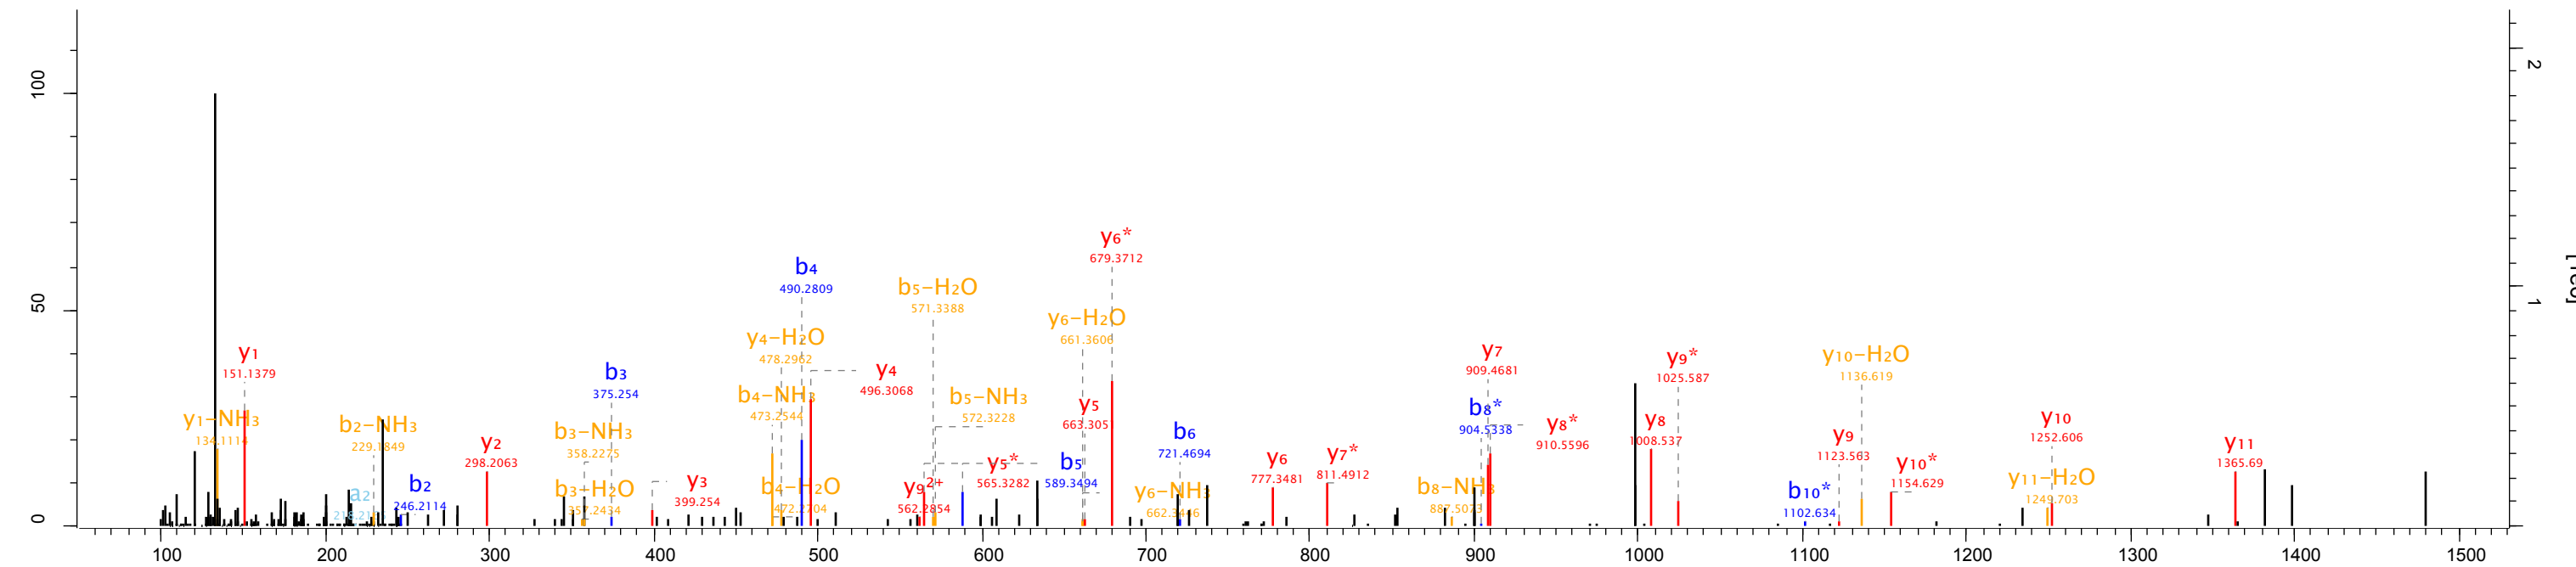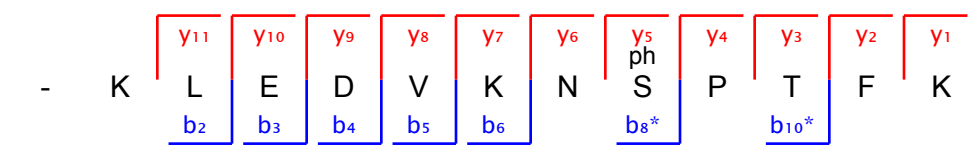

Raw file Scan Method Score m/z Gene names  
 20150812\_A375SR\_Phospho\_BR1\_08 7188 FTMS; HCD 213.13 742.84 CLASP1

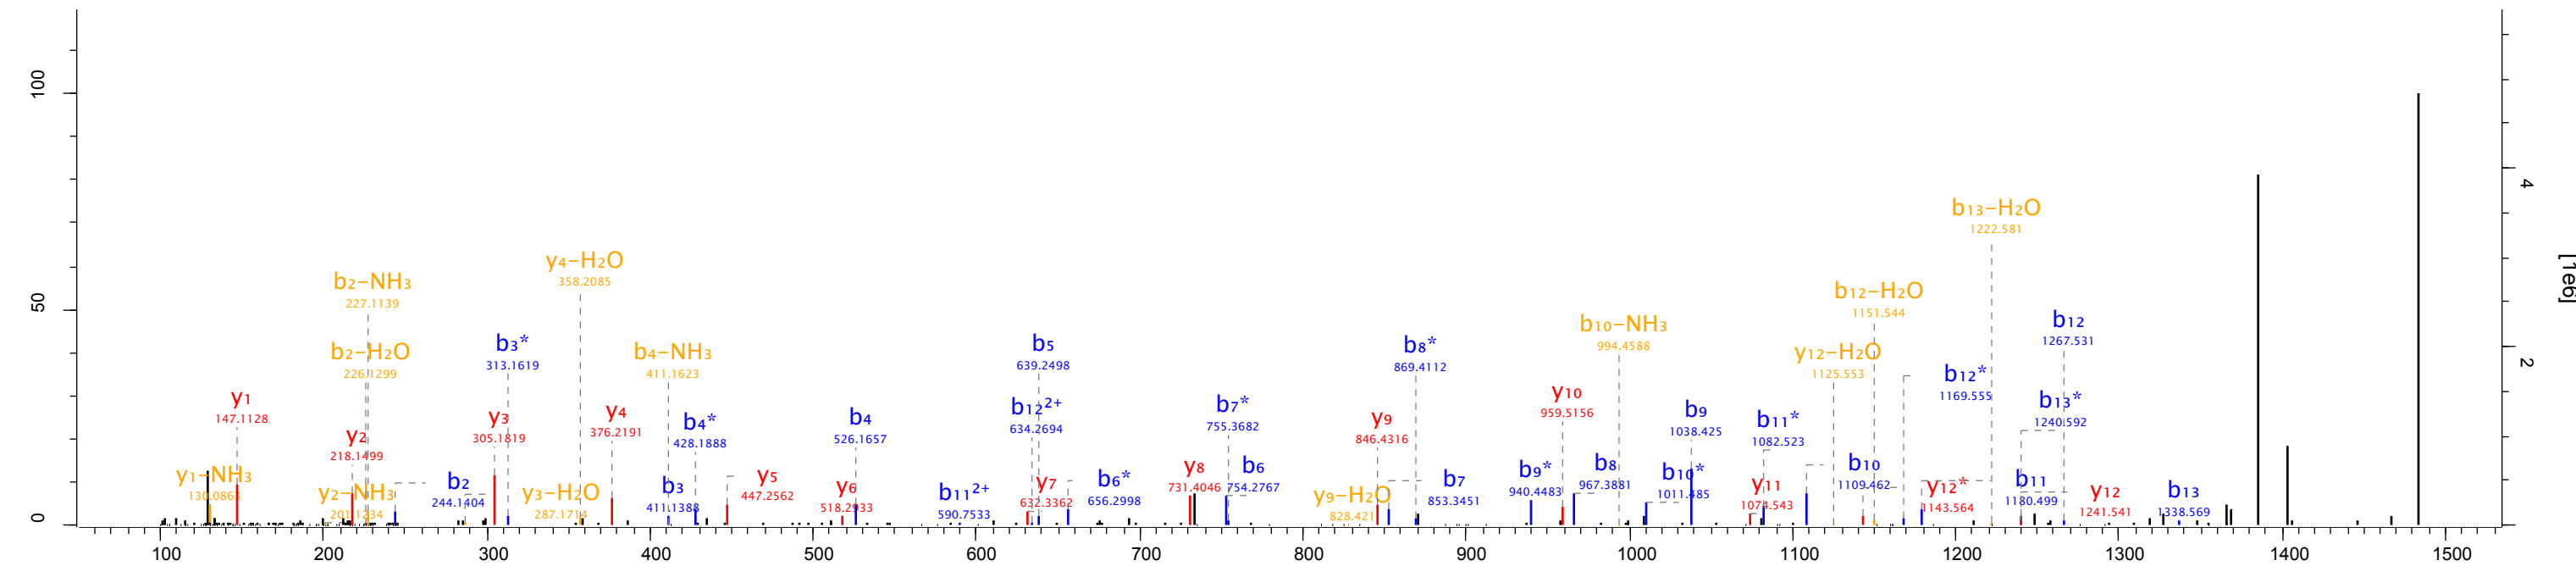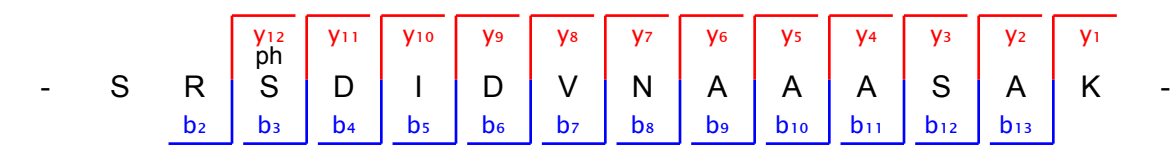

Raw file 20150812\_A375SR\_Phospho\_BR1\_08 Scan 7358 Method FTMS; HCD Score 54.07 m/z 1144.44 Gene names CREBBP

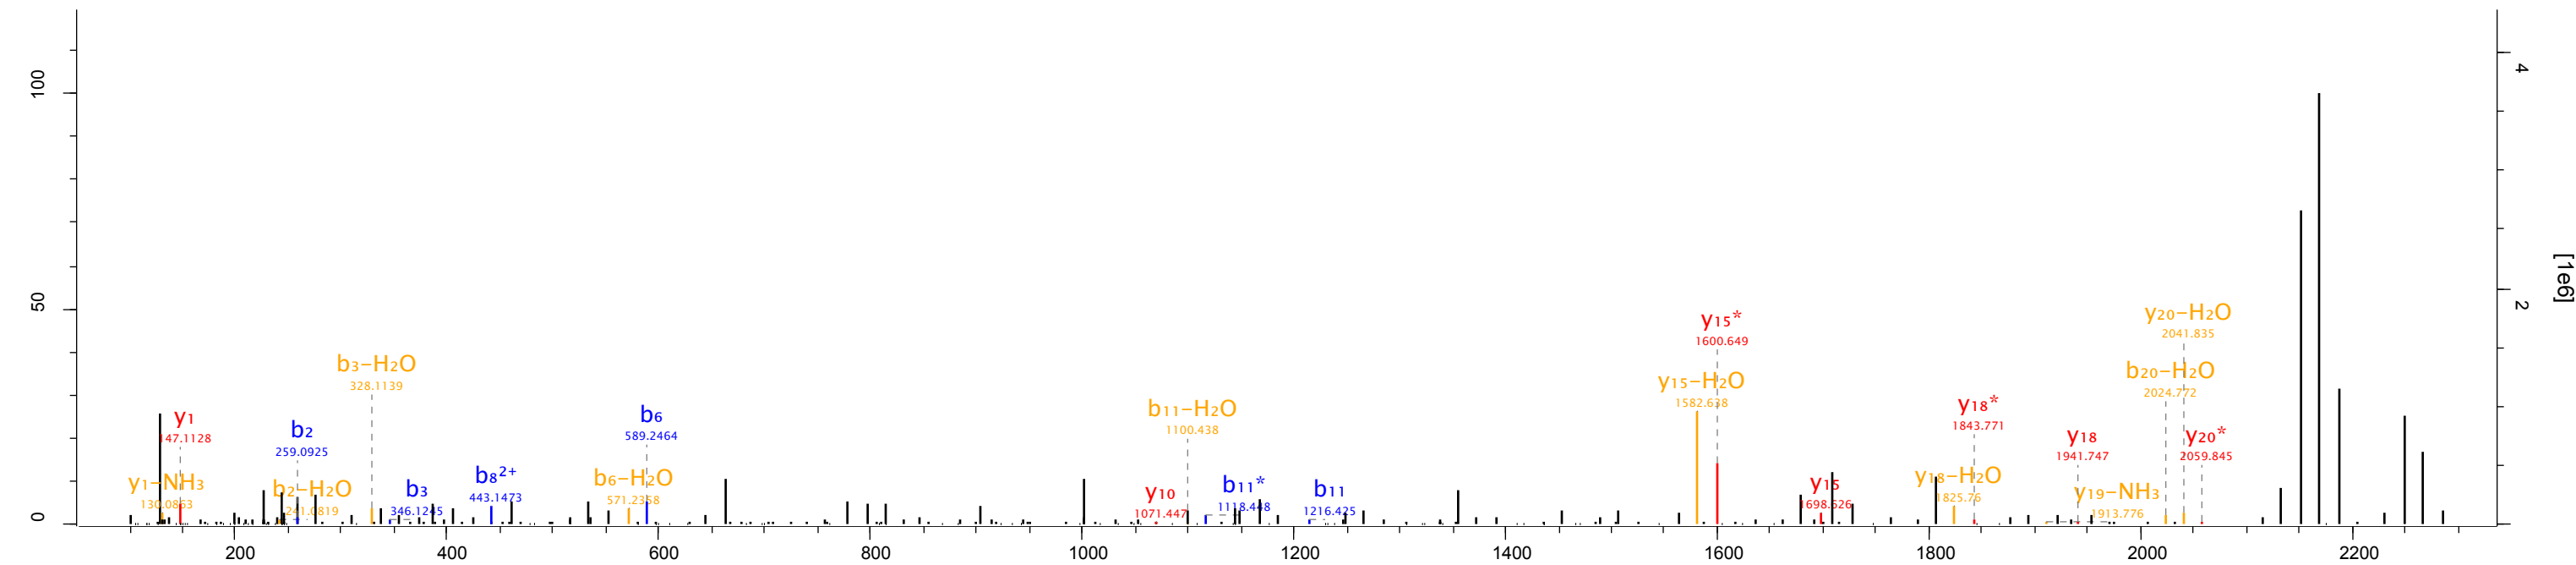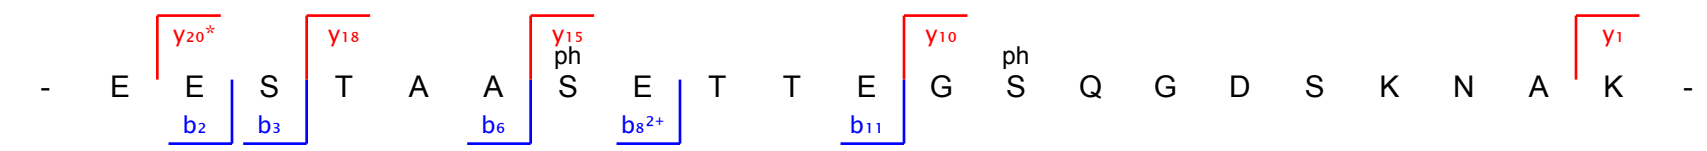

Raw file 20150812\_A375SR\_Phospho\_BR1\_08 Scan 7998 Method FTMS; HCD Score 85.53 m/z 423.71 Gene names IRF2BP1

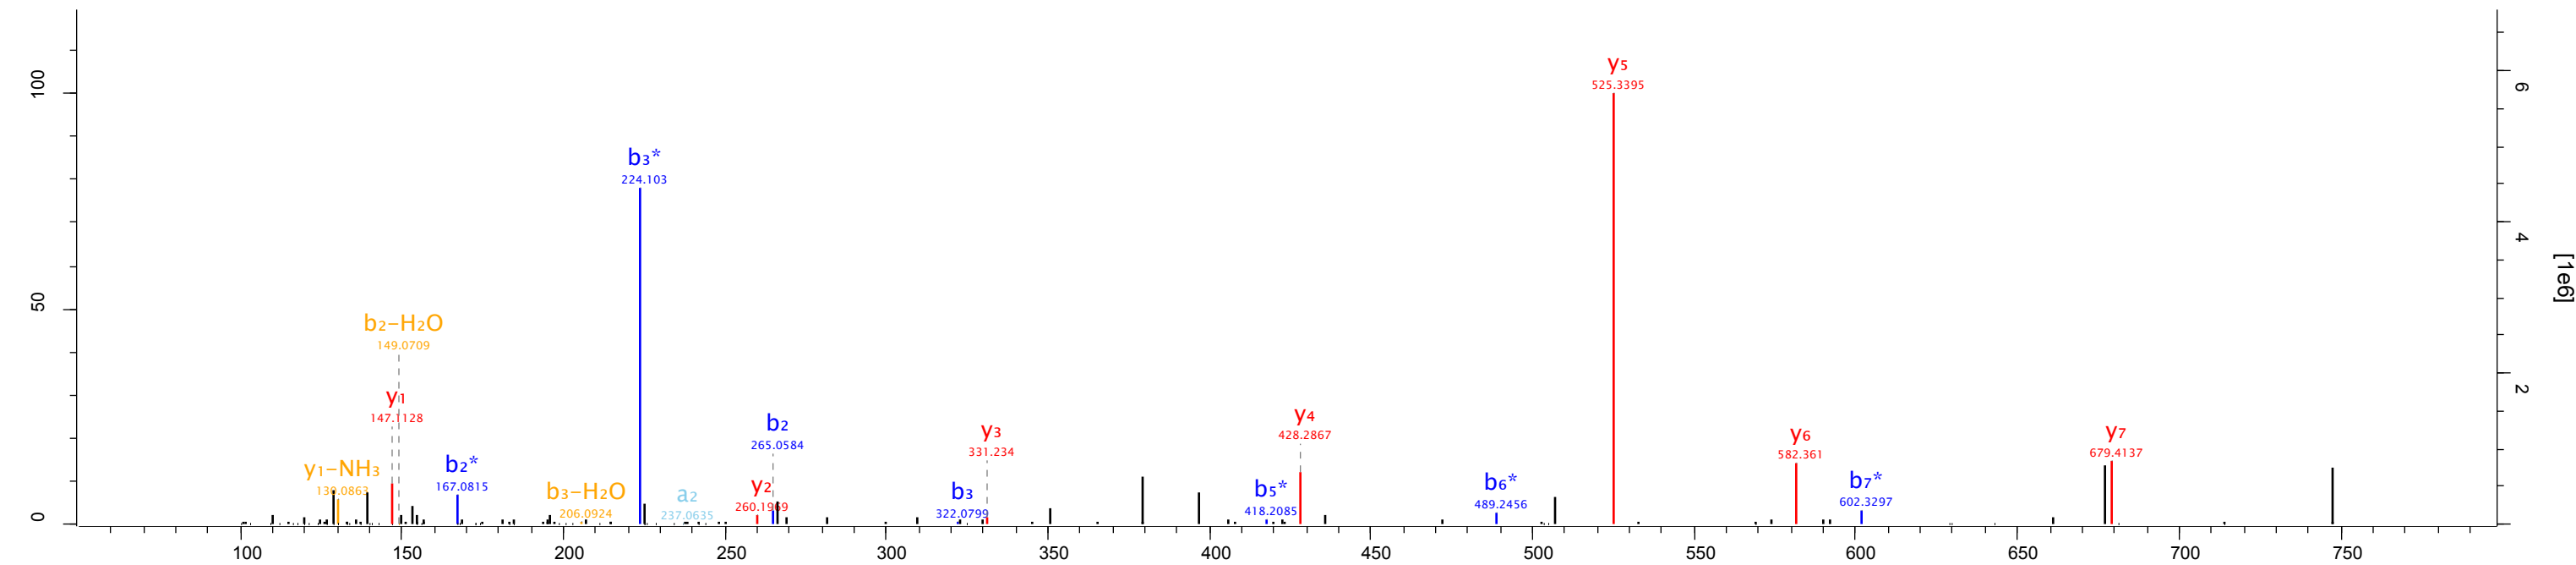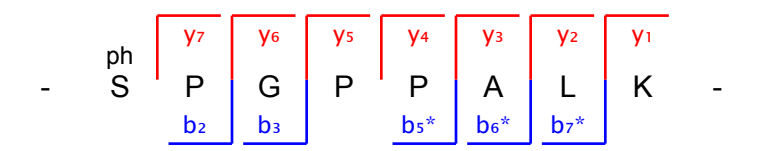

Raw file Scan Method Score m/z Gene names

20150812\_A375SR\_Phospho\_BR1\_08 8308 FTMS; HCD 138.82 691.29 STIP1

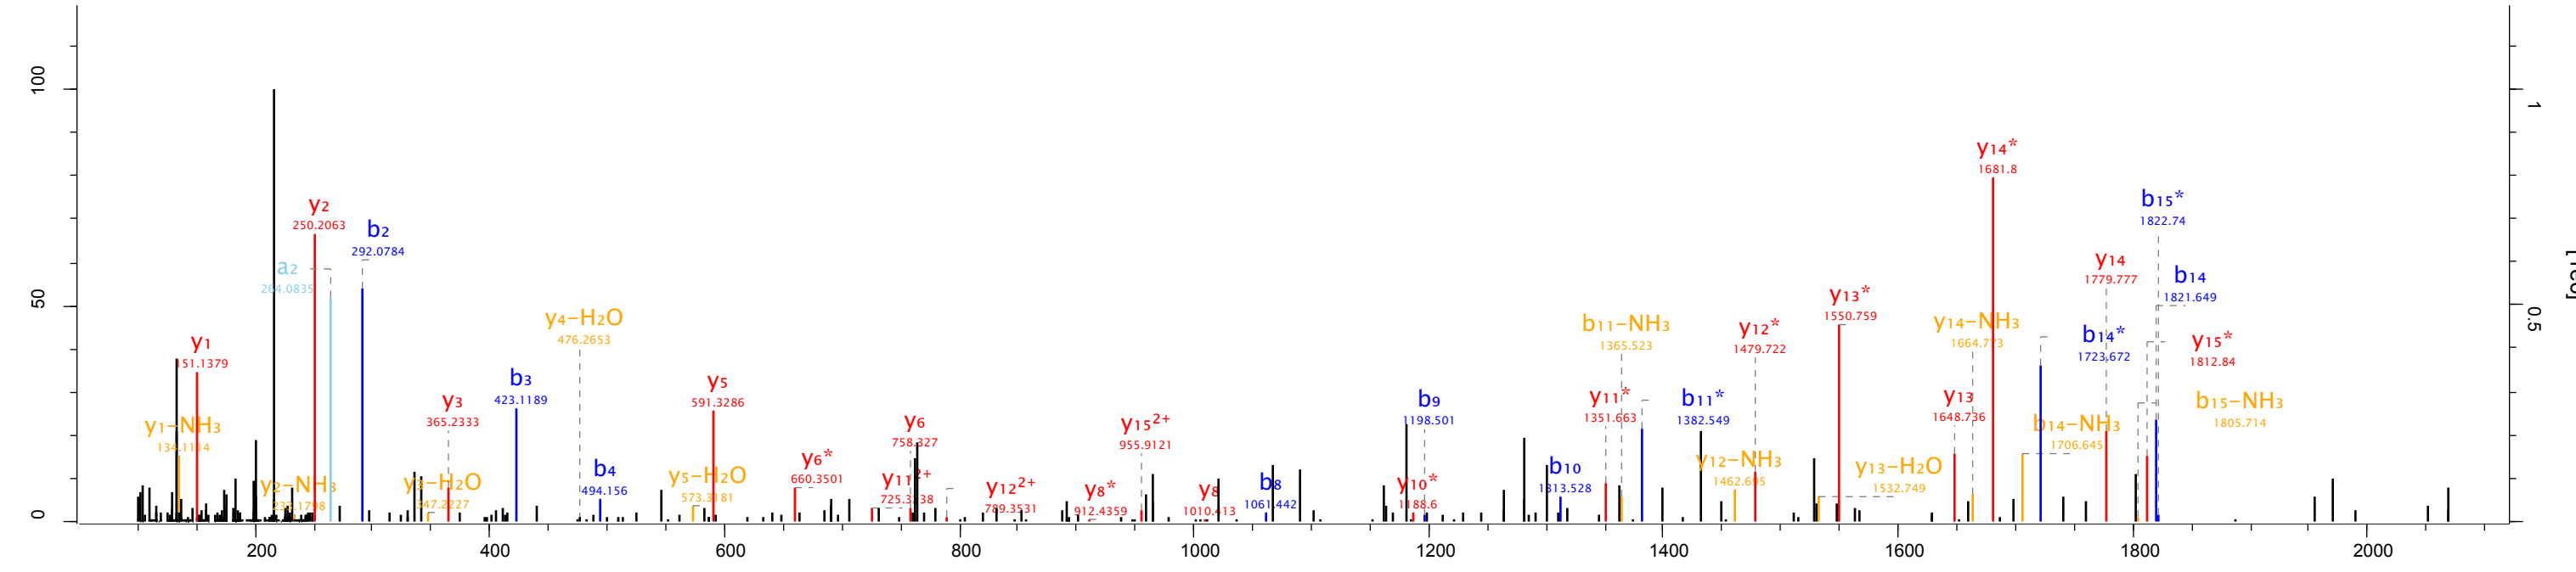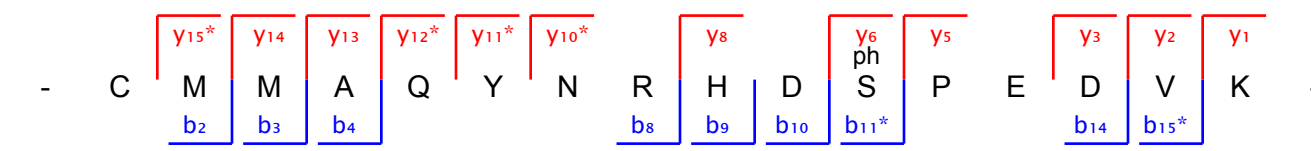

Raw file: 20150812\_A375SR\_Phospho\_BR1\_08  
 Scan: 8348 Method: FTMS; HCD Score: 100.07 m/z: 739.33 Gene names: METTL3

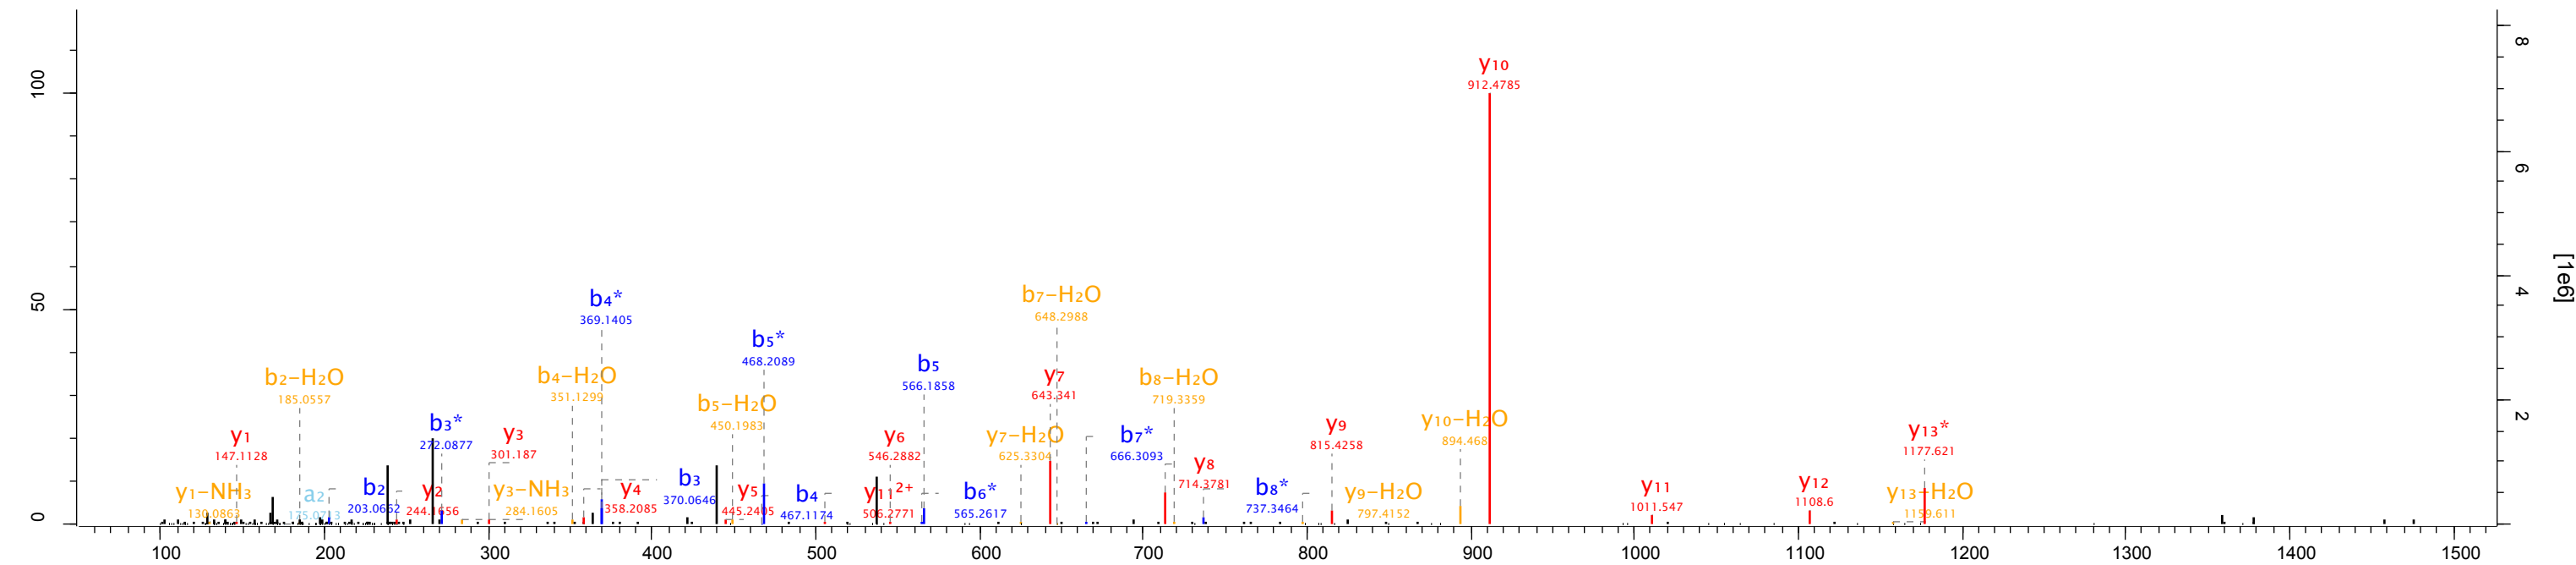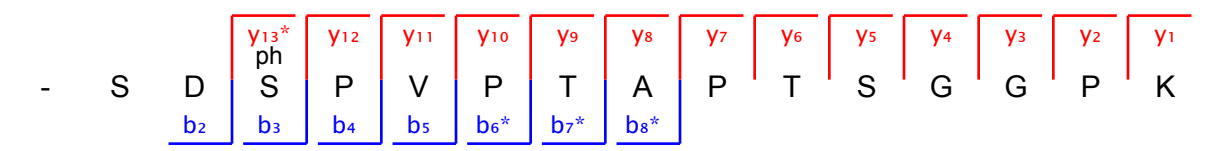

Raw file: 20150812\_A375SR\_Phospho\_BR1\_08  
 Scan: 8718 Method: FTMS; HCD Score: 272.63 m/z: 885.92 Gene names: PPP1R18

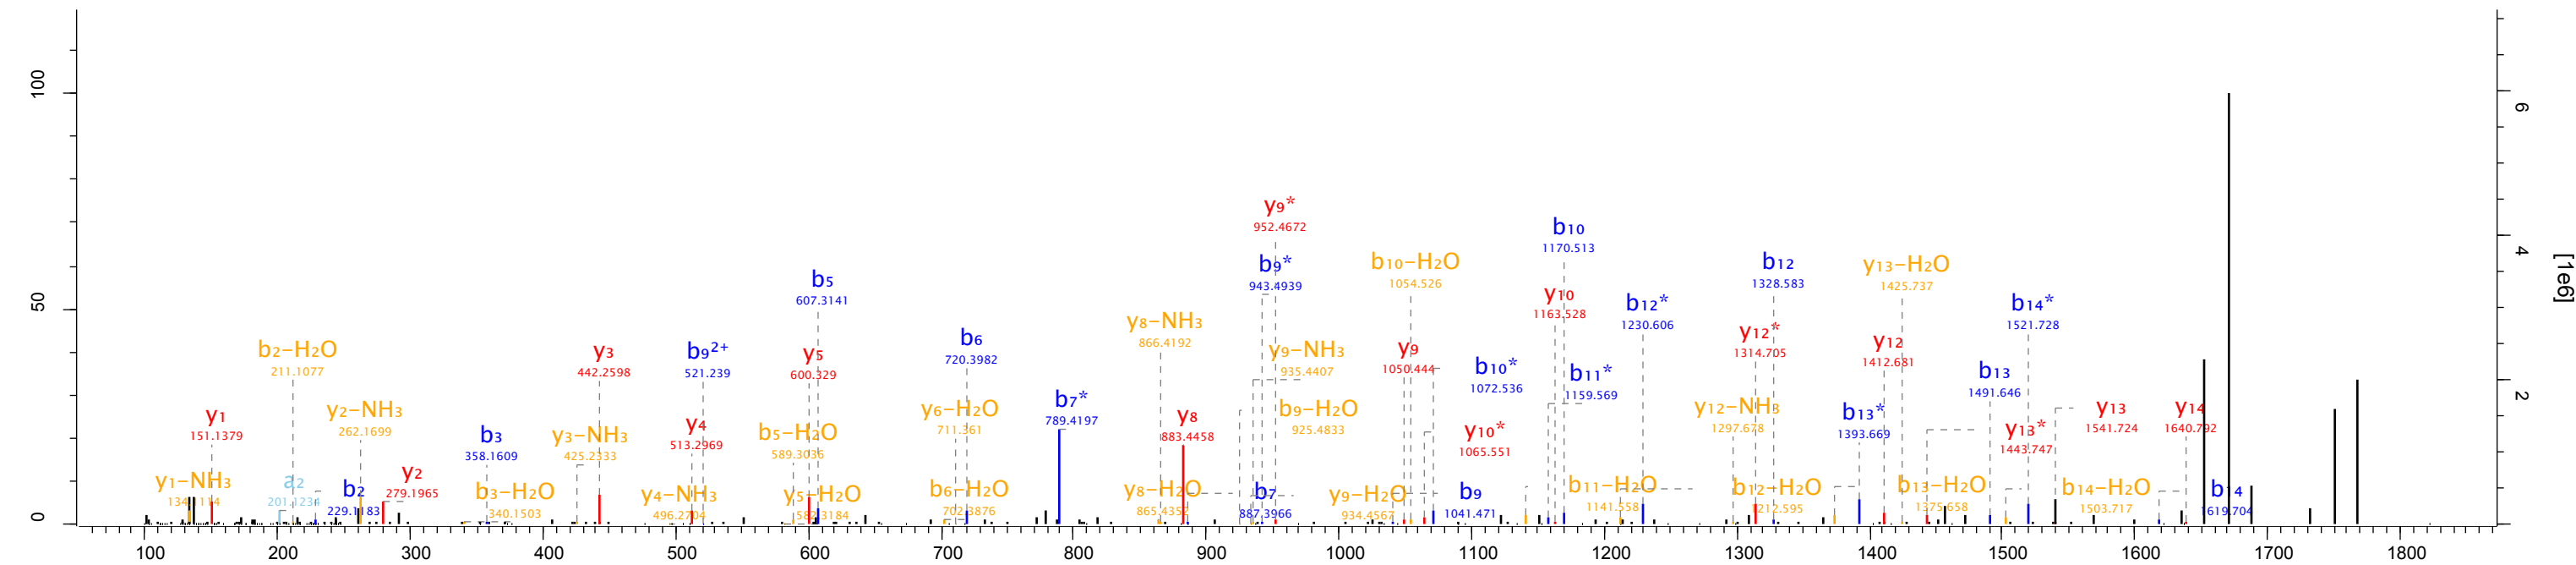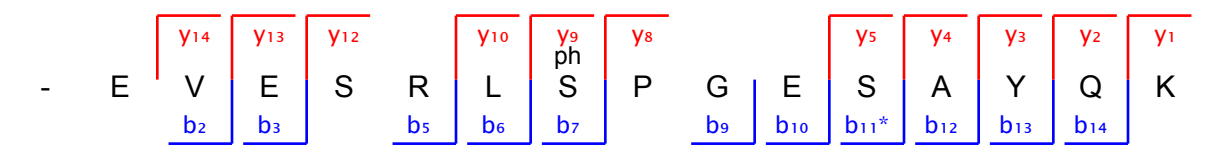

Raw file: 20150812\_A375SR\_Phospho\_BR1\_08  
 Scan: 9398 Method: FTMS; HCD Score: 66.26 m/z: 597.64 Gene names: CHAMP1

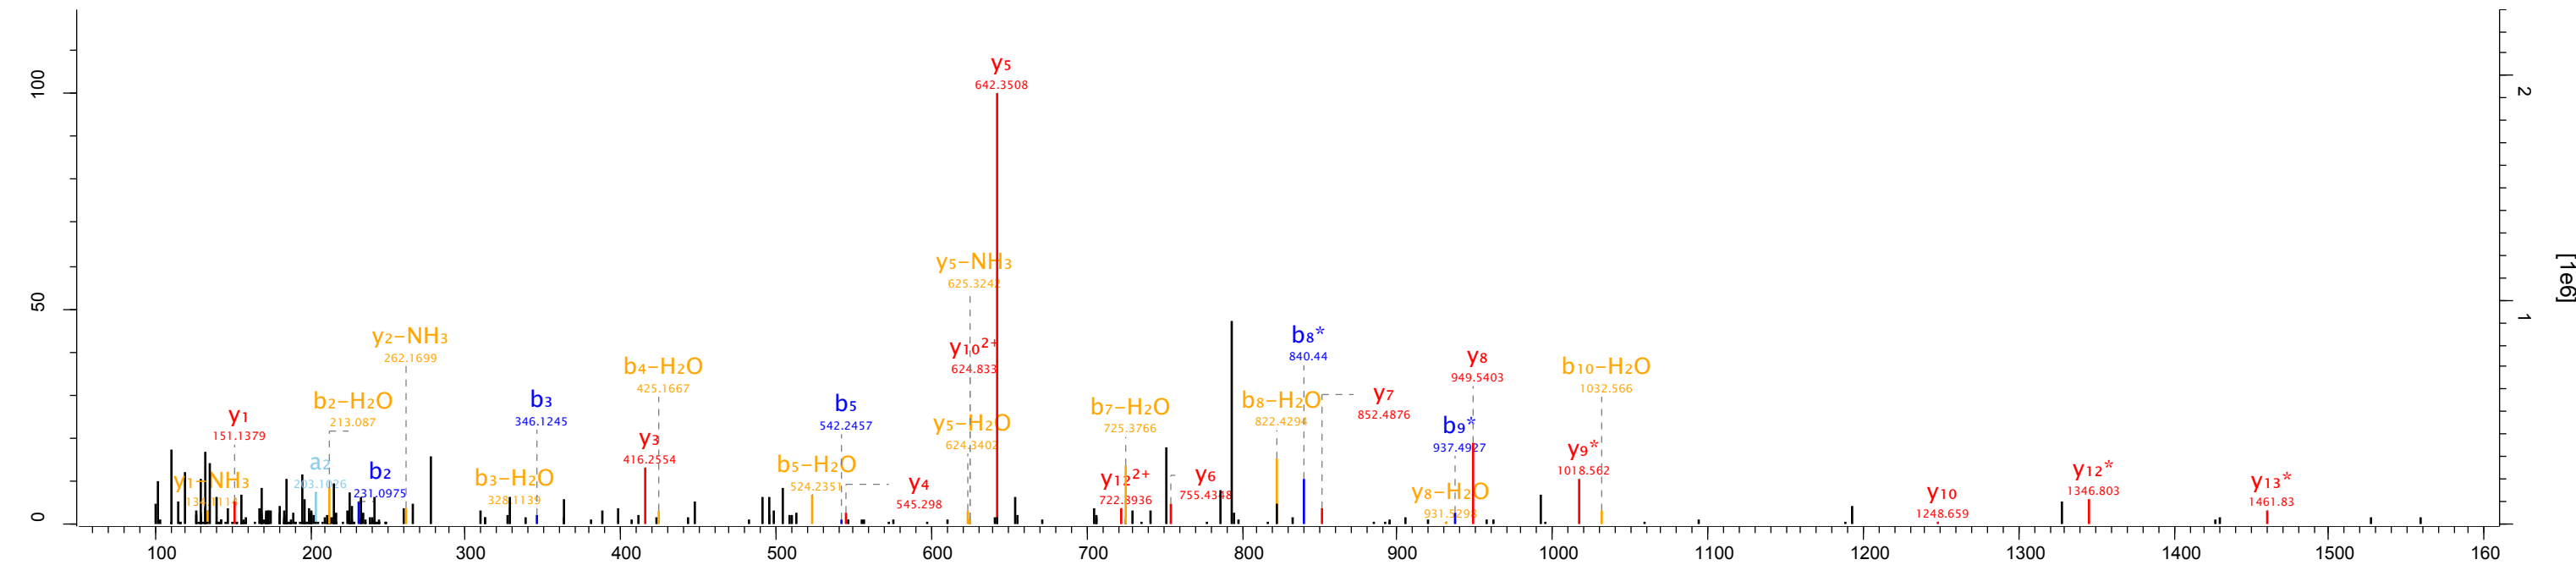

Protein sequence: - E T D P V K S P P L P E H Q K -

Fragmentation sites (b and y ions) are indicated by brackets below the sequence:

- b2: T
- b3: D
- b5: V
- b8\*: P
- b9\*: P

Other ions are labeled above the sequence:

- y13\*: D
- y12\*: P
- y10: K
- y9\*ph: S
- y8: P
- y7: P
- y6: L
- y5: P
- y4: E
- y3: H
- y1: Q



Raw file 20150812\_A375SR\_Phospho\_BR1\_09 Scan 10598 Method FTMS; HCD Score 71 m/z 691.33 Gene names ANK3

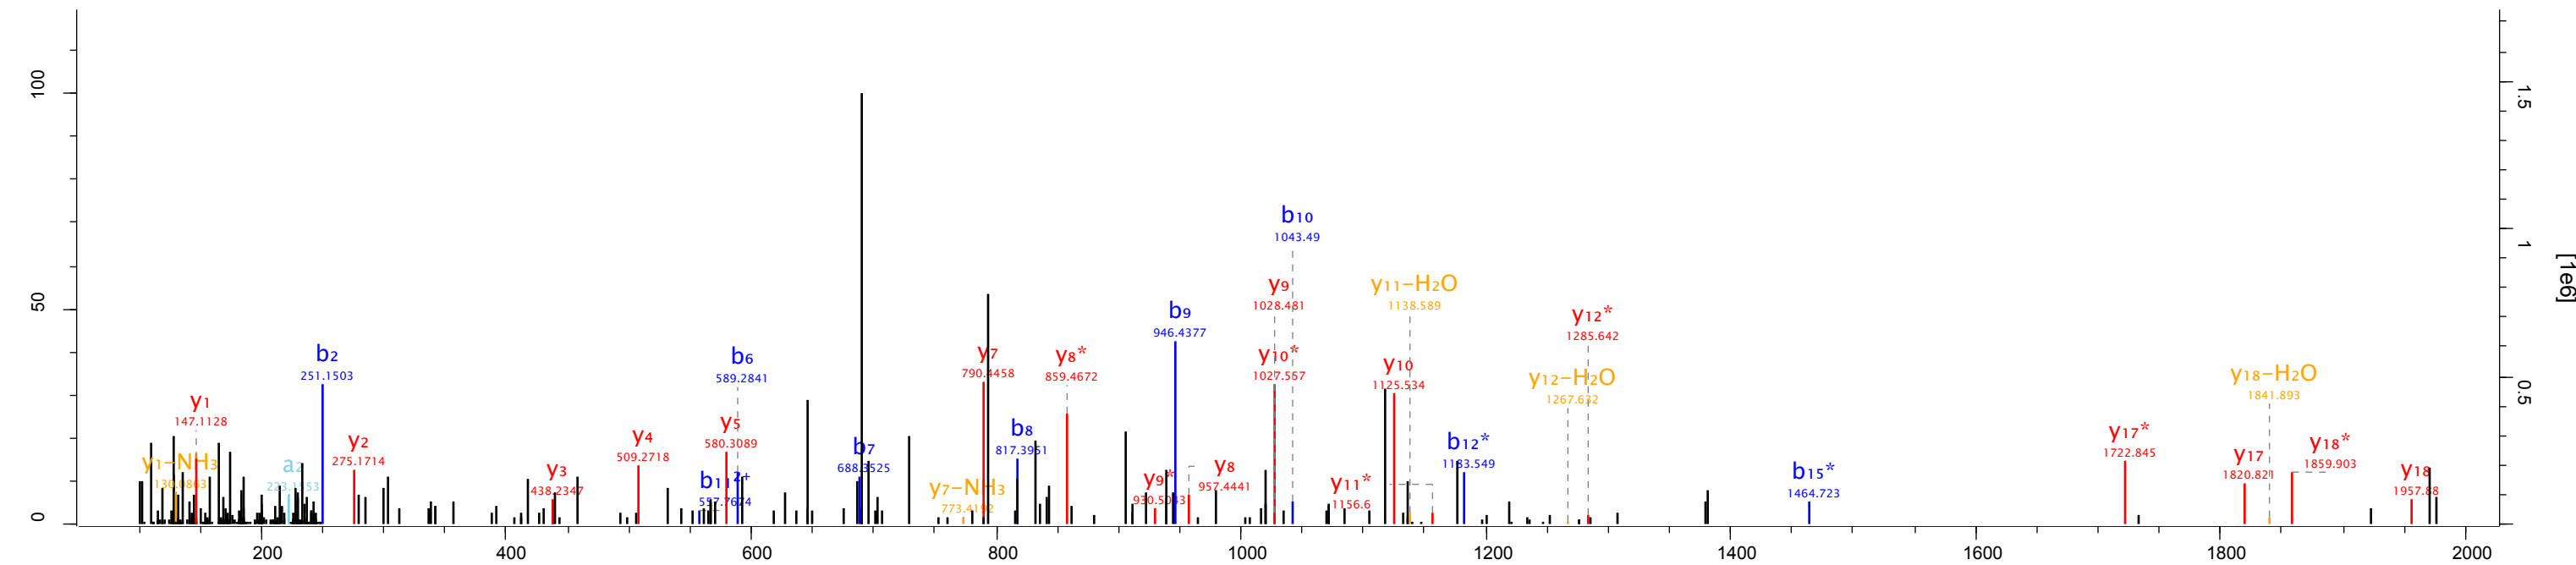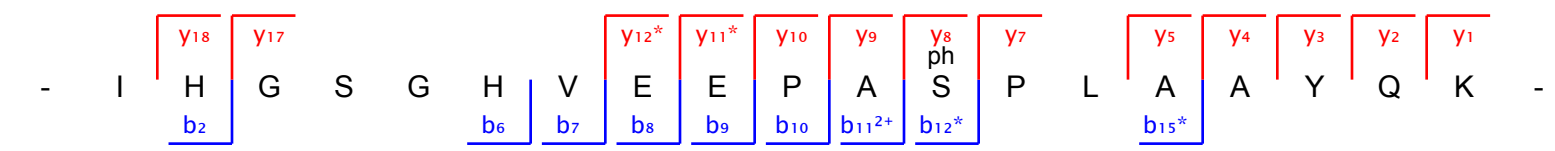

Raw file 20150812\_A375SR\_Phospho\_BR1\_09 Scan 11268 Method FTMS; HCD Score 153.48 m/z 815.06 Gene names SCAF1

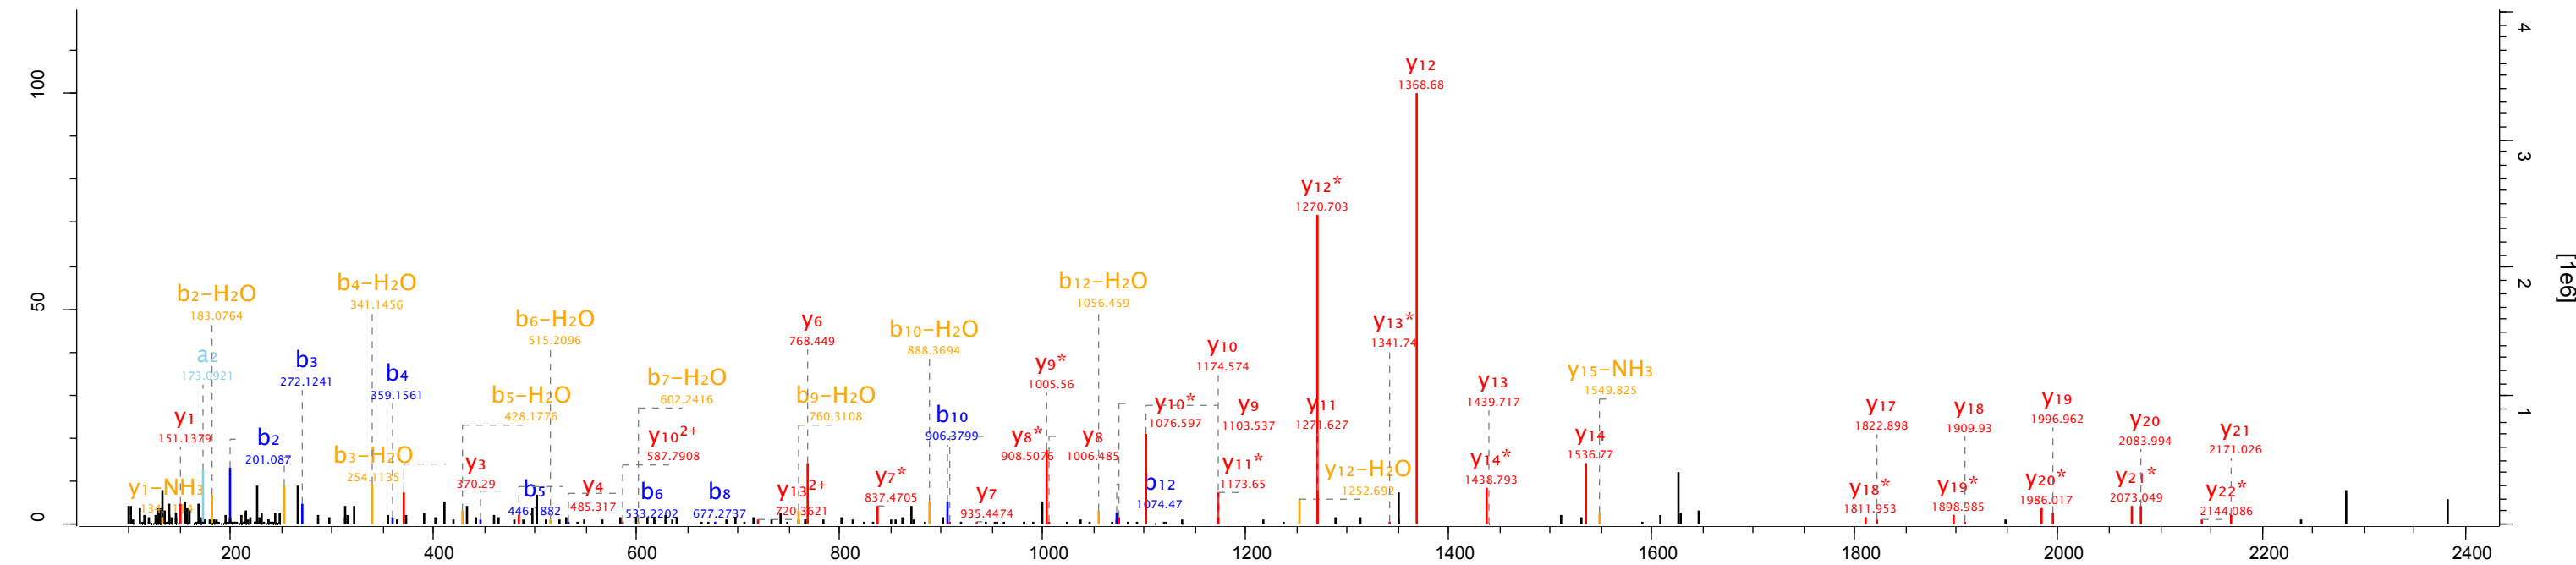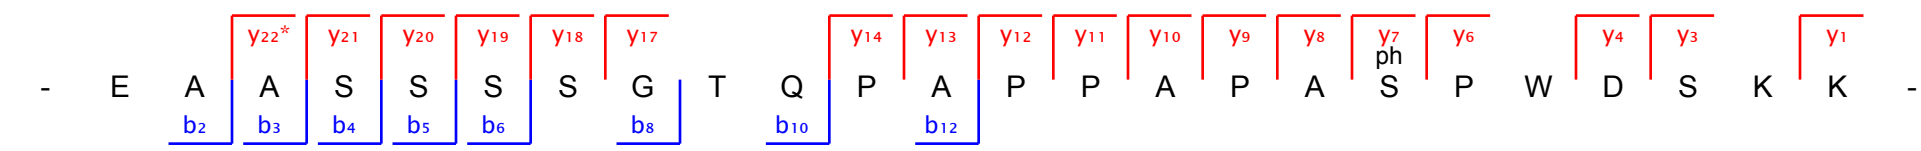

Raw file 20150812\_A375SR\_Phospho\_BR1\_09 Scan 11988 Method FTMS; HCD Score 83.35 m/z 504.61 Gene names FUBP3

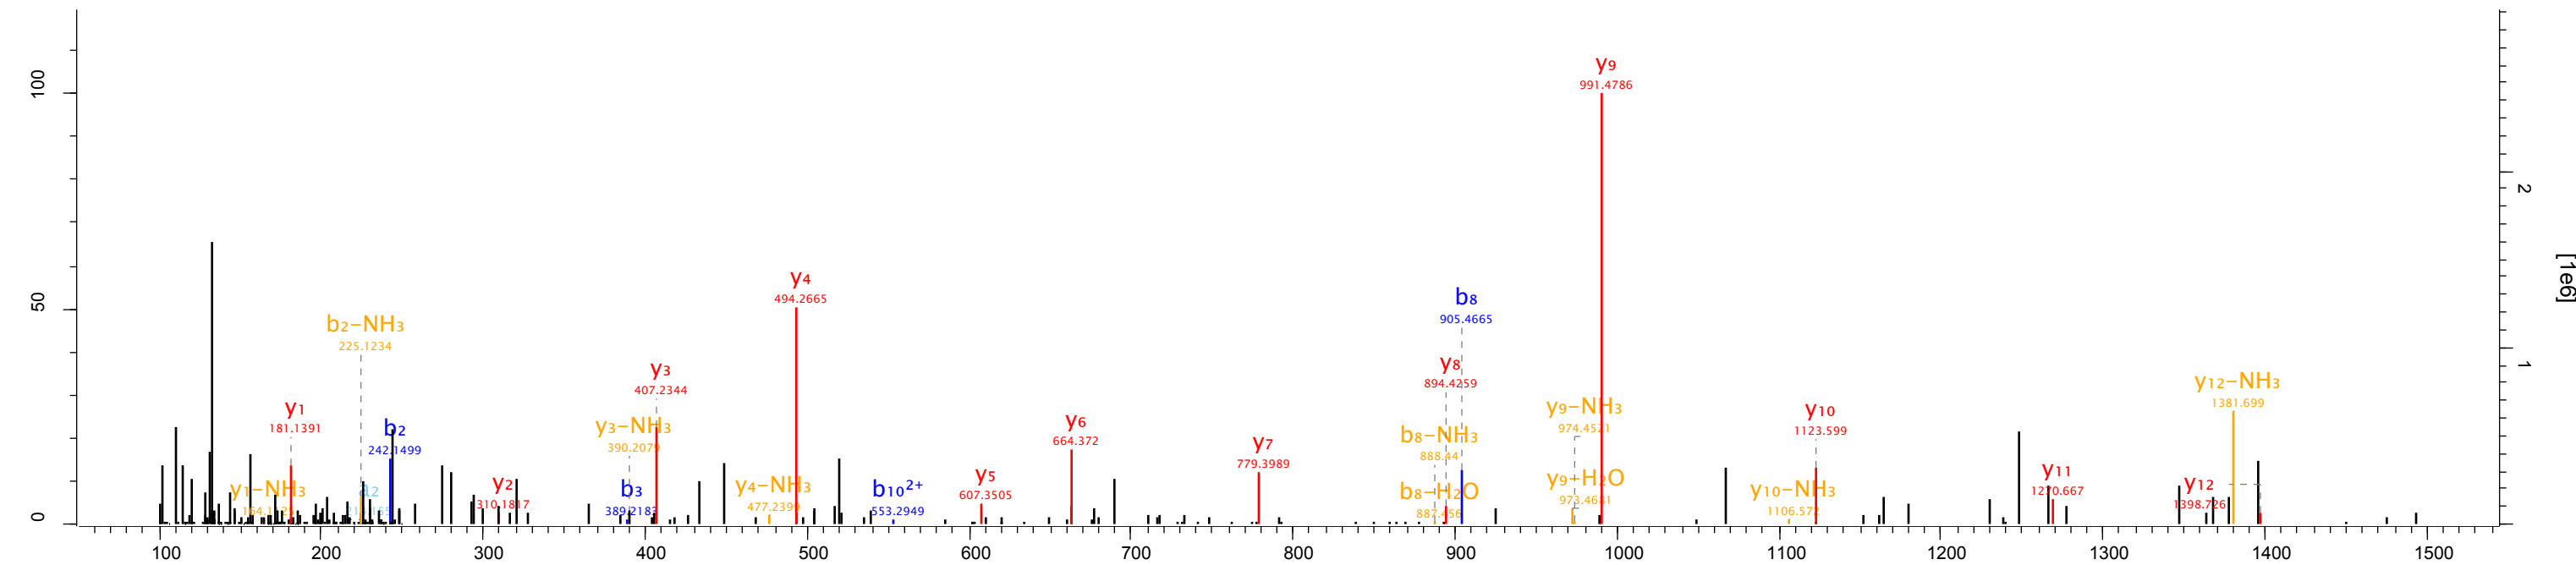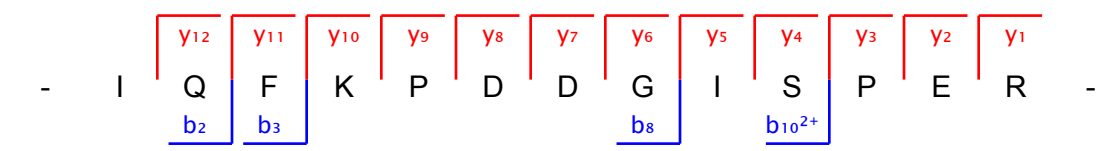

Raw file: 20150812\_A375SR\_Phospho\_BR1\_09  
 Scan: 12478 Method: FTMS; HCD Score: 137.58 m/z: 570.27 Gene names: PRKRA

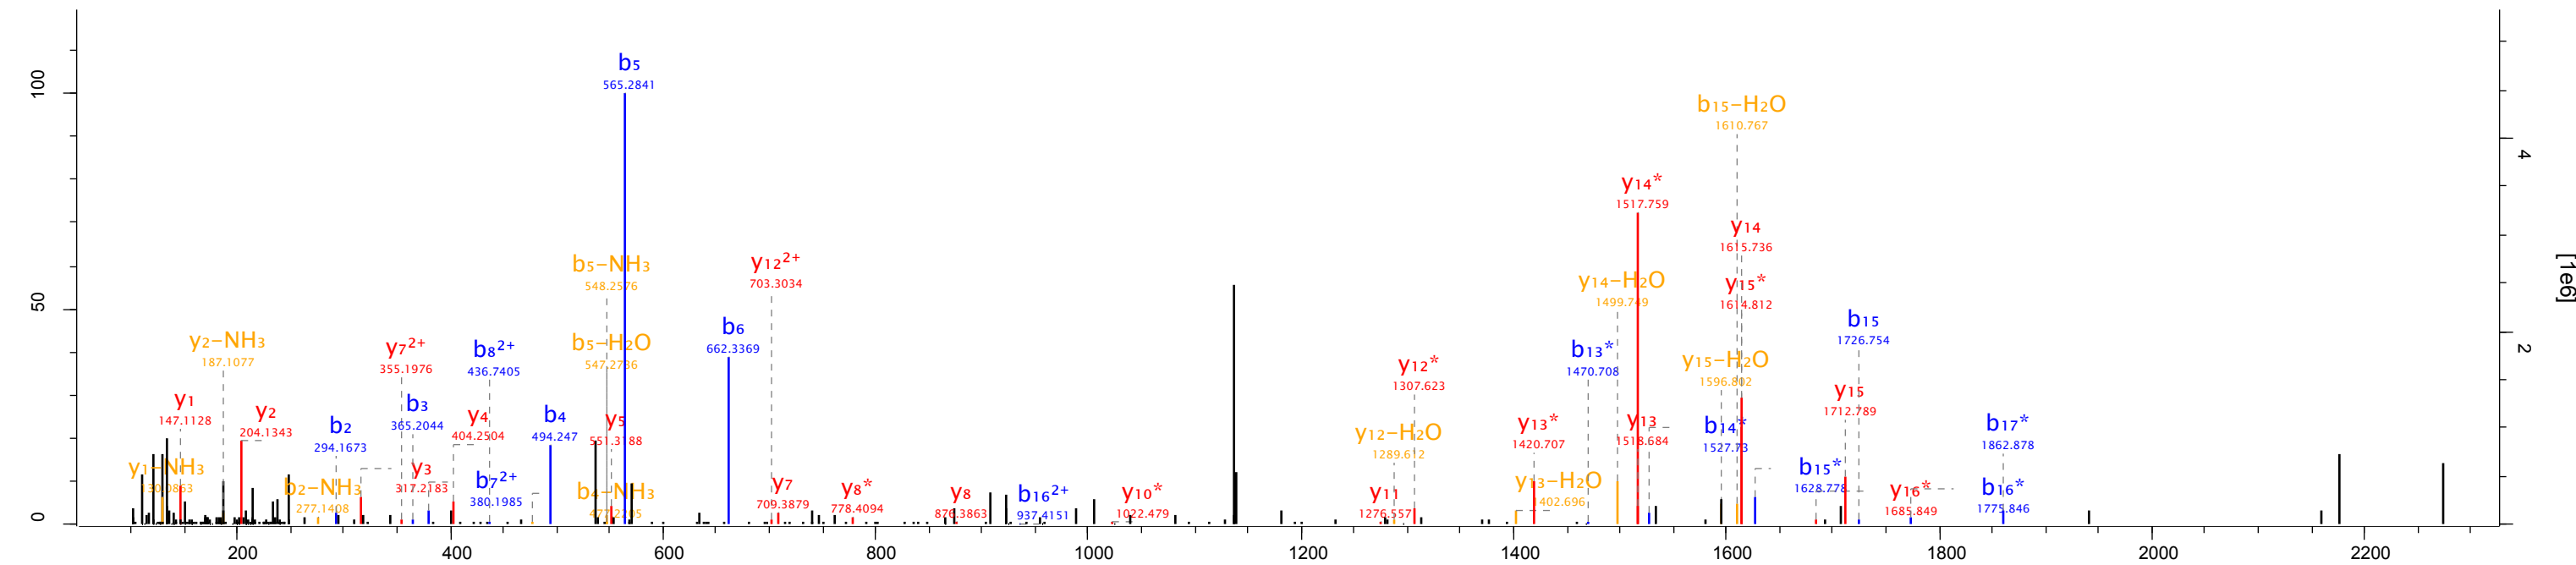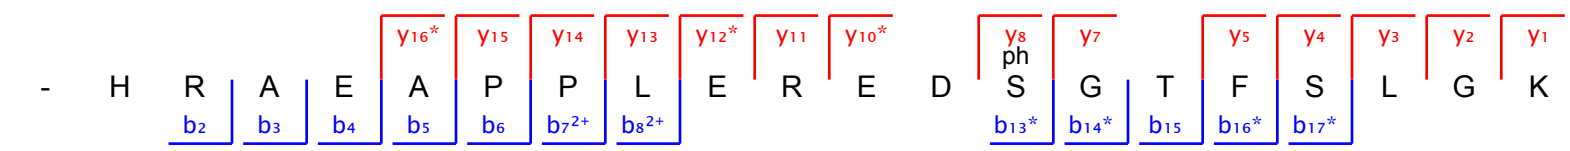

Raw file  
 20150812\_A375SR\_Phospho\_BR1\_09  
 Scan 13018 Method FTMS; HCD Score 247.76 m/z 663.61 Gene names HMGA1

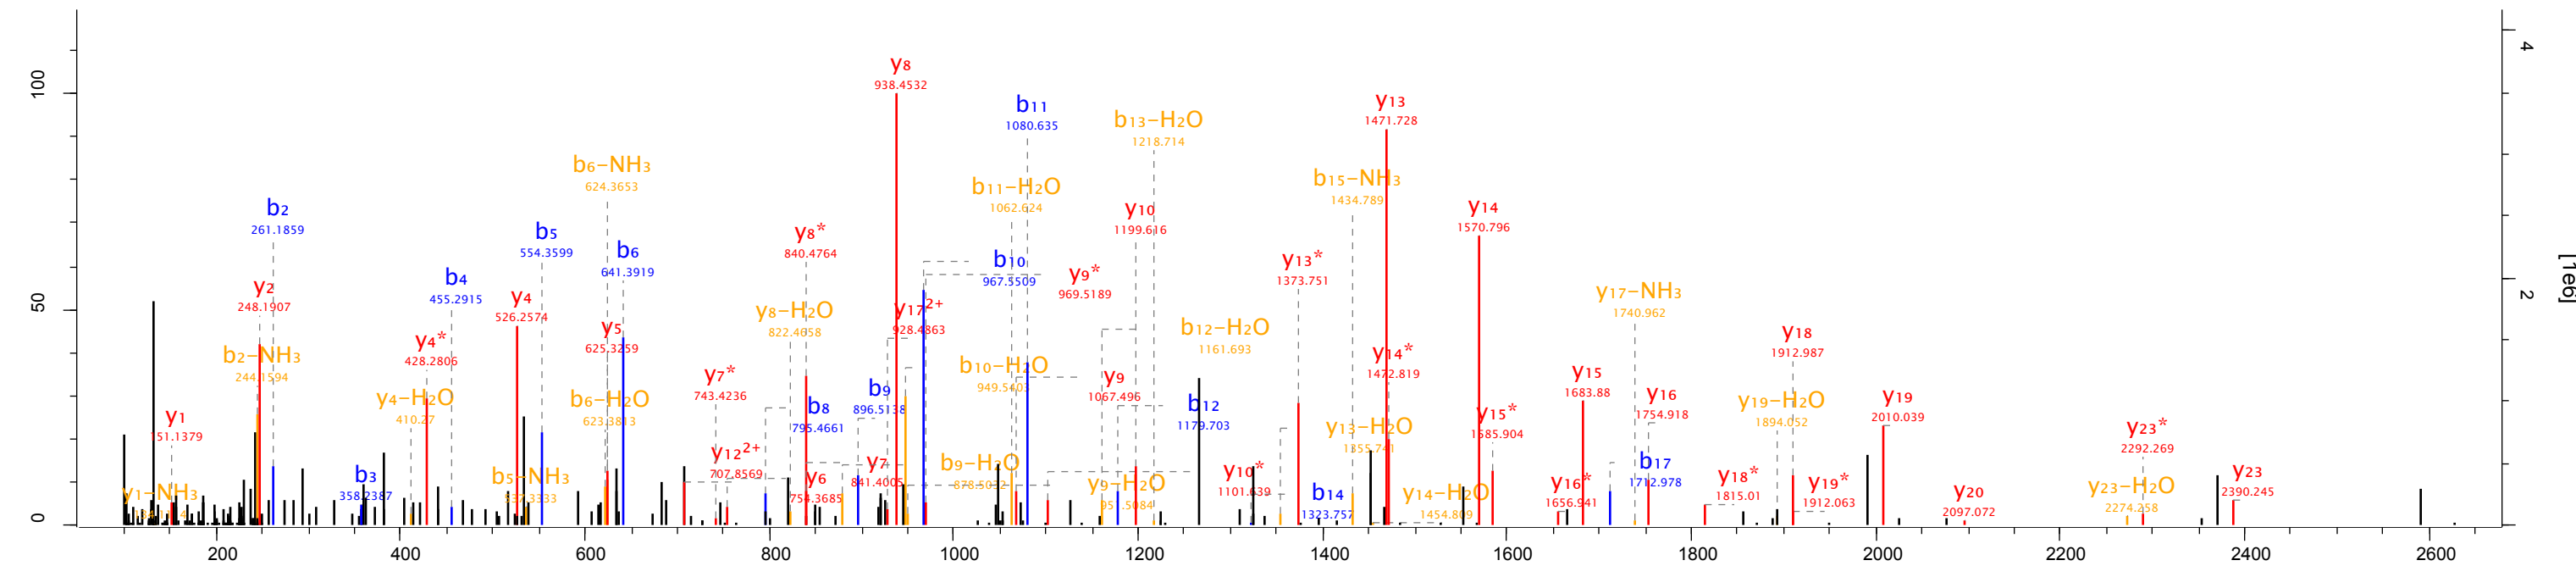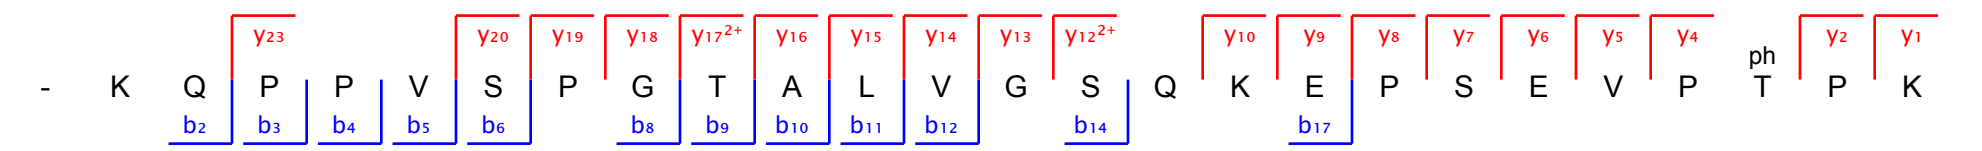

Raw file  
 20150812\_A375SR\_Phospho\_BR1\_09  
 Scan 13318 Method FTMS; HCD Score 132.28 m/z 619.03 Gene names HIRIP3

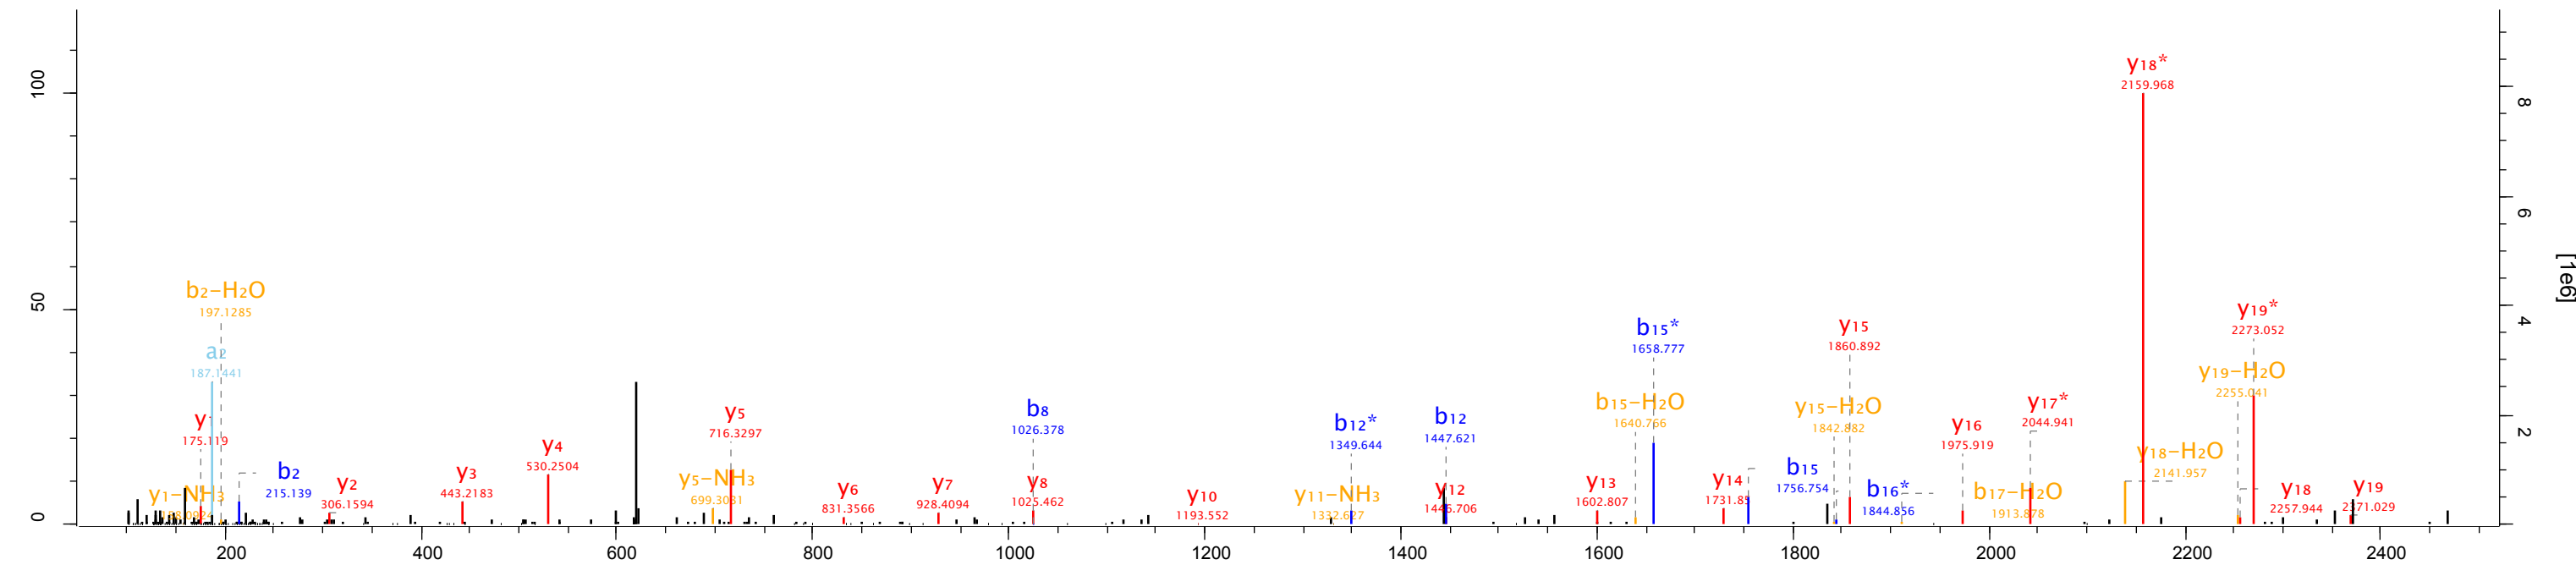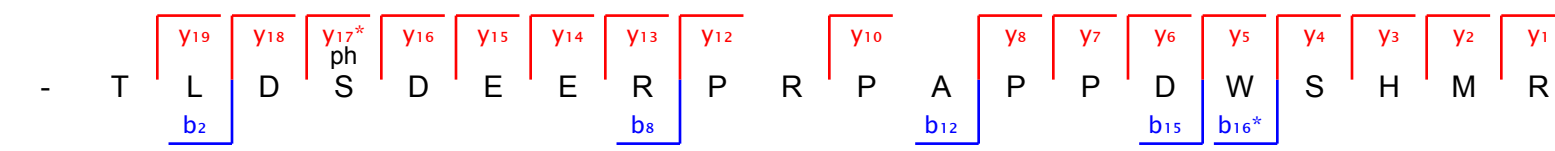

Raw file: 20150812\_A375SR\_Phospho\_BR1\_09  
 Scan: 13558 Method: FTMS; HCD Score: 131.45 m/z: 651.31 Gene names: UIMC1

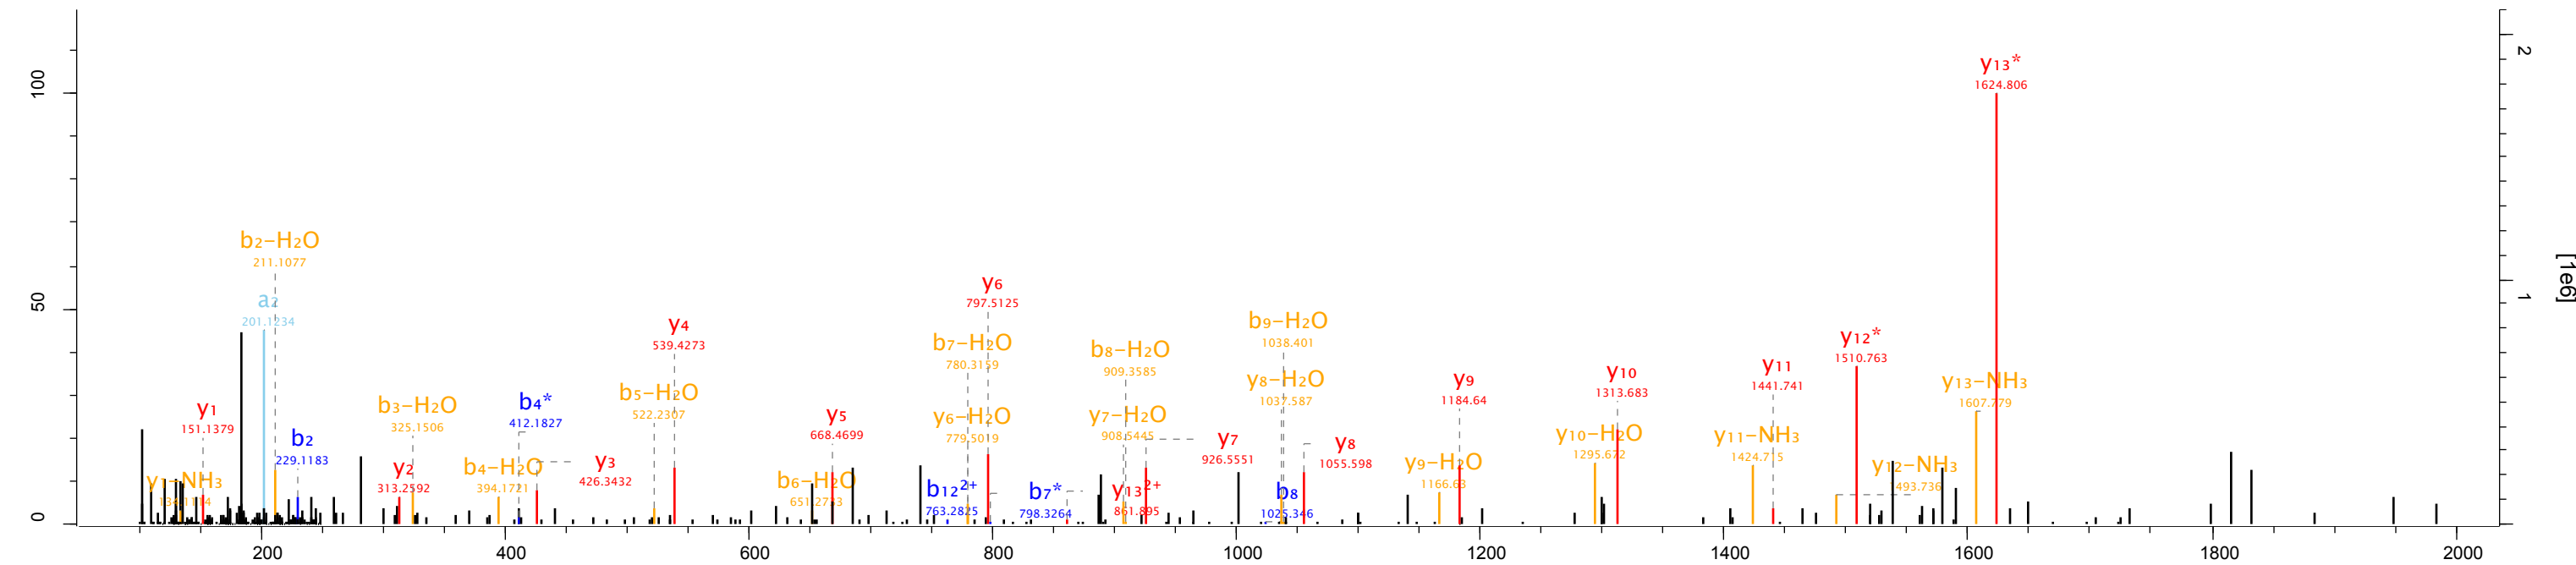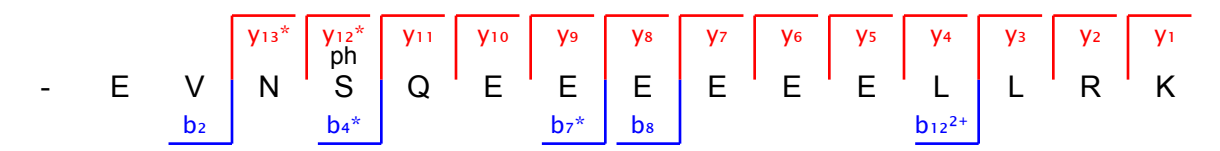

Raw file: 20150812\_A375SR\_Phospho\_BR1\_09  
 Scan: 1578 Method: FTMS; HCD Score: 265.08 m/z: 803.81 Gene names: HDGFRP2

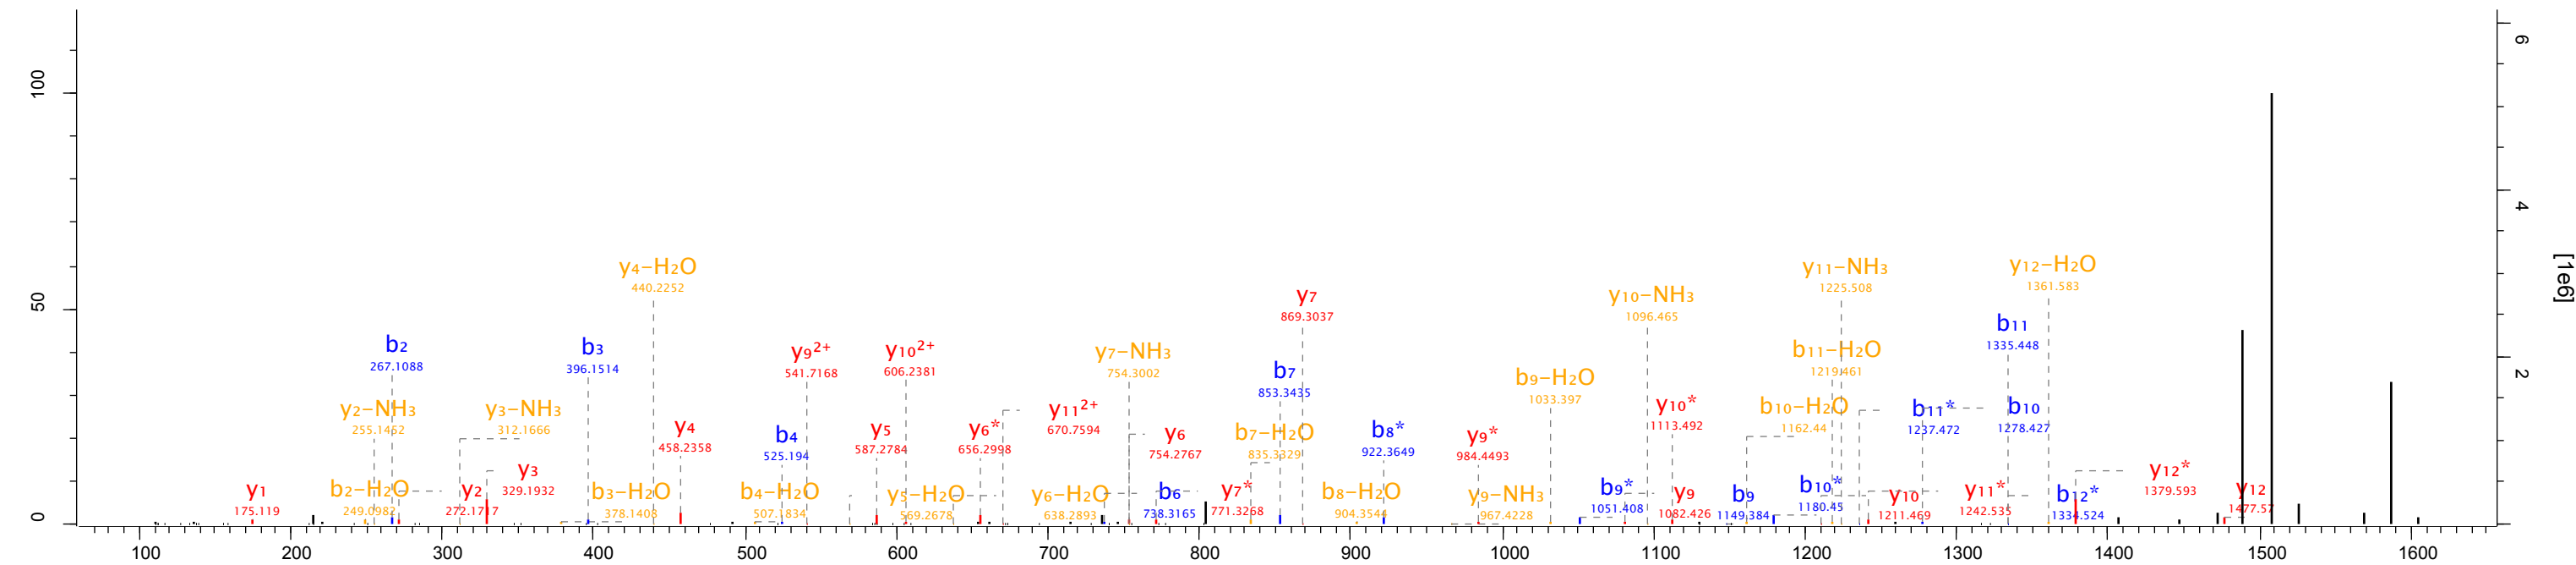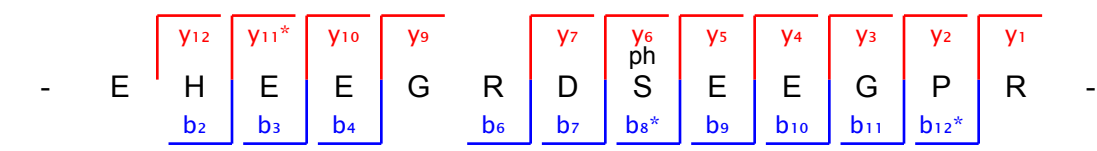



Raw file: 20150812\_A375SR\_Phospho\_BR1\_09  
 Scan: 17978 Method: FTMS; HCD Score: 322.67 m/z: 929.11 Gene names: WNK1

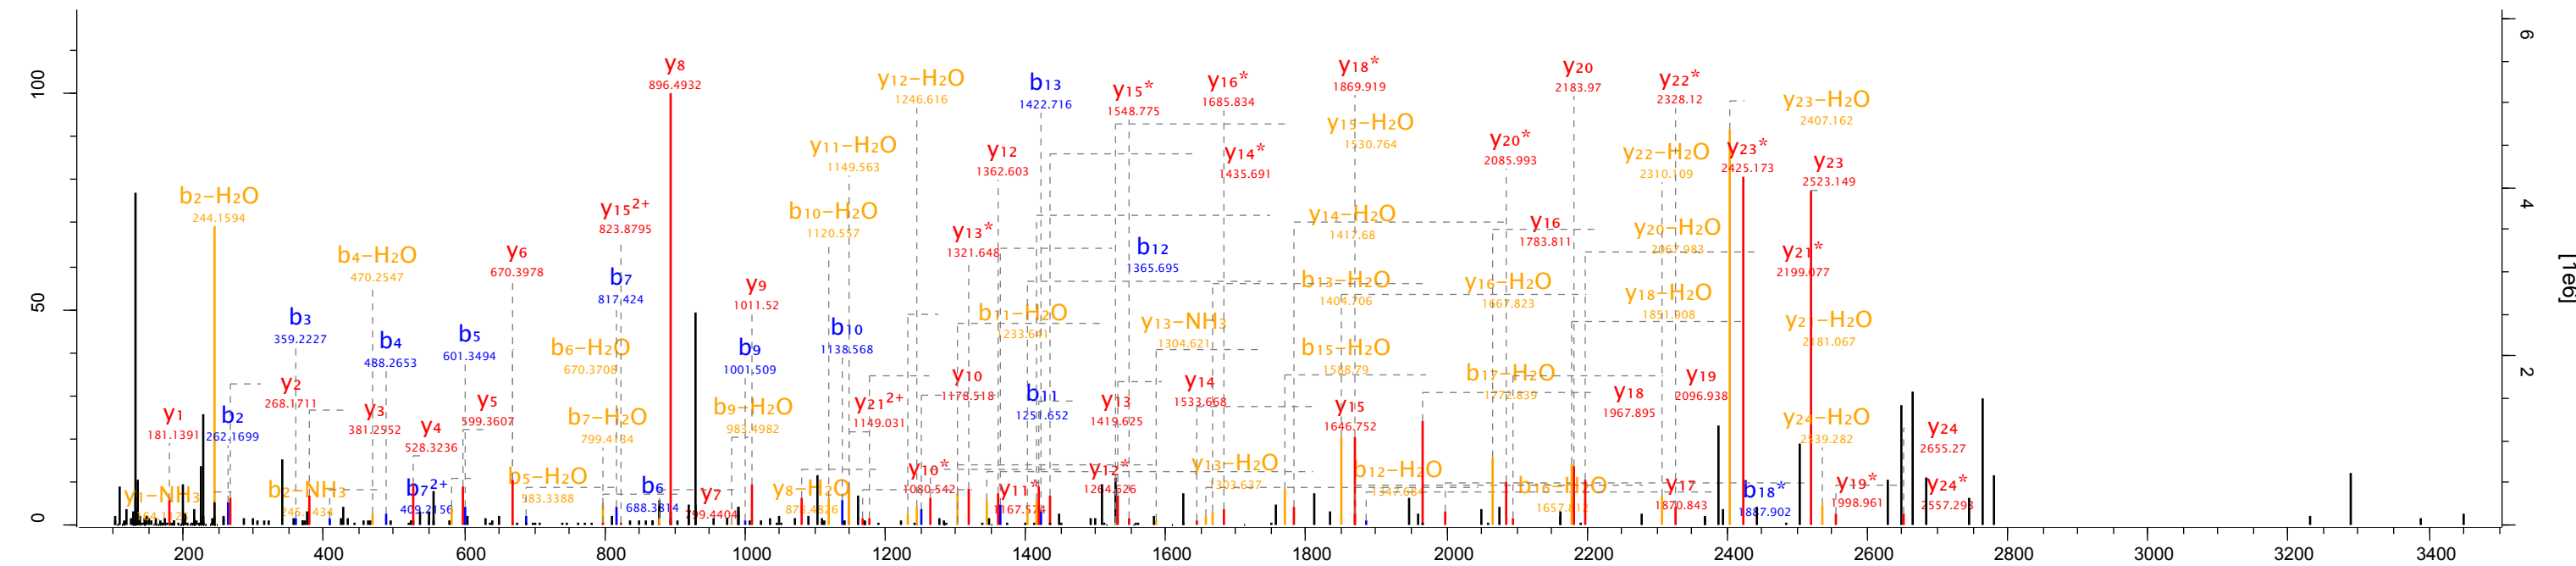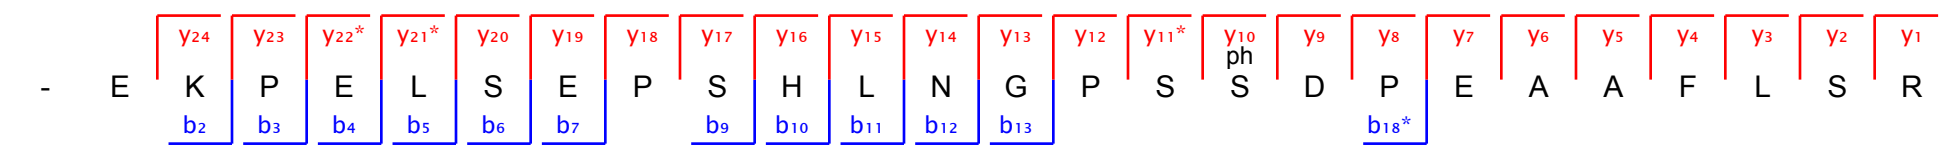

Raw file: 20150812\_A375SR\_Phospho\_BR1\_09  
 Scan: 2168 Method: FTMS; HCD Score: 122.53 m/z: 652.52 Gene names: PHF6

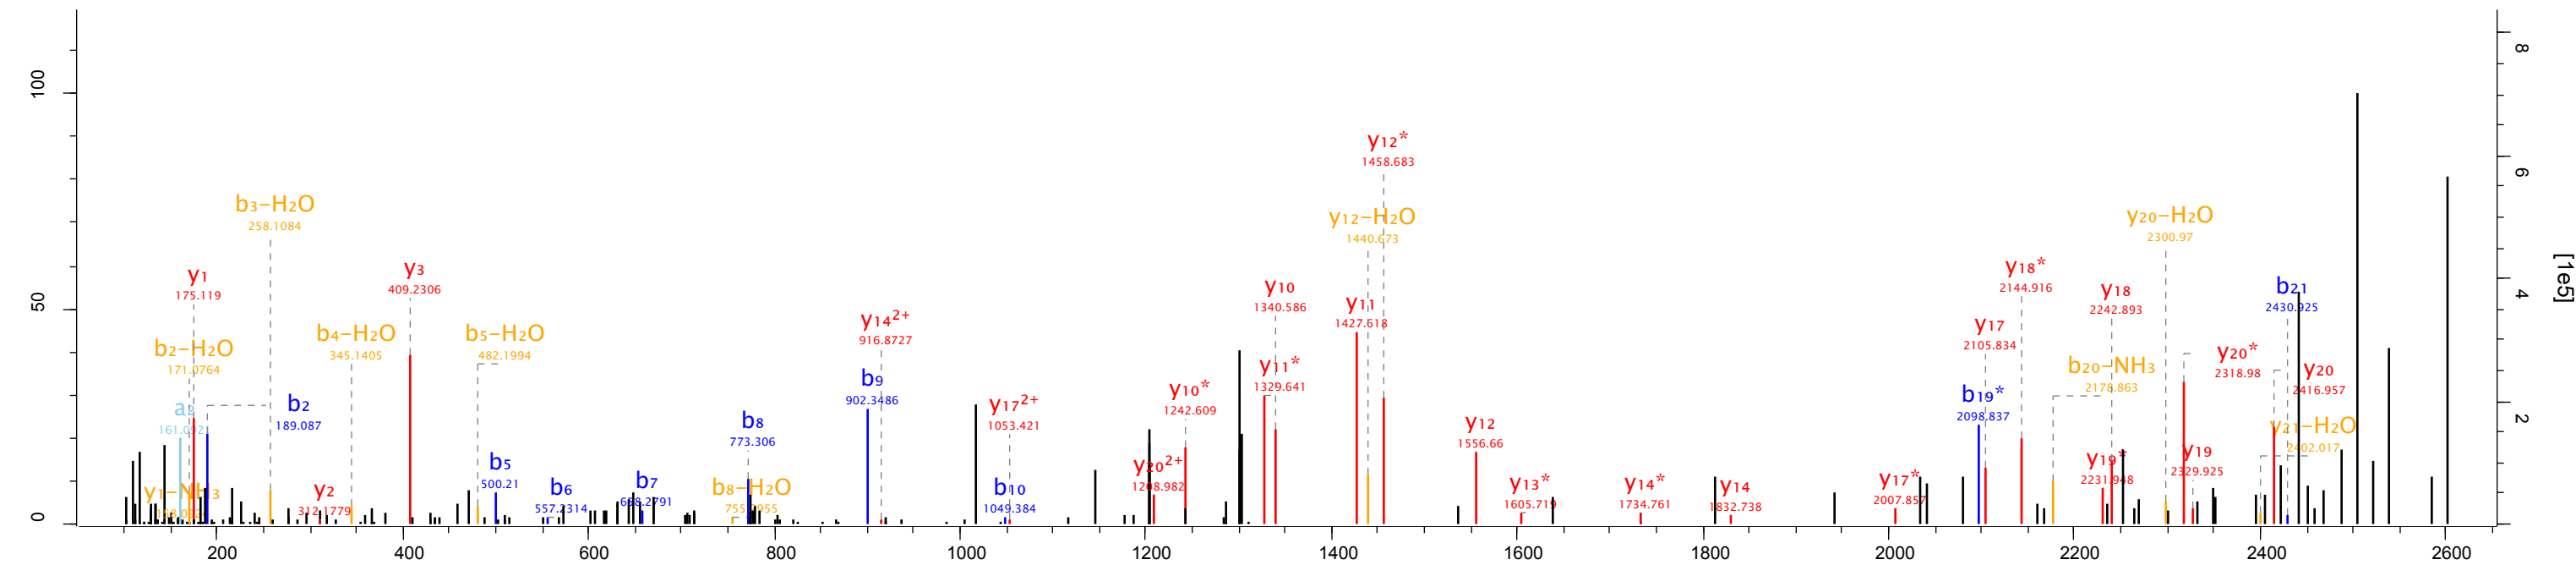

- S T S S H G T D E M E S S Y R D R S P H R -

Fragmentation mapping (b and y ions) is shown below the sequence:

- b ions (blue boxes):** b<sub>2</sub> (under T), b<sub>5</sub> (under H), b<sub>6</sub> (under G), b<sub>7</sub> (under T), b<sub>8</sub> (under D), b<sub>9</sub> (under E), b<sub>10</sub> (under M), b<sub>19</sub>\* (under S), b<sub>21</sub> (under H).
- y ions (red boxes):** y<sub>20</sub> (over S), y<sub>19</sub> (over S), y<sub>18</sub> (over H), y<sub>17</sub> (over G), y<sub>14</sub> (over E), y<sub>13</sub>\* OX (over M), y<sub>12</sub> (over E), y<sub>11</sub> (over S), y<sub>10</sub> ph (over S), y<sub>3</sub> (over P), y<sub>2</sub> (over H), y<sub>1</sub> (over R).

Raw file Scan Method Score m/z Gene names  
 20150812\_A375SR\_Phospho\_BR1\_09 25708 FTMS; HCD 123.62 842.38 ANLN

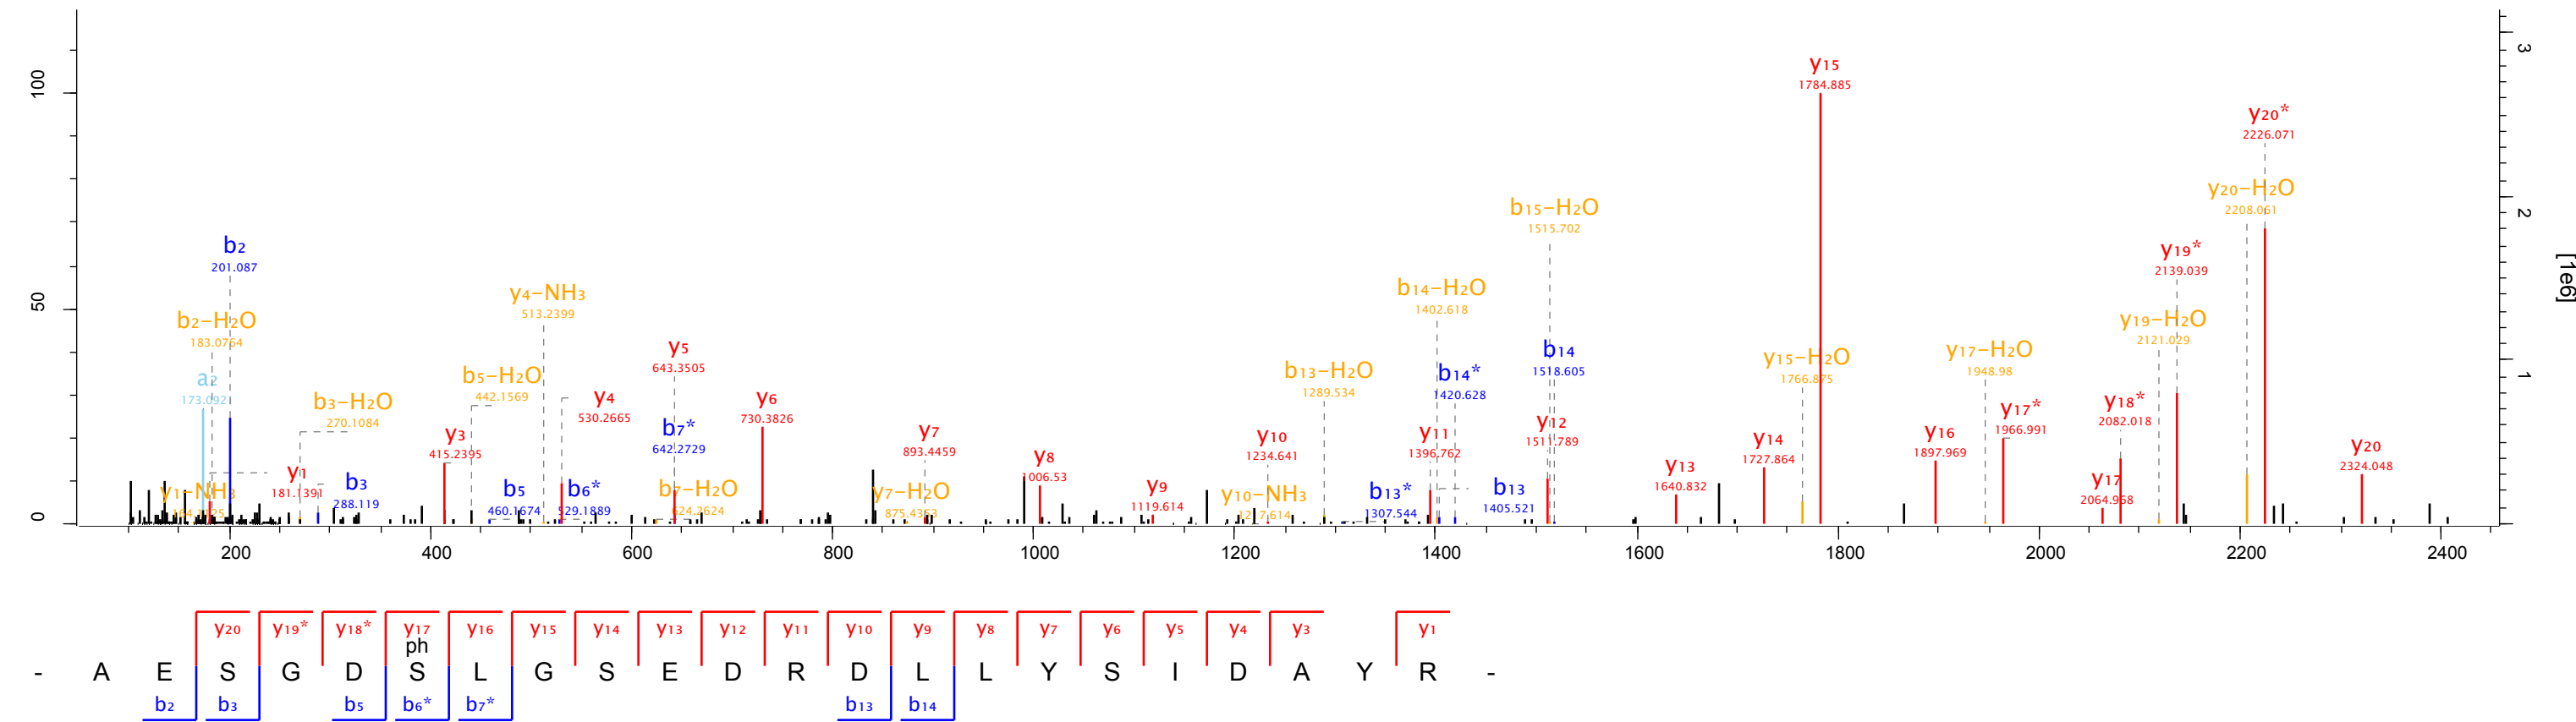

Raw file 20150812\_A375SR\_Phospho\_BR1\_09 Scan 27708 Method FTMS; HCD Score 70.8 m/z 753.37 Gene names RPRD2

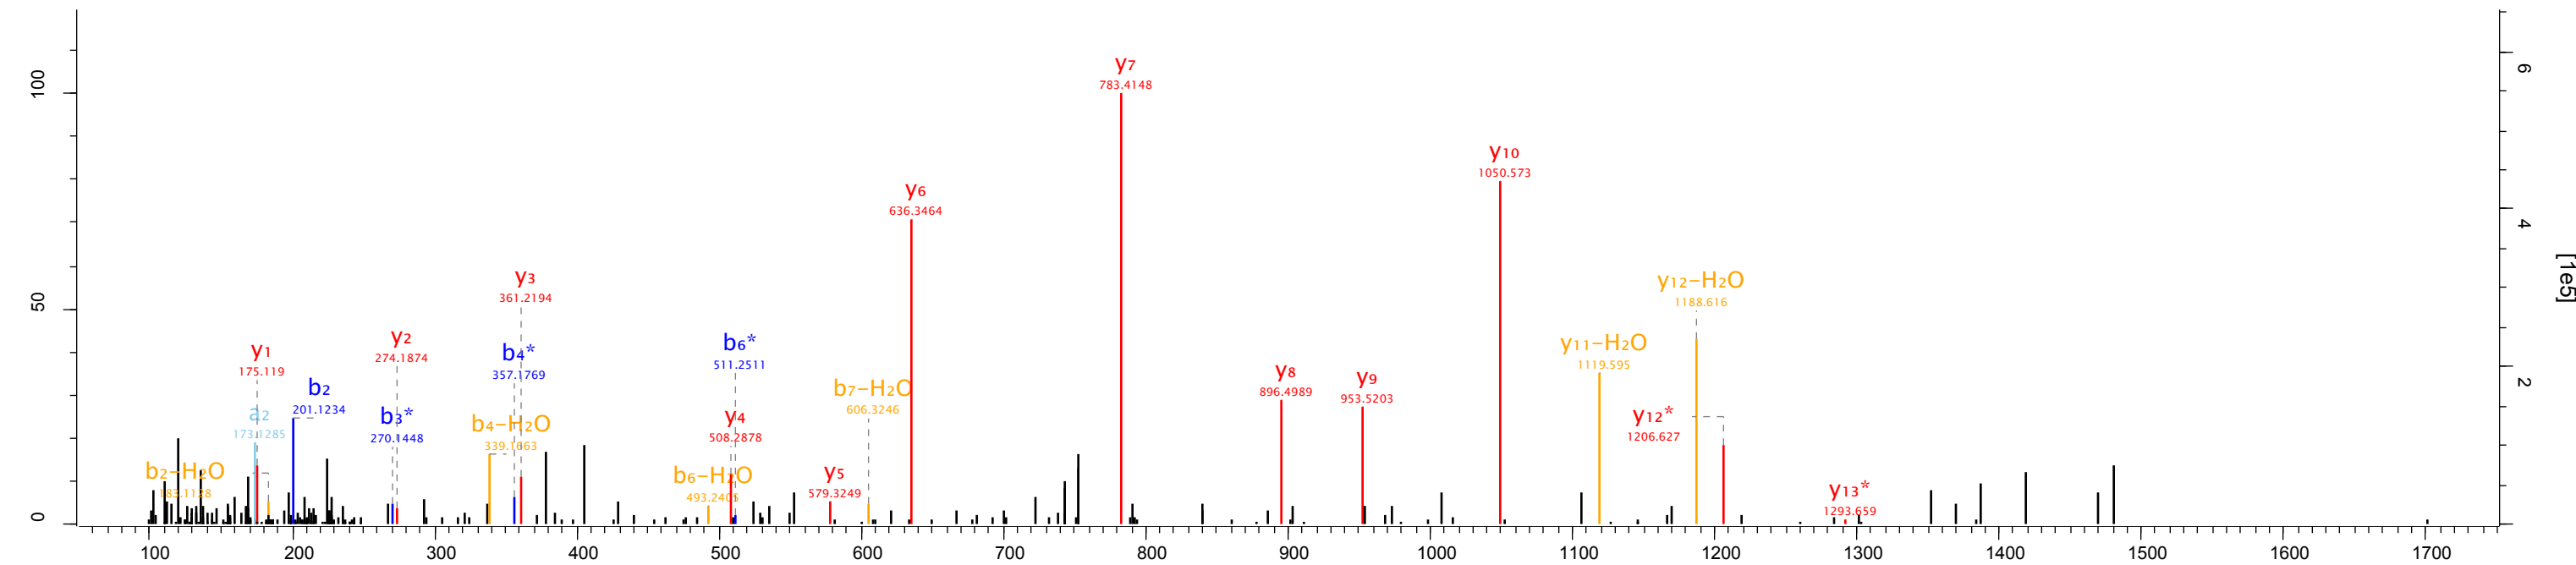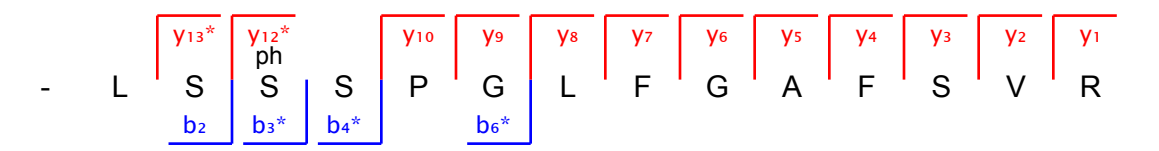

Raw file Scan Method Score m/z Gene names  
 20150812\_A375SR\_Phospho\_BR1\_09 3628 FTMS; HCD 93.48 520.25 ATRX

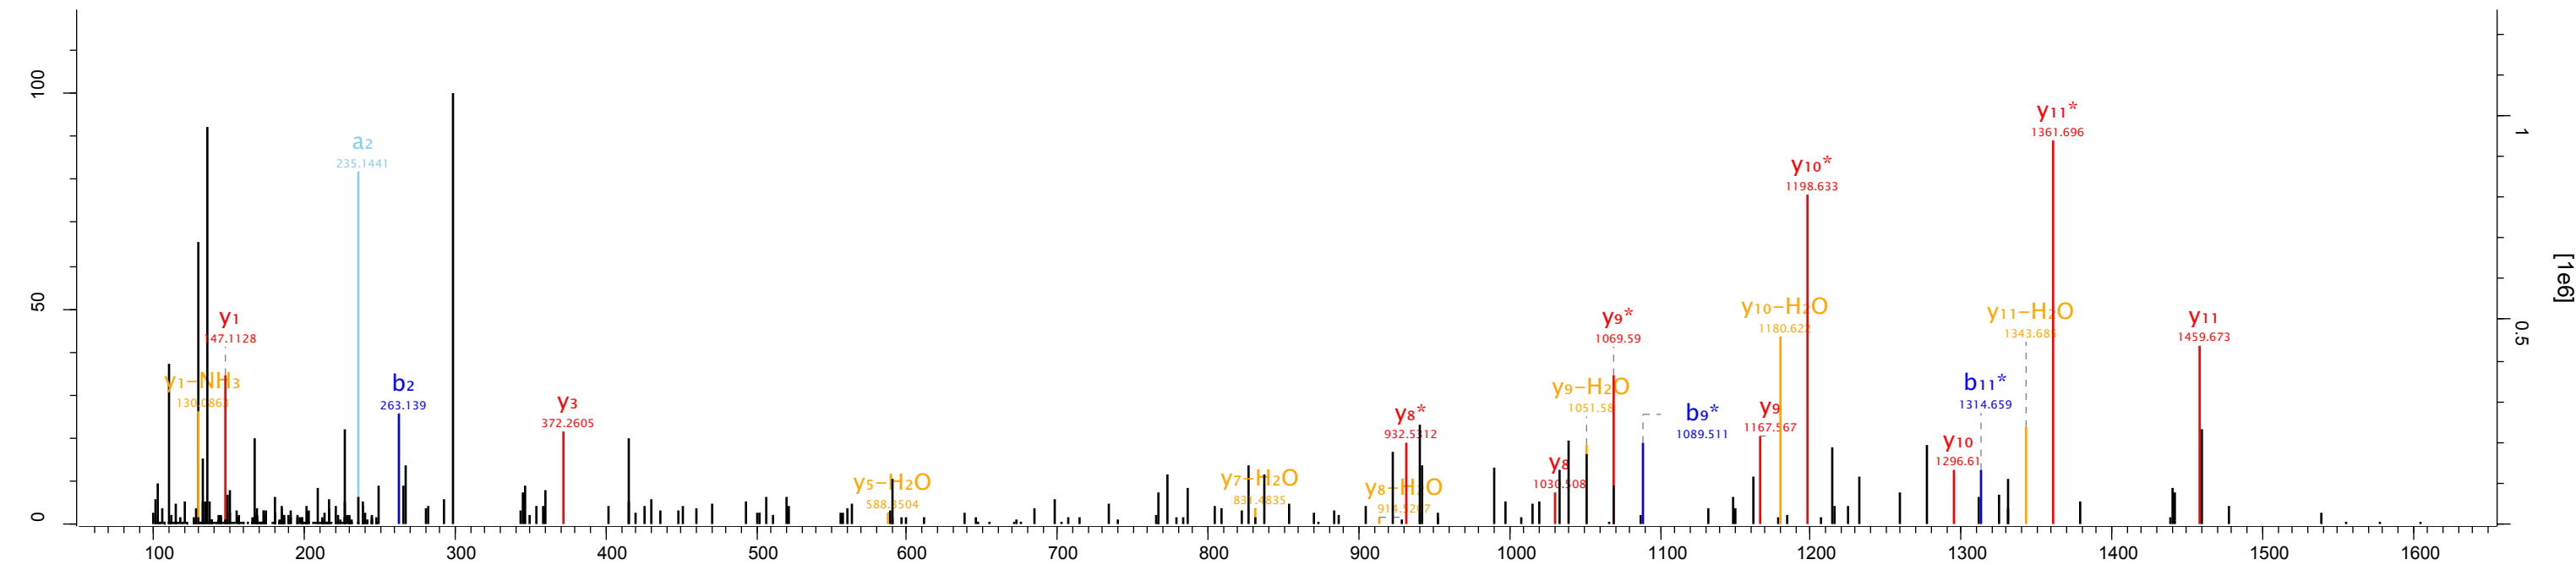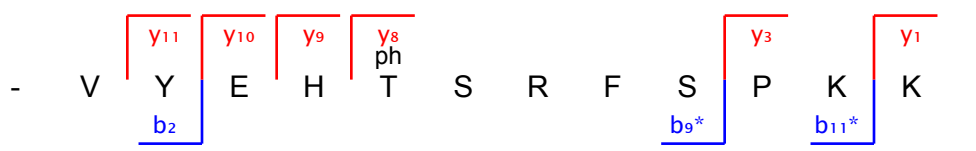

Raw file: 20150812\_A375SR\_Phospho\_BR1\_09  
 Scan: 4528 Method: FTMS; HCD Score: 57.6 m/z: 519.96 Gene names: CRTCI

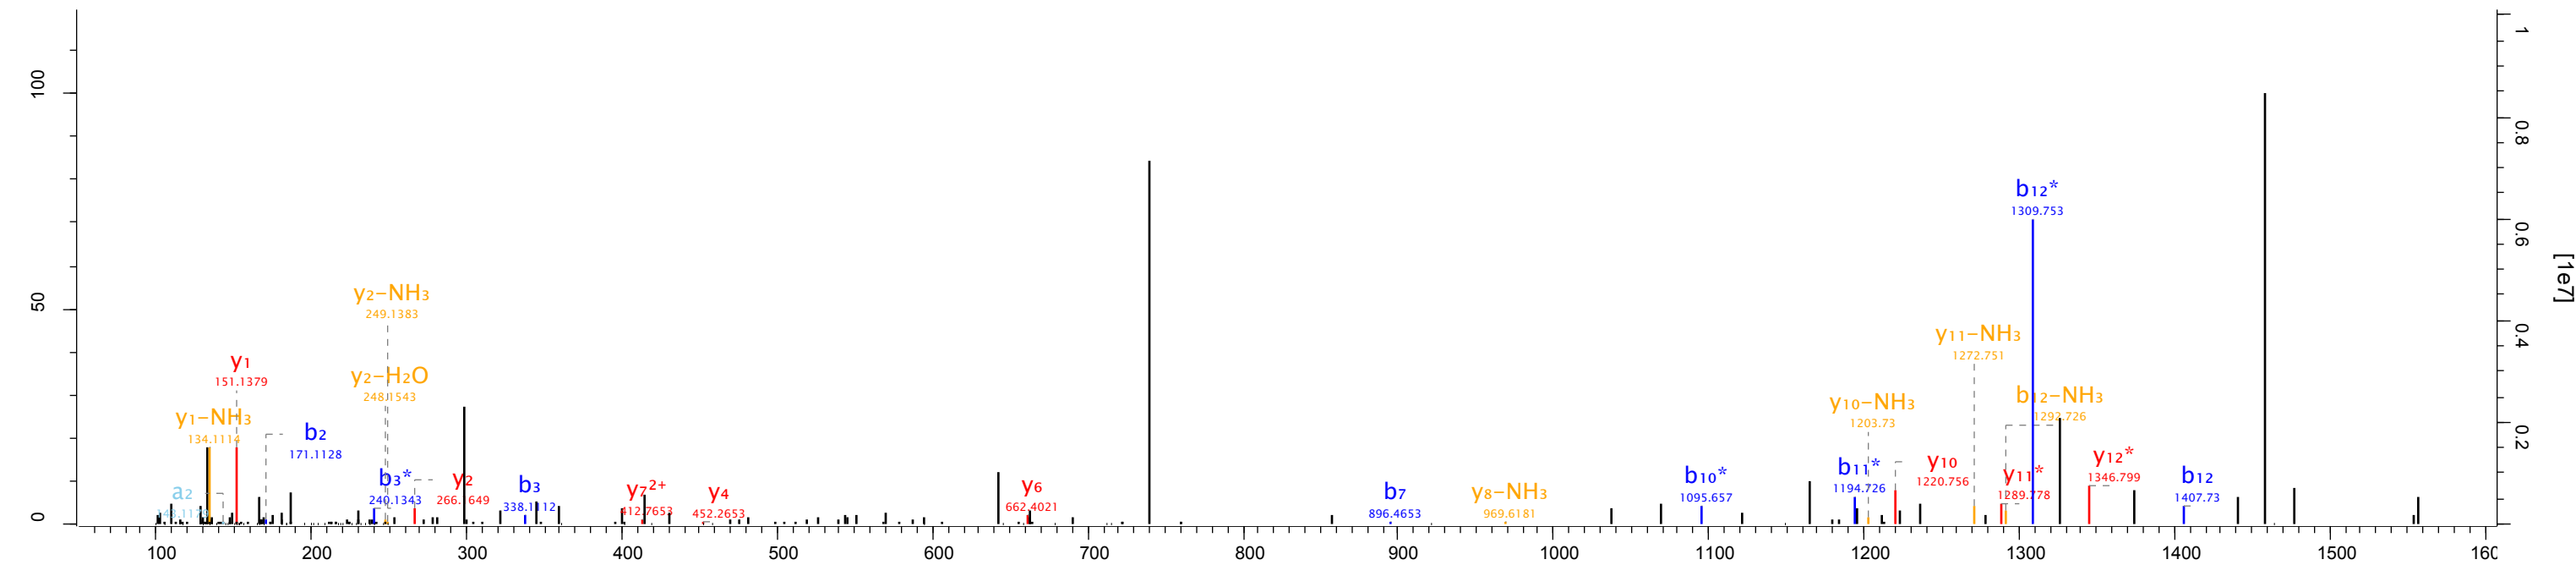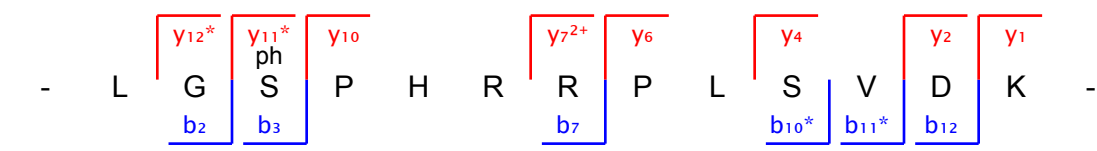

Raw file: 20150812\_A375SR\_Phospho\_BR1\_09  
 Scan: 5058  
 Method: FTMS; HCD  
 Score: 120.56  
 m/z: 602.93  
 Gene names: HDGFRP2

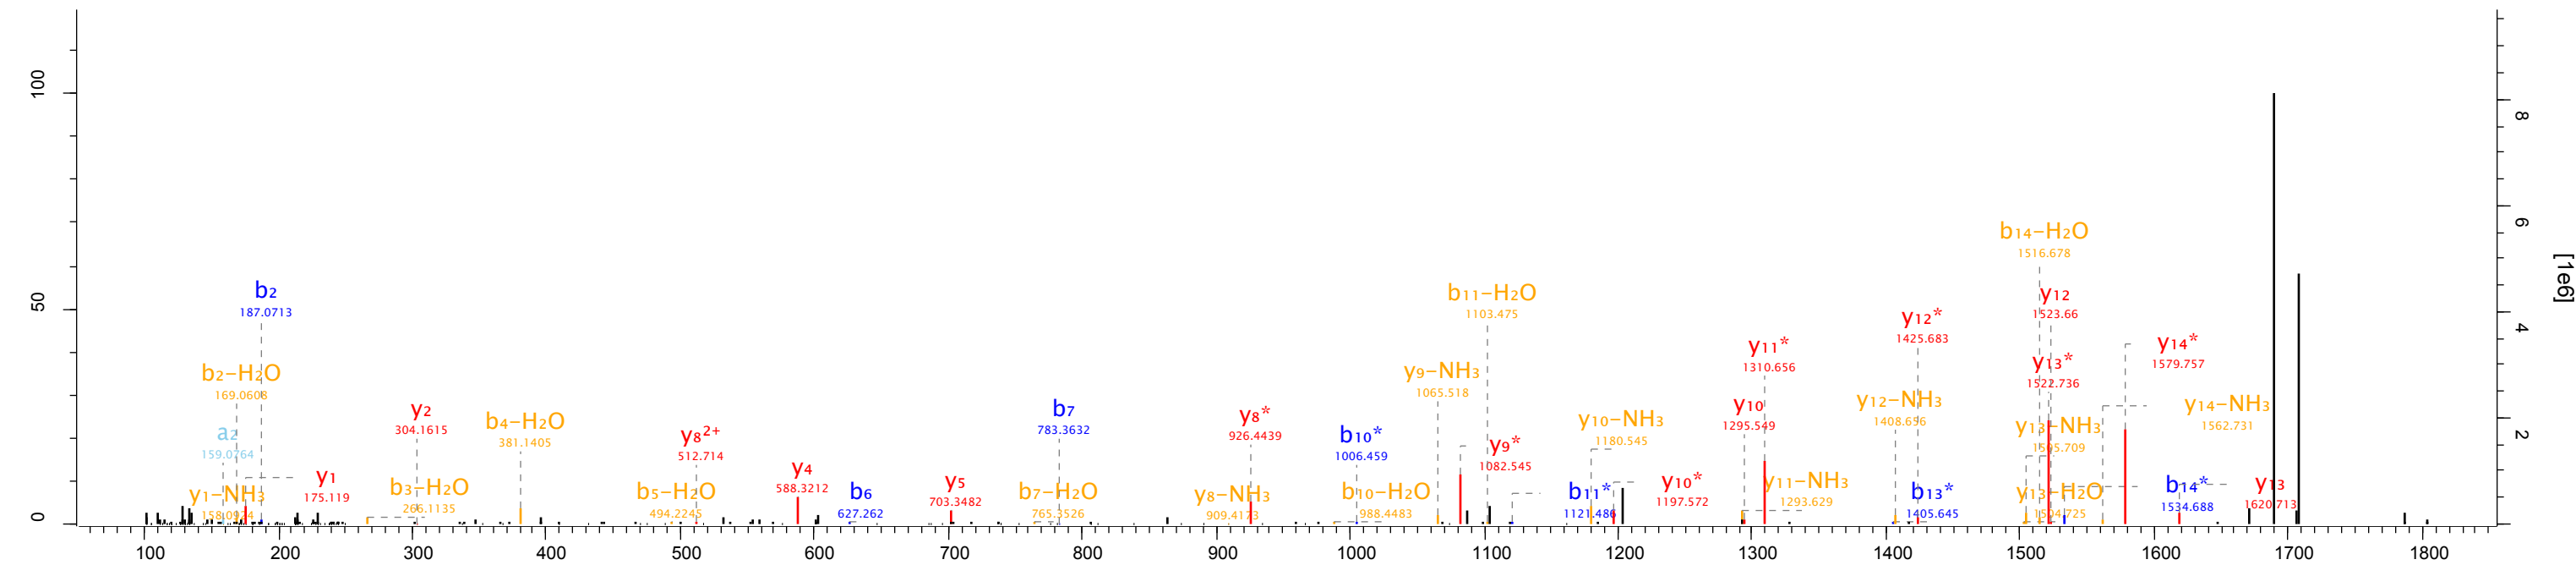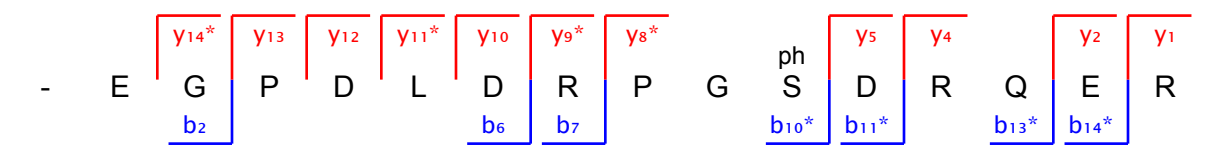

Raw file  
20150812\_A375SR\_Phospho\_BR1\_09

Scan Method Score m/z Gene names  
6598 FTMS; HCD 84.17 637.65 PANK2

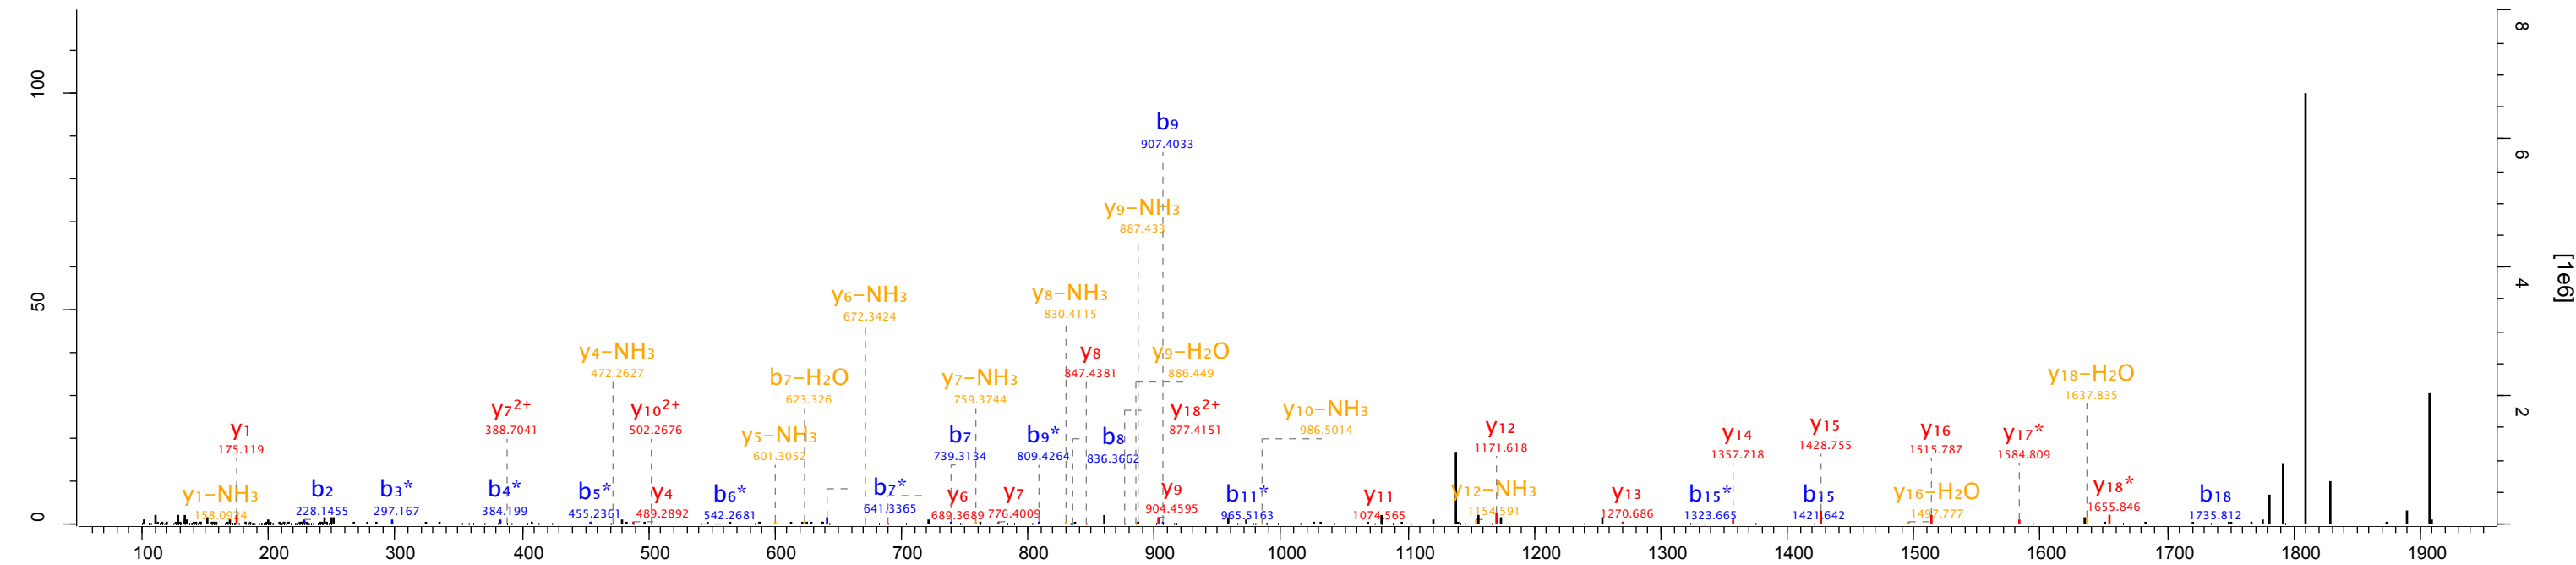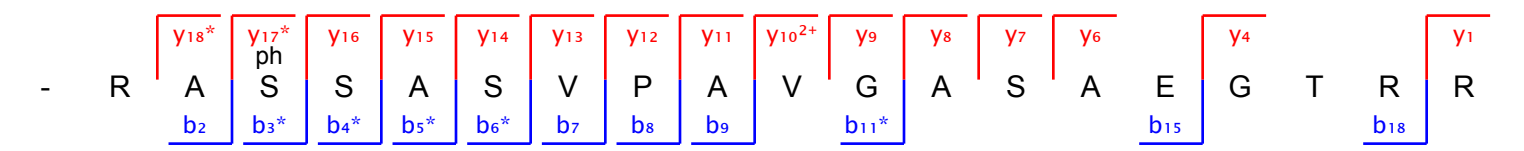



Raw file: 20150812\_A375SR\_Phospho\_BR1\_09  
 Scan: 7388 Method: FTMS; HCD Score: 54 m/z: 1208.49 Gene names: CREBBP

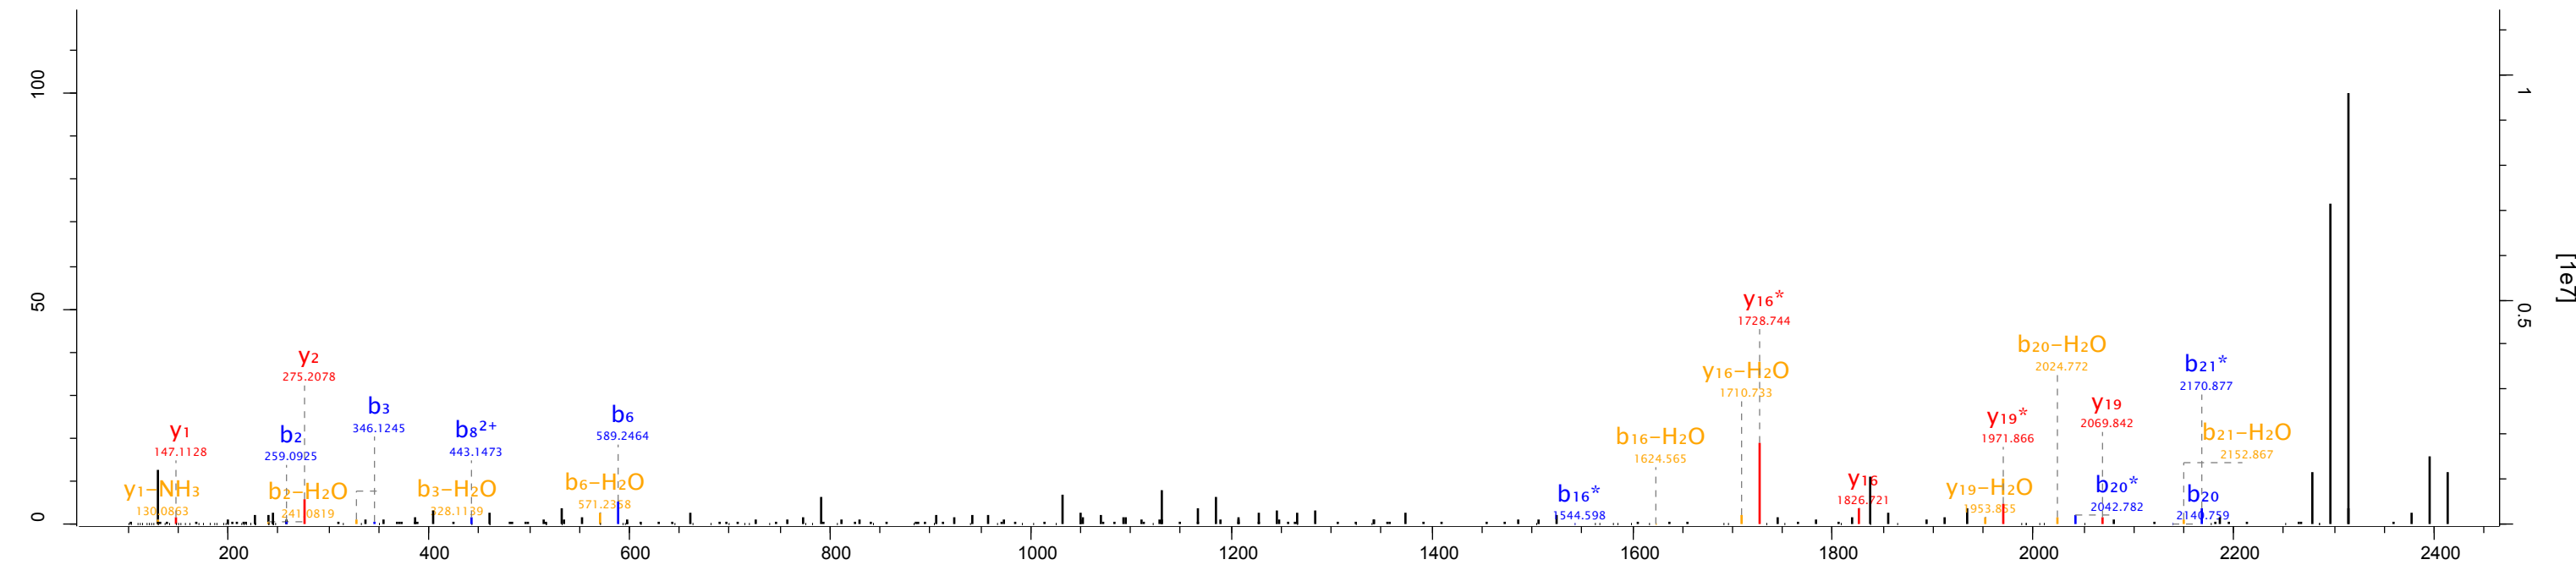

- E E S T A A S E T T E G S Q G D S K N A K K -

Fragmentation mapping (b and y ions) is shown below the sequence:

- Blue boxes (b ions):** b2 (E-E), b3 (E-S), b6 (A-A), b8<sup>2+</sup> (S-E), b16\* (D-S), b20 (A-K), b21\* (K-K).
- Red boxes (y ions):** y19 (S-T), y16 (S-ph), y2 (K-K), y1 (K-K).

Raw file: 20150812\_A375SR\_Phospho\_BR1\_10  
 Scan: 11168 Method: FTMS; HCD Score: 133.76 m/z: 739.06 Gene names: SIRT6

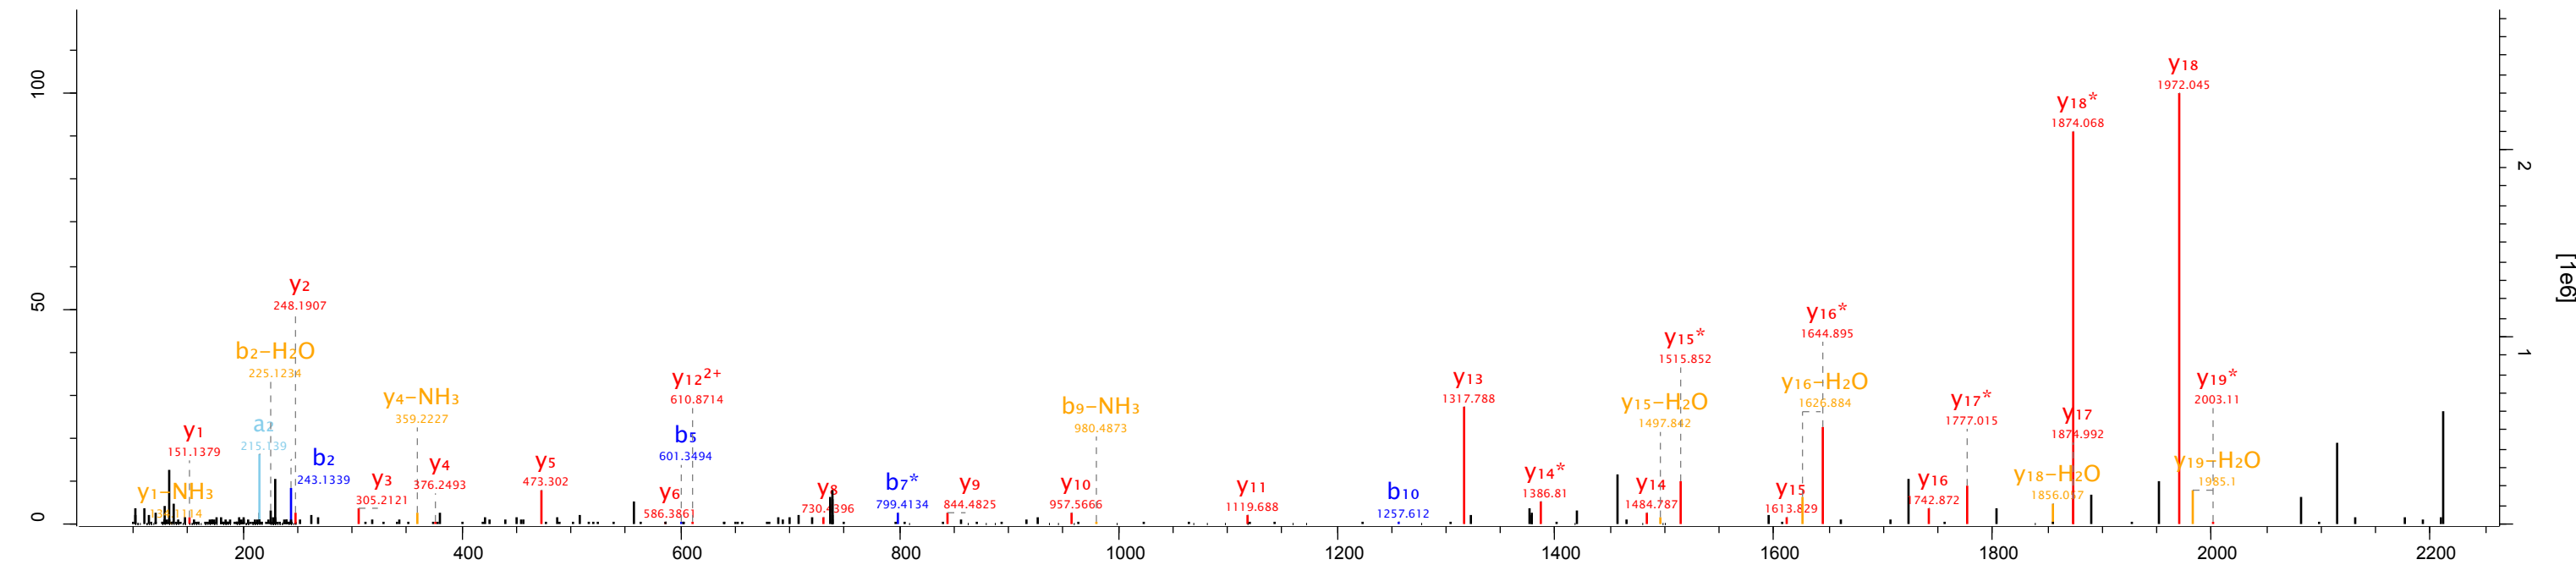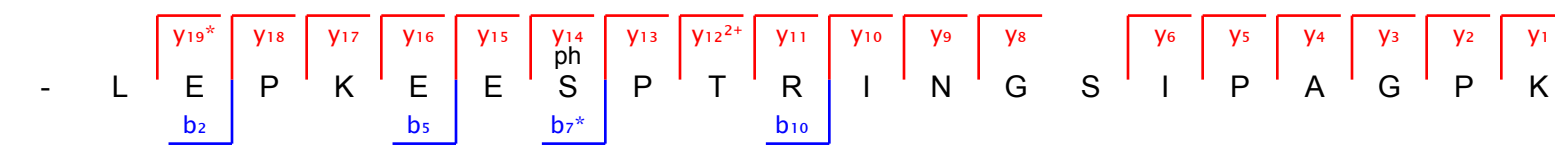

Raw file 20150812\_A375SR\_Phospho\_BR1\_10 Scan 12478 Method FTMS; HCD Score 61.53 m/z 558.29

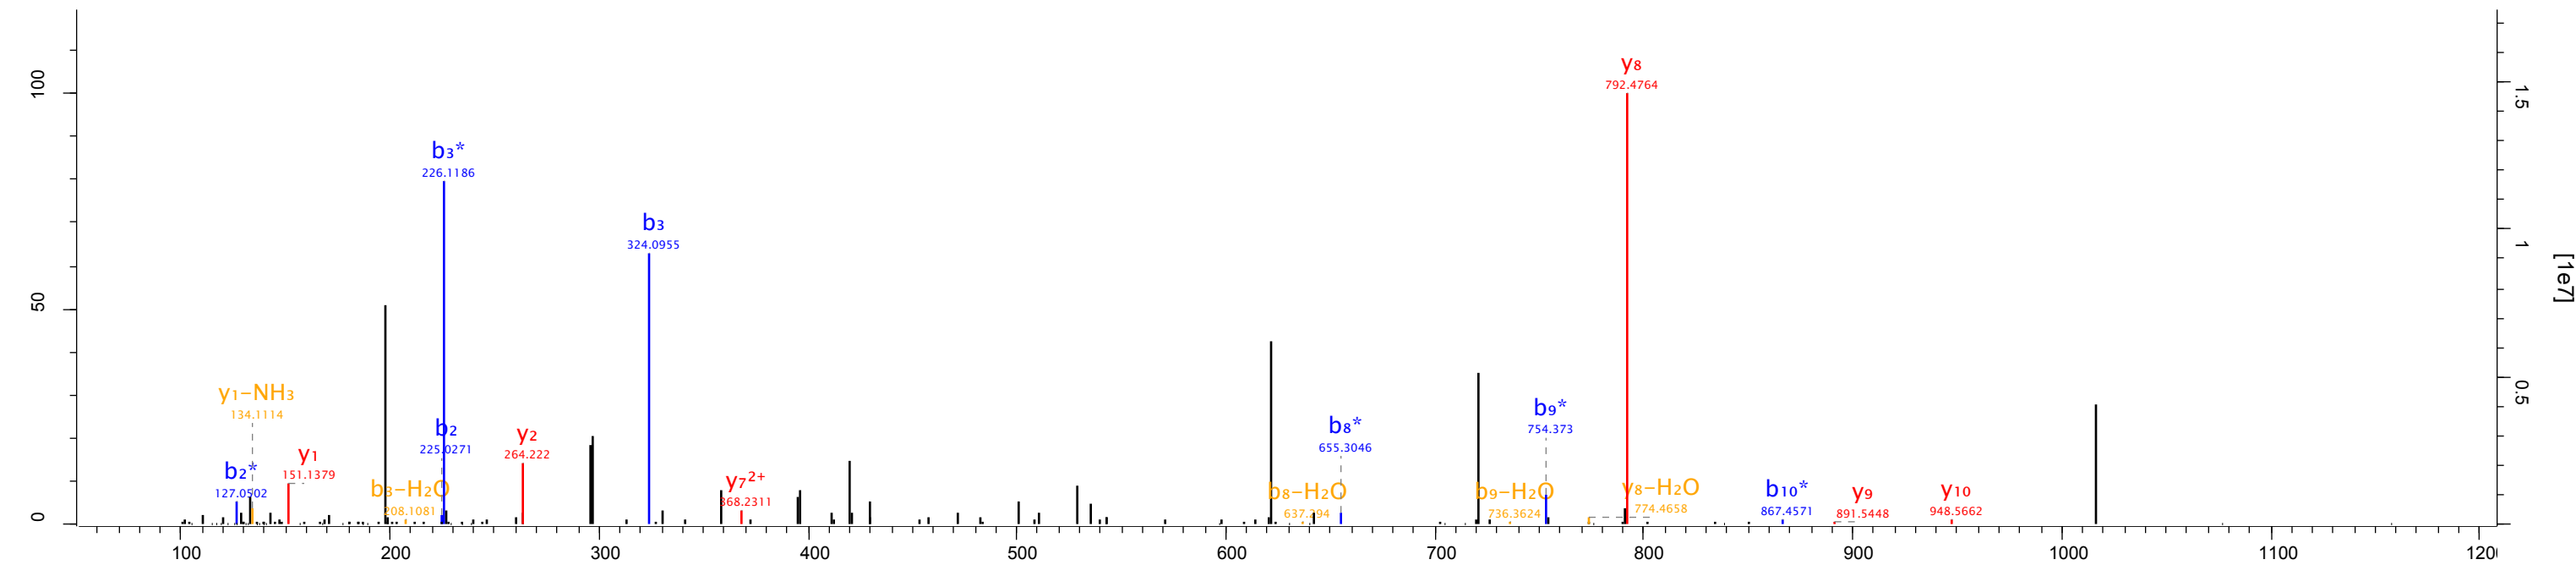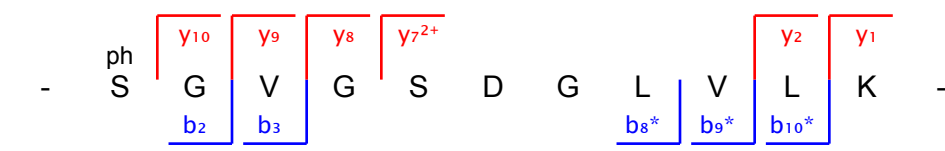

Raw file  
 20150812\_A375SR\_Phospho\_BR1\_10  
 Scan 12908 Method FTMS; HCD Score 92.04 m/z 682.8 Gene names SUGT1

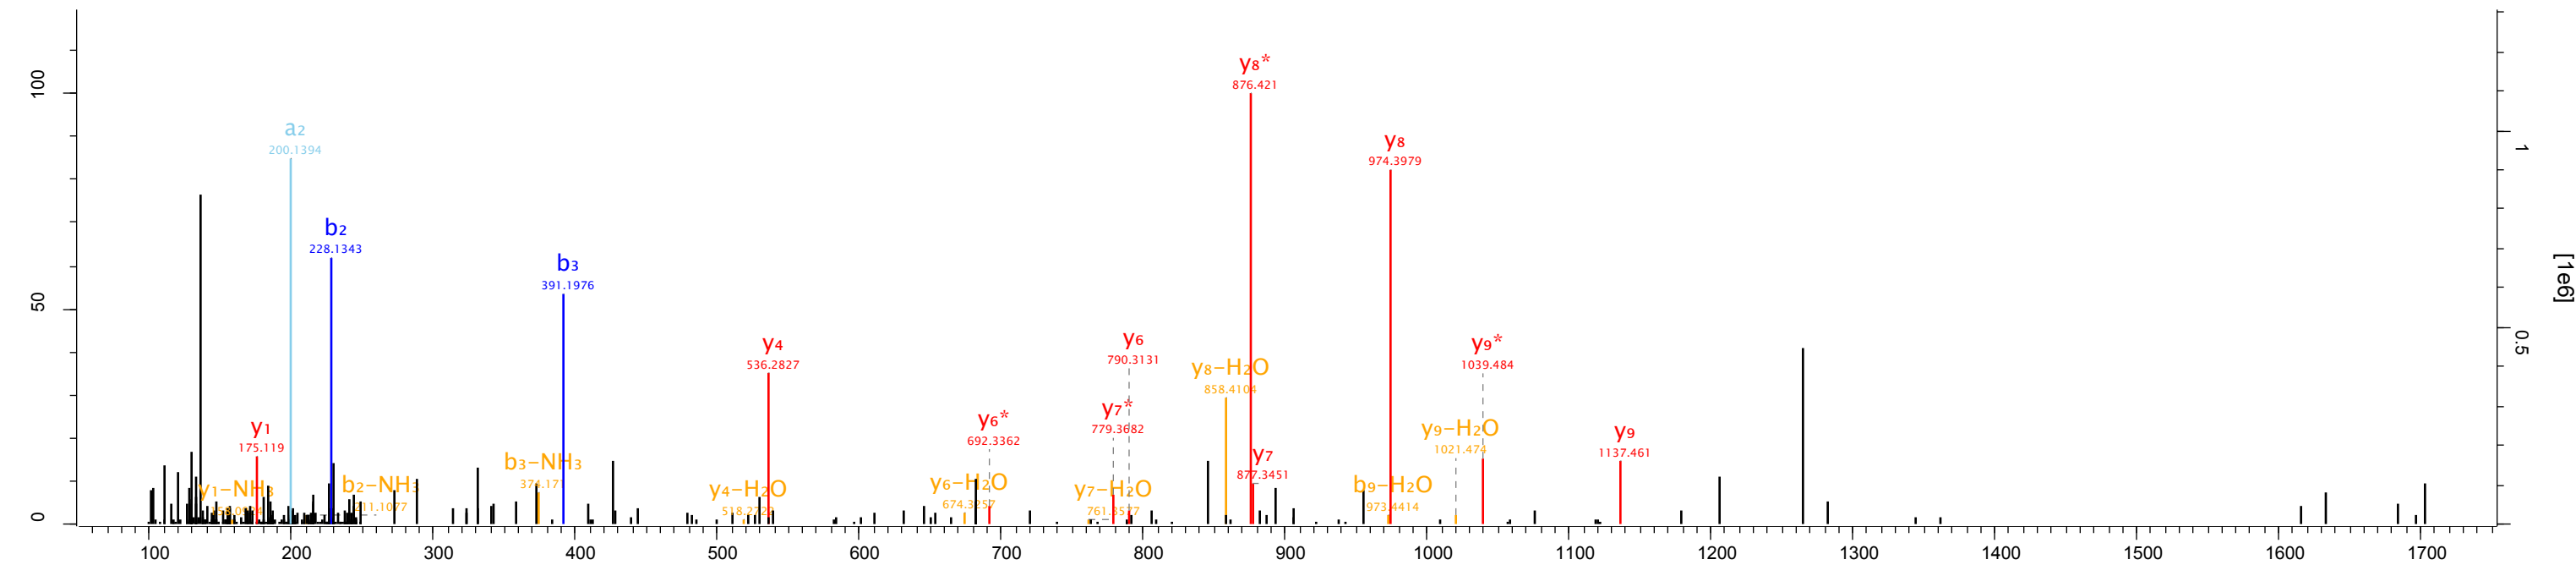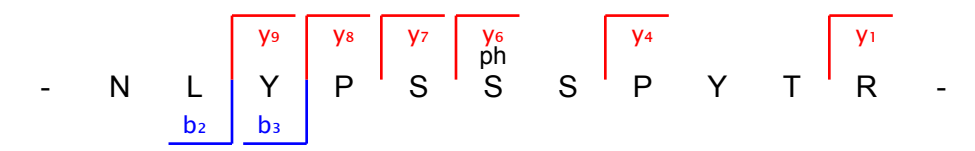



Raw file: 20150812\_A375SR\_Phospho\_BR1\_10  
 Scan: 13368 Method: FTMS; HCD Score: 143.47 m/z: 673.64 Gene names: EMD

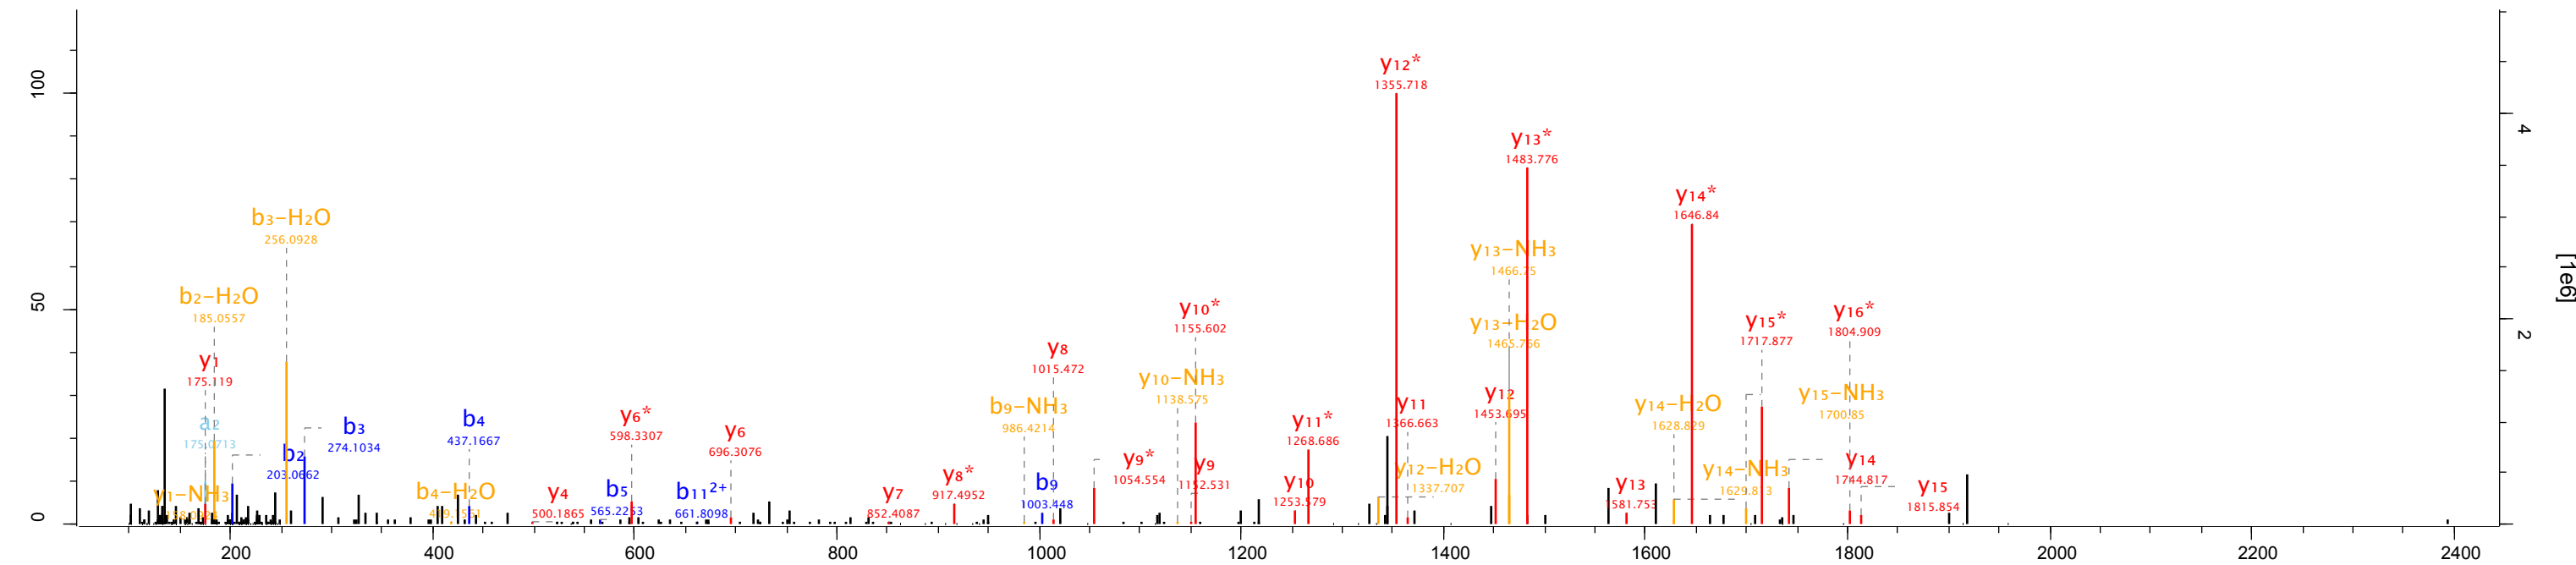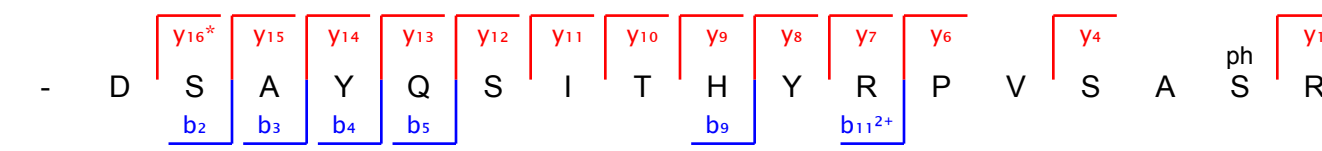

Raw file Scan Method Score m/z Gene names  
 20150812\_A375SR\_Phospho\_BR1\_10 14898 FTMS; HCD 94.55 558.78 CIC

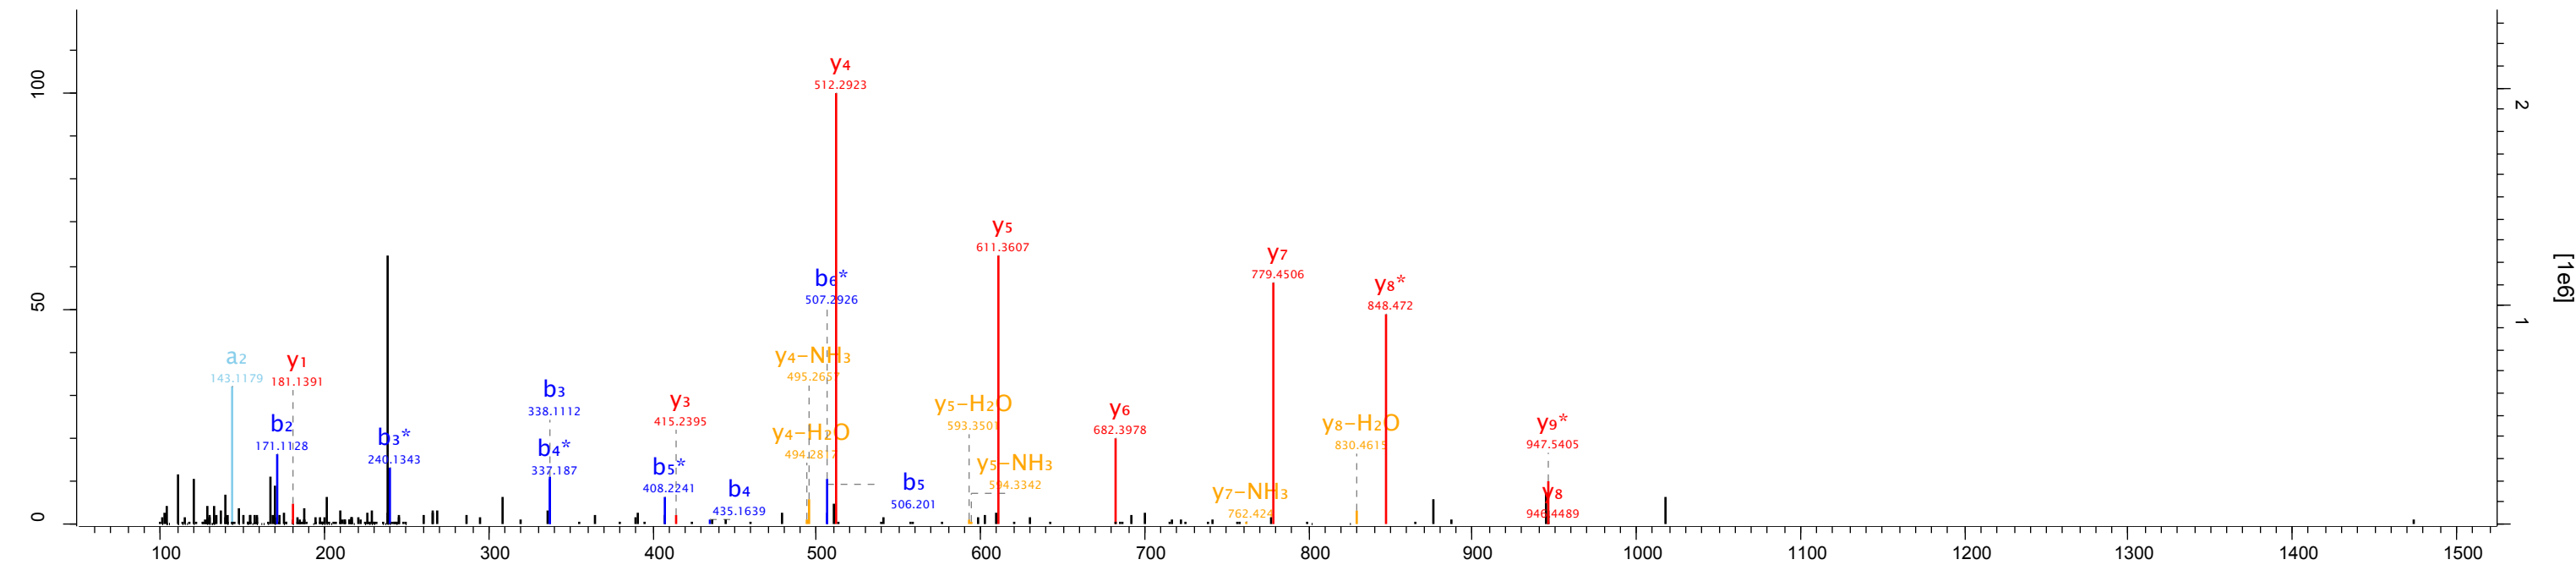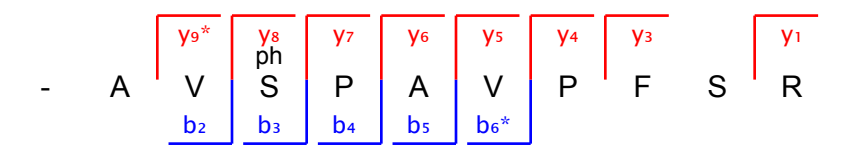

Raw file  
20150812\_A375SR\_Phospho\_BR1\_10

Scan 23288 Method FTMS; HCD Score 168.22 m/z 711.68 Gene names MAP1B

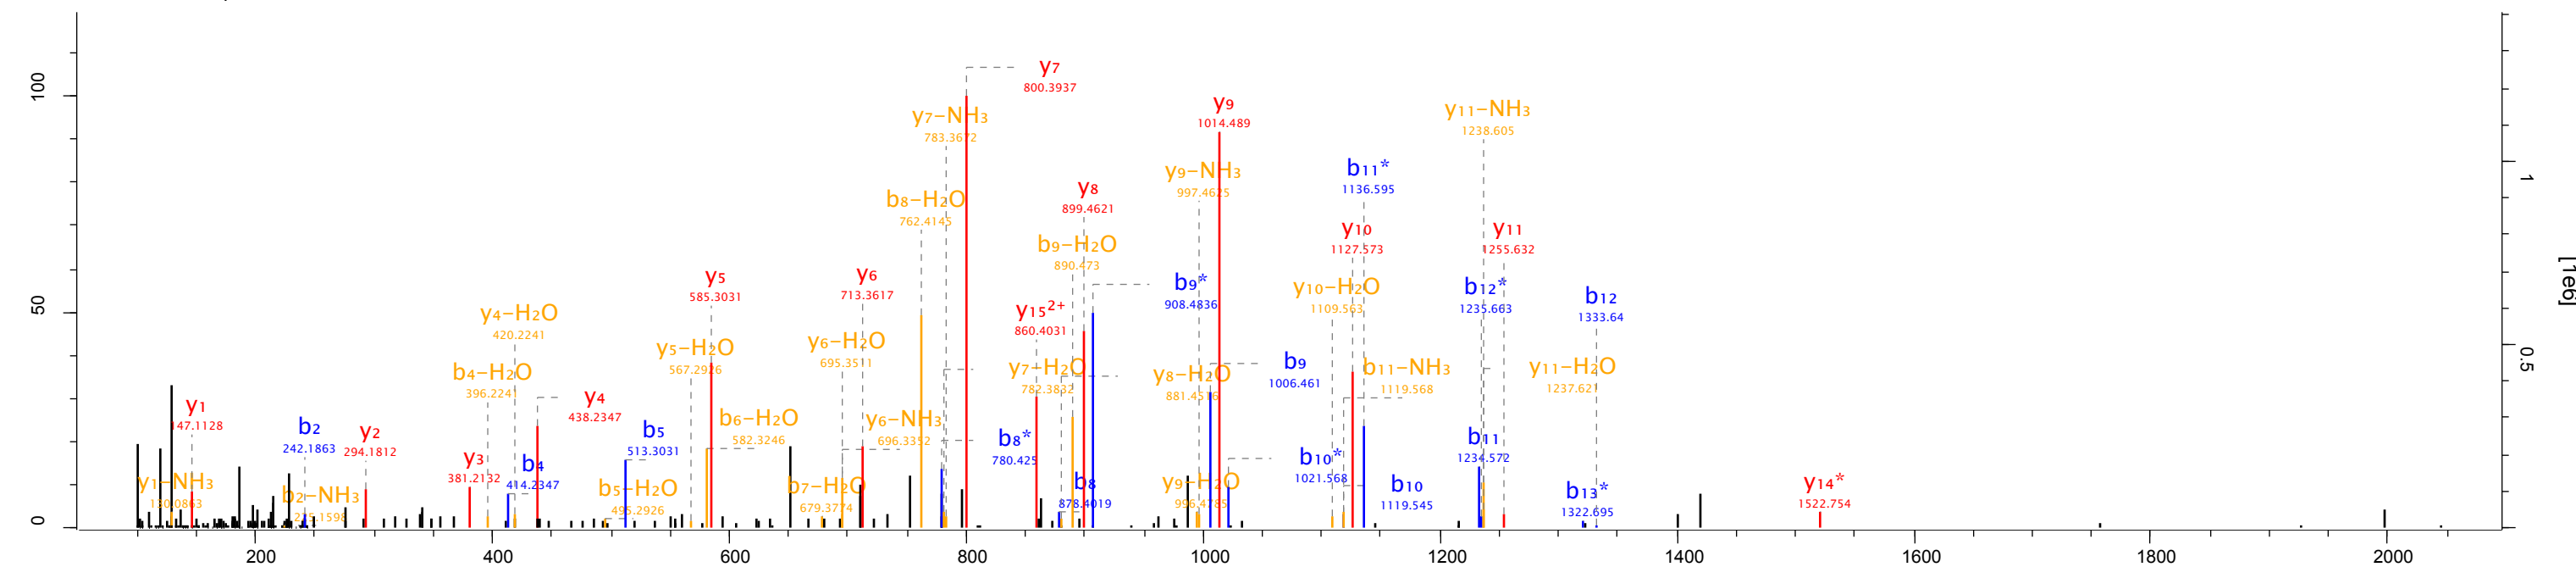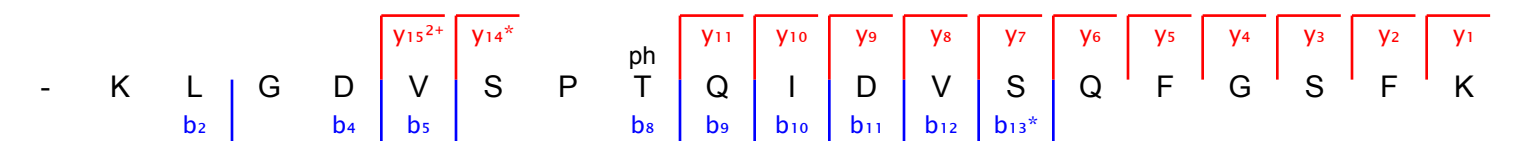



Raw file 28328 FTMS; HCD 127.48 823.06 PLEC

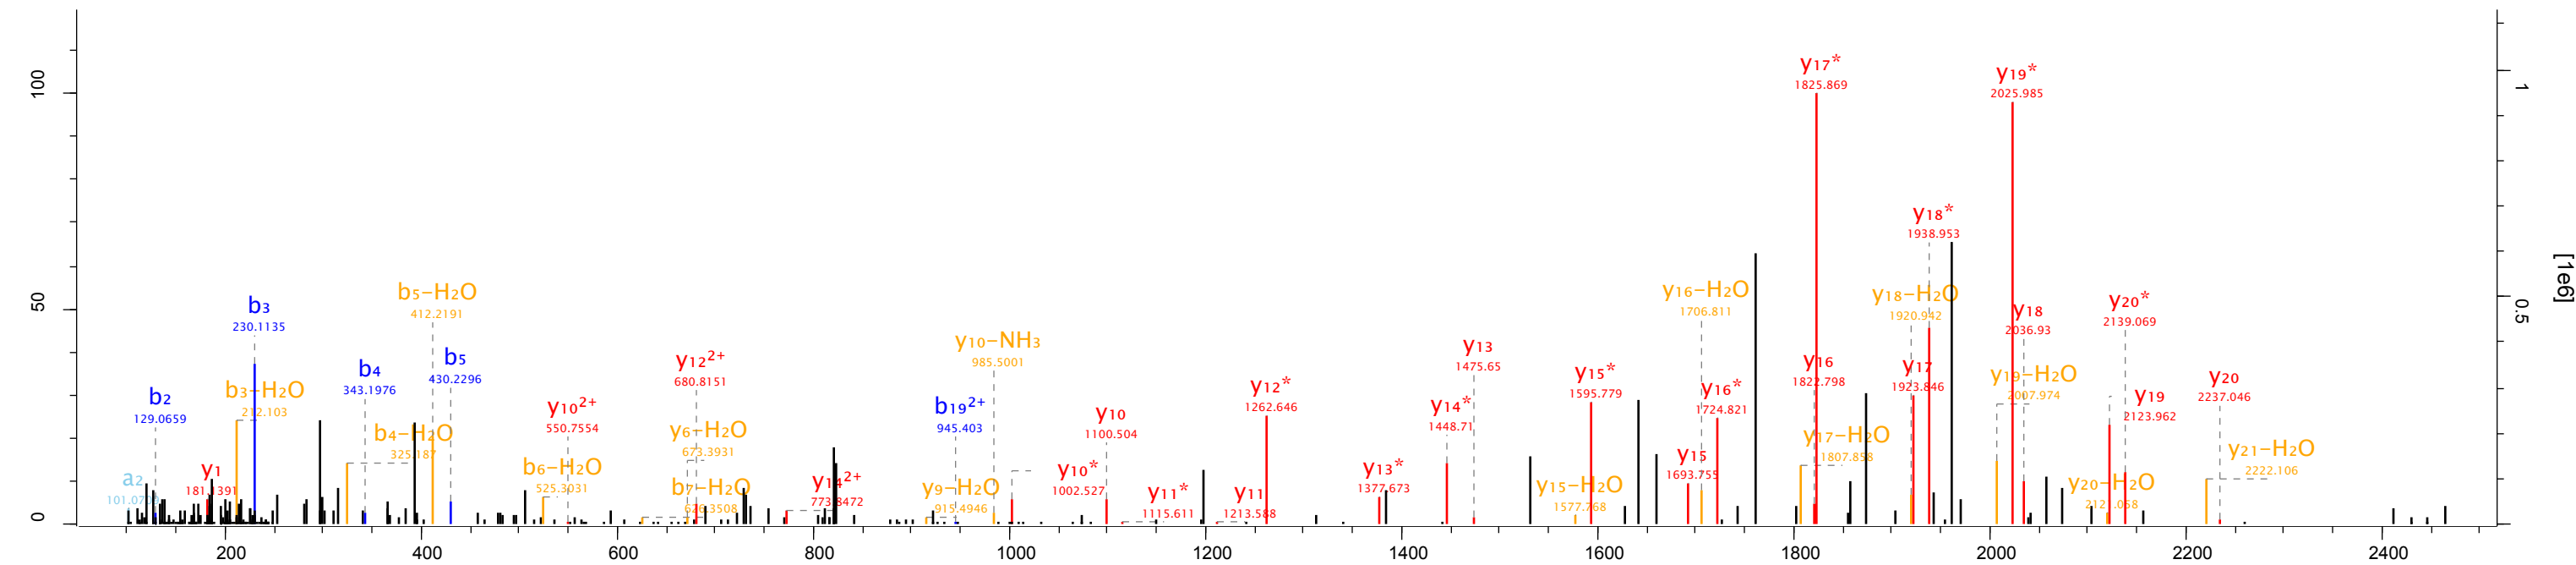

- A G T L S I T E F A D M L S G N A G G F R S R -

b<sub>2</sub>
b<sub>3</sub>
b<sub>4</sub>
b<sub>5</sub>
y<sub>20</sub>
y<sub>19</sub>
y<sub>18</sub>
y<sub>17</sub>
y<sub>16</sub>
y<sub>15</sub>
y<sub>14</sub>\*
y<sub>13</sub>
y<sub>12</sub>\*
y<sub>11</sub>
y<sub>10</sub>  
ph
y<sub>10</sub>  
ox
y<sub>11</sub>\*
y<sub>12</sub>\*
y<sub>13</sub>\*
y<sub>14</sub>\*
y<sub>15</sub>\*
y<sub>16</sub>\*
y<sub>17</sub>\*
y<sub>18</sub>\*
y<sub>19</sub>\*
y<sub>20</sub>\*

Raw file: 20150812\_A375SR\_Phospho\_BR1\_10  
 Scan: 6188 Method: FTMS; HCD Score: 266 m/z: 834.84 Gene names: USP39

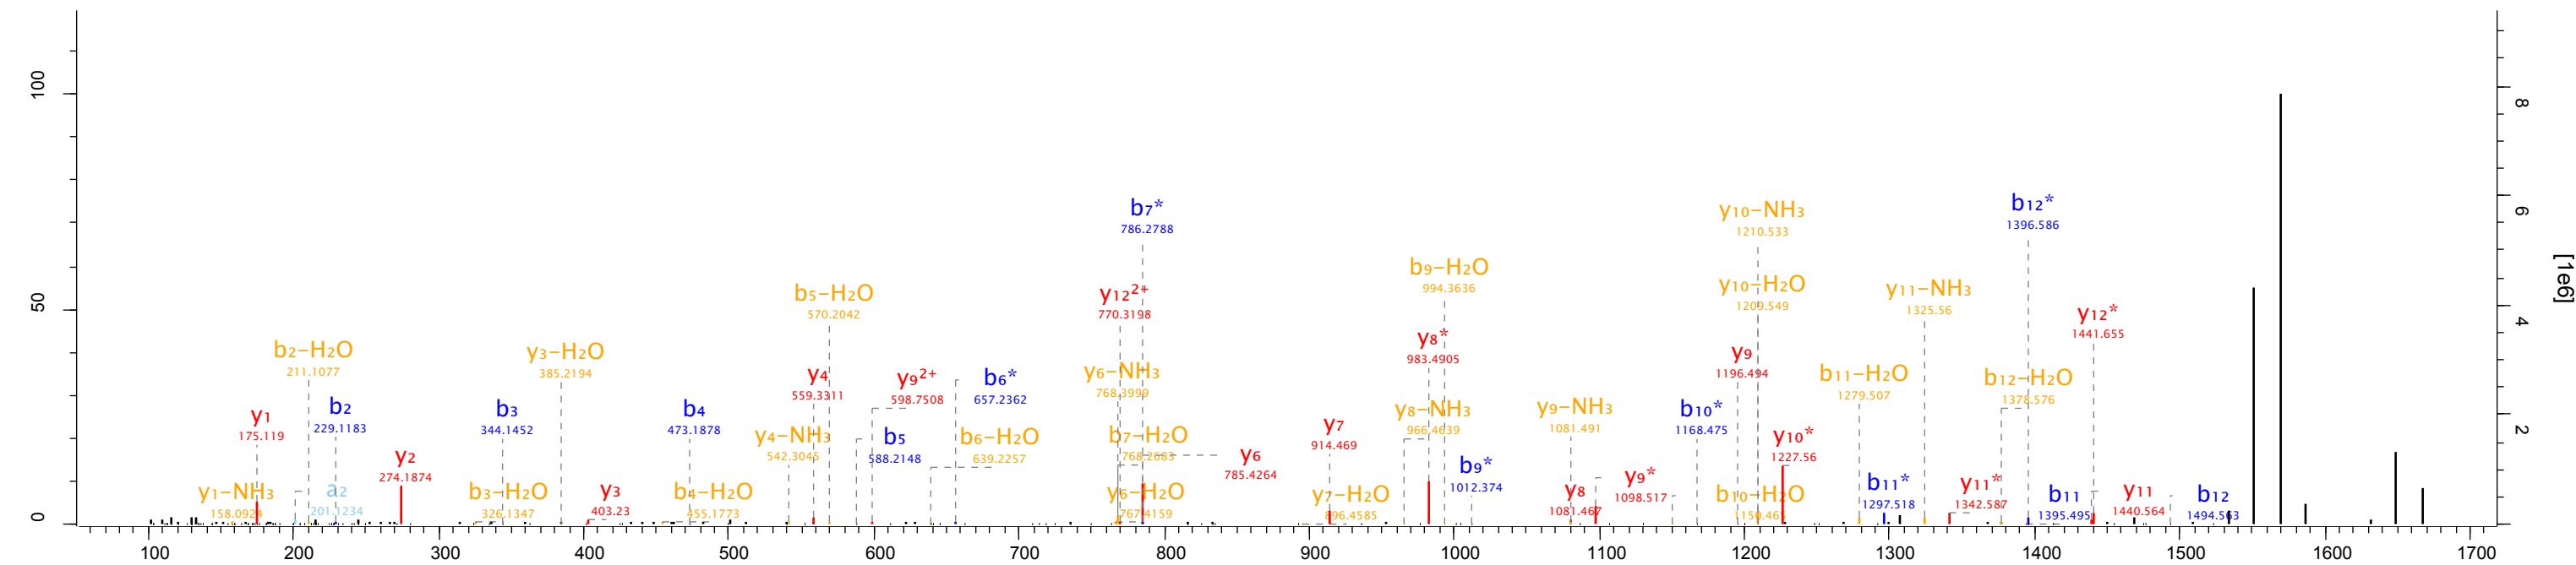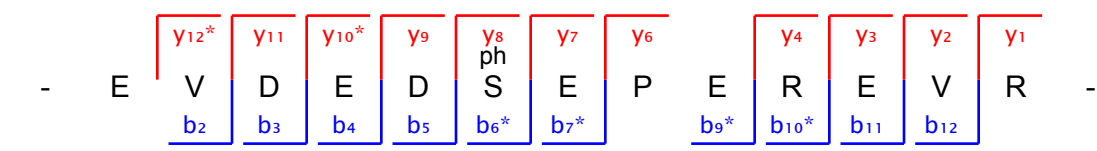

Raw file: 20150812\_A375SR\_Phospho\_BR1\_10  
 Scan: 6678 Method: FTMS; HCD Score: 162.8 m/z: 494.75 Gene names: DBN1

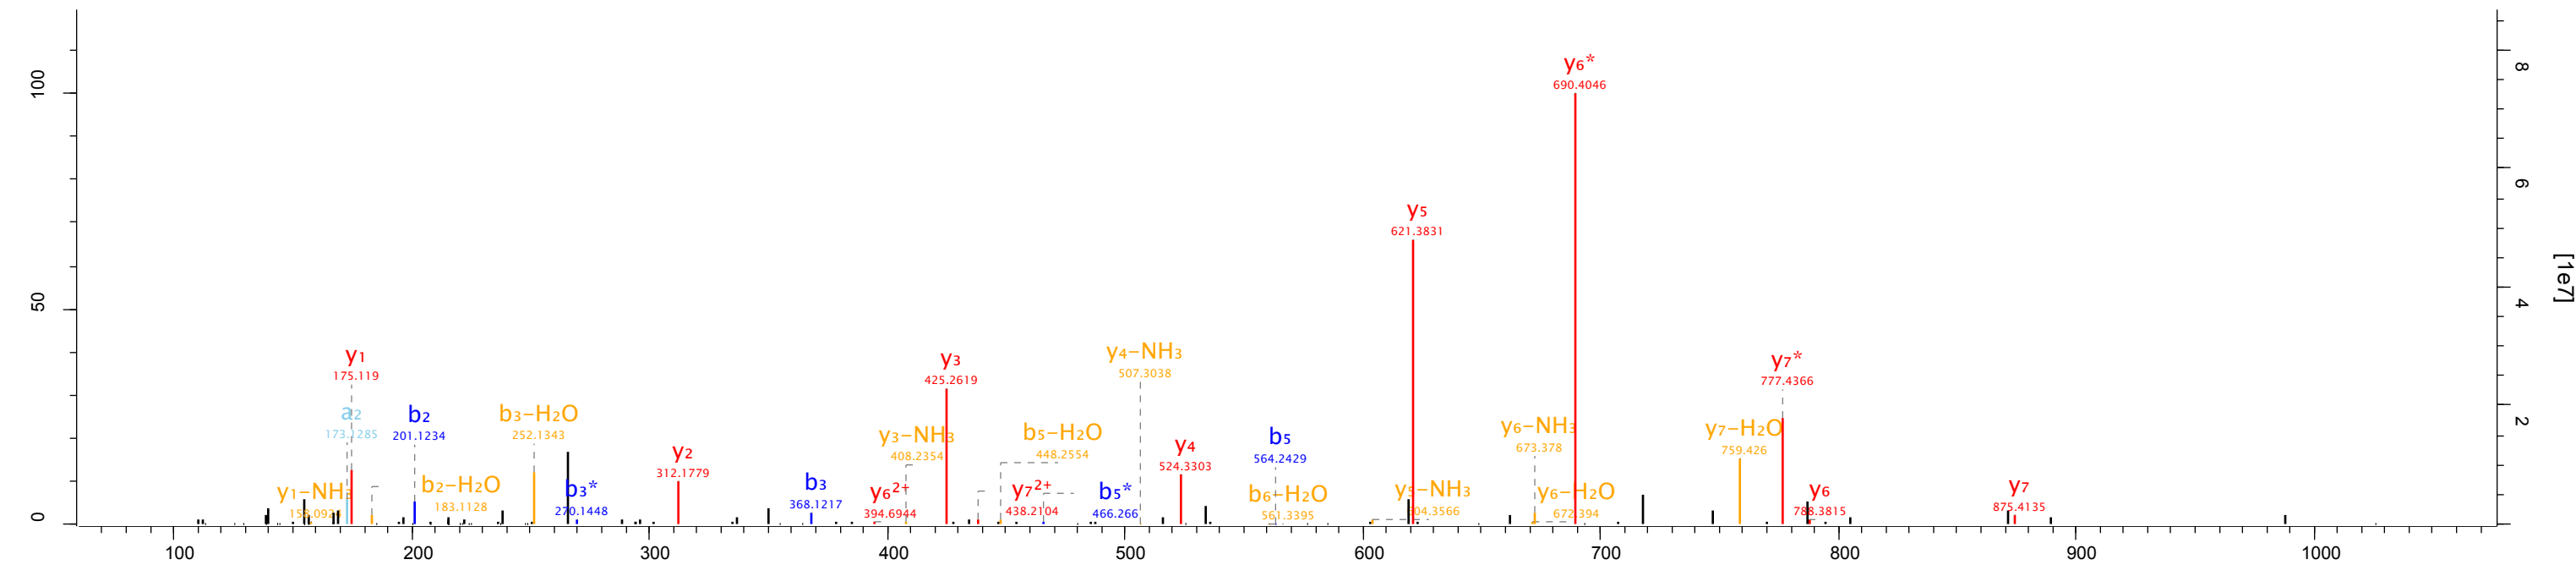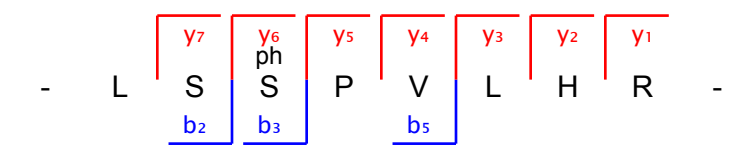

Raw file 20150812\_A375SR\_Phospho\_BR1\_10 Scan 7948 Method FTMS; HCD Score 81.53 m/z 650.8 Gene names RLTPR

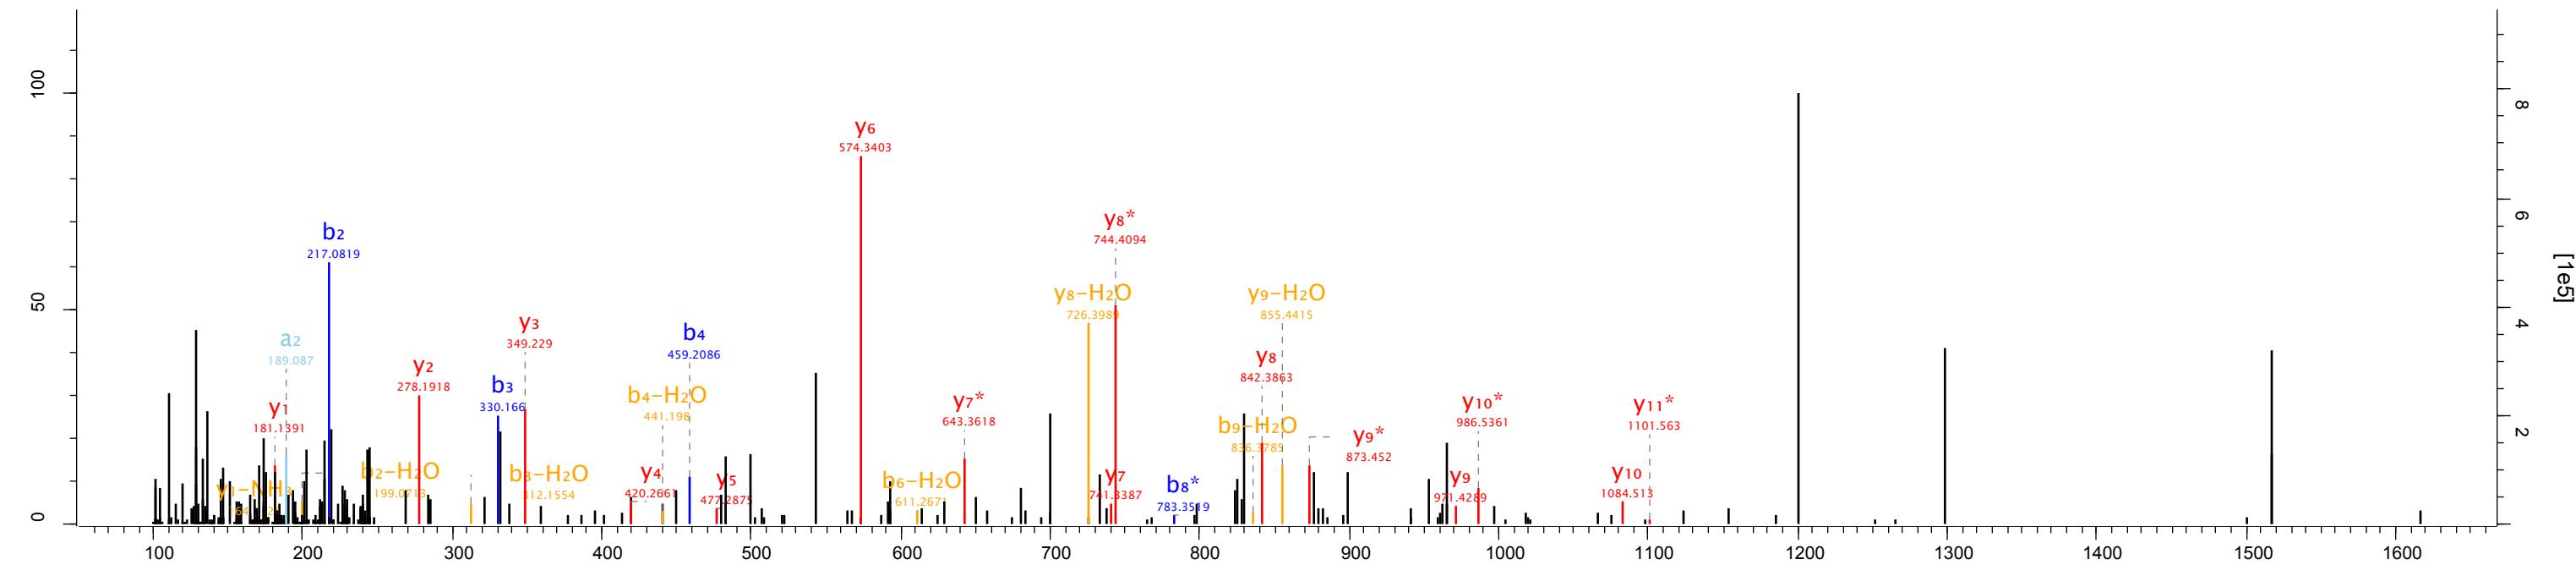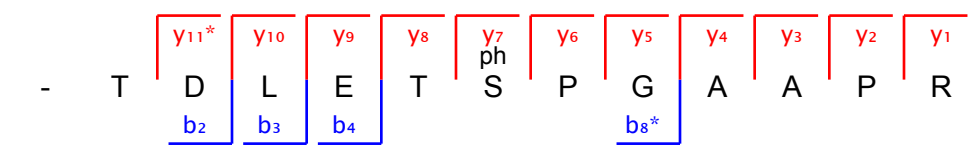

Raw file 20150812\_A375SR\_Phospho\_BR1\_10 Scan 8418 Method FTMS; HCD Score 90.46 m/z 866.42 Gene names ABI2

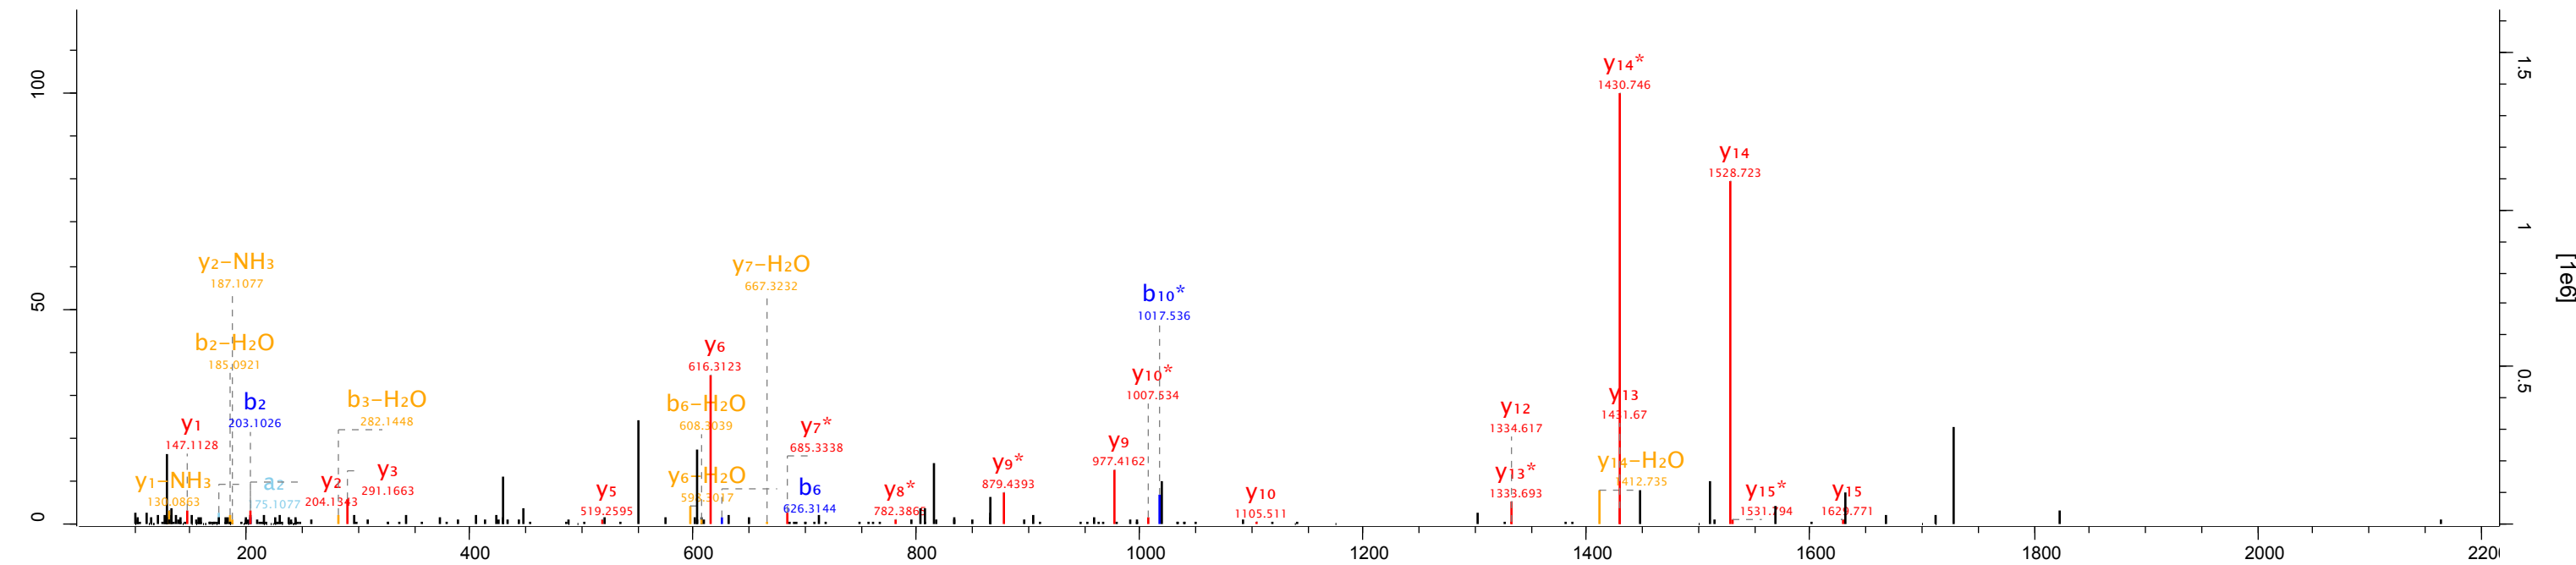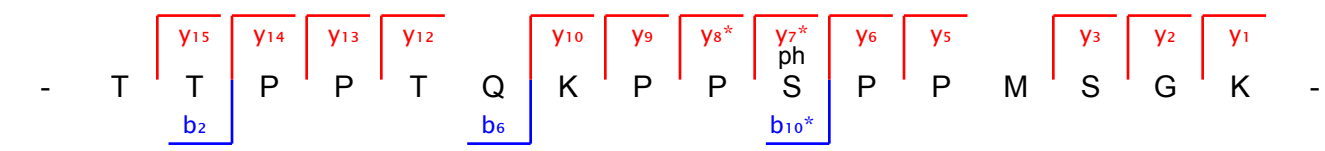

Raw file 20150812\_A375SR\_Phospho\_BR1\_10 Scan 9028 Method FTMS; HCD Score 158.35 m/z 648.35 Gene names ARID4B

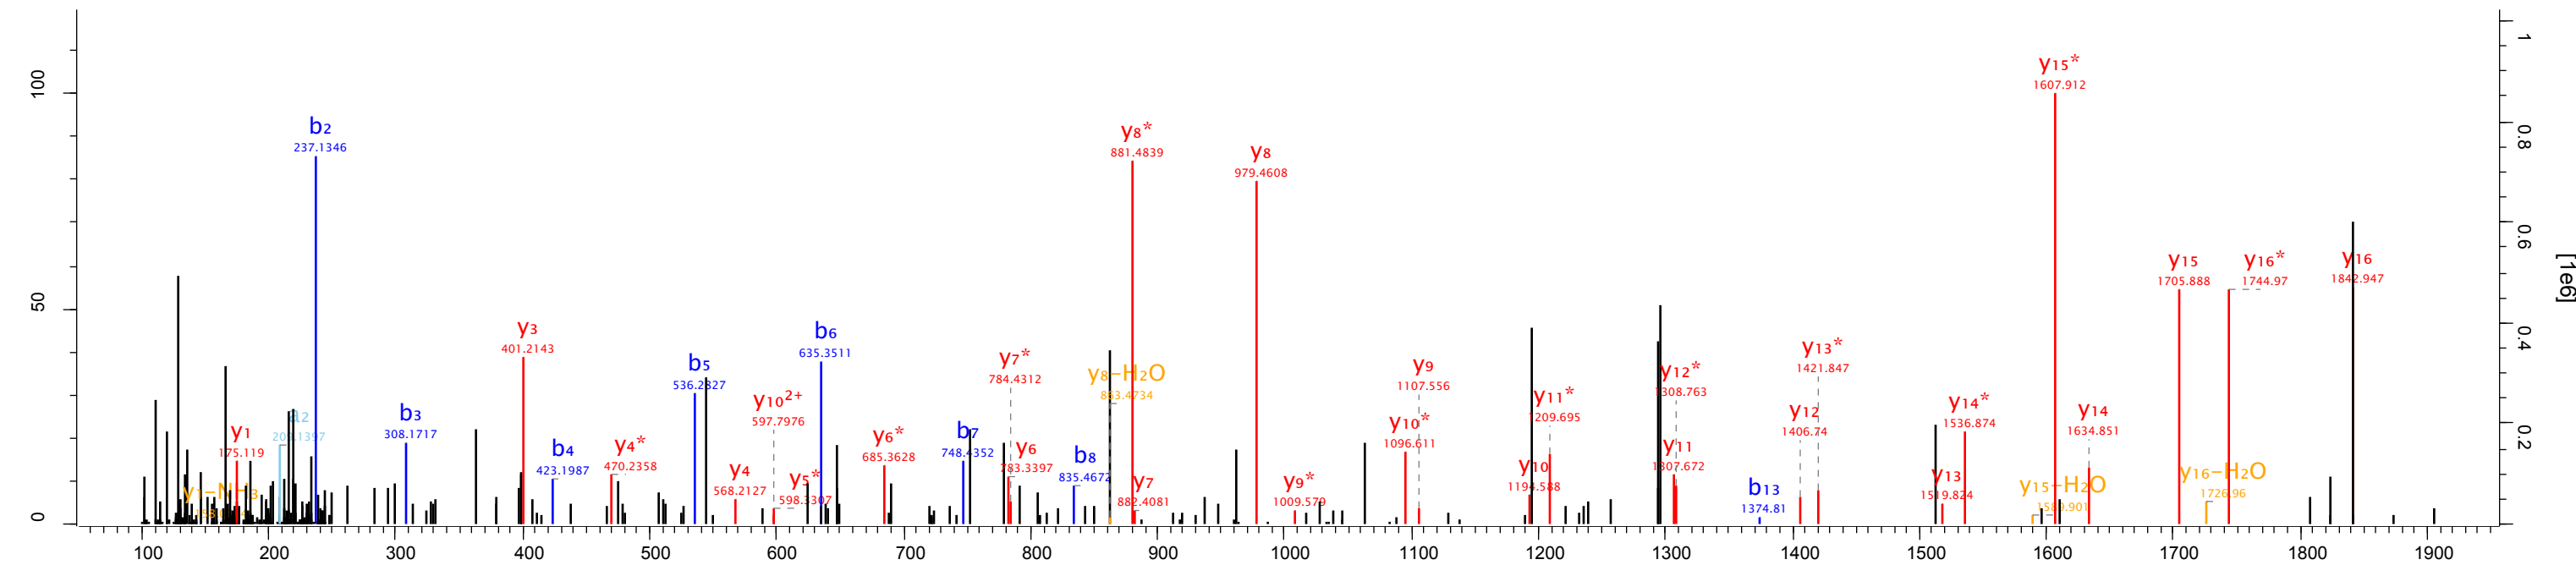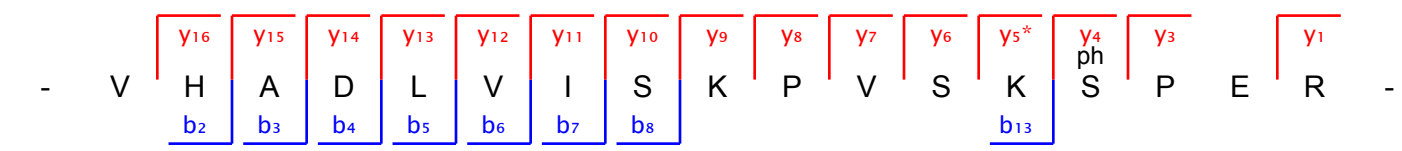

Raw file: 20150812\_A375SR\_Phospho\_BR1\_10  
 Scan: 9788 Method: FTMS; HCD Score: 167.35 m/z: 865.39 Gene names: MAP1B

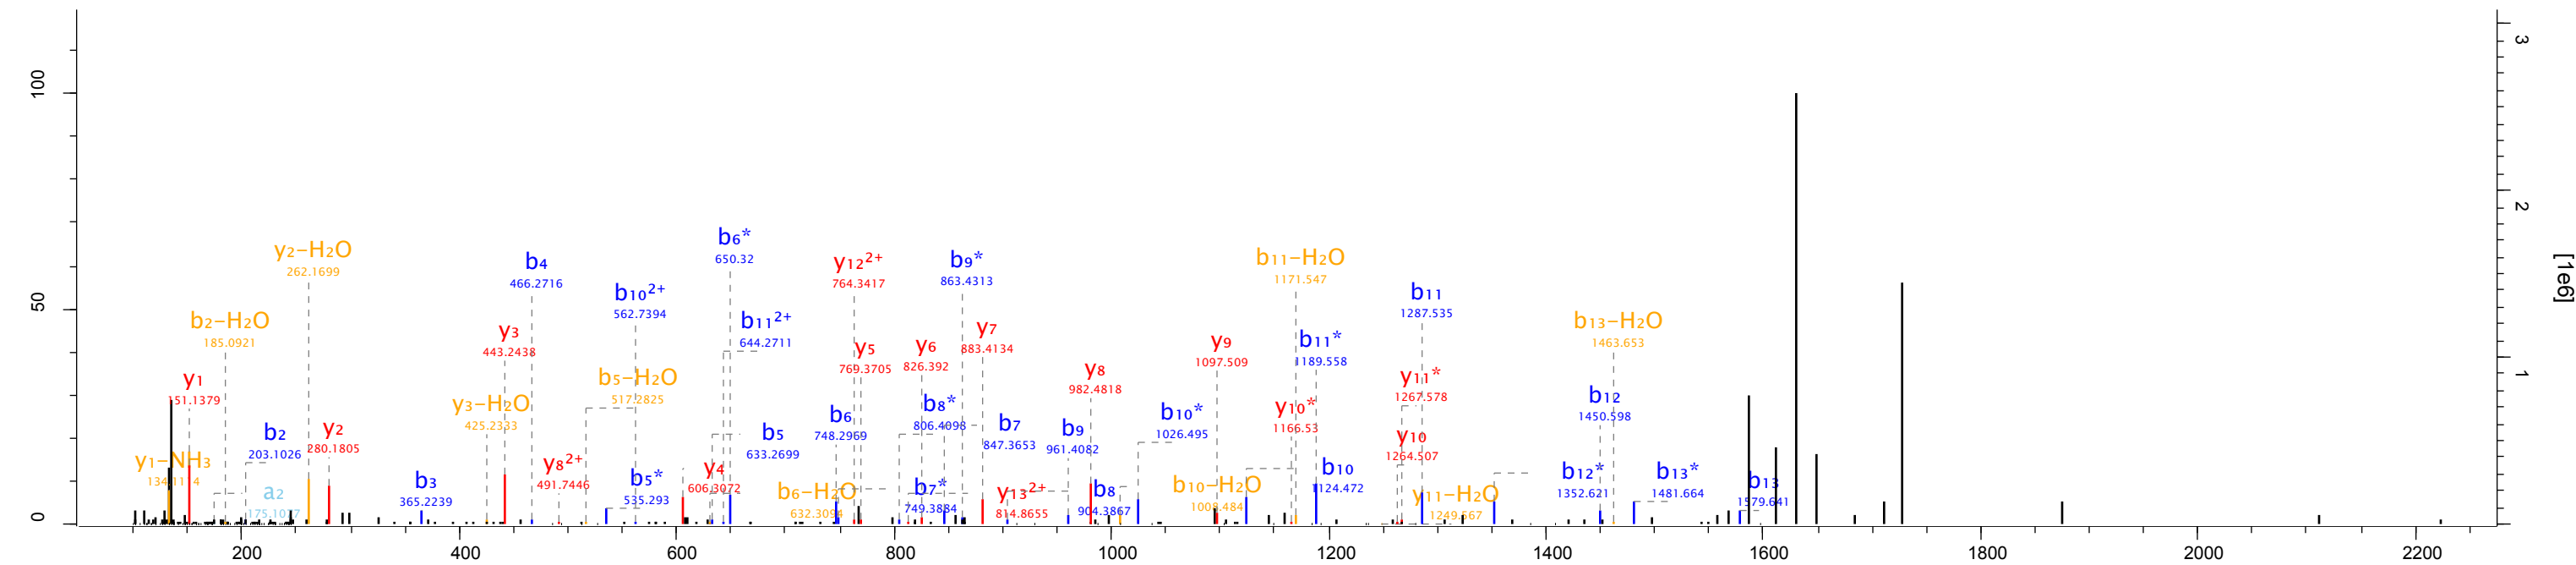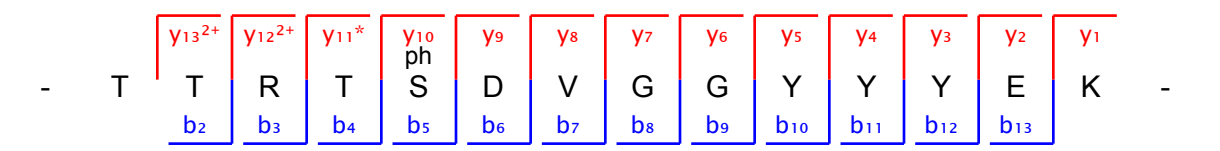

Raw file: 20150812\_A375SR\_Phospho\_BR1\_01  
 Scan: 3049 Method: FTMS; HCD Score: 112.95 m/z: 532.22 Gene names: SRRM2

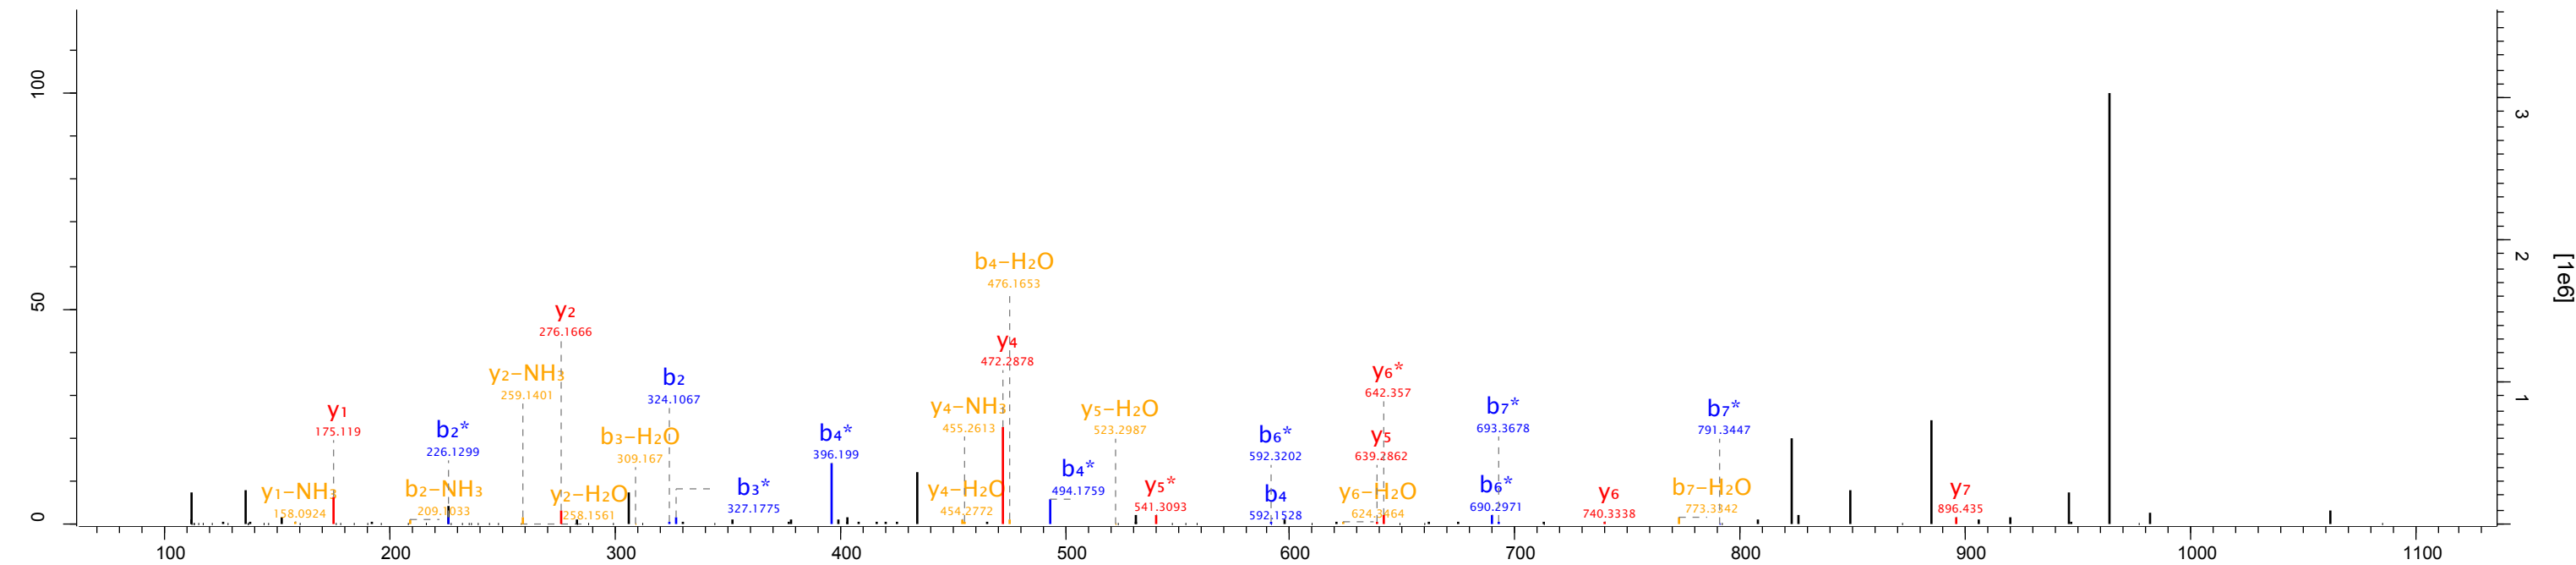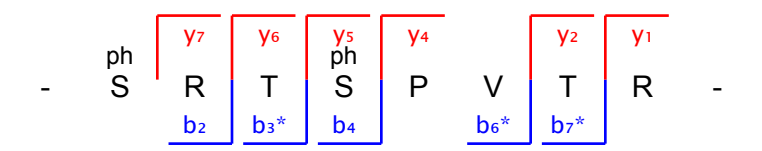



Raw file 20150812\_A375SR\_Phospho\_BR1\_01 Scan 7089 Method FTMS; HCD Score 42.93 m/z 920 Gene names PWP1

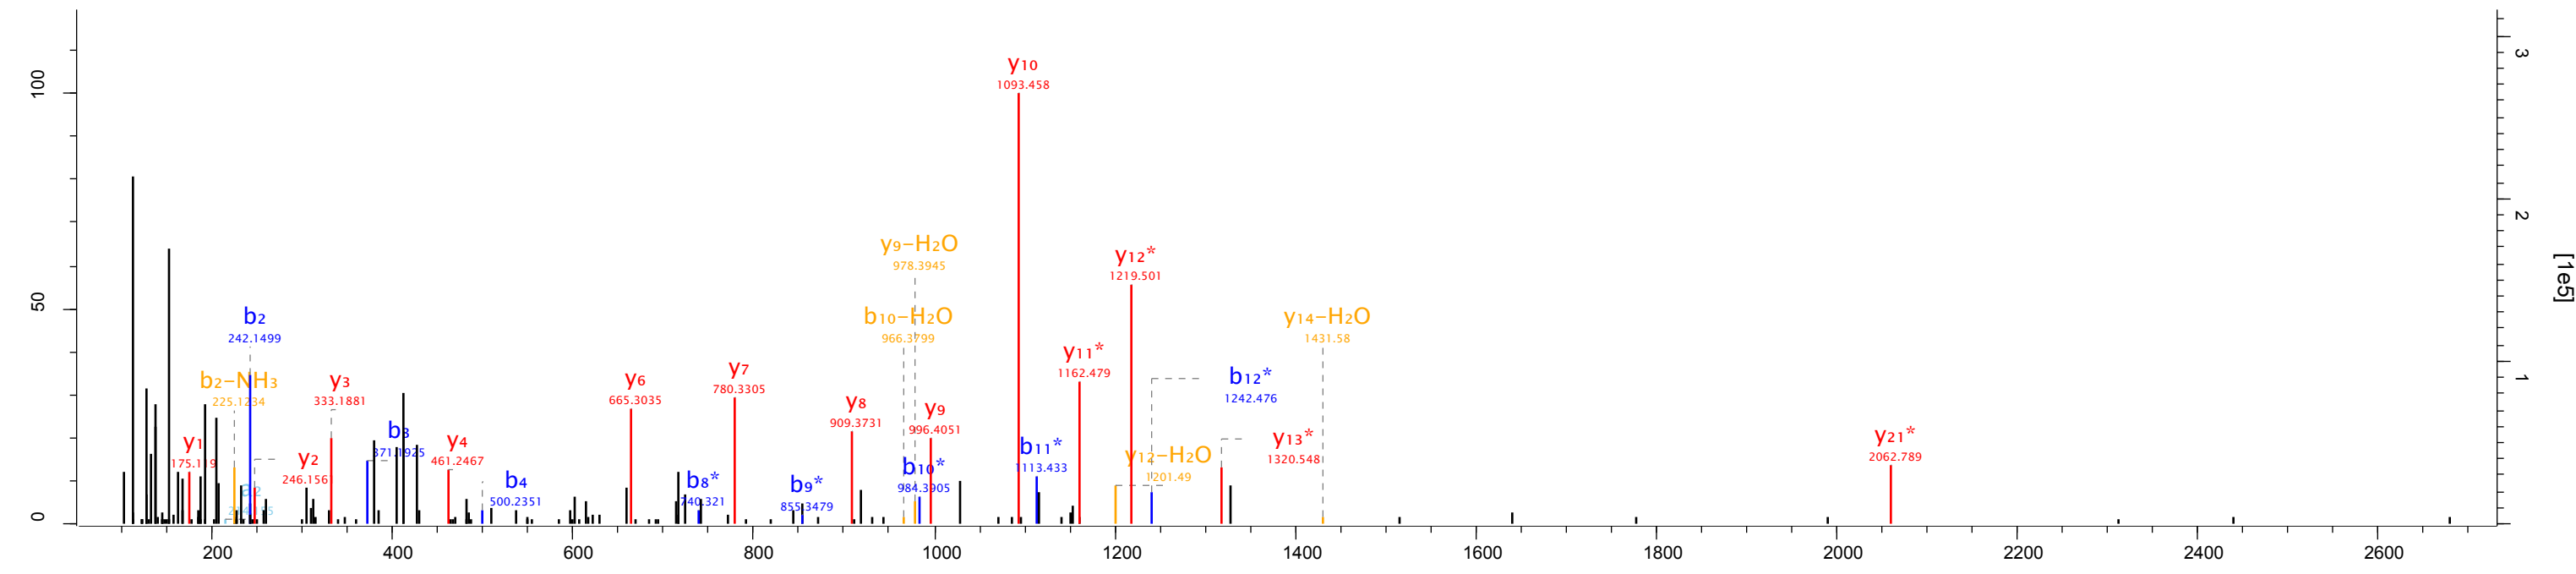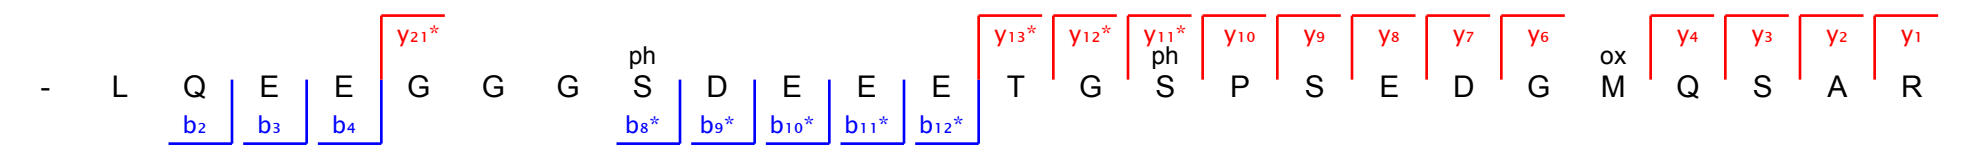

Raw file 20150812\_A375SR\_Phospho\_BR1\_01 Scan 9599 Method FTMS; HCD Score 41.42 m/z 772.26 Gene names KLF13

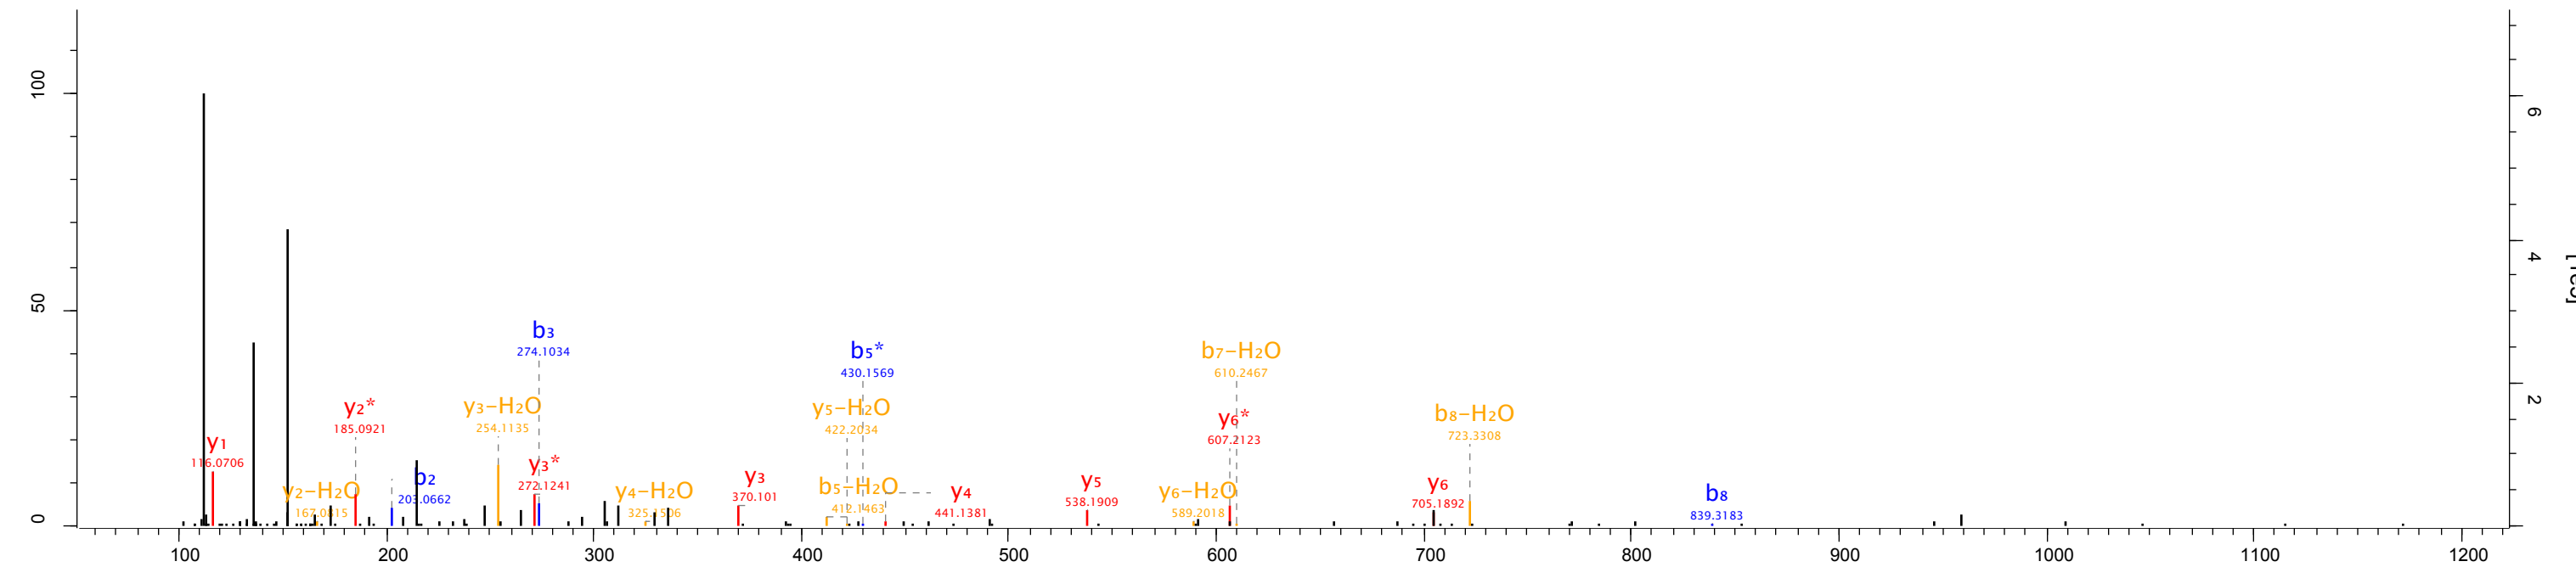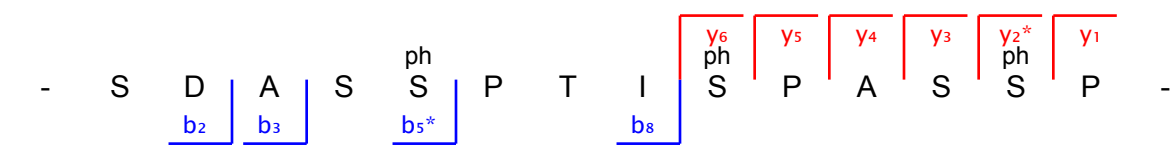

Raw file: 20150812\_A375SR\_Phospho\_BR1\_01  
 Scan: 9699 Method: FTMS; HCD Score: 167.28 m/z: 971.89 Gene names: SPAG9

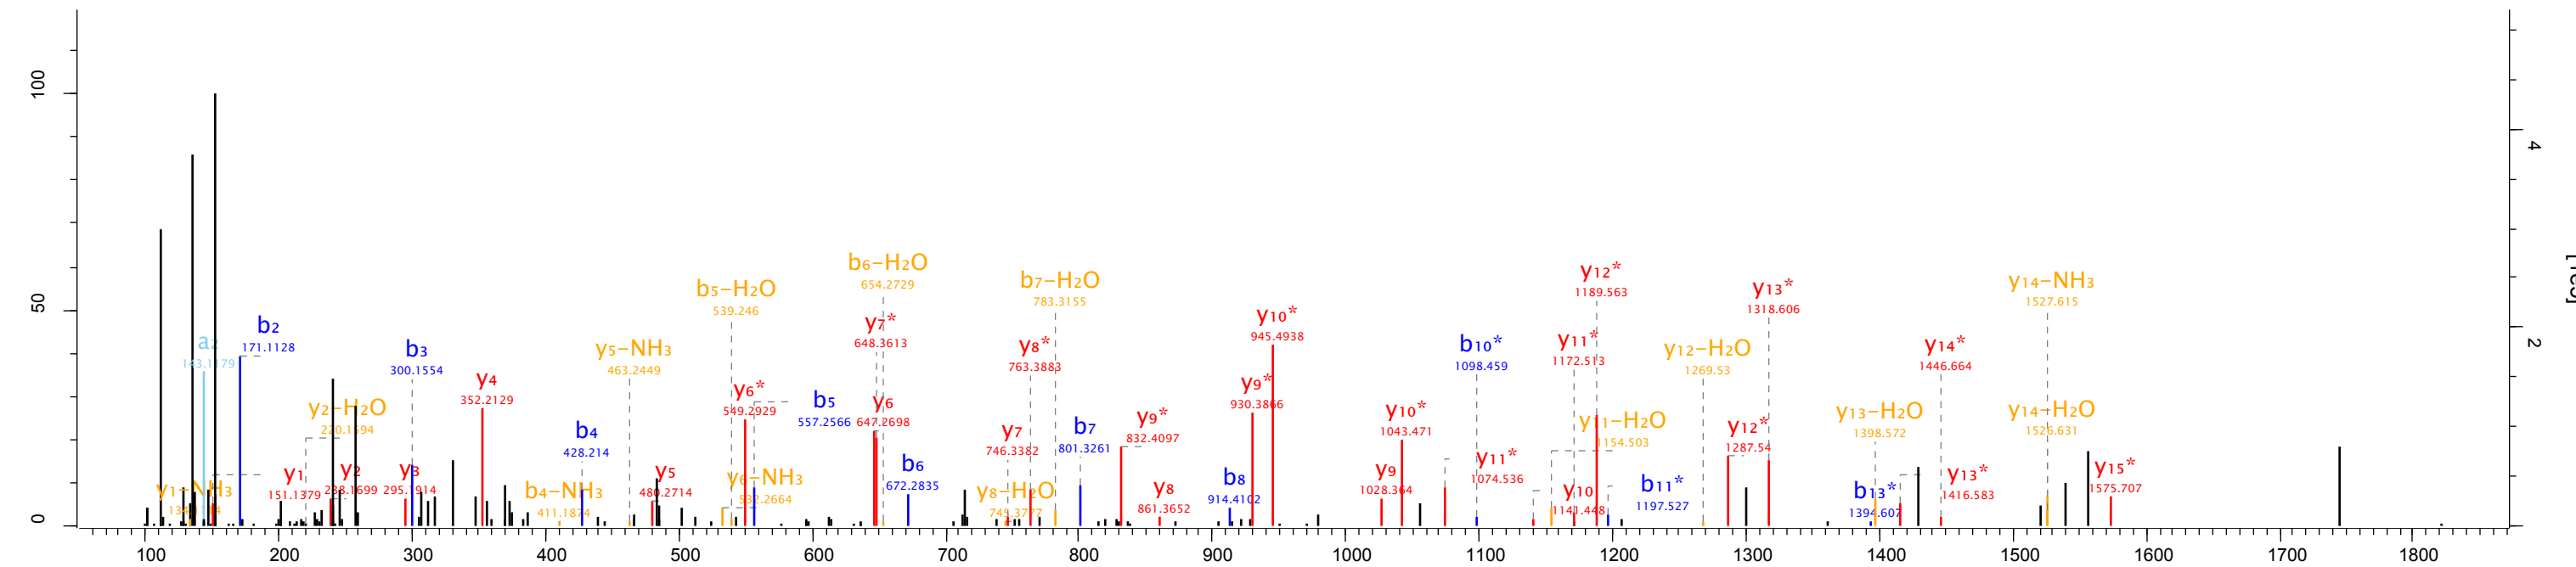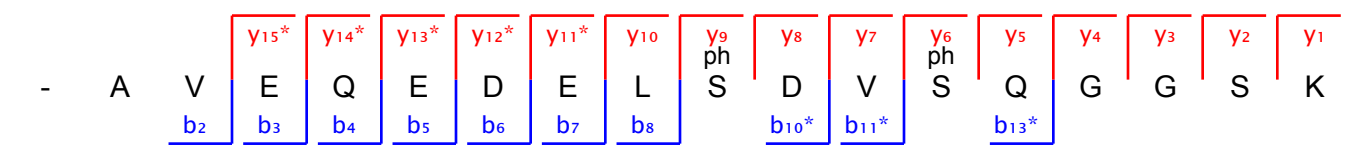

Raw file Scan Method Score m/z Gene names  
 20150812\_A375SR\_Phospho\_BR1\_02 10179 FTMS; HCD 164.26 1002.9 HDGFRP2

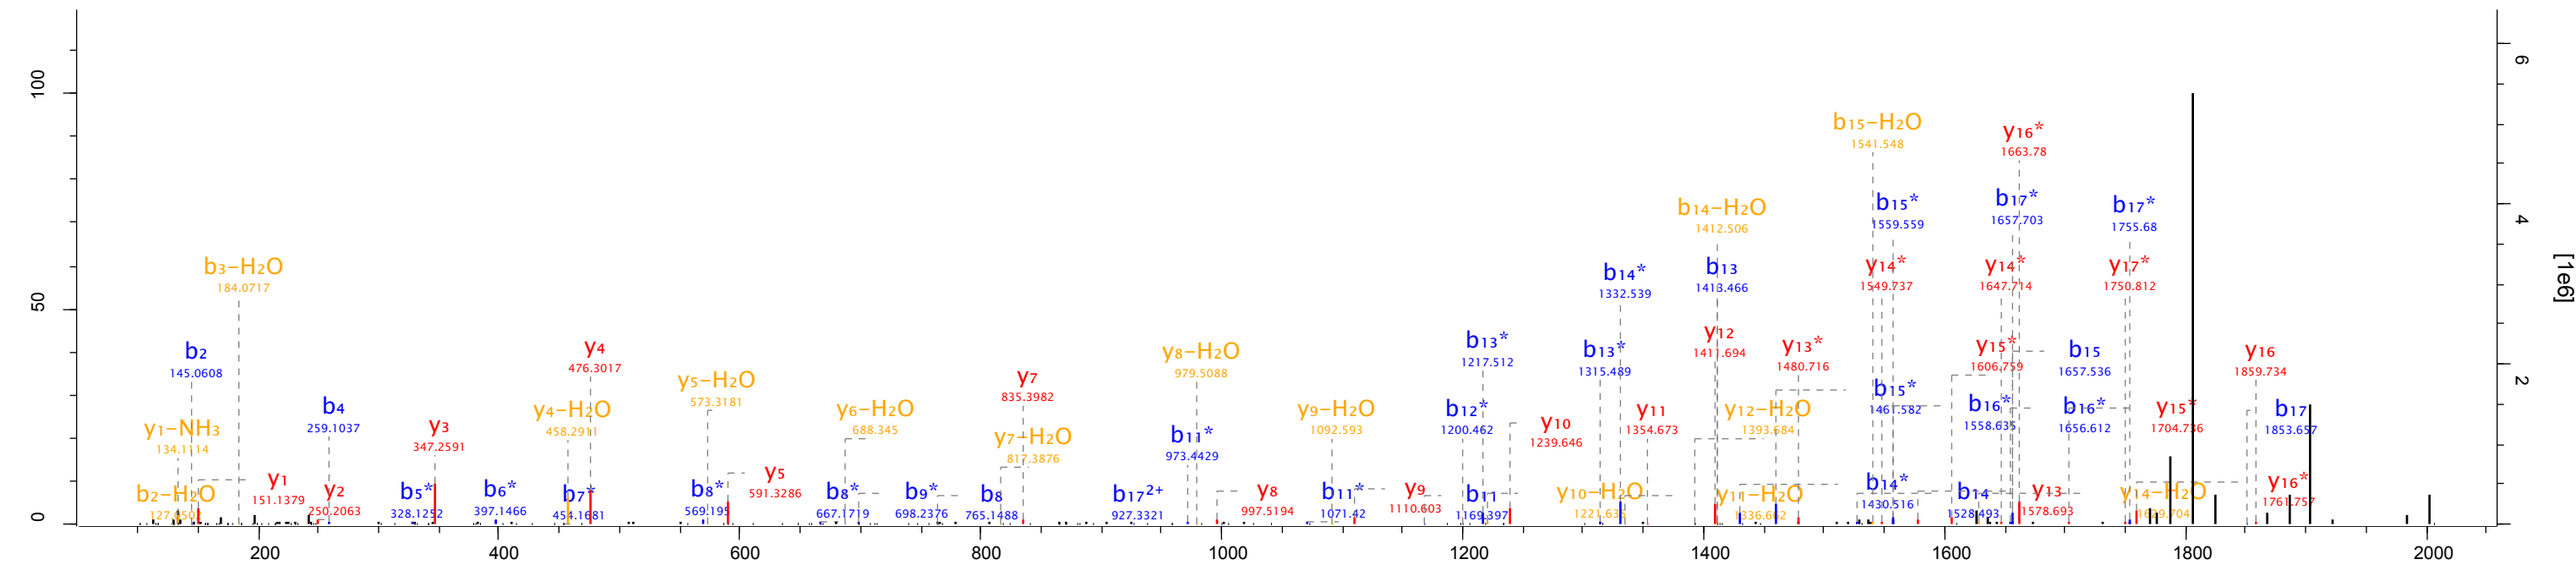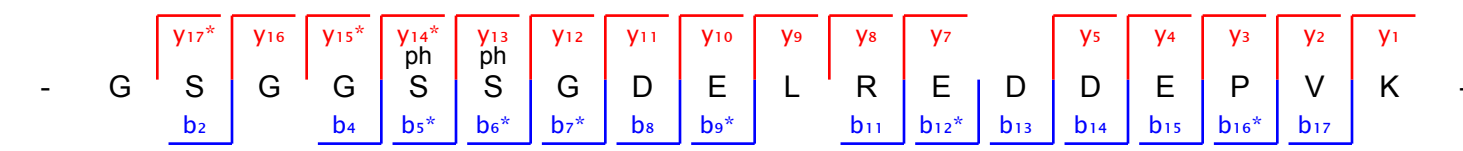

Raw file Scan Method Score m/z Gene names  
 20150812\_A375SR\_Phospho\_BR1\_02 10209 FTMS; HCD 98.06 703.76 SRPK2

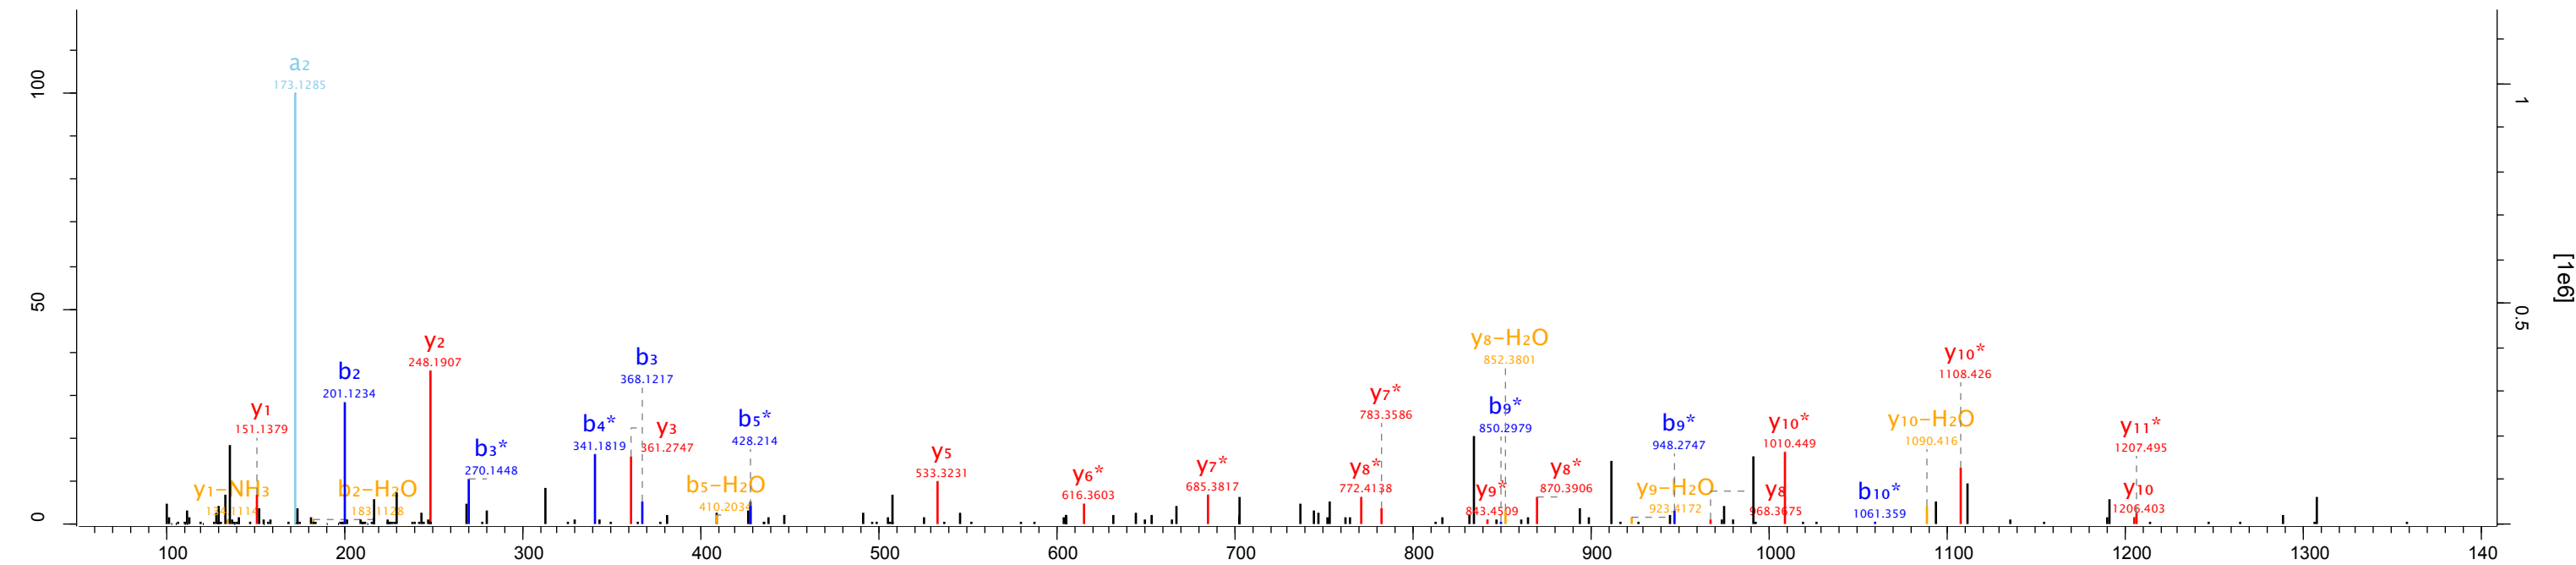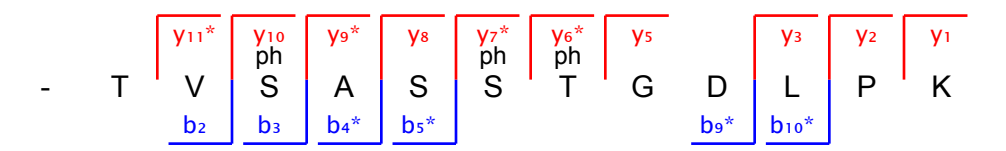

Raw file Scan Method Score m/z Gene names  
 20150812\_A375SR\_Phospho\_BR1\_02 10309 FTMS; HCD 245.09 863.85 RABEP1

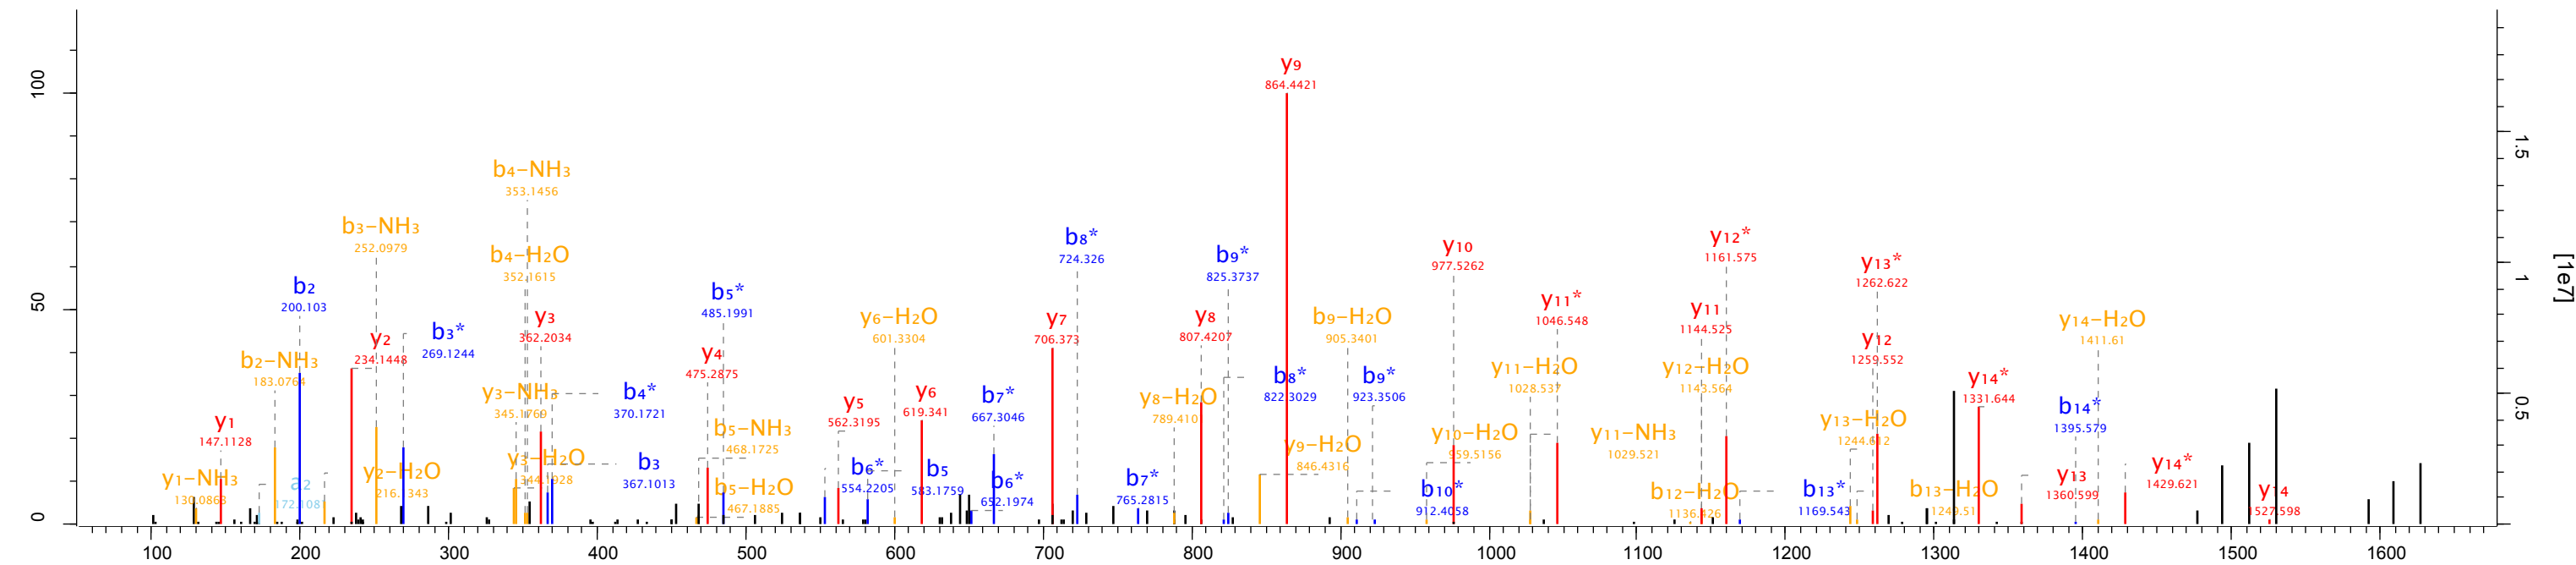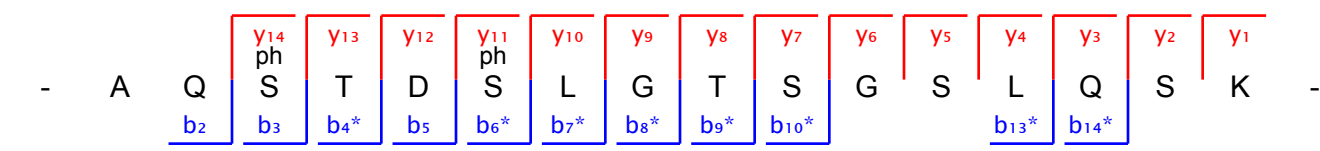

Raw file  
 20150812\_A375SR\_Phospho\_BR1\_02  
 Scan 10349 Method FTMS; HCD Score 186.68 m/z 1122.48 Gene names CCDC9

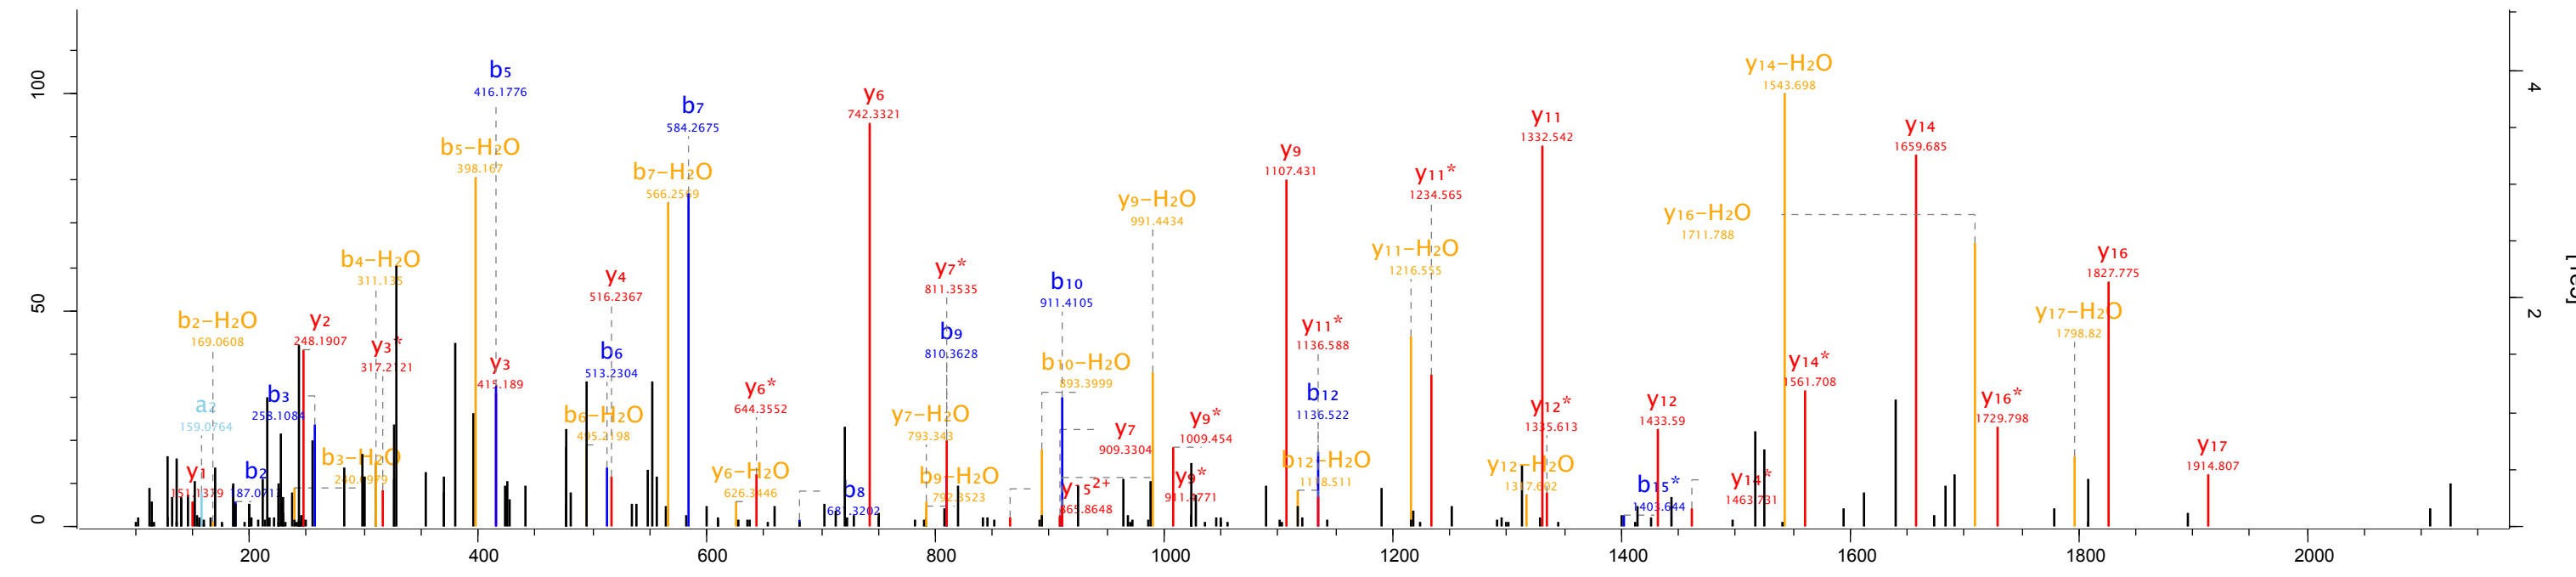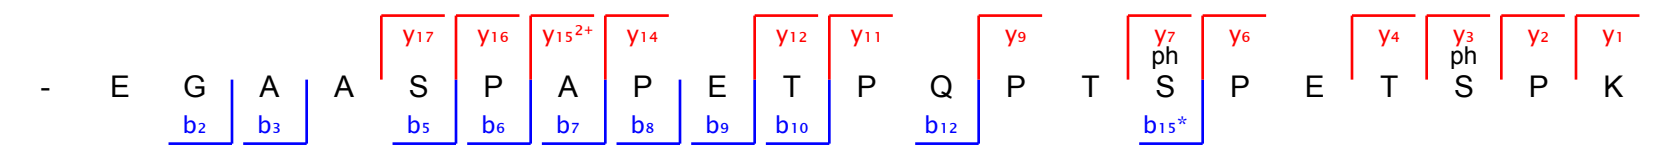

Raw file 20150812\_A375SR\_Phospho\_BR1\_02 Scan 10359 Method FTMS; HCD Score 80.82 m/z 999.35 Gene names PA2G4

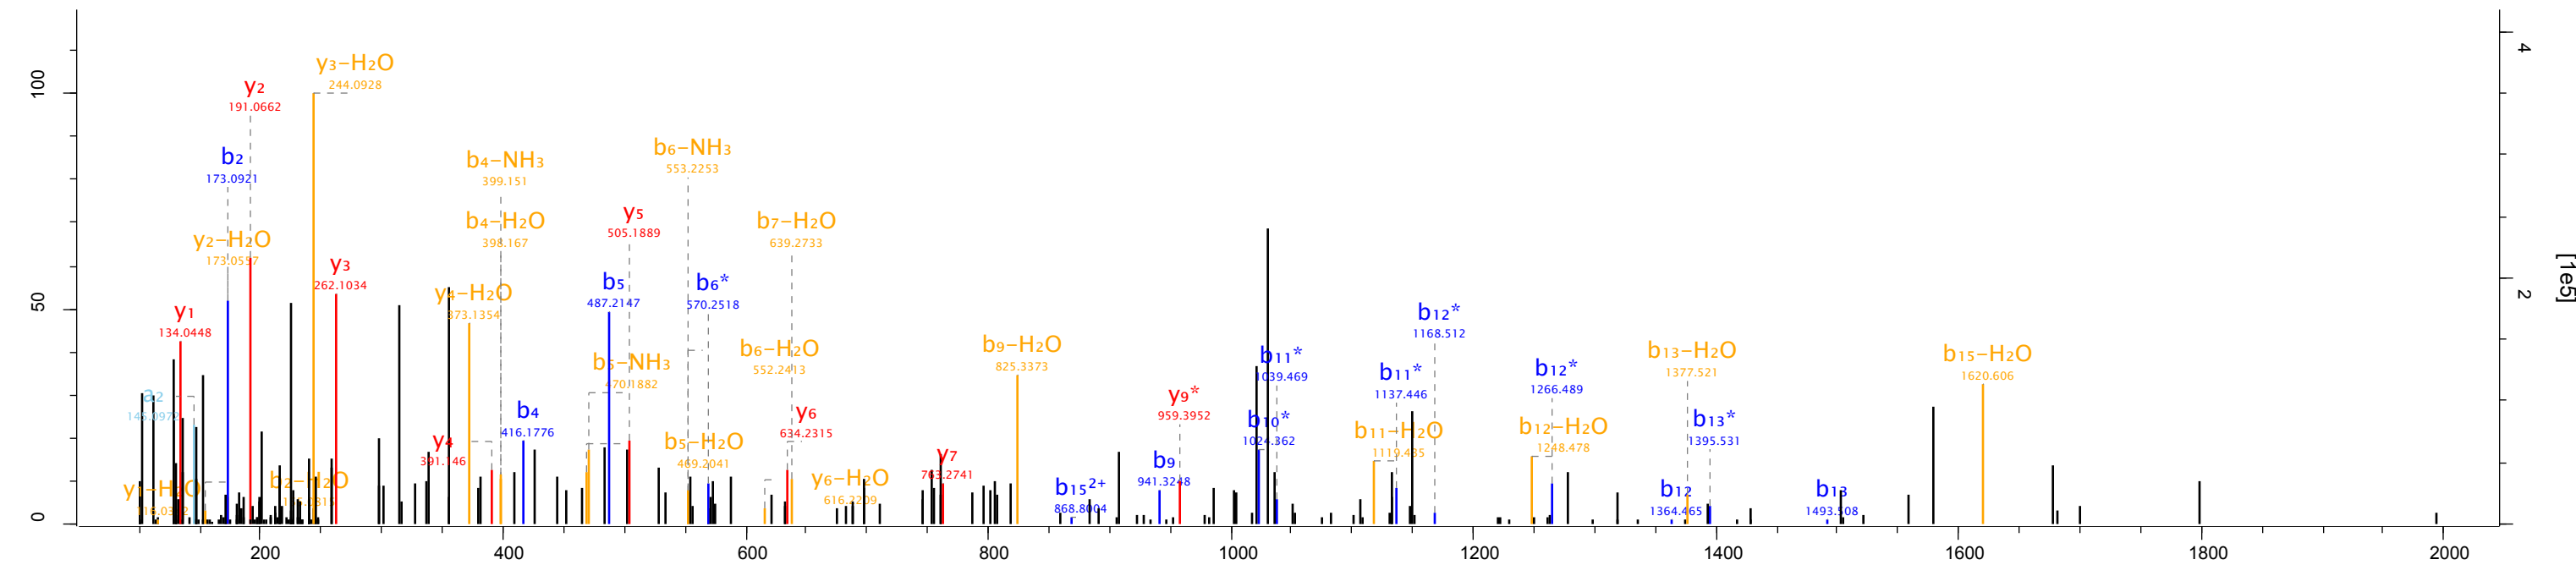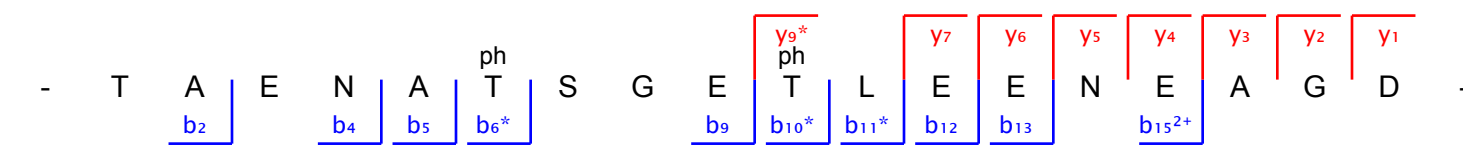



Raw file: 20150812\_A375SR\_Phospho\_BR1\_02  
 Scan: 10389 Method: FTMS; HCD Score: 137.39 m/z: 867.83 Gene names: SQSTM1

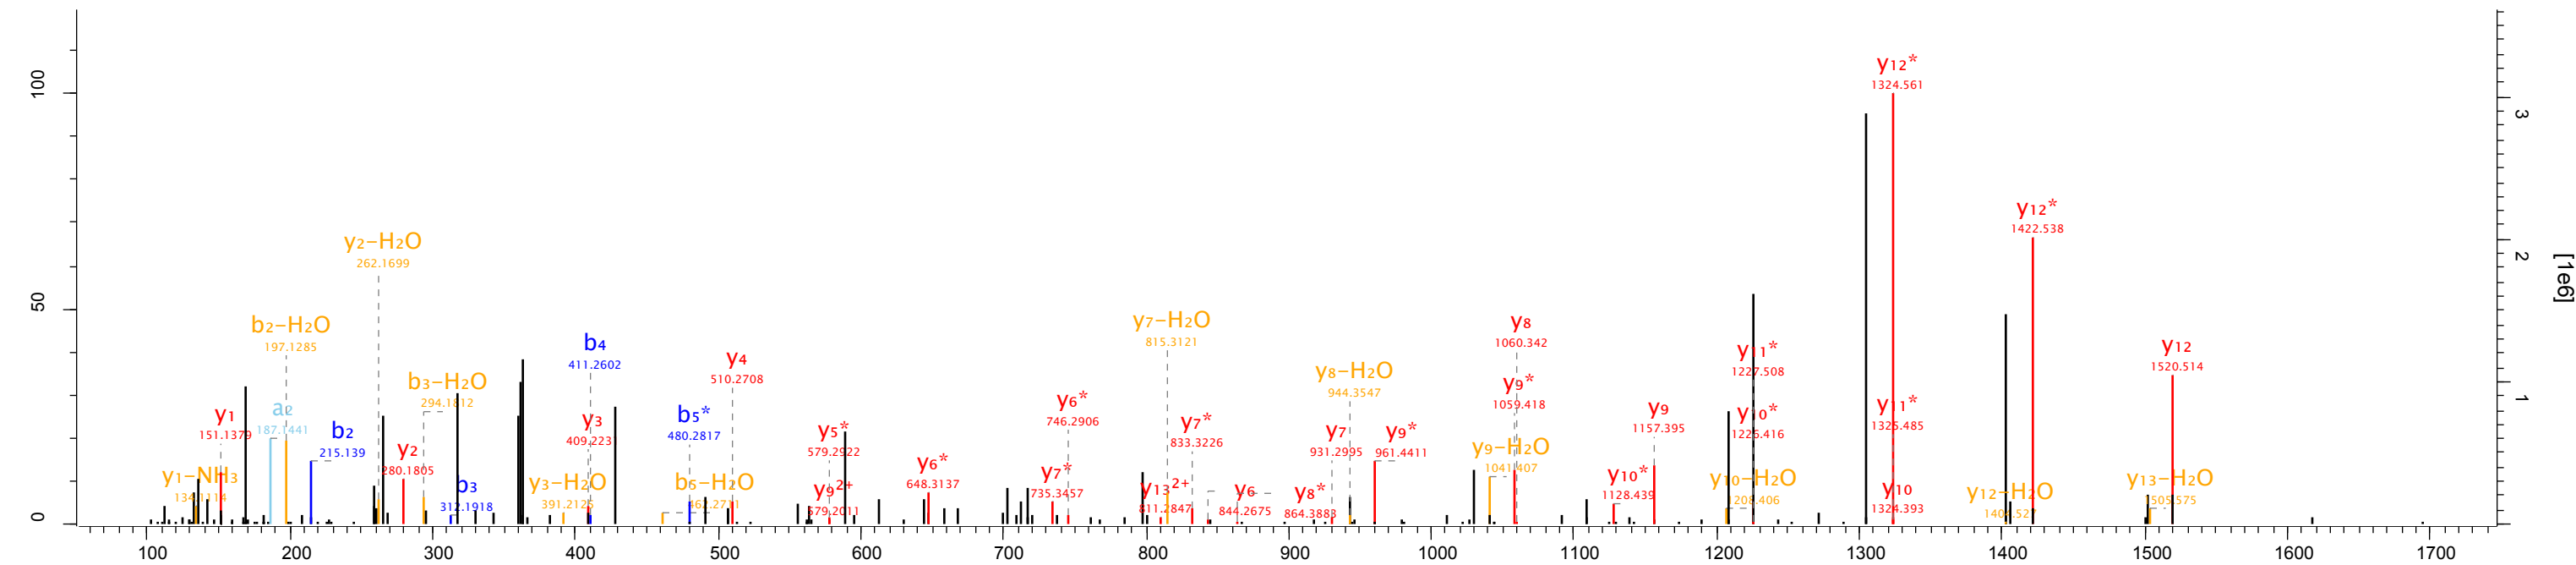

Sequence: L T P V P E S S P S T E E K -

Fragmentation mapping (boxed):

- $y_{13}^{2+}$  (T) →  $b_2$
- $y_{12}$  (P) →  $b_3$
- $y_{11}^*$  (V) →  $b_4$
- $y_{10}$  (ph S) →  $b_5^*$

Raw file Scan Method Score m/z Gene names  
 20150812\_A375SR\_Phospho\_BR1\_02 10809 FTMS; HCD 212.17 1019.07 XPC

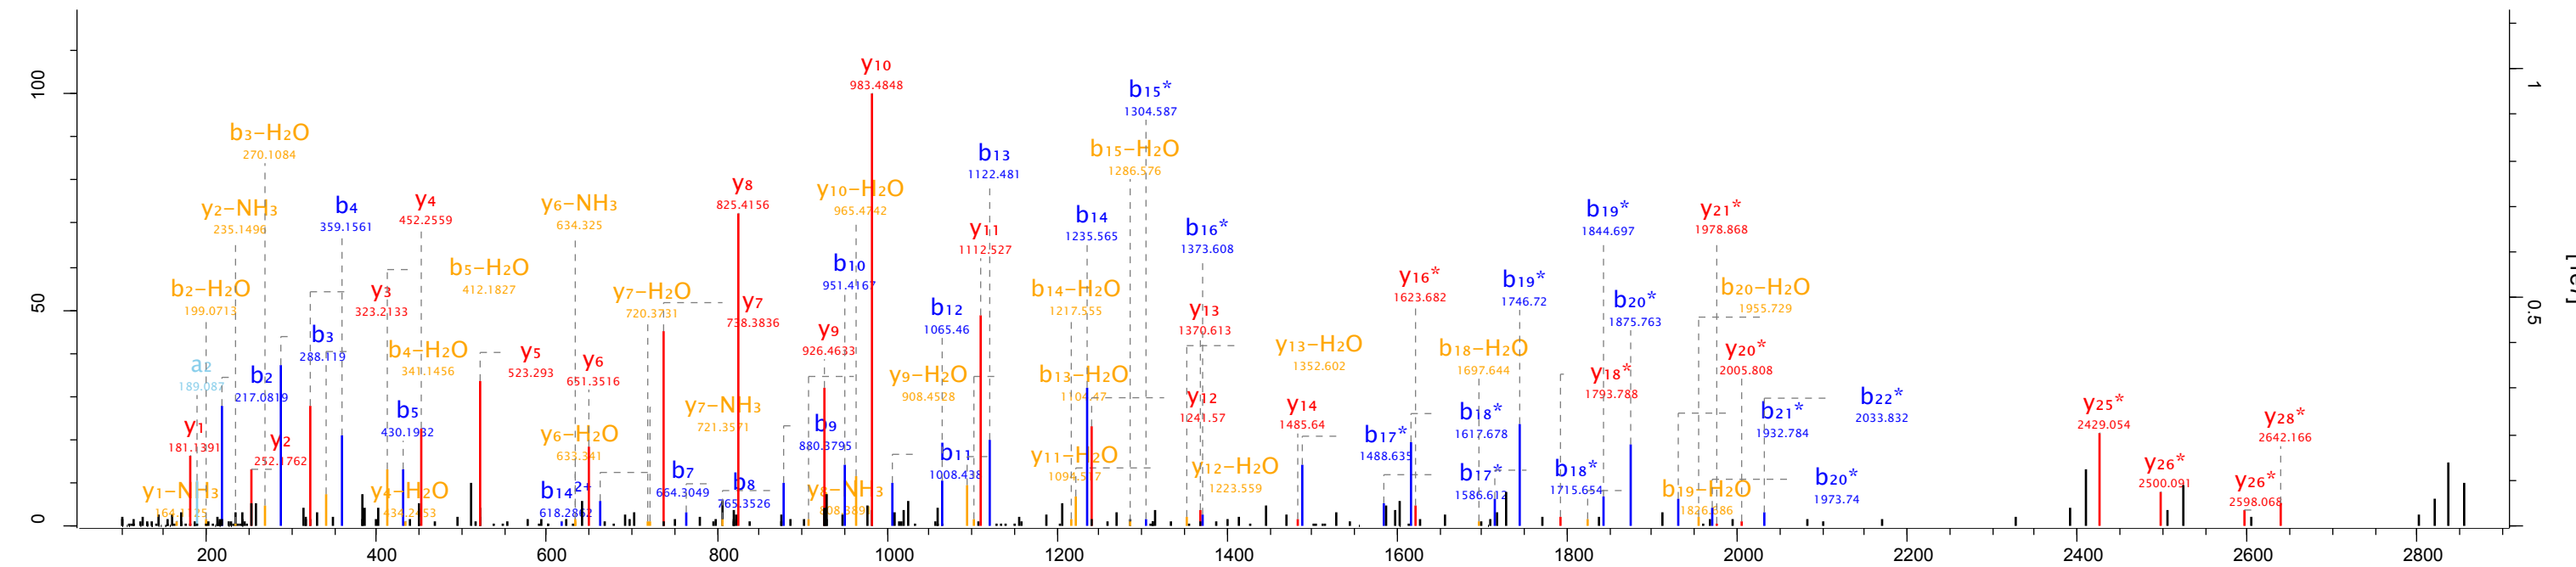

- S E A A A P H T D A G G G L S ph S D E E E G T S S Q A E A A R -

Fragmentation mapping below the sequence:

- Red boxes (y-ions): y28\* (A), y26\* (A), y25\* (A), y21\* (A), y20\* (G), y18\* (G), y16\* (S), y14 (D), y13 (E), y12 (E), y11 (E), y10 (G), y9 (T), y8 (S), y7 (S), y6 (Q), y5 (A), y4 (E), y3 (A), y2 (A), y1 (R)
- Blue boxes (b-ions): b2 (E), b3 (A), b4 (A), b5 (A), b7 (H), b8 (T), b9 (D), b10 (A), b11 (G), b12 (G), b13 (G), b14 (L), b15\* (S), b16\* (S), b17\* (D), b18\* (E), b19\* (E), b20\* (E), b21\* (G), b22\* (T)

Raw file  
 20150812\_A375SR\_Phospho\_BR1\_02  
 Scan 10929 Method FTMS; HCD Score 47.53 m/z 1254.02 Gene names PRRC2C

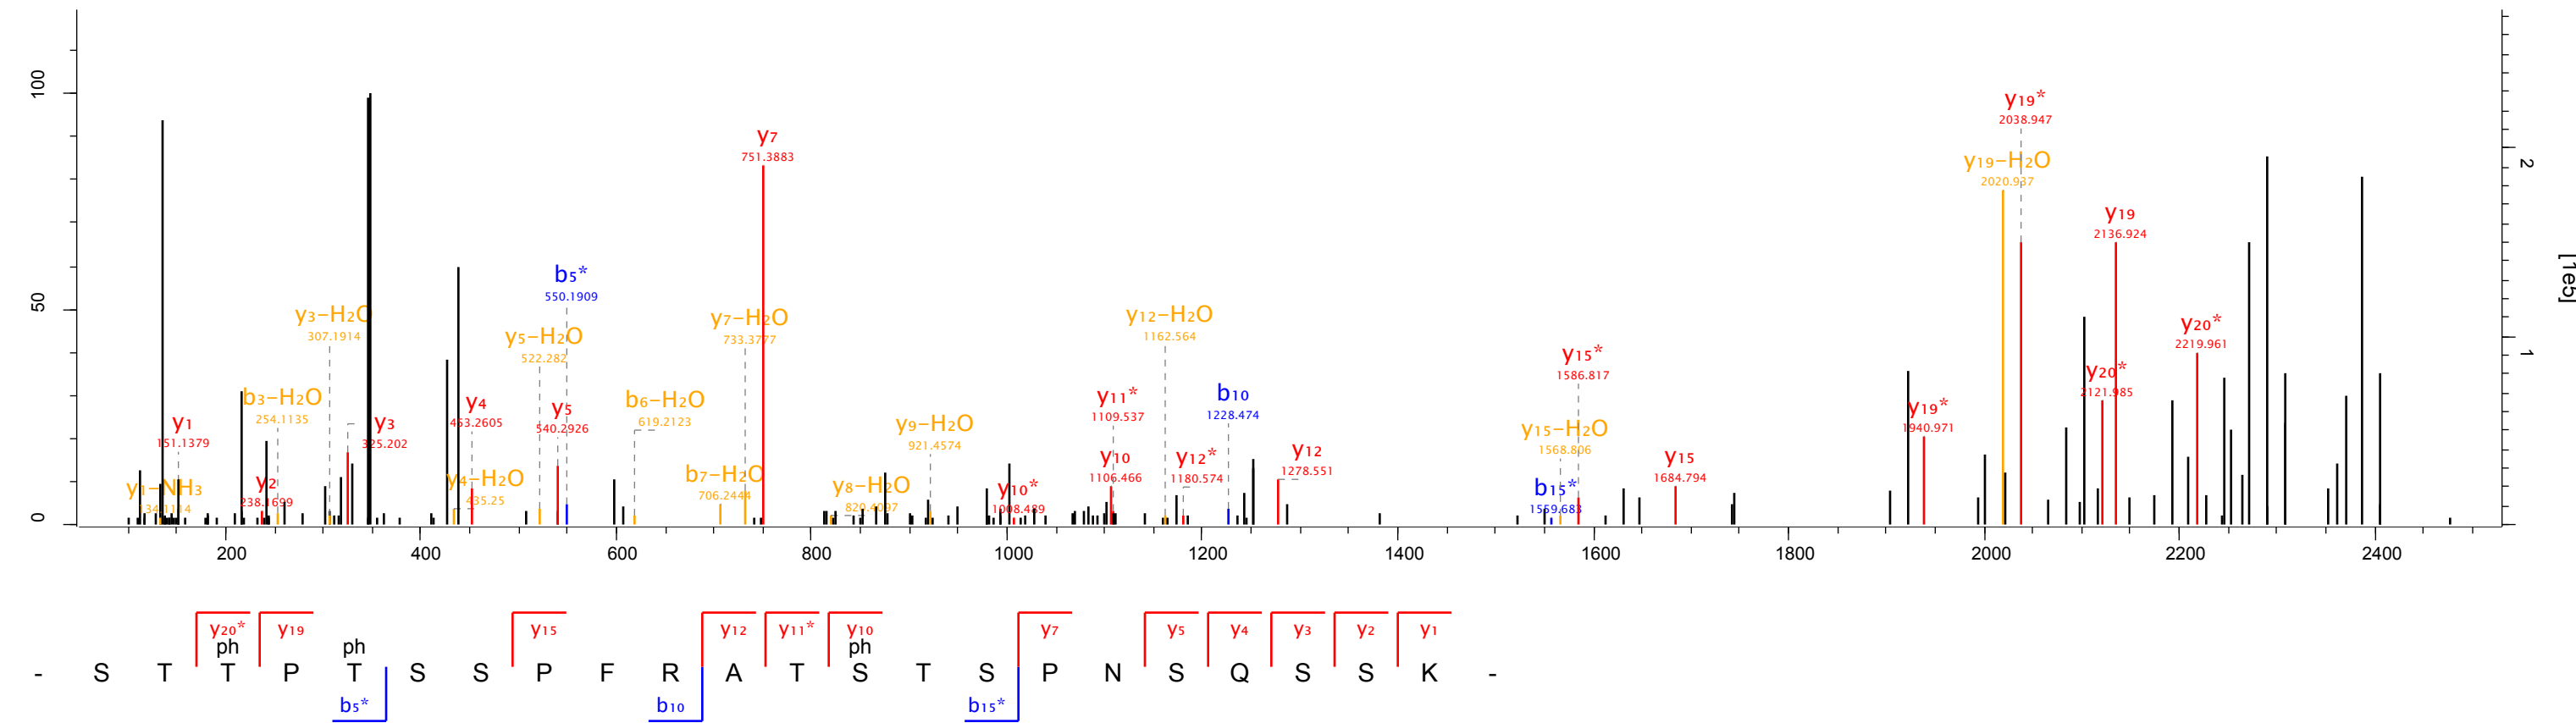

Raw file 20150812\_A375SR\_Phospho\_BR1\_02 Scan 11049 Method FTMS; HCD Score 71.7 m/z 641.98 Gene names MINK1

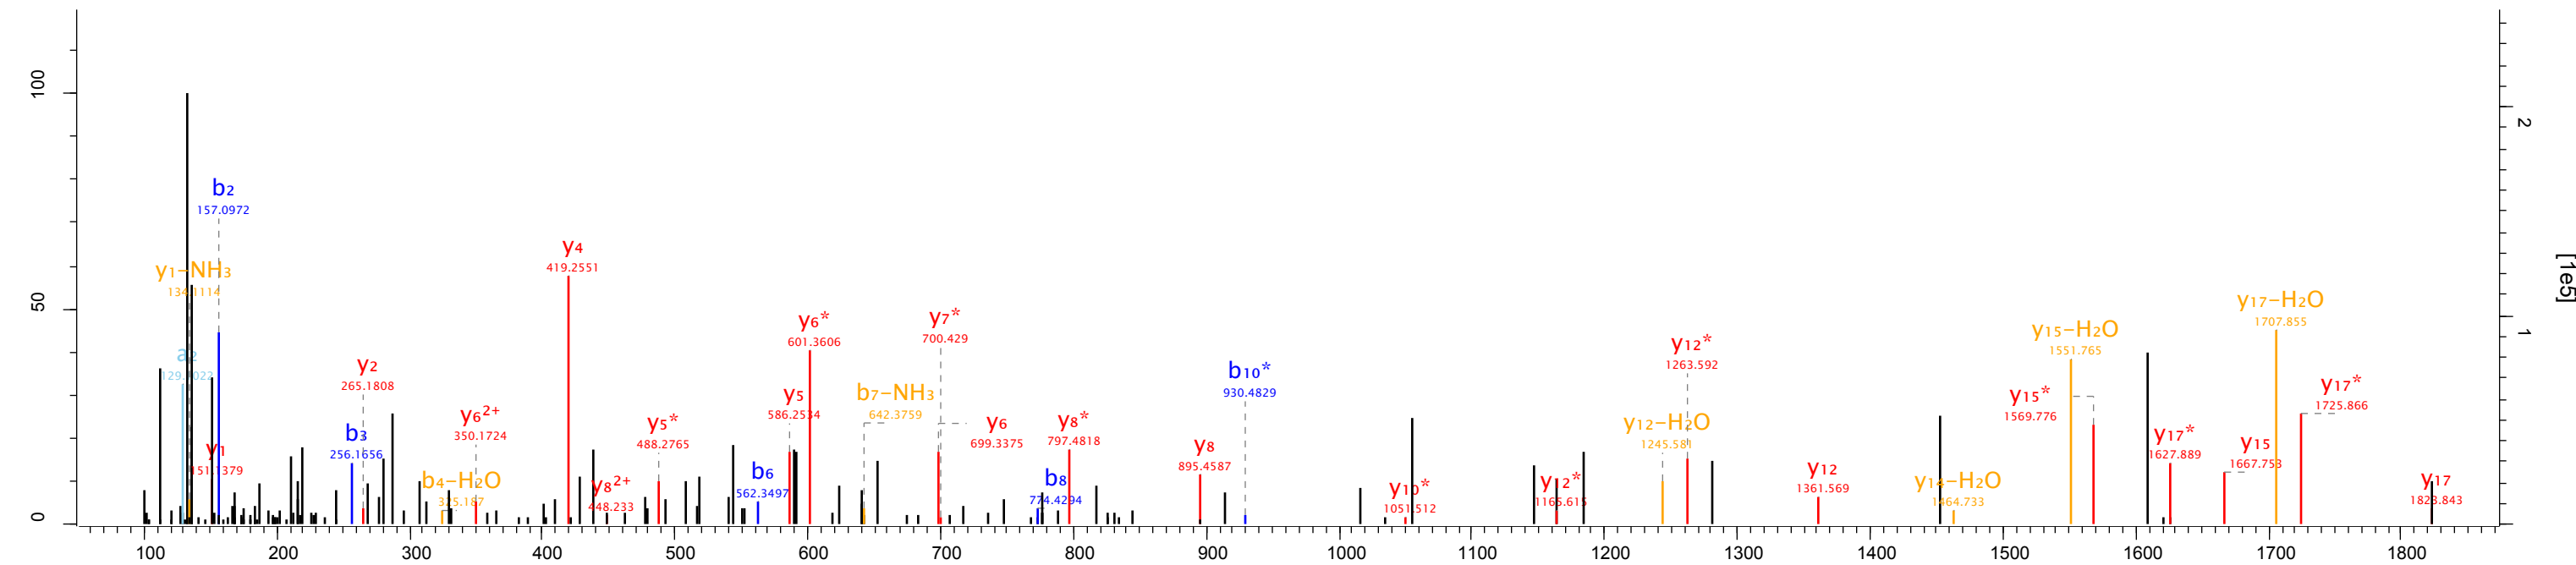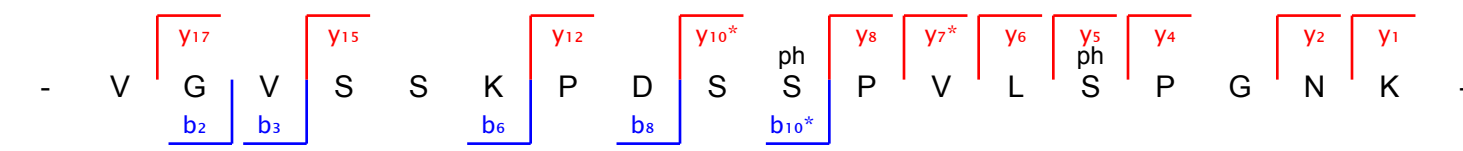

Raw file 20150812\_A375SR\_Phospho\_BR1\_02 Scan 11209 Method FTMS; HCD Score 172.99 m/z 738.81 Gene names PPIP5K2

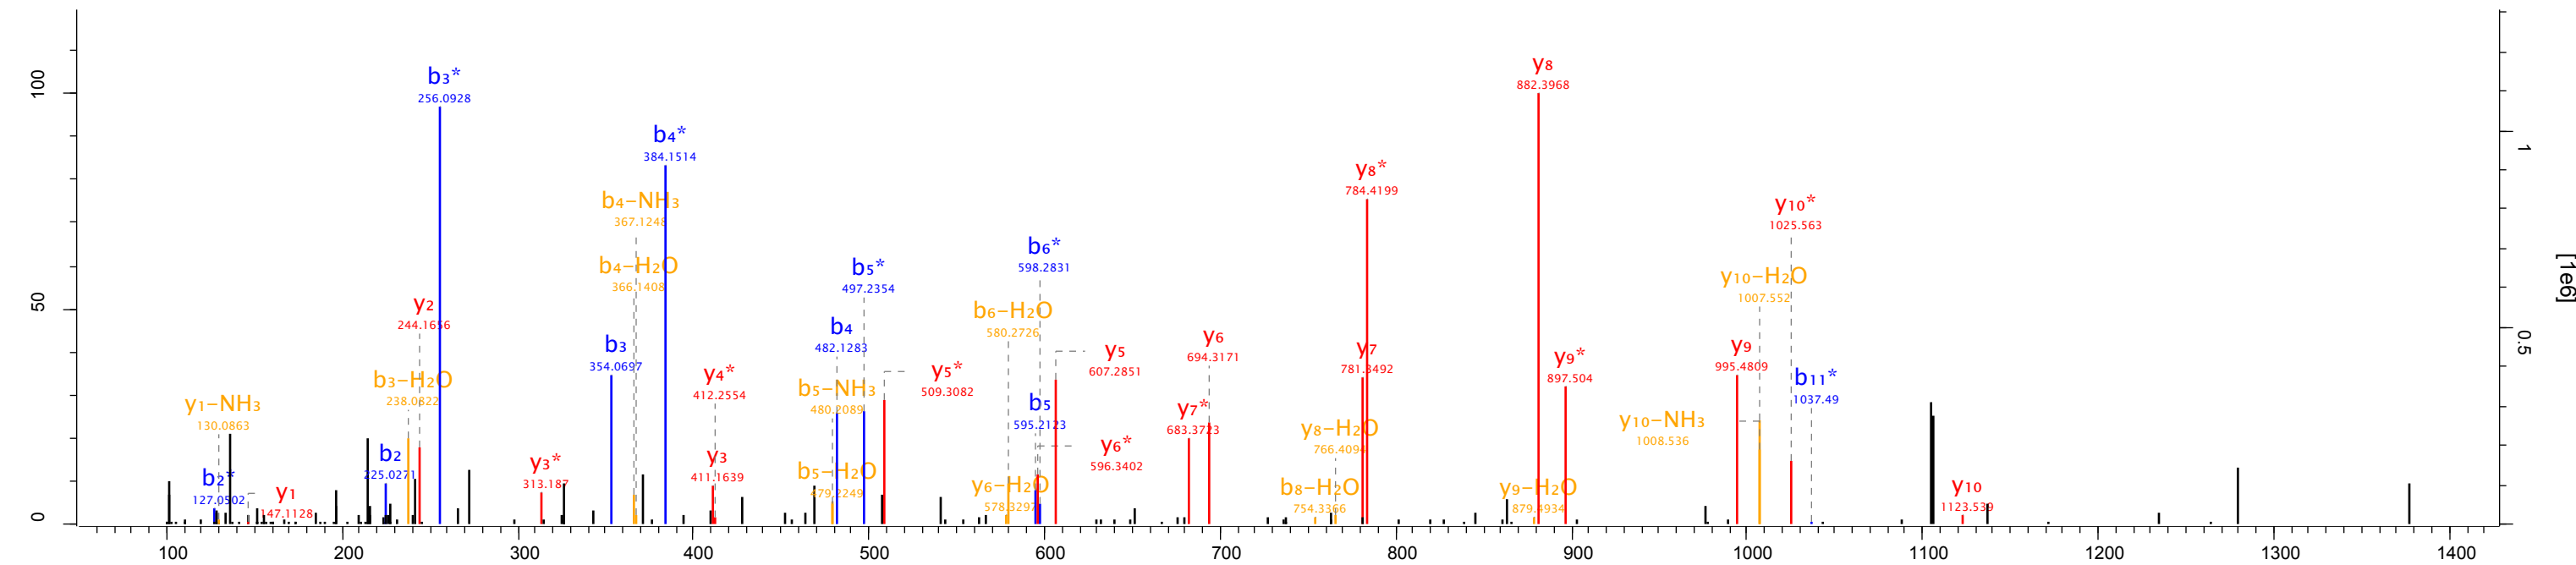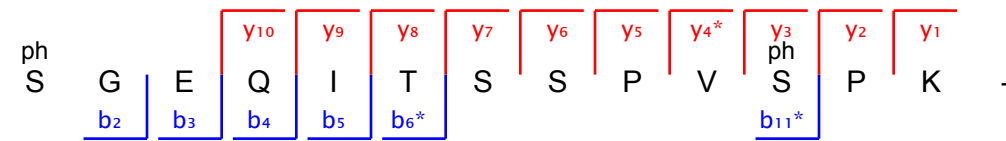

Raw file 20150812\_A375SR\_Phospho\_BR1\_02 Scan 11529 Method FTMS; HCD Score 95.52 m/z 781 Gene names PCYT1A

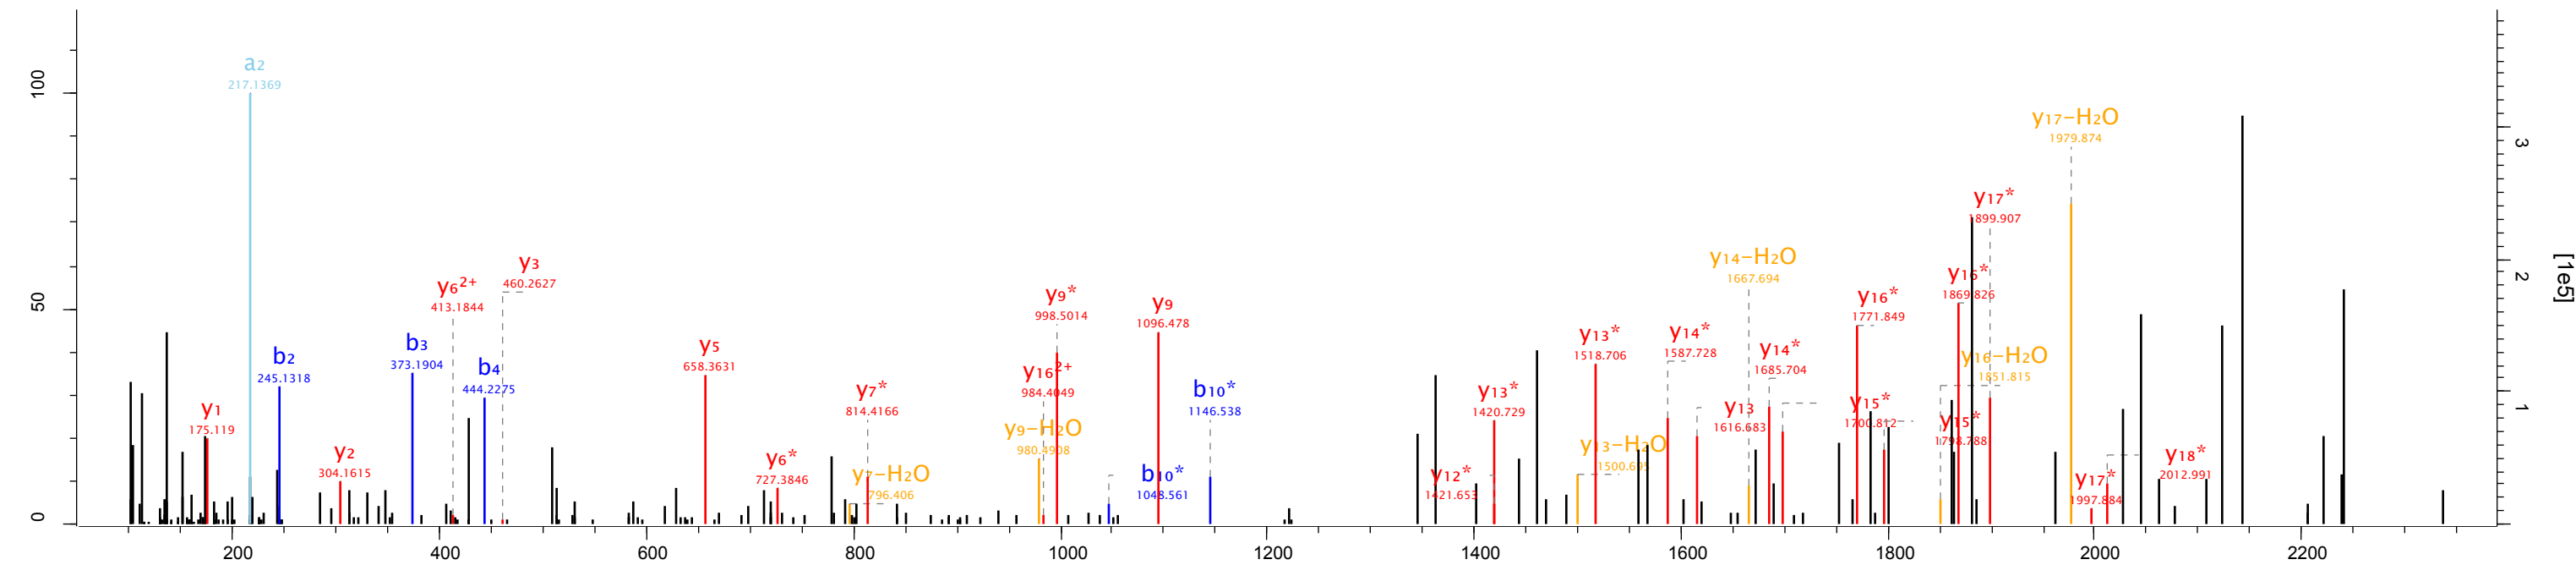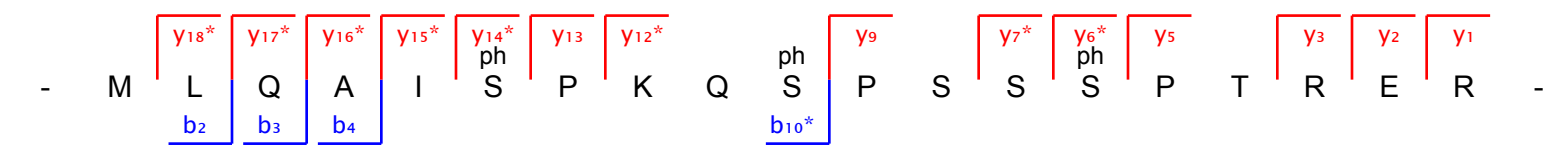



Raw file: 20150812\_A375SR\_Phospho\_BR1\_02  
 Scan: 11619 Method: FTMS; HCD Score: 129.82 m/z: 781.31 Gene names: ITGB4

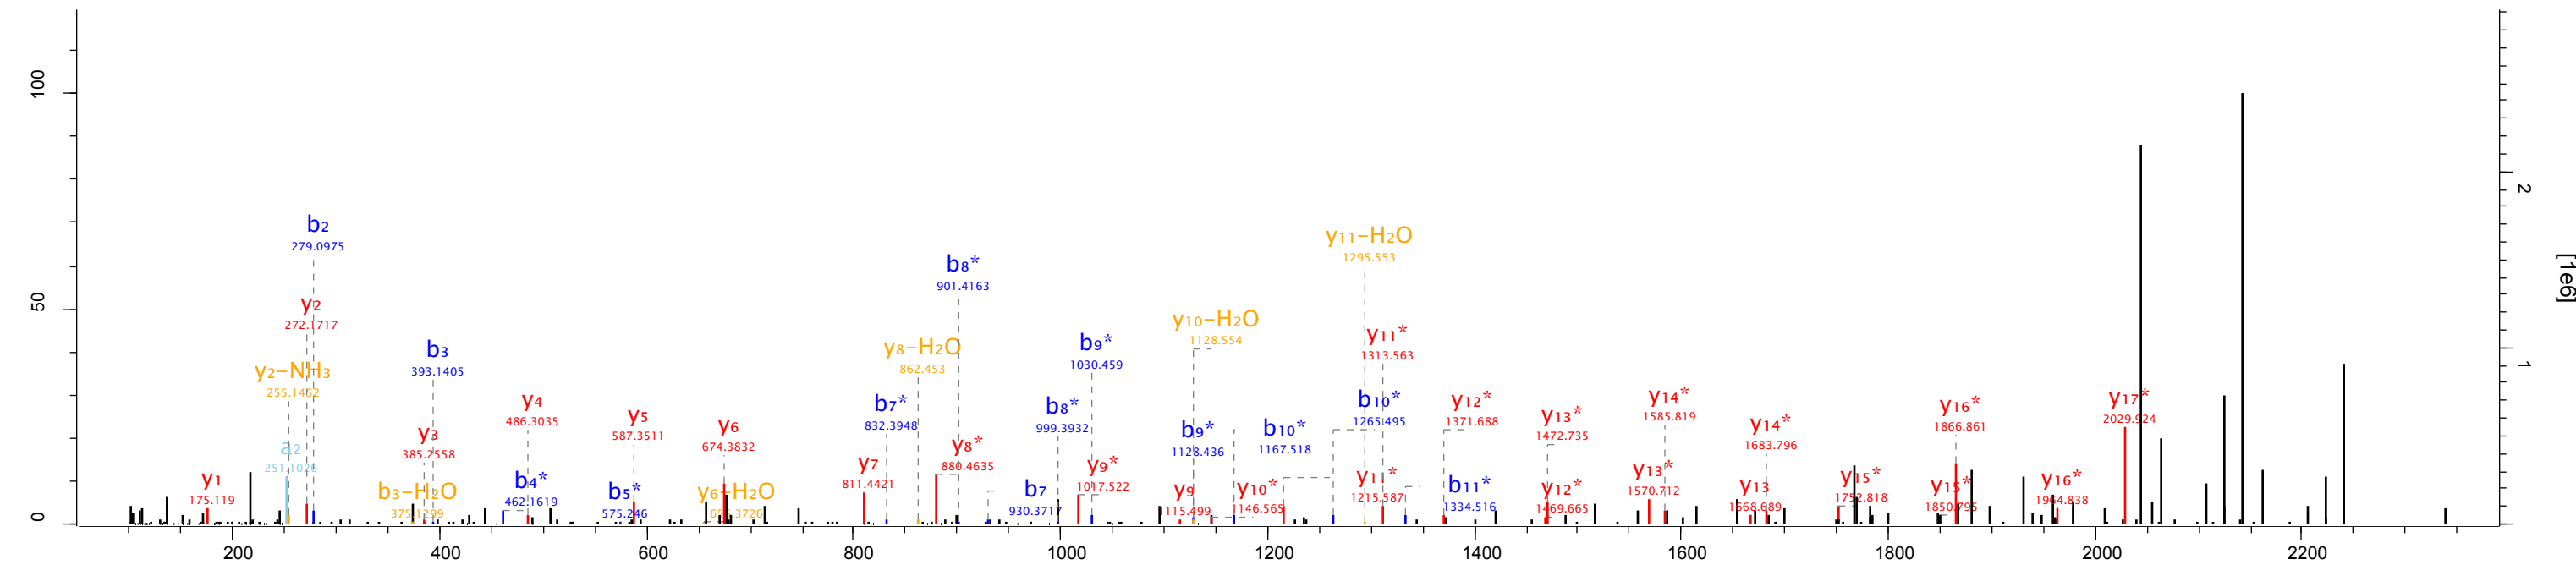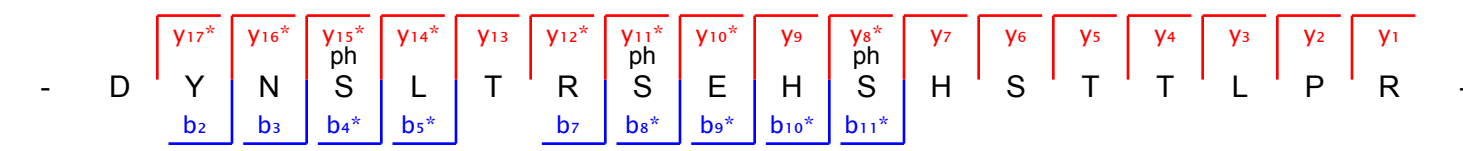



Raw file 20150812\_A375SR\_Phospho\_BR1\_02 Scan 11739 Method FTMS; HCD Score 106.6 m/z 669.28 Gene names SRRM2

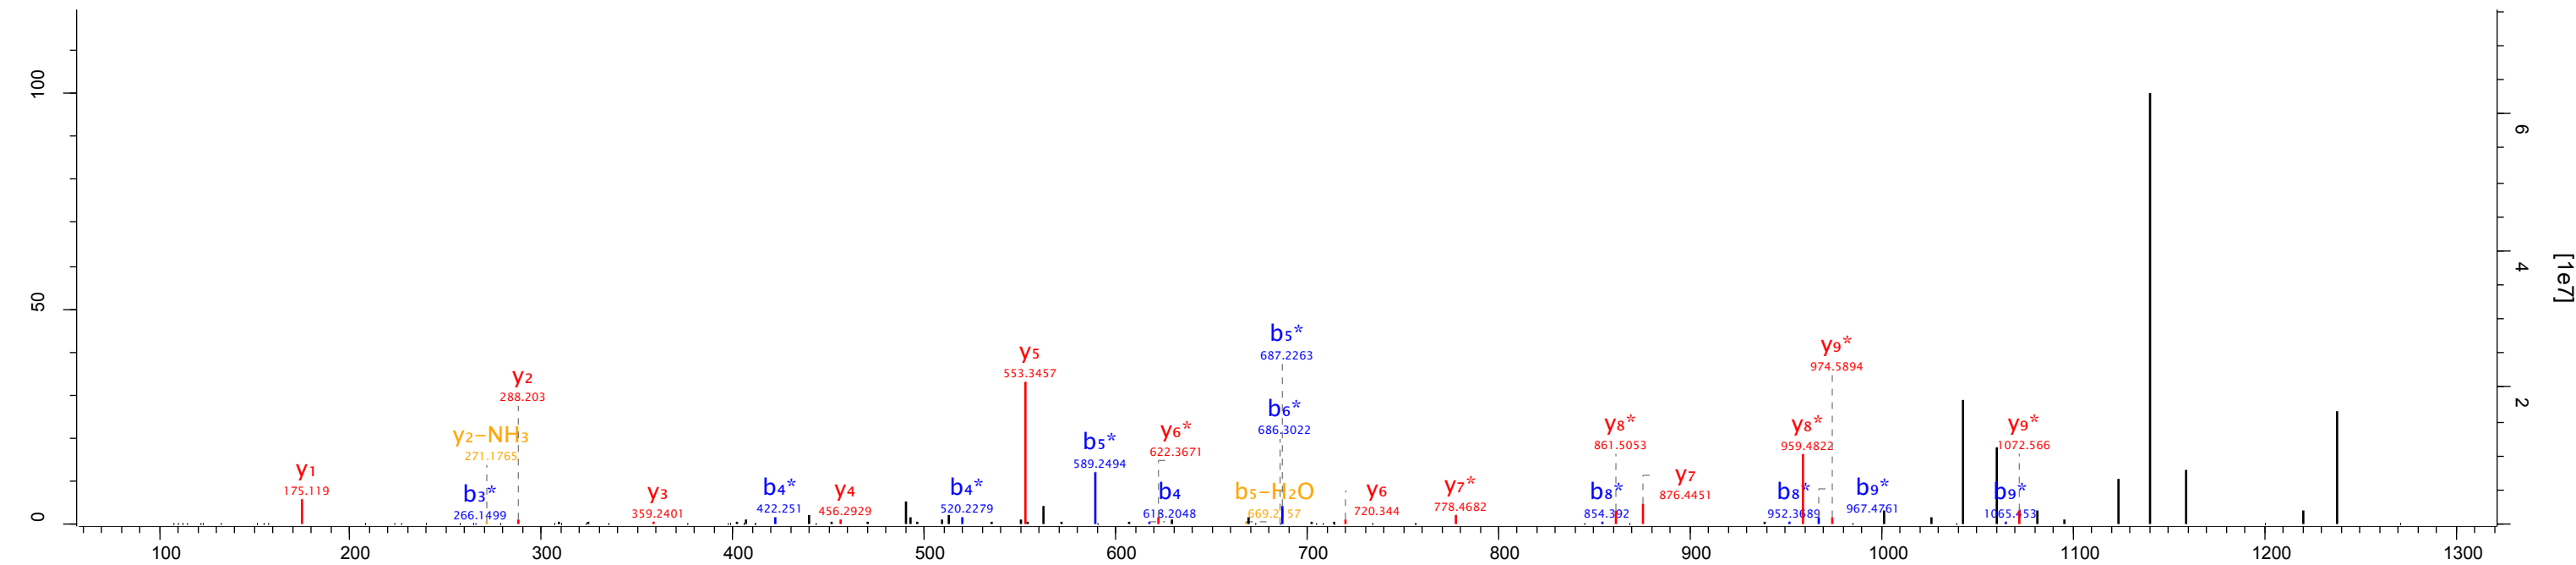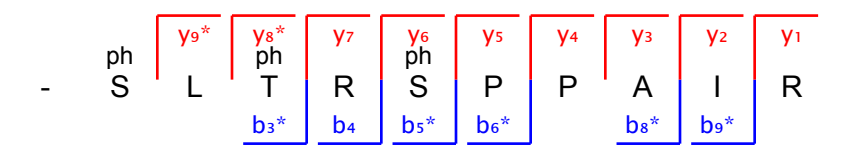

Raw file: 20150812\_A375SR\_Phospho\_BR1\_02  
 Scan: 11799 Method: FTMS; HCD Score: 209.71 m/z: 941.36 Gene names: TRA2A

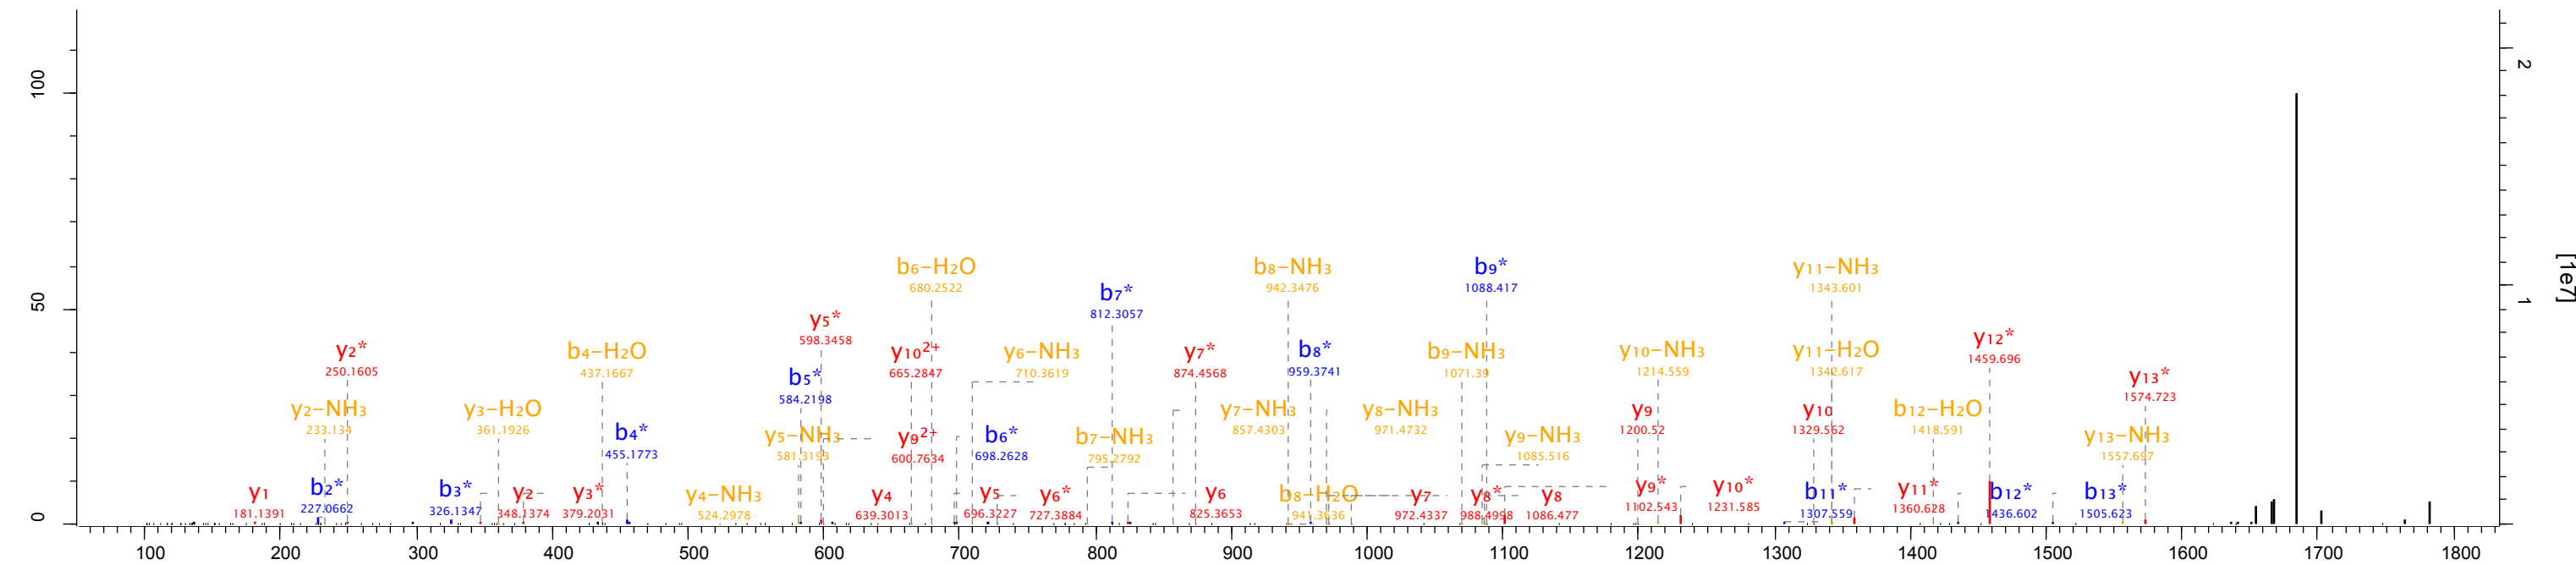

ac - pH S

|      |      |      |     |     |     |     |     |    |      |      |          |    |
|------|------|------|-----|-----|-----|-----|-----|----|------|------|----------|----|
| y13* | y12* | y11* | y10 | y9  | y8  | y7  | y6  | y5 | y4   | y3*  | y2<br>pH | y1 |
| D    | V    | E    | E   | N   | N   | F   | E   | G  | R    | E    | S        | R  |
| b2*  | b3*  | b4*  | b5* | b6* | b7* | b8* | b9* |    | b11* | b12* | b13*     |    |

Raw file: 20150812\_A375SR\_Phospho\_BR1\_02  
 Scan: 12049 Method: FTMS; HCD Score: 164.99 m/z: 1007.84 Gene names: CCDC25

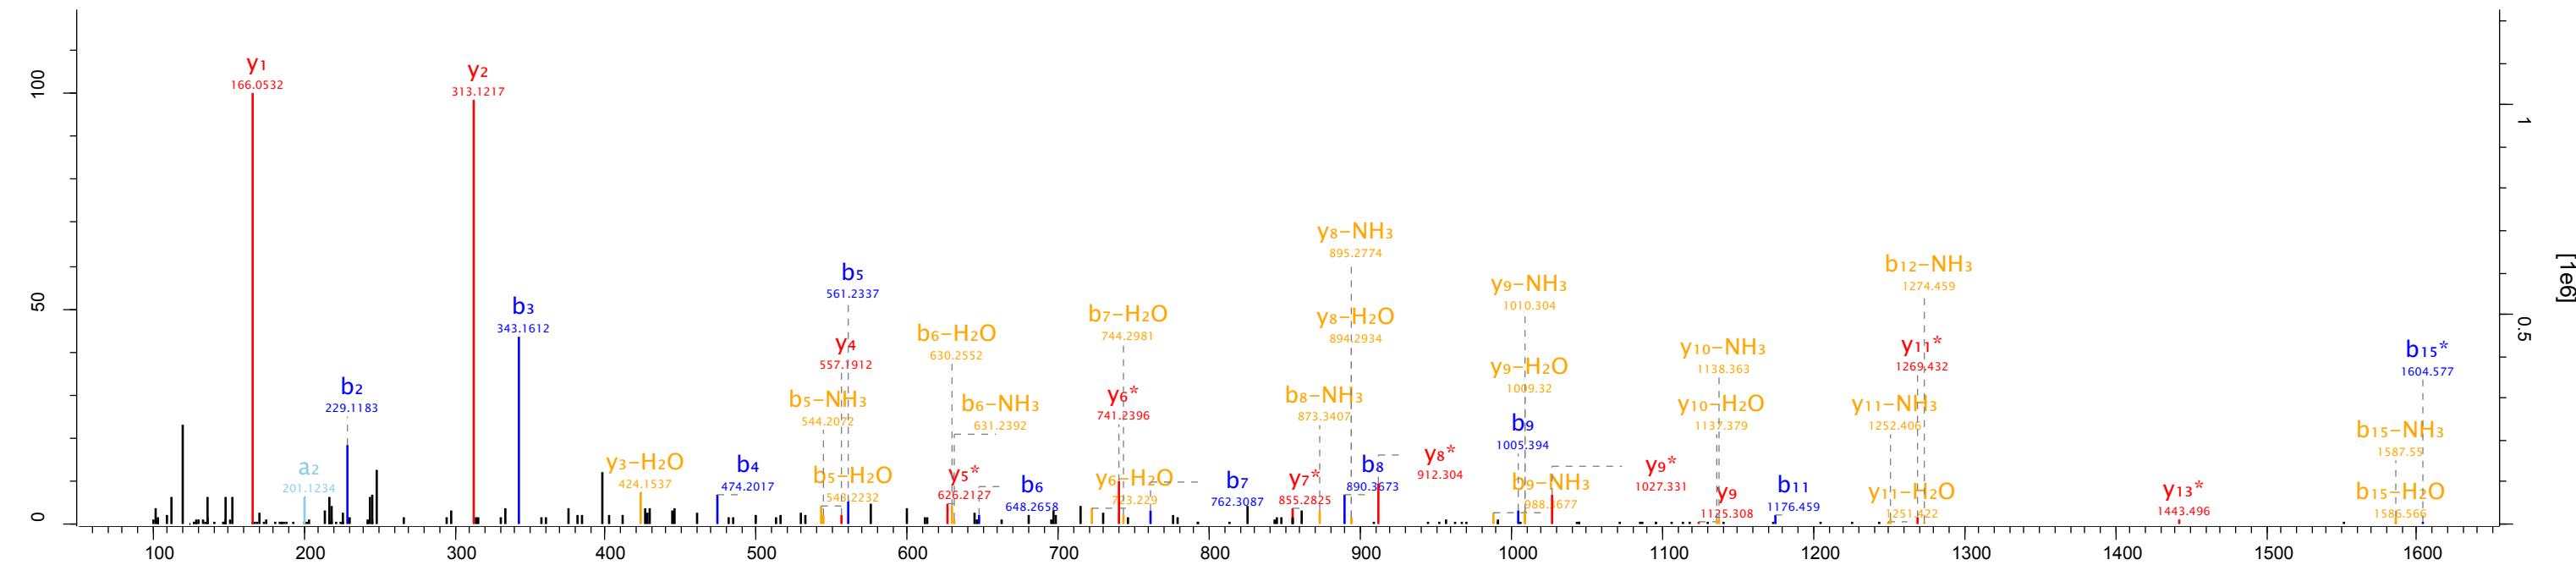

Sequence: V E N M S S N Q D G N D S D E F M -

Fragmentation sites (b ions): b2 (E), b3 (N), b4 (M), b5 (S), b6 (S), b7 (N), b8 (Q), b9 (D), b11 (N), b15\* (E)

Fragmentation sites (y ions): y13\* (S), y11\* (N), y9 (D), y8\* (G), y7\* (N), y6\* (D), y5\* (S), y4 (D), y2 (F), y1 ox (M)

Raw file: 20150812\_A375SR\_Phospho\_BR1\_02  
 Scan: 12079 Method: FTMS; HCD Score: 209 m/z: 1339.4 Gene names: WBP11

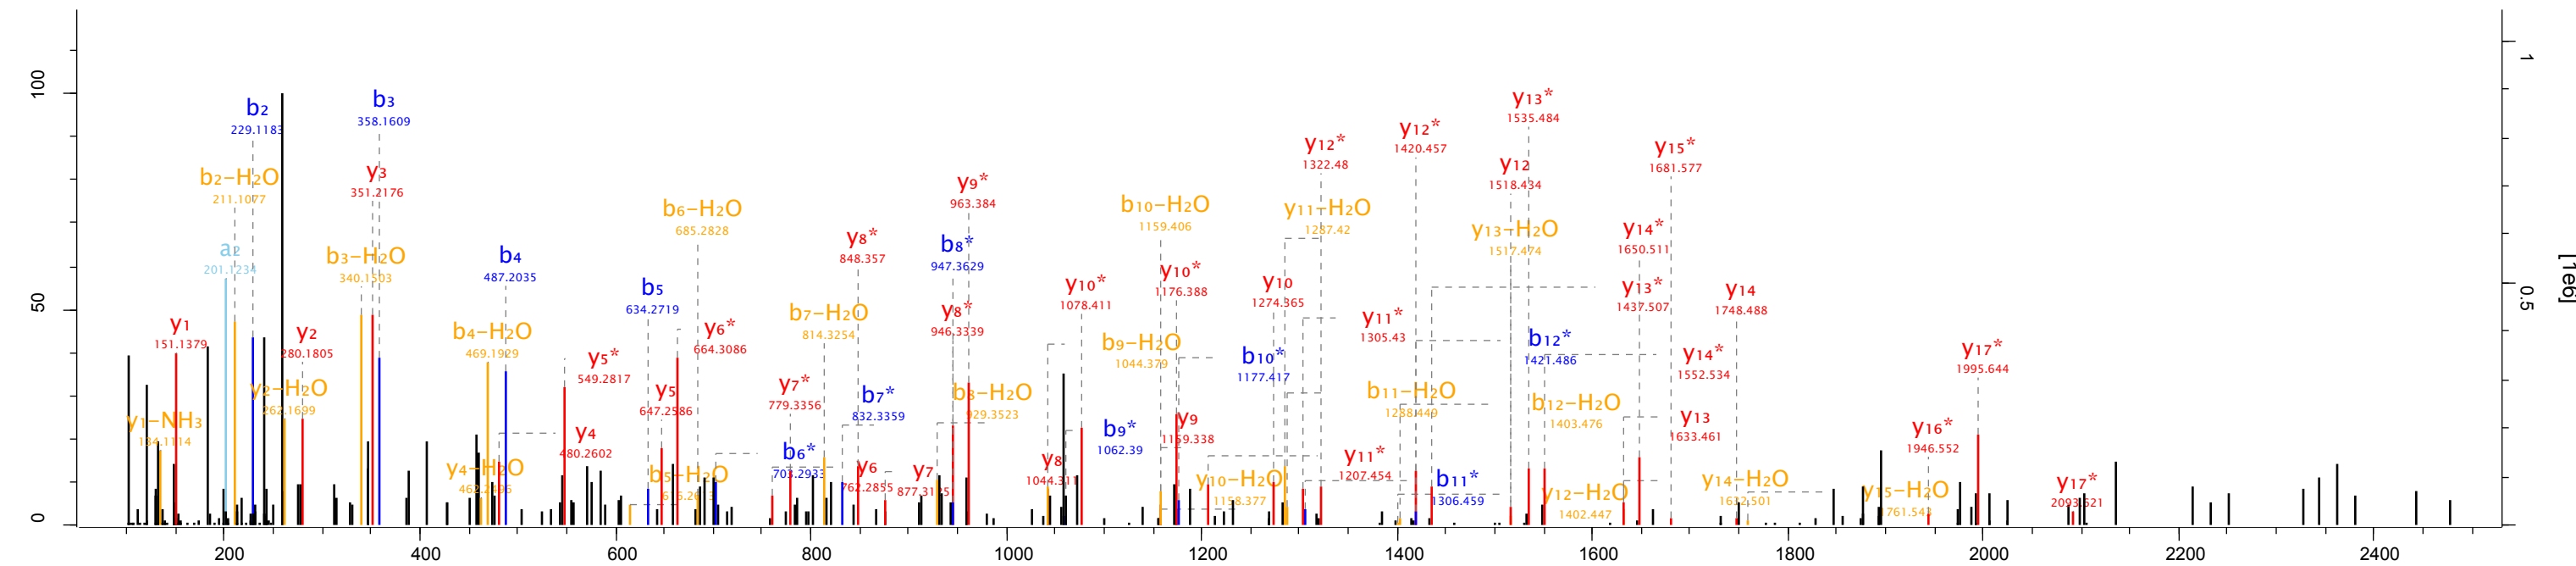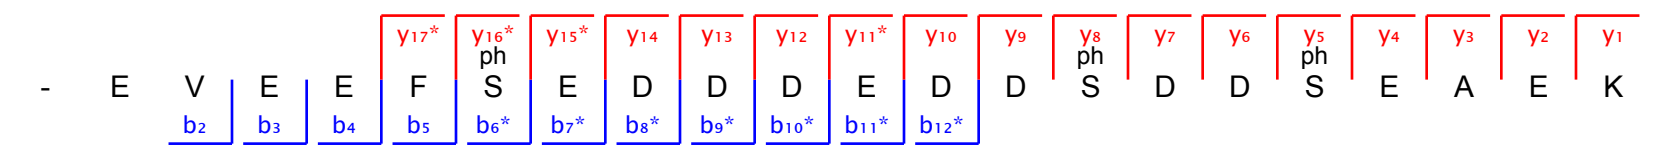

Raw file 20150812\_A375SR\_Phospho\_BR1\_02 Scan 12659 Method FTMS; HCD Score 269.39 m/z 926.87 Gene names TNKS1BP1

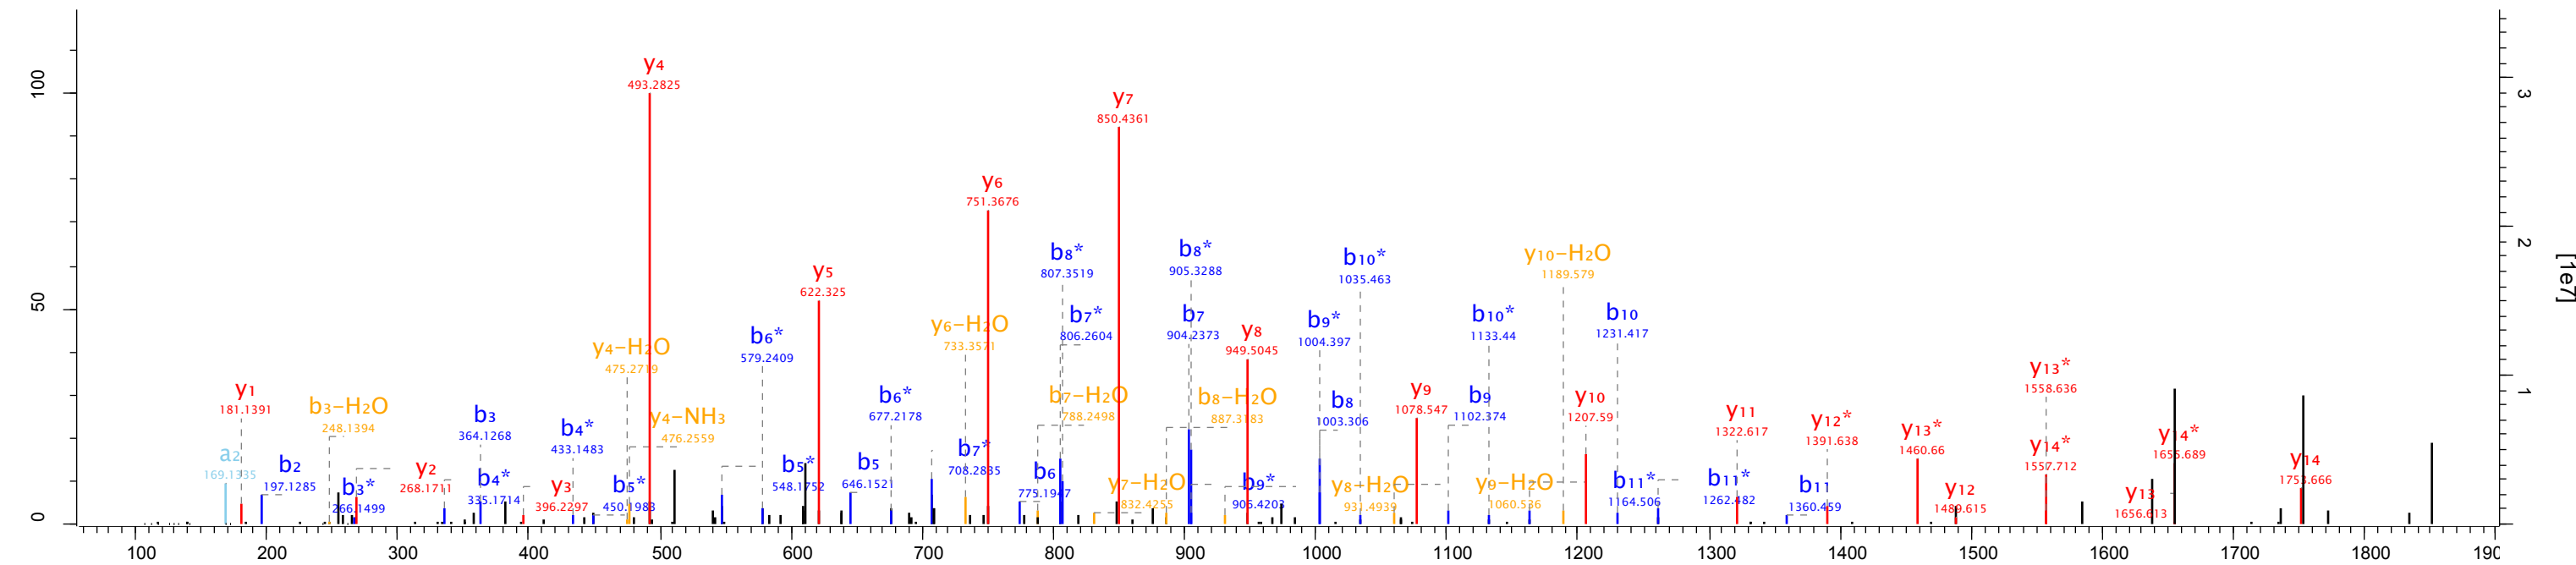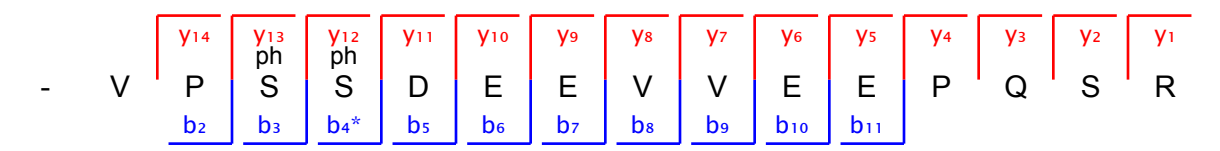

Raw file 20150812\_A375SR\_Phospho\_BR1\_02 Scan 12719 Method FTMS; HCD Score 179.71 m/z 1015.91 Gene names MAP1S

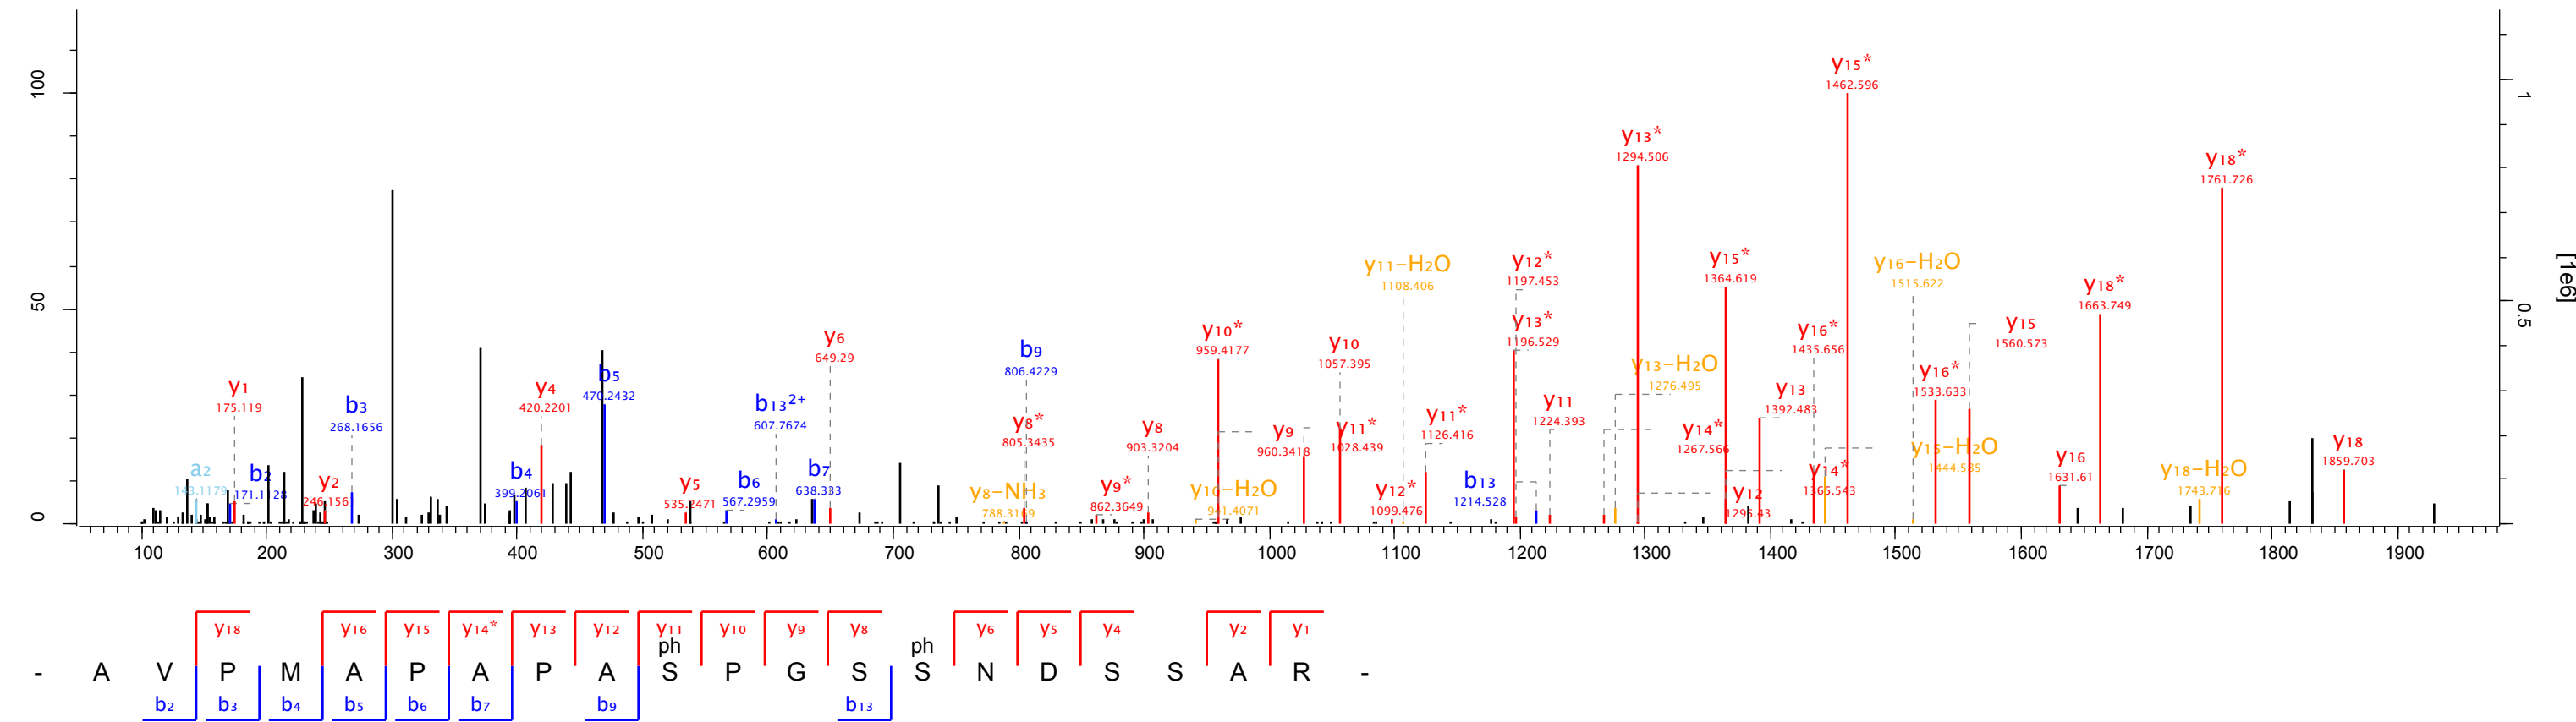

Raw file 20150812\_A375SR\_Phospho\_BR1\_02 Scan 12929 Method FTMS; HCD Score 64.37 m/z 615.78 Gene names ITGB4

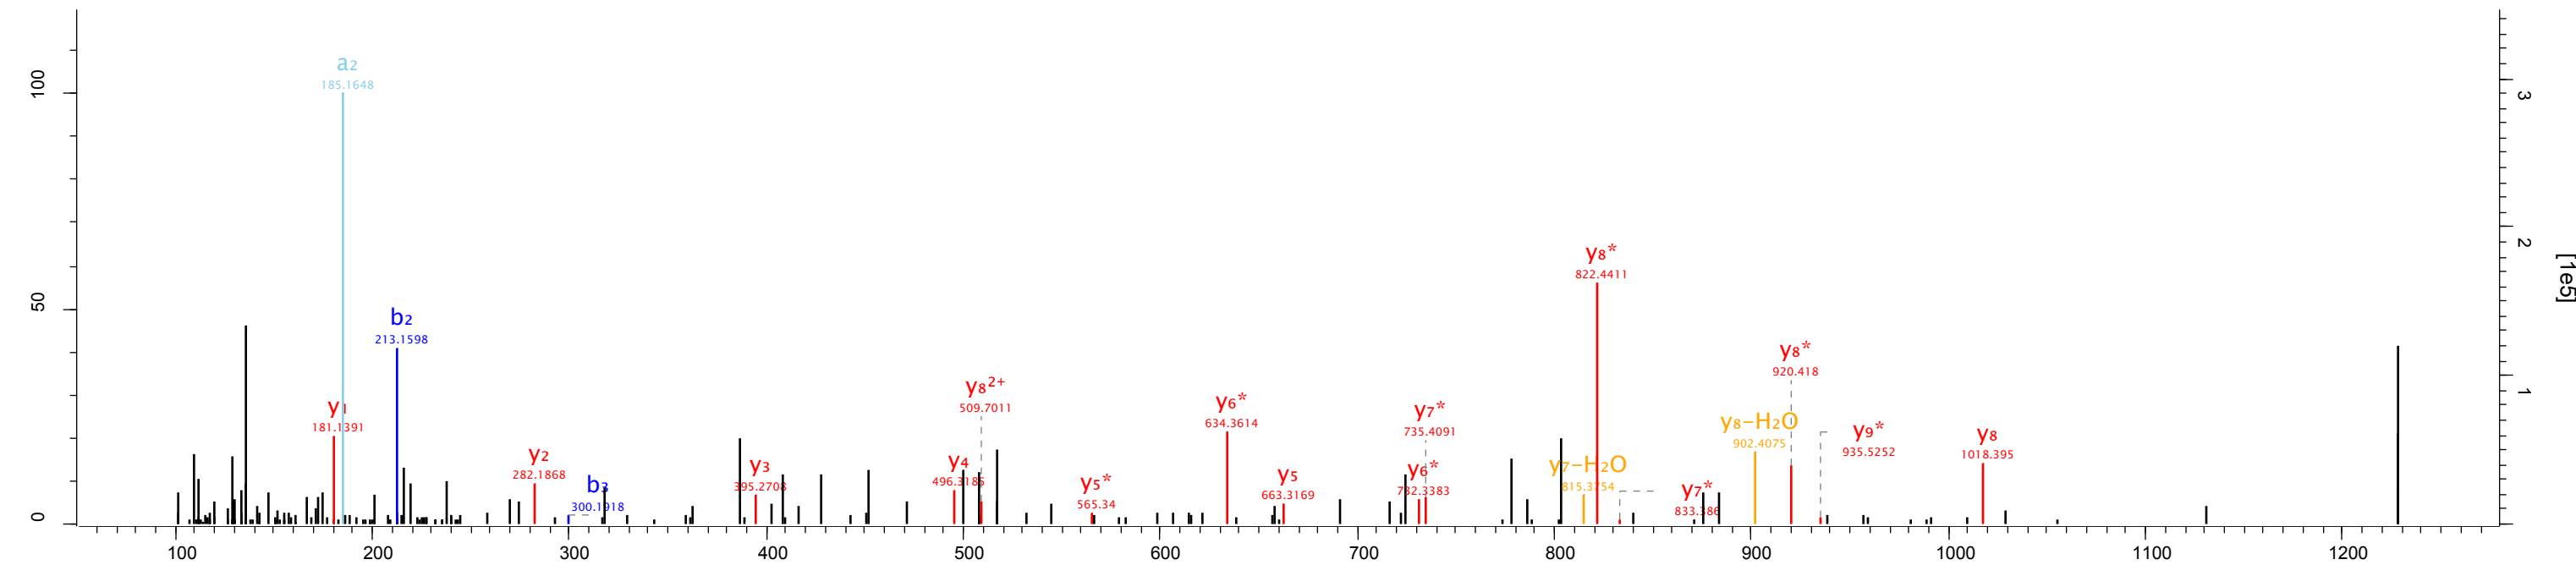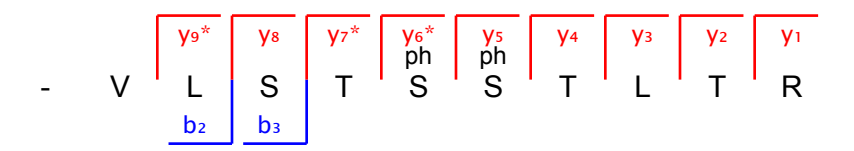

Raw file 20150812\_A375SR\_Phospho\_BR1\_02 Scan 12959 Method FTMS; HCD Score 49.09 m/z 709.25 Gene names CENPU;MLF1IP

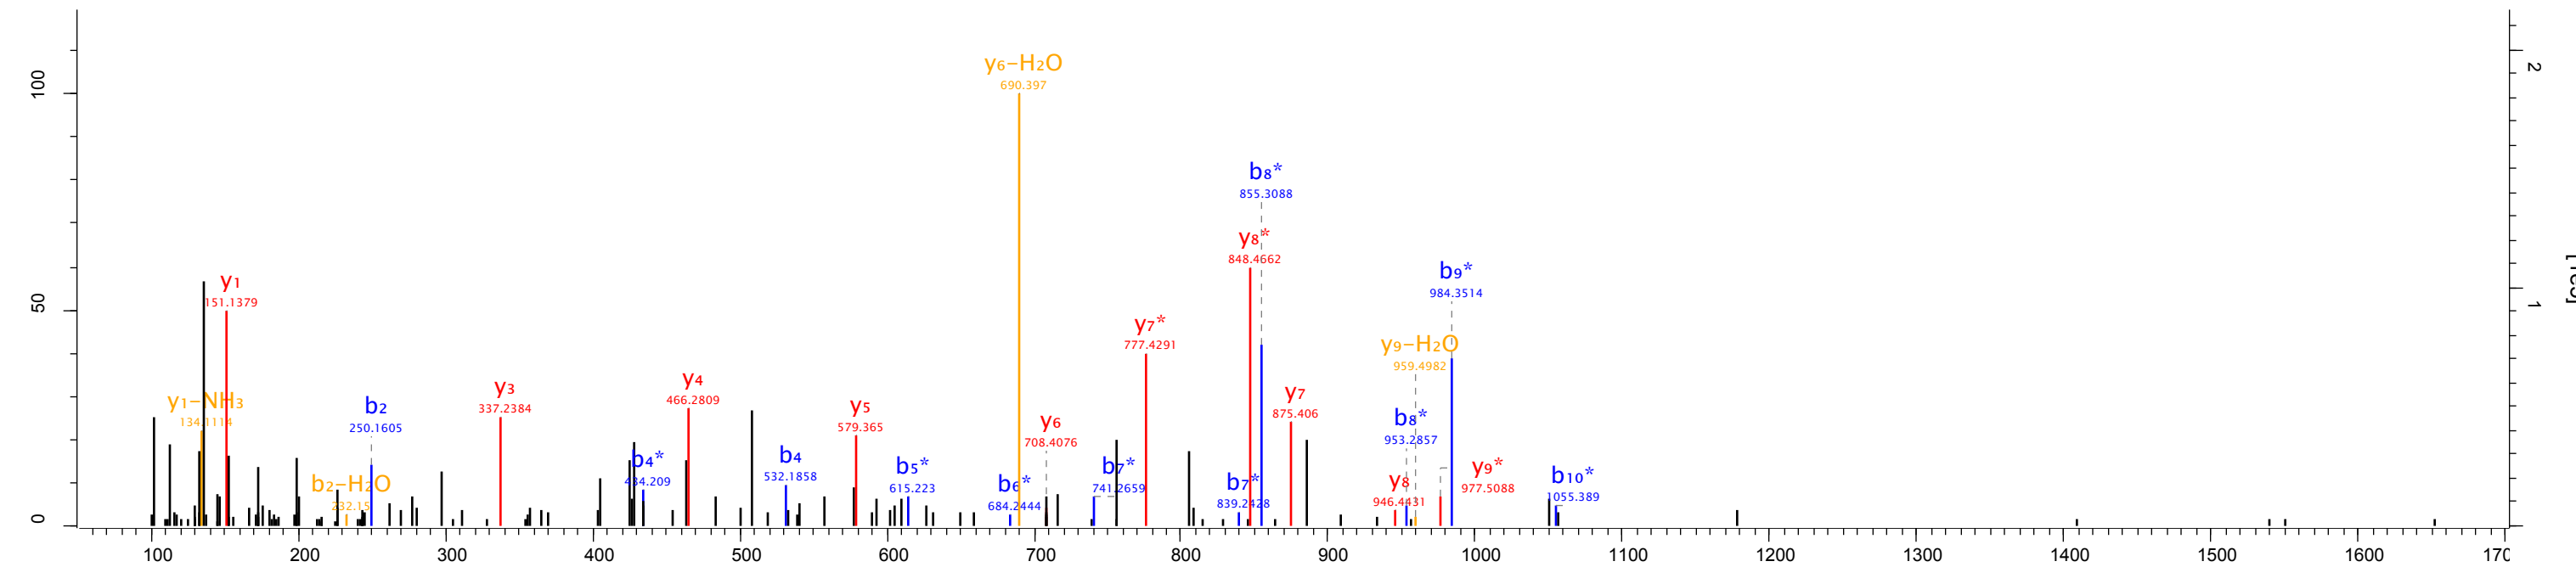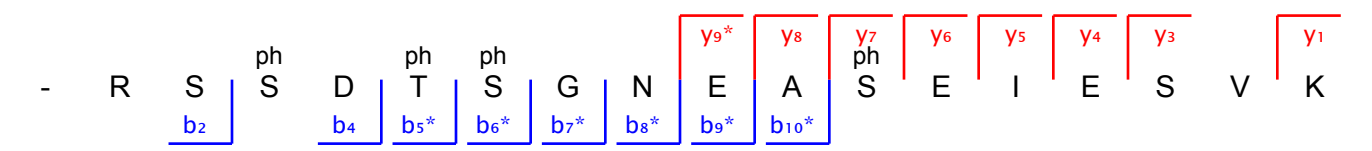



Raw file: 20150812\_A375SR\_Phospho\_BR1\_02  
 Scan: 13529 Method: FTMS; HCD Score: 166.6 m/z: 1068.86 Gene names: RRP9

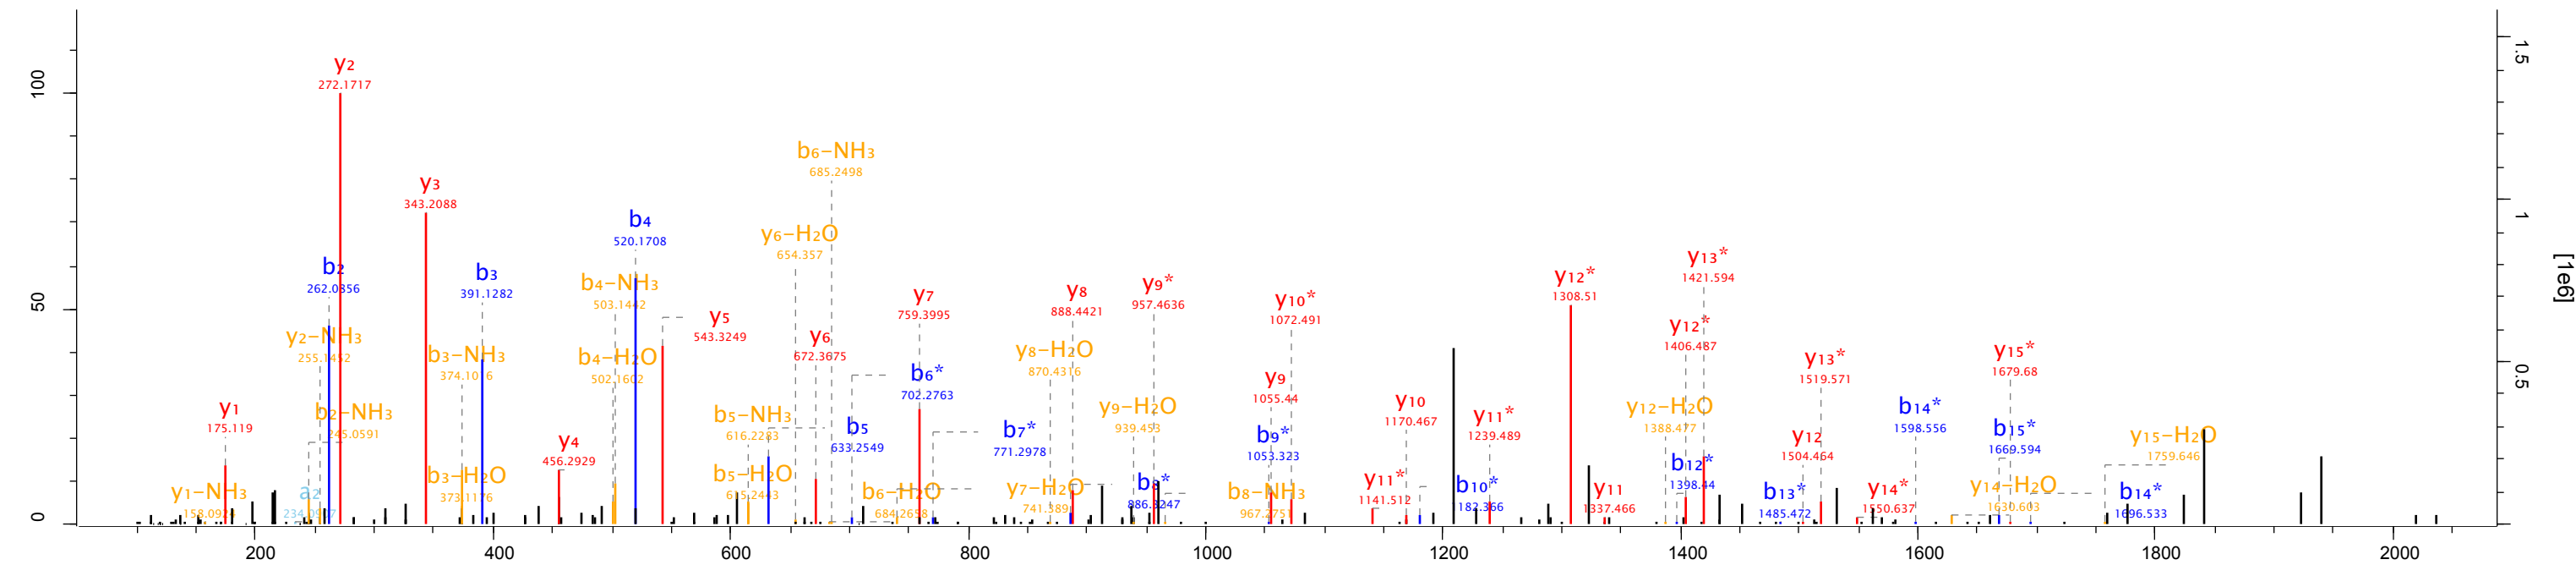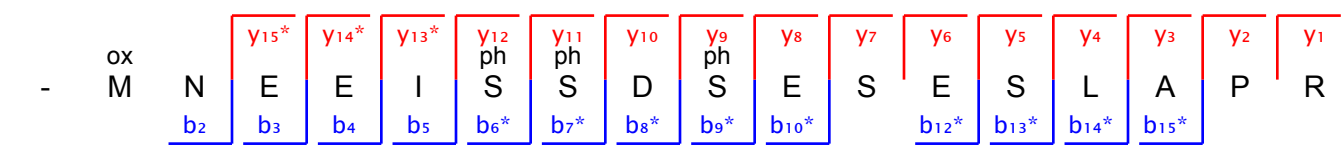

Raw file: 20150812\_A375SR\_Phospho\_BR1\_02  
 Scan: 13849 Method: FTMS; HCD Score: 89.91 m/z: 889.34 Gene names: ERCC6L

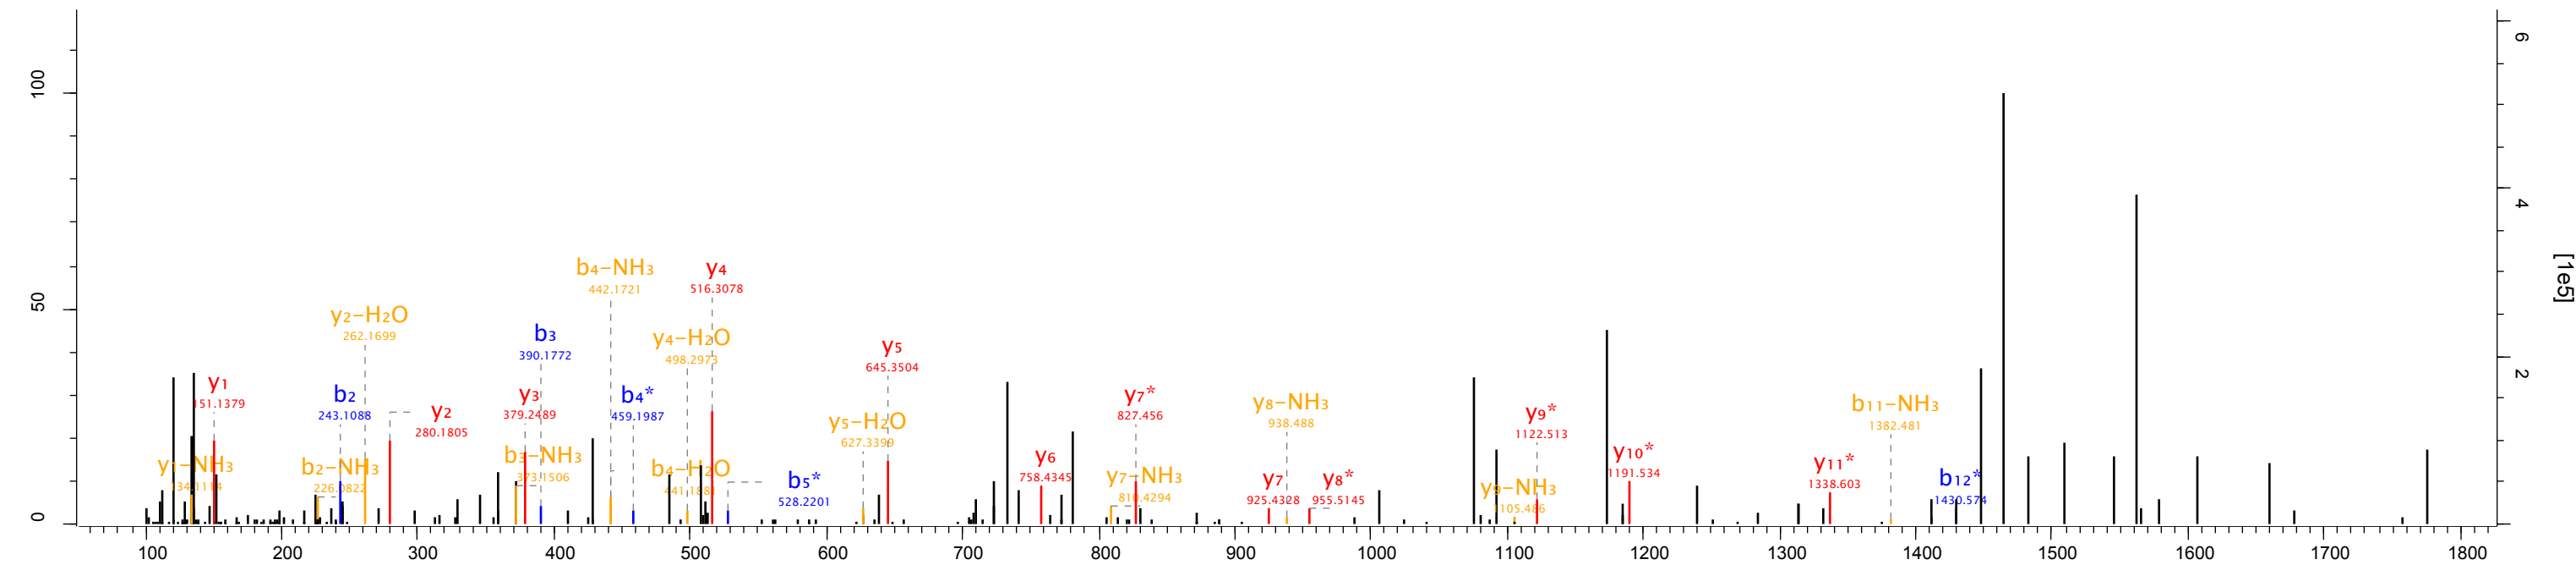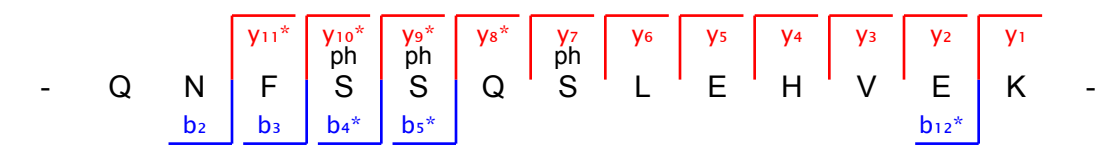

Raw file: 20150812\_A375SR\_Phospho\_BR1\_02  
 Scan: 14039 Method: FTMS; HCD Score: 96.23 m/z: 851.84 Gene names: DSP

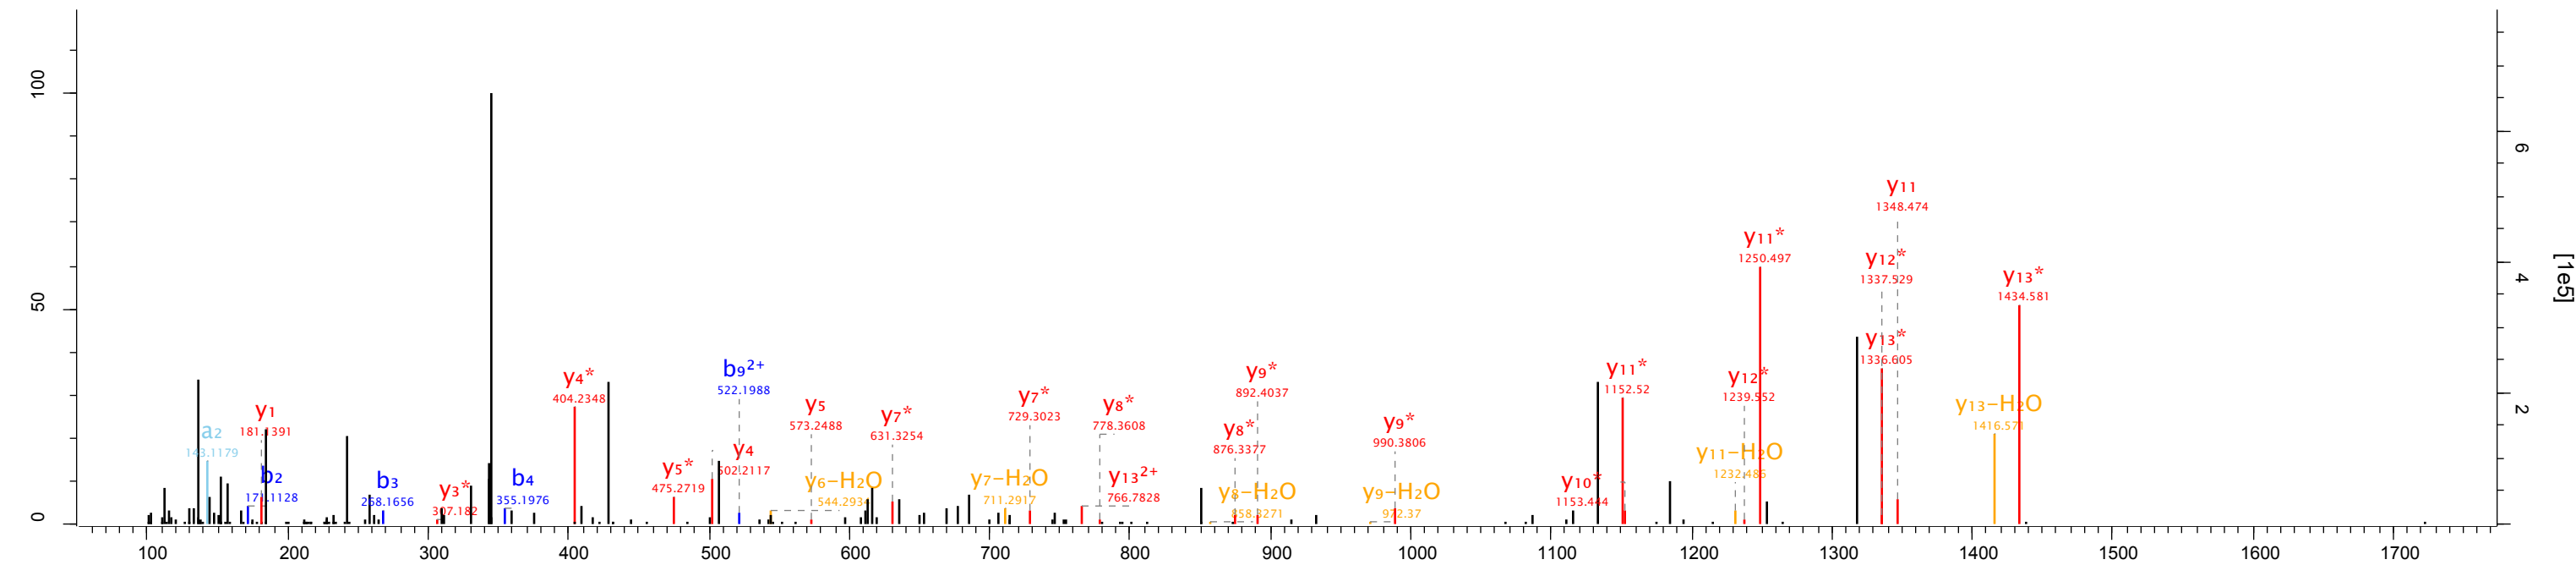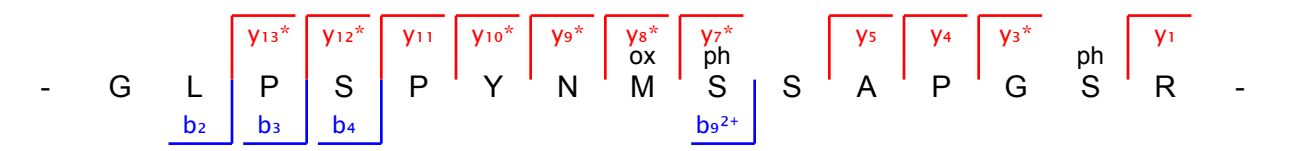

Raw file: 20150812\_A375SR\_Phospho\_BR1\_02  
 Scan: 14729 Method: FTMS; HCD Score: 102.07 m/z: 818.37 Gene names: RPS6KB1

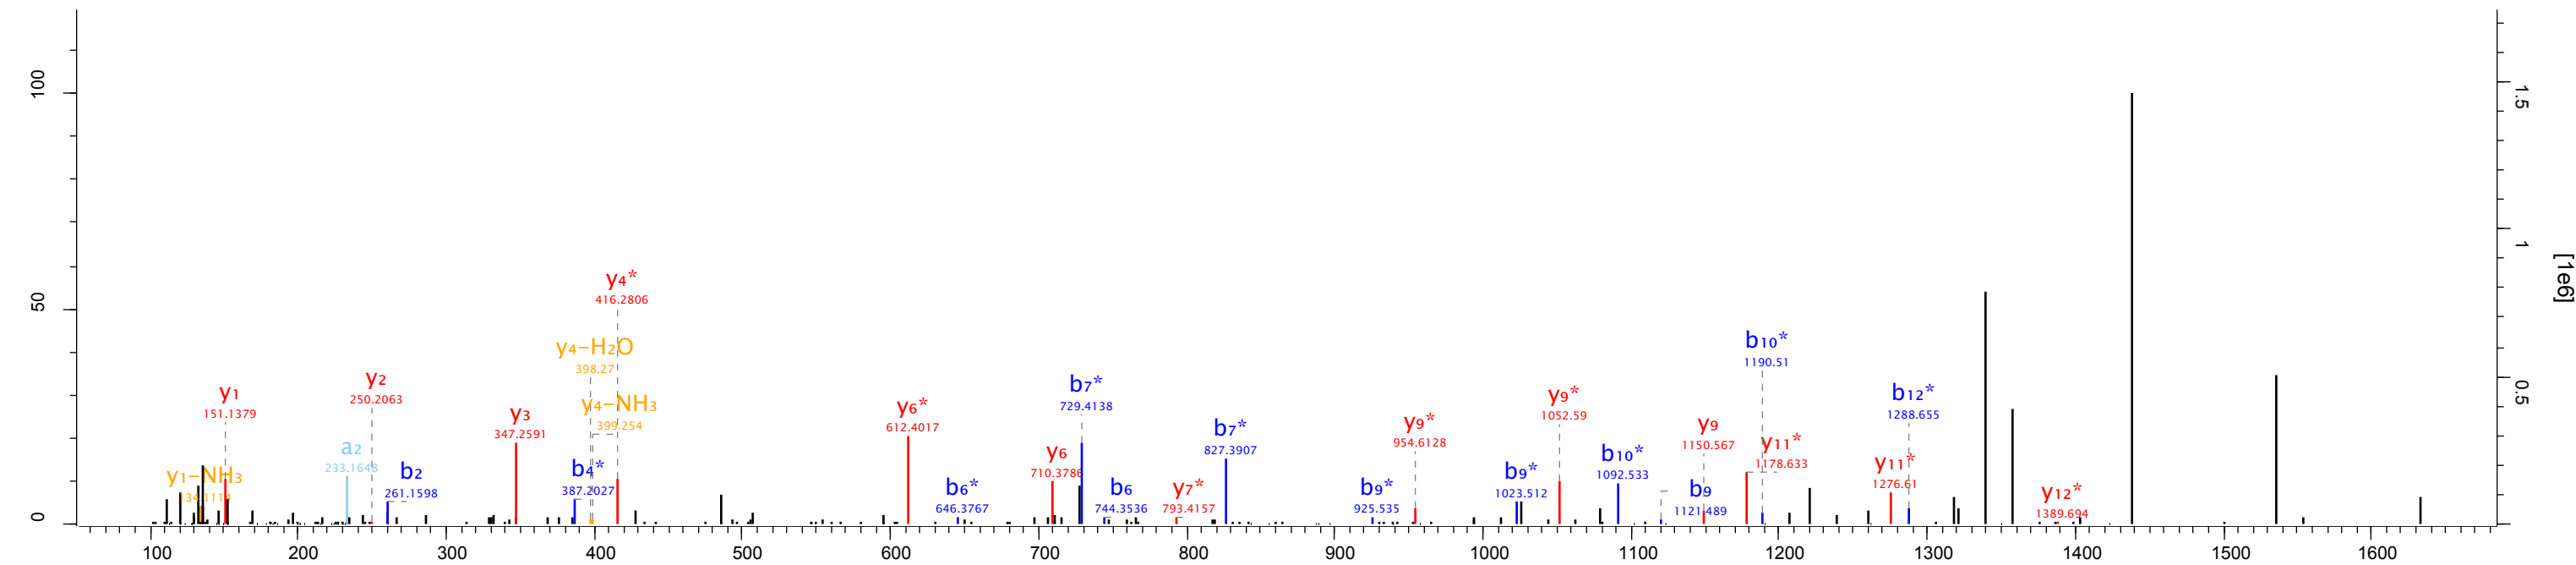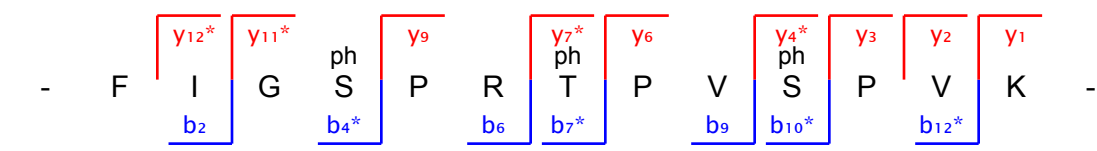

Raw file  
20150812\_A375SR\_Phospho\_BR1\_02

Scan 15439 Method FTMS; HCD Score 101.07 m/z 928.37 Gene names DDX54

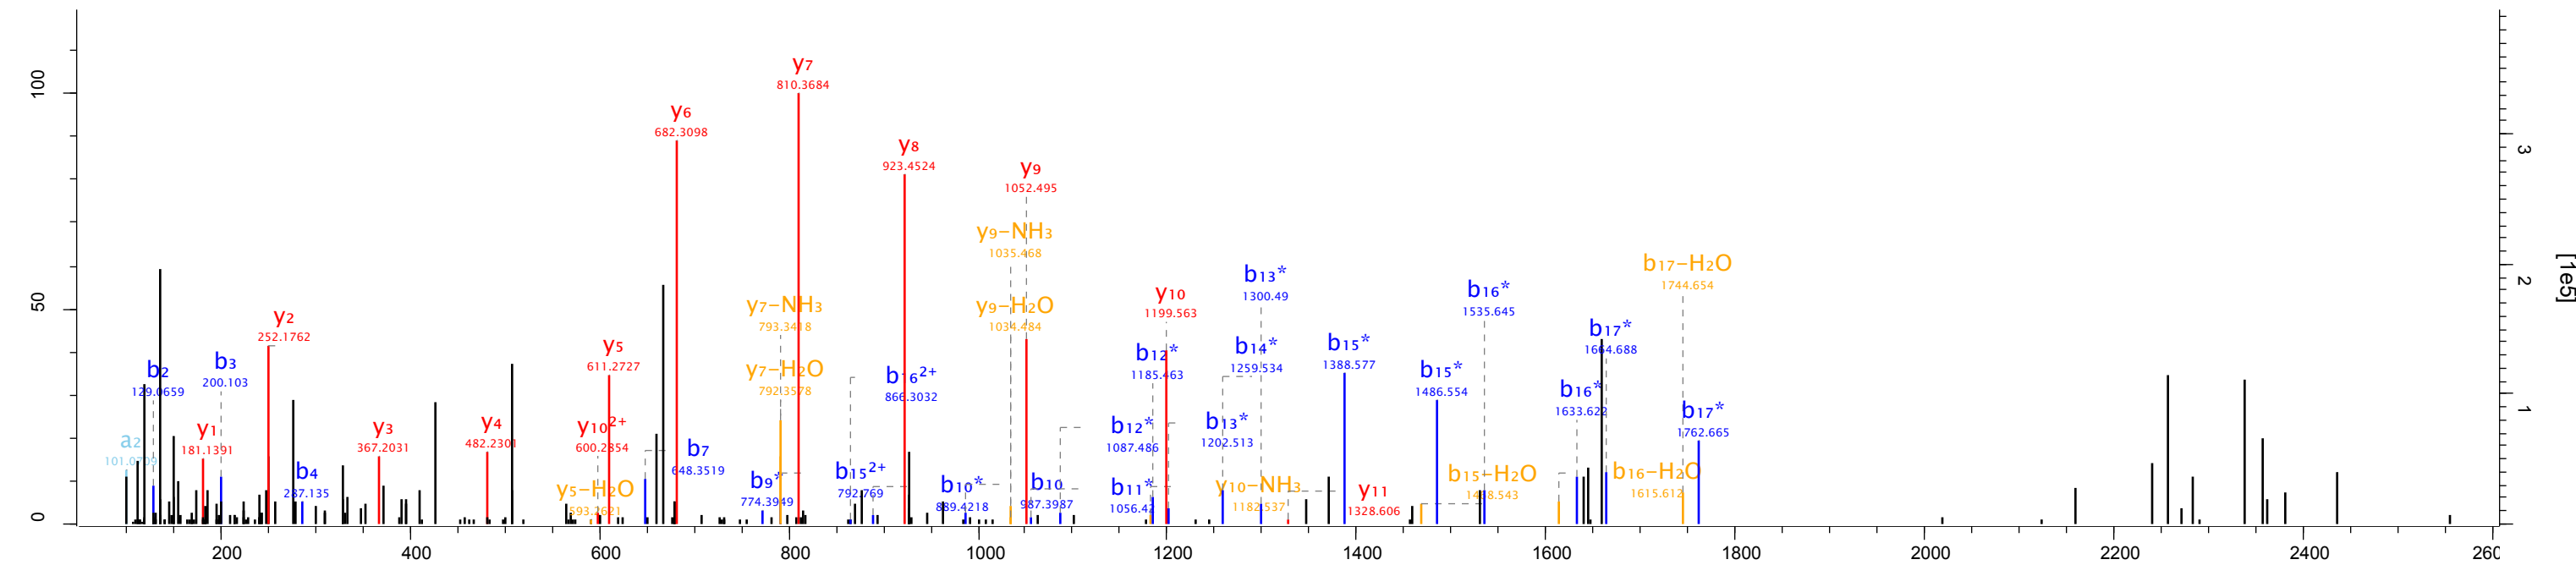

- G A A S Q A R G ph S D S E D G y11 y10 y9 y8 y7 y6 y5 y4 y3 y2 y1  
b2 b3 b4 b7 b9\* b10 b11\* b12\* b13\* b14\* b15\* b16\* b17\* E F E I Q A E D D A R -

Raw file 20150812\_A375SR\_Phospho\_BR1\_02 Scan 16059 Method FTMS; HCD Score 97.29 m/z 1035.77 Gene names REPS1

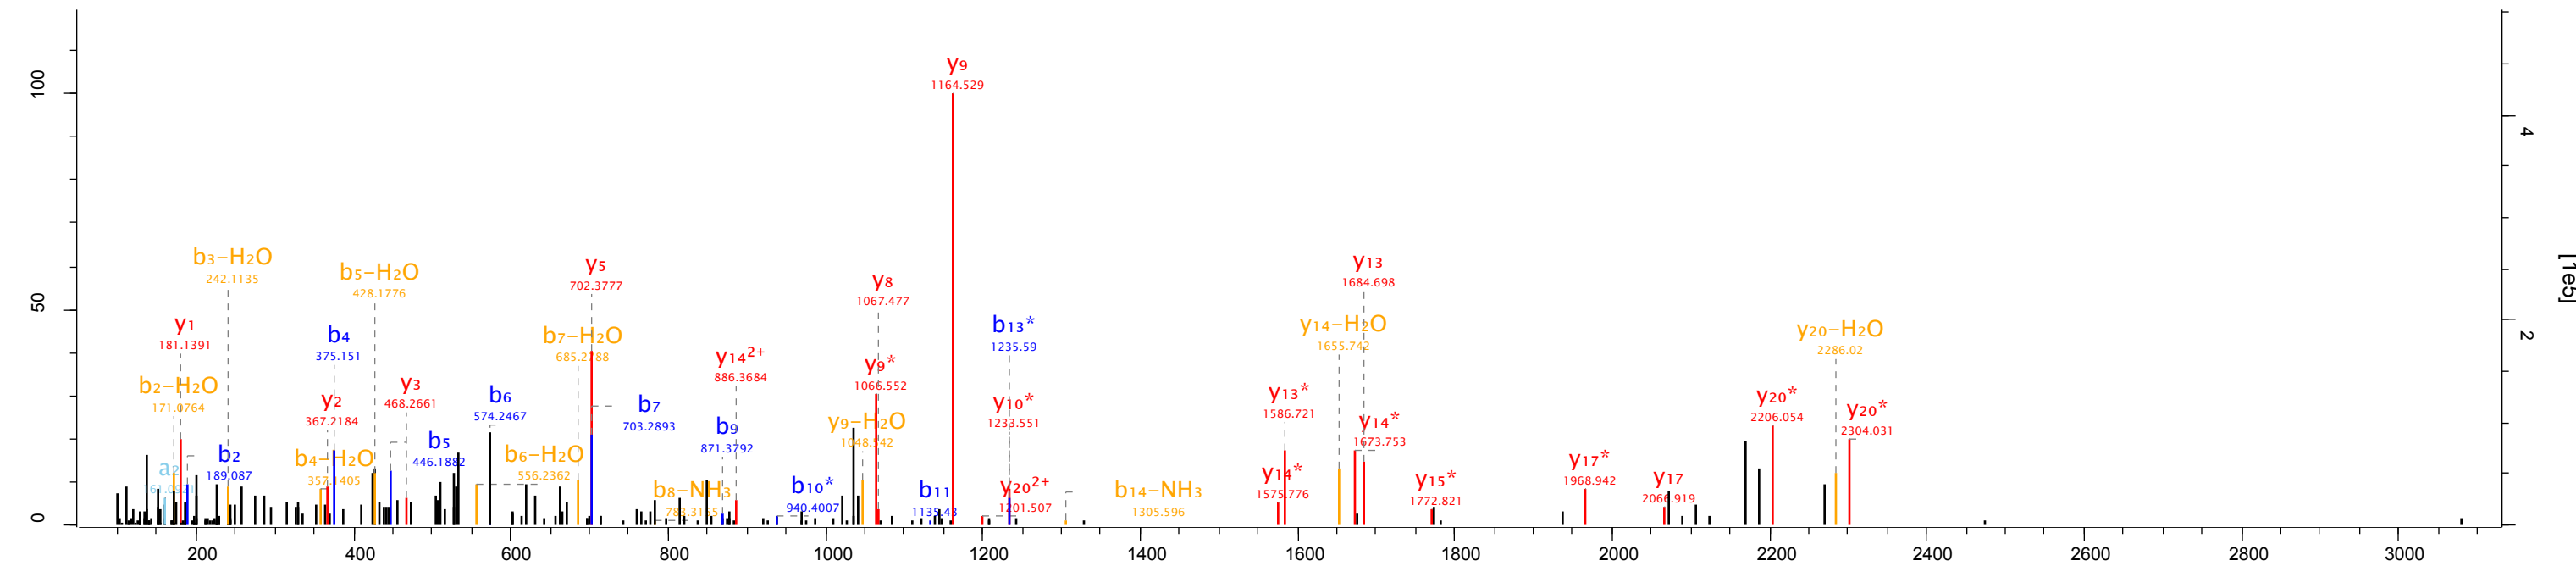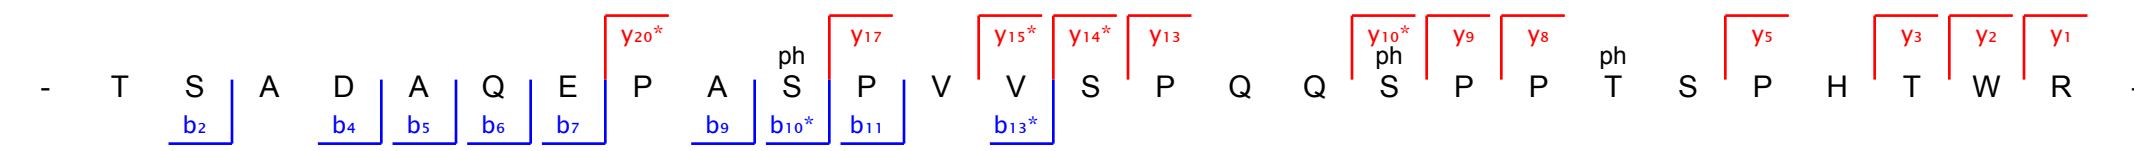

Raw file Scan Method Score m/z Gene names  
 20150812\_A375SR\_Phospho\_BR1\_02 16159 FTMS; HCD 157.98 762.81 ARHGEF2

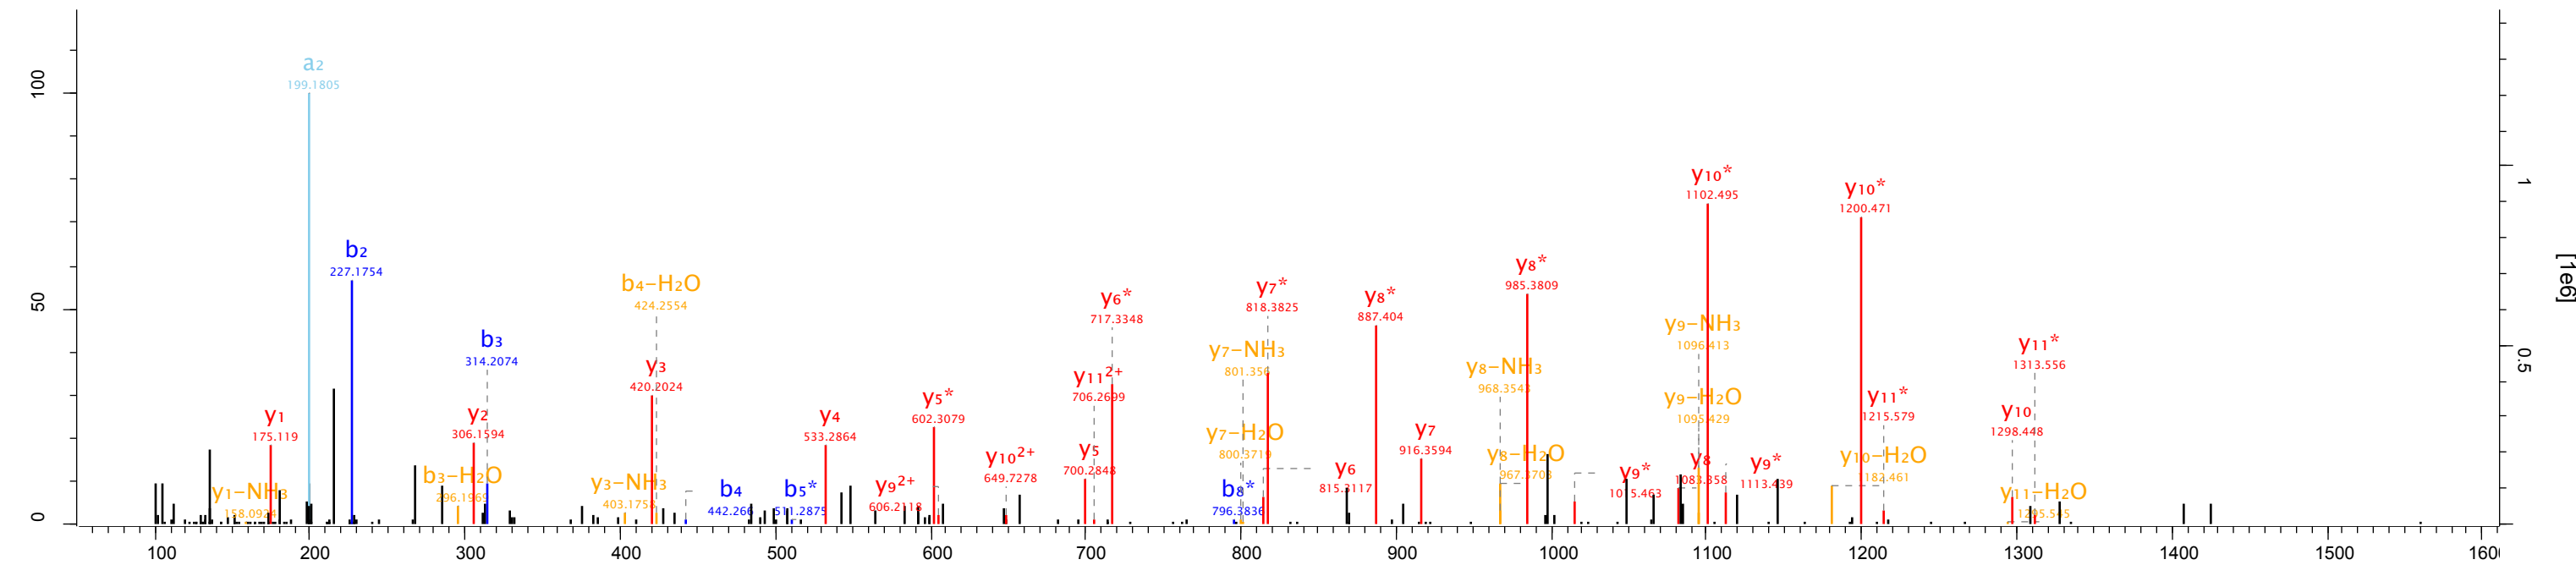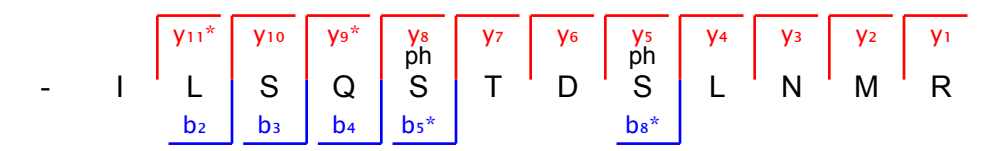

Raw file 20150812\_A375SR\_Phospho\_BR1\_02 Scan 17549 Method FTMS; HCD Score 123.19 m/z 902.33 Gene names KAT7

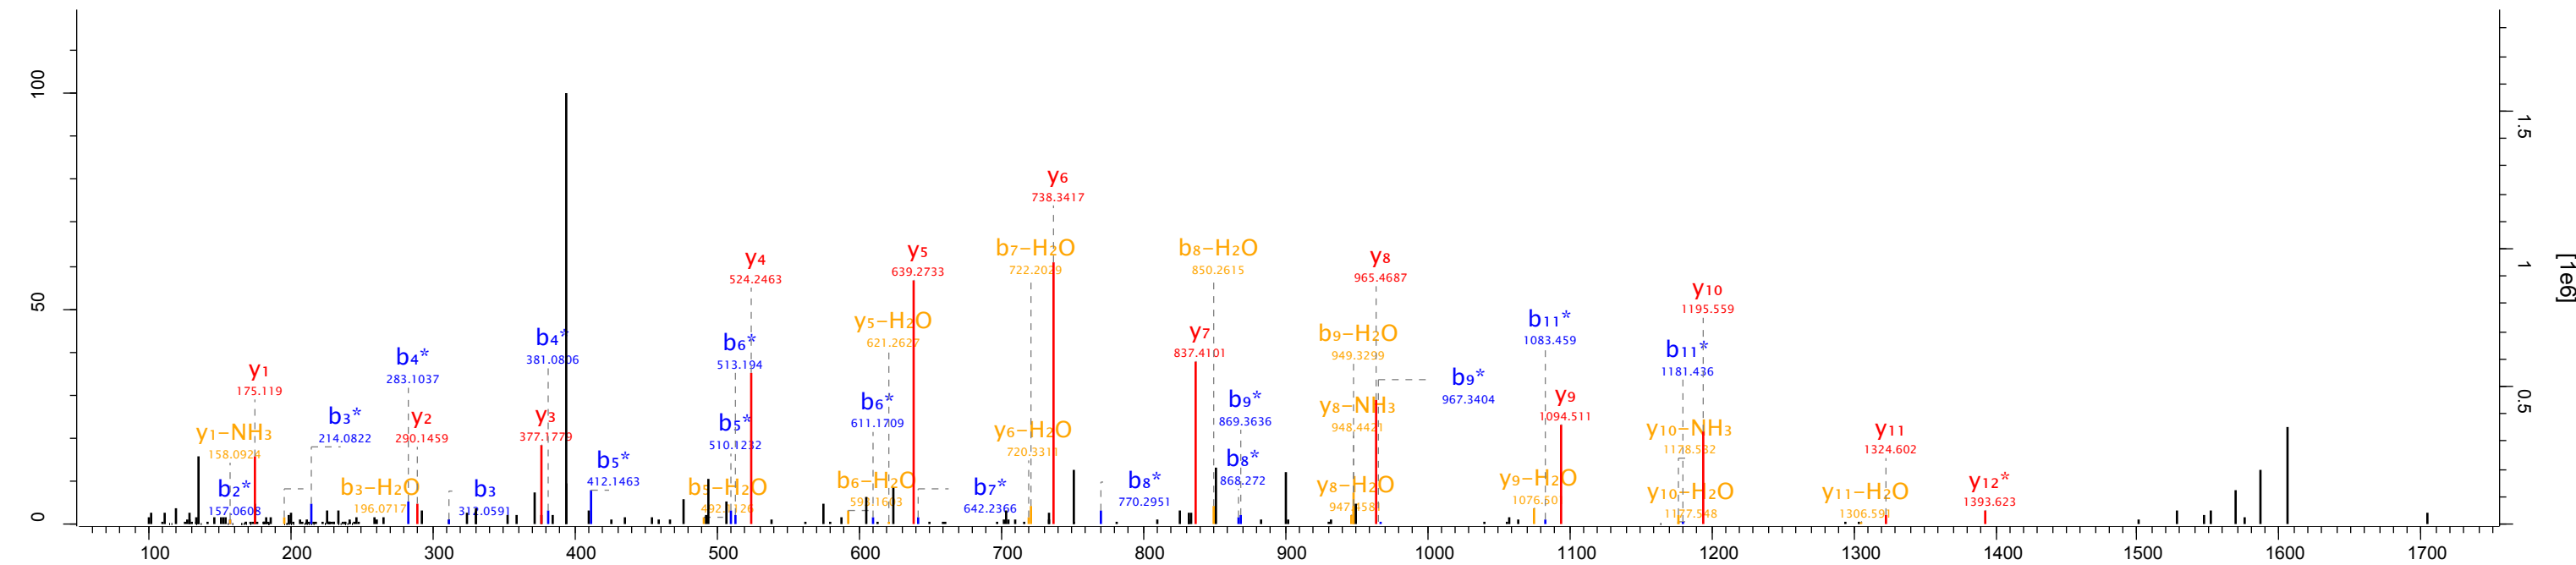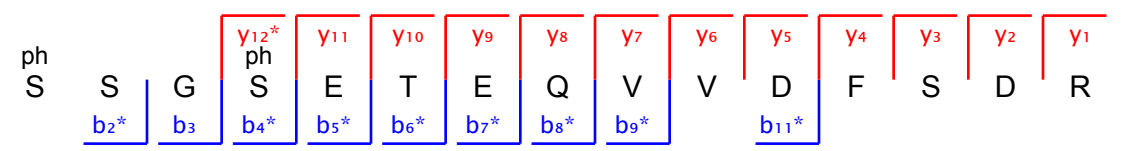





Raw file: 20150812\_A375SR\_Phospho\_BR1\_02  
 Scan: 17999 Method: FTMS; HCD Score: 53.43 m/z: 1148.77 Gene names: LARP1

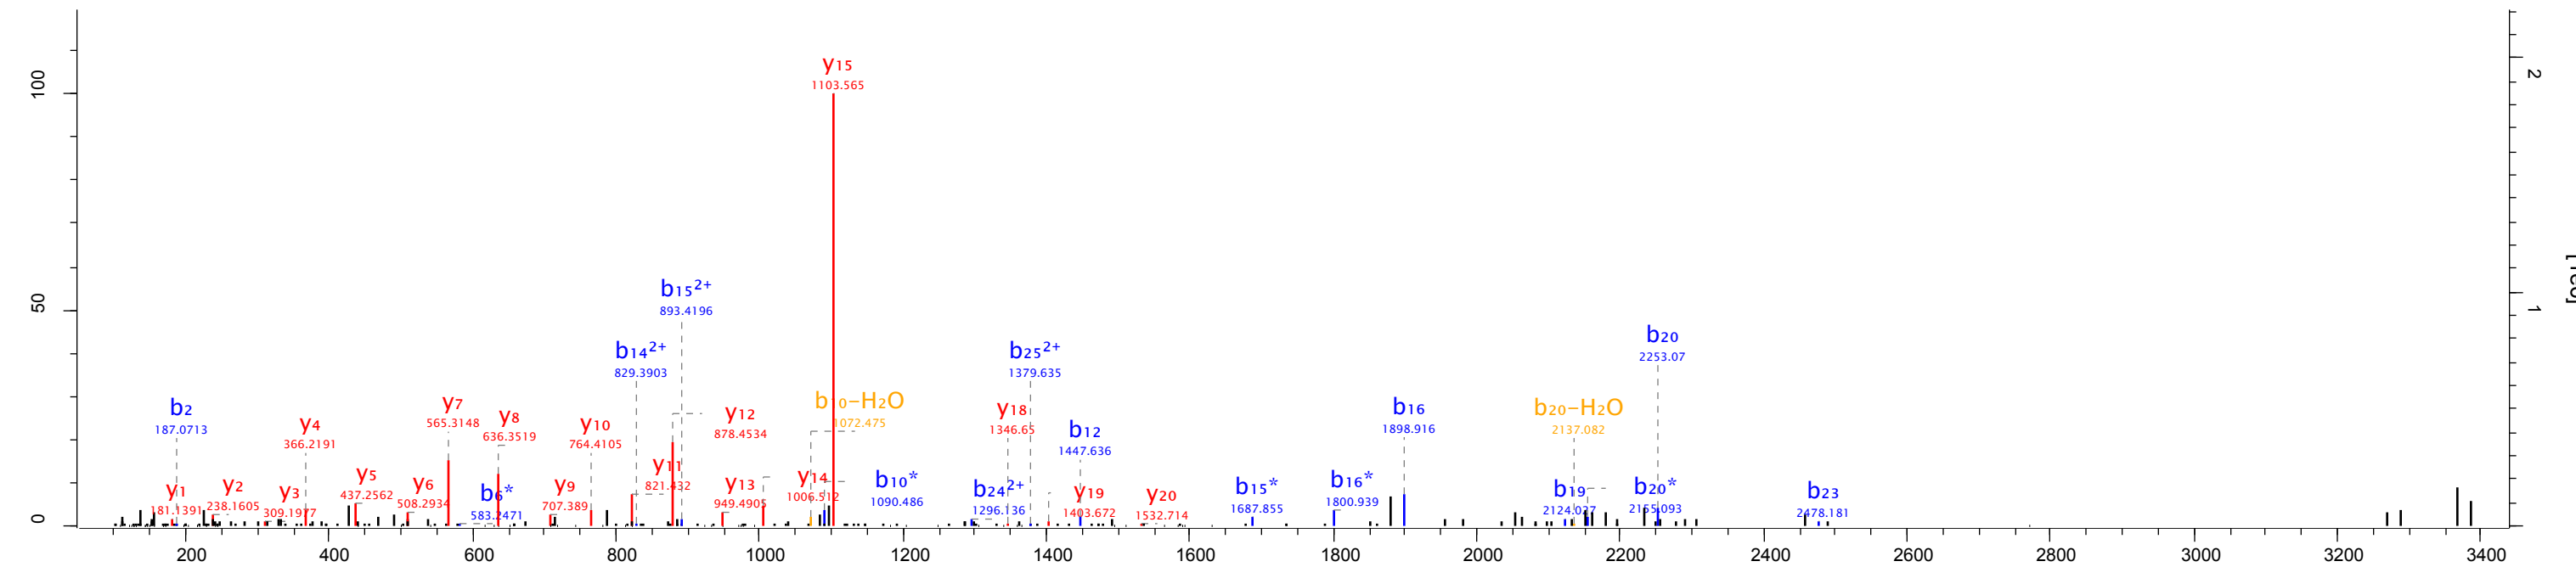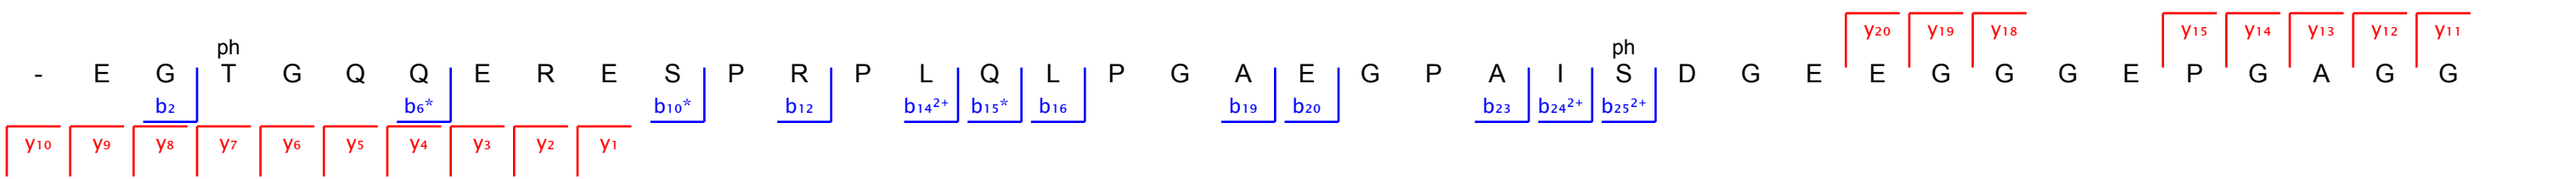

Raw file 20150812\_A375SR\_Phospho\_BR1\_02 Scan 18259 Method FTMS; HCD Score 107.24 m/z 995.94 Gene names TTC7B

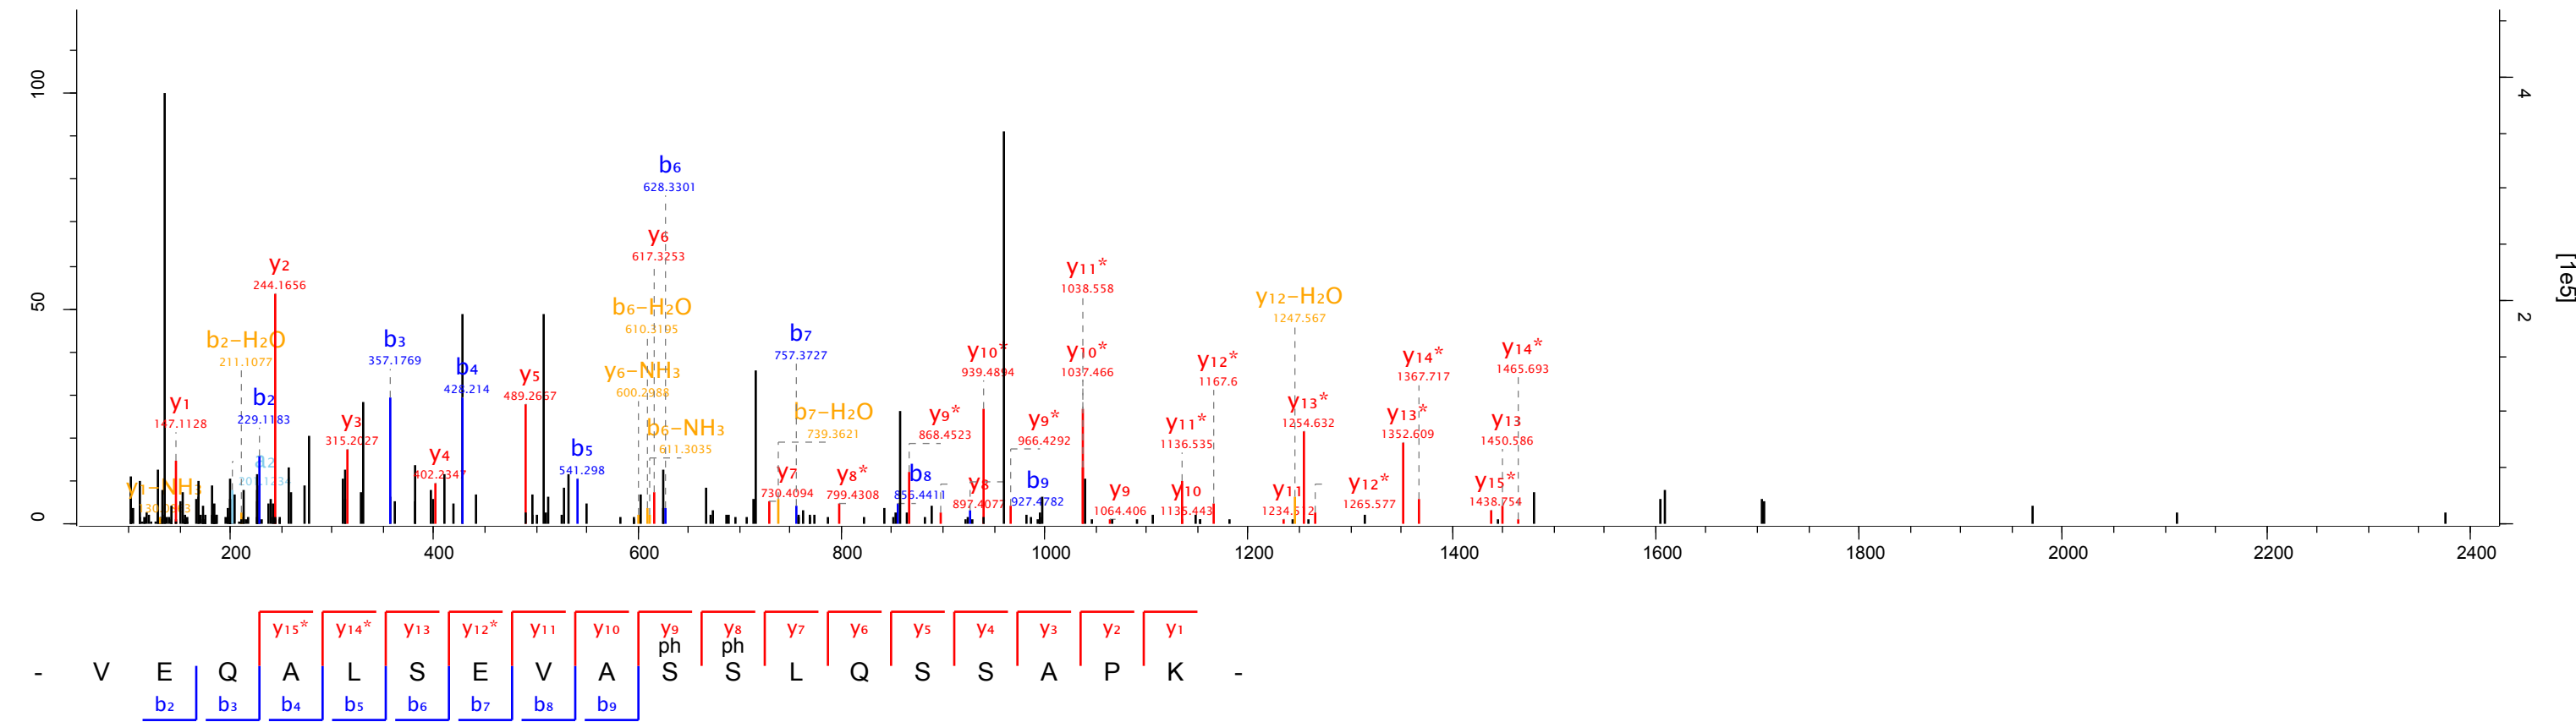

Raw file 20150812\_A375SR\_Phospho\_BR1\_02 Scan 18559 Method FTMS; HCD Score 67.4 m/z 873.35 Gene names C2CD5

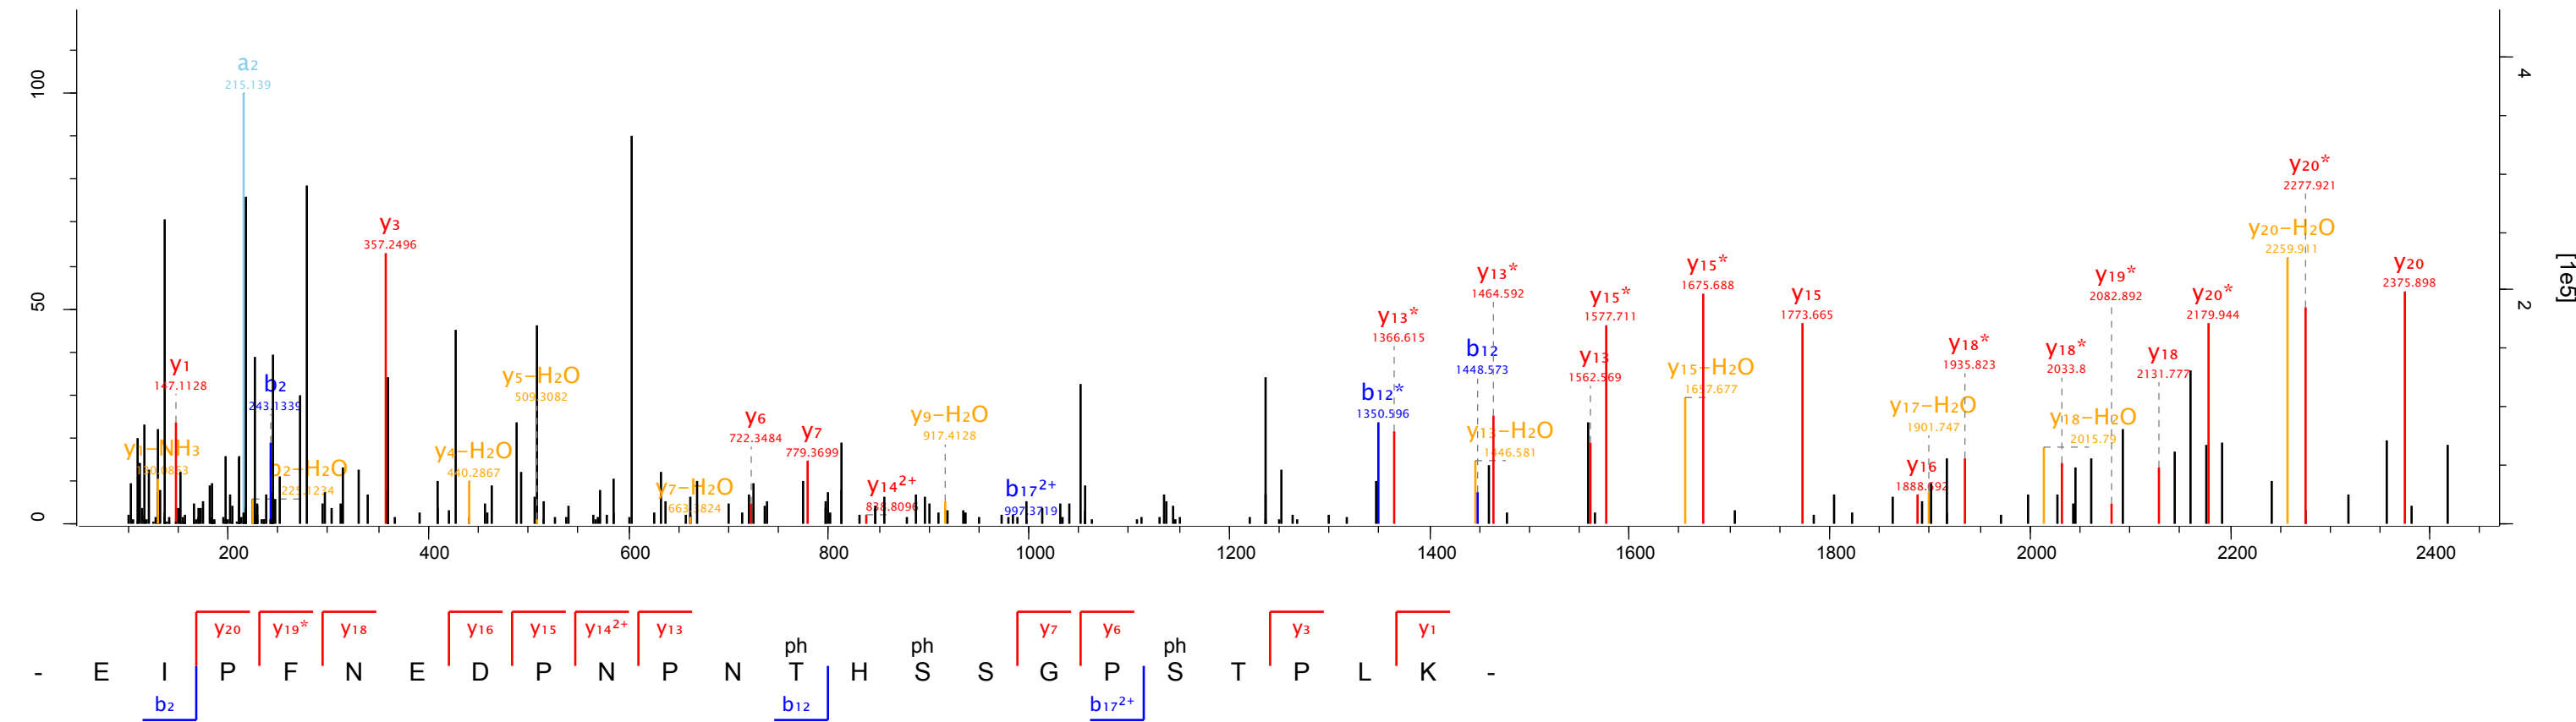

Raw file 20150812\_A375SR\_Phospho\_BR1\_02 Scan 18619 Method FTMS; HCD Score 82.89 m/z 722.98 Gene names PCM1

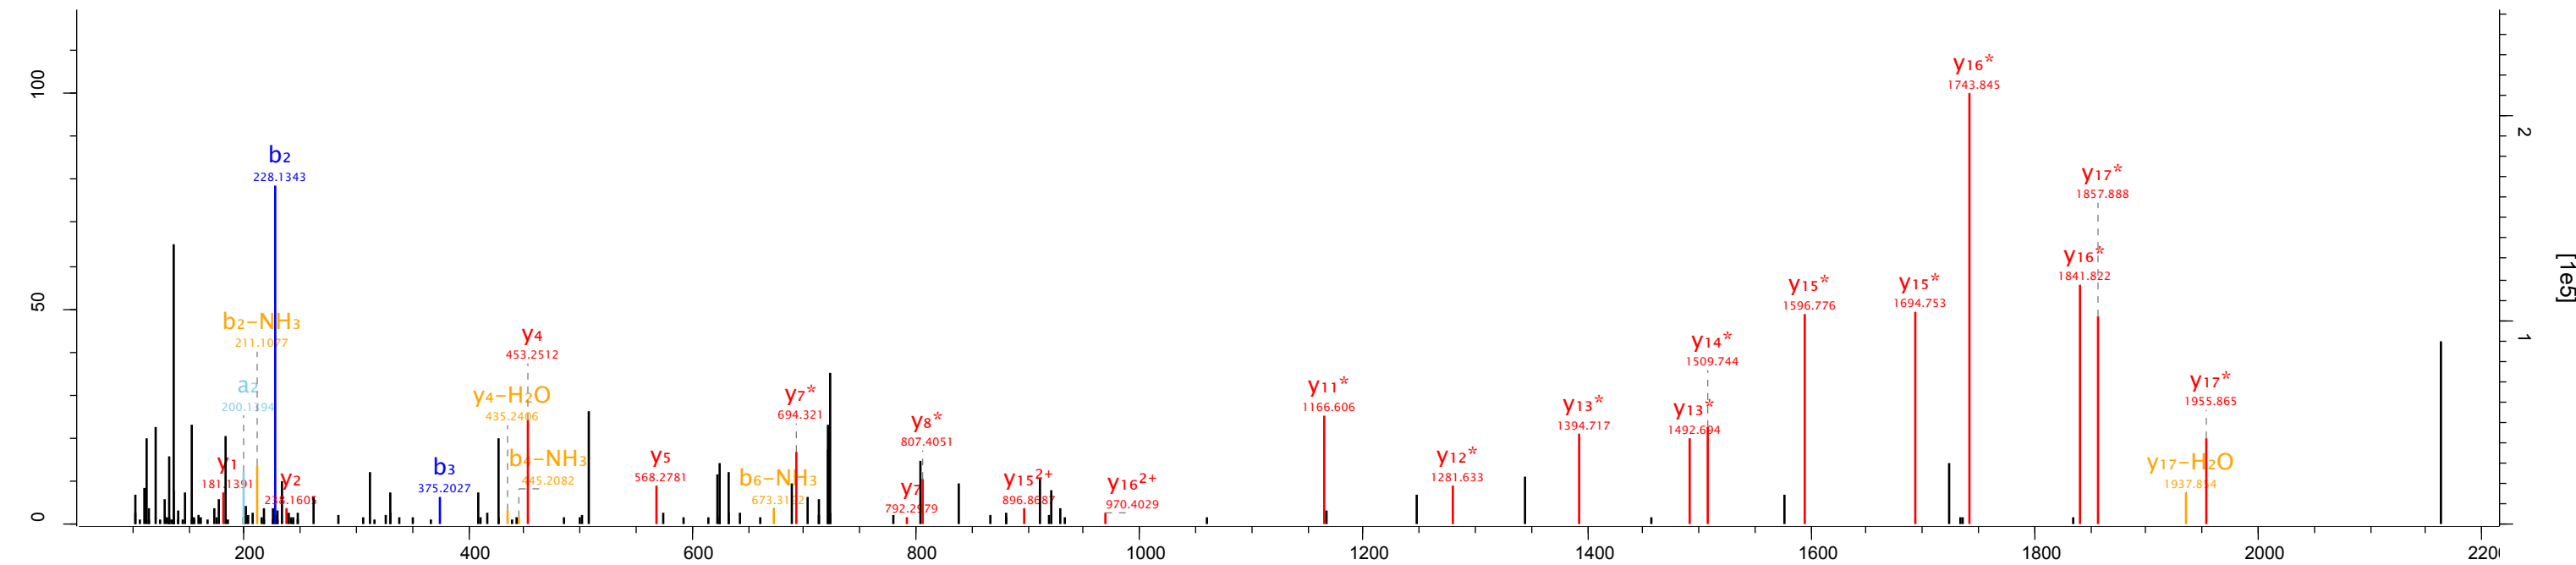

- I N F S D L D Q R ph S I G ph S D S Q G R -

b<sub>2</sub> b<sub>3</sub>

y<sub>17</sub>\* y<sub>16</sub>\* y<sub>15</sub>\* y<sub>14</sub>\* y<sub>13</sub>\* y<sub>12</sub>\* y<sub>11</sub>\*

Raw file 20150812\_A375SR\_Phospho\_BR1\_02 Scan 18849 Method FTMS; HCD Score 74.82 m/z 703.96 Gene names NKTR

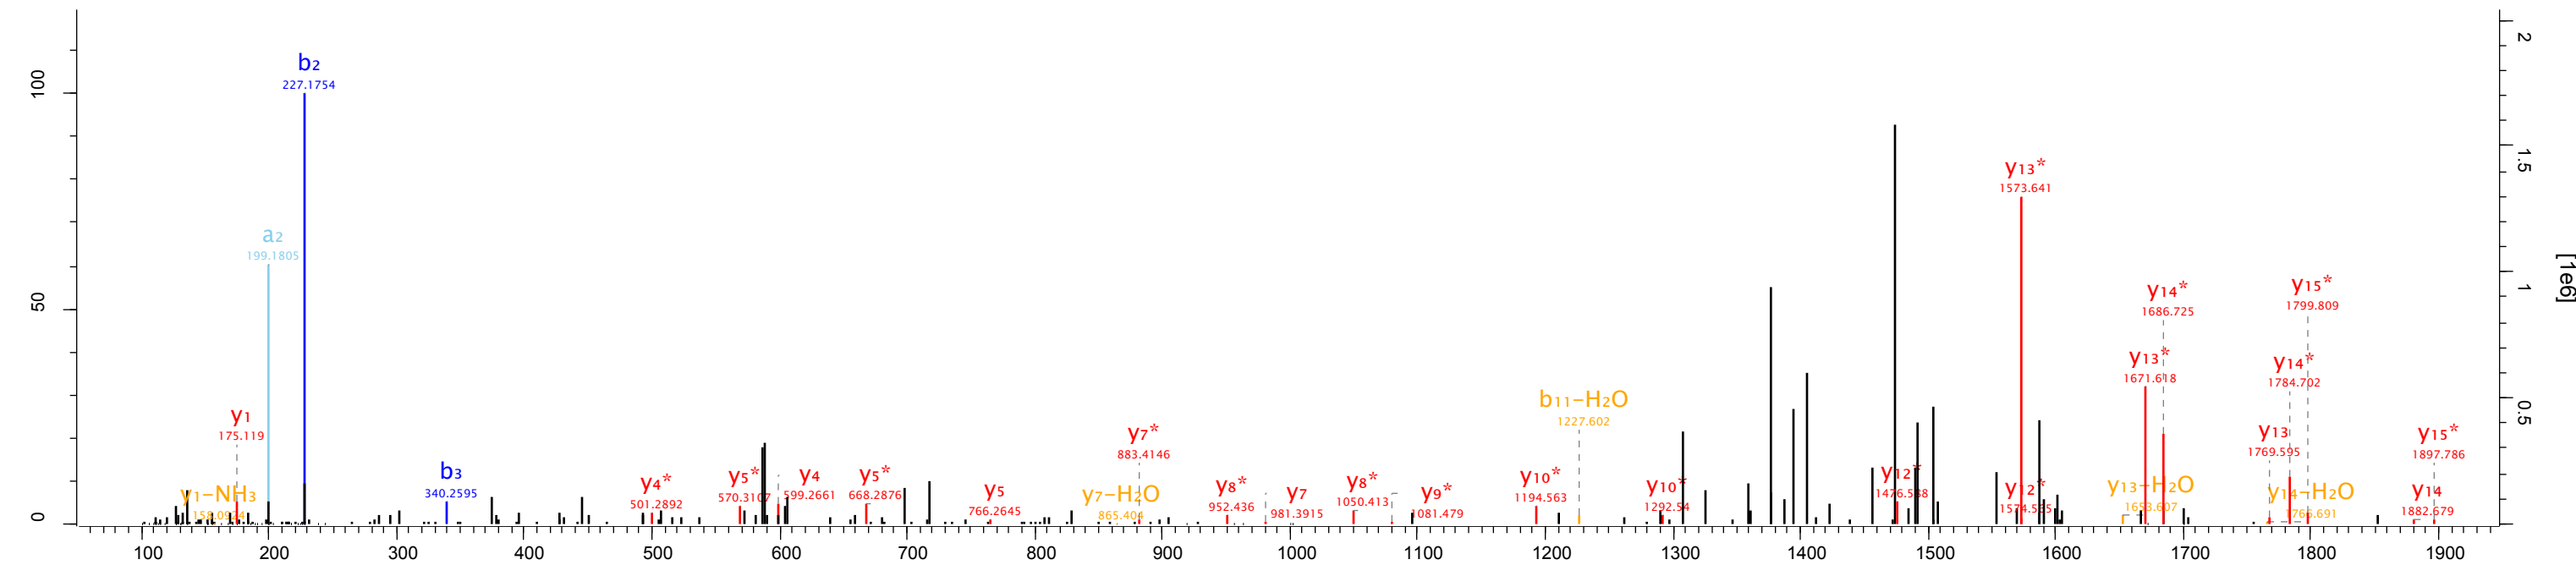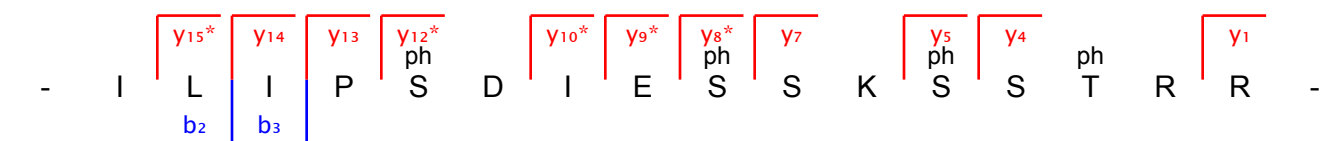

Raw file  
 20150812\_A375SR\_Phospho\_BR1\_02  
 Scan 18879 Method FTMS; HCD Score 152.32 m/z 710.35 Gene names ATRX

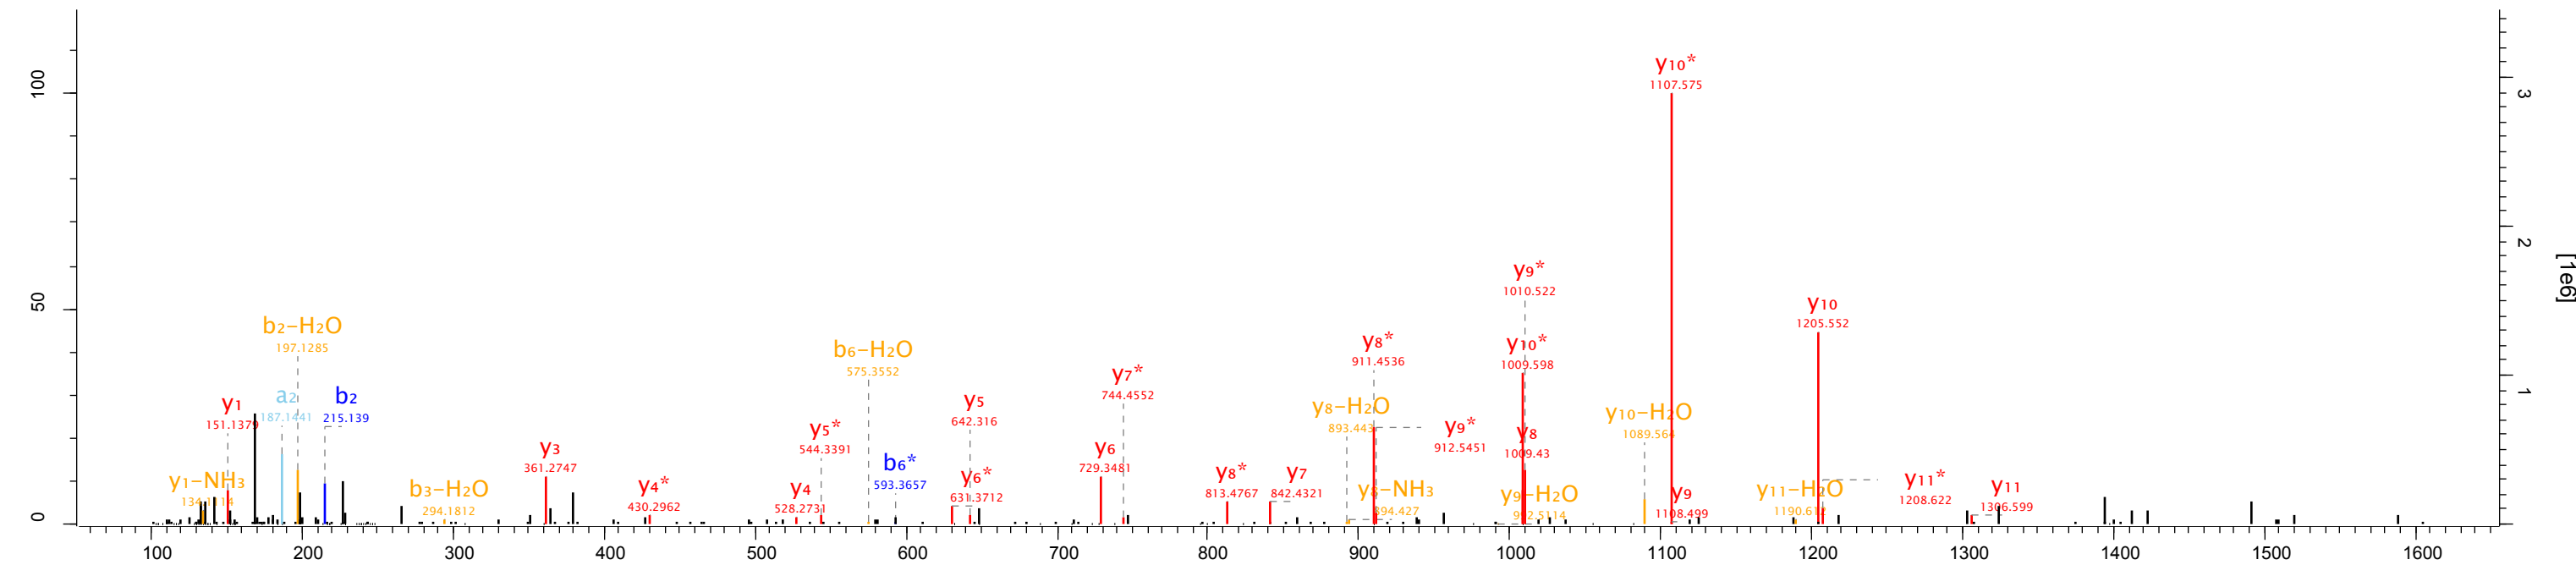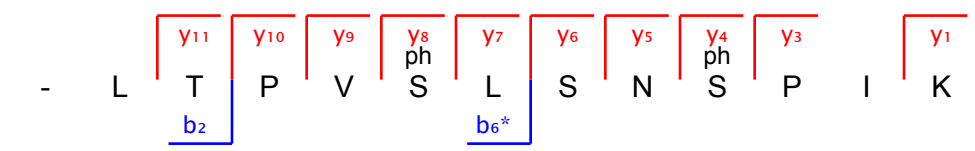

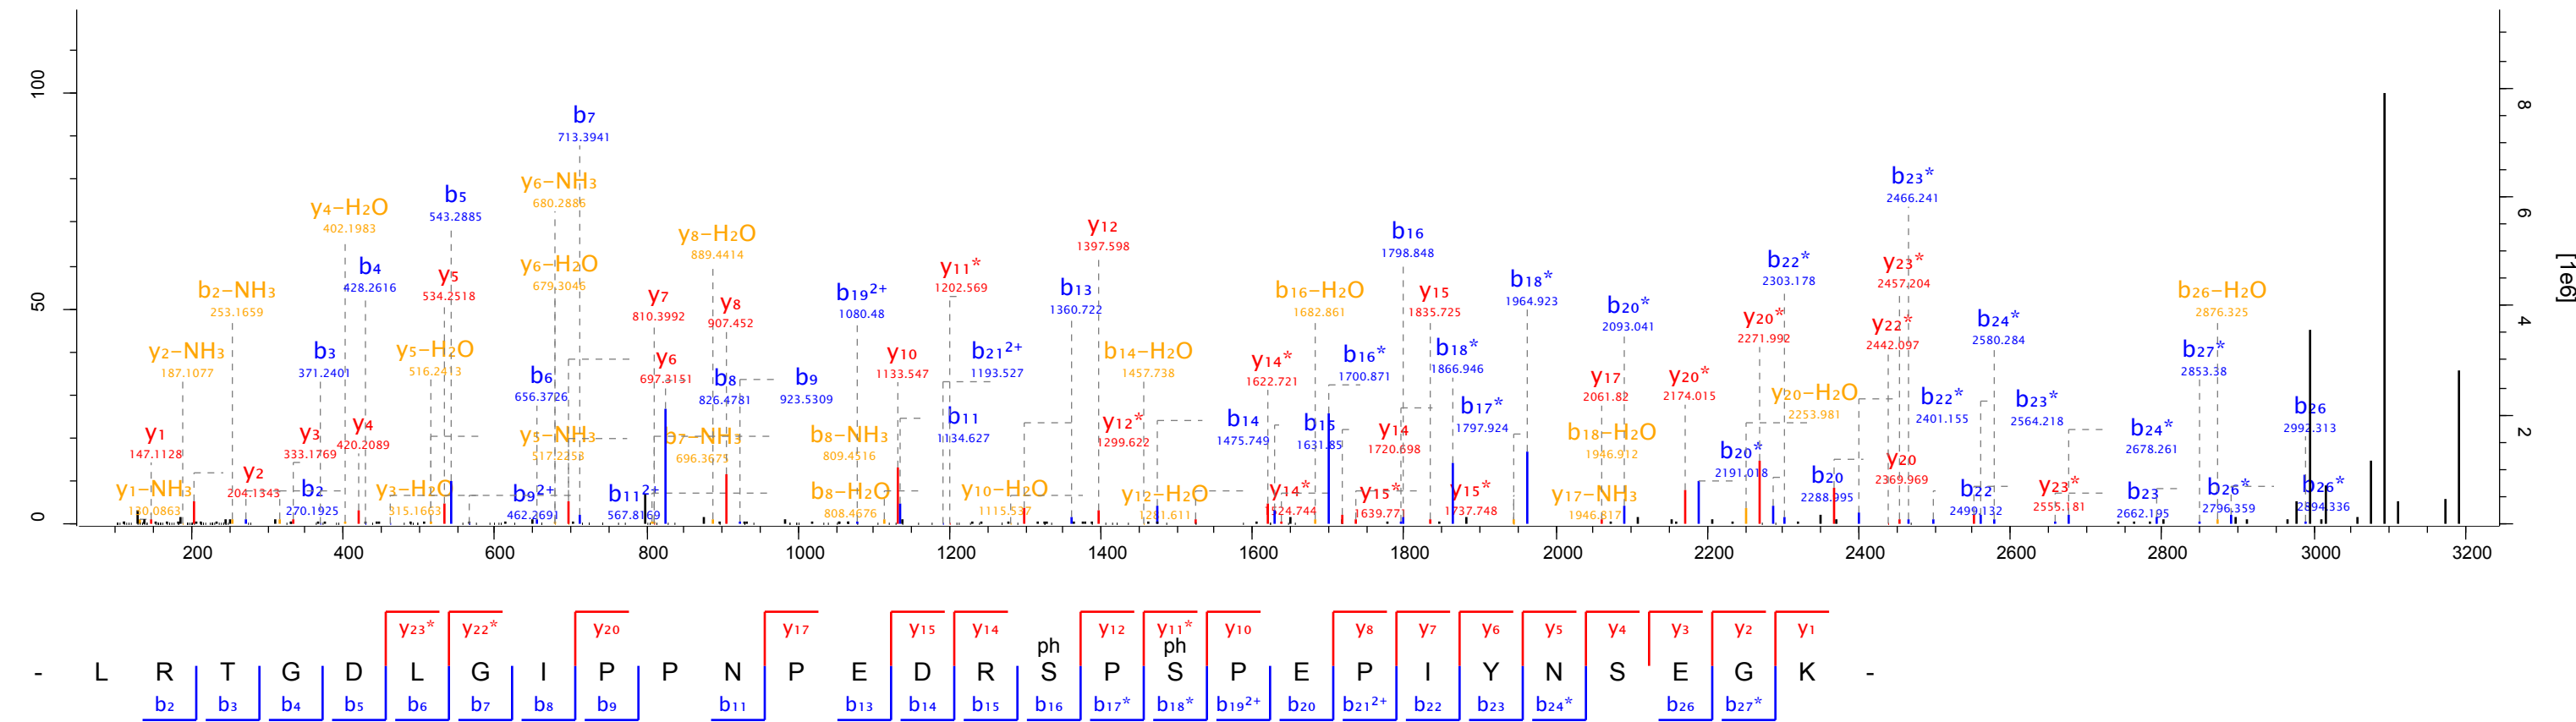



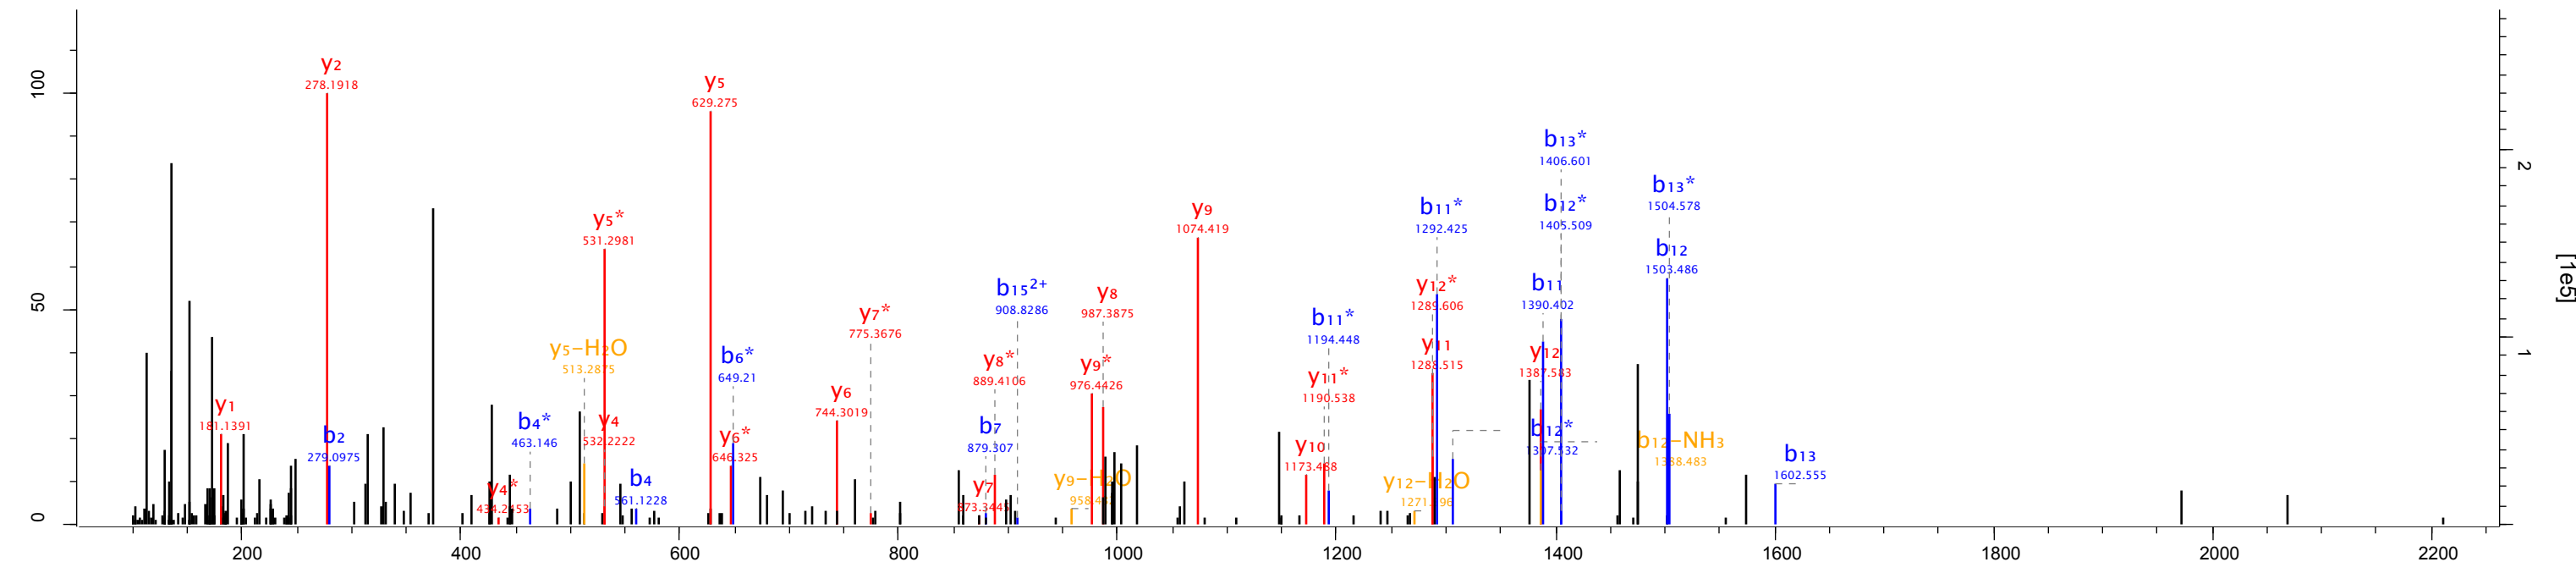

- Y D S ph D G E K S D D N L V V D V S N E D P S S P R -

Fragmentation labels (b and y ions) are shown below the corresponding amino acid residues:

- b<sub>2</sub> (under D)
- b<sub>4</sub> (under D)
- b<sub>6</sub><sup>\*</sup> (under E)
- b<sub>7</sub> (under K)
- b<sub>11</sub> (under N)
- b<sub>12</sub> (under L)
- b<sub>13</sub> (under V)
- b<sub>15</sub><sup>2+</sup> (under V)
- y<sub>12</sub> (under V)
- y<sub>11</sub> (under D)
- y<sub>10</sub> (under V)
- y<sub>9</sub> (under S)
- y<sub>8</sub> (under N)
- y<sub>7</sub> (under E)
- y<sub>6</sub> (under D)
- y<sub>5</sub> (under P)
- y<sub>4</sub> (under S)
- y<sub>2</sub> (under P)
- y<sub>1</sub> (under R)

Raw file Scan Method Score m/z Gene names  
 20150812\_A375SR\_Phospho\_BR1\_02 19139 FTMS; HCD 71.53 684.78 TBC1D1

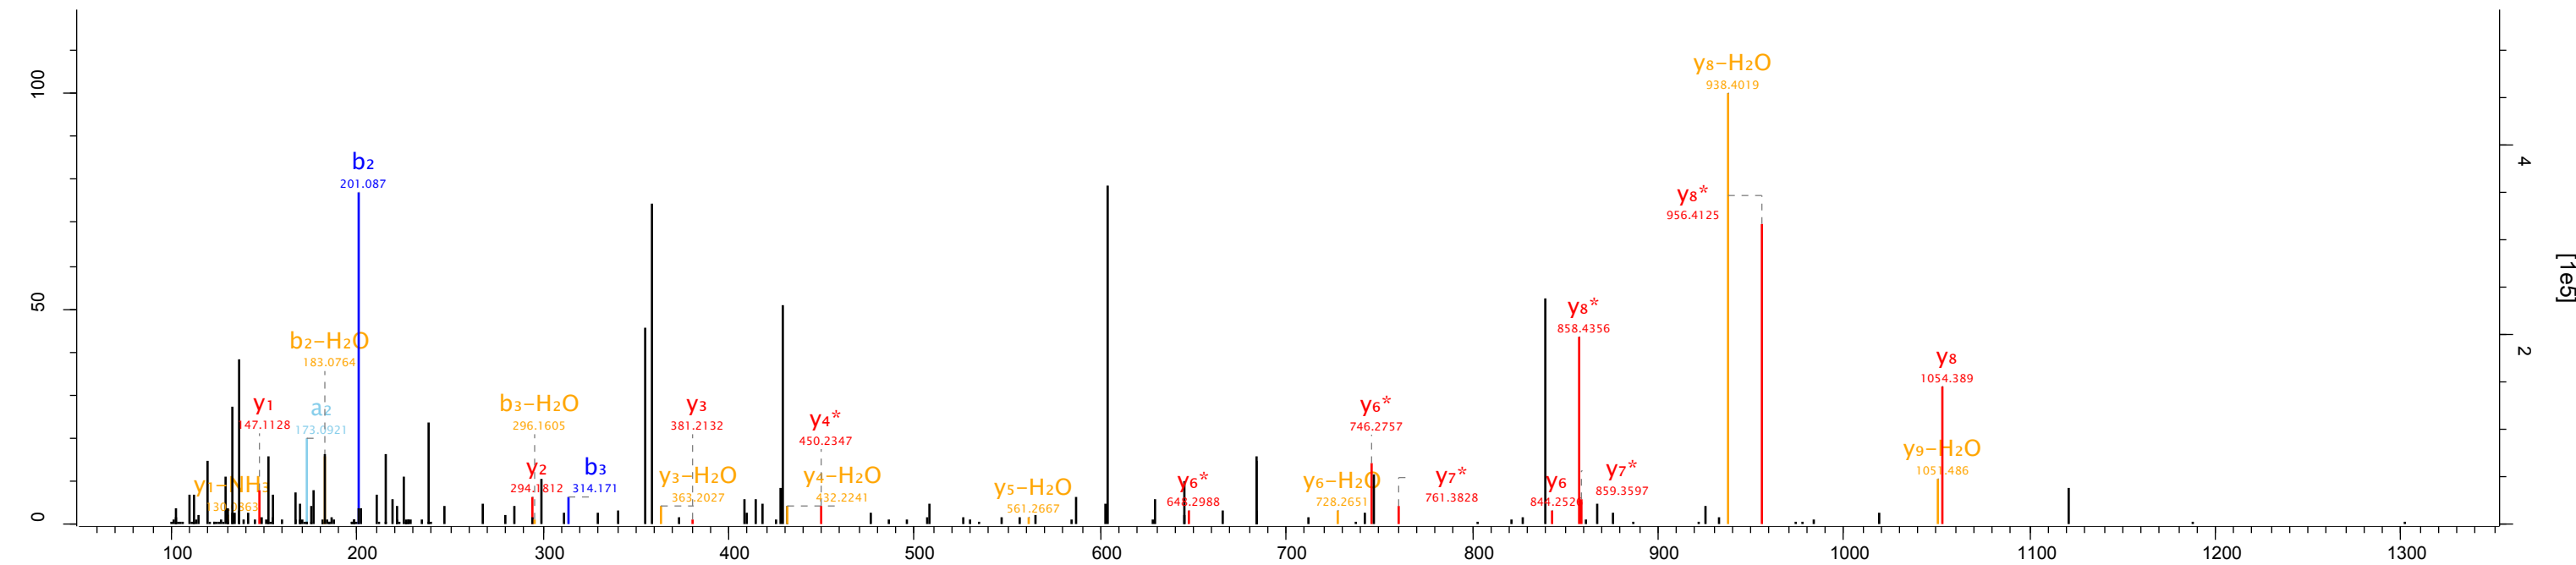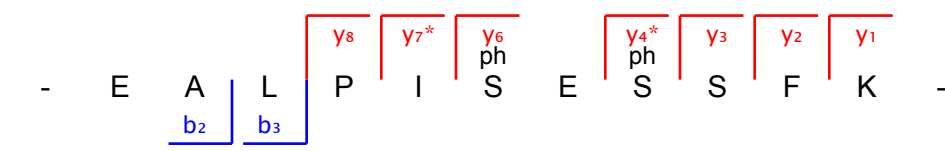

Raw file 20150812\_A375SR\_Phospho\_BR1\_02 Scan 19219 Method FTMS; HCD Score 85.49 m/z 1063.43 Gene names PCM1

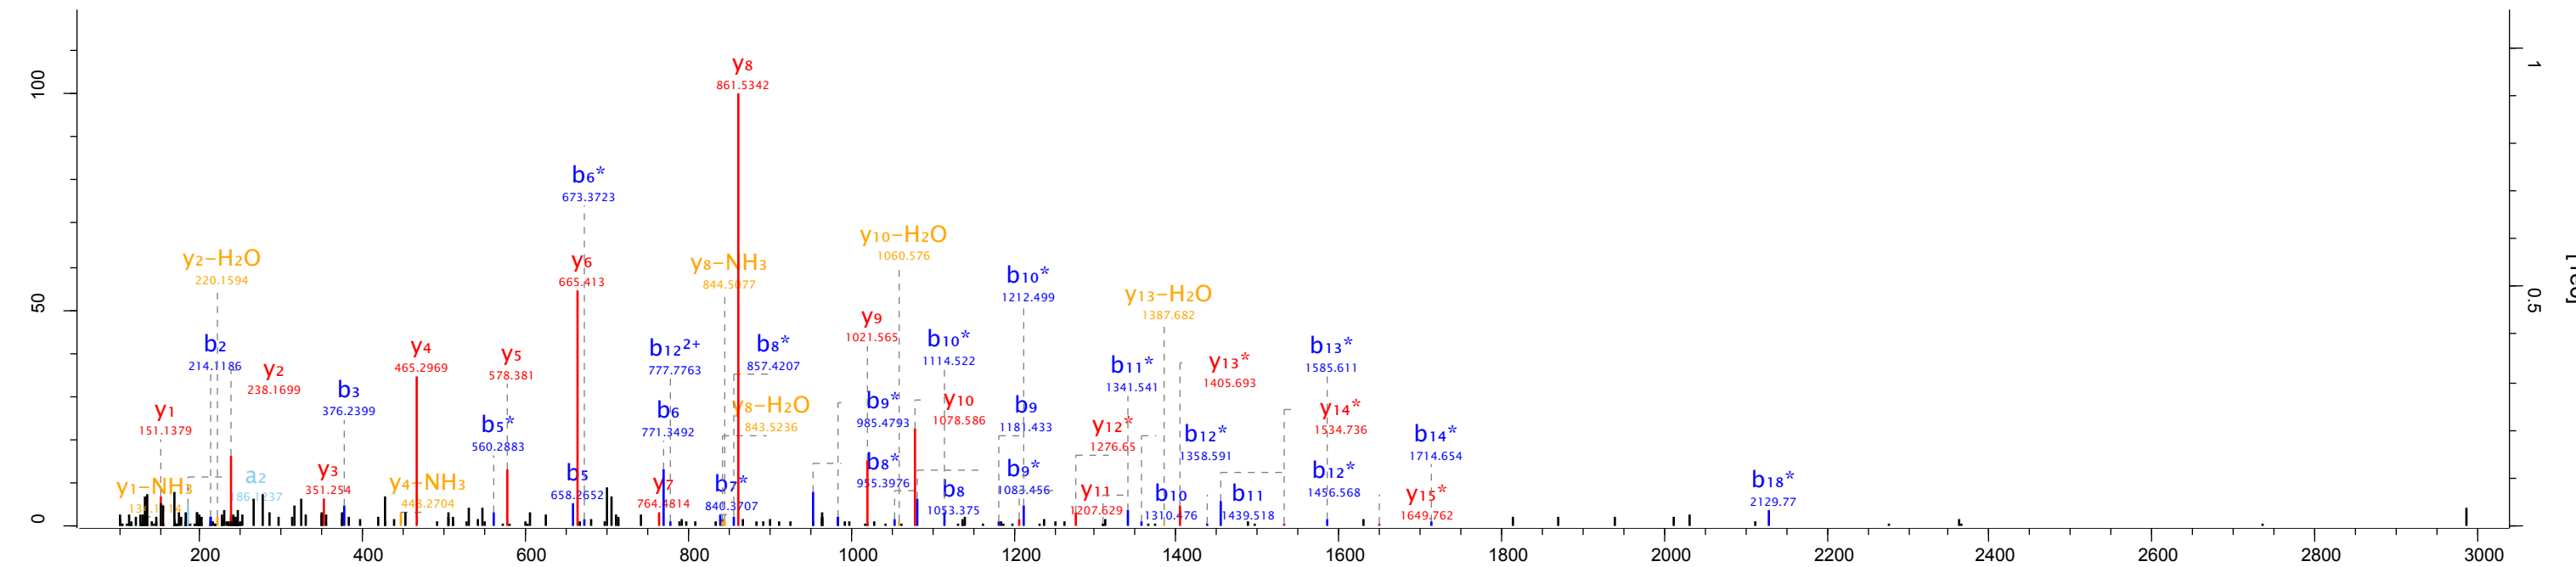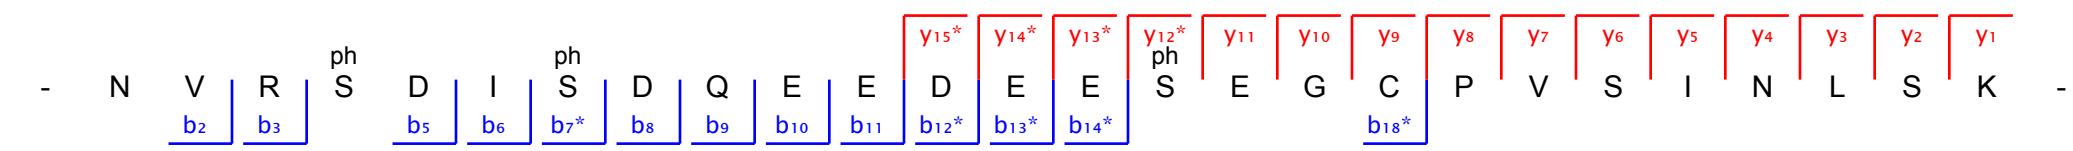

Raw file: 20150812\_A375SR\_Phospho\_BR1\_02  
 Scan: 19519 Method: FTMS; HCD Score: 89.66 m/z: 1029.12 Gene names: NCOA7

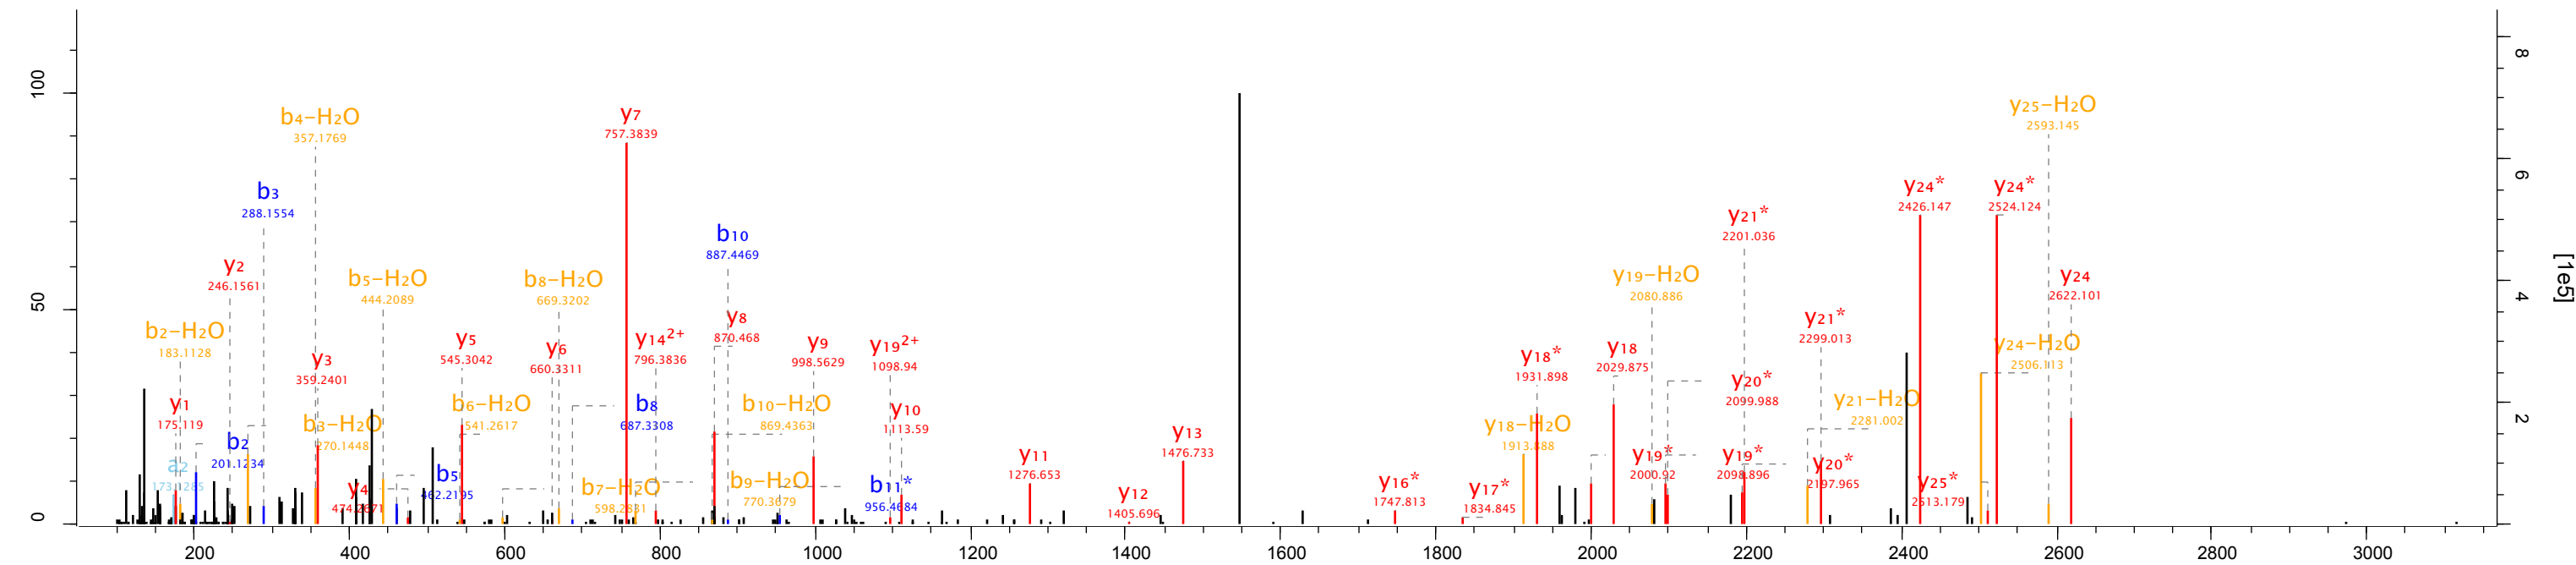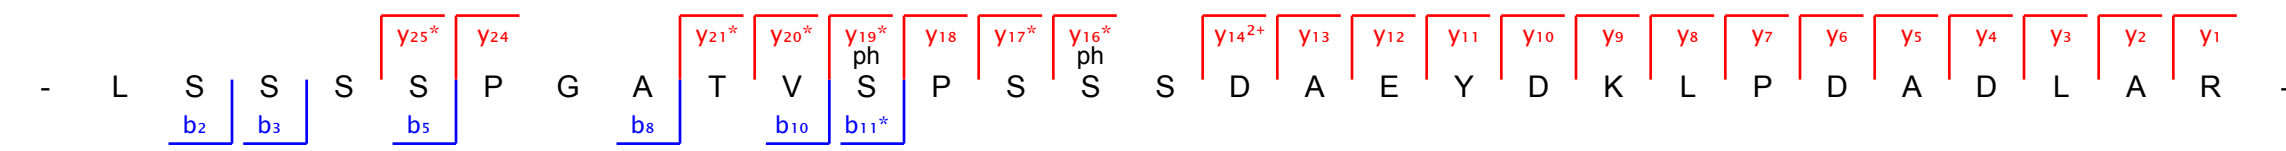

Raw file Scan Method Score m/z Gene names  
 20150812\_A375SR\_Phospho\_BR1\_02 20159 FTMS; HCD 46.46 1009.41 CD3EAP

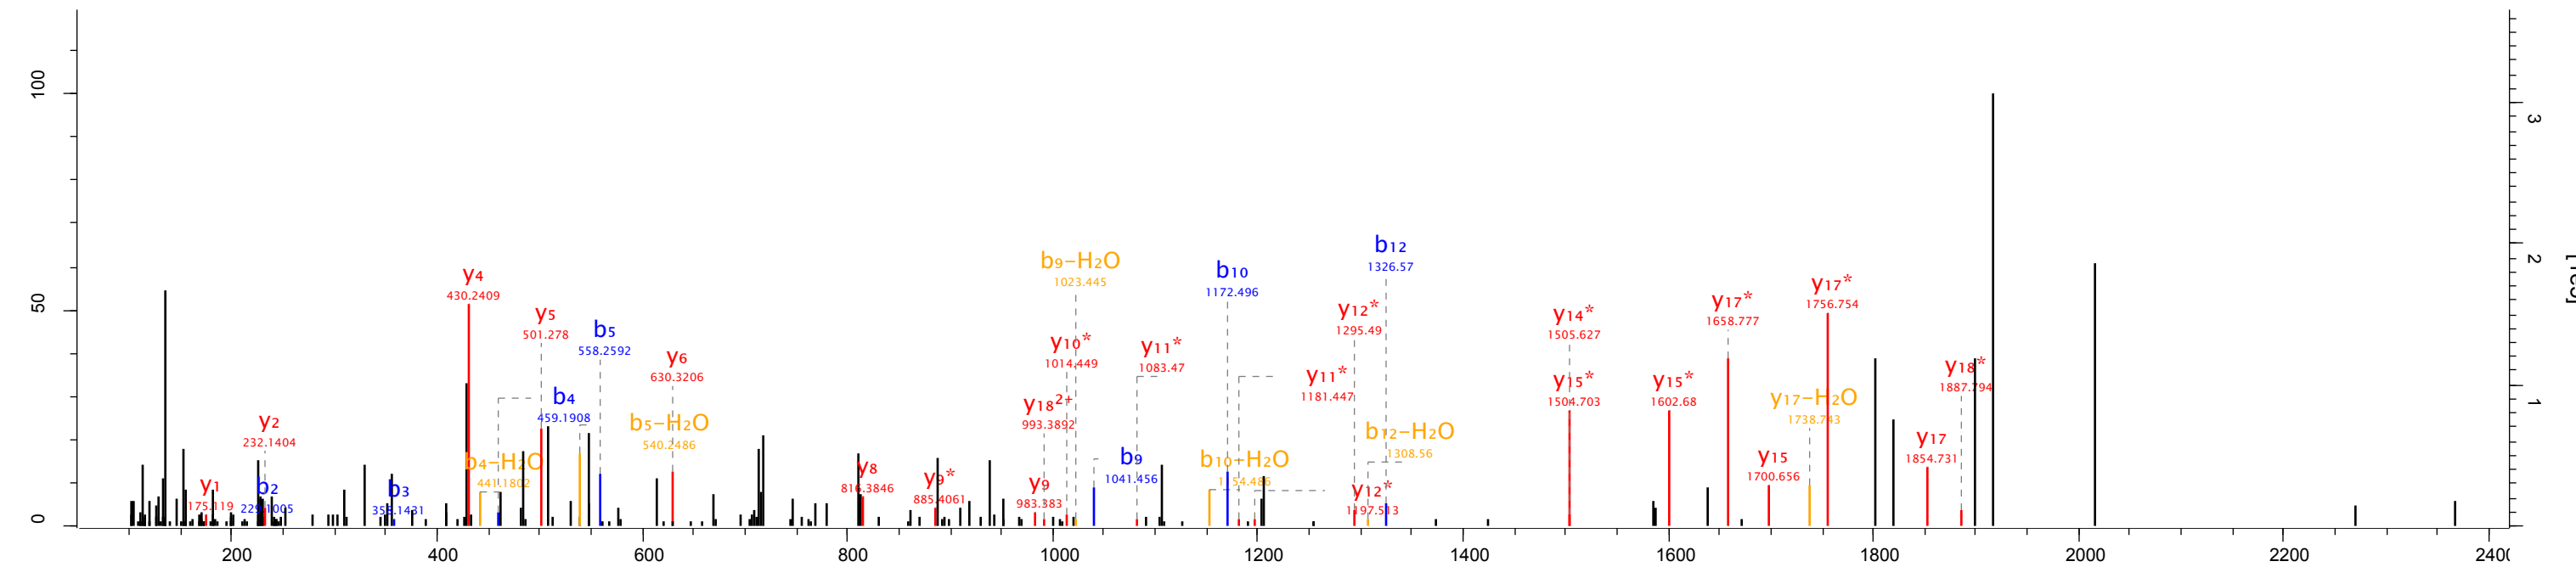

- M P E T V P Q E E M P G P P L N S E S G E E A P T G R -

Fragmentation mapping (b and y ions) is shown below the sequence:

- b<sub>2</sub> (under P)
- b<sub>3</sub> (under E)
- b<sub>4</sub> (under T)
- b<sub>5</sub> (under V)
- b<sub>9</sub> (under E)
- b<sub>10</sub> (under M)
- b<sub>12</sub> (under G)
- y<sub>18</sub>\* (above M)
- y<sub>17</sub> (above P)
- y<sub>15</sub> (above P)
- y<sub>14</sub>\* (above P)
- y<sub>12</sub>\* (above N)
- y<sub>11</sub>\* (above S)
- y<sub>10</sub>\* (above E)
- y<sub>9</sub> (above S)
- y<sub>8</sub> (above G)
- y<sub>6</sub> (above E)
- y<sub>5</sub> (above A)
- y<sub>4</sub> (above P)
- y<sub>2</sub> (above G)
- y<sub>1</sub> (above R)

Raw file 20150812\_A375SR\_Phospho\_BR1\_02 Scan 20959 Method FTMS; HCD Score 48.46 m/z 1220.86 Gene names PDE12

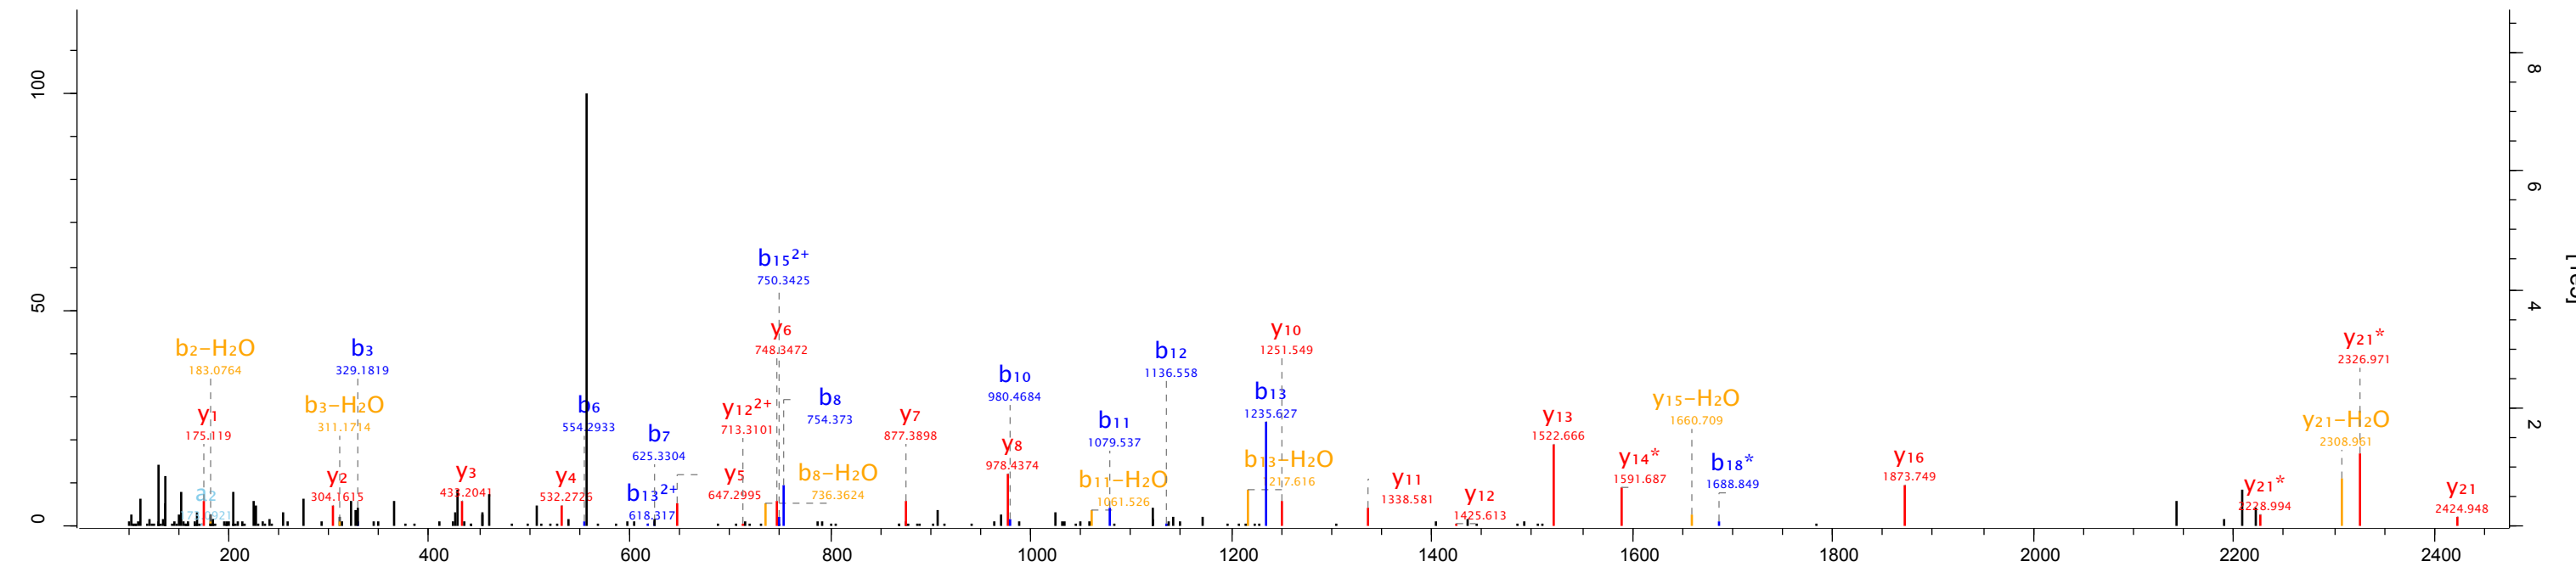

- E A K P G A A E P E V G V P S ph S L S P S y<sub>14</sub>\* ph S y<sub>13</sub> y<sub>12</sub> y<sub>11</sub> y<sub>10</sub> W y<sub>8</sub> y<sub>7</sub> y<sub>6</sub> y<sub>5</sub> y<sub>4</sub> y<sub>3</sub> y<sub>2</sub> y<sub>1</sub> -

a<sub>2</sub>
b<sub>3</sub>
b<sub>6</sub>
b<sub>7</sub>
b<sub>8</sub>
b<sub>10</sub>
b<sub>11</sub>
b<sub>12</sub>
b<sub>13</sub>
b<sub>15</sub><sup>2+</sup>
b<sub>18</sub>\*
y<sub>21</sub>
y<sub>16</sub>
y<sub>14</sub>\*
y<sub>13</sub>
y<sub>12</sub>
y<sub>11</sub>
y<sub>10</sub>
y<sub>8</sub>
y<sub>7</sub>
y<sub>6</sub>
y<sub>5</sub>
y<sub>4</sub>
y<sub>3</sub>
y<sub>2</sub>
y<sub>1</sub>

Raw file  
20150812\_A375SR\_Phospho\_BR1\_02

Scan Method Score m/z Gene names  
22969 FTMS; HCD 202.35 1024.79 KRI1

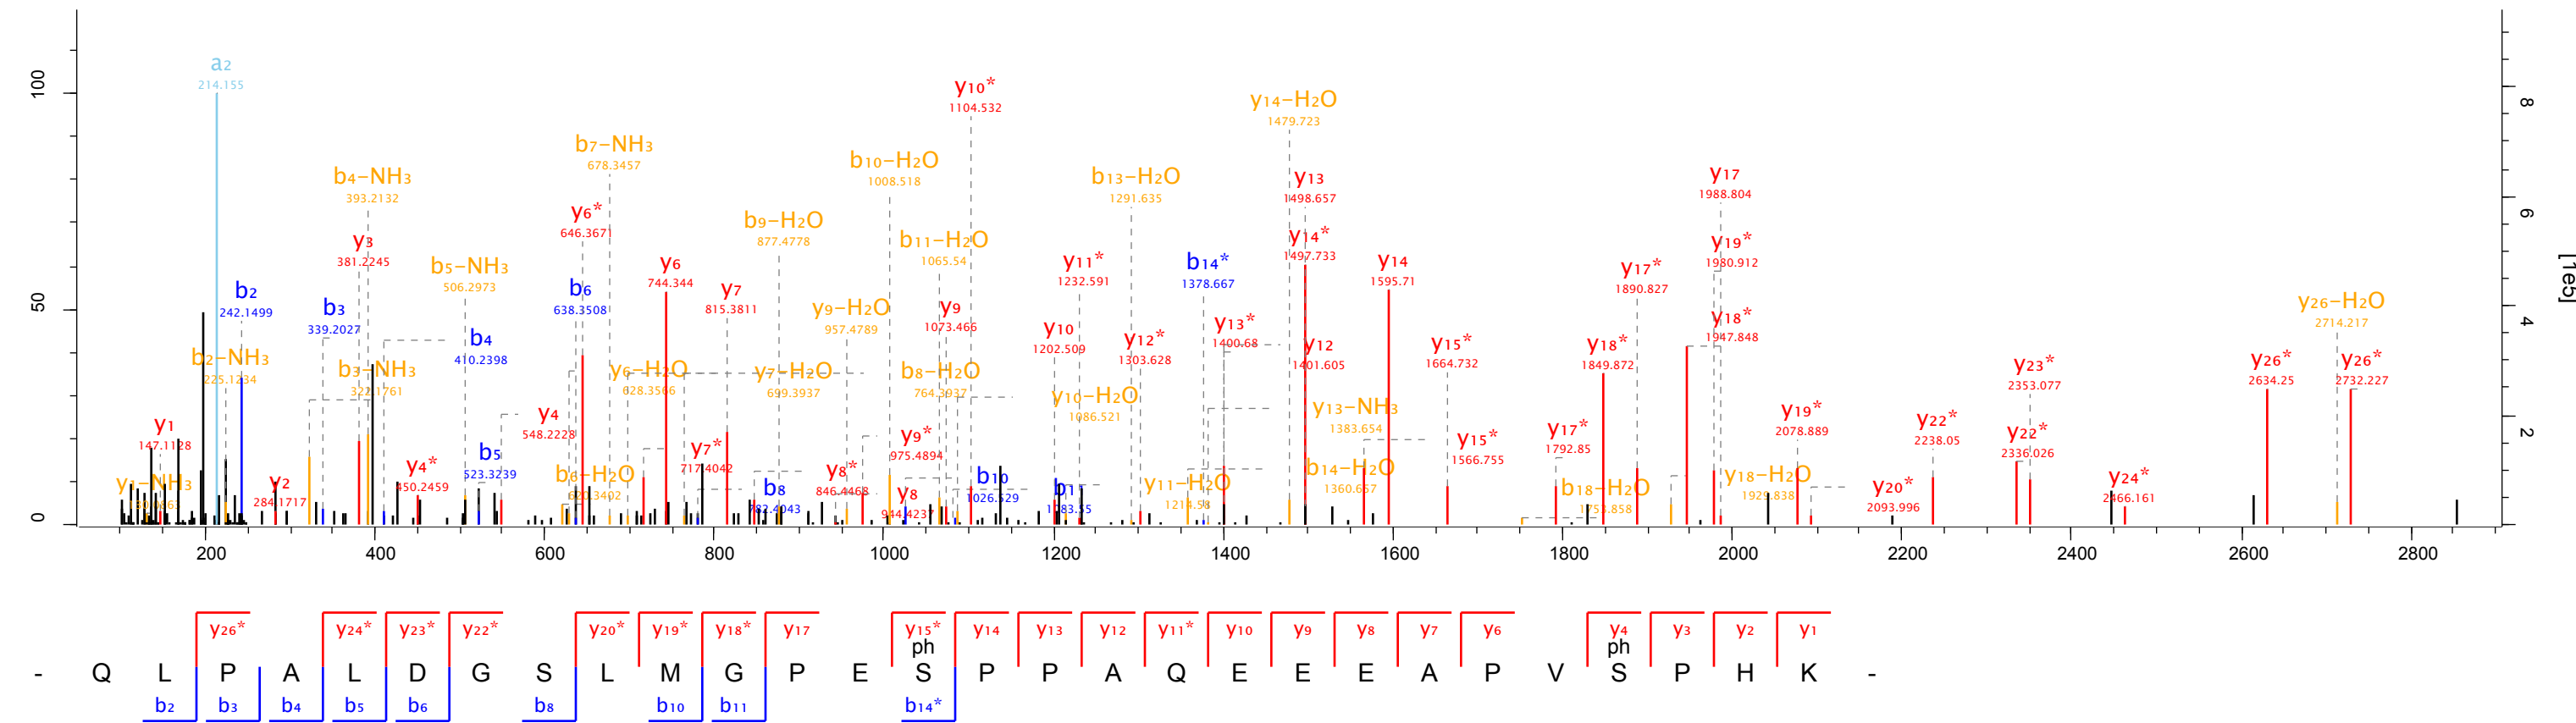

Raw file: 20150812\_A375SR\_Phospho\_BR1\_02  
 Scan: 23429 Method: FTMS; HCD Score: 85.16 m/z: 1284.03 Gene names: TACC1

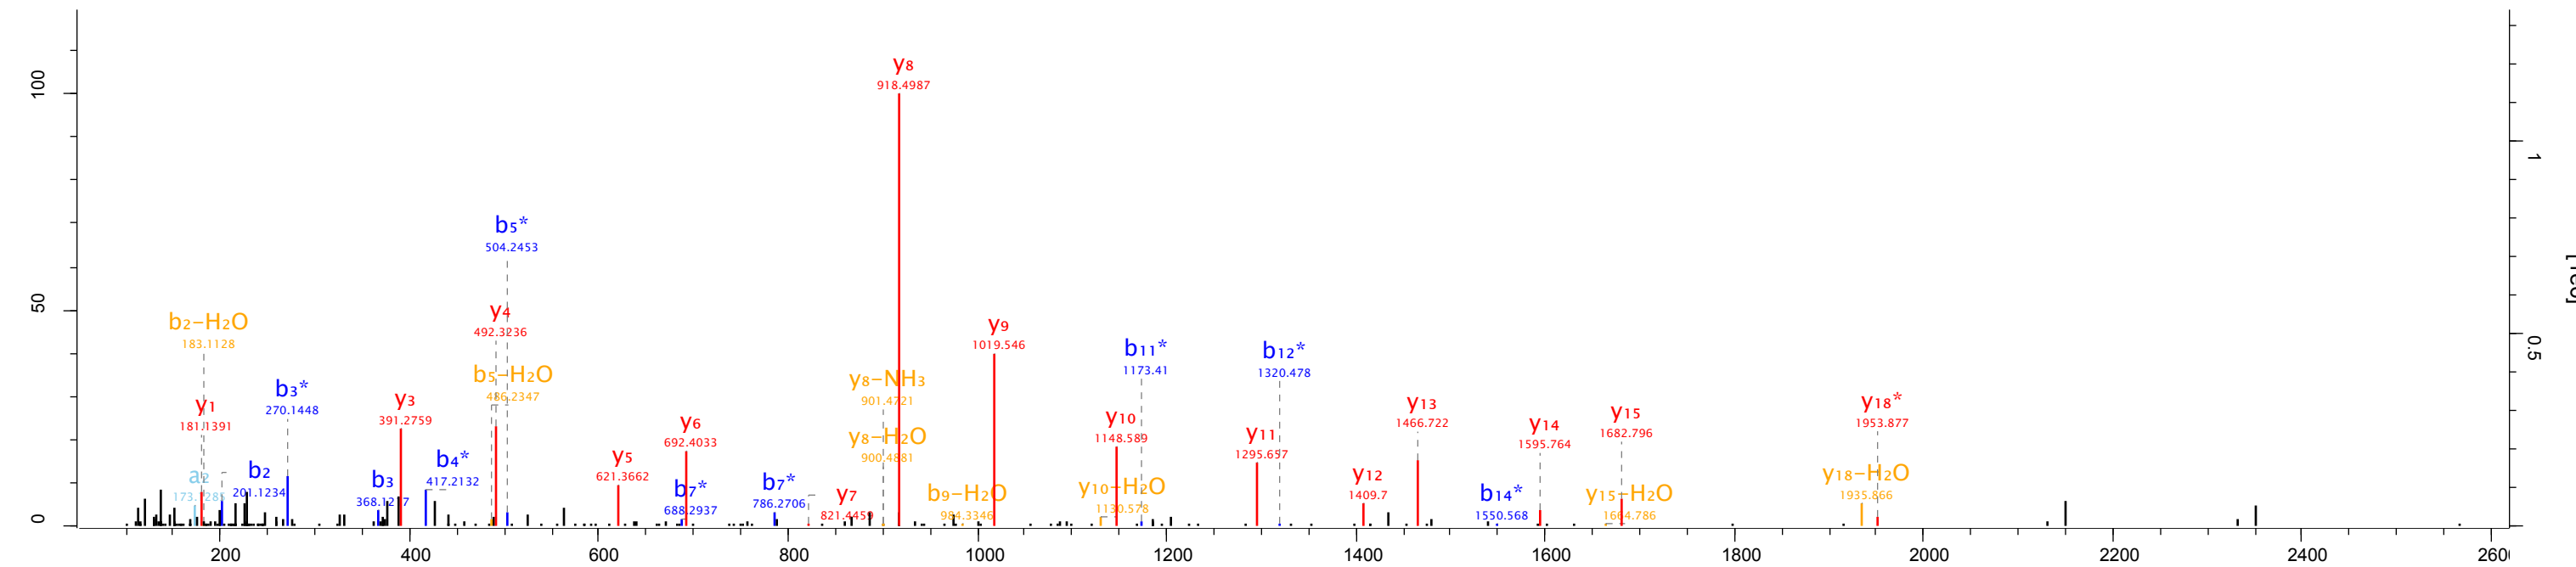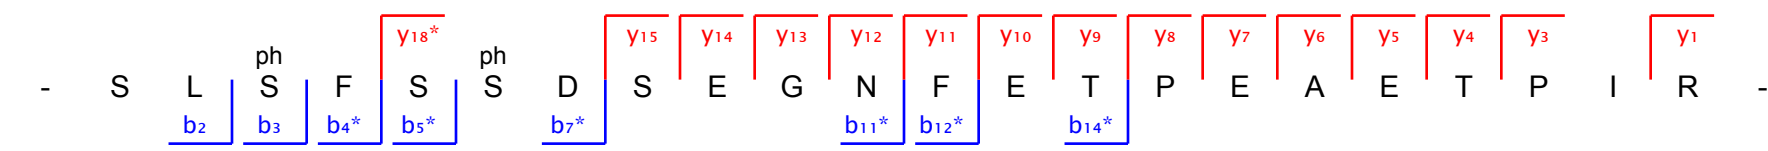



Raw file: 20150812\_A375SR\_Phospho\_BR1\_02  
 Scan: 23499 Method: FTMS; HCD Score: 57.31 m/z: 1430.64 Gene names: SSFA2

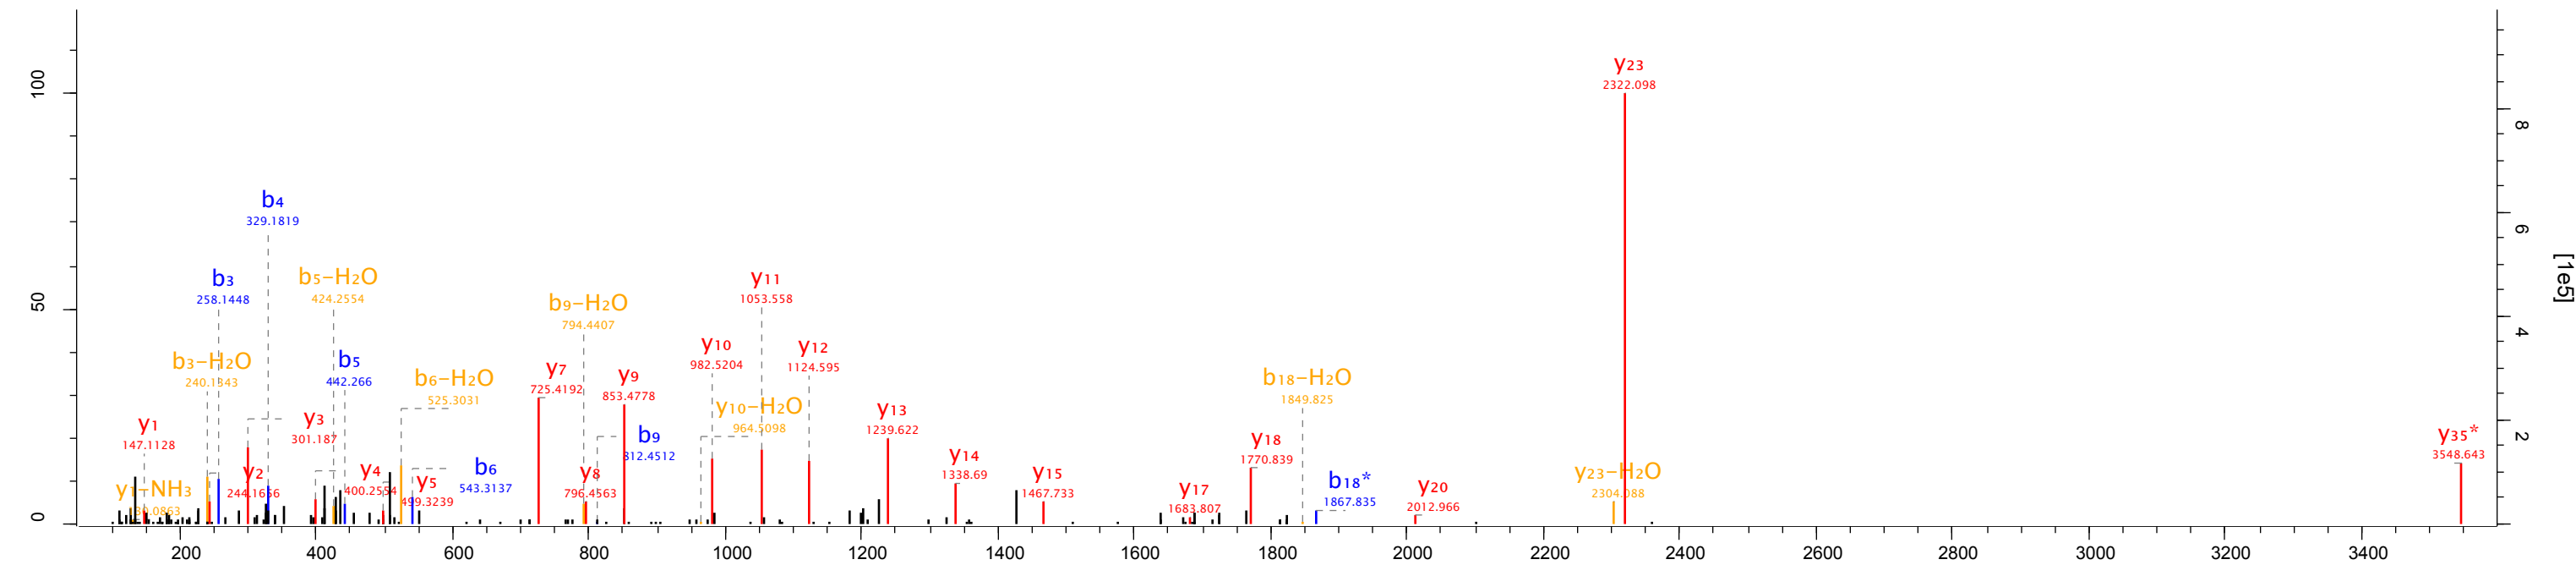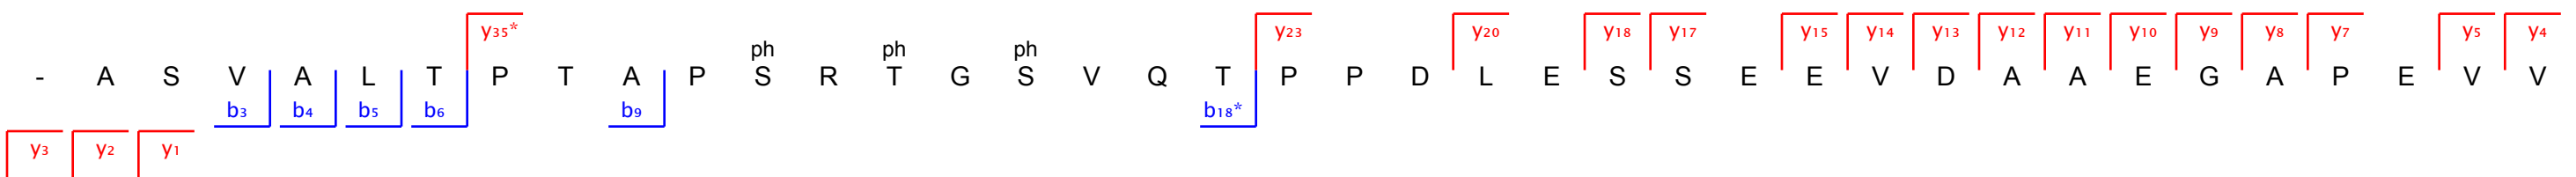

Raw file: 20150812\_A375SR\_Phospho\_BR1\_02  
 Scan: 23789 Method: FTMS; HCD Score: 88.29 m/z: 1203.74 Gene names: HEXIM1

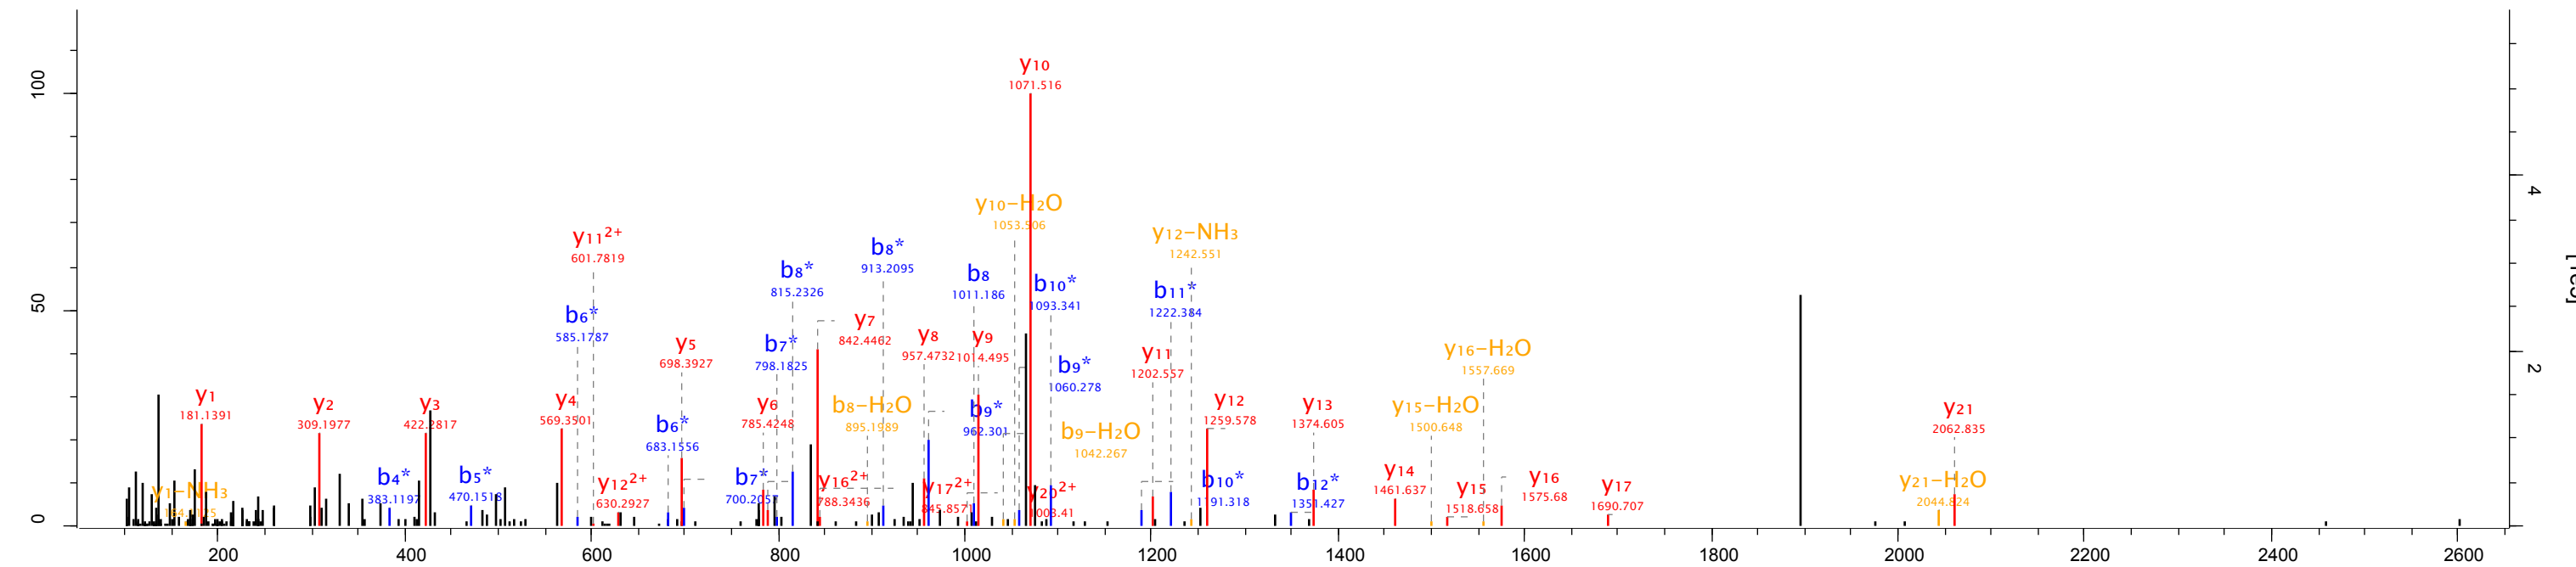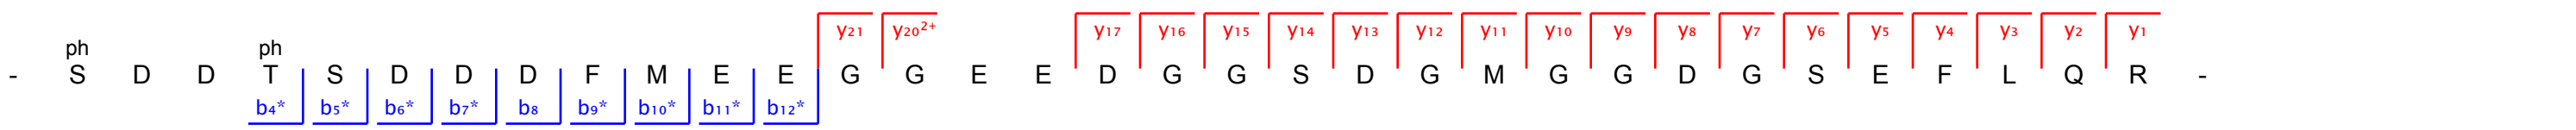

Raw file 20150812\_A375SR\_Phospho\_BR1\_02 Scan 24009 Method FTMS; HCD Score 46.4 m/z 1078.93 Gene names SRRM2

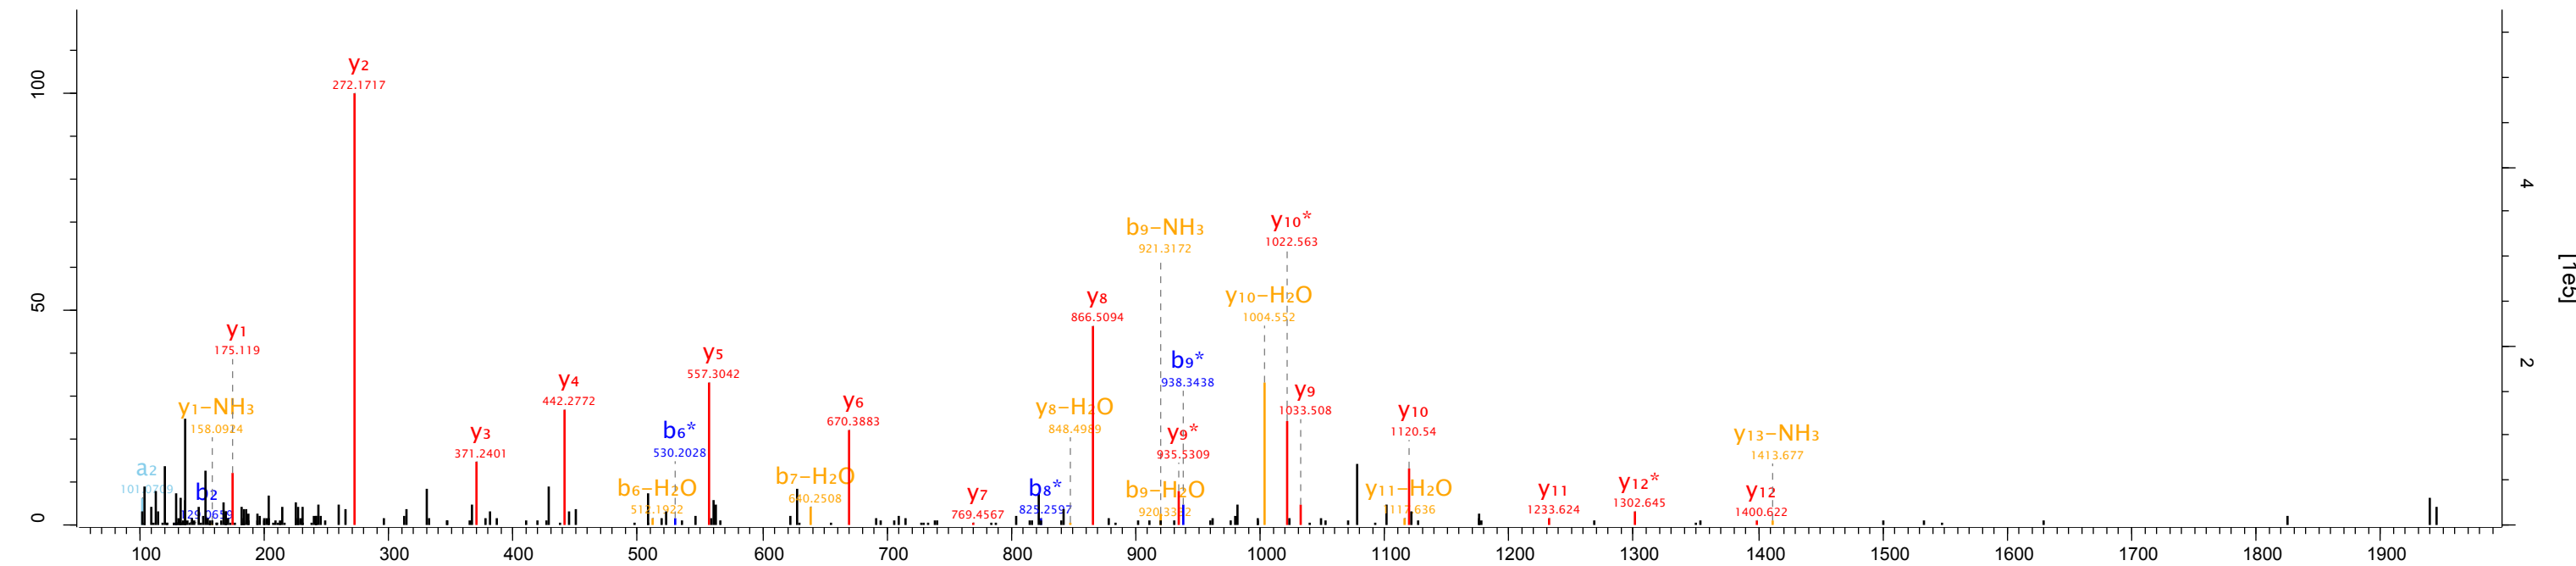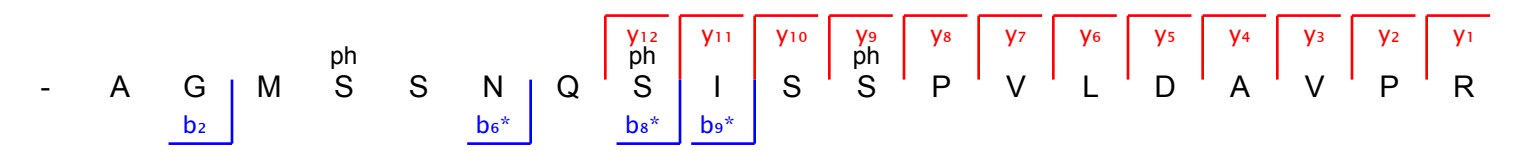

Raw file  
 20150812\_A375SR\_Phospho\_BR1\_02  
 Scan 24419 Method FTMS; HCD Score 148.3 m/z 1271.98 Gene names BZW2

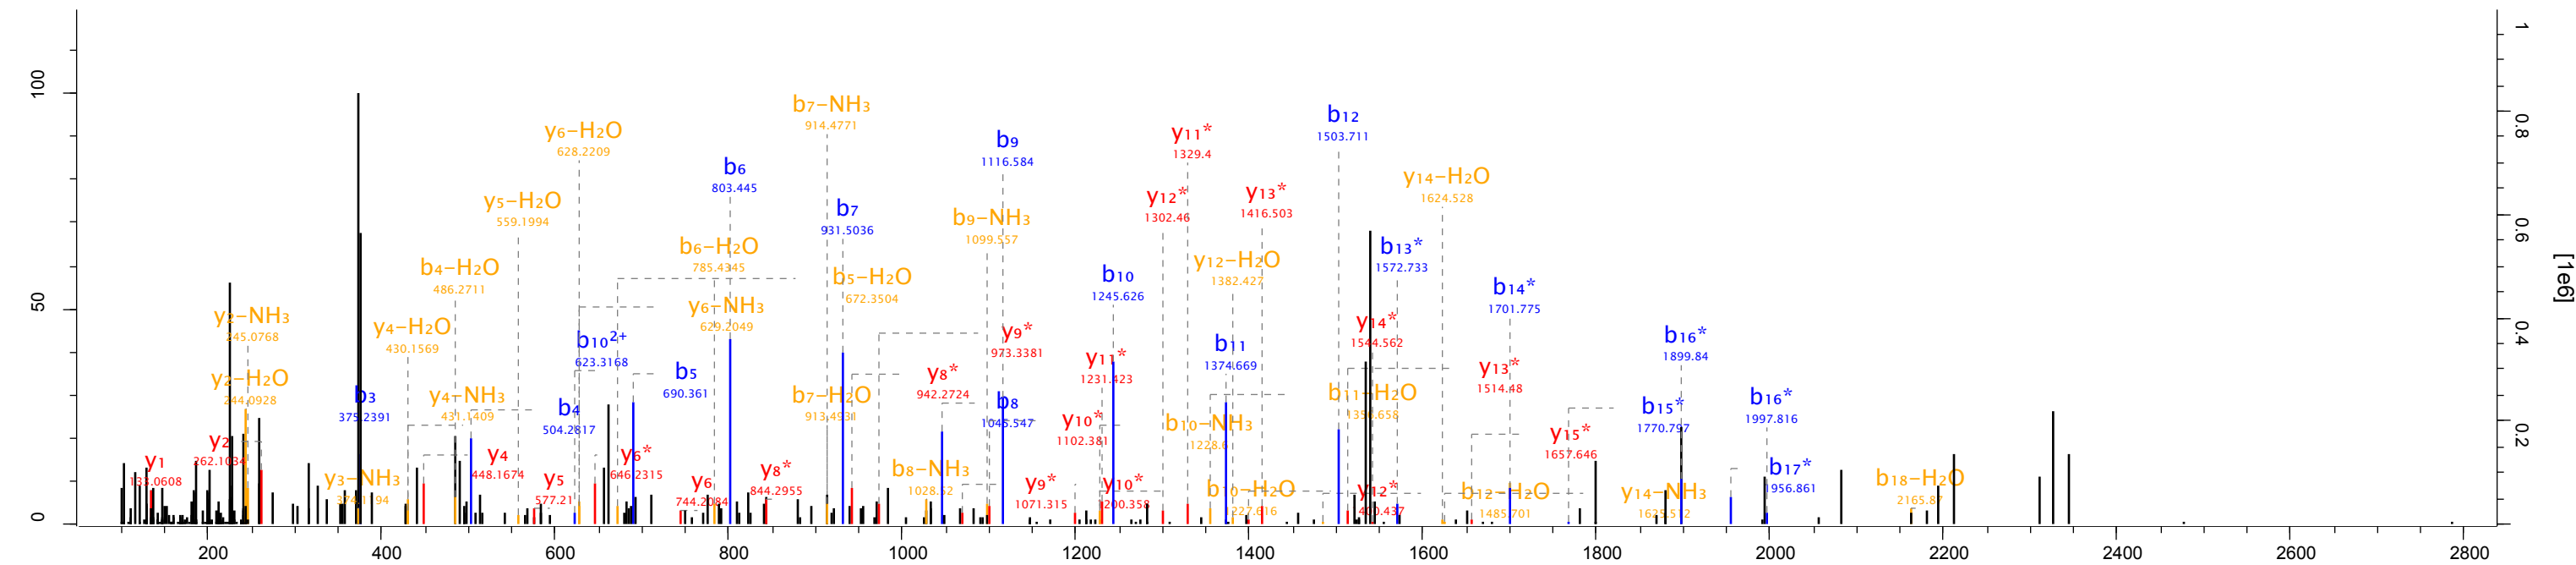

- K F V E W L Q N A E E E S E S E G E E N -

b<sub>3</sub>
b<sub>4</sub>
b<sub>5</sub>
b<sub>6</sub>
b<sub>7</sub>
b<sub>8</sub>
b<sub>9</sub>
b<sub>10</sub>
b<sub>11</sub>
b<sub>12</sub>
b<sub>13</sub>\*
b<sub>14</sub>\*
b<sub>15</sub>\*
b<sub>16</sub>\*
b<sub>17</sub>\*

y<sub>15</sub>\*
y<sub>14</sub>\*
y<sub>13</sub>\*
y<sub>12</sub>\*
y<sub>11</sub>\*
y<sub>10</sub>\*
y<sub>9</sub>\*
y<sub>8</sub>\*
y<sub>6</sub>ph
y<sub>5</sub>
y<sub>4</sub>
y<sub>2</sub>
y<sub>1</sub>

Raw file: 20150812\_A375SR\_Phospho\_BR1\_02  
 Scan: 25519 Method: FTMS; HCD Score: 72.44 m/z: 1096.29 Gene names: BCL9L

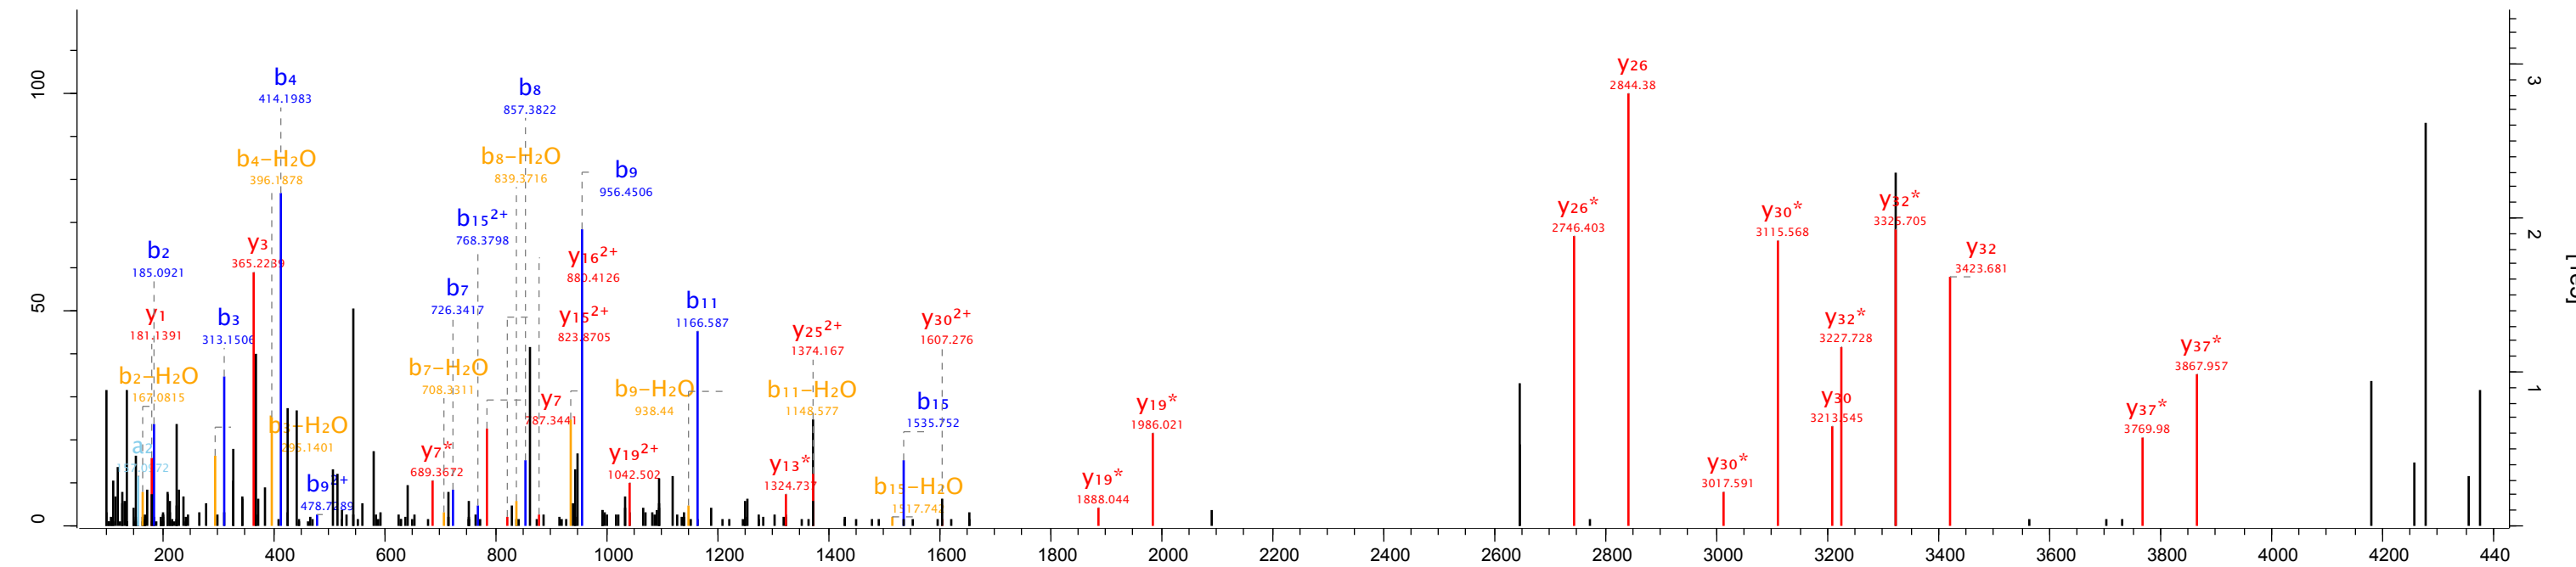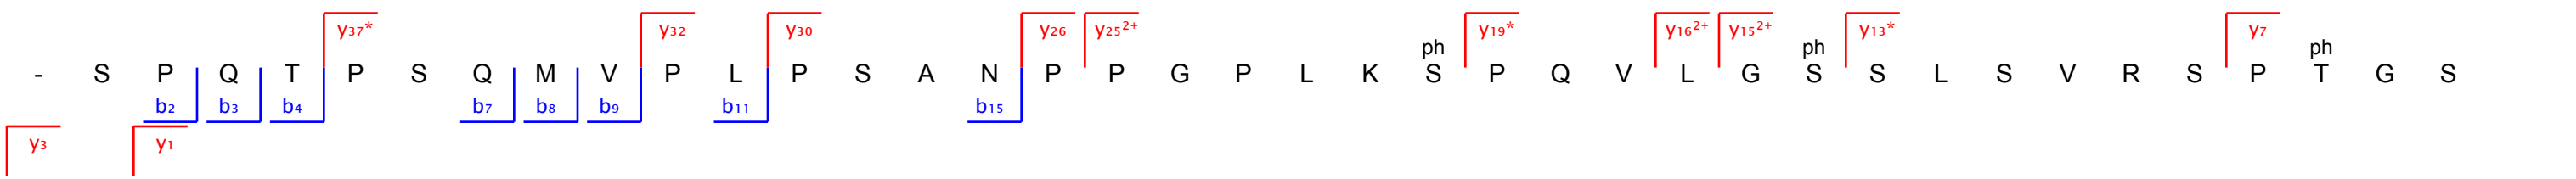

Raw file: 20150812\_A375SR\_Phospho\_BR1\_02  
 Scan: 2869 Method: FTMS; HCD Score: 222.2 m/z: 814.34 Gene names: CBX3

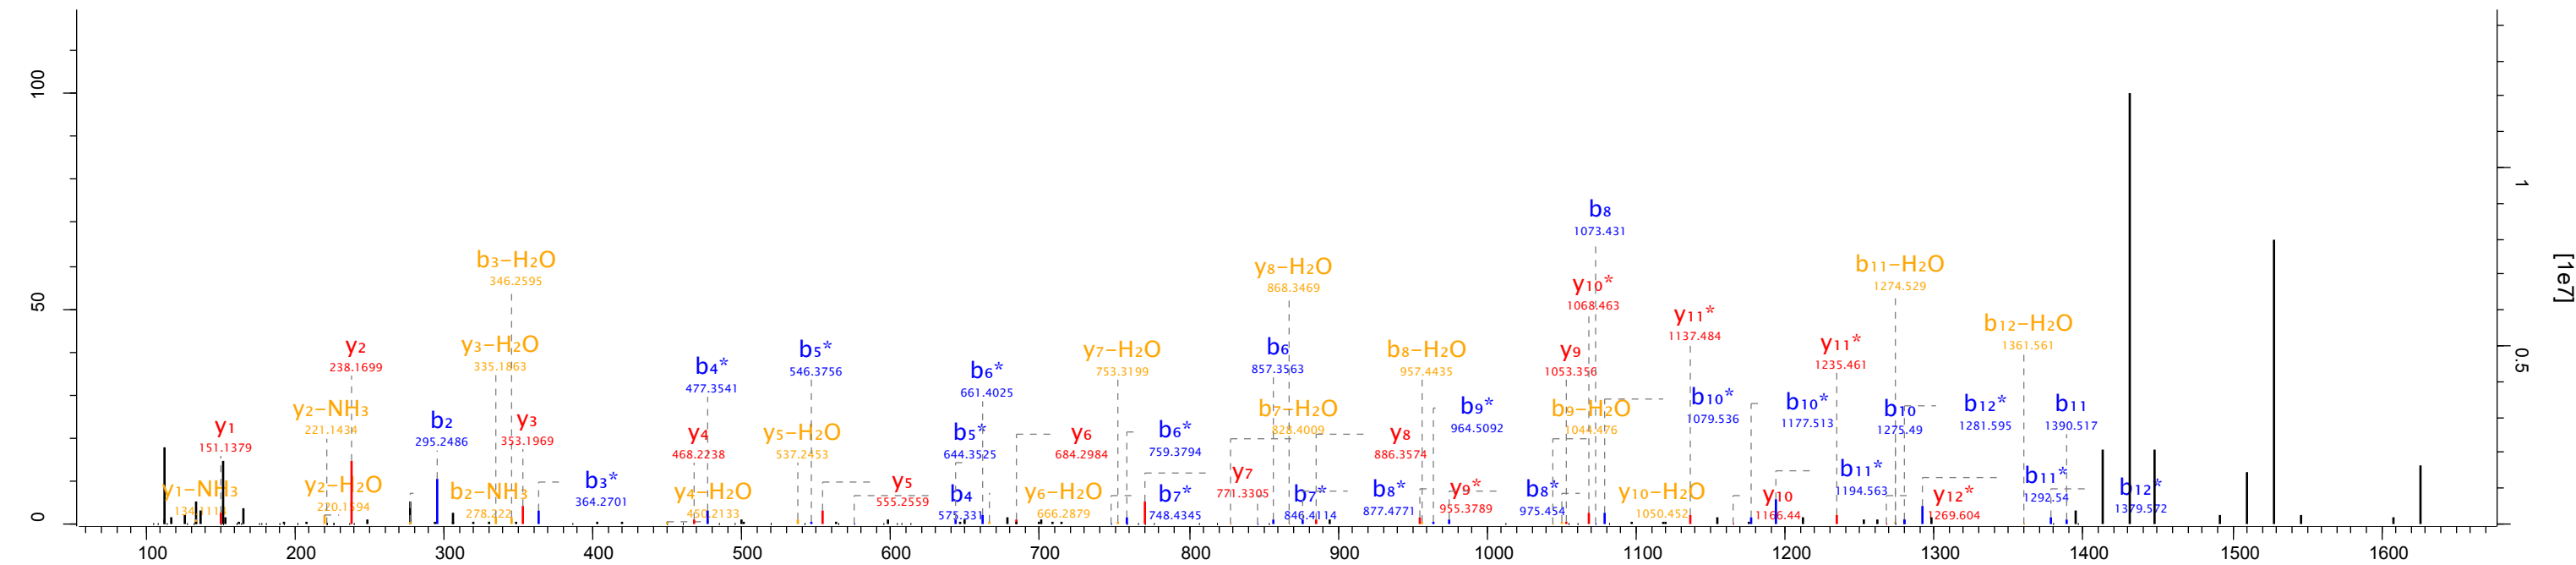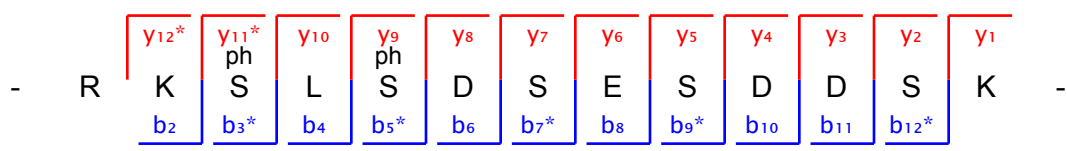

Raw file: 20150812\_A375SR\_Phospho\_BR1\_02  
 Scan: 3879 Method: FTMS; HCD Score: 55.54 m/z: 804.29 Gene names: BUD13

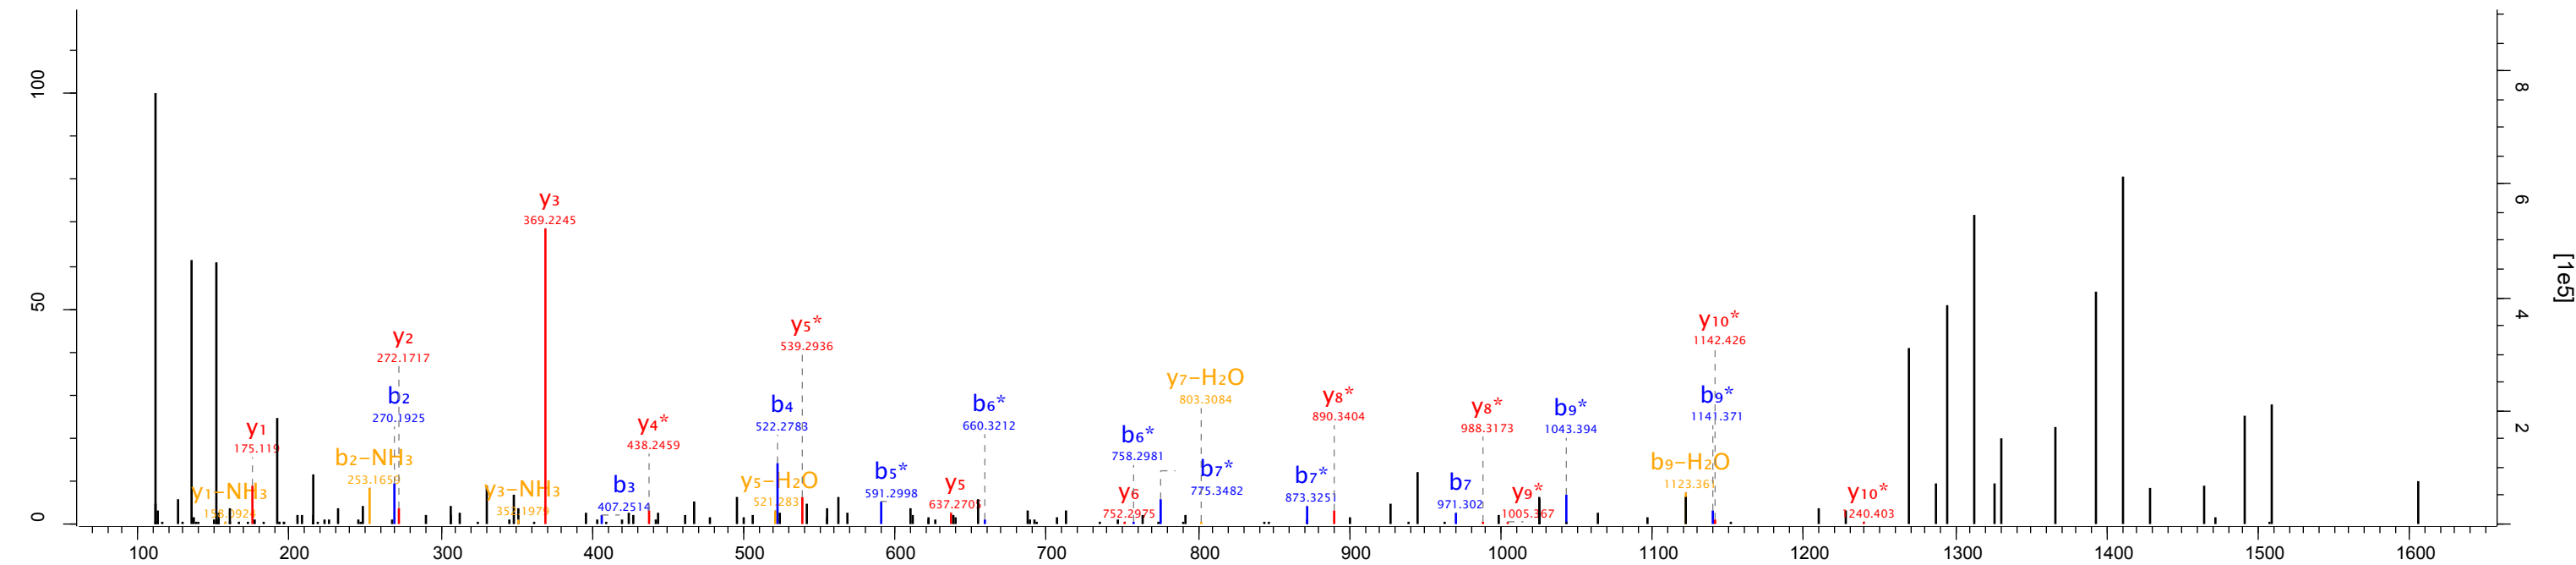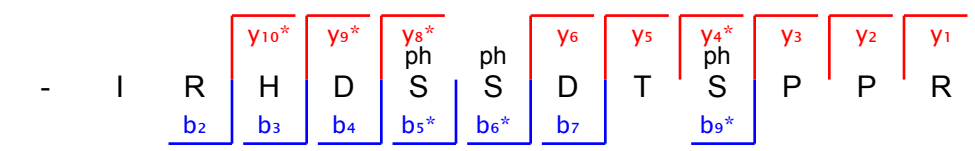

Raw file: 20150812\_A375SR\_Phospho\_BR1\_02  
 Scan: 3999 Method: FTMS; HCD Score: 108.26 m/z: 689.28 Gene names: SRRM1

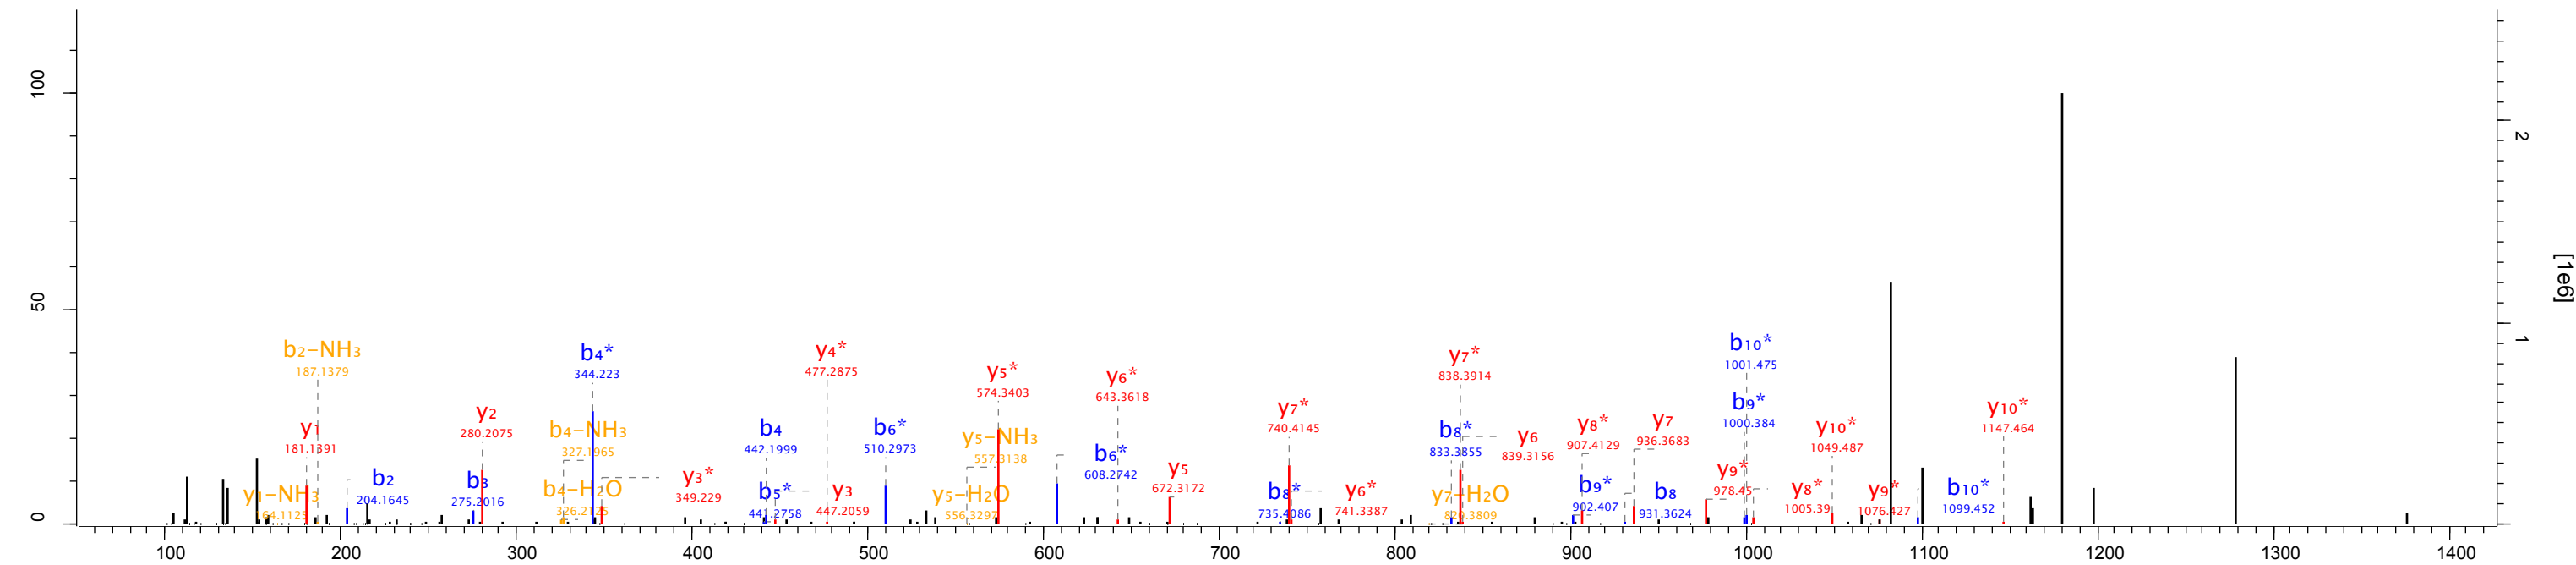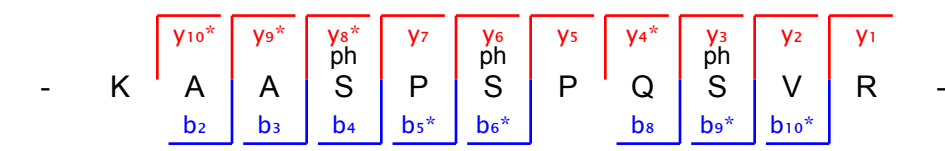



Raw file: 20150812\_A375SR\_Phospho\_BR1\_02  
 Scan: 4469 Method: FTMS; HCD Score: 72.9 m/z: 700.78 Gene names: SRRM2

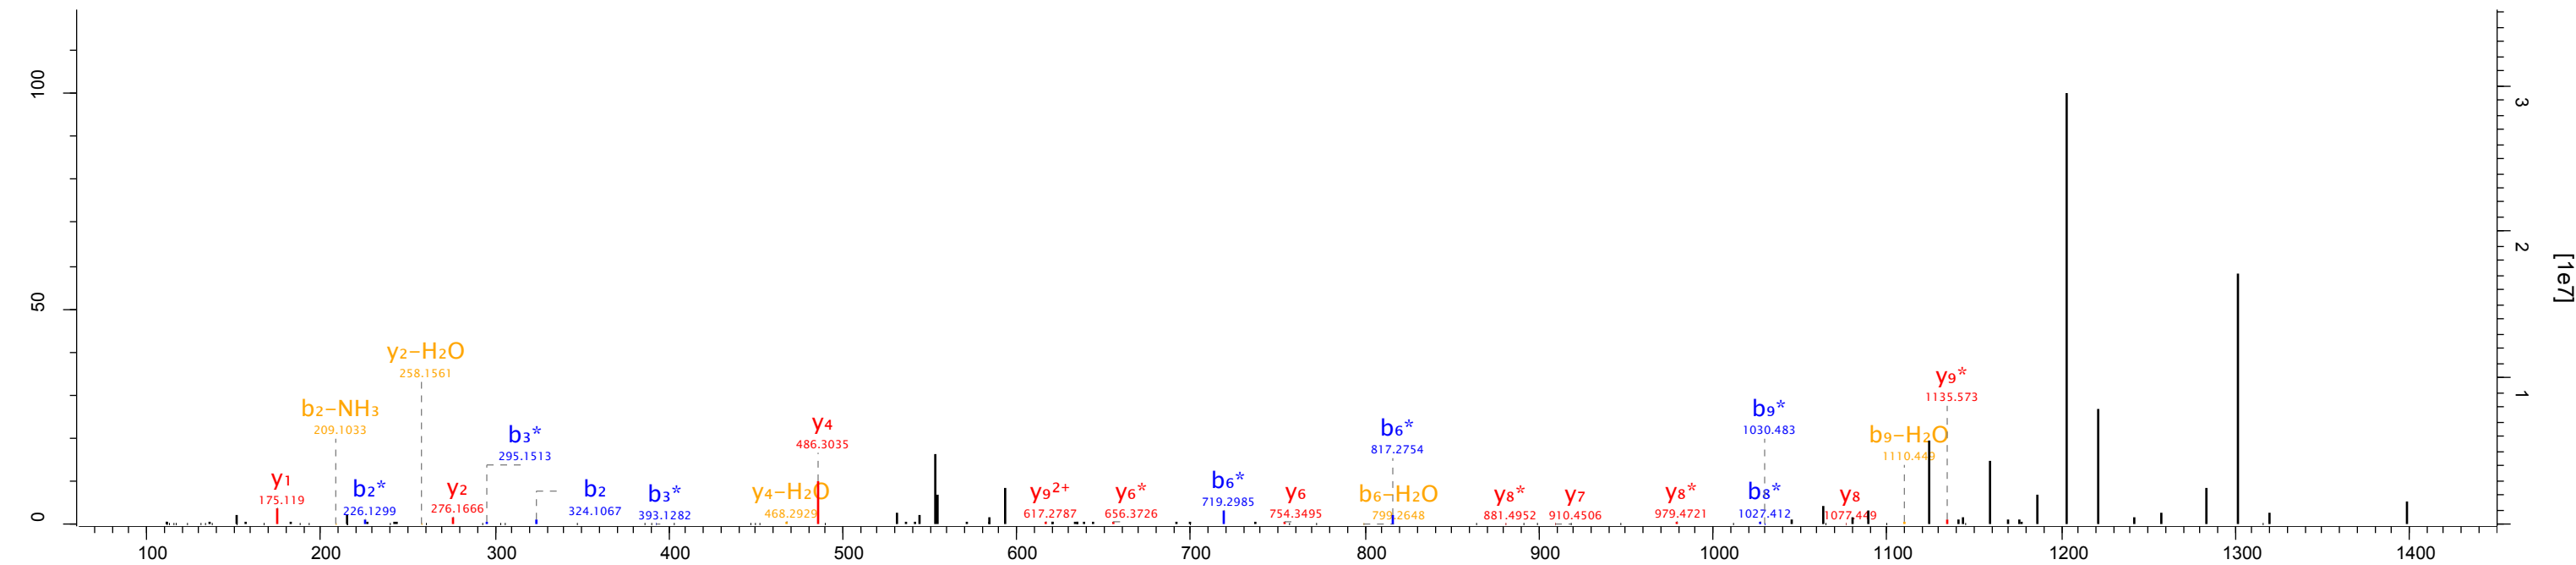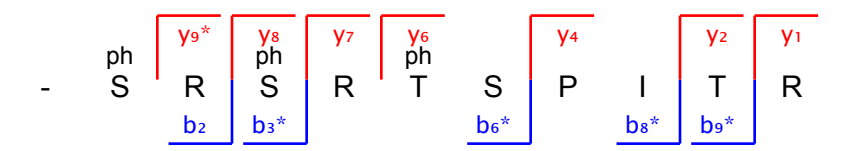

Raw file: 20150812\_A375SR\_Phospho\_BR1\_02  
 Scan: 5079 Method: FTMS; HCD Score: 44.18 m/z: 874.02 Gene names: BUD13

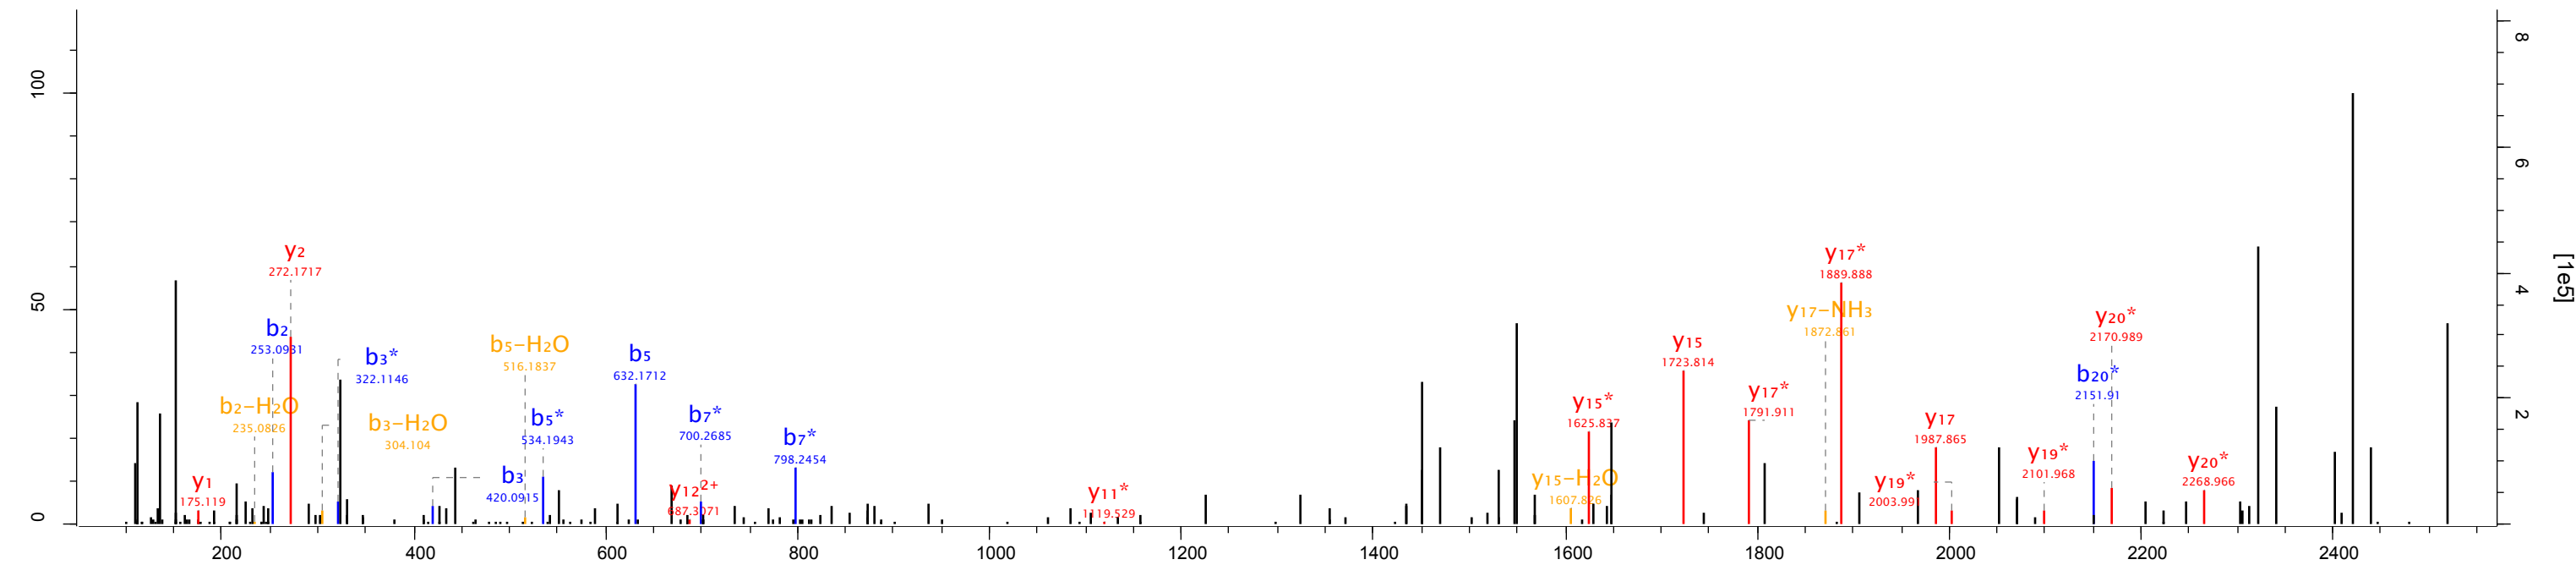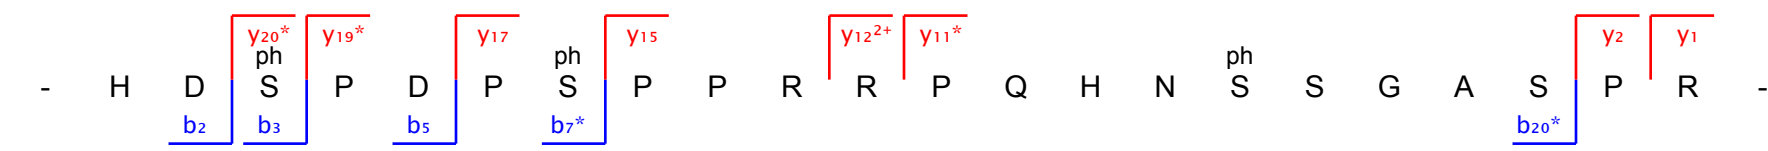

Raw file: 20150812\_A375SR\_Phospho\_BR1\_02  
 Scan: 5209 Method: FTMS; HCD Score: 107.53 m/z: 450.51 Gene names: TRA2B

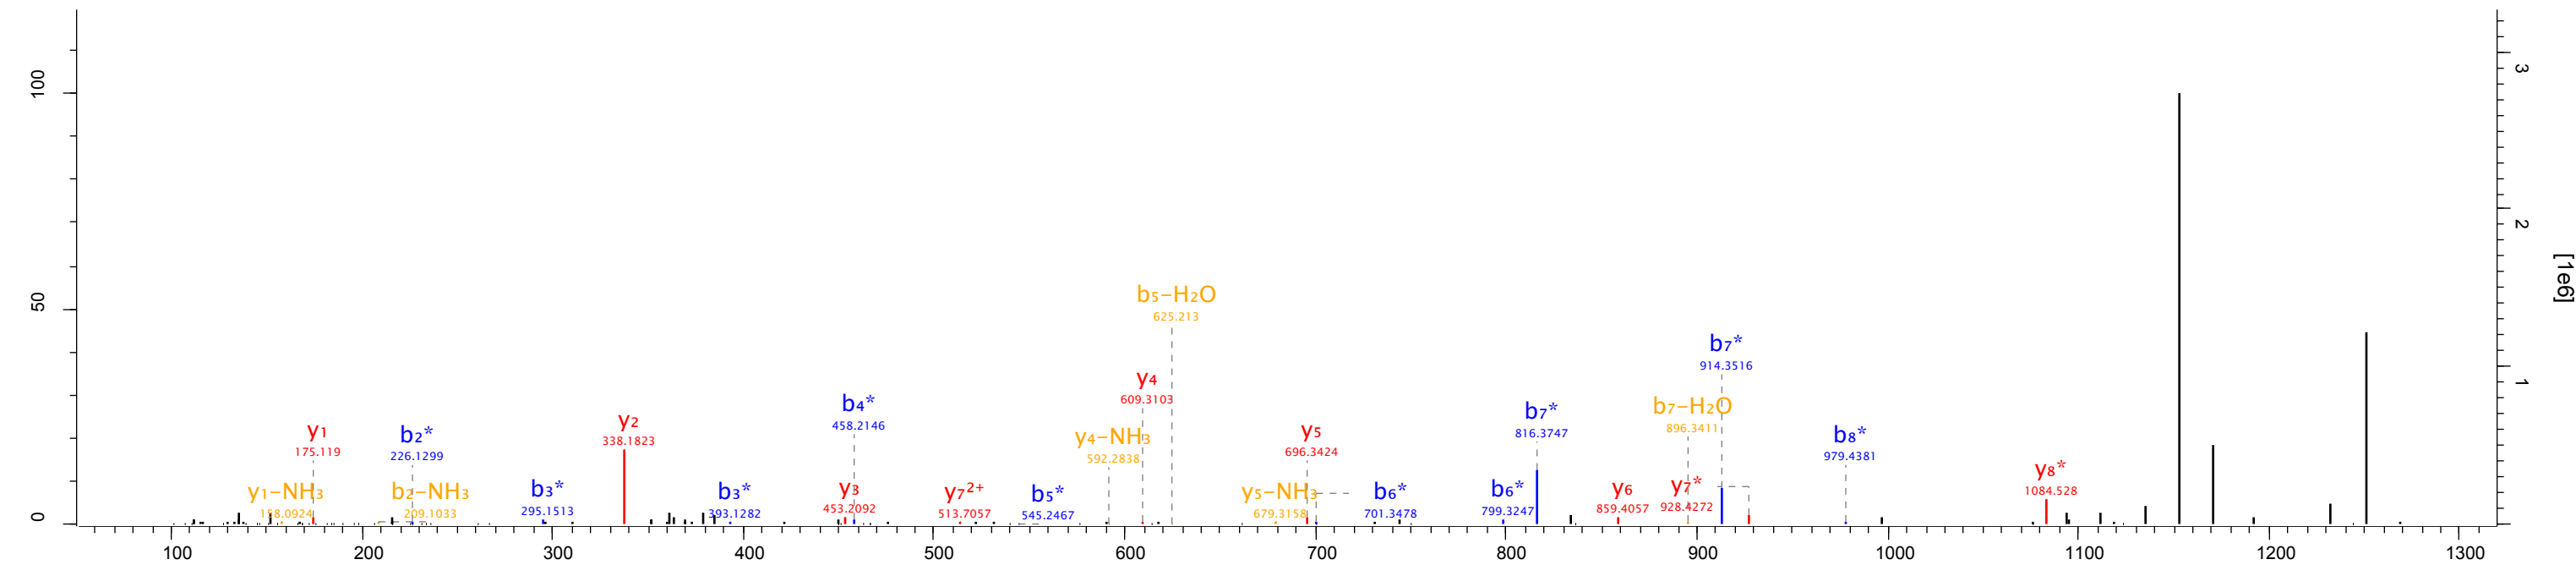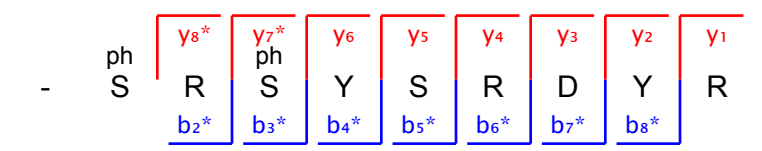

Raw file: 20150812\_A375SR\_Phospho\_BR1\_02  
 Scan: 5449 Method: FTMS; HCD Score: 59.98 m/z: 578.27 Gene names: HNRNPU

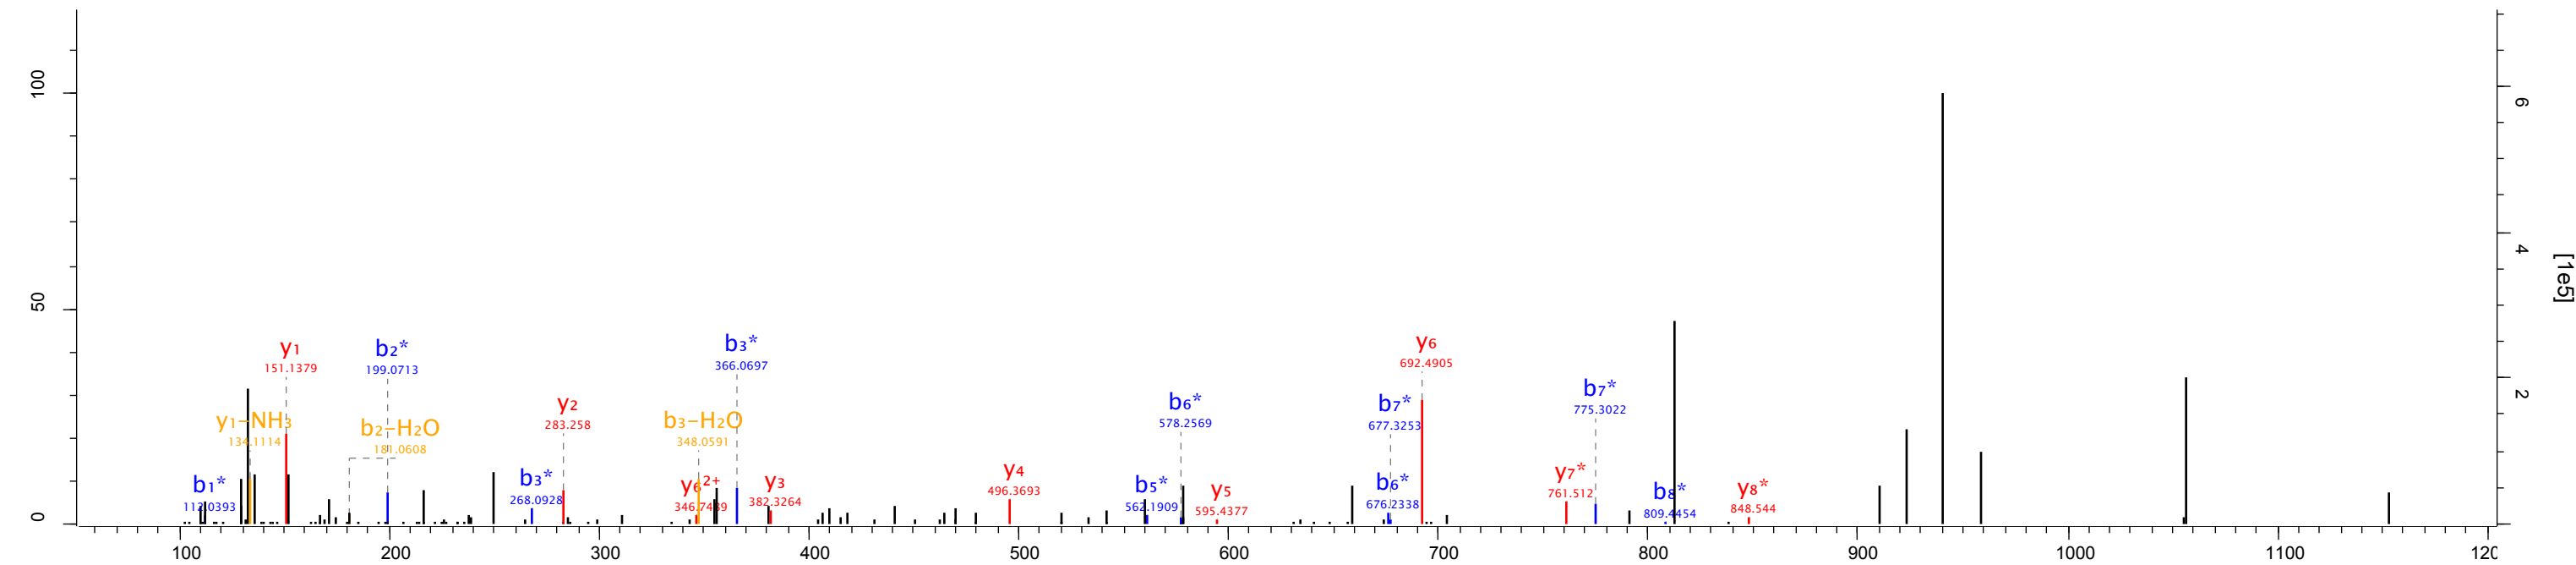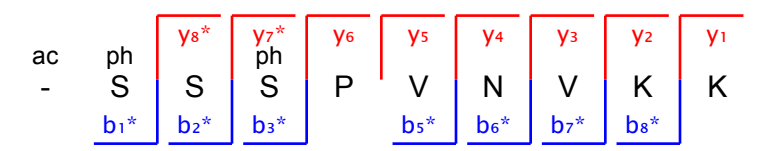

Raw file: 20150812\_A375SR\_Phospho\_BR1\_02  
 Scan: 5559 Method: FTMS; HCD Score: 168.15 m/z: 713.62 Gene names: RSF1

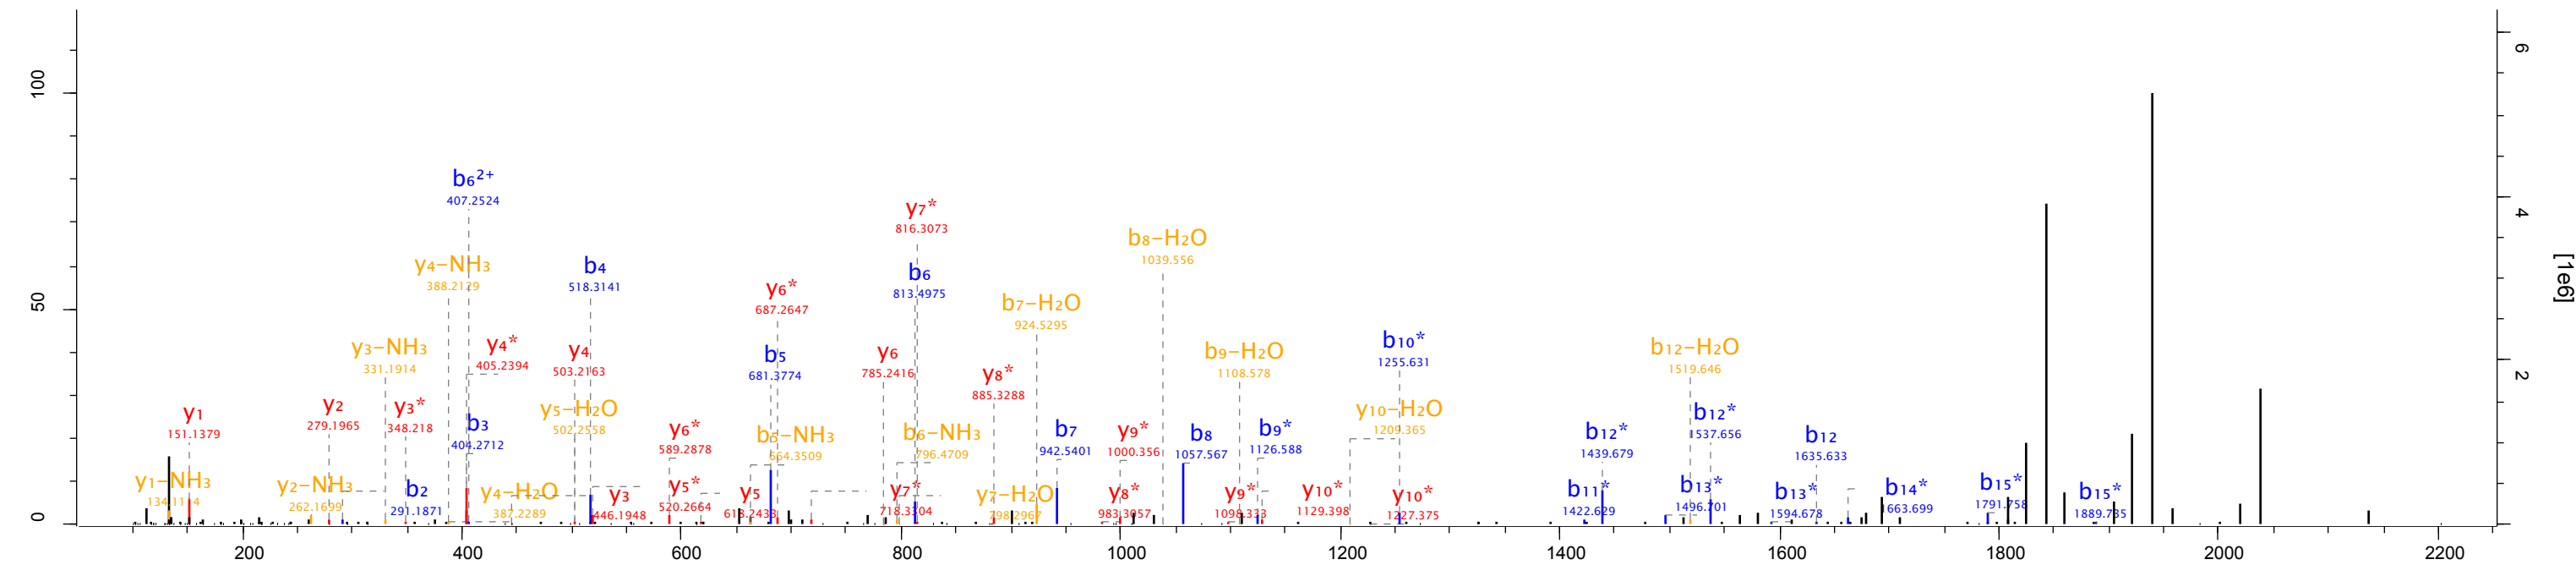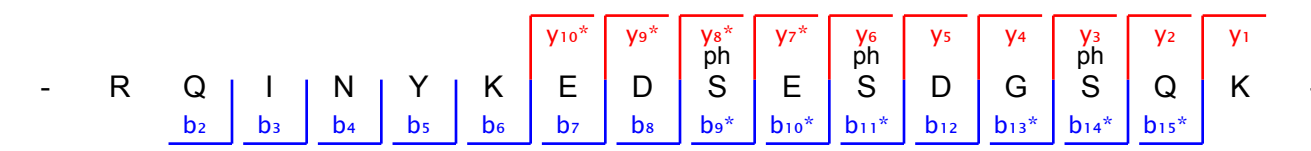

Raw file: 20150812\_A375SR\_Phospho\_BR1\_02  
 Scan: 5889 Method: FTMS; HCD Score: 45.74 m/z: 649.9 Gene names: SRRM2

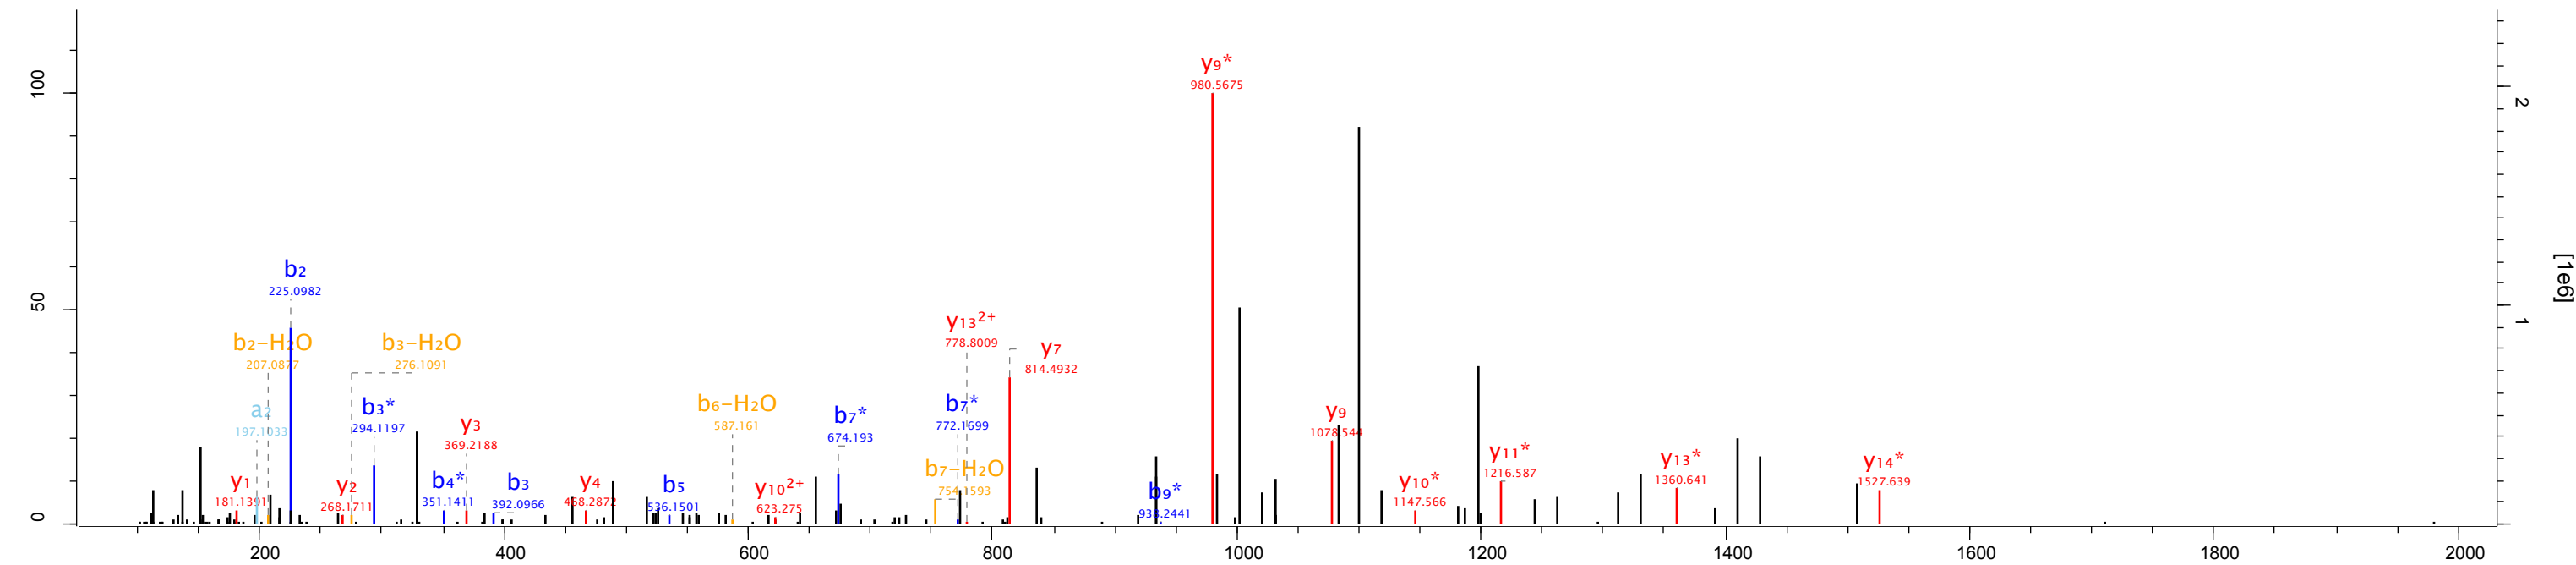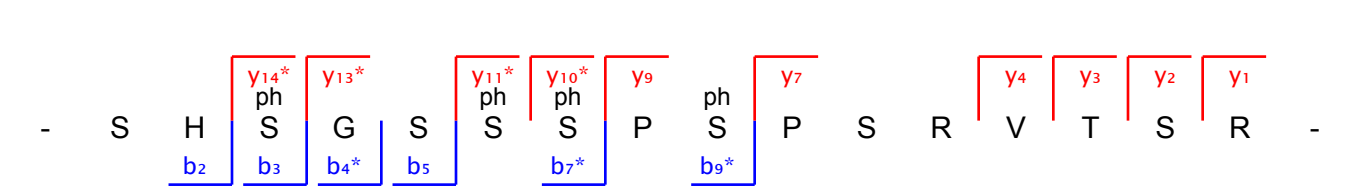

Raw file: 20150812\_A375SR\_Phospho\_BR1\_02  
 Scan: 6249 Method: FTMS; HCD Score: 69.75 m/z: 746.3 Gene names: ATXN2L

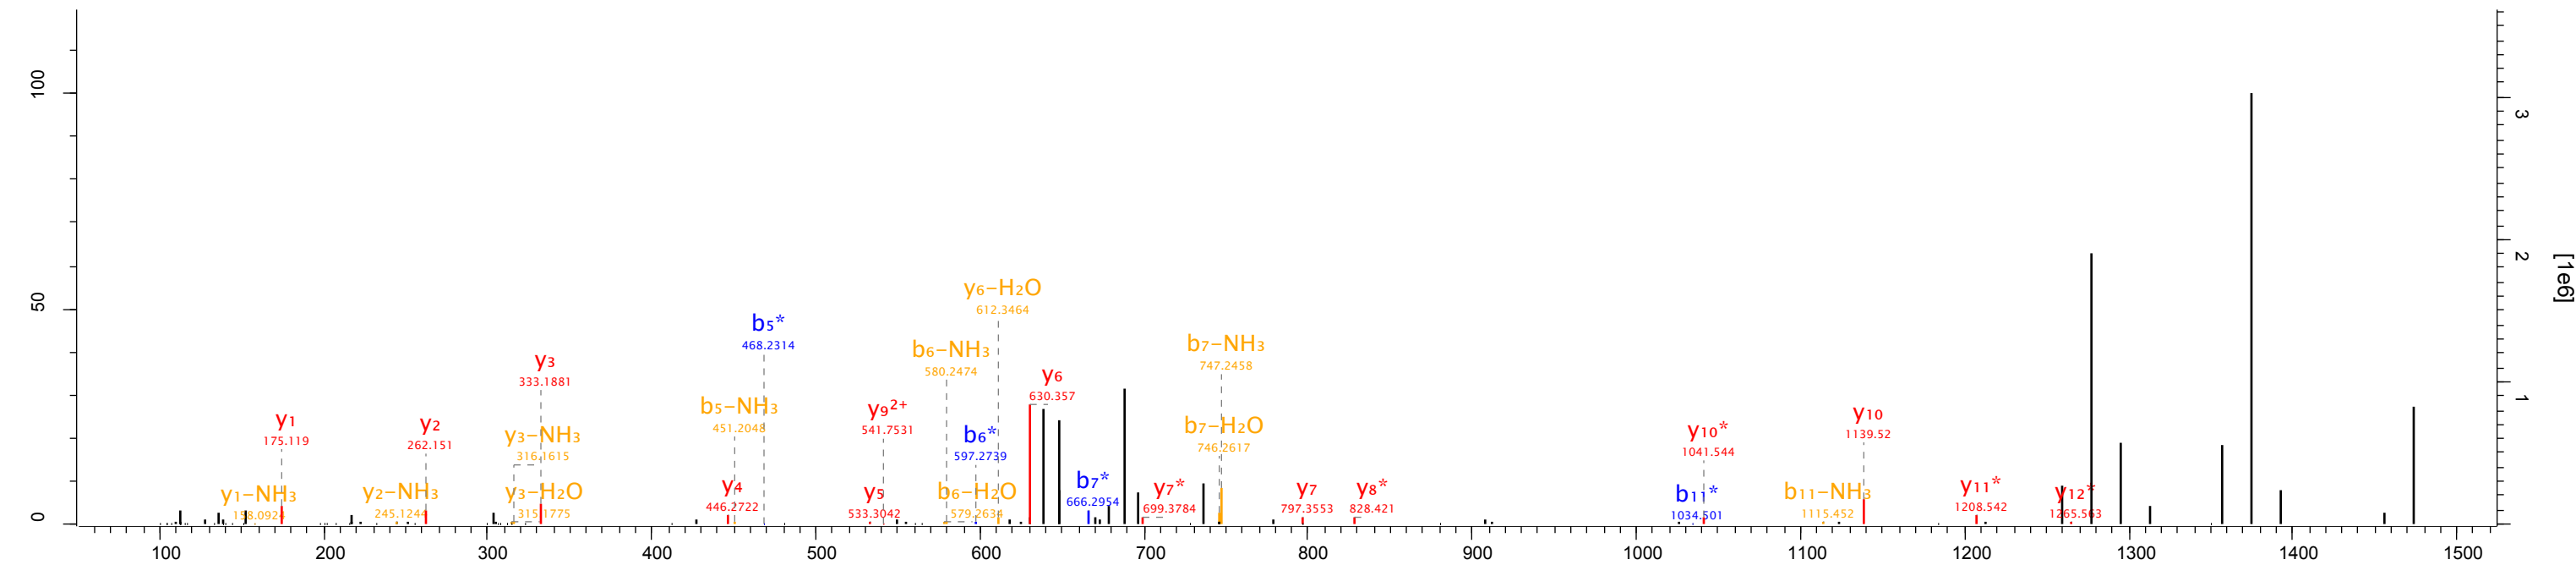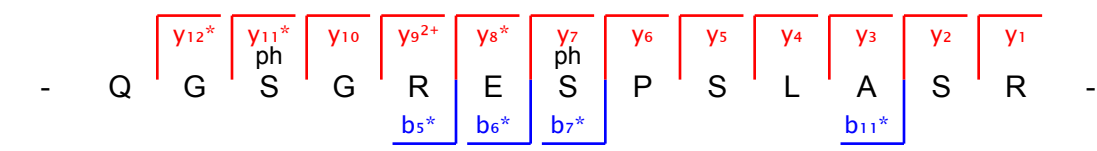

Raw file Scan Method Score m/z Gene names  
 20150812\_A375SR\_Phospho\_BR1\_02 6909 FTMS; HCD 353.73 1033.88 UTP18

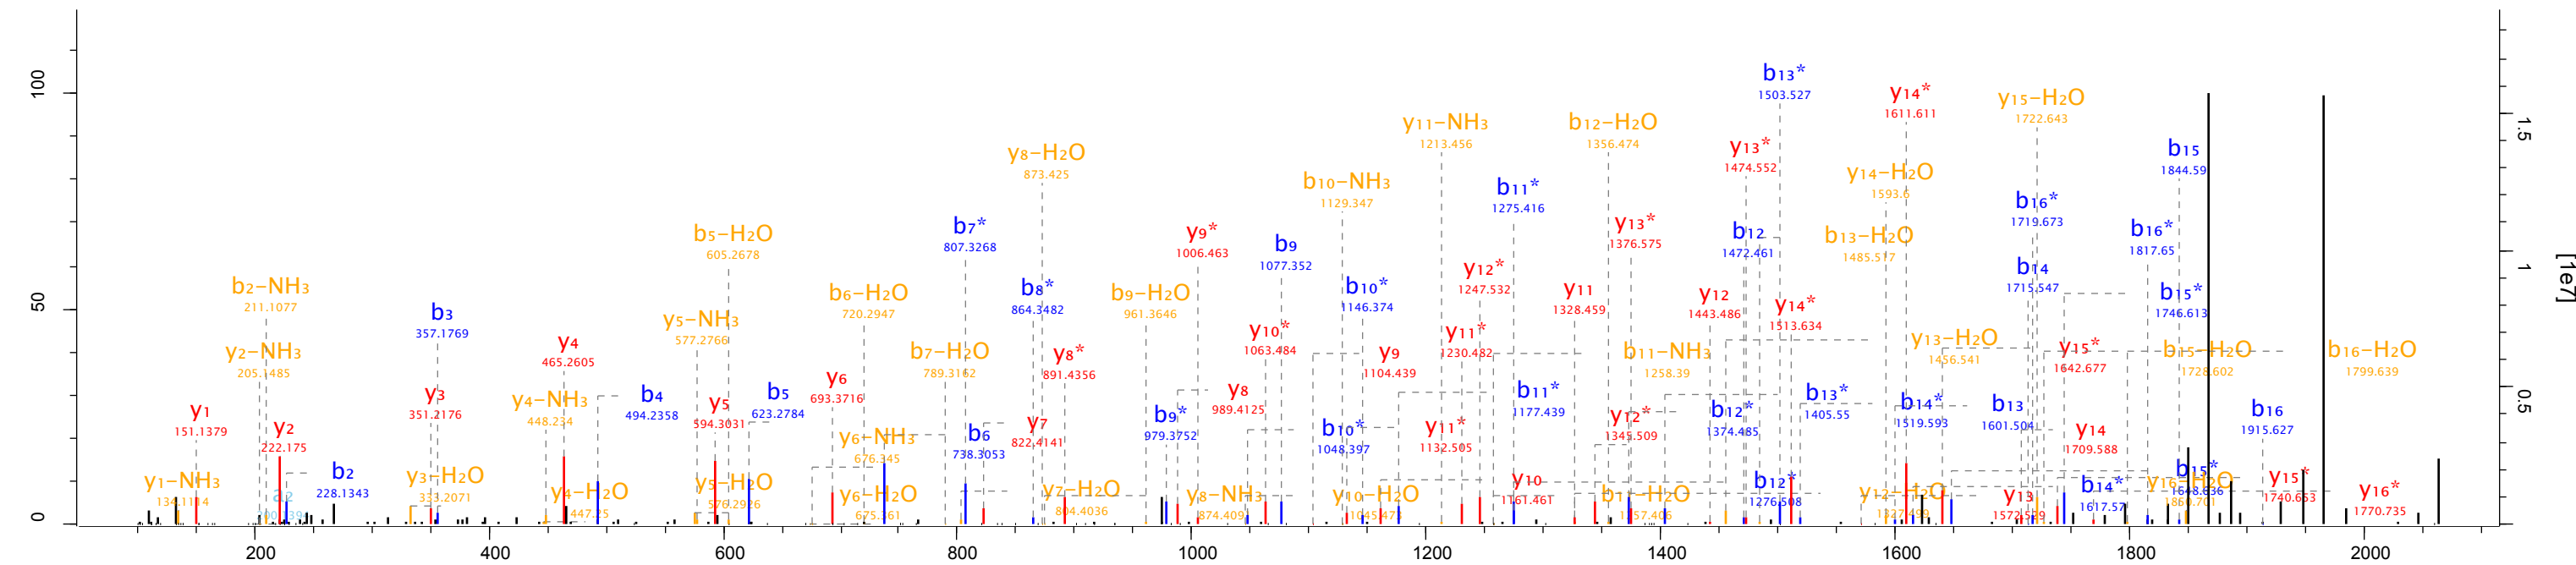

V Q E H E D S G D S E V E N E A K -

b2 b3 b4 b5 b6 b7\* b8\* b9 b10\* b11\* b12 b13 b14 b15 b16



Raw file: 20150812\_A375SR\_Phospho\_BR1\_02  
 Scan: 6929 Method: FTMS; HCD Score: 177.12 m/z: 1022.41 Gene names: SPTBN1

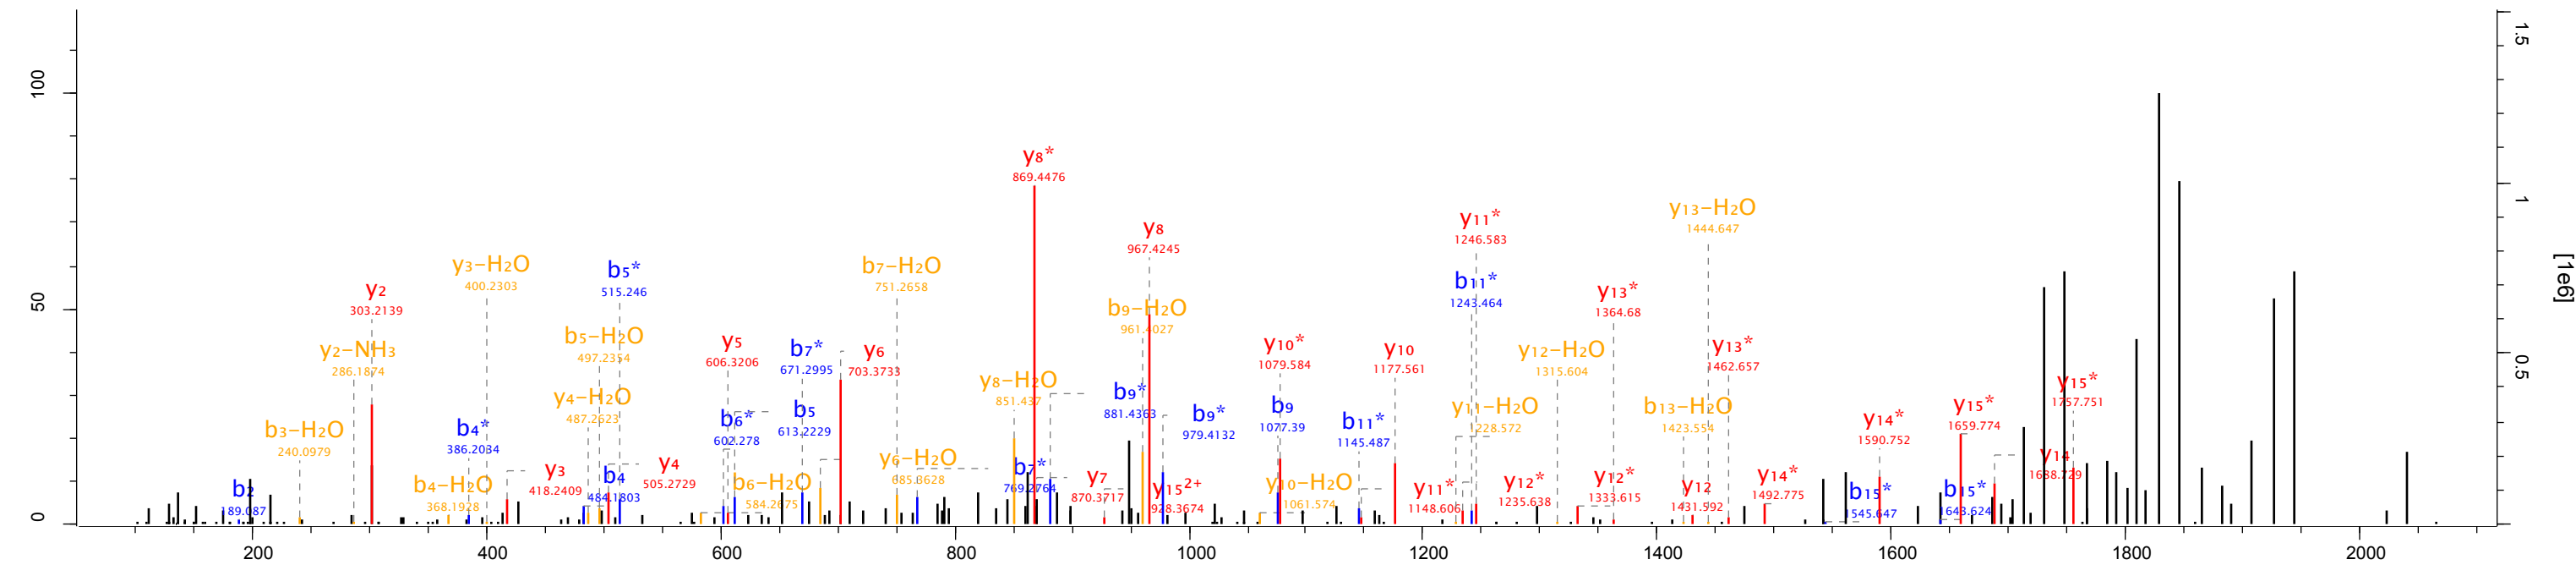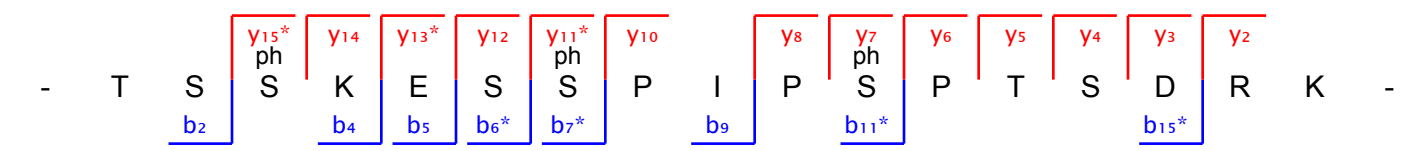

Raw file 20150812\_A375SR\_Phospho\_BR1\_02 Scan 6949 Method FTMS; HCD Score 157.64 m/z 699.27 Gene names SRRM2

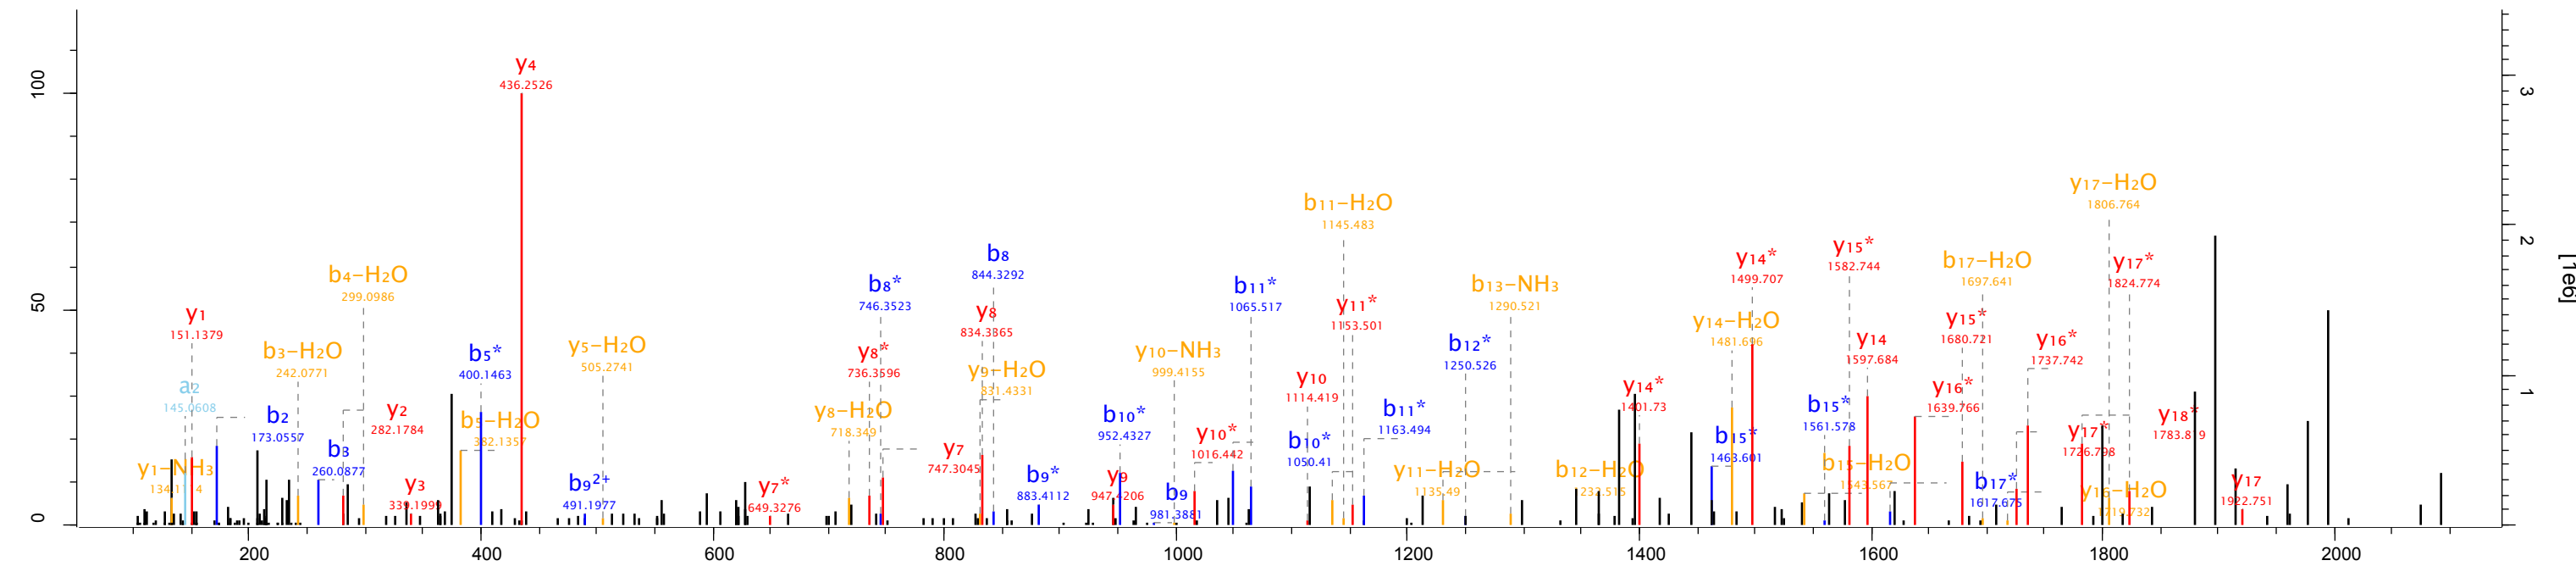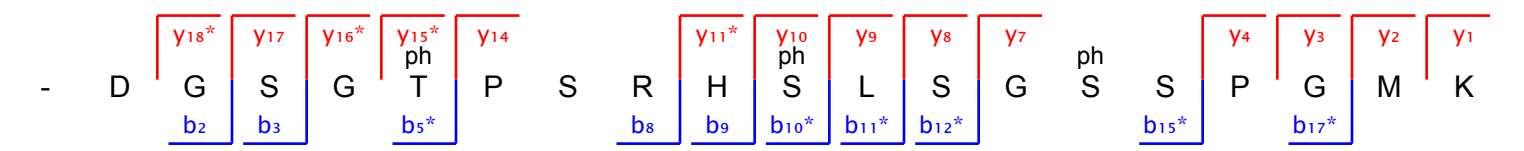

Raw file 20150812\_A375SR\_Phospho\_BR1\_02 Scan 7369 Method FTMS; HCD Score 59.61 m/z 616.78 Gene names SRSF7

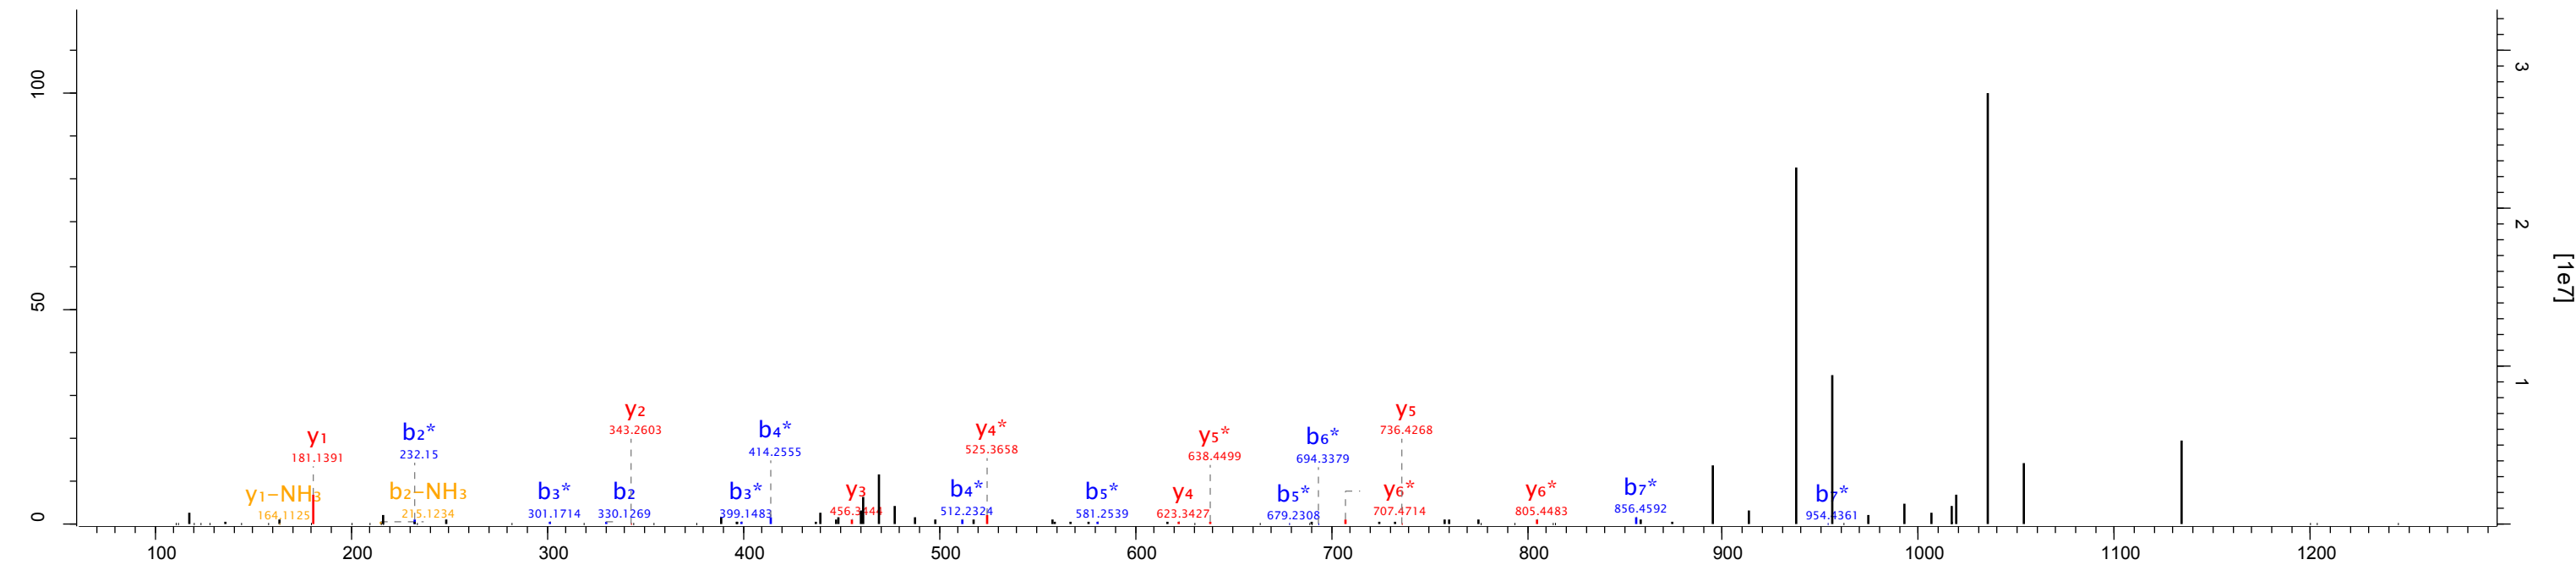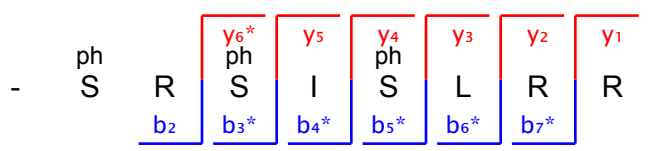

Raw file: 20150812\_A375SR\_Phospho\_BR1\_02  
 Scan: 8059 Method: FTMS; HCD Score: 132.51 m/z: 793.82 Gene names: UBAP2L

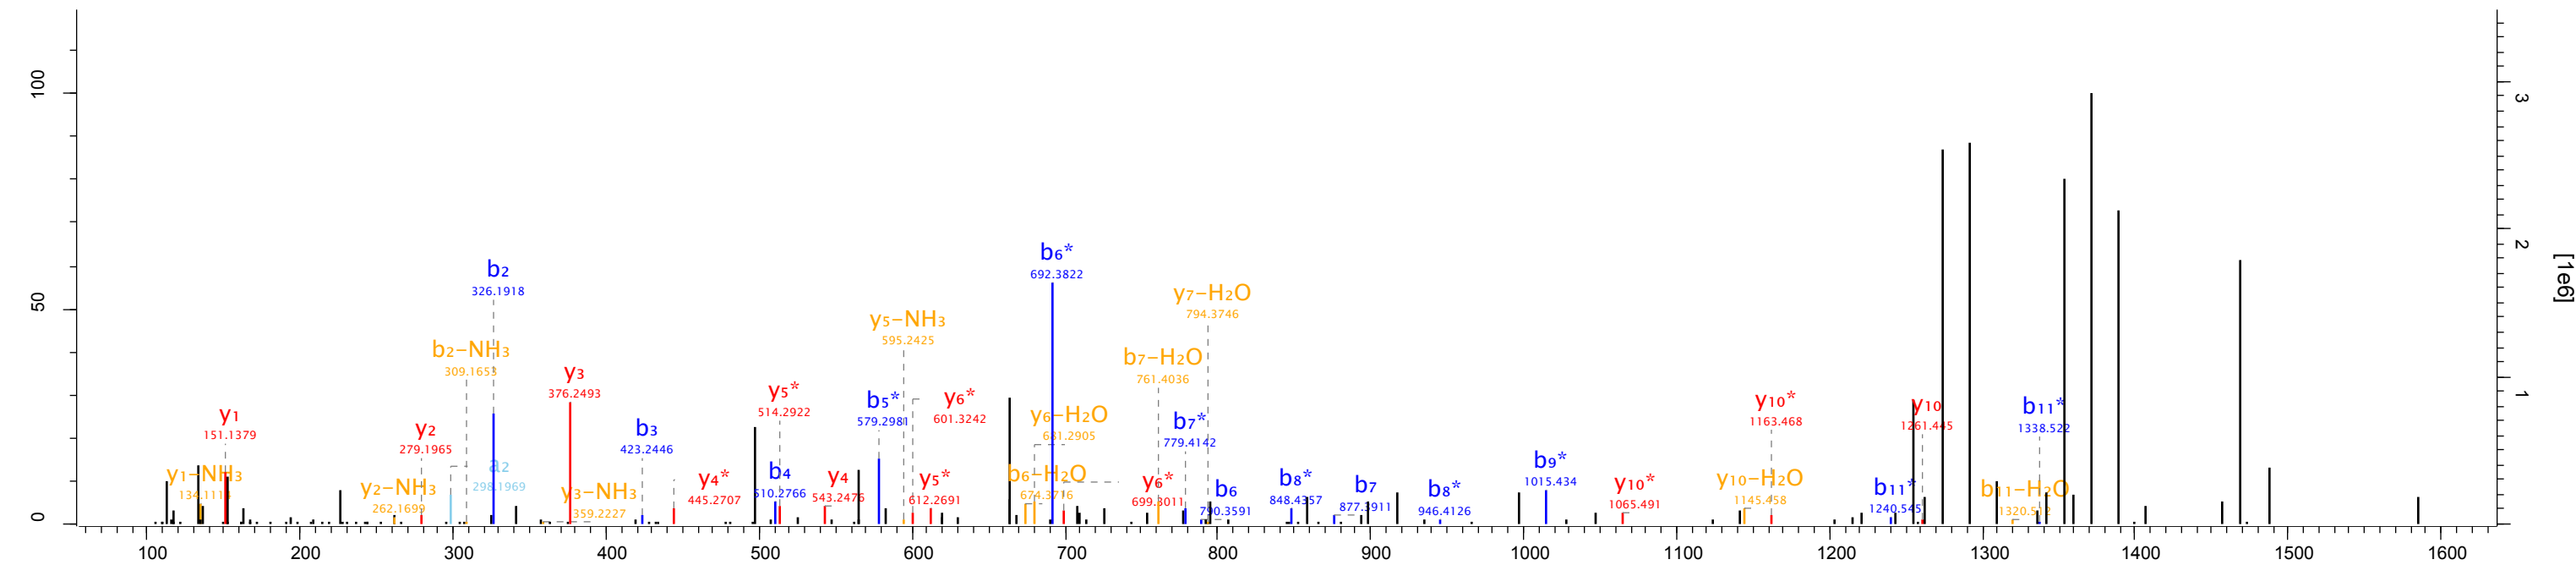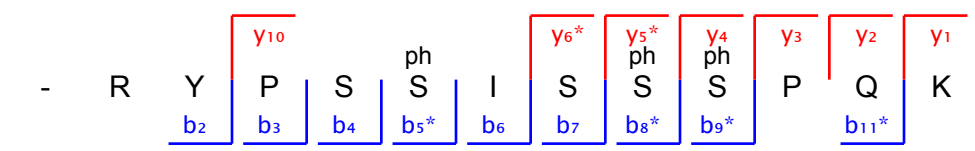

Raw file 20150812\_A375SR\_Phospho\_BR1\_02 Scan 8169 Method FTMS; HCD Score 102.57 m/z 709.75 Gene names DNAJC6

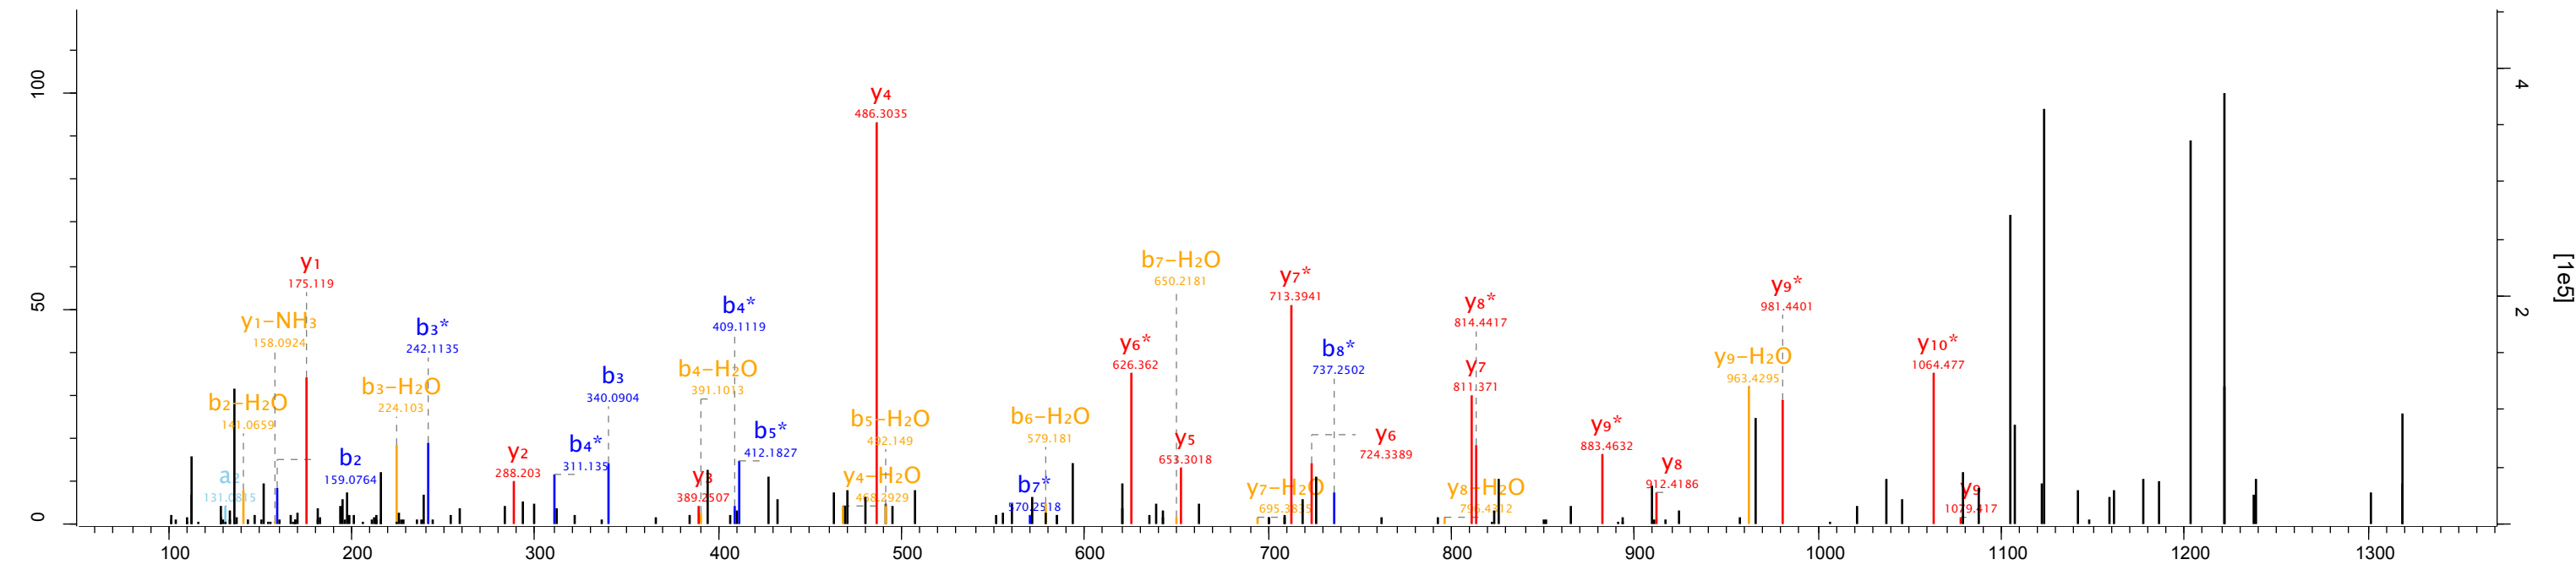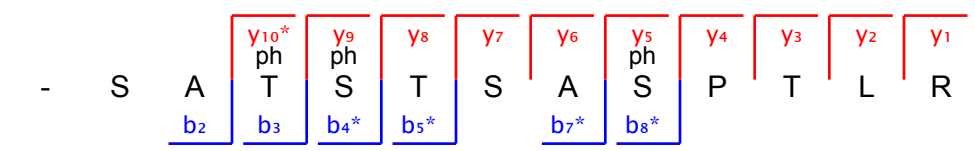

Raw file: 20150812\_A375SR\_Phospho\_BR1\_02  
 Scan: 8259 Method: FTMS; HCD Score: 125.82 m/z: 899.7 Gene names: UBAP2L

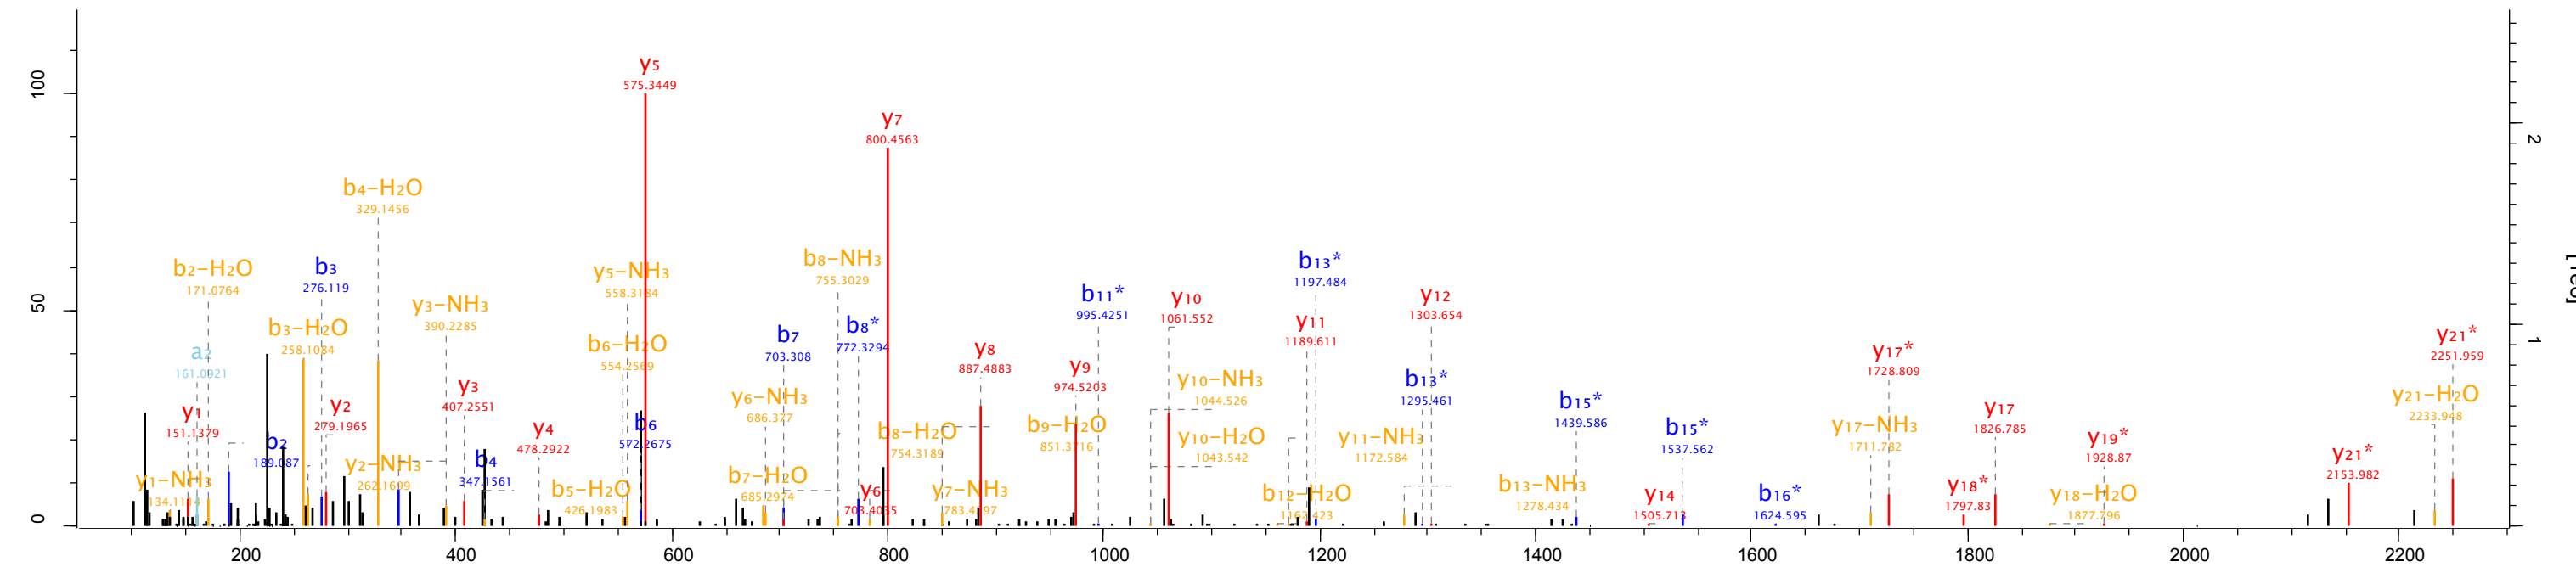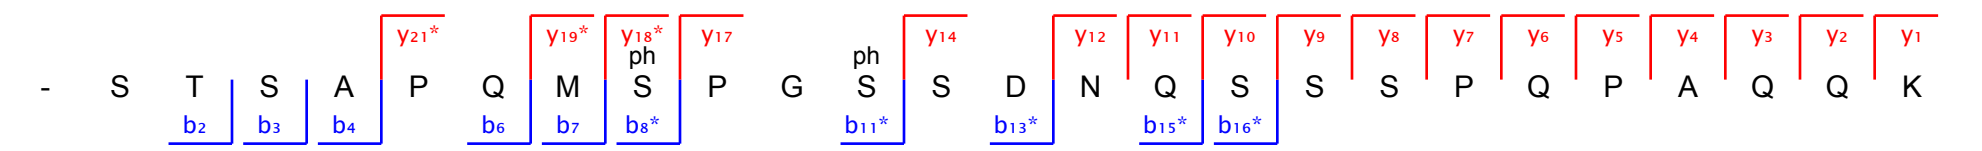

Raw file 20150812\_A375SR\_Phospho\_BR1\_02 Scan 8899 Method FTMS; HCD Score 93.5 m/z 1099.93 Gene names CIC

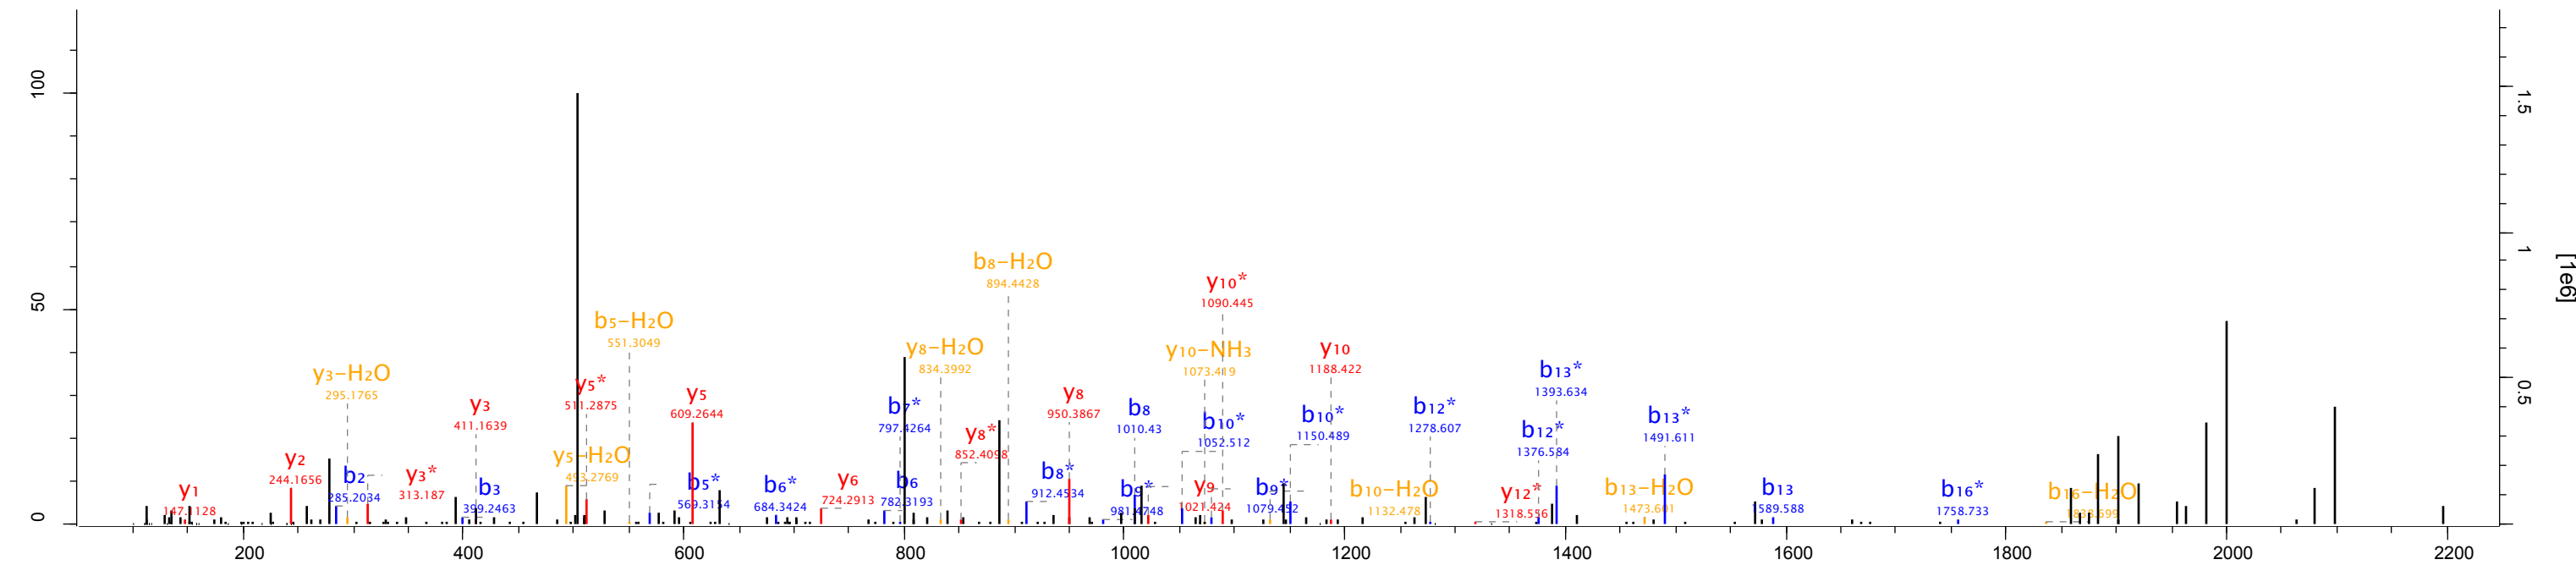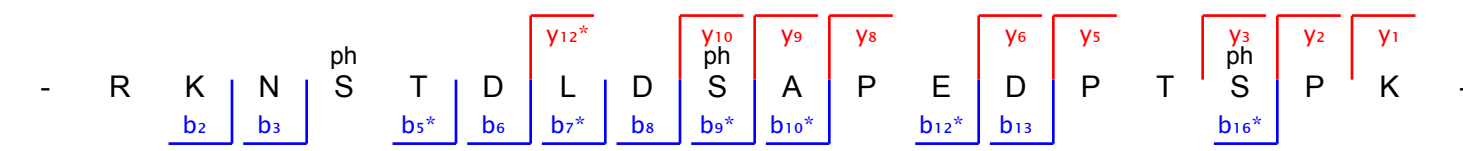

Raw file: 20150812\_A375SR\_Phospho\_BR1\_02  
 Scan: 8949 Method: FTMS; HCD Score: 212.55 m/z: 862.81 Gene names: DTD1

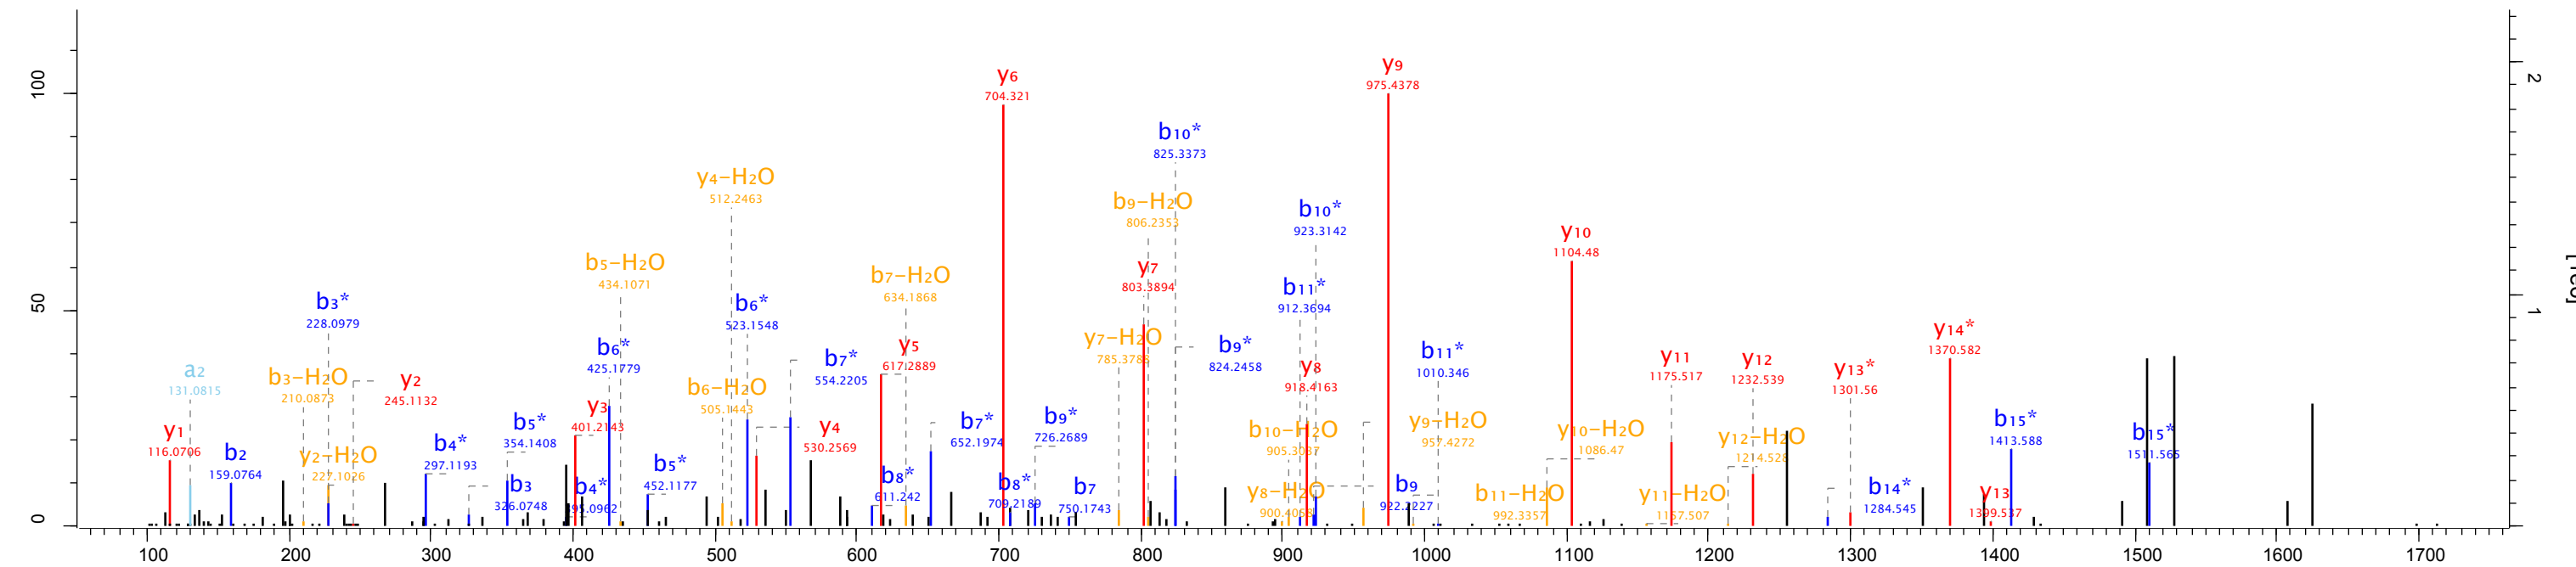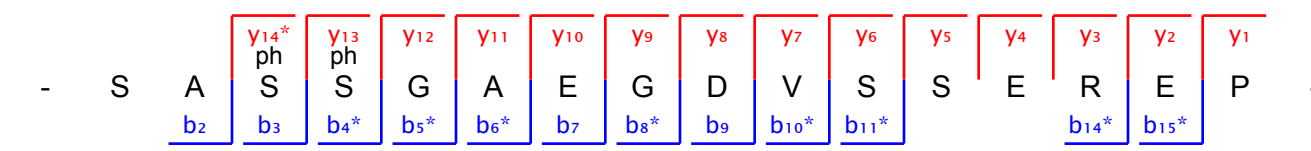



Raw file: 20150812\_A375SR\_Phospho\_BR1\_02  
 Scan: 9249 Method: FTMS; HCD Score: 52.02 m/z: 898.84 Gene names: KIAA1522

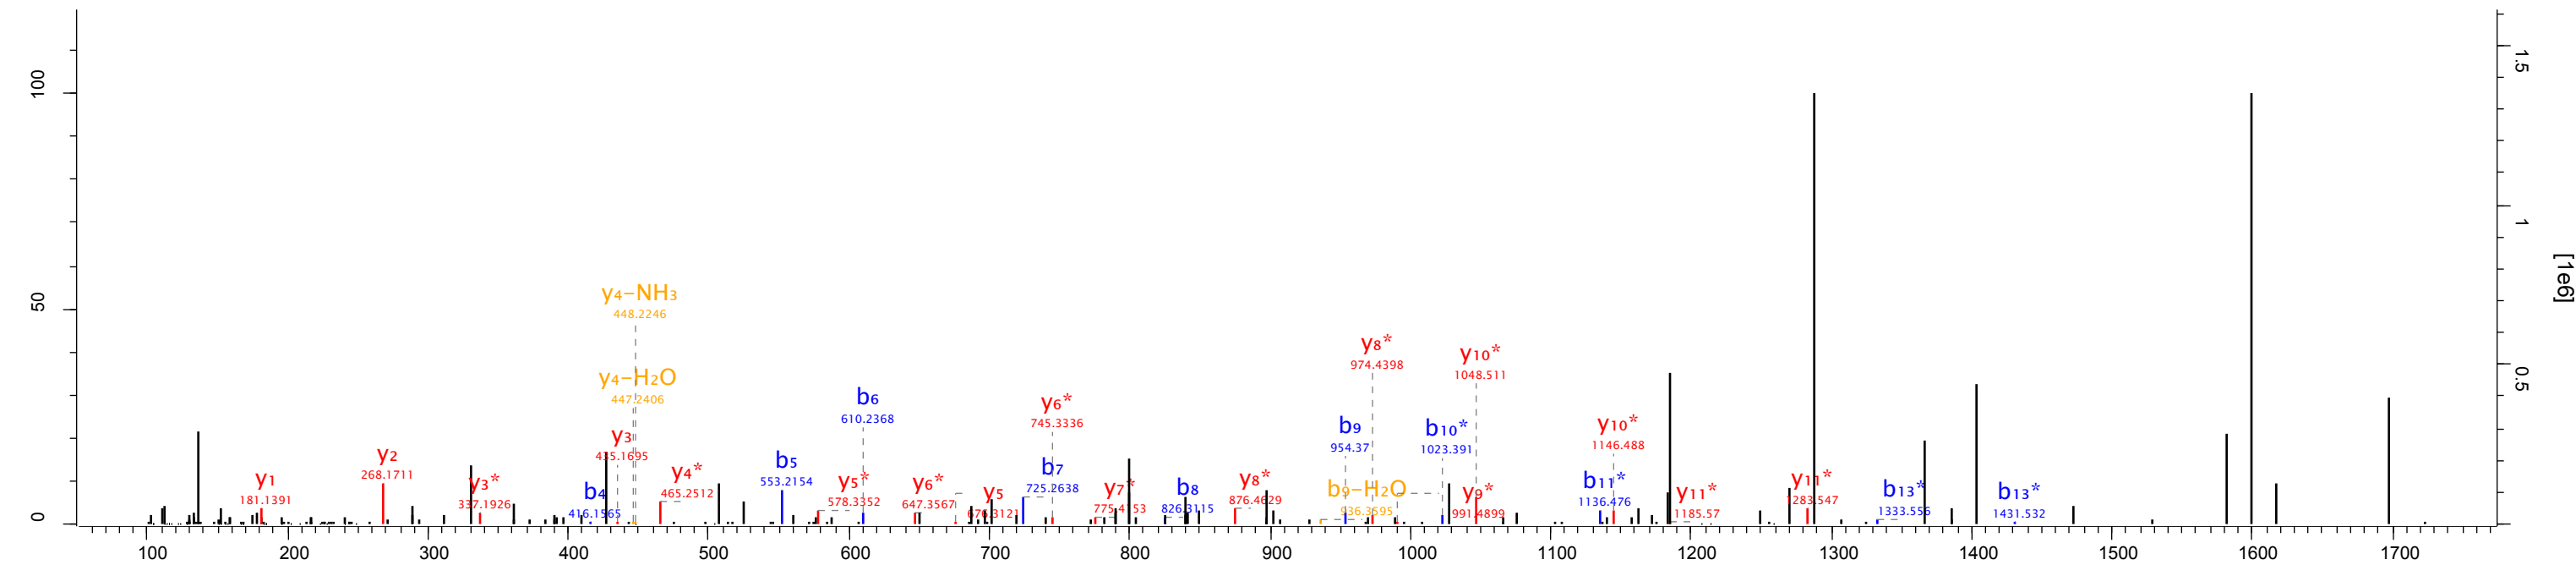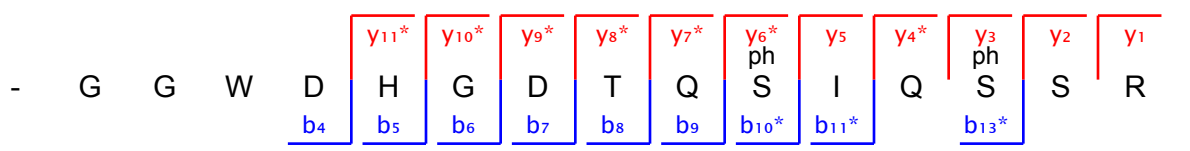



Raw file: 20150812\_A375SR\_Phospho\_BR1\_03  
 Scan: 10039 Method: FTMS; HCD Score: 184.16 m/z: 877.32 Gene names: PDHA1;PDHA2

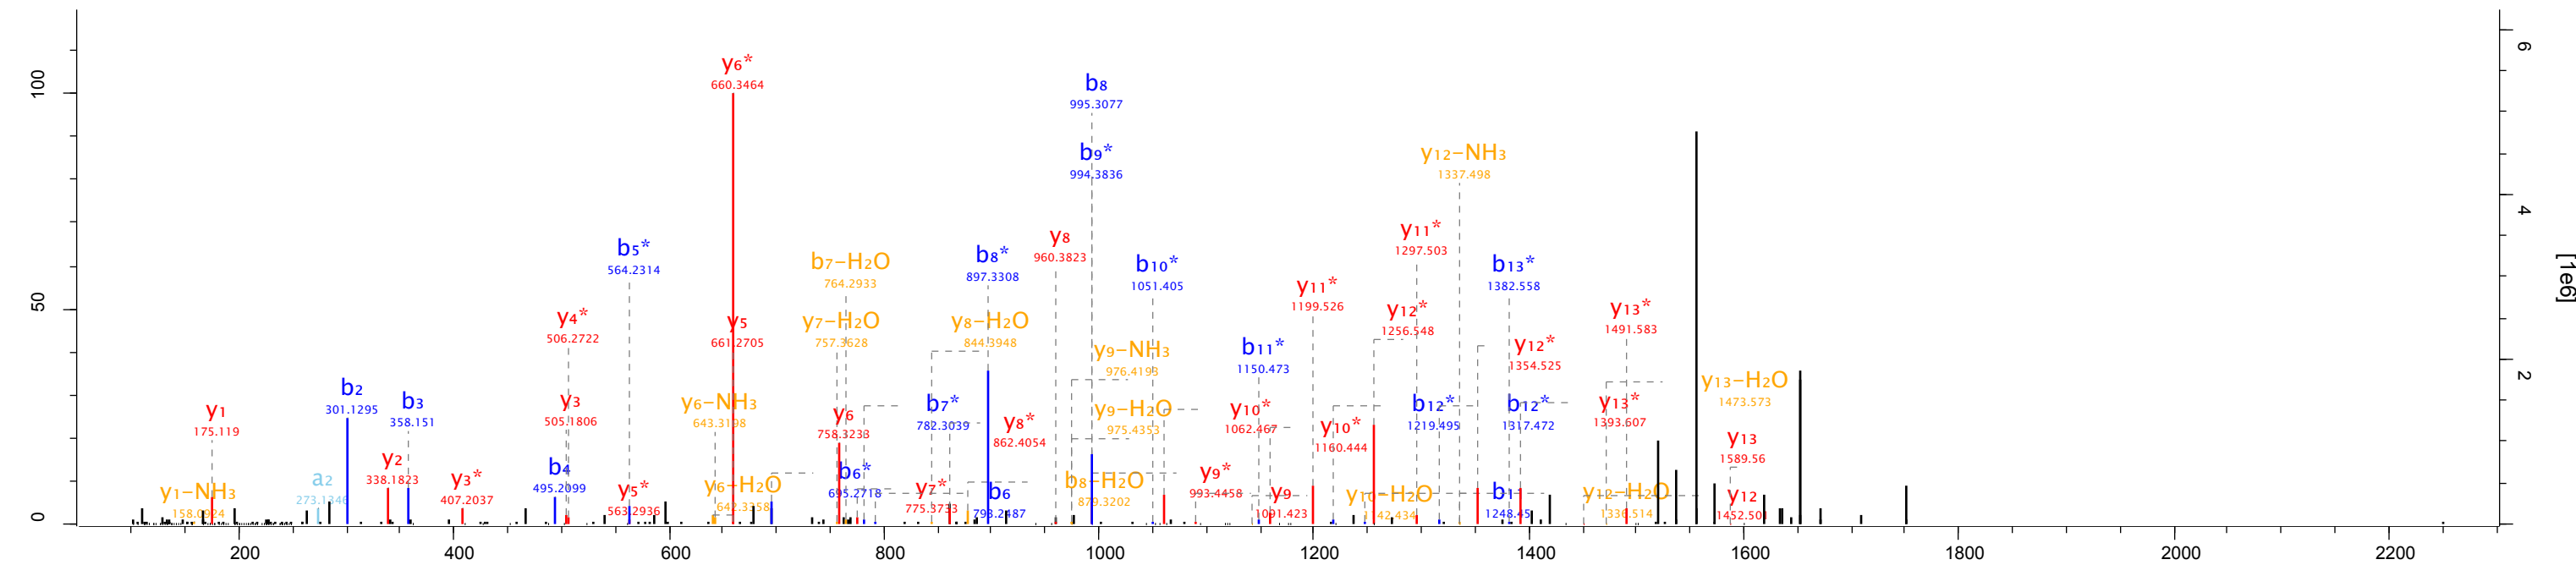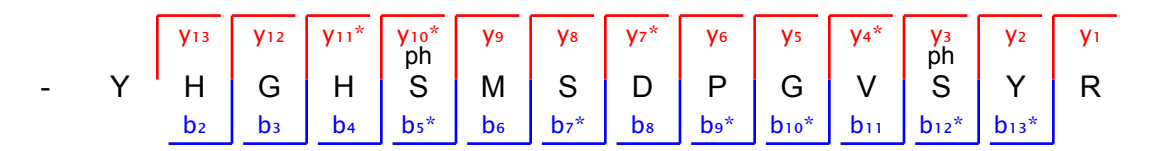

Raw file 20150812\_A375SR\_Phospho\_BR1\_03 Scan 10349 Method FTMS; HCD Score 145.1 m/z 597.81 Gene names PLEC

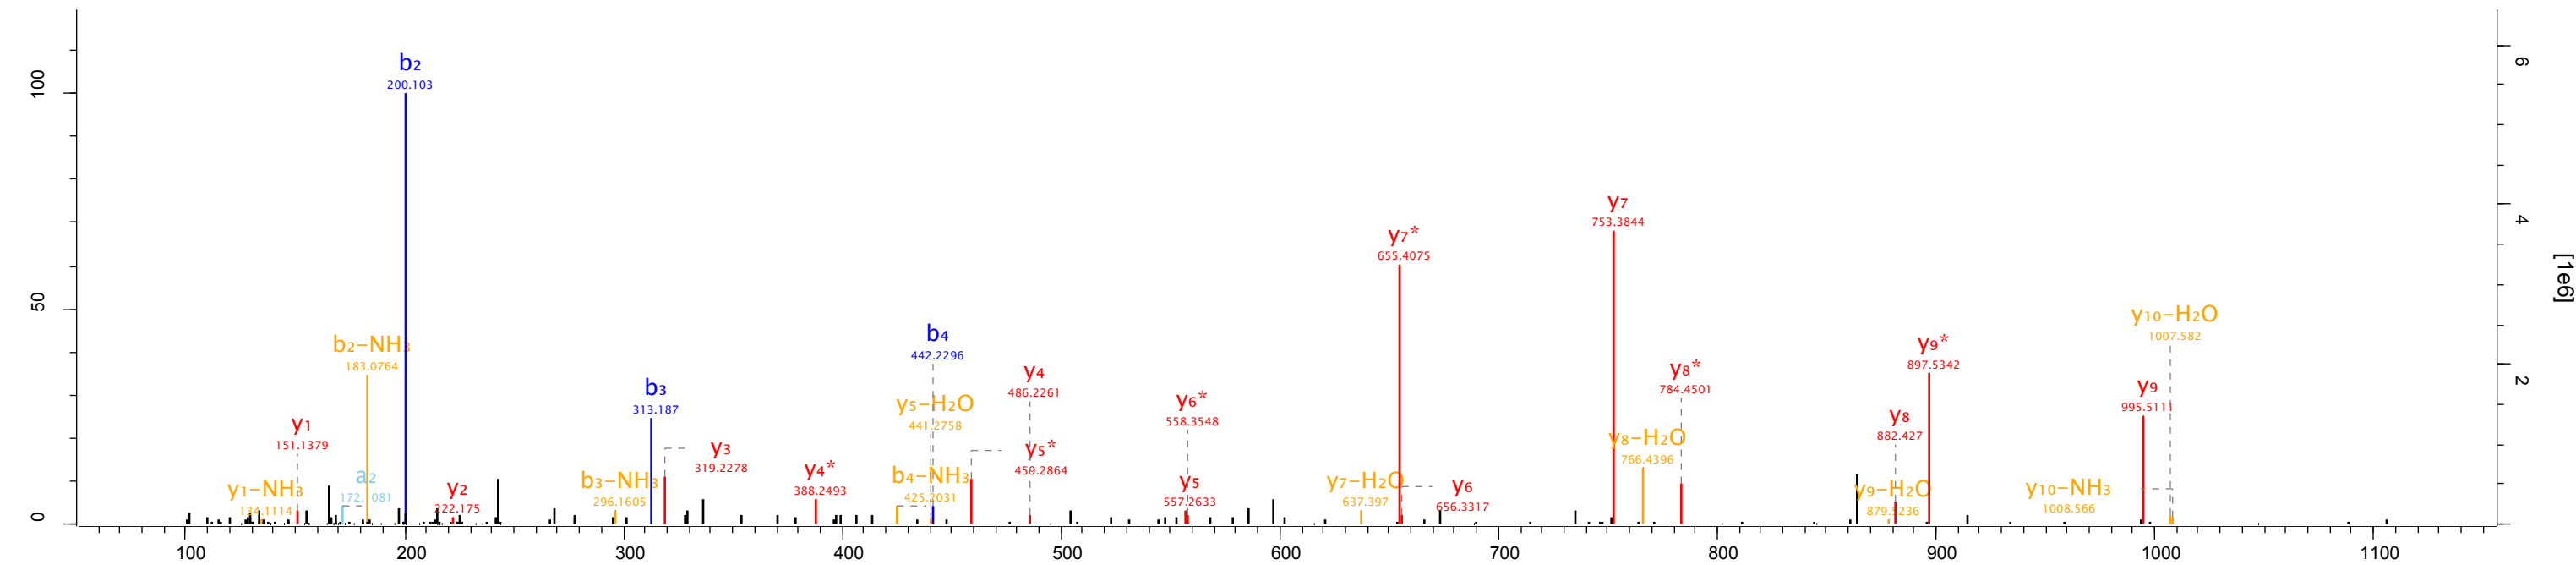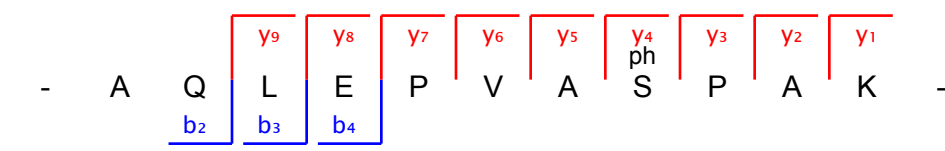

Raw file: 20150812\_A375SR\_Phospho\_BR1\_03  
 Scan: 10559 Method: FTMS; HCD Score: 169.66 m/z: 1241.6 Gene names: LMNB1;LMNB2

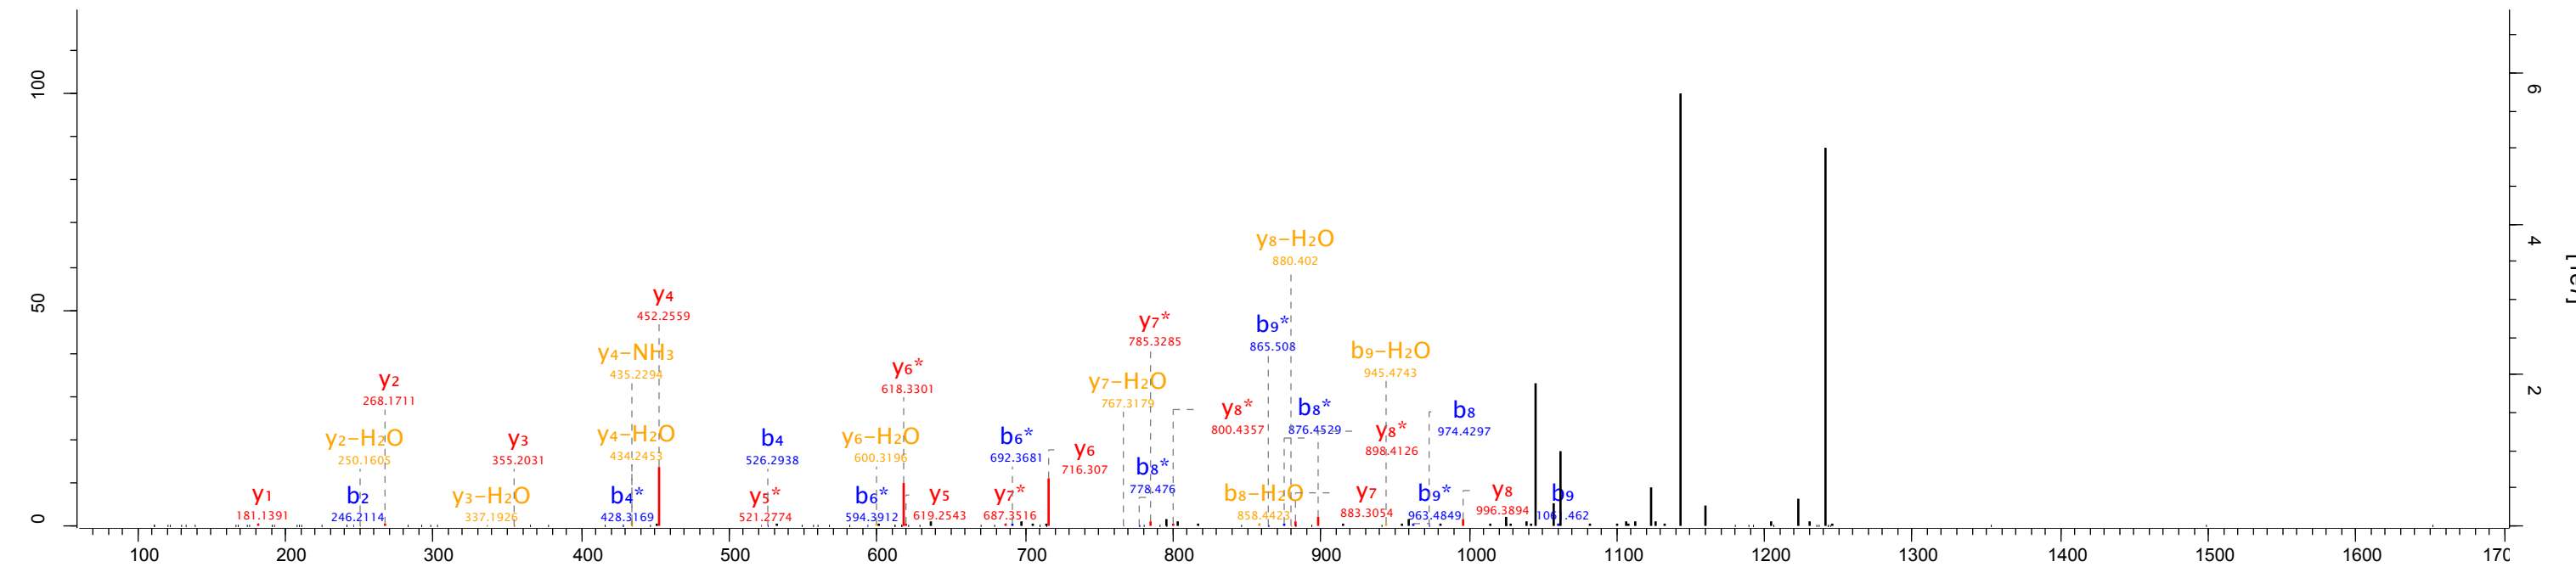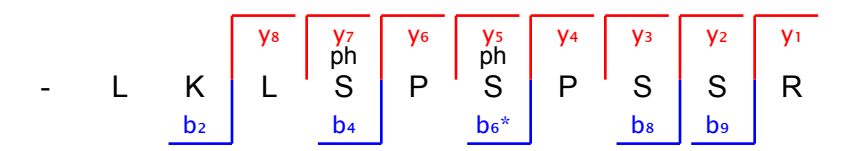

Raw file 20150812\_A375SR\_Phospho\_BR1\_03 Scan 10709 Method FTMS; HCD Score 78.4 m/z 668.76 Gene names NKTR

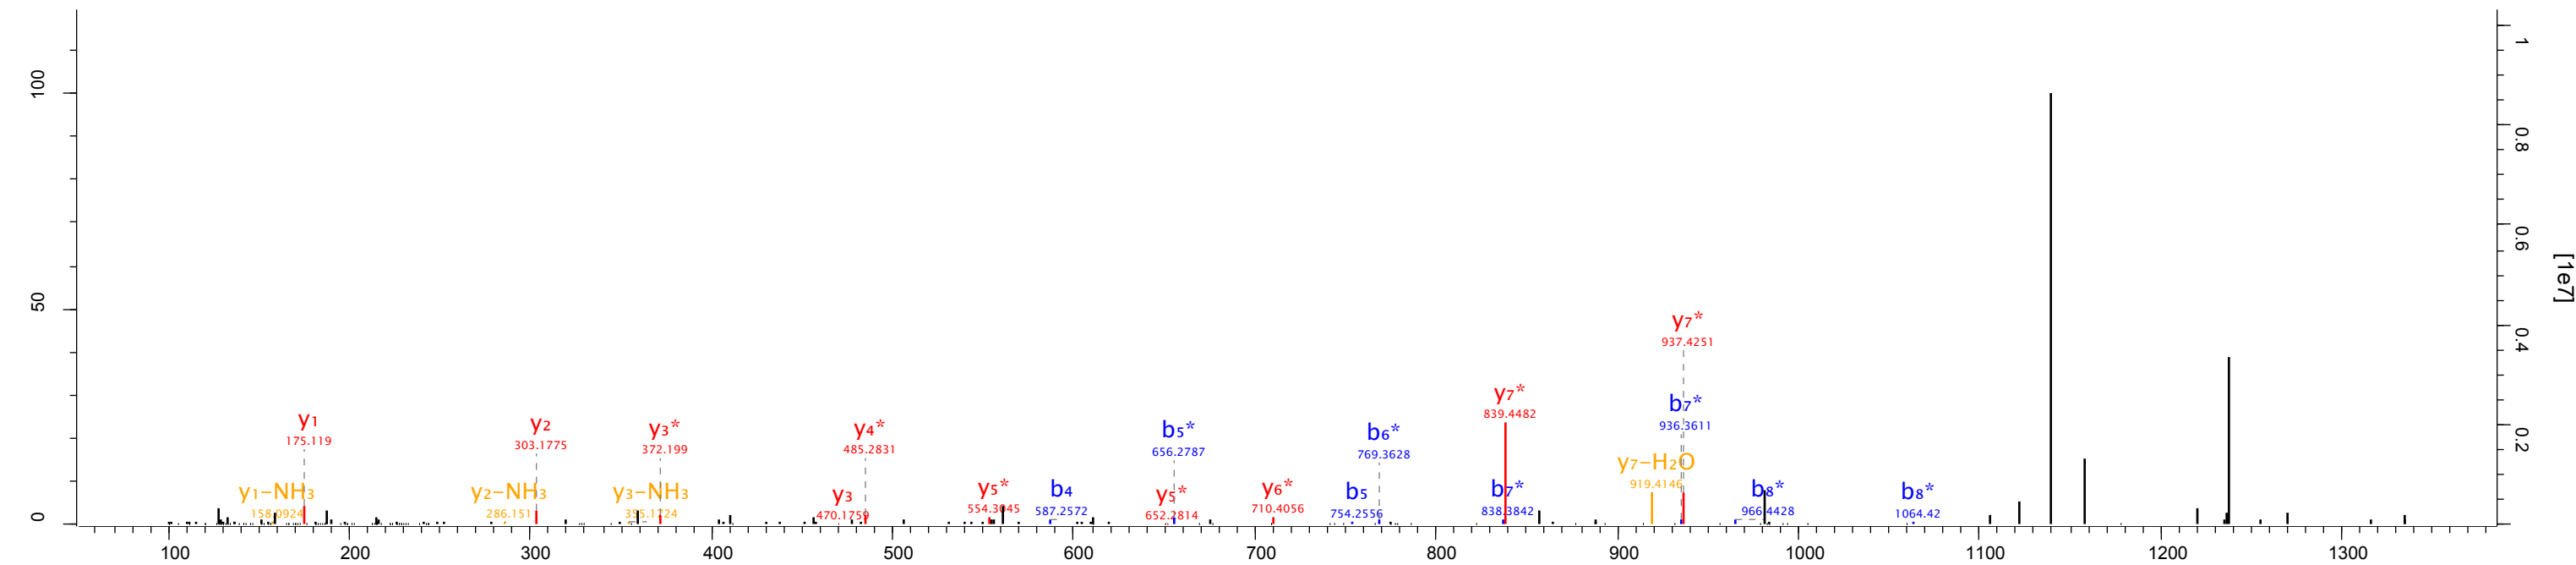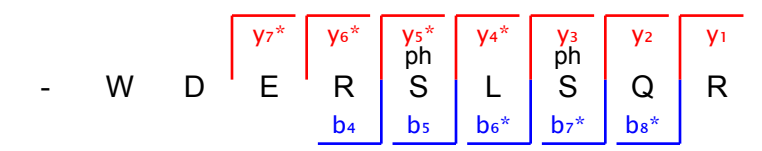

Raw file 20150812\_A375SR\_Phospho\_BR1\_03 Scan 11099 Method FTMS; HCD Score 79.61 m/z 589.77 Gene names PLEKHM1

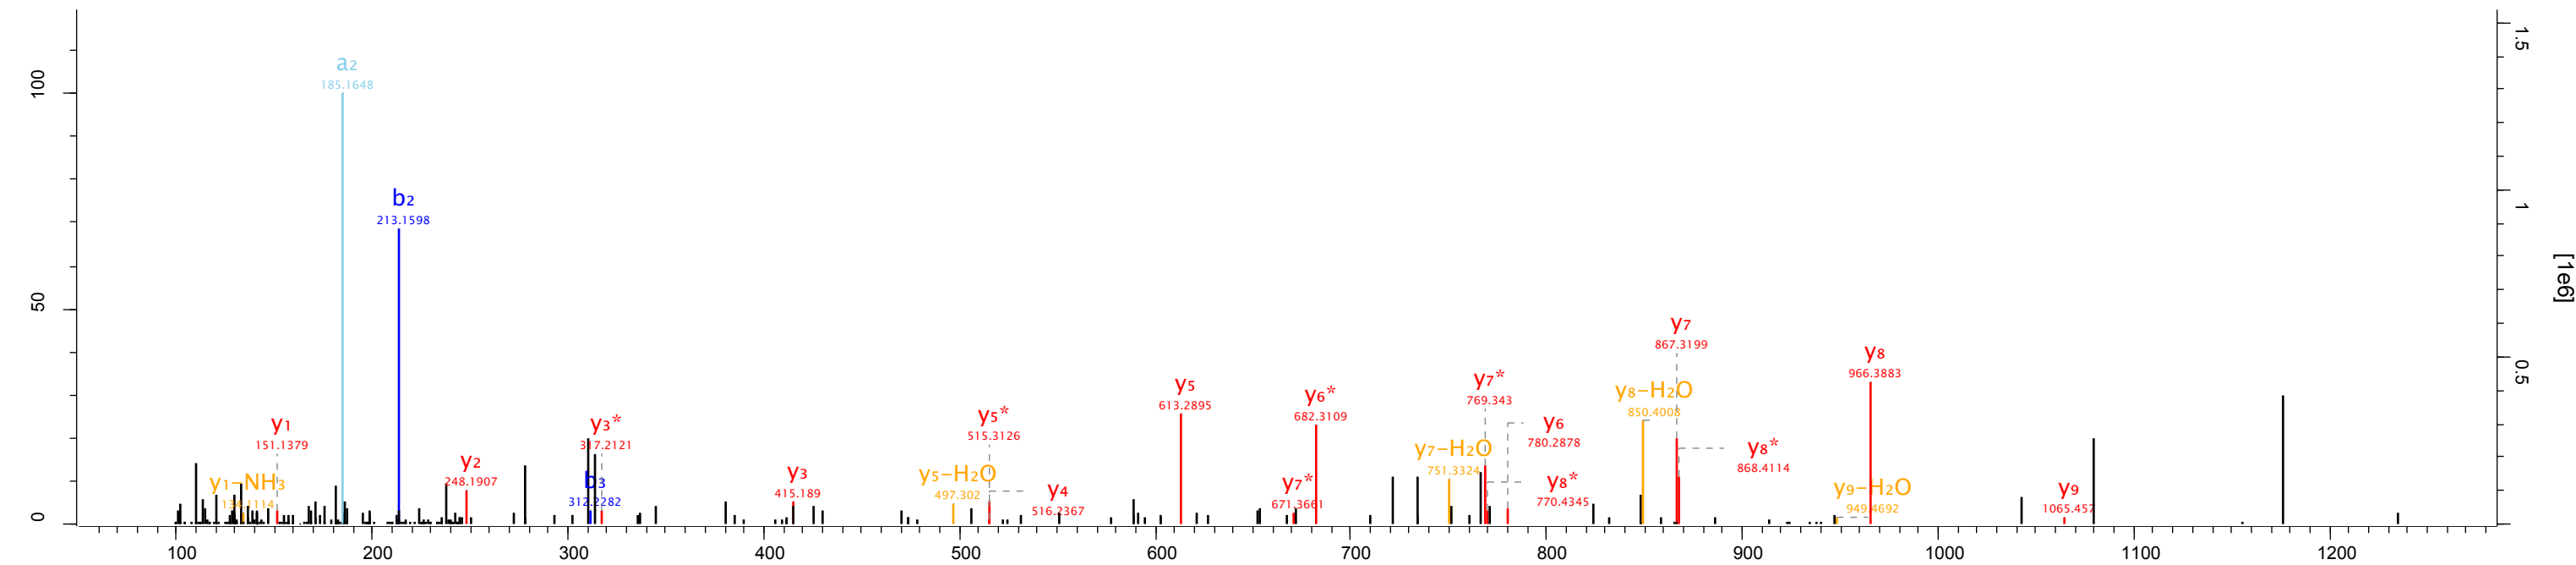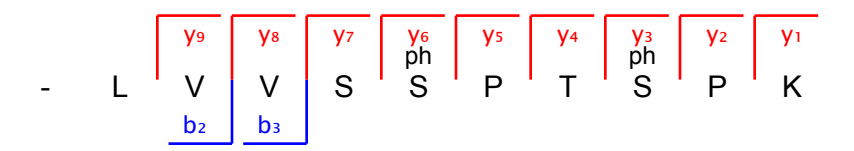

Raw file Scan Method Score m/z Gene names  
 20150812\_A375SR\_Phospho\_BR1\_03 11229 FTMS; HCD 126.03 1026.42 CLN3

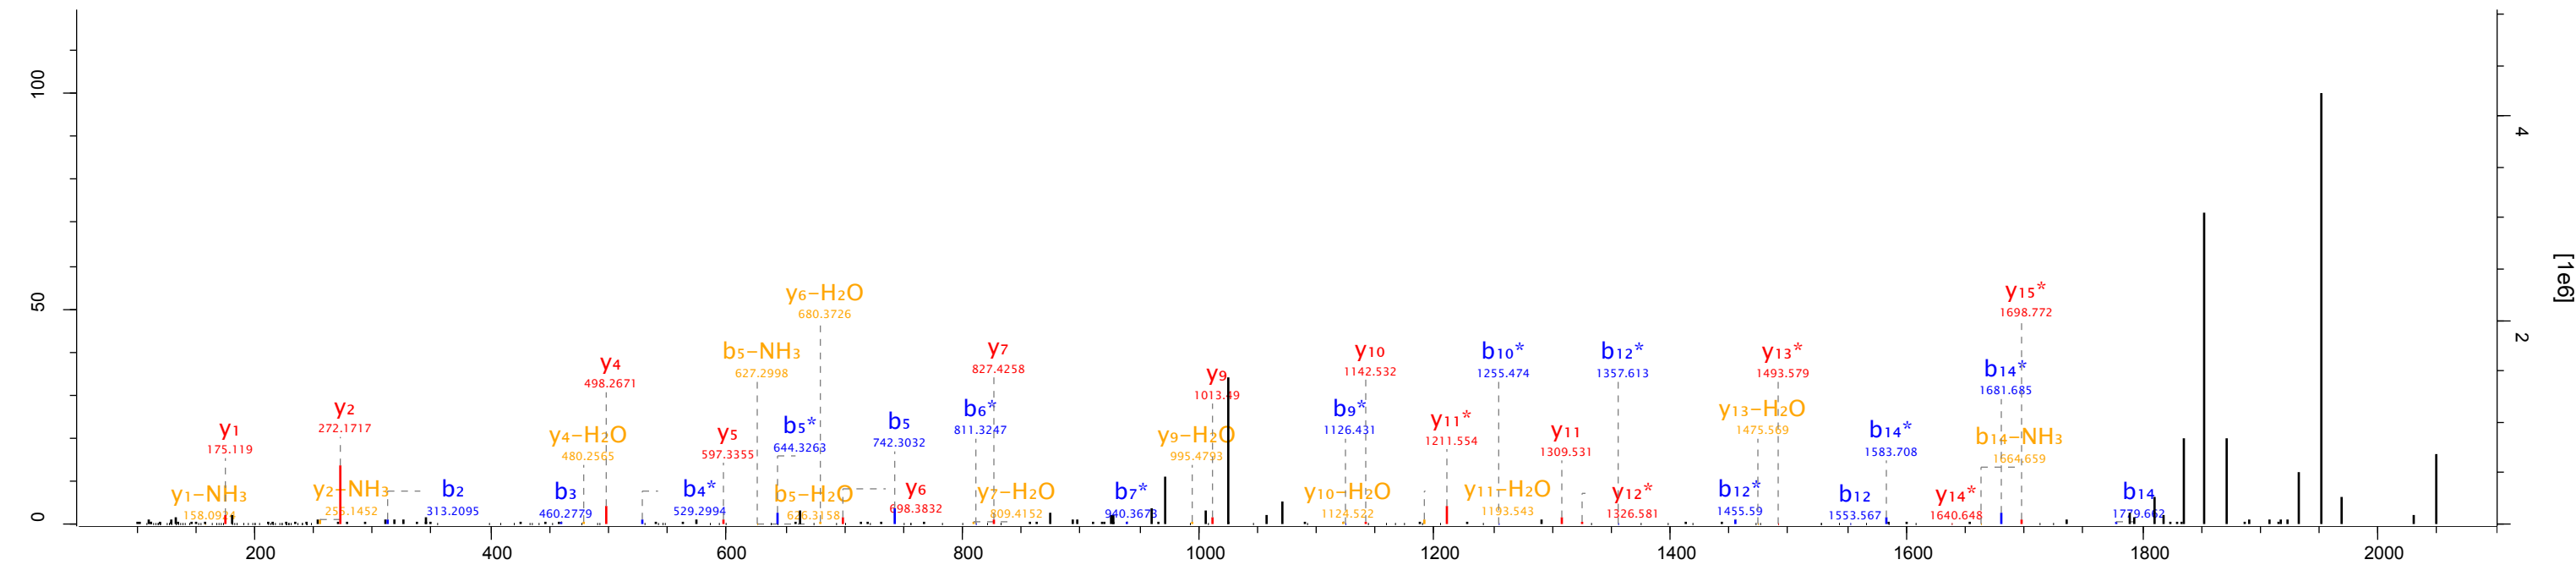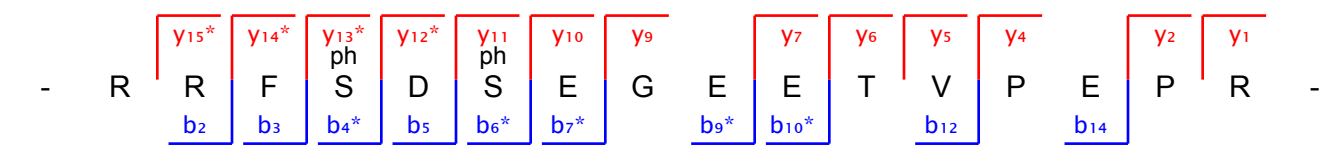



Raw file: 20150812\_A375SR\_Phospho\_BR1\_03  
 Scan: 11529 Method: FTMS; HCD Score: 480.36 m/z: 1137.45 Gene names: HSP90AA1

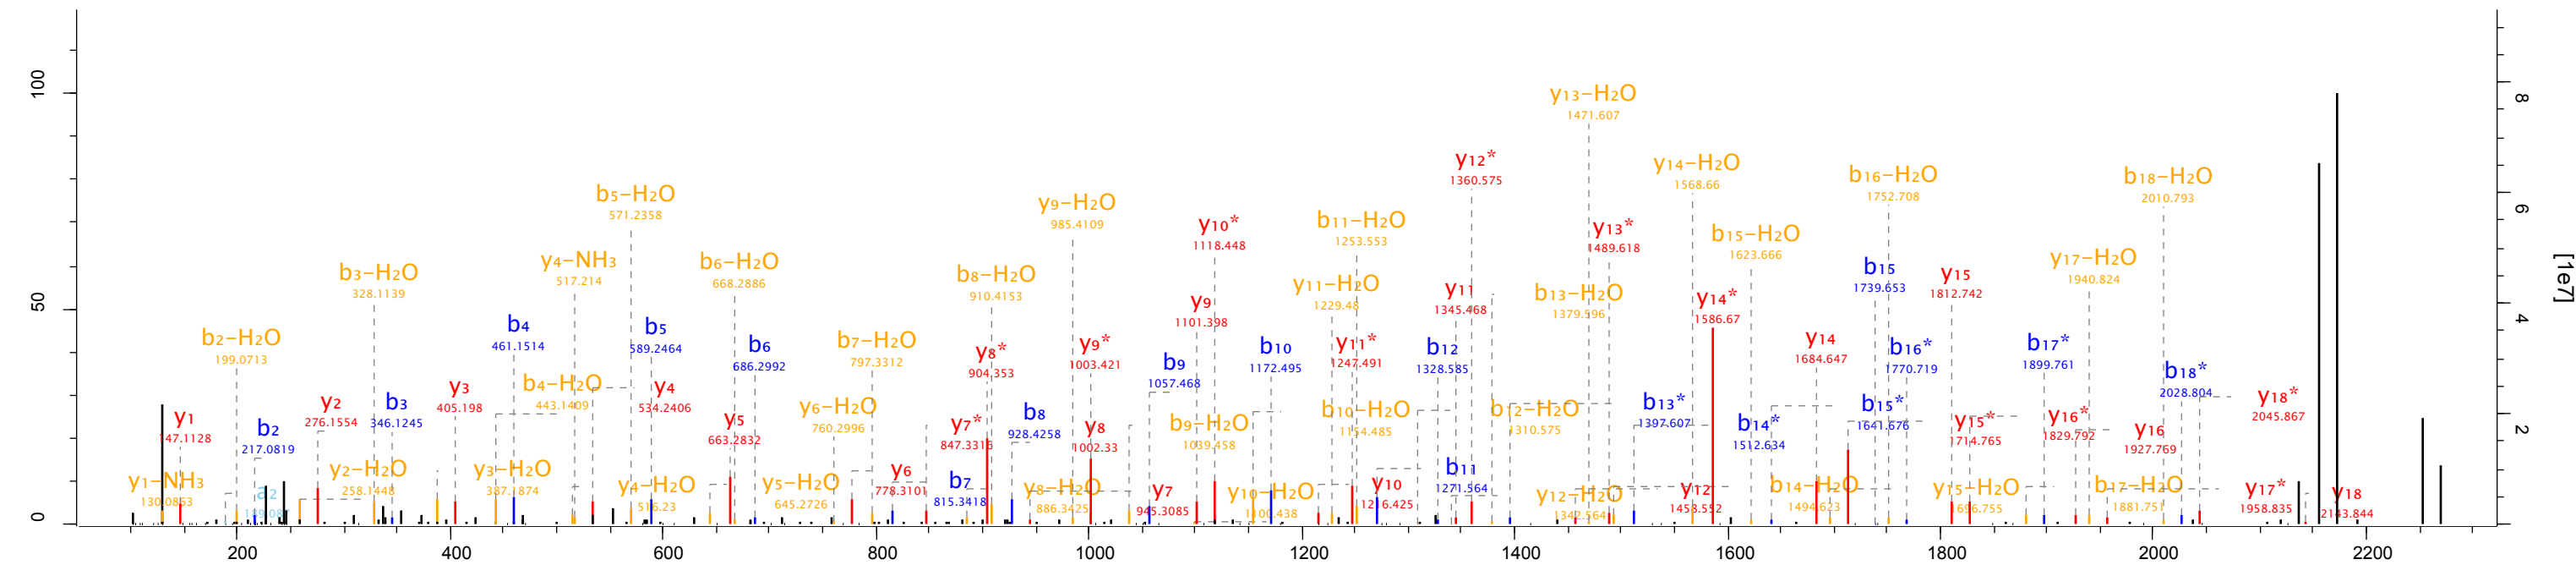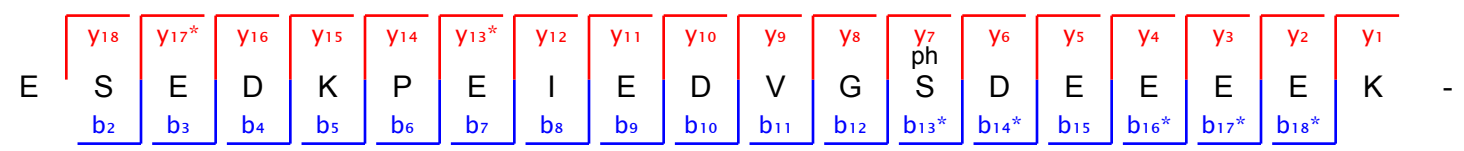

Raw file Scan Method Score m/z Gene names  
 20150812\_A375SR\_Phospho\_BR1\_03 11709 FTMS; HCD 255 1084.01 AIM1

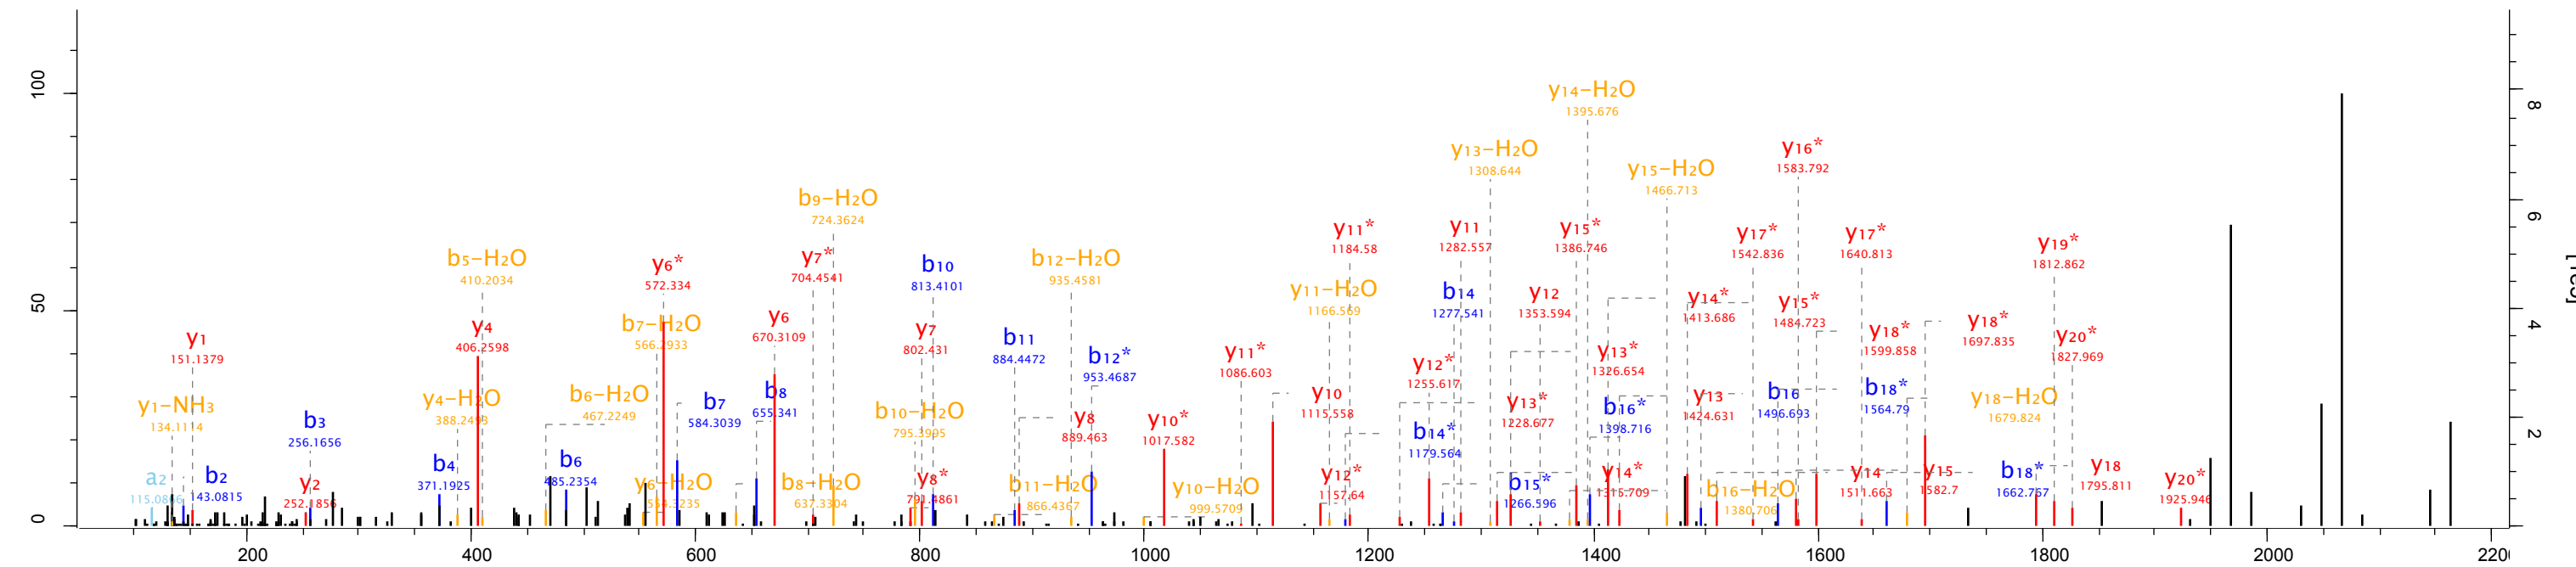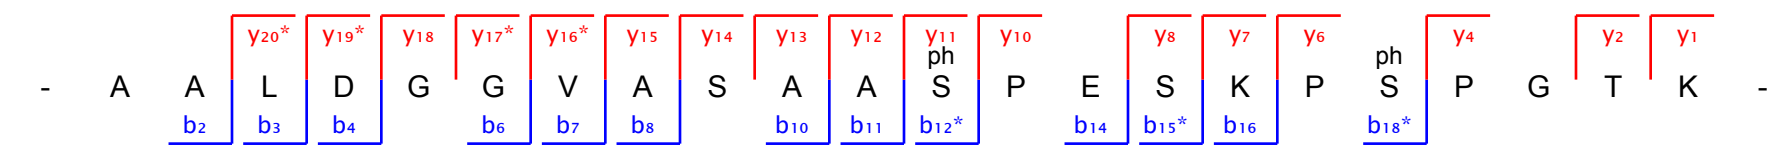

Raw file: 20150812\_A375SR\_Phospho\_BR1\_03  
 Scan: 11839 Method: FTMS; HCD Score: 119.65 m/z: 738.06 Gene names: ELAC2

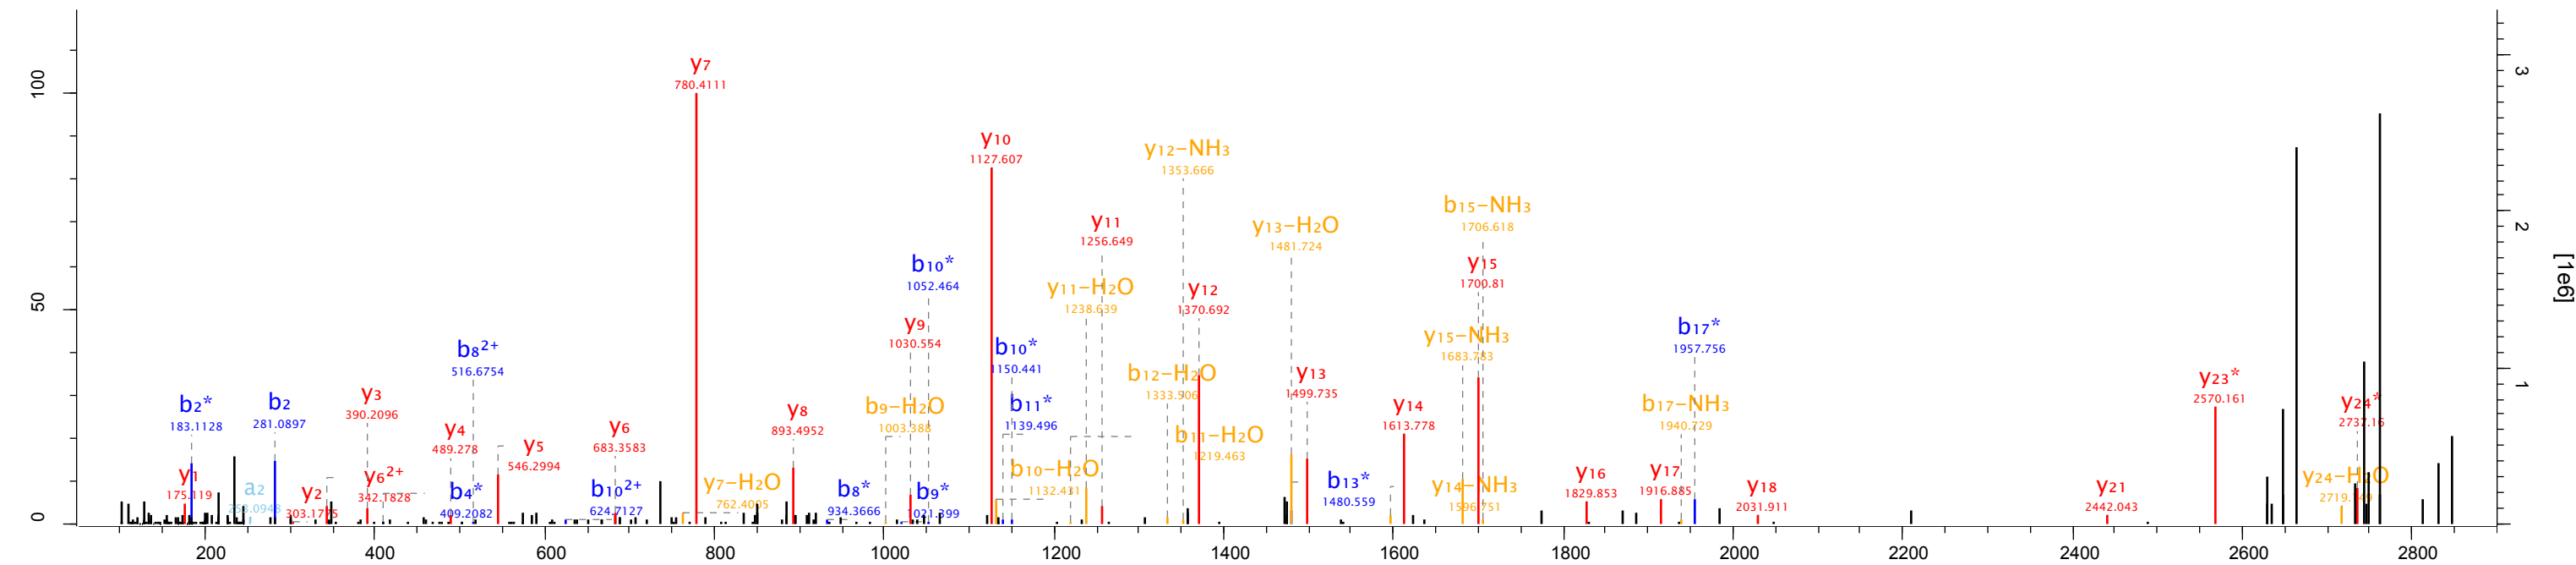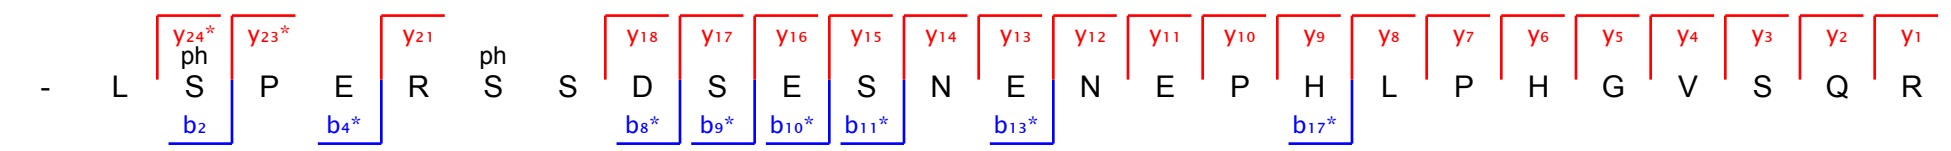

Raw file: 20150812\_A375SR\_Phospho\_BR1\_03  
 Scan: 11849 Method: FTMS; HCD Score: 76.35 m/z: 1209.95 Gene names: DGCR8

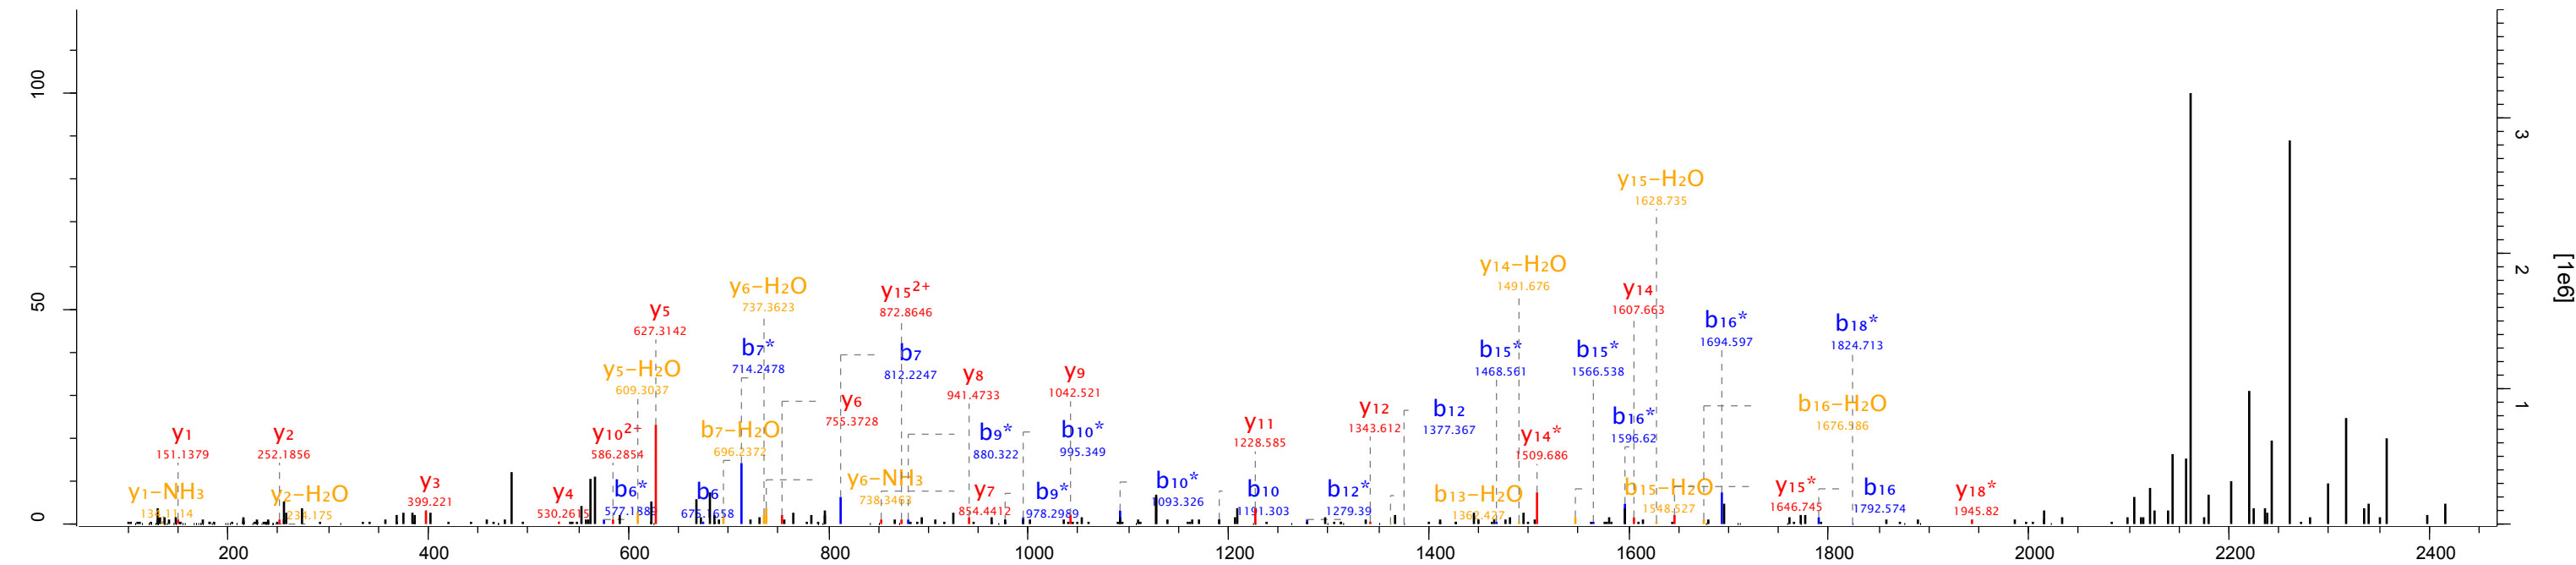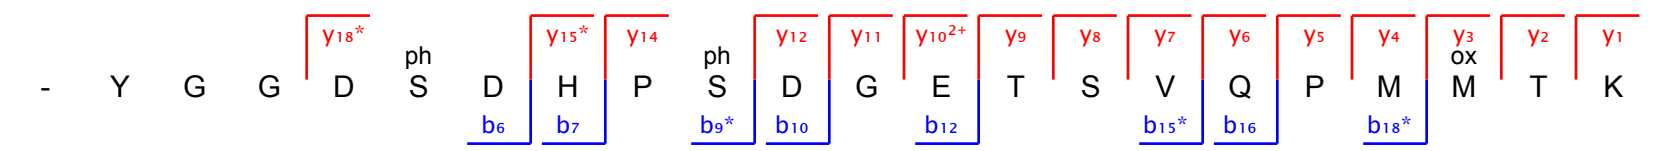

Raw file 20150812\_A375SR\_Phospho\_BR1\_03 Scan 12009 Method FTMS; HCD Score 40.24 m/z 707.83

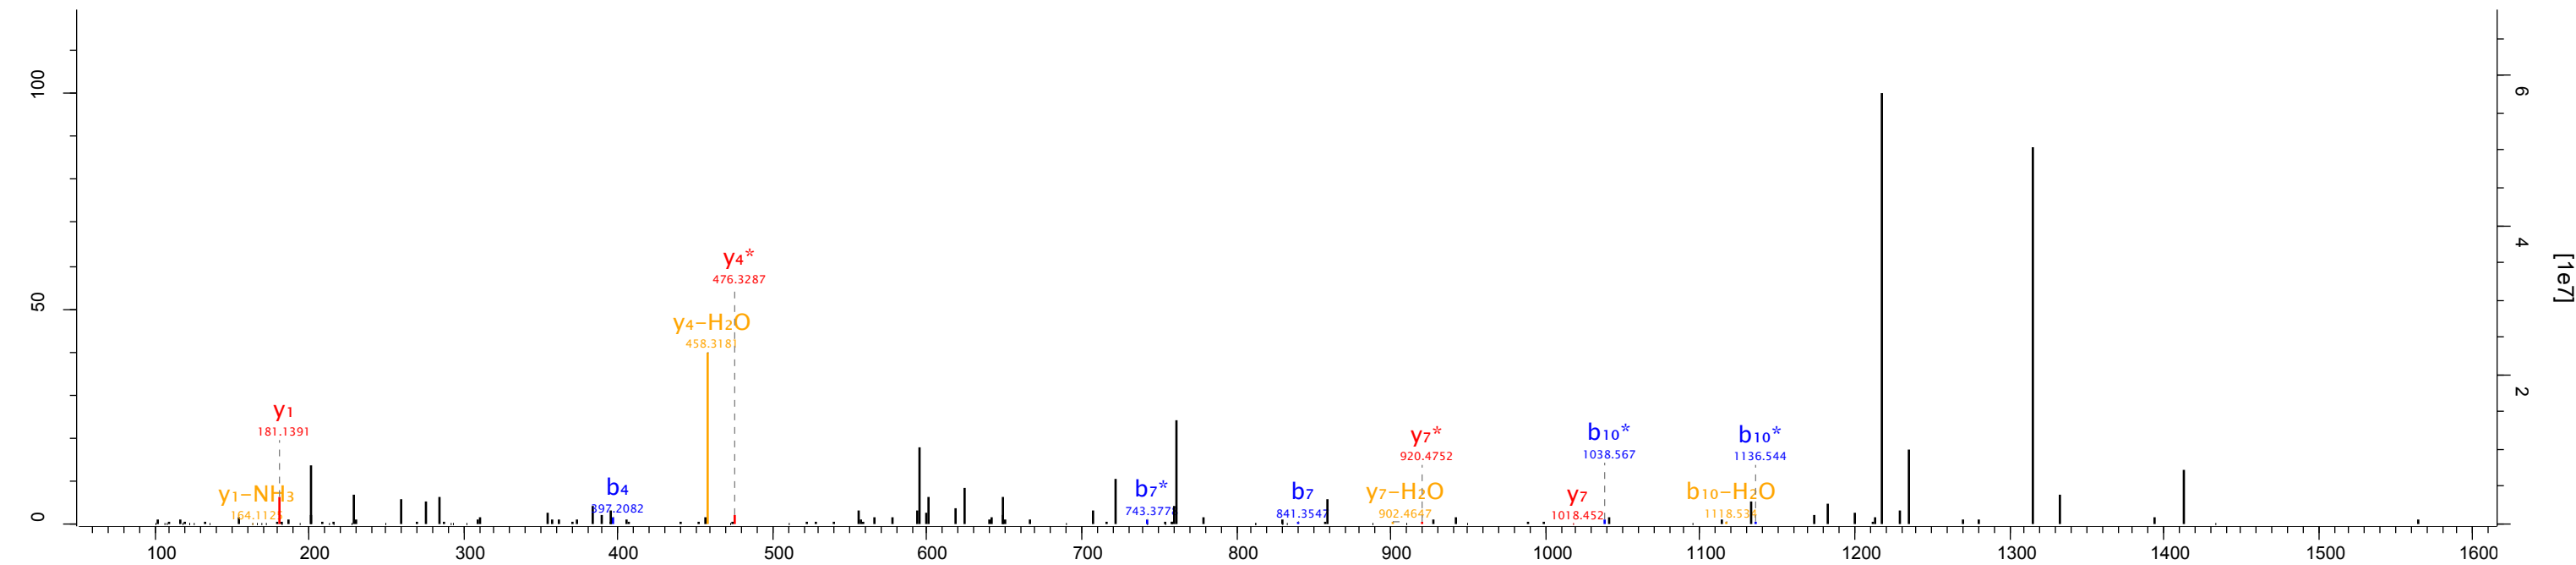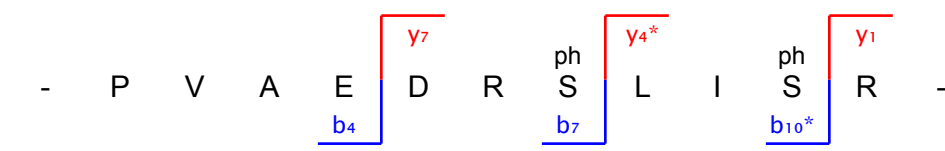

Raw file 20150812\_A375SR\_Phospho\_BR1\_03 Scan 12019 Method FTMS; HCD Score 97.39 m/z 917.89 Gene names MAP3K3

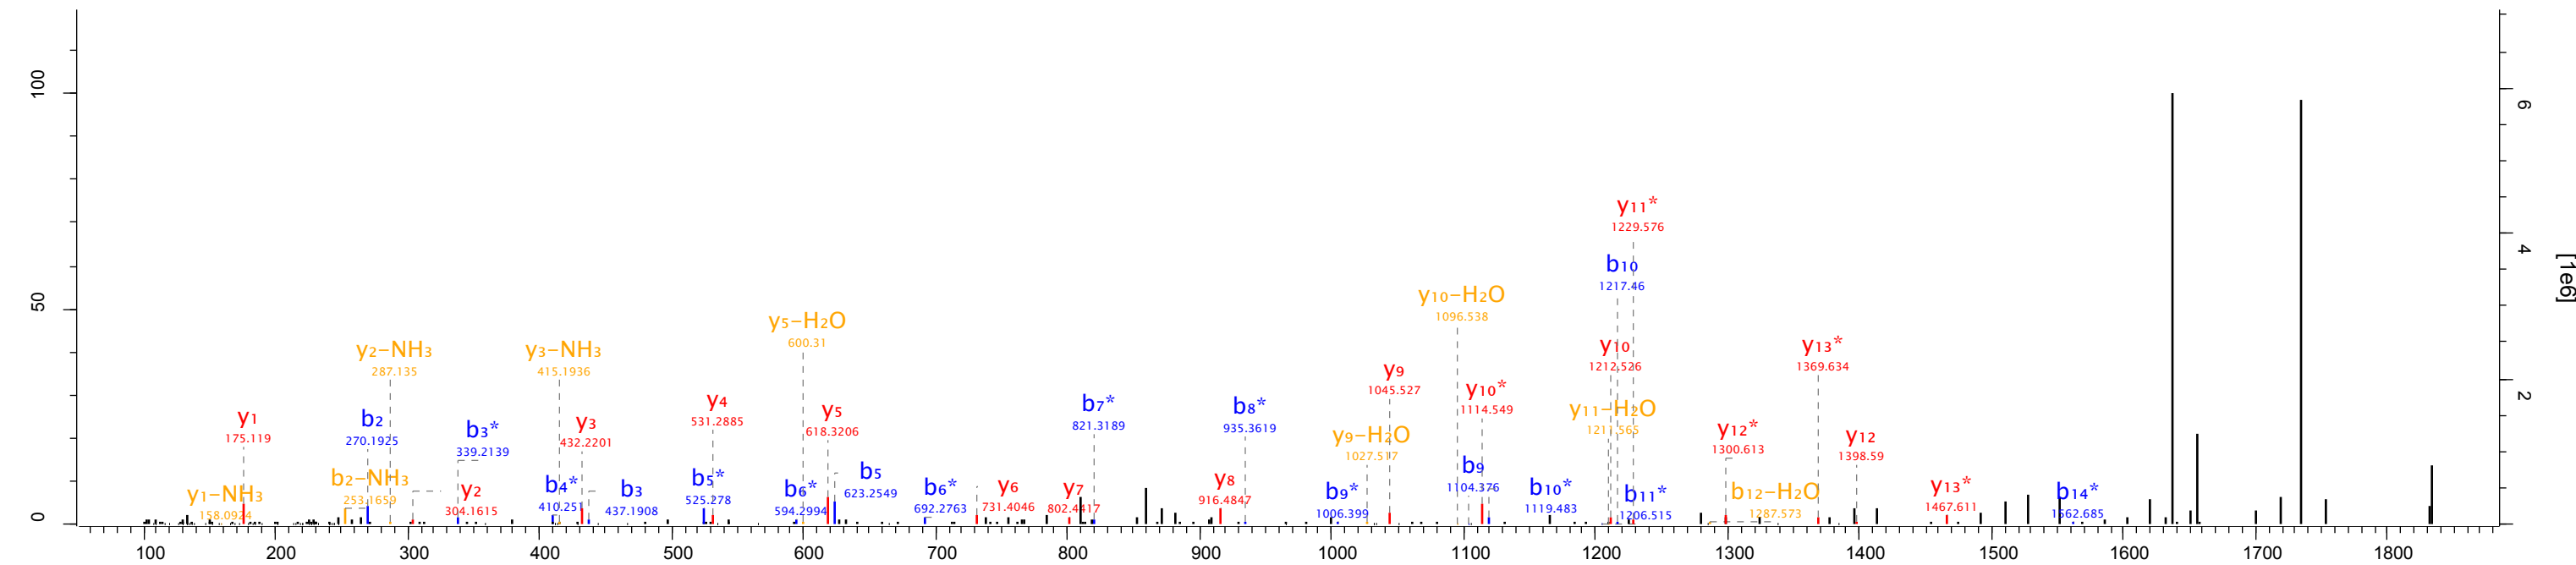

- L R y13\*  
ph  
S y12  
A y11\*  
D y10  
ph  
S y9  
E y8  
N y7  
A y6  
L y5  
S y4  
V y3  
Q y2  
E y1  
R -

b2 b3 b4\* b5 b6\* b7\* b8\* b9 b10 b11\* b14\*

Raw file: 20150812\_A375SR\_Phospho\_BR1\_03  
 Scan: 12449 Method: FTMS; HCD Score: 124.19 m/z: 904.89 Gene names: DOT1L

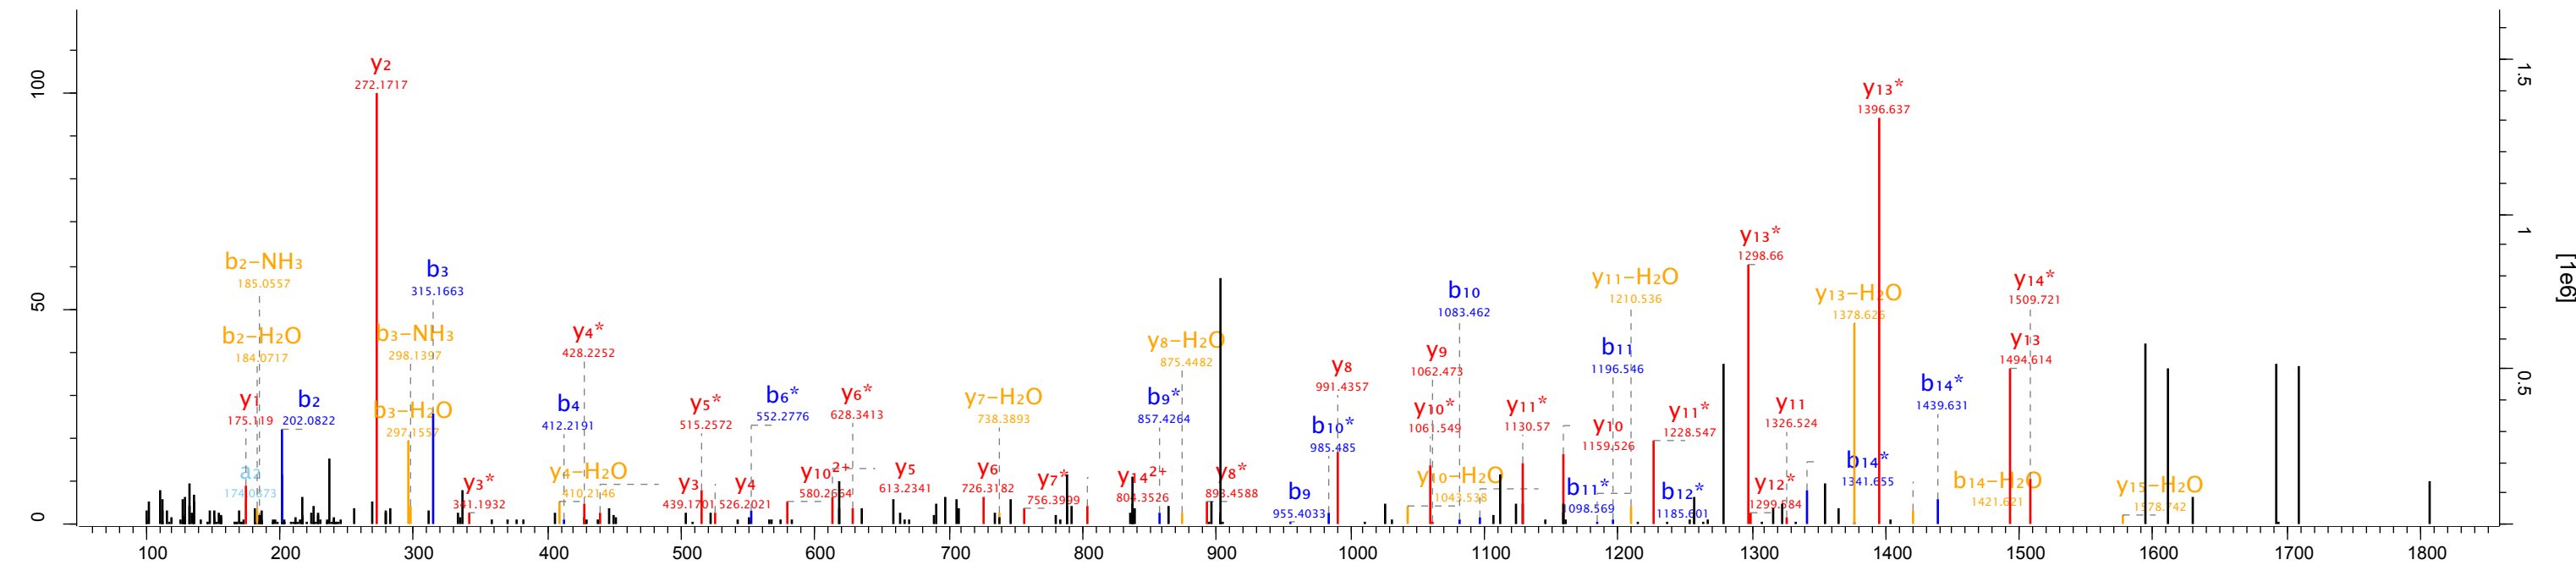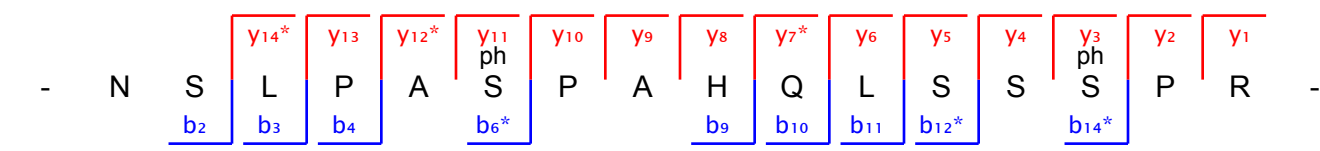

Raw file 20150812\_A375SR\_Phospho\_BR1\_03 Scan 12689 Method FTMS; HCD Score 166.85 m/z 938.7 Gene names SAP130

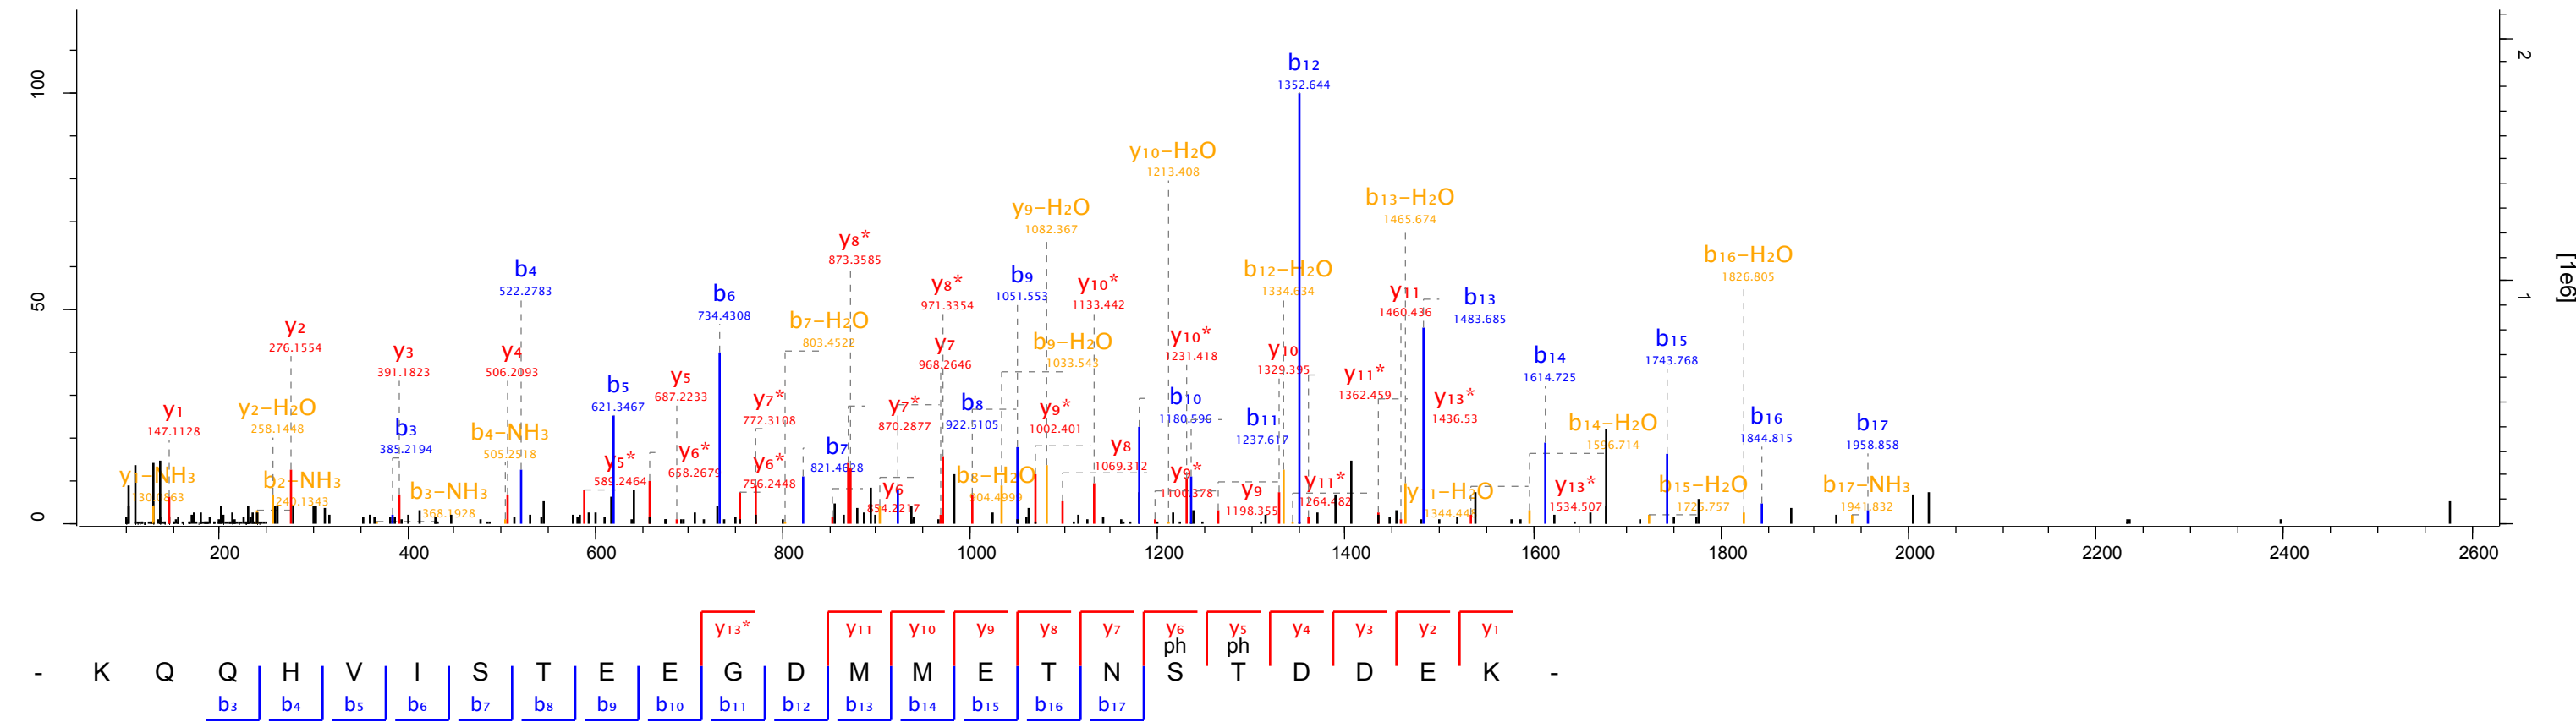



Raw file 20150812\_A375SR\_Phospho\_BR1\_03 Scan 12869 Method FTMS; HCD Score 266.67 m/z 1064.44 Gene names NDRG3

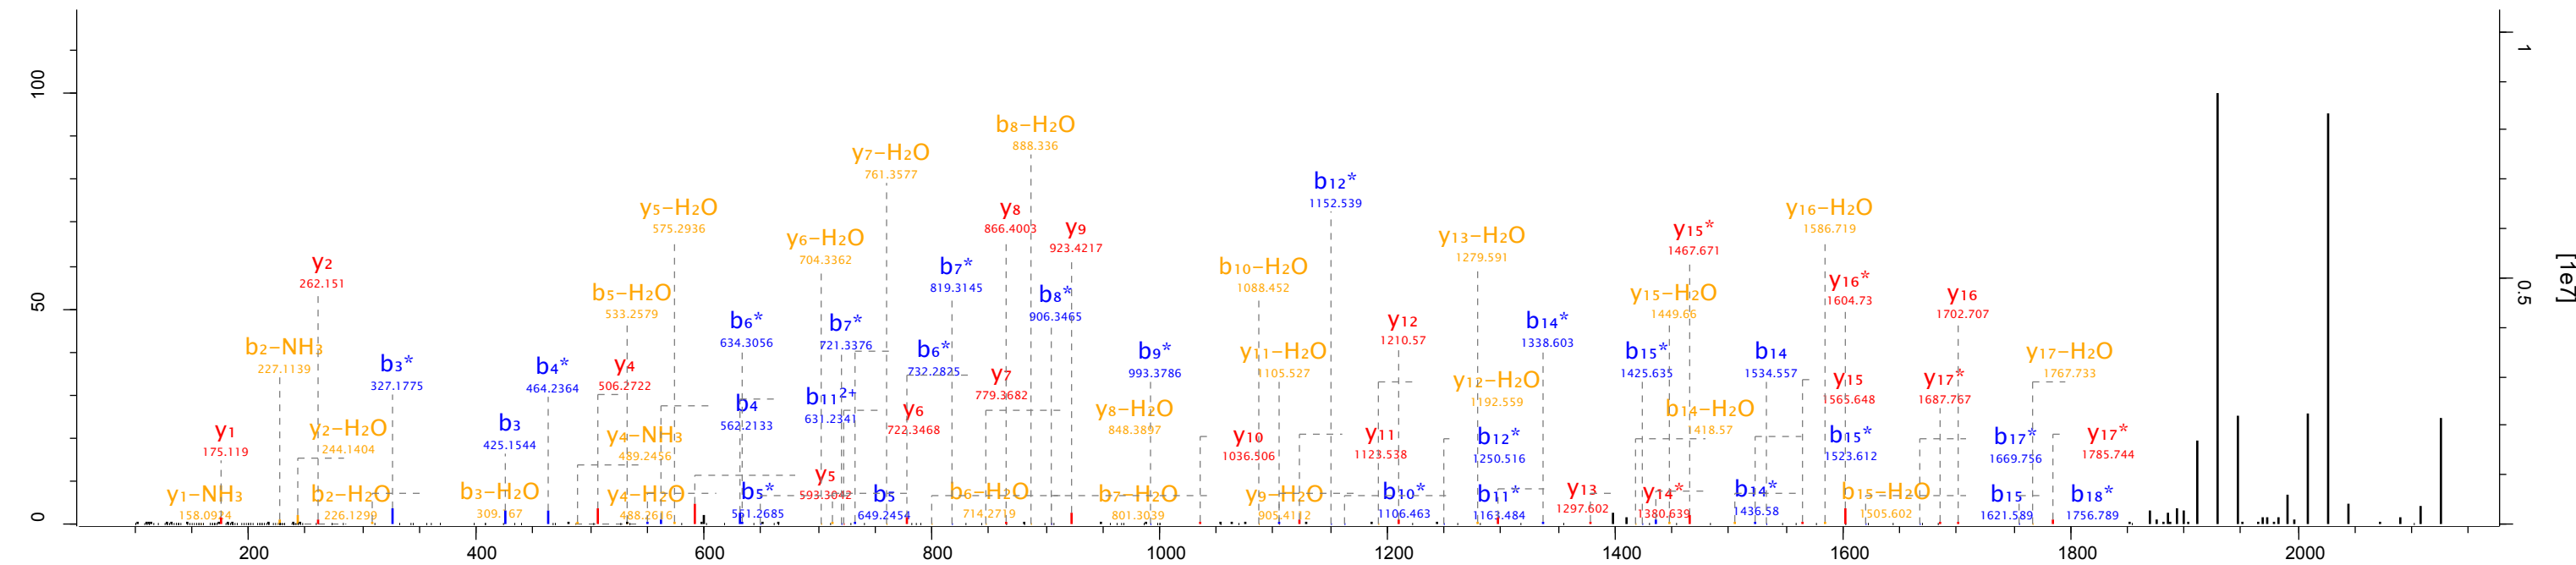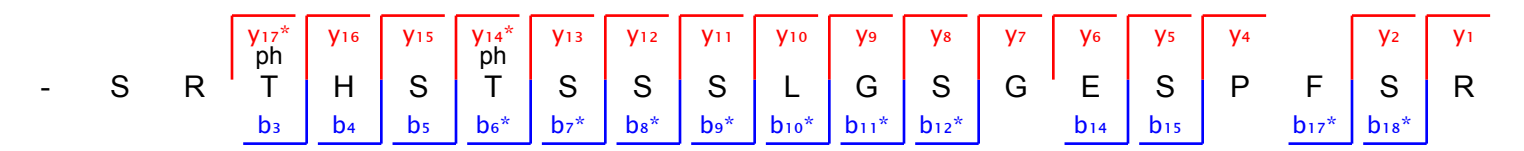

Raw file Scan Method Score m/z Gene names

20150812\_A375SR\_Phospho\_BR1\_03 12919 FTMS; HCD 56.85 834 BTBD10

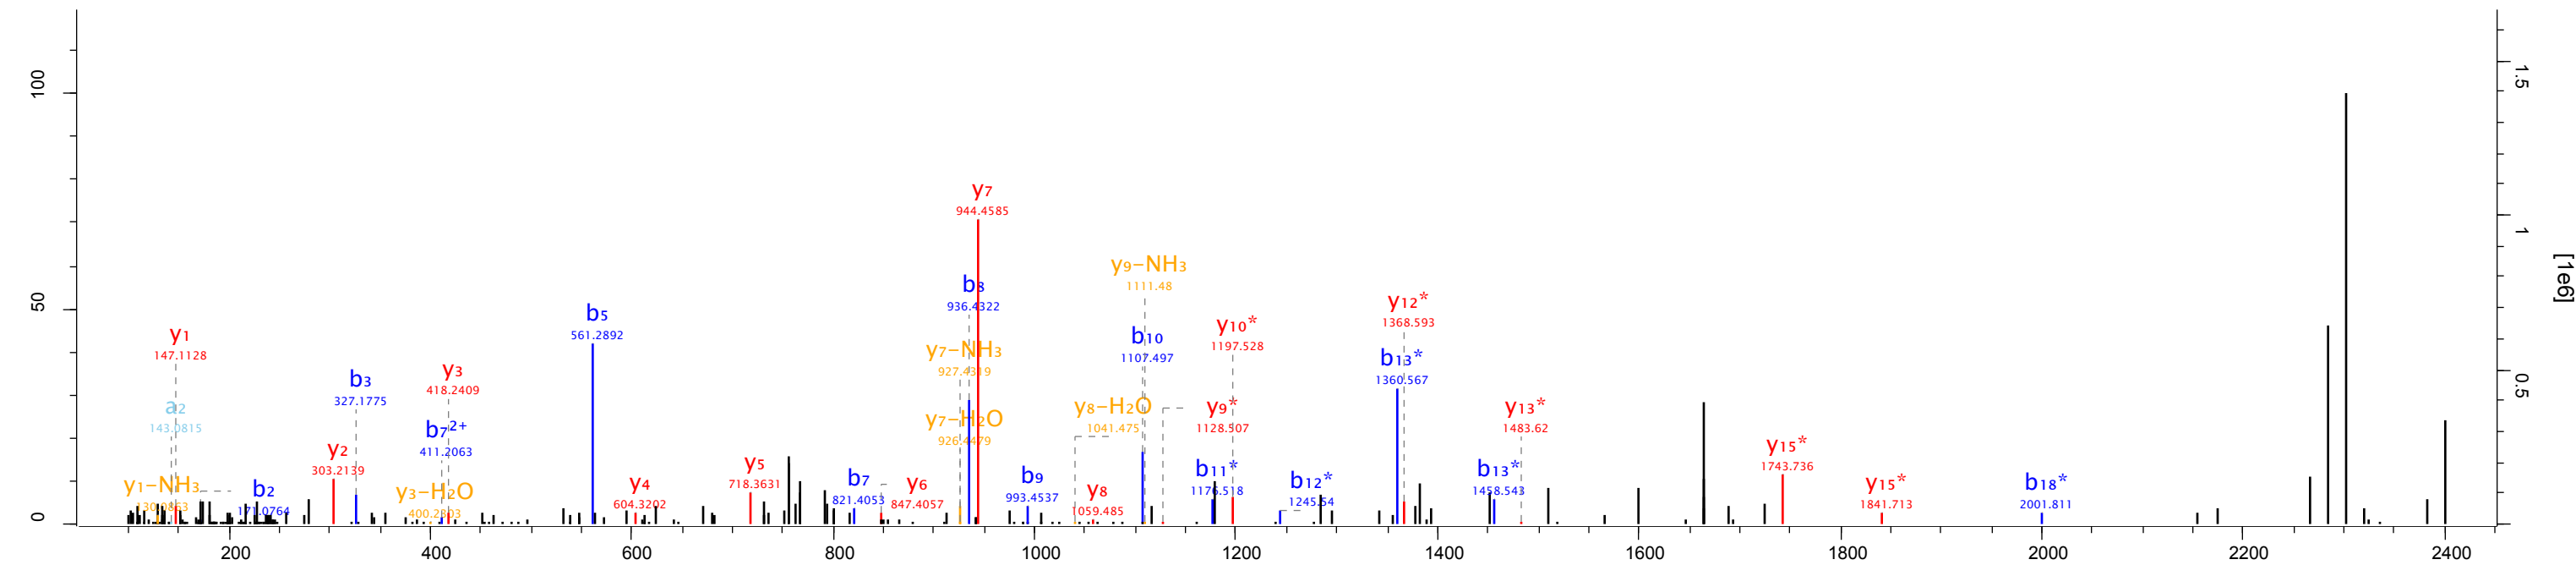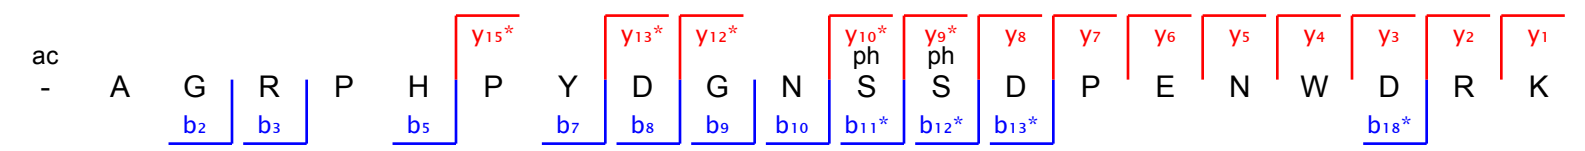

Raw file 20150812\_A375SR\_Phospho\_BR1\_03 Scan 13009 Method FTMS; HCD Score 165.82 m/z 714.8 Gene names HUWE1

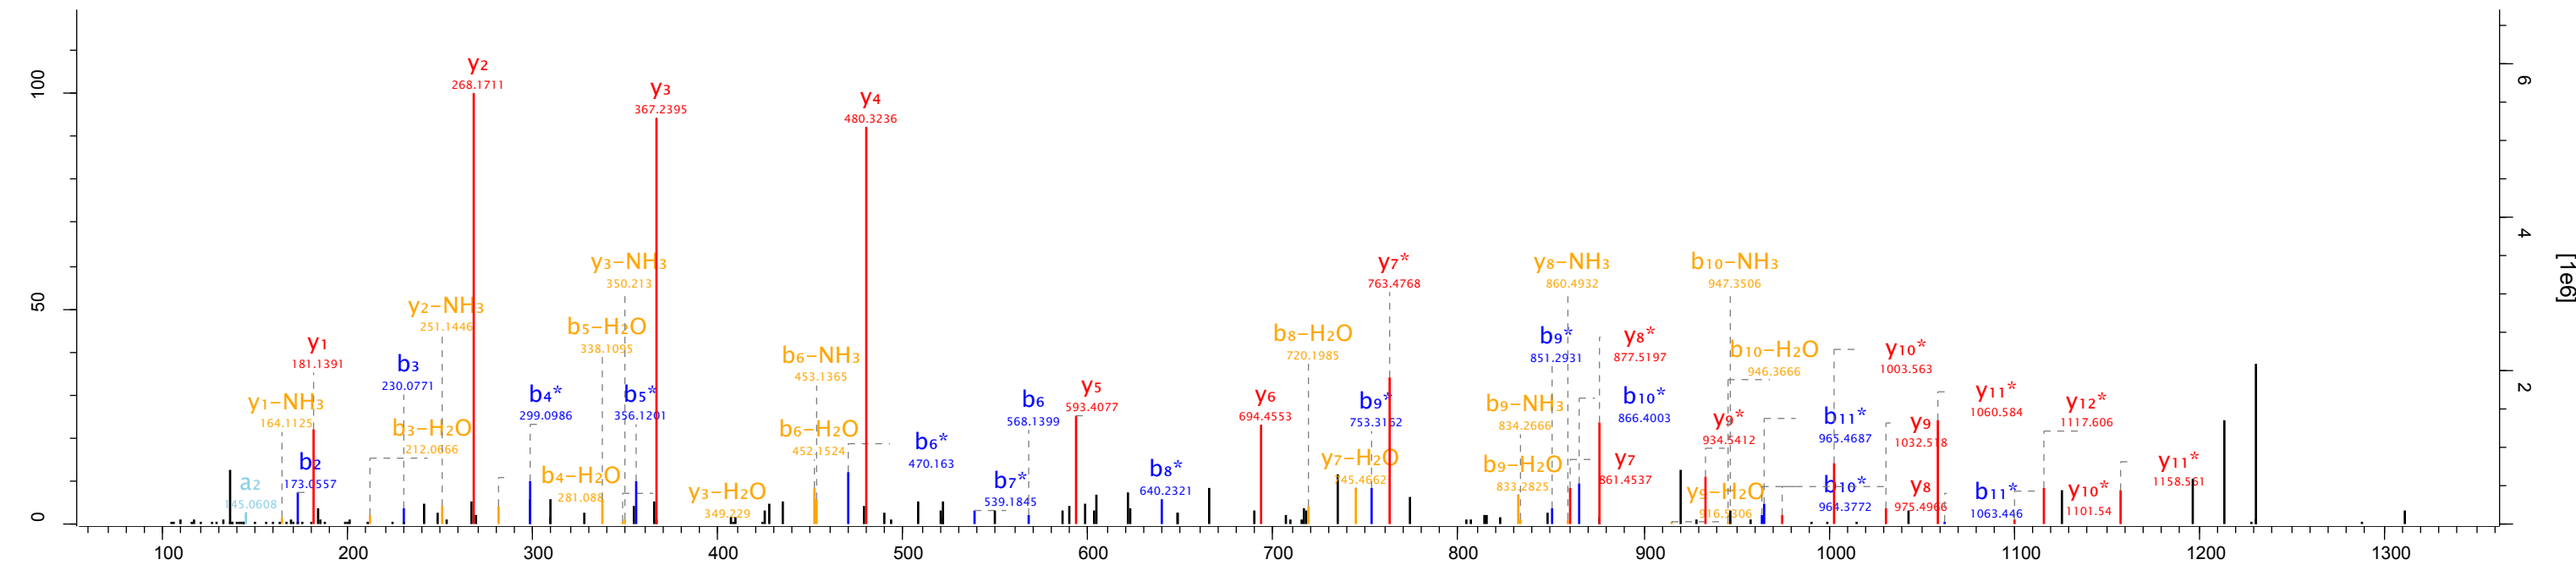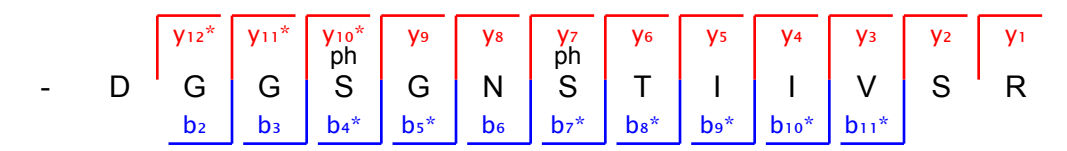

Raw file: 20150812\_A375SR\_Phospho\_BR1\_03  
 Scan: 13179 Method: FTMS; HCD Score: 155.53 m/z: 483.24 Gene names: RASSF8

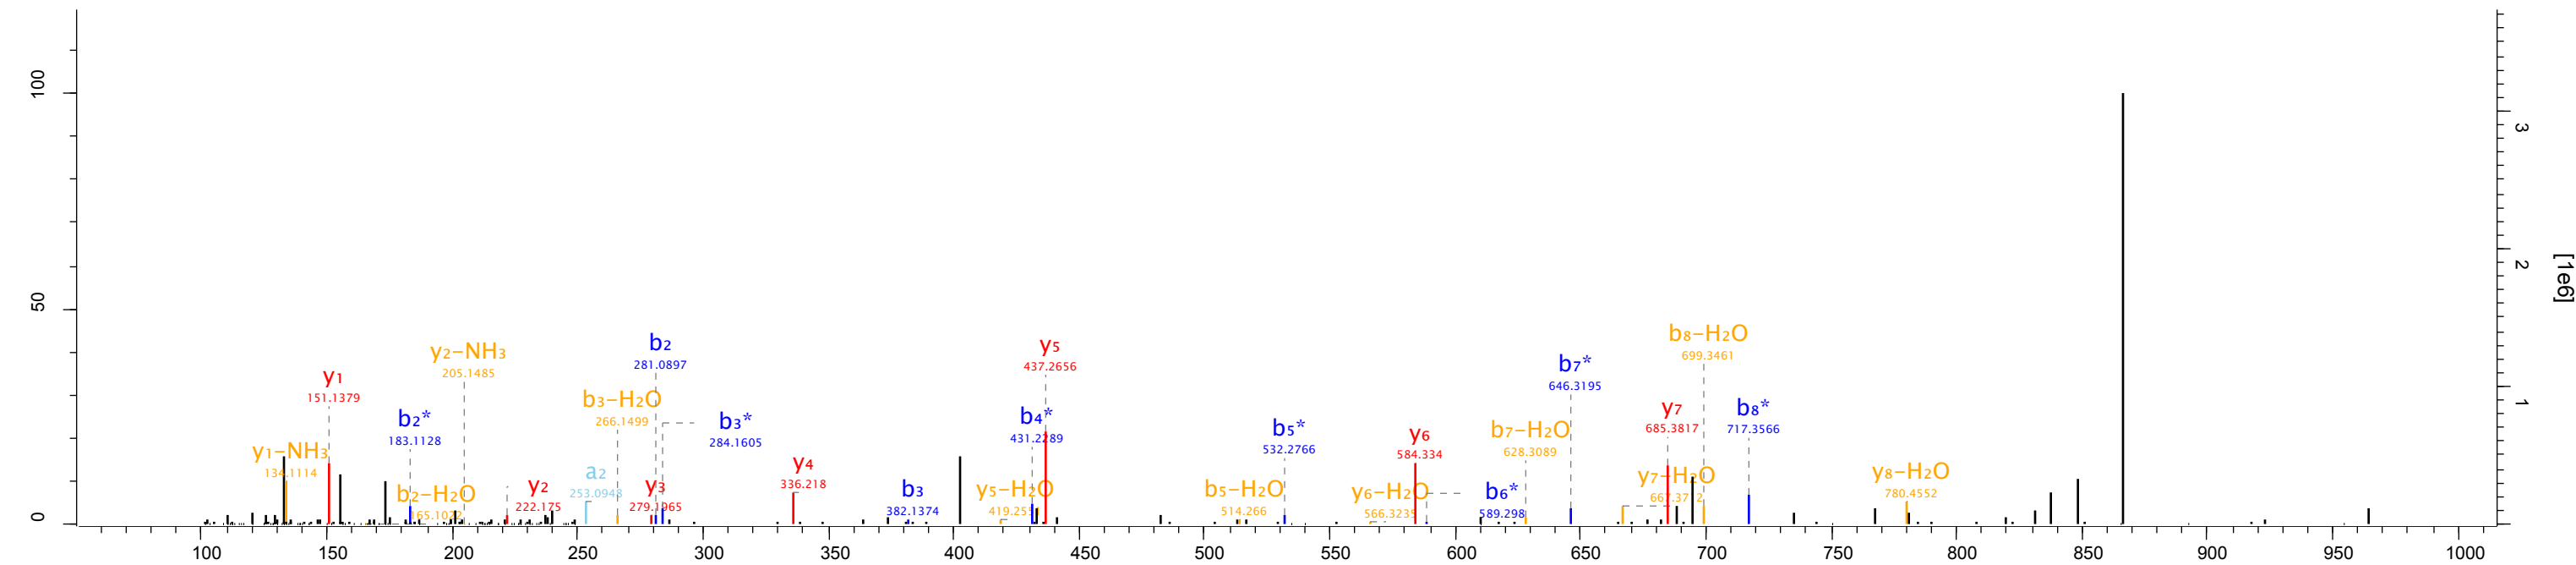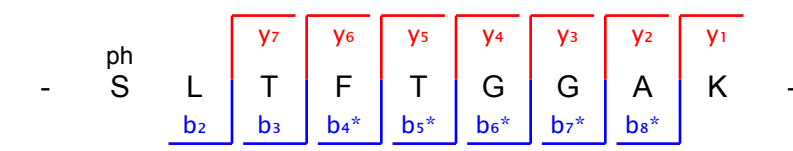

Raw file 20150812\_A375SR\_Phospho\_BR1\_03 Scan 13619 Method FTMS; HCD Score 195.39 m/z 1037.41 Gene names PRRC2A

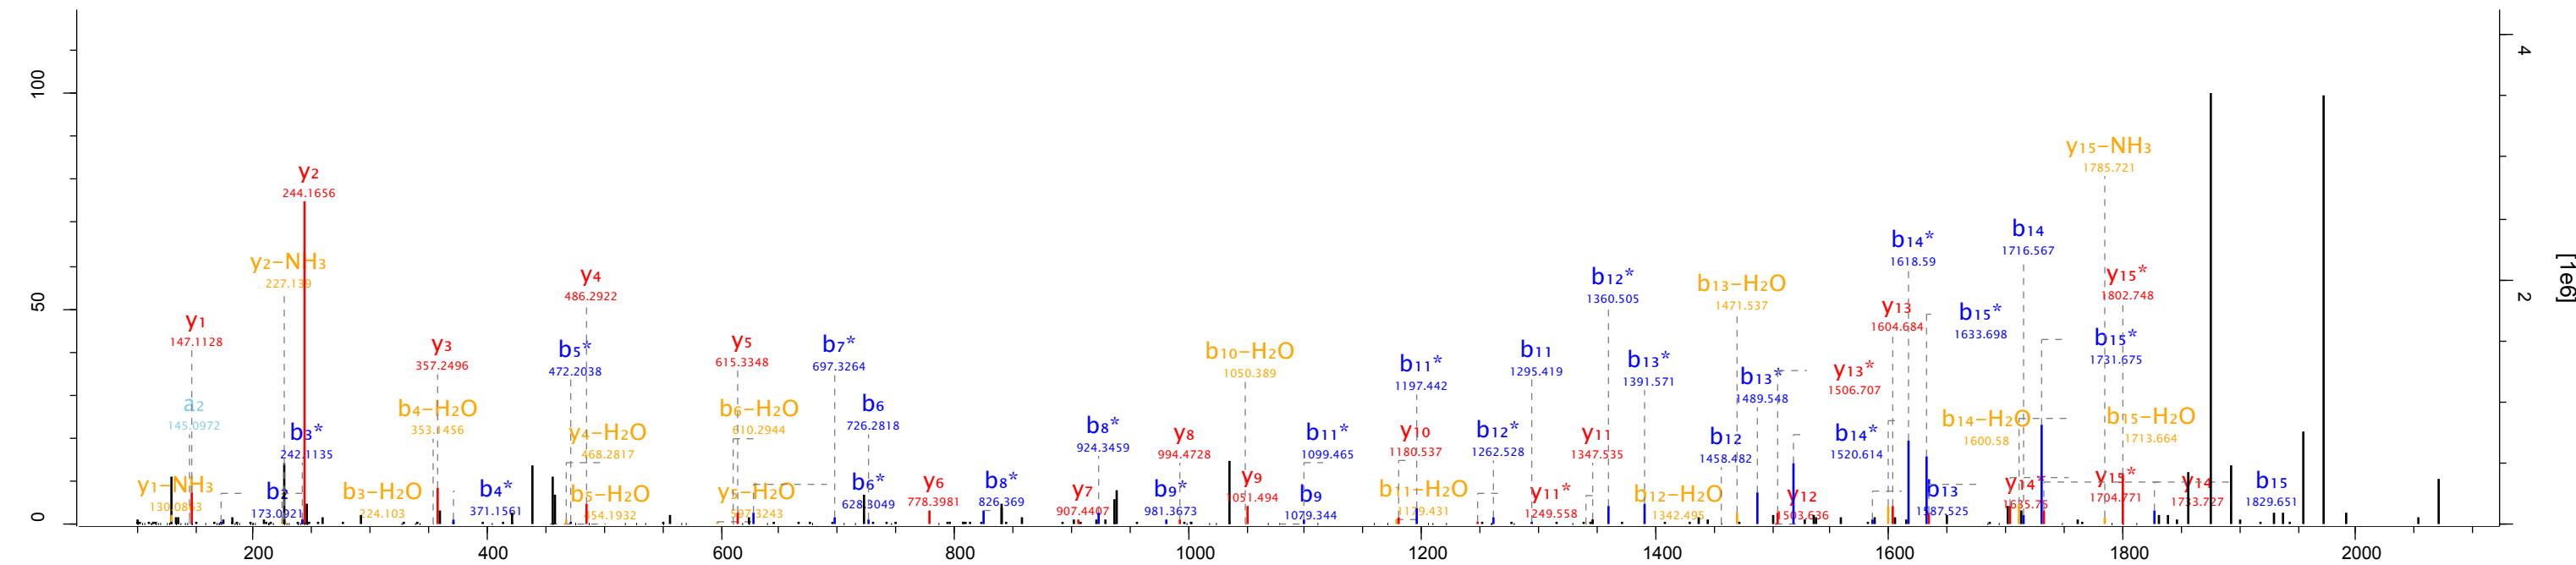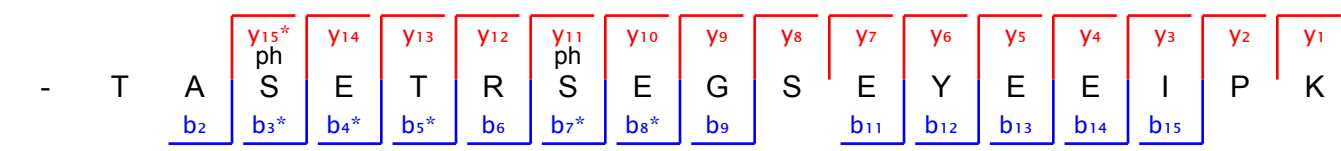

Raw file 20150812\_A375SR\_Phospho\_BR1\_03 Scan 13779 Method FTMS; HCD Score 113.13 m/z 713.32 Gene names SOX5

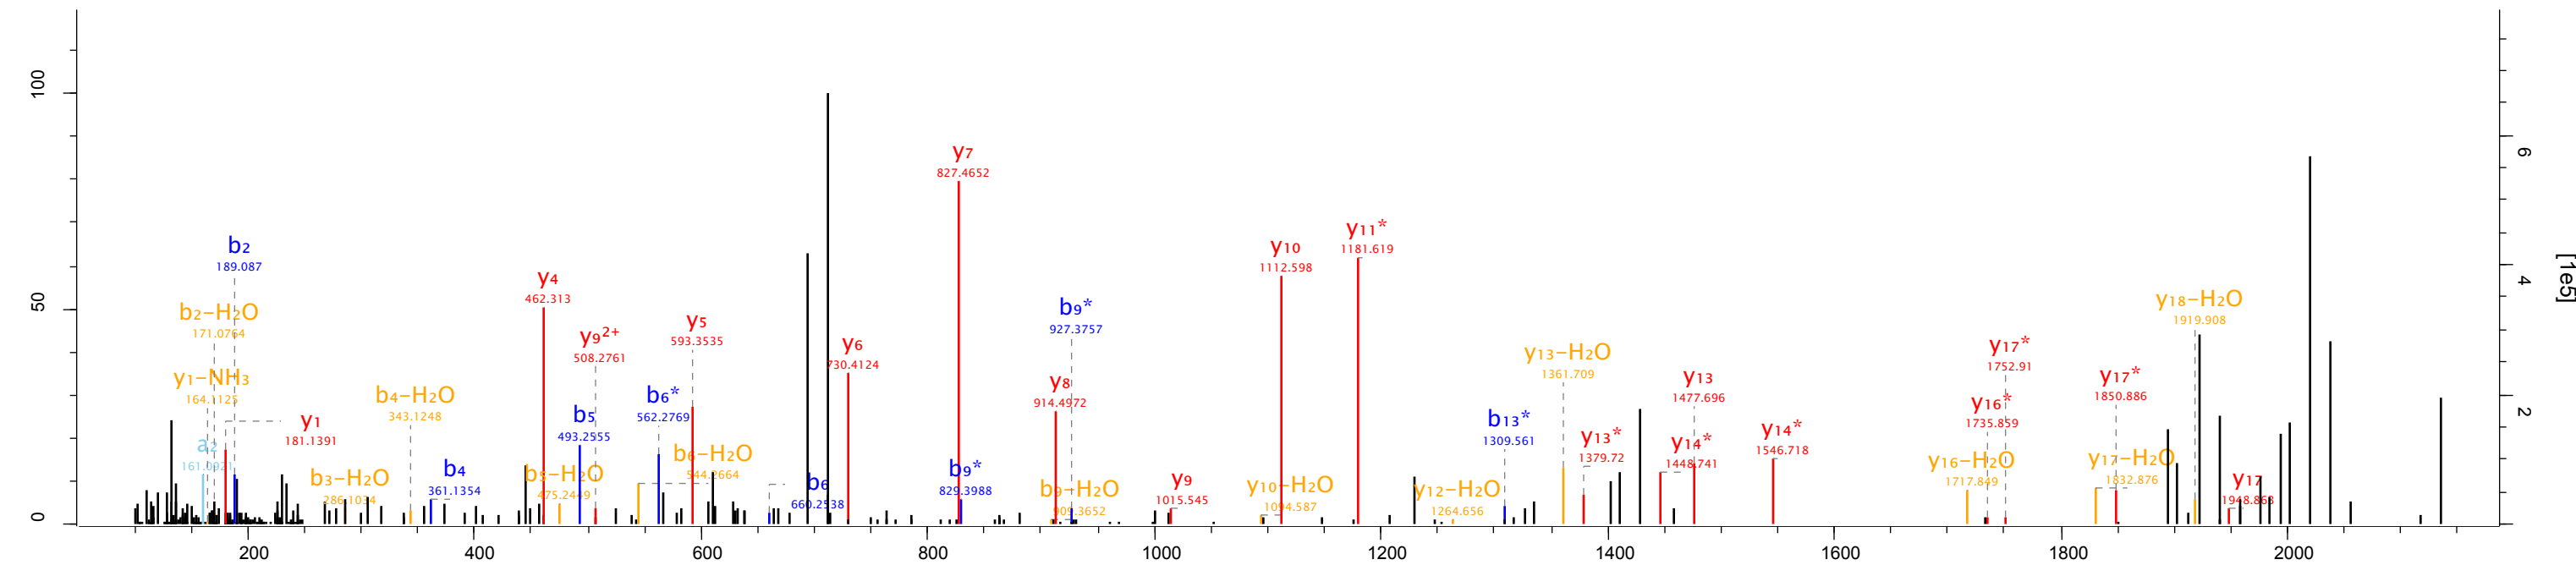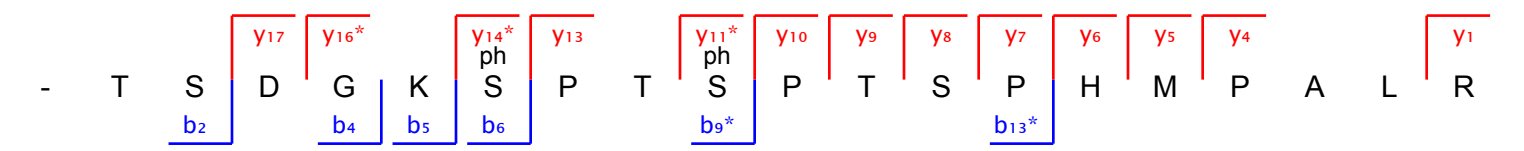

Raw file: 20150812\_A375SR\_Phospho\_BR1\_03  
 Scan: 14249 Method: FTMS; HCD Score: 148.15 m/z: 860.68 Gene names: FIP1L1

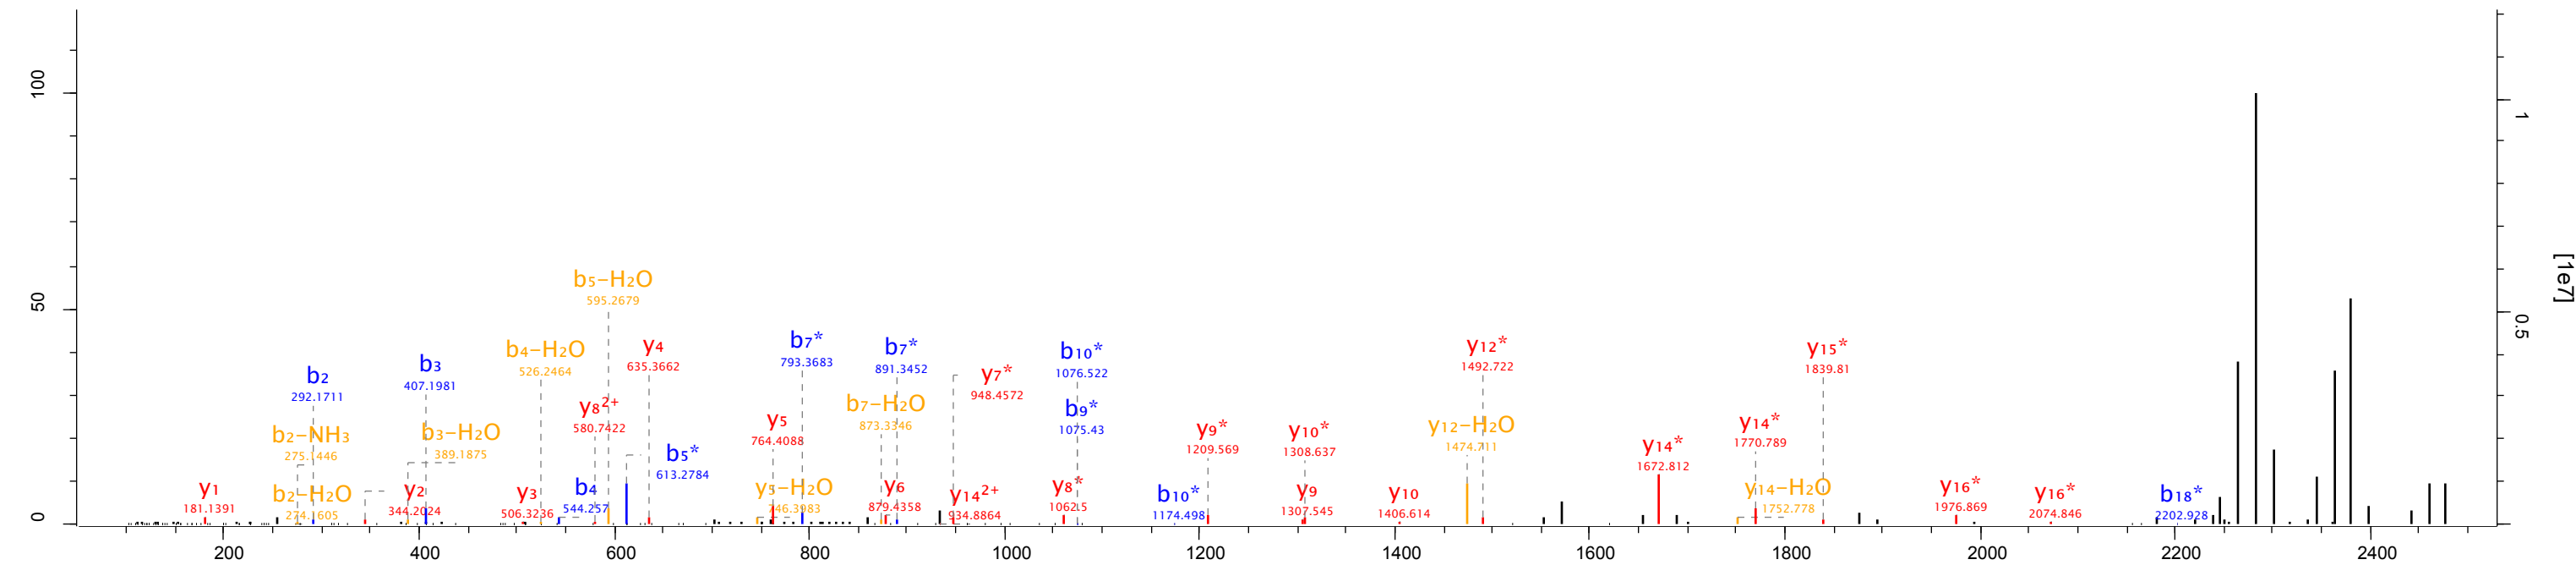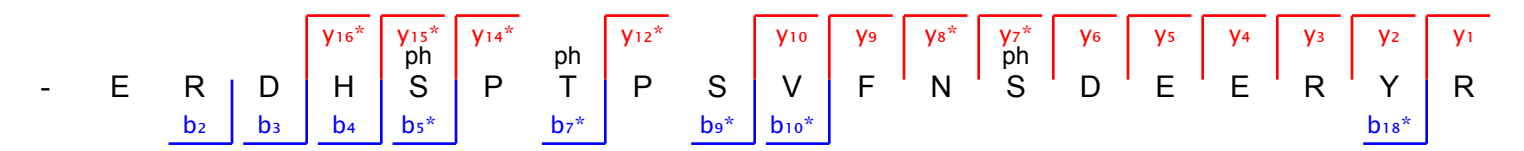

Raw file 20150812\_A375SR\_Phospho\_BR1\_03 Scan 14349 Method FTMS; HCD Score 168.69 m/z 590.76 Gene names LARP6

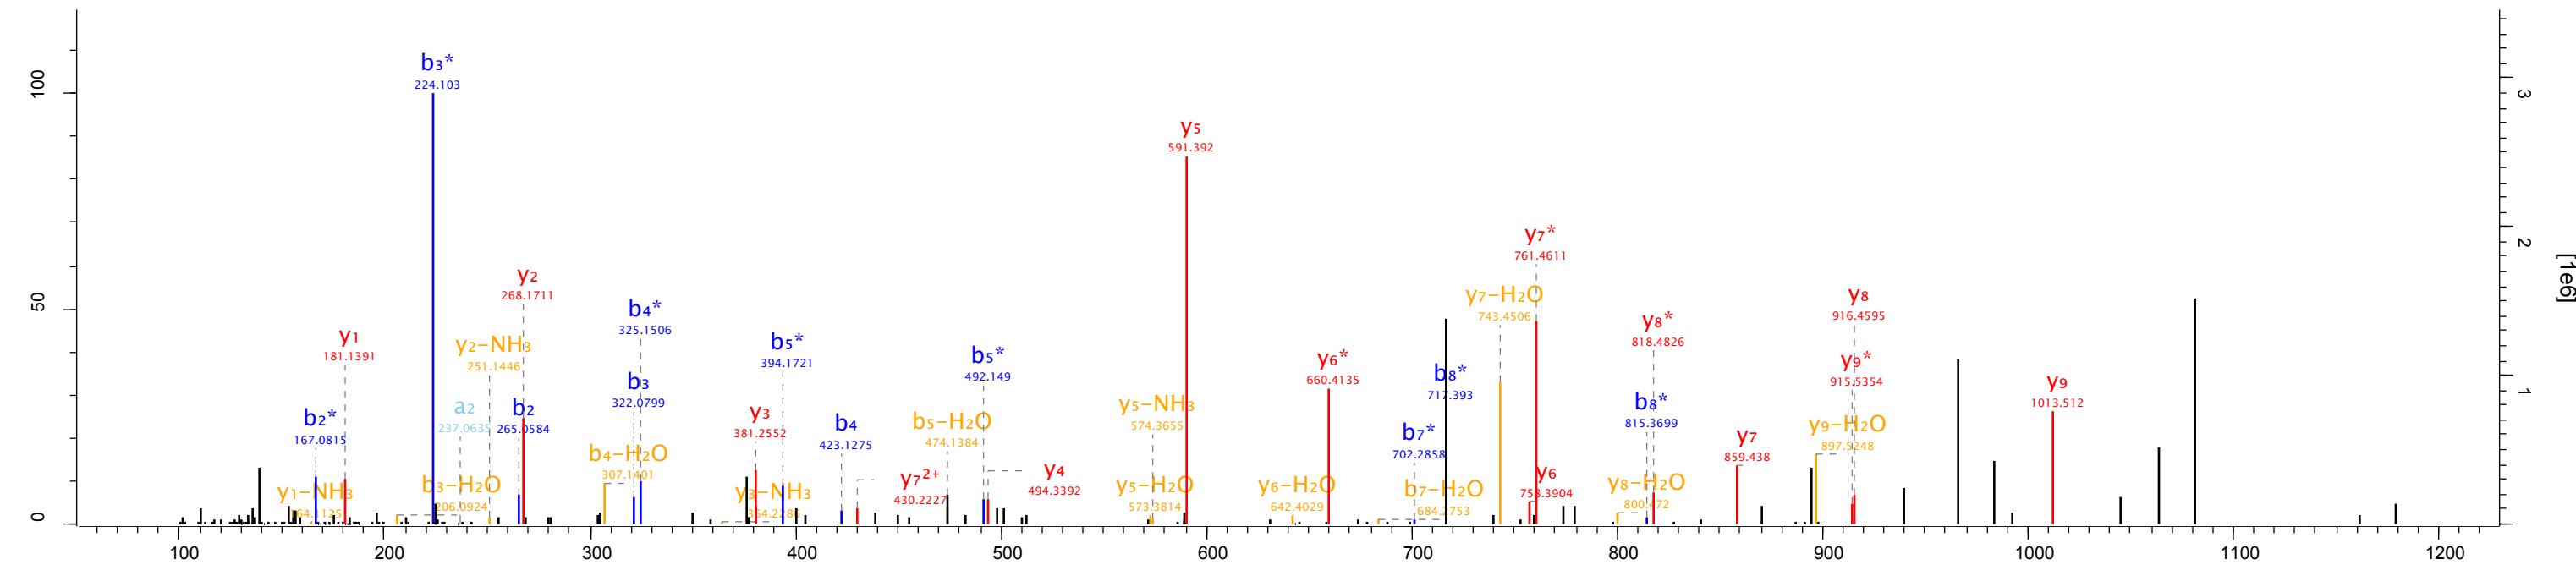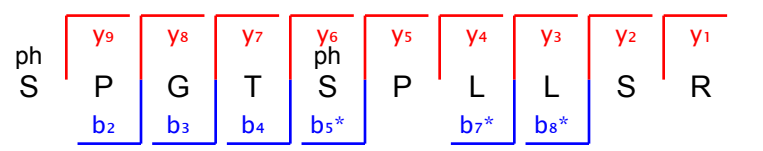



Raw file: 20150812\_A375SR\_Phospho\_BR1\_03  
 Scan: 14569 Method: FTMS; HCD Score: 341.92 m/z: 1561.72 Gene names: PAGE5

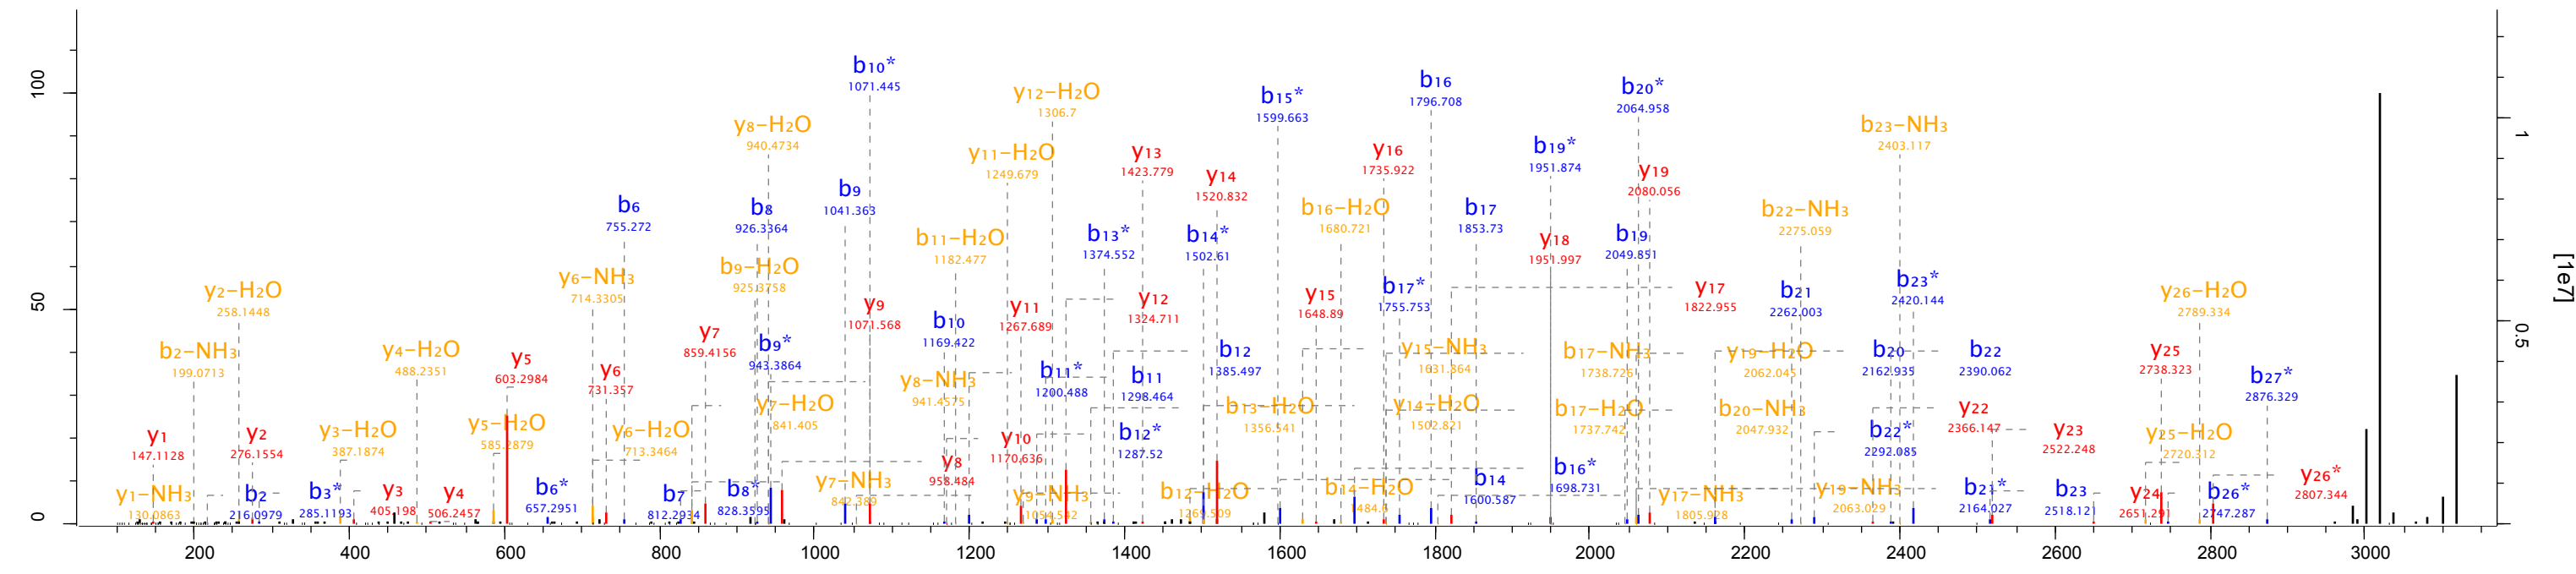

Sequence: - S Q S ph S E R G N D Q E S S Q P V G P V I V Q Q P T E E K -

Fragmentation sites (b ions): b<sub>2</sub>, b<sub>3</sub>\*

Fragmentation sites (y ions): y<sub>26</sub>\*, y<sub>25</sub>, y<sub>24</sub>, y<sub>23</sub>, y<sub>22</sub>, y<sub>19</sub>, y<sub>18</sub>, y<sub>17</sub>, y<sub>16</sub>, y<sub>15</sub>, y<sub>14</sub>, y<sub>13</sub>, y<sub>12</sub>, y<sub>11</sub>, y<sub>10</sub>, y<sub>9</sub>, y<sub>8</sub>, y<sub>7</sub>, y<sub>6</sub>, y<sub>5</sub>, y<sub>4</sub>, y<sub>3</sub>, y<sub>2</sub>, y<sub>1</sub>

Fragmentation sites (b ions): b<sub>6</sub>, b<sub>7</sub>, b<sub>8</sub>, b<sub>9</sub>, b<sub>10</sub>, b<sub>11</sub>, b<sub>12</sub>, b<sub>13</sub>\*, b<sub>14</sub>, b<sub>15</sub>\*, b<sub>16</sub>, b<sub>17</sub>, b<sub>19</sub>, b<sub>20</sub>, b<sub>21</sub>, b<sub>22</sub>, b<sub>23</sub>, b<sub>26</sub>\*, b<sub>27</sub>\*

Raw file 20150812\_A375SR\_Phospho\_BR1\_03 Scan 14759 Method FTMS; HCD Score 110.92 m/z 951.42 Gene names HEXIM2

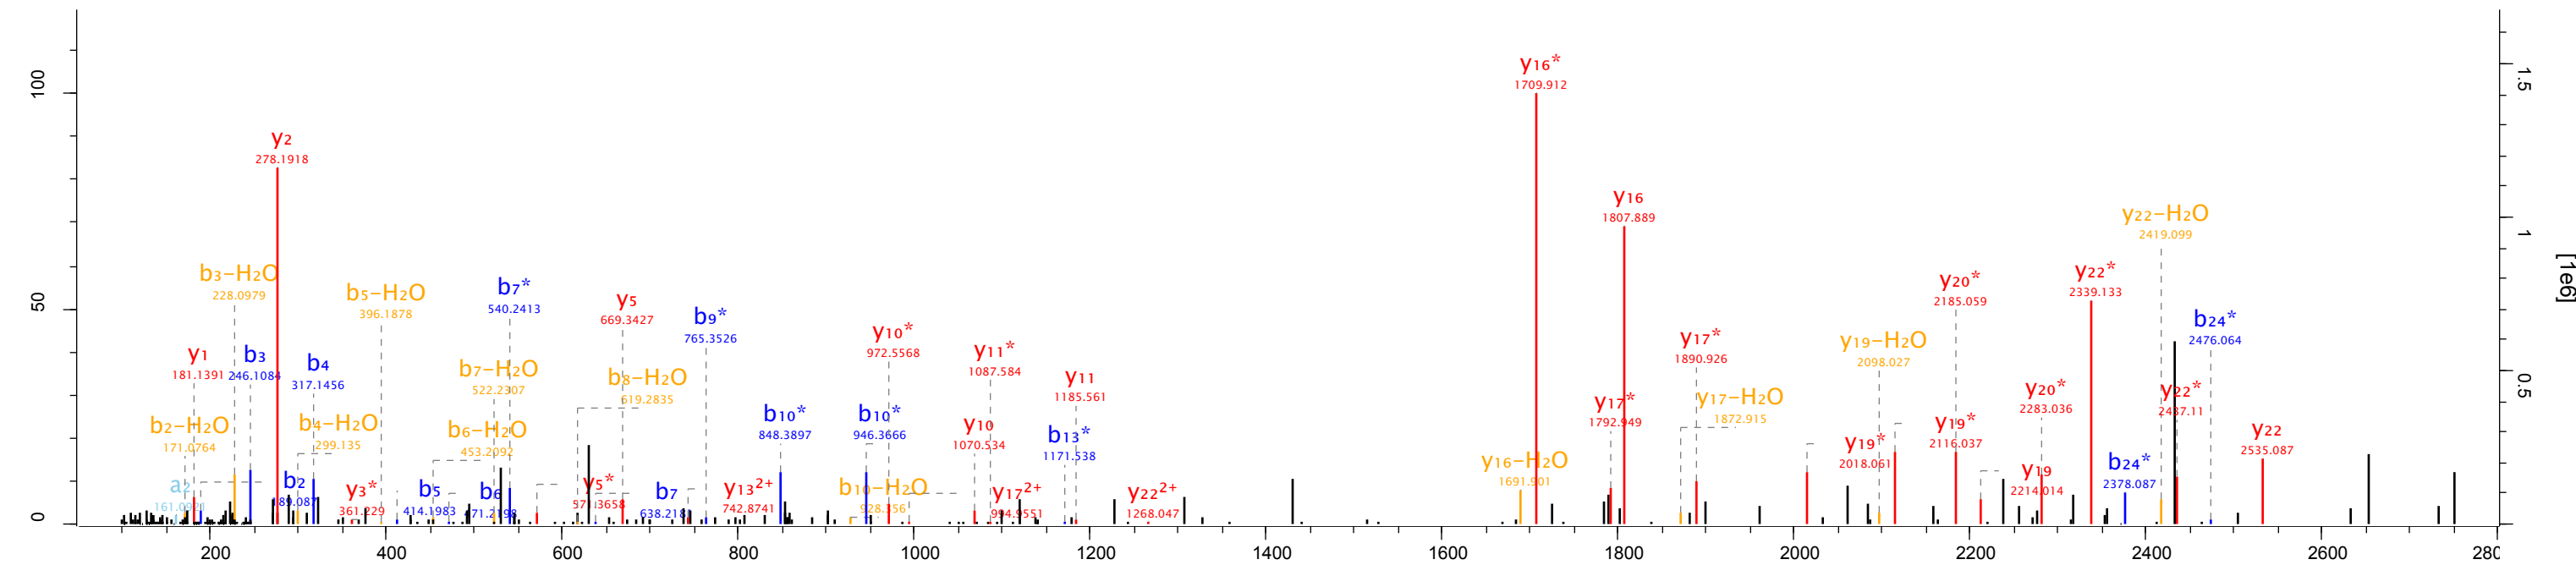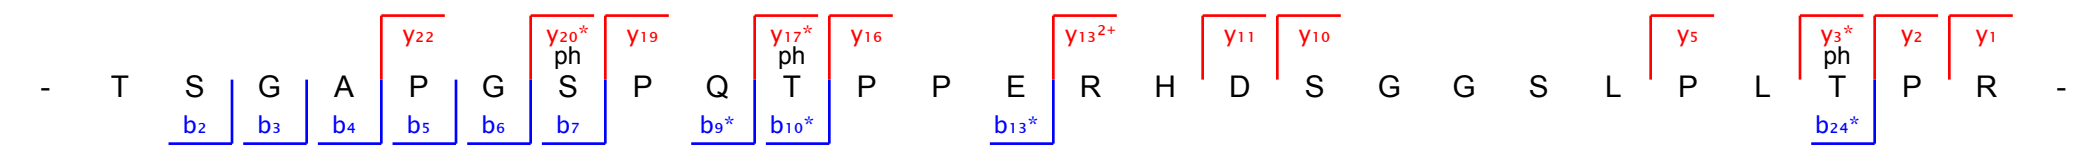

Raw file Scan Method Score m/z Gene names  
 20150812\_A375SR\_Phospho\_BR1\_03 14769 FTMS; HCD 101.41 602 EIF4G3

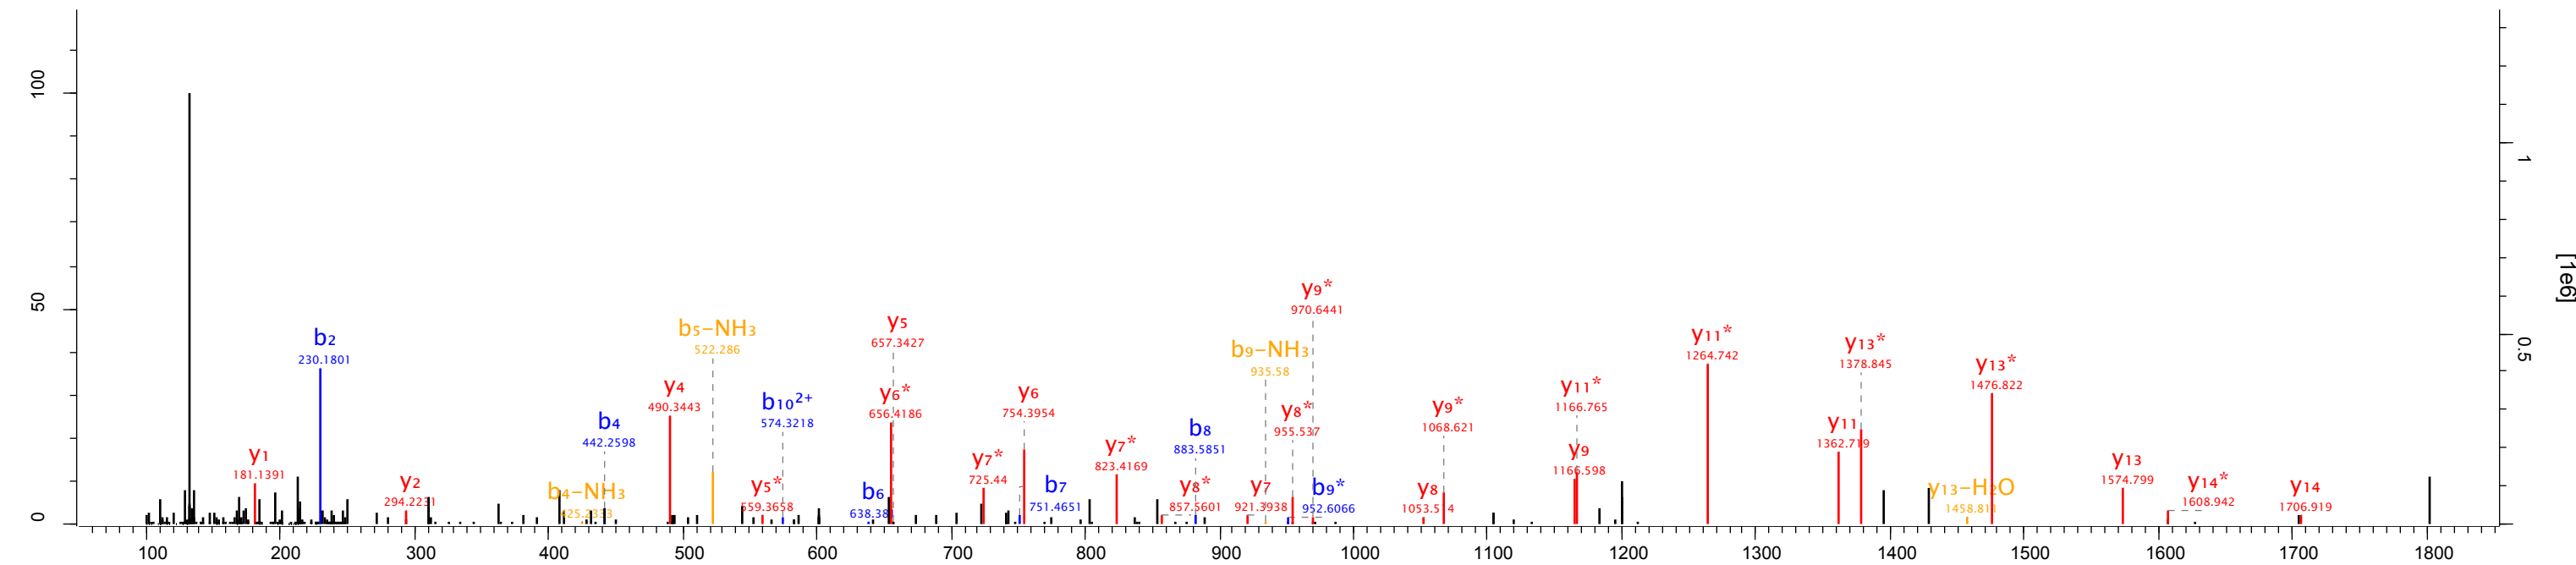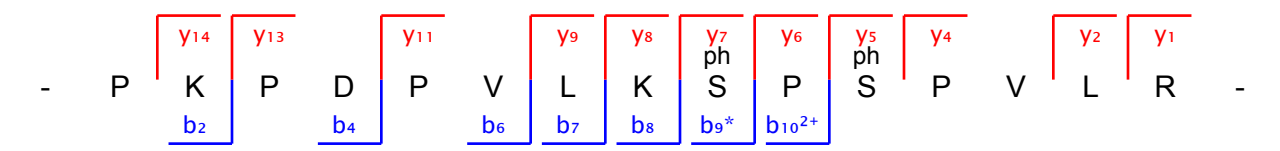

Raw file 20150812\_A375SR\_Phospho\_BR1\_03 Scan 15289 Method FTMS; HCD Score 211.77 m/z 1177.48 Gene names DOCK7

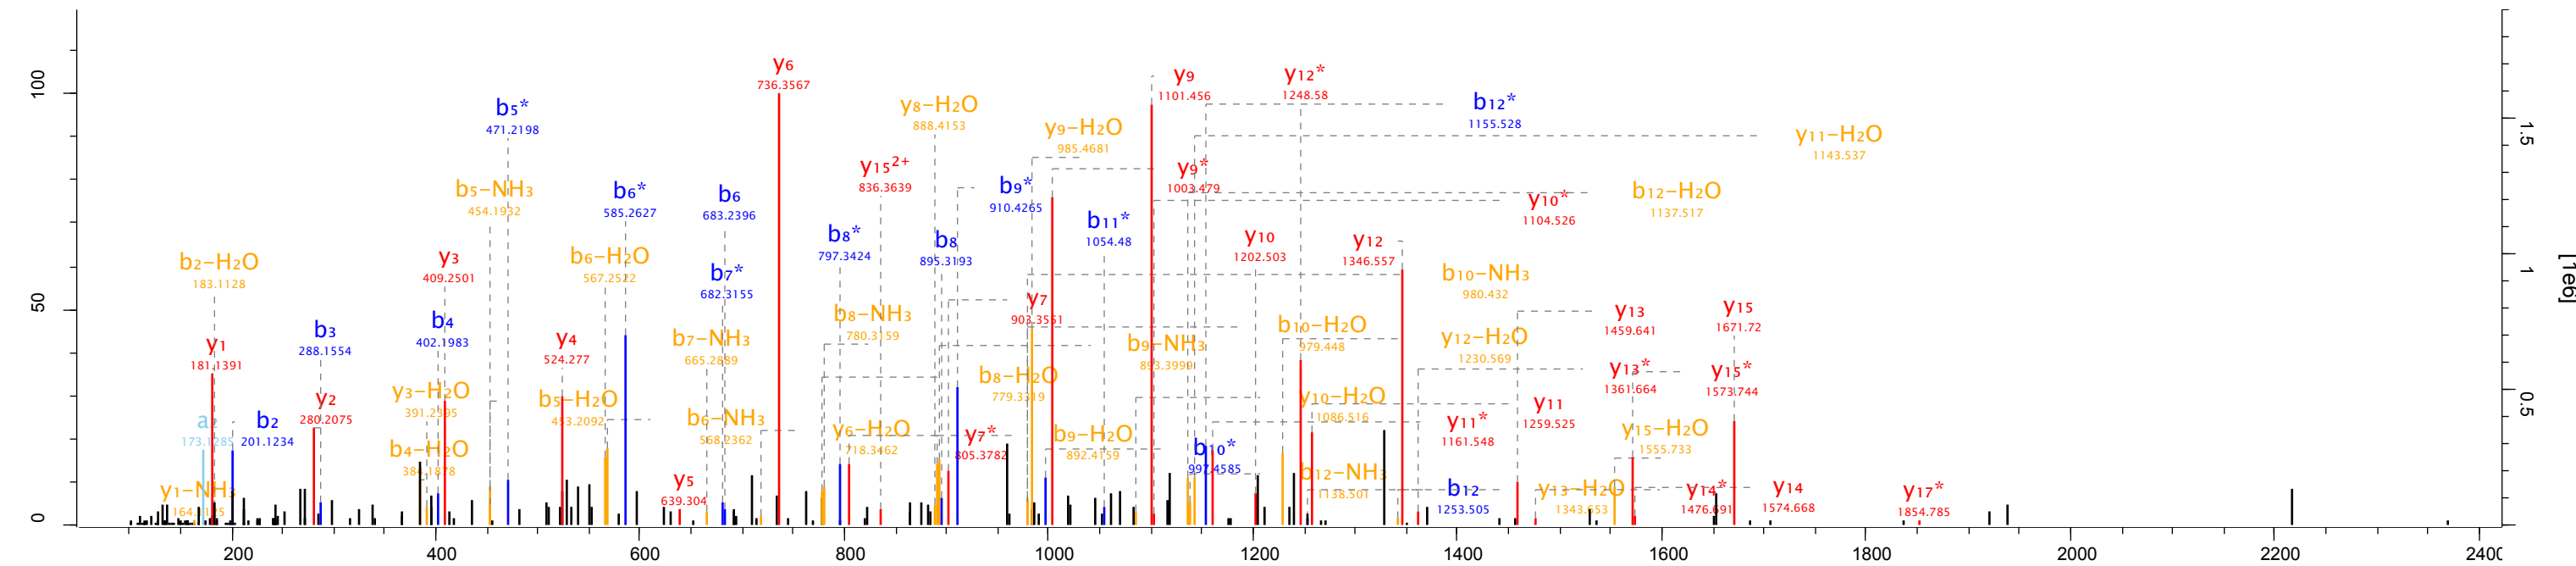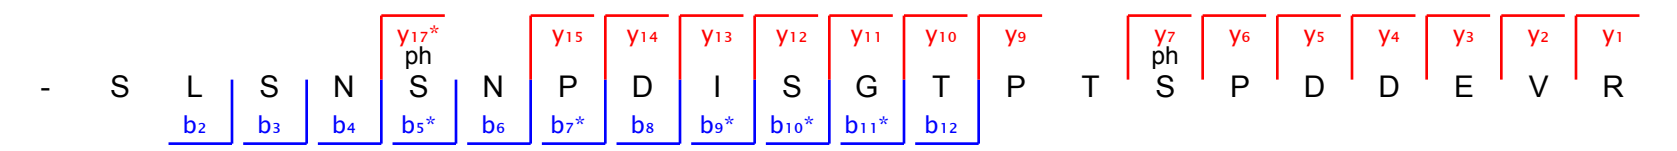

Raw file Scan Method Score m/z Gene names  
 20150812\_A375SR\_Phospho\_BR1\_03 15319 FTMS; HCD 137.36 848.36 SPTBN1

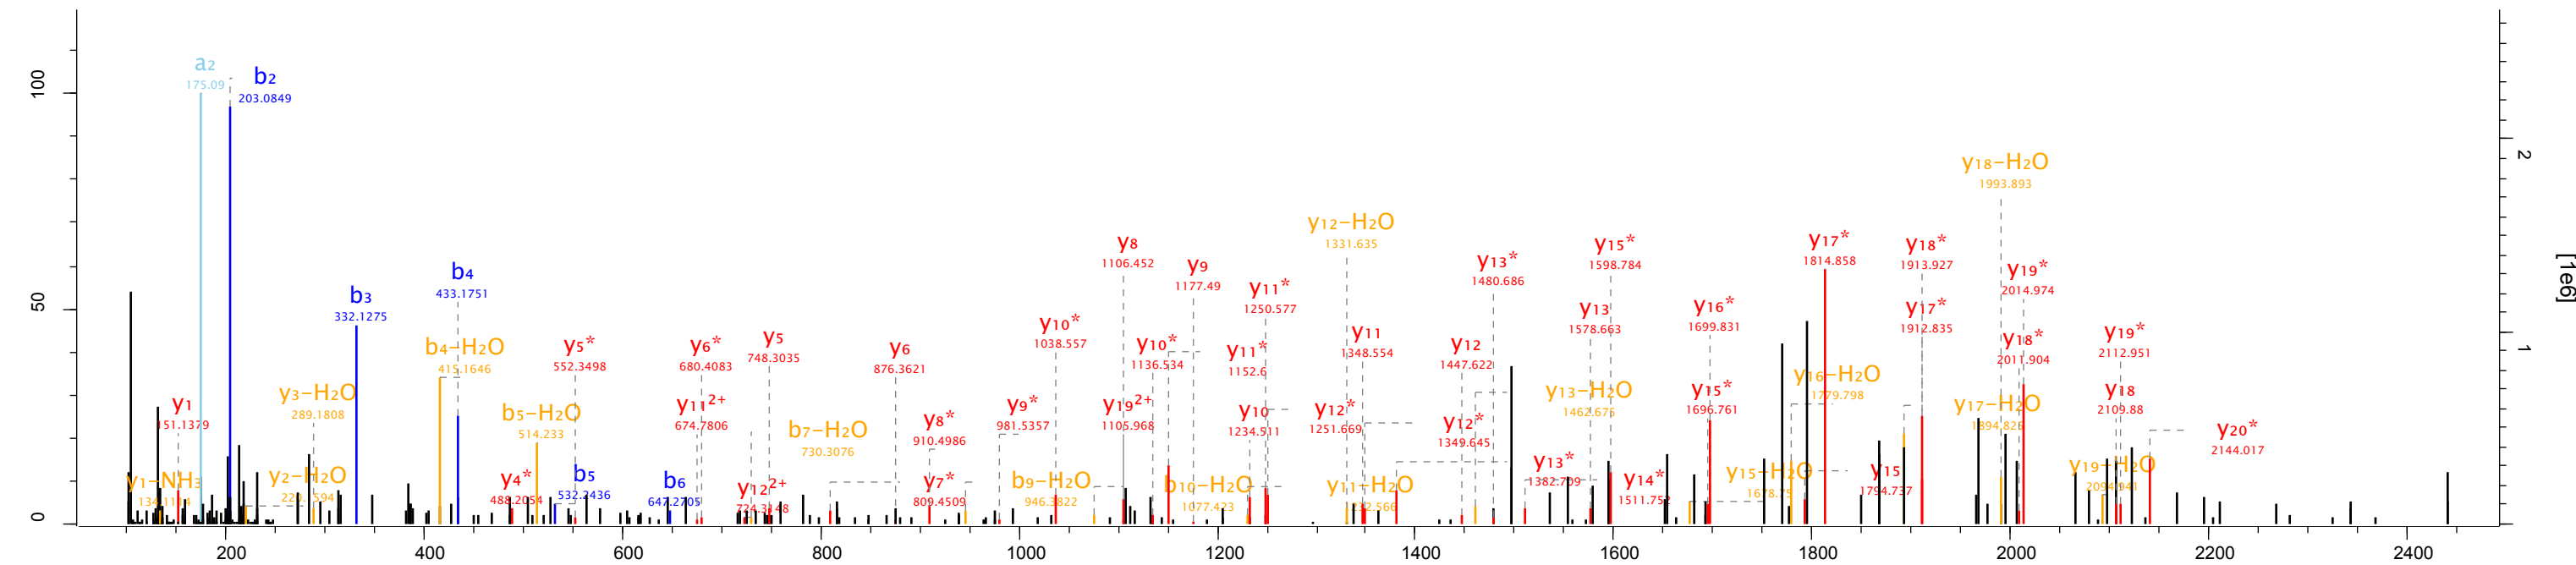

- M A E T V D T S E M V N G A T E Q R T ph S S K -

b<sub>2</sub>
b<sub>3</sub>
b<sub>4</sub>
b<sub>5</sub>
b<sub>6</sub>
y<sub>20</sub>\*
y<sub>19</sub>\*
y<sub>18</sub>
y<sub>17</sub>\*
y<sub>16</sub>\*
y<sub>15</sub>
y<sub>14</sub>\*
y<sub>13</sub>
y<sub>12</sub>
y<sub>11</sub>
y<sub>10</sub>
y<sub>9</sub>
y<sub>8</sub>
y<sub>7</sub>\*
y<sub>6</sub>
y<sub>5</sub>
y<sub>4</sub>\*
ph
S
S
K

Raw file: 20150812\_A375SR\_Phospho\_BR1\_03  
 Scan: 15409 Method: FTMS; HCD Score: 122.89 m/z: 1027.43 Gene names: MARCKS

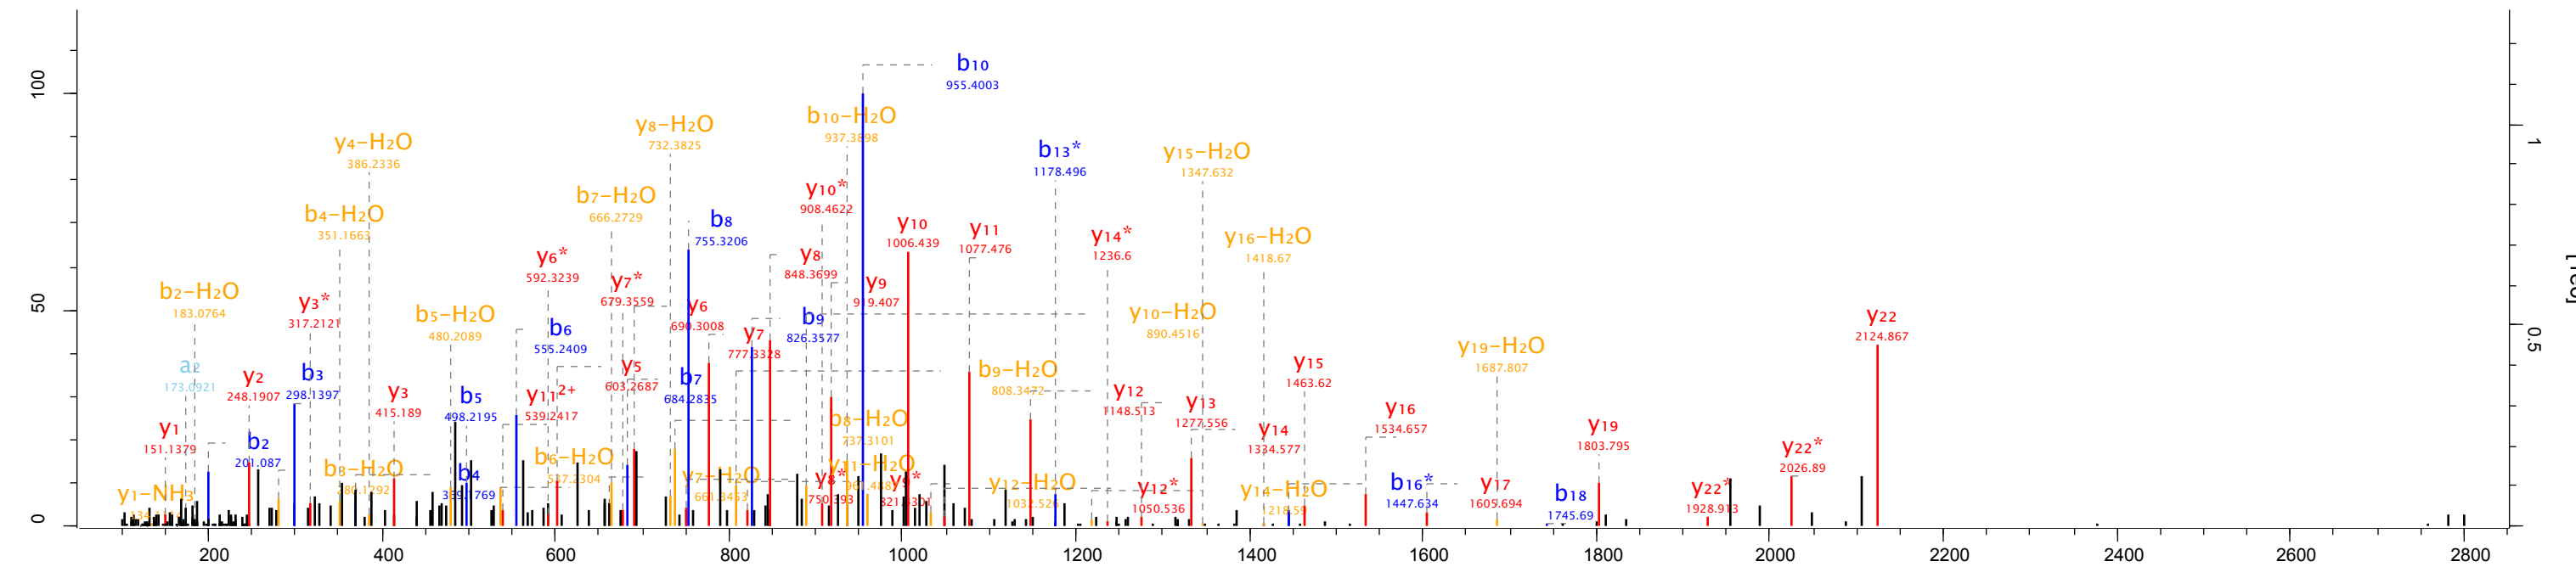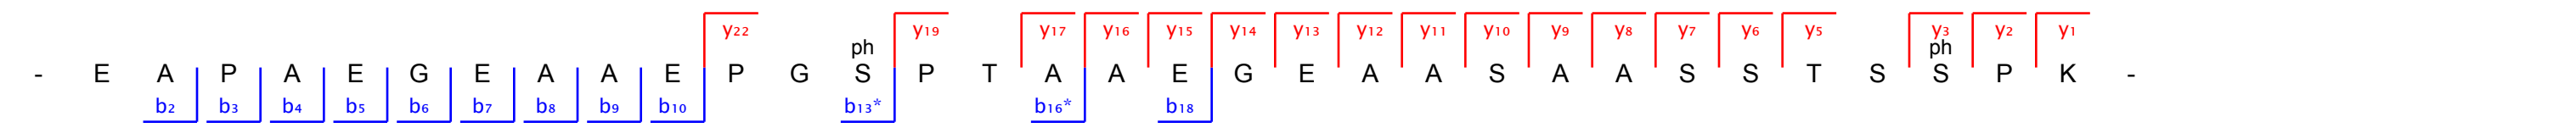

Raw file  
20150812\_A375SR\_Phospho\_BR1\_03

Scan 15509 Method FTMS; HCD Score 142.72 m/z 1014.1 Gene names INCENP

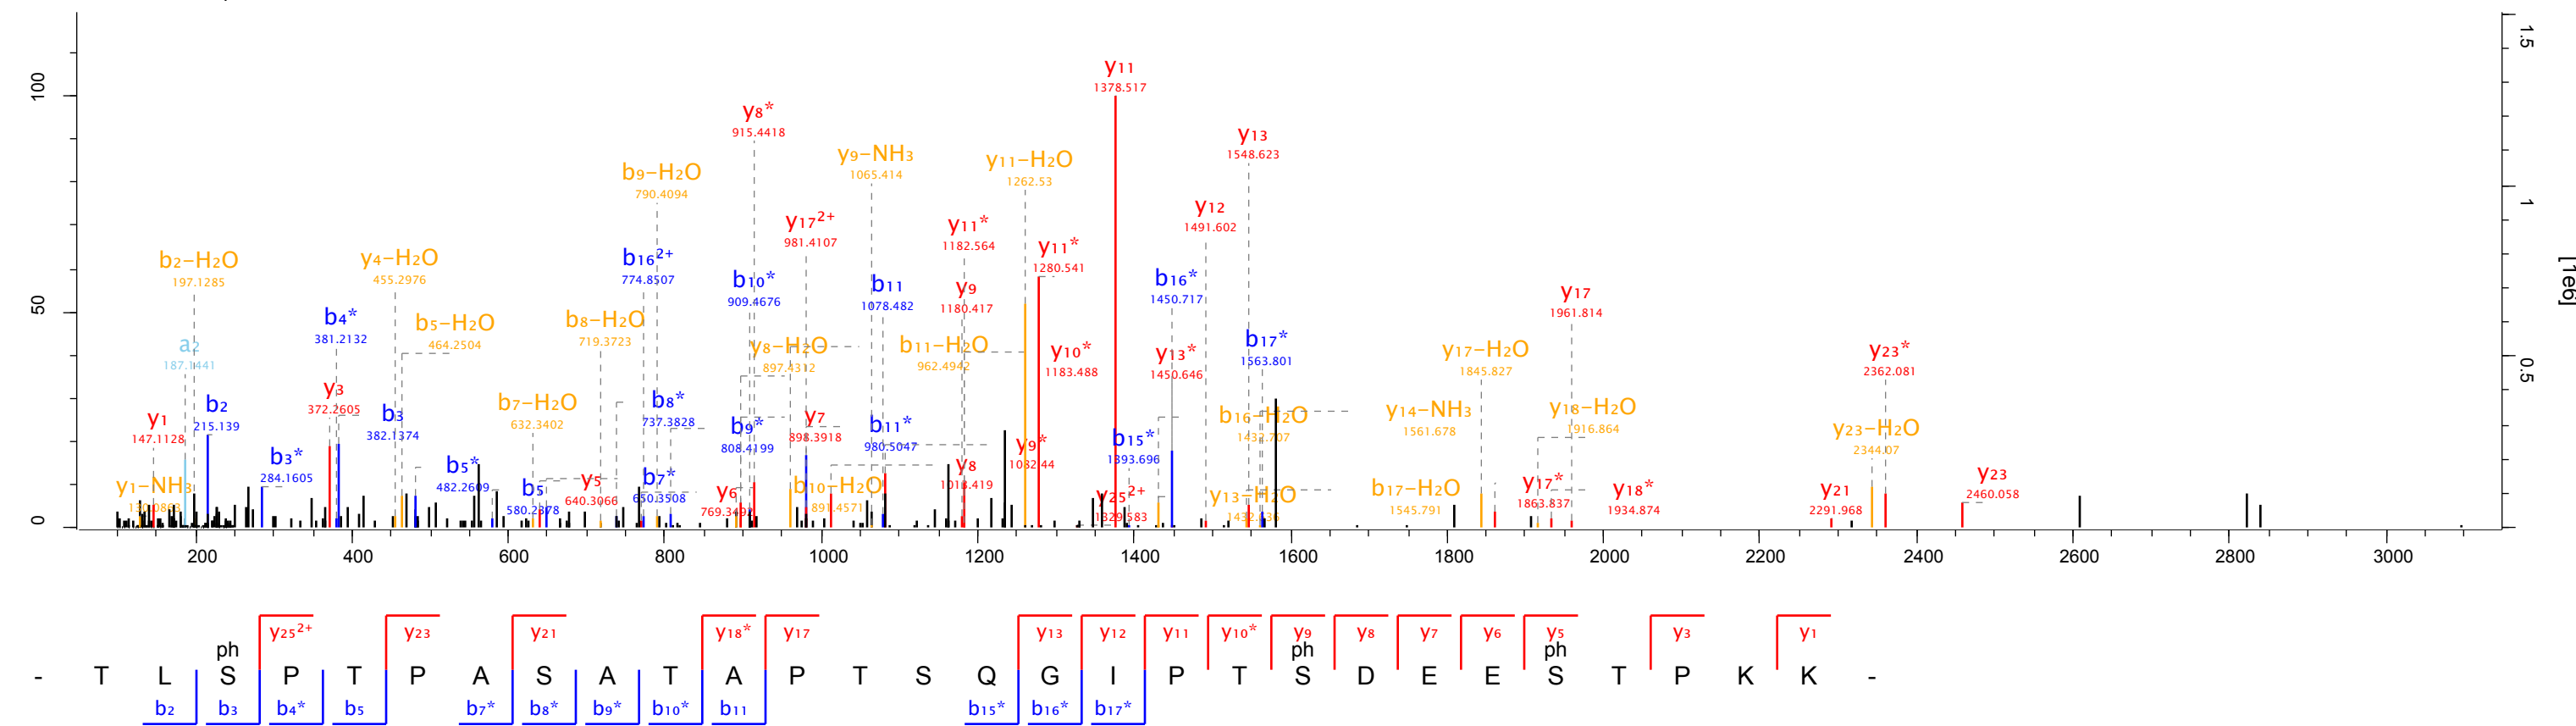

Raw file Scan Method Score m/z Gene names  
 20150812\_A375SR\_Phospho\_BR1\_03 15829 FTMS; HCD 93.38 866.07 MPRIP

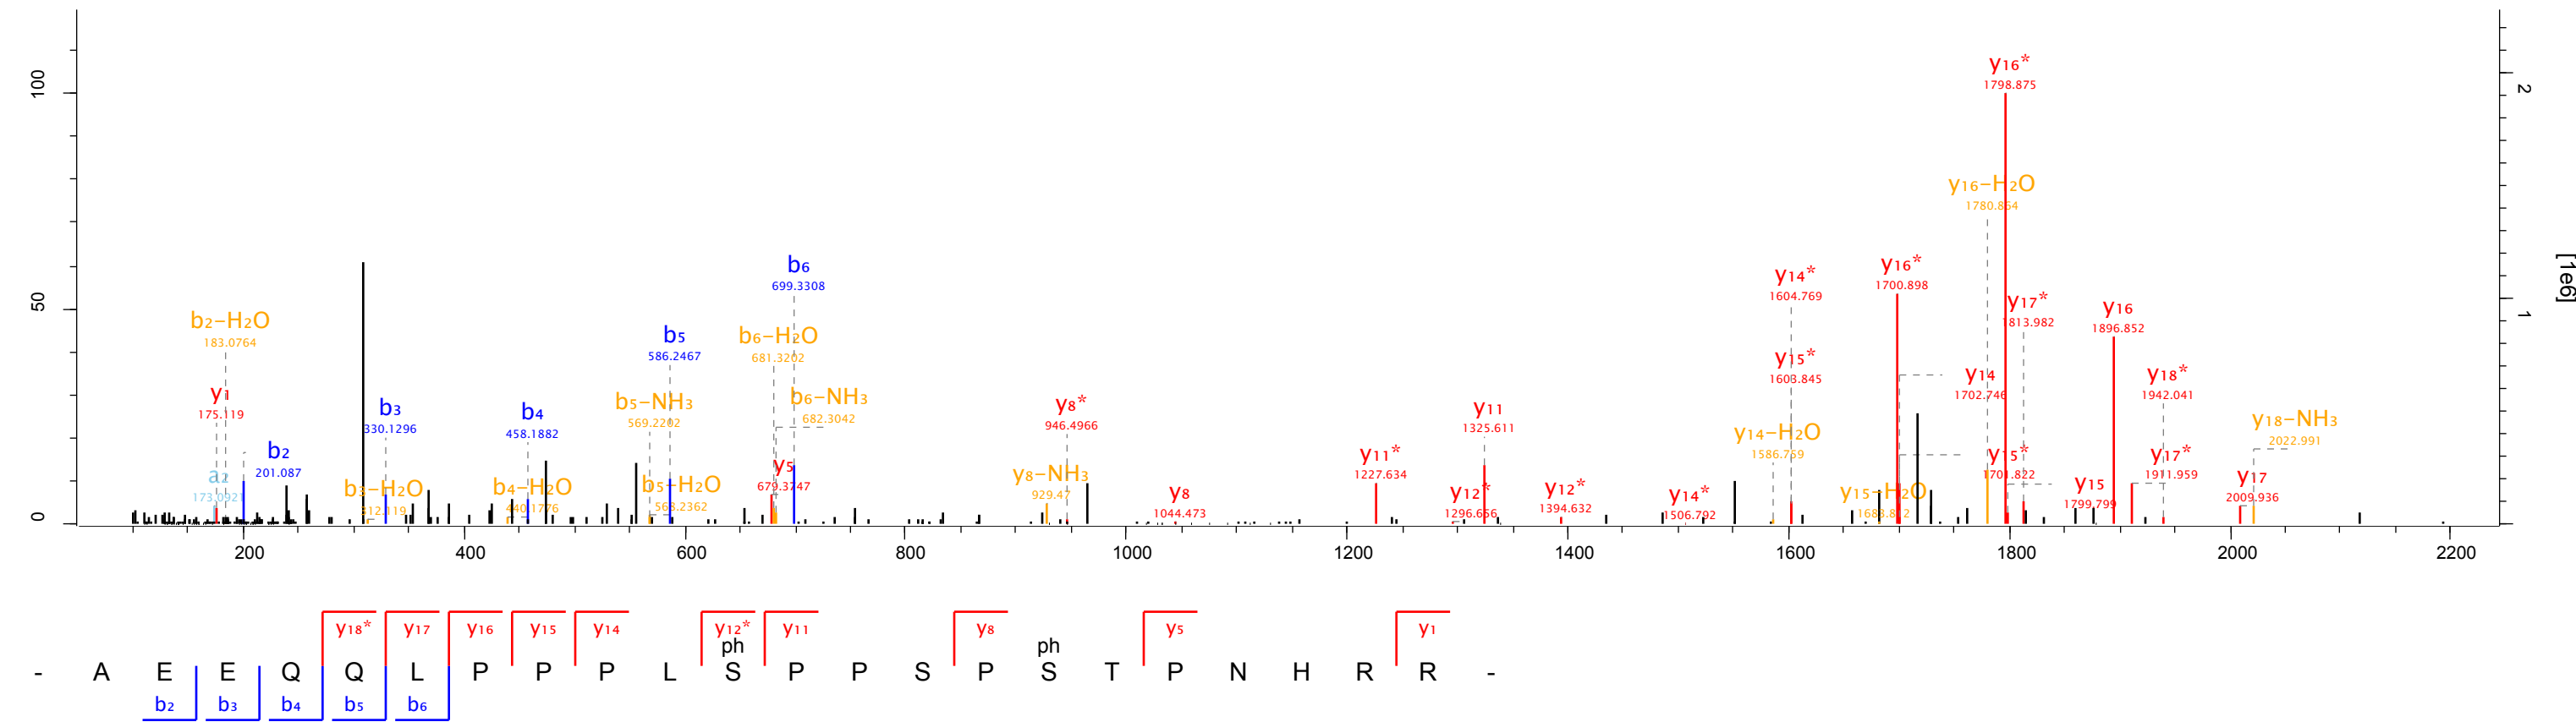





Raw file: 20150812\_A375SR\_Phospho\_BR1\_03  
 Scan: 16539 Method: FTMS; HCD Score: 160.21 m/z: 741.31 Gene names: MED1

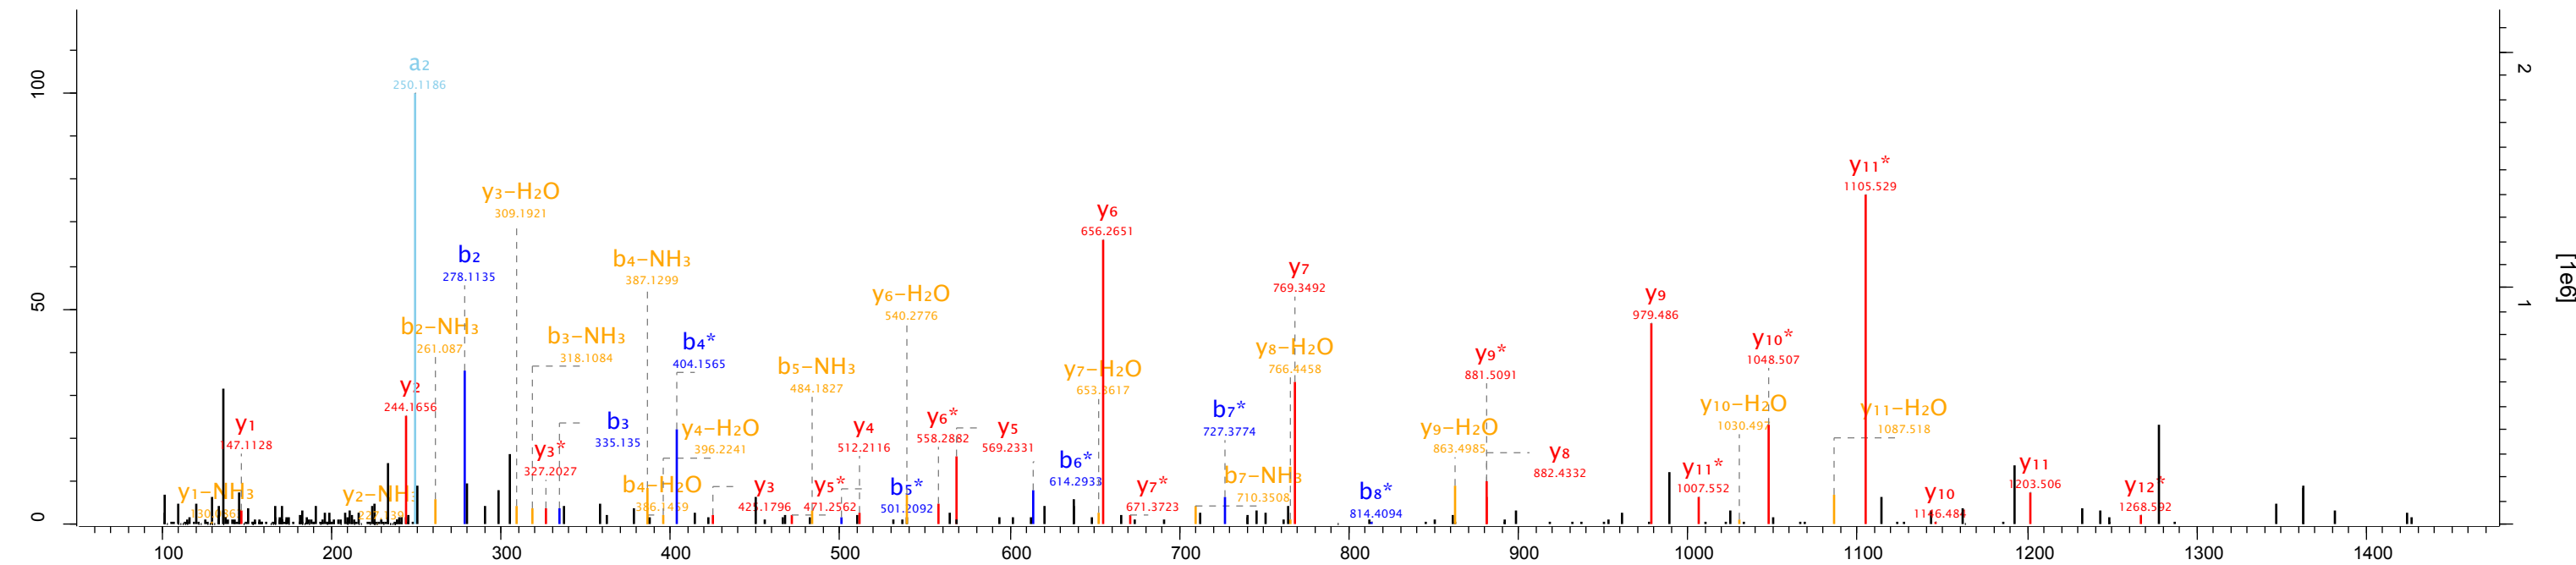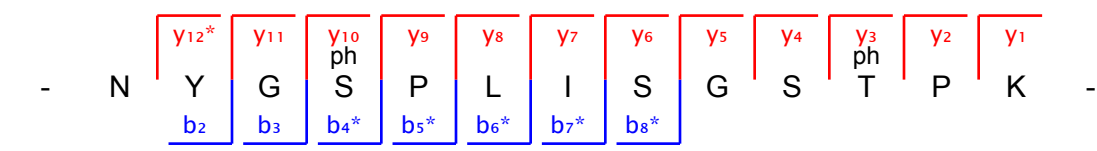

Raw file: 20150812\_A375SR\_Phospho\_BR1\_03  
 Scan: 16649 Method: FTMS; HCD Score: 213.66 m/z: 1175.51 Gene names: KLHDC4

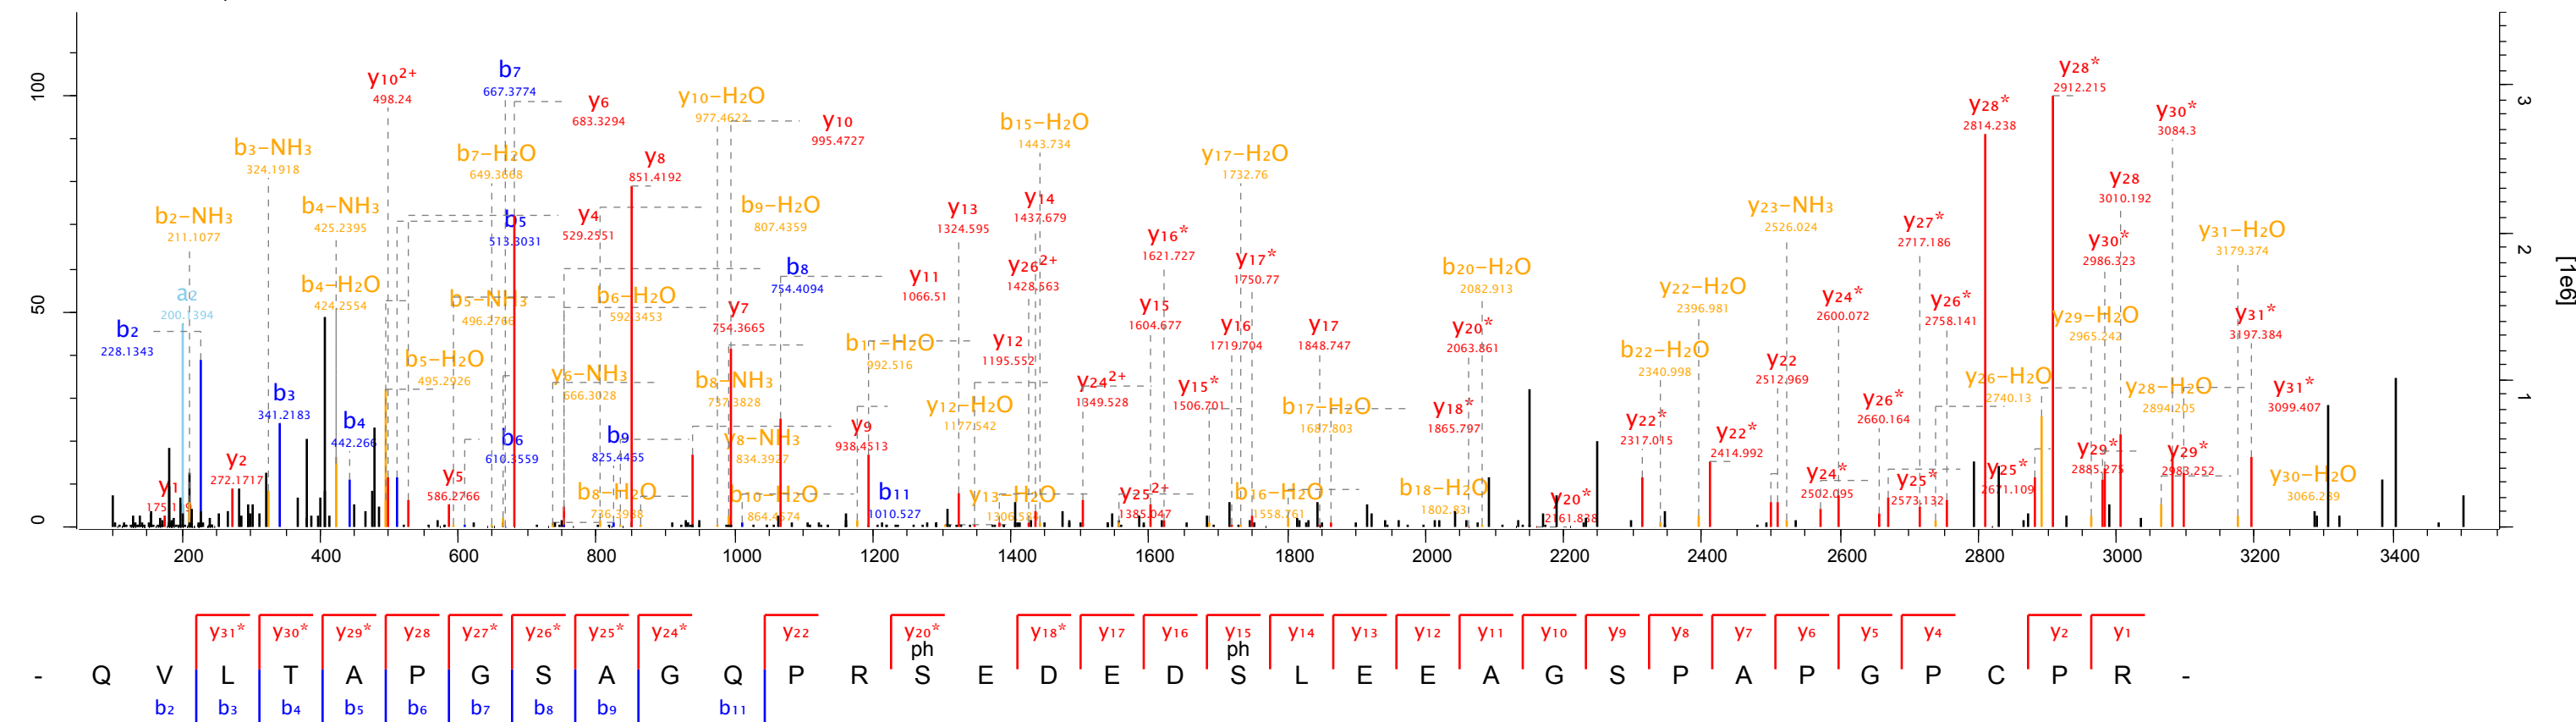

Raw file: 20150812\_A375SR\_Phospho\_BR1\_03  
 Scan: 16679 Method: FTMS; HCD Score: 95.5 m/z: 827.31 Gene names: RNF219

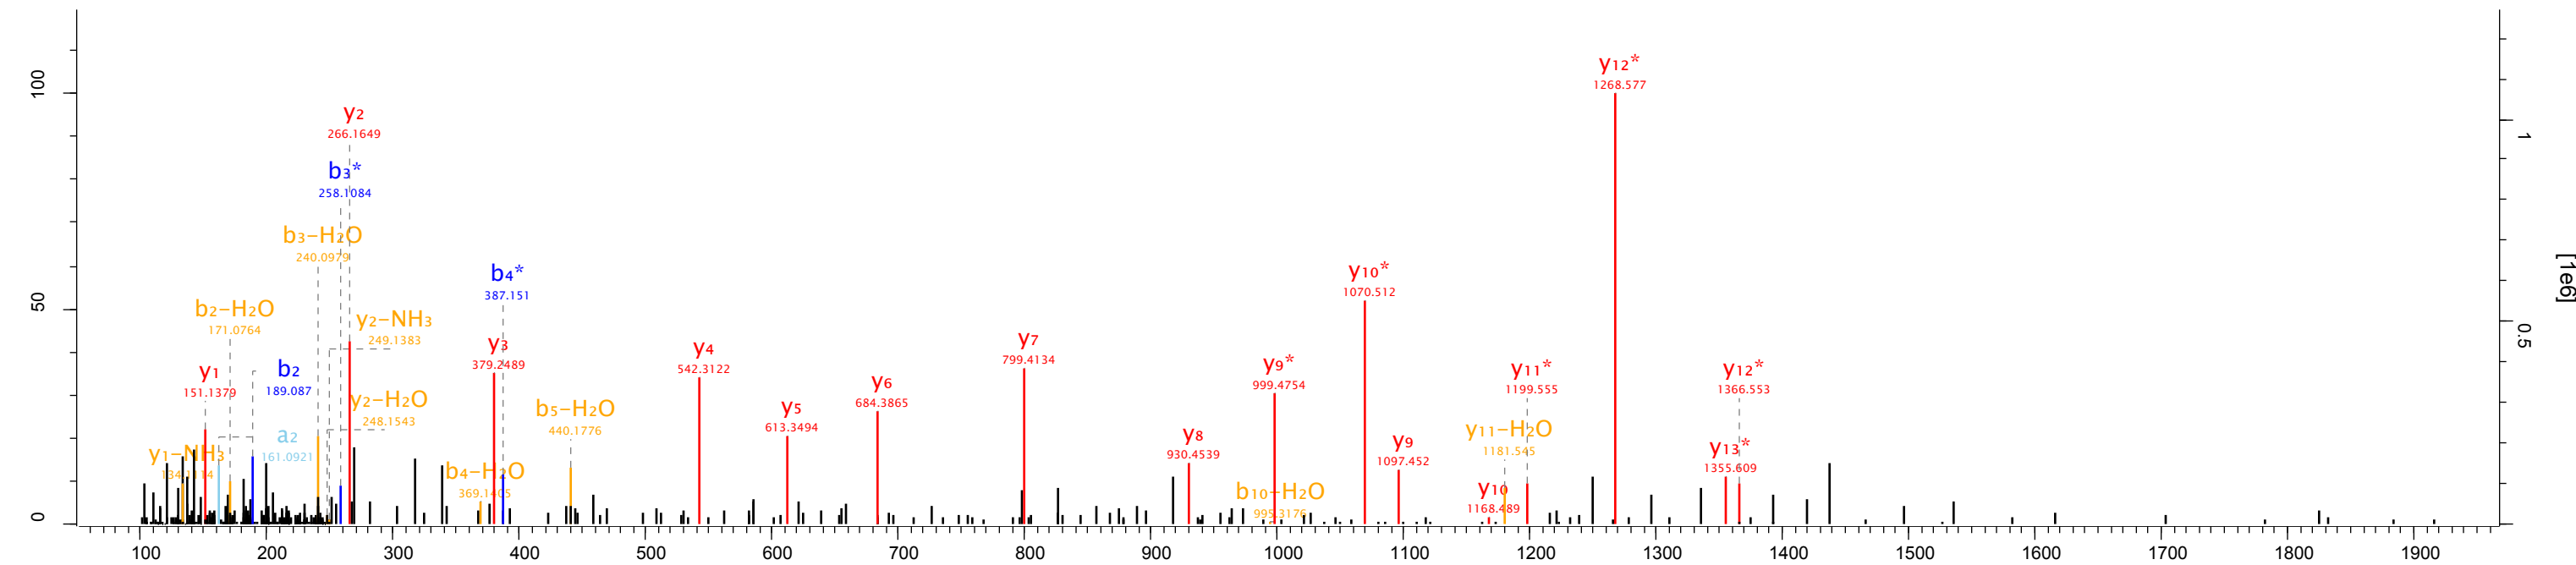

- T S S E A S M D A A Y L D K -

Fragmentation sites (b and y ions) are indicated by brackets below the sequence:

- b2 (under S)
- b3\* (under S)
- b4\* (under E)
- y13\* (over S)
- y12\* (over S)
- y11\* (over E)
- y10 (over A)
- y9 (over S)
- y8 (over M)
- y7 (over D)
- y6 (over A)
- y5 (over A)
- y4 (over Y)
- y3 (over L)
- y2 (over D)
- y1 (over K)

Raw file 20150812\_A375SR\_Phospho\_BR1\_03 Scan 16969 Method FTMS; HCD Score 92.82 m/z 965.16 Gene names SERBP1

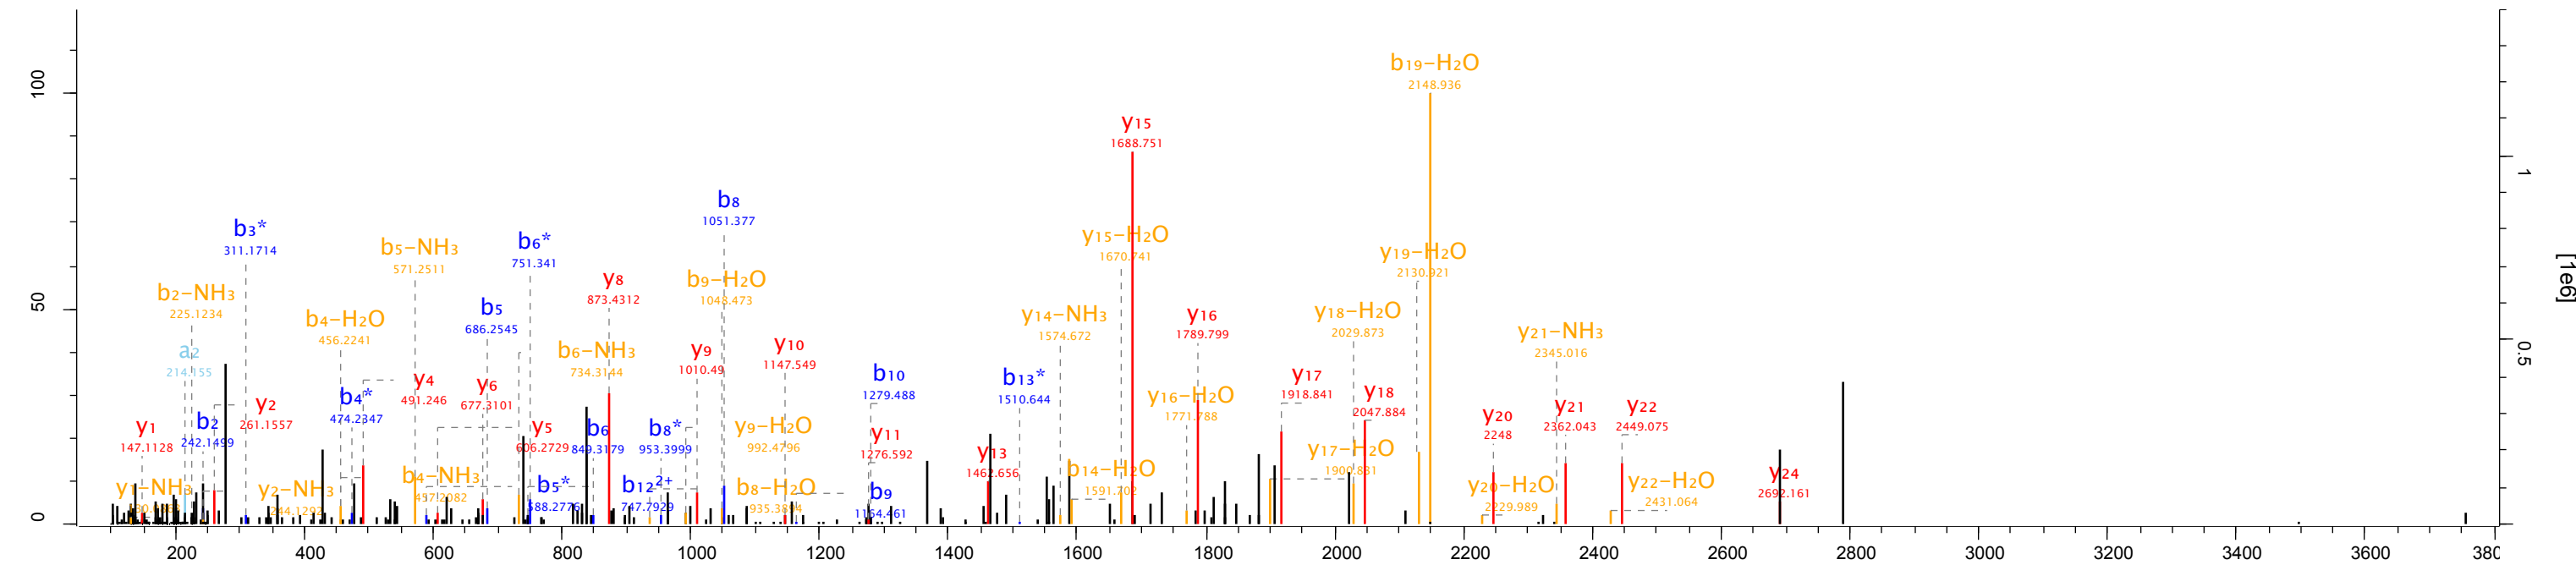

- Q I S Y N Y S D L D Q S N V T E E T P E G E E H H P V A D T E N K -

Fragmentation mapping (b and y ions) is shown below the sequence:

- Blue boxes: b2 (I), b3\* (S), b4\* (Y), b5 (N), b6 (Y), b8 (D), b9 (L), b10 (D), b12<sup>2+</sup> (S), b13\* (N)
- Red boxes: y1 (K), y2 (N), y4 (T), y5 (D), y6 (A), y8 (P), y9 (H), y10 (H), y11 (E), y13 (G), y15 (P), y16 (T), y17 (E), y18 (E), y20 (V), y21 (N), y22 (S), y24 (D)

Raw file 20150812\_A375SR\_Phospho\_BR1\_03 Scan 17229 Method FTMS; HCD Score 180.68 m/z 988.41 Gene names AKT1

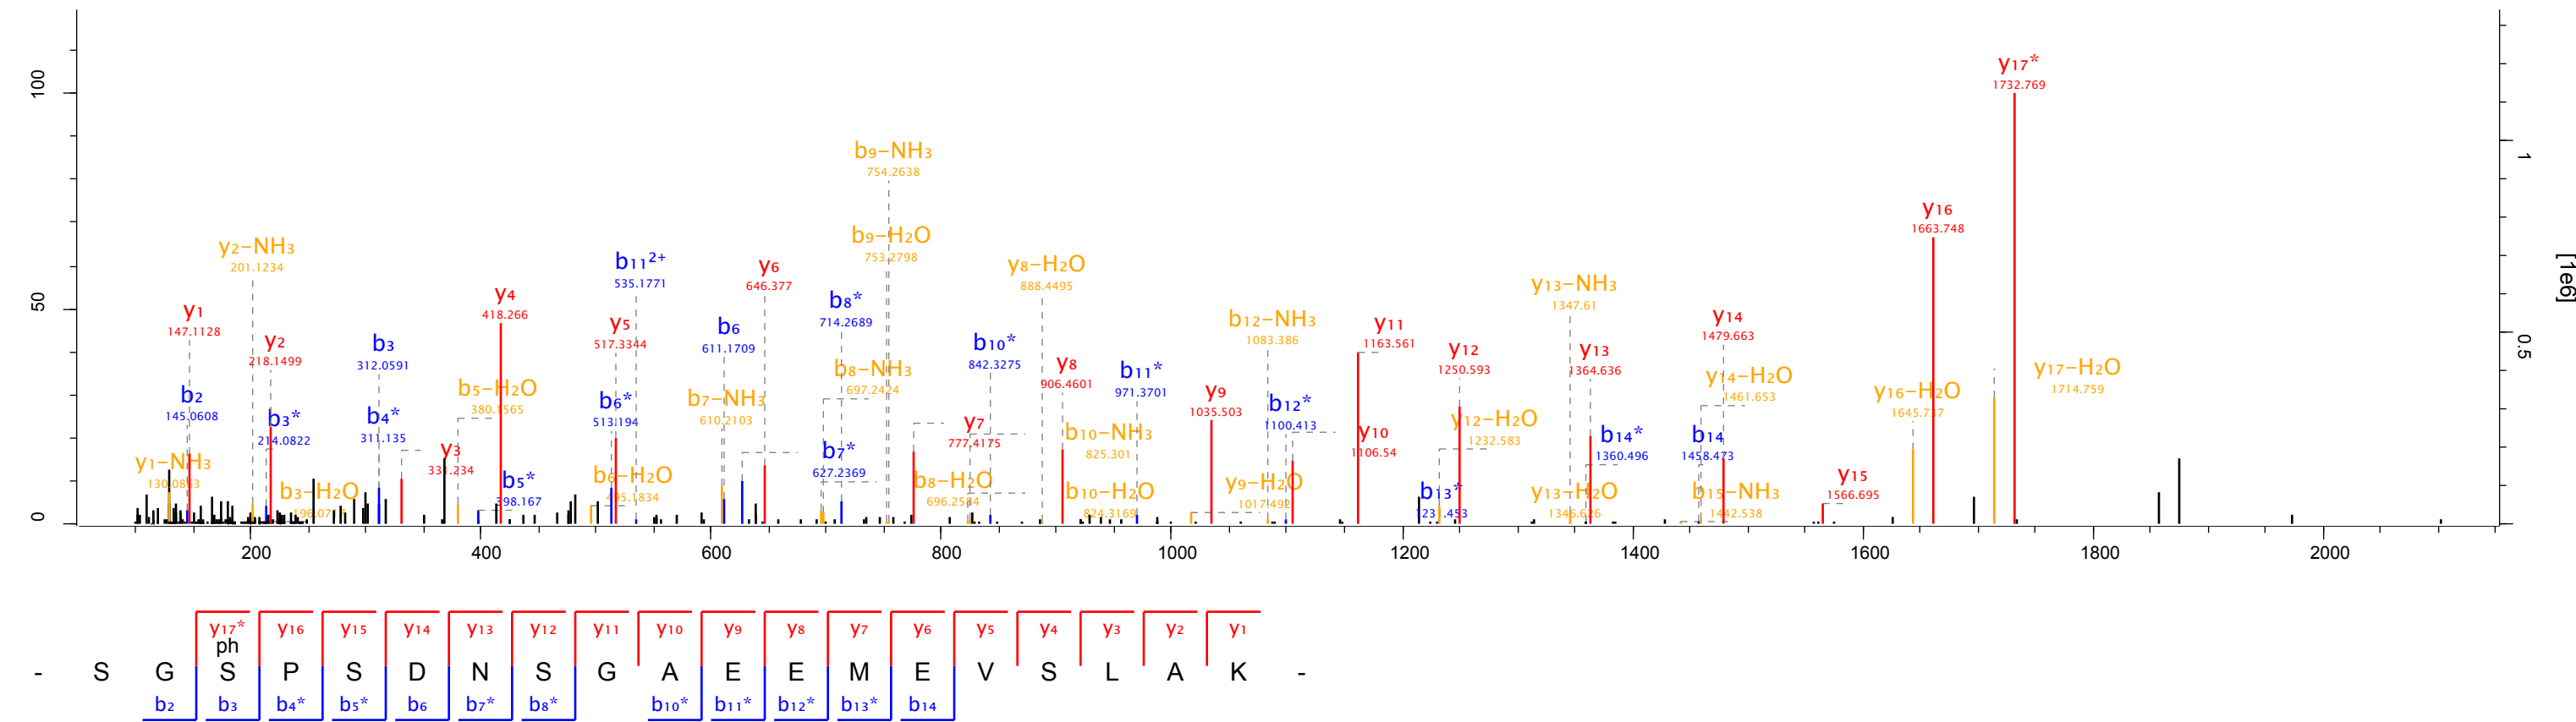

Raw file: 20150812\_A375SR\_Phospho\_BR1\_03  
 Scan: 17279 Method: FTMS; HCD Score: 243.06 m/z: 1333.25 Gene names: RNF20

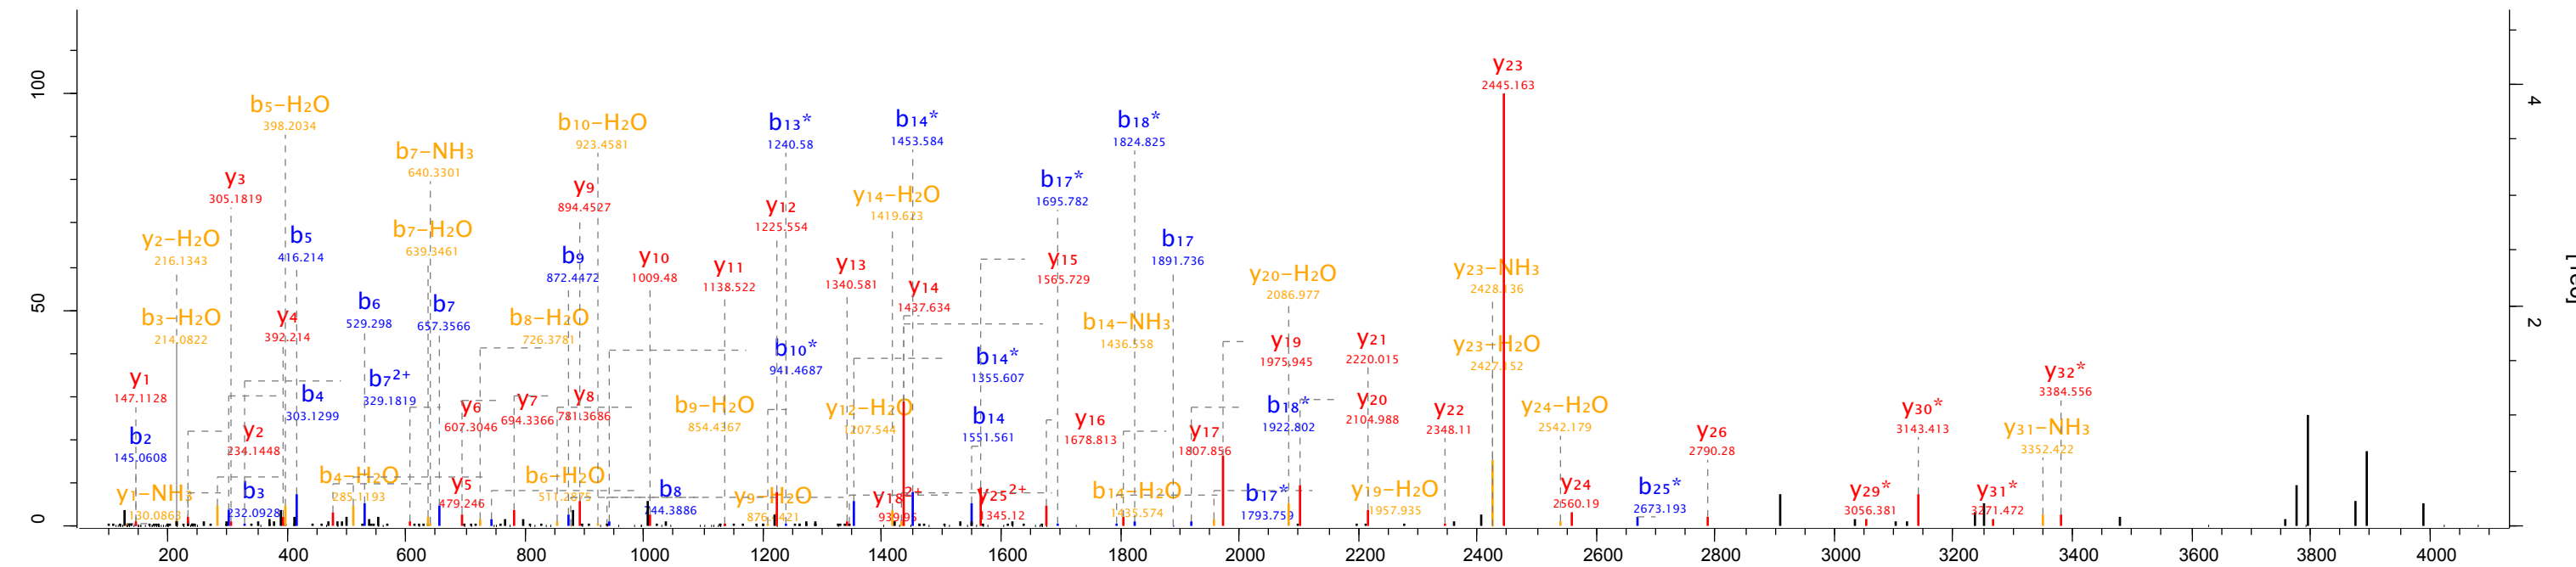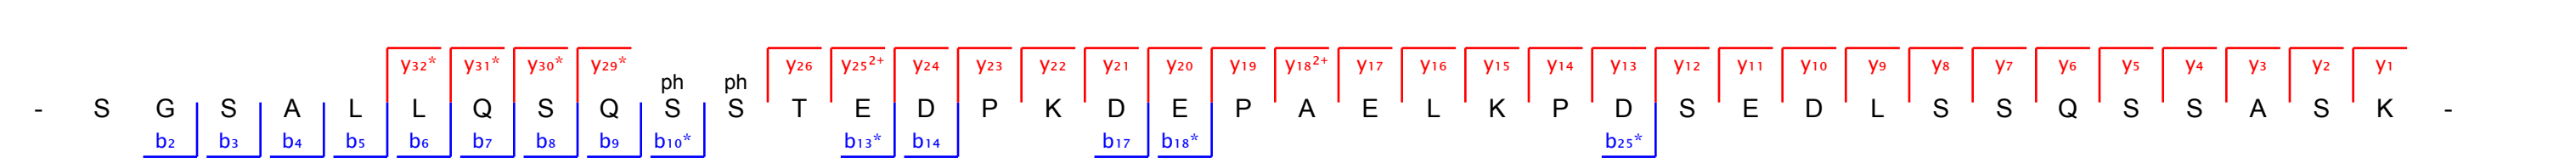

Raw file: 20150812\_A375SR\_Phospho\_BR1\_03  
 Scan: 17309 Method: FTMS; HCD Score: 169.46 m/z: 1137.49 Gene names: DHX34

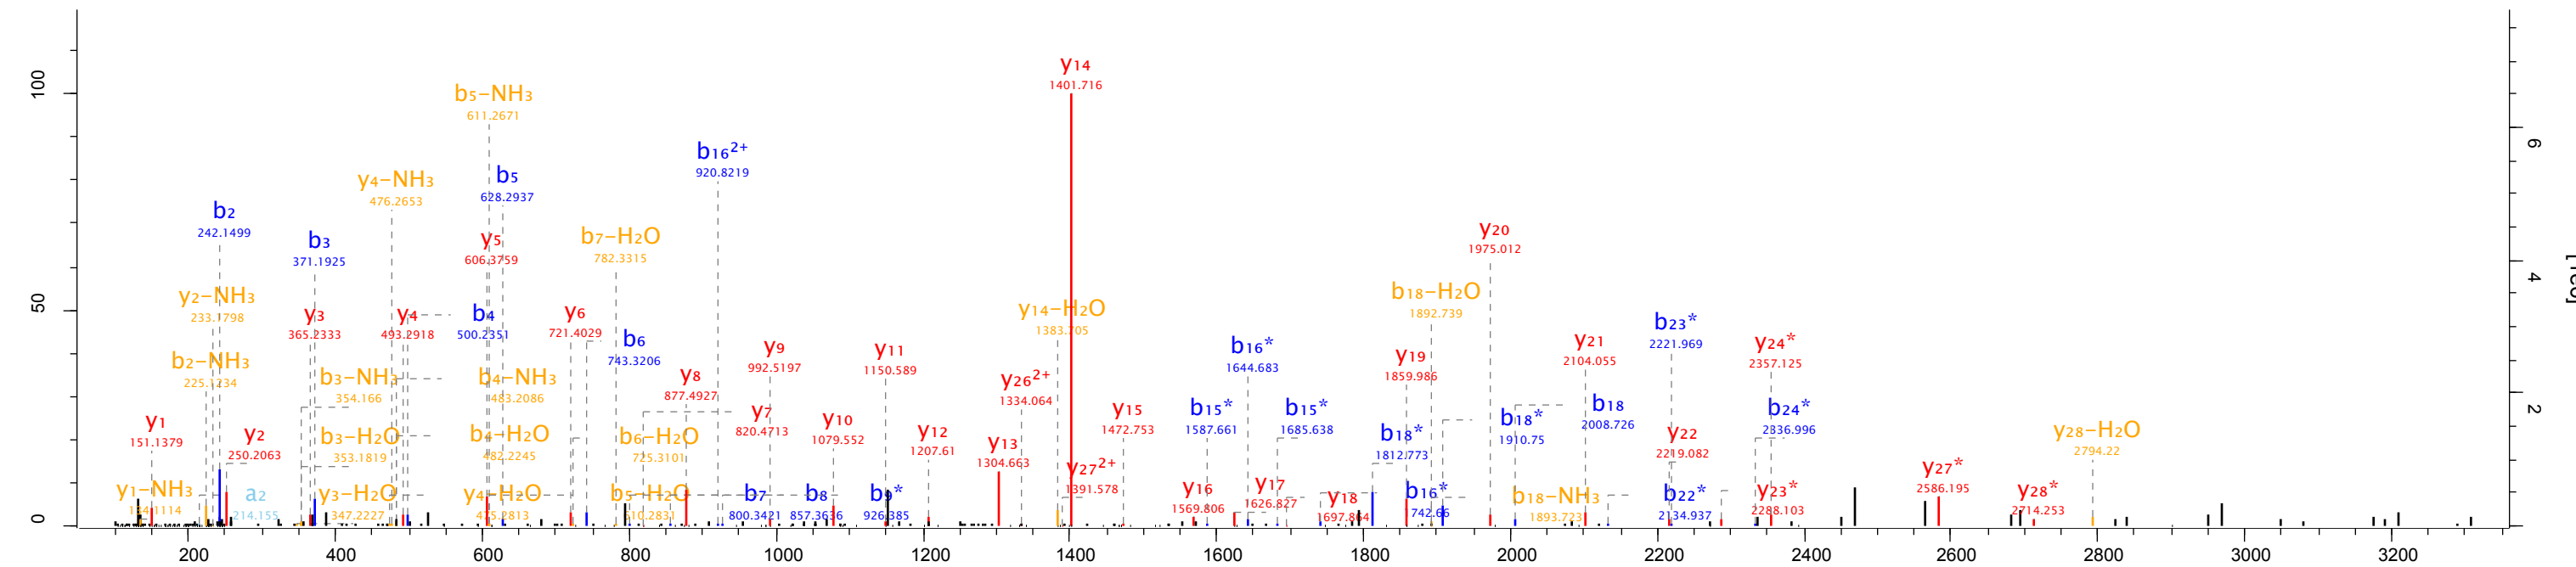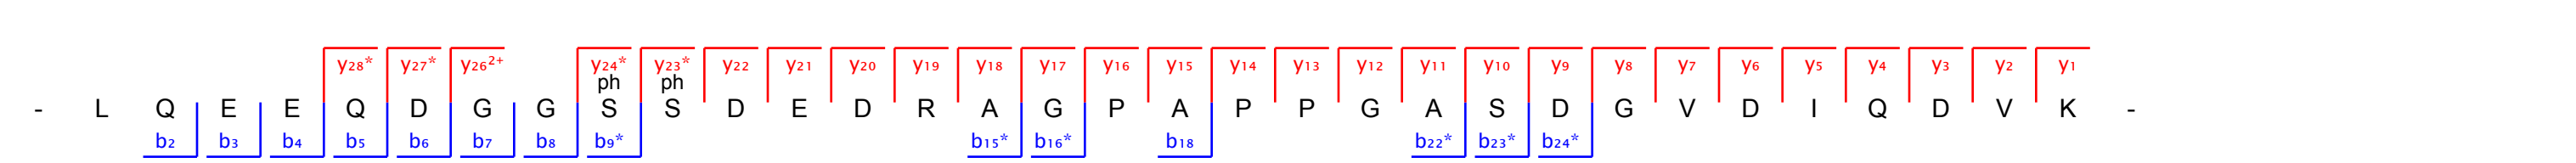



Raw file 20150812\_A375SR\_Phospho\_BR1\_03 Scan 17369 Method FTMS; HCD Score 160.67 m/z 681.32 Gene names TANC2

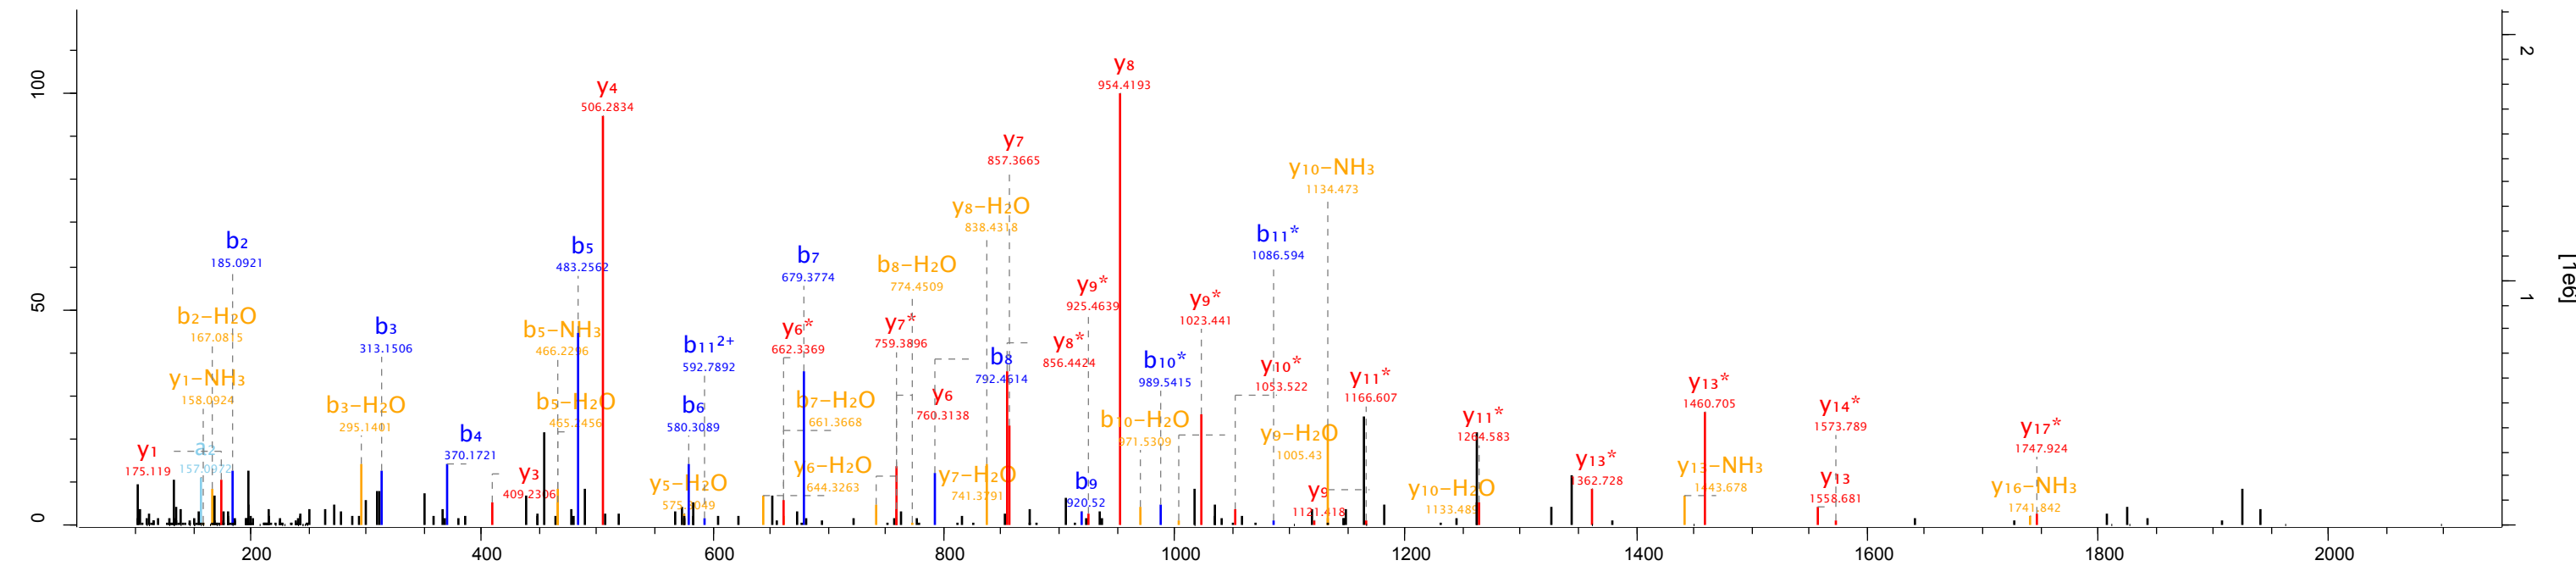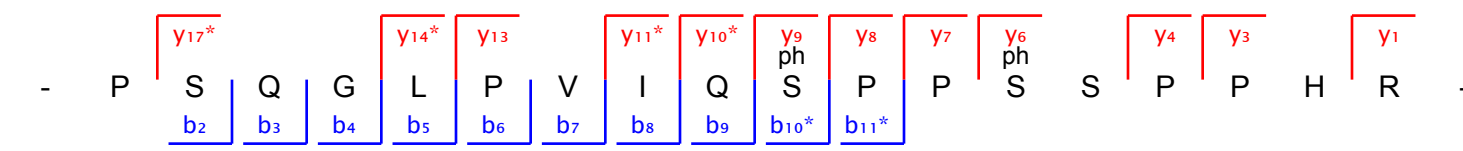

Raw file 20150812\_A375SR\_Phospho\_BR1\_03 Scan 17459 Method FTMS; HCD Score 145.85 m/z 871.72 Gene names DENND4C

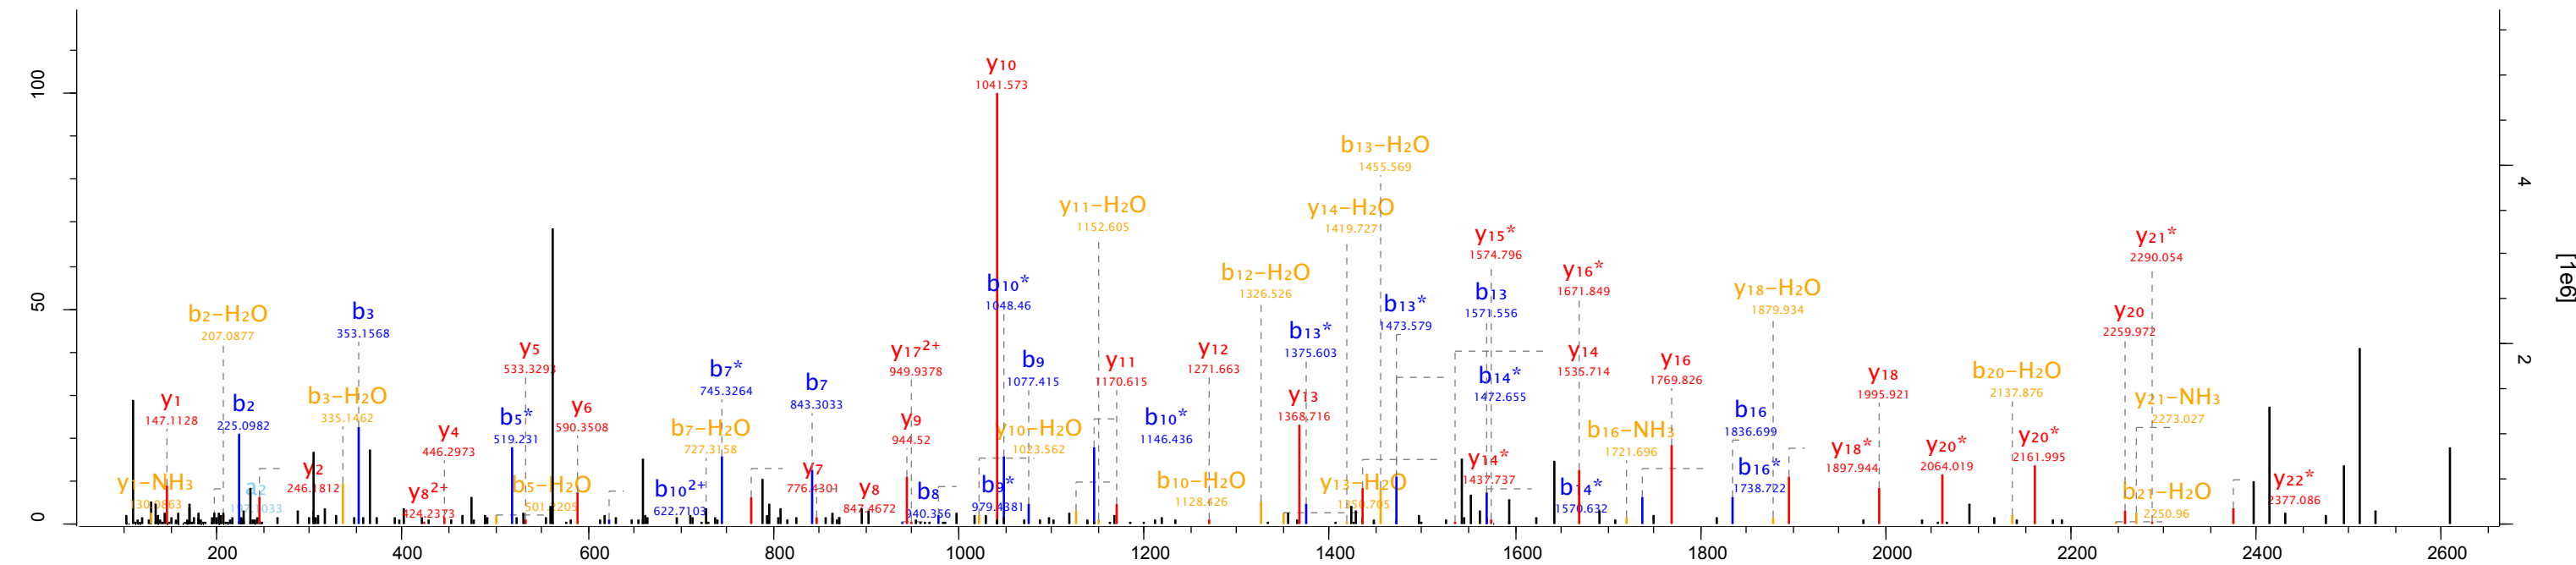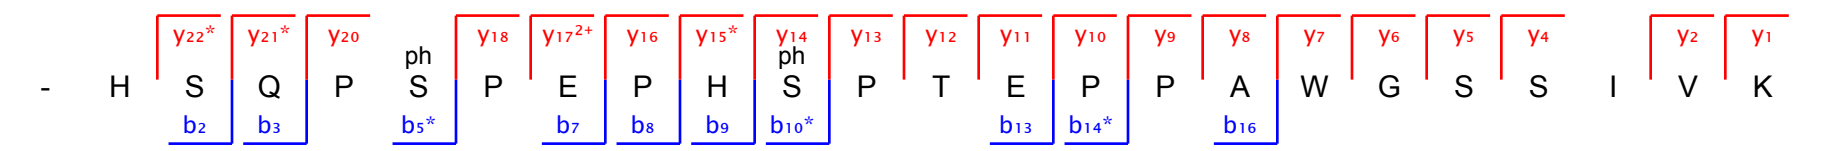

Raw file 20150812\_A375SR\_Phospho\_BR1\_03 Scan 17609 Method FTMS; HCD Score 144.89 m/z 1223.97 Gene names AKAP8

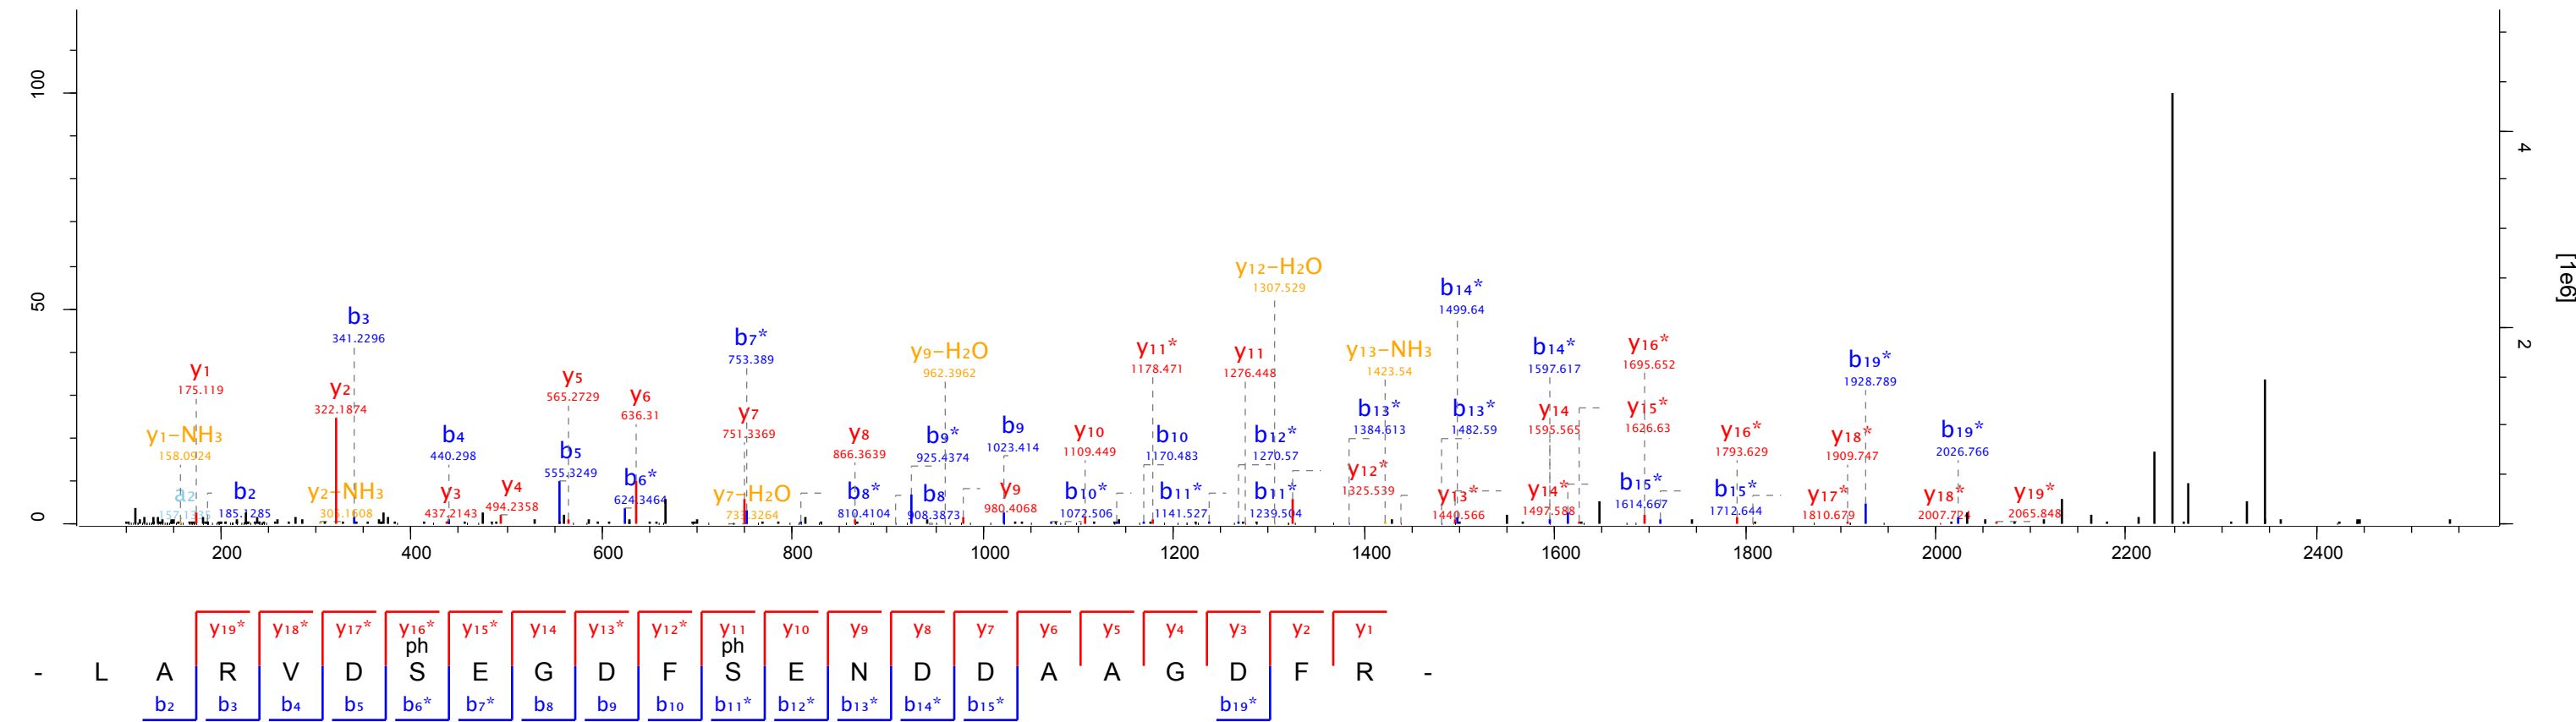

Raw file 20150812\_A375SR\_Phospho\_BR1\_03 Scan 17949 Method FTMS; HCD Score 232.37 m/z 1086.97 Gene names CDC5L

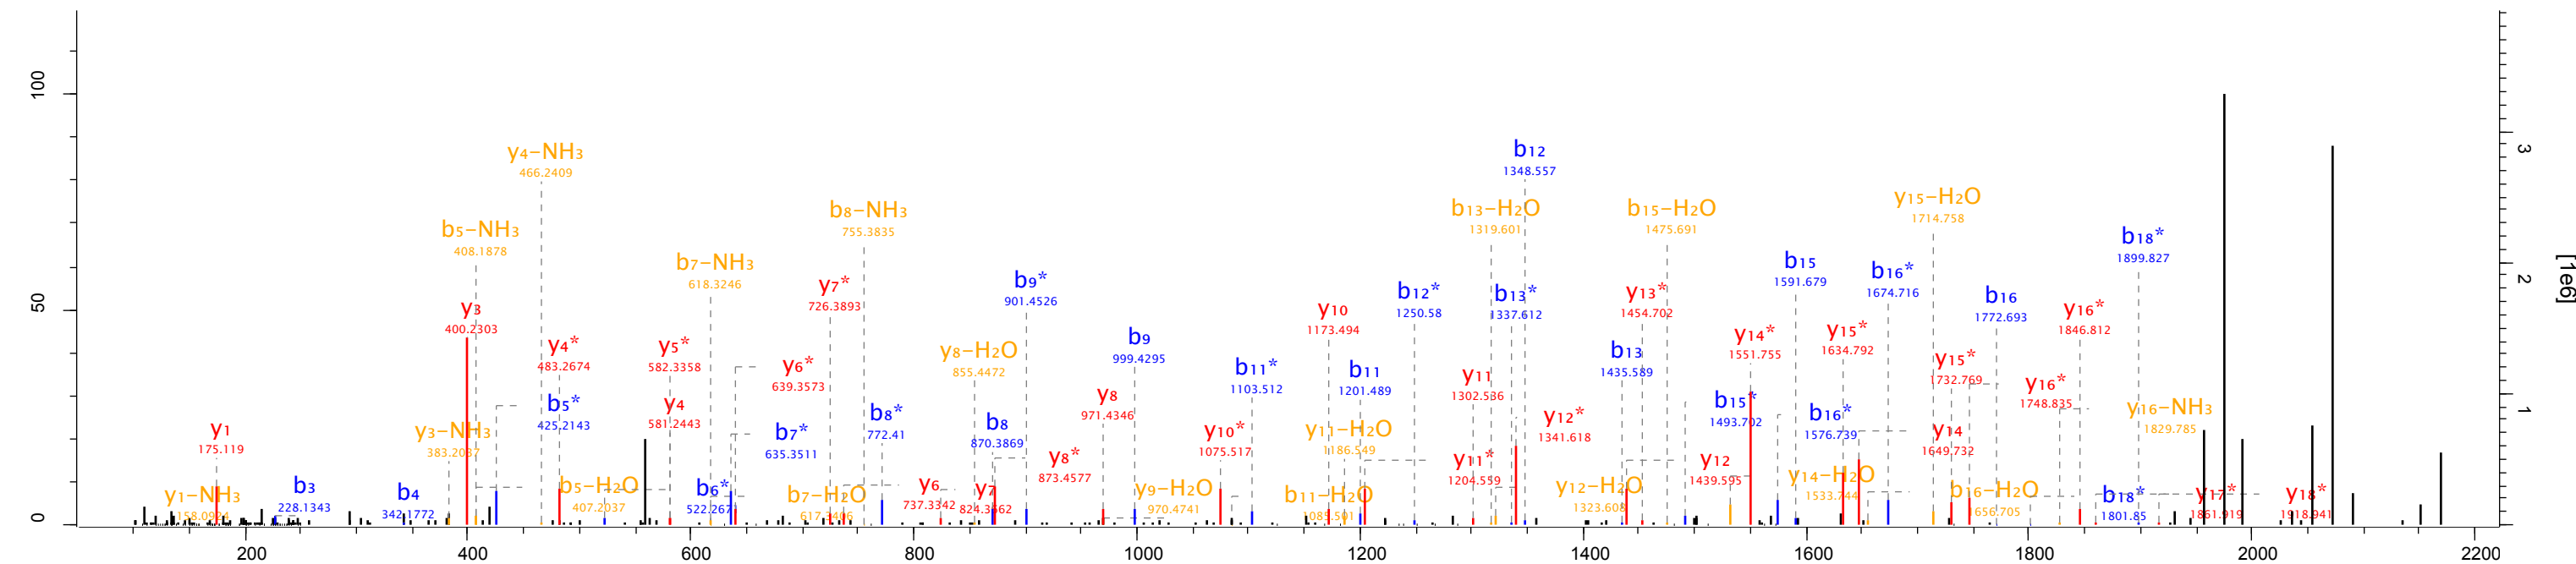

- G G L N P L H E S D F S G V P Q R -

Fragmentation mapping (b and y ions):

- Red boxes (y ions): y18\* (G), y17\* (L), y16\* (N), y15\* (ph T), y14 (P), y13\* (L), y12 (H), y11 (E), y10 (S), y8 (F), y7 (S), y6 (G), y5\* (V), y4 (ph T), y3 (P), y1 (R)
- Blue boxes (b ions): b3 (G), b4 (N), b5\* (ph T), b6\* (P), b7\* (L), b8 (H), b9 (E), b11 (S), b12 (F), b13 (S), b15 (V), b16 (ph T), b18\* (Q)

Raw file 20150812\_A375SR\_Phospho\_BR1\_03 Scan 18079 Method FTMS; HCD Score 91.43 m/z 911.45 Gene names CPEB2

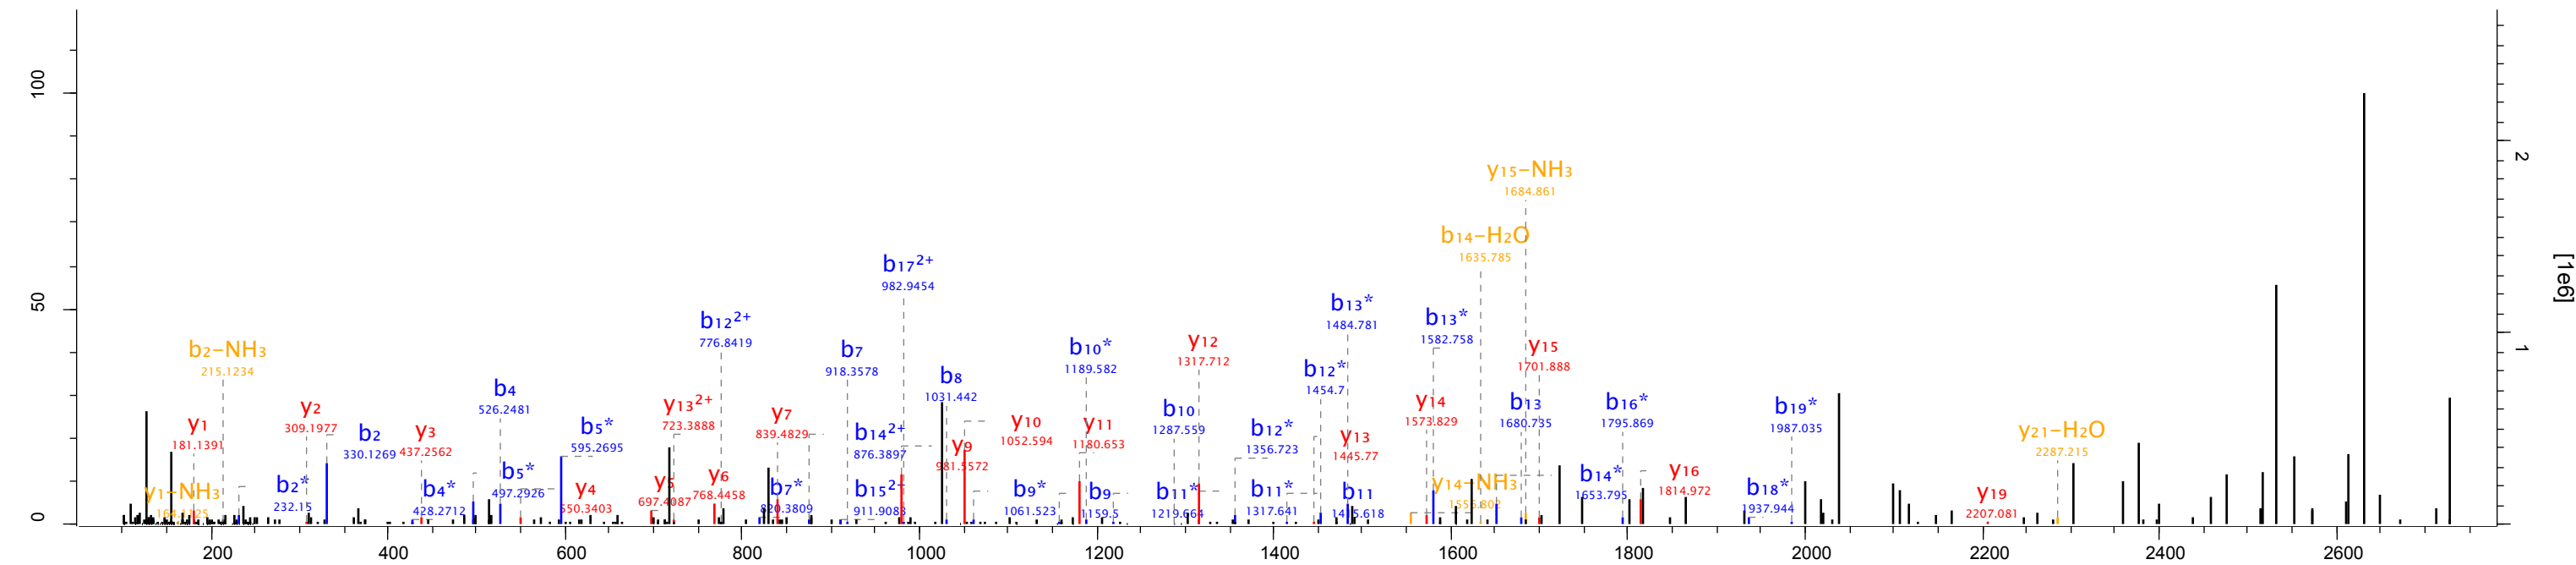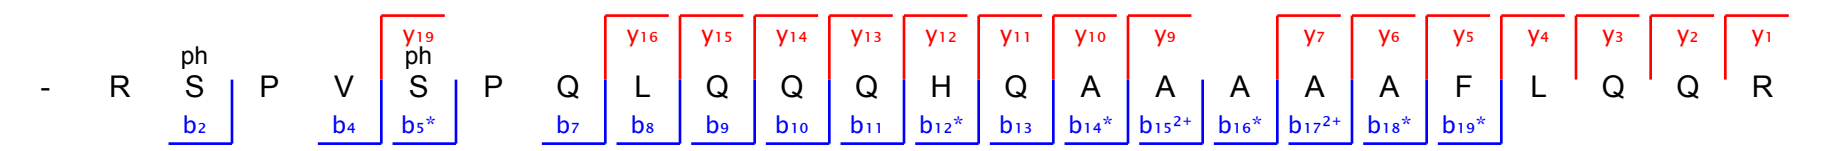

Raw file 20150812\_A375SR\_Phospho\_BR1\_03 Scan 18189 Method FTMS; HCD Score 197.28 m/z 717.04 Gene names SPTBN1

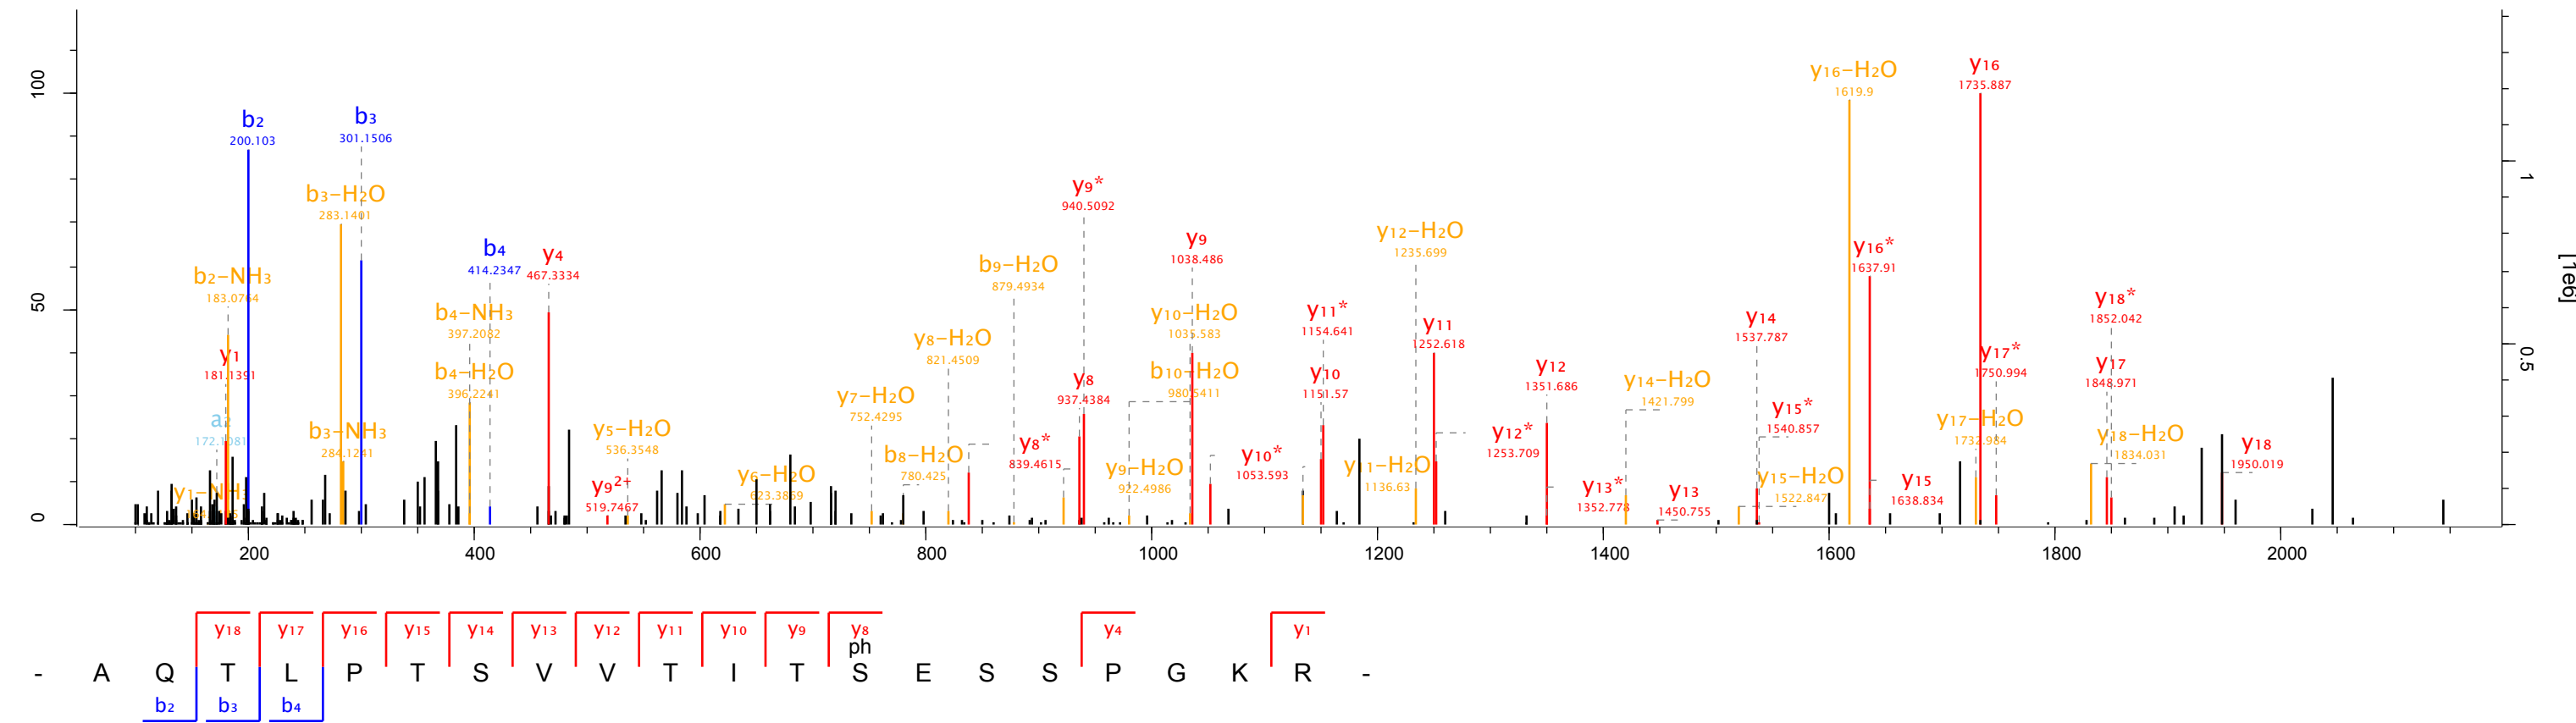

Raw file 20150812\_A375SR\_Phospho\_BR1\_03 Scan 18679 Method FTMS; HCD Score 176.48 m/z 1044.47 Gene names MAP1B

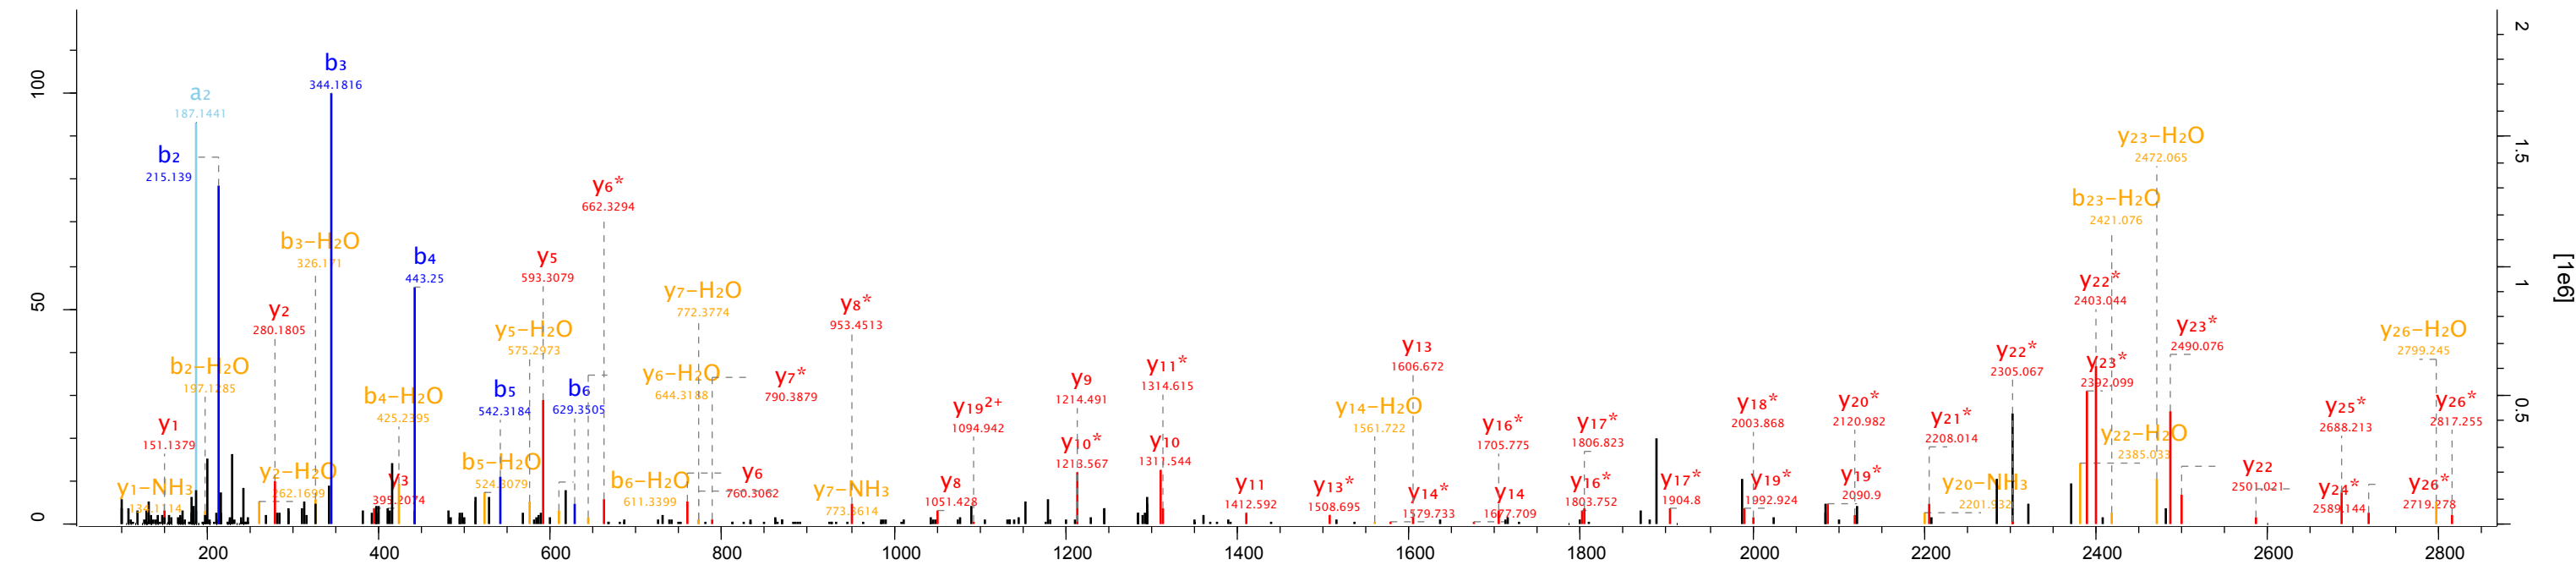

- T L E V V S P S Q S V T G S A G H T P Y Y Q S P T D E K -

b<sub>2</sub>
b<sub>3</sub>
b<sub>4</sub>
b<sub>5</sub>
b<sub>6</sub>
y<sub>26</sub>\*
y<sub>25</sub>\*
y<sub>24</sub>\*
y<sub>23</sub>\*
y<sub>22</sub>
y<sub>21</sub>\*
y<sub>20</sub>\*
y<sub>19</sub>\*
y<sub>18</sub>\*
y<sub>17</sub>\*
y<sub>16</sub>\*
y<sub>14</sub>
y<sub>13</sub>
y<sub>11</sub>
y<sub>10</sub>
y<sub>9</sub>
y<sub>8</sub>
y<sub>7</sub>\*
y<sub>6</sub>
y<sub>5</sub>
y<sub>3</sub>
y<sub>2</sub>
y<sub>1</sub>

Raw file 20150812\_A375SR\_Phospho\_BR1\_03 Scan 18719 Method FTMS; HCD Score 182.19 m/z 1081.12 Gene names NCOR2

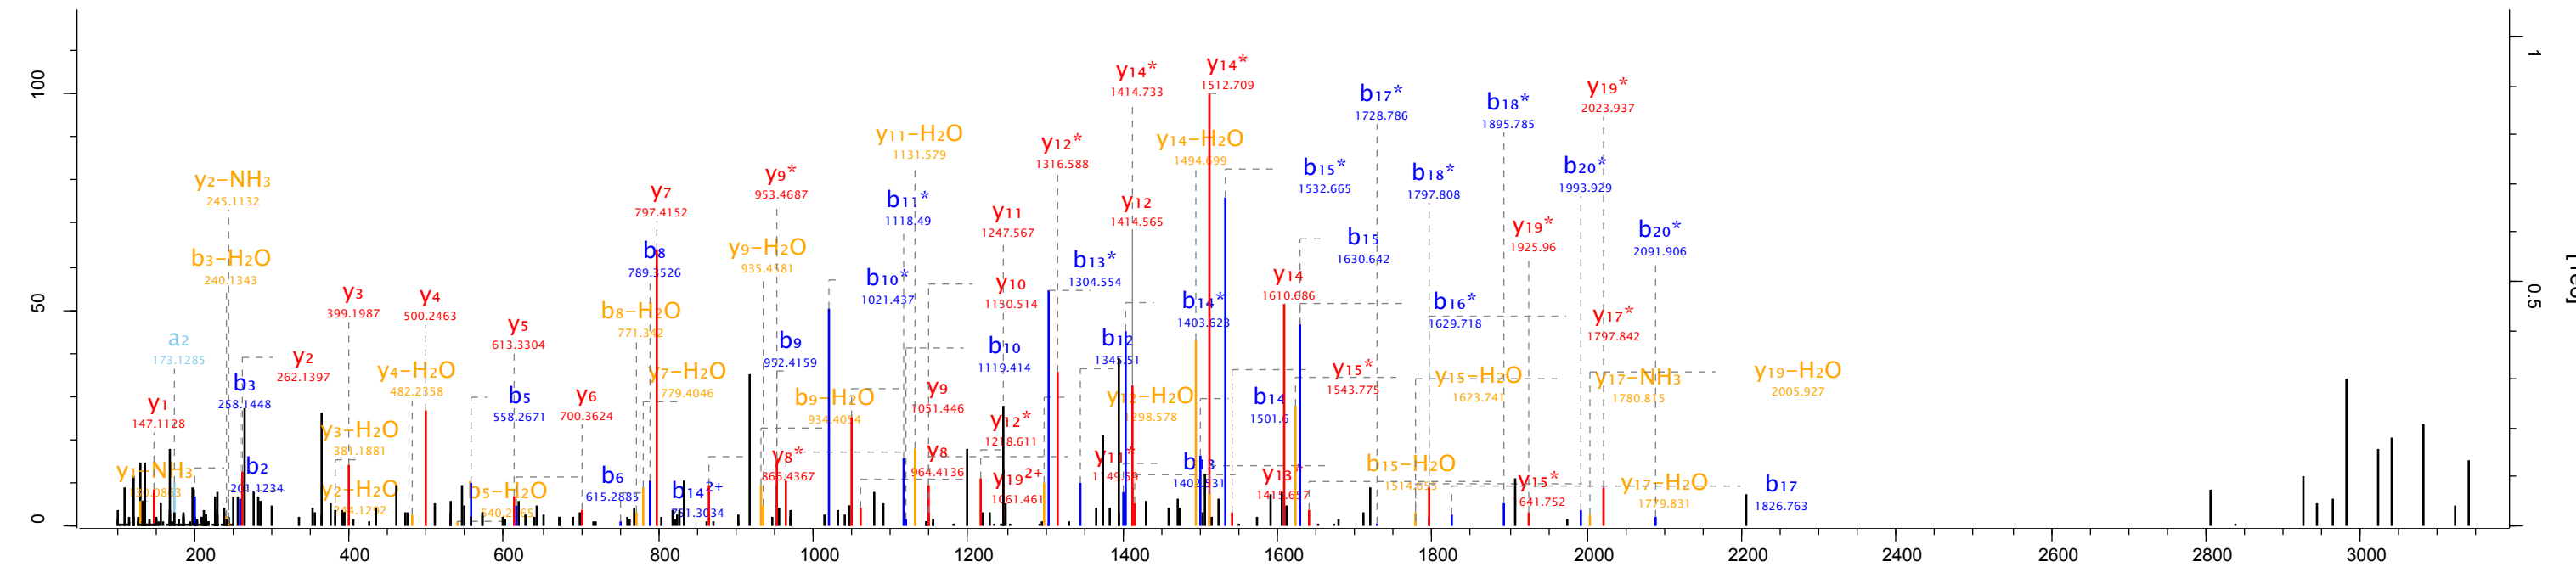

- S L G Y H G S S Y S ph P E G V E P V ph S P V S S ph S P S L T H D K -

Fragmentation mapping (b and y ions) is shown below the sequence:

- b2: L
- b3: LG
- b5: HY
- b6: HYG
- b8: SS
- b9: SSY
- b10: SSYph
- b11\*: SSYP
- b12: SSYPE
- b13: SSYPEG
- b14: SSYPEGV
- b15: SSYPEVE
- b16\*: SSYPEVP
- b17: SSYPEVPph
- b18\*: SSYPEVPphS
- b20\*: SSYPEVP



Raw file: 20150812\_A375SR\_Phospho\_BR1\_03  
 Scan: 18979 Method: FTMS; HCD Score: 154.13 m/z: 956.86 Gene names: LARP6

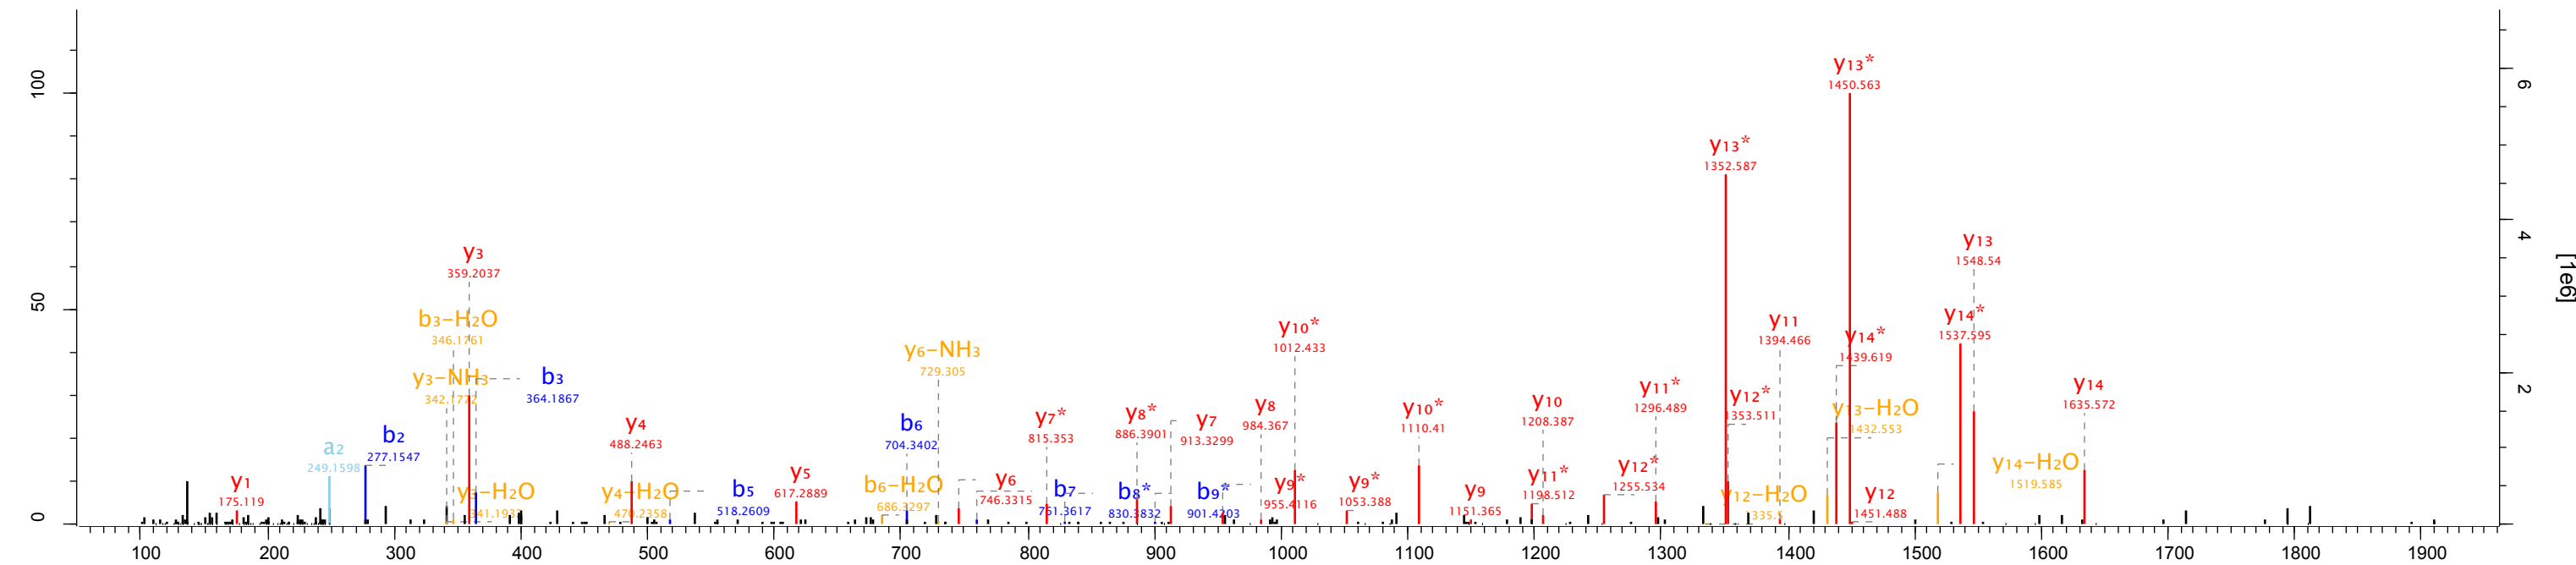

Protein sequence: - Y L S P G W G S A S E E E P S R -

Fragmentation sites (b ions): b2 (L/S), b3 (S/P), b5 (G/W), b6 (W/G), b7 (G/S), b8\* (S/A), b9\* (A/S)

Fragmentation sites (y ions): y1 (R/S), y3 (S/G), y4 (G/W), y5 (W/S), y6 (S/A), y7 (A/S), y8 (S/A), y9 (A/S), y10 (S/A), y11 (A/S), y12 (S/A), y13 (S/A), y14 (A/S)

Raw file 20150812\_A375SR\_Phospho\_BR1\_03 Scan 19499 Method FTMS; HCD Score 133.86 m/z 1197.57 Gene names FOXH1;XRCC1

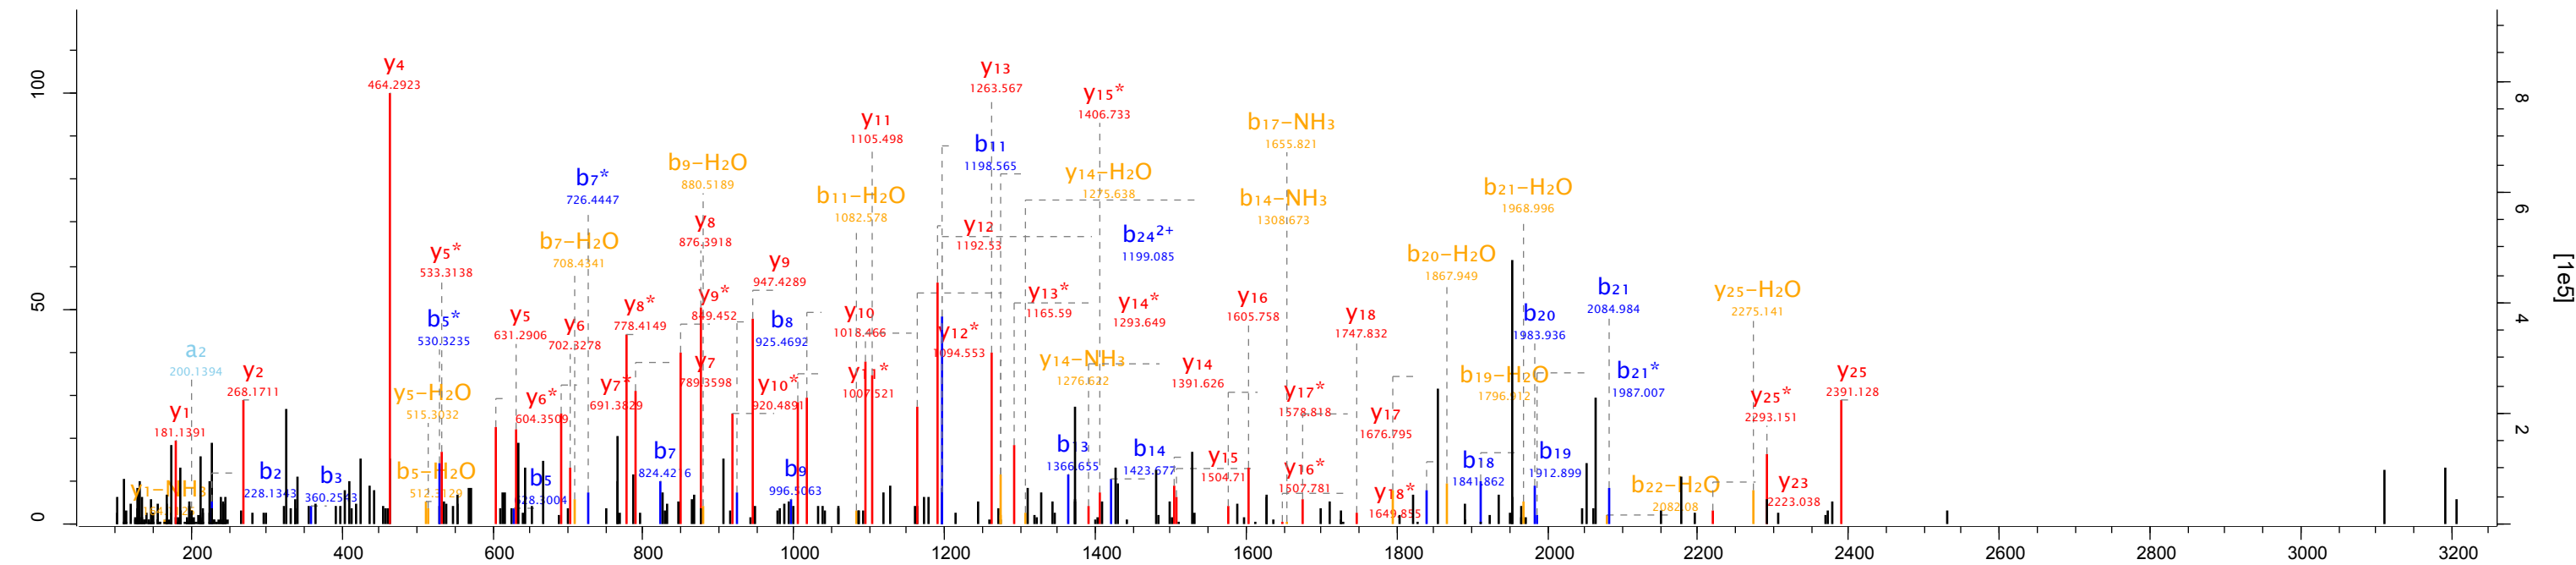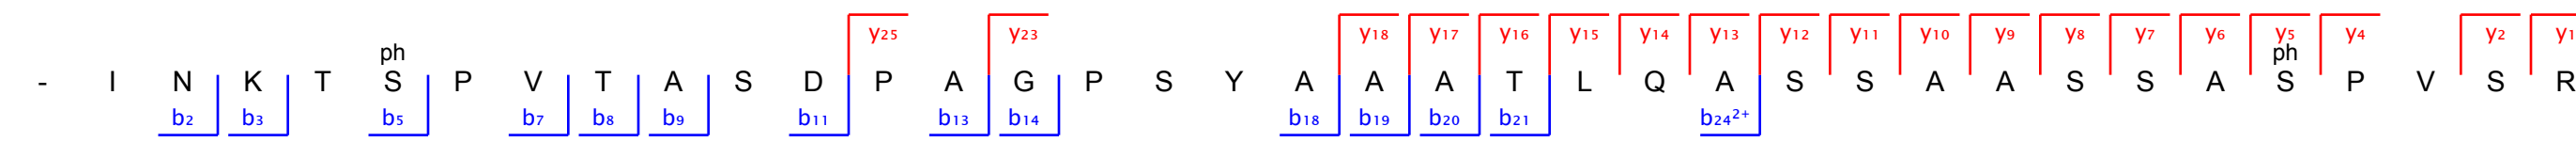

Raw file 20150812\_A375SR\_Phospho\_BR1\_03 Scan 19519 Method FTMS; HCD Score 47.52 m/z 954.43 Gene names FRS2

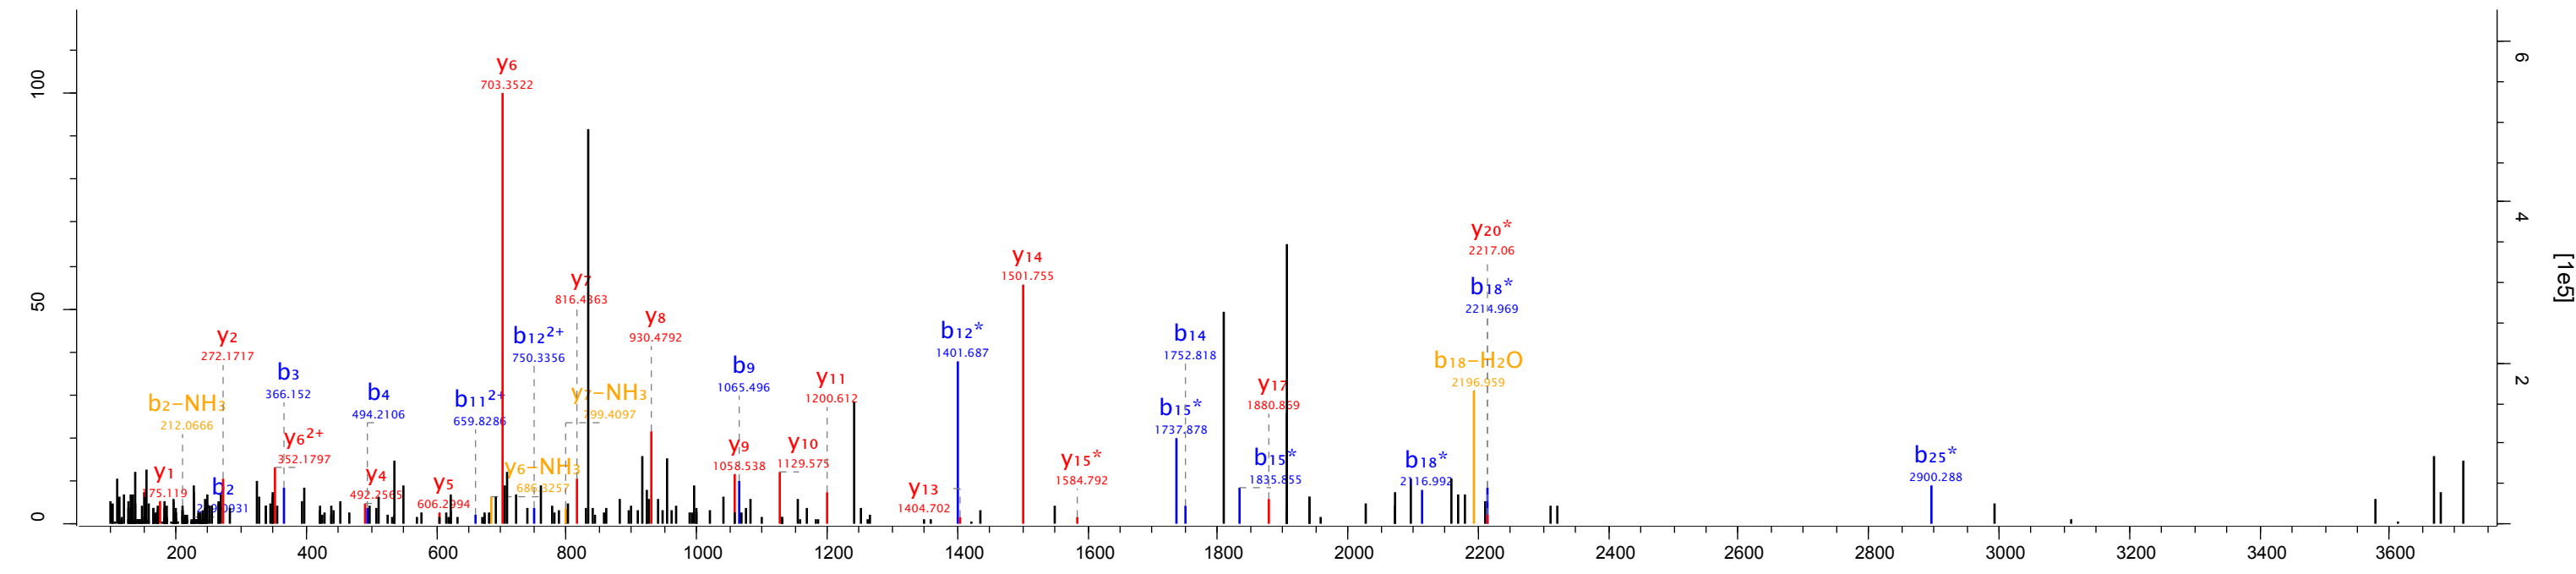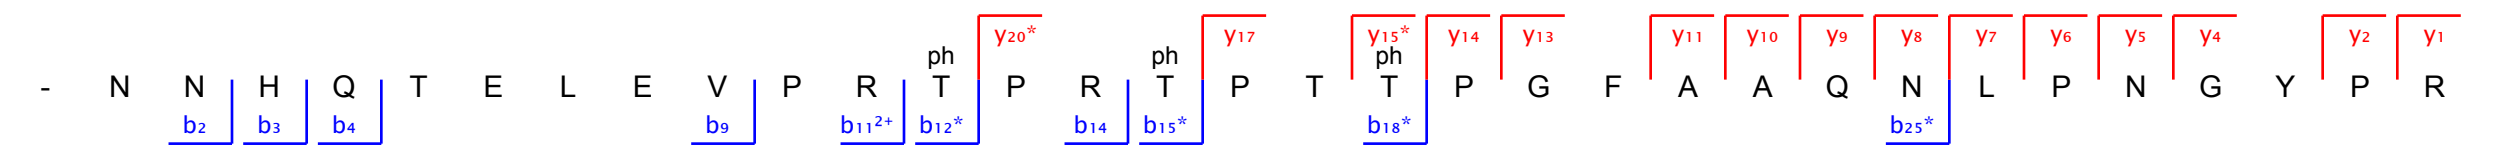

Raw file 20150812\_A375SR\_Phospho\_BR1\_03 Scan 19799 Method FTMS; HCD Score 148.94 m/z 900.78 Gene names SUFU

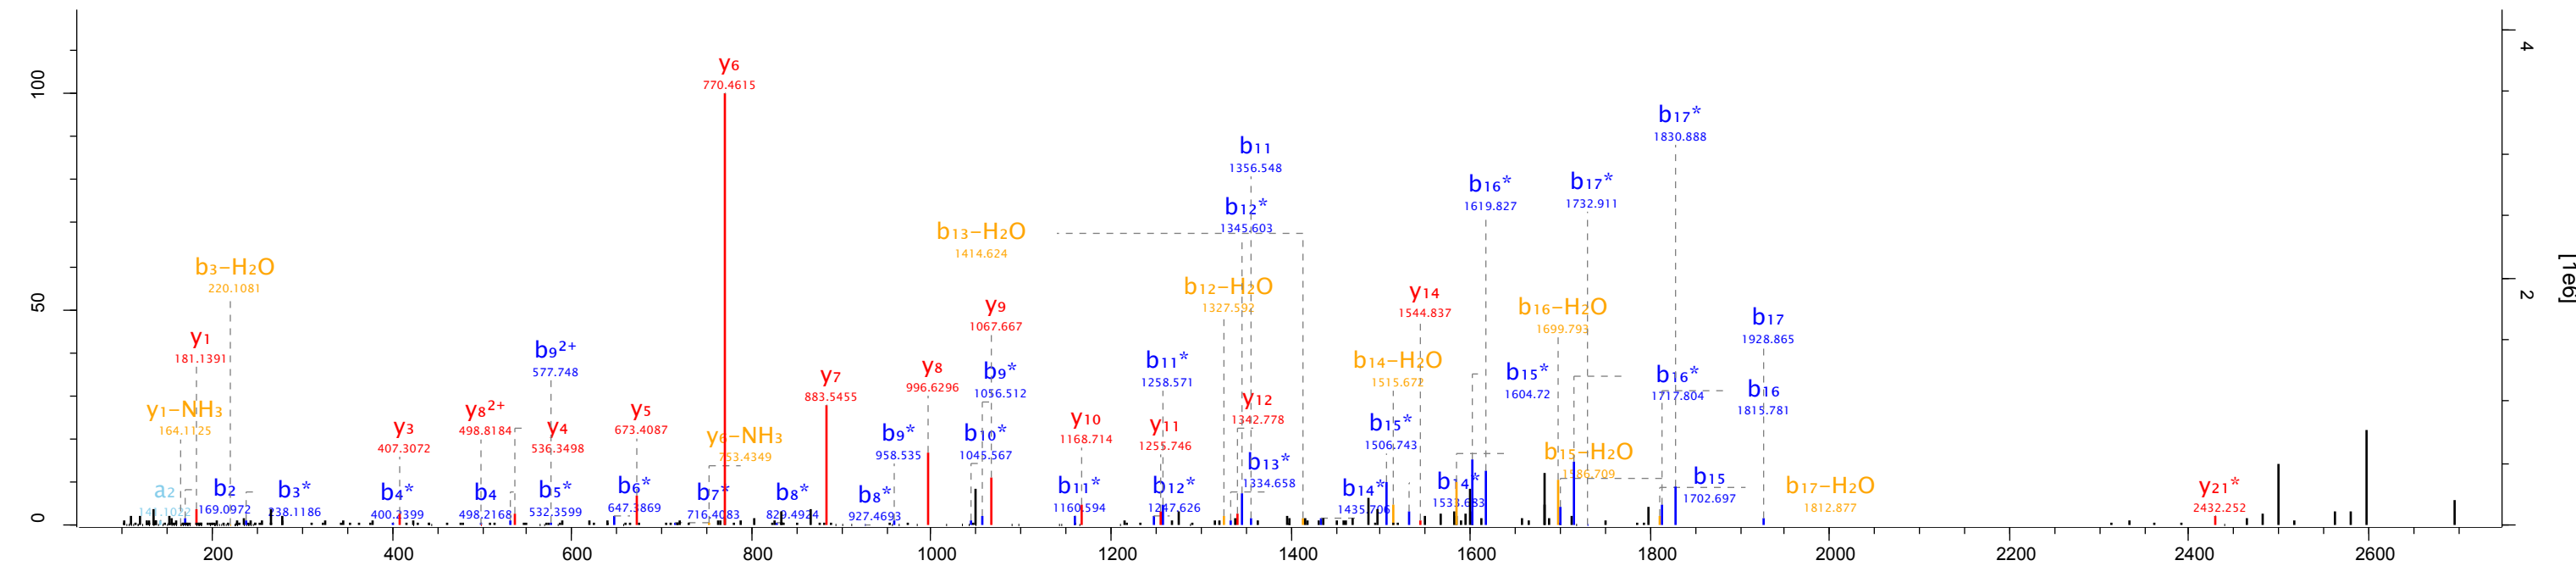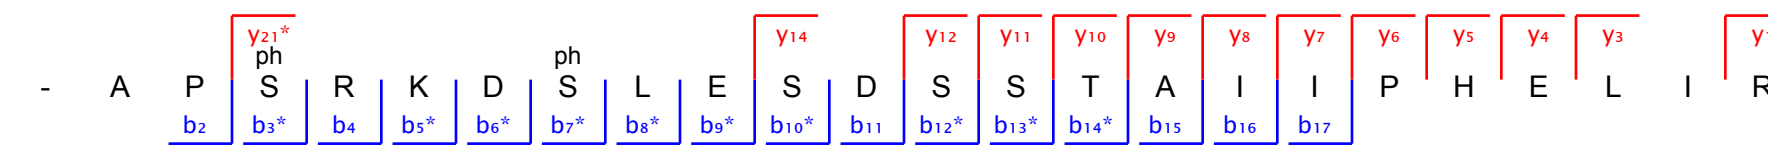

Raw file: 20150812\_A375SR\_Phospho\_BR1\_03  
 Scan: 19959 Method: FTMS; HCD Score: 114.91 m/z: 1087.84 Gene names: ATXN1

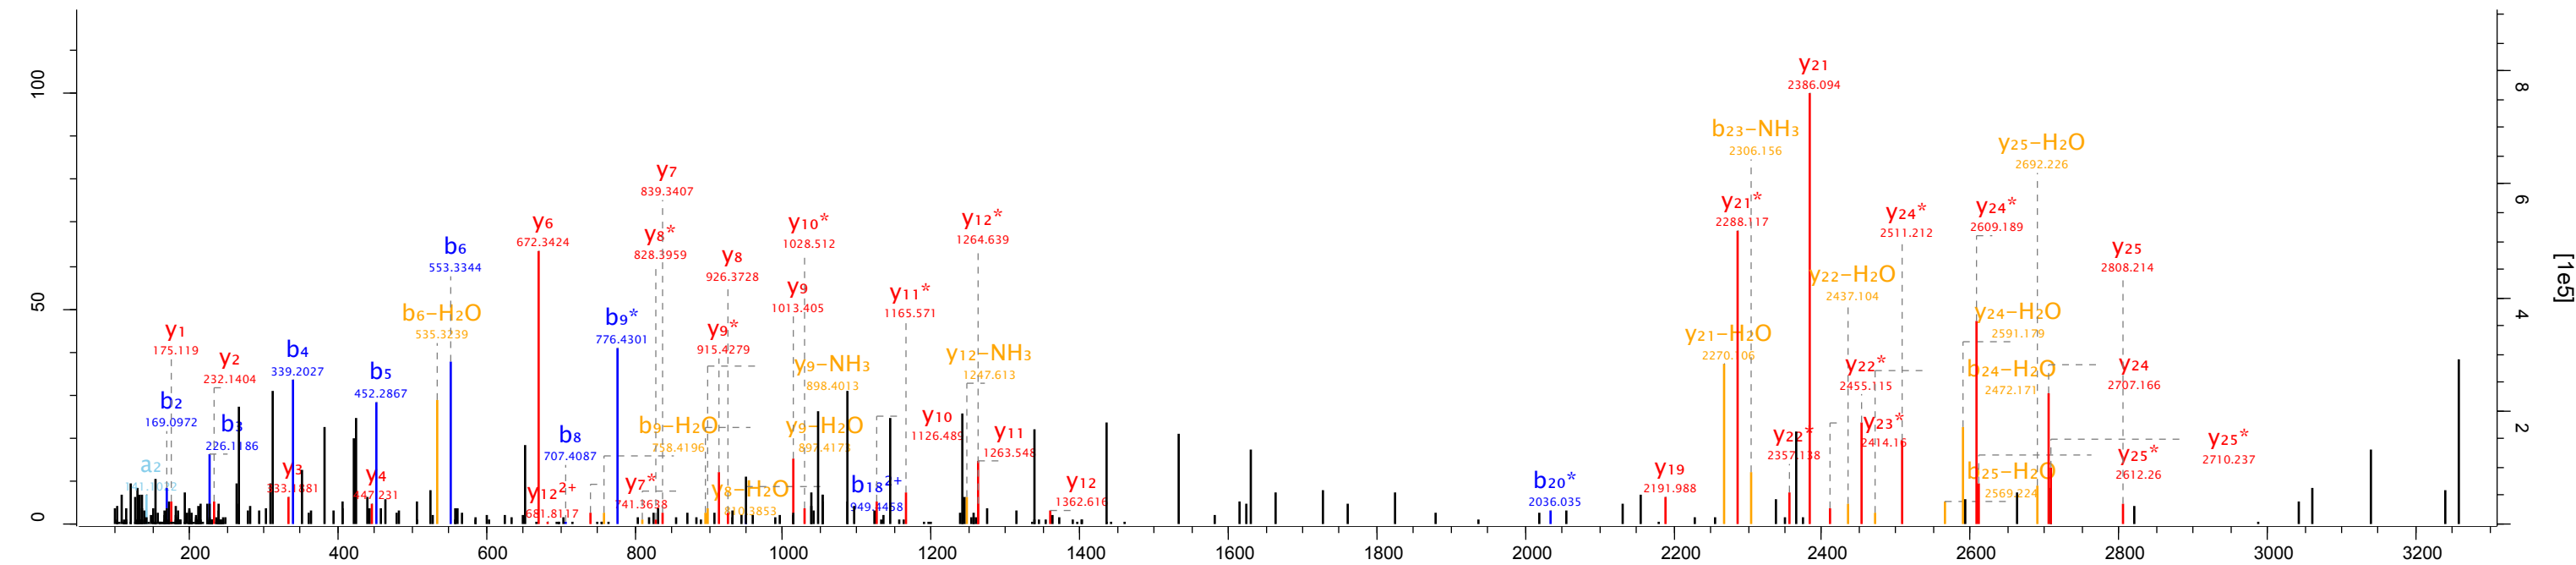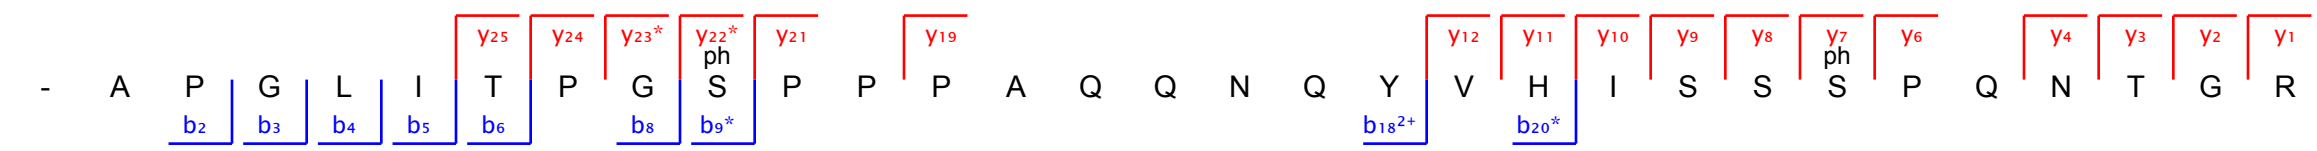

Raw file: 20150812\_A375SR\_Phospho\_BR1\_03  
 Scan: 20559 Method: FTMS; HCD Score: 128.95 m/z: 880.89 Gene names: SKA3

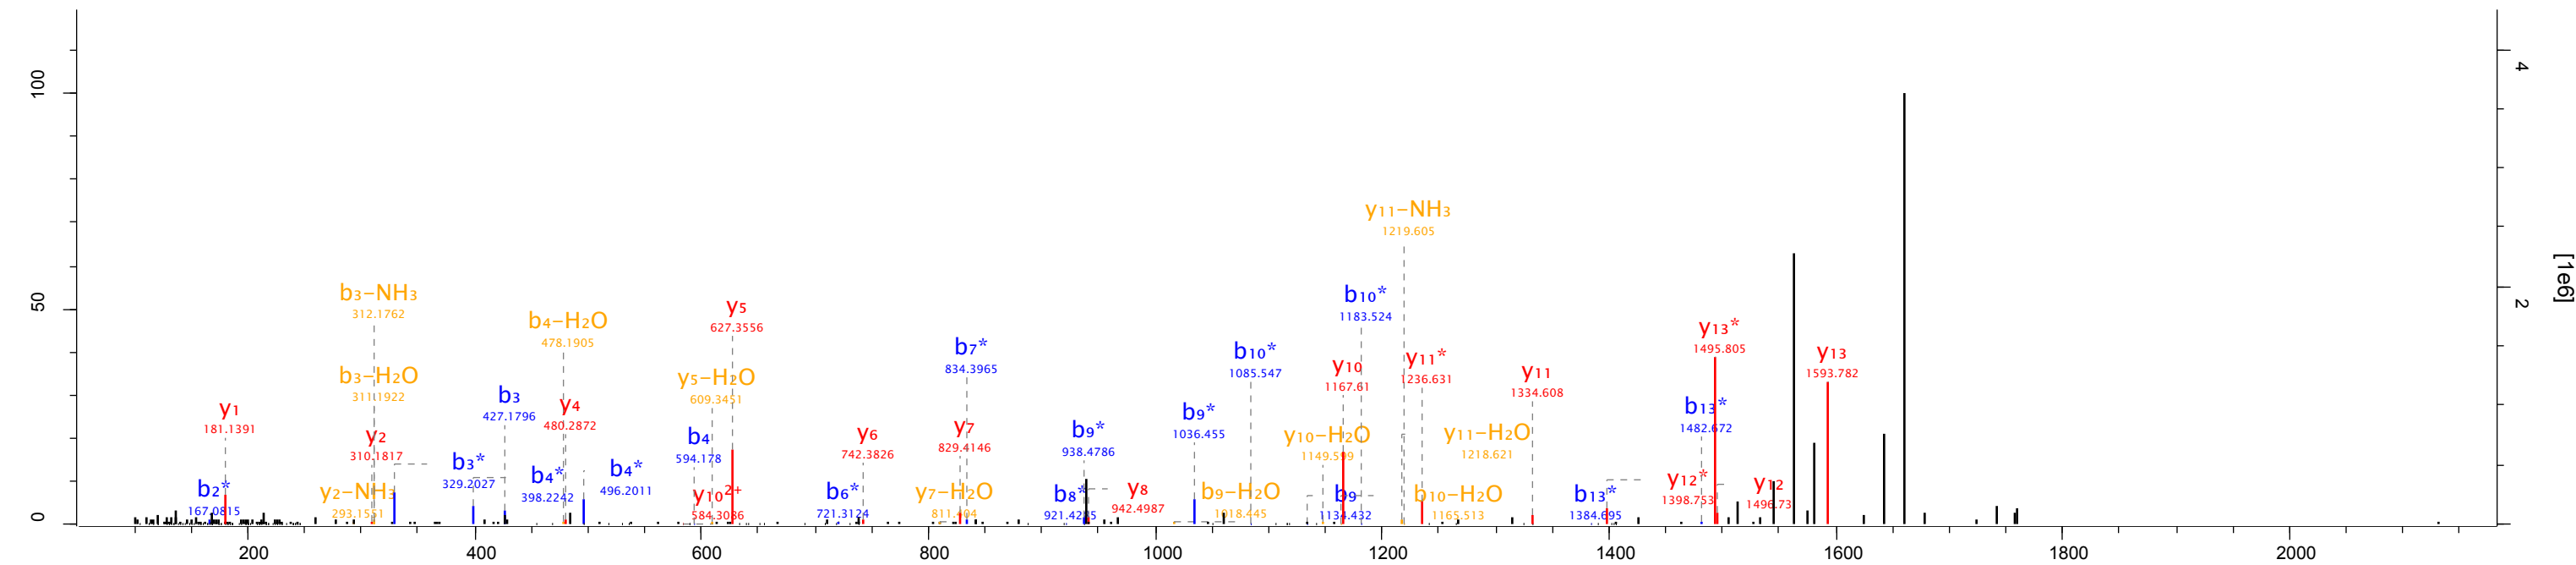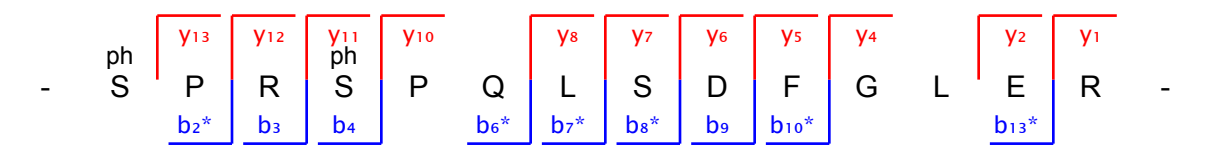

Raw file  
 20150812\_A375SR\_Phospho\_BR1\_03  
 Scan 21099 Method FTMS; HCD Score 160.15 m/z 846.9 Gene names TFE3

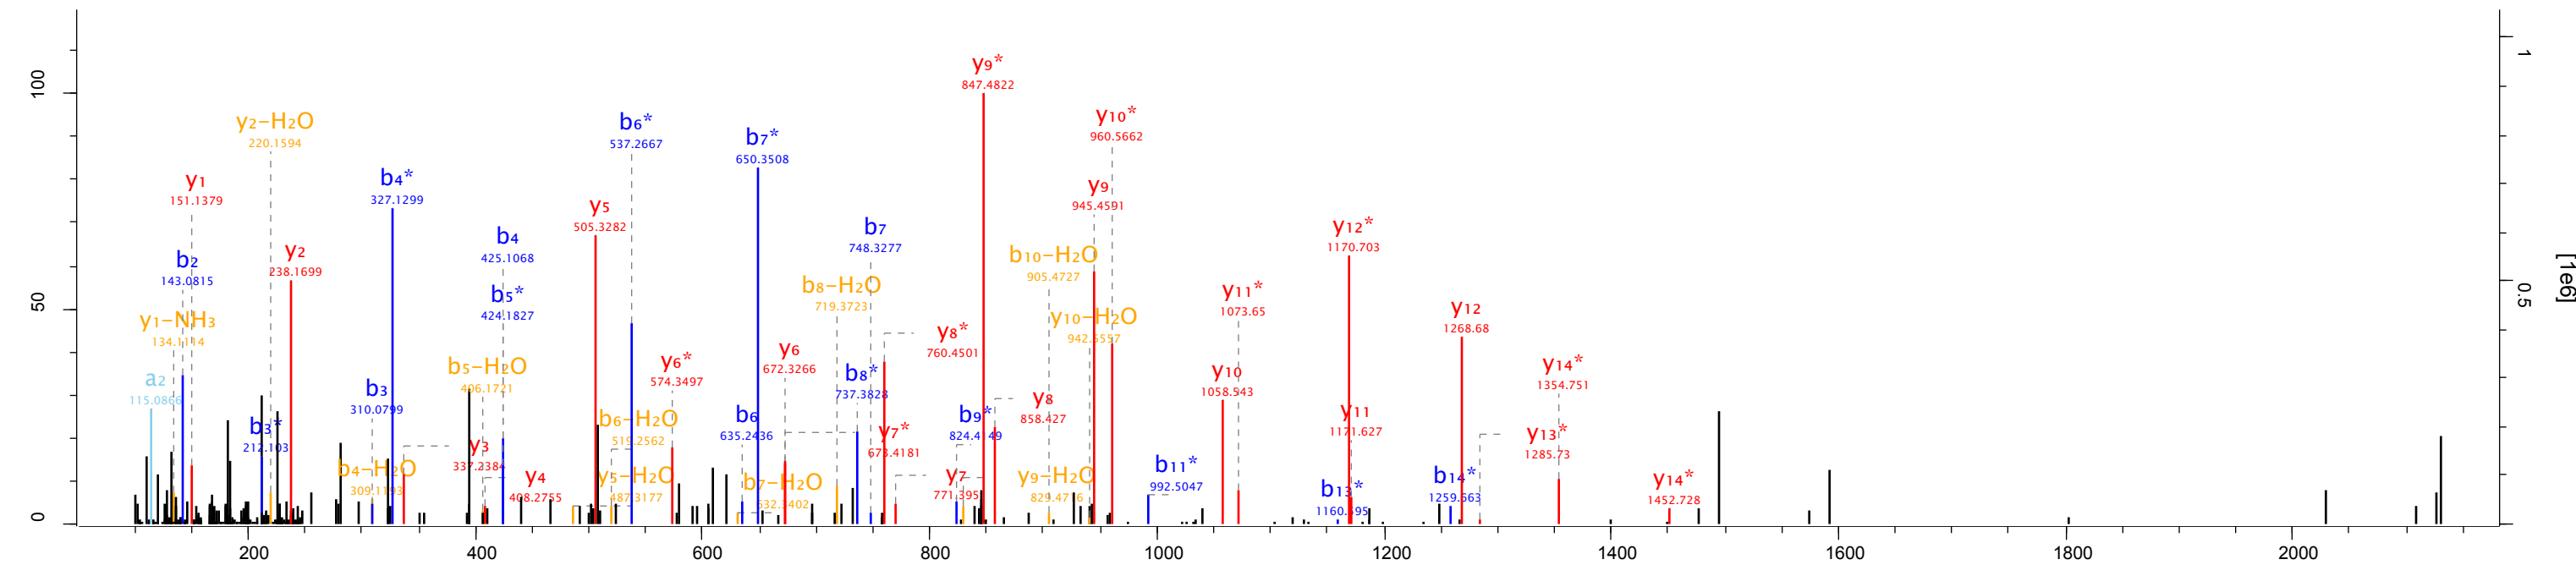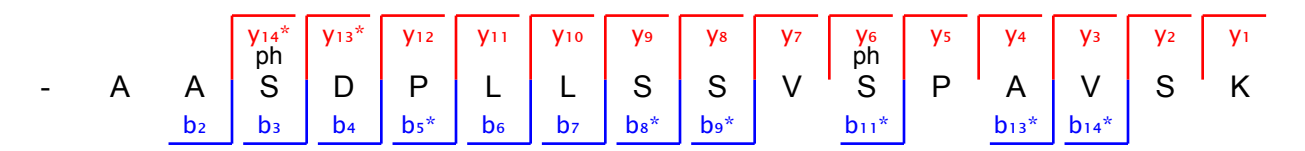

Raw file  
20150812\_A375SR\_Phospho\_BR1\_03

Scan 21209 Method FTMS; HCD Score 294 m/z 1309.62 Gene names ZMYND8

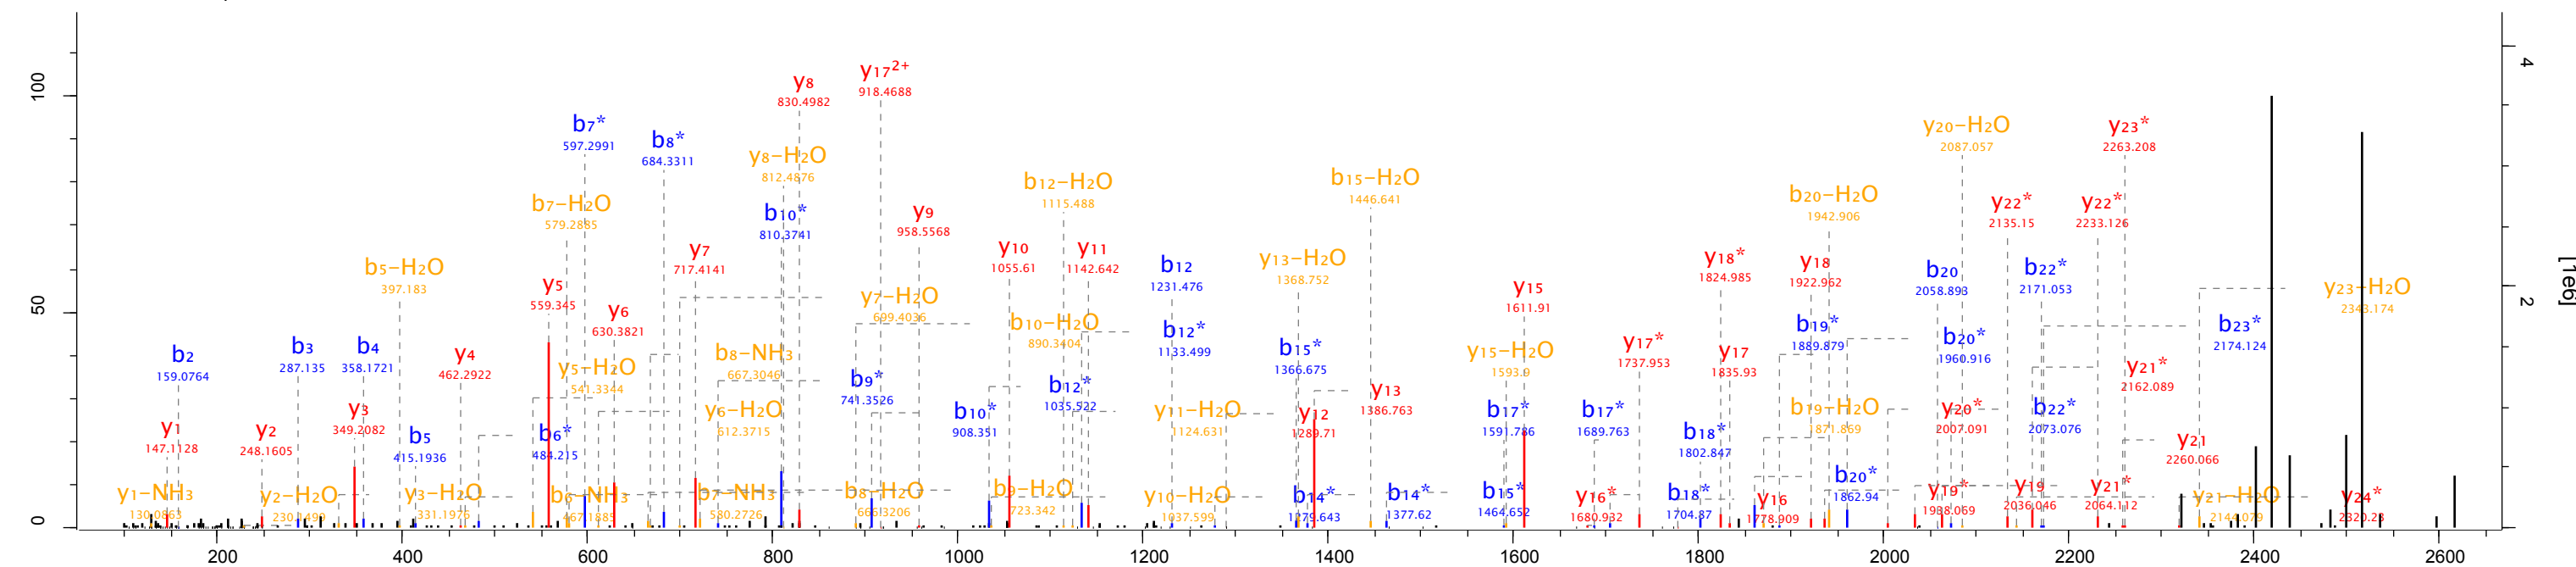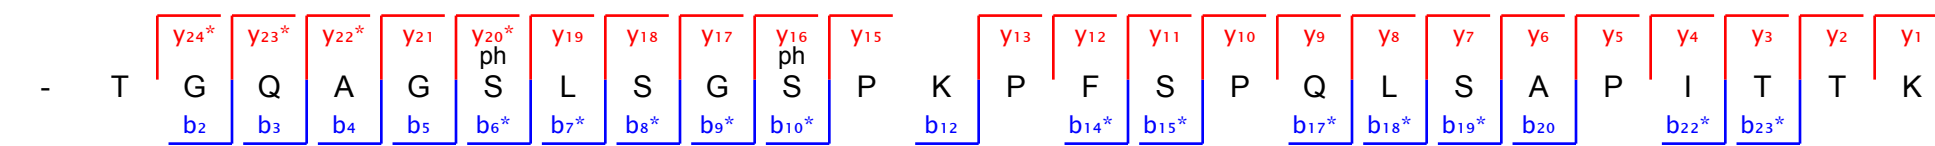



Raw file: 20150812\_A375SR\_Phospho\_BR1\_03  
 Scan: 21289 Method: FTMS; HCD Score: 175.34 m/z: 944.96 Gene names: TANC2

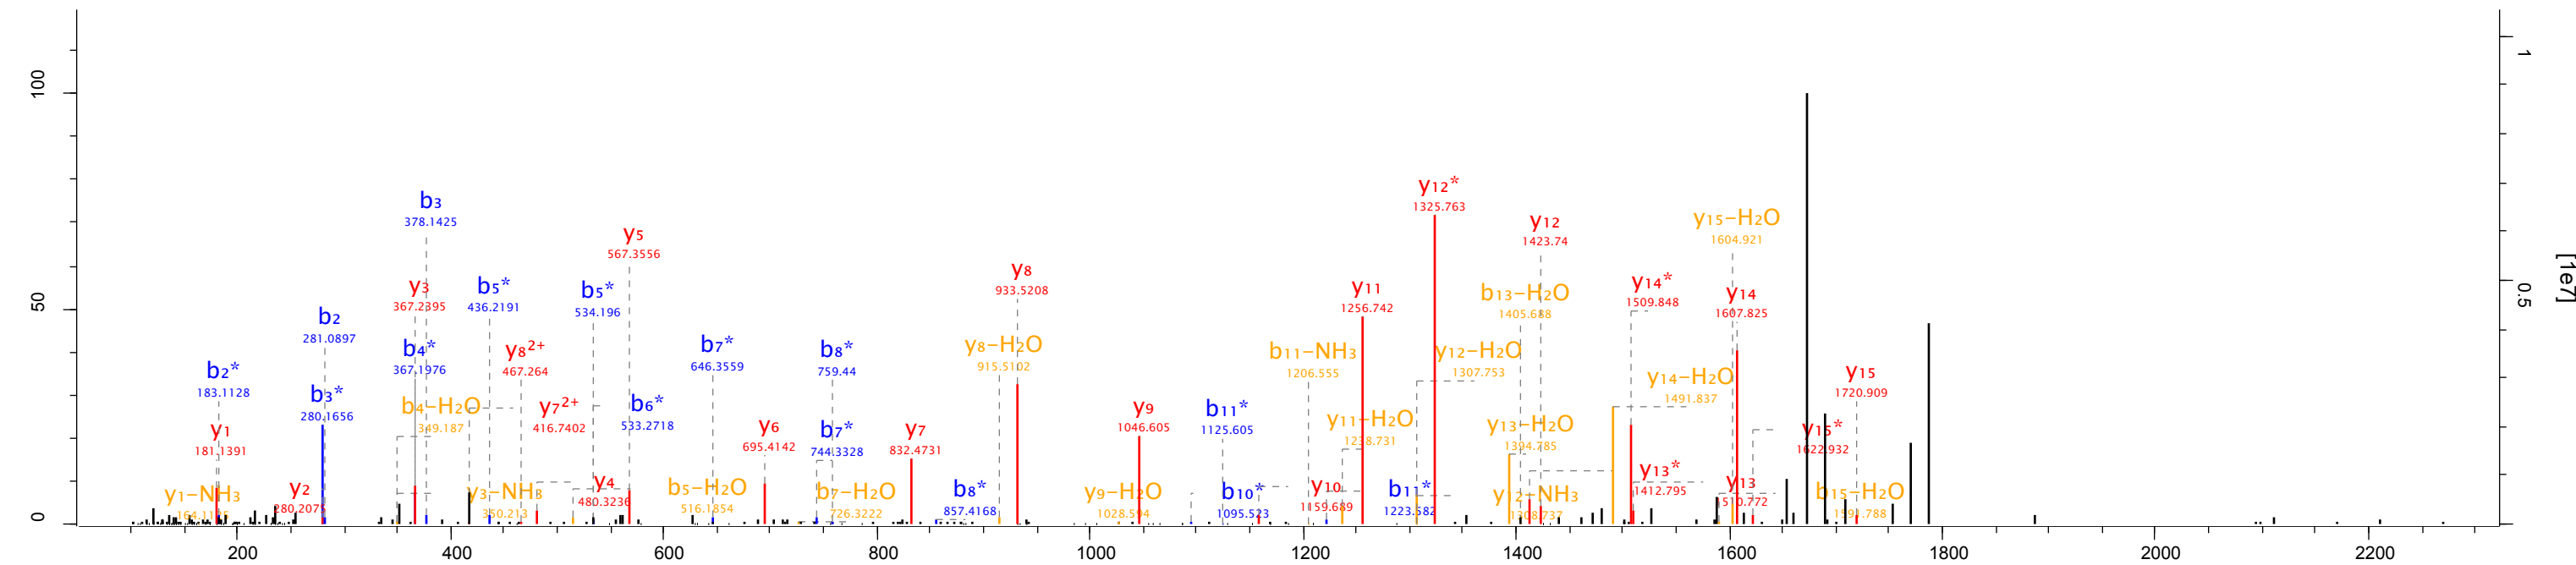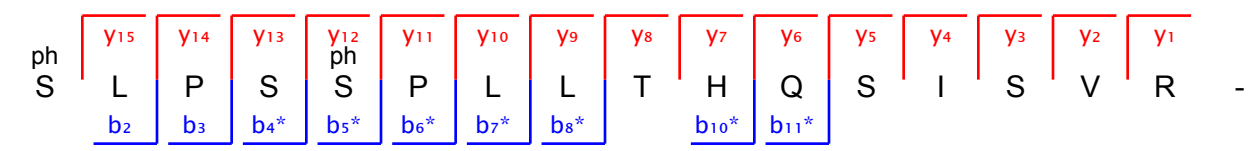

Raw file: 20150812\_A375SR\_Phospho\_BR1\_03  
 Scan: 21629 Method: FTMS; HCD Score: 73.86 m/z: 1037.18 Gene names: FOXK1

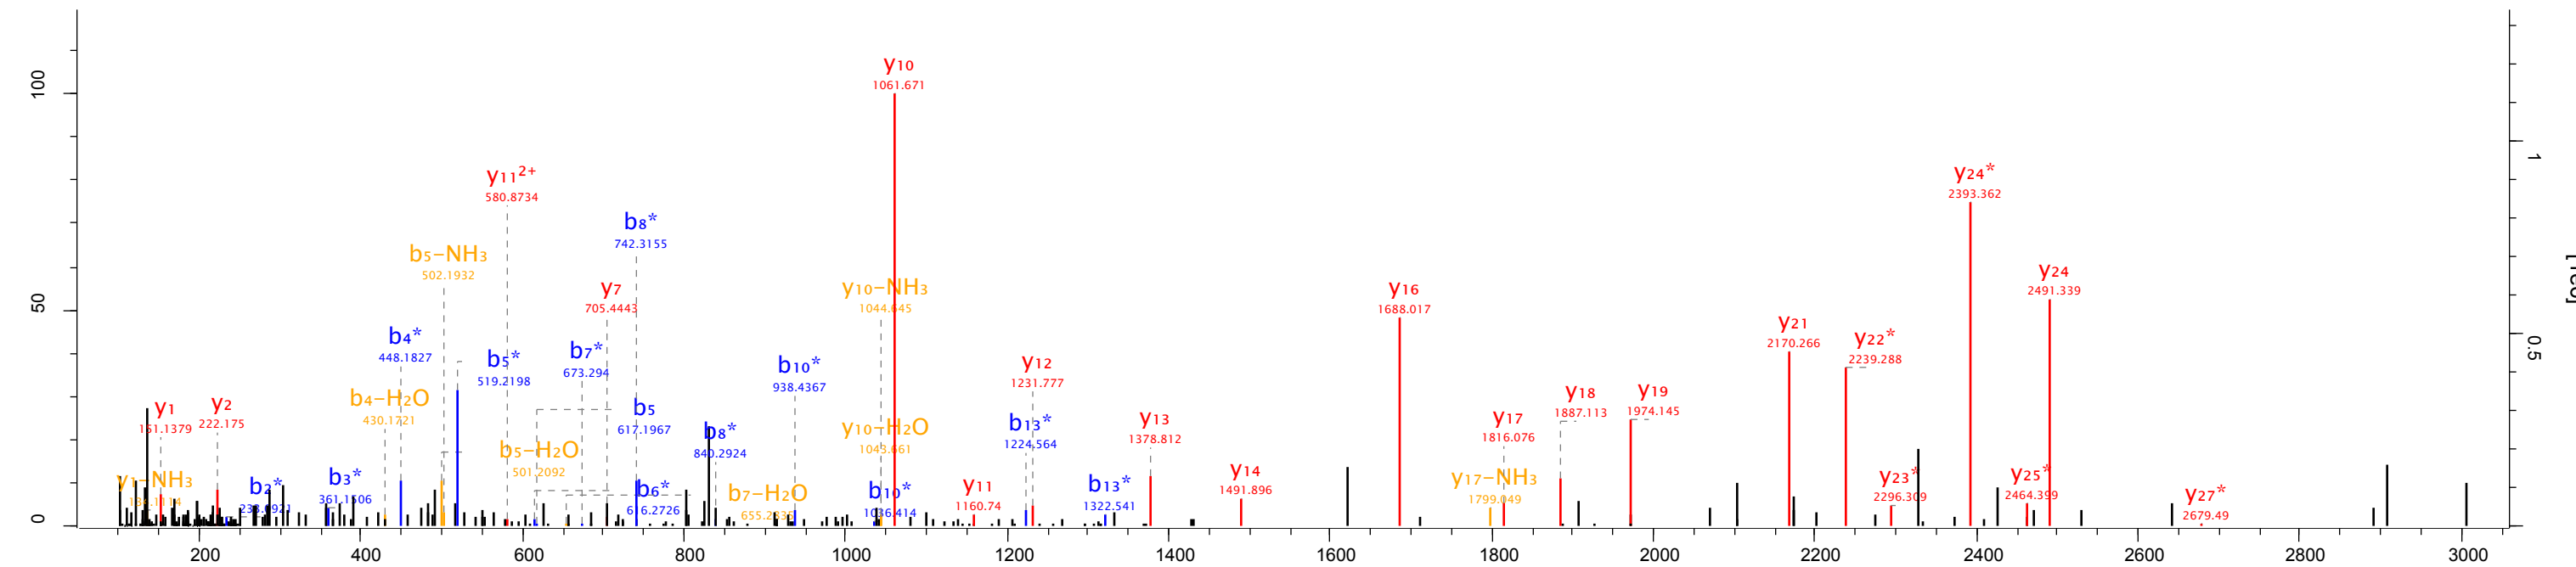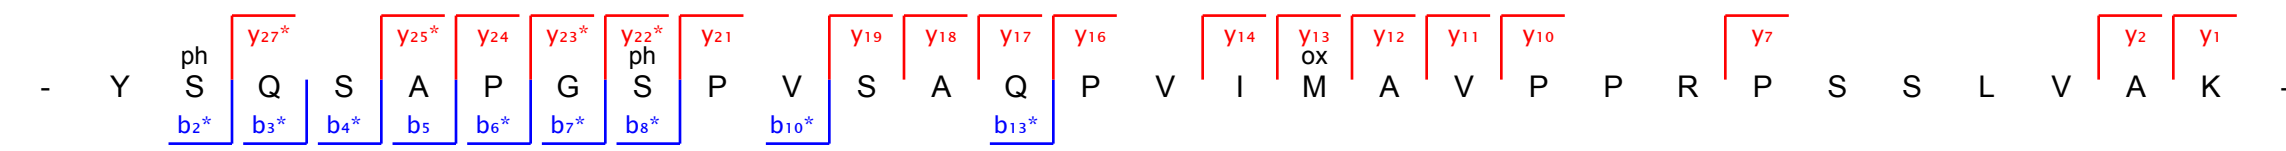

Raw file 20150812\_A375SR\_Phospho\_BR1\_03 Scan 22269 Method FTMS; HCD Score 93.49 m/z 730.6 Gene names MEX3C

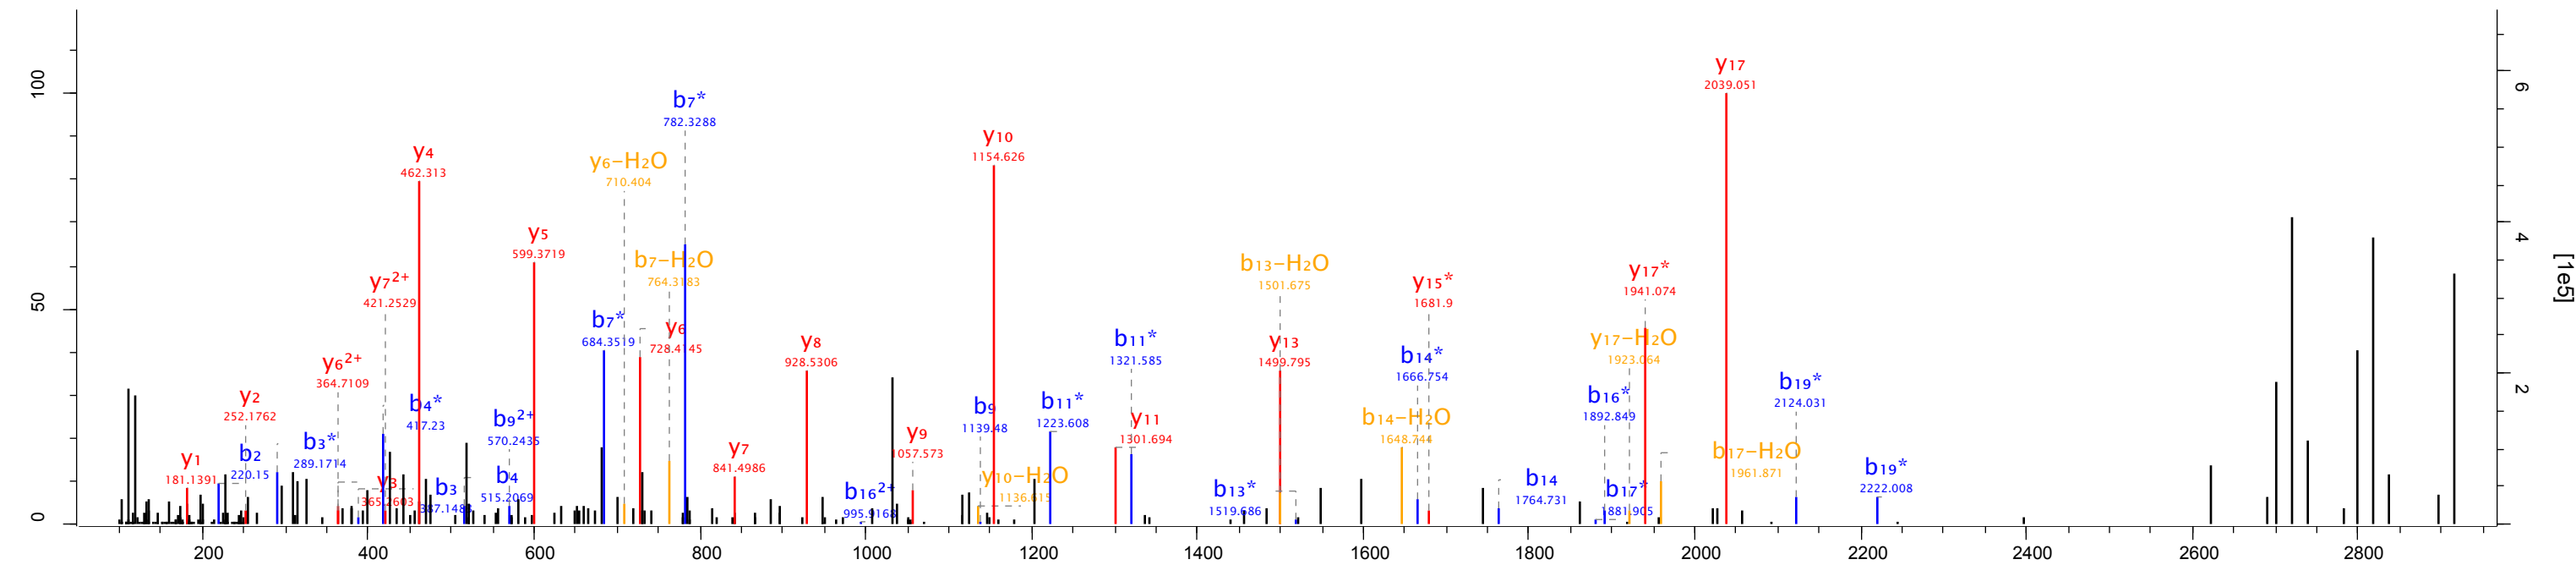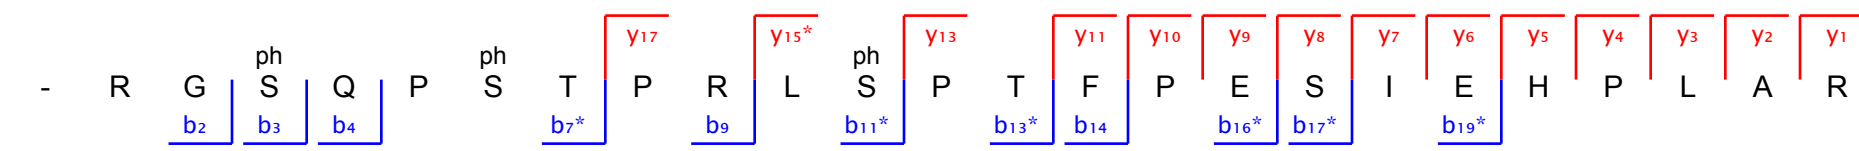

Raw file  
 20150812\_A375SR\_Phospho\_BR1\_03  
 Scan 22489 Method FTMS; HCD Score 115.24 m/z 1365.1 Gene names MSANTD2

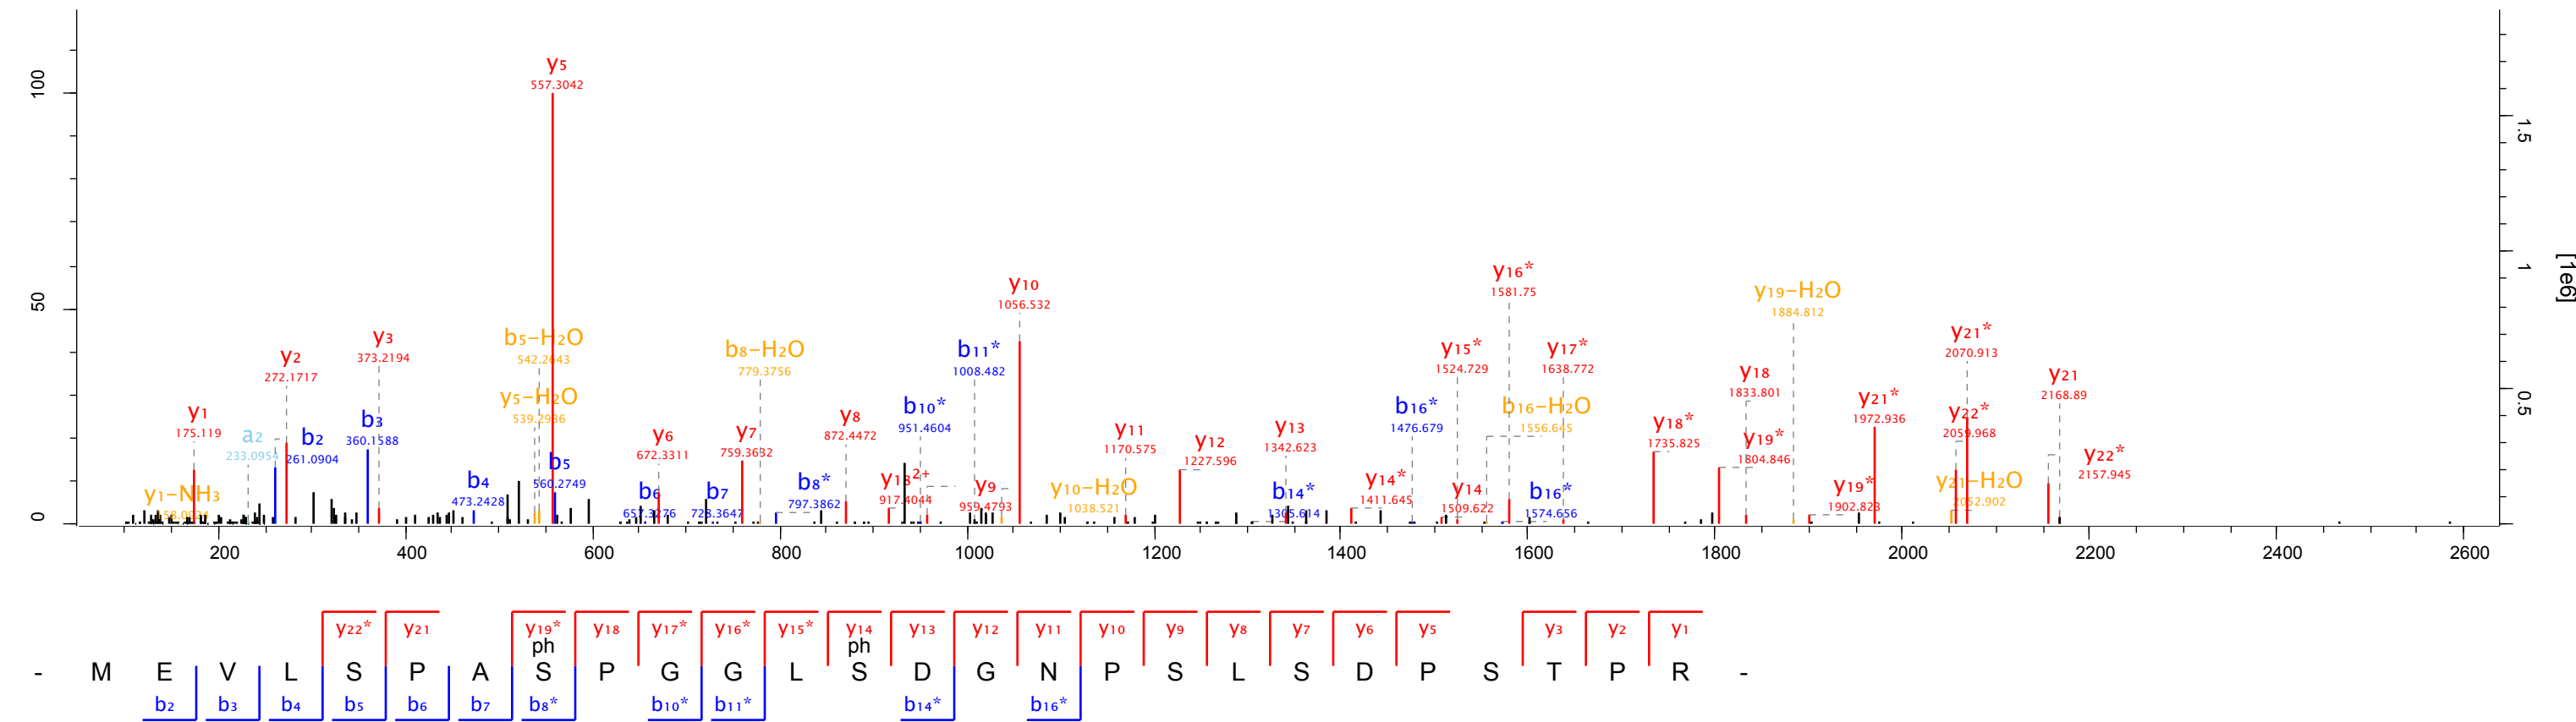

Raw file: 20150812\_A375SR\_Phospho\_BR1\_03  
 Scan: 22809 Method: FTMS; HCD Score: 204.63 m/z: 1156.84 Gene names: CTTN

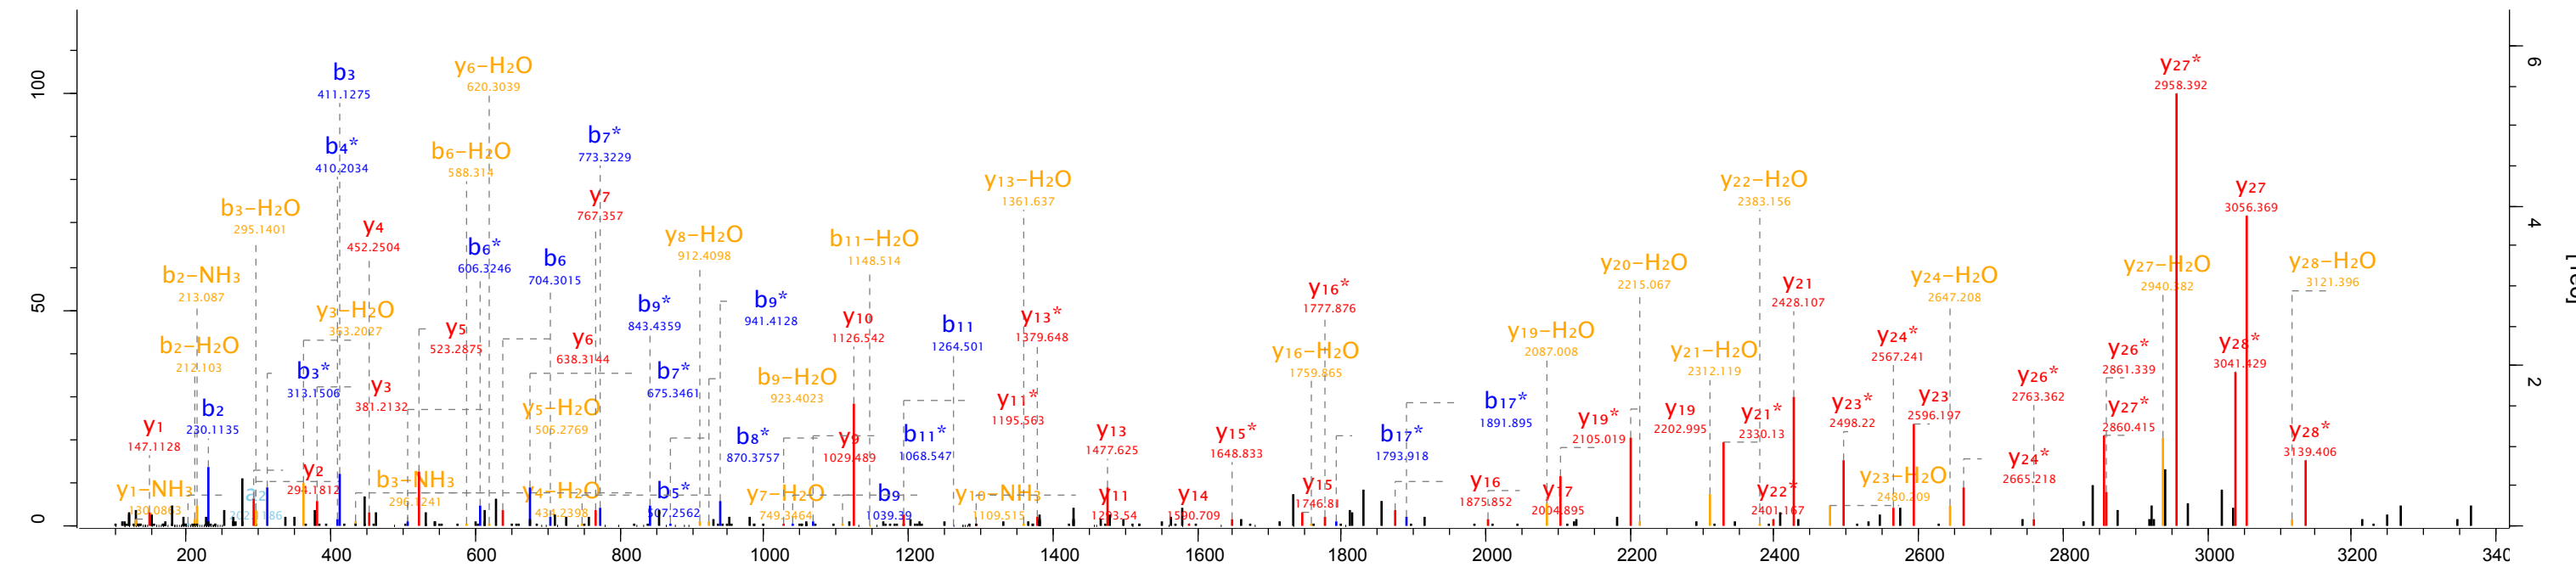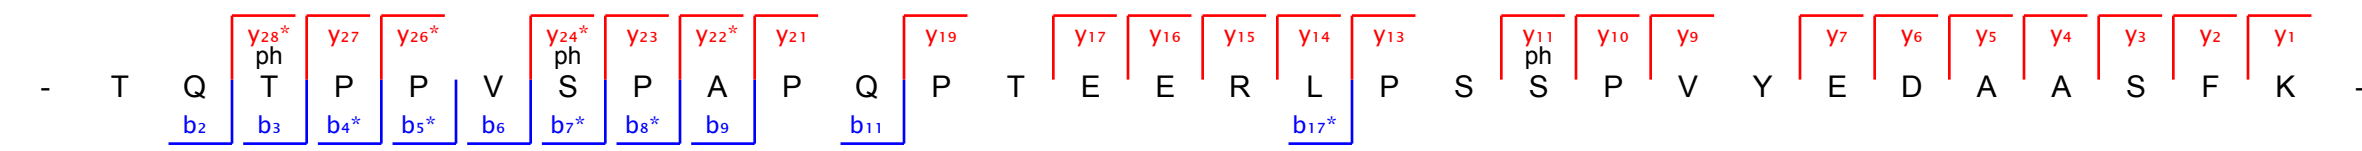

Raw file 20150812\_A375SR\_Phospho\_BR1\_03 Scan 22939 Method FTMS; HCD Score 173.13 m/z 879.4 Gene names EPS15

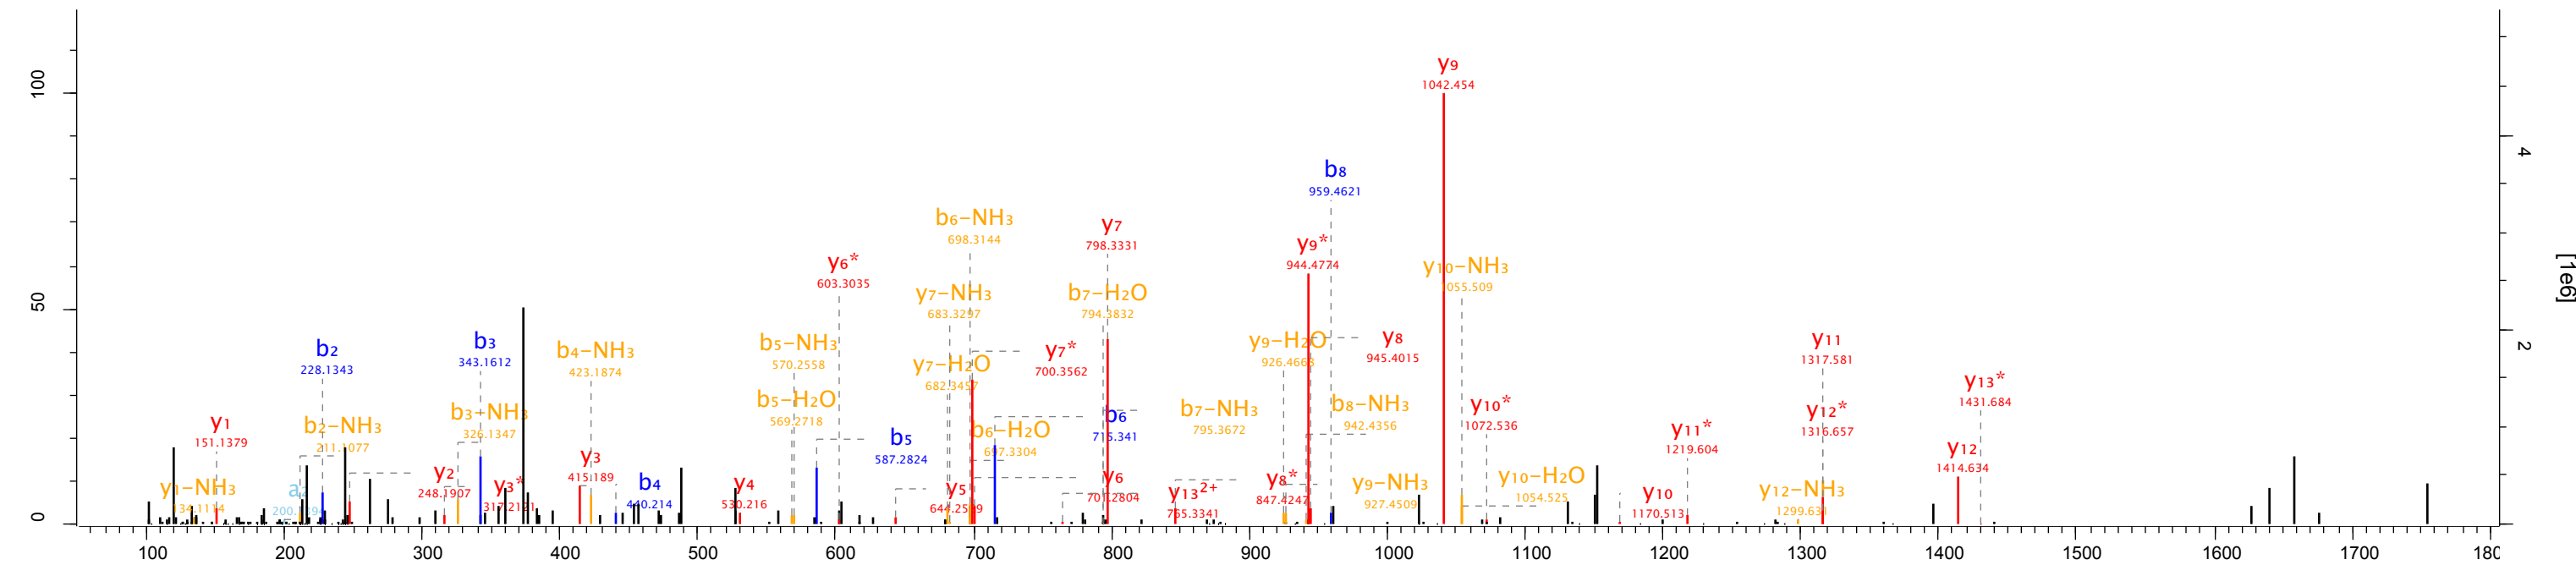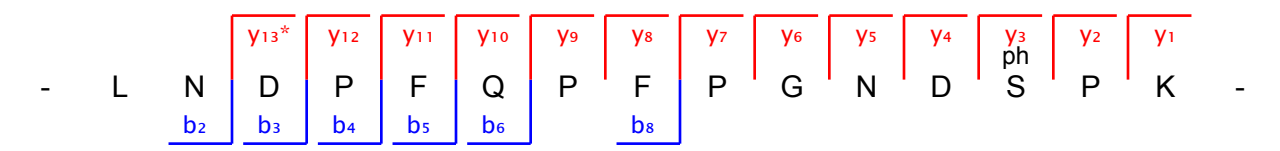

Raw file 20150812\_A375SR\_Phospho\_BR1\_03 Scan 23089 Method FTMS; HCD Score 228.46 m/z 931.3 Gene names OSTF1

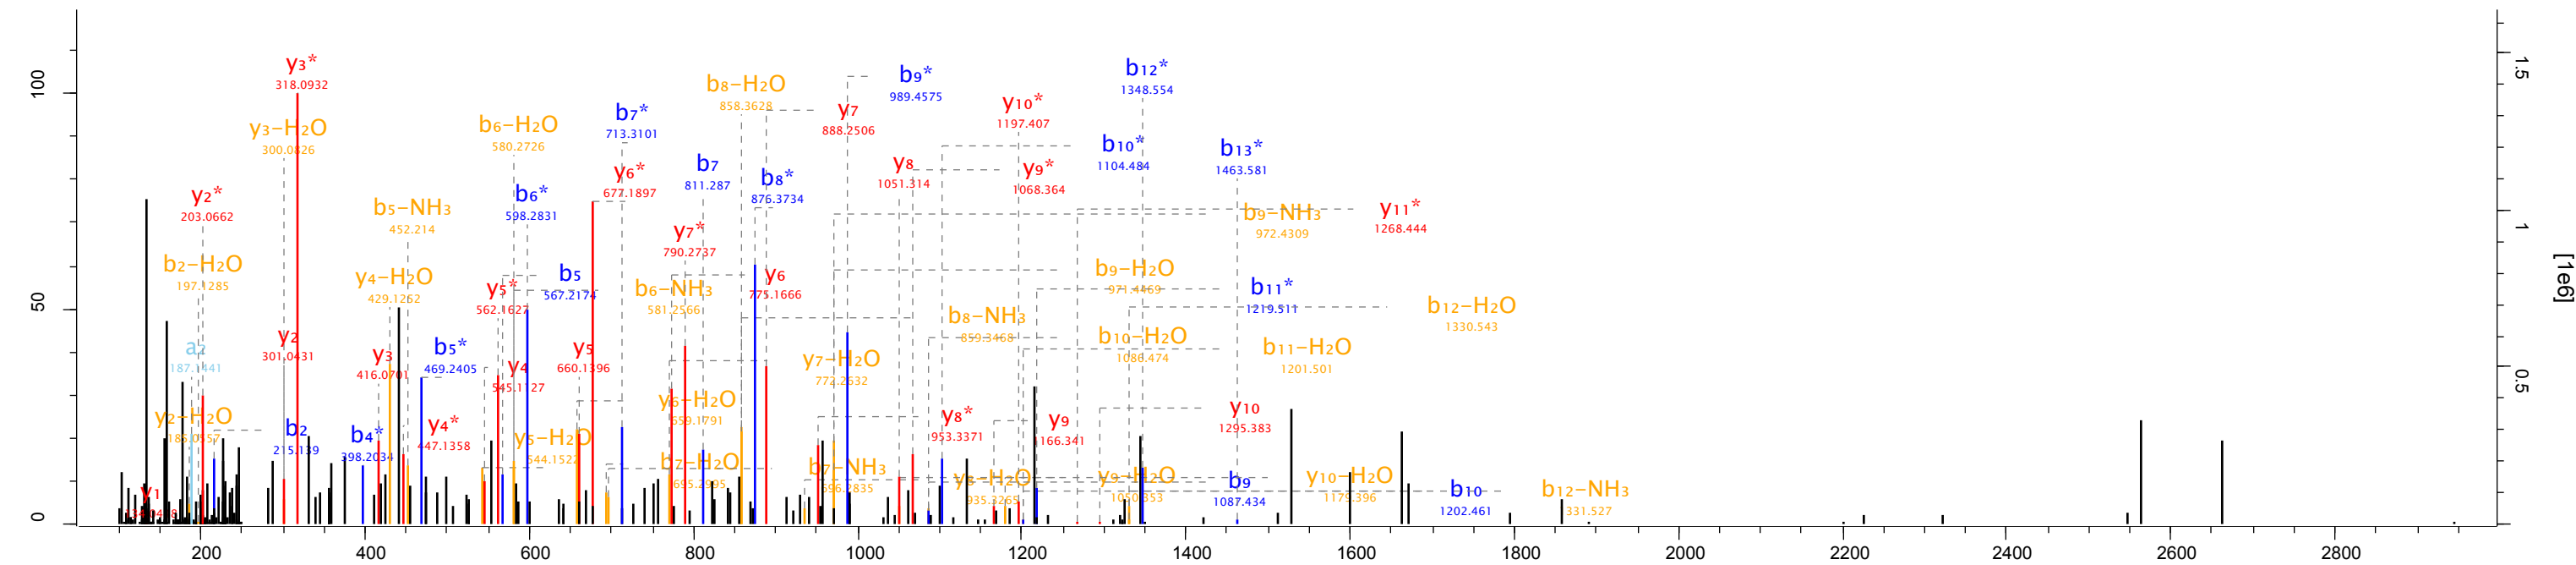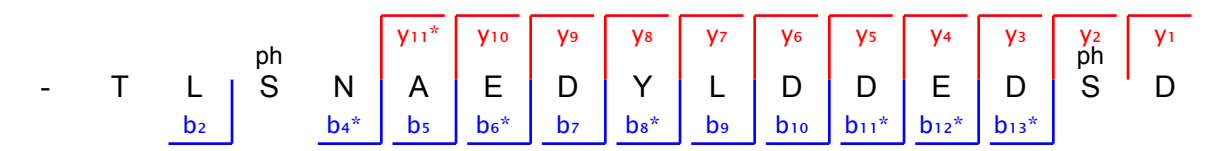

Raw file: 20150812\_A375SR\_Phospho\_BR1\_03  
 Scan: 2309 Method: FTMS; HCD Score: 103.27 m/z: 769.66 Gene names: ZC3H13

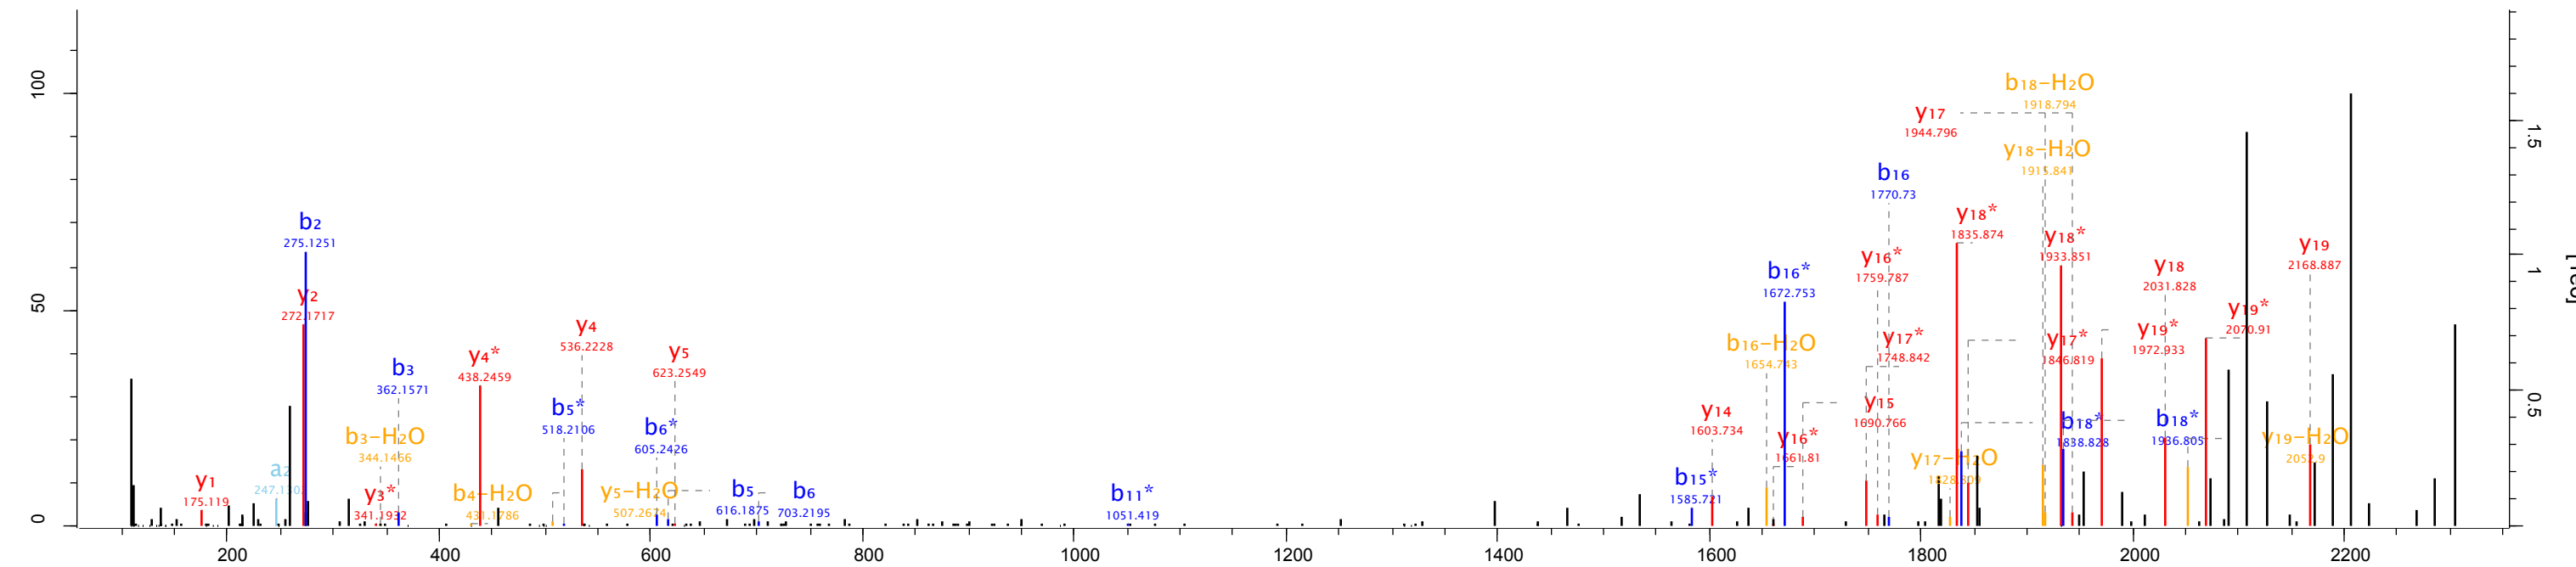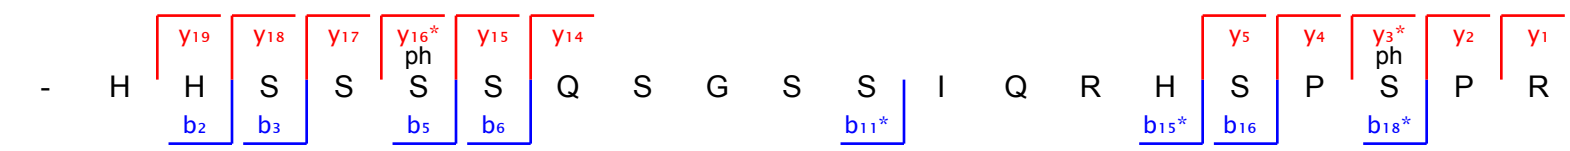



Raw file  
 20150812\_A375SR\_Phospho\_BR1\_03  
 Scan 23209 Method FTMS; HCD Score 328.7 m/z 1341.64 Gene names CCNL1

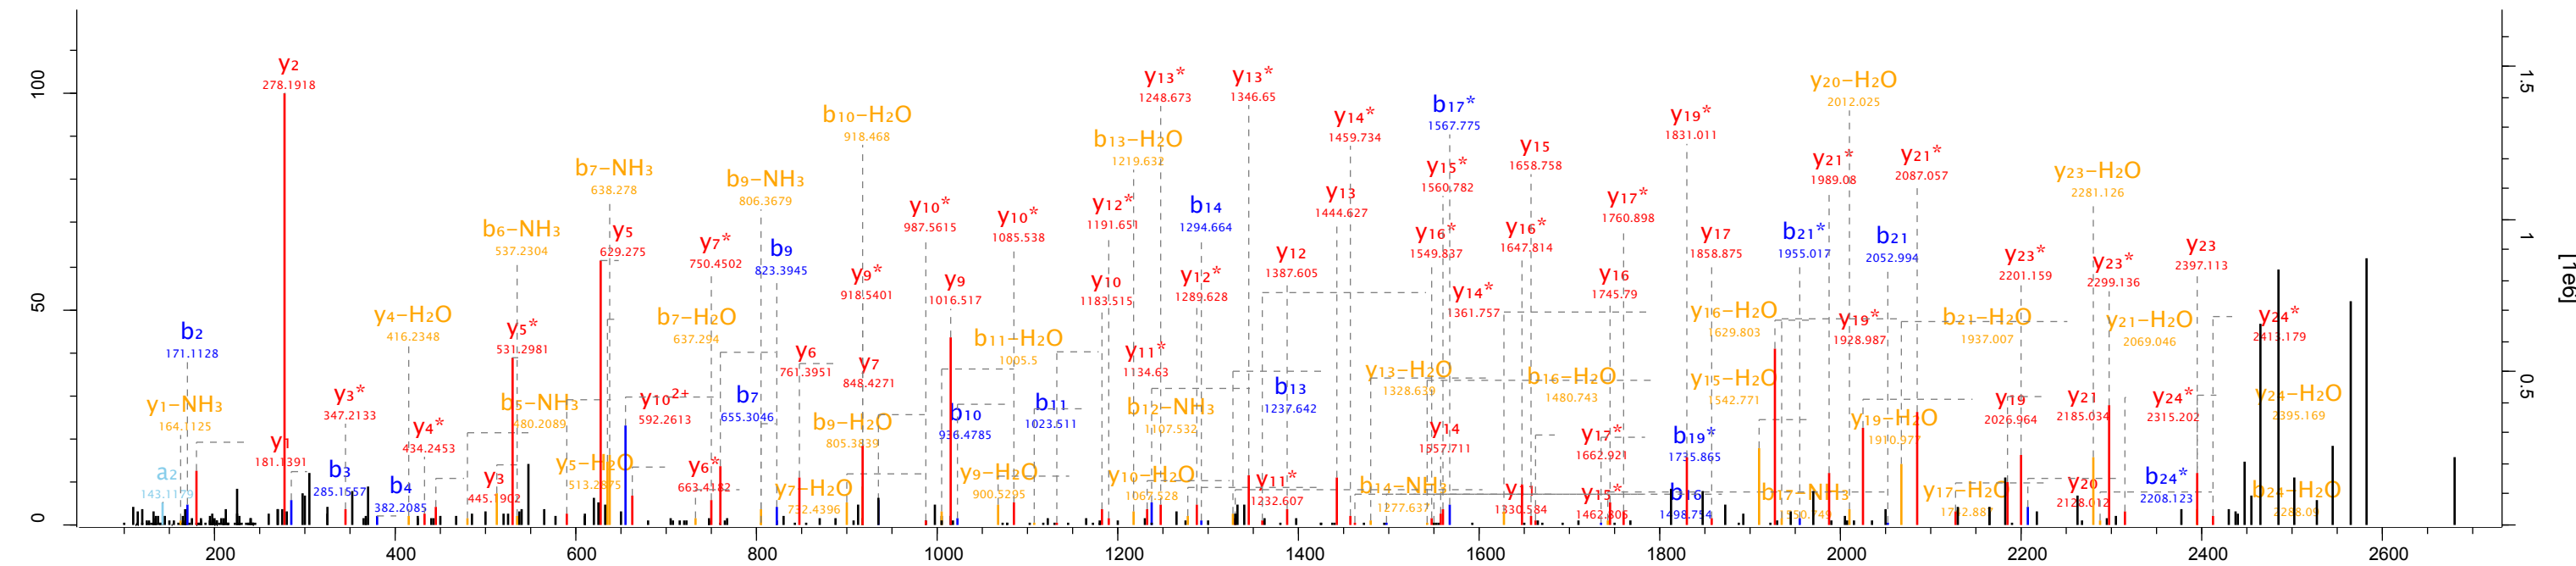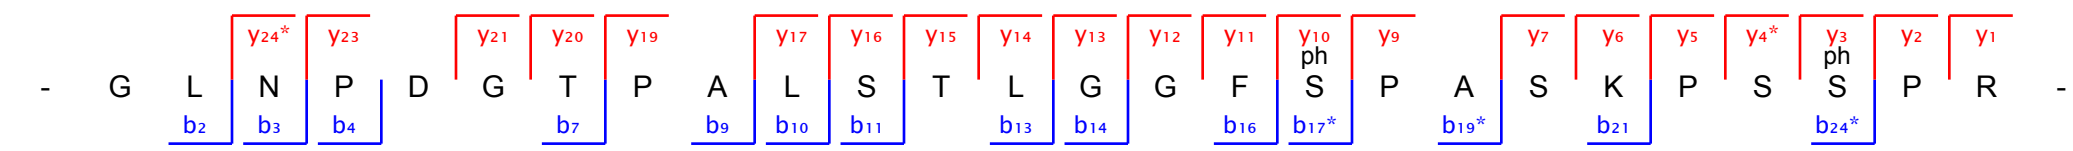

Raw file 20150812\_A375SR\_Phospho\_BR1\_03 Scan 23309 FTMS; HCD Score 105.51 m/z 1007.07 Gene names FAM177A1

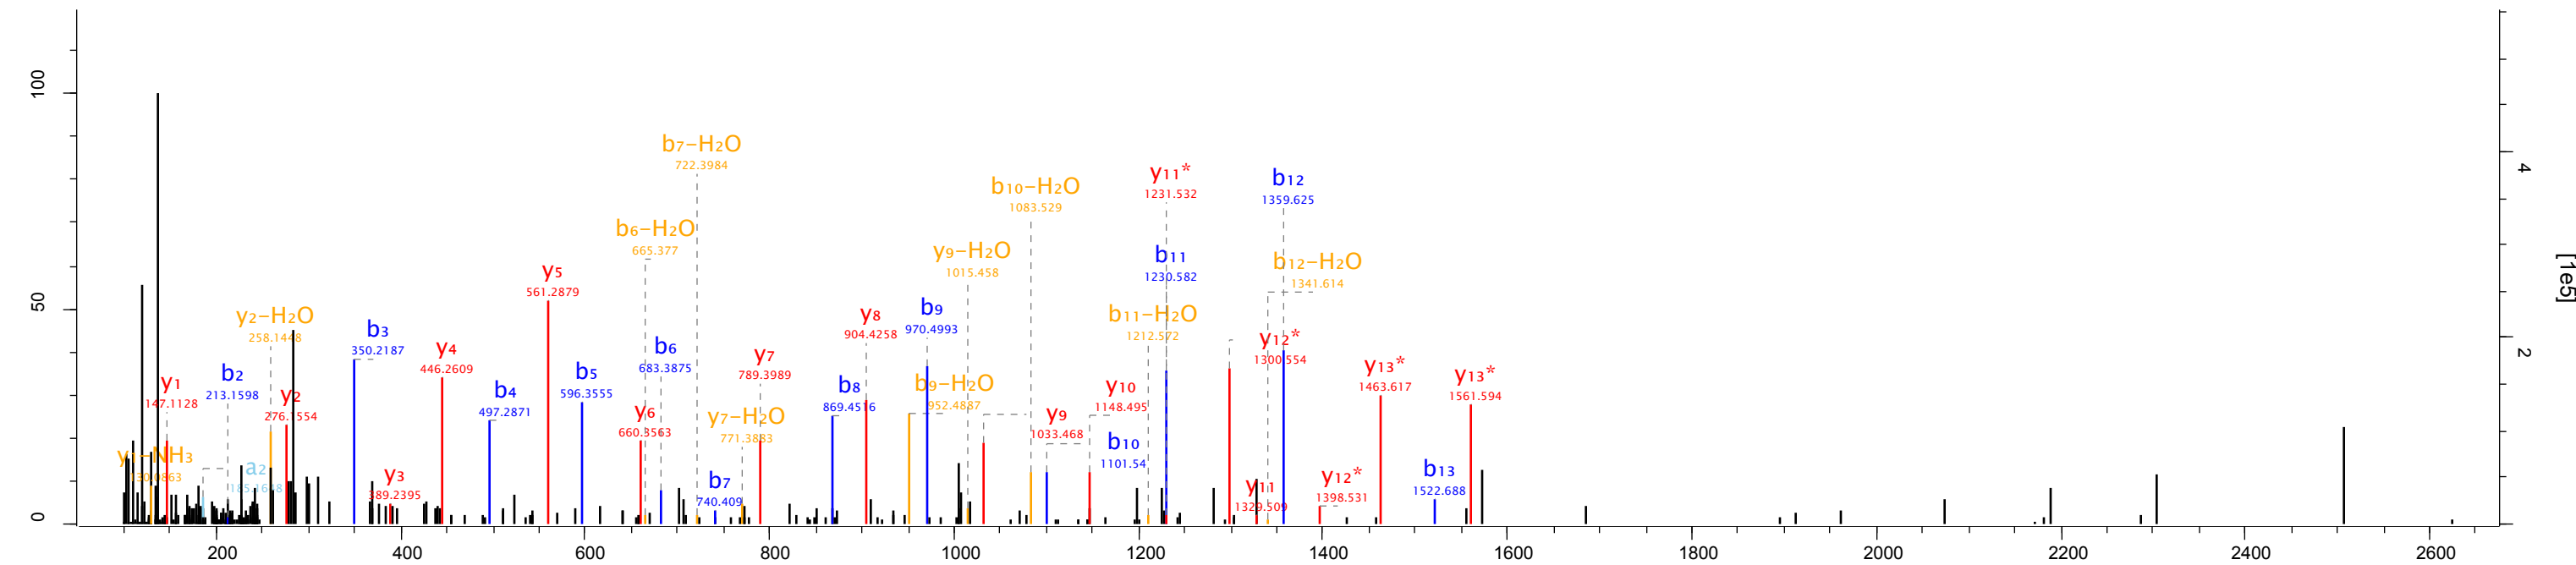

- V I H F V S G E T M E E Y S T D E D E V D G L E K -

Fragmentation mapping (b and y ions) is shown below the sequence:

- b2: I
- b3: IH
- b4: IHF
- b5: IHFV
- b6: IHFVS
- b7: IHFVSG
- b8: IHFVSGE
- b9: IHFVSGET
- b10: IHFVSGETM
- b11: IHFVSGETME
- b12: IHFVSGETMEE
- b13: IHFVSGETMEEY
- y1: K
- y2: EL
- y3: ELG
- y4: ELGD
- y5: ELGDV
- y6: ELGDVE
- y7: ELGDVED
- y8: ELGDVEDD
- y9: ELGDVEDDE
- y10: ELGDVEDDET
- y11: ELGDVEDDETS
- y12\*: ELGDVEDDETSph
- y13\*: ELGDVEDDETSphY

Raw file: 20150812\_A375SR\_Phospho\_BR1\_03  
 Scan: 23379 Method: FTMS; HCD Score: 98.76 m/z: 873.86 Gene names: ARHGAP35

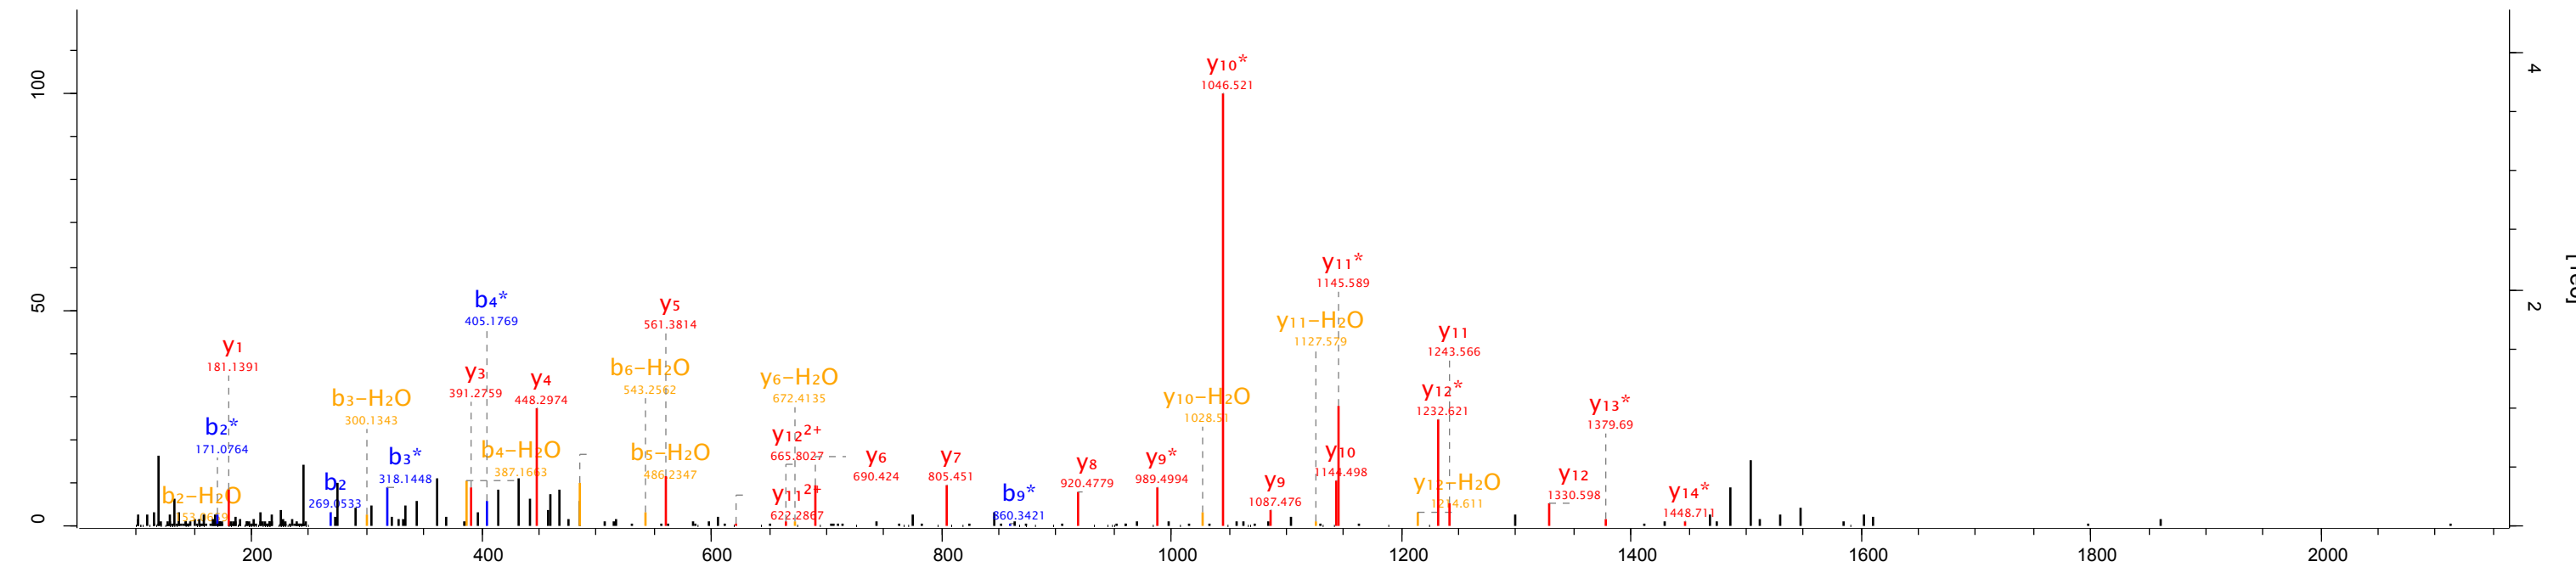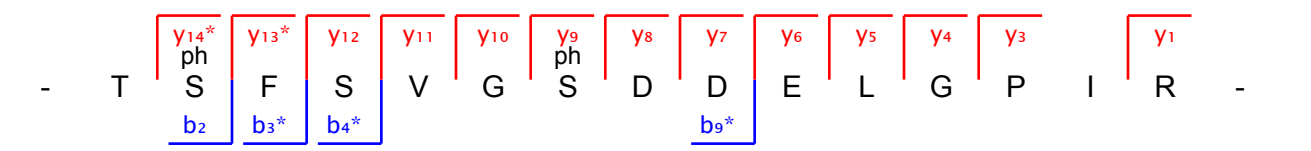

Raw file  
 20150812\_A375SR\_Phospho\_BR1\_03  
 Scan 23479 Method FTMS; HCD Score 234.45 m/z 1263.99 Gene names GTPBP4

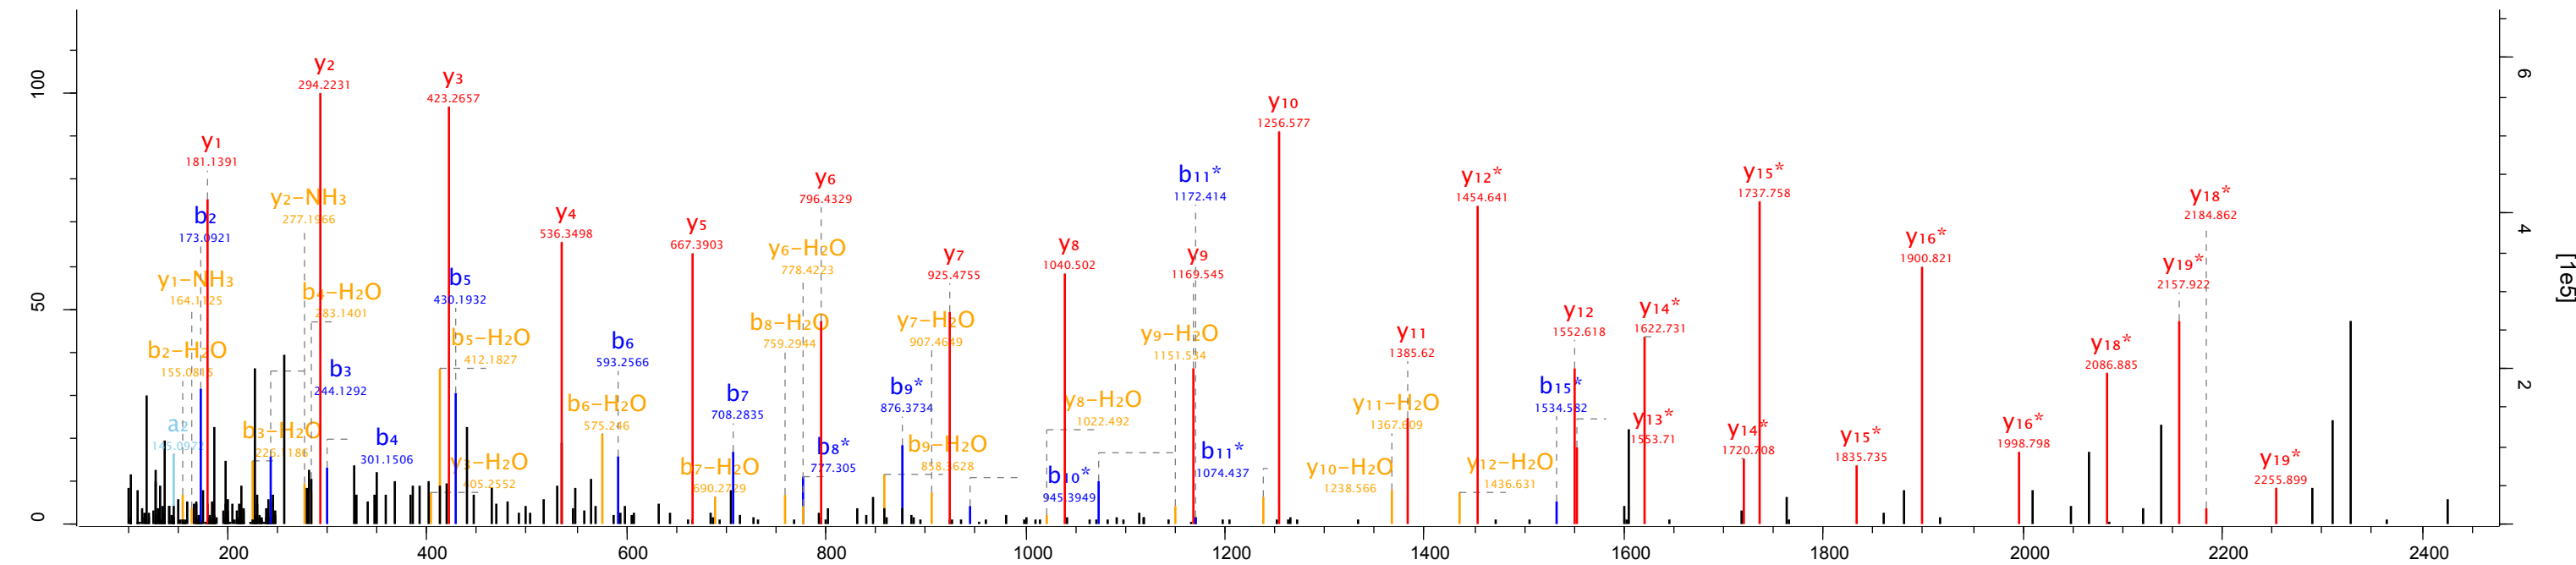

- T A A G E Y D S V S E S E D E E M L E I R -

Fragmentation mapping below the sequence:

- Red boxes (y-ions): y19\* (A), y18\* (G), y16\* (Y), y15\* (D), y14\* (S), y13\* (V), y12 ph (S), y11 (E), y10 (S), y9 (E), y8 (D), y7 (E), y6 (E), y5 (M), y4 (L), y3 (E), y2 (I), y1 (R)
- Blue boxes (b-ions): b2 (A), b3 (A), b4 (G), b5 (E), b6 (Y), b7 (D), b8\* (S), b9\* (V), b10\* (S), b11\* (E), b15\* (E)

Raw file  
20150812\_A375SR\_Phospho\_BR1\_03

Scan 23549 Method FTMS; HCD Score 93.36 m/z 1063.46 Gene names CDC5L

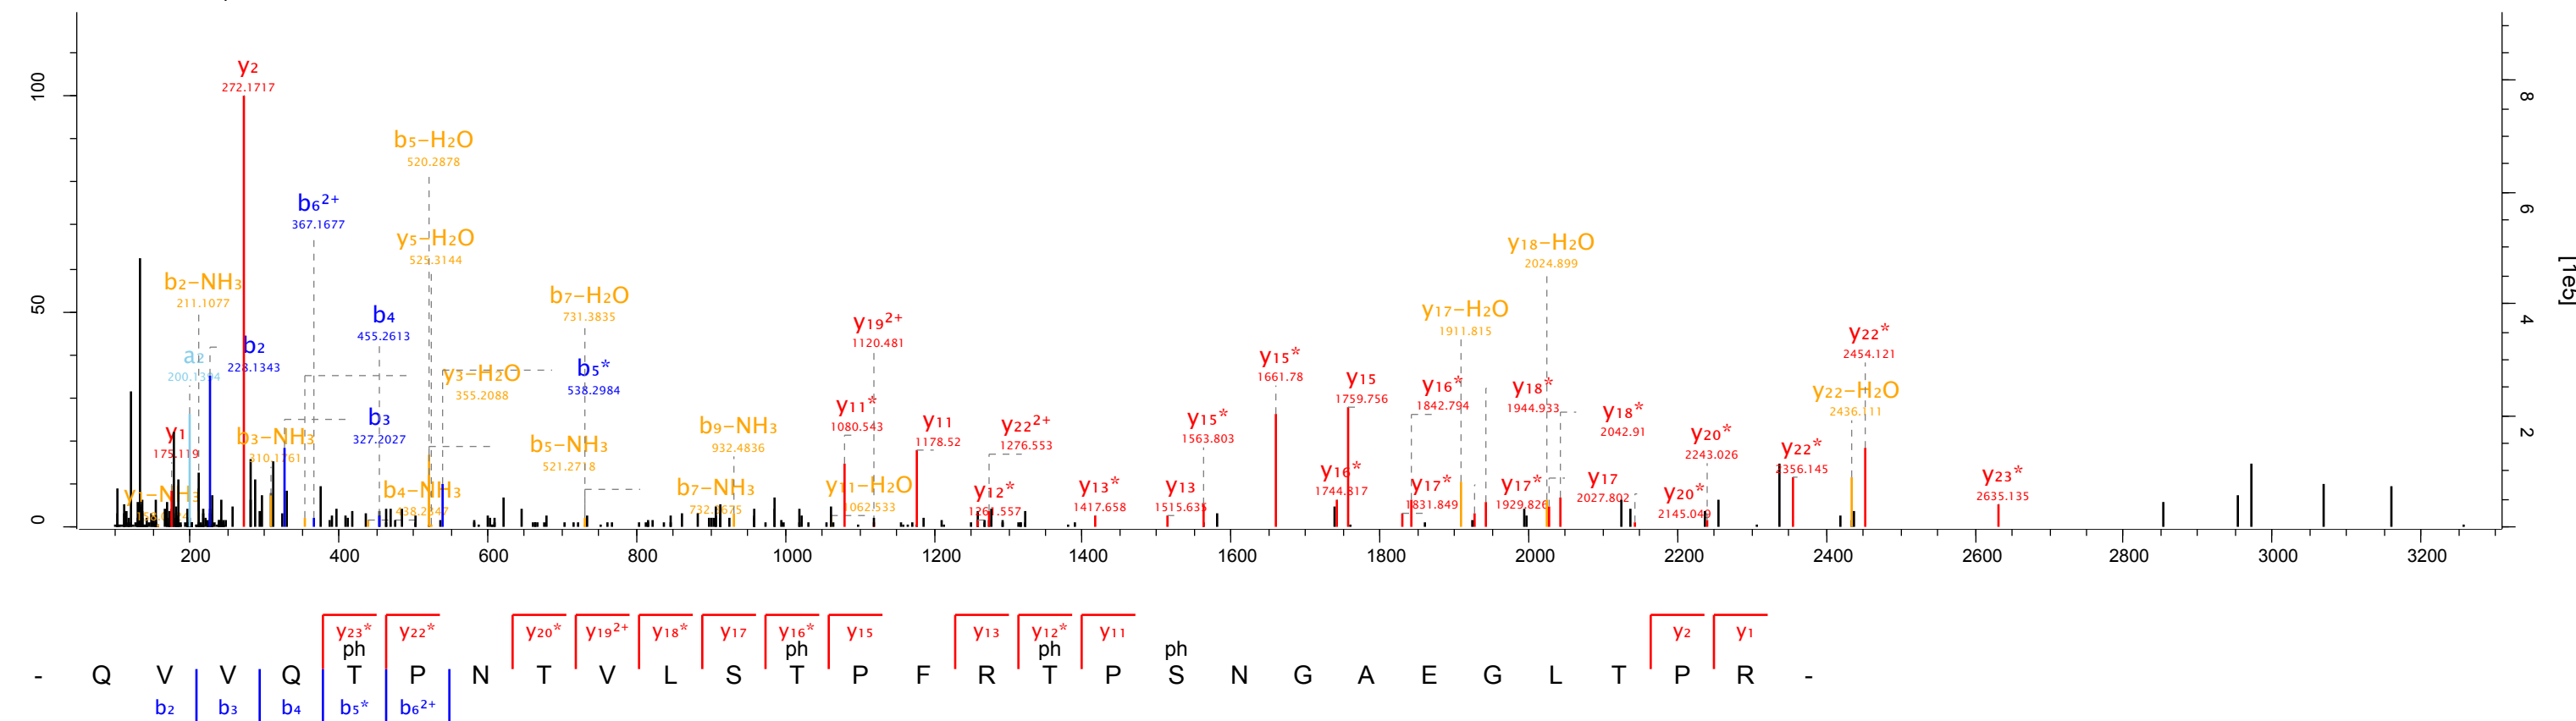

Raw file  
20150812\_A375SR\_Phospho\_BR1\_03

Scan Method Score m/z Gene names  
23629 FTMS; HCD 86.77 1007.45 SYNRG

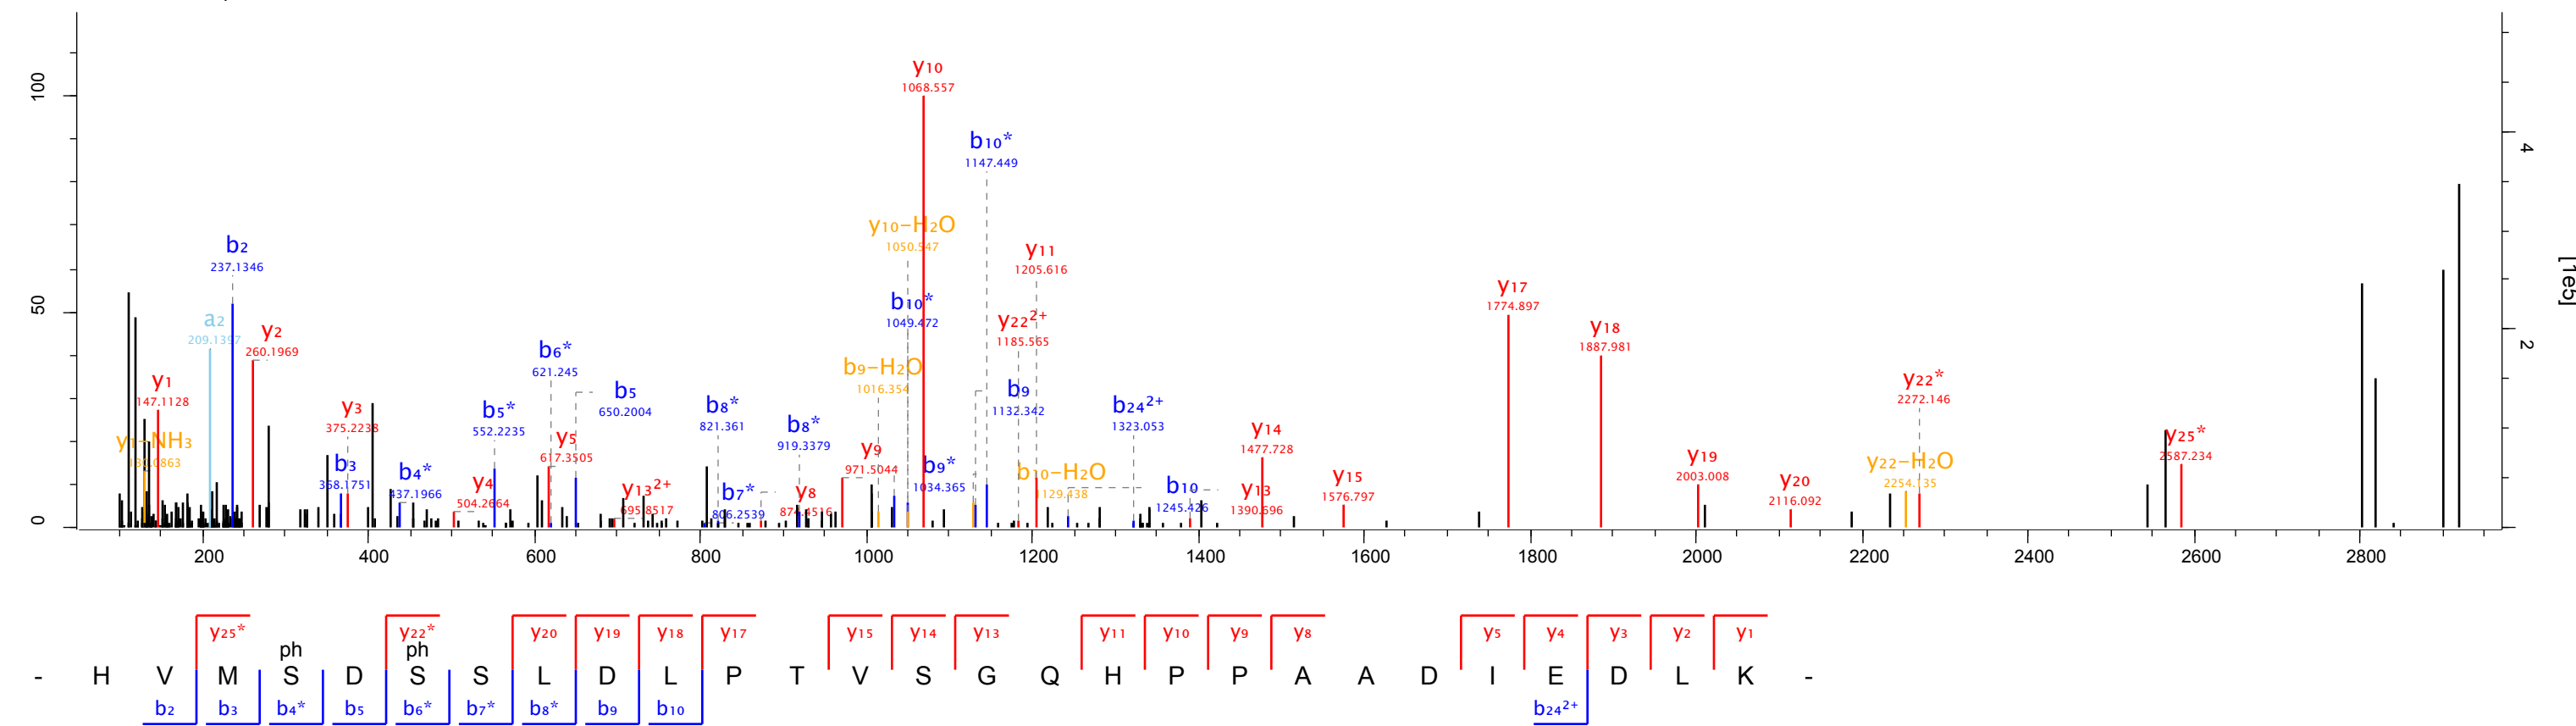

Raw file 20150812\_A375SR\_Phospho\_BR1\_03 Scan 23649 Method FTMS; HCD Score 241.99 m/z 756.84 Gene names MAP1B

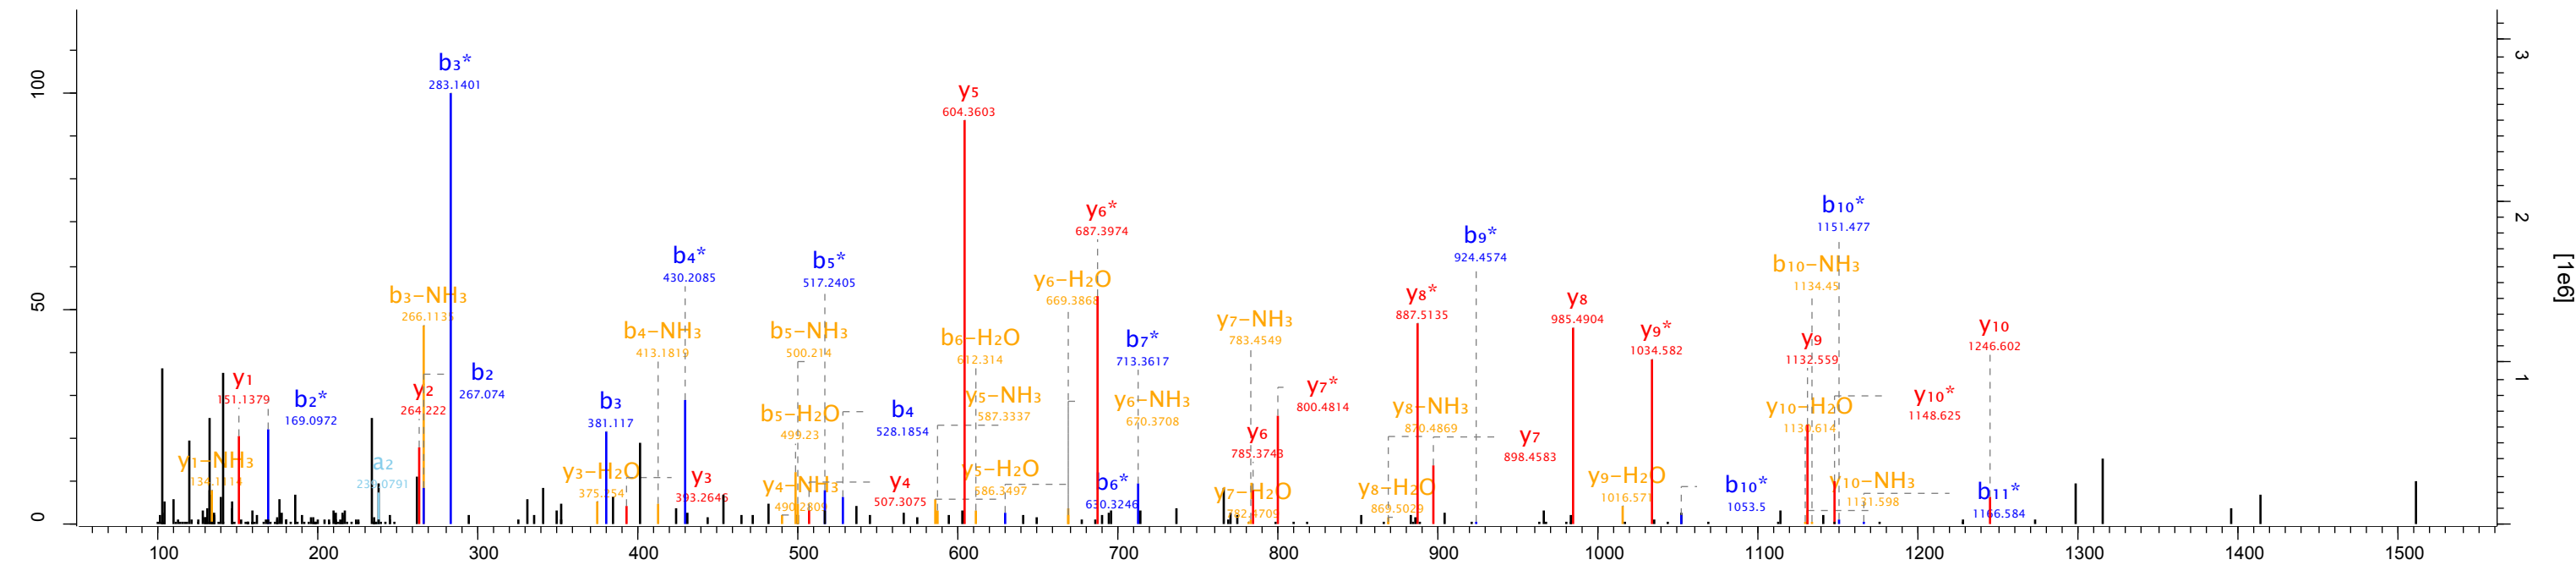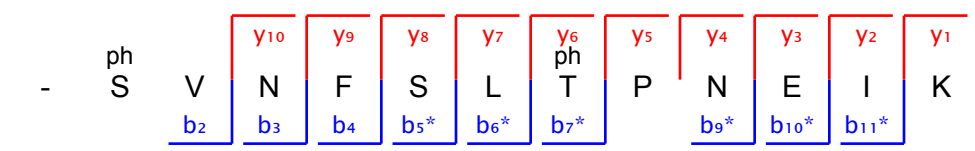

Raw file: 20150812\_A375SR\_Phospho\_BR1\_03  
 Scan: 23739 Method: FTMS; HCD Score: 78.16 m/z: 586.25 Gene names: HRH1

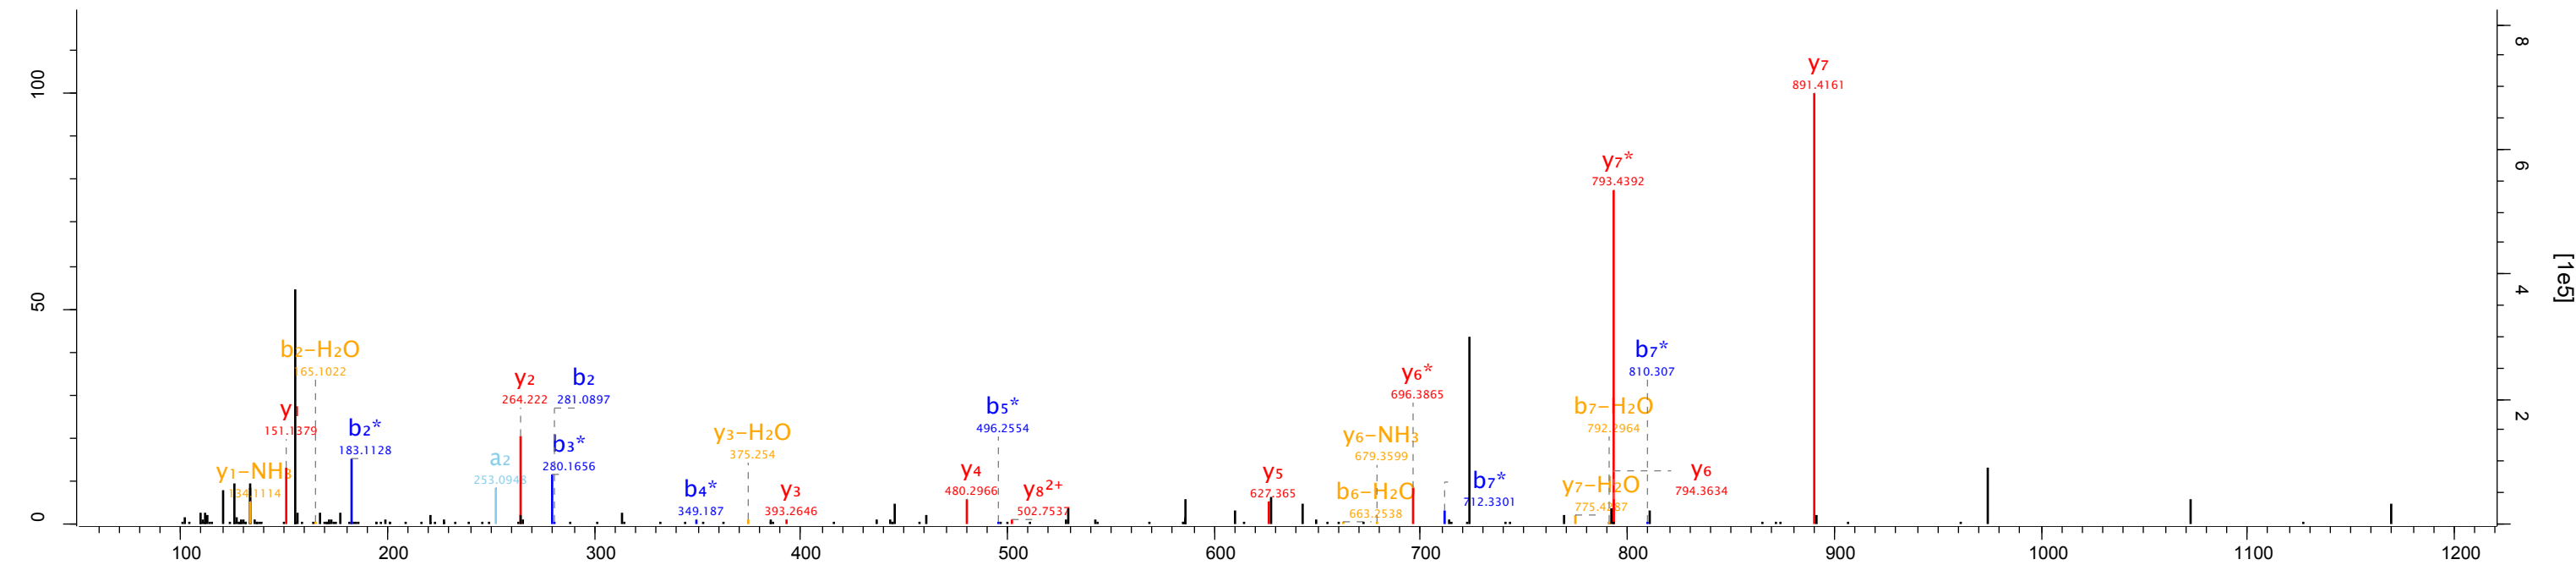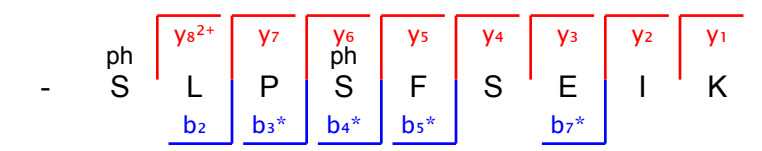



Raw file 20150812\_A375SR\_Phospho\_BR1\_03 Scan 24239 Method FTMS; HCD Score 94.2 m/z 886.72 Gene names IGF2R

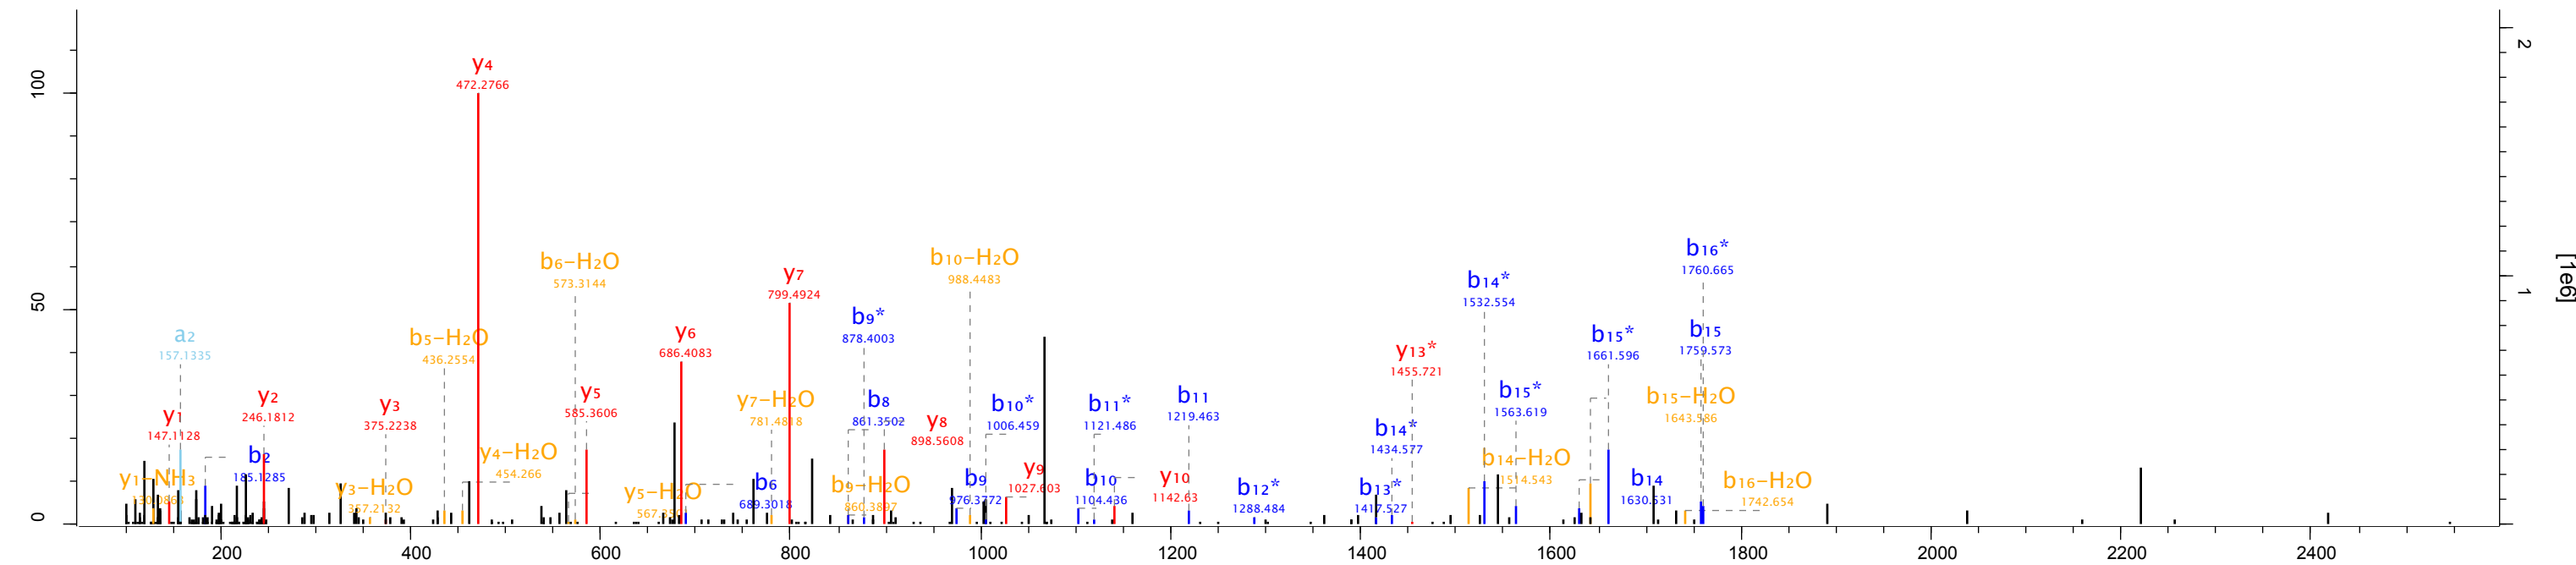

- A L S S L H G D D Q D S E D E V L T I P E V K -

Fragmentation labels below the sequence: b2 (under L), b6 (under H), b8 (under D), b9 (under D), b10 (under Q), b11 (under D), b12\* (under S), b13\* (under E), b14 (under D), b15 (under E), b16\* (under V). Red boxes above the sequence indicate y-ions: y13\* (under D), y10 (under D), y9 (under E), y8 (under V), y7 (under L), y6 (under T), y5 (under I), y4 (under P), y3 (under E), y2 (under V), y1 (under K).

Raw file: 20150812\_A375SR\_Phospho\_BR1\_03  
 Scan: 24949 Method: FTMS; HCD Score: 100.81 m/z: 1146.52 Gene names: SP3

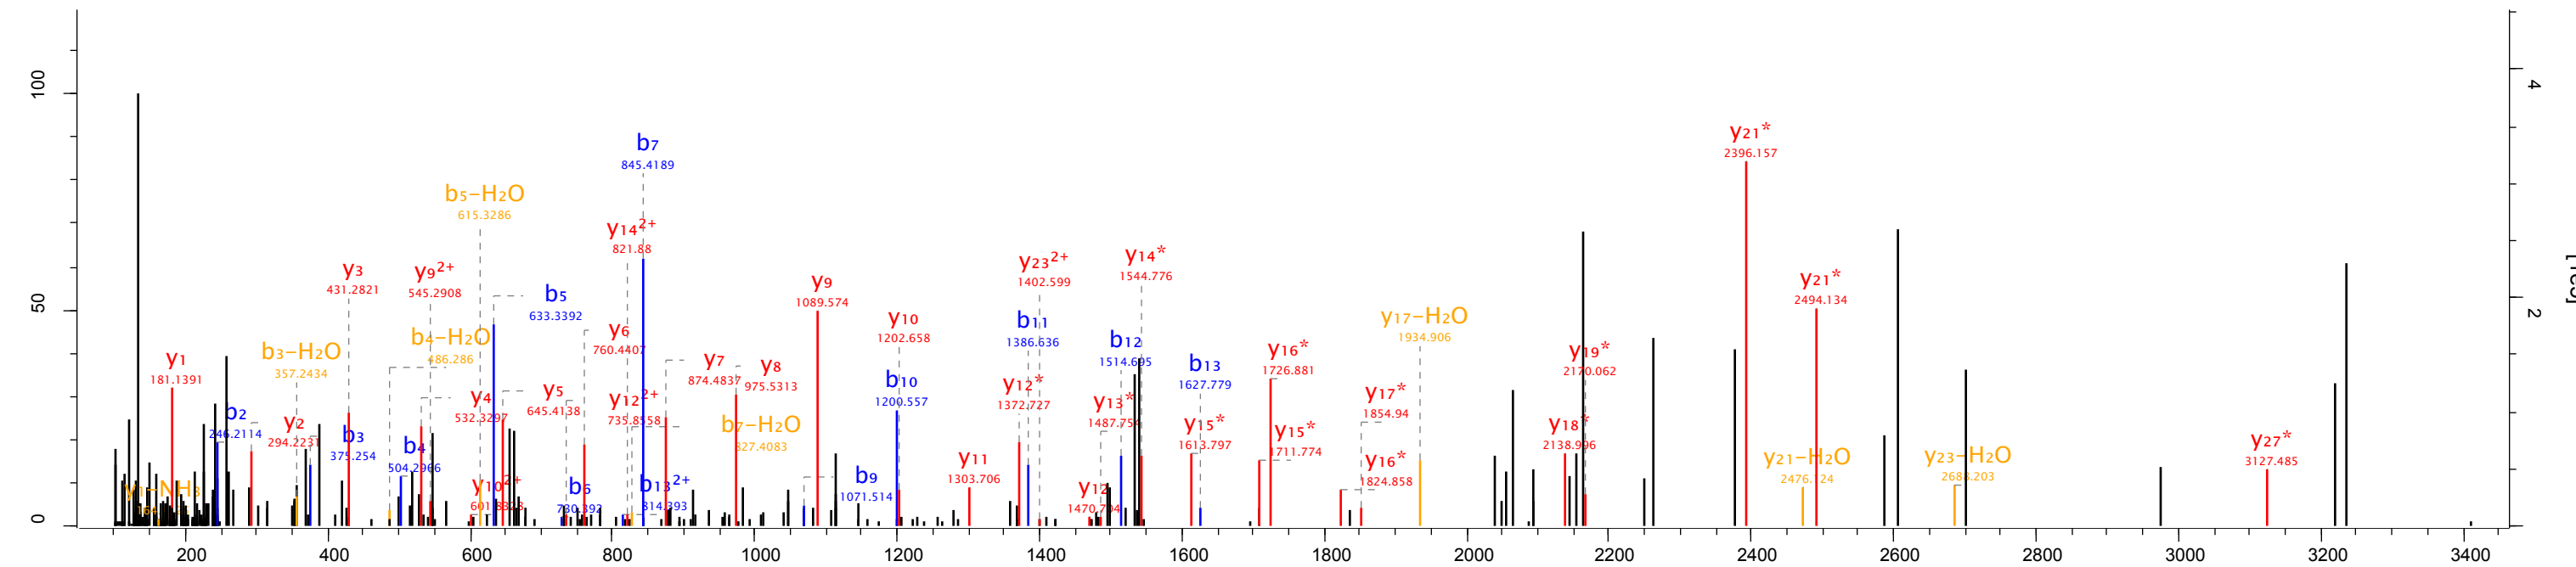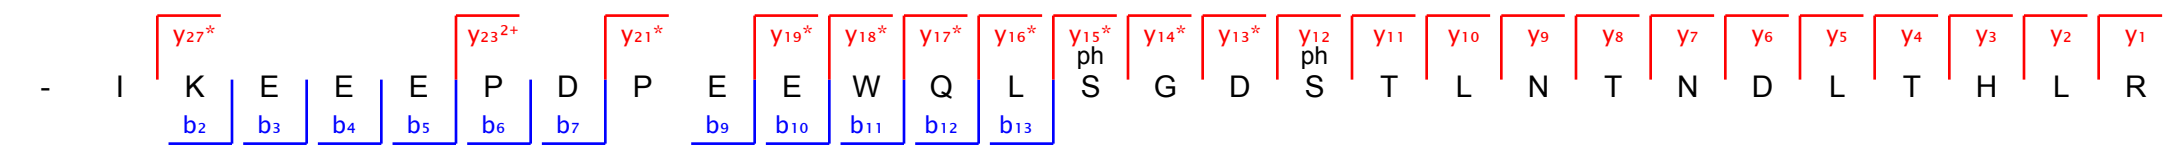

Raw file: 20150812\_A375SR\_Phospho\_BR1\_03  
 Scan: 25119 Method: FTMS; HCD Score: 186.94 m/z: 777.33 Gene names: GRK5;GRK6

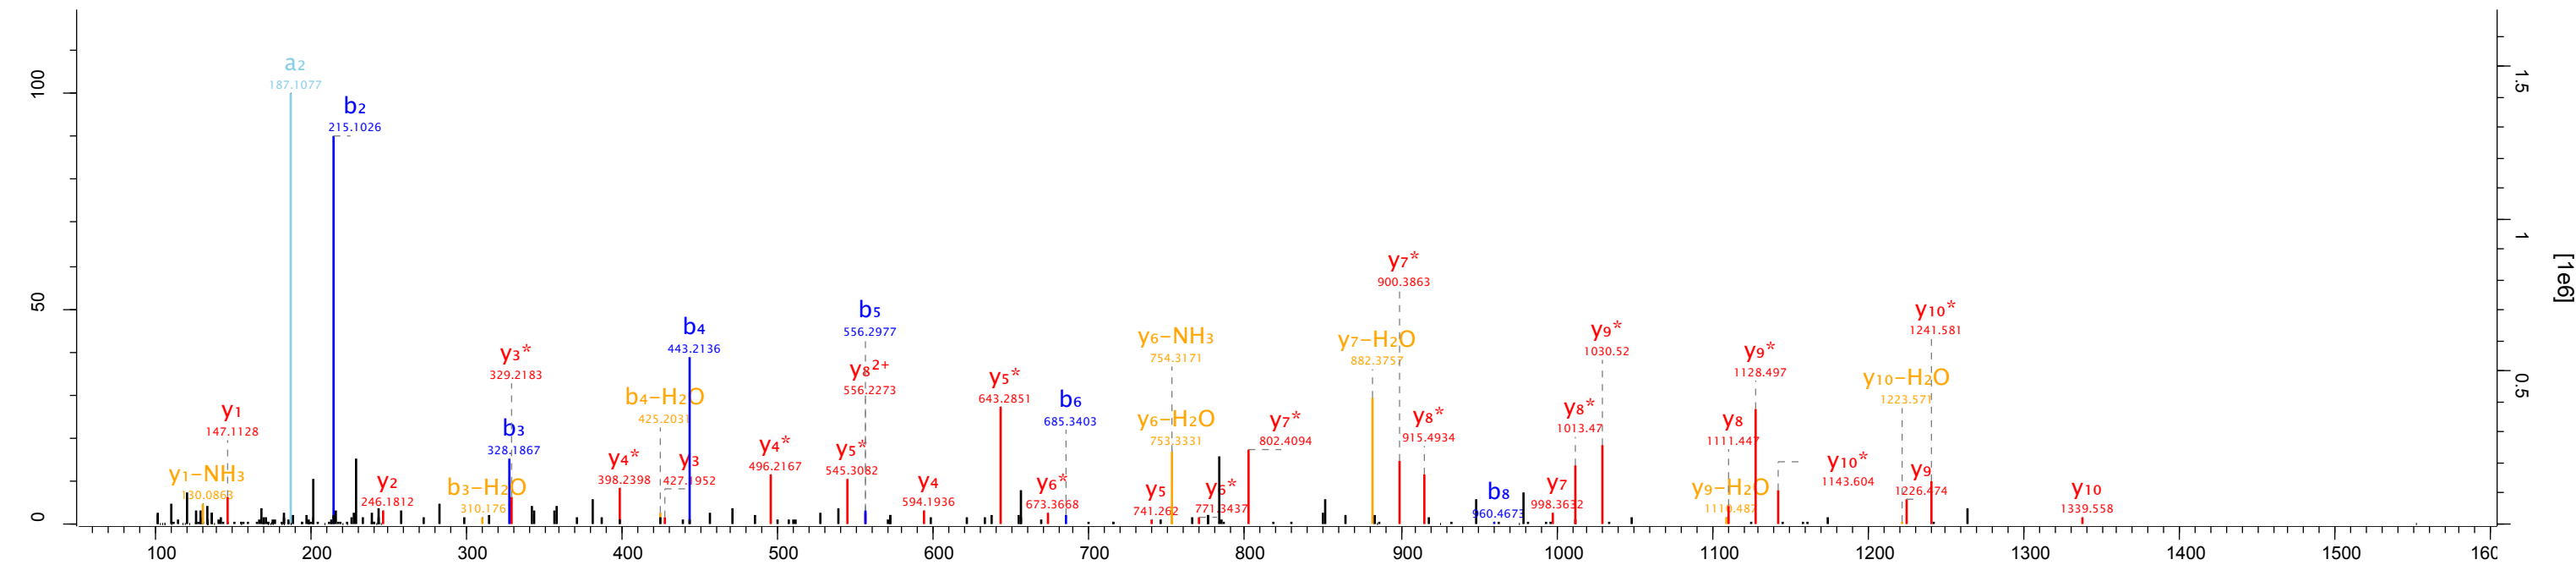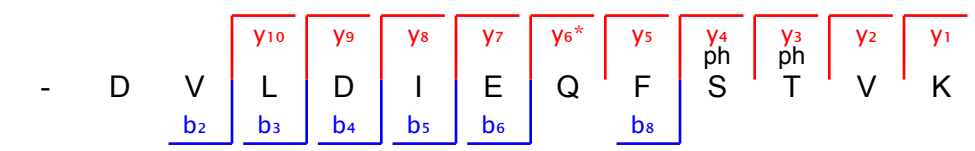

Raw file: 20150812\_A375SR\_Phospho\_BR1\_03  
 Scan: 2519 Method: FTMS; HCD Score: 131.48 m/z: 722.29 Gene names: ZC3H13

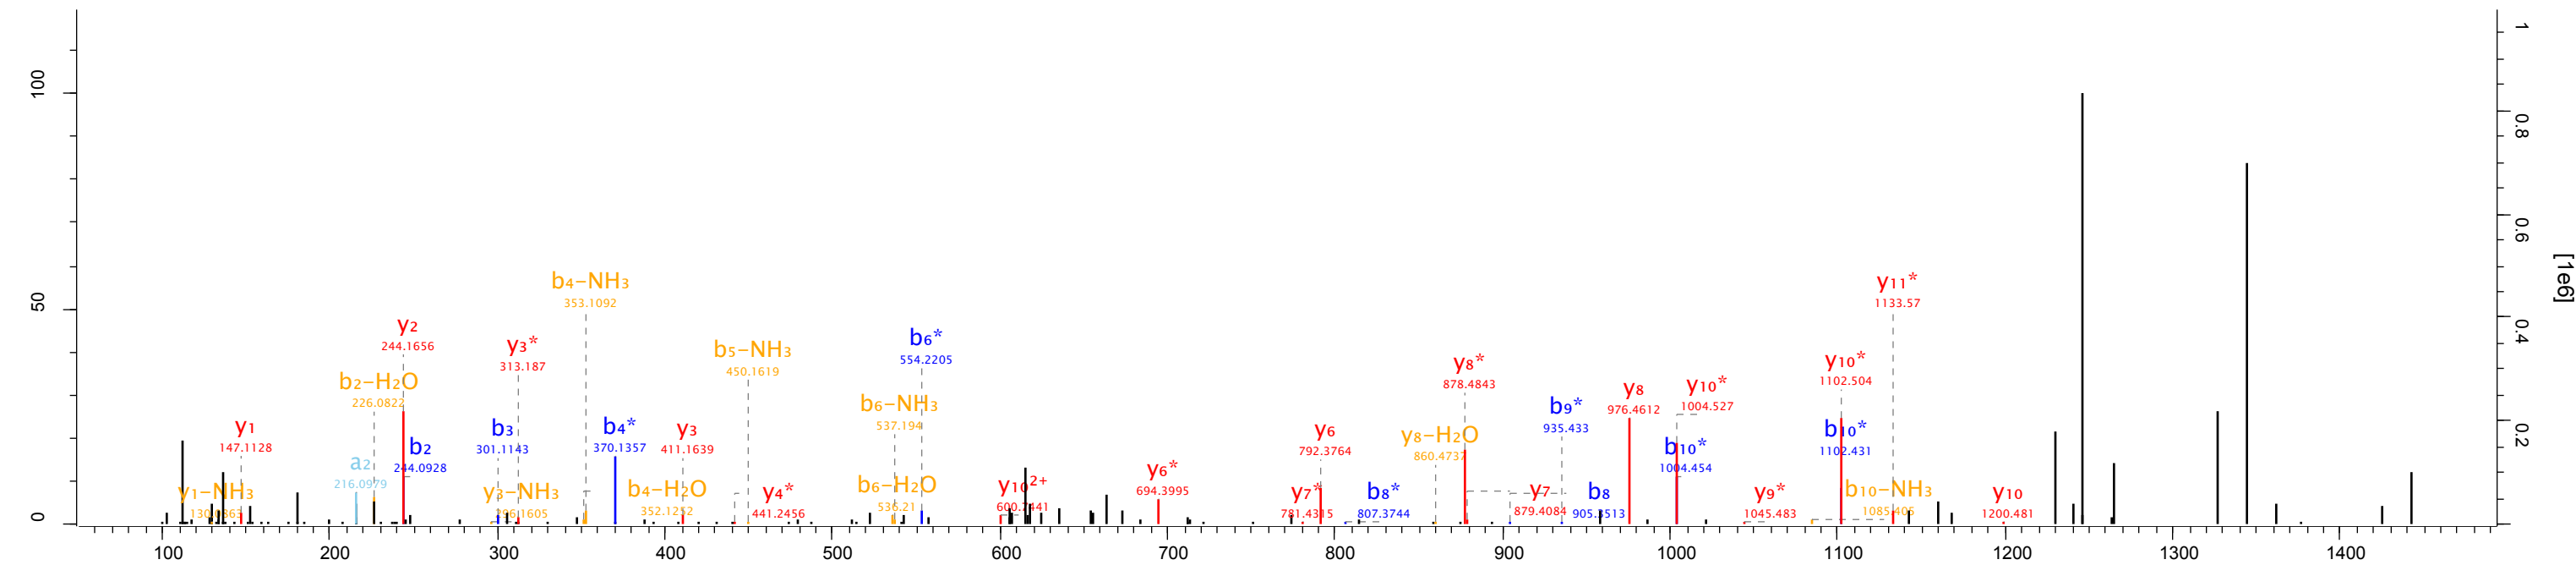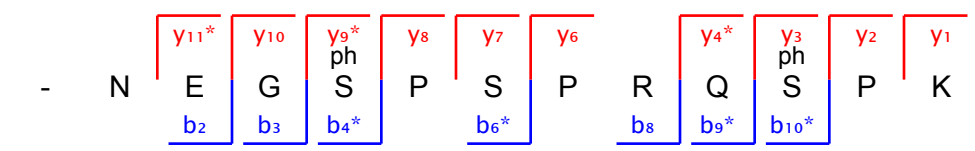

Raw file 20150812\_A375SR\_Phospho\_BR1\_03 Scan 25299 Method FTMS; HCD Score 206.28 m/z 1128.47 Gene names STAG2

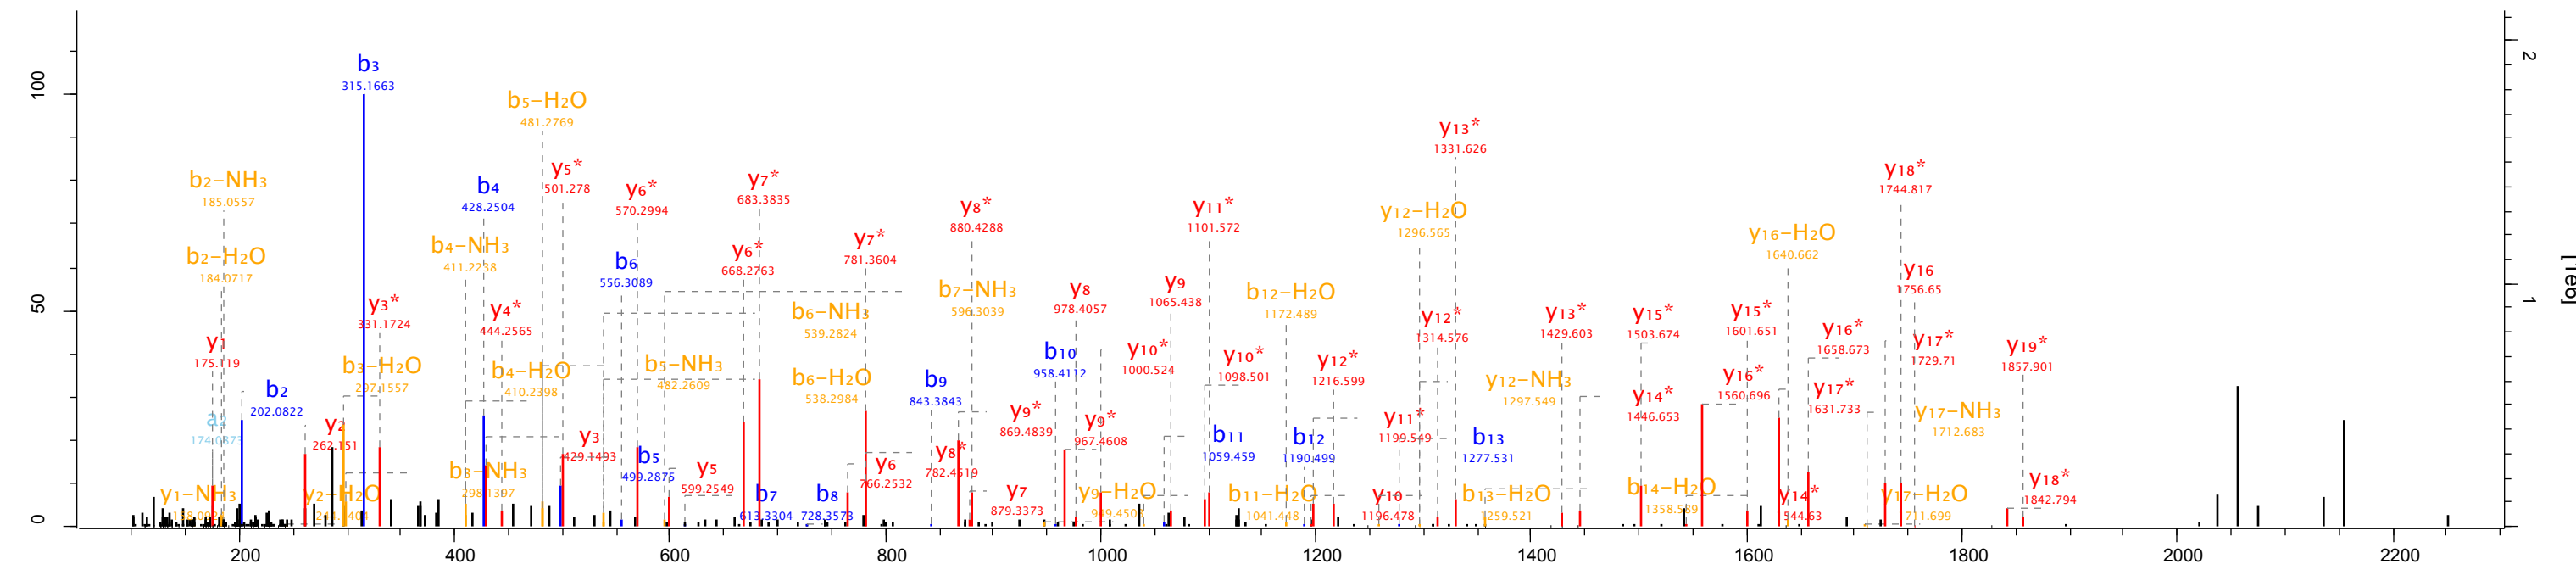

- N S L L A G G D D T M S V I S G I S S R -

b<sub>2</sub>
b<sub>3</sub>
b<sub>4</sub>
b<sub>5</sub>
b<sub>6</sub>
b<sub>7</sub>
b<sub>8</sub>
b<sub>9</sub>
b<sub>10</sub>
b<sub>11</sub>
b<sub>12</sub>
b<sub>13</sub>
y<sub>19</sub>\*
y<sub>18</sub>\*
y<sub>17</sub>\*
y<sub>16</sub>
y<sub>15</sub>\*
y<sub>14</sub>\*
y<sub>13</sub>\*
y<sub>12</sub>\*
y<sub>11</sub>\*
y<sub>10</sub>
y<sub>9</sub>
y<sub>8</sub>
y<sub>7</sub>
y<sub>6</sub>ph
y<sub>5</sub>
y<sub>4</sub>\*
y<sub>3</sub>ph
y<sub>2</sub>
y<sub>1</sub>

Raw file 20150812\_A375SR\_Phospho\_BR1\_03 Scan 26159 Method FTMS; HCD Score 323.91 m/z 770.37 Gene names NAV1

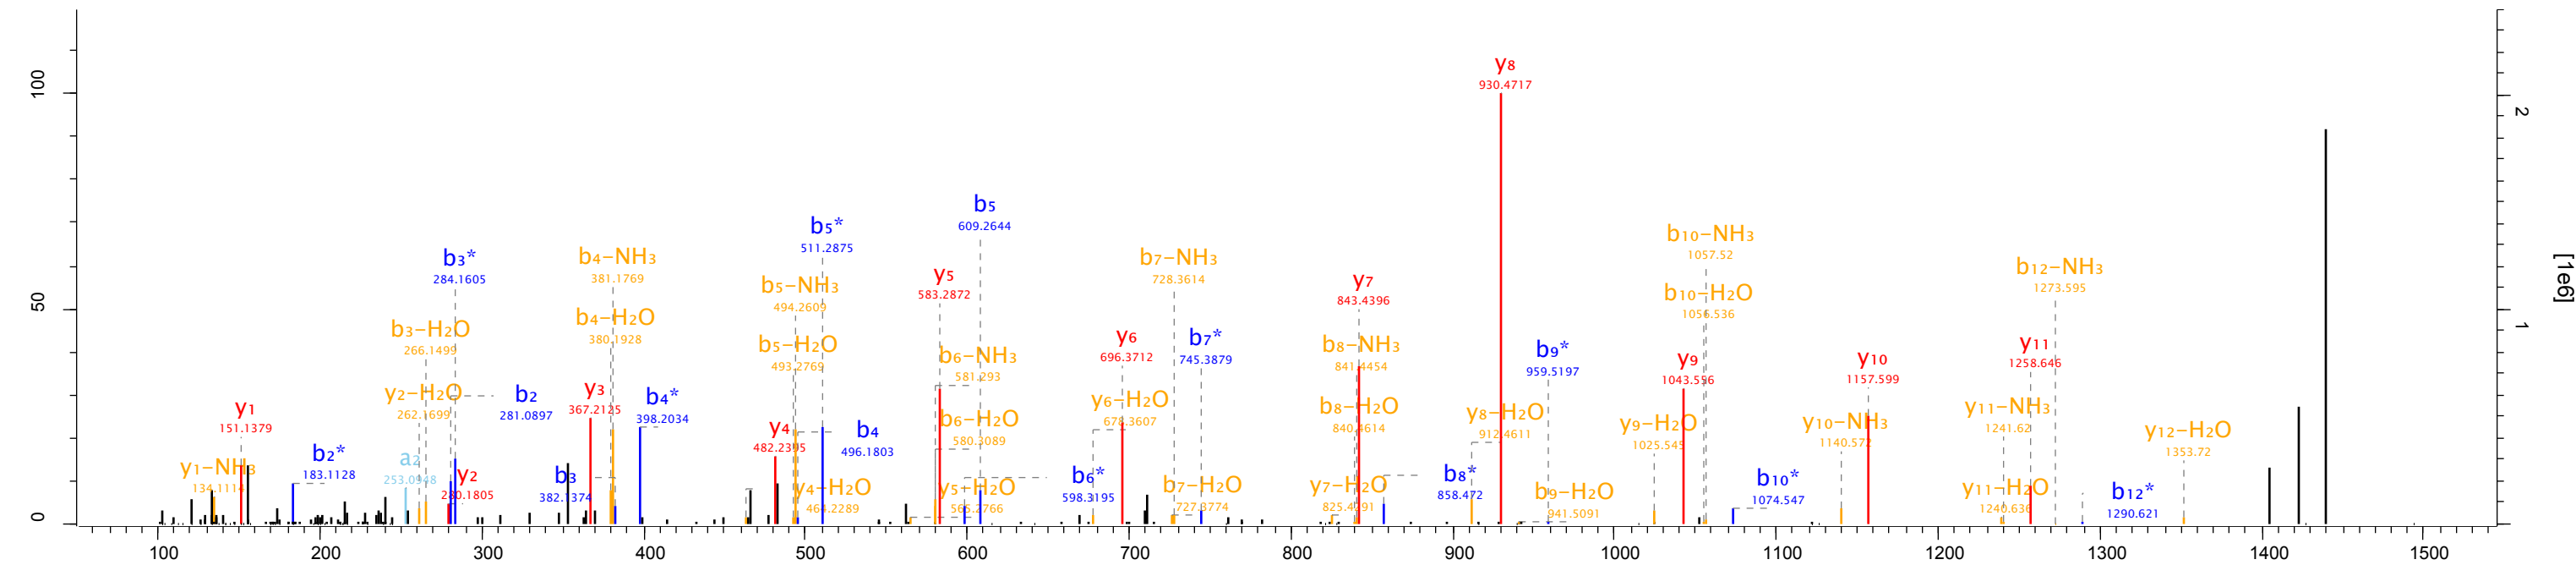

ph S

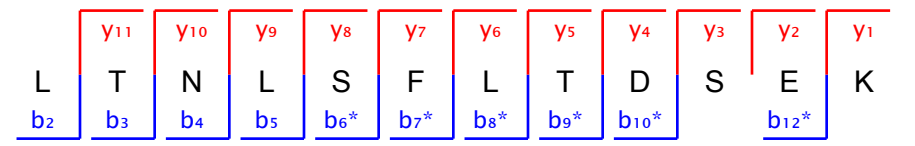

Raw file 20150812\_A375SR\_Phospho\_BR1\_03 Scan 26229 Method FTMS; HCD Score 46.82 m/z 937.73 Gene names SP4

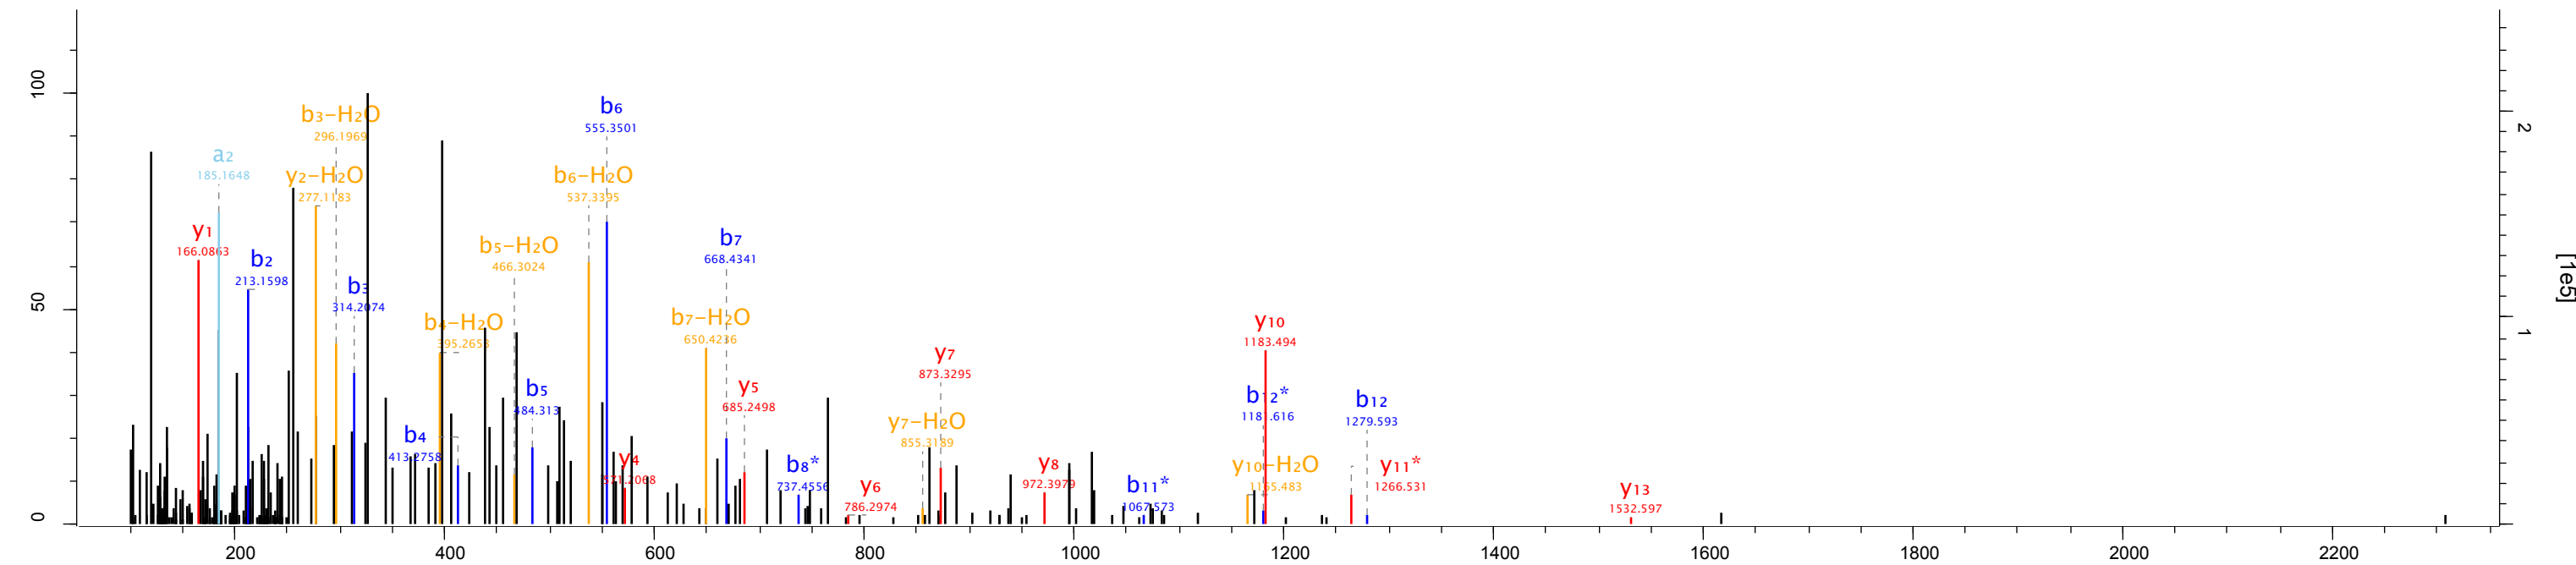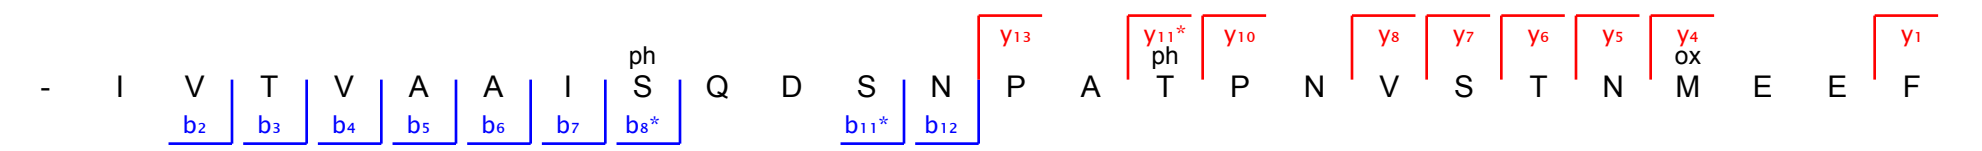

Raw file: 20150812\_A375SR\_Phospho\_BR1\_03  
 Scan: 2629 Method: FTMS; HCD Score: 112.06 m/z: 686.3 Gene names: SRRM2

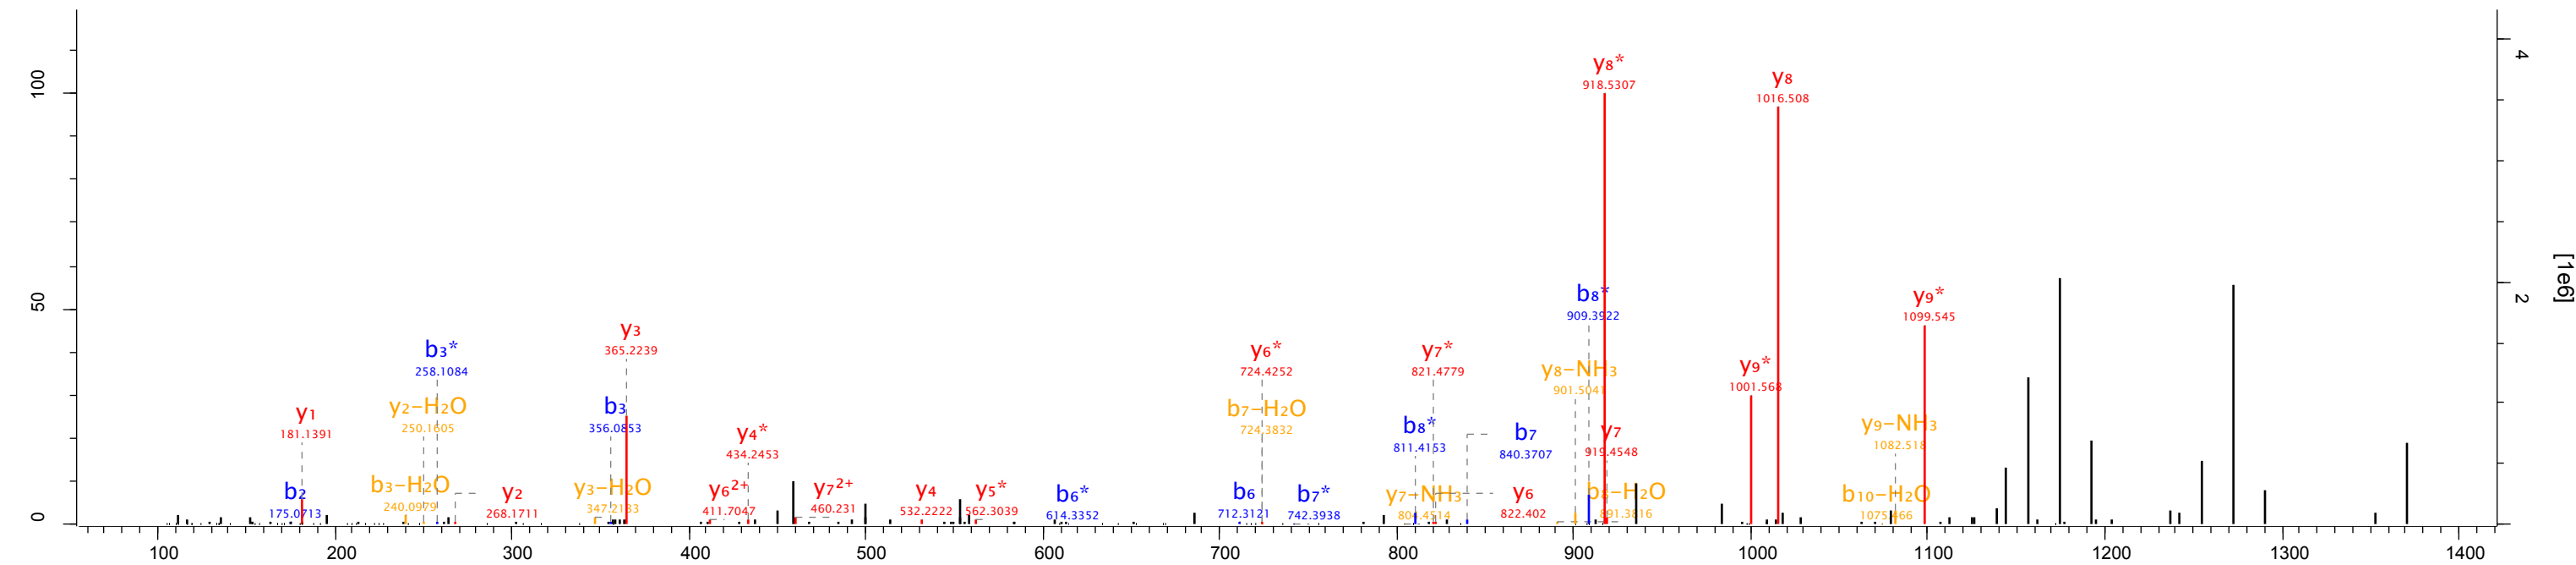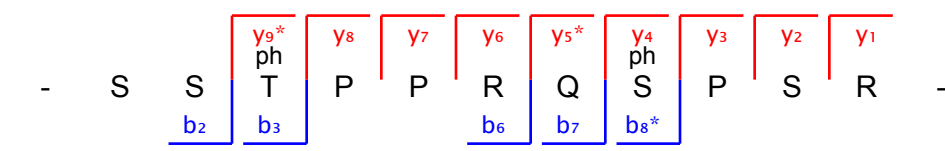



Raw file 20150812\_A375SR\_Phospho\_BR1\_03 Scan 26339 Method FTMS; HCD Score 134.05 m/z 1131.22 Gene names MICALL1

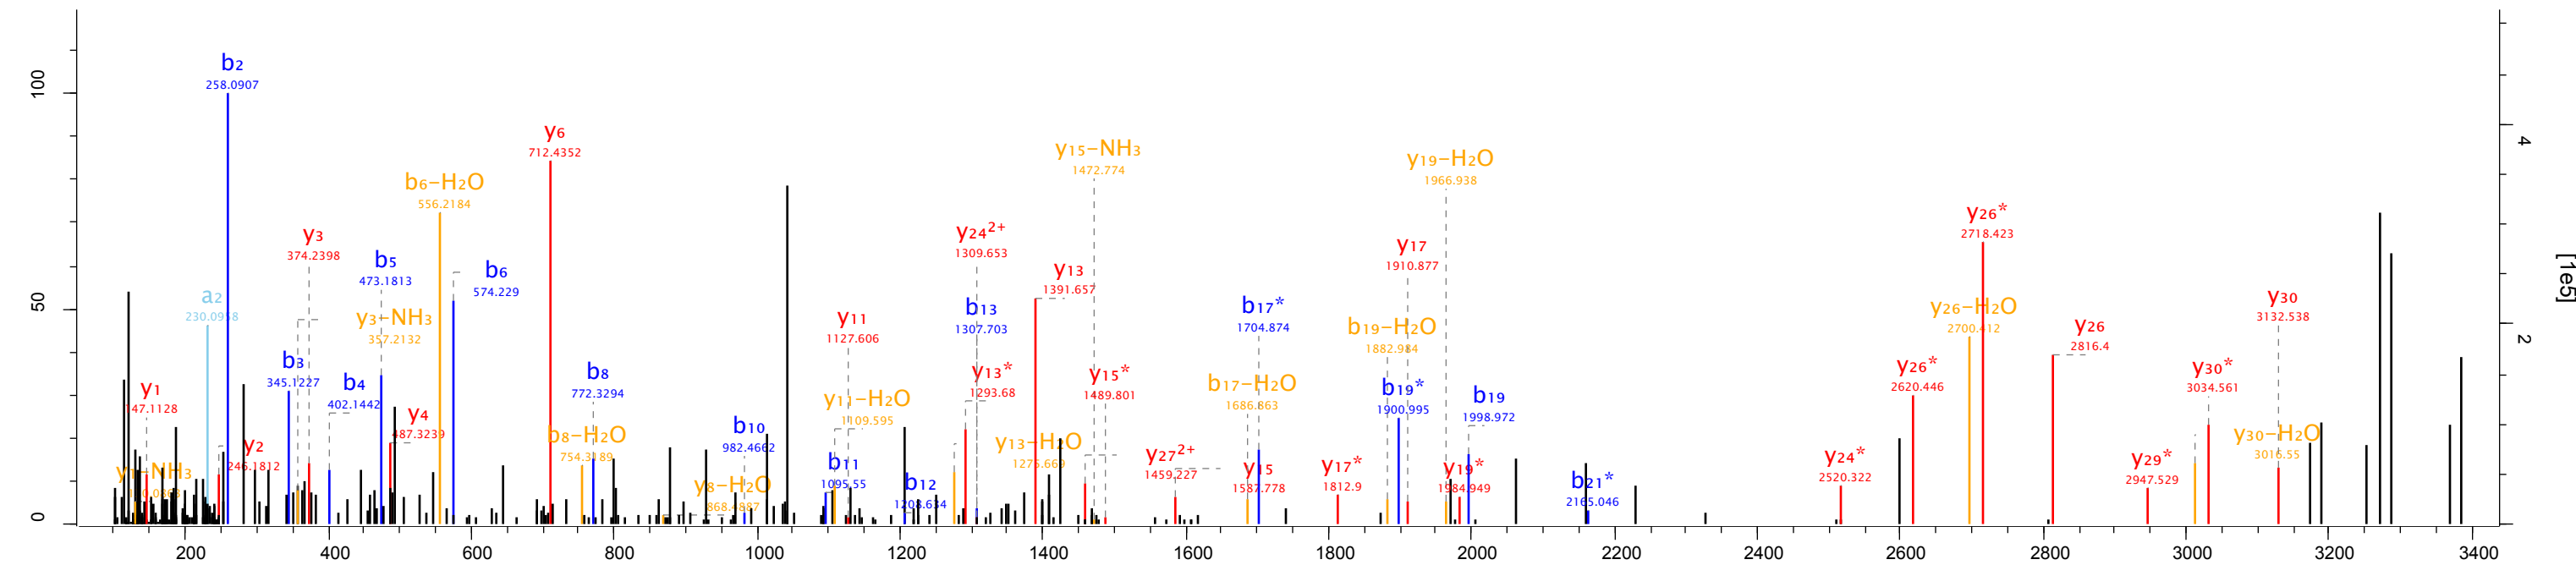

- P C S G A T P T P L L L V G D R S P V P S P G S S S P Q L Q V K -

Fragmentation labels (b and y ions) are shown below the corresponding amino acids in the sequence:

- b<sub>2</sub> (under C)
- b<sub>3</sub> (under S)
- b<sub>4</sub> (under G)
- b<sub>5</sub> (under A)
- b<sub>6</sub> (under T)
- b<sub>8</sub> (under P)
- b<sub>10</sub> (under L)
- b<sub>11</sub> (under L)
- b<sub>12</sub> (under L)
- b<sub>13</sub> (under V)
- b<sub>17</sub>\* (under S)
- b<sub>19</sub> (under V)
- b<sub>21</sub>\* (under P)
- y<sub>1</sub> (under K)
- y<sub>2</sub> (under V)
- y<sub>3</sub> (under Q)
- y<sub>4</sub> (under L)
- y<sub>6</sub> (under P)
- y<sub>11</sub> (under P)
- y<sub>13</sub> (under P)
- y<sub>15</sub> (under P)
- y<sub>17</sub> (under R)
- y<sub>19</sub>\* (under G)
- y<sub>24</sub>\* (under P)
- y<sub>26</sub>\* (under P)
- y<sub>27</sub><sup>2+</sup> (under T)
- y<sub>29</sub>\* (under G)
- y<sub>30</sub>\* (under S)

Raw file: 20150812\_A375SR\_Phospho\_BR1\_03  
 Scan: 26829 Method: FTMS; HCD Score: 227.84 m/z: 1107.18 Gene names: IL1A

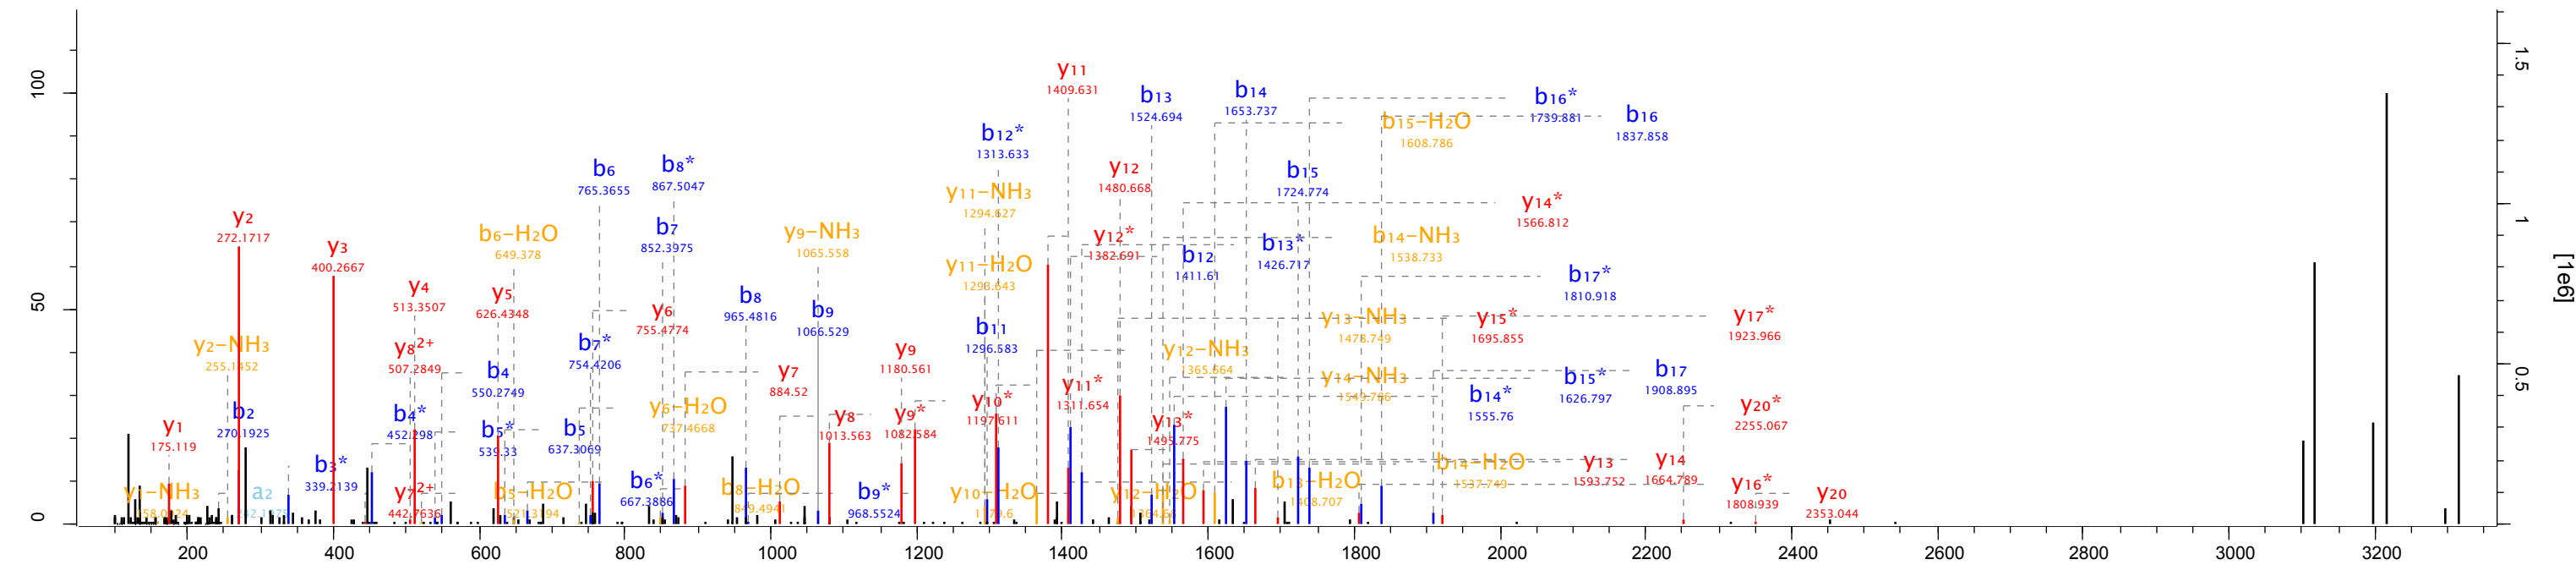

- R L S L S Q S I T D D D L E A I A N D S E E E I I K P R -  
 (b<sub>2</sub> b<sub>3</sub><sup>\*</sup> b<sub>4</sub> b<sub>5</sub> b<sub>6</sub> b<sub>7</sub> b<sub>8</sub> b<sub>9</sub> b<sub>11</sub> b<sub>12</sub> b<sub>13</sub> b<sub>14</sub> b<sub>15</sub> b<sub>16</sub> b<sub>17</sub> y<sub>20</sub>)

Raw file: 20150812\_A375SR\_Phospho\_BR1\_03  
 Scan: 27469 Method: FTMS; HCD Score: 41.69 m/z: 1021.22 Gene names: TJP1

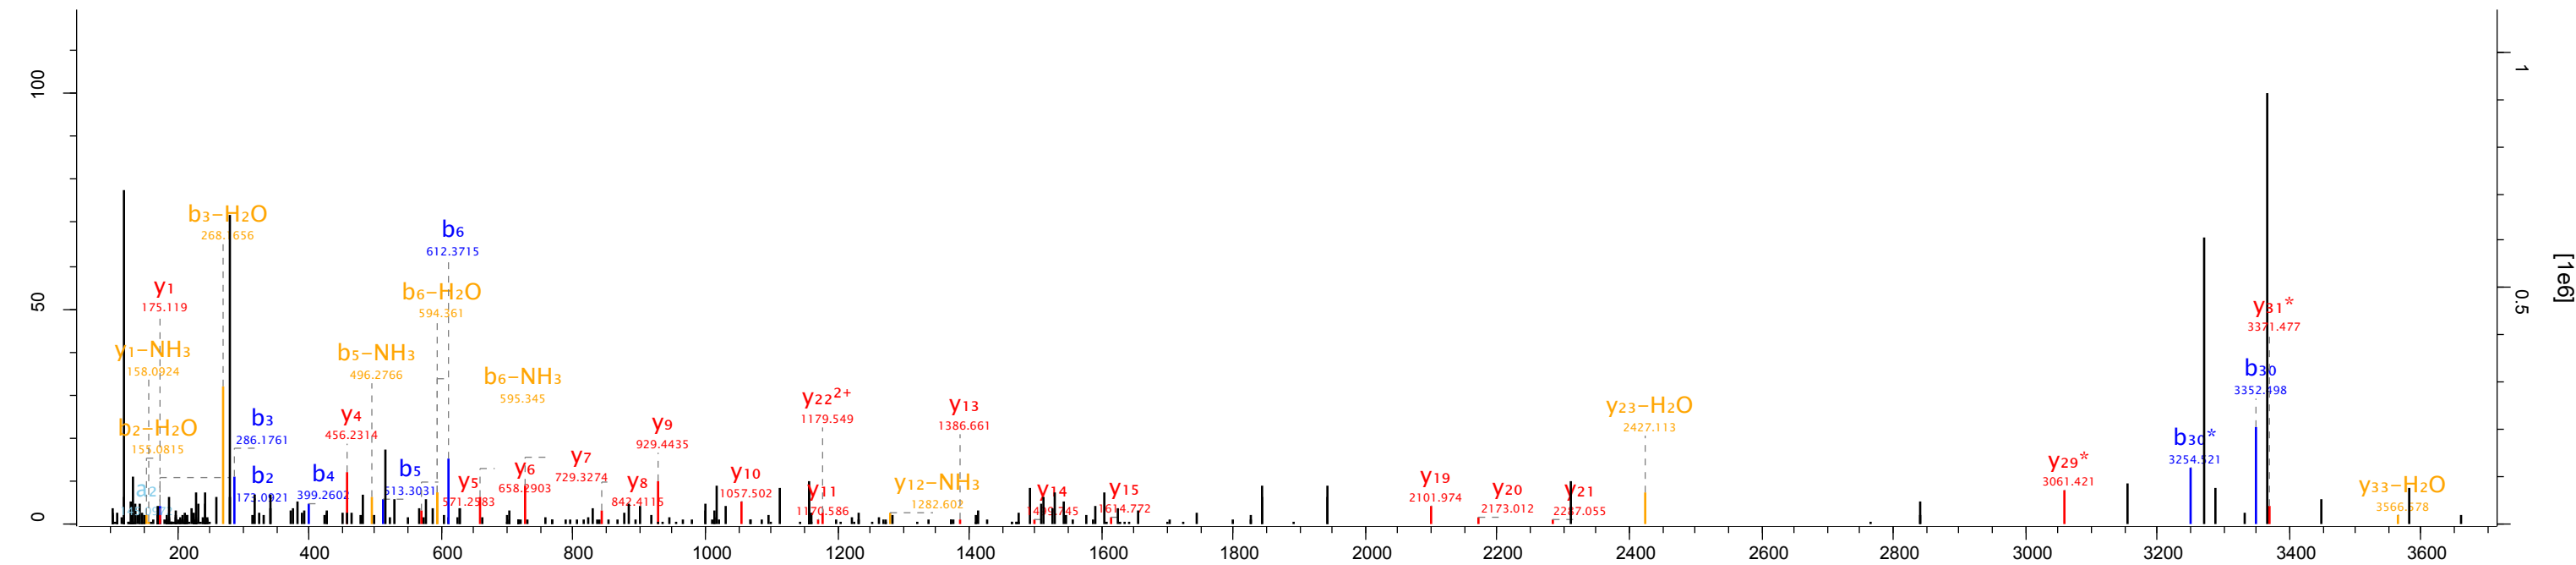

- A T L L N V P D L S D S I H S A N A S E R D D I S E I Q S L A S D H S G R -

Fragmentation mapping (b and y ions):

- b<sub>2</sub> (T), b<sub>3</sub> (L), b<sub>4</sub> (L), b<sub>5</sub> (N), b<sub>6</sub> (V)
- y<sub>1</sub> (R), y<sub>4</sub> (D), y<sub>5</sub> (L), y<sub>6</sub> (A), y<sub>7</sub> (S), y<sub>8</sub> (D), y<sub>9</sub> (H), y<sub>10</sub> (S), y<sub>11</sub> (I), y<sub>13</sub> (S), y<sub>14</sub> (D), y<sub>15</sub> (D), y<sub>19</sub> (S), y<sub>20</sub> (A), y<sub>21</sub> (N), y<sub>22</sub><sup>2+</sup> (A), y<sub>29</sub><sup>\*</sup> (L), y<sub>31</sub><sup>\*</sup> (P)

Raw file Scan Method Score m/z Gene names  
 20150812\_A375SR\_Phospho\_BR1\_03 27519 FTMS; HCD 130.75 755.68 RBM12B

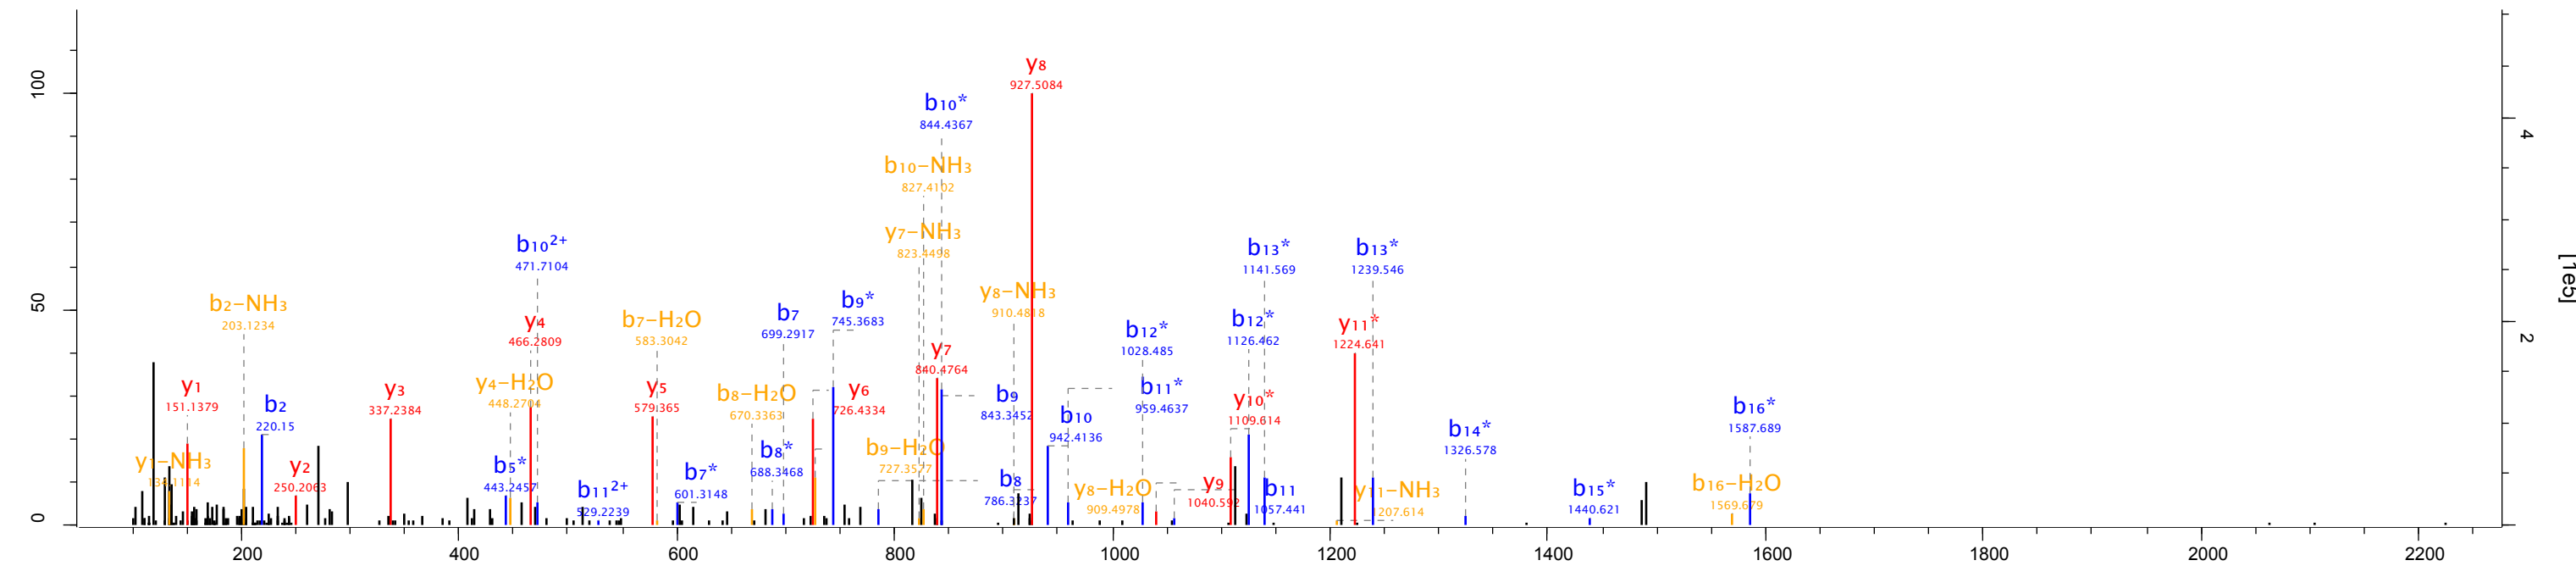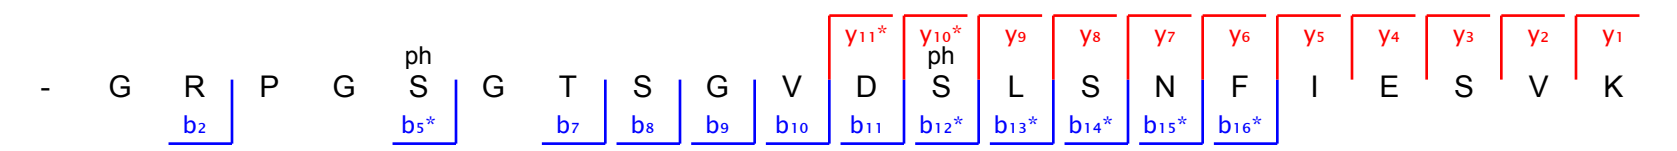

Raw file: 20150812\_A375SR\_Phospho\_BR1\_03  
 Scan: 27549 Method: FTMS; HCD Score: 169.72 m/z: 848.45 Gene names: ALS2

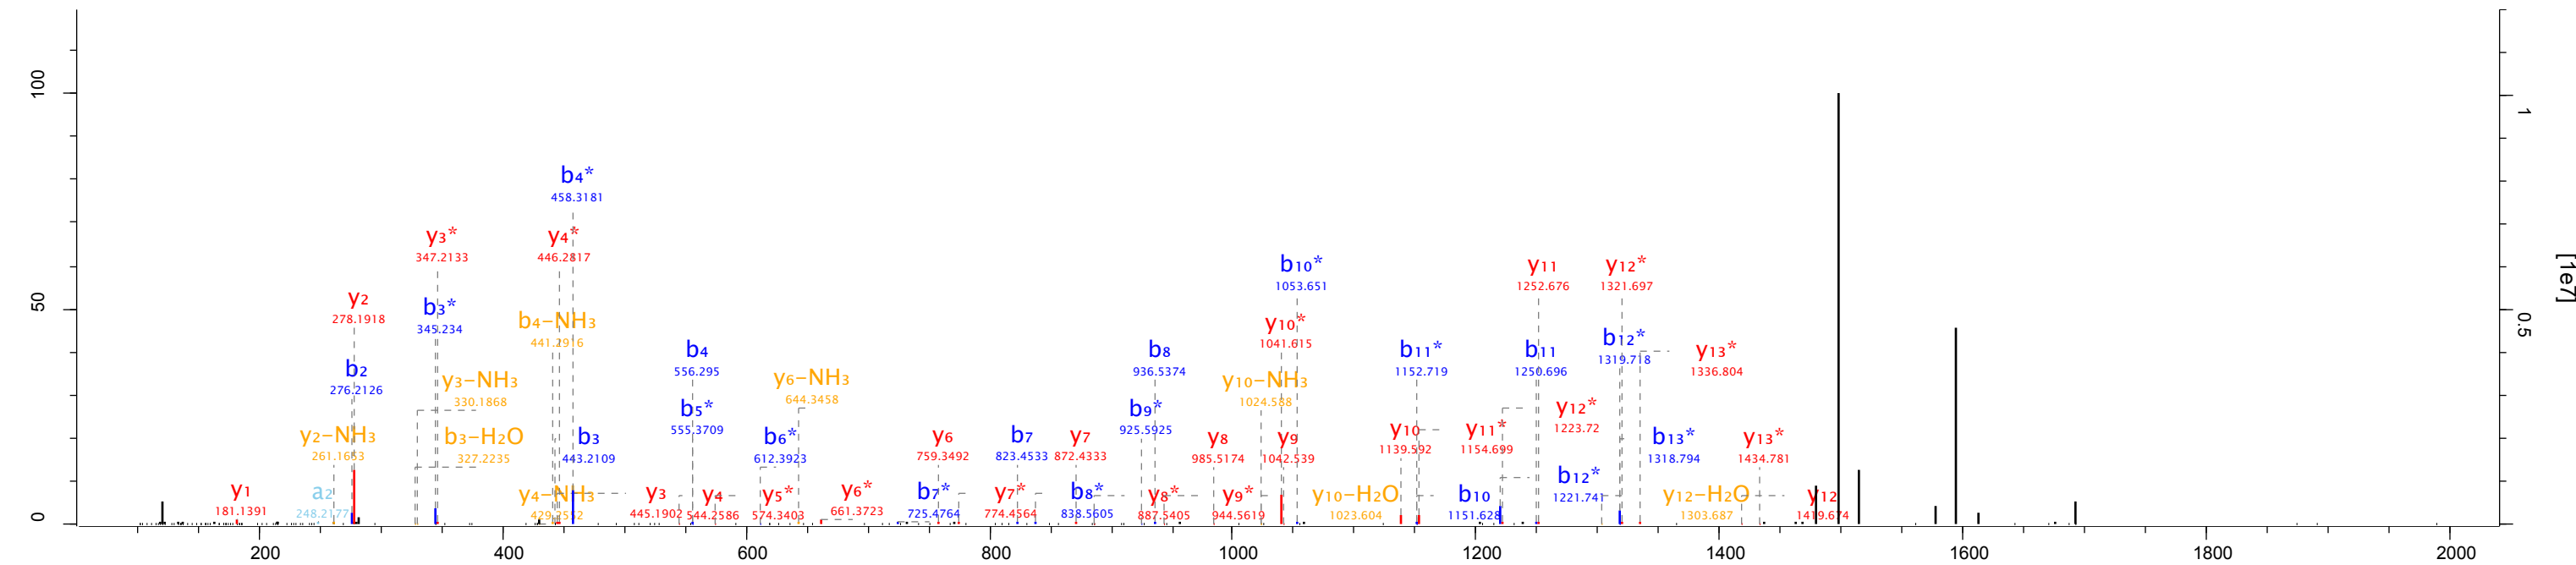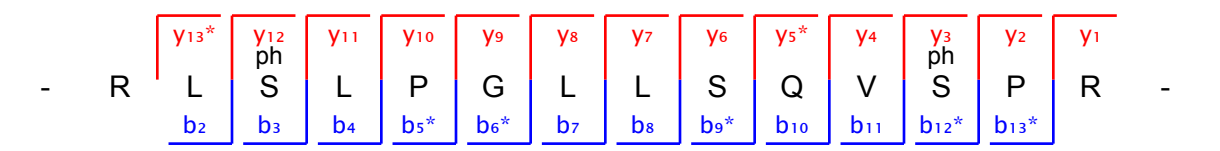

Raw file: 20150812\_A375SR\_Phospho\_BR1\_03  
 Scan: 27669 Method: FTMS; HCD Score: 88.84 m/z: 1121.83 Gene names: TP53BP1

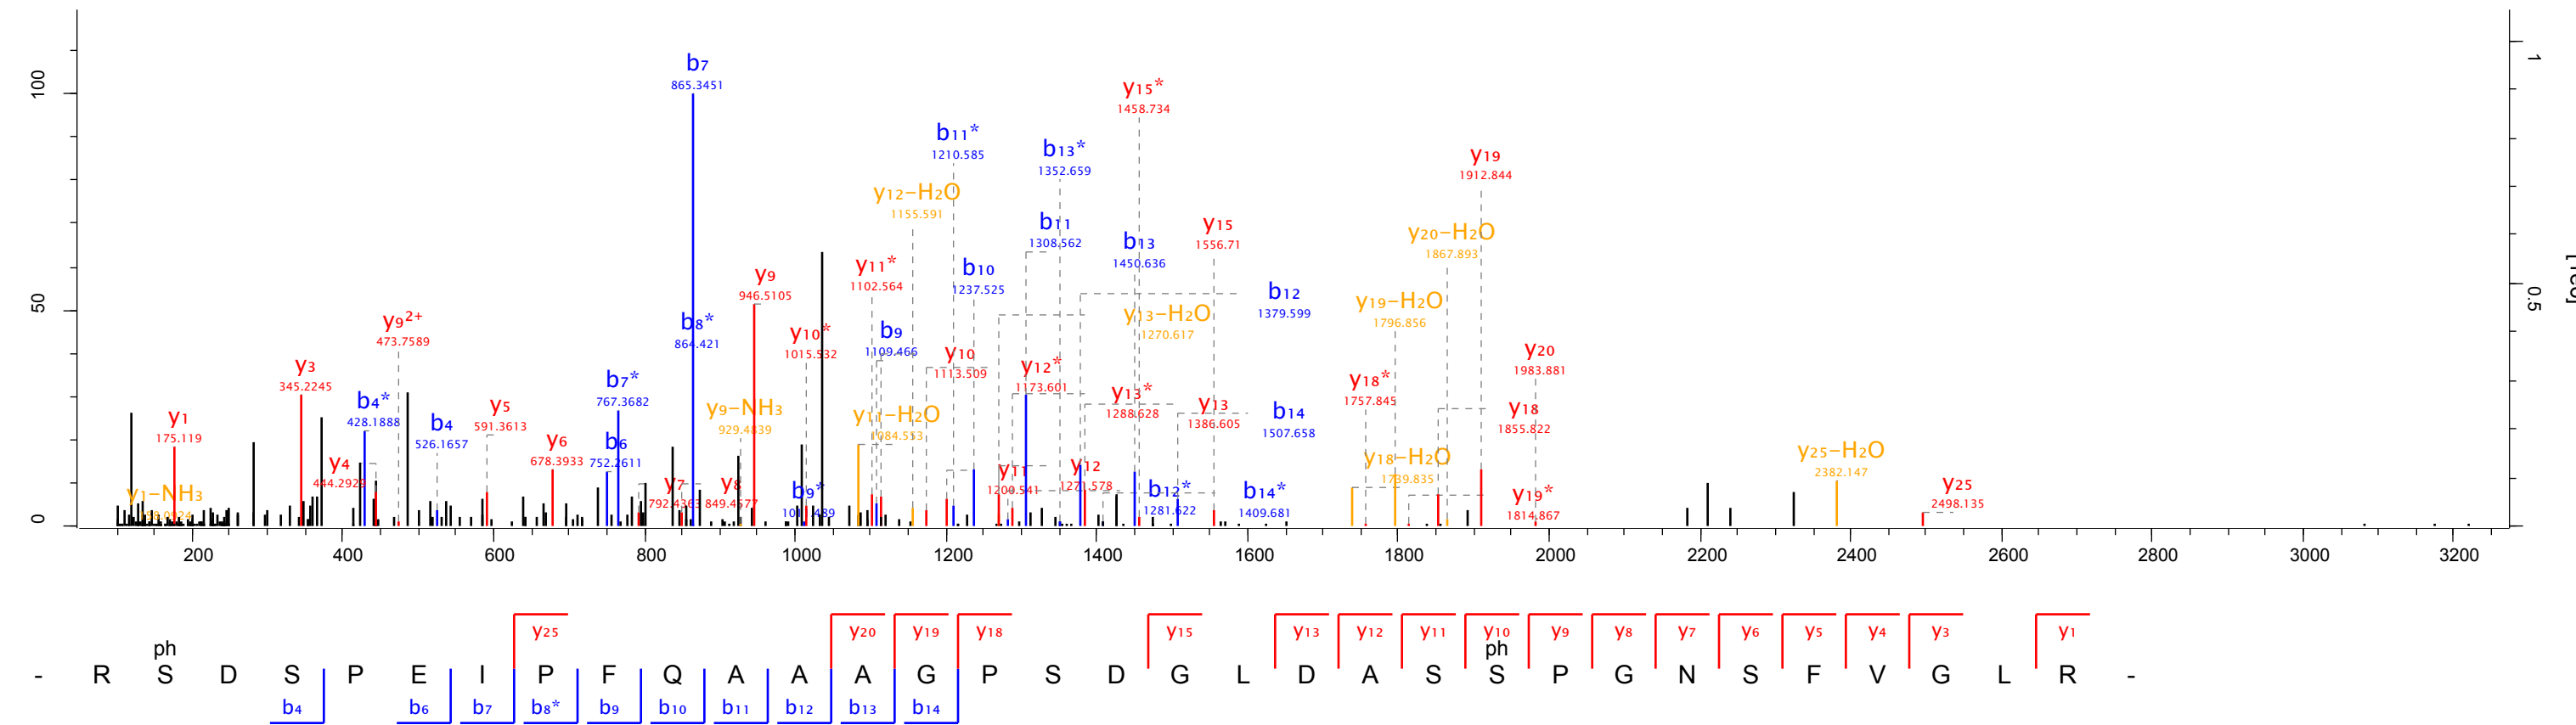

Raw file 20150812\_A375SR\_Phospho\_BR1\_03 Scan 27899 Method FTMS; HCD Score 237.55 m/z 1241.91 Gene names SAP30

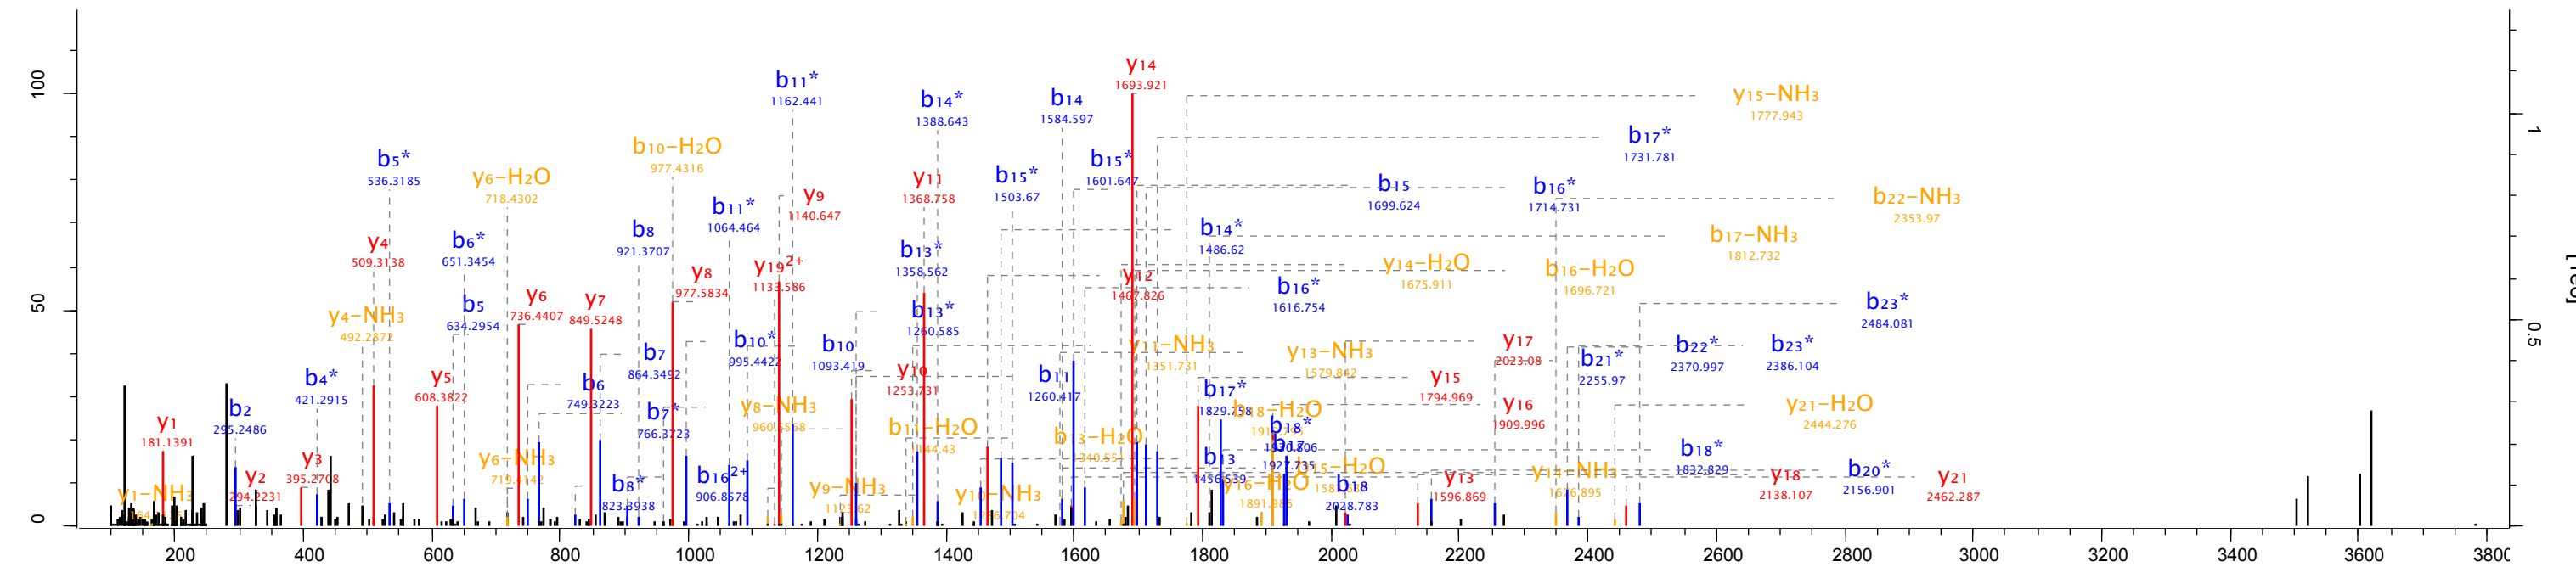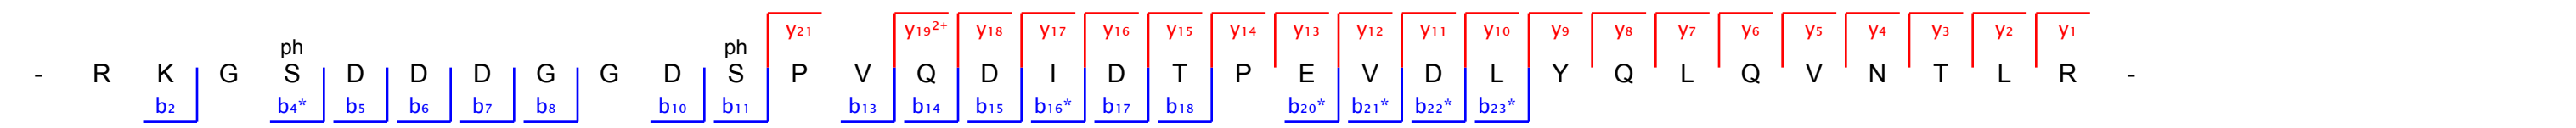

Raw file  
20150812\_A375SR\_Phospho\_BR1\_03

Scan 28159 Method FTMS; HCD Score 332.57 m/z 1188.5 Gene names DNTTIP2

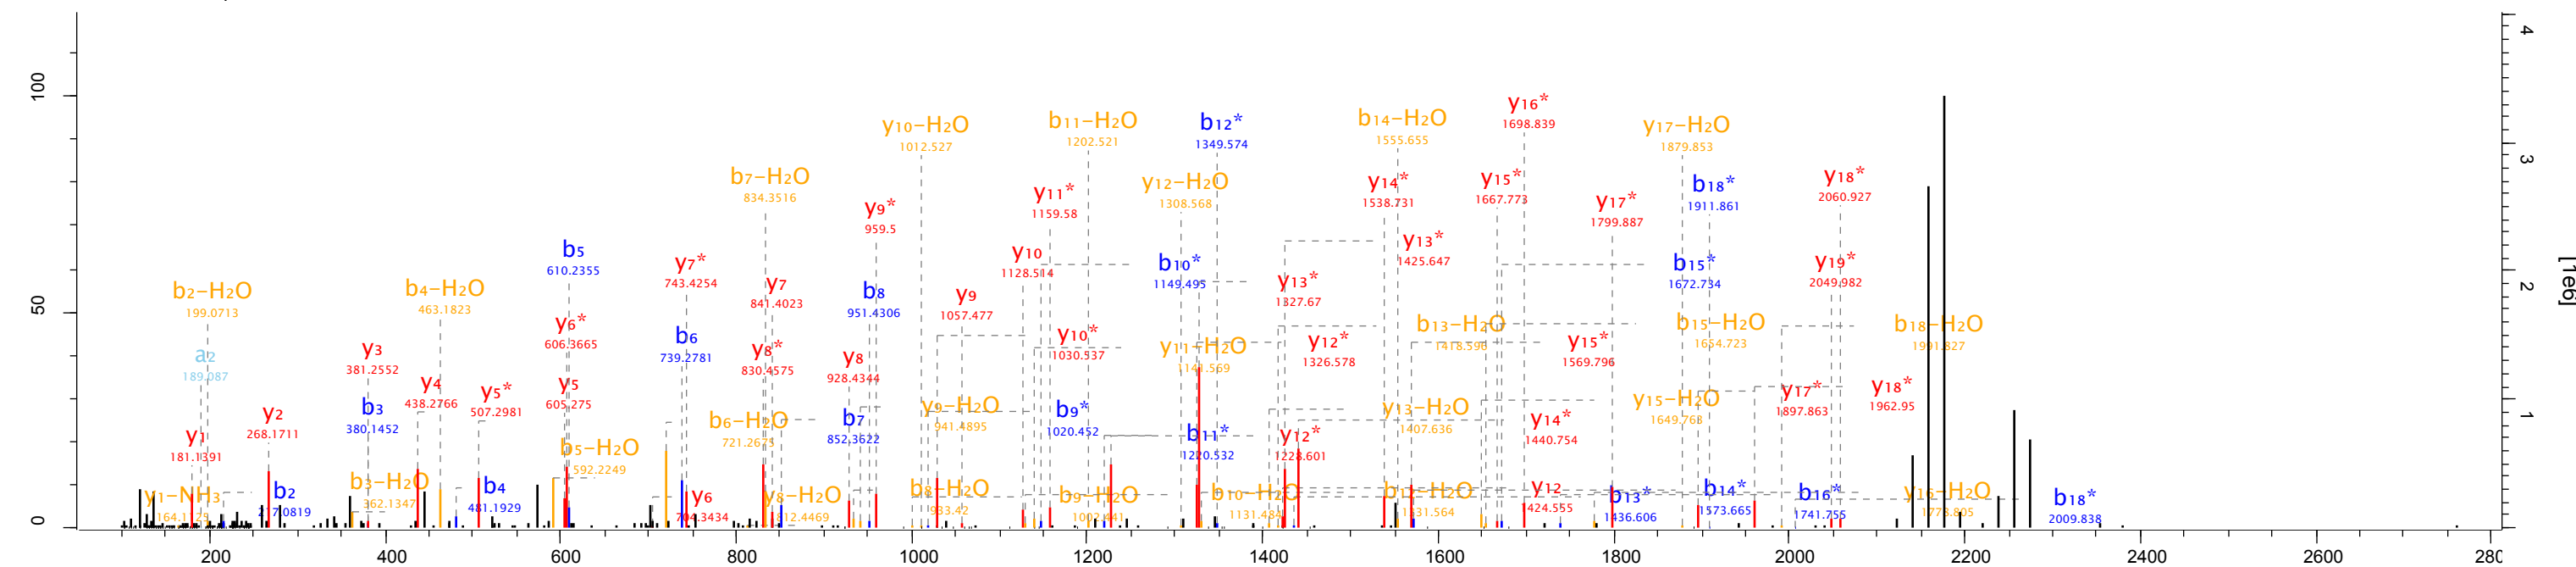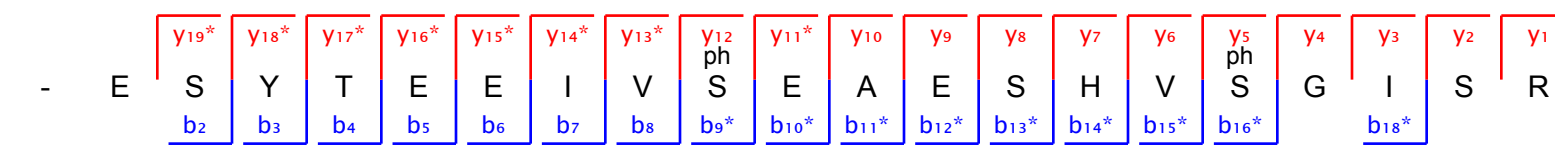



Raw file 20150812\_A375SR\_Phospho\_BR1\_03 Scan 28189 Method FTMS; HCD Score 92.13 m/z 959.9 Gene names ATP2B1

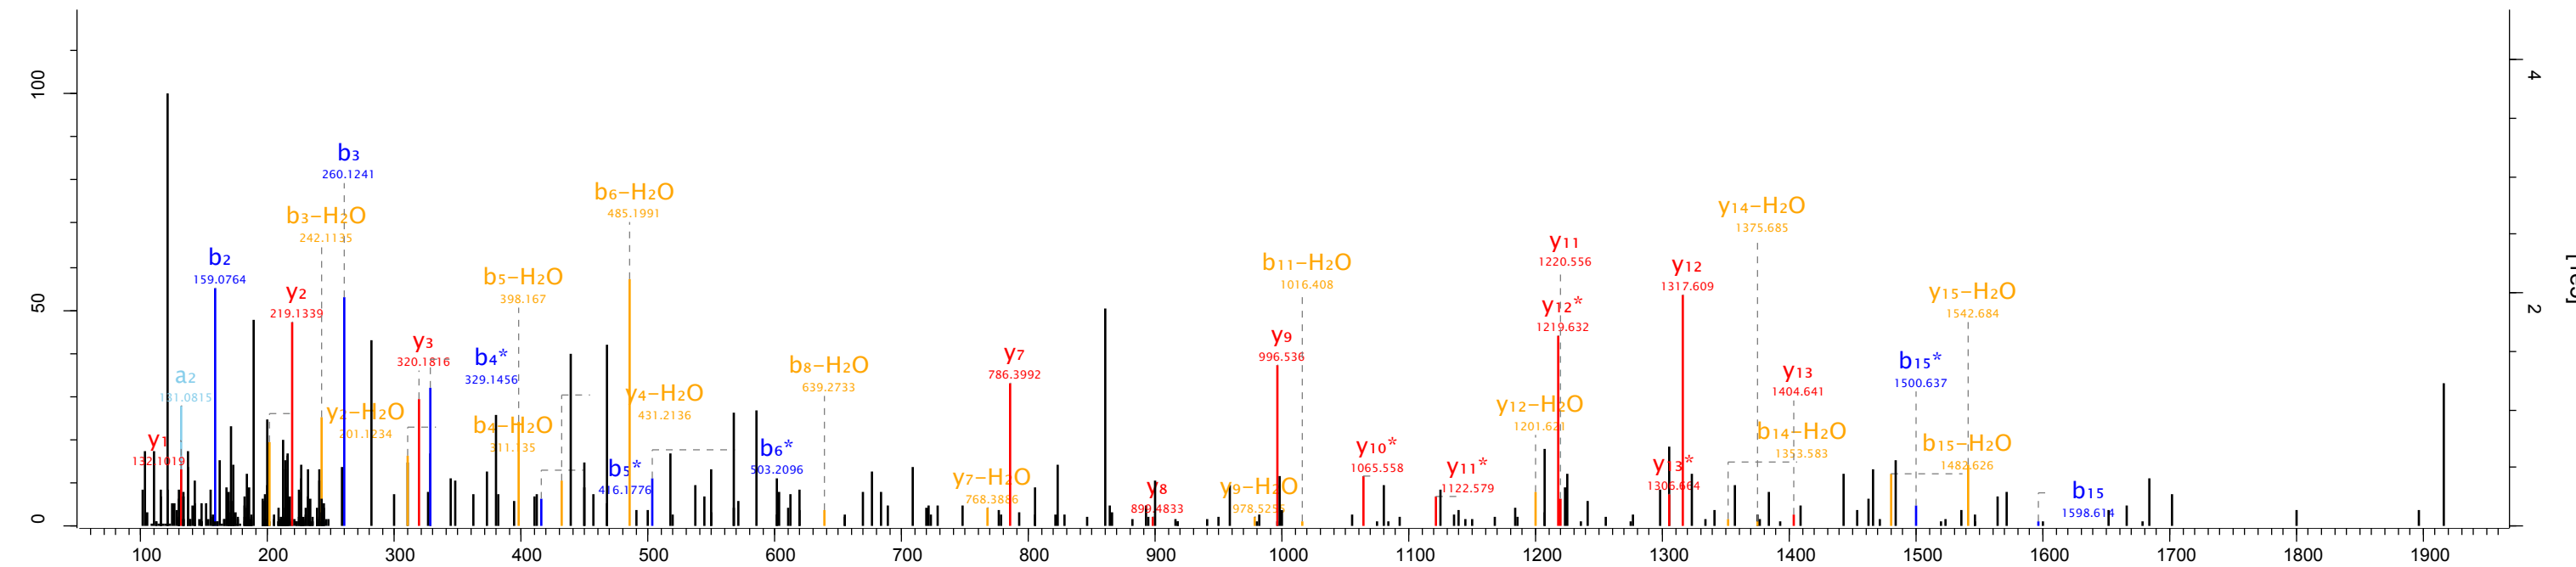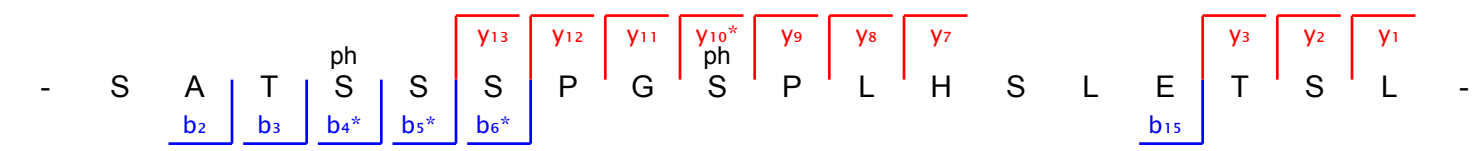

Raw file 20150812\_A375SR\_Phospho\_BR1\_03 Scan 28479 Method FTMS; HCD Score 173.35 m/z 1185.94 Gene names NOC2L

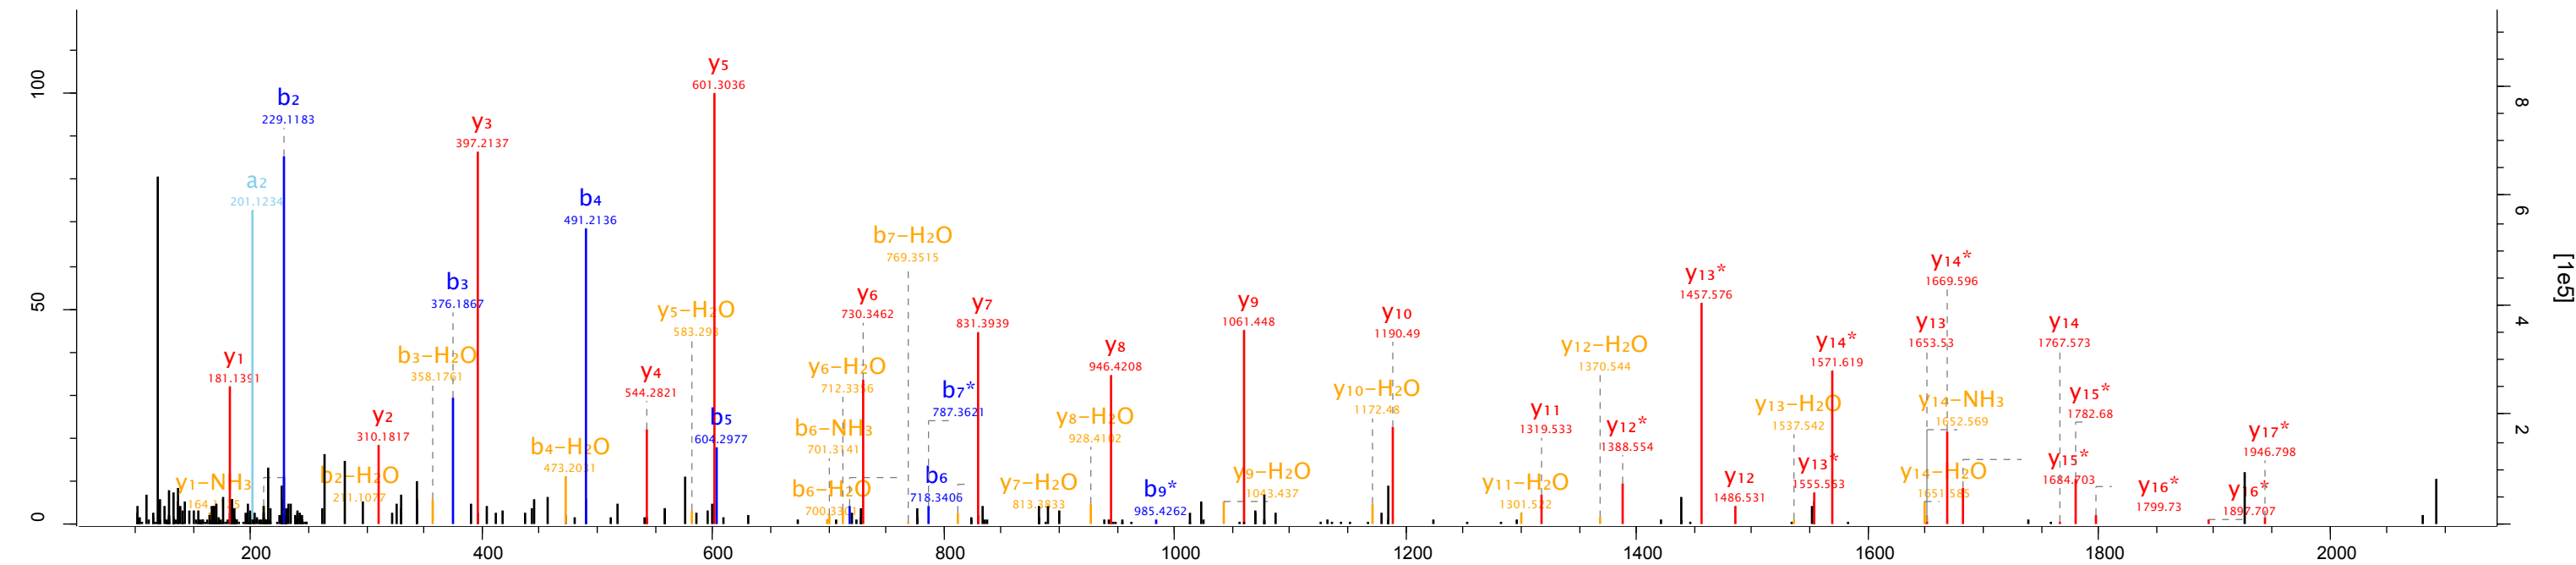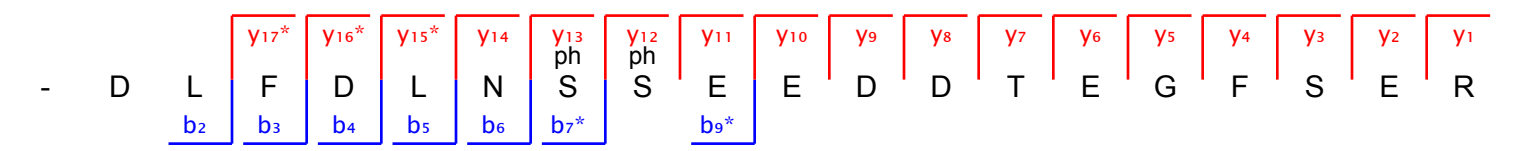

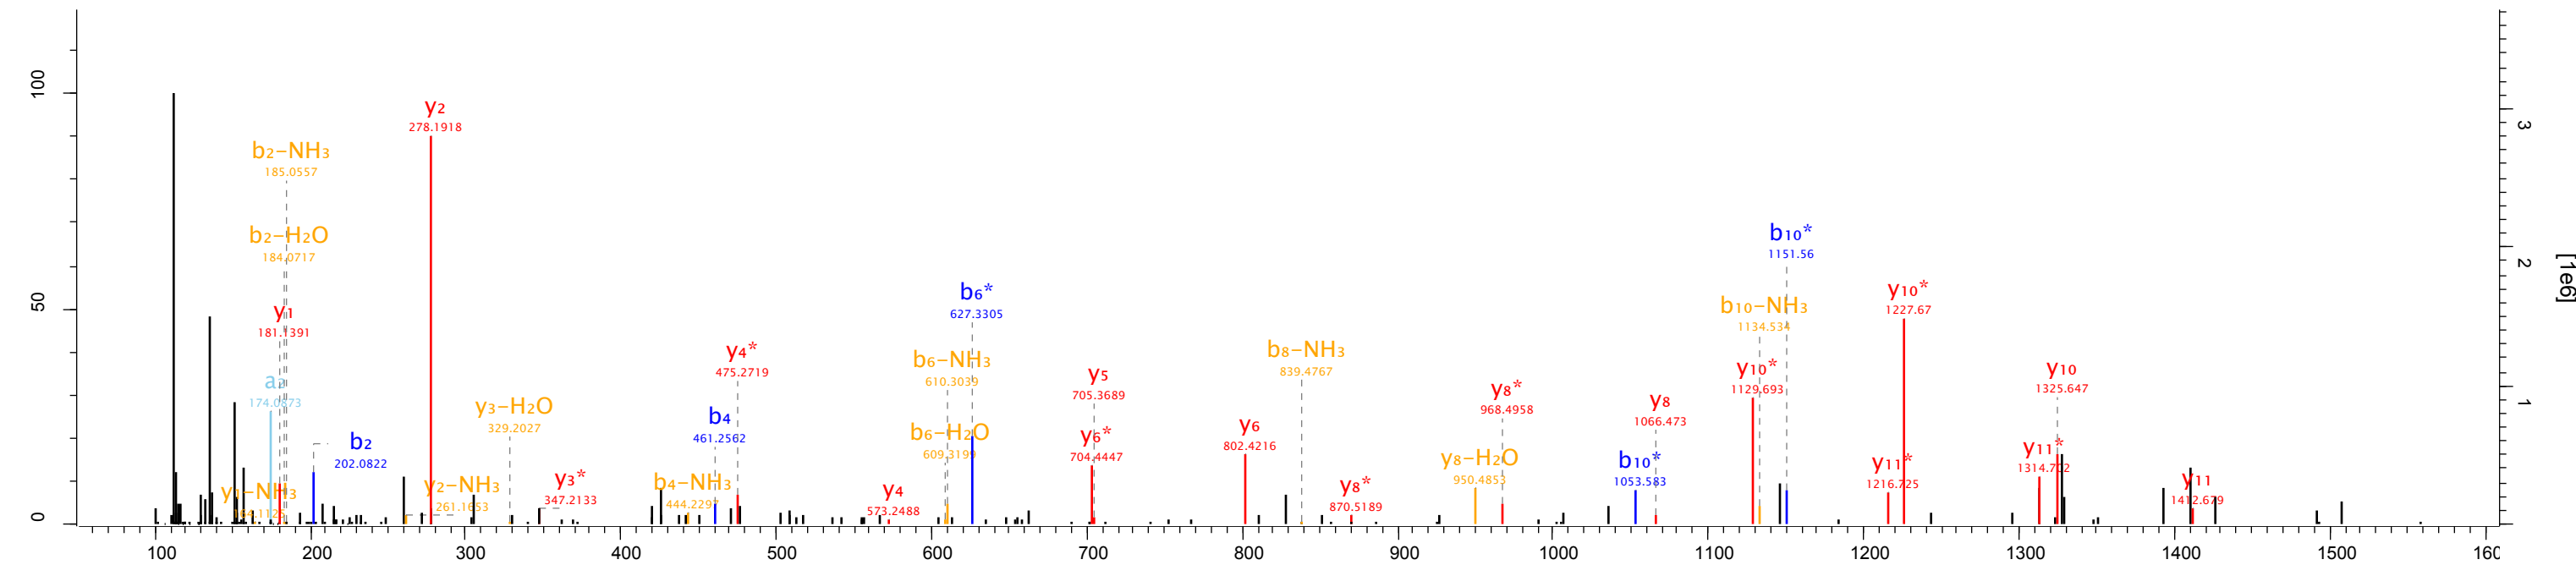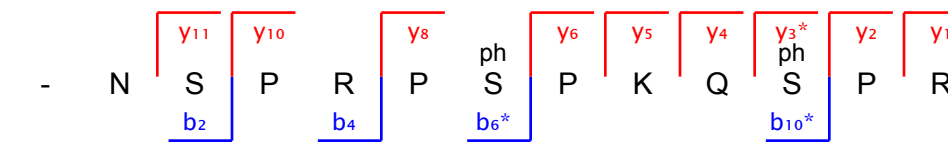

Raw file: 20150812\_A375SR\_Phospho\_BR1\_03  
 Scan: 3069 Method: FTMS; HCD Score: 117.2 m/z: 541.89 Gene names: BUD13

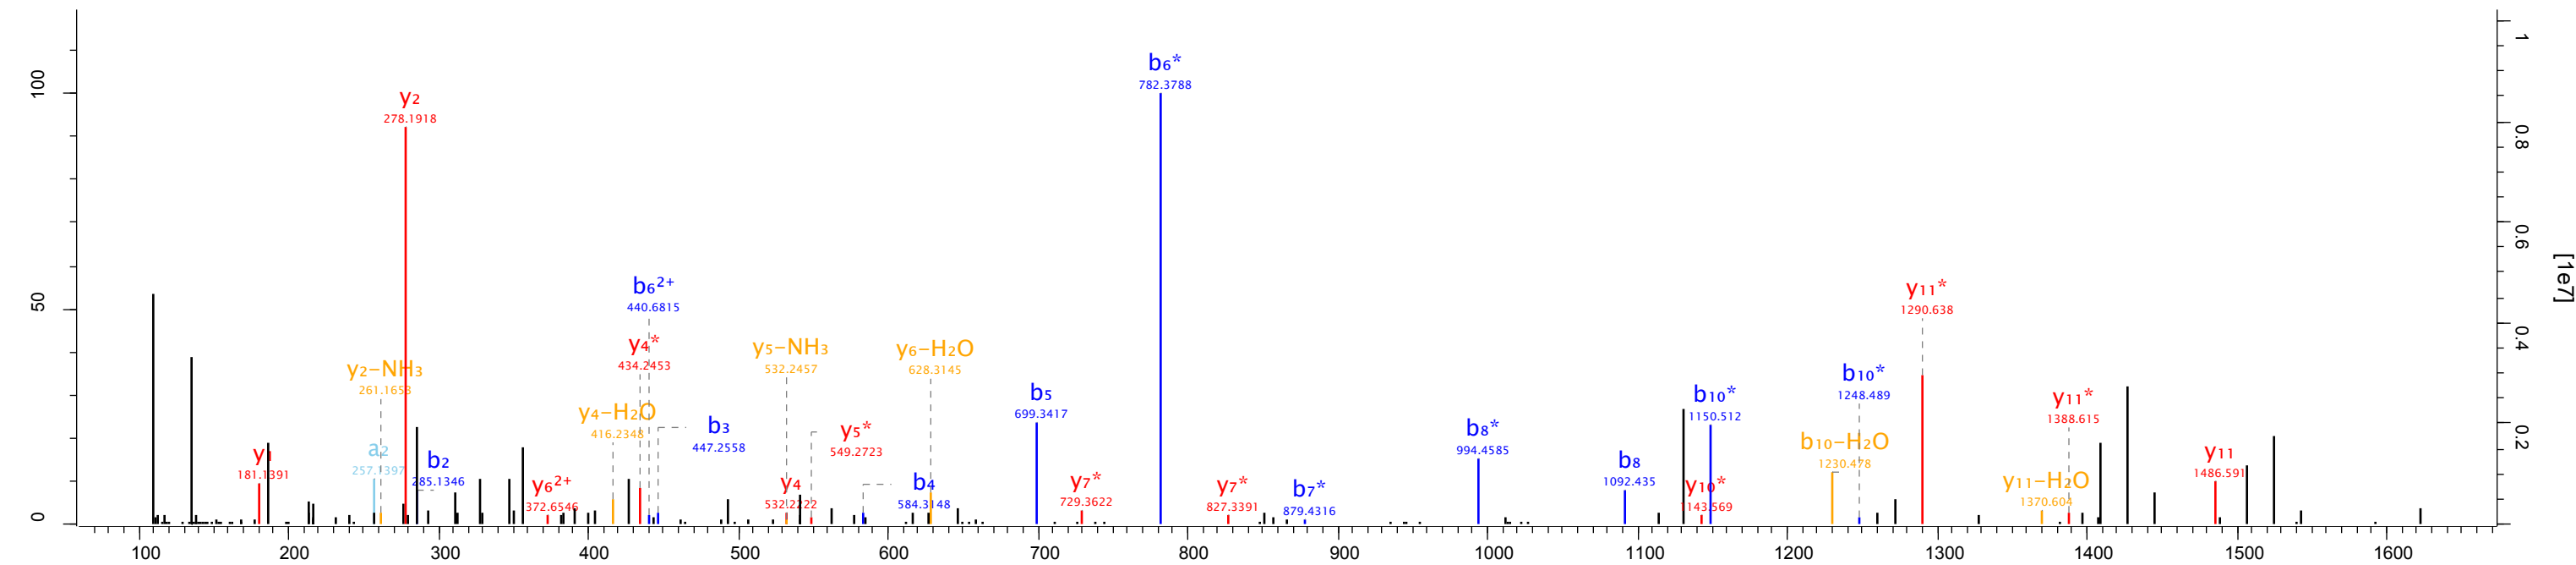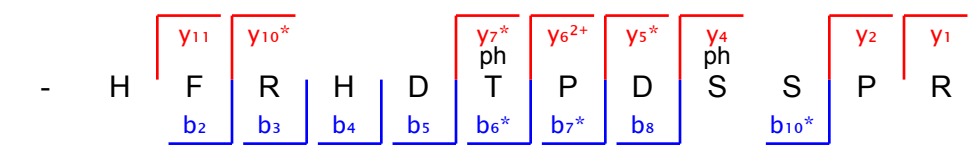

Raw file: 20150812\_A375SR\_Phospho\_BR1\_03  
 Scan: 3239 Method: FTMS; HCD Score: 184.37 m/z: 797.79 Gene names: HIRIP3

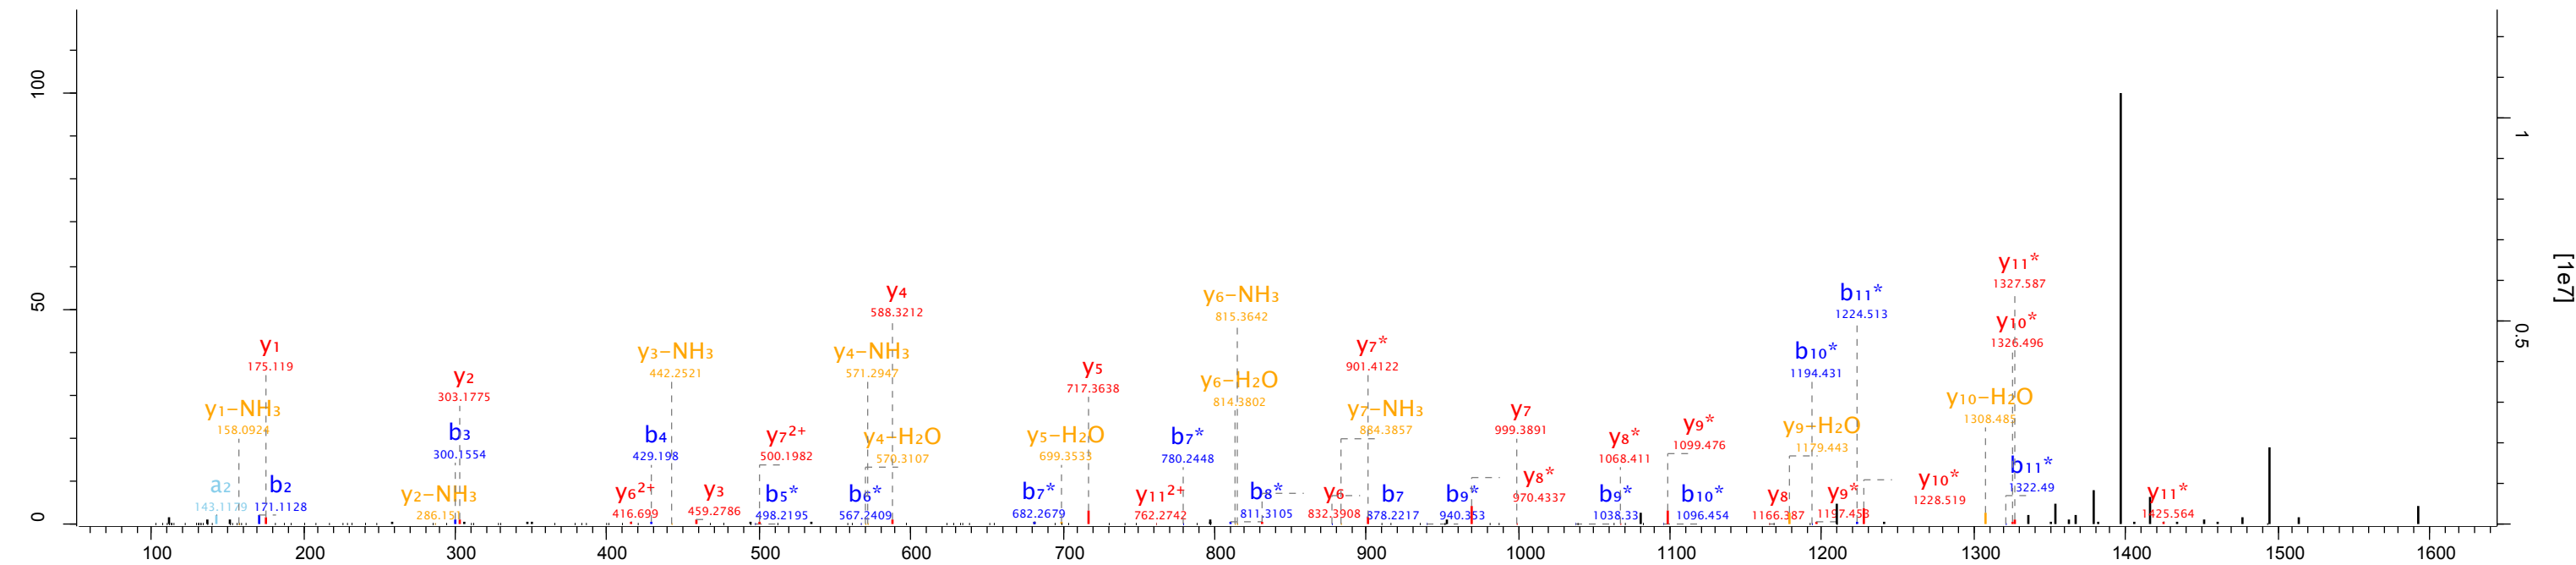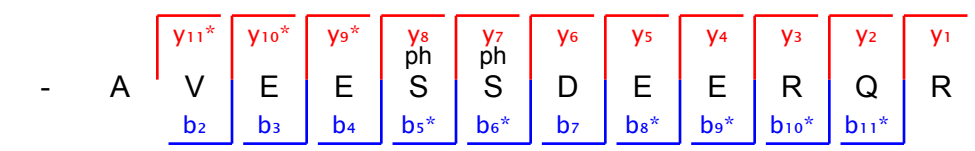

Raw file  
20150812\_A375SR\_Phospho\_BR1\_03

Scan 3319 Method FTMS; HCD Score 342.34 m/z 1003.4 Gene names TMPO

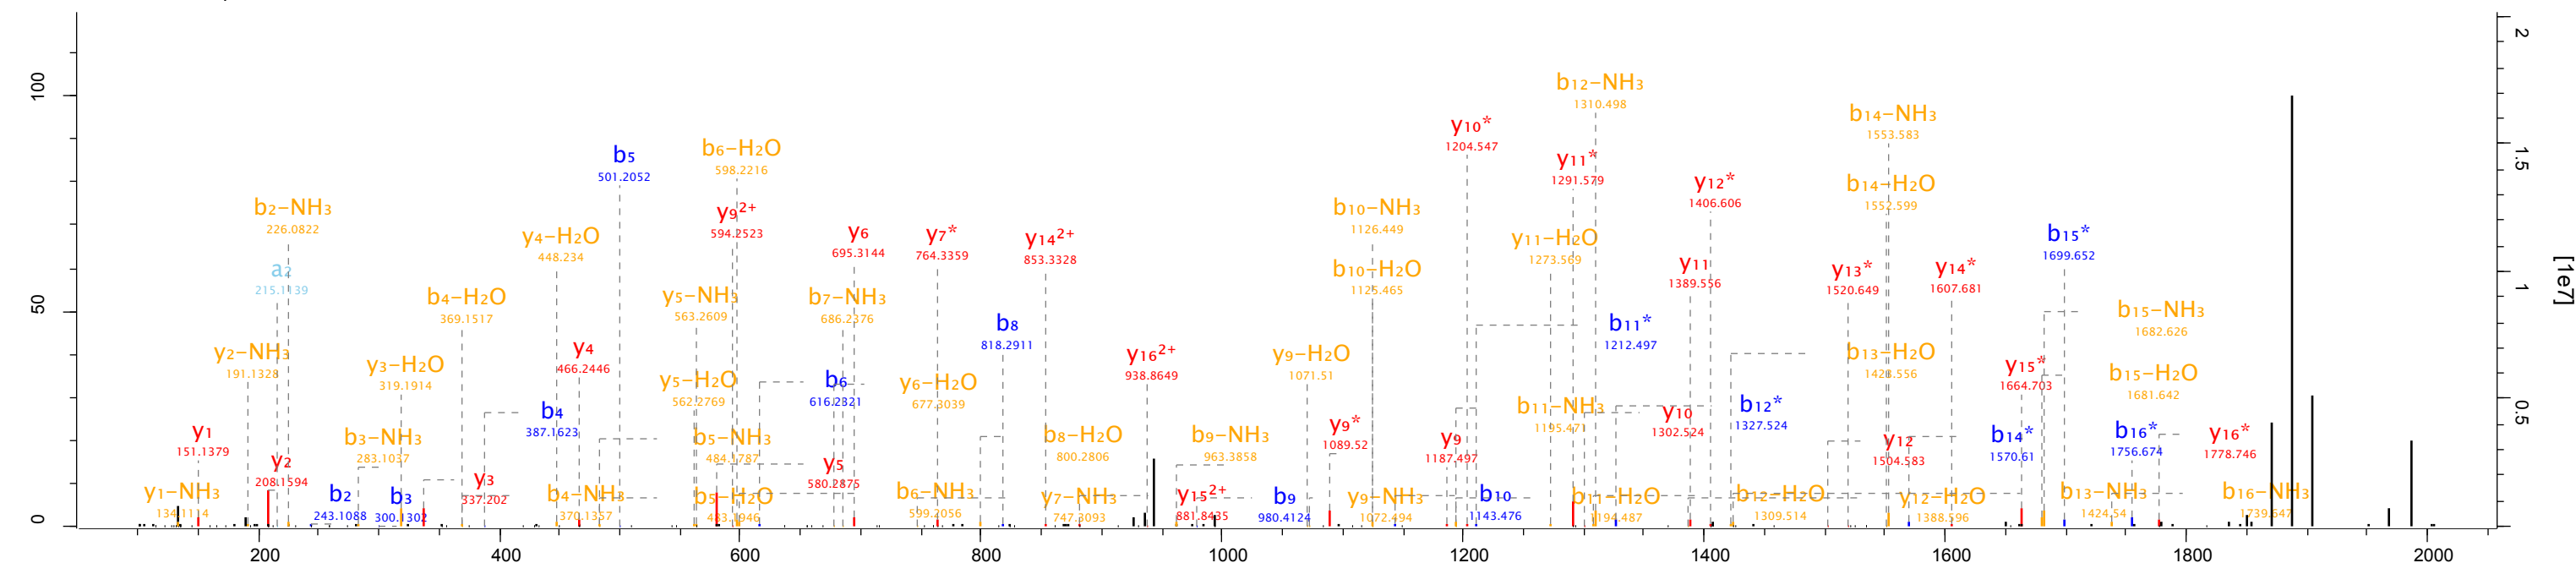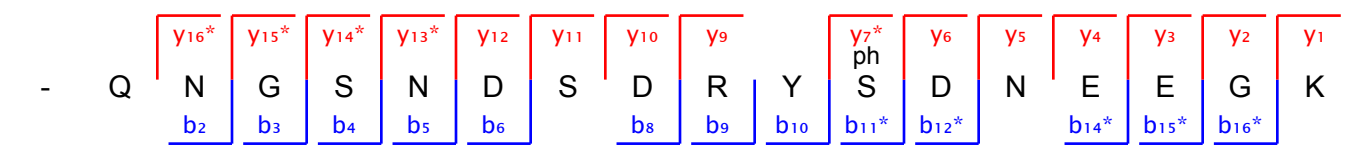

Raw file  
20150812\_A375SR\_Phospho\_BR1\_03

Scan 4079 Method FTMS; HCD Score 164.65 m/z 695.28 Gene names TGS1

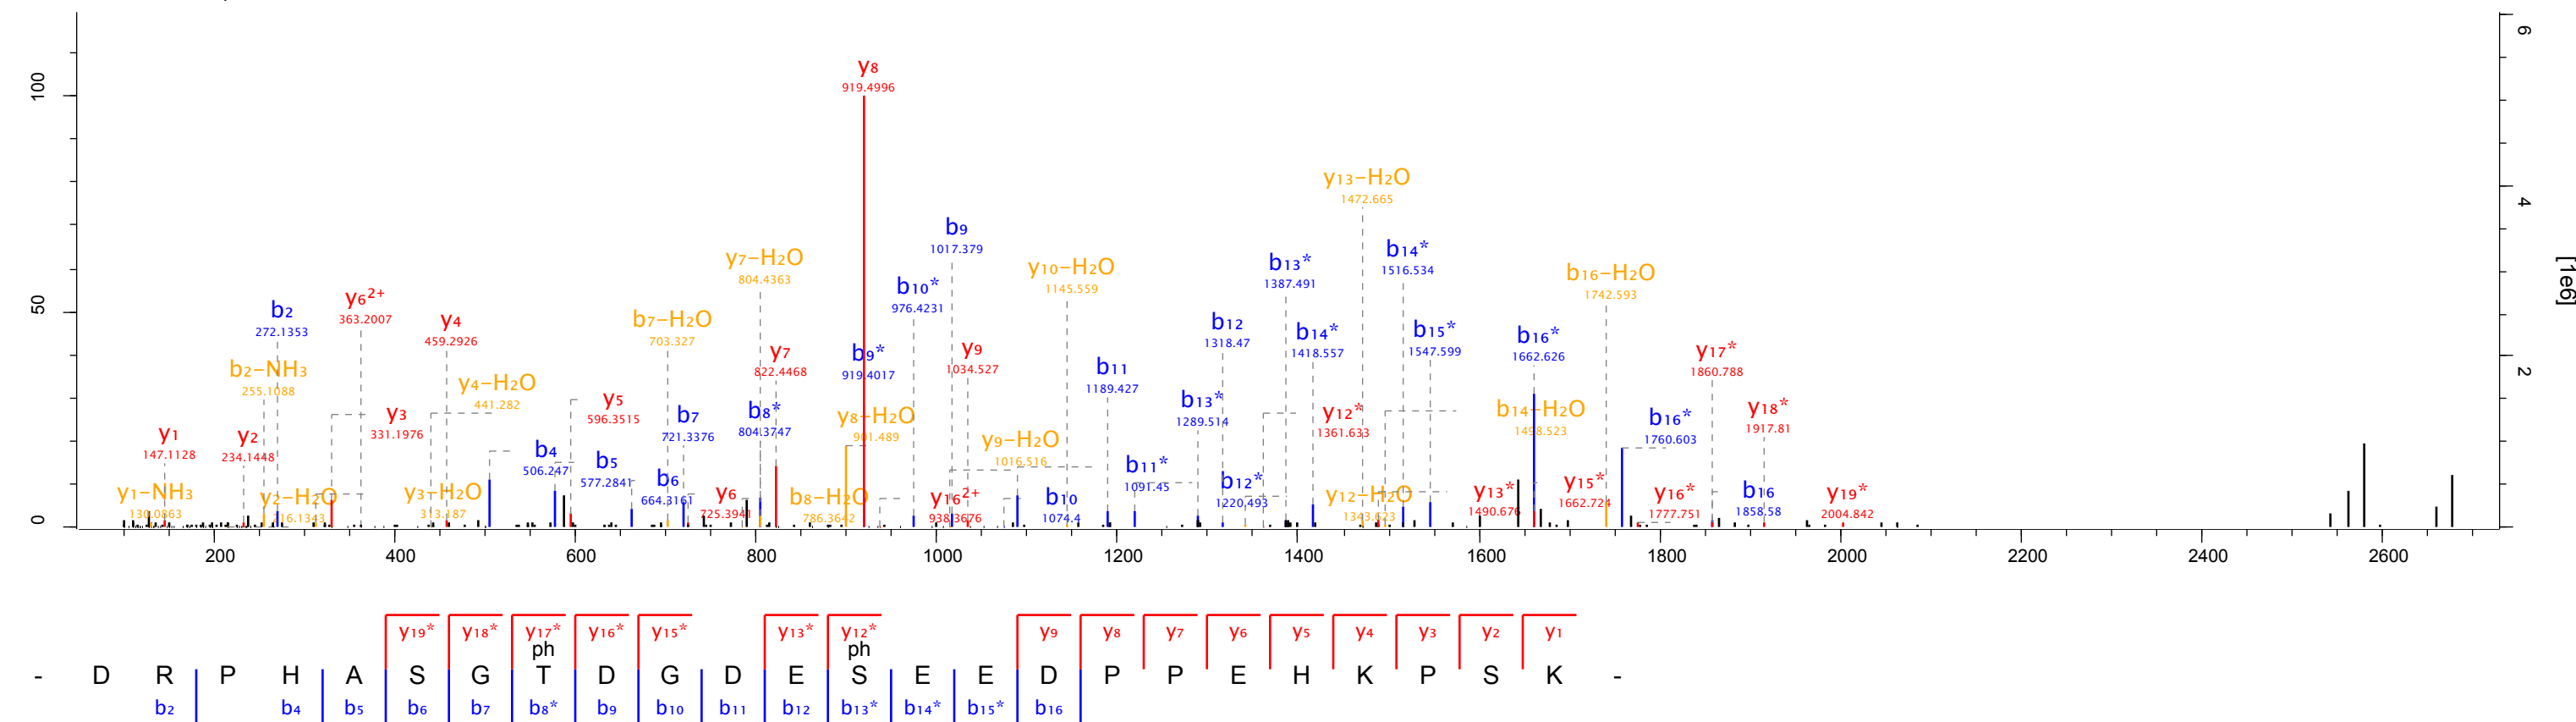

20150812\_A375SR\_Phospho\_BR1\_03

4189 FTMS; HCD 139.02 982.87 PNN

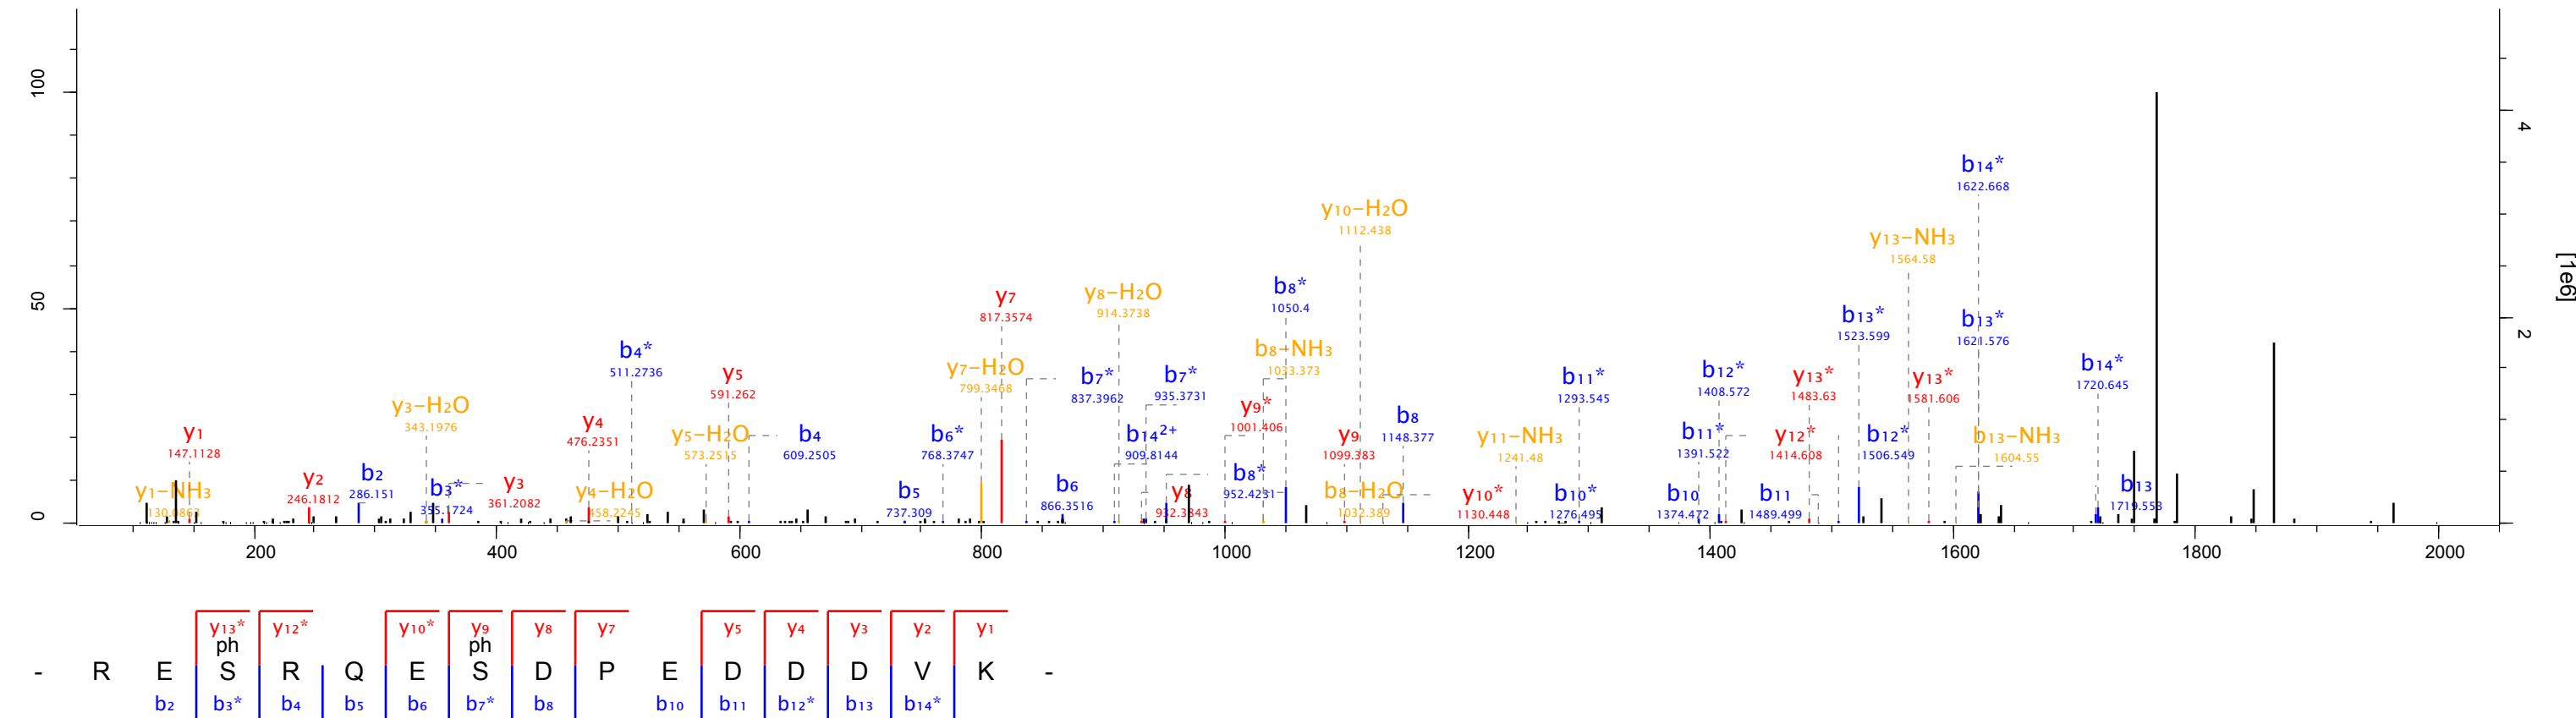



Raw file: 20150812\_A375SR\_Phospho\_BR1\_03  
 Scan: 4539 Method: FTMS; HCD Score: 188.27 m/z: 811.36 Gene names: JMJD1C

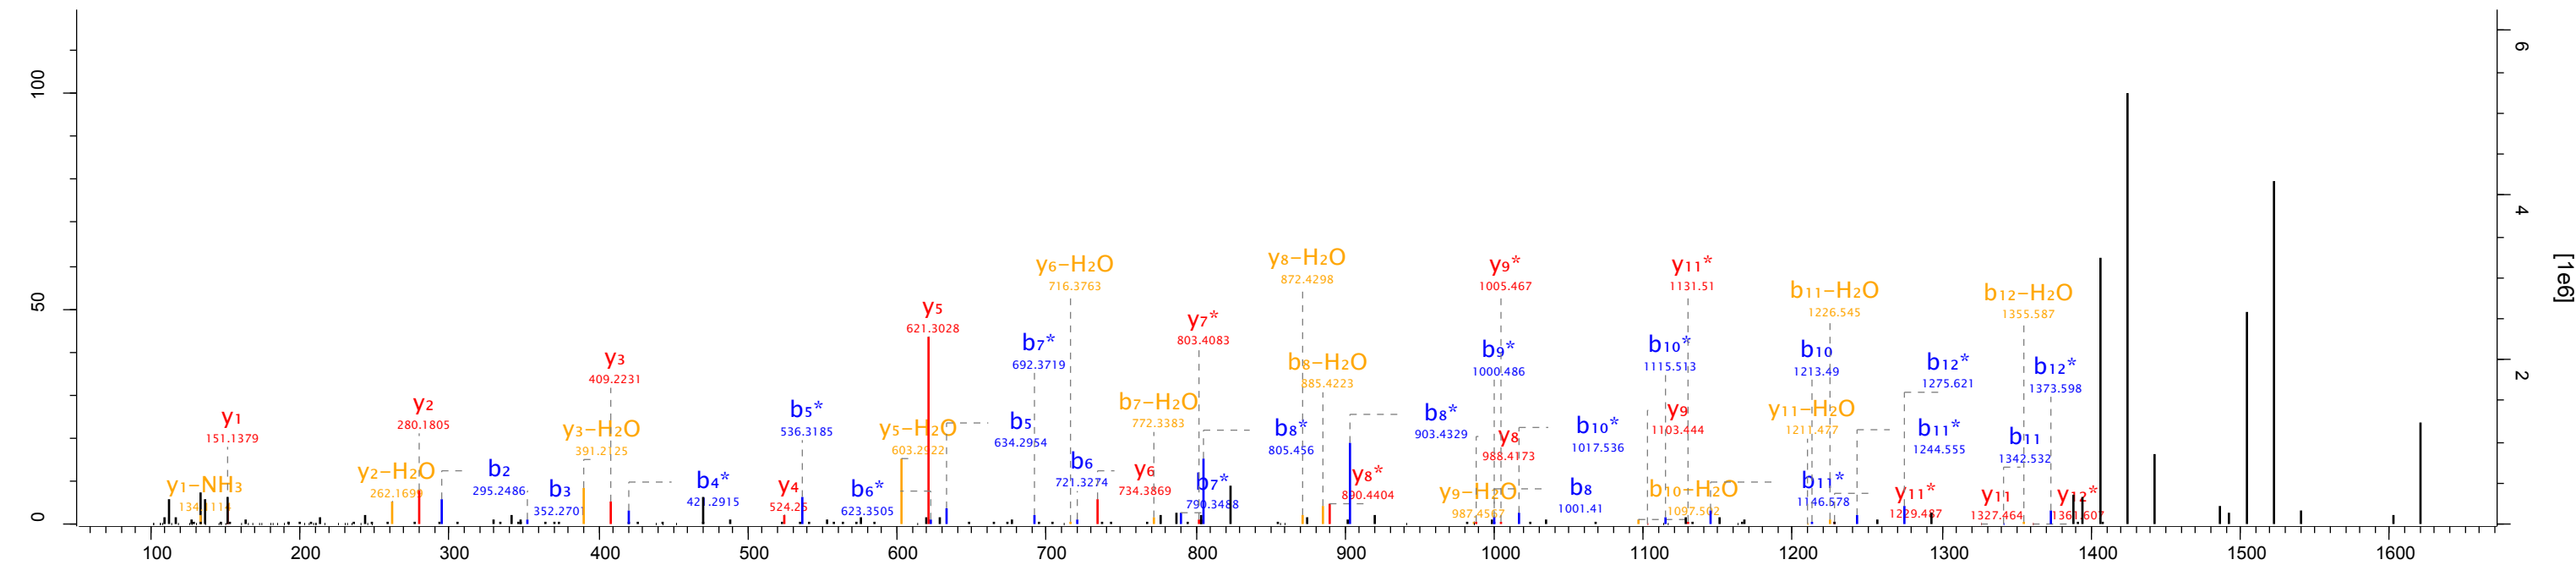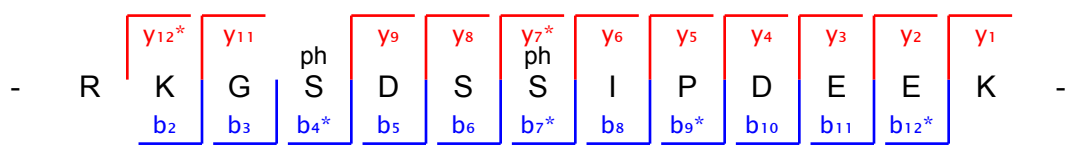

Raw file 20150812\_A375SR\_Phospho\_BR1\_03 Scan 4909 Method FTMS; HCD Score 169.7 m/z 773.02 Gene names FARP1

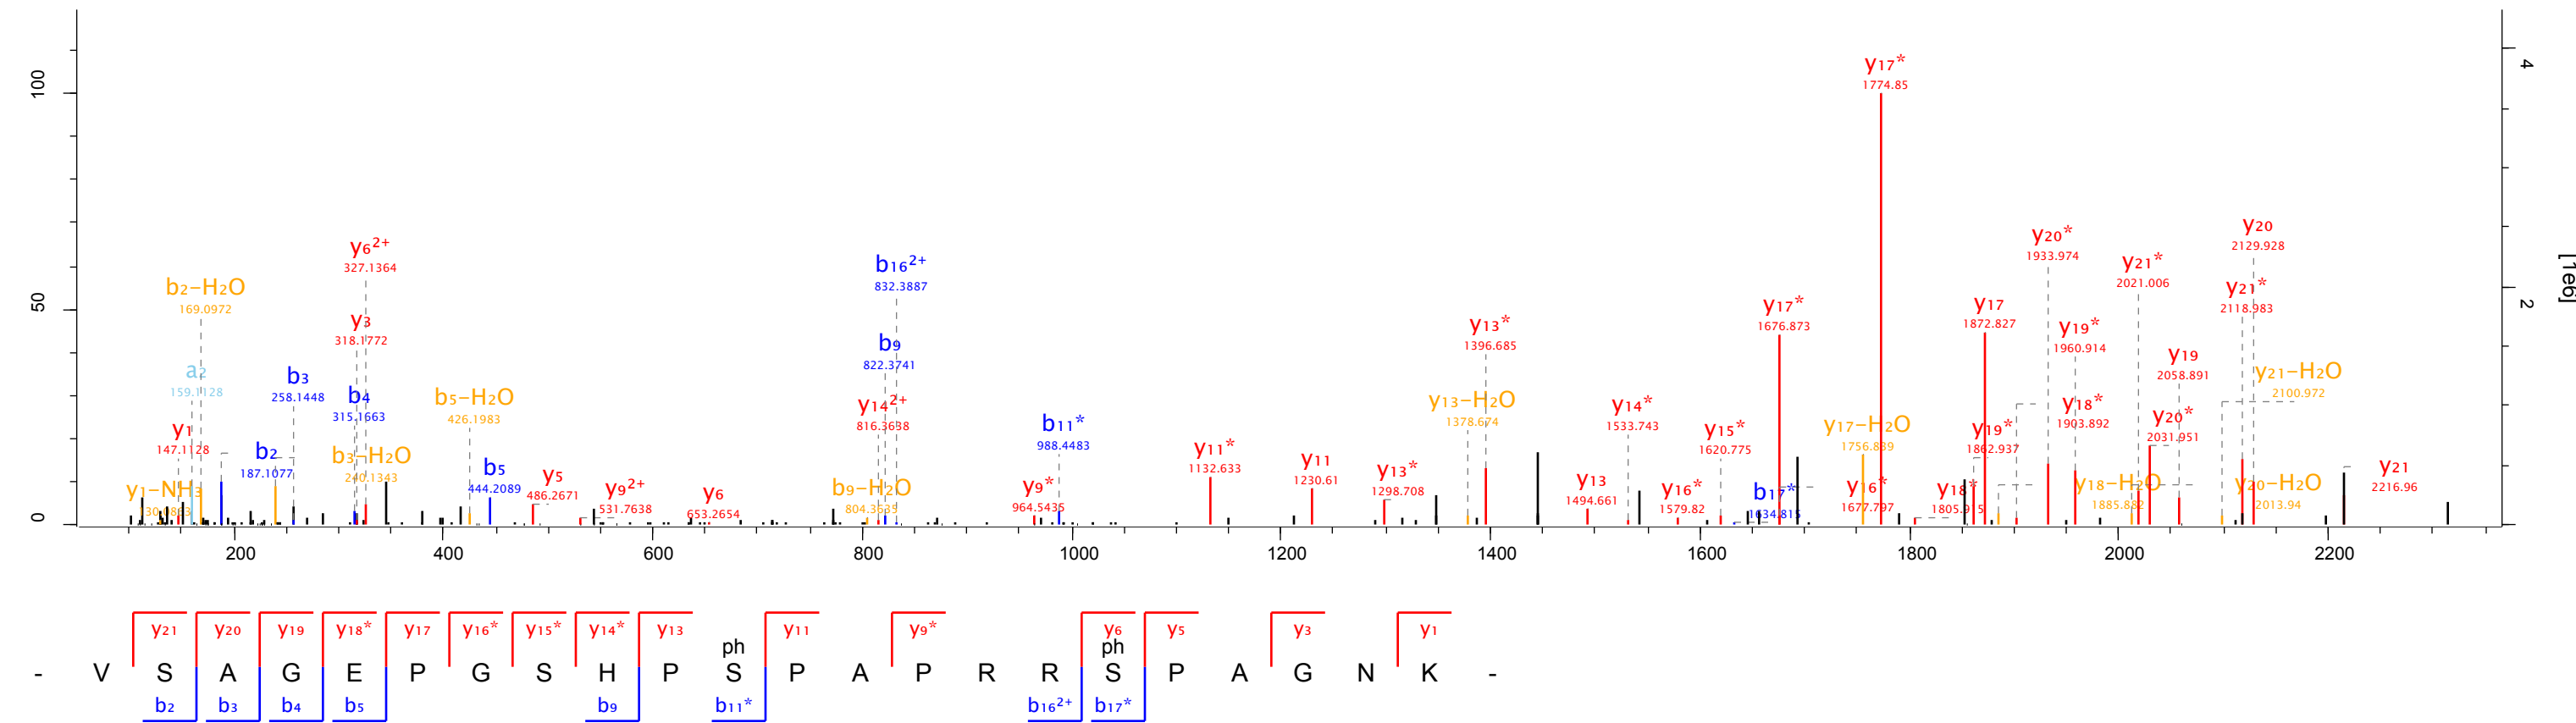

Raw file 20150812\_A375SR\_Phospho\_BR1\_03 Scan 5219 Method FTMS; HCD Score 72.16 m/z 747.79 Gene names BCL9L

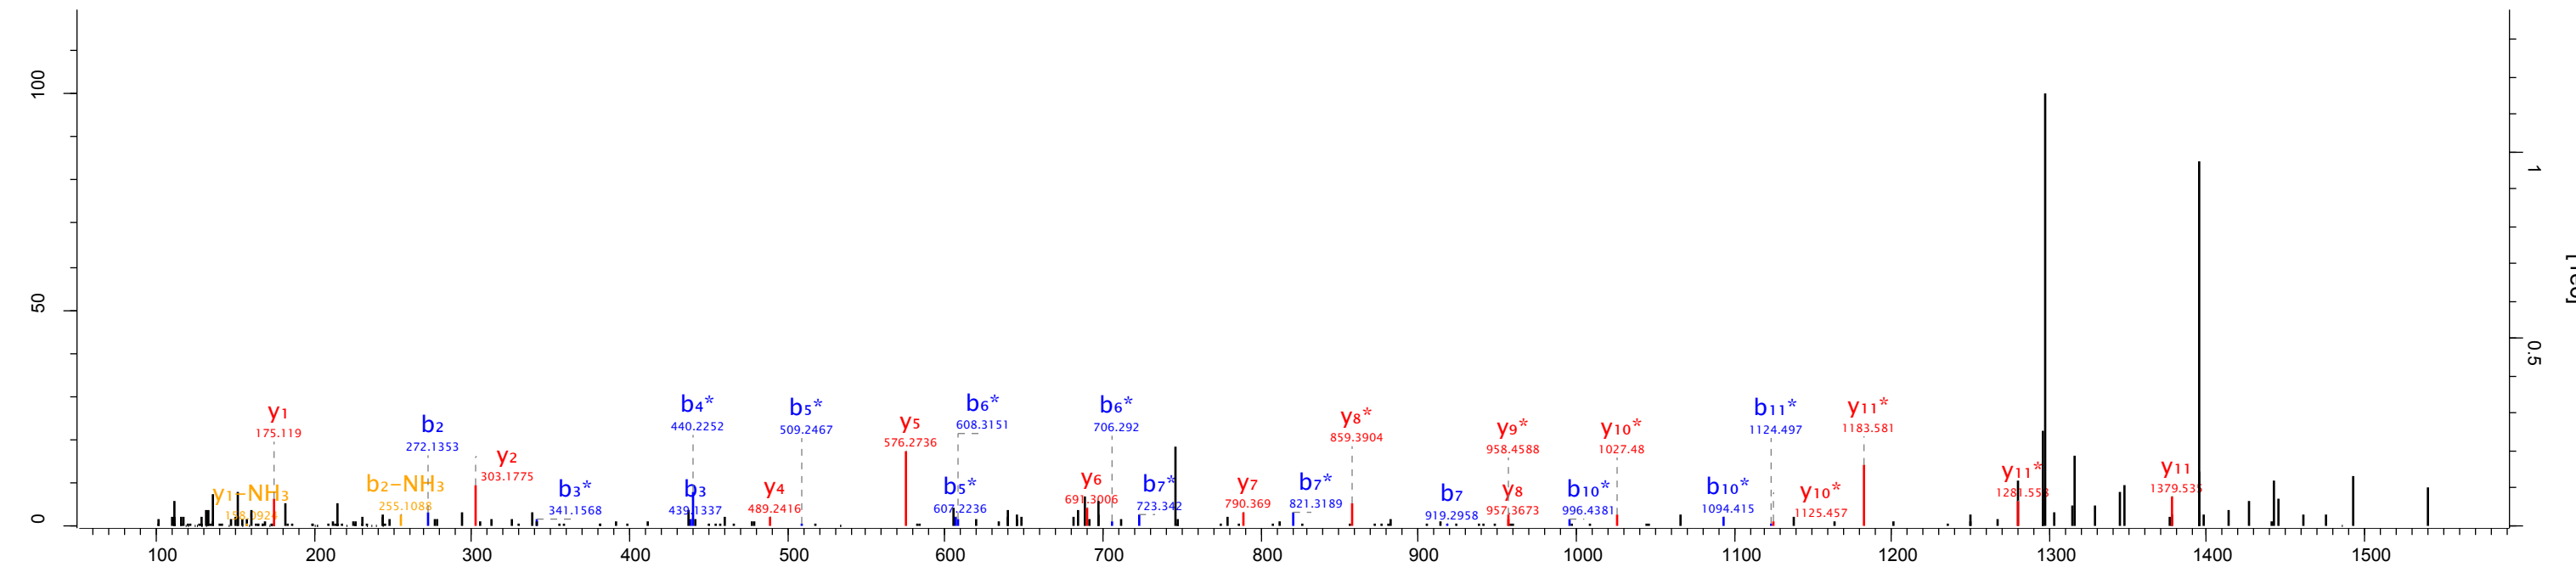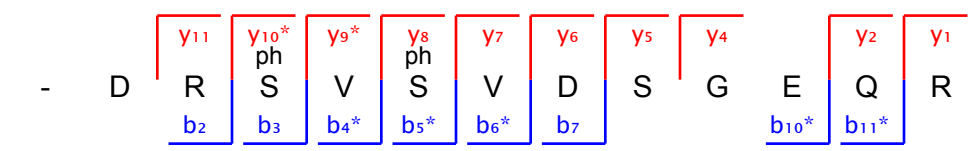

Raw file 20150812\_A375SR\_Phospho\_BR1\_03 Scan 5389 Method FTMS; HCD Score 79.32 m/z 708.32 Gene names PPP1R3D

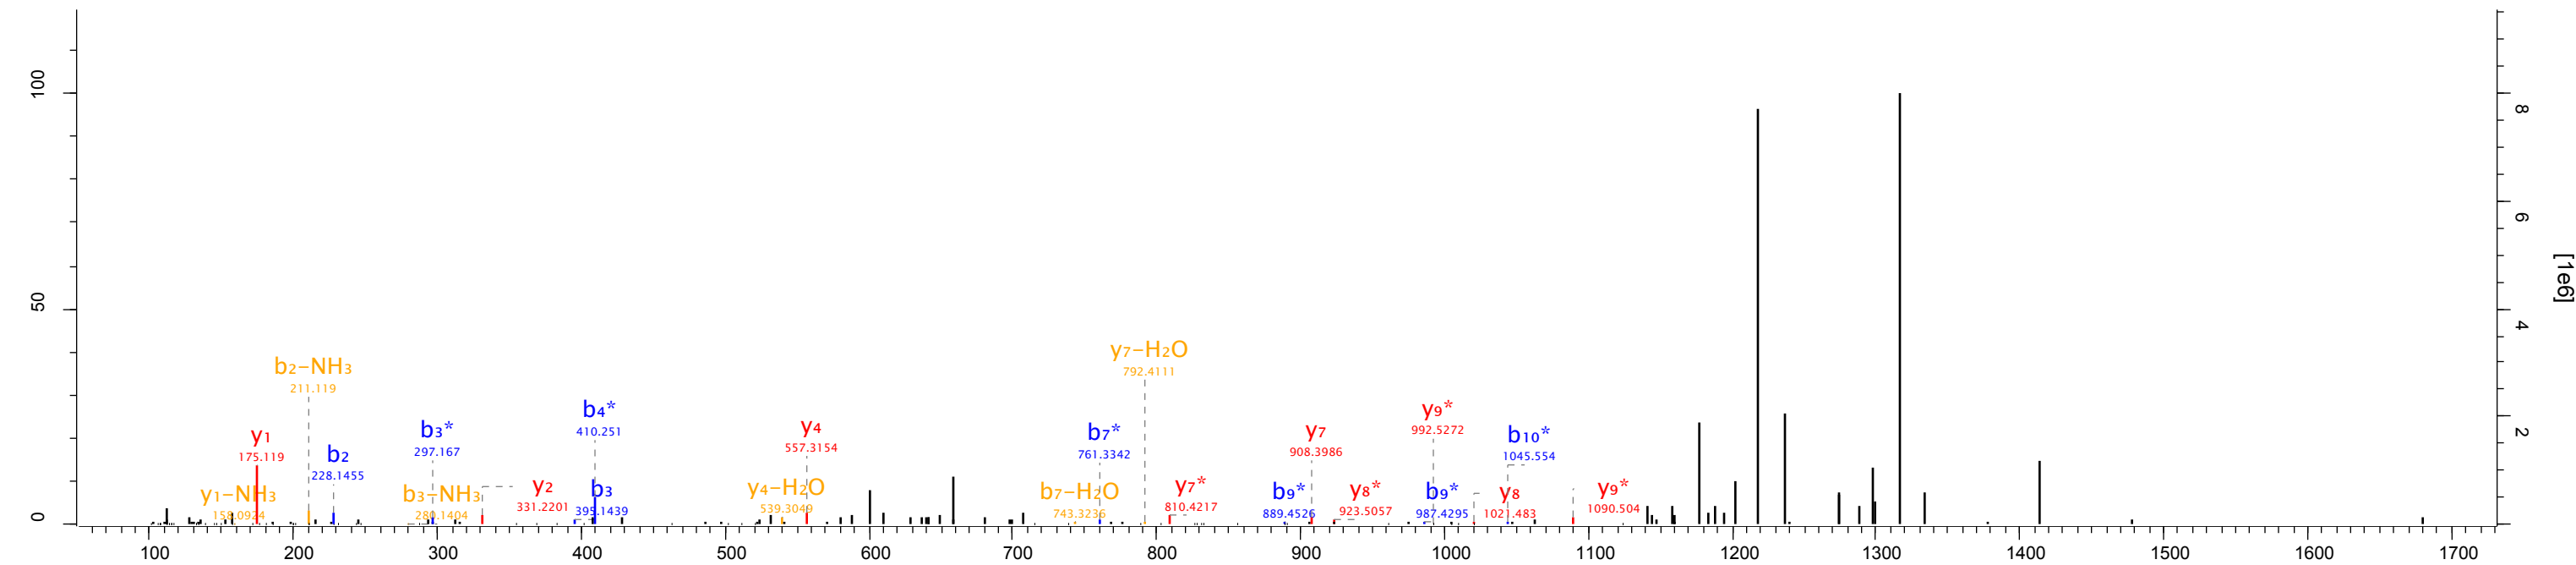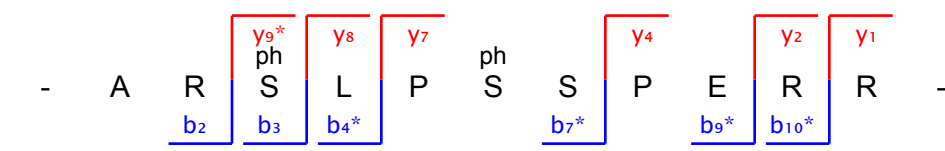

Raw file 20150812\_A375SR\_Phospho\_BR1\_03 Scan 5519 Method FTMS; HCD Score 322.64 m/z 1198.96 Gene names PSIP1

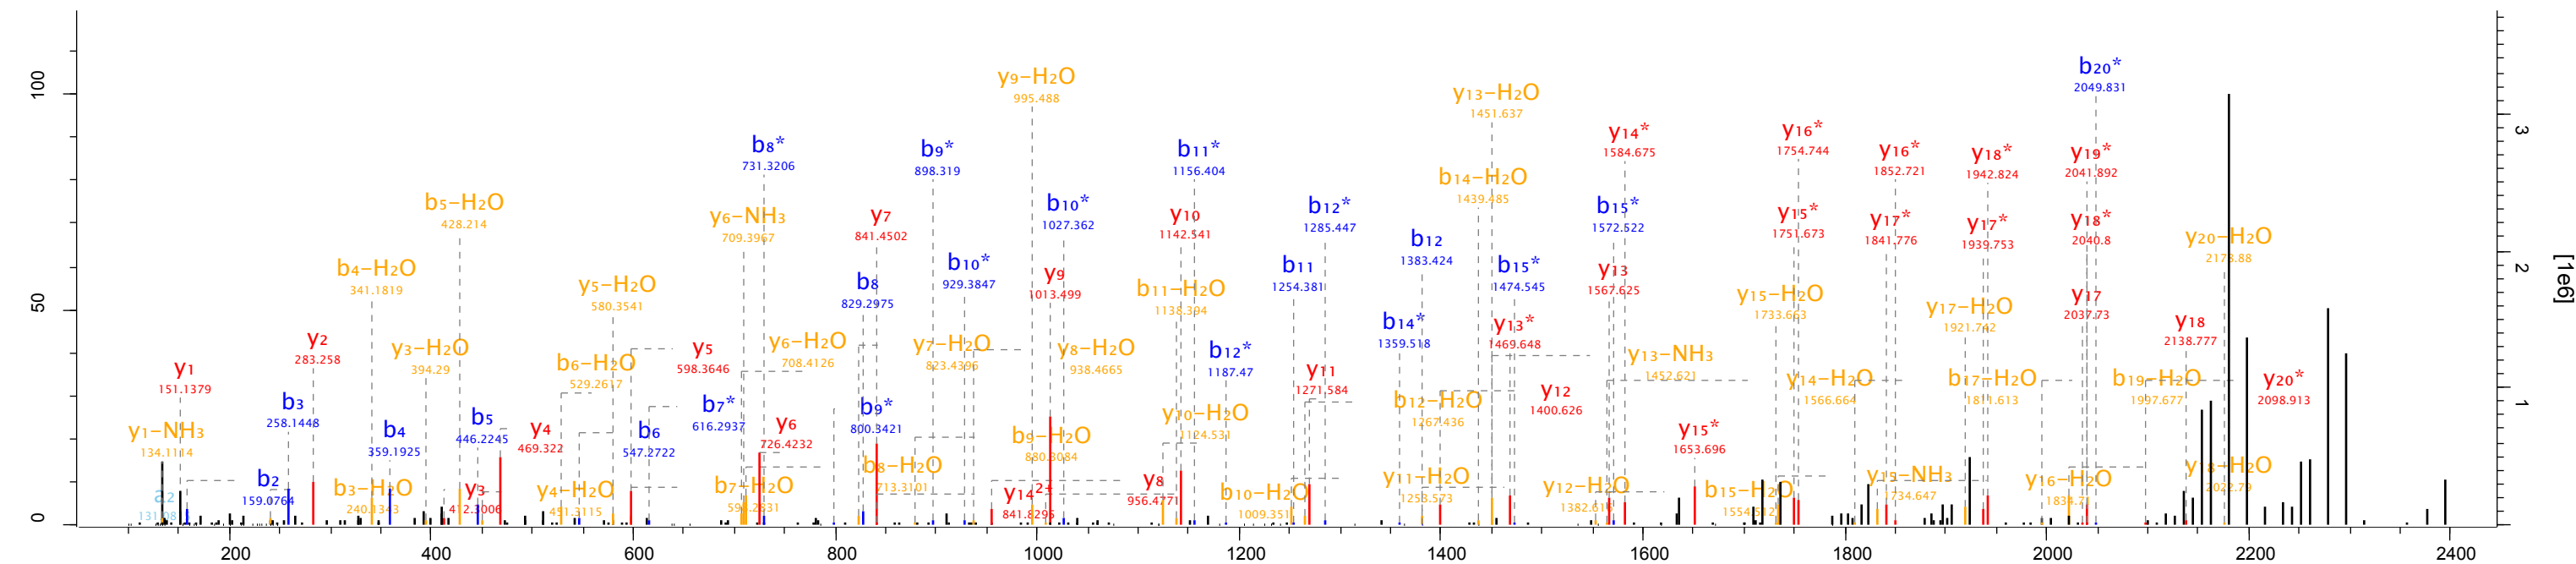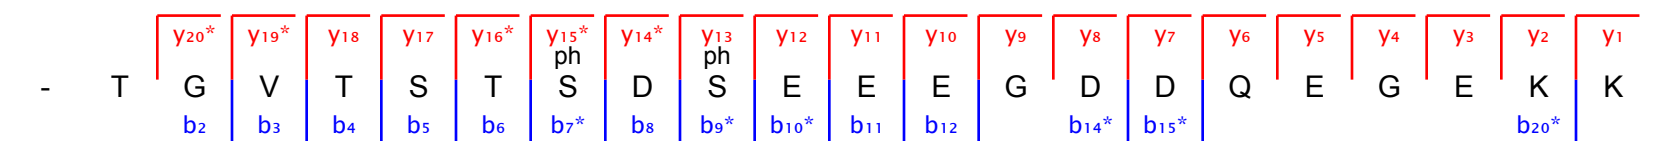

Raw file 20150812\_A375SR\_Phospho\_BR1\_03 Scan 5839 Method FTMS; HCD Score 165.49 m/z 857.32 Gene names KIF1C

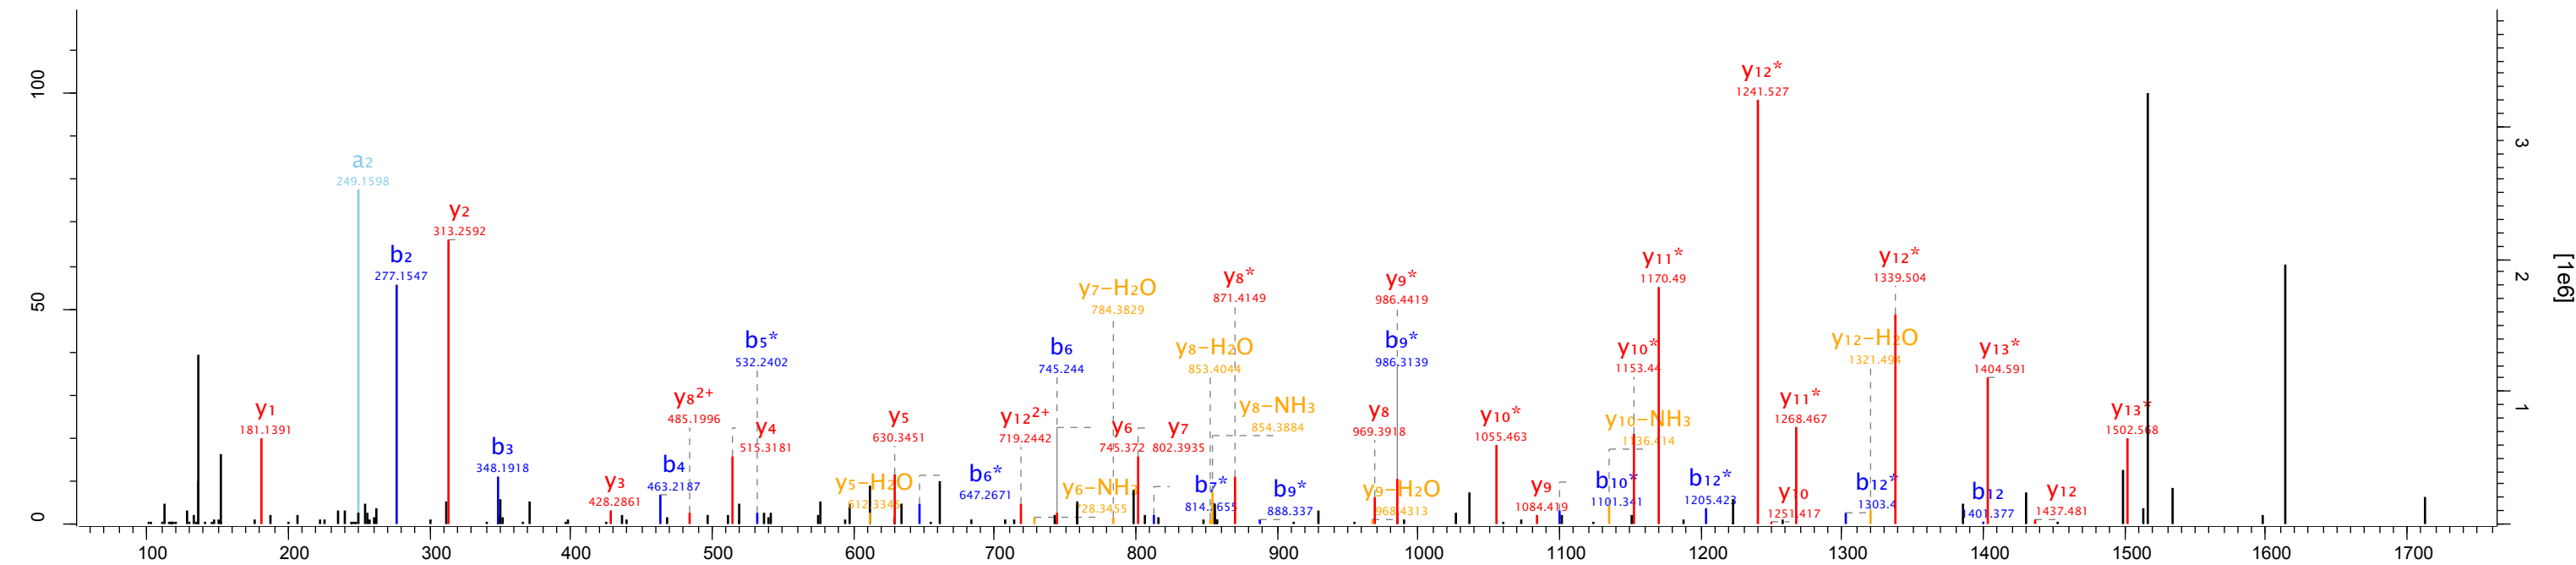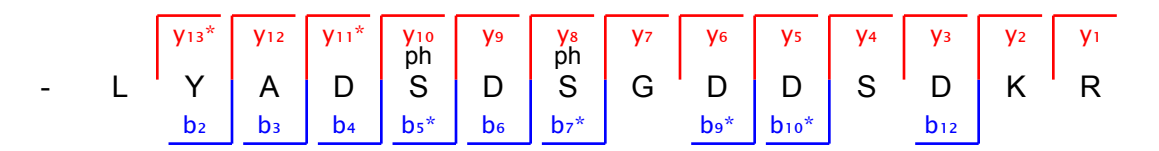

Raw file: 20150812\_A375SR\_Phospho\_BR1\_03  
 Scan: 5869 Method: FTMS; HCD Score: 92.97 m/z: 530.22 Gene names: NSMCE4A

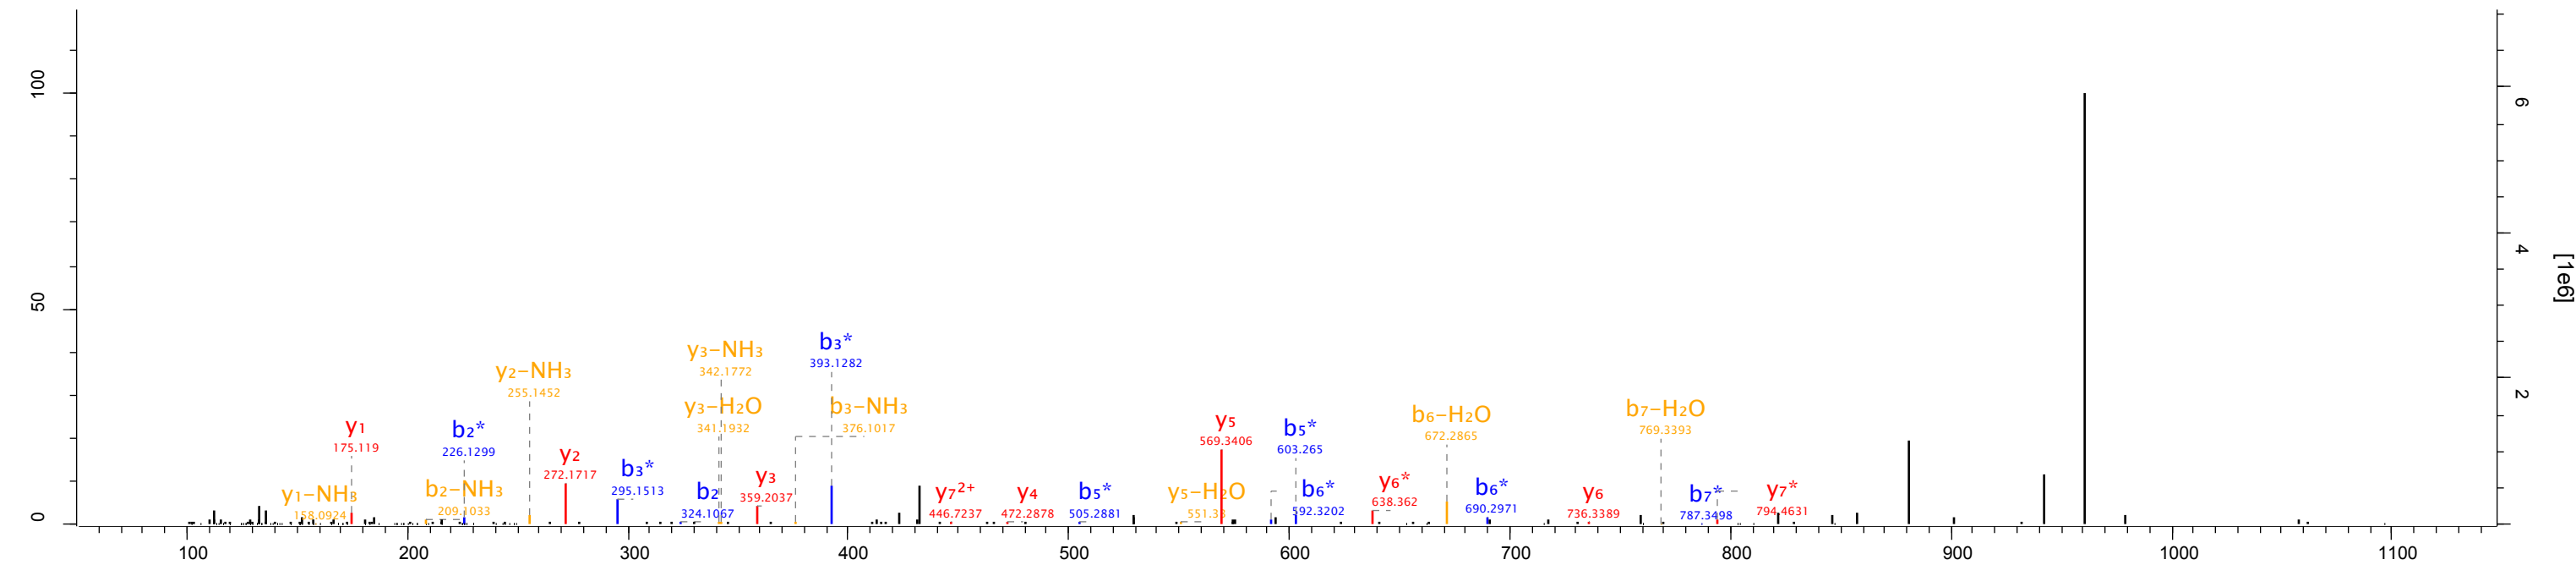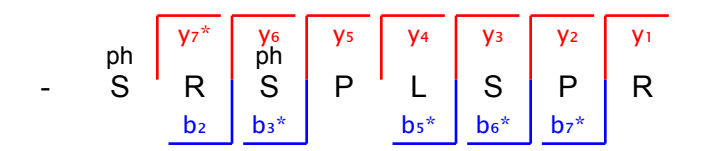

Raw file: 20150812\_A375SR\_Phospho\_BR1\_03  
 Scan: 6559 Method: FTMS; HCD Score: 148.06 m/z: 586.24 Gene names: MKI67

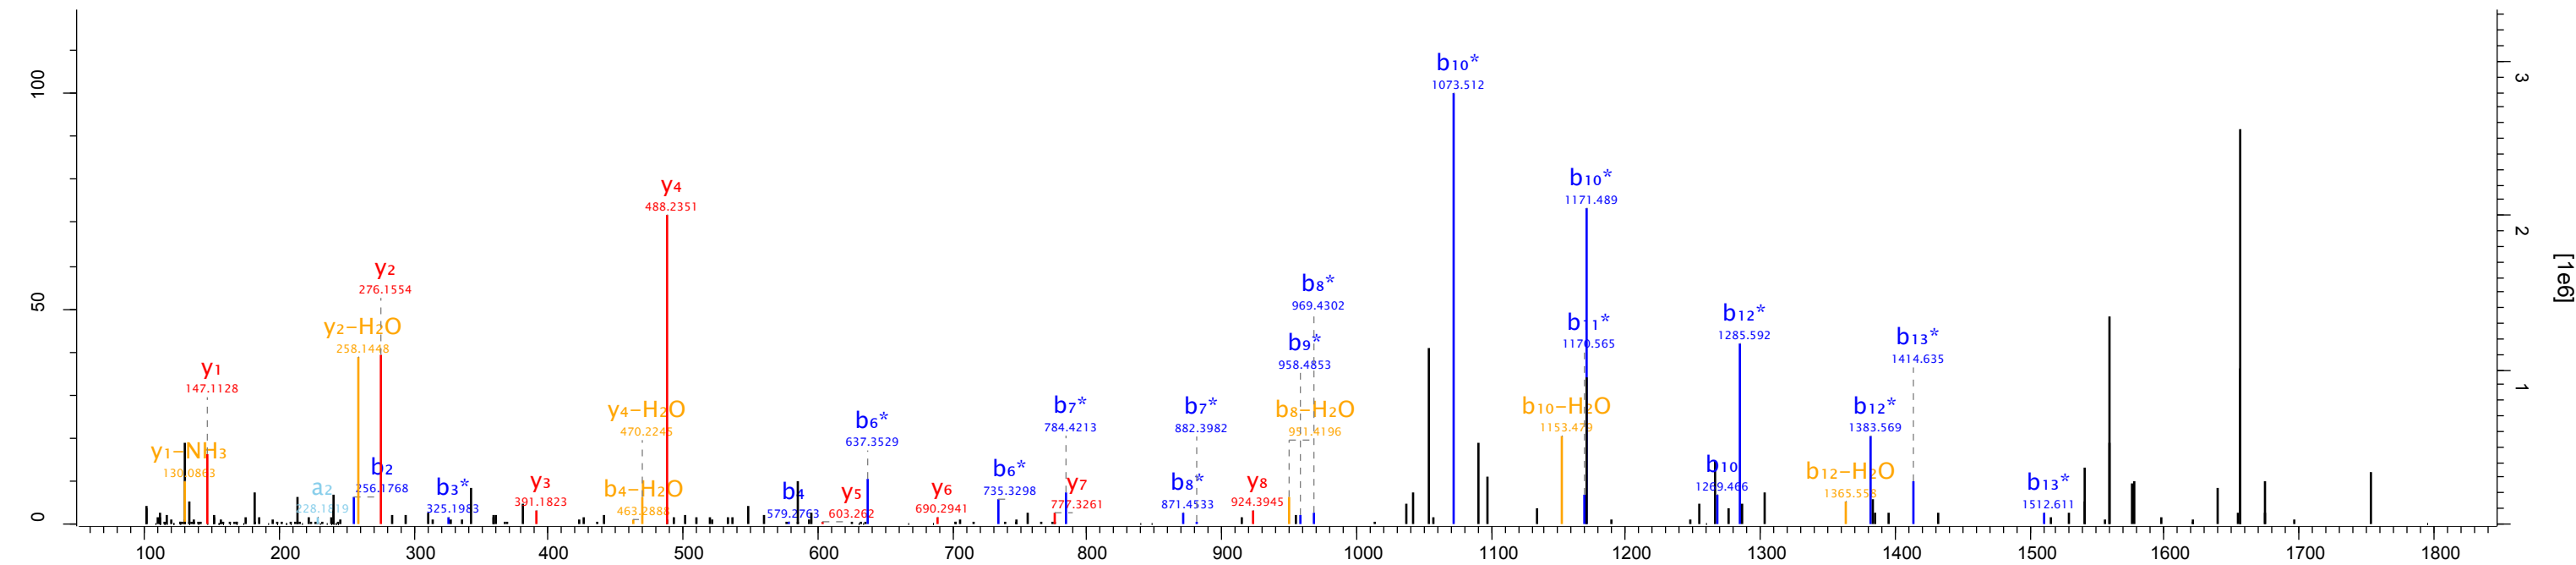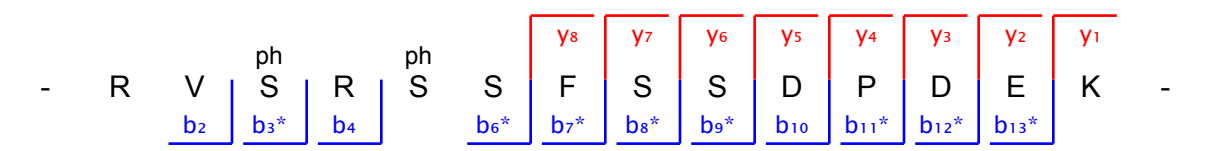



Raw file: 20150812\_A375SR\_Phospho\_BR1\_03  
 Scan: 6869 Method: FTMS; HCD Score: 100.21 m/z: 686.27 Gene names: ARHGAP21

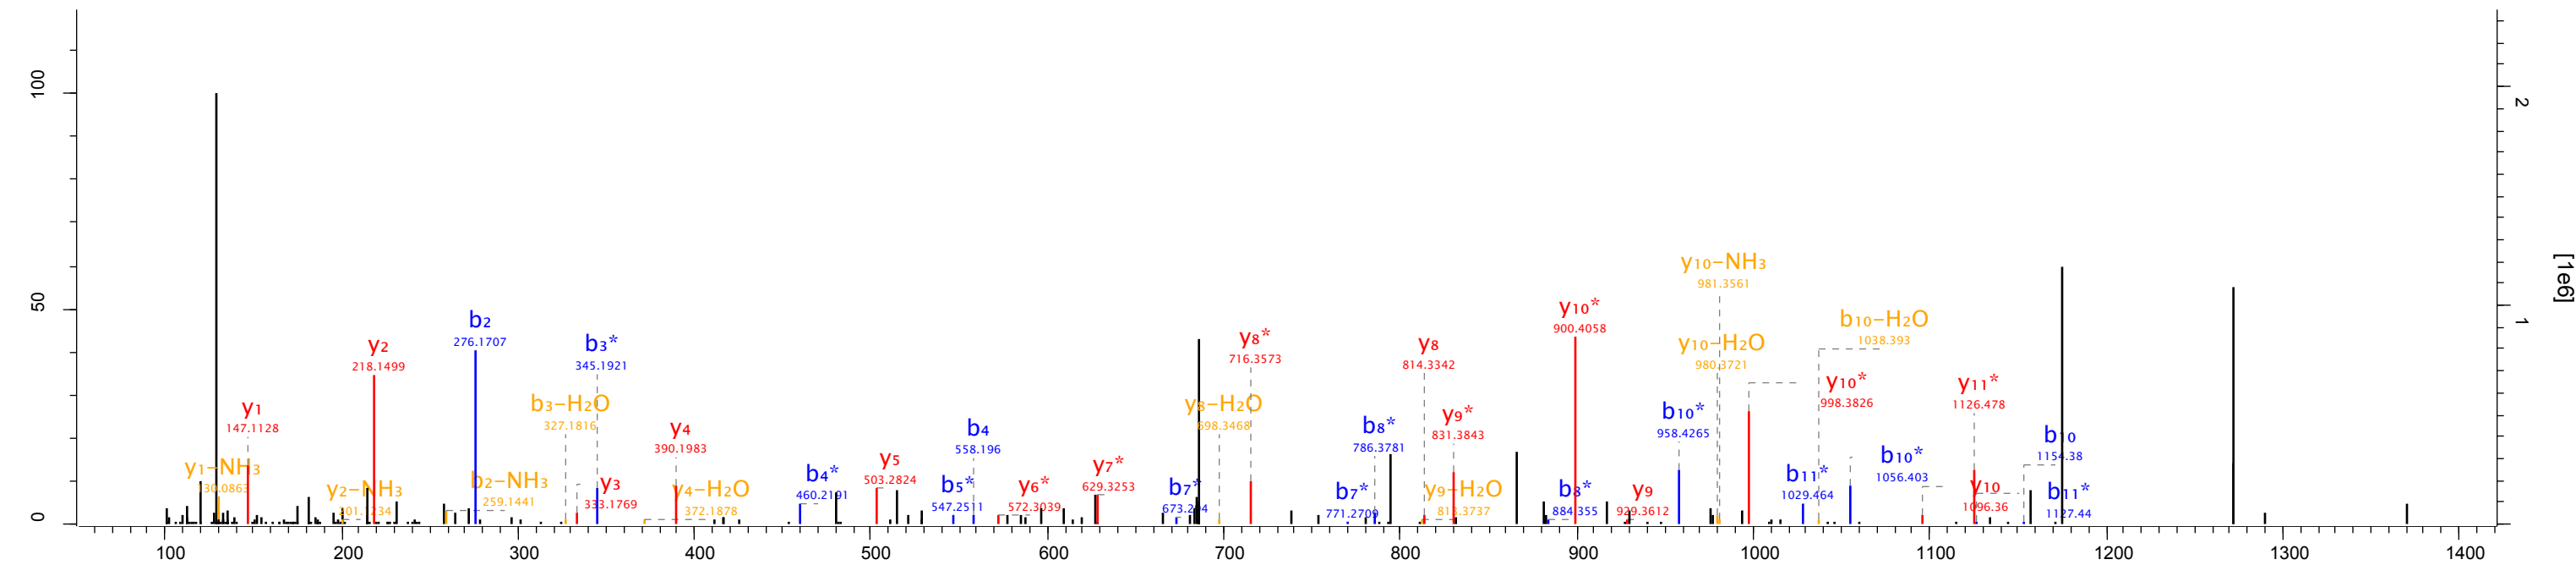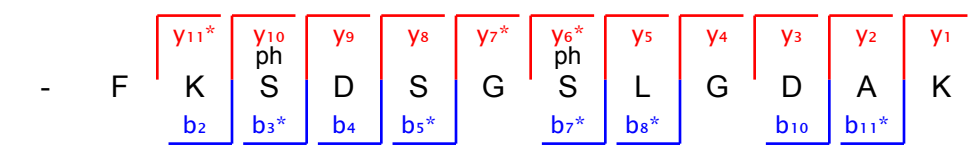

Raw file: 20150812\_A375SR\_Phospho\_BR1\_03  
 Scan: 7189 Method: FTMS; HCD Score: 136.11 m/z: 971.88 Gene names: RBM15

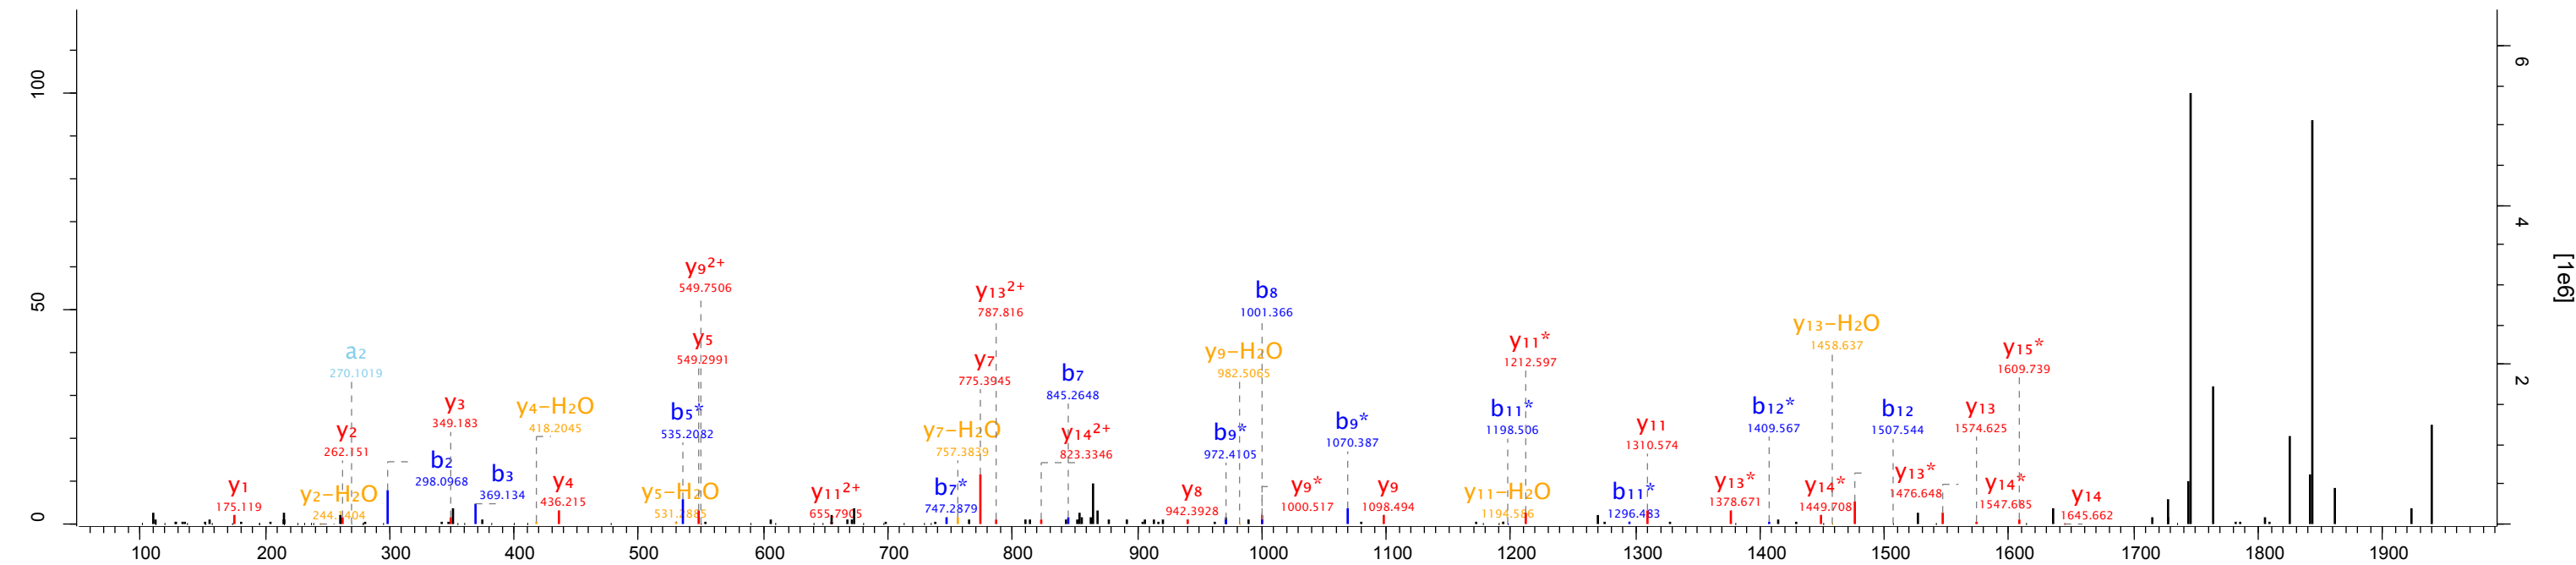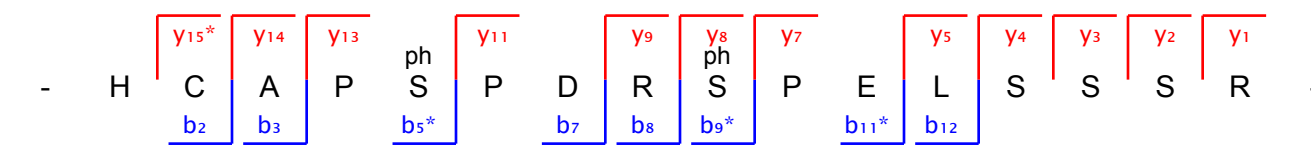

Raw file: 20150812\_A375SR\_Phospho\_BR1\_03  
 Scan: 7359 Method: FTMS; HCD Score: 51.5 m/z: 531.58 Gene names: CLK3

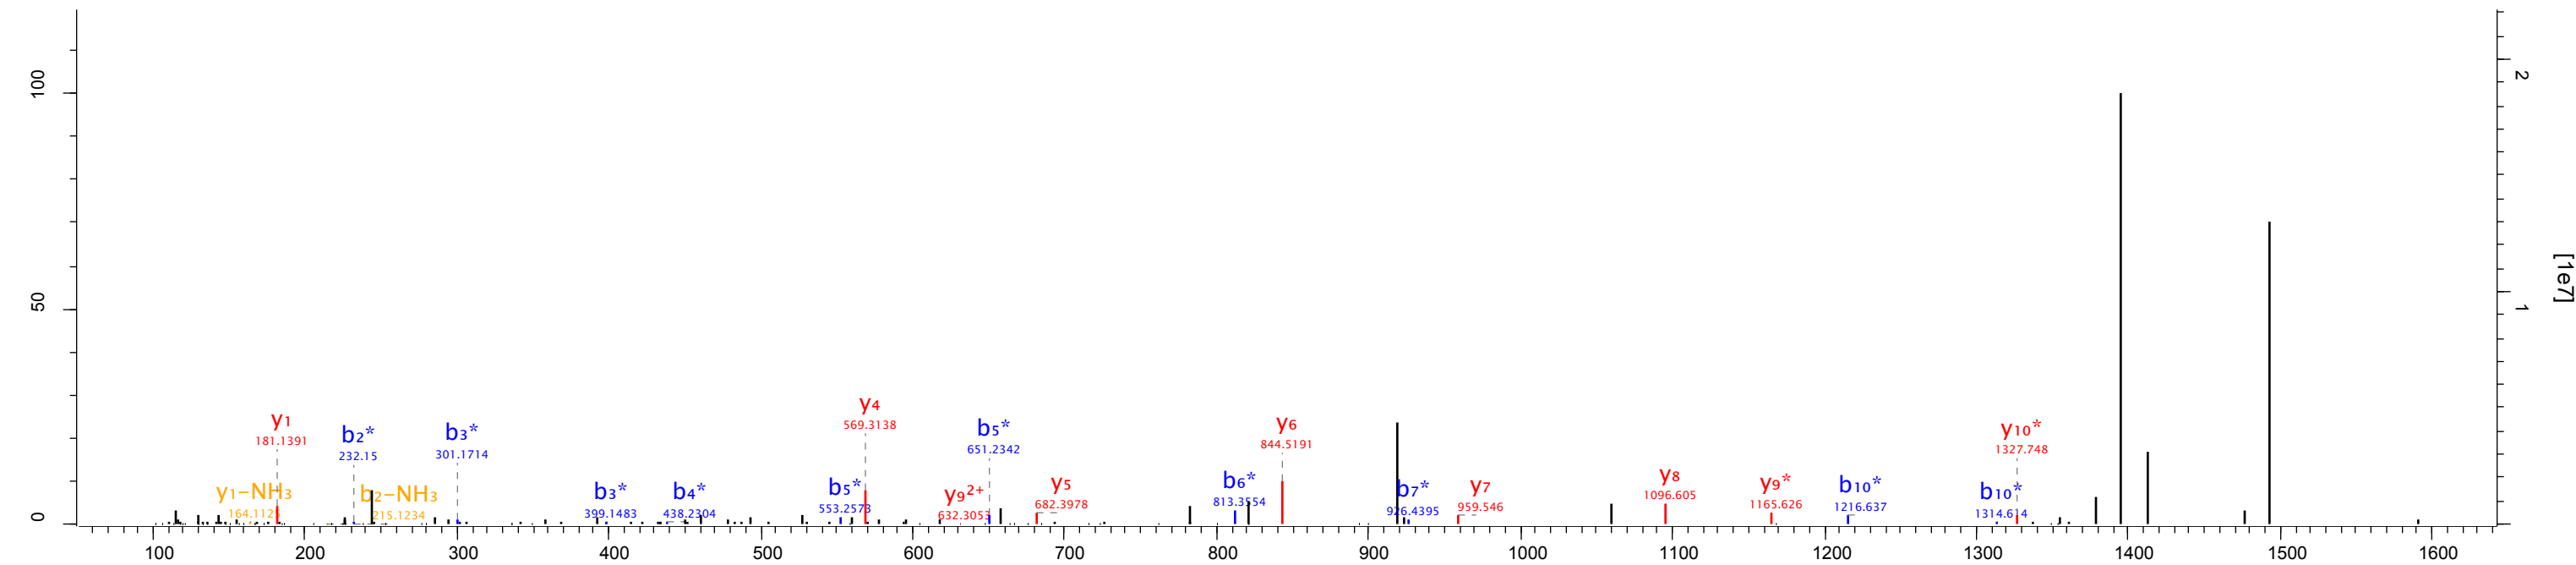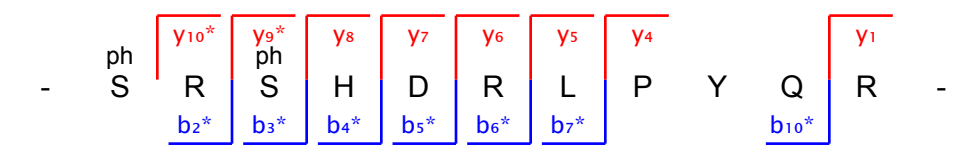

Raw file: 20150812\_A375SR\_Phospho\_BR1\_03  
 Scan: 7499 Method: FTMS; HCD Score: 74.29 m/z: 694.95 Gene names: DLC1

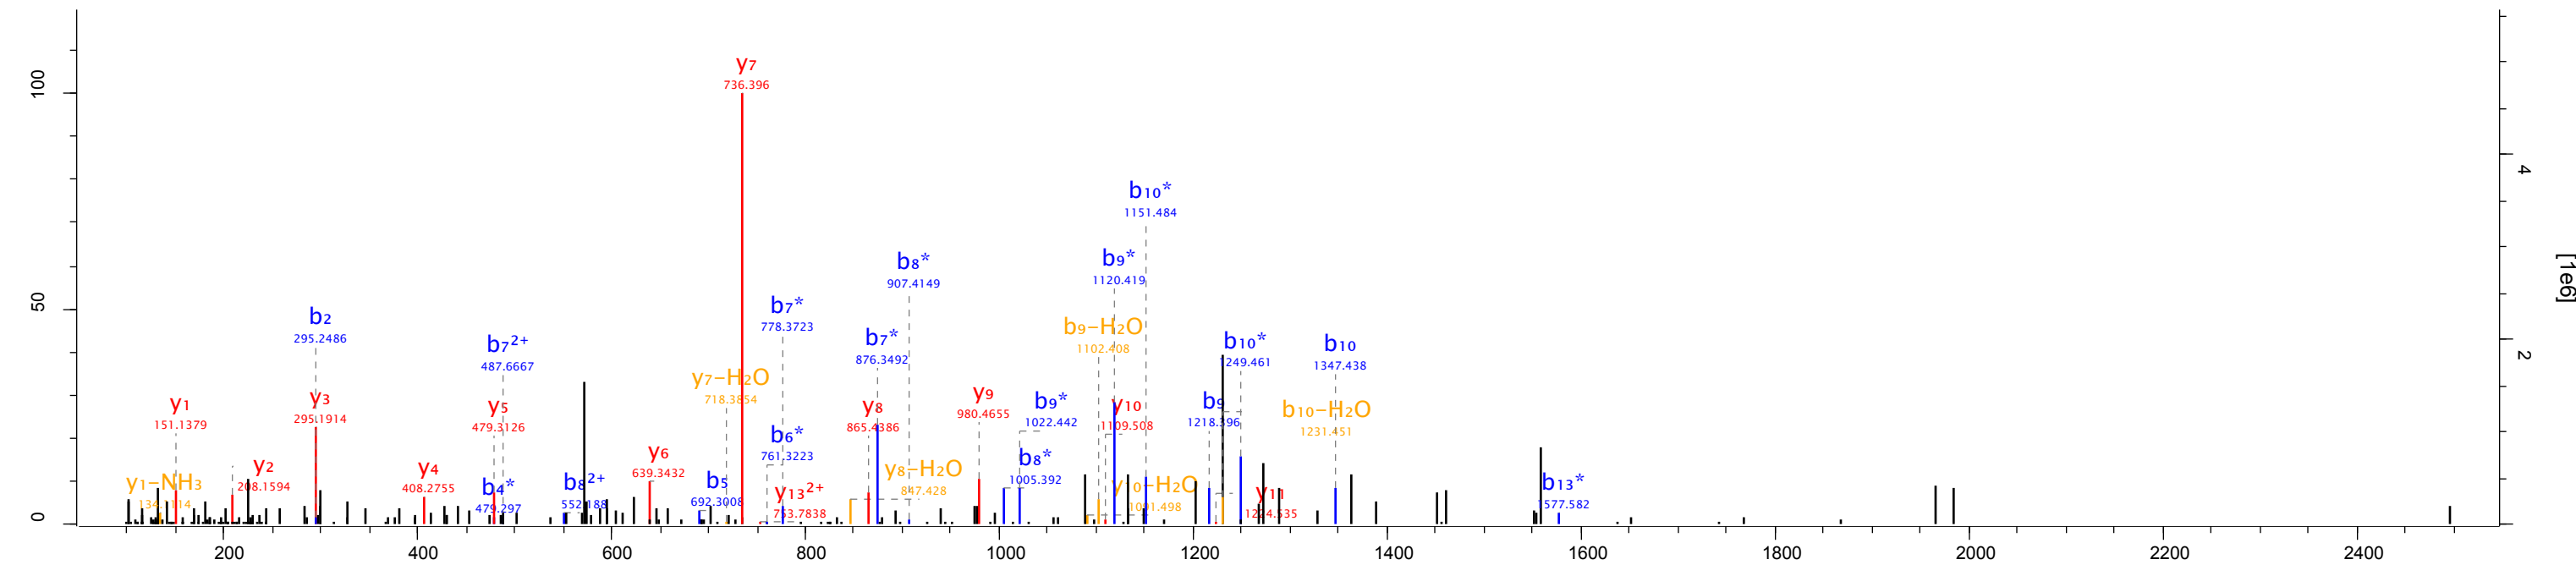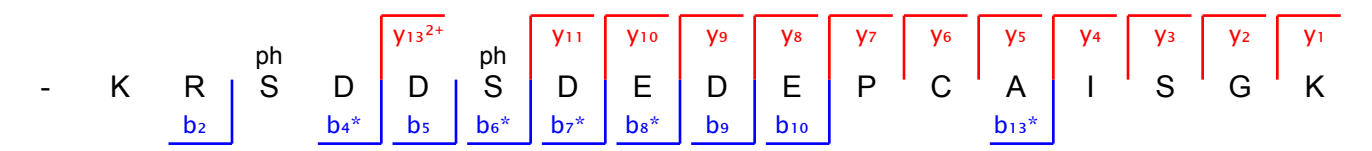

Raw file: 20150812\_A375SR\_Phospho\_BR1\_03  
 Scan: 7669 Method: FTMS; HCD Score: 106.6 m/z: 696.24 Gene names: IWS1

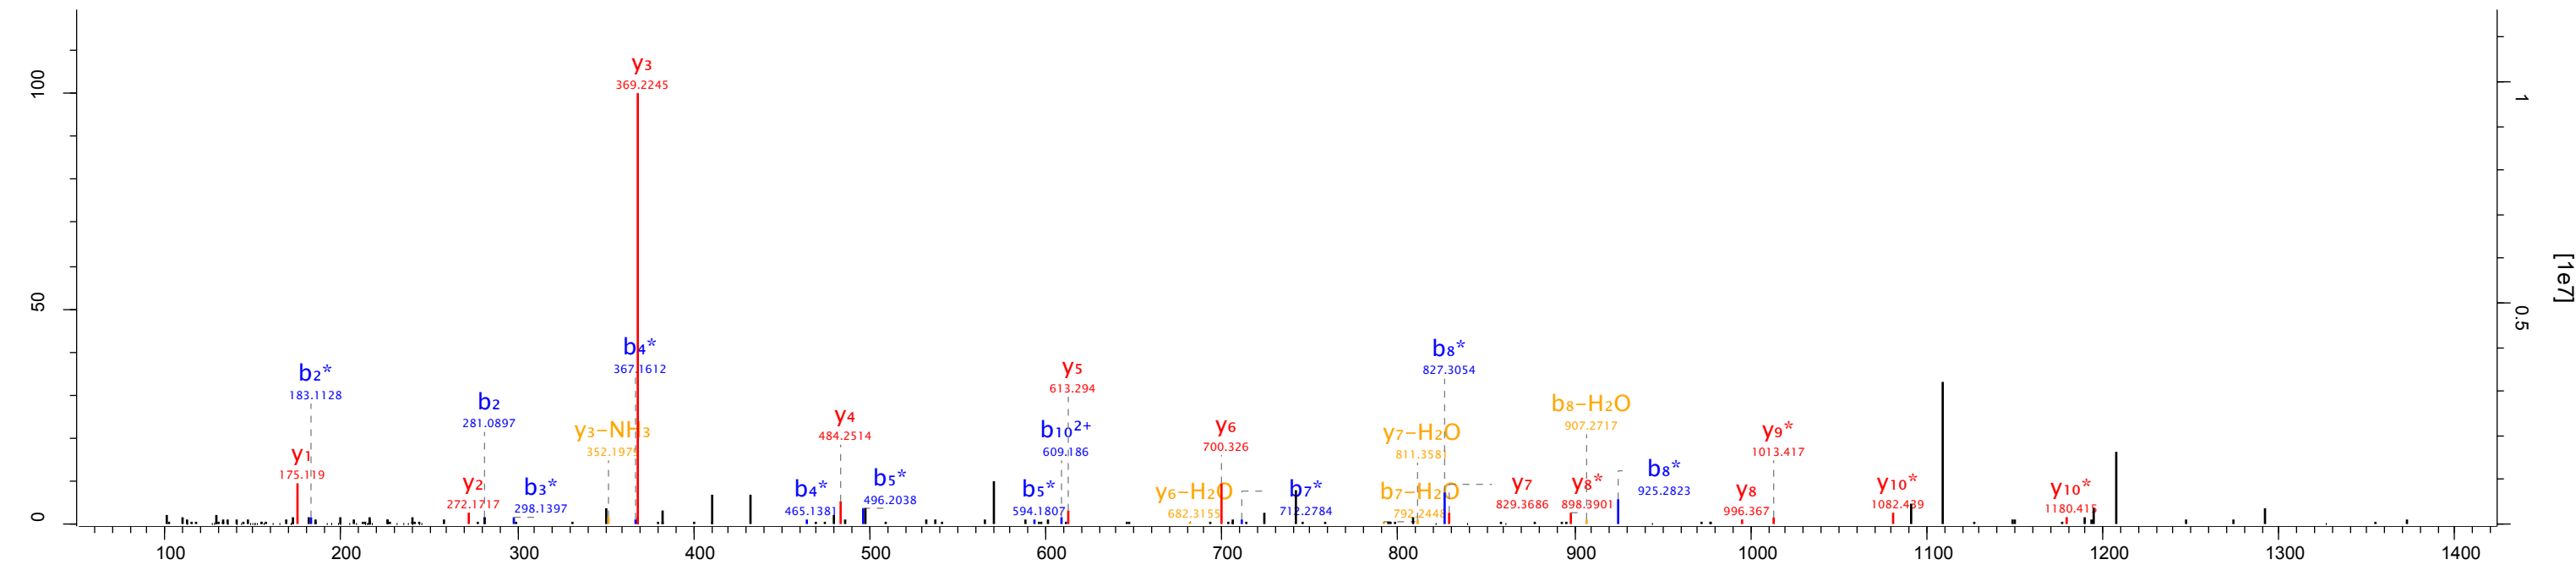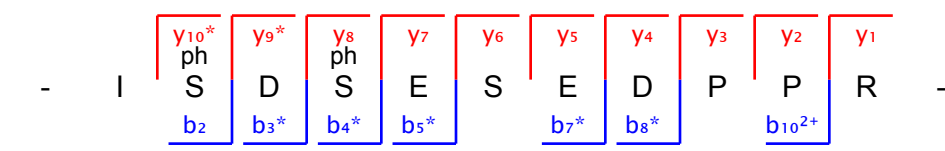

Raw file Scan Method Score m/z Gene names  
 20150812\_A375SR\_Phospho\_BR1\_03 7759 FTMS; HCD 350.09 1178.01 NUCKS1

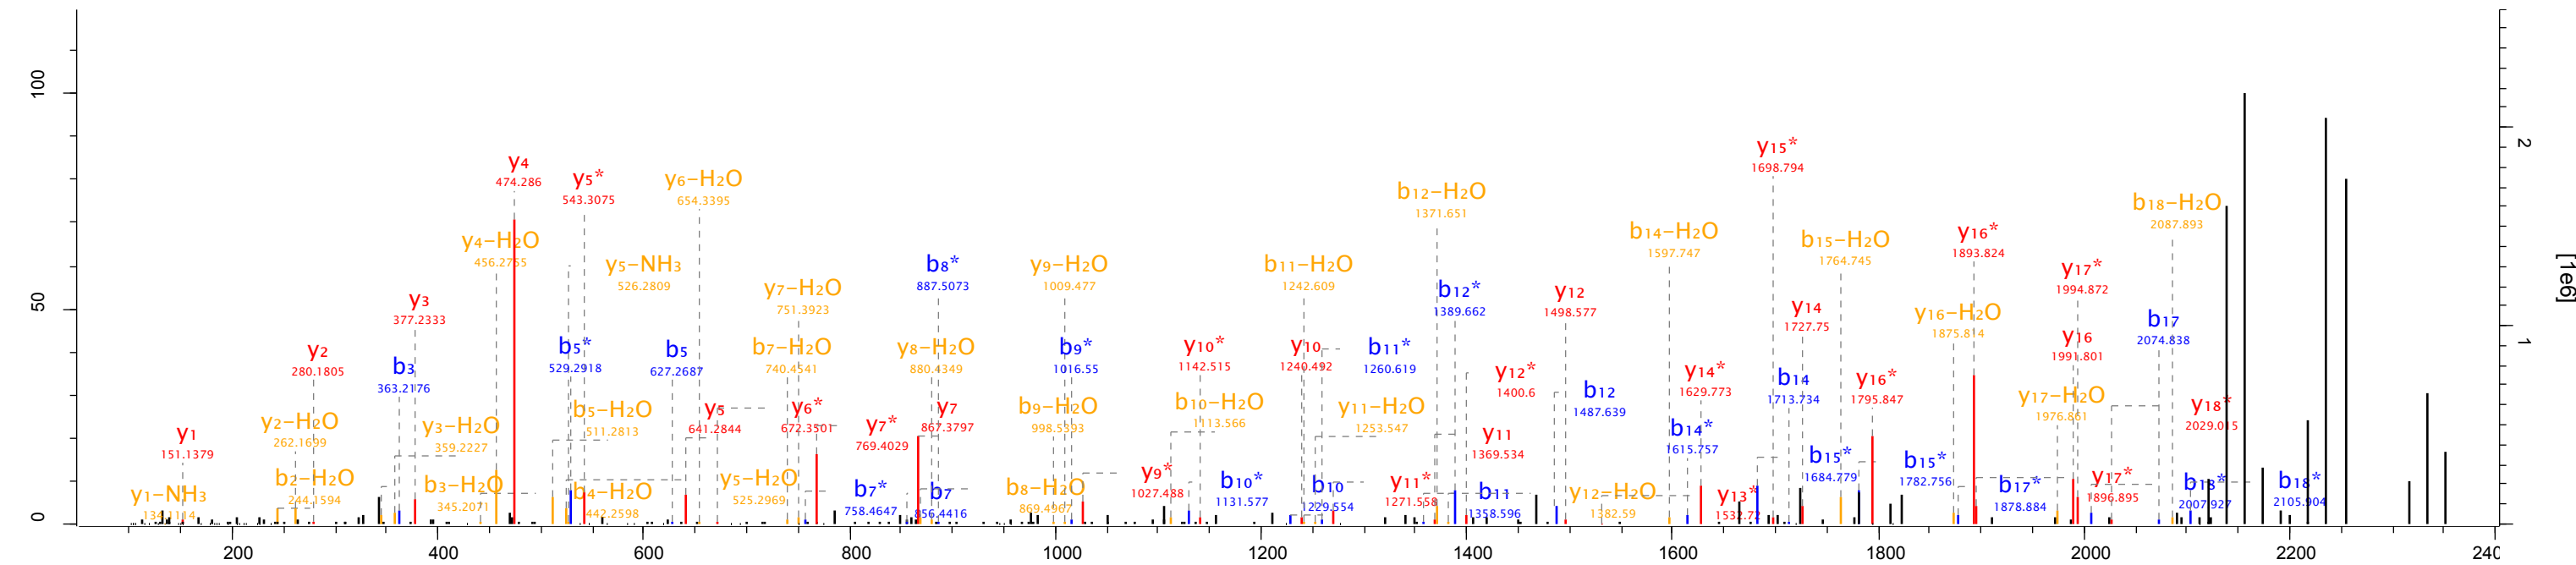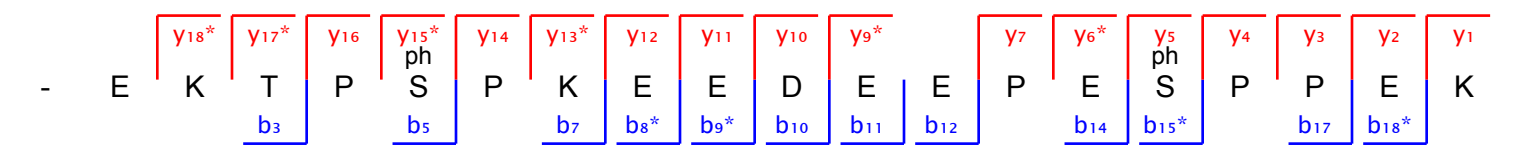

Raw file 20150812\_A375SR\_Phospho\_BR1\_03 Scan 8019 Method FTMS; HCD Score 137.32 m/z 805.32 Gene names TAF6

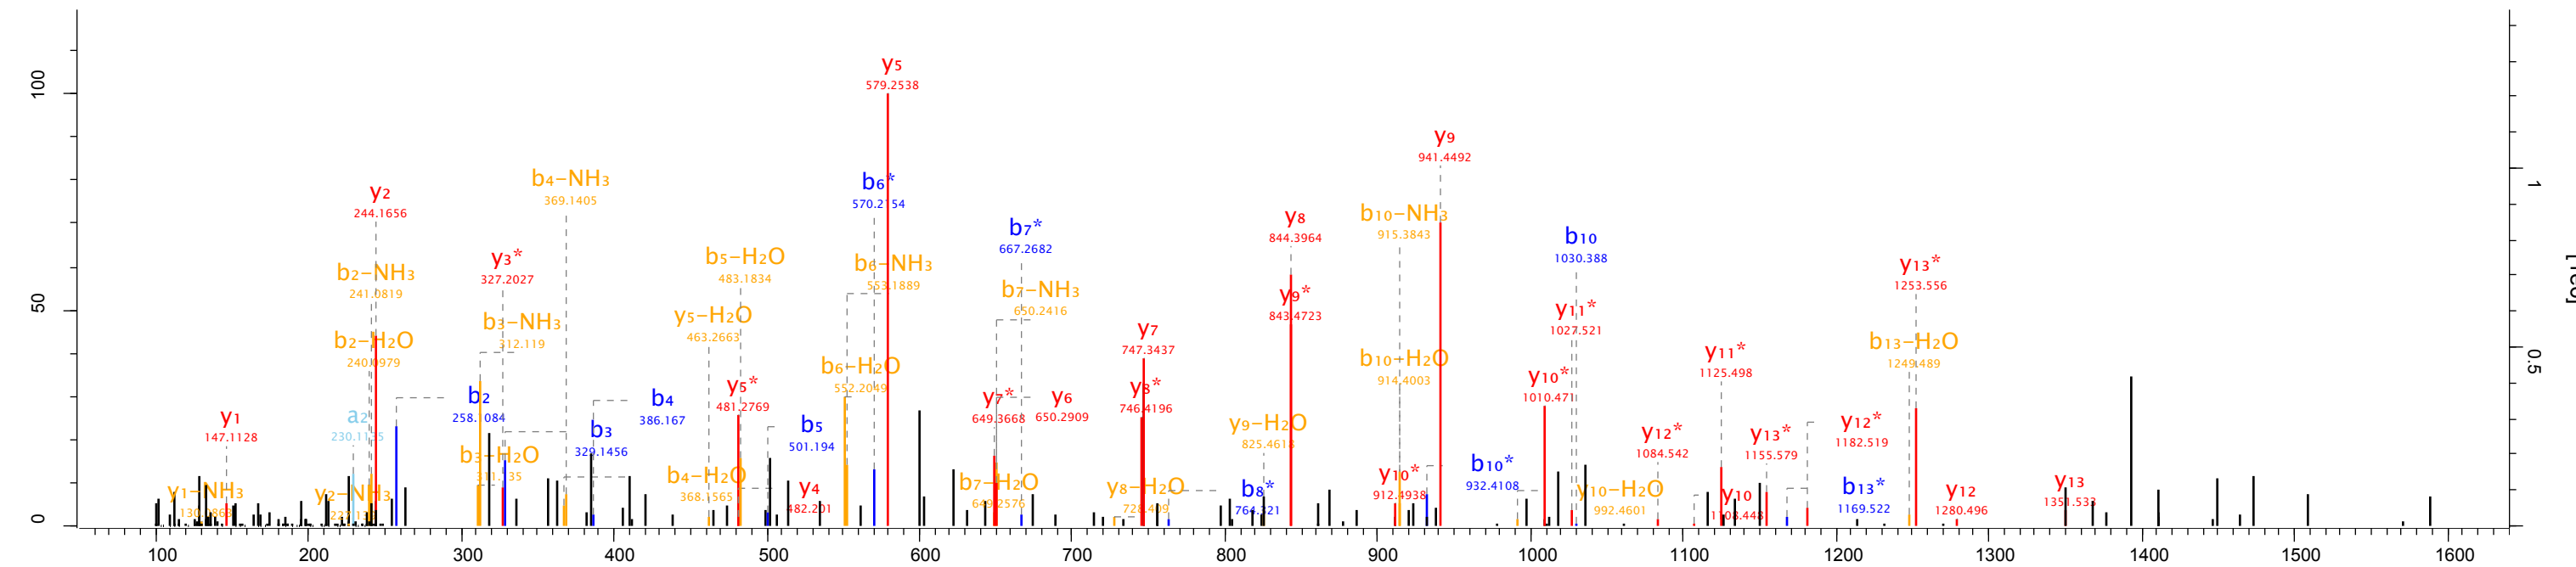

- Q E A G D S P P P A P G T P K -

b<sub>2</sub>
y<sub>13</sub>
y<sub>12</sub>
y<sub>11</sub>\*
y<sub>10</sub>
y<sub>9</sub>
y<sub>8</sub>
y<sub>7</sub>
y<sub>6</sub>
y<sub>5</sub>
y<sub>4</sub>
y<sub>3</sub>\*
y<sub>2</sub>
y<sub>1</sub>

b<sub>3</sub>
b<sub>4</sub>
b<sub>5</sub>
b<sub>6</sub>\*
b<sub>7</sub>\*
b<sub>8</sub>\*
b<sub>10</sub>
b<sub>13</sub>\*

Raw file: 20150812\_A375SR\_Phospho\_BR1\_03  
 Scan: 8219 Method: FTMS; HCD Score: 178.69 m/z: 948.07 Gene names: PHF3

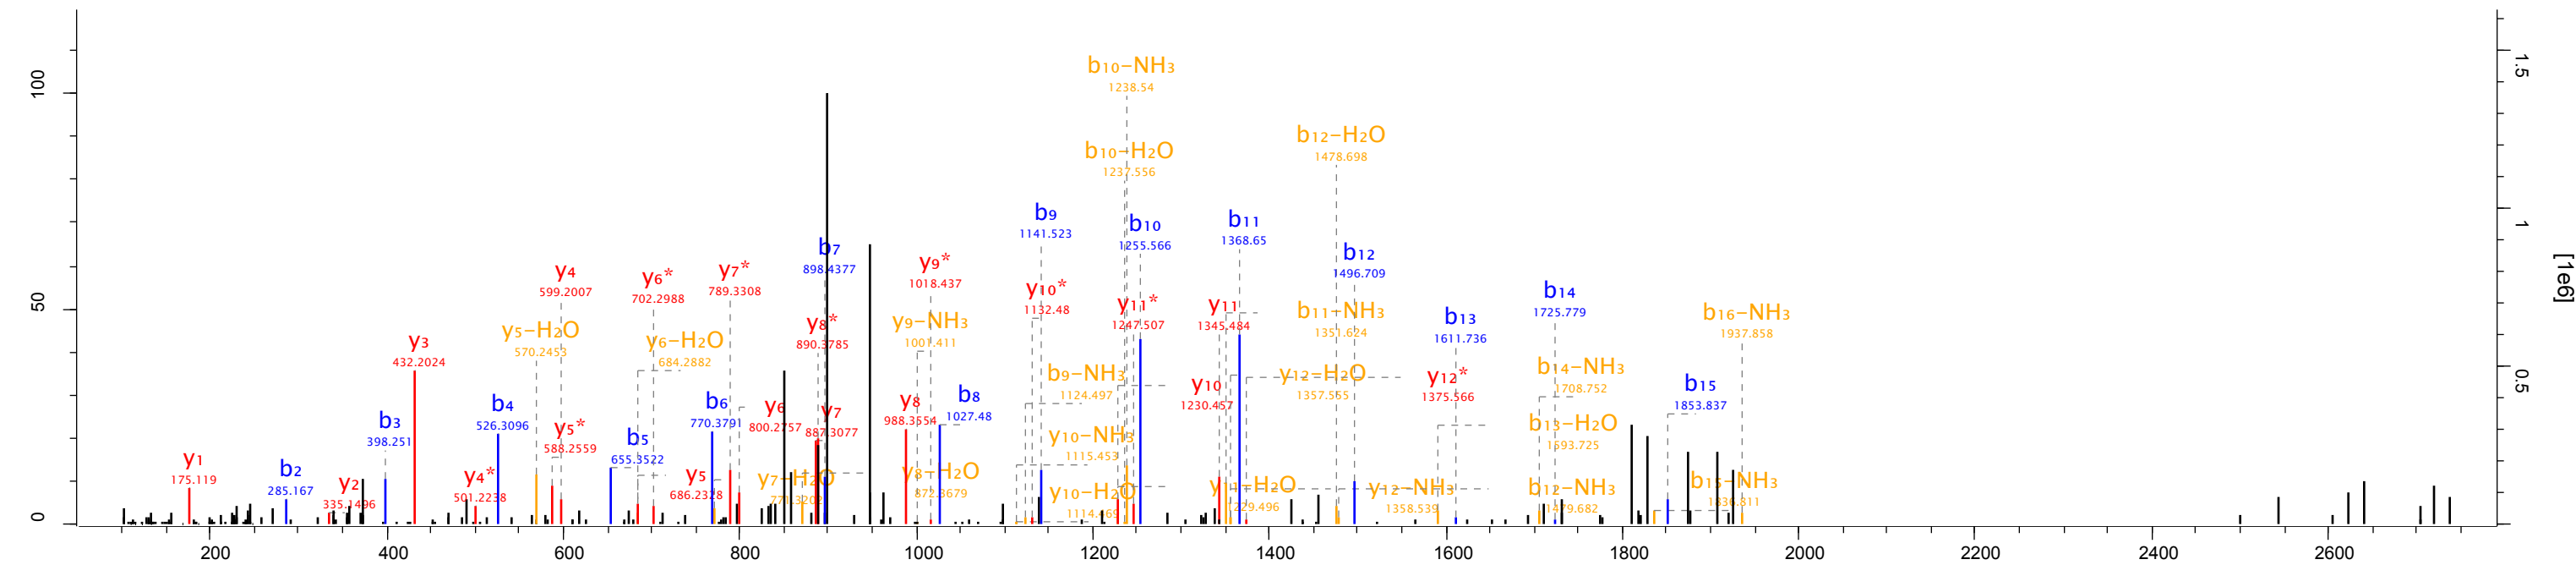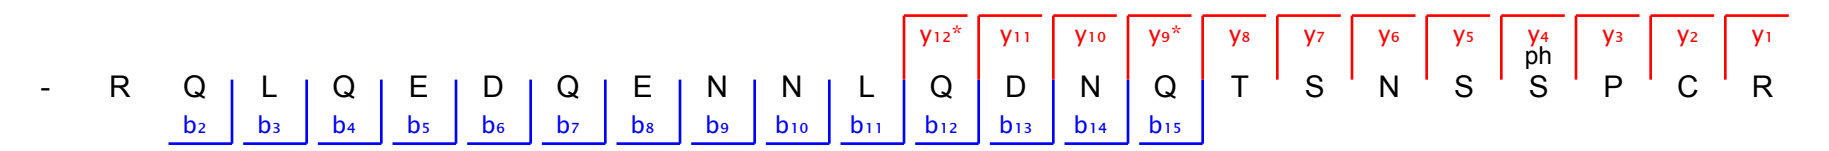



Raw file: 20150812\_A375SR\_Phospho\_BR1\_03  
 Scan: 8599 Method: FTMS; HCD Score: 118.36 m/z: 791.82 Gene names: CAMSAP2

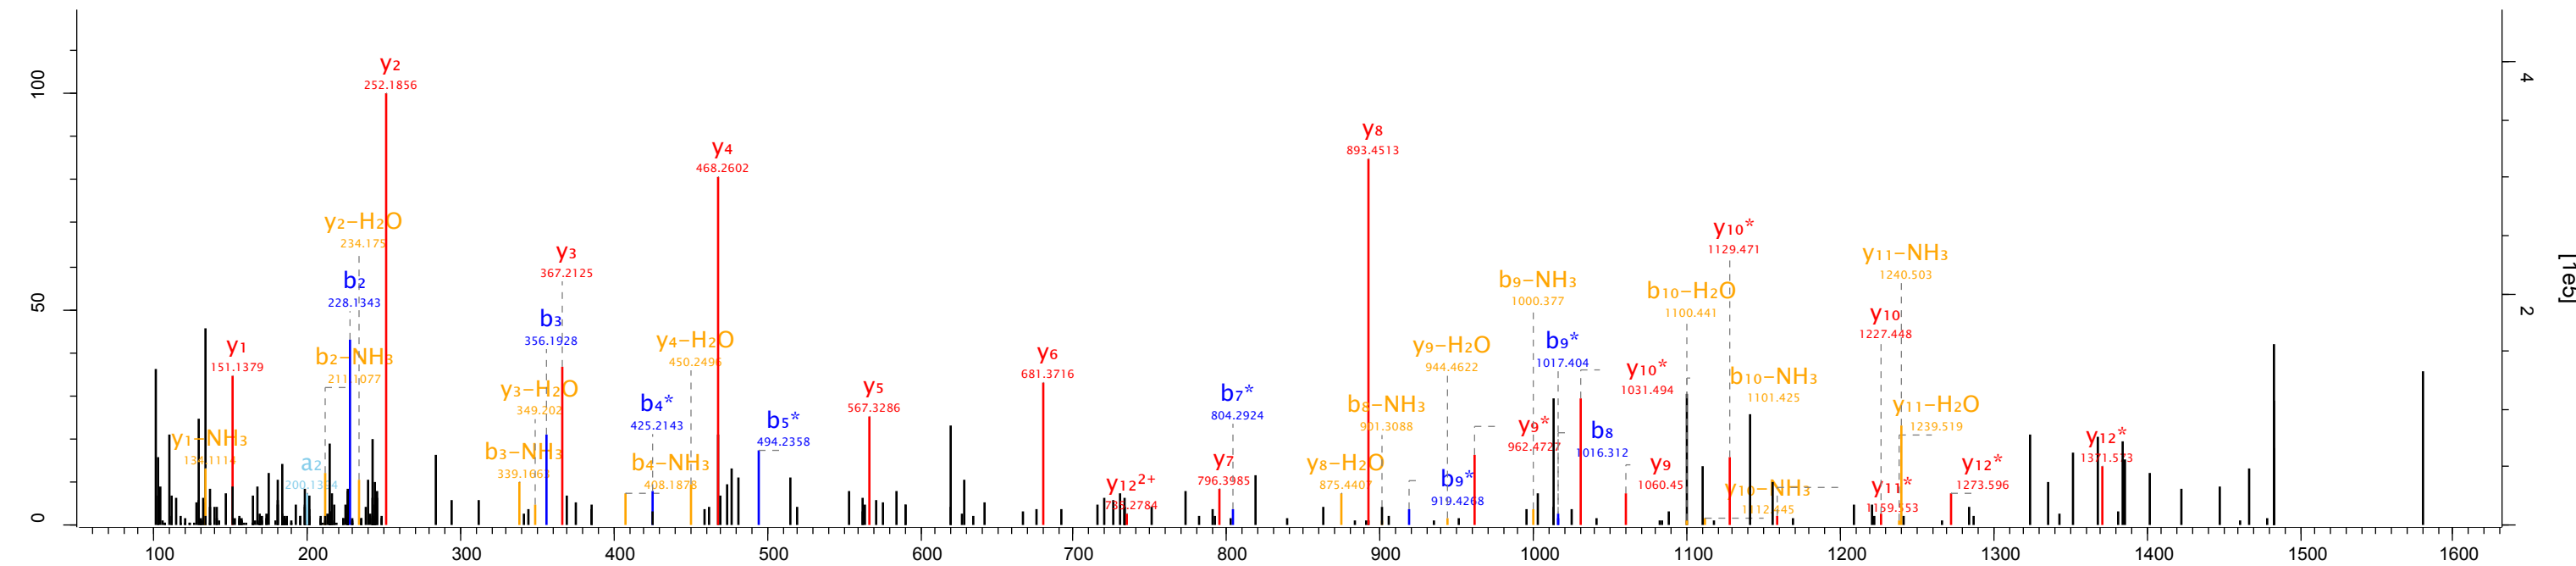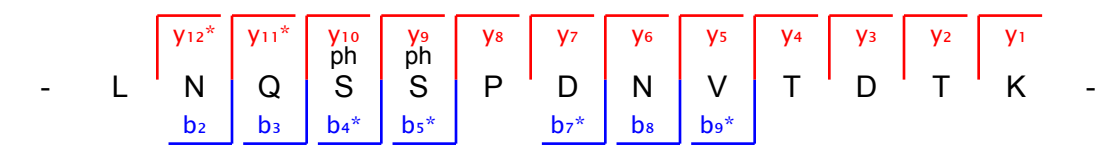

Raw file: 20150812\_A375SR\_Phospho\_BR1\_03  
 Scan: 8759 Method: FTMS; HCD Score: 136.43 m/z: 867.85 Gene names: CDK13

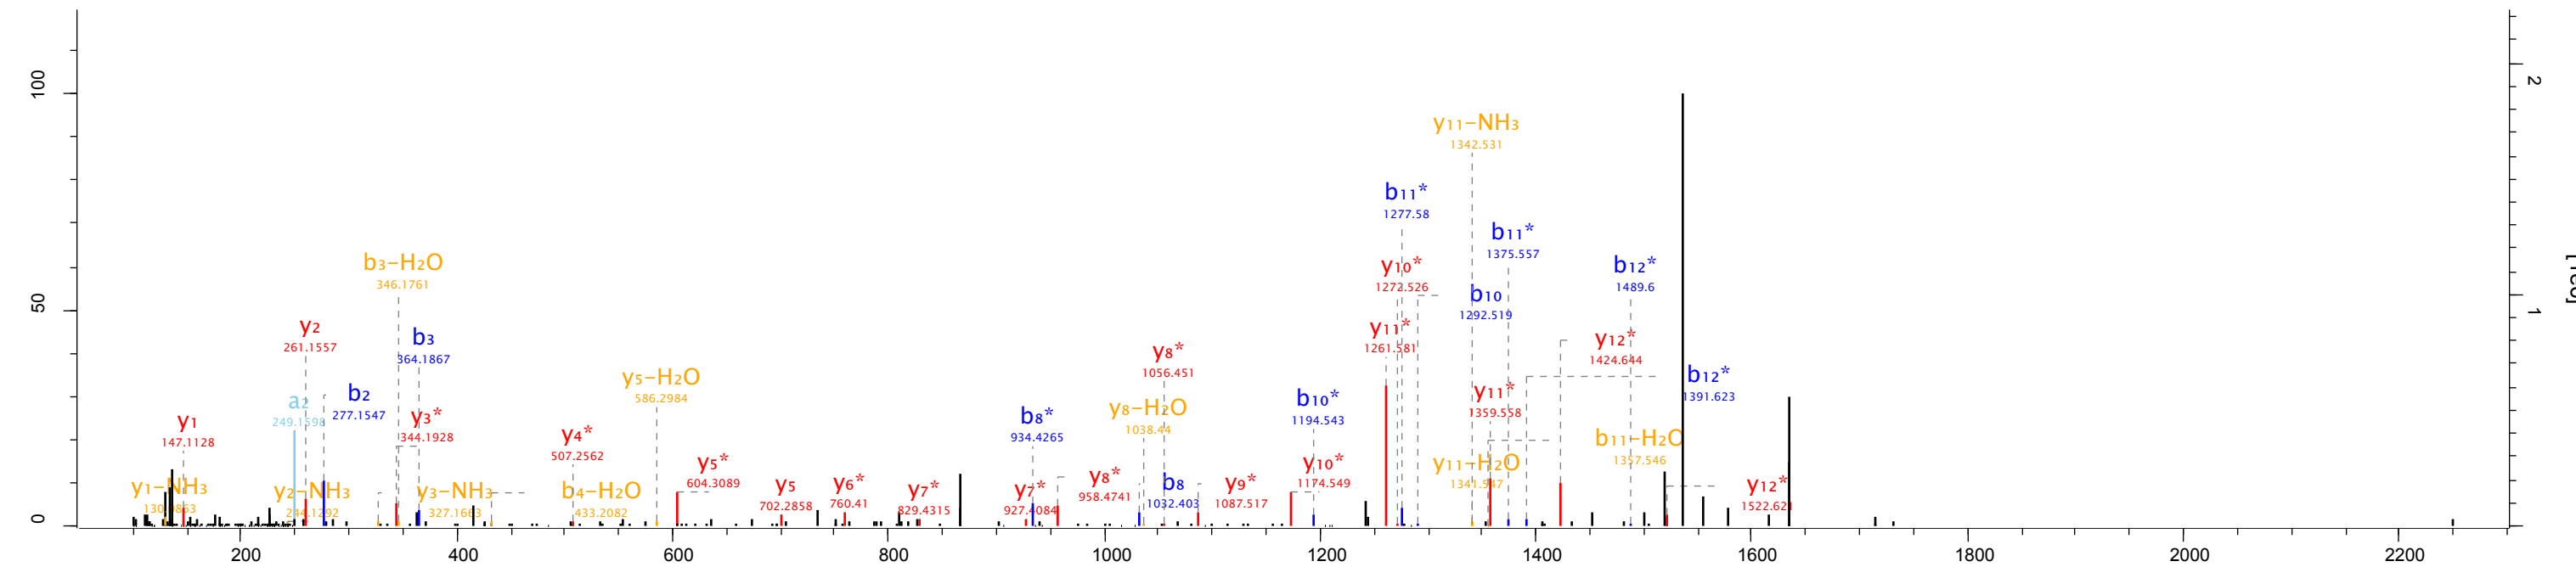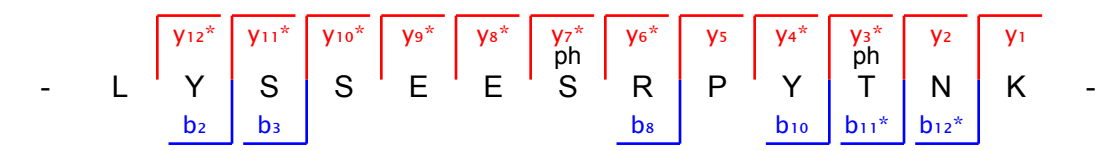

Raw file: 20150812\_A375SR\_Phospho\_BR1\_03  
 Scan: 8859 Method: FTMS; HCD Score: 125.12 m/z: 805.32 Gene names: TCEAL3

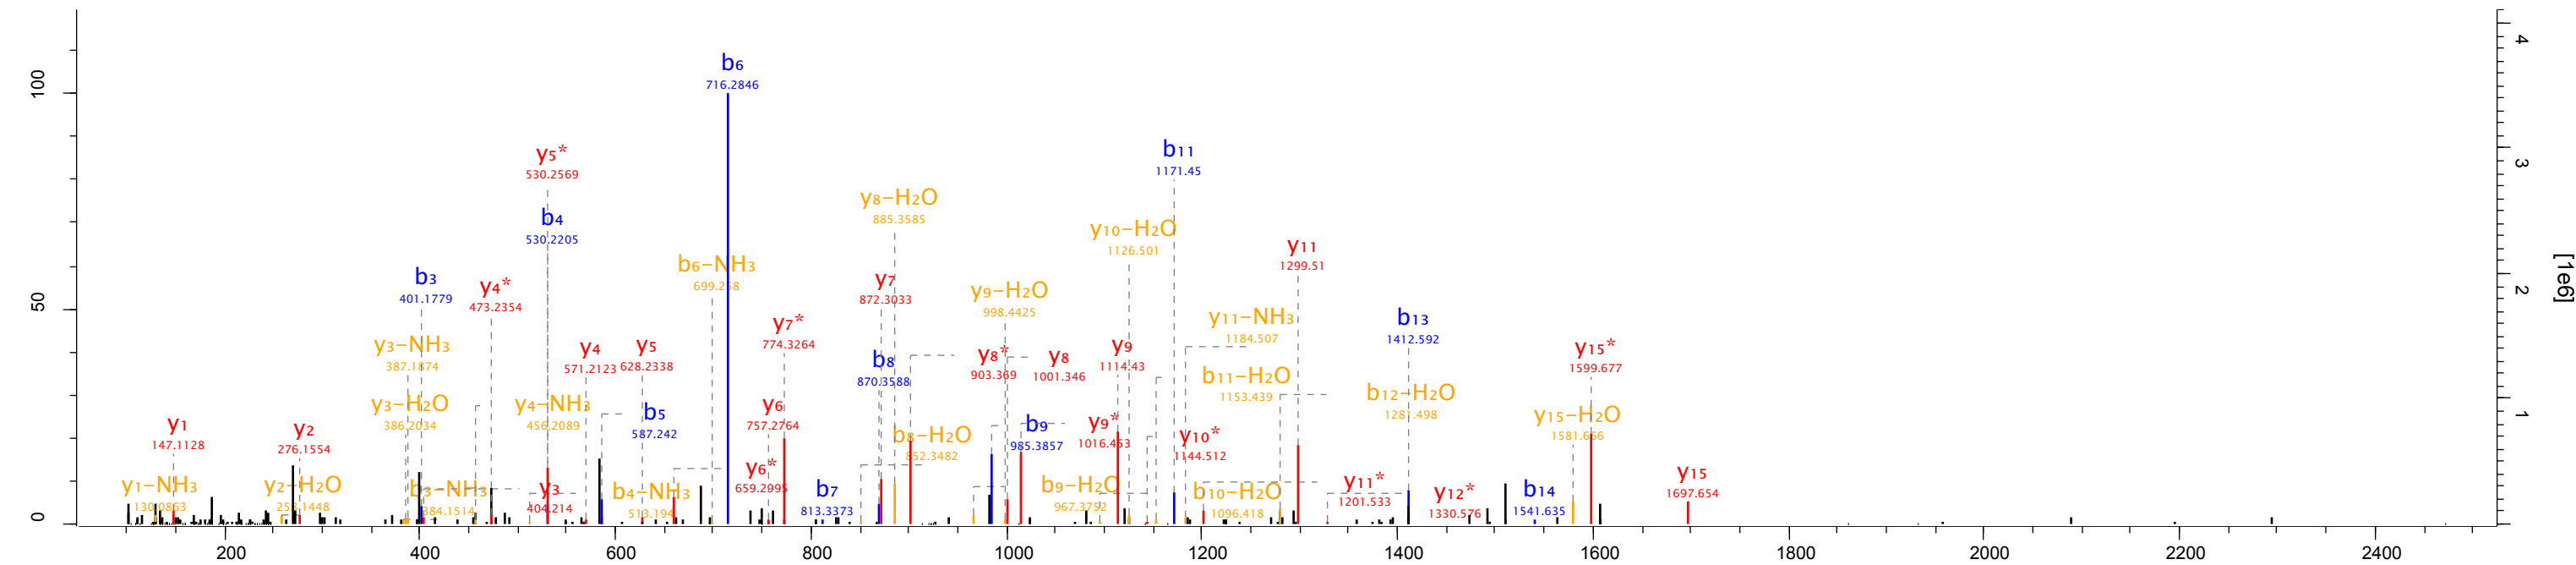

- R E D E G E P G D E G Q L E D E G S Q E K -

b<sub>3</sub>
b<sub>4</sub>
b<sub>5</sub>
b<sub>6</sub>
b<sub>7</sub>
b<sub>8</sub>
b<sub>9</sub>
b<sub>11</sub>
b<sub>13</sub>
b<sub>14</sub>
y<sub>15</sub>
y<sub>12</sub>\*
y<sub>11</sub>
y<sub>10</sub>\*
y<sub>9</sub>
y<sub>8</sub>
y<sub>7</sub>
y<sub>6</sub>
y<sub>5</sub>
y<sub>4</sub><sup>ph</sup>
y<sub>3</sub>
y<sub>2</sub>
y<sub>1</sub>

Raw file: 20150812\_A375SR\_Phospho\_BR1\_03  
 Scan: 8989 Method: FTMS; HCD Score: 196.83 m/z: 881.36 Gene names: ZNF318

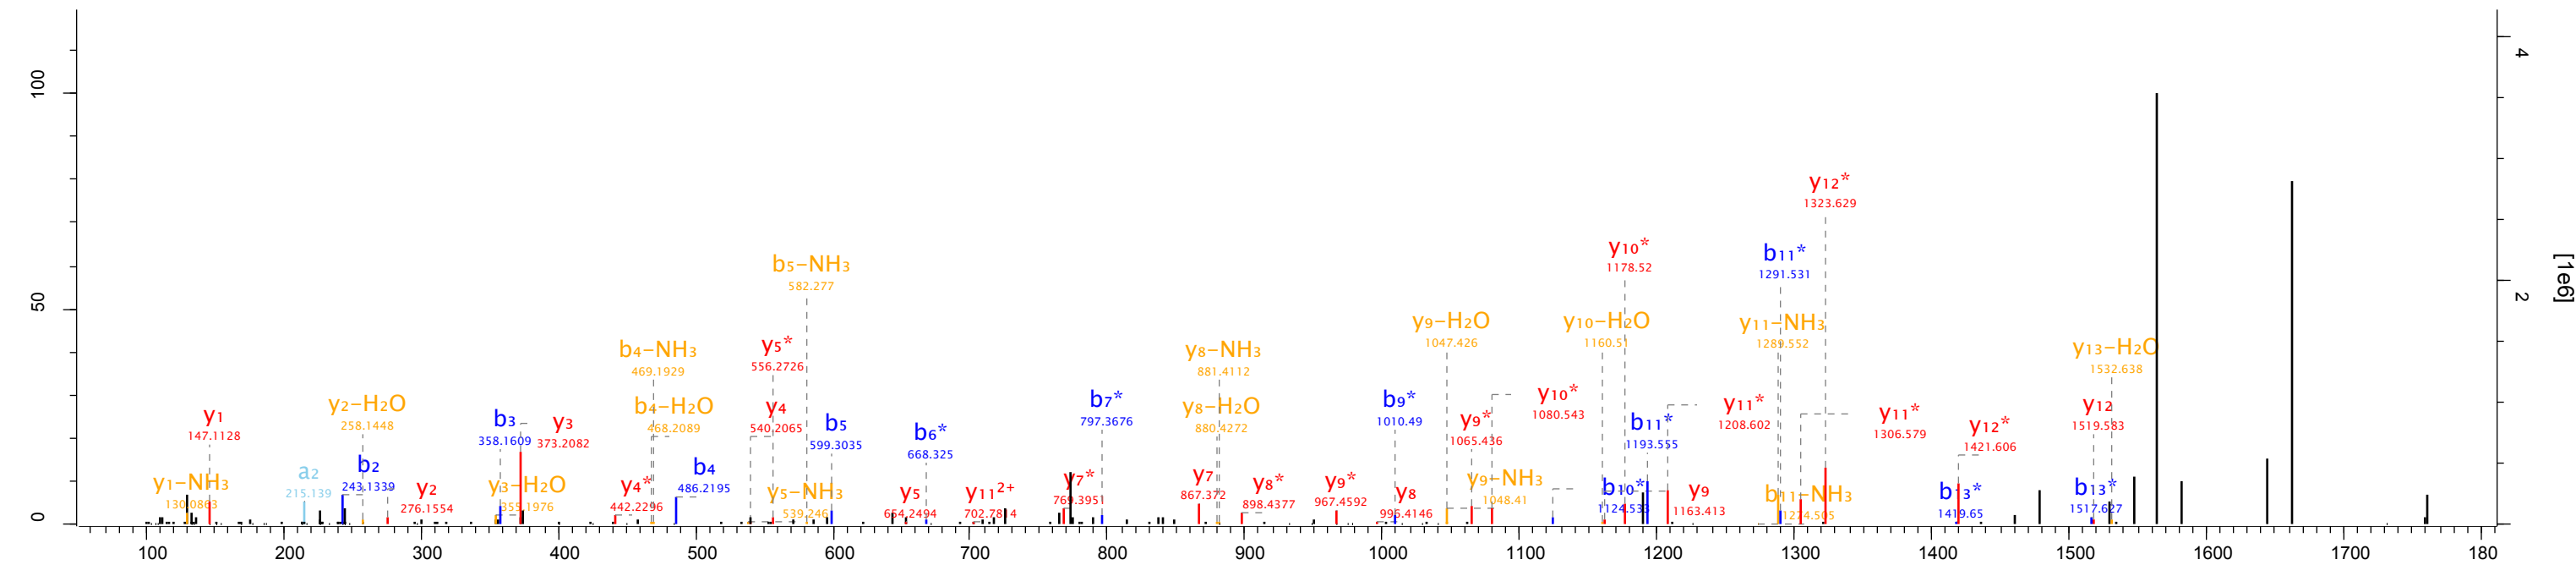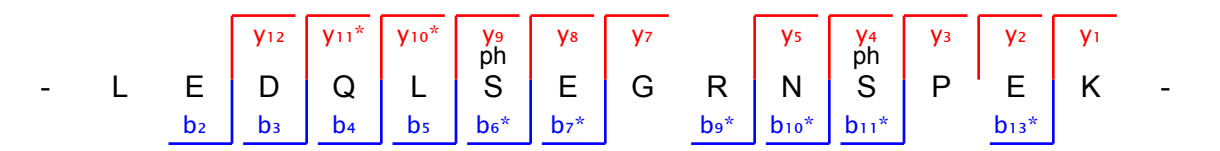

Raw file: 20150812\_A375SR\_Phospho\_BR1\_03  
 Scan: 8999 Method: FTMS; HCD Score: 169.35 m/z: 951.71 Gene names: USP4

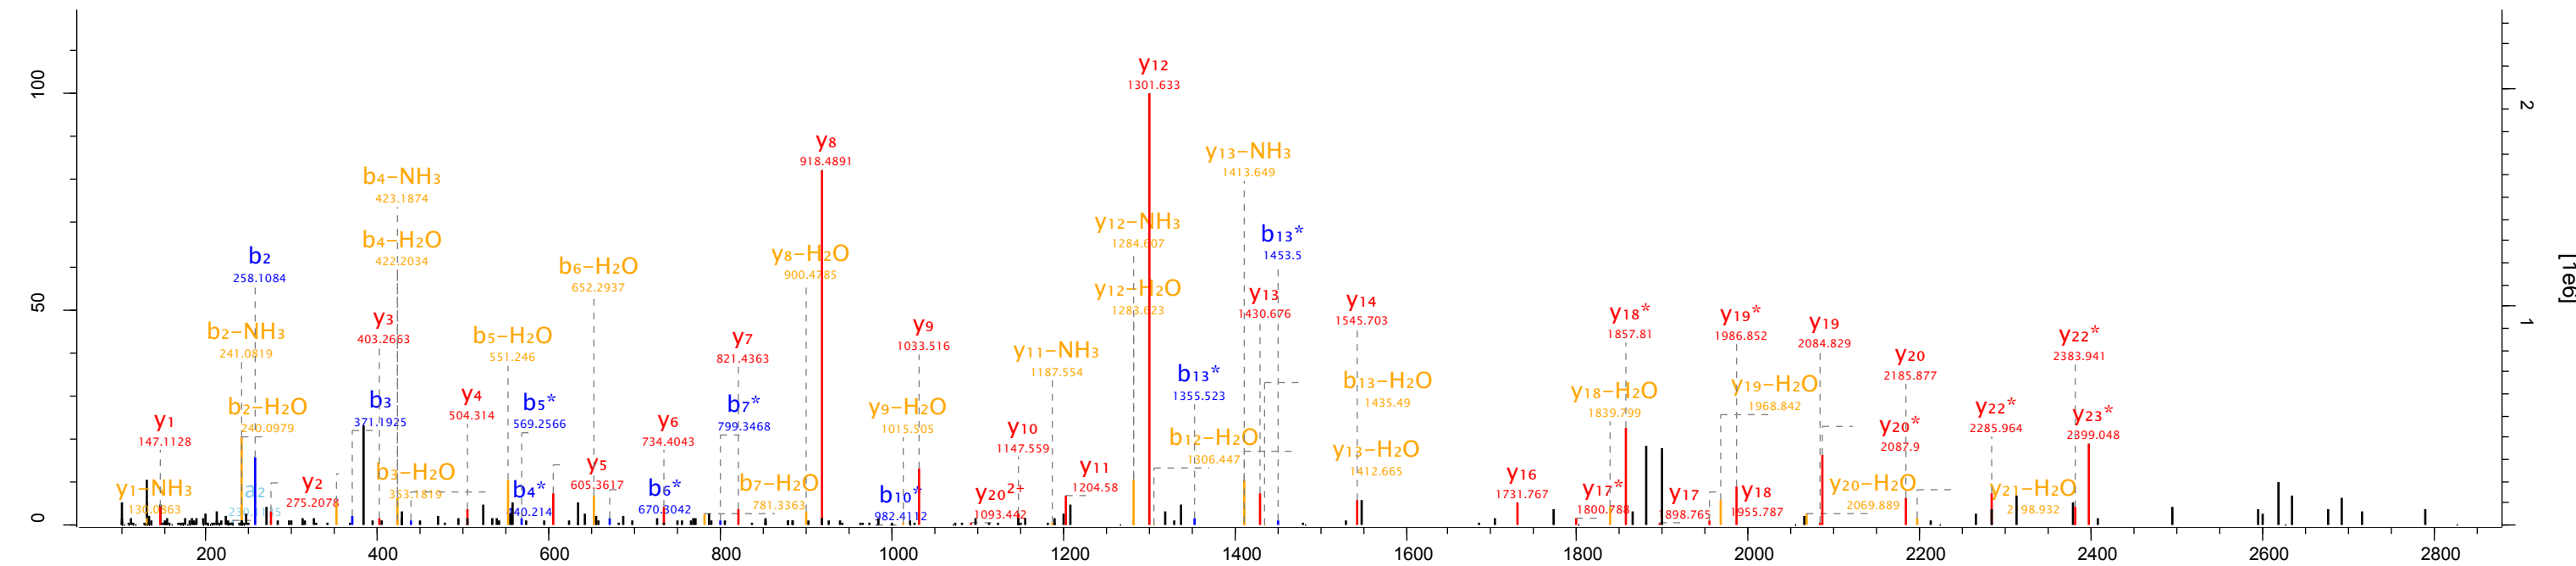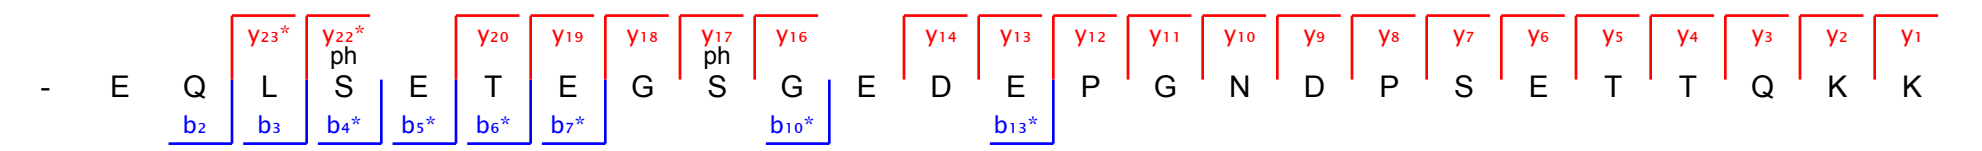

Raw file 20150812\_A375SR\_Phospho\_BR1\_03 Scan 9139 Method FTMS; HCD Score 125.9 m/z 748.81 Gene names UBAP2L

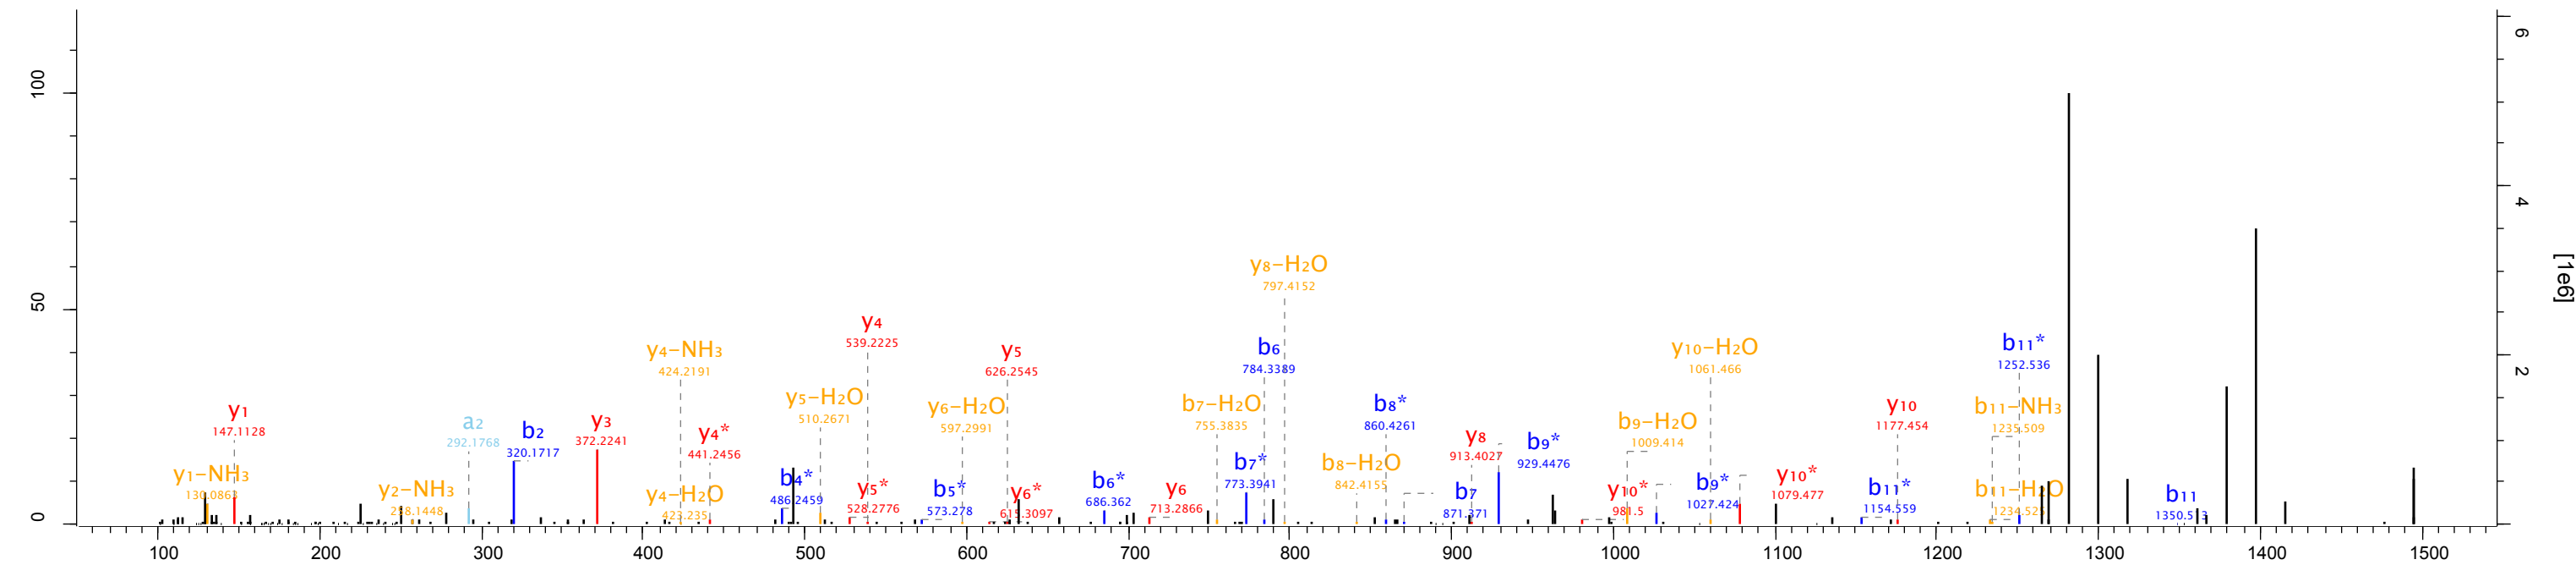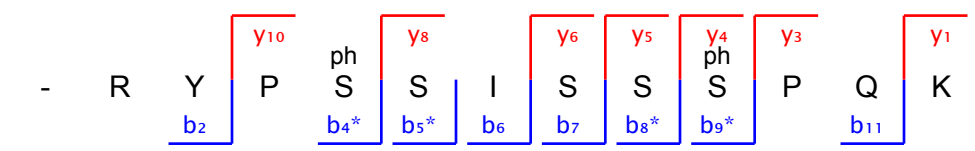

Raw file: 20150812\_A375SR\_Phospho\_BR1\_03  
 Scan: 9269 Method: FTMS; HCD Score: 83.76 m/z: 675.77 Gene names: TRIM2

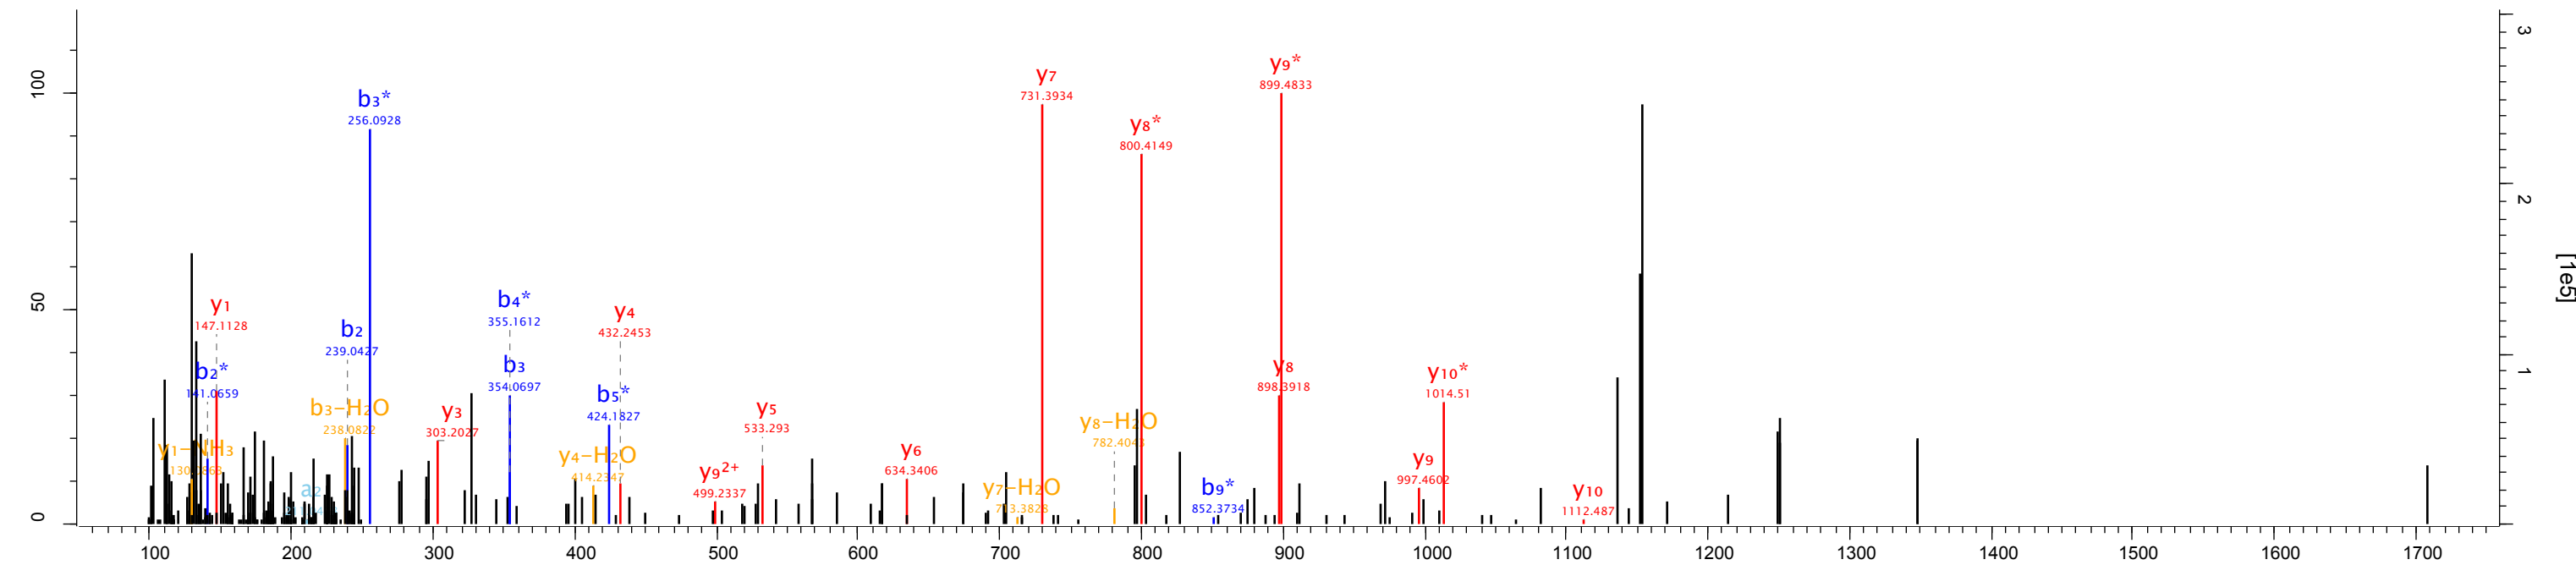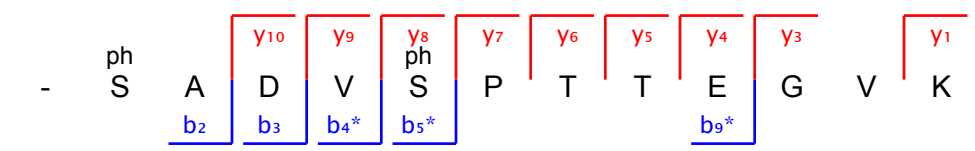

Raw file: 20150812\_A375SR\_Phospho\_BR1\_03  
 Scan: 9579 Method: FTMS; HCD Score: 57.67 m/z: 804.37 Gene names: CEP170

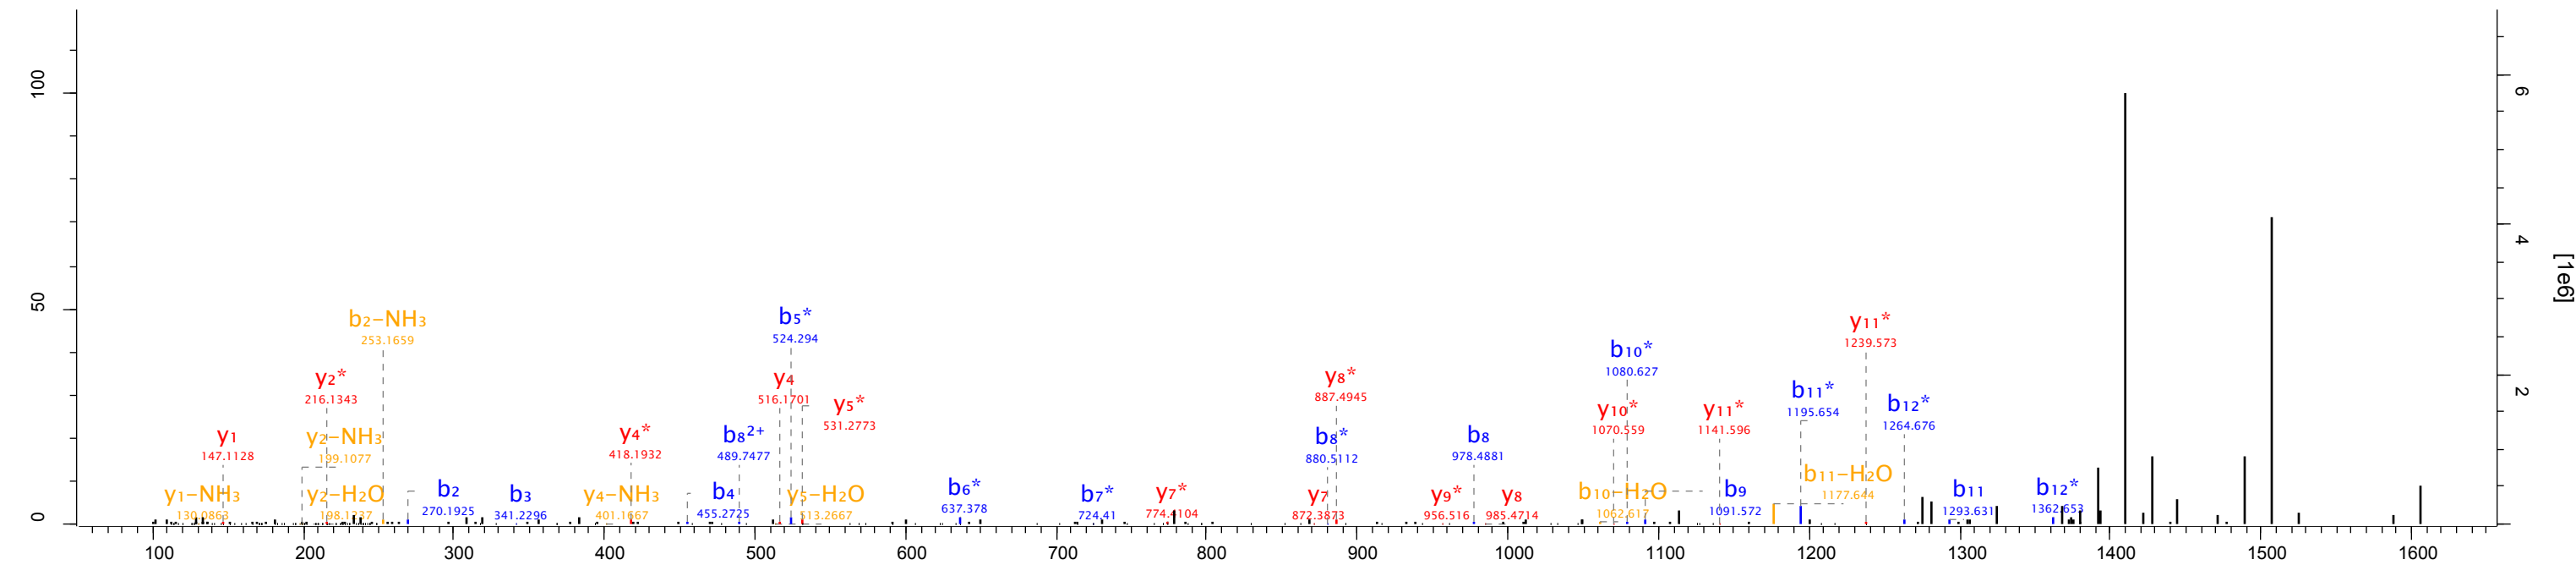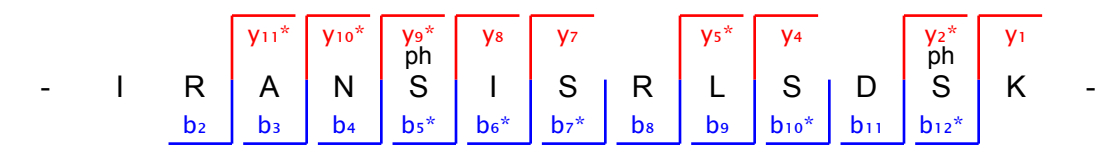



Raw file: 20150812\_A375SR\_Phospho\_BR1\_03  
 Scan: 9699 Method: FTMS; HCD Score: 207.08 m/z: 858.34 Gene names: AKT1S1

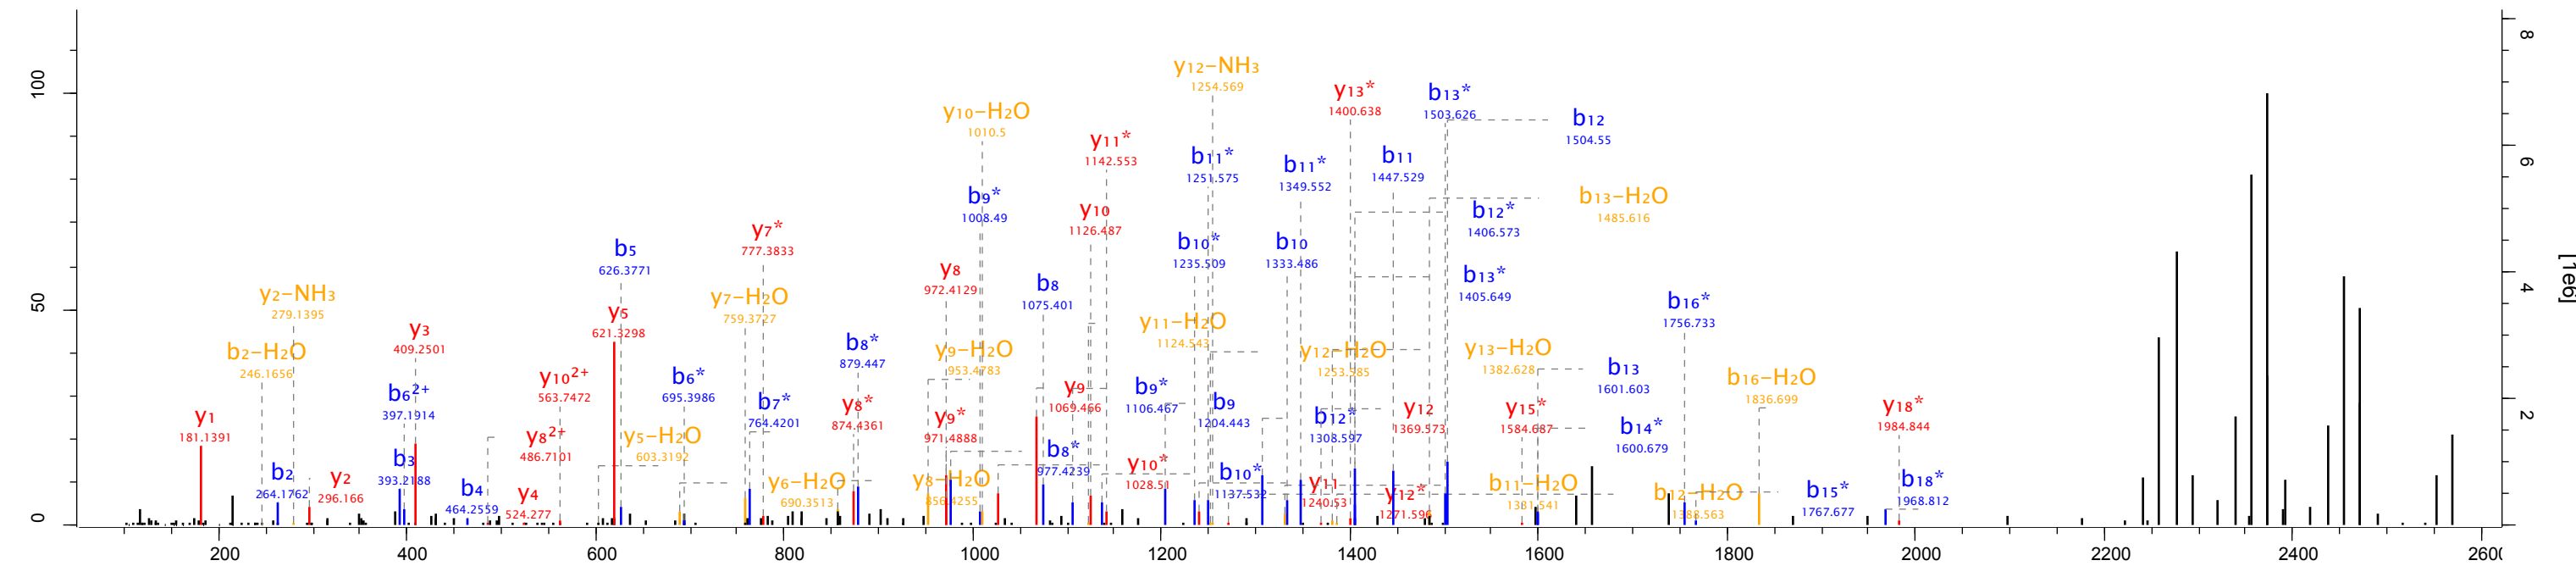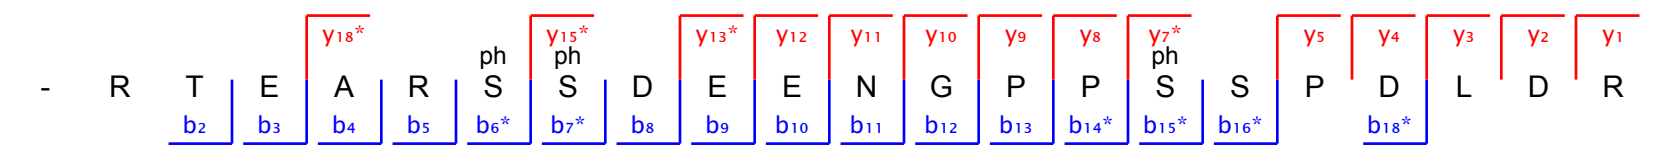

Raw file 20150812\_A375SR\_Phospho\_BR1\_04 Scan 10919 Method FTMS; HCD Score 281.97 m/z 925.87 Gene names EEF1B2

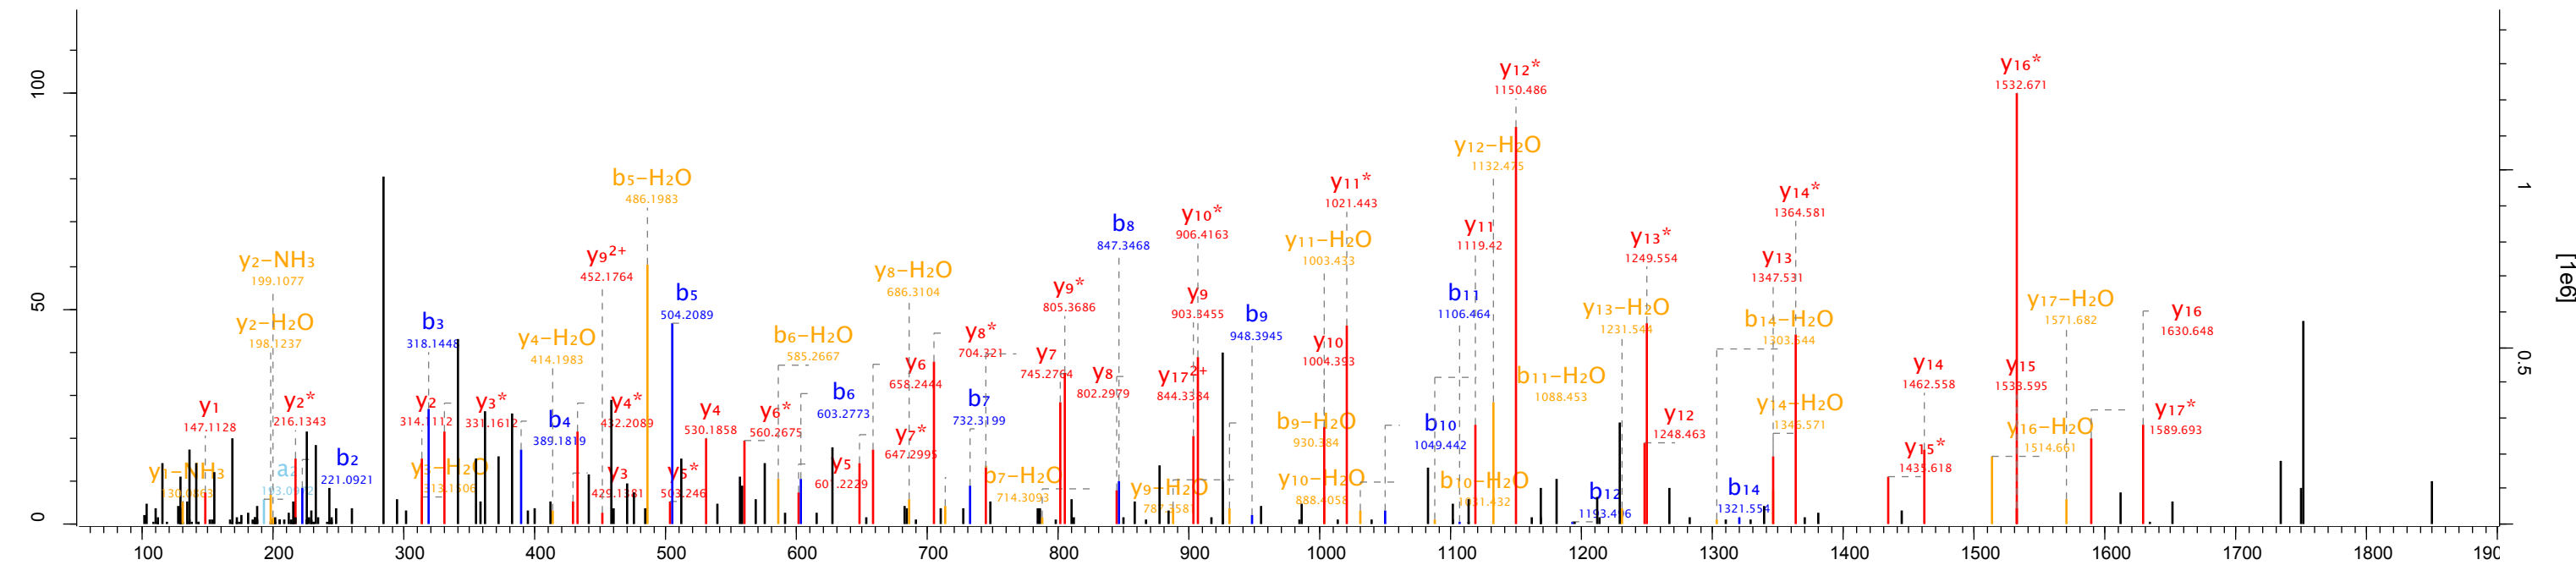

- Y y17\* y16 y15 y14 y13 y12 y11 y10 y9 y8 y7 y6 y5 y4 y3 y2 ph S y1 -

b2 b3 b4 b5 b6 b7 b8 b9 b10 b11 b12 b14 G T D S K -

Raw file 20150812\_A375SR\_Phospho\_BR1\_04 Scan 11009 Method FTMS; HCD Score 112.43 m/z 851.82 Gene names SLC2A13

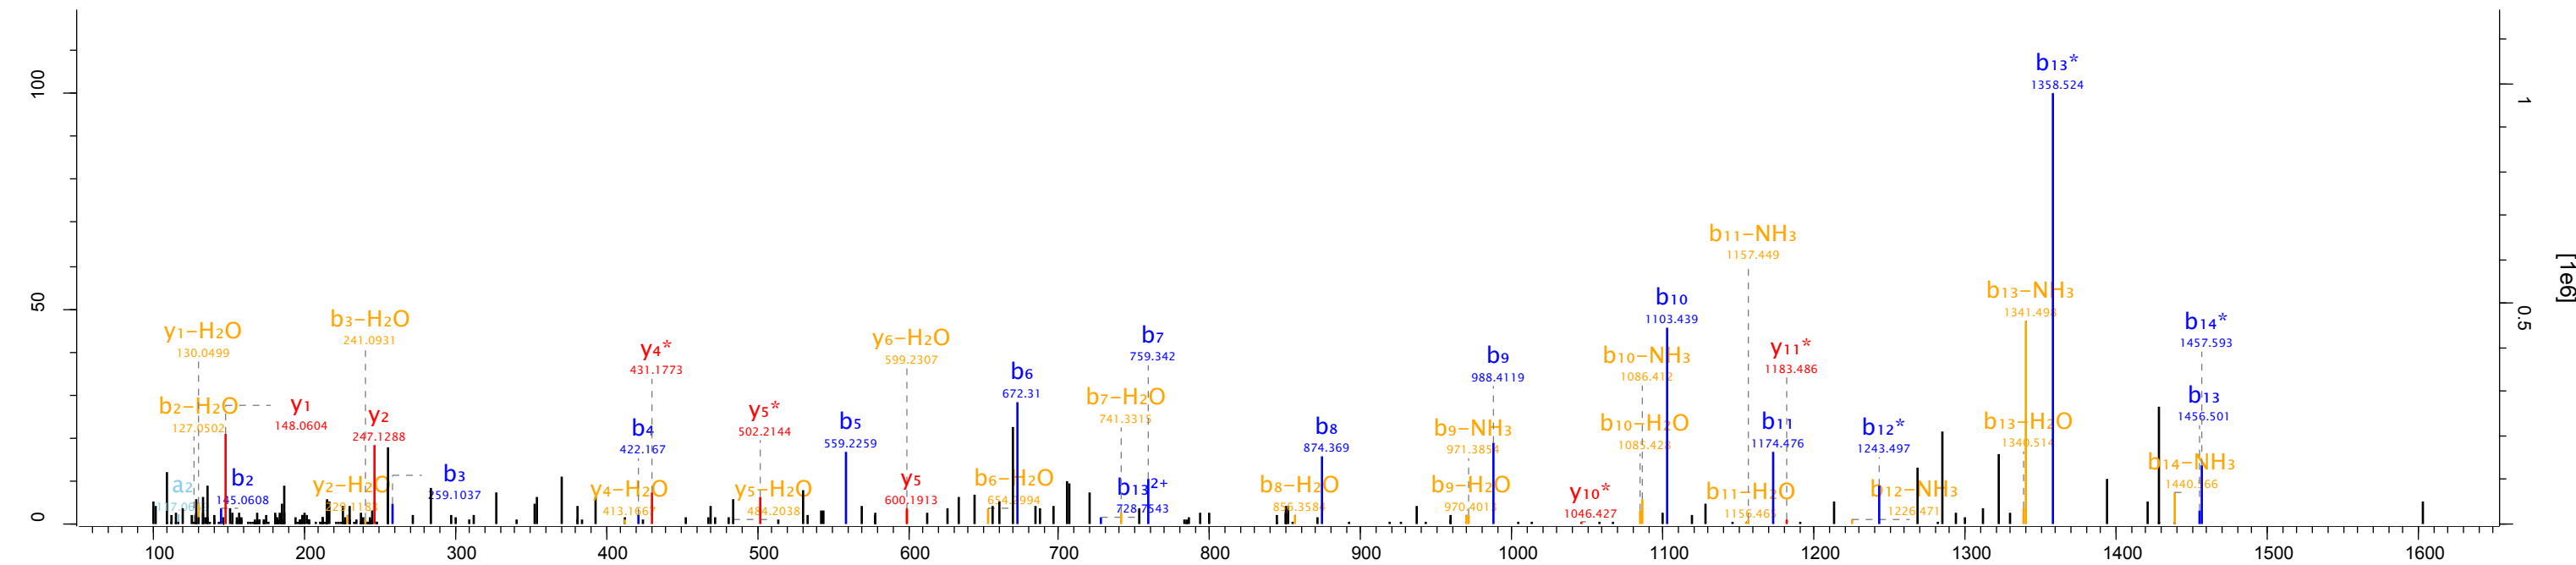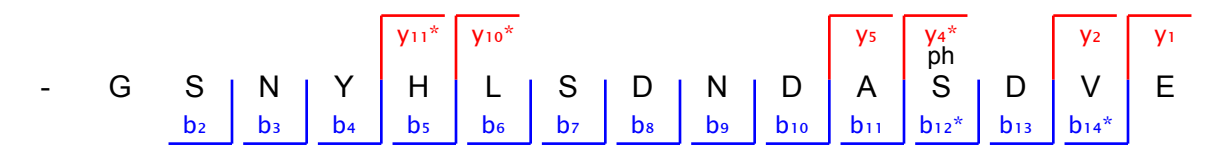

Raw file: 20150812\_A375SR\_Phospho\_BR1\_04  
 Scan: 11199 Method: FTMS; HCD Score: 430.66 m/z: 1140.95 Gene names: HTATSF1

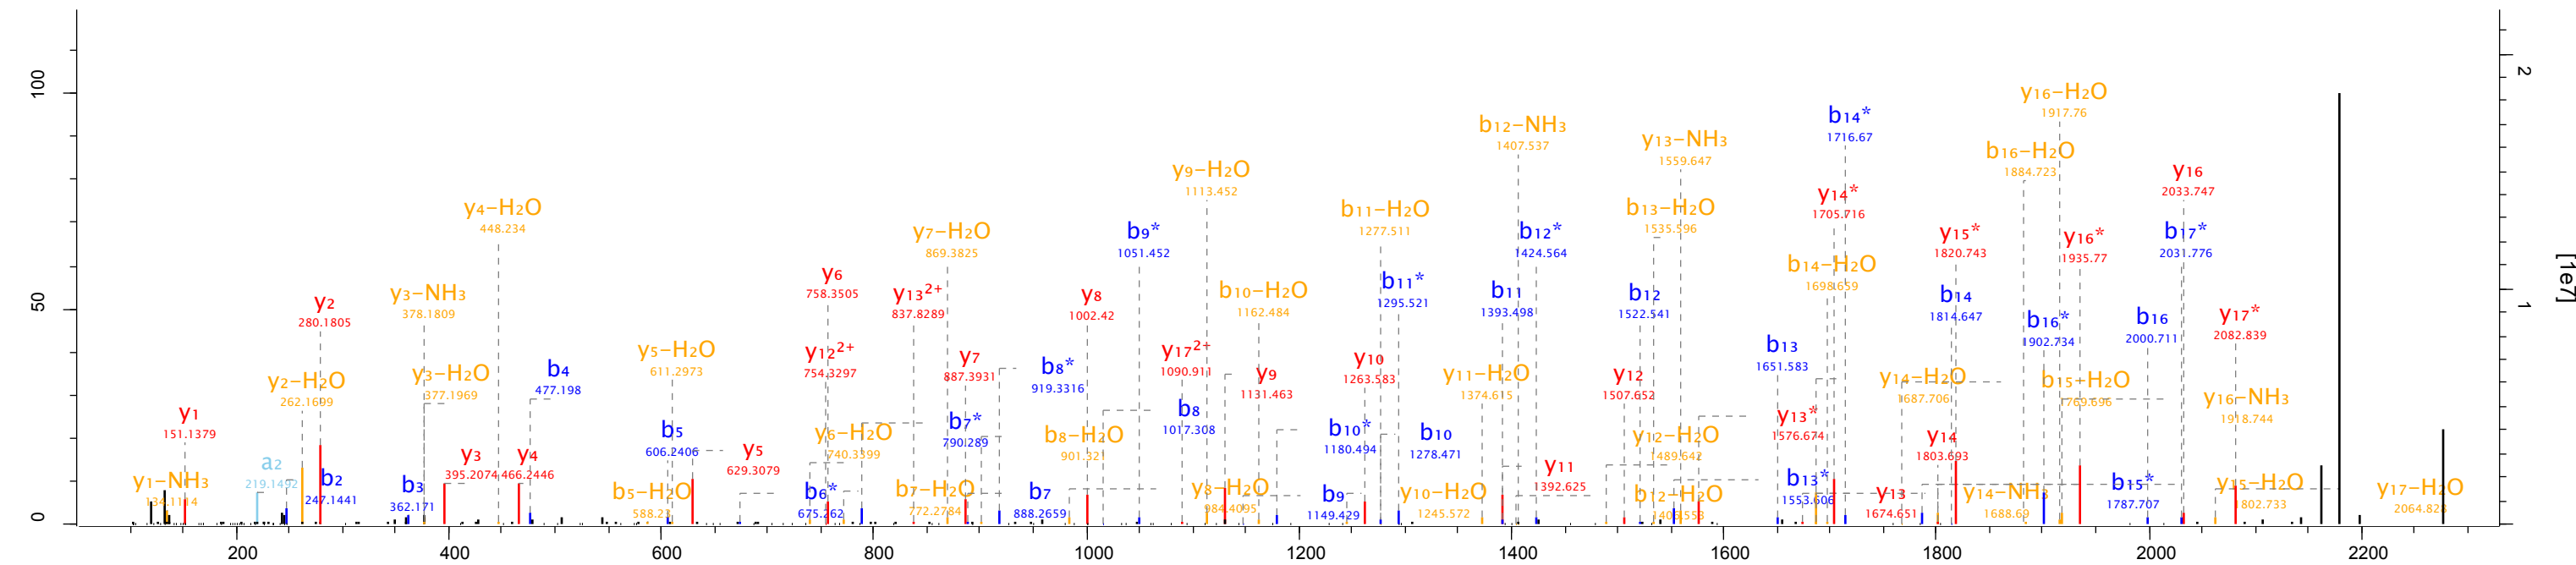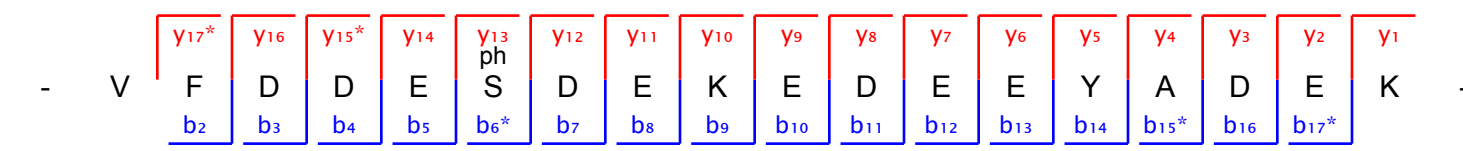

Raw file 20150812\_A375SR\_Phospho\_BR1\_04 Scan 11549 Method FTMS; HCD Score 283.75 m/z 1022.44 Gene names HBS1L

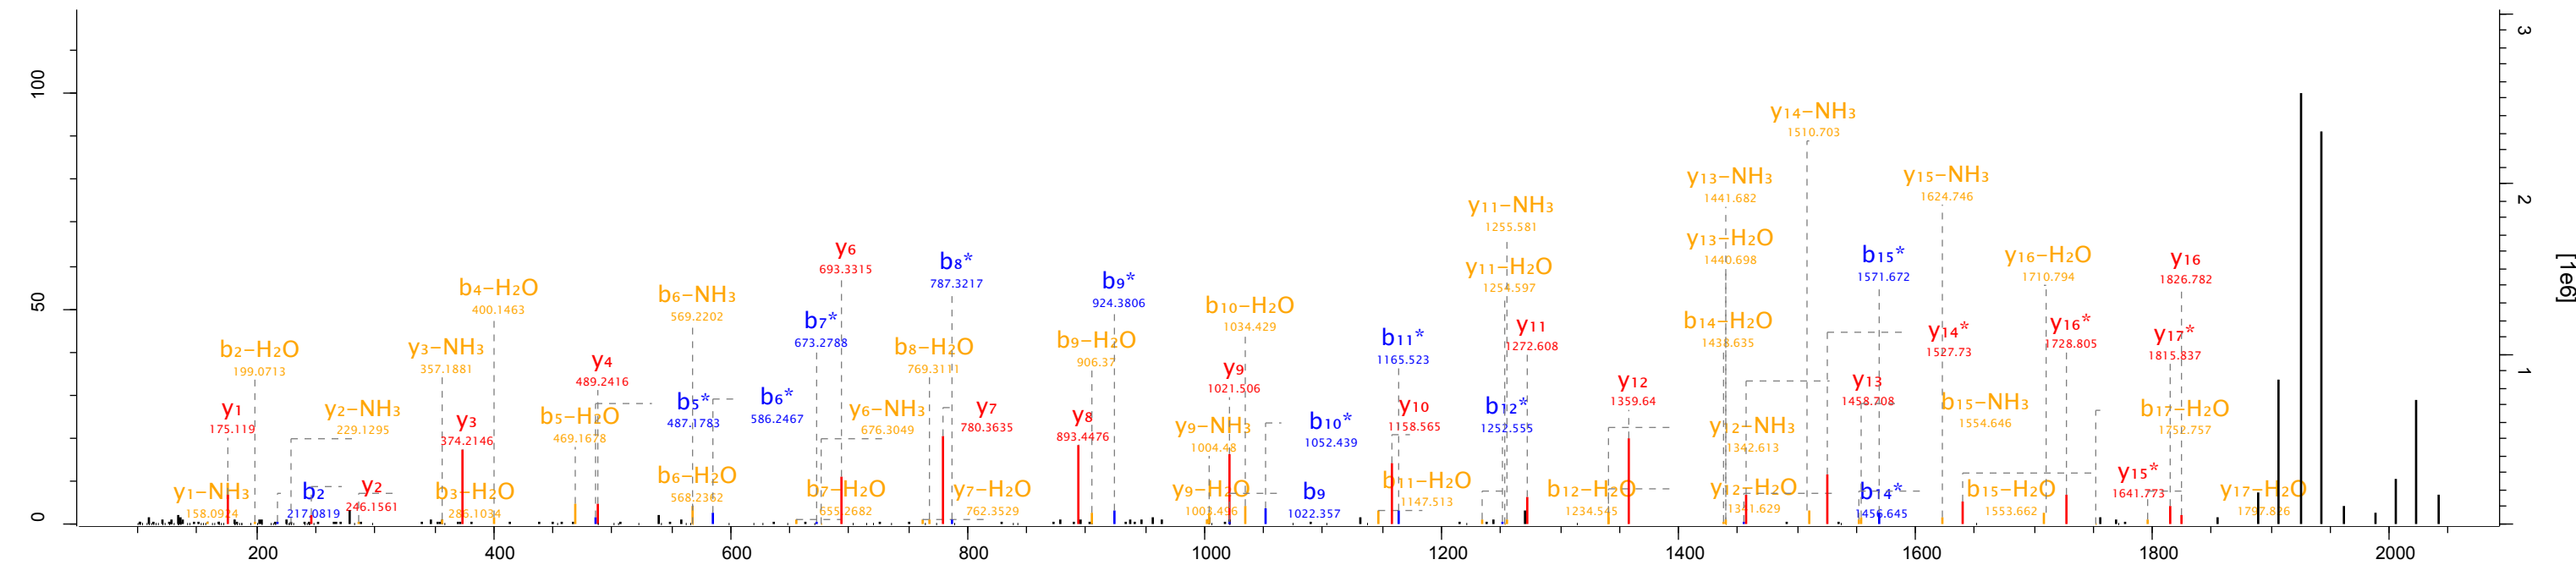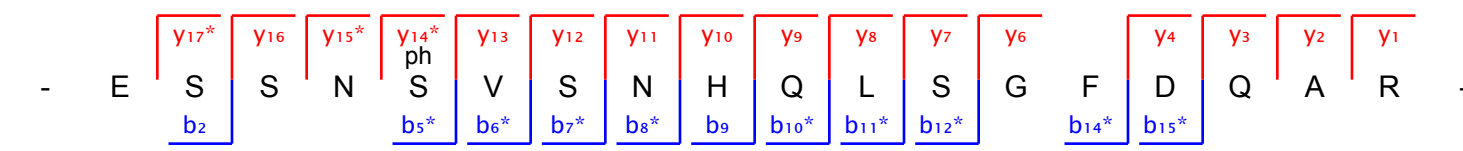



Raw file: 20150812\_A375SR\_Phospho\_BR1\_04  
 Scan: 1209 Method: FTMS; HCD Score: 225.94 m/z: 750.86 Gene names: SRRM1

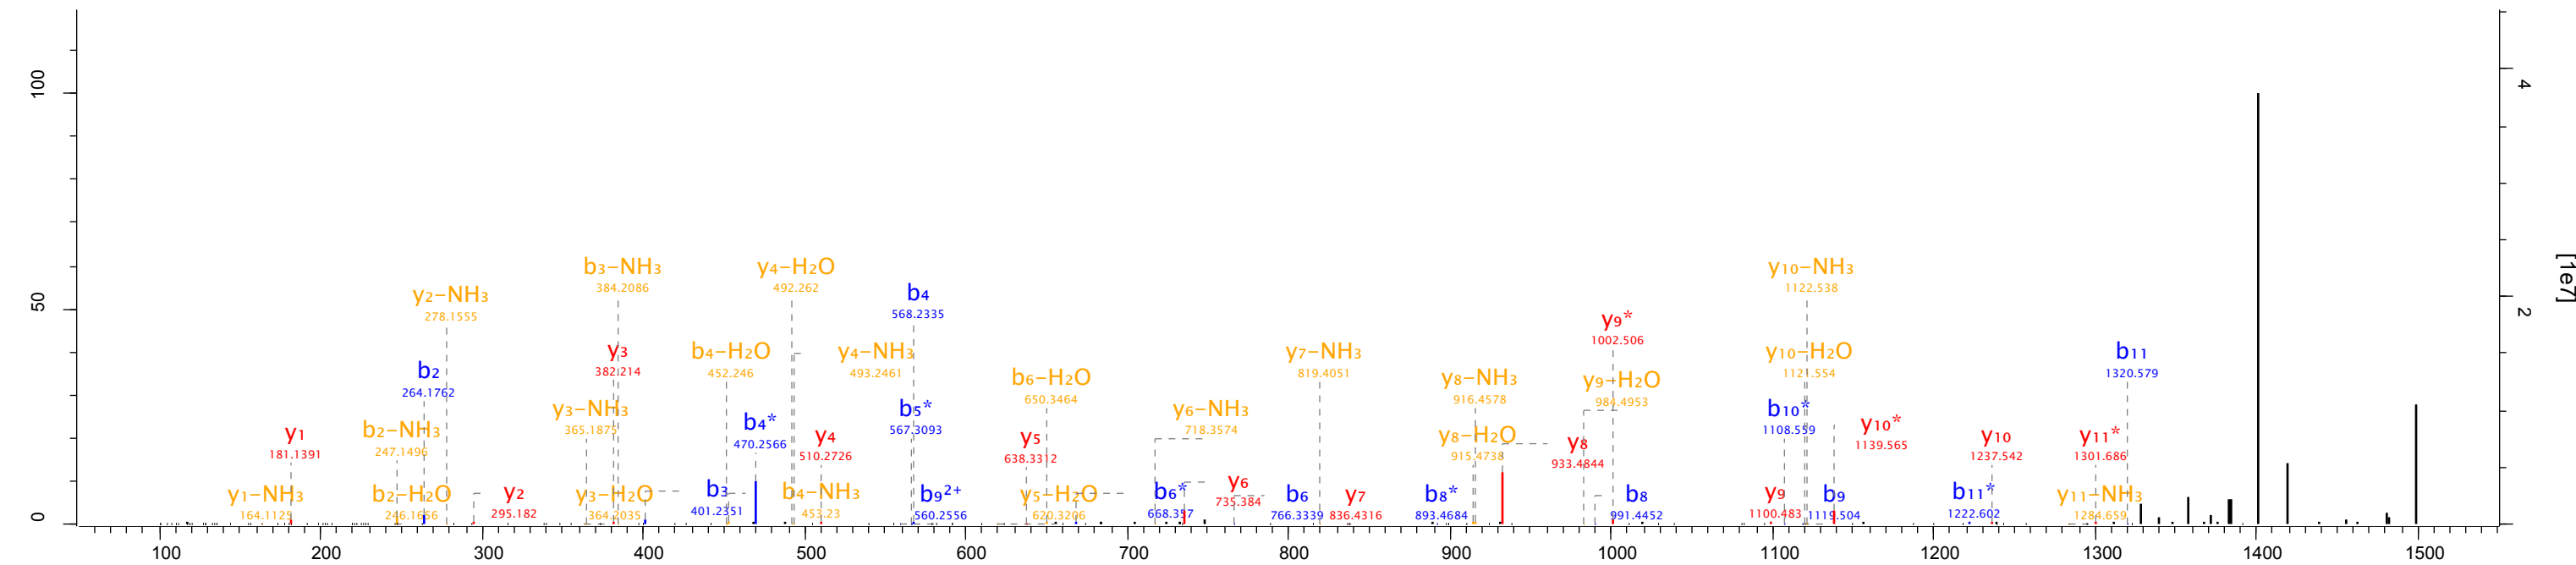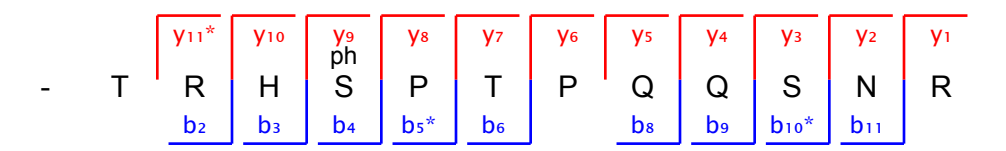

Raw file 20150812\_A375SR\_Phospho\_BR1\_04 Scan 12969 Method FTMS; HCD Score 229.71 m/z 737.32 Gene names MYPN

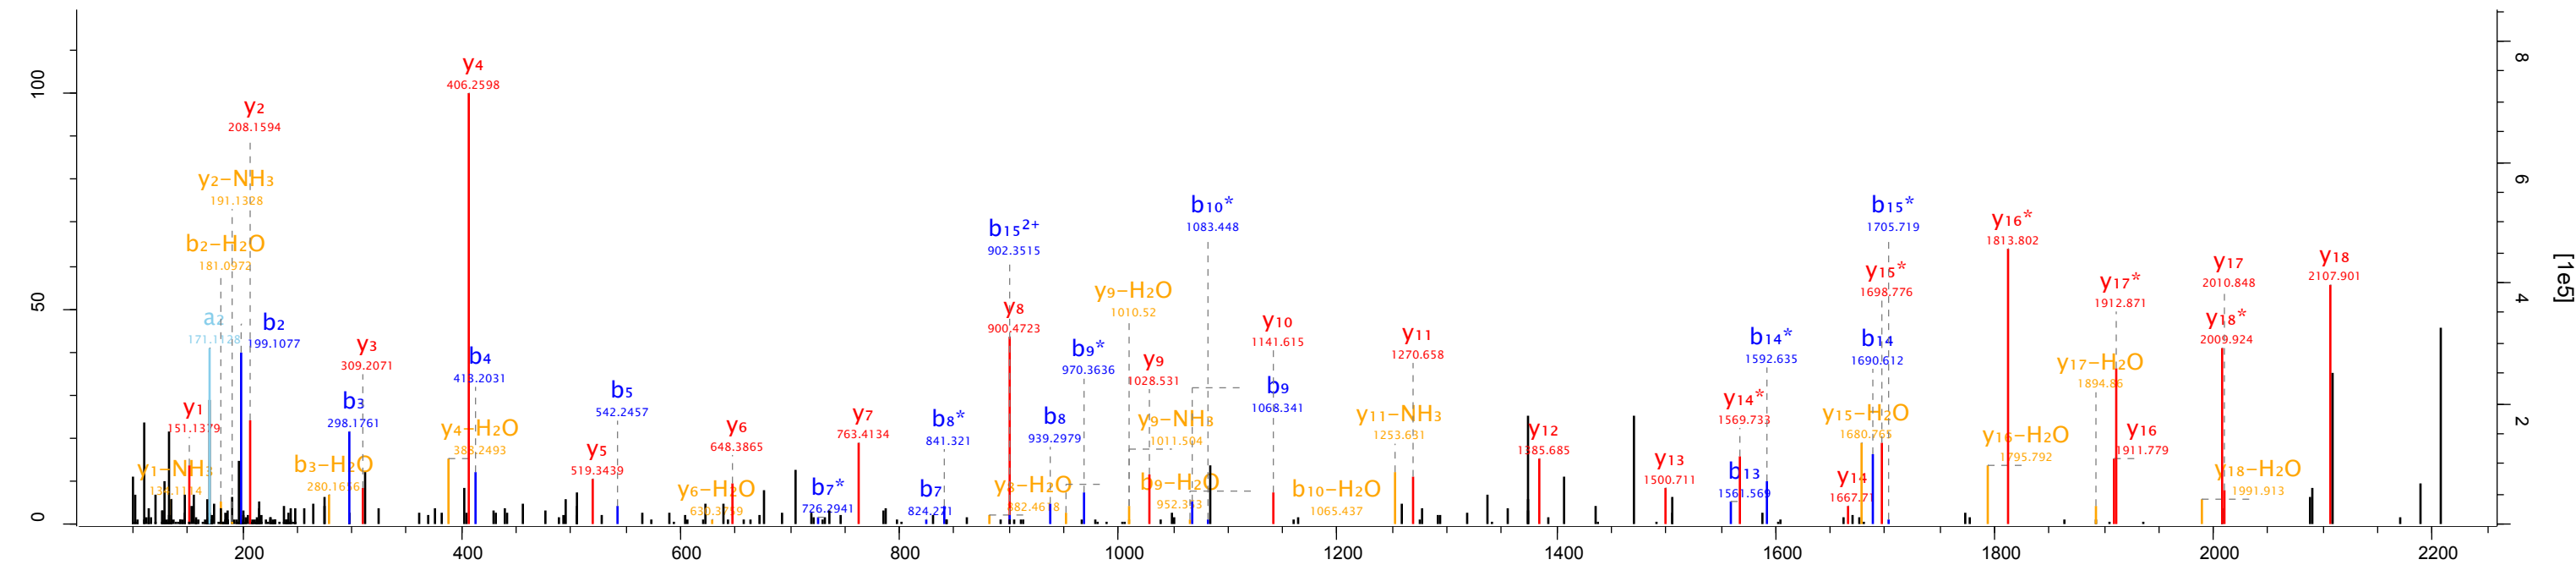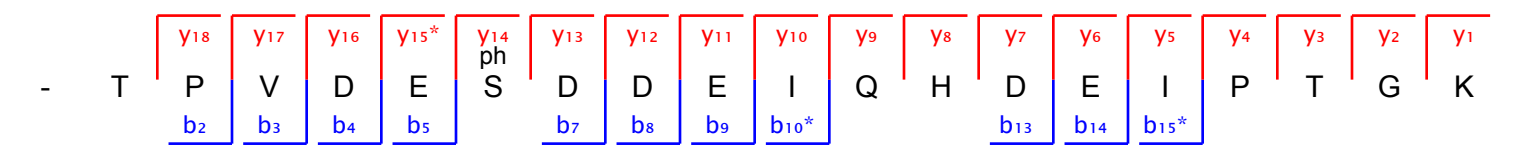



Raw file Scan Method m/z Gene names  
 20150812\_A375SR\_Phospho\_BR1\_04 13089 FTMS; HCD 227.57 898.73 CCDC86

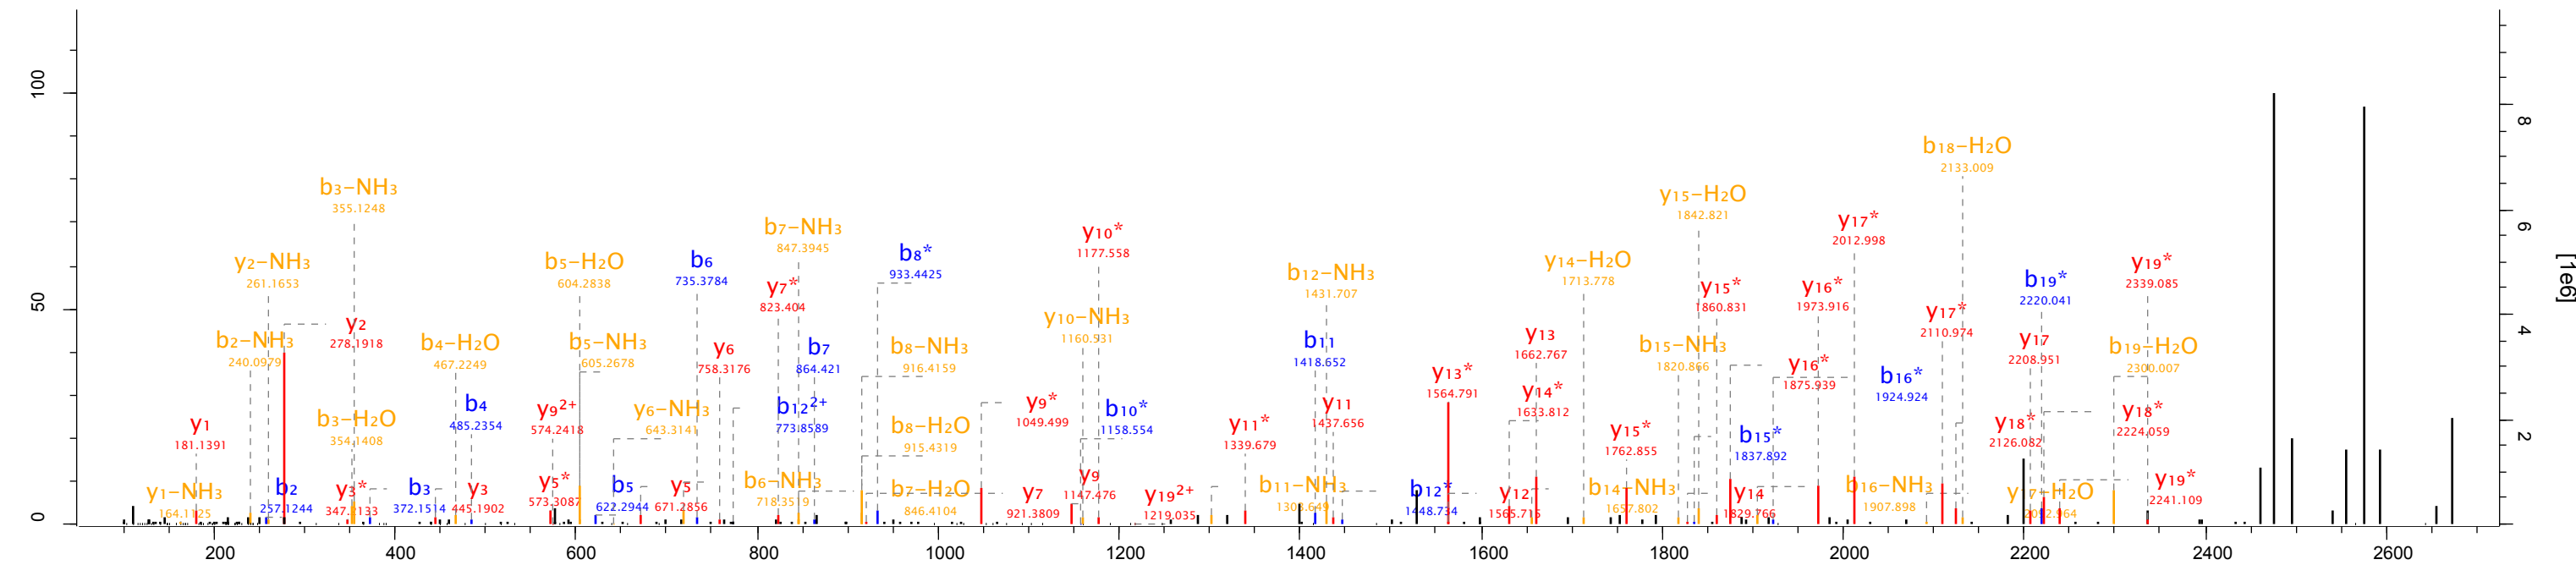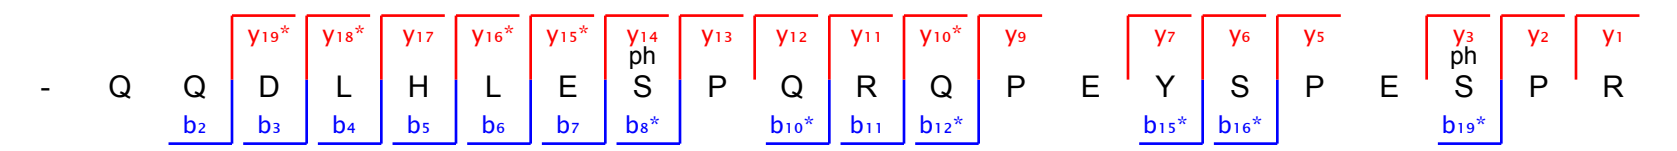

Raw file 20150812\_A375SR\_Phospho\_BR1\_04 Scan 14039 Method FTMS; HCD Score 352.25 m/z 1239.6 Gene names CCDC86

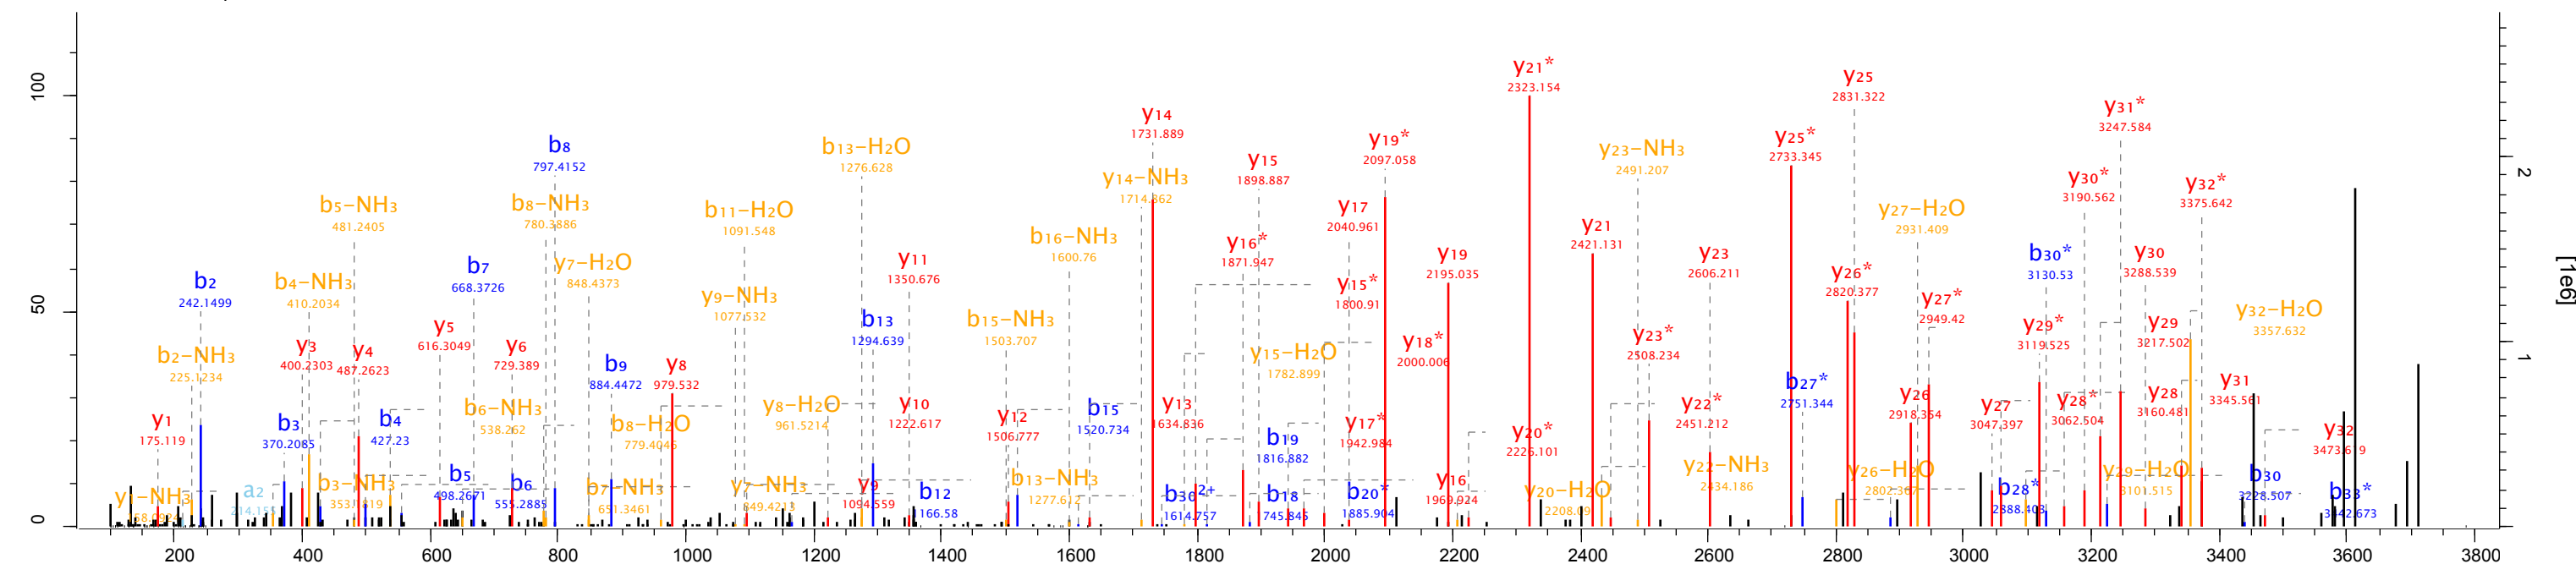

- L Q Q G A G L E S P Q G Q P E P G A A S P Q R Q Q D L H L E S P Q R -

Fragmentation mapping (b and y ions) is shown below the sequence:

- Q (b<sub>2</sub>)
- Q (b<sub>3</sub>)
- G (b<sub>4</sub>)
- A (b<sub>5</sub>)
- G (b<sub>6</sub>)
- L (b<sub>7</sub>)
- E (b<sub>8</sub>)
- S (b<sub>9</sub>)
- P (b<sub>10</sub>)
- Q (b<sub>11</sub>)
- G (b<sub>12</sub>)
- Q (b<sub>13</sub>)
- P (b<sub>14</sub>)
- E (b<sub>15</sub>)
- P (b<sub>16</sub>)
- G (b<sub>17</sub>)
- A (b<sub>18</sub>)
- A (b<sub>19</sub>)
- S (b<sub>20</sub>\*)
- P (b<sub>21</sub>)
- Q (b<sub>22</sub>)
- R (b<sub>23</sub>)
- Q (b<sub>24</sub>)
- Q (b<sub>25</sub>)
- D (b<sub>26</sub>)
- L (b<sub>27</sub>\*)
- H (b<sub>28</sub>\*)
- L (b<sub>29</sub>)
- E (b<sub>30</sub>)
- S (b<sub>31</sub>)
- P (b<sub>32</sub>)
- Q (b<sub>33</sub>\*)
- R (b<sub>34</sub>)

Raw file 20150812\_A375SR\_Phospho\_BR1\_04 Scan 14209 Method FTMS; HCD Score 111.38 m/z 952.43 Gene names DDX20

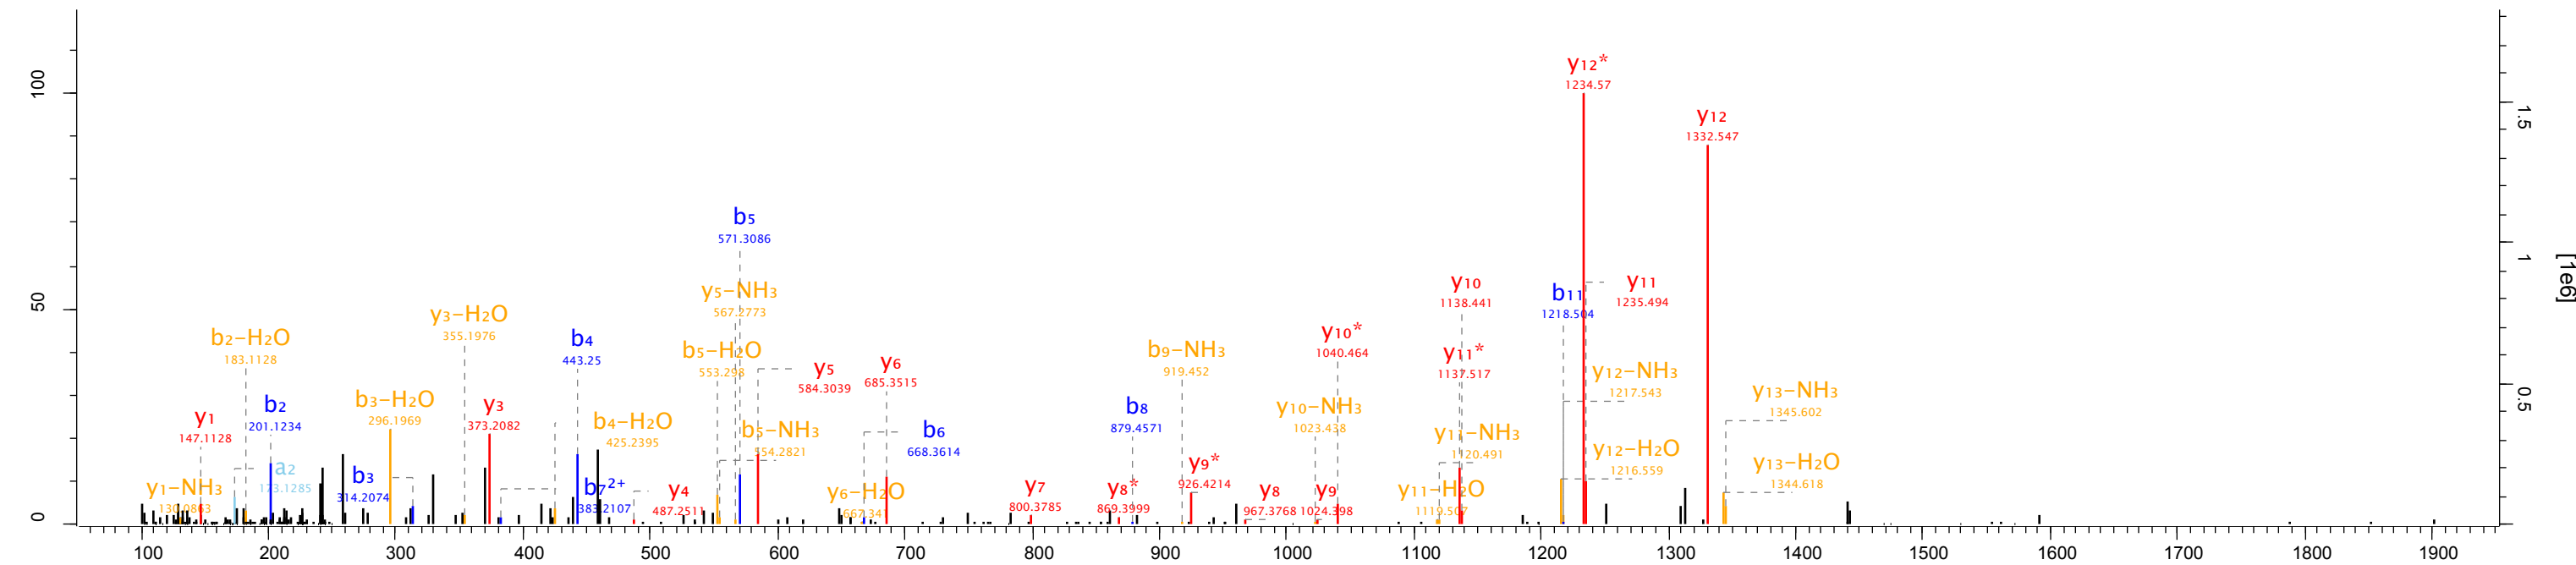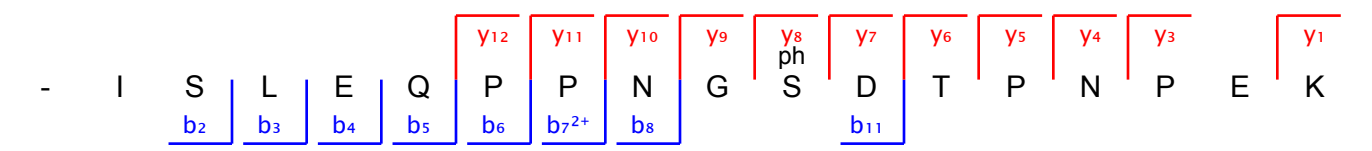

Raw file 20150812\_A375SR\_Phospho\_BR1\_04 Scan 14549 Method FTMS; HCD Score 127.72 m/z 1059.19 Gene names UBXN1

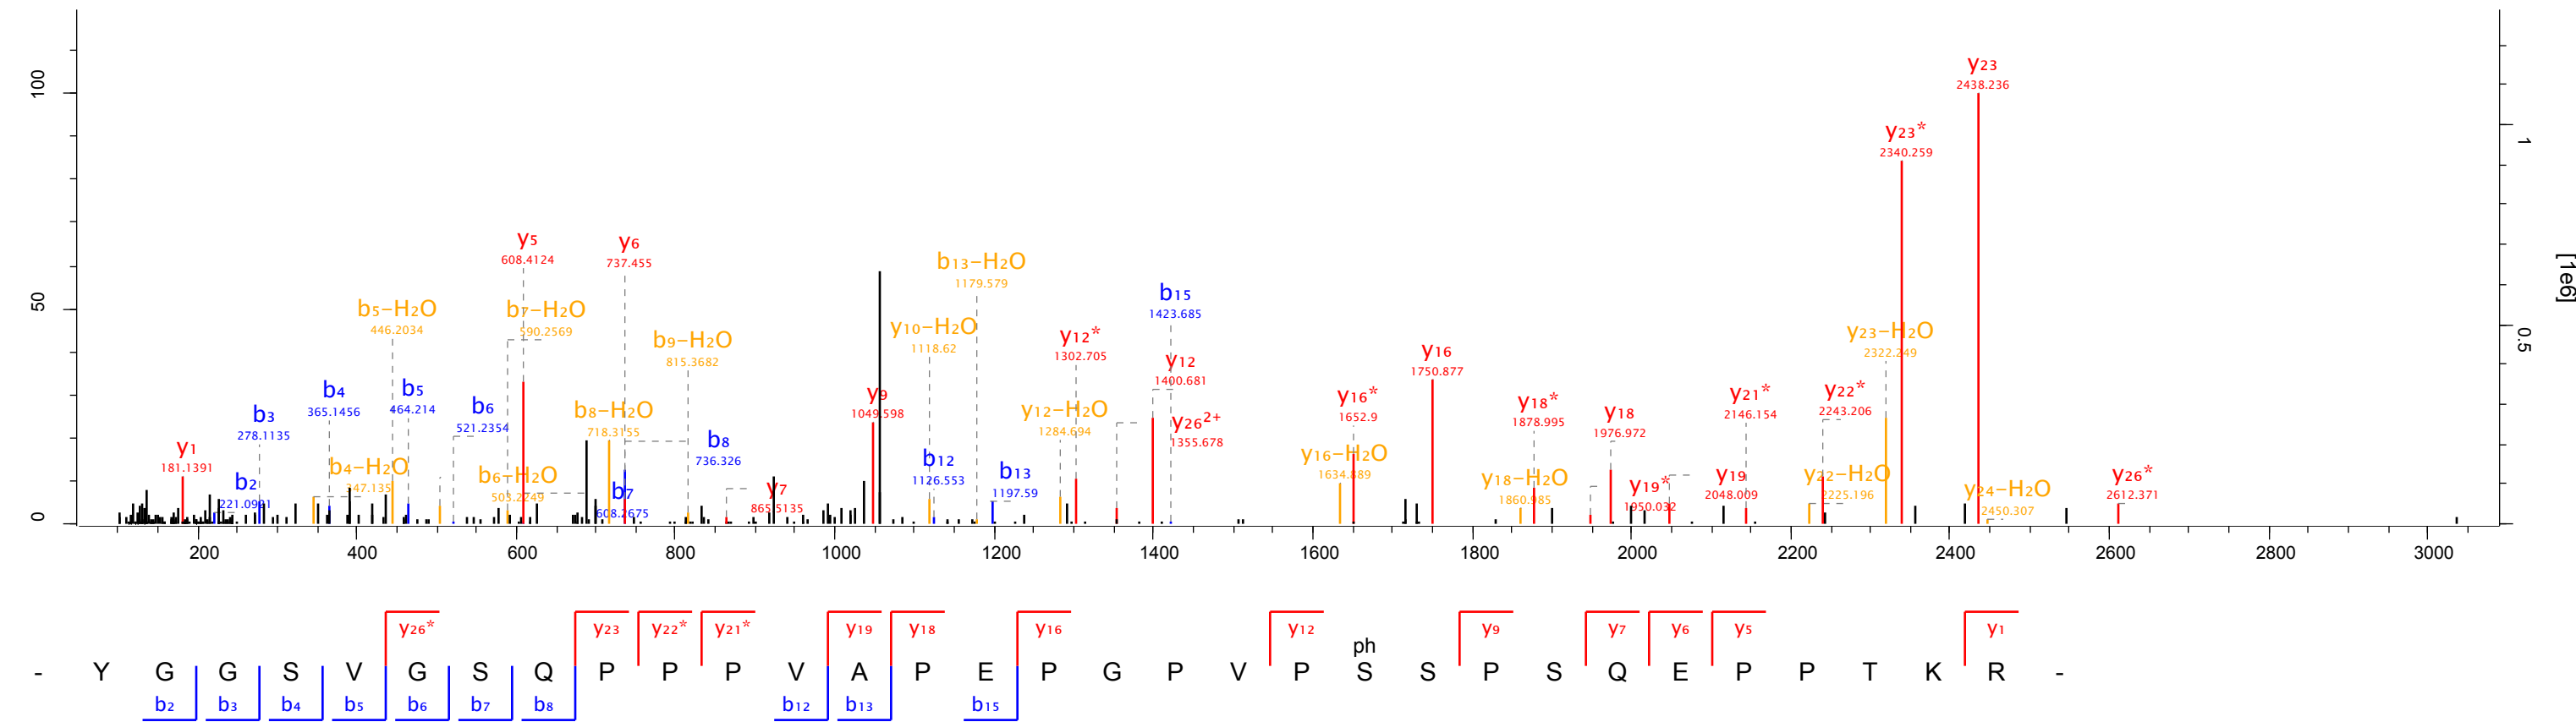

Raw file: 20150812\_A375SR\_Phospho\_BR1\_04  
 Scan: 14759 Method: FTMS; HCD Score: 133.74 m/z: 918.42 Gene names: PLEC

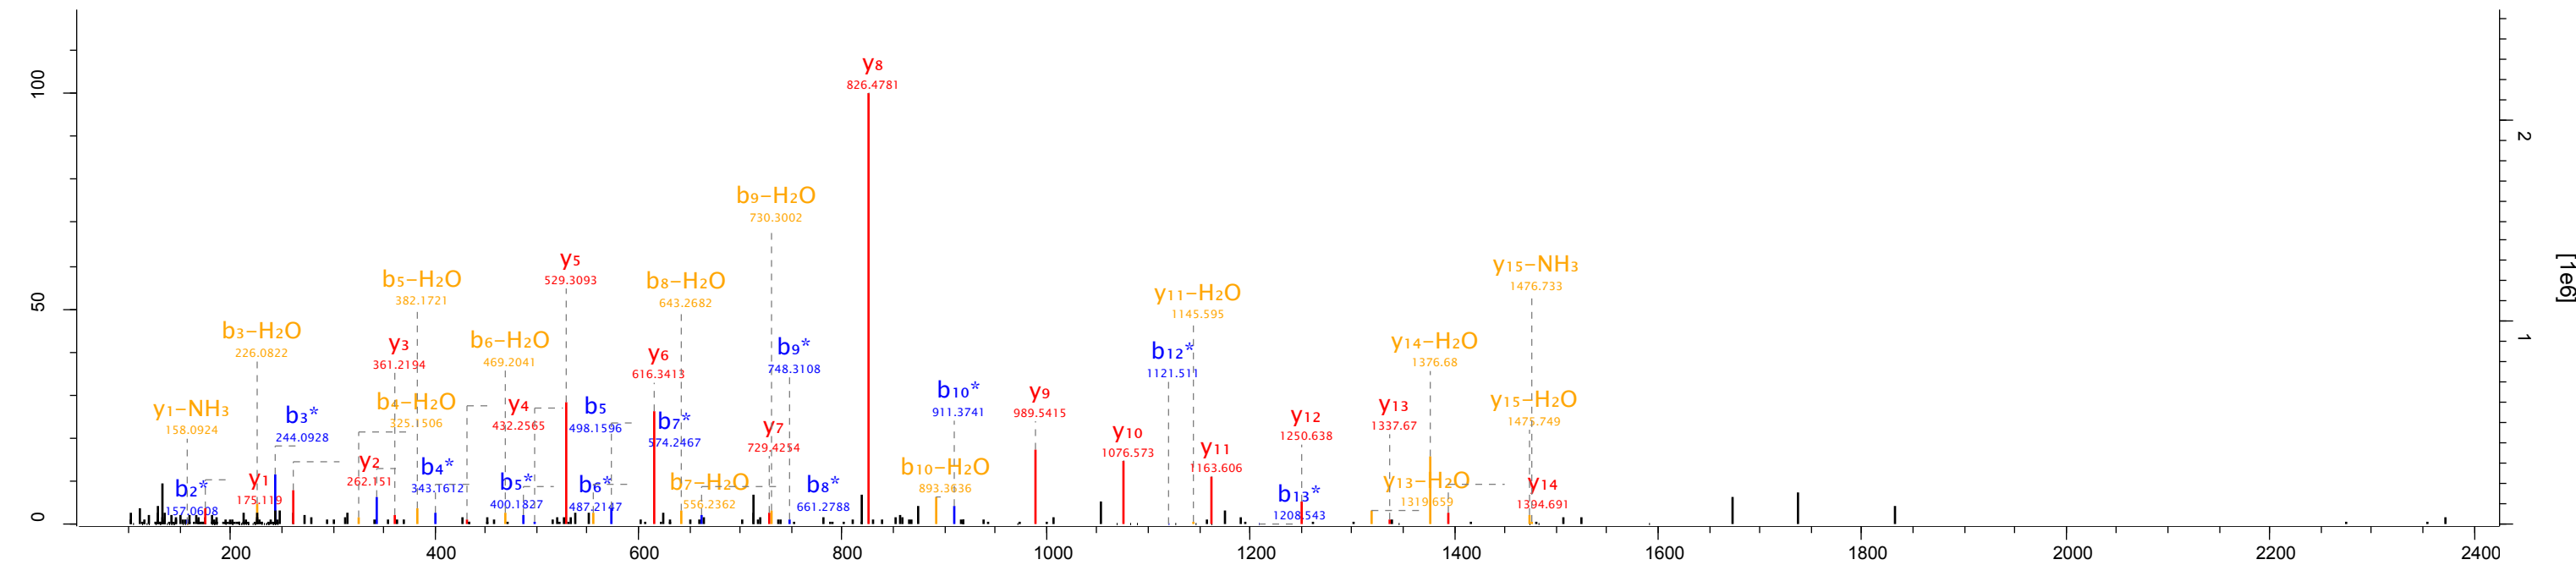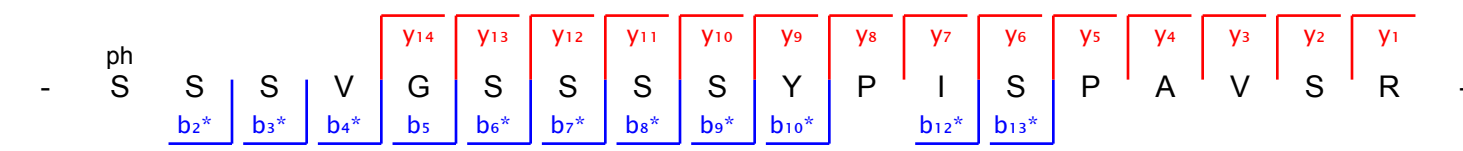

Raw file Scan Method Score m/z Gene names  
 20150812\_A375SR\_Phospho\_BR1\_04 15239 FTMS; HCD 192.58 907.45 HMGA1

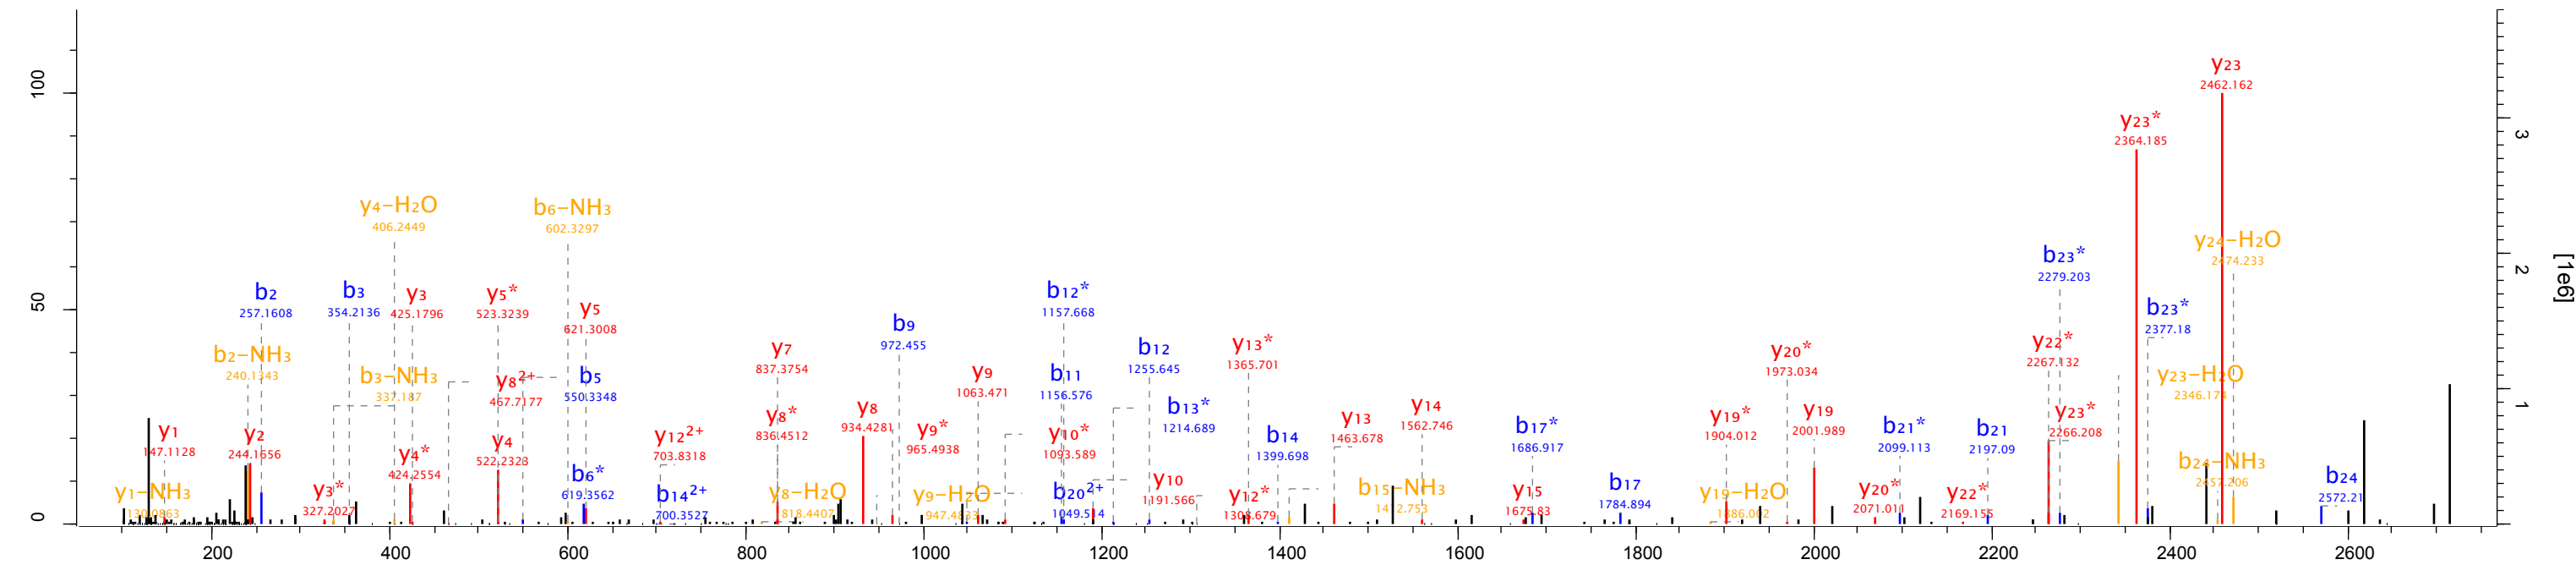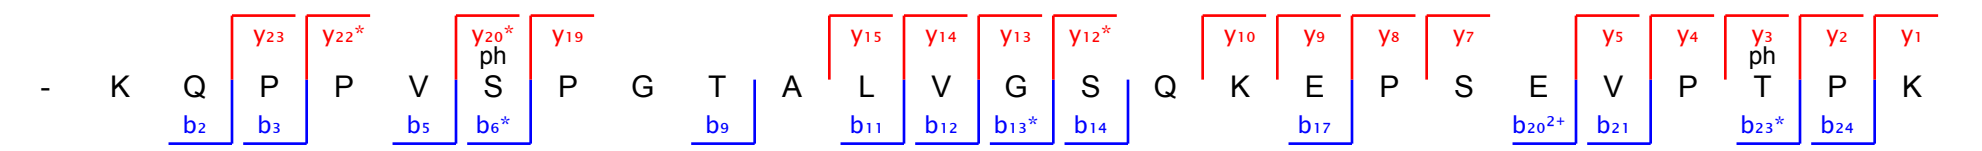

Raw file: 20150812\_A375SR\_Phospho\_BR1\_04  
 Scan: 15709 Method: FTMS; HCD Score: 251.59 m/z: 1097.14 Gene names: RBM6

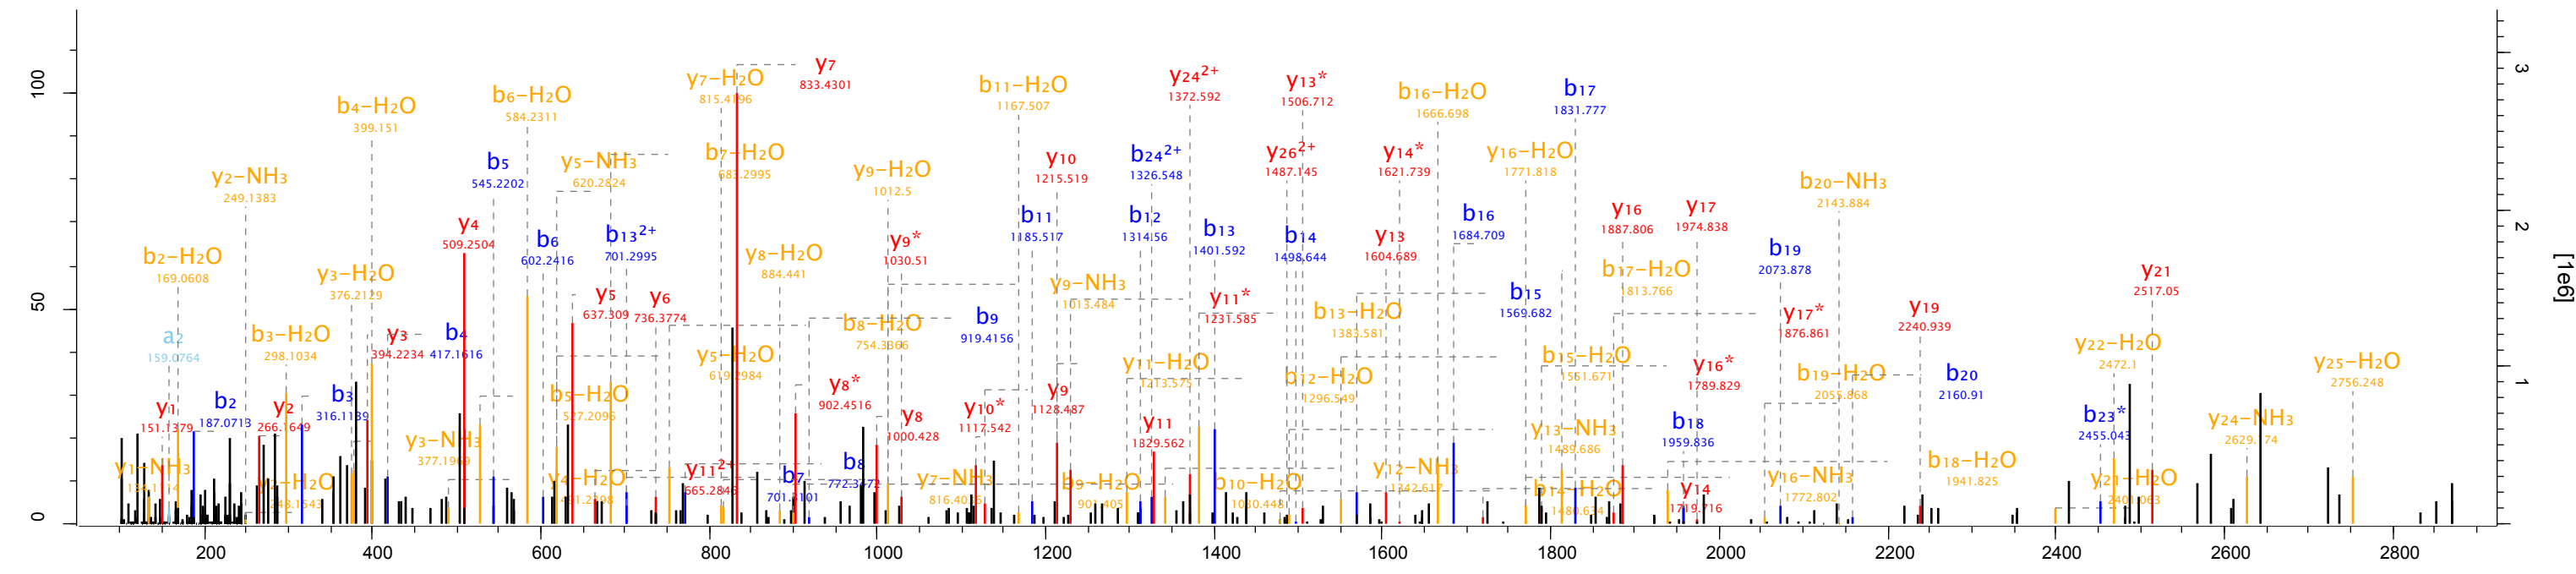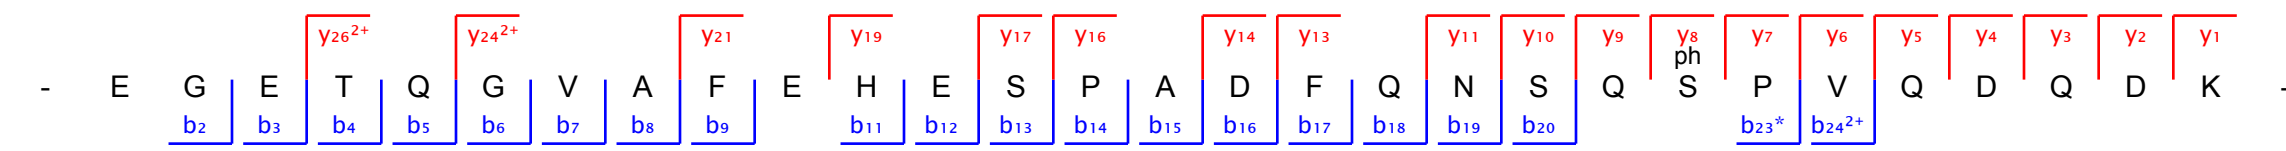

Raw file 20150812\_A375SR\_Phospho\_BR1\_04 Scan 16069 Method FTMS; HCD Score 84.33 m/z 775.64 Gene names NUCKS1

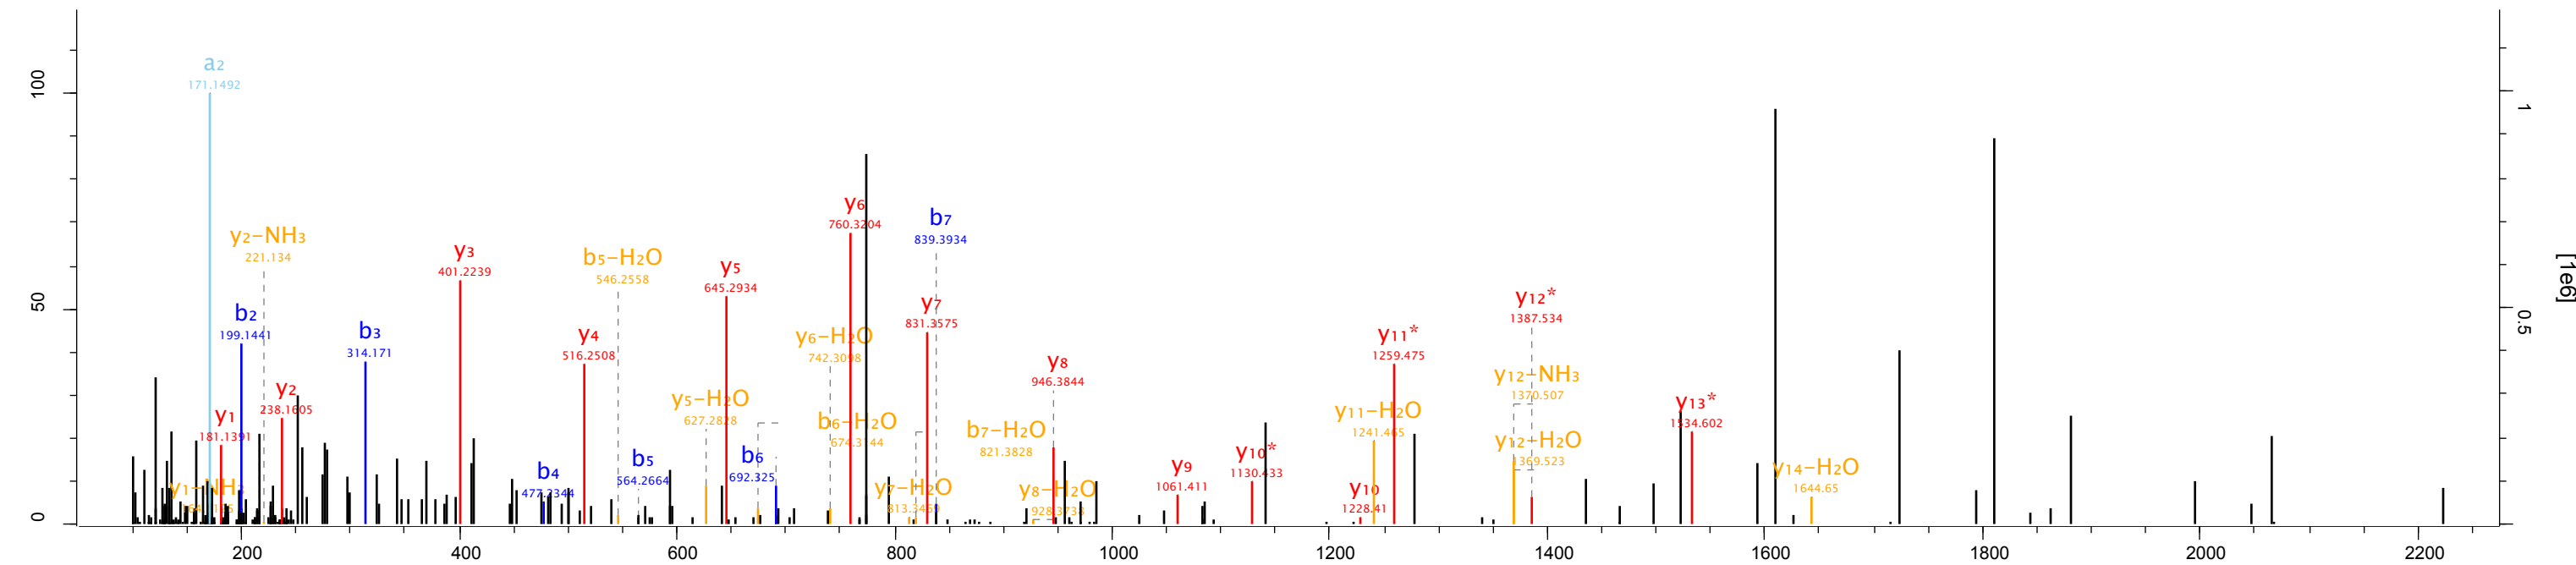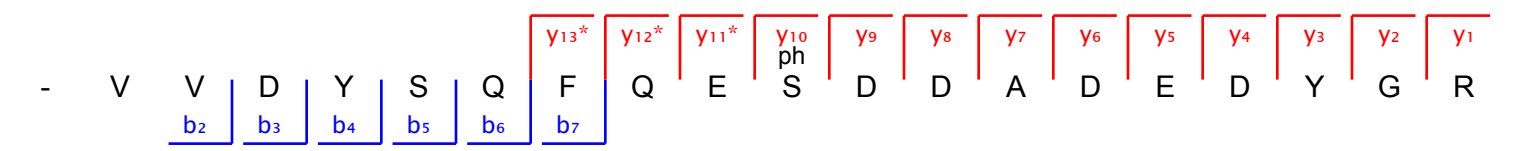



Raw file: 20150812\_A375SR\_Phospho\_BR1\_04  
 Scan: 17319 Method: FTMS; HCD Score: 201.73 m/z: 906.45 Gene names: NUFIP1

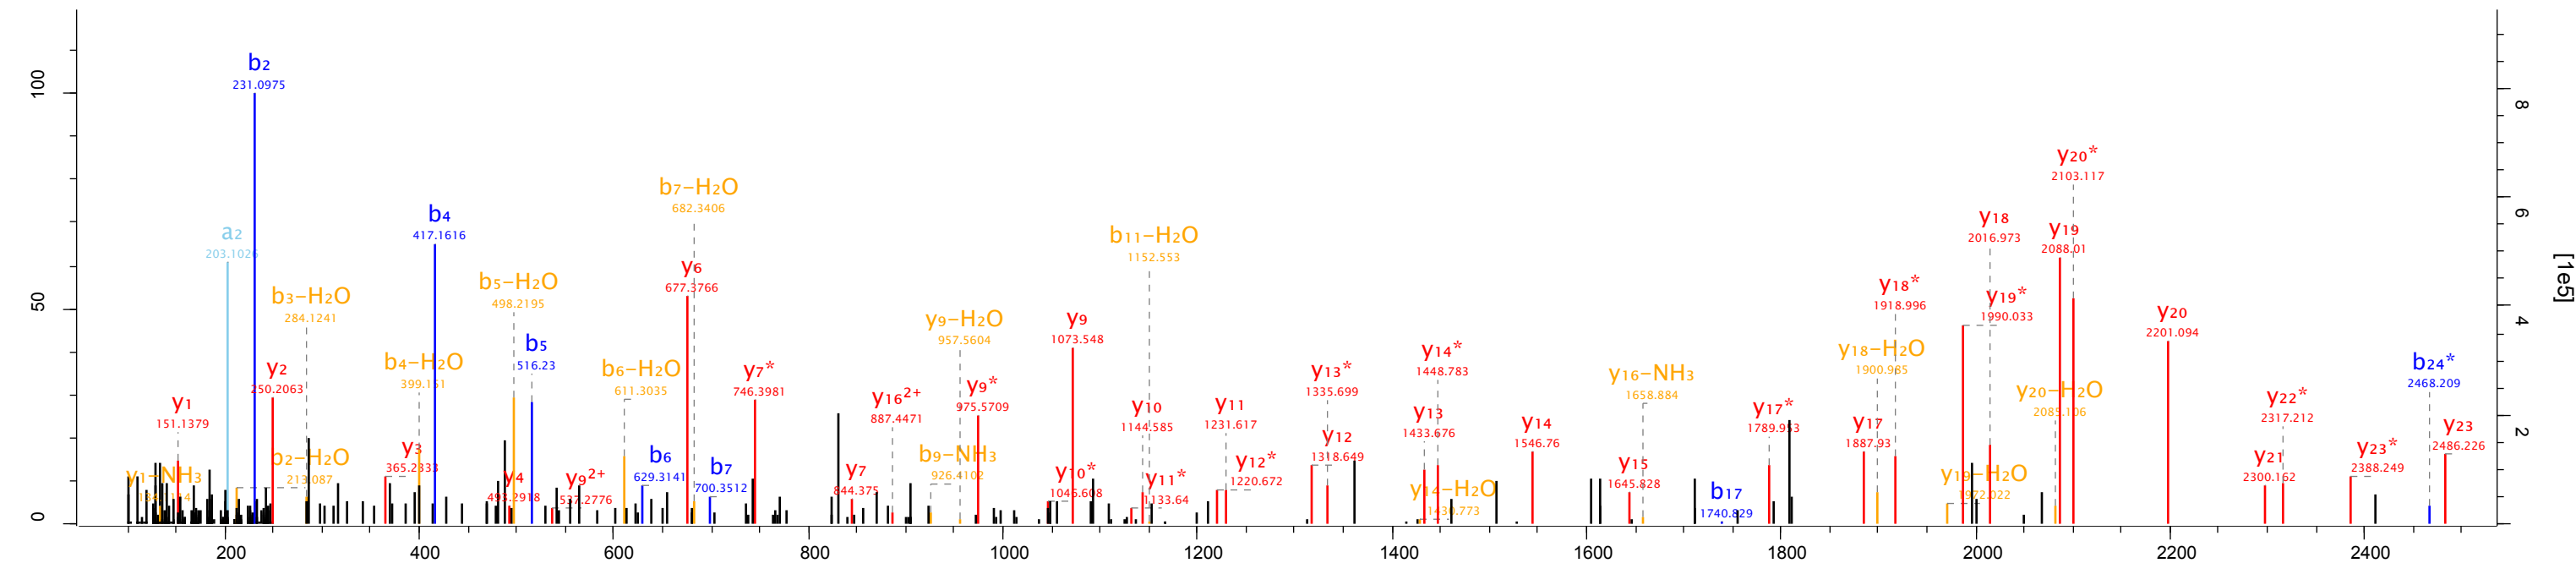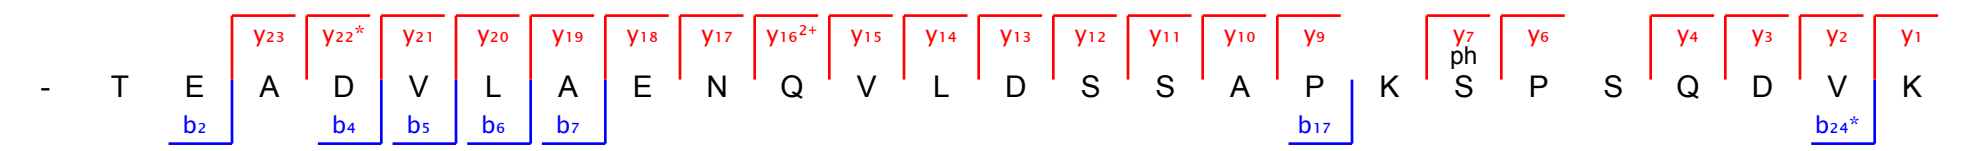

Raw file 20150812\_A375SR\_Phospho\_BR1\_04 Scan 17889 Method FTMS; HCD Score 198.83 m/z 778.33 Gene names MAPK3

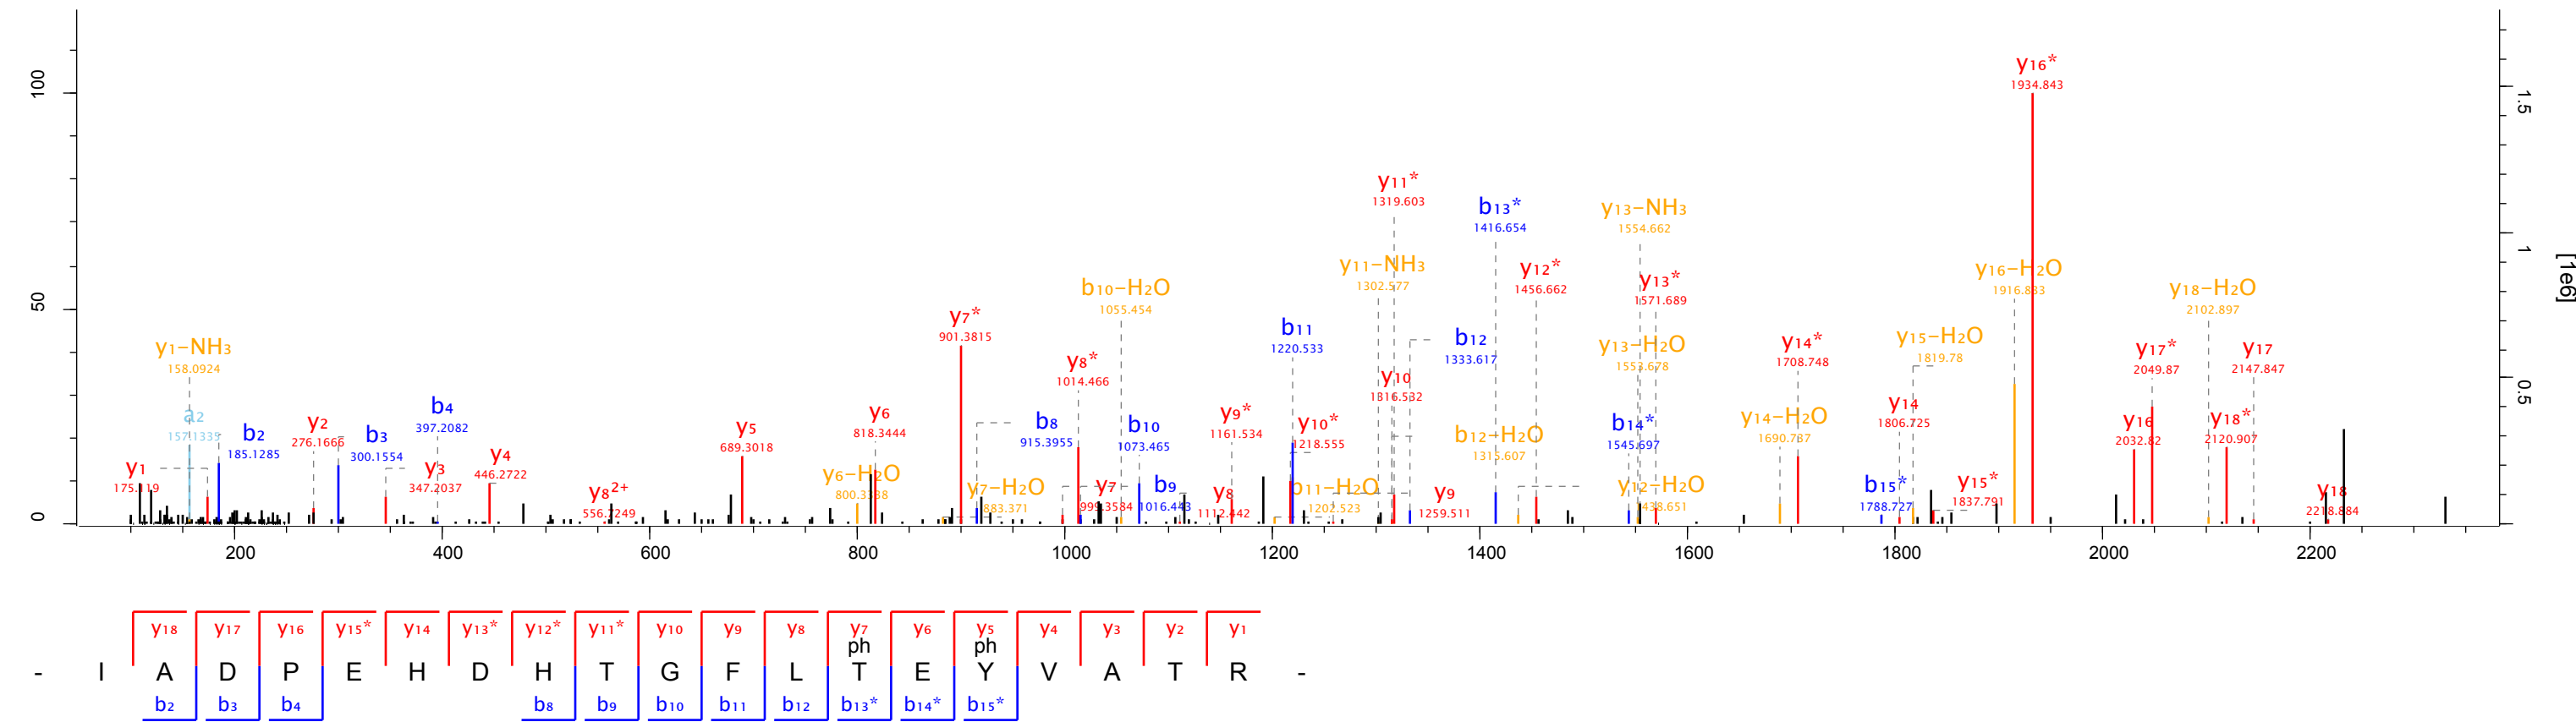

Raw file 20150812\_A375SR\_Phospho\_BR1\_04 Scan 1799 Method FTMS; HCD Score 228.32 m/z 717.88 Gene names UBE2O

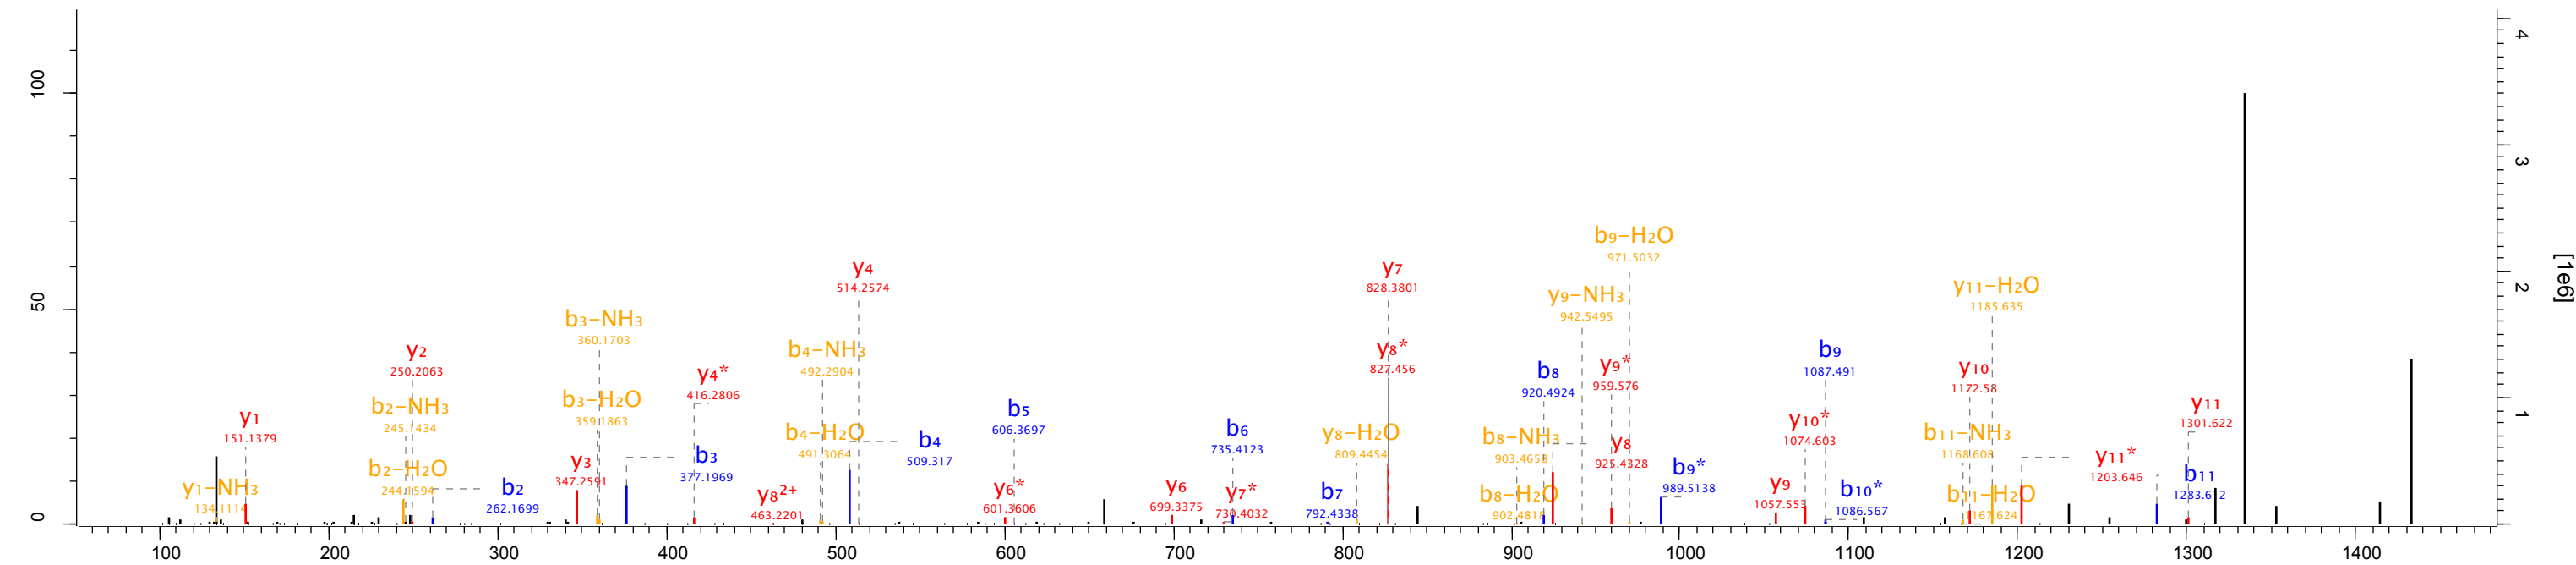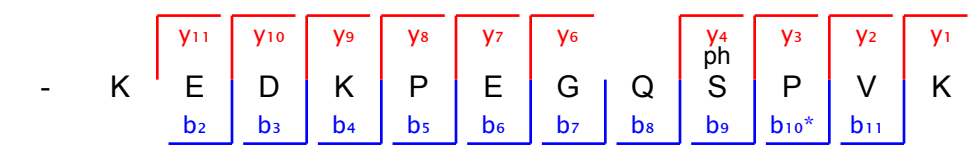

Raw file 20150812\_A375SR\_Phospho\_BR1\_04 Scan 18519 Method FTMS; HCD Score 258.65 m/z 1259.07 Gene names ARHGEF2

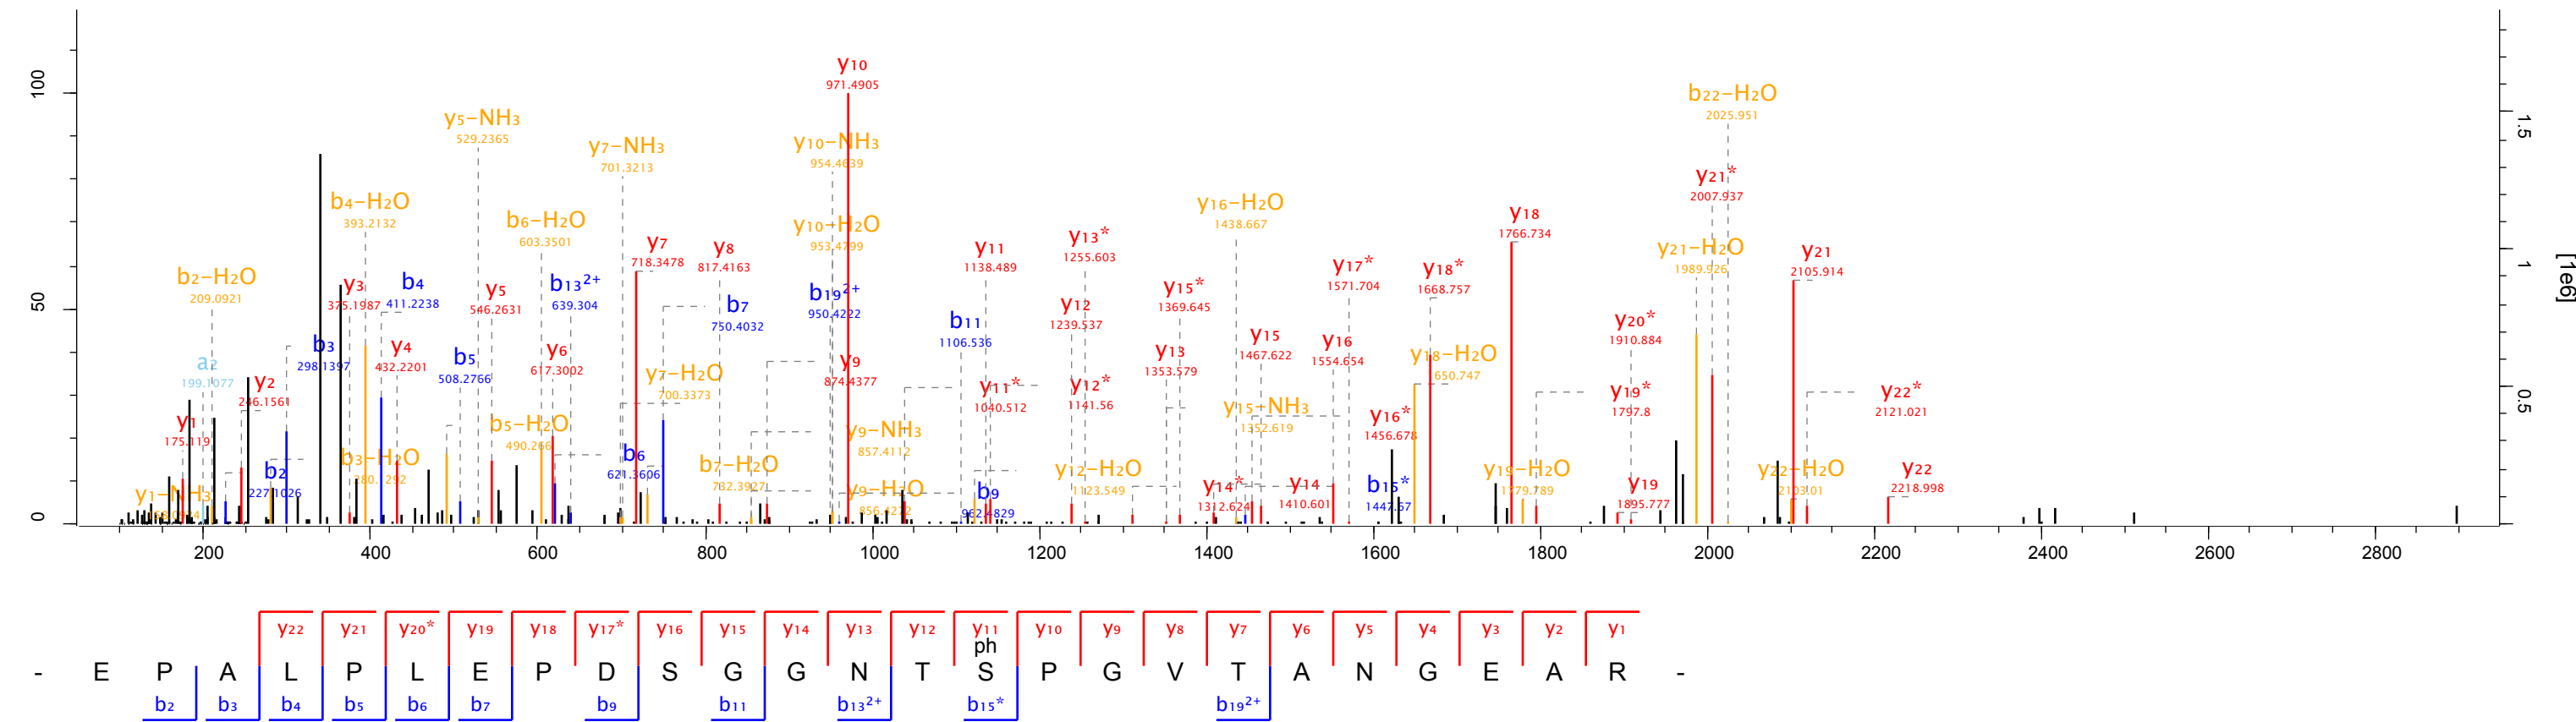

Raw file  
20150812\_A375SR\_Phospho\_BR1\_04

Scan 18559 Method FTMS; HCD Score 277.81 m/z 929.45 Gene names WNK1

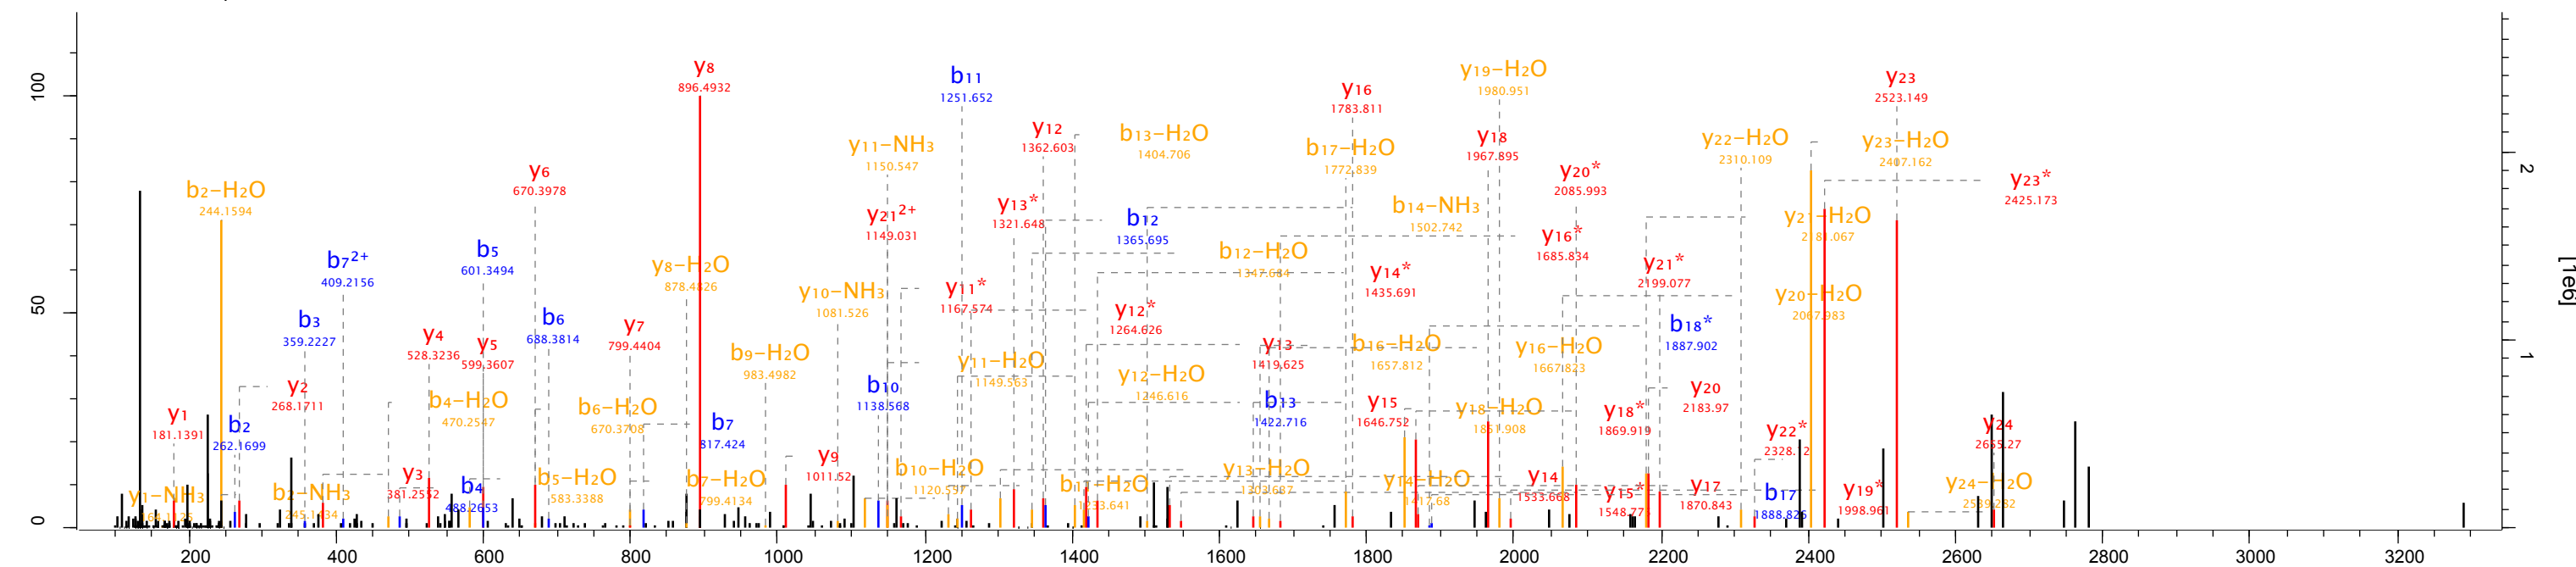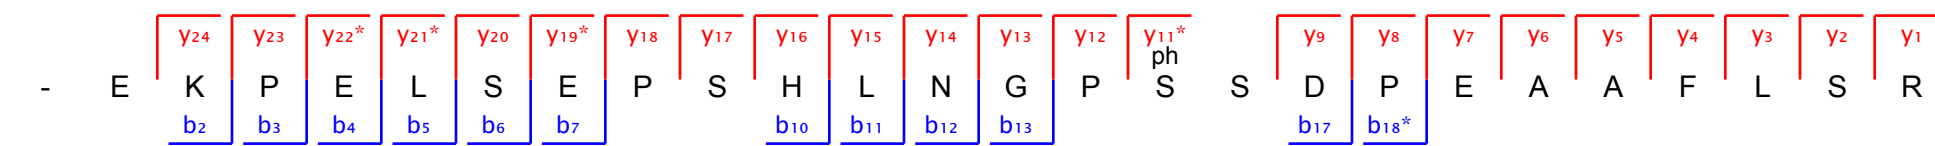

Raw file Scan Method Score m/z Gene names  
 20150812\_A375SR\_Phospho\_BR1\_04 18699 FTMS; HCD 244.75 1035.83 IRS2

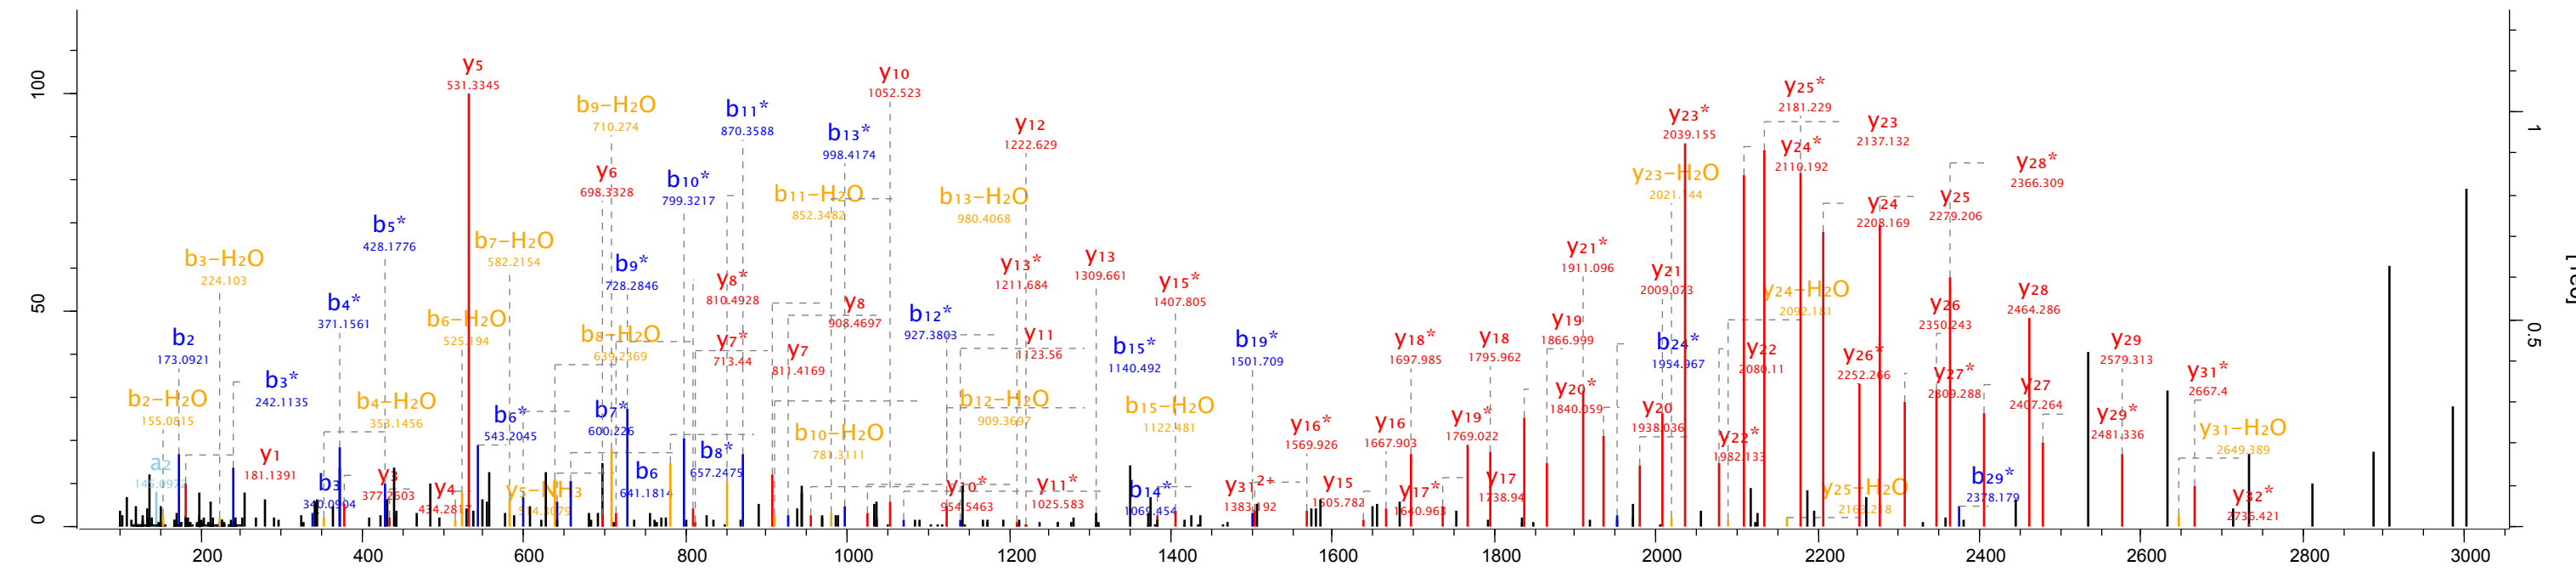

- T A S E G D G G A A G A A A A G A R P V S V A G S P L S P G P V R -

b<sub>2</sub>
b<sub>3</sub>
b<sub>4</sub><sup>\*</sup>
b<sub>5</sub><sup>\*</sup>
b<sub>6</sub>
b<sub>7</sub><sup>\*</sup>
b<sub>8</sub><sup>\*</sup>
b<sub>9</sub><sup>\*</sup>
b<sub>10</sub><sup>\*</sup>
b<sub>11</sub><sup>\*</sup>
b<sub>12</sub><sup>\*</sup>
b<sub>13</sub><sup>\*</sup>
b<sub>14</sub><sup>\*</sup>
b<sub>15</sub><sup>\*</sup>
b<sub>19</sub><sup>\*</sup>
b<sub>24</sub><sup>\*</sup>
b<sub>29</sub><sup>\*</sup>
y<sub>1</sub>
y<sub>3</sub>
y<sub>4</sub>
y<sub>5</sub>
y<sub>6</sub>
y<sub>7</sub>
y<sub>8</sub>
y<sub>10</sub>
y<sub>11</sub>
y<sub>12</sub>
y<sub>13</sub>
y<sub>15</sub>
y<sub>16</sub>
y<sub>17</sub>
y<sub>18</sub>
y<sub>19</sub>
y<sub>20</sub>
y<sub>21</sub>
y<sub>22</sub>
y<sub>23</sub>
y<sub>24</sub>
y<sub>25</sub>
y<sub>26</sub>
y<sub>27</sub>
y<sub>28</sub>
y<sub>29</sub>
y<sub>31</sub><sup>\*</sup>
y<sub>32</sub><sup>\*</sup>
y<sub>32</sub><sup>\*</sup>ph

Raw file 20150812\_A375SR\_Phospho\_BR1\_04 Scan 18909 Method FTMS; HCD Score 80.38 m/z 746.85 Gene names SNTB1

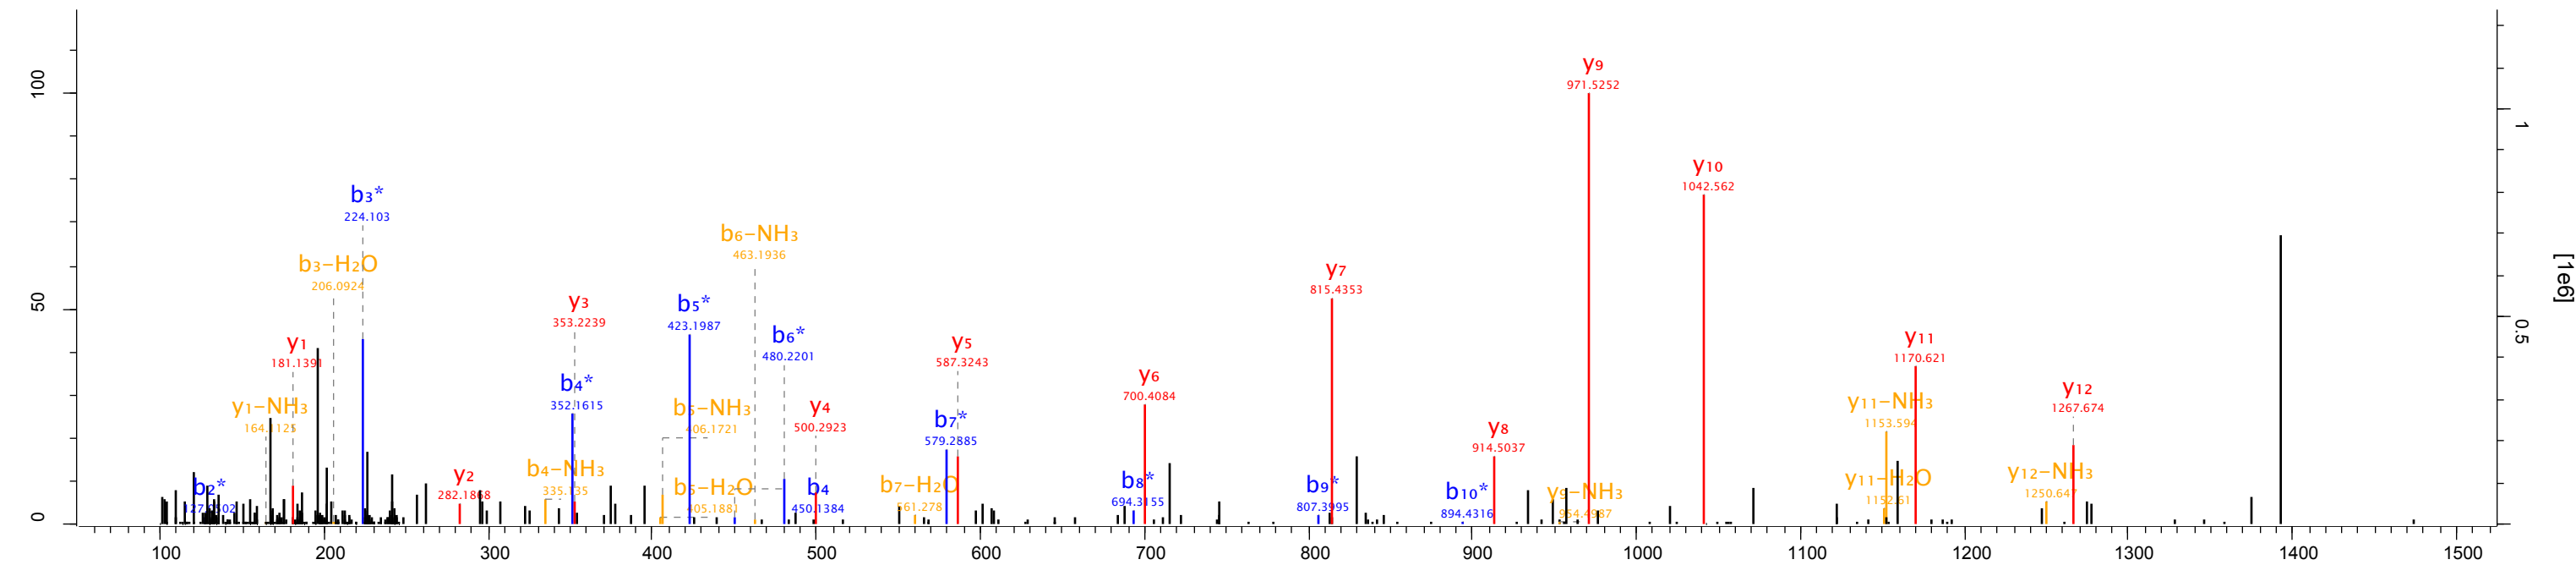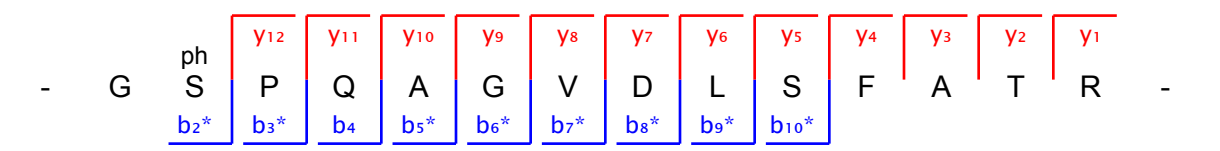

Raw file 20150812\_A375SR\_Phospho\_BR1\_04 Scan 20249 Method FTMS; HCD Score 55.7 m/z 1142.51 Gene names AKAP12

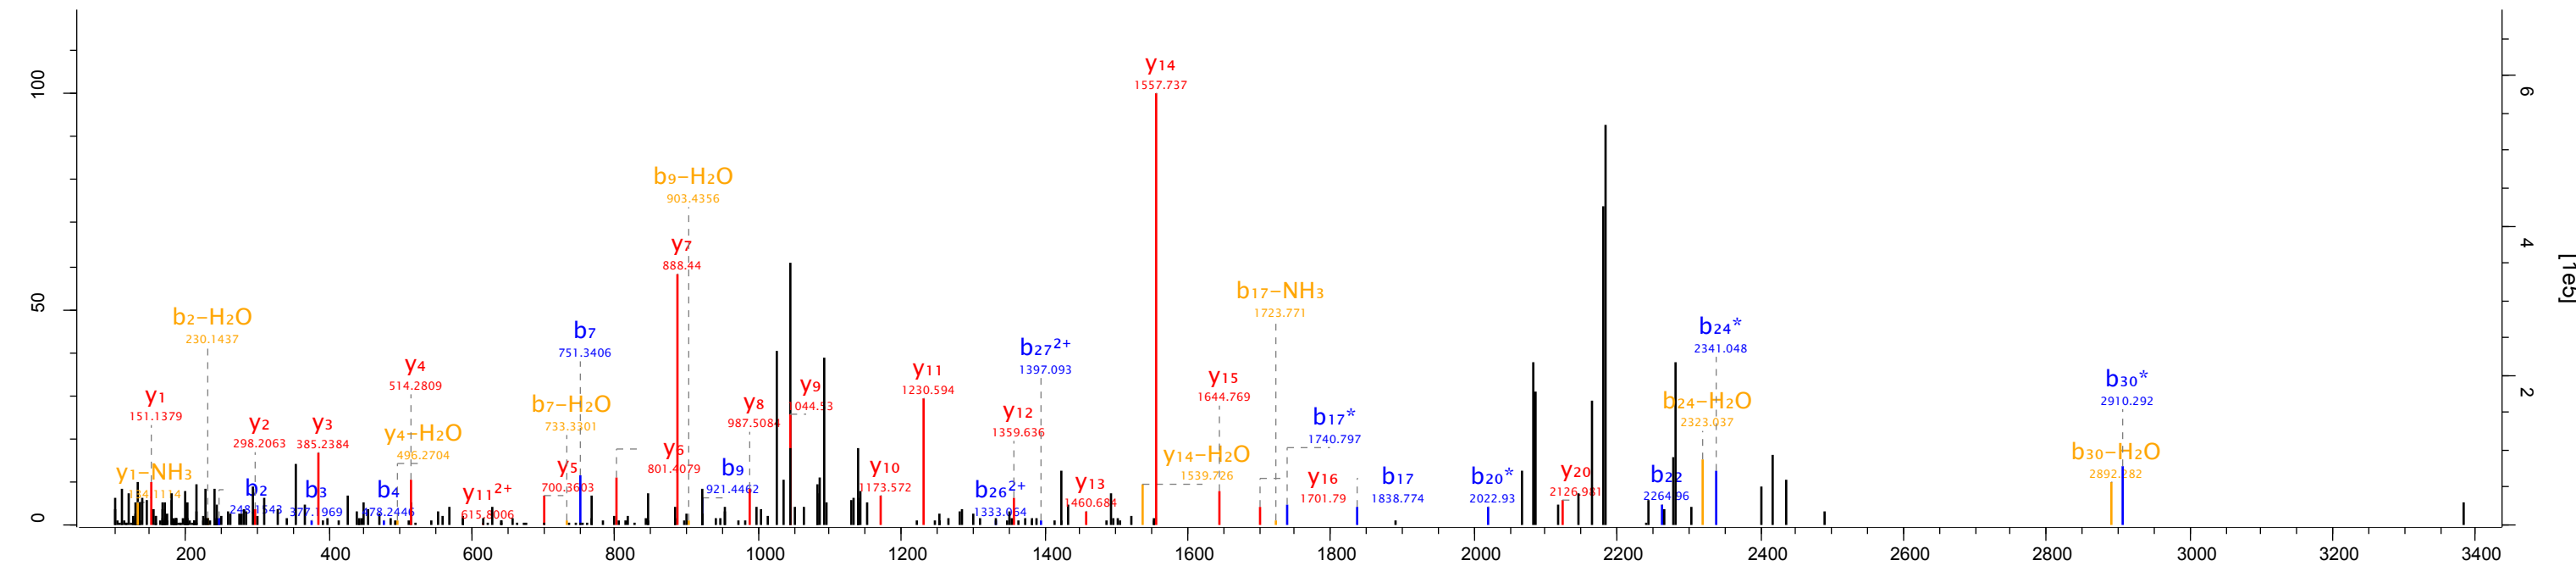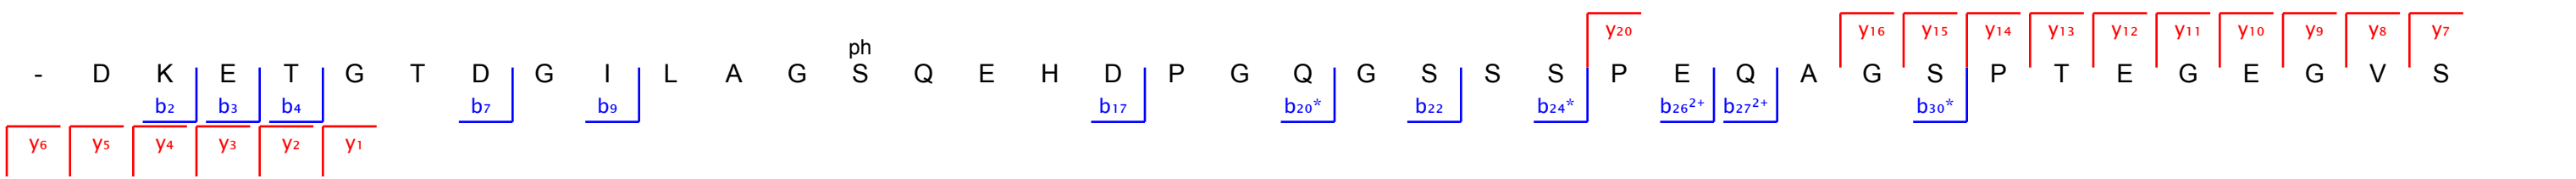



Raw file 20150812\_A375SR\_Phospho\_BR1\_04 Scan 20269 Method FTMS; HCD Score 325.32 m/z 1233.04 Gene names MAP1B

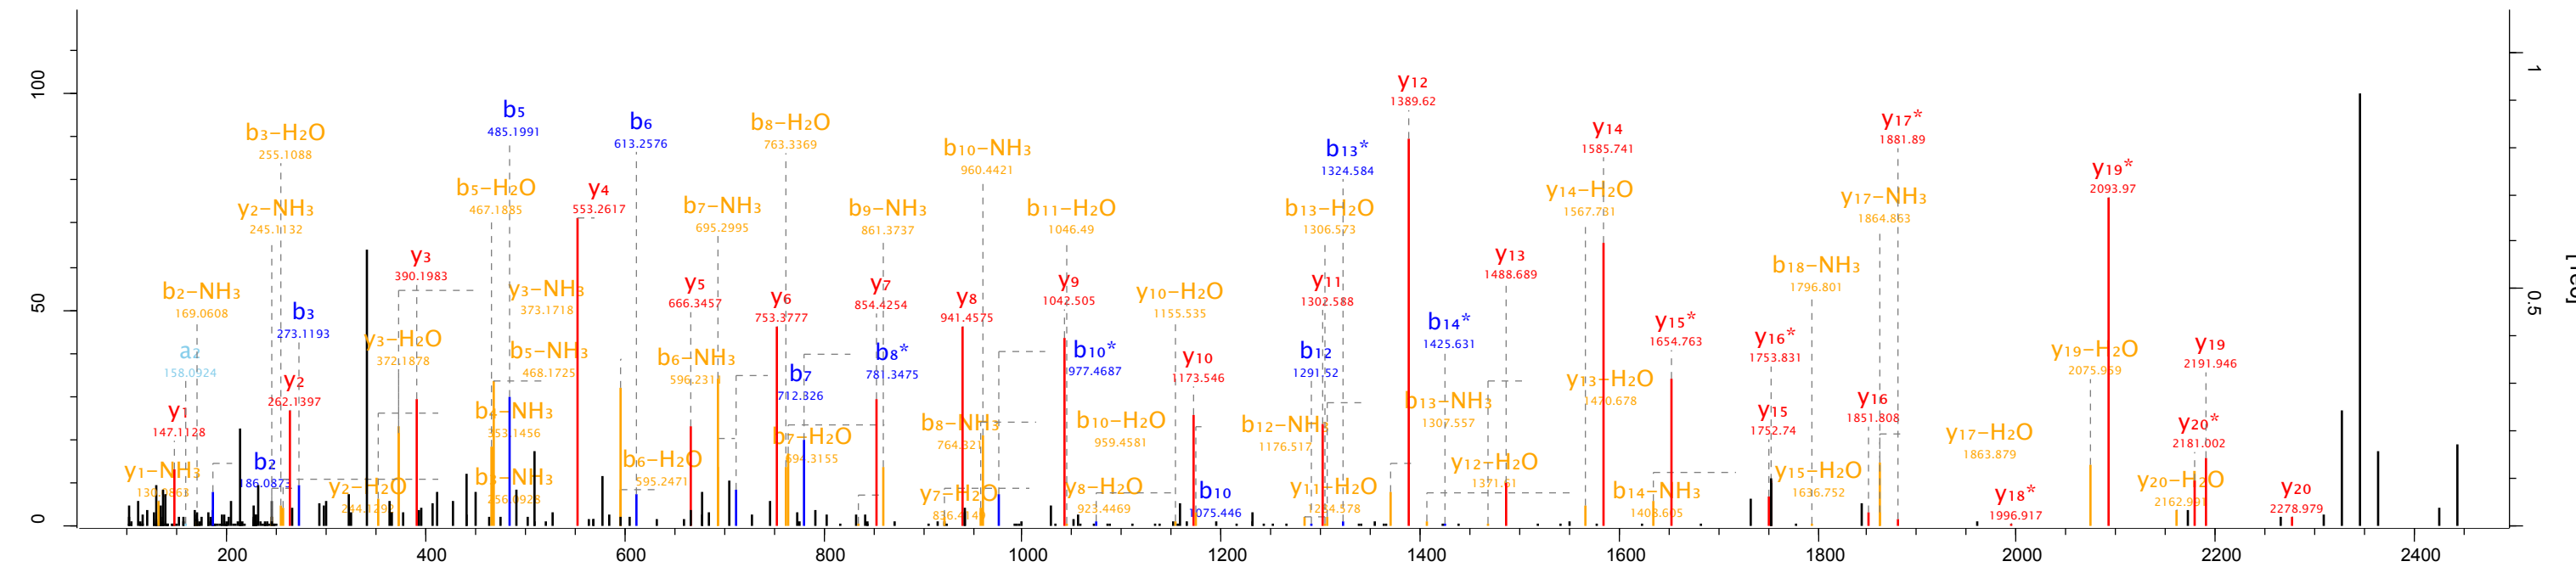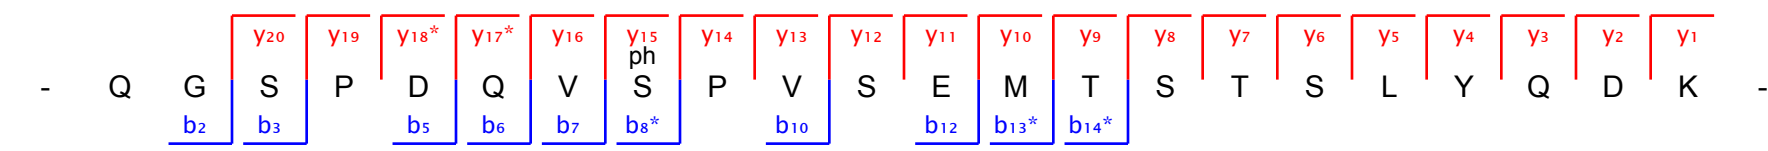



Raw file: 20150812\_A375SR\_Phospho\_BR1\_04  
 Scan: 20519 Method: FTMS; HCD Score: 111.35 m/z: 863.9 Gene names: C2CD5

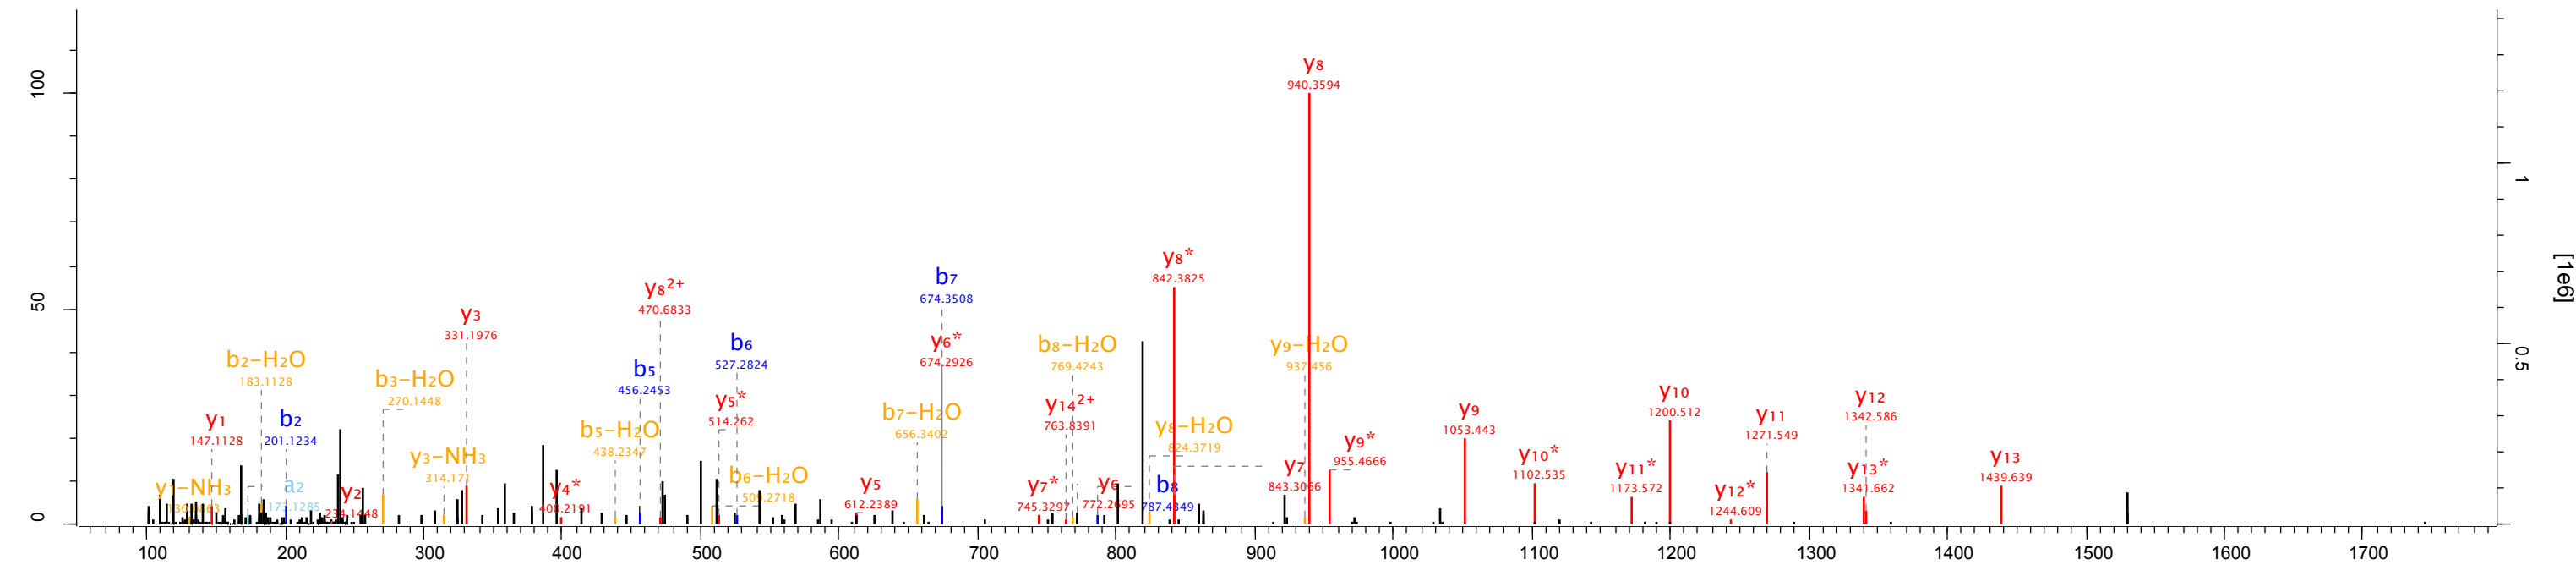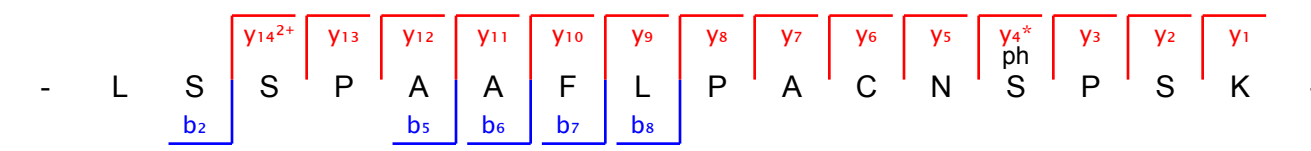

Raw file  
20150812\_A375SR\_Phospho\_BR1\_04

Scan 21579 Method FTMS; HCD Score 88.52 m/z 965.11 Gene names XRN2

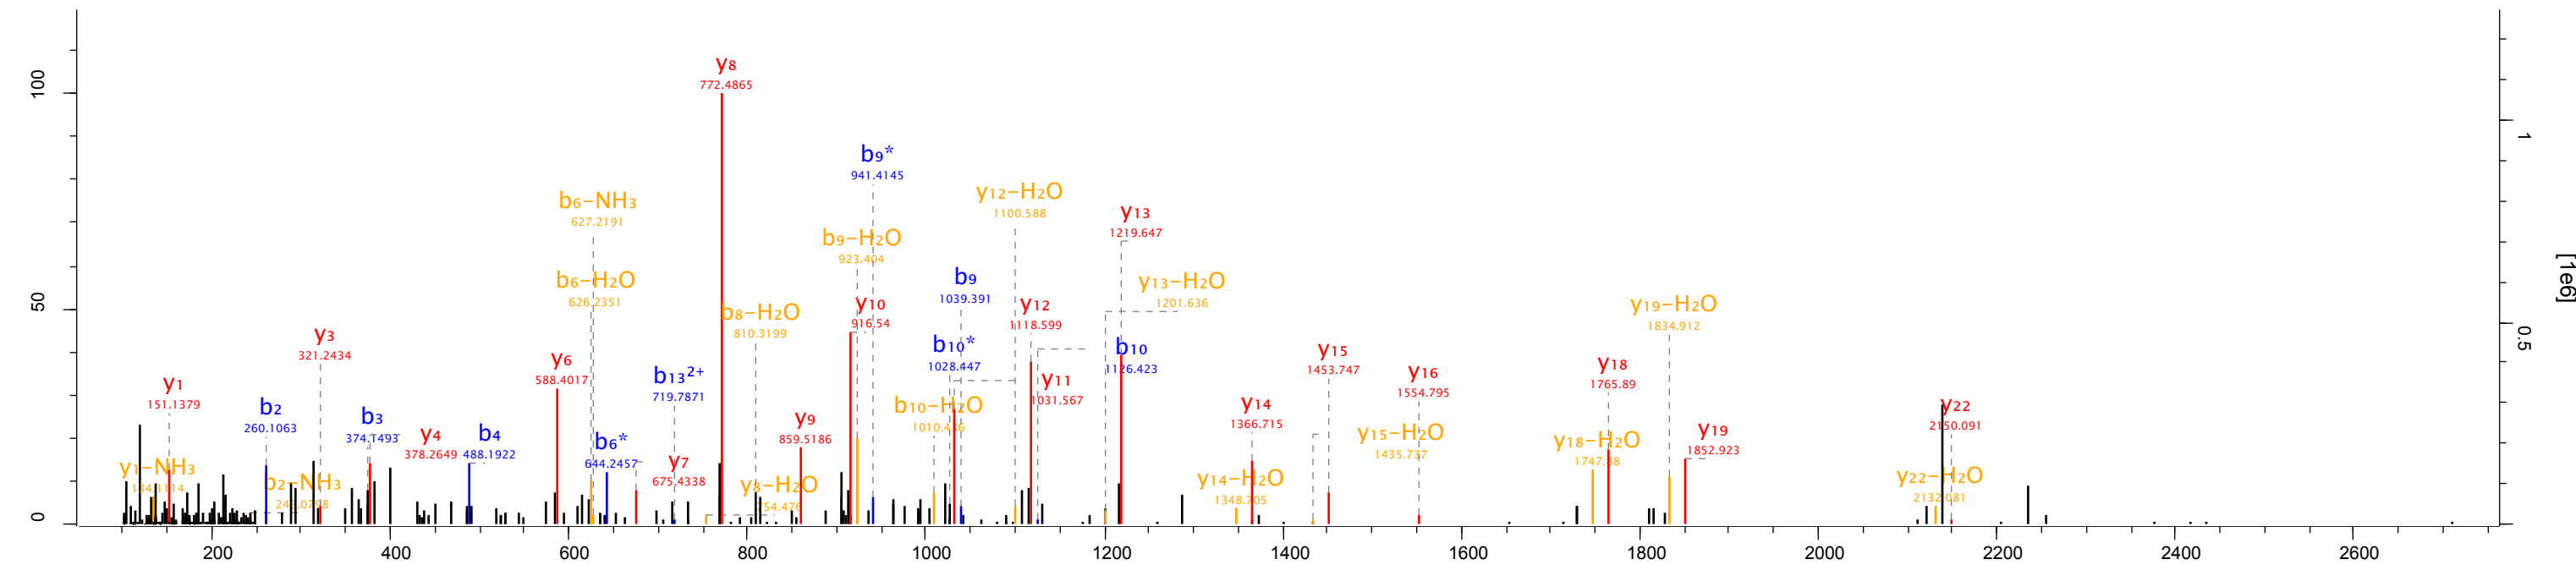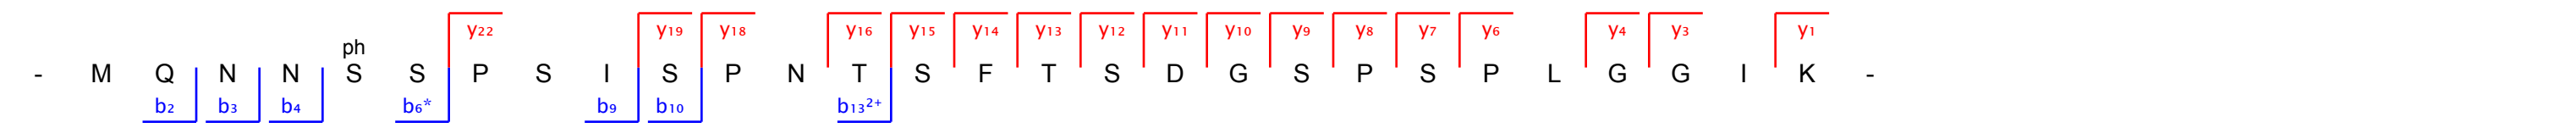

Raw file: 20150812\_A375SR\_Phospho\_BR1\_04  
 Scan: 22259 Method: FTMS; HCD Score: 271.48 m/z: 925.43 Gene names: SAFB

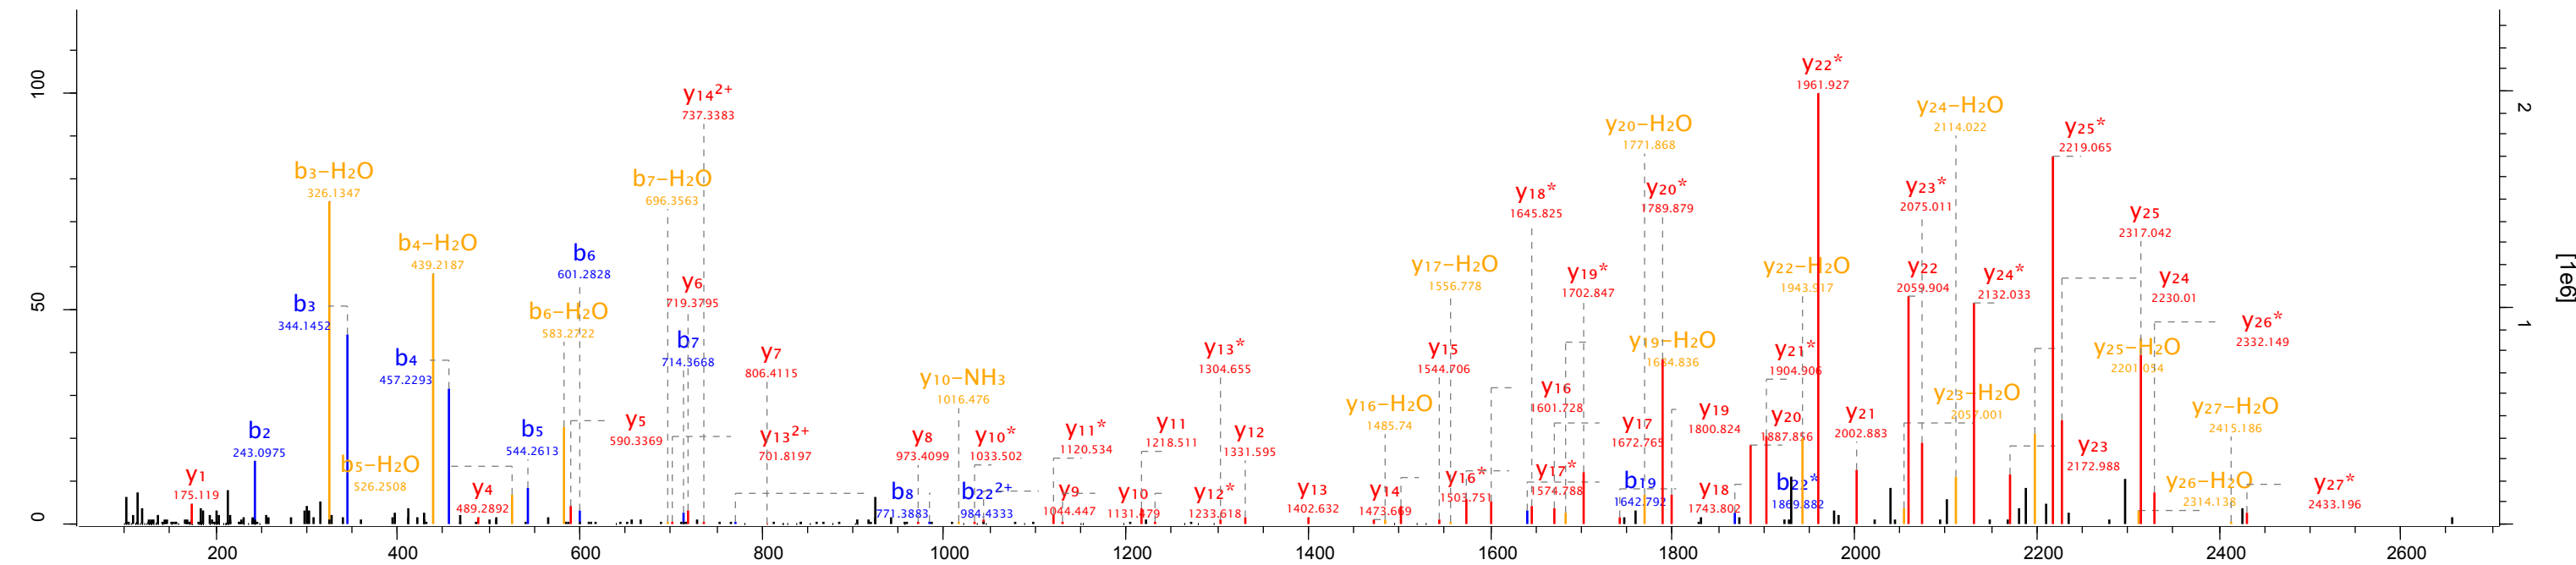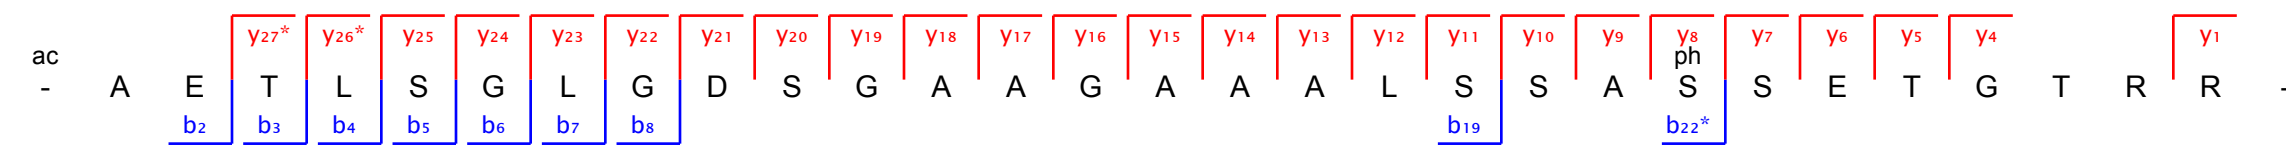

Raw file 20150812\_A375SR\_Phospho\_BR1\_04 Scan 22469 Method FTMS; HCD Score 214.05 m/z 1016.93 Gene names YTHDF2

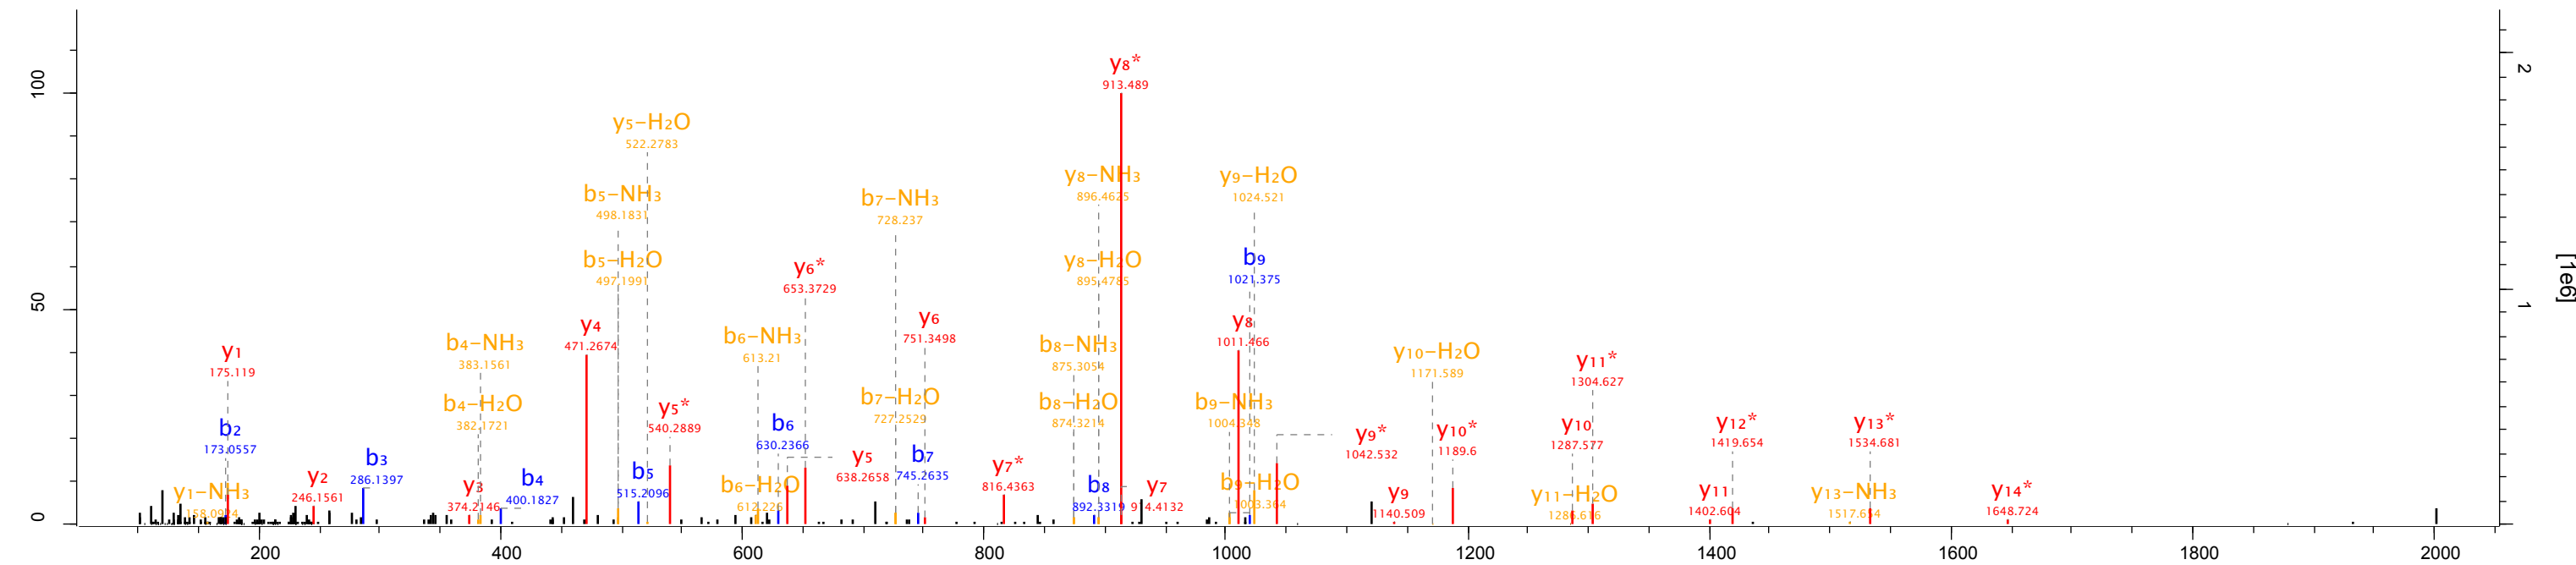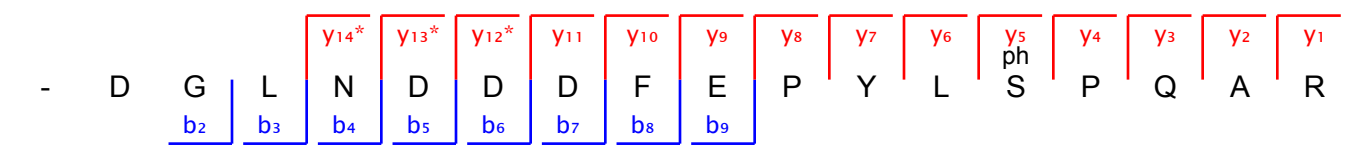

Raw file: 20150812\_A375SR\_Phospho\_BR1\_04  
 Scan: 22629 Method: FTMS; HCD Score: 232.11 m/z: 850.76 Gene names: FCHO2

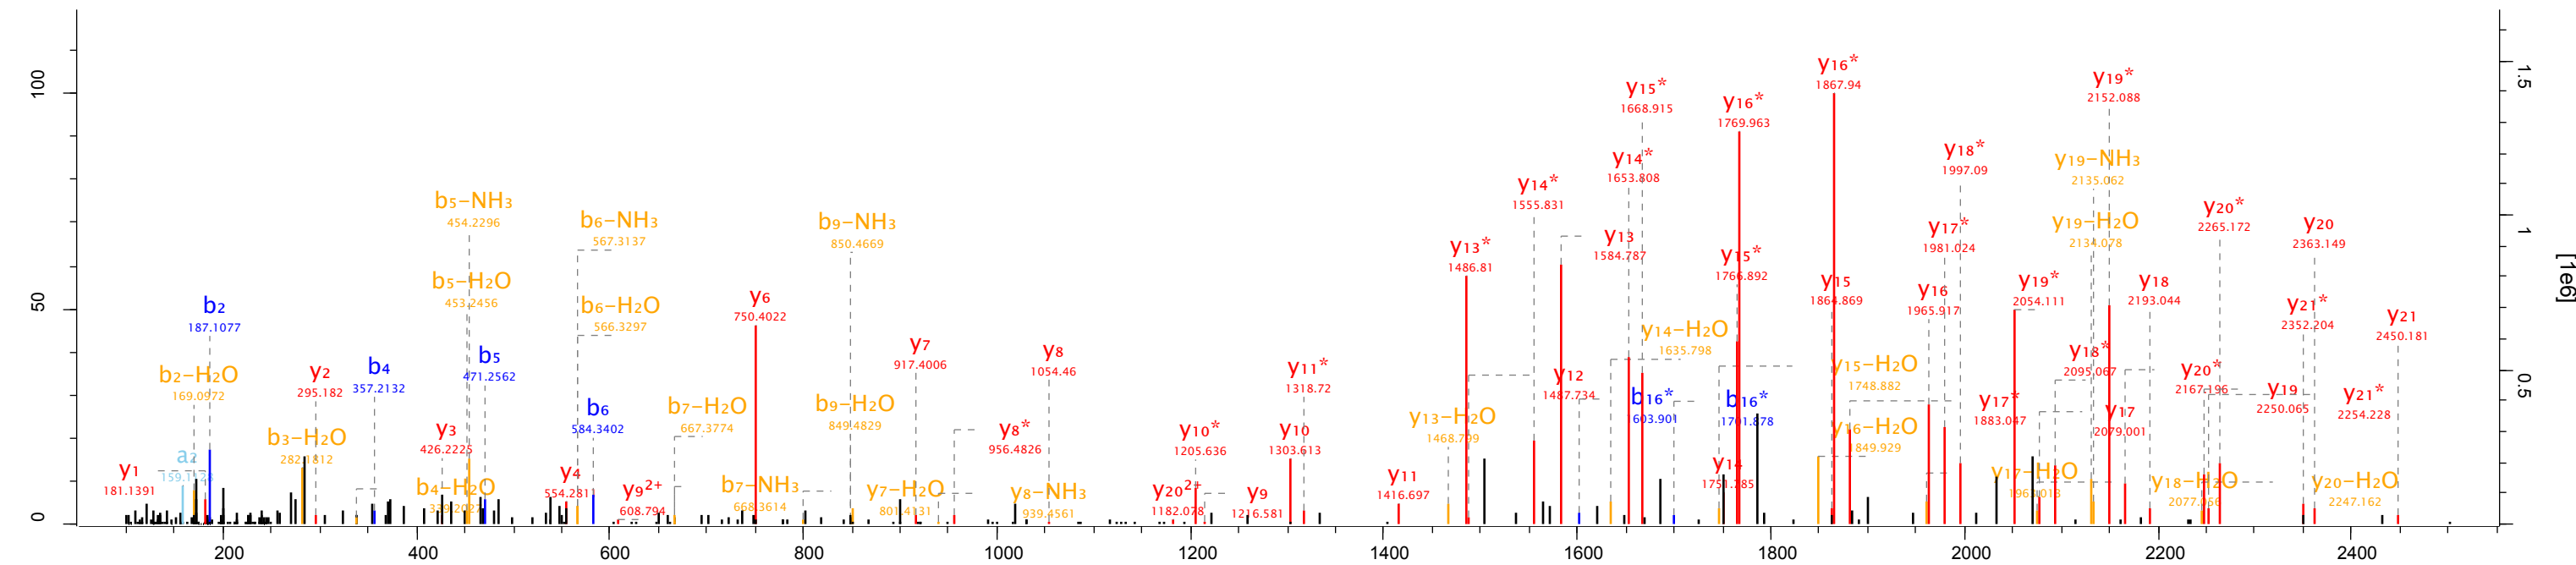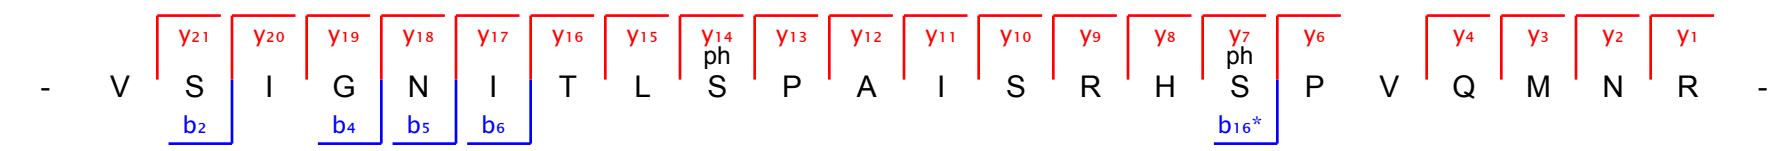

Raw file  
20150812\_A375SR\_Phospho\_BR1\_04

Scan 2279 Method FTMS; HCD Score 114.25 m/z 600.29 Gene names CDK9

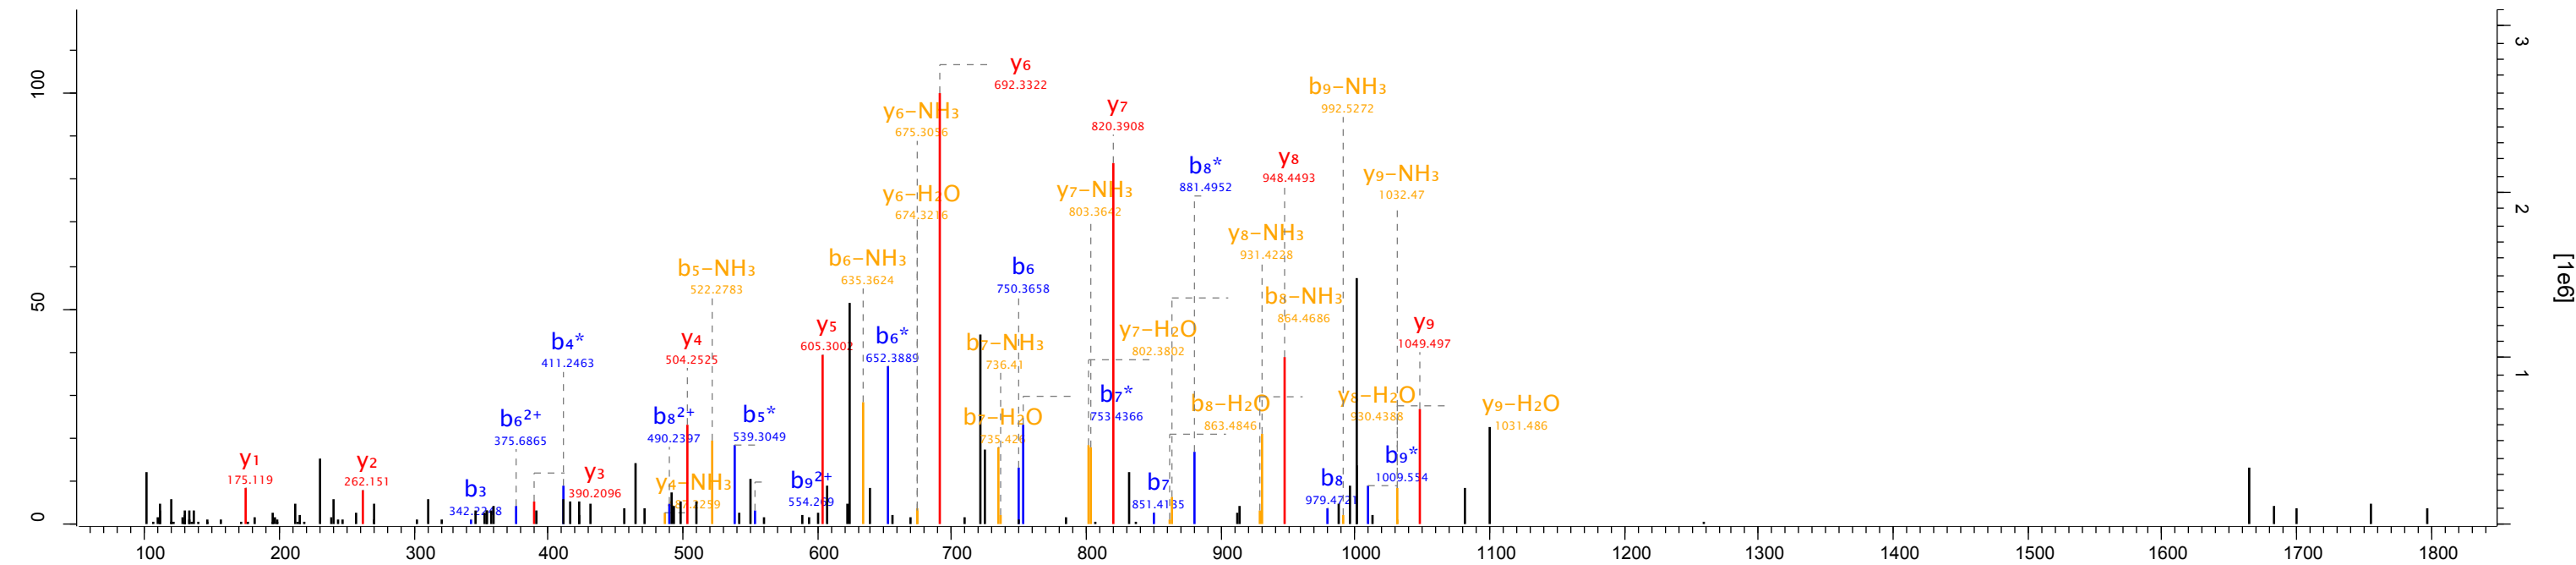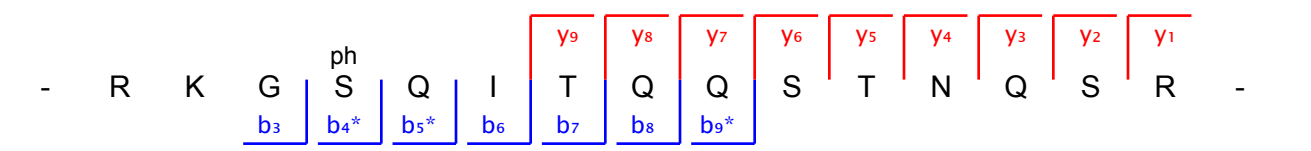



Raw file  
20150812\_A375SR\_Phospho\_BR1\_04

Scan 23519 Method FTMS; HCD Score 258.46 m/z 962.97 Gene names RSL1D1

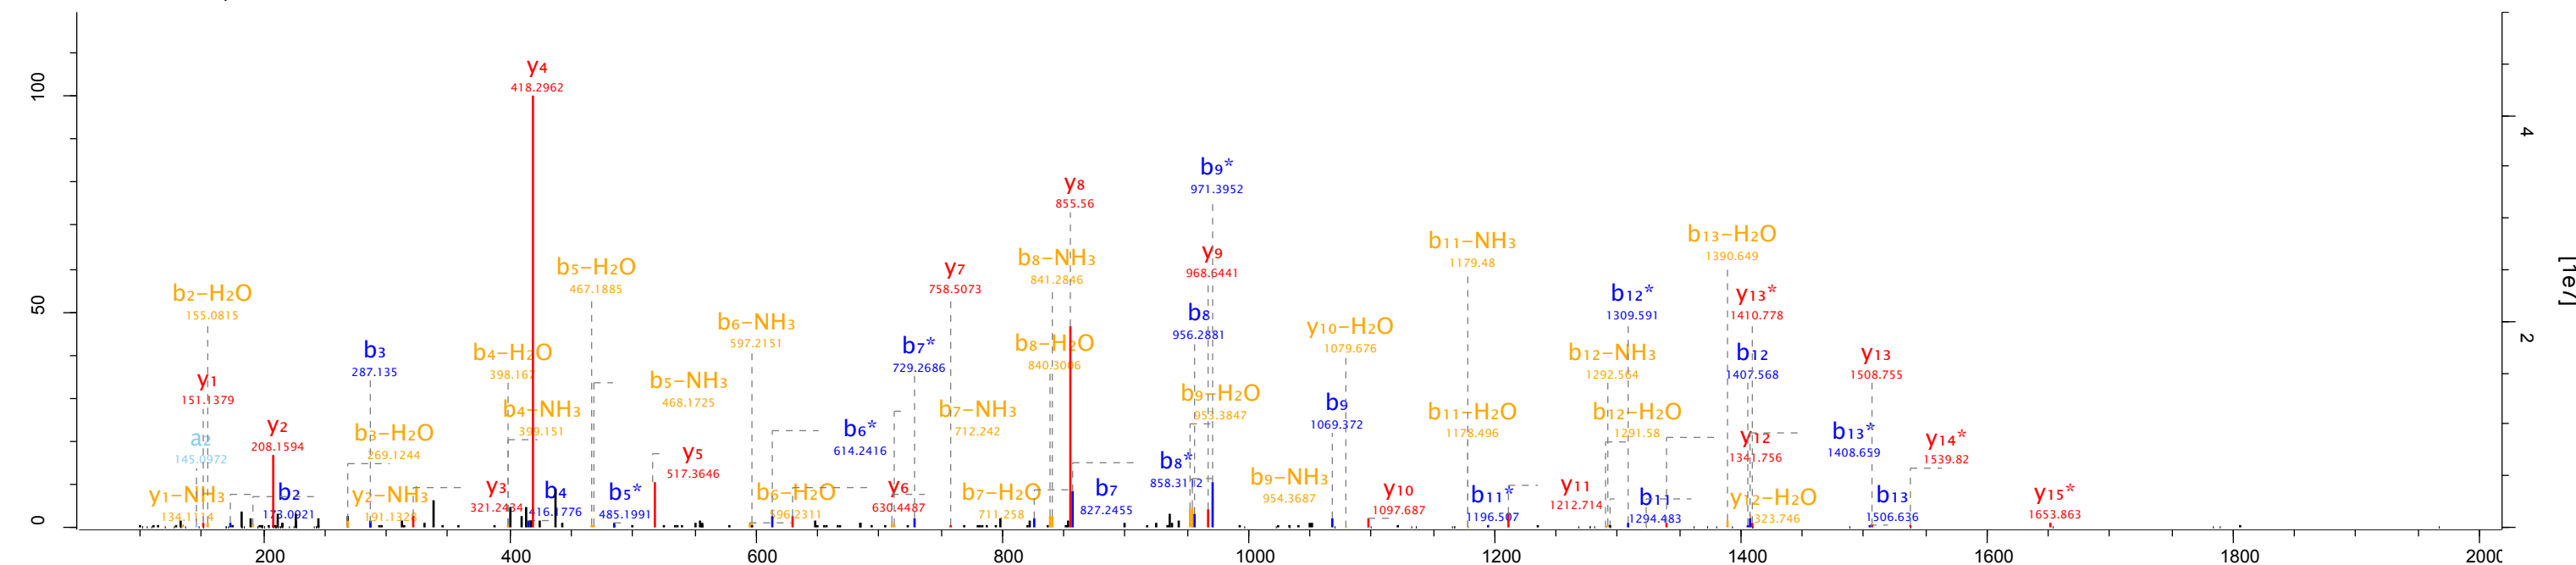

- A T N E S E D E I P Q L V P I G K -

b2 b3 b4 b5\* b6\* b7 b8 b9 b11 b12 b13

y15\* y14\* y13 ph y12 y11 y10 y9 y8 y7 y6 y5 y4 y3 y2 y1

Raw file 20150812\_A375SR\_Phospho\_BR1\_04 Scan 25279 Method FTMS; HCD Score 291.95 m/z 1054.01 Gene names HNRNPUL2;HNRNPUL2-BSCL2

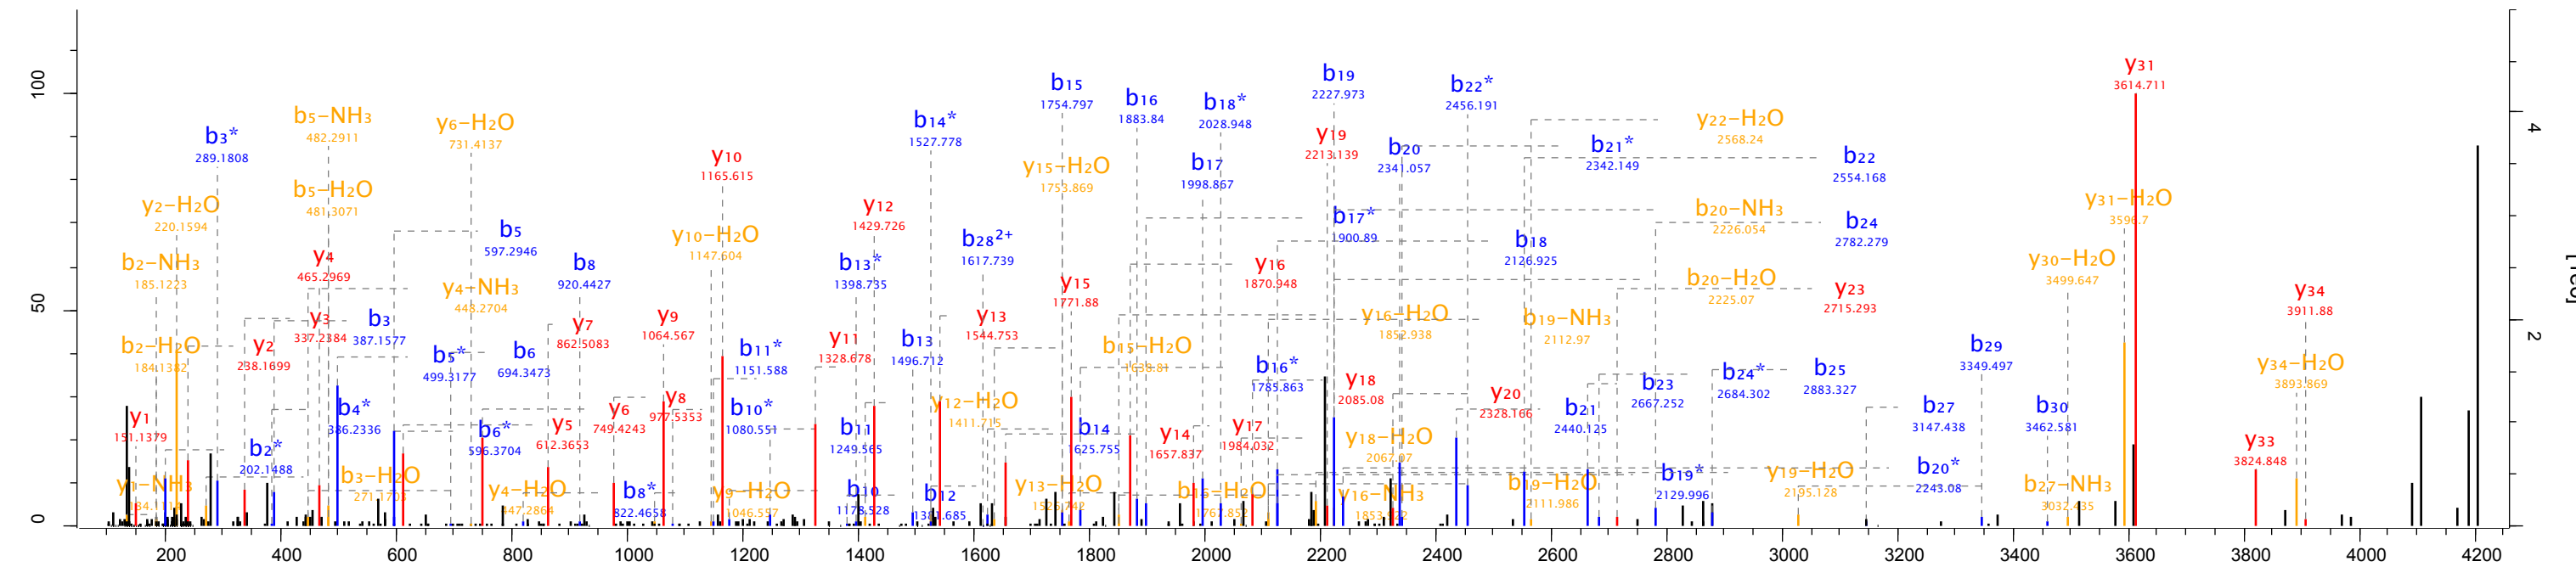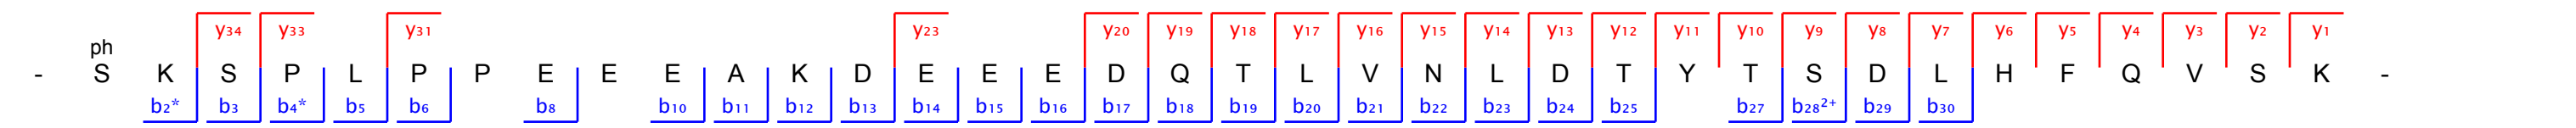

Raw file: 20150812\_A375SR\_Phospho\_BR1\_04  
 Scan: 2559 Method: FTMS; HCD Score: 56.08 m/z: 642.95 Gene names: RICTOR

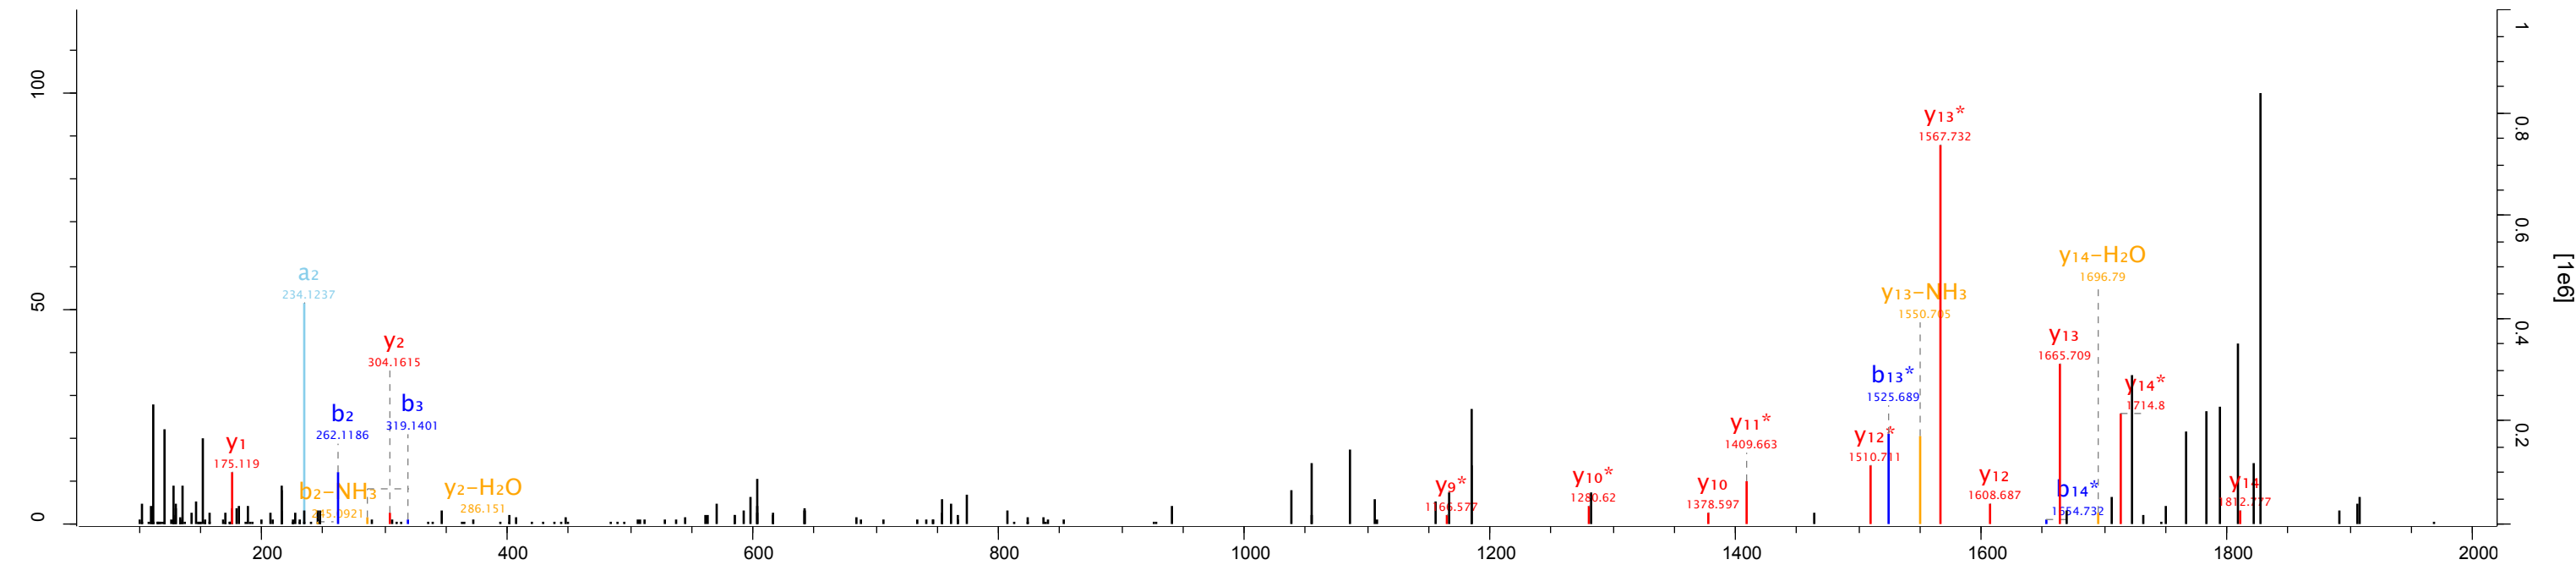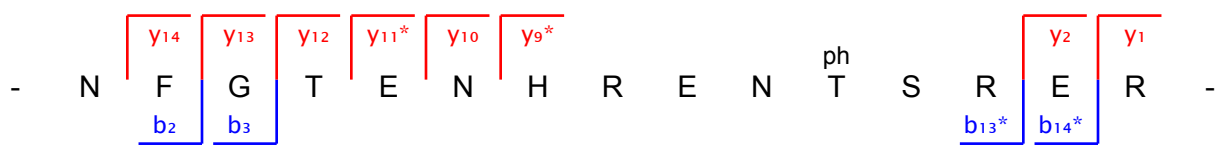

Raw file: 20150812\_A375SR\_Phospho\_BR1\_04  
 Scan: 2569 Method: FTMS; HCD Score: 106.42 m/z: 862.33 Gene names: GPATCH8

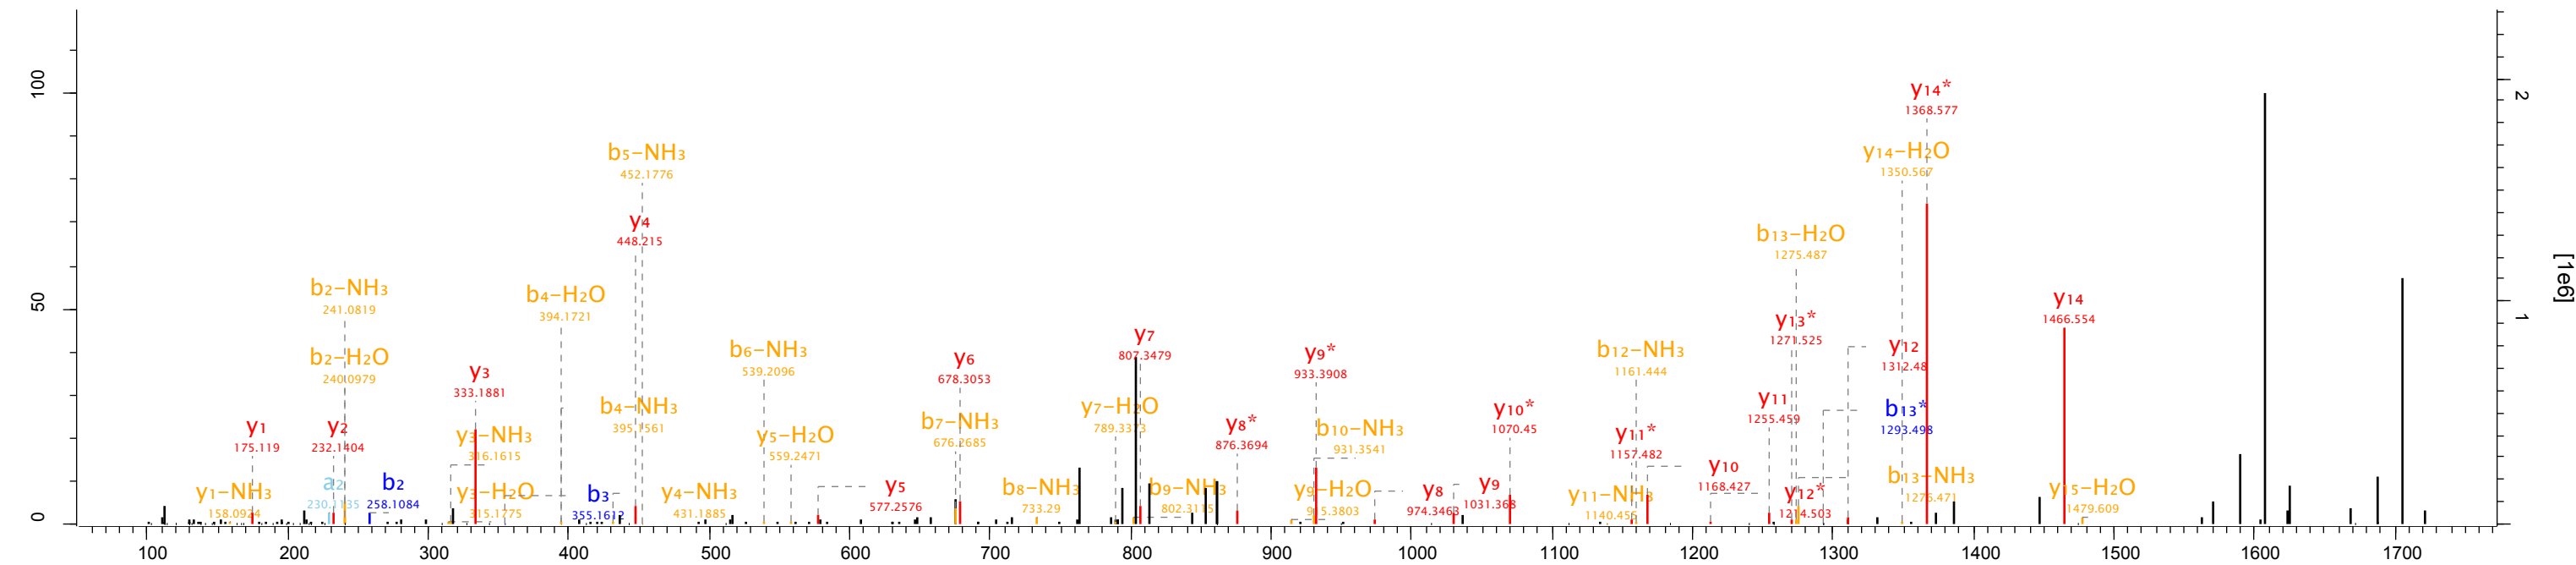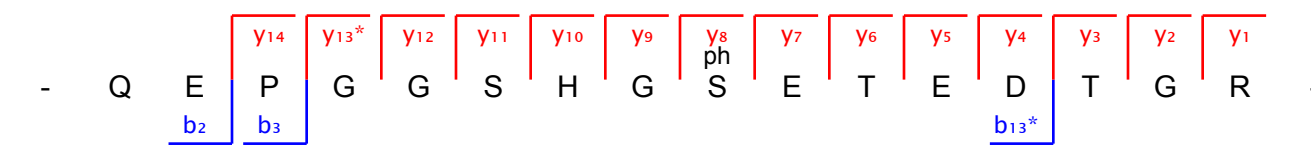

Raw file: 20150812\_A375SR\_Phospho\_BR1\_04  
 Scan: 2589 Method: FTMS; HCD Score: 42.86 m/z: 616.32 Gene names: ARAF

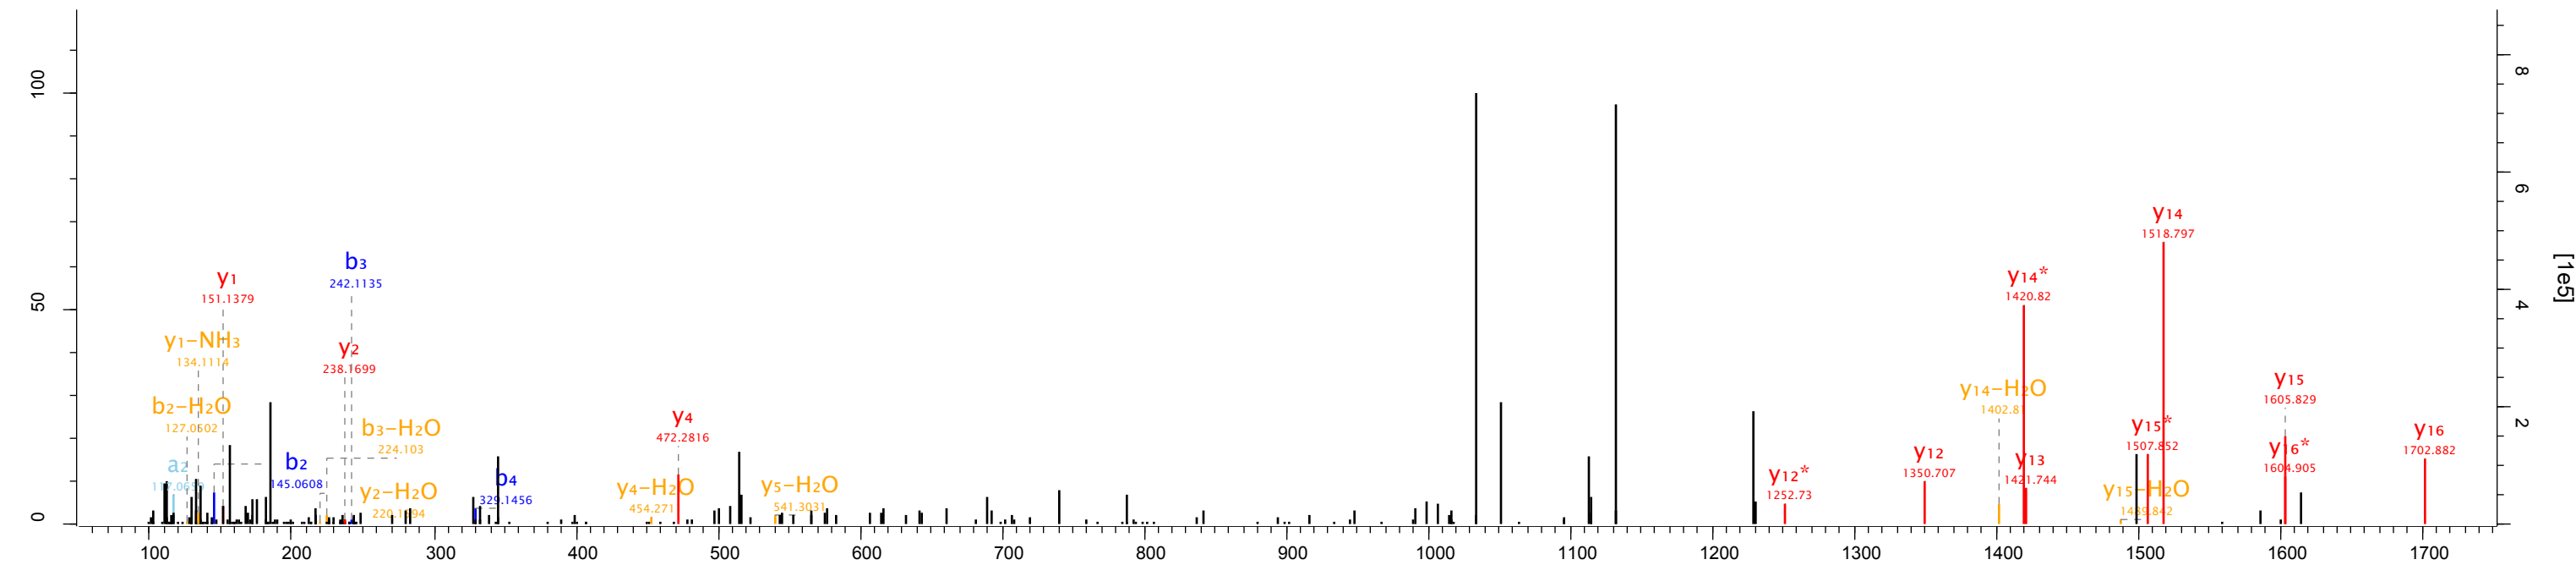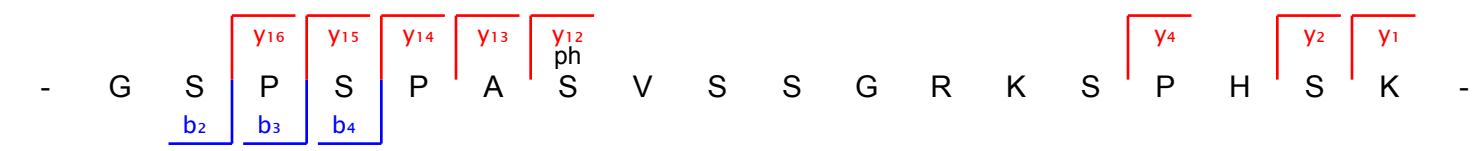

Raw file 20150812\_A375SR\_Phospho\_BR1\_04 Scan 2599 Method FTMS; HCD Score 47.68 m/z 574.25 Gene names PPHLN1

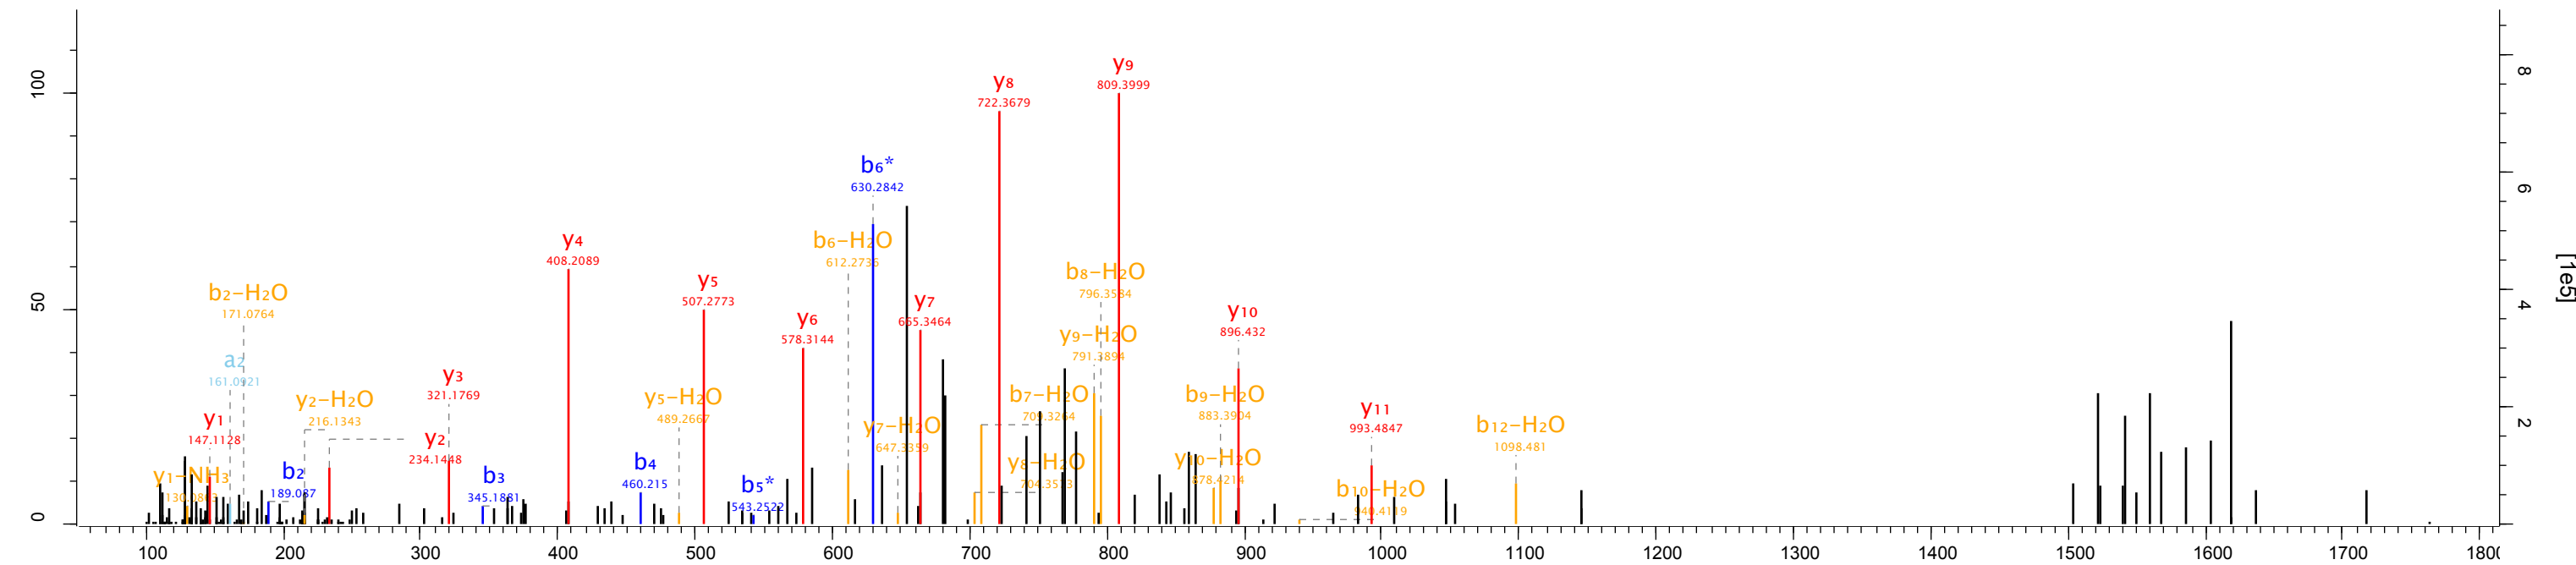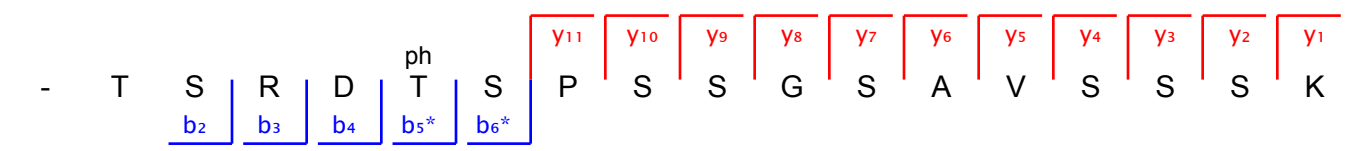

Raw file: 20150812\_A375SR\_Phospho\_BR1\_04  
 Scan: 27999 Method: FTMS; HCD Score: 350.18 m/z: 1057.04 Gene names: HOMER3;H2AFX

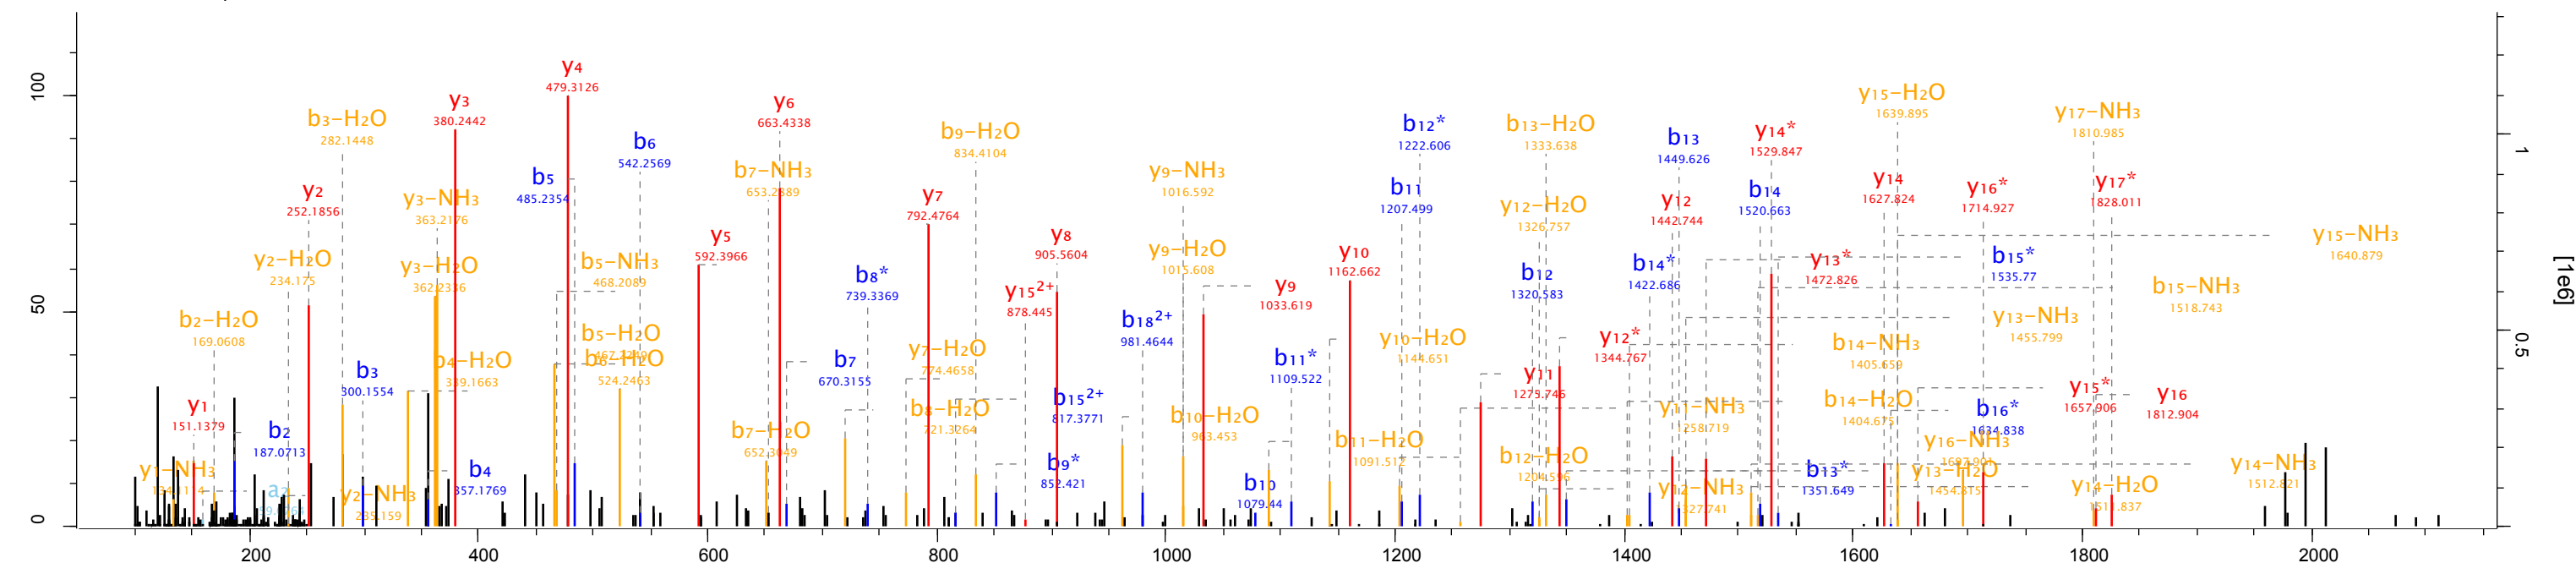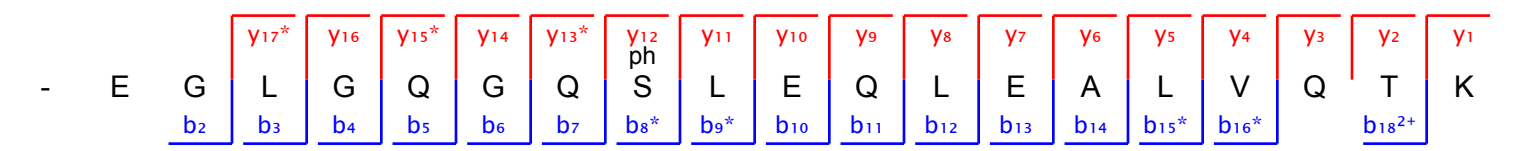

Raw file: 20150812\_A375SR\_Phospho\_BR1\_04  
 Scan: 3009 Method: FTMS; HCD Score: 96.49 m/z: 526.26 Gene names: LRCH3

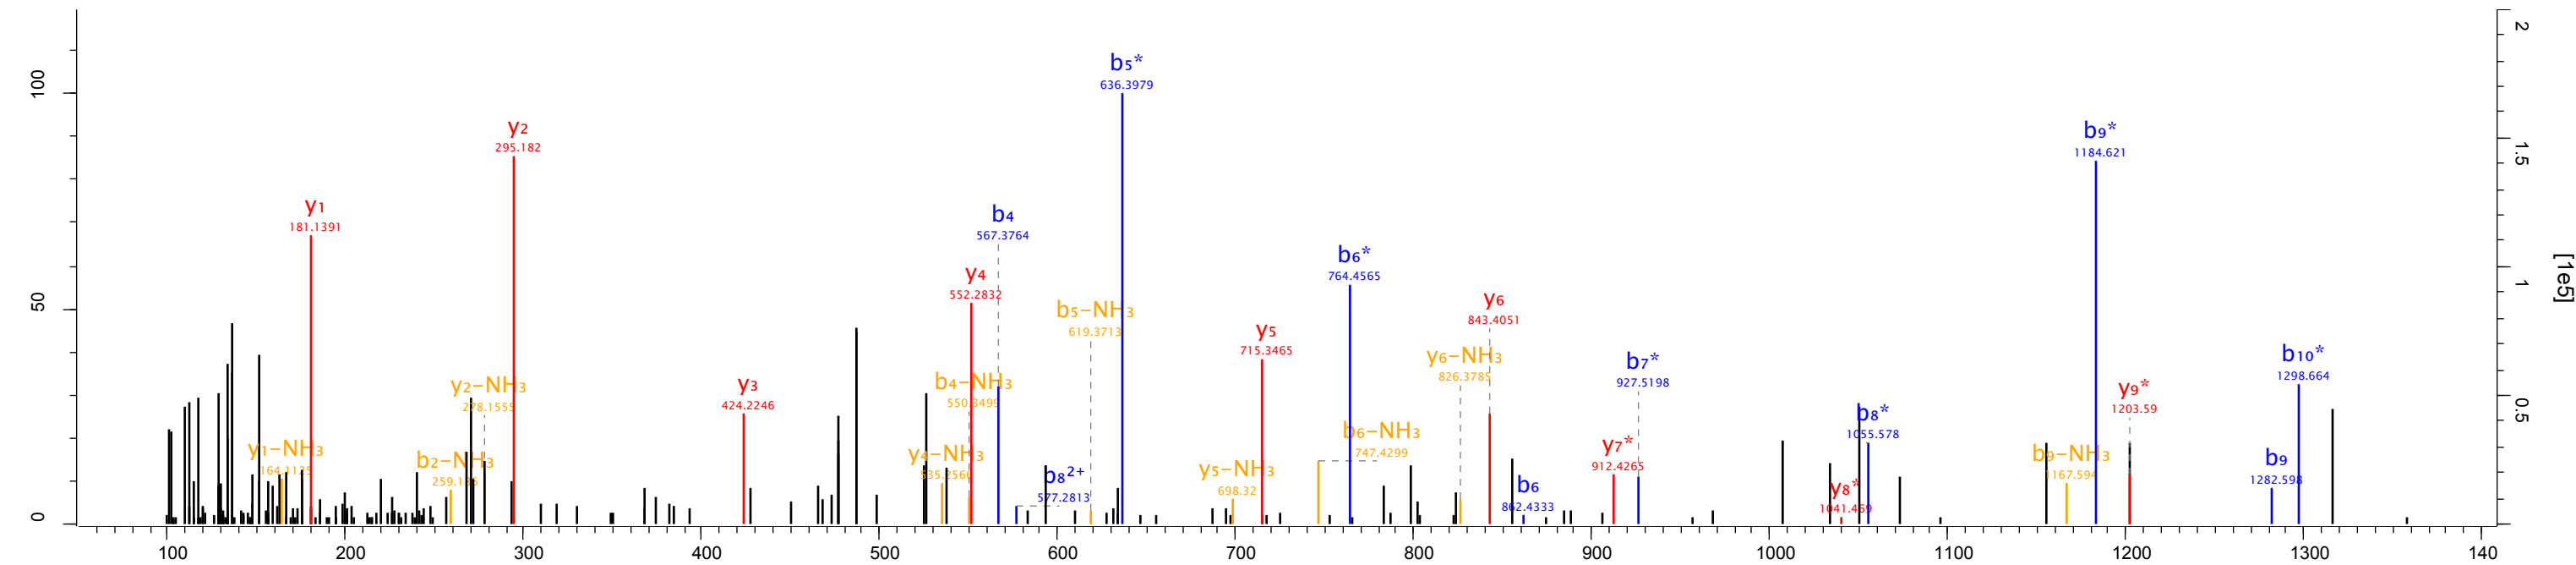

Sequence: - L R R E S Q Y Q E N R -  
 Fragmentation sites: b4, b5\*, b6, b7\*, b8\*, b9, b10\* (underlined in blue)  
 Cleavage sites: y9\*, y8\*, y7\*, y6, y5, y4, y3, y2, y1 (boxed in red)



Raw file: 20150812\_A375SR\_Phospho\_BR1\_04  
 Scan: 3069 Method: FTMS; HCD Score: 247.82 m/z: 847.32 Gene names: SLK

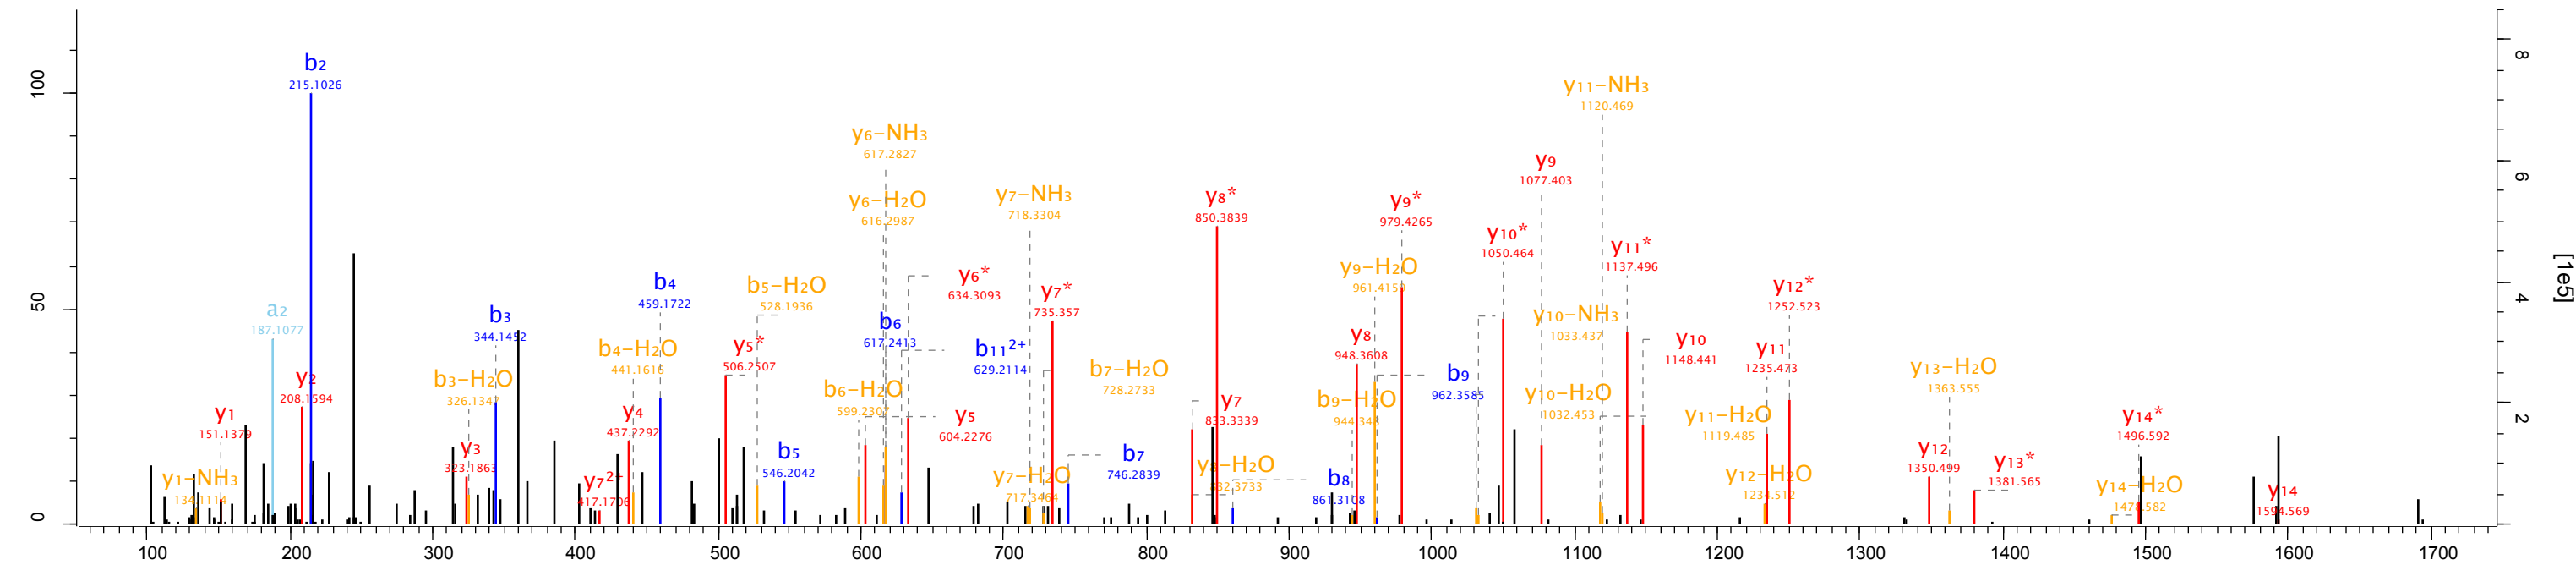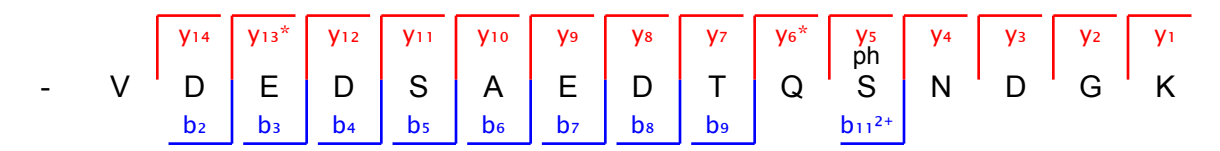

Raw file: 20150812\_A375SR\_Phospho\_BR1\_04  
 Scan: 3359 Method: FTMS; HCD Score: 221.4 m/z: 759.36 Gene names: TRIT1

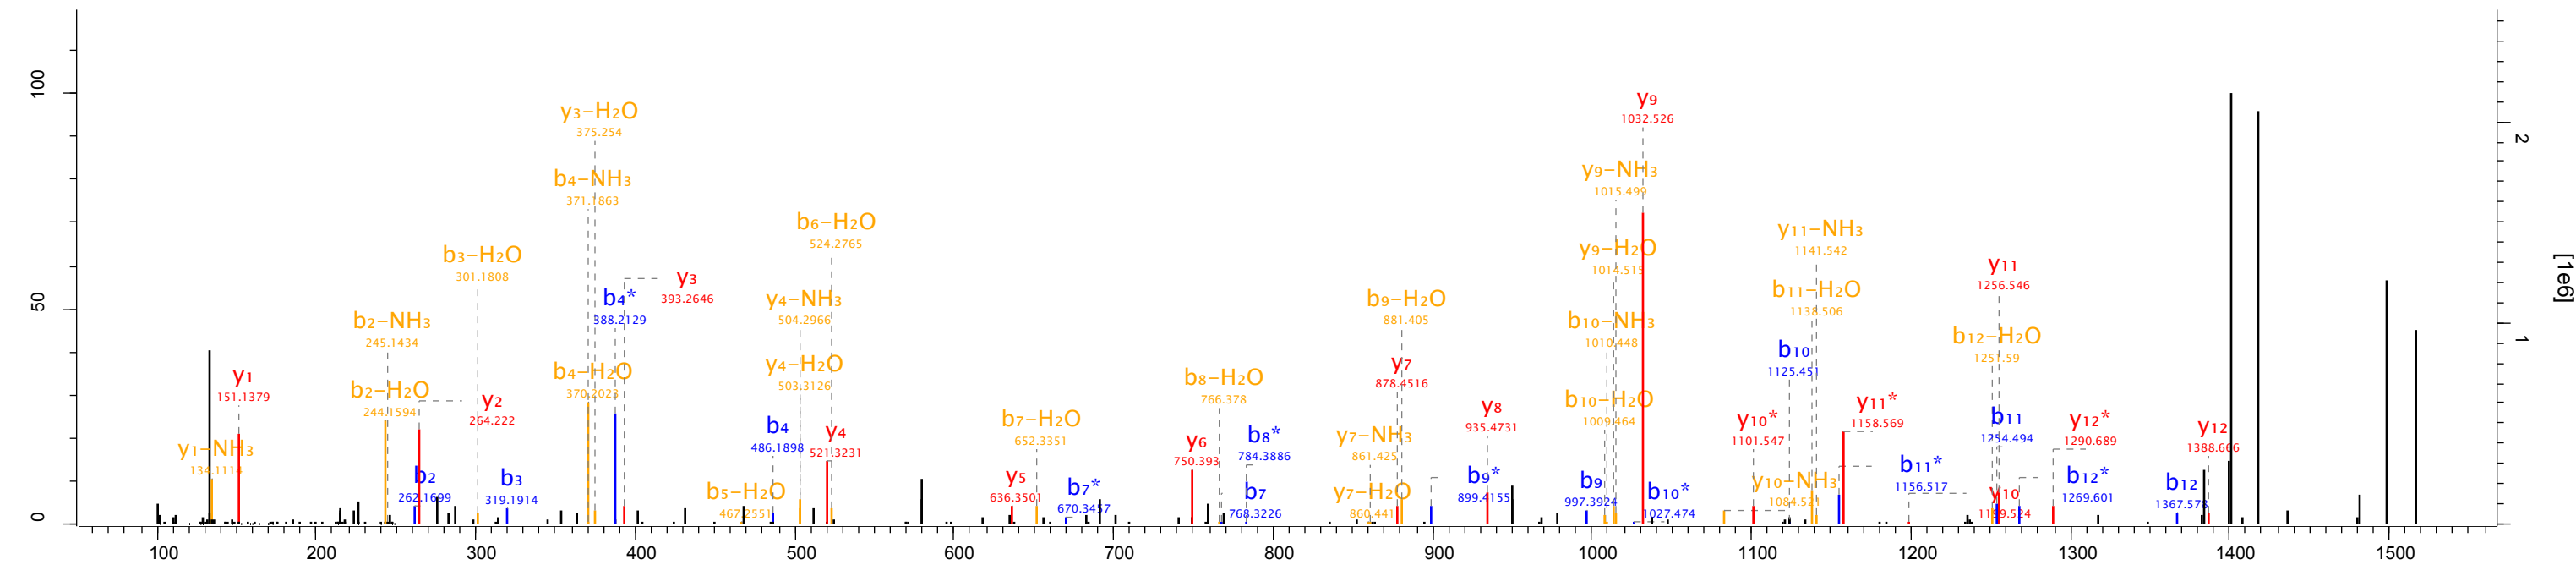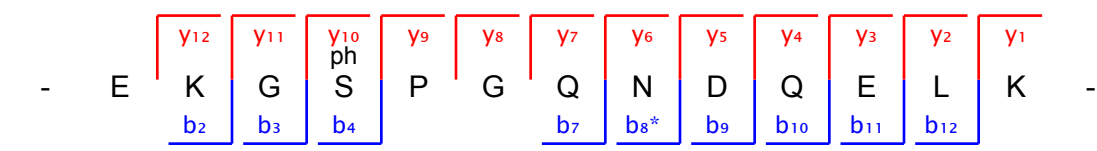

Raw file: 20150812\_A375SR\_Phospho\_BR1\_04  
 Scan: 3449 Method: FTMS; HCD Score: 128.21 m/z: 417.56 Gene names: CIT

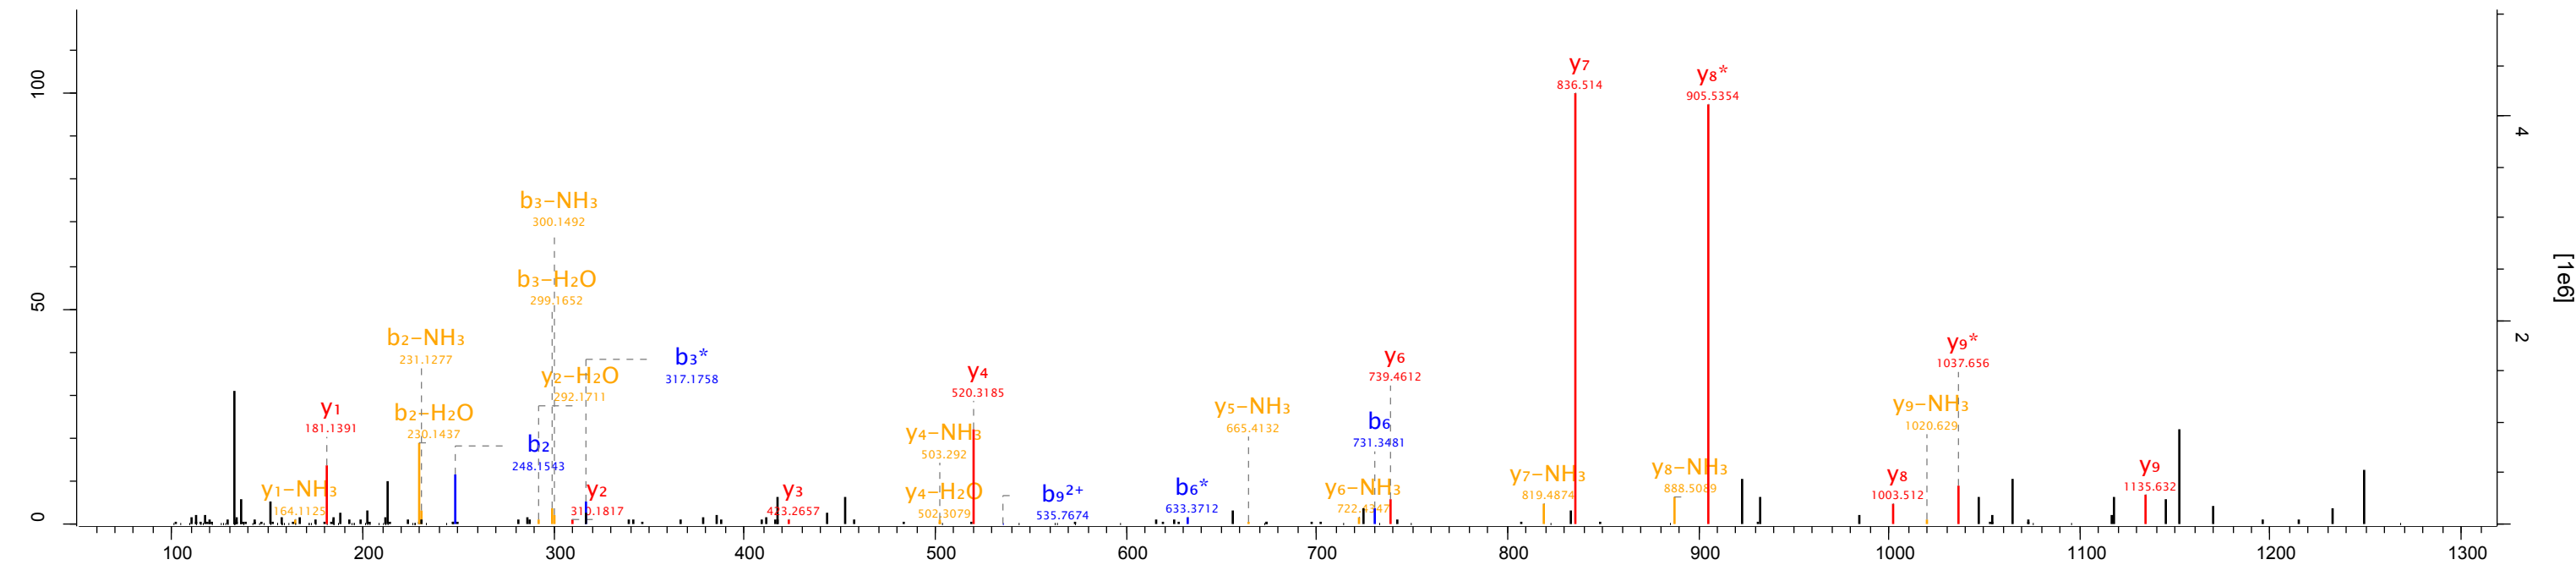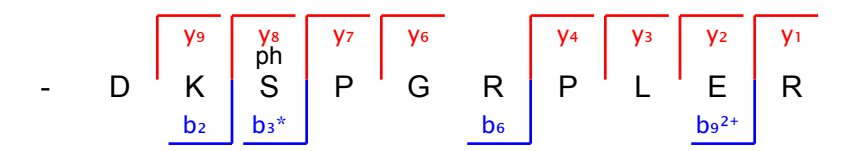

Raw file: 20150812\_A375SR\_Phospho\_BR1\_04  
 Scan: 3529 Method: FTMS; HCD Score: 55.62 m/z: 674.29 Gene names: FOSL2

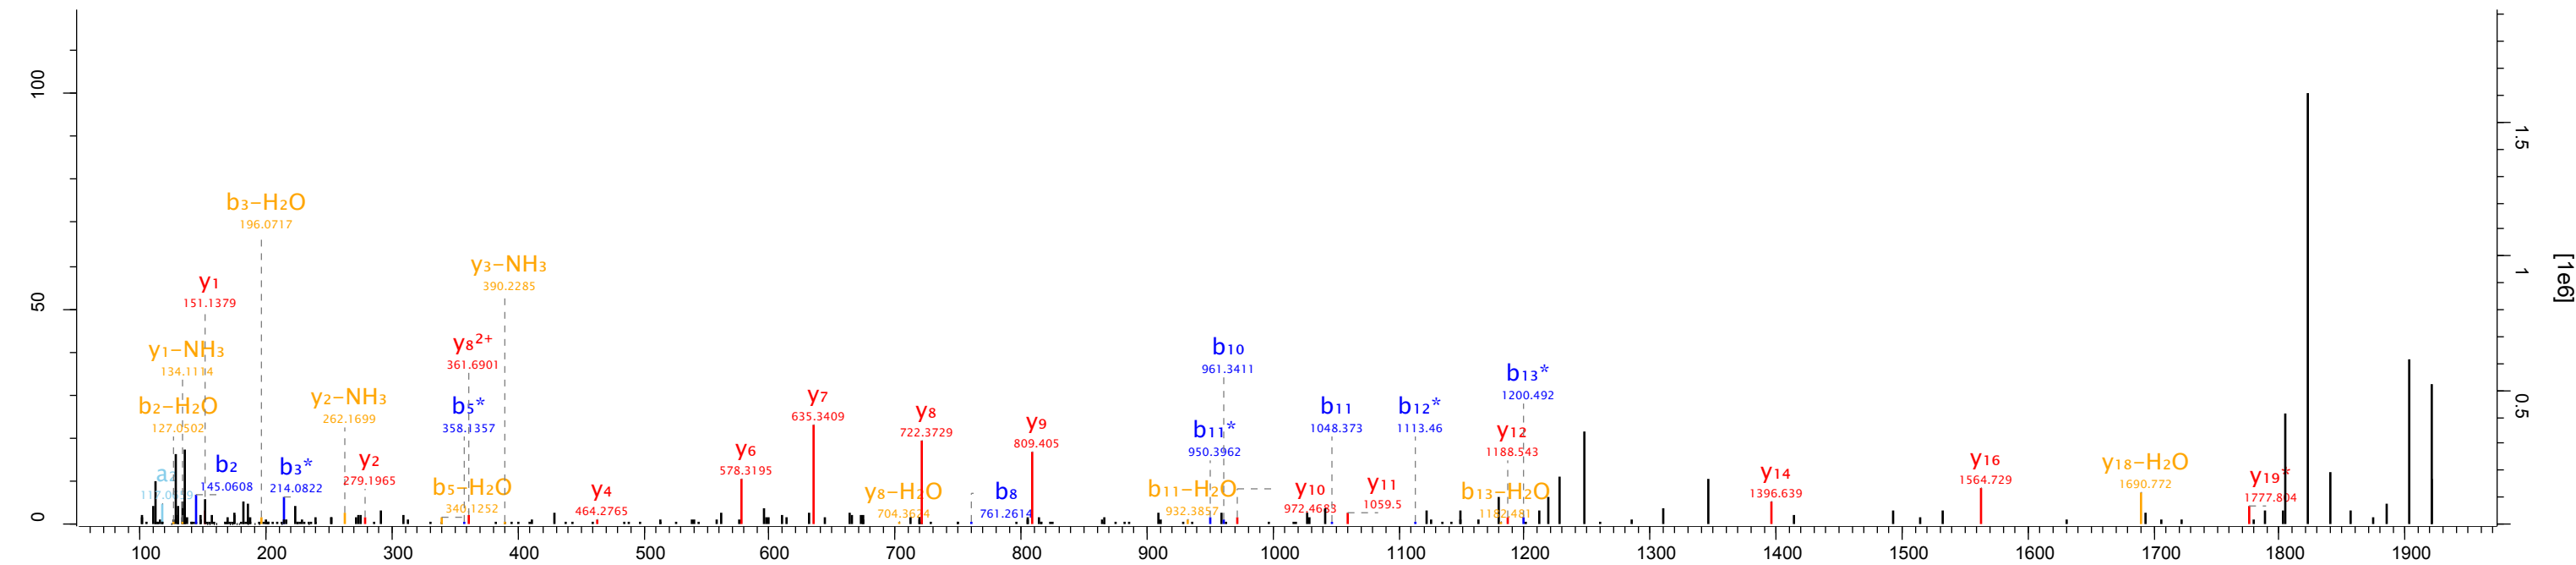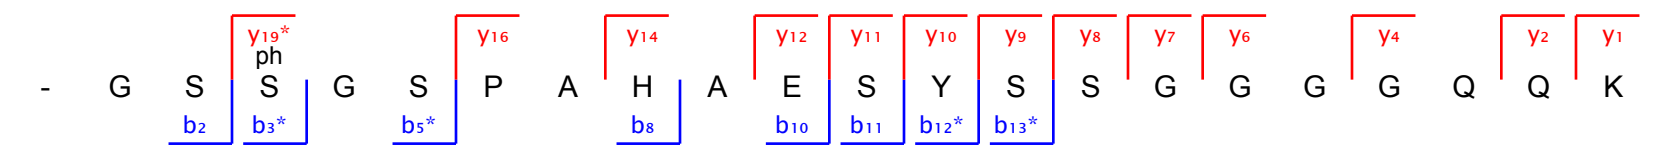

Raw file: 20150812\_A375SR\_Phospho\_BR1\_04  
 Scan: 3569 Method: FTMS; HCD Score: 324.61 m/z: 978.41 Gene names: SH3PXD2A

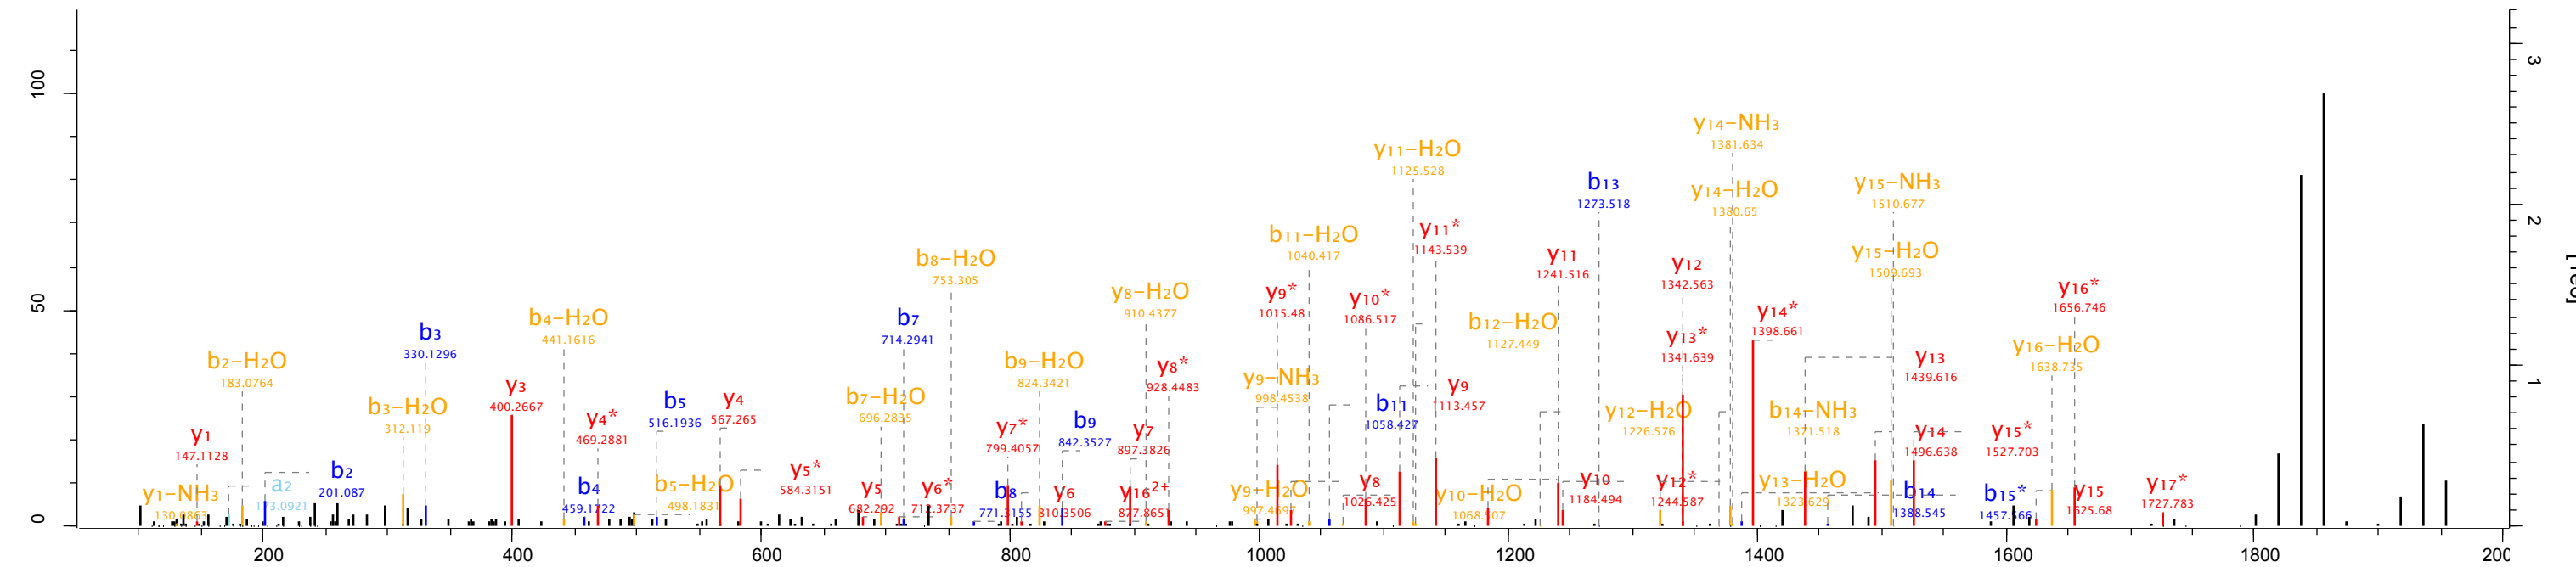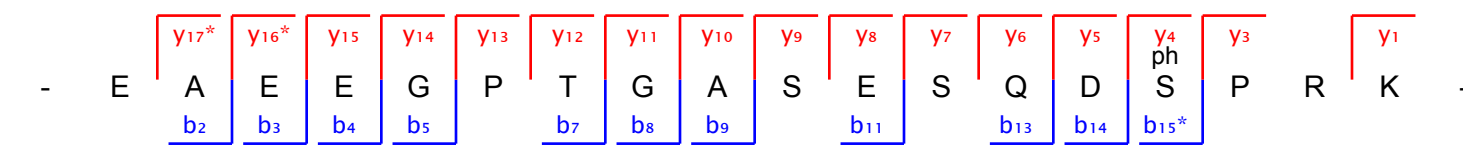

Raw file: 20150812\_A375SR\_Phospho\_BR1\_04  
 Scan: 3639 Method: FTMS; HCD Score: 189.59 m/z: 754.83 Gene names: LMO7

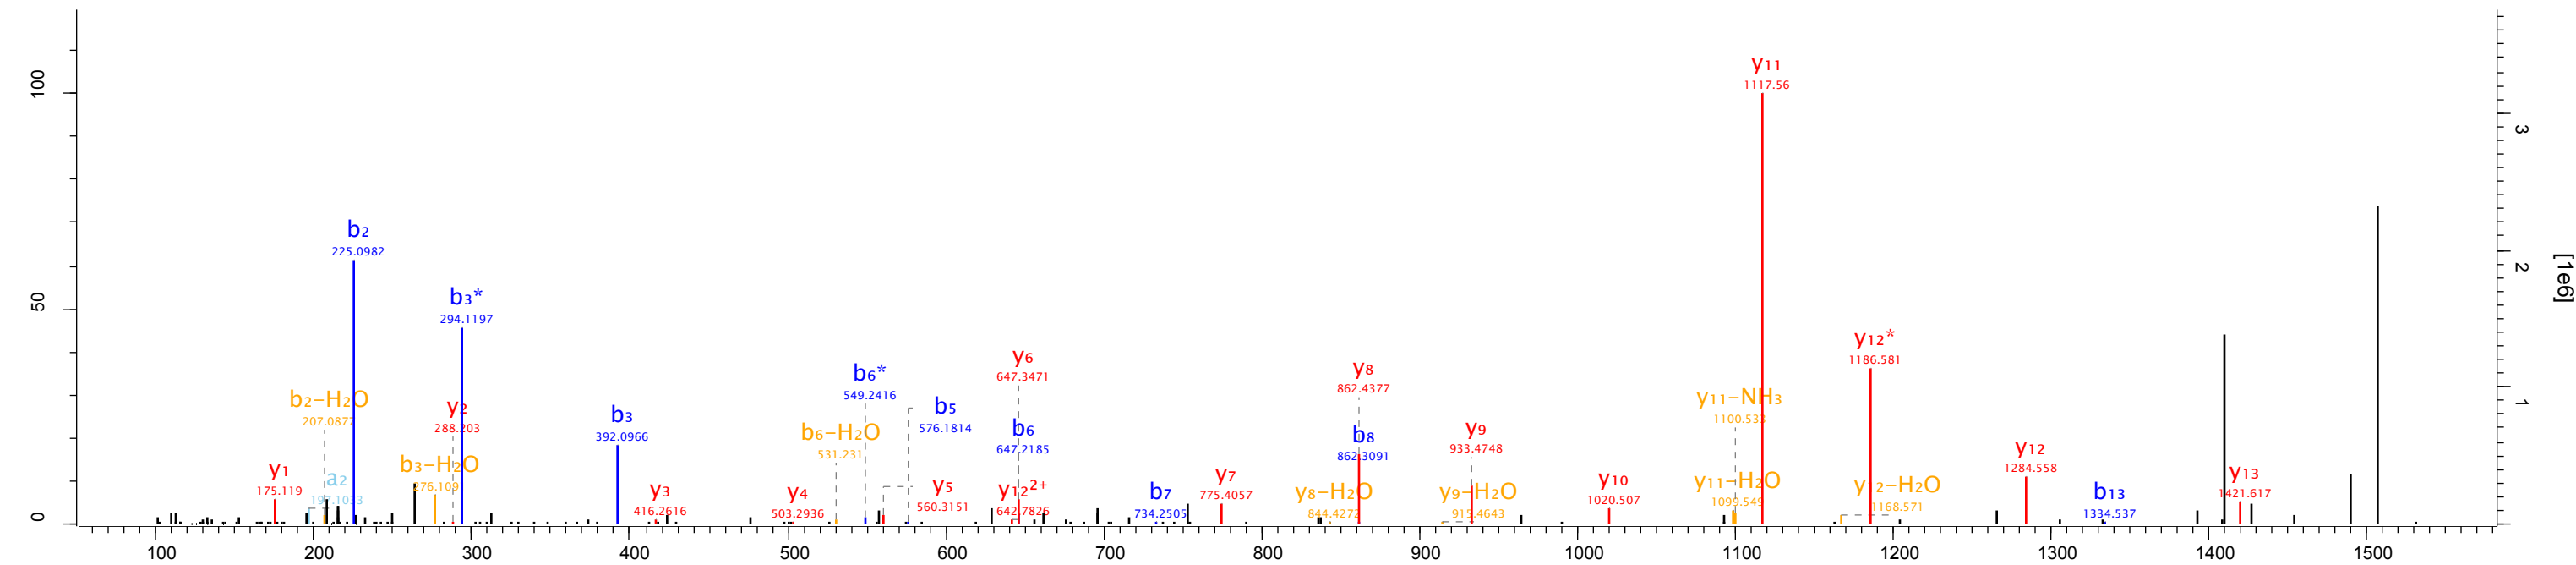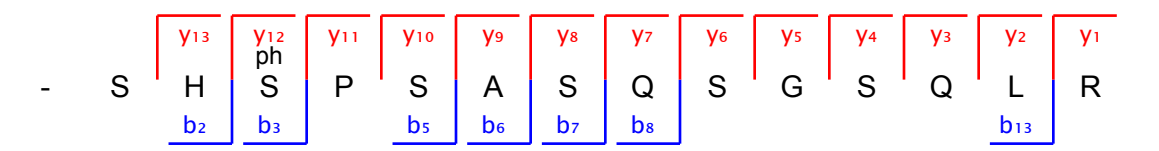

Raw file 20150812\_A375SR\_Phospho\_BR1\_04 Scan 3839 Method FTMS; HCD Score 161.09 m/z 687.29 Gene names KPNA2;POU2F2

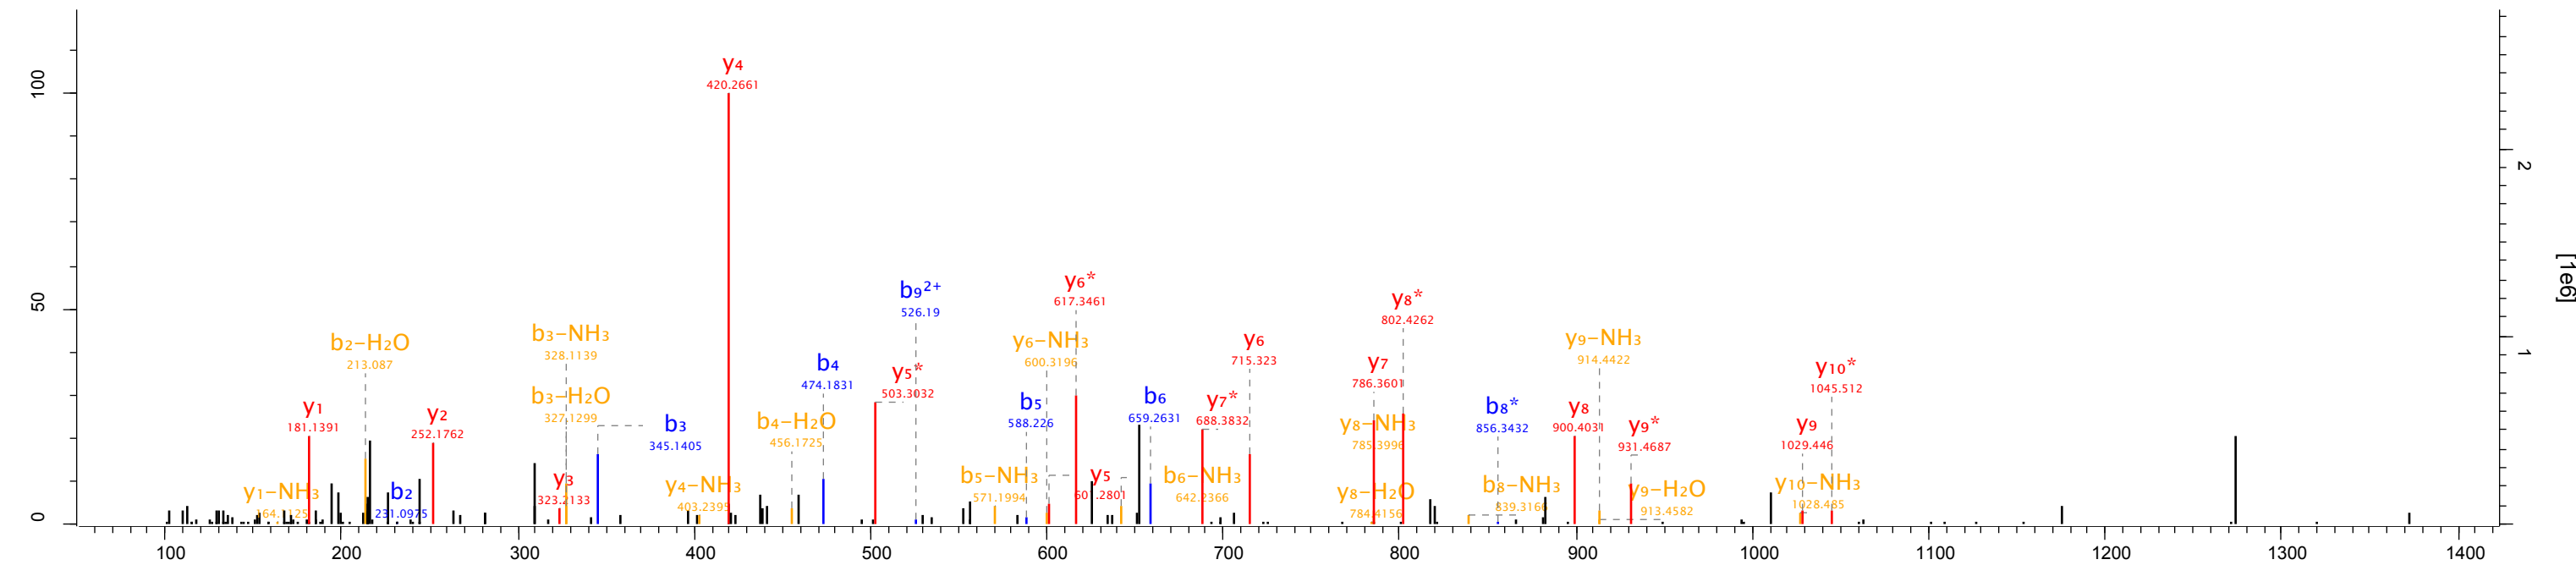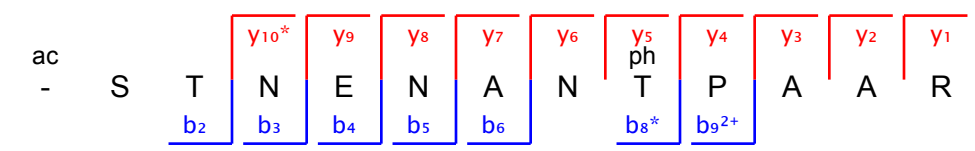

20150812\_A375SR\_Phospho\_BR1\_04 5929 FTMS; HCD 266.17 685.32 TMPO

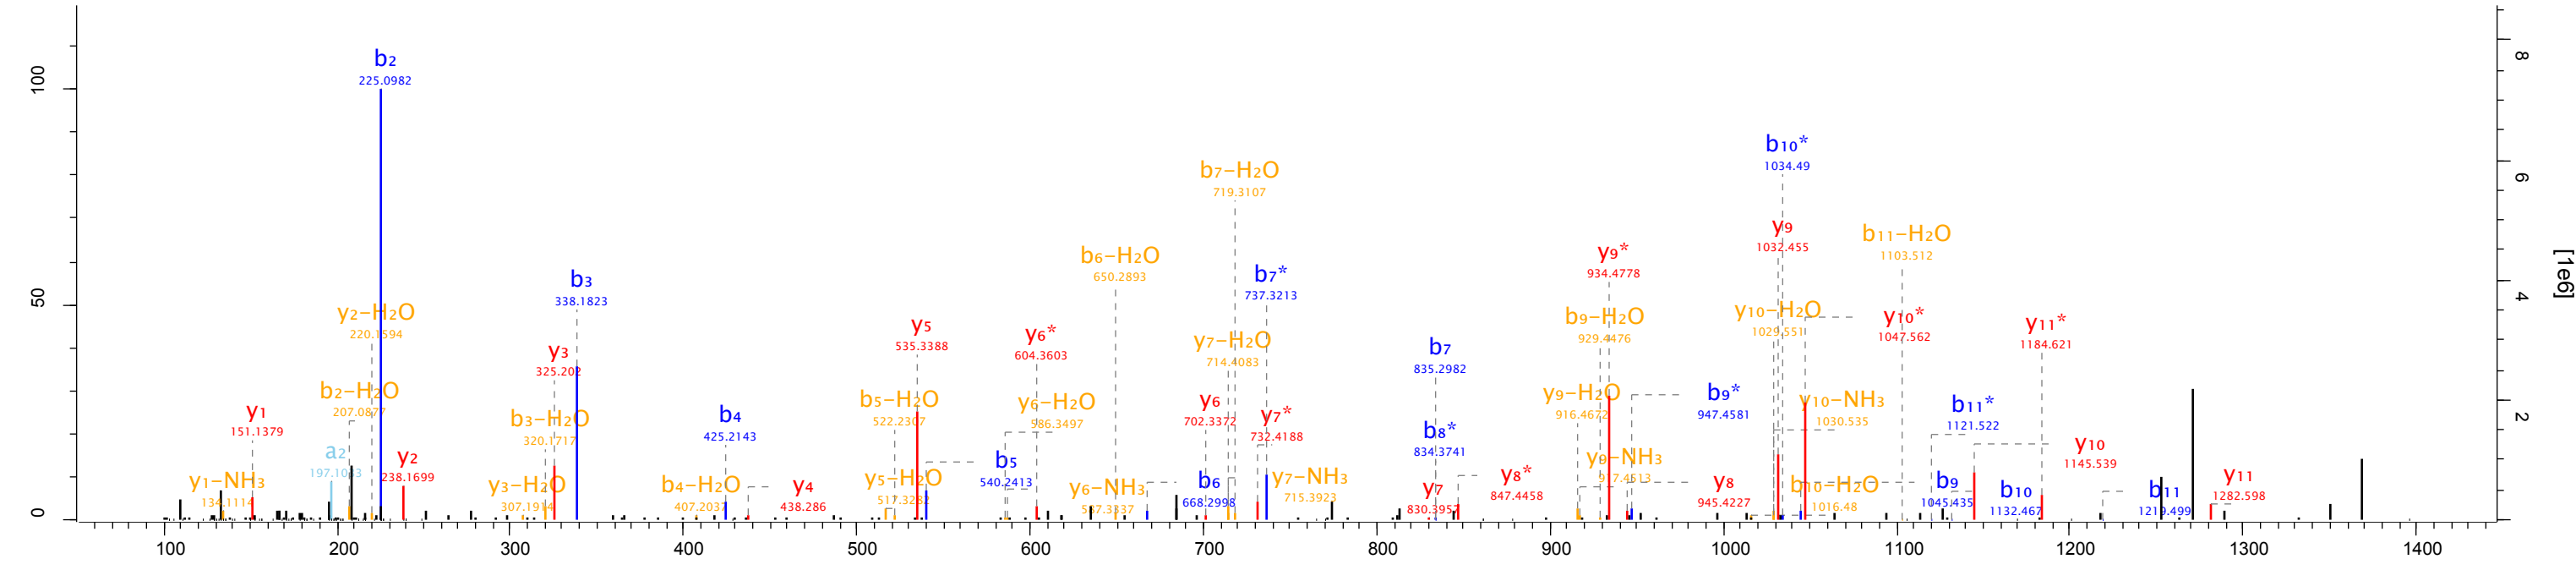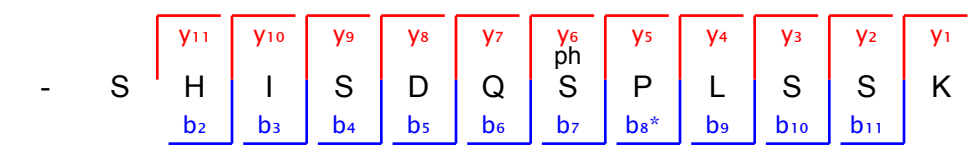



Raw file 20150812\_A375SR\_Phospho\_BR1\_04 Scan 5949 Method FTMS; HCD Score 150.36 m/z 842.91 Gene names IRF2BP2

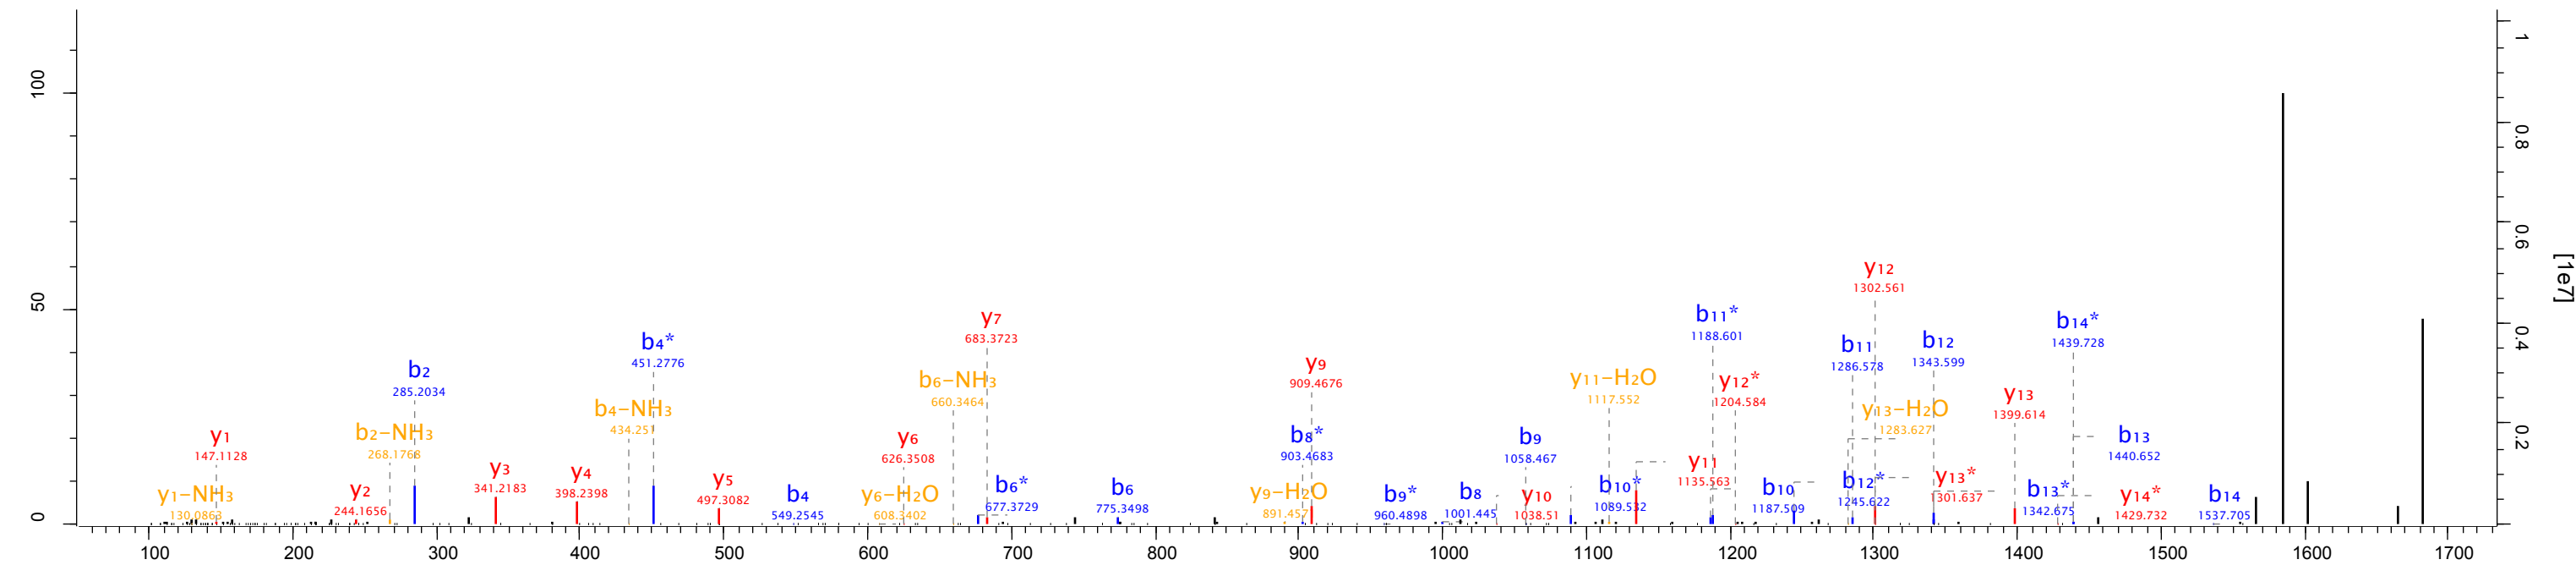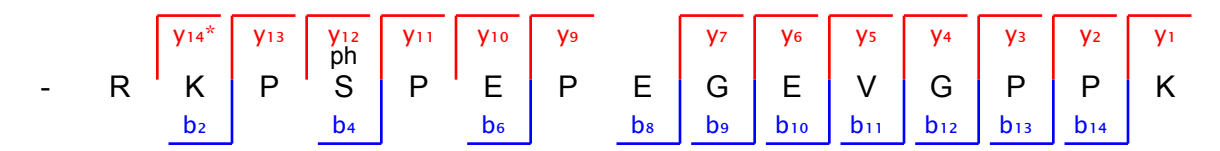

Raw file: 20150812\_A375SR\_Phospho\_BR1\_04  
 Scan: 5999 Method: FTMS; HCD Score: 184.2 m/z: 725.64 Gene names: APC

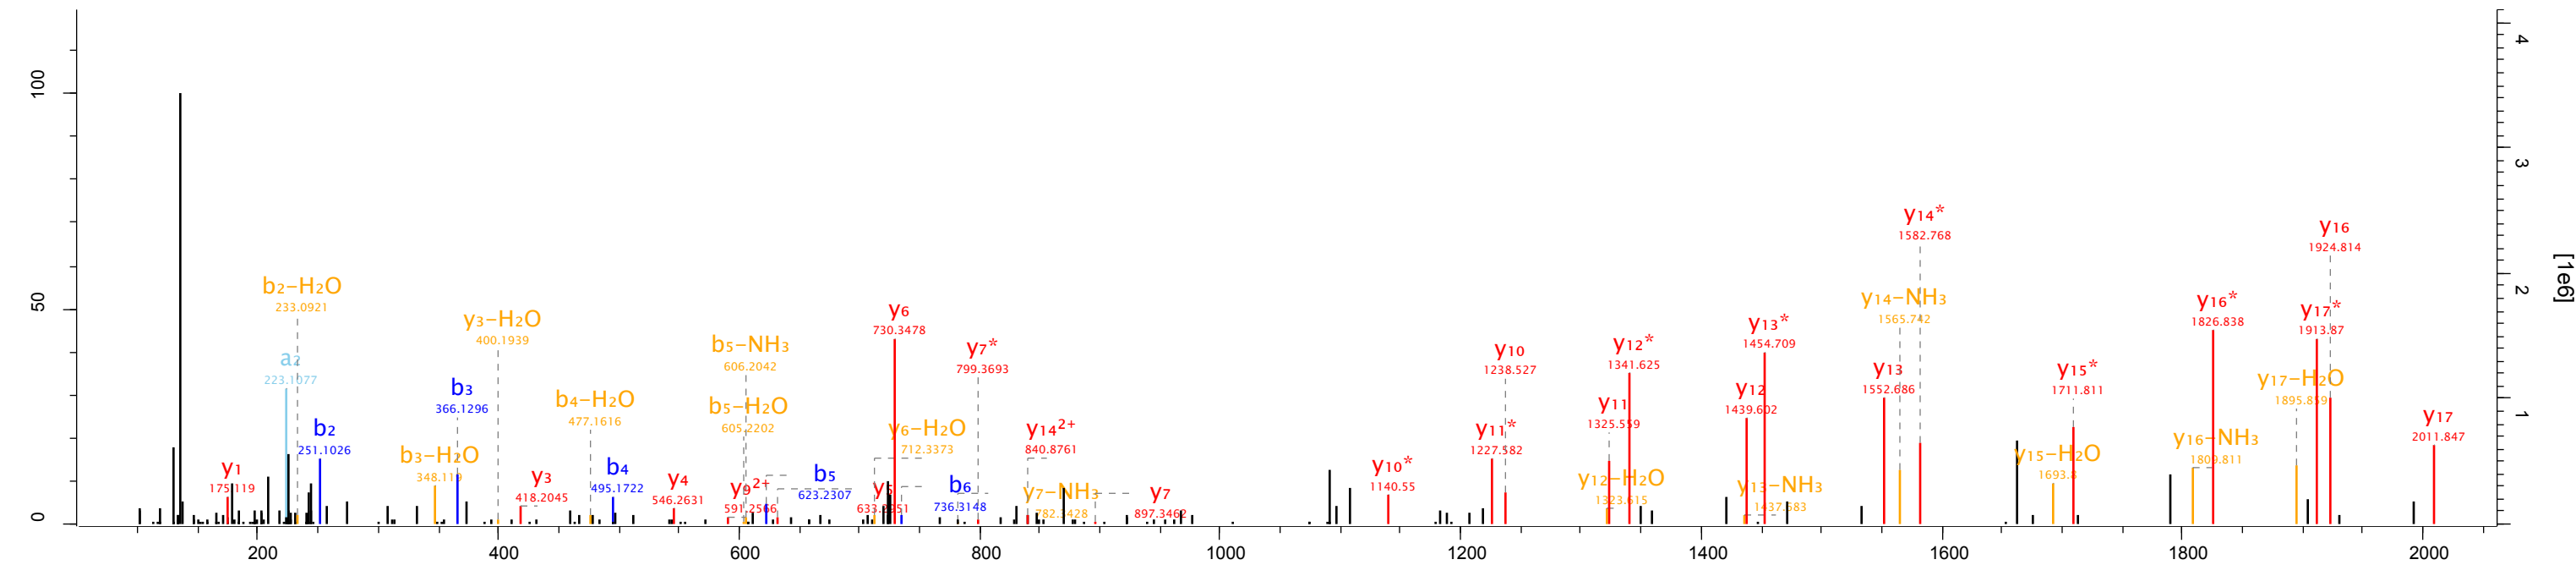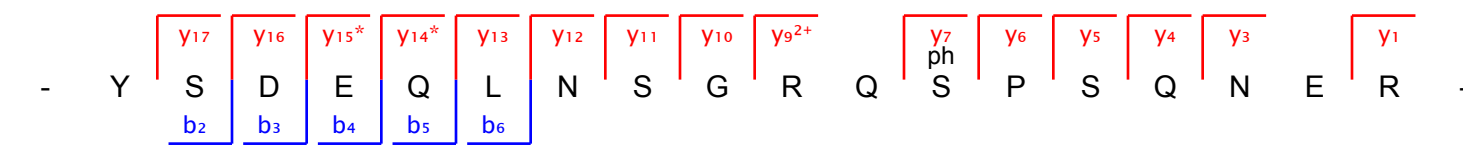

Raw file: 20150812\_A375SR\_Phospho\_BR1\_04  
 Scan: 6249 Method: FTMS; HCD Score: 125.75 m/z: 491.22 Gene names: UIMC1

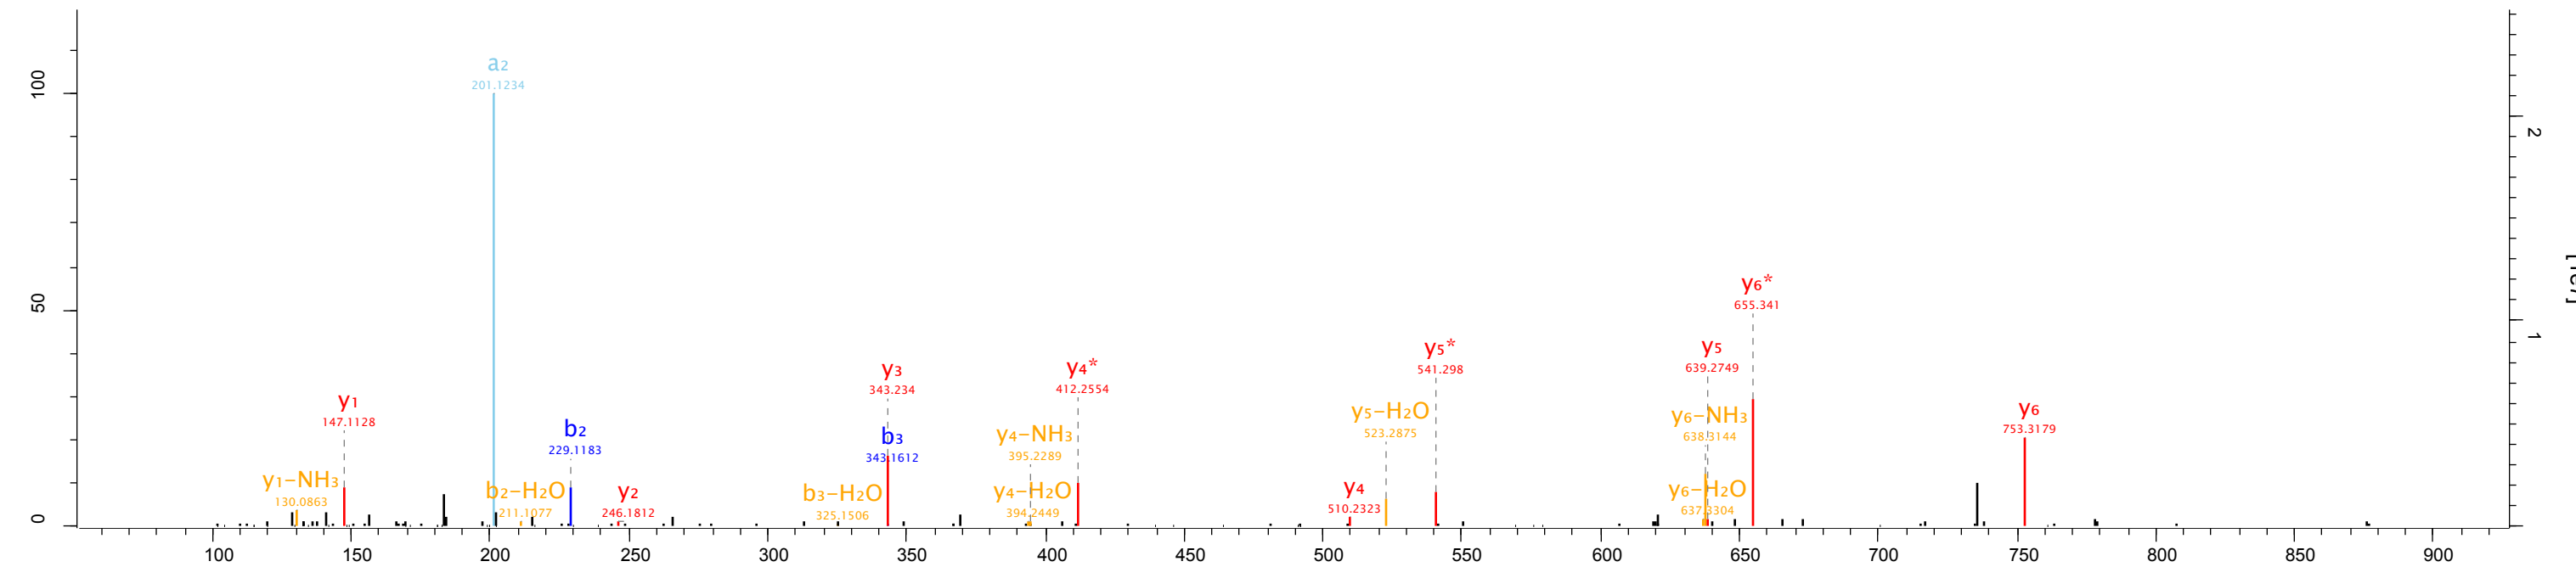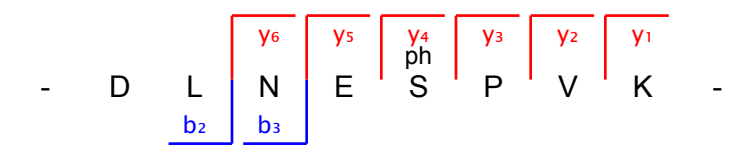

Raw file: 20150812\_A375SR\_Phospho\_BR1\_04  
 Scan: 6549 Method: FTMS; HCD Score: 176.87 m/z: 992.76 Gene names: DIS3L2

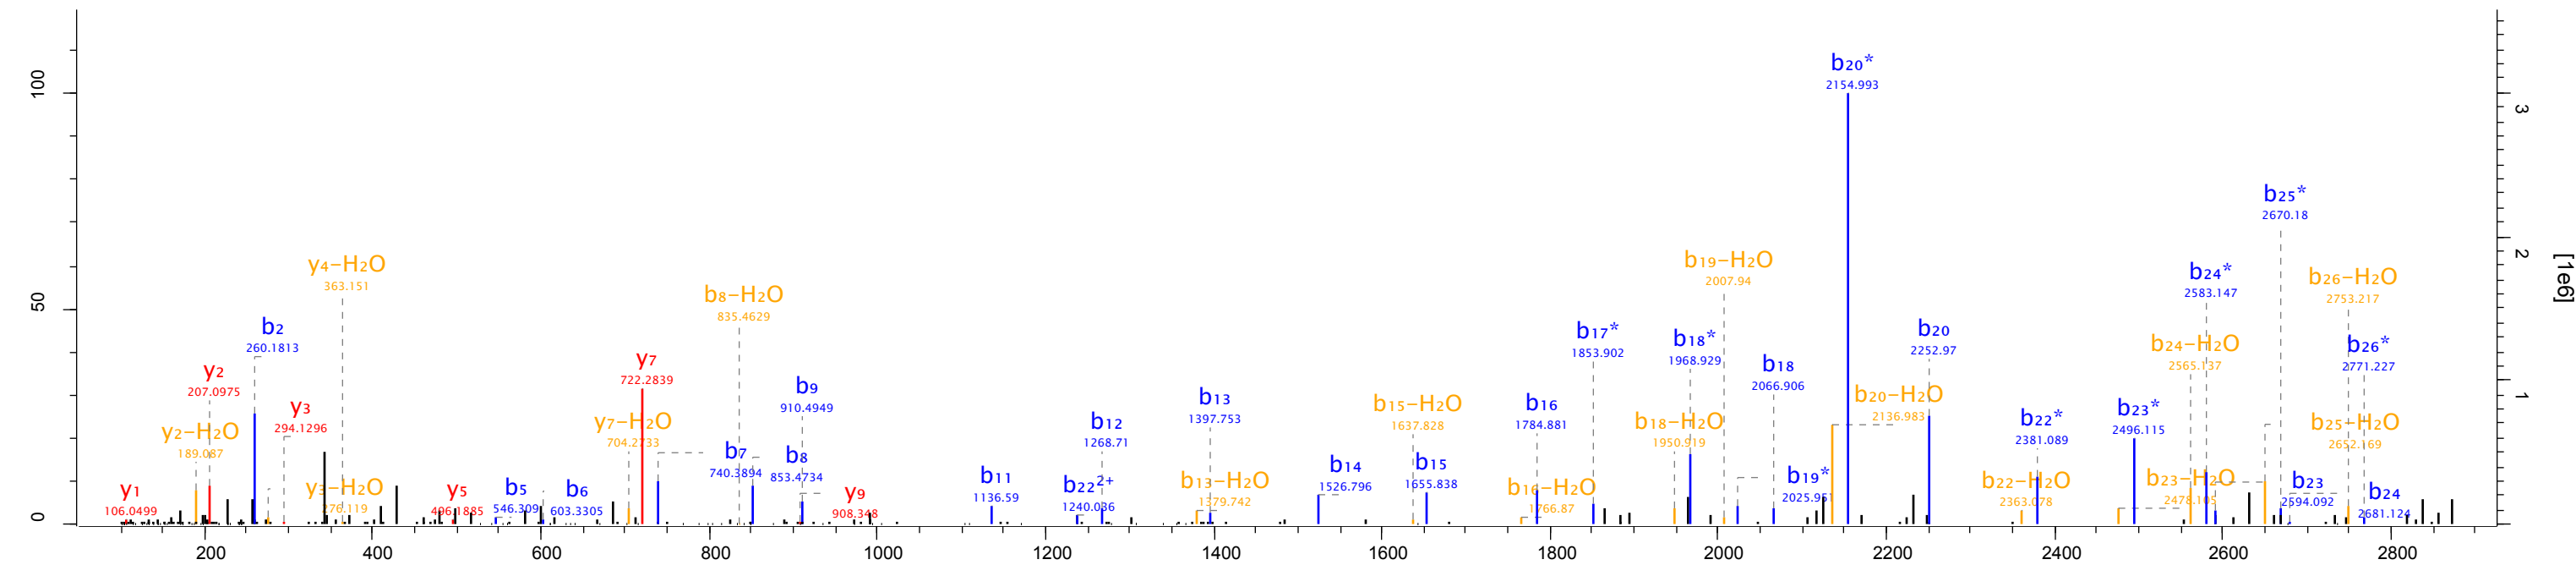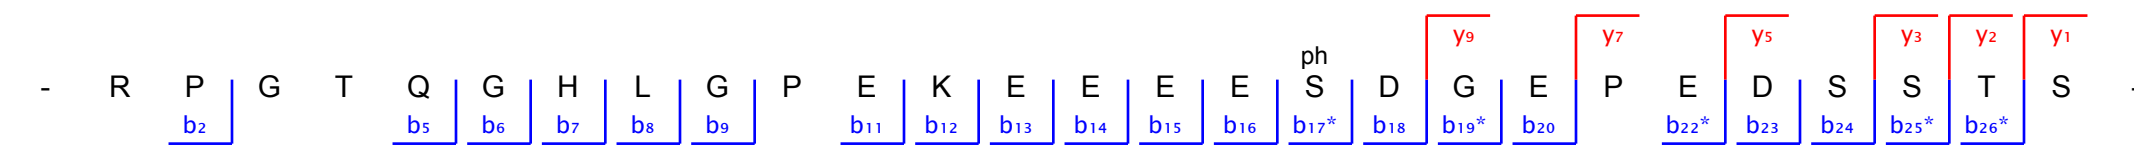

Raw file 20150812\_A375SR\_Phospho\_BR1\_04 Scan 6569 Method FTMS; HCD Score 286.8 m/z 1000.42 Gene names TCF12

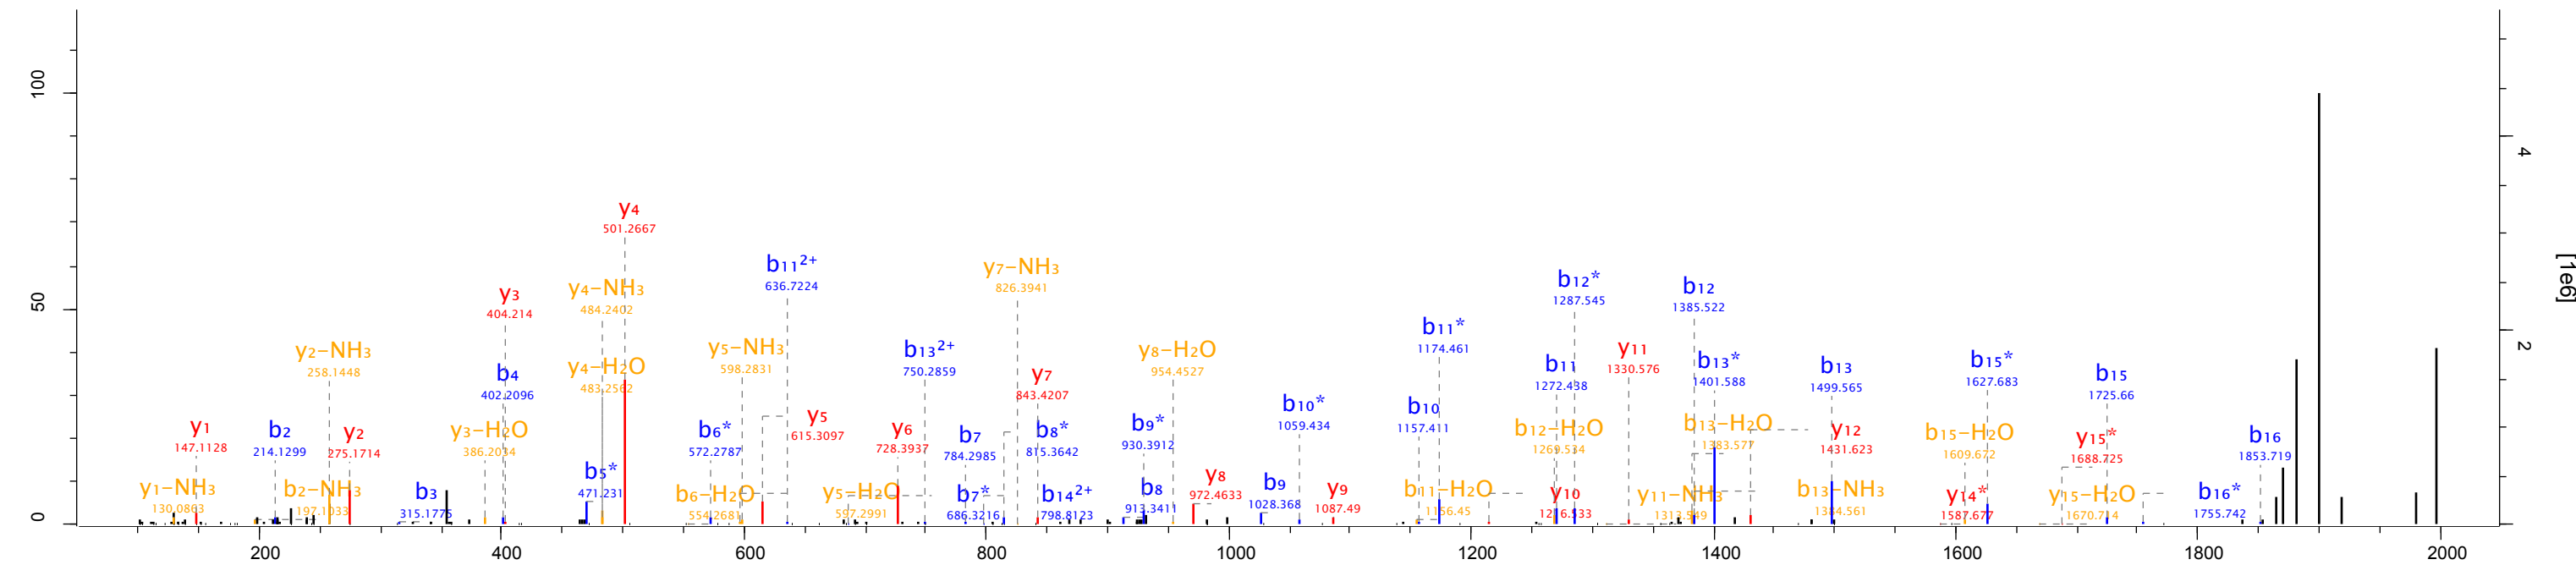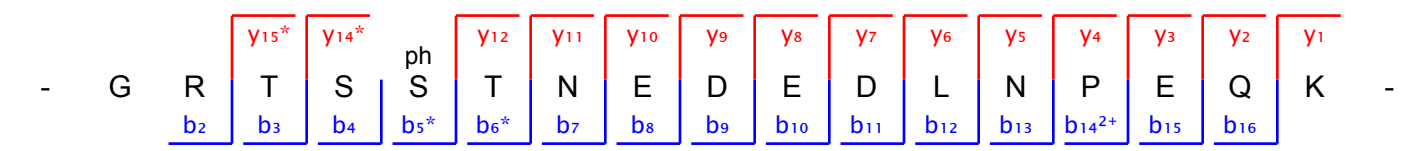

Raw file: 20150812\_A375SR\_Phospho\_BR1\_04  
 Scan: 6709 Method: FTMS; HCD Score: 136.43 m/z: 573.64 Gene names: SPAST

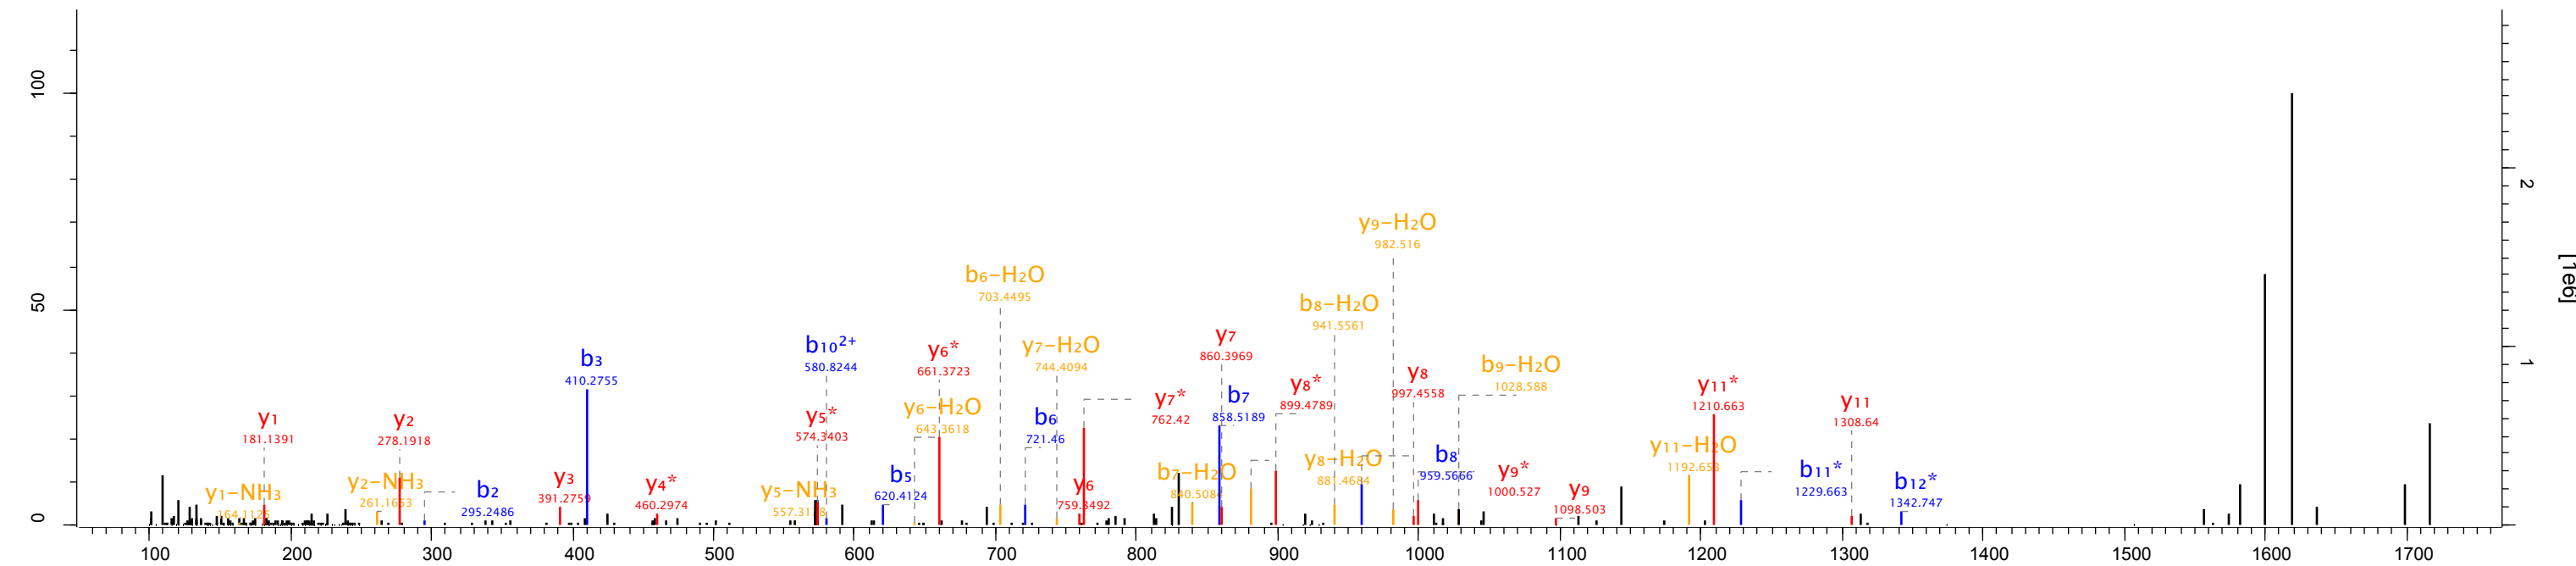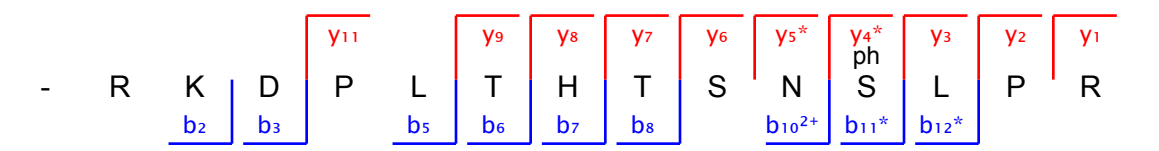

Raw file: 20150812\_A375SR\_Phospho\_BR1\_04  
 Scan: 7949 Method: FTMS; HCD Score: 150.64 m/z: 857.94 Gene names: CIC

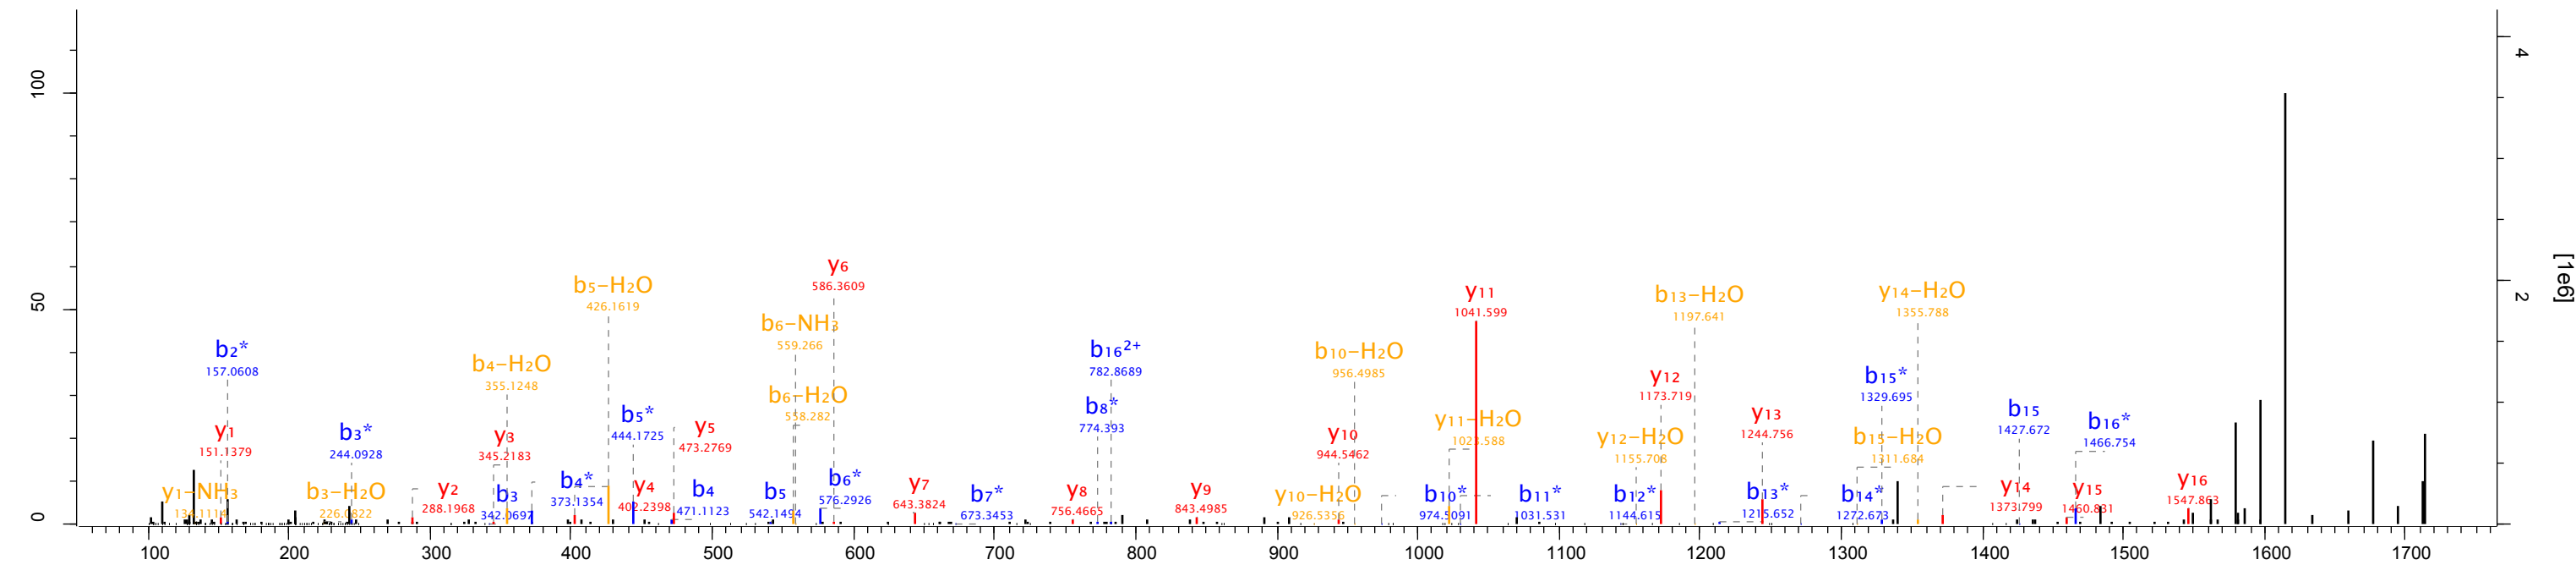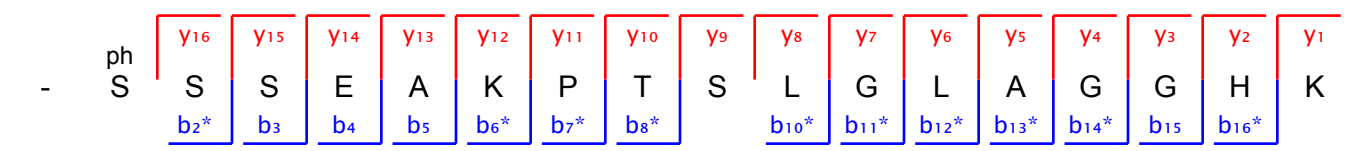

Raw file 20150812\_A375SR\_Phospho\_BR1\_04 Scan 8069 Method FTMS; HCD Score 54.05 m/z 605.31 Gene names AHCTF1

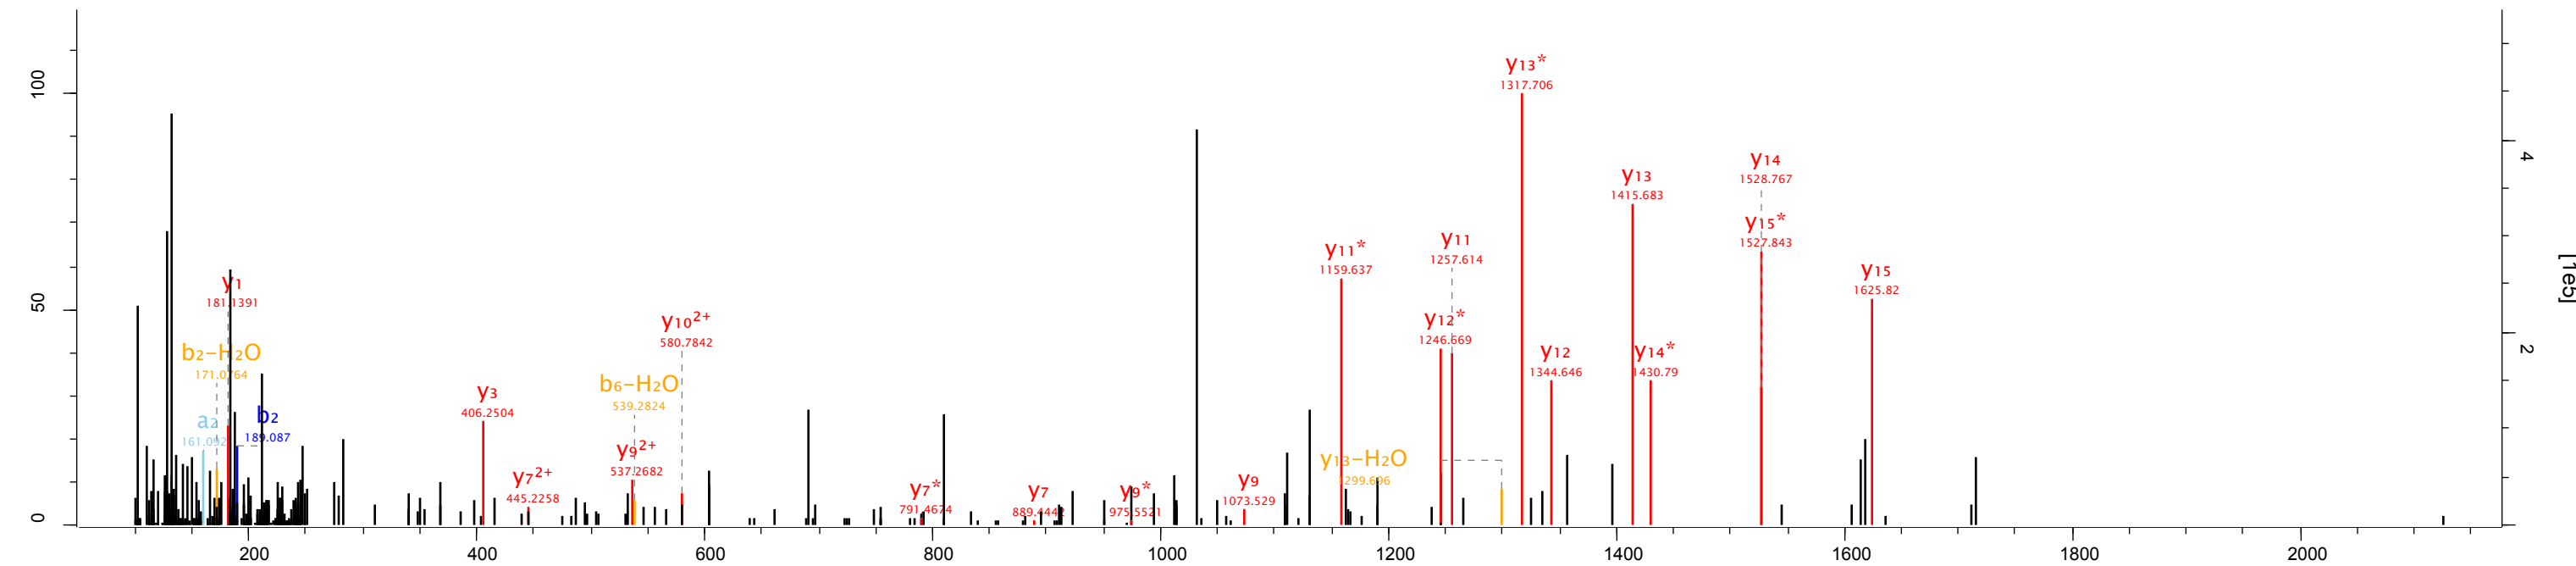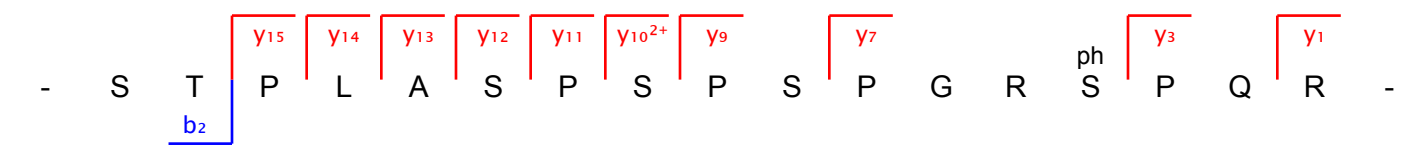



Raw file: 20150812\_A375SR\_Phospho\_BR1\_04  
 Scan: 8119 Method: FTMS; HCD Score: 280.64 m/z: 832.37 Gene names: CLASP1

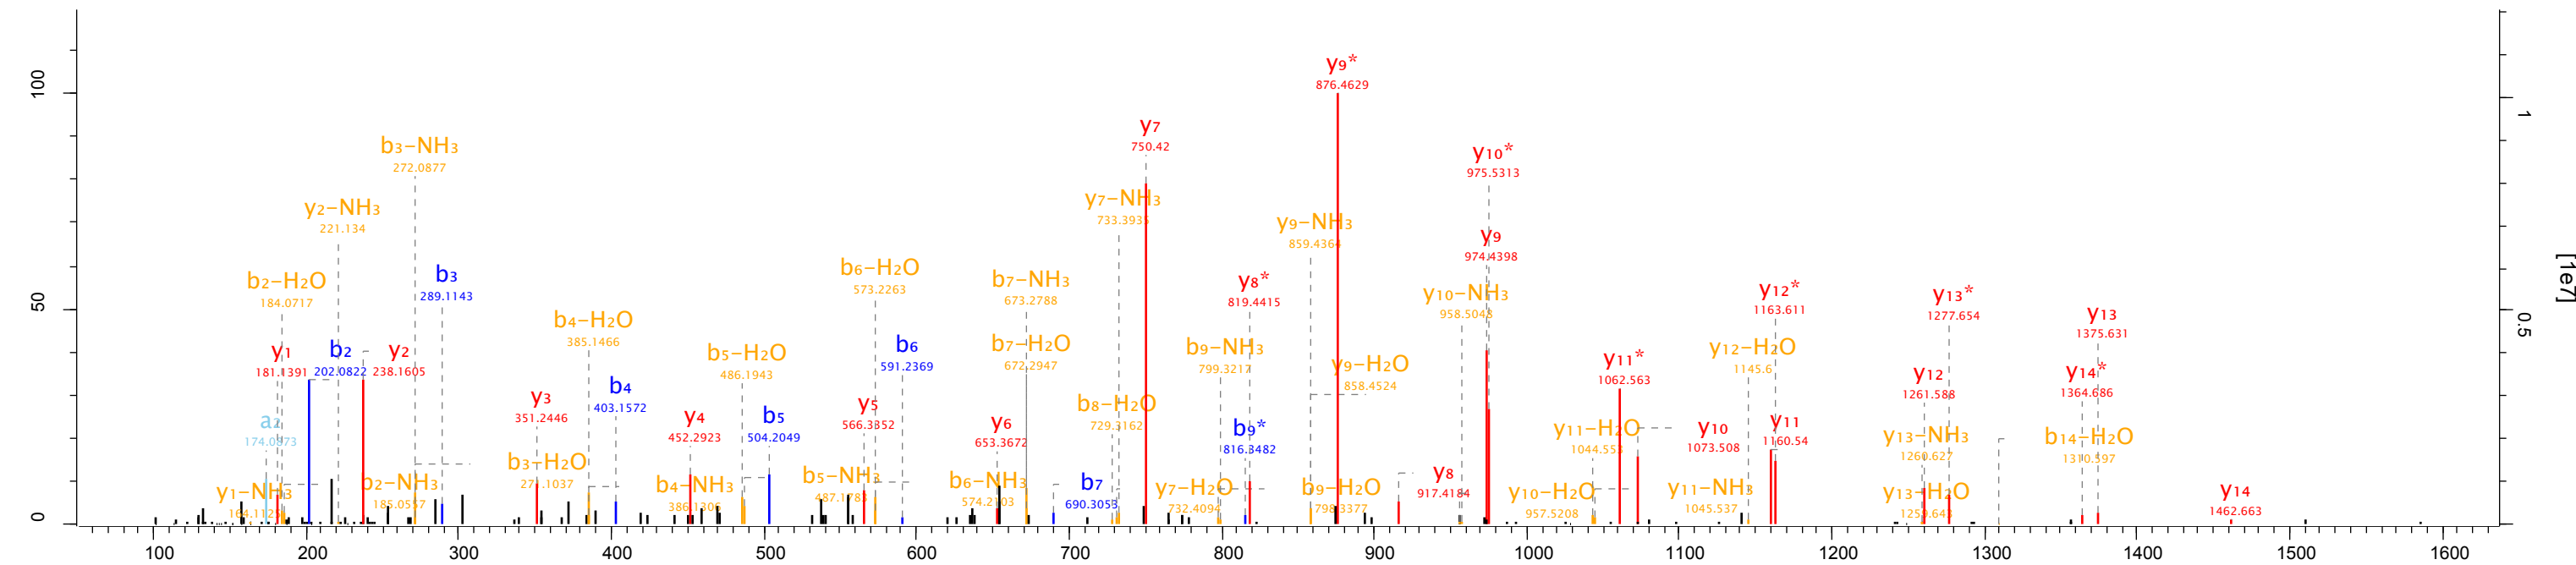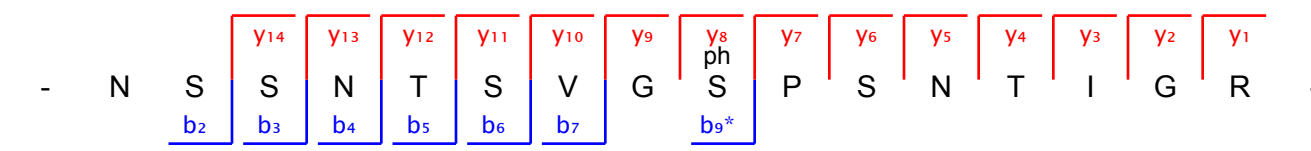

Raw file 20150812\_A375SR\_Phospho\_BR1\_04 Scan 8159 Method FTMS; HCD Score 245.06 m/z 873.92 Gene names CCNT2

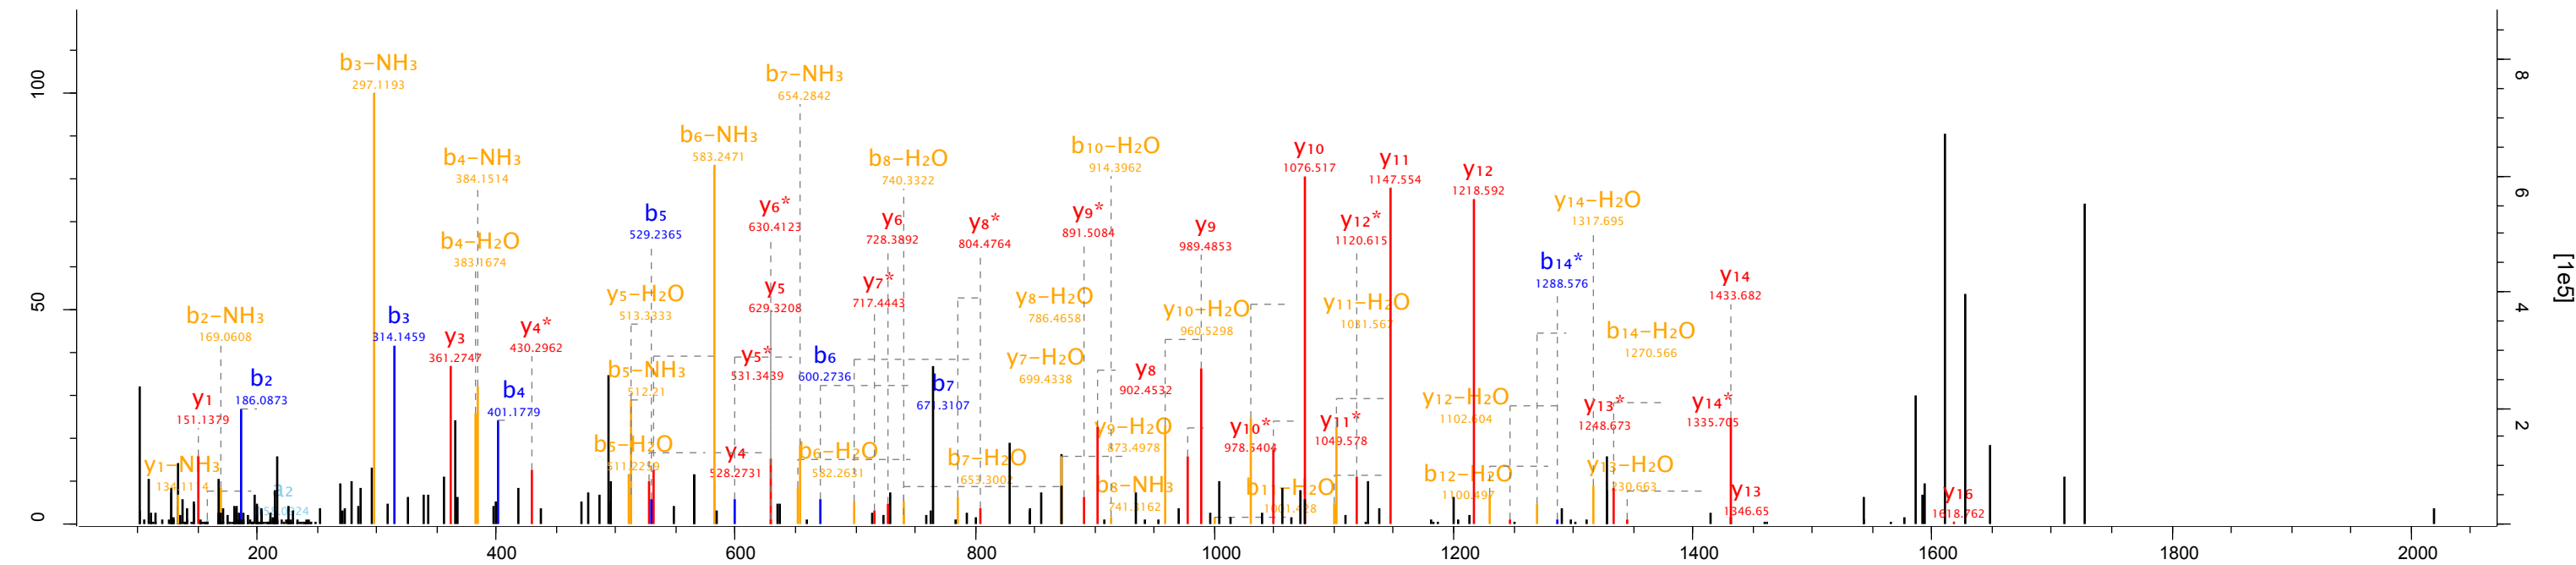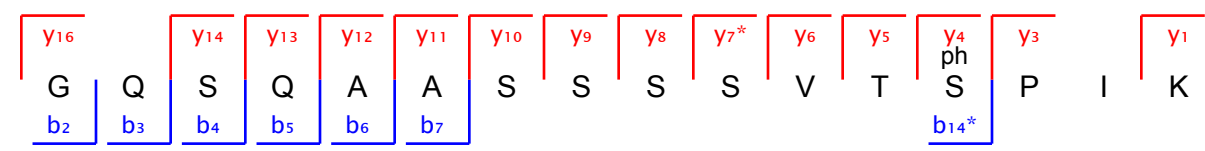

Raw file 20150812\_A375SR\_Phospho\_BR1\_04 Scan 8589 Method FTMS; HCD Score 41.99 m/z 610.26 Gene names TNRC6A

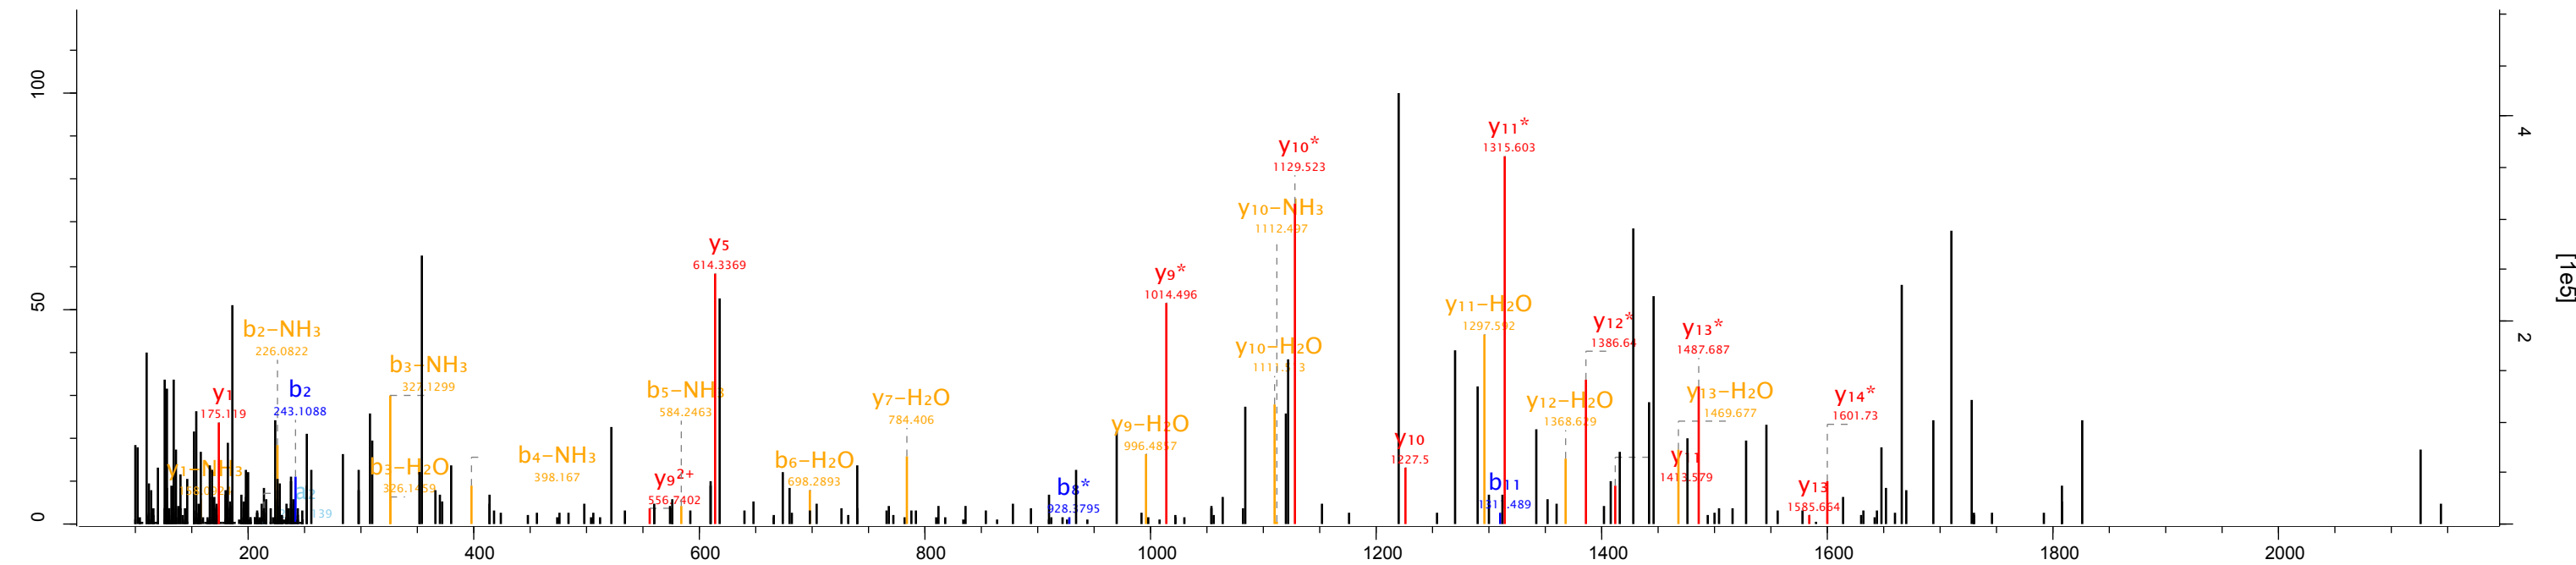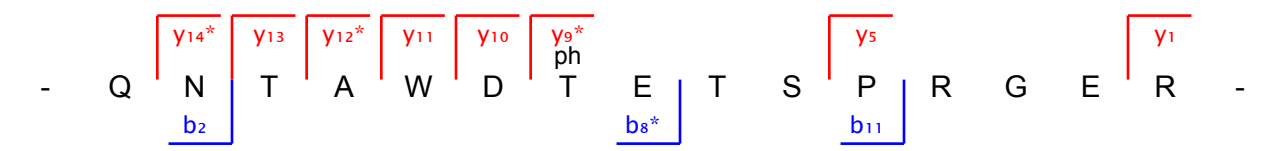

Raw file: 20150812\_A375SR\_Phospho\_BR1\_04  
 Scan: 8599 Method: FTMS; HCD Score: 165.17 m/z: 802.87 Gene names: HDGFRP2

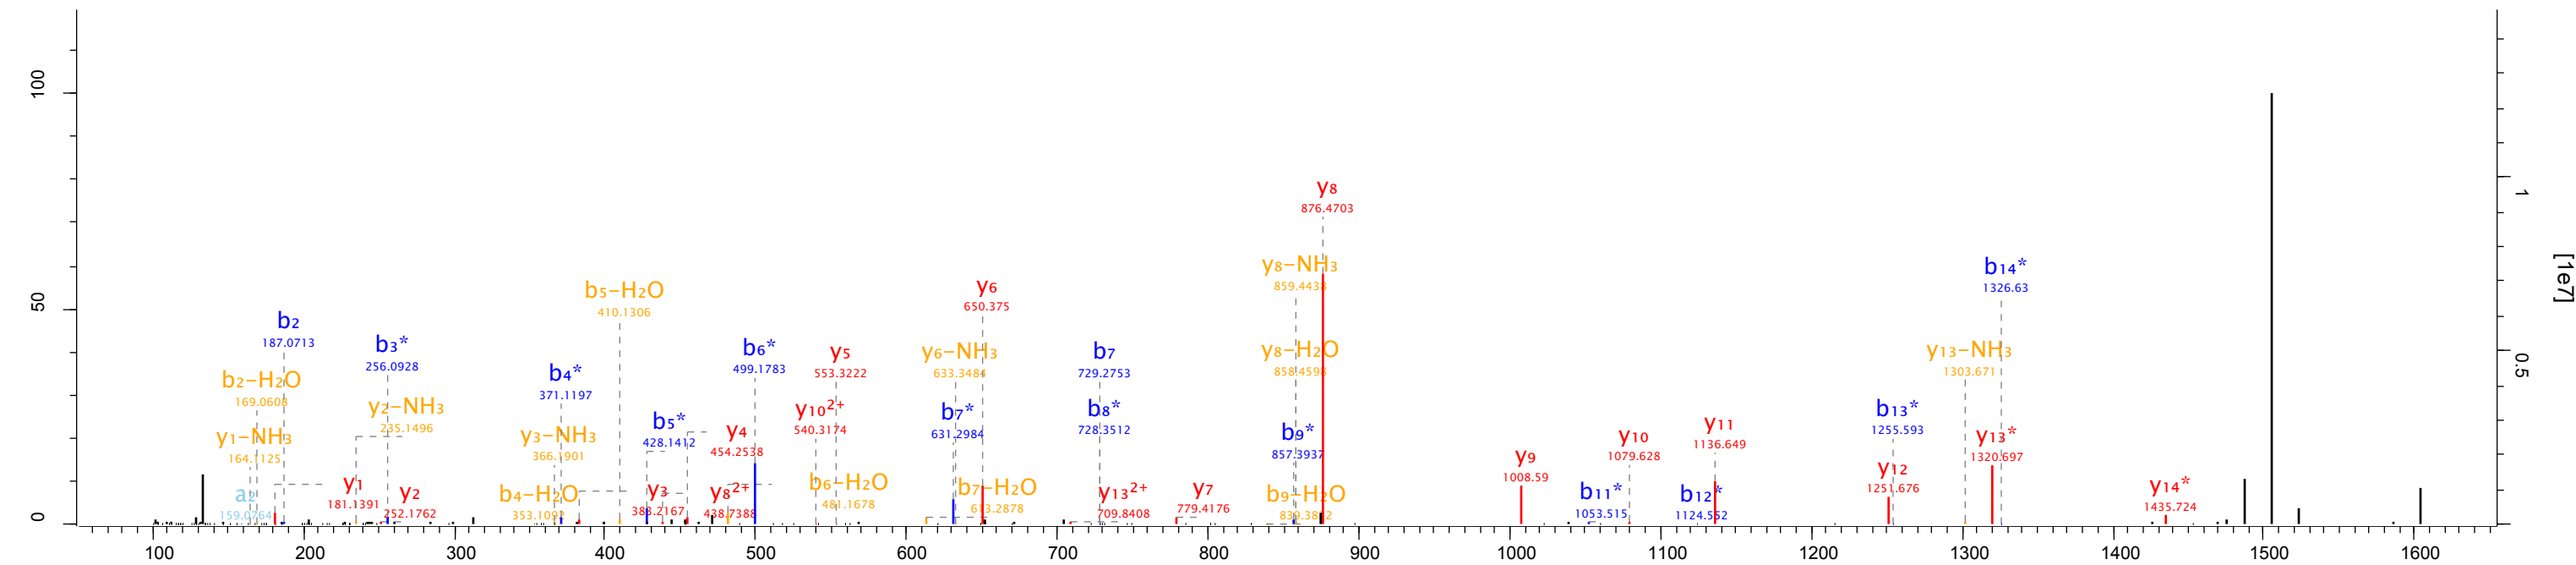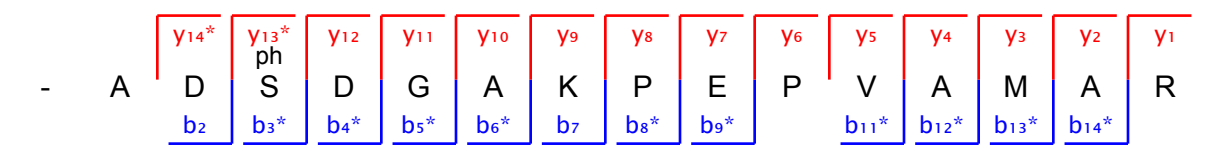

Raw file 20150812\_A375SR\_Phospho\_BR1\_04 Scan 9149 Method FTMS; HCD Score 159.4 m/z 742.37 Gene names POLA2

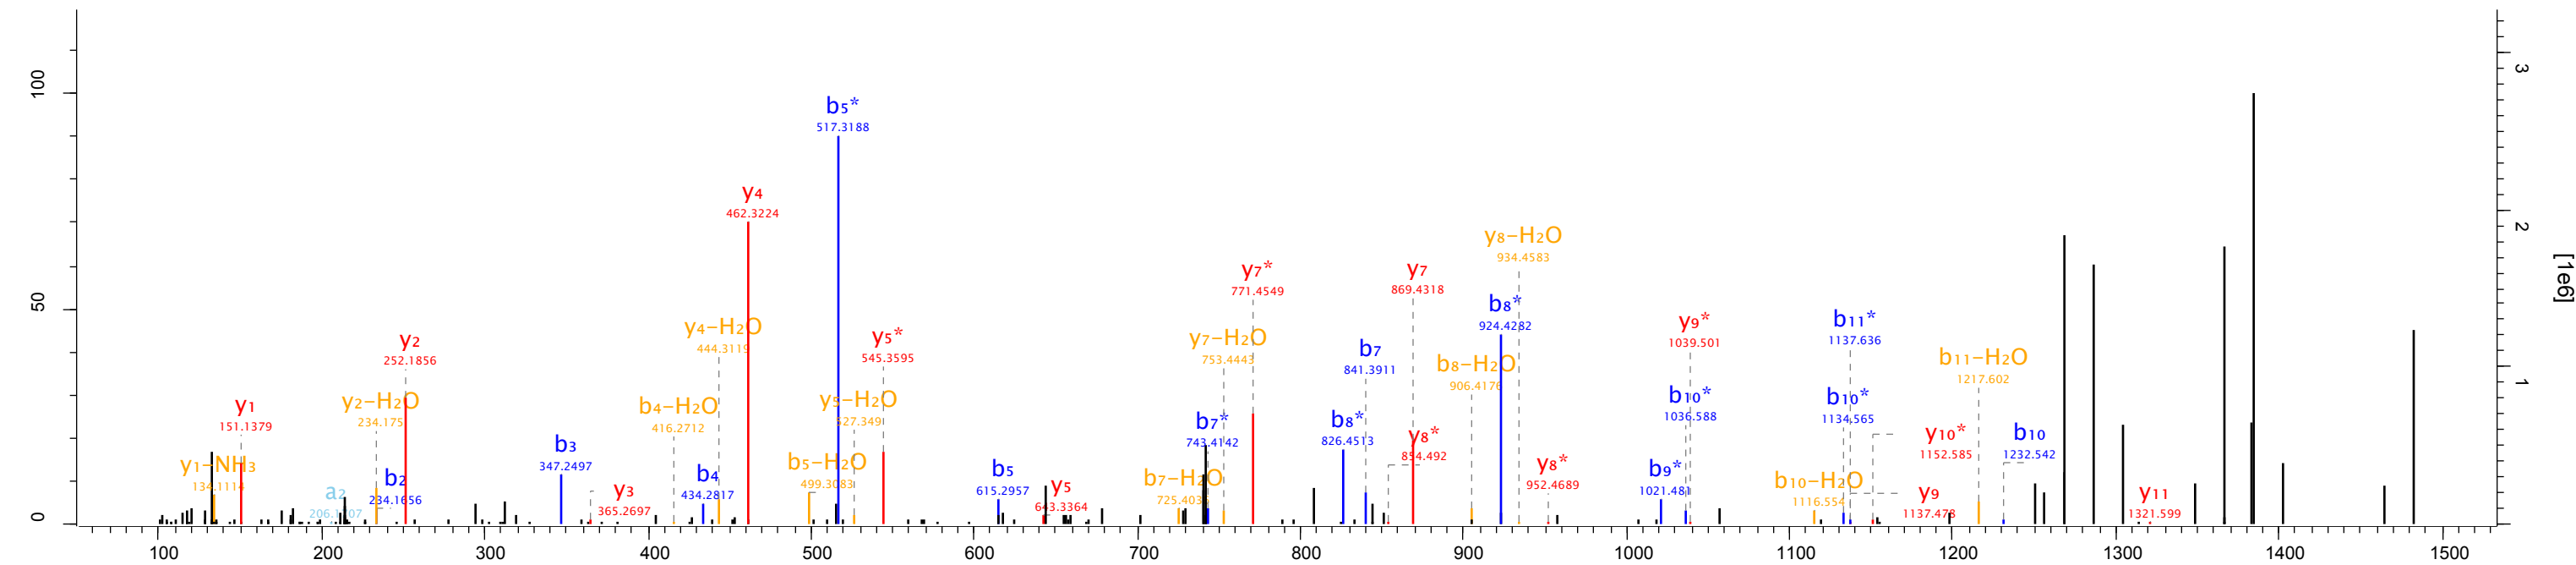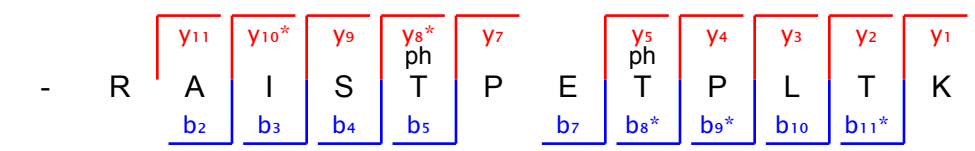

Raw file: 20150812\_A375SR\_Phospho\_BR1\_05  
 Scan: 10219 Method: FTMS; HCD Score: 175.83 m/z: 830.04 Gene names: INTS10

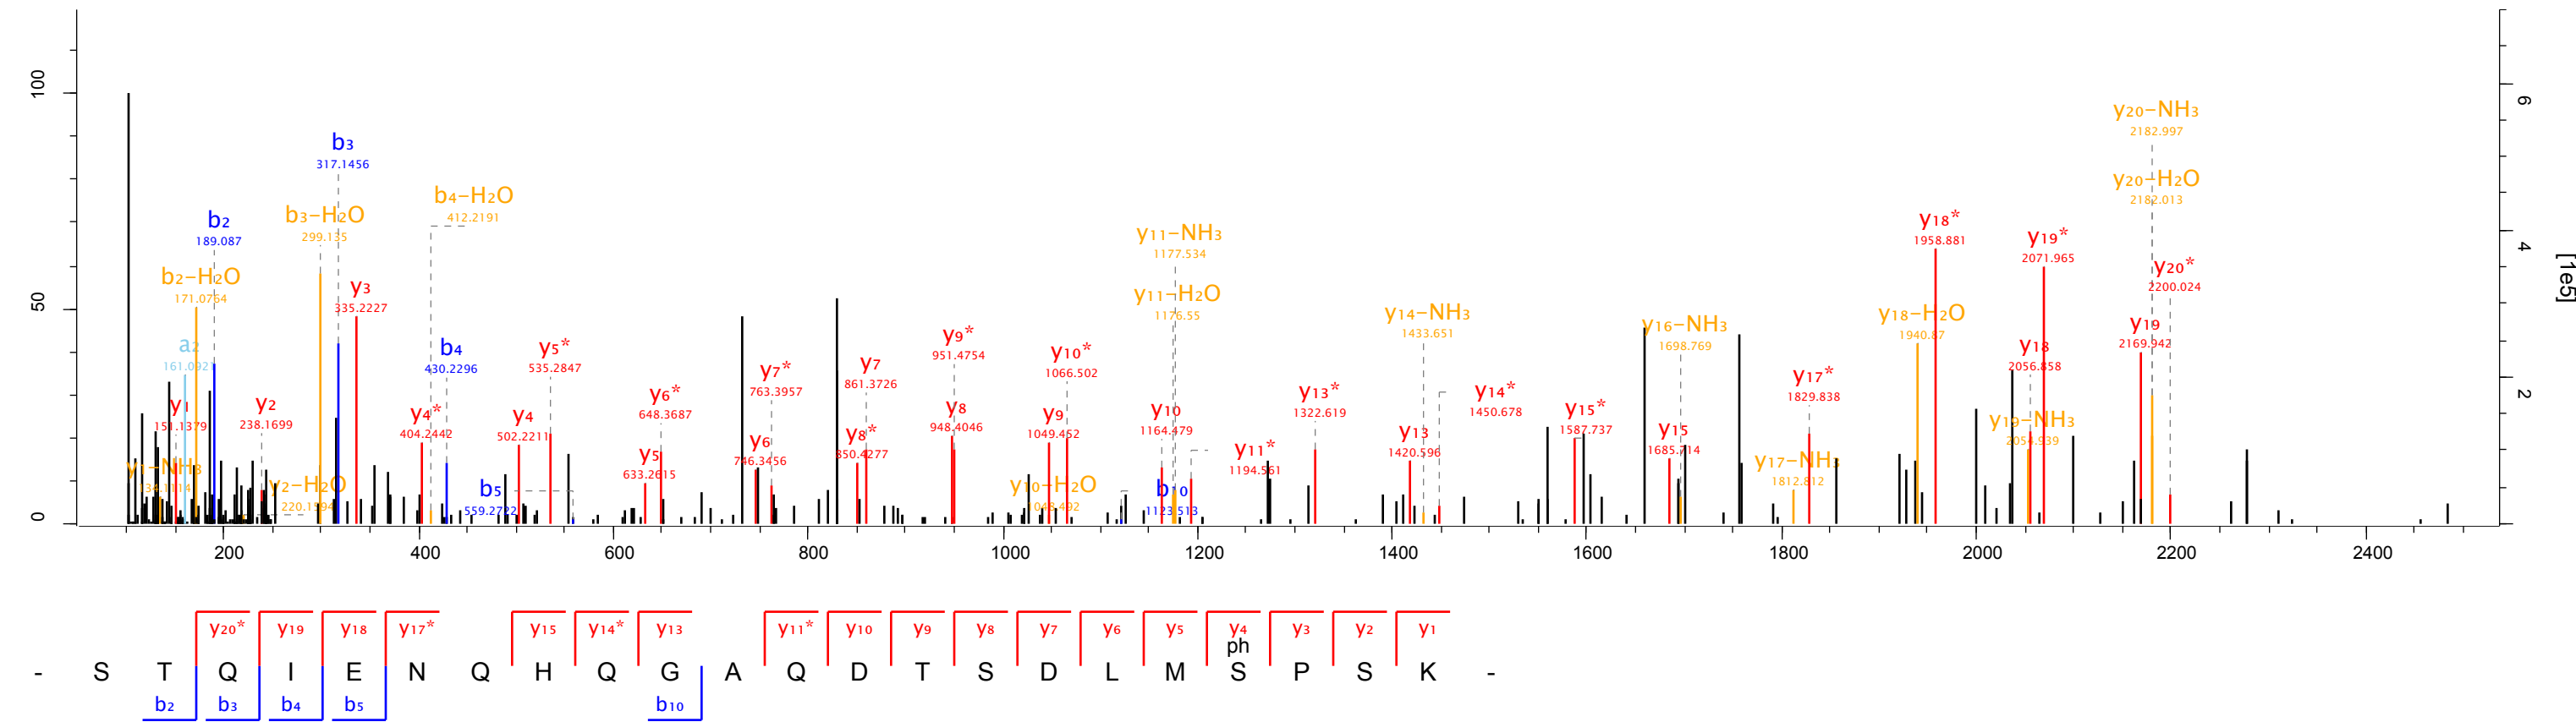

Raw file: 20150812\_A375SR\_Phospho\_BR1\_05  
 Scan: 10239 Method: FTMS; HCD Score: 81.24 m/z: 560.75 Gene names: MISP

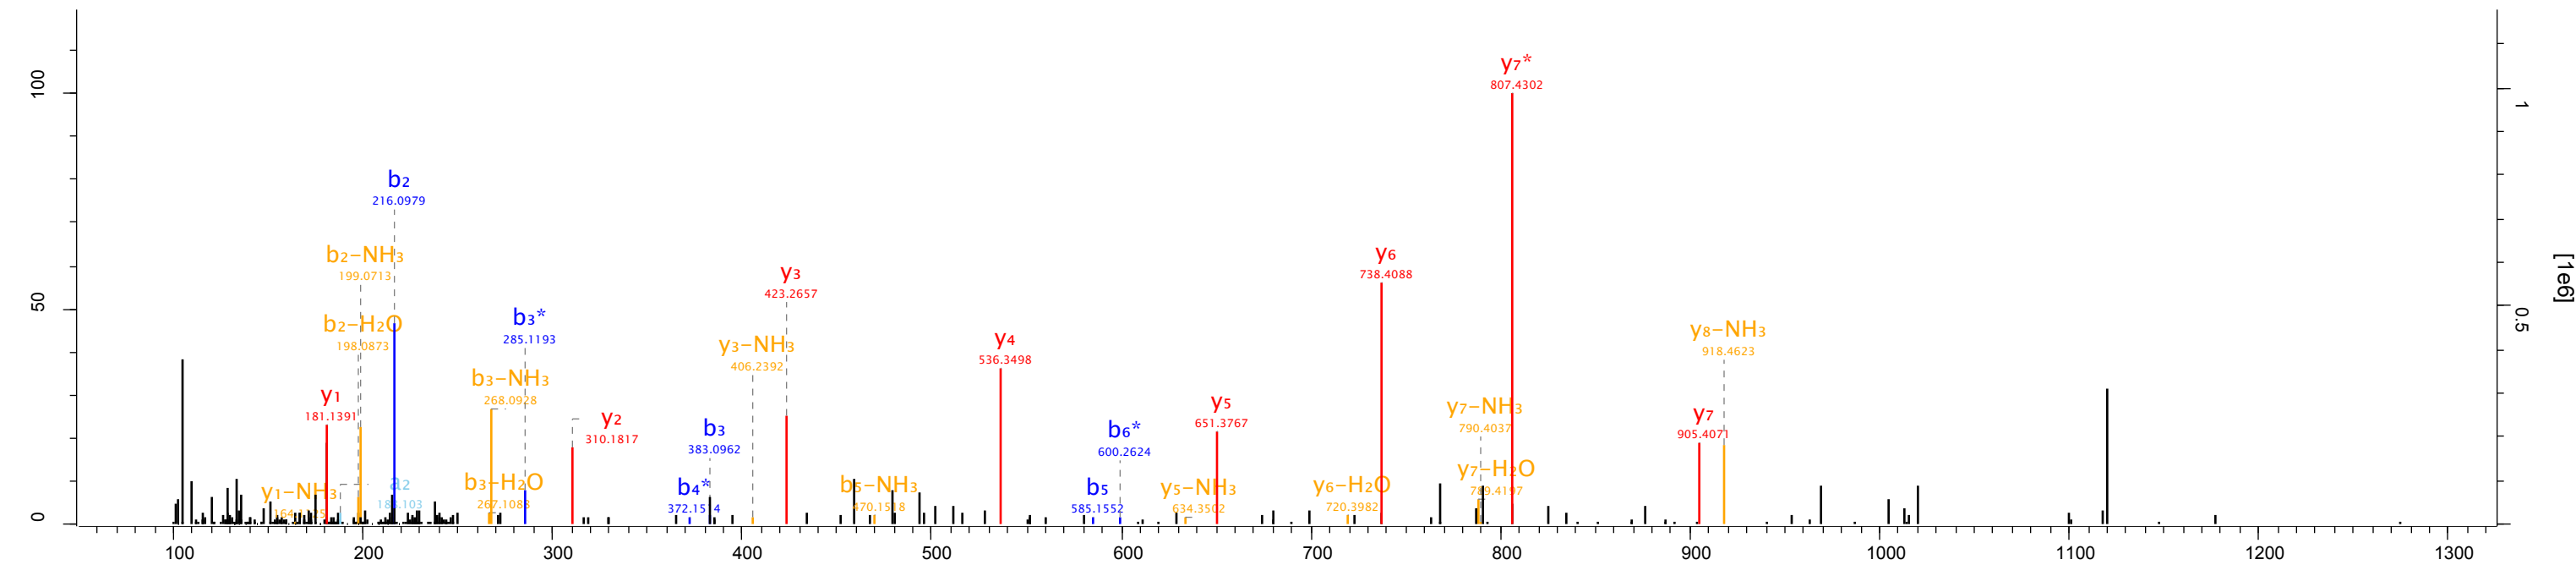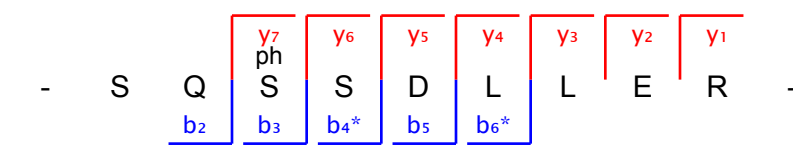

Raw file 20150812\_A375SR\_Phospho\_BR1\_05 Scan 10549 Method FTMS; HCD Score 132.05 m/z 643.31 Gene names C11orf30;EMSY

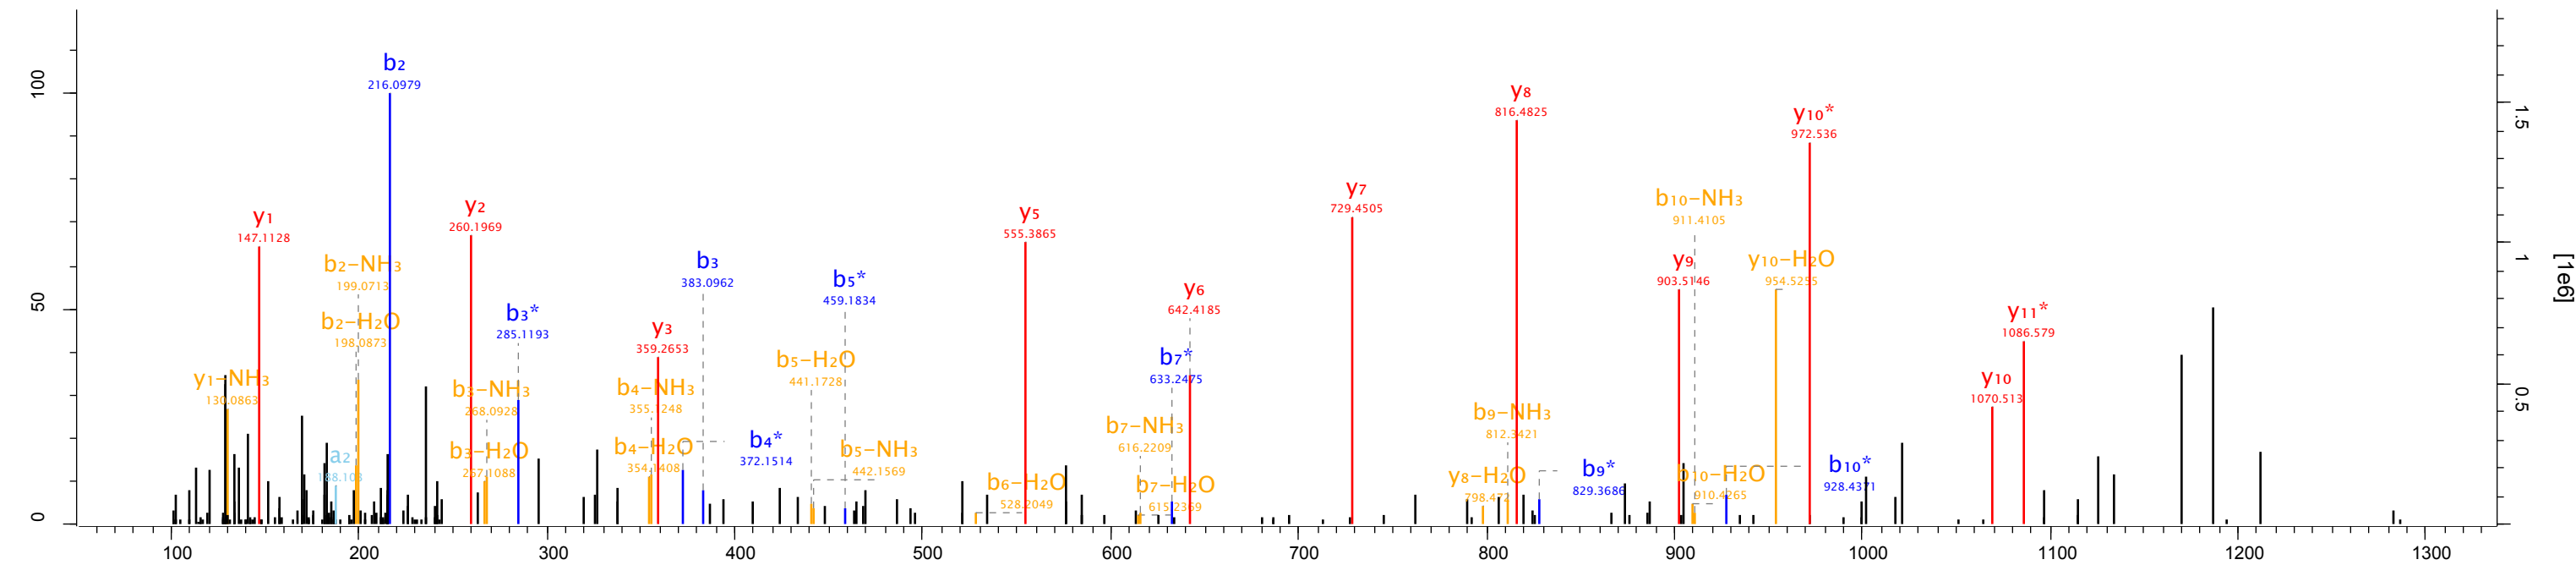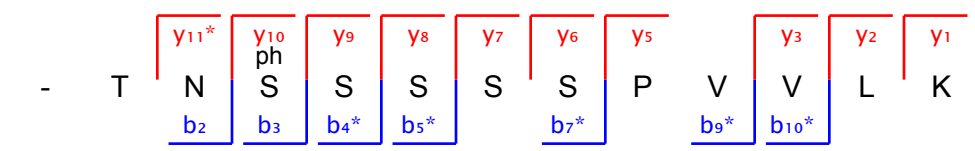



Raw file 20150812\_A375SR\_Phospho\_BR1\_05 Scan 11139 Method FTMS; HCD Score 130.19 m/z 985.47 Gene names DYNC1LI1

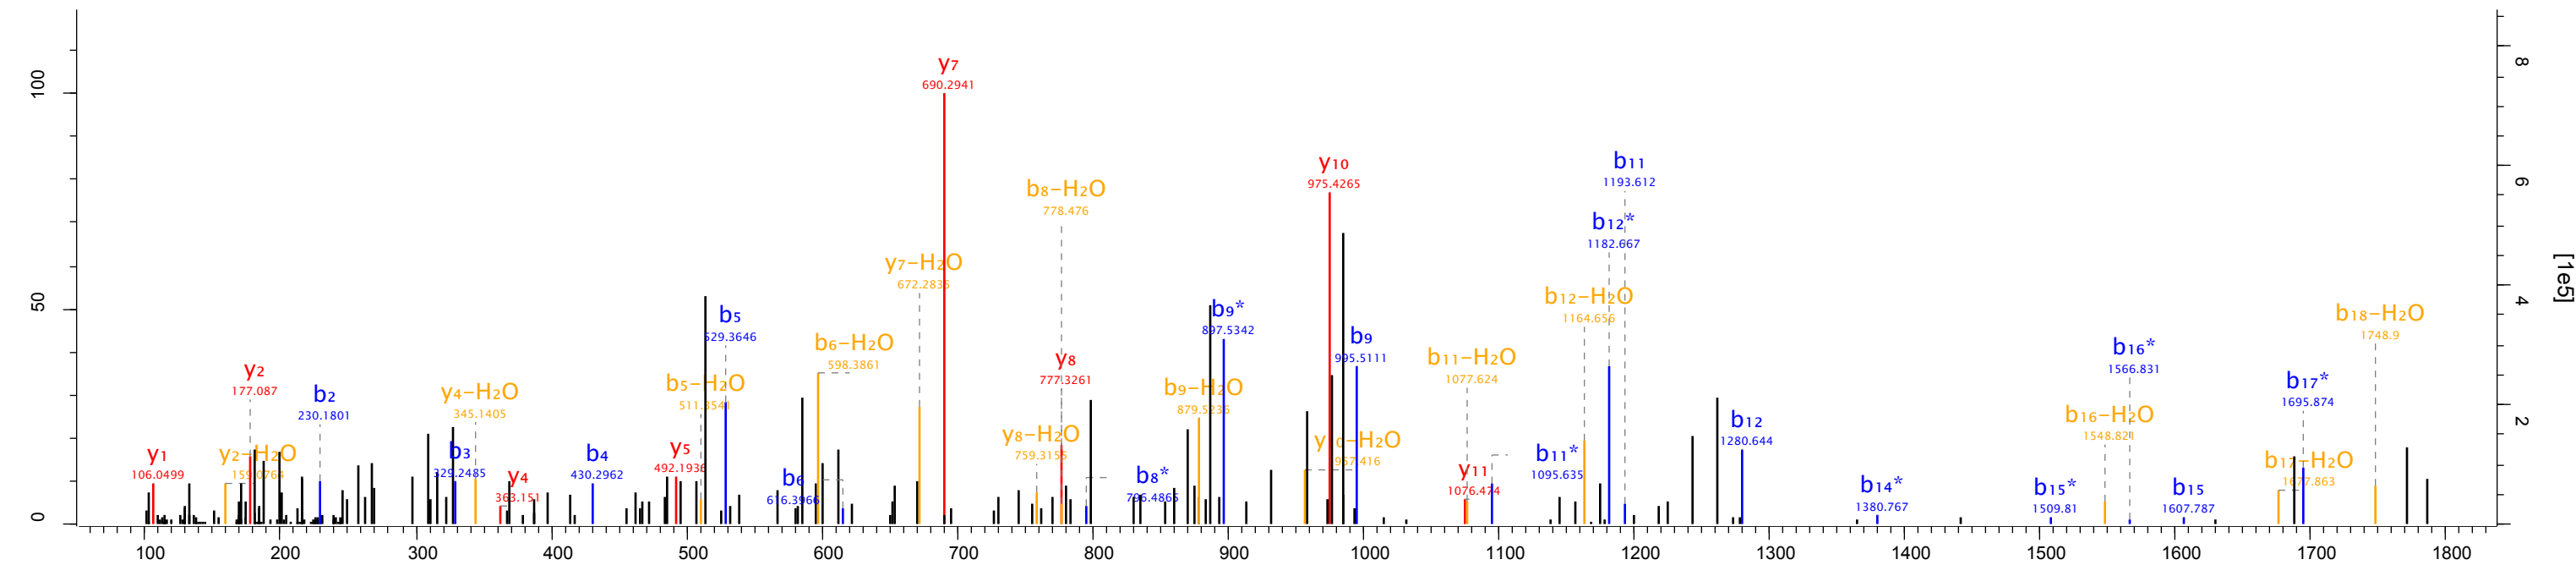

- K P V T V S P ph T T P T S P T E G E A S -

b<sub>2</sub>
b<sub>3</sub>
b<sub>4</sub>
b<sub>5</sub>
b<sub>6</sub>
b<sub>8</sub>\*
b<sub>9</sub>
b<sub>11</sub>
b<sub>12</sub>
b<sub>14</sub>\*
b<sub>15</sub>
b<sub>16</sub>\*
b<sub>17</sub>\*
y<sub>11</sub>
y<sub>10</sub>
y<sub>8</sub>
y<sub>7</sub>
y<sub>5</sub>
y<sub>4</sub>
y<sub>2</sub>
y<sub>1</sub>

Raw file 20150812\_A375SR\_Phospho\_BR1\_05 Scan 11199 Method FTMS; HCD Score 270.96 m/z 732.68 Gene names LIG3

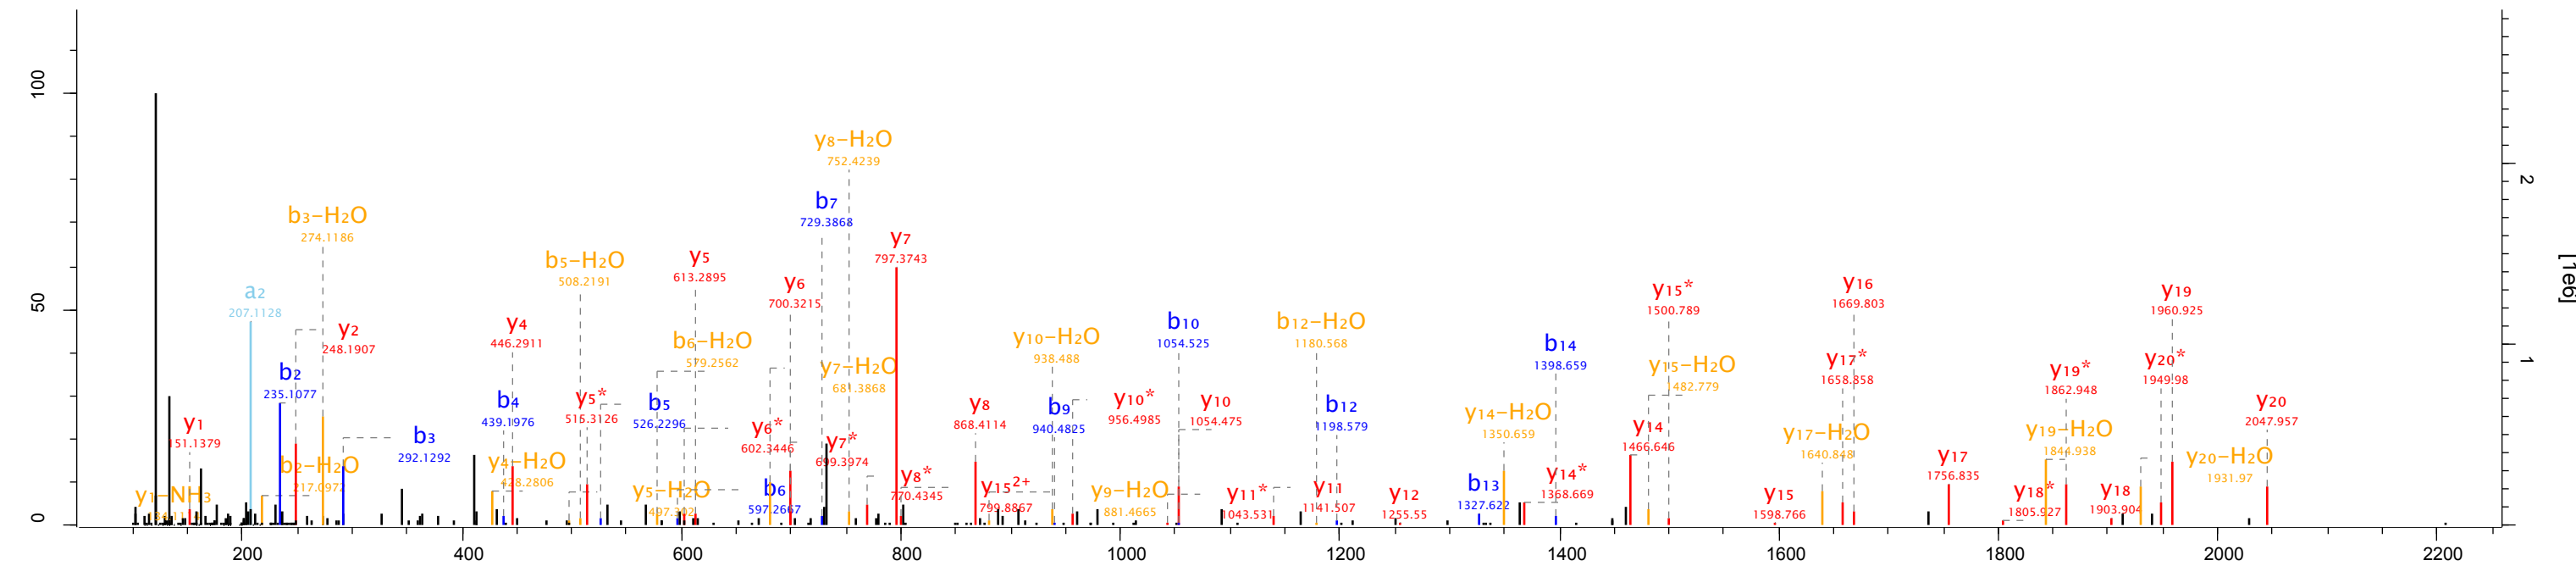

- F S G F S A K P N N S G E A P S S P T P K -

y20 y19 y18 y17 y16 y15 y14  
b2 b3 b4 b5 b6 b7
b9 b10 b12 b13 b14

Raw file: 20150812\_A375SR\_Phospho\_BR1\_05  
 Scan: 11869 Method: FTMS; HCD Score: 210.07 m/z: 784.38 Gene names: FMNL1

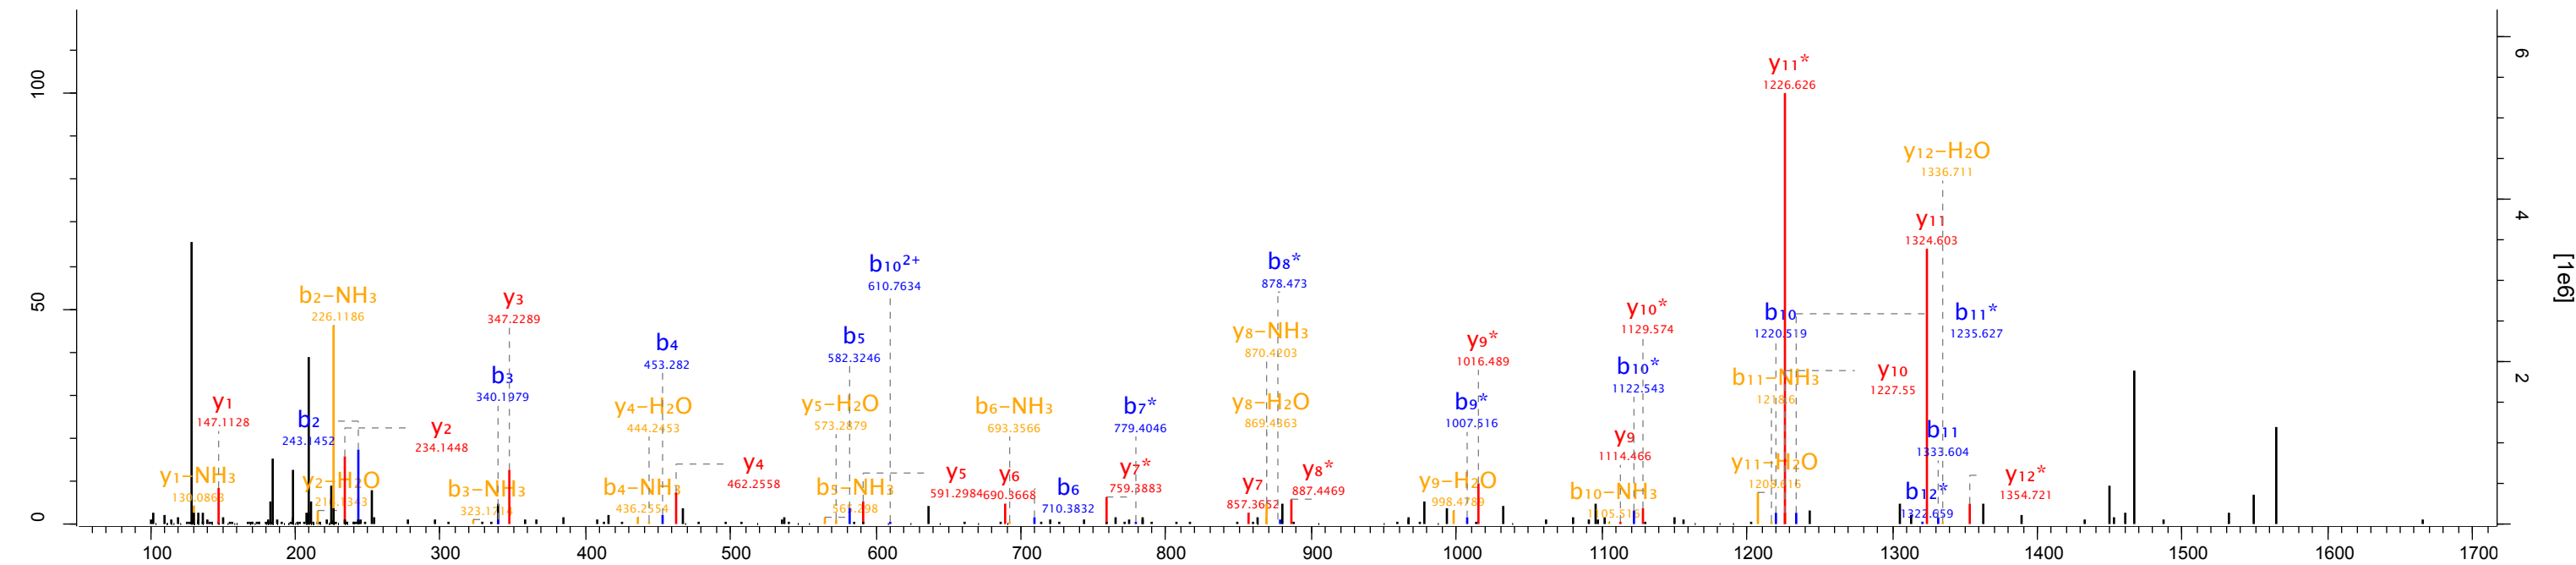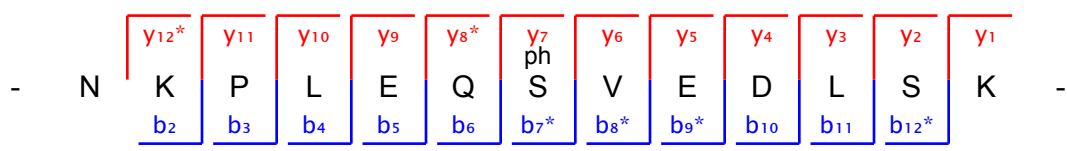

Raw file: 20150812\_A375SR\_Phospho\_BR1\_05  
 Scan: 12349 Method: FTMS; HCD Score: 170.11 m/z: 665.97 Gene names: ARHGAP5

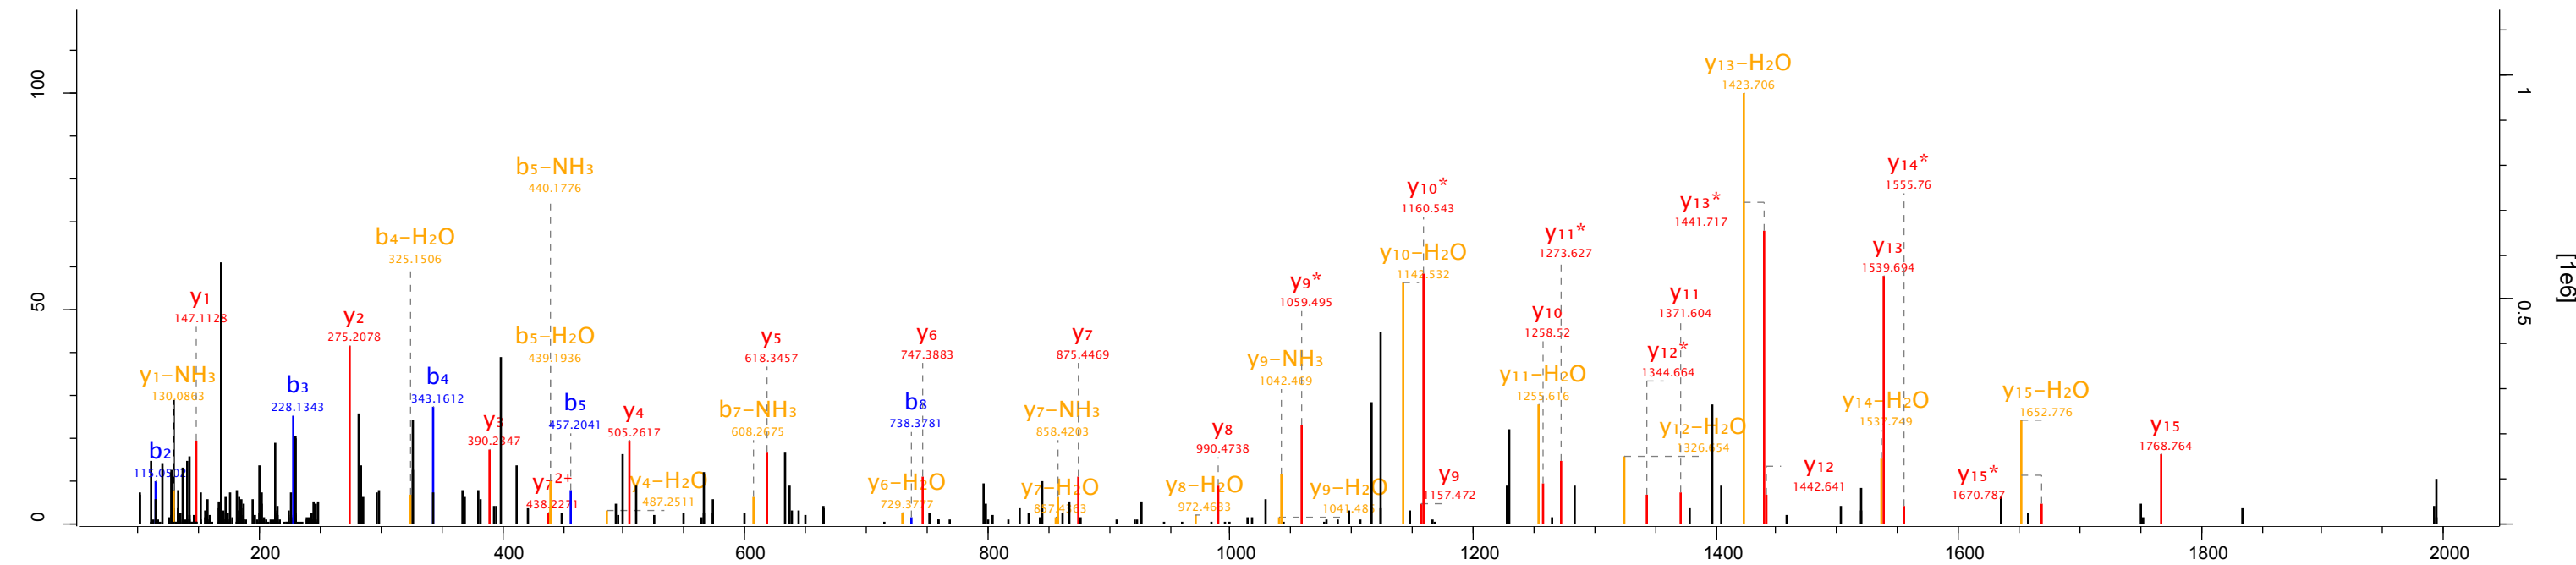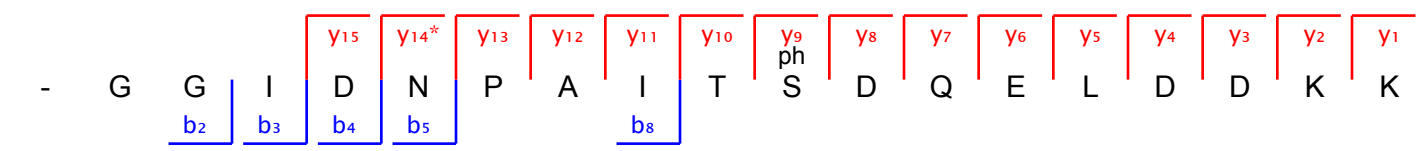

Raw file: 20150812\_A375SR\_Phospho\_BR1\_05  
 Scan: 12399 Method: FTMS; HCD Score: 86.36 m/z: 830.38 Gene names: KIAA1033

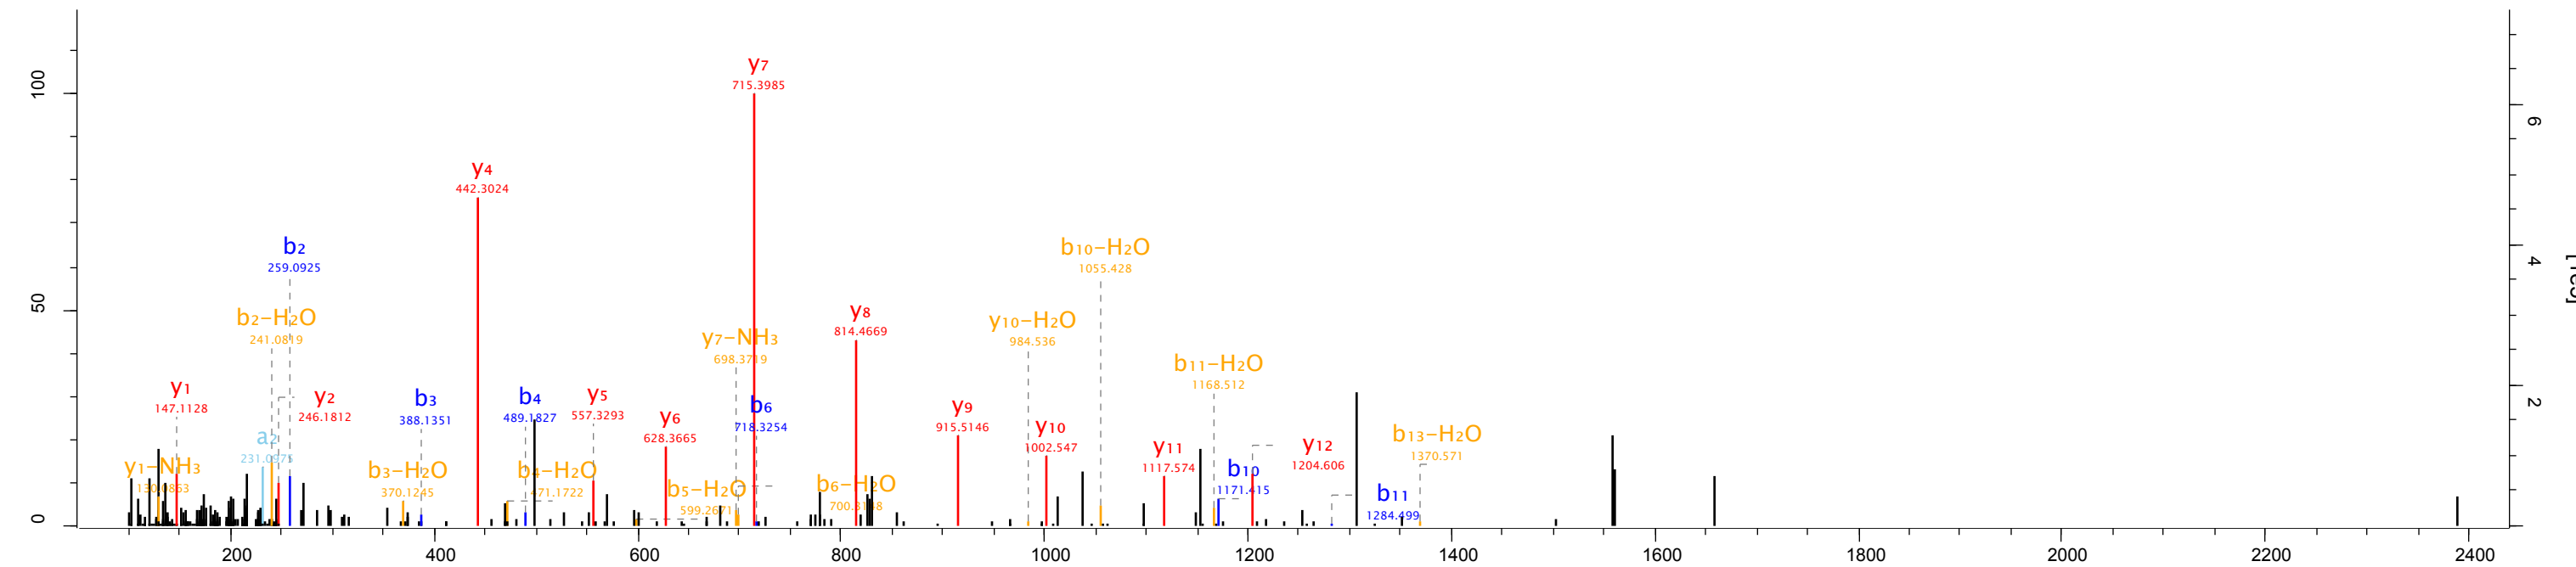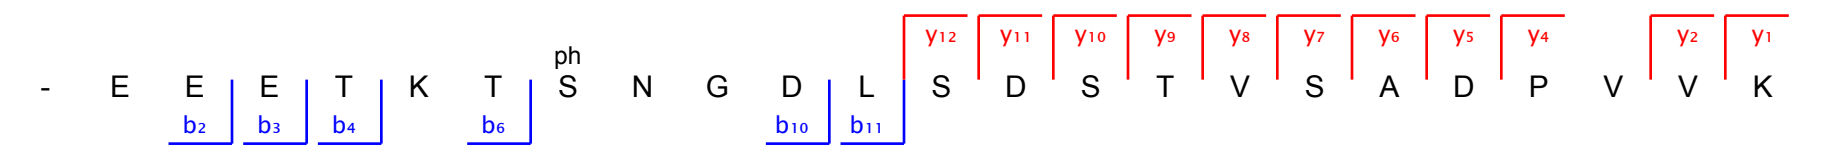

Raw file 20150812\_A375SR\_Phospho\_BR1\_05 Scan 12589 Method FTMS; HCD Score 121.77 m/z 541.6 Gene names CHAMP1

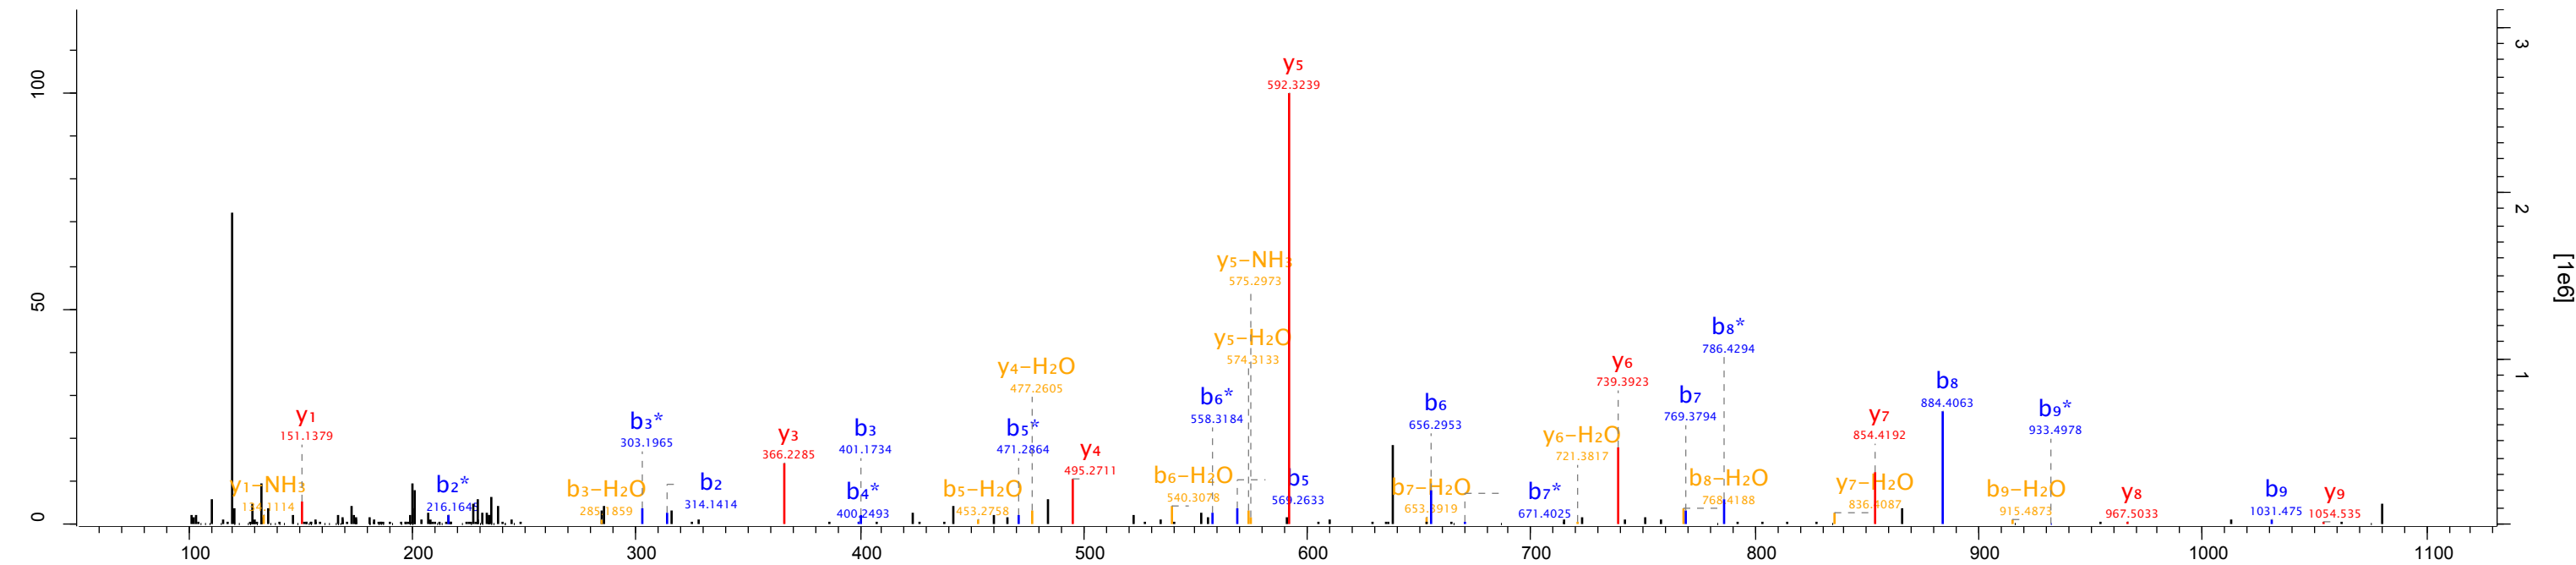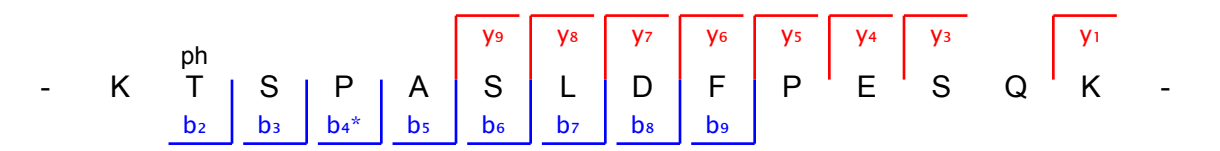

Raw file 20150812\_A375SR\_Phospho\_BR1\_05 Scan 12599 Method FTMS; HCD Score 159.86 m/z 1069.98 Gene names ARID1A

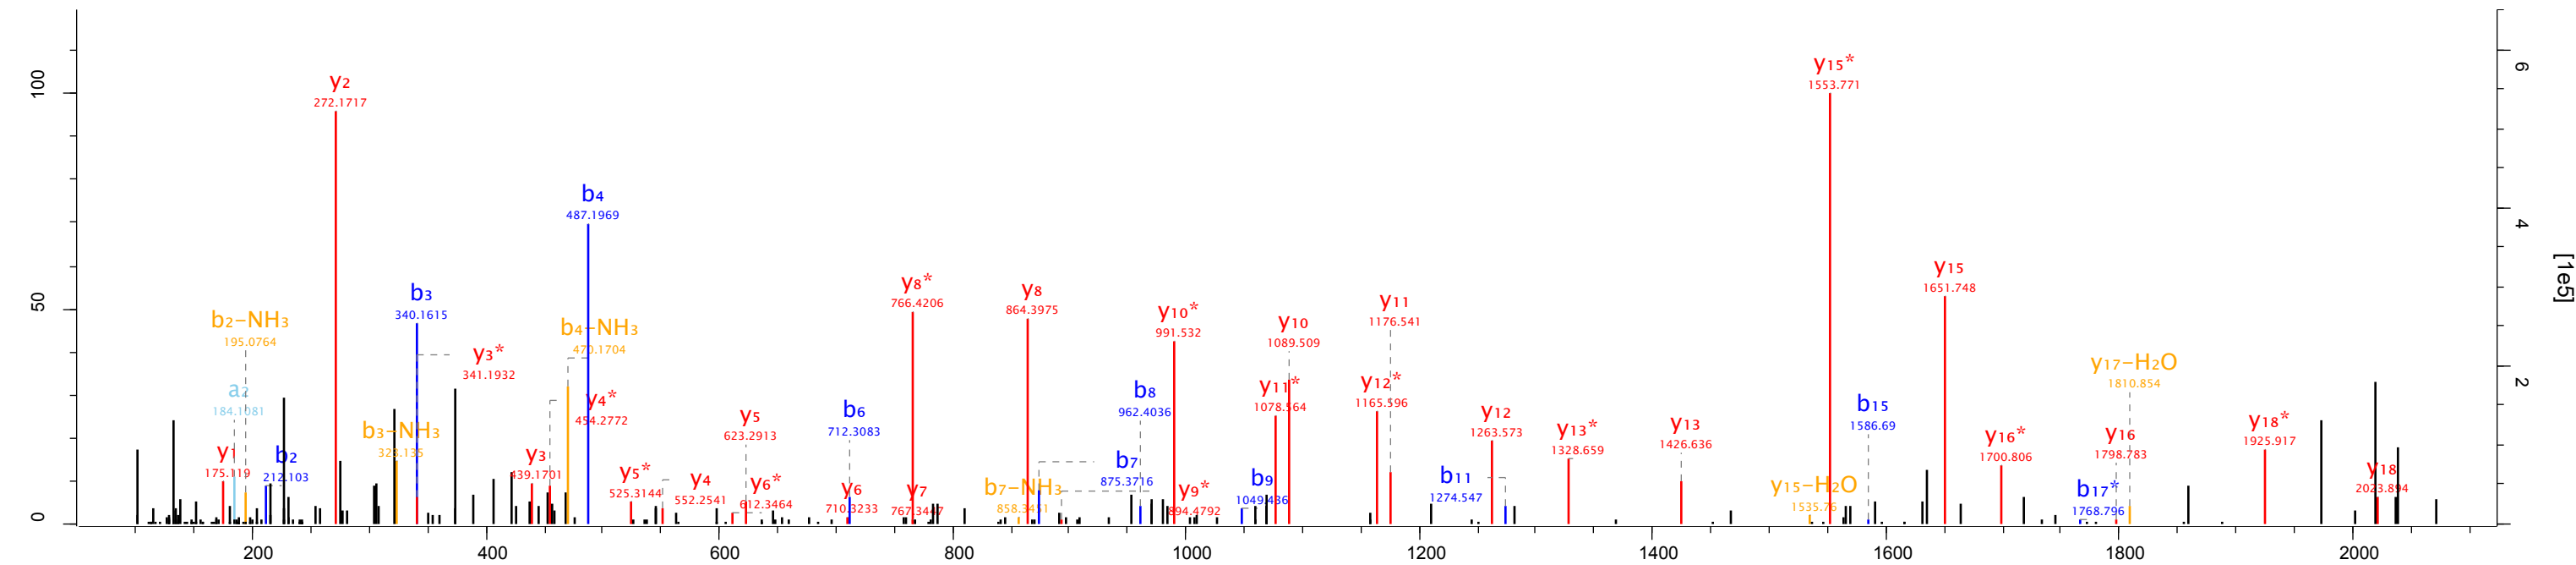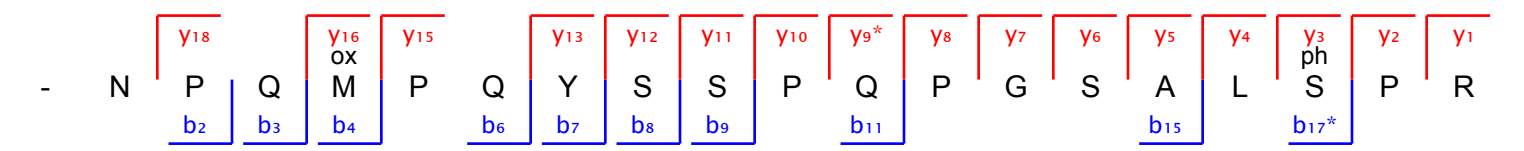

Raw file 20150812\_A375SR\_Phospho\_BR1\_05 Scan 12919 Method FTMS; HCD Score 216.52 m/z 908.07 Gene names SIPA1

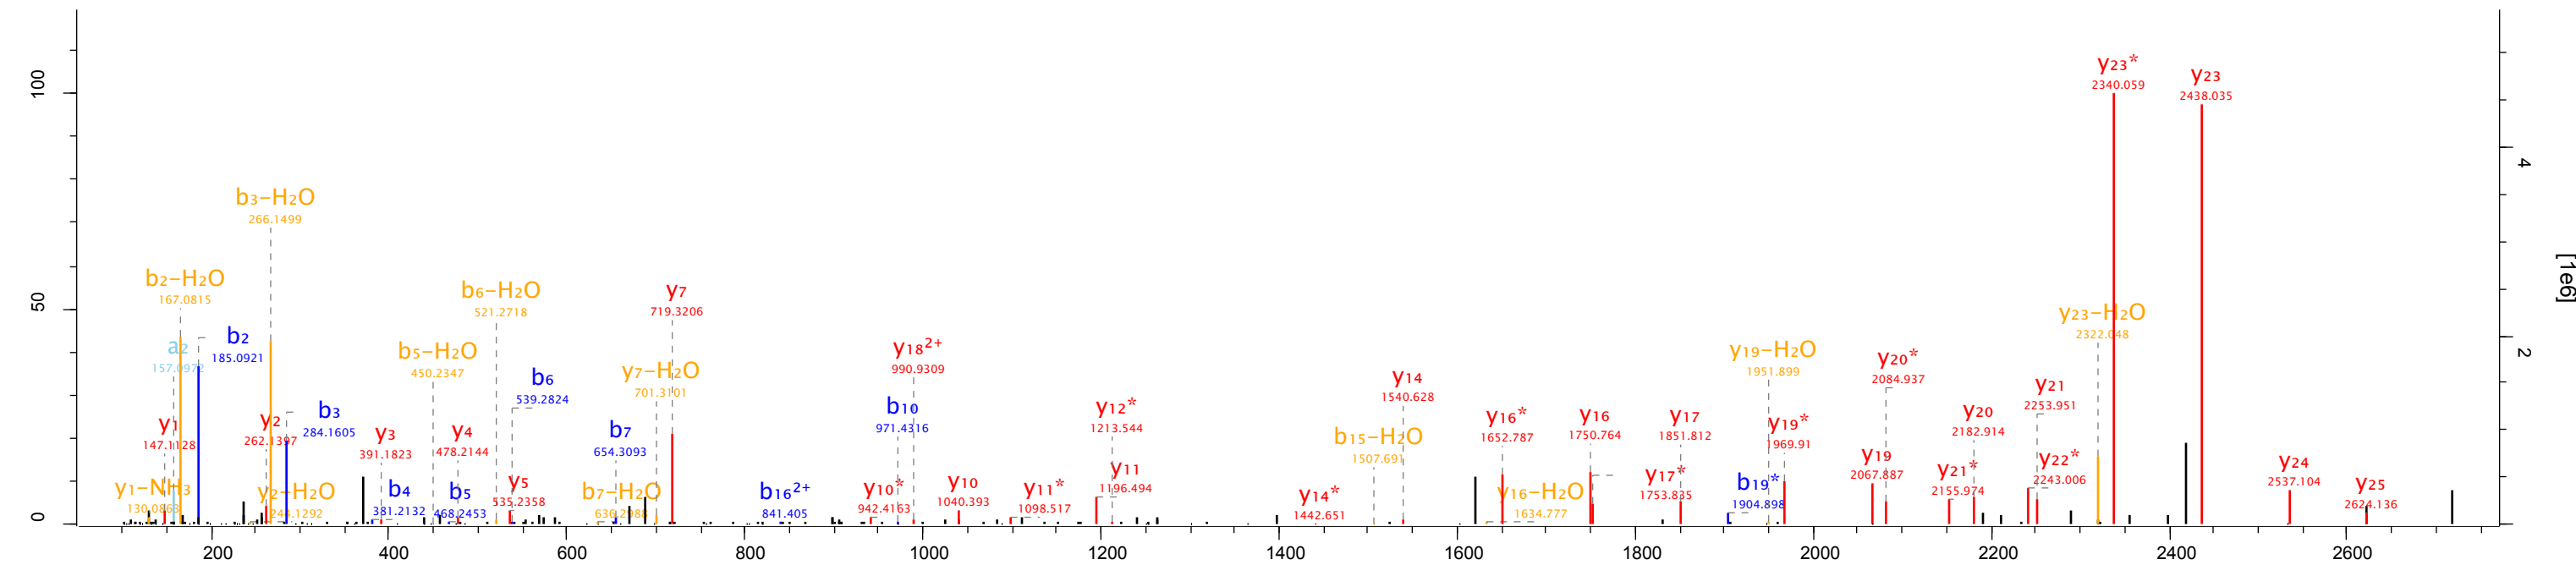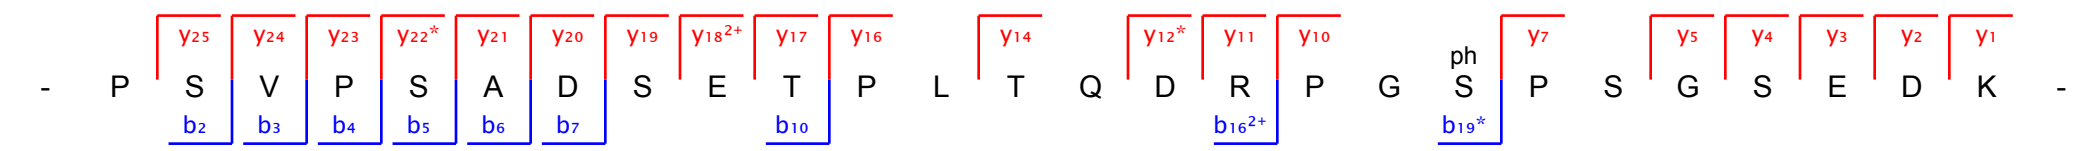



Raw file 20150812\_A375SR\_Phospho\_BR1\_05 Scan 13199 Method FTMS; HCD Score 78.29 m/z 631.8 Gene names HARS2

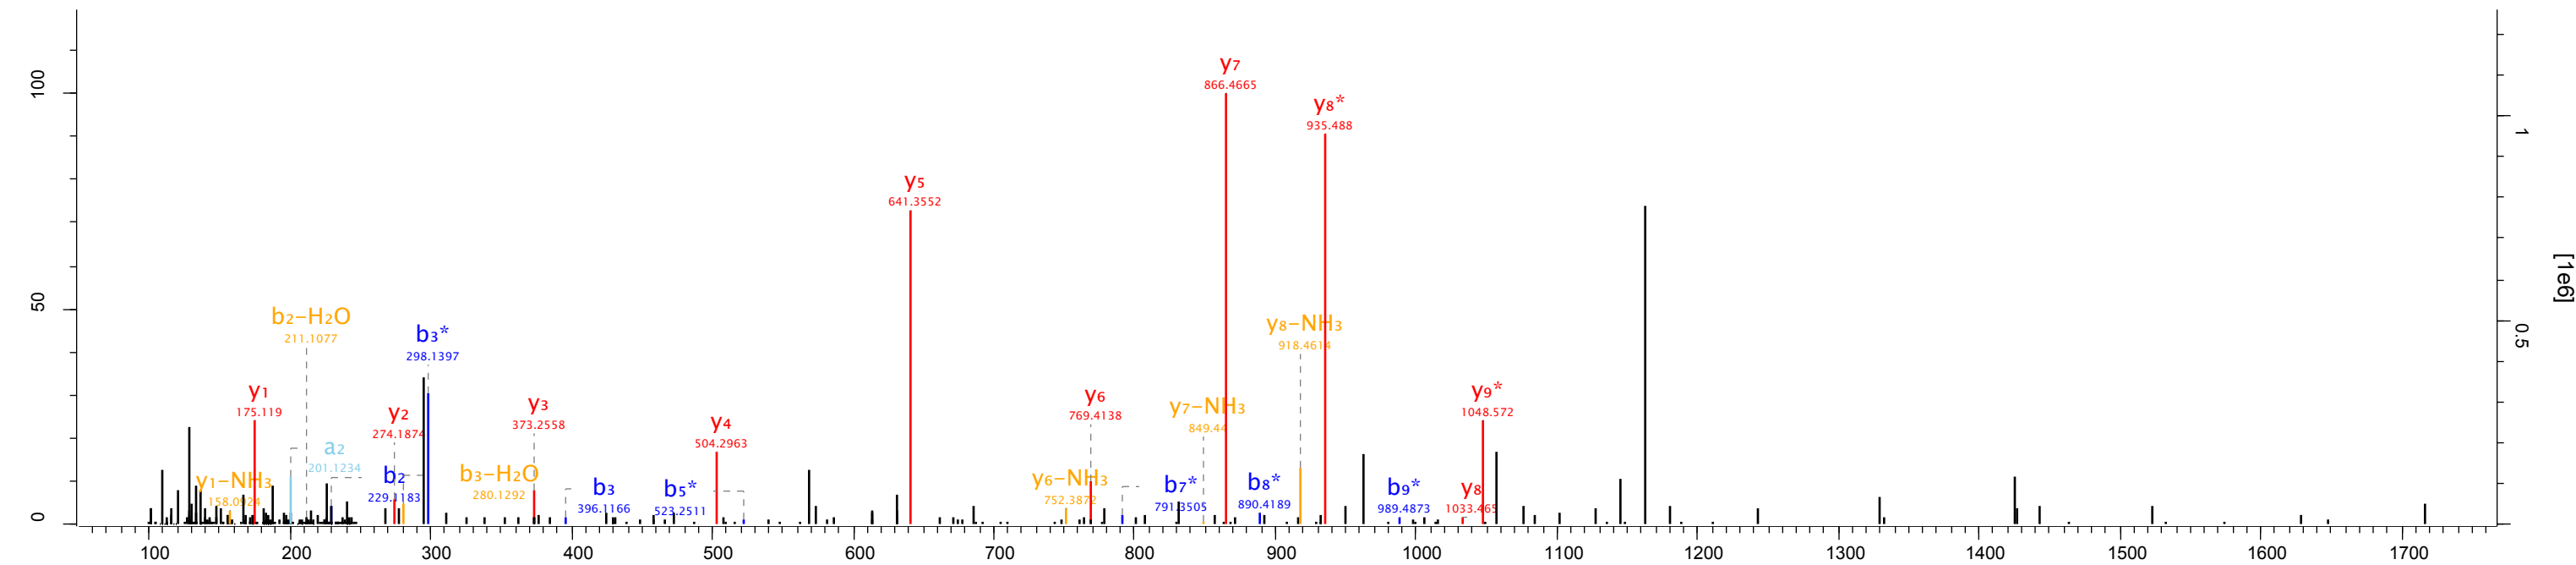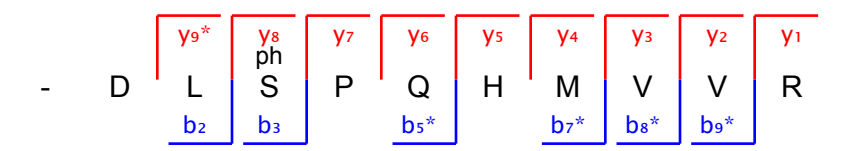

Raw file: 20150812\_A375SR\_Phospho\_BR1\_05  
 Scan: 1379 Method: FTMS; HCD Score: 124.18 m/z: 511.73 Gene names: ZC3H18

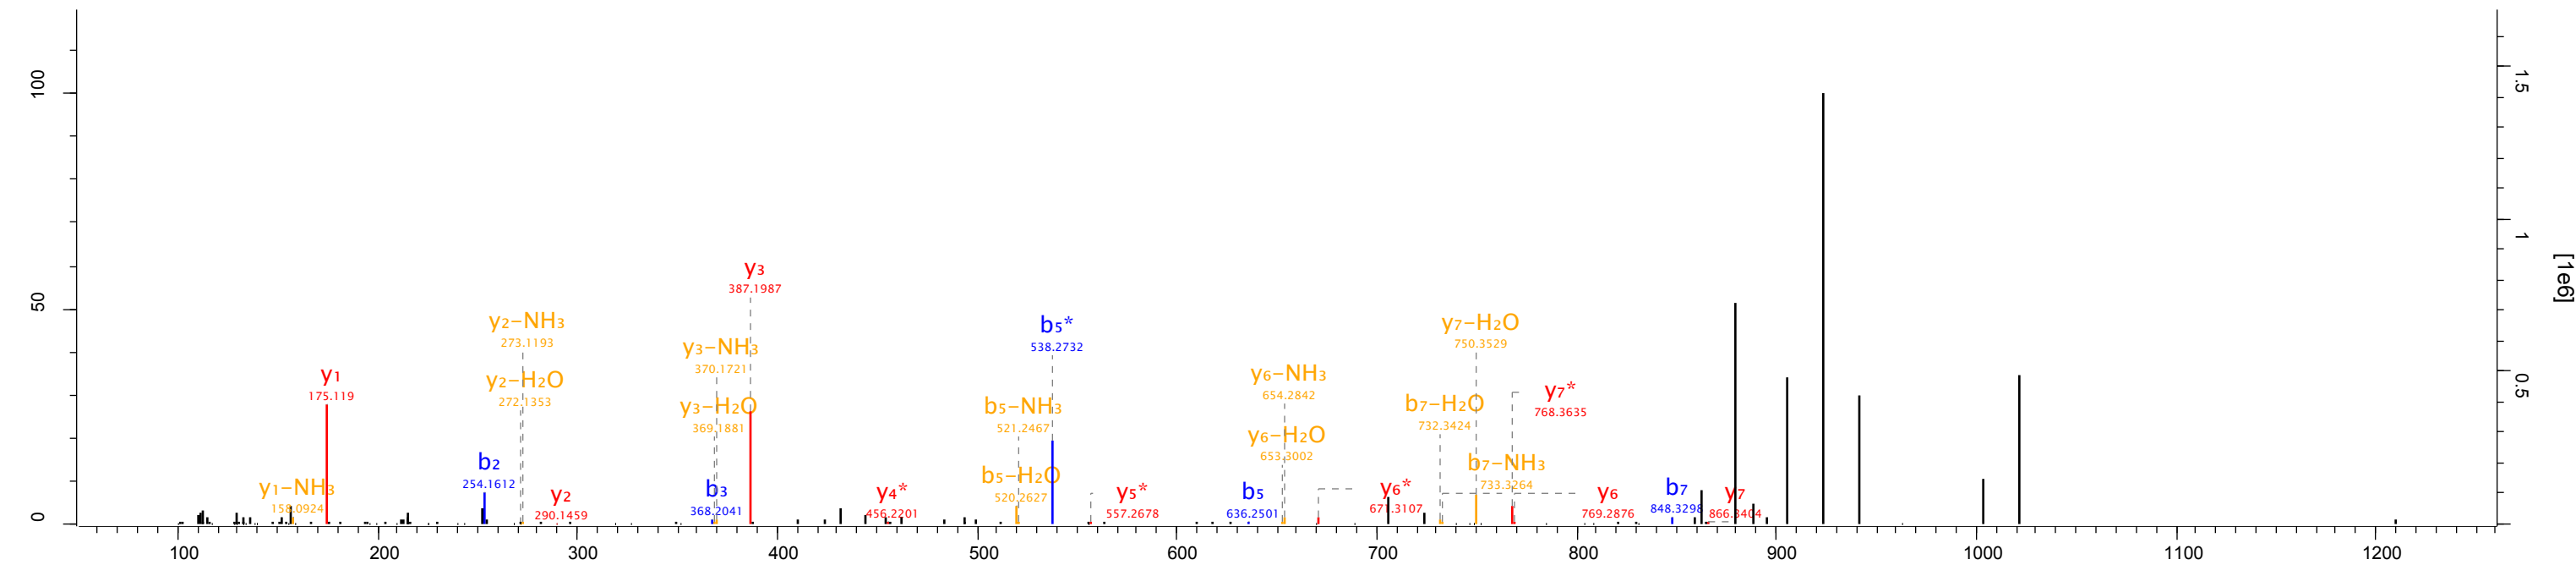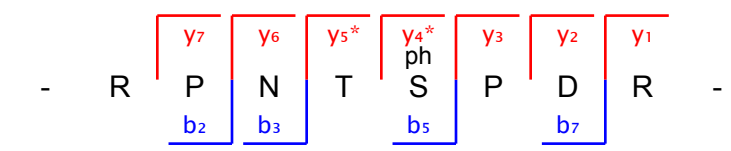

Raw file: 20150812\_A375SR\_Phospho\_BR1\_05  
 Scan: 1429 Method: FTMS; HCD Score: 273.51 m/z: 801.86 Gene names: LMNA

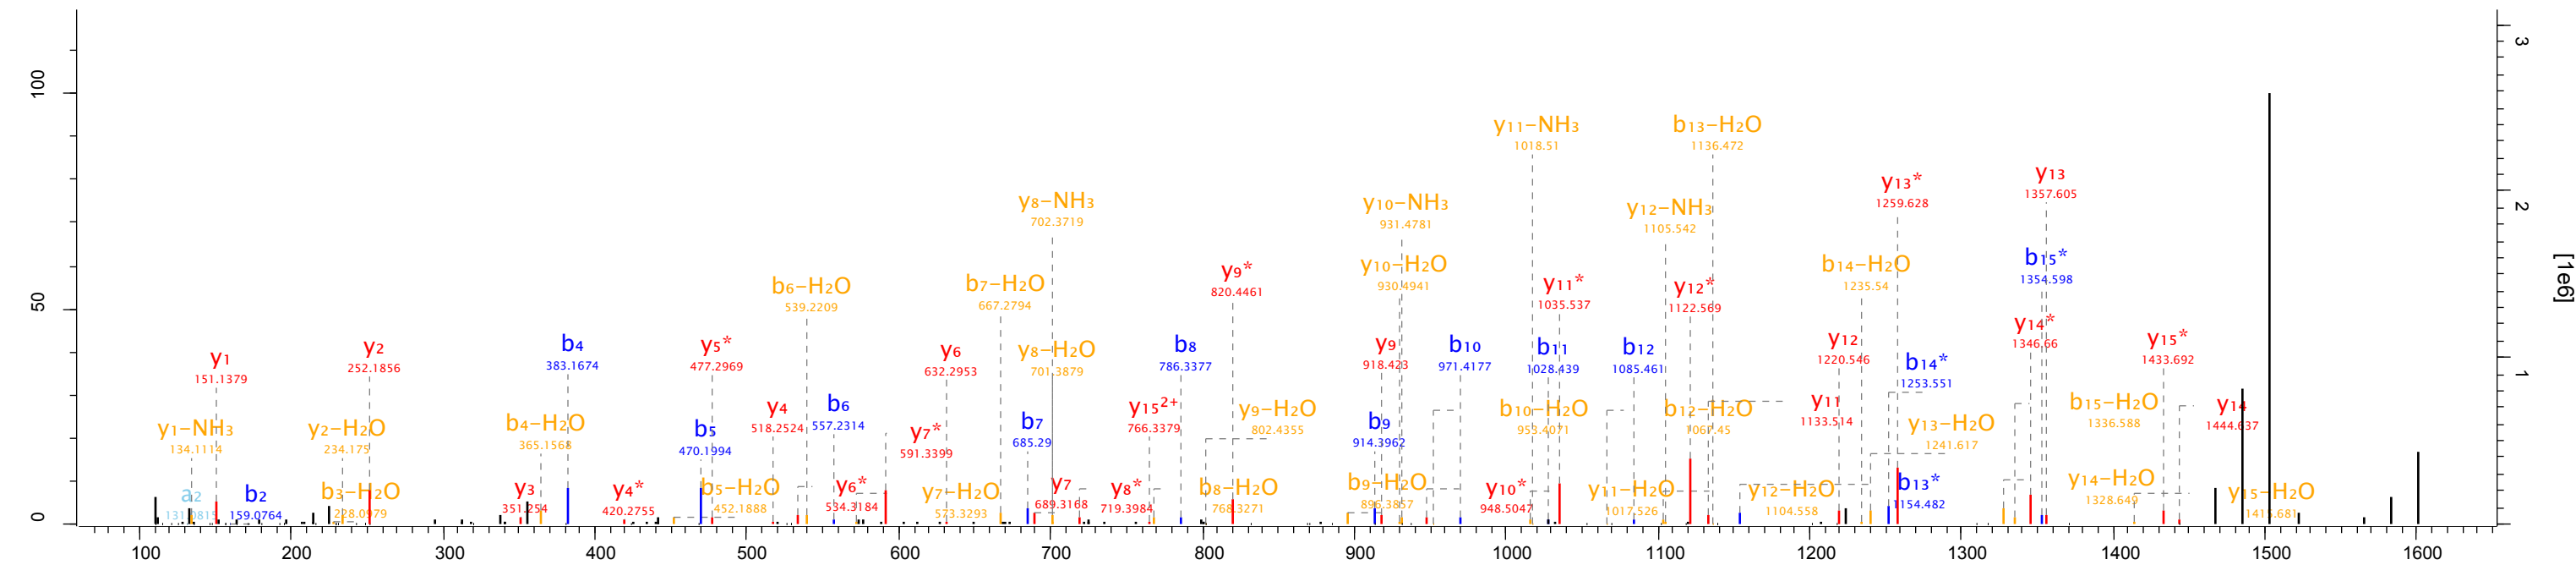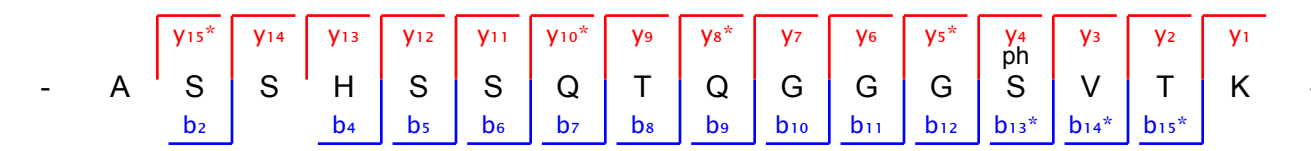

Raw file  
20150812\_A375SR\_Phospho\_BR1\_05

Scan 15429 FTMS; HCD Score 175.91 m/z 793.39 Gene names DOCK7

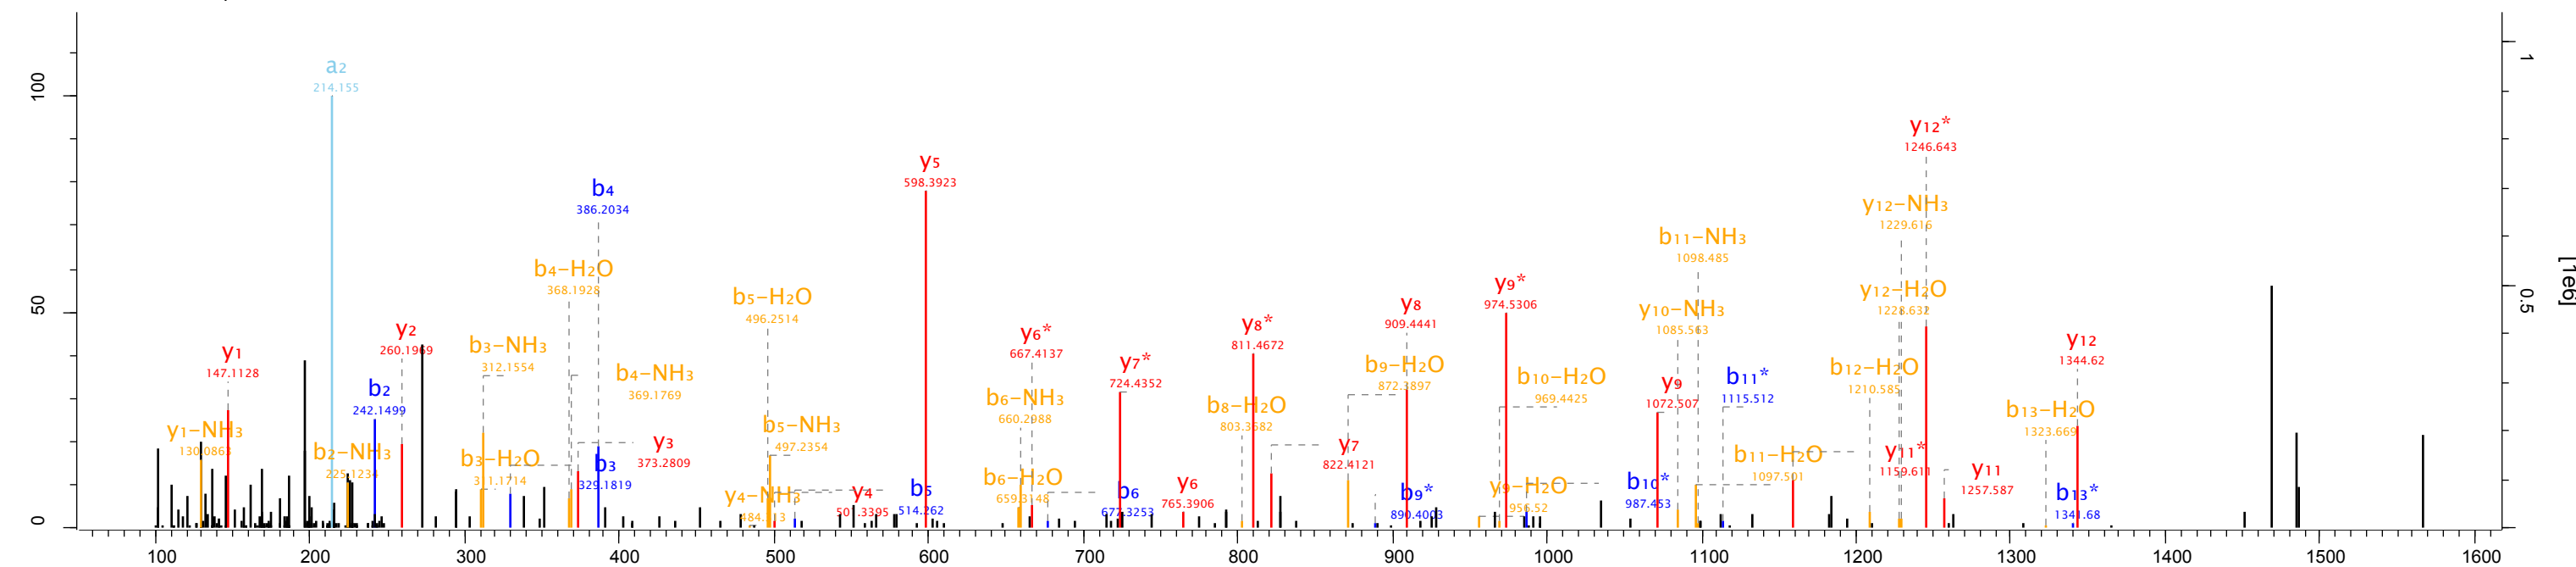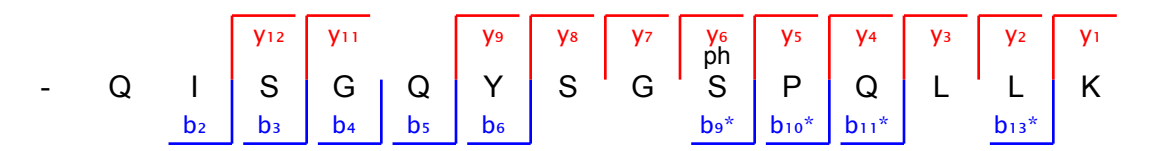

Raw file: 20150812\_A375SR\_Phospho\_BR1\_05  
 Scan: 15469 Method: FTMS; HCD Score: 72.9 m/z: 741.32 Gene names: LUZP1

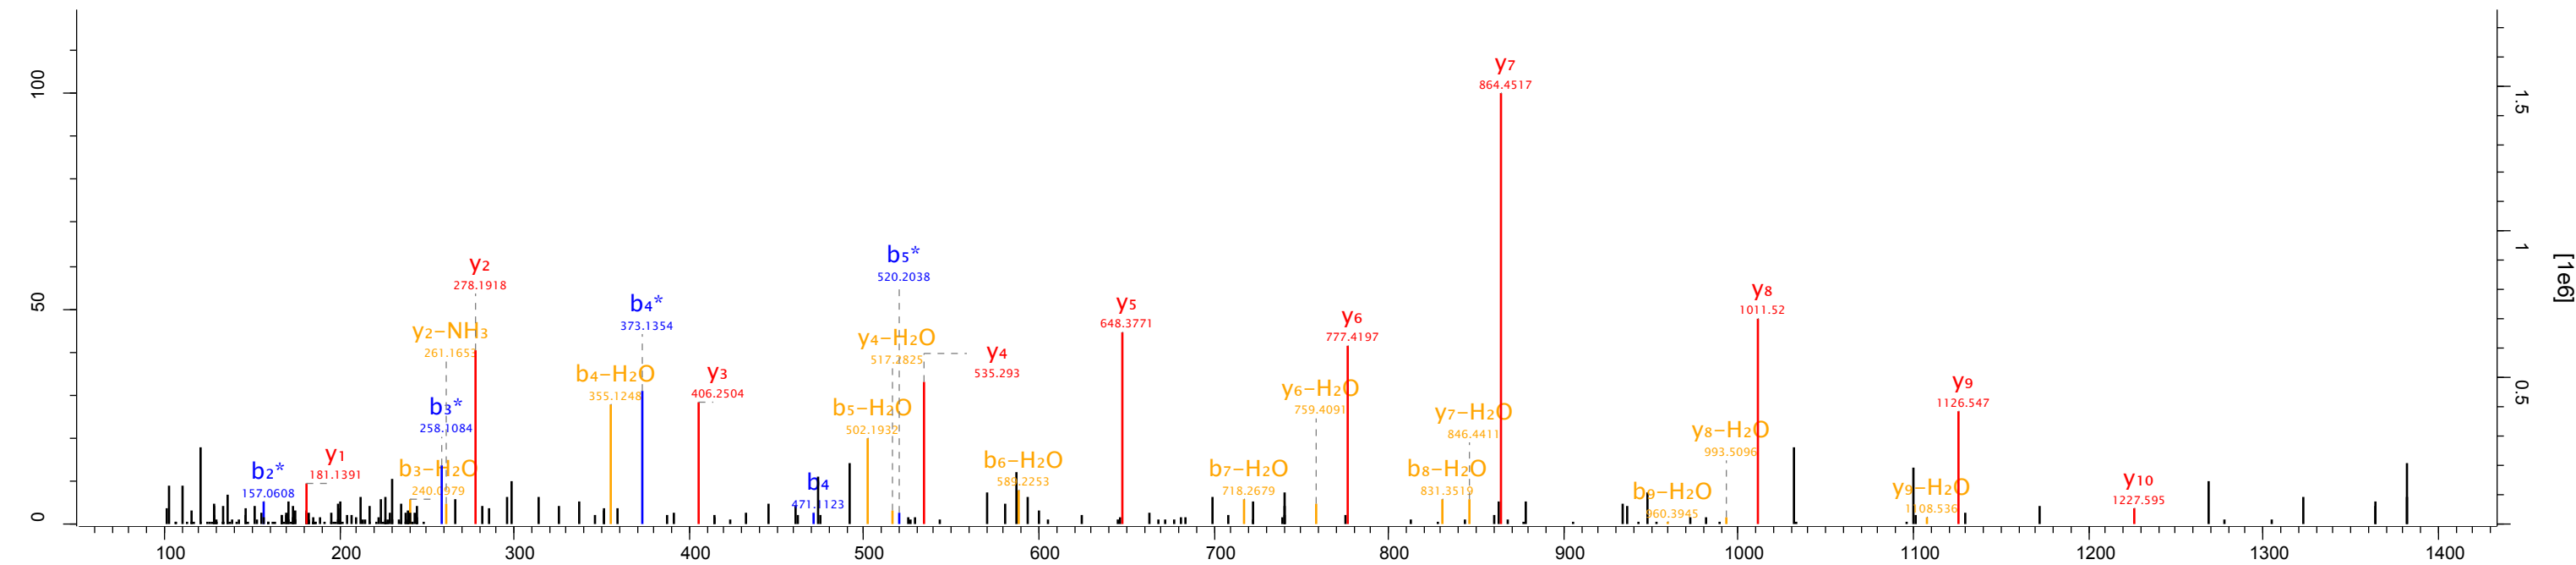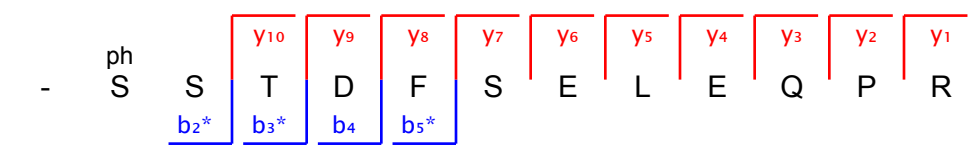

Raw file: 20150812\_A375SR\_Phospho\_BR1\_05  
 Scan: 15619 Method: FTMS; HCD Score: 172.6 m/z: 1034.15 Gene names: PROSER2;C10orf47

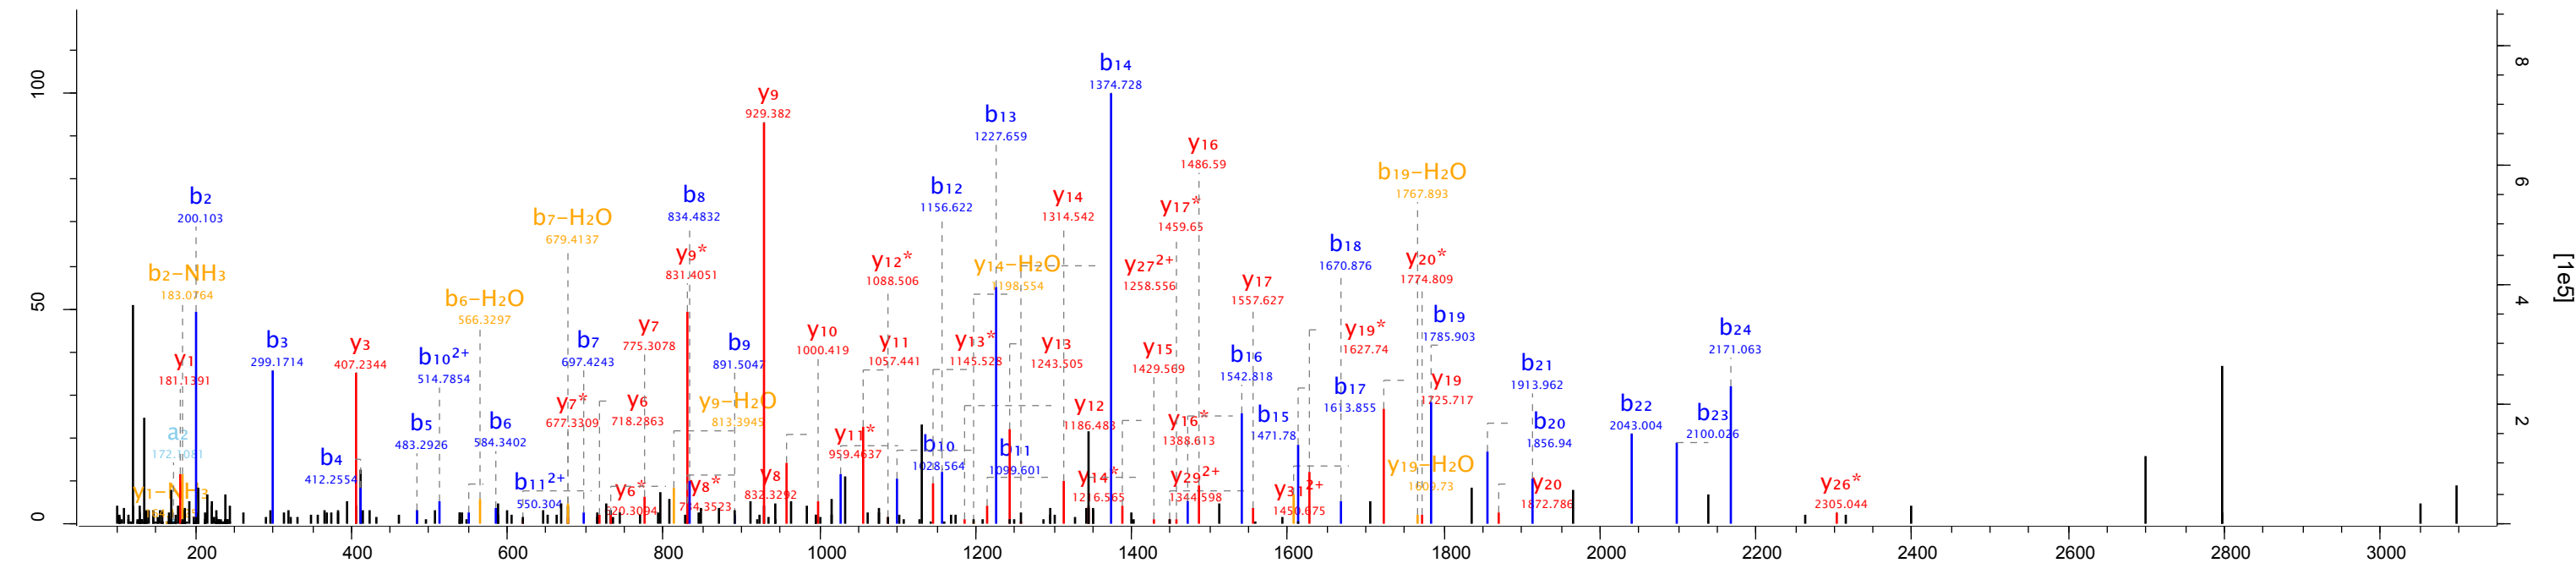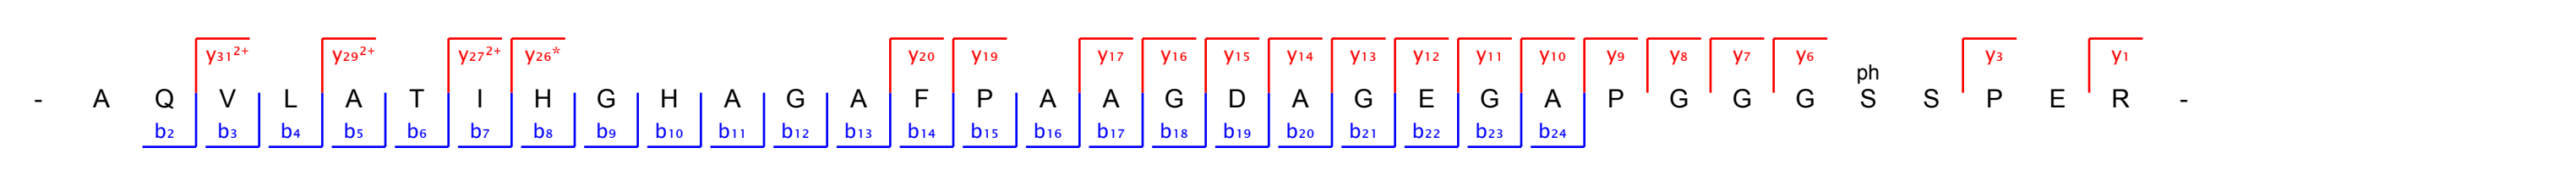

Raw file 20150812\_A375SR\_Phospho\_BR1\_05 Scan 15749 Method FTMS; HCD Score 243.76 m/z 1010.47 Gene names RAB11FIP5

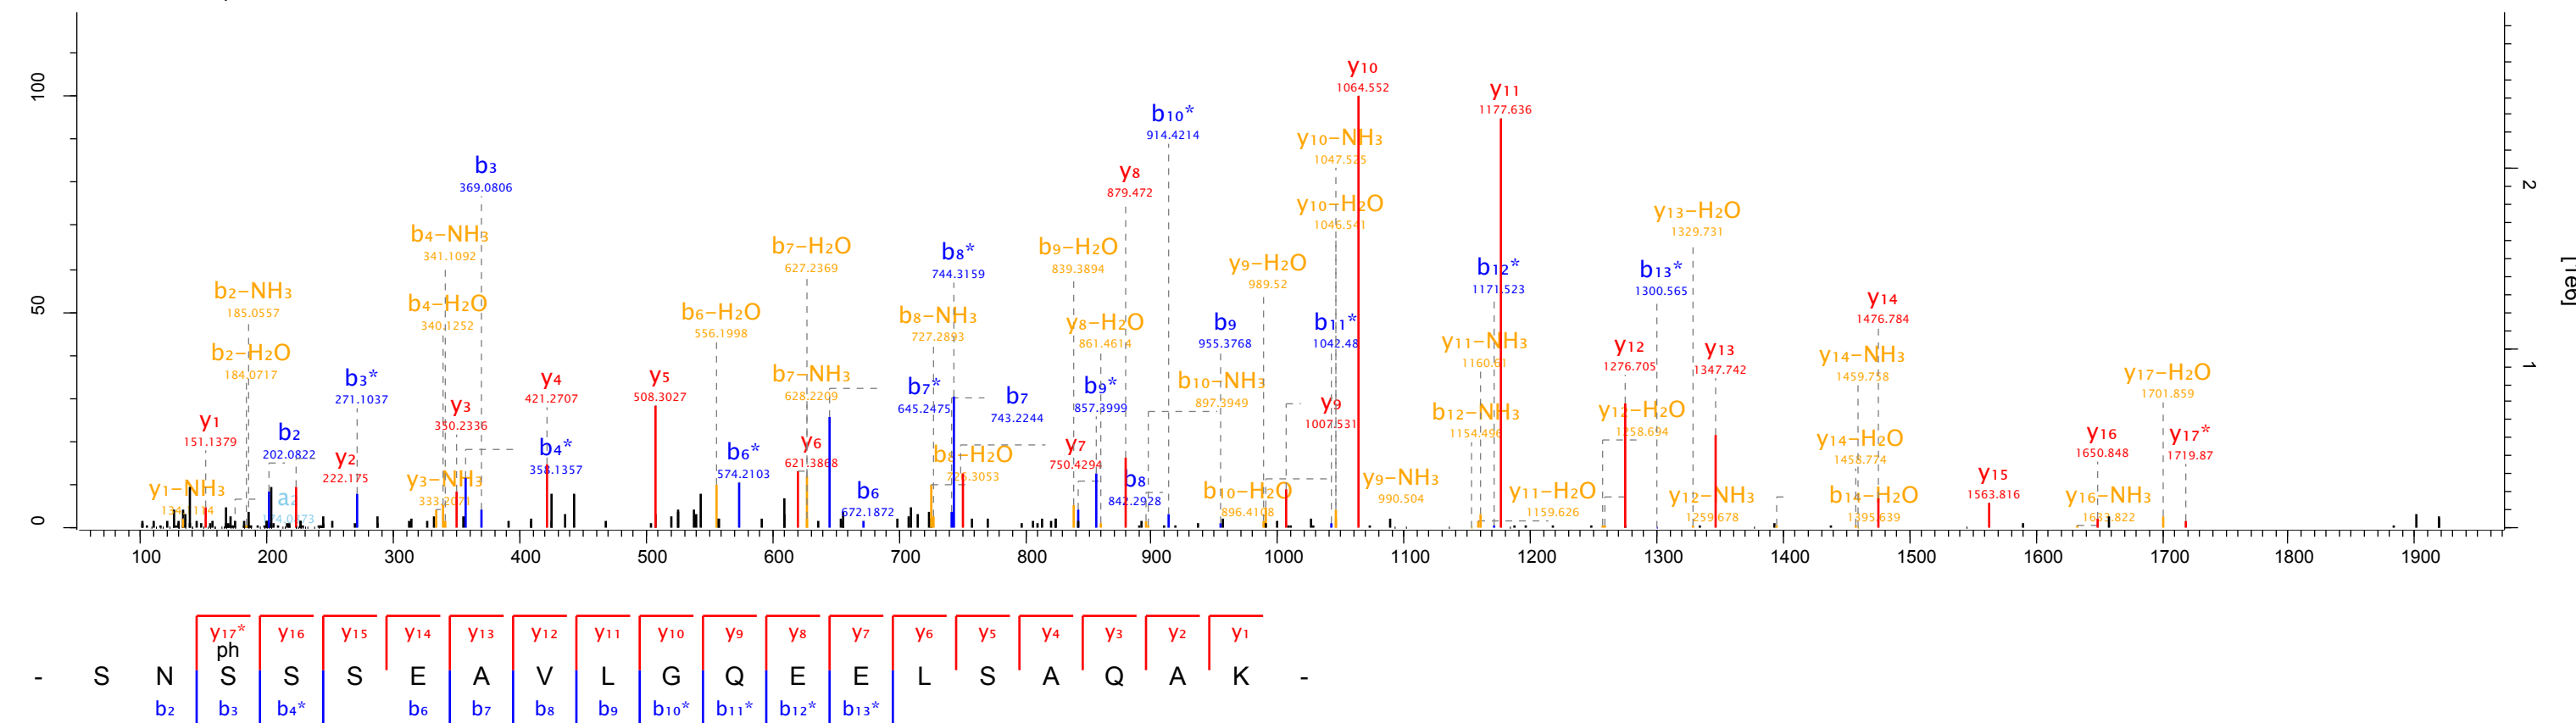

Raw file 20150812\_A375SR\_Phospho\_BR1\_05 Scan 15799 Method FTMS; HCD Score 103.88 m/z 726.37 Gene names ATAT1

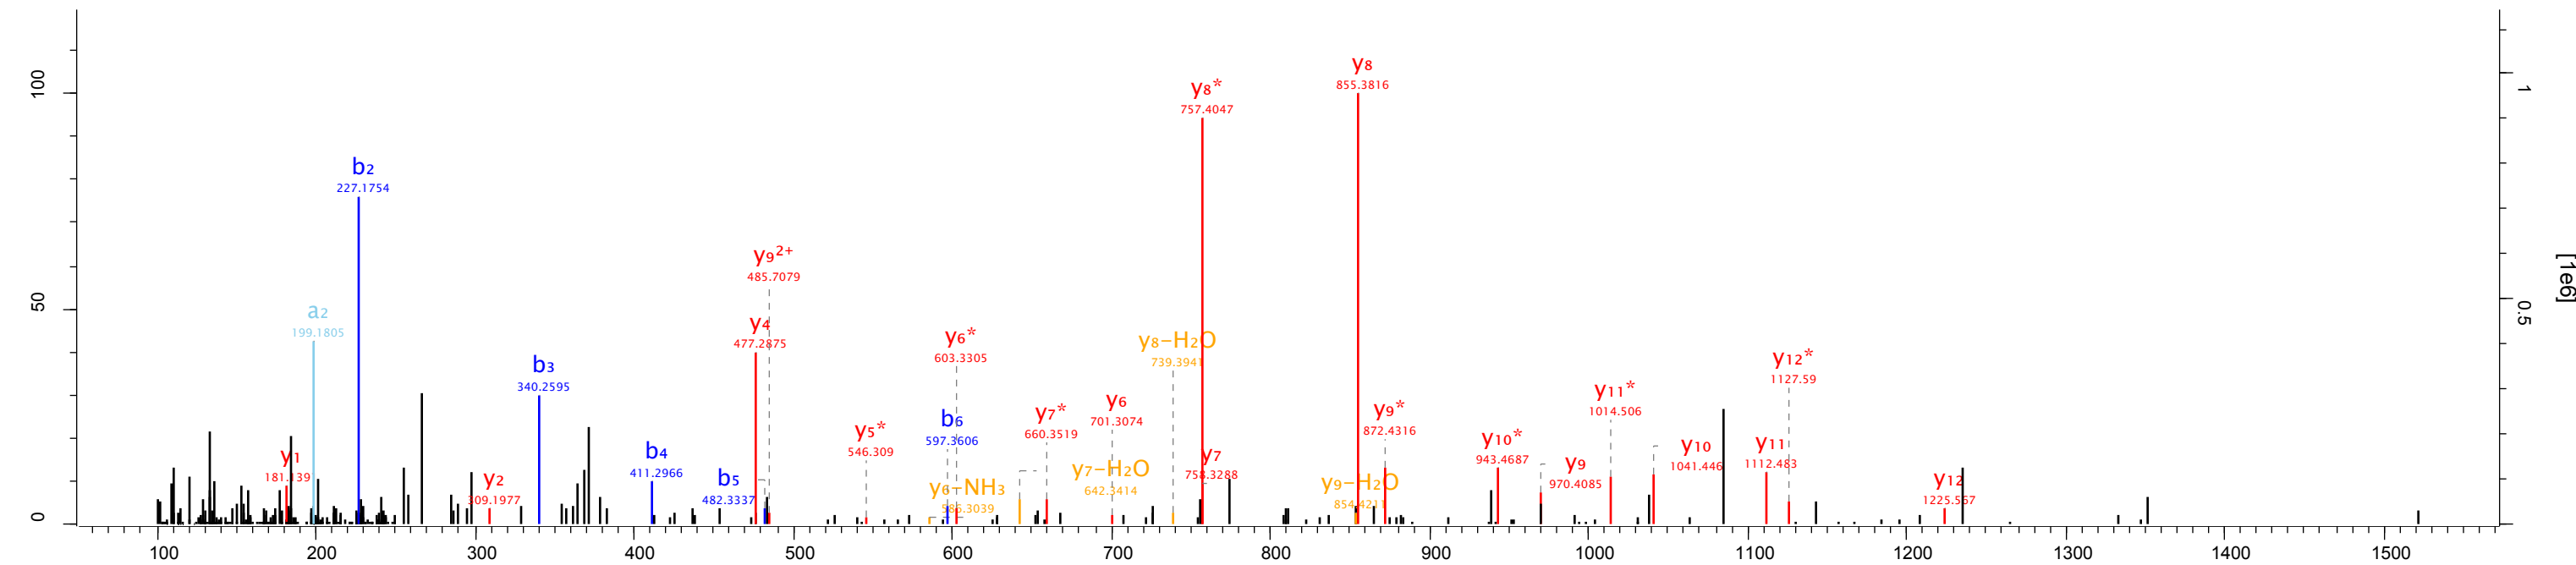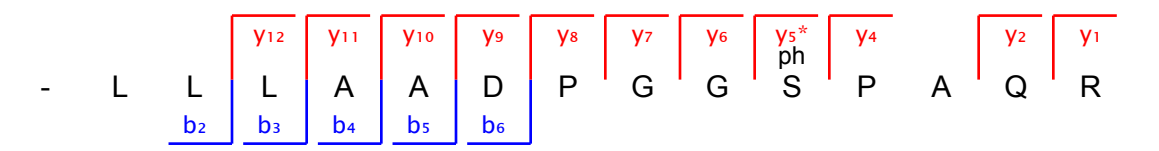



Raw file 20150812\_A375SR\_Phospho\_BR1\_05 Scan 16559 Method FTMS; HCD Score 143.17 m/z 978.47 Gene names MAP3K7;DKFZp586F0420

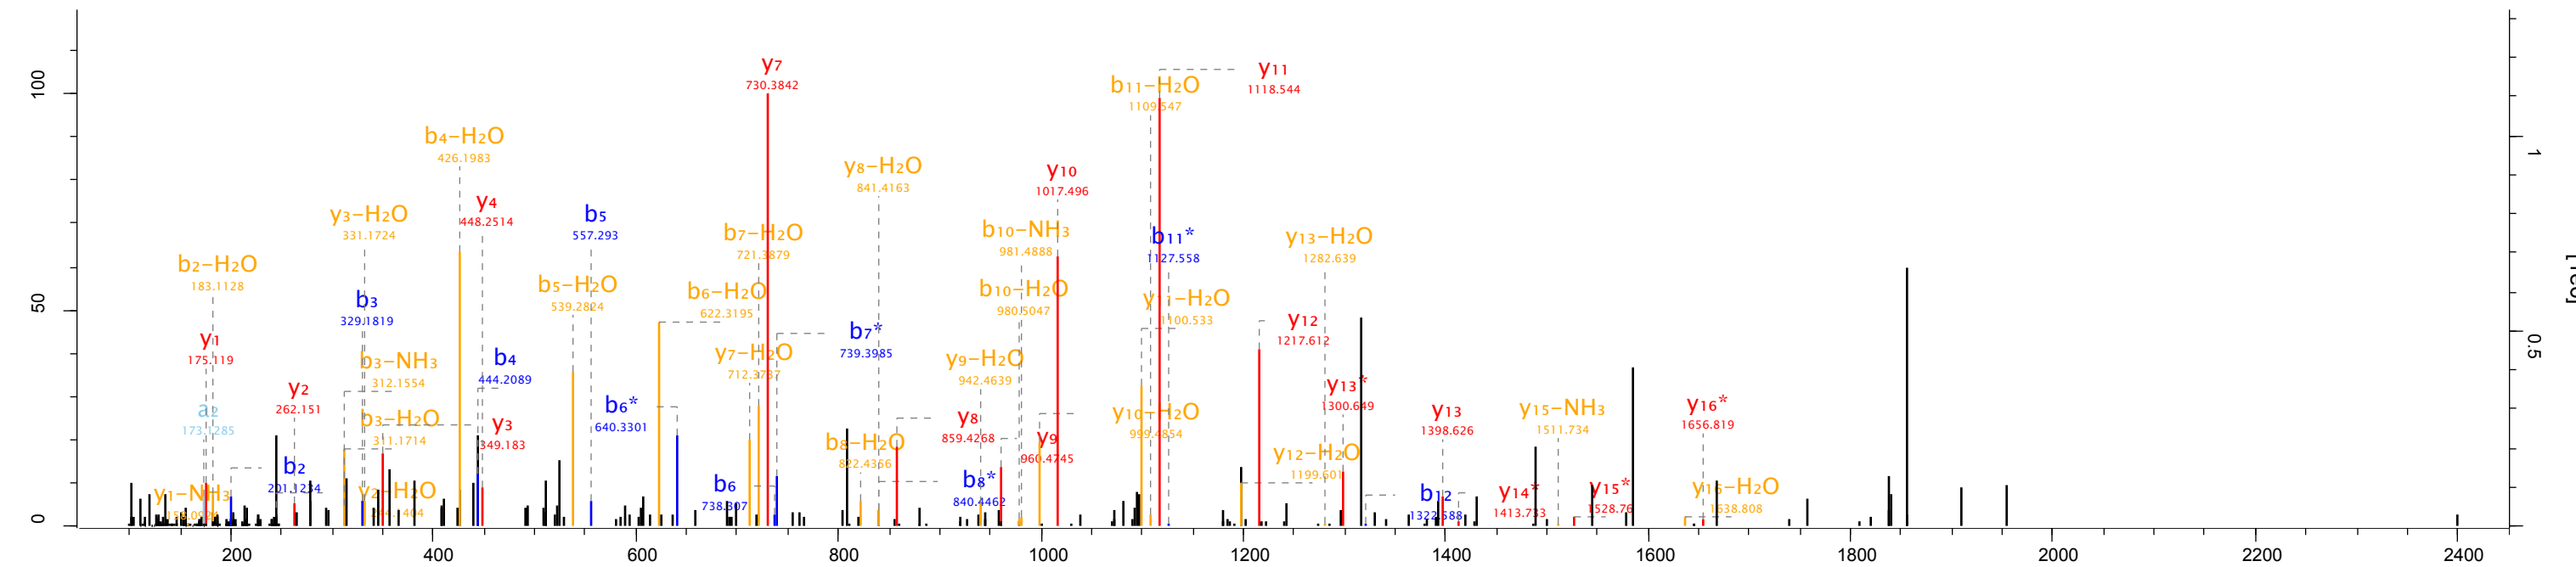

- S I Q D L T V T G T E P G Q V S S R -

b<sub>2</sub>
b<sub>3</sub>
b<sub>4</sub>
b<sub>5</sub>
b<sub>6</sub>
b<sub>7</sub>\*
b<sub>8</sub>\*
b<sub>11</sub>\*
b<sub>12</sub>

y<sub>16</sub>\*
y<sub>15</sub>\*
y<sub>14</sub>\*
y<sub>13</sub>
y<sub>12</sub>
y<sub>11</sub>
y<sub>10</sub>
y<sub>9</sub>
y<sub>8</sub>
y<sub>7</sub>

Raw file 20150812\_A375SR\_Phospho\_BR1\_05 Scan 1659 Method FTMS; HCD Score 51.29 m/z 531.77 Gene names AFF4

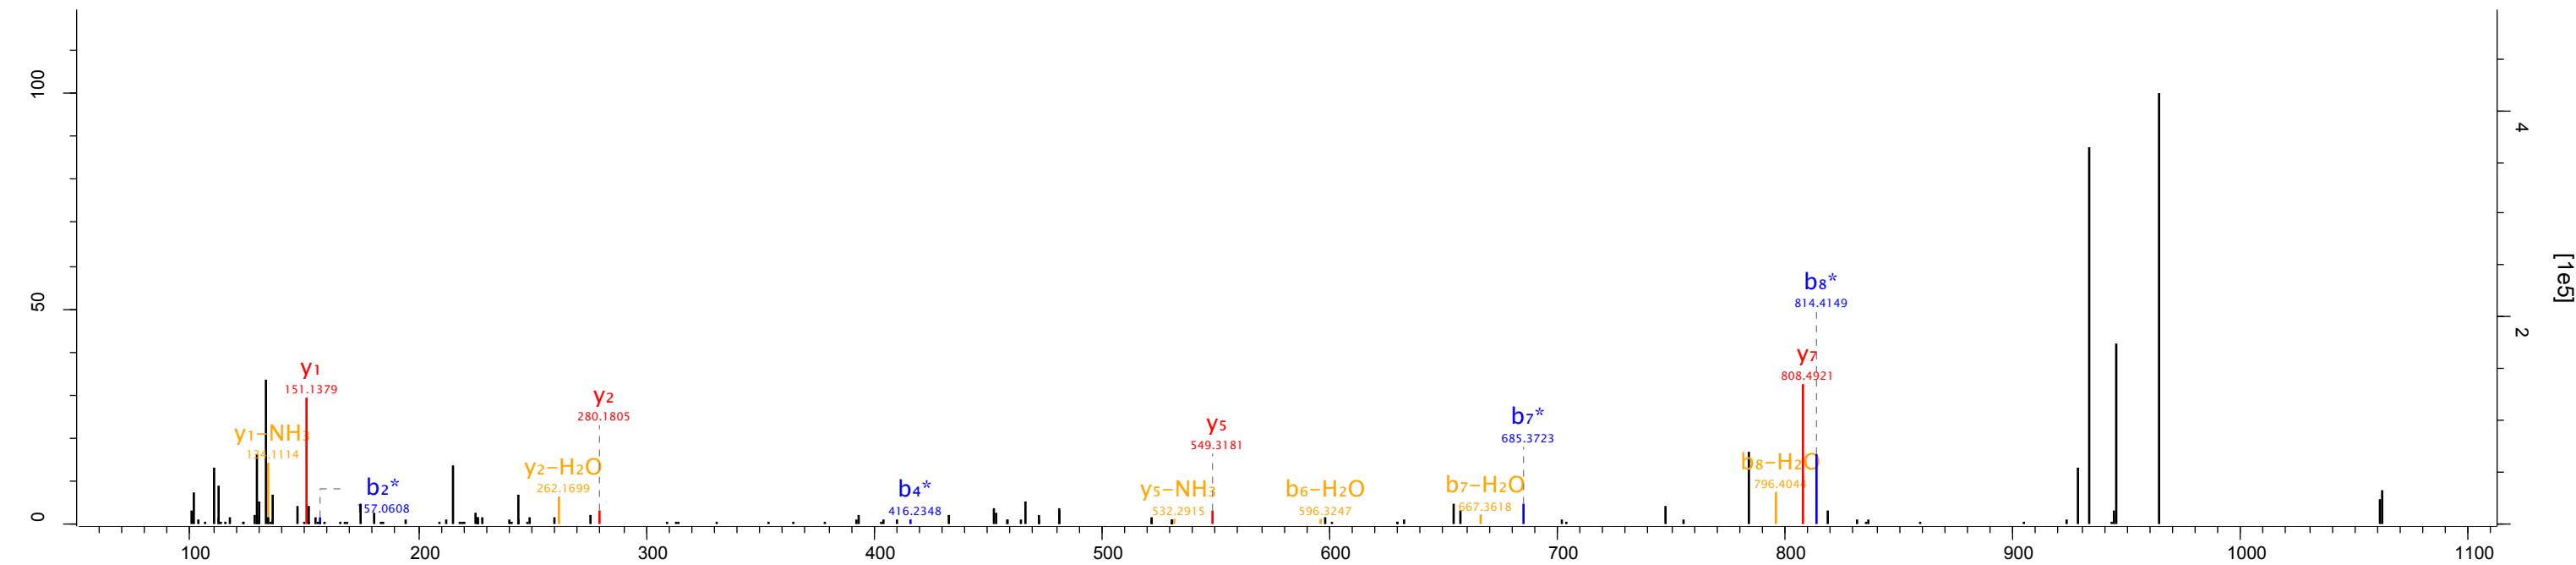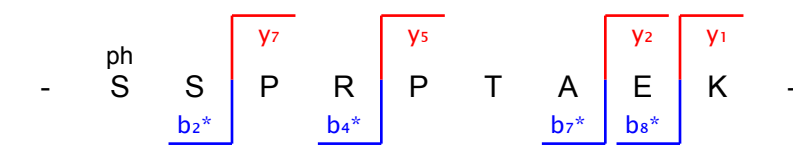

Raw file: 20150812\_A375SR\_Phospho\_BR1\_05  
 Scan: 1759 Method: FTMS; HCD Score: 264.97 m/z: 949.4 Gene names: EIF4B

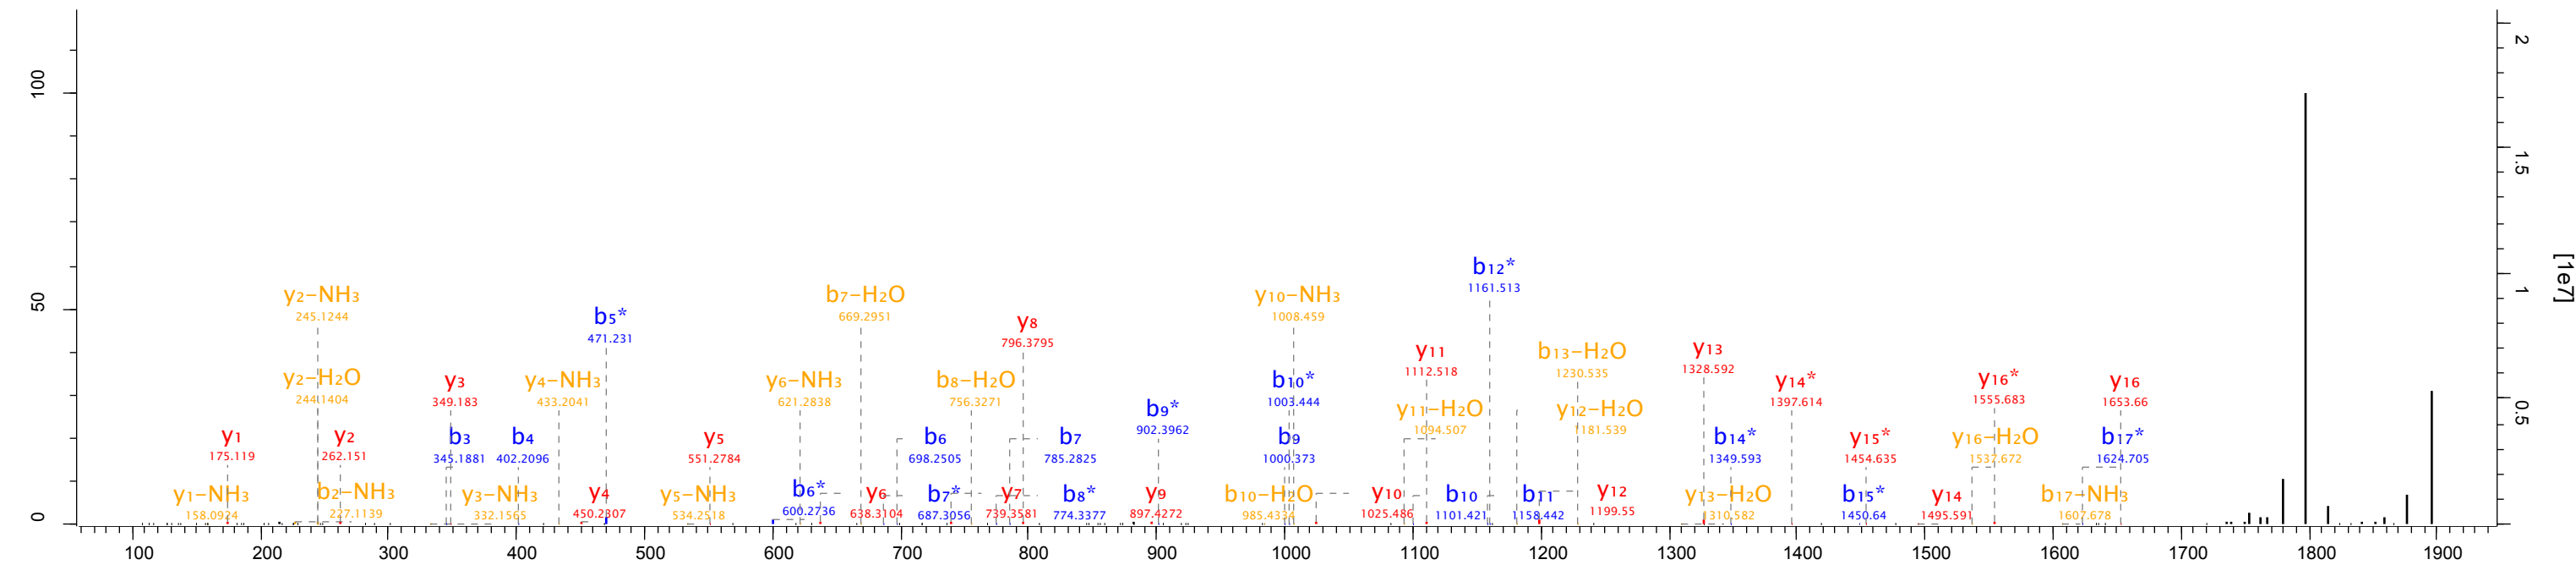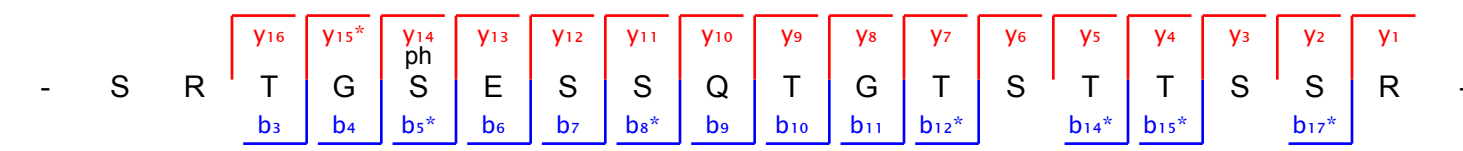

Raw file 20150812\_A375SR\_Phospho\_BR1\_05 Scan 18249 Method FTMS; HCD Score 138.56 m/z 745.88 Gene names MEF2C

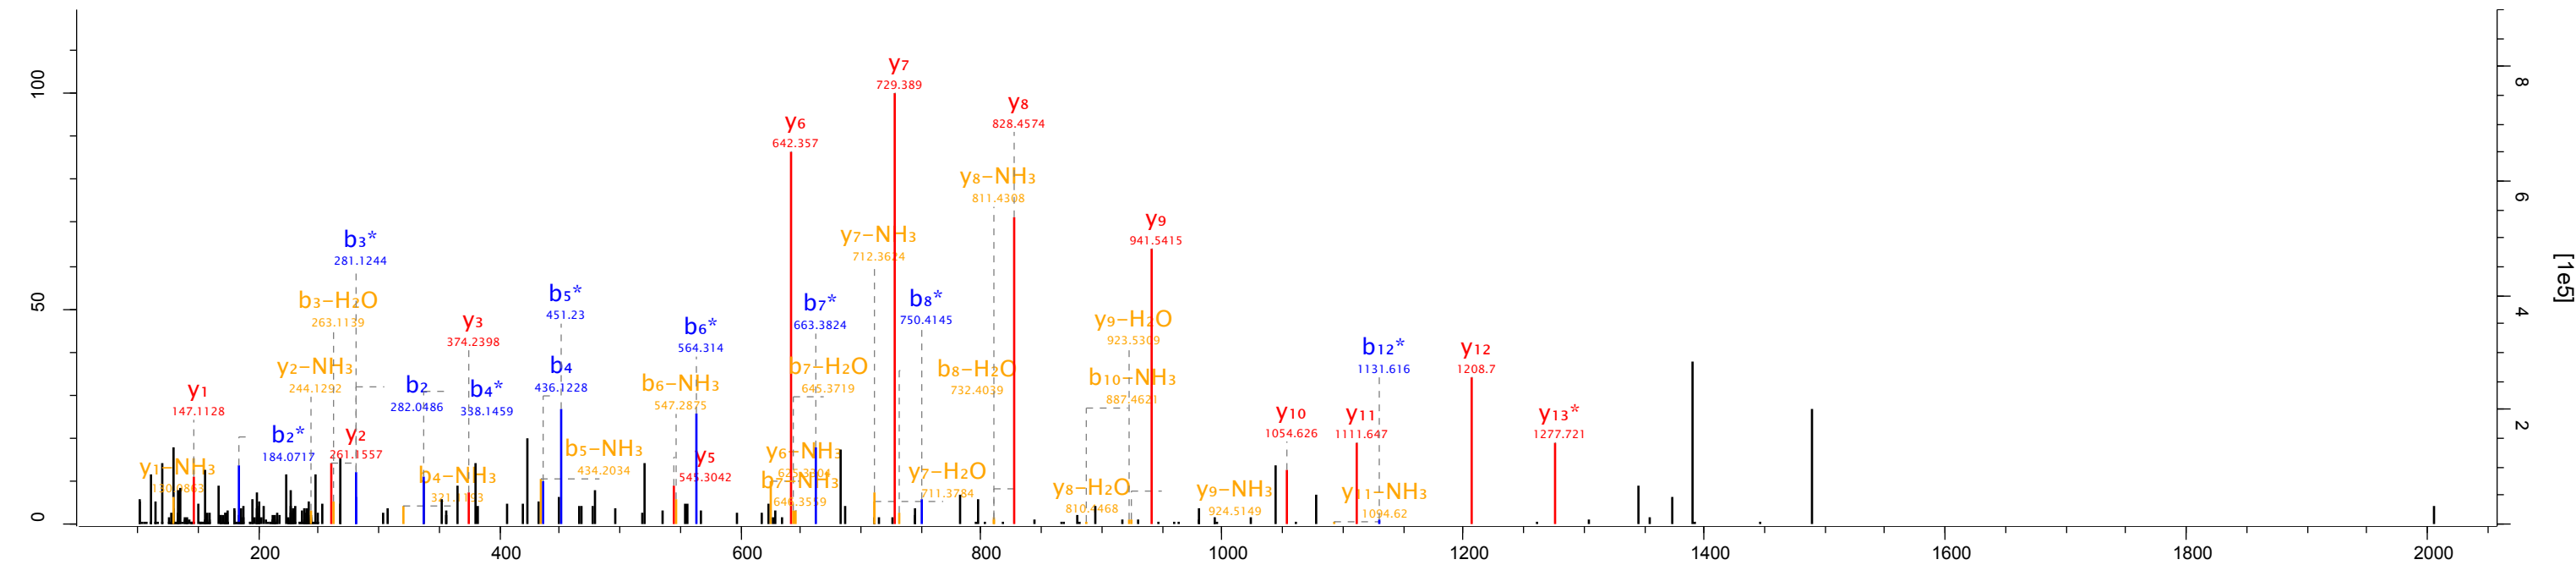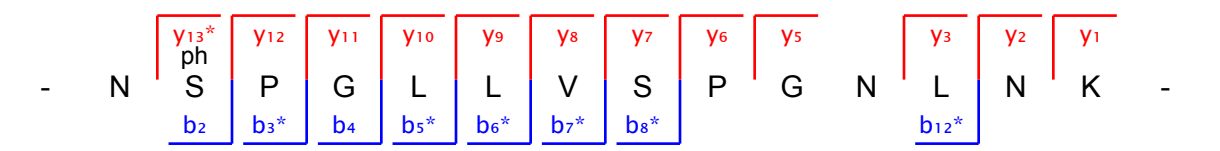

Raw file 20150812\_A375SR\_Phospho\_BR1\_05 Scan 1879 Method FTMS; HCD Score 252.7 m/z 862.42 Gene names ZNF326

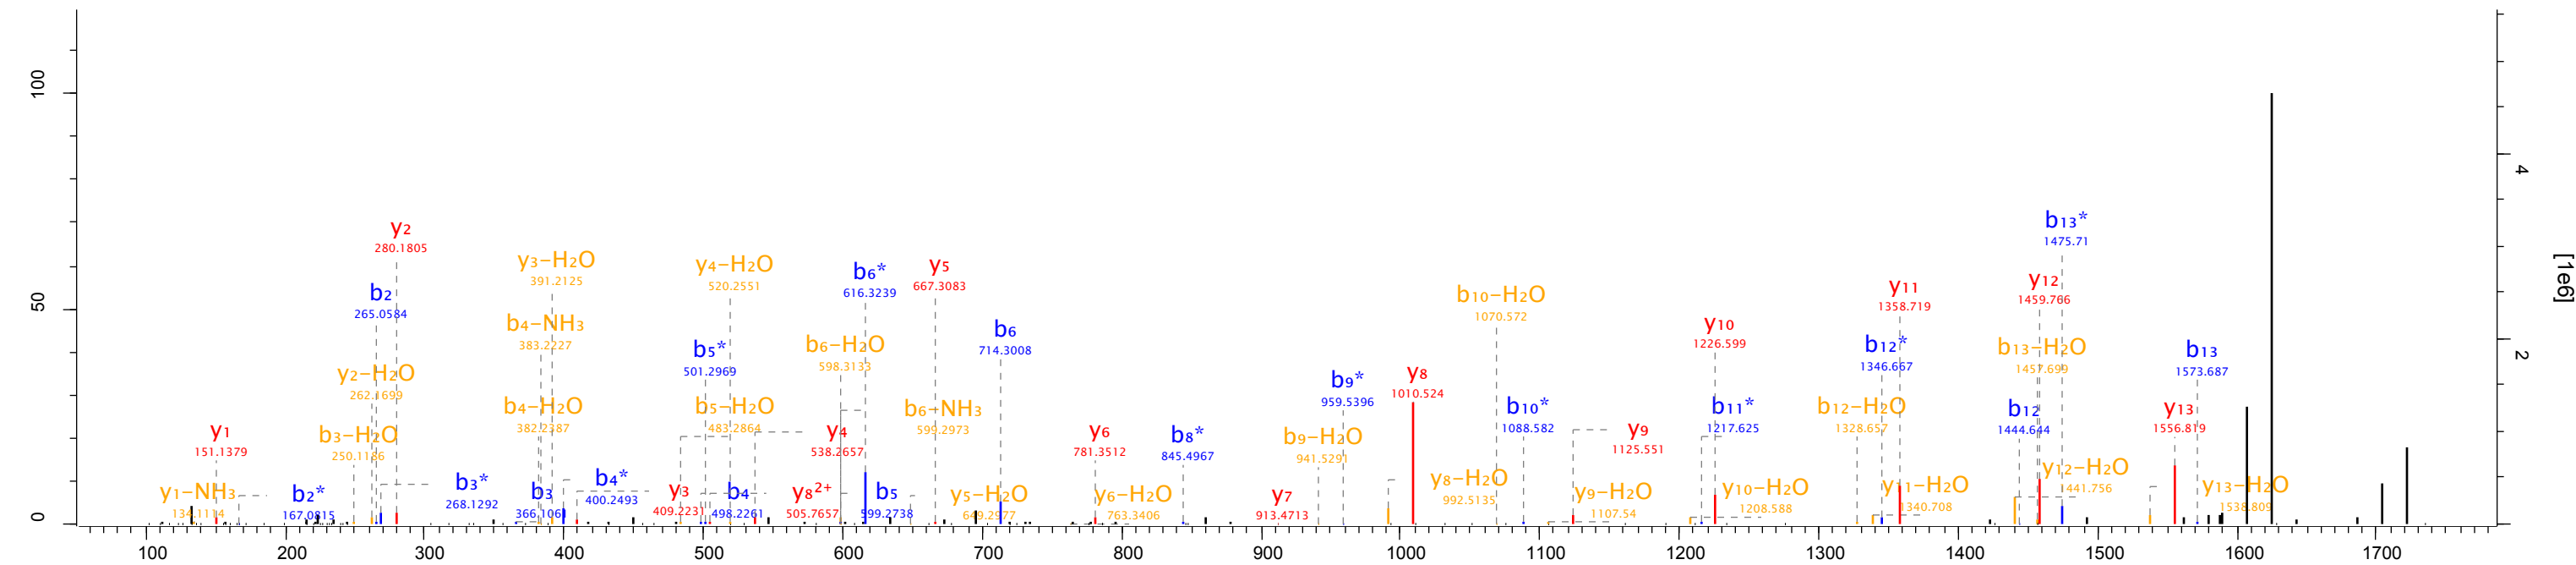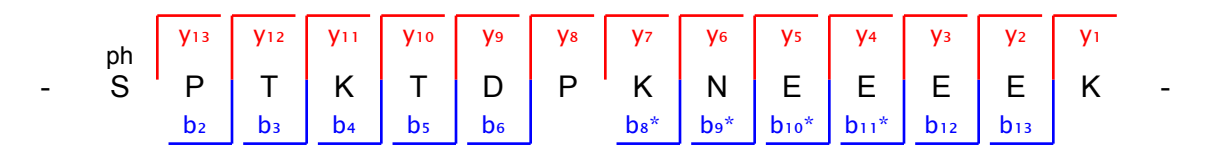

Raw file: 20150812\_A375SR\_Phospho\_BR1\_05  
 Scan: 20189 Method: FTMS; HCD Score: 85.56 m/z: 774.81 Gene names: EIF4EBP1

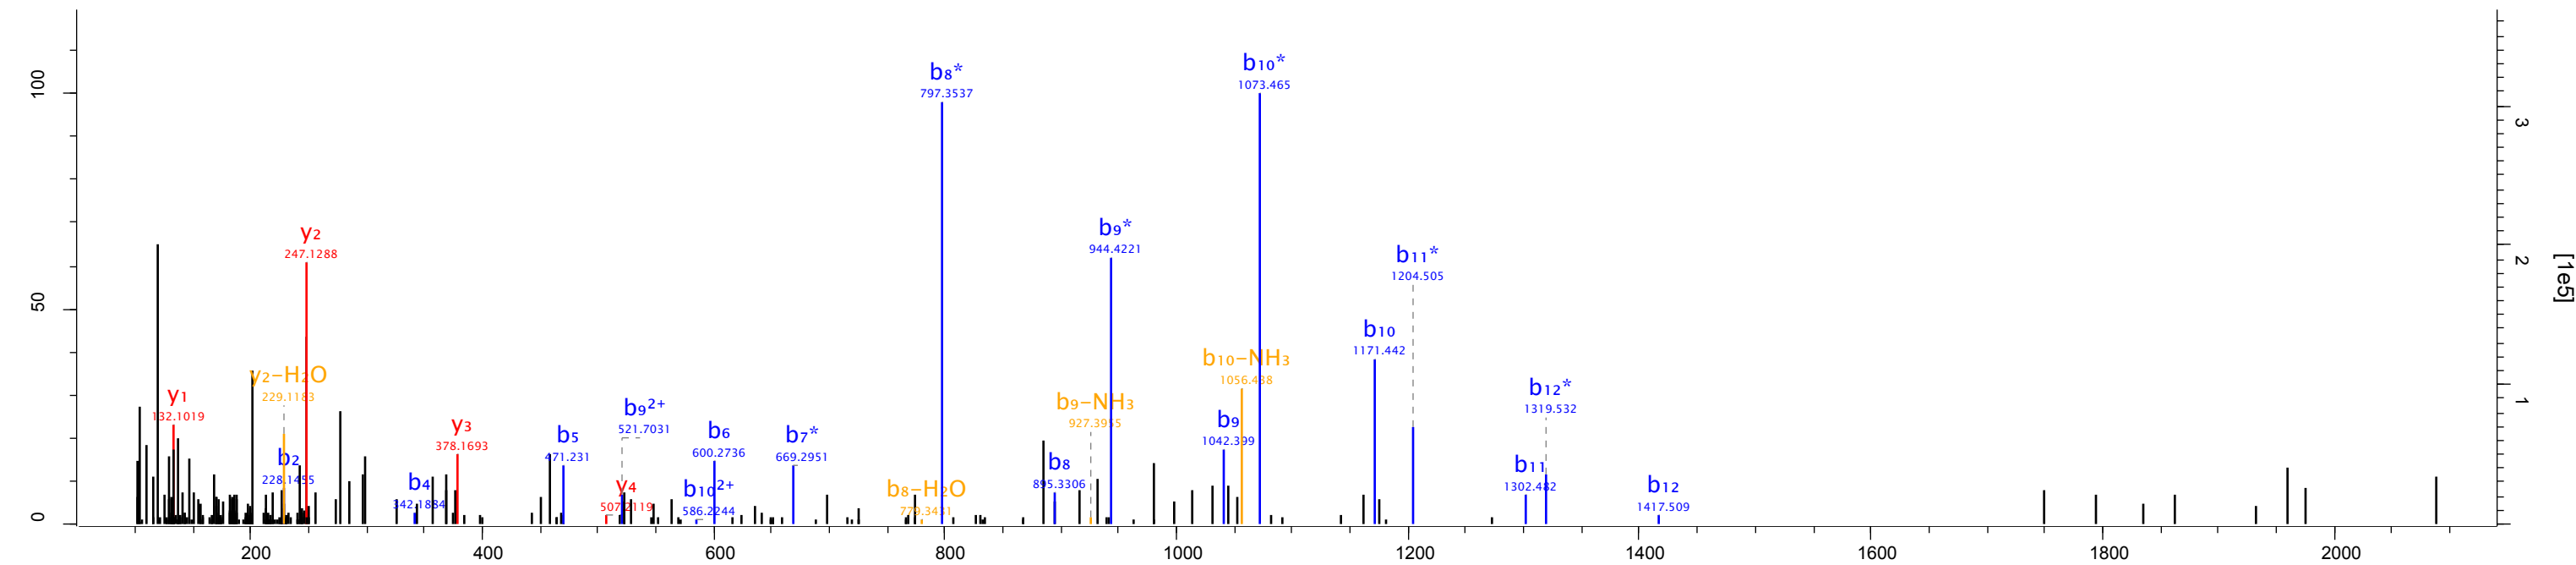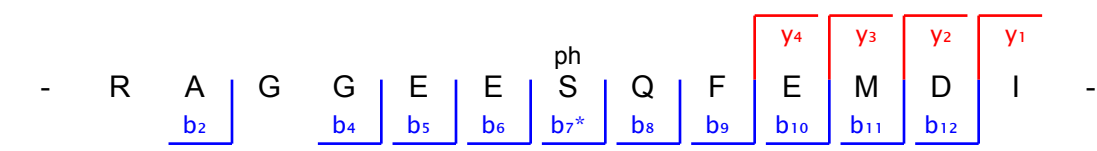

Raw file 20150812\_A375SR\_Phospho\_BR1\_05 Scan 20209 Method FTMS; HCD Score 75.91 m/z 662.96 Gene names CRK

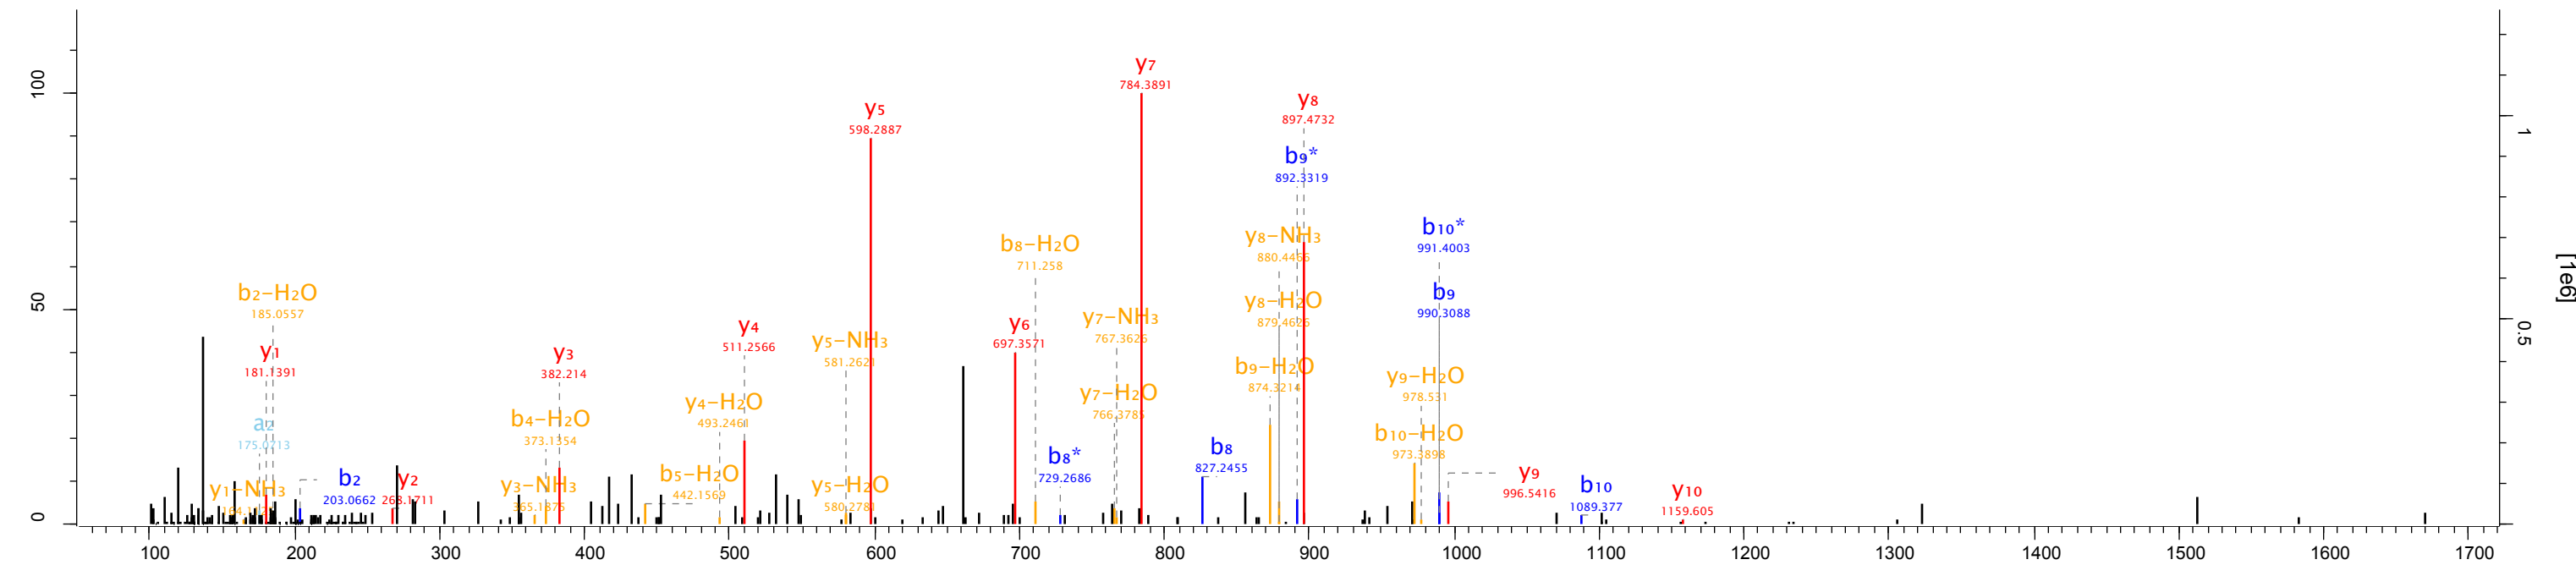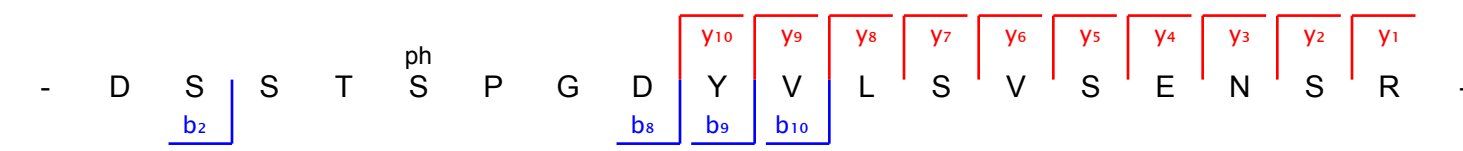

Raw file: 20150812\_A375SR\_Phospho\_BR1\_05  
 Scan: 2059 Method: FTMS; HCD Score: 43.86 m/z: 498.9 Gene names: BRCA1

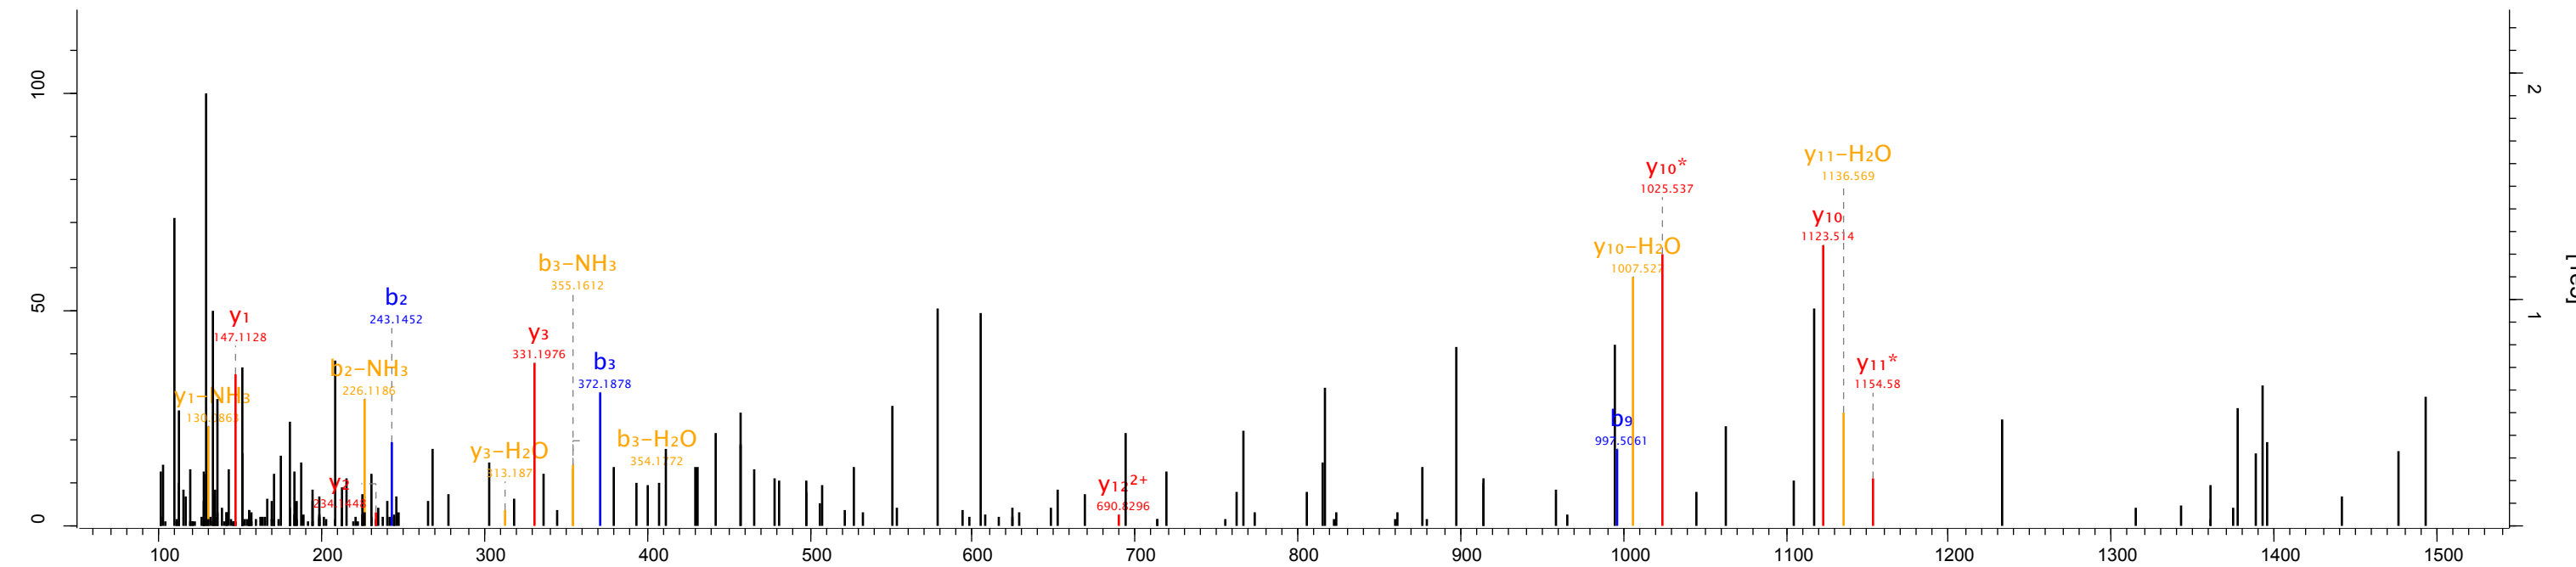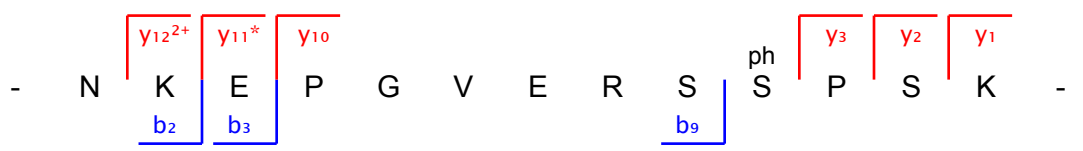



Raw file Scan Method Score m/z Gene names  
 20150812\_A375SR\_Phospho\_BR1\_05 21409 FTMS; HCD 96.38 691.72 MYBBP1A

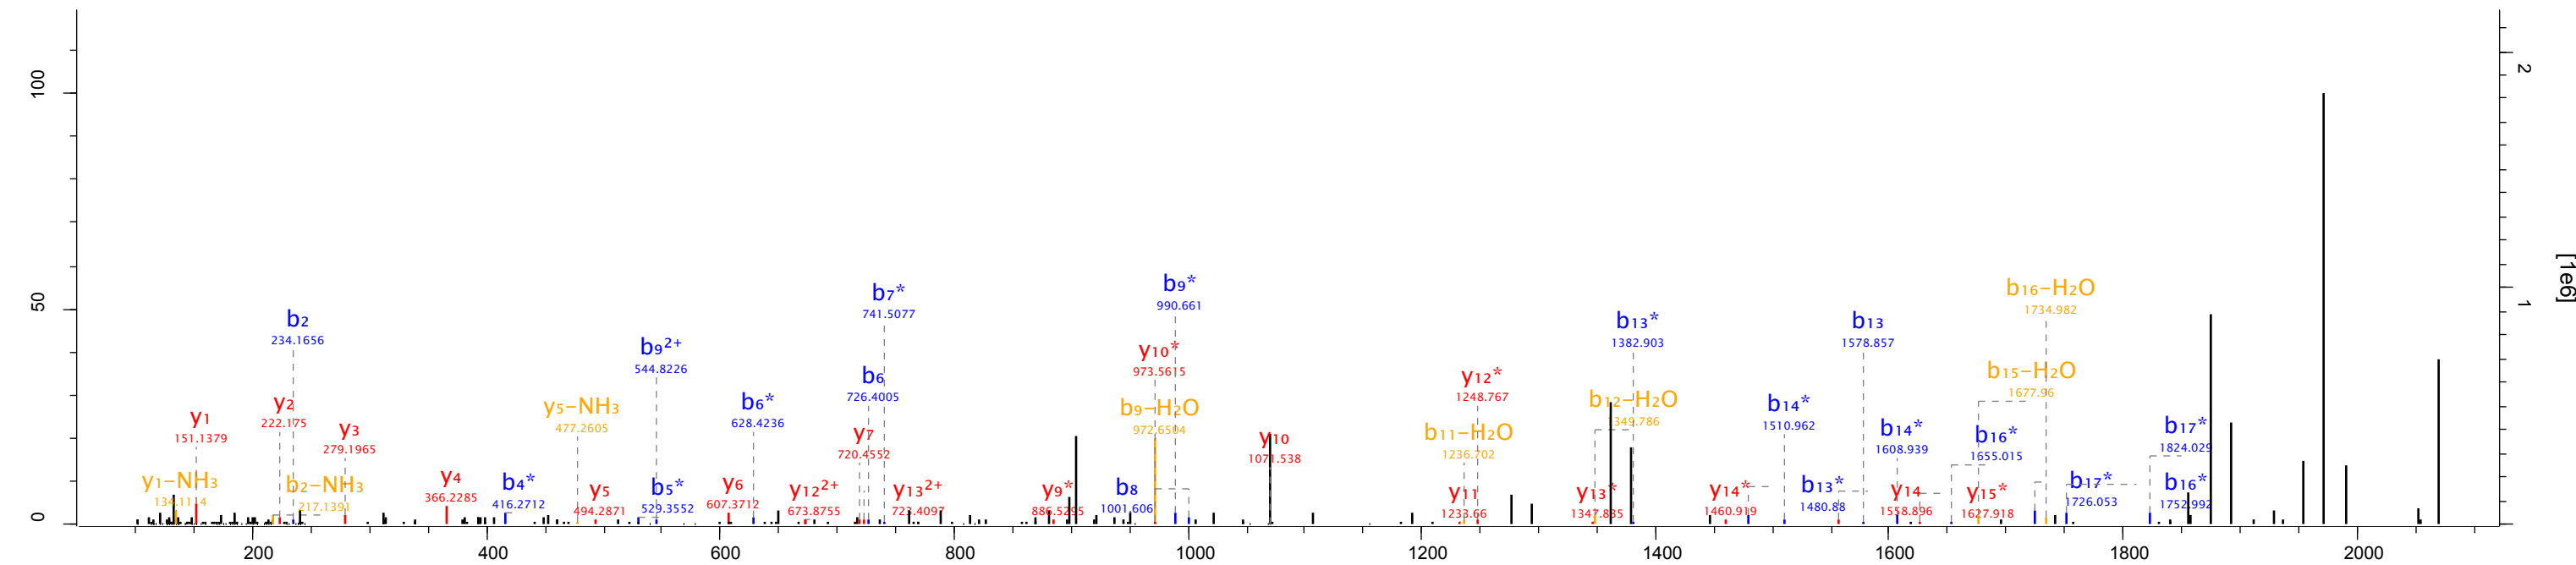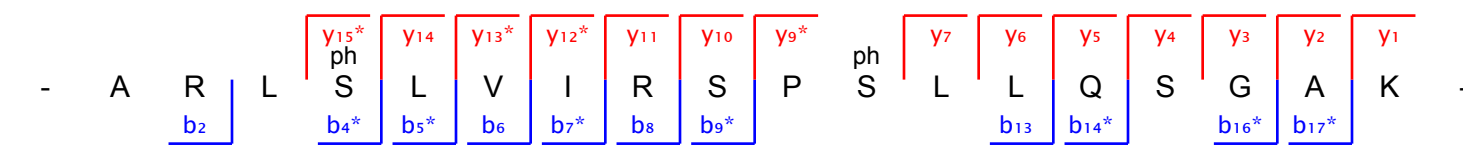

Raw file: 20150812\_A375SR\_Phospho\_BR1\_05  
 Scan: 2159 Method: FTMS; HCD Score: 106.16 m/z: 546.78 Gene names: CFL1

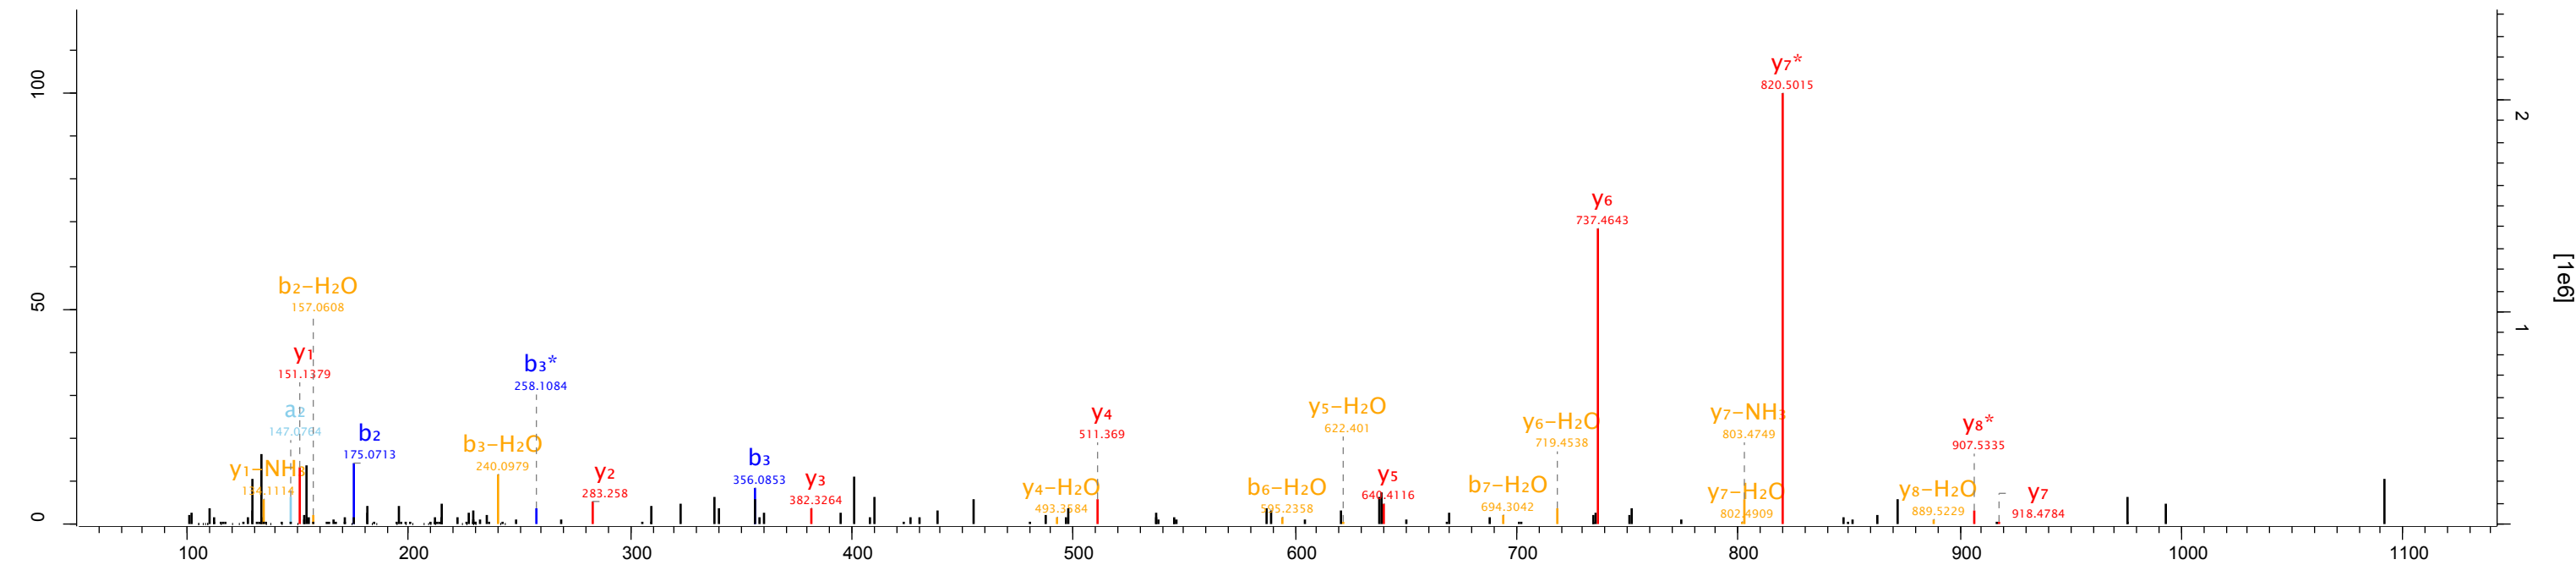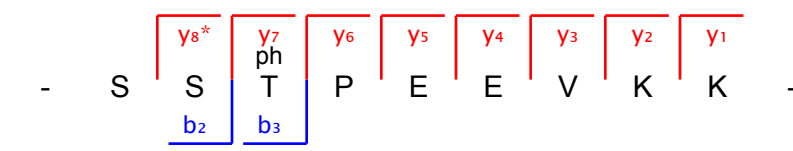

Raw file: 20150812\_A375SR\_Phospho\_BR1\_05  
 Scan: 22849 Method: FTMS; HCD Score: 110.92 m/z: 1130.17 Gene names: NFATC2IP

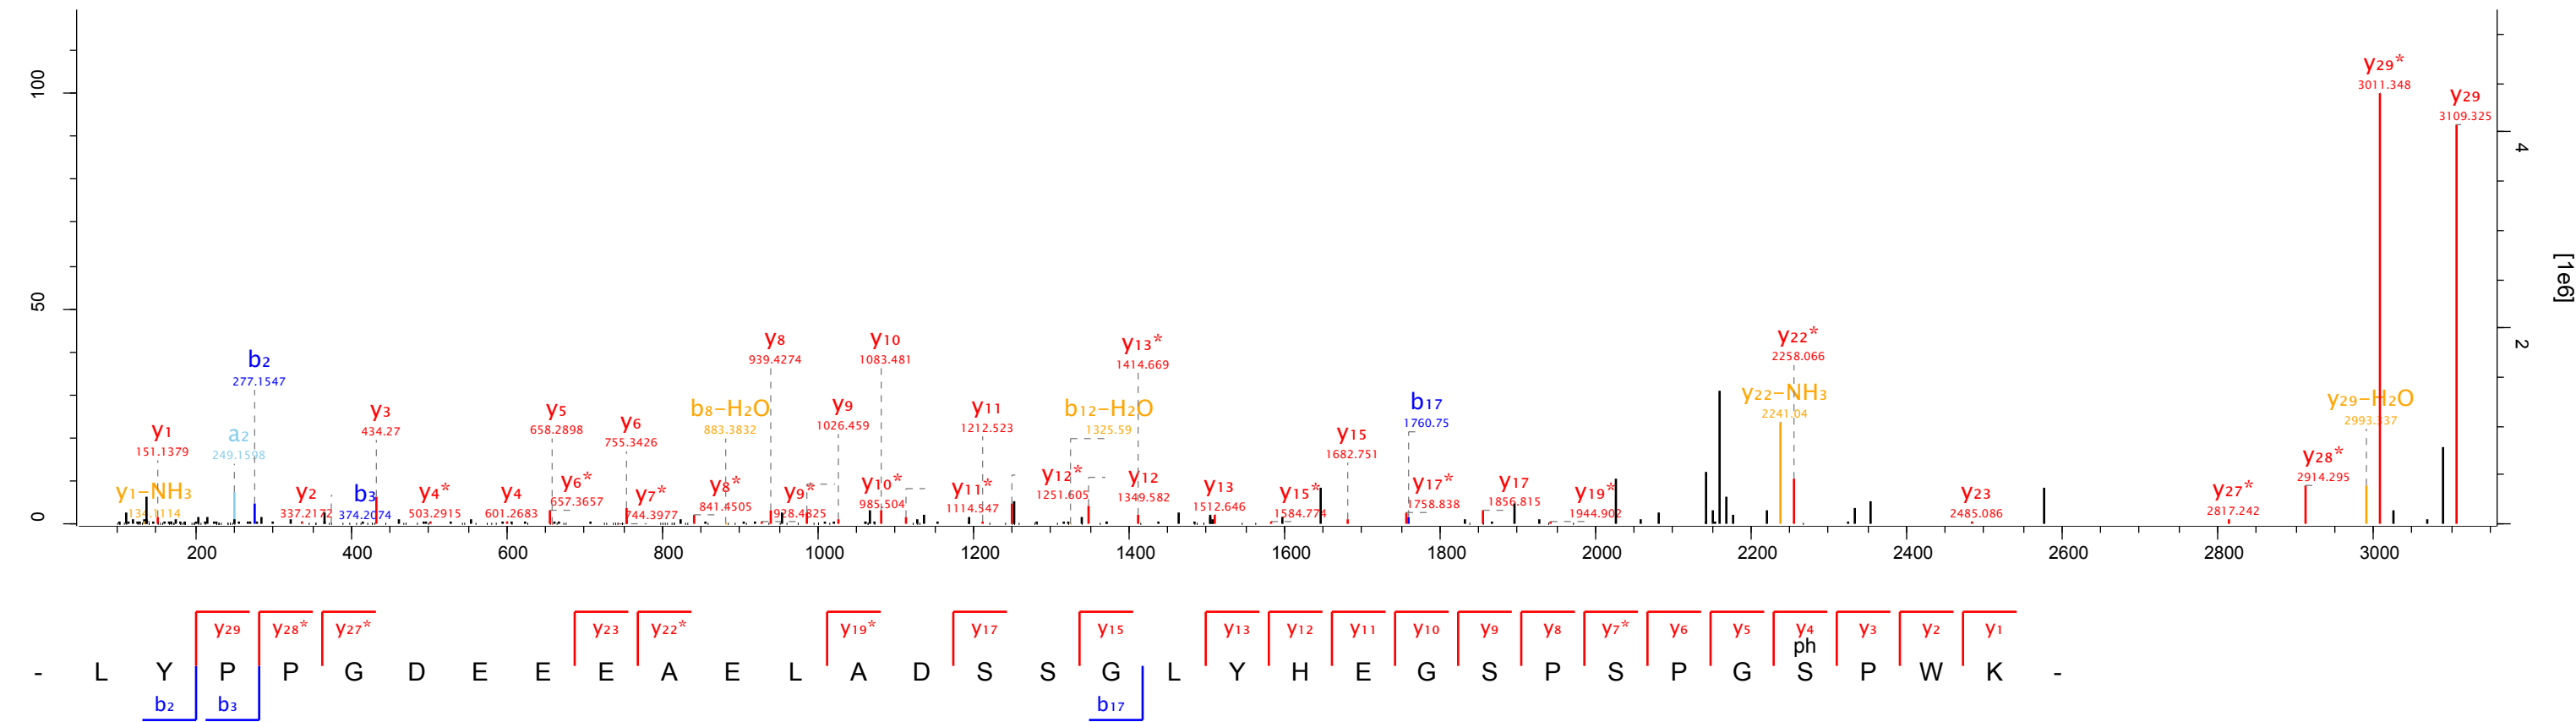

Raw file 20150812\_A375SR\_Phospho\_BR1\_05 Scan 23499 Method FTMS; HCD Score 77.22 m/z 829.43 Gene names BRCA2

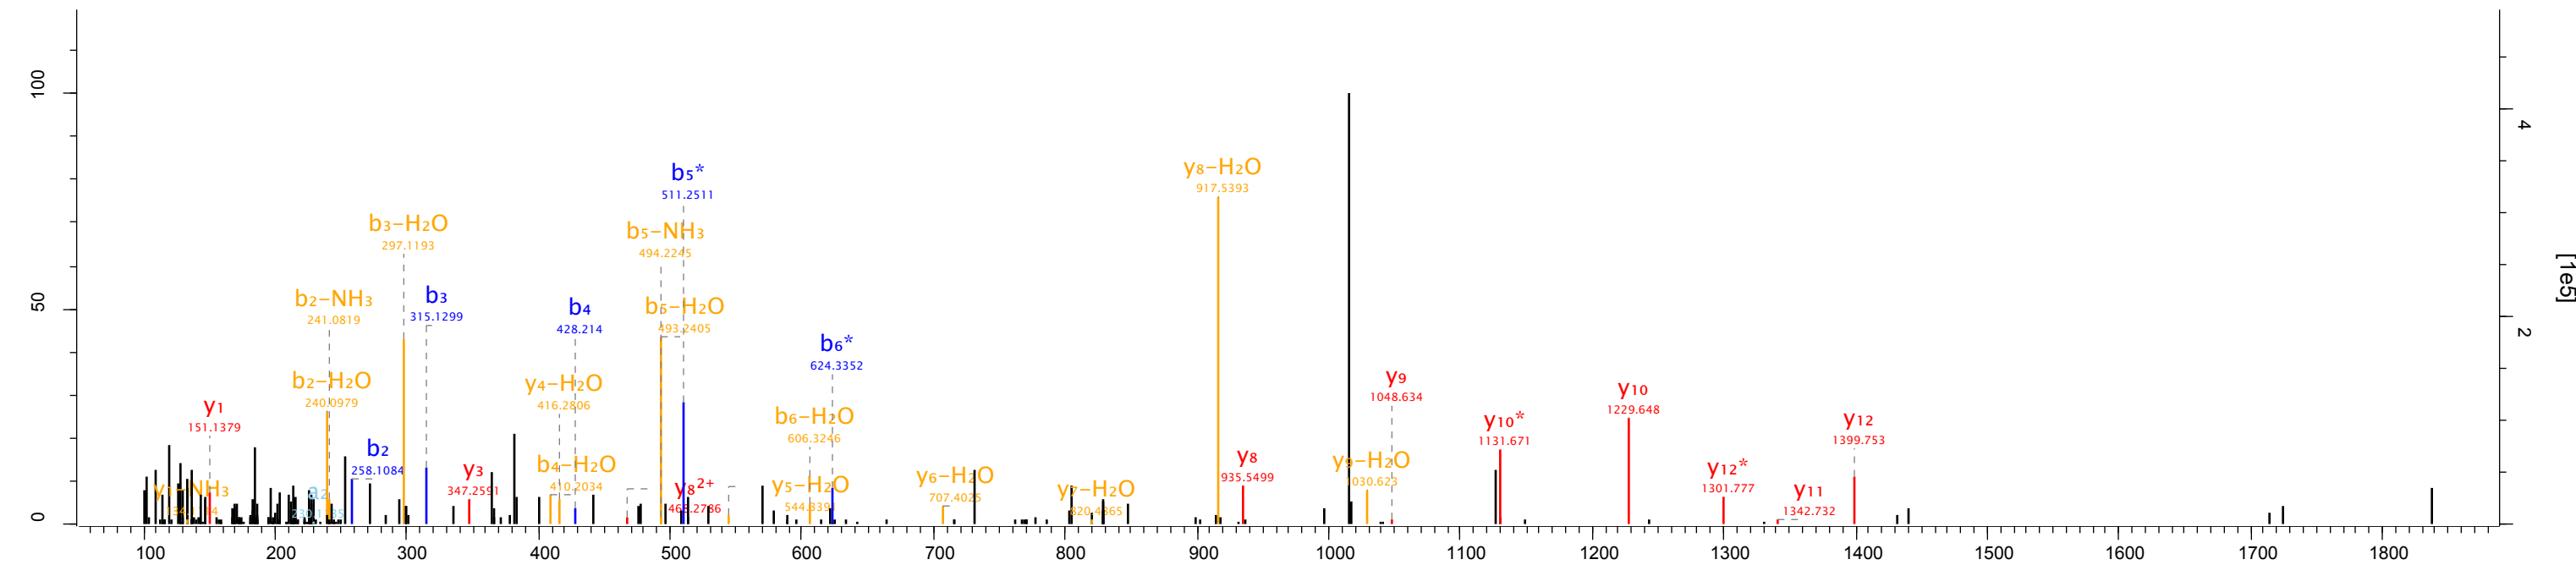

- E Q G L ph T L P L Y Q S P V K -

Fragmentation mapping: b2 (Q), b3 (G), b4 (L), b5\* (ph), b6\* (T), y1 (K), y3 (P), y8 (V), y9 (L), y10 (T), y11 (L), y12 (G).

Raw file: 20150812\_A375SR\_Phospho\_BR1\_05  
 Scan: 25909 Method: FTMS; HCD Score: 249.44 m/z: 1279.62 Gene names: WDR44

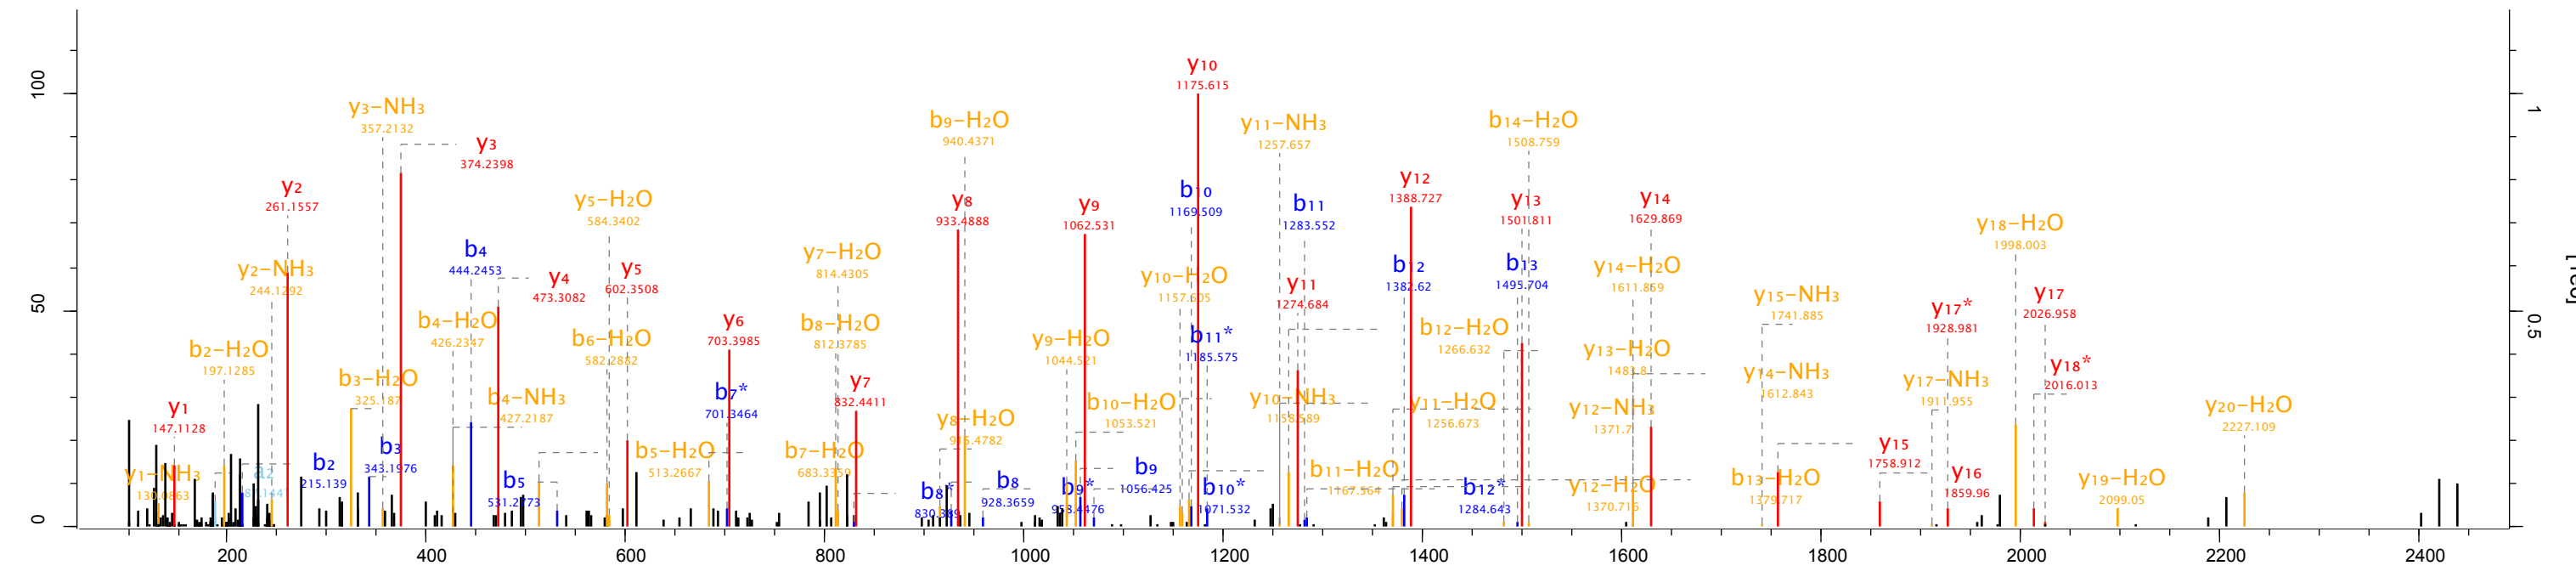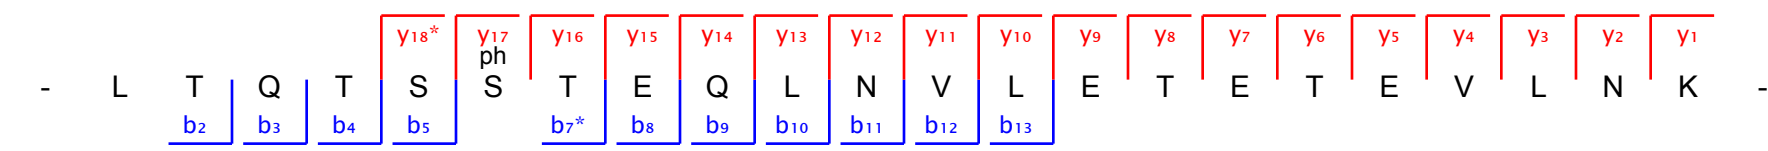

Raw file: 20150812\_A375SR\_Phospho\_BR1\_05  
 Scan: 26219 Method: FTMS; HCD Score: 174.82 m/z: 925.49 Gene names: GPN1

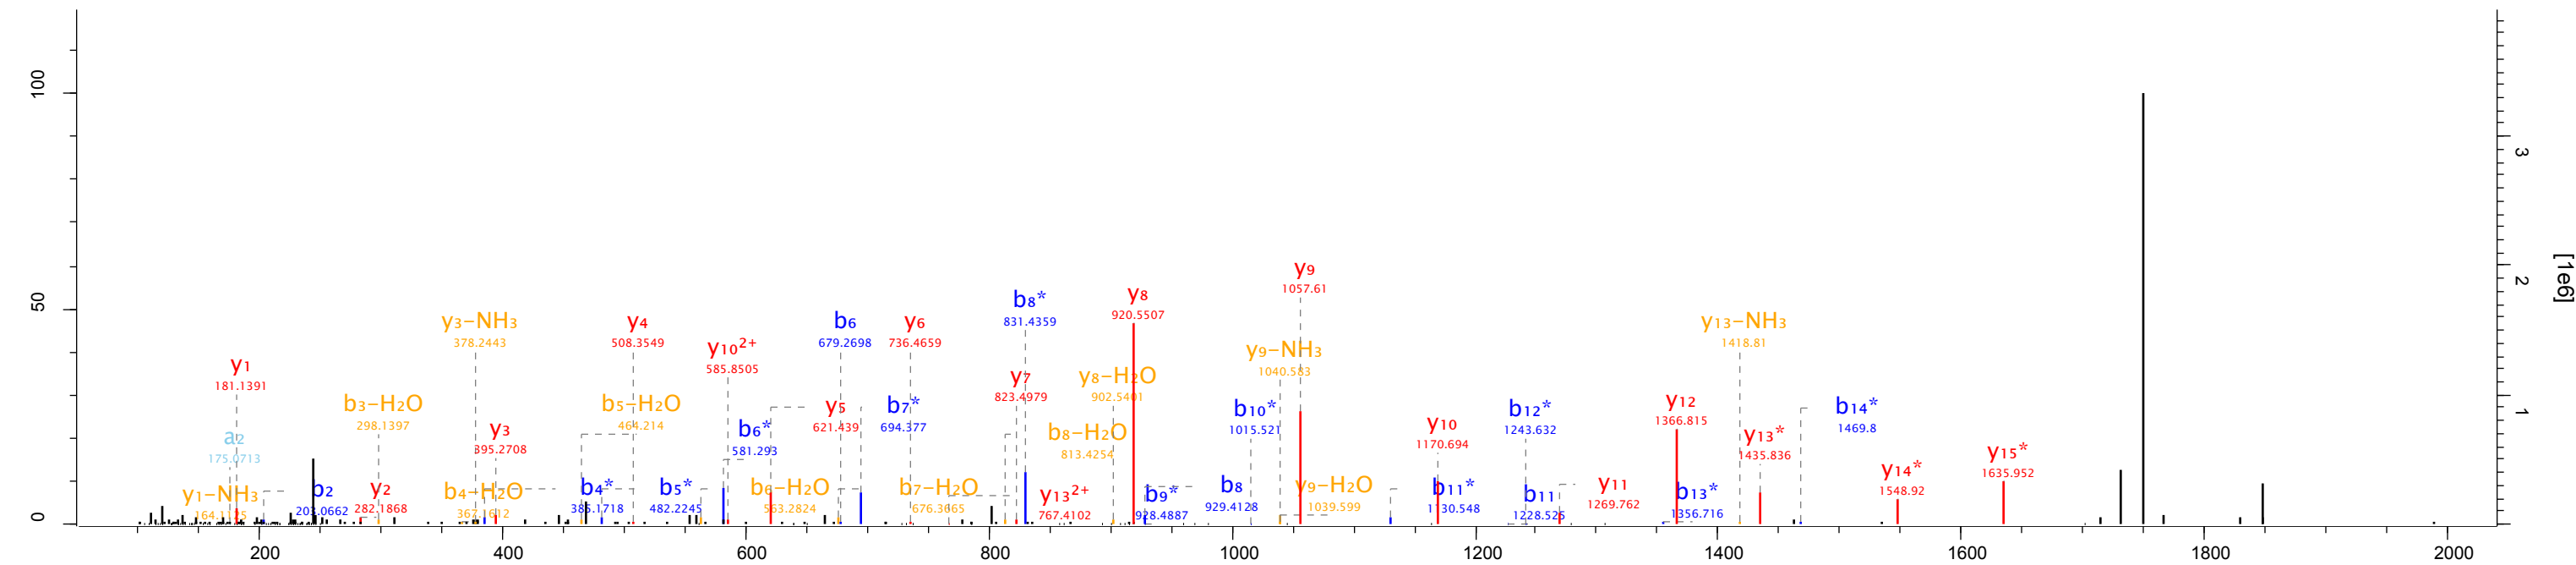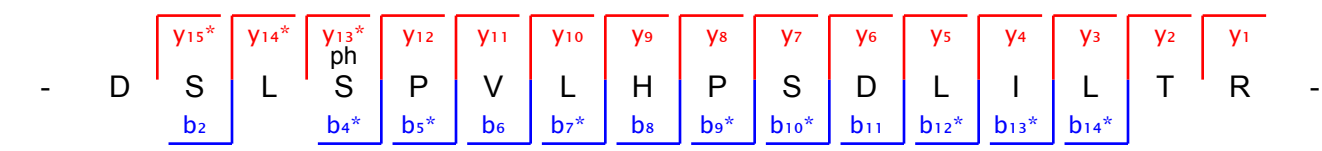

Raw file: 20150812\_A375SR\_Phospho\_BR1\_05  
 Scan: 26249 Method: FTMS; HCD Score: 87.54 m/z: 1389.98 Gene names: MED15

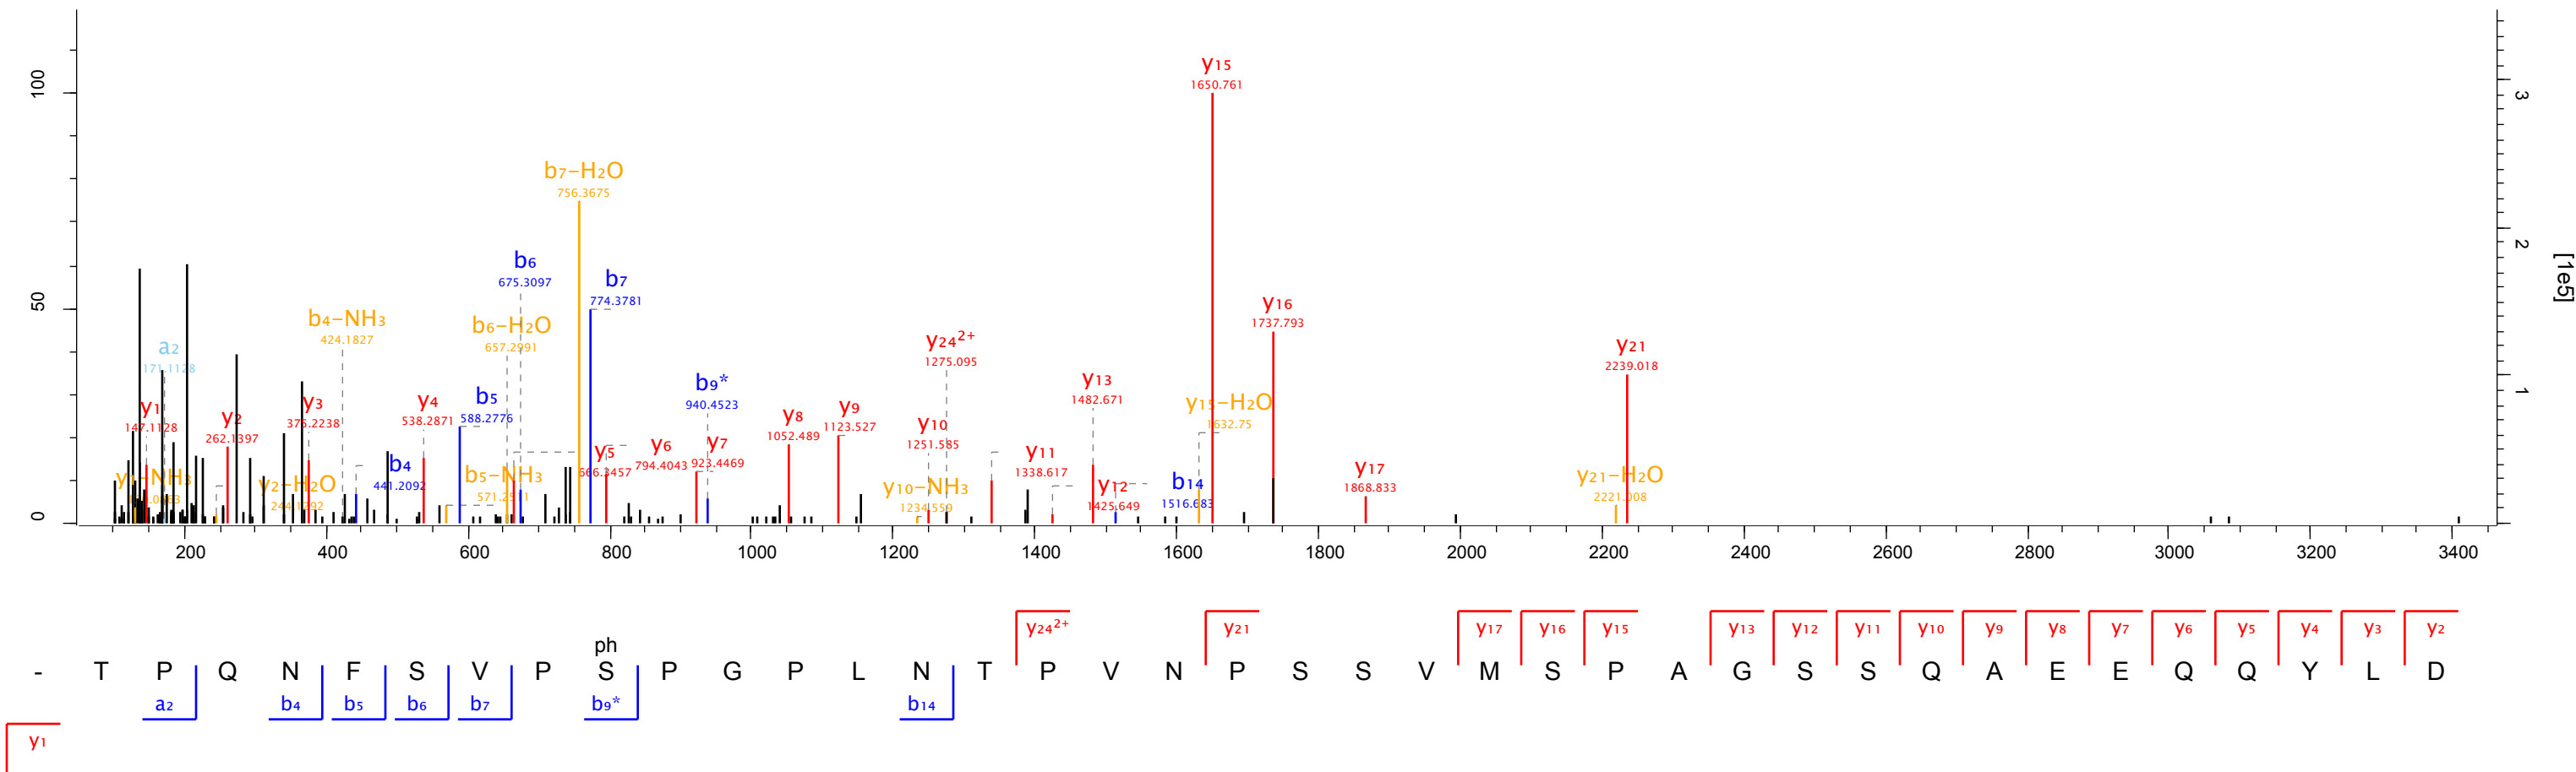

Raw file: 20150812\_A375SR\_Phospho\_BR1\_05  
 Scan: 2709 Method: FTMS; HCD Score: 94.45 m/z: 464.22 Gene names: REPS1

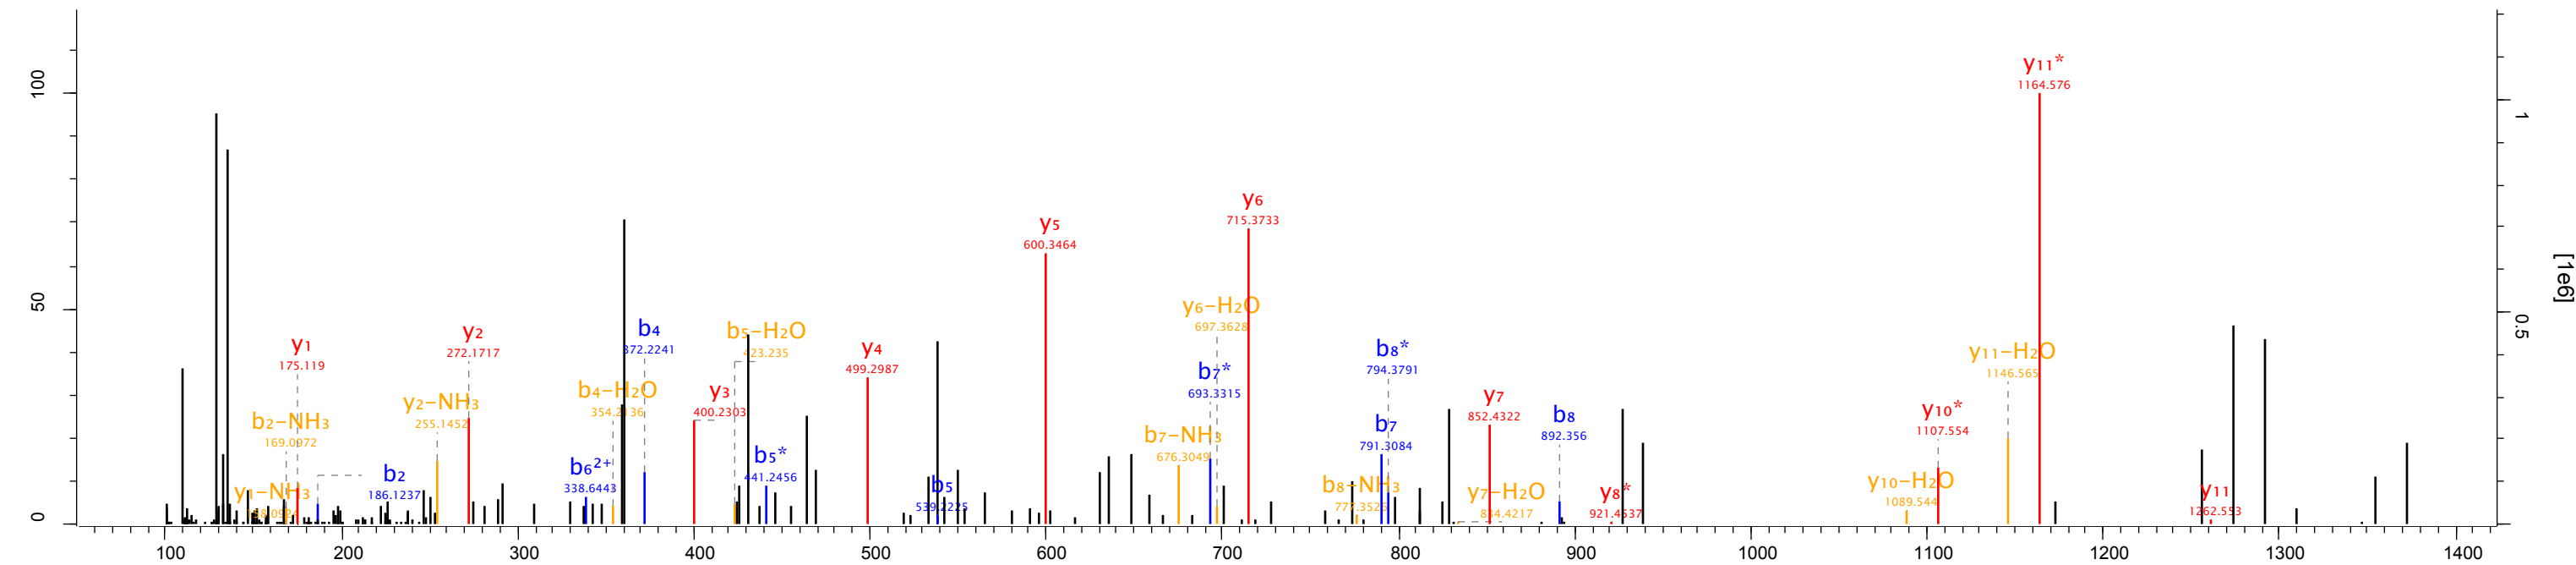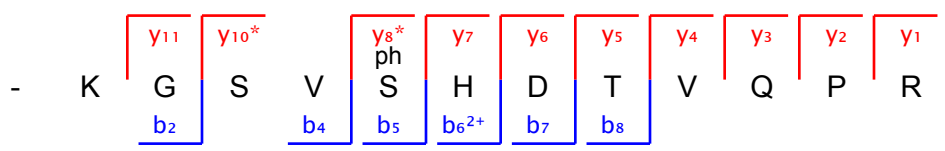



Raw file: 20150812\_A375SR\_Phospho\_BR1\_05  
 Scan: 2909 Method: FTMS; HCD Score: 83.37 m/z: 508.9 Gene names: TENC1

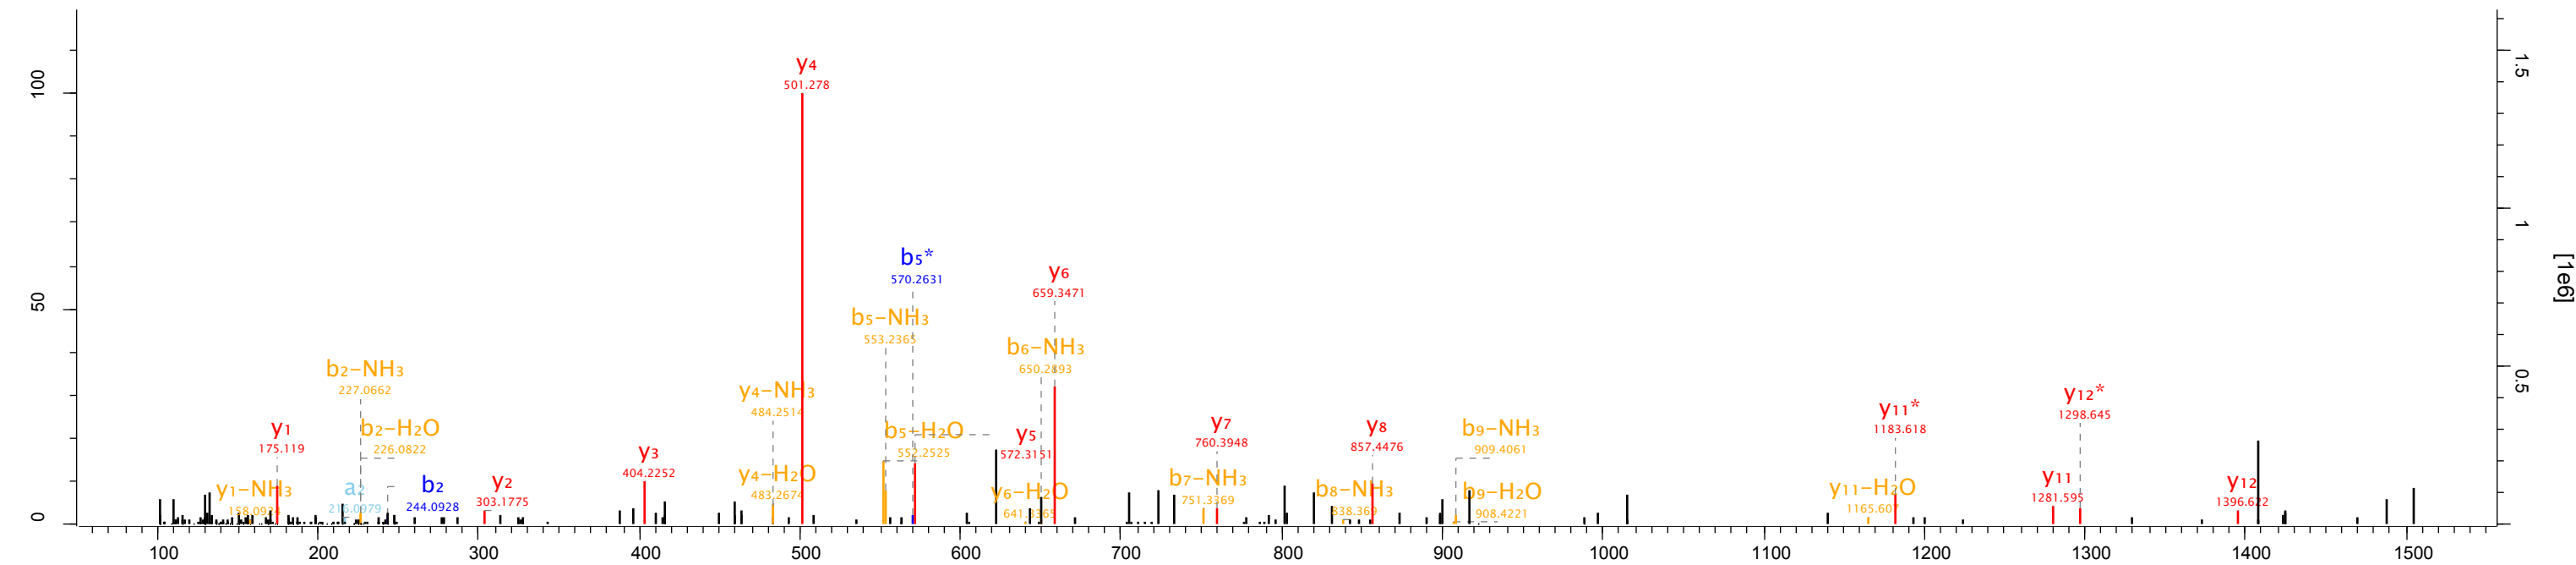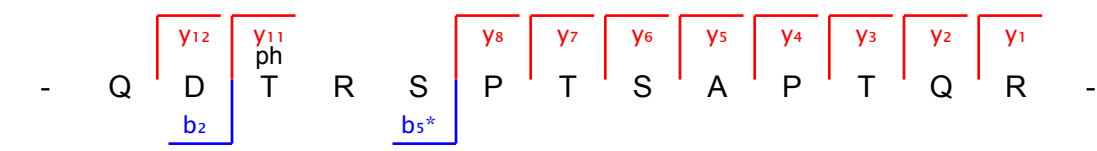

Raw file: 20150812\_A375SR\_Phospho\_BR1\_05  
 Scan: 3159 Method: FTMS; HCD Score: 159.41 m/z: 674.78 Gene names: SPAG9

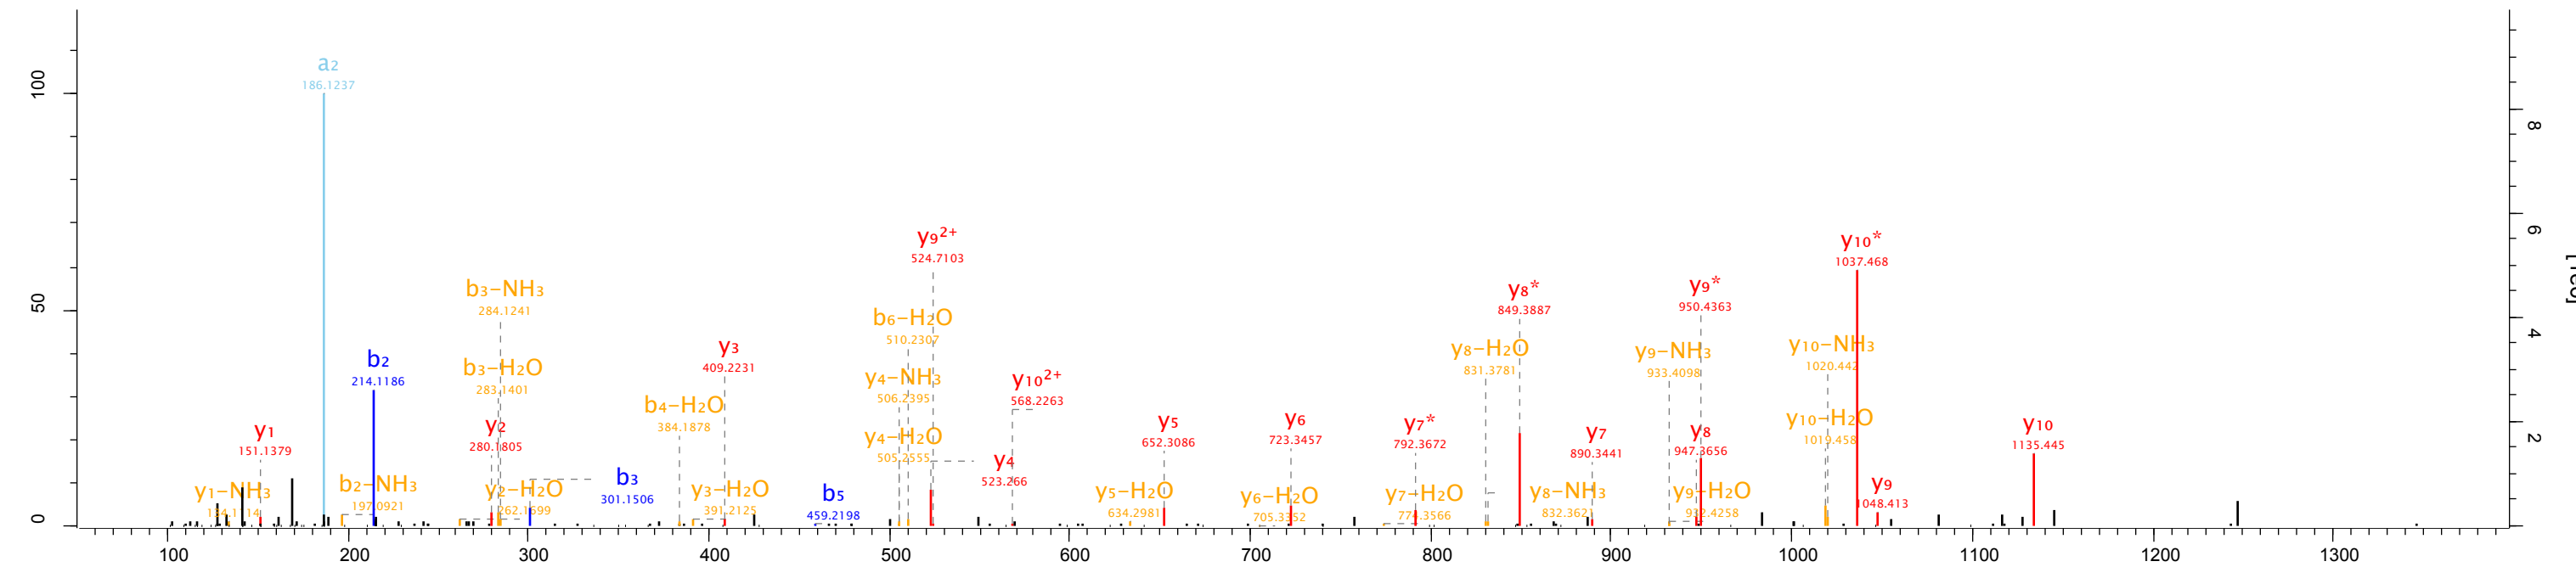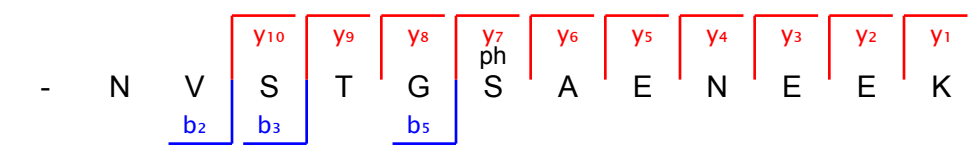

Raw file 20150812\_A375SR\_Phospho\_BR1\_05 Scan 3399 Method FTMS; HCD Score 163.26 m/z 676.8 Gene names WWP2

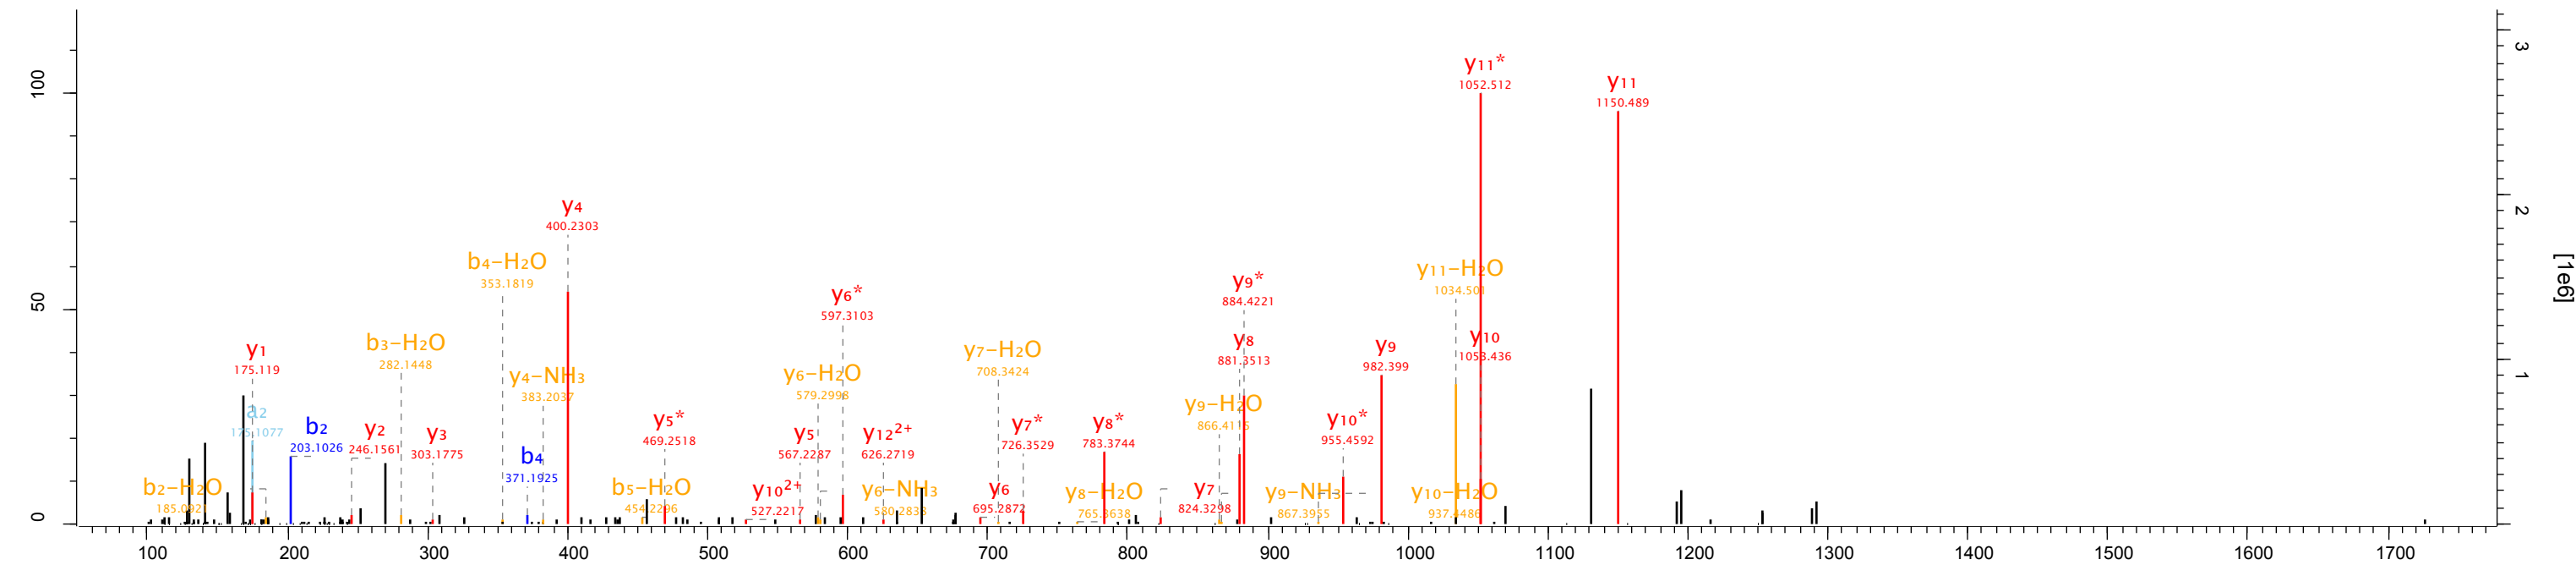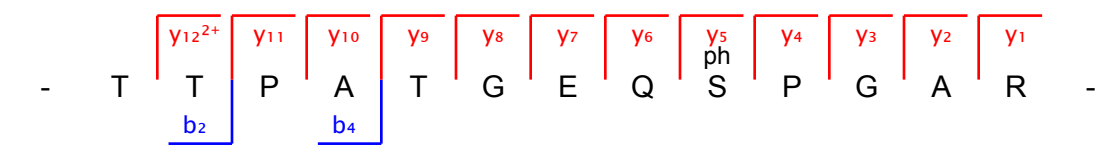

Raw file: 20150812\_A375SR\_Phospho\_BR1\_05  
 Scan: 3419 Method: FTMS; HCD Score: 101.72 m/z: 554.93 Gene names: HUWE1

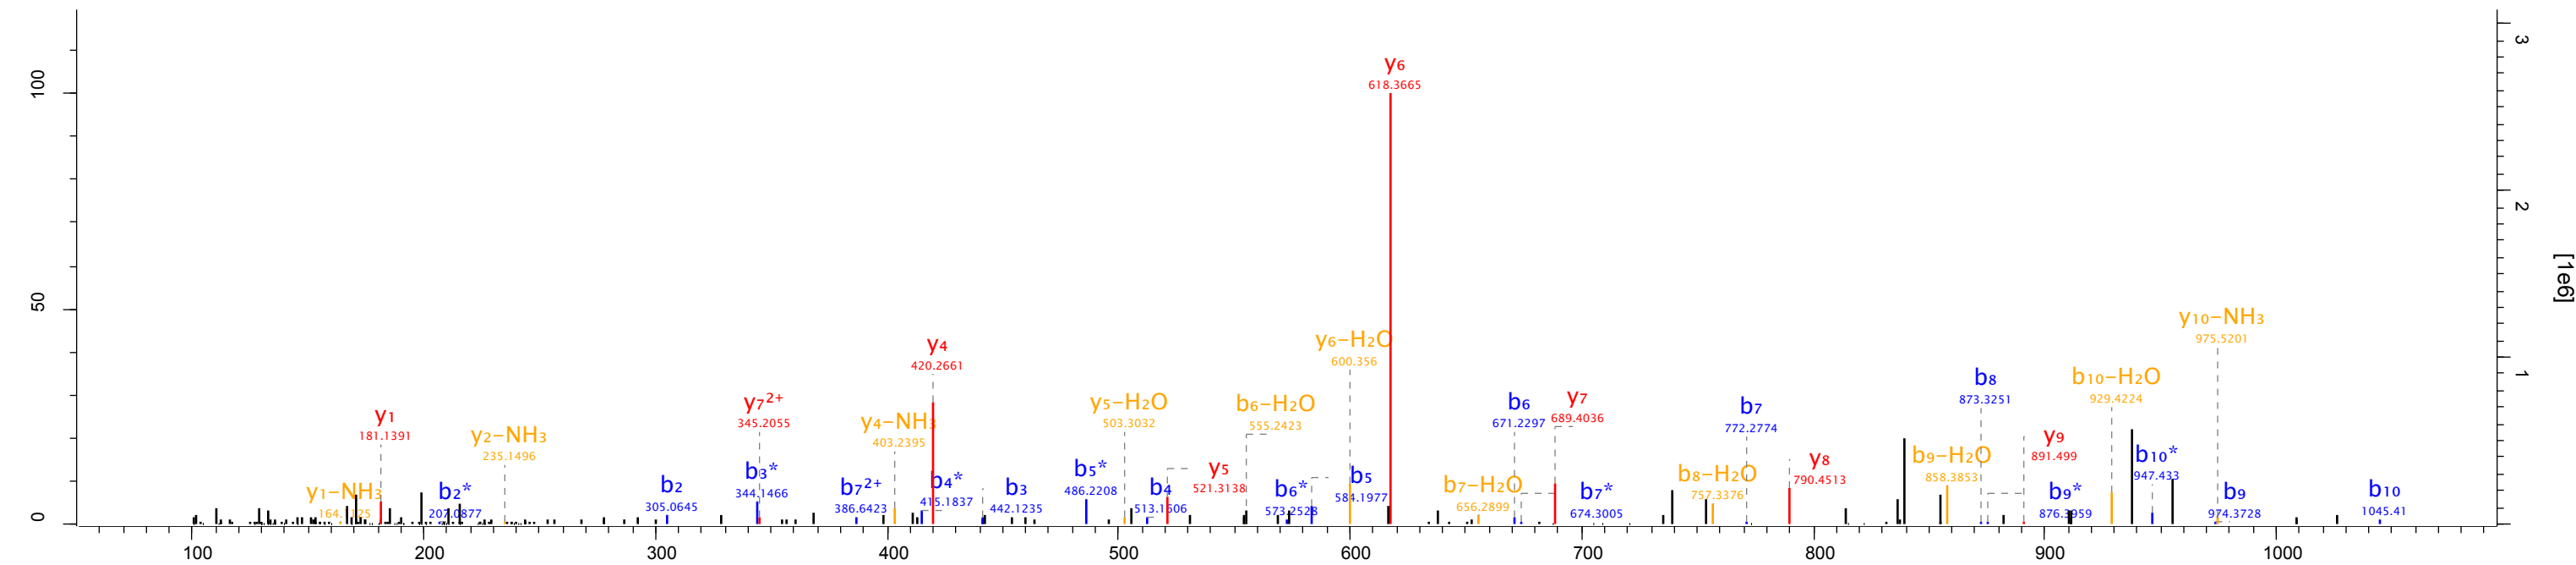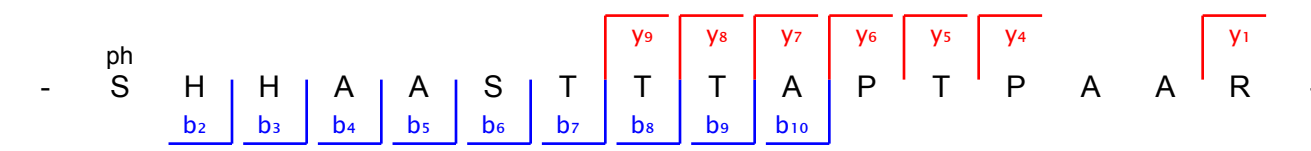

Raw file: 20150812\_A375SR\_Phospho\_BR1\_05  
 Scan: 4399 Method: FTMS; HCD Score: 198.3 m/z: 793.32 Gene names: RBMX;RBMXL1

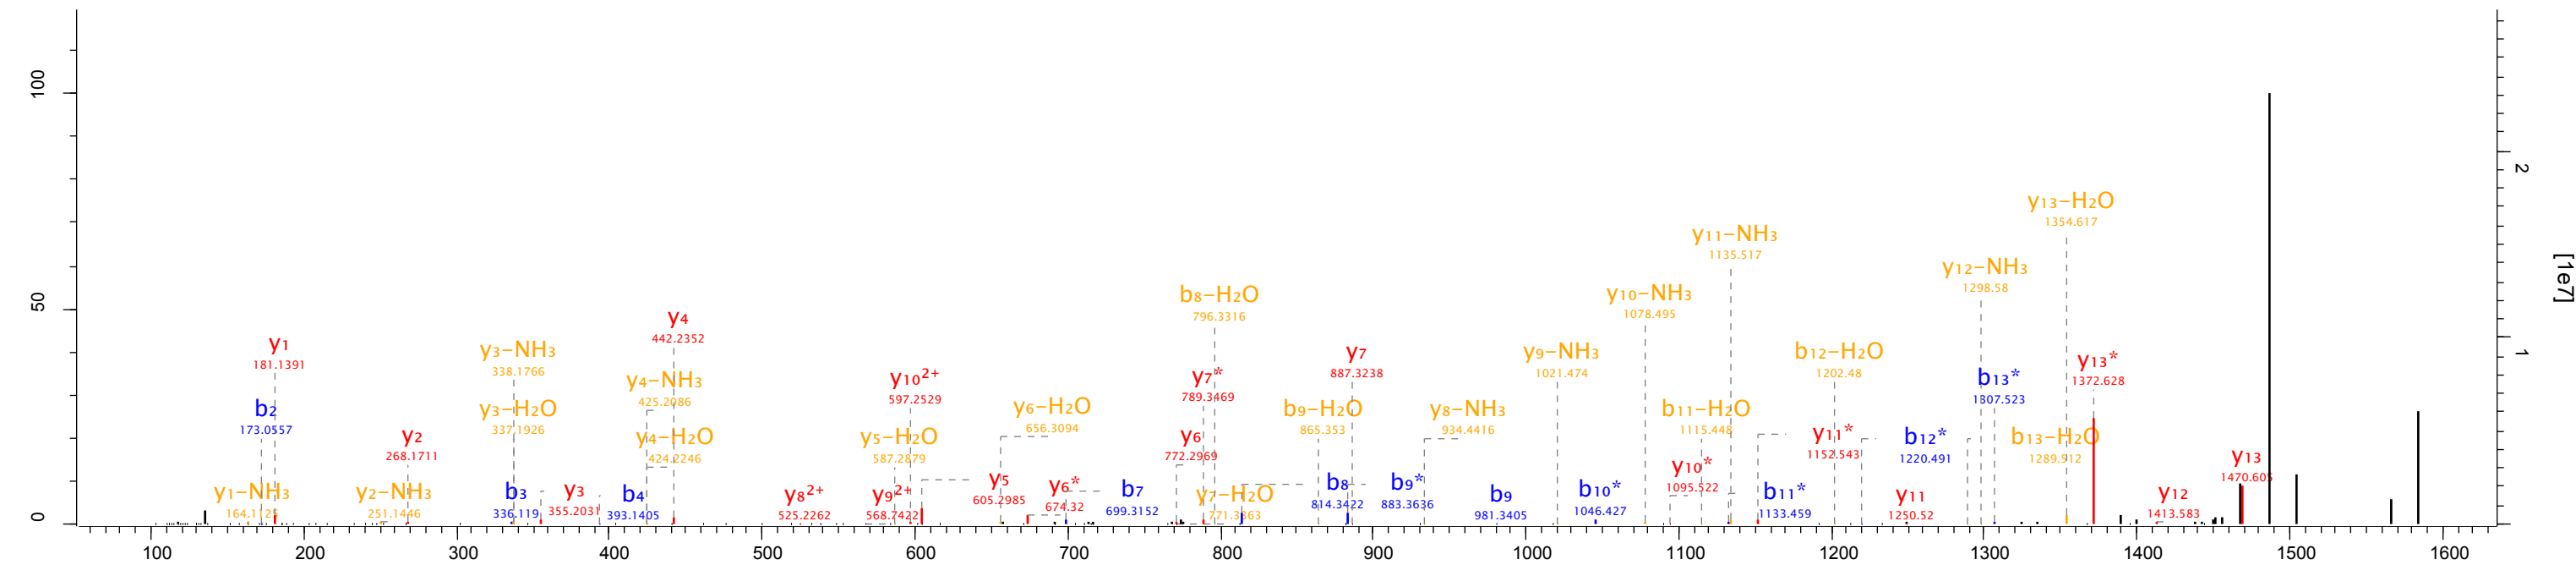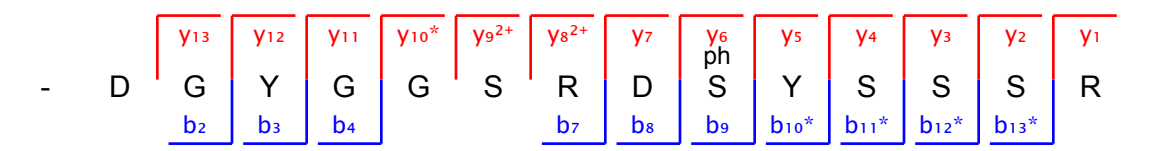

Raw file Scan Method Score m/z Gene names  
 20150812\_A375SR\_Phospho\_BR1\_05 4499 FTMS; HCD 79.49 574.95 RBMX;RBMXL1

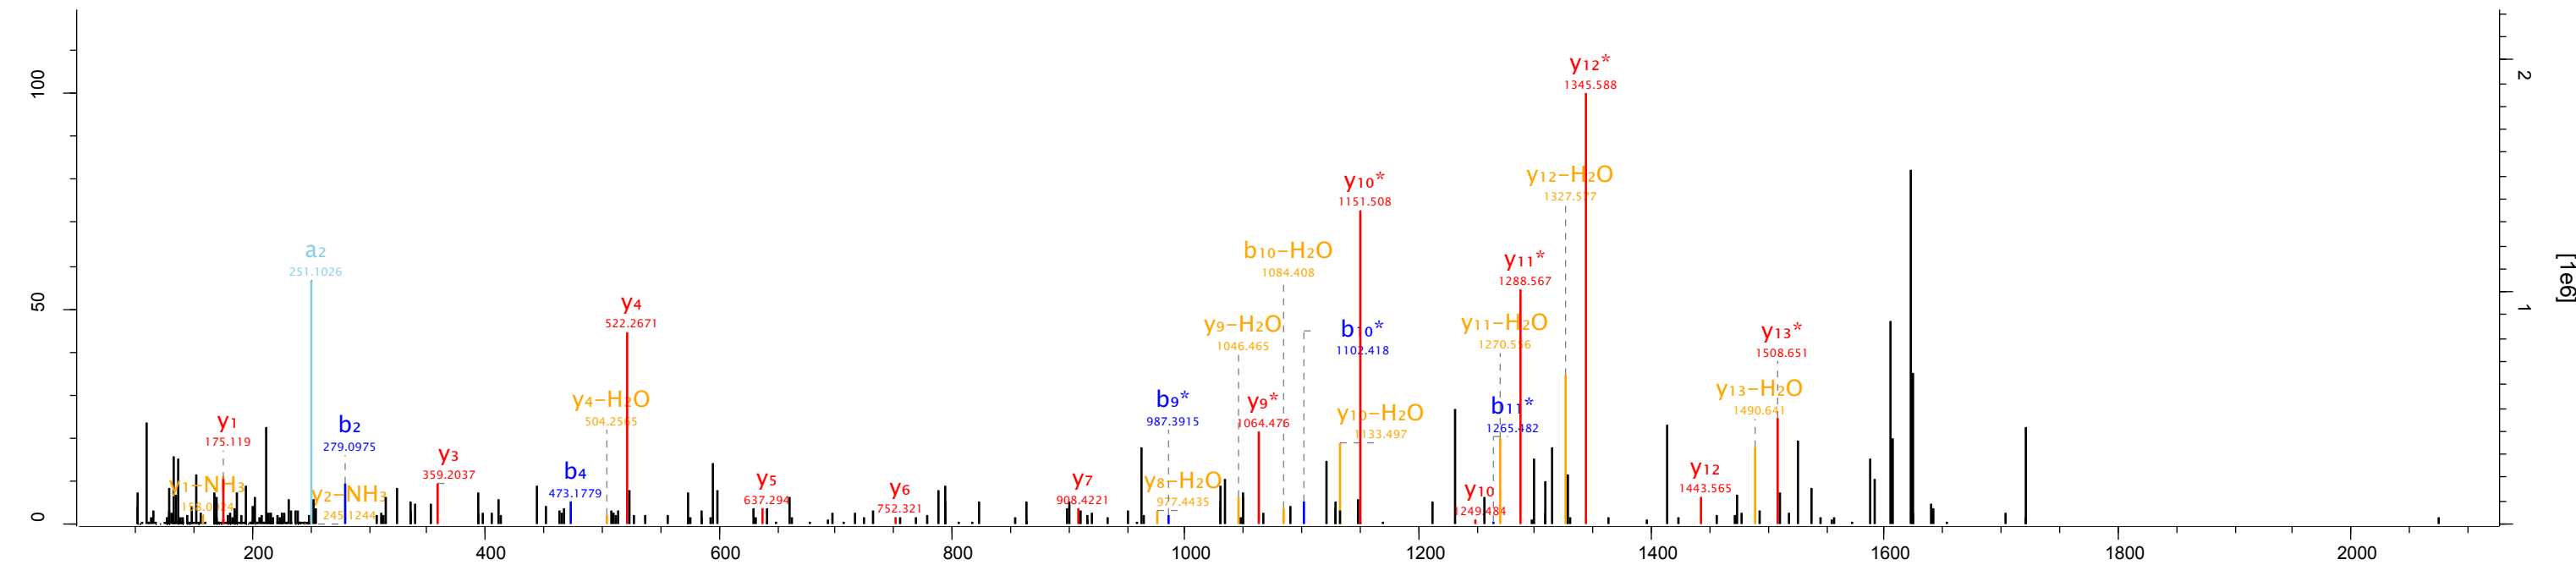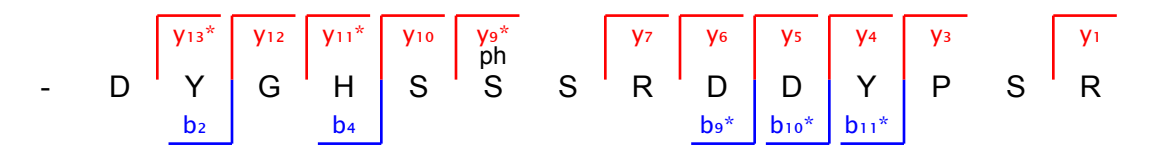

Raw file: 20150812\_A375SR\_Phospho\_BR1\_05  
 Scan: 4559 Method: FTMS; HCD Score: 134.98 m/z: 523.22 Gene names: CEP170

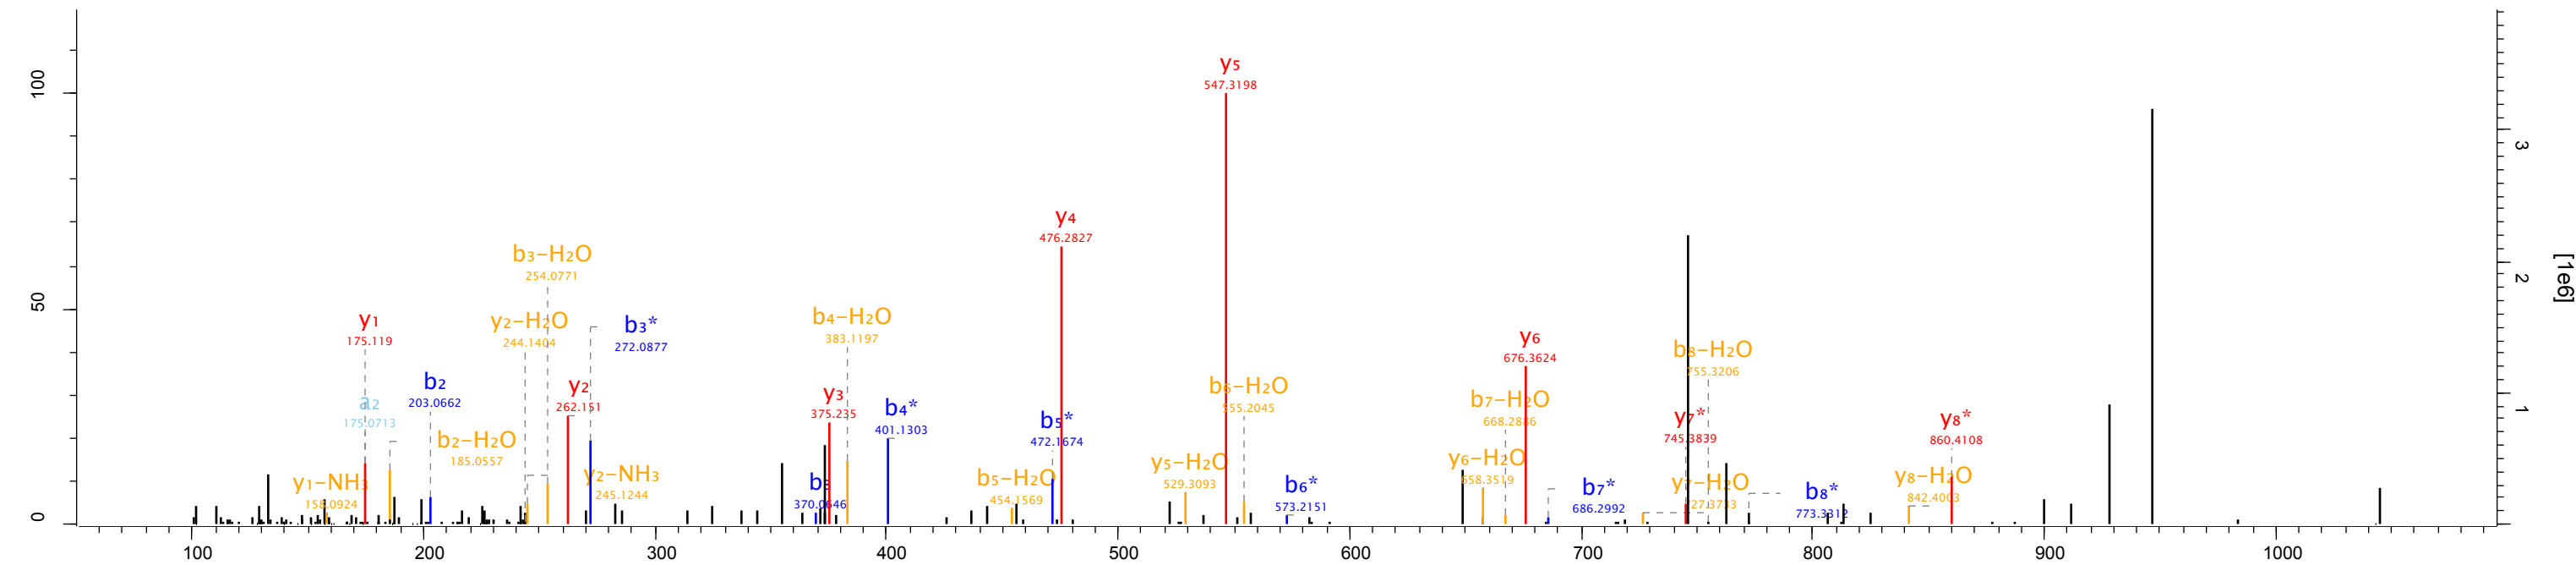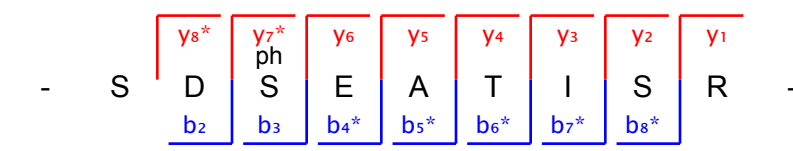

Raw file: 20150812\_A375SR\_Phospho\_BR1\_05  
 Scan: 4909 Method: FTMS; HCD Score: 133.48 m/z: 639.79 Gene names: SSH2

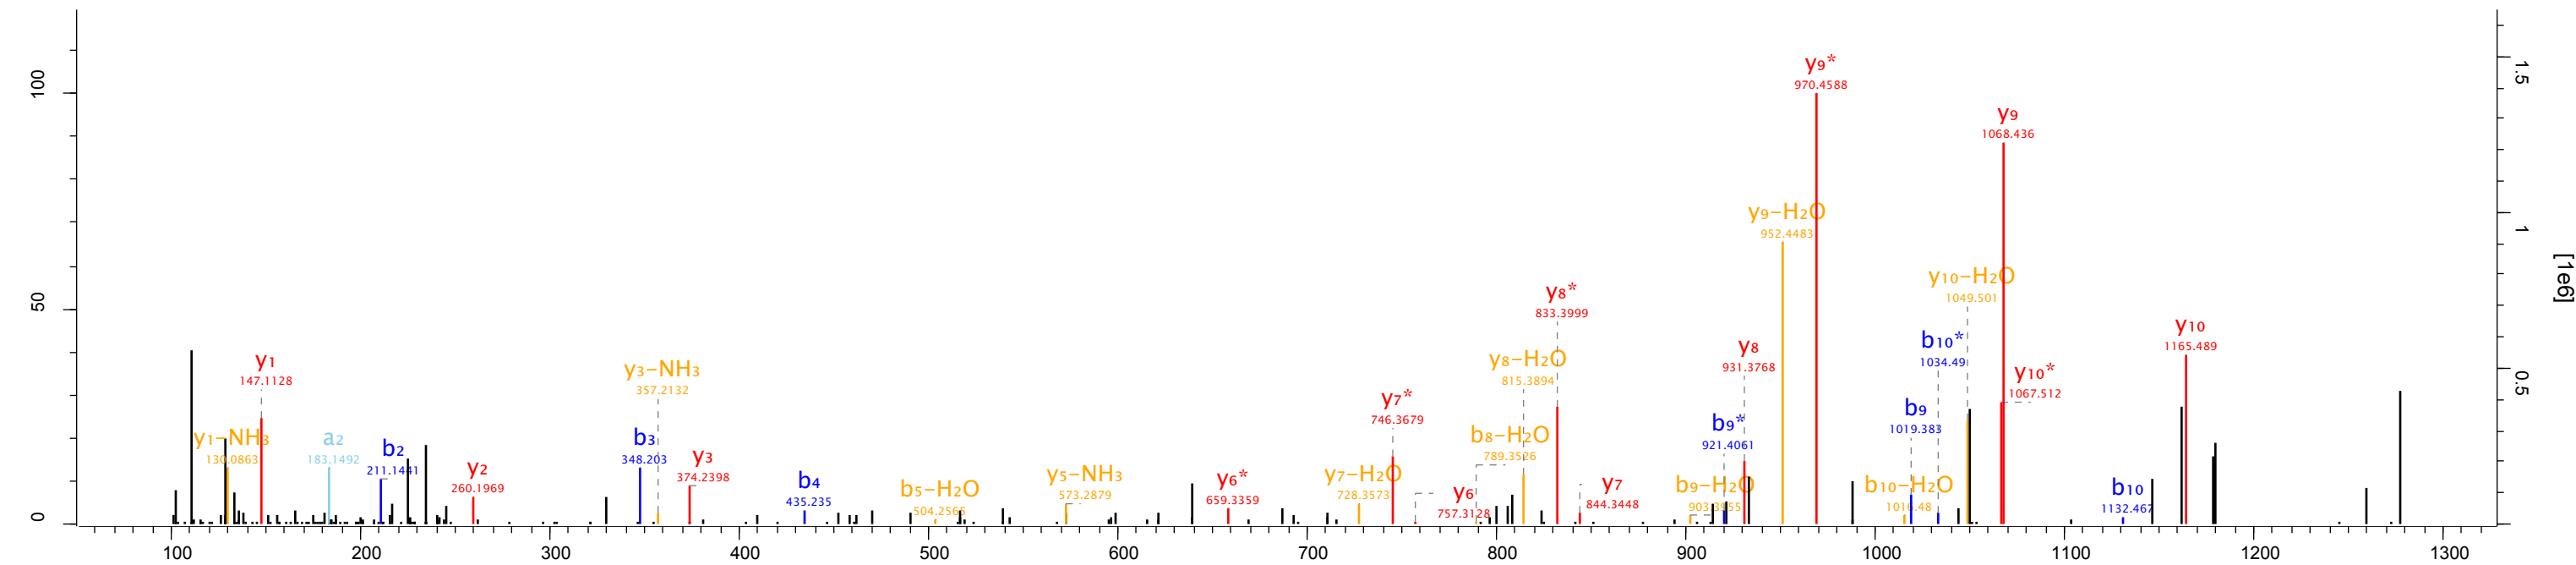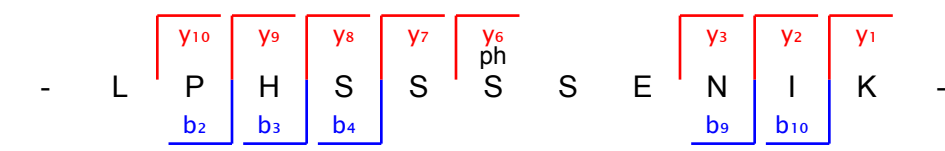



Raw file 20150812\_A375SR\_Phospho\_BR1\_05 Scan 5189 Method FTMS; HCD Score 145.36 m/z 742.84

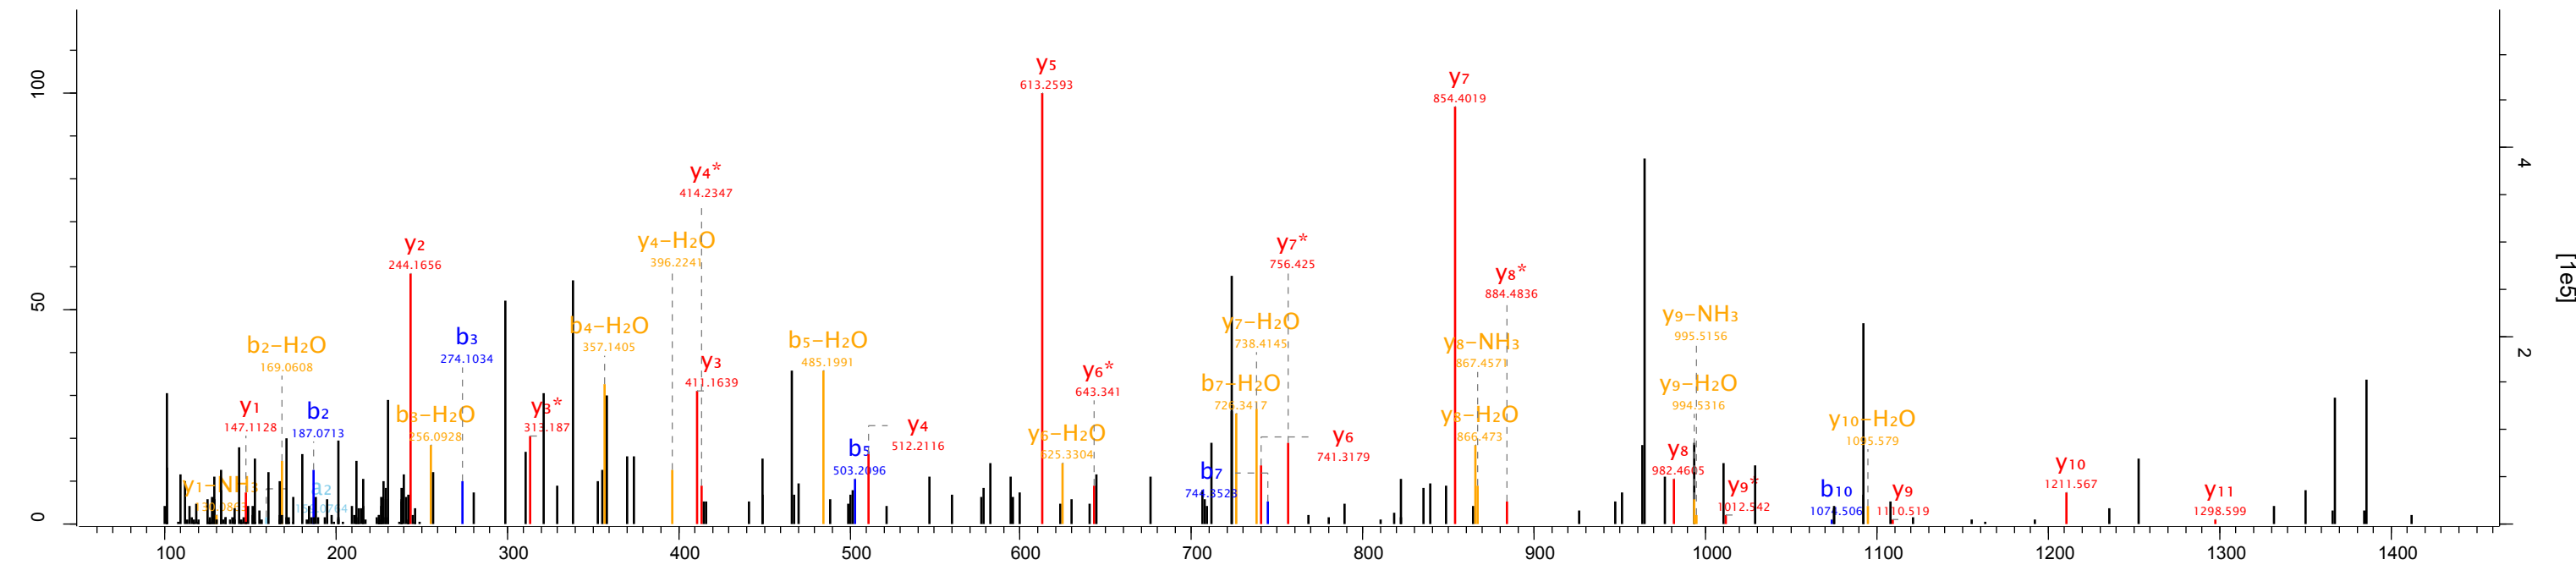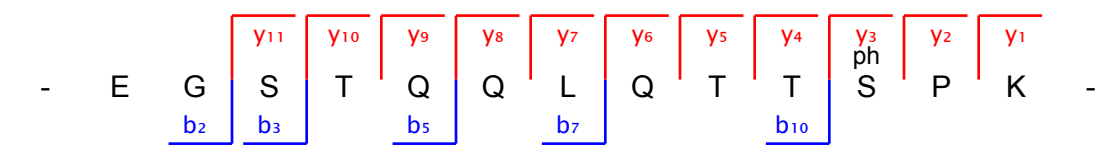

Raw file: 20150812\_A375SR\_Phospho\_BR1\_05  
 Scan: 5389 Method: FTMS; HCD Score: 81.02 m/z: 493.21 Gene names: KIF15

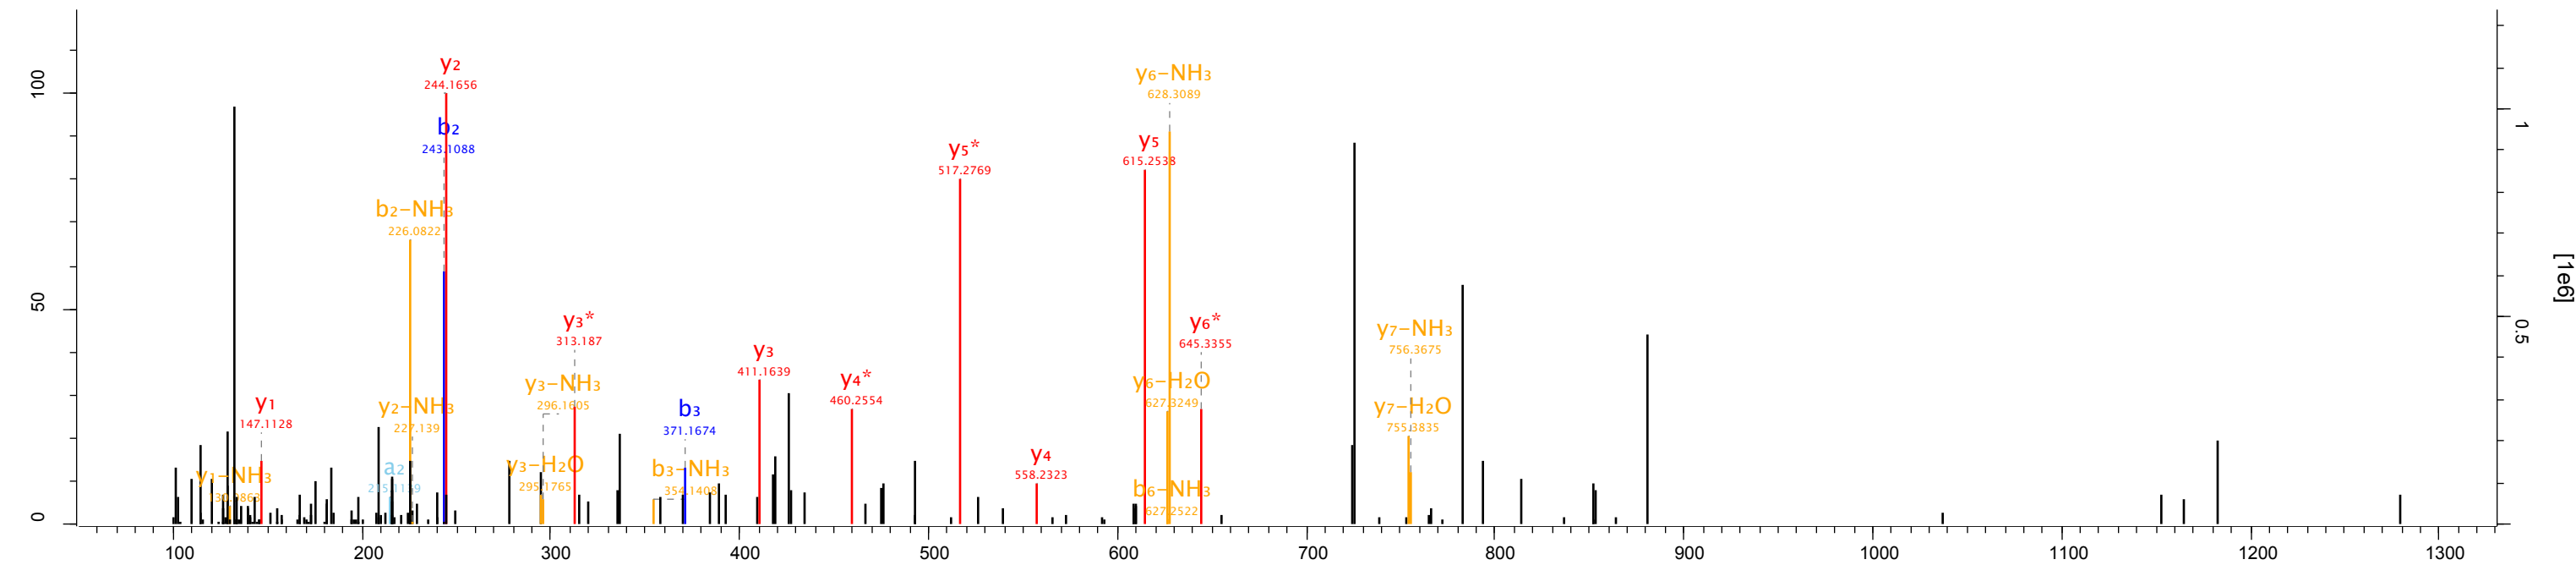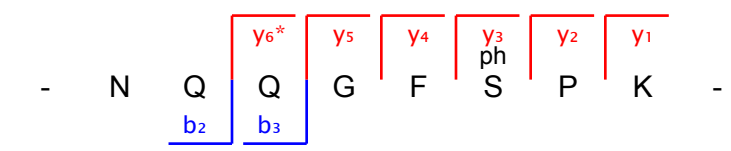

Raw file: 20150812\_A375SR\_Phospho\_BR1\_05  
 Scan: 5419 Method: FTMS; HCD Score: 178.14 m/z: 744.29 Gene names: SERINC1

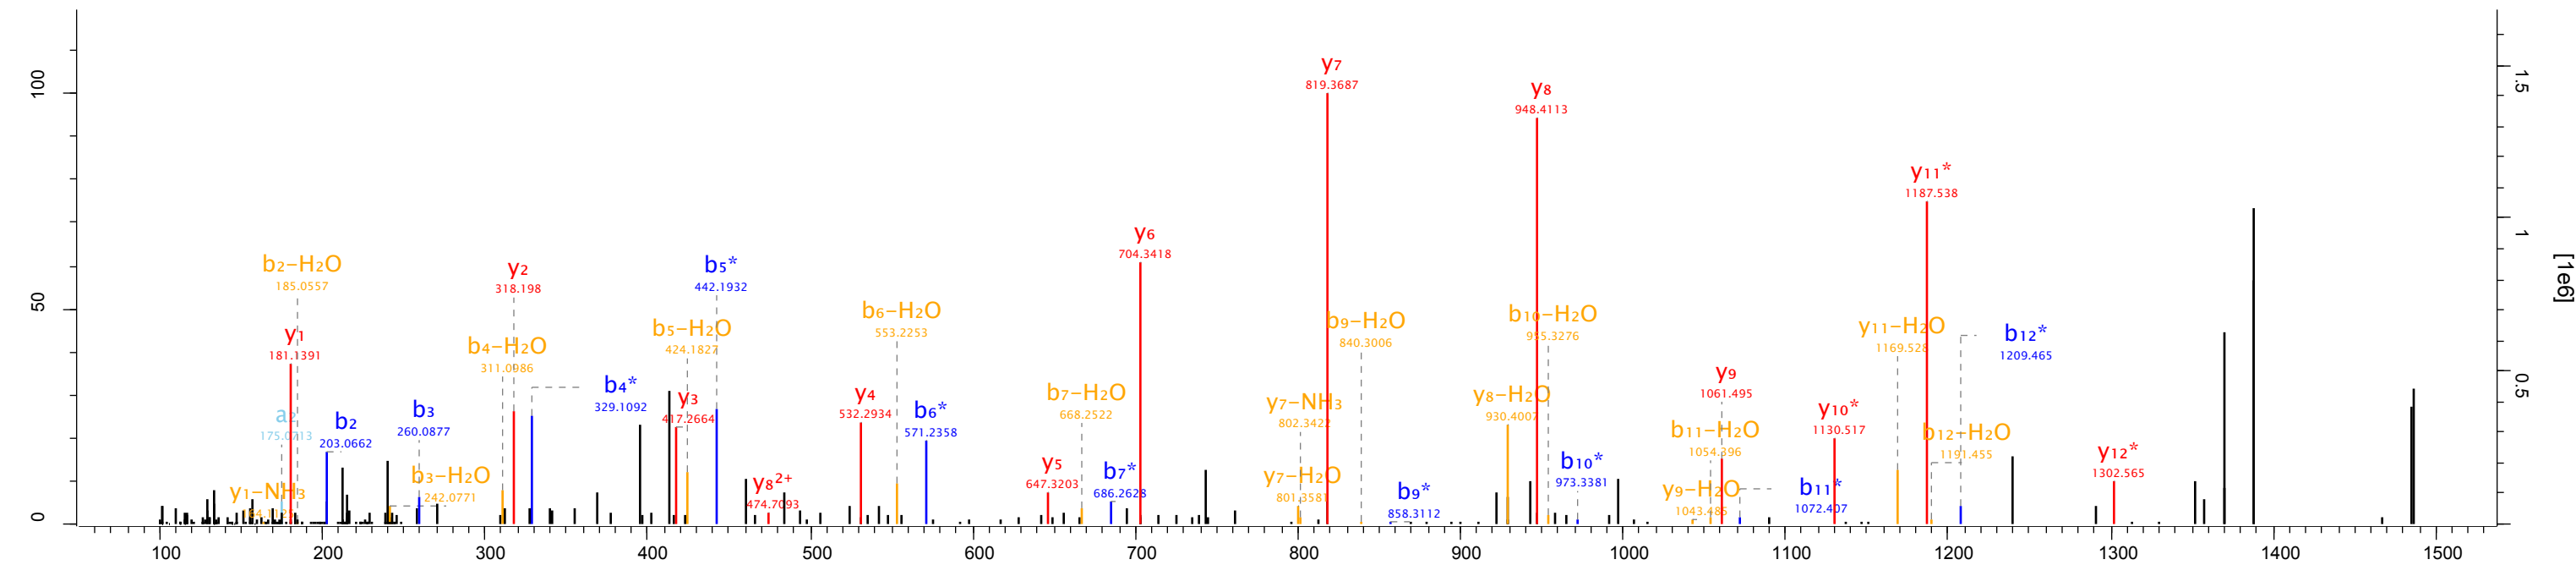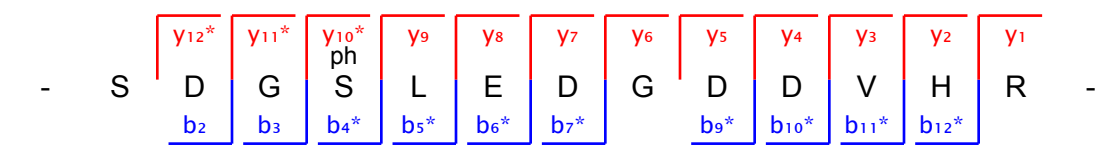

Raw file: 20150812\_A375SR\_Phospho\_BR1\_05  
 Scan: 6059 Method: FTMS; HCD Score: 178.34 m/z: 698.84 Gene names: CAPRN2

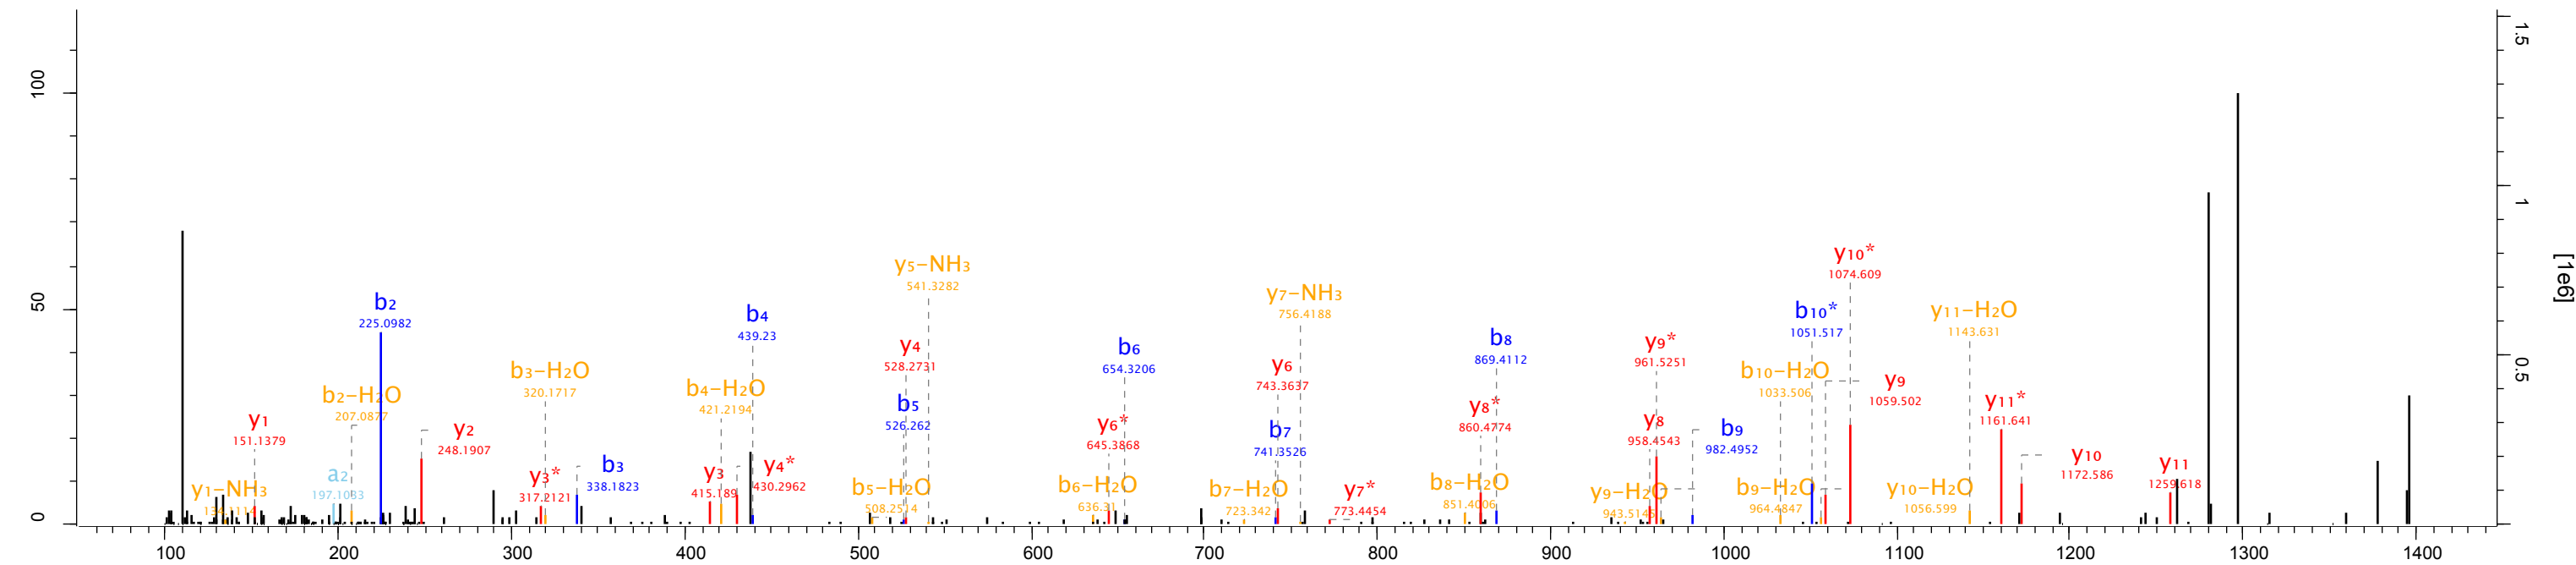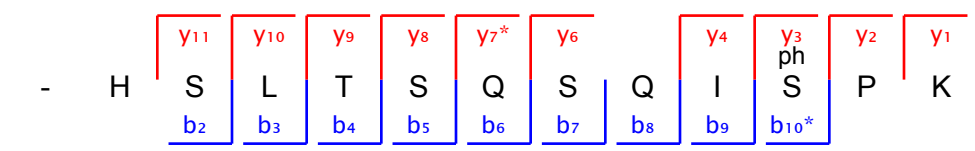

Raw file 20150812\_A375SR\_Phospho\_BR1\_05 Scan 6189 Method FTMS; HCD Score 150.9 m/z 577.28 Gene names NME1-NME2;NME2;NME2P1

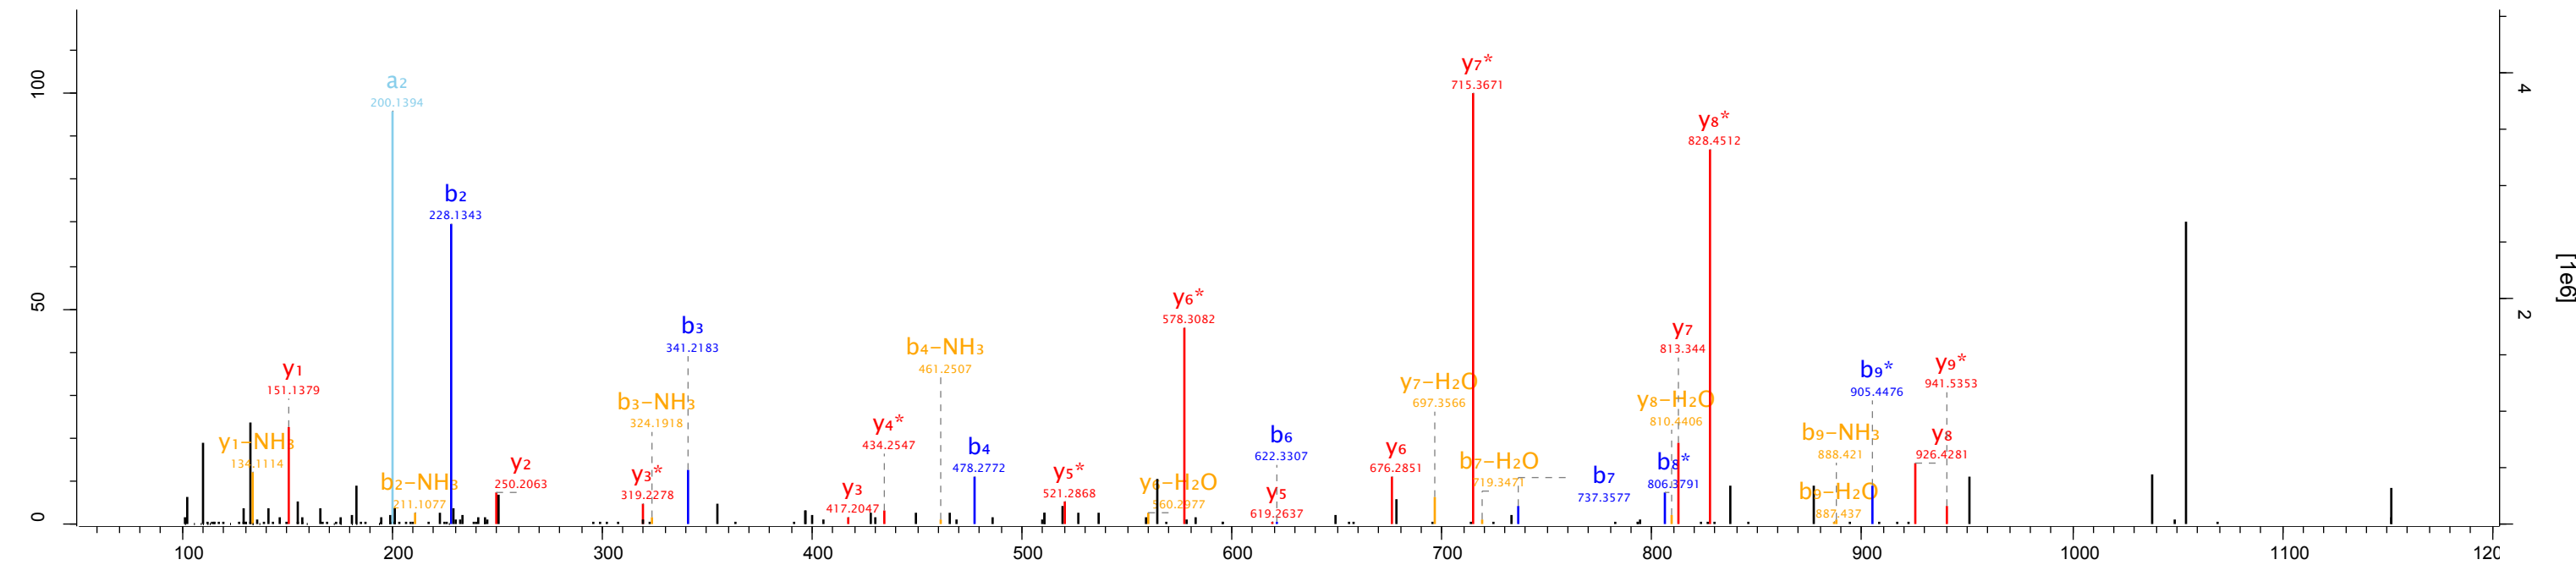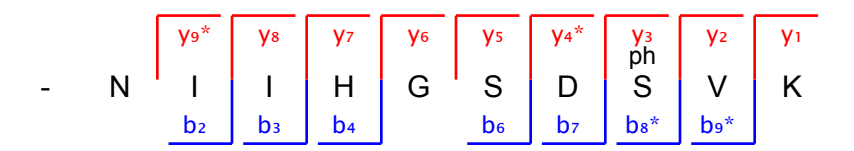

Raw file: 20150812\_A375SR\_Phospho\_BR1\_05  
 Scan: 6799 Method: FTMS; HCD Score: 208.72 m/z: 889.87 Gene names: SLC4A7

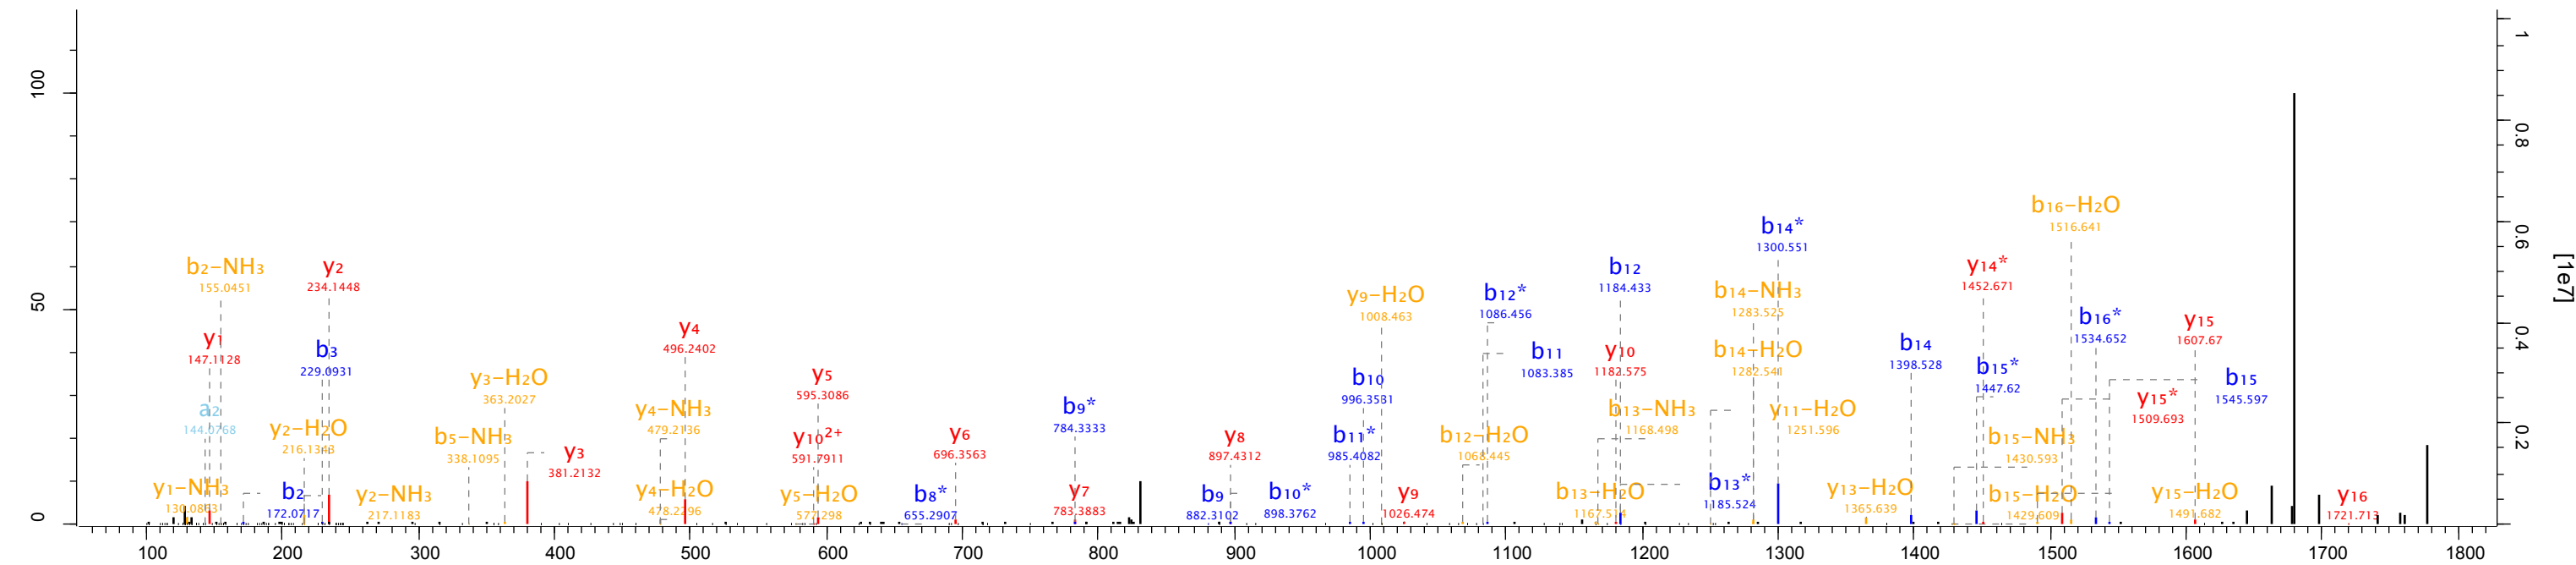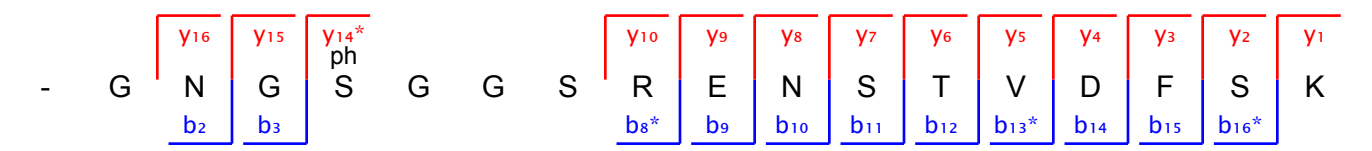



Raw file: 20150812\_A375SR\_Phospho\_BR1\_05  
 Scan: 7259 Method: FTMS; HCD Score: 44.99 m/z: 537.3 Gene names: NPM1

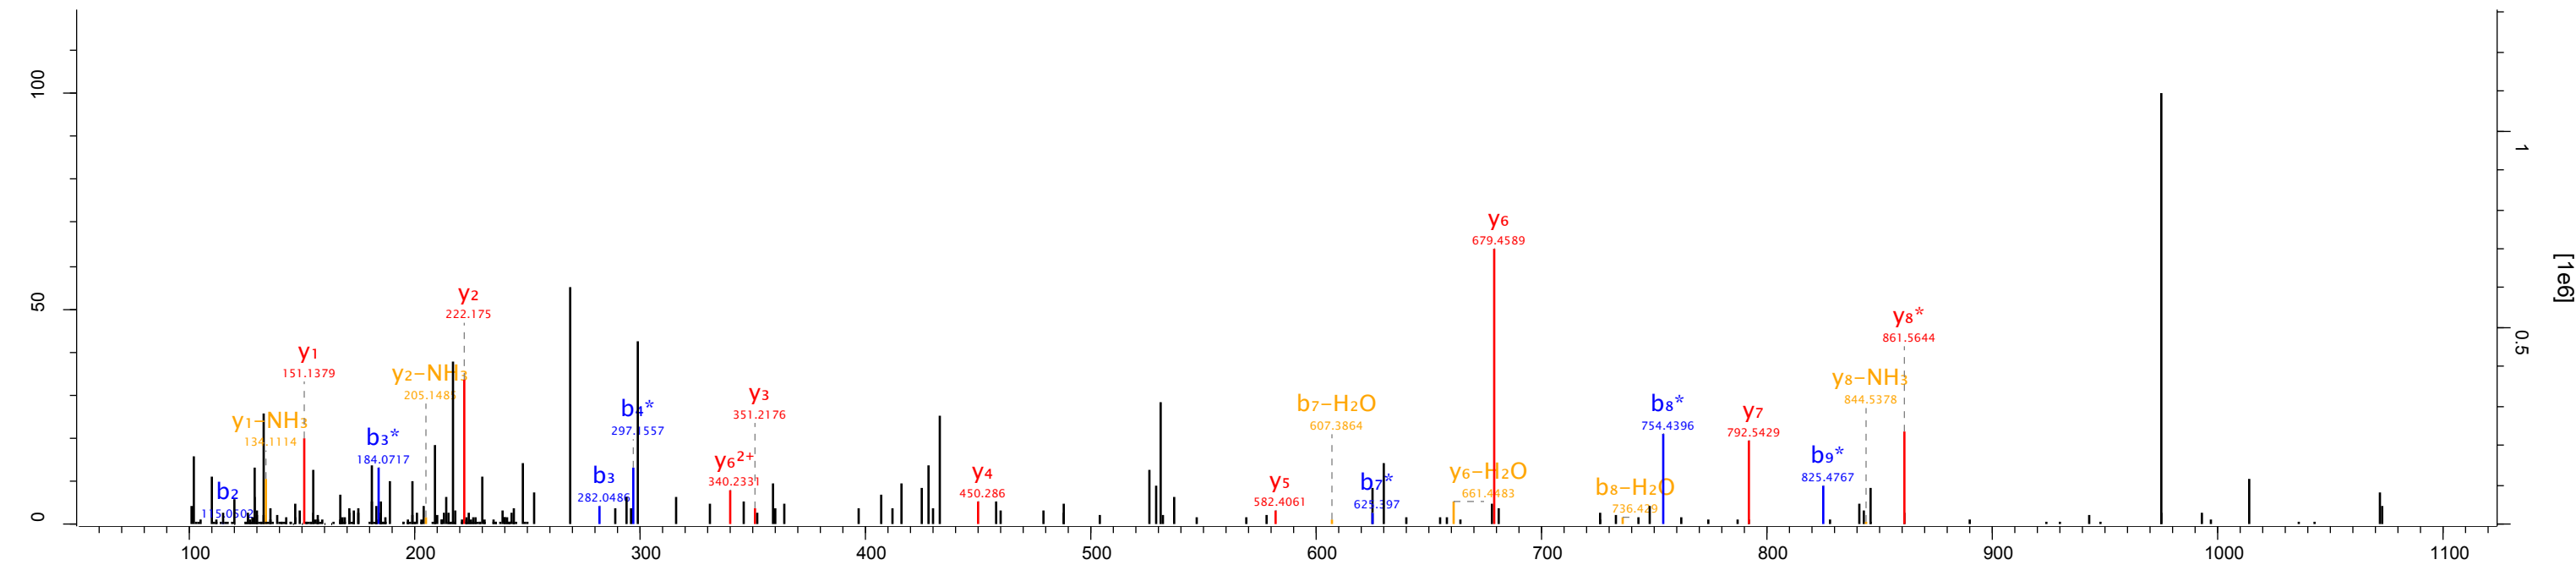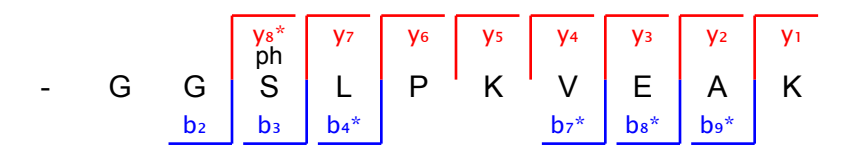



Raw file: 20150812\_A375SR\_Phospho\_BR1\_05  
 Scan: 7499 Method: FTMS; HCD Score: 81.66 m/z: 474.59 Gene names: TBC1D10B

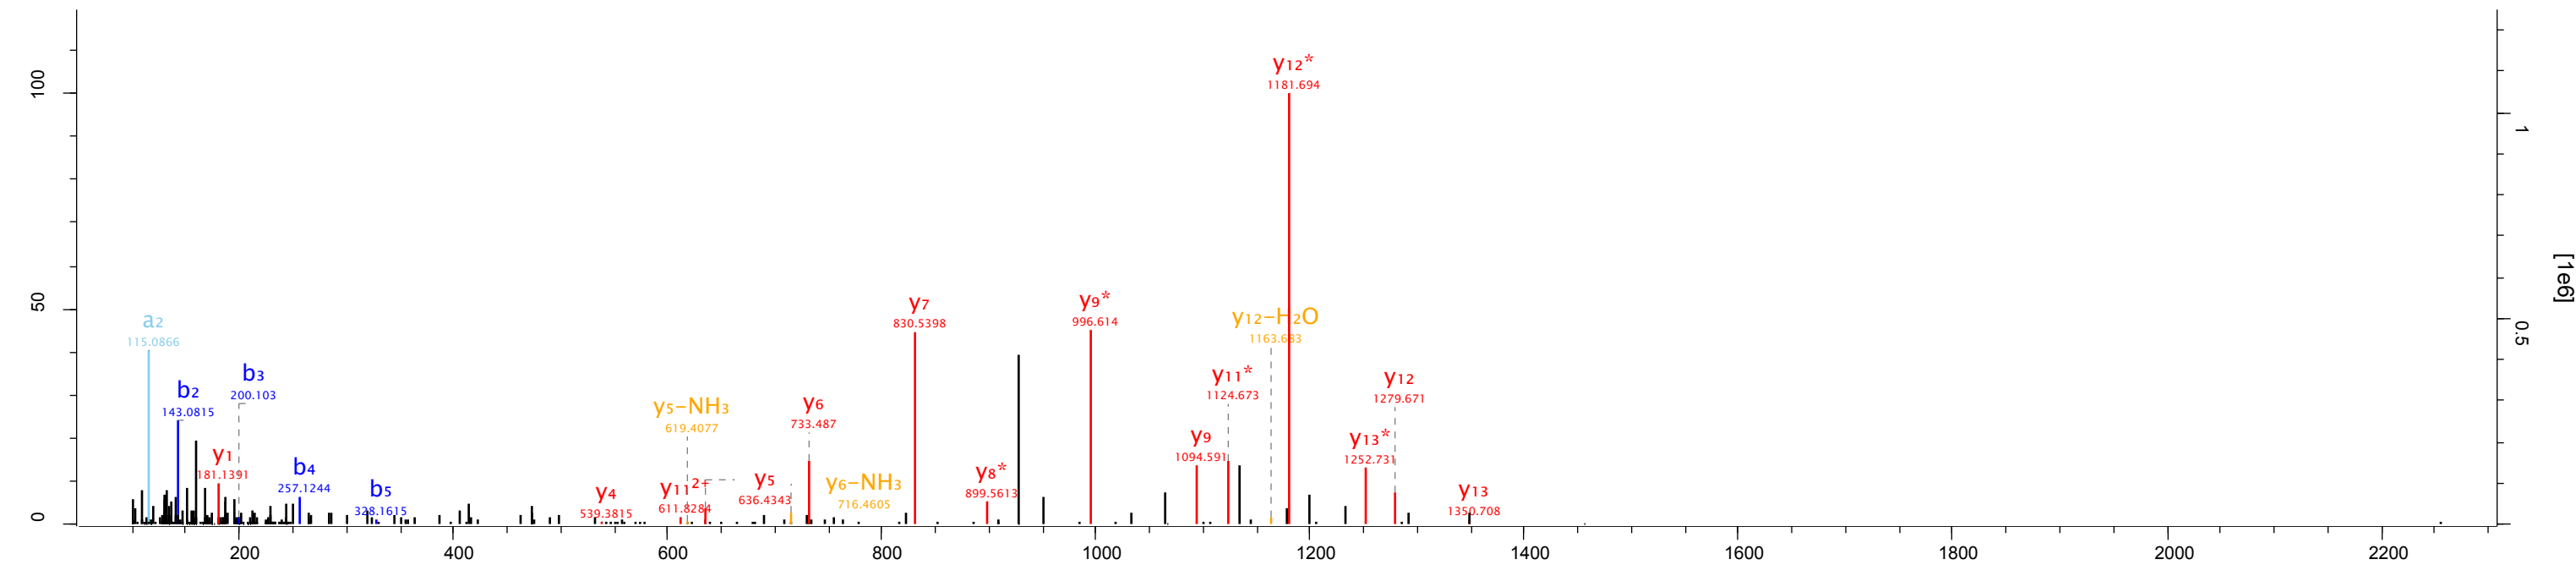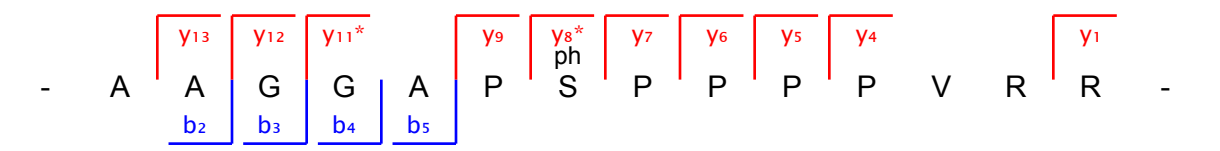

Raw file: 20150812\_A375SR\_Phospho\_BR1\_05  
 Scan: 7559 Method: FTMS; HCD Score: 118.24 m/z: 636.81 Gene names: MAPK8IP3

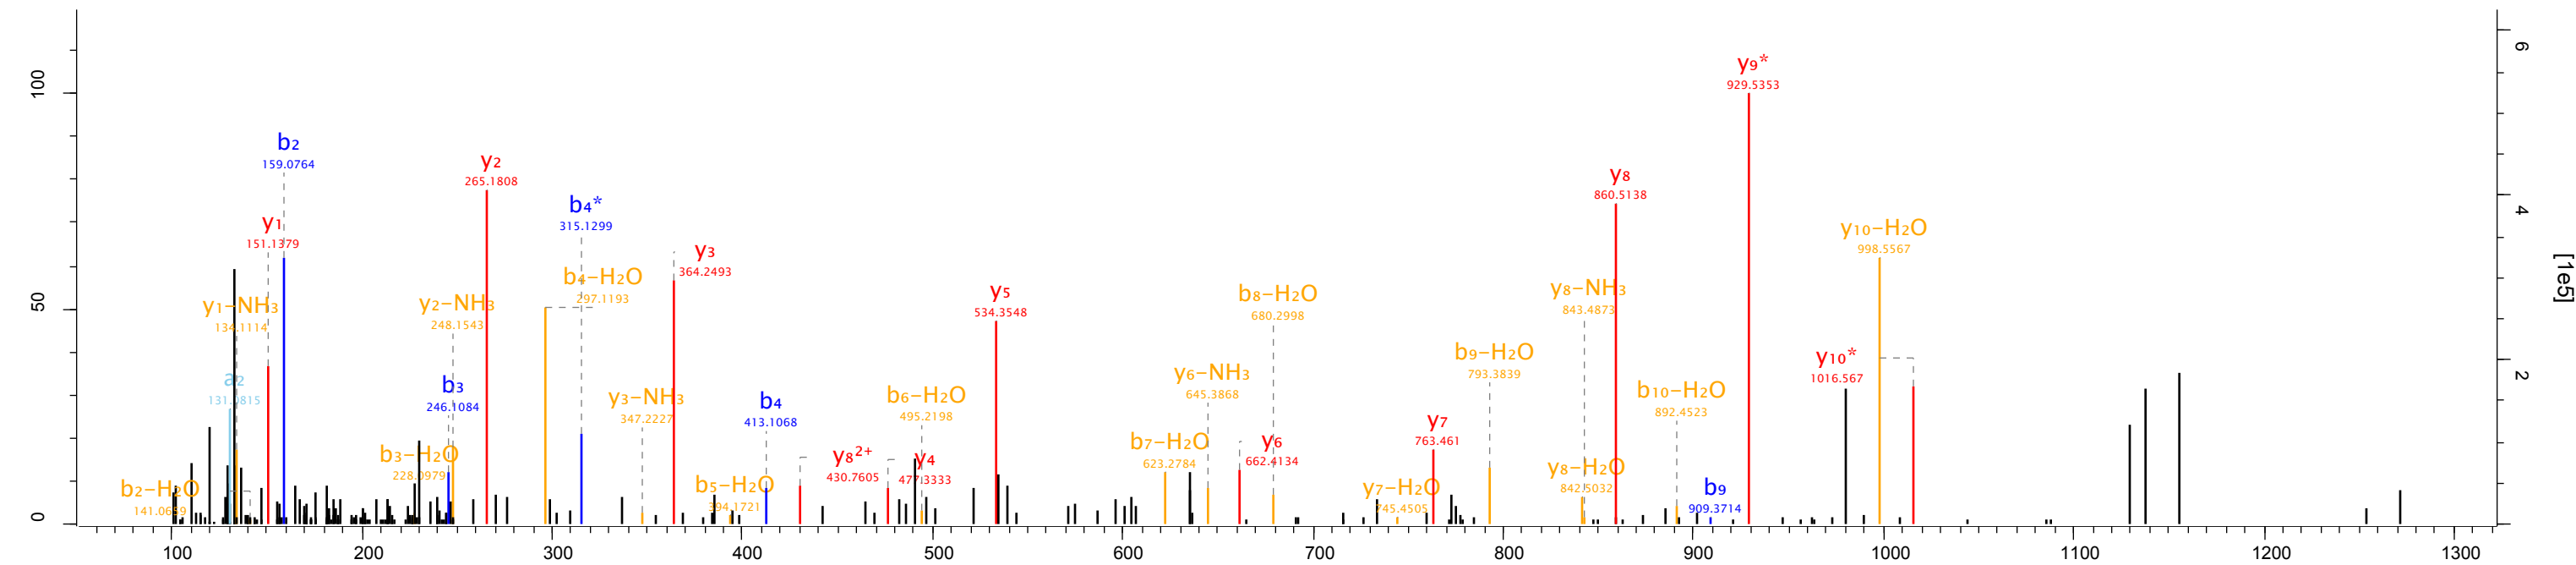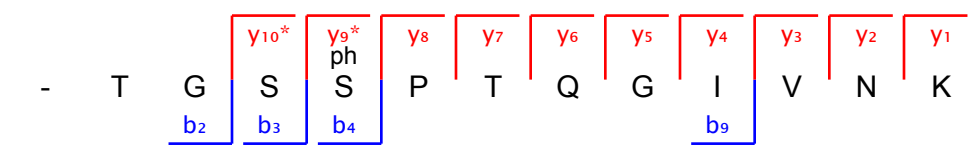

Raw file  
20150812\_A375SR\_Phospho\_BR1\_05

Scan 8459 Method FTMS; HCD Score 200.68 m/z 583.24 Gene names RBMX

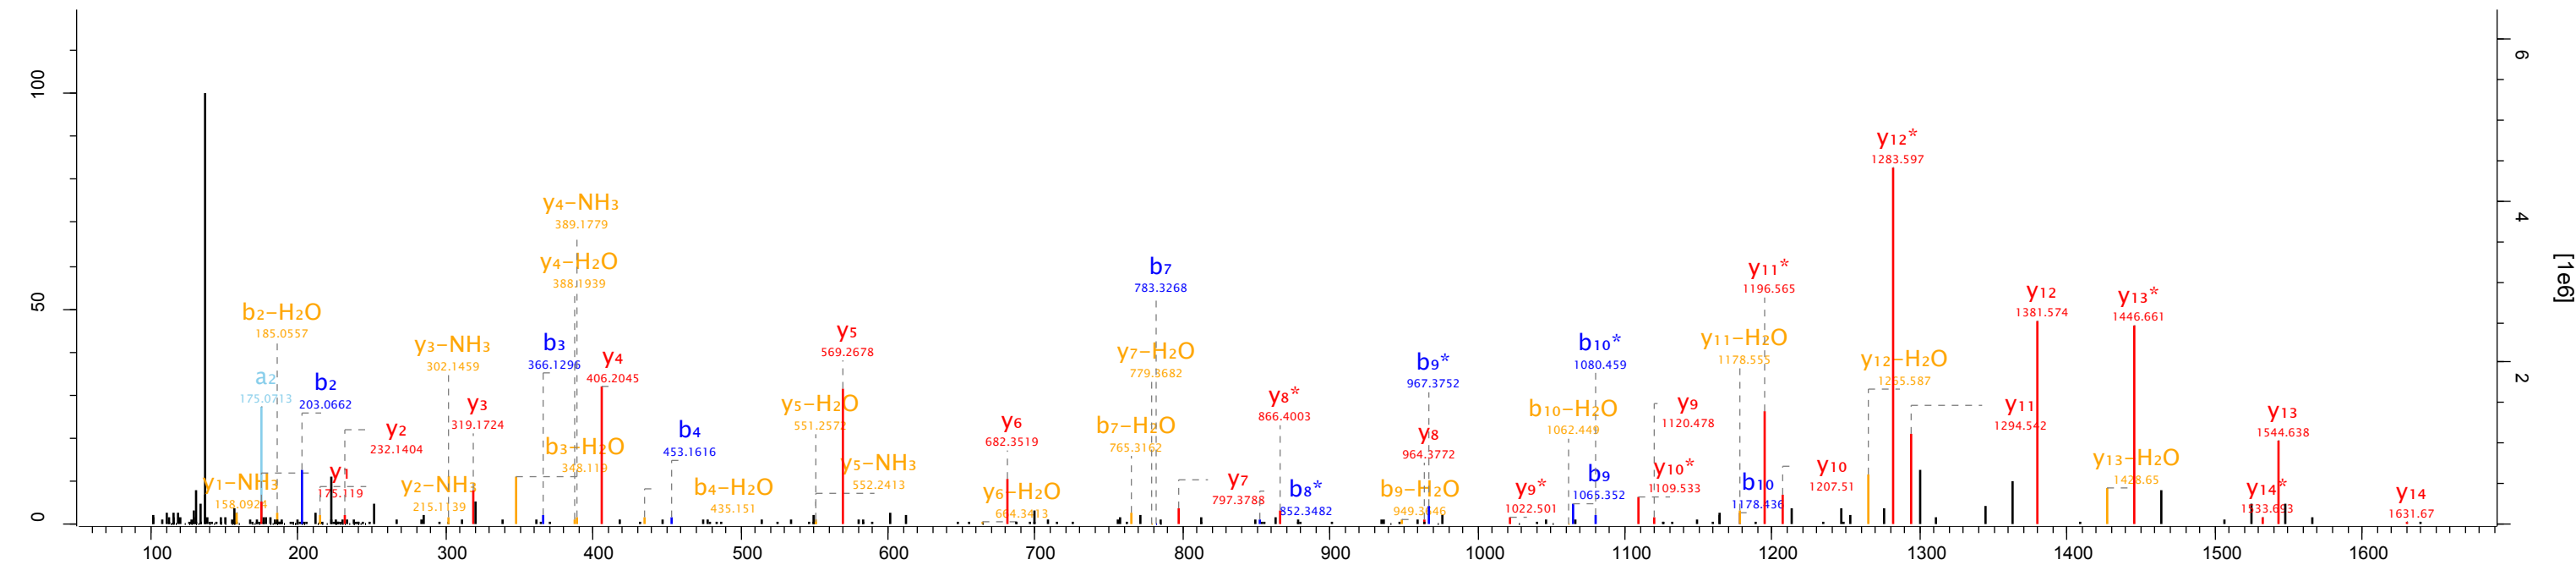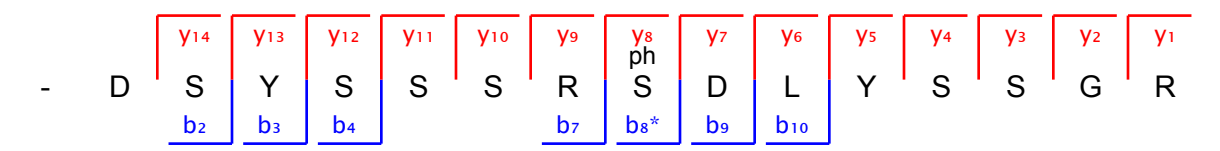

Raw file: 20150812\_A375SR\_Phospho\_BR1\_05  
 Scan: 8659 Method: FTMS; HCD Score: 163.84 m/z: 653.82 Gene names: ZNF687

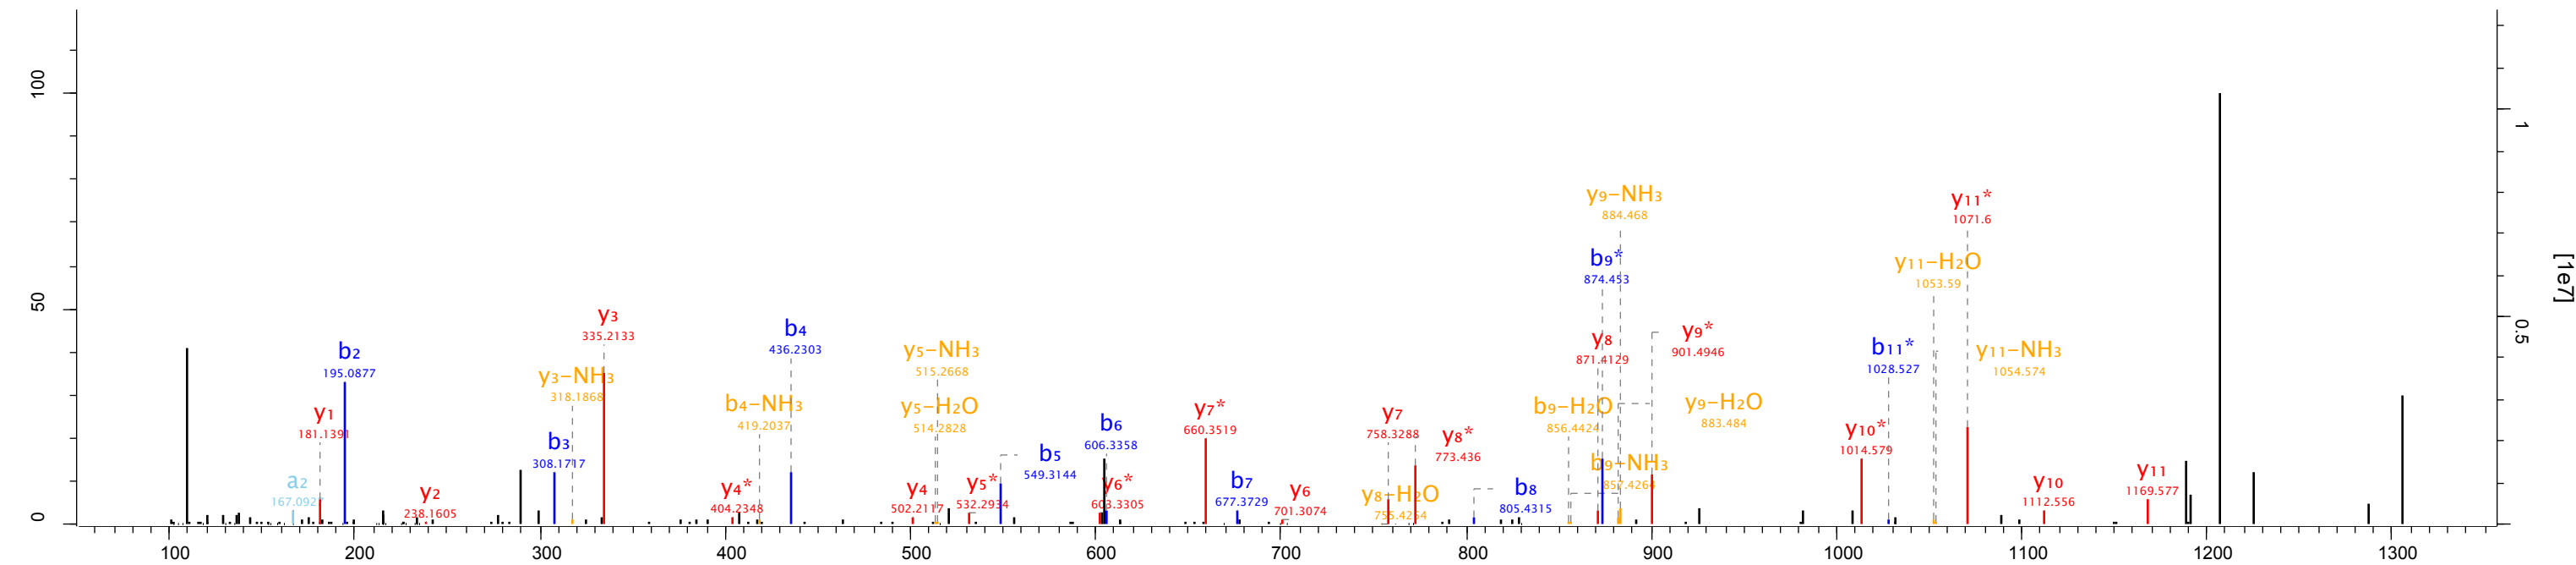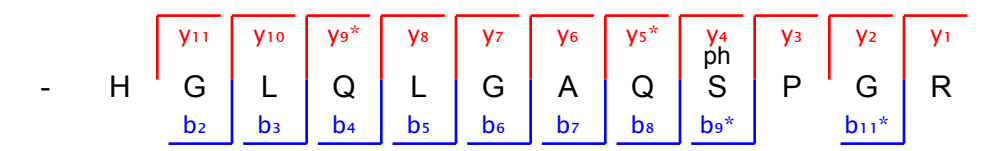

Raw file: 20150812\_A375SR\_Phospho\_BR1\_06  
 Scan: 10249 Method: FTMS; HCD Score: 78.19 m/z: 648.79 Gene names: MKI67

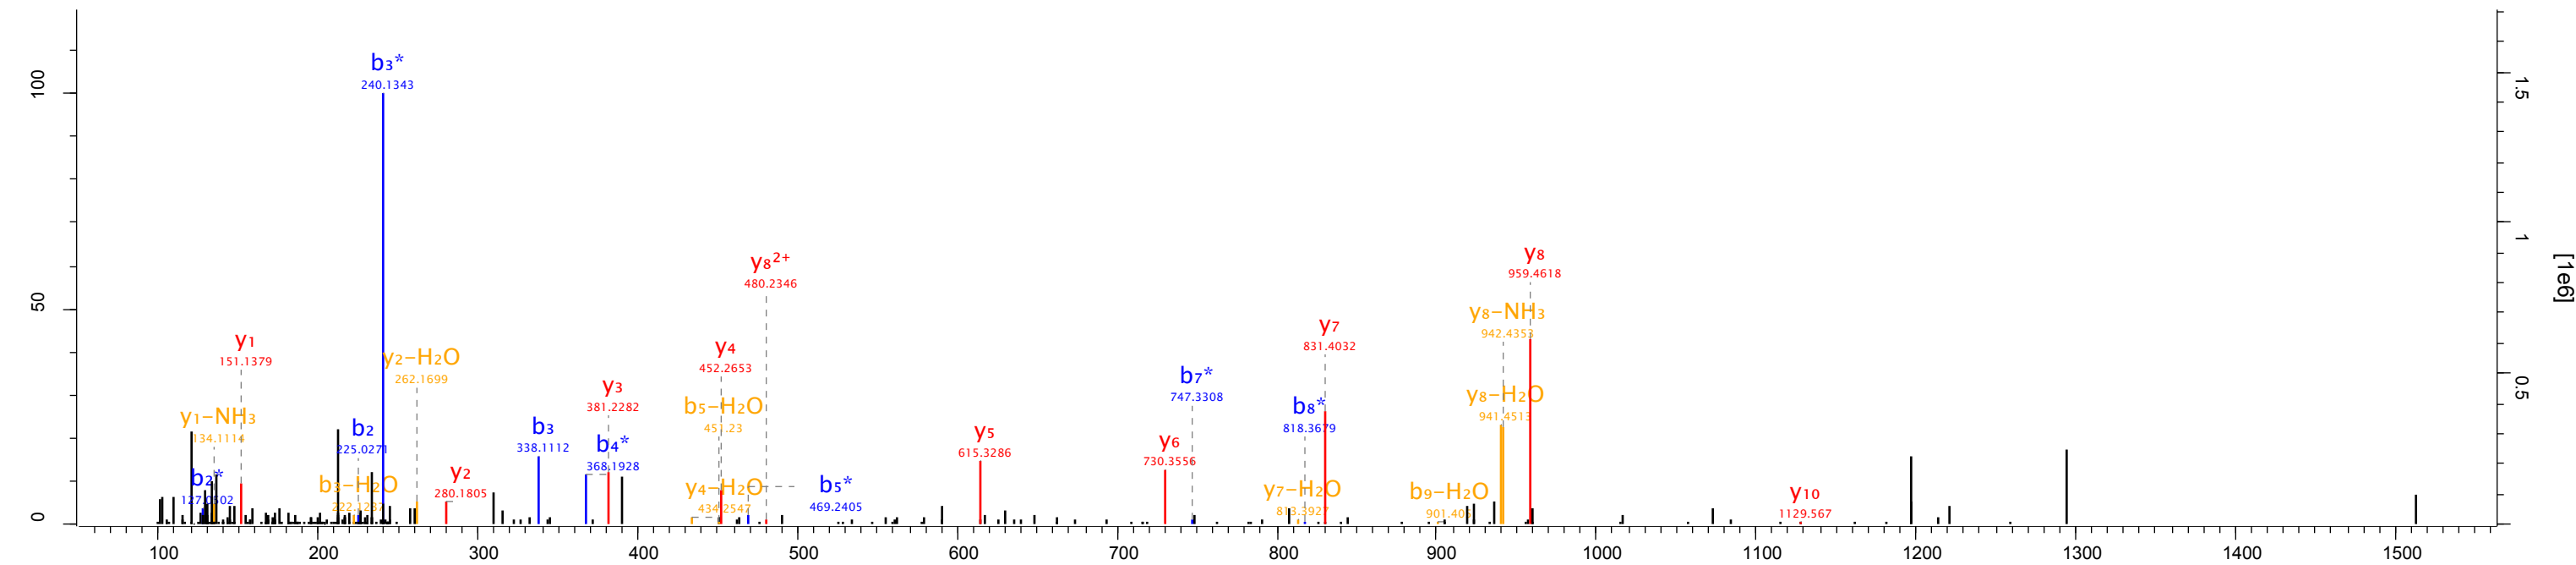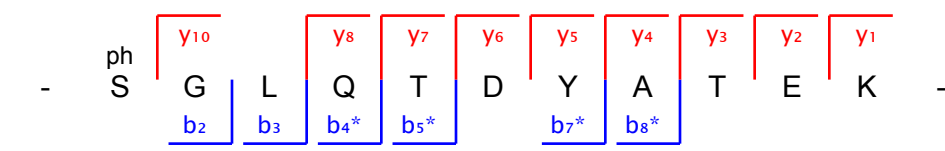

Raw file: 20150812\_A375SR\_Phospho\_BR1\_06  
 Scan: 10449 Method: FTMS; HCD Score: 133.27 m/z: 981.46 Gene names: EYA3

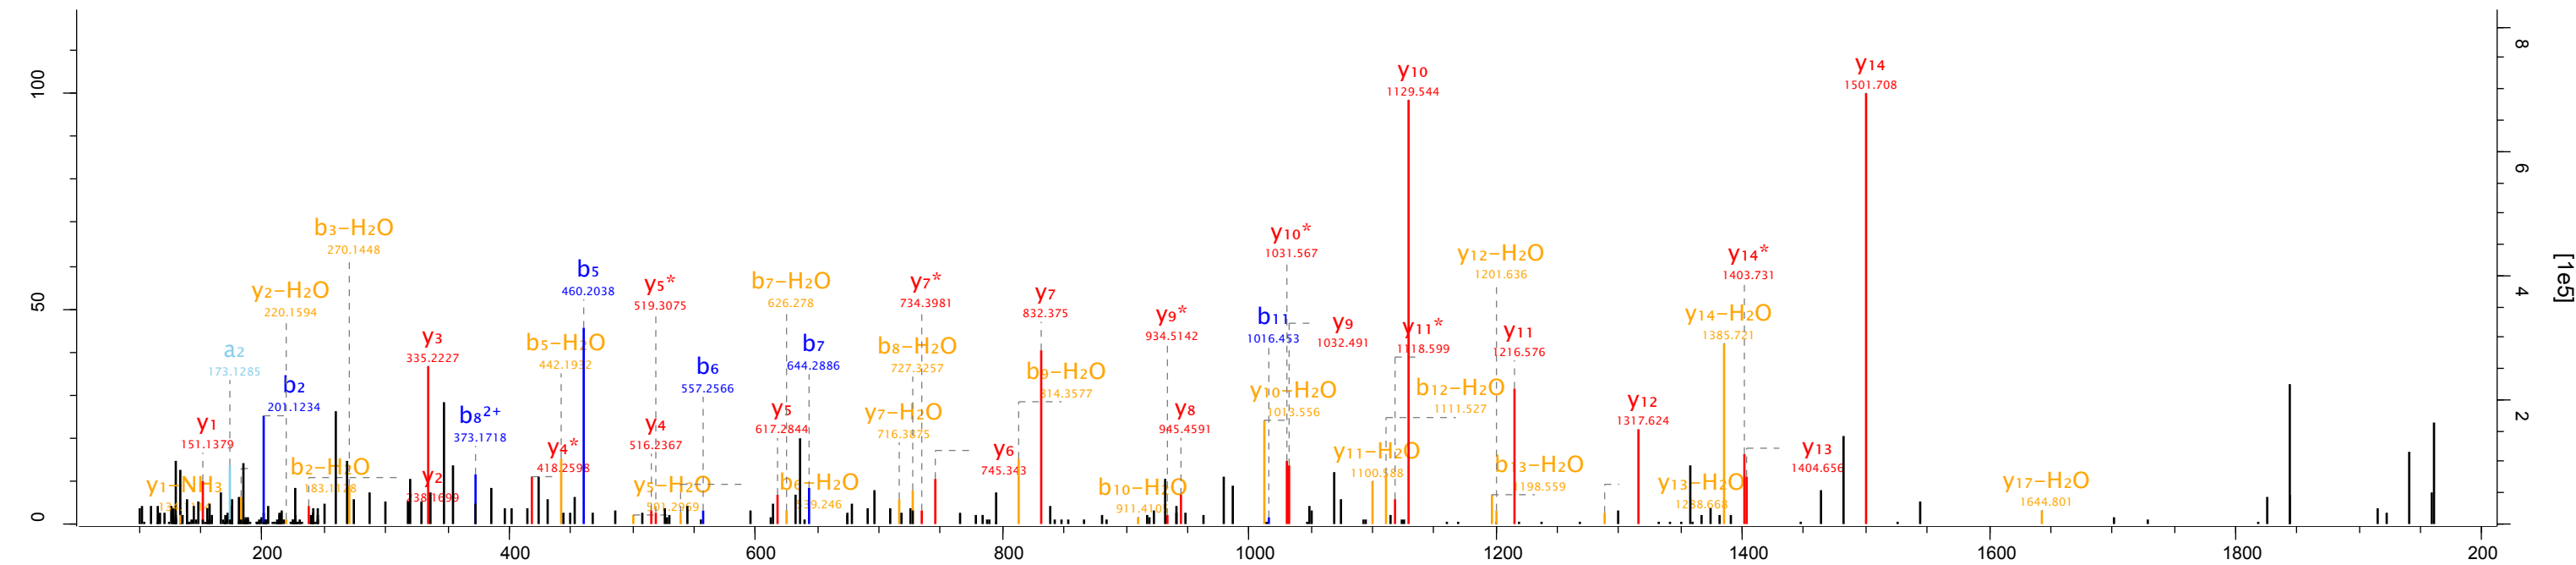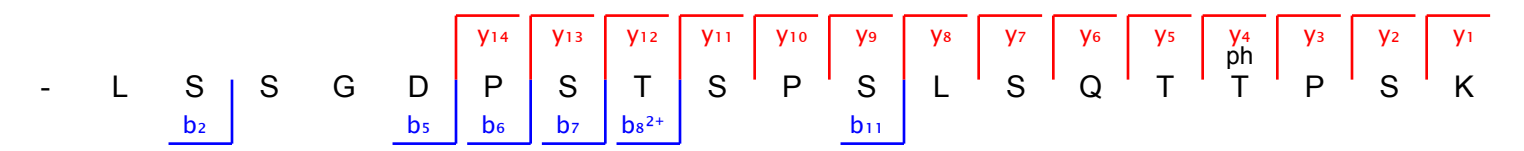

Raw file 20150812\_A375SR\_Phospho\_BR1\_06 Scan 11799 Method FTMS; HCD Score 179.79 m/z 975.93 Gene names MAP1S

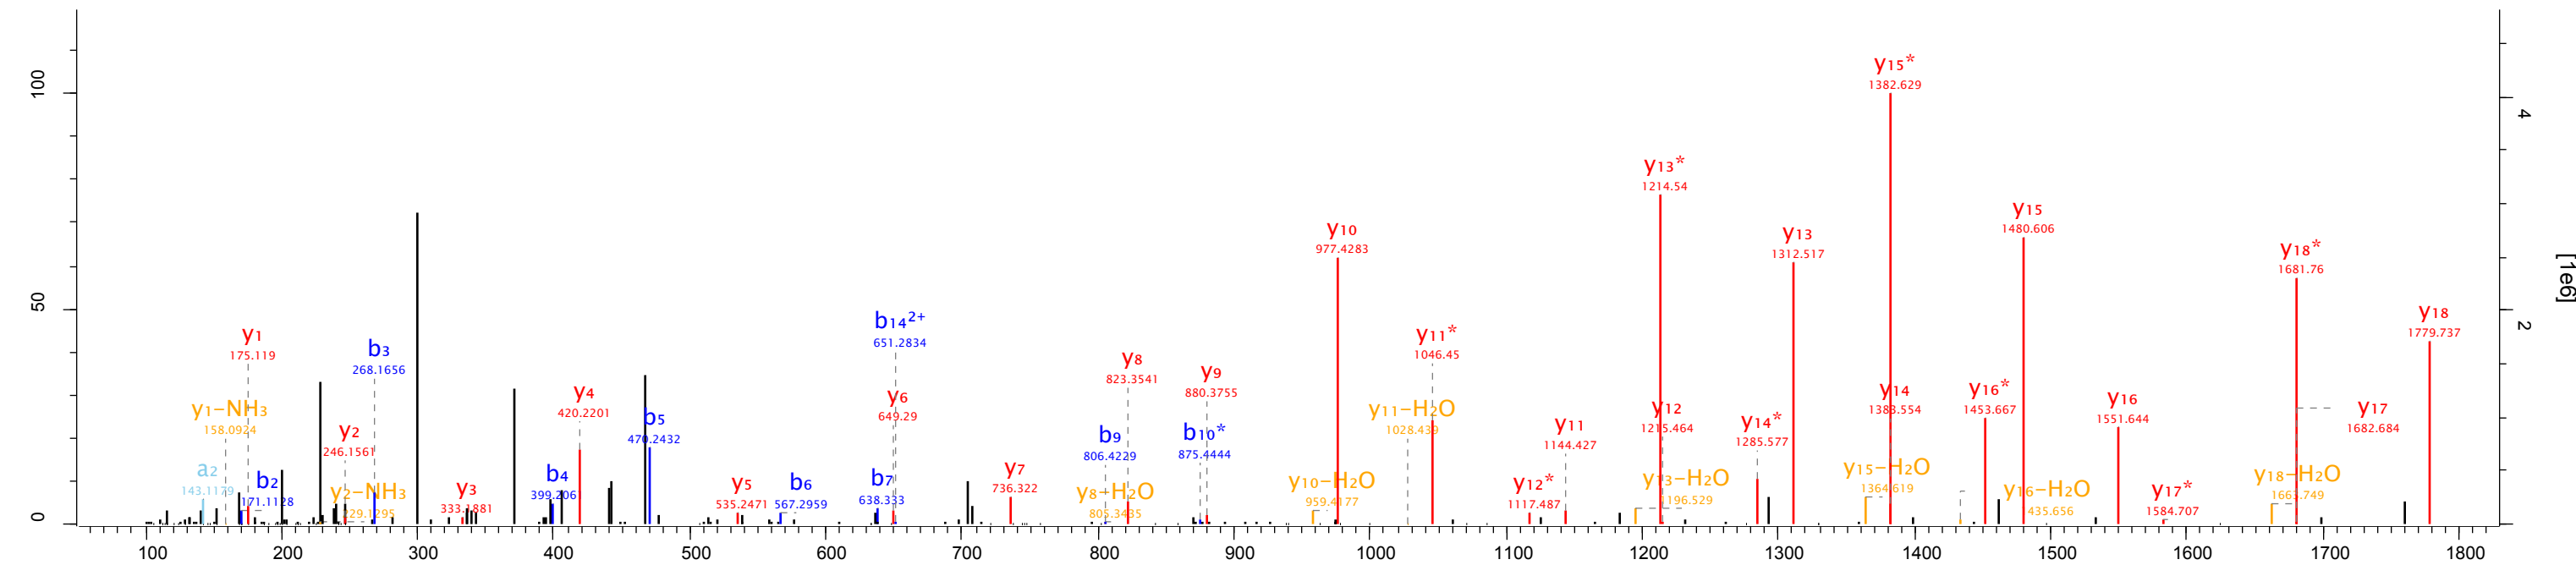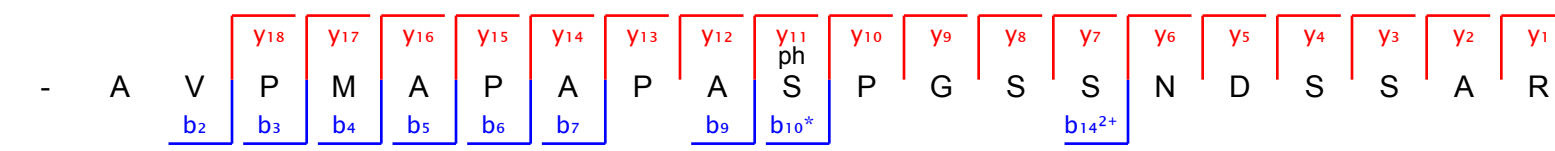

Raw file: 20150812\_A375SR\_Phospho\_BR1\_06  
 Scan: 11839 Method: FTMS; HCD Score: 142.19 m/z: 693.86 Gene names: ELK3

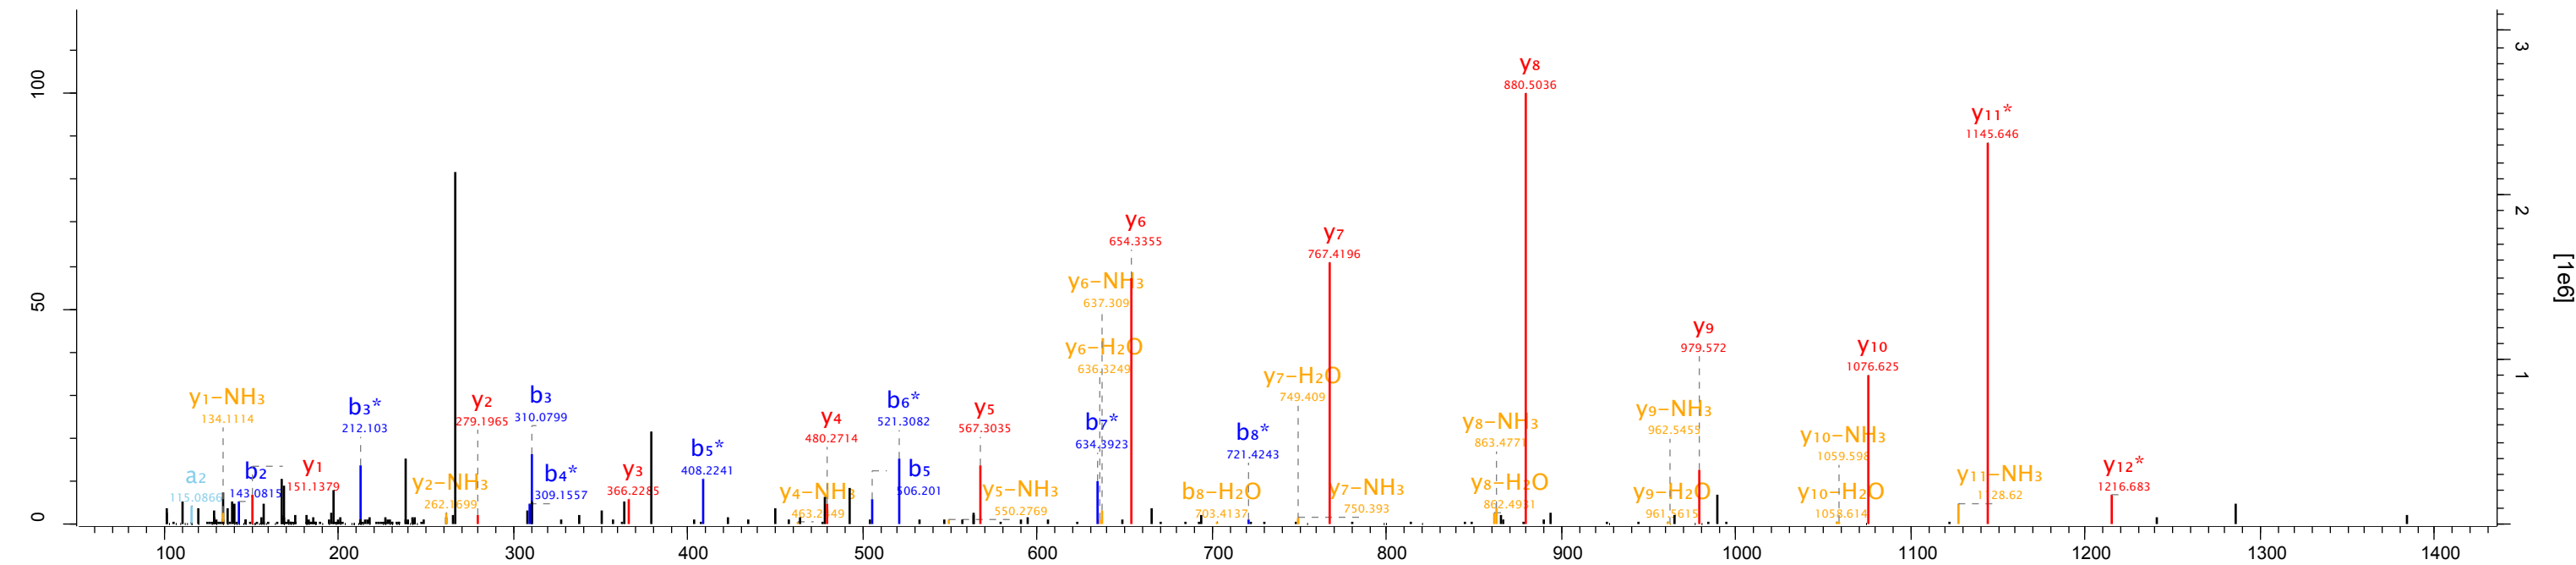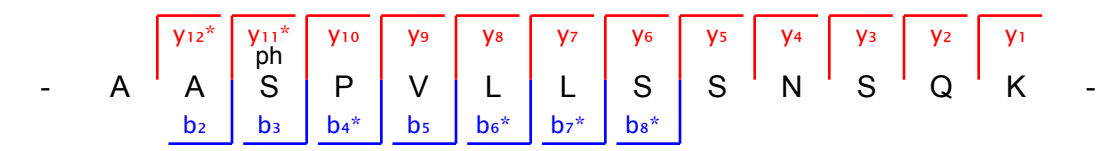



Raw file Scan Method Score m/z Gene names  
 20150812\_A375SR\_Phospho\_BR1\_06 11889 FTMS; HCD 106.16 588.83 SPTAN1

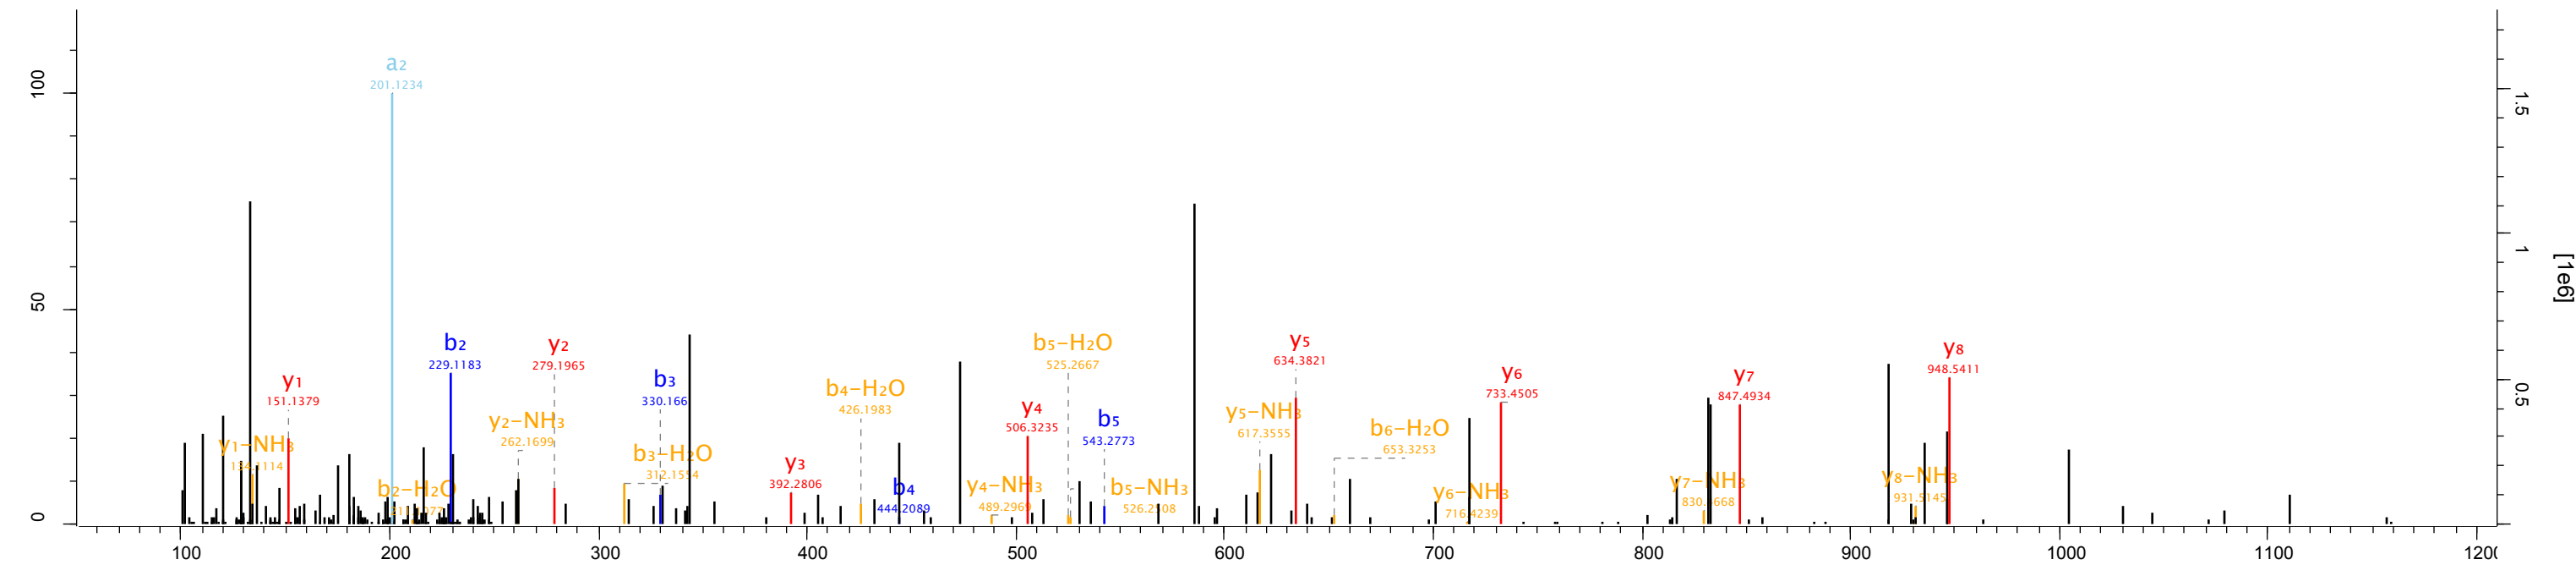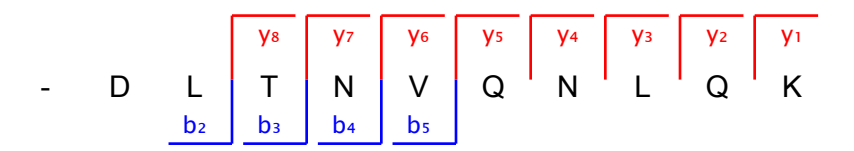

Raw file: 20150812\_A375SR\_Phospho\_BR1\_06  
 Scan: 1279 Method: FTMS; HCD Score: 137.8 m/z: 492.56 Gene names: RSRC2

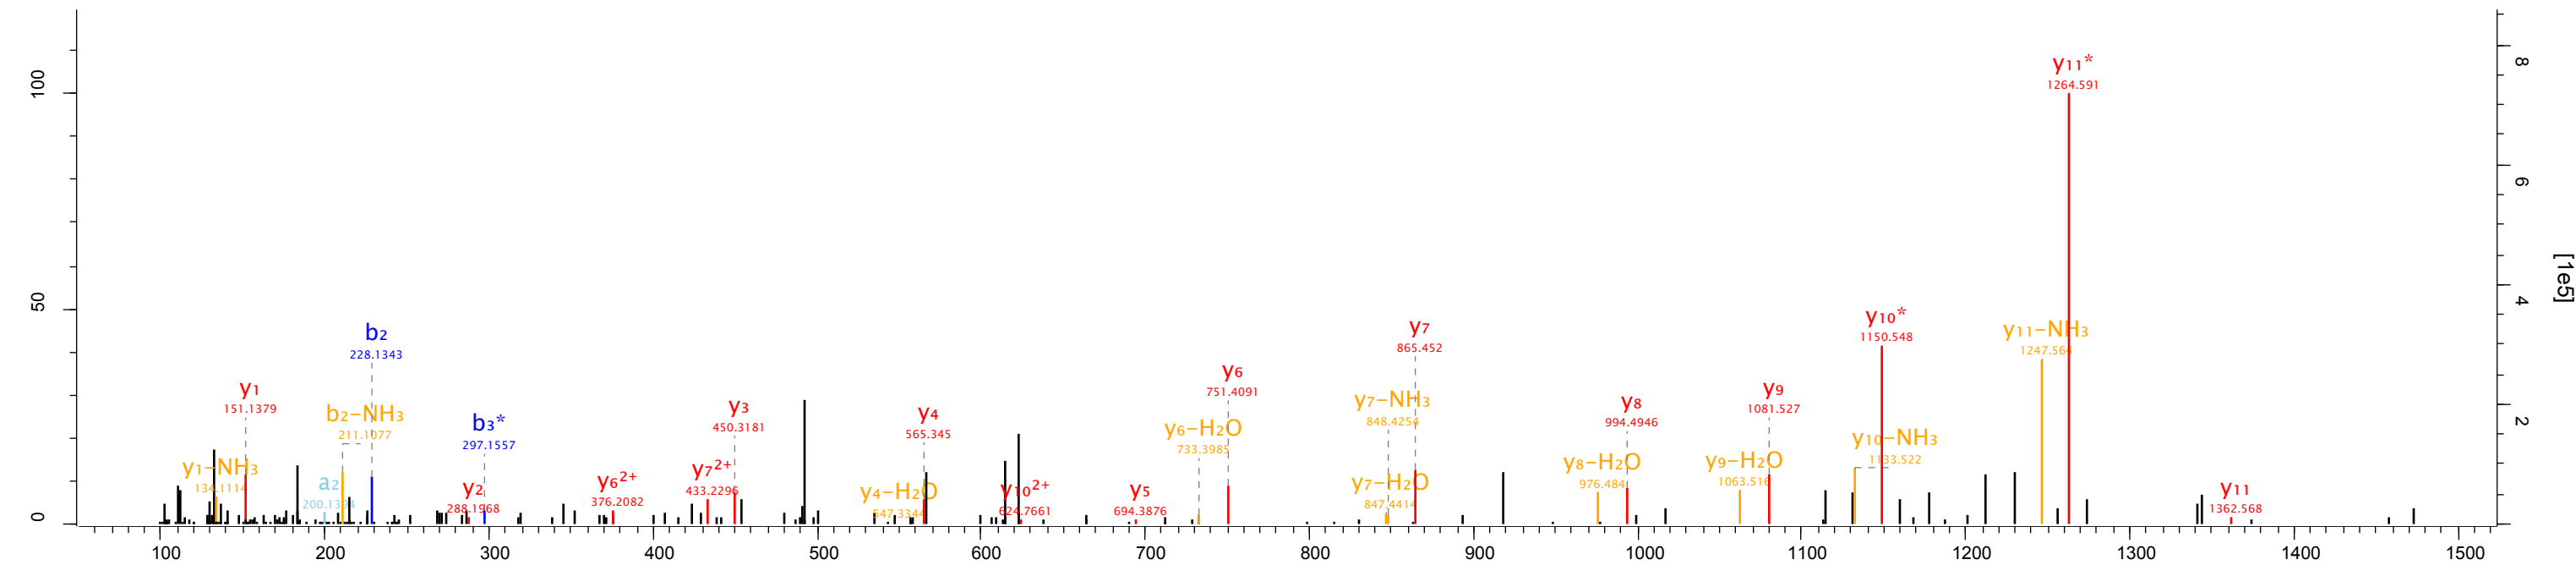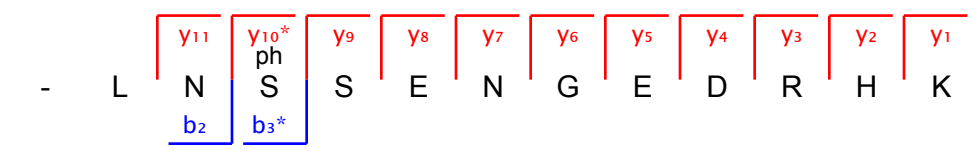

Raw file: 20150812\_A375SR\_Phospho\_BR1\_06  
 Scan: 13079 Method: FTMS; HCD Score: 238.23 m/z: 856.74 Gene names: ARFGAP2

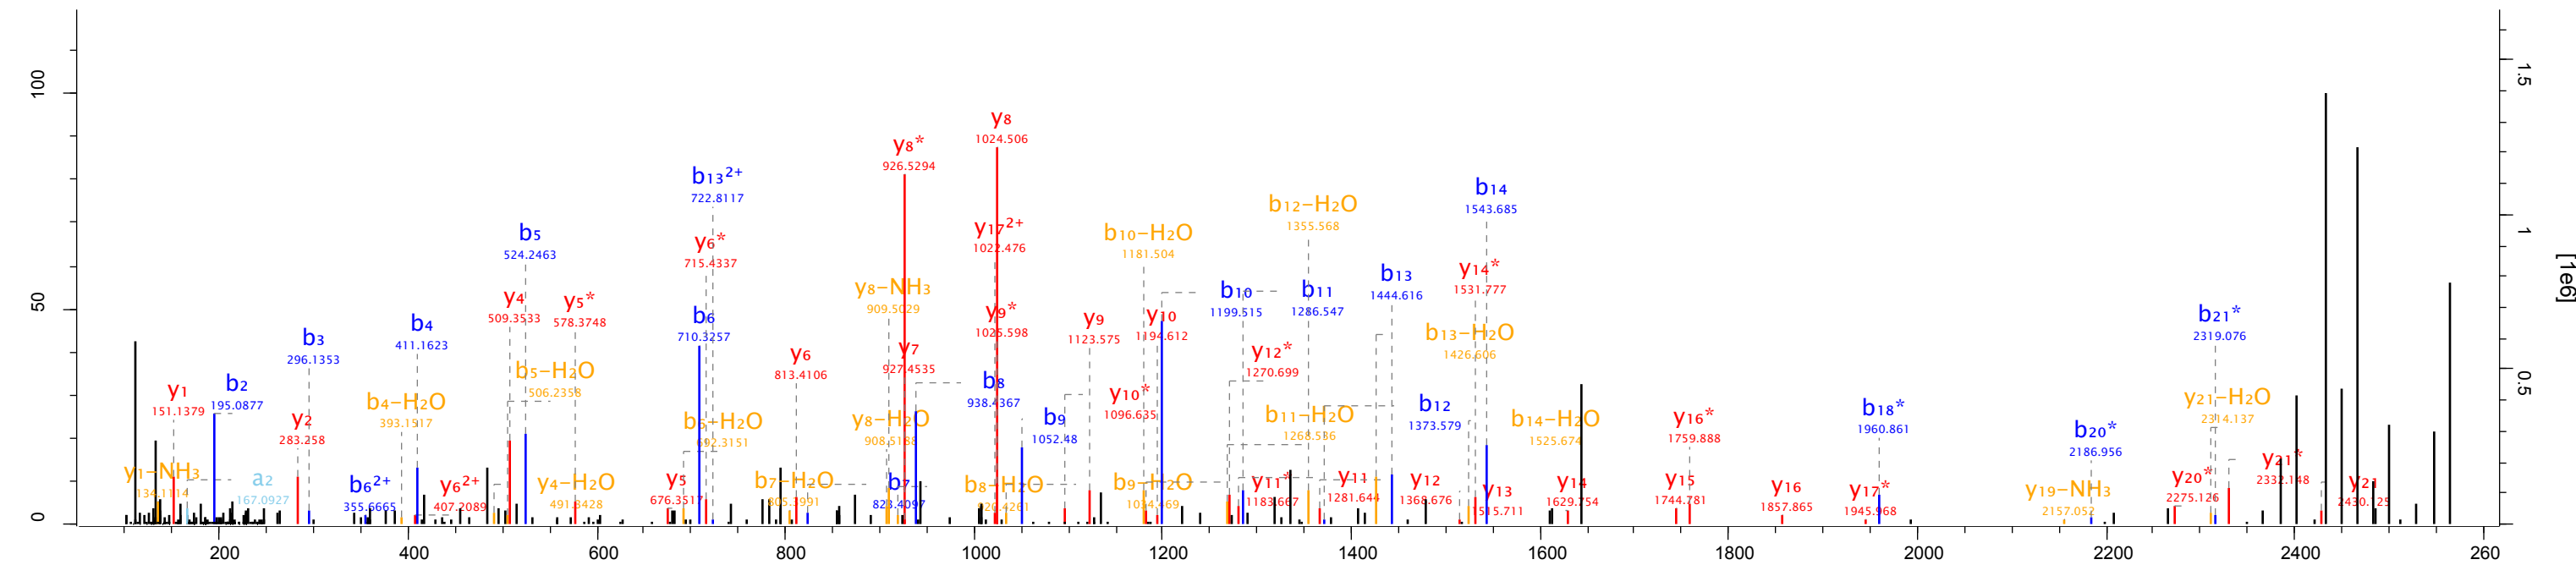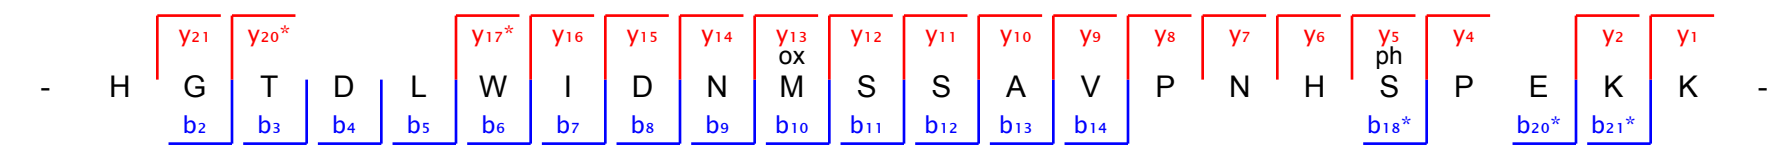

Raw file 20150812\_A375SR\_Phospho\_BR1\_06 Scan 13209 Method FTMS; HCD Score 184.66 m/z 792.88 Gene names HMG20A

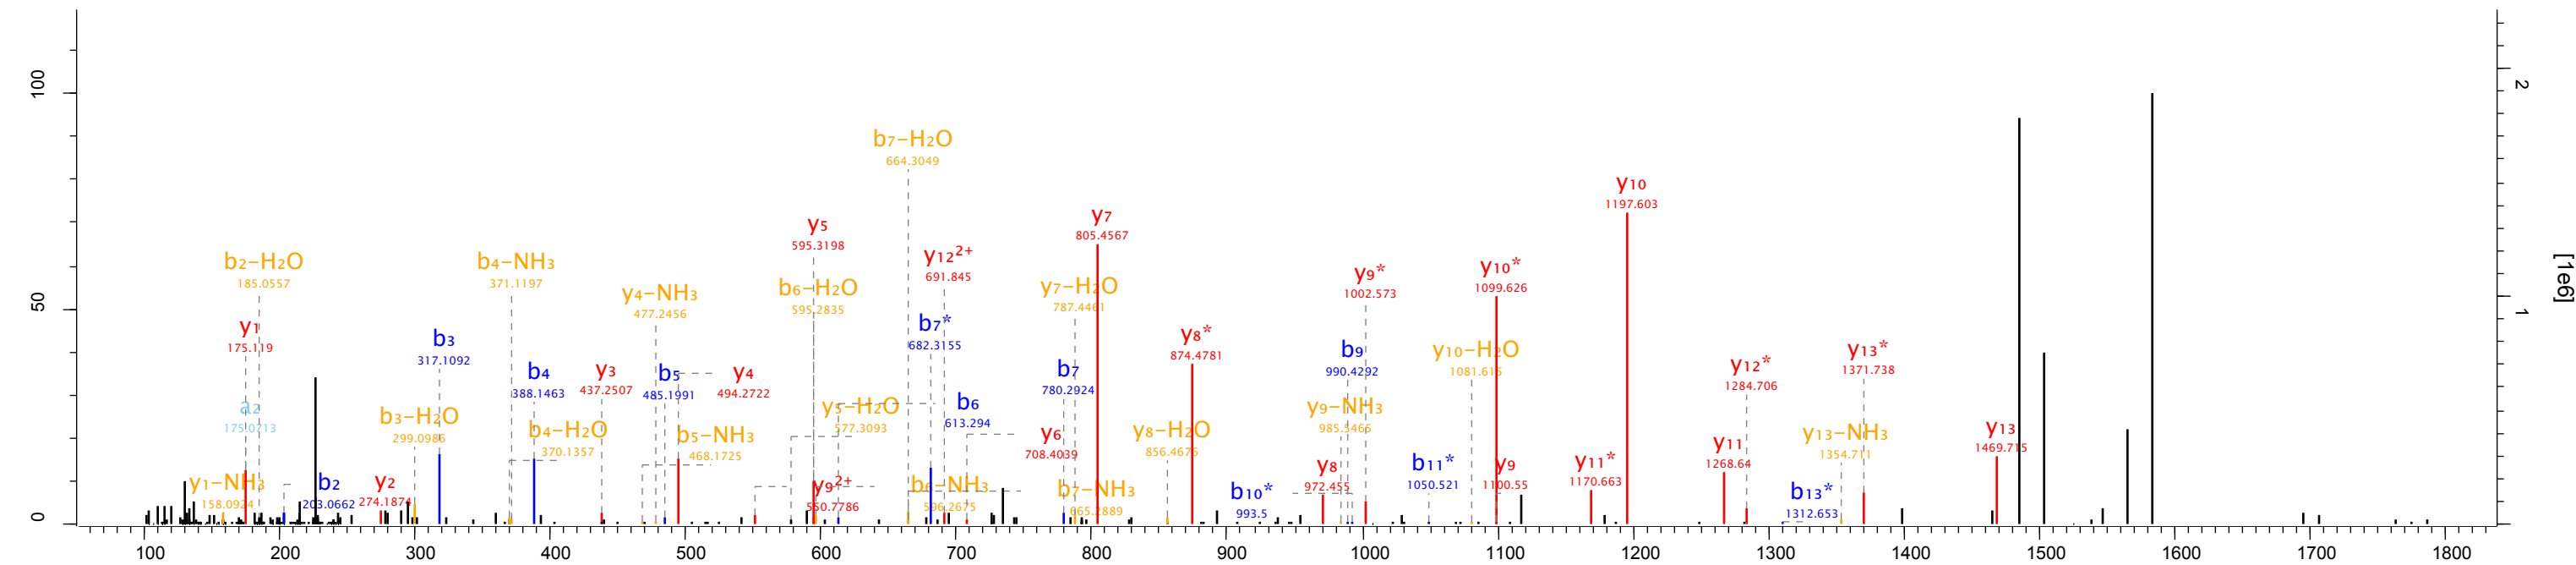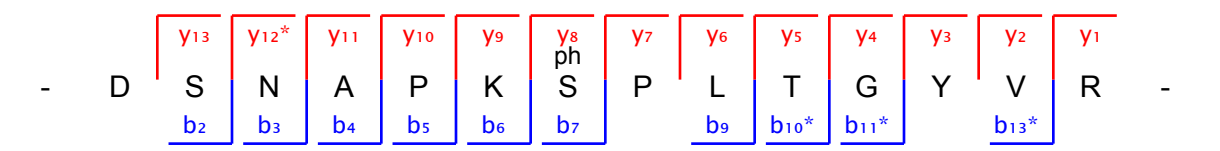

Raw file 20150812\_A375SR\_Phospho\_BR1\_06 Scan 13509 Method FTMS; HCD Score 107.09 m/z 642.77 Gene names RBM7

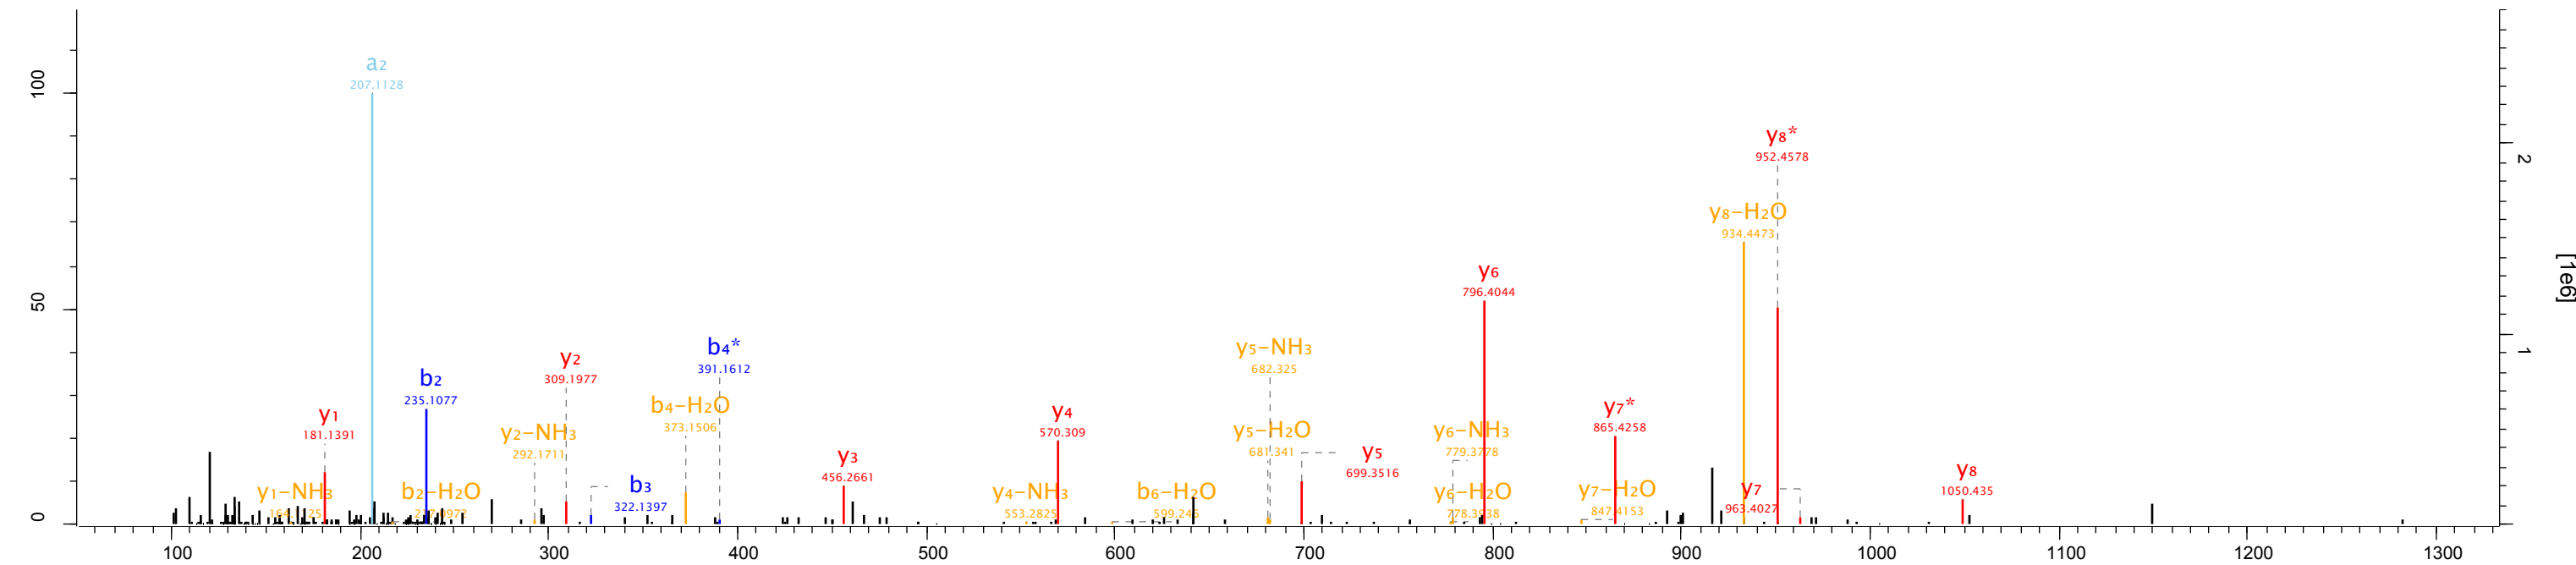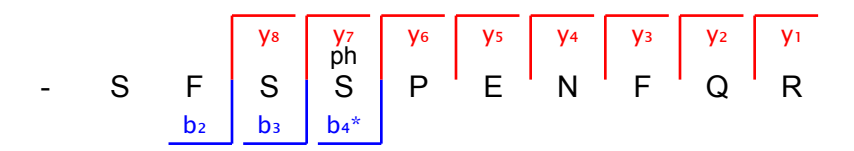

Raw file 20150812\_A375SR\_Phospho\_BR1\_06 Scan 13999 Method FTMS; HCD Score 101.17 m/z 646.64 Gene names OFD1

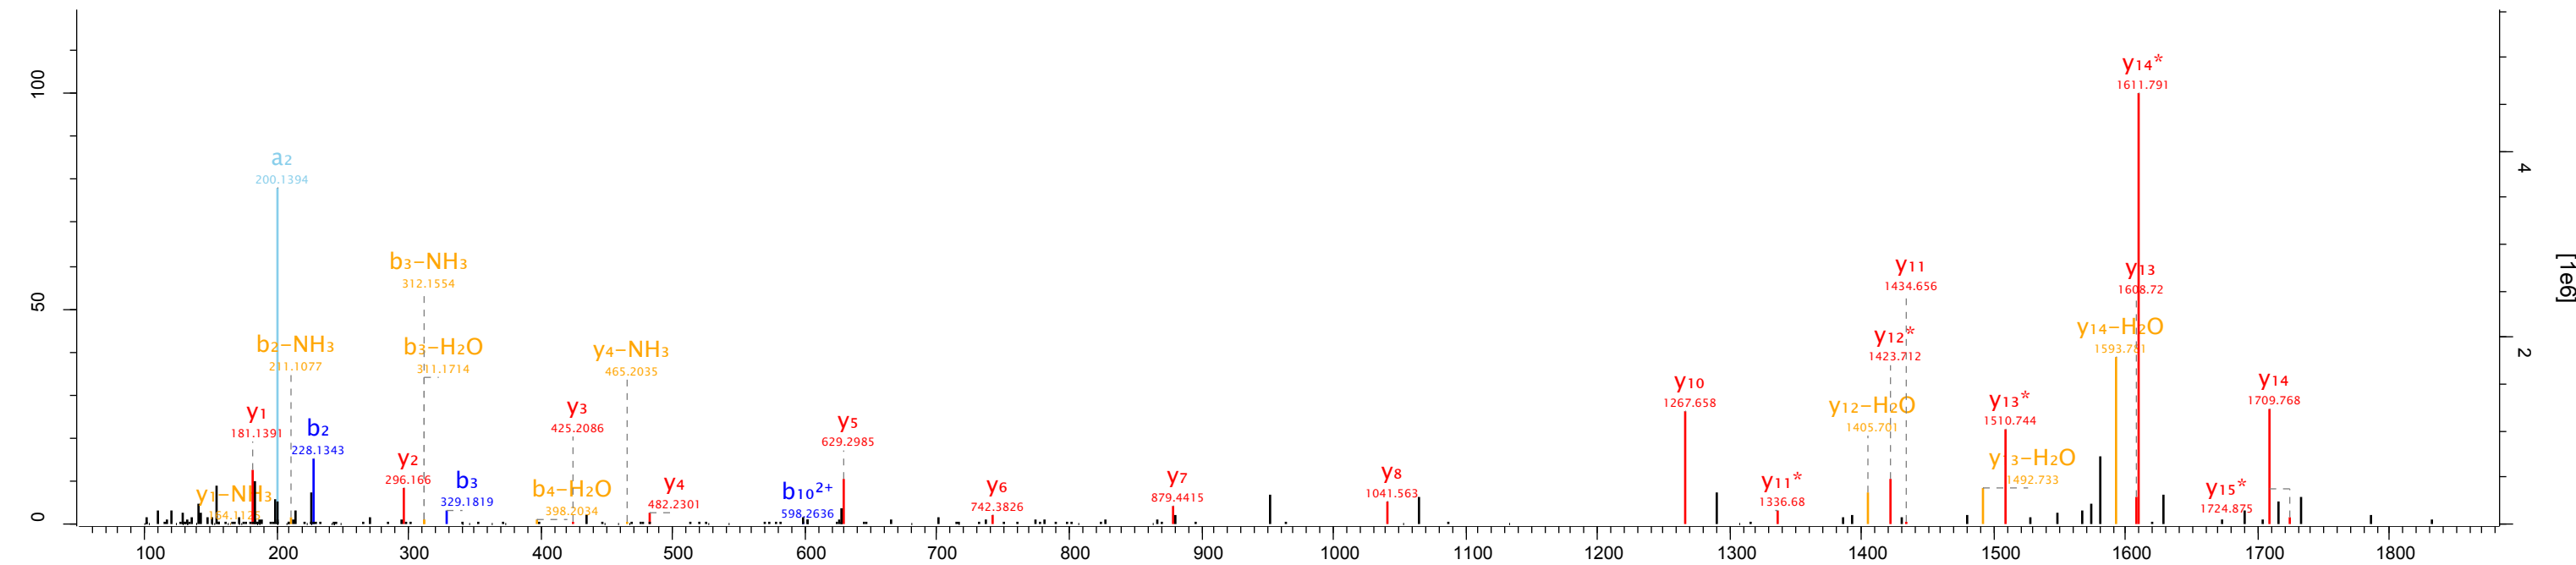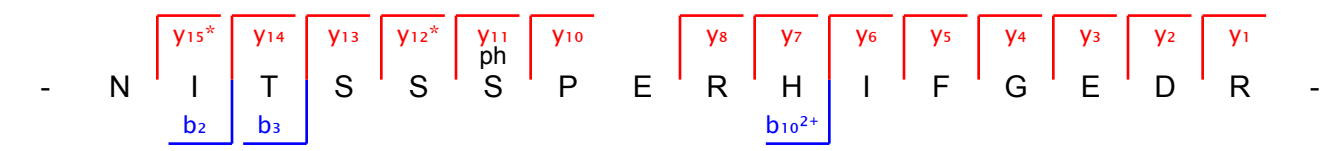

Raw file: 20150812\_A375SR\_Phospho\_BR1\_06  
 Scan: 14269 Method: FTMS; HCD Score: 286.57 m/z: 1109.01 Gene names: SPAG7

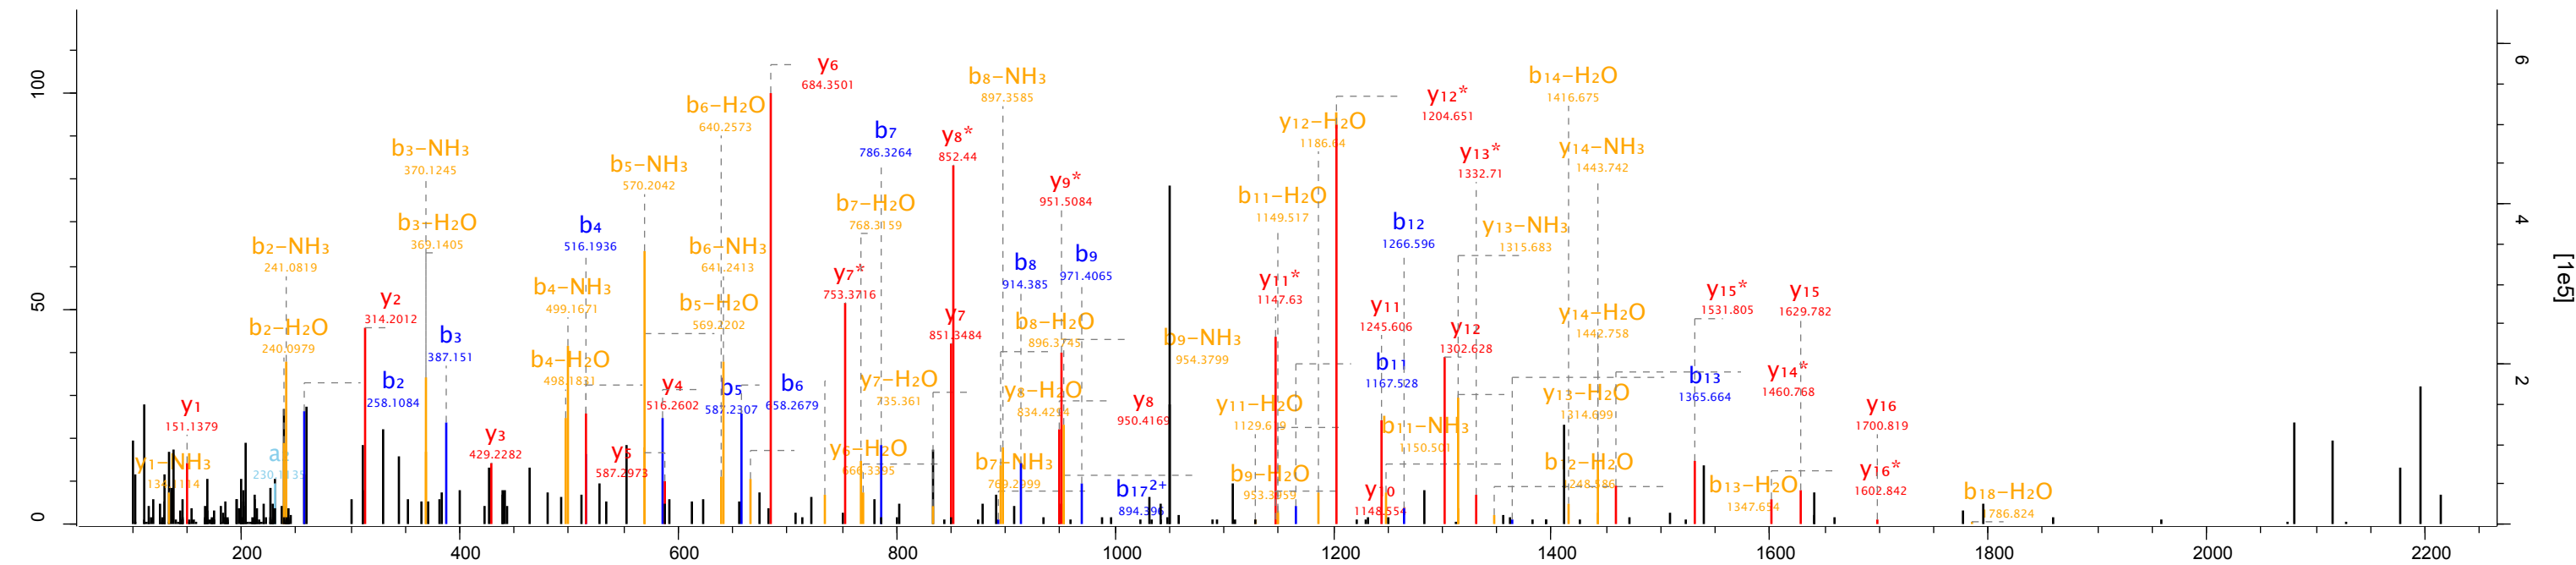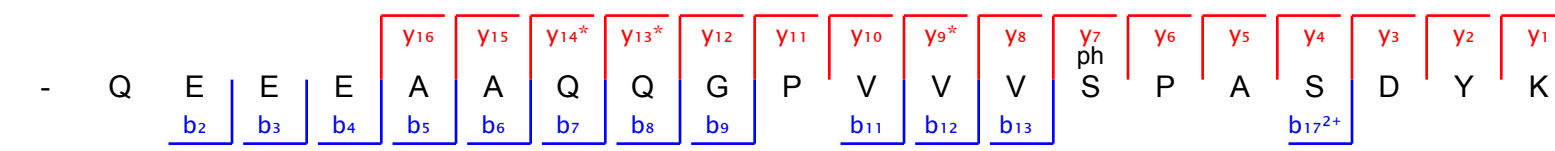

Raw file 20150812\_A375SR\_Phospho\_BR1\_06 Scan 14359 Method FTMS; HCD Score 157.33 m/z 675.82 Gene names CHAMP1

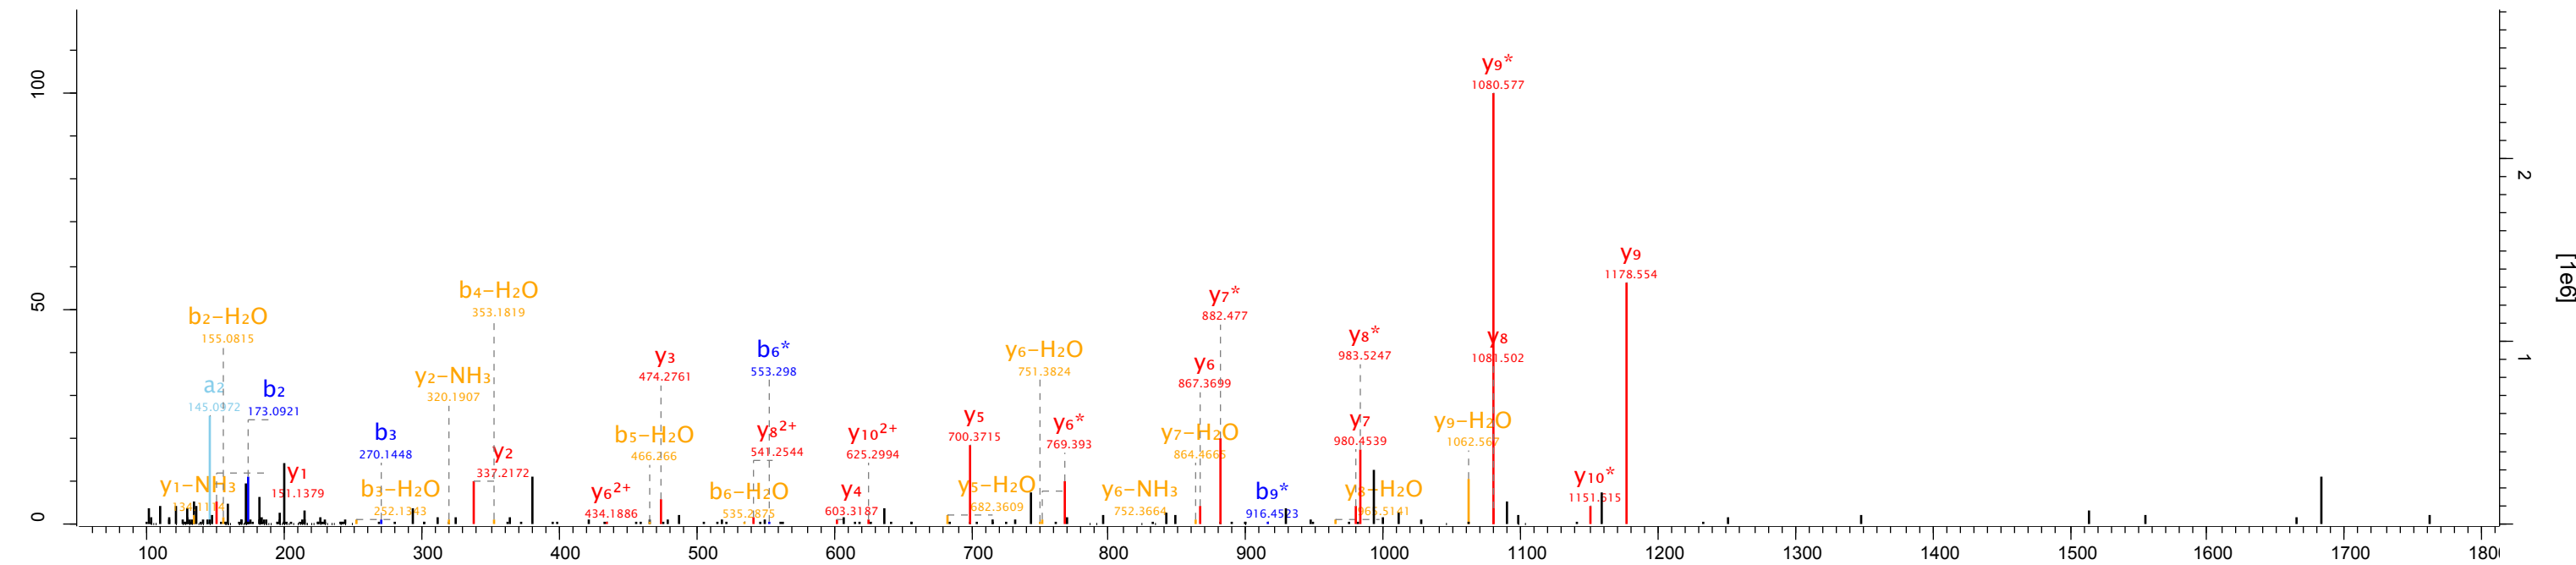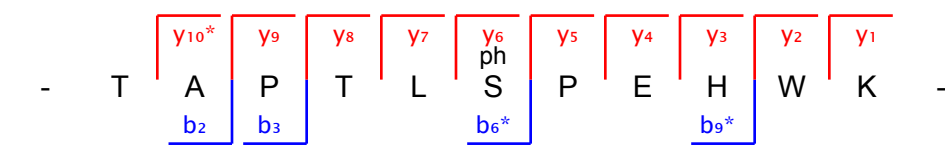



Raw file Scan Method Score m/z Gene names  
 20150812\_A375SR\_Phospho\_BR1\_06 15649 FTMS; HCD 145.46 510.94 CEP135

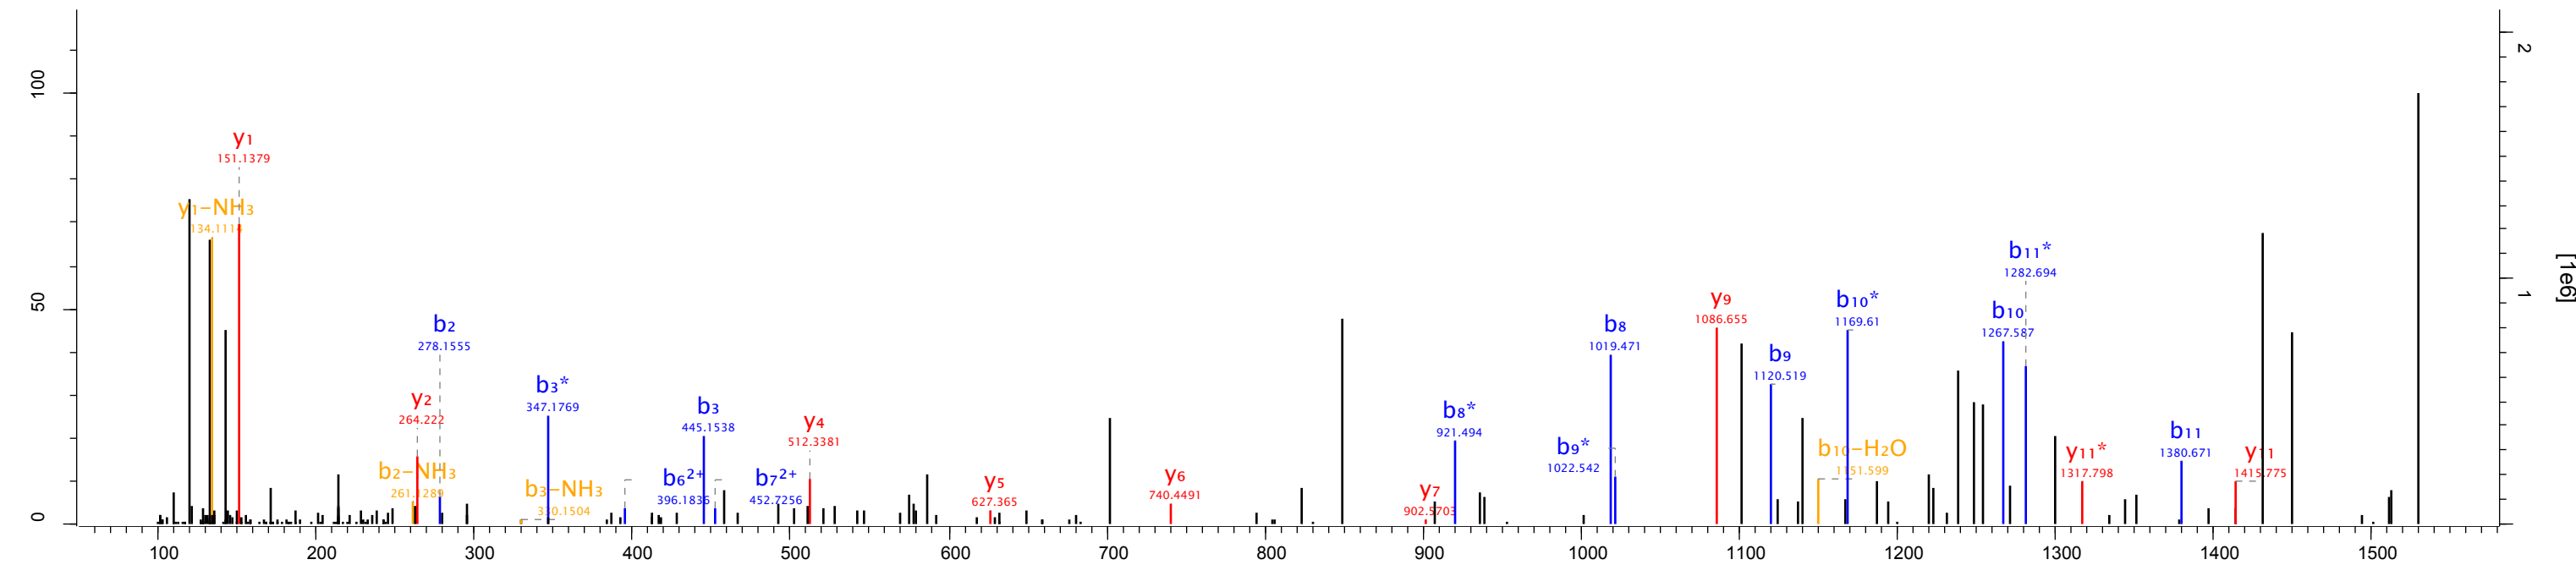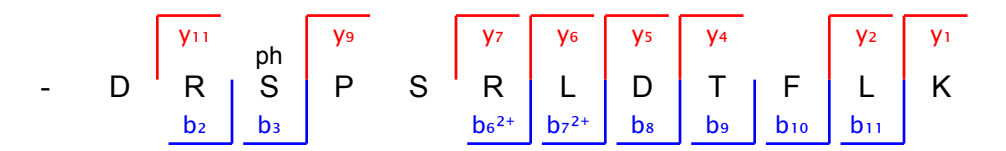

Raw file 20150812\_A375SR\_Phospho\_BR1\_06 Scan 15789 Method FTMS; HCD Score 45.44 m/z 686.96 Gene names WDR47

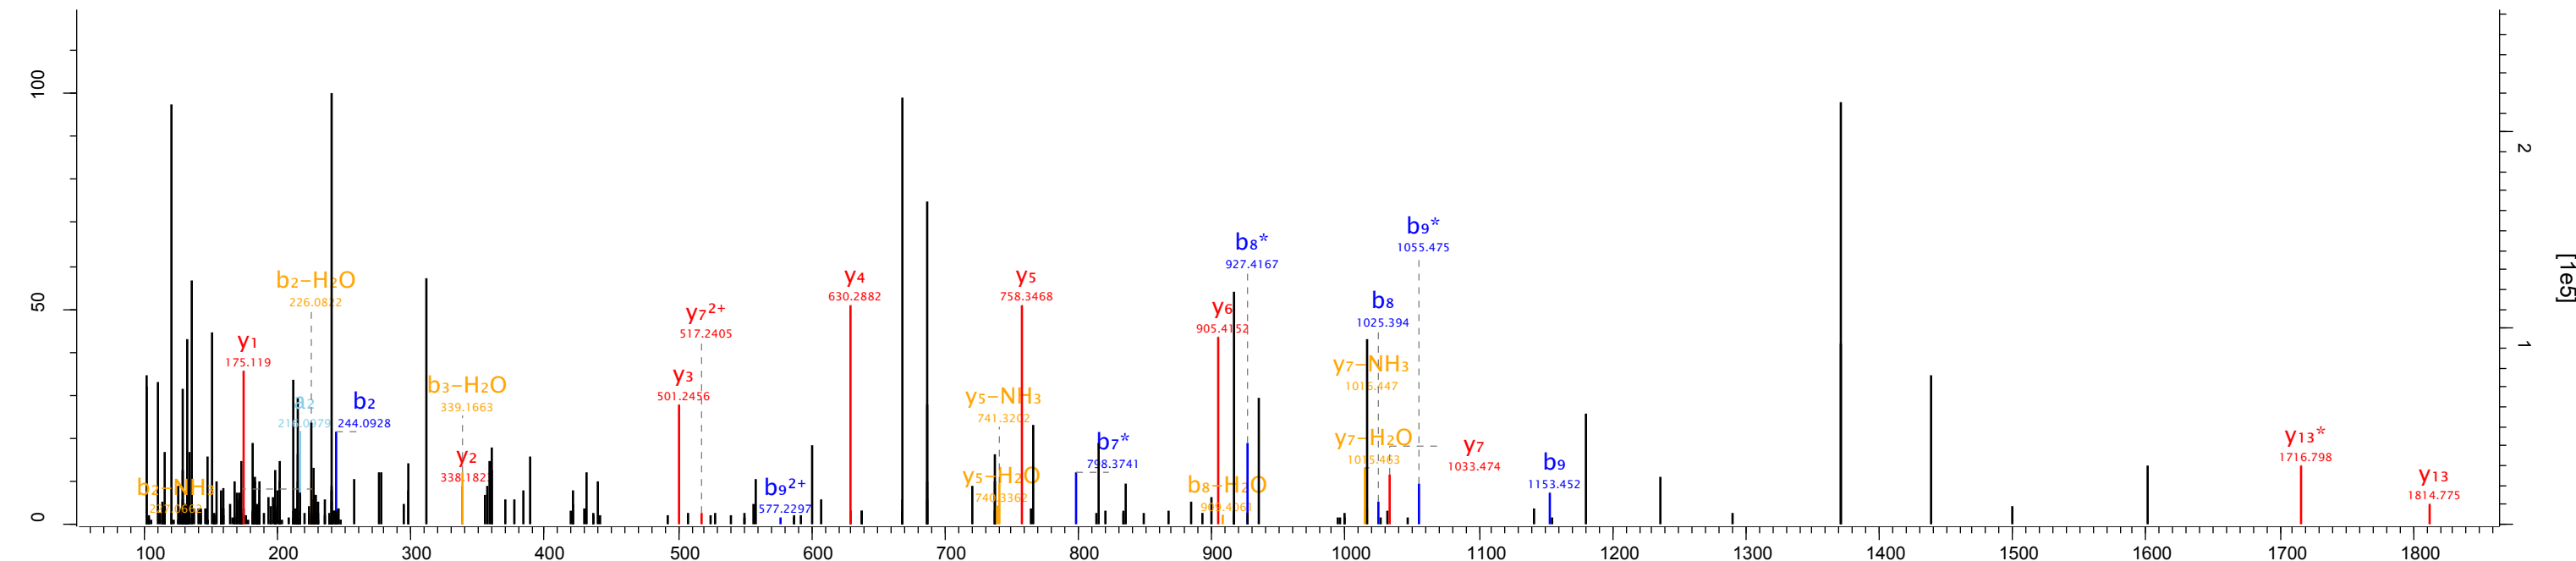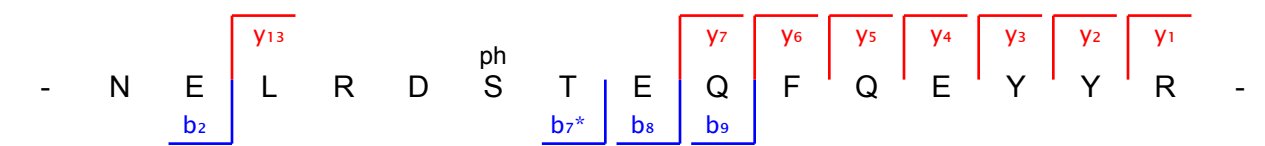

Raw file 20150812\_A375SR\_Phospho\_BR1\_06 Scan 17559 Method FTMS; HCD Score 369.53 m/z 1080.44 Gene names NUCKS1

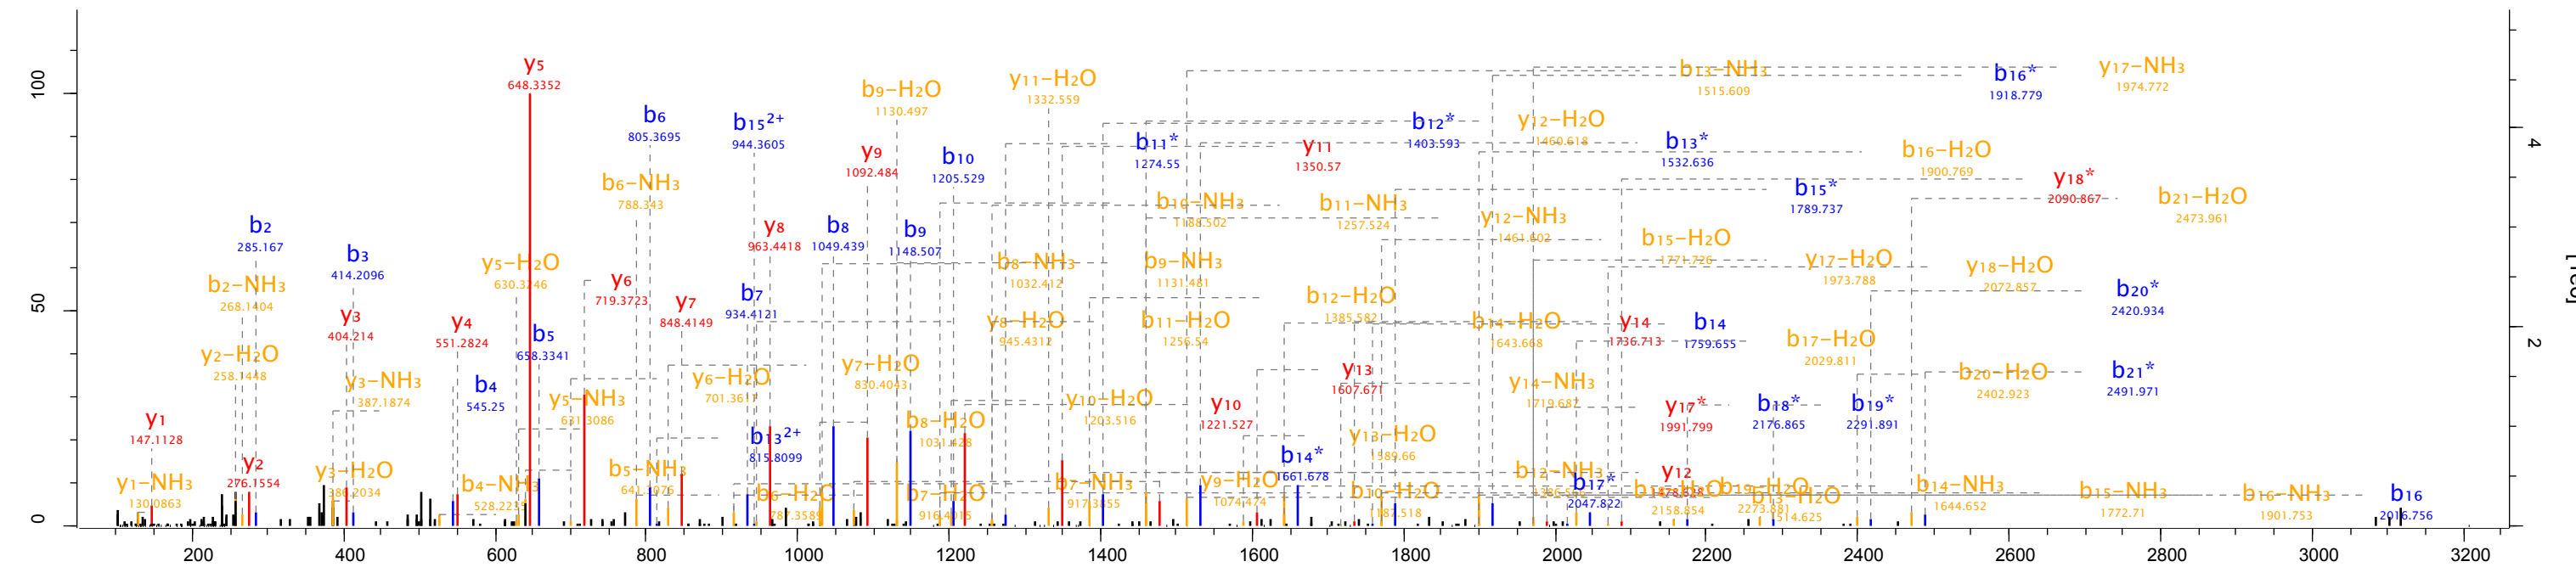

- Q R E M L M ox E D V G S E E E Q E E E D E A P F Q E K -

b<sub>2</sub>
b<sub>3</sub>
b<sub>4</sub>
b<sub>5</sub>
b<sub>6</sub>
b<sub>7</sub>
b<sub>8</sub>
b<sub>9</sub>
b<sub>10</sub>
b<sub>11</sub><sup>\*</sup>
b<sub>12</sub><sup>\*</sup>
b<sub>13</sub><sup>\*</sup>
b<sub>14</sub>
b<sub>15</sub><sup>\*</sup>
b<sub>16</sub>
b<sub>17</sub><sup>\*</sup>
b<sub>18</sub><sup>\*</sup>
b<sub>19</sub><sup>\*</sup>
b<sub>20</sub><sup>\*</sup>
b<sub>21</sub><sup>\*</sup>

y<sub>18</sub><sup>\*</sup>
y<sub>17</sub><sup>\*</sup>
y<sub>14</sub>
y<sub>13</sub>
y<sub>12</sub>
y<sub>11</sub>
y<sub>10</sub>
y<sub>9</sub>
y<sub>8</sub>
y<sub>7</sub>
y<sub>6</sub>
y<sub>5</sub>
y<sub>4</sub>
y<sub>3</sub>
y<sub>2</sub>
y<sub>1</sub>

Raw file: 20150812\_A375SR\_Phospho\_BR1\_06  
 Scan: 17749 Method: FTMS; HCD Score: 94.73 m/z: 1094.88 Gene names: FNBP1

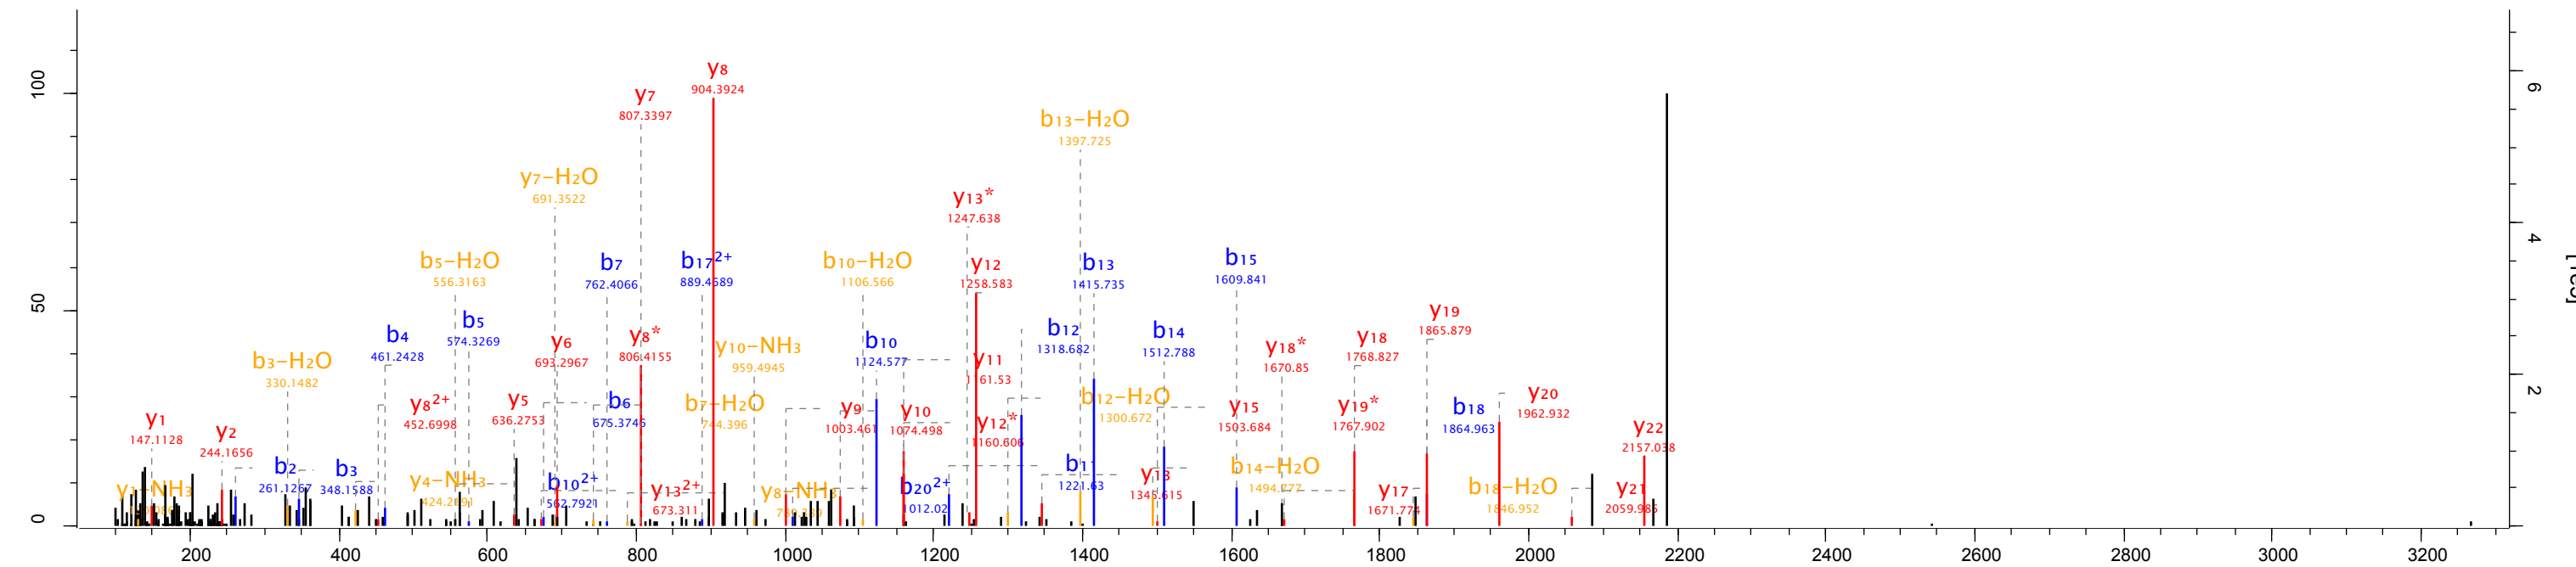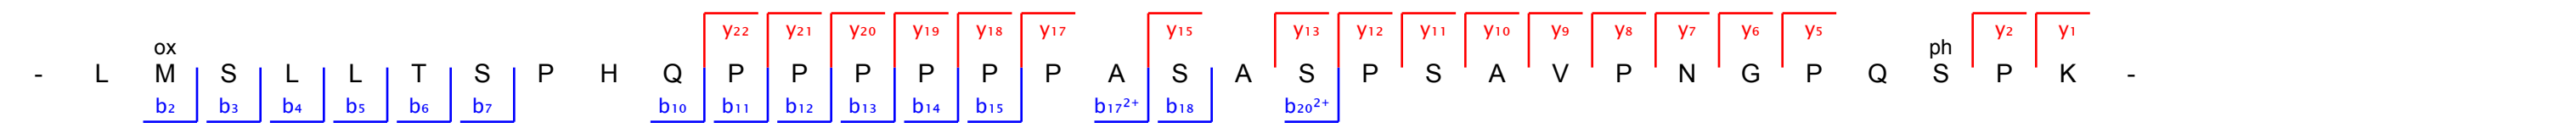

Raw file 20150812\_A375SR\_Phospho\_BR1\_06 Scan 17929 Method FTMS; HCD Score 319.11 m/z 1244.58 Gene names LRRC47

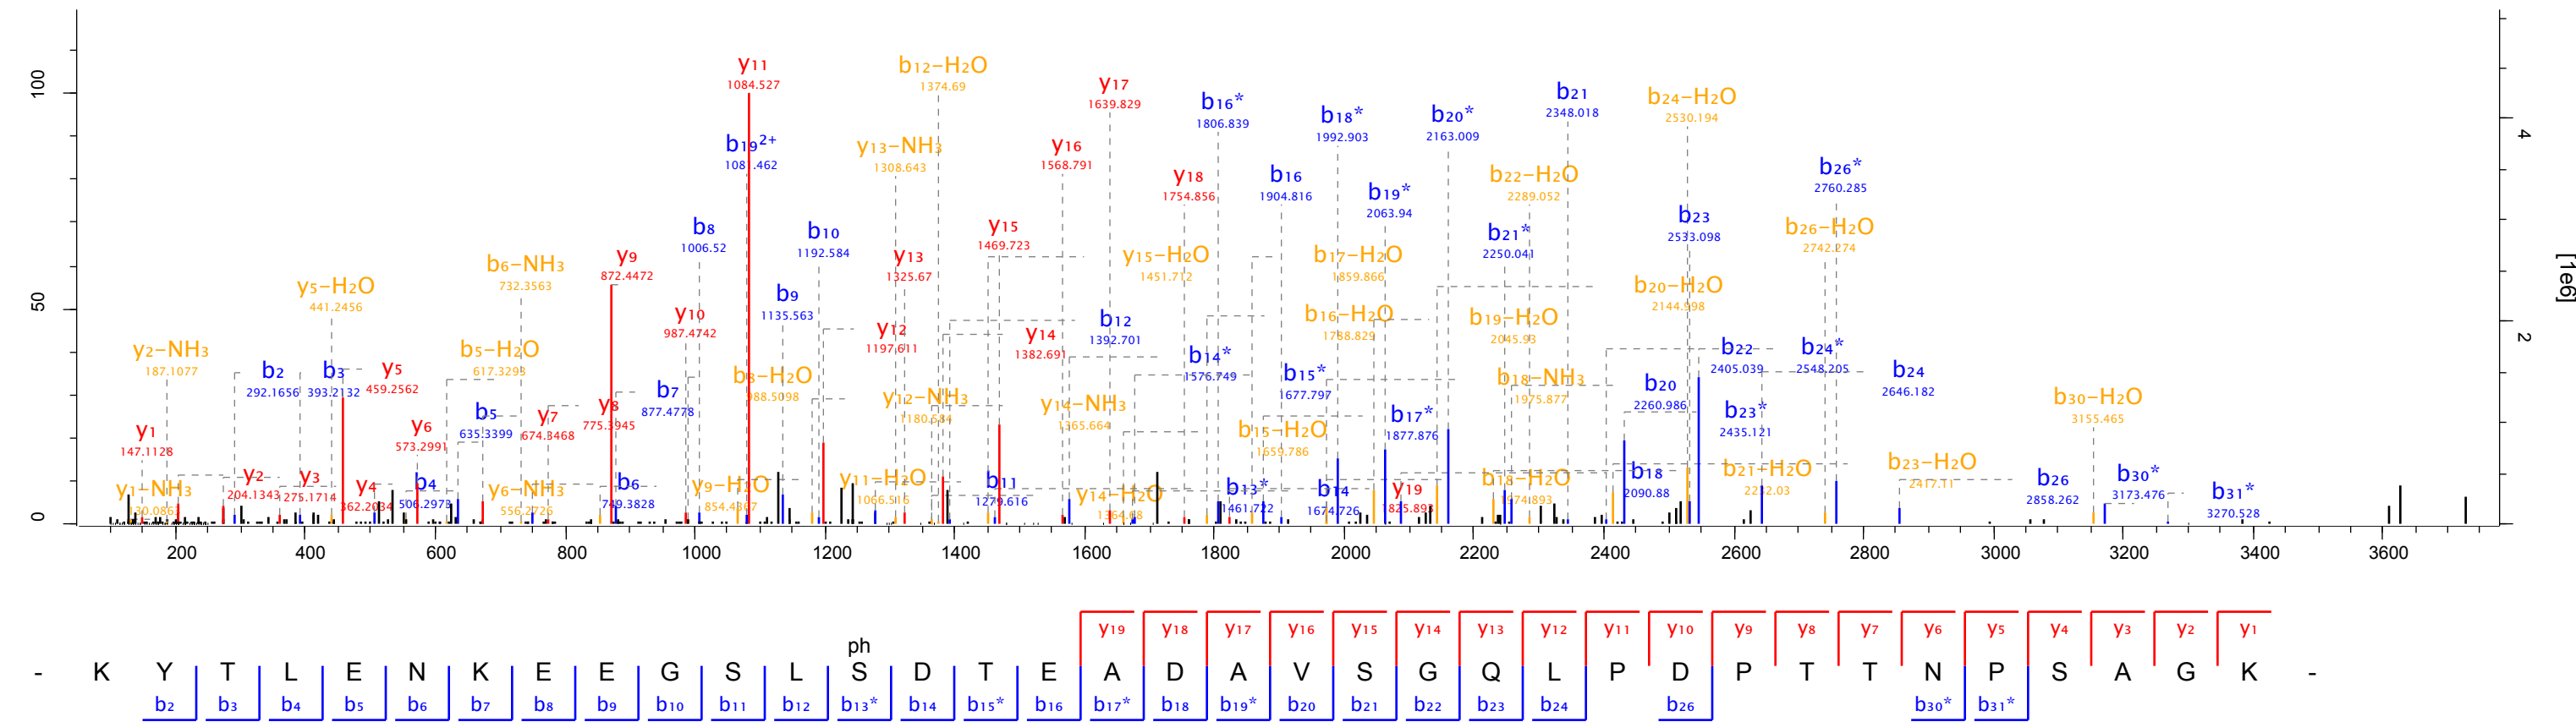

Raw file: 20150812\_A375SR\_Phospho\_BR1\_06  
 Scan: 18089 Method: FTMS; HCD Score: 237.63 m/z: 1189.55 Gene names: PAK1

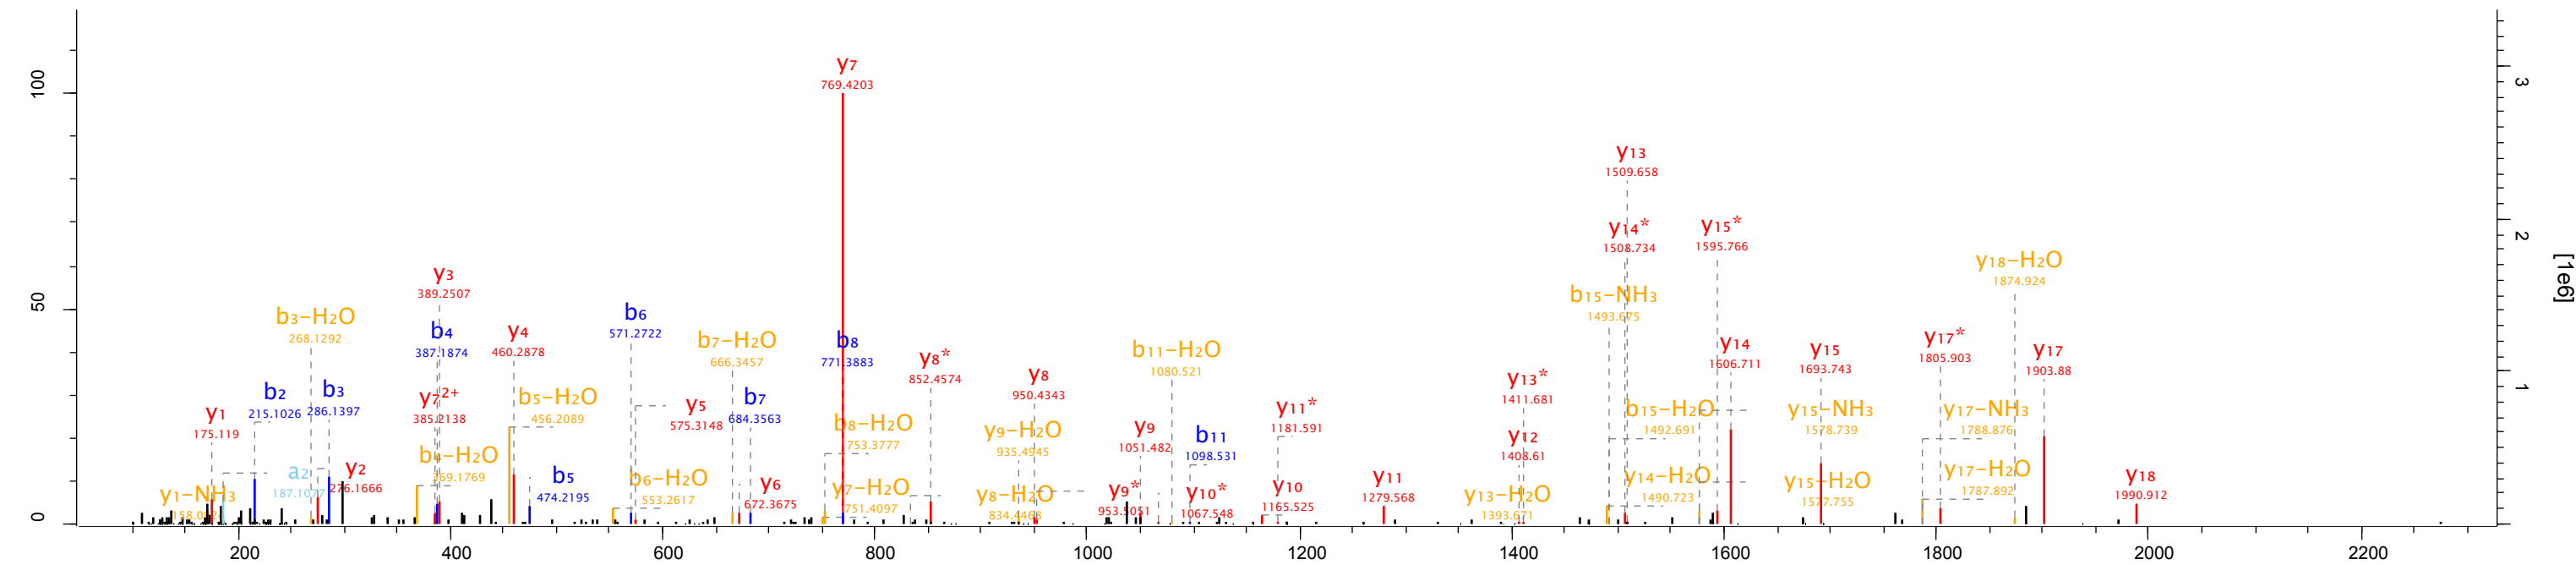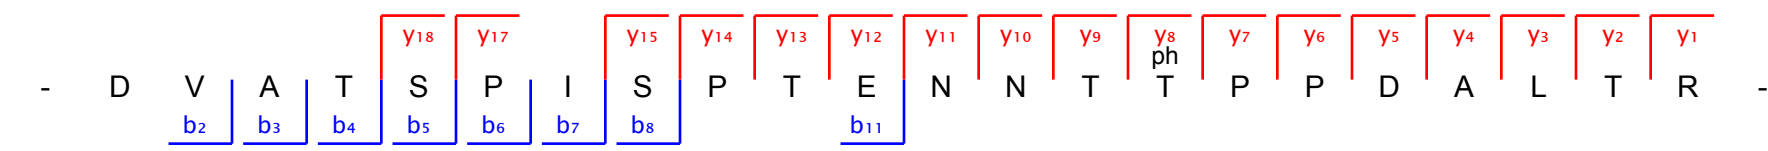

Raw file: 20150812\_A375SR\_Phospho\_BR1\_06  
 Scan: 18389 Method: FTMS; HCD Score: 57.98 m/z: 1305.25 Gene names: NACA2

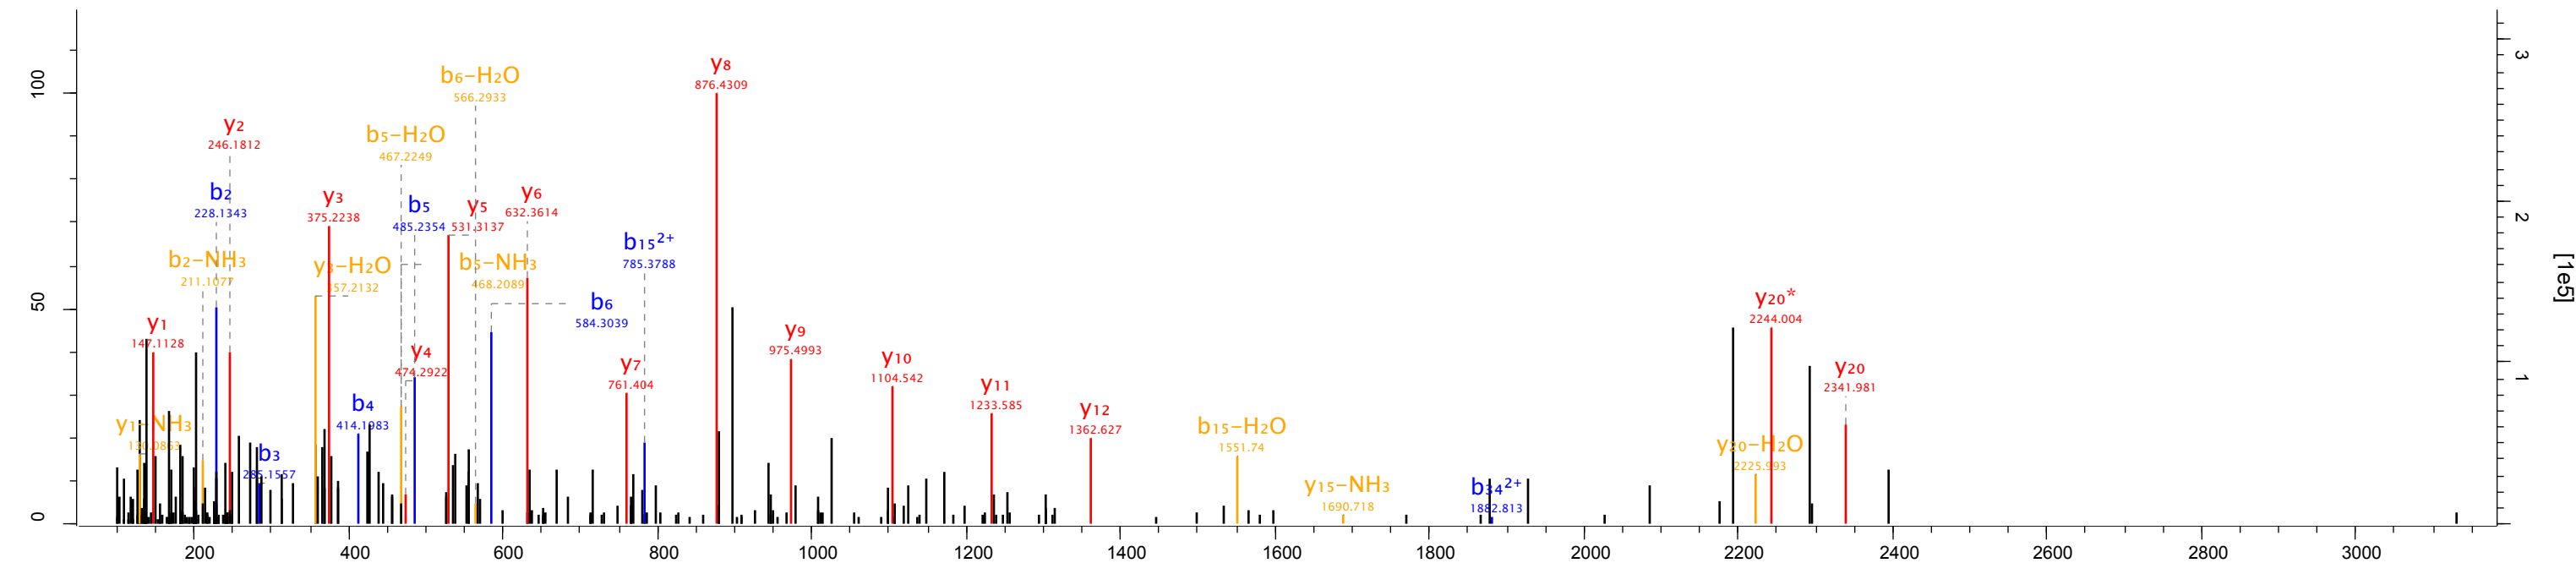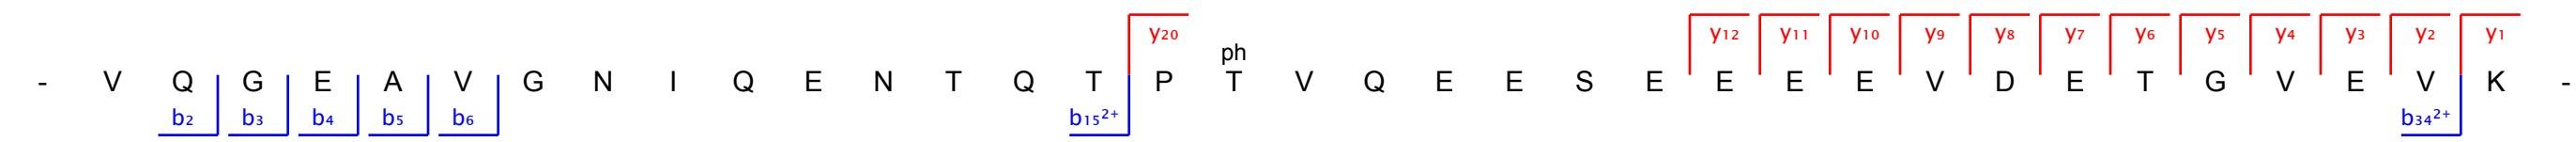

20150812\_A375SR\_Phospho\_BR1\_06 2119 FTMS; HCD 205.37 622.78 ABCC1

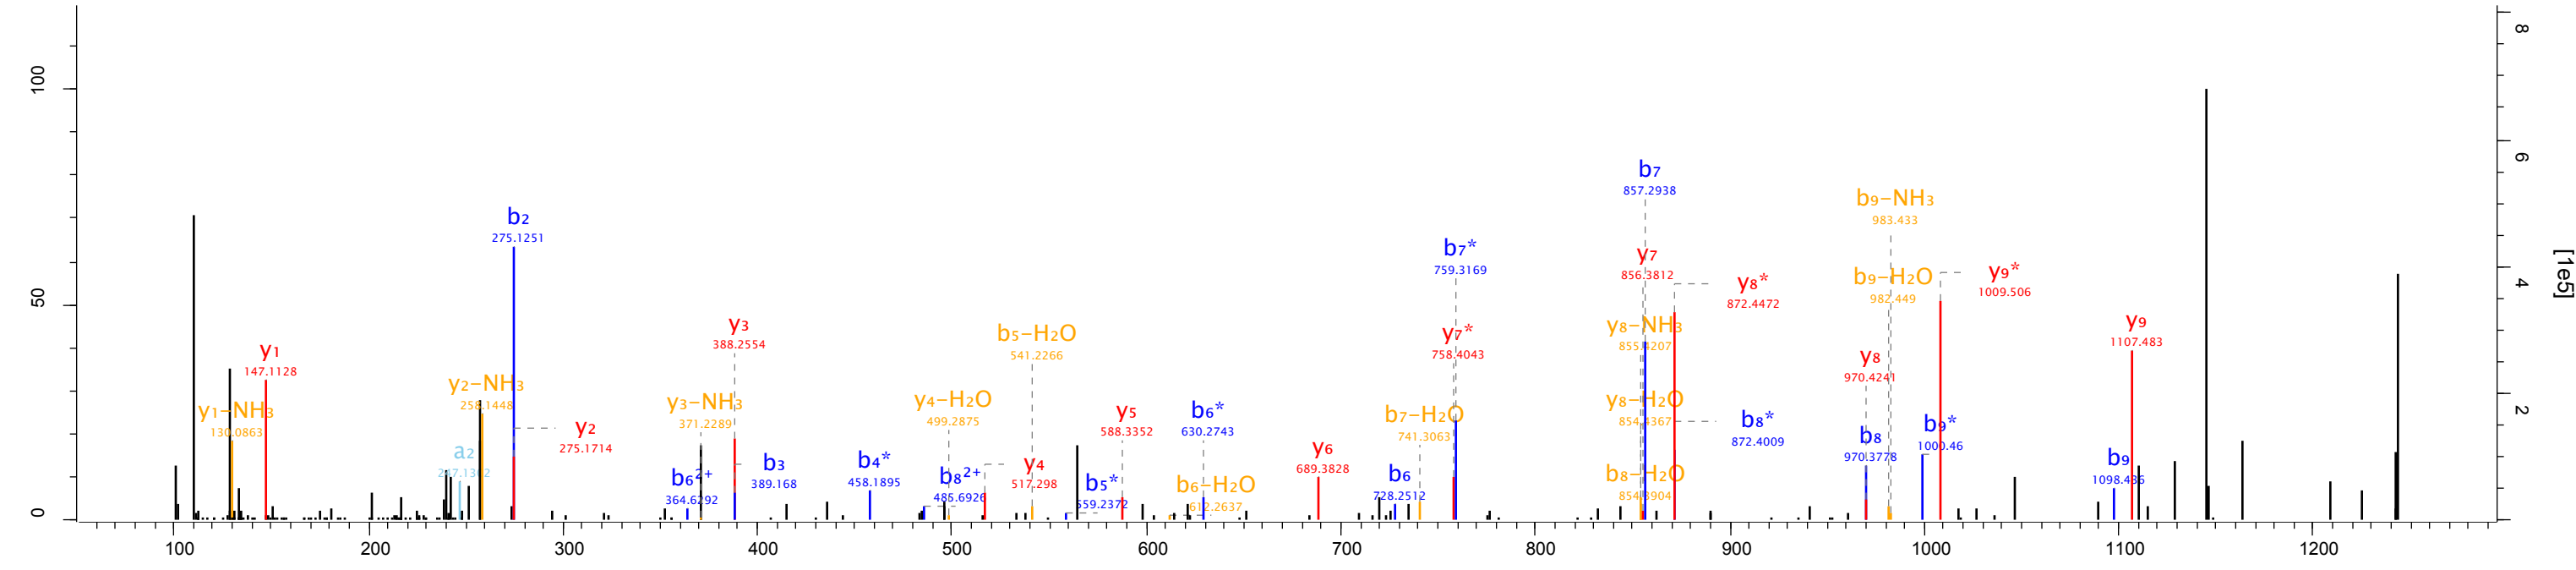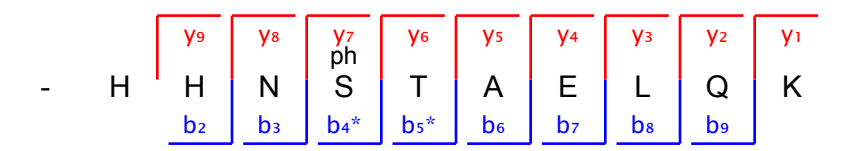



Raw file 20150812\_A375SR\_Phospho\_BR1\_06 Scan 2169 Method FTMS; HCD Score 94.29 m/z 593.29 Gene names LMNA

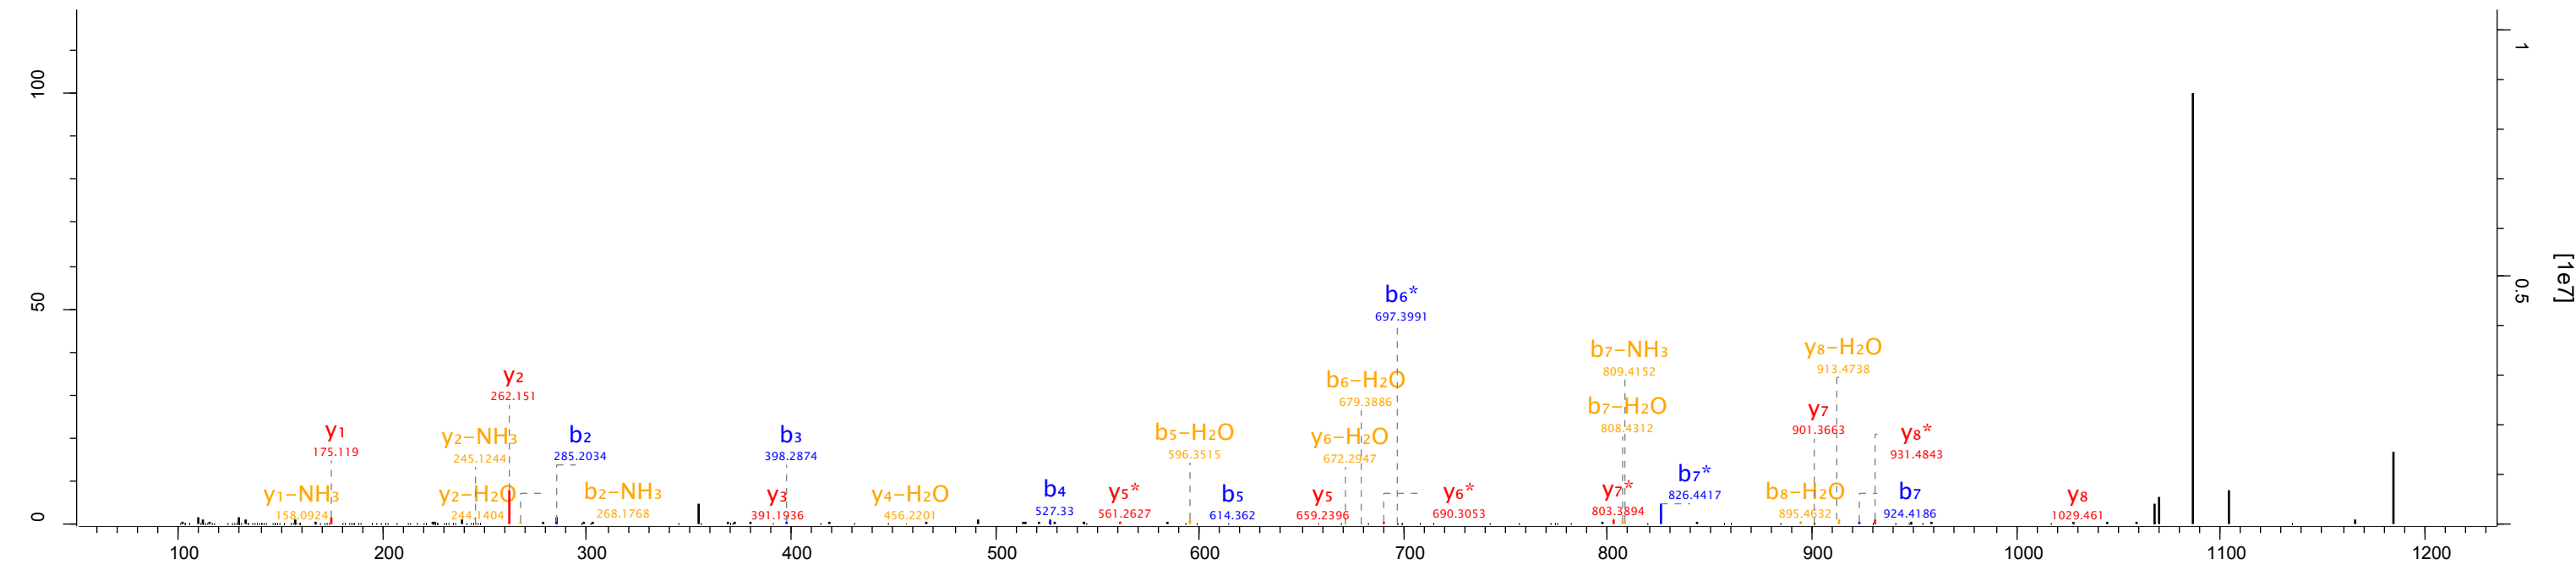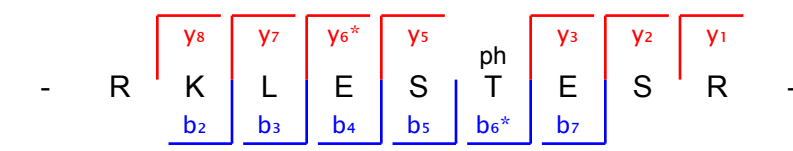

Raw file 20150812\_A375SR\_Phospho\_BR1\_06 Scan 22379 Method FTMS; HCD Score 48.58 m/z 884.43 Gene names BAIAP2;CCDC43

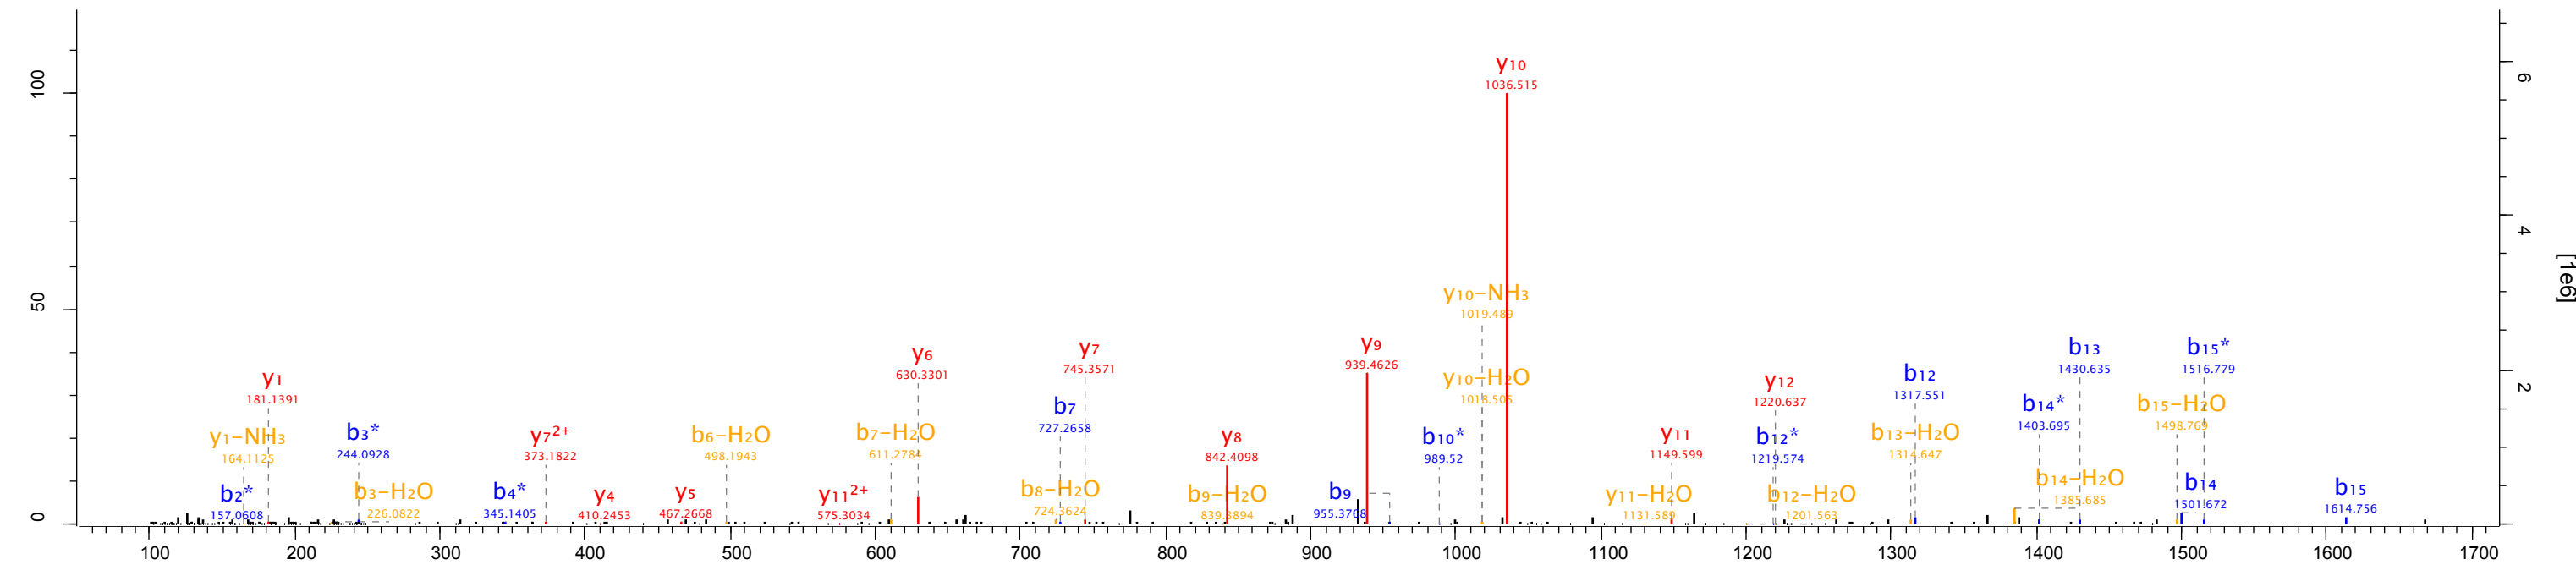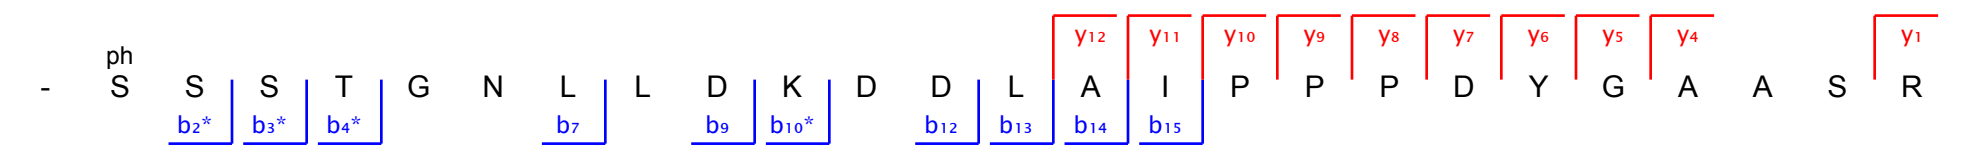

Raw file: 20150812\_A375SR\_Phospho\_BR1\_06  
 Scan: 3069 Method: FTMS; HCD Score: 153.57 m/z: 686.3 Gene names: WDR33

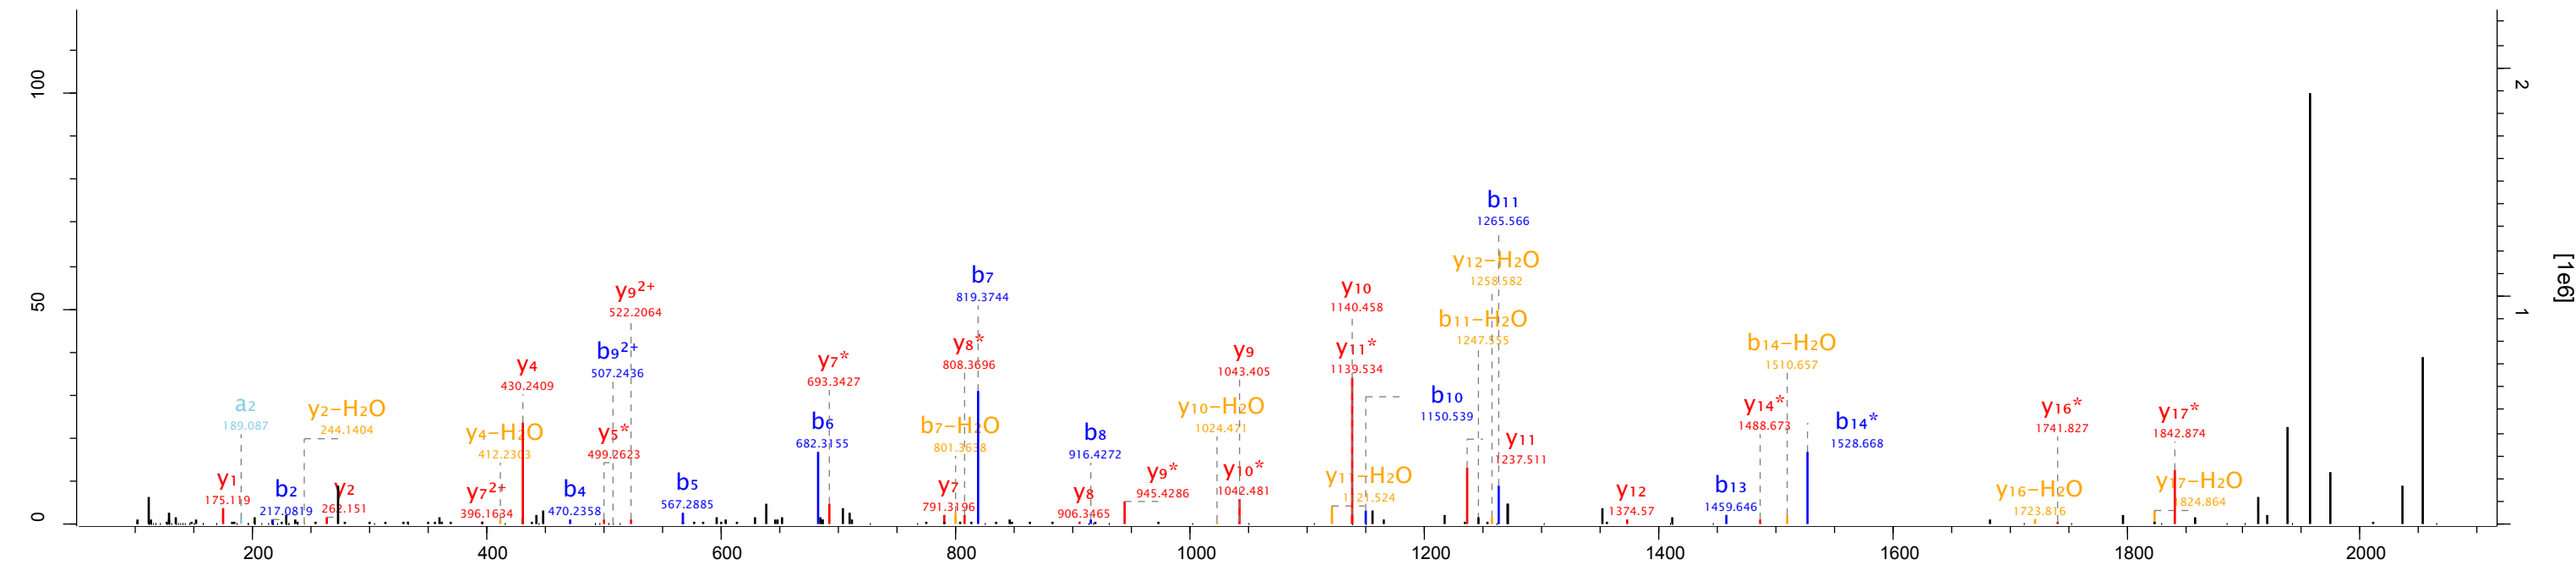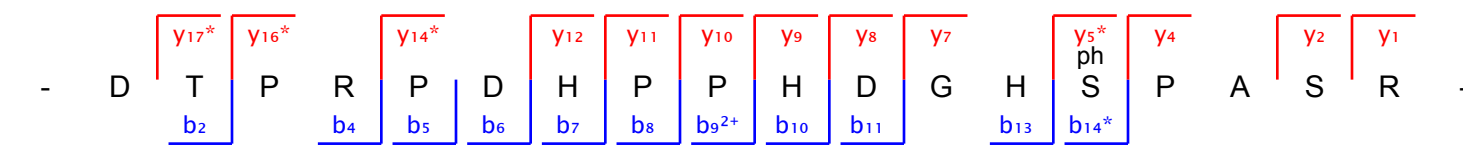

Raw file 20150812\_A375SR\_Phospho\_BR1\_06 Scan 3089 Method FTMS; HCD Score 79.09 m/z 698.31 Gene names DDX5

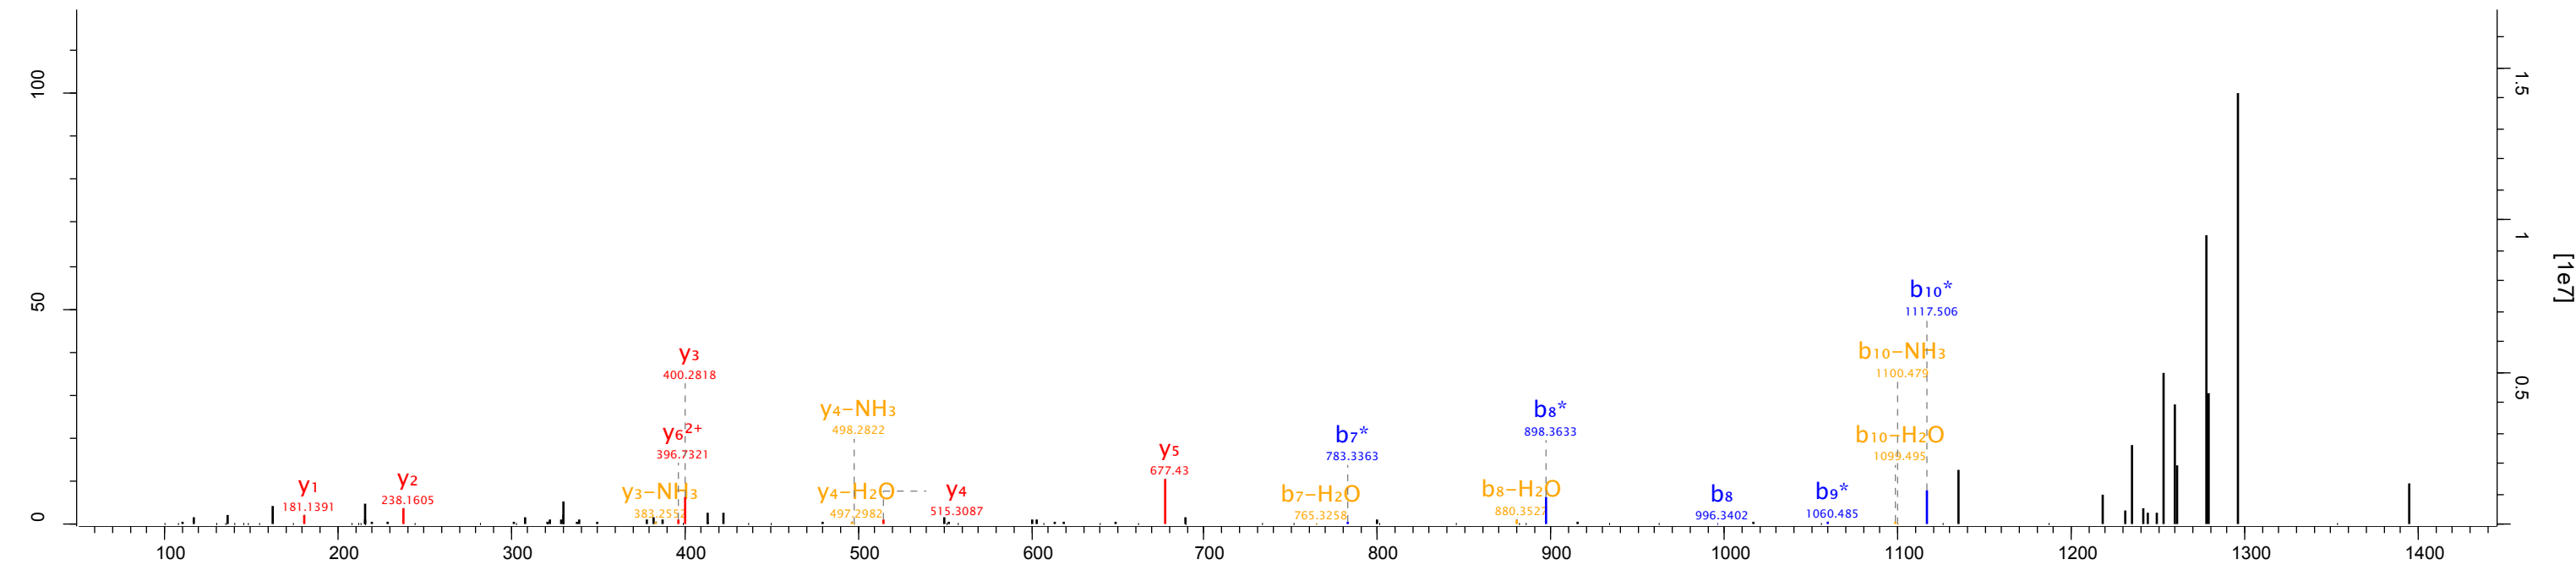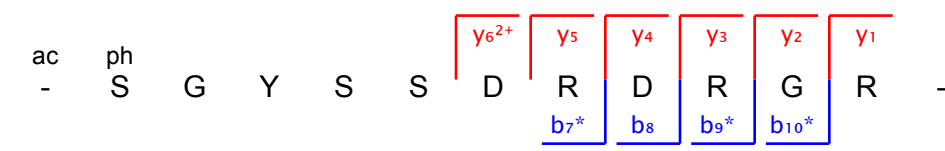

Raw file 20150812\_A375SR\_Phospho\_BR1\_06 Scan 3119 Method FTMS; HCD Score 200.9 m/z 660.87 Gene names DNTTIP2

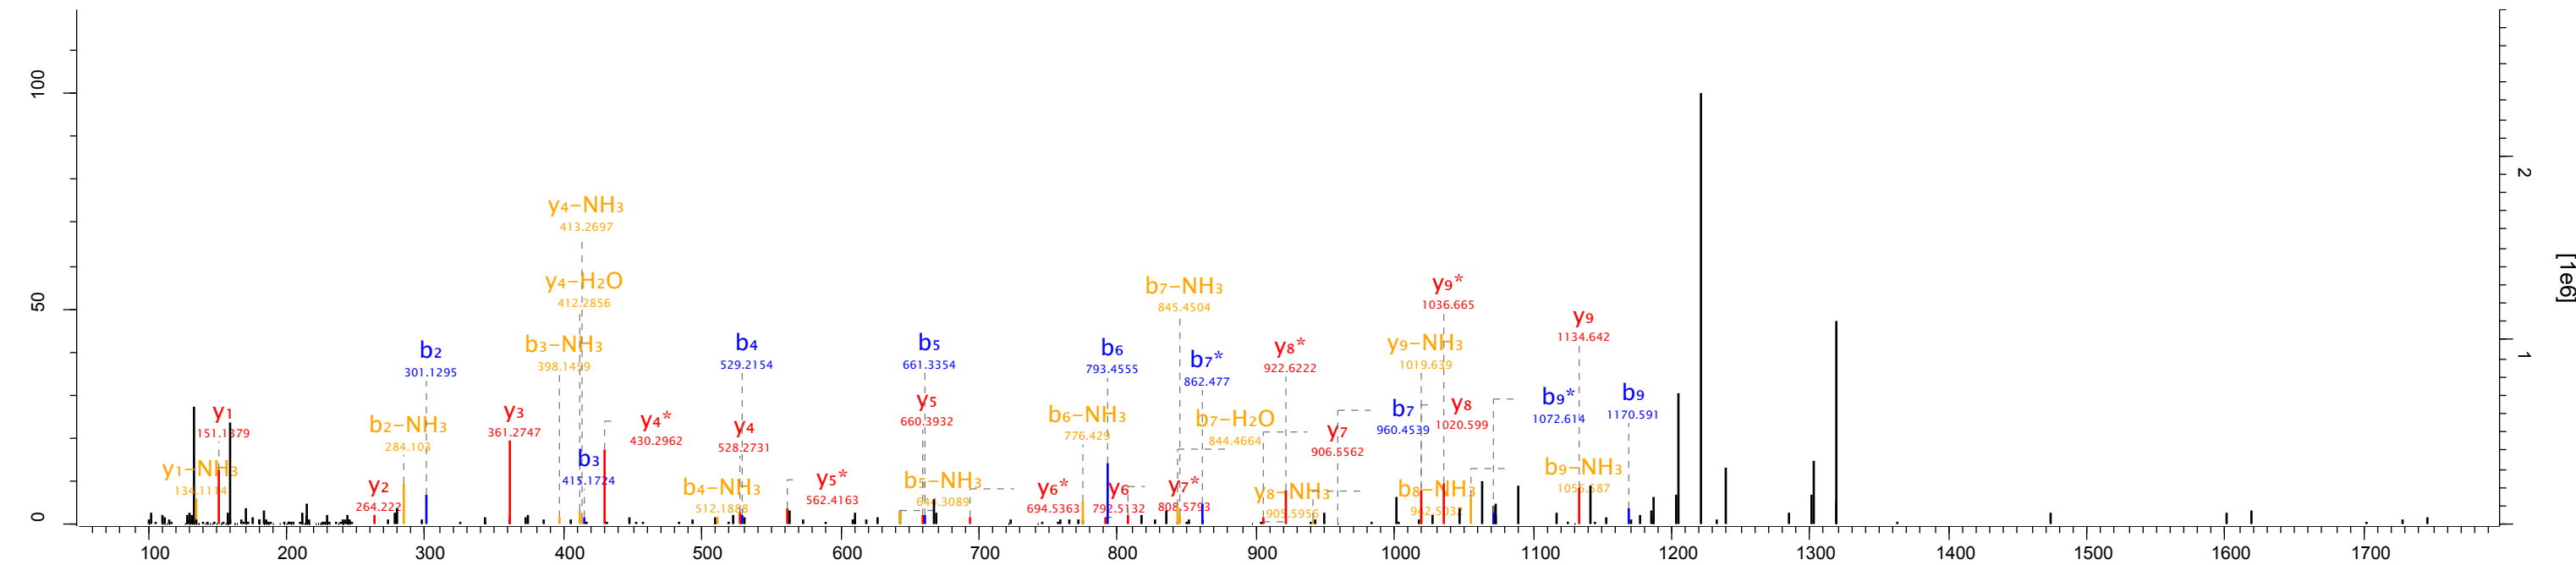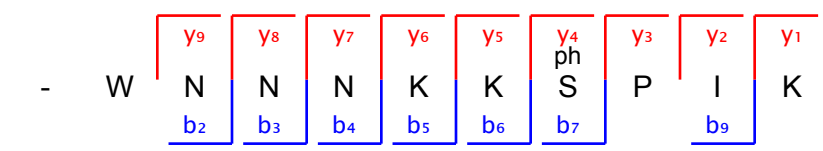

Raw file Scan Method Score m/z Gene names  
 20150812\_A375SR\_Phospho\_BR1\_06 3369 FTMS; HCD 89.23 421.88 KATNB1

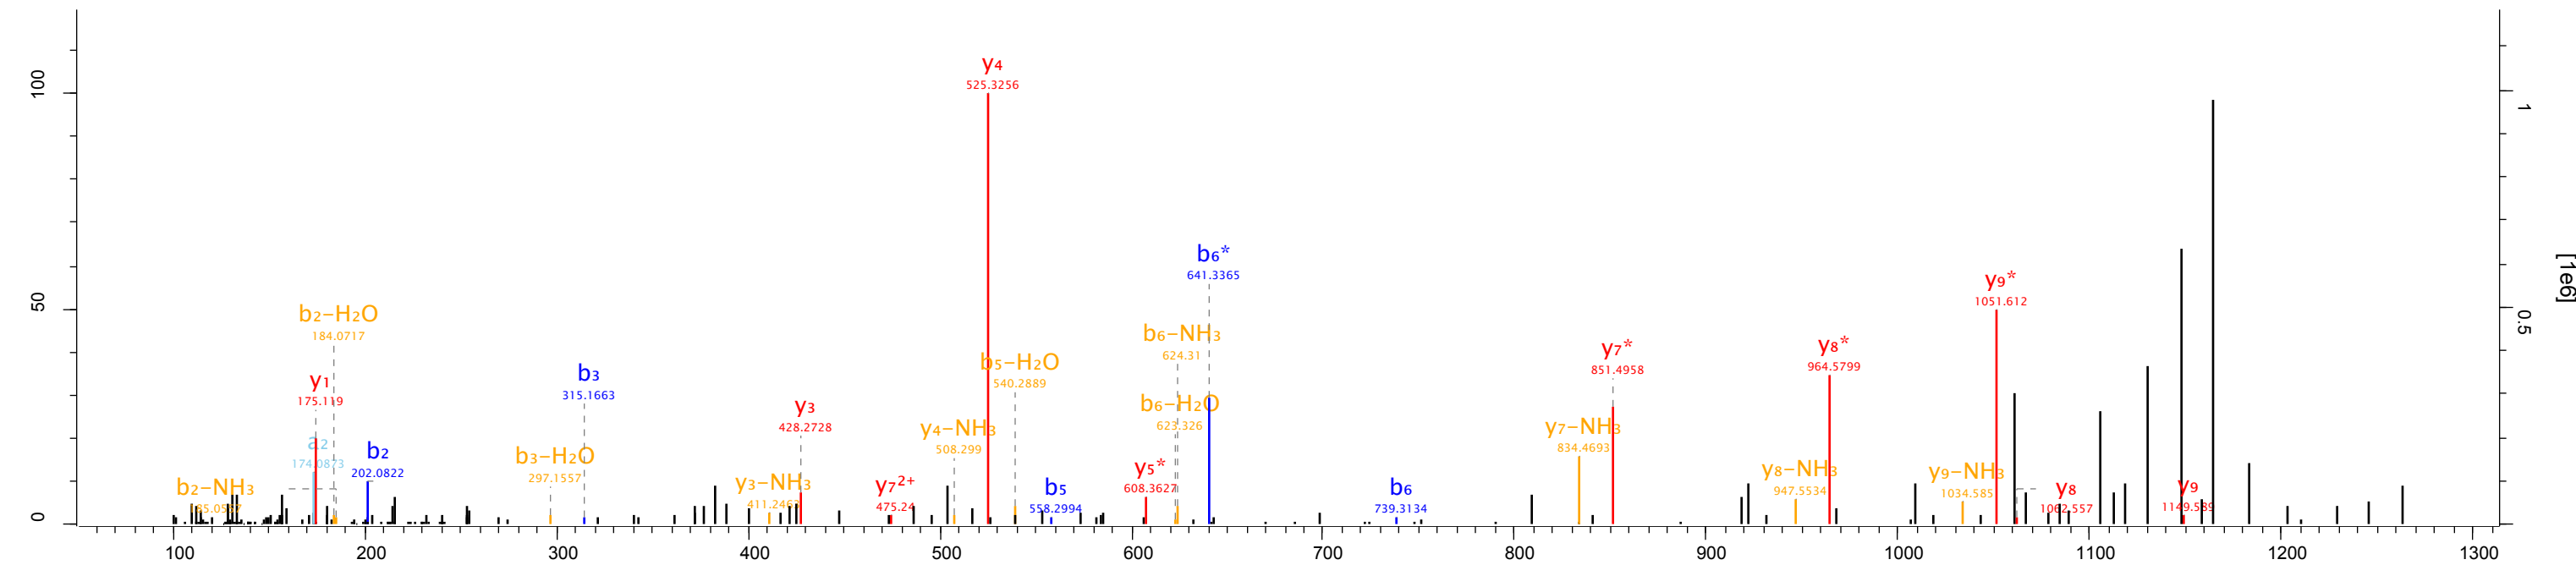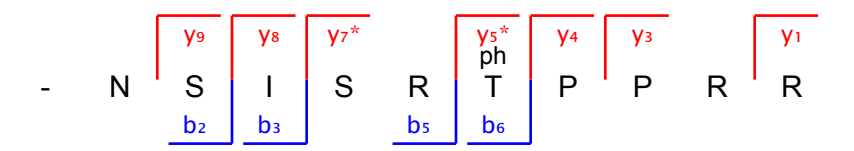

Raw file 20150812\_A375SR\_Phospho\_BR1\_06 Scan 3389 Method FTMS; HCD Score 227 m/z 749.39 Gene names MAP1B

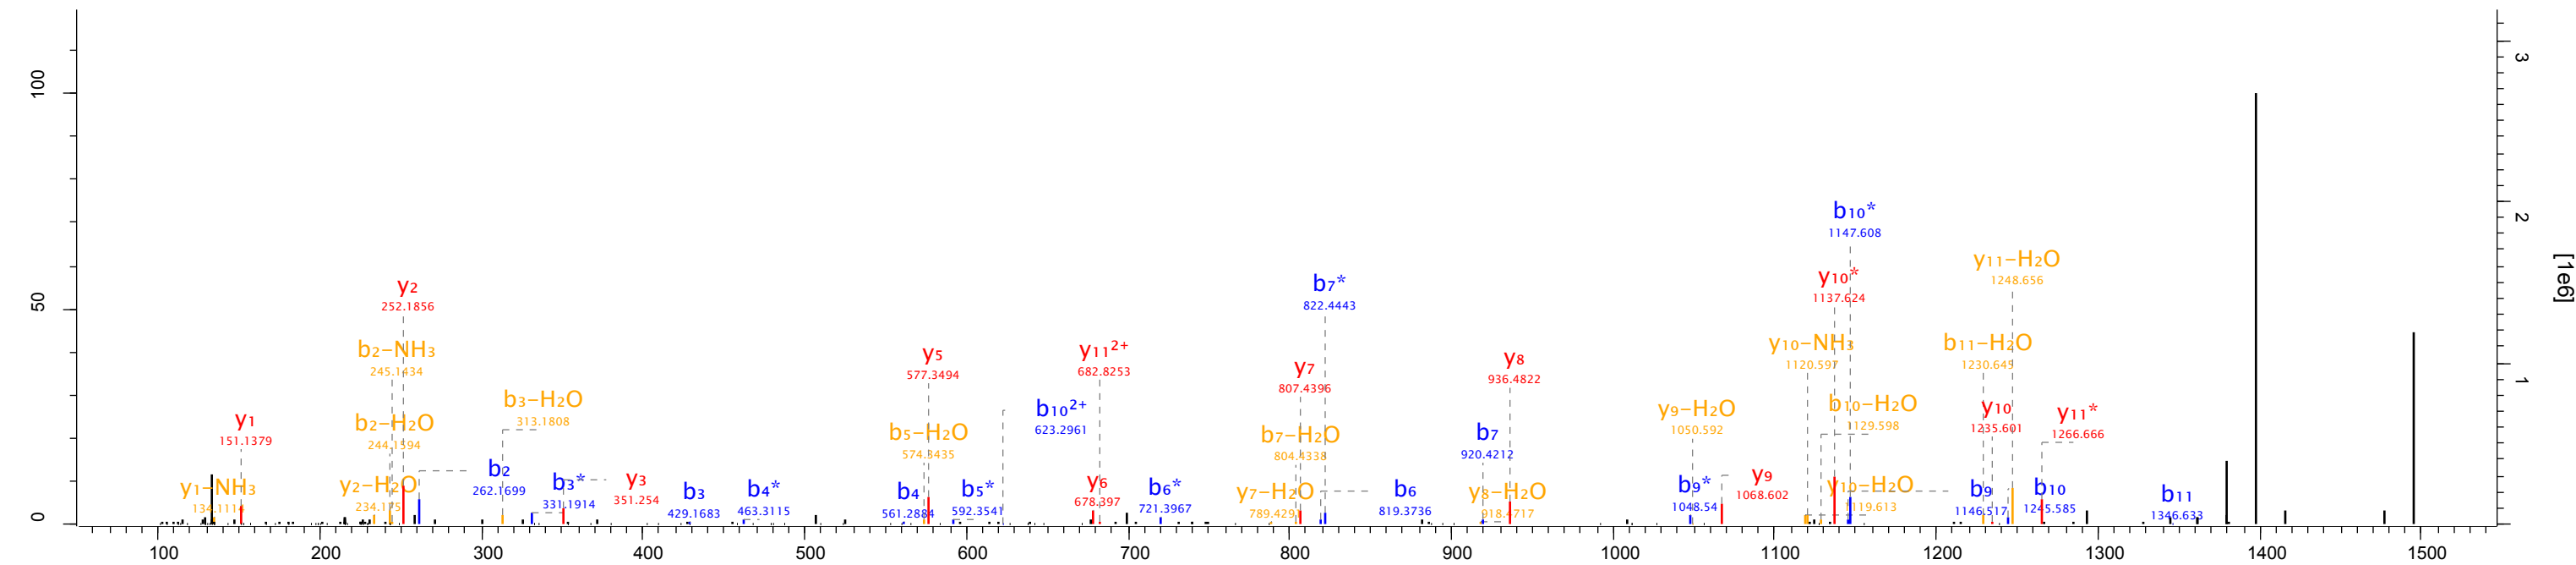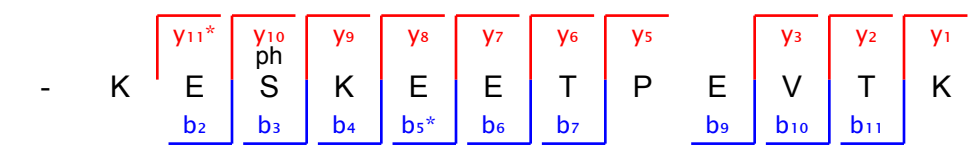

Raw file: 20150812\_A375SR\_Phospho\_BR1\_06  
 Scan: 3429 Method: FTMS; HCD Score: 158.91 m/z: 718.35 Gene names: PTBP1

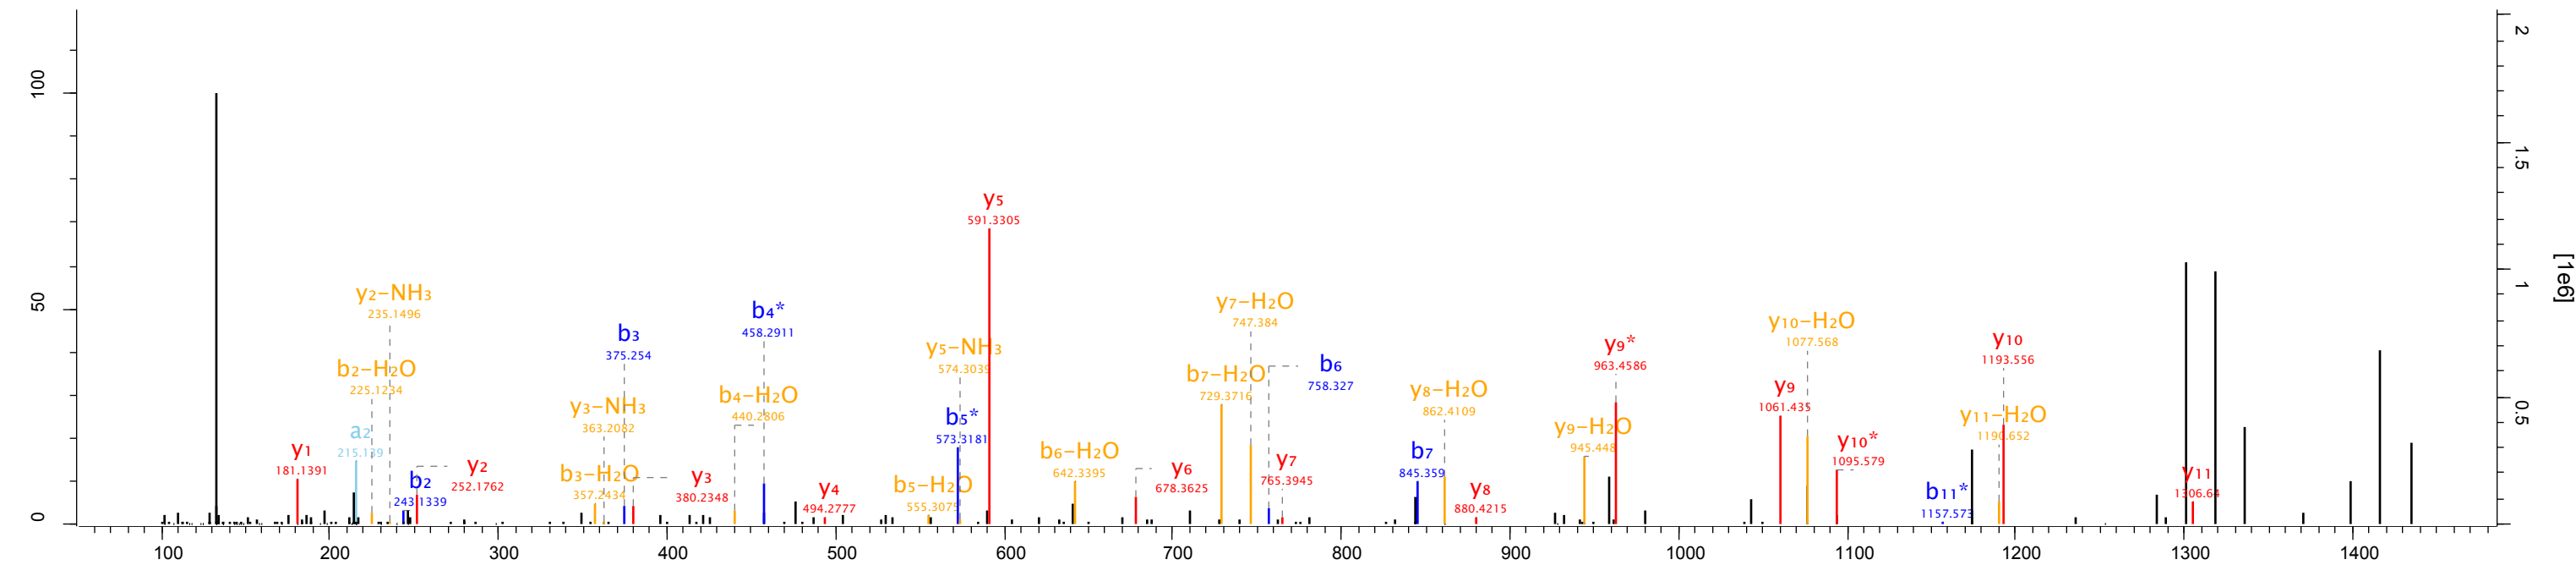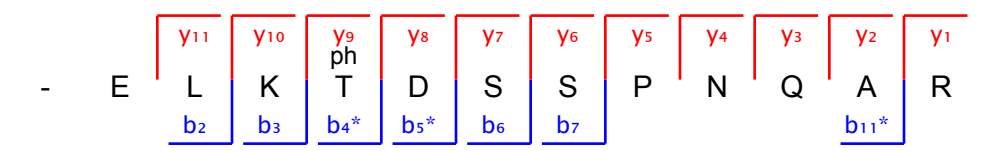



Raw file: 20150812\_A375SR\_Phospho\_BR1\_06  
 Scan: 4209 Method: FTMS; HCD Score: 220.71 m/z: 655.96 Gene names: NFX1

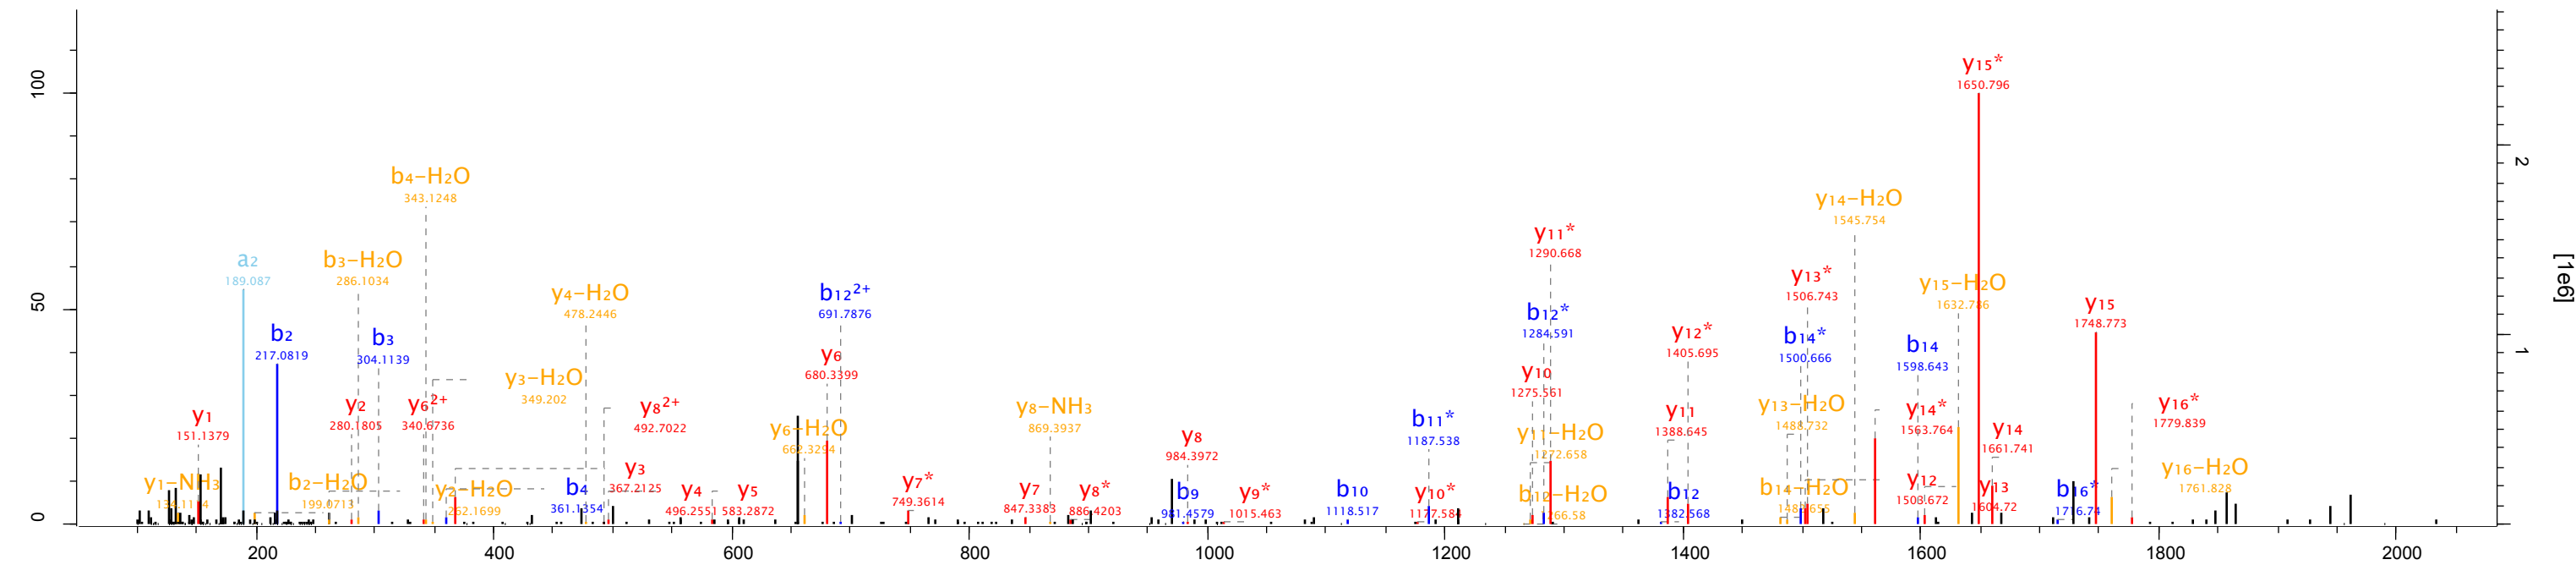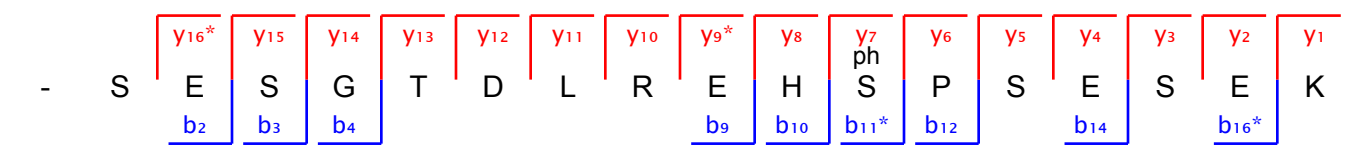

Raw file: 20150812\_A375SR\_Phospho\_BR1\_06  
 Scan: 4799 Method: FTMS; HCD Score: 68.84 m/z: 482.25 Gene names: UBA1

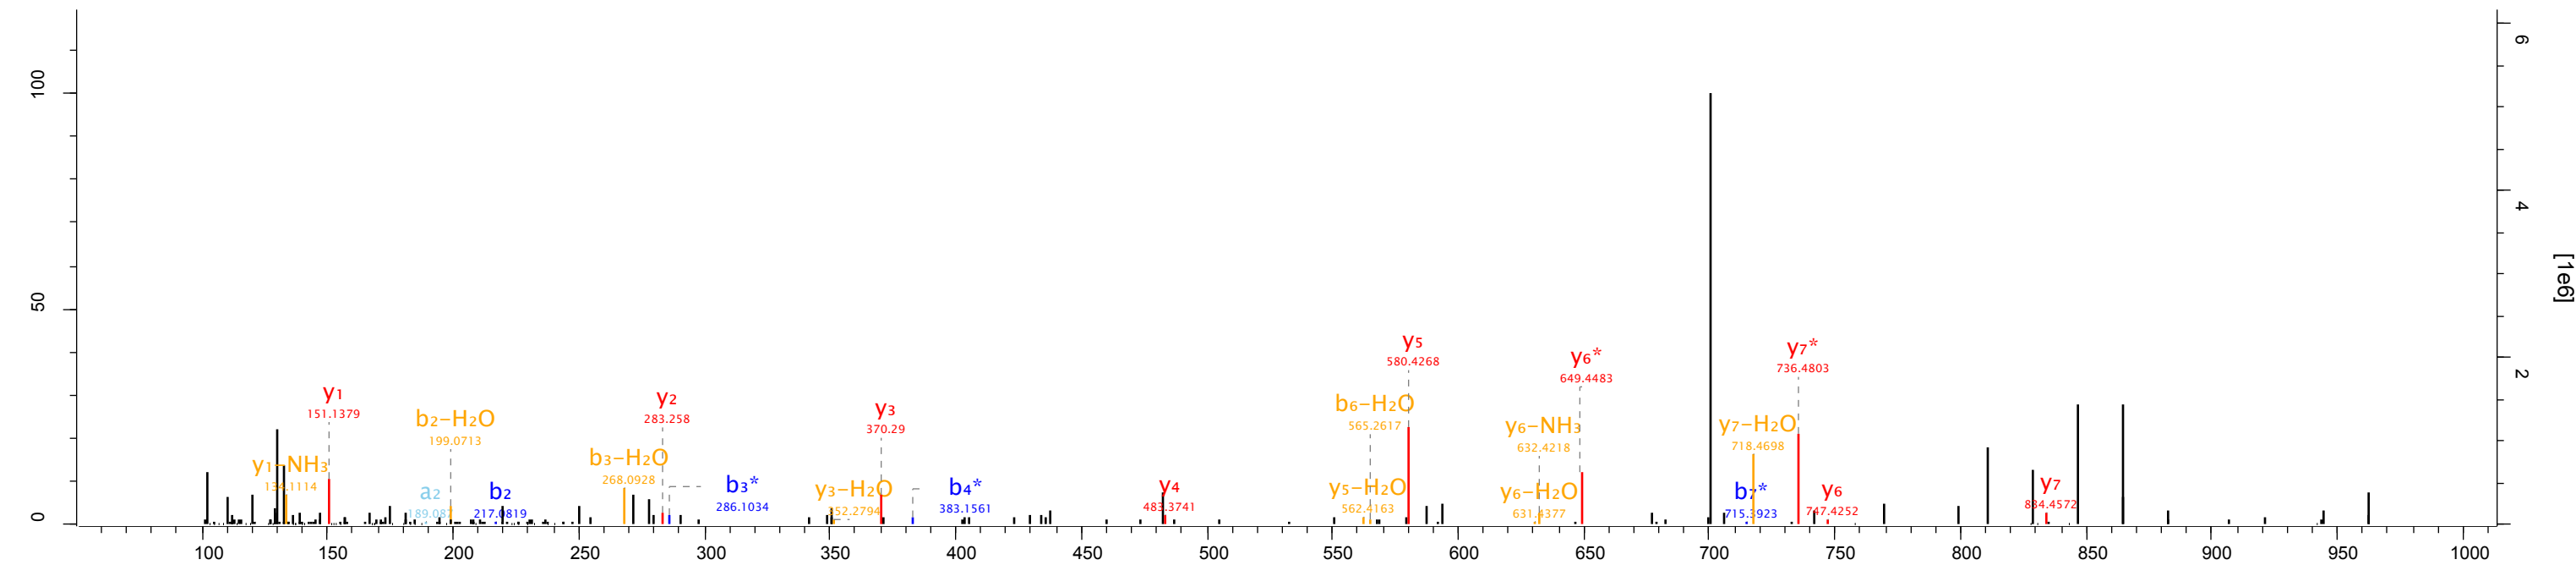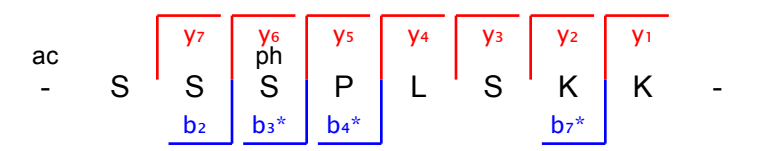

Raw file: 20150812\_A375SR\_Phospho\_BR1\_06  
 Scan: 4989 Method: FTMS; HCD Score: 92.8 m/z: 755.89 Gene names: MCM2

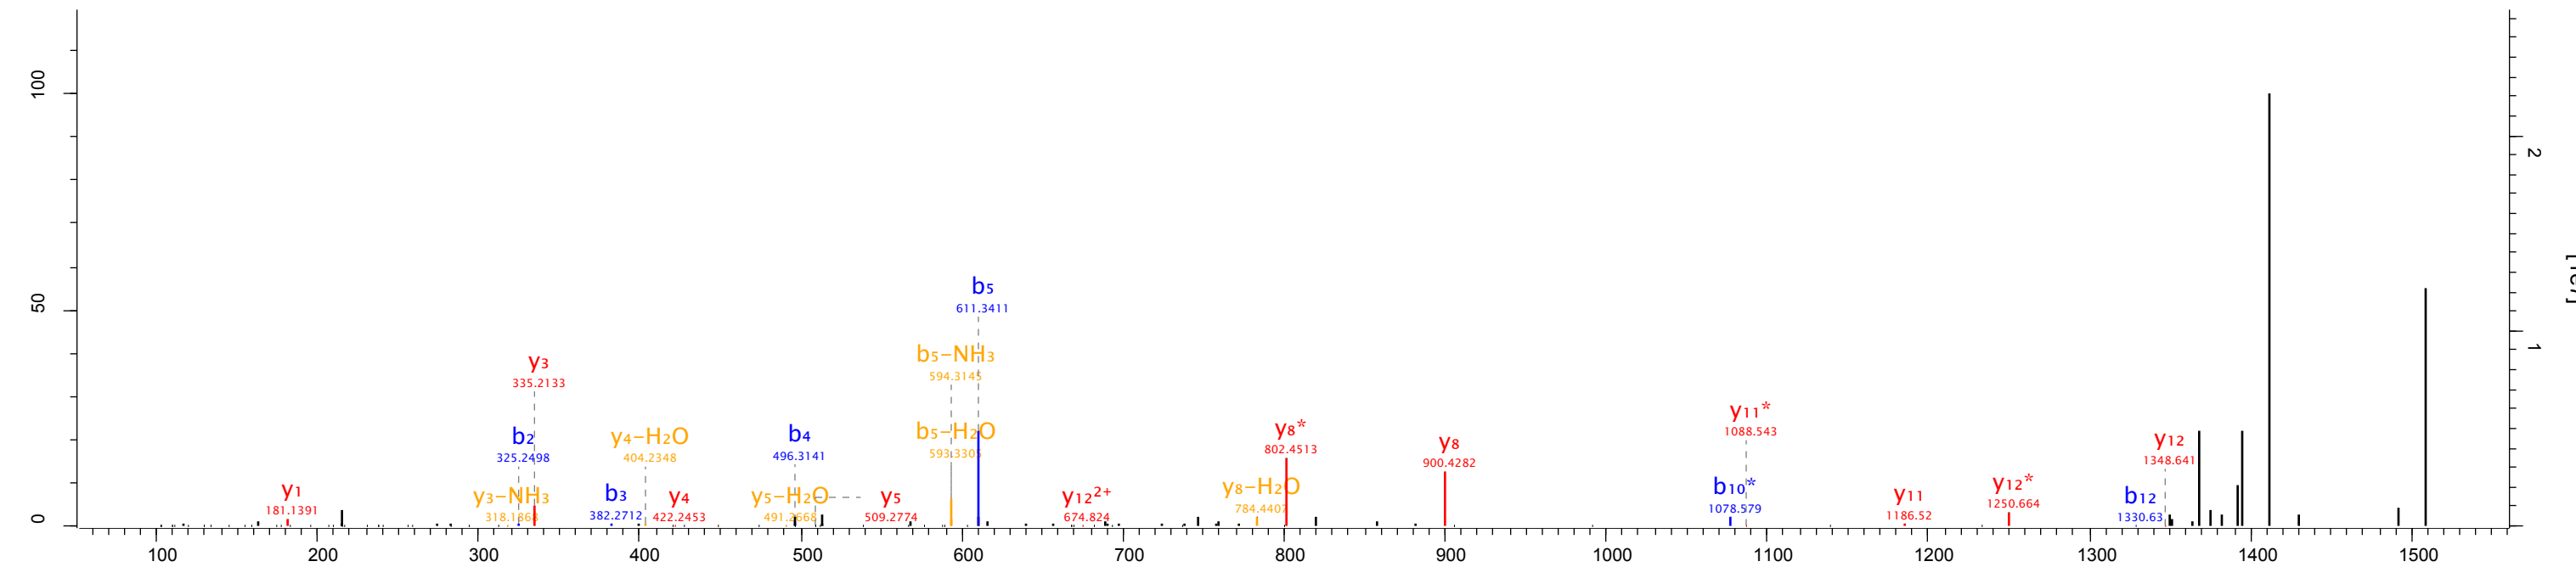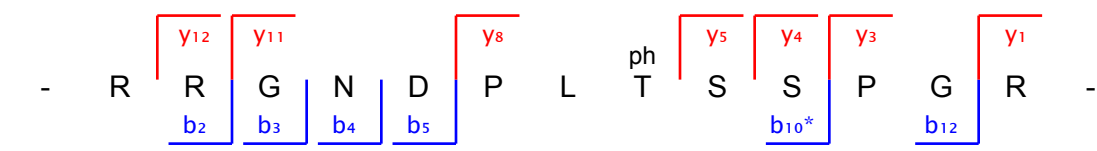

Raw file: 20150812\_A375SR\_Phospho\_BR1\_06  
 Scan: 5399 Method: FTMS; HCD Score: 137.73 m/z: 639.79 Gene names: SSH2

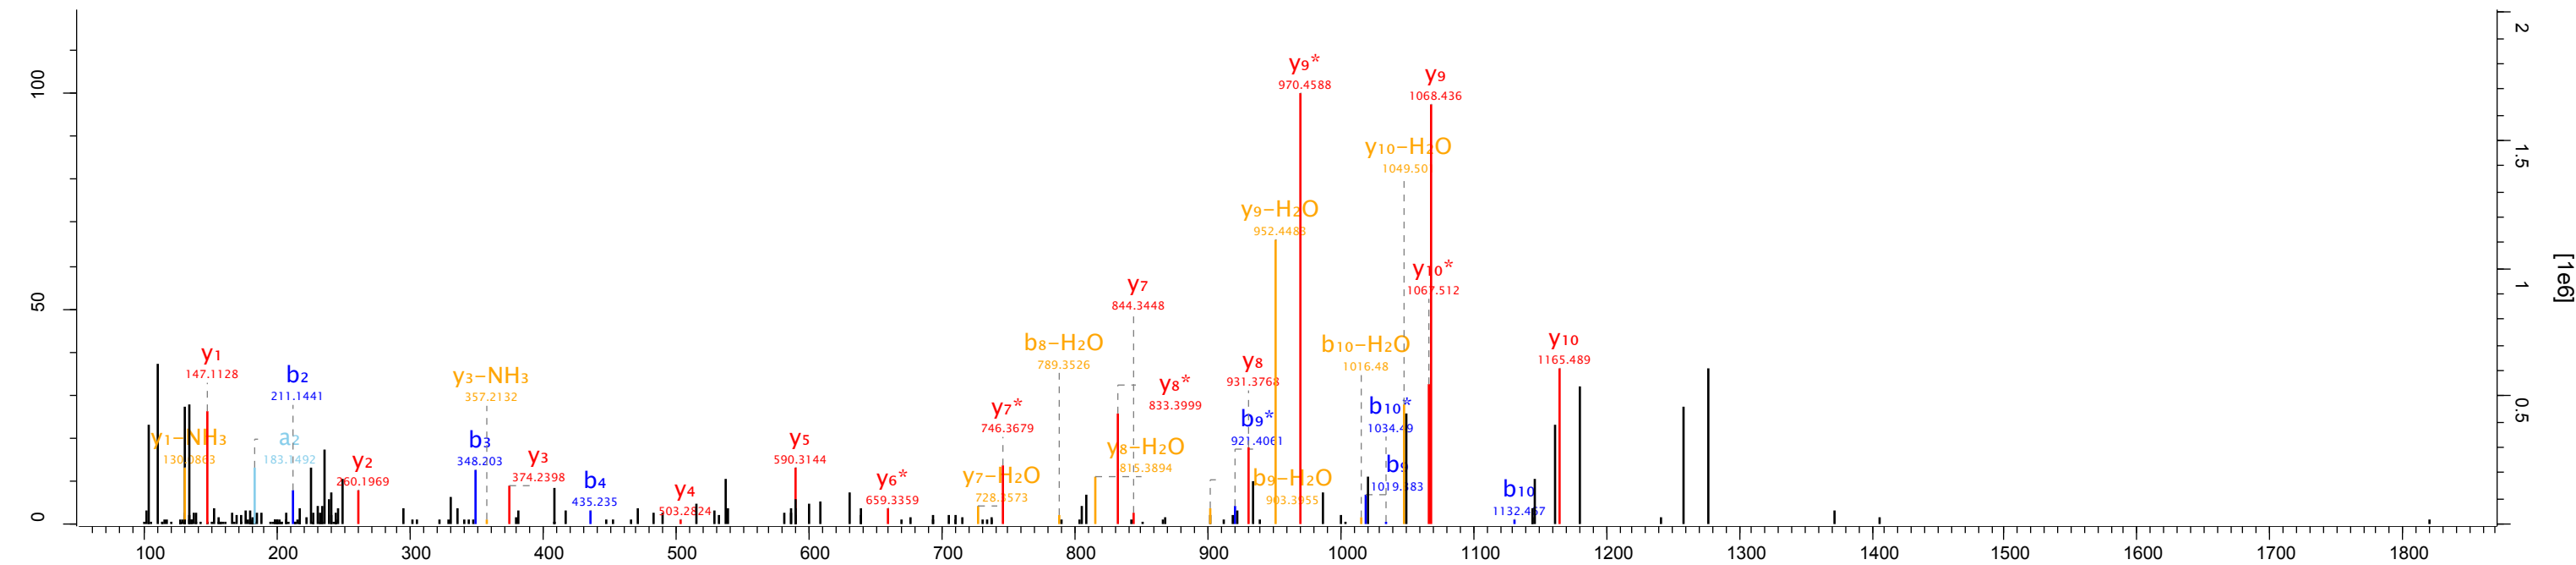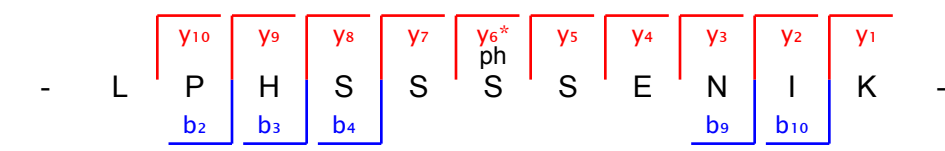

Raw file: 20150812\_A375SR\_Phospho\_BR1\_06  
 Scan: 6199 Method: FTMS; HCD Score: 211.27 m/z: 904.43 Gene names: MYO9B

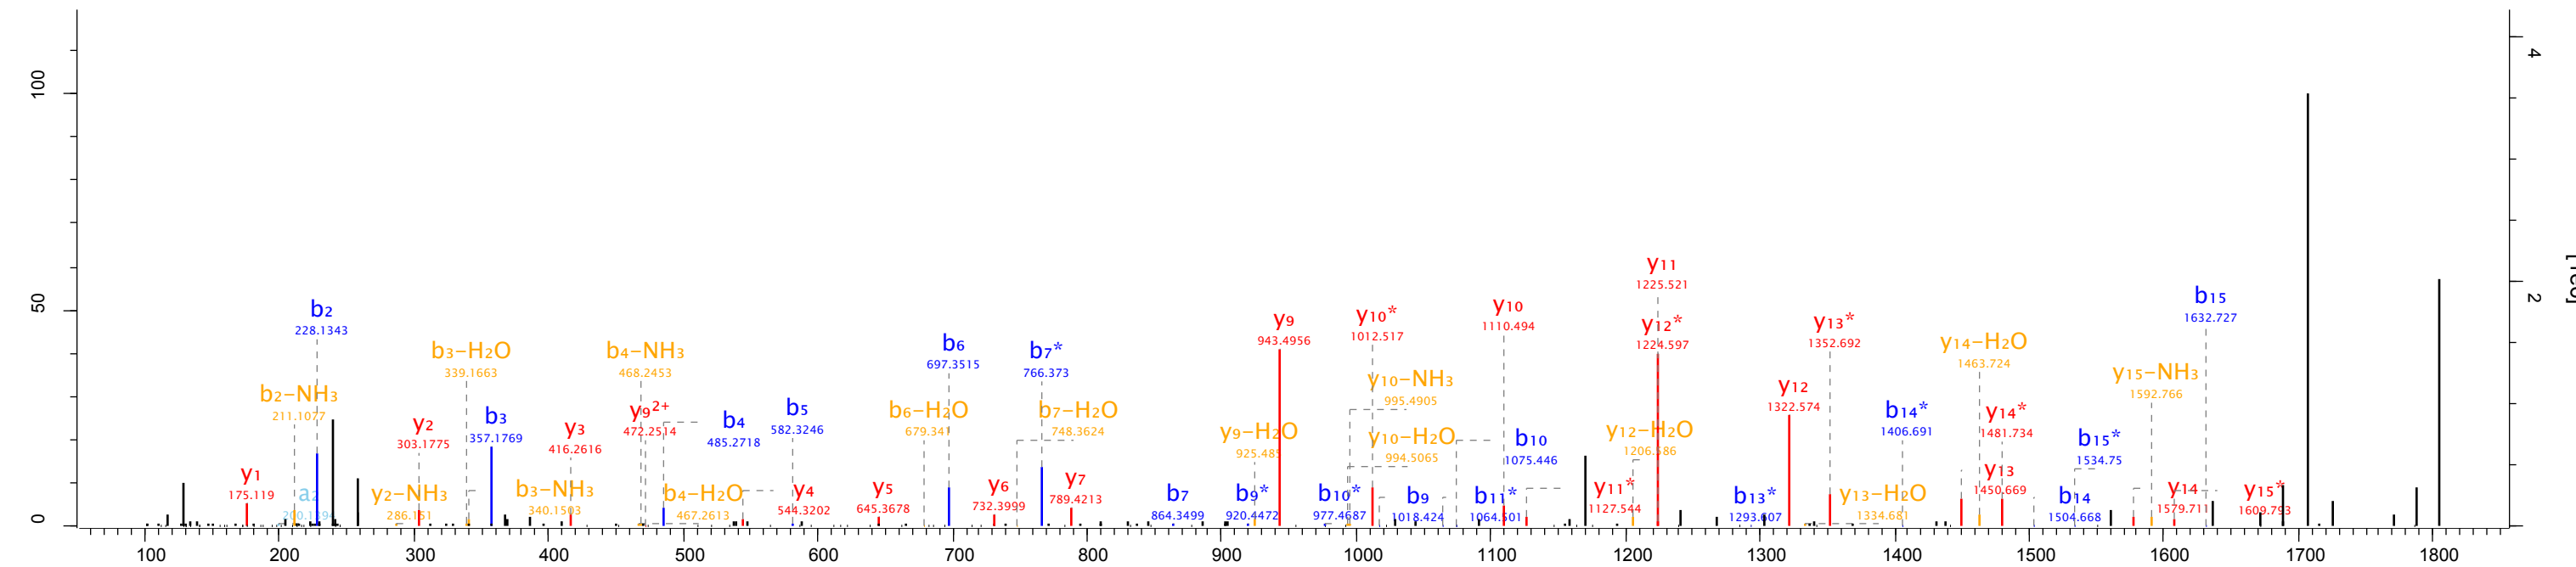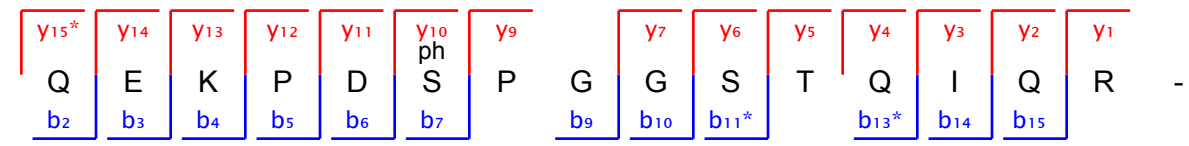

Raw file: 20150812\_A375SR\_Phospho\_BR1\_06  
 Scan: 6319 Method: FTMS; HCD Score: 124.43 m/z: 610.79 Gene names: LSM14A

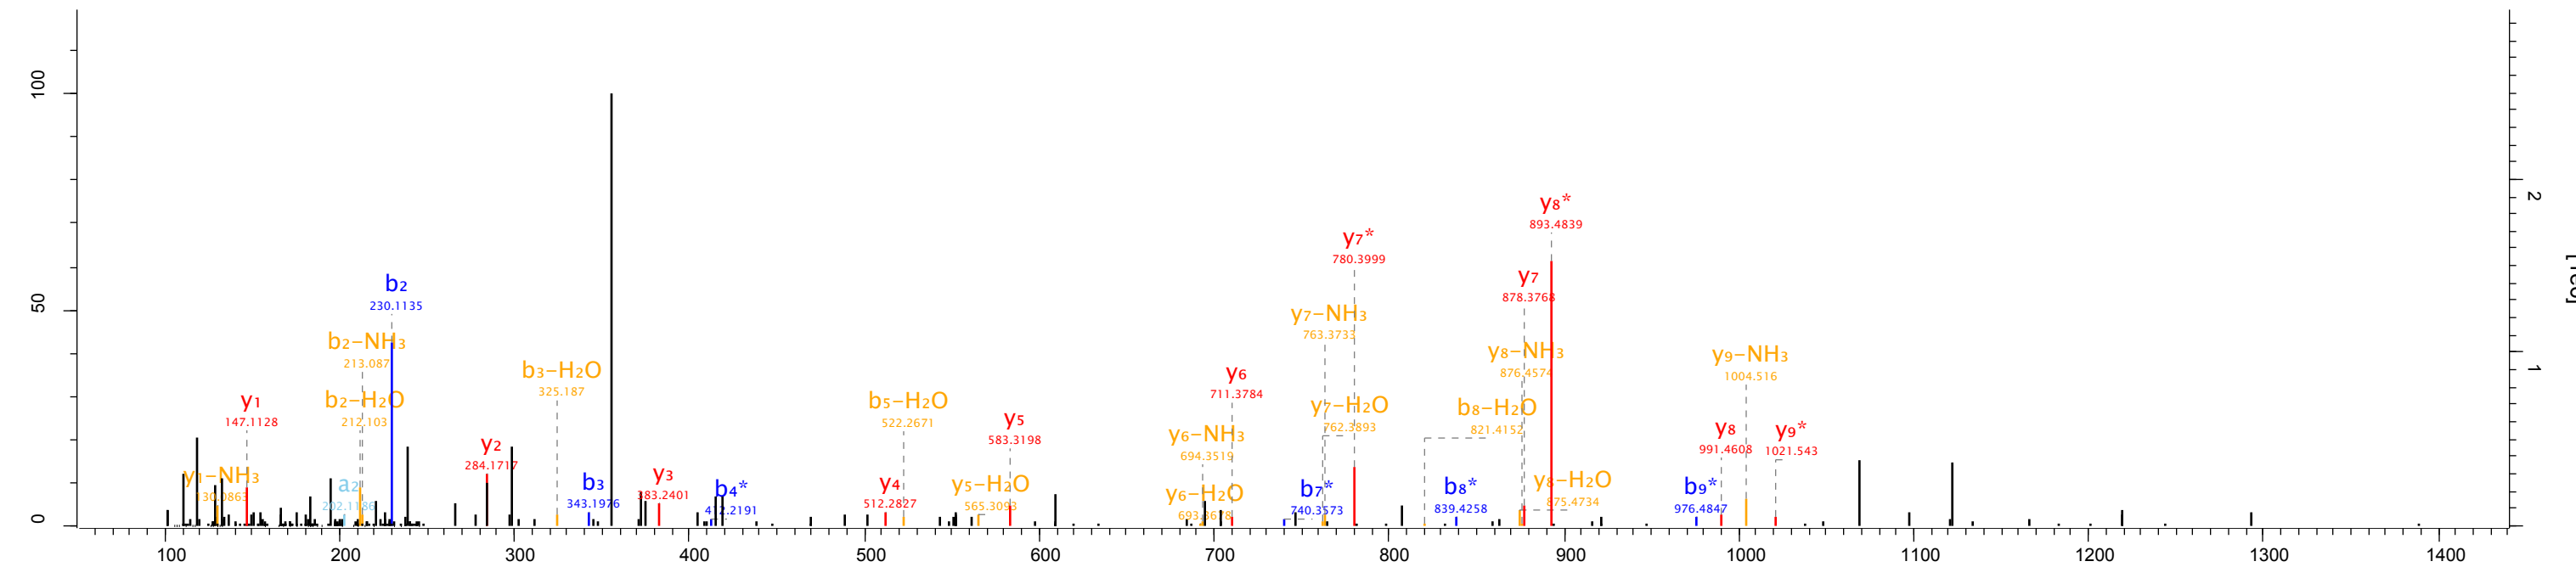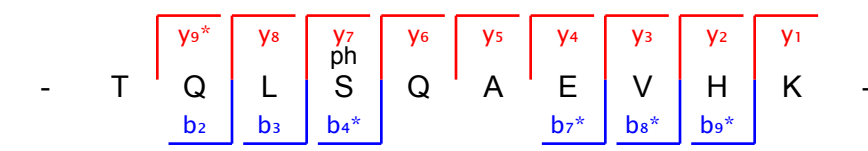

Raw file: 20150812\_A375SR\_Phospho\_BR1\_06  
 Scan: 7009 Method: FTMS; HCD Score: 97.06 m/z: 666.31 Gene names: C12orf45

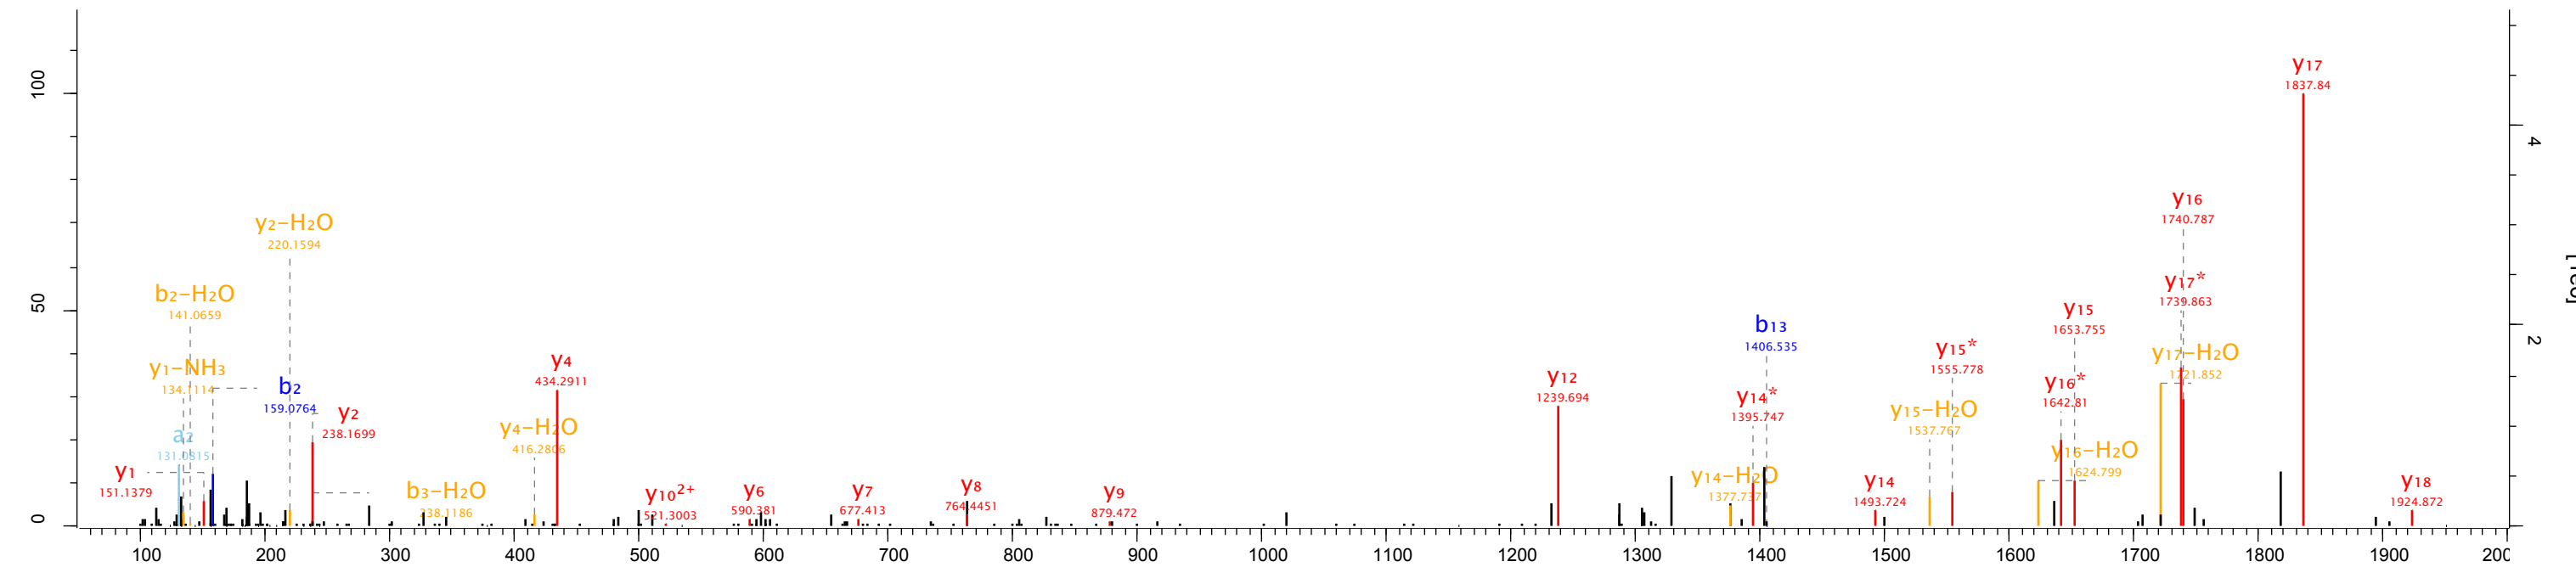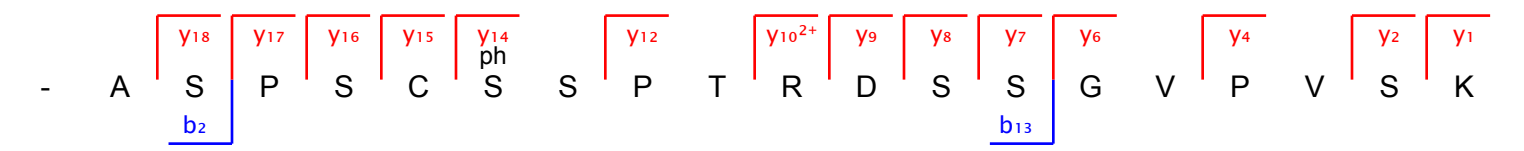

Raw file: 20150812\_A375SR\_Phospho\_BR1\_06  
 Scan: 7069 Method: FTMS; HCD Score: 85.58 m/z: 483.28 Gene names: ADRBK1

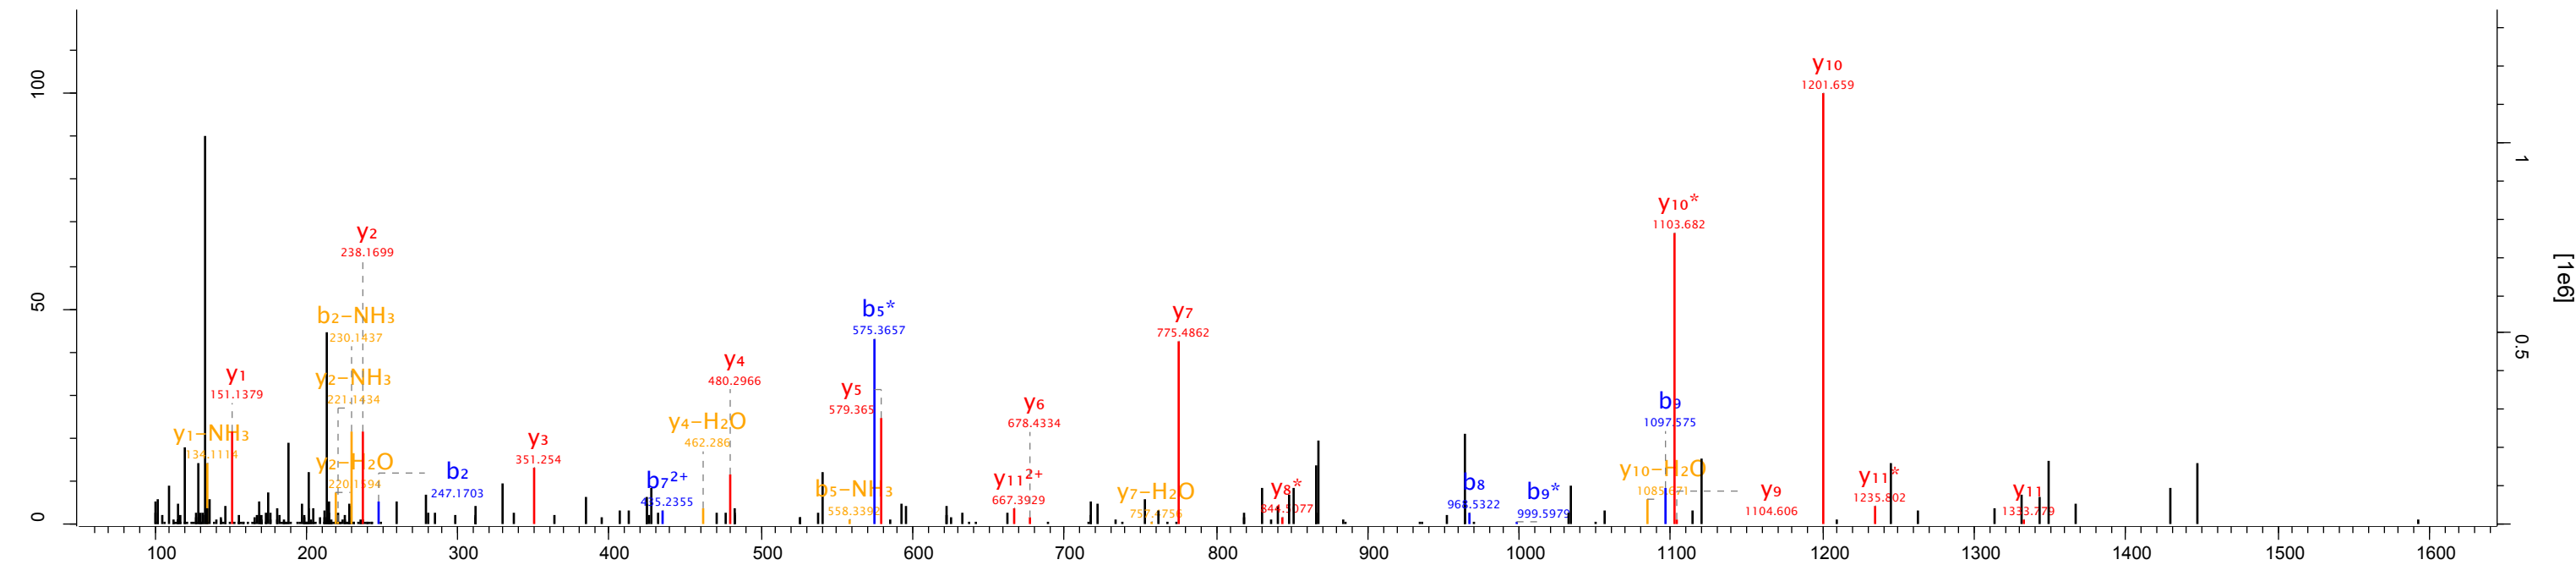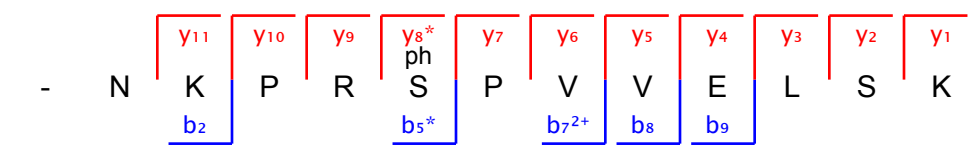



Raw file: 20150812\_A375SR\_Phospho\_BR1\_06  
 Scan: 8399 Method: FTMS; HCD Score: 142.23 m/z: 853.93 Gene names: CAD

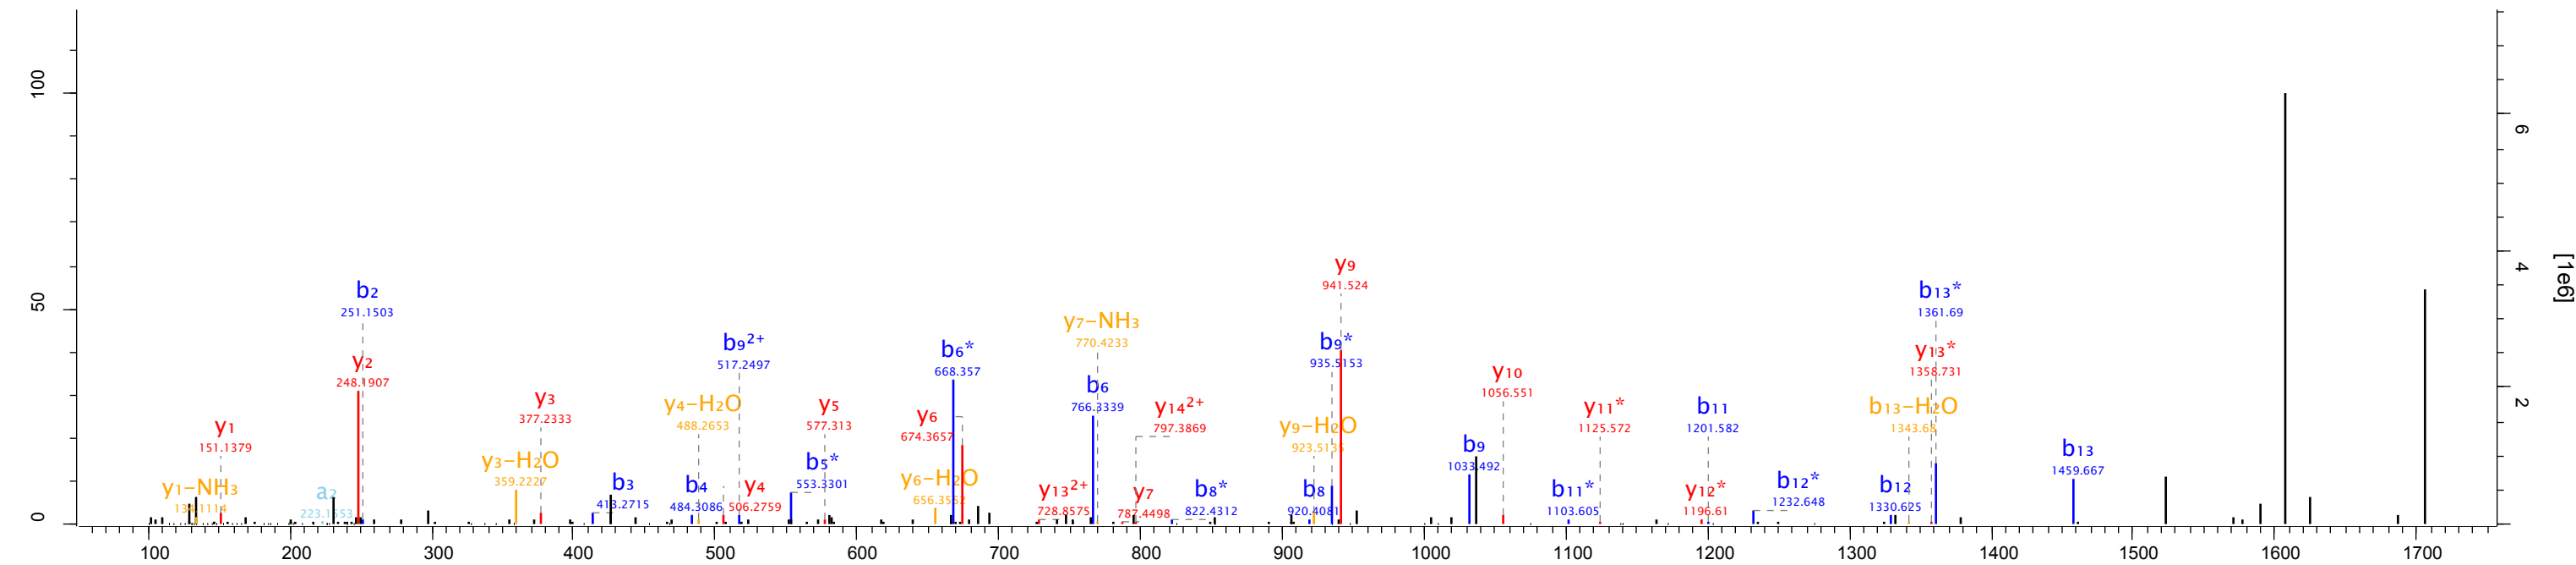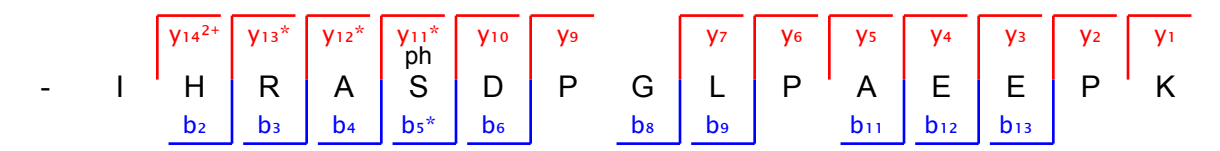

Raw file: 20150812\_A375SR\_Phospho\_BR1\_06  
 Scan: 9069 Method: FTMS; HCD Score: 48.97 m/z: 644.97 Gene names: SRRM2

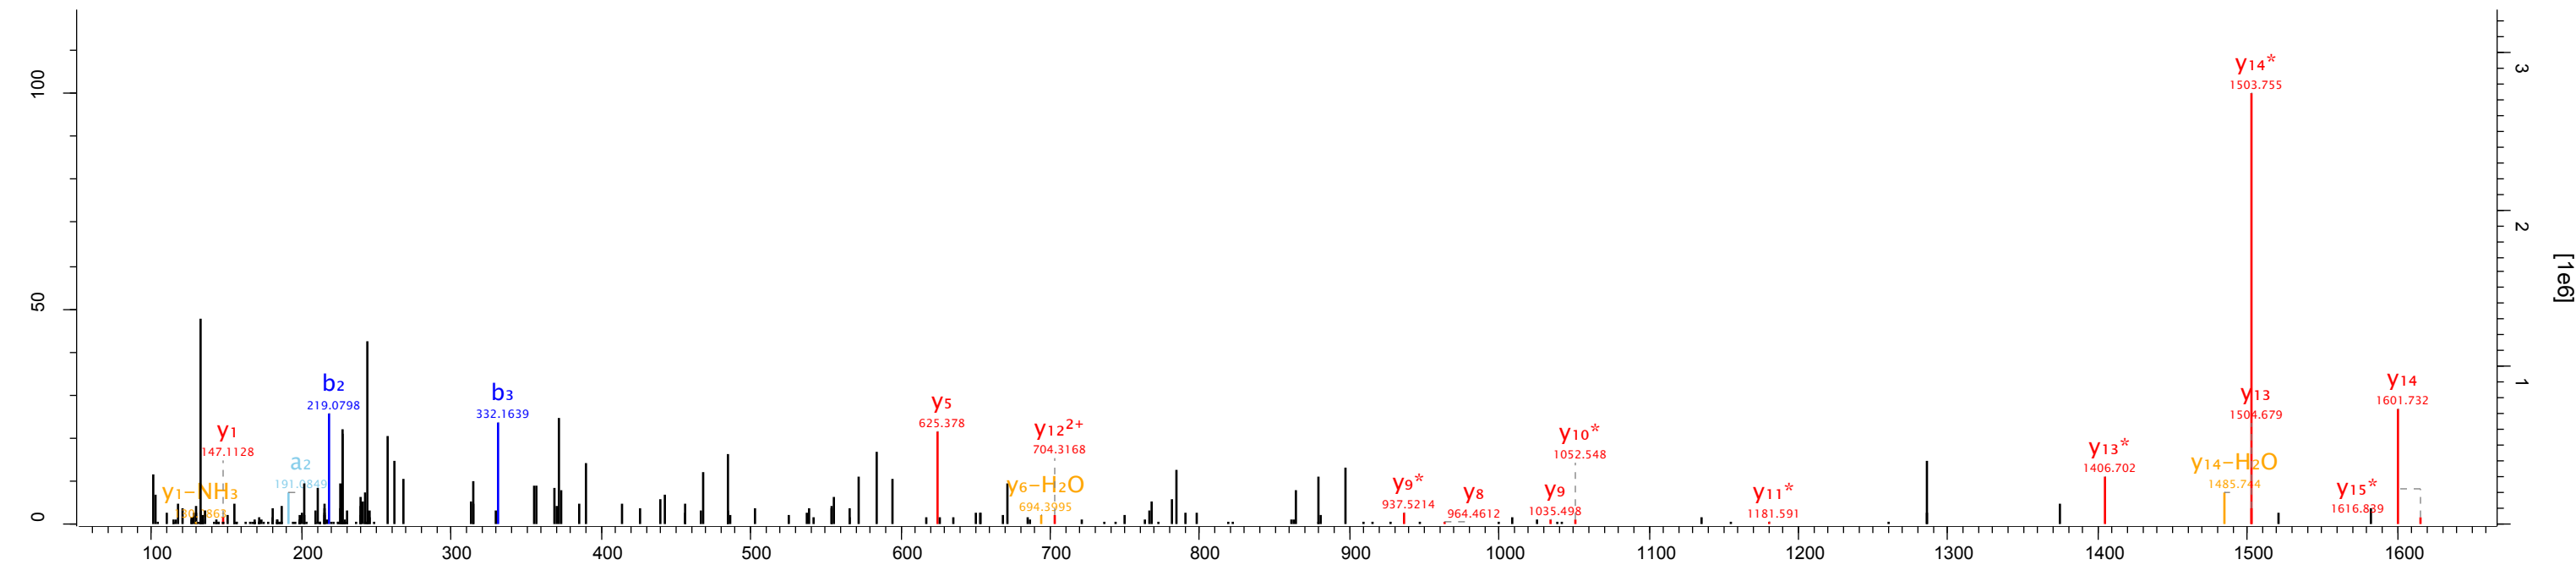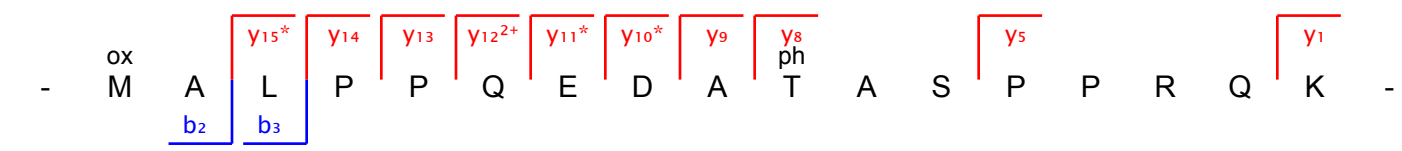

Raw file: 20150812\_A375SR\_Phospho\_BR1\_06  
 Scan: 9079 Method: FTMS; HCD Score: 131.32 m/z: 623.31 Gene names: KRR1

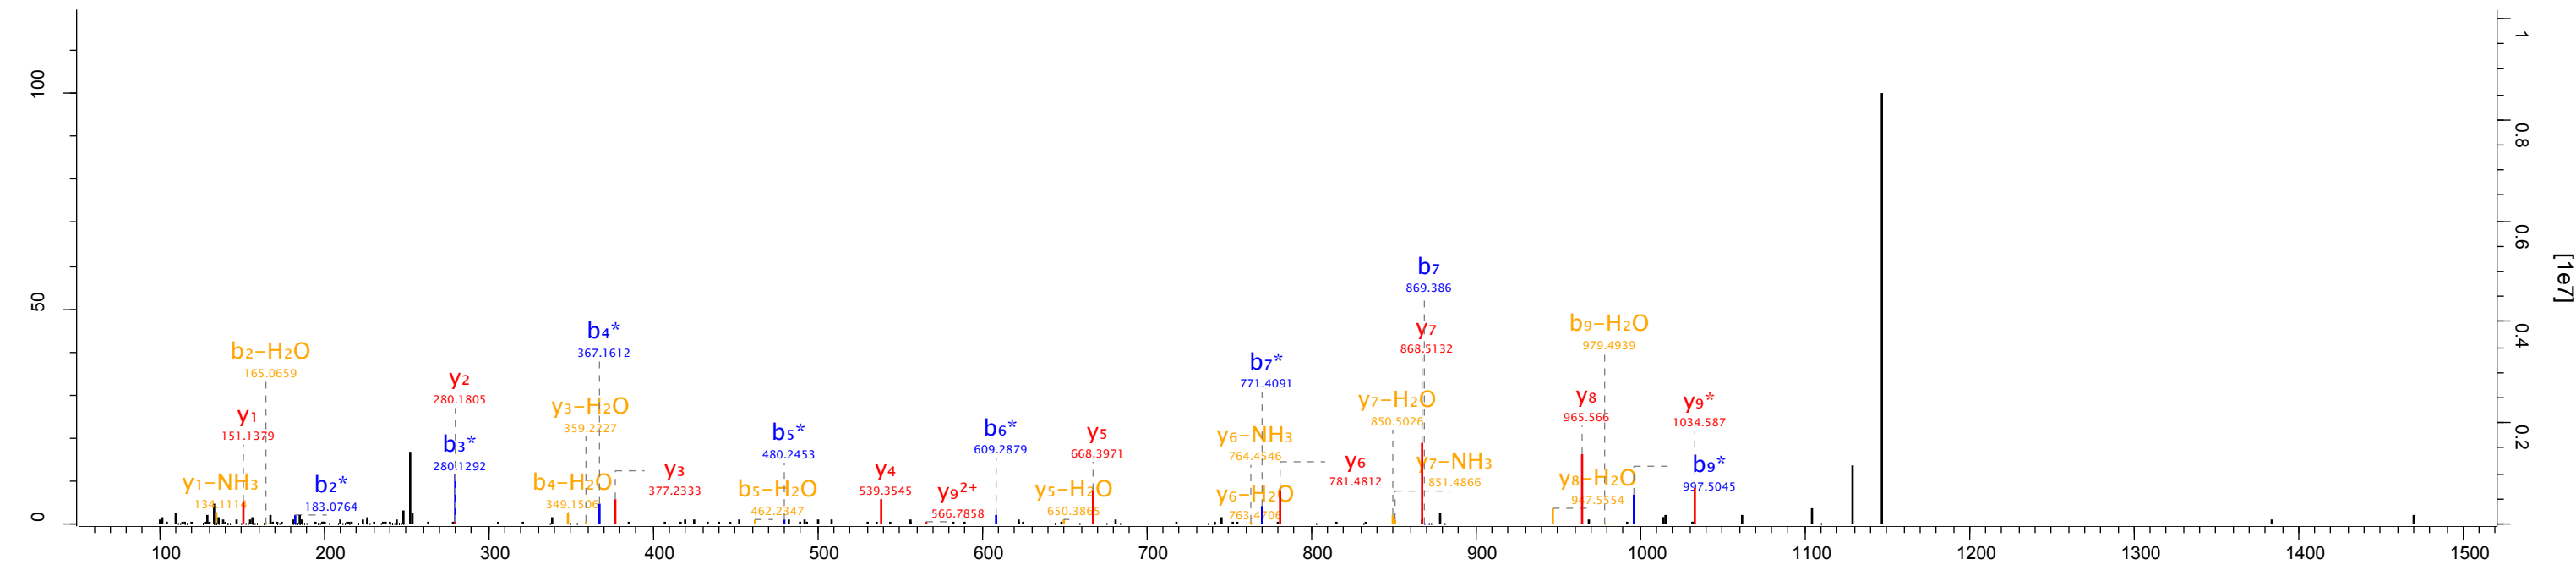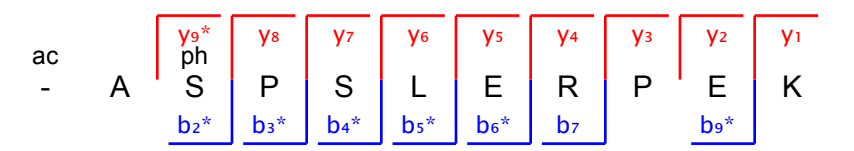

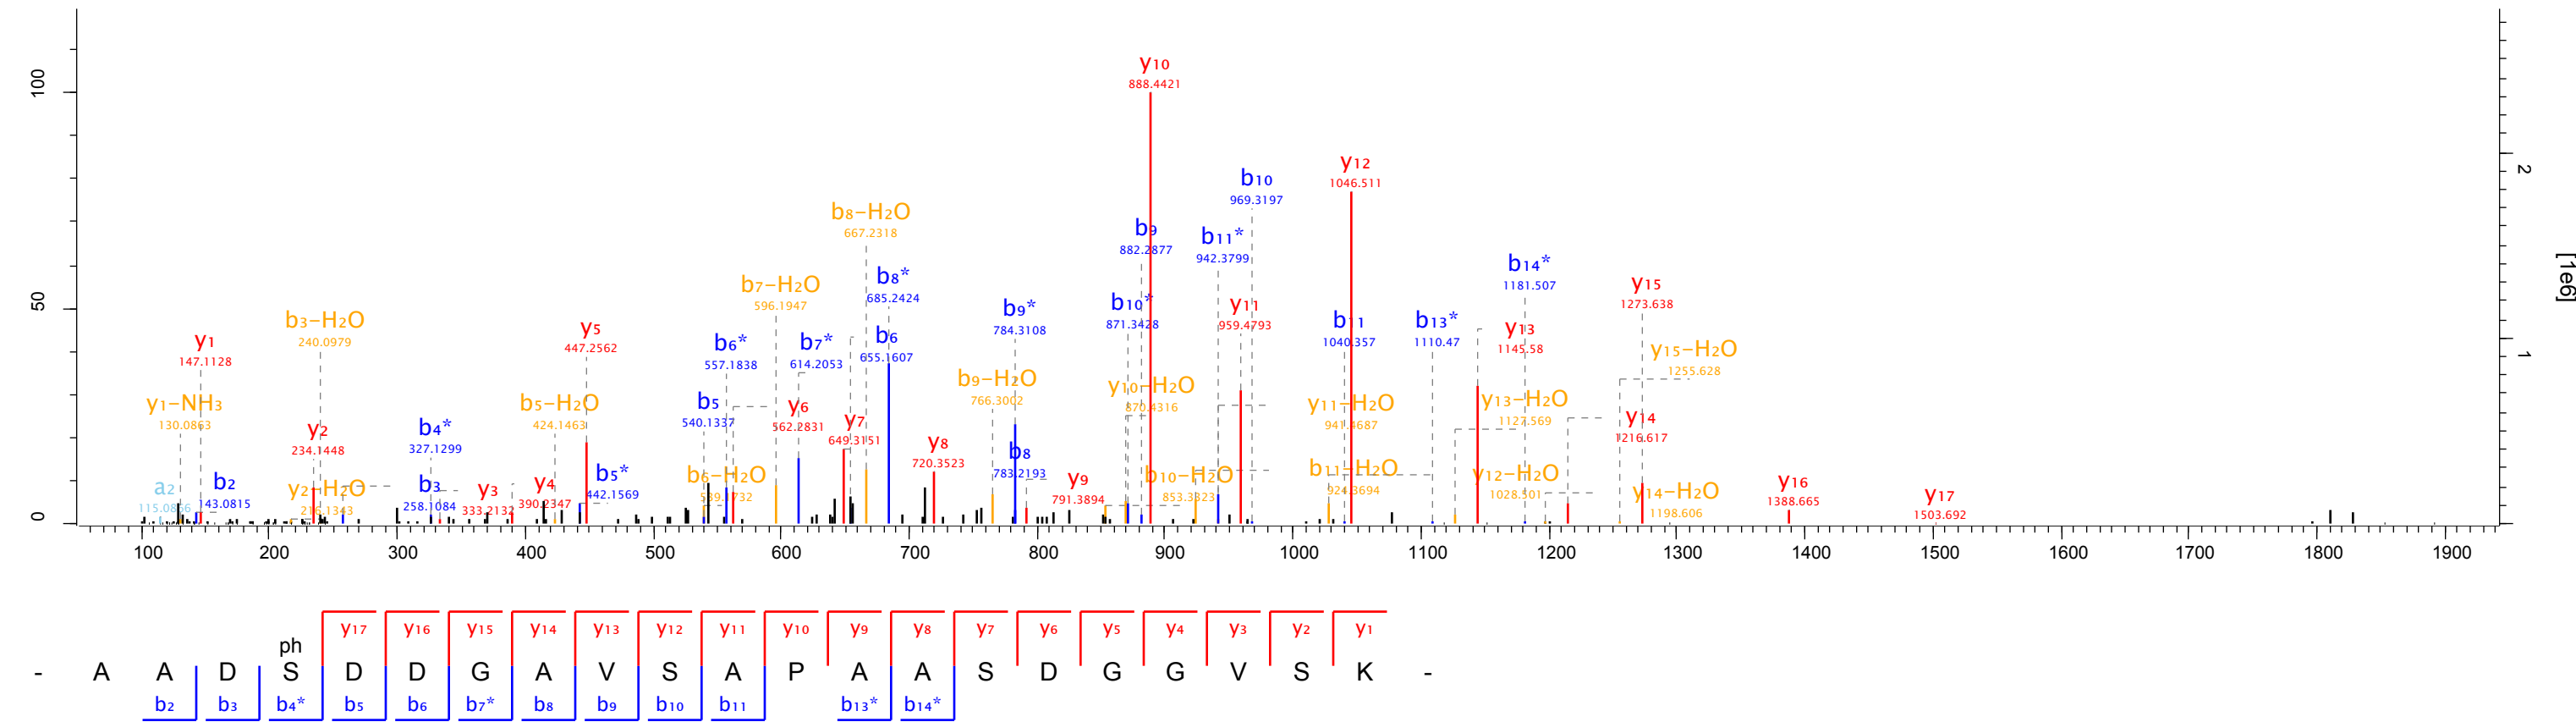

Raw file: 20150812\_A375SR\_Phospho\_BR1\_06  
 Scan: 9809 Method: FTMS; HCD Score: 91.12 m/z: 504.24 Gene names: RPL18A

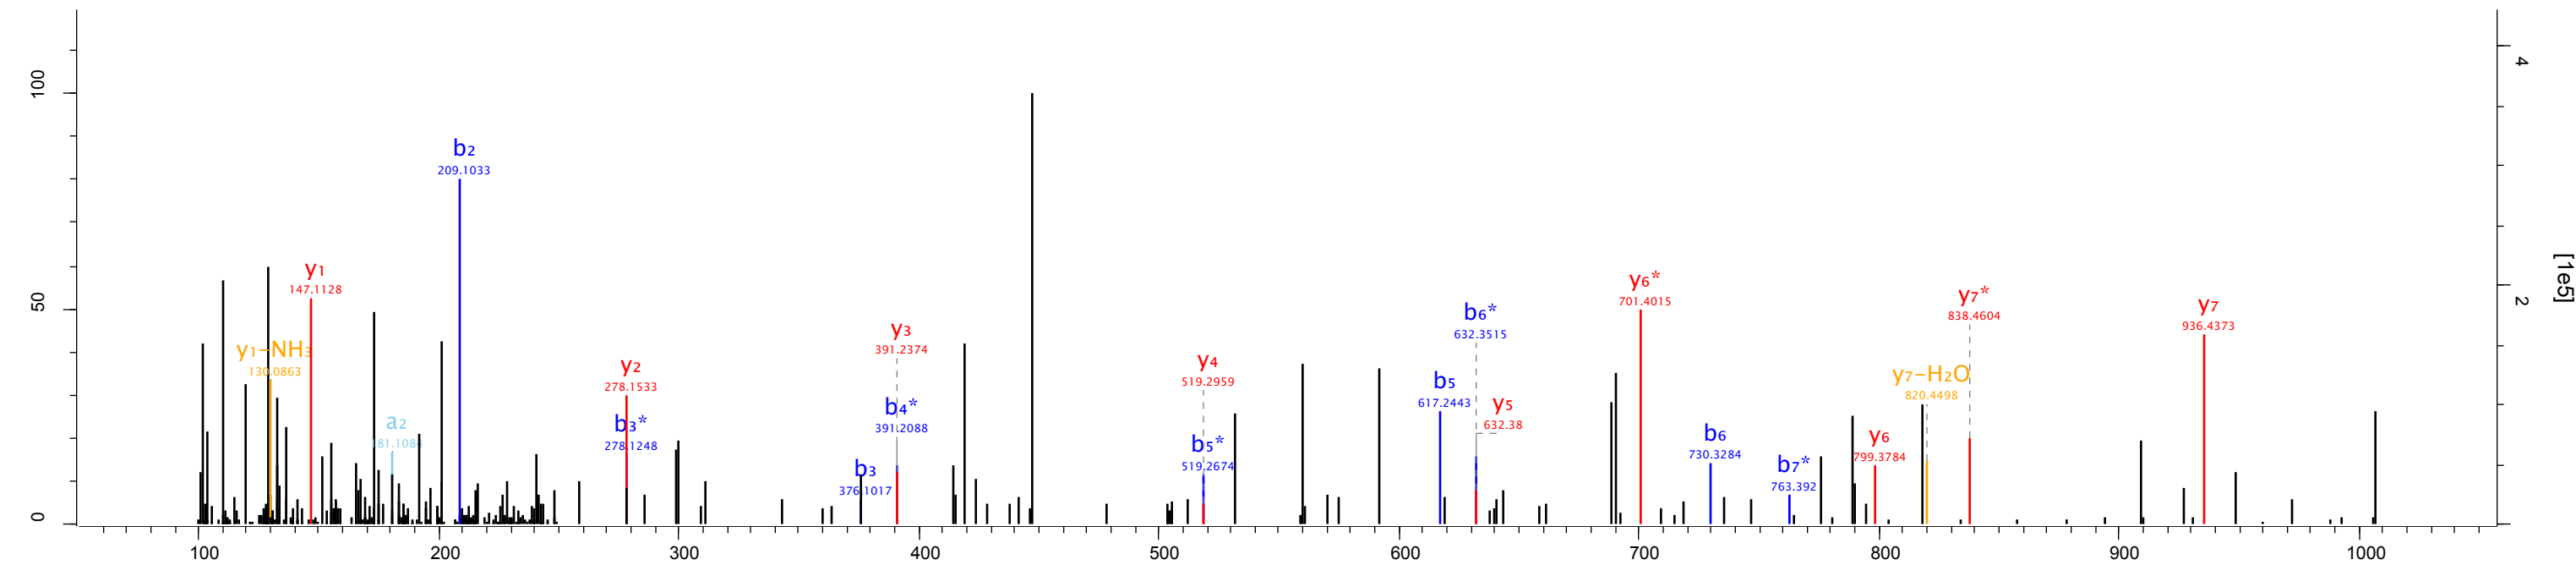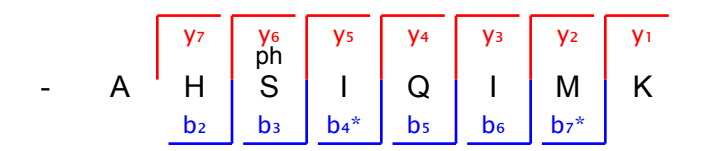

Raw file: 20150812\_A375SR\_Phospho\_BR1\_06  
 Scan: 9849 Method: FTMS; HCD Score: 141.73 m/z: 560.78 Gene names: MAPK6

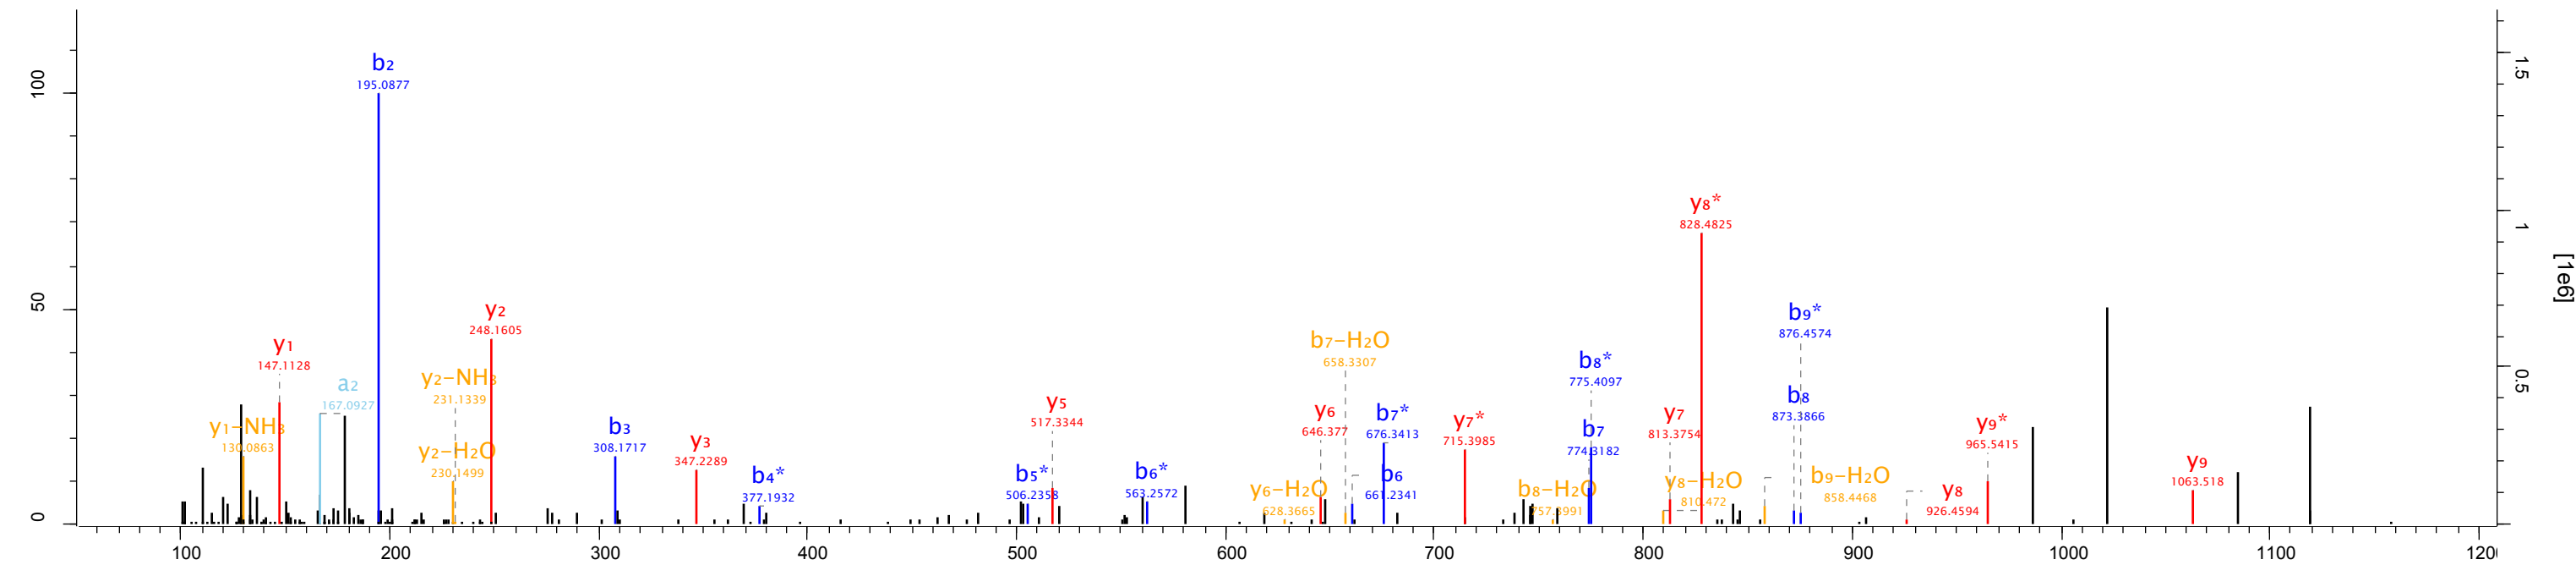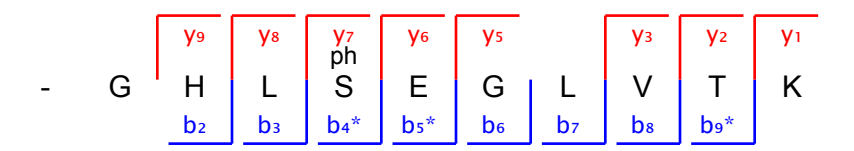

Raw file  
20150812\_A375SR\_Phospho\_BR1\_07

Scan 10129 Method FTMS; HCD Score 154.65 m/z 913.91 Gene names TLE1

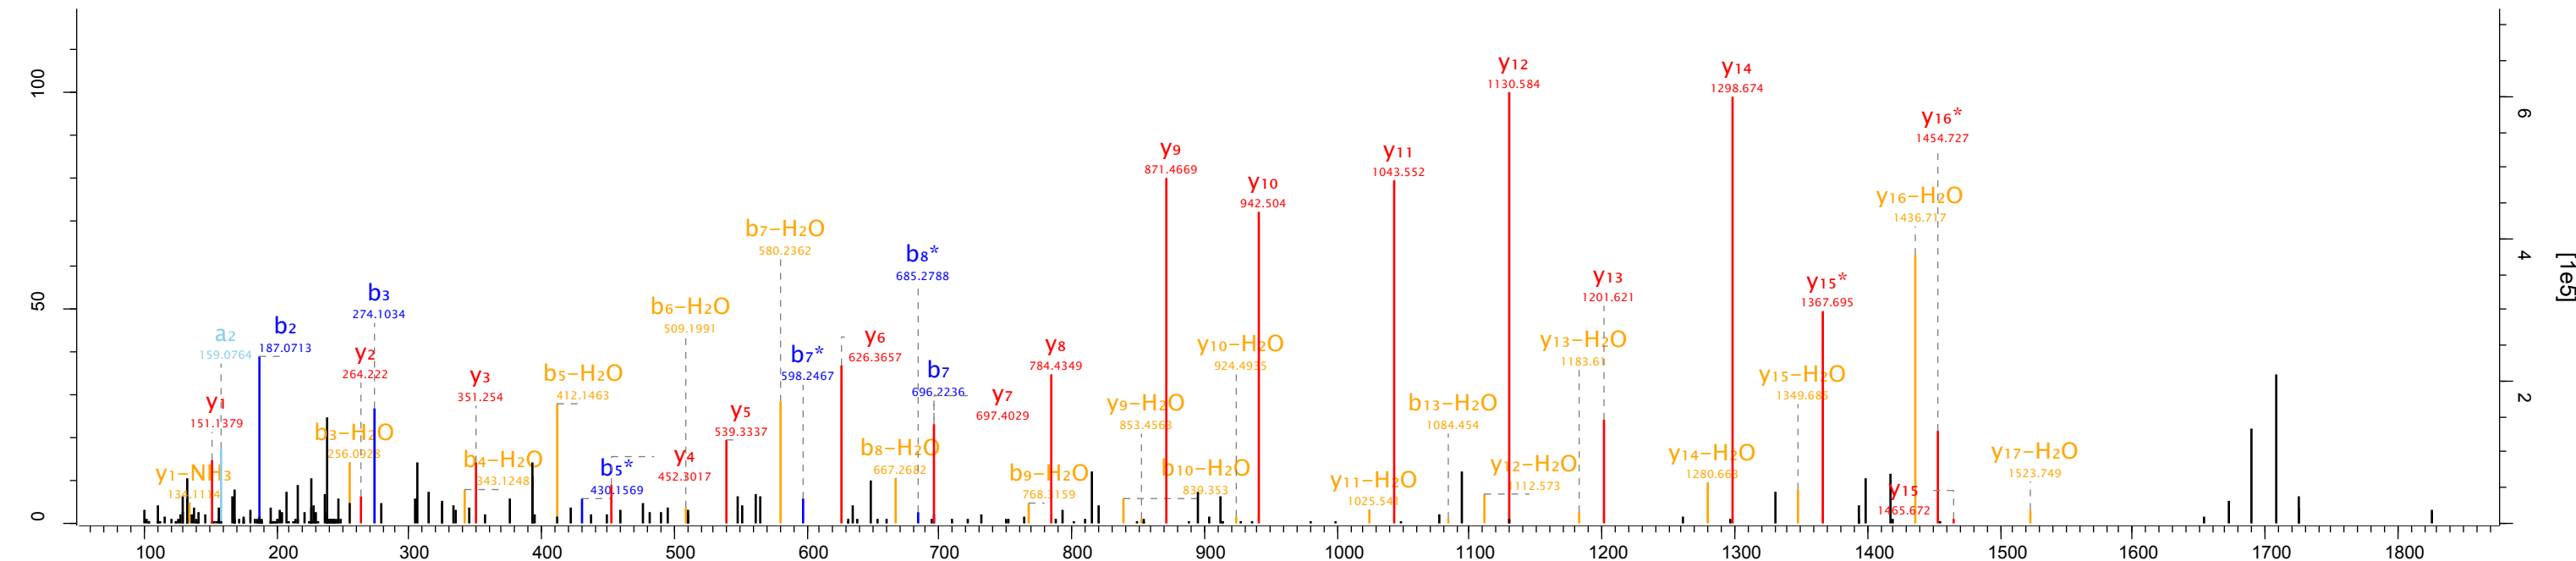

- D A S S P A S T A S S T S L K -

Fragmentation scheme showing b and y ions corresponding to the peptide sequence. The b ions (blue) are b2, b3, b5\*, b7, b8\*. The y ions (red) are y1 through y16\*.

Raw file: 20150812\_A375SR\_Phospho\_BR1\_07  
 Scan: 10669 Method: FTMS; HCD Score: 158.31 m/z: 456.93 Gene names: ESF1

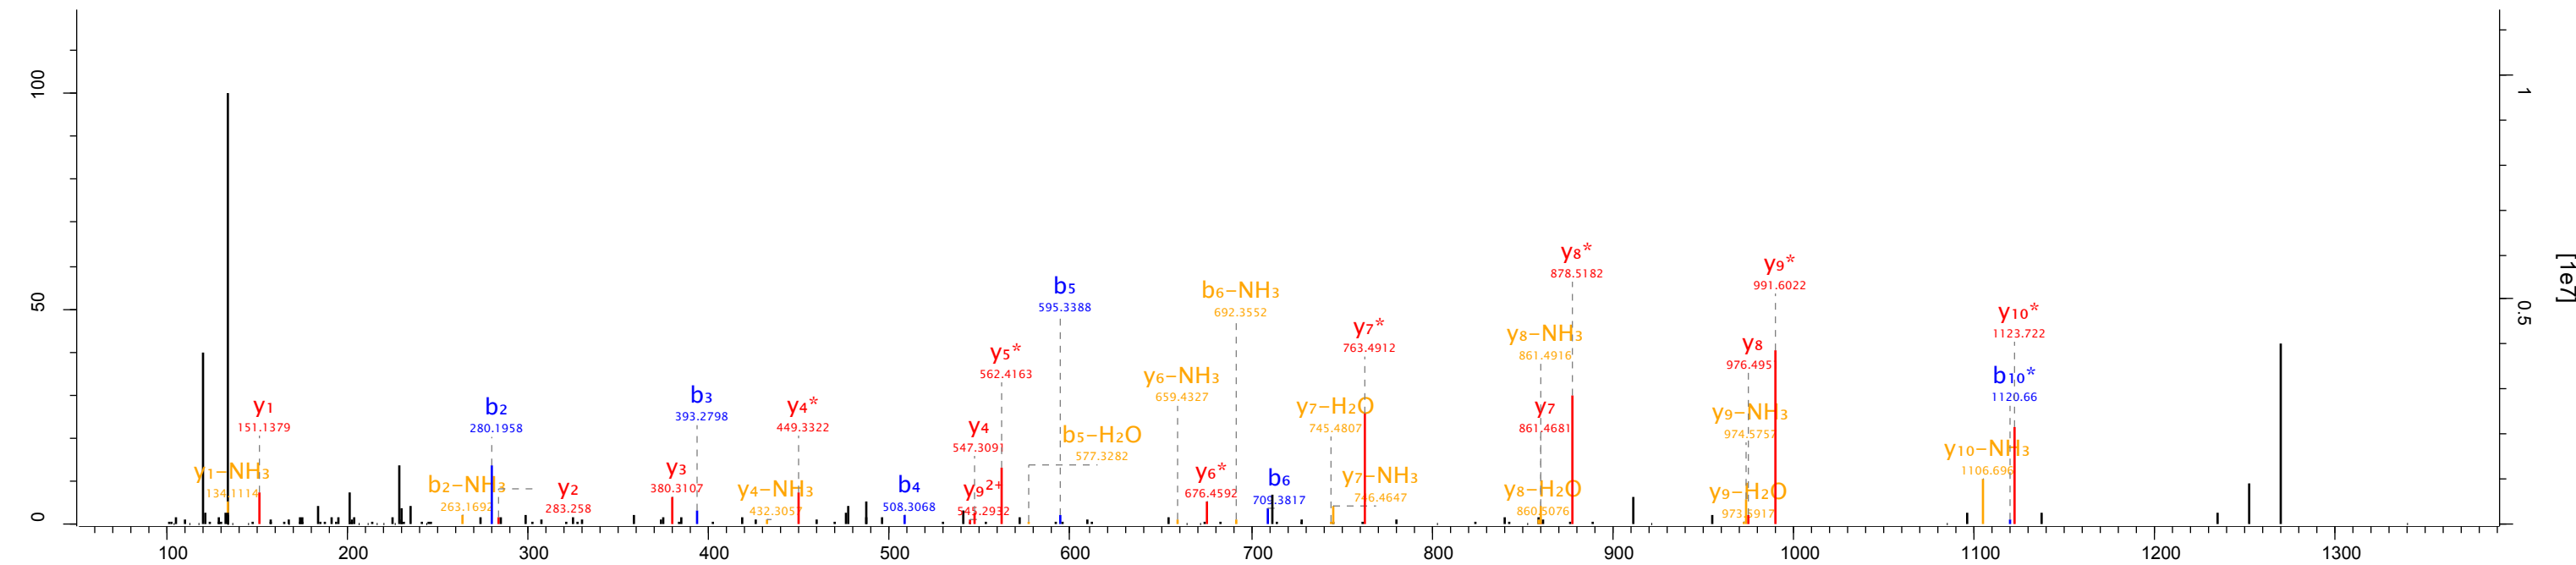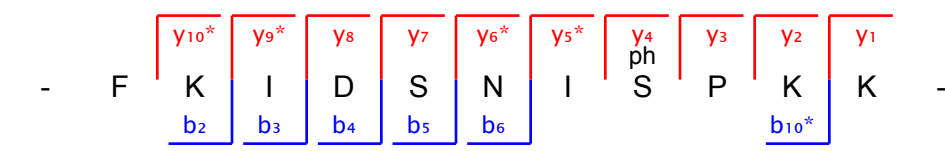



Raw file 20150812\_A375SR\_Phospho\_BR1\_07 Scan 11419 Method FTMS; HCD Score 186.27 m/z 1119.55 Gene names MAP7D1

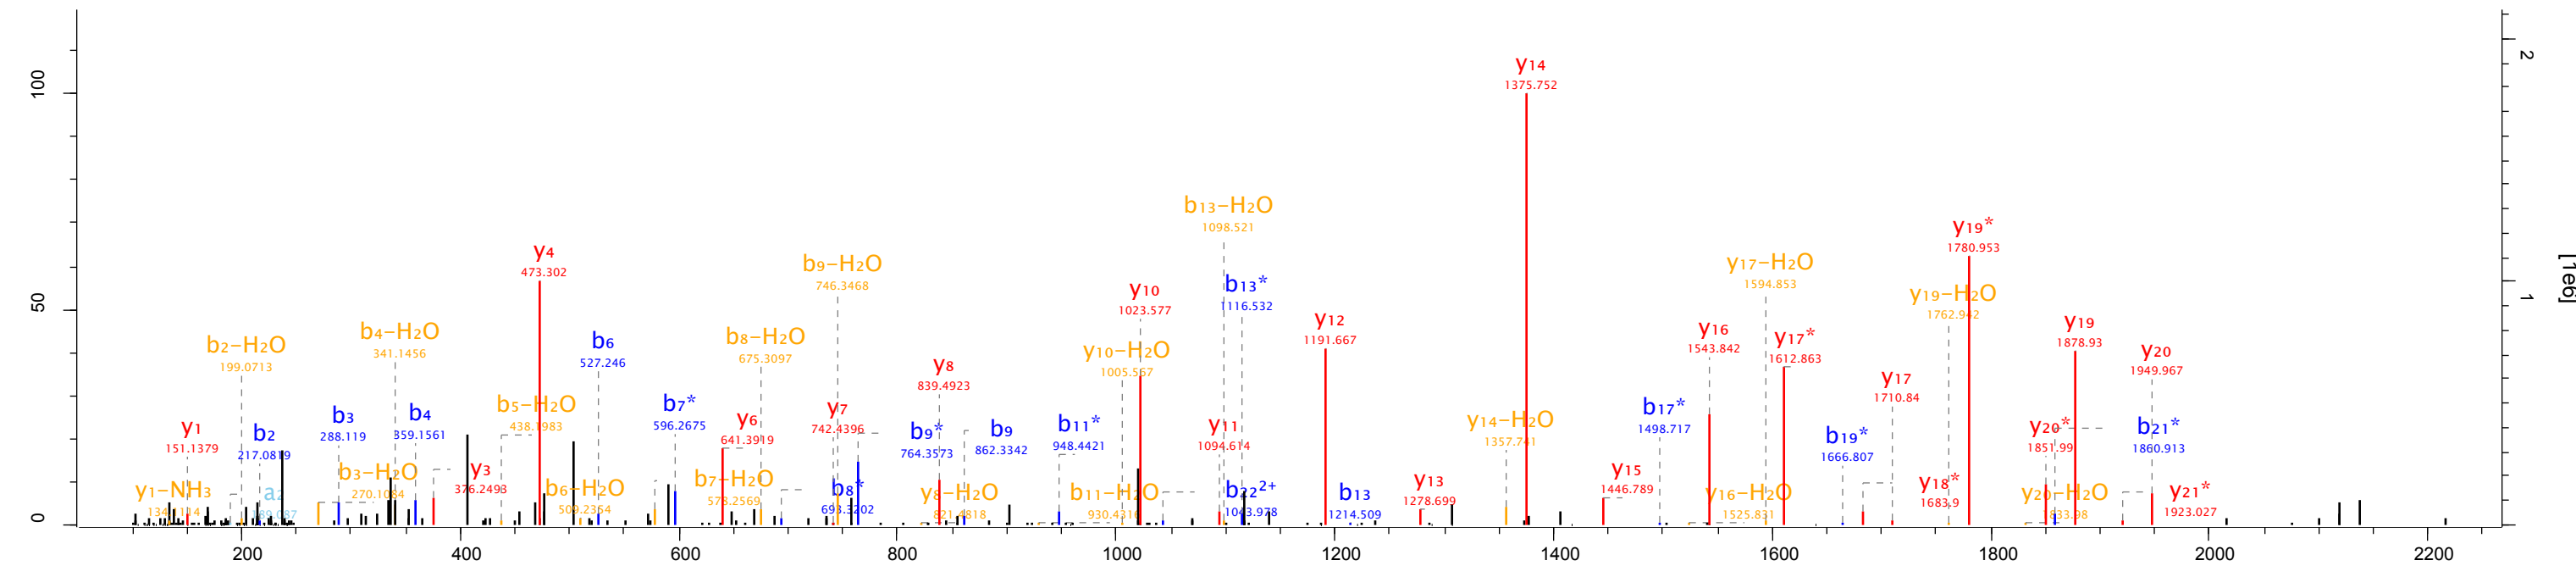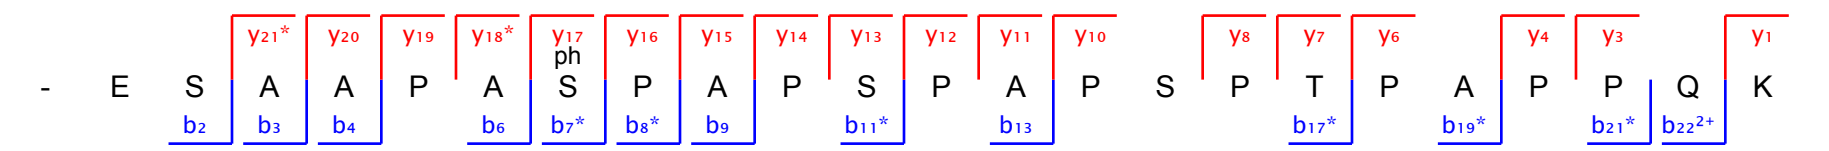

Raw file: 20150812\_A375SR\_Phospho\_BR1\_07  
 Scan: 13459 Method: FTMS; HCD Score: 183.07 m/z: 883.92 Gene names: GLRX3

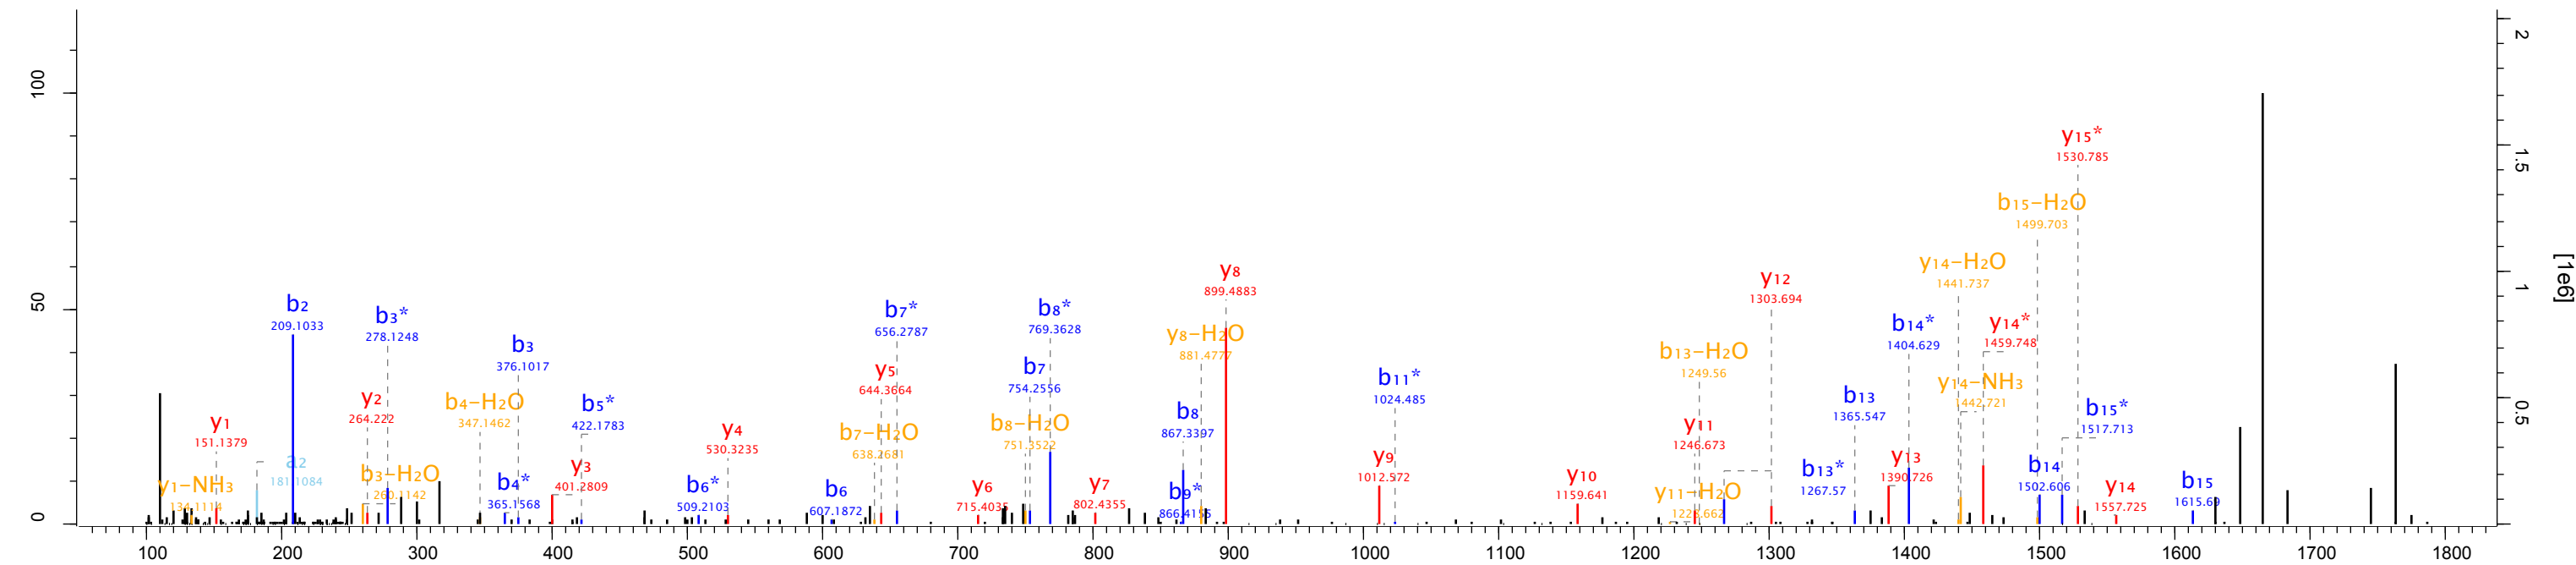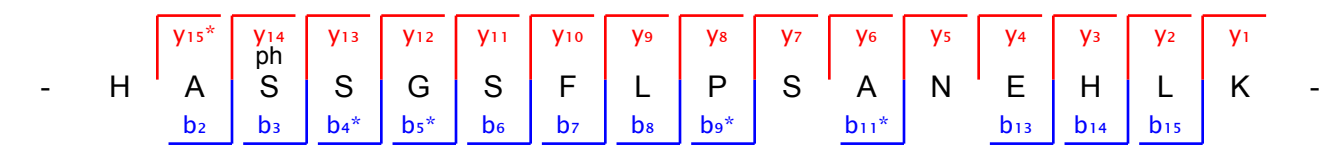

Raw file Scan Method Score m/z Gene names  
 20150812\_A375SR\_Phospho\_BR1\_07 14889 FTMS; HCD 118.91 766.89 SEPT11

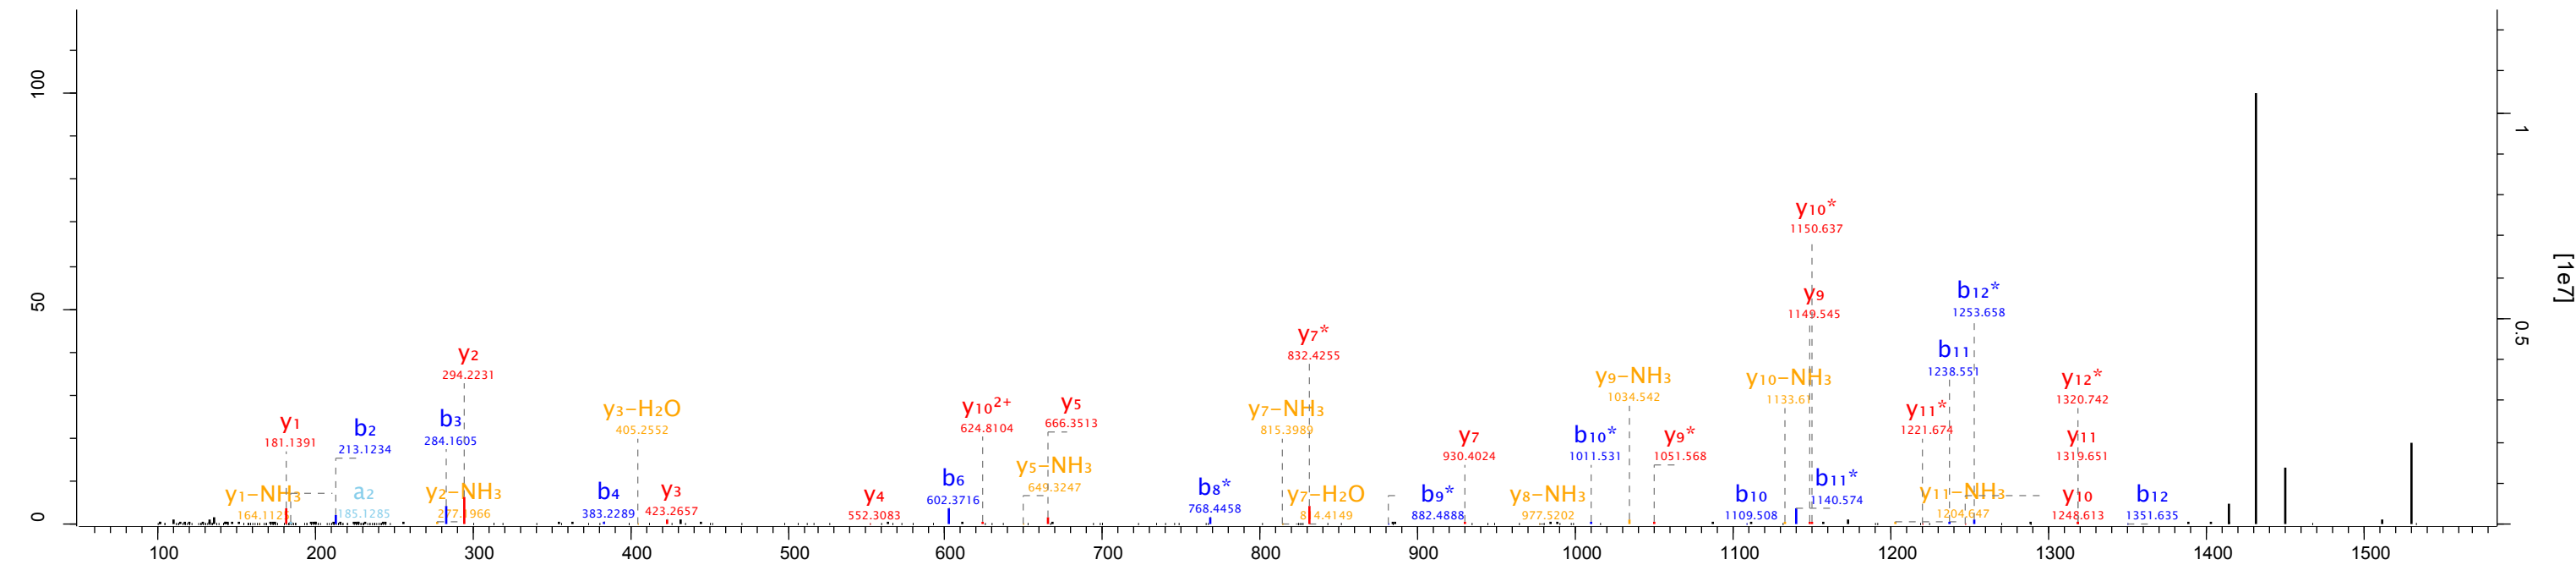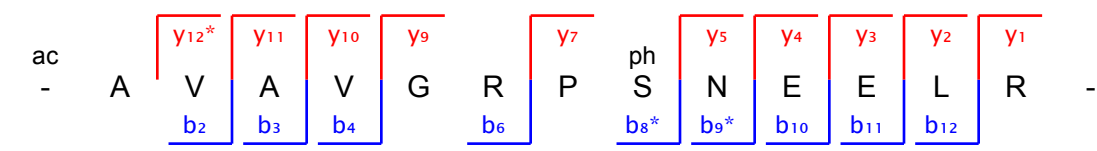

Raw file  
20150812\_A375SR\_Phospho\_BR1\_07

Scan 15709 Method FTMS; HCD Score 379.55 m/z 1155.5 Gene names SERBP1

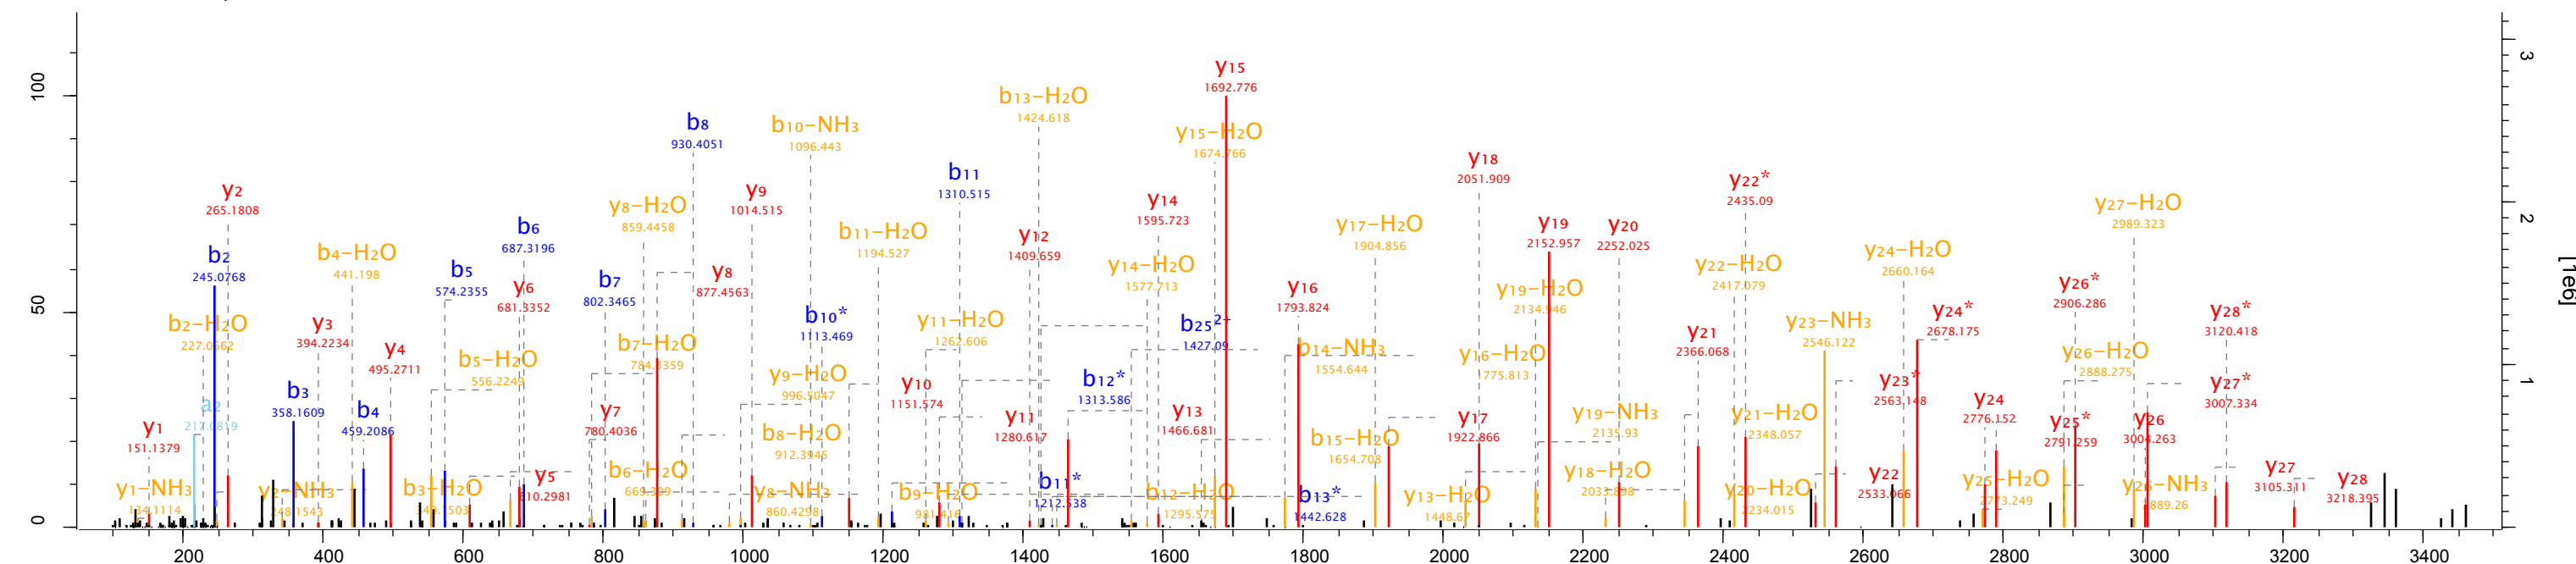

- D E L T D L Q S N V T E E T P E G E E H H P V A D T E N K -

Fragmentation mapping (b and y ions) is shown below the sequence:

- Red boxes (y ions): y28, y27, y26, y25\*, y24, y23\*, y22, y21, y20, y19, y18, y17, y16, y15, y14, y13, y12, y11, y10, y9, y8, y7, y6, y5, y4, y3, y2, y1
- Blue boxes (b ions): b2, b3, b4, b5, b6, b7, b8, b10\*, b11, b12\*, b13\*, b25<sup>2+</sup>

Raw file Scan Method Score m/z Gene names  
 20150812\_A375SR\_Phospho\_BR1\_07 15969 FTMS; HCD 74.43 698.77 RBL2

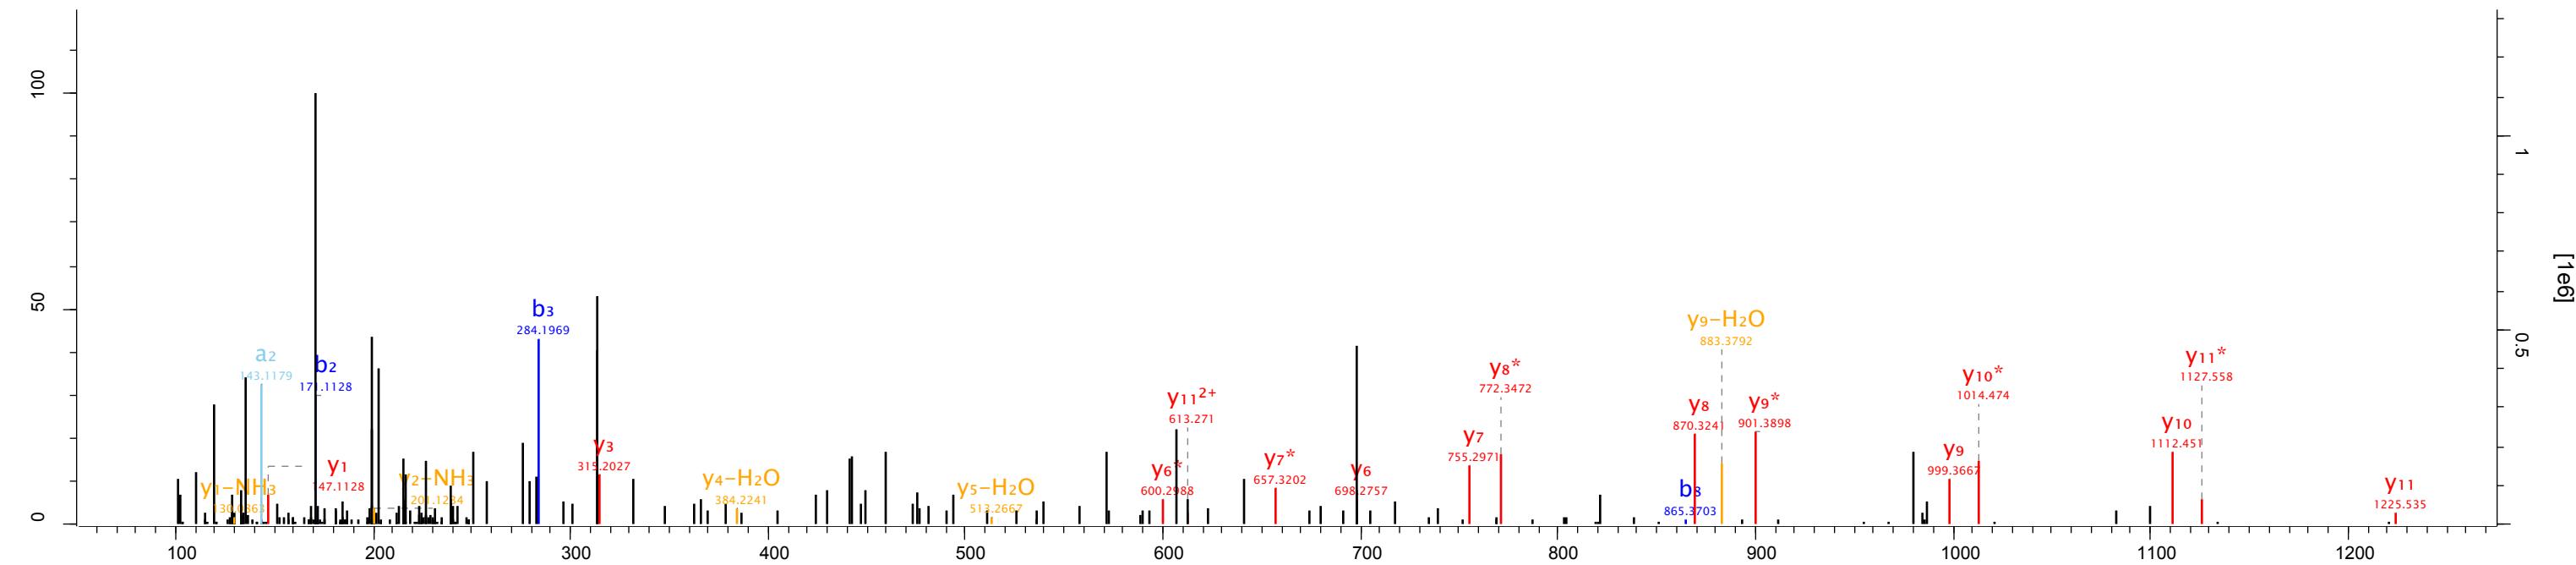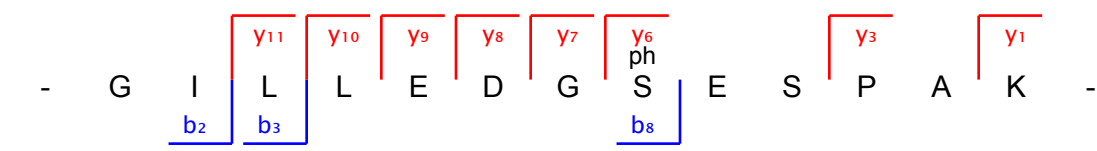

Raw file: 20150812\_A375SR\_Phospho\_BR1\_07  
 Scan: 1599 Method: FTMS; HCD Score: 102.07 m/z: 339.16 Gene names: PPHLN1

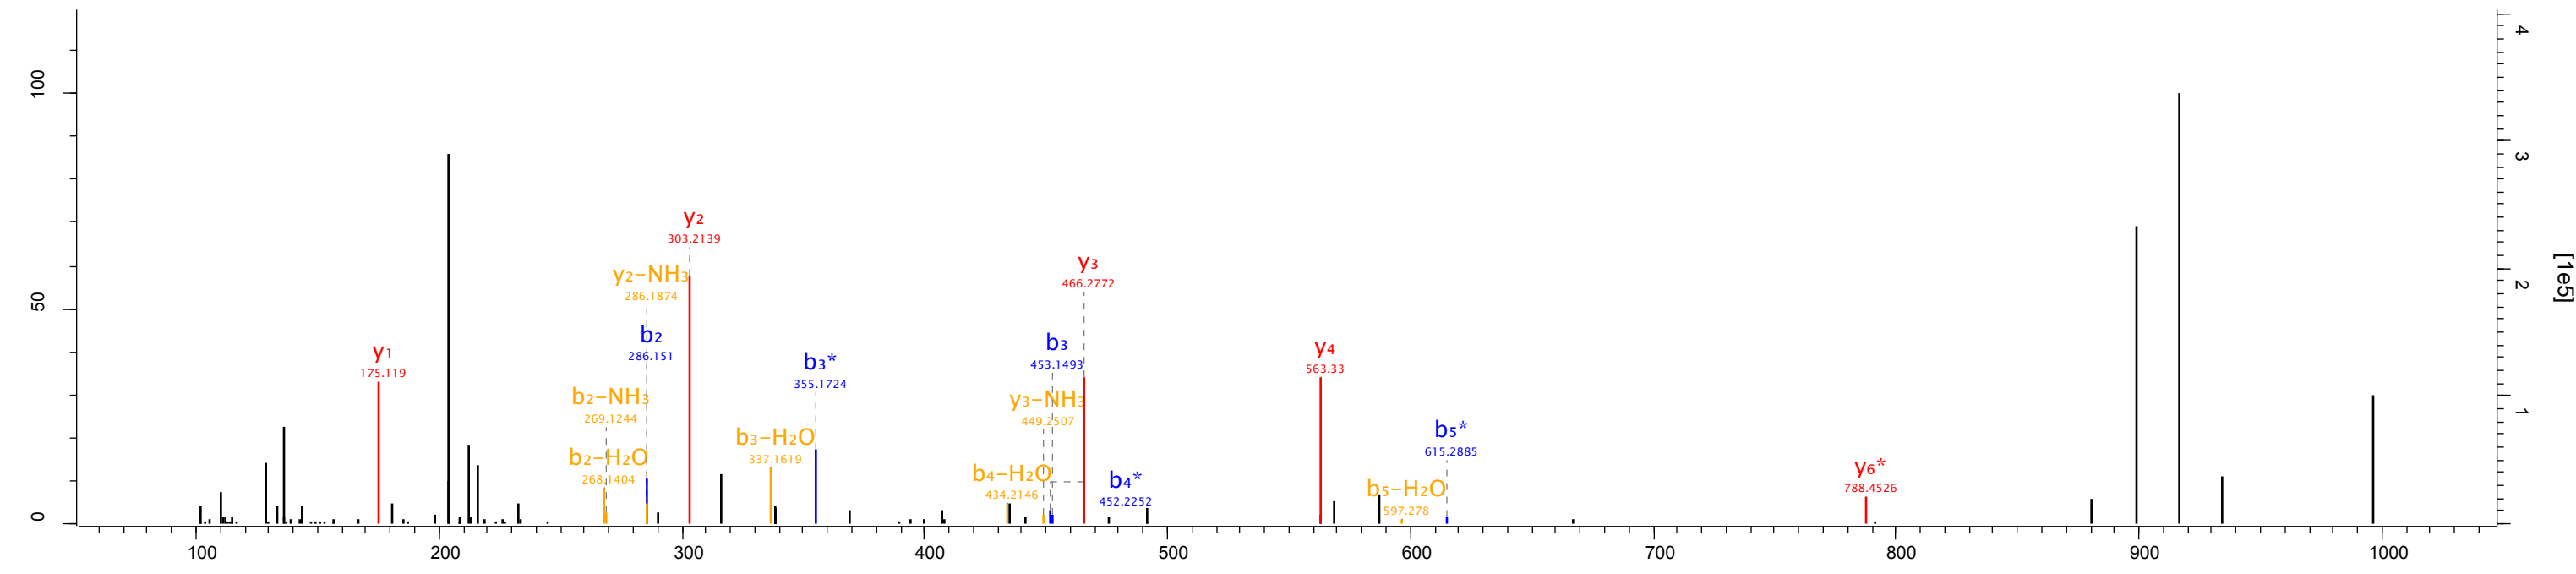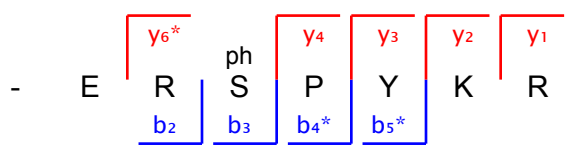

Raw file Scan Method Score m/z Gene names  
 20150812\_A375SR\_Phospho\_BR1\_07 16929 FTMS; HCD 303.94 920.06 ZC3H18

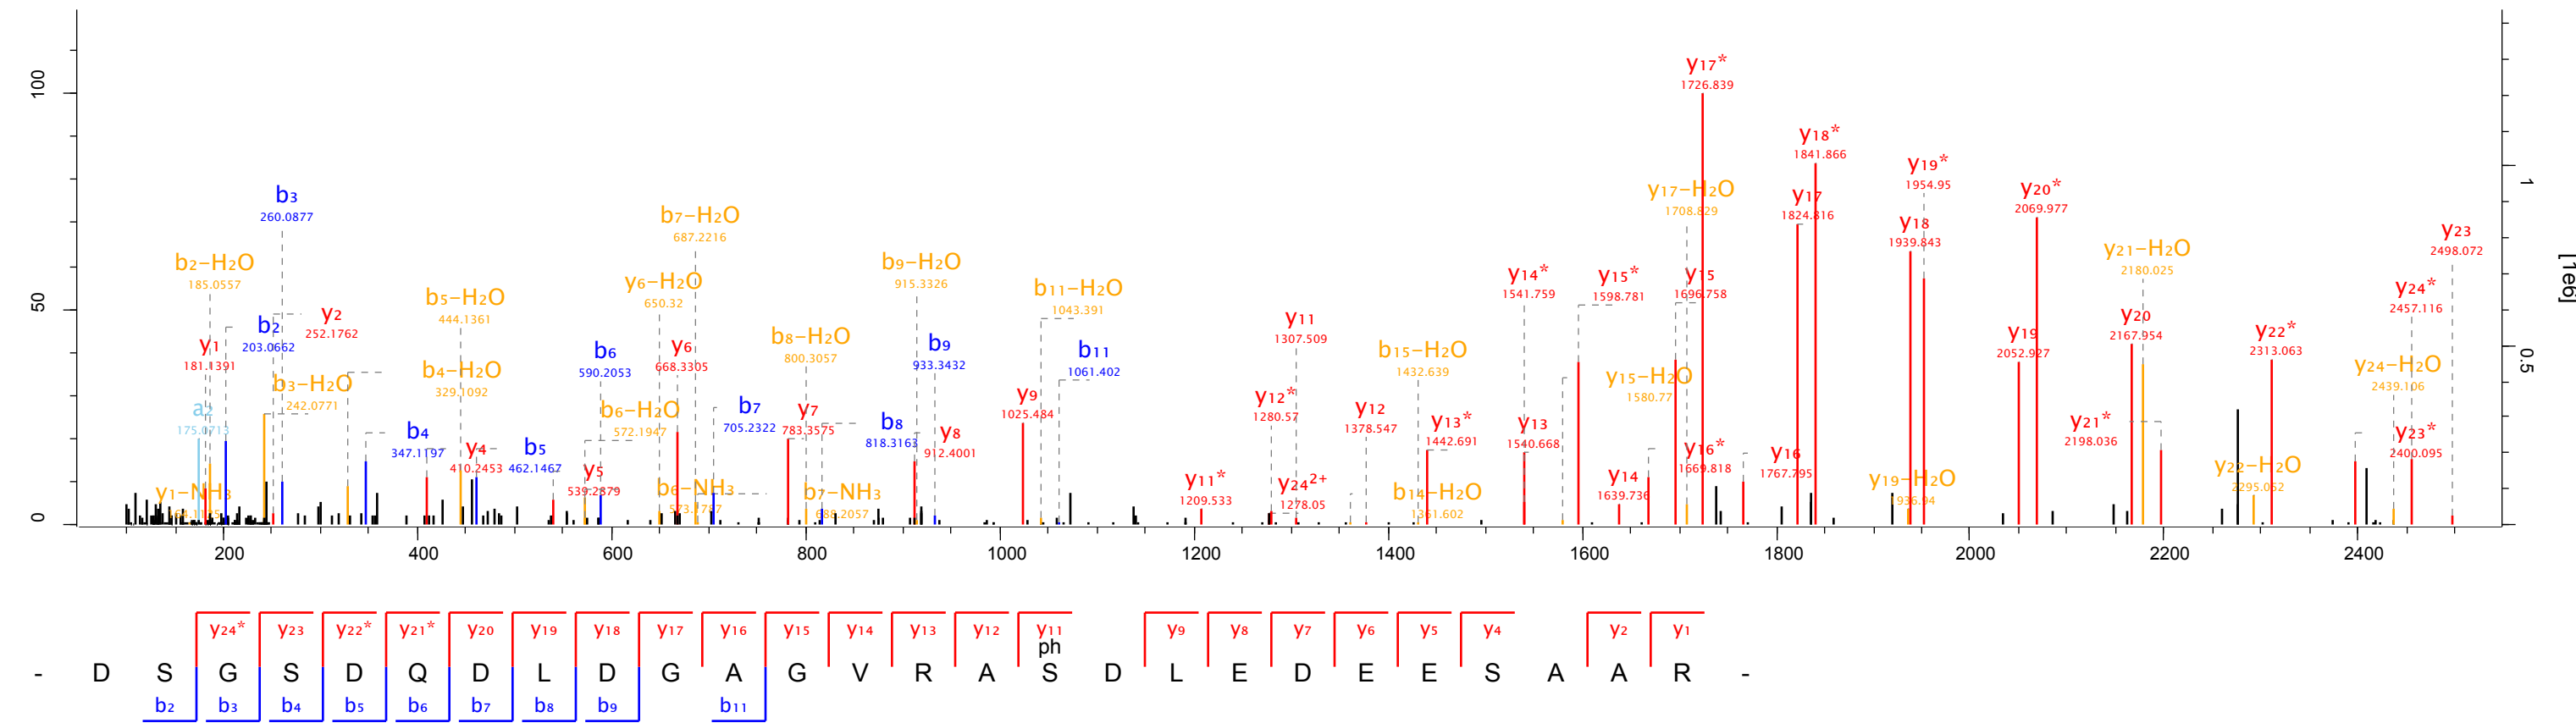

Raw file 20150812\_A375SR\_Phospho\_BR1\_07 Scan 17719 Method FTMS; HCD Score 164.48 m/z 541.27 Gene names BCLAF1

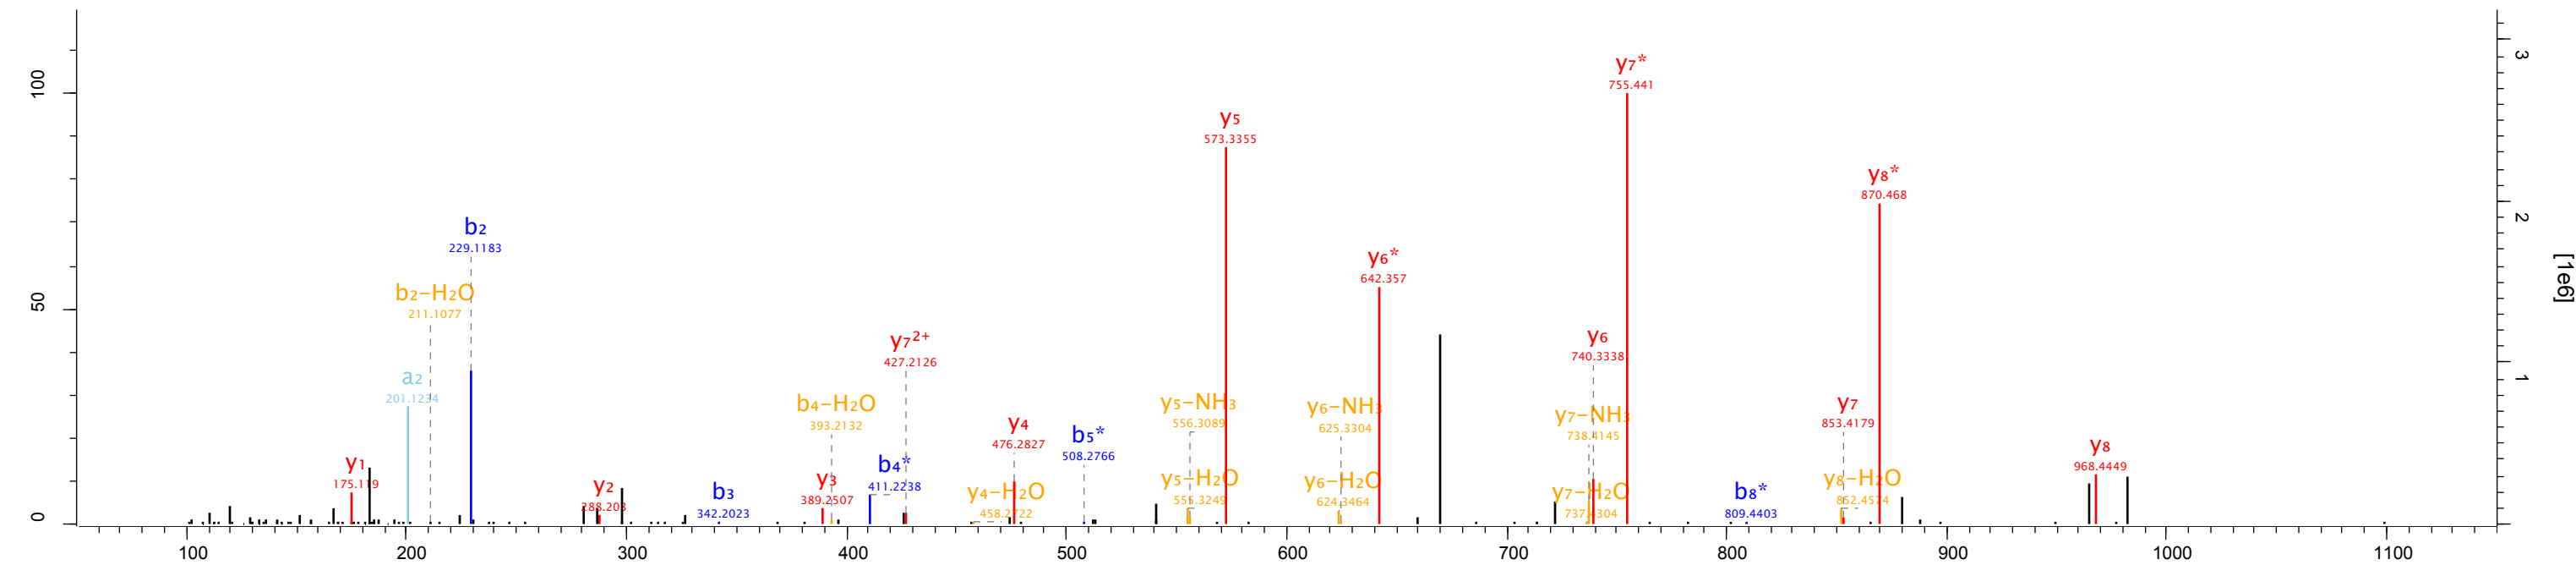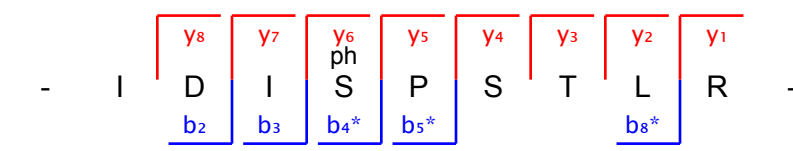



Raw file Scan Method Score m/z Gene names  
 20150812\_A375SR\_Phospho\_BR1\_07 18369 FTMS; HCD 76.94 667.28 FAM175A

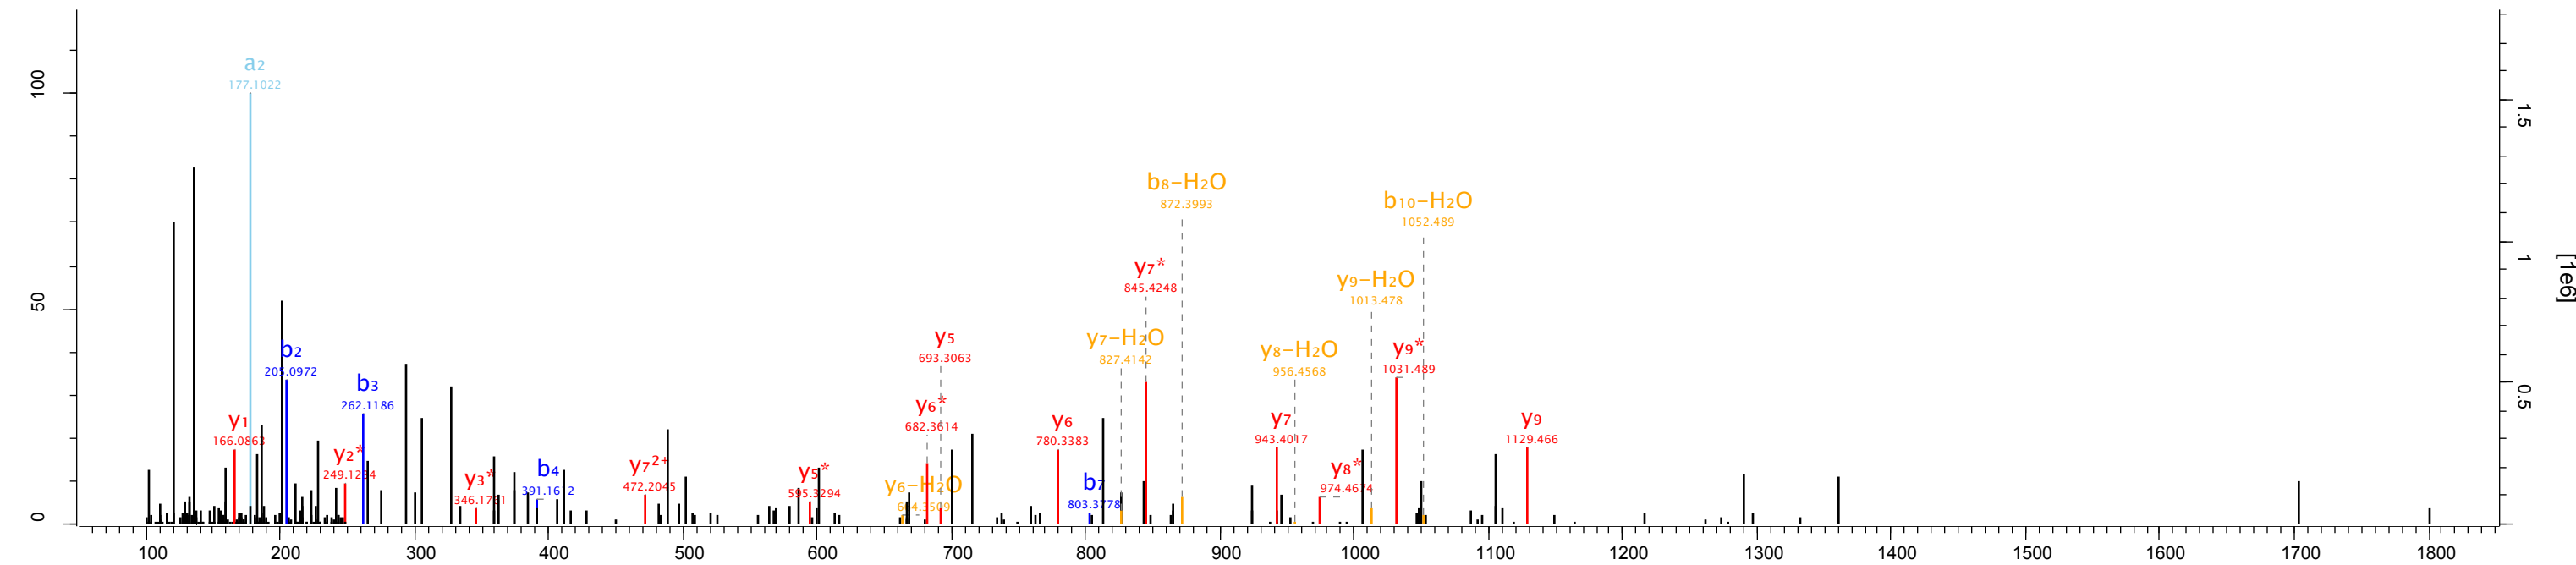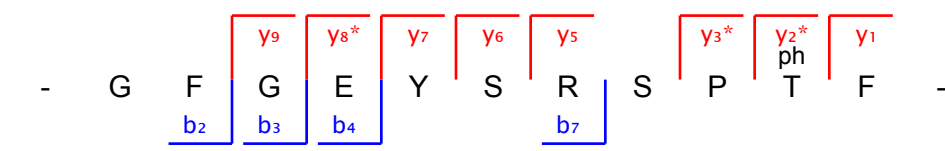

Raw file: 20150812\_A375SR\_Phospho\_BR1\_07  
 Scan: 19279 Method: FTMS; HCD Score: 50.1 m/z: 583.94 Gene names: VIM

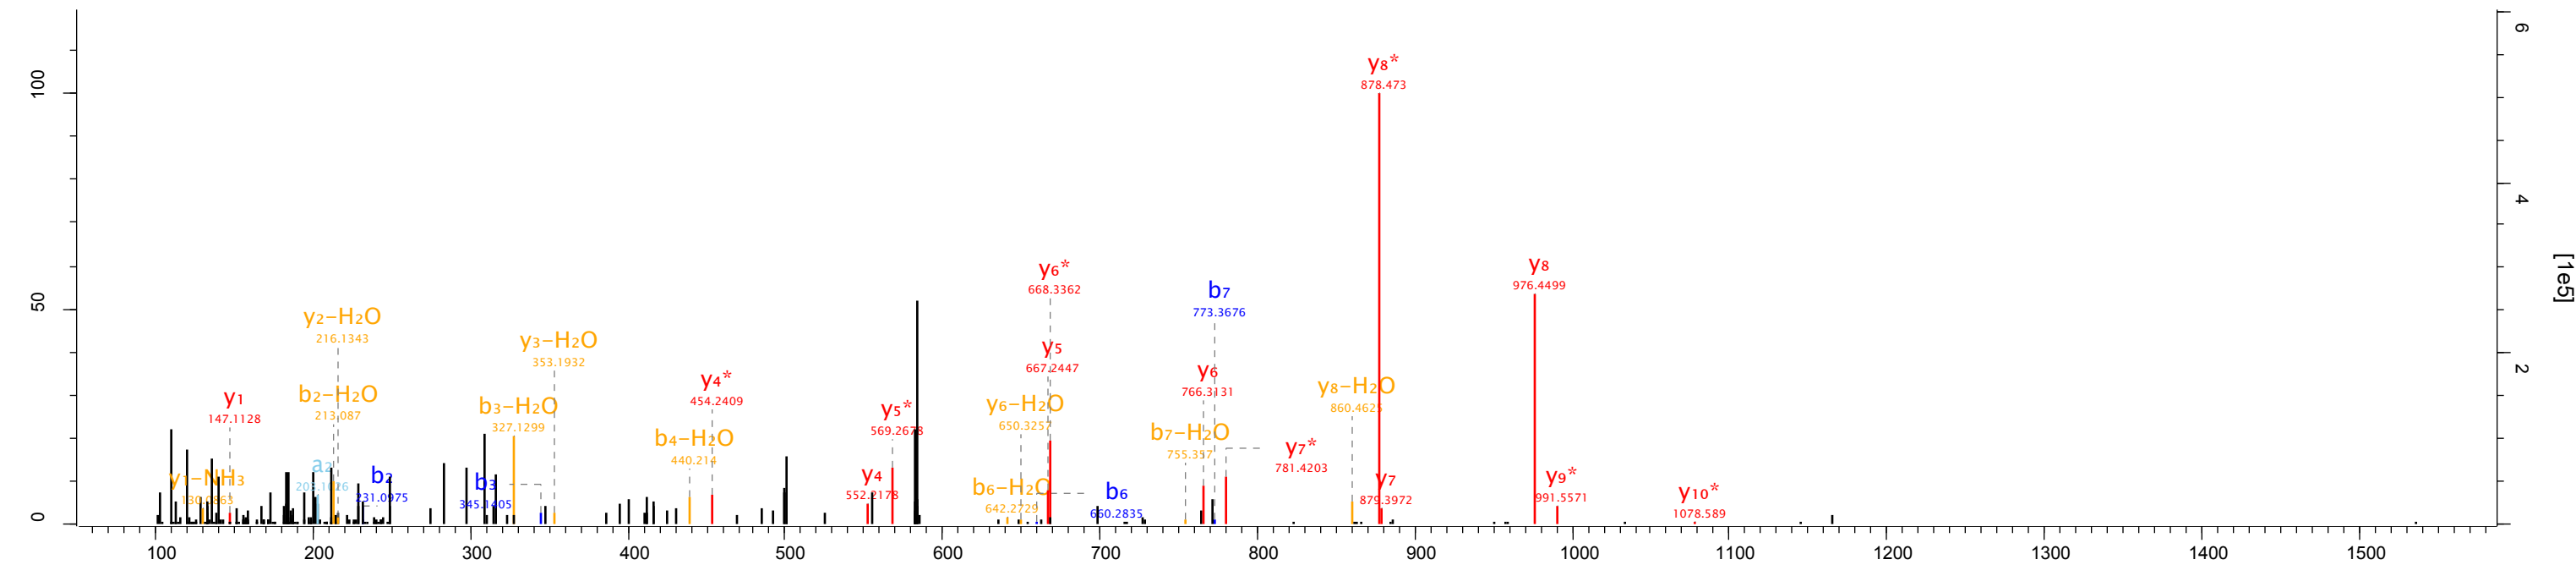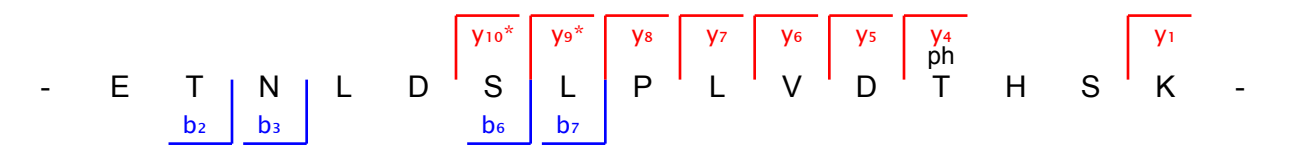

Raw file: 20150812\_A375SR\_Phospho\_BR1\_07  
 Scan: 20849 Method: FTMS; HCD Score: 139.6 m/z: 1060.21 Gene names: CUEDC2

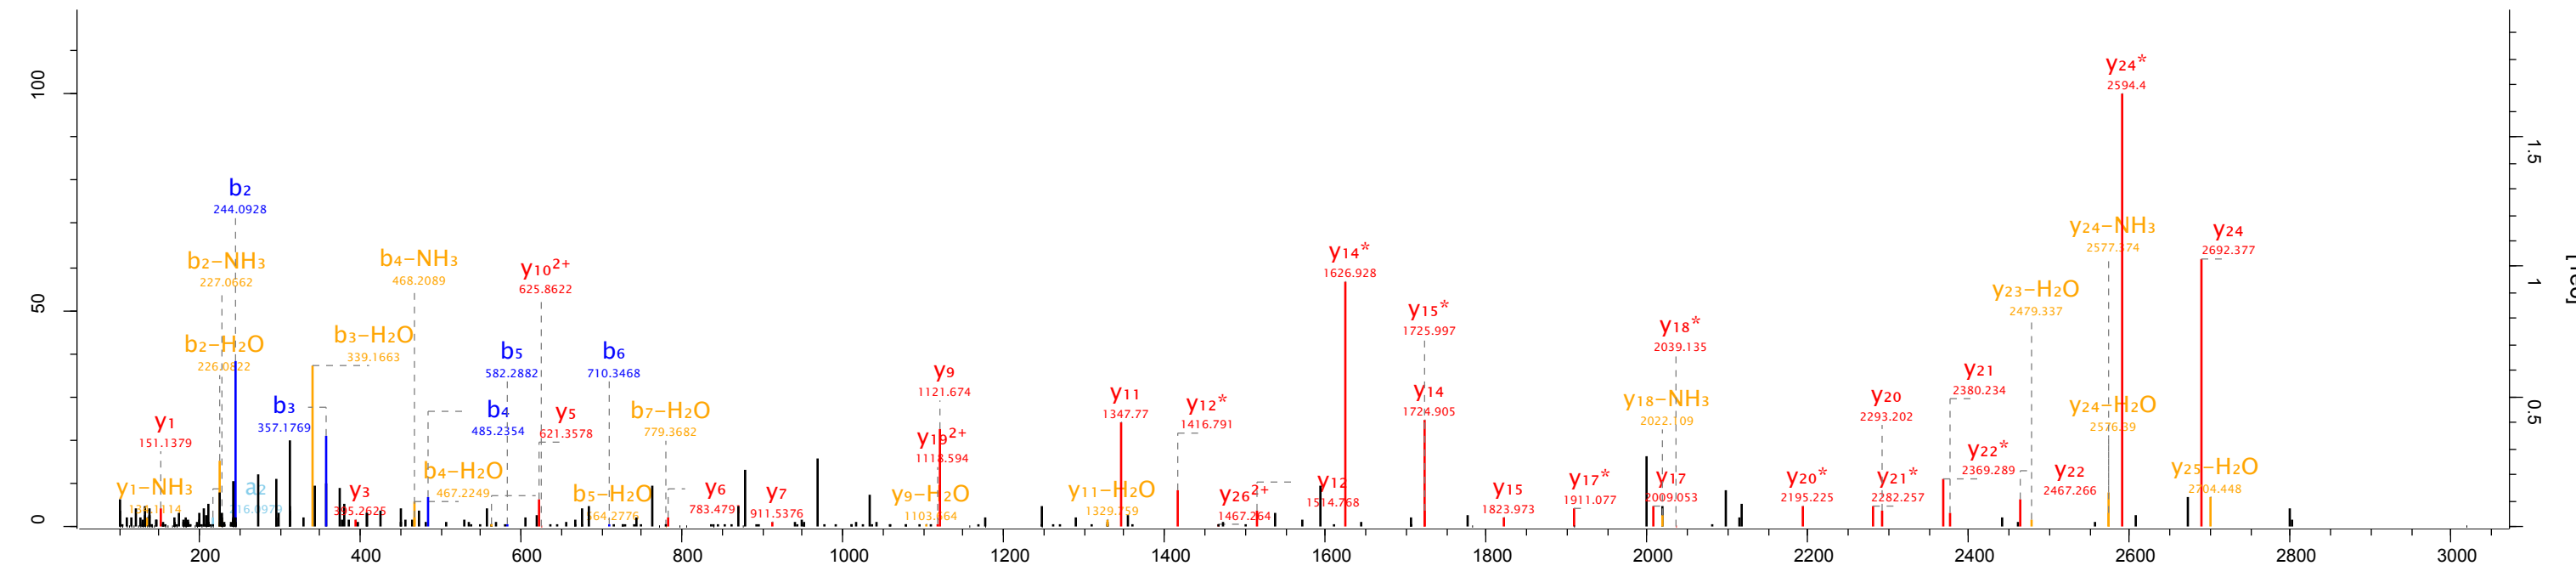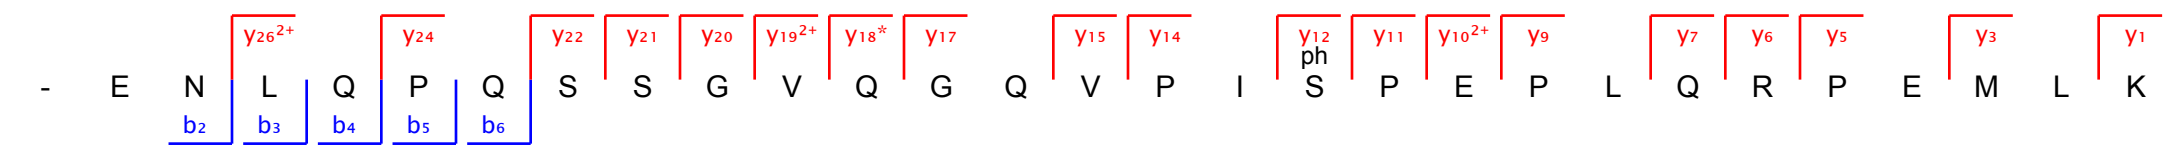

Raw file  
 20150812\_A375SR\_Phospho\_BR1\_07  
 Scan 23859 Method FTMS; HCD Score 128.74 m/z 828.93 Gene names BRCA2

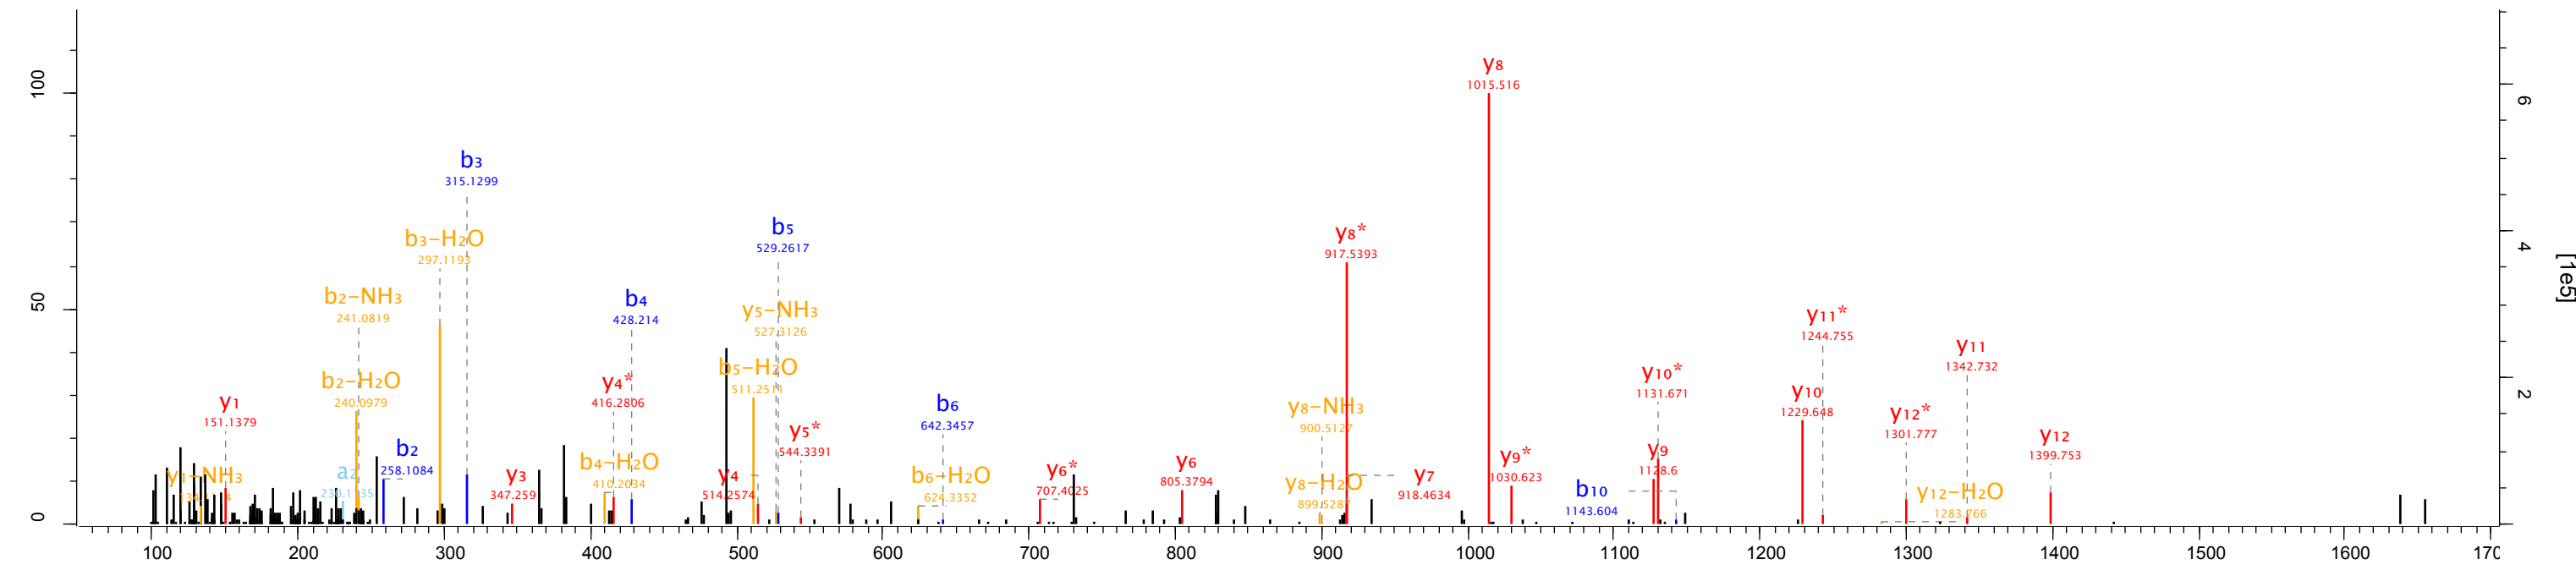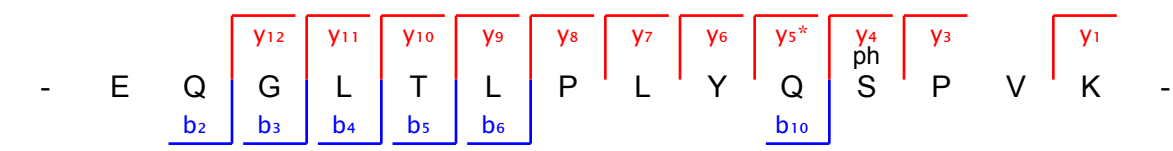

Raw file 20150812\_A375SR\_Phospho\_BR1\_07 Scan 25049 Method FTMS; HCD Score 84.37 m/z 1281.57 Gene names PELP1

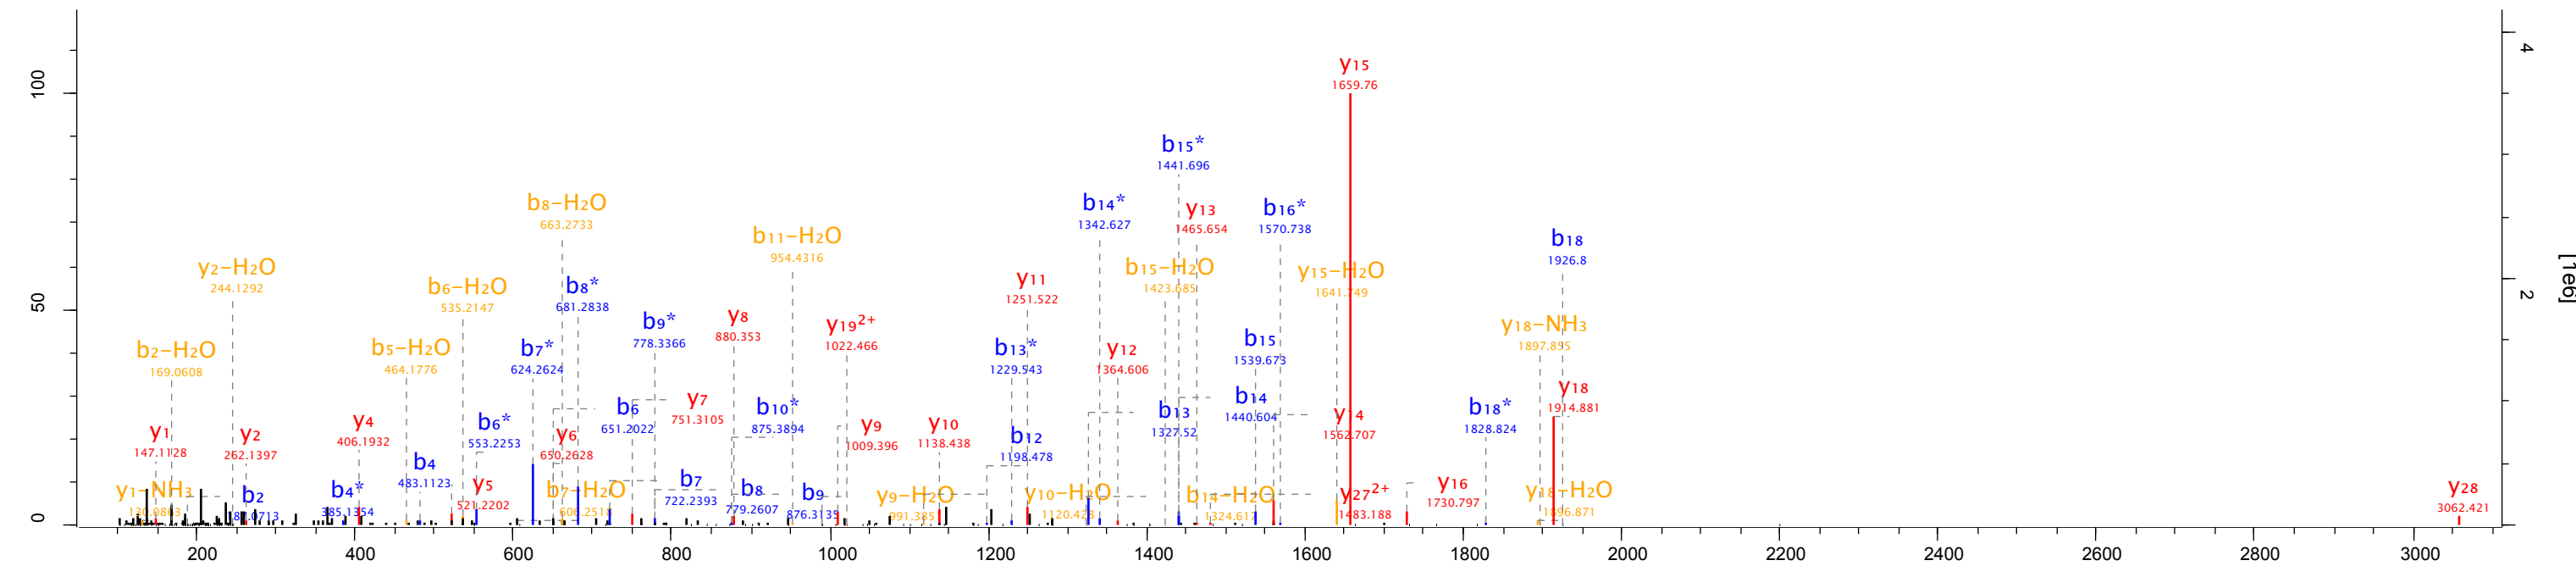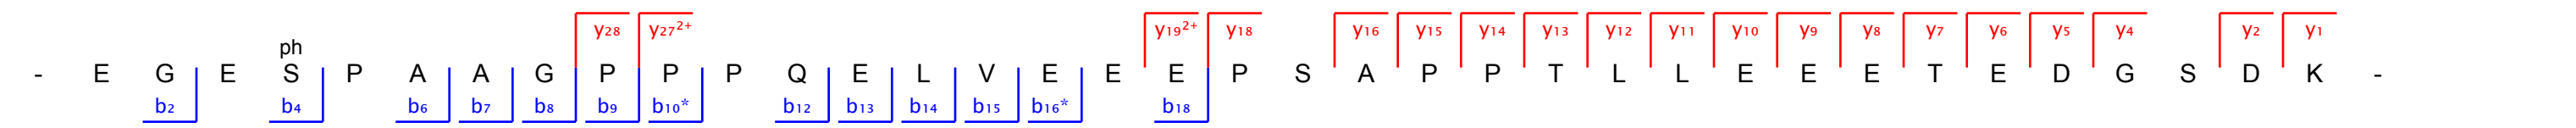

Raw file 20150812\_A375SR\_Phospho\_BR1\_07 Scan 2699 Method FTMS; HCD Score 97.9 m/z 544.61 Gene names ZC3H13

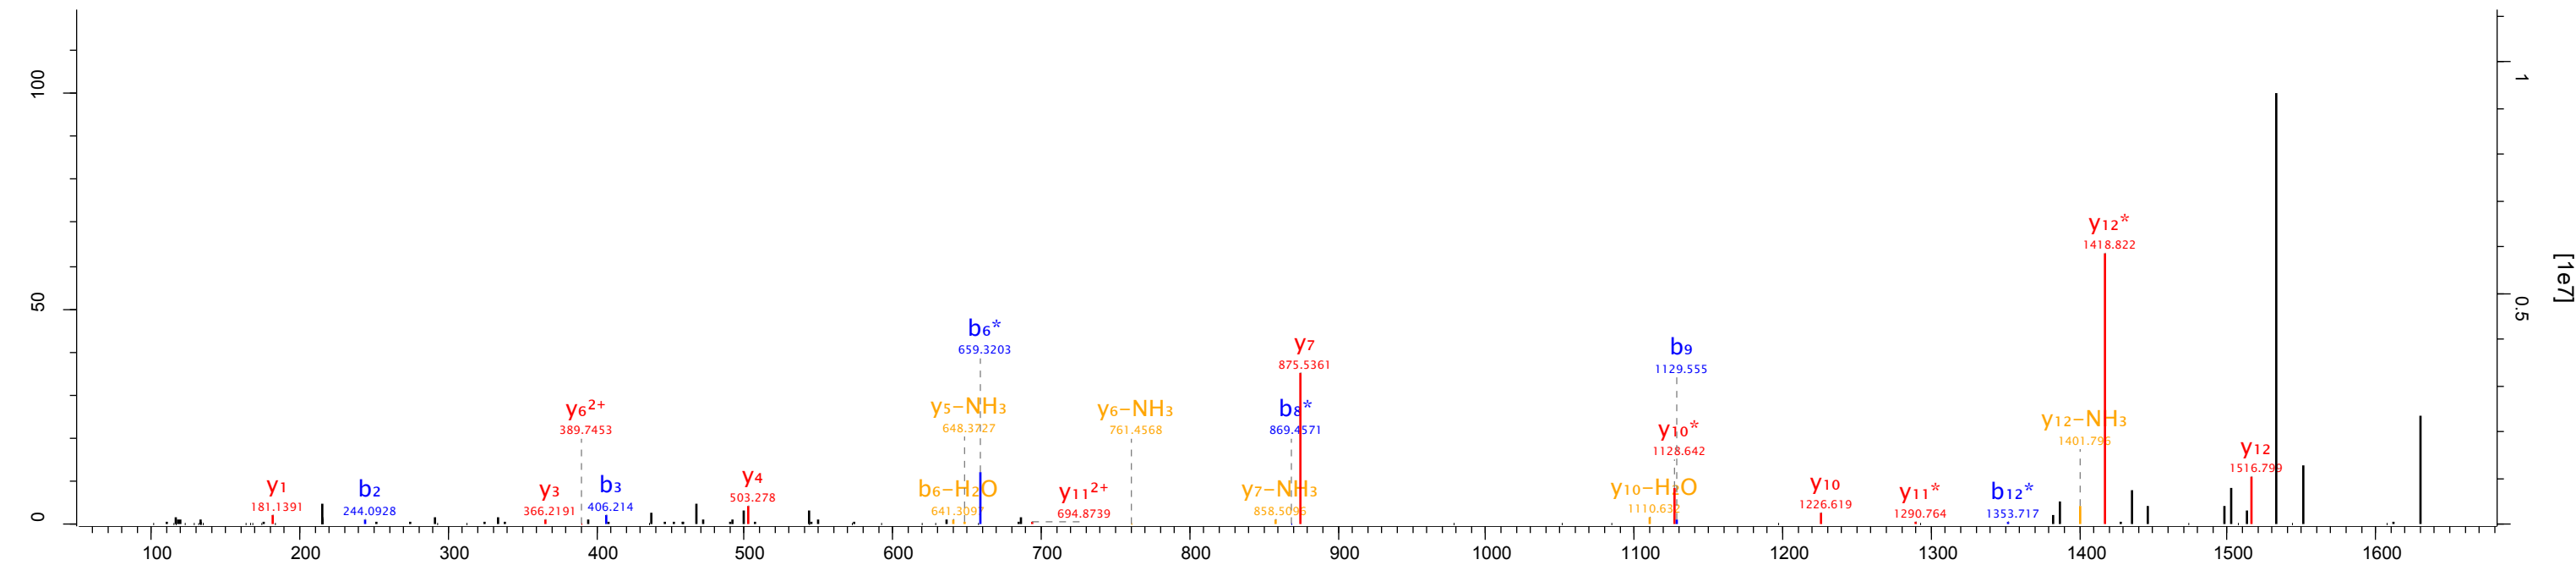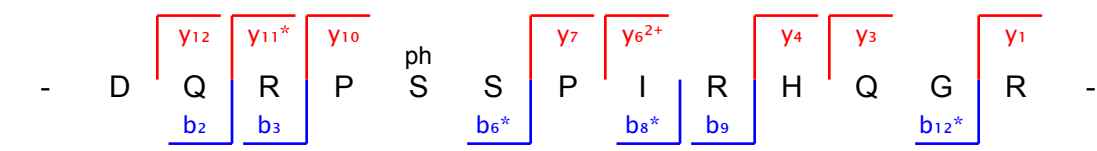

Raw file 20150812\_A375SR\_Phospho\_BR1\_07 Scan 2859 Method FTMS; HCD Score 87.77 m/z 697.29 Gene names TUSC1

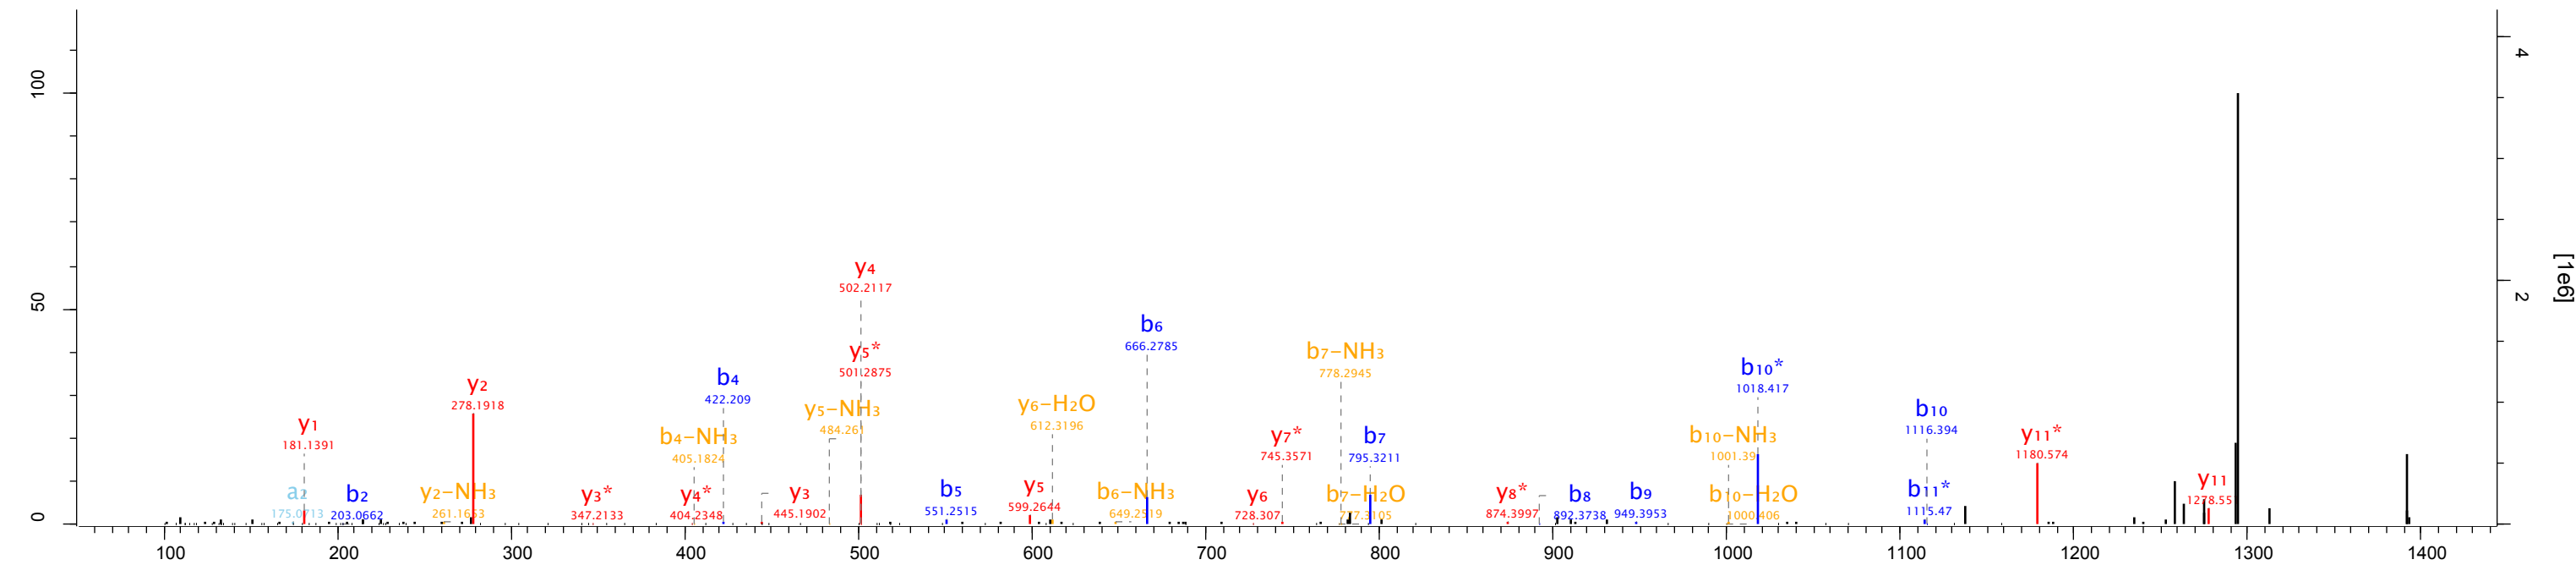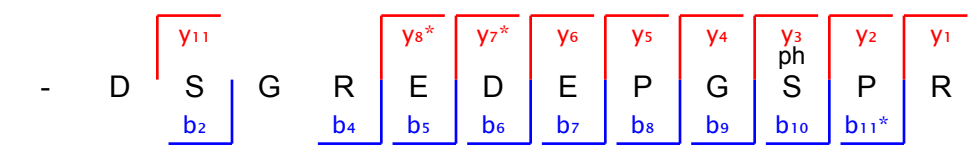

Raw file 20150812\_A375SR\_Phospho\_BR1\_07 Scan 3649 Method FTMS; HCD Score 95.51 m/z 601.93 Gene names NCOR2

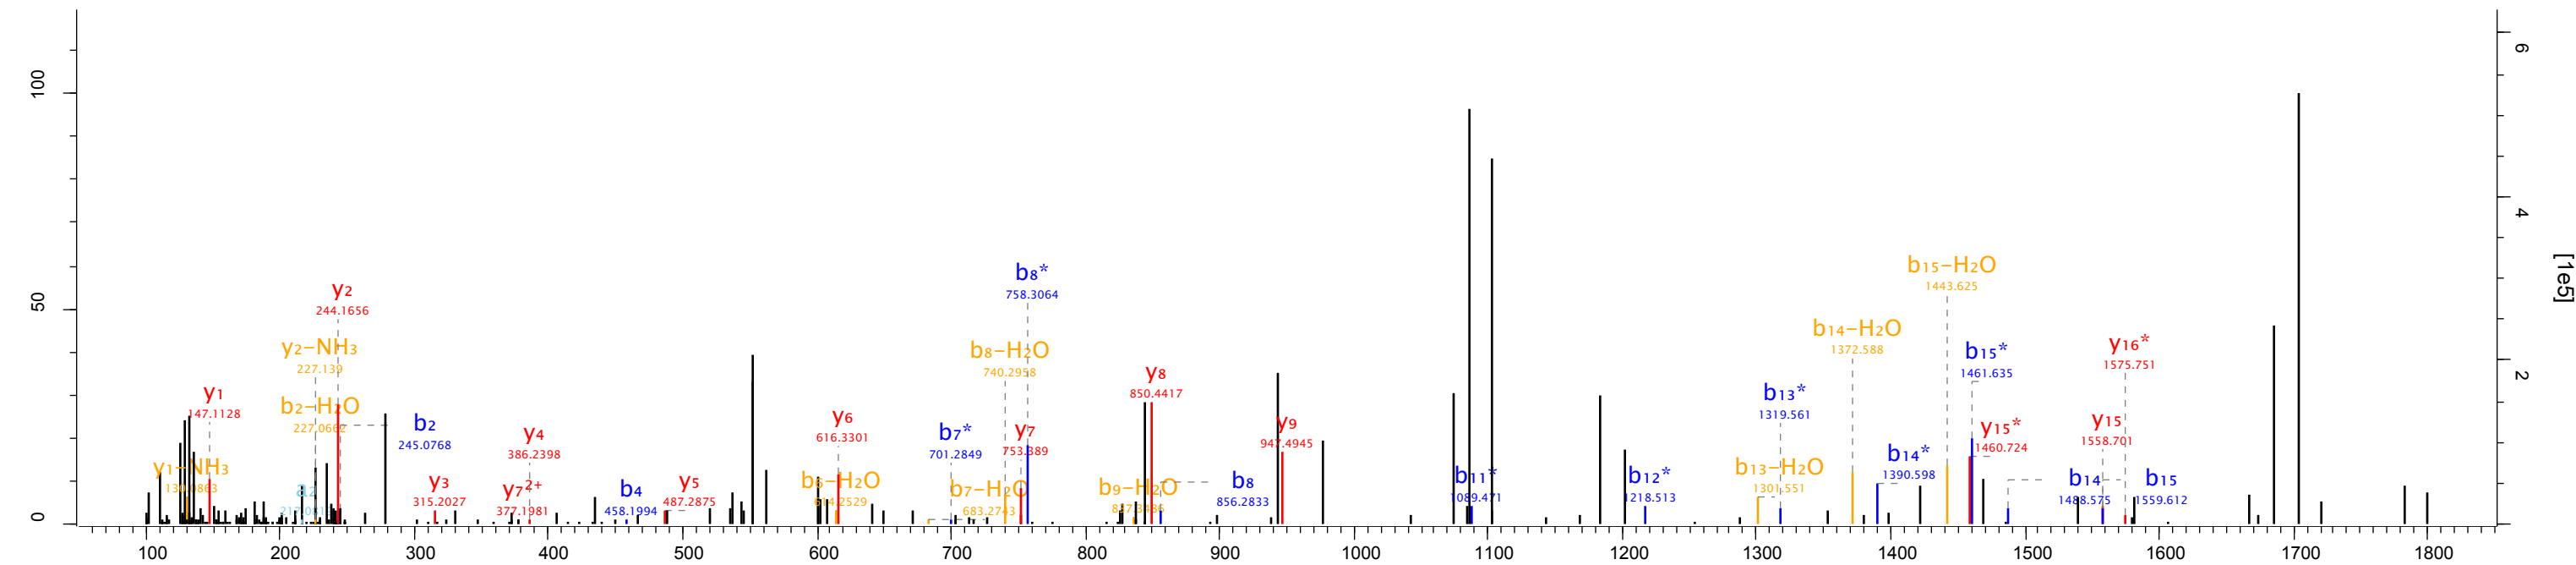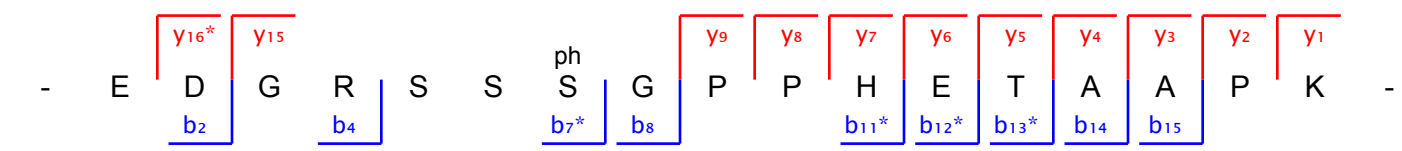



Raw file: 20150812\_A375SR\_Phospho\_BR1\_07  
 Scan: 8499 Method: FTMS; HCD Score: 64.57 m/z: 705.34 Gene names: ARHGAP32

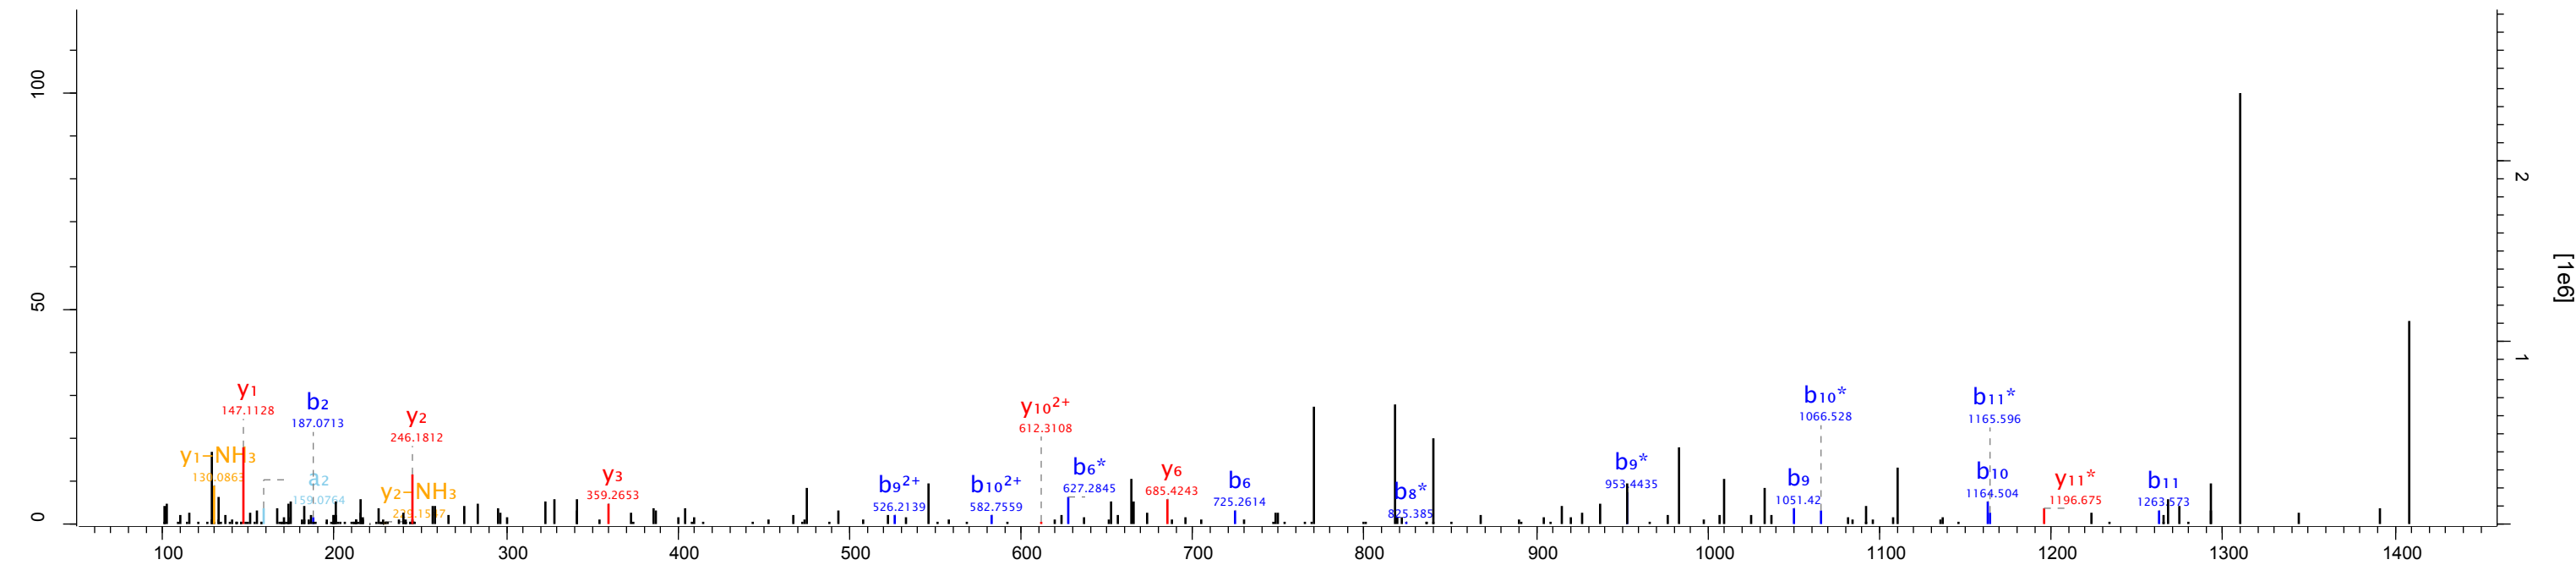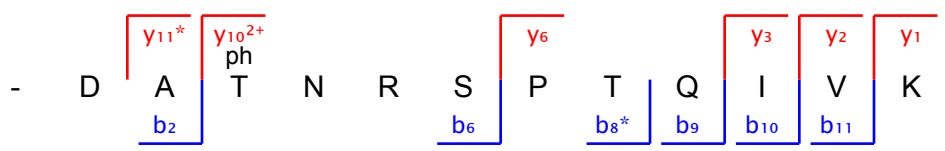

Raw file 20150812\_A375SR\_Phospho\_BR1\_07 Scan 8529 Method FTMS; HCD Score 145.92 m/z 595.83 Gene names OXSR1

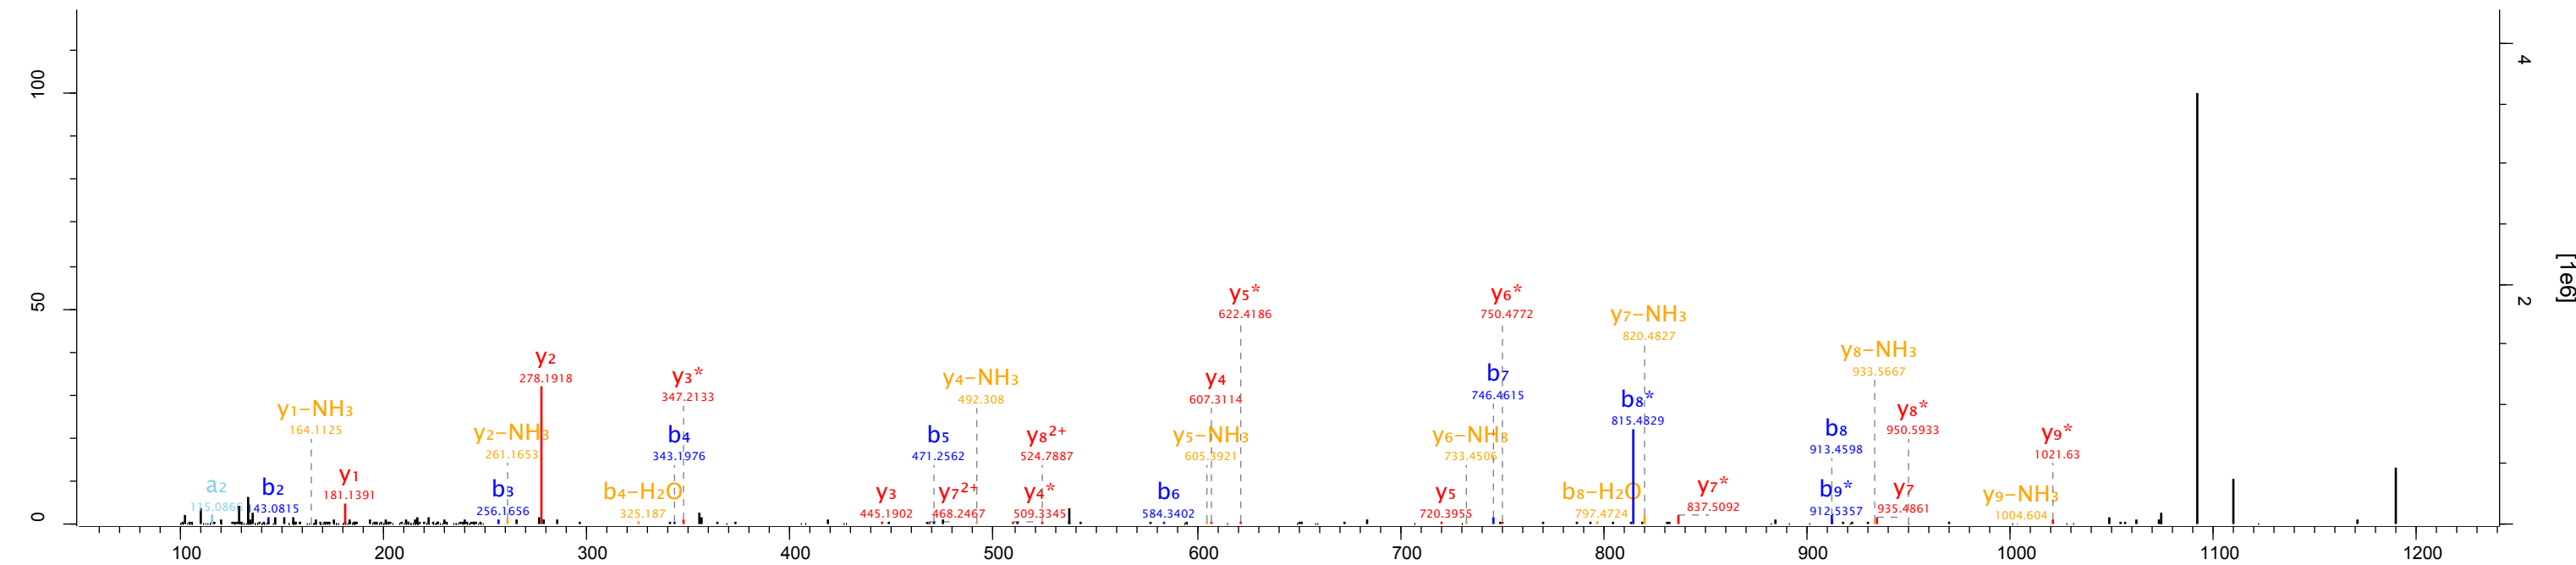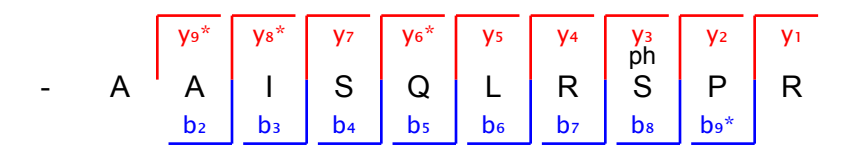

Raw file: 20150812\_A375SR\_Phospho\_BR1\_07  
 Scan: 9019 Method: FTMS; HCD Score: 95.66 m/z: 717.35 Gene names: ACTL6A

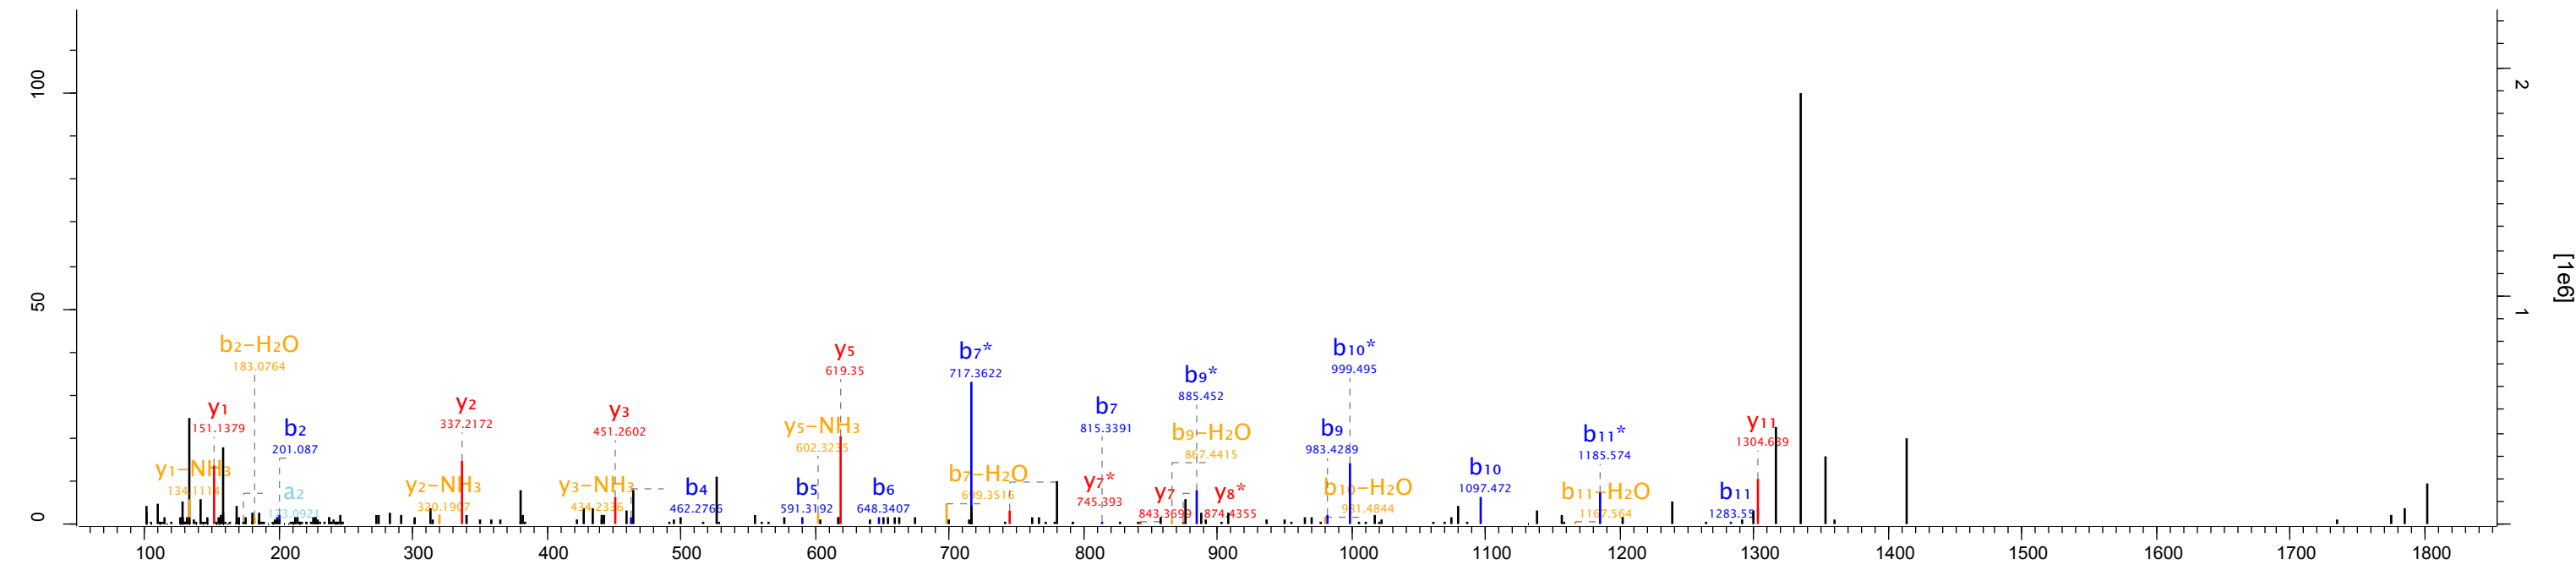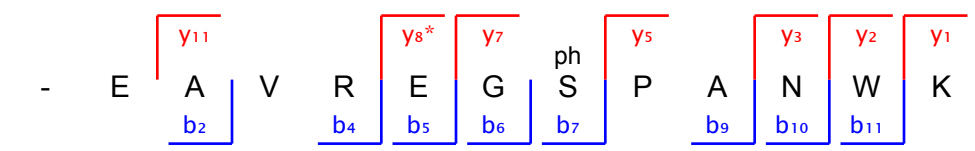

Raw file: 20150812\_A375SR\_Phospho\_BR1\_08  
 Scan: 10849 Method: FTMS; HCD Score: 101.42 m/z: 708.88 Gene names: KIF11

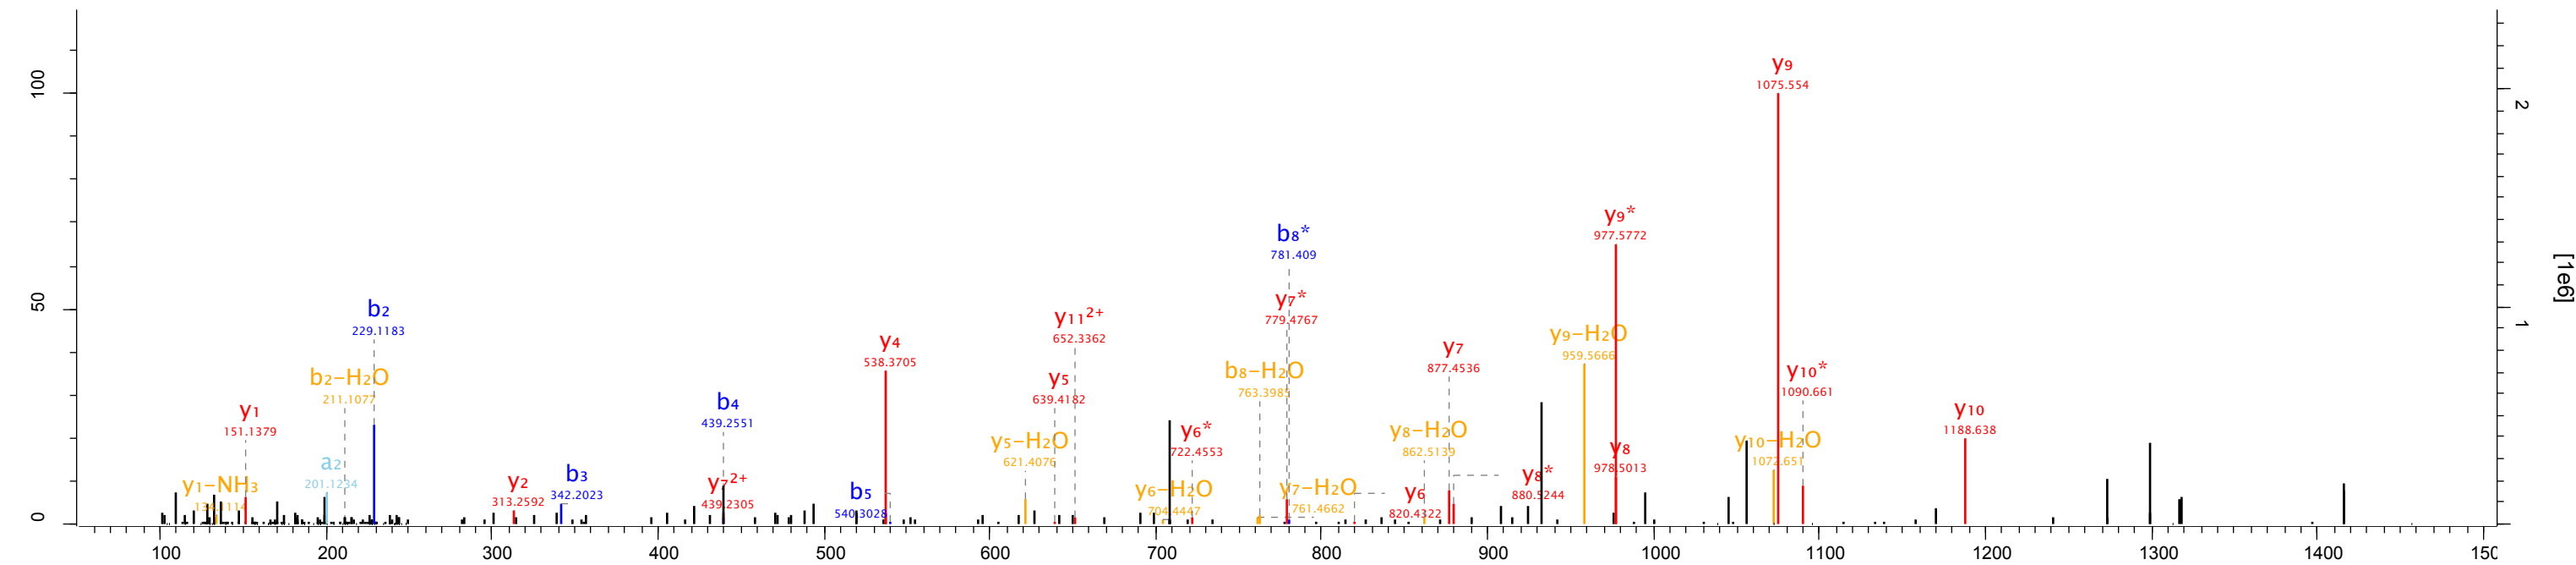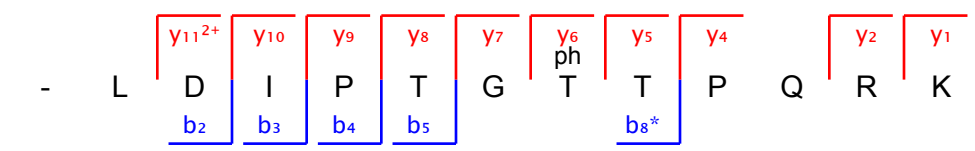

Raw file 20150812\_A375SR\_Phospho\_BR1\_08 Scan 12559 Method FTMS; HCD Score 98.94 m/z 436.56 Gene names CCDC88A

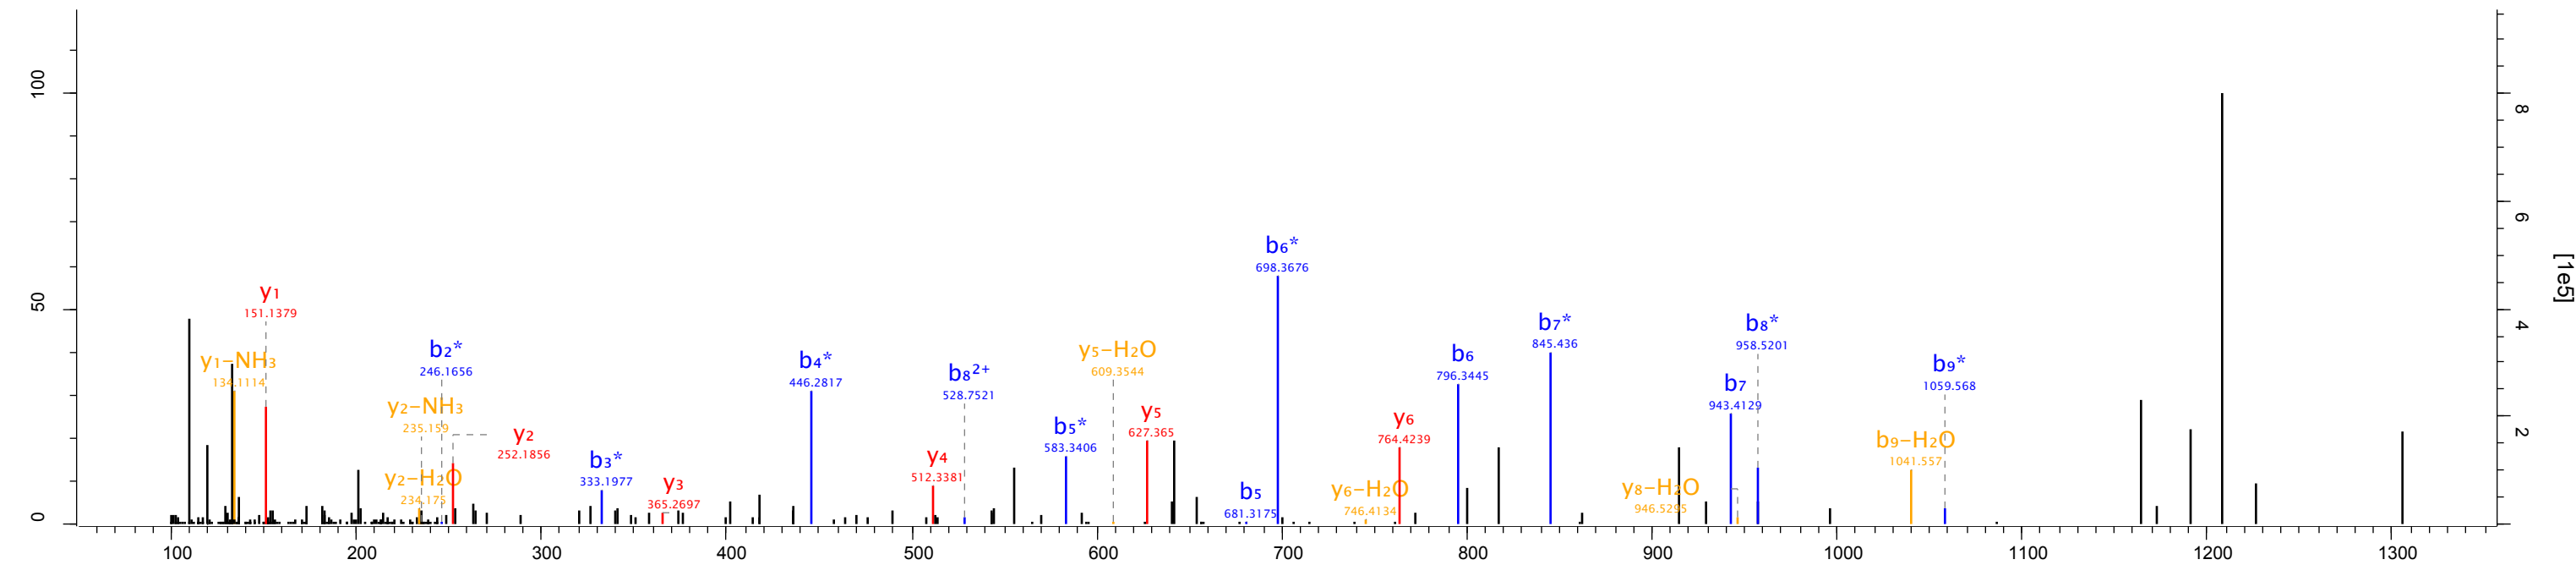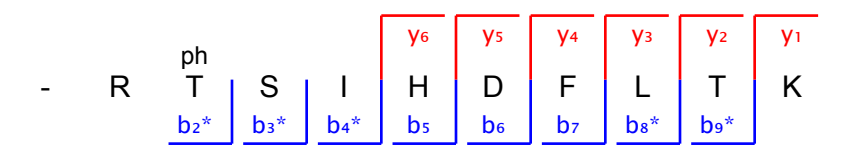

Raw file 20150812\_A375SR\_Phospho\_BR1\_08 Scan 14659 Method FTMS; HCD Score 118.59 m/z 536.02 Gene names ERF

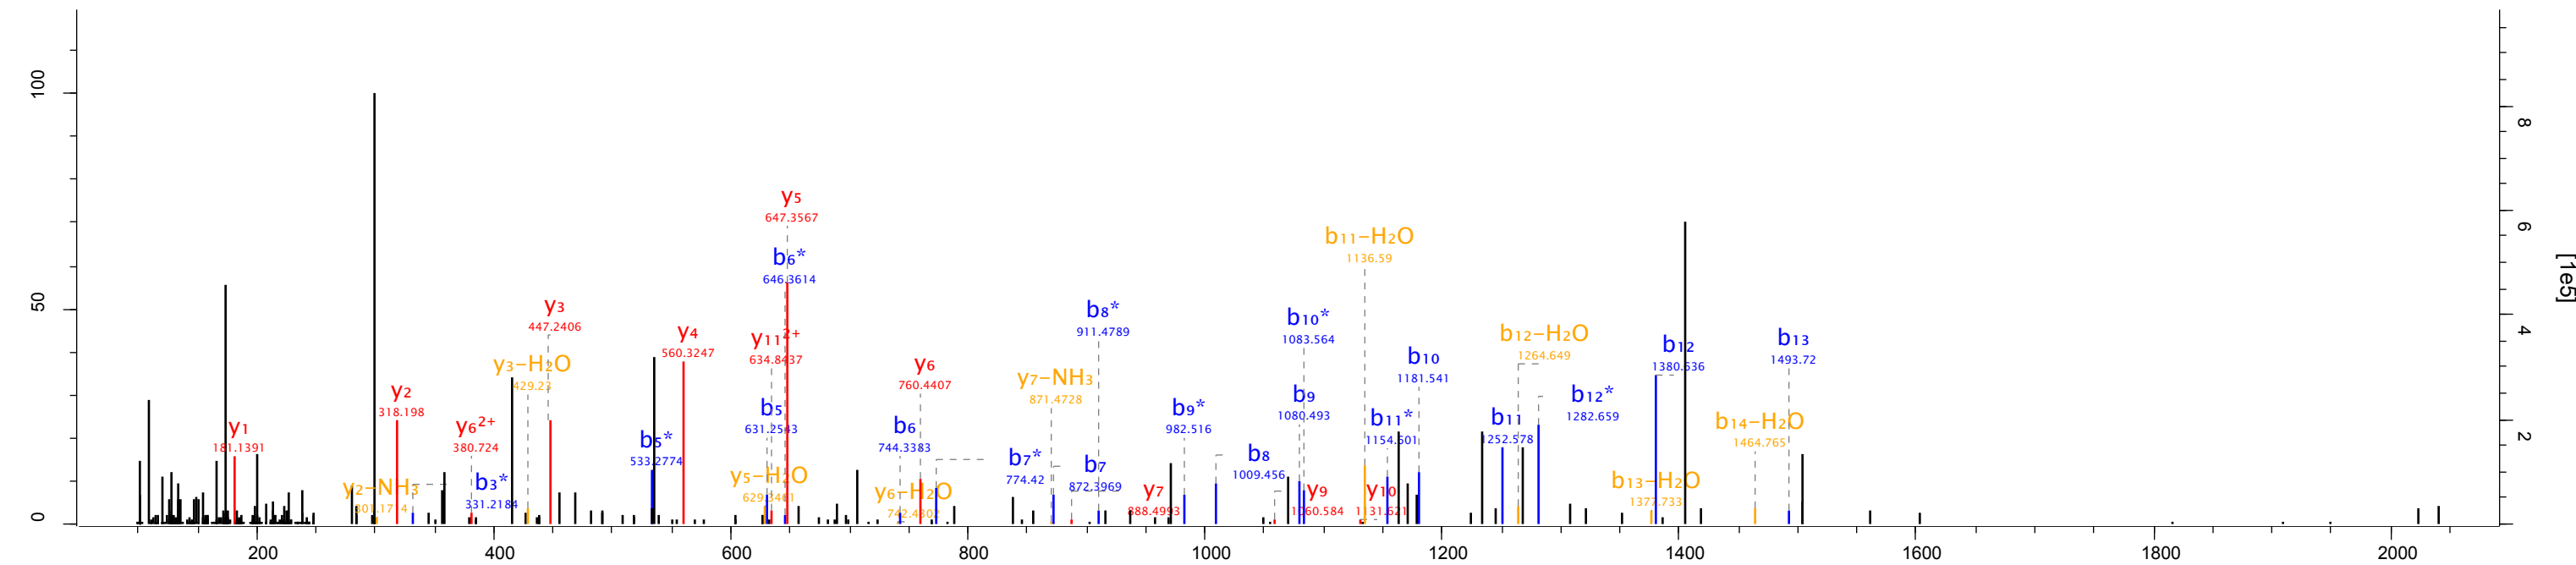

- R V ph S S D L Q H A T A Q L S L E H R -

b3\* b5 b6 b7 b8 b9 b10 b11 b12 b13

y11<sup>2+</sup> y10 y9 y7 y6 y5 y4 y3 y2 y1

Raw file 20150812\_A375SR\_Phospho\_BR1\_08 Scan 16379 Method FTMS; HCD Score 43.68 m/z 766.36 Gene names C7orf31

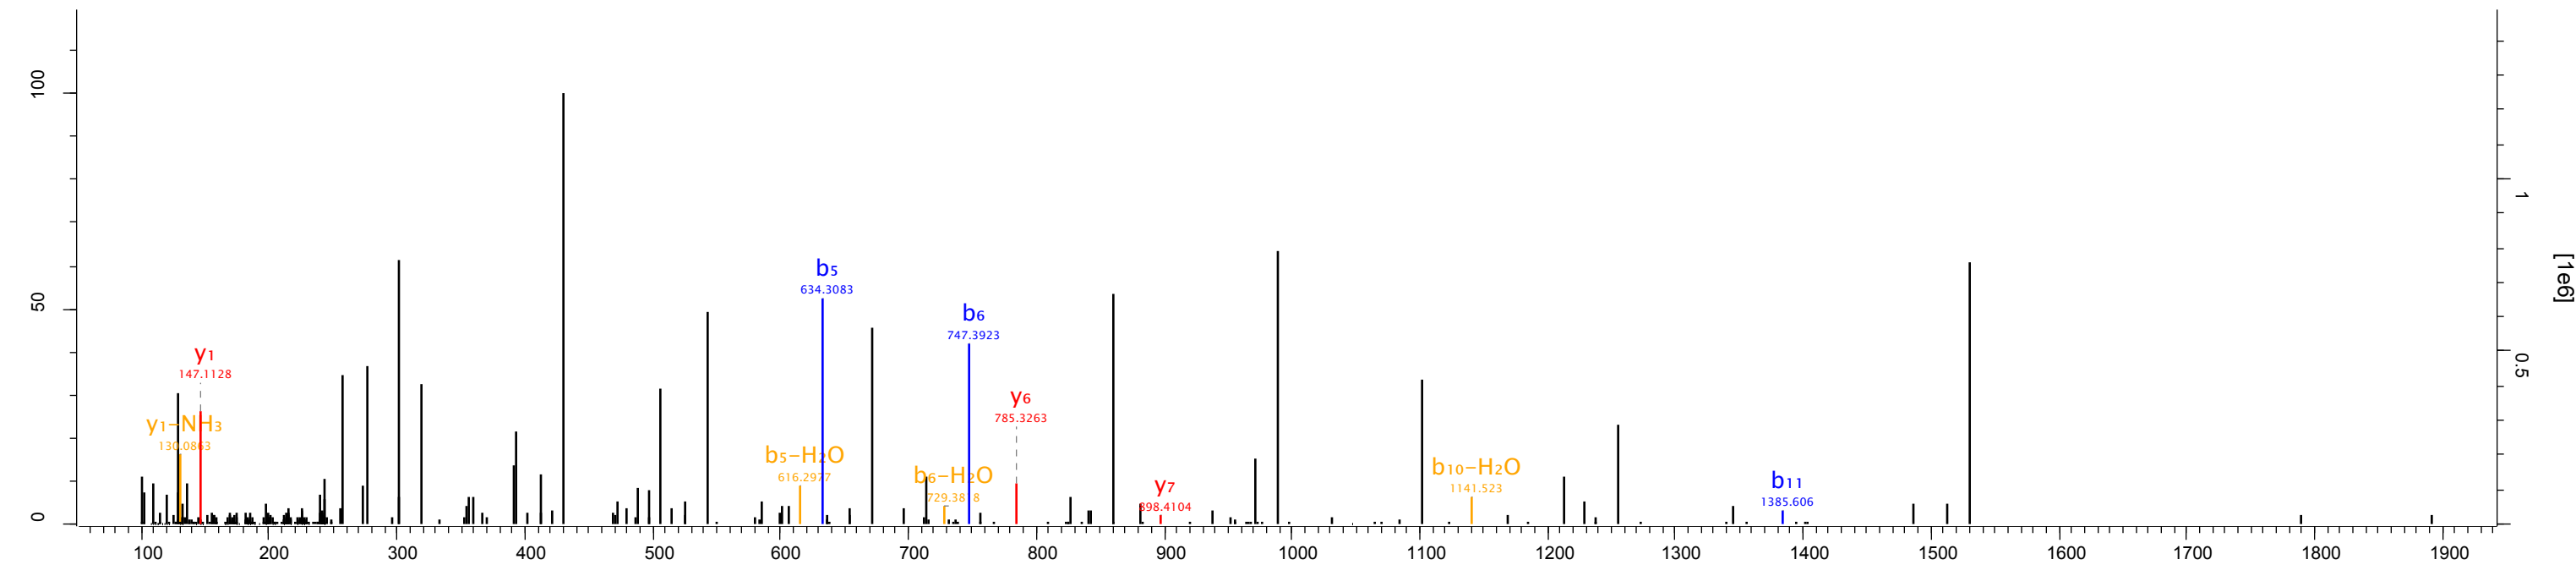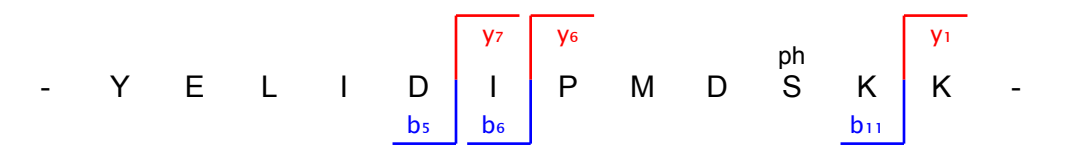

Raw file: 20150812\_A375SR\_Phospho\_BR1\_08  
 Scan: 17439 Method: FTMS; HCD Score: 87.08 m/z: 936.95 Gene names: LRRC47

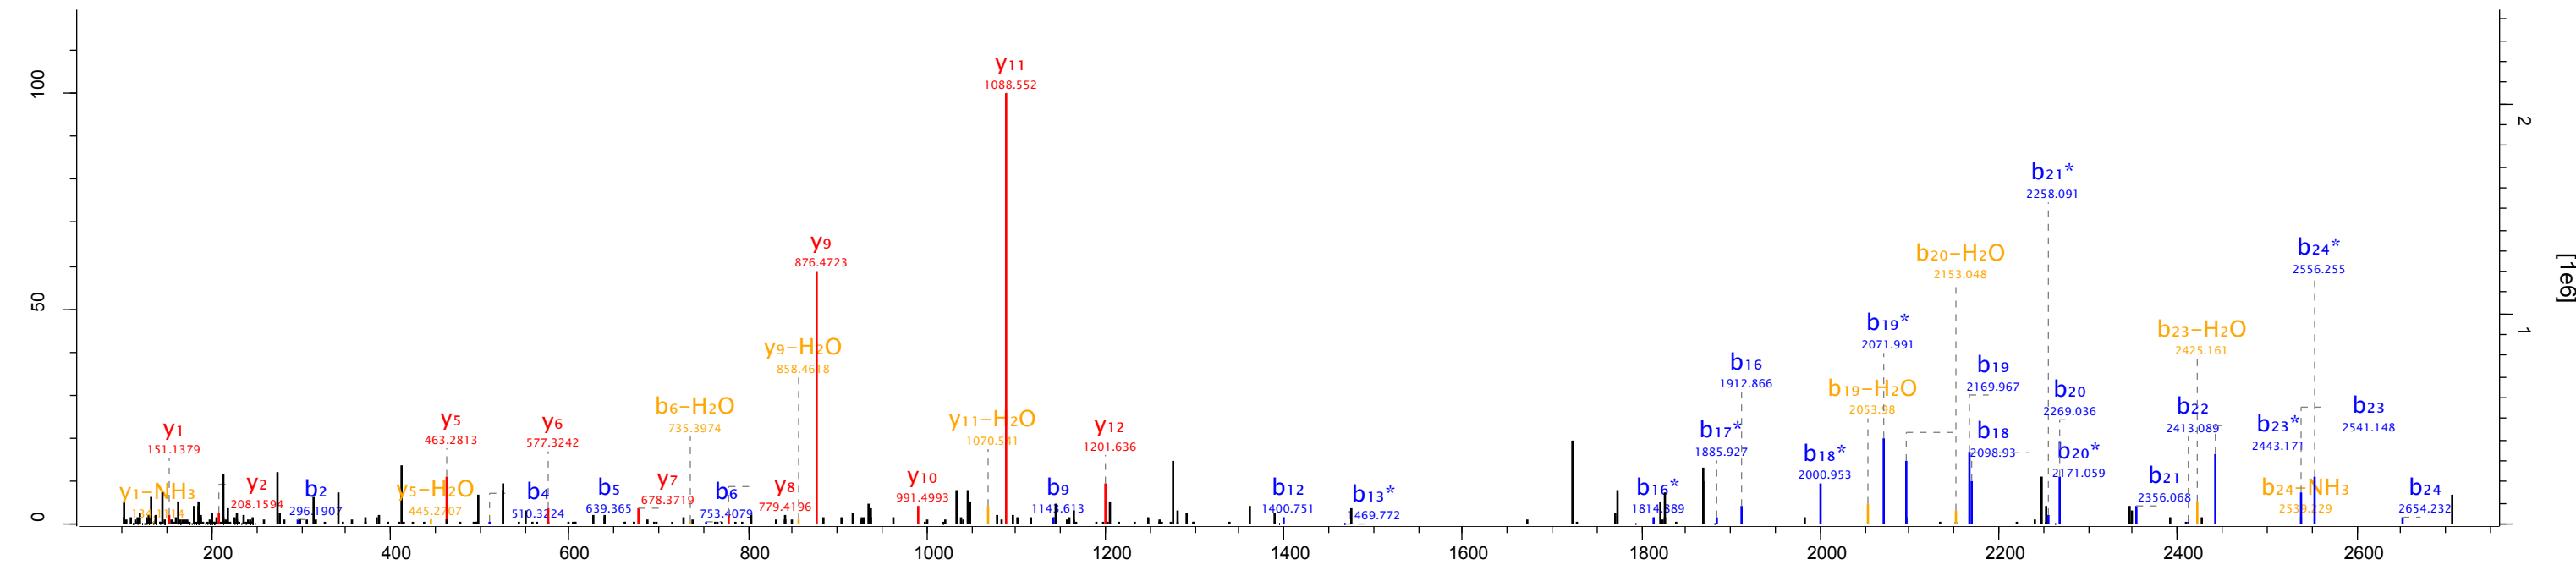

Protein sequence: - K Y T L E N K E E G S L S D T E A D A V S G Q L P D P T T N P S A G K -

Fragmentation sites (b ions): b2 (Y), b4 (L), b5 (E), b6 (N), b9 (E), b12 (L), b13\* (S), b16 (E), b17\* (A), b18 (D), b19 (A), b20 (V), b21 (S), b22 (G), b23 (Q), b24 (L)

Fragmentation sites (y ions): y1 (N), y2 (G), y5 (E), y6 (E), y7 (T), y8 (T), y9 (P), y10 (D), y11 (P), y12 (L)

Post-translational modification: ph (phosphorylation) on Serine (S) at position 13.



Raw file 20150812\_A375SR\_Phospho\_BR1\_08 Scan 17649 Method FTMS; HCD Score 186.96 m/z 751.41 Gene names TTF1

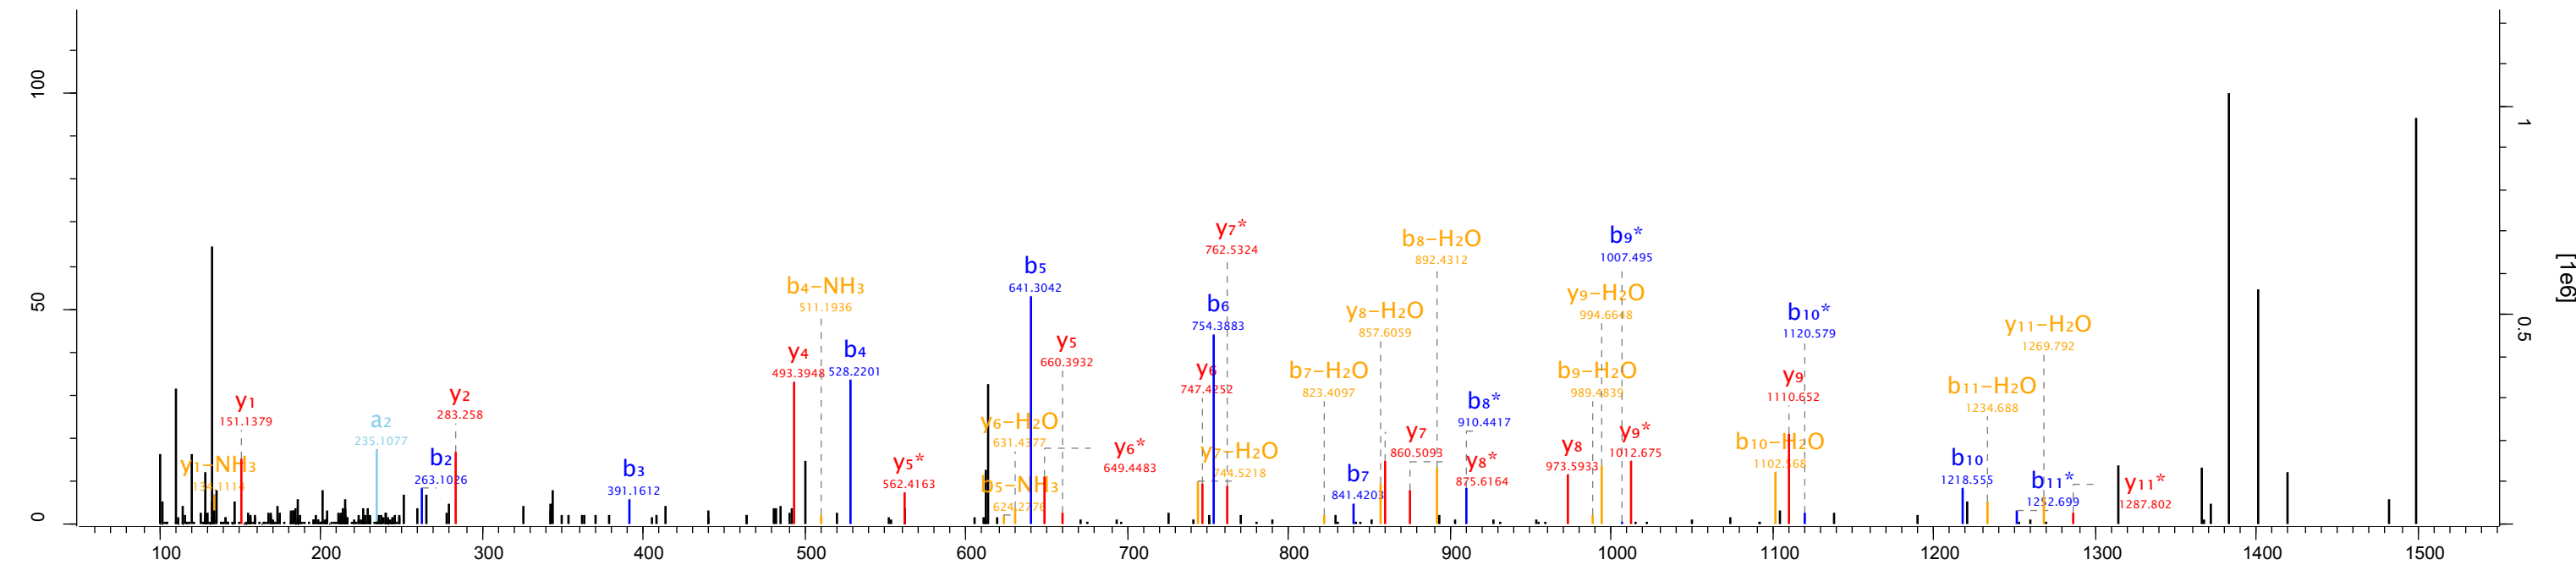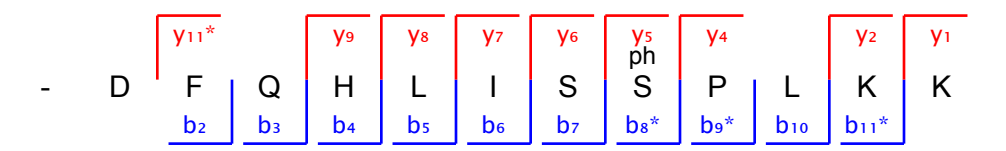

Raw file Scan Method Score m/z Gene names  
 20150812\_A375SR\_Phospho\_BR1\_08 18269 FTMS; HCD 167.61 713.33 AHNAK

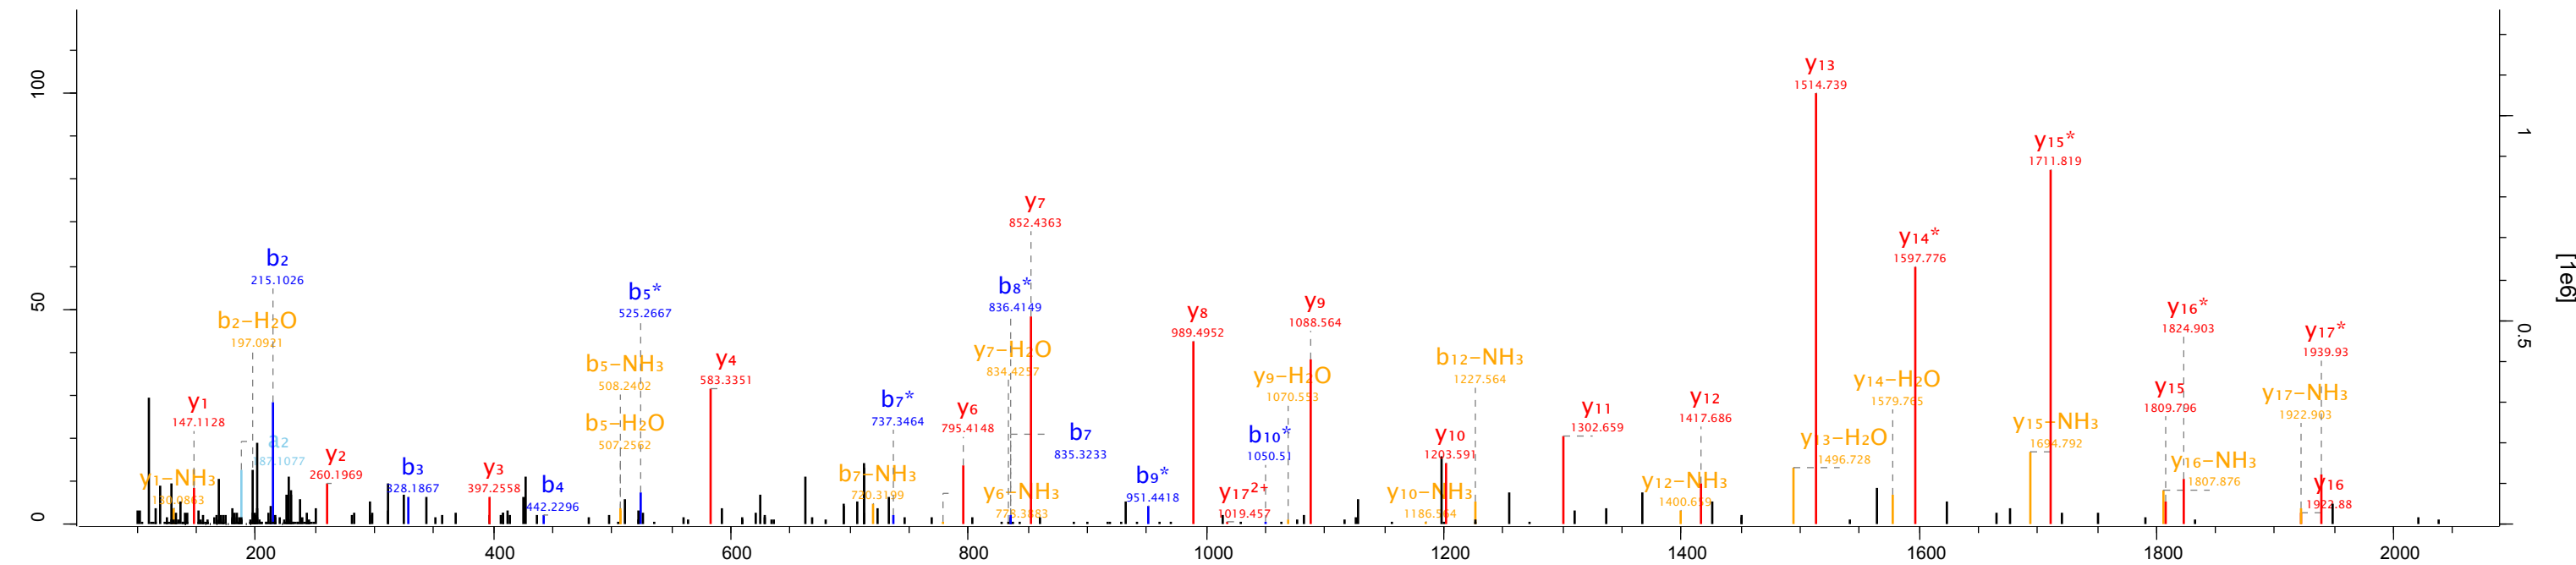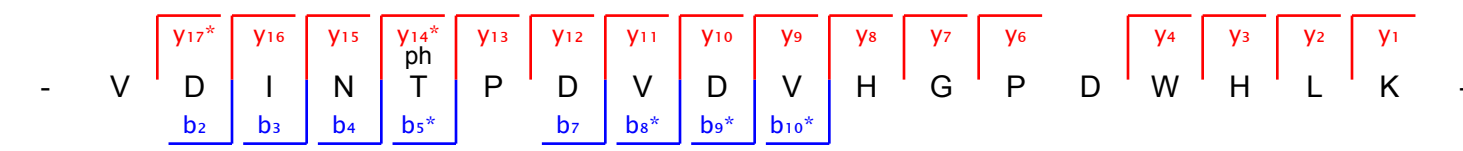

Raw file 20150812\_A375SR\_Phospho\_BR1\_08 Scan 18439 Method FTMS; HCD Score 201.17 m/z 852.04 Gene names STAU1

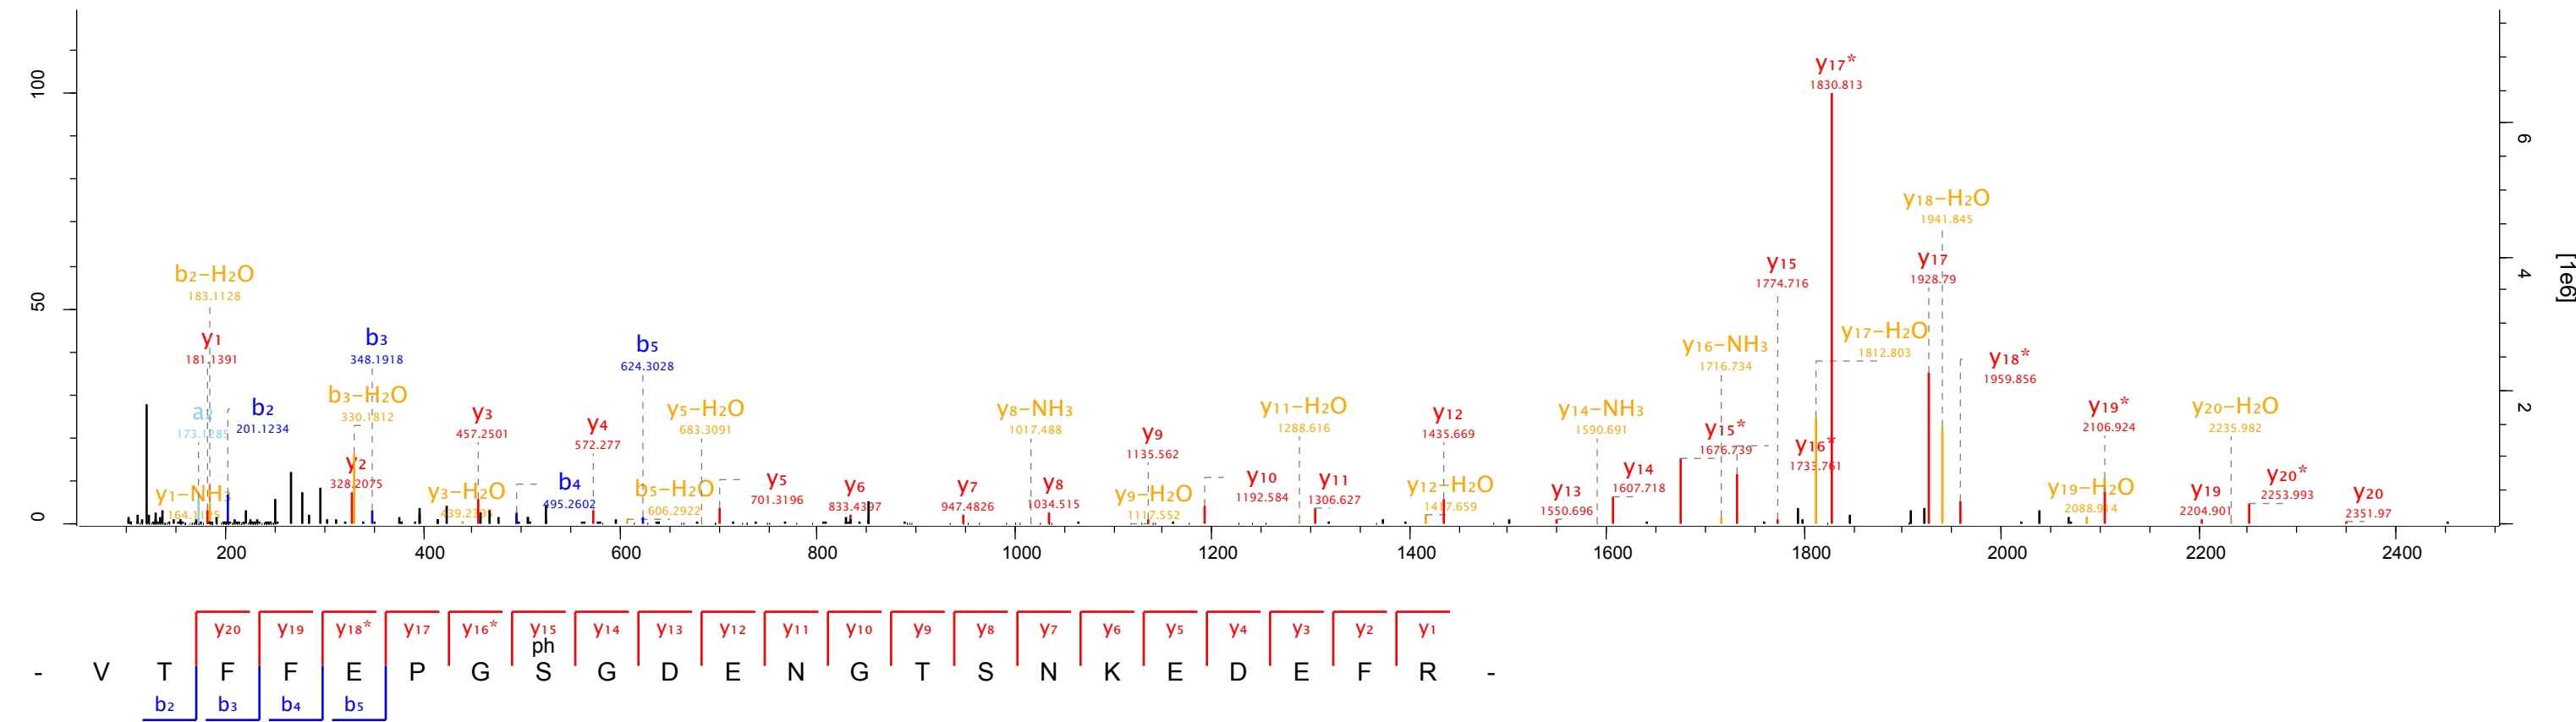

Raw file 20150812\_A375SR\_Phospho\_BR1\_08 Scan 22409 Method FTMS; HCD Score 79.18 m/z 1140.87 Gene names CRTC2

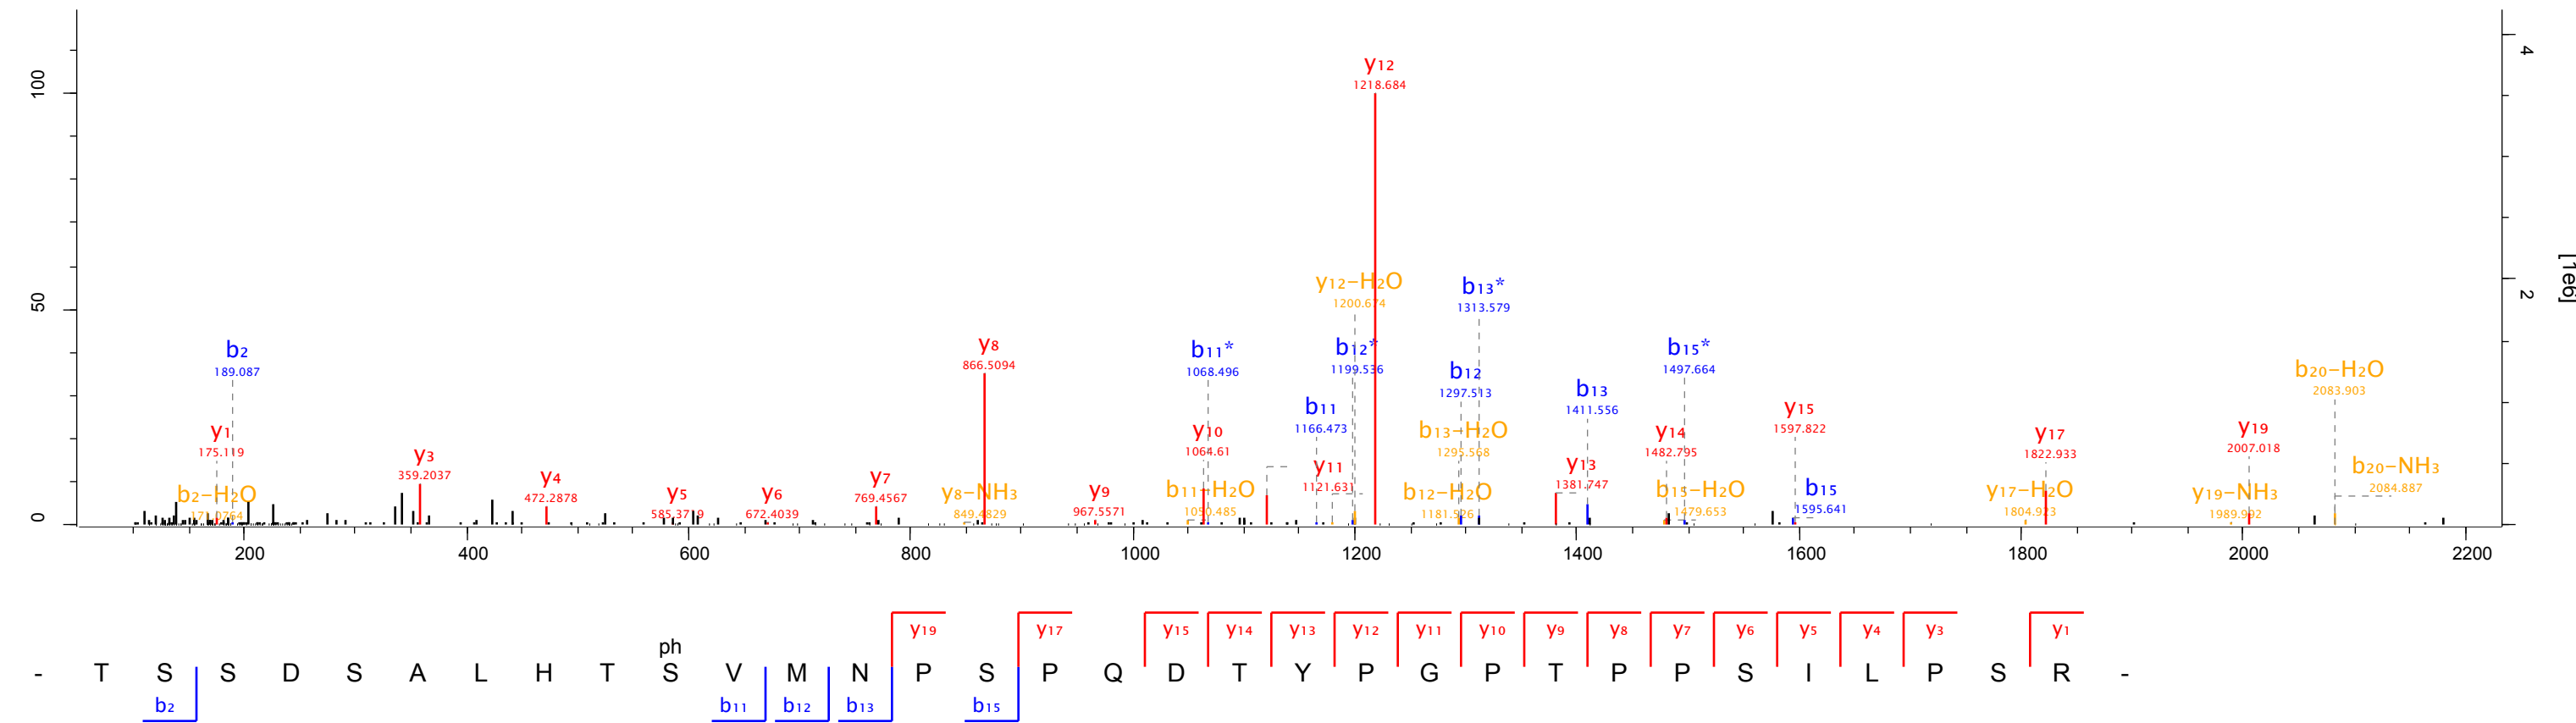

Raw file 20150812\_A375SR\_Phospho\_BR1\_08 Scan 24119 Method FTMS; HCD Score 206.7 m/z 809.91 Gene names FLNA

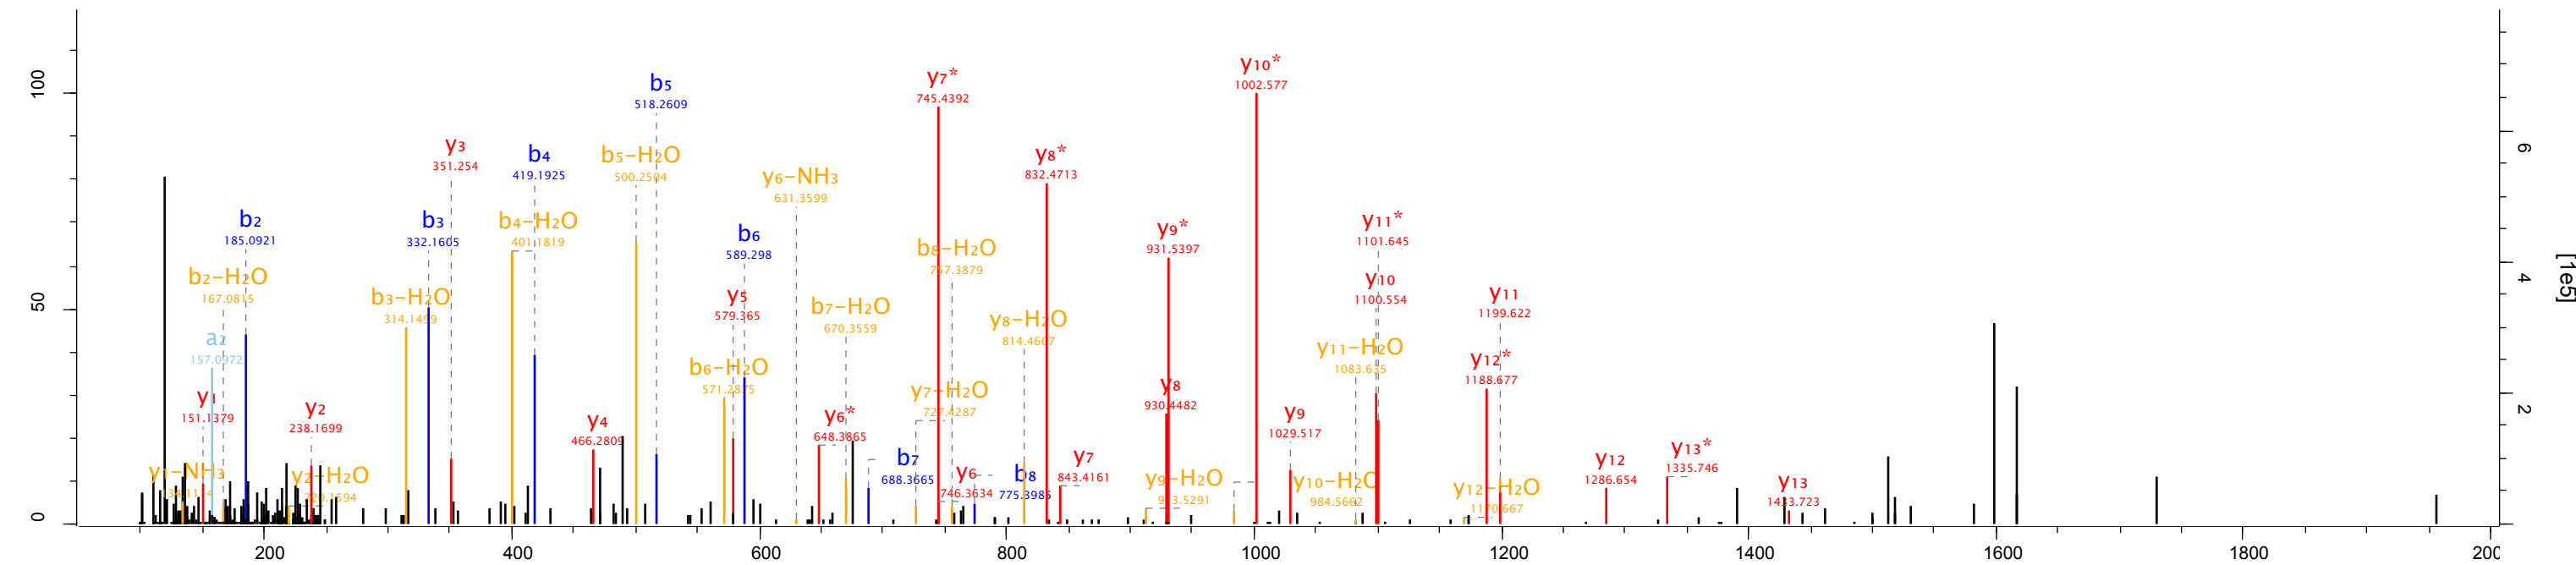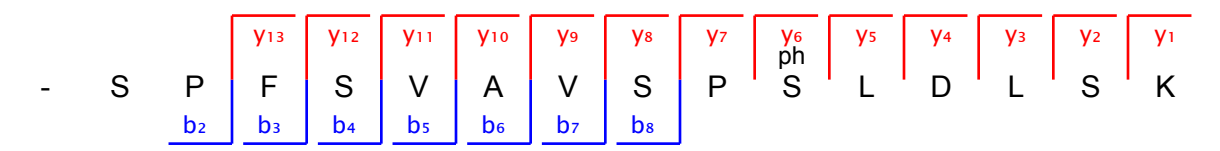

Raw file Scan Method Score m/z Gene names  
 20150812\_A375SR\_Phospho\_BR1\_08 25029 FTMS; HCD 329.14 855.71 ERF

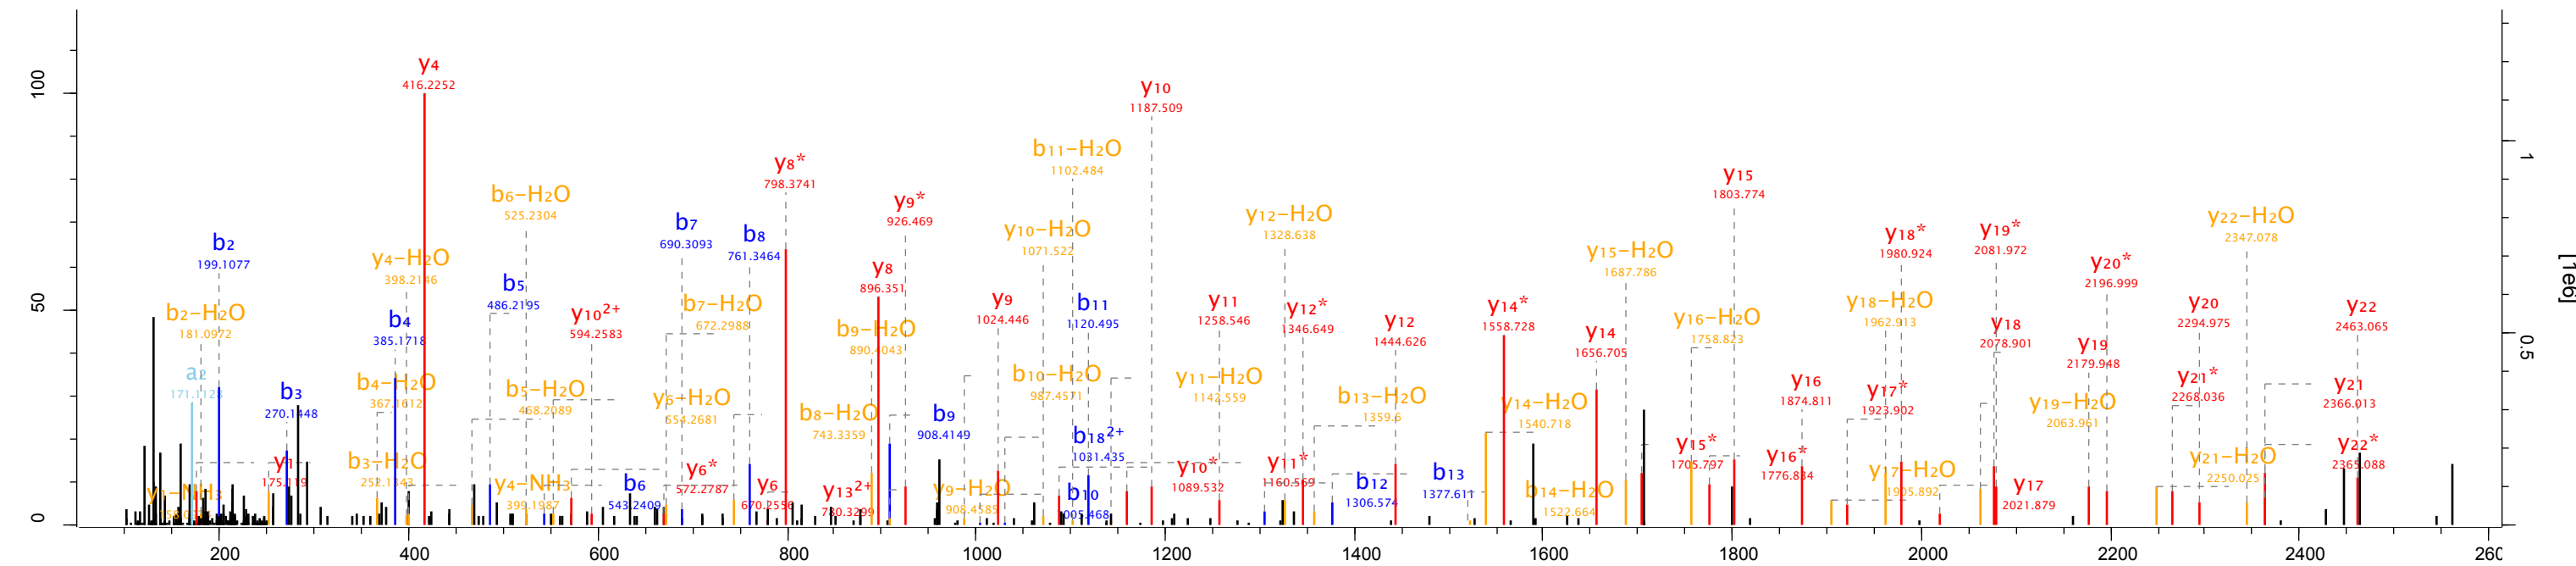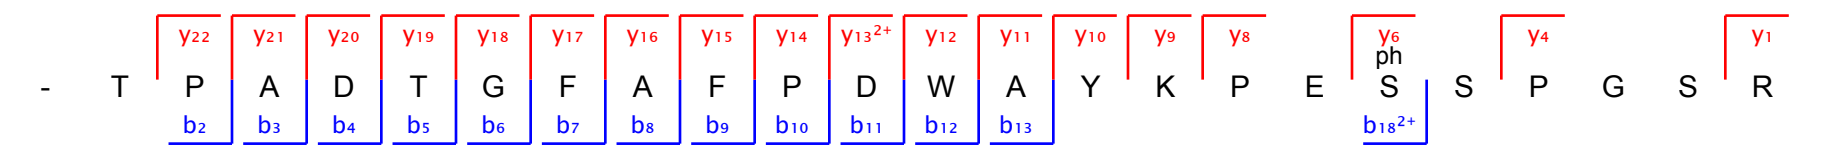

Raw file: 20150812\_A375SR\_Phospho\_BR1\_08  
 Scan: 26759 Method: FTMS; HCD Score: 181.75 m/z: 1311.63 Gene names: NES

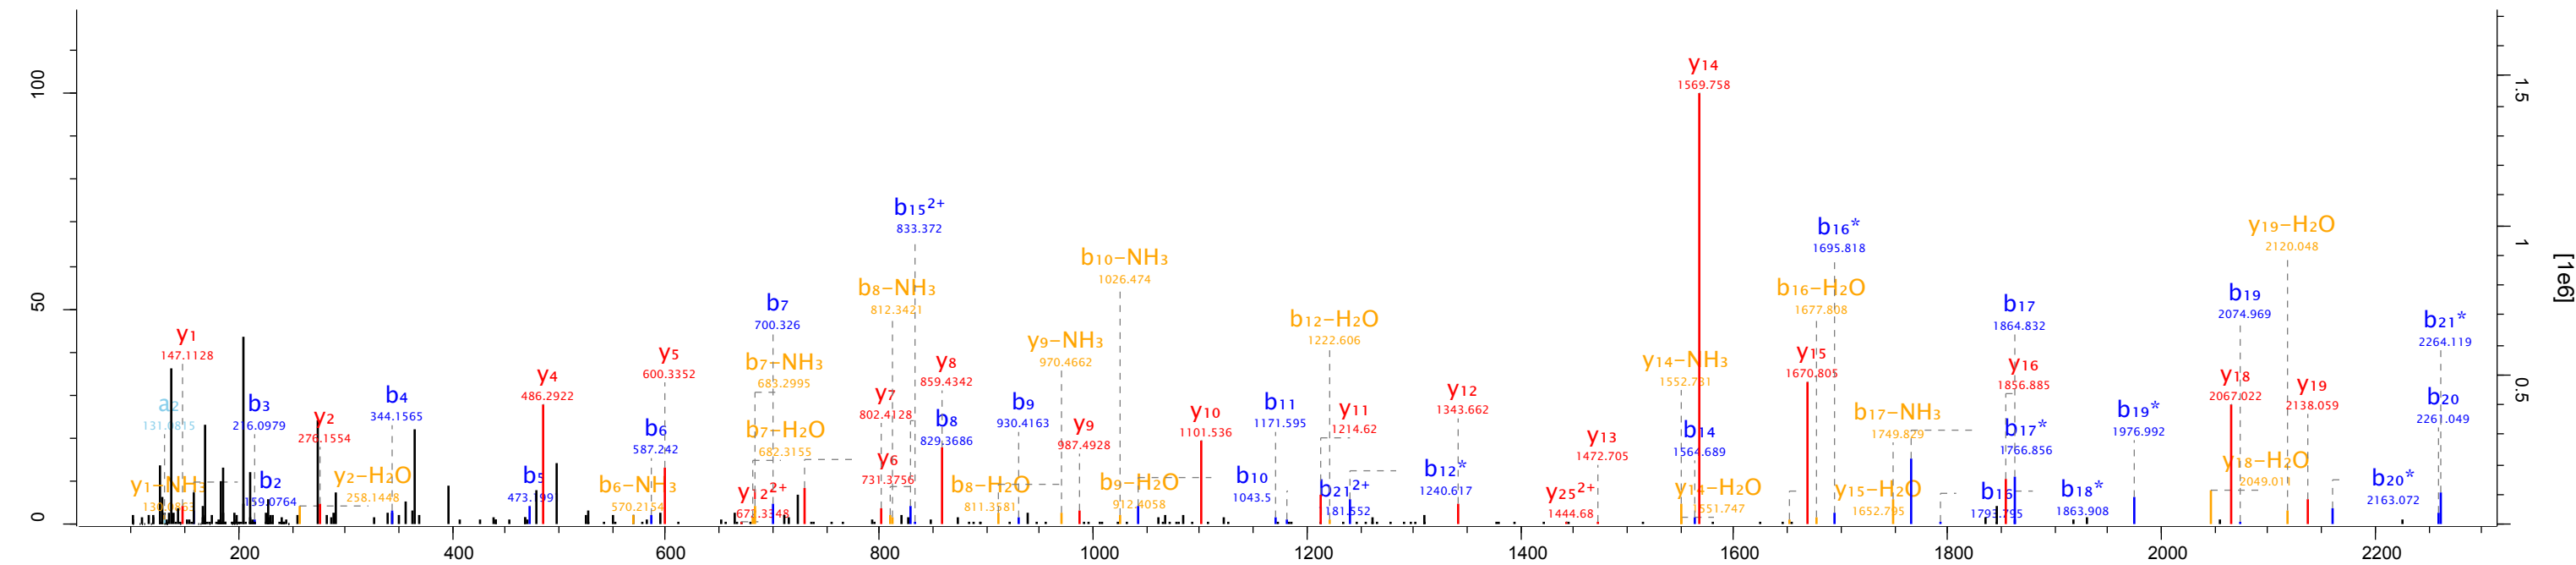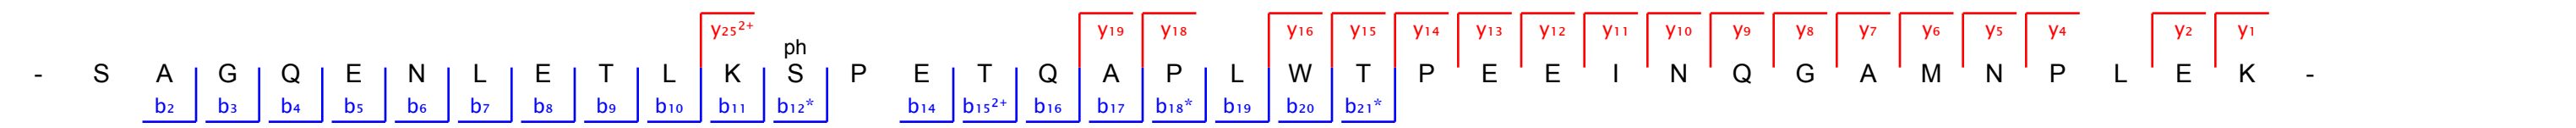

Raw file 20150812\_A375SR\_Phospho\_BR1\_08 Scan 27089 Method FTMS; HCD Score 274.91 m/z 918.09 Gene names APC

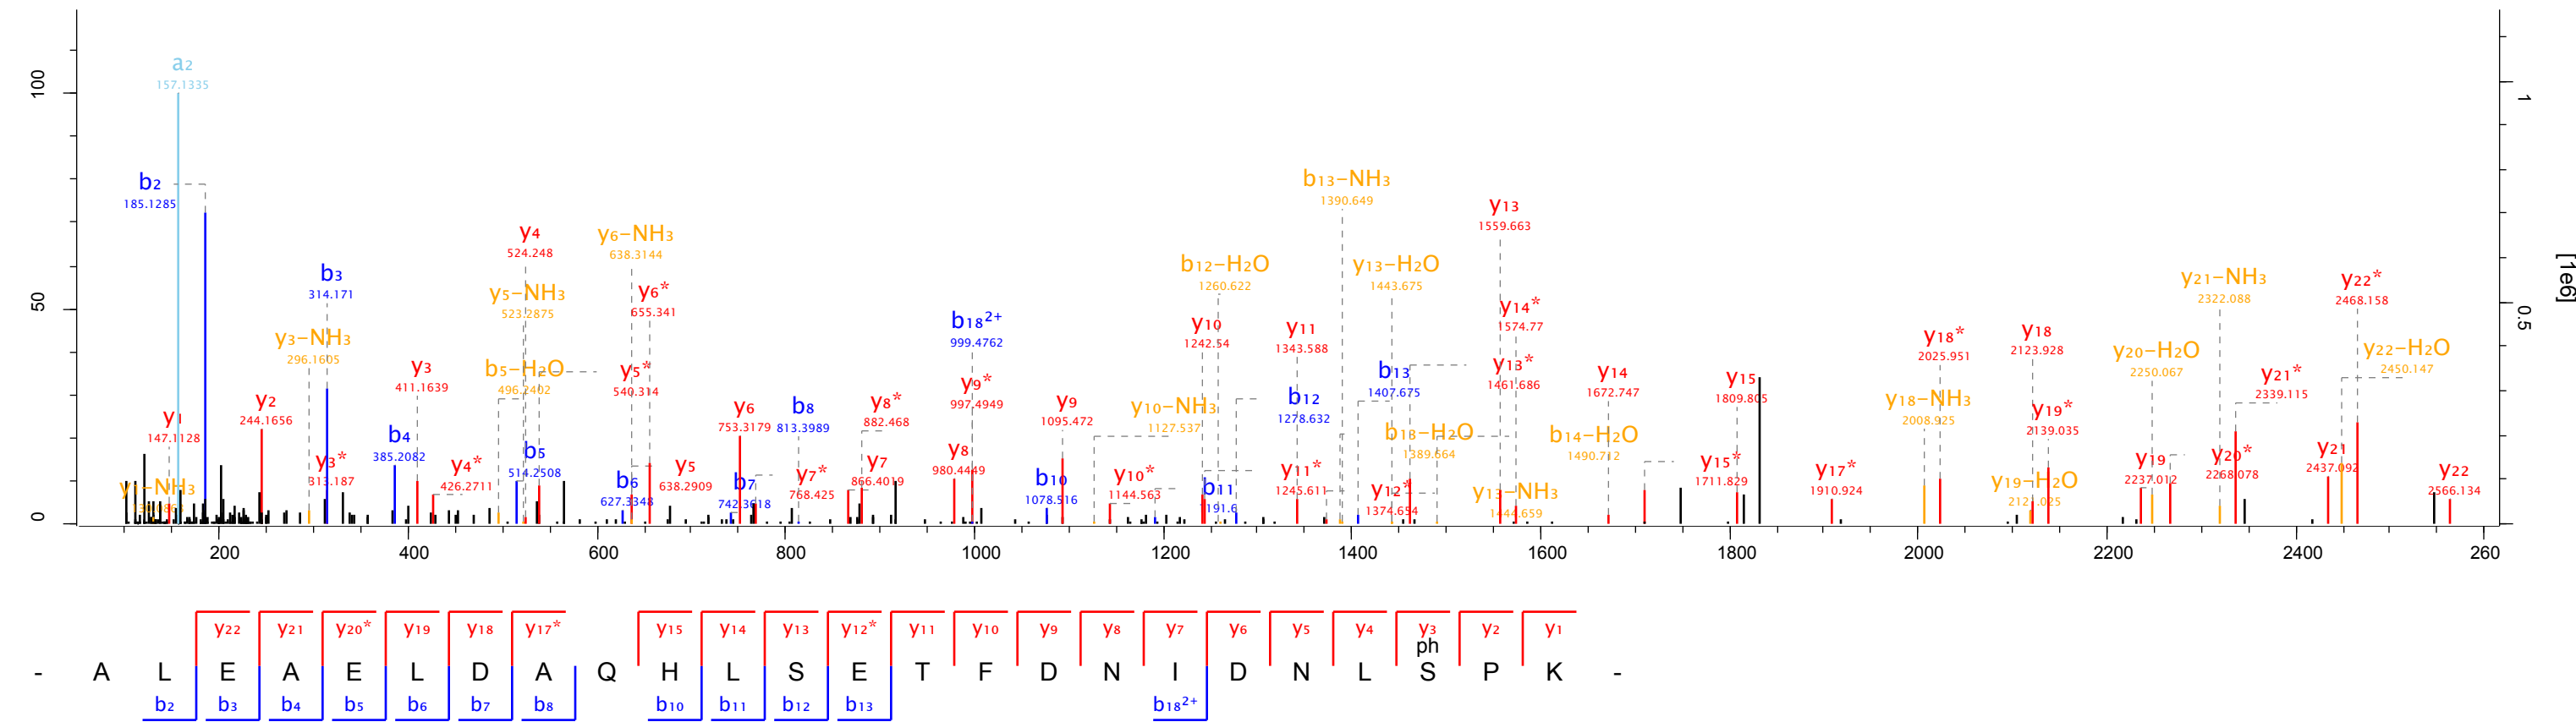



Raw file 20150812\_A375SR\_Phospho\_BR1\_08 Scan 28069 Method FTMS; HCD Score 248.02 m/z 1264.54 Gene names HNRNPUL1

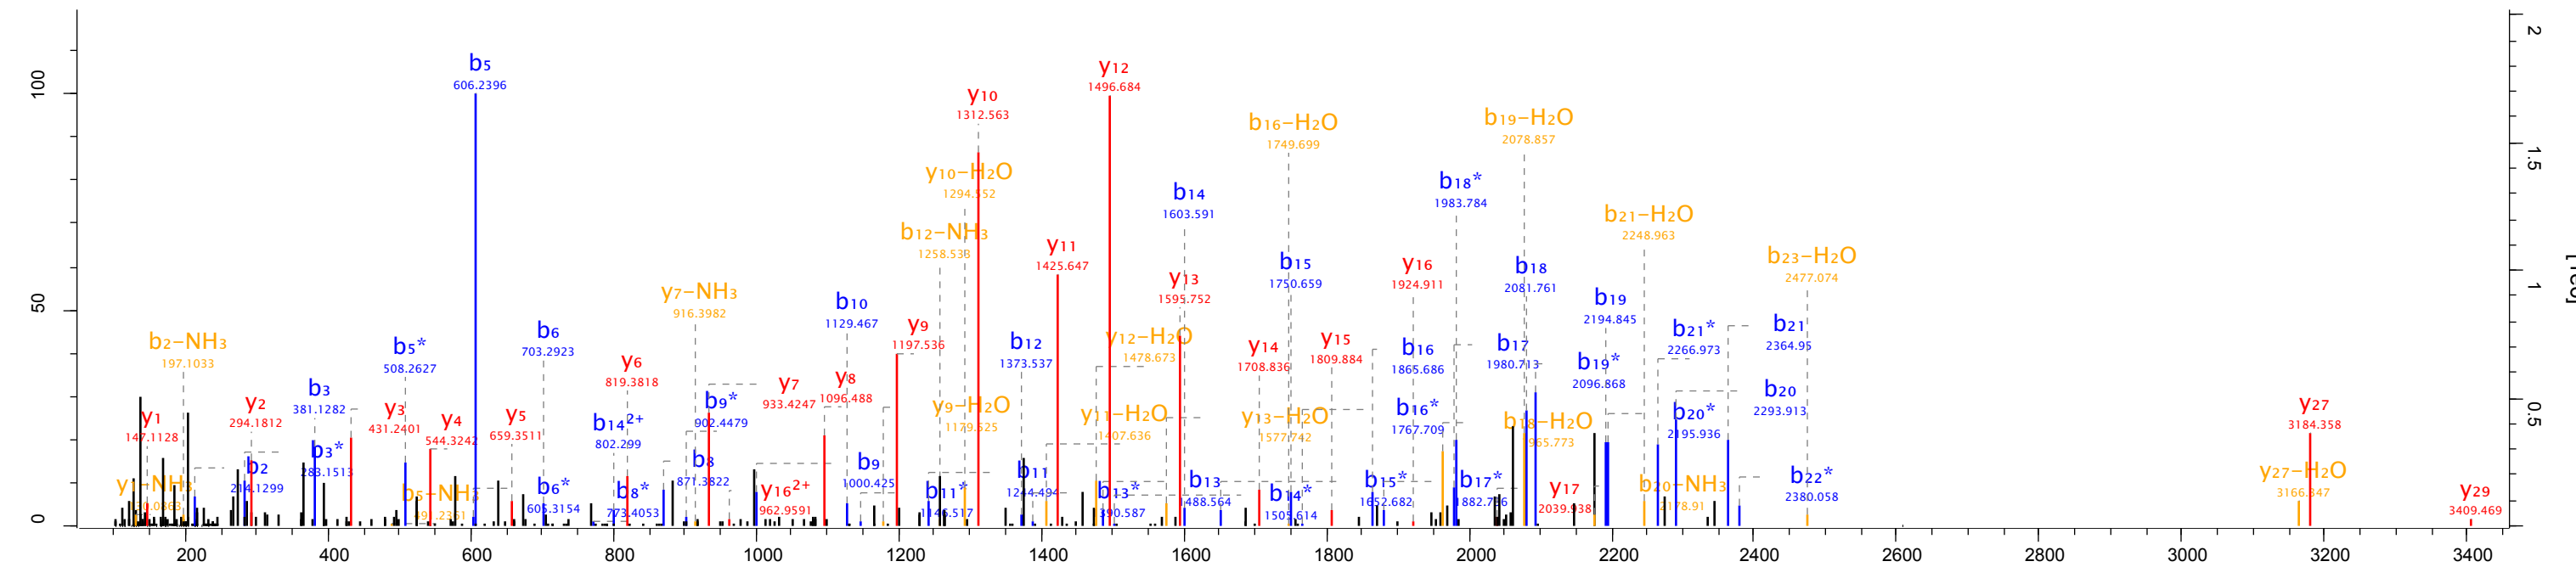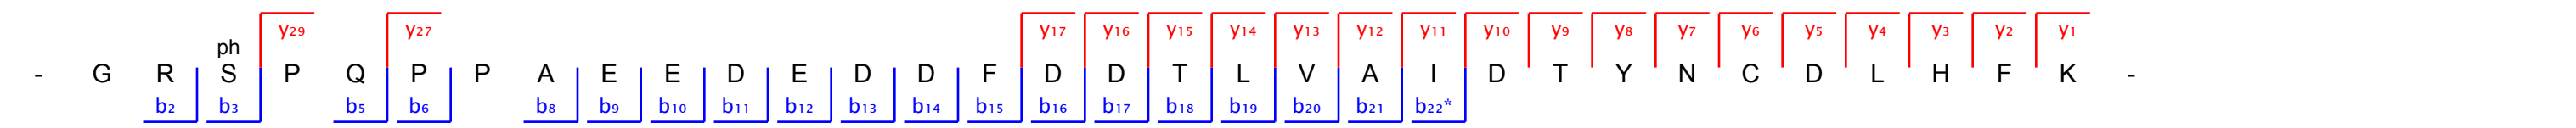

Raw file: 20150812\_A375SR\_Phospho\_BR1\_08  
 Scan: 3479 Method: FTMS; HCD Score: 113.33 m/z: 454.55 Gene names: PAPOLG

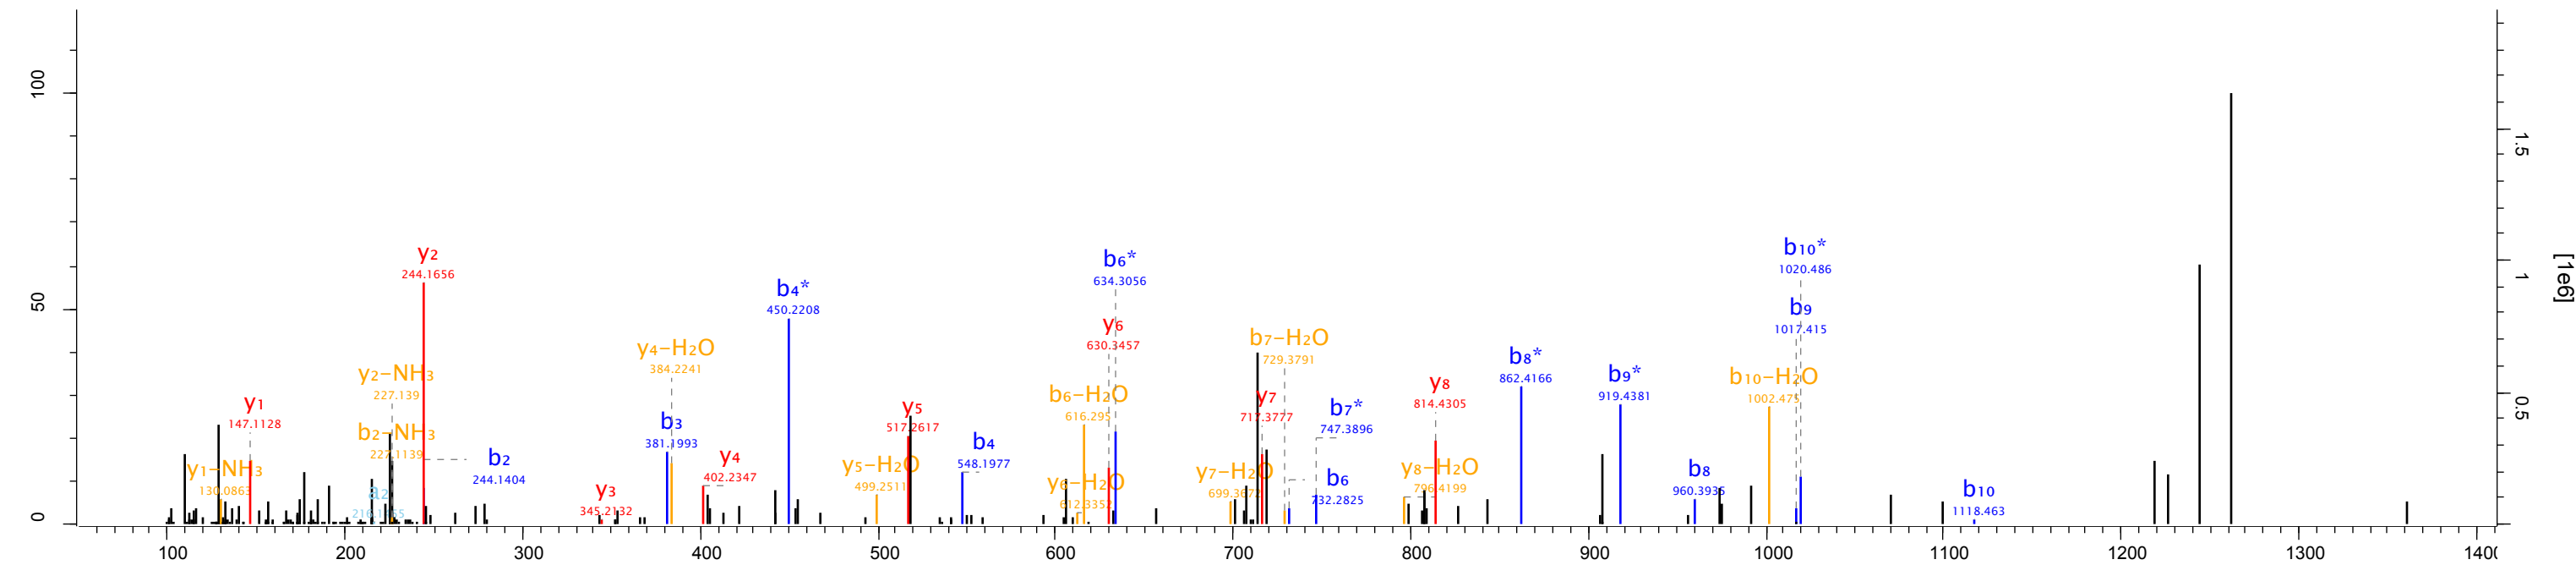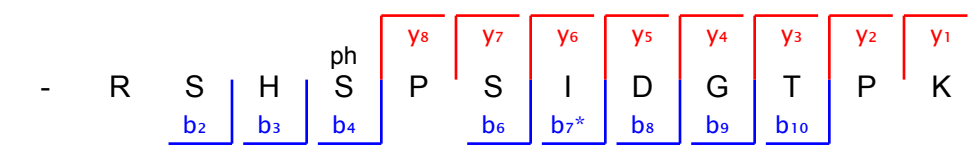

Raw file: 20150812\_A375SR\_Phospho\_BR1\_08  
 Scan: 4959 Method: FTMS; HCD Score: 113.81 m/z: 650.81 Gene names: ARHGAP21

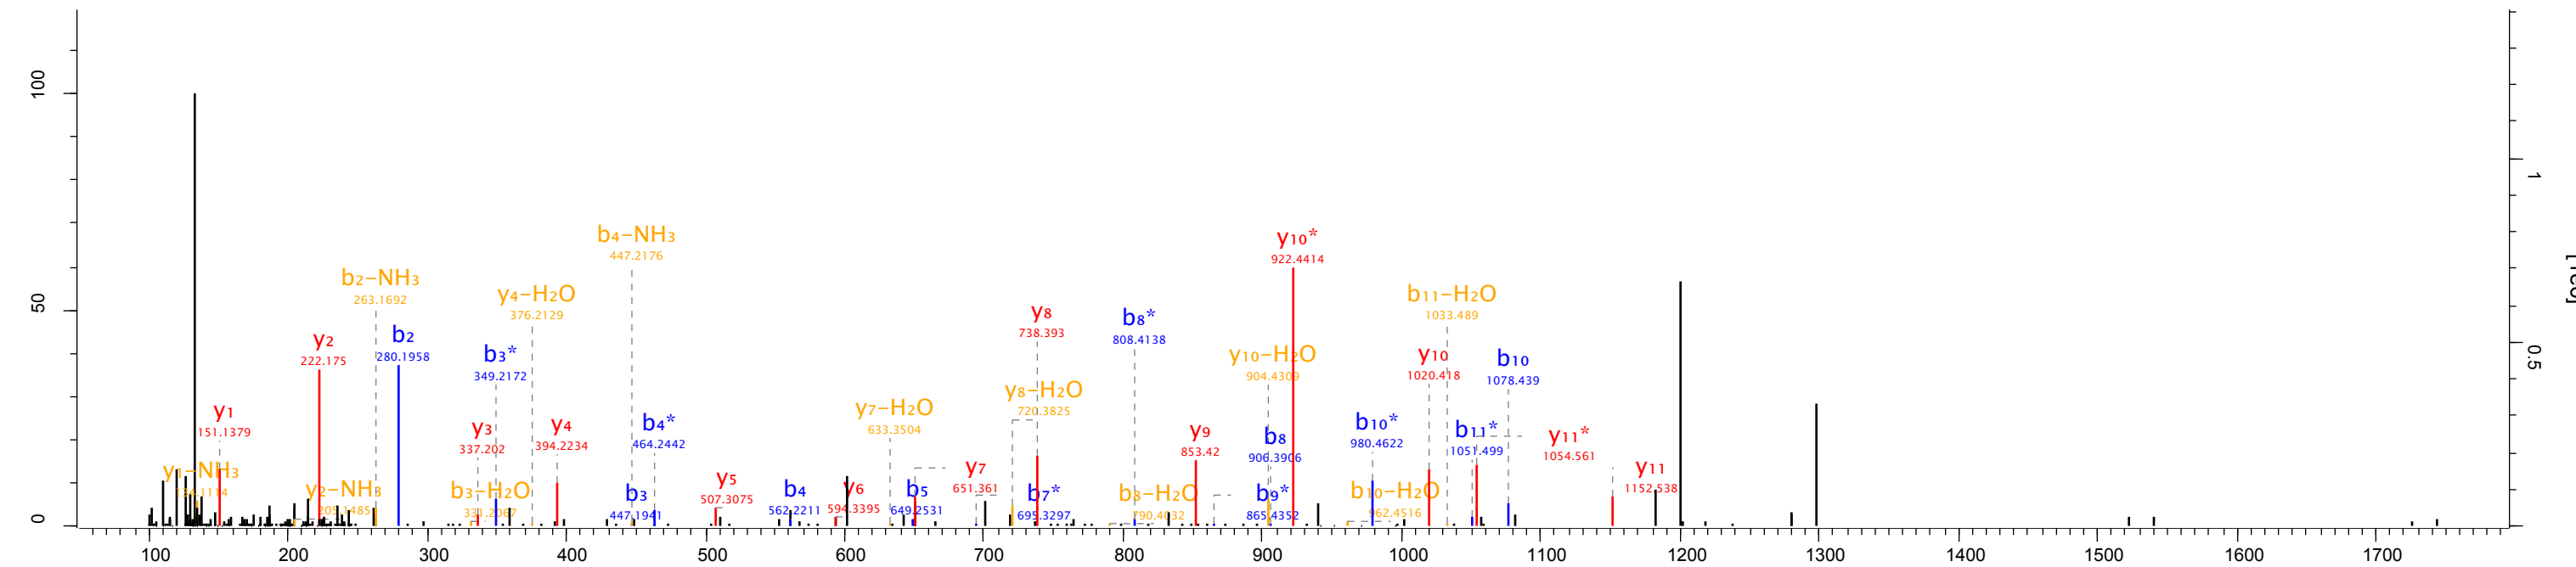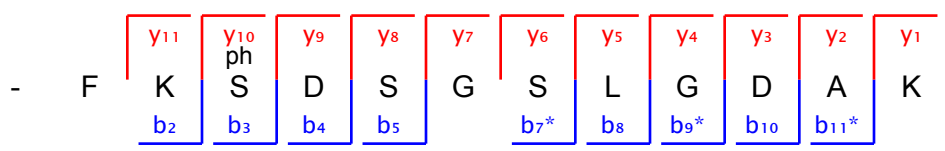

Raw file: 20150812\_A375SR\_Phospho\_BR1\_08  
 Scan: 5049 Method: FTMS; HCD Score: 80.69 m/z: 541.77 Gene names: EIF3A

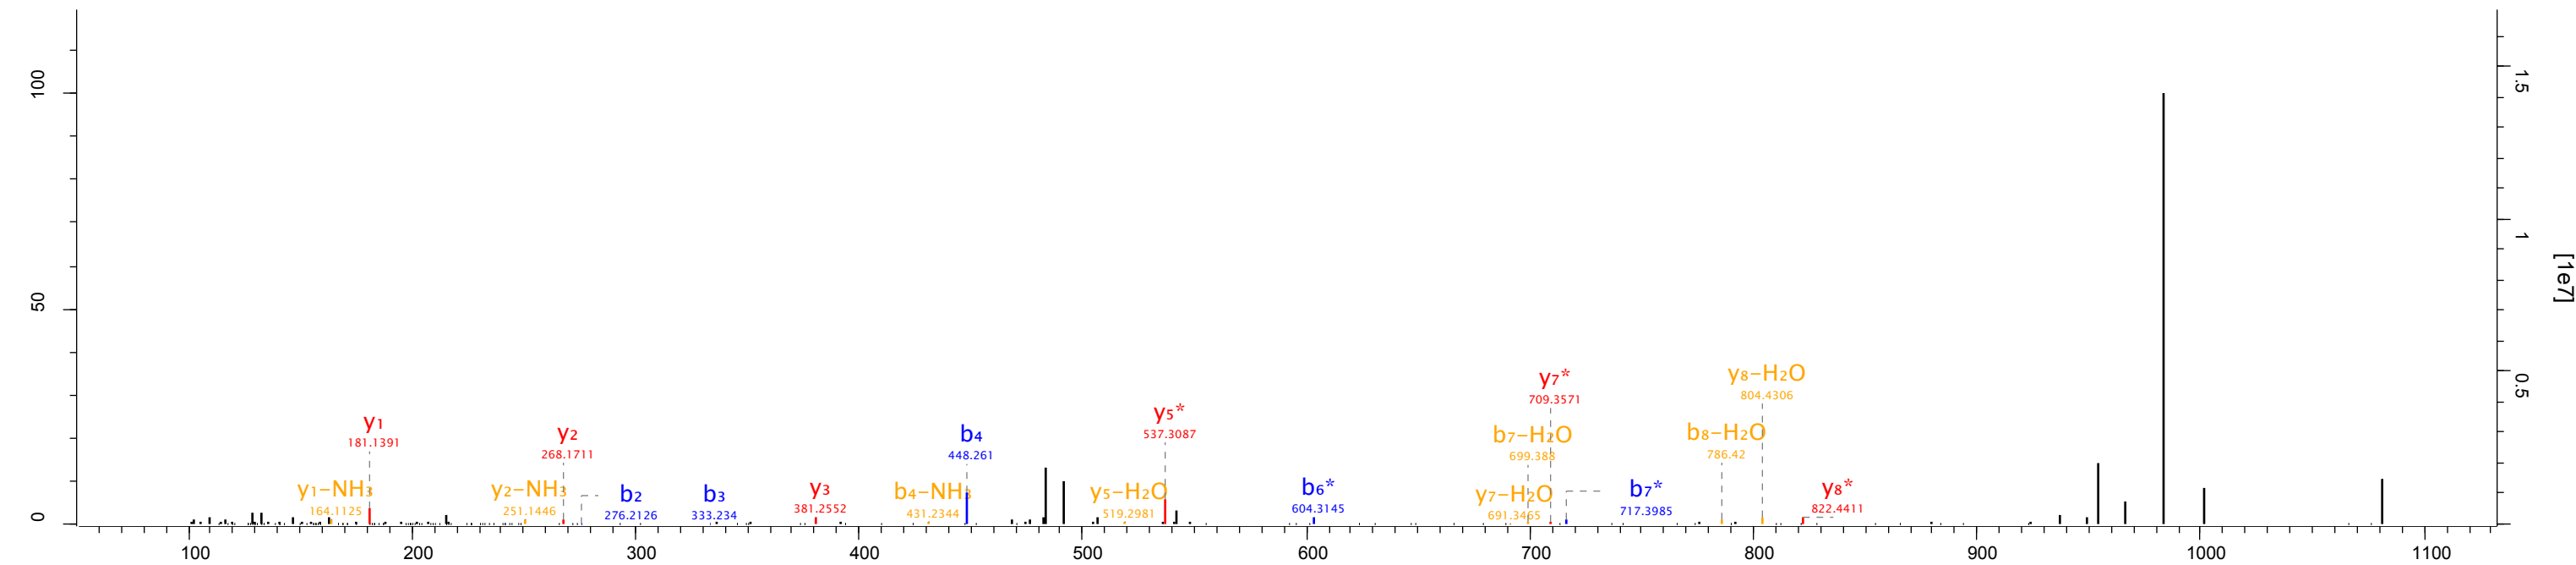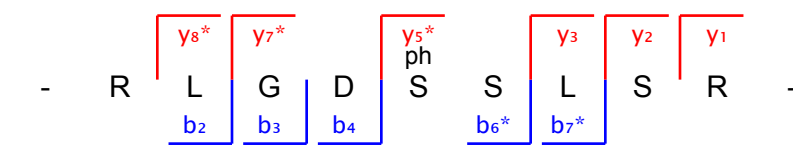

Raw file: 20150812\_A375SR\_Phospho\_BR1\_08  
 Scan: 5209 Method: FTMS; HCD Score: 83.63 m/z: 596.8 Gene names: PPFIBP1

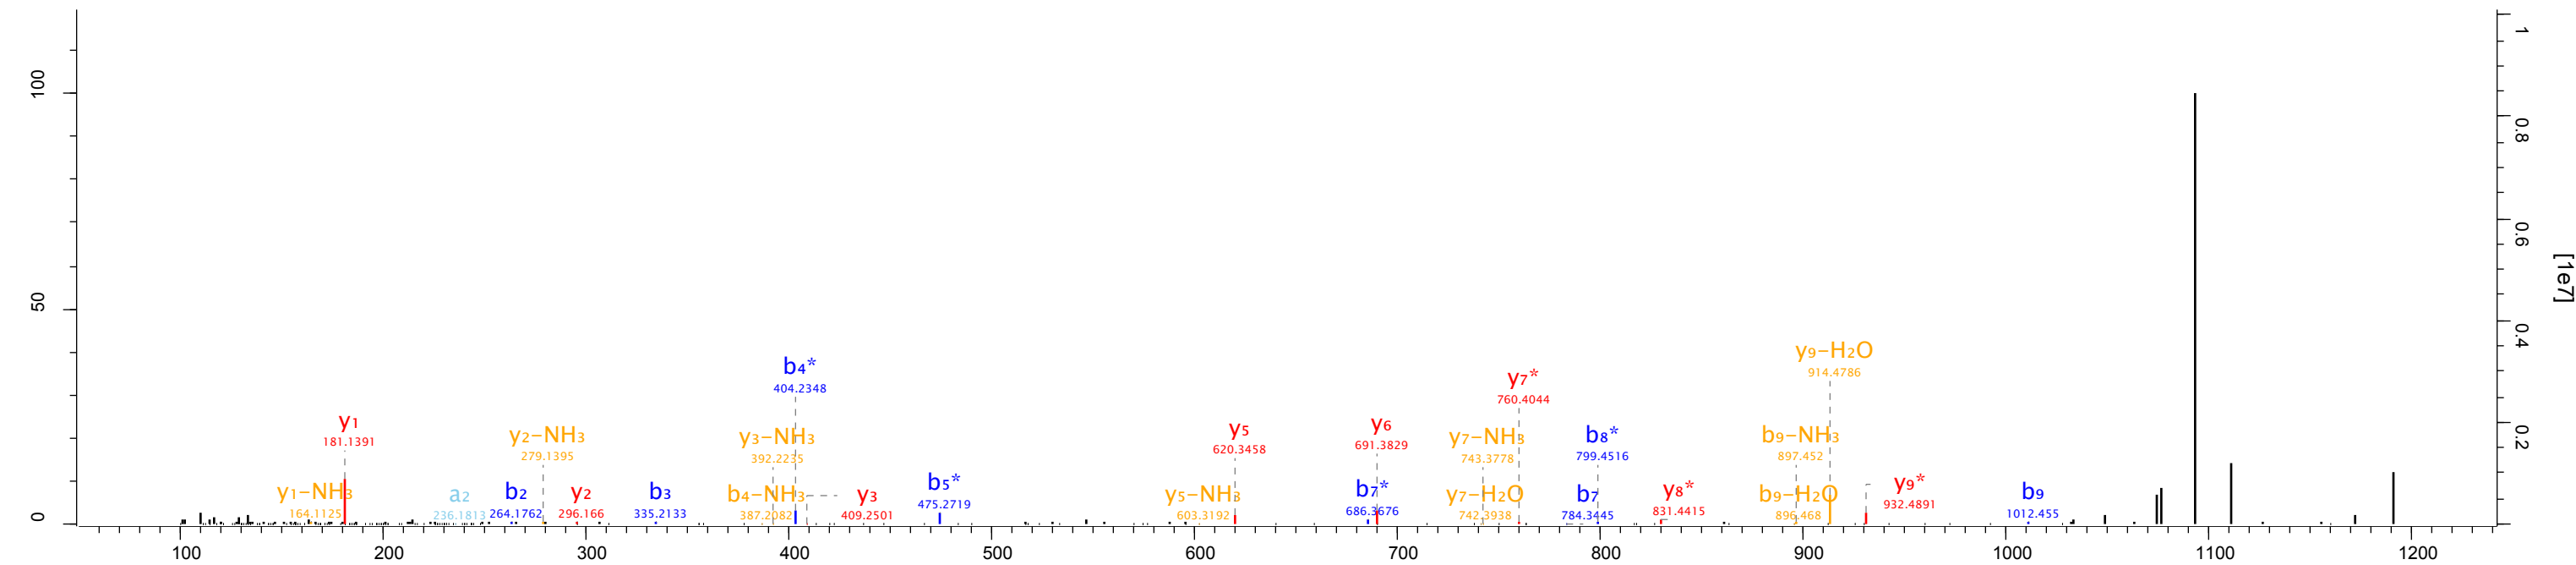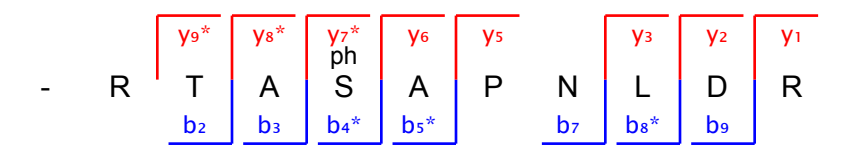

Raw file Scan Method Score m/z Gene names  
 20150812\_A375SR\_Phospho\_BR1\_08 6159 FTMS; HCD 83.29 498.58 CLASRP

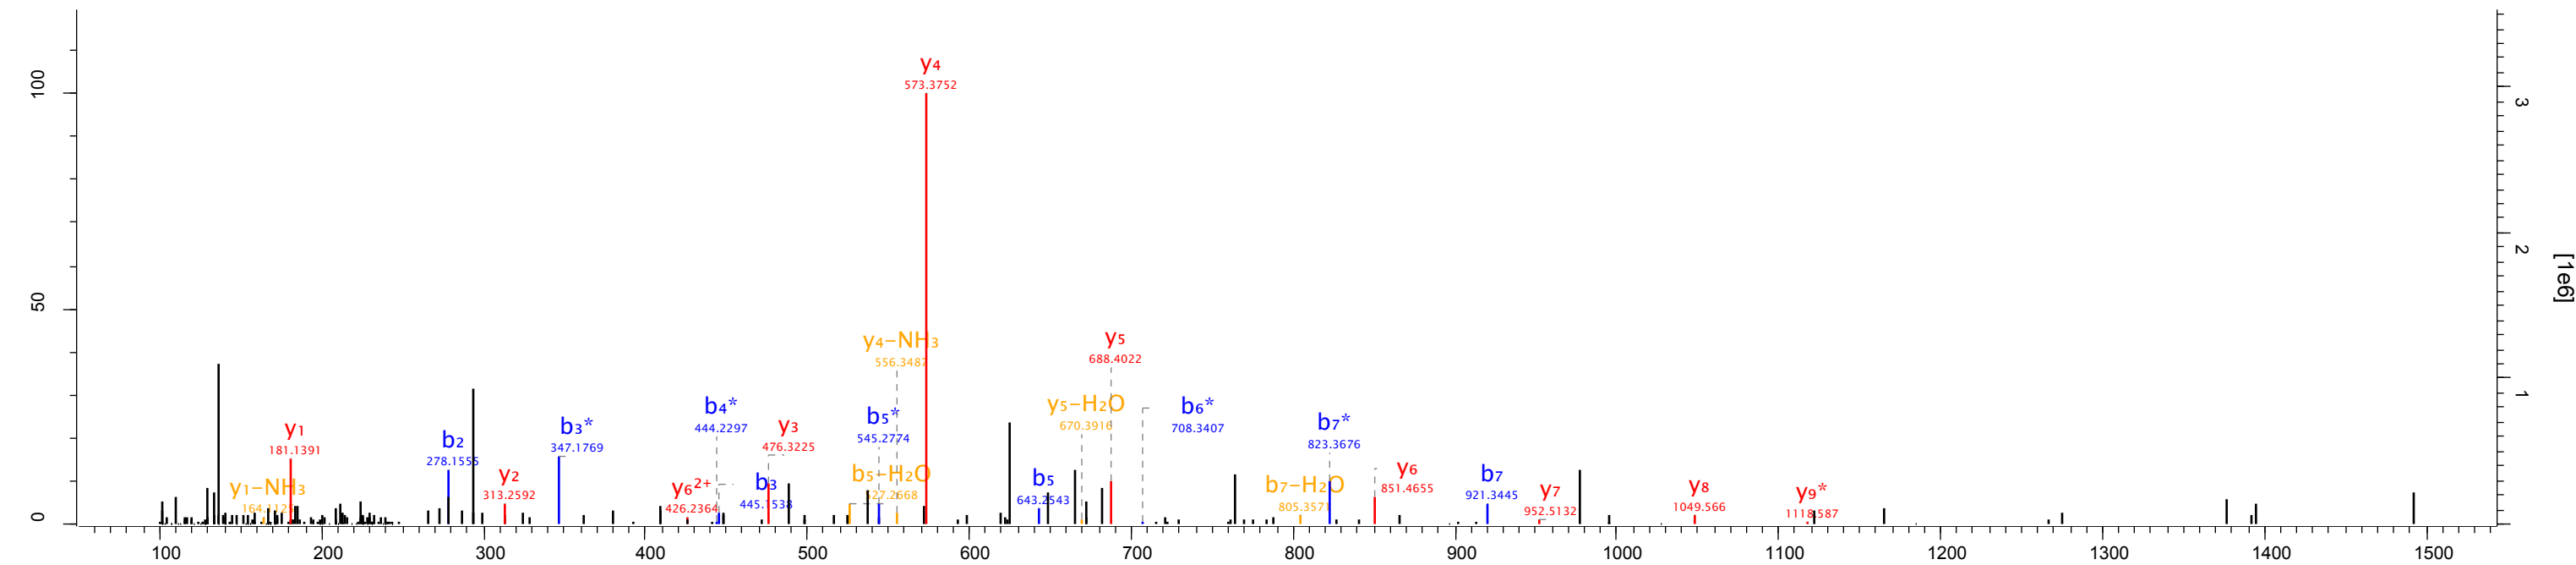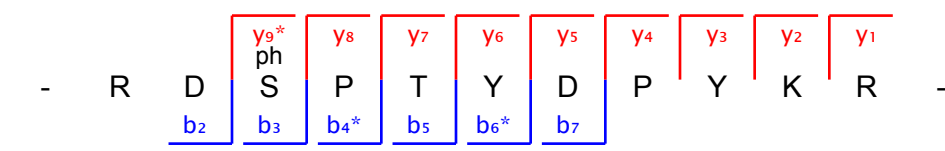

Raw file: 20150812\_A375SR\_Phospho\_BR1\_08  
 Scan: 6319 Method: FTMS; HCD Score: 149.57 m/z: 709.81 Gene names: E2F7

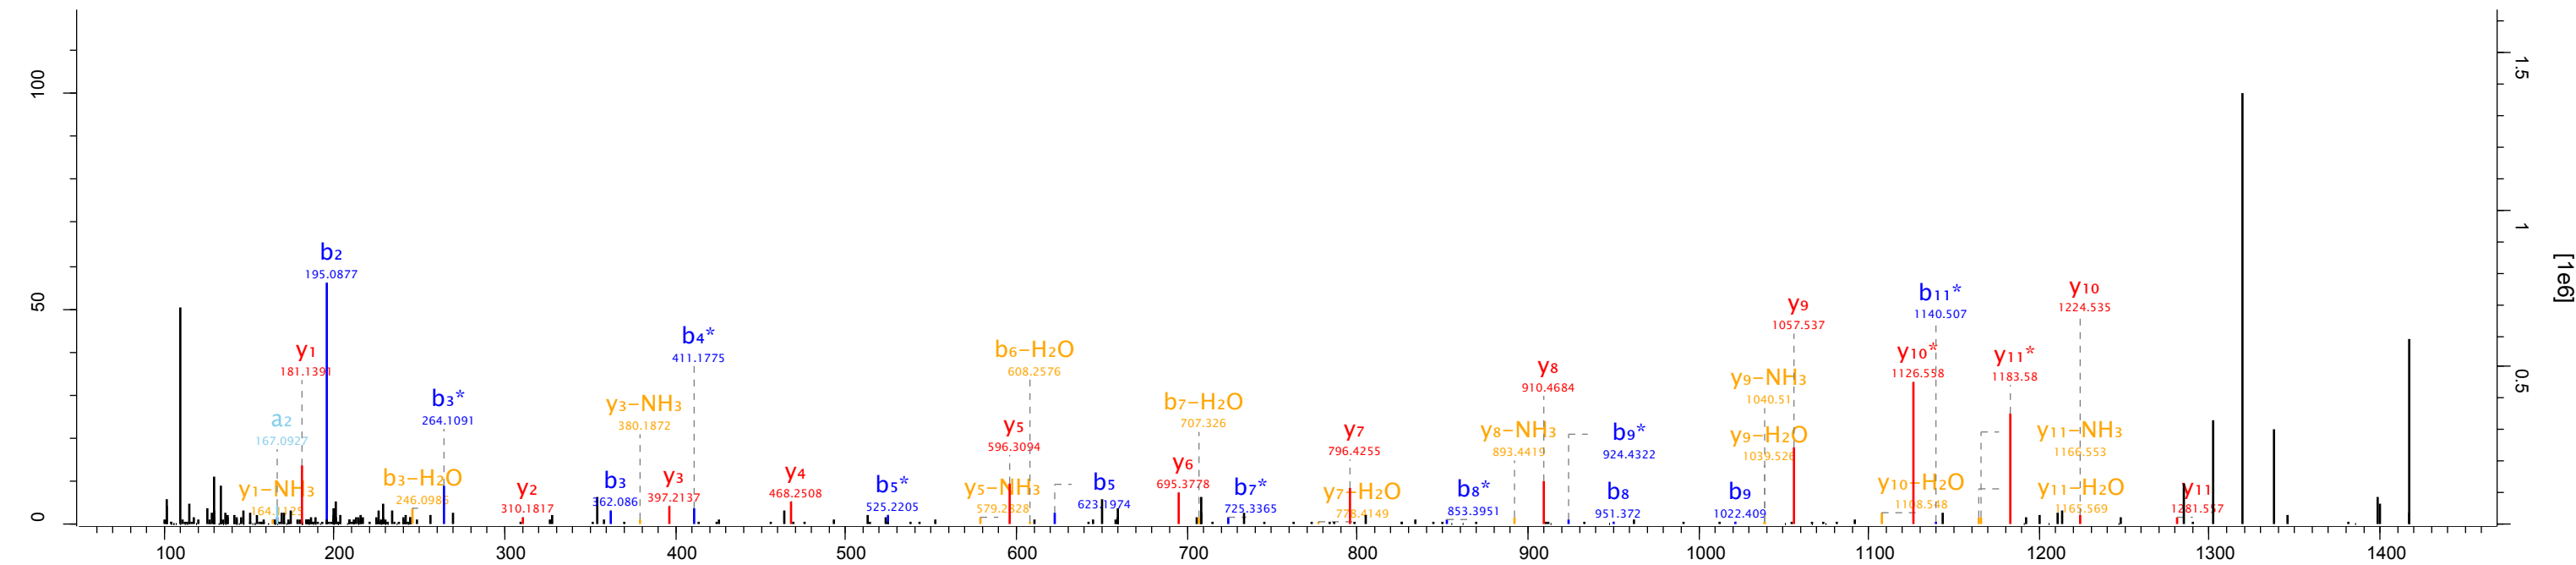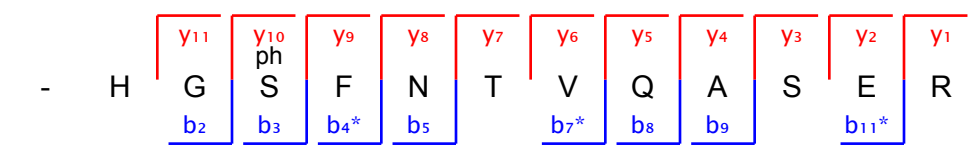

Raw file: 20150812\_A375SR\_Phospho\_BR1\_08  
 Scan: 6409 Method: FTMS; HCD Score: 147.62 m/z: 505.76 Gene names: INCENP

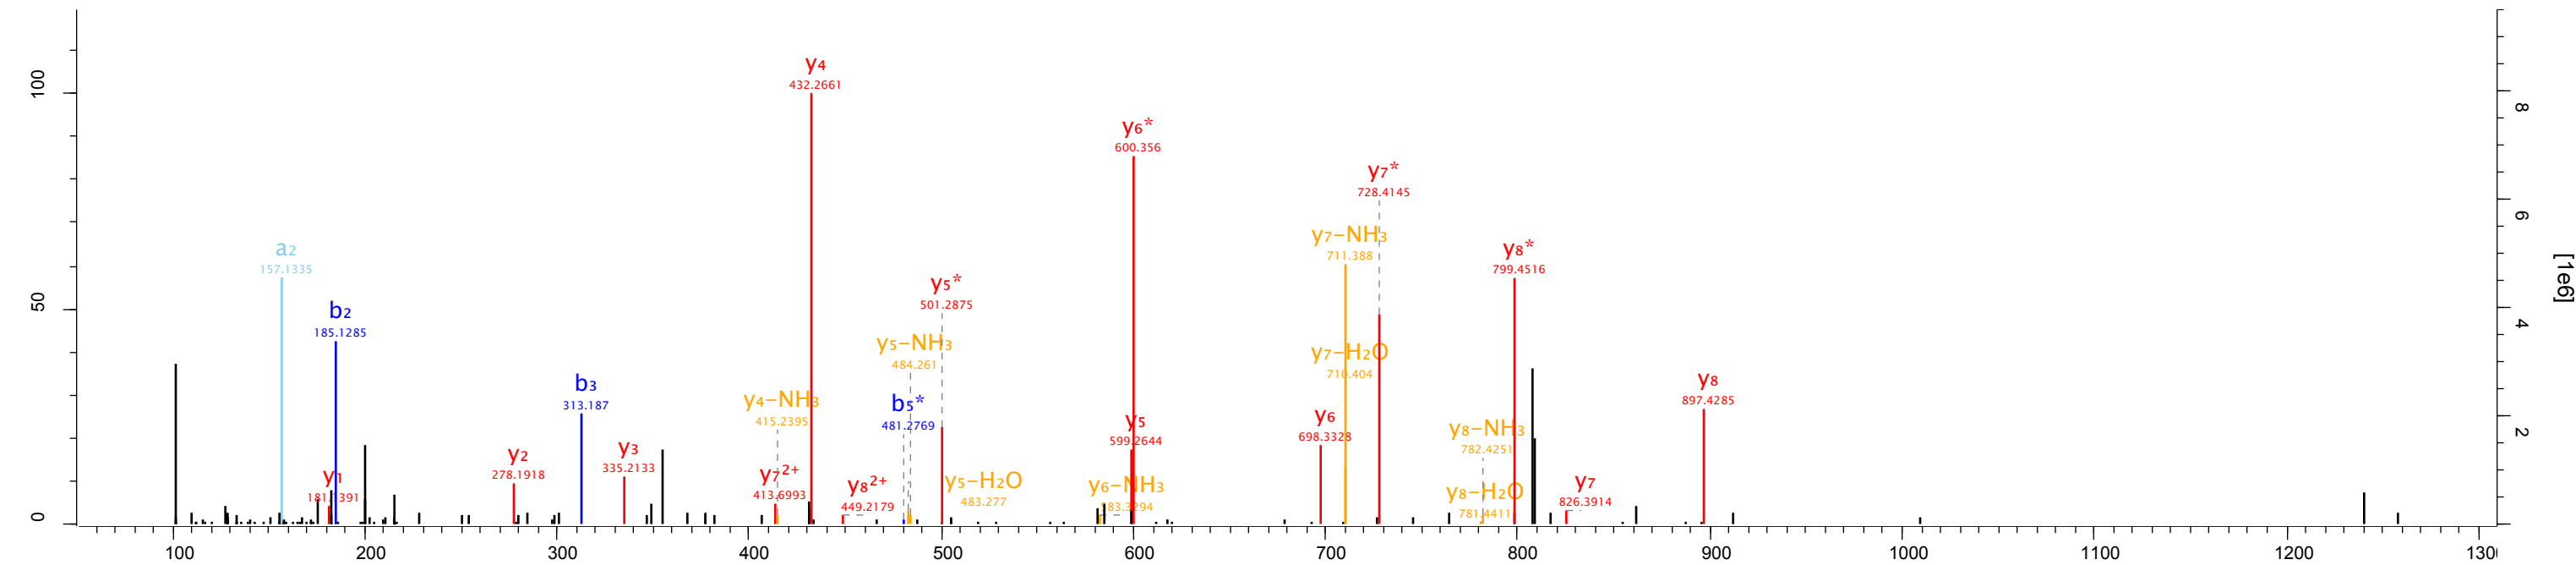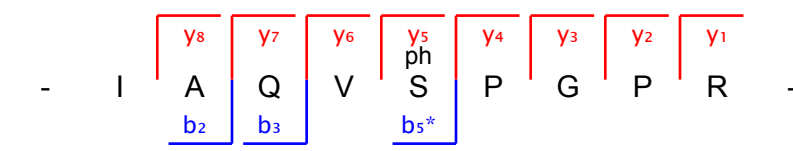



Raw file: 20150812\_A375SR\_Phospho\_BR1\_08  
 Scan: 6459 Method: FTMS; HCD Score: 80.75 m/z: 973.94 Gene names: SCEL

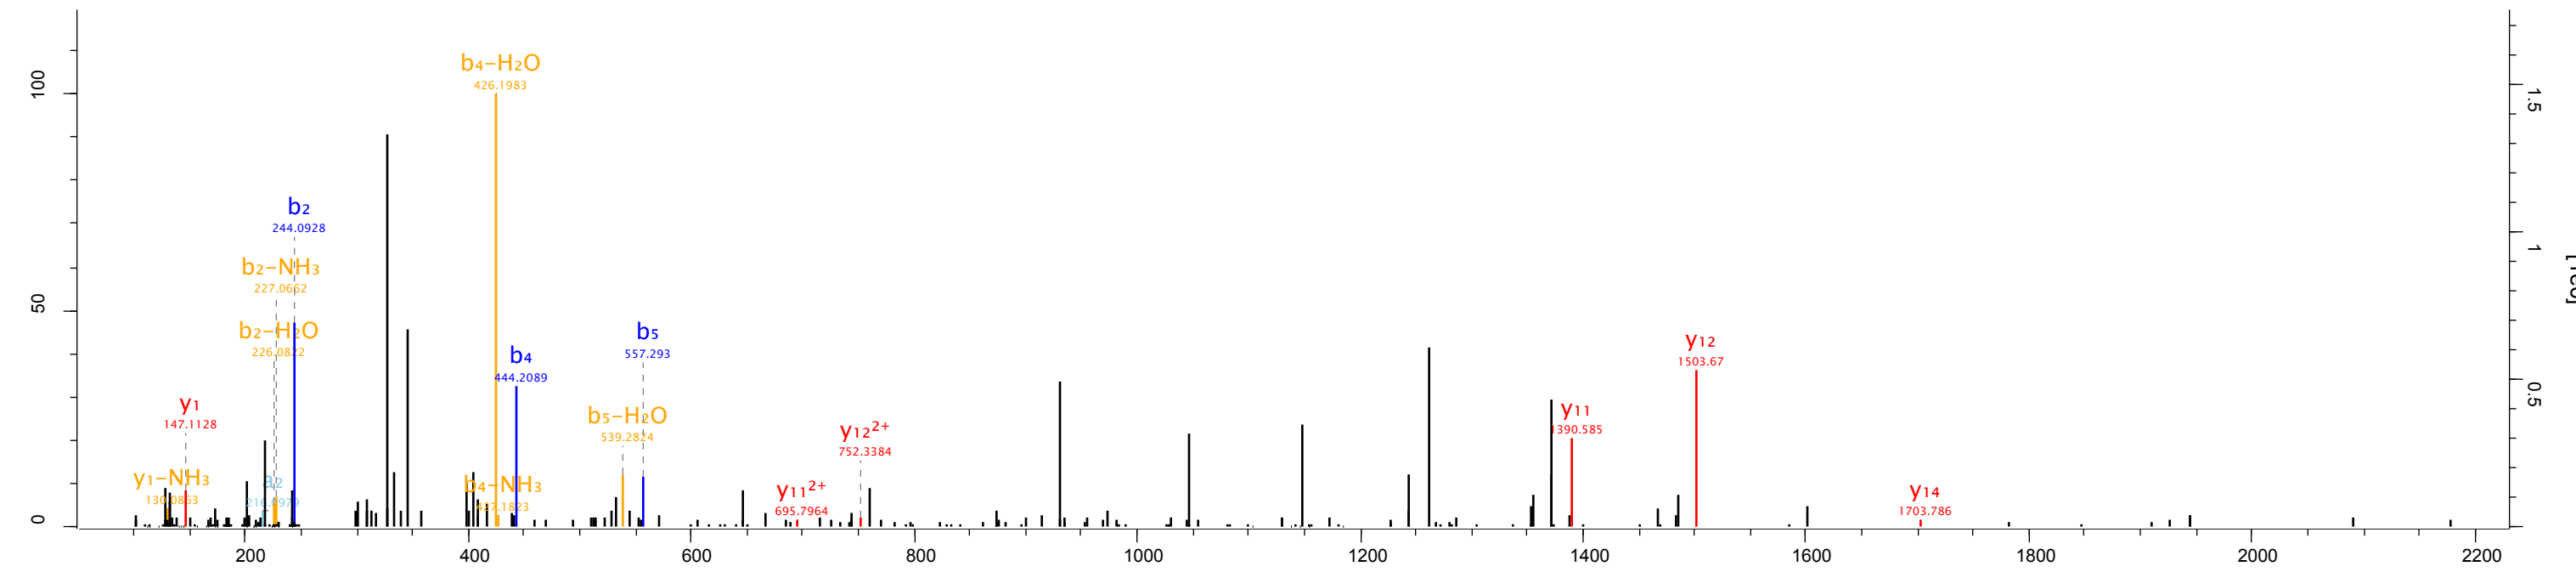

ac - S N V T L R K ox ph S P T G N E M ox K -

Fragmentation mapping:  
 - b2: N-V  
 - b4: T-L  
 - b5: L-R  
 - y1: K  
 - y11: L-R  
 - y12: L  
 - y14: V

Raw file: 20150812\_A375SR\_Phospho\_BR1\_08  
 Scan: 7449 Method: FTMS; HCD Score: 109.07 m/z: 549.76 Gene names: RNF25

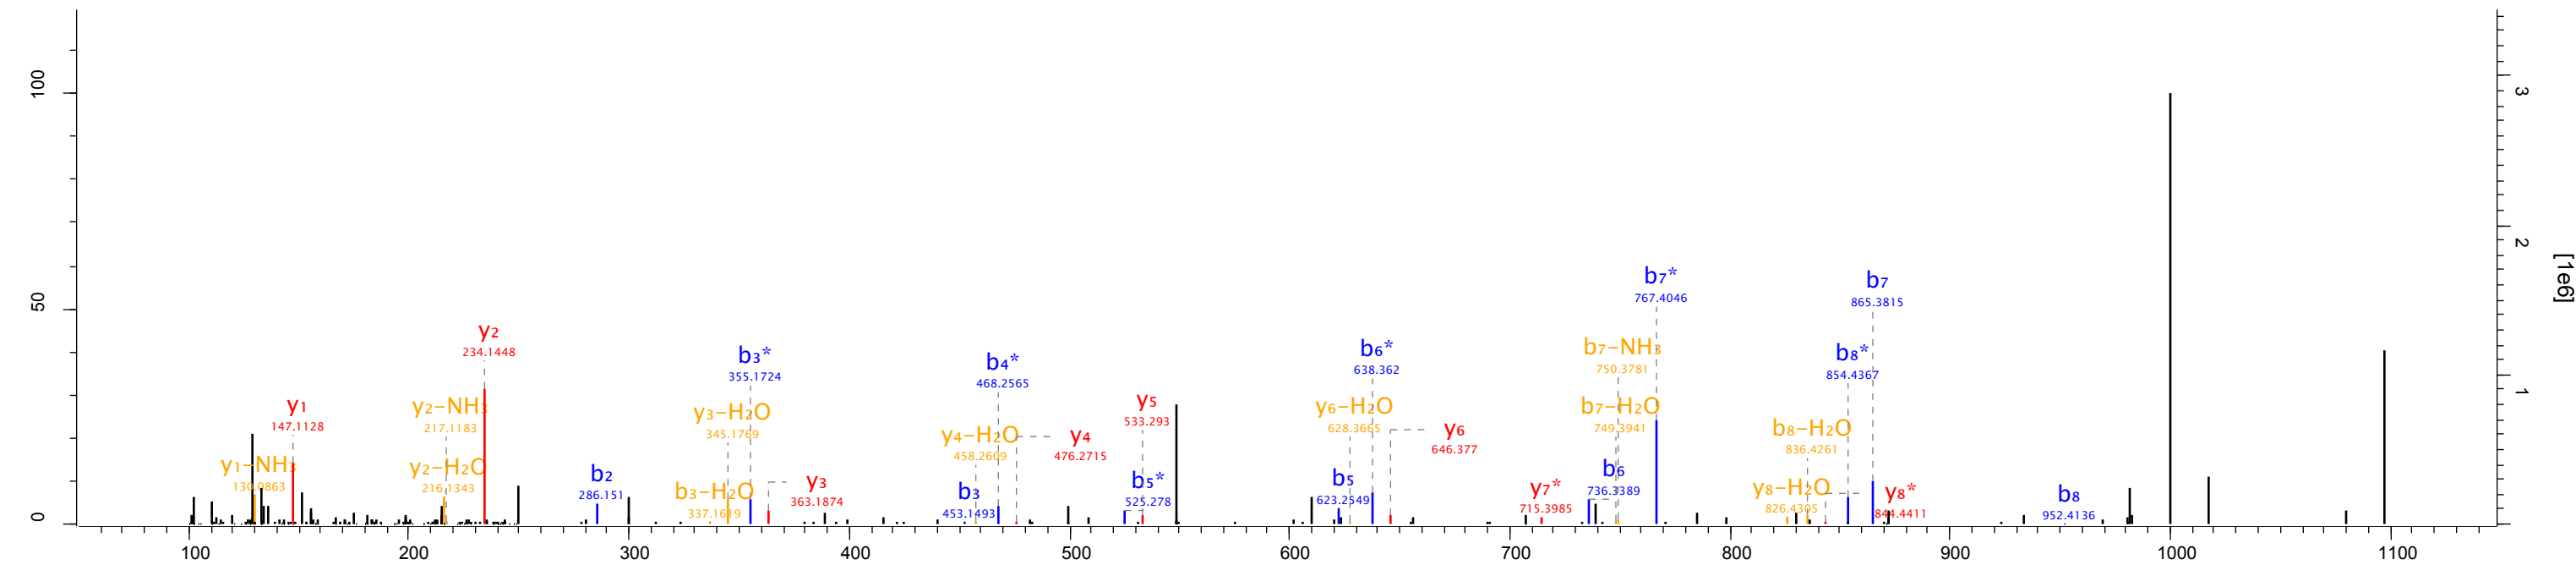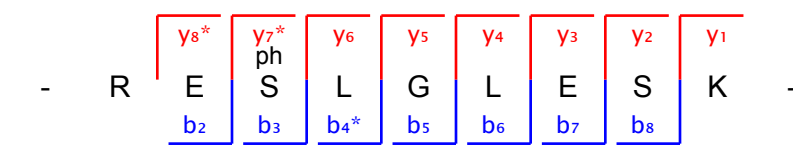

Raw file: 20150812\_A375SR\_Phospho\_BR1\_08  
 Scan: 9059 Method: FTMS; HCD Score: 138.91 m/z: 714.33 Gene names: TNIK

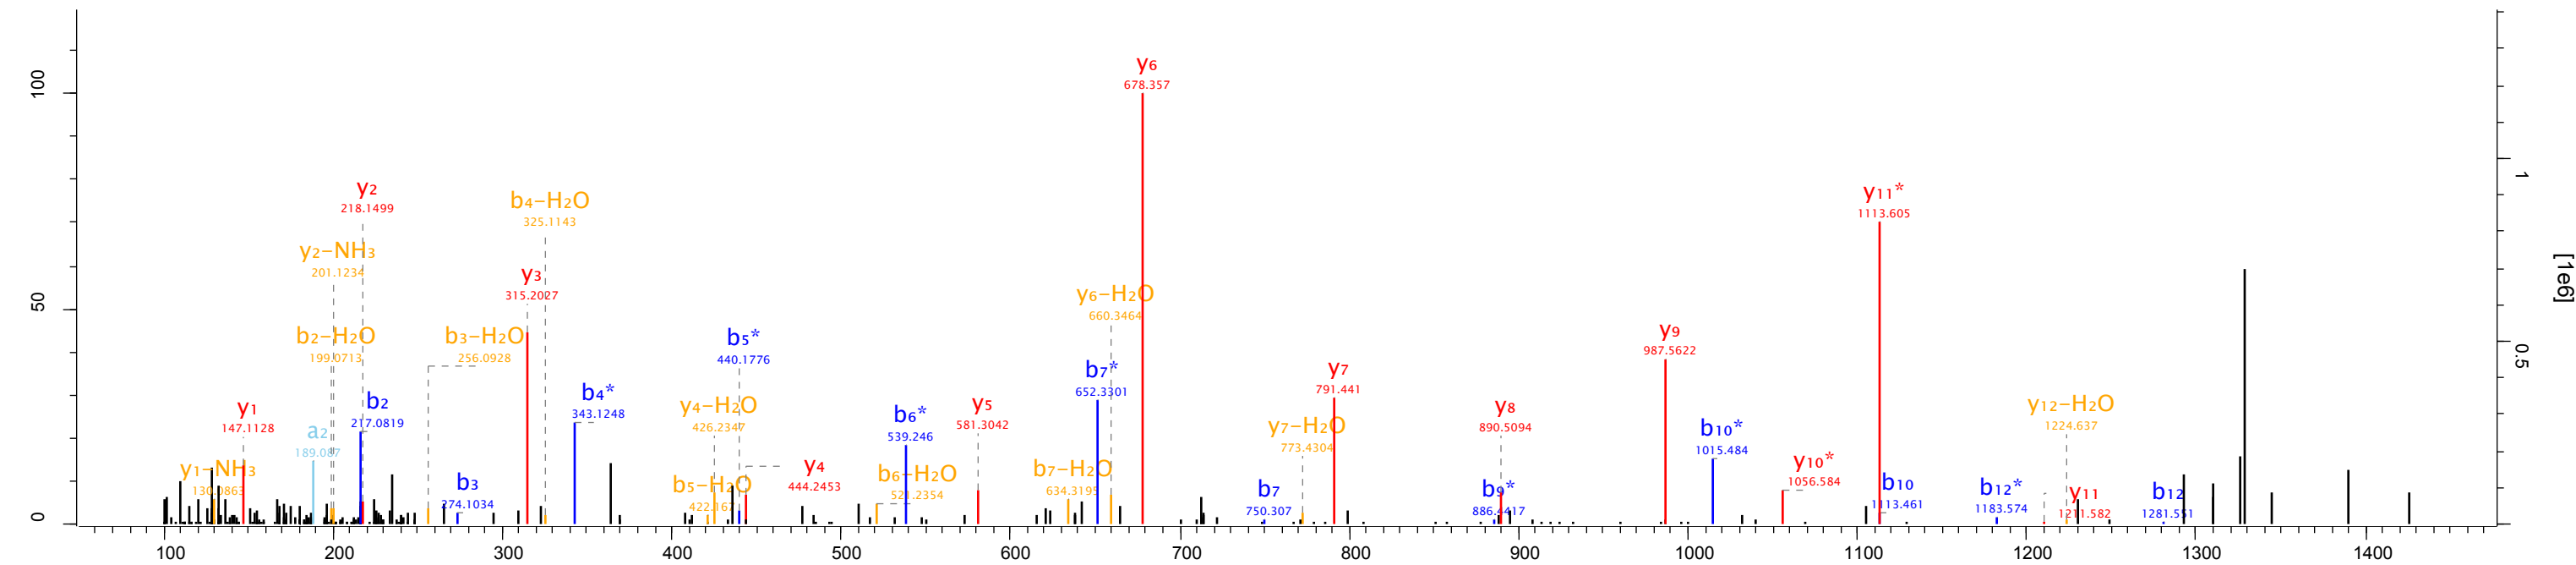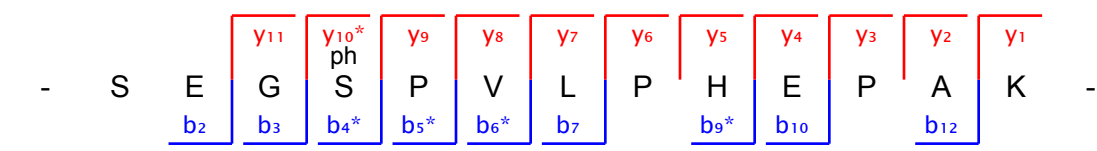

Raw file: 20150812\_A375SR\_Phospho\_BR1\_08  
 Scan: 9419 Method: FTMS; HCD Score: 130.69 m/z: 584.78 Gene names: CAMSAP2

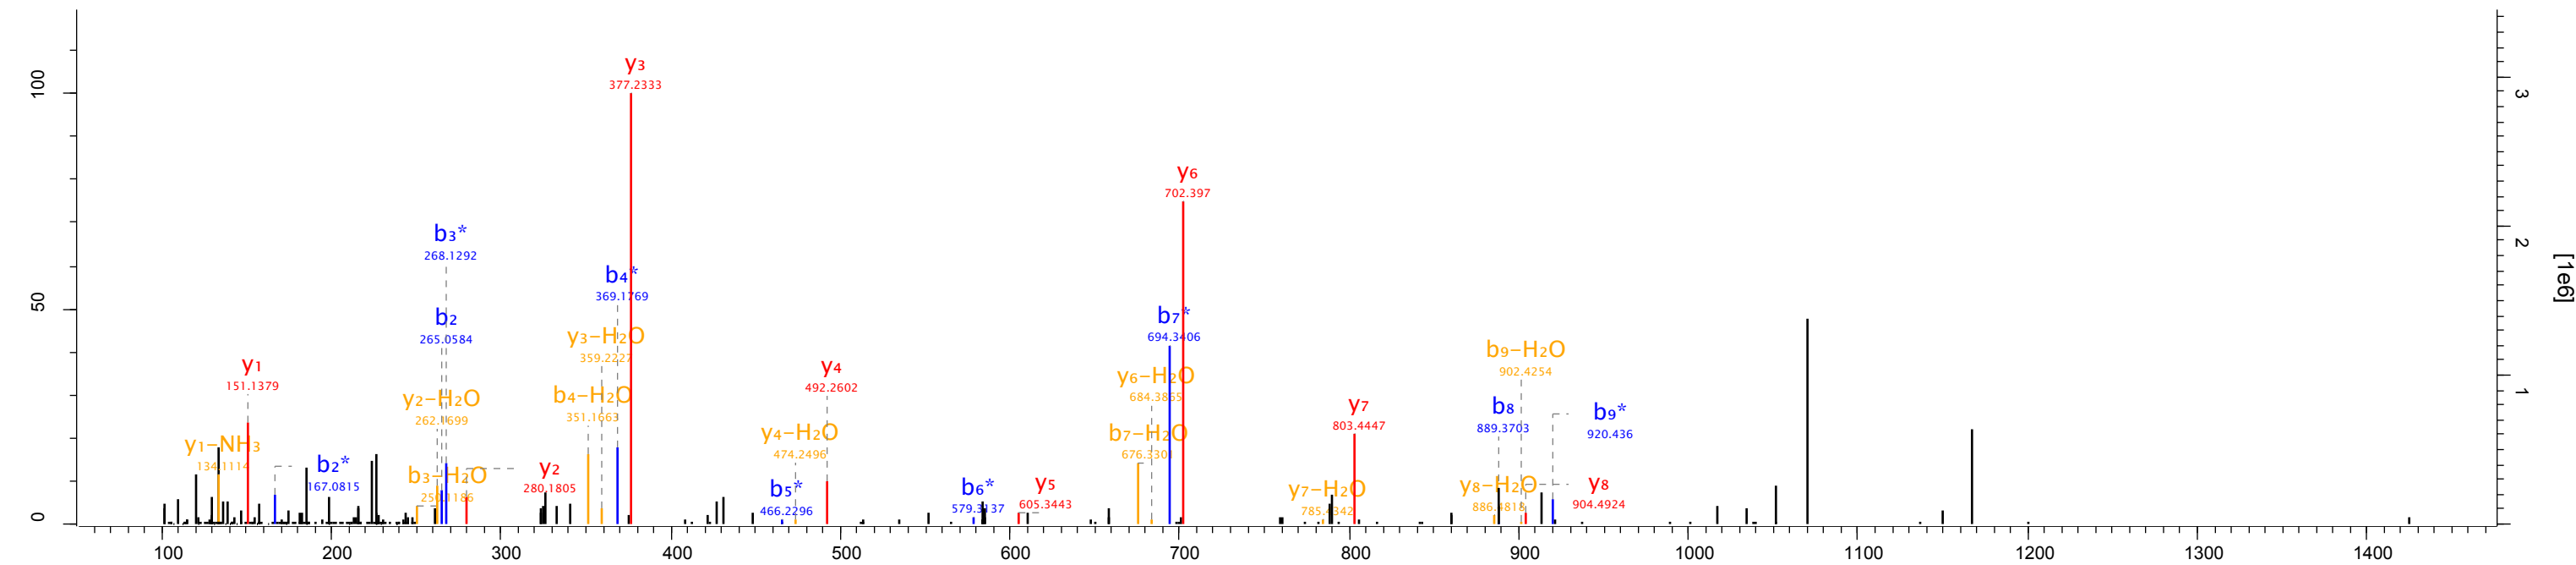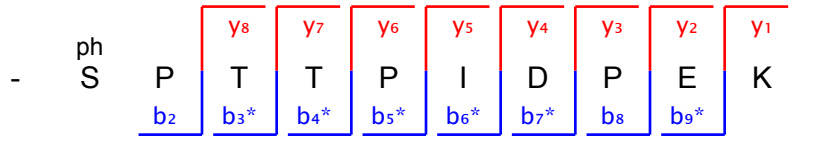

Raw file: 20150812\_A375SR\_Phospho\_BR1\_08  
 Scan: 9699 Method: FTMS; HCD Score: 134.75 m/z: 545.77 Gene names: MAPKAP1

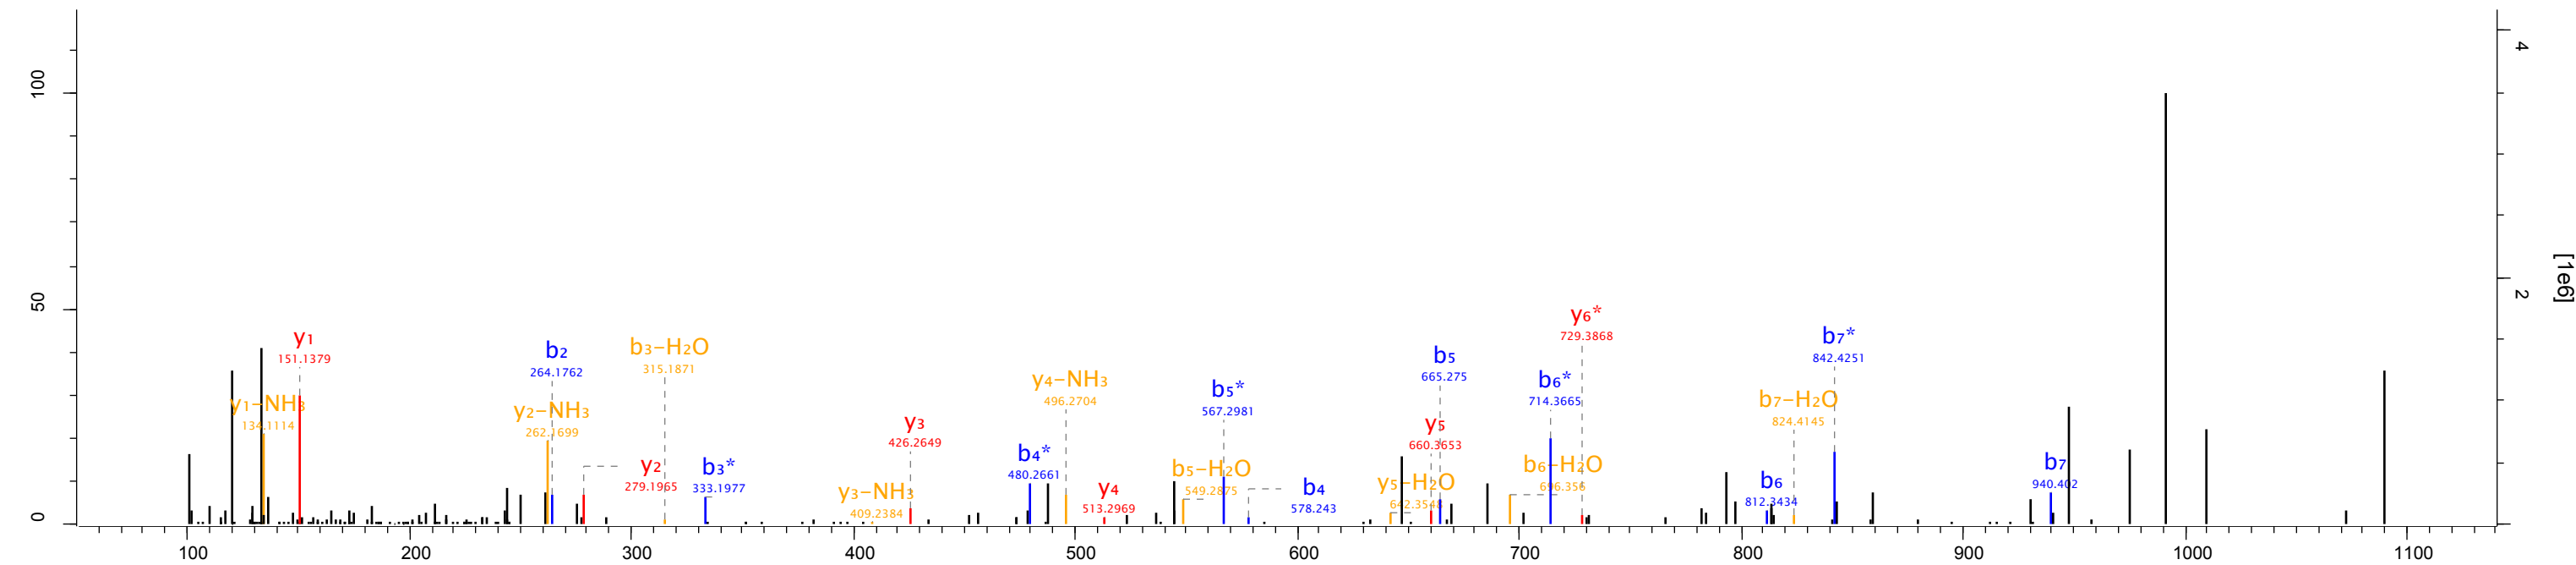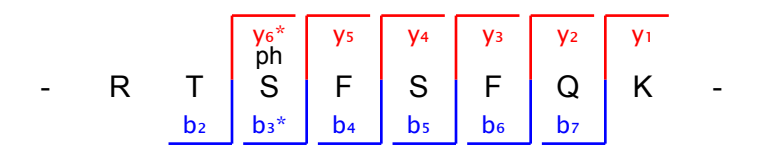

Raw file Scan Method Score m/z Gene names  
 20150812\_A375SR\_Phospho\_BR1\_09 11559 FTMS; HCD 237.39 772.9 WIZ

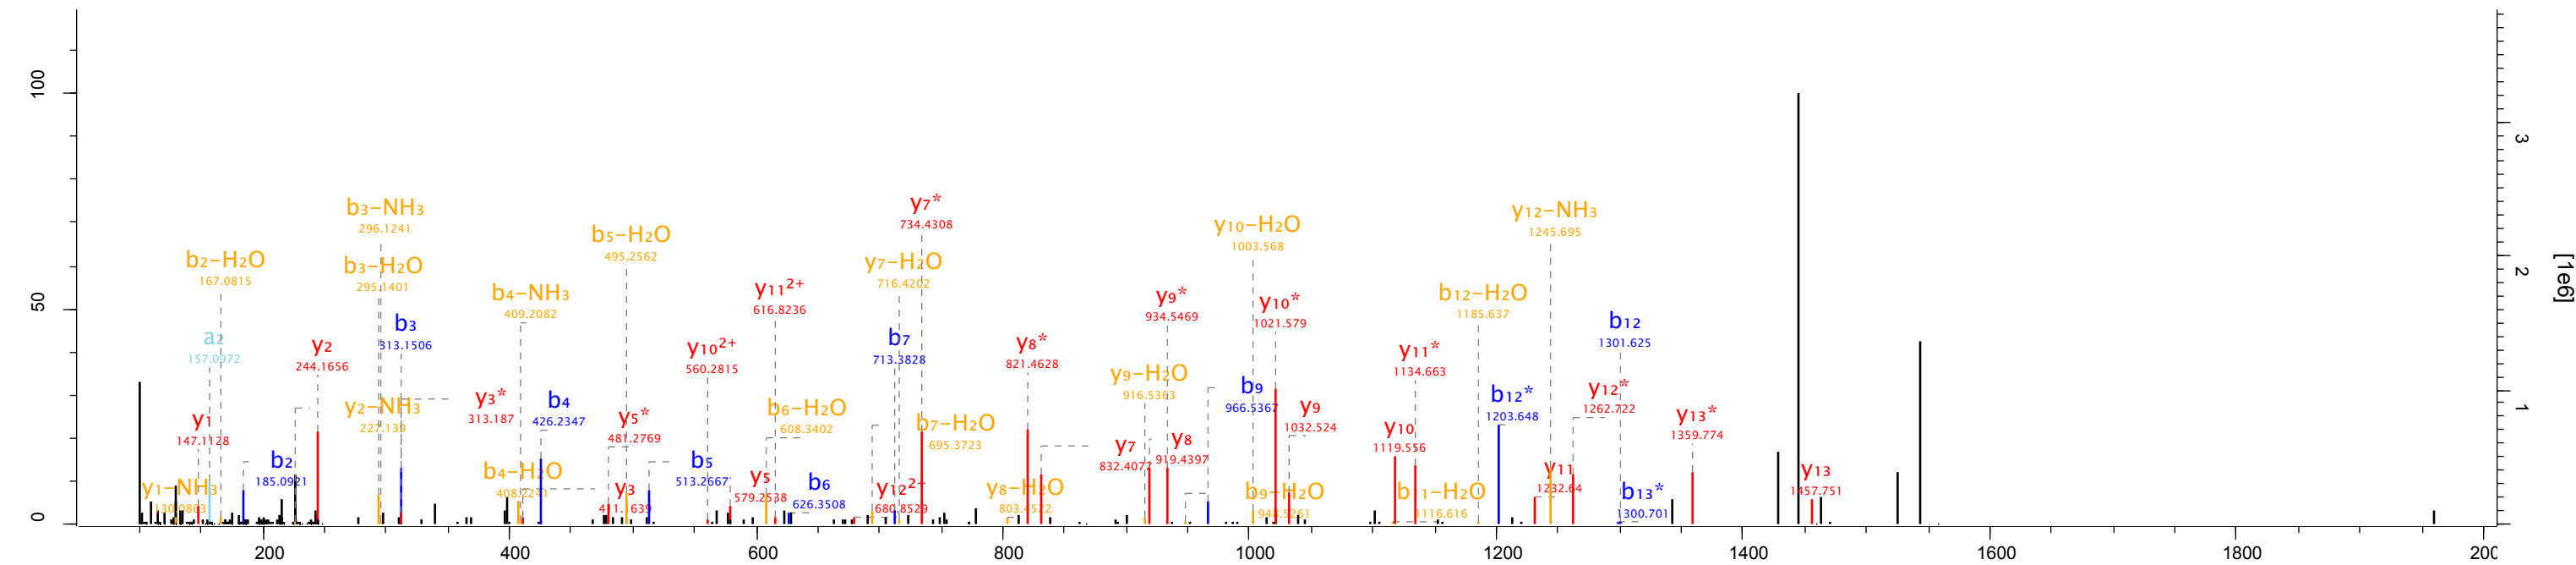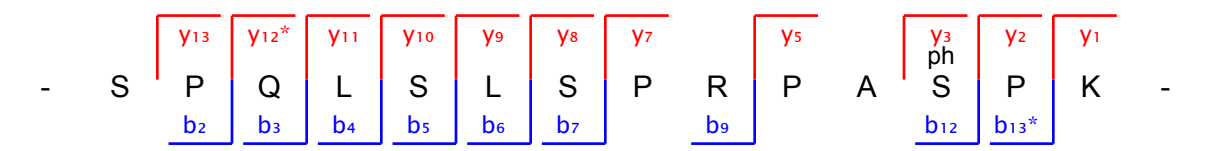

Raw file 20150812\_A375SR\_Phospho\_BR1\_09 Scan 15799 Method FTMS; HCD Score 67.65 m/z 601.33 Gene names QDPR

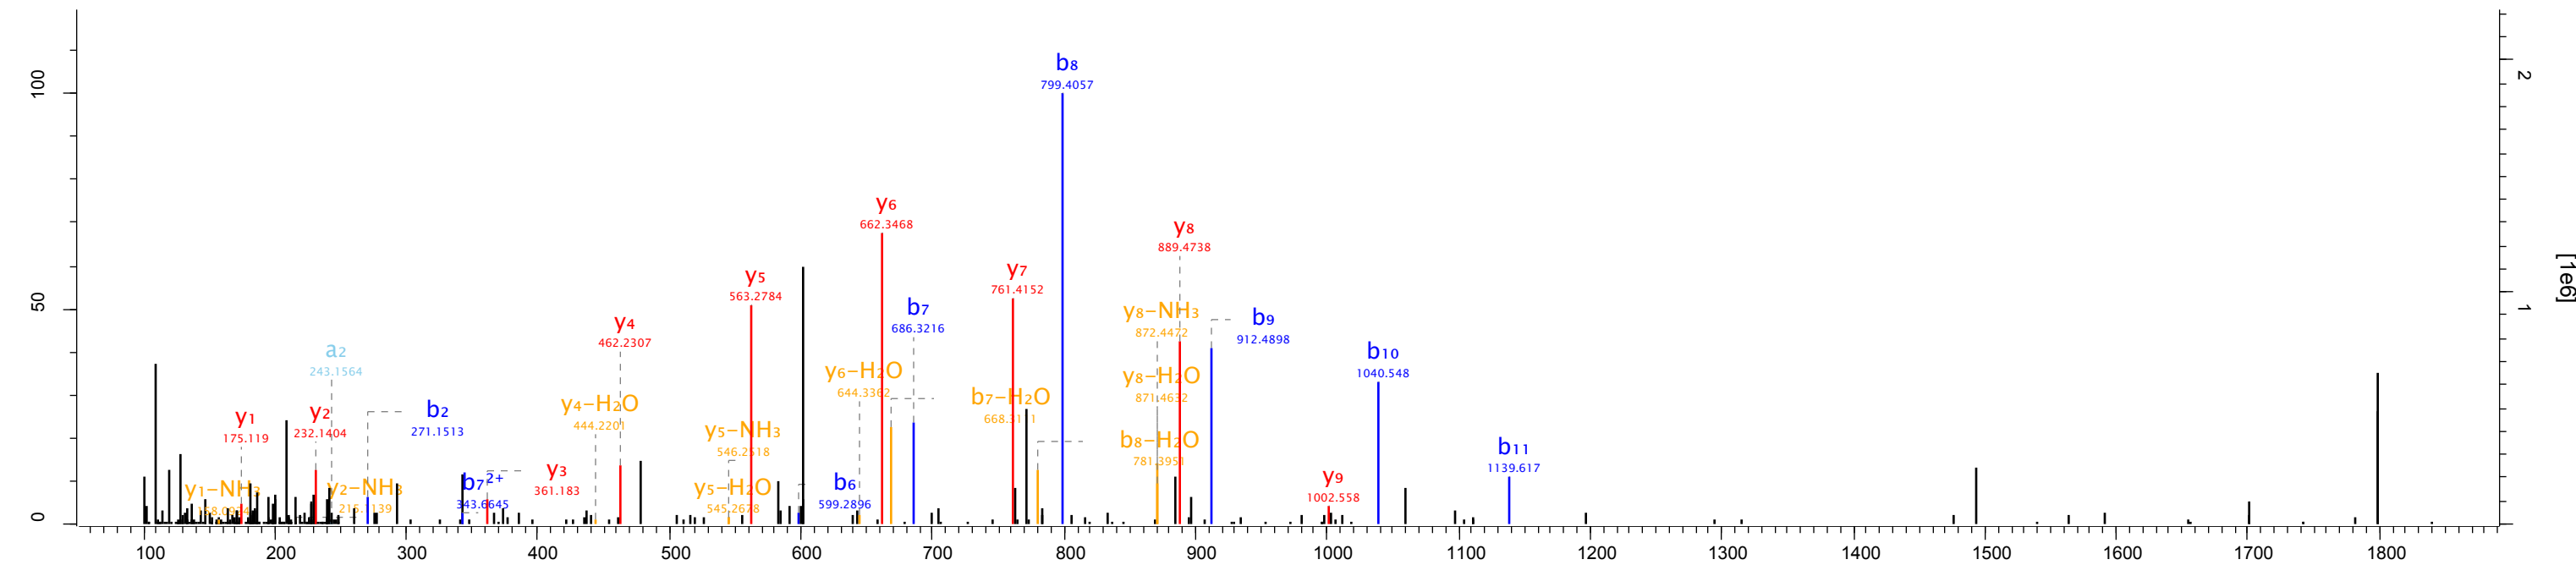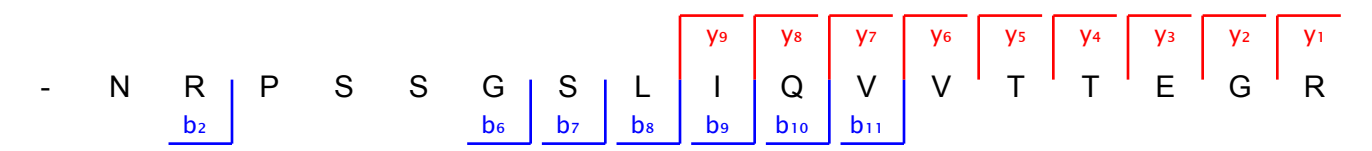

Raw file Scan Method Score m/z Gene names  
 20150812\_A375SR\_Phospho\_BR1\_09 17169 FTMS; HCD 174.89 878.73 OTUD5

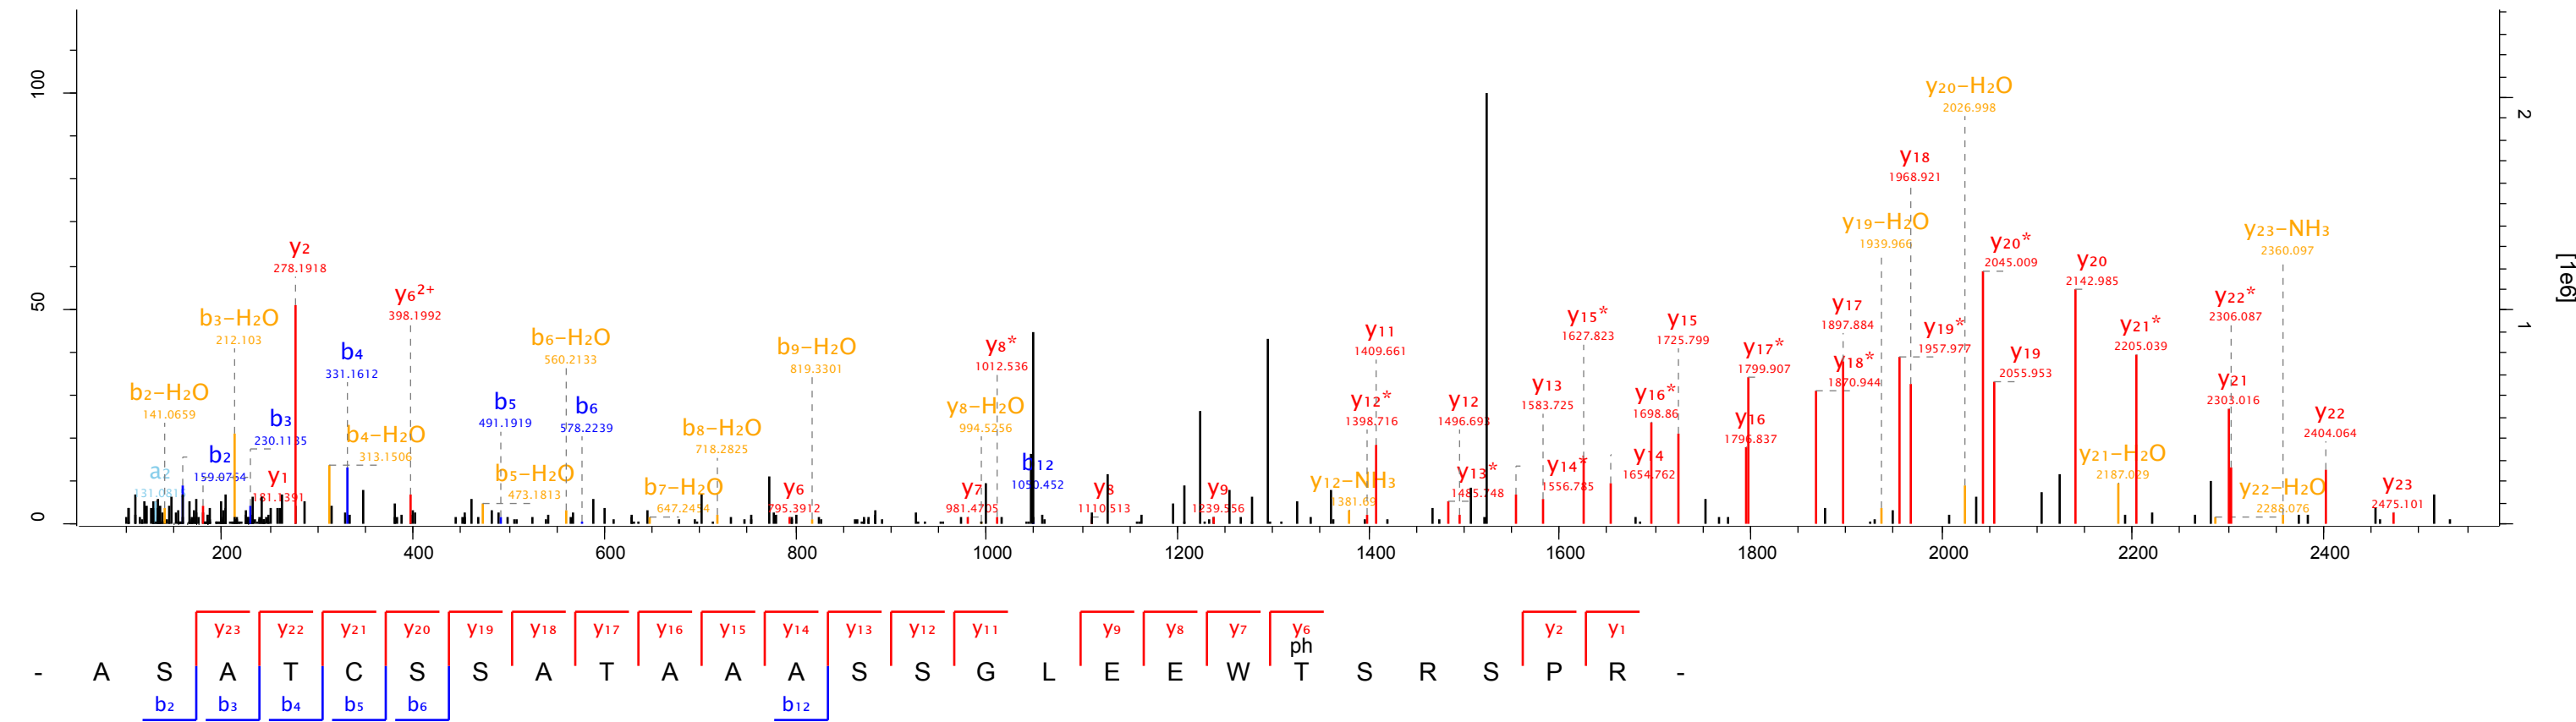



Raw file 20150812\_A375SR\_Phospho\_BR1\_09 Scan 1779 Method FTMS; HCD Score 122.34 m/z 395.86 Gene names LMNA

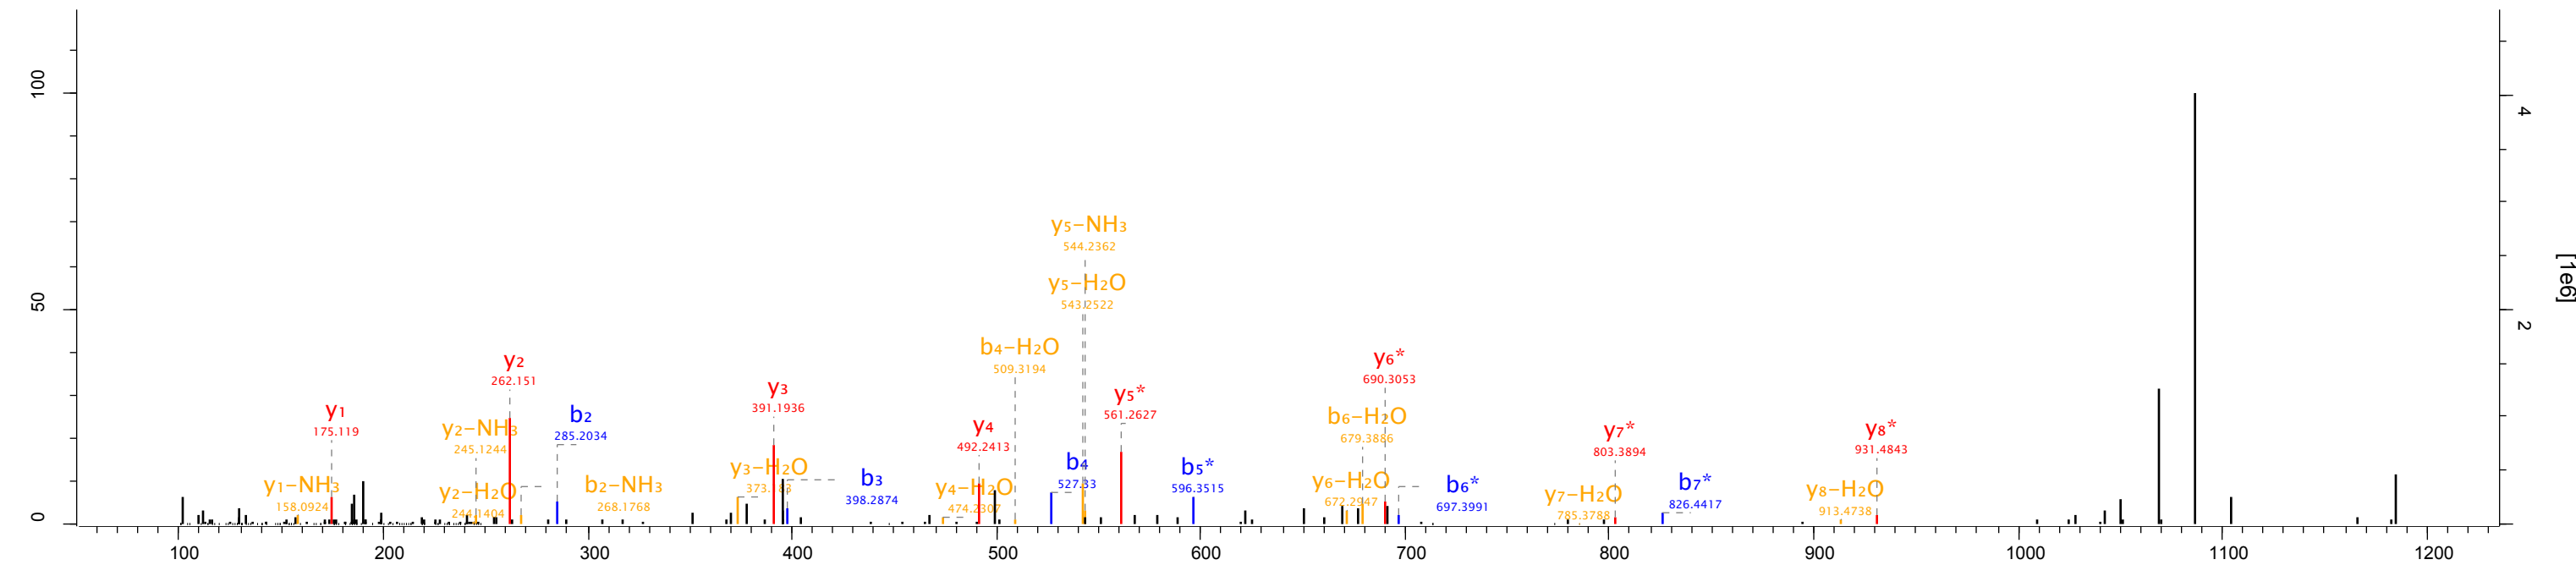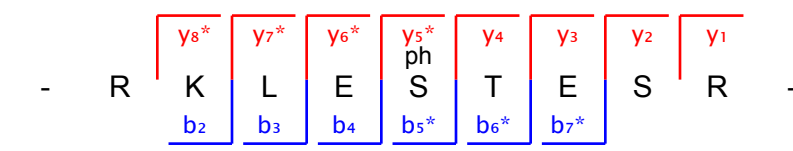

Raw file 20150812\_A375SR\_Phospho\_BR1\_09 Scan 19899 Method FTMS; HCD Score 153.55 m/z 1023.8 Gene names WDR3

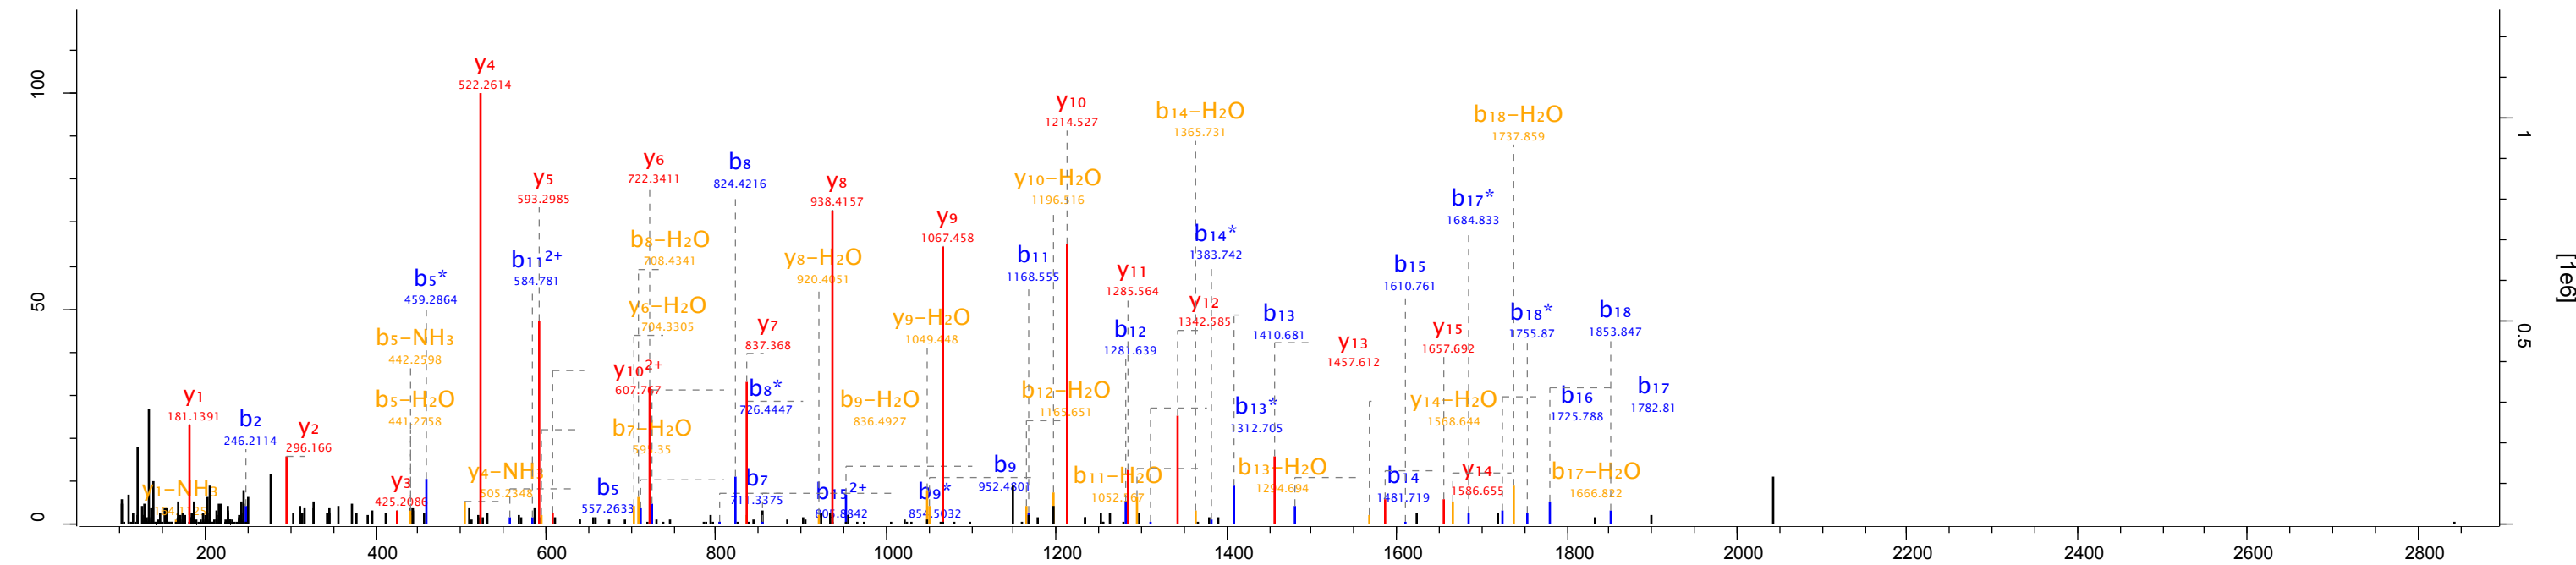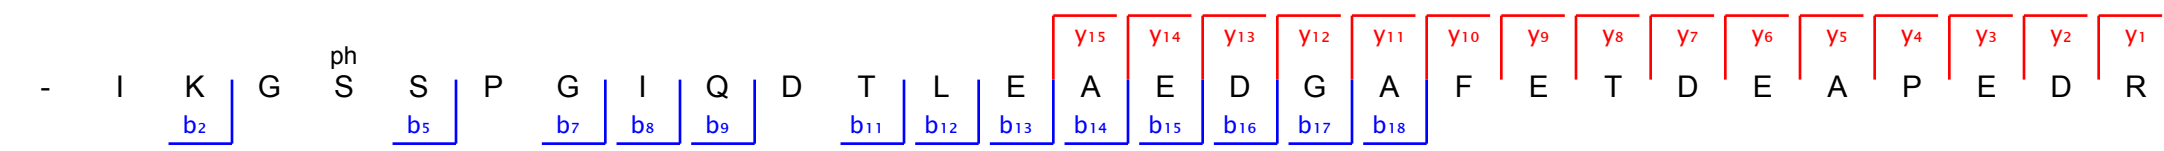

Raw file 20150812\_A375SR\_Phospho\_BR1\_09 Scan 28399 Method FTMS; HCD Score 235.02 m/z 1073.21 Gene names CDC42EP4

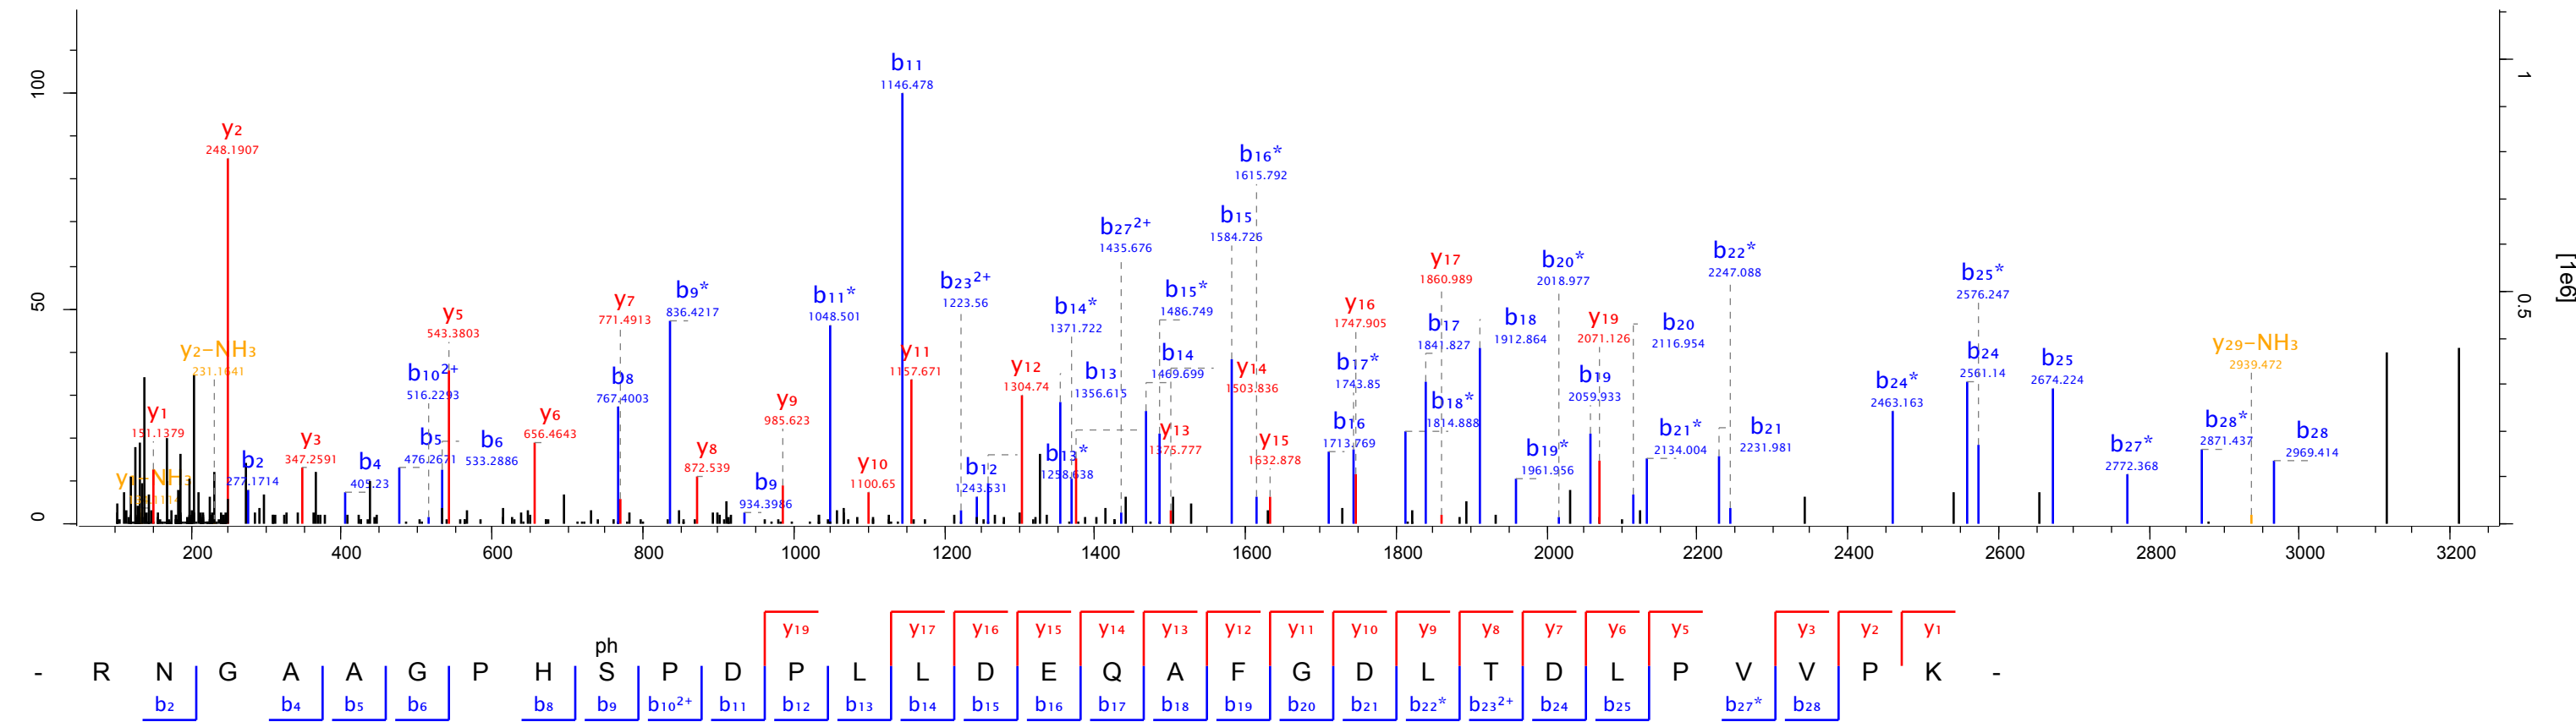

Raw file: 20150812\_A375SR\_Phospho\_BR1\_09  
 Scan: 5499 Method: FTMS; HCD Score: 176.23 m/z: 723.66 Gene names: HSF1

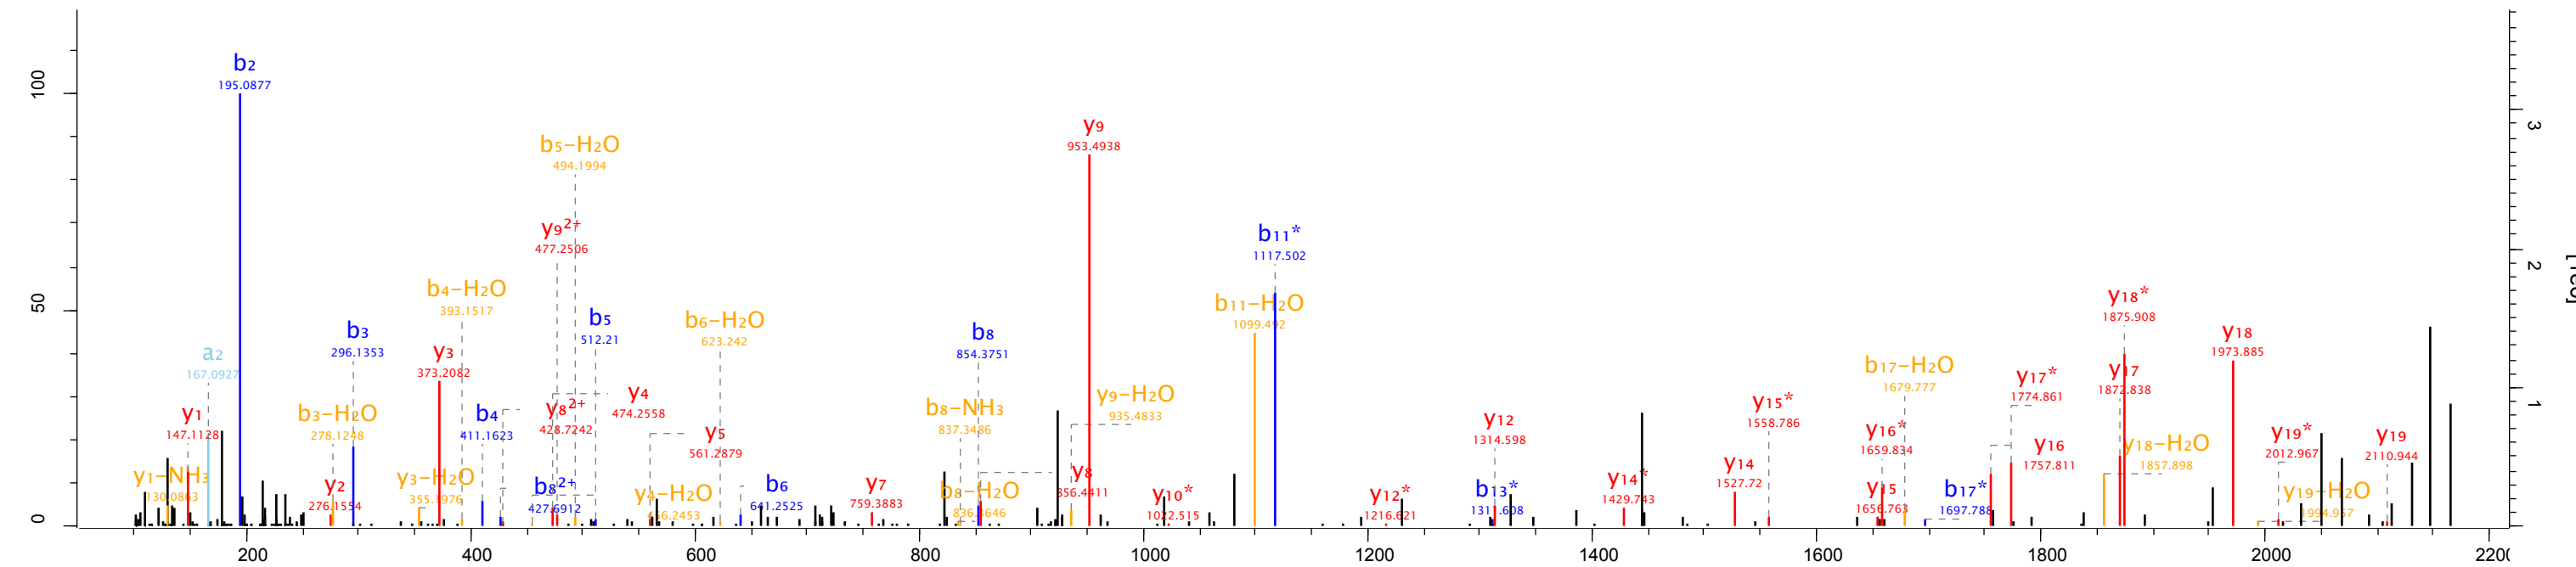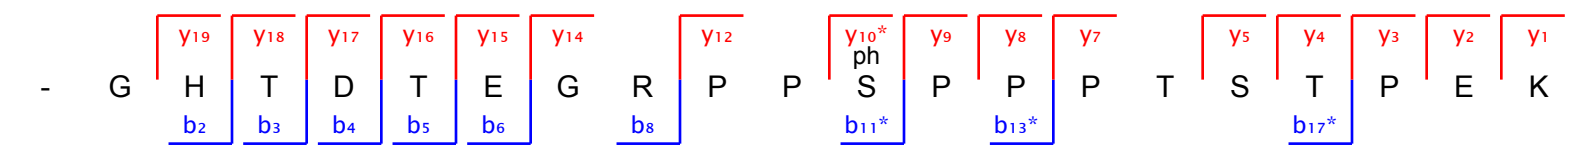

Raw file 20150812\_A375SR\_Phospho\_BR1\_09 Scan 6819 Method FTMS; HCD Score 51.09 m/z 517.6 Gene names PRKD2

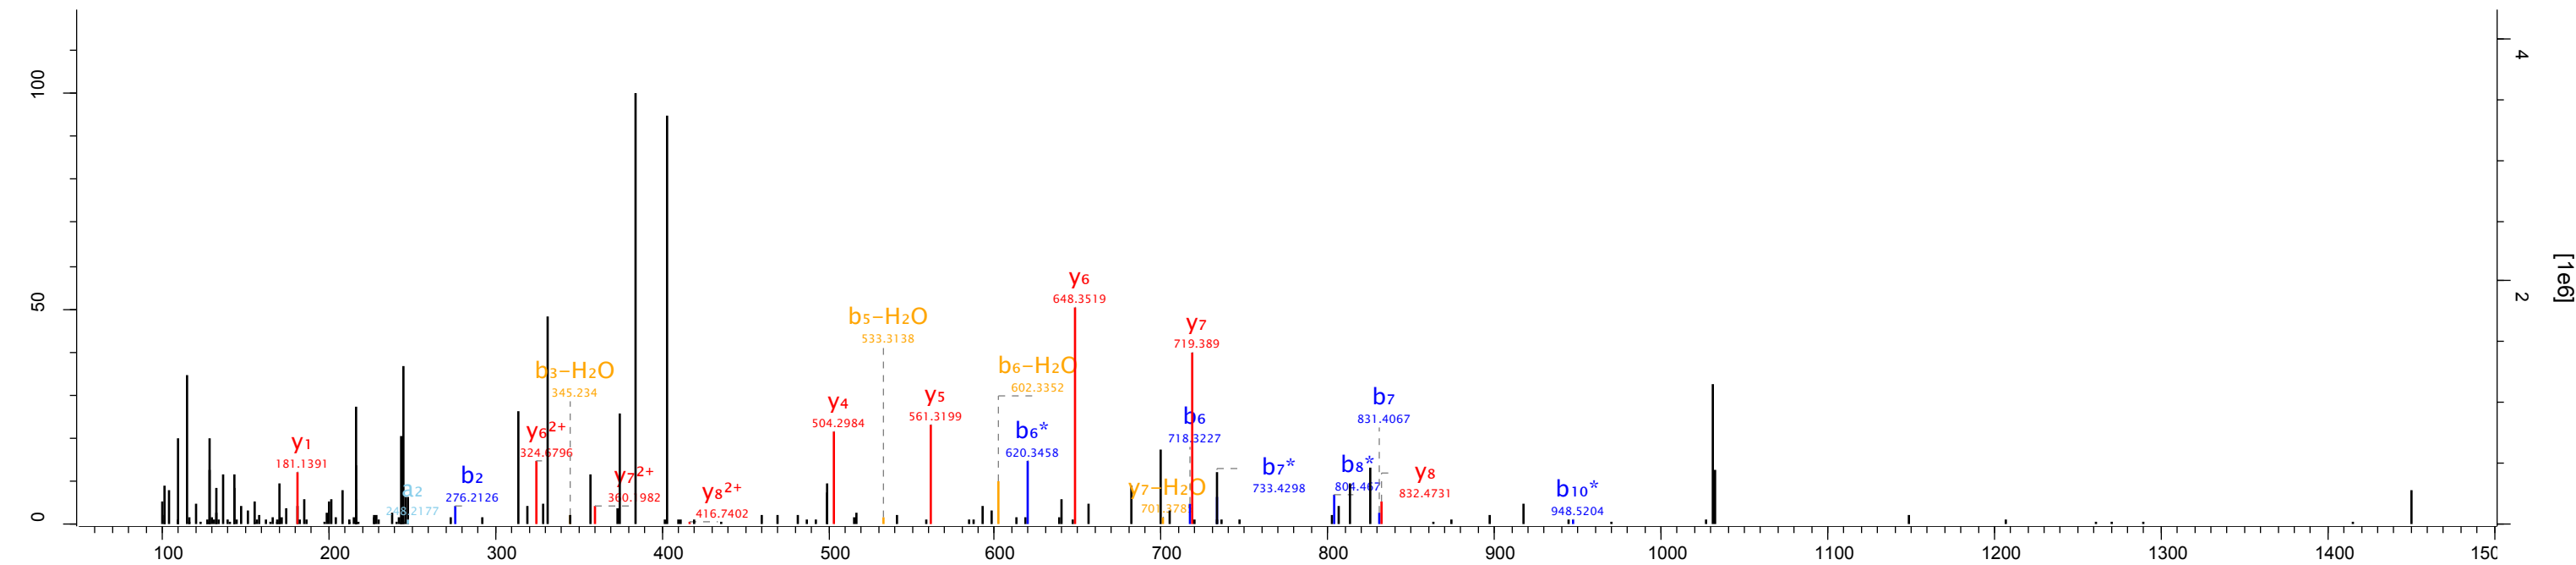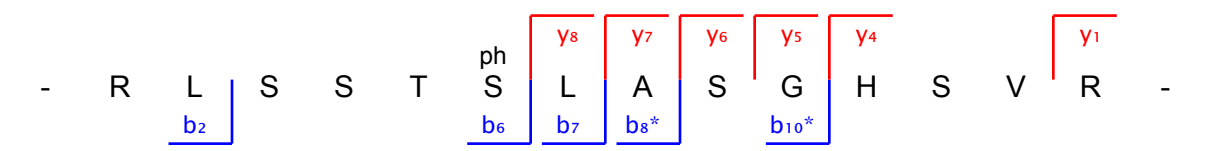

Raw file 20150812\_A375SR\_Phospho\_BR1\_09 Scan 8409 Method FTMS; HCD Score 184.48 m/z 682.29 Gene names ZNF217

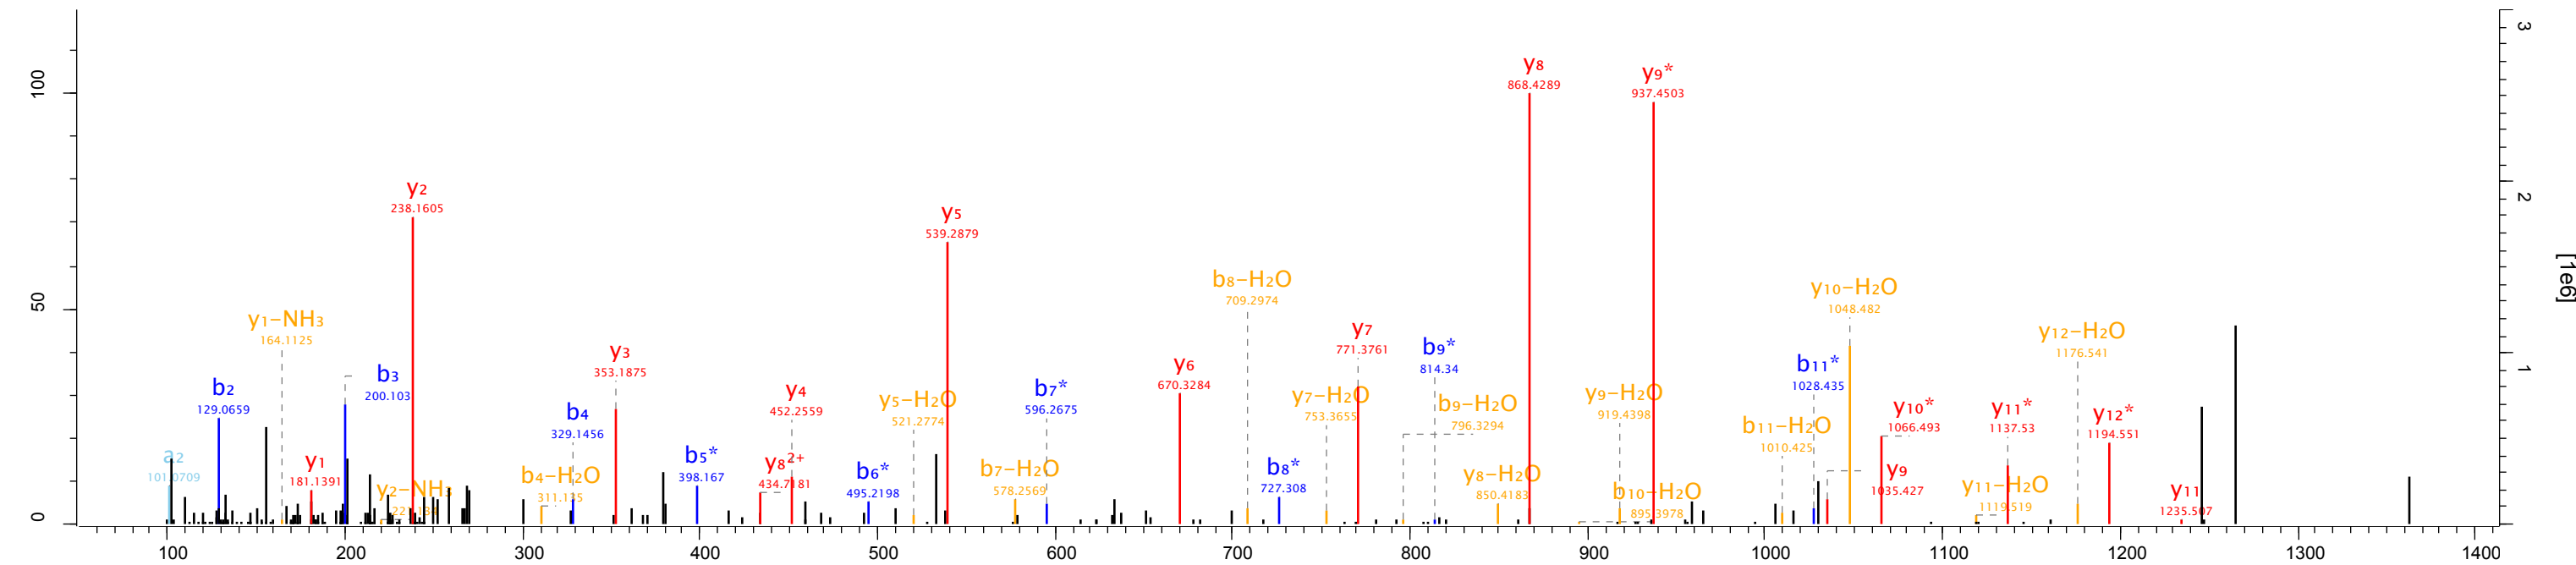

- A y12\* y11 y10\* y9<sup>ph</sup> y8 y7 y6 y5 y4 y3 y2 y1 -

b2 b3 b4 b5\* b6\* b7\* b8\* b9\* b11\*

G A E S P T M S V D G R -

Raw file: 20150812\_A375SR\_Phospho\_BR1\_09  
 Scan: 9839 Method: FTMS; HCD Score: 63.73 m/z: 618.33 Gene names: CEP170

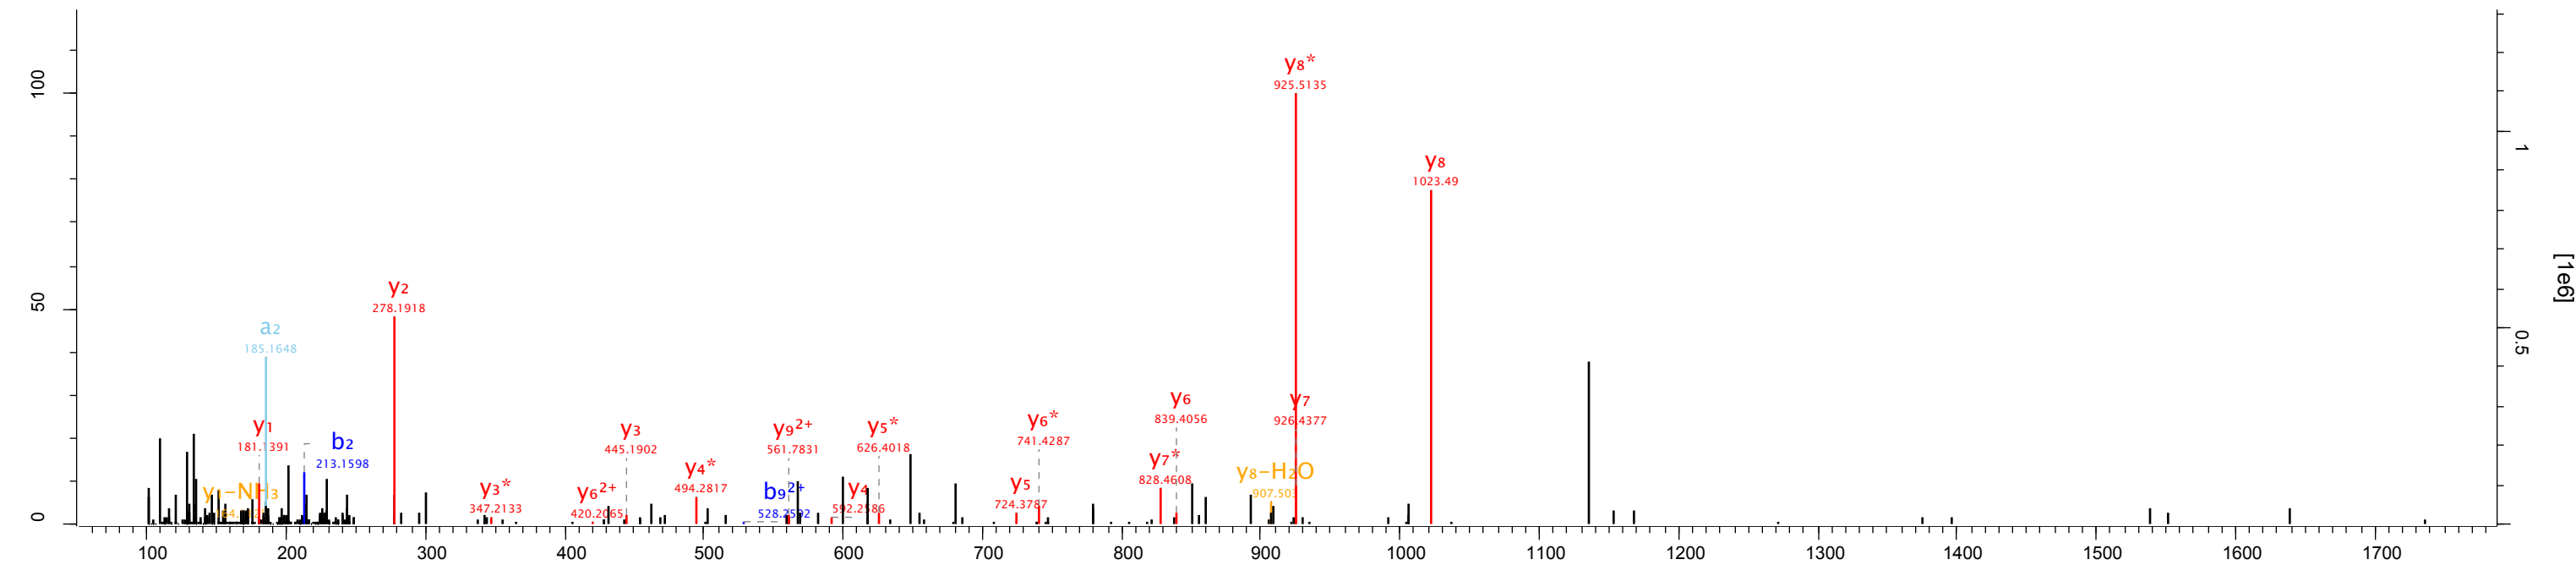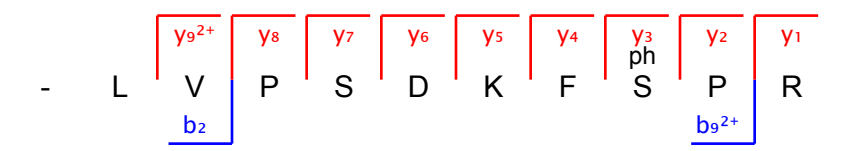

Raw file 20150812\_A375SR\_Phospho\_BR1\_10 Scan 10889 Method FTMS; HCD Score 72.68 m/z 718.35 Gene names DDB2

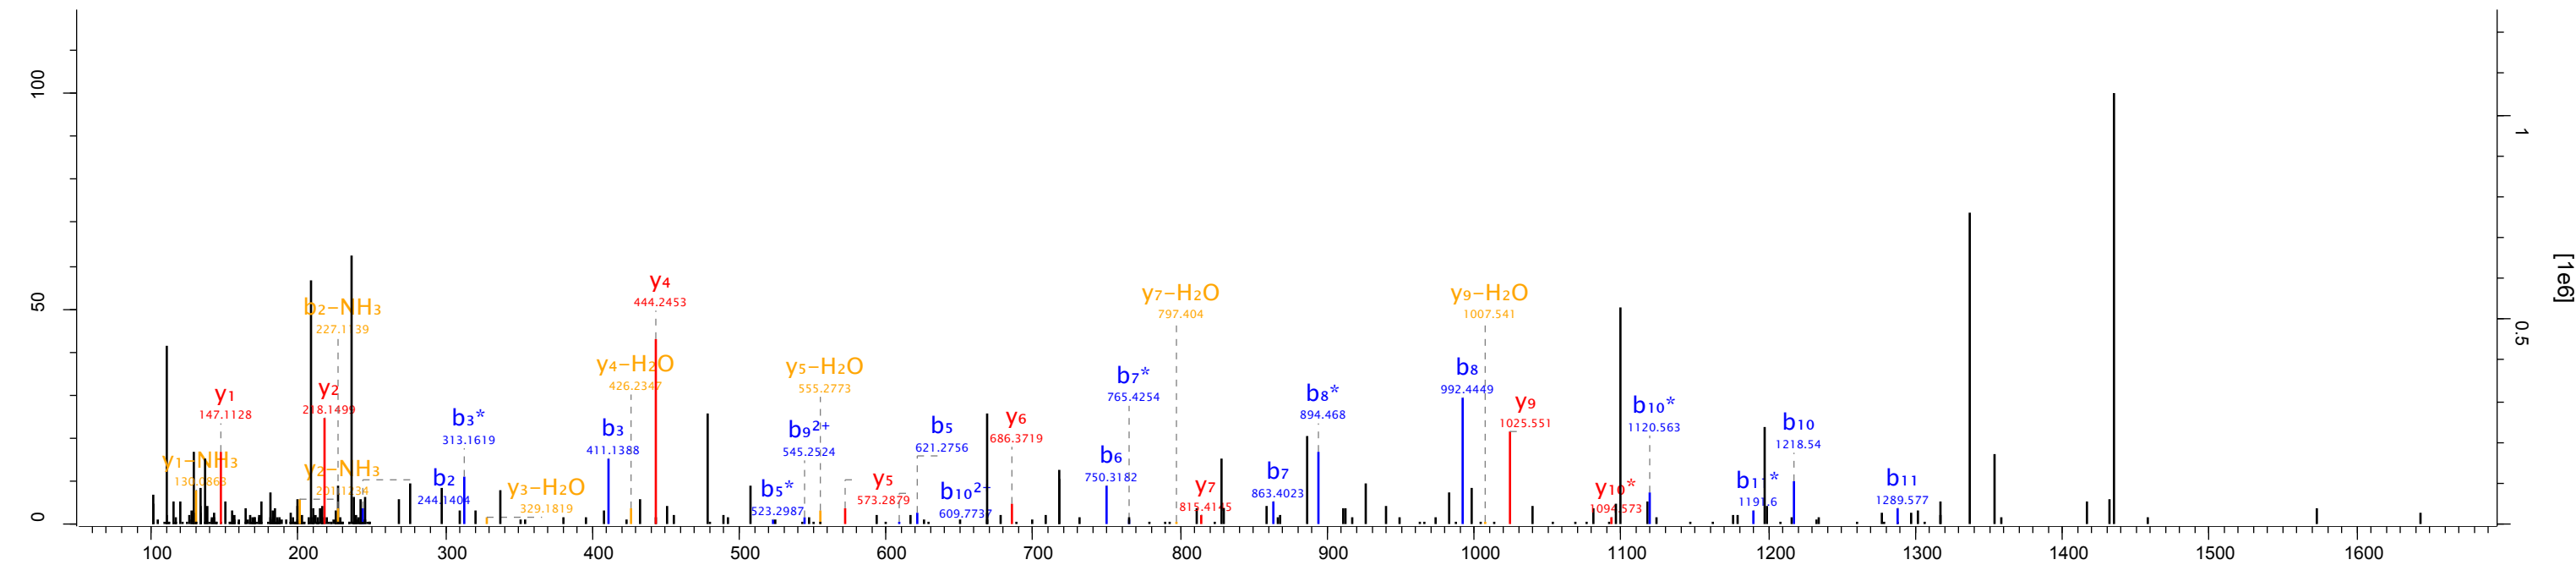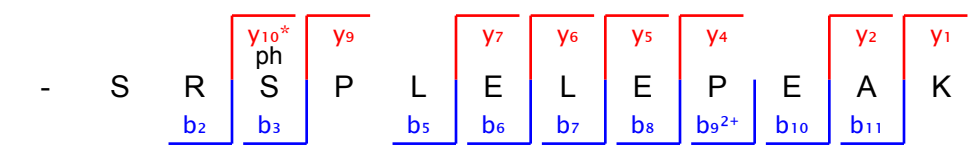



Raw file: 20150812\_A375SR\_Phospho\_BR1\_10  
 Scan: 14119 Method: FTMS; HCD Score: 196.65 m/z: 697.86 Gene names: KLC1

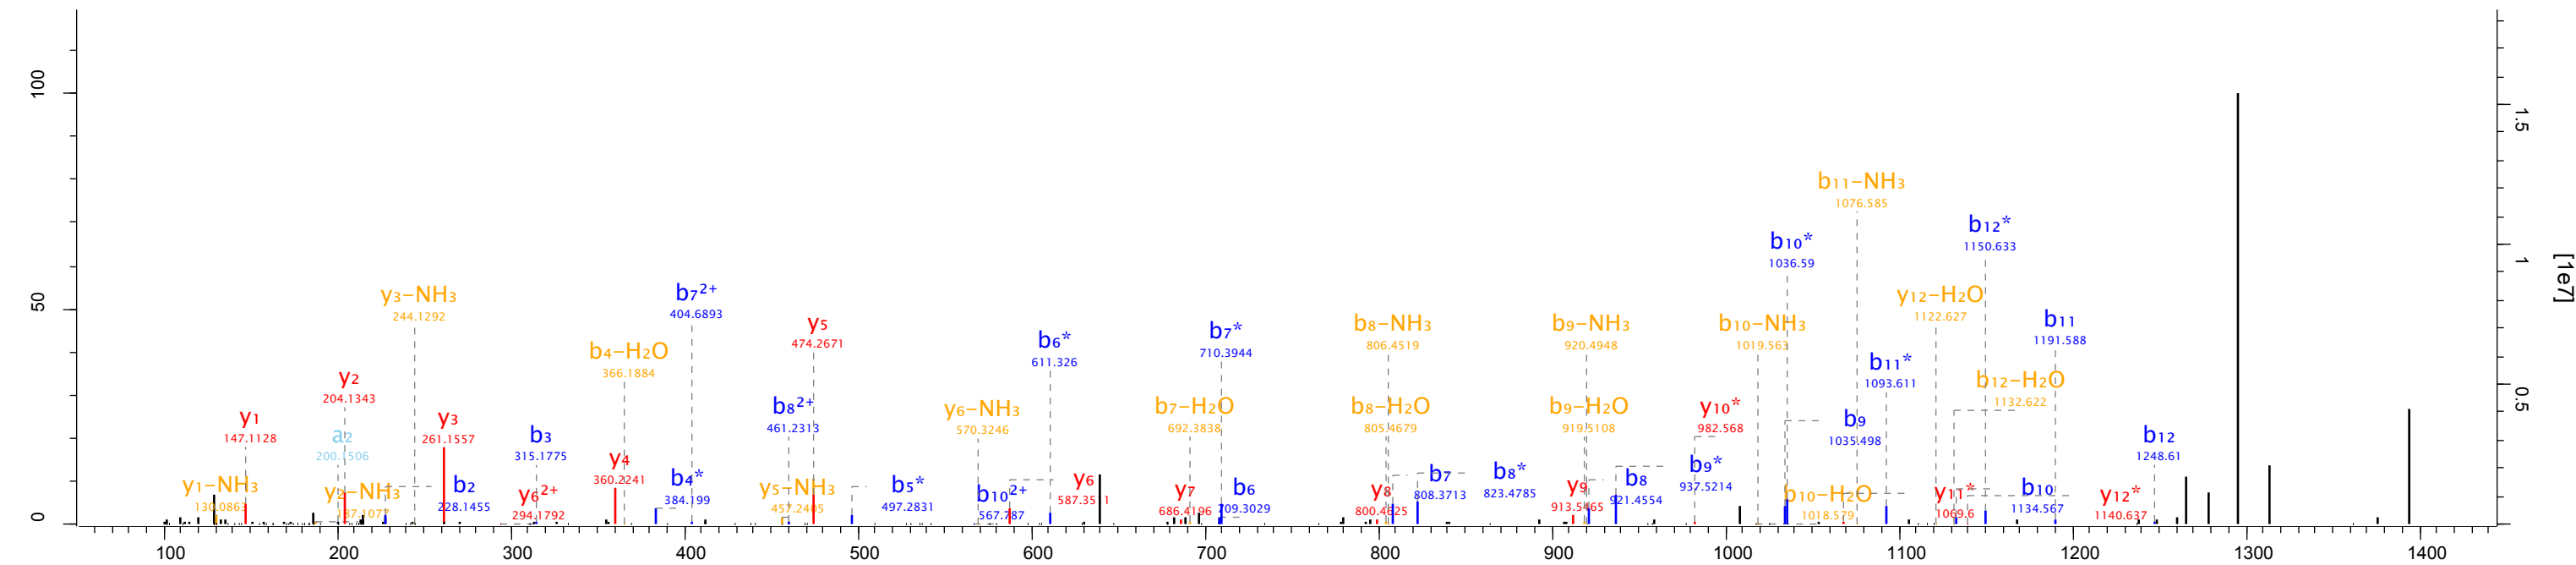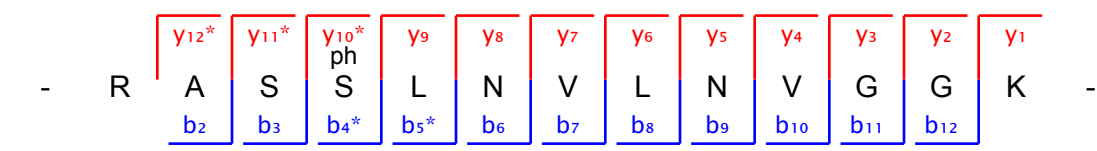

Raw file: 20150812\_A375SR\_Phospho\_BR1\_10  
 Scan: 15169 Method: FTMS; HCD Score: 187.78 m/z: 790.86 Gene names: HN1L

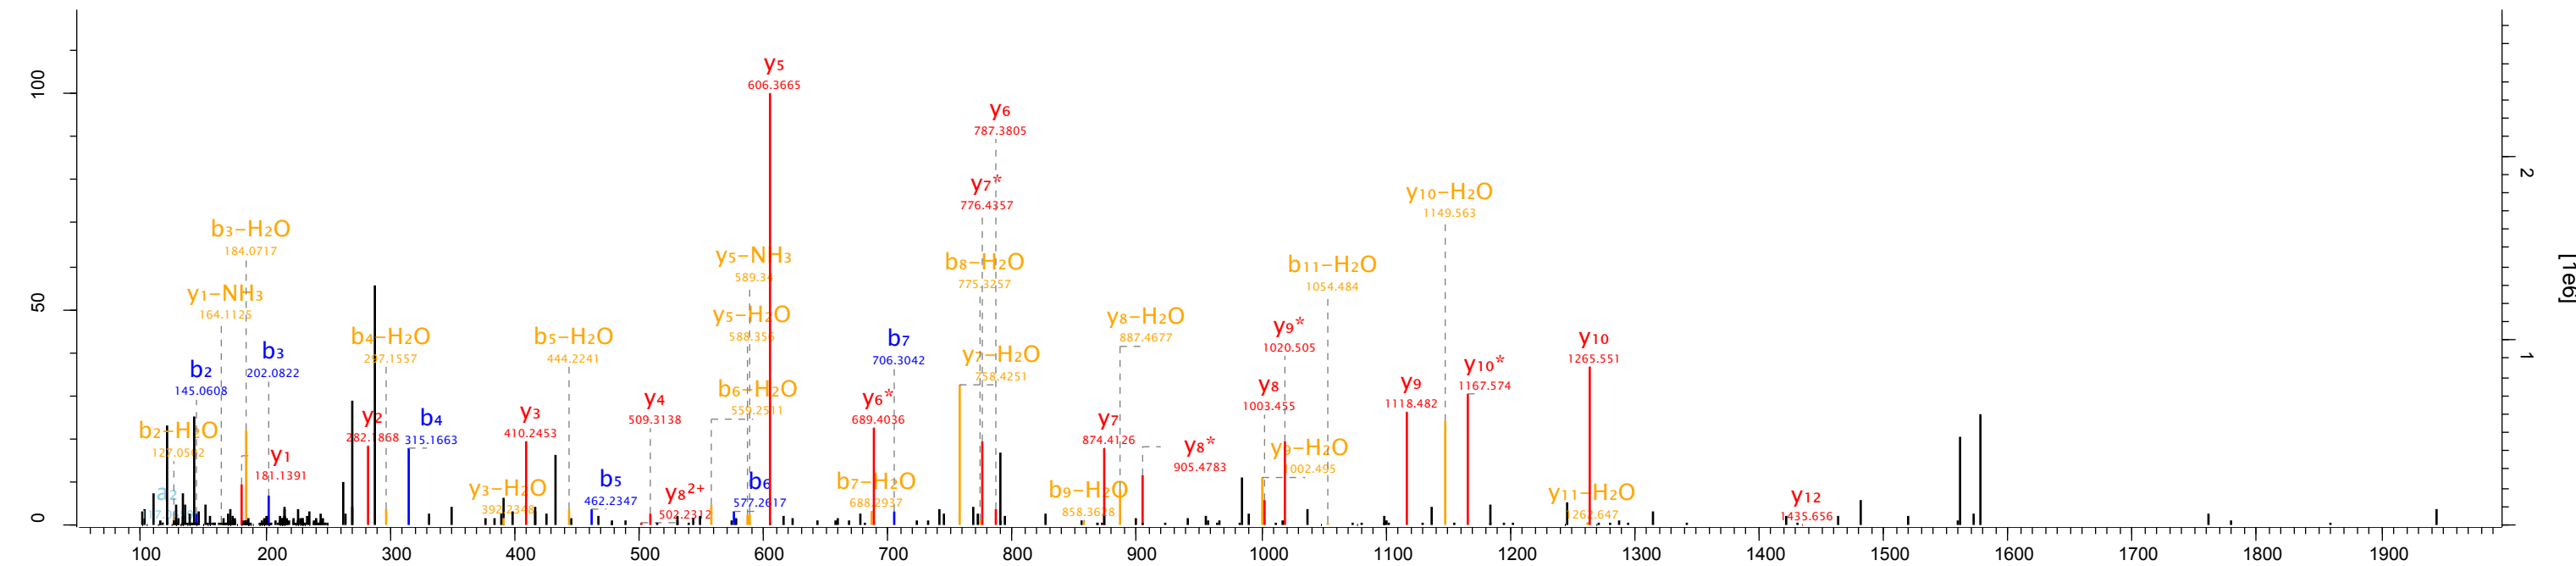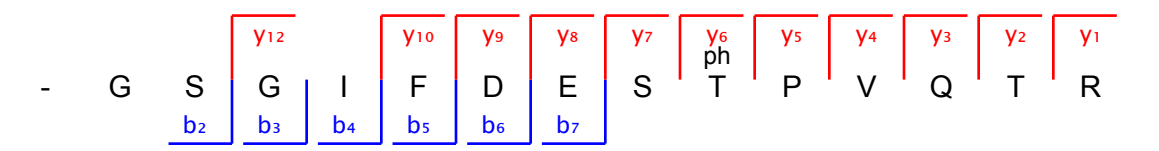

Raw file: 20150812\_A375SR\_Phospho\_BR1\_10  
 Scan: 15329 Method: FTMS; HCD Score: 95.2 m/z: 719.85 Gene names: PKP4

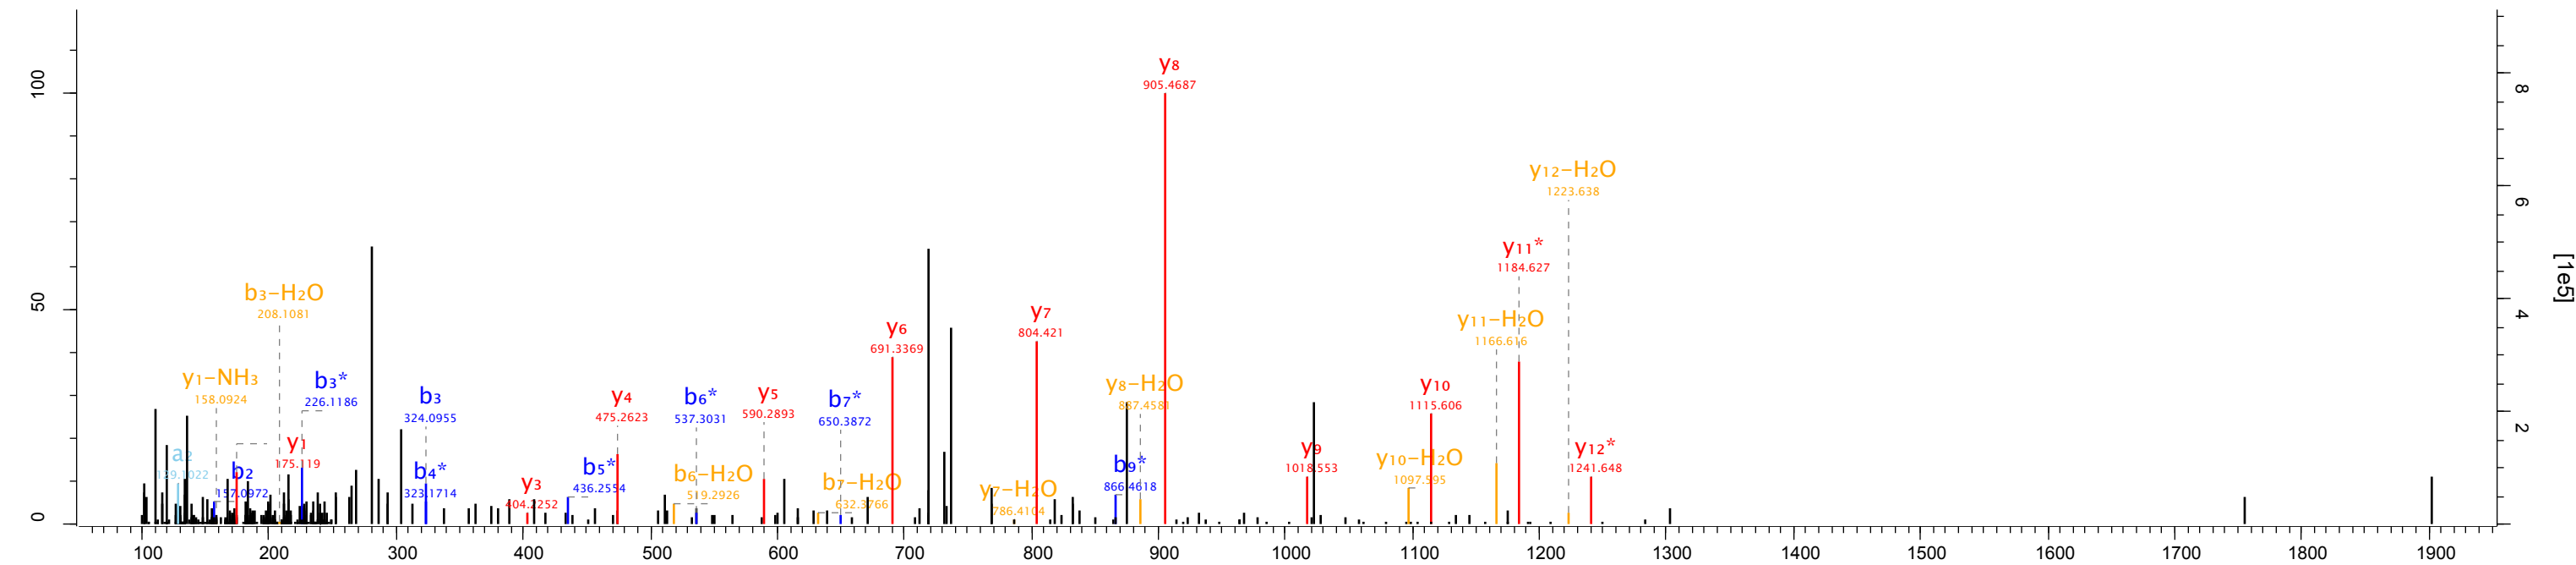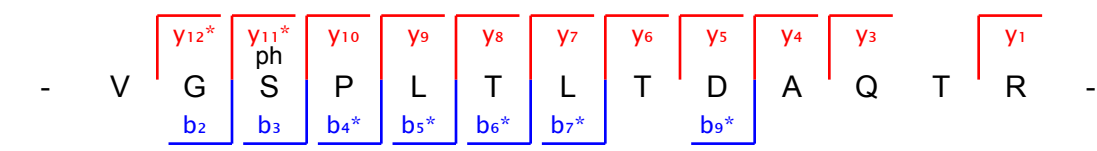

Raw file  
20150812\_A375SR\_Phospho\_BR1\_10

Scan 18249 Method FTMS; HCD Score 246.77 m/z 847.05 Gene names TLN1

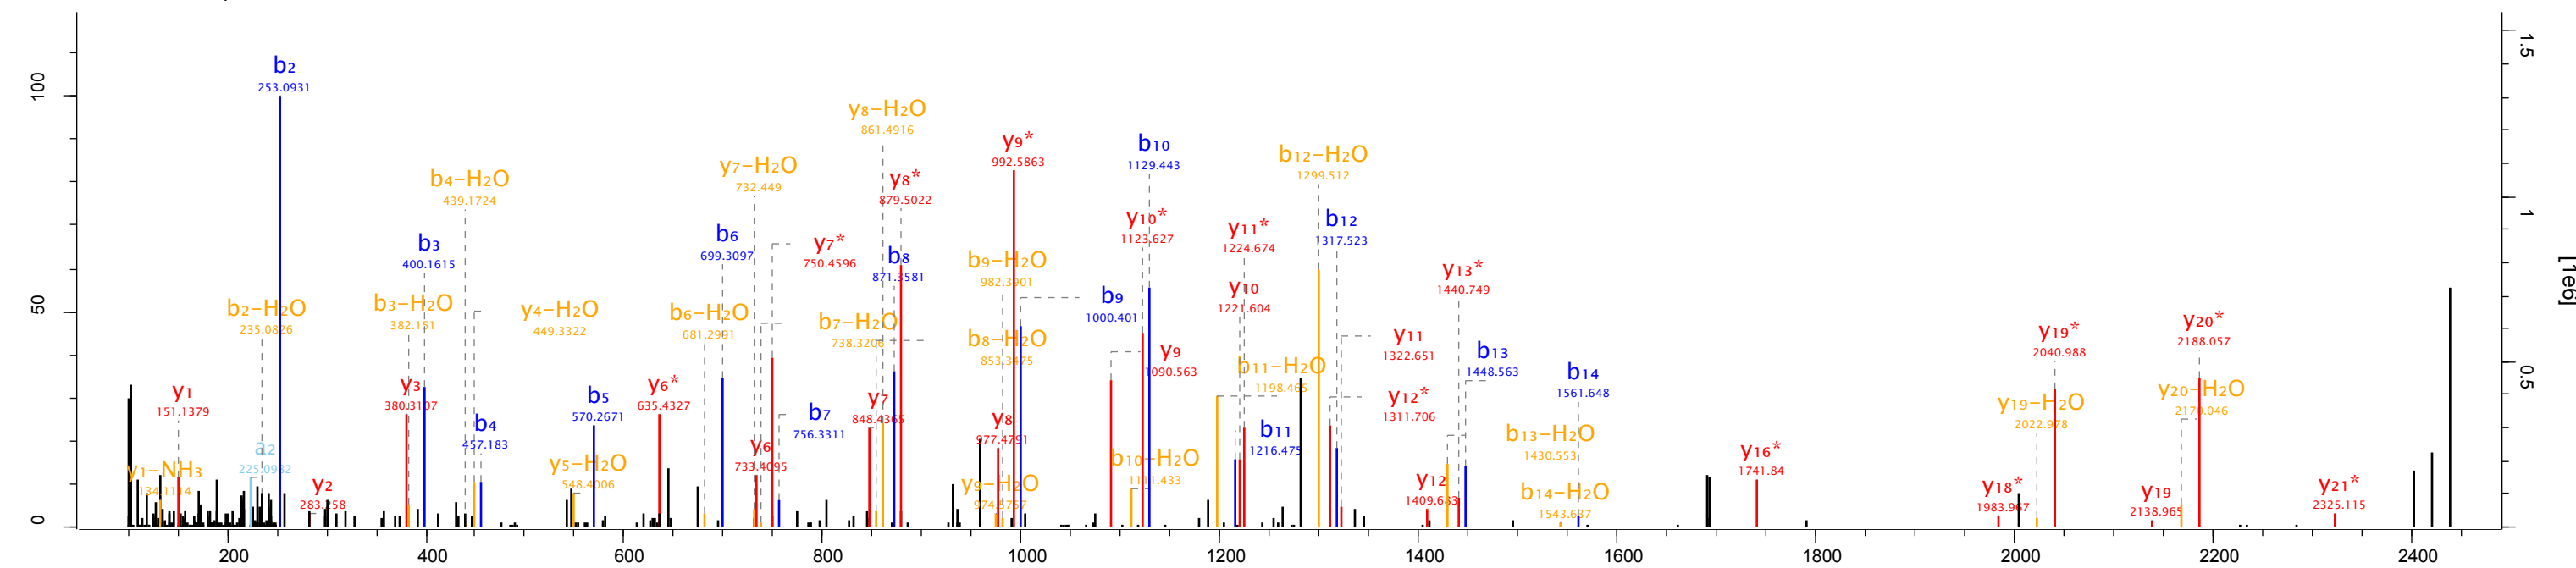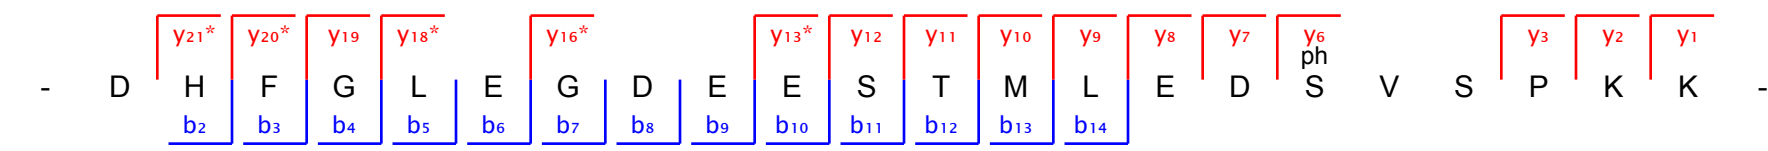

Raw file: 20150812\_A375SR\_Phospho\_BR1\_10  
 Scan: 23169 Method: FTMS; HCD Score: 107.75 m/z: 797.38 Gene names: SSH1

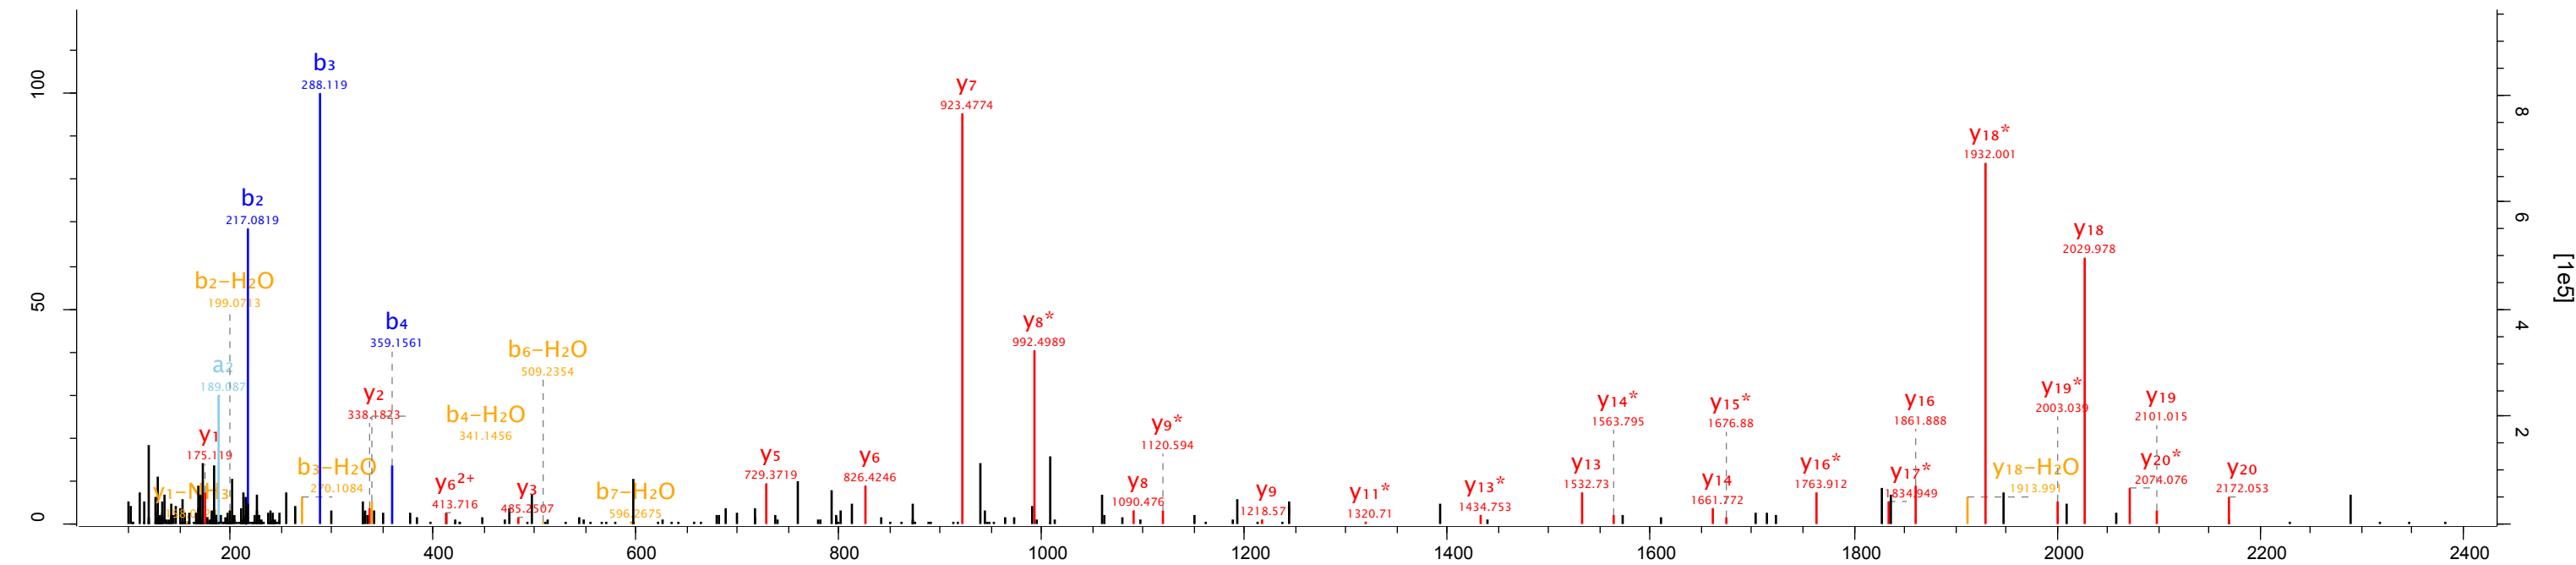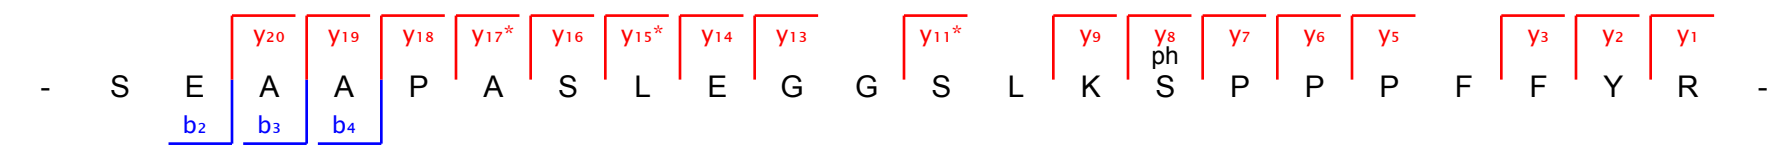

Raw file  
20150812\_A375SR\_Phospho\_BR1\_10

Scan Method Score m/z Gene names  
5229 FTMS; HCD 428.19 1244.53 SSB

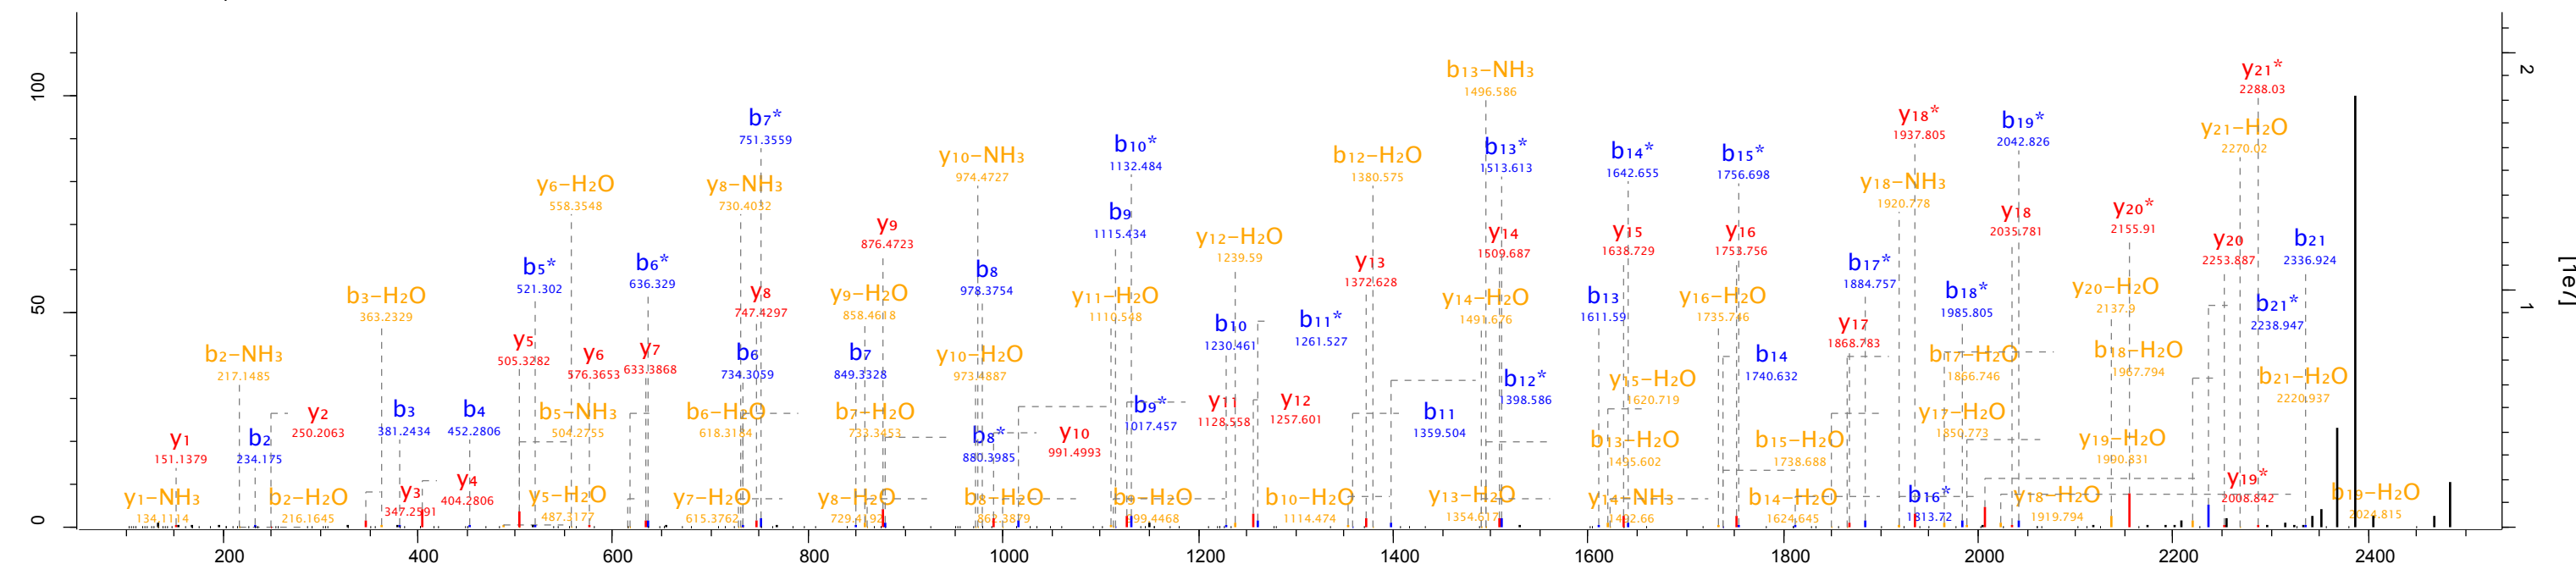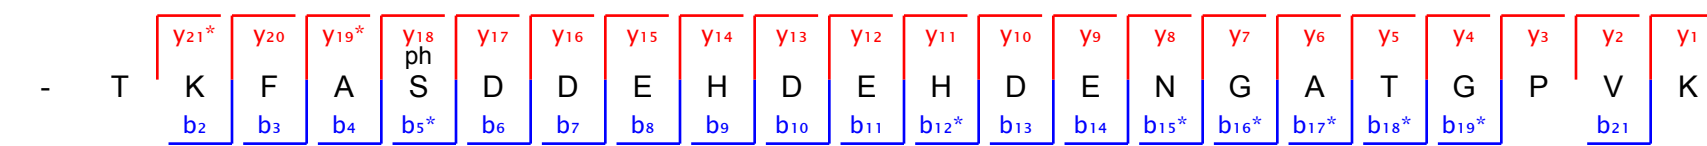

Raw file  
 20150812\_A375SR\_Phospho\_BR1\_10  
 Scan 7109 Method FTMS; HCD Score 75.21 m/z 614.61 Gene names SERBP1

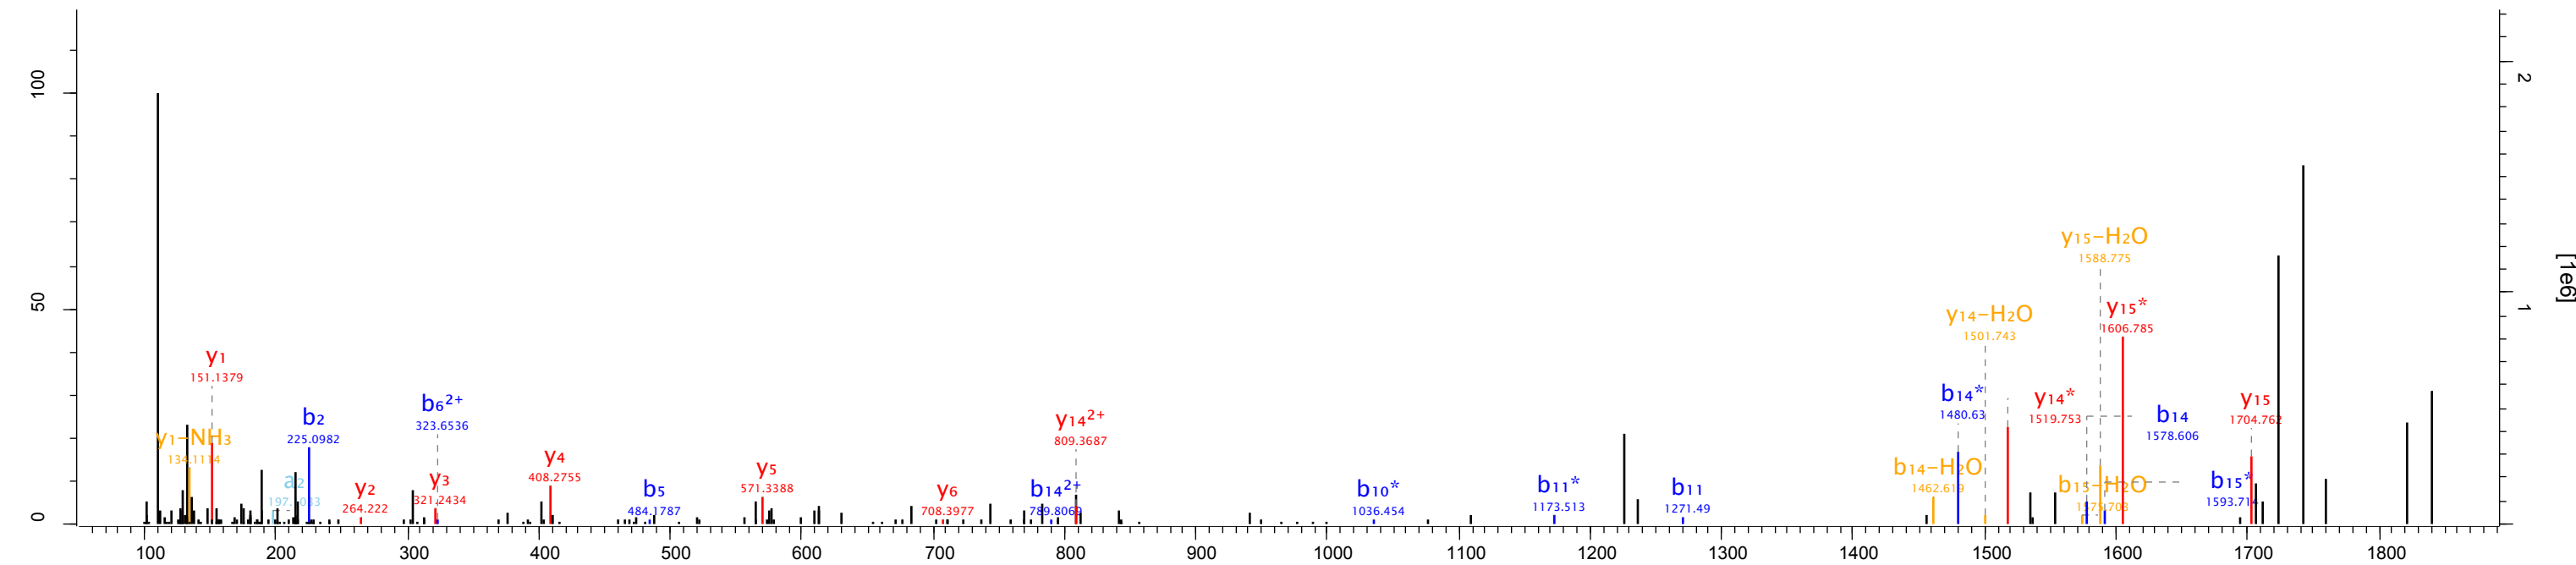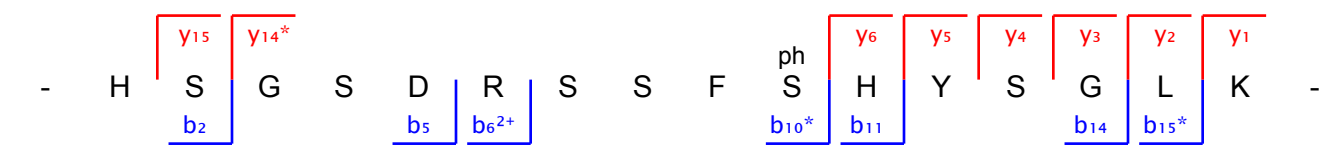

Raw file: 20150812\_A375SR\_Phospho\_BR1\_10  
 Scan: 8089 Method: FTMS; HCD Score: 269.25 m/z: 833.91 Gene names: ATXN2

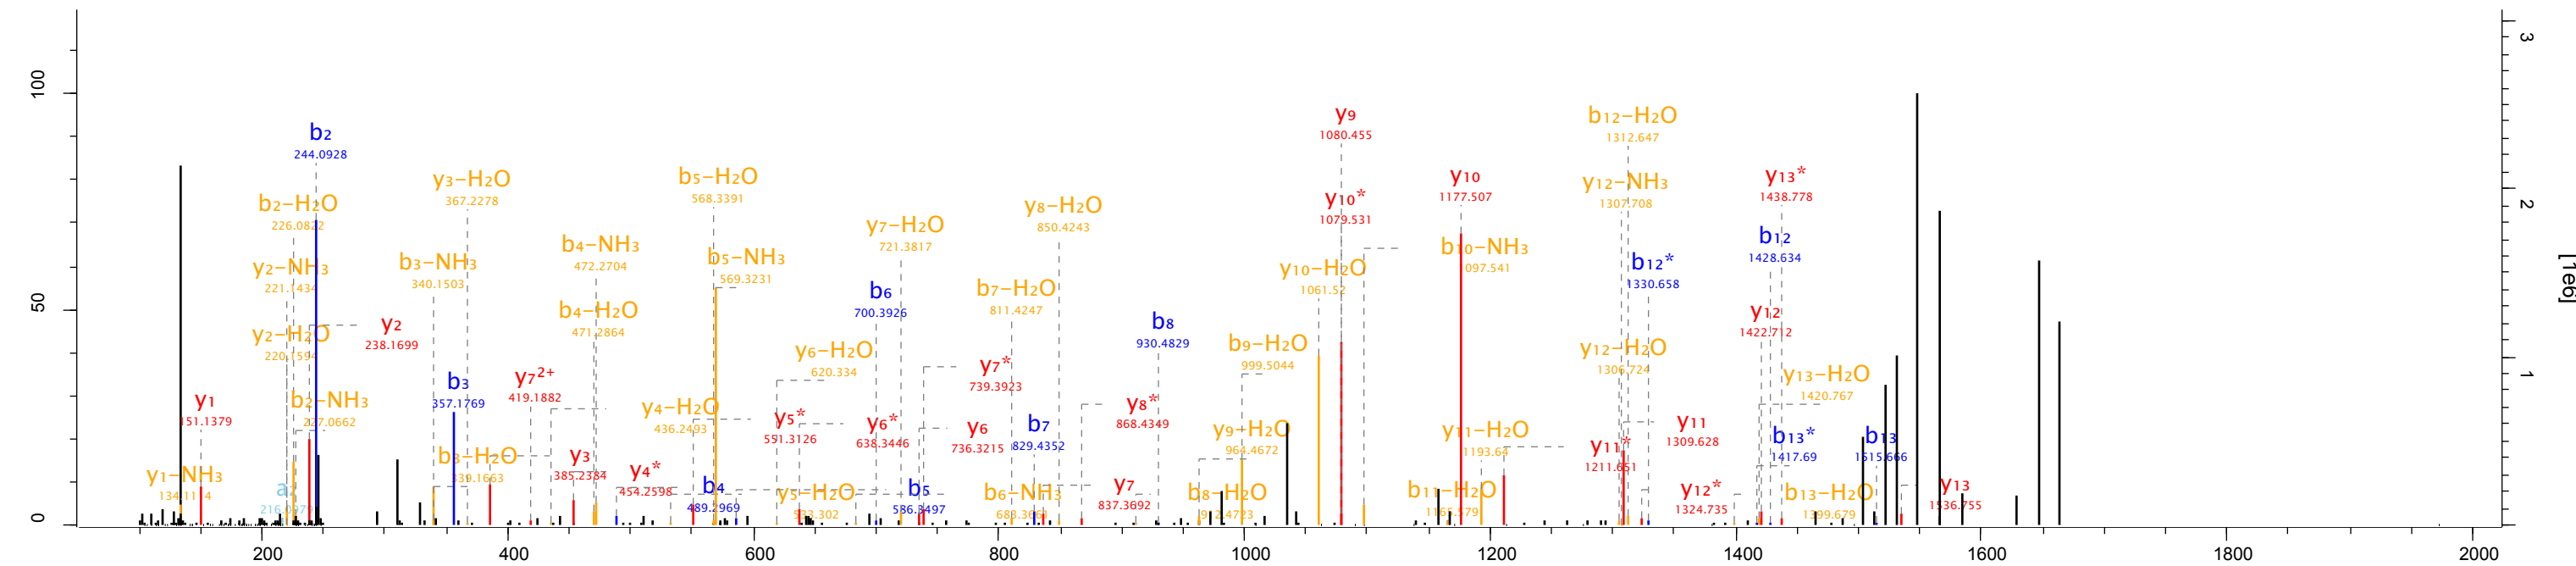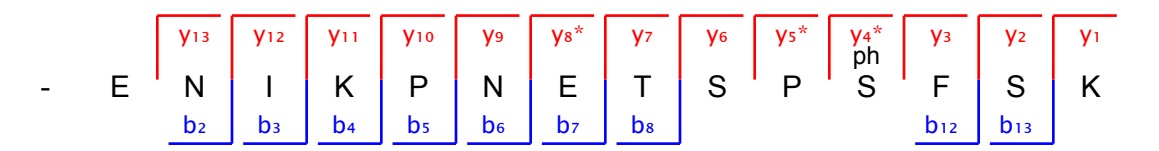



Raw file 20150812\_A375SR\_Phospho\_BR1\_10 Scan 9409 Method FTMS; HCD Score 200.2 m/z 873.39 Gene names ACLY

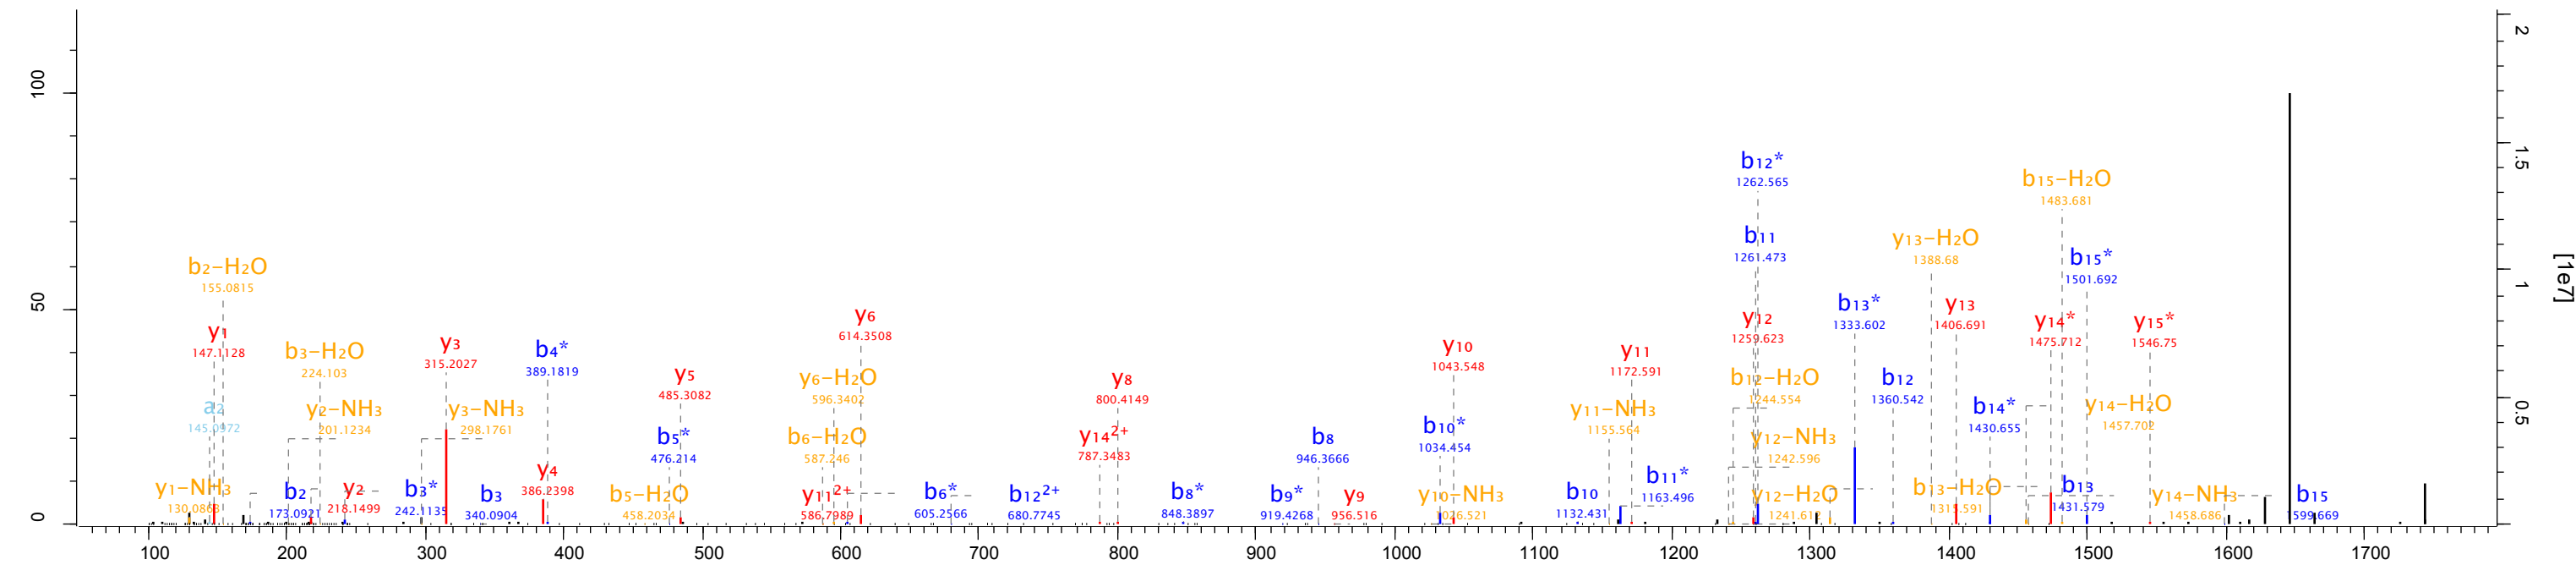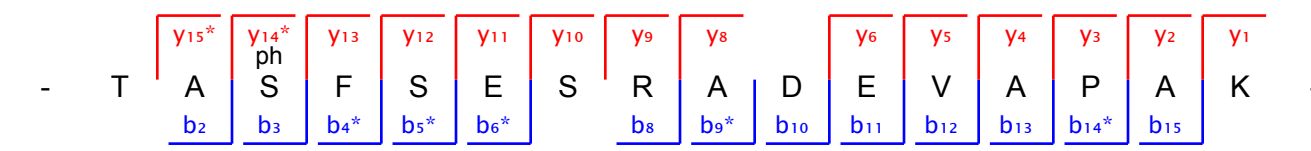

Raw file Scan Method Score m/z Gene names  
 20150814\_A375SR\_Phospho\_BR2\_02 10400 FTMS; HCD 93.17 1011.87 SPAG9

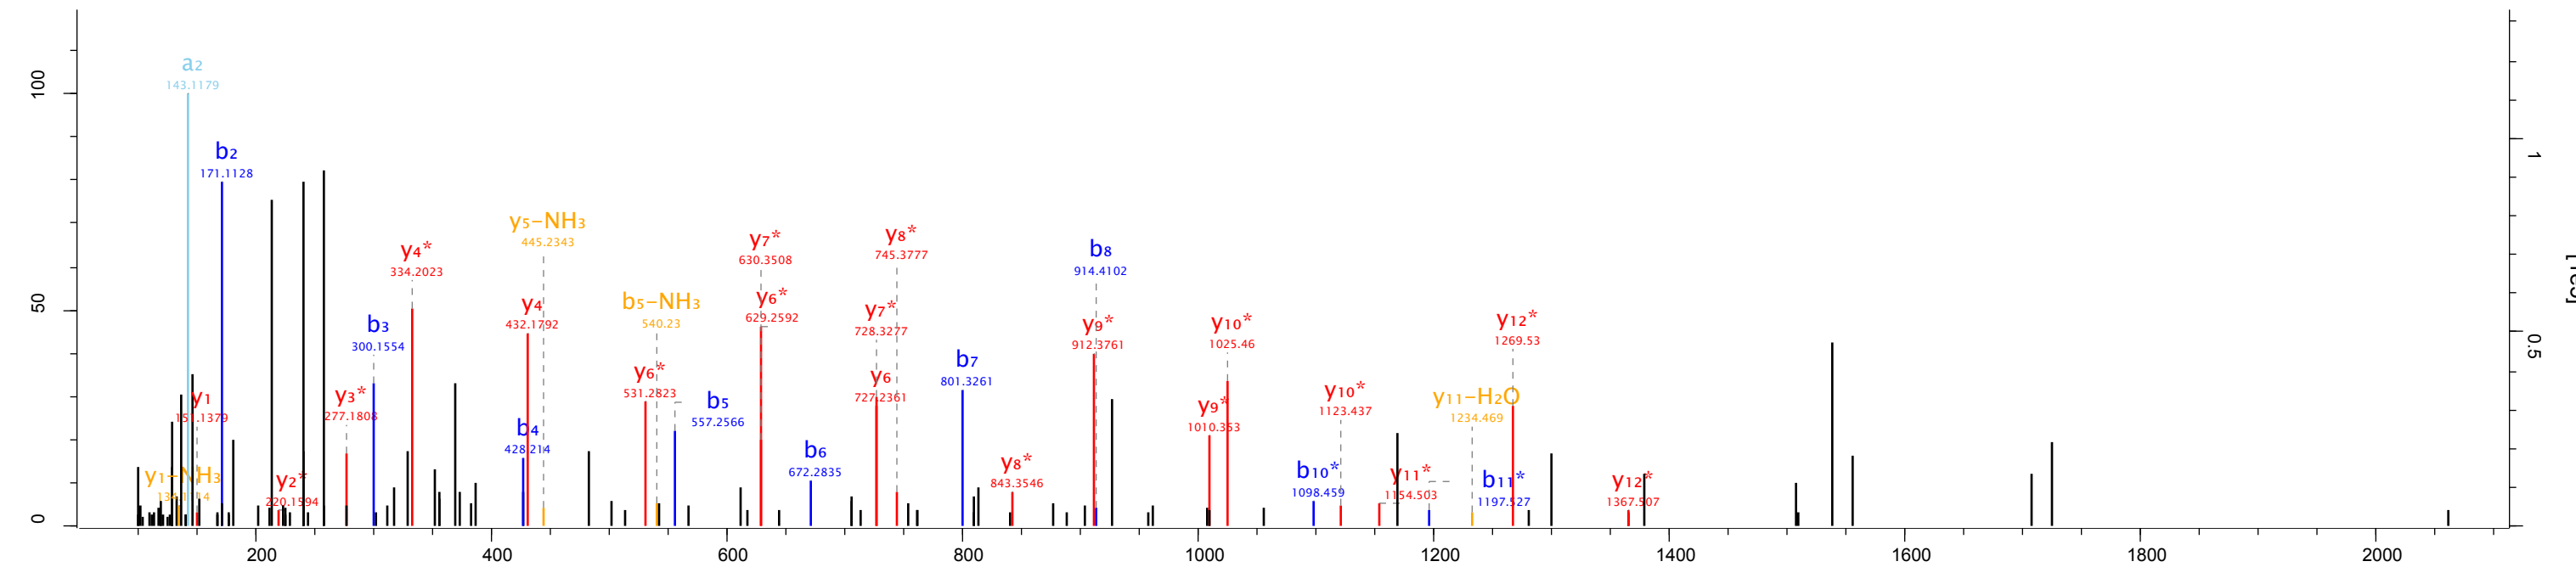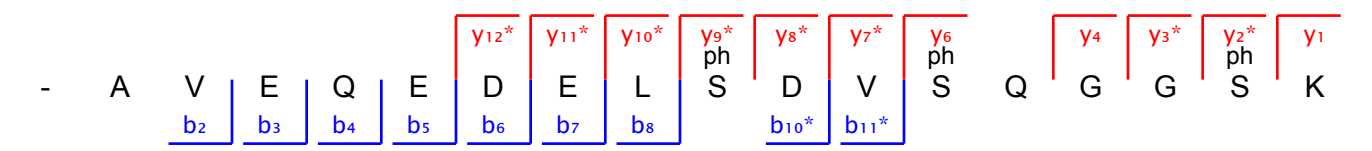

Raw file: 20150814\_A375SR\_Phospho\_BR2\_02  
 Scan: 10540 Method: FTMS; HCD Score: 93.57 m/z: 836.01 Gene names: PRRC2C

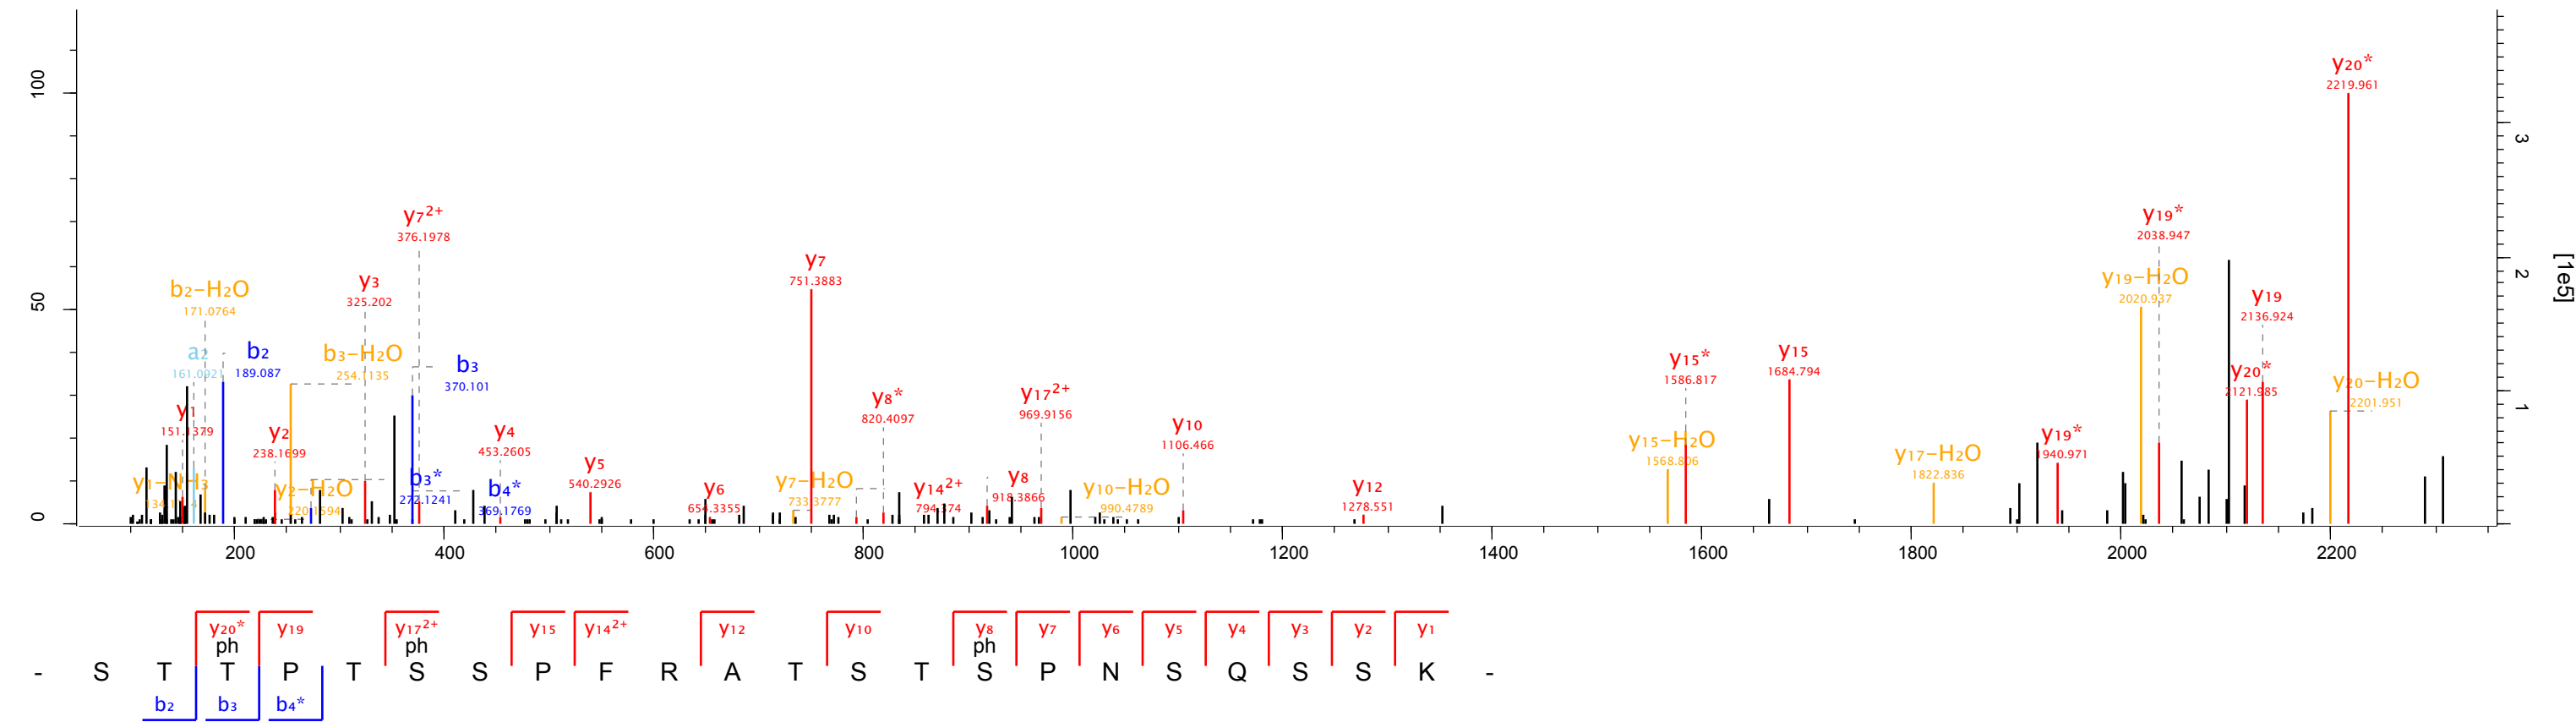

Raw file 20150814\_A375SR\_Phospho\_BR2\_02 Scan 11050 Method FTMS; HCD Score 127.3 m/z 639.25 Gene names TLE4

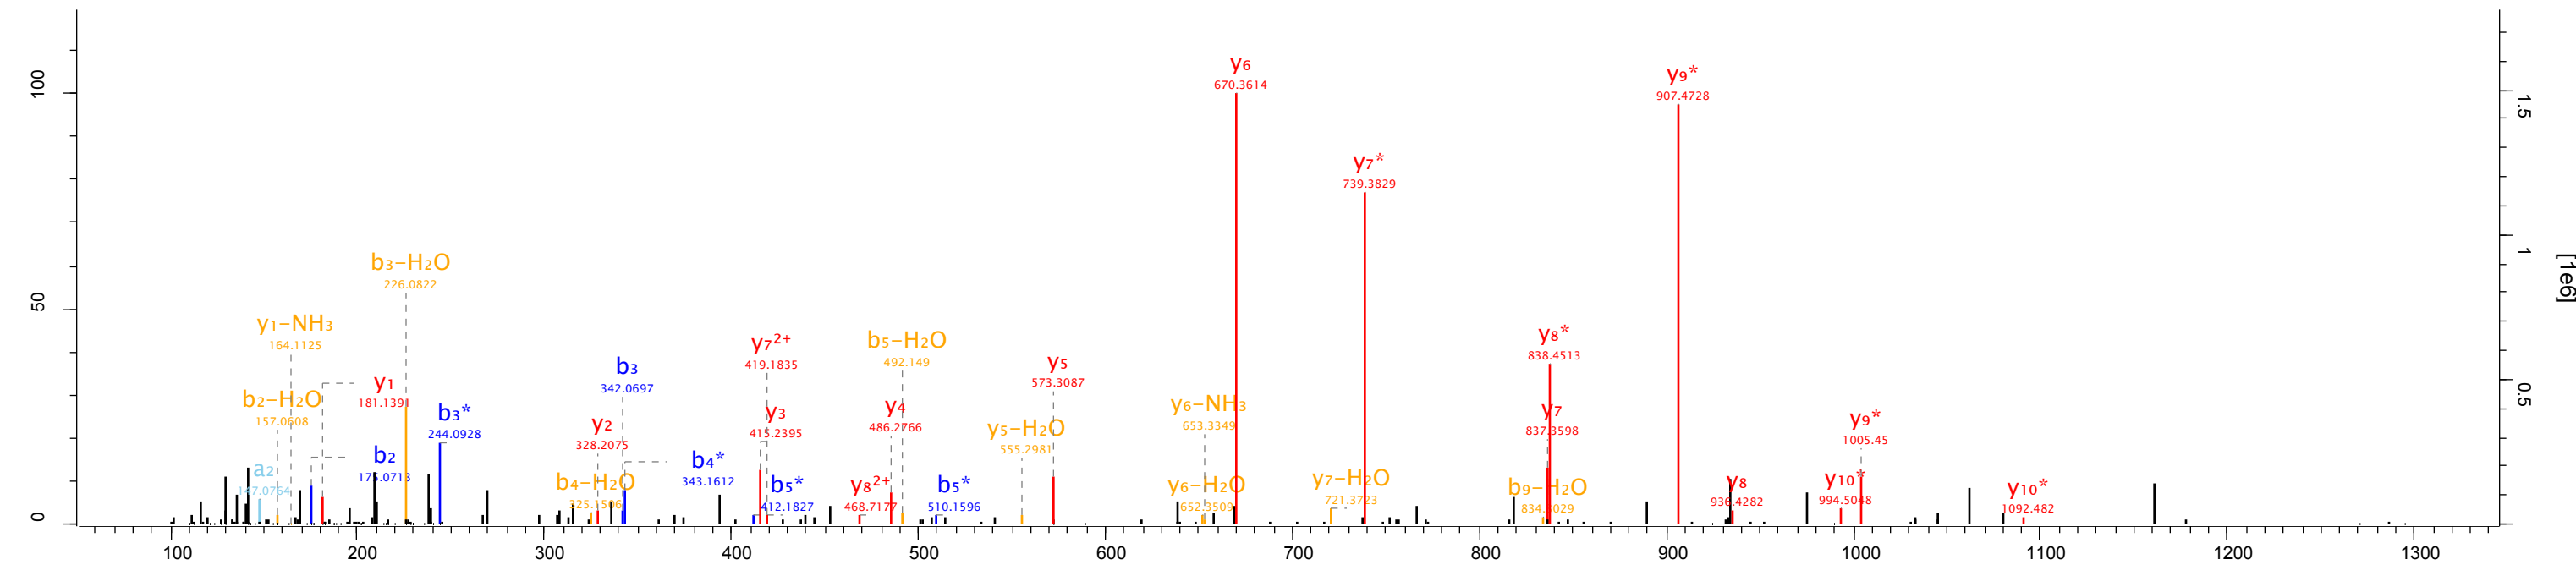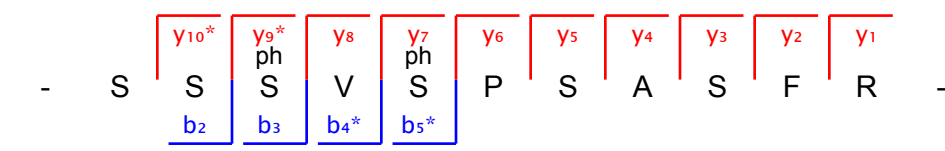

Raw file  
20150814\_A375SR\_Phospho\_BR2\_02

Scan Method Score m/z Gene names  
11360 FTMS; HCD 96.79 1080.9 ERCC6L

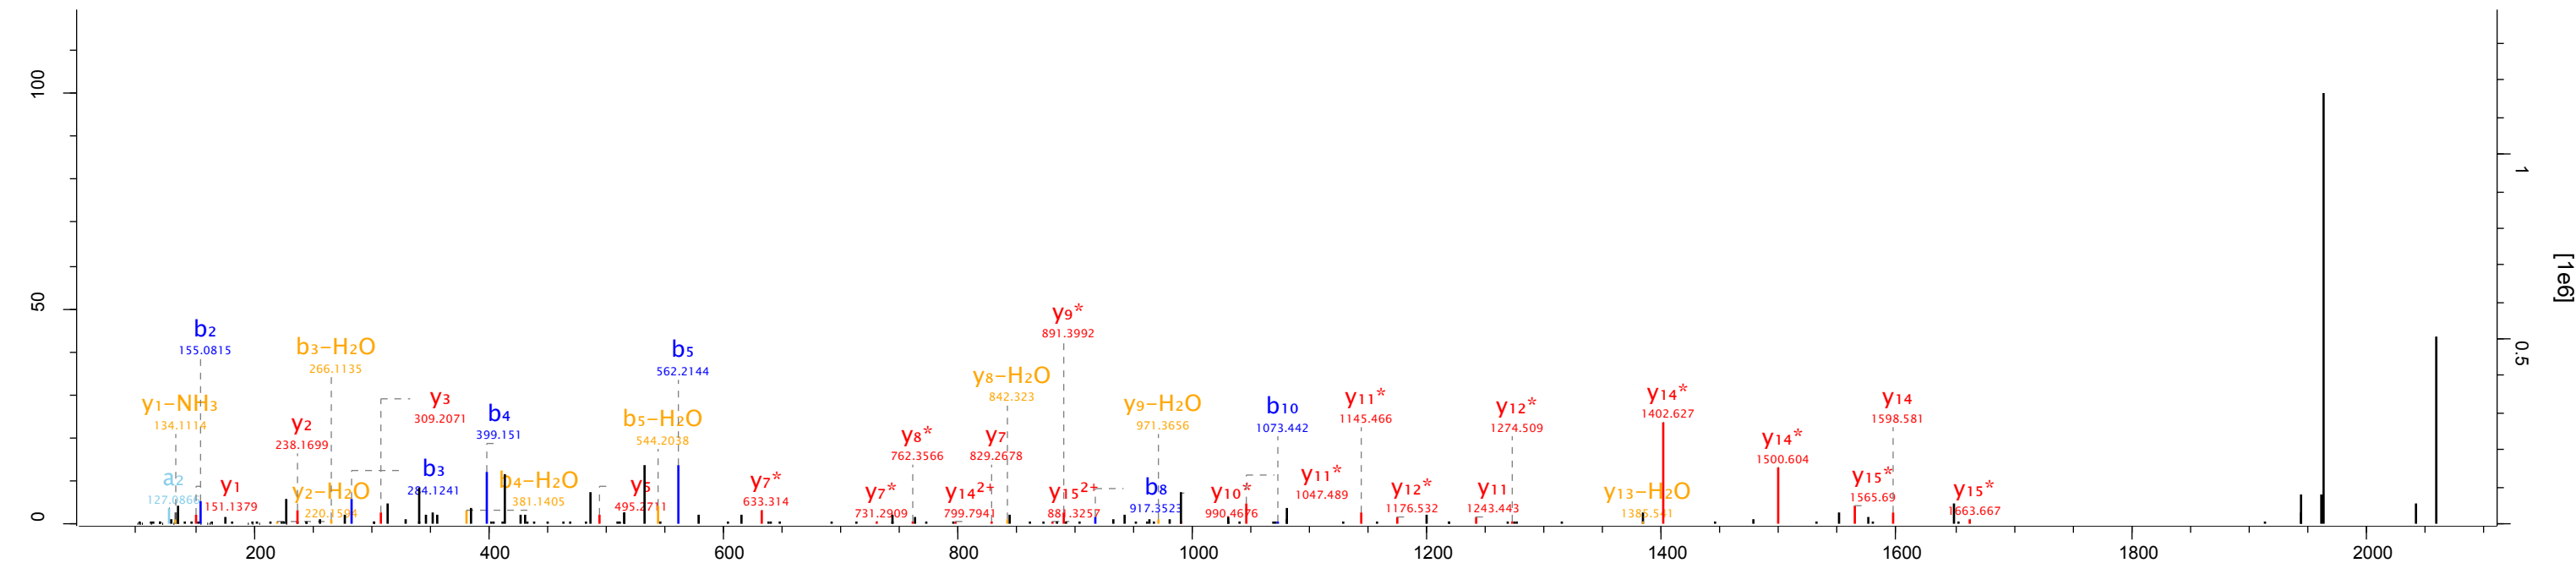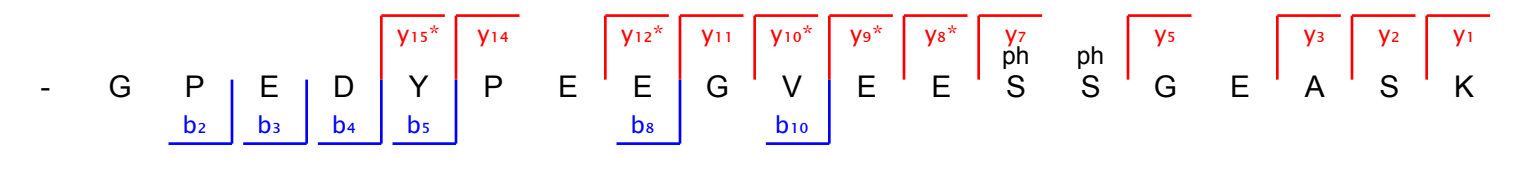

Raw file 20150814\_A375SR\_Phospho\_BR2\_02 Scan 11690 Method FTMS; HCD Score 68.64 m/z 1094.79 Gene names MIER1

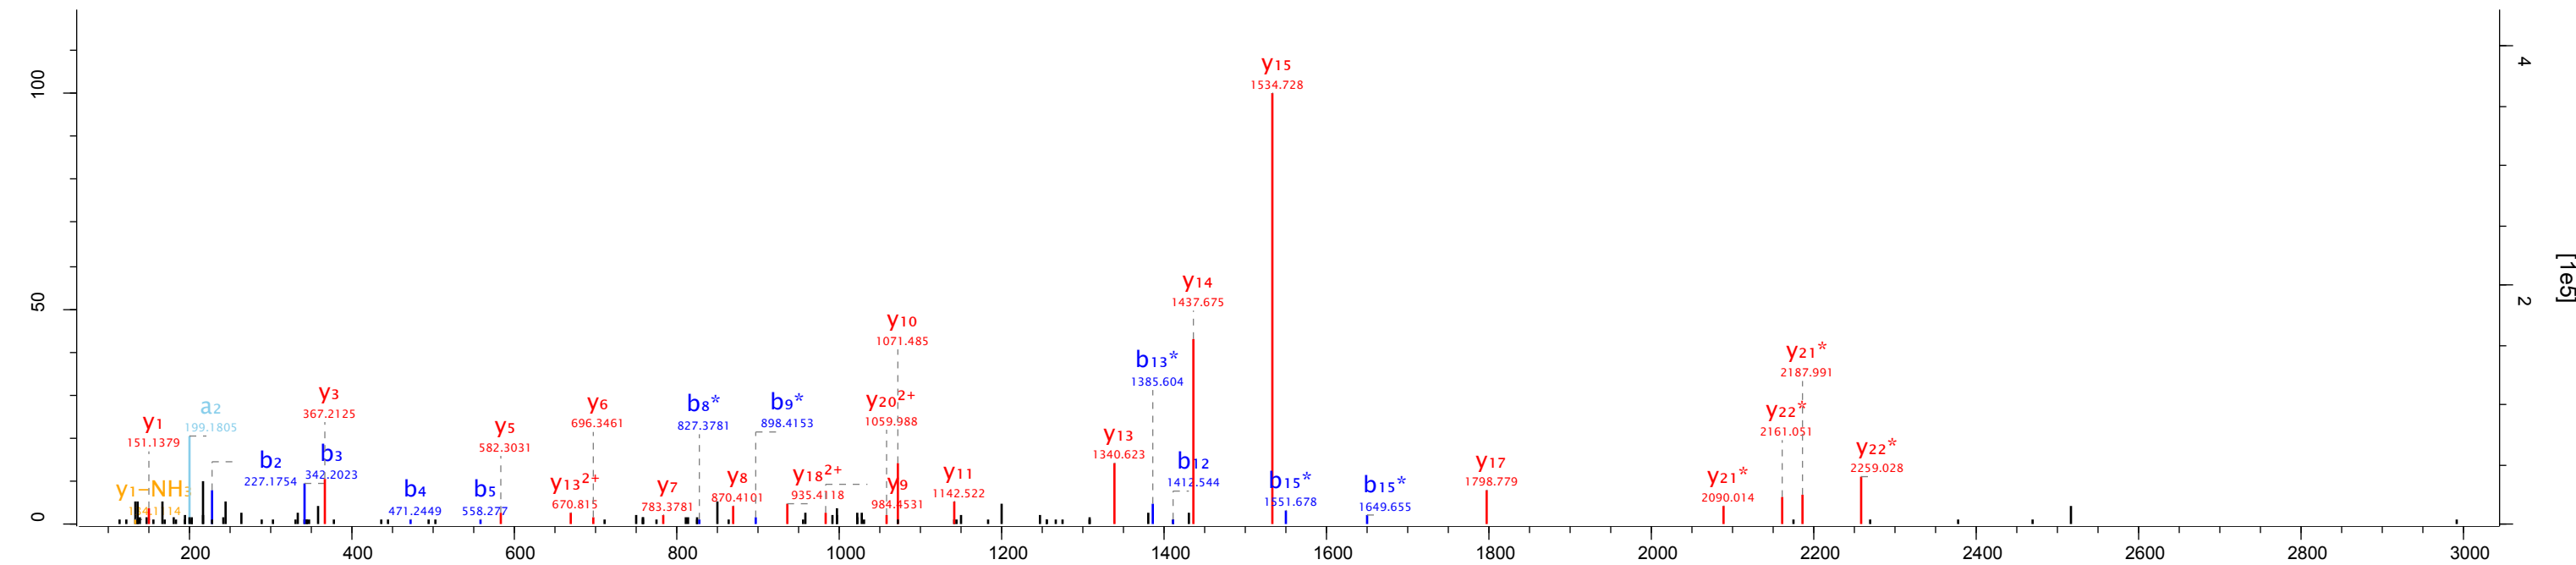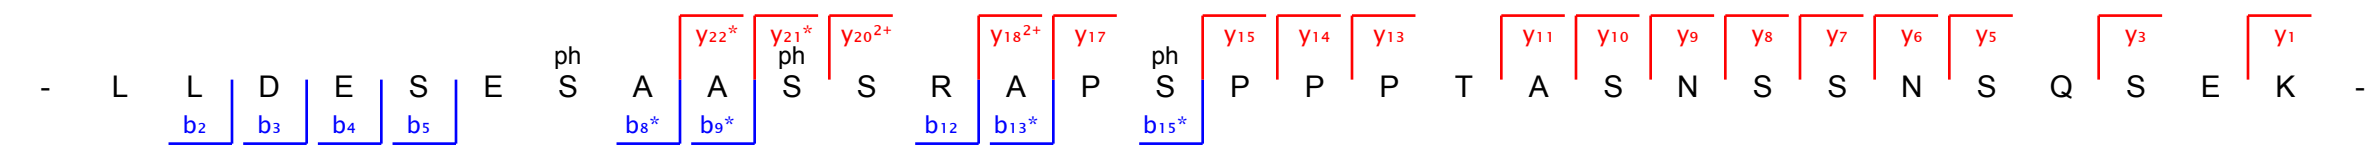



Raw file 20150814\_A375SR\_Phospho\_BR2\_02 Scan 13210 Method FTMS; HCD Score 57.31 m/z 1025.41 Gene names FNBP4

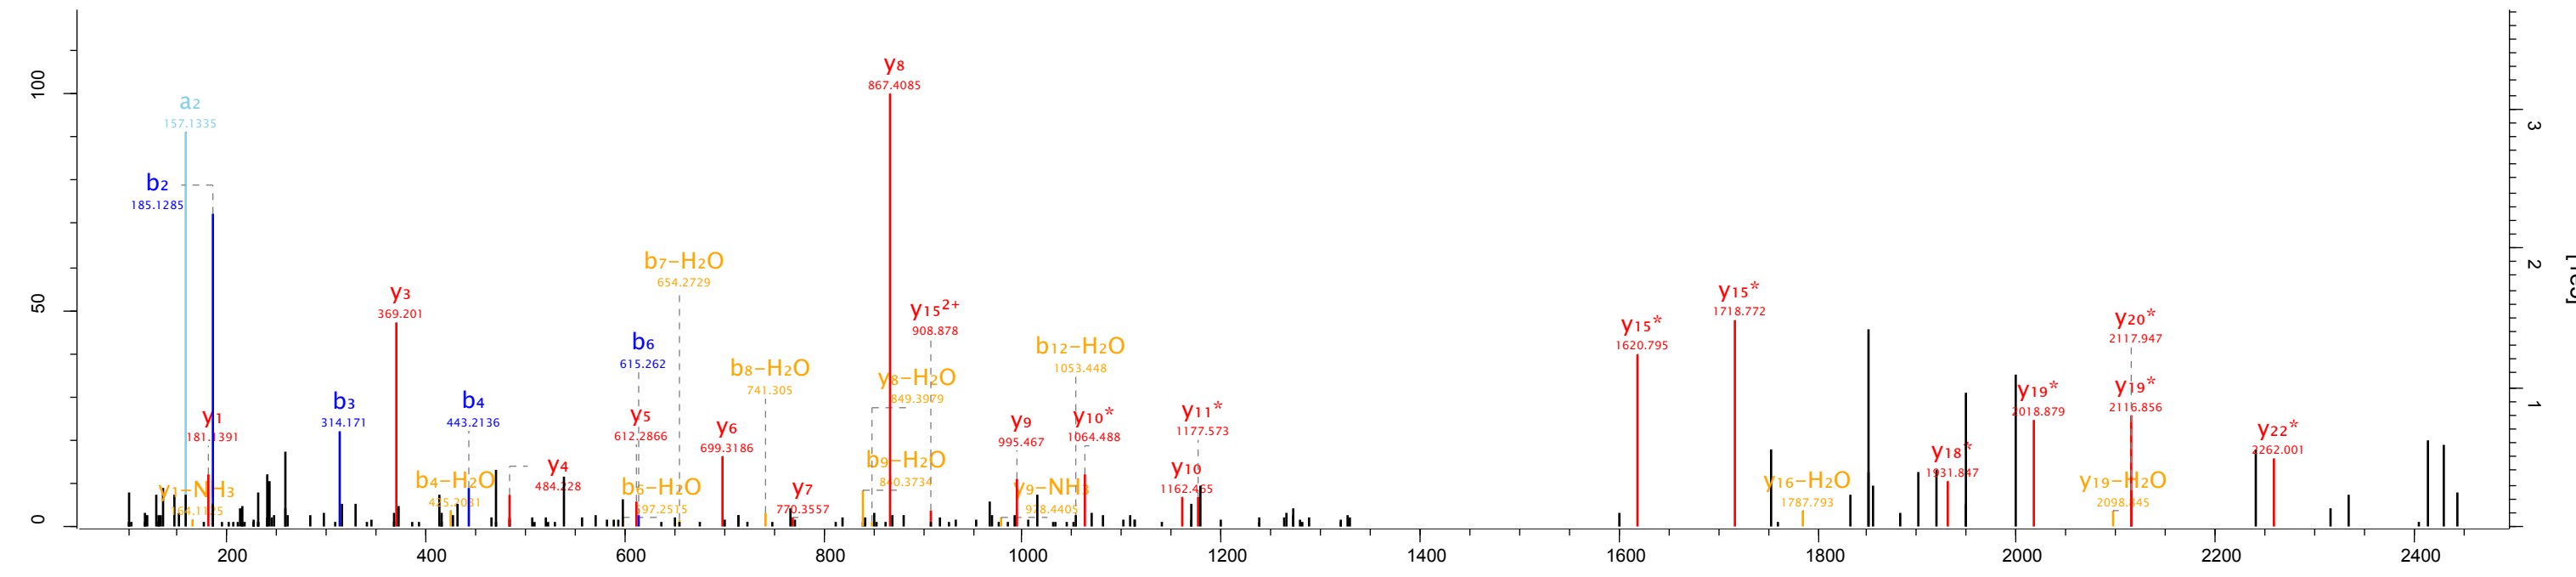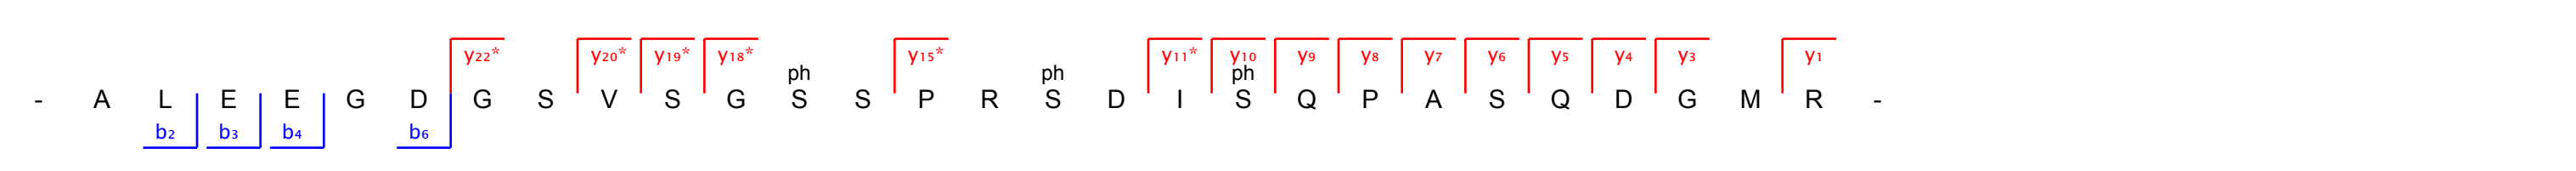



Raw file: 20150814\_A375SR\_Phospho\_BR2\_02  
 Scan: 13850 Method: FTMS; HCD Score: 60.32 m/z: 891.37 Gene names: ABLIM1

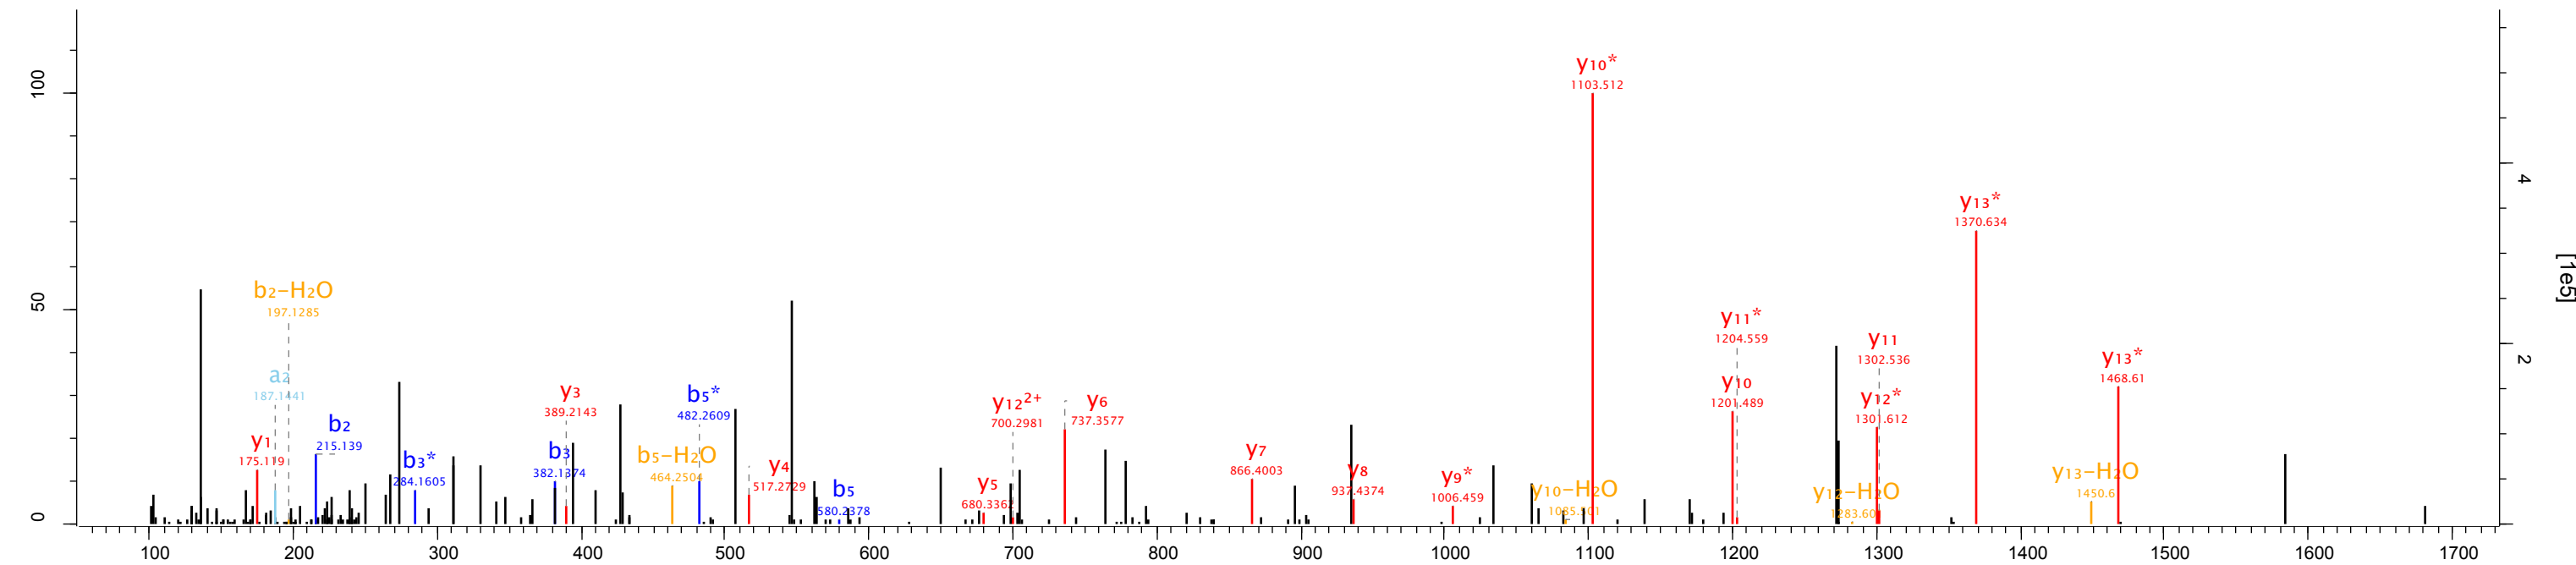

Protein sequence: - T L L S P T P S A E G Y Q D V R -

Fragmentation mapping:

- b2: L
- b3: L S
- b5: T P
- y1: R
- y3: D
- y4: V
- y5: Y
- y6: G
- y7: E
- y8: A
- y9\*: S
- y10: P
- y11: T
- y12\*: P
- y13\*: S

Raw file 20150814\_A375SR\_Phospho\_BR2\_02 Scan 14210 Method FTMS; HCD Score 173.45 m/z 1029.4 Gene names PEX19;DCAF8

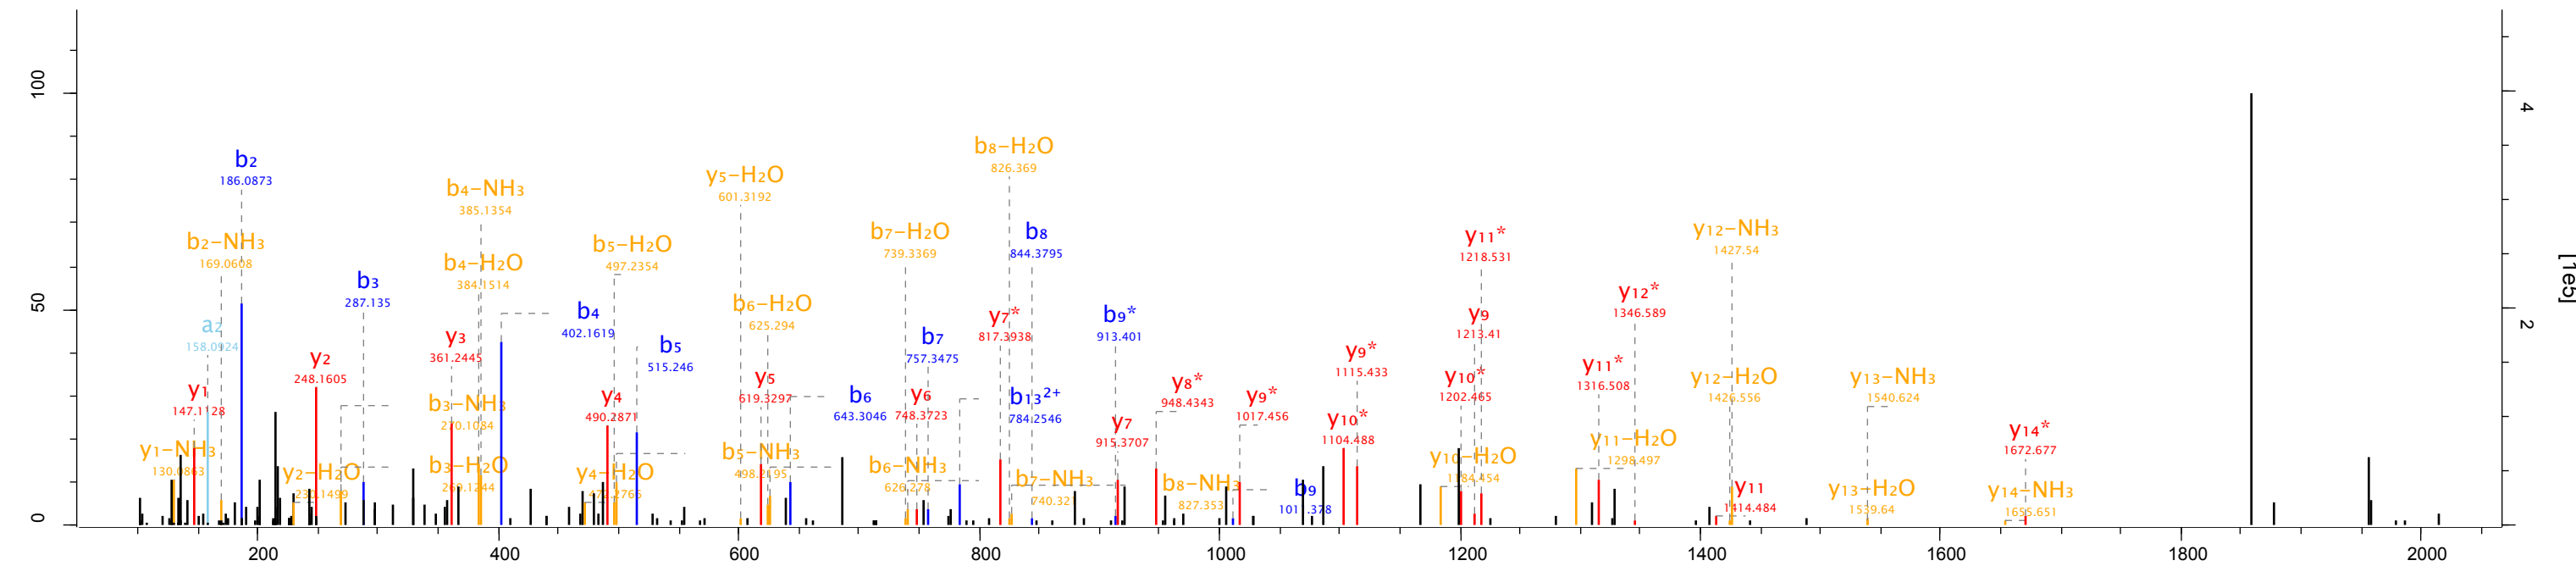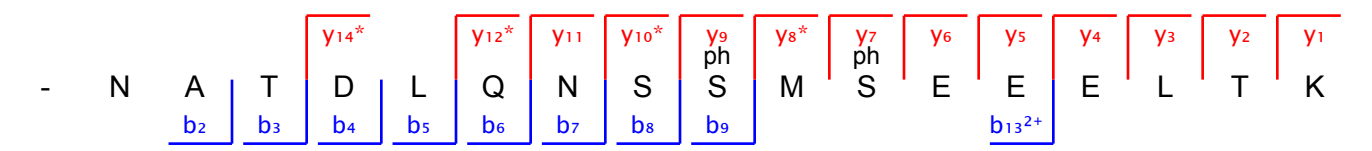

Raw file: 20150814\_A375SR\_Phospho\_BR2\_02  
 Scan: 14270 Method: FTMS; HCD Score: 163.16 m/z: 1218.97 Gene names: PLEC

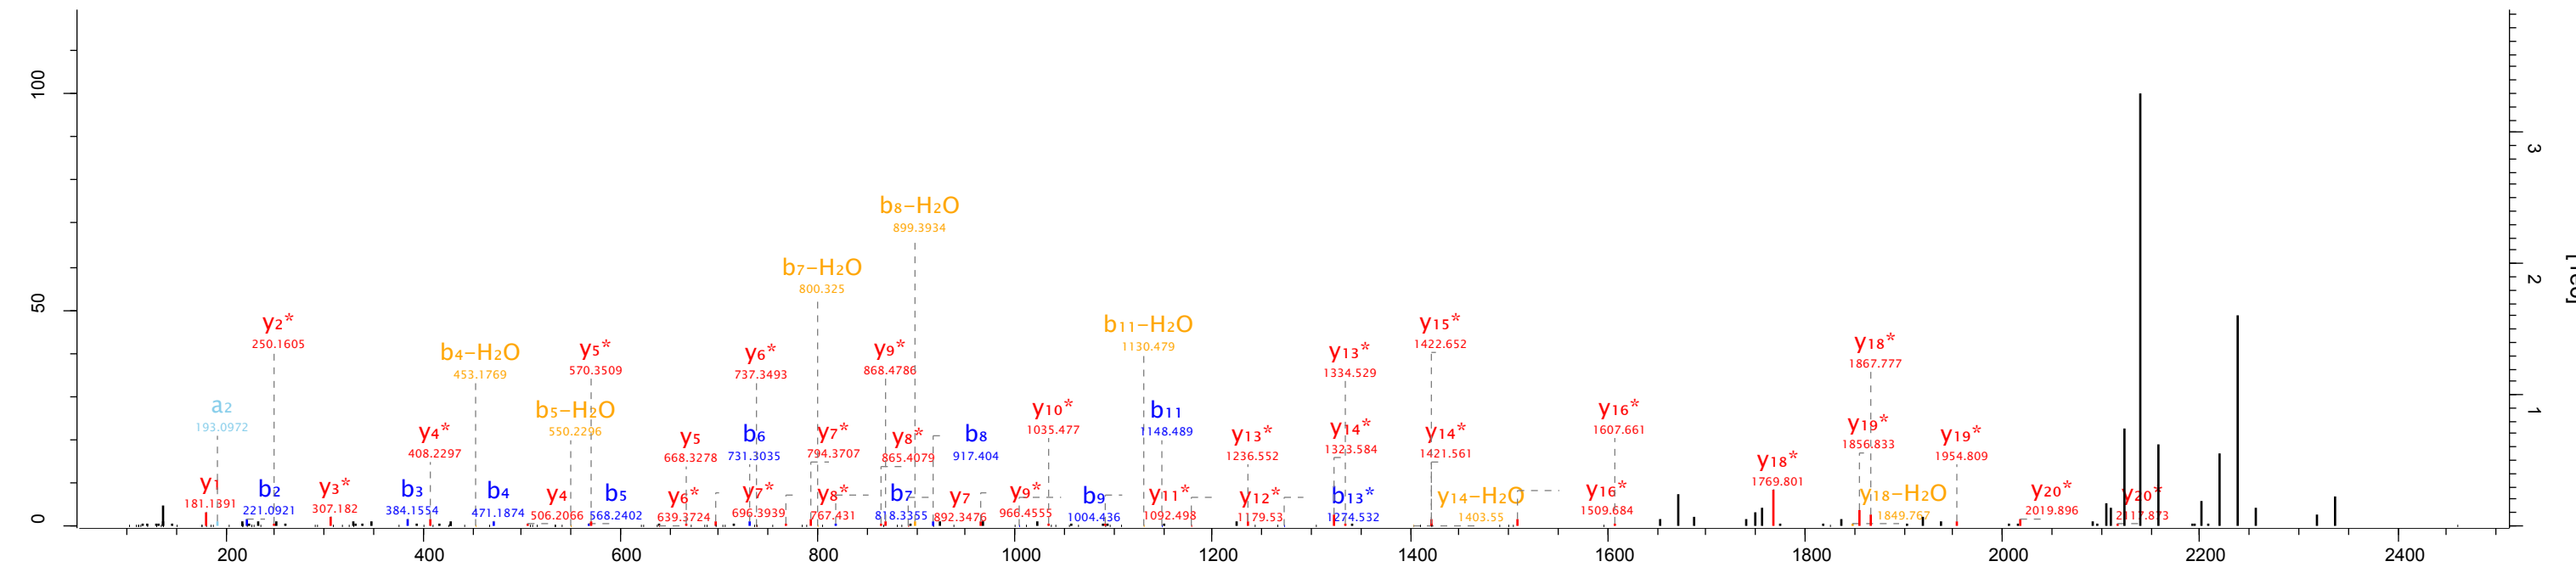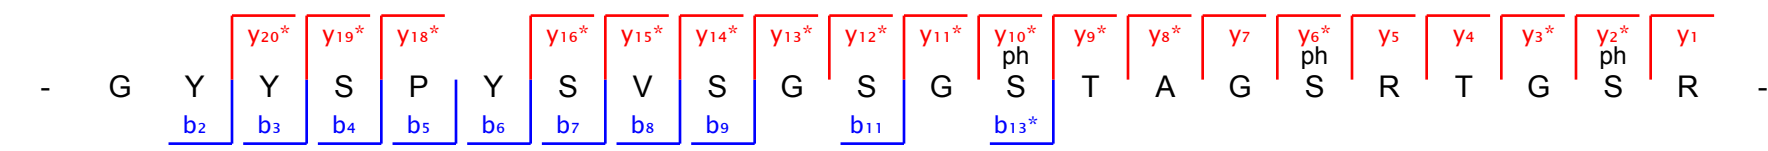



Raw file: 20150814\_A375SR\_Phospho\_BR2\_02  
 Scan: 14510  
 Method: FTMS; HCD  
 Score: 104.09  
 m/z: 875.06  
 Gene names: UNG;DKFZp781L1143

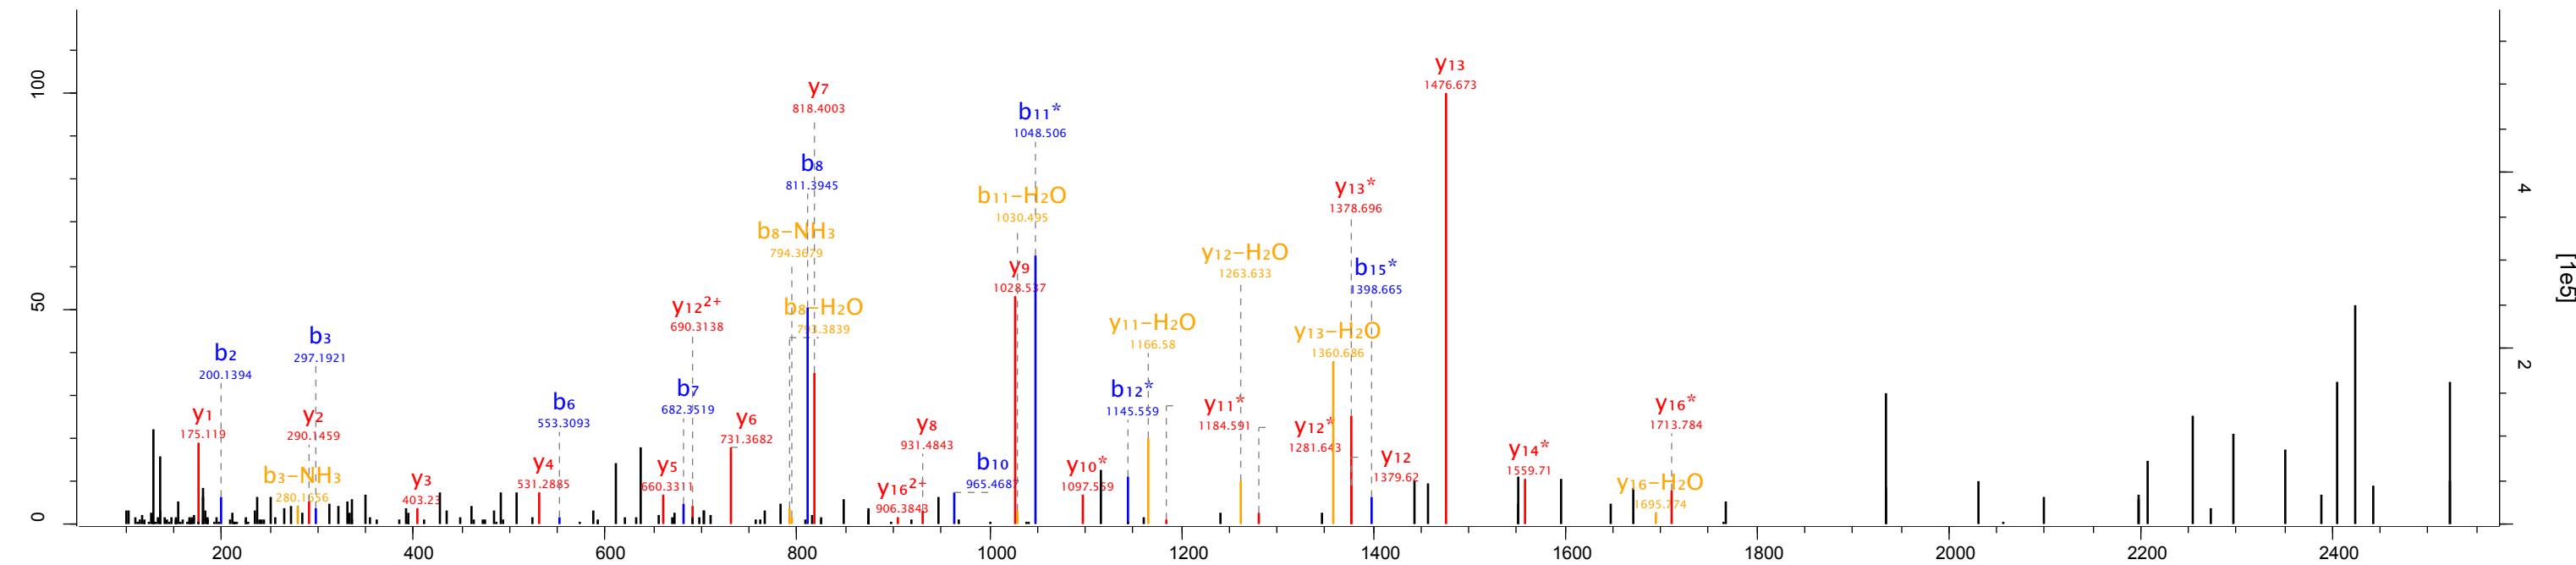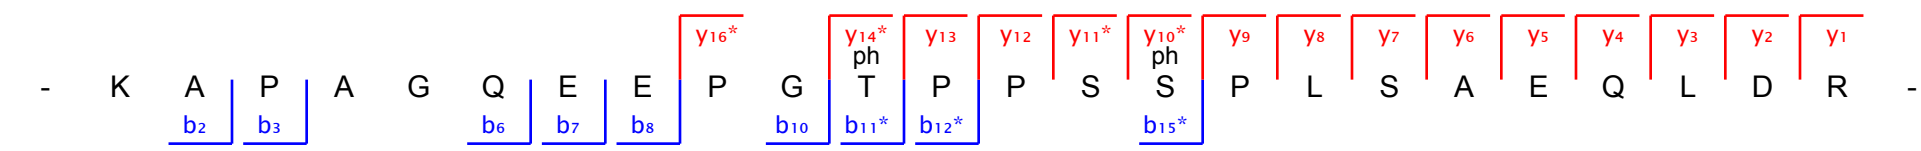

Raw file 20150814\_A375SR\_Phospho\_BR2\_02 Scan 14910 Method FTMS; HCD Score 103.78 m/z 928.7 Gene names DDX54

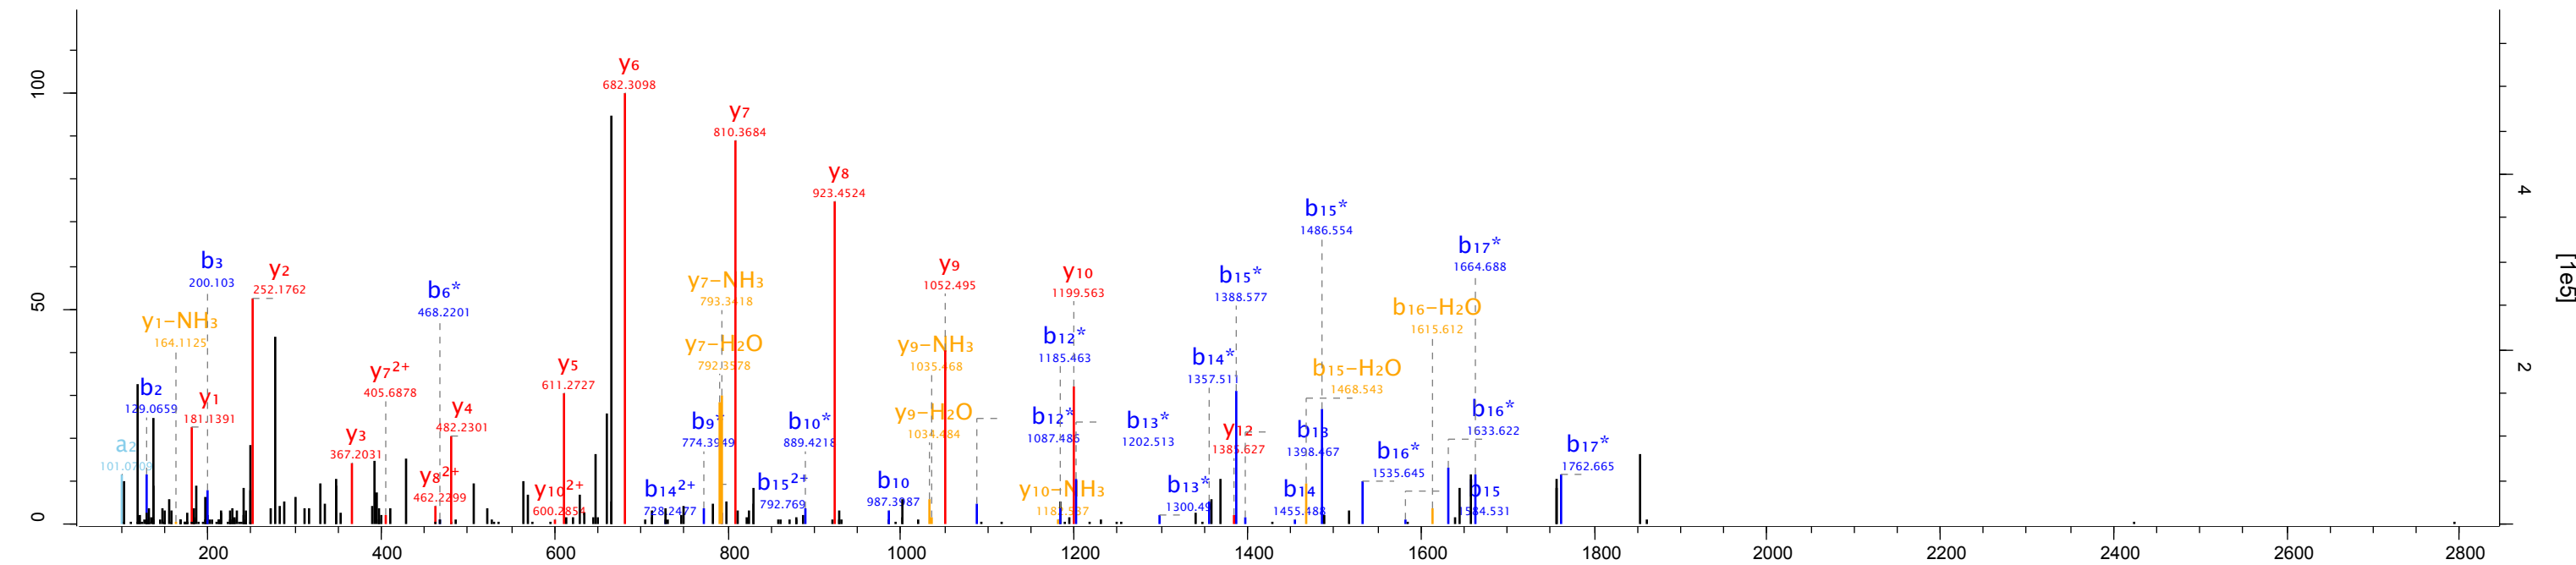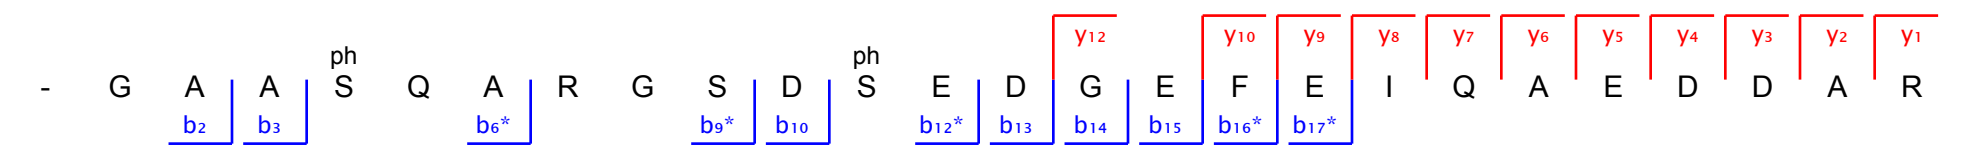

Raw file 20150814\_A375SR\_Phospho\_BR2\_02 Scan 15810 Method FTMS; HCD Score 123.42 m/z 757.35 Gene names PTPN13

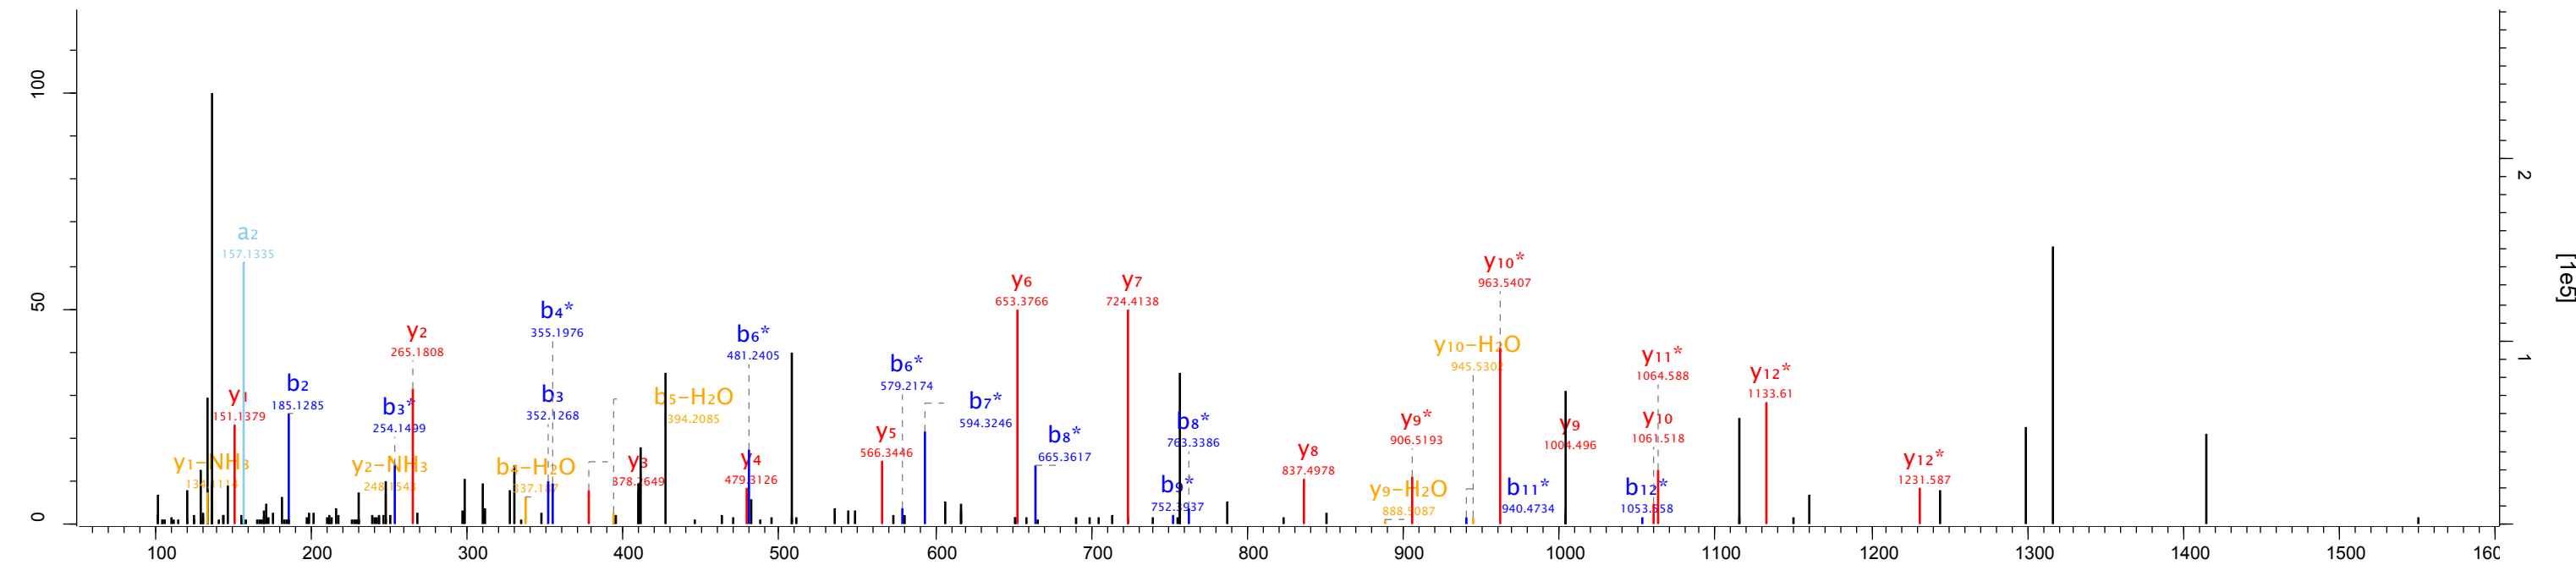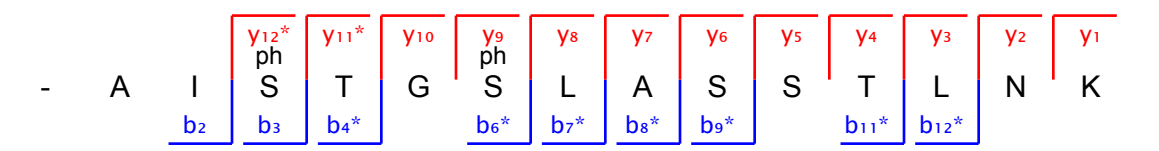

Raw file: 20150814\_A375SR\_Phospho\_BR2\_02  
 Scan: 17390 Method: FTMS; HCD Score: 81.97 m/z: 1027.89 Gene names: AKT1

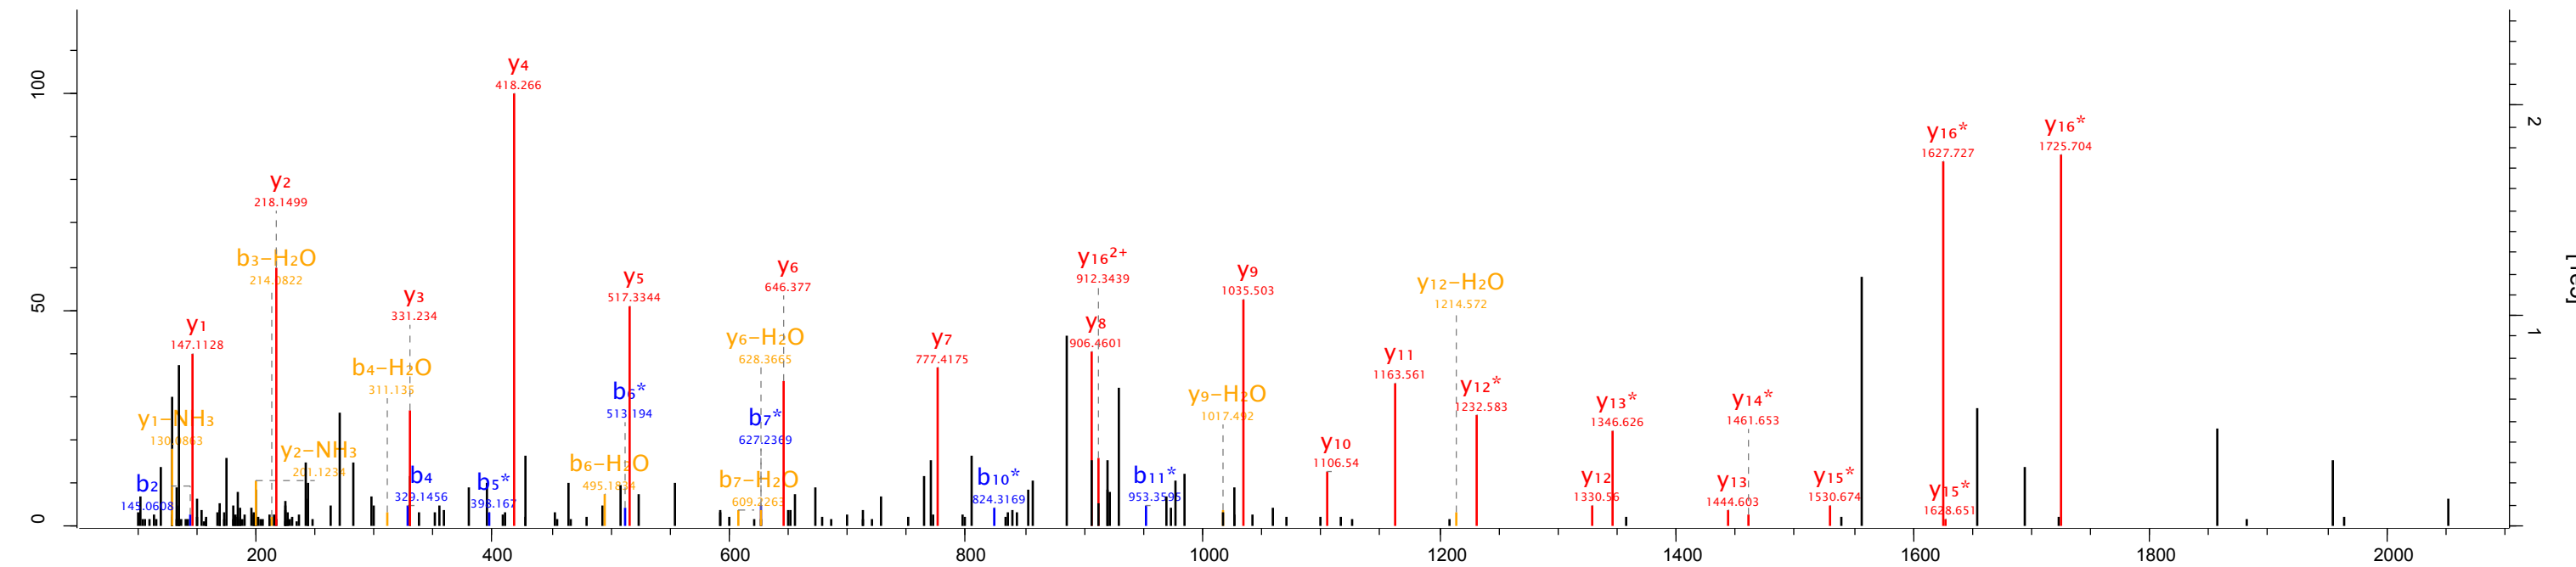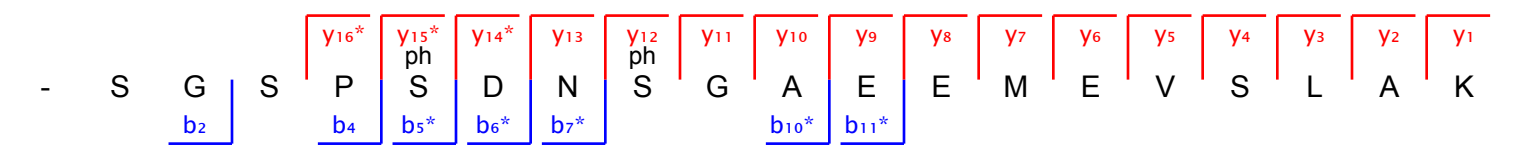



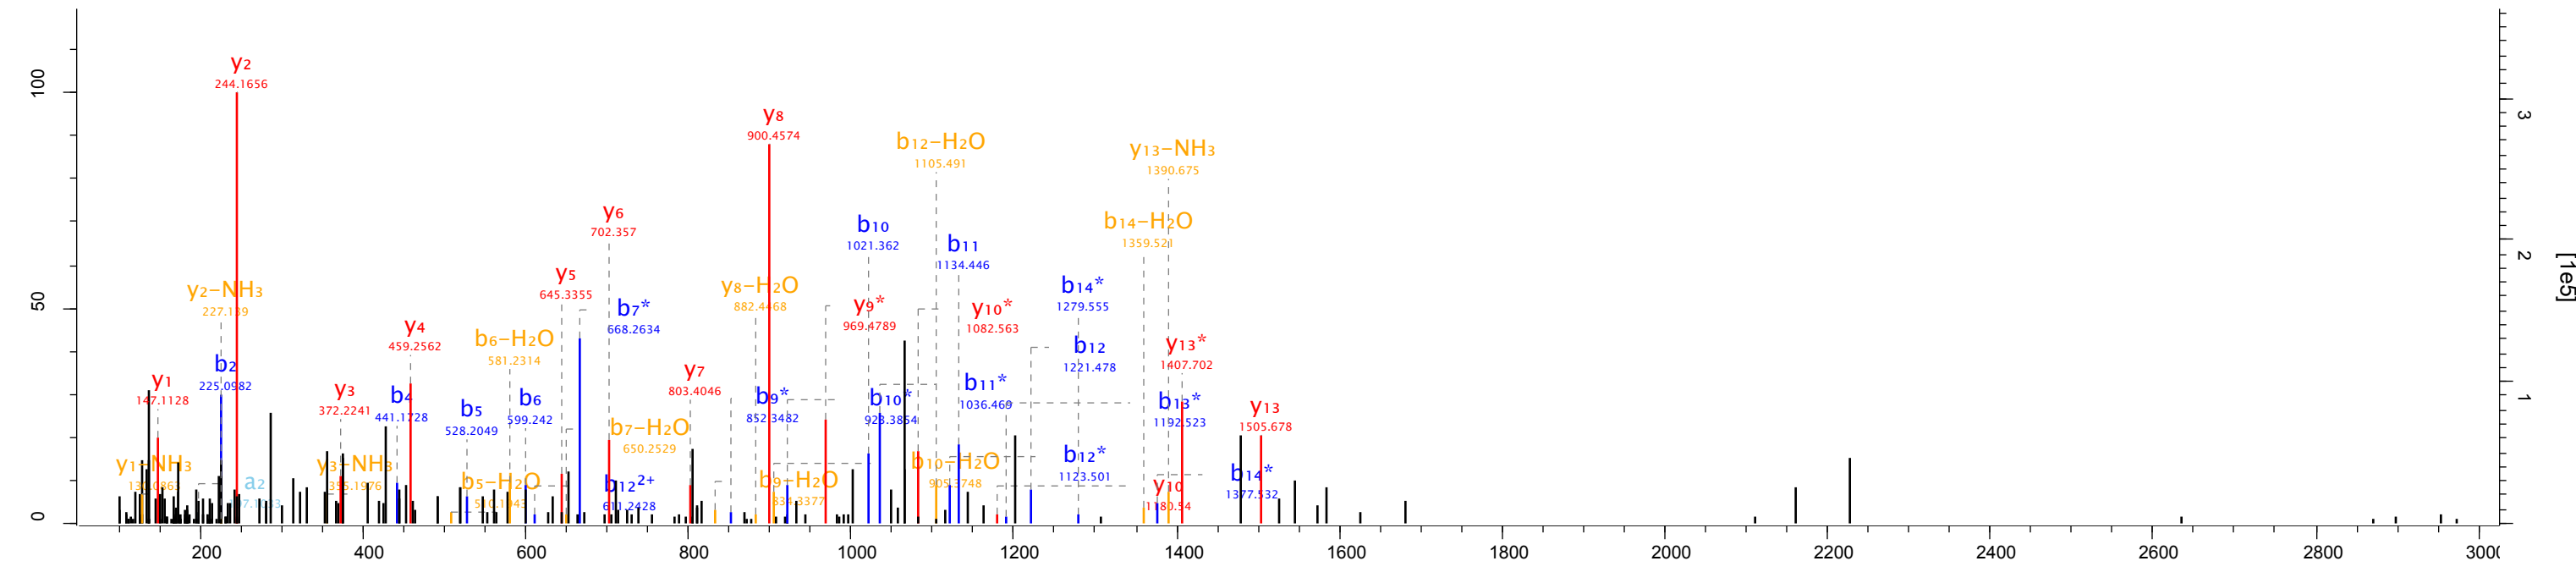

- S H S E S A S P S A L S S S P N N L S P T G W S Q P K -

Fragmentation mapping (b and y ions) is shown below the sequence:

- b<sub>2</sub> (under H)
- b<sub>4</sub> (under E)
- b<sub>5</sub> (under S)
- b<sub>6</sub> (under A)
- b<sub>7</sub>\* (under S)
- b<sub>9</sub>\* (under S)
- b<sub>10</sub> (under A)
- b<sub>11</sub> (under L)
- b<sub>12</sub> (under S)
- b<sub>13</sub>\* (under S)
- b<sub>14</sub>\* (under S)
- y<sub>1</sub> (under K)
- y<sub>2</sub> (under P)
- y<sub>3</sub> (under Q)
- y<sub>4</sub> (under S)
- y<sub>5</sub> (under W)
- y<sub>6</sub> (under G)
- y<sub>7</sub> (under T)
- y<sub>8</sub> (under P)
- y<sub>9</sub>\* (under S)
- y<sub>10</sub> (under L)
- y<sub>13</sub> (under P)

Raw file: 20150814\_A375SR\_Phospho\_BR2\_02  
 Scan: 19180 Method: FTMS; HCD Score: 57.21 m/z: 1046.92 Gene names: POM121

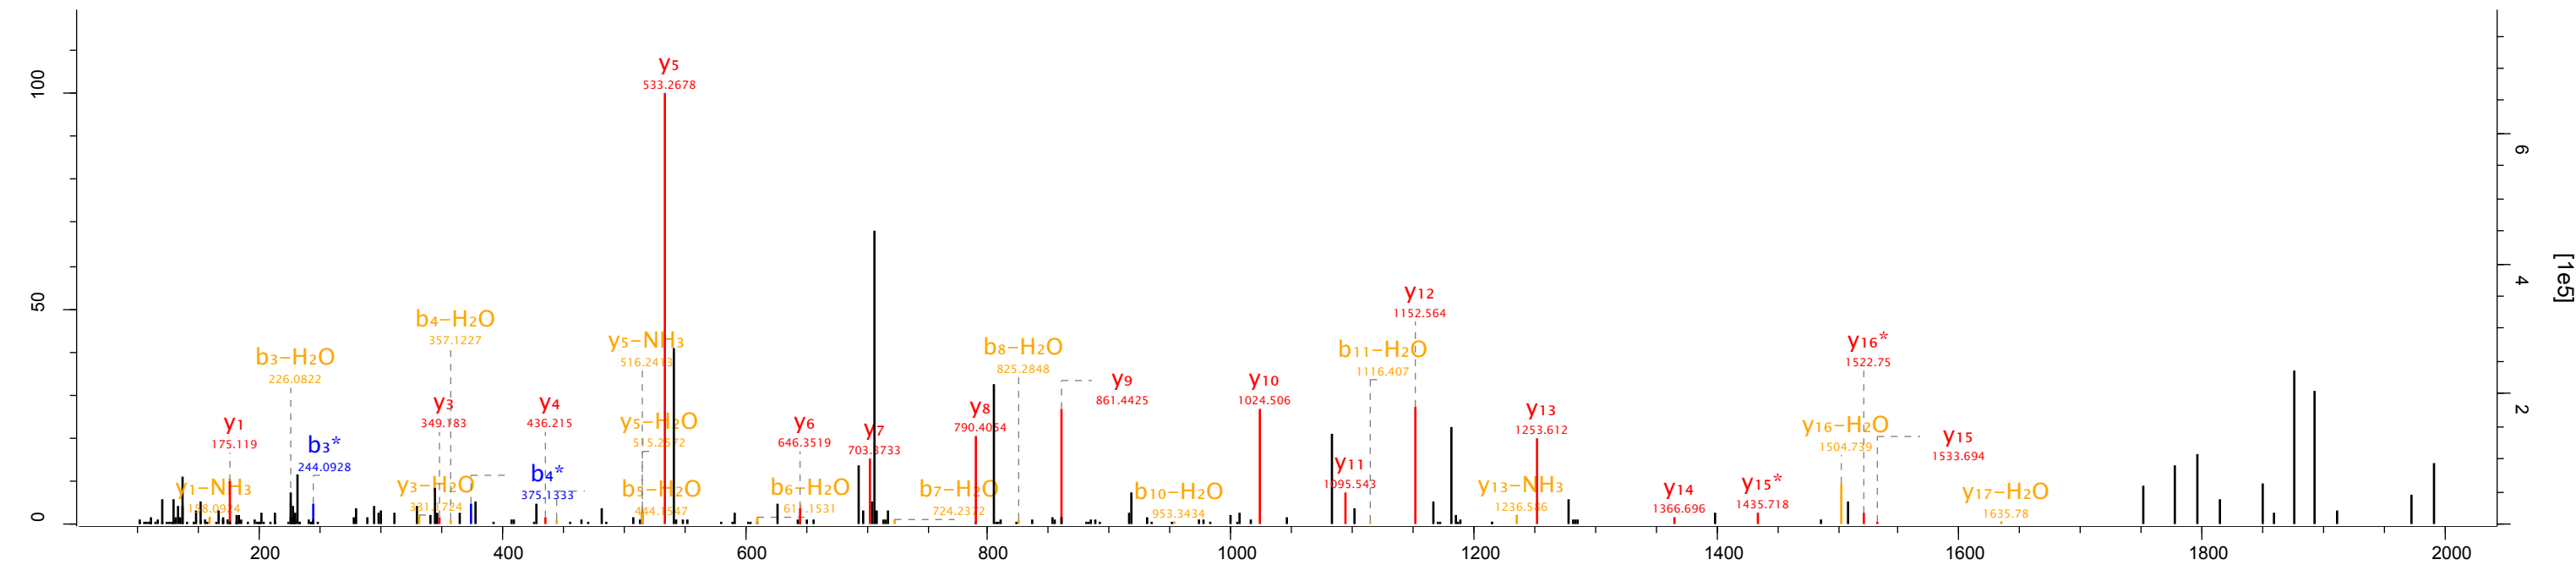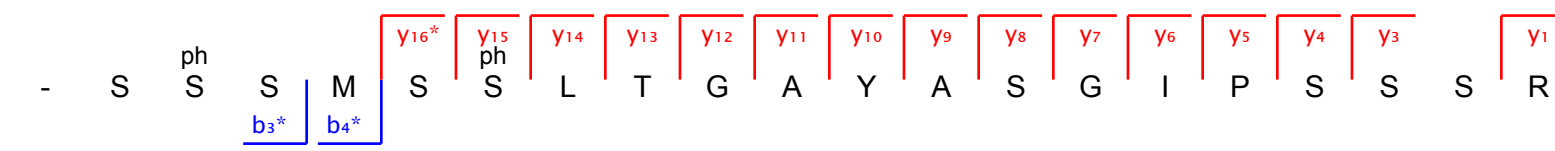

Raw file: 20150814\_A375SR\_Phospho\_BR2\_02  
 Scan: 19200 Method: FTMS; HCD Score: 138.37 m/z: 1222.48 Gene names: MAP1B

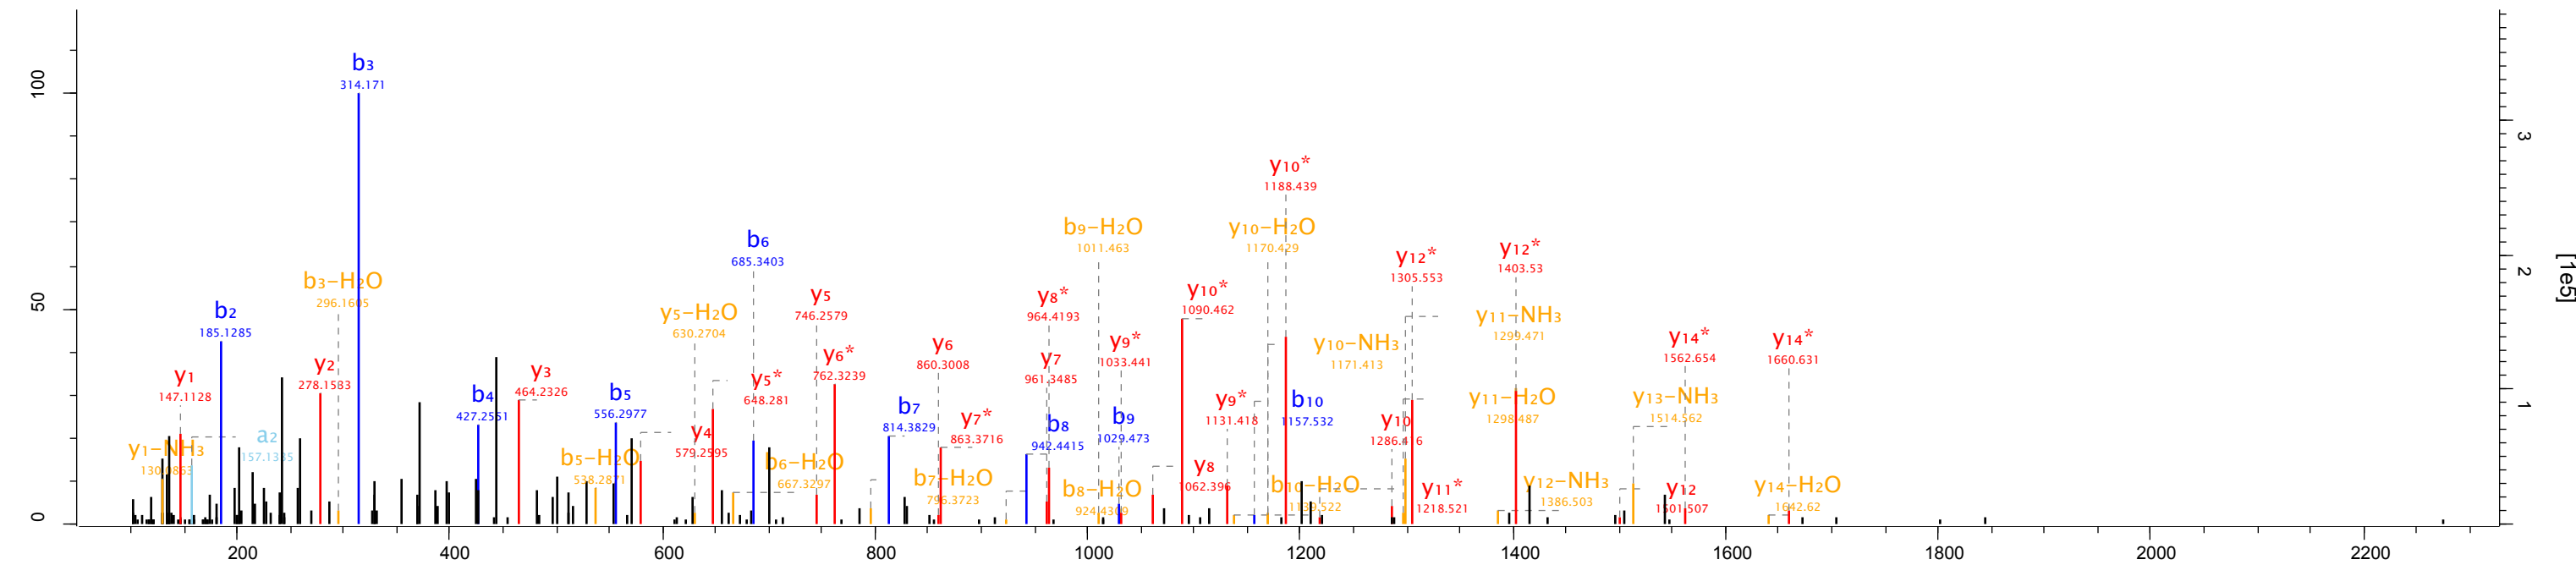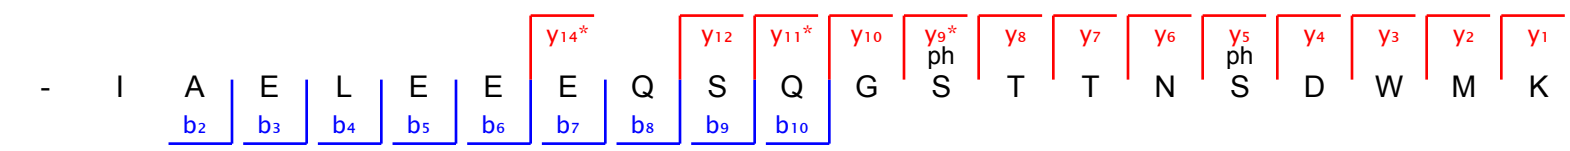

Raw file: 20150814\_A375SR\_Phospho\_BR2\_02  
 Scan: 19850 Method: FTMS; HCD Score: 63.4 m/z: 1510.98 Gene names: PACSIN2

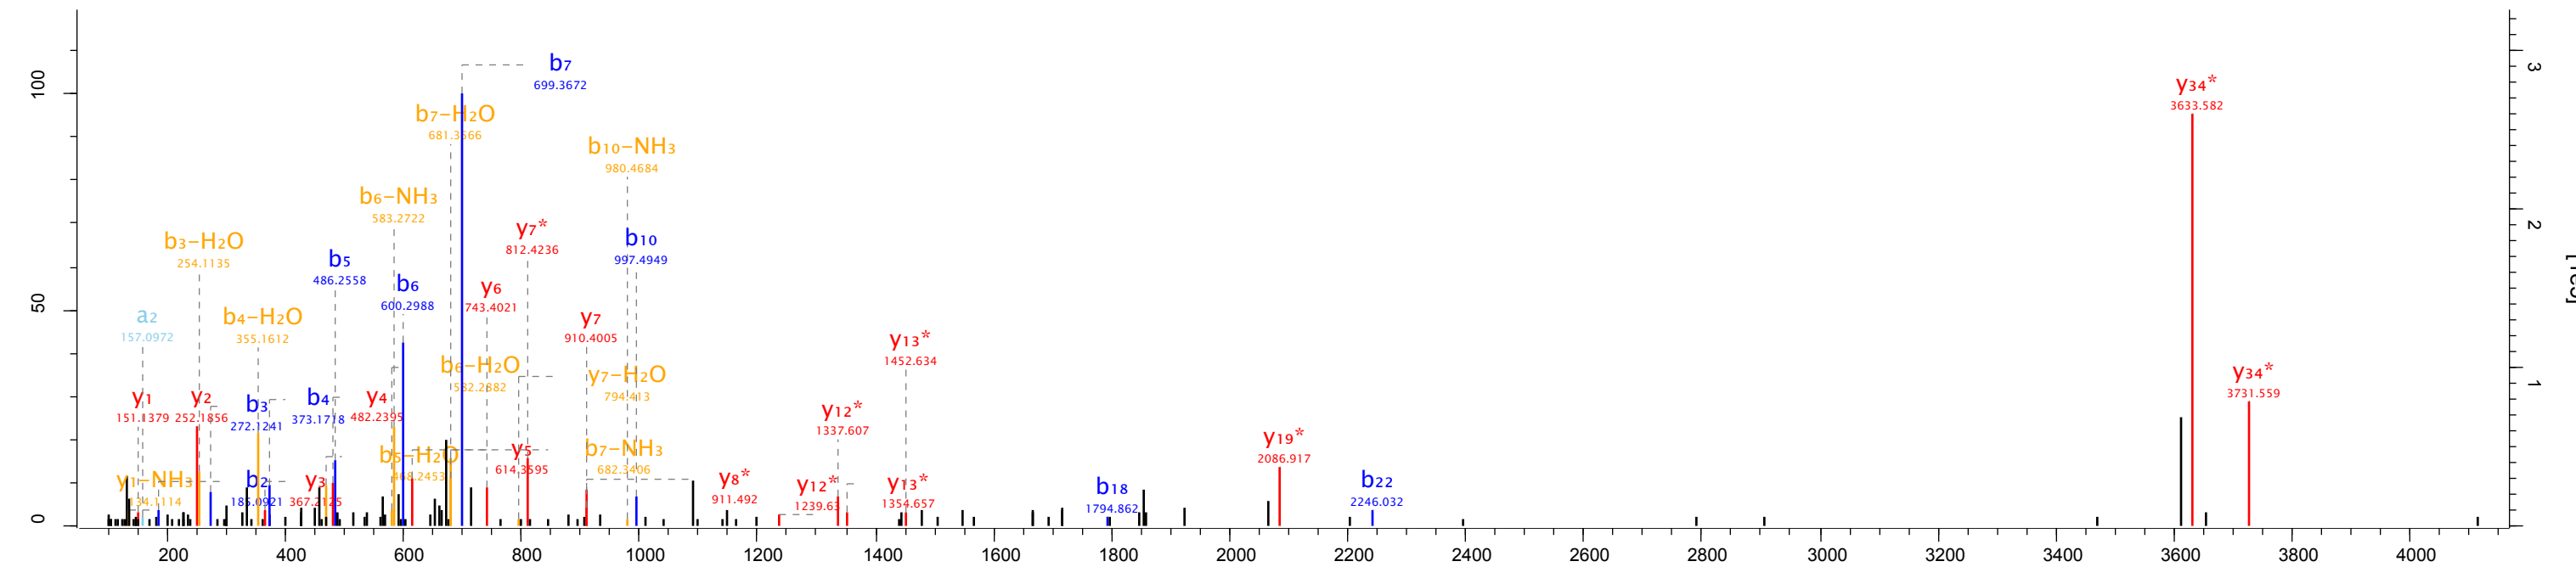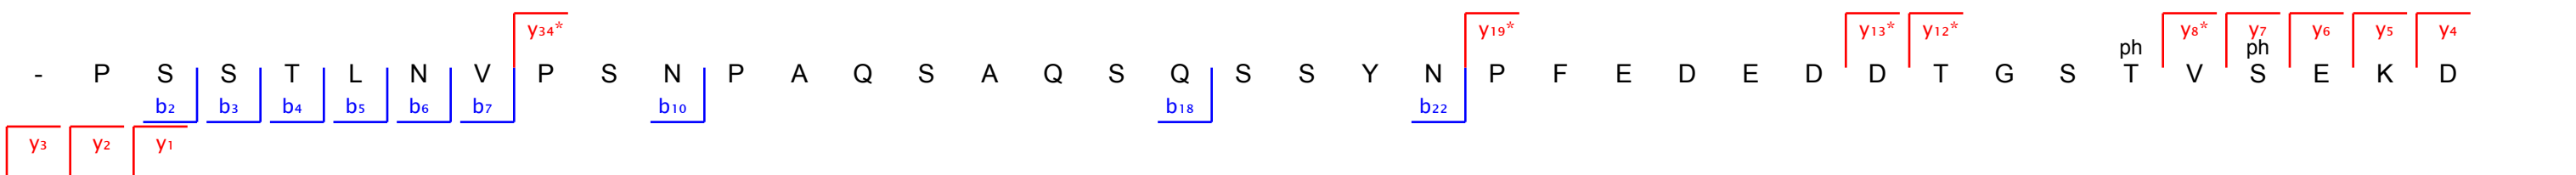

Raw file: 20150814\_A375SR\_Phospho\_BR2\_02  
 Scan: 20860 Method: FTMS; HCD Score: 68.22 m/z: 1020.78 Gene names: SSFA2

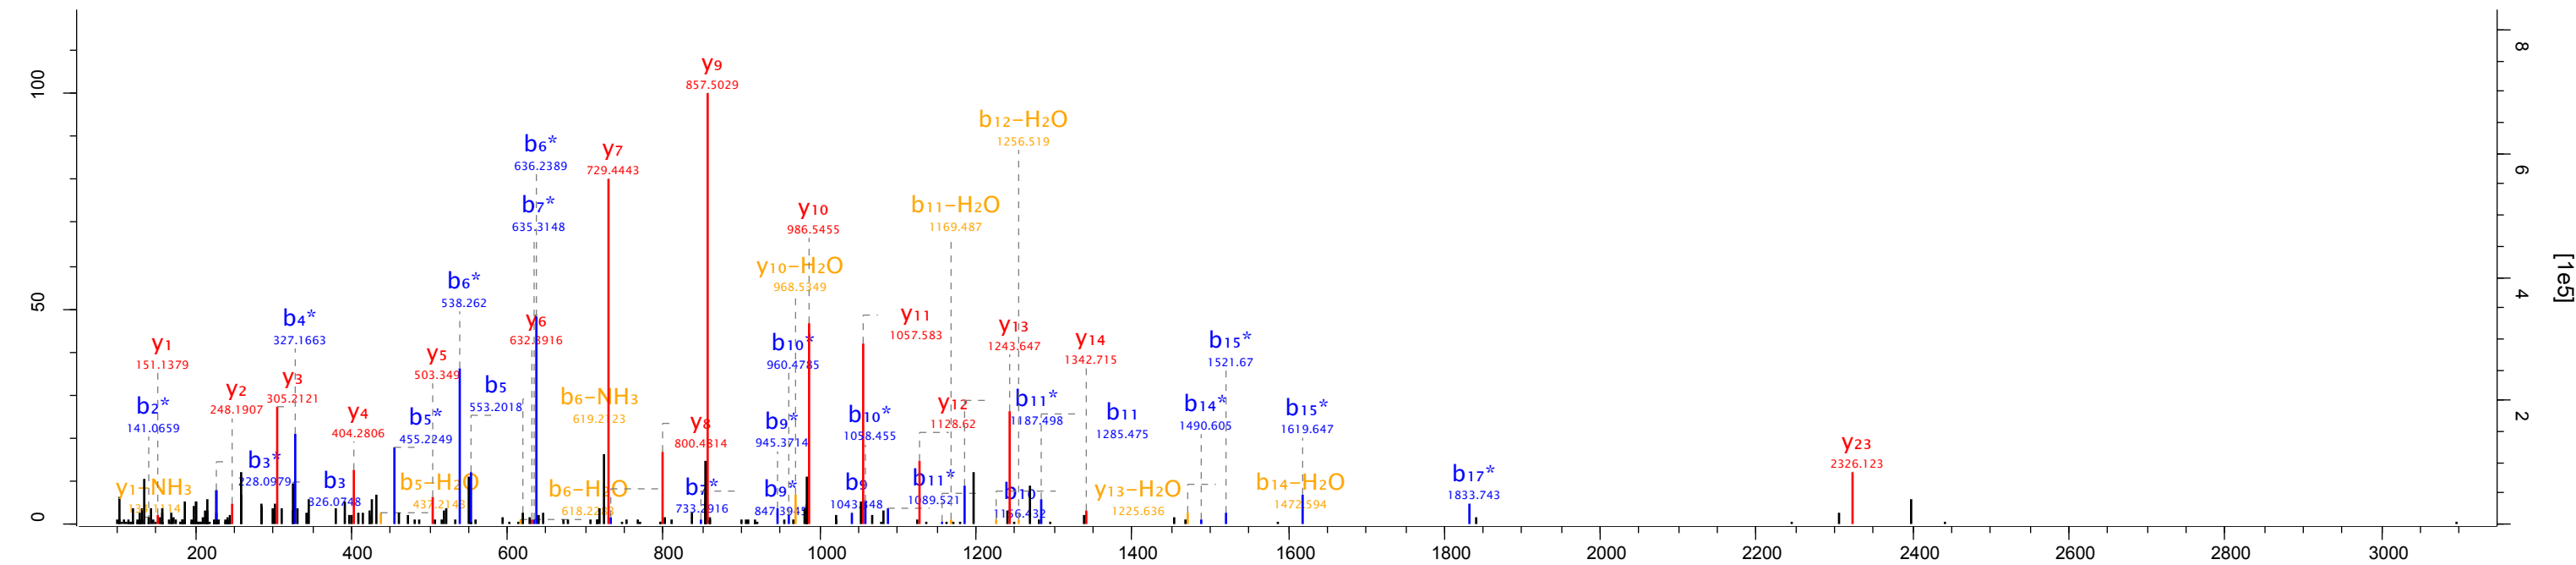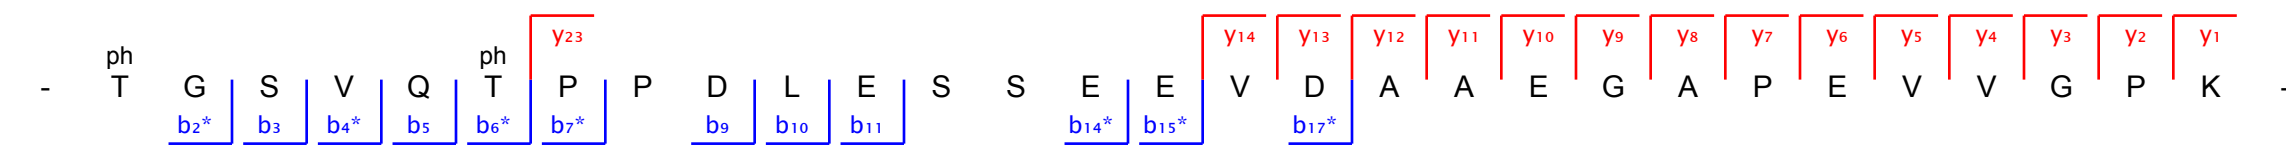

Raw file 20150814\_A375SR\_Phospho\_BR2\_02 Scan 25140 Method FTMS; HCD Score 148.56 m/z 895.9 Gene names SMAD5

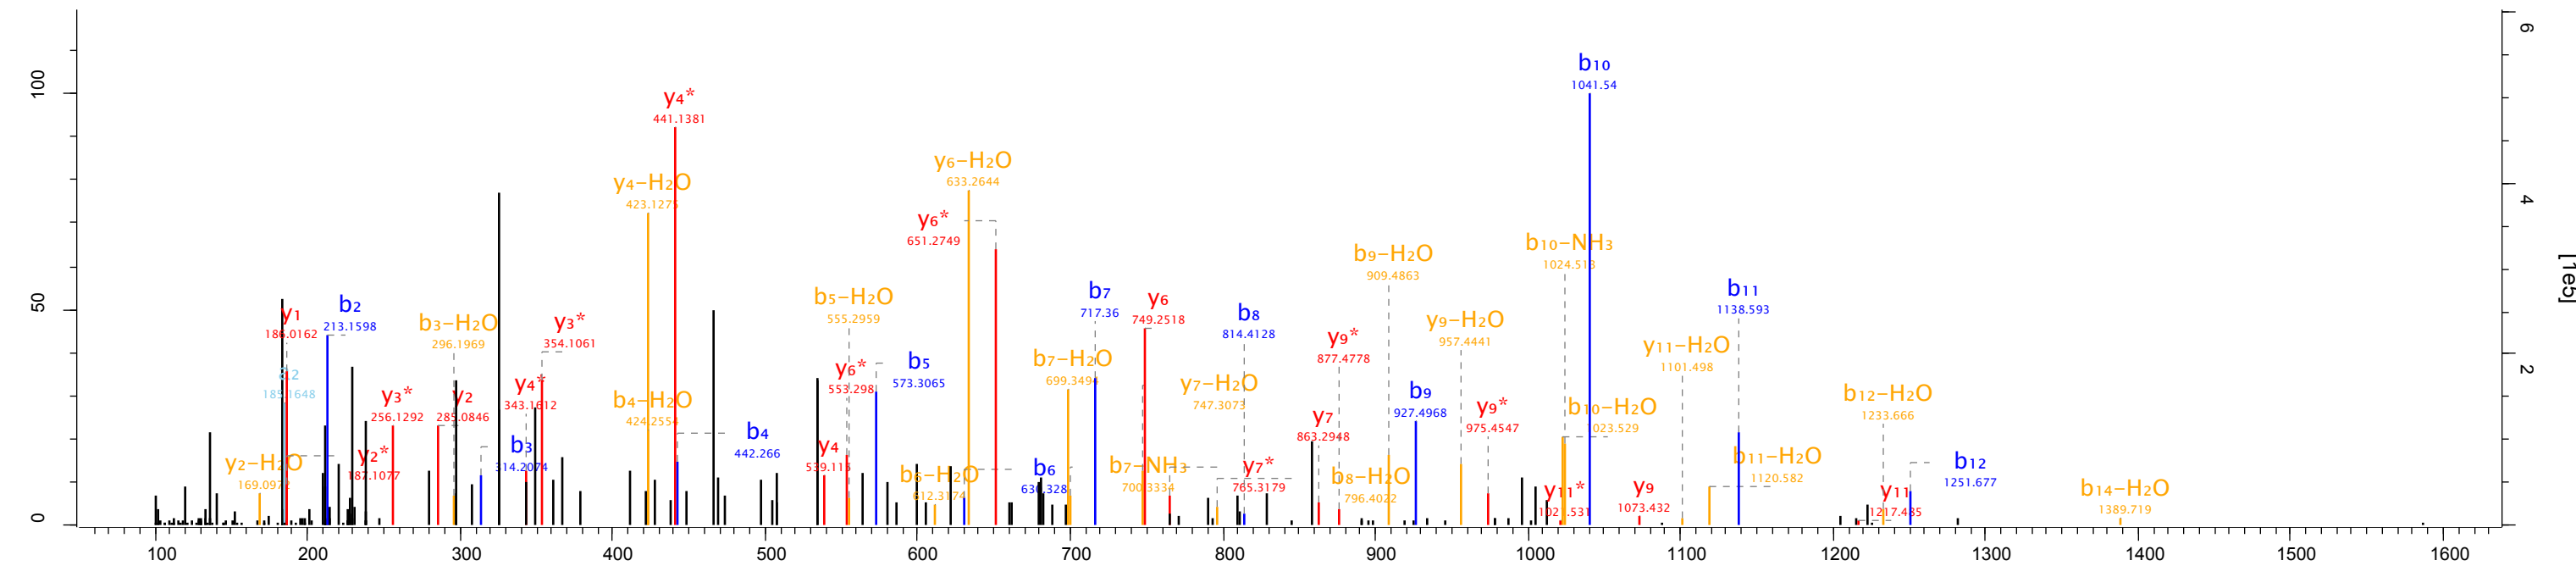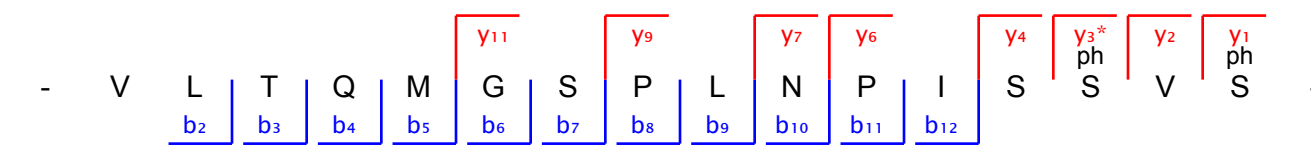

Raw file Scan Method Score m/z Gene names  
 20150814\_A375SR\_Phospho\_BR2\_02 25380 FTMS; HCD 76.59 1051.81 FOXK2

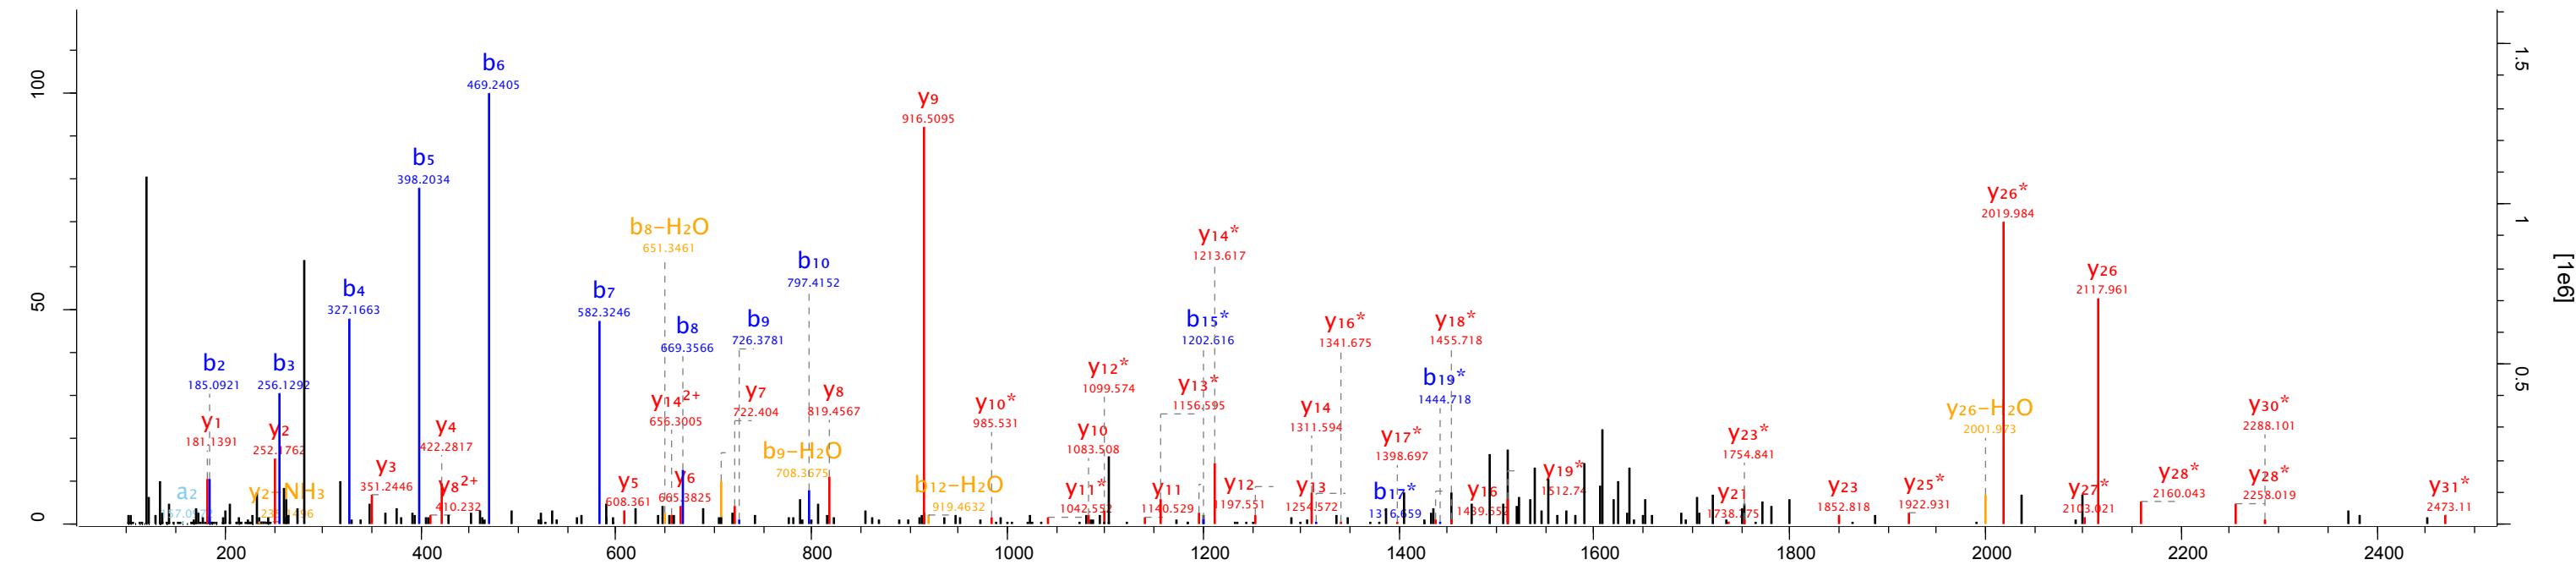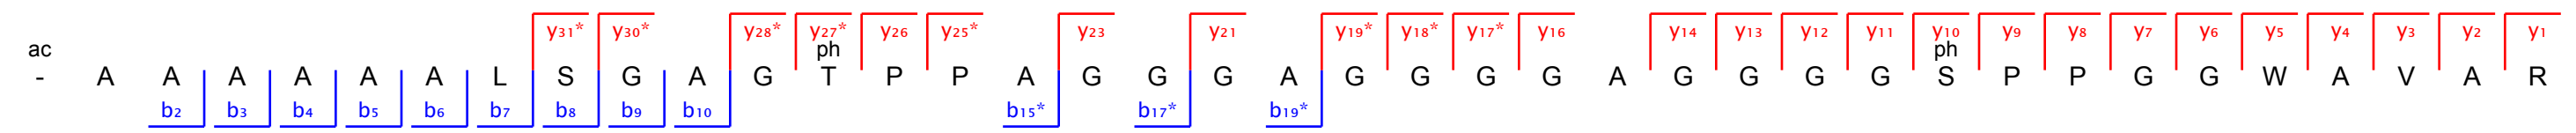

Raw file  
 20150814\_A375SR\_Phospho\_BR2\_02  
 Scan 25850 Method FTMS; HCD Score 58.52 m/z 1429.01 Gene names CCDC6

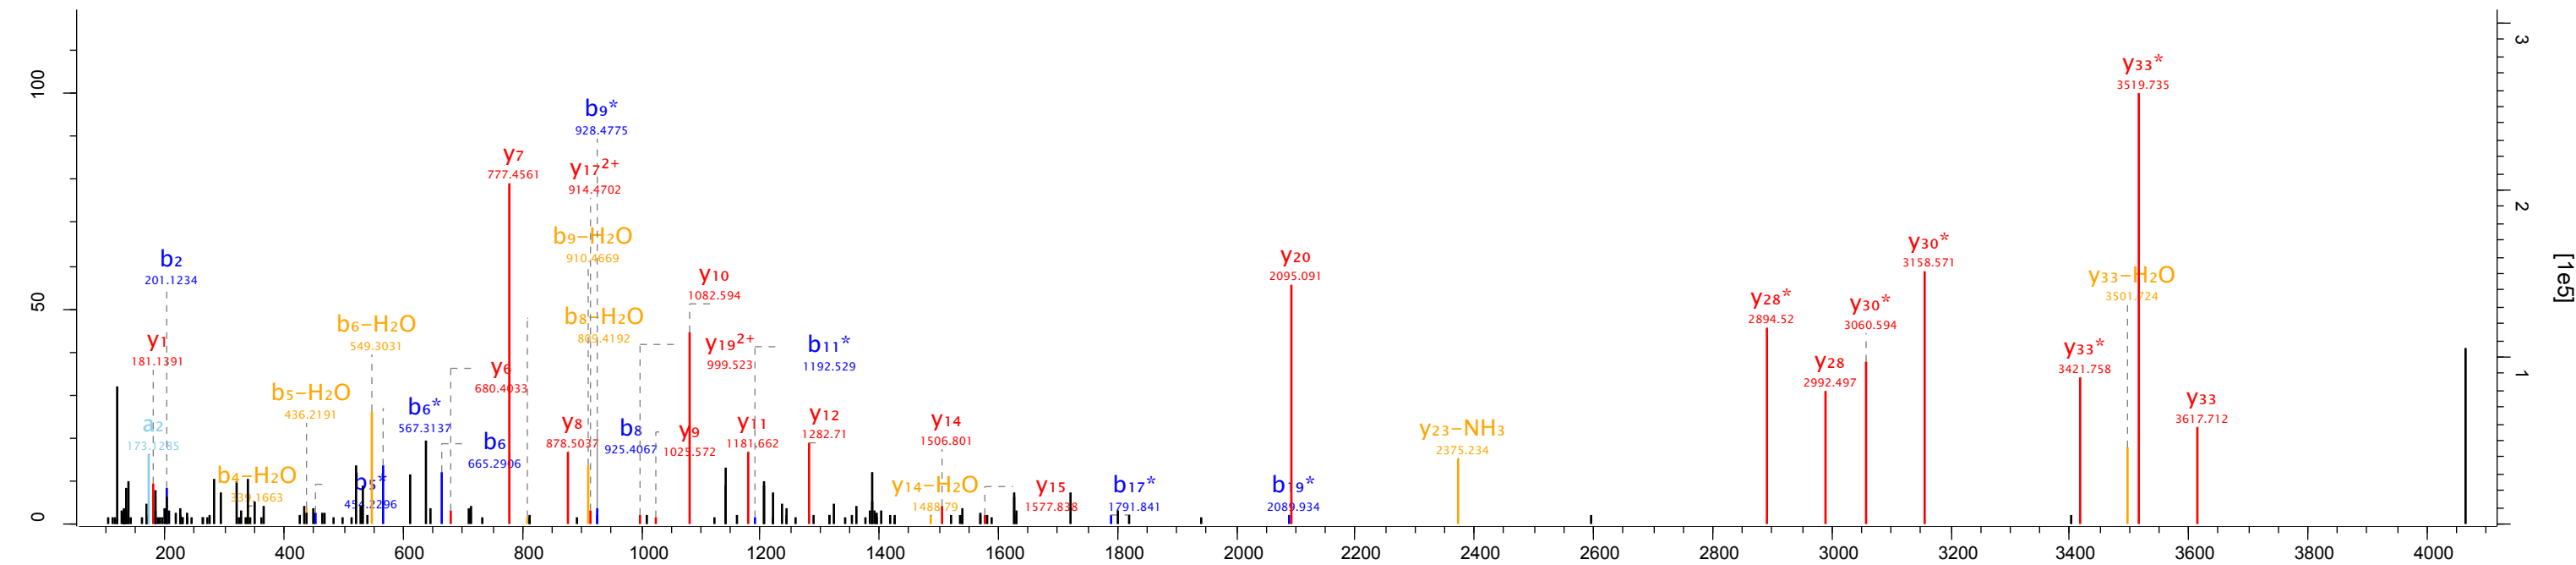

- T V S ph S P I P Y T P ph S P S S R P I S P G L S Y A S H T V G F T P P T S L T

Labels below the sequence indicate the fragmentation sites for the b and y ions shown in the mass spectrum above. Blue brackets indicate b-ion fragmentation sites (b2, b5\*, b6, b8, b9\*, b11\*, b17\*, b19\*), and red brackets indicate y-ion fragmentation sites (y1, y33, y30\*, y28, y20, y19<sup>2+</sup>, y17<sup>2+</sup>, y15, y14, y12, y11, y10, y9, y8, y7, y6).



Raw file: 20150814\_A375SR\_Phospho\_BR2\_02  
 Scan: 5860 Method: FTMS; HCD Score: 187.04 m/z: 1028.37 Gene names: MAK16

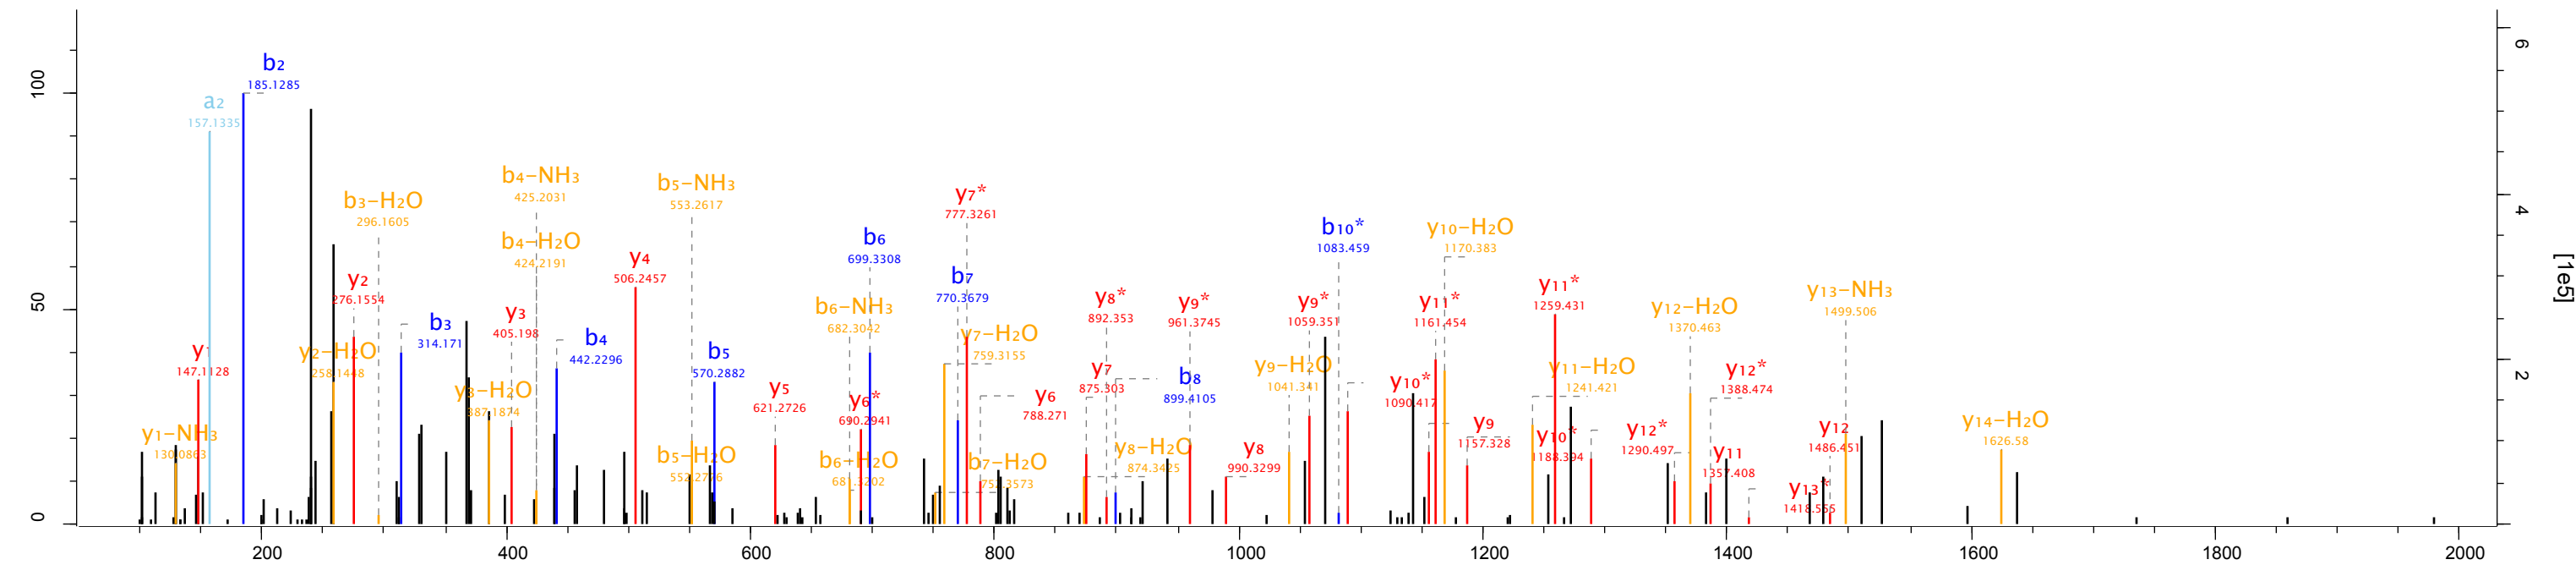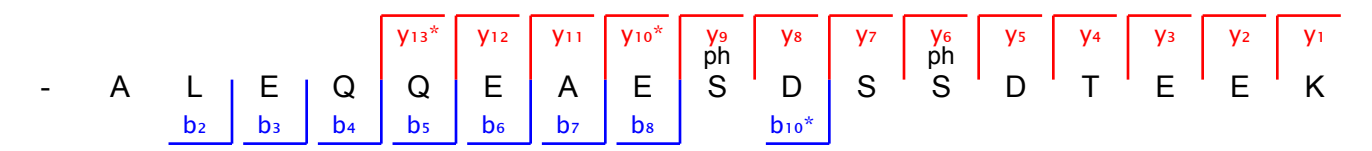

Raw file 20150814\_A375SR\_Phospho\_BR2\_02 Scan 5880 Method FTMS; HCD Score 58.72 m/z 599.24 Gene names CASKIN2

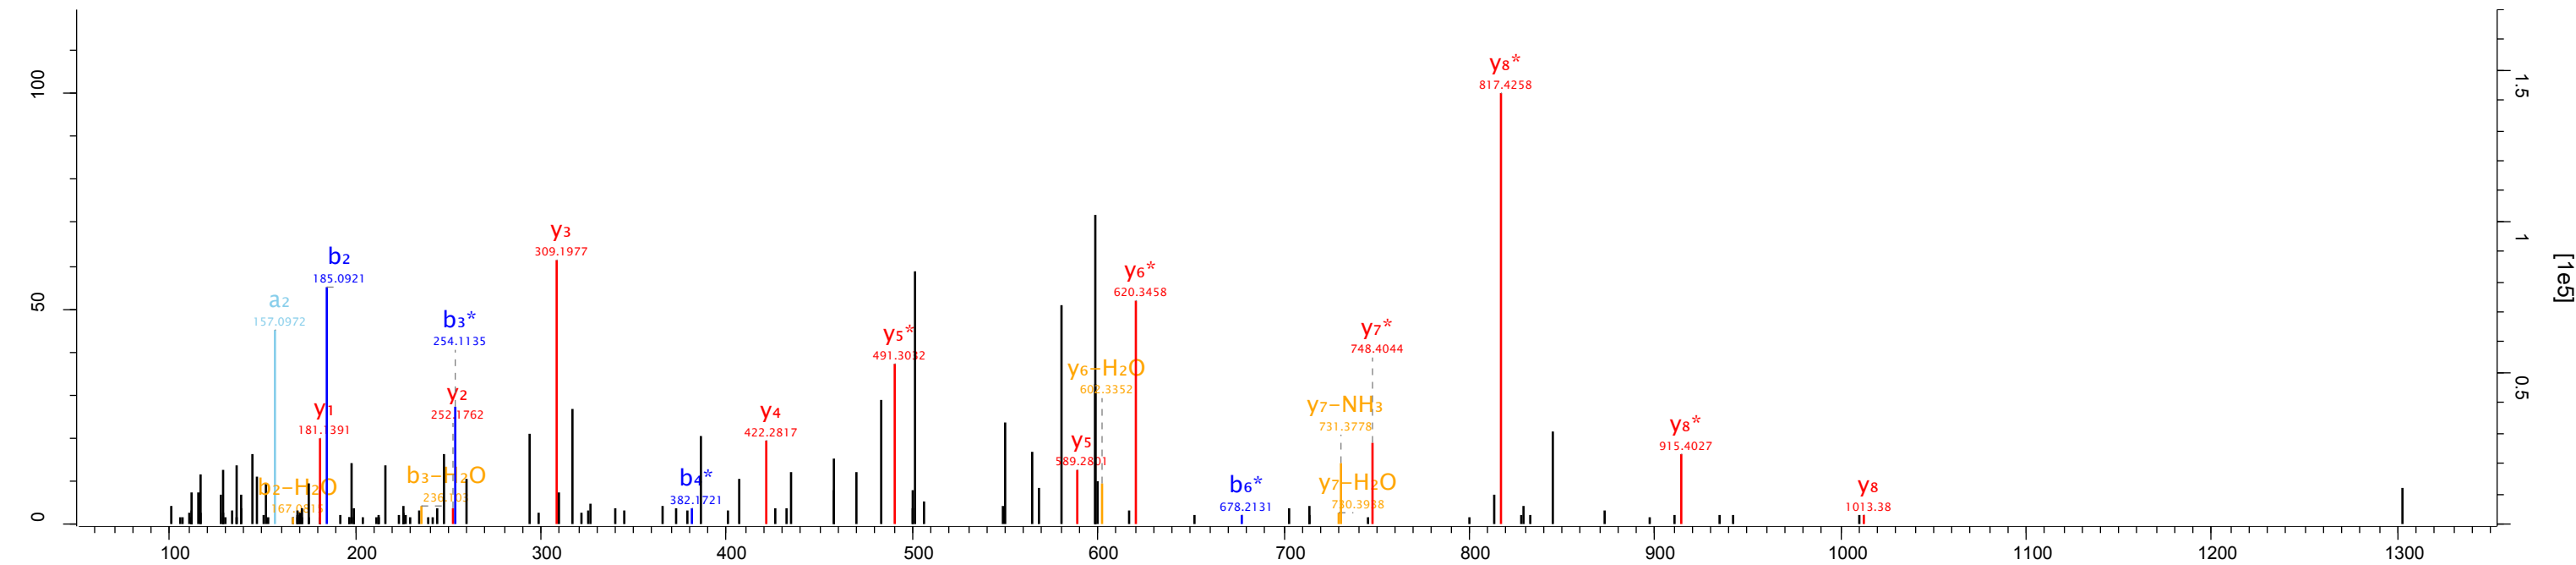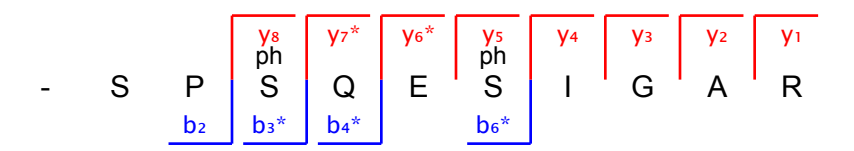

Raw file: 20150814\_A375SR\_Phospho\_BR2\_02  
 Scan: 6970 Method: FTMS; HCD Score: 99.27 m/z: 893.02 Gene names: PPIA1

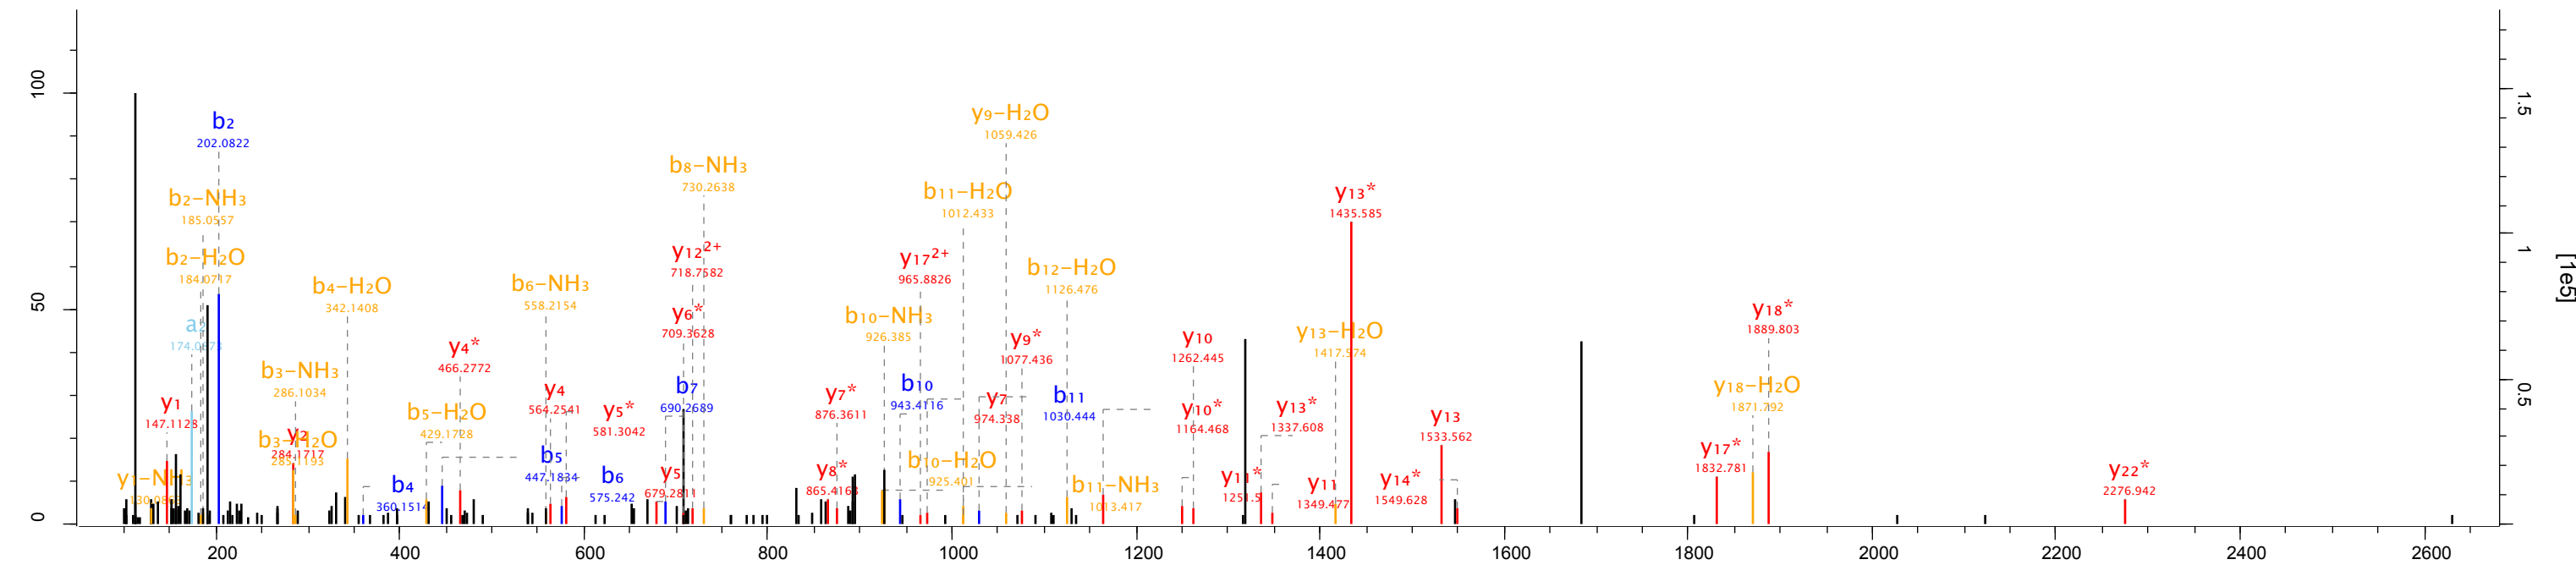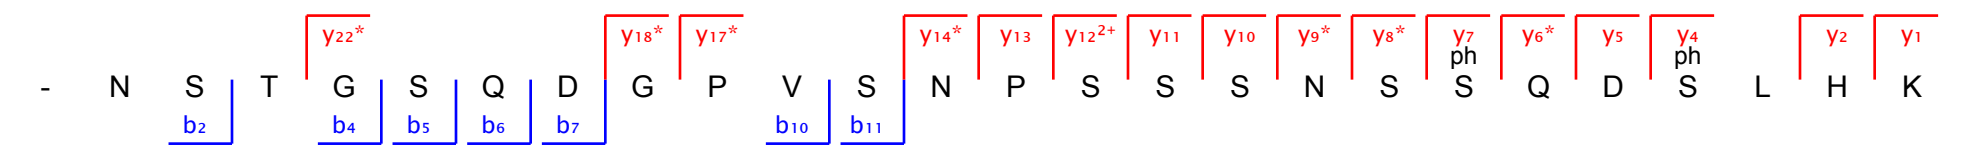

Raw file: 20150814\_A375SR\_Phospho\_BR2\_02  
 Scan: 7360 Method: FTMS; HCD Score: 179.71 m/z: 714.72 Gene names: FAM208A

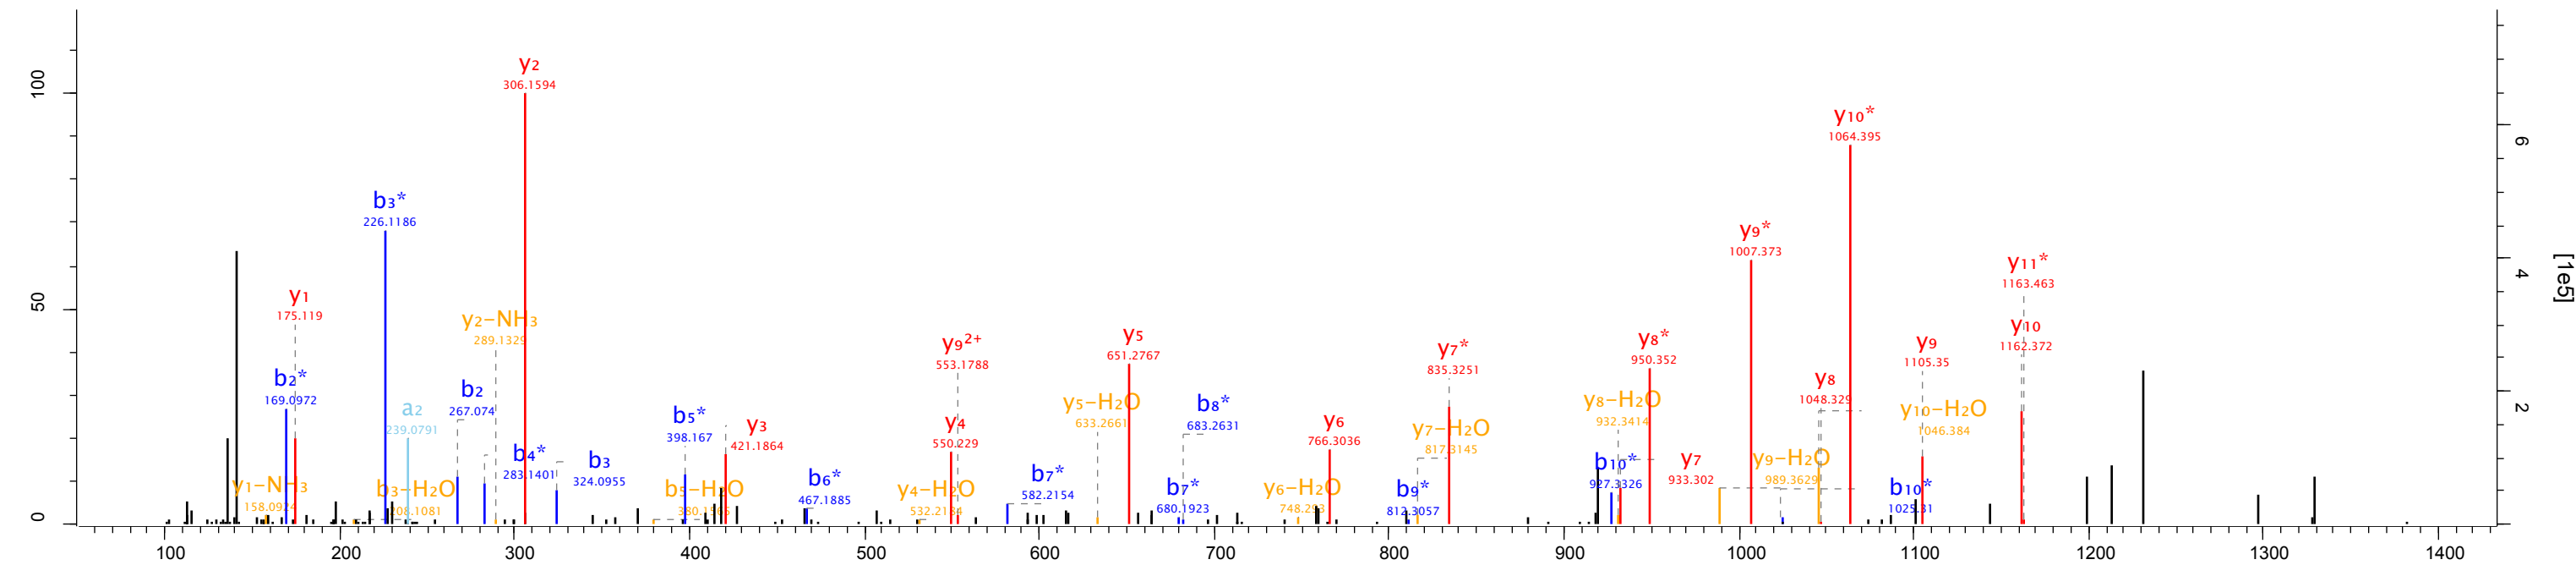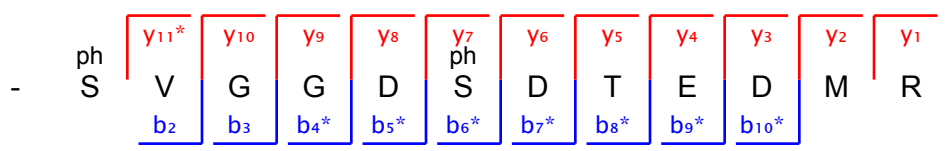

Raw file: 20150814\_A375SR\_Phospho\_BR2\_02  
 Scan: 7610 Method: FTMS; HCD Score: 144.18 m/z: 932.83 Gene names: SART3

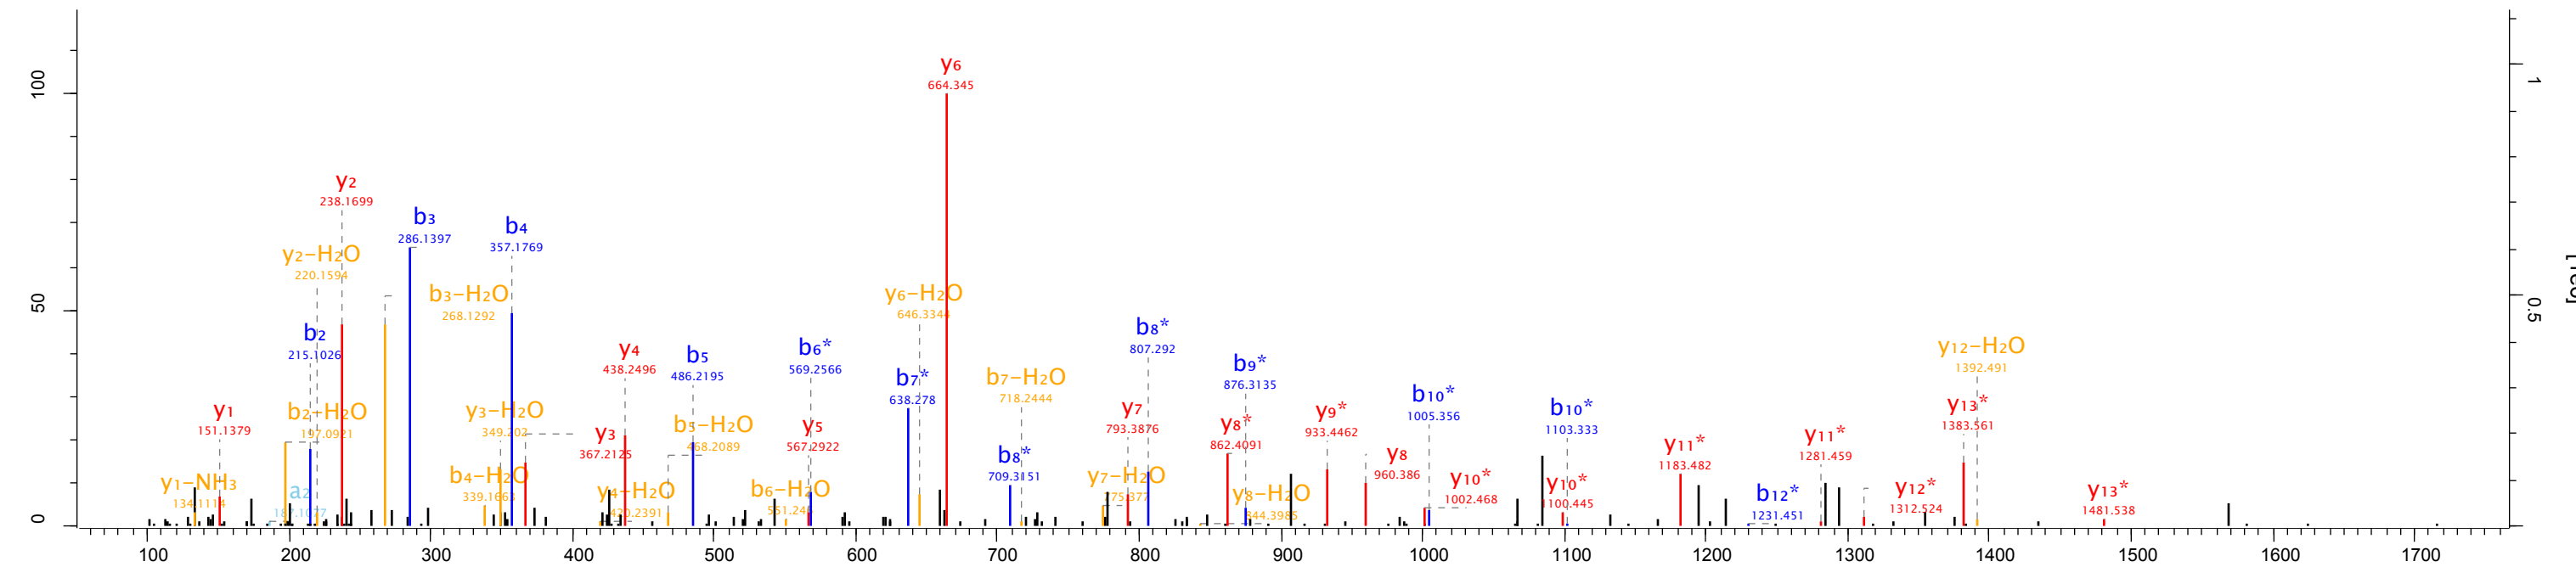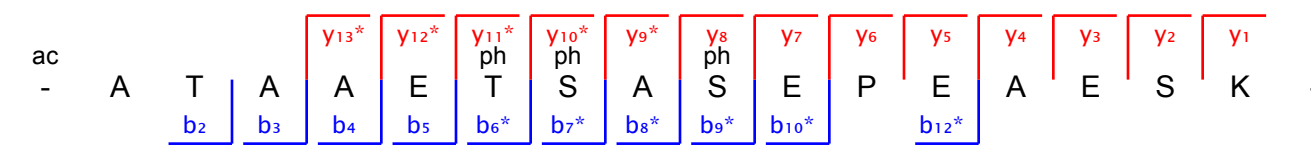

Raw file 20150814\_A375SR\_Phospho\_BR2\_02 Scan 8020 Method FTMS; HCD Score 53.45 m/z 572.76 Gene names WIPI2

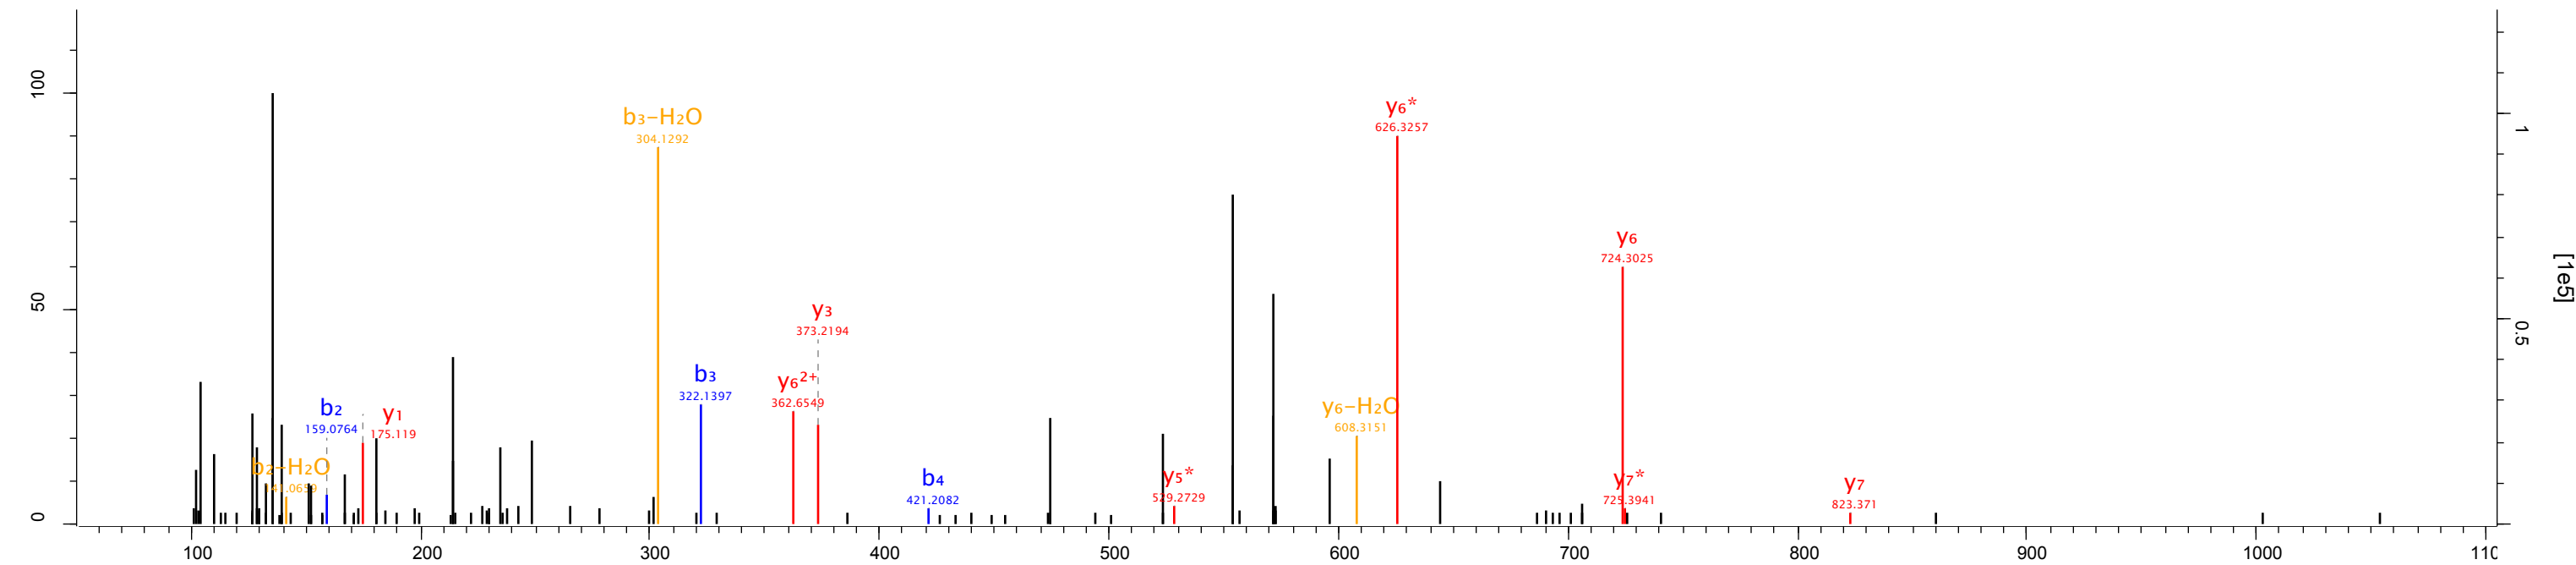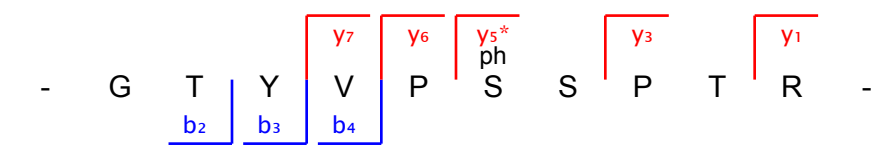

Raw file: 20150814\_A375SR\_Phospho\_BR2\_02  
 Scan: 8400 Method: FTMS; HCD Score: 119.68 m/z: 747.28 Gene names: CCDC93

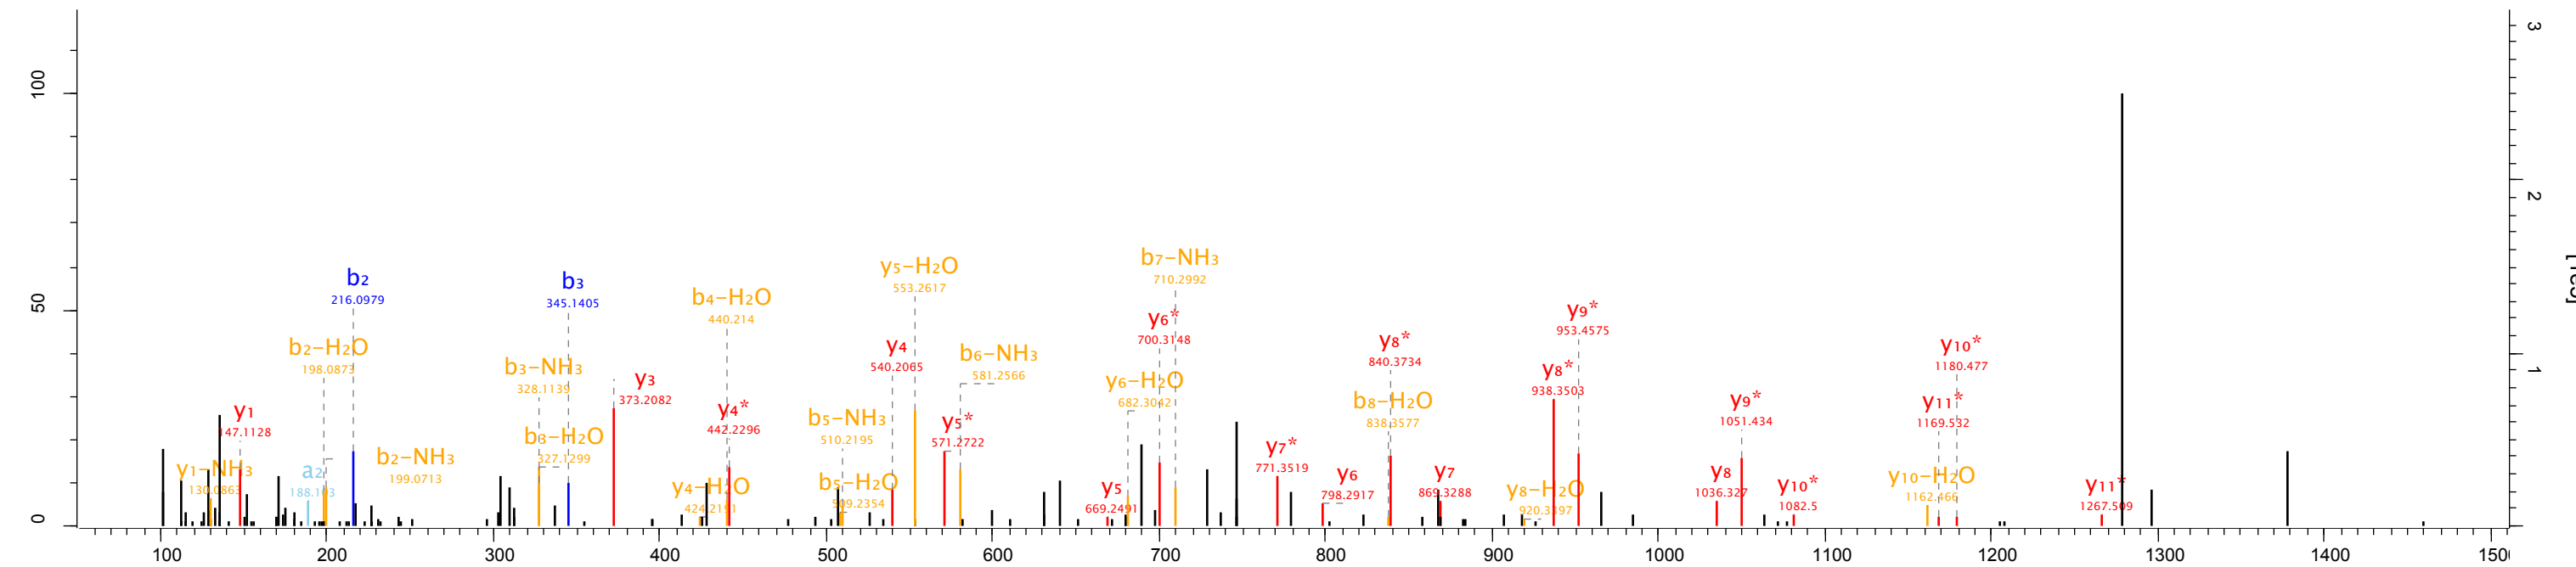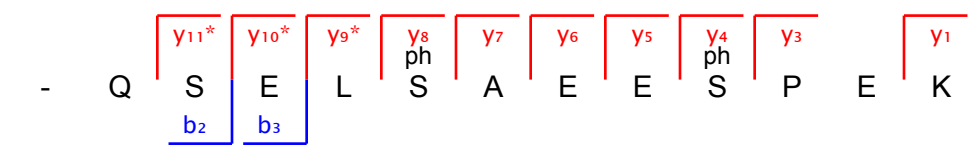

Raw file 20150814\_A375SR\_Phospho\_BR2\_02 Scan 9010 Method FTMS; HCD Score 69.36 m/z 776.34 Gene names KIF21A

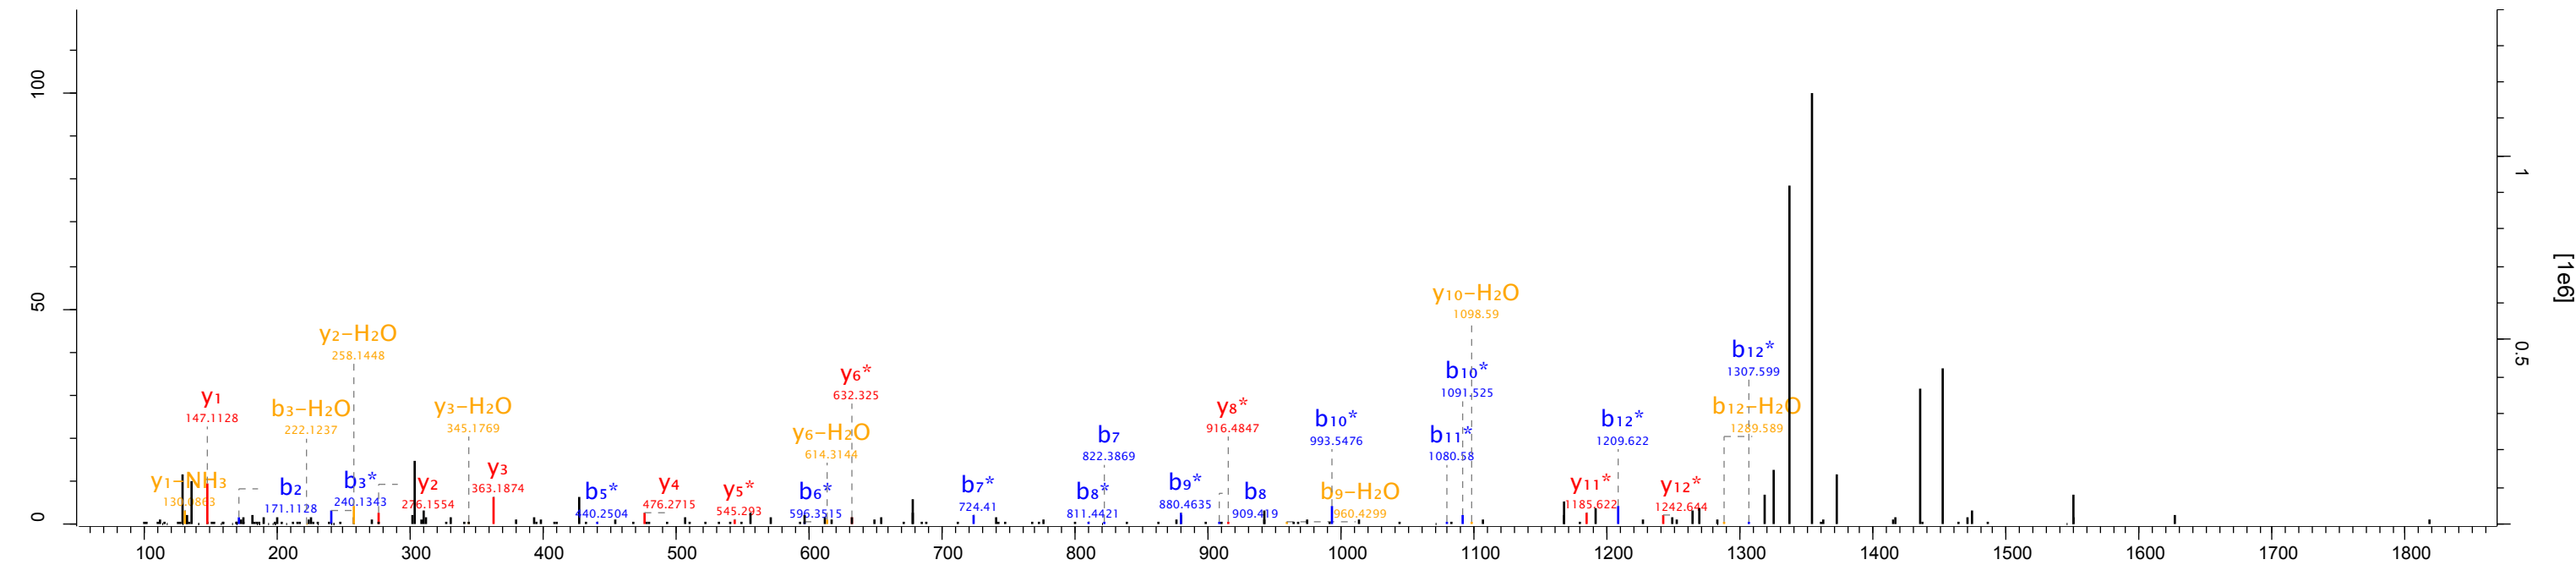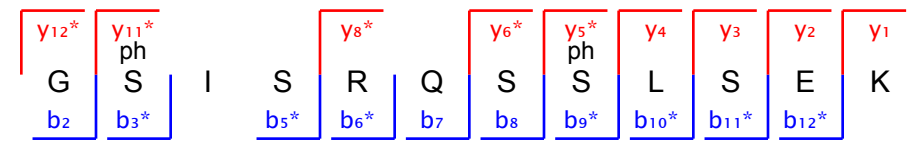



Raw file: 20150814\_A375SR\_Phospho\_BR2\_02  
 Scan: 9290 Method: FTMS; HCD Score: 50.72 m/z: 654.94 Gene names: AHCTF1

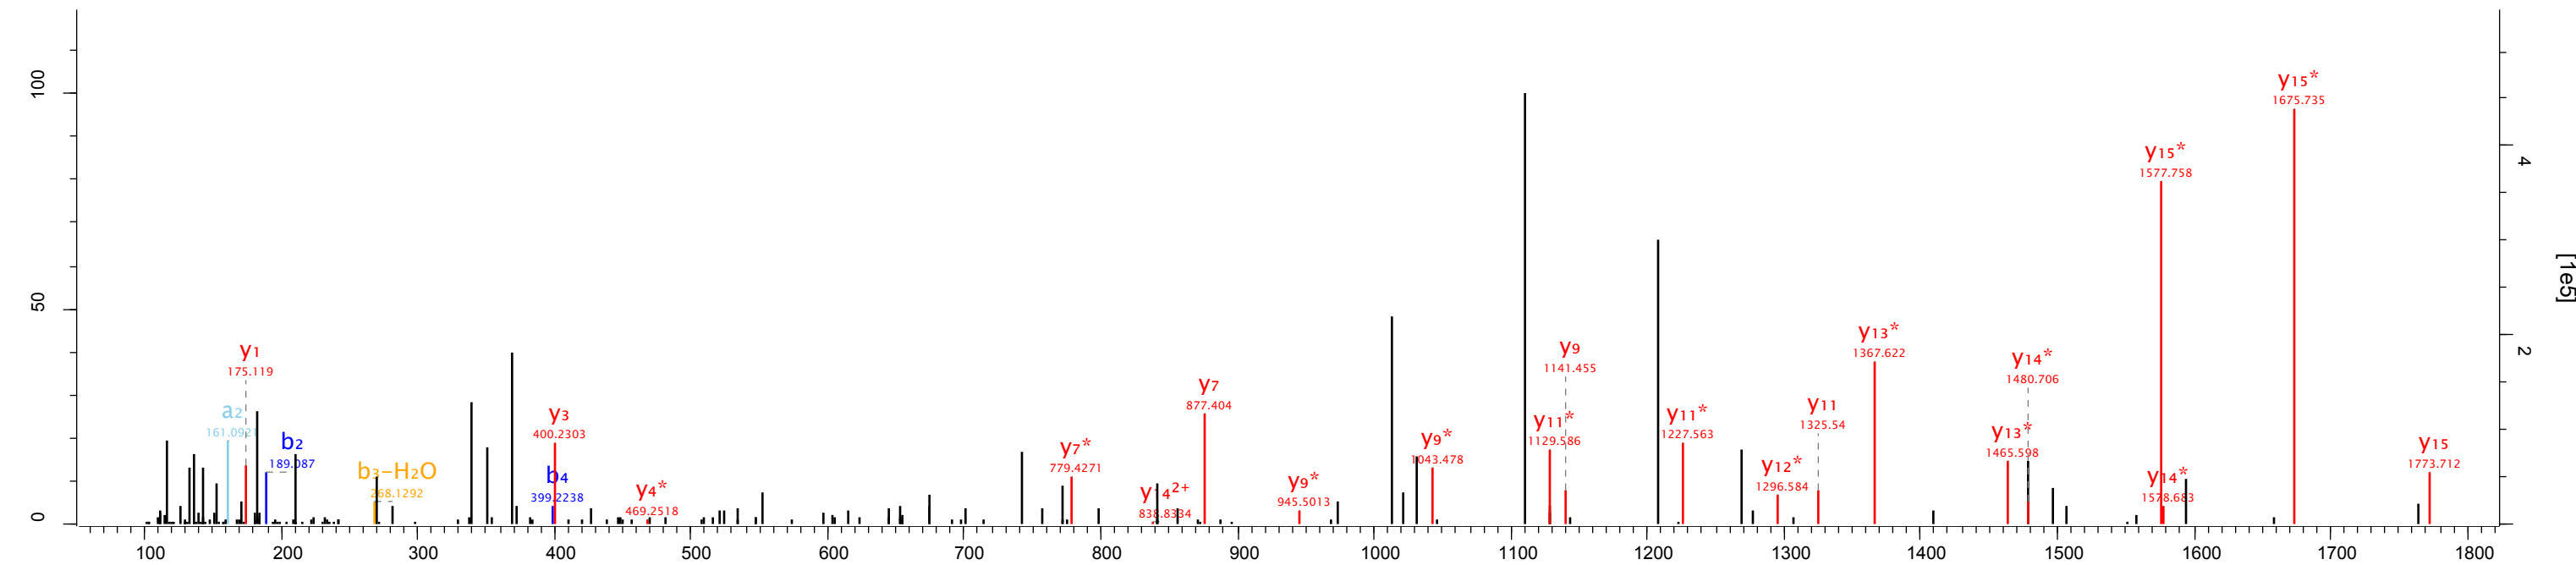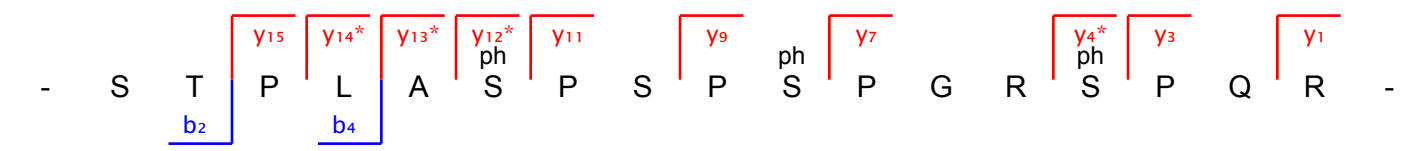

Raw file: 20150814\_A375SR\_Phospho\_BR2\_02  
 Scan: 9860 Method: FTMS; HCD Score: 137.27 m/z: 697.77 Gene names: TERF1

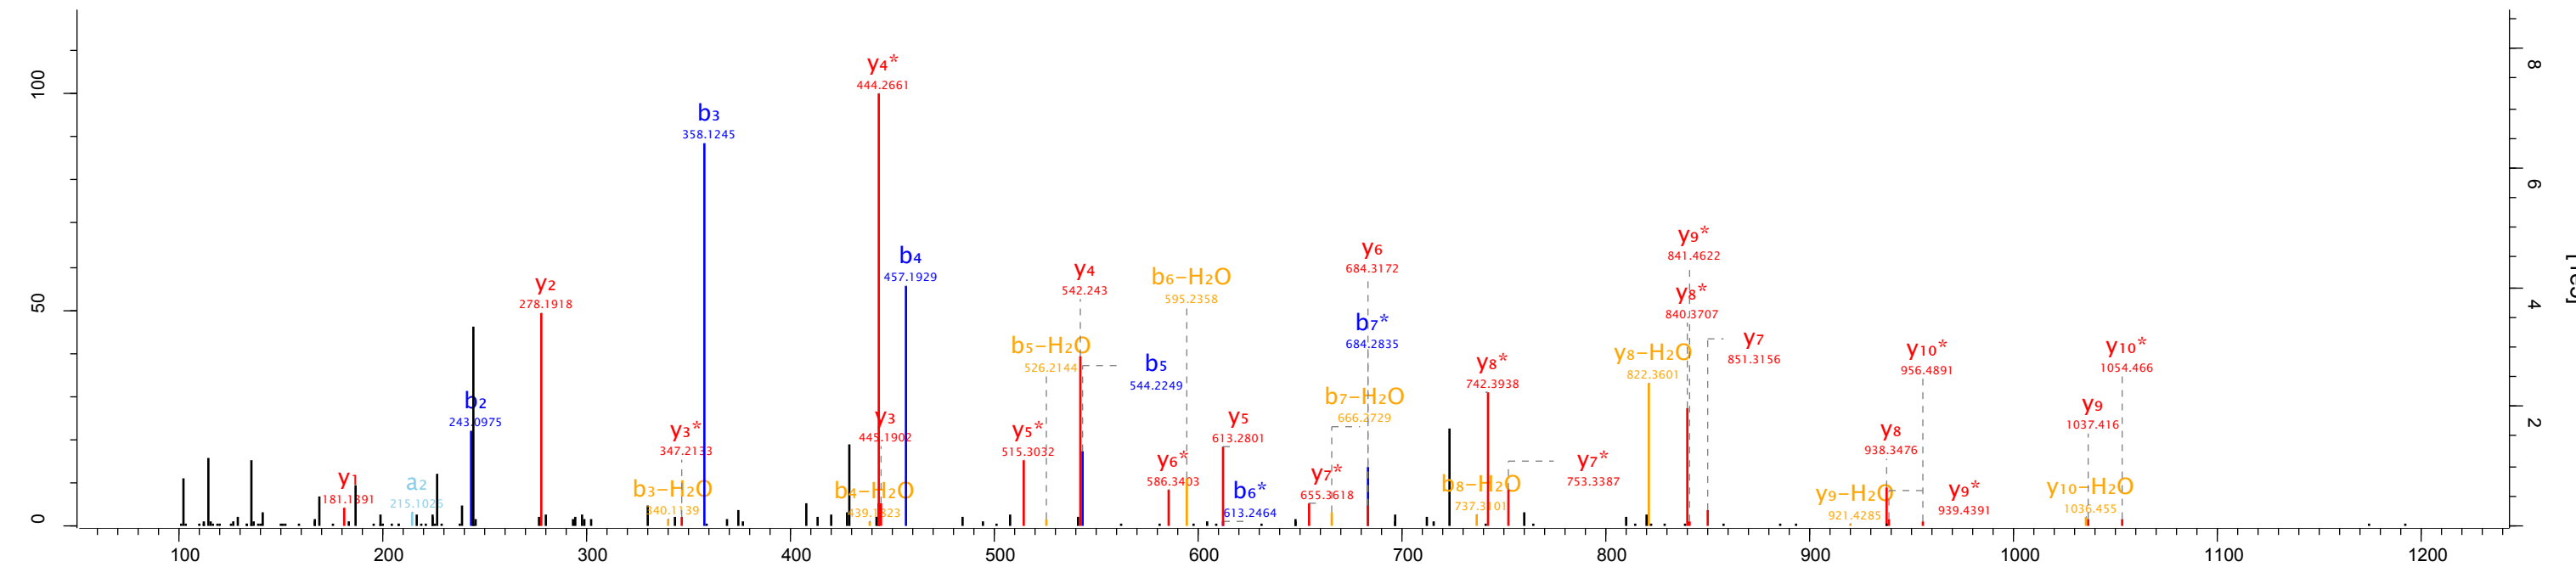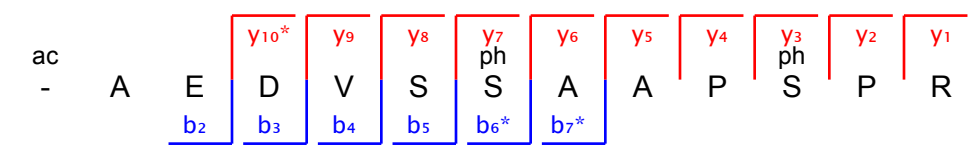

Raw file: 20150814\_A375SR\_Phospho\_BR2\_03  
 Scan: 10100 Method: FTMS; HCD Score: 150.7 m/z: 815.35 Gene names: ARFGEF2

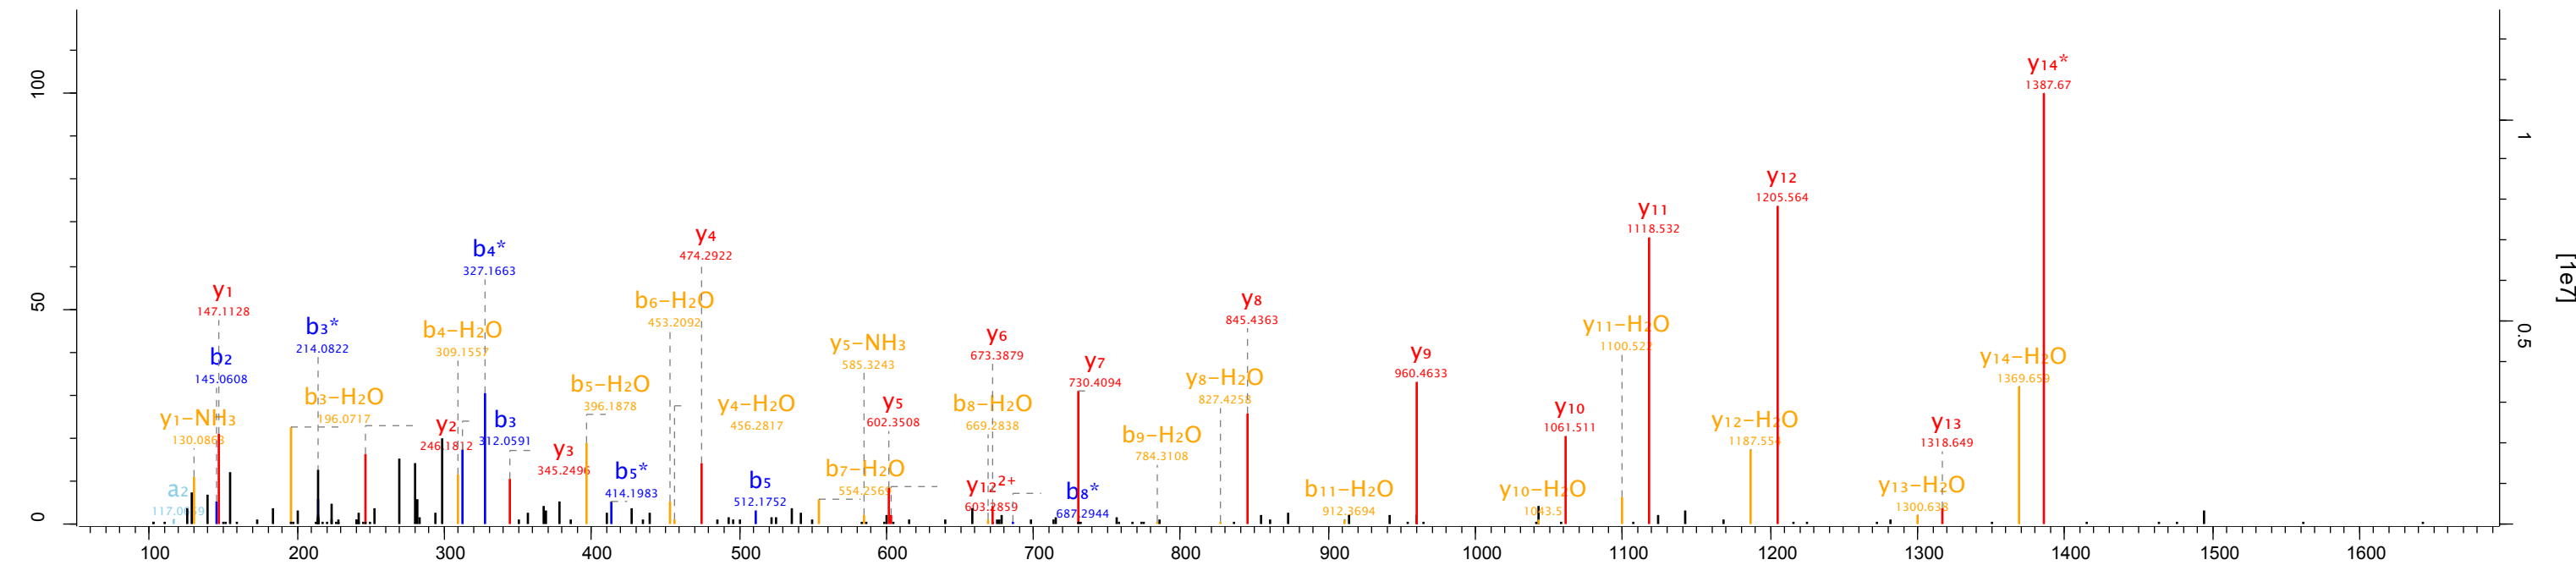

Protein sequence: - G S S ph S L S G T D D G A Q E V V K -

Fragmentation sites (b and y ions) are indicated by brackets below the sequence:

- b2: S
- b3: S
- b4\*: L
- b5: S
- b8\*: D

Raw file 20150814\_A375SR\_Phospho\_BR2\_03 Scan 10130 Method FTMS; HCD Score 48.96 m/z 591.29 Gene names MORC2

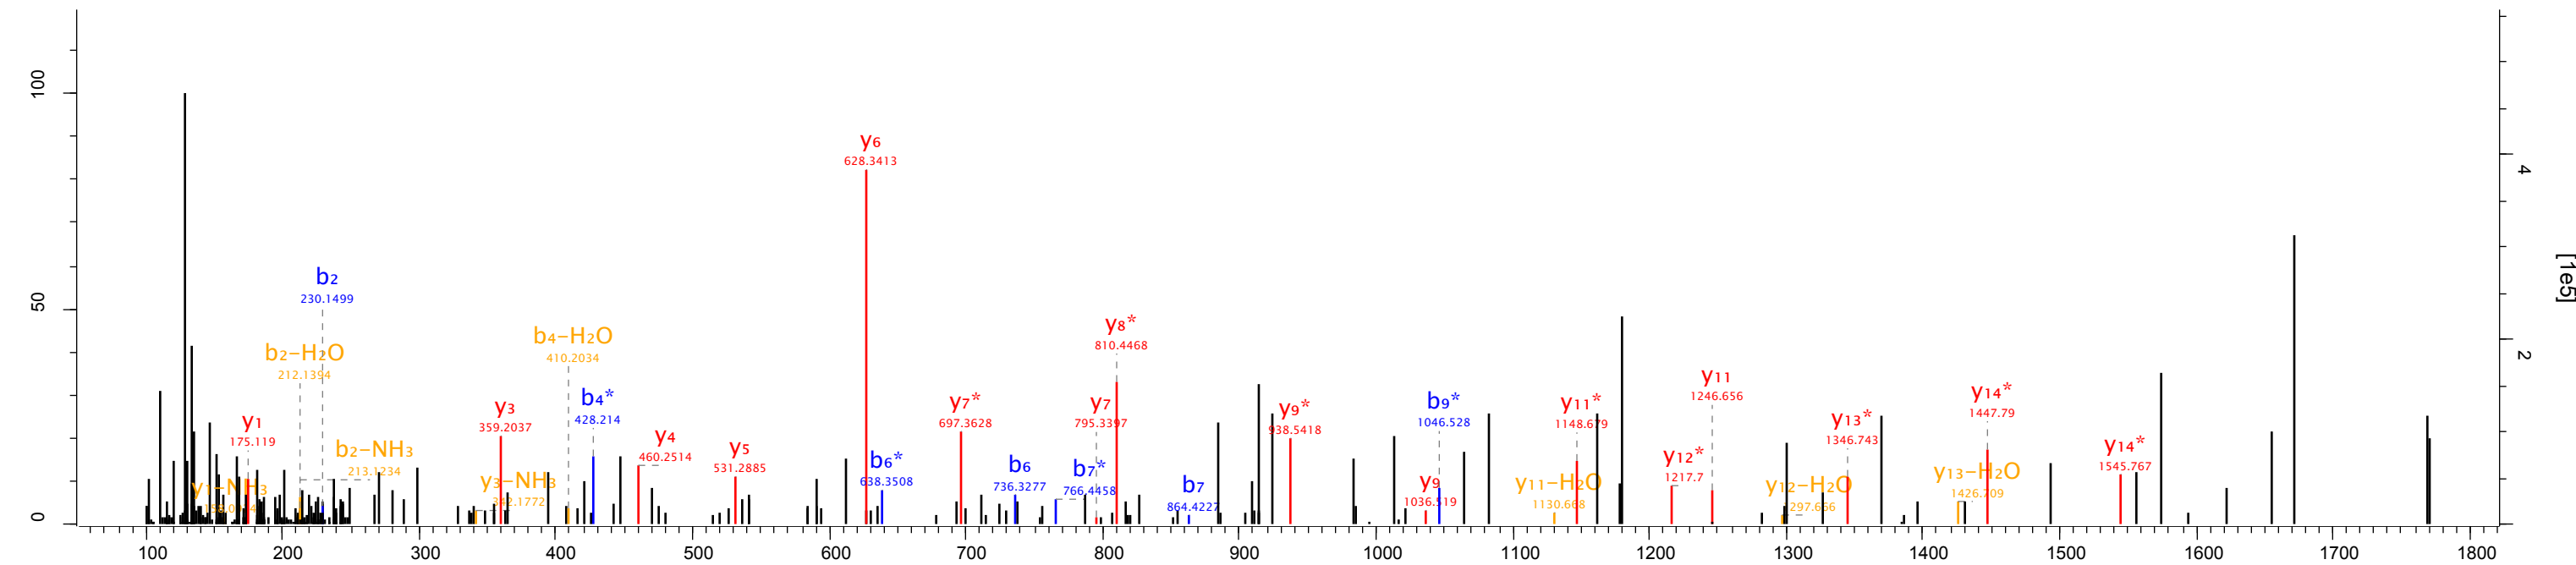

- K T E S P I K L S P A T P S R -

Fragmentation mapping (b and y ions) is shown below the sequence:

- Red boxes above the sequence indicate y ions: y14\* (T), y13\* (E), y12\* (S), y11 (P), y9 (K), y8\* (L), y7 (S), y6 (P), y5 (A), y4 (T), y3 (P), y1 (R).
- Blue boxes below the sequence indicate b ions: b2 (T), b4\* (S), b6 (I), b7 (K), b9\* (S).

Raw file: 20150814\_A375SR\_Phospho\_BR2\_03  
 Scan: 10250 Method: FTMS; HCD Score: 139.5 m/z: 879.38 Gene names: DTL

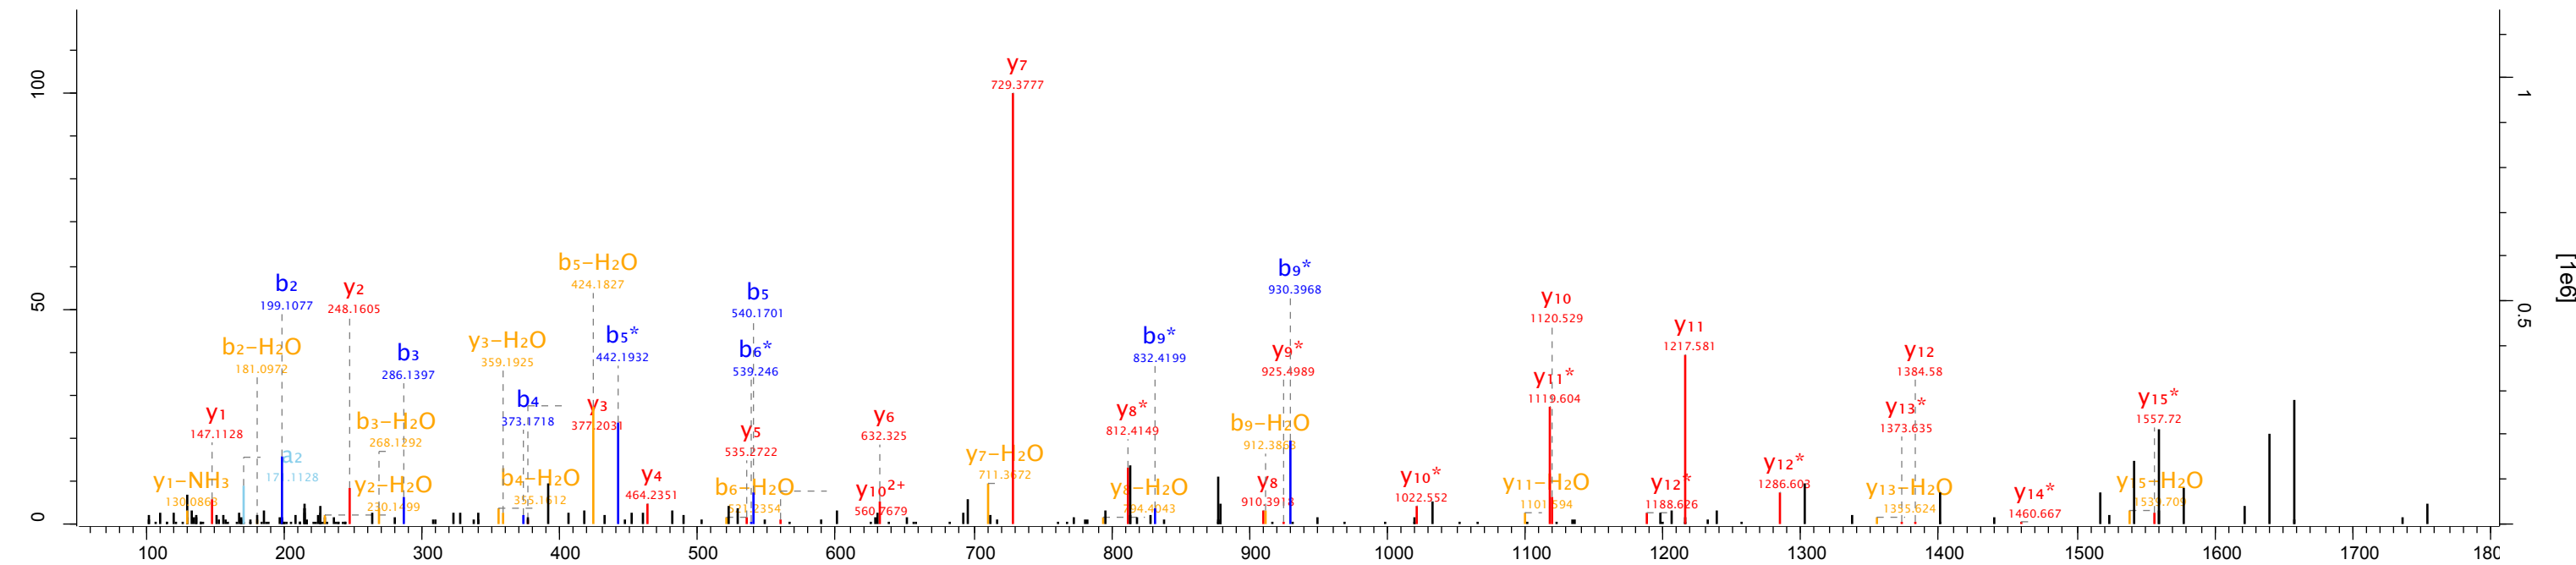

- T y<sub>15</sub>\* y<sub>14</sub>\* y<sub>13</sub>\* y<sub>12</sub> y<sub>11</sub> y<sub>10</sub> y<sub>9</sub>\* y<sub>8</sub> y<sub>7</sub> y<sub>6</sub> y<sub>5</sub> y<sub>4</sub> y<sub>3</sub> y<sub>2</sub> y<sub>1</sub> -

P S S ph P P I T P P A S E T K

b<sub>2</sub> b<sub>3</sub> b<sub>4</sub> b<sub>5</sub> b<sub>6</sub>\* b<sub>9</sub>\*

Raw file 20150814\_A375SR\_Phospho\_BR2\_03 Scan 10420 Method FTMS; HCD Score 157.68 m/z 787.31 Gene names PI4K2A

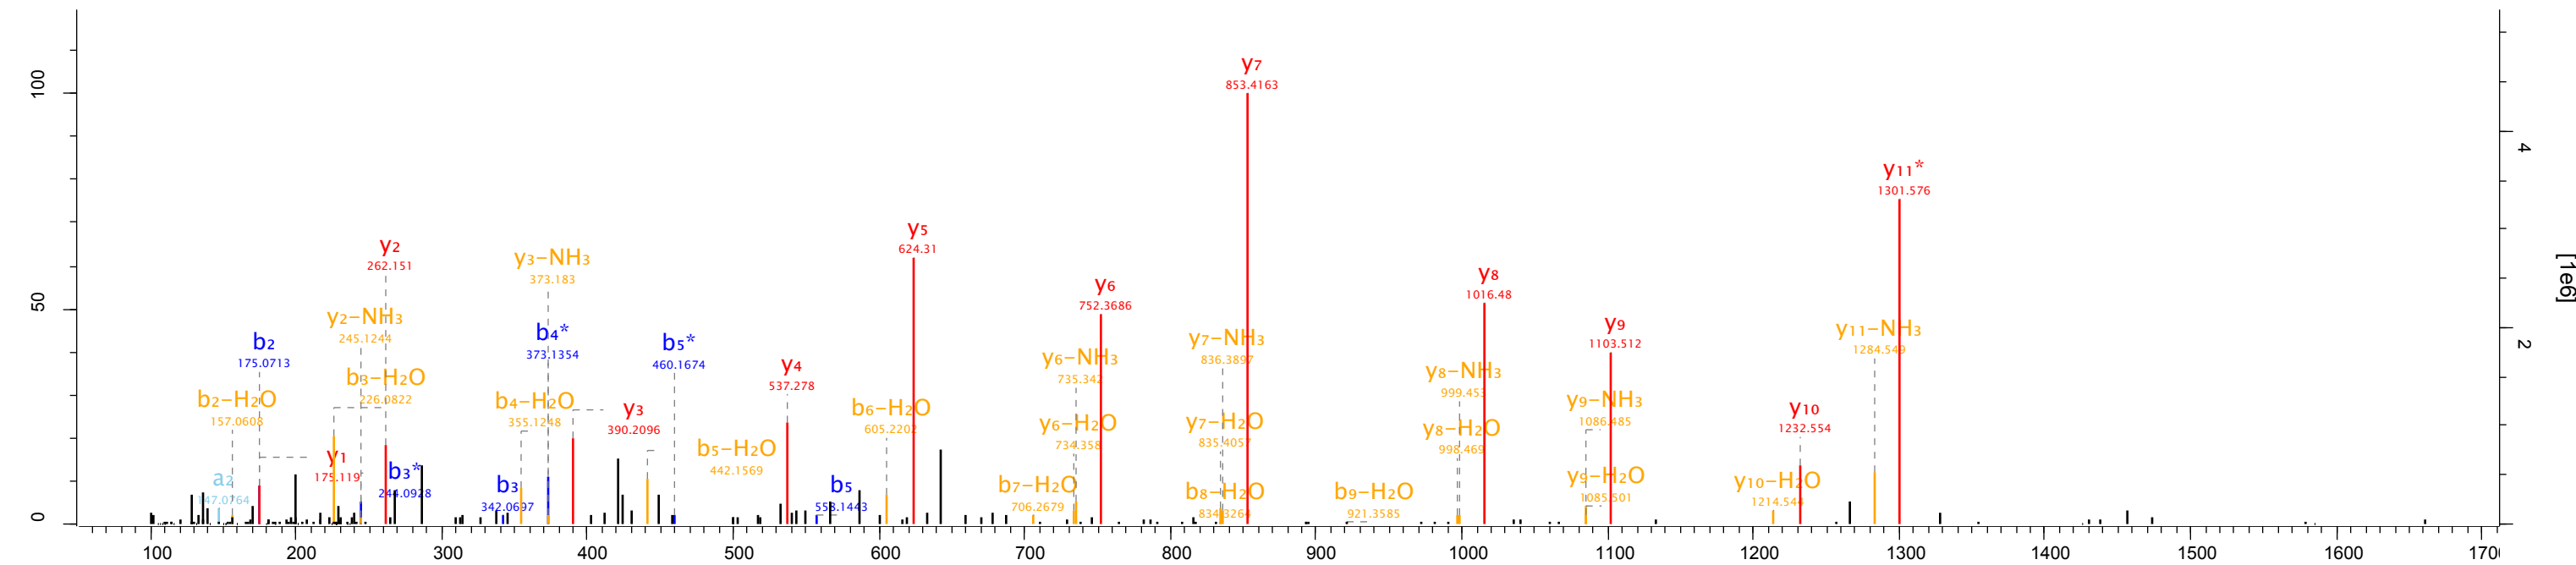

- S S S<sub>b2</sub> S<sub>b3</sub> E<sub>b4\*</sub> S<sub>b5</sub> Y Y<sub>11\*</sub> Y<sub>10</sub> Y<sub>9</sub> Y<sub>8</sub> Y<sub>7</sub> Y<sub>6</sub> Y<sub>5</sub> Y<sub>4</sub> Y<sub>3</sub> Y<sub>2</sub> Y<sub>1</sub> -

Raw file Scan Method Score m/z Gene names  
 20150814\_A375SR\_Phospho\_BR2\_03 10810 FTMS; HCD 86.04 719.55 EPB41L1

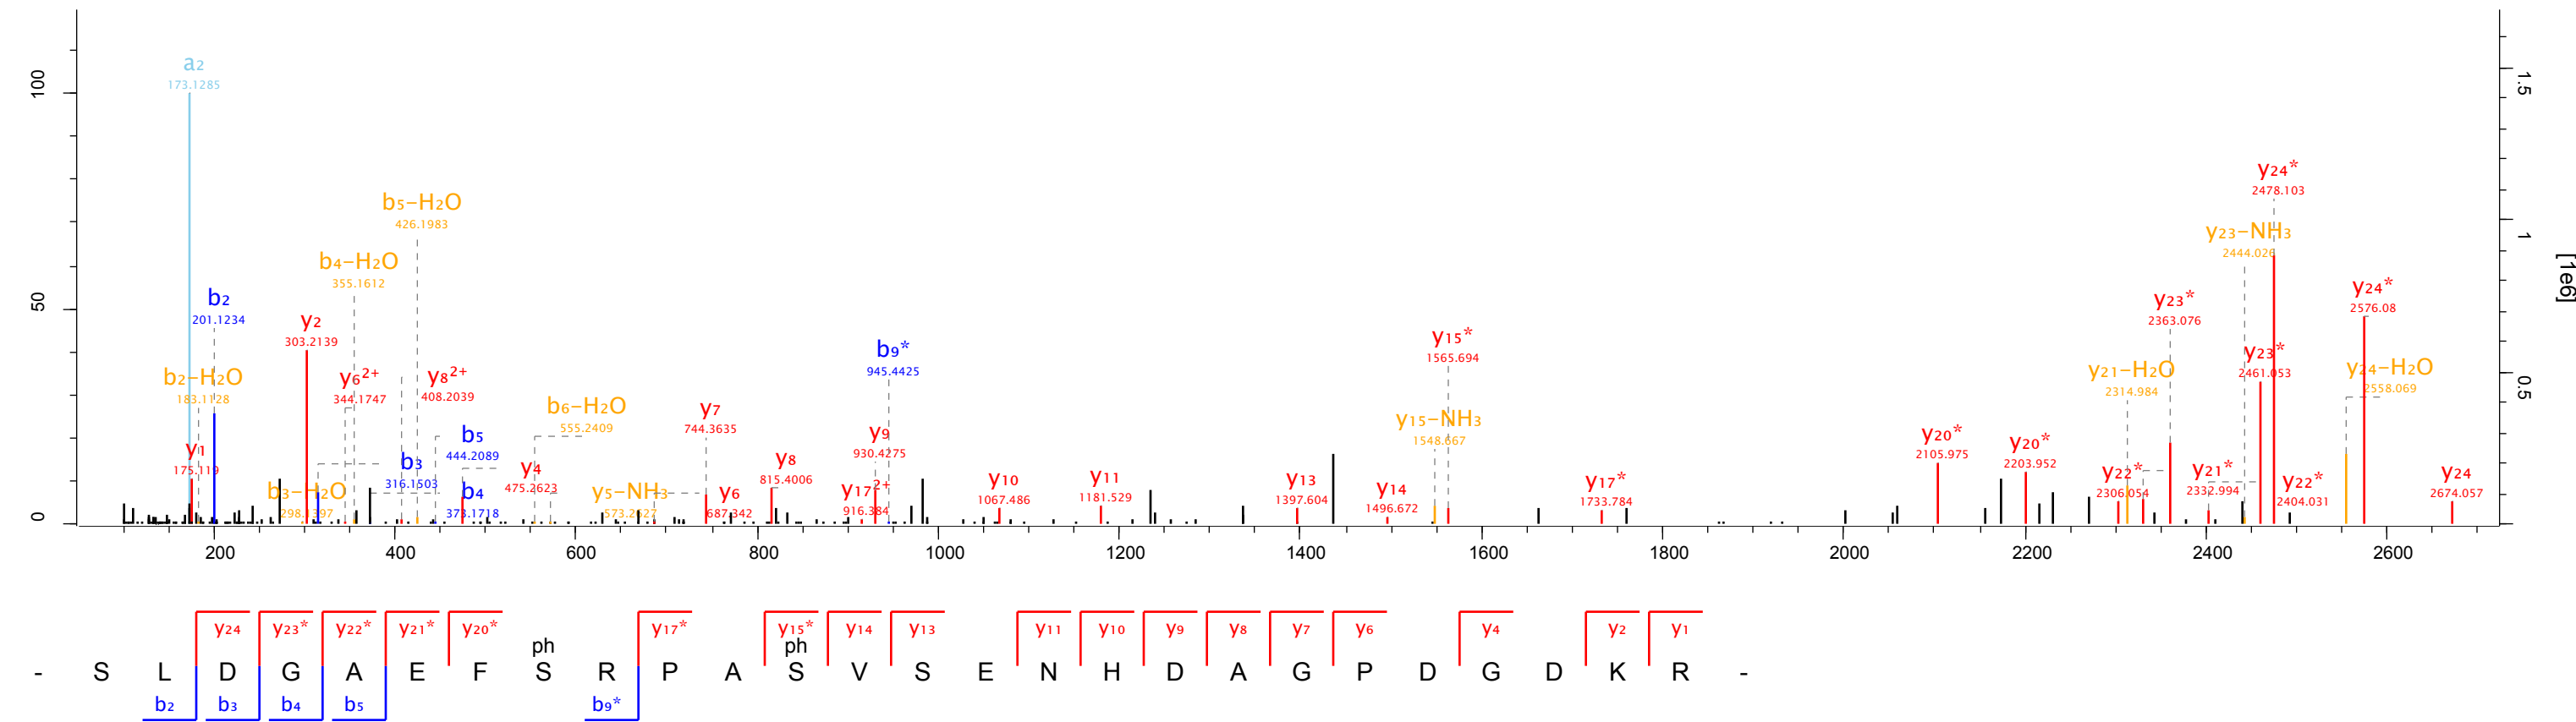

Raw file 20150814\_A375SR\_Phospho\_BR2\_03 Scan 11570 Method FTMS; HCD Score 79.05 m/z 804 Gene names BCL9L

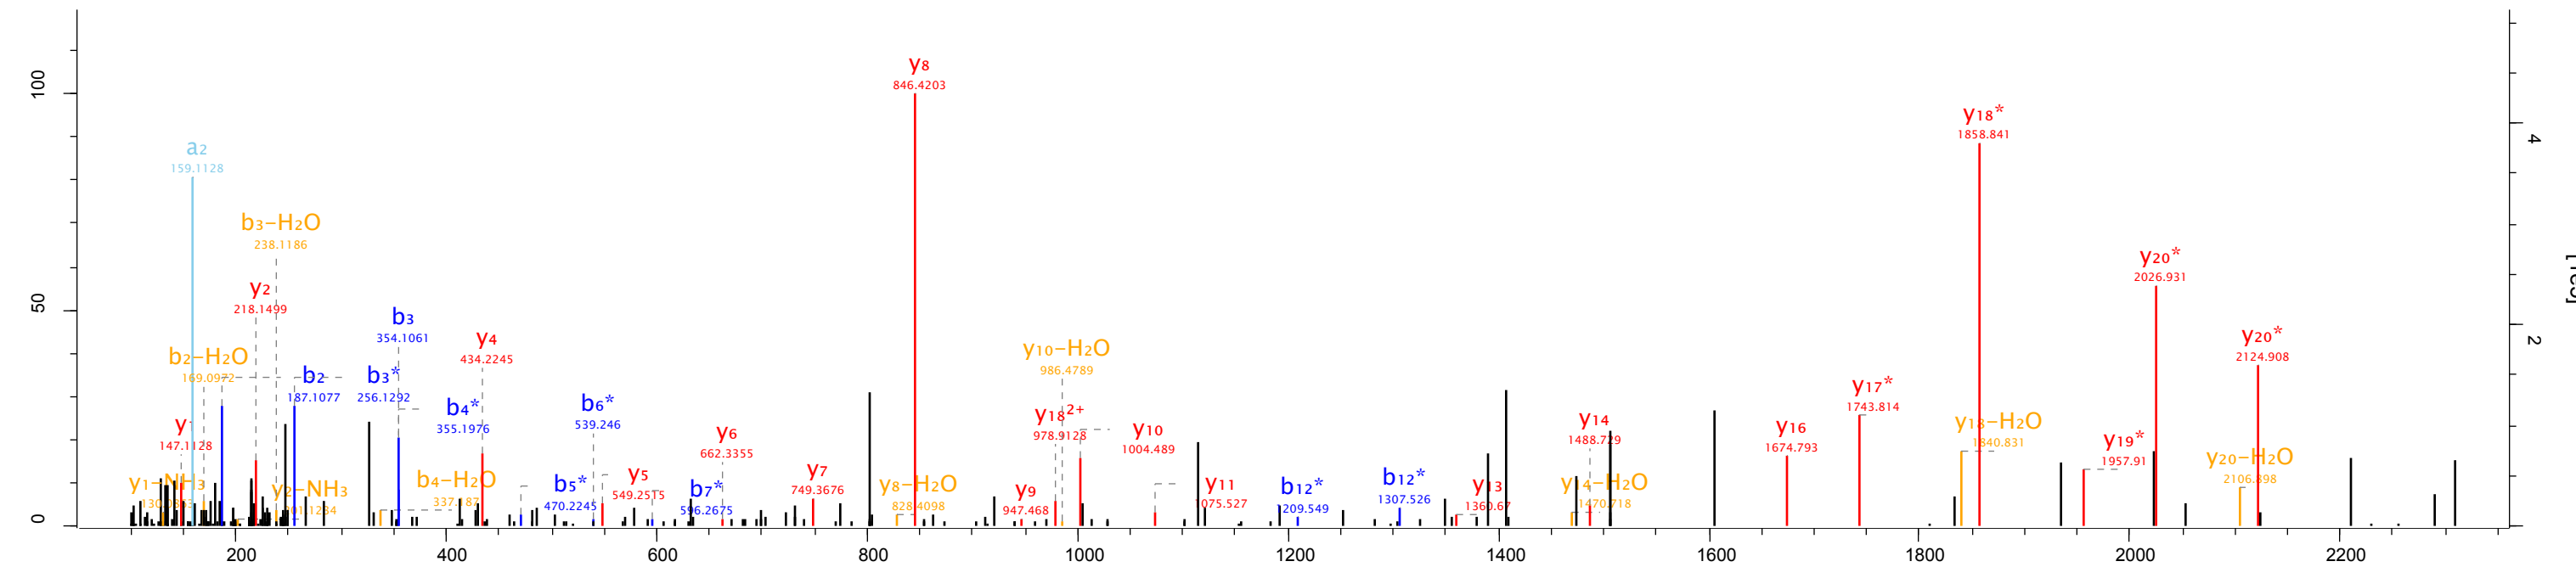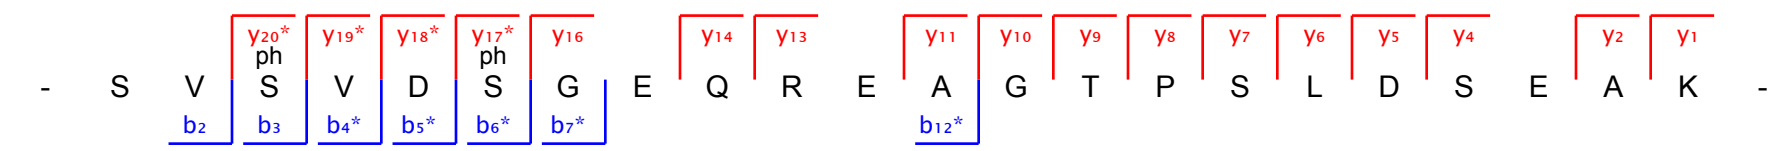



Raw file: 20150814\_A375SR\_Phospho\_BR2\_03  
 Scan: 11660 Method: FTMS; HCD Score: 72.62 m/z: 701.28 Gene names: PPF1BP1

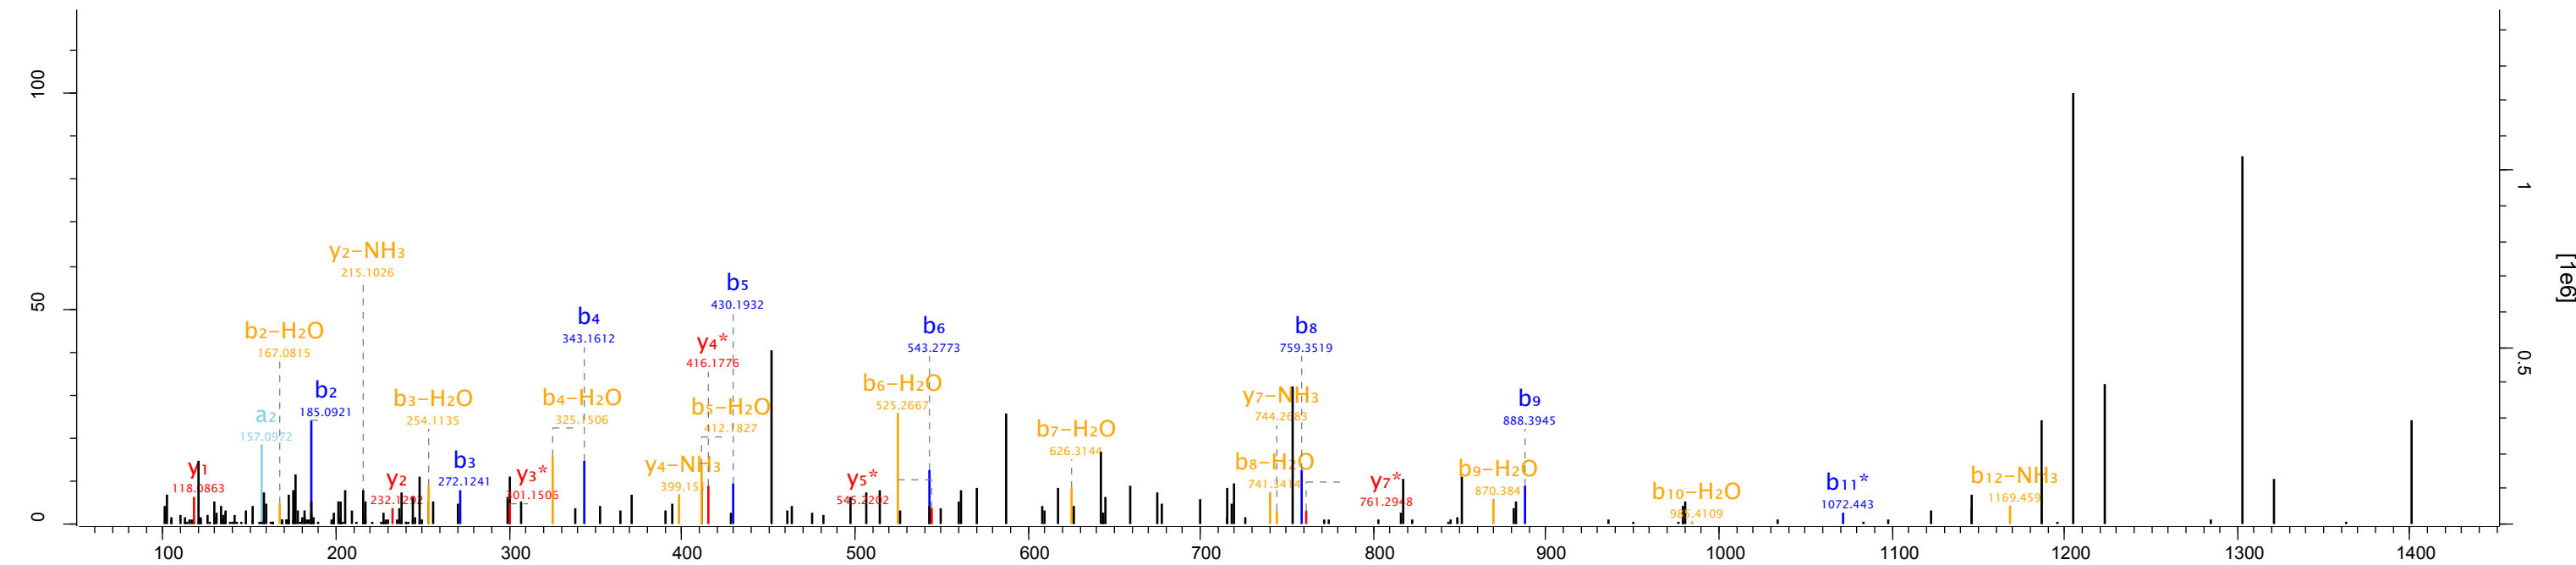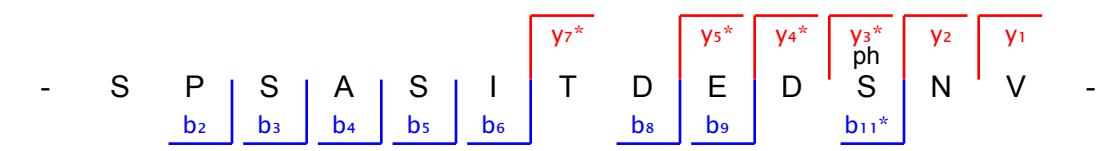

Raw file: 20150814\_A375SR\_Phospho\_BR2\_03  
 Scan: 11780 Method: FTMS; HCD Score: 258.43 m/z: 935.36 Gene names: DHX16

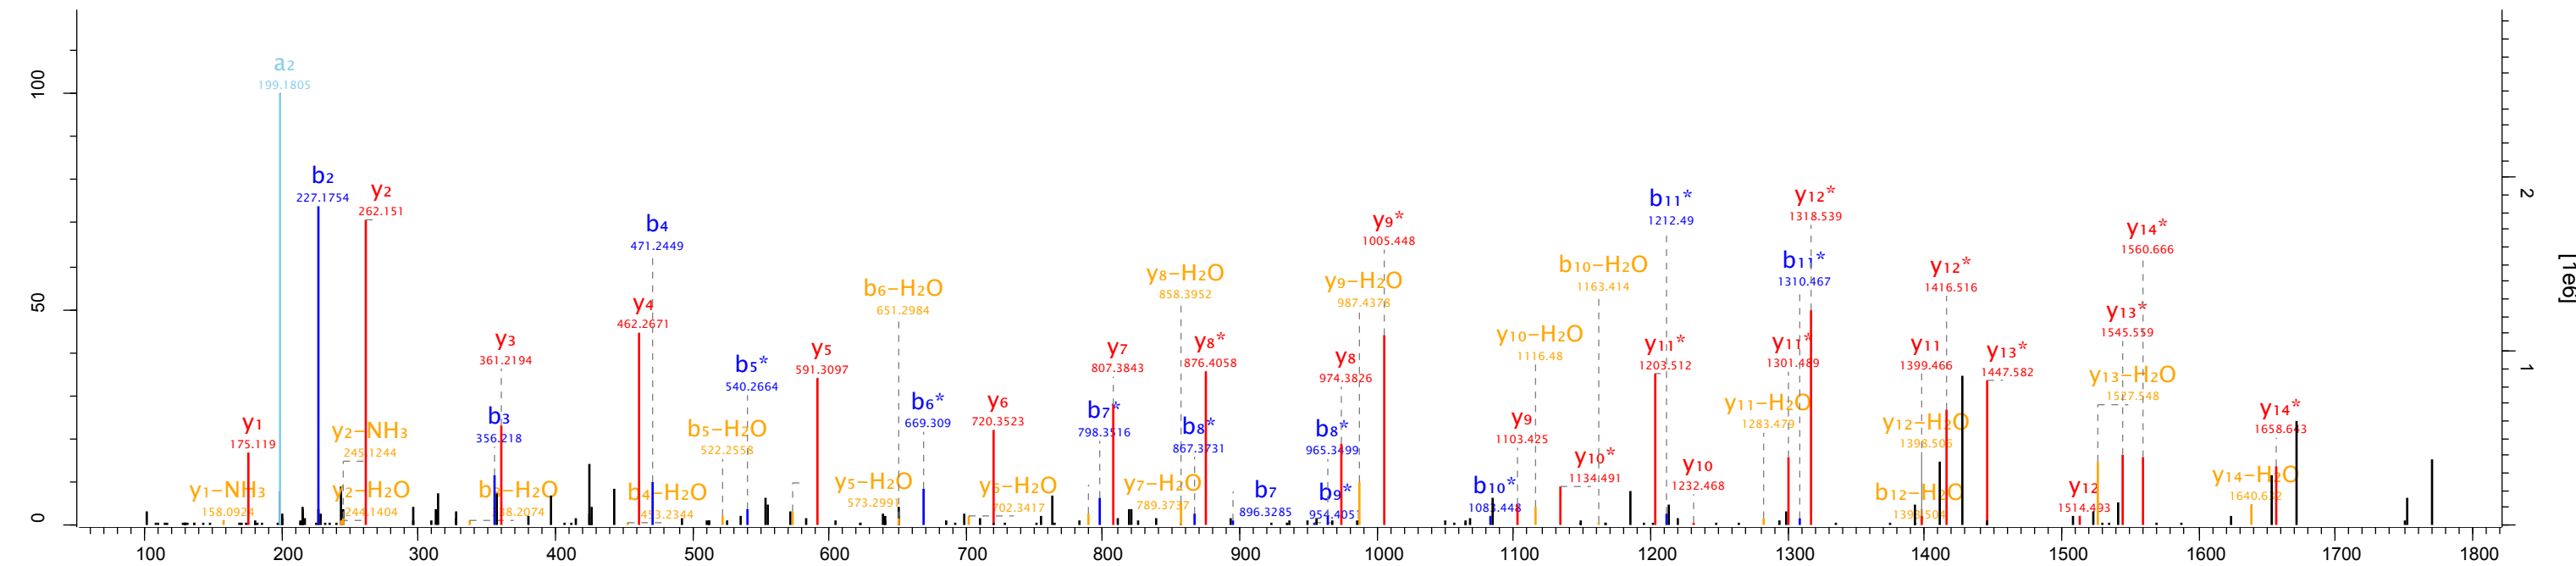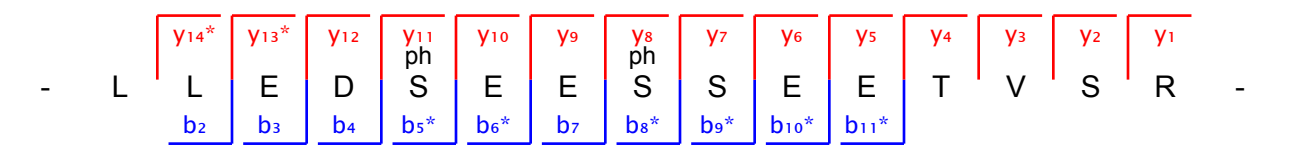

Raw file: 20150814\_A375SR\_Phospho\_BR2\_03  
 Scan: 11850 Method: FTMS; HCD Score: 93.84 m/z: 545.23 Gene names: C2CD3

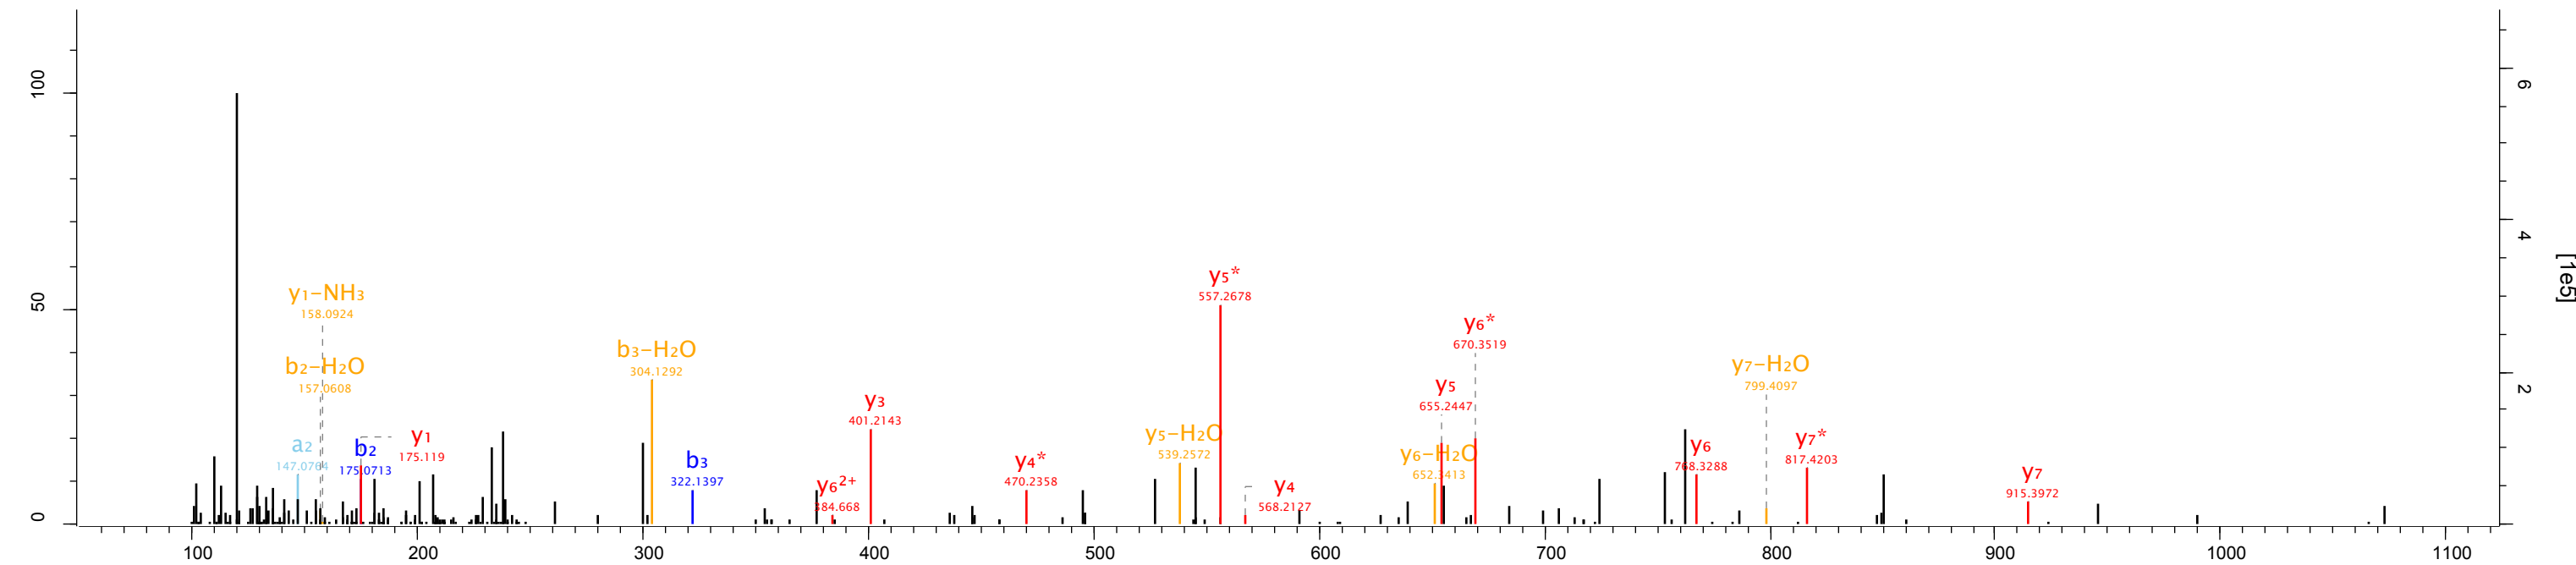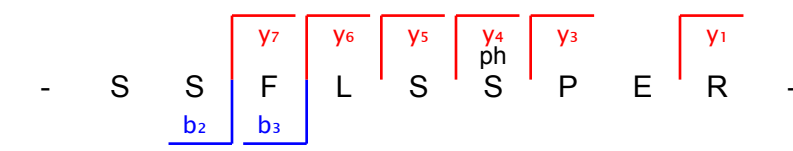

Raw file Scan Method Score m/z Gene names  
 20150814\_A375SR\_Phospho\_BR2\_03 11990 FTMS; HCD 90.17 757.31 ZNF768

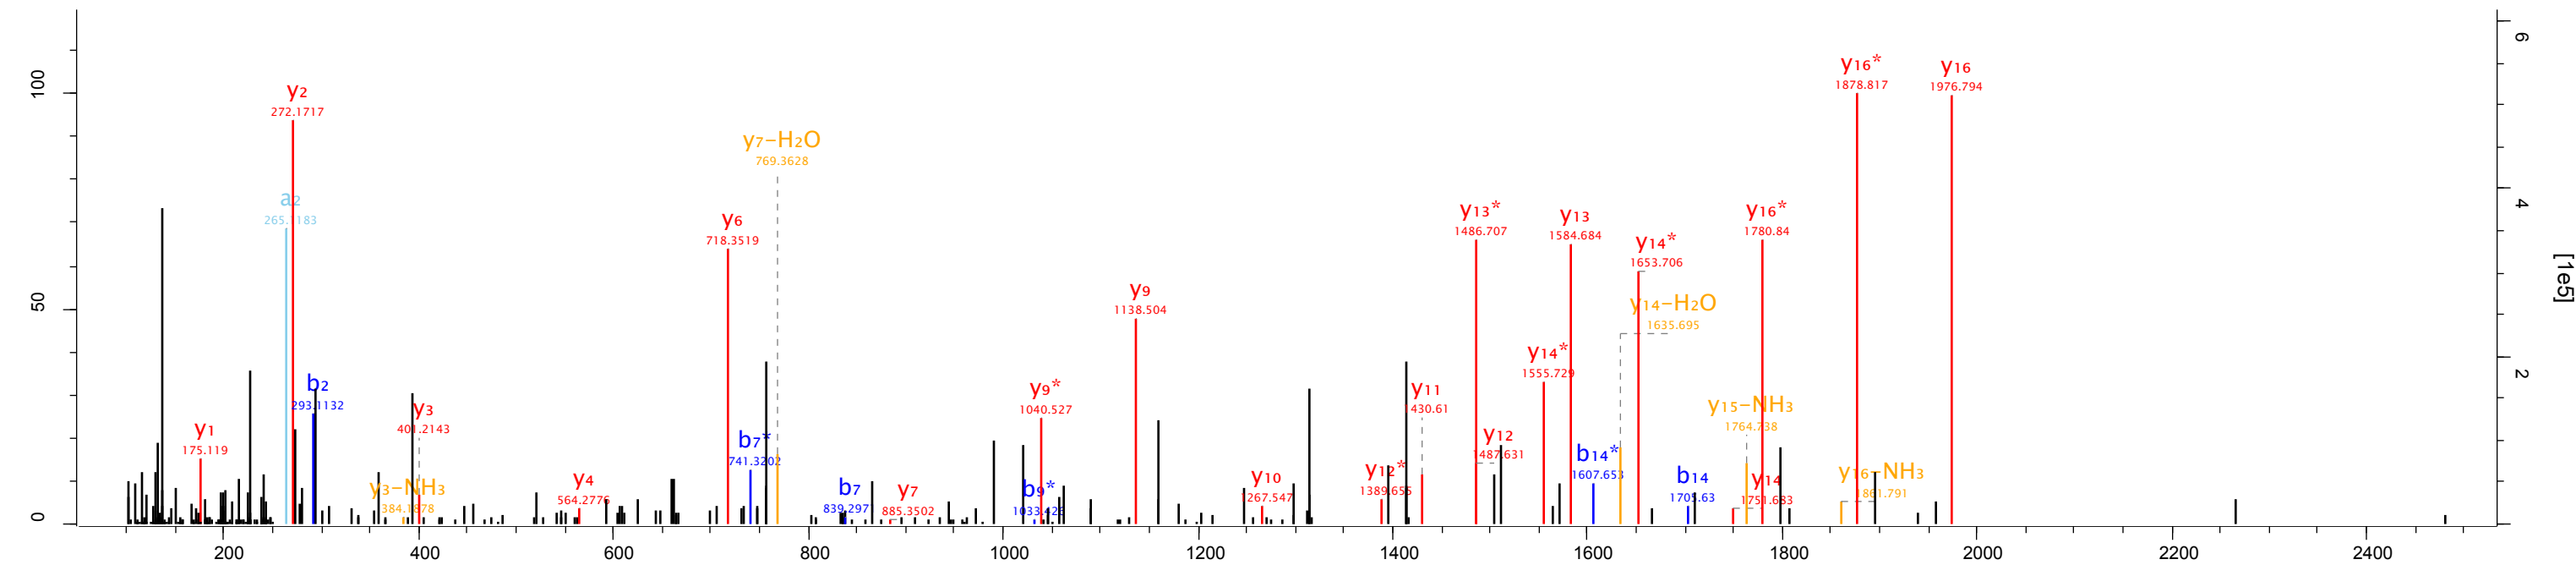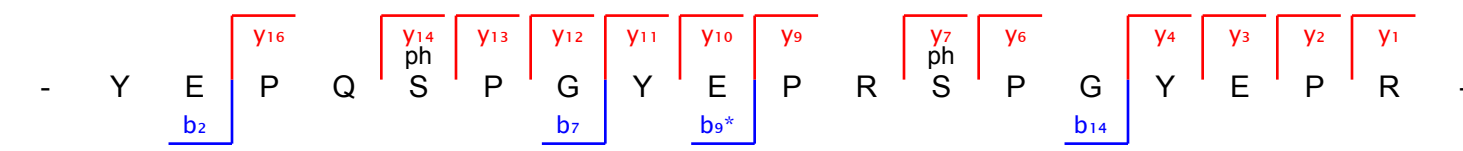

Raw file Scan Method Score m/z Gene names  
 20150814\_A375SR\_Phospho\_BR2\_03 12070 FTMS; HCD 83.45 574.23 PAG1

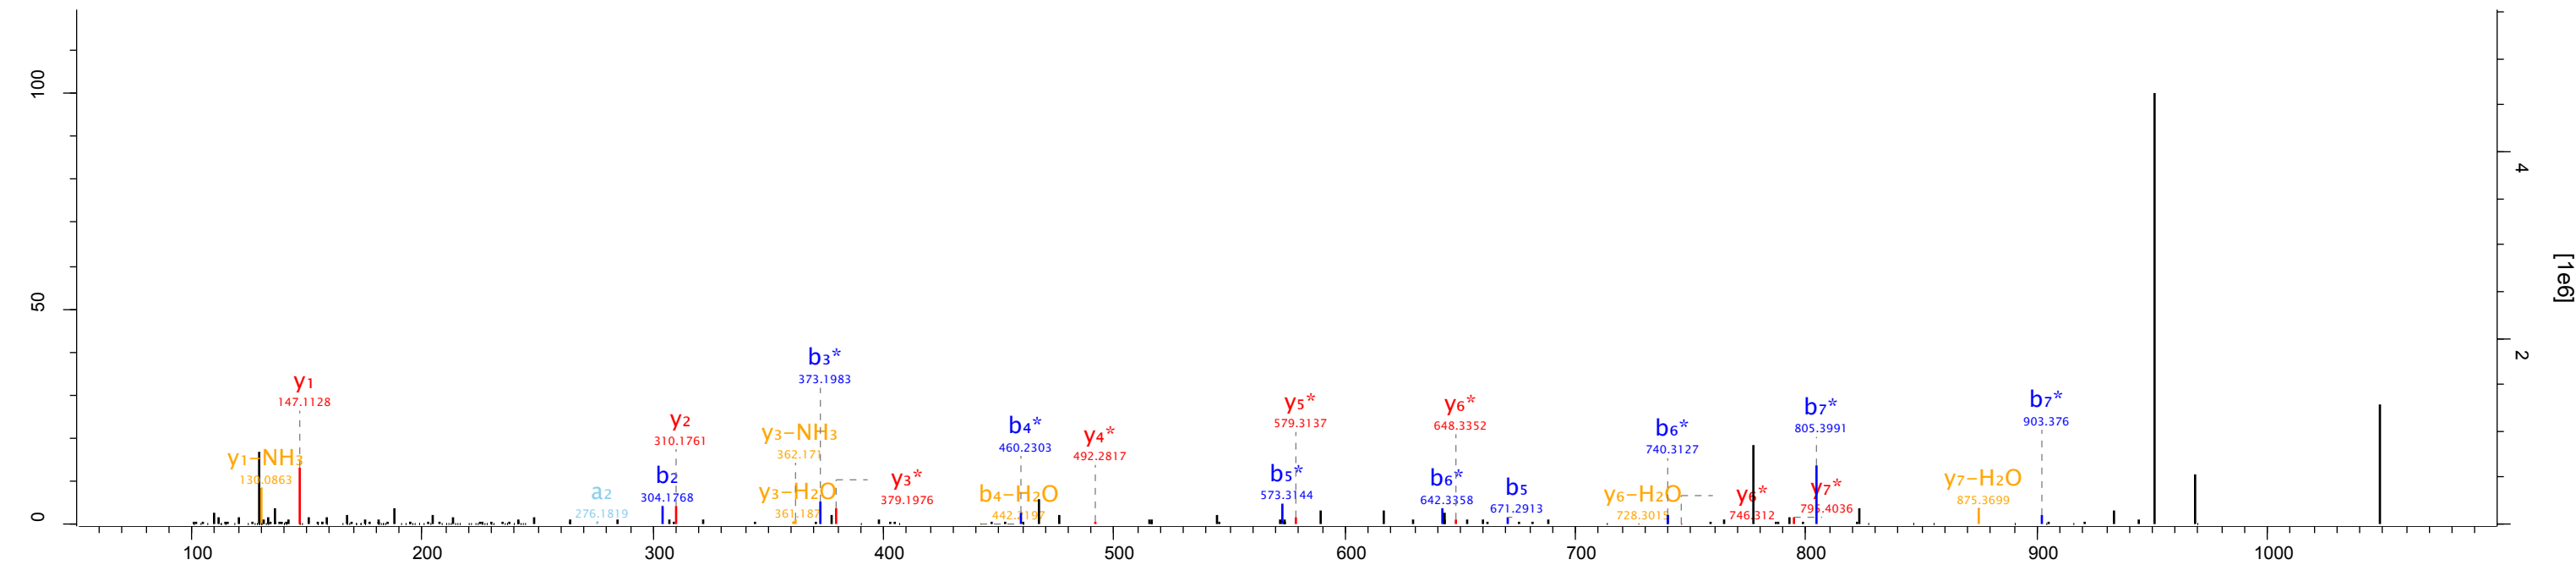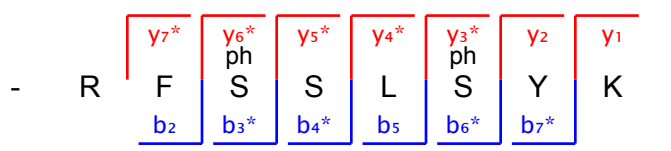

Raw file 20150814\_A375SR\_Phospho\_BR2\_03 Scan 12550 Method FTMS; HCD Score 59.23 m/z 576.26 Gene names SORBS3

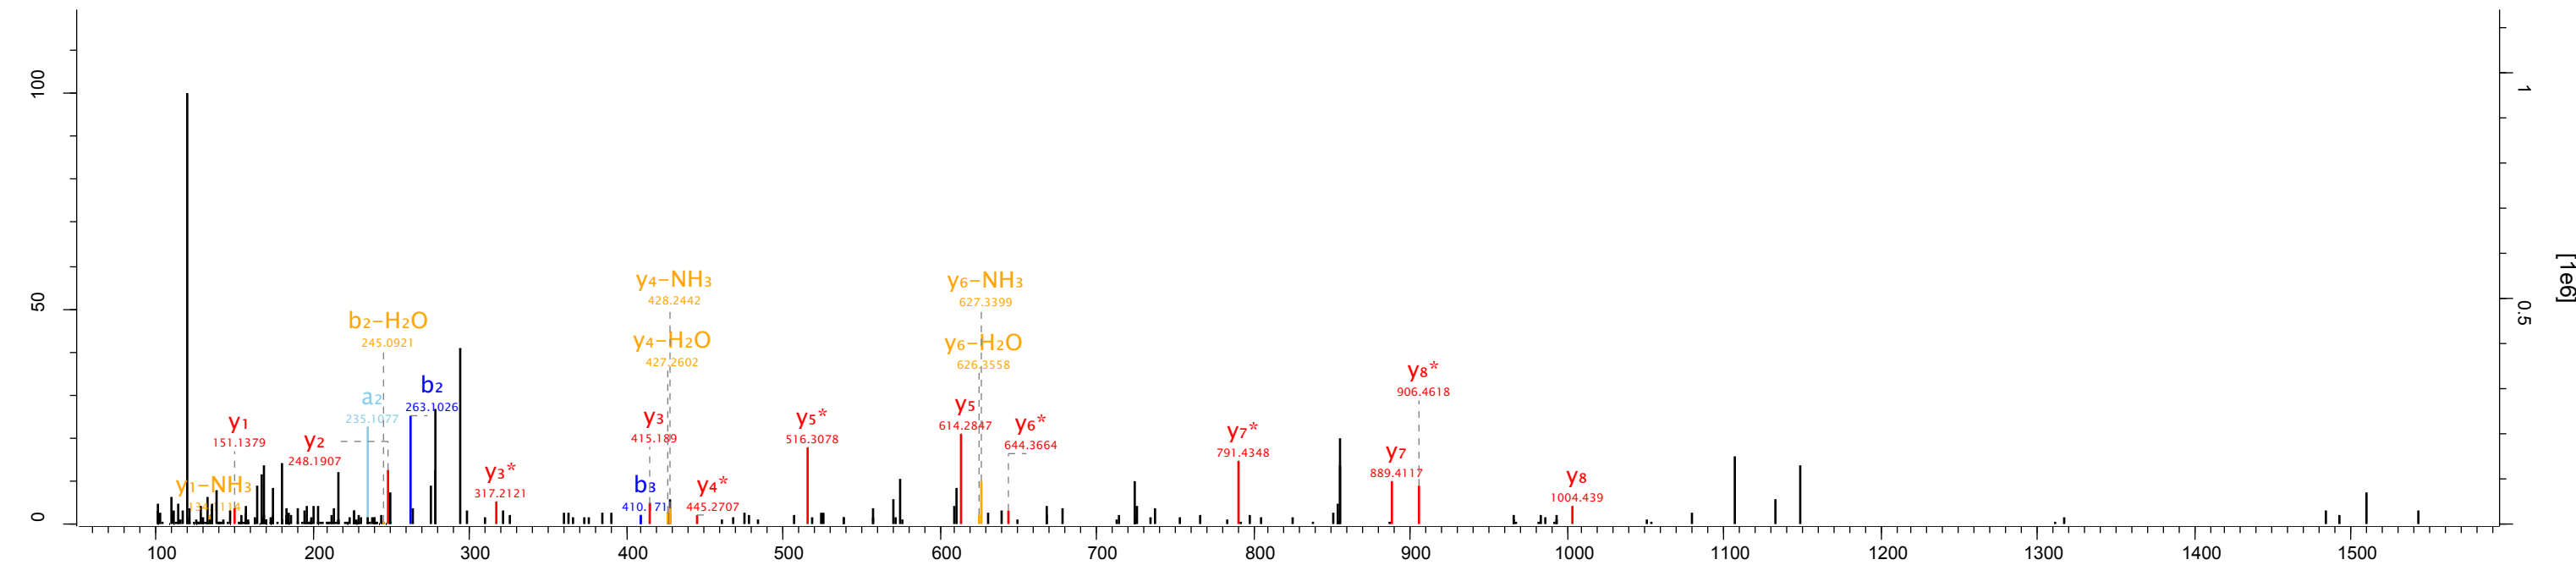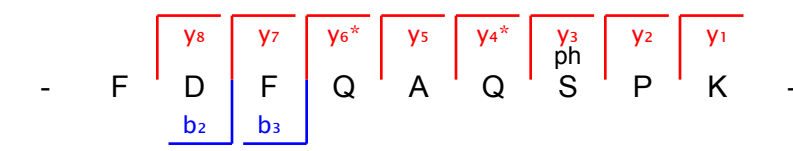

Raw file 20150814\_A375SR\_Phospho\_BR2\_03 Scan 12620 Method FTMS; HCD Score 99.24 m/z 647.25 Gene names WDR13

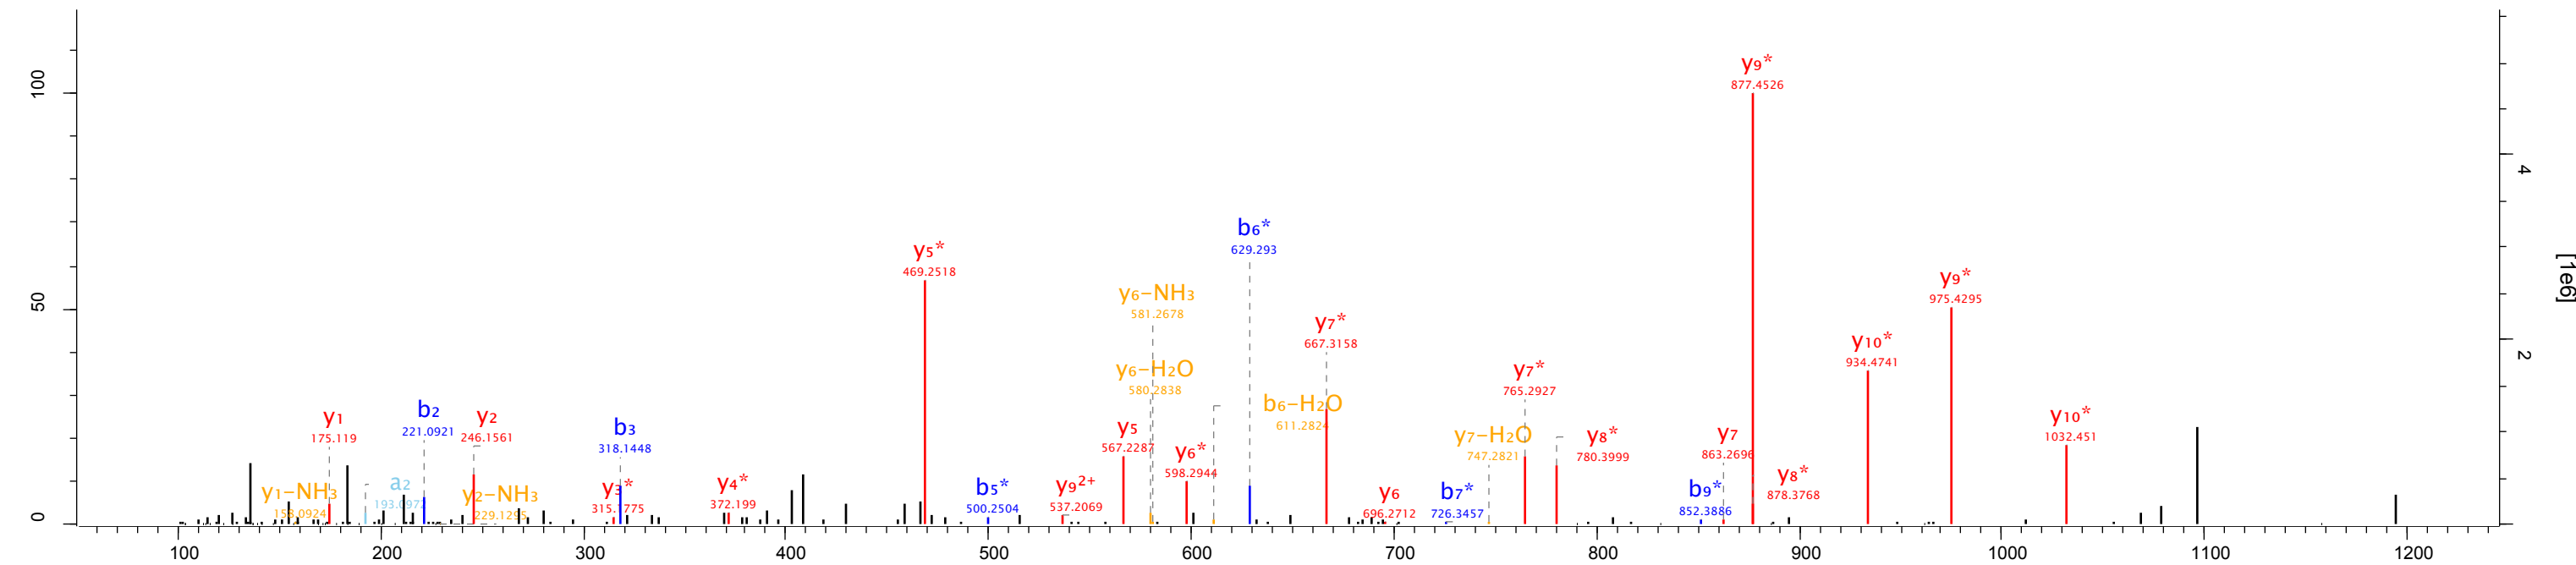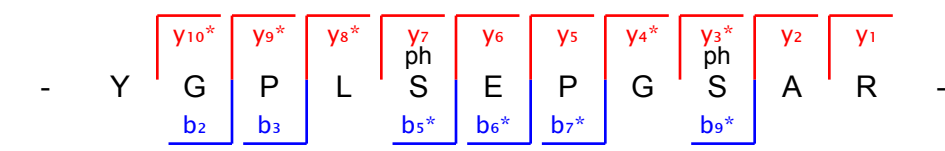

Raw file 20150814\_A375SR\_Phospho\_BR2\_03 Scan 13020 Method FTMS; HCD Score 270.32 m/z 1038.13 Gene names PAGE2;PAGE2B

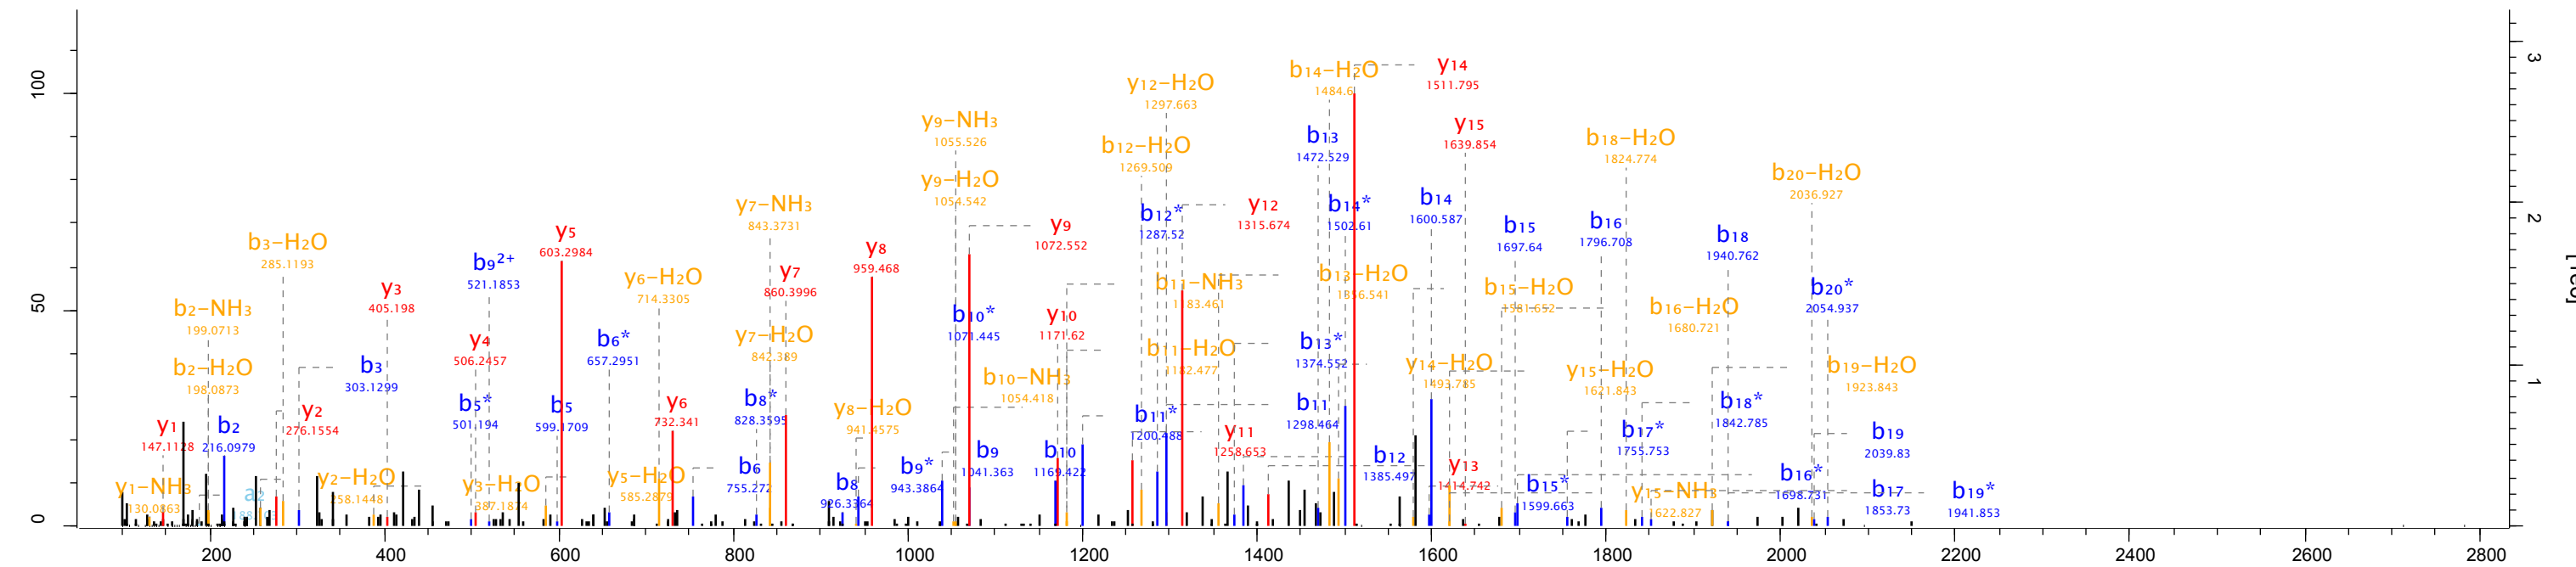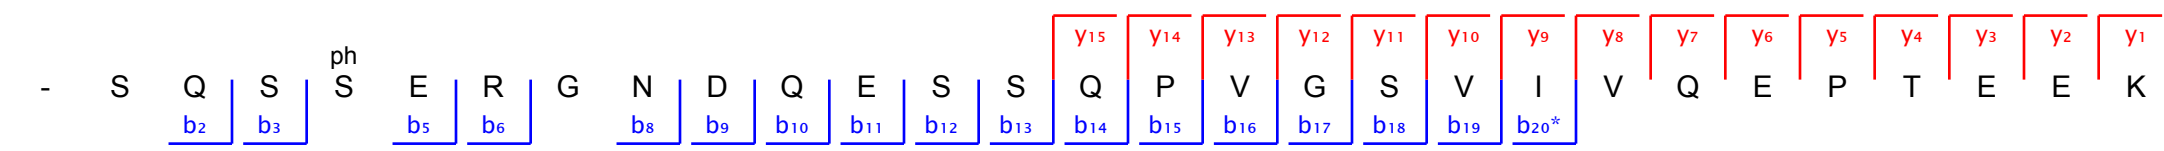



Raw file 20150814\_A375SR\_Phospho\_BR2\_03 Scan 13030 Method FTMS; HCD Score 195.94 m/z 958.43 Gene names DCP1A

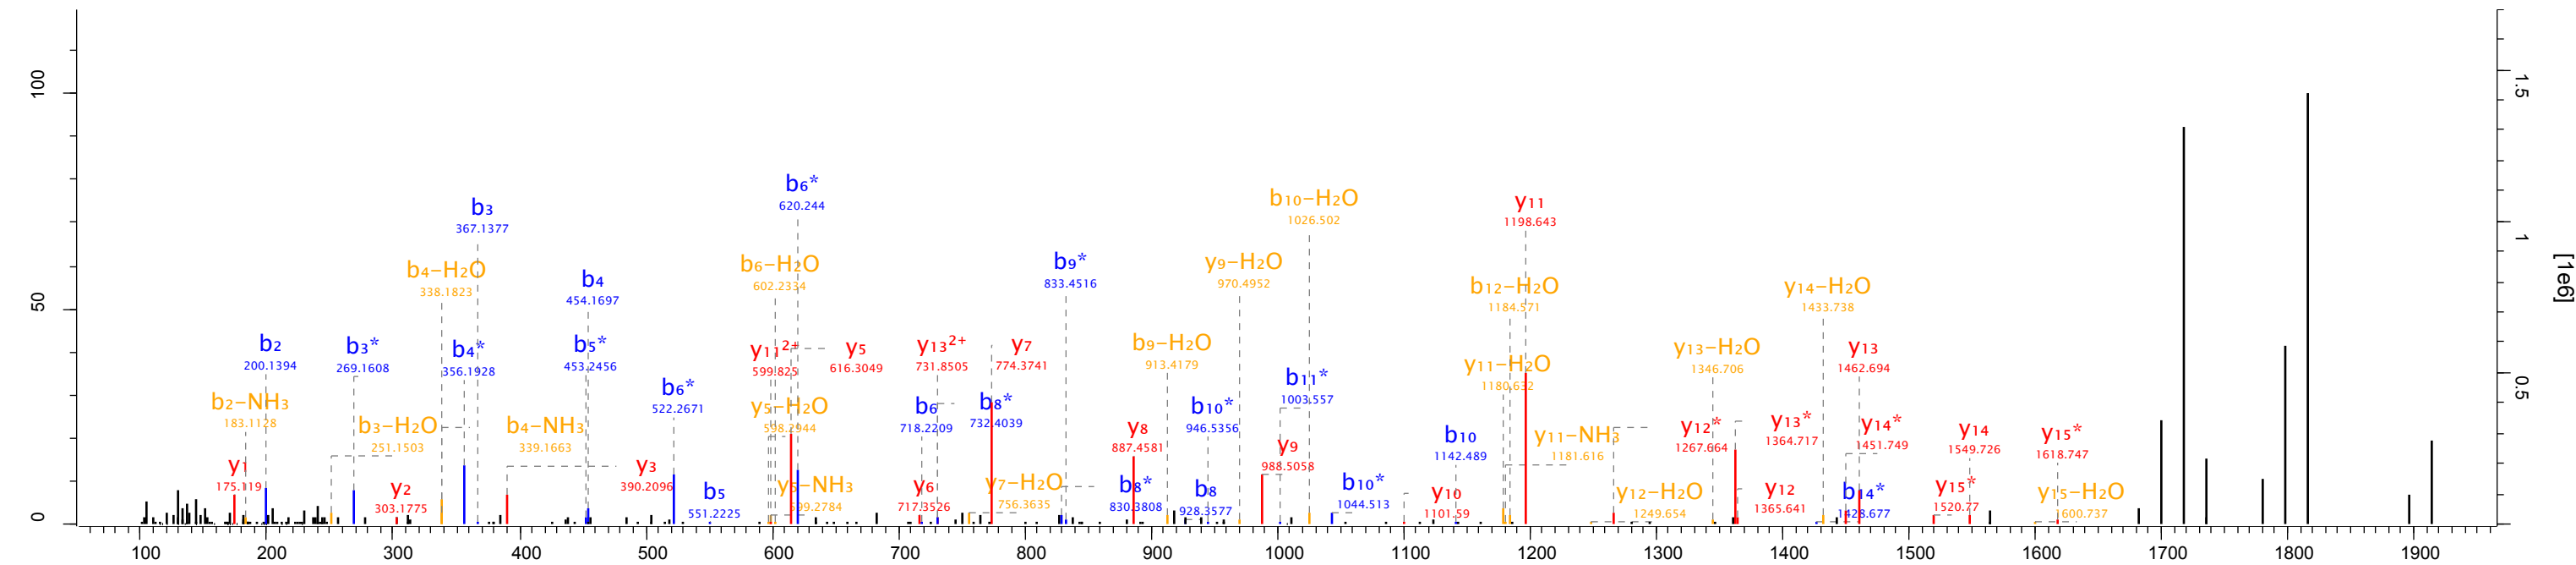

- K A S S P S P L T I G T P E S Q R -

Fragmentation mapping (b and y ions):

- b2: A
- b3: S
- b4: S
- b5: P
- b6: S
- b8: L
- b9\*: T
- b10: I
- b11\*: G
- b14\*: E
- y1: R
- y2: Q
- y3: S
- y5: P
- y6: T
- y7: G
- y8: I
- y9: T
- y10: P
- y11: P
- y12: S
- y13: P
- y14: S
- y15\*: S

Raw file: 20150814\_A375SR\_Phospho\_BR2\_03  
 Scan: 13150 Method: FTMS; HCD Score: 188.1 m/z: 881.39 Gene names: TBC1D15

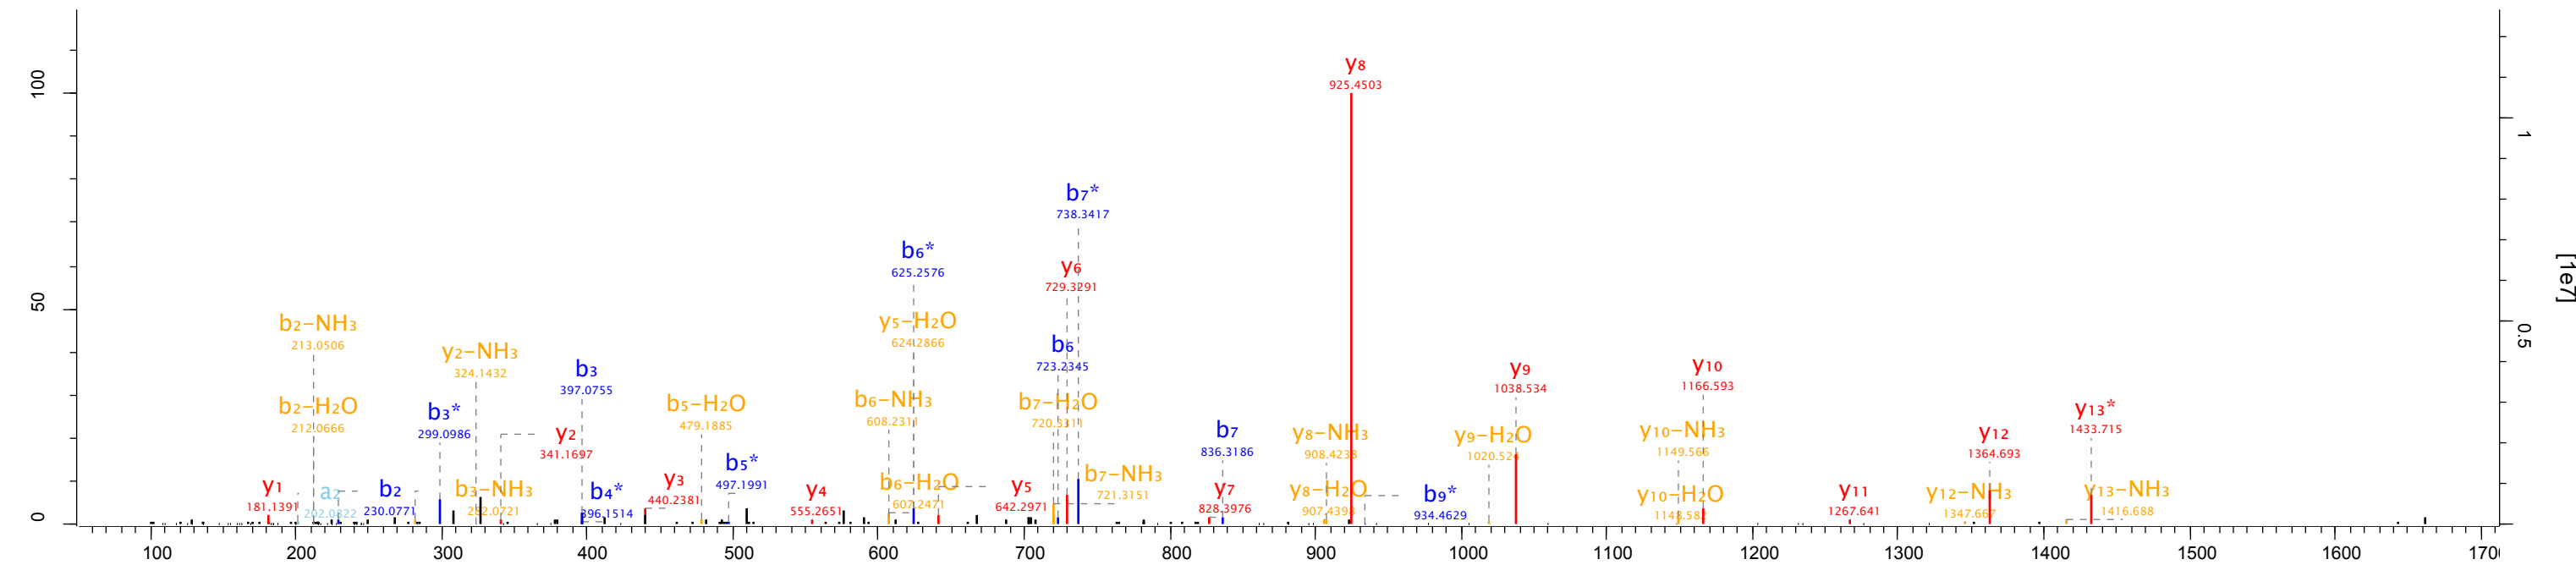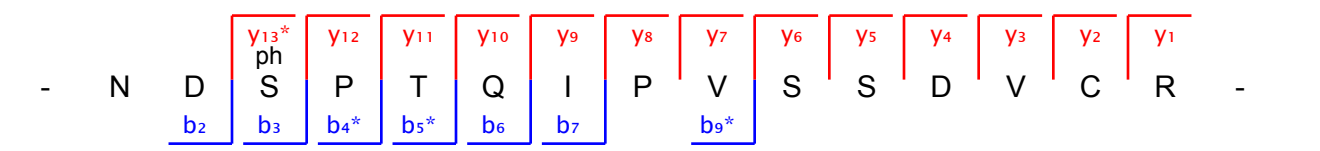

Raw file 20150814\_A375SR\_Phospho\_BR2\_03 Scan 13540 Method FTMS; HCD Score 75.01 m/z 810.83 Gene names ITGA3

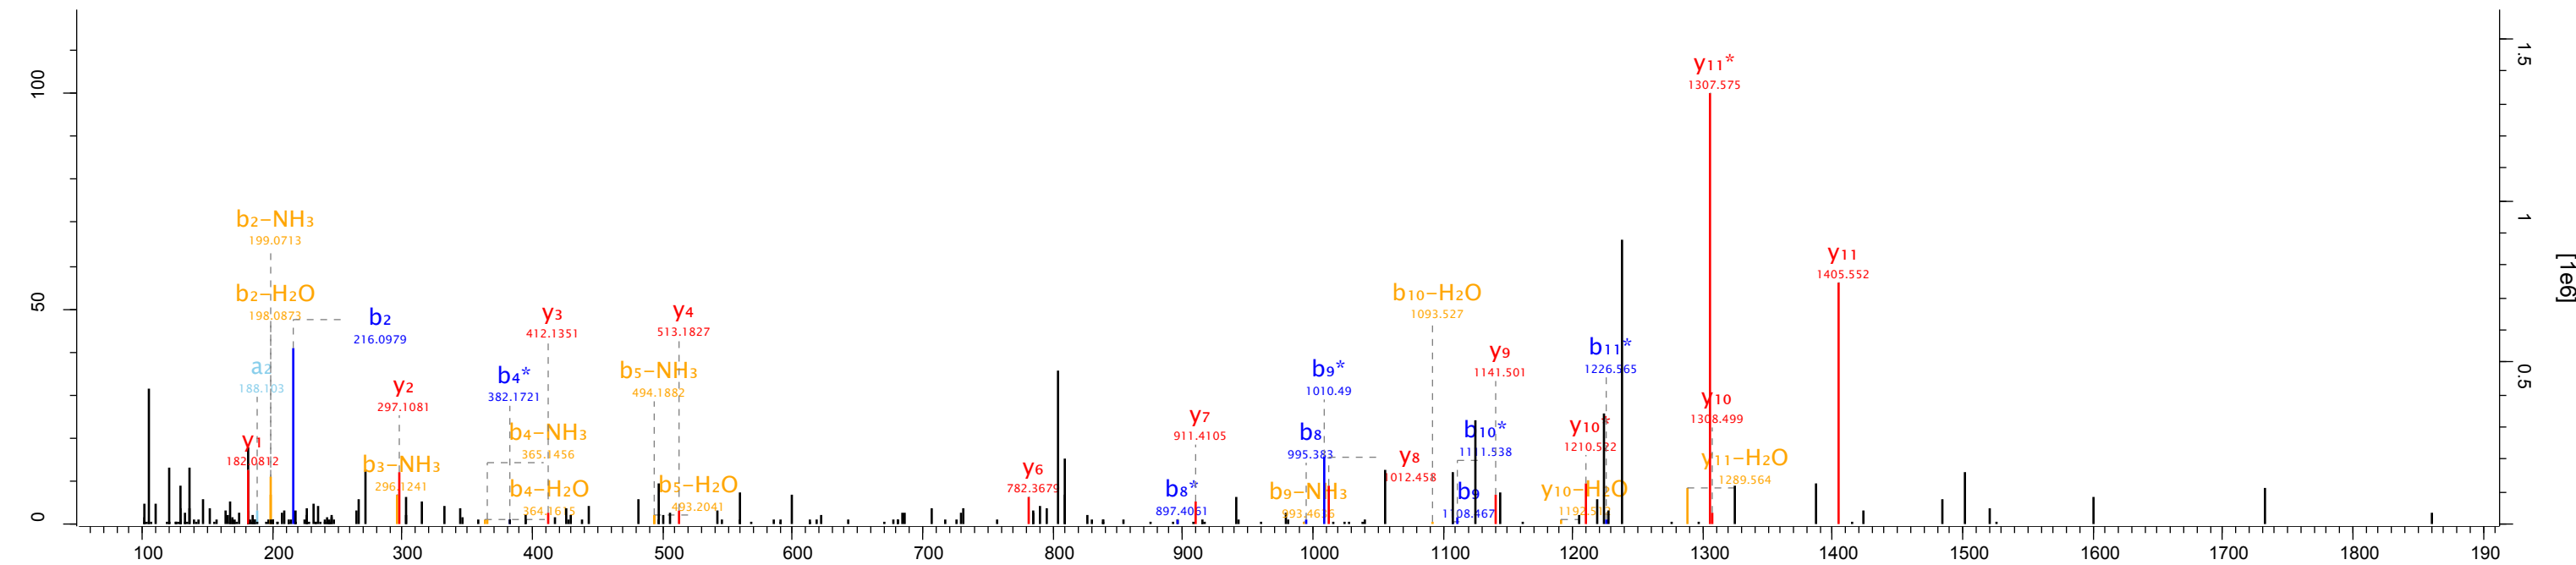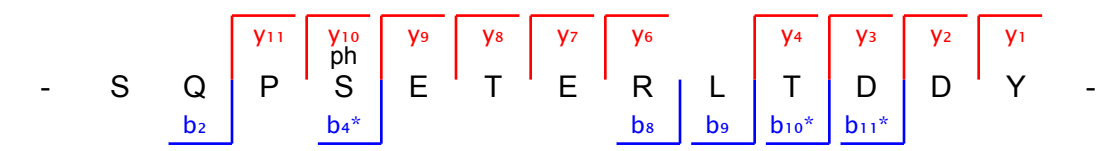

Raw file 20150814\_A375SR\_Phospho\_BR2\_03 Scan 13610 Method FTMS; HCD Score 202.47 m/z 977.43 Gene names ZDHHC5

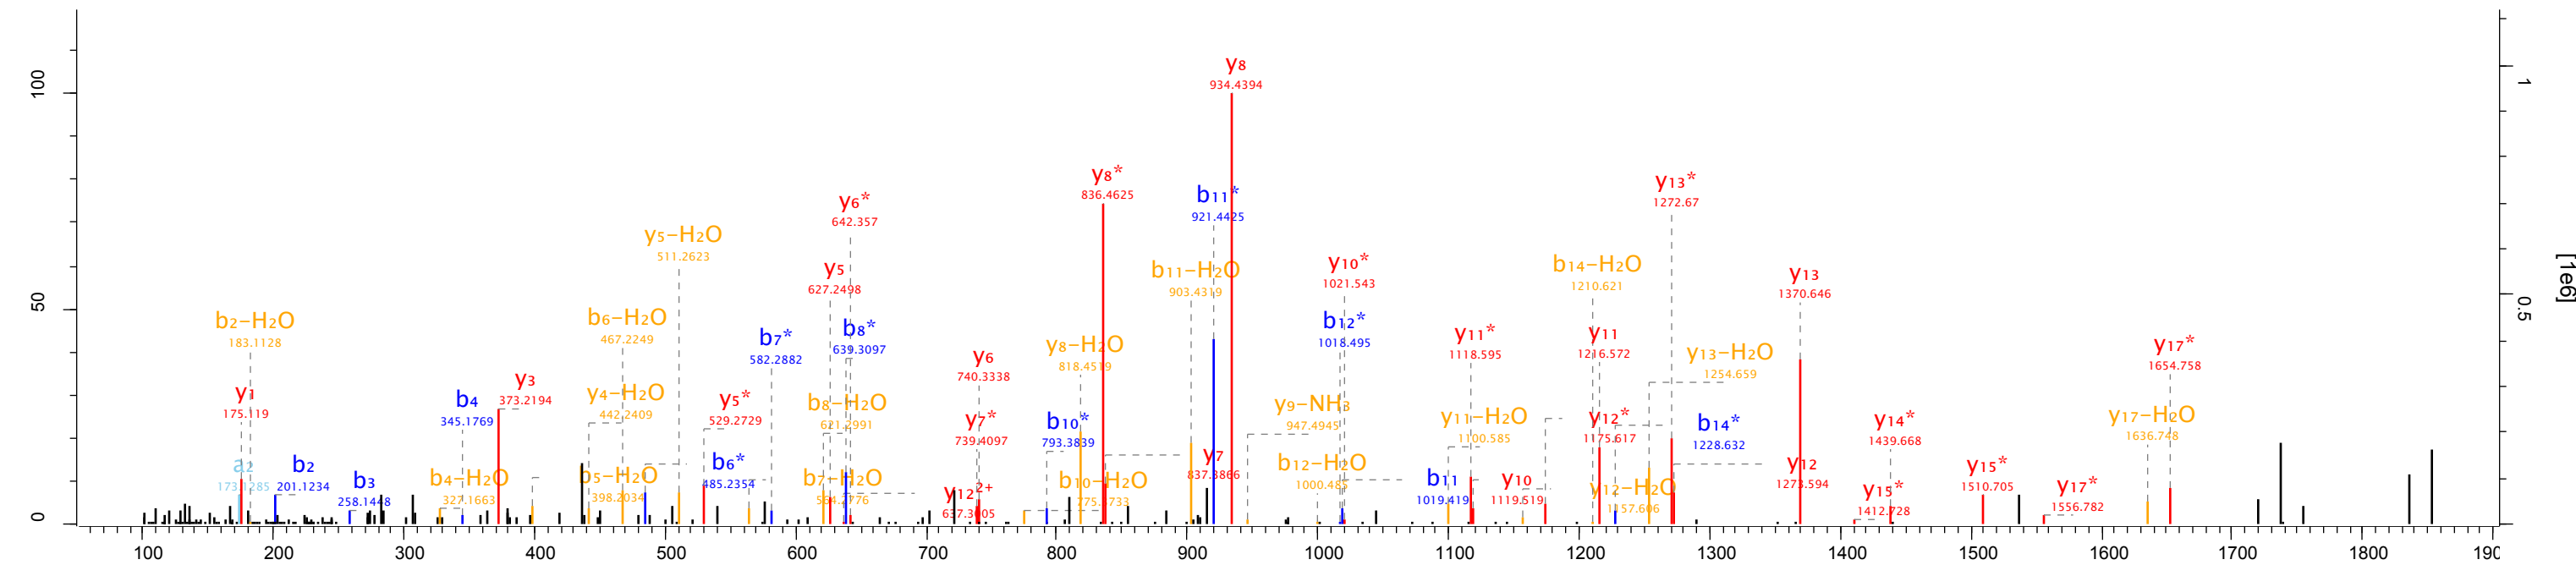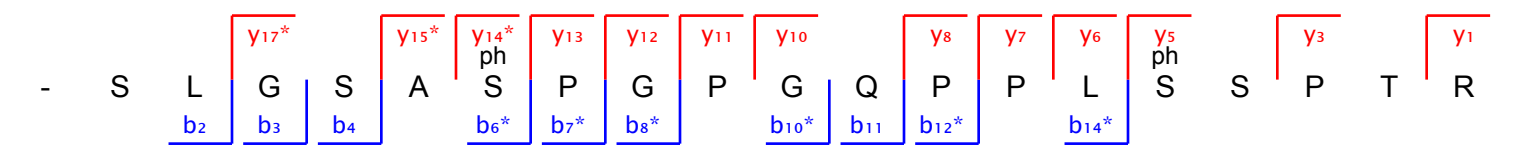

Raw file 20150814\_A375SR\_Phospho\_BR2\_03 Scan 13730 Method FTMS; HCD Score 89.75 m/z 993.8 Gene names LARP1

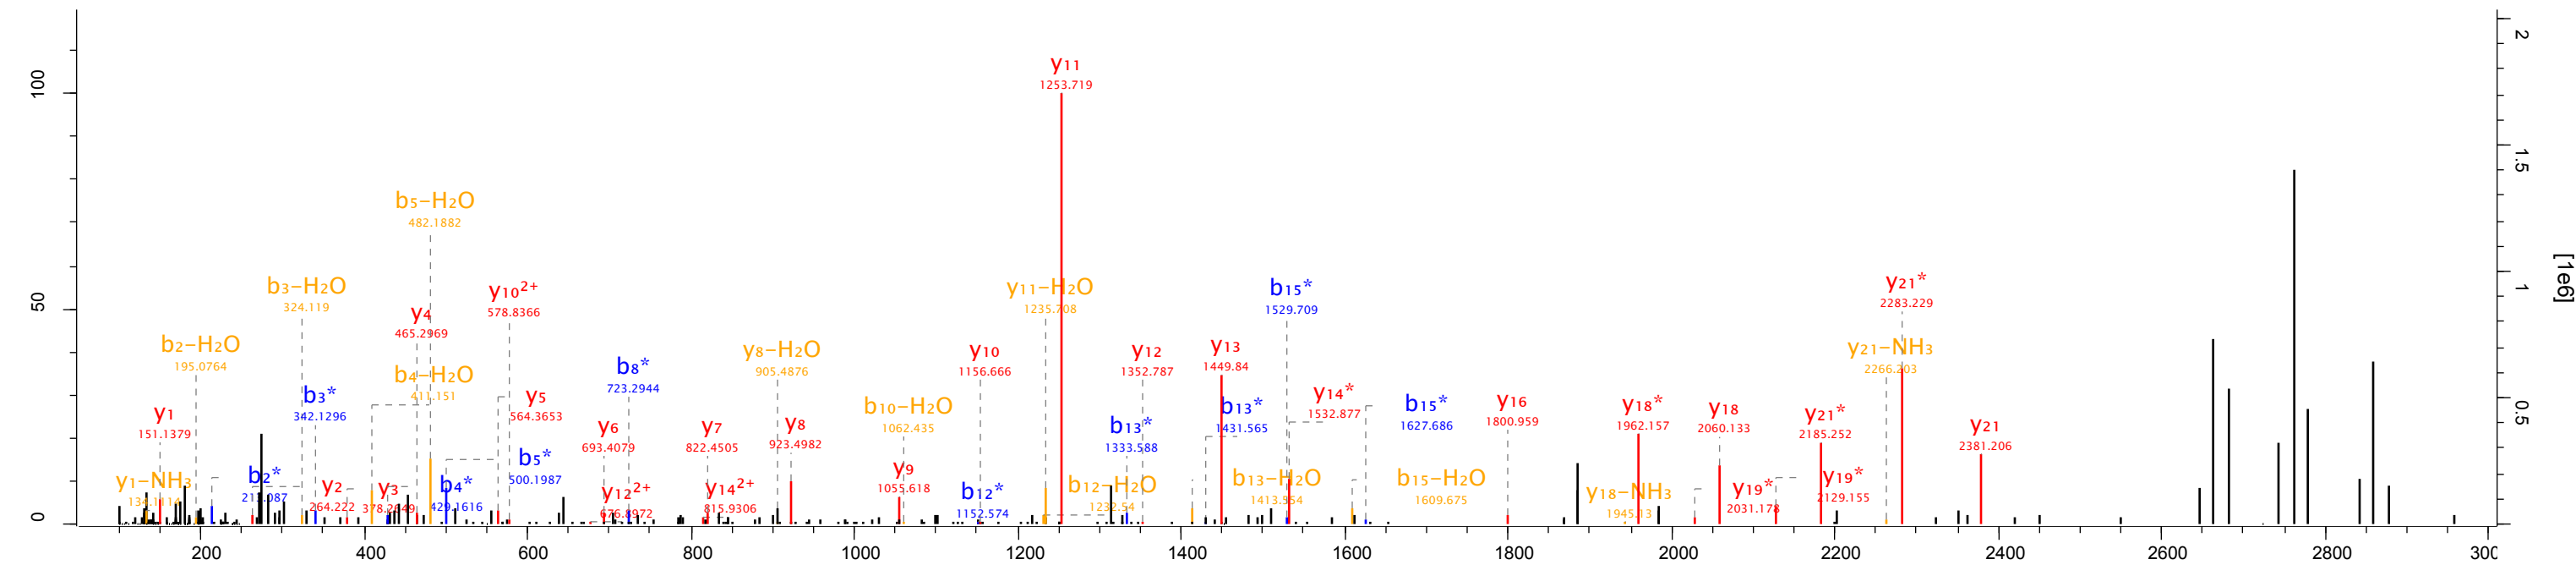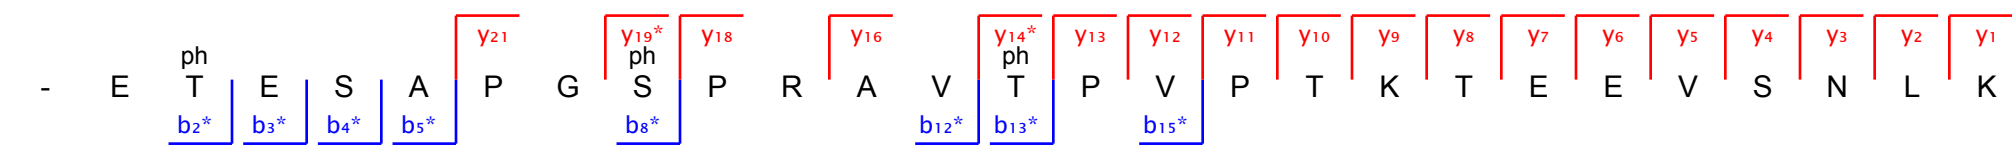

Raw file: 20150814\_A375SR\_Phospho\_BR2\_03  
 Scan: 13940 Method: FTMS; HCD Score: 193.5 m/z: 1167.99 Gene names: ABCF1

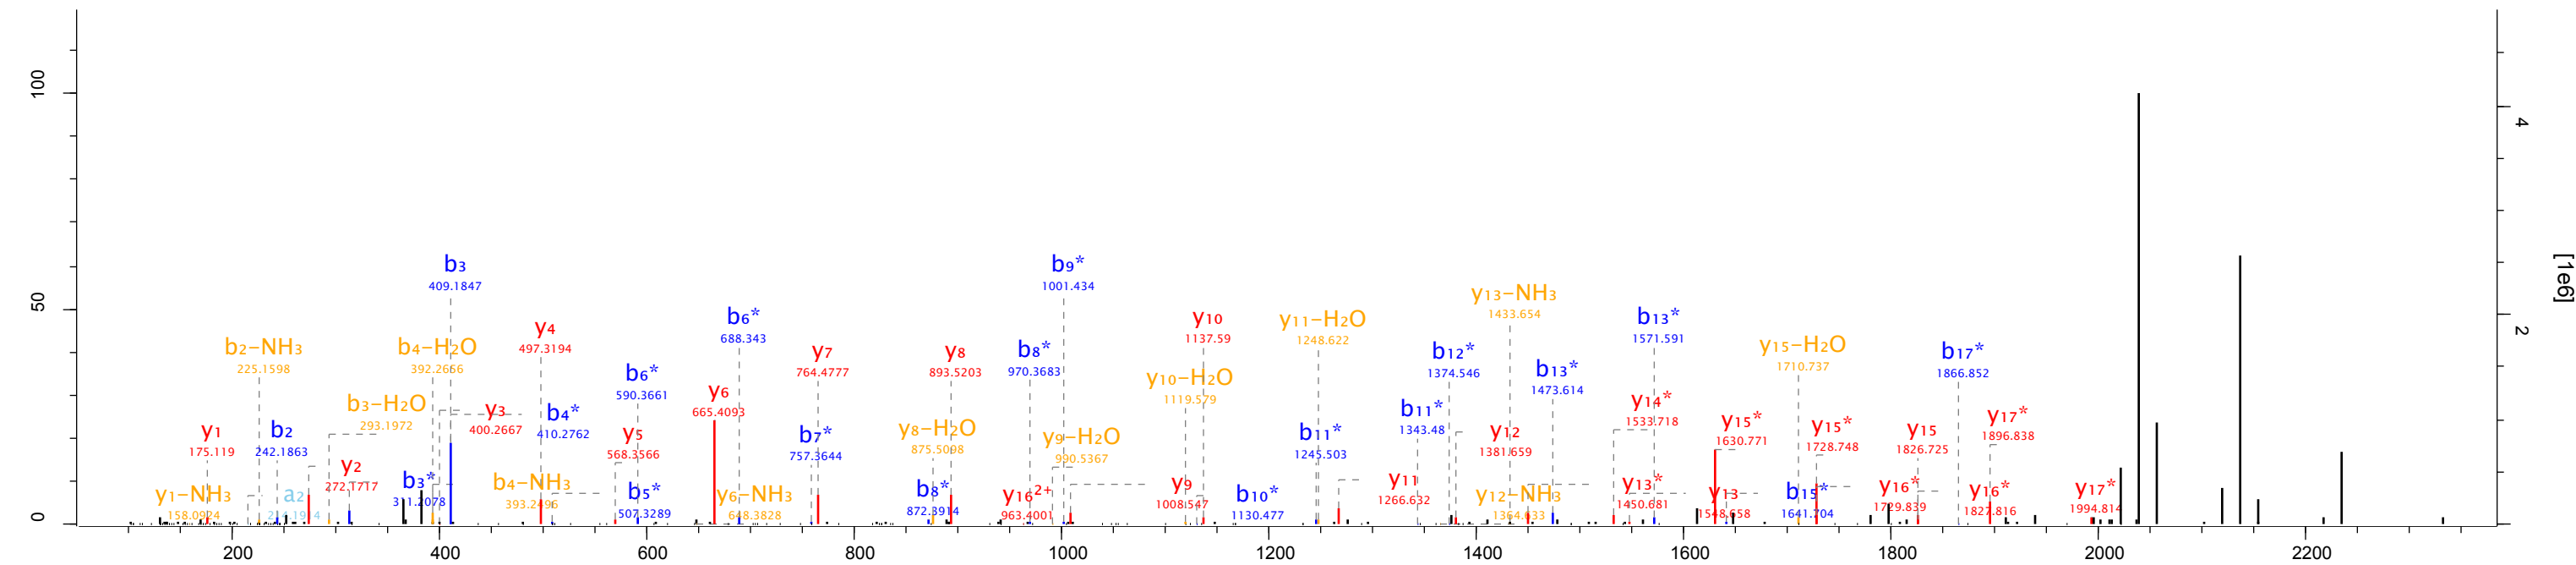

Protein sequence: - K L S V P T S D E E D E V P A P K P R -

Fragmentation sites (b and y ions) are indicated by boxes below the sequence:

- b<sub>2</sub> (L)
- b<sub>3</sub> (S)
- b<sub>4</sub>\*
- b<sub>5</sub>\*
- b<sub>6</sub>\*
- b<sub>7</sub>\*
- b<sub>8</sub>\*
- b<sub>9</sub>\*
- b<sub>10</sub>\*
- b<sub>11</sub>\*
- b<sub>12</sub>\*
- b<sub>13</sub>\*
- b<sub>15</sub>\*
- b<sub>17</sub>\*

Raw file: 20150814\_A375SR\_Phospho\_BR2\_03  
 Scan: 14030 Method: FTMS; HCD Score: 163.04 m/z: 897.9 Gene names: DCP1A

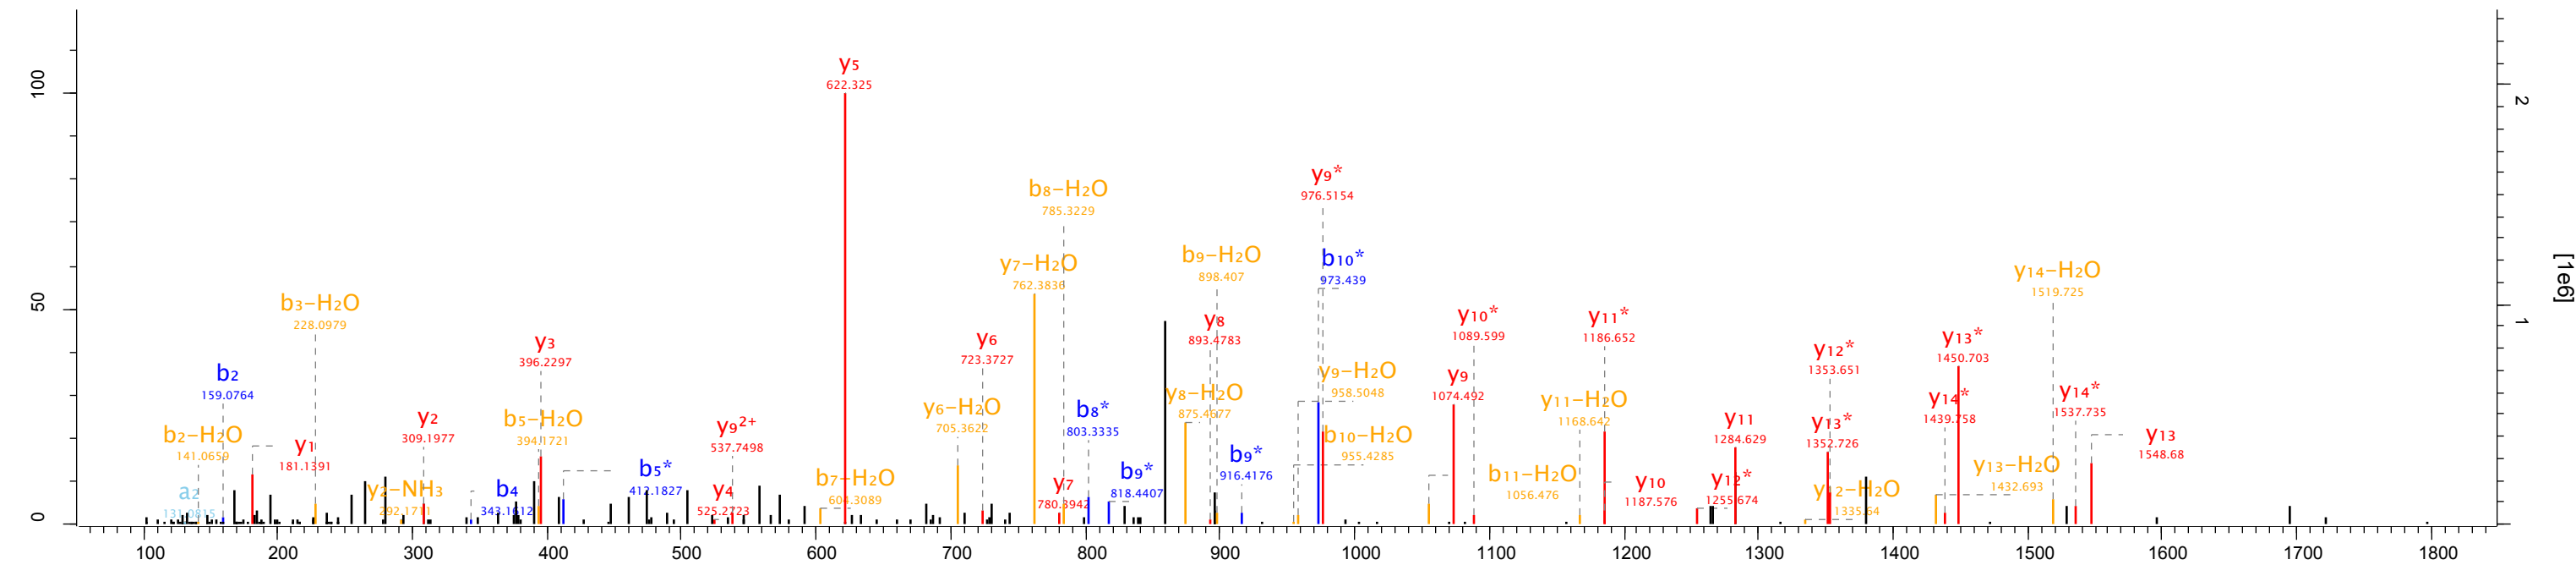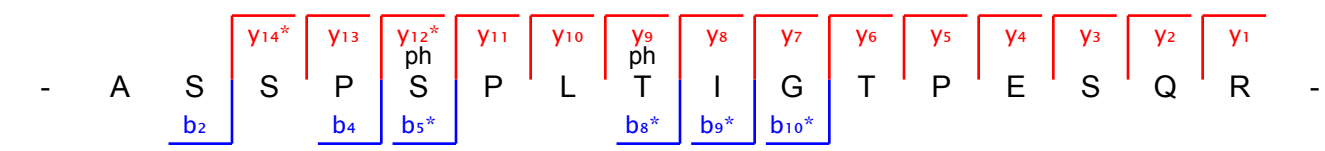

Raw file: 20150814\_A375SR\_Phospho\_BR2\_03  
 Scan: 14300 Method: FTMS; HCD Score: 129.77 m/z: 685.81 Gene names: RAB6A

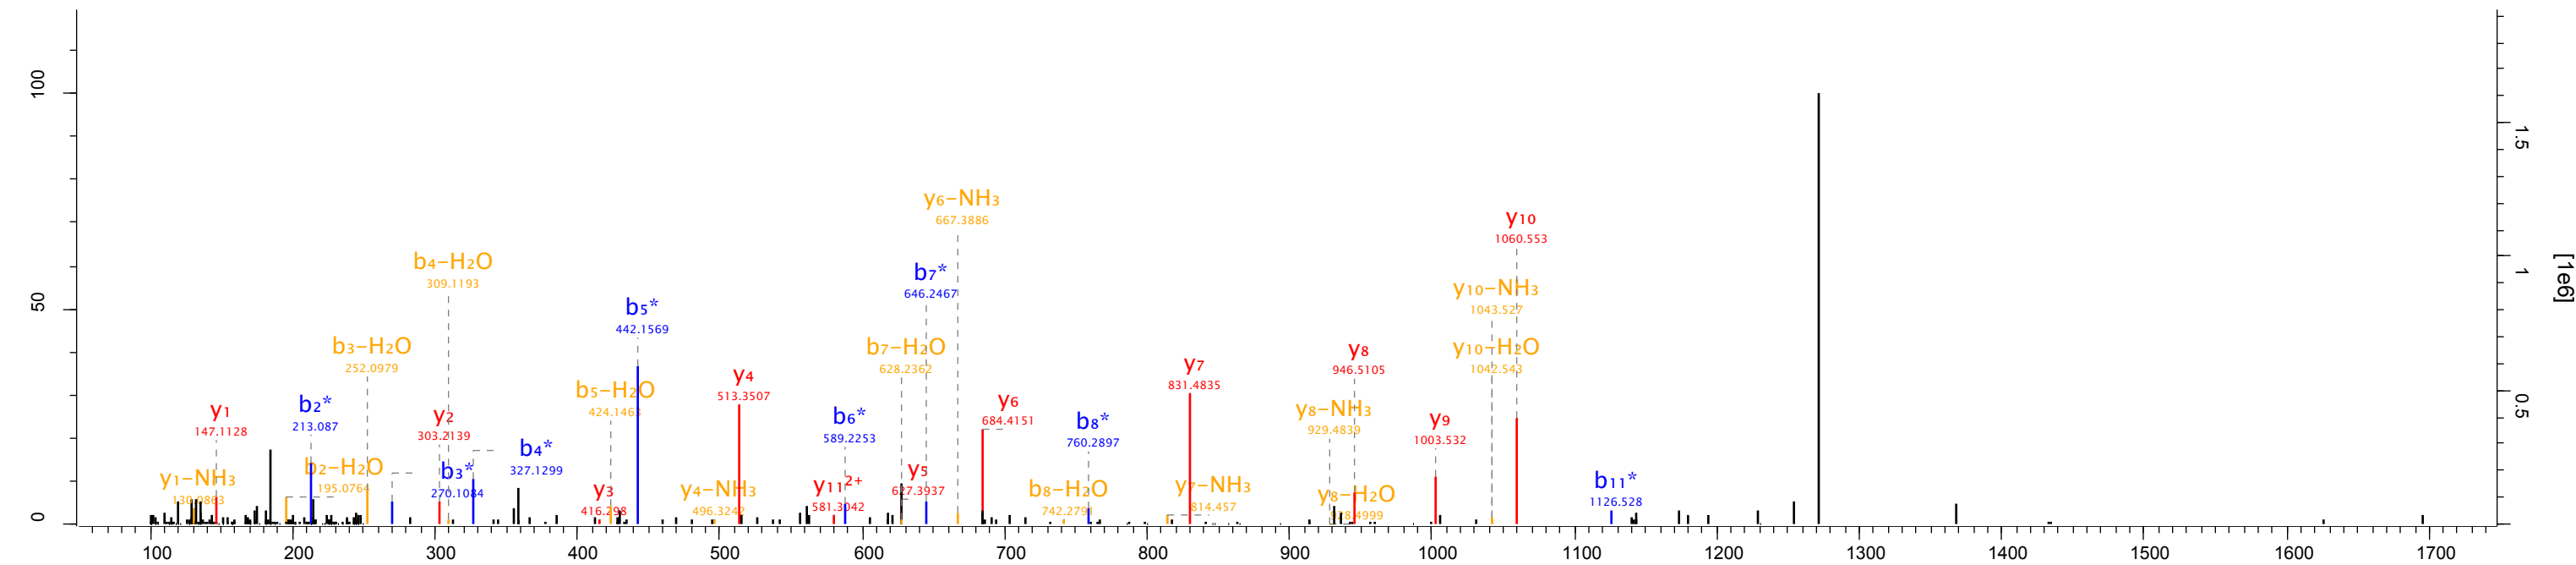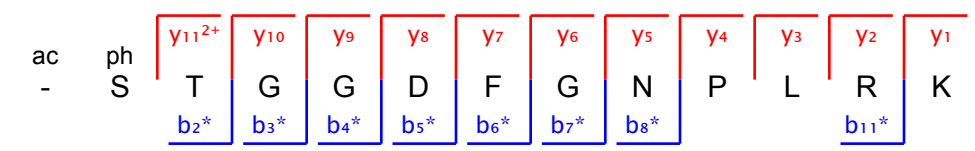



Raw file 20150814\_A375SR\_Phospho\_BR2\_03 Scan 14380 Method FTMS; HCD Score 131.82 m/z 731.79 Gene names TMF1

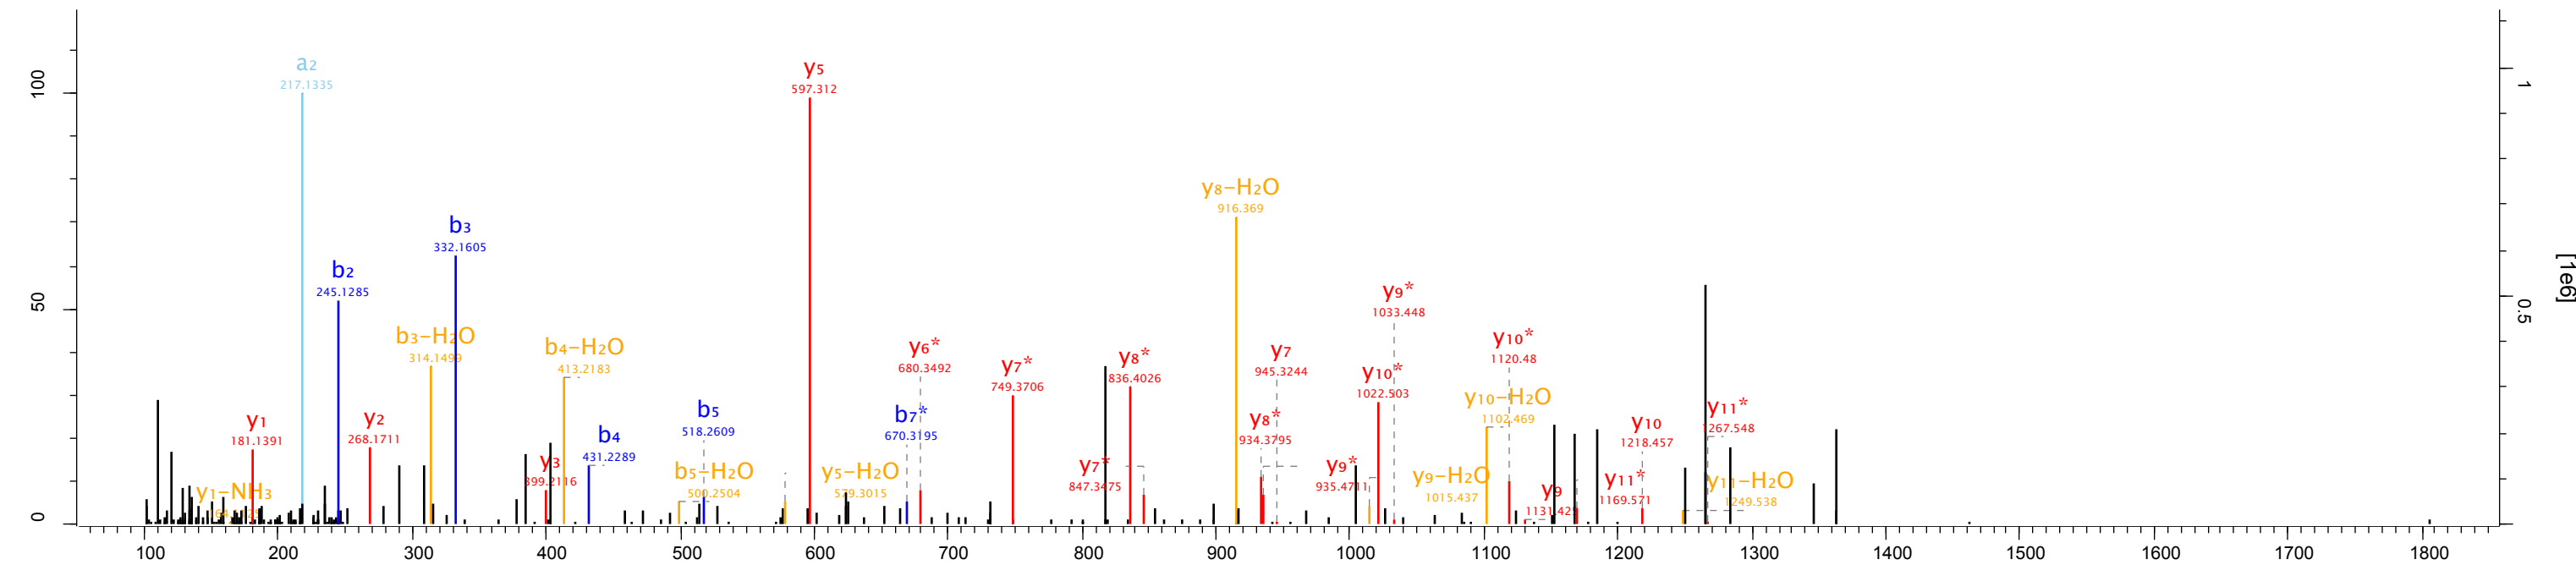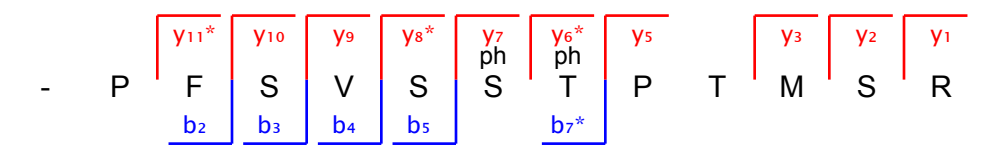

Raw file  
20150814\_A375SR\_Phospho\_BR2\_03

Scan 14430 Method FTMS; HCD Score 258.19 m/z 1351.57 Gene names QSER1

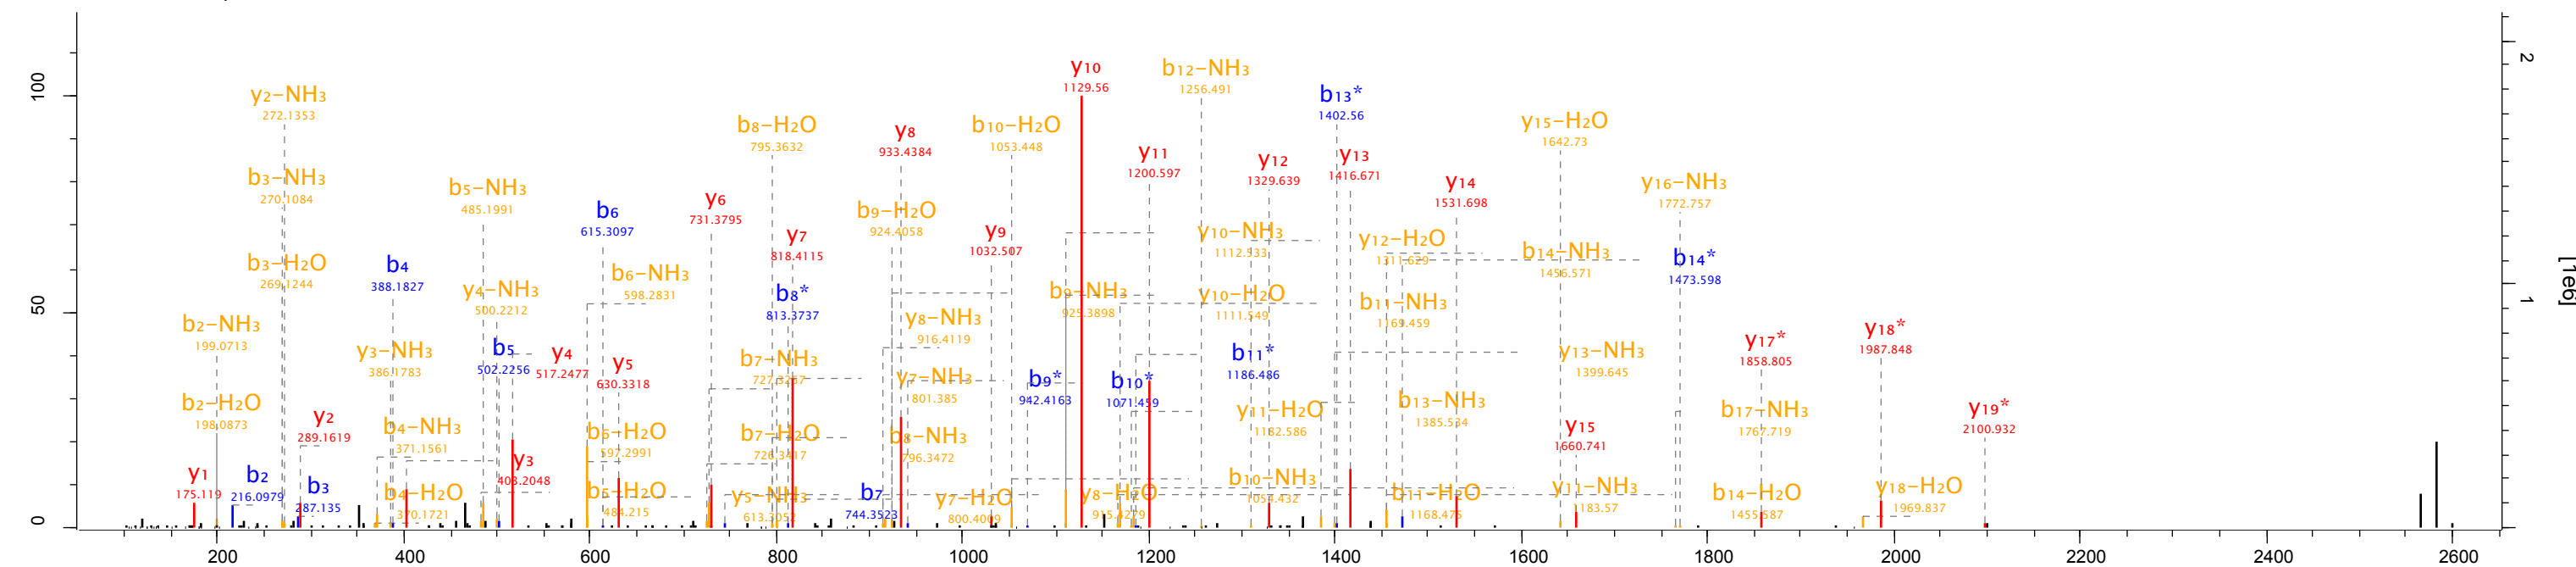

- Q S A T N L E S E E D S E A P V D S T L N N N R -

b<sub>2</sub>
b<sub>3</sub>
b<sub>4</sub>
b<sub>5</sub>
b<sub>6</sub>
b<sub>7</sub>
b<sub>8</sub>\*
b<sub>9</sub>\*
b<sub>10</sub>\*
b<sub>11</sub>\*
b<sub>13</sub>\*
b<sub>14</sub>\*
y<sub>19</sub>\*
y<sub>18</sub>\*
y<sub>17</sub>\*
y<sub>15</sub>
y<sub>14</sub>
y<sub>13</sub>
y<sub>12</sub>
y<sub>11</sub>
y<sub>10</sub>
y<sub>9</sub>
y<sub>8</sub>
y<sub>7</sub>
y<sub>6</sub>
y<sub>5</sub>
y<sub>4</sub>
y<sub>3</sub>
y<sub>2</sub>
y<sub>1</sub>

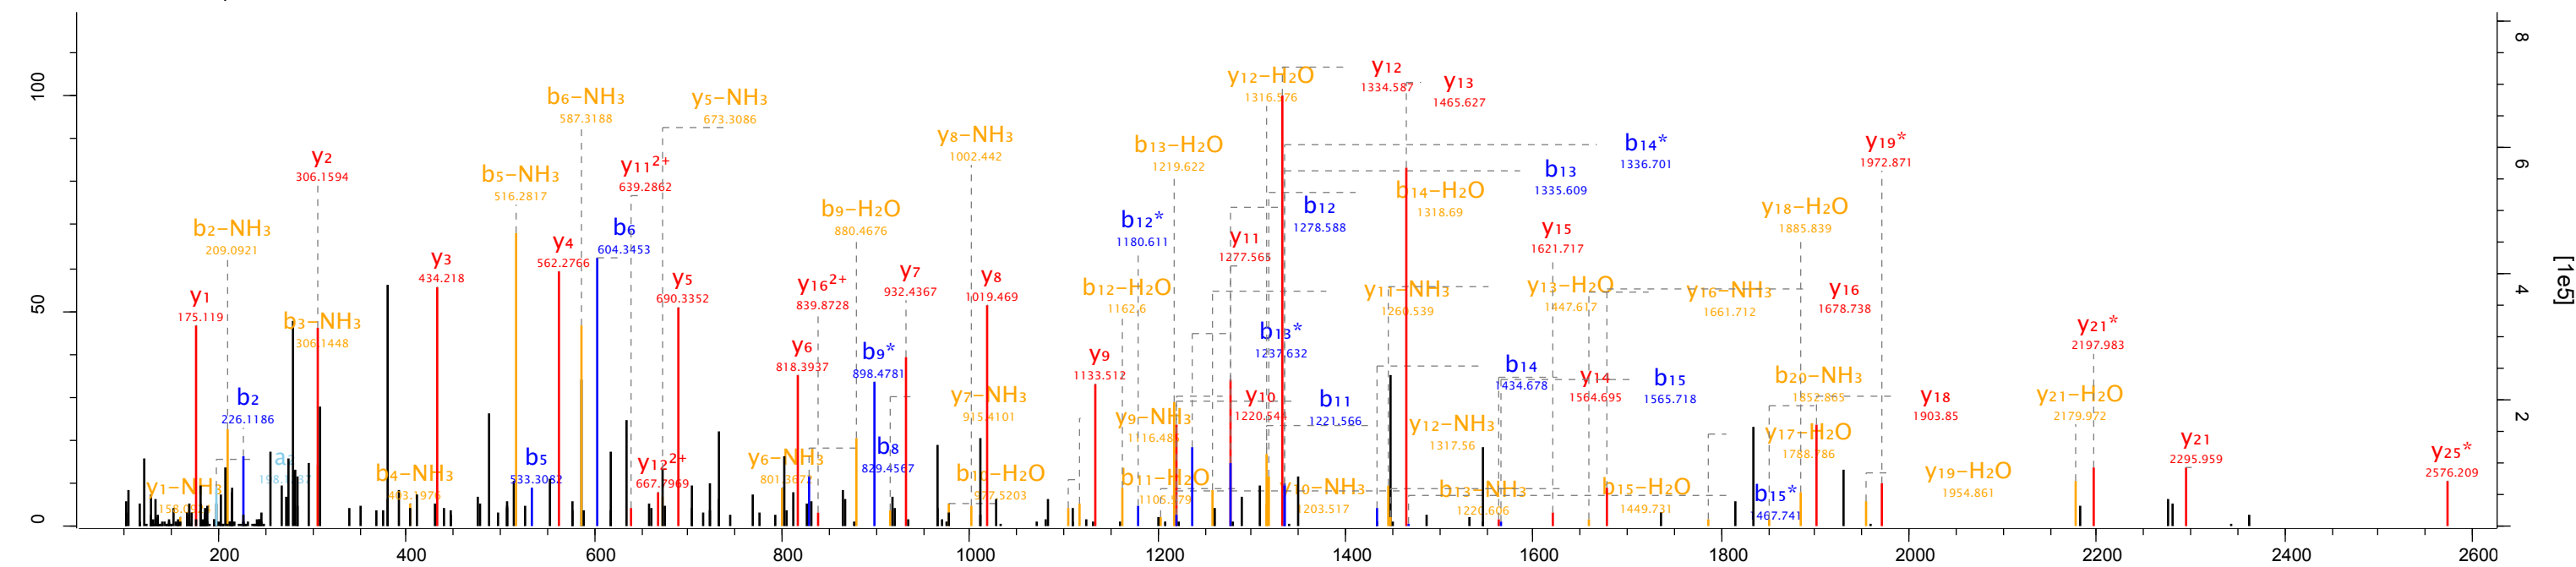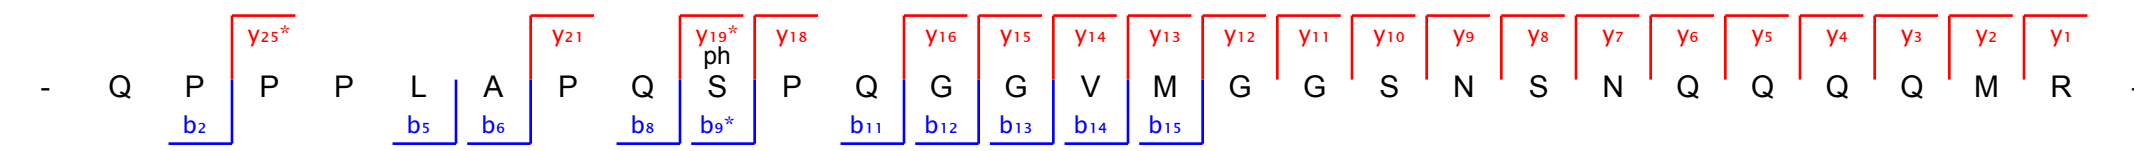

Raw file 20150814\_A375SR\_Phospho\_BR2\_03 Scan 14500 Method FTMS; HCD Score 121.18 m/z 738.31 Gene names LUZP1

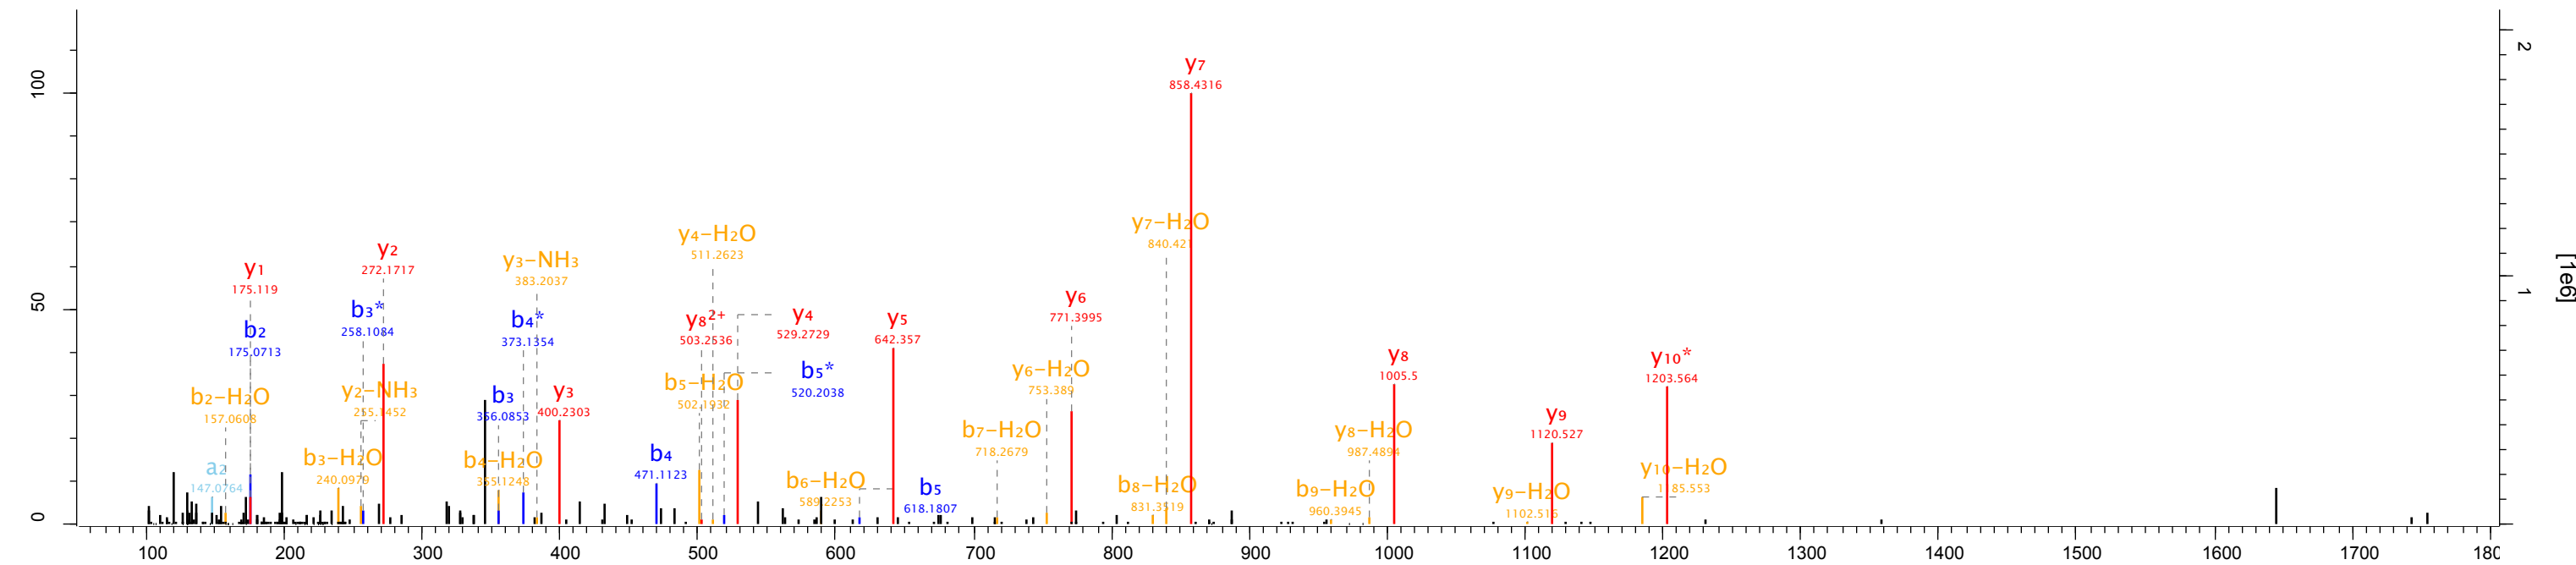

- S S **y<sub>10</sub>\*** **y<sub>9</sub>** **y<sub>8</sub>** **y<sub>7</sub>** **y<sub>6</sub>** **y<sub>5</sub>** **y<sub>4</sub>** **y<sub>3</sub>** **y<sub>2</sub>** **y<sub>1</sub>** -  
 - S S **b<sub>2</sub>** **b<sub>3</sub>** **b<sub>4</sub>** **b<sub>5</sub>** -  
 T D F S E L E Q P R -

Raw file 20150814\_A375SR\_Phospho\_BR2\_03 Scan 14860 Method FTMS; HCD Score 257.26 m/z 1144.98 Gene names OSBP

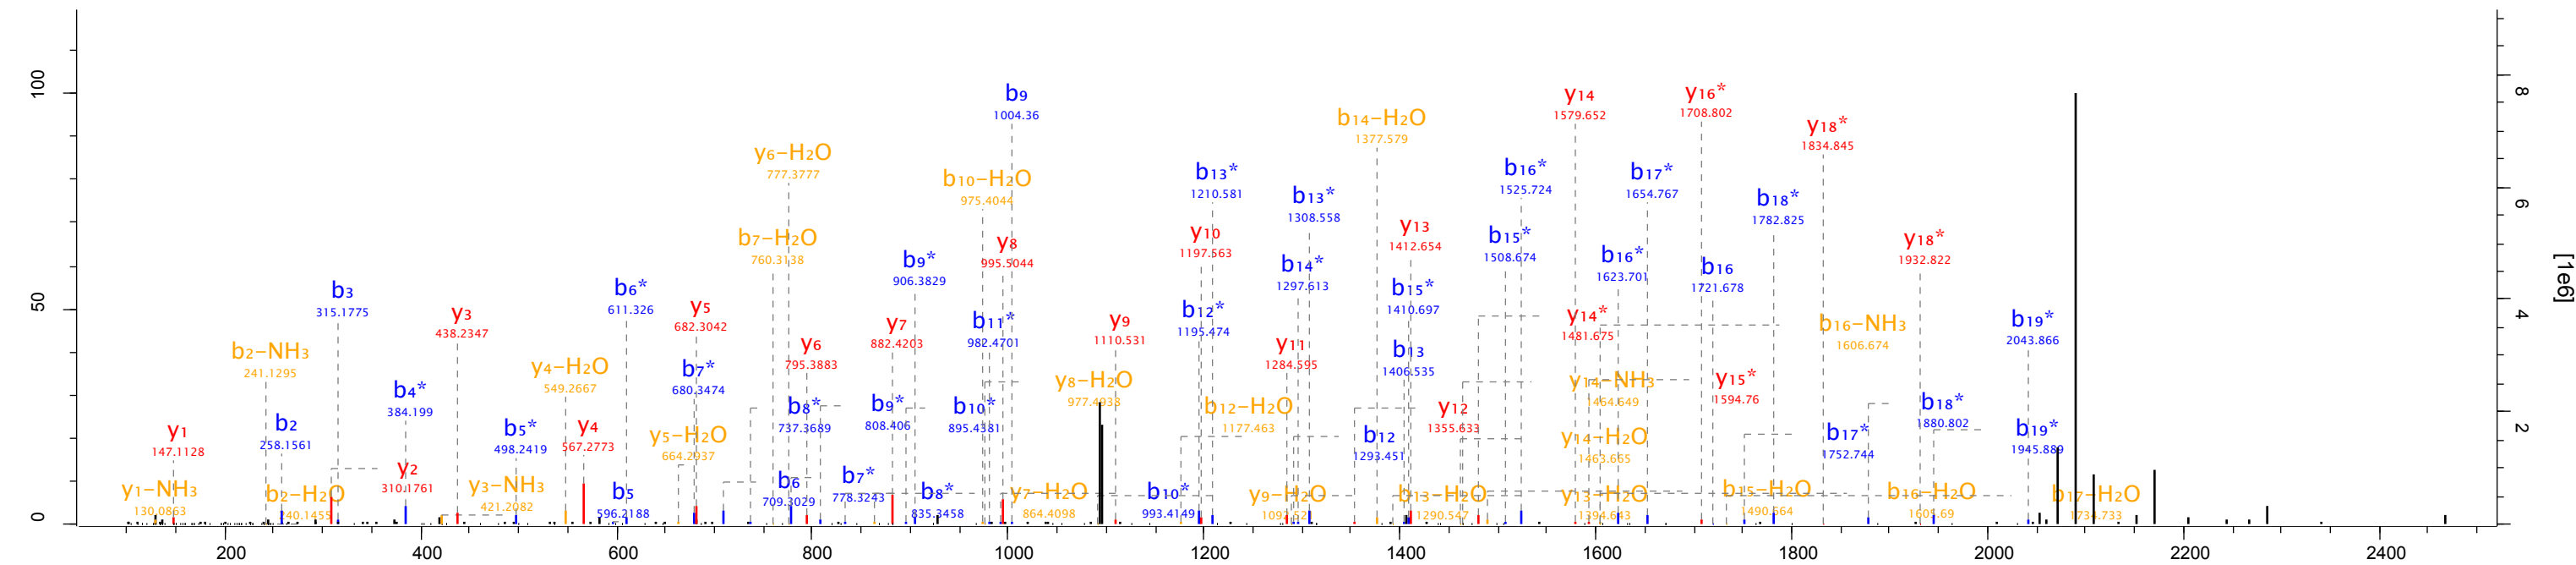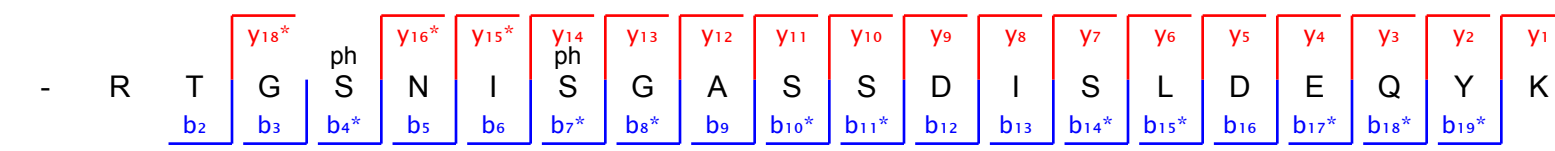

Raw file: 20150814\_A375SR\_Phospho\_BR2\_03  
 Scan: 1500 Method: FTMS; HCD Score: 63.68 m/z: 441.19 Gene names: SRRM2

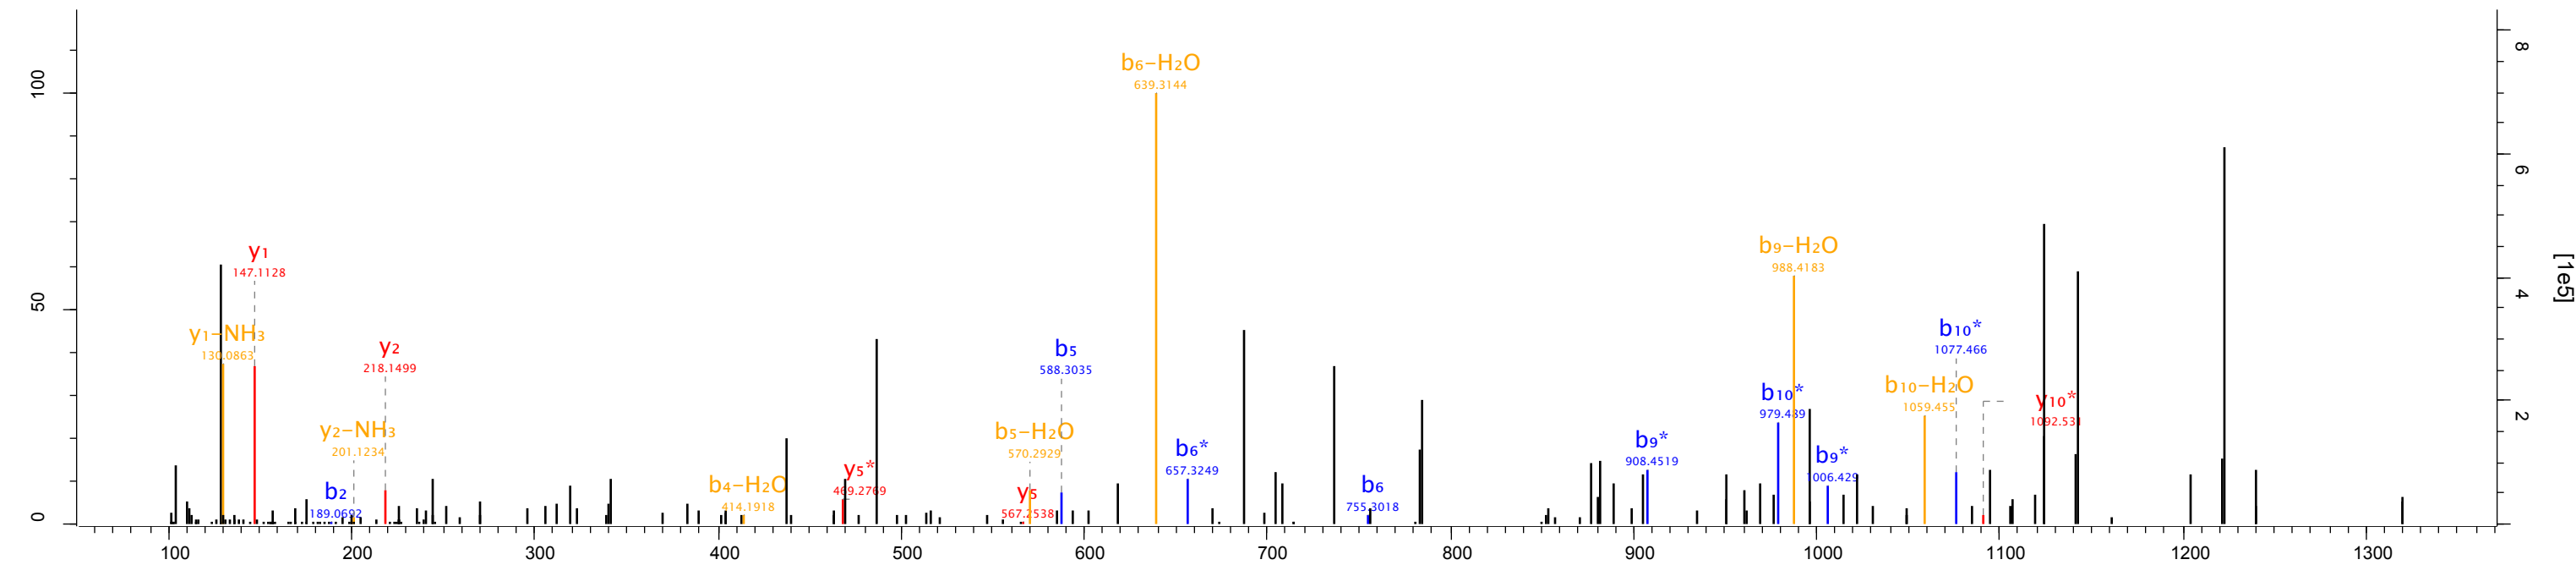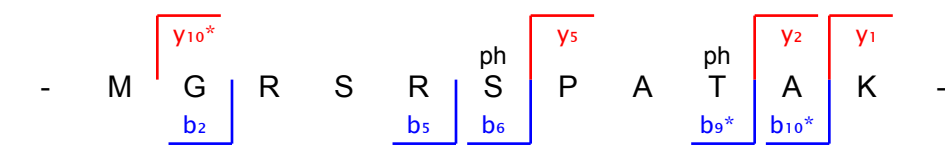

Raw file Scan Method Score m/z Gene names  
 20150814\_A375SR\_Phospho\_BR2\_03 15410 FTMS; HCD 426.91 1124.79 PPP1R12A

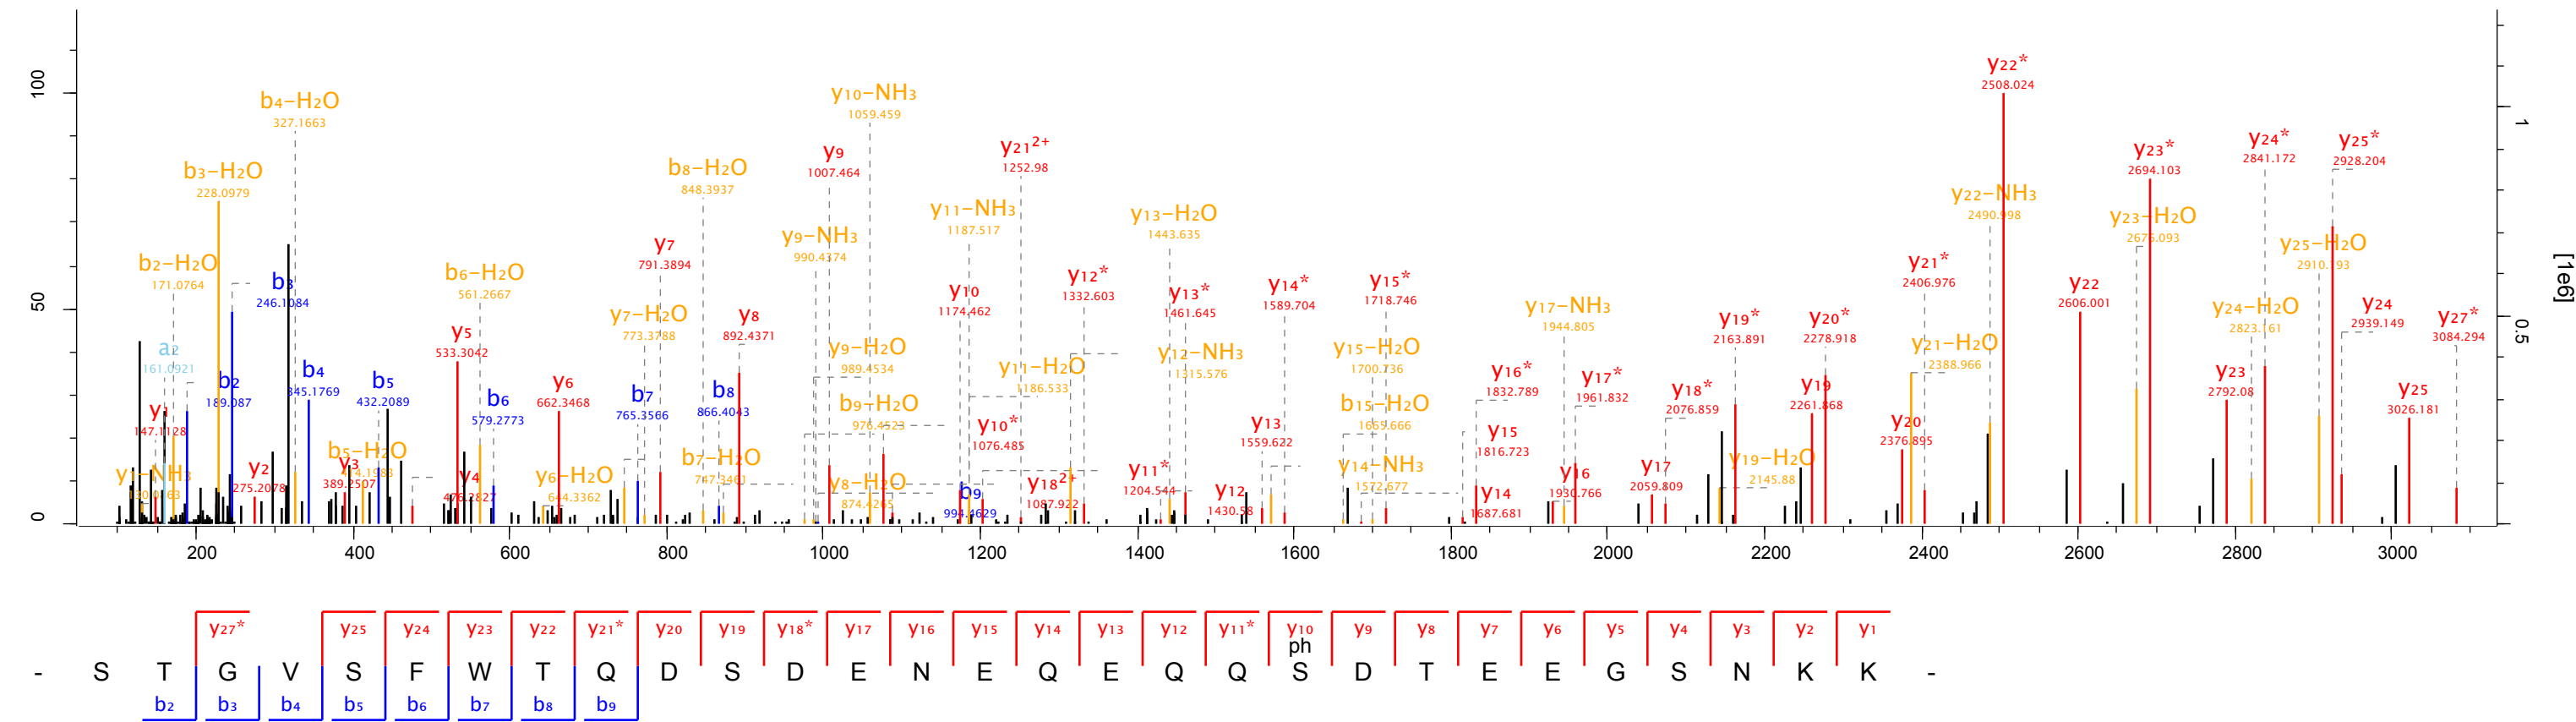

Raw file: 20150814\_A375SR\_Phospho\_BR2\_03  
 Scan: 15770 Method: FTMS; HCD Score: 85.85 m/z: 948.43 Gene names: UBE4B

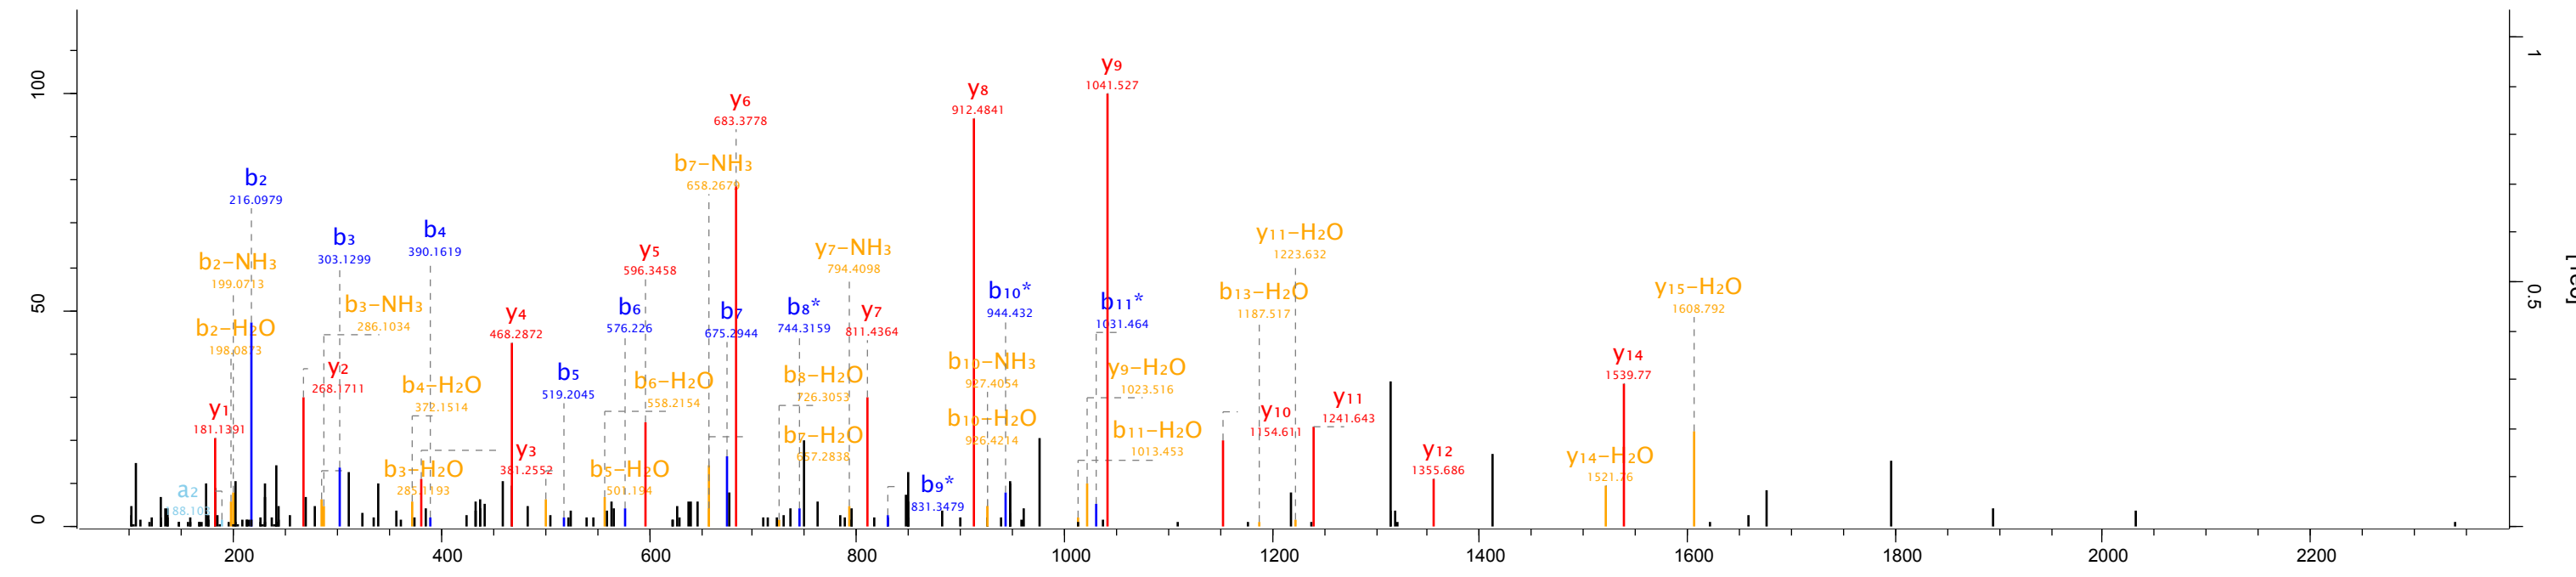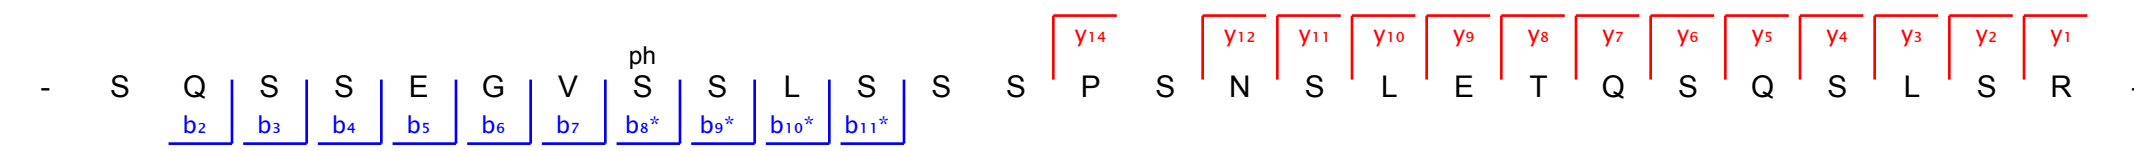



Raw file 20150814\_A375SR\_Phospho\_BR2\_03 Scan 15990 Method FTMS; HCD Score 65.49 m/z 744.82 Gene names LIMD1

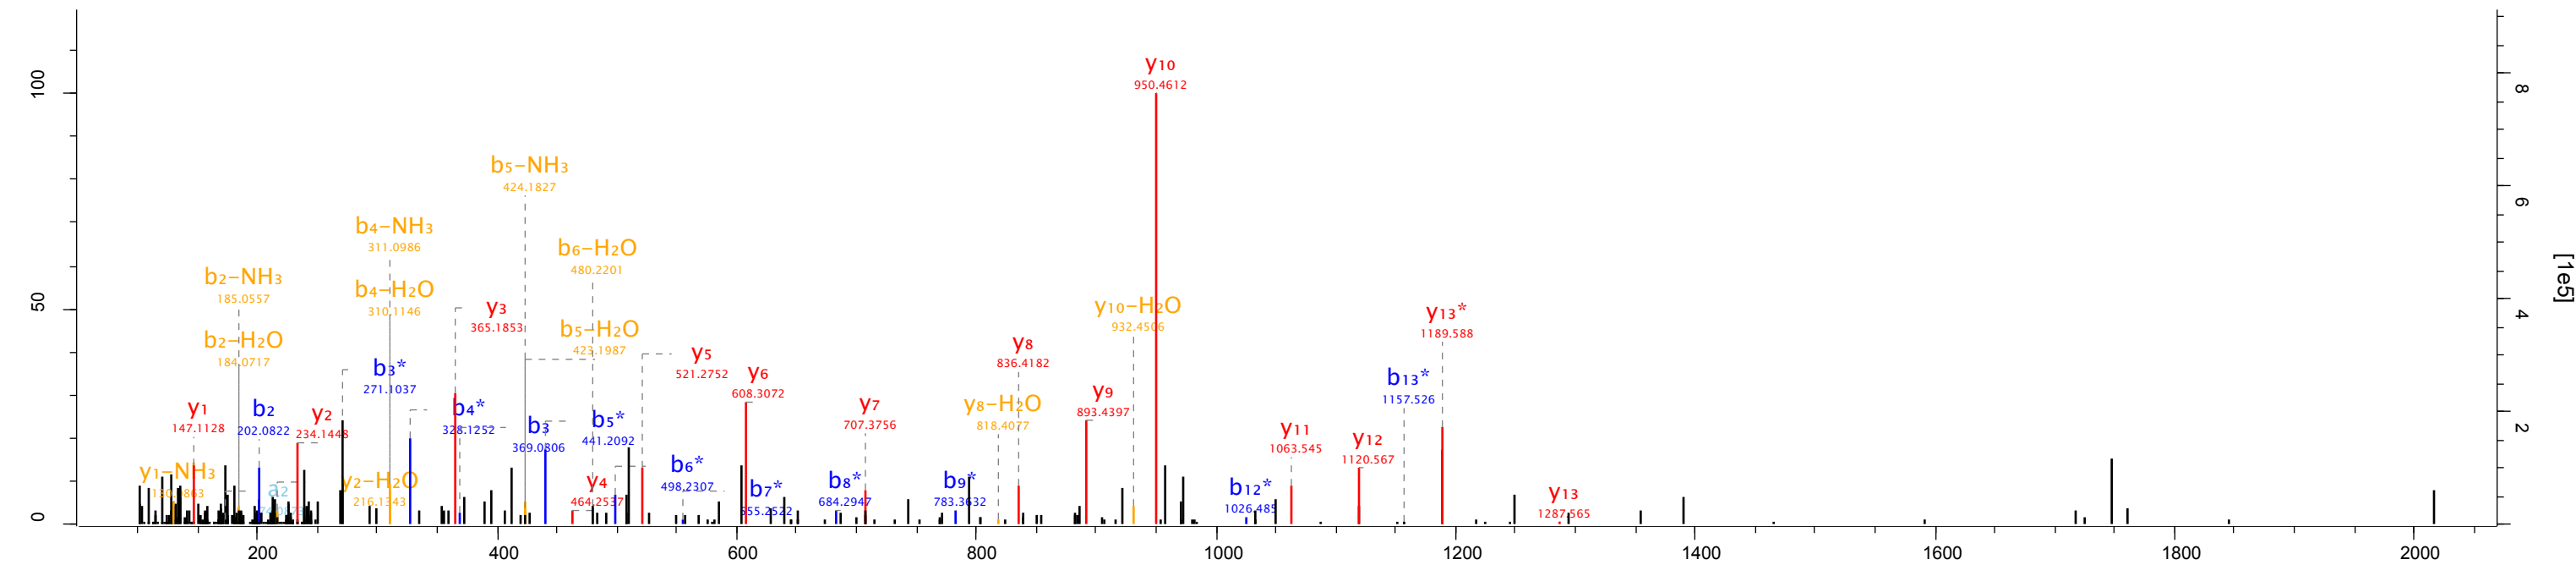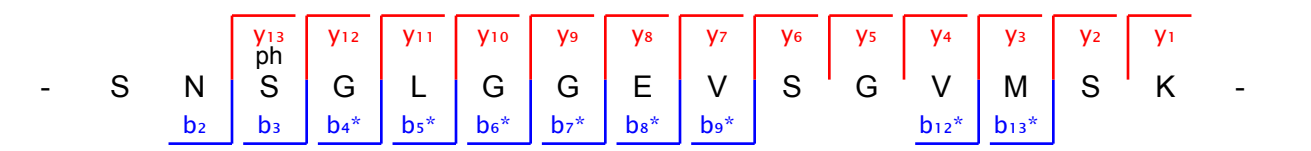

Raw file: 20150814\_A375SR\_Phospho\_BR2\_03  
 Scan: 16310 Method: FTMS; HCD Score: 86.72 m/z: 1269.56 Gene names: FAM91A1

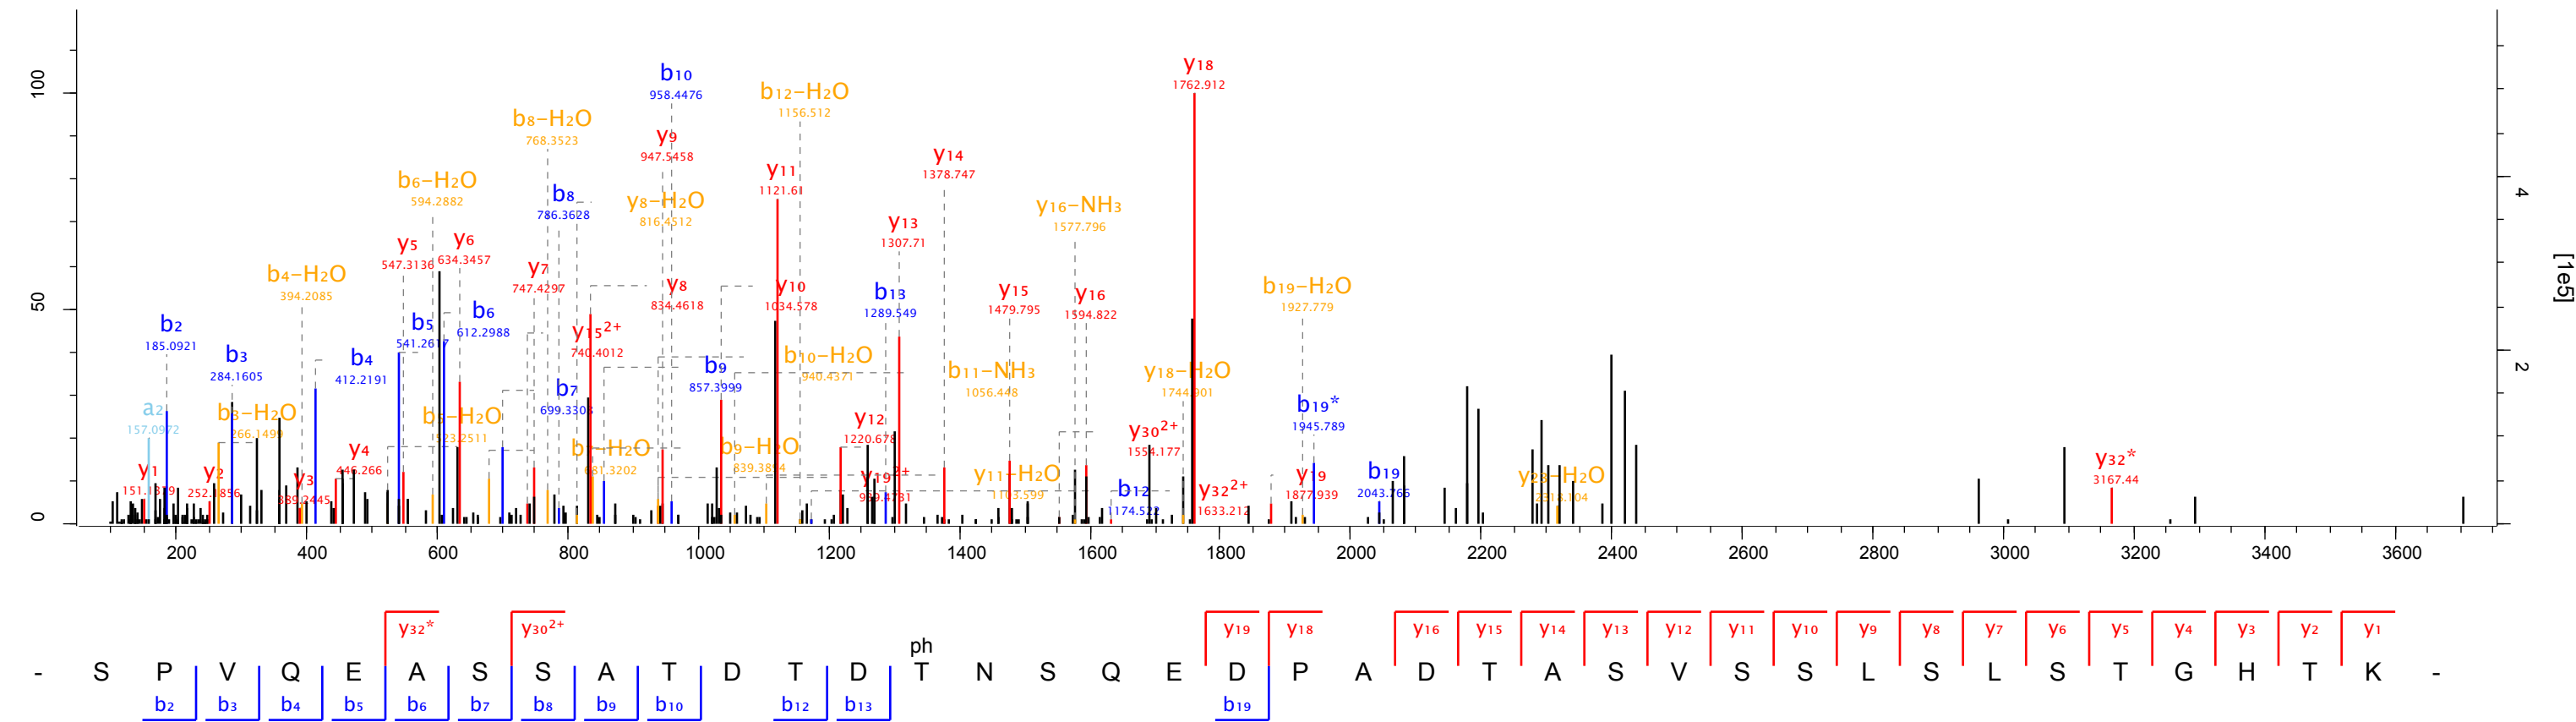

Raw file 20150814\_A375SR\_Phospho\_BR2\_03 Scan 16510 Method FTMS; HCD Score 186.67 m/z 767.35 Gene names CARHSP1

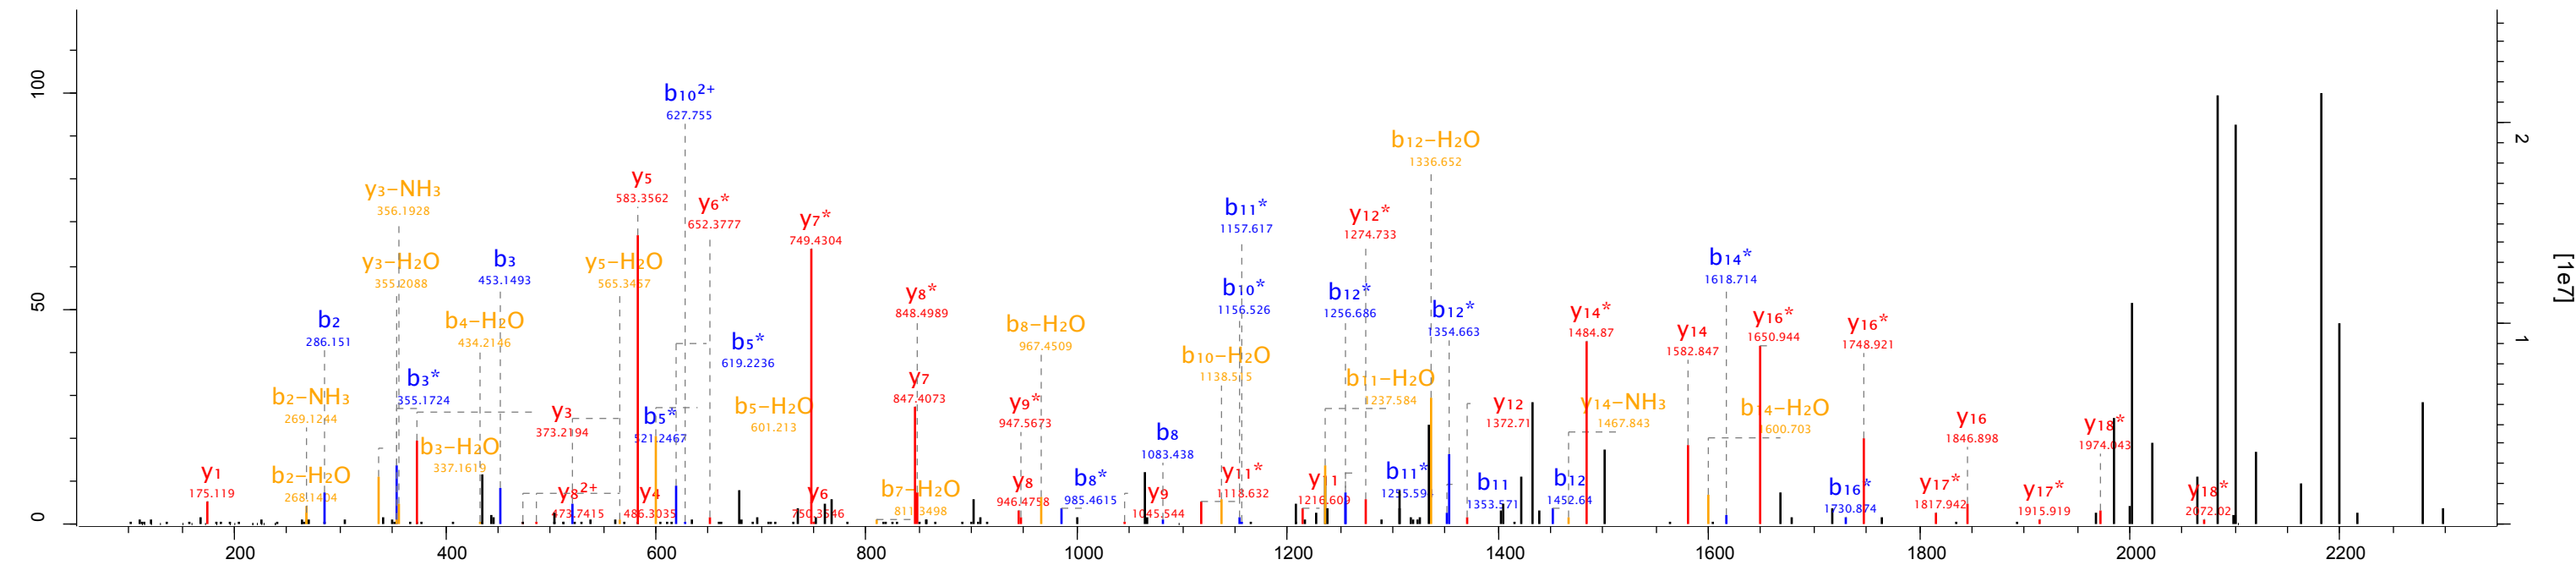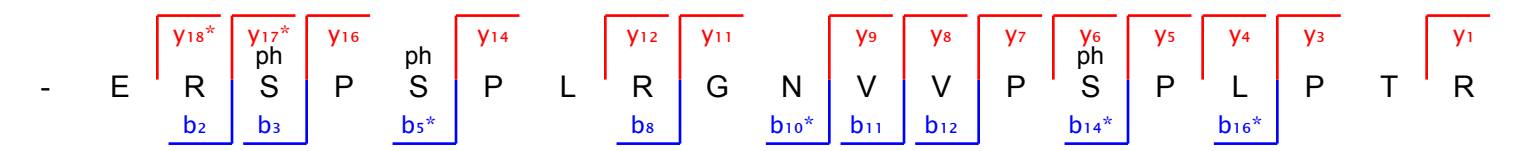

Raw file 20150814\_A375SR\_Phospho\_BR2\_03 Scan 16630 Method FTMS; HCD Score 45.94 m/z 972.94 Gene names CCDC86

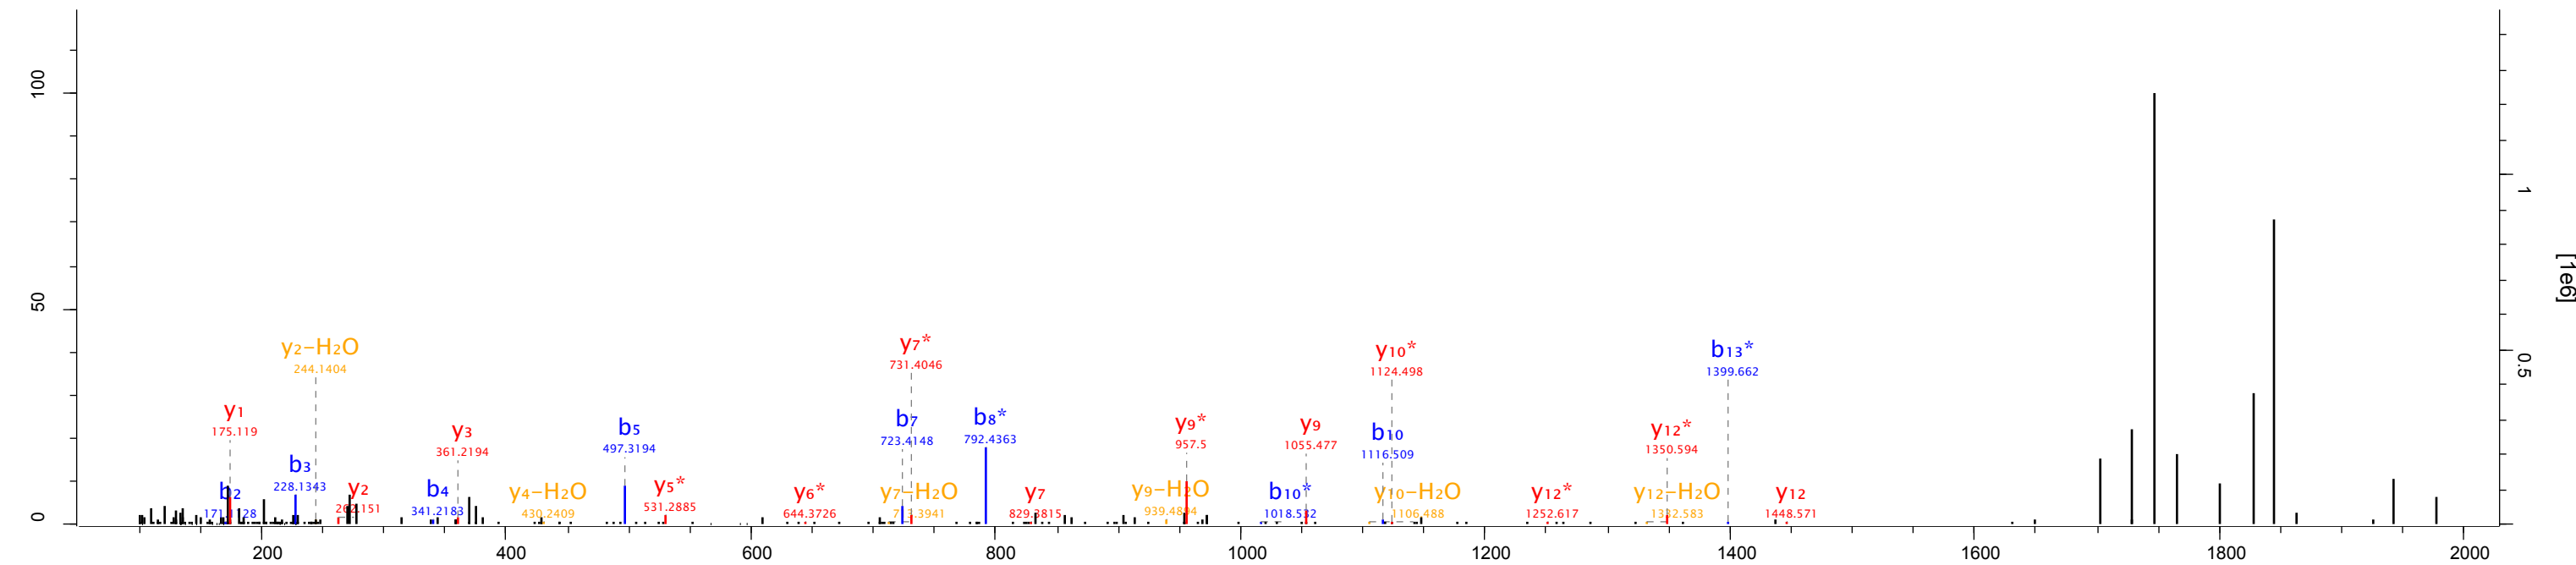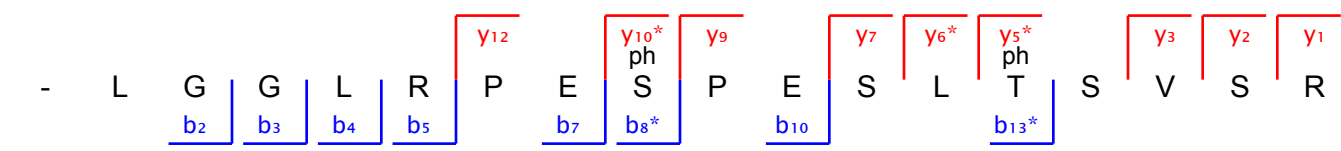

Raw file Scan Method Score m/z Gene names  
 20150814\_A375SR\_Phospho\_BR2\_03 17230 FTMS; HCD 192.12 935.91 PPP1R13L

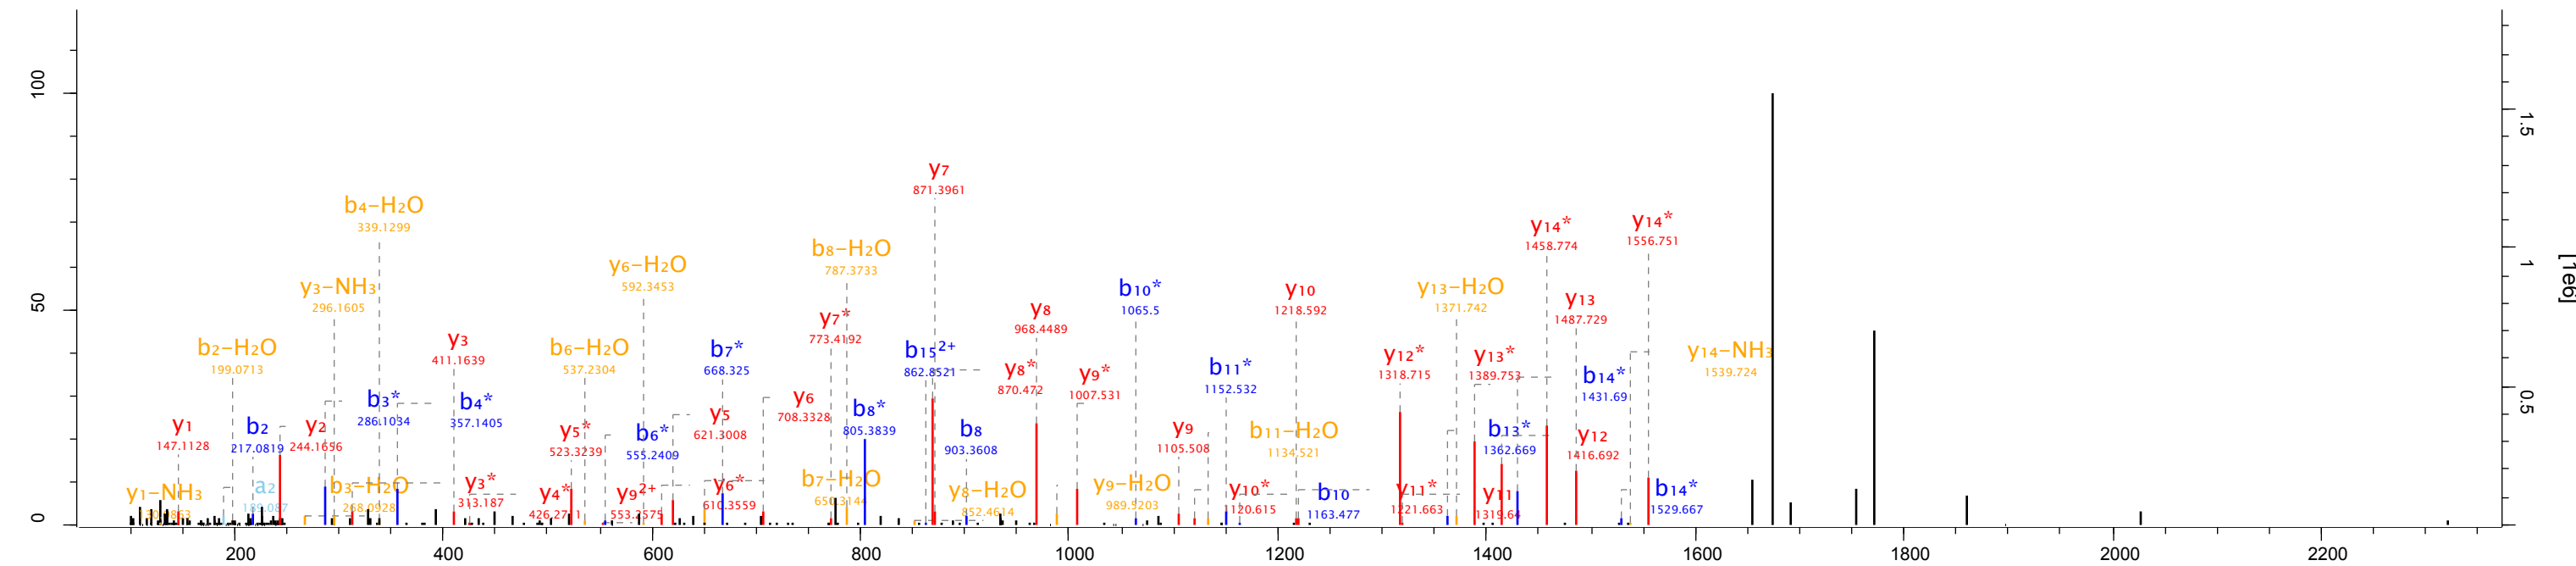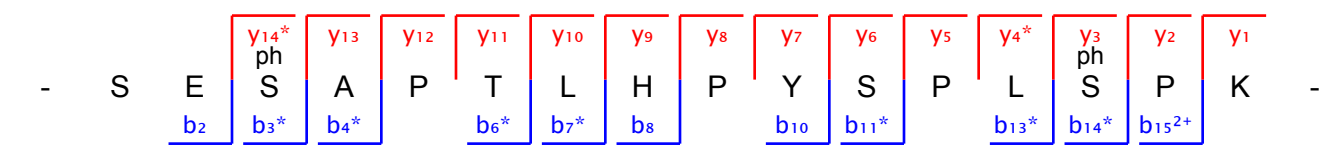

Raw file: 20150814\_A375SR\_Phospho\_BR2\_03  
 Scan: 17290 Method: FTMS; HCD Score: 89.17 m/z: 516.74 Gene names: KIF4A

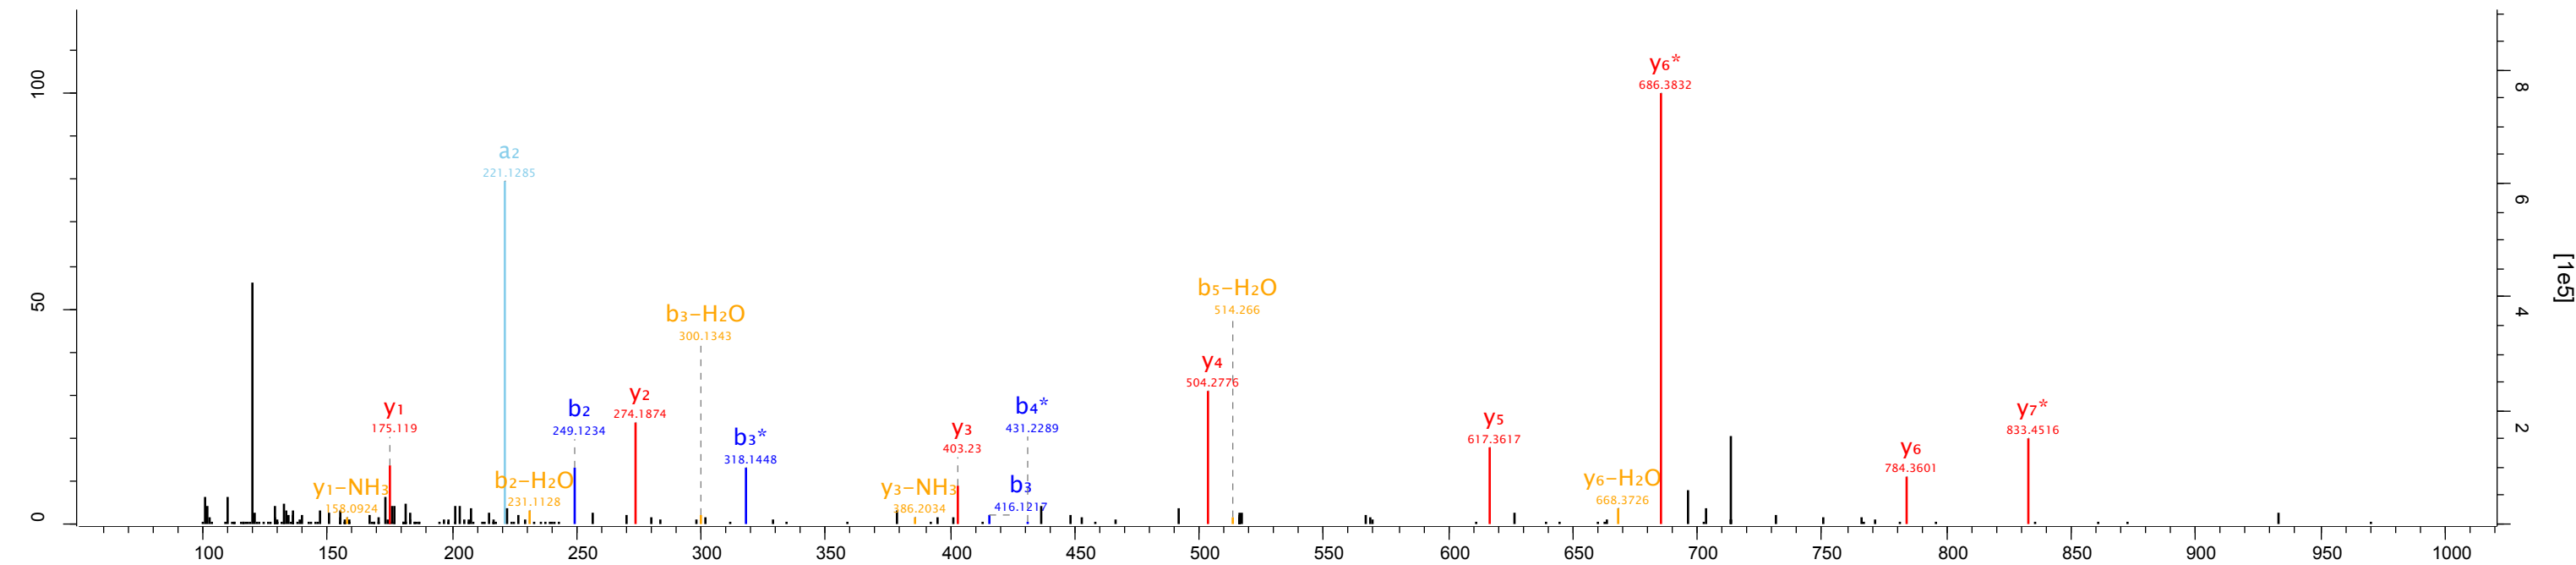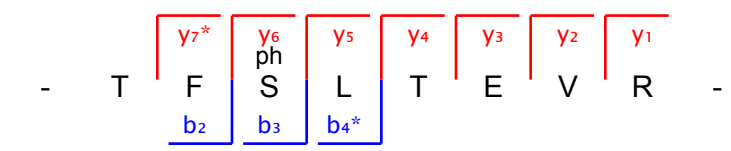

Raw file 20150814\_A375SR\_Phospho\_BR2\_03 Scan 17520 Method FTMS; HCD Score 142.32 m/z 821.86 Gene names MAP4

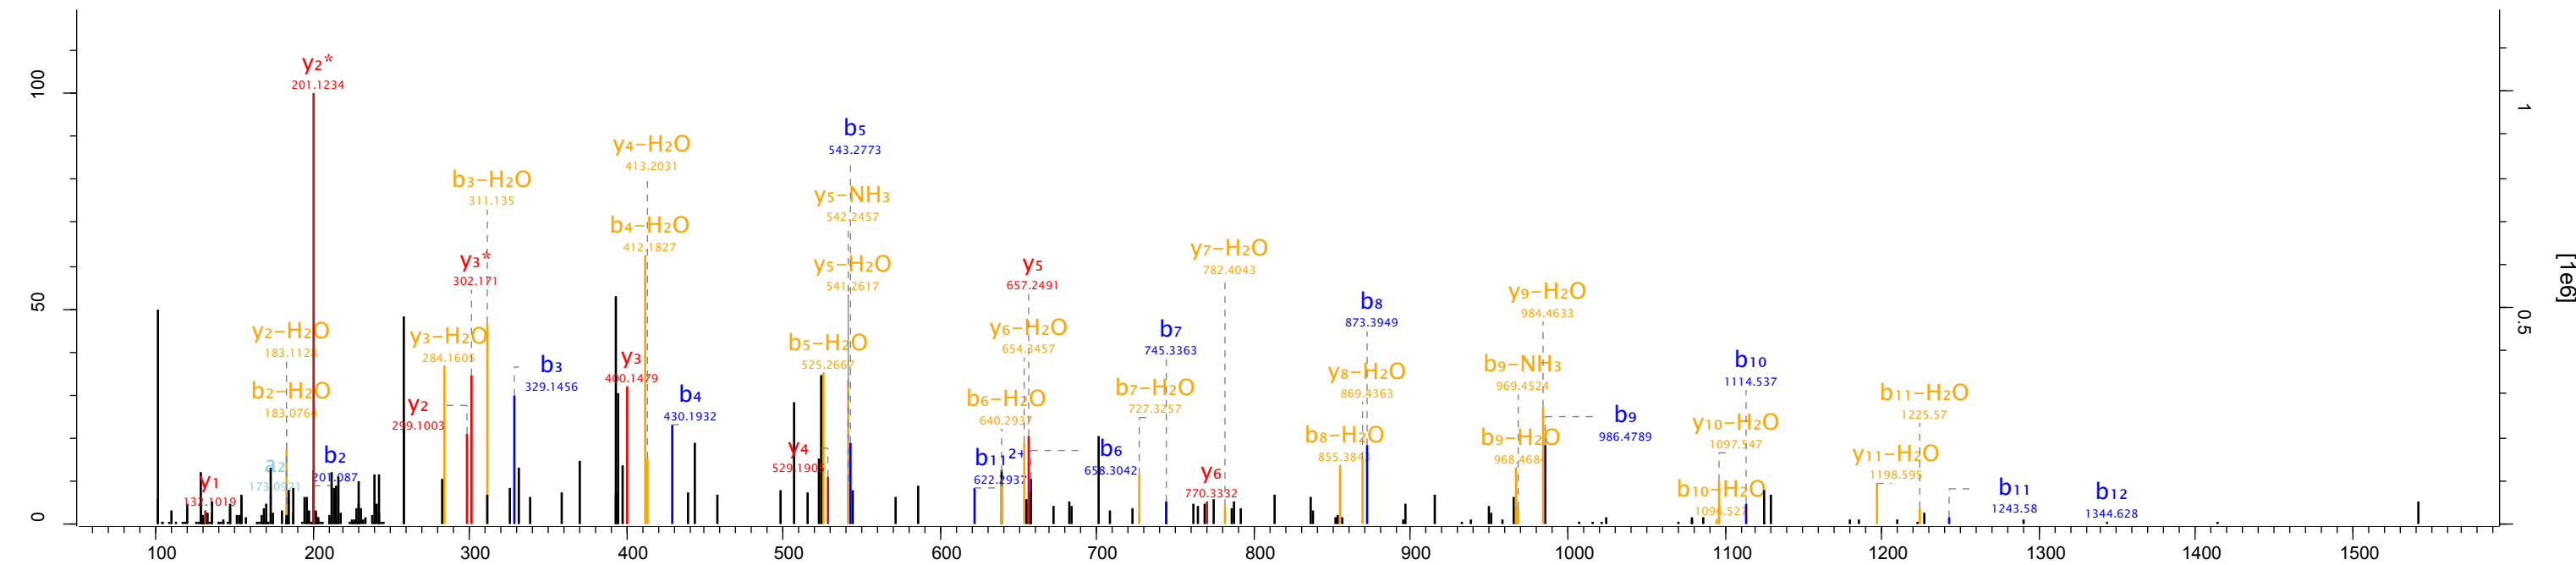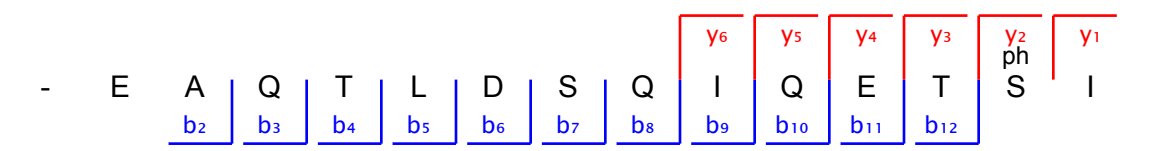





Raw file 20150814\_A375SR\_Phospho\_BR2\_03 Scan 17860 Method FTMS; HCD Score 75.55 m/z 853.35 Gene names COIL

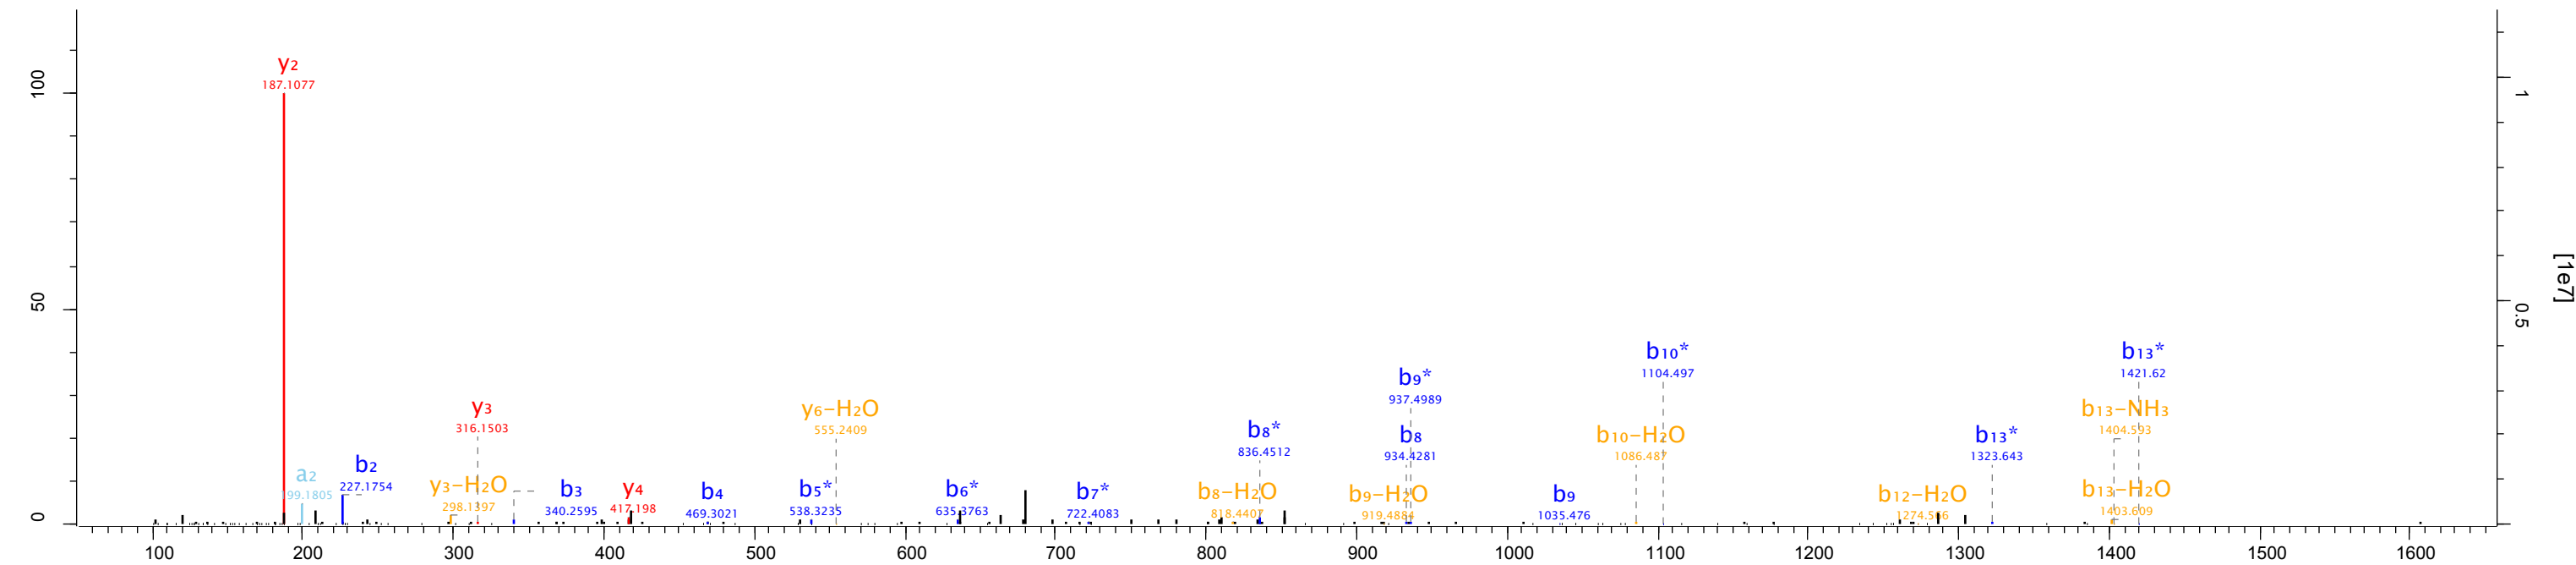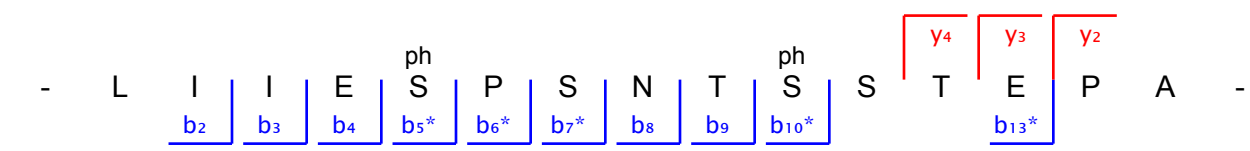

Raw file: 20150814\_A375SR\_Phospho\_BR2\_03  
 Scan: 18240 Method: FTMS; HCD Score: 166.03 m/z: 1373.56 Gene names: MAGEA4

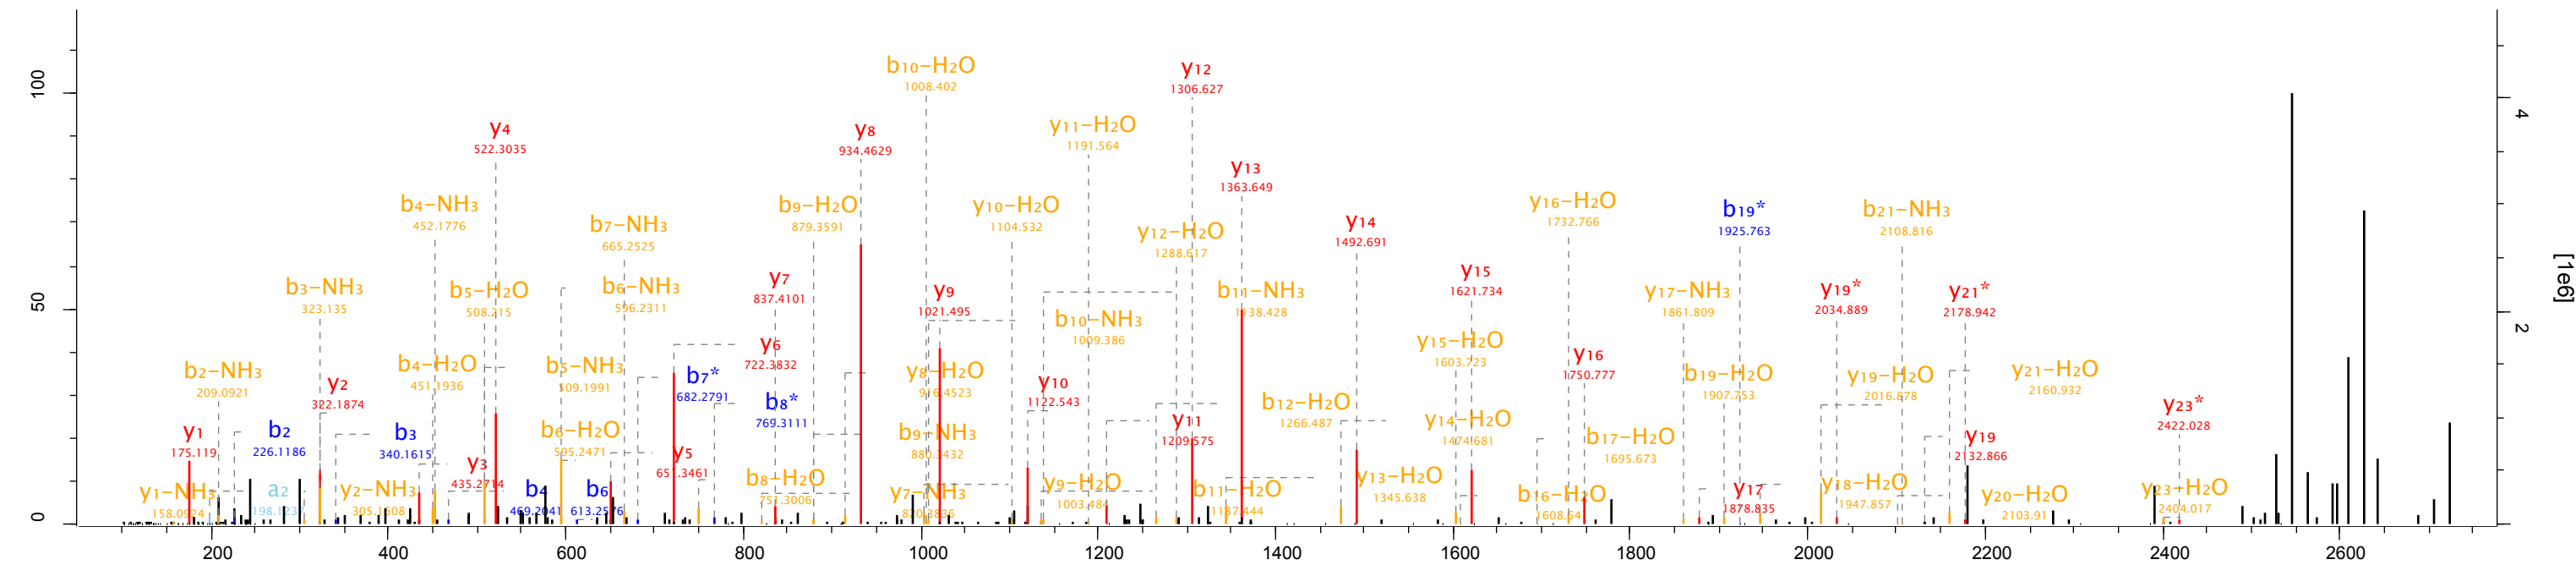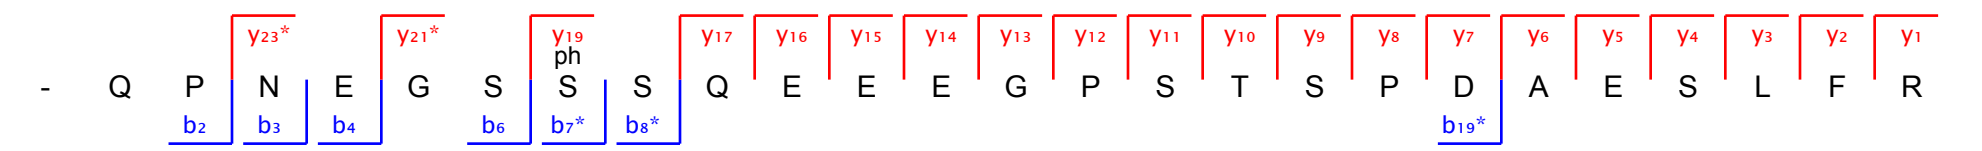

Raw file 20150814\_A375SR\_Phospho\_BR2\_03 Scan 18470 Method FTMS; HCD Score 62.1 m/z 791.75 Gene names PPM1A

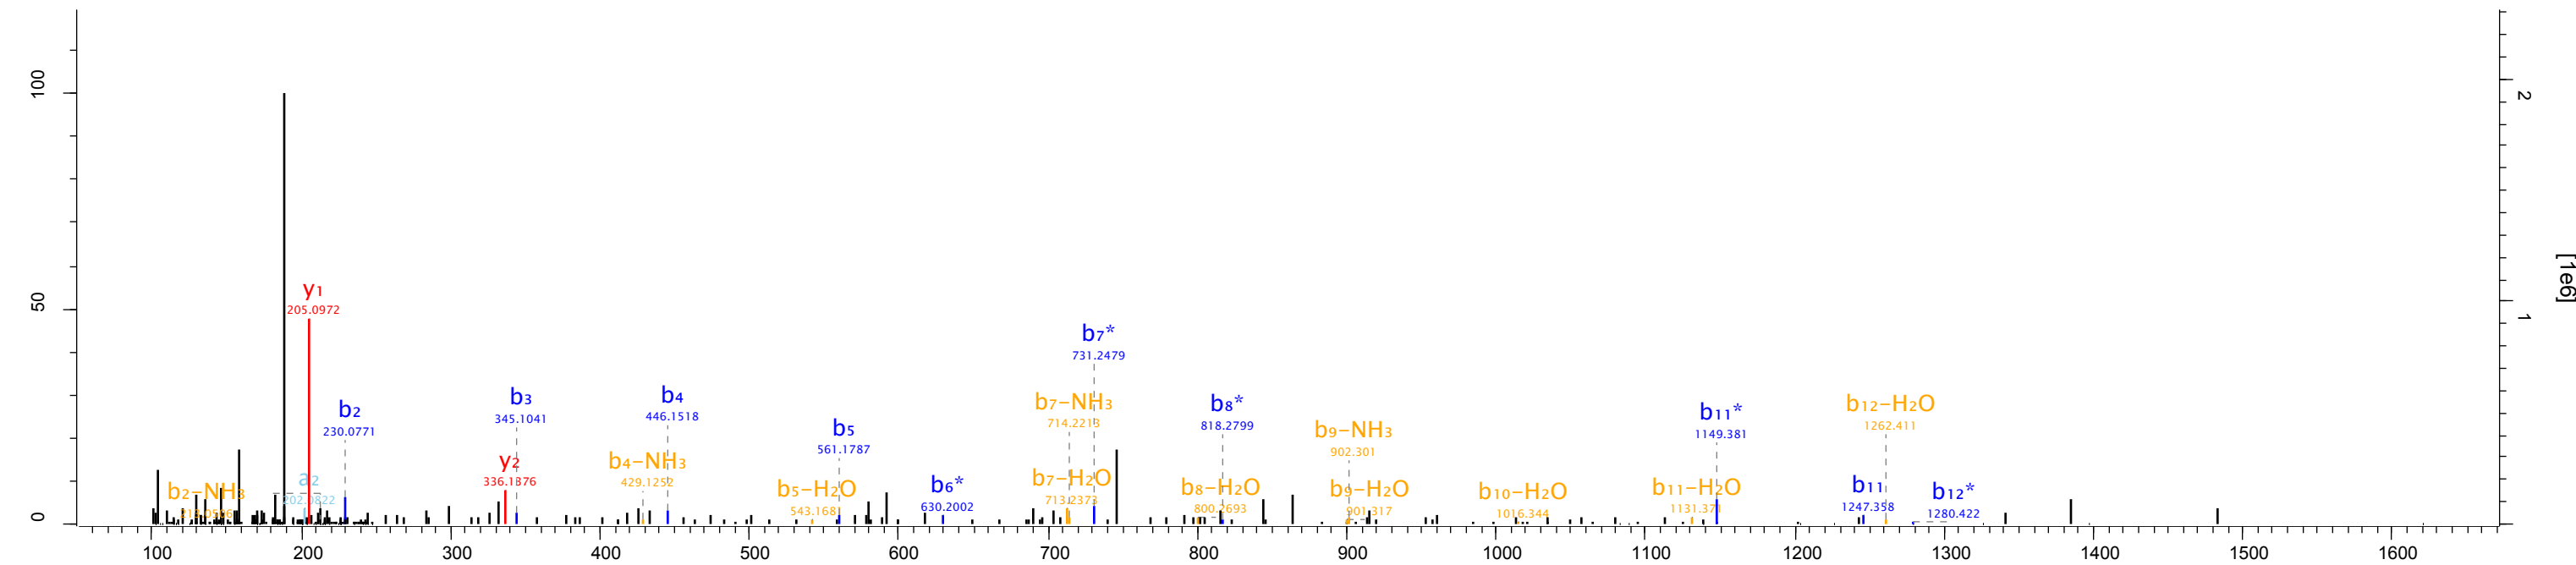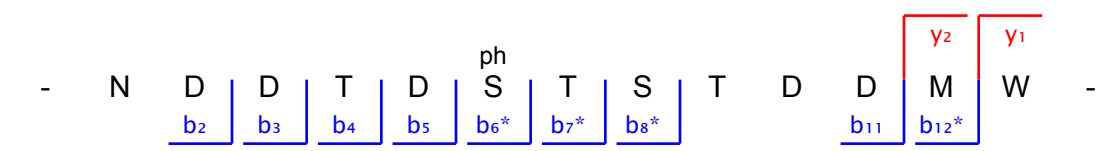

Raw file: 20150814\_A375SR\_Phospho\_BR2\_03  
 Scan: 18480 Method: FTMS; HCD Score: 165.89 m/z: 770.32 Gene names: FKBP15

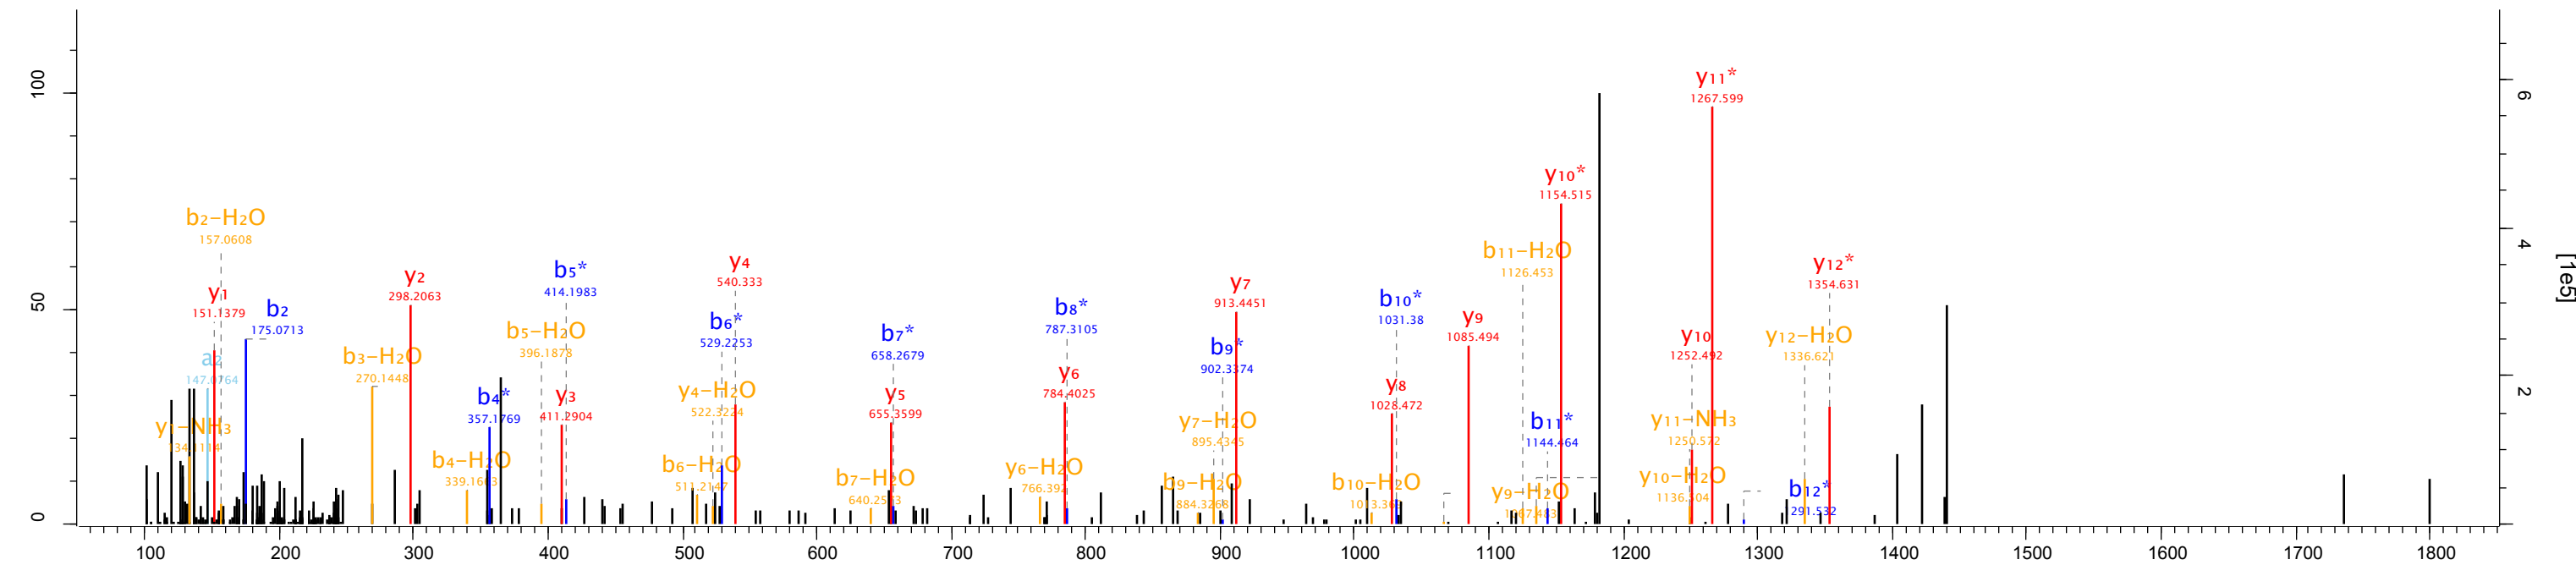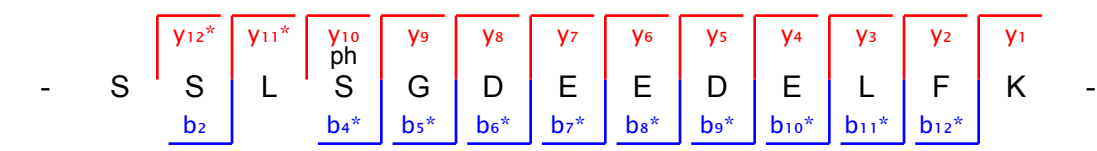

Raw file 20150814\_A375SR\_Phospho\_BR2\_03 Scan 18550 Method FTMS; HCD Score 73.67 m/z 1030.91 Gene names DENND4A

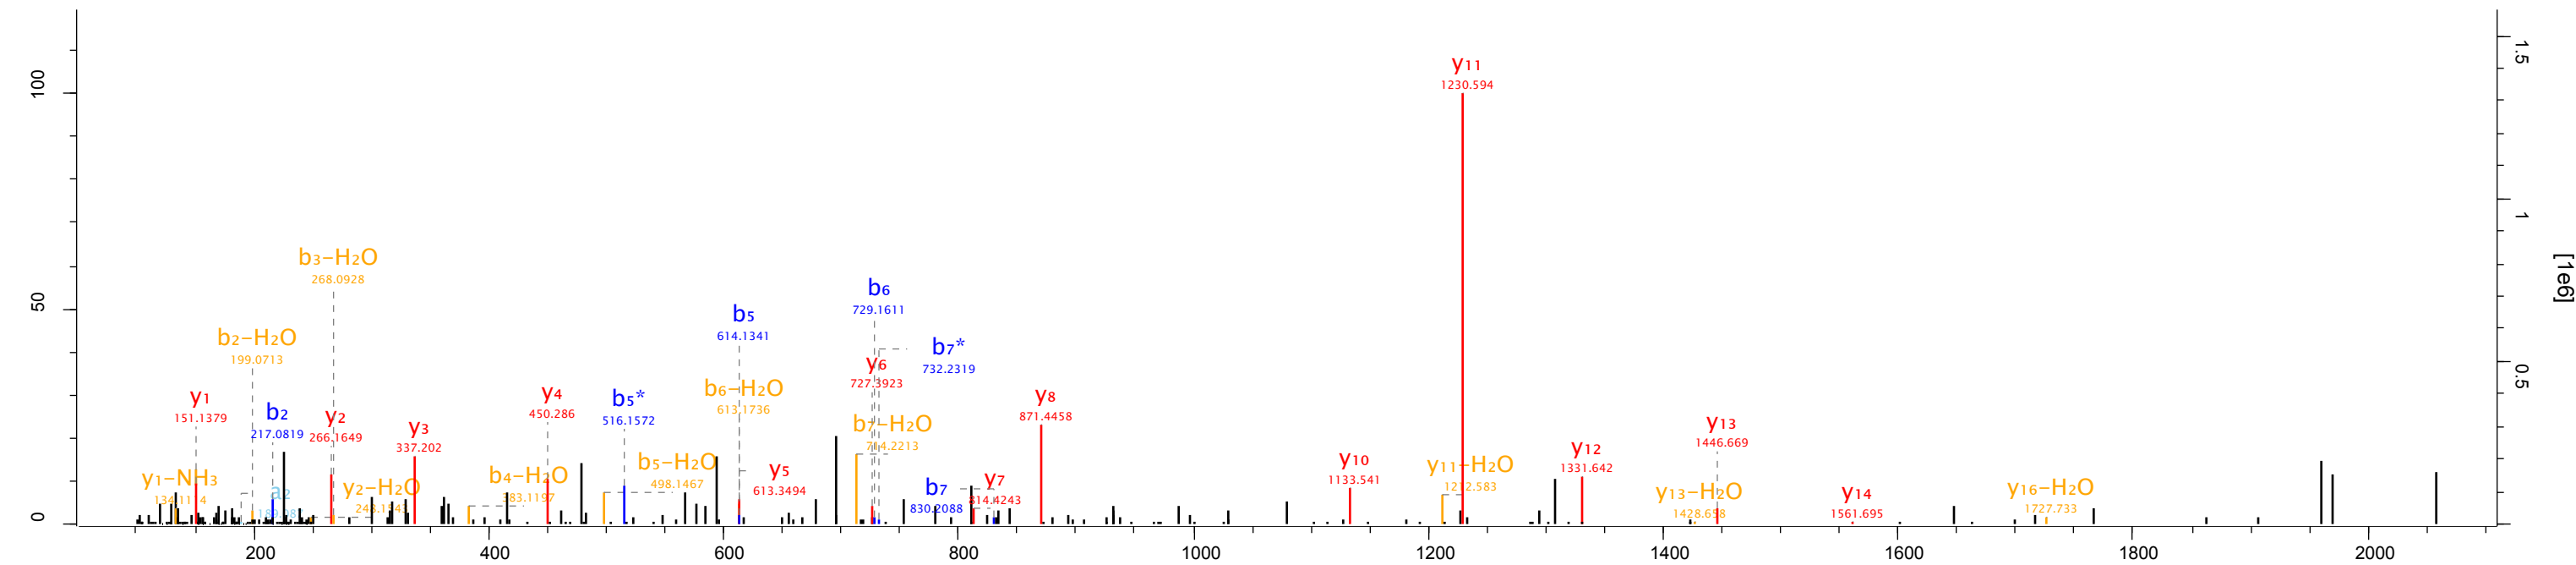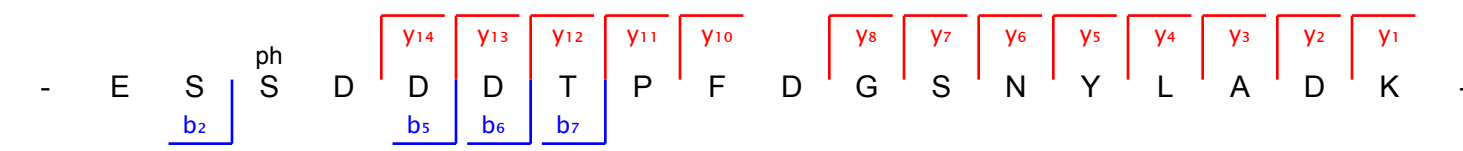



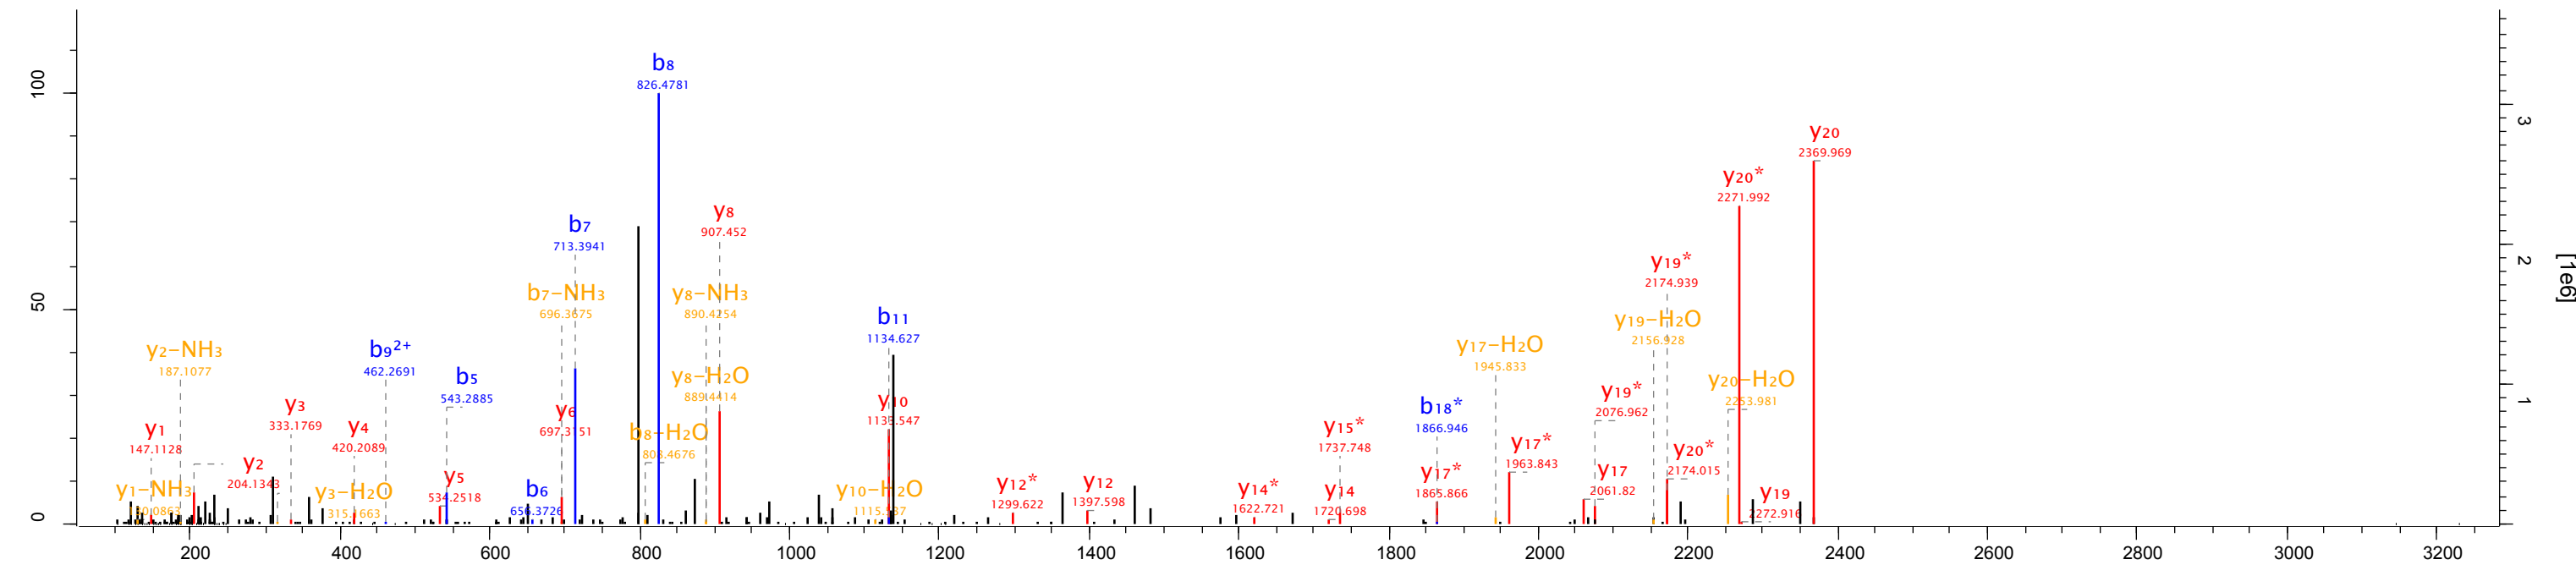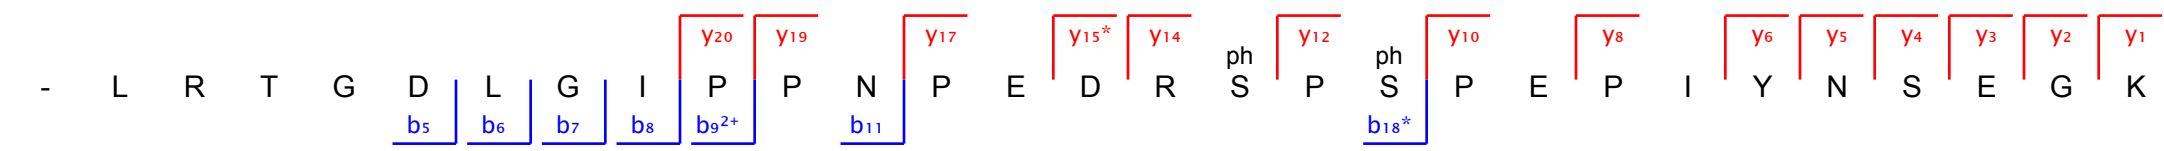

Raw file: 20150814\_A375SR\_Phospho\_BR2\_03  
 Scan: 19070 Method: FTMS; HCD Score: 158.65 m/z: 736.86 Gene names: ARHGEF7; ARHGEF6

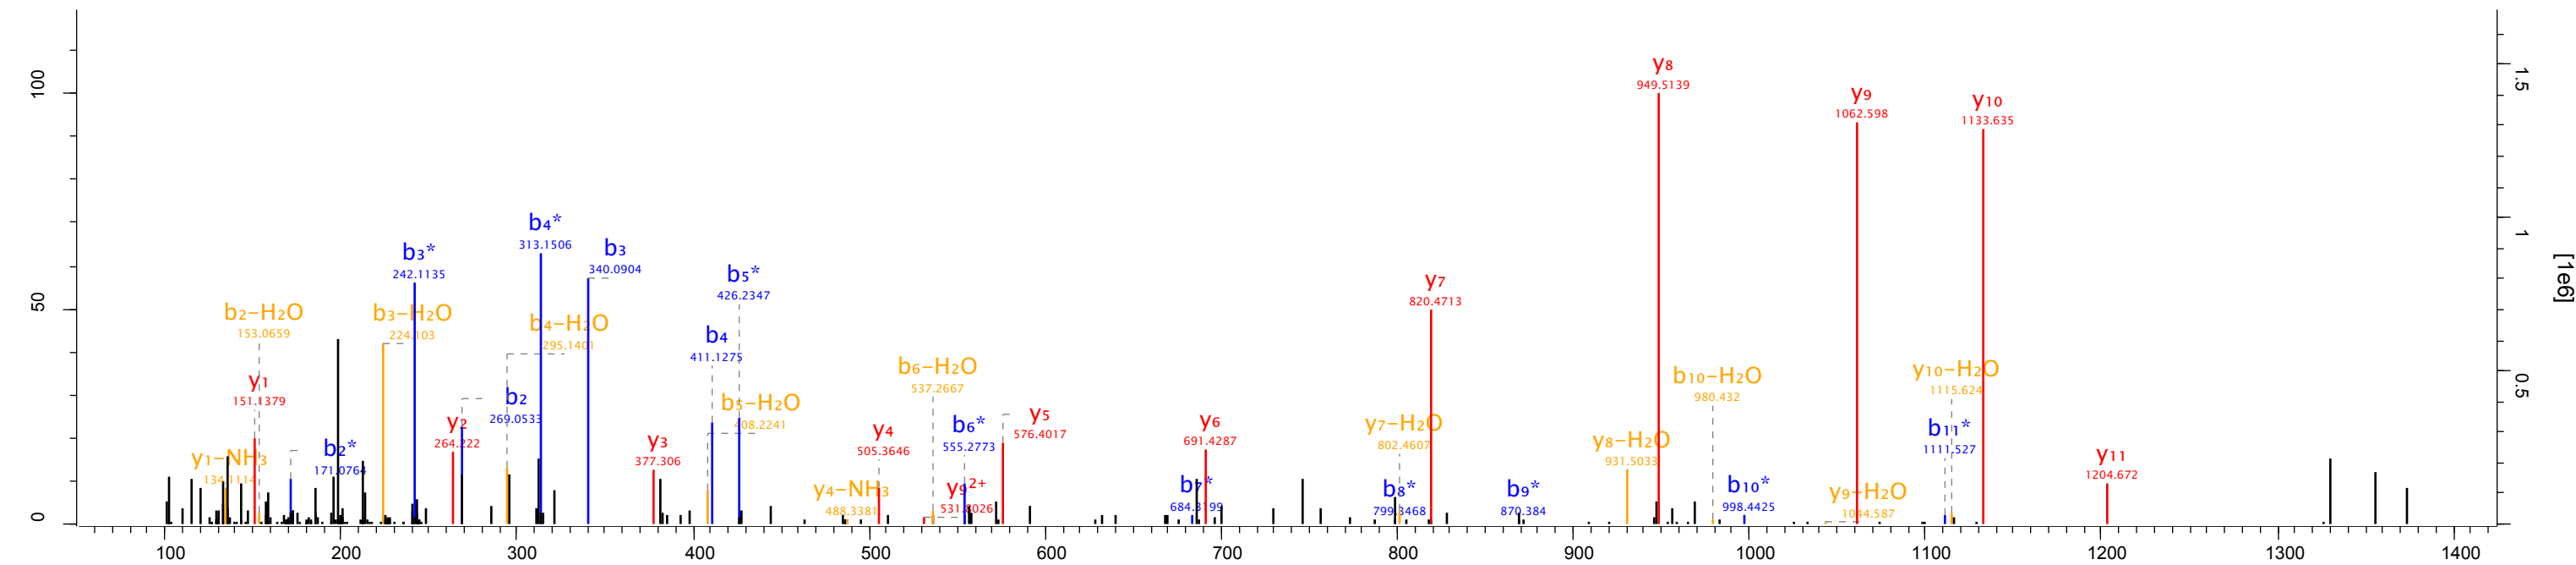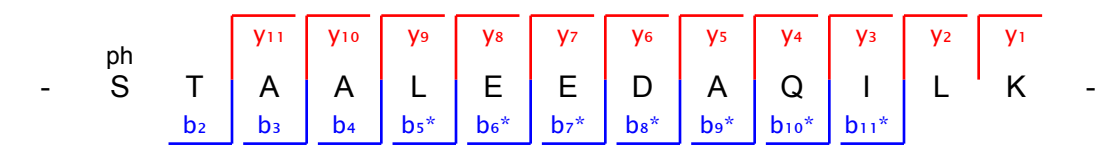



Raw file 20150814\_A375SR\_Phospho\_BR2\_03 Scan 19120 Method FTMS; HCD Score 203.5 m/z 983.96

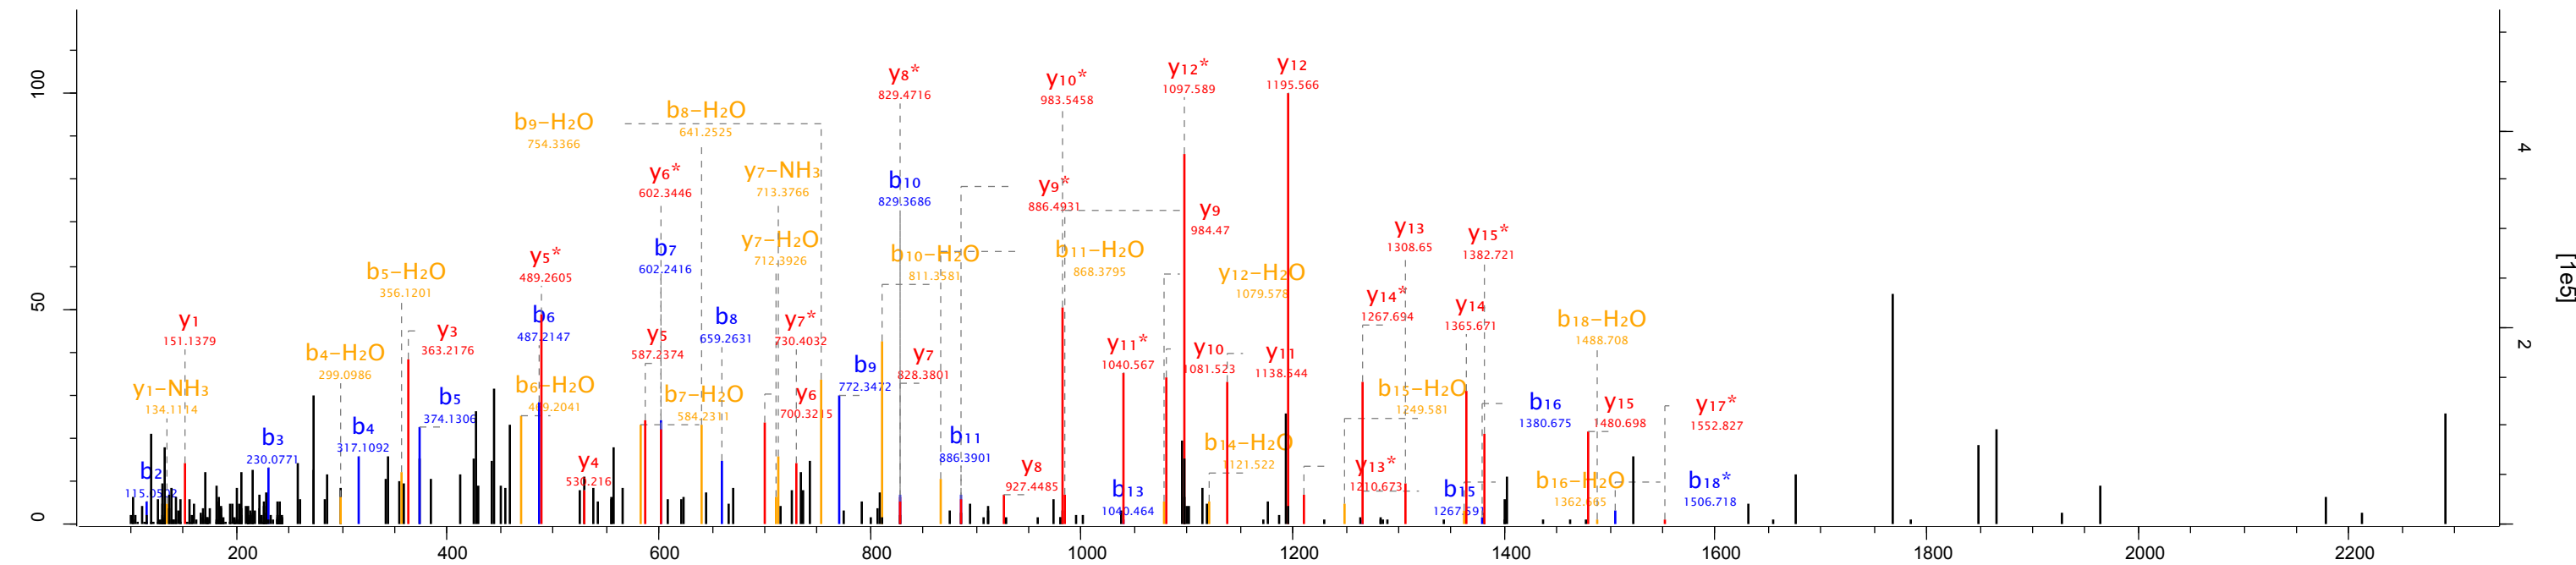

- G G D S G L D G L G G P G V Q L G S P D K -

Fragmentation mapping (b and y ions) is shown below the sequence:

- b2 (G), b3 (G), b4 (D), b5 (S), b6 (L), b7 (D), b8 (G), b9 (L), b10 (G), b11 (G), b13 (P), b15 (Q), b16 (L), b18\* (S)
- y1 (K), y3 (P), y4 (S), y5 (G), y6 (L), y7 (Q), y8 (V), y9 (G), y10 (P), y11 (G), y12 (G), y13 (L), y14 (D), y15 (D), y17\* (S)

Raw file Scan Method Score m/z Gene names  
 20150814\_A375SR\_Phospho\_BR2\_03 19270 FTMS; HCD 354.64 1119.45 MYO18A

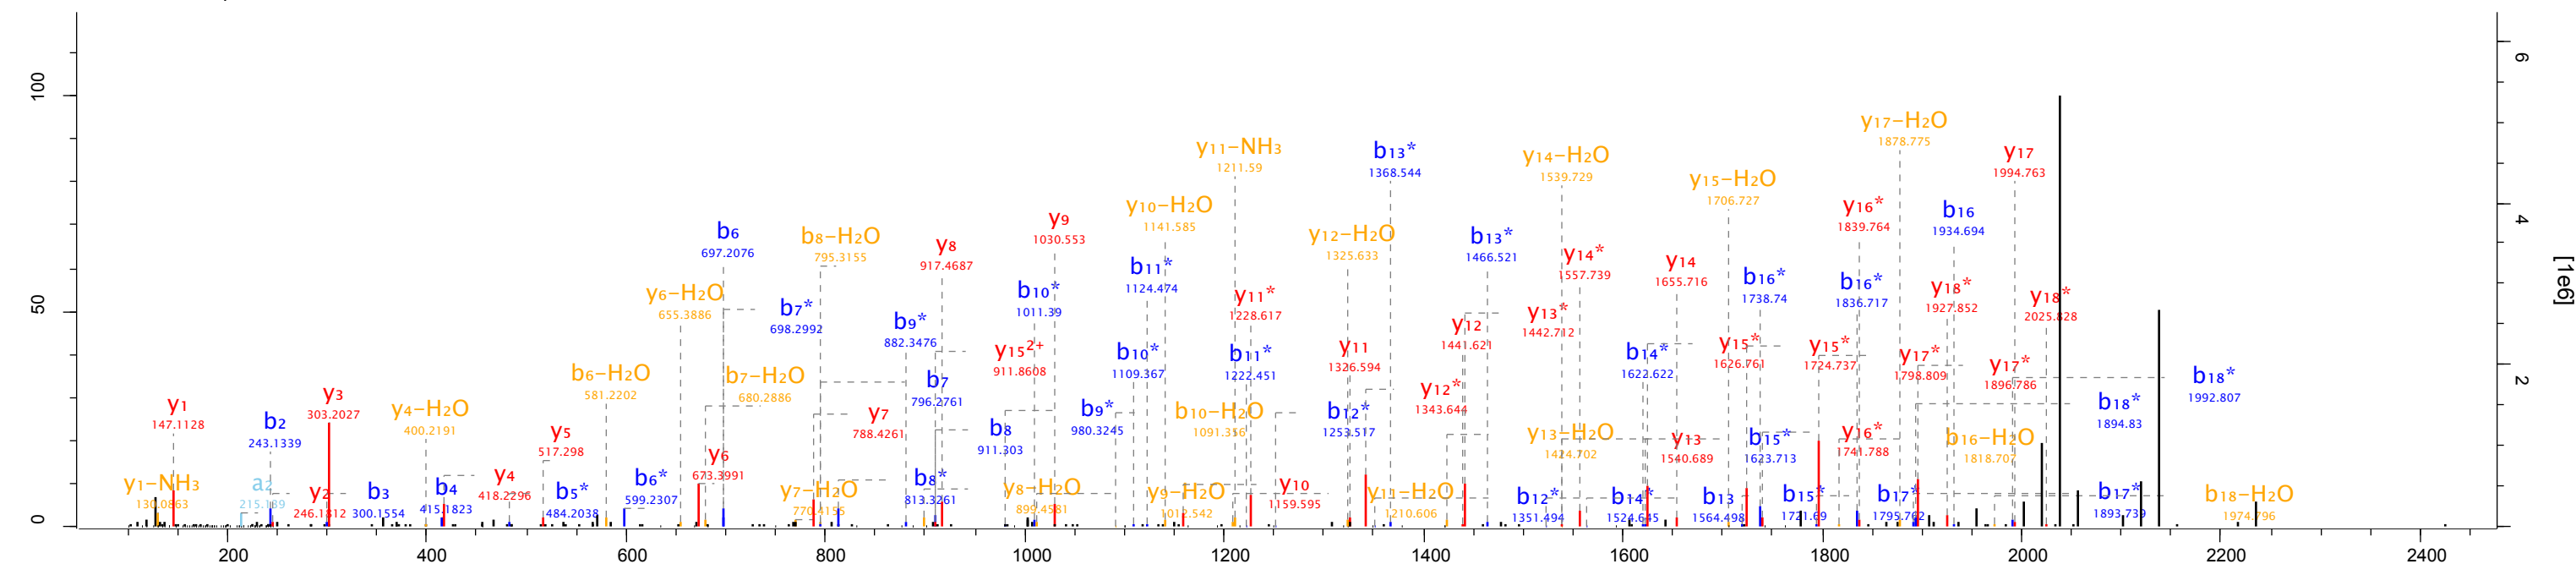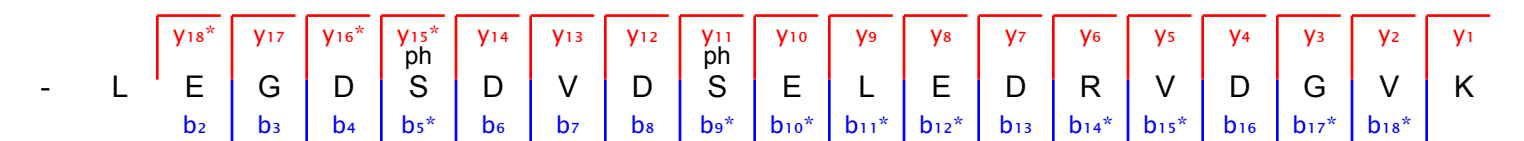

Raw file: 20150814\_A375SR\_Phospho\_BR2\_03  
 Scan: 19340 Method: FTMS; HCD Score: 74.29 m/z: 766.67 Gene names: TMEM230

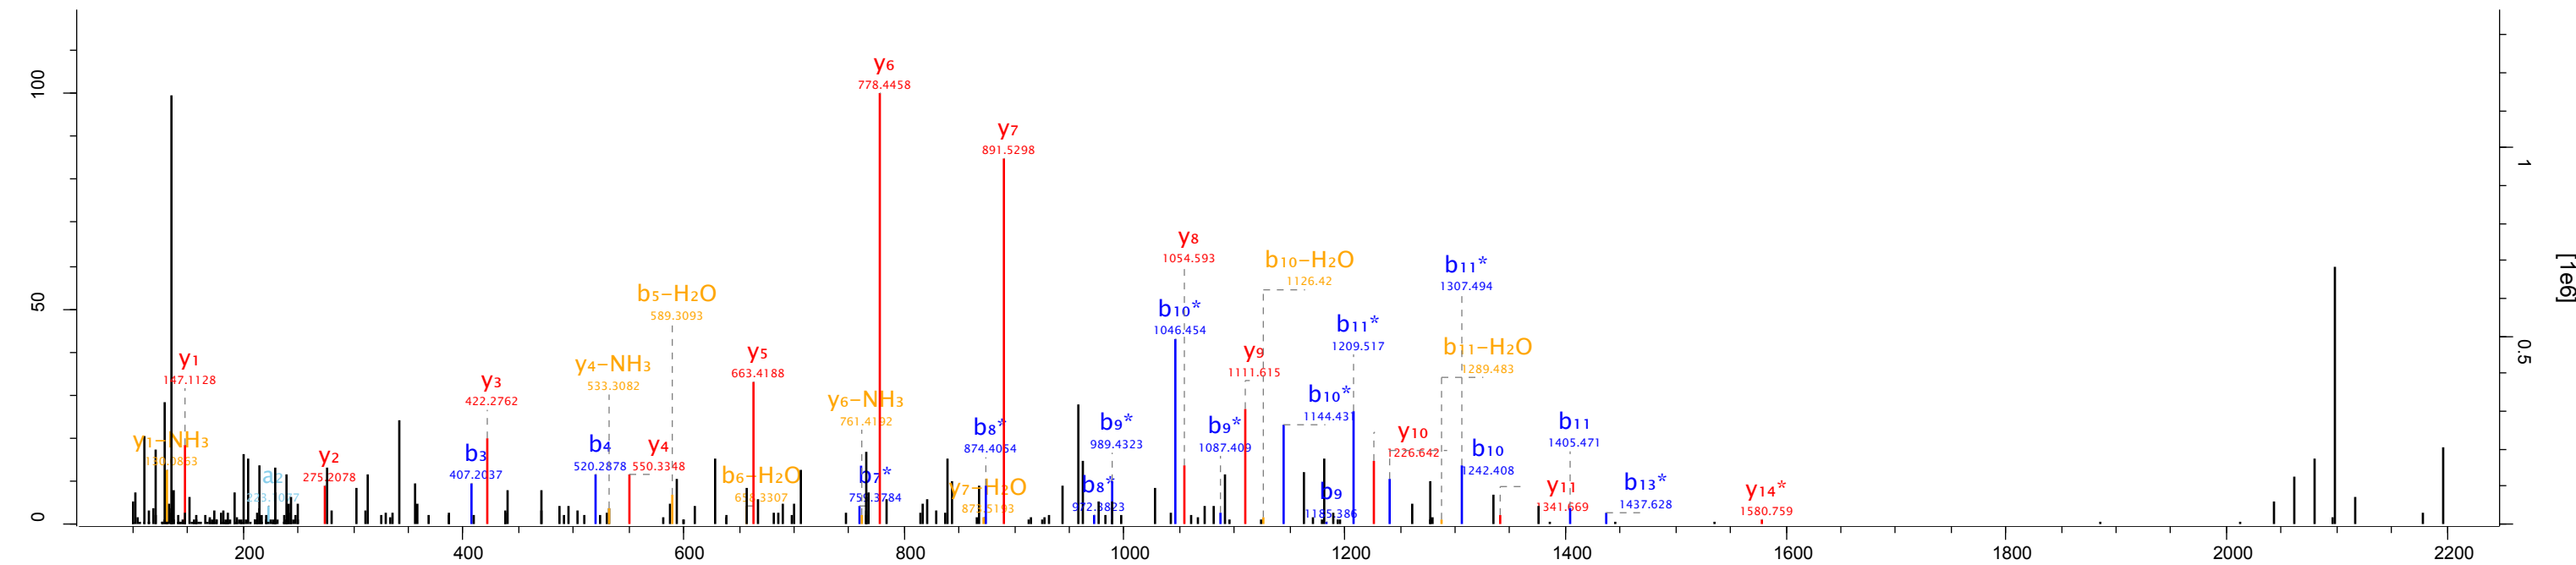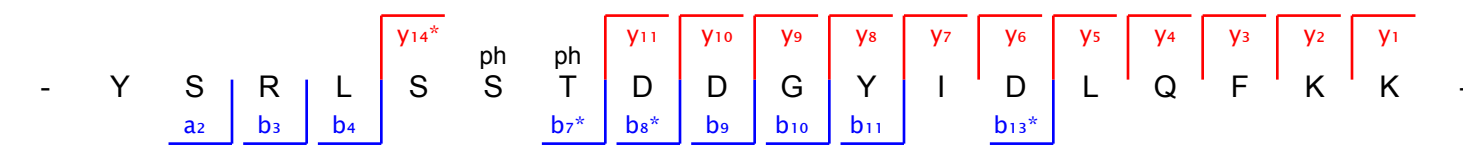

Raw file  
20150814\_A375SR\_Phospho\_BR2\_03

Scan 19600 Method FTMS; HCD Score 170.01 m/z 921.07 Gene names RAB11FIP1

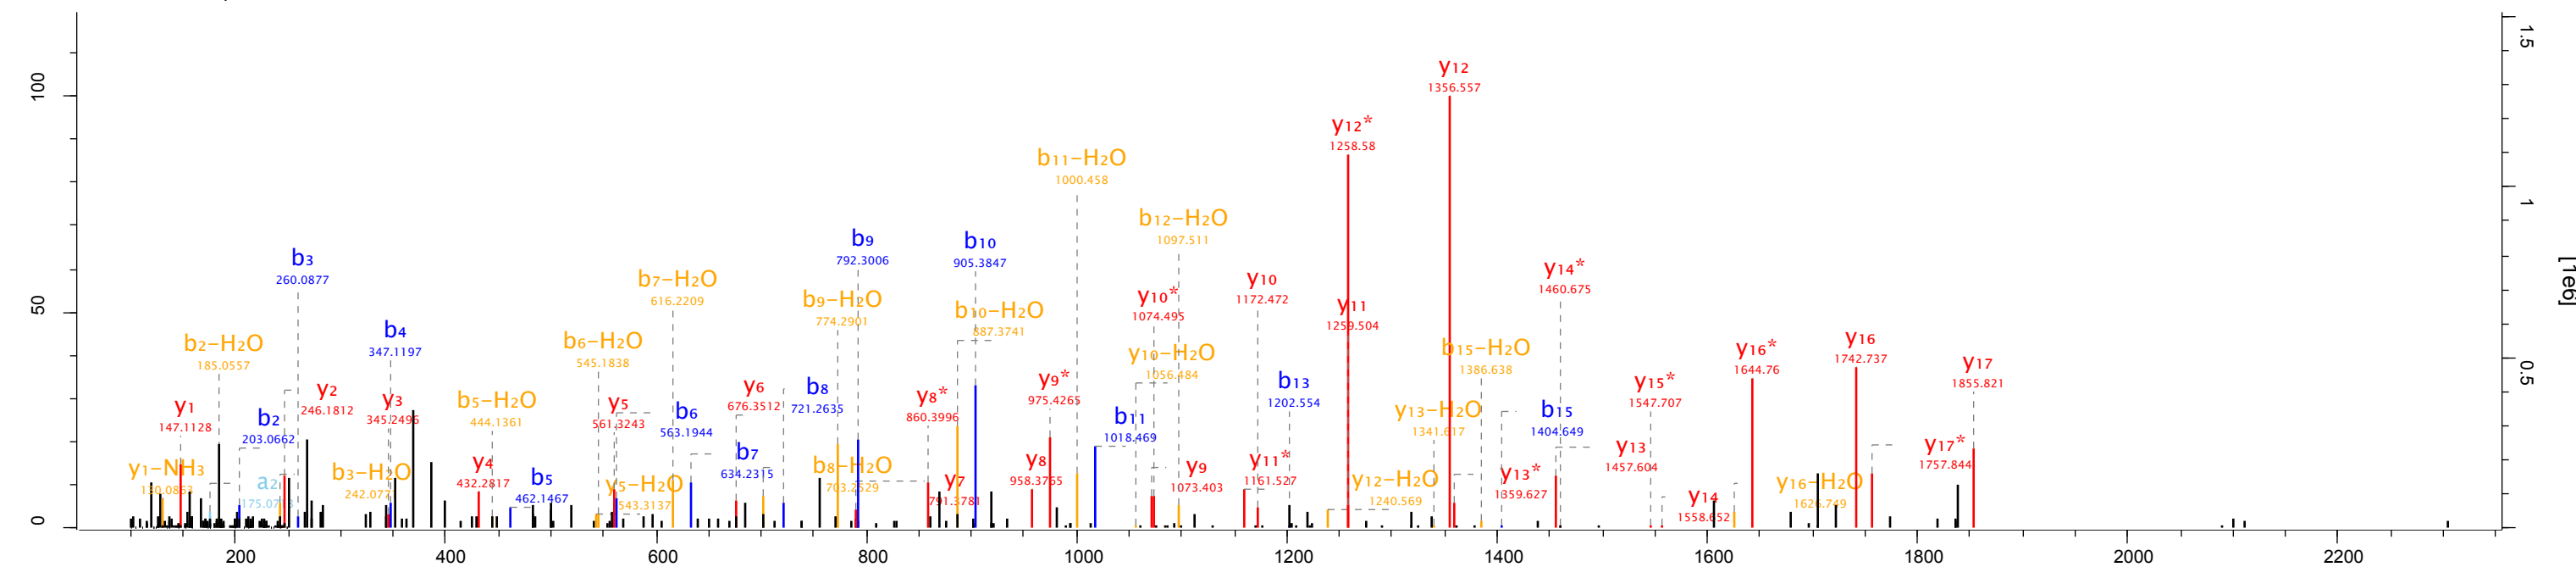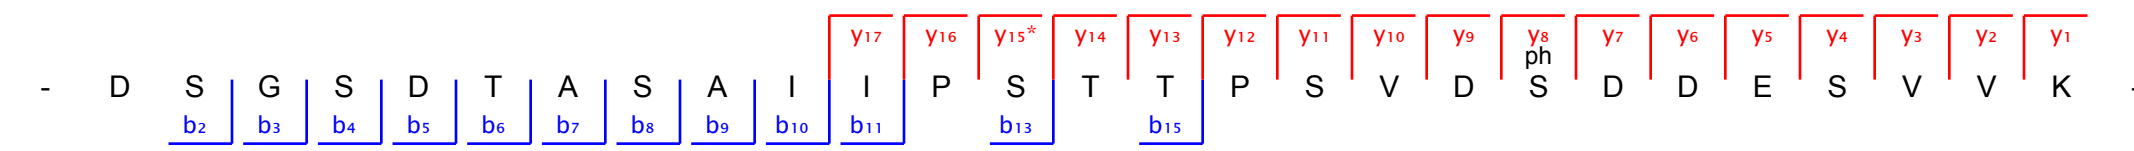

Raw file: 20150814\_A375SR\_Phospho\_BR2\_03  
 Scan: 19840 Method: FTMS; HCD Score: 89.34 m/z: 728.34 Gene names: AKAP12

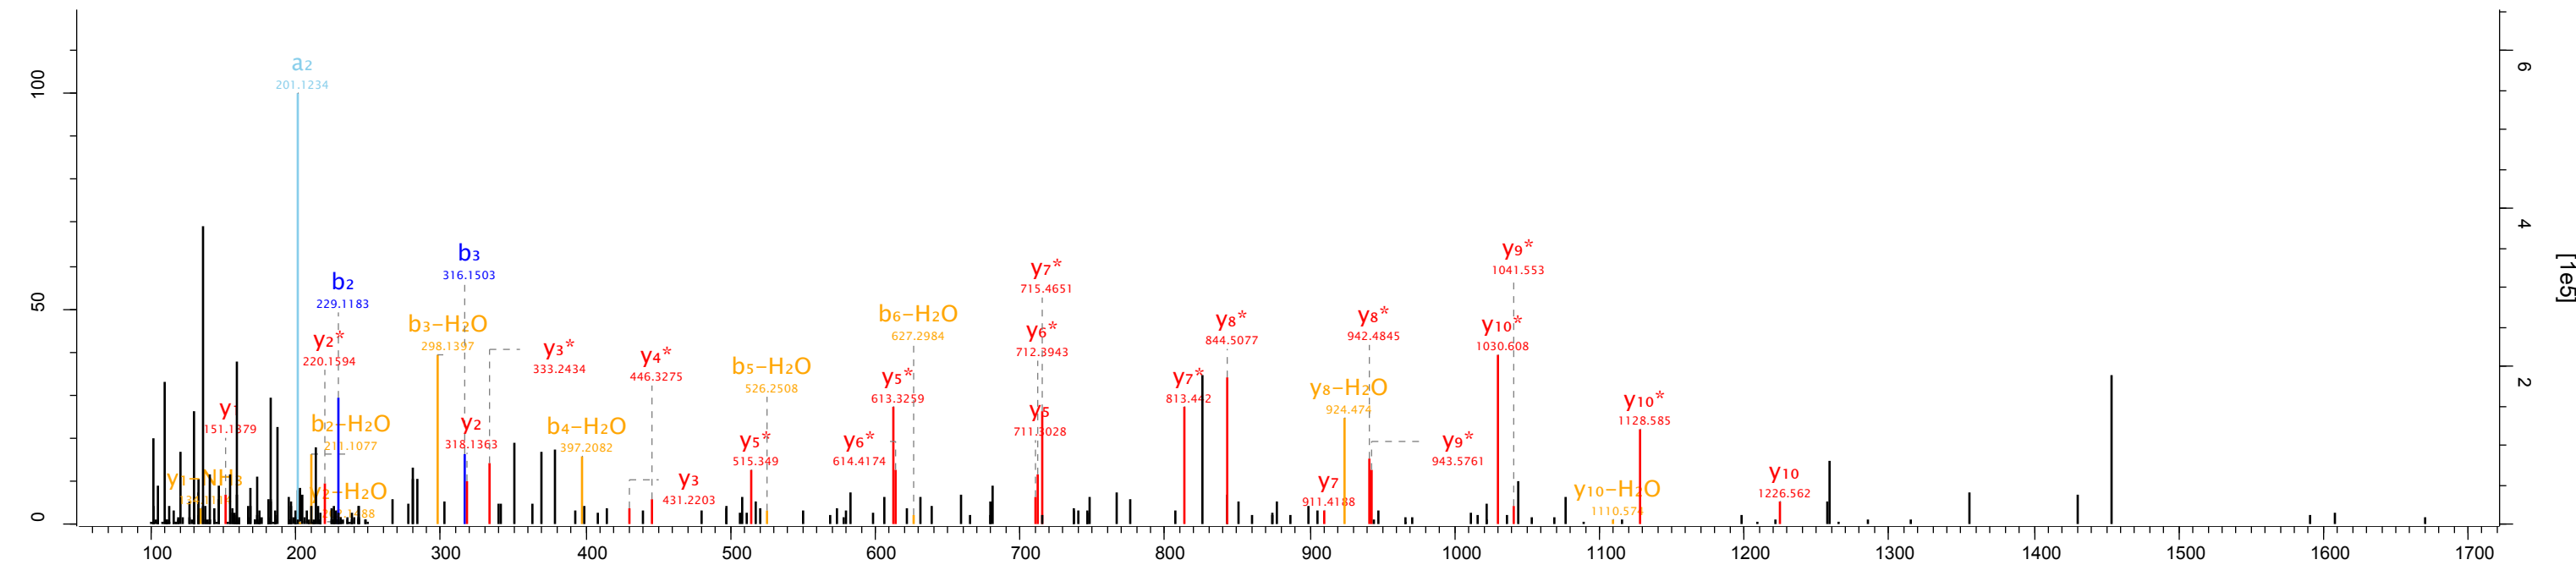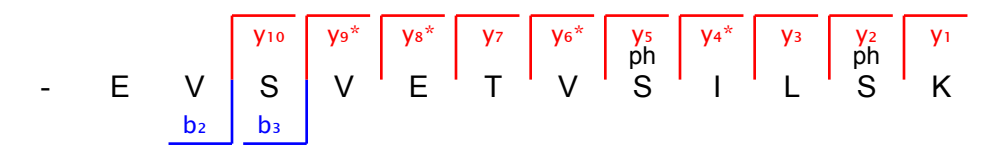

Raw file: 20150814\_A375SR\_Phospho\_BR2\_03  
 Scan: 19920 Method: FTMS; HCD Score: 83.07 m/z: 641.29 Gene names: LIMCH1

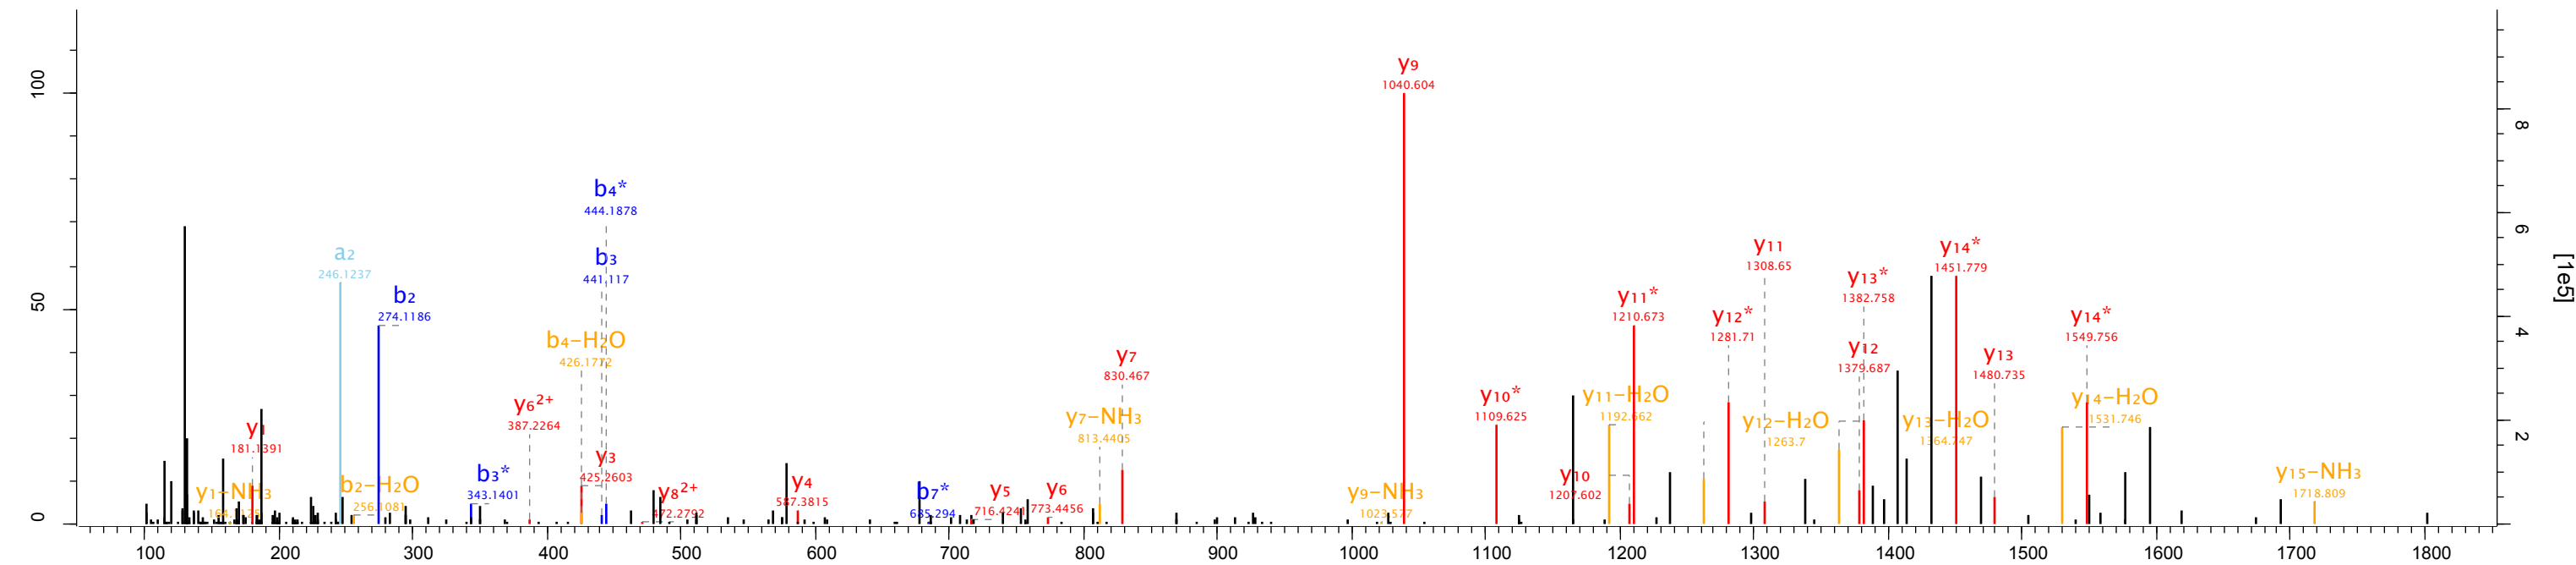

Protein sequence: - S W S T A T S P L G G E R P F R -

Fragmentation sites (b and y ions) are indicated by brackets below the sequence:

- Red brackets (y ions): y14\* (S-T), y13 (T-A), y12 (A-T), y11 (T-S), y10 ph (S-P), y9 (P-L), y8<sup>2+</sup> (L-G), y7 (G-G), y6 (G-E), y5 (E-R), y4 (R-P), y3 (P-F), y1 (F-R)
- Blue brackets (b ions): b2 (W-S), b3 (S-T), b4\* (T-A), b7\* (S-P)

Raw file: 20150814\_A375SR\_Phospho\_BR2\_03  
 Scan: 20630 Method: FTMS; HCD Score: 160.27 m/z: 1023.89 Gene names: TTF1

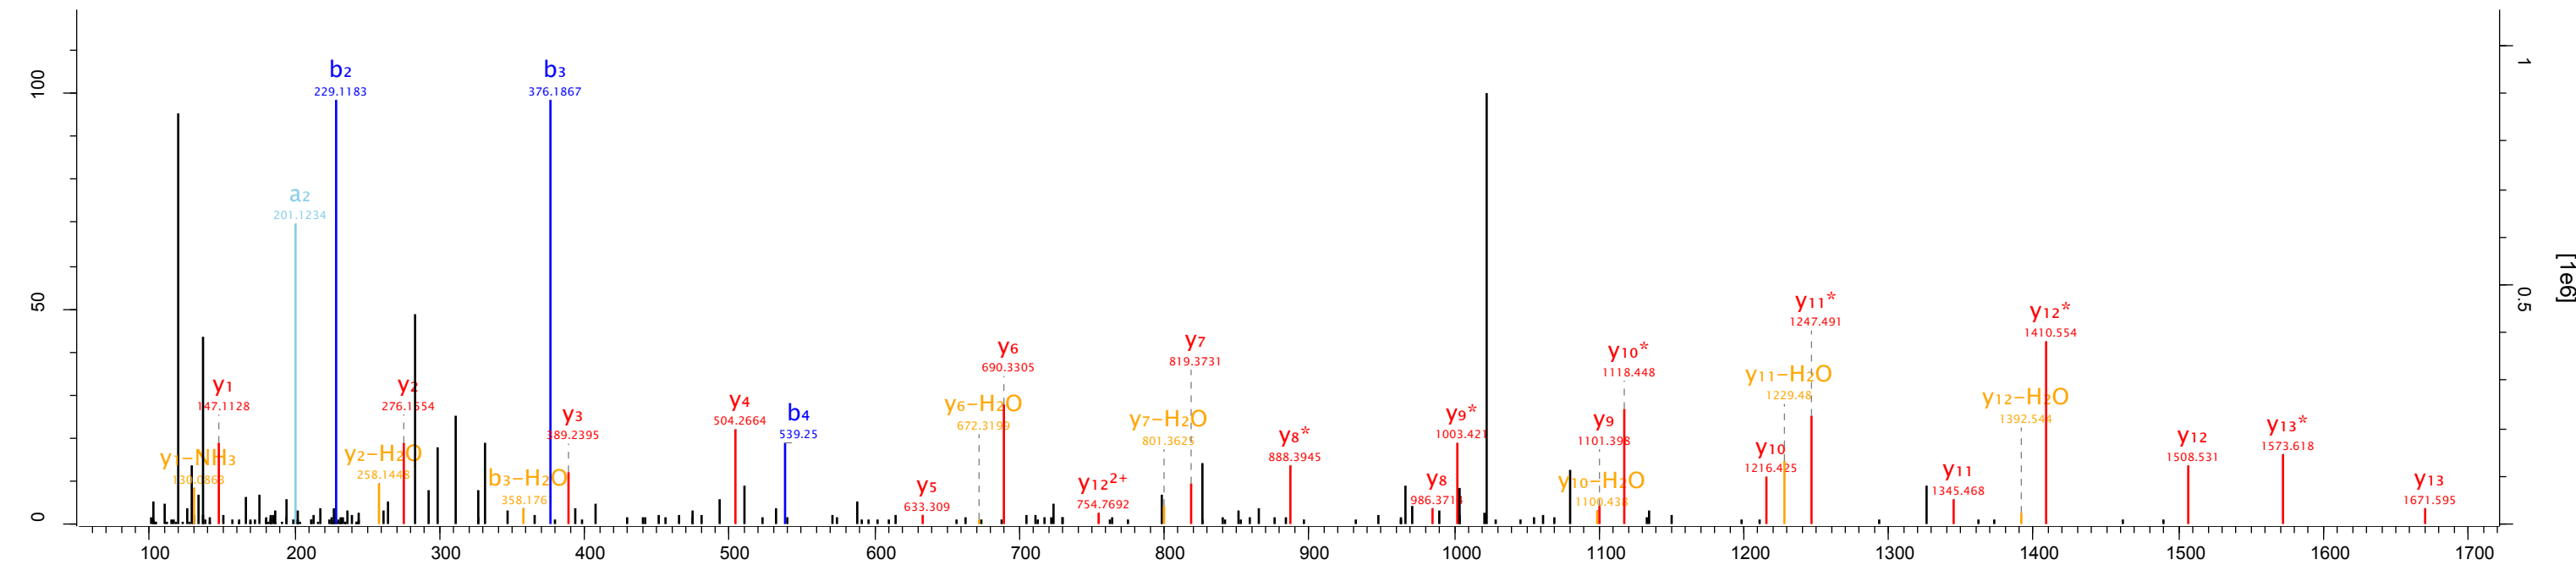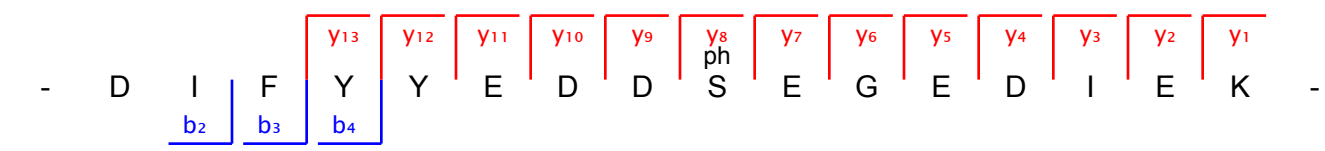

Raw file  
20150814\_A375SR\_Phospho\_BR2\_03

Scan 20990 Method FTMS; HCD Score 434.67 m/z 1304.52 Gene names GIT1

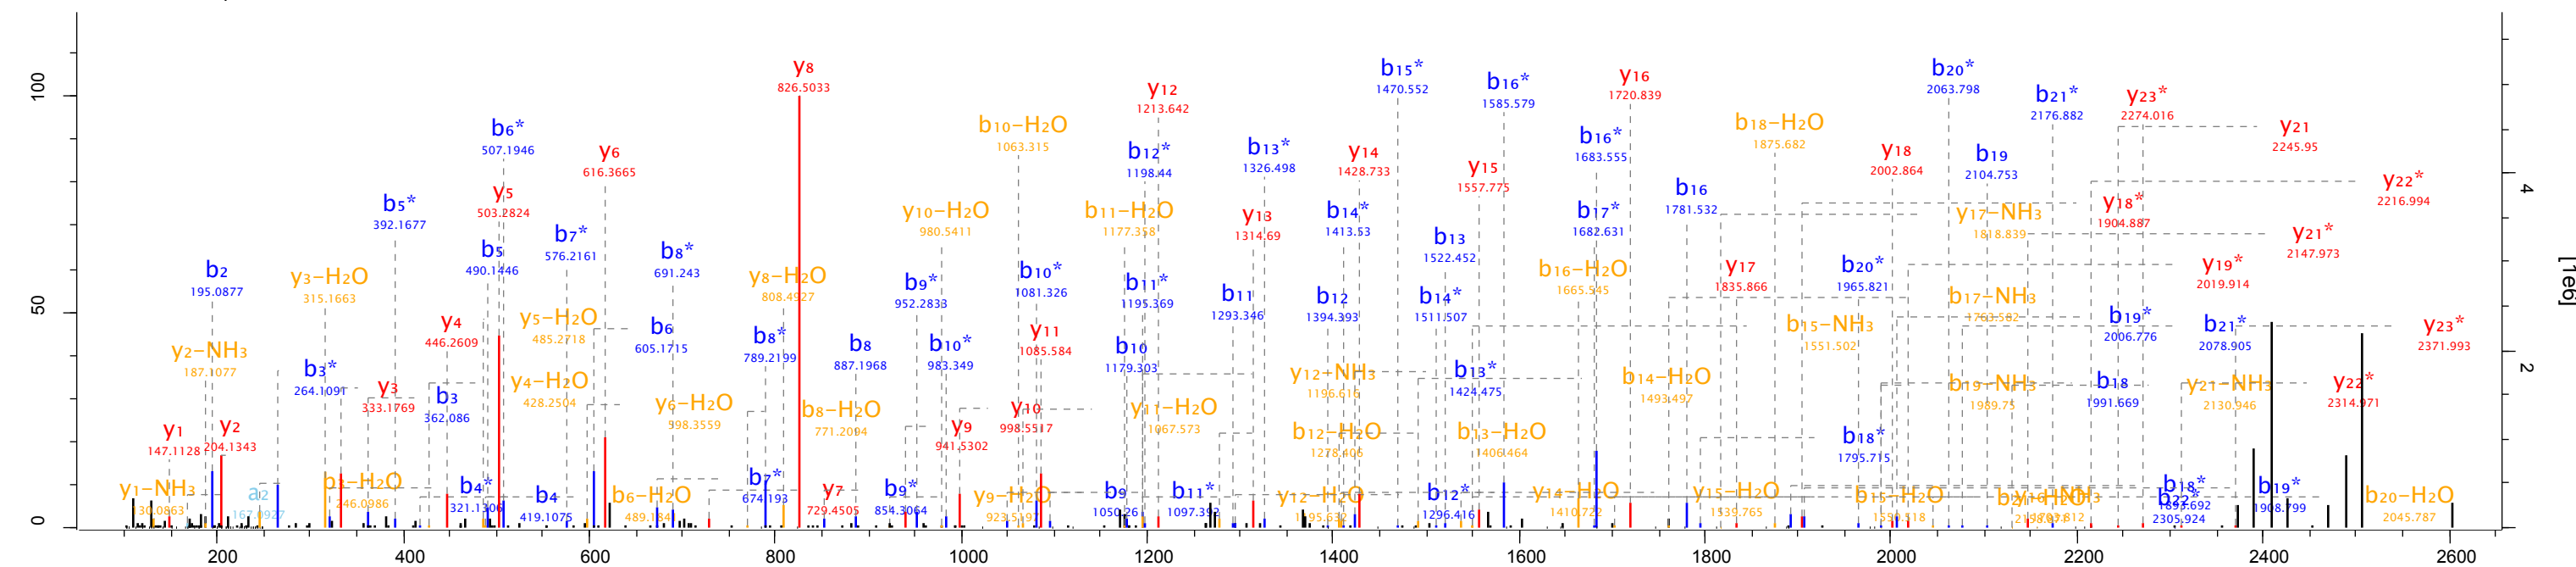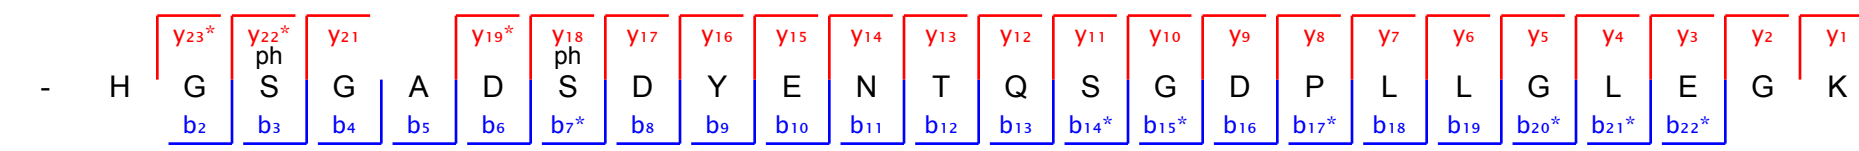



Raw file 20150814\_A375SR\_Phospho\_BR2\_03 Scan 21090 Method FTMS; HCD Score 111.3 m/z 1167.2 Gene names SCRIB

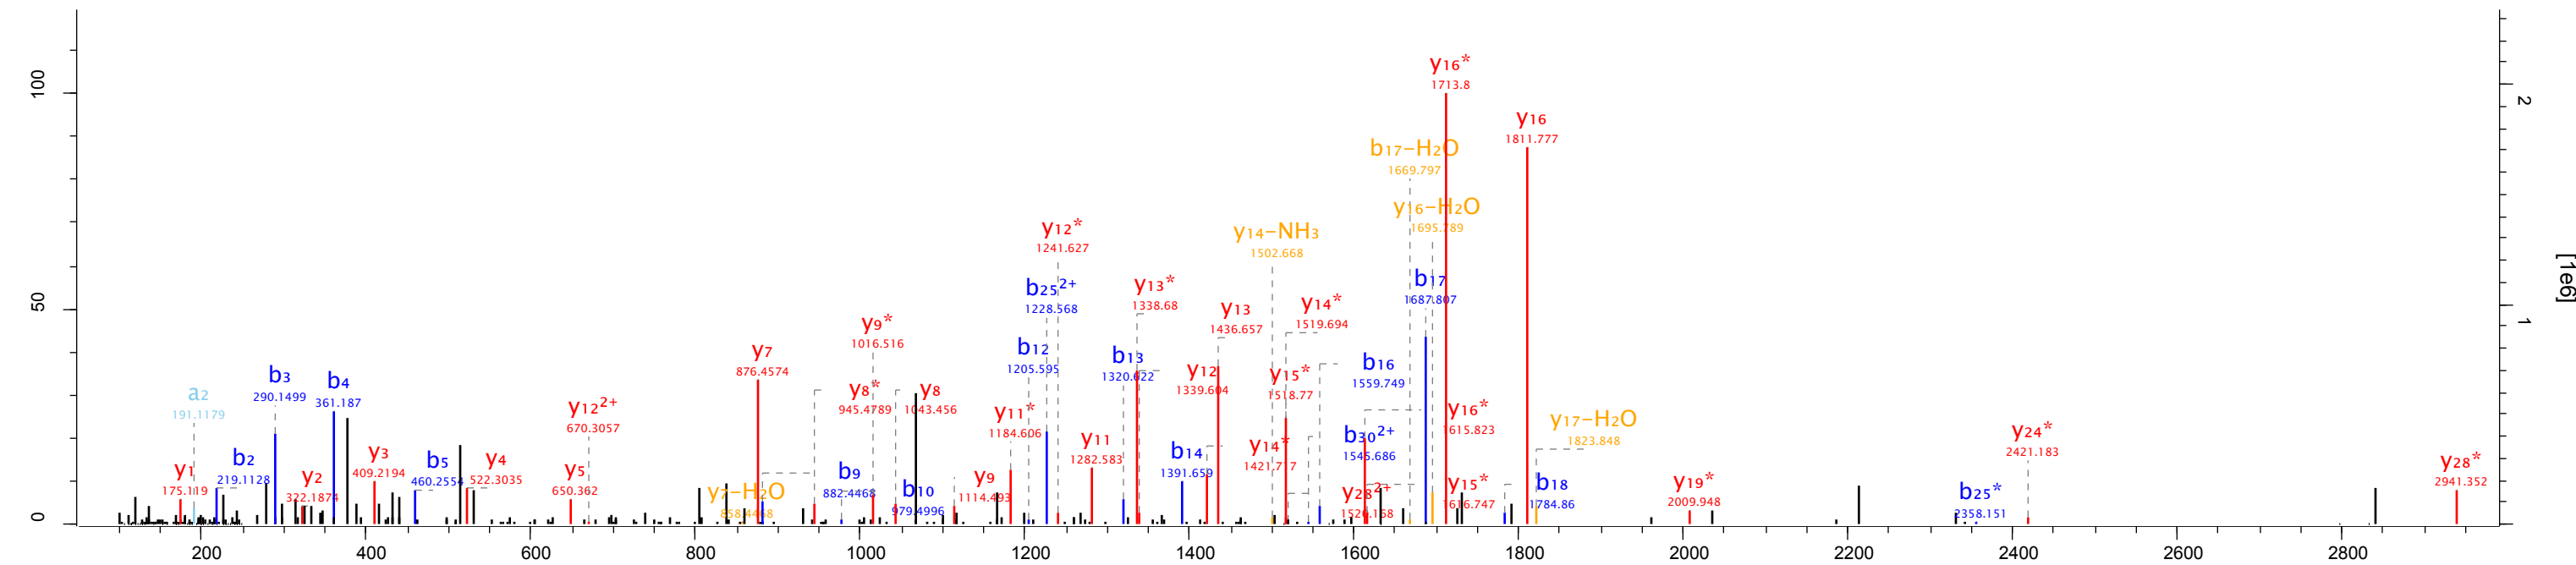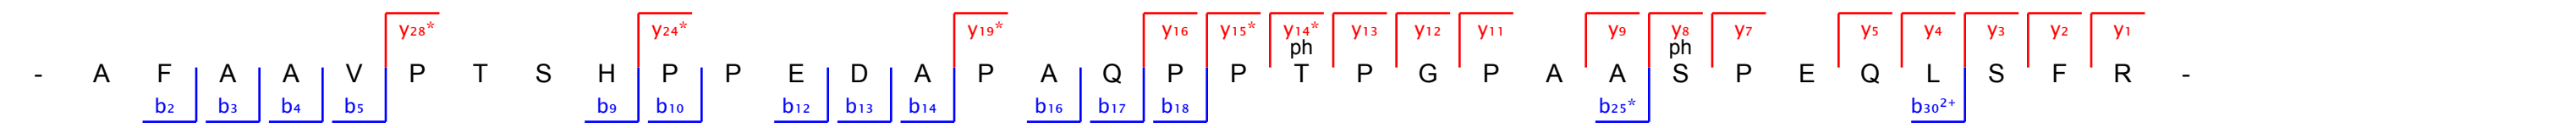

Raw file 20150814\_A375SR\_Phospho\_BR2\_03 Scan 21200 Method FTMS; HCD Score 177.85 m/z 828.03 Gene names SGK223

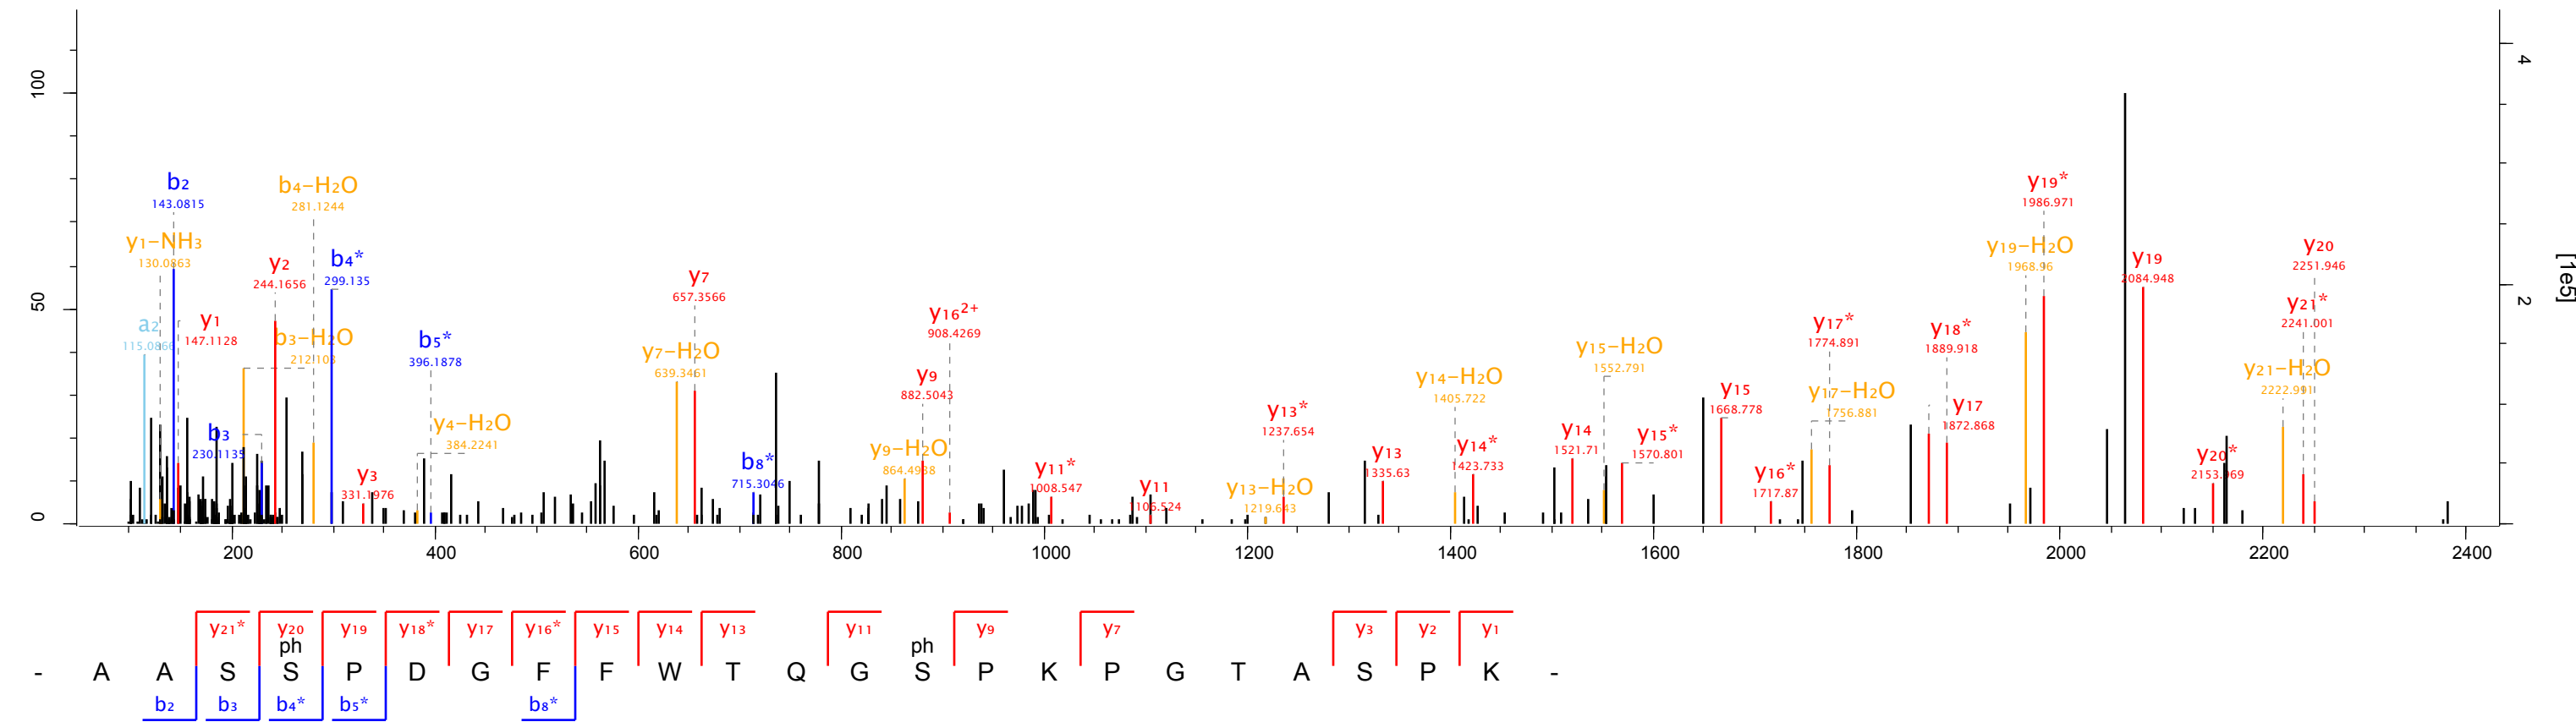

Raw file 20150814\_A375SR\_Phospho\_BR2\_03 Scan 21240 Method FTMS; HCD Score 170.55 m/z 1198.55 Gene names DLGAP4

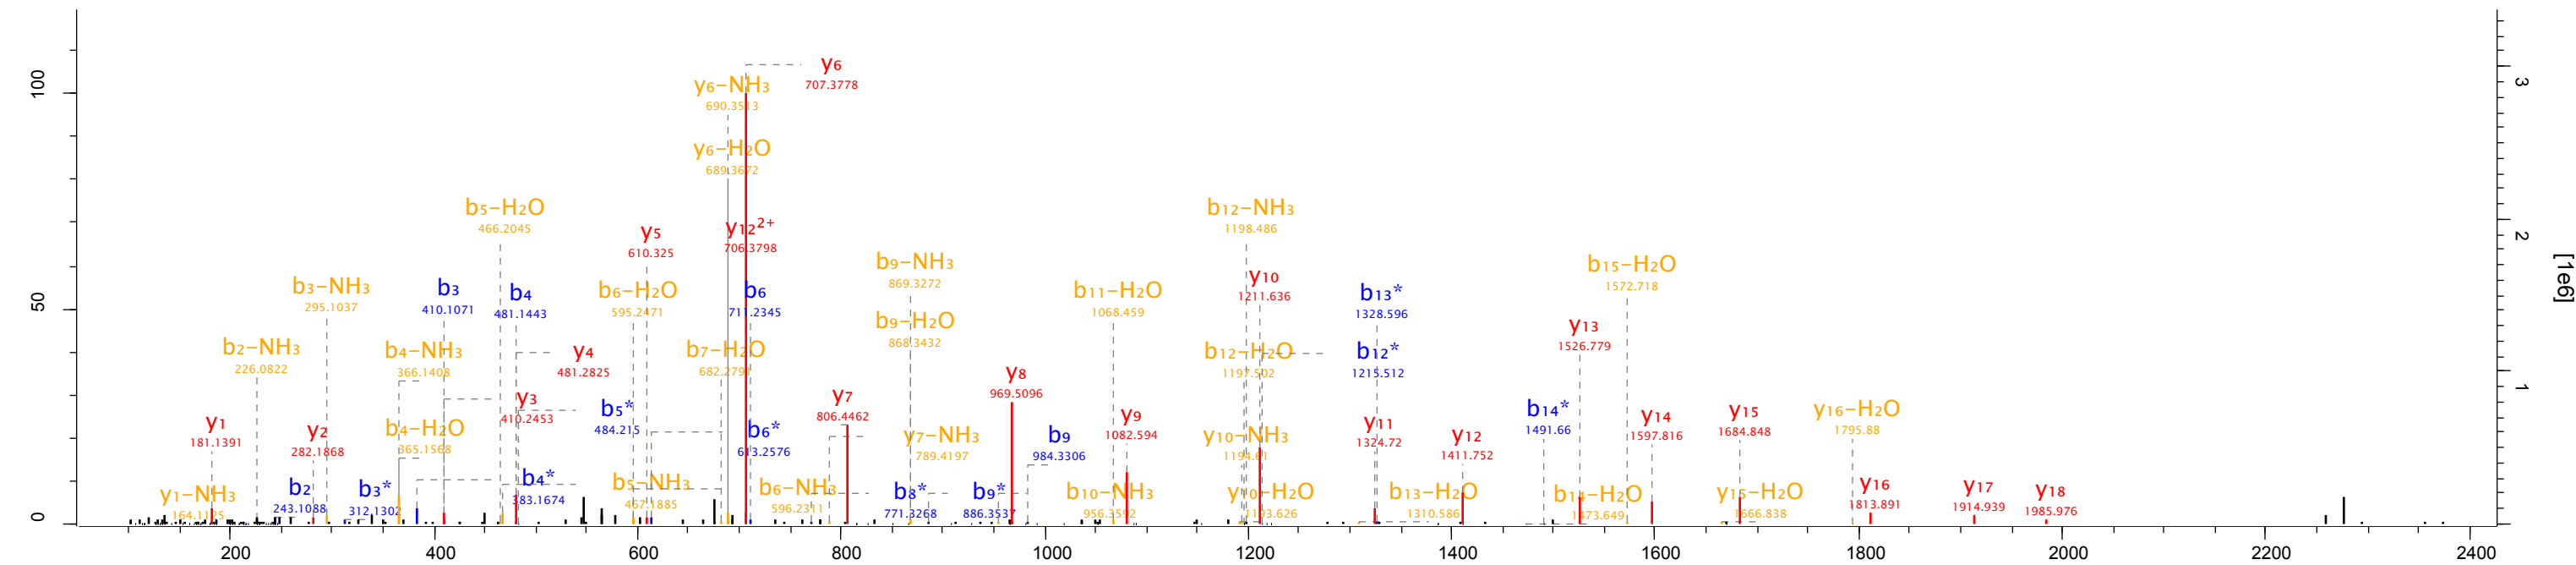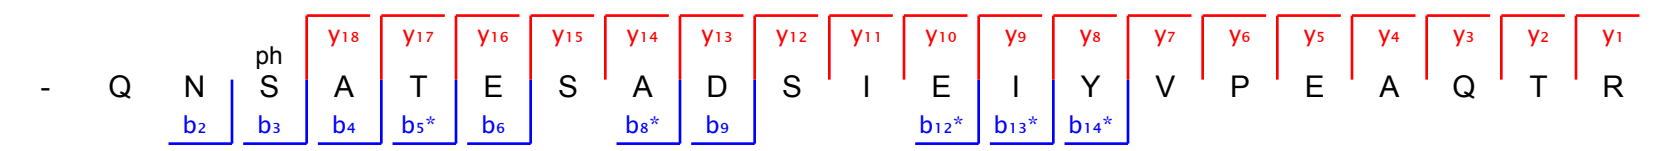

Raw file: 20150814\_A375SR\_Phospho\_BR2\_03  
 Scan: 21250 Method: FTMS; HCD Score: 91.84 m/z: 1086.25 Gene names: KAT8

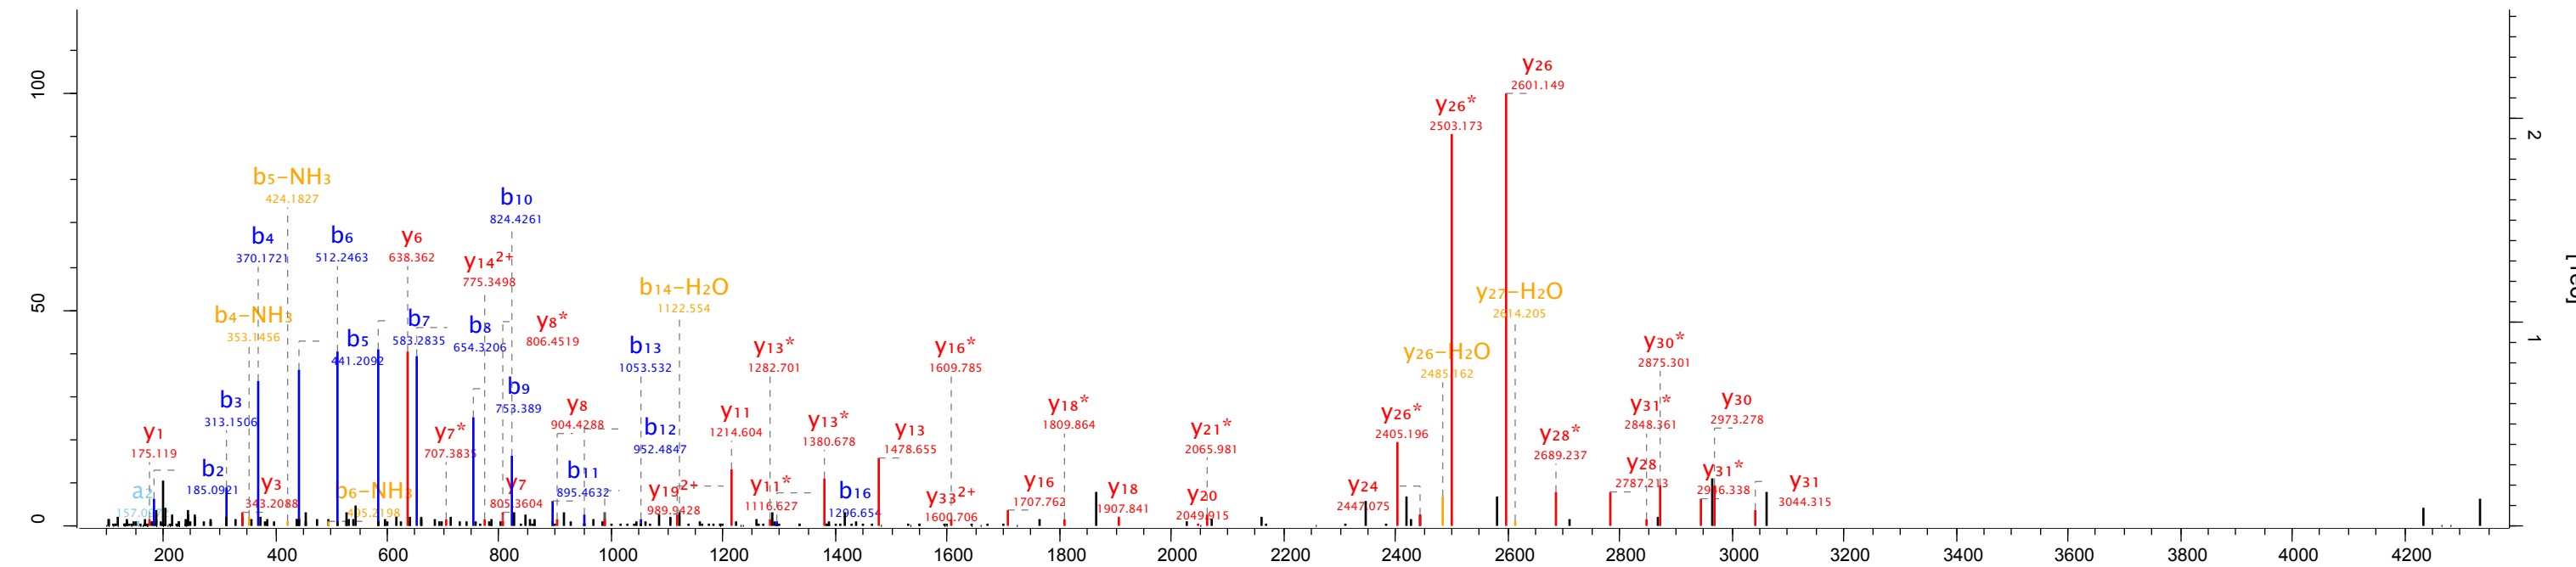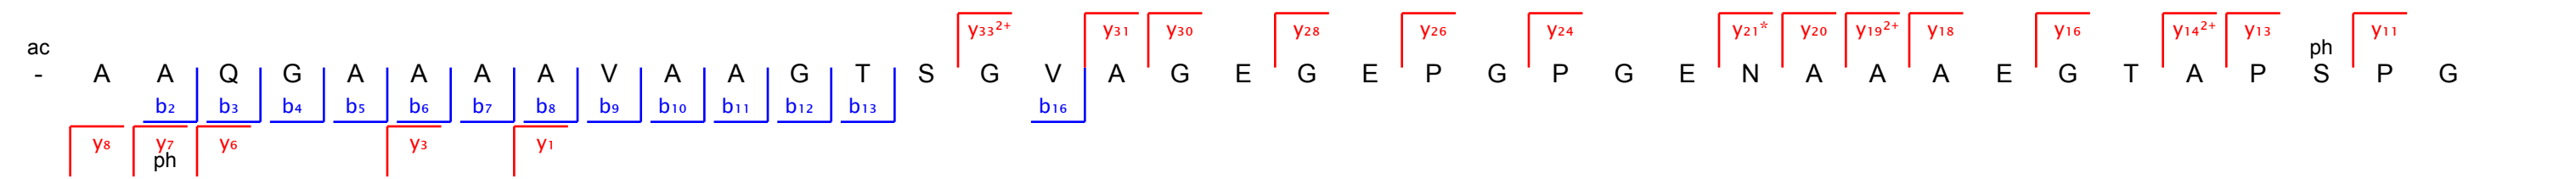

Raw file 20150814\_A375SR\_Phospho\_BR2\_03 Scan 21400 Method FTMS; HCD Score 163.37 m/z 1070.47 Gene names HUWE1

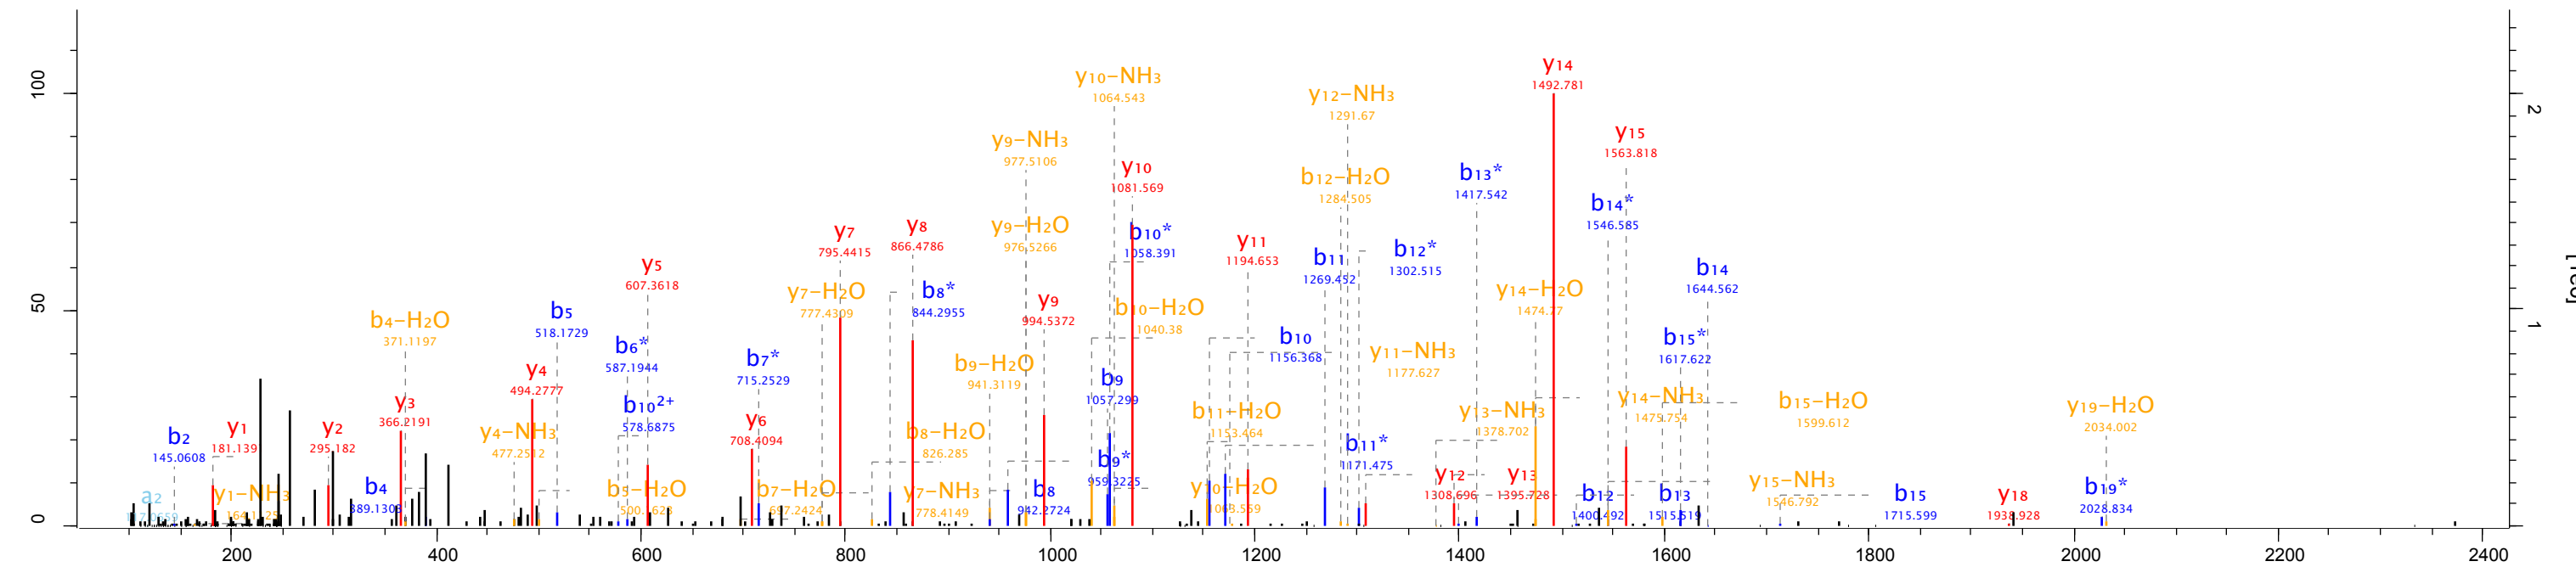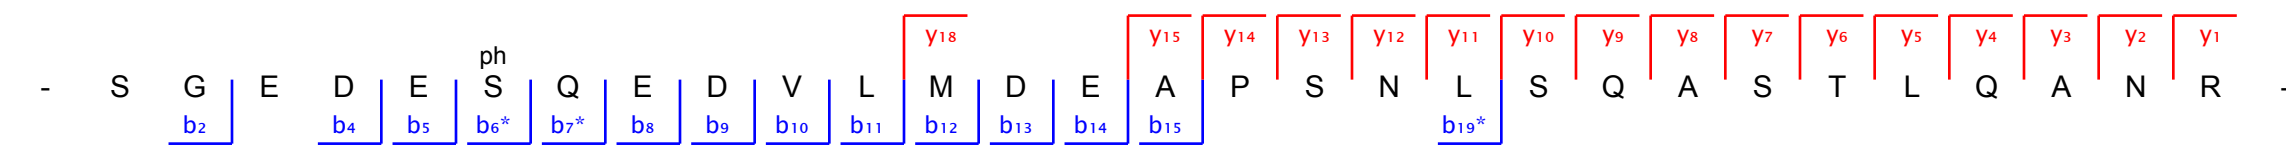

Raw file  
 20150814\_A375SR\_Phospho\_BR2\_03  
 Scan 21410 Method FTMS; HCD Score 233.87 m/z 934.44 Gene names KIF14

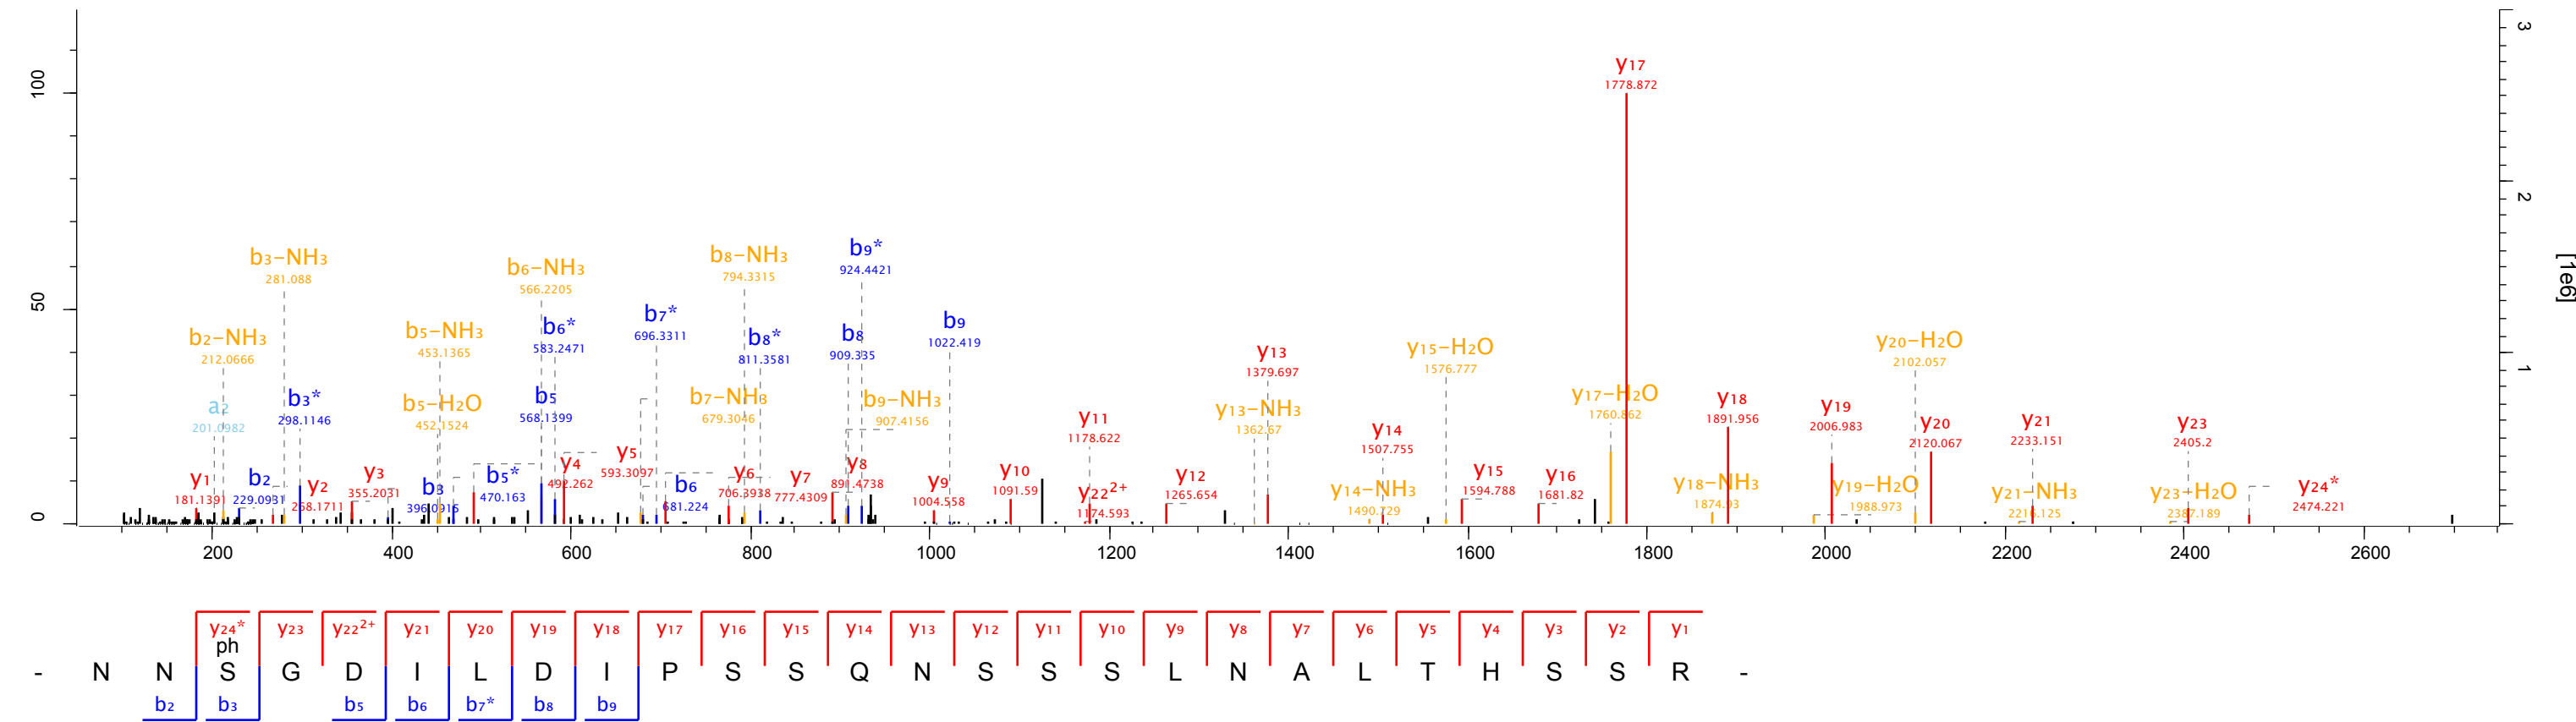

Raw file: 20150814\_A375SR\_Phospho\_BR2\_03  
 Scan: 2170 Method: FTMS; HCD Score: 183.1 m/z: 631.28 Gene names: CDKN1A

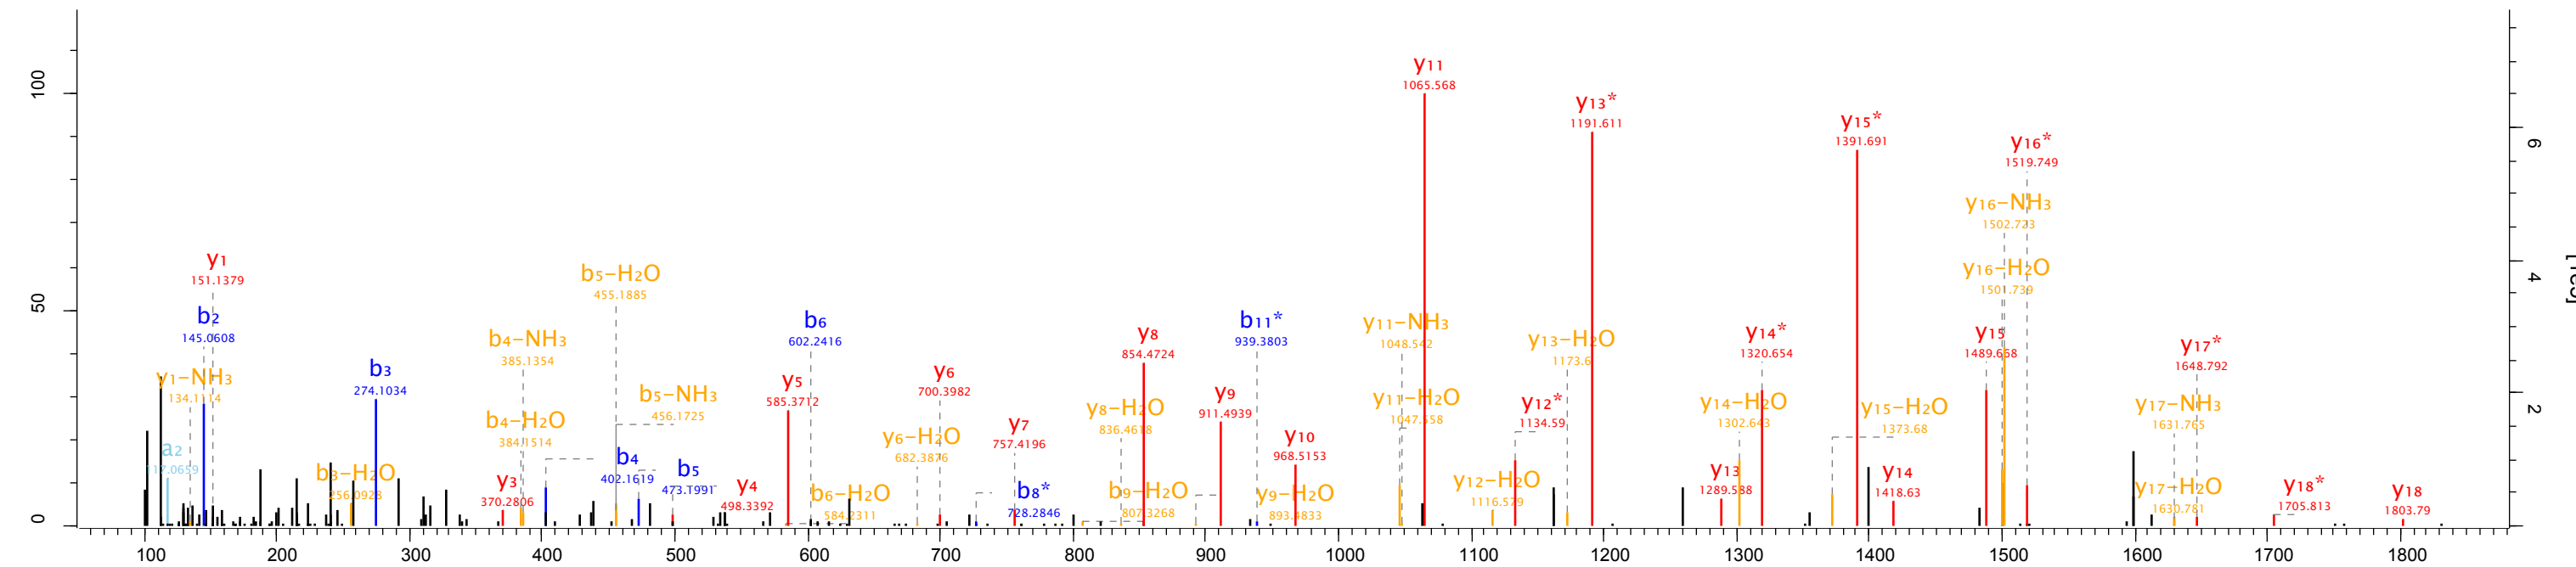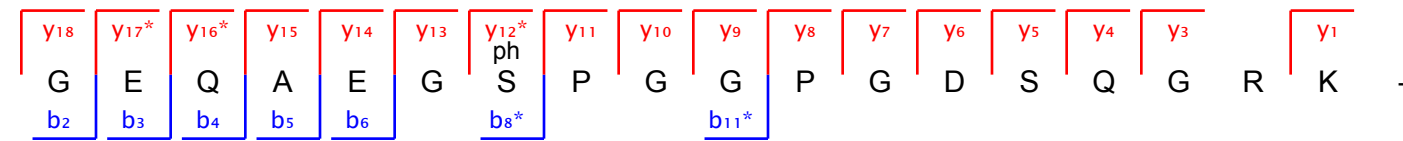

Raw file 20150814\_A375SR\_Phospho\_BR2\_03 Scan 21860 Method FTMS; HCD Score 76.91 m/z 805.35 Gene names MYO1E

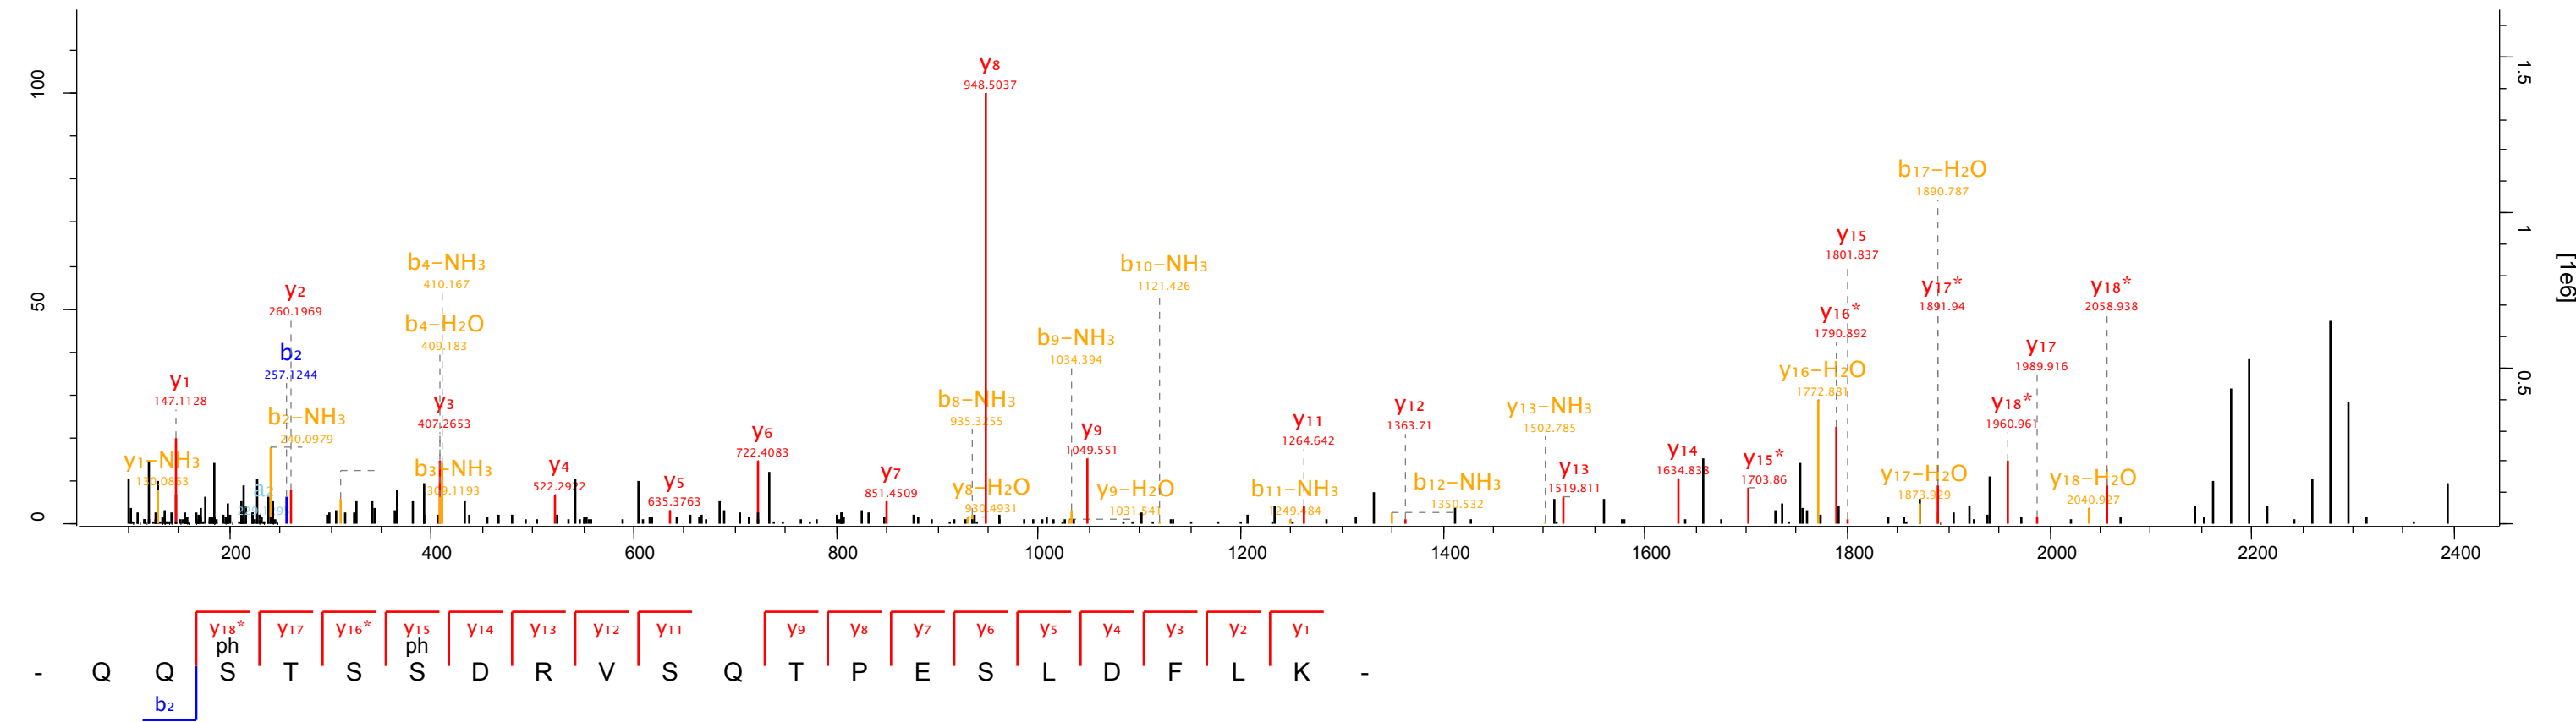



Raw file 20150814\_A375SR\_Phospho\_BR2\_03 Scan 22040 Method FTMS; HCD Score 144.73 m/z 644.28 Gene names NFATC4

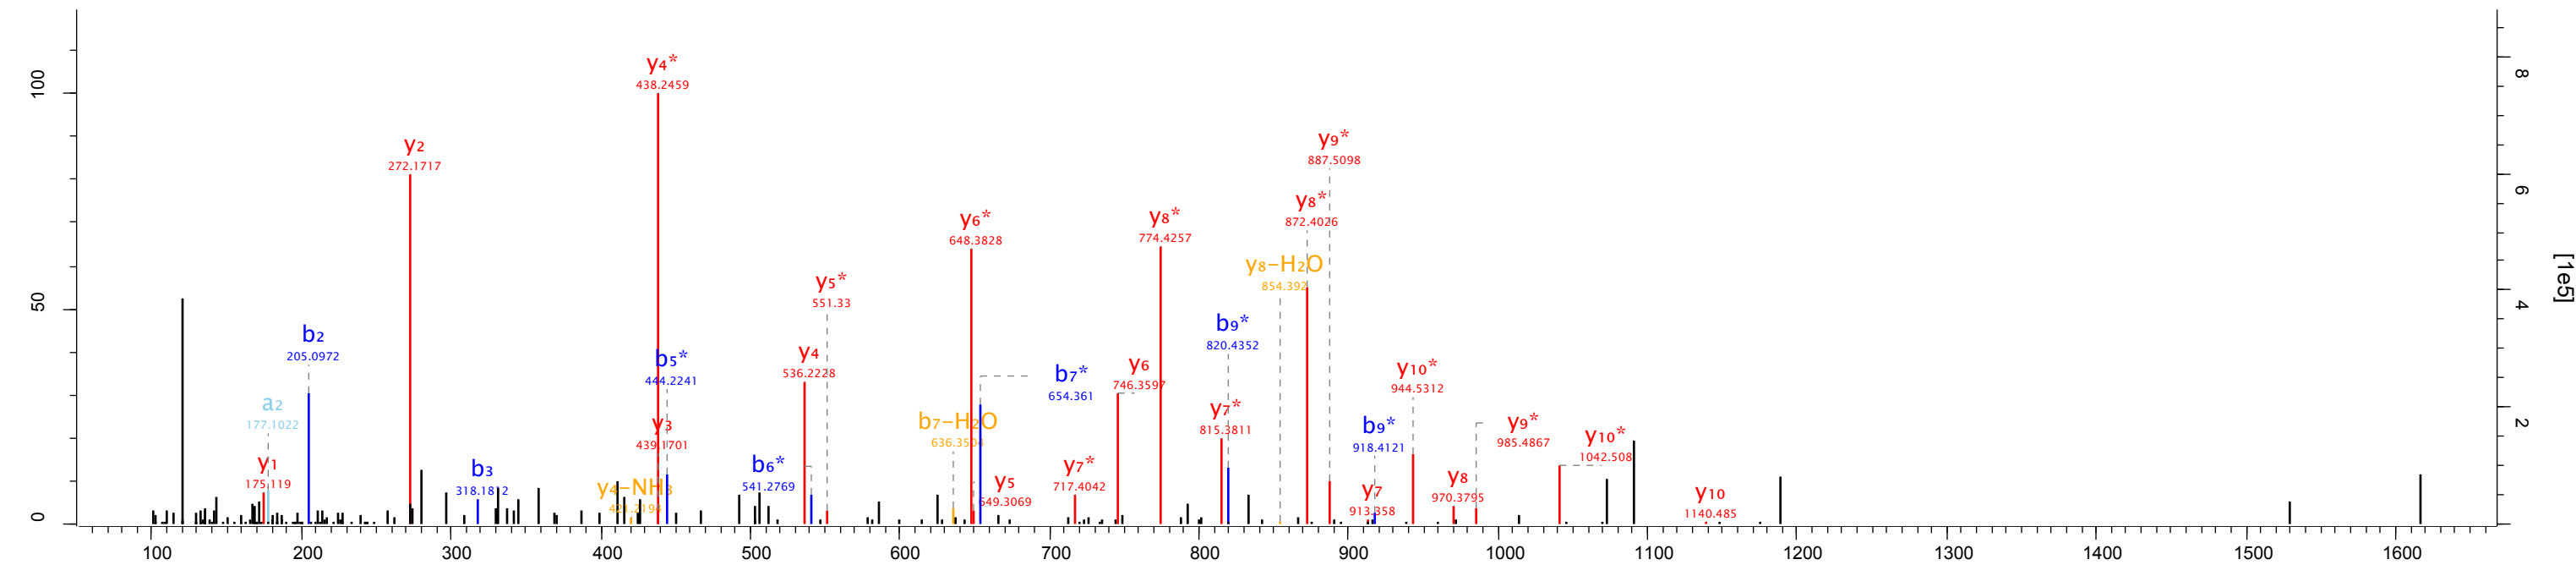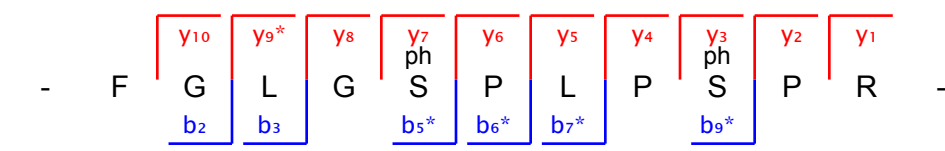

Raw file: 20150814\_A375SR\_Phospho\_BR2\_03  
 Scan: 22120 Method: FTMS; HCD Score: 218.86 m/z: 1200.5 Gene names: TOP2B

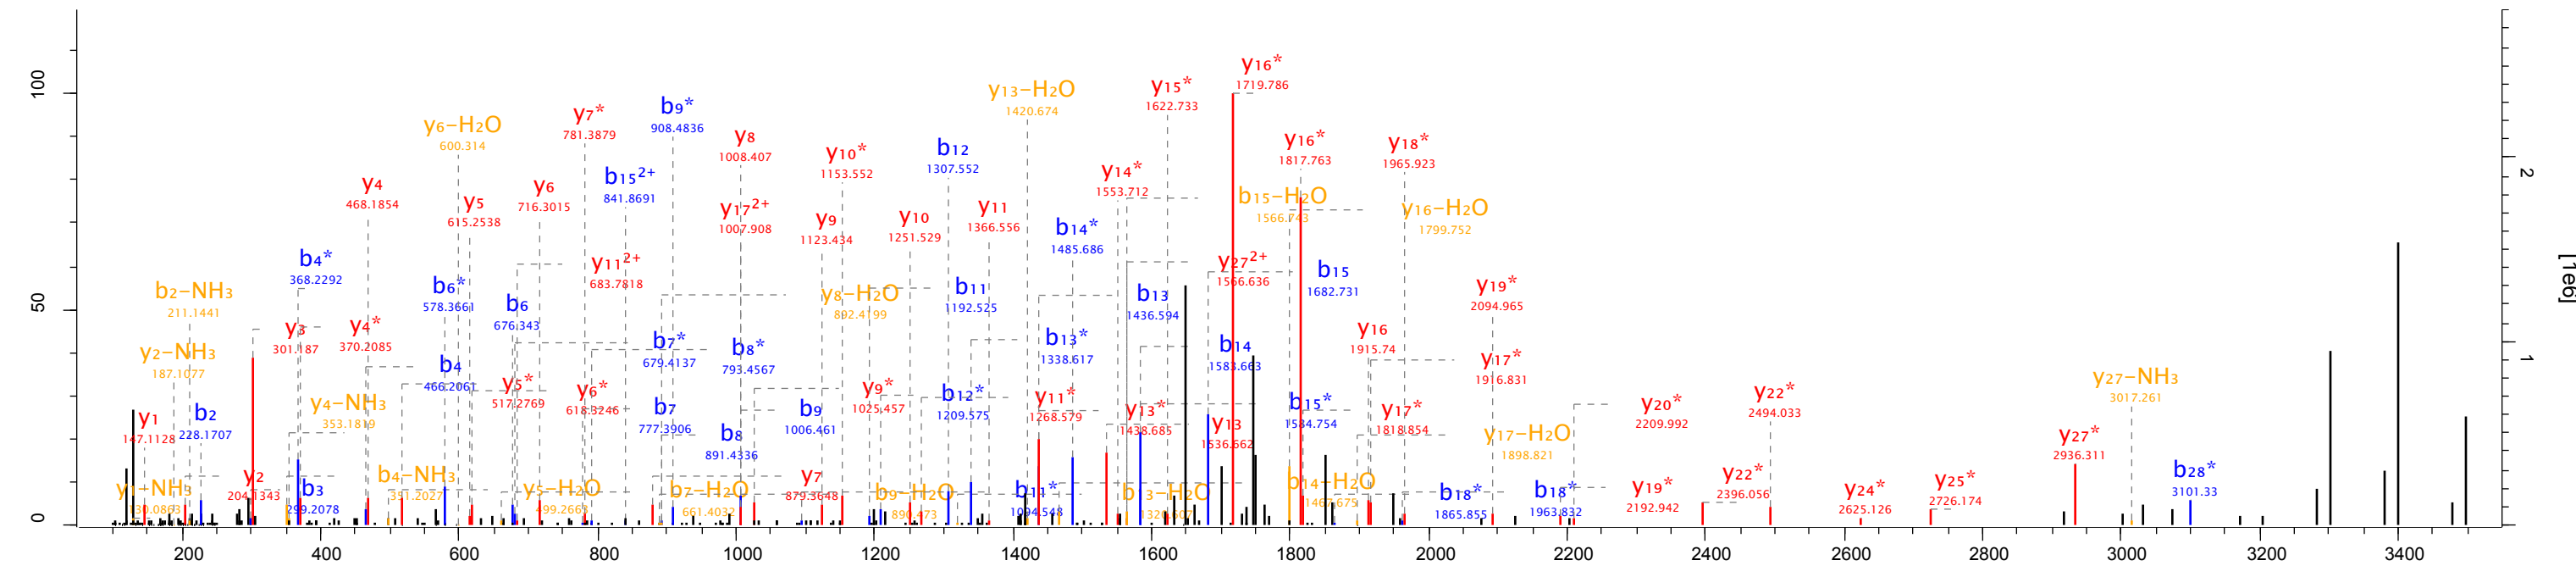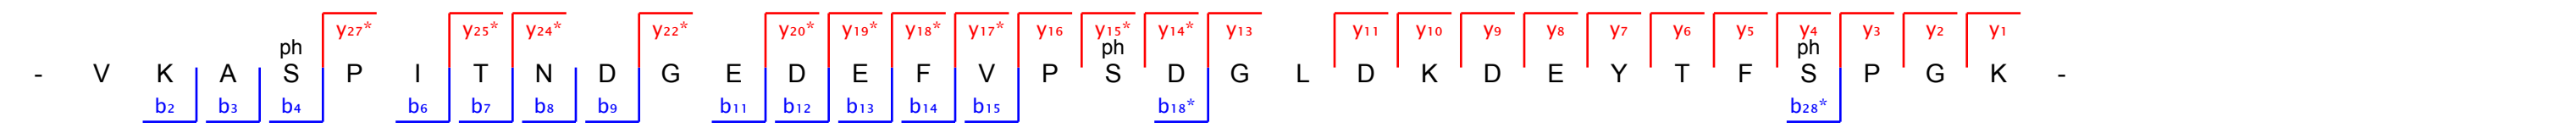

Raw file 20150814\_A375SR\_Phospho\_BR2\_03 Scan 22330 Method FTMS; HCD Score 169.13 m/z 1188.58 Gene names LSM14A

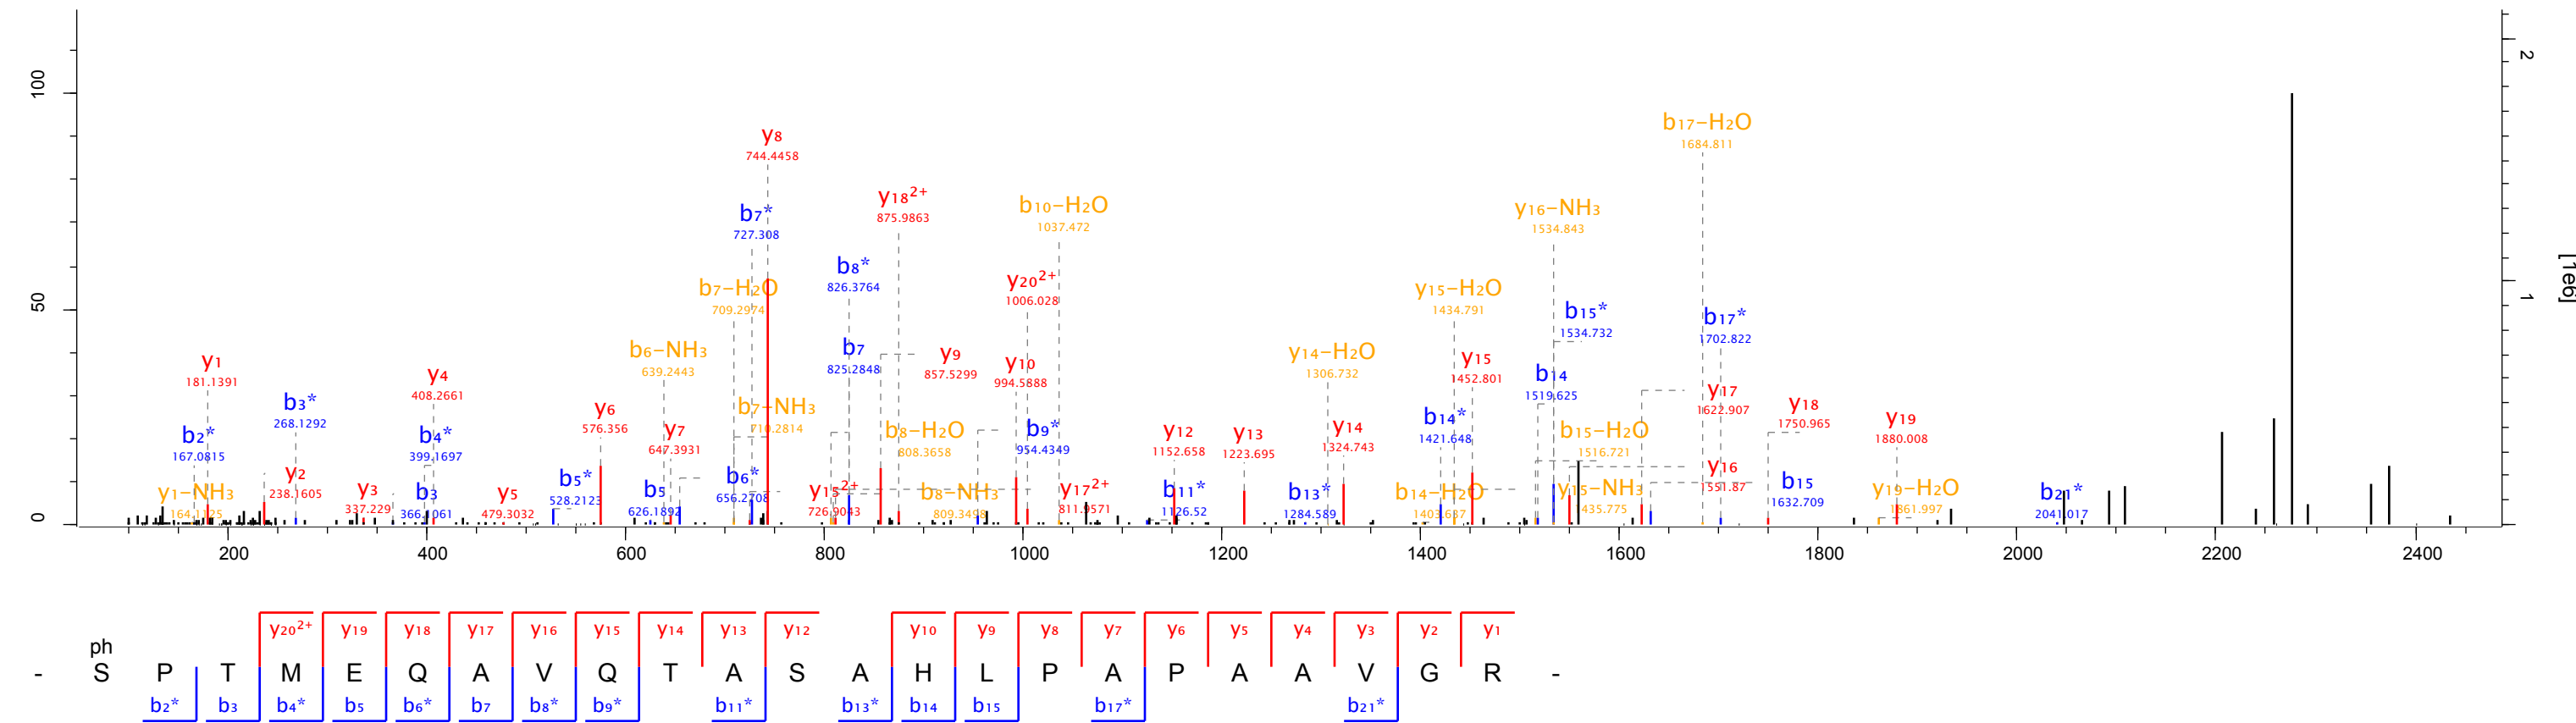

Raw file: 20150814\_A375SR\_Phospho\_BR2\_03  
 Scan: 22490 Method: FTMS; HCD Score: 100.66 m/z: 1491.56 Gene names: SUPT6H

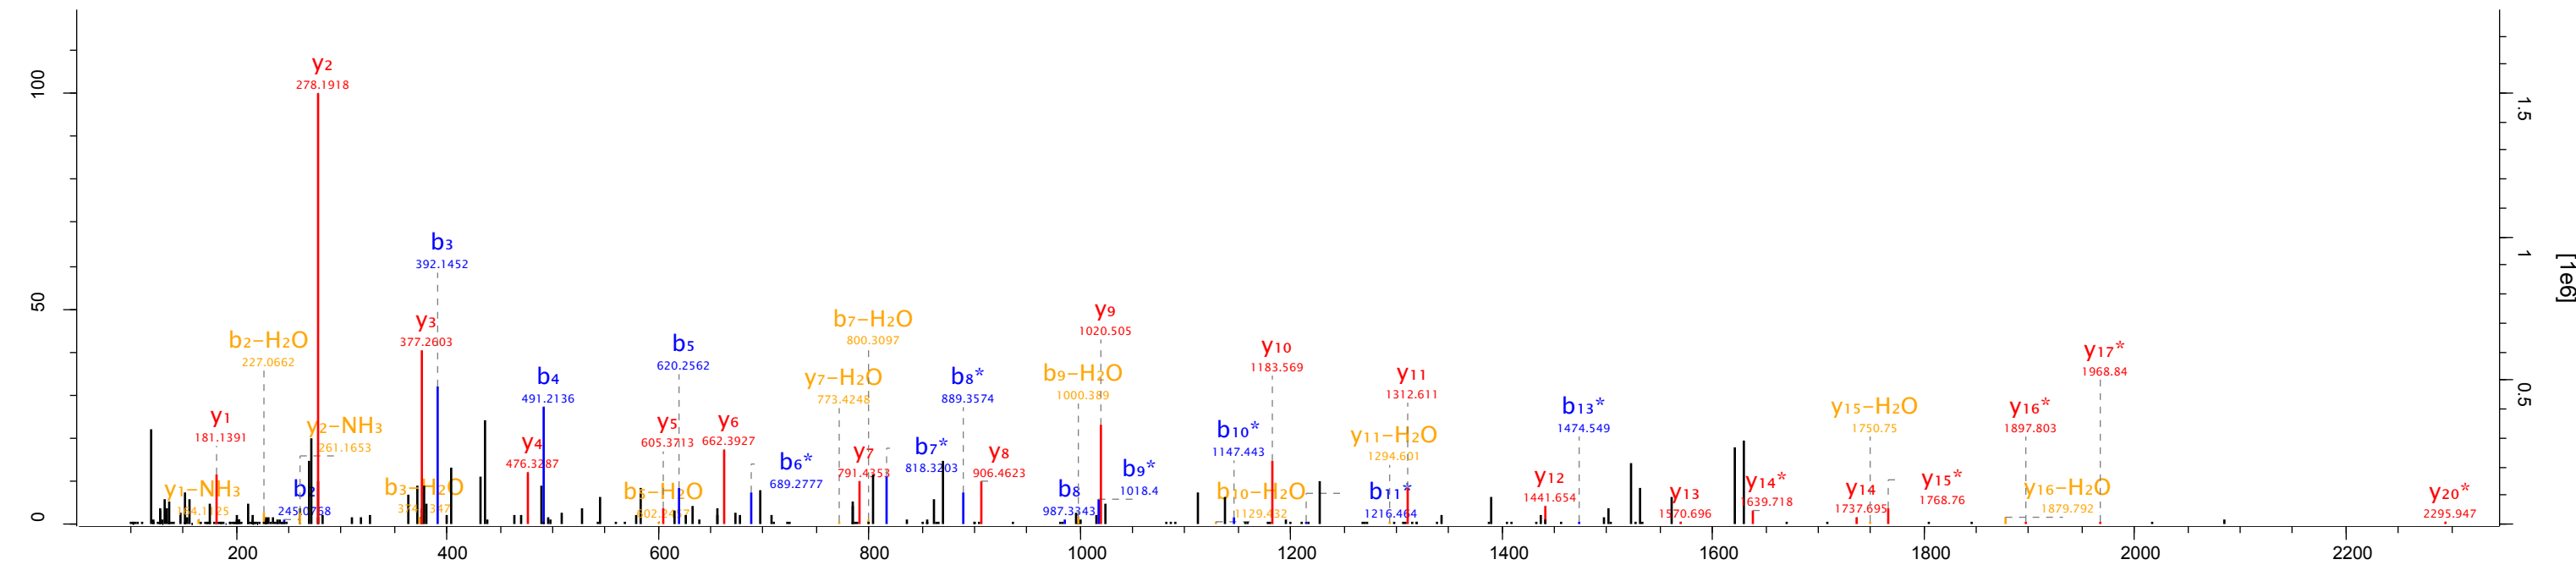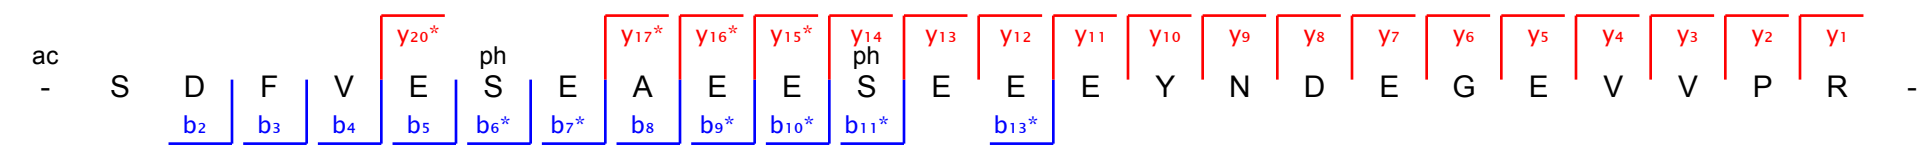

Raw file 20150814\_A375SR\_Phospho\_BR2\_03 Scan 22670 Method FTMS; HCD Score 127.62 m/z 722.8 Gene names CHAF1A

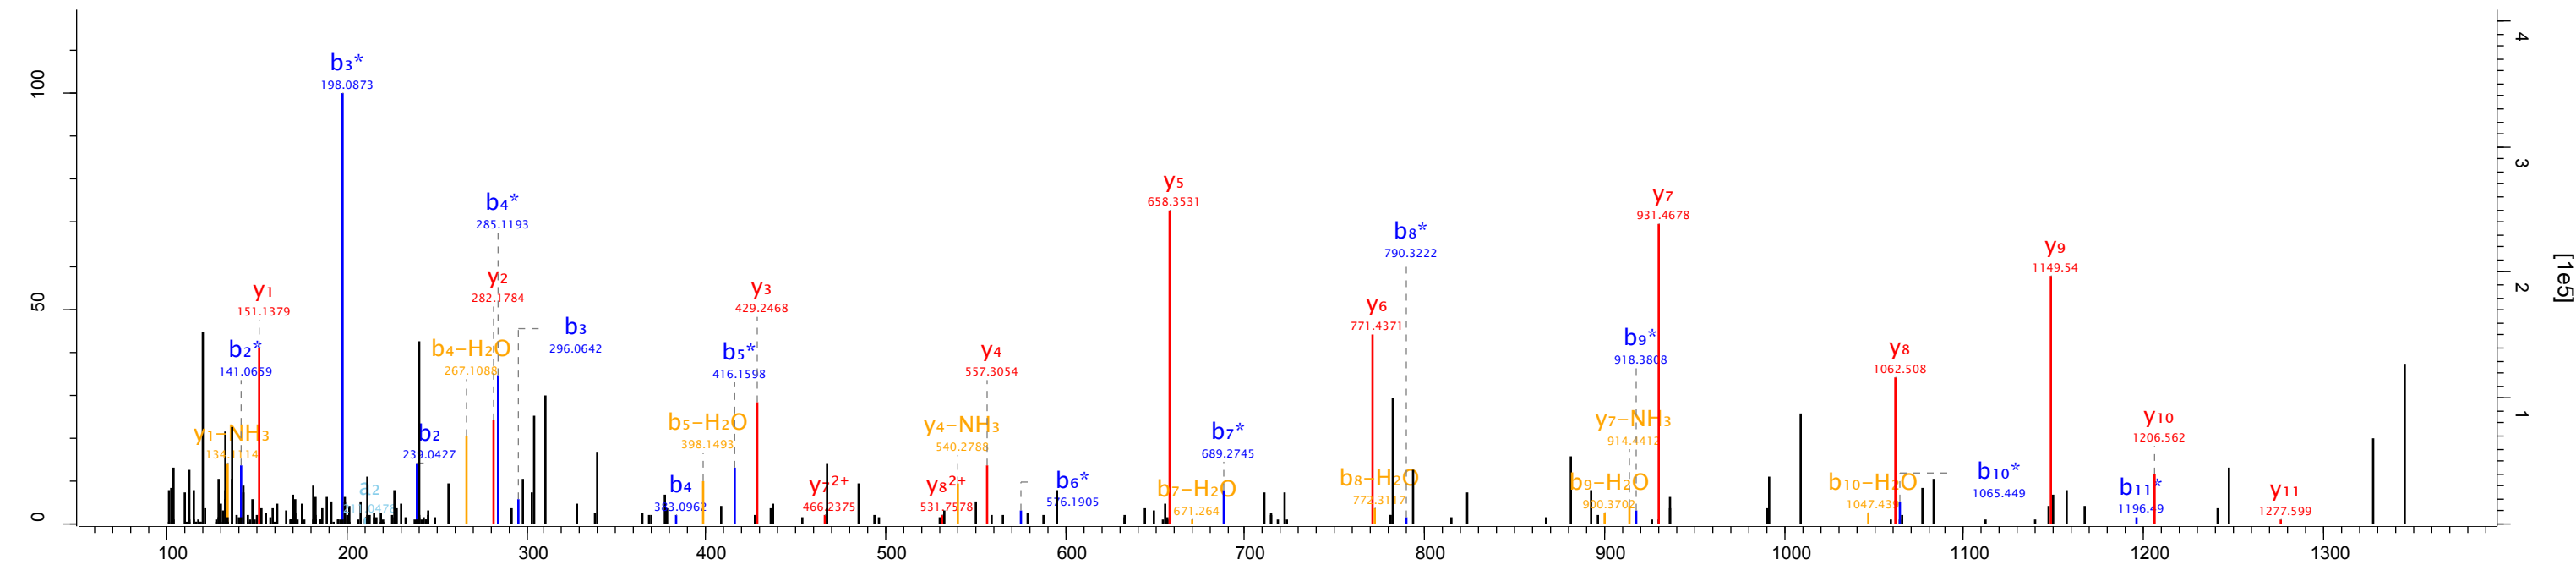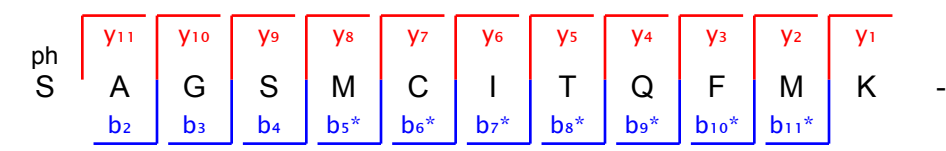

Raw file  
20150814\_A375SR\_Phospho\_BR2\_03

Scan Method Score m/z Gene names  
22810 FTMS; HCD 151.18 946.38 EVI5

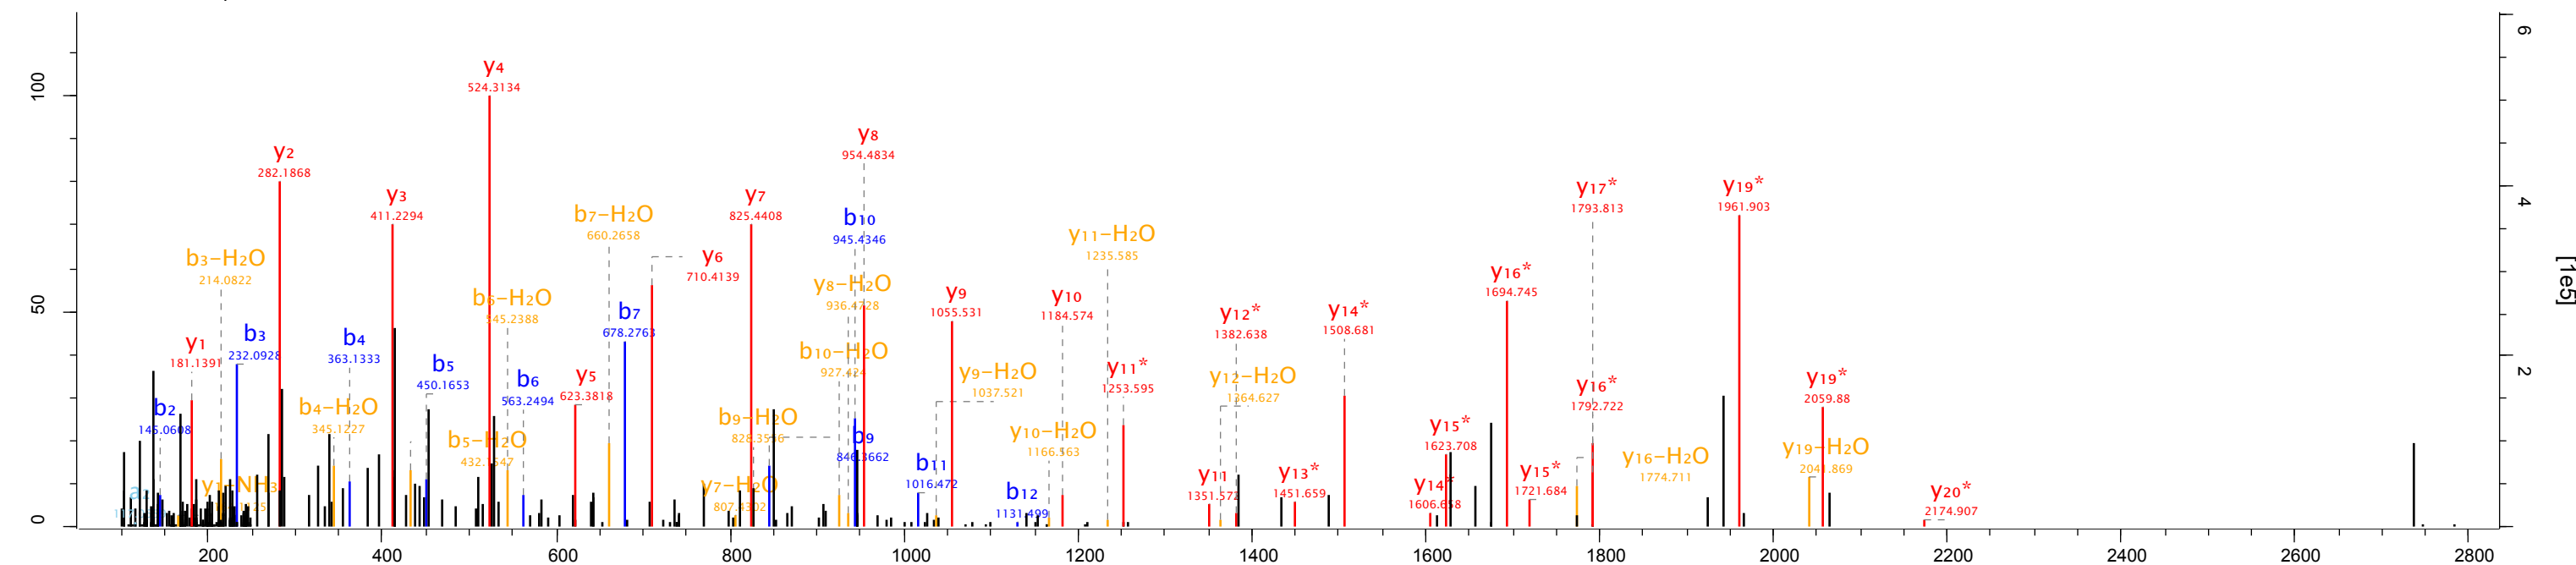

- S G S M S L D P A V A D G S E S E T E D S V L E T R -

b<sub>2</sub> b<sub>3</sub> b<sub>4</sub> b<sub>5</sub> b<sub>6</sub> b<sub>7</sub> b<sub>9</sub> b<sub>10</sub> b<sub>11</sub> b<sub>12</sub> y<sub>20</sub>\* y<sub>19</sub>\* y<sub>17</sub>\* y<sub>16</sub>\* y<sub>15</sub>\* y<sub>14</sub>\* y<sub>13</sub>\* y<sub>12</sub>\* y<sub>11</sub> y<sub>10</sub> y<sub>9</sub> y<sub>8</sub> y<sub>7</sub> y<sub>6</sub> y<sub>5</sub> y<sub>4</sub> y<sub>3</sub> y<sub>2</sub> y<sub>1</sub>

Raw file: 20150814\_A375SR\_Phospho\_BR2\_03  
 Scan: 23170 Method: FTMS; HCD Score: 48.22 m/z: 956.7 Gene names: MPHOSPH10

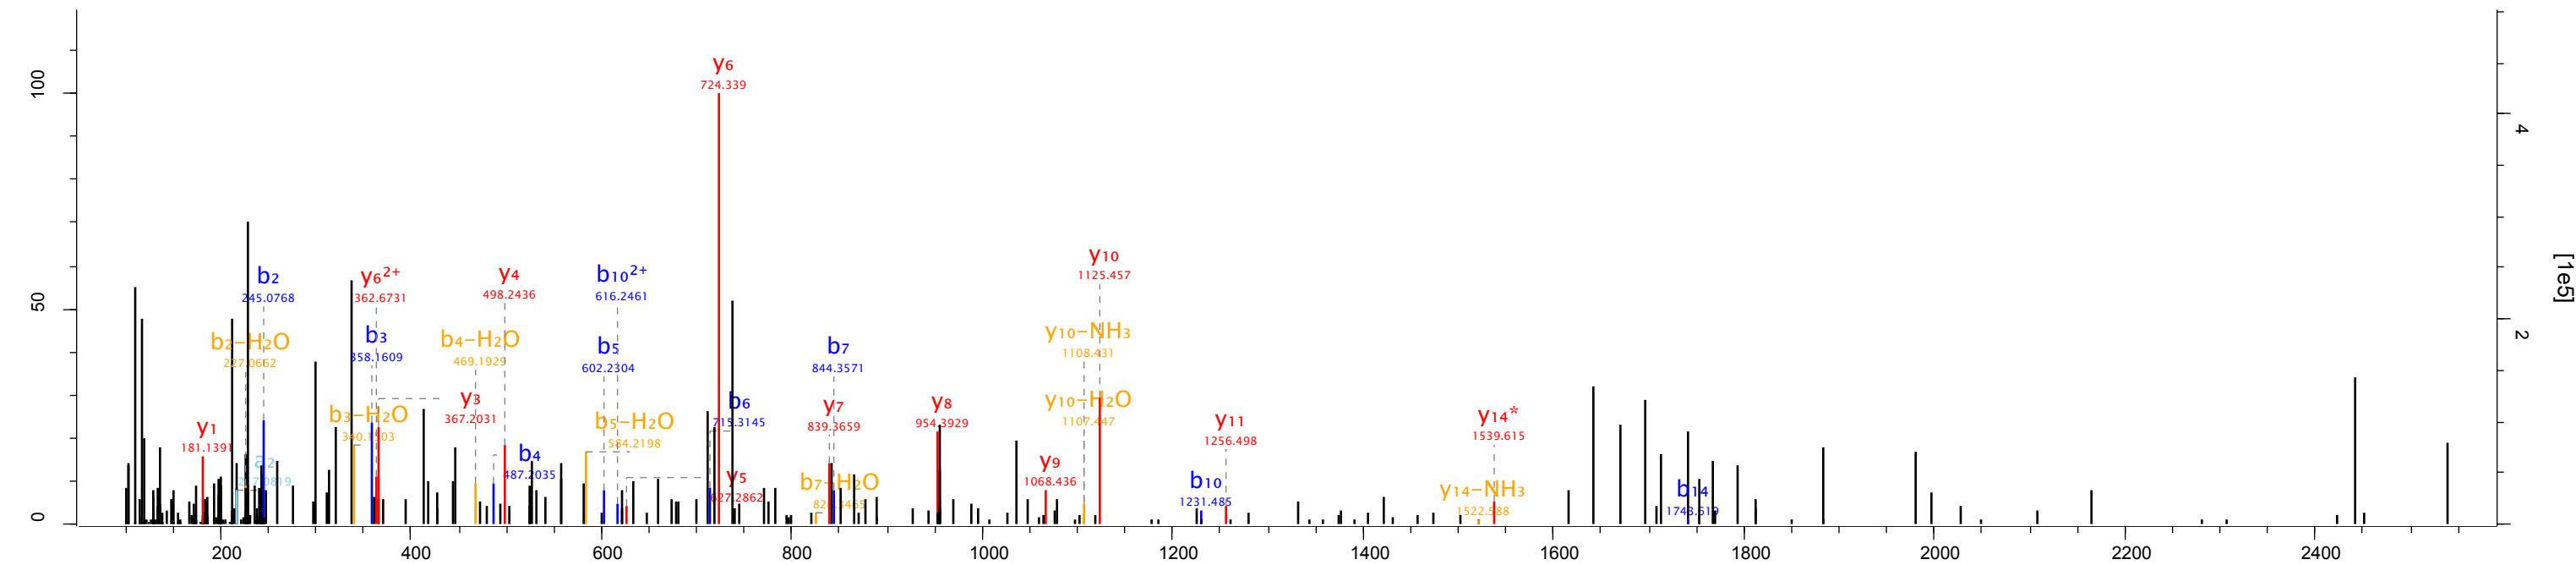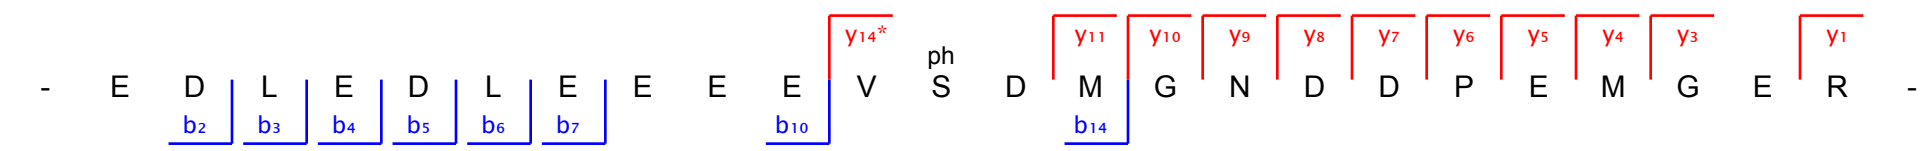

Raw file 20150814\_A375SR\_Phospho\_BR2\_03 Scan 23240 Method FTMS; HCD Score 221.77 m/z 853.41 Gene names RASAL2

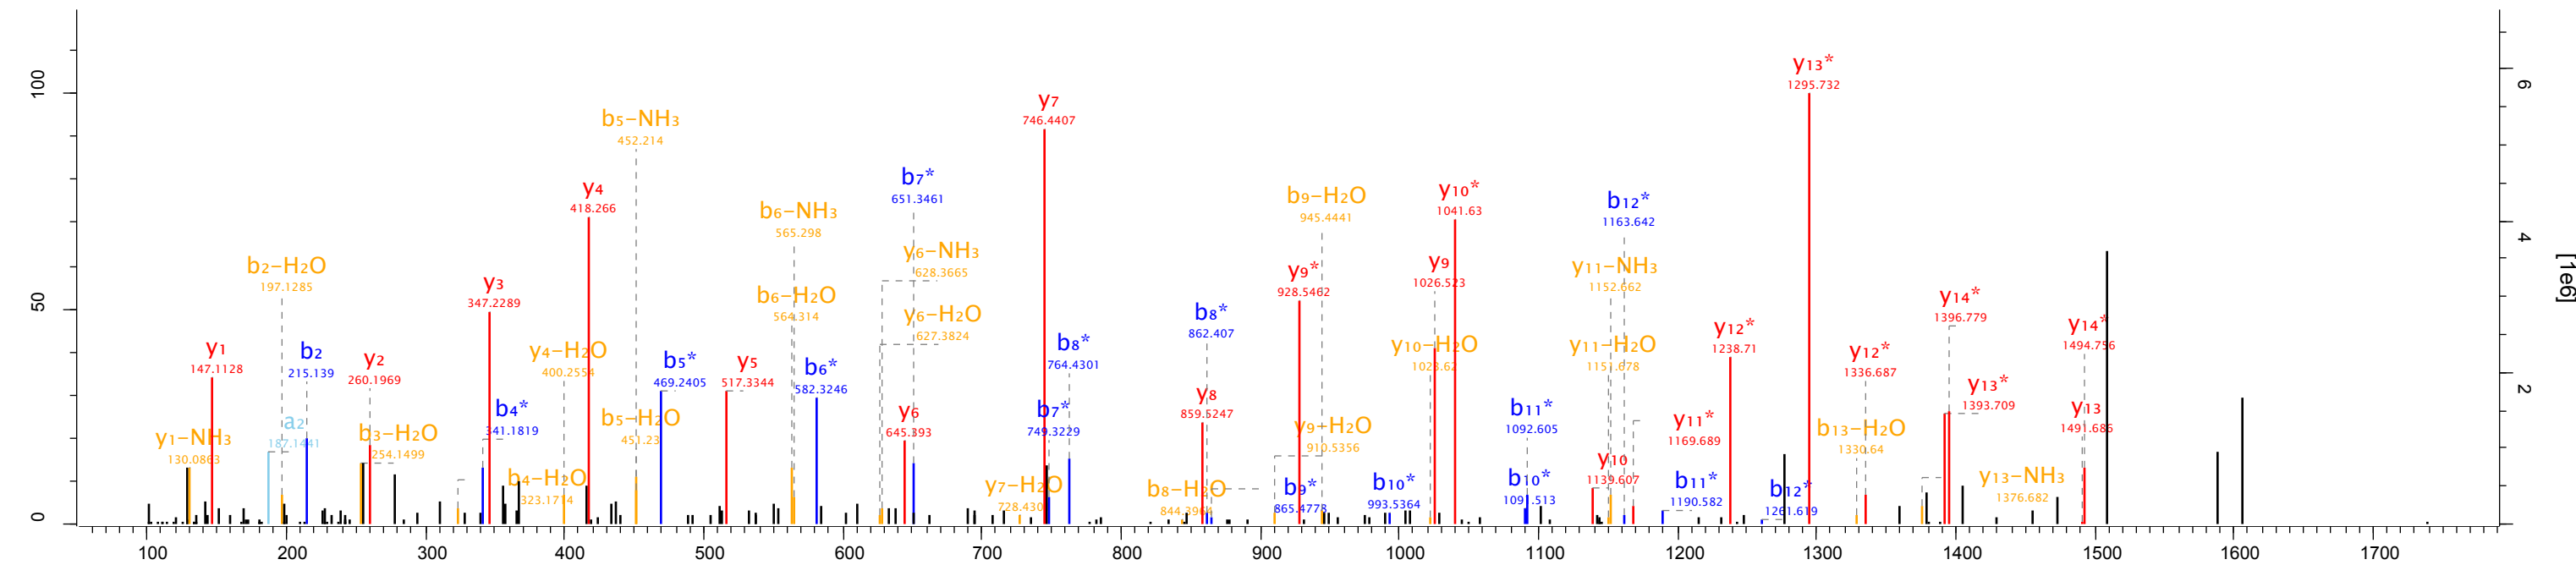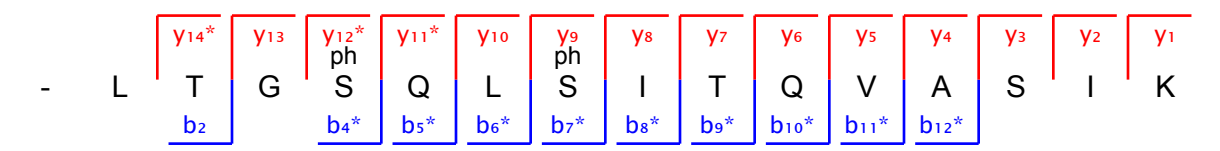



Raw file: 20150814\_A375SR\_Phospho\_BR2\_03  
 Scan: 23250 Method: FTMS; HCD Score: 157.14 m/z: 966.43 Gene names: CEP170

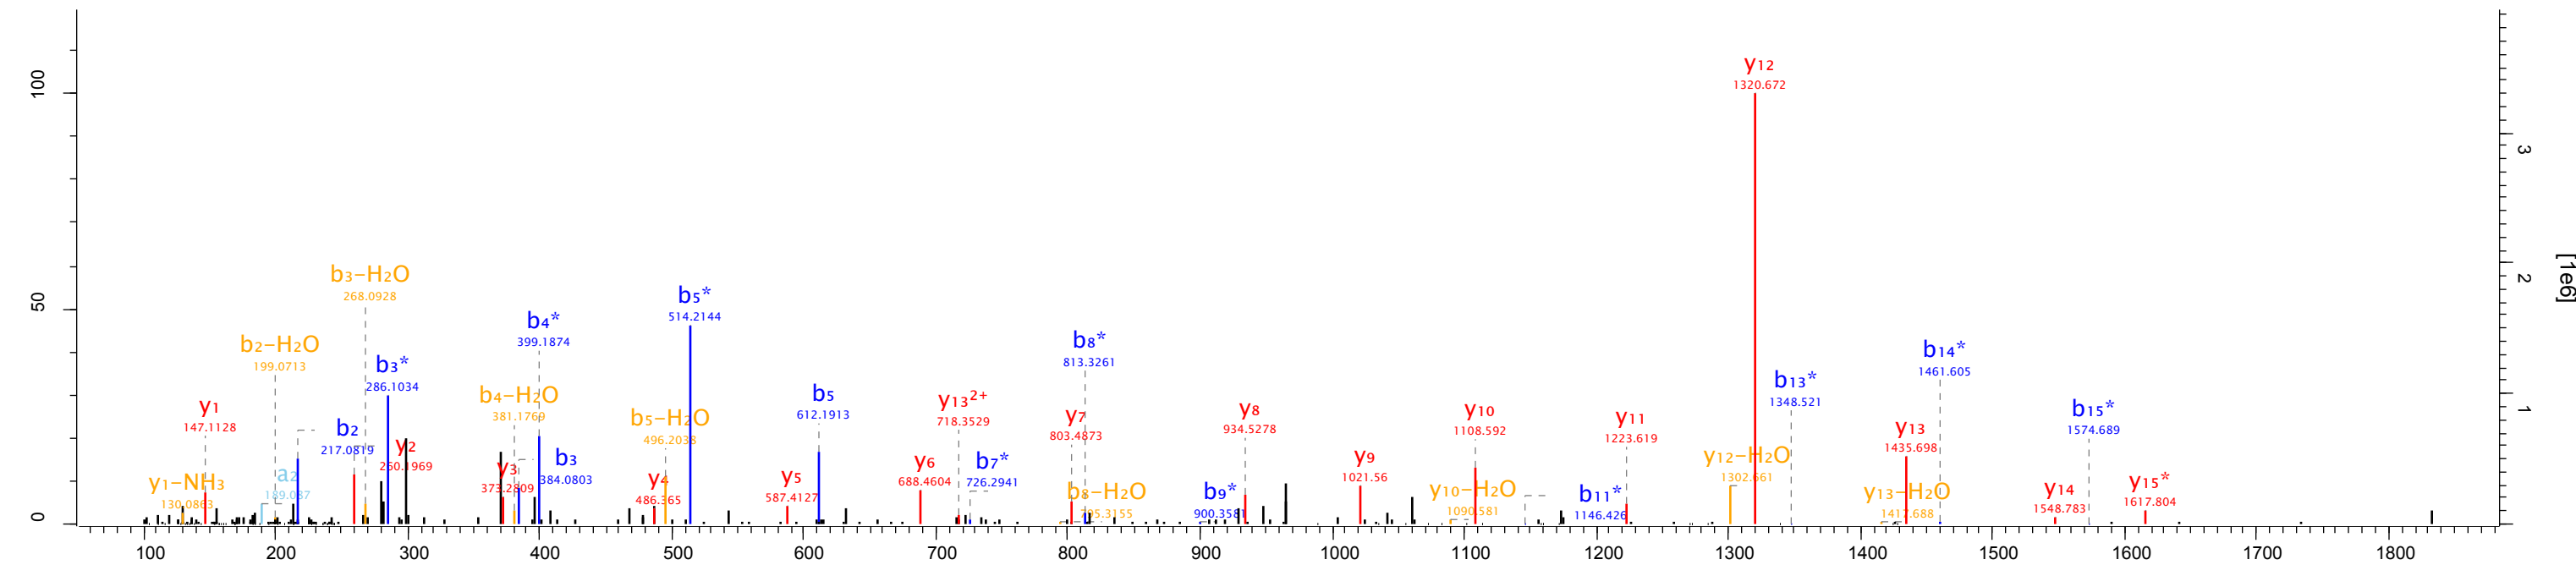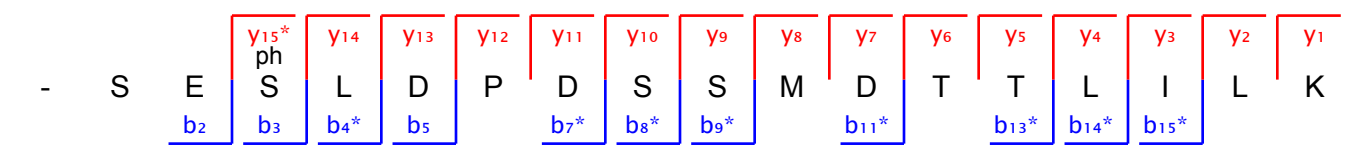

Raw file: 20150814\_A375SR\_Phospho\_BR2\_03  
 Scan: 23320 Method: FTMS; HCD Score: 182.82 m/z: 875.1 Gene names: NES

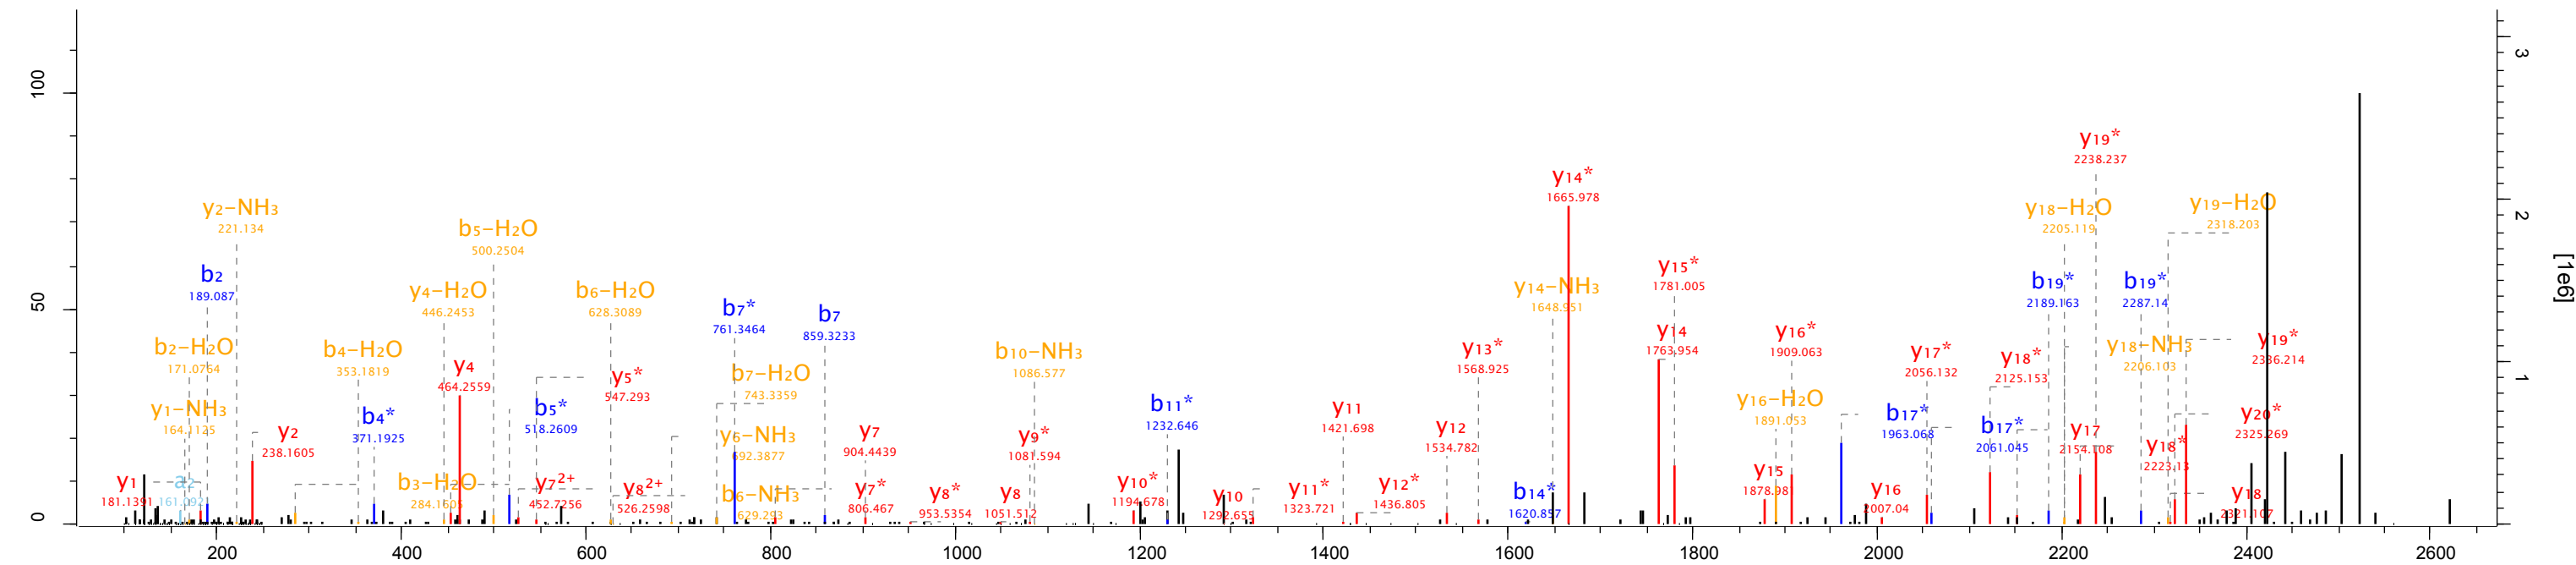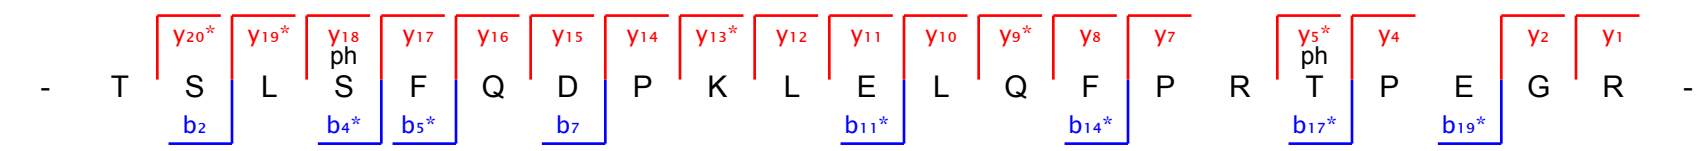

Raw file: 20150814\_A375SR\_Phospho\_BR2\_03  
 Scan: 23370 Method: FTMS; HCD Score: 109.08 m/z: 1227.46 Gene names: WWOX

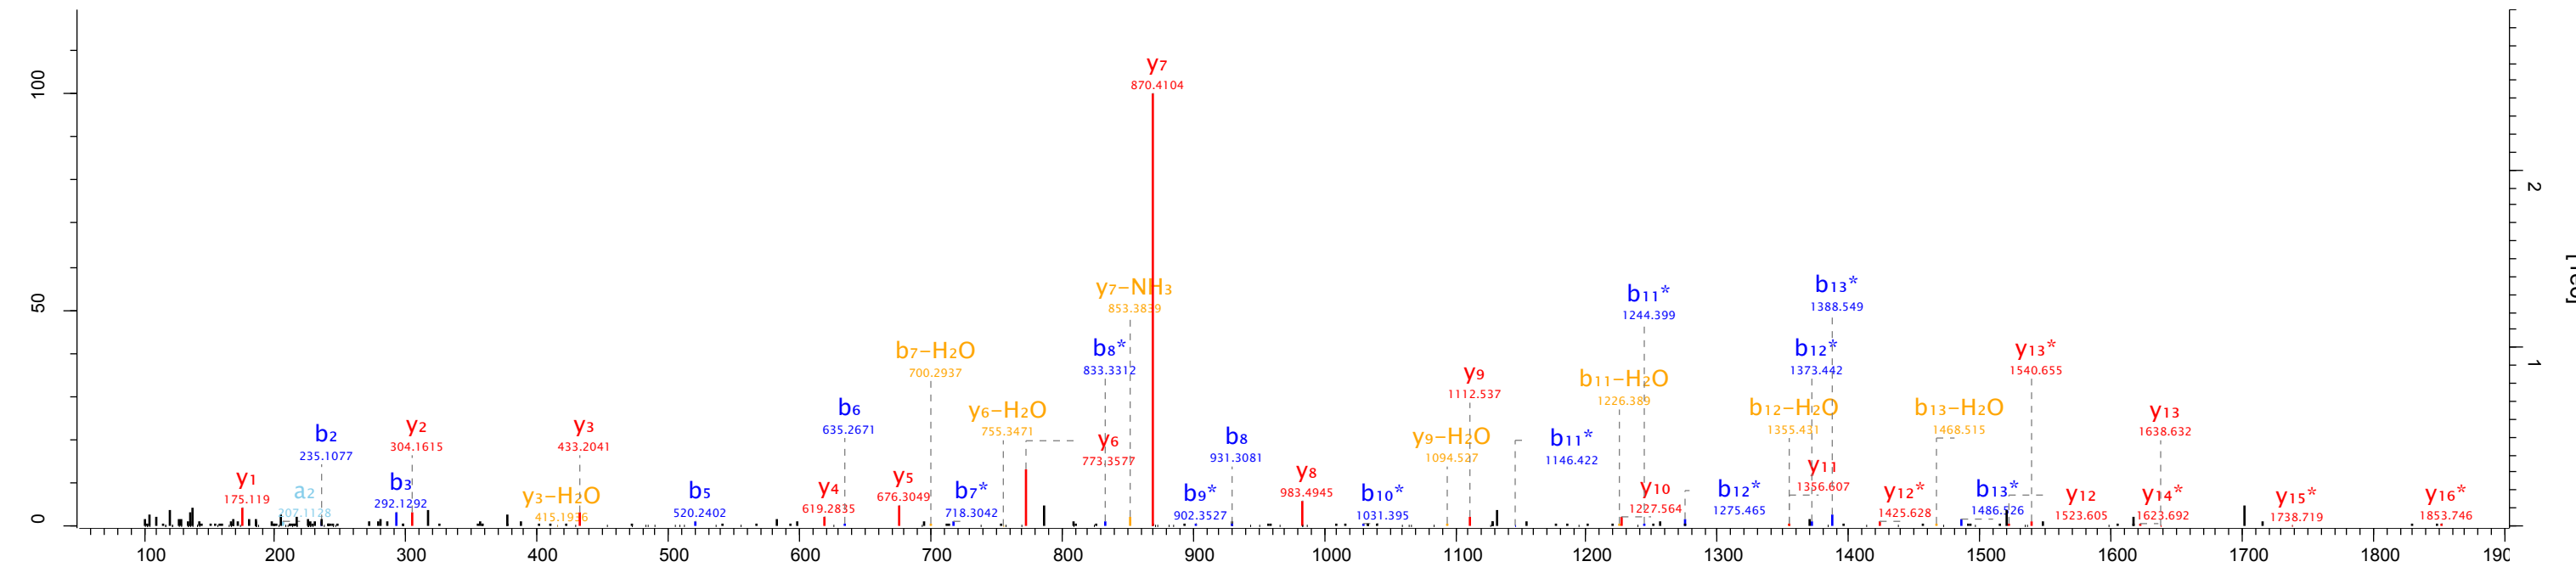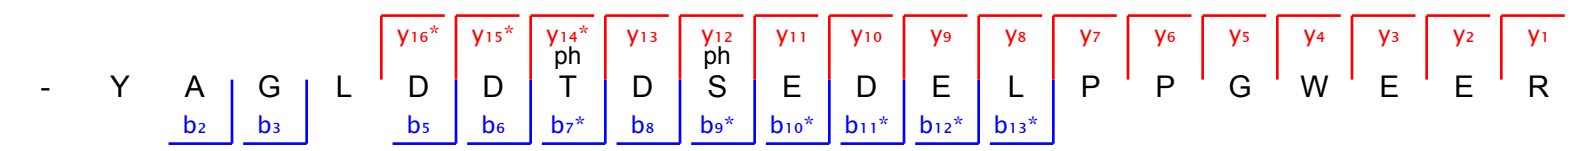

Raw file: 20150814\_A375SR\_Phospho\_BR2\_03  
 Scan: 23430 Method: FTMS; HCD Score: 116.52 m/z: 961.12 Gene names: SPTBN1

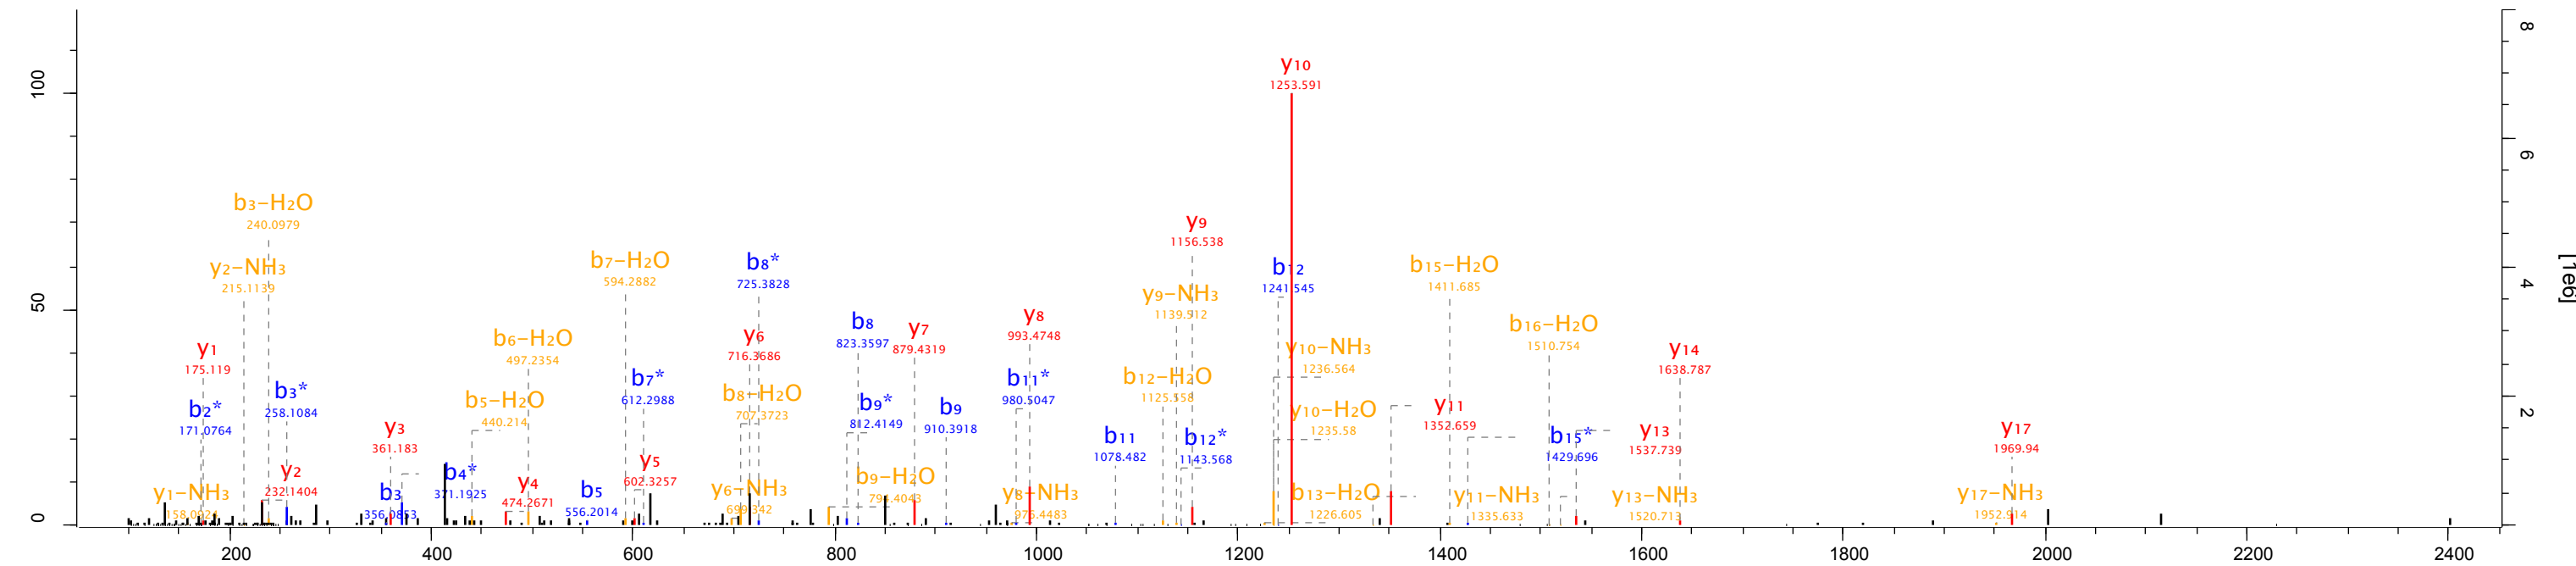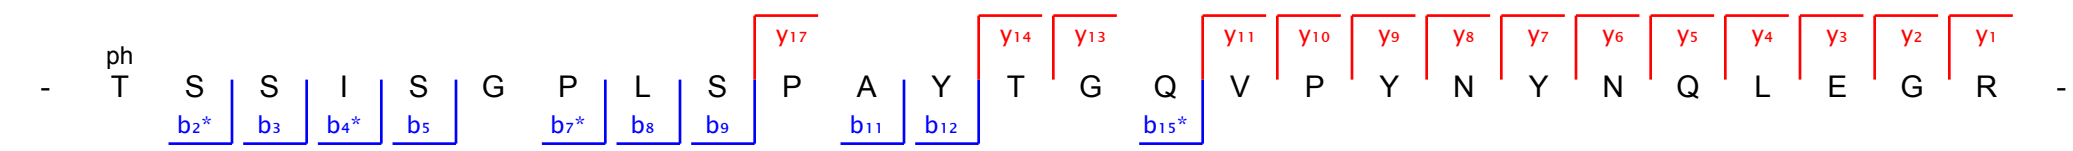

Raw file 20150814\_A375SR\_Phospho\_BR2\_03 Scan 24120 Method FTMS; HCD Score 73.37 m/z 974.79 Gene names FHOD1

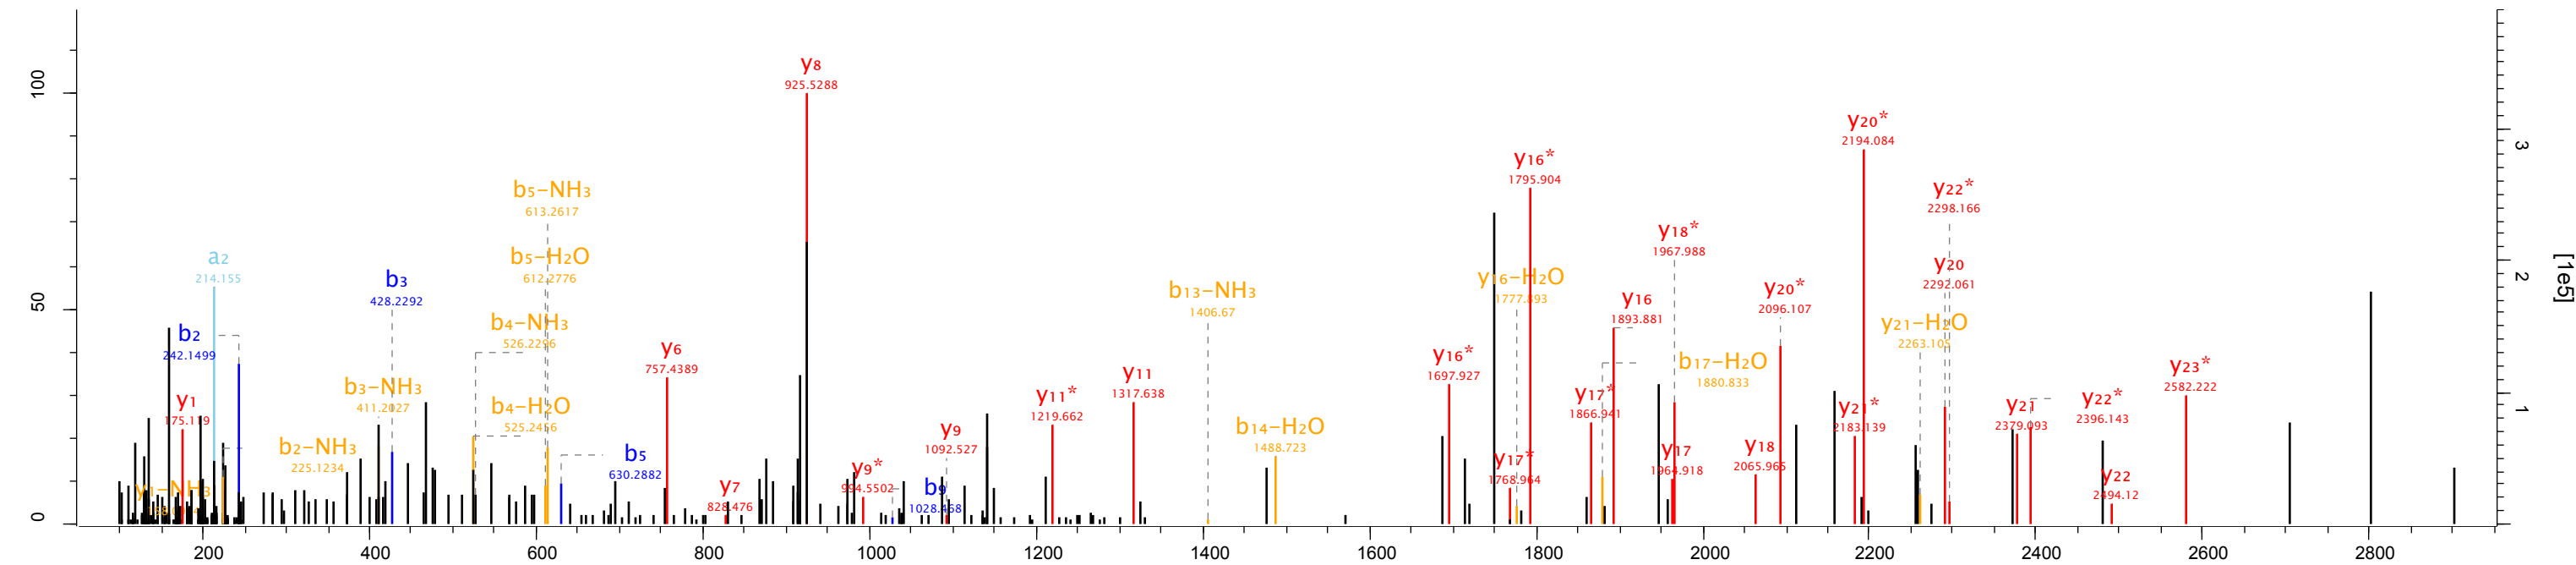

- Q L W D S P E T A P A A R T P Q S P A P C V L L R -

Annotations below the sequence:

- Red boxes above the sequence: y23\* (W), y22 (D), y21 (S), y20 (P), y18 (T), y17 (A), y16 (P), y11 (P), y9-ph (S), y8 (P), y7 (A), y6 (P), y1 (R).
- Blue boxes below the sequence: b2 (L), b3 (W), b5 (S), b9 (A).

Raw file: 20150814\_A375SR\_Phospho\_BR2\_03  
 Scan: 24500 Method: FTMS; HCD Score: 78.69 m/z: 1205.55 Gene names: NUMB

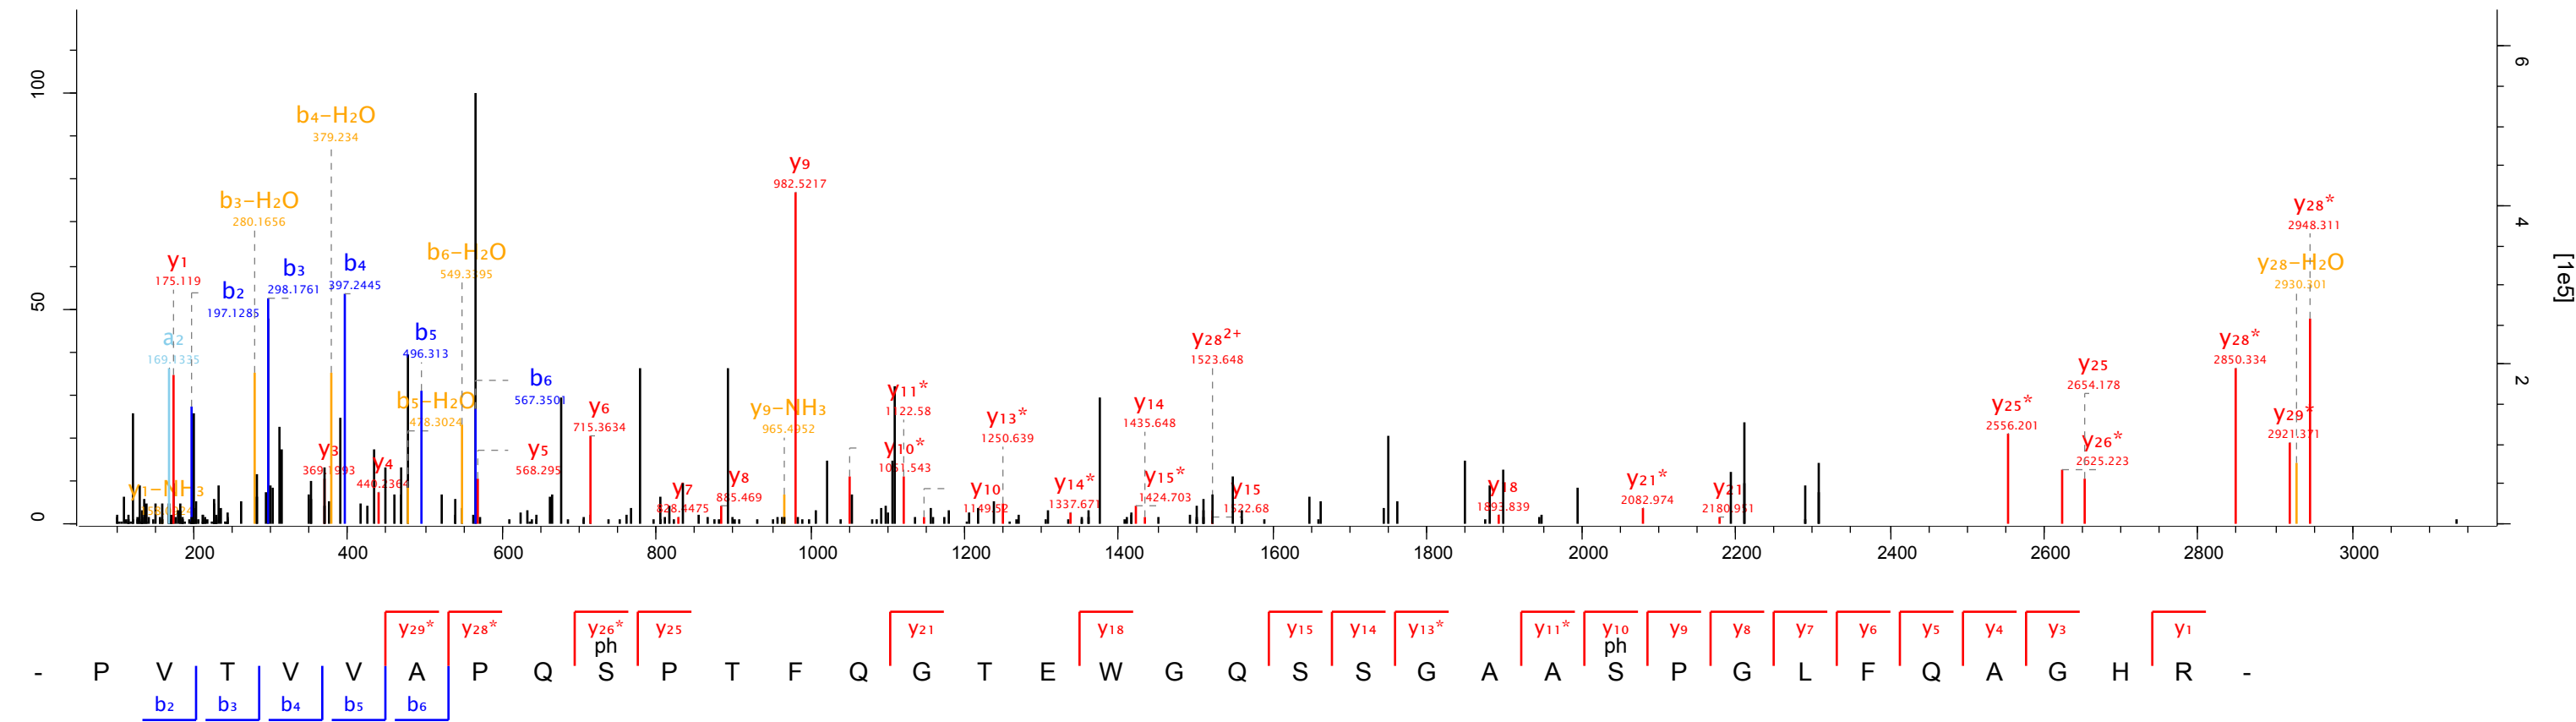

Raw file 20150814\_A375SR\_Phospho\_BR2\_03 Scan 24600 Method FTMS; HCD Score 320.65 m/z 1285.03 Gene names RABL6

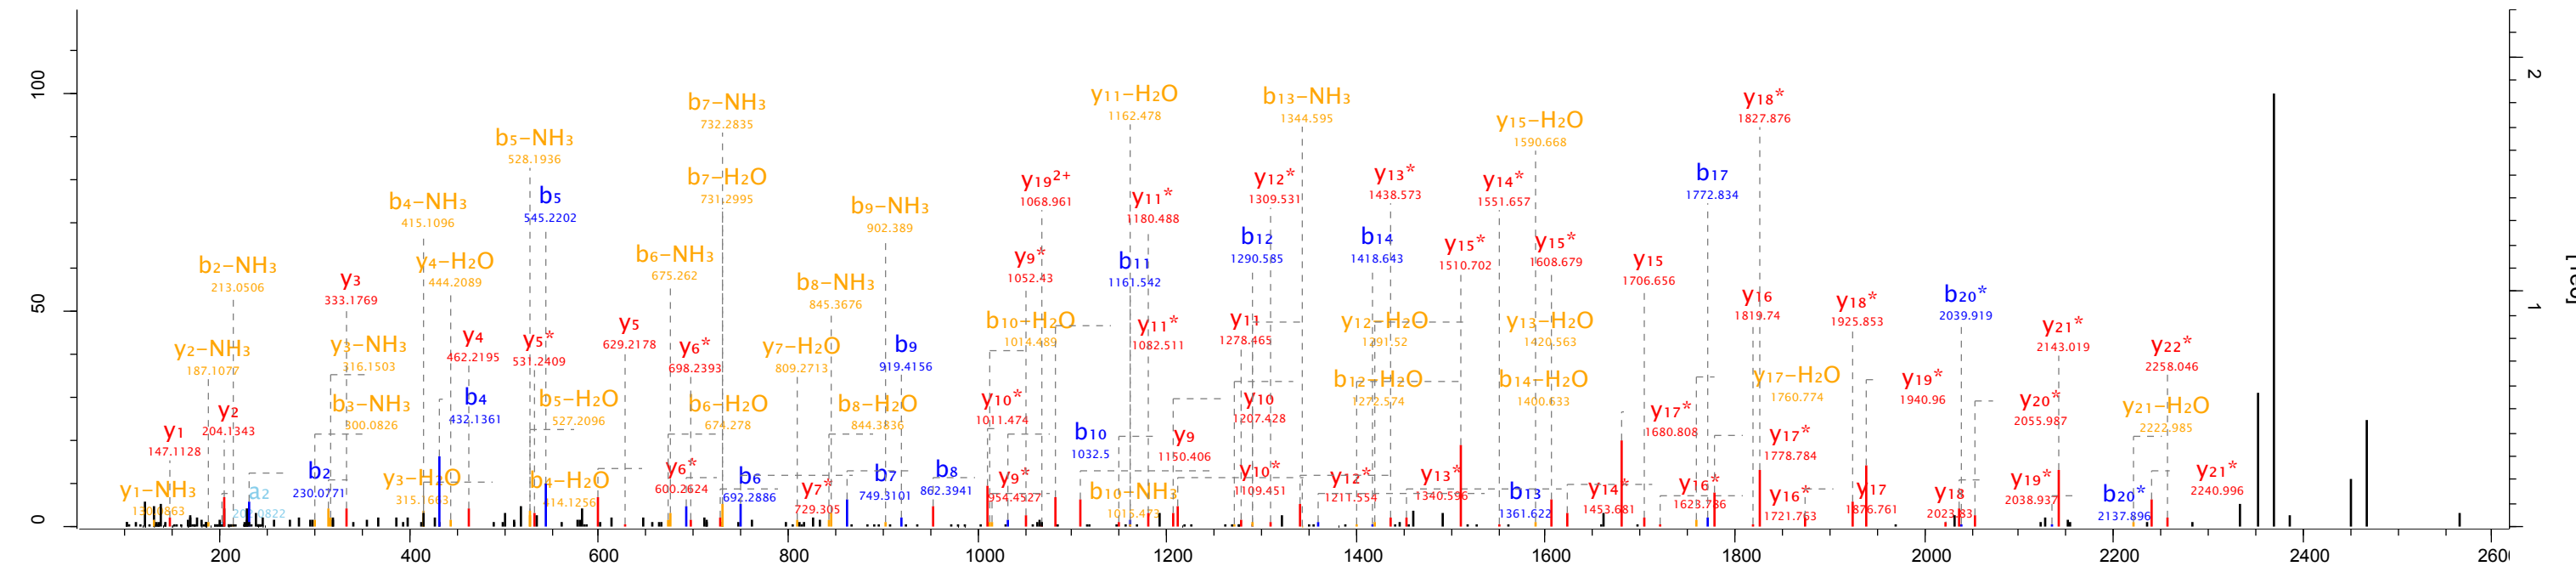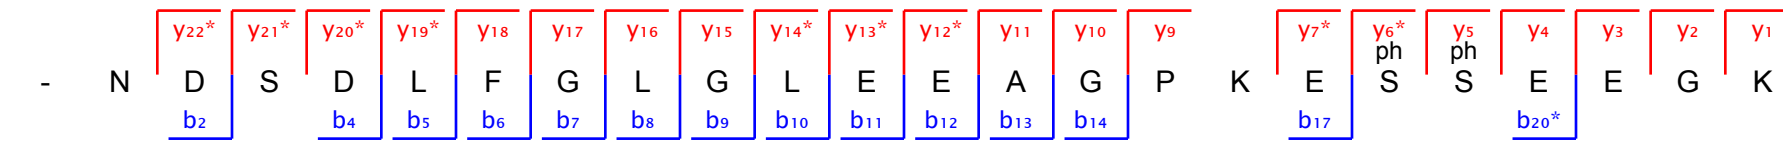

Raw file 20150814\_A375SR\_Phospho\_BR2\_03 Scan 24860 Method FTMS; HCD Score 146.76 m/z 1196.56 Gene names SIK3

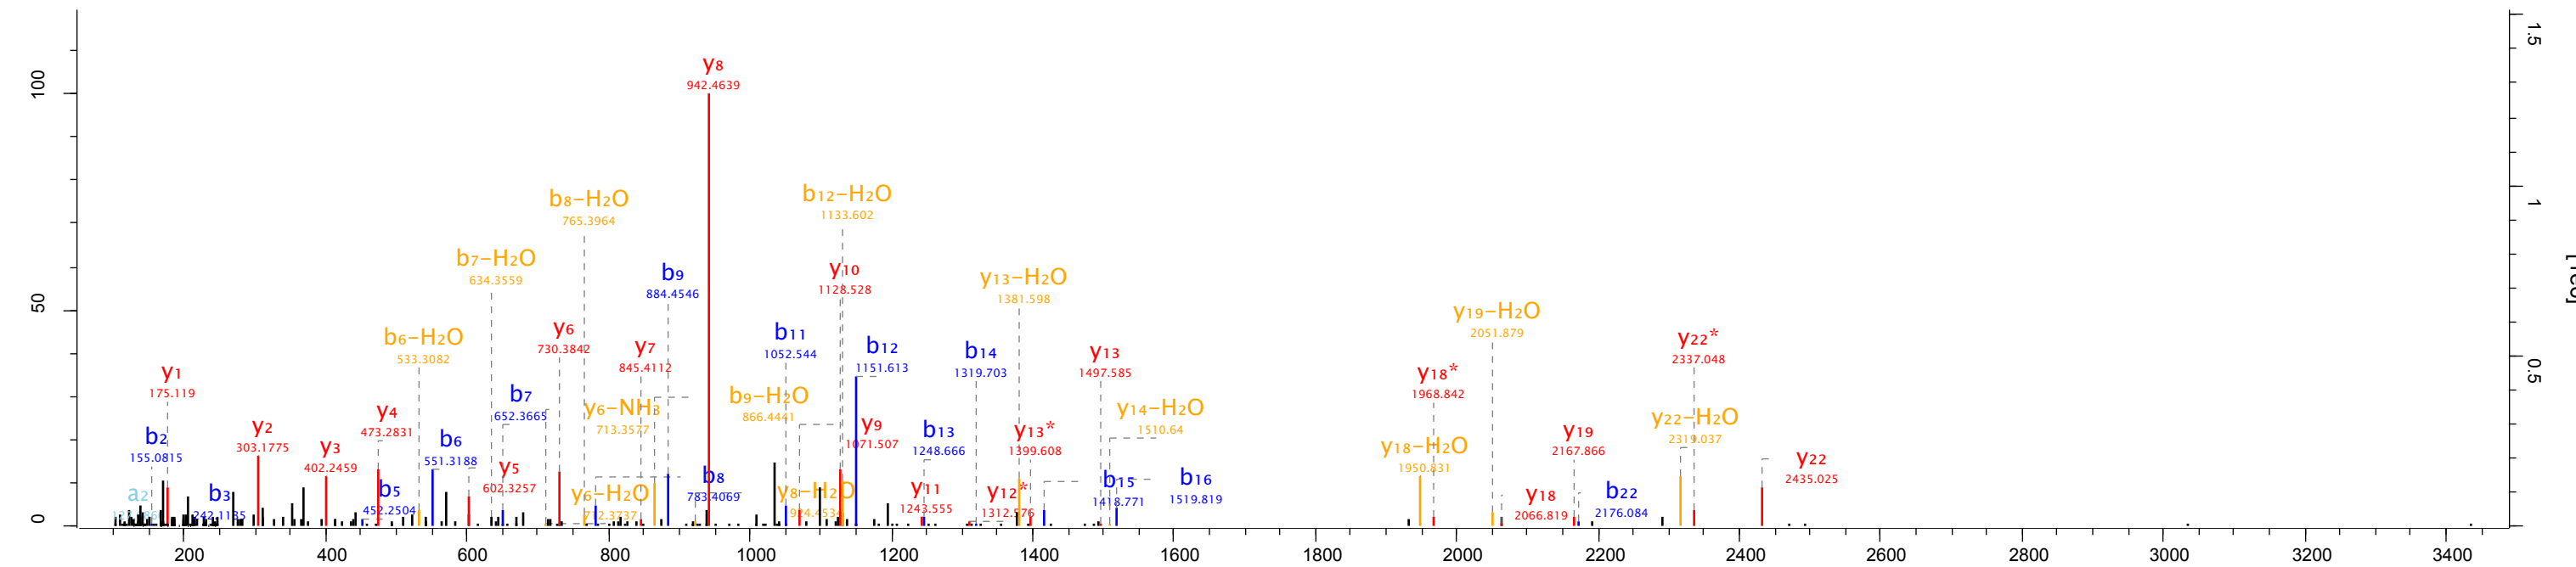

- G P S P L V T M T P A V P A V T P V D E E S S D G E P D Q E A V Q R -

Fragmentation mapping (b and y ions):

- b2: P
- b3: S
- b5: L
- b6: V
- b7: T
- b8: M
- b9: T
- b11: A
- b12: V
- b13: P
- b14: A
- b15: V
- b16: T
- b22: S
- y1: R
- y2: Q
- y3: V
- y4: A
- y5: E
- y6: Q
- y7: D
- y8: P
- y9: E
- y10: G
- y11: D
- y12\*: S
- y13: S
- y18: S
- y19: S
- y22: P



Raw file  
 20150814\_A375SR\_Phospho\_BR2\_03  
 Scan 25150 Method FTMS; HCD Score 82.95 m/z 944.41 Gene names RTN4

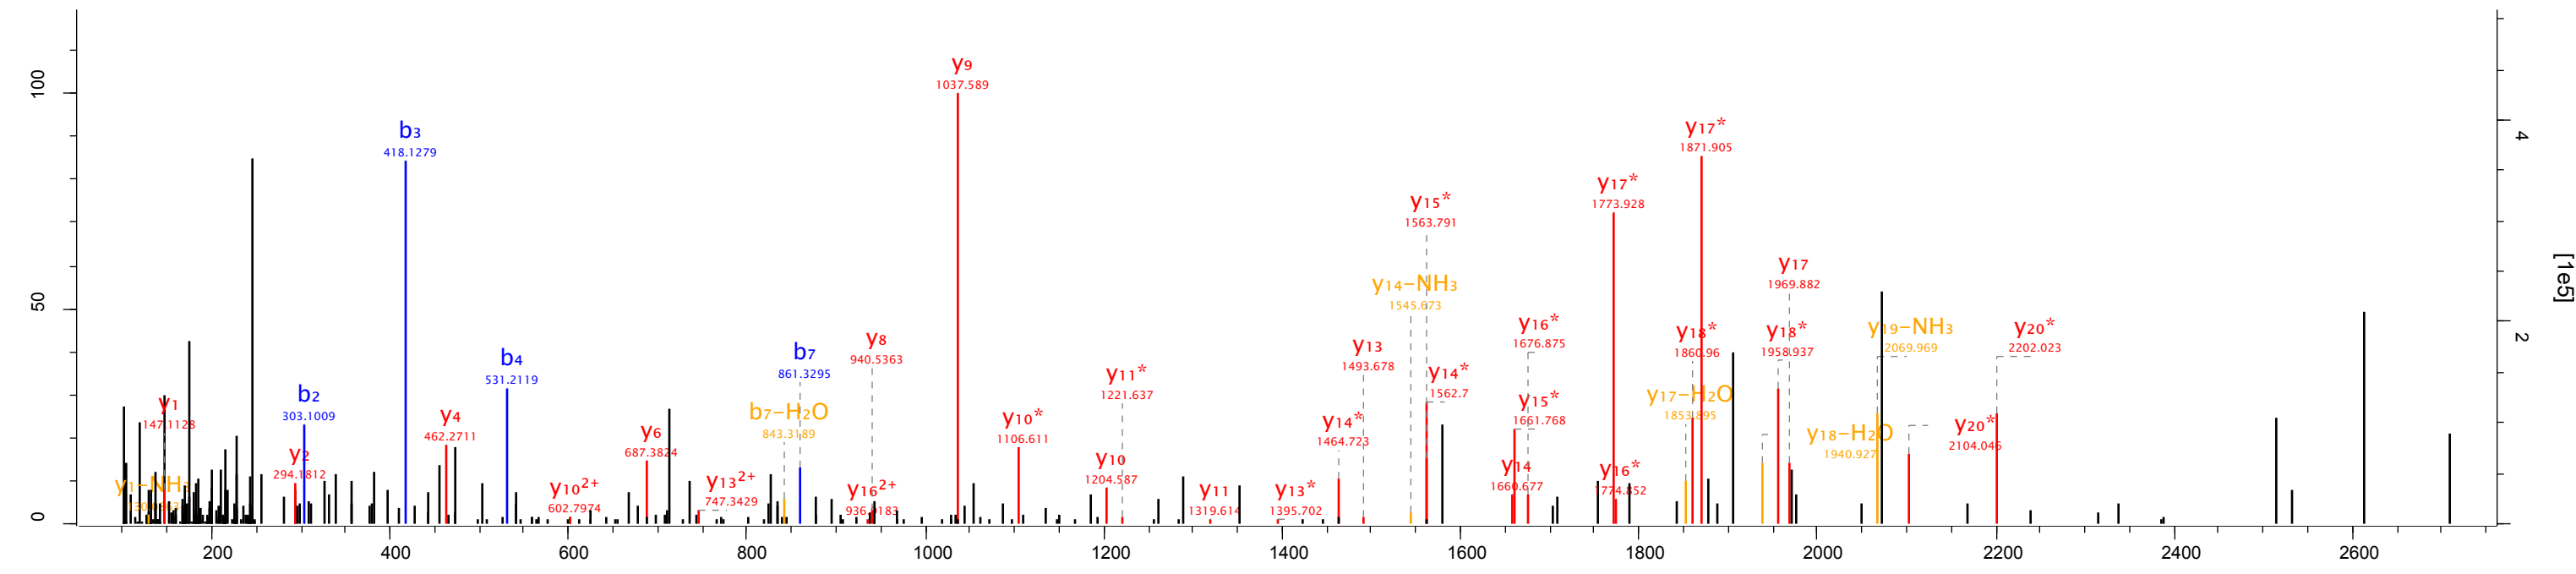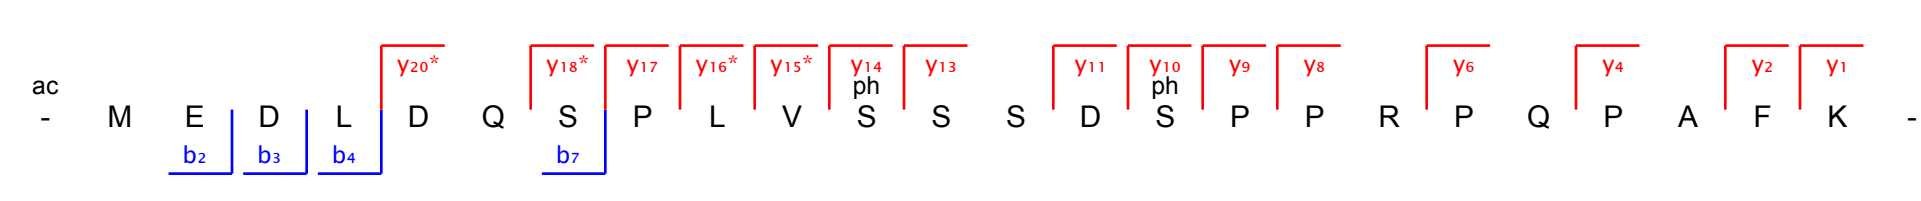



Raw file: 20150814\_A375SR\_Phospho\_BR2\_03  
 Scan: 25300 Method: FTMS; HCD Score: 219.99 m/z: 904.92 Gene names: PLEC

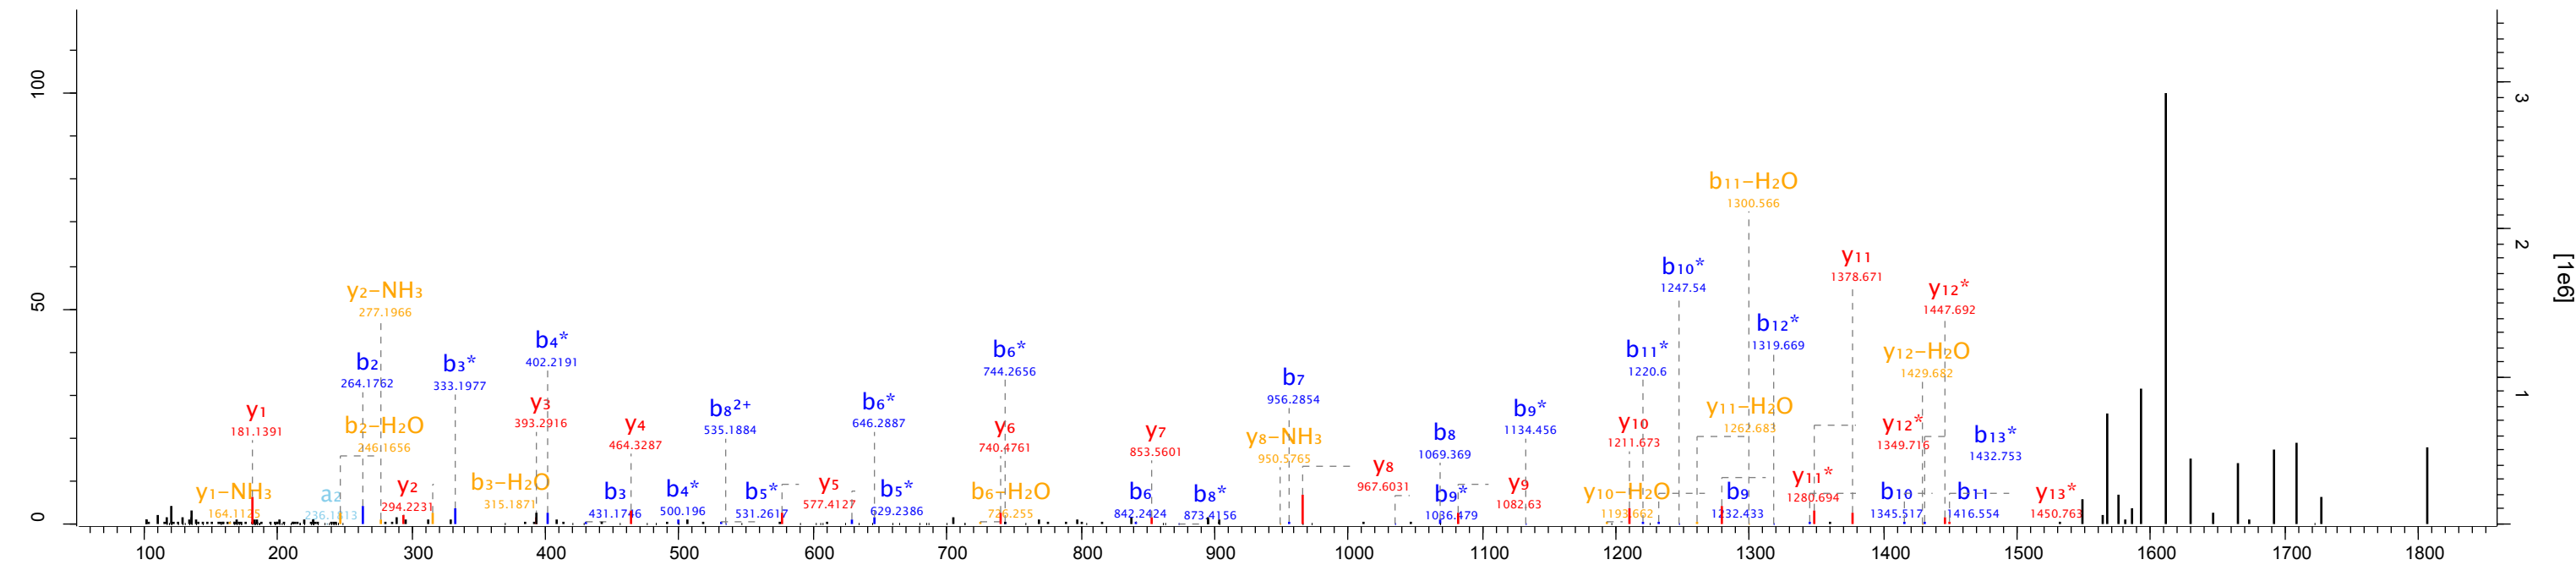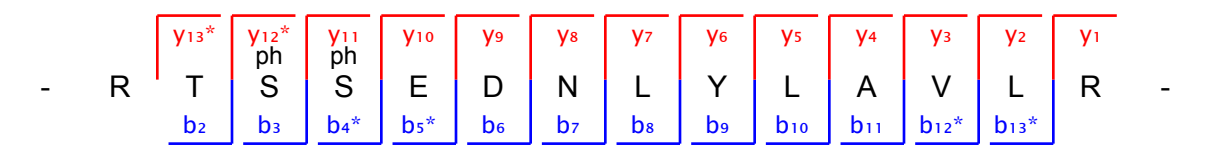

Raw file  
 20150814\_A375SR\_Phospho\_BR2\_03  
 Scan 25440 Method FTMS; HCD Score 75.7 m/z 757.63 Gene names LRFN1

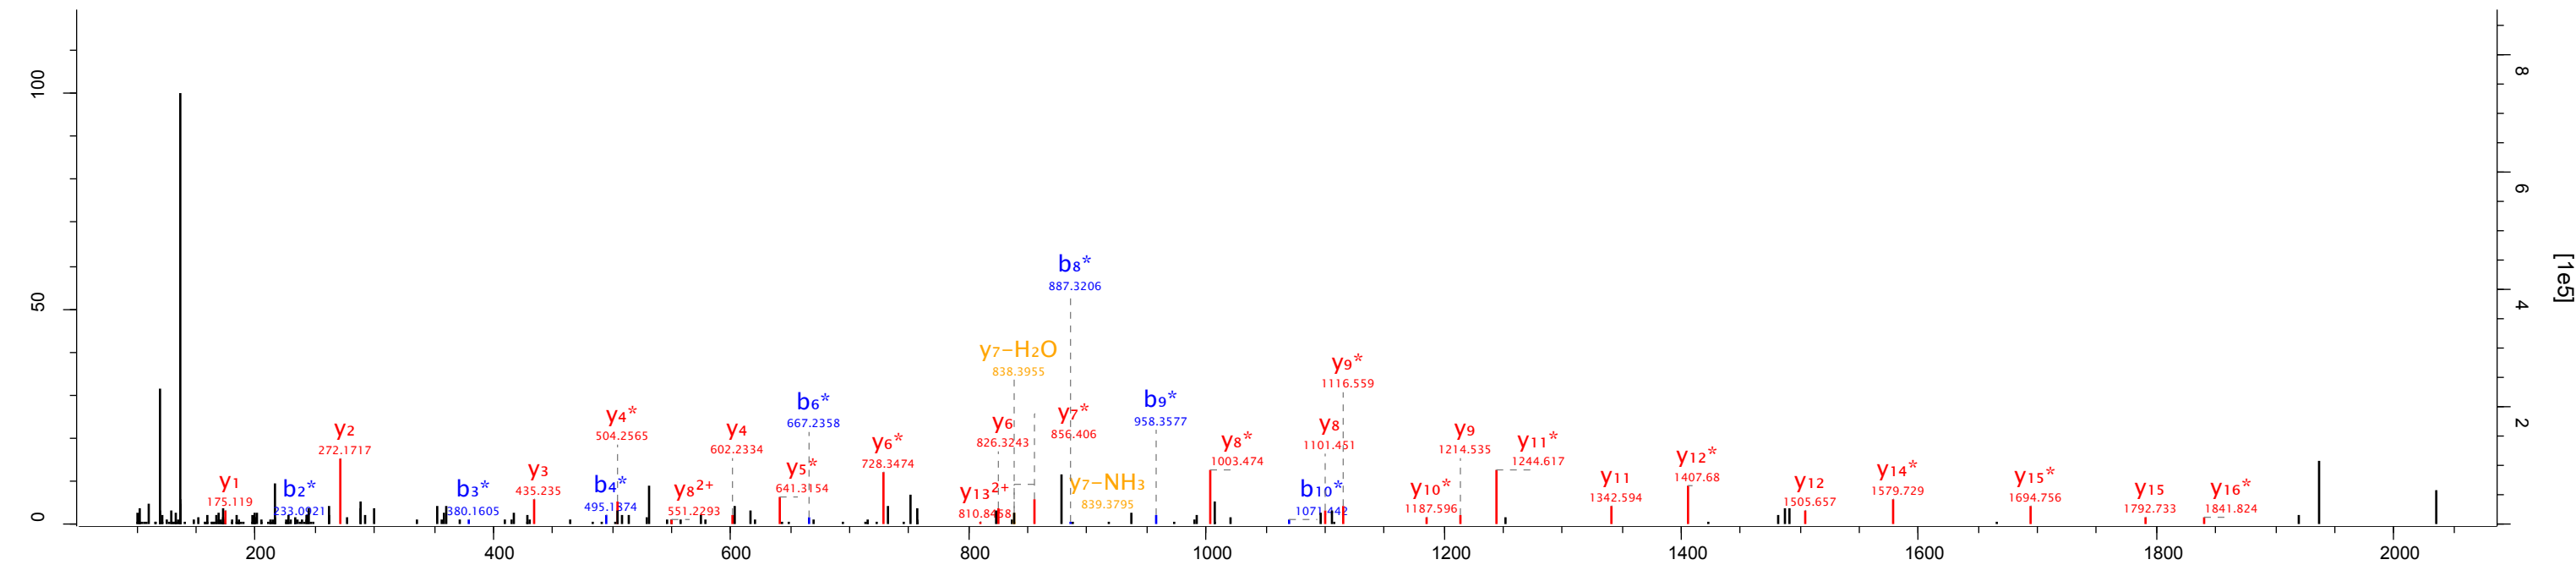

- Y ph S Y<sub>16</sub>\* Y<sub>15</sub>\* Y<sub>14</sub>\* Y<sub>13</sub><sup>2+</sup> Y<sub>12</sub> Y<sub>11</sub> Y<sub>10</sub>\* Y<sub>9</sub> Y<sub>8</sub> Y<sub>7</sub>\* Y<sub>6</sub> Y<sub>5</sub>\* Y<sub>4</sub> Y<sub>3</sub> Y<sub>2</sub> Y<sub>1</sub> -  
 b<sub>2</sub>\* b<sub>3</sub>\* b<sub>4</sub>\* b<sub>6</sub>\* b<sub>8</sub>\* b<sub>9</sub>\* b<sub>10</sub>\*

Raw file: 20150814\_A375SR\_Phospho\_BR2\_03  
 Scan: 25940 Method: FTMS; HCD Score: 101.43 m/z: 672.34 Gene names: AHNAK

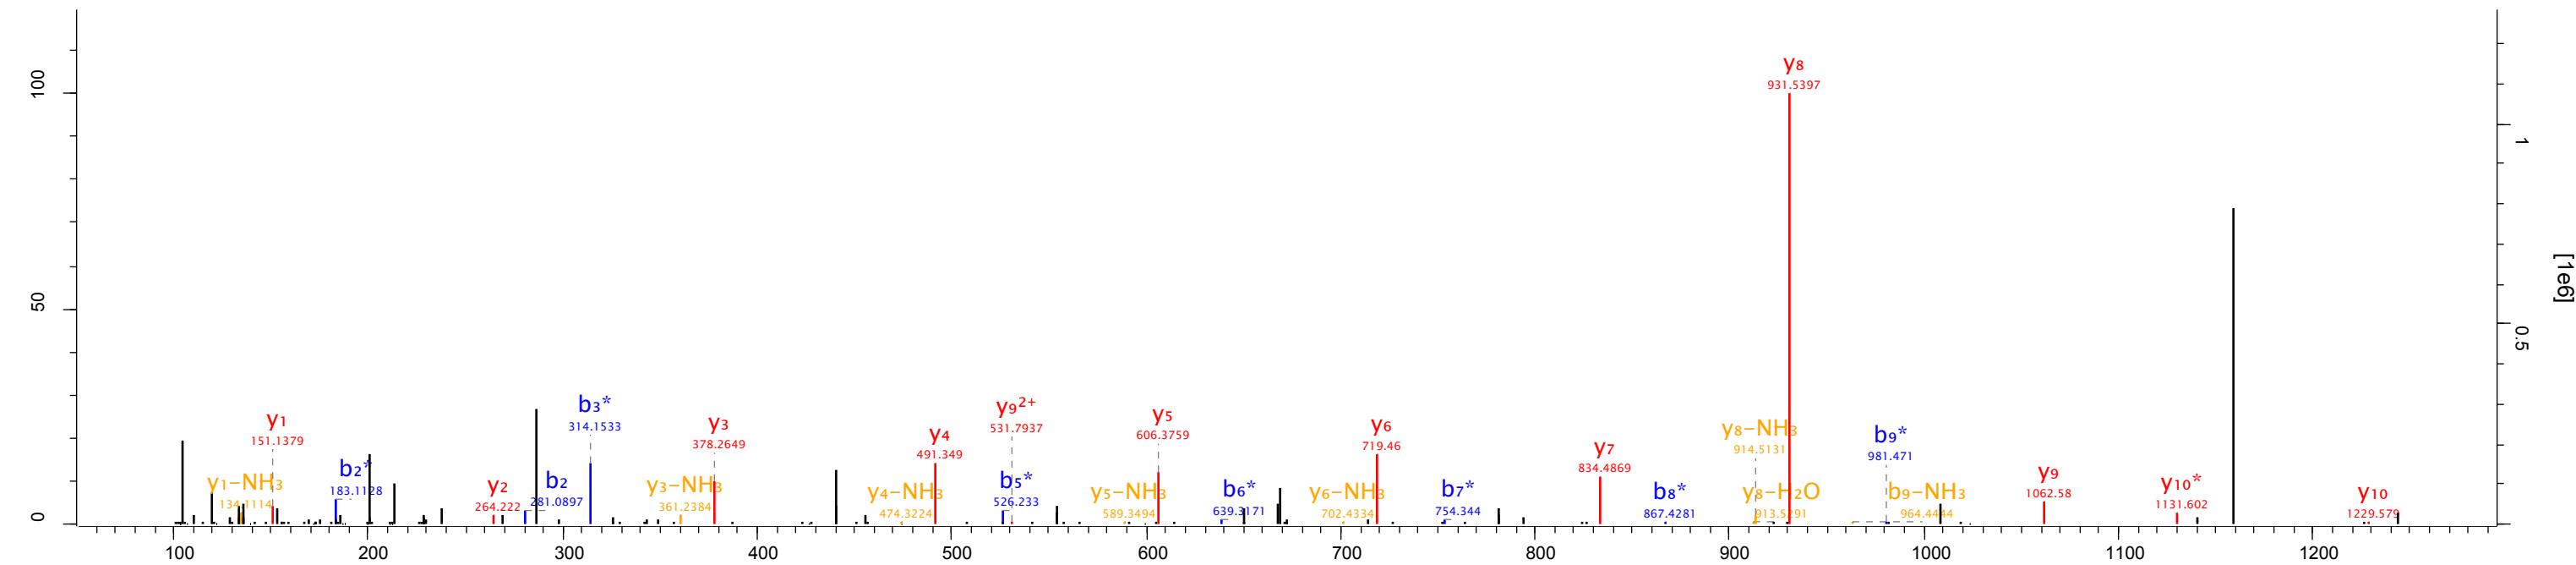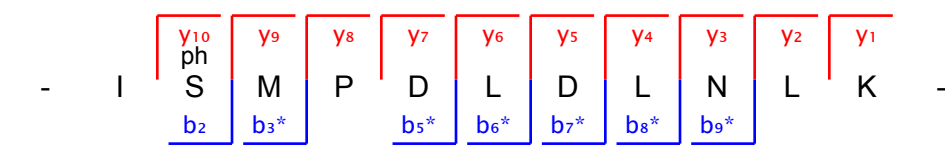

Raw file 20150814\_A375SR\_Phospho\_BR2\_03 Scan 26070 Method FTMS; HCD Score 252.23 m/z 1319.46 Gene names MRE11A

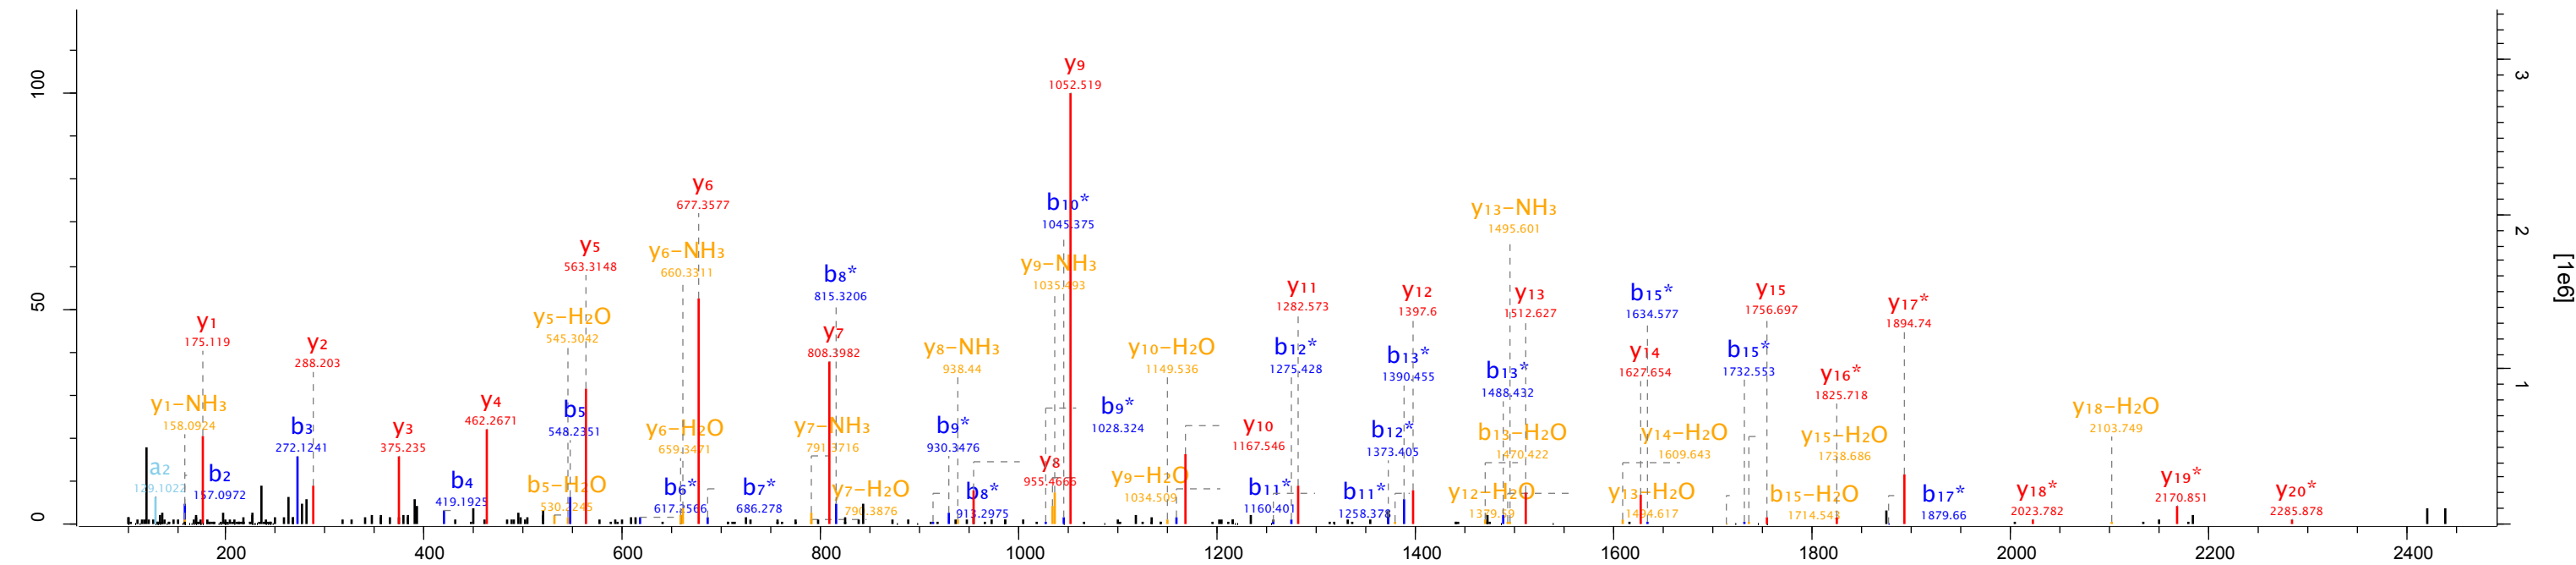

- G V D F E S S E D D D D P F M N T S S L R -

b<sub>2</sub>
b<sub>3</sub>
b<sub>4</sub>
b<sub>5</sub>
b<sub>6</sub>\*
b<sub>7</sub>\*
b<sub>8</sub>\*
b<sub>9</sub>\*
b<sub>10</sub>\*
b<sub>11</sub>\*
b<sub>12</sub>\*
b<sub>13</sub>\*
b<sub>15</sub>\*
b<sub>17</sub>\*

y<sub>20</sub>\*
y<sub>19</sub>\*
y<sub>18</sub>\*
y<sub>17</sub>\*
y<sub>16</sub>\*
y<sub>15</sub>
y<sub>14</sub>
y<sub>13</sub>
y<sub>12</sub>
y<sub>11</sub>
y<sub>10</sub>
y<sub>9</sub>
y<sub>8</sub>
y<sub>7</sub>
y<sub>6</sub>
y<sub>5</sub>
y<sub>4</sub>
y<sub>3</sub>
y<sub>2</sub>
y<sub>1</sub>

Raw file: 20150814\_A375SR\_Phospho\_BR2\_03  
 Scan: 26130  
 Method: FTMS; HCD  
 Score: 49.48  
 m/z: 988.81  
 Gene names: KMT2D

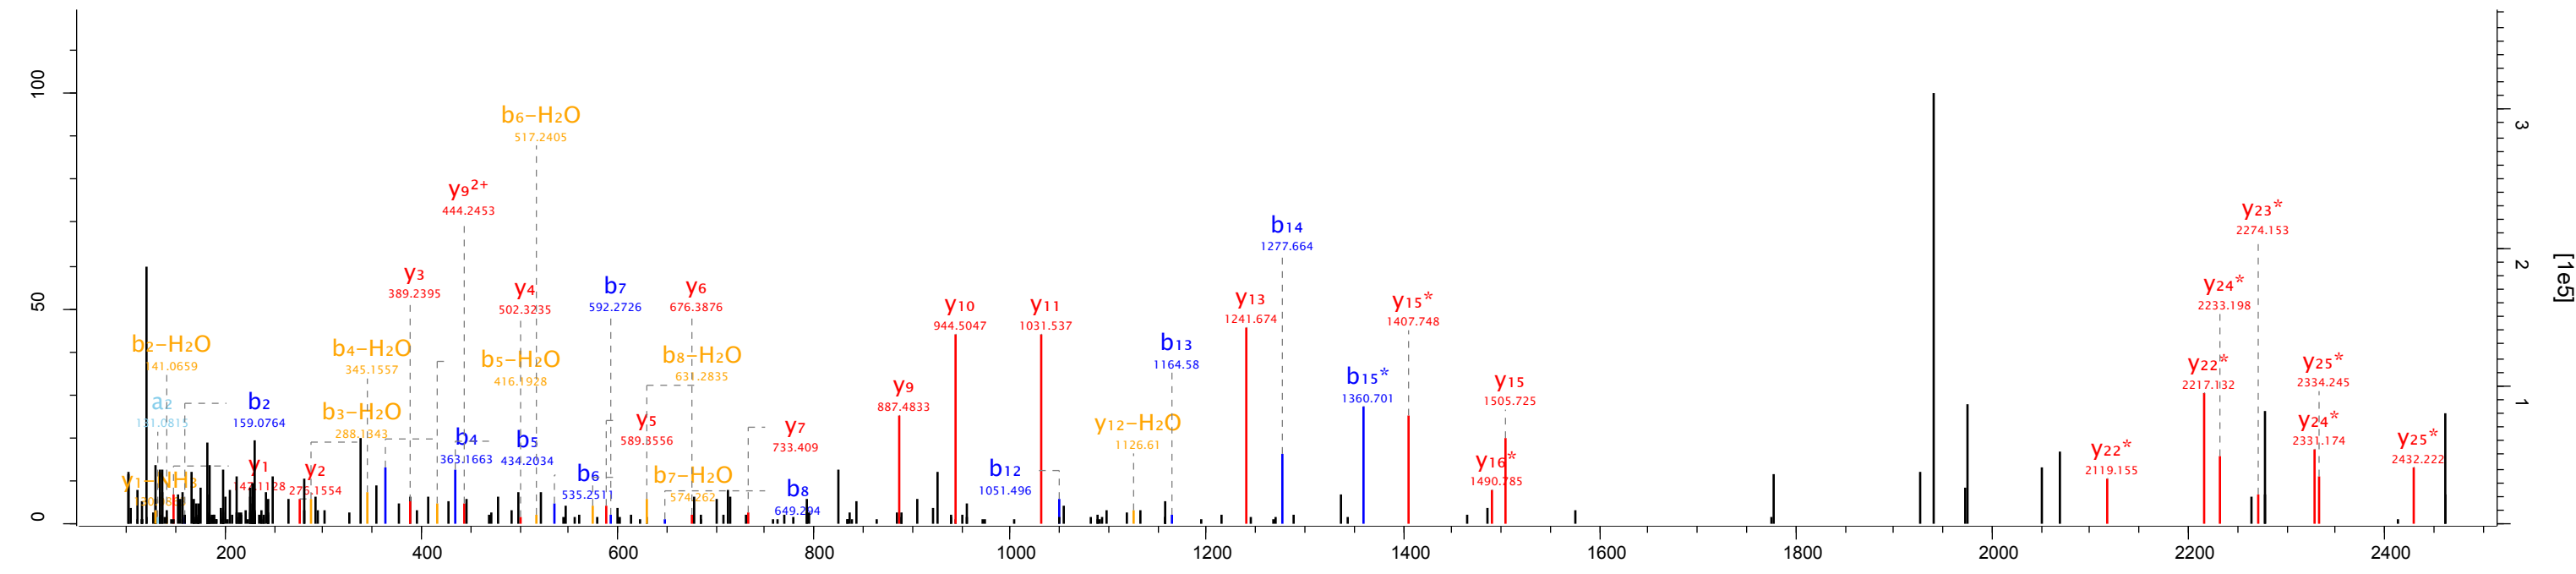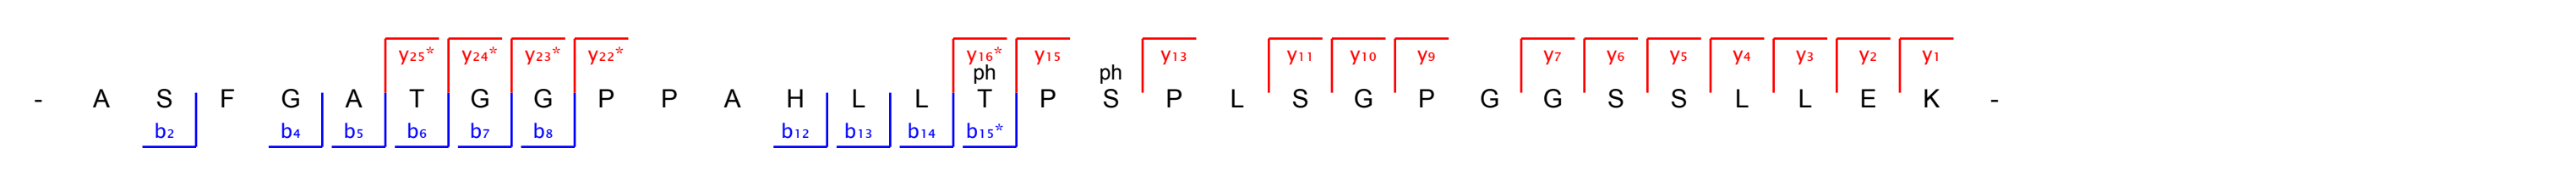

Raw file: 20150814\_A375SR\_Phospho\_BR2\_03  
 Scan: 26270 Method: FTMS; HCD Score: 104.81 m/z: 907.94 Gene names: ZNF521

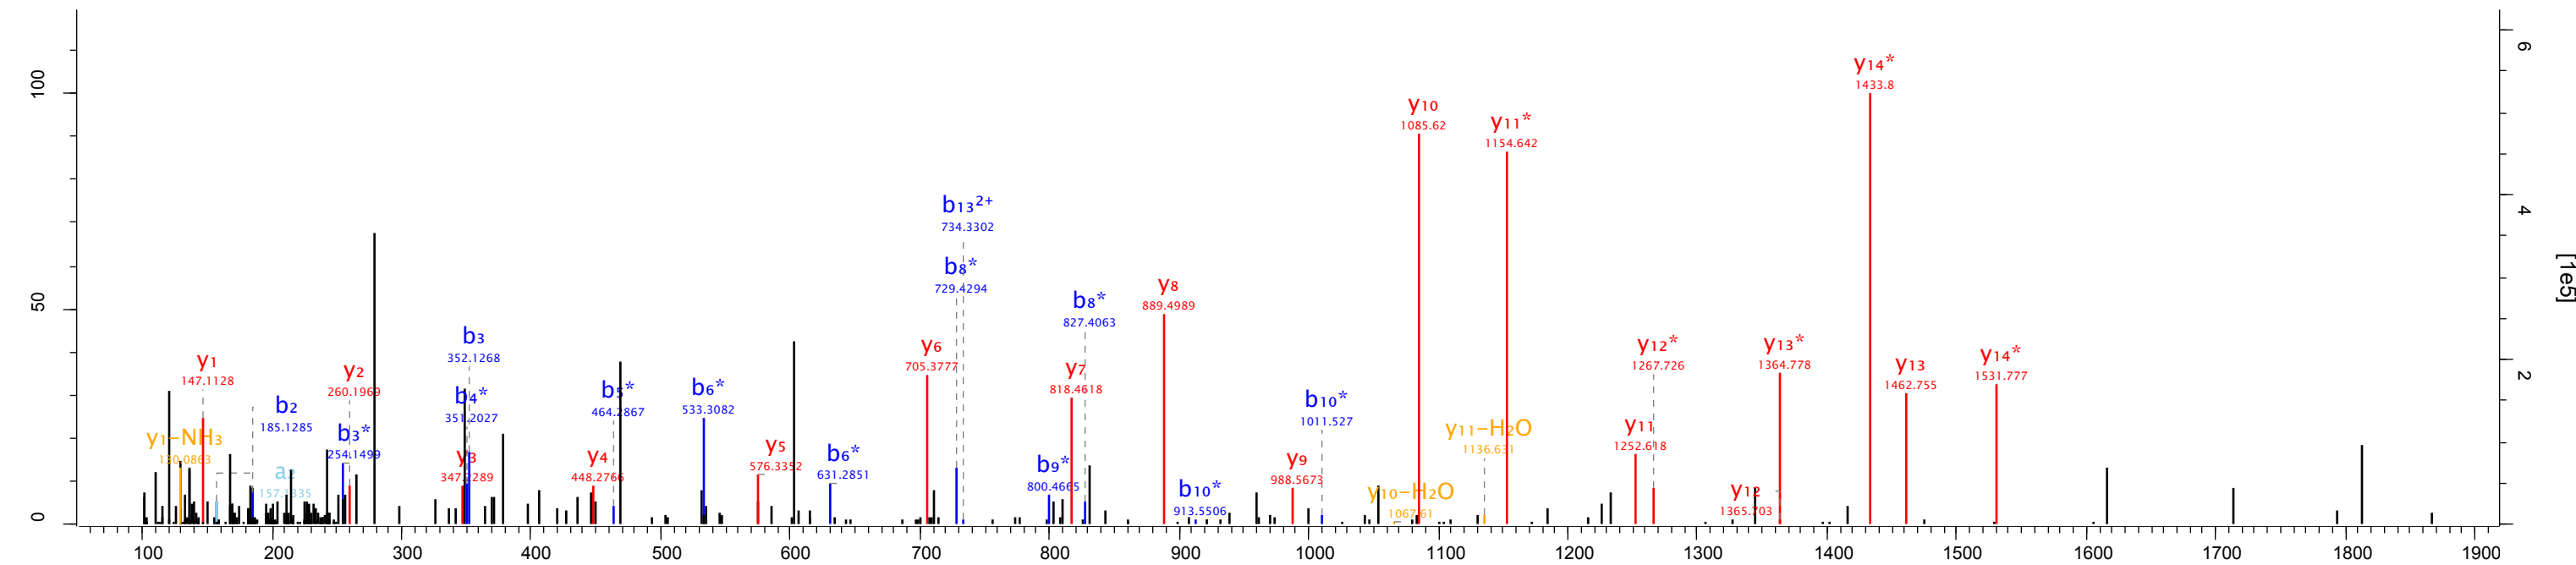

- A L y14\*  
ph  
S y13  
P y12  
L y11  
ph  
S P y9  
V y8  
A y7  
I y6  
E y5  
Q y4  
T y3  
S y2  
L y1  
K -

b2 b3 b4\* b5\* b6\* b8\* b9\* b10\* b13<sup>2+</sup>



Raw file: 20150814\_A375SR\_Phospho\_BR2\_03  
 Scan: 27150 Method: FTMS; HCD Score: 137.99 m/z: 1227.2 Gene names: CRTC2

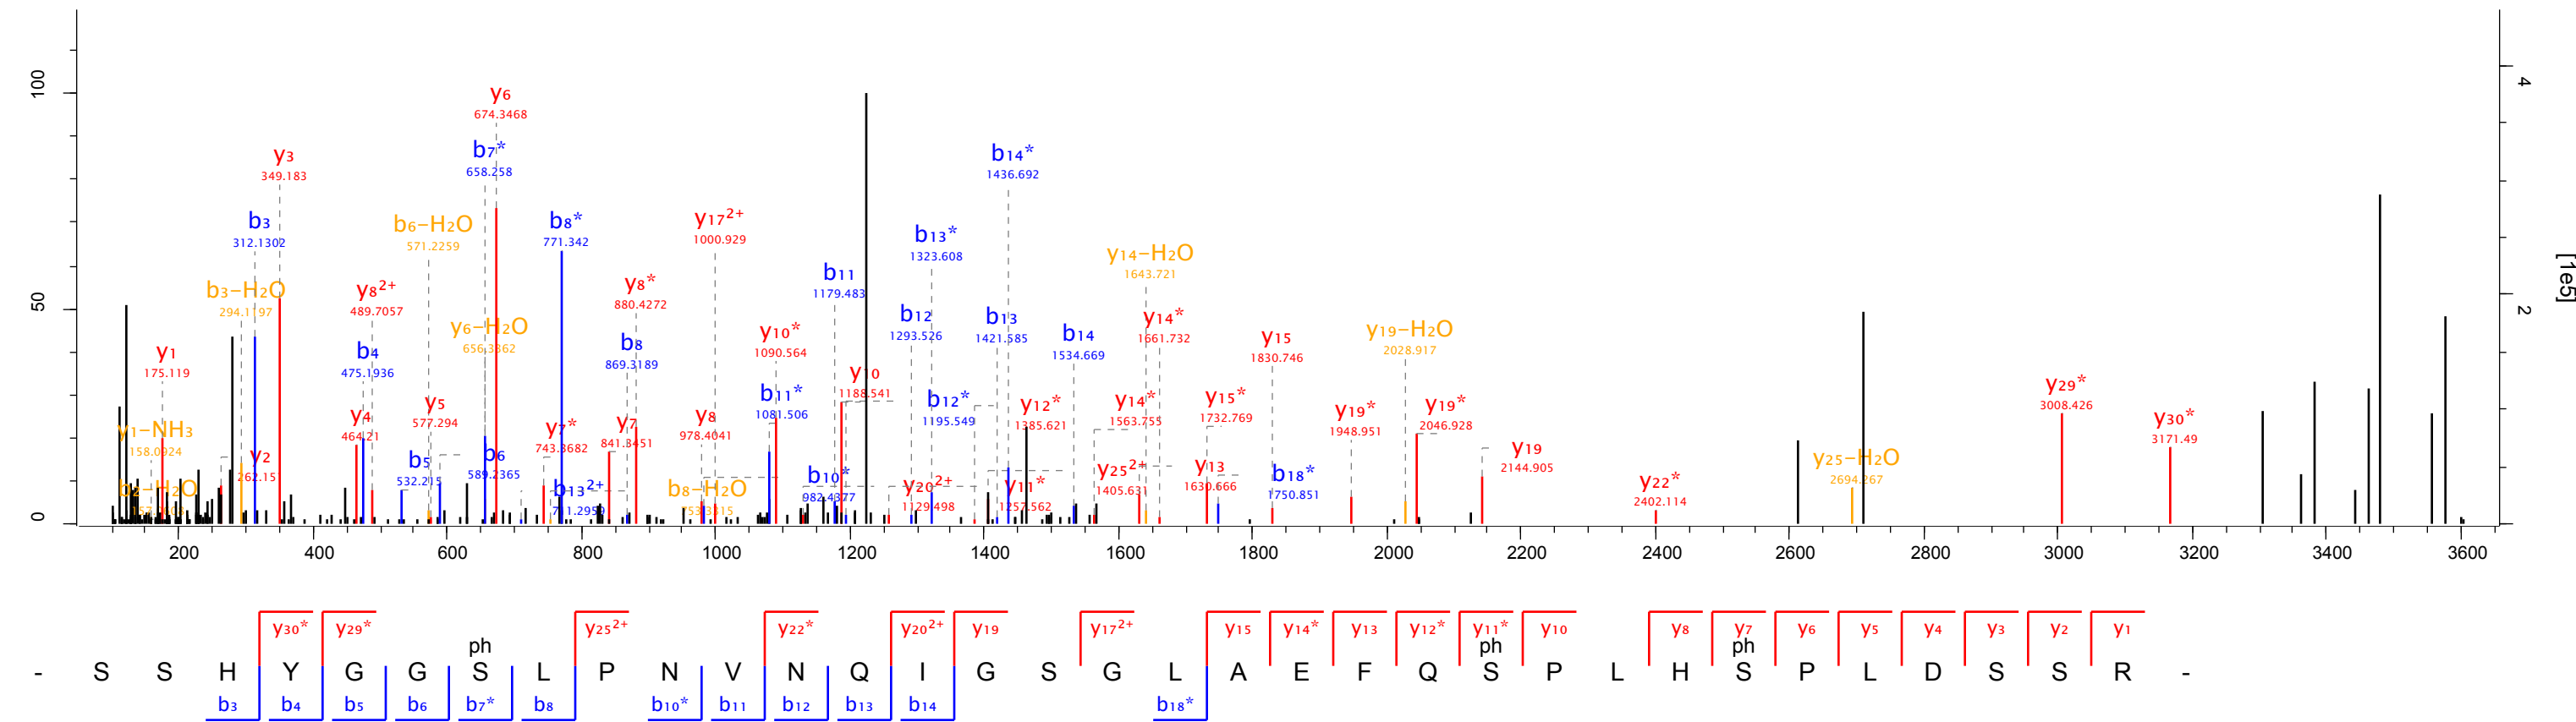

Raw file Scan Method Score m/z Gene names  
 20150814\_A375SR\_Phospho\_BR2\_03 27340 FTMS; HCD 60.42 1128.52 PBK

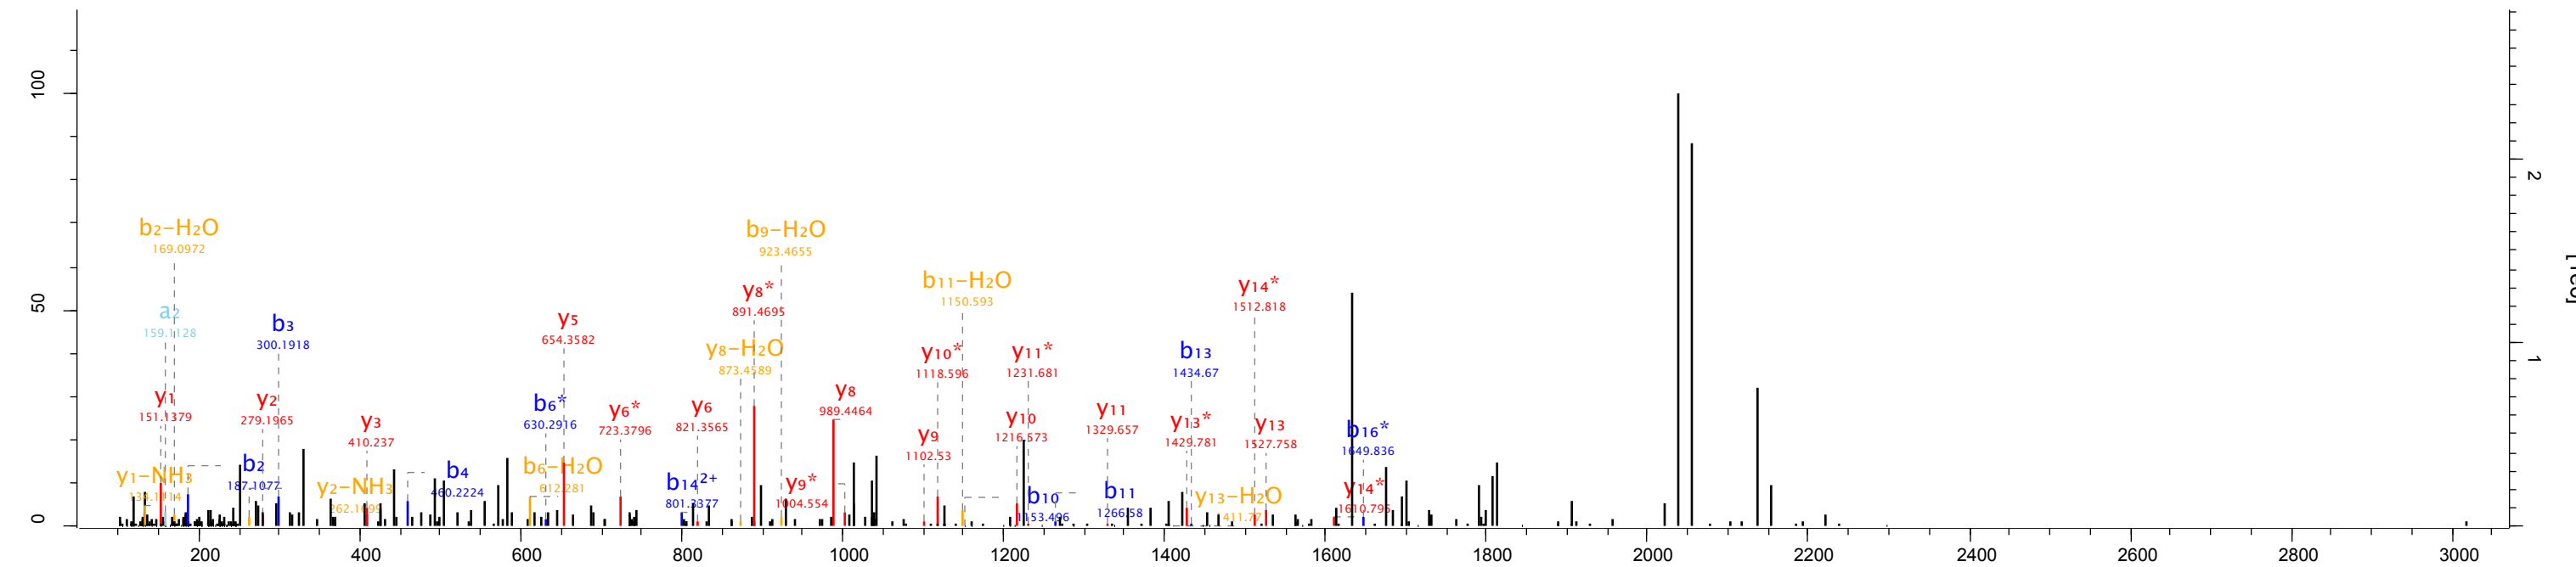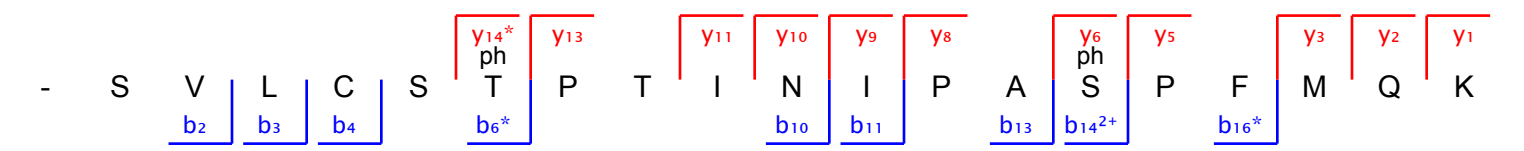

Raw file: 20150814\_A375SR\_Phospho\_BR2\_03  
 Scan: 27740 Method: FTMS; HCD Score: 167.02 m/z: 853.87 Gene names: OTUD4

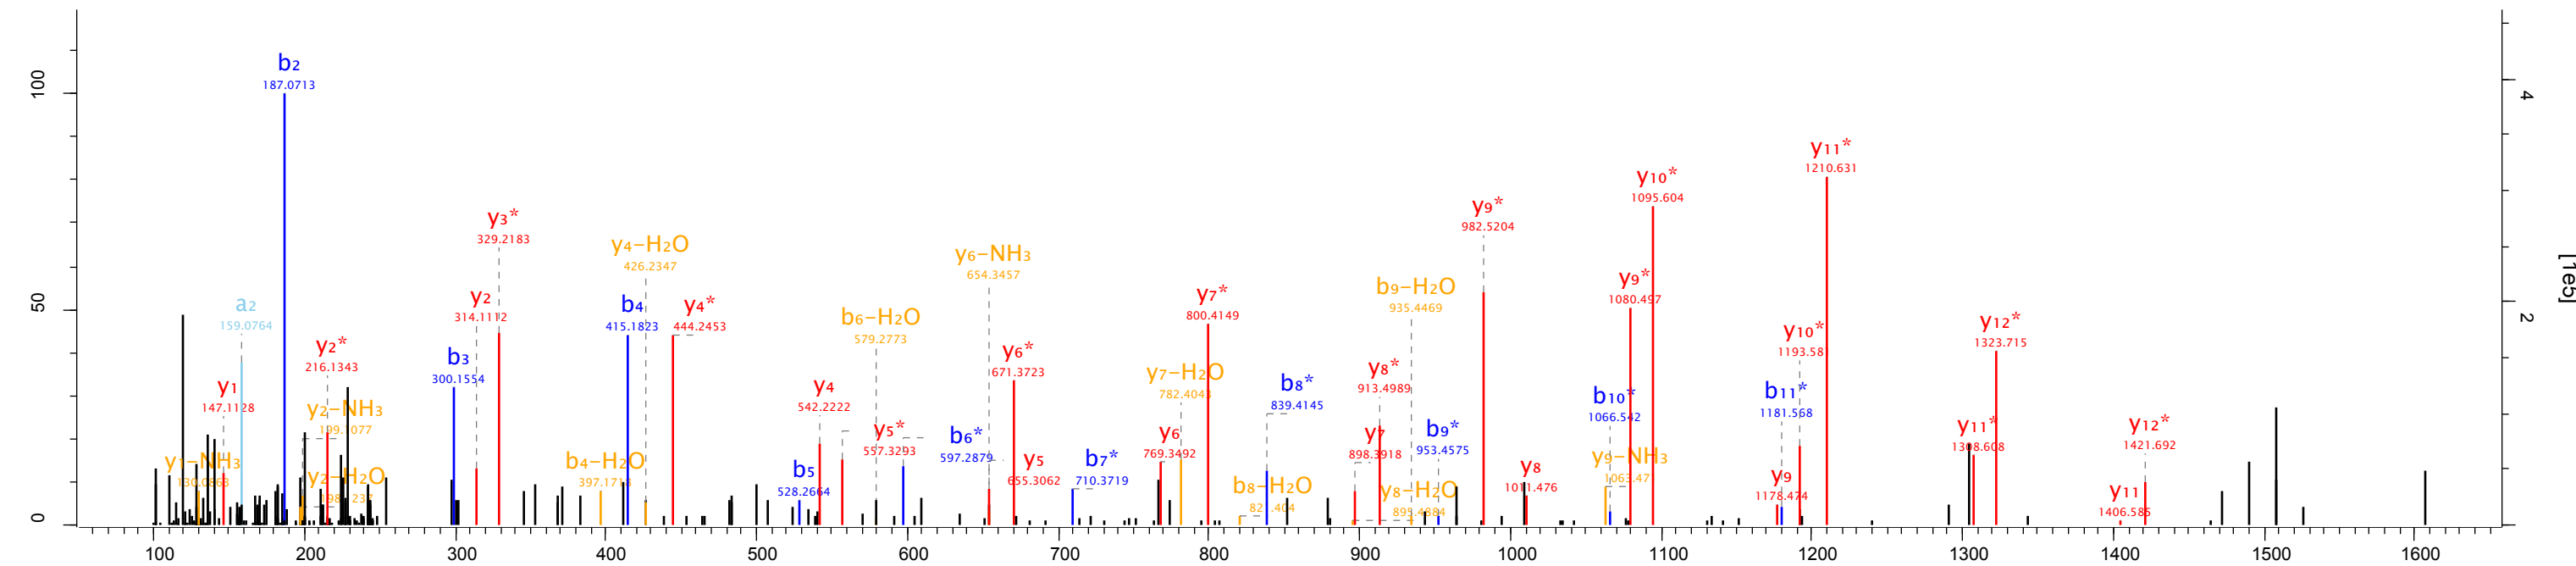

- G E L D L S L E N L D L S K -

y<sub>12</sub>\*
y<sub>11</sub>
y<sub>10</sub>\*
y<sub>9</sub>ph
y<sub>8</sub>
y<sub>7</sub>
y<sub>6</sub>
y<sub>5</sub>
y<sub>4</sub>
y<sub>3</sub>\*
y<sub>2</sub>ph
y<sub>1</sub>

b<sub>2</sub>
b<sub>3</sub>
b<sub>4</sub>
b<sub>5</sub>
b<sub>6</sub>\*
b<sub>7</sub>\*
b<sub>8</sub>\*
b<sub>9</sub>\*
b<sub>10</sub>\*
b<sub>11</sub>\*

Raw file 20150814\_A375SR\_Phospho\_BR2\_03 Scan 27790 Method FTMS; HCD Score 124.82 m/z 1315.22 Gene names KCTD15

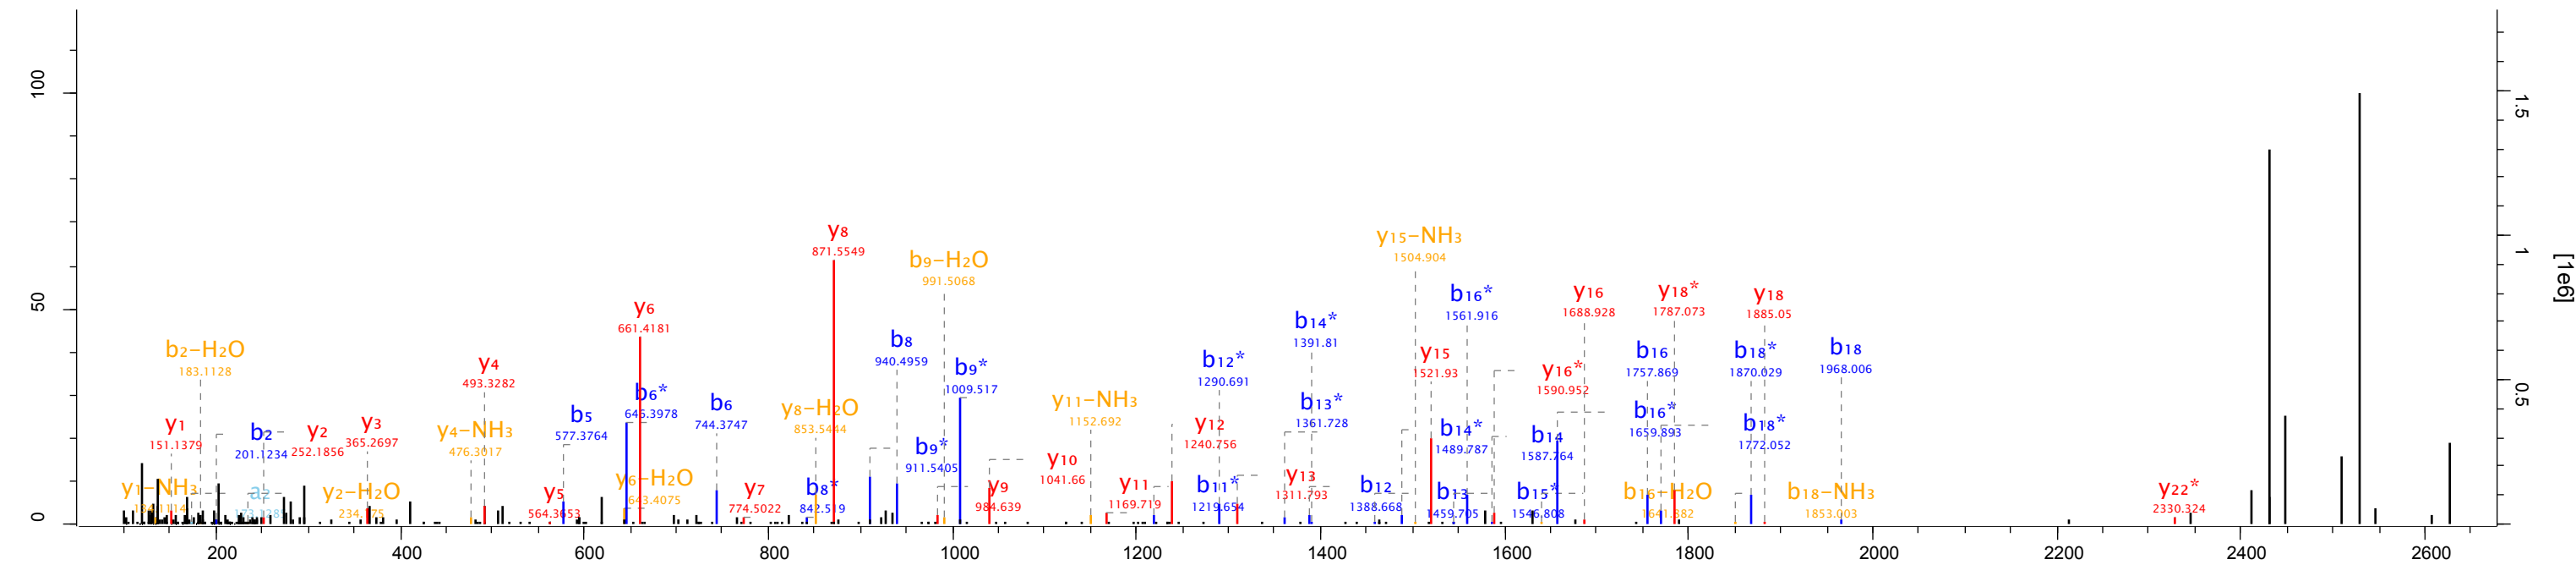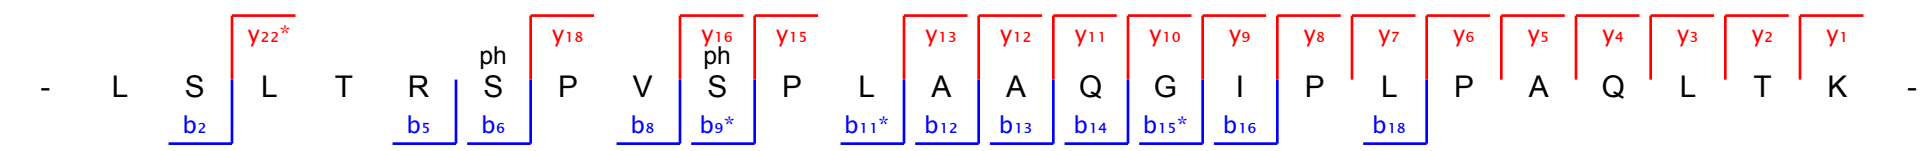

Raw file 20150814\_A375SR\_Phospho\_BR2\_03 Scan 28030 Method FTMS; HCD Score 154.56 m/z 1258.57 Gene names MLPH

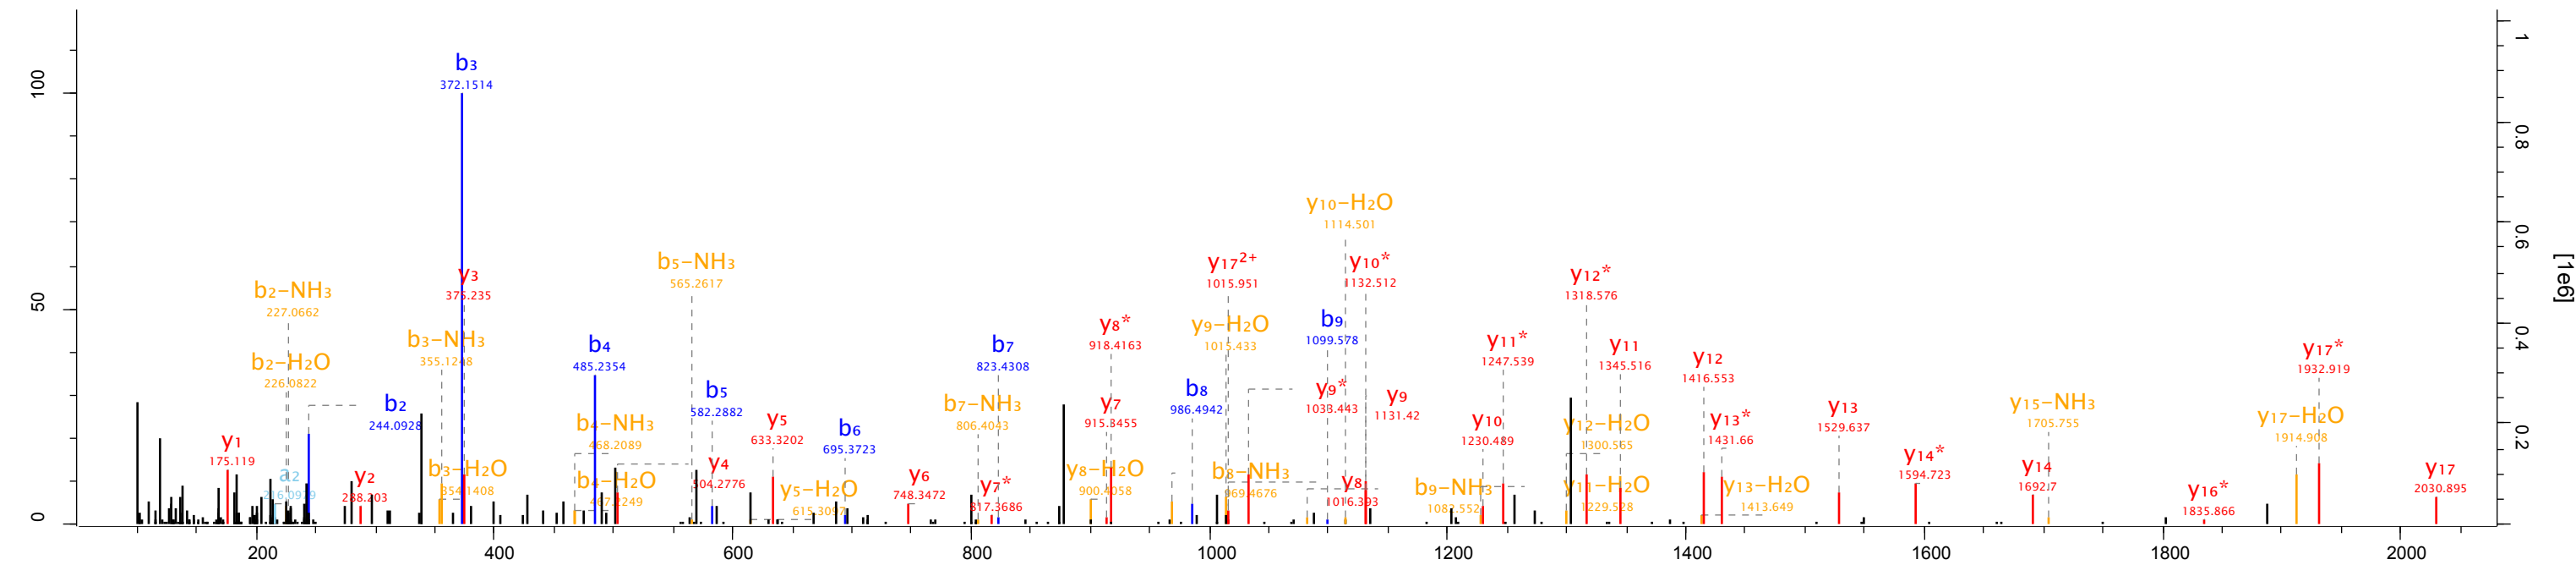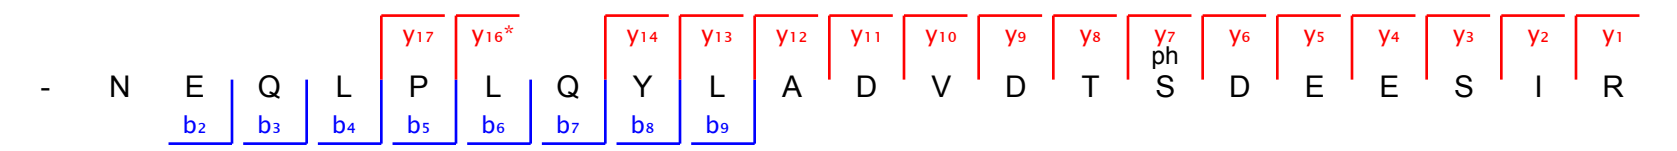





Raw file 20150814\_A375SR\_Phospho\_BR2\_03 Scan 28340 Method FTMS; HCD Score 94.02 m/z 755.68 Gene names RBM12B

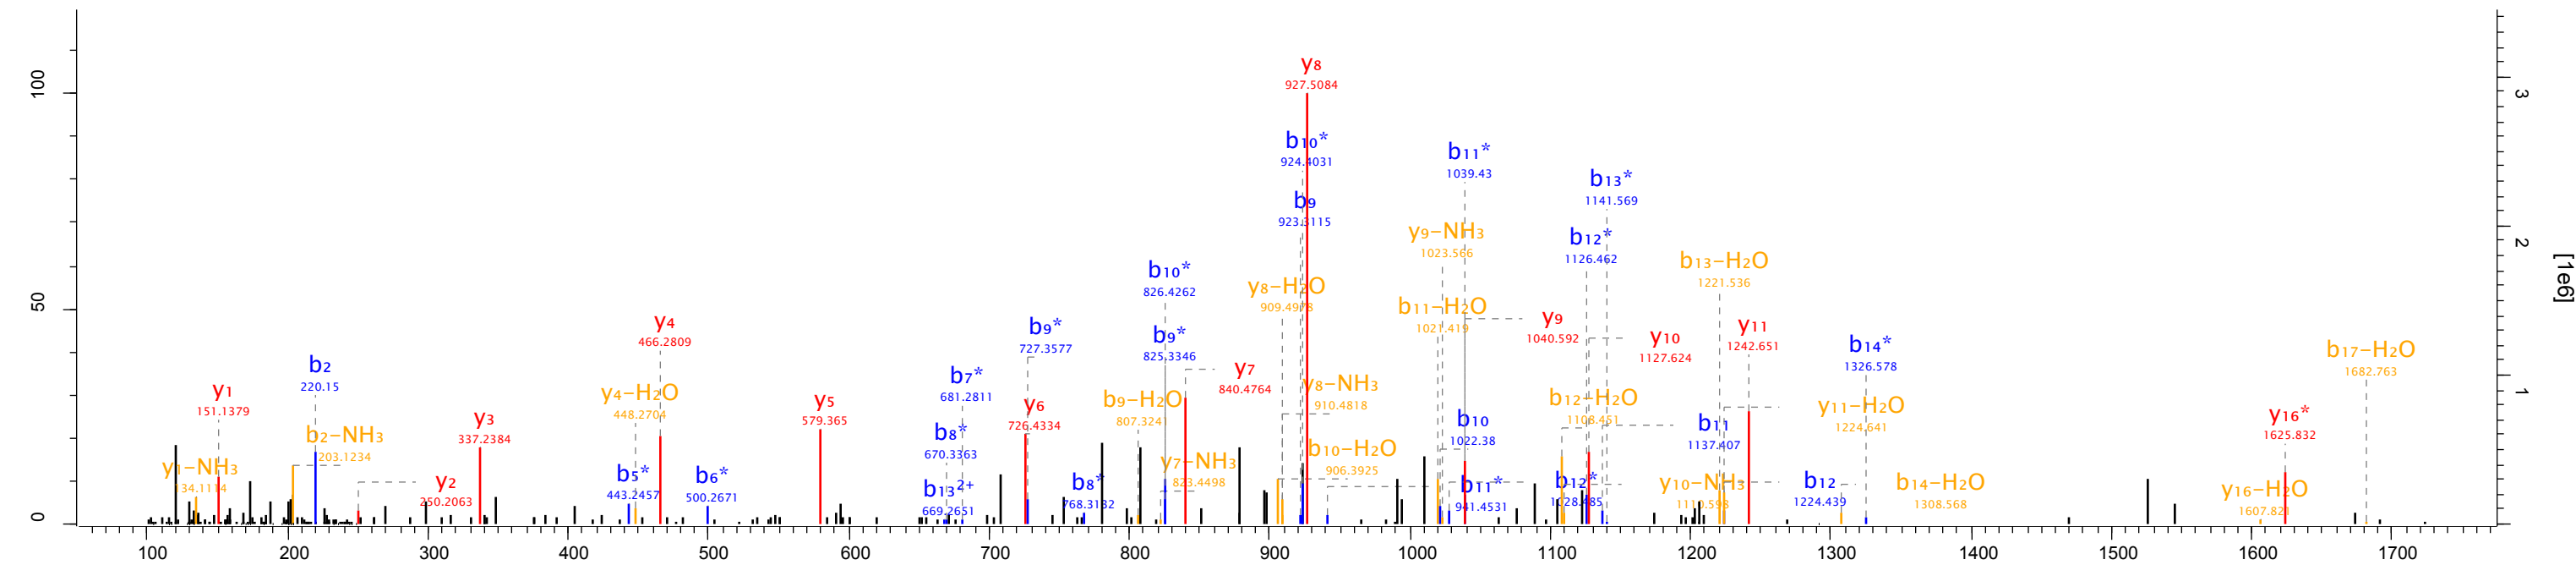

- G R P G ph S G T S G V D S L S N F I E S V K -

b<sub>2</sub>
b<sub>5</sub>\*
b<sub>6</sub>\*
b<sub>7</sub>\*
b<sub>8</sub>\*
b<sub>9</sub>
b<sub>10</sub>
b<sub>11</sub>
b<sub>12</sub>
b<sub>13</sub>\*
b<sub>14</sub>\*
y<sub>16</sub>\*
y<sub>11</sub>
y<sub>10</sub>
y<sub>9</sub>
y<sub>8</sub>
y<sub>7</sub>
y<sub>6</sub>
y<sub>5</sub>
y<sub>4</sub>
y<sub>3</sub>
y<sub>2</sub>
y<sub>1</sub>



Raw file: 20150814\_A375SR\_Phospho\_BR2\_03  
 Scan: 28470 Method: FTMS; HCD Score: 197.73 m/z: 792.67 Gene names: DNNTIP2

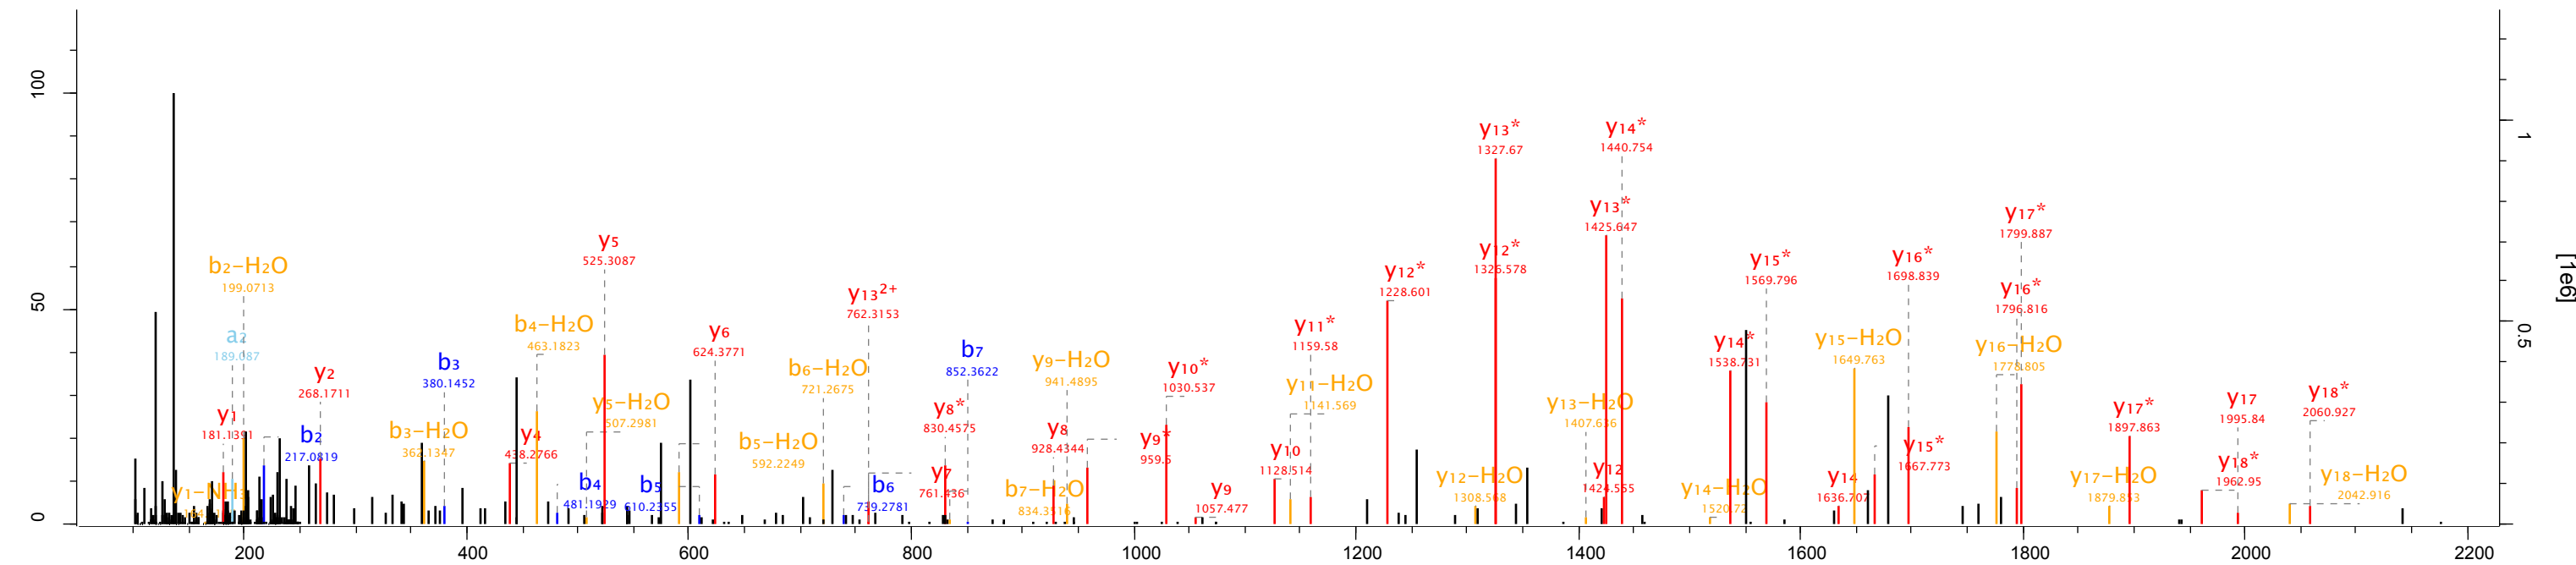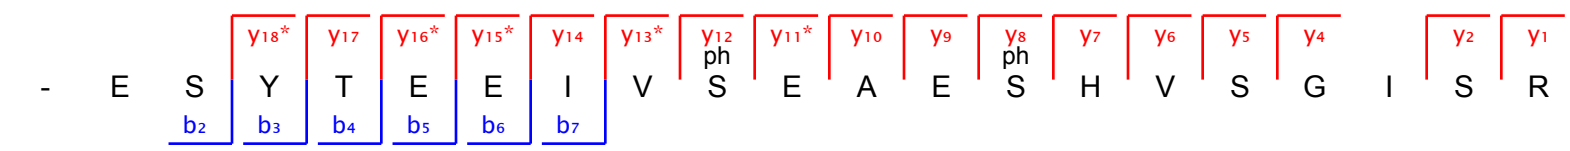

Raw file: 20150814\_A375SR\_Phospho\_BR2\_03  
 Scan: 28870 Method: FTMS; HCD Score: 97.71 m/z: 872.92 Gene names: NSL1

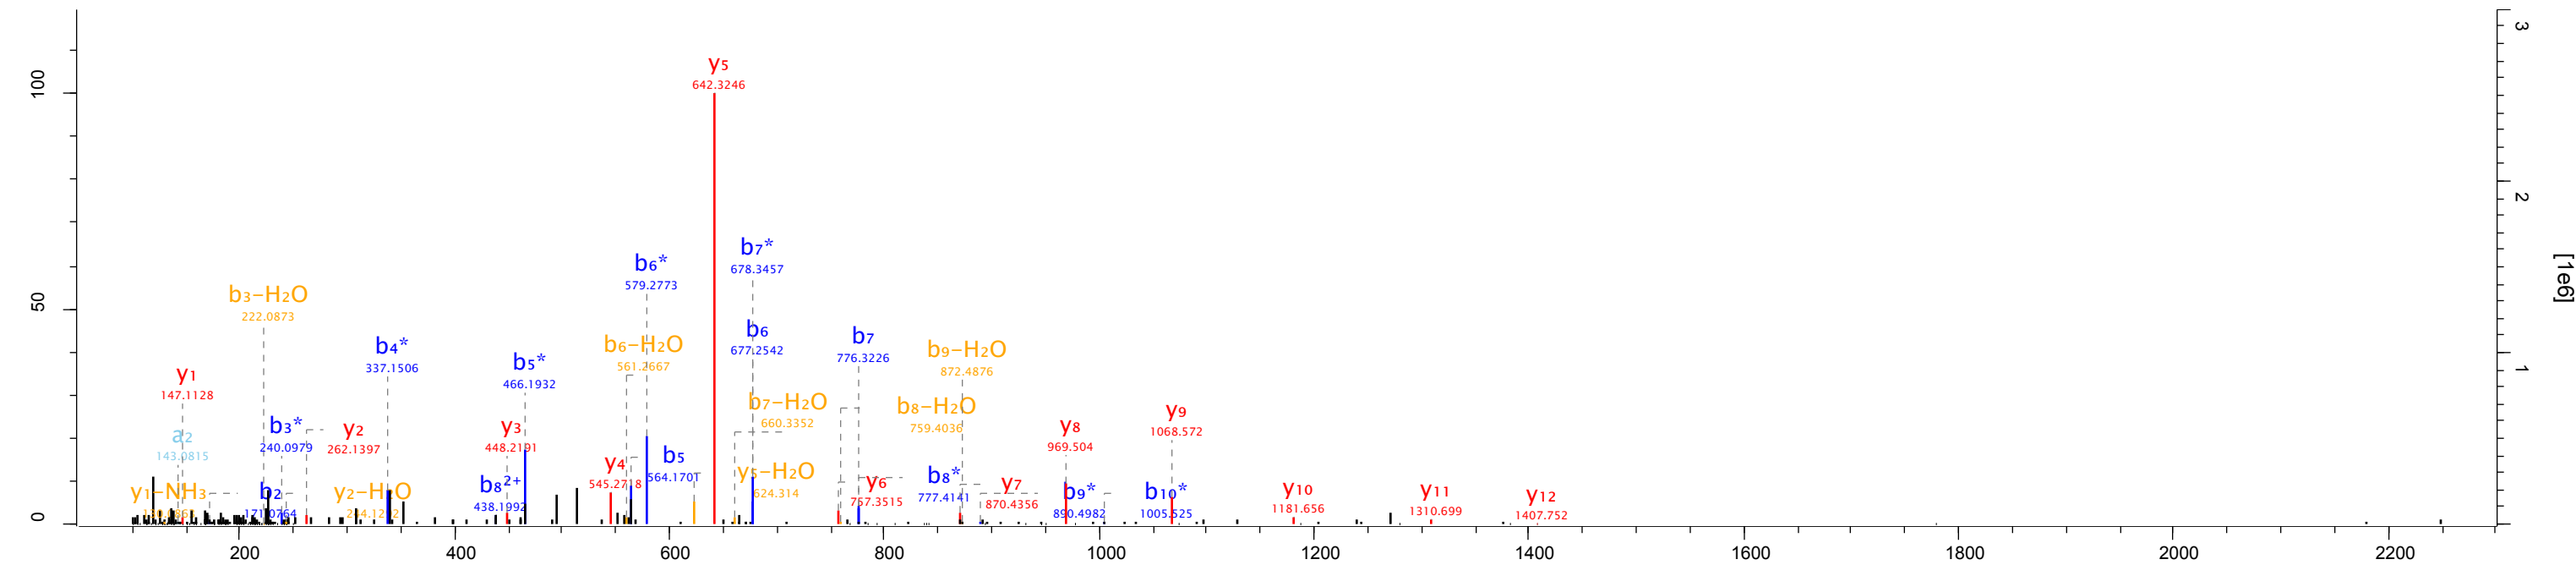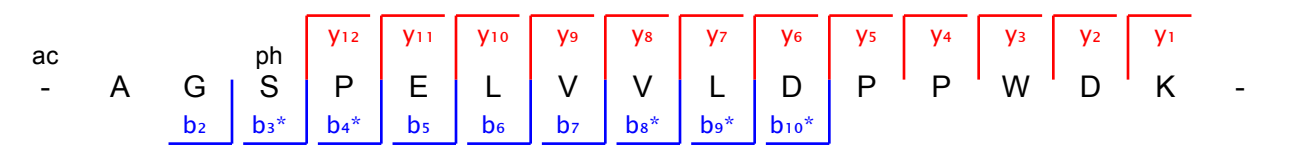

Raw file 20150814\_A375SR\_Phospho\_BR2\_03 Scan 28900 Method FTMS; HCD Score 93.89 m/z 998.83 Gene names NFIB

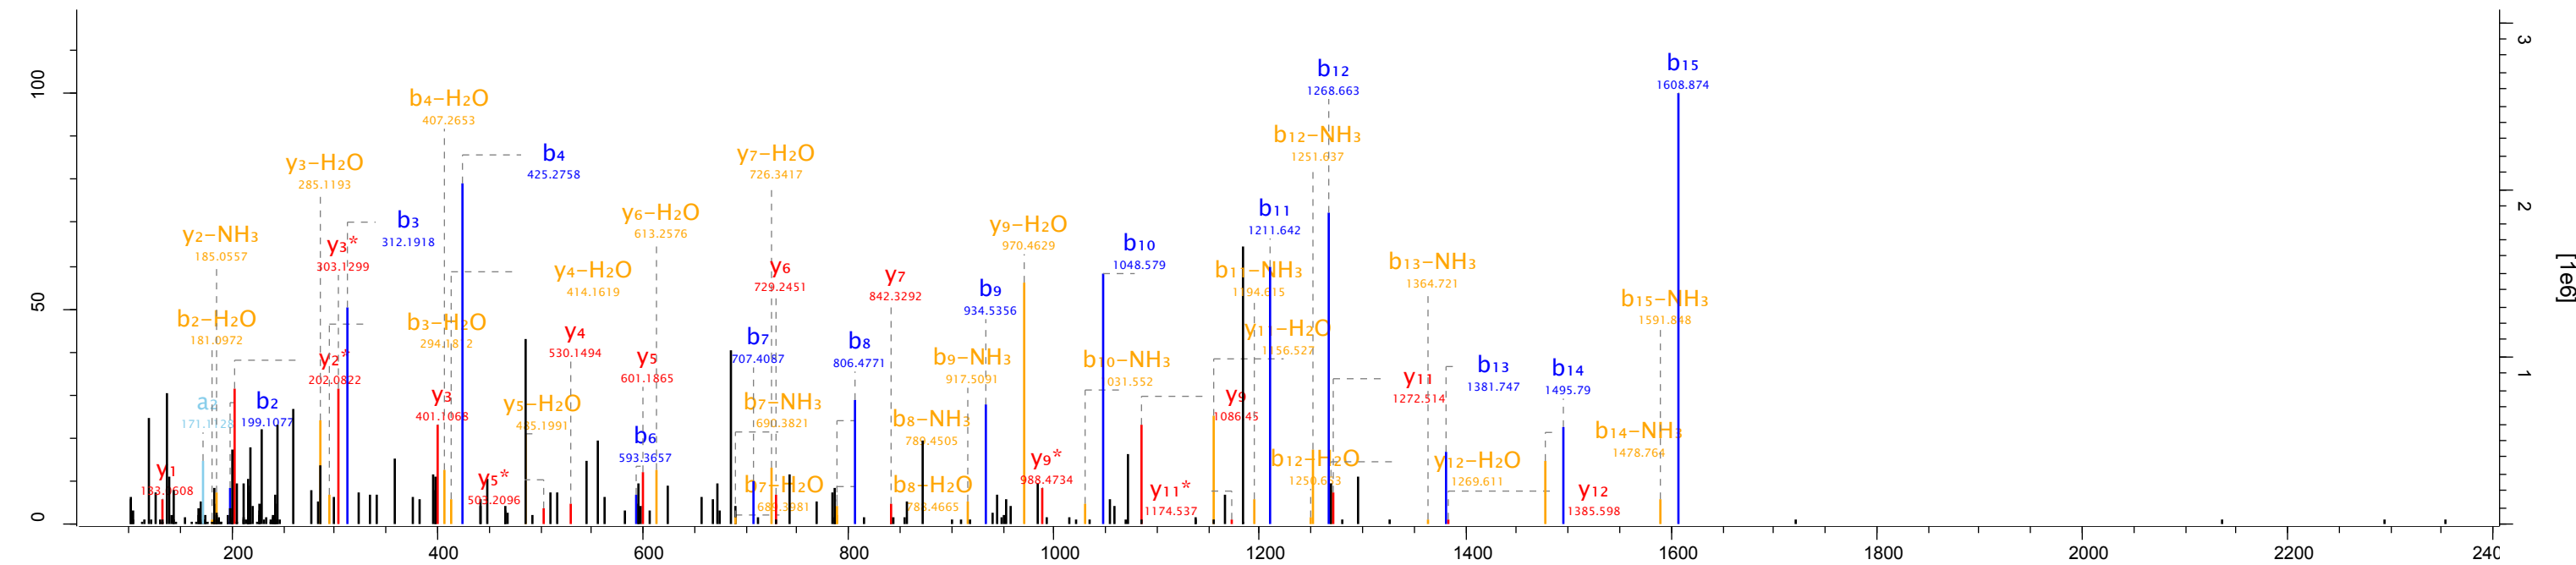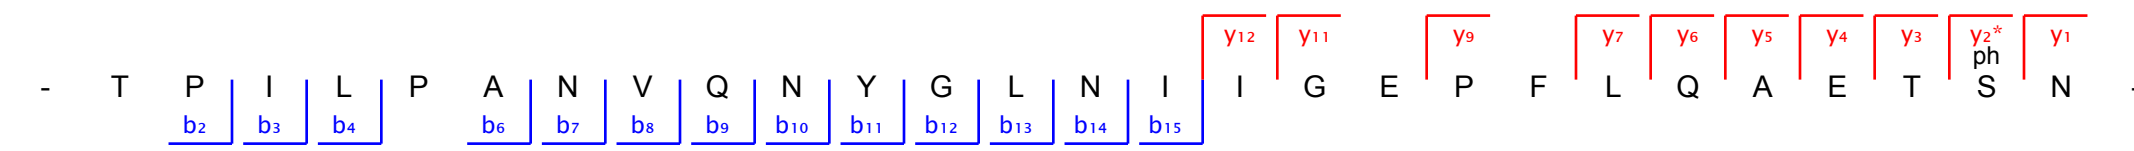

Raw file: 20150814\_A375SR\_Phospho\_BR2\_03  
 Scan: 3500 Method: FTMS; HCD Score: 70.17 m/z: 738.84 Gene names: EIF4G1

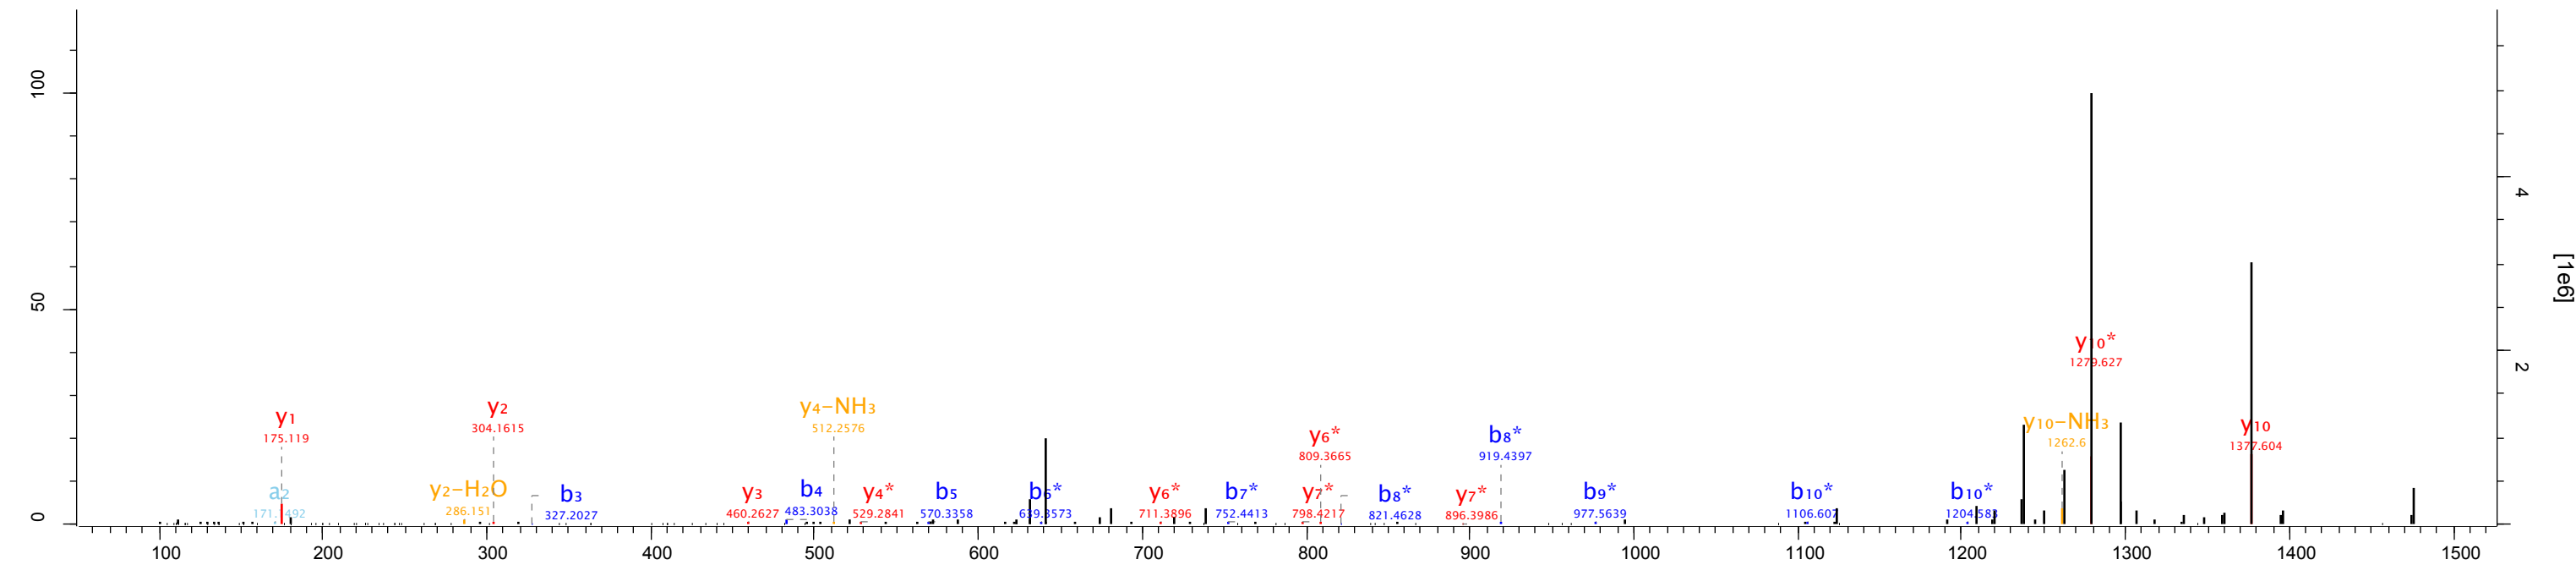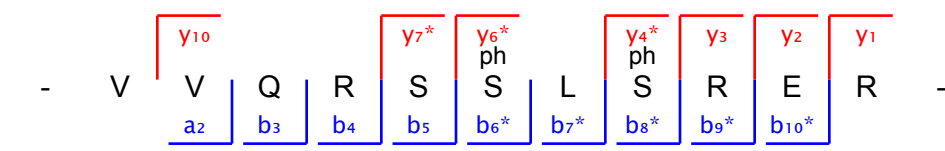

Raw file: 20150814\_A375SR\_Phospho\_BR2\_03  
 Scan: 3740 Method: FTMS; HCD Score: 207.21 m/z: 914.4 Gene names: CLASP1

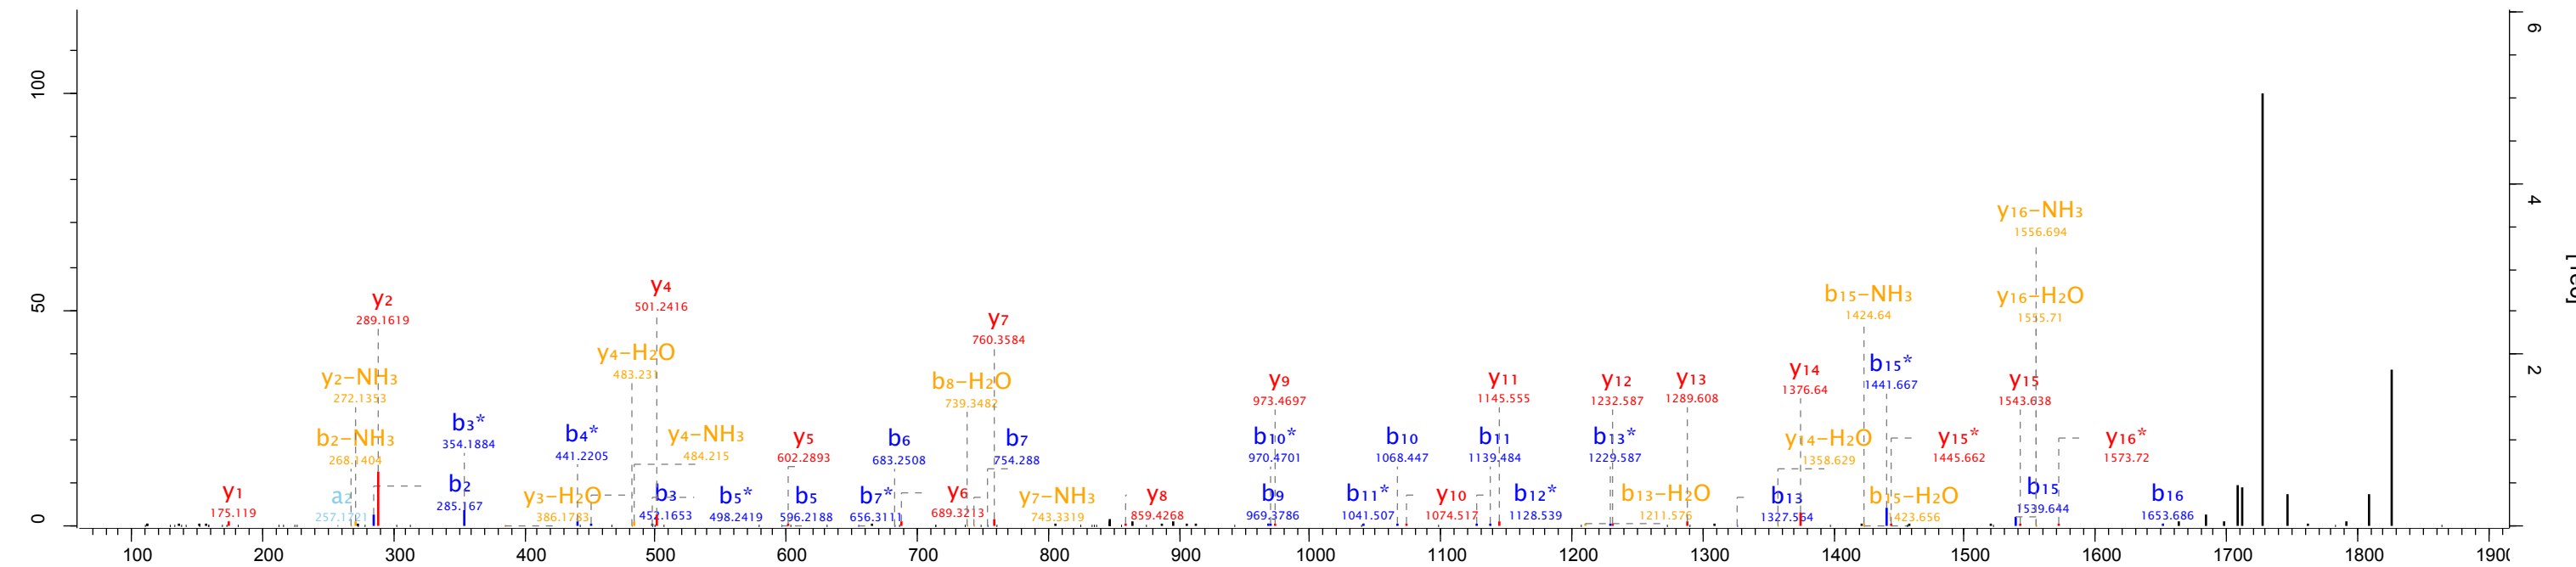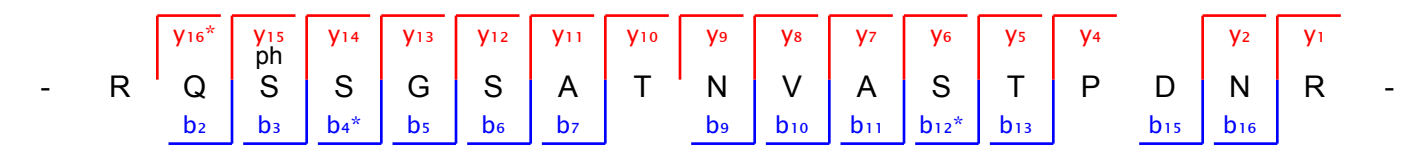

Raw file 20150814\_A375SR\_Phospho\_BR2\_03 Scan 4190 Method FTMS; HCD Score 115.73 m/z 677.8 Gene names LMNB2

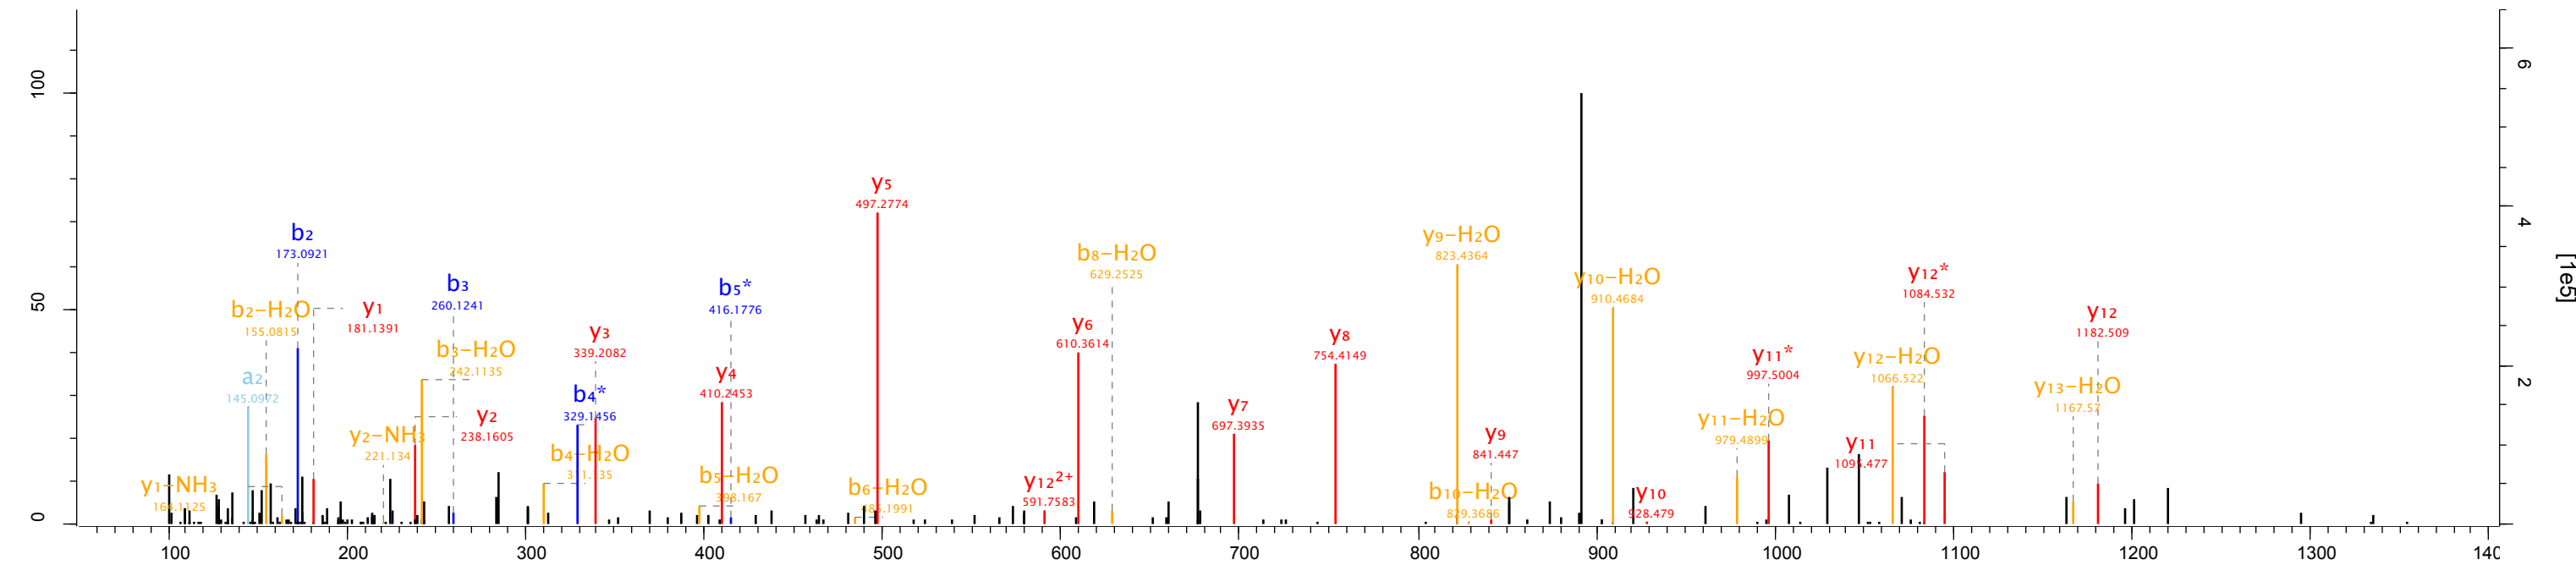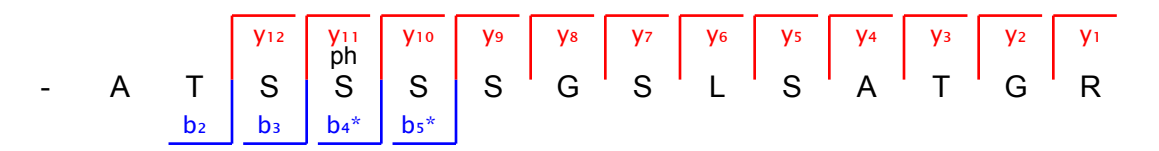

Raw file: 20150814\_A375SR\_Phospho\_BR2\_03  
 Scan: 4300 Method: FTMS; HCD Score: 239.09 m/z: 861.36 Gene names: AKAP12

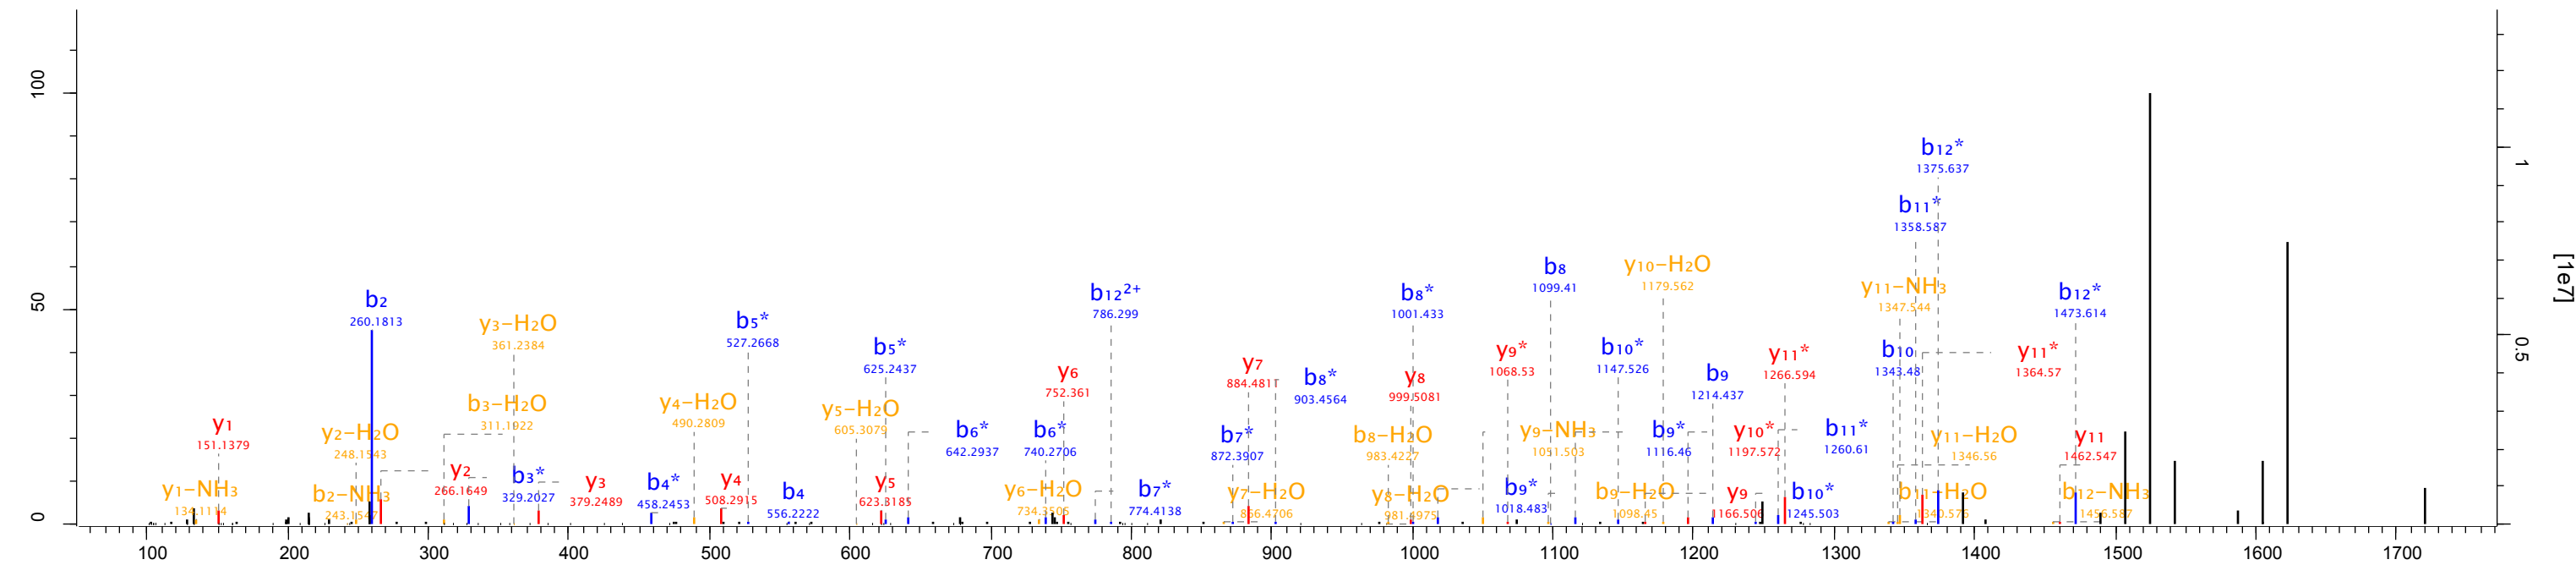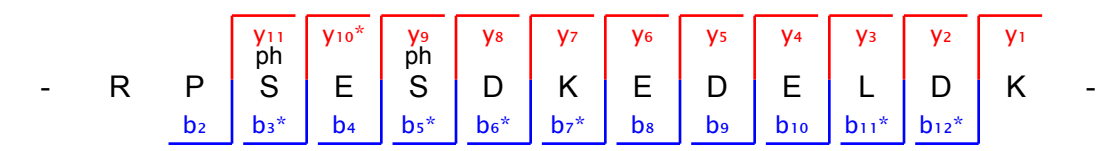

Raw file 20150814\_A375SR\_Phospho\_BR2\_03 Scan 4710 Method FTMS; HCD Score 166.96 m/z 727.31 Gene names U2AF1

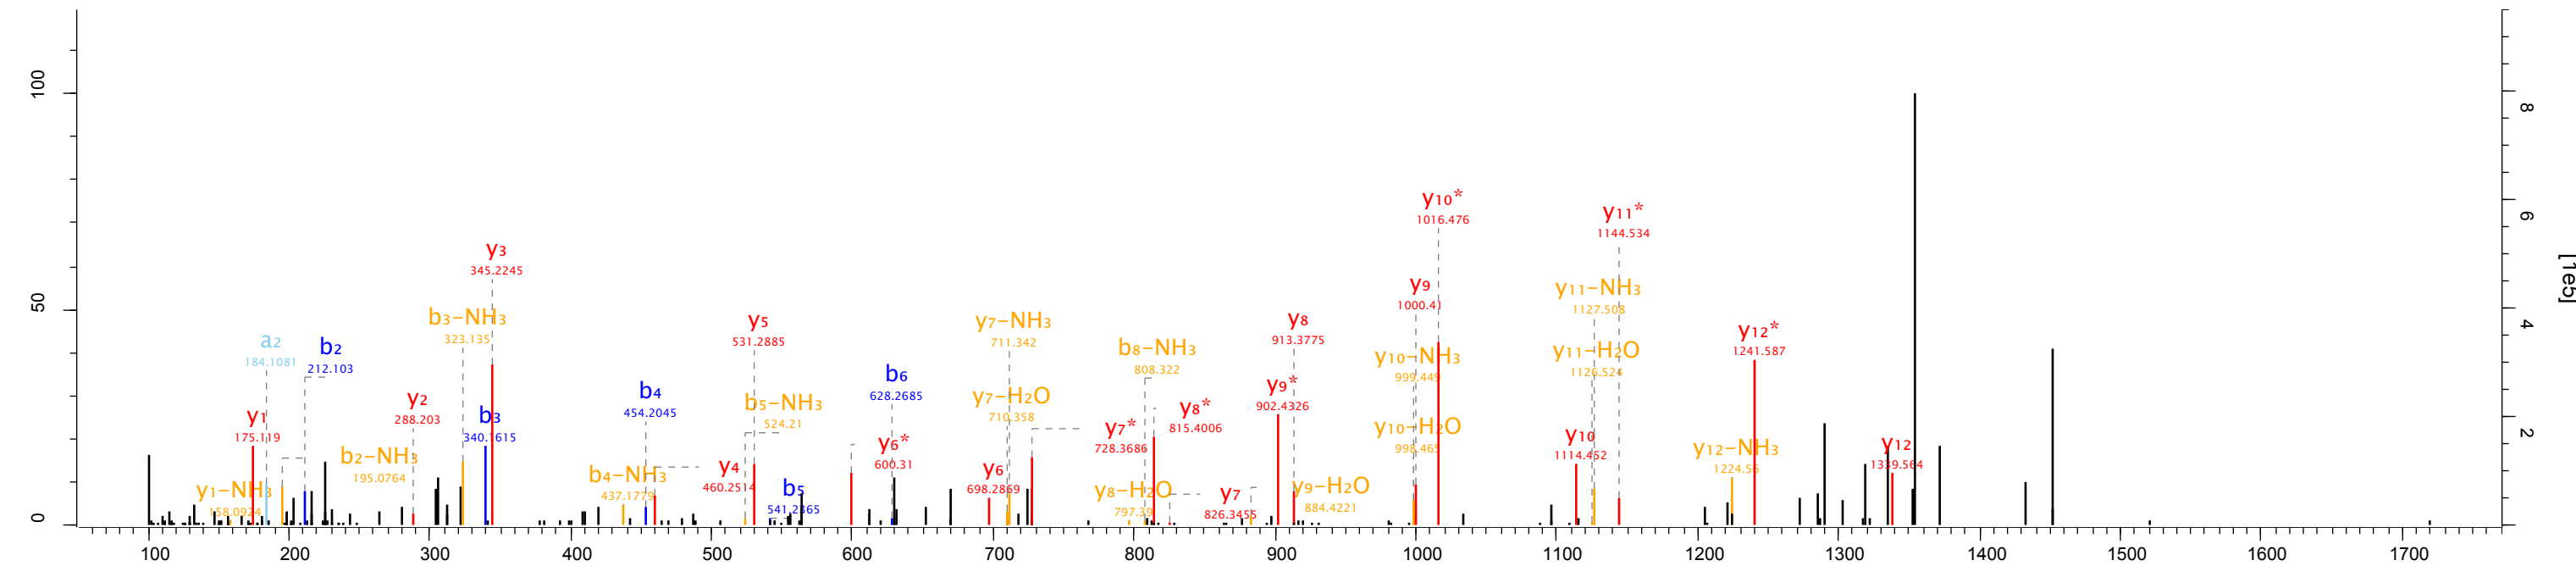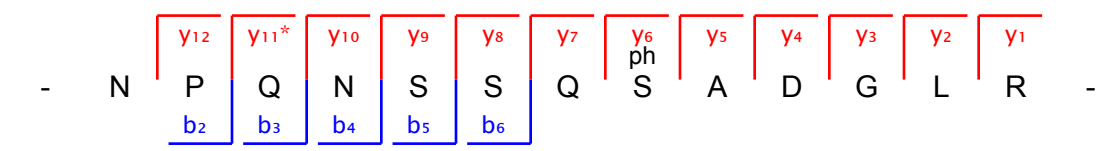



Raw file: 20150814\_A375SR\_Phospho\_BR2\_03  
 Scan: 5820 Method: FTMS; HCD Score: 146.48 m/z: 629.76 Gene names: ALG3

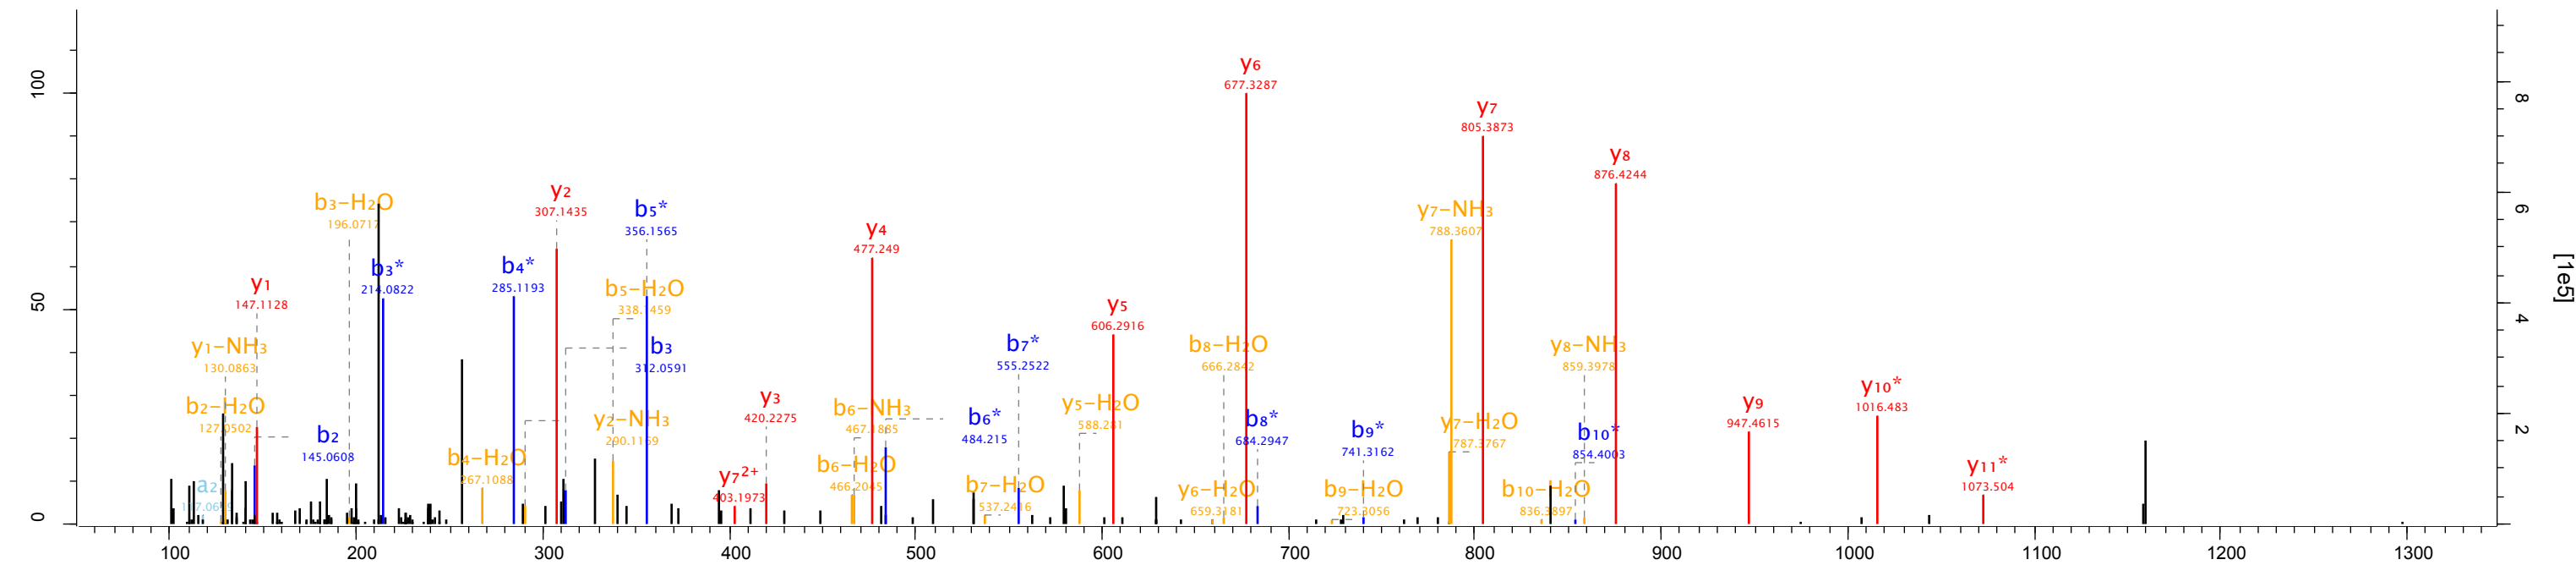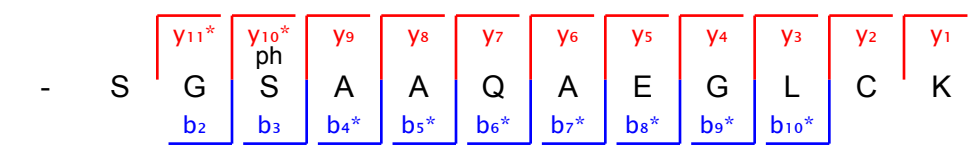

Raw file: 20150814\_A375SR\_Phospho\_BR2\_03  
 Scan: 5990 Method: FTMS; HCD Score: 177.71 m/z: 937.88 Gene names: PDS5B

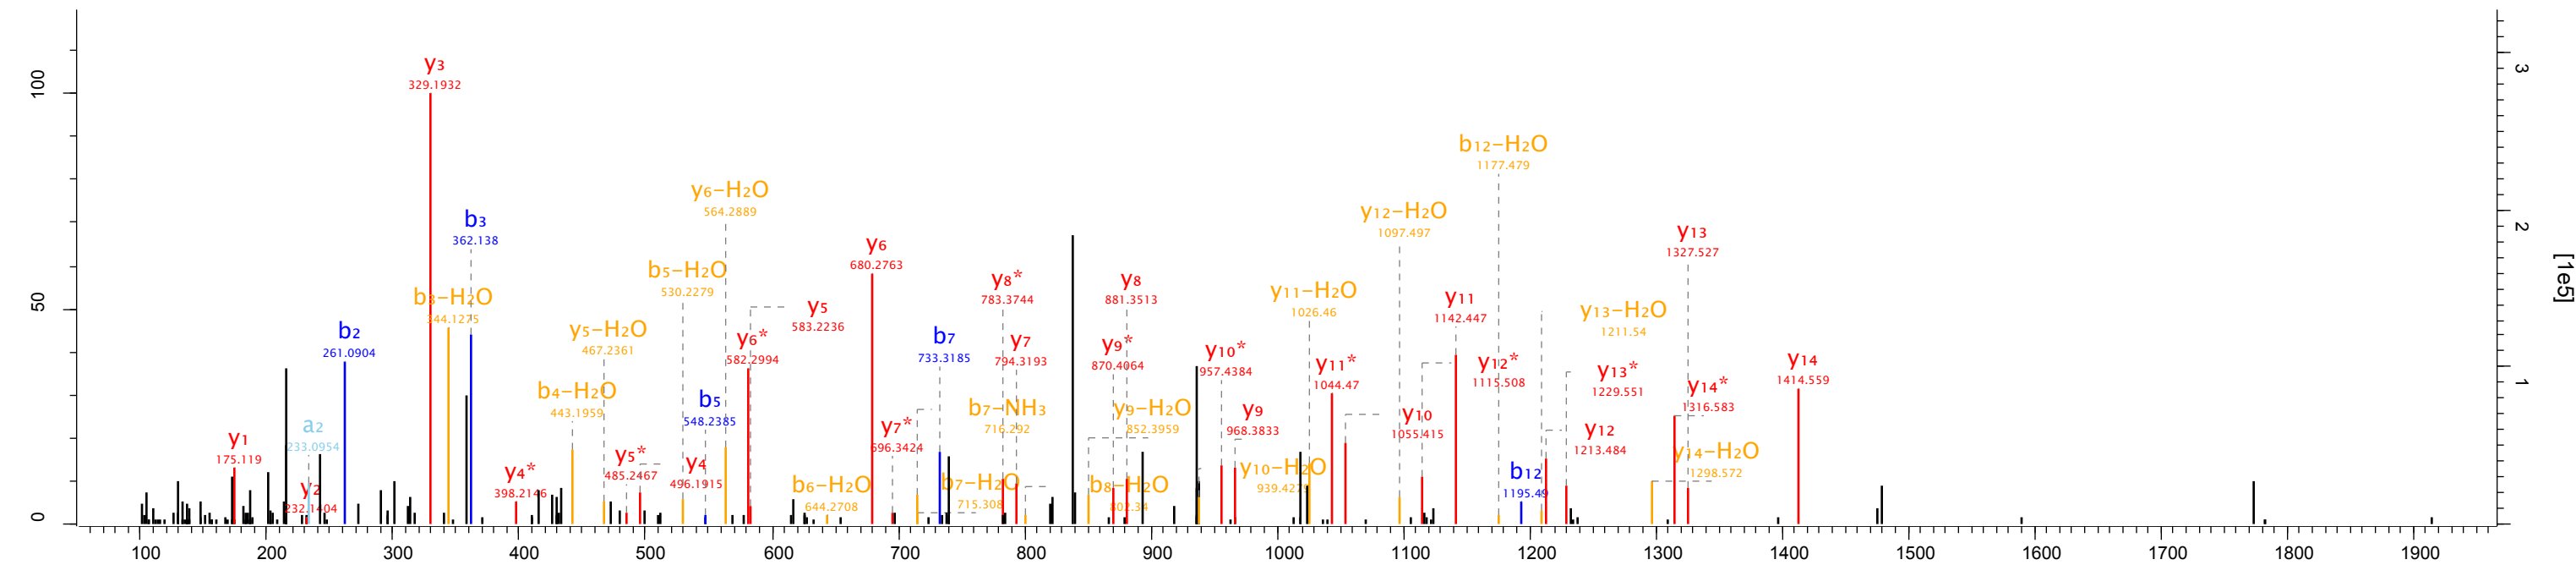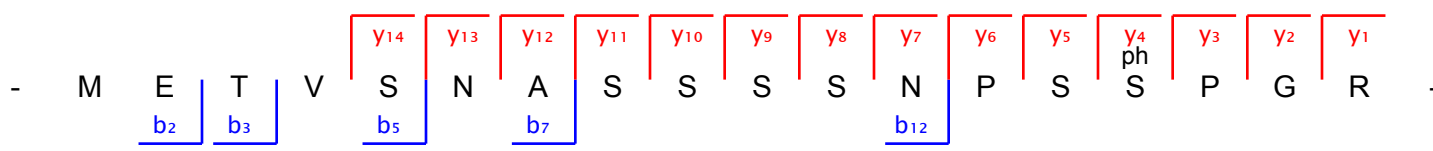

Raw file: 20150814\_A375SR\_Phospho\_BR2\_03  
 Scan: 6030 Method: FTMS; HCD Score: 268.06 m/z: 1005.94 Gene names: TCF12

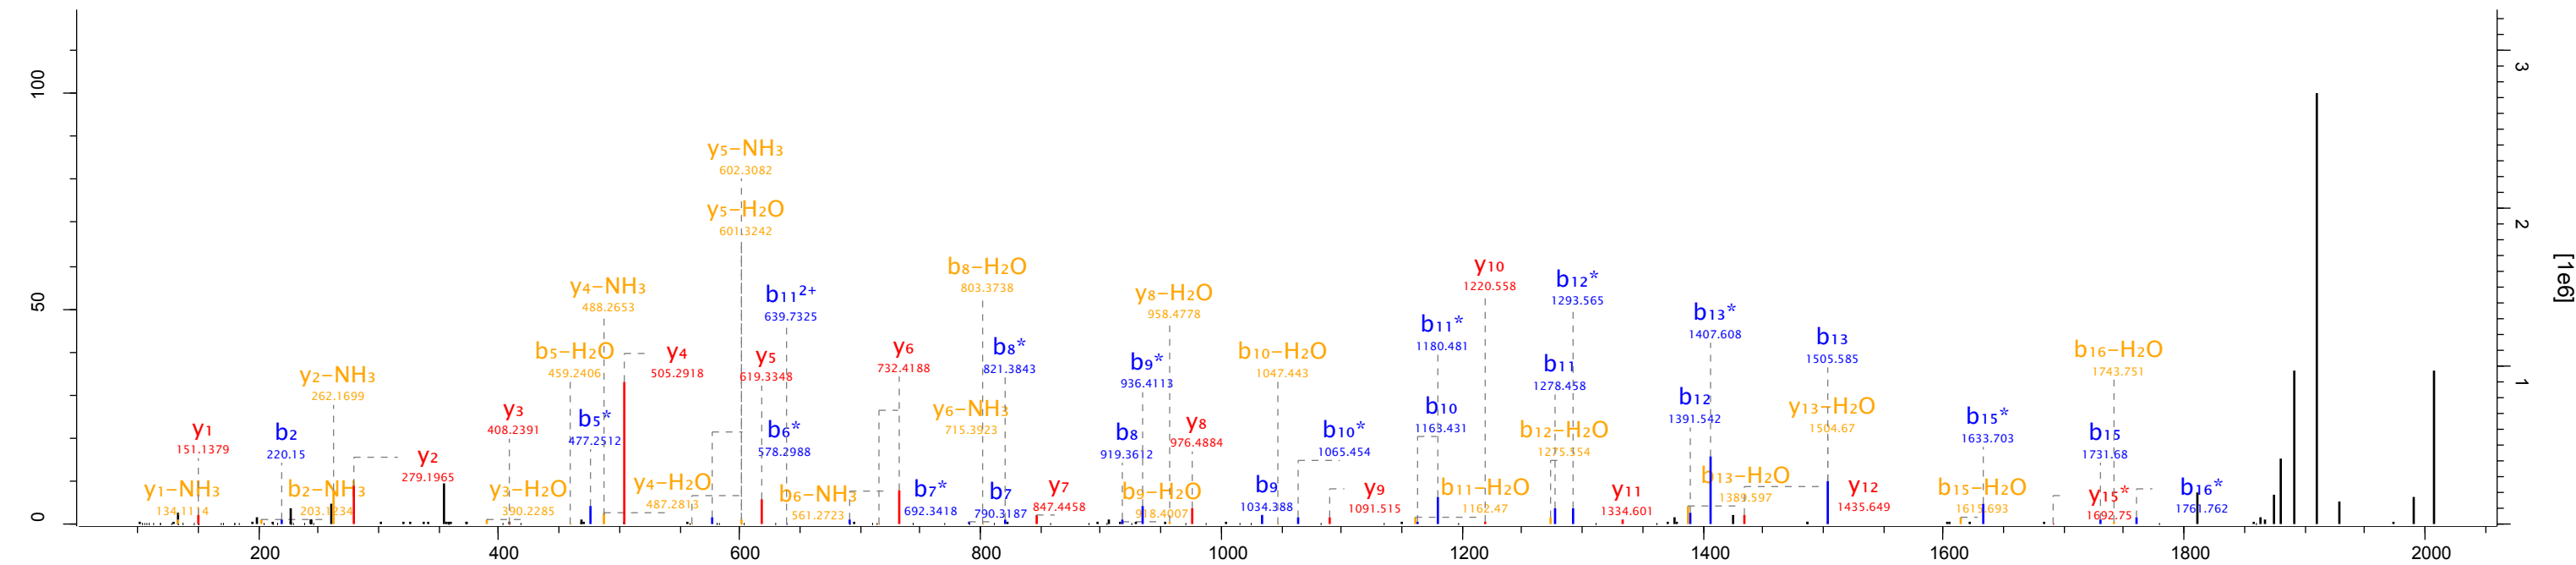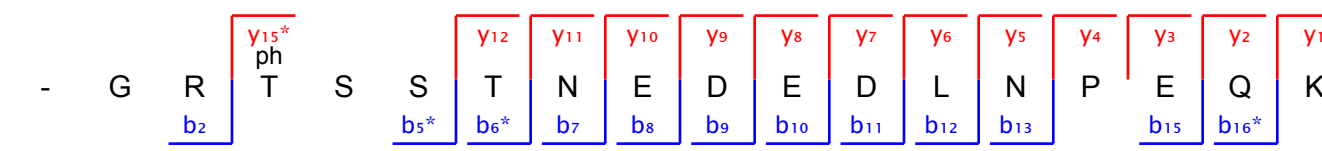

Raw file: 20150814\_A375SR\_Phospho\_BR2\_03  
 Scan: 6330 Method: FTMS; HCD Score: 77.04 m/z: 882.83 Gene names: RBMX;RBMXL1

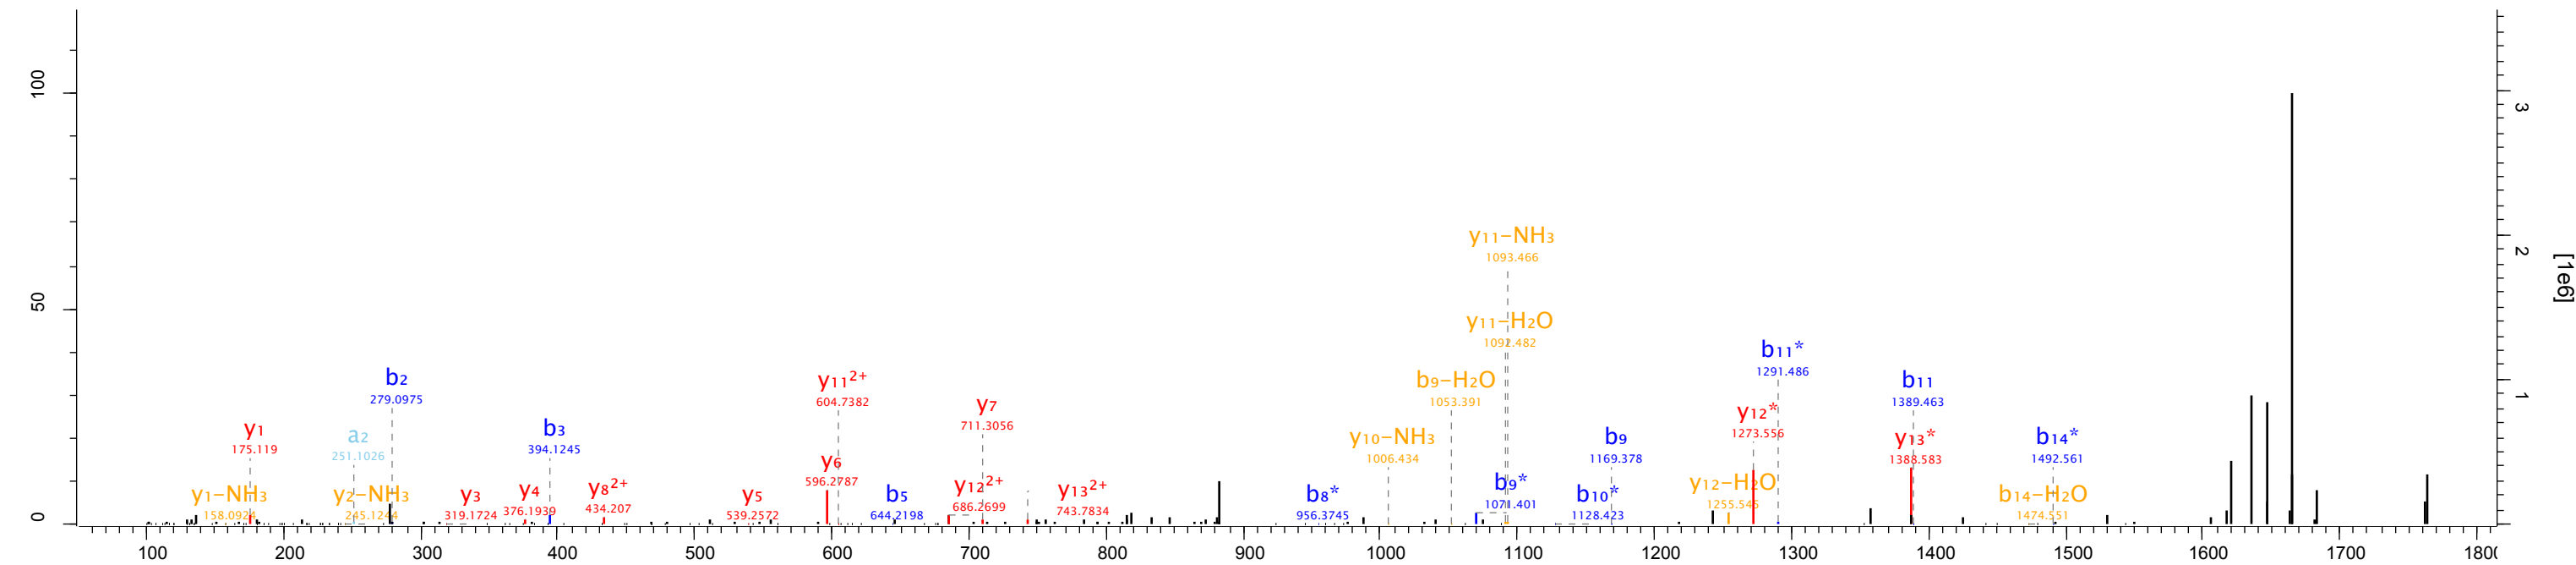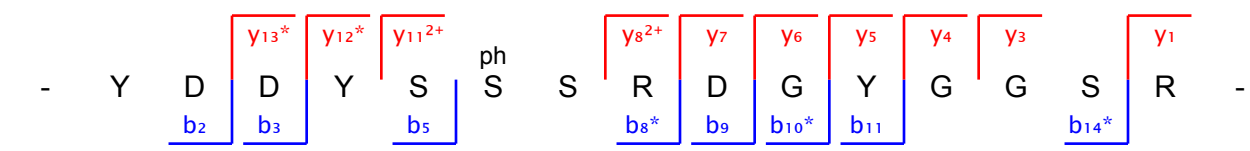

Raw file: 20150814\_A375SR\_Phospho\_BR2\_03  
 Scan: 6500 Method: FTMS; HCD Score: 218.83 m/z: 713.79 Gene names: ANKRD17

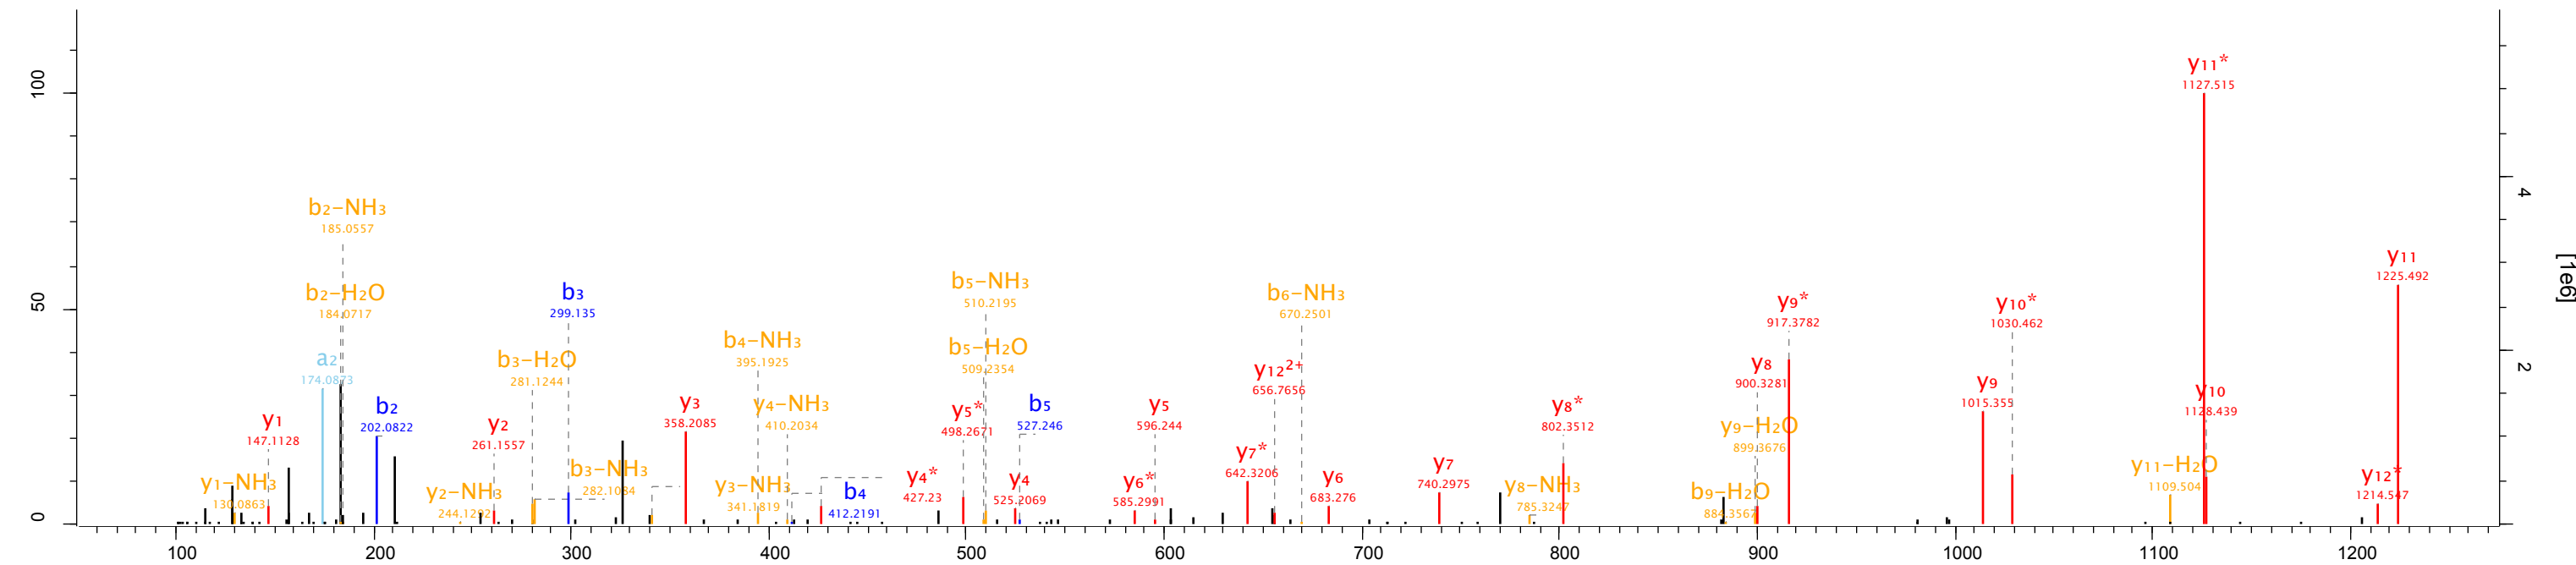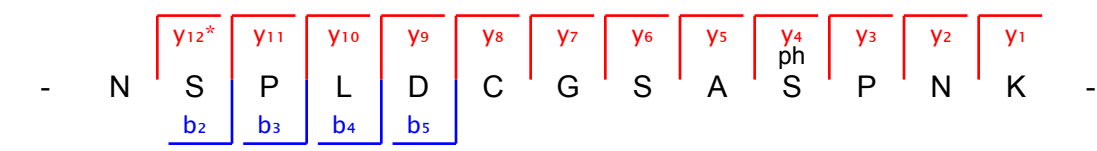

Raw file: 20150814\_A375SR\_Phospho\_BR2\_03  
 Scan: 7430 Method: FTMS; HCD Score: 59.23 m/z: 630.77 Gene names: EPB41

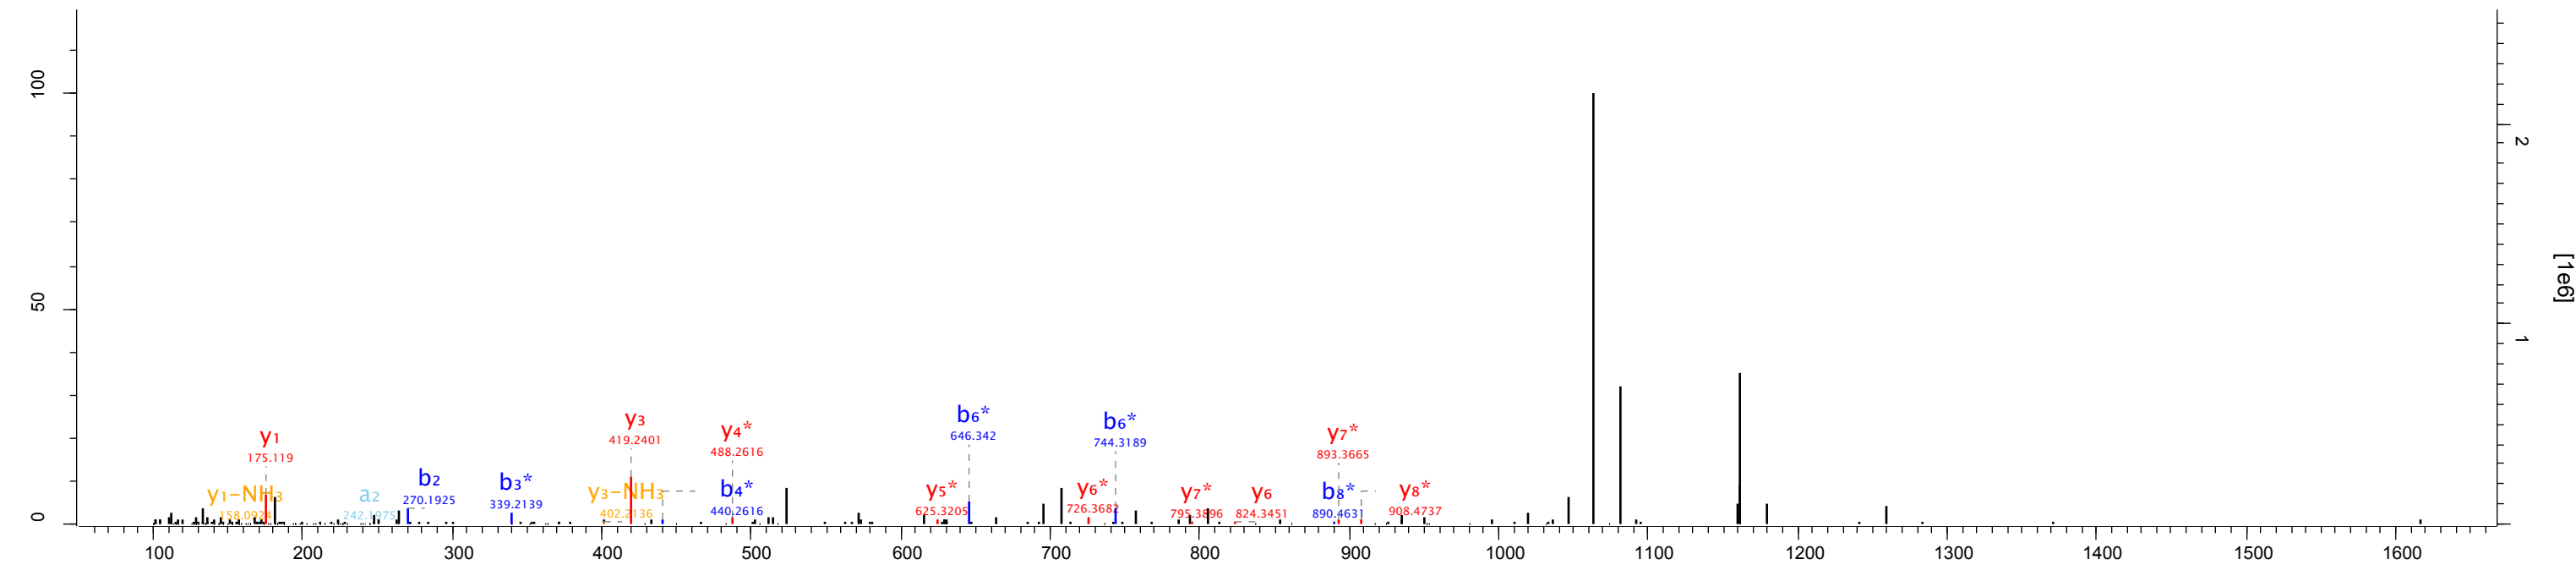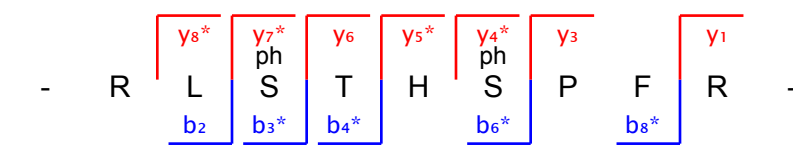

Raw file: 20150814\_A375SR\_Phospho\_BR2\_03  
 Scan: 7970 Method: FTMS; HCD Score: 135.14 m/z: 593.79 Gene names: GTF2F1

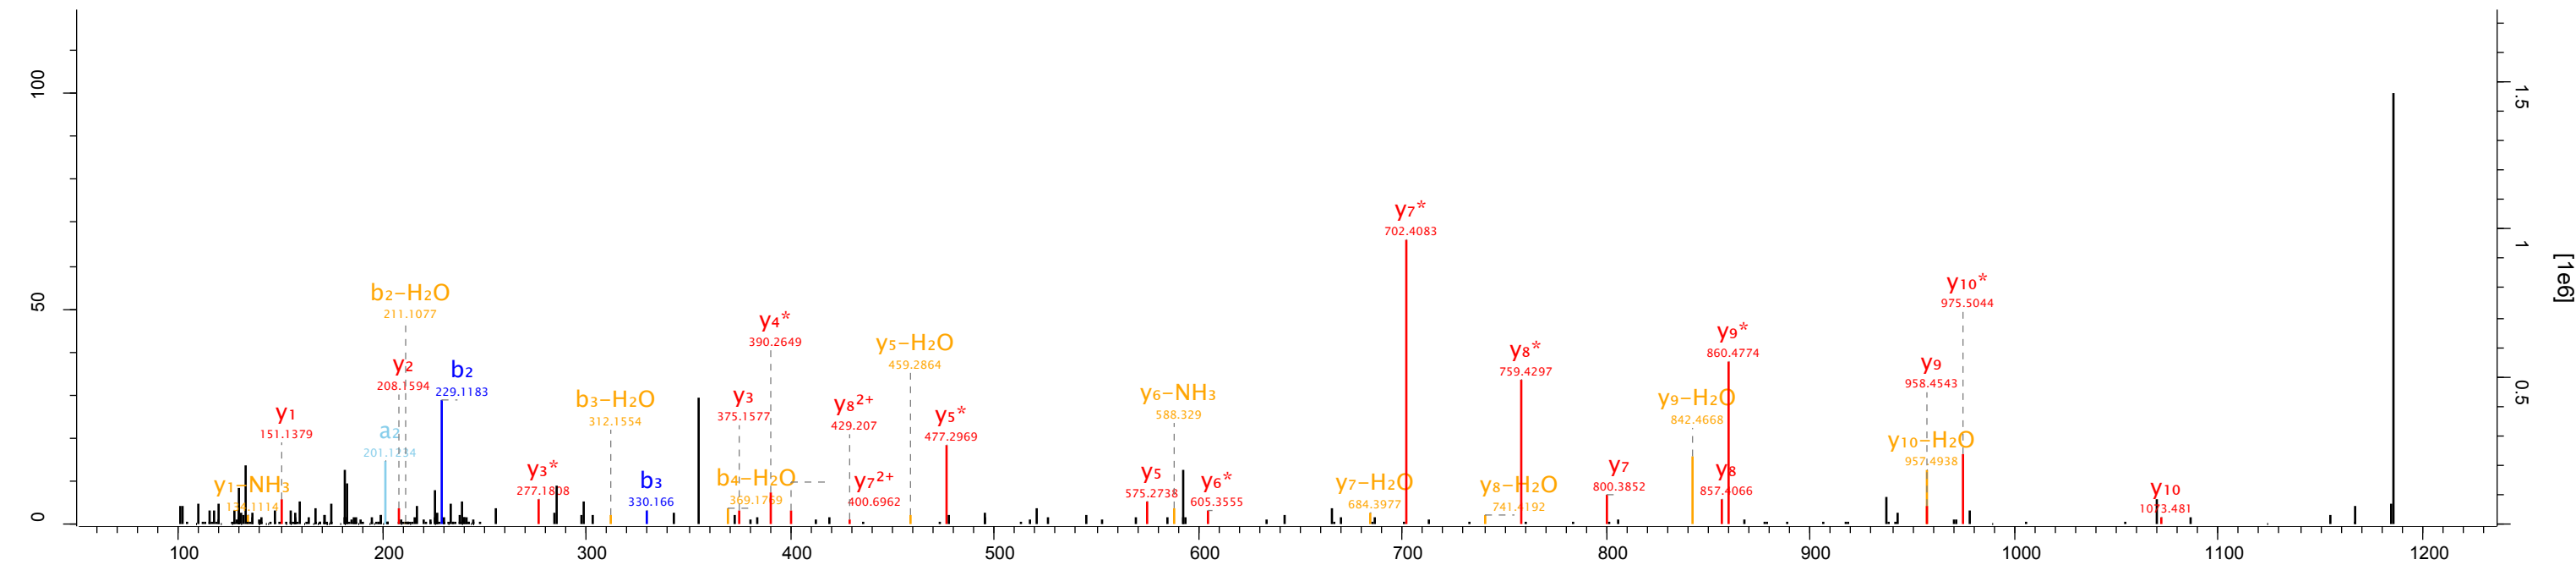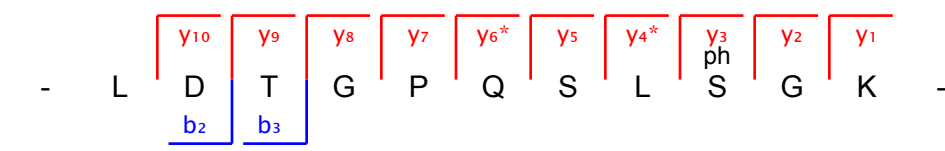

Raw file: 20150814\_A375SR\_Phospho\_BR2\_03  
 Scan: 8350 Method: FTMS; HCD Score: 146.09 m/z: 1012.94 Gene names: ARHGEF11

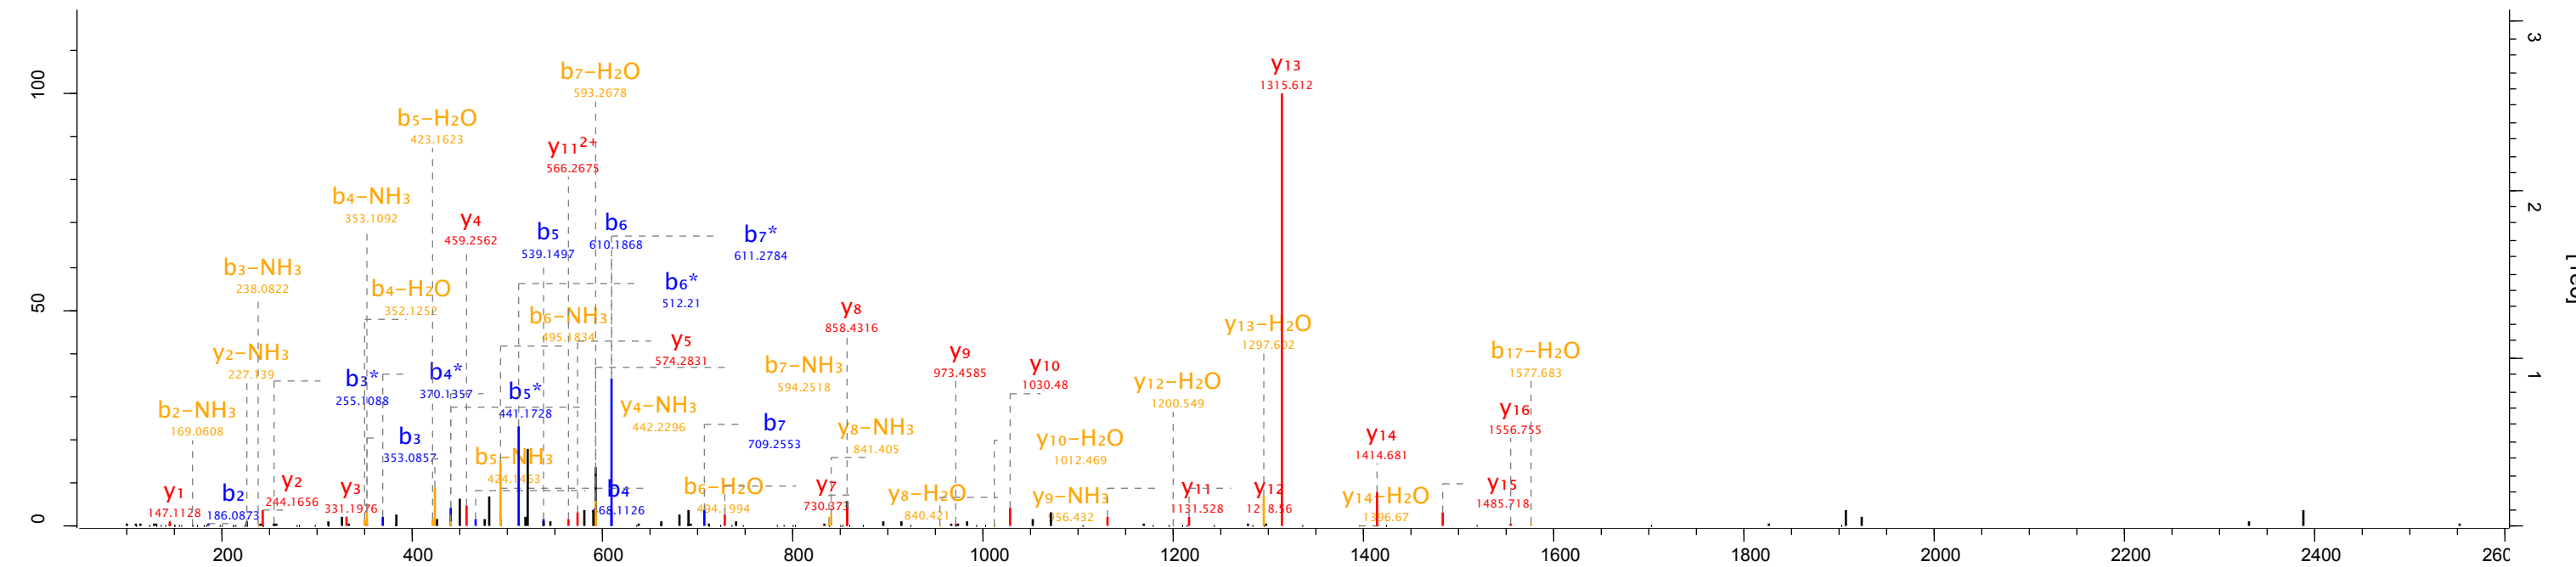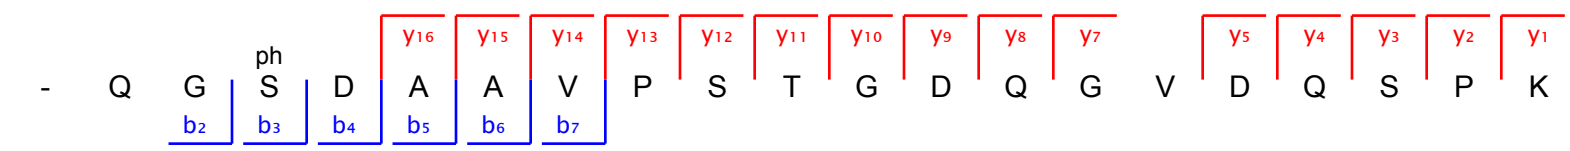



Raw file: 20150814\_A375SR\_Phospho\_BR2\_04  
 Scan: 10070 Method: FTMS; HCD Score: 128.57 m/z: 632.78 Gene names: DDX20

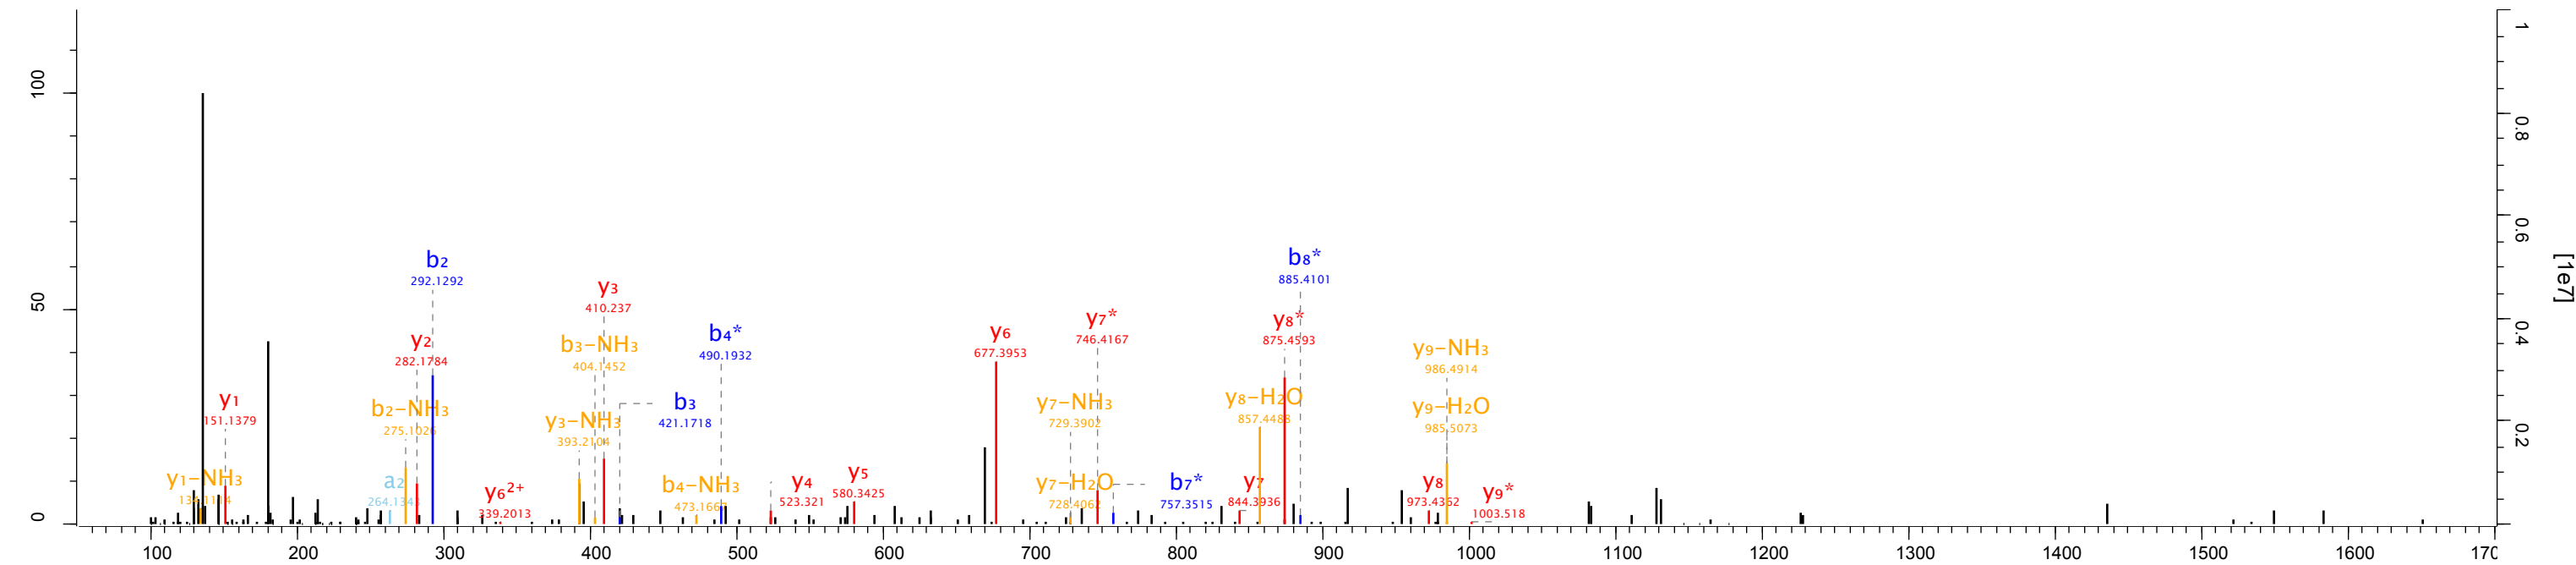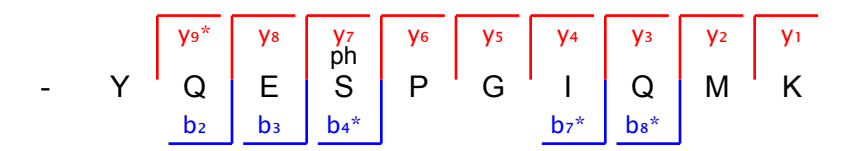

Raw file: 20150814\_A375SR\_Phospho\_BR2\_04  
 Scan: 10180 Method: FTMS; HCD Score: 76.01 m/z: 588.28 Gene names: ZNF608

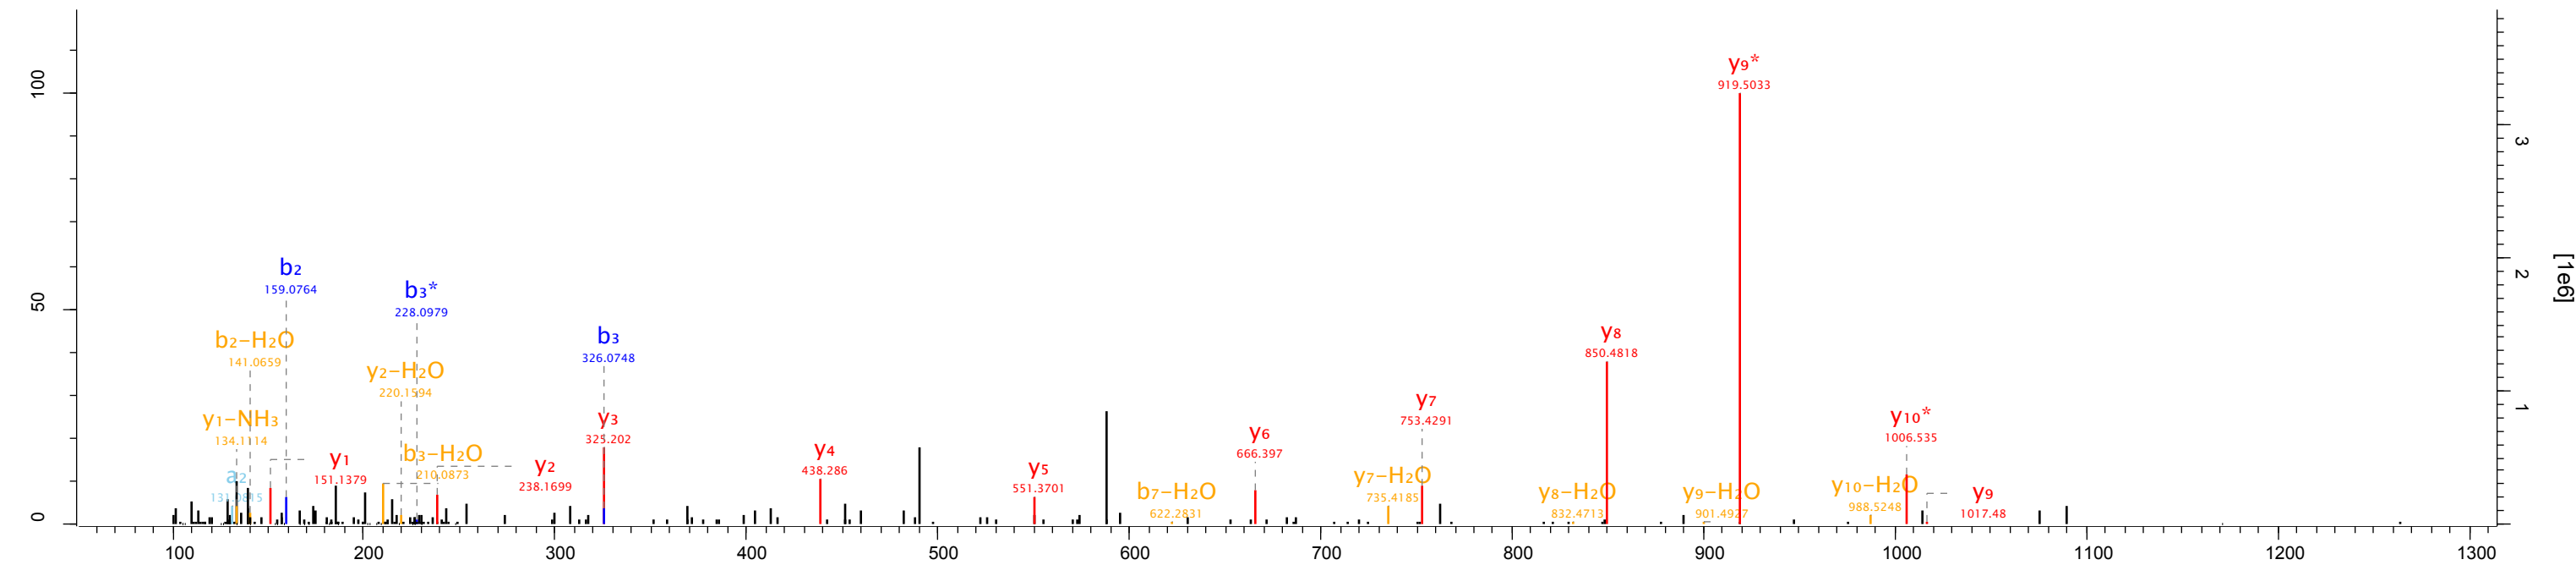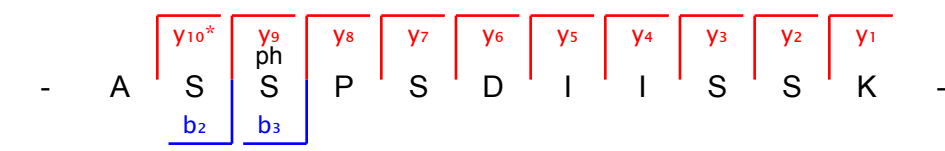

Raw file: 20150814\_A375SR\_Phospho\_BR2\_04  
 Scan: 10270 Method: FTMS; HCD Score: 283.49 m/z: 923.37 Gene names: MDM2;mdm2

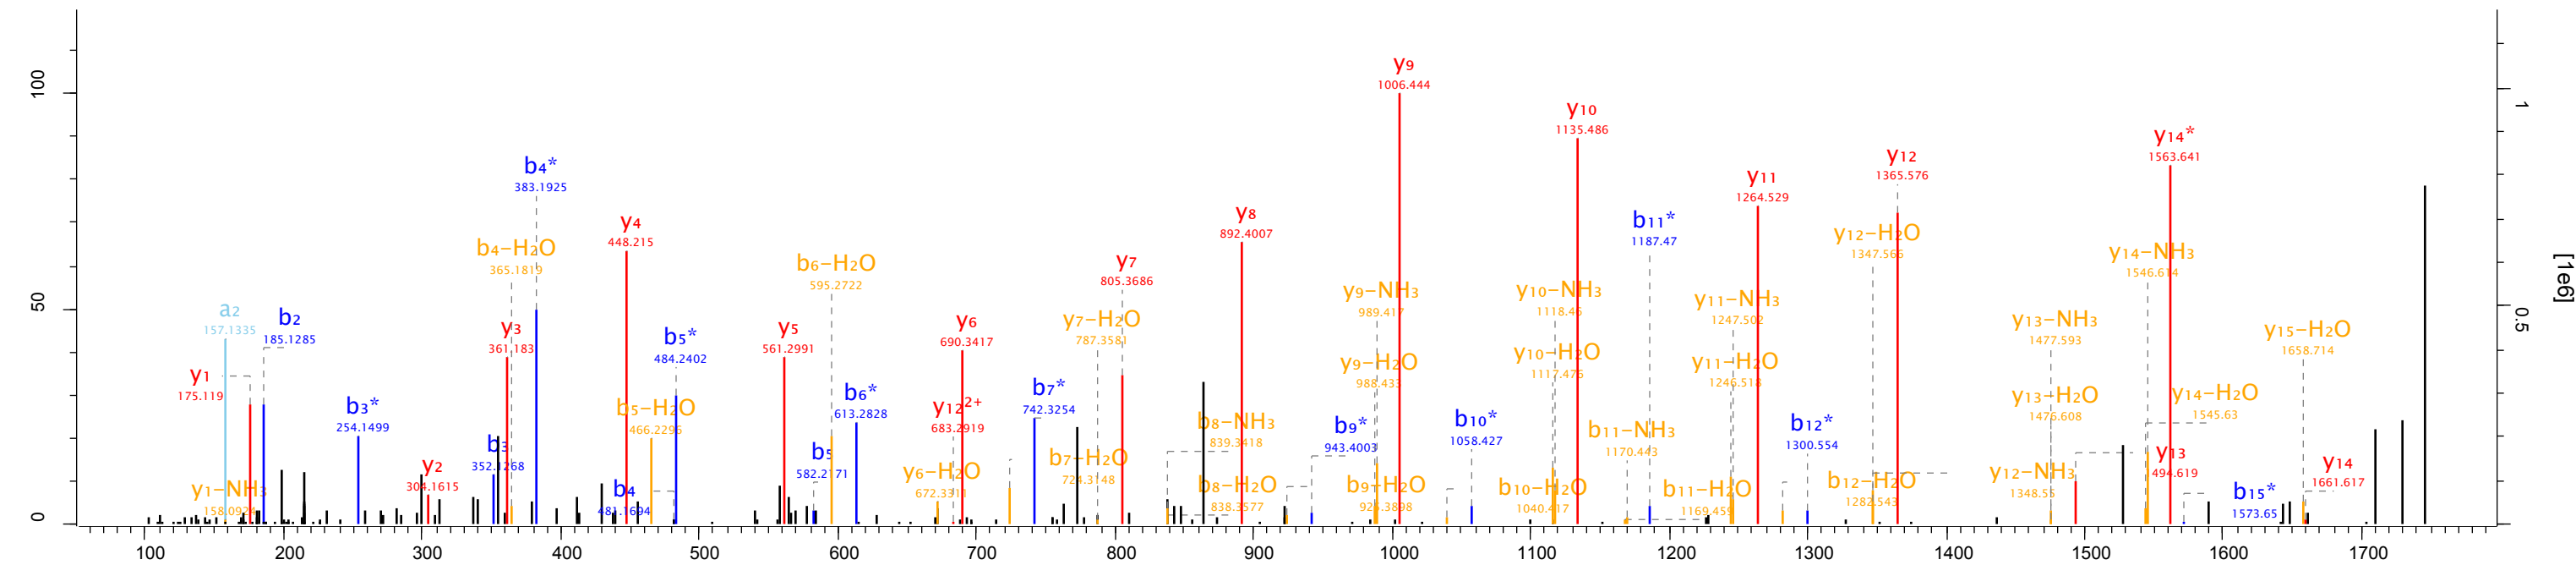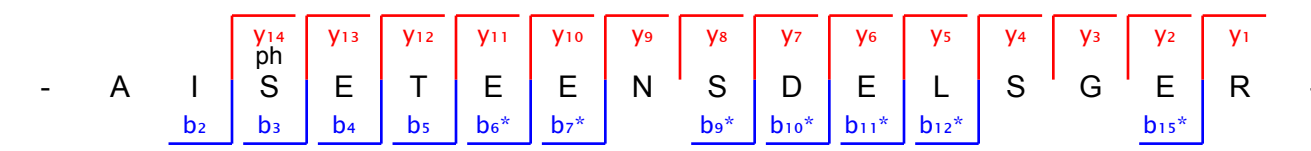

Raw file: 20150814\_A375SR\_Phospho\_BR2\_04  
 Scan: 10300 Method: FTMS; HCD Score: 144.51 m/z: 619.76 Gene names: C2CD5

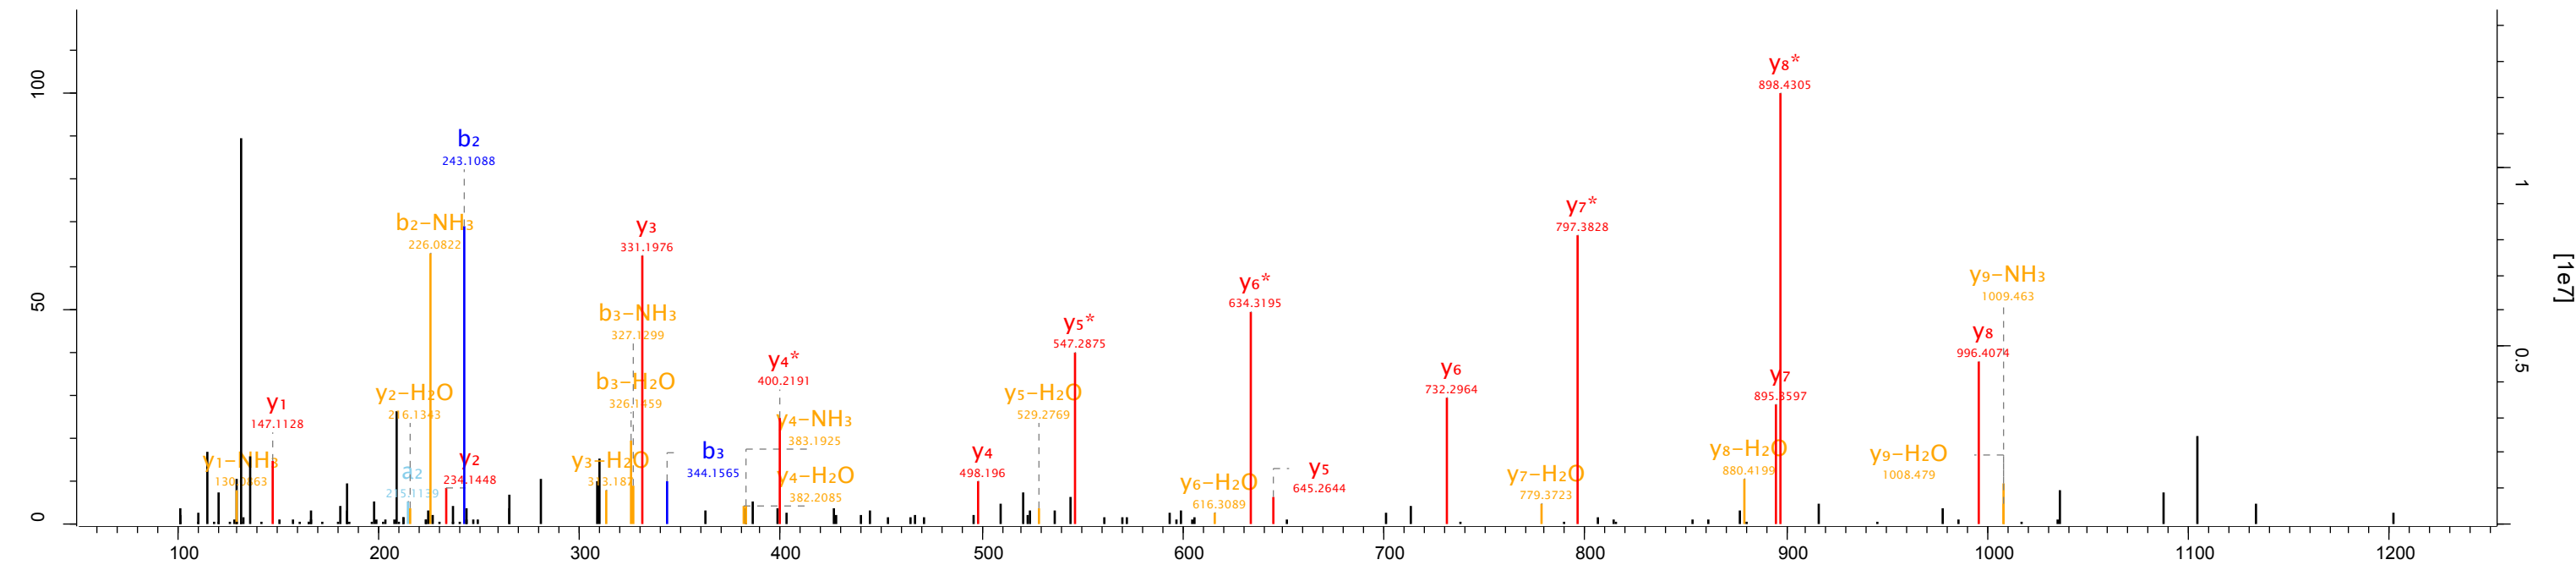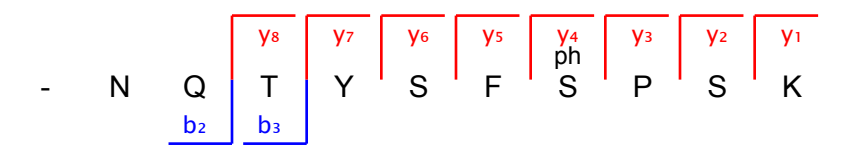

Raw file 20150814\_A375SR\_Phospho\_BR2\_04 Scan 10440 Method FTMS; HCD Score 158.8 m/z 913.45 Gene names SMG7

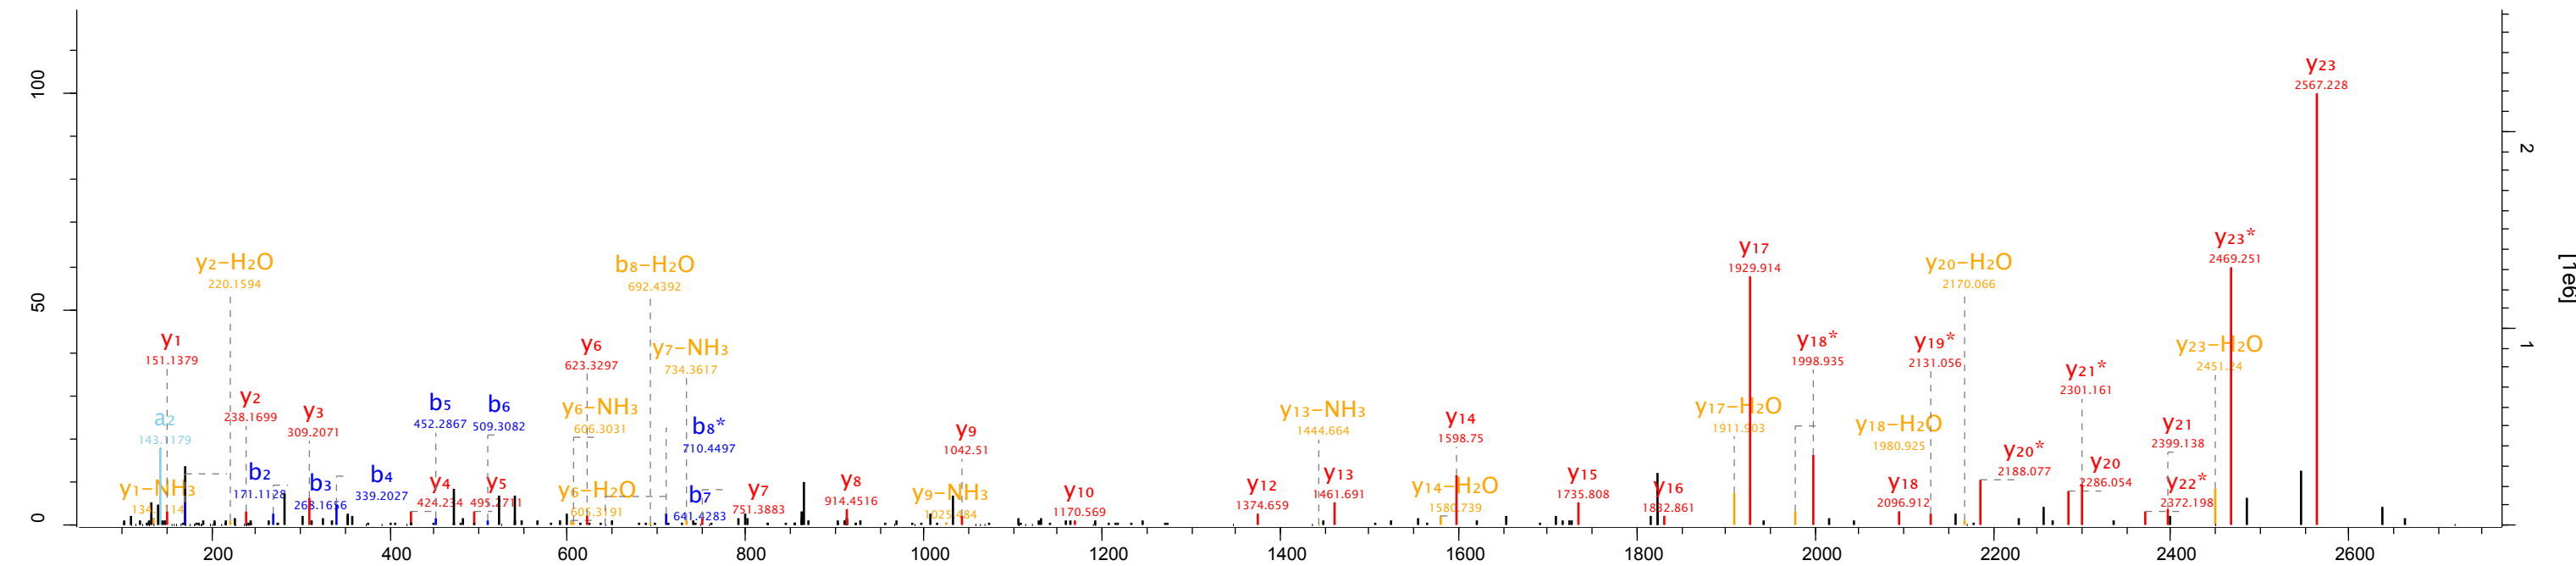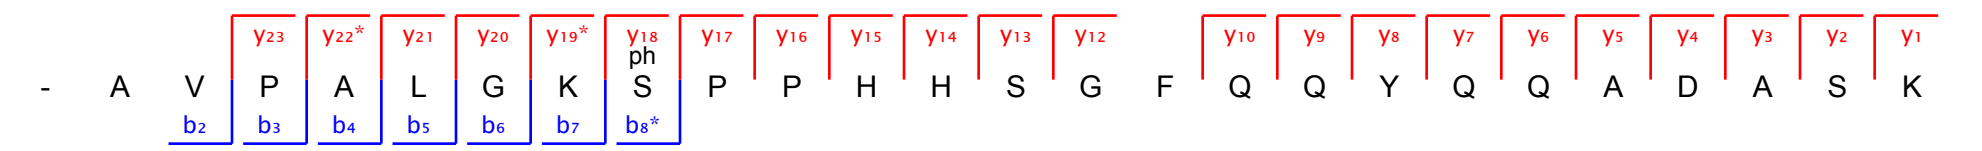

Raw file 20150814\_A375SR\_Phospho\_BR2\_04 Scan 10780 Method FTMS; HCD Score 194.27 m/z 858.39 Gene names BOD1L1

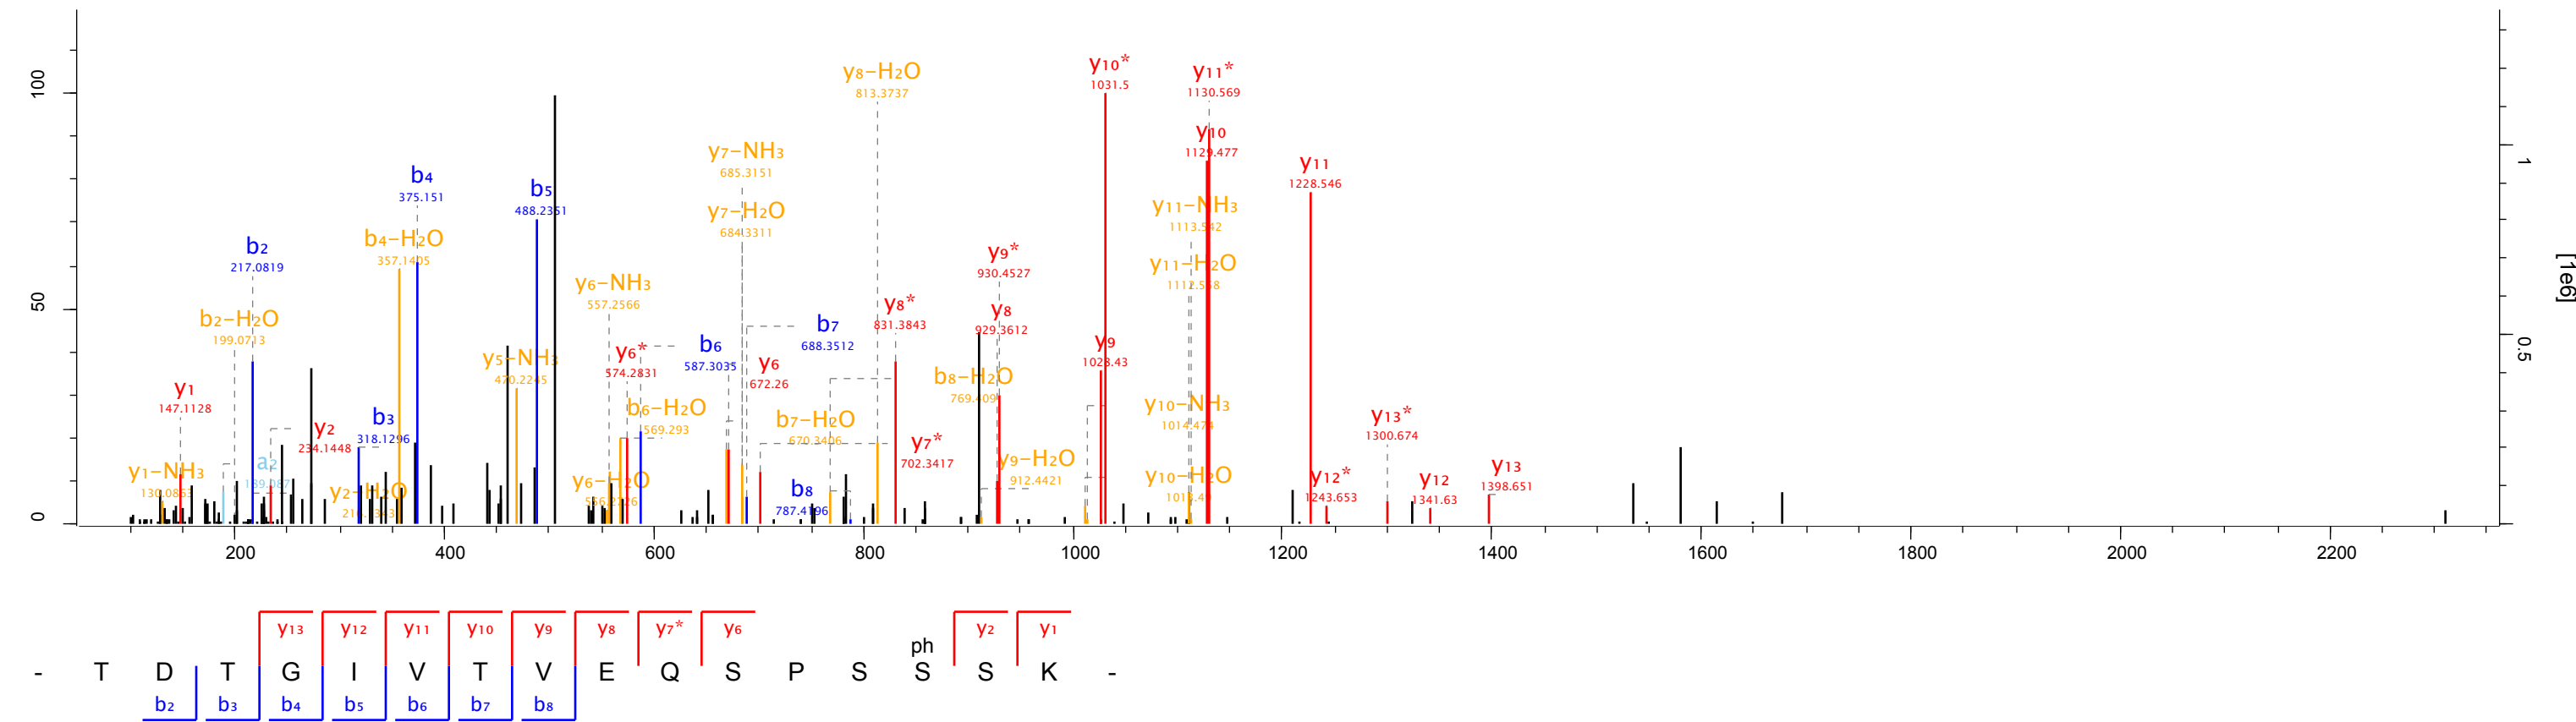

Raw file: 20150814\_A375SR\_Phospho\_BR2\_04  
 Scan: 10890 Method: FTMS; HCD Score: 75.99 m/z: 899.42 Gene names: SIK3

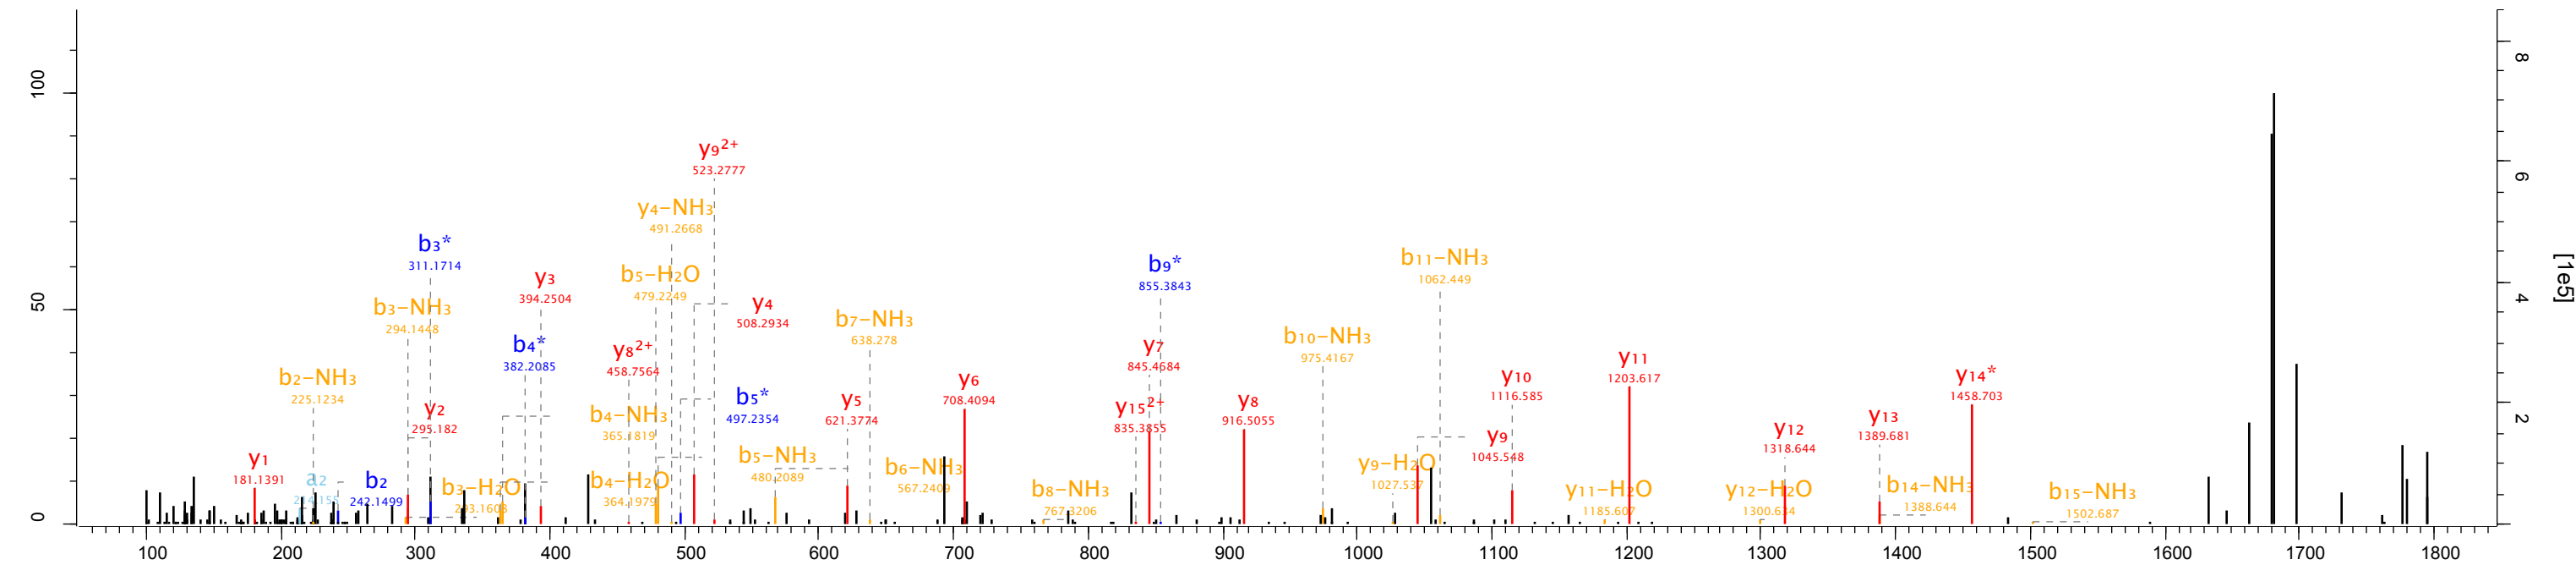

Protein sequence: - Q L S A D S A E A H S L N V N R -

Fragmentation mapping (b and y ions):

- Red boxes (y ions): y<sub>15</sub><sup>2+</sup> (L), y<sub>14</sub><sup>\*</sup> (S), y<sub>13</sub> (A), y<sub>12</sub> (D), y<sub>11</sub> (S), y<sub>10</sub> (A), y<sub>9</sub> (E), y<sub>8</sub> (A), y<sub>7</sub> (H), y<sub>6</sub> (S), y<sub>5</sub> (L), y<sub>4</sub> (N), y<sub>3</sub> (V), y<sub>2</sub> (N), y<sub>1</sub> (R)
- Blue boxes (b ions): b<sub>2</sub> (L), b<sub>3</sub><sup>\*</sup> (S), b<sub>4</sub><sup>\*</sup> (A), b<sub>5</sub><sup>\*</sup> (D), b<sub>9</sub><sup>\*</sup> (A)





Raw file: 20150814\_A375SR\_Phospho\_BR2\_04  
 Scan: 11120    Method: FTMS; HCD    Score: 165.34    m/z: 735.34    Gene names: EPB41L2

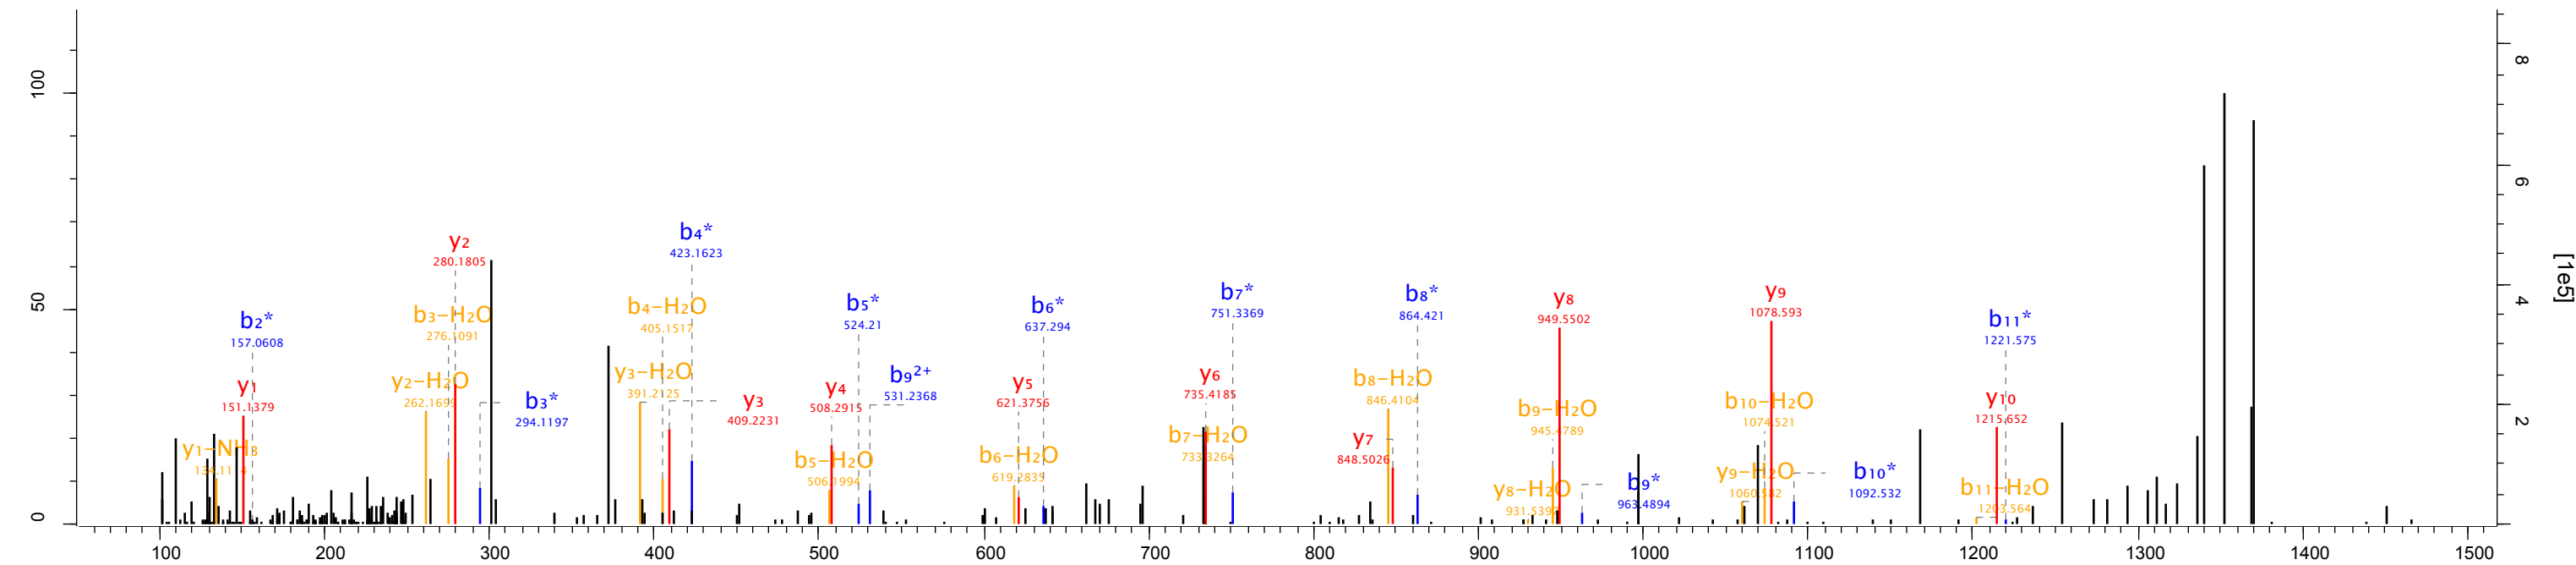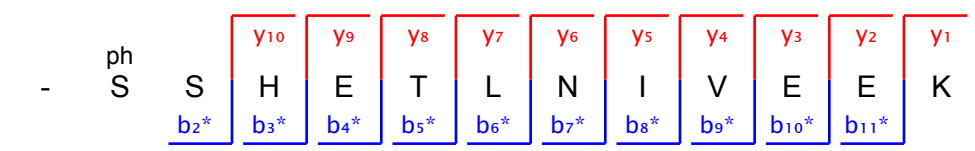

Raw file: 20150814\_A375SR\_Phospho\_BR2\_04  
 Scan: 11190 Method: FTMS; HCD Score: 153.25 m/z: 980.42 Gene names: FOSL2

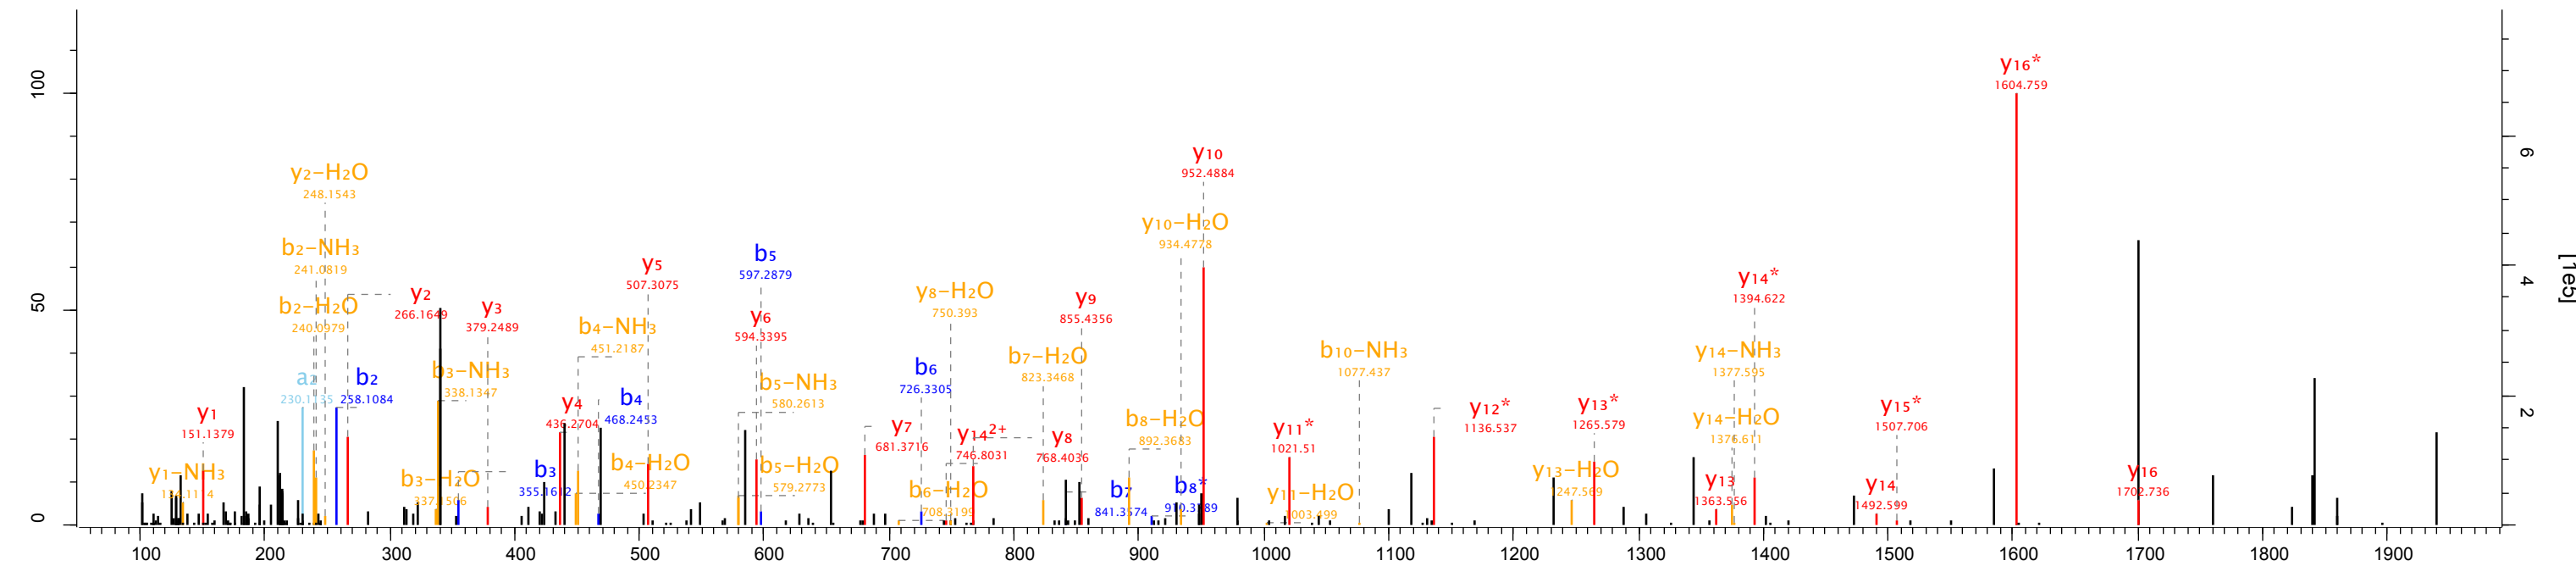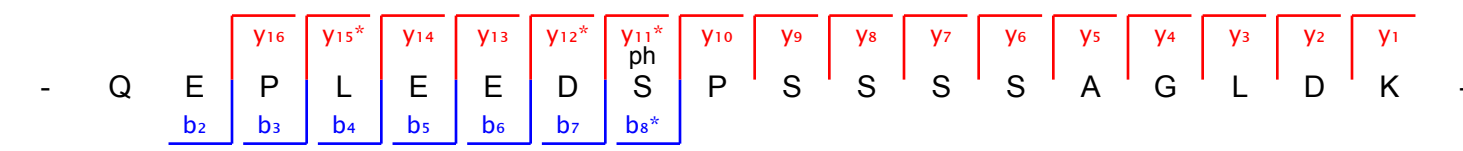

Raw file: 20150814\_A375SR\_Phospho\_BR2\_04  
 Scan: 11220  
 Method: FTMS; HCD  
 Score: 135.91  
 m/z: 641.32  
 Gene names: RPS6KA3

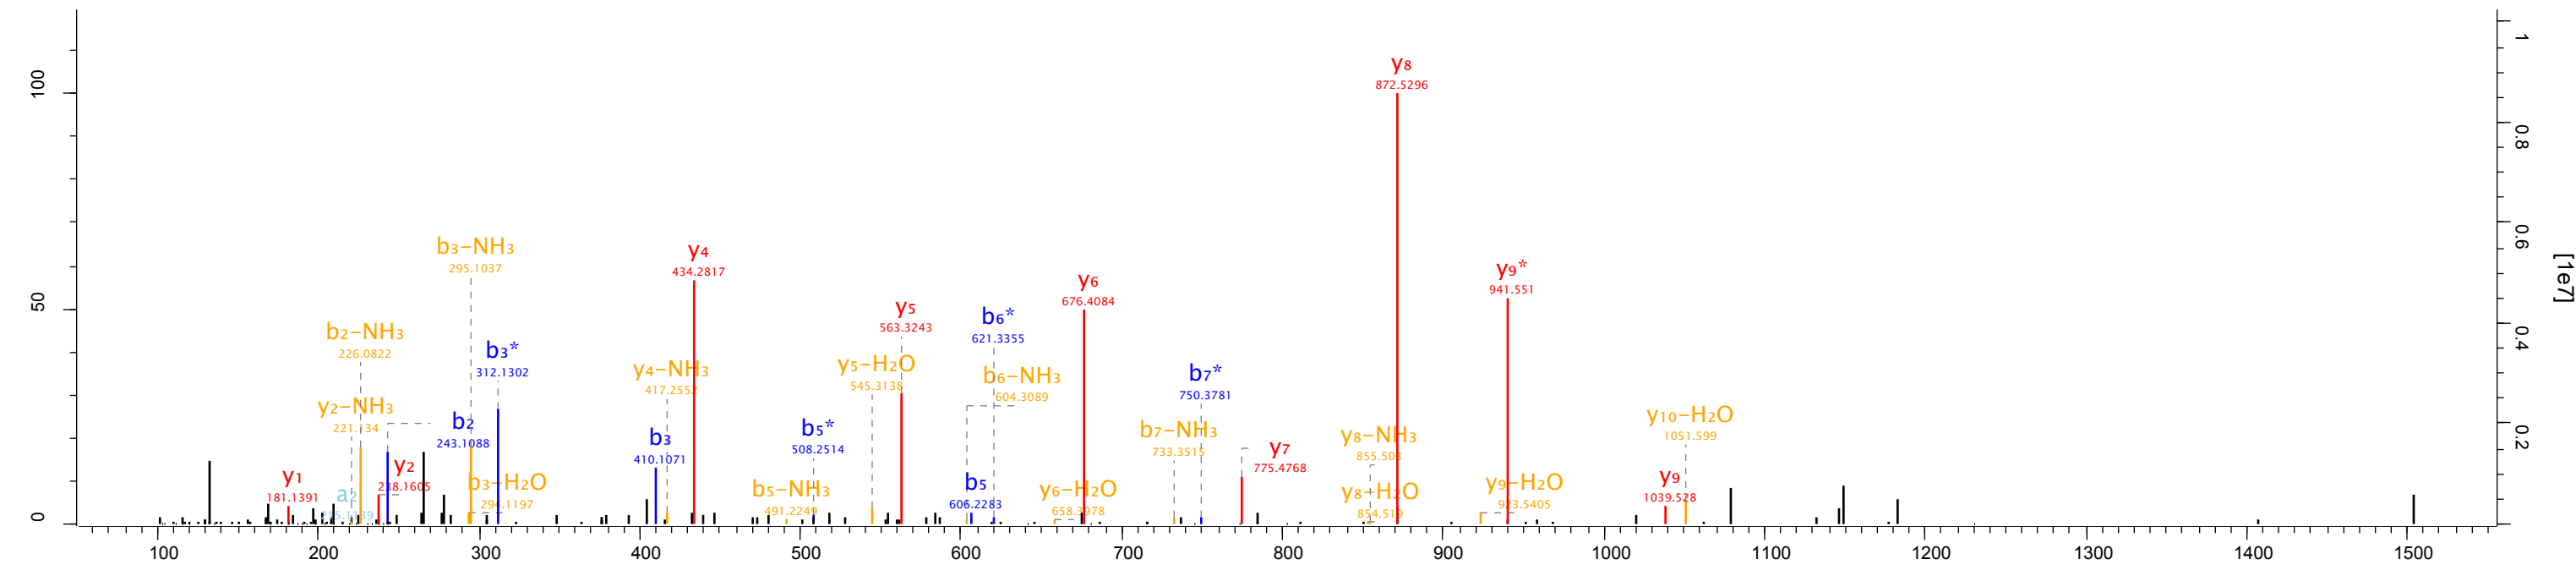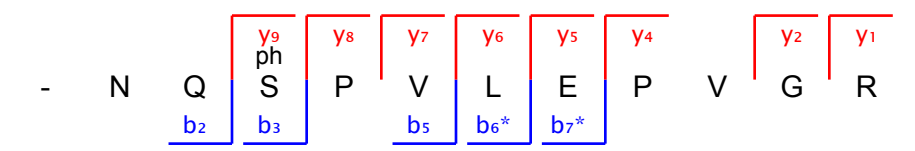

Raw file 20150814\_A375SR\_Phospho\_BR2\_04 Scan 11240 Method FTMS; HCD Score 189.56 m/z 821.88 Gene names NCOA3

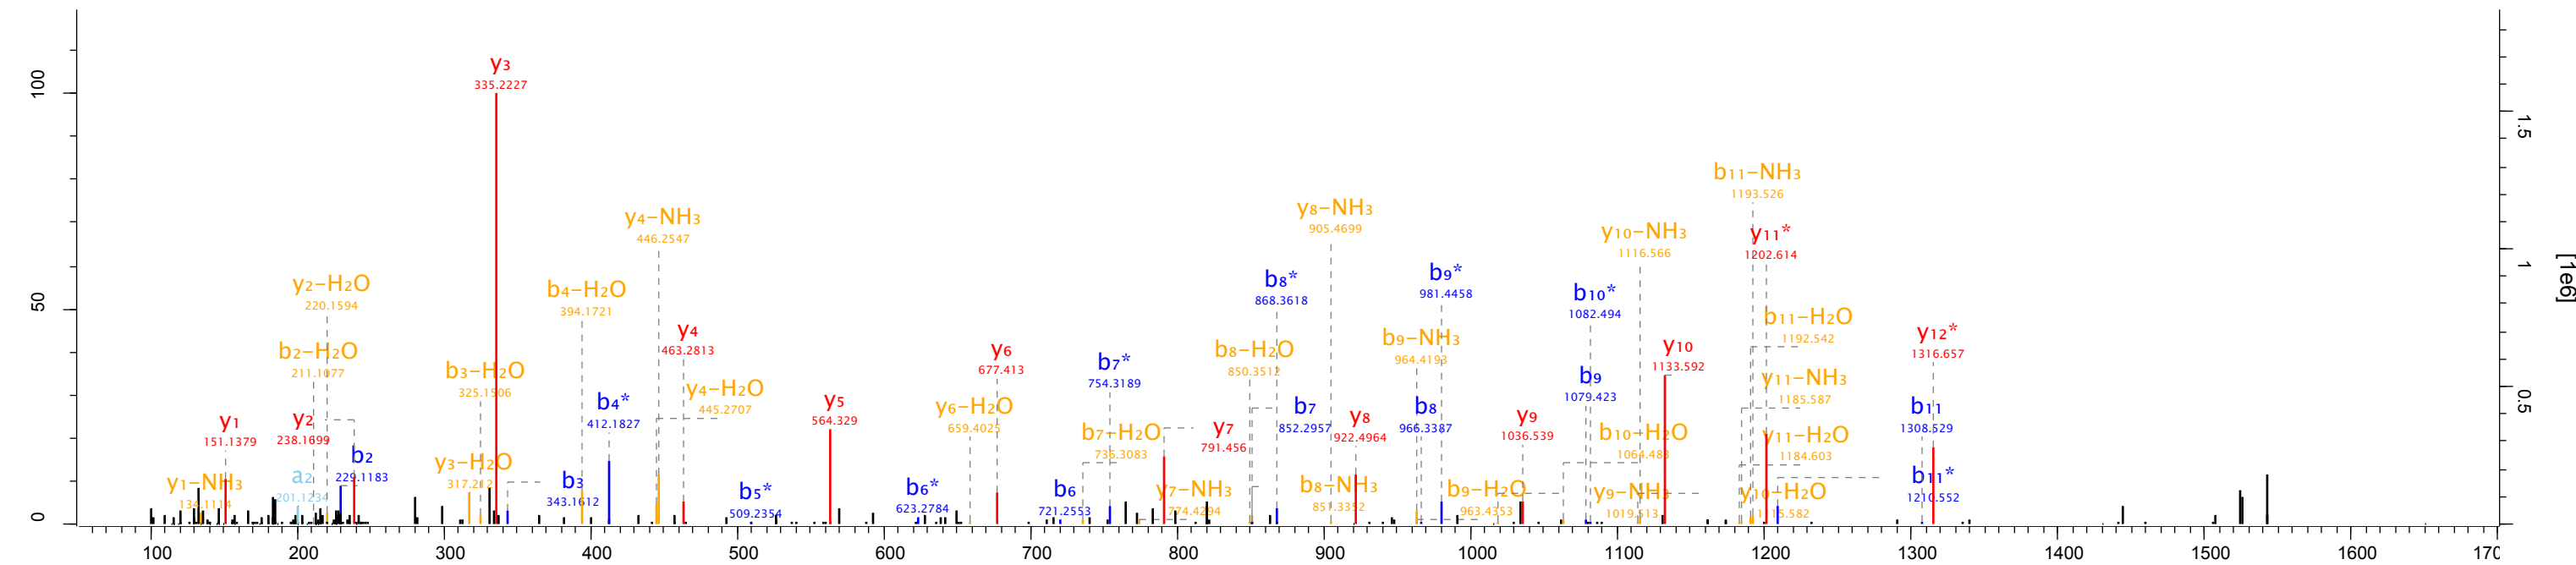

- L D N N P N M N I T Q P S K -  
 b<sub>2</sub> b<sub>3</sub> b<sub>4</sub>\* b<sub>5</sub>\* b<sub>6</sub> b<sub>7</sub> b<sub>8</sub> b<sub>9</sub> b<sub>10</sub>\* b<sub>11</sub>

Raw file 20150814\_A375SR\_Phospho\_BR2\_04 Scan 11990 Method FTMS; HCD Score 130.95 m/z 698.79 Gene names UPF3B

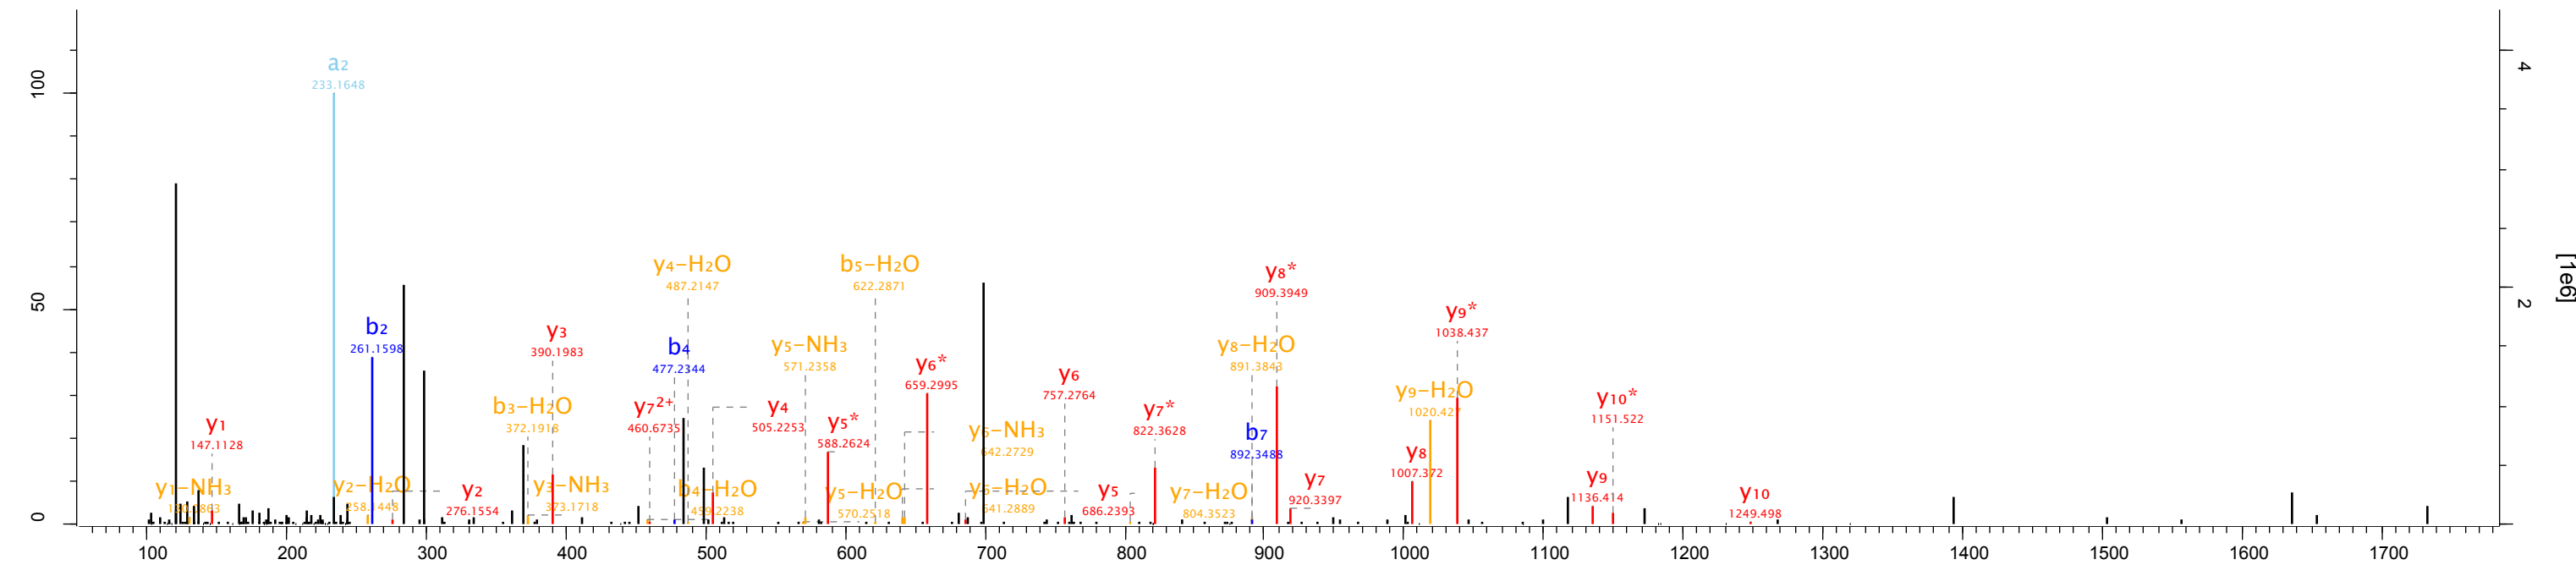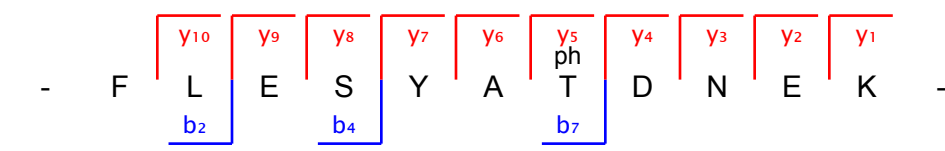

Raw file: 20150814\_A375SR\_Phospho\_BR2\_04  
 Scan: 12150 Method: FTMS; HCD Score: 203.2 m/z: 836.42 Gene names: DYNC1LI1

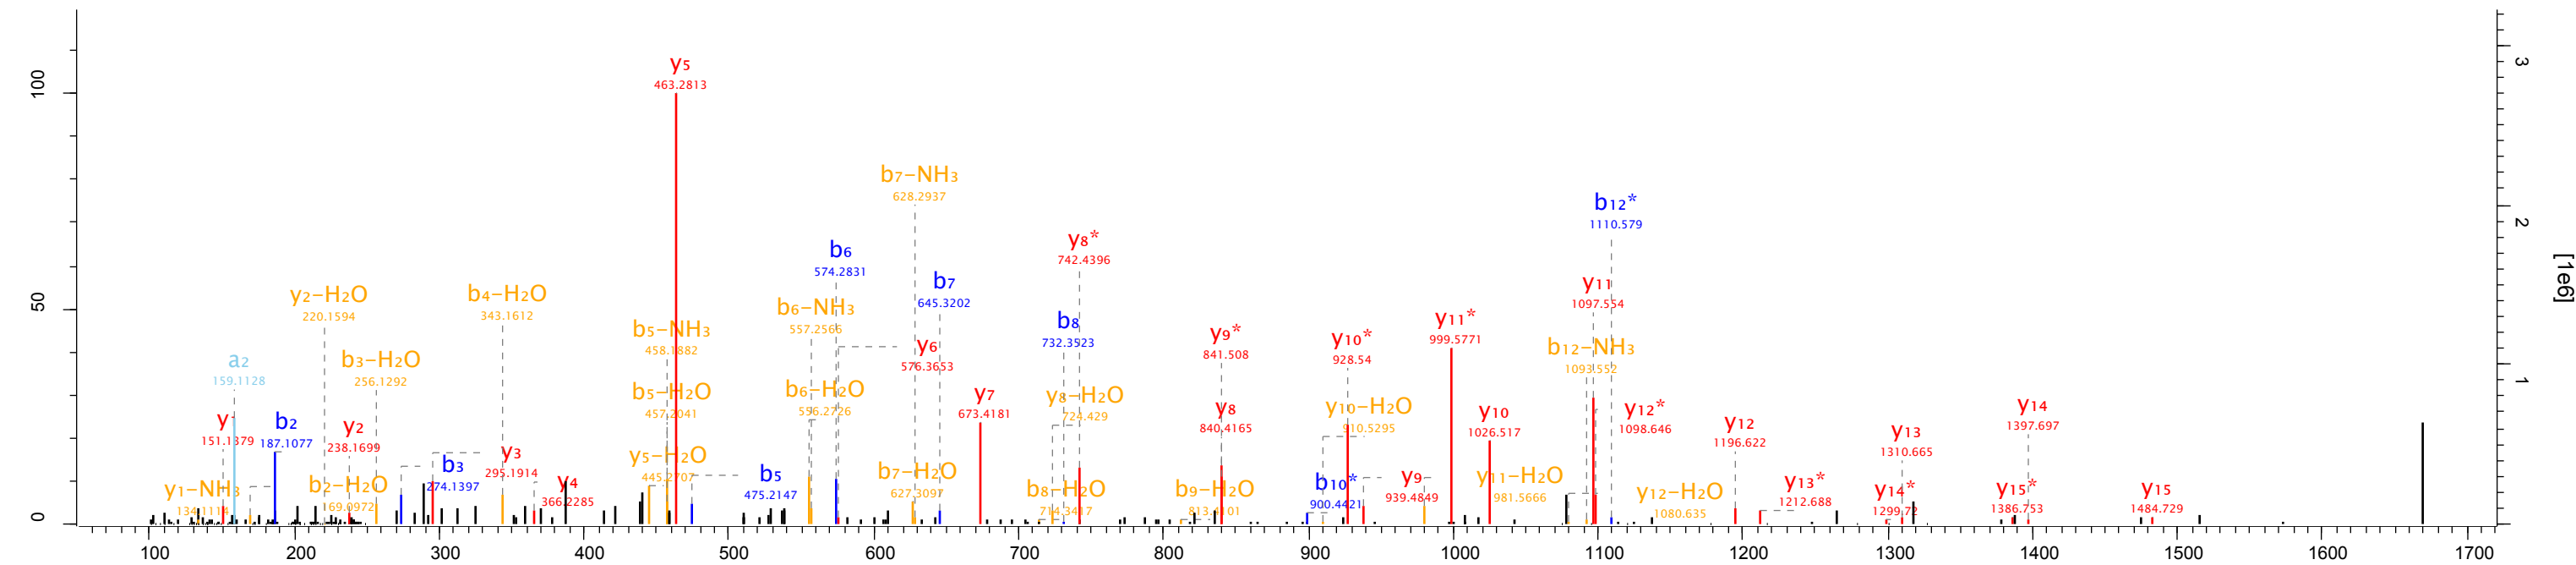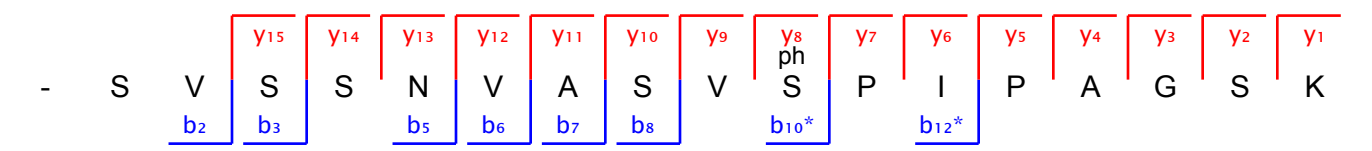

Raw file: 20150814\_A375SR\_Phospho\_BR2\_04  
 Scan: 12210  
 Method: FTMS; HCD  
 Score: 147.26  
 m/z: 757.68  
 Gene names: ARFGEF2

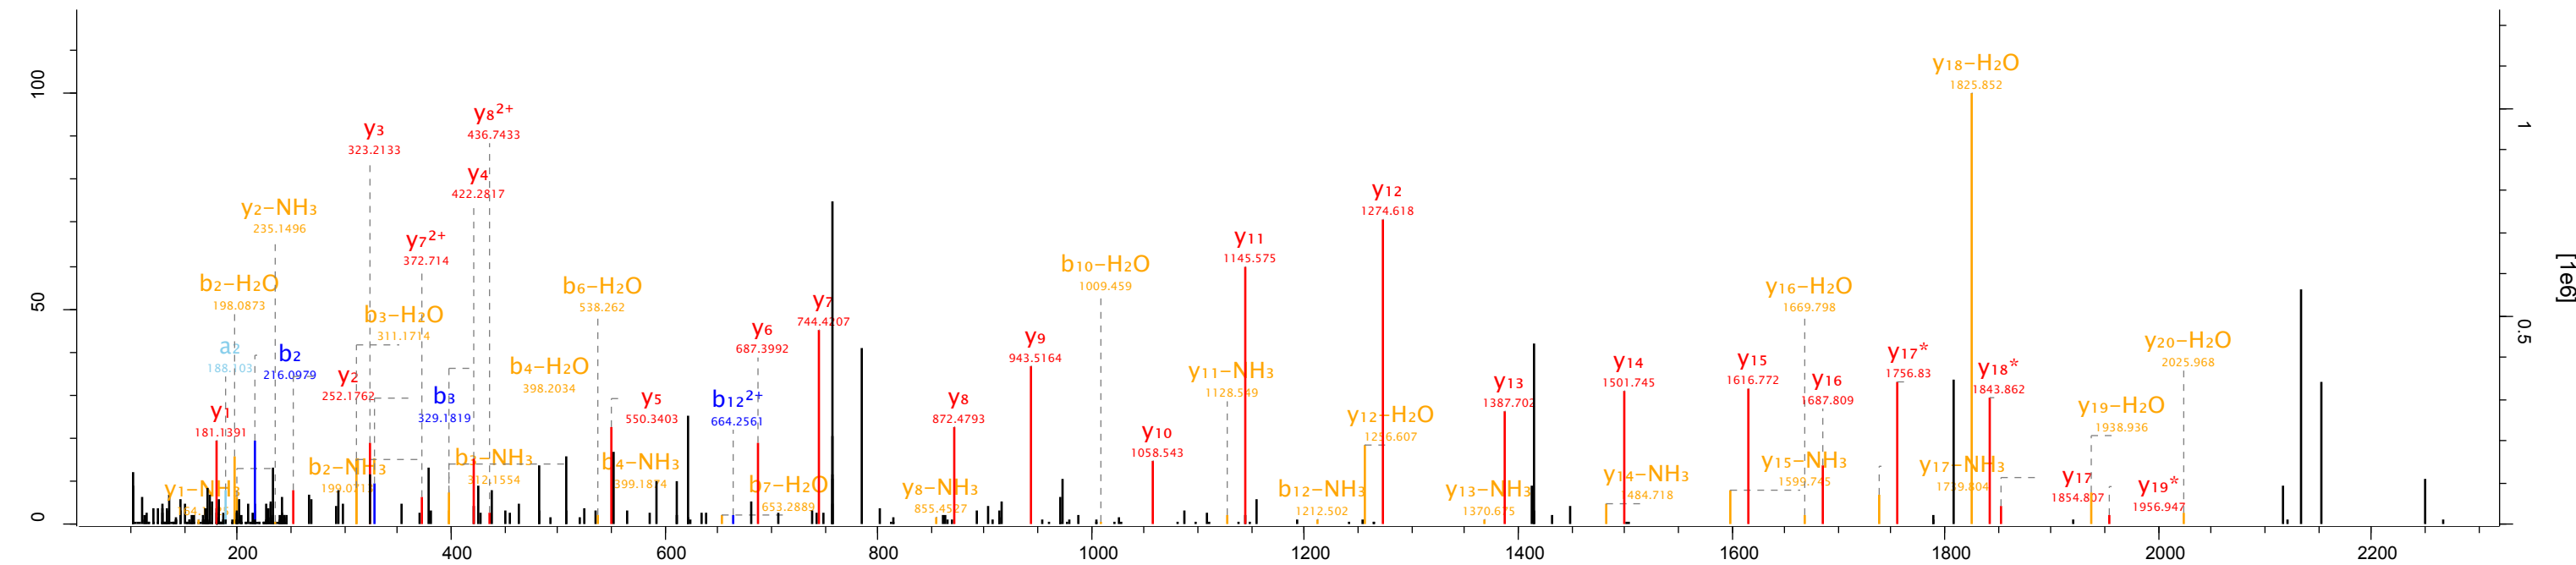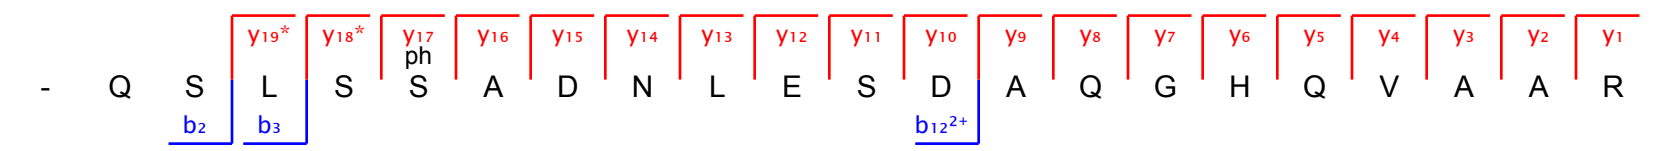

Raw file: 20150814\_A375SR\_Phospho\_BR2\_04  
 Scan: 12360 Method: FTMS; HCD Score: 101.97 m/z: 484.74 Gene names: CCDC88A

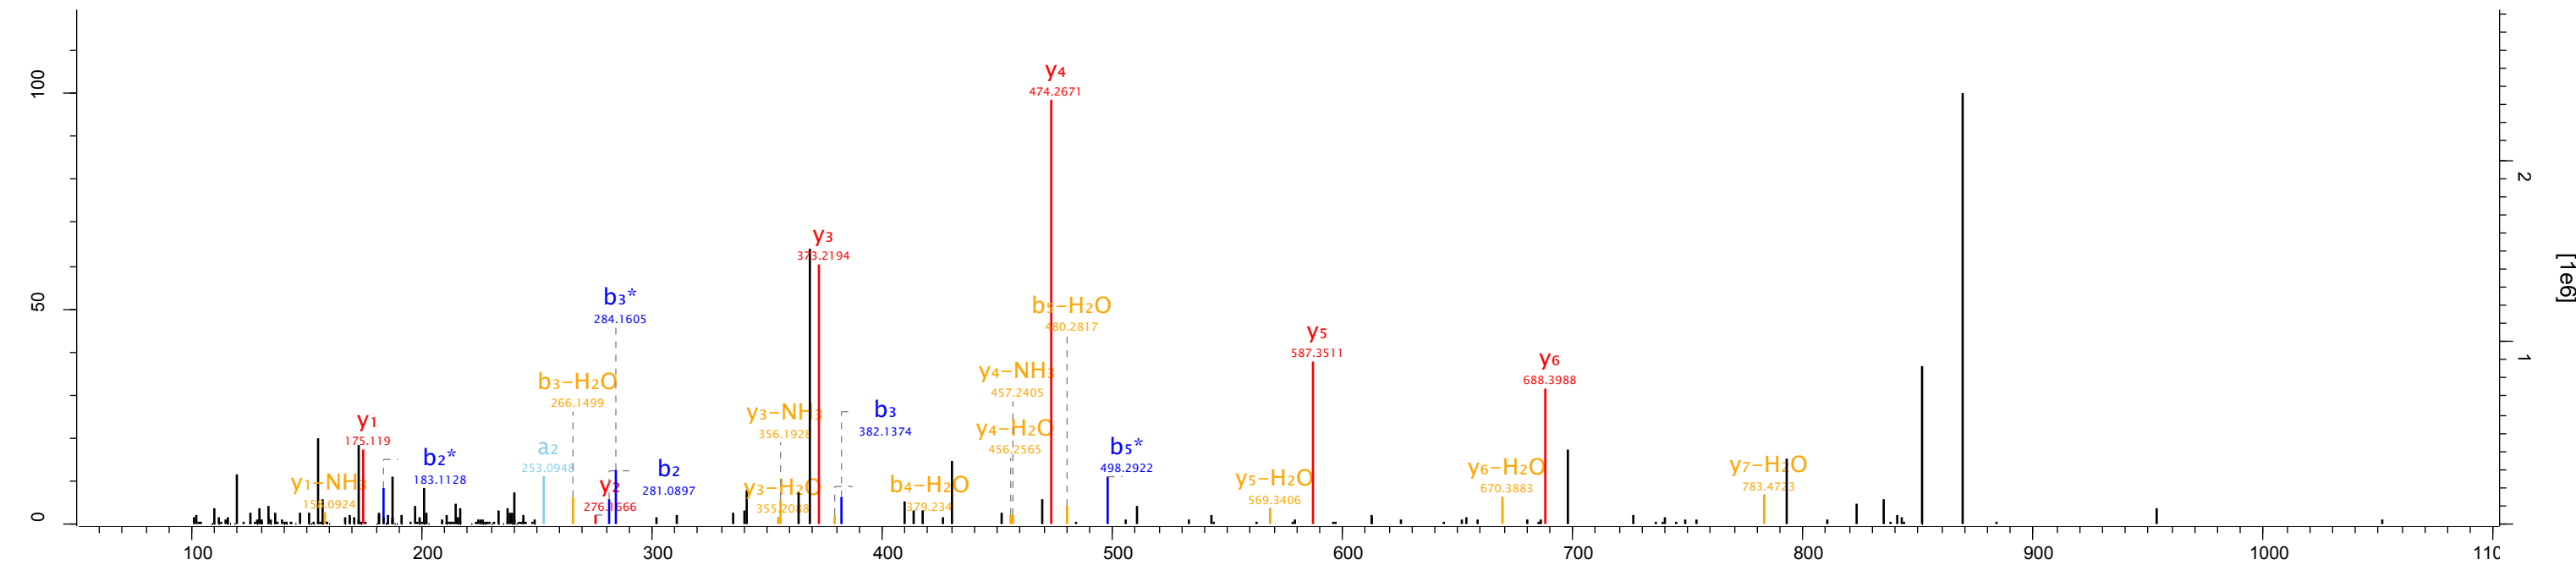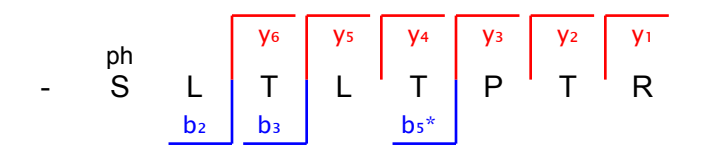



Raw file 20150814\_A375SR\_Phospho\_BR2\_04 Scan 12480 Method FTMS; HCD Score 49.22 m/z 552.26 Gene names DNMBP

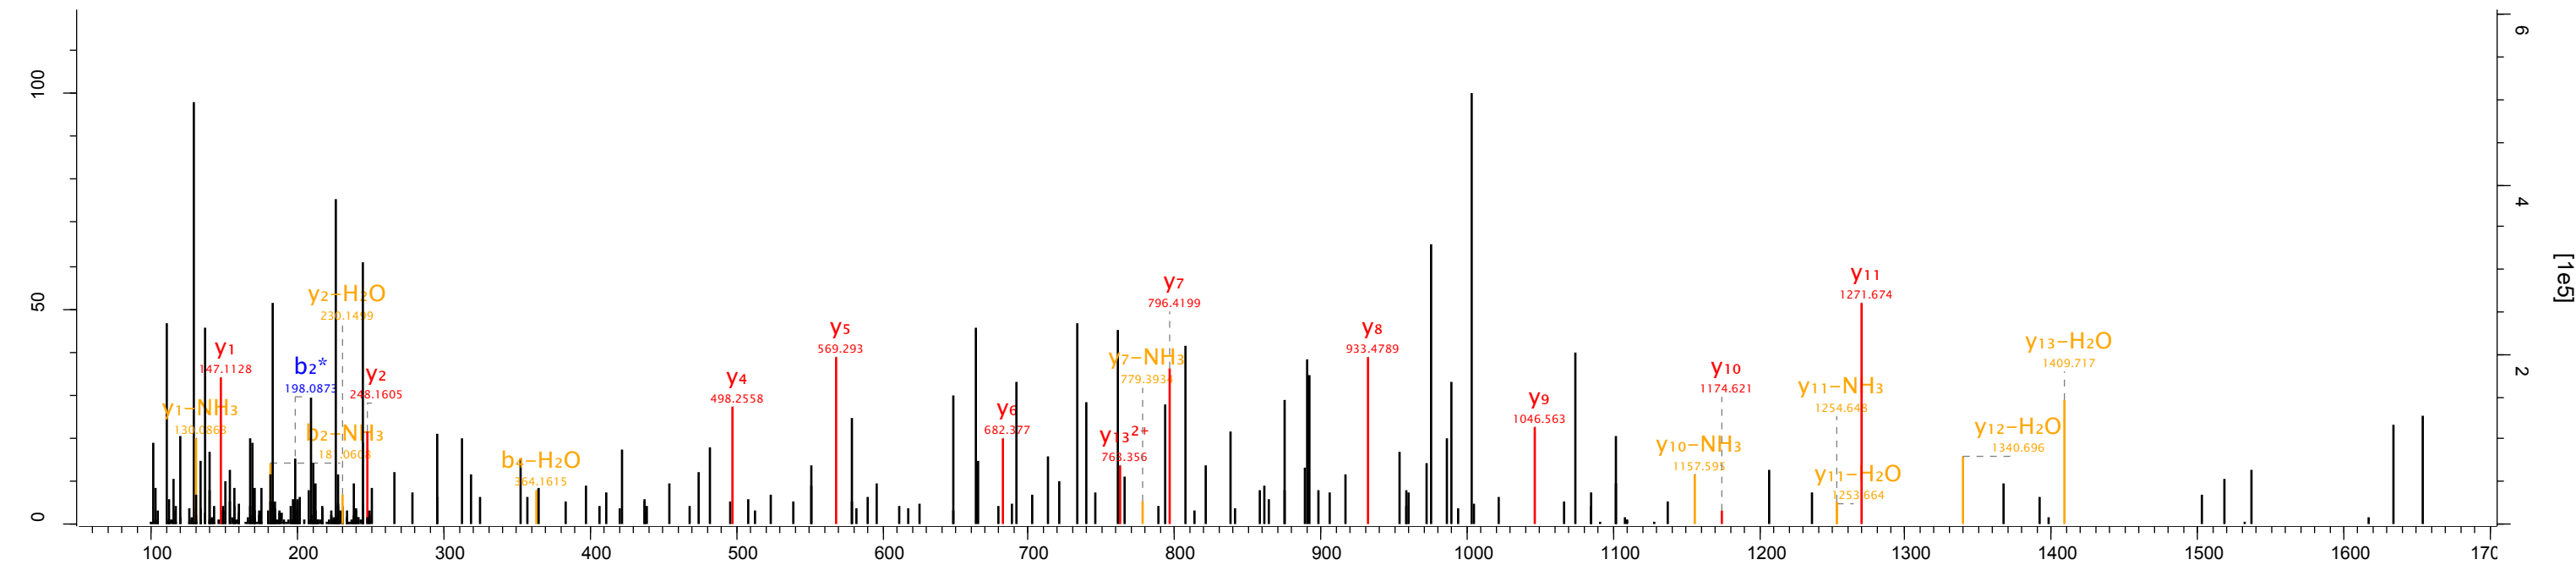

- Q y13<sup>2+</sup>  
ph  
S b2\* S y11 y10 y9 y8 y7 y6 y5 y4 Y y2 y1 -

P Q L H N L A S T K

Raw file: 20150814\_A375SR\_Phospho\_BR2\_04  
 Scan: 12530 Method: FTMS; HCD Score: 267.33 m/z: 881.9 Gene names: TNKS1BP1

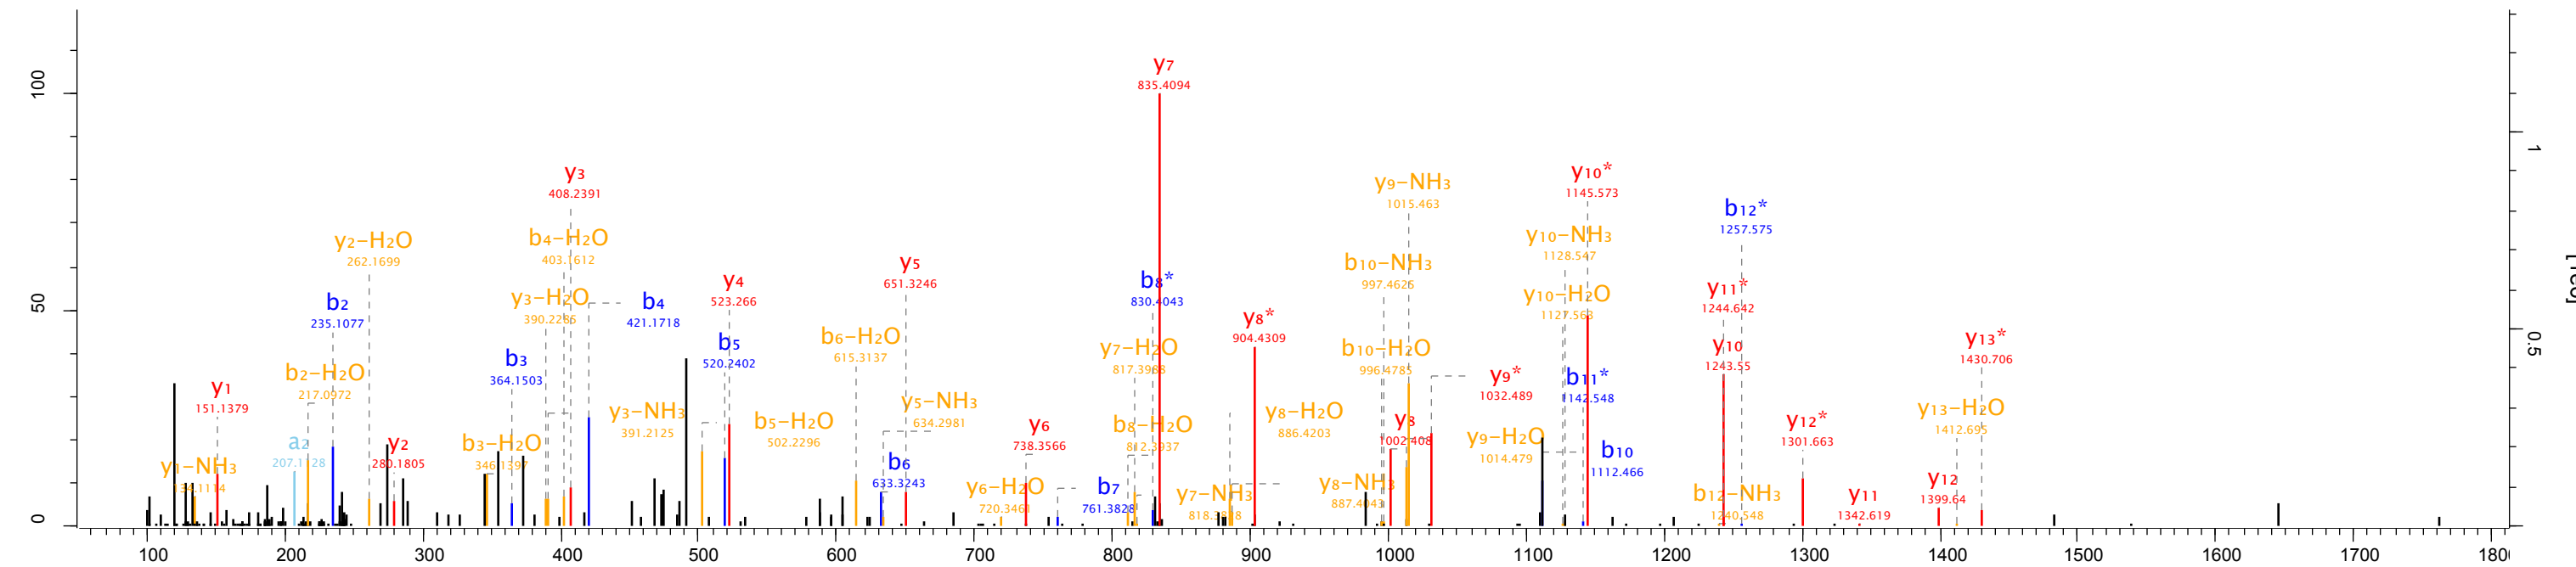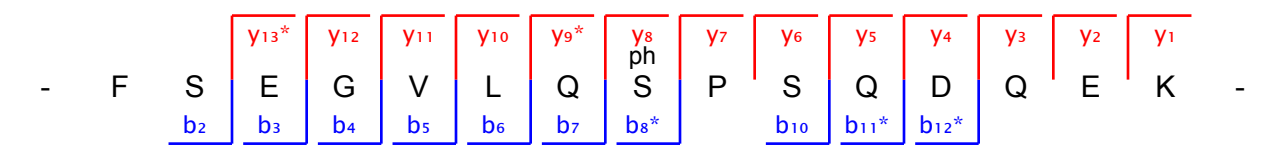

Raw file: 20150814\_A375SR\_Phospho\_BR2\_04  
 Scan: 12600 Method: FTMS; HCD Score: 80.44 m/z: 594.76 Gene names: PWP1

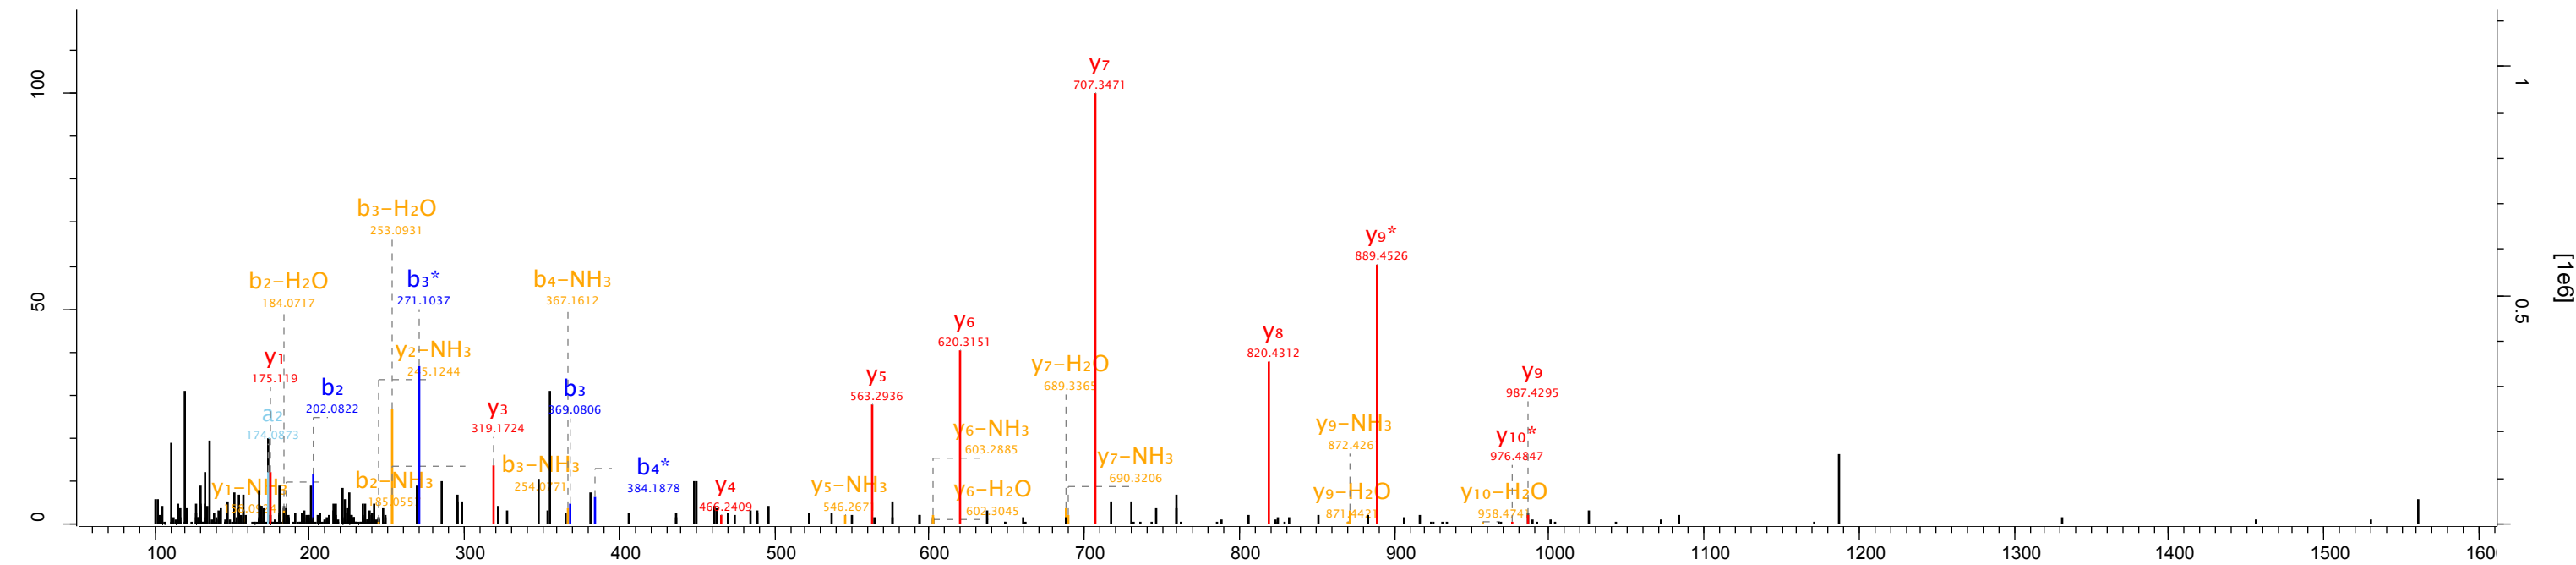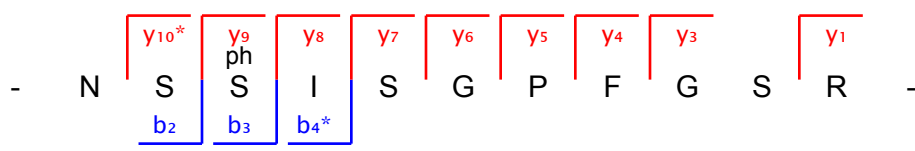

Raw file: 20150814\_A375SR\_Phospho\_BR2\_04  
 Scan: 1270 Method: FTMS; HCD Score: 98.63 m/z: 517.74 Gene names: ZC3H18

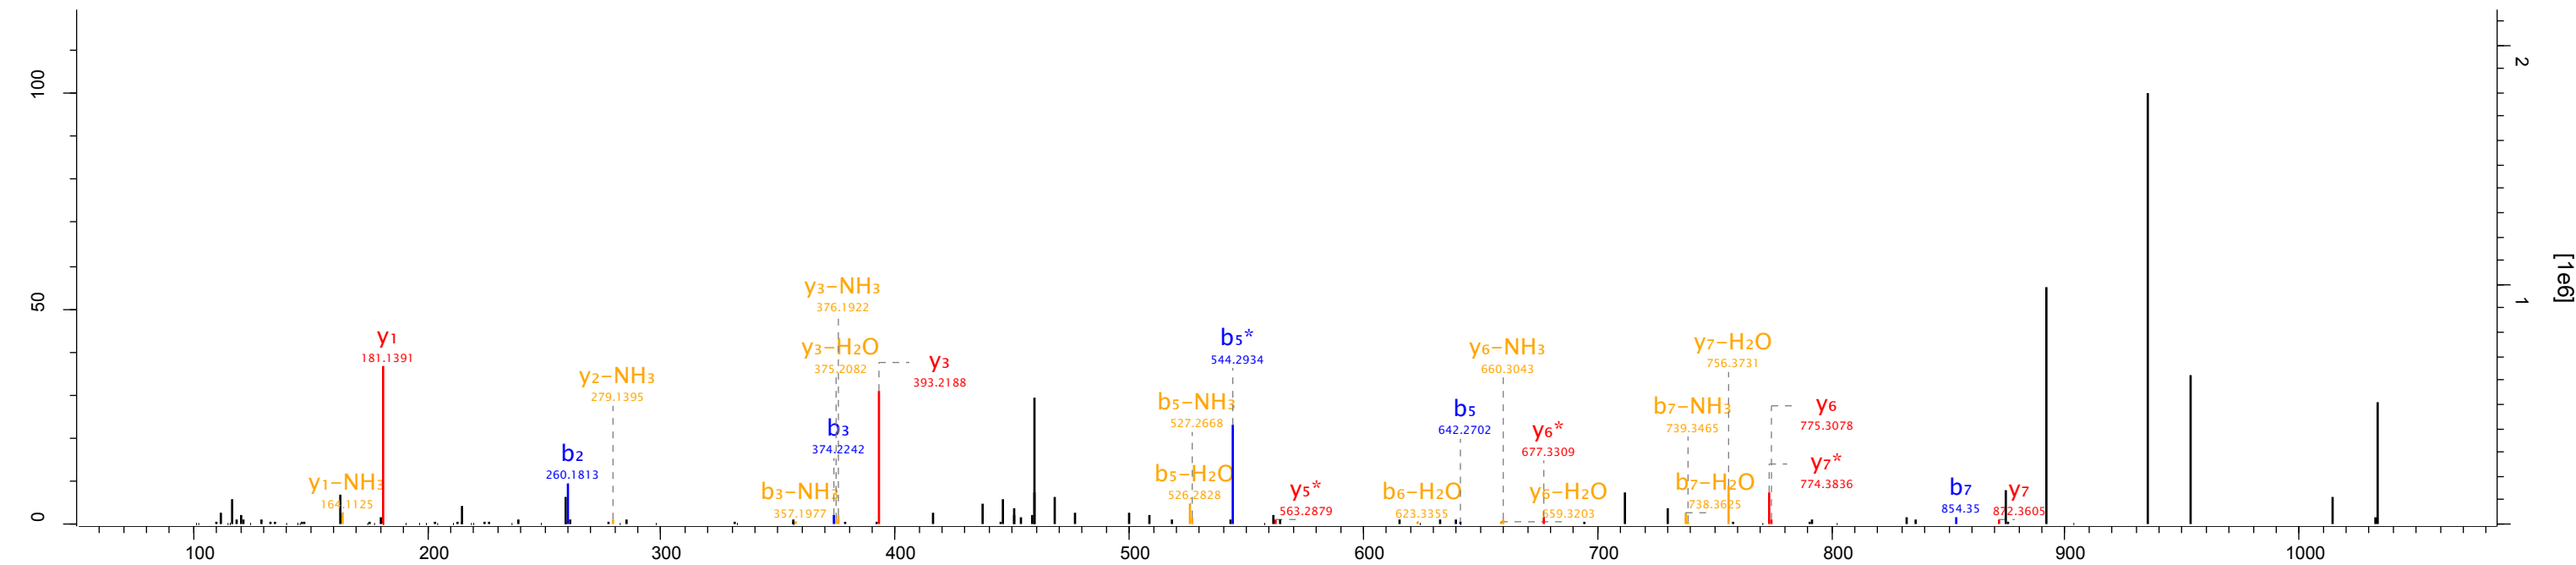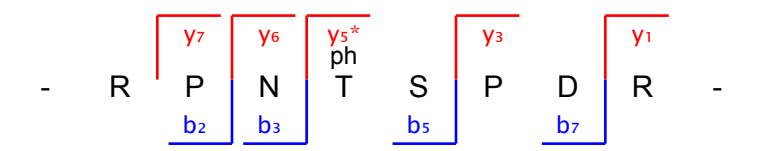

Raw file: 20150814\_A375SR\_Phospho\_BR2\_04  
 Scan: 12940 Method: FTMS; HCD Score: 107.46 m/z: 615.26 Gene names: GLCCI1

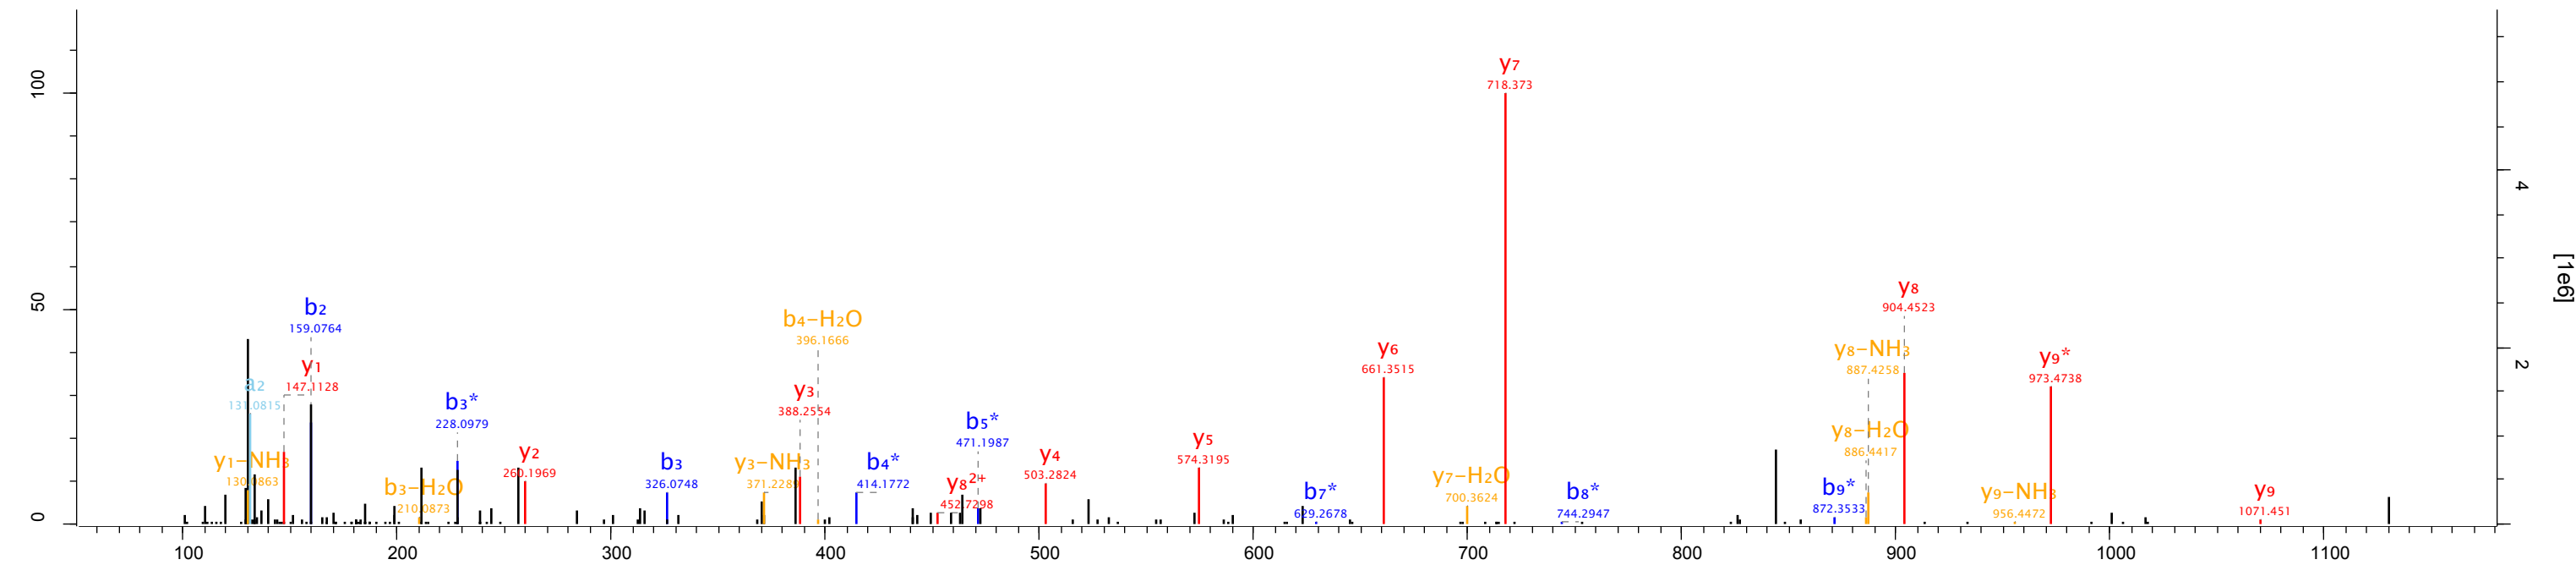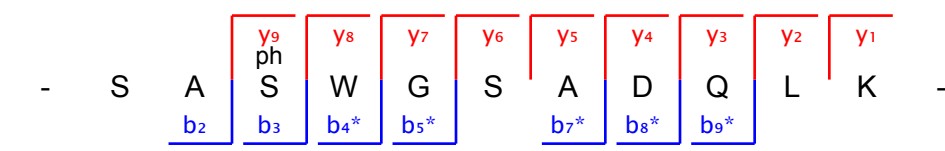

Raw file 20150814\_A375SR\_Phospho\_BR2\_04 Scan 13120 Method FTMS; HCD Score 89.31 m/z 515.93 Gene names BAD

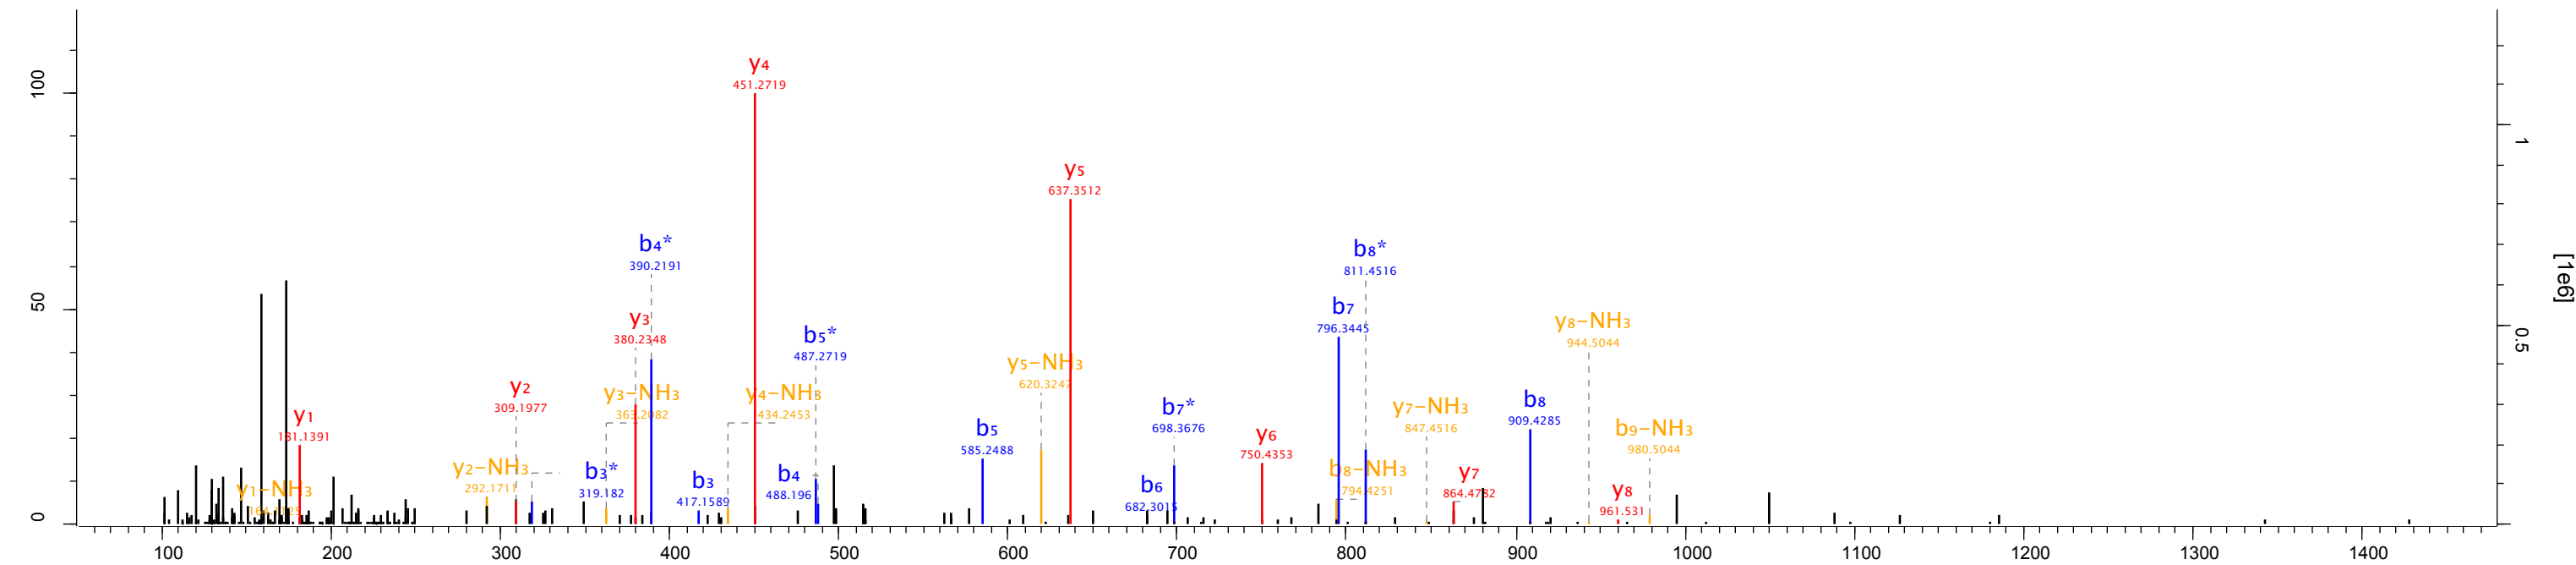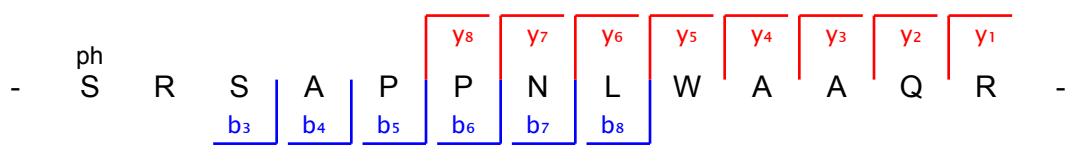

Raw file: 20150814\_A375SR\_Phospho\_BR2\_04  
 Scan: 13350 Method: FTMS; HCD Score: 178.89 m/z: 871.37 Gene names: VPS51

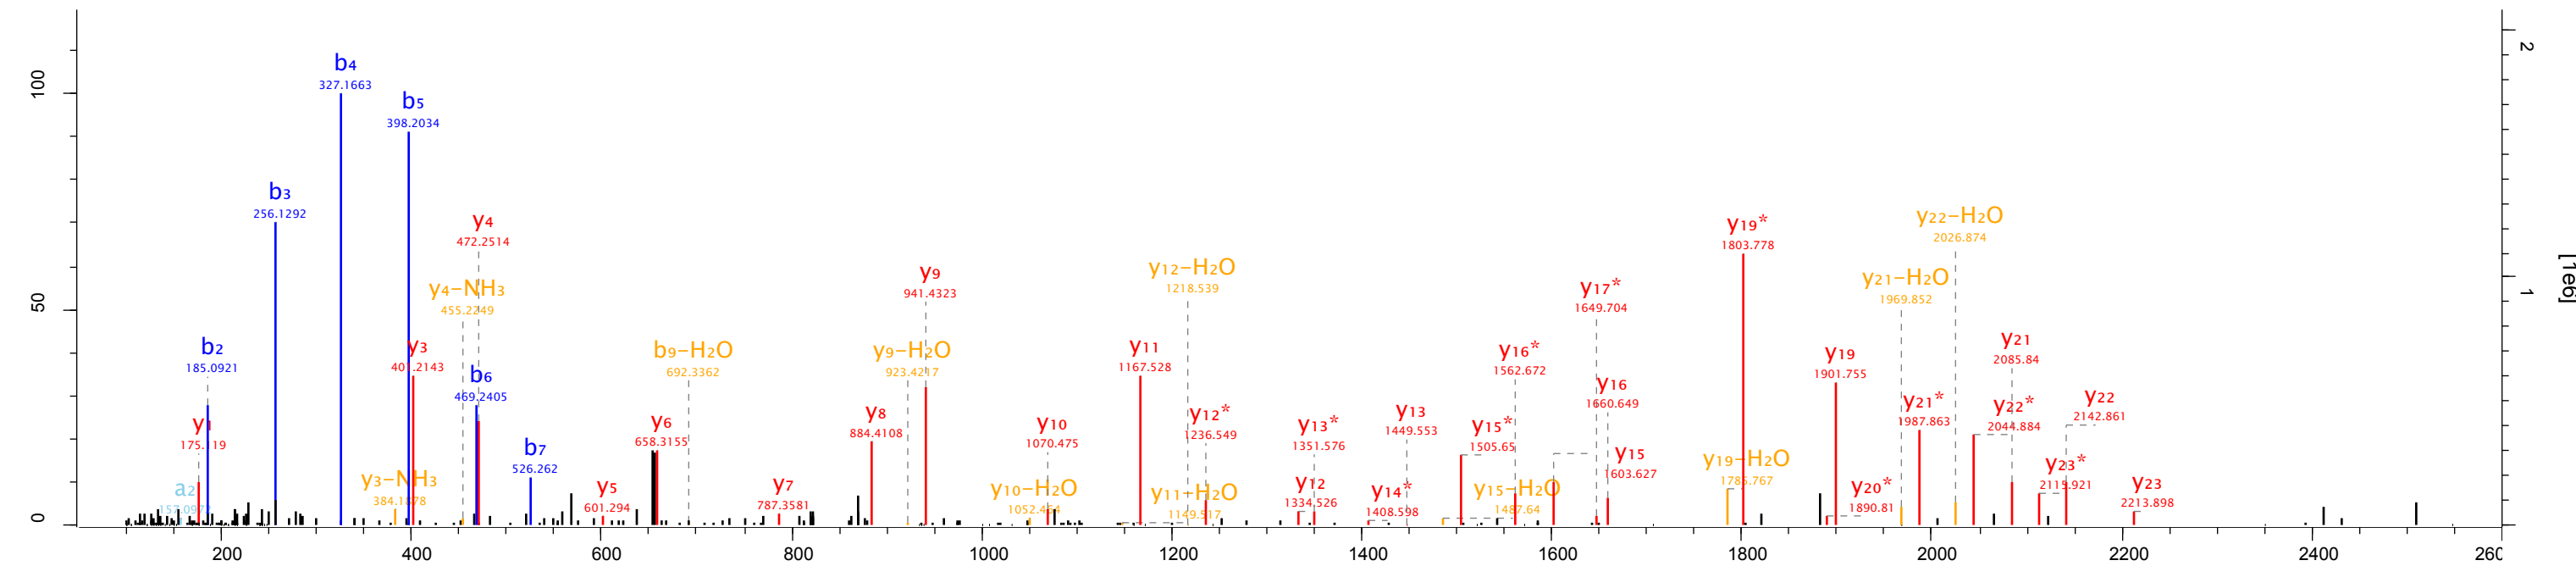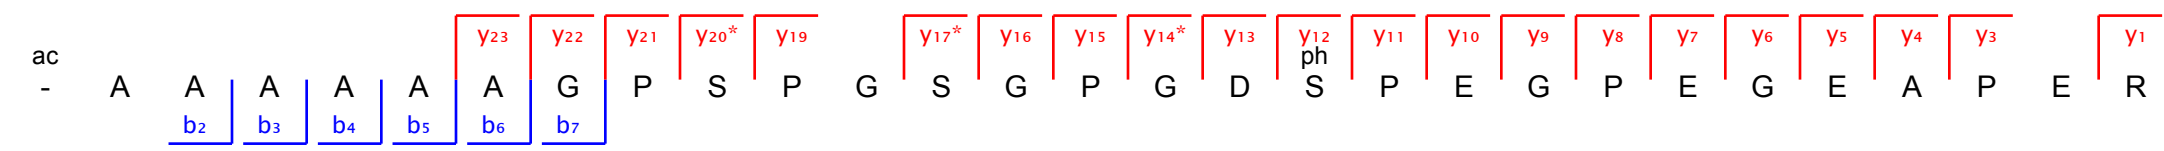

Raw file 20150814\_A375SR\_Phospho\_BR2\_04 Scan 13610 Method FTMS; HCD Score 123.69 m/z 387.69 Gene names TELO2

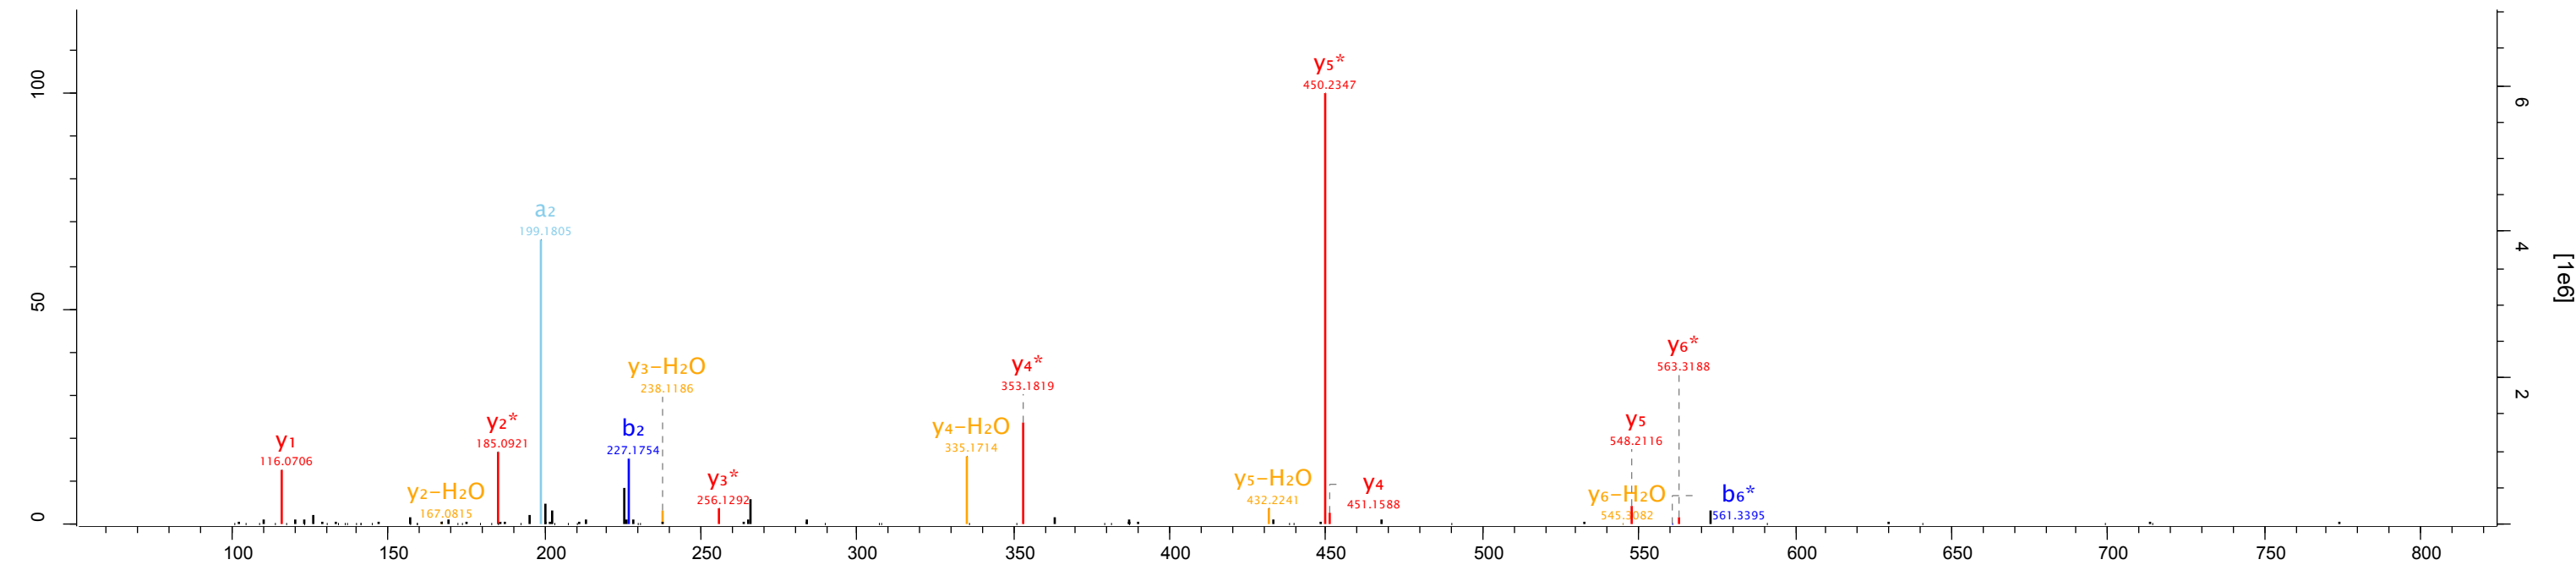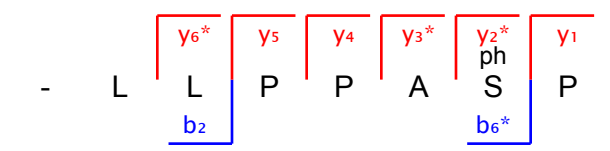



Raw file: 20150814\_A375SR\_Phospho\_BR2\_04  
 Scan: 13680 Method: FTMS; HCD Score: 273.37 m/z: 1051.97 Gene names: ARHGEF12

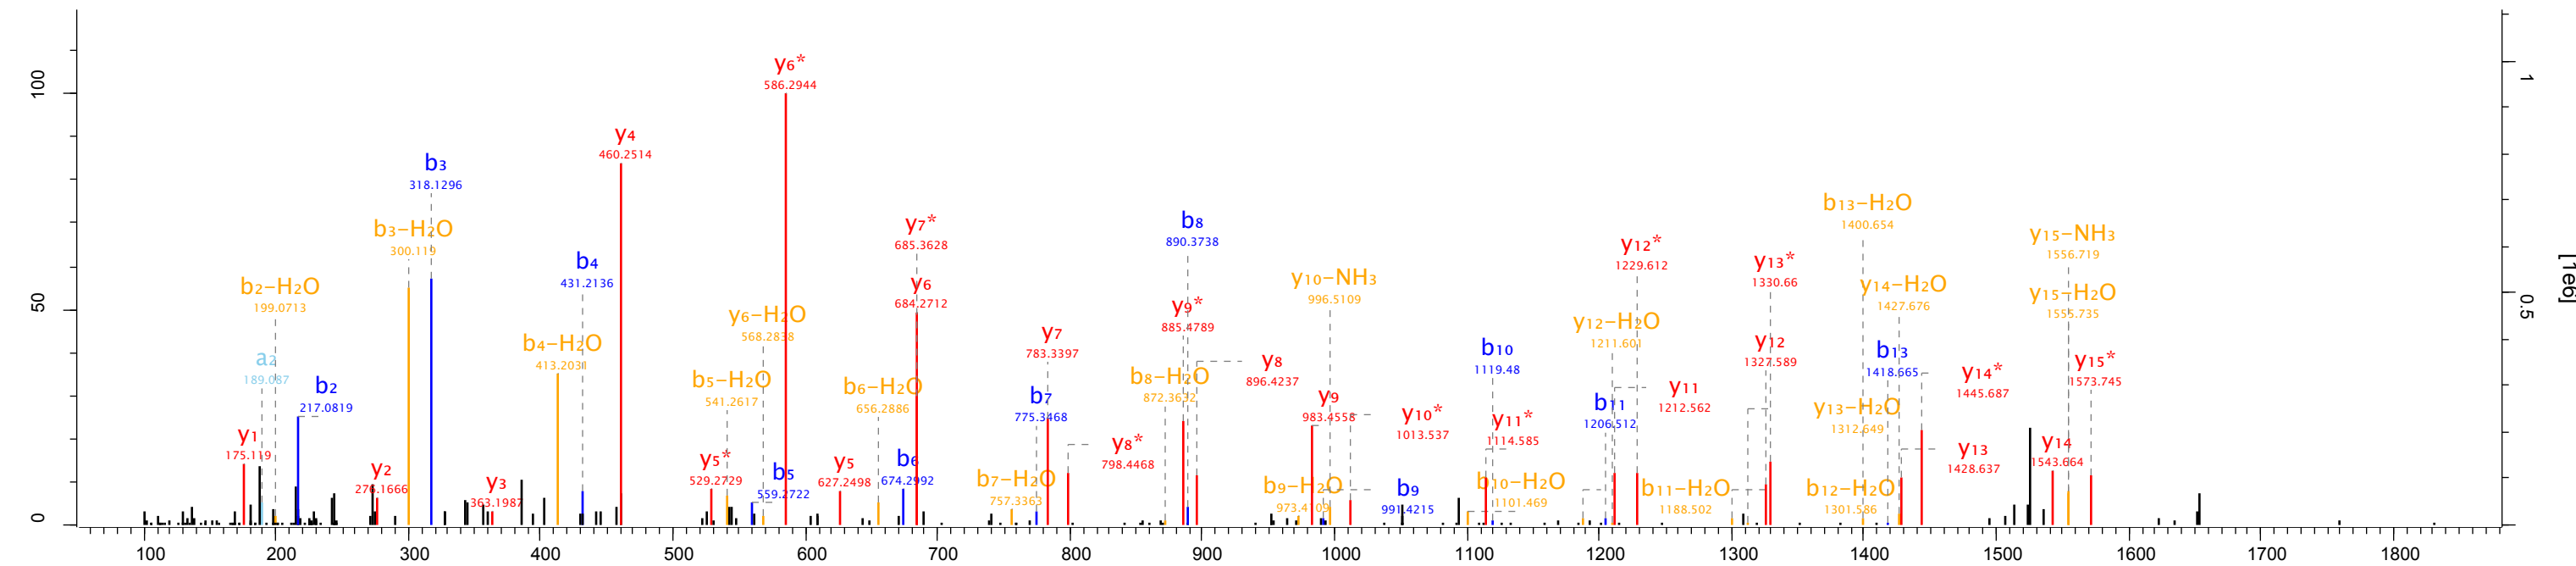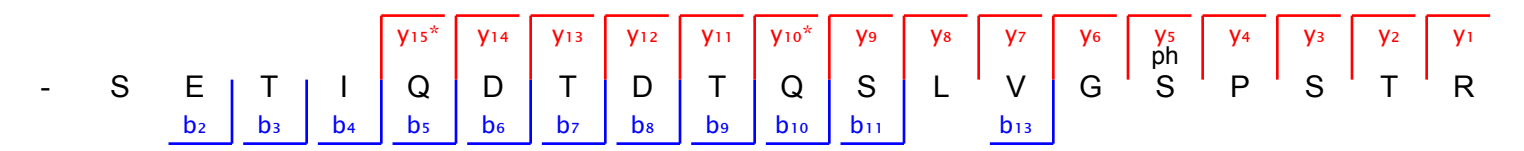

Raw file  
20150814\_A375SR\_Phospho\_BR2\_04

Scan 13710 Method FTMS; HCD Score 316.6 m/z 1110.02 Gene names OSBP

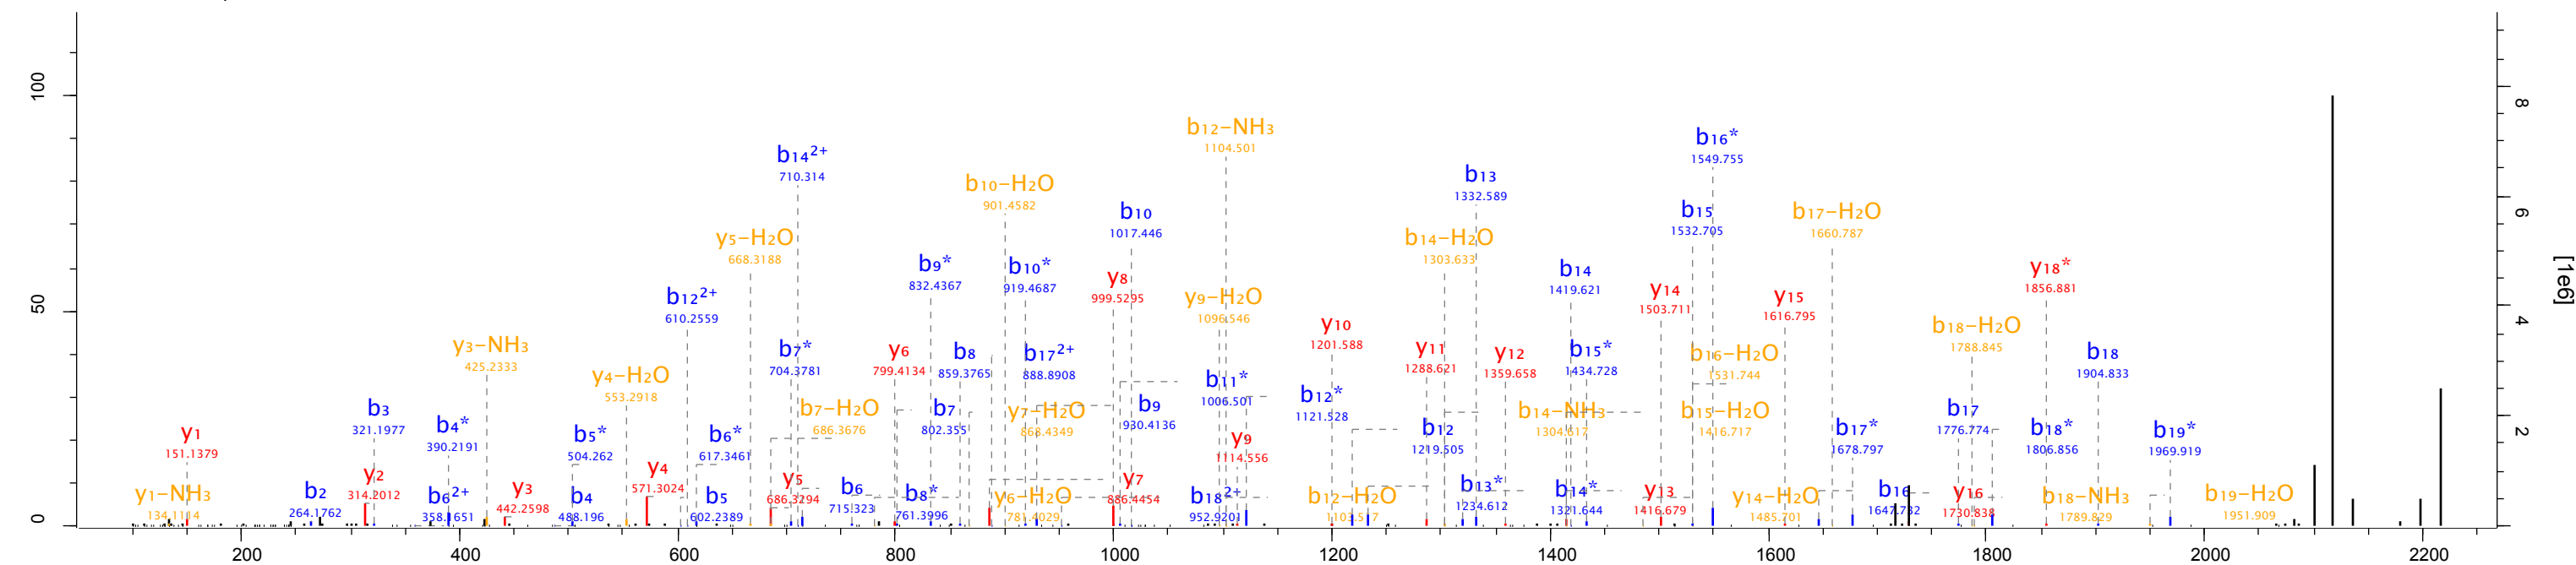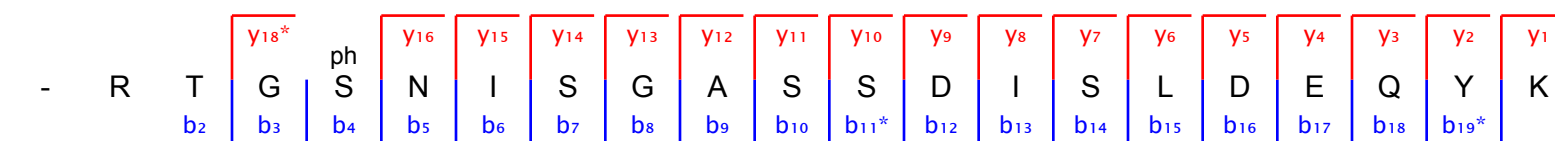

Raw file 20150814\_A375SR\_Phospho\_BR2\_04 Scan 13770 Method FTMS; HCD Score 137.52 m/z 764.35 Gene names ASPM

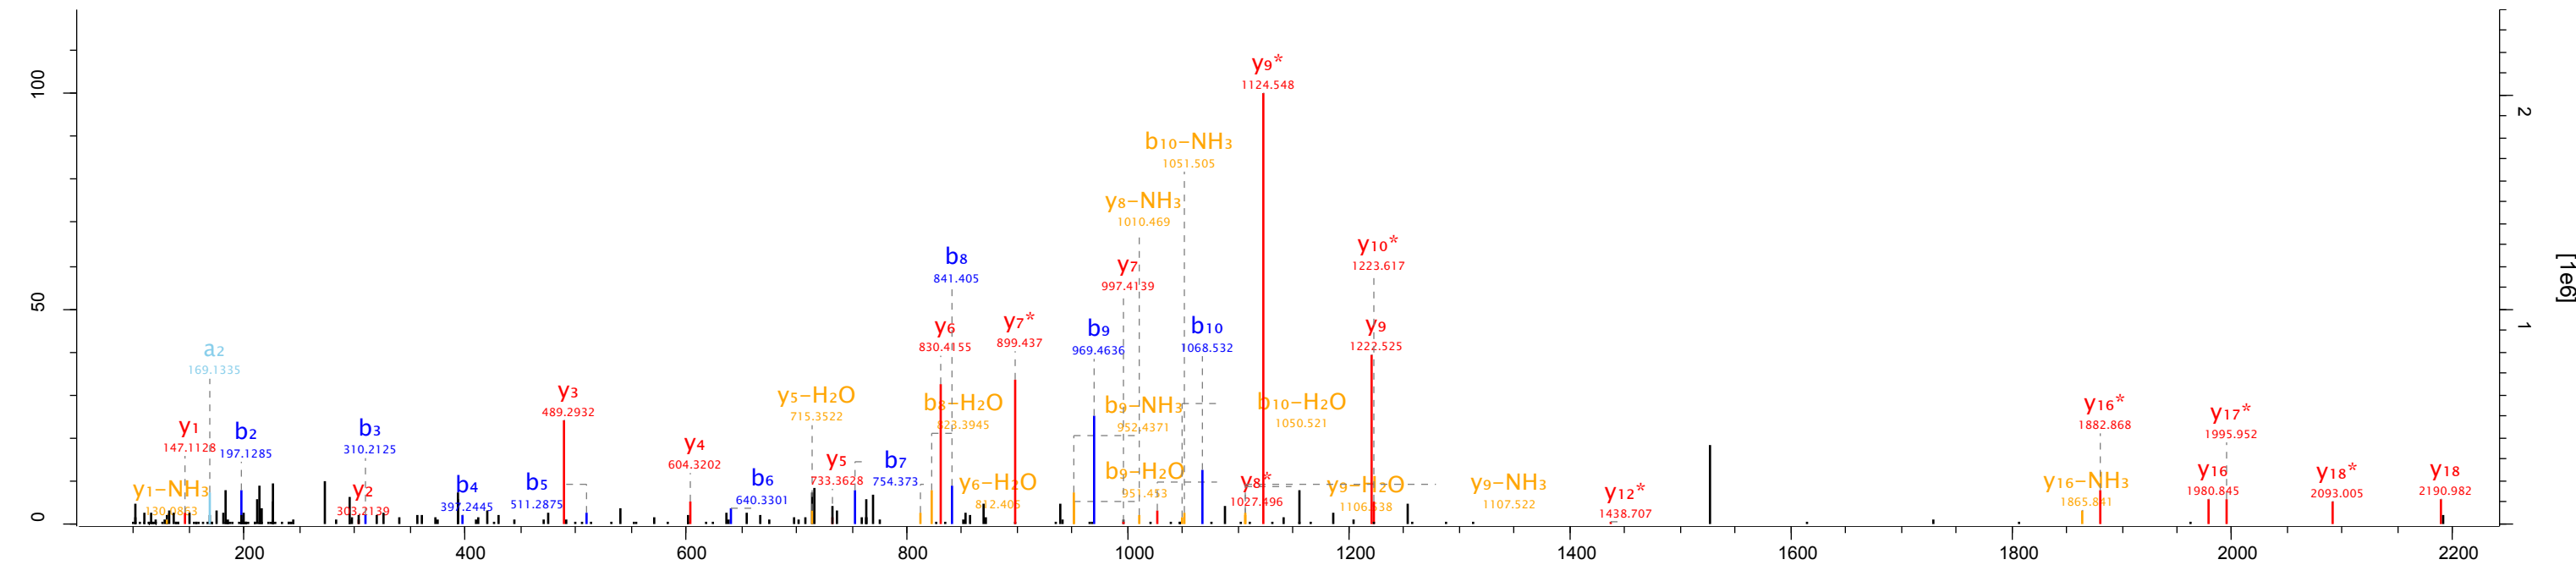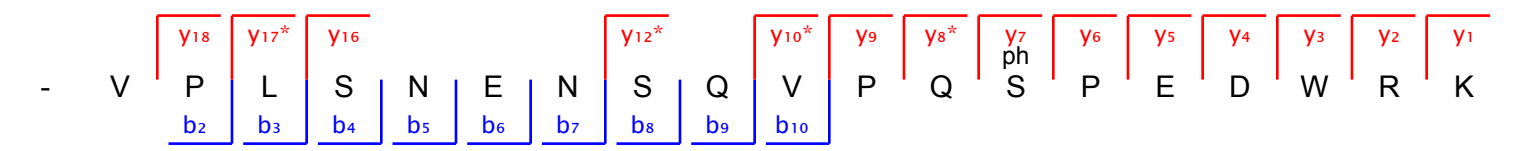

Raw file  
 20150814\_A375SR\_Phospho\_BR2\_04  
 Scan 13890 Method FTMS; HCD Score 204.65 m/z 706 Gene names BAIAP2L2

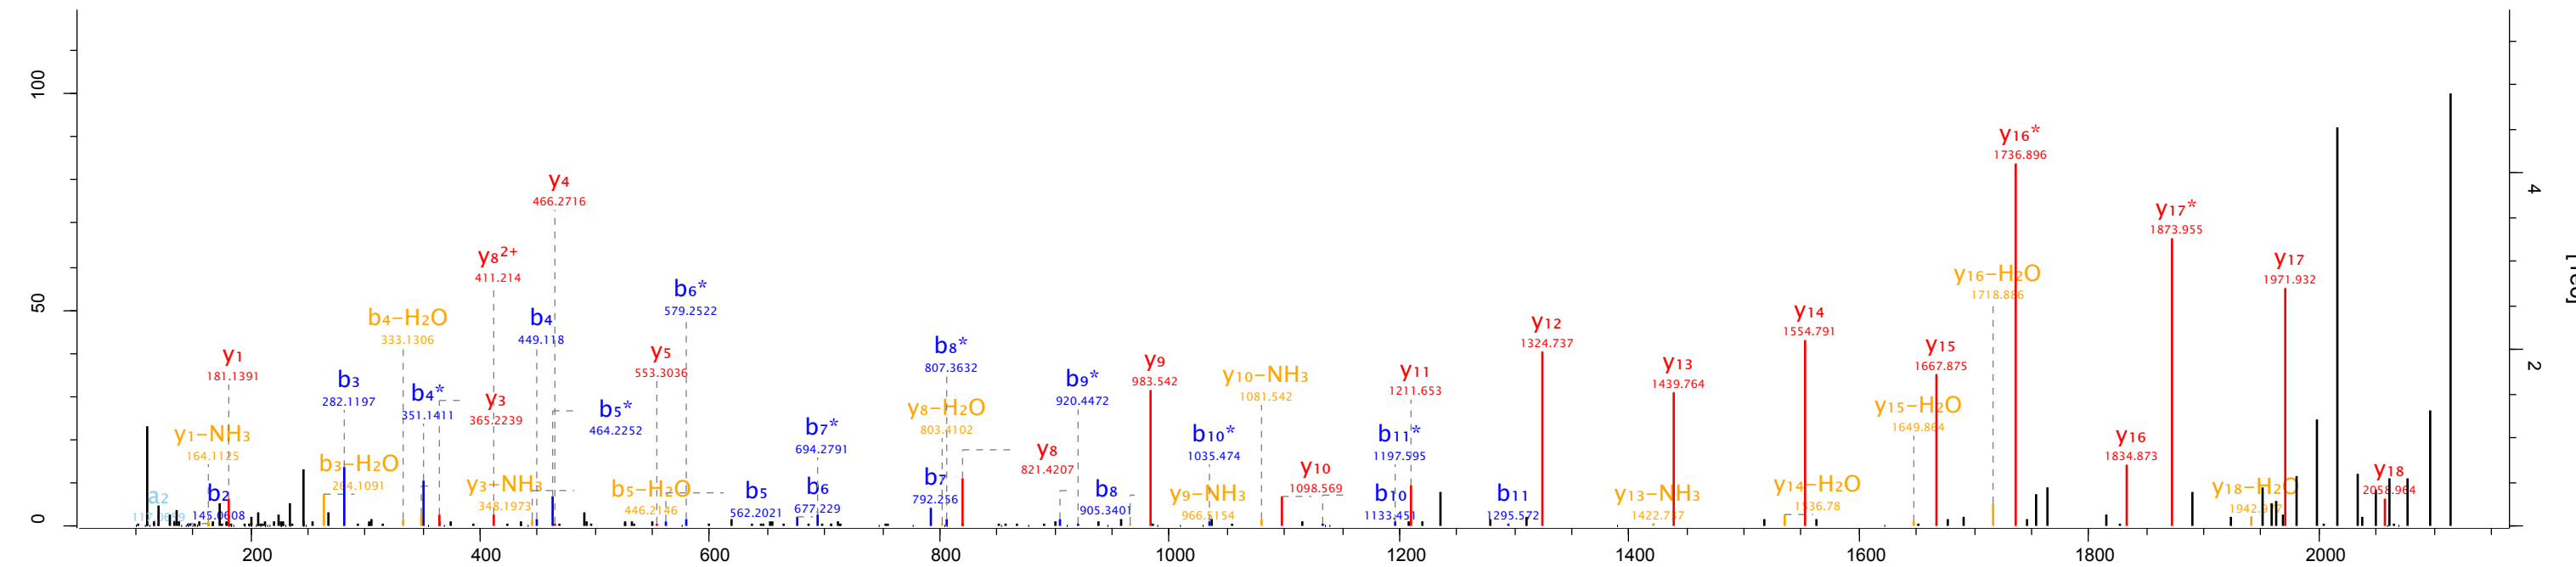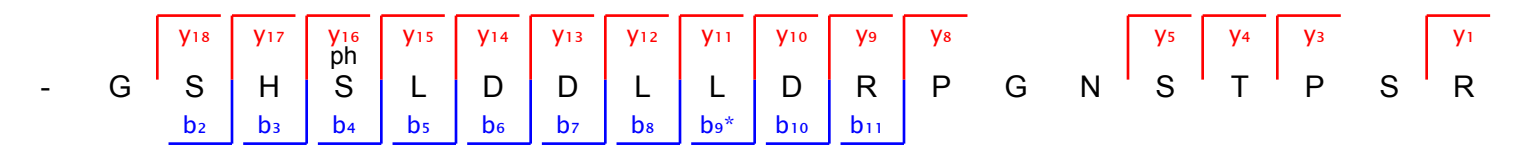

Raw file  
20150814\_A375SR\_Phospho\_BR2\_04

Scan 14350 Method FTMS; HCD Score 211.81 m/z 1054.92 Gene names MAP1B

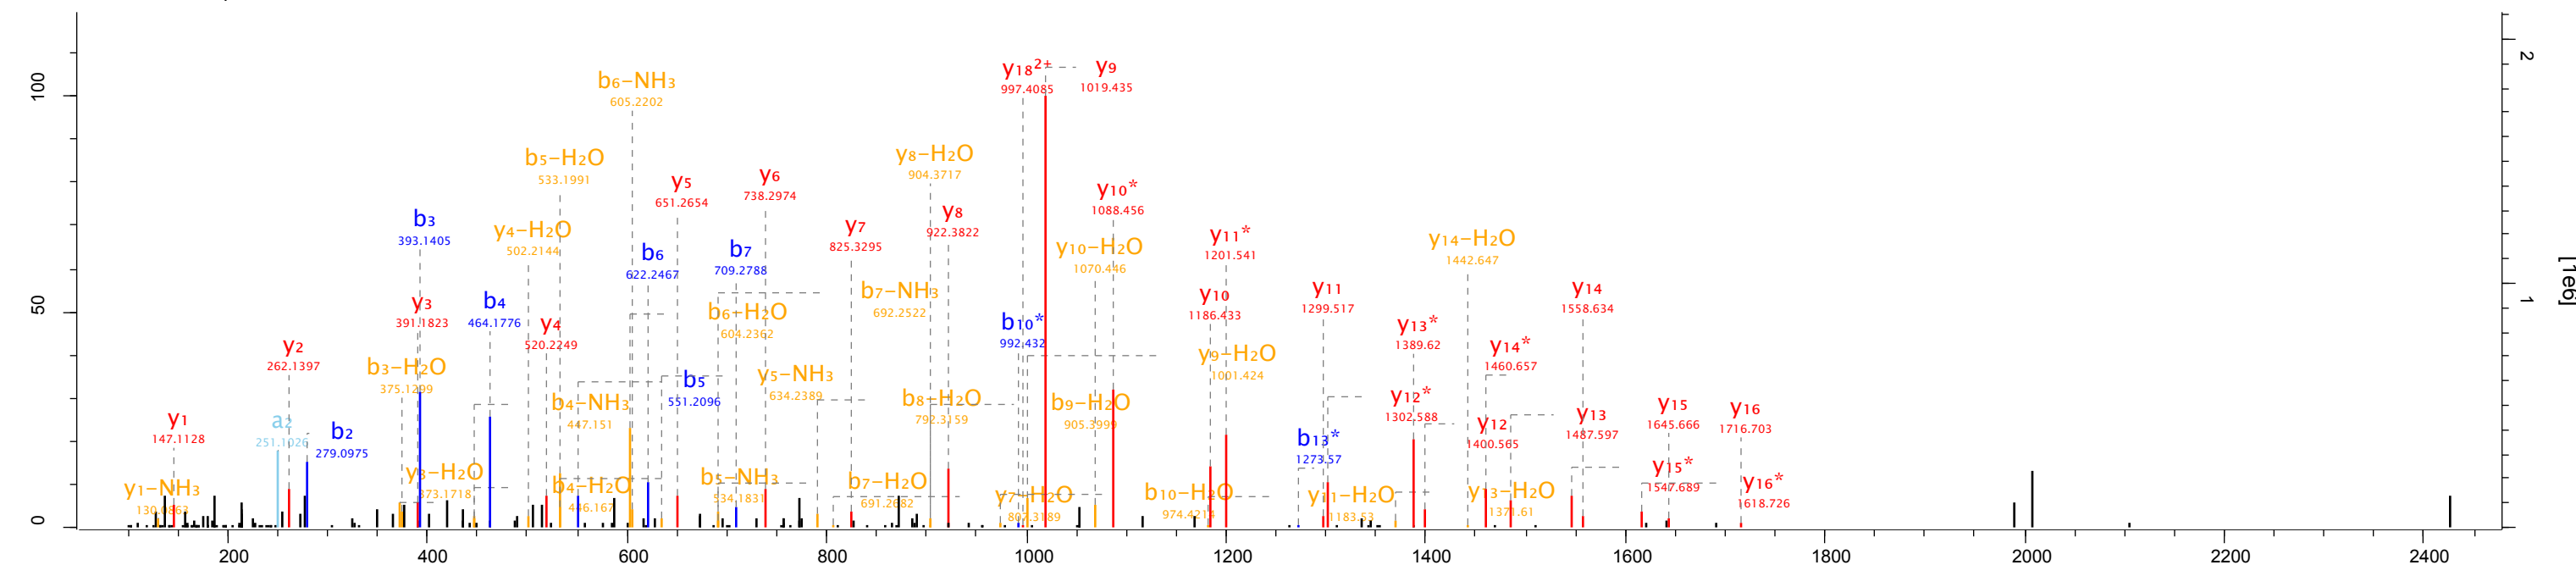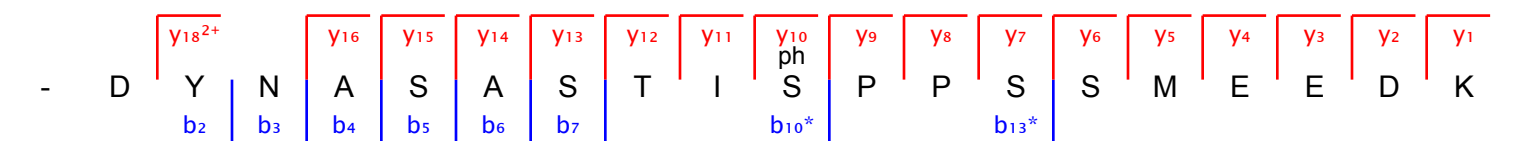

Raw file: 20150814\_A375SR\_Phospho\_BR2\_04  
 Scan: 14410  
 Method: FTMS; HCD  
 Score: 92.64  
 m/z: 601.3  
 Gene names: KIF21A

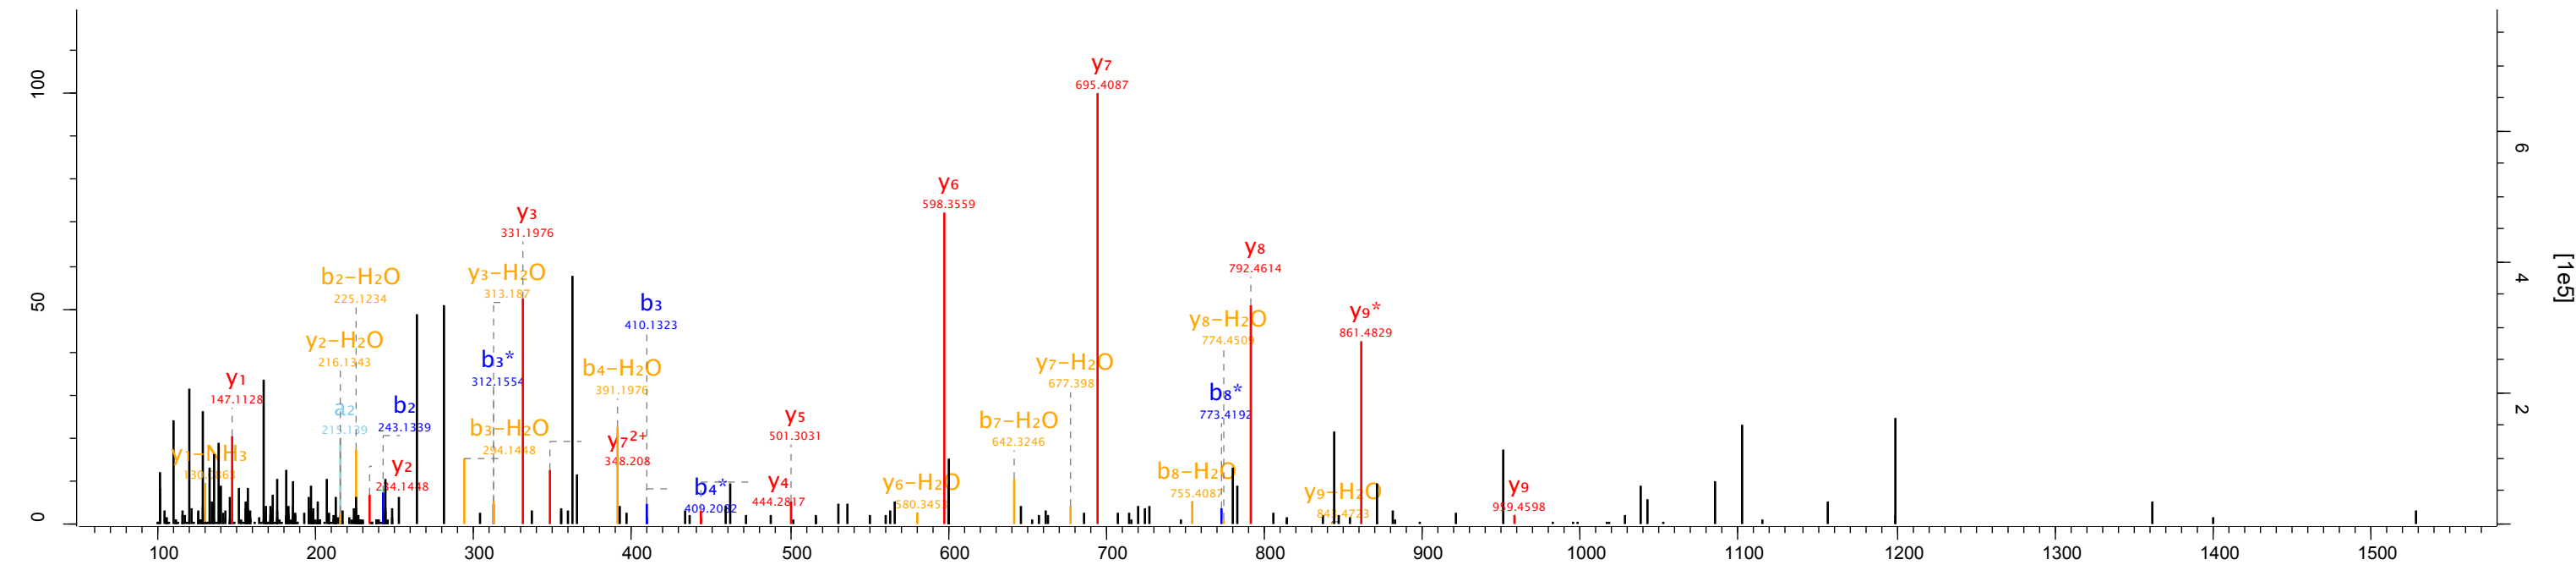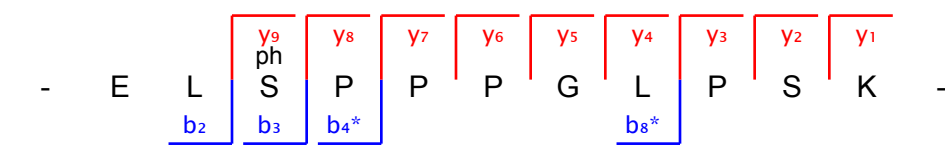

Raw file Scan Method Score m/z Gene names  
 20150814\_A375SR\_Phospho\_BR2\_04 14680 FTMS; HCD 145.04 963.94 PFKM

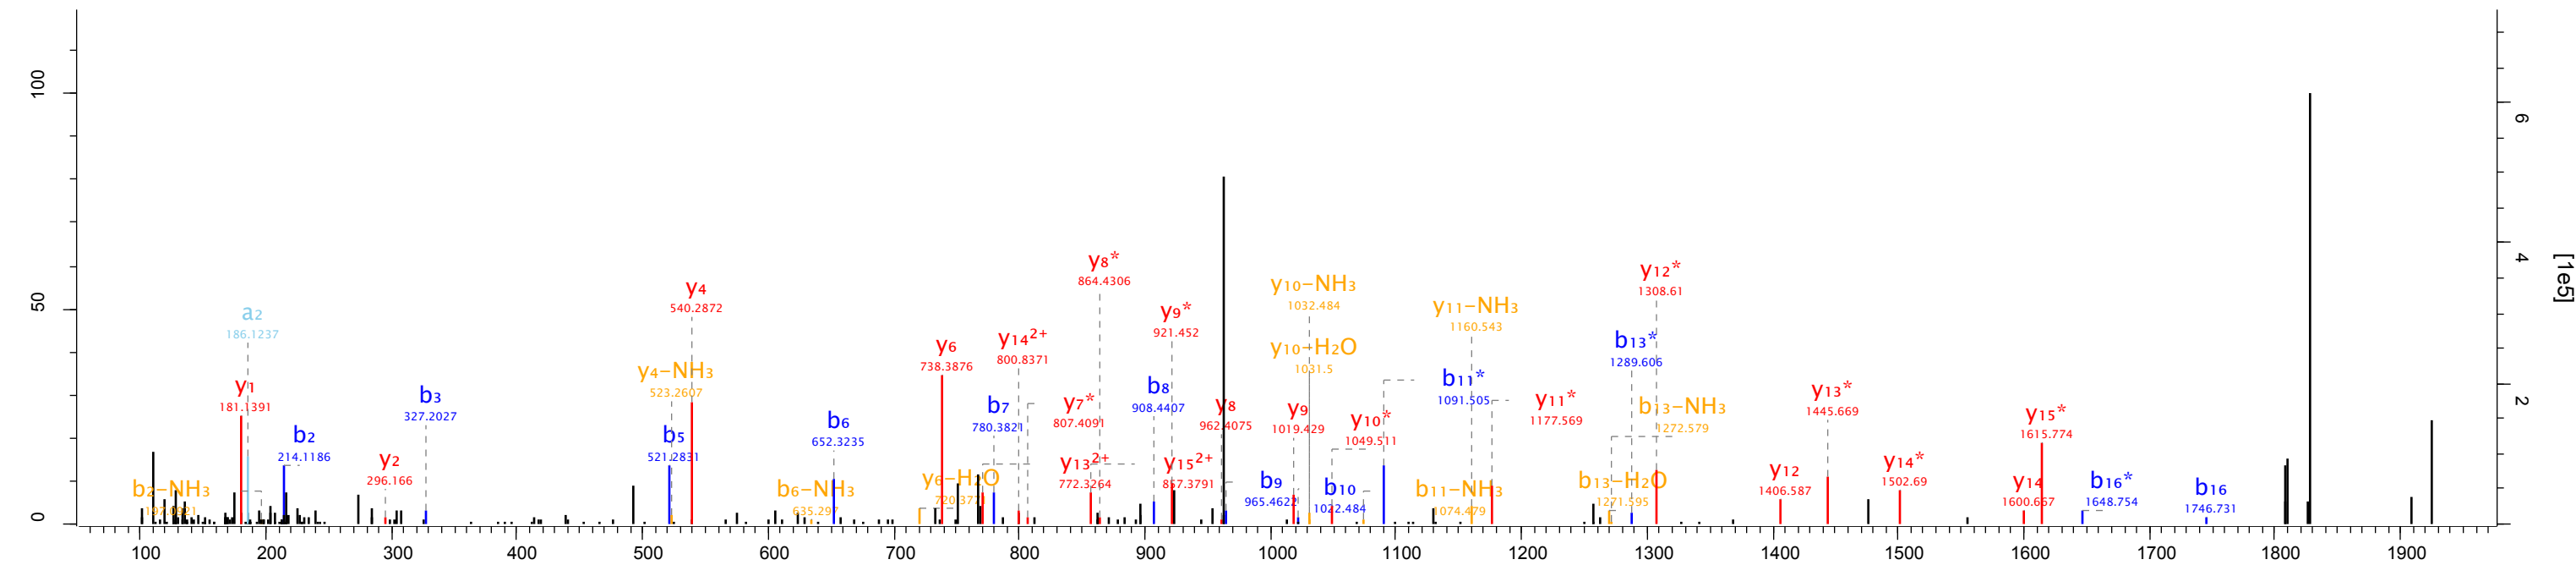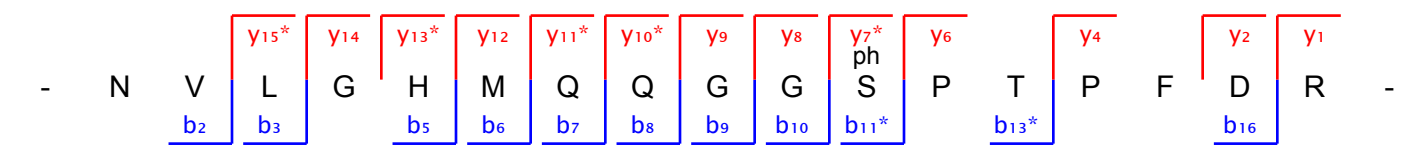

Raw file  
20150814\_A375SR\_Phospho\_BR2\_04

Scan 15040 Method FTMS; HCD Score 64.16 m/z 668.33 Gene names PKP2

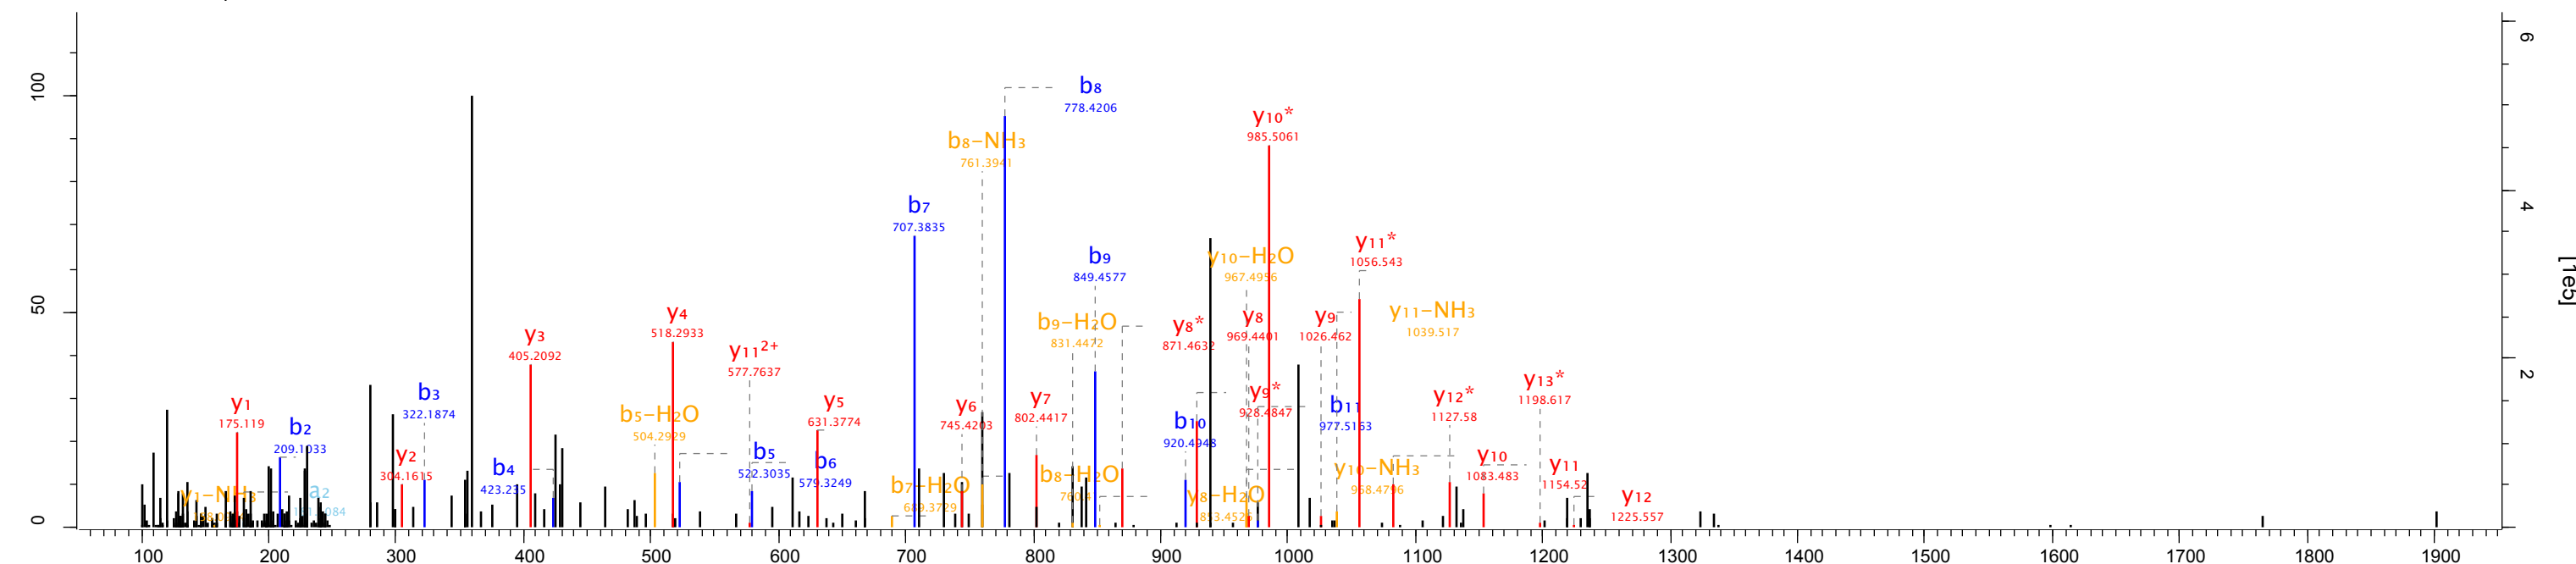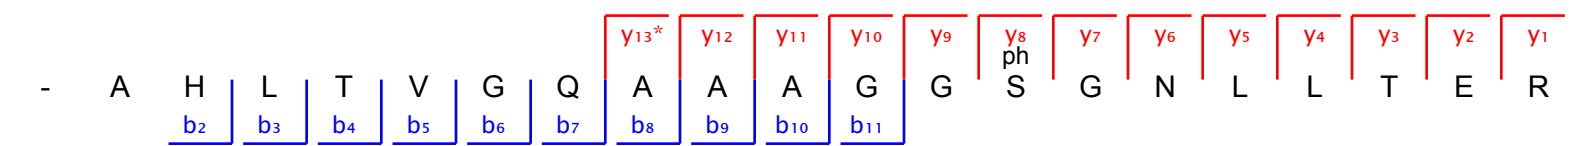



Raw file  
20150814\_A375SR\_Phospho\_BR2\_04

Scan 15100 Method FTMS; HCD Score 259.35 m/z 969.41 Gene names ATXN7L3

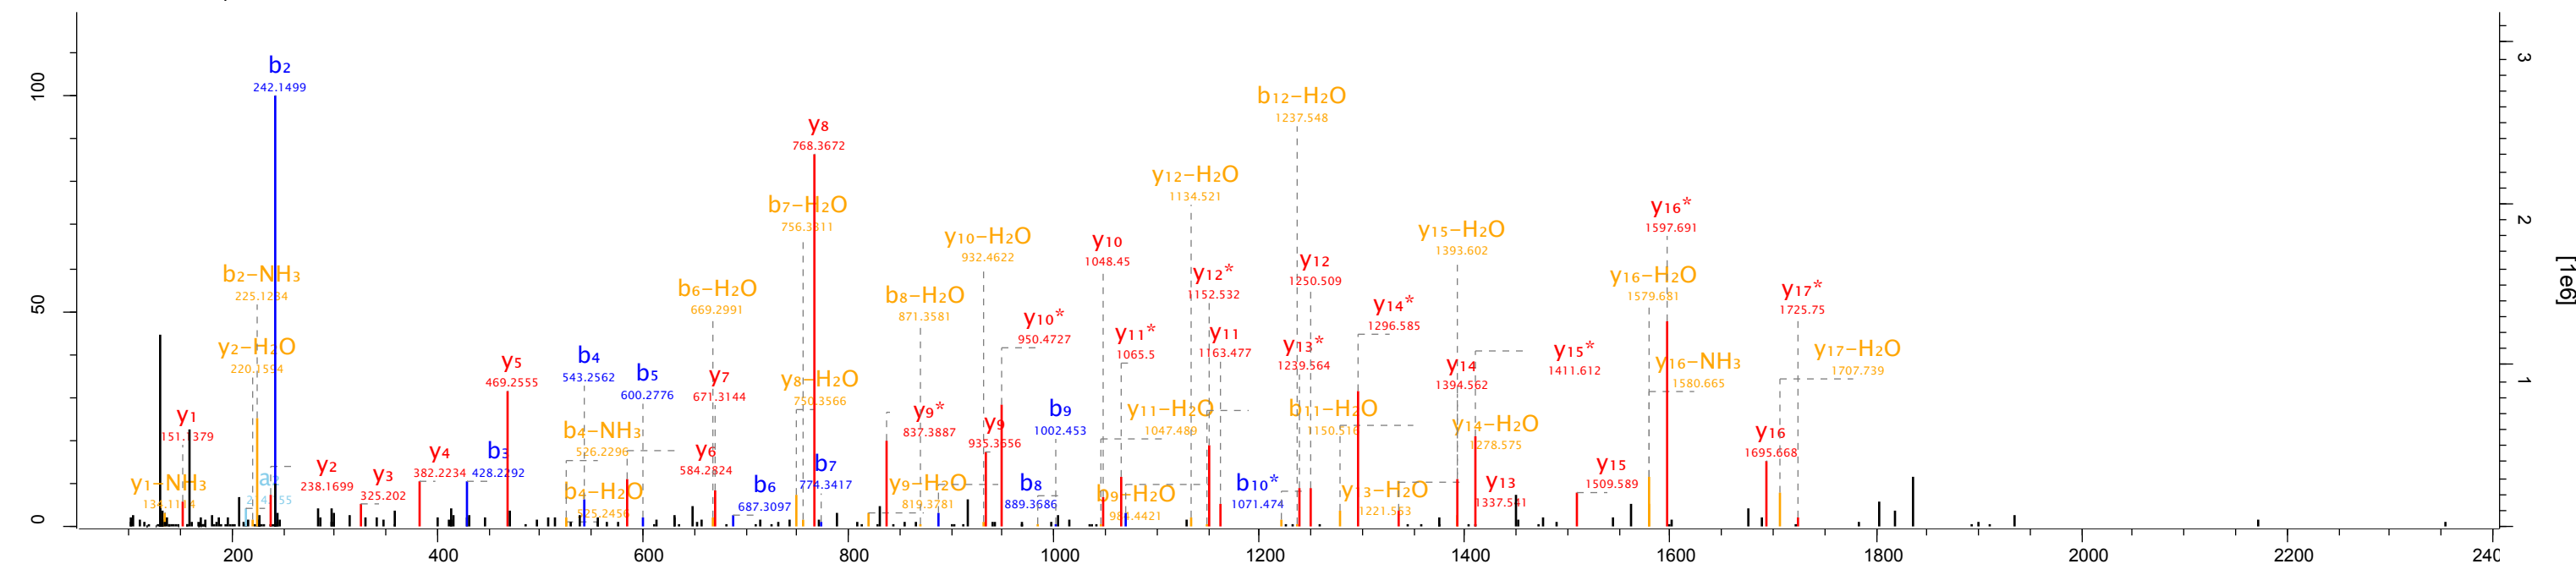

- L Q W D G S S D L S P S D S G S S K -

Fragmentation labels below the sequence:

- Red boxes: y<sub>17</sub>\*, y<sub>16</sub>, y<sub>15</sub>, y<sub>14</sub>, y<sub>13</sub>, y<sub>12</sub>, y<sub>11</sub>, y<sub>10</sub>, y<sub>9</sub>, y<sub>8</sub>, y<sub>7</sub>, y<sub>6</sub>, y<sub>5</sub>, y<sub>4</sub>, y<sub>3</sub>, y<sub>2</sub>, y<sub>1</sub>
- Blue boxes: b<sub>2</sub>, b<sub>3</sub>, b<sub>4</sub>, b<sub>5</sub>, b<sub>6</sub>, b<sub>7</sub>, b<sub>8</sub>, b<sub>9</sub>, b<sub>10</sub>\*

Raw file  
20150814\_A375SR\_Phospho\_BR2\_04

Scan 15490 Method FTMS; HCD Score 297.92 m/z 1028.45 Gene names CTDSPL2

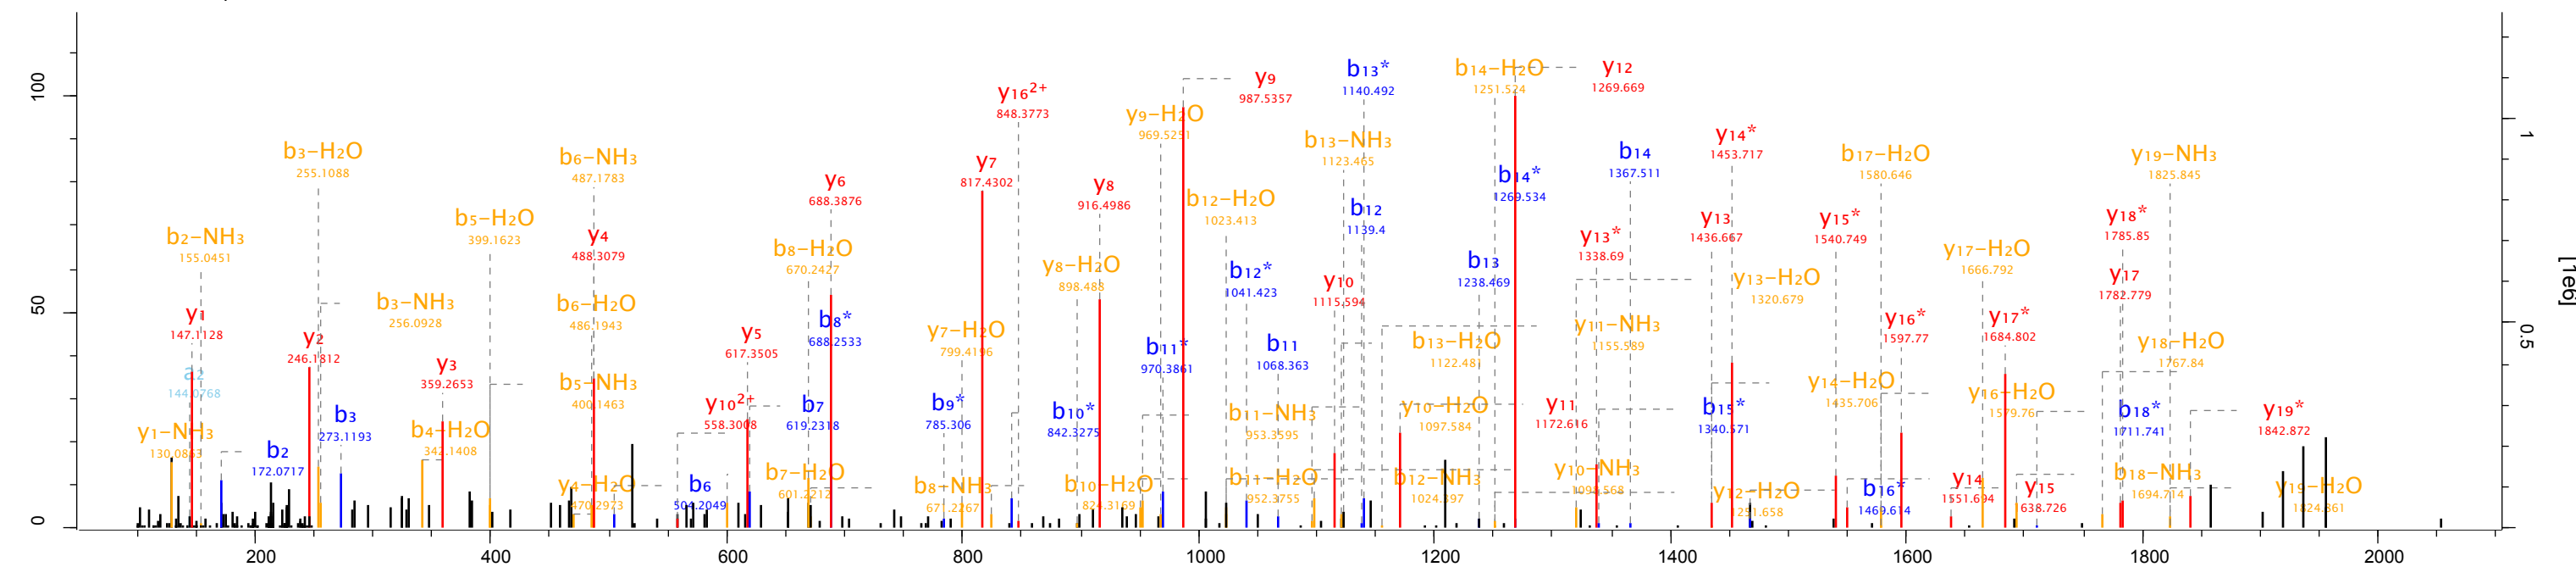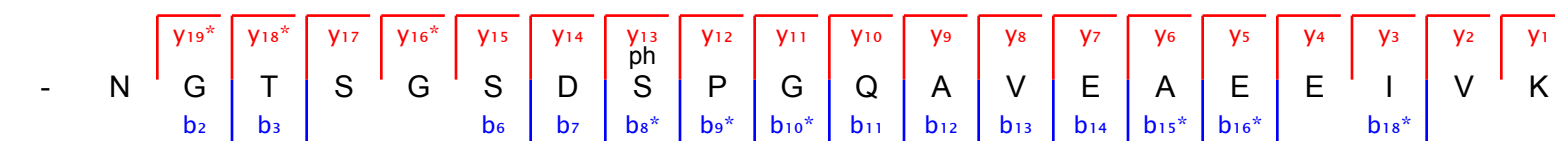

Raw file: 20150814\_A375SR\_Phospho\_BR2\_04  
 Scan: 15550 Method: FTMS; HCD Score: 152.89 m/z: 780.32 Gene names: OBSL1

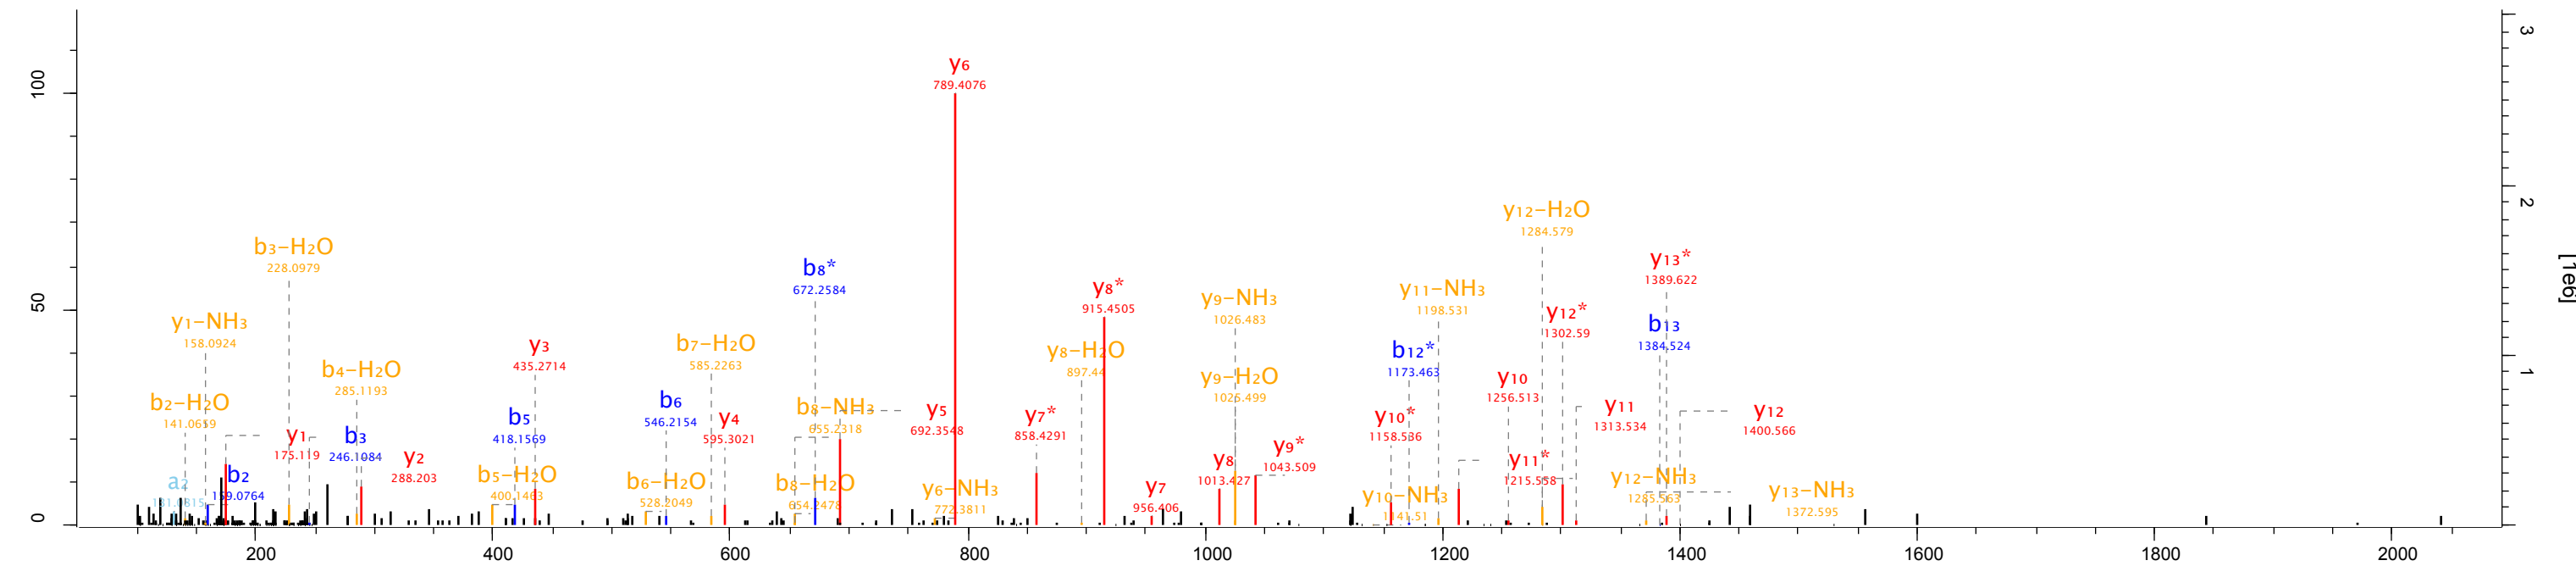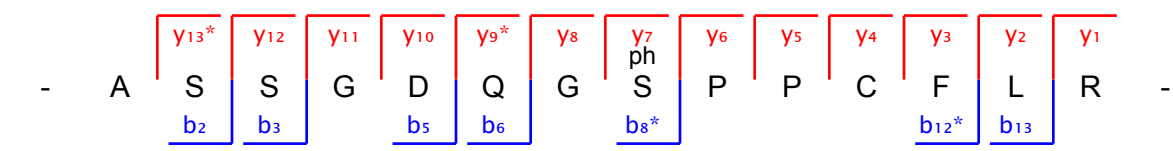

Raw file 20150814\_A375SR\_Phospho\_BR2\_04 Scan 15570 Method FTMS; HCD Score 140.73 m/z 852.39 Gene names LRRC16A

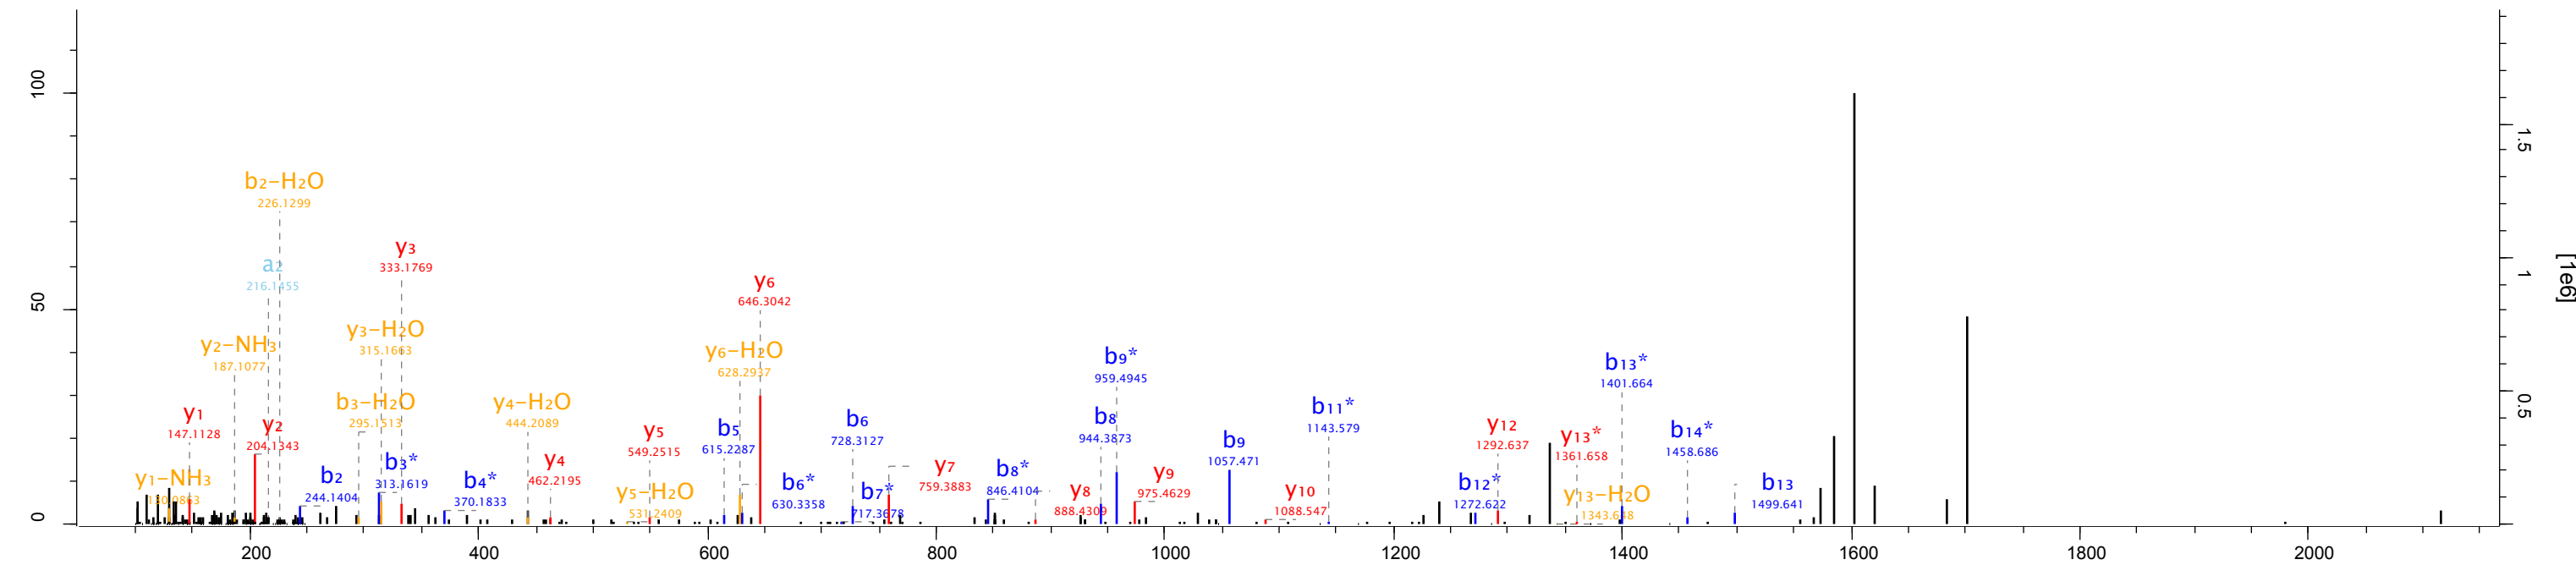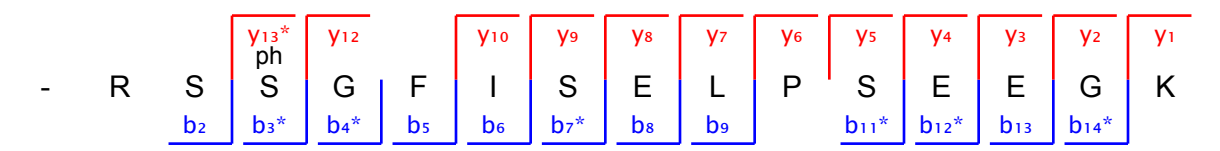

Raw file 20150814\_A375SR\_Phospho\_BR2\_04 Scan 15780 Method FTMS; HCD Score 135.1 m/z 745.35 Gene names NEDD4

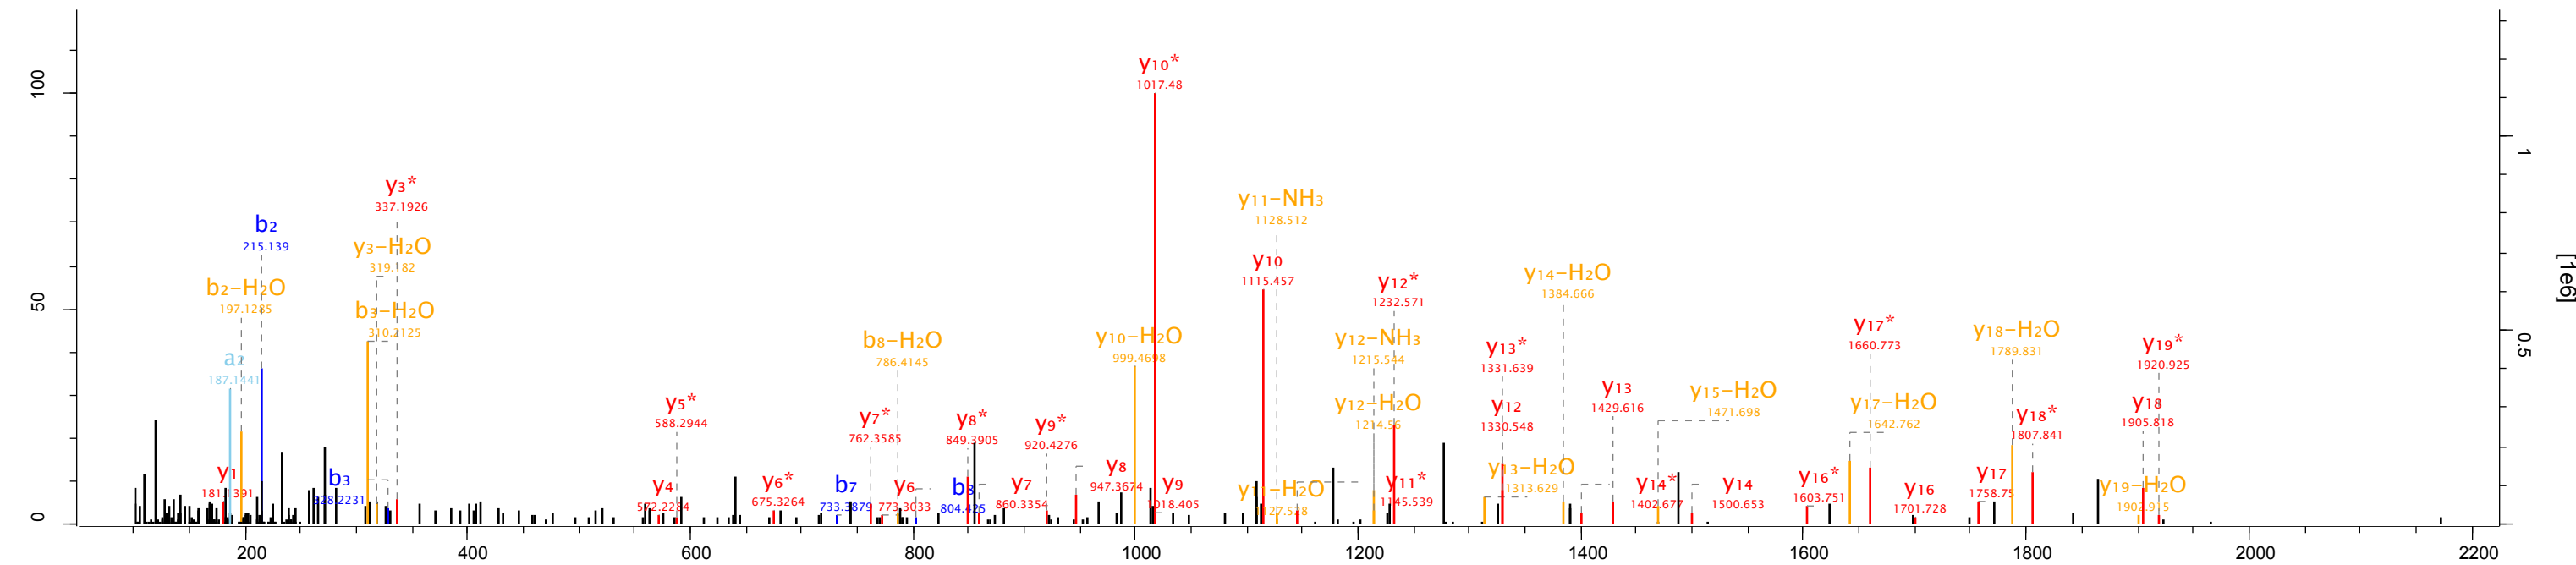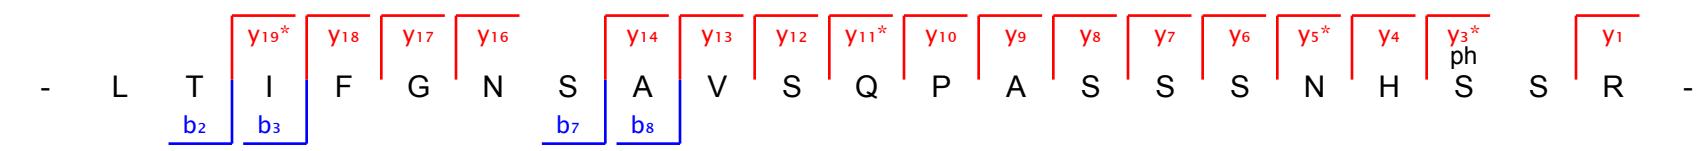

Raw file: 20150814\_A375SR\_Phospho\_BR2\_04  
 Scan: 15790 Method: FTMS; HCD Score: 63.45 m/z: 730.35 Gene names: PFN1

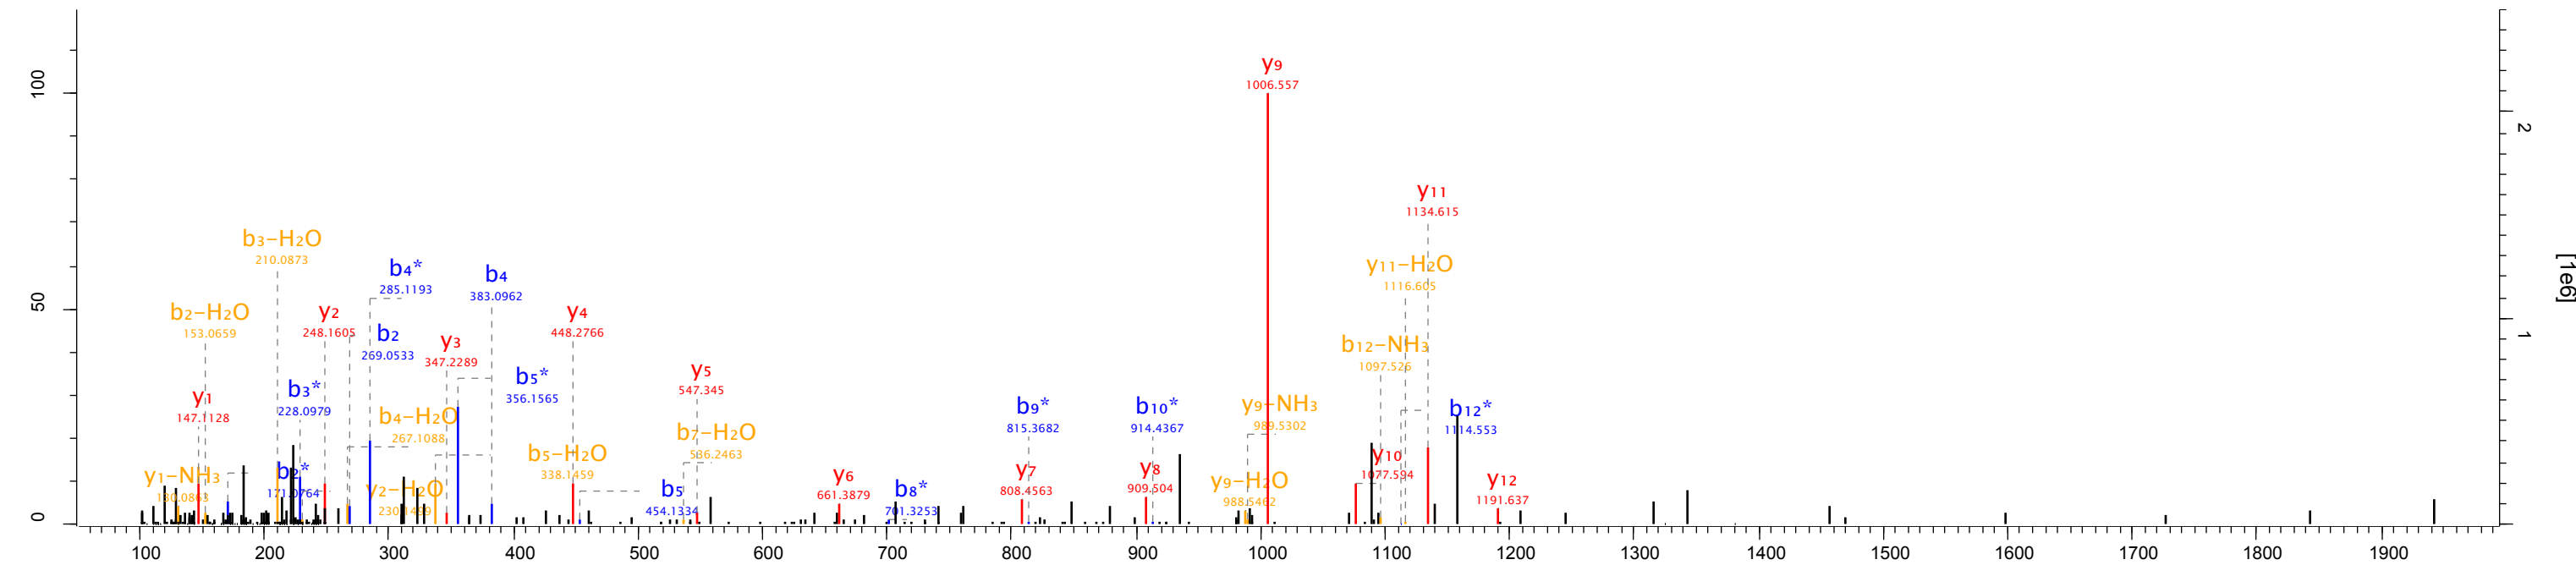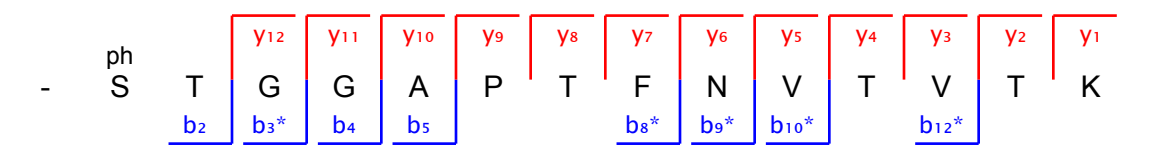

Raw file: 20150814\_A375SR\_Phospho\_BR2\_04  
 Scan: 16120  
 Method: FTMS; HCD  
 Score: 88.64  
 m/z: 1203.55  
 Gene names: KDM1A

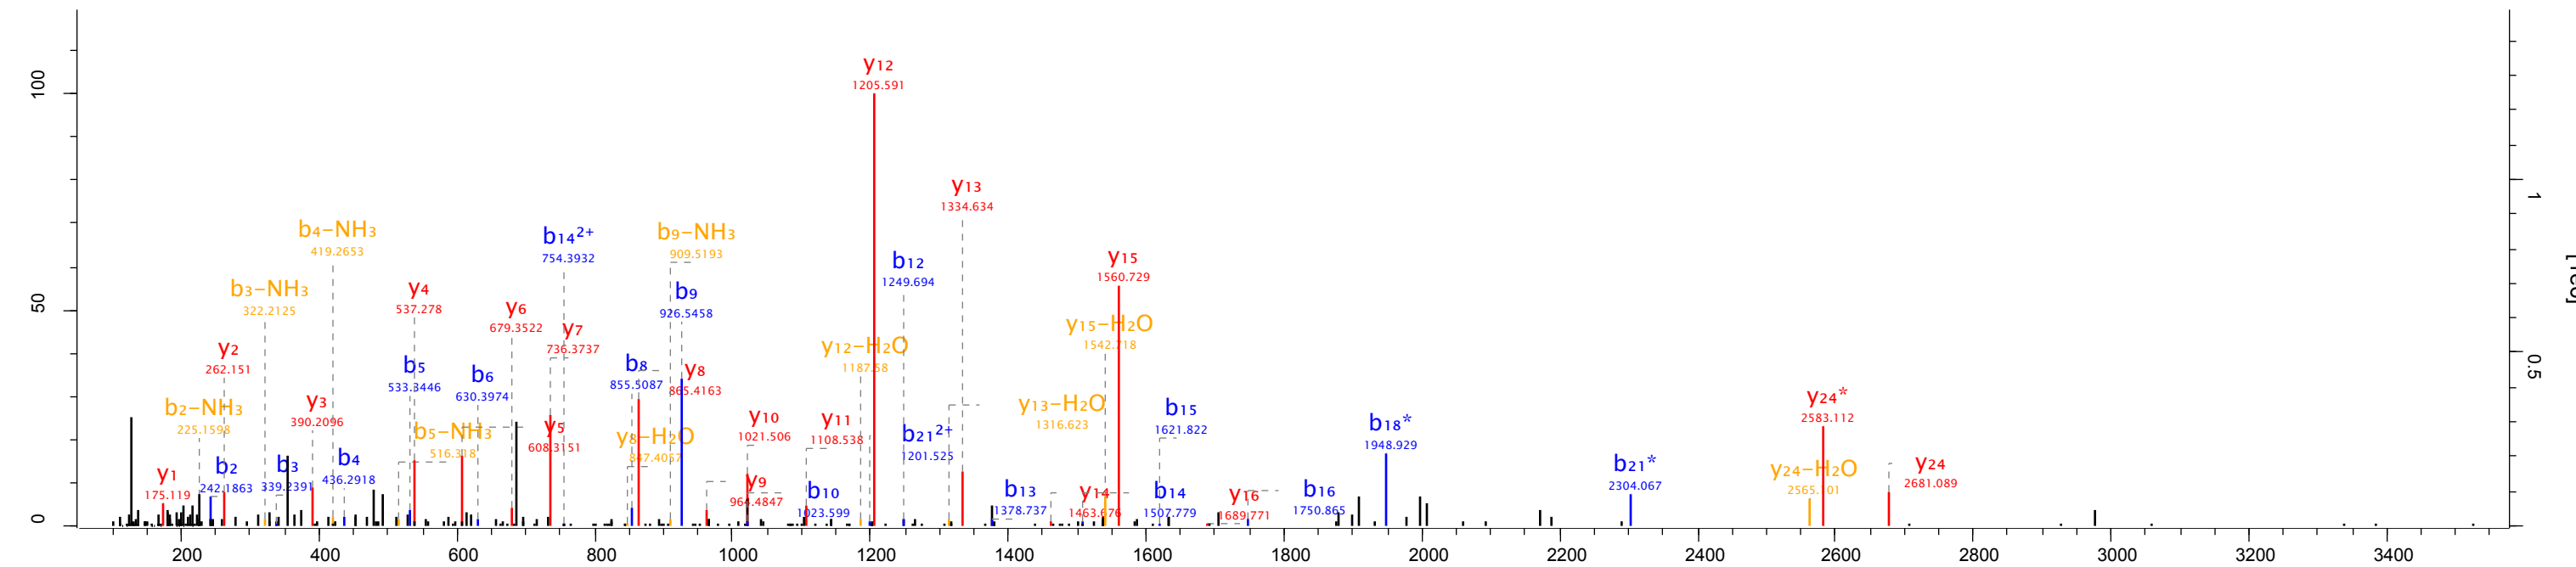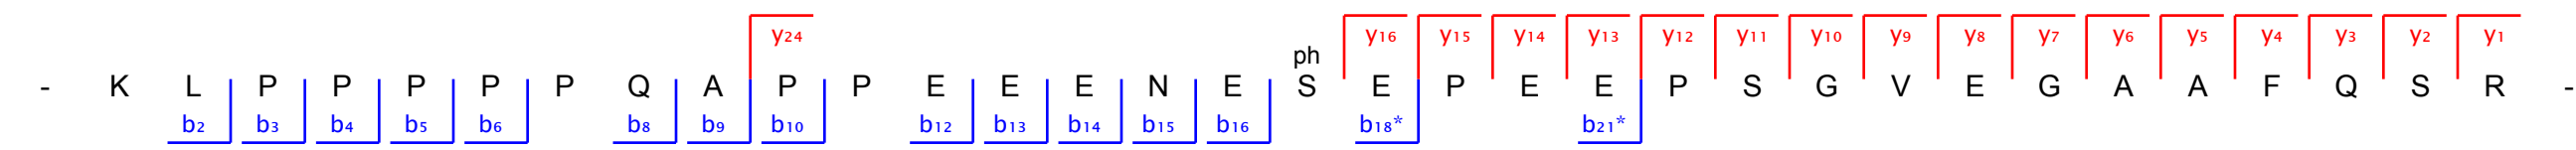

Raw file: 20150814\_A375SR\_Phospho\_BR2\_04  
 Scan: 16190 Method: FTMS; HCD Score: 199.57 m/z: 1024.47 Gene names: PRKCD

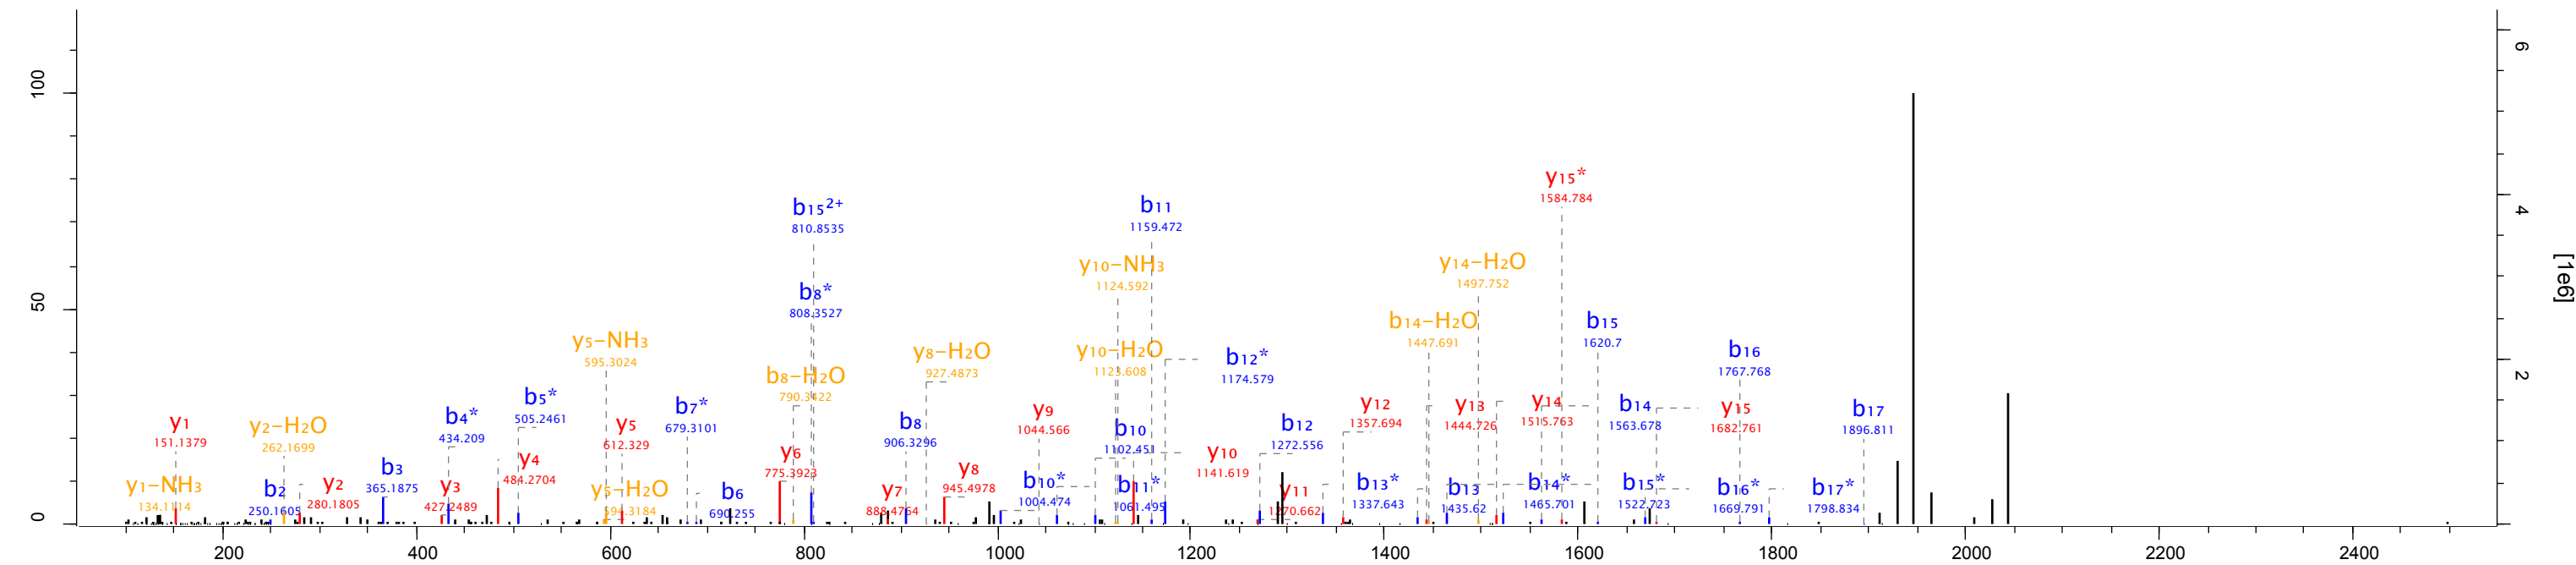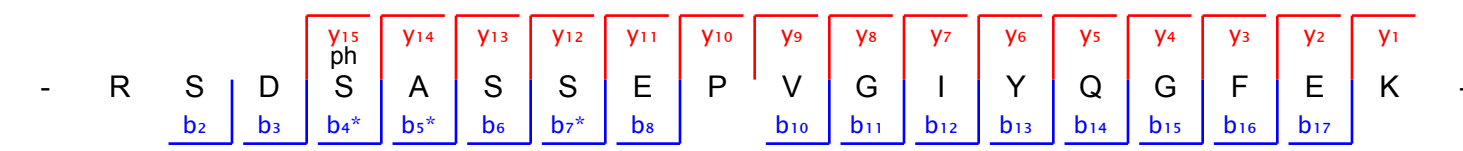



Raw file: 20150814\_A375SR\_Phospho\_BR2\_04  
 Scan: 16400 Method: FTMS; HCD Score: 136.33 m/z: 624.32 Gene names: LAMTOR1

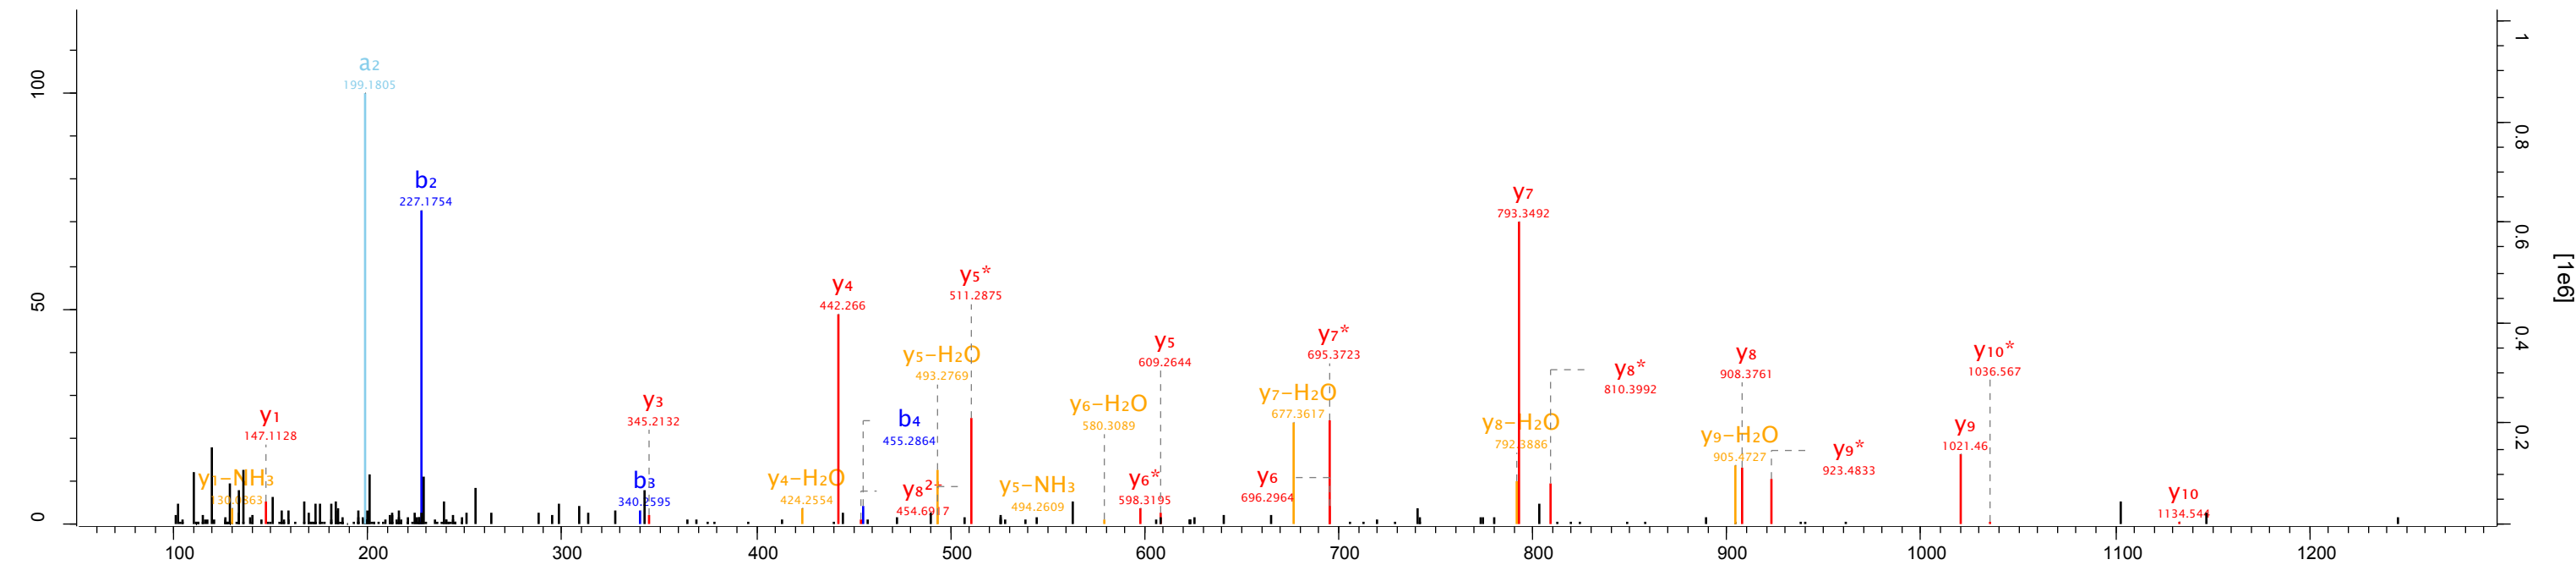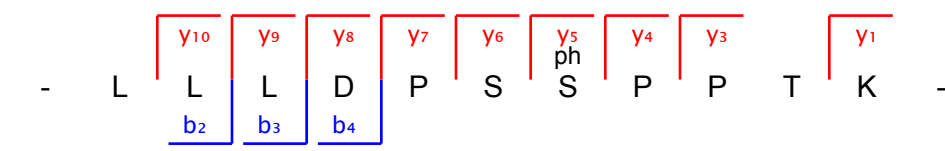

Raw file: 20150814\_A375SR\_Phospho\_BR2\_04  
 Scan: 16450 Method: FTMS; HCD Score: 157.07 m/z: 786.32 Gene names: SNAP23

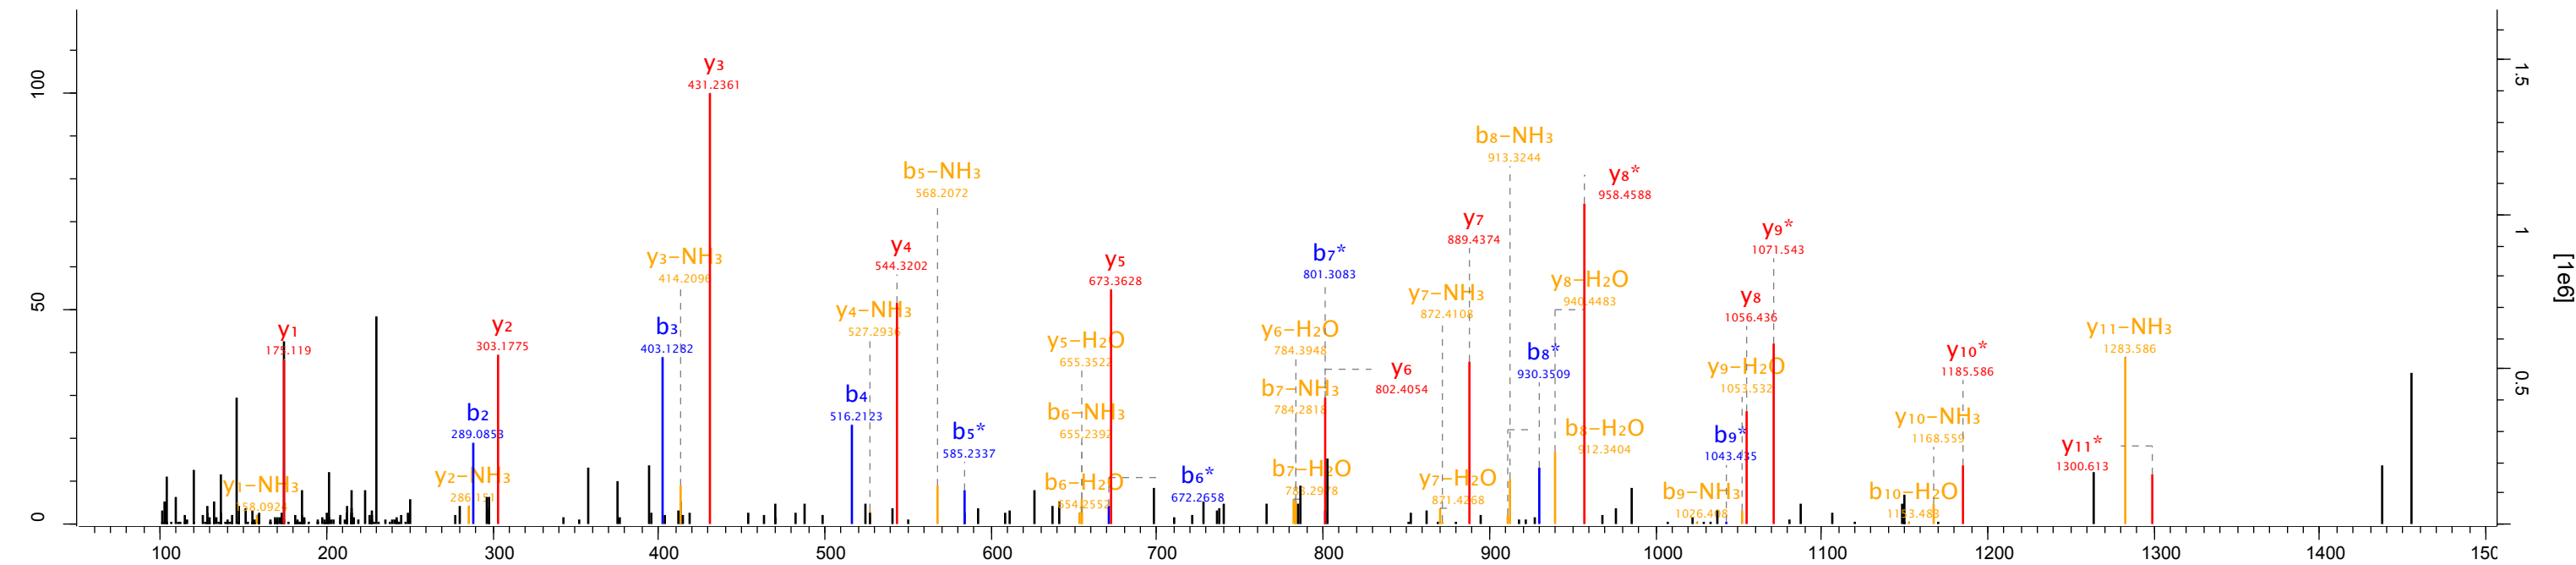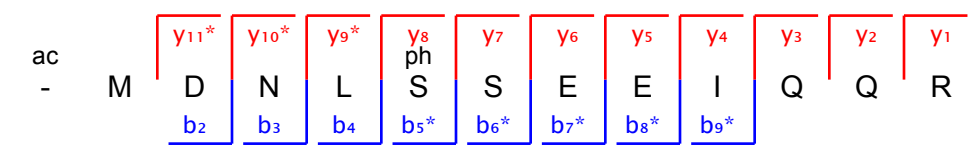

Raw file Scan Method Score m/z Gene names  
 20150814\_A375SR\_Phospho\_BR2\_04 16560 FTMS; HCD 109.55 890.62 HDAC3

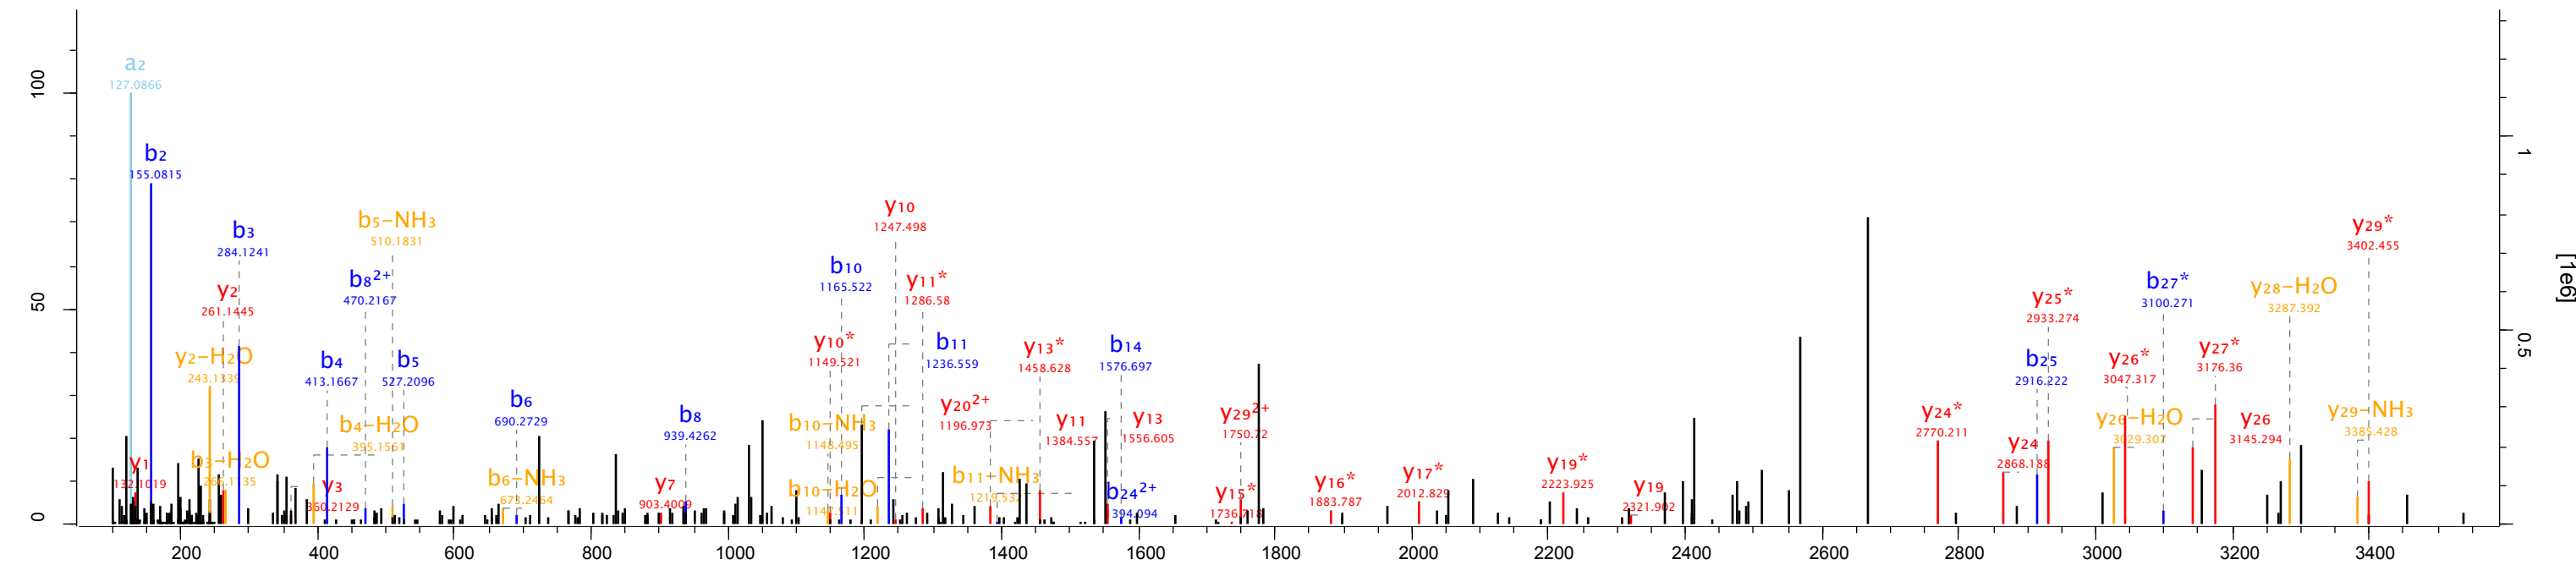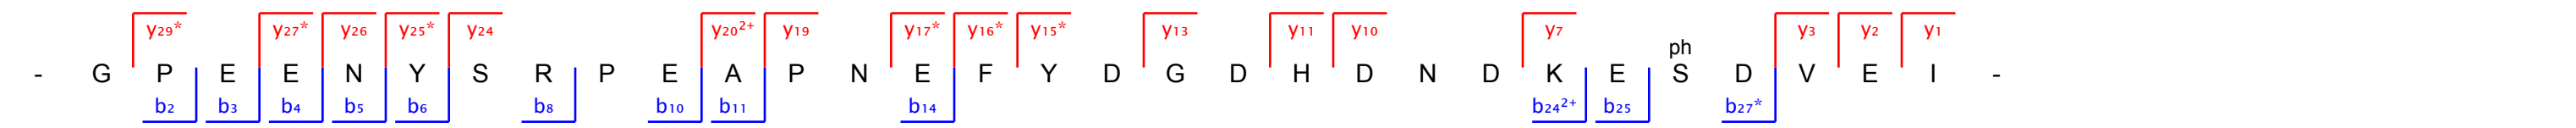

Raw file: 20150814\_A375SR\_Phospho\_BR2\_04  
 Scan: 17310 Method: FTMS; HCD Score: 101.12 m/z: 570.76 Gene names: GPATCH2L

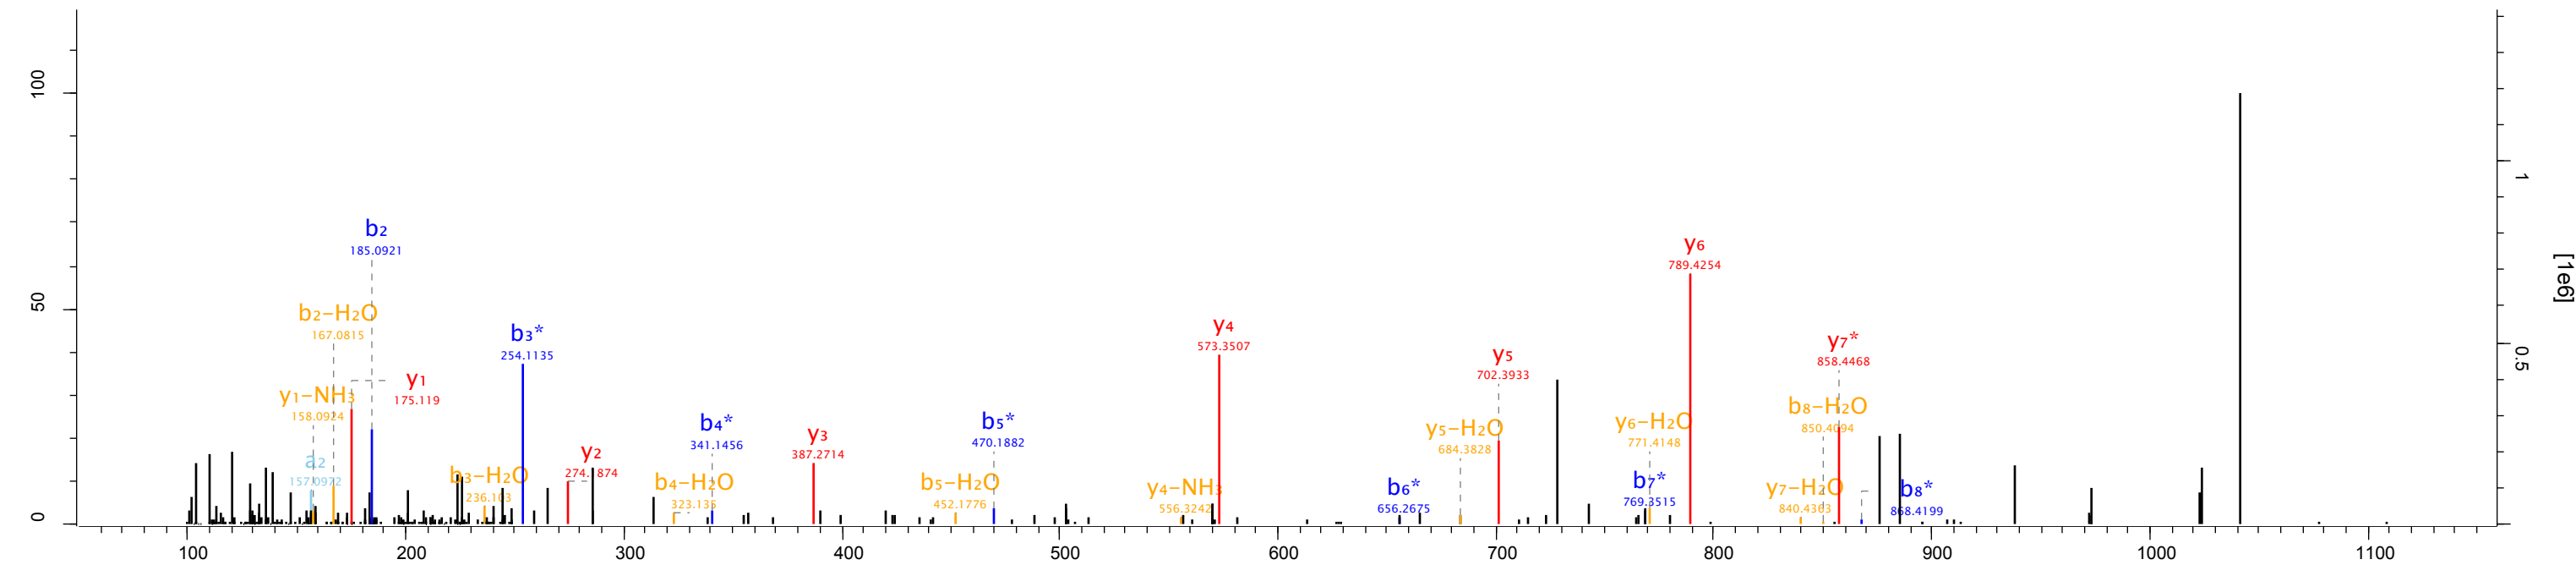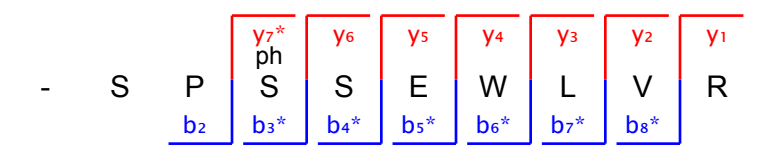

Raw file 20150814\_A375SR\_Phospho\_BR2\_04 Scan 17380 Method FTMS; HCD Score 166.52 m/z 681.8 Gene names NIPBL

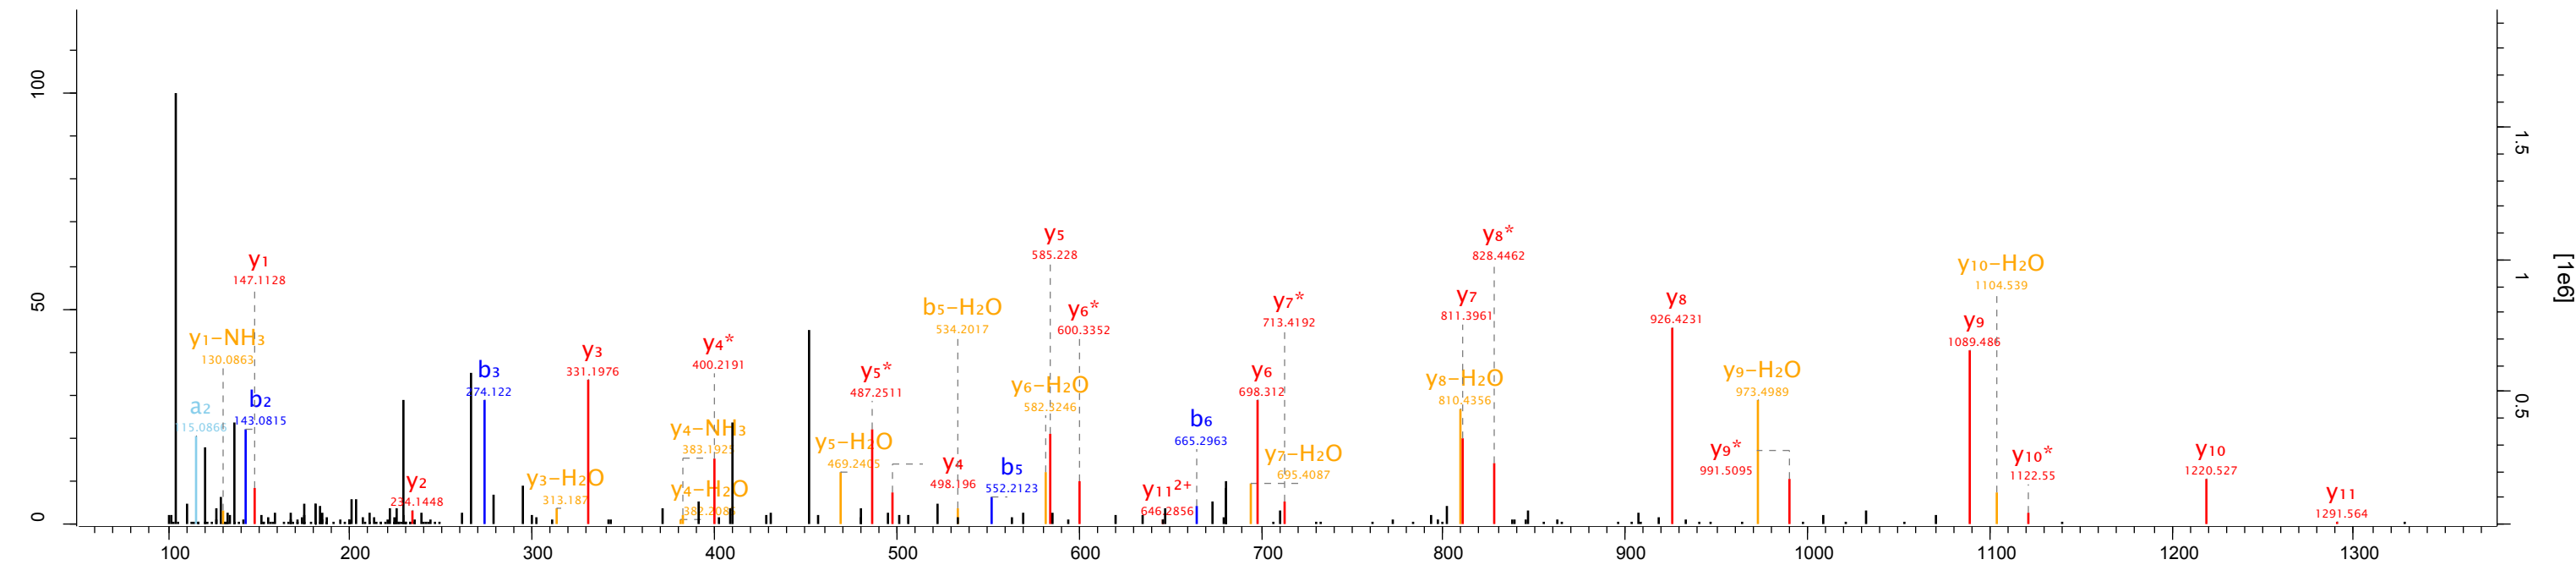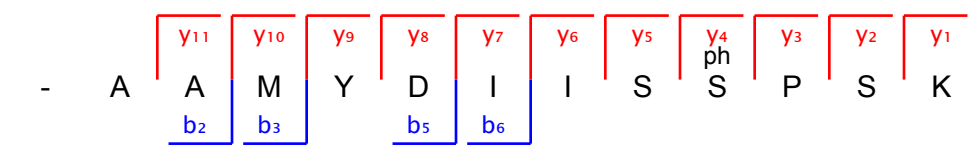

Raw file: 20150814\_A375SR\_Phospho\_BR2\_04  
 Scan: 17390 Method: FTMS; HCD Score: 206.41 m/z: 1027.13 Gene names: DHX36

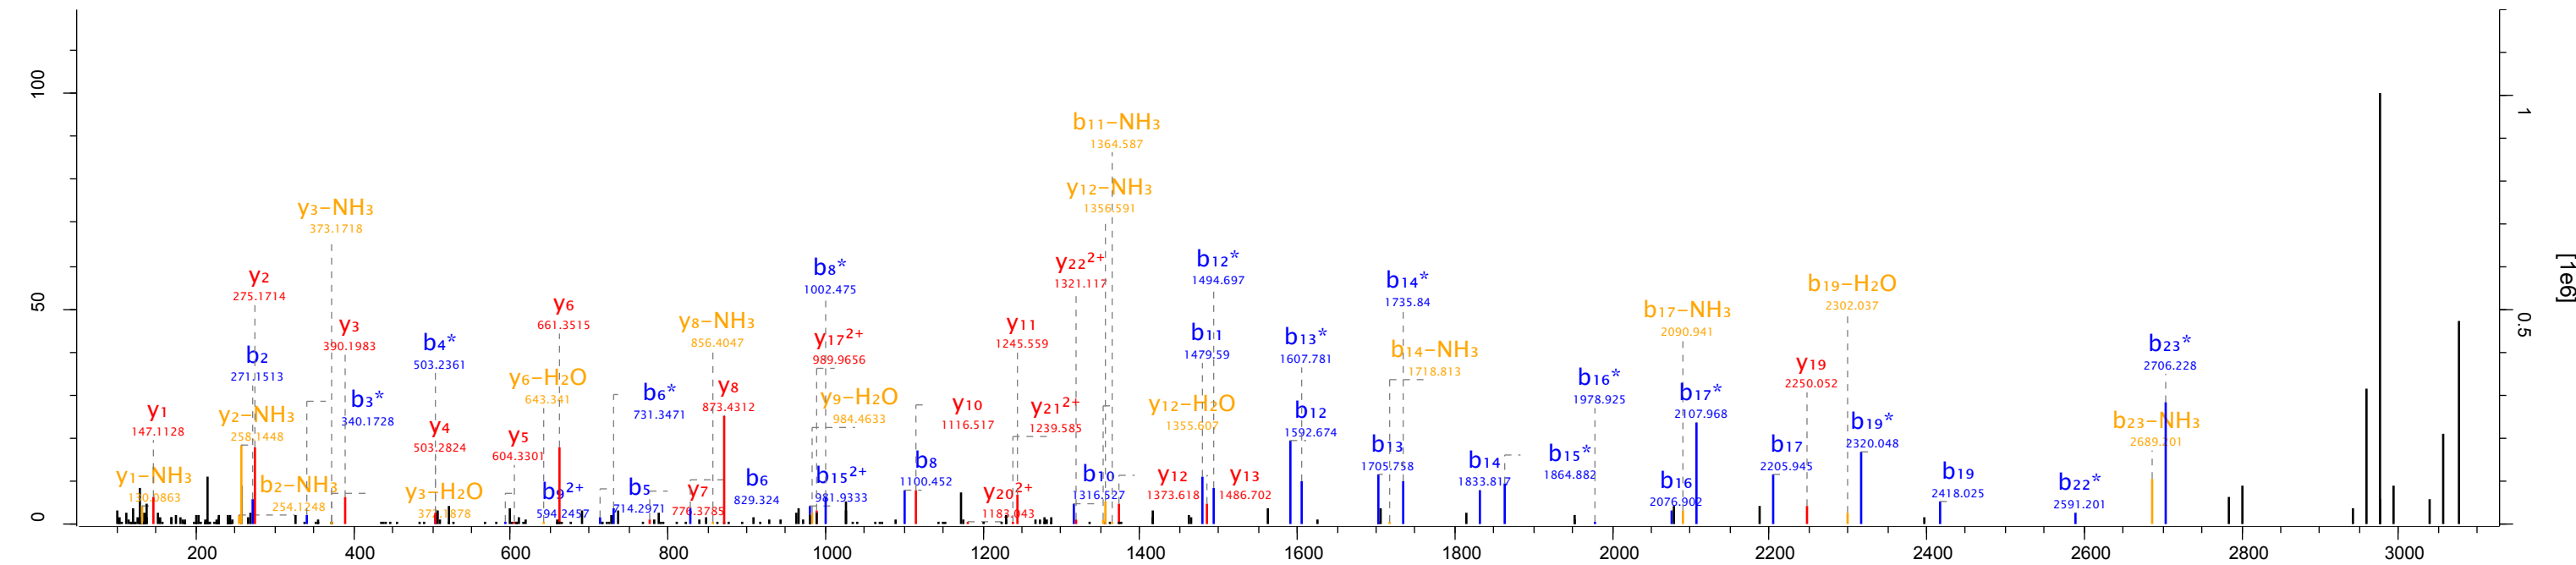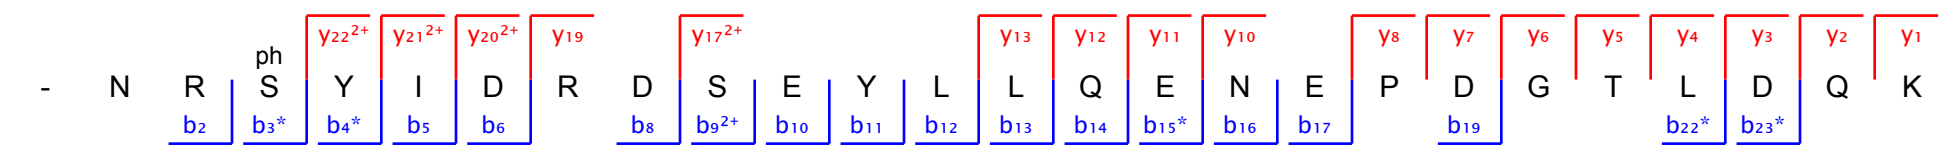

Raw file 20150814\_A375SR\_Phospho\_BR2\_04 Scan 17460 Method FTMS; HCD Score 165.36 m/z 729.83 Gene names MPRIP

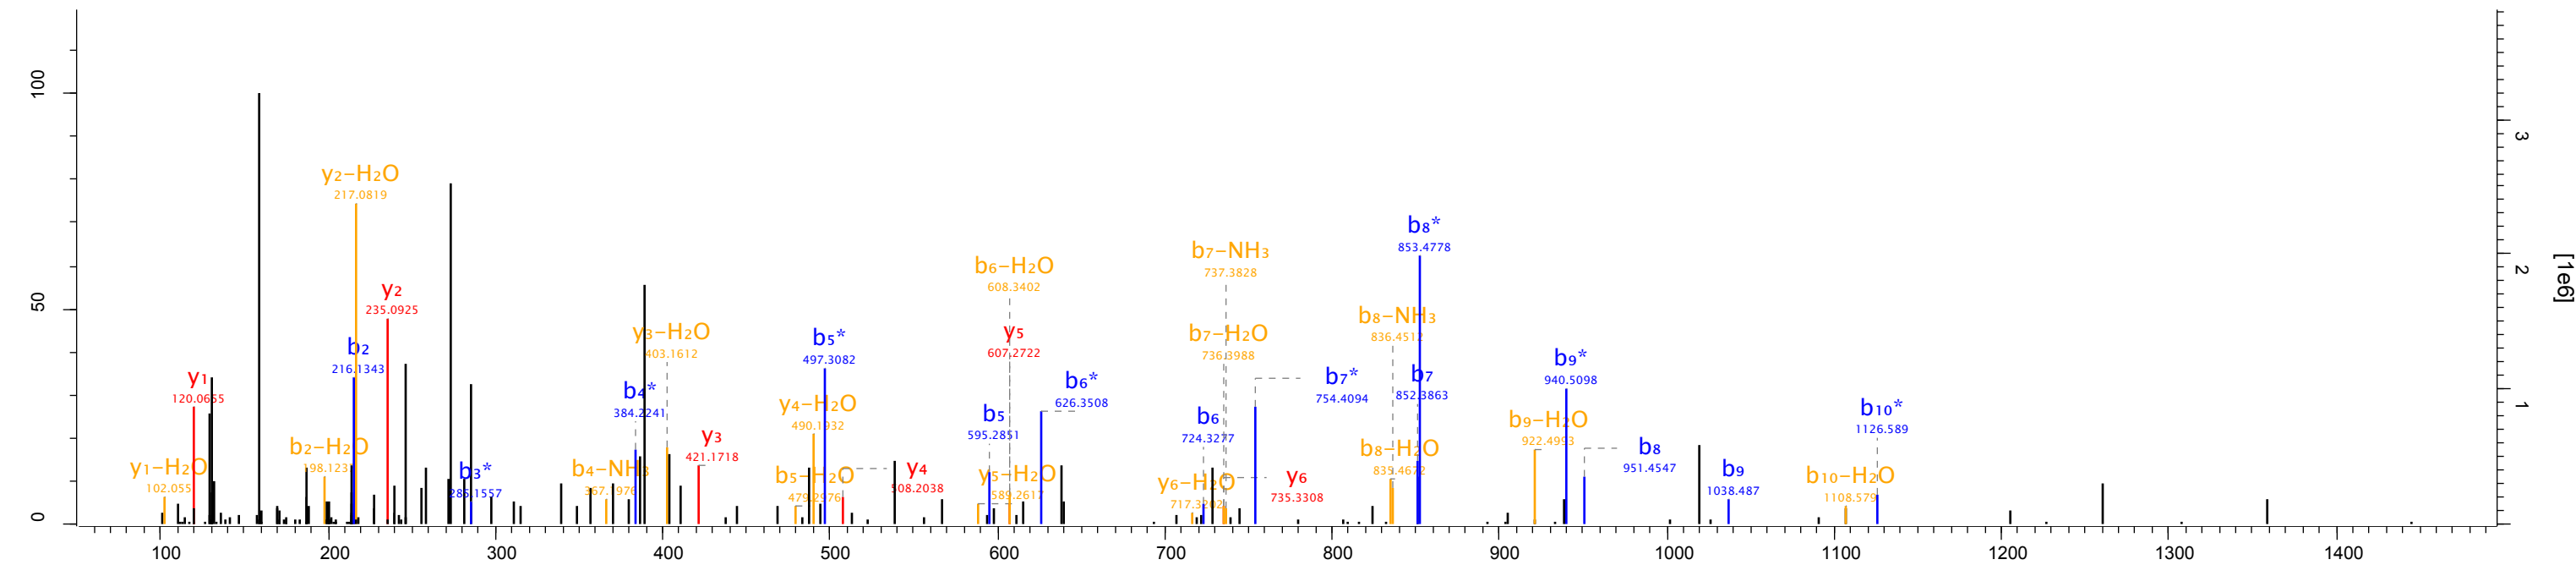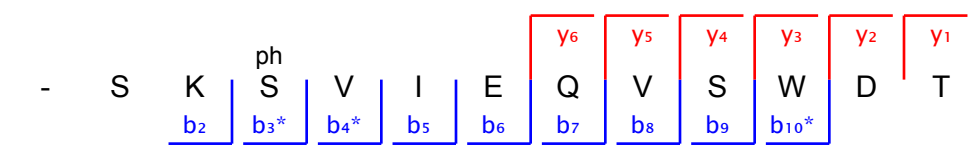

Raw file: 20150814\_A375SR\_Phospho\_BR2\_04  
 Scan: 17500 Method: FTMS; HCD Score: 104.9 m/z: 598.29 Gene names: PNPLA2

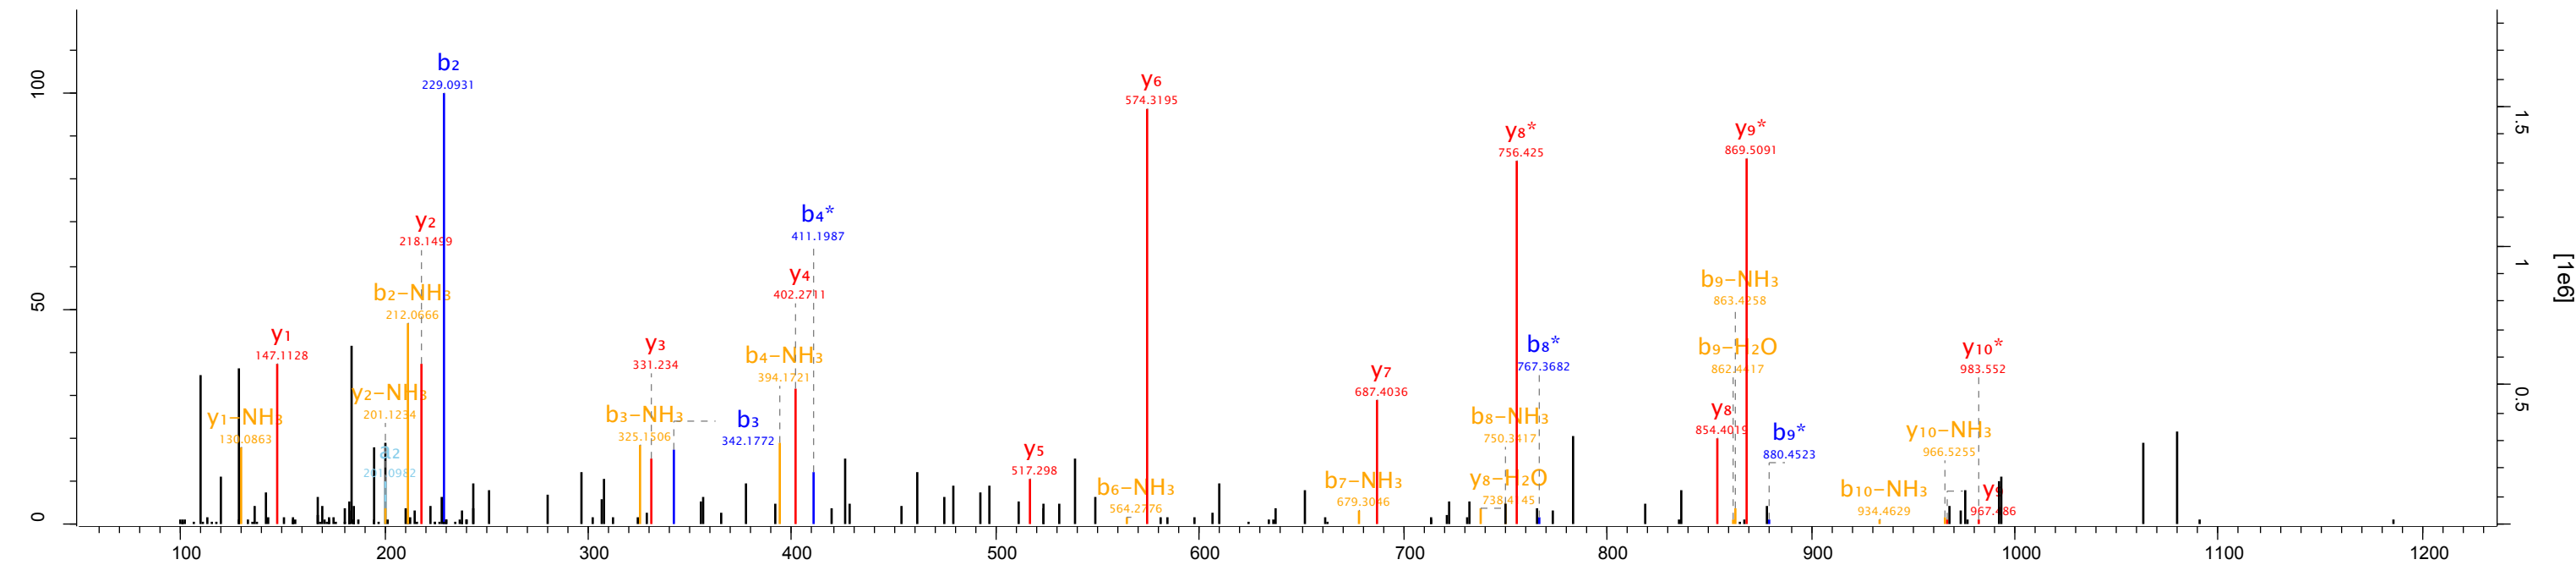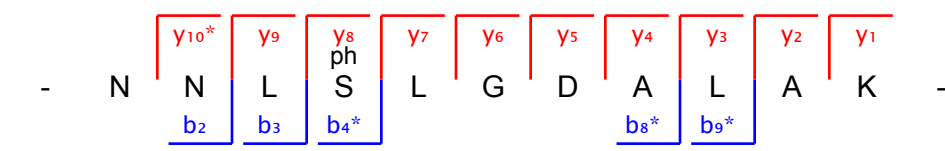



Raw file  
20150814\_A375SR\_Phospho\_BR2\_04

Scan 17680 Method FTMS; HCD Score 328.17 m/z 1373.57 Gene names MAGEA4

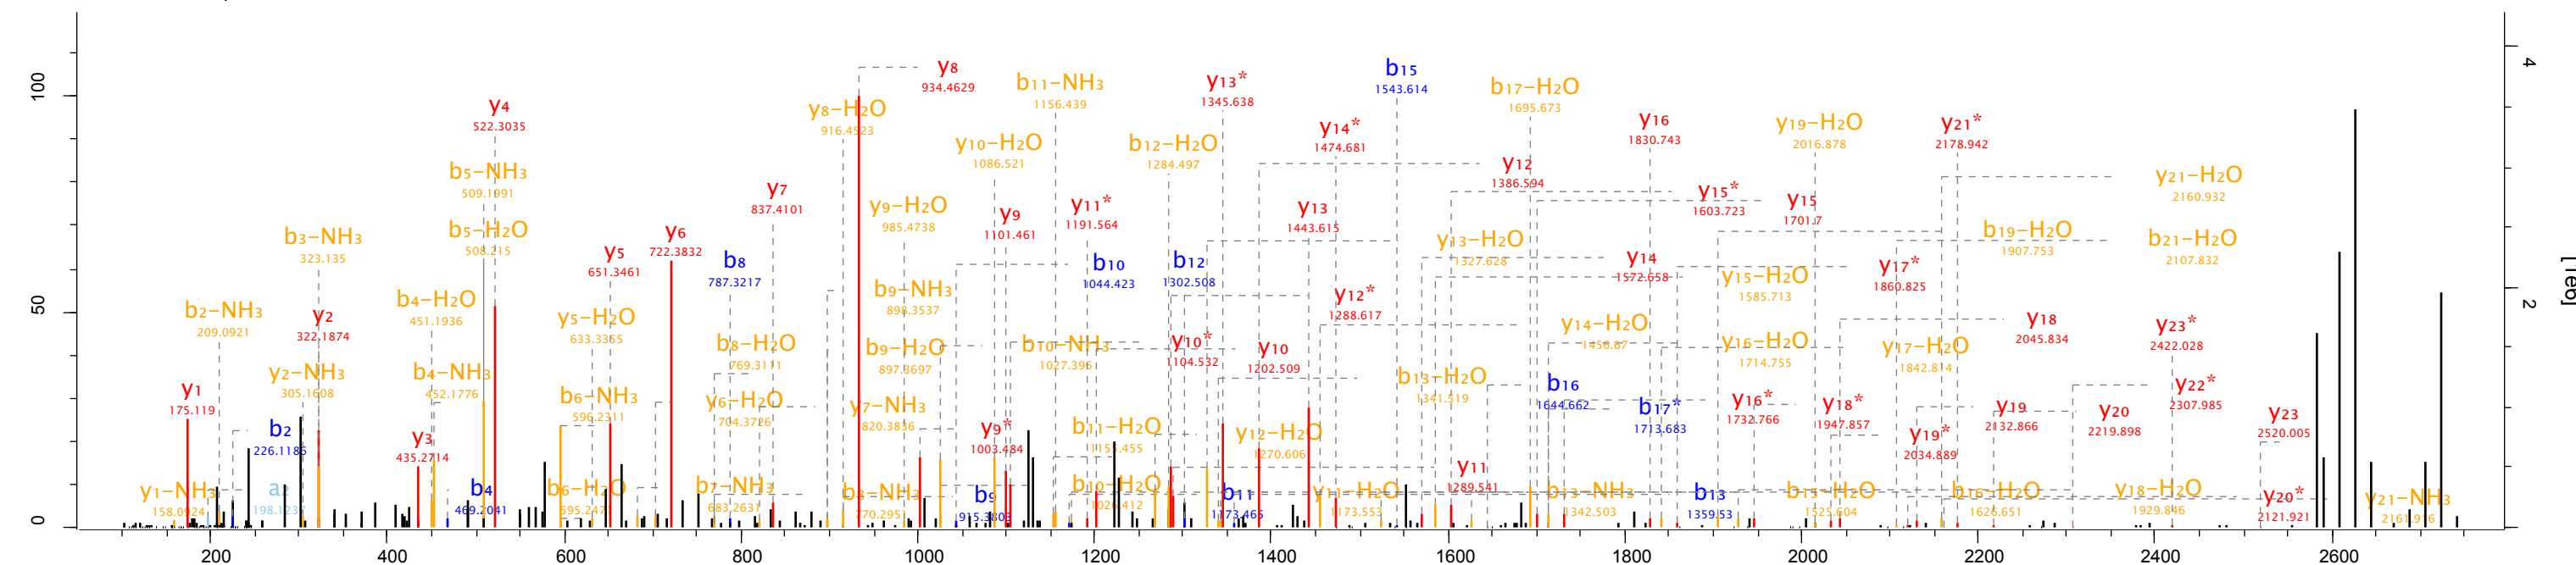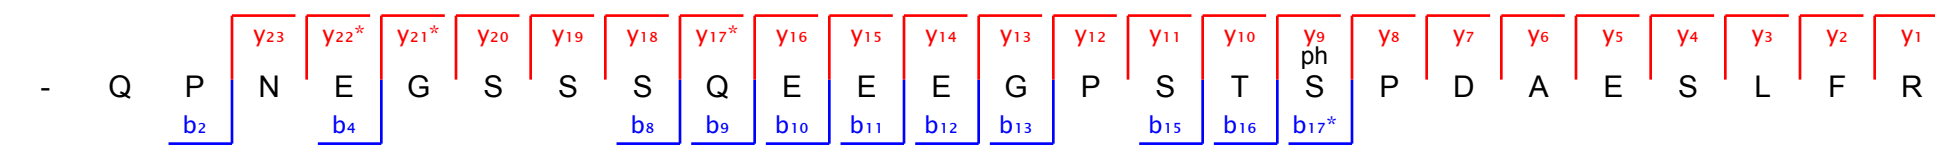

Raw file 20150814\_A375SR\_Phospho\_BR2\_04 Scan 17750 Method FTMS; HCD Score 193.63 m/z 1078.9 Gene names EIF4B

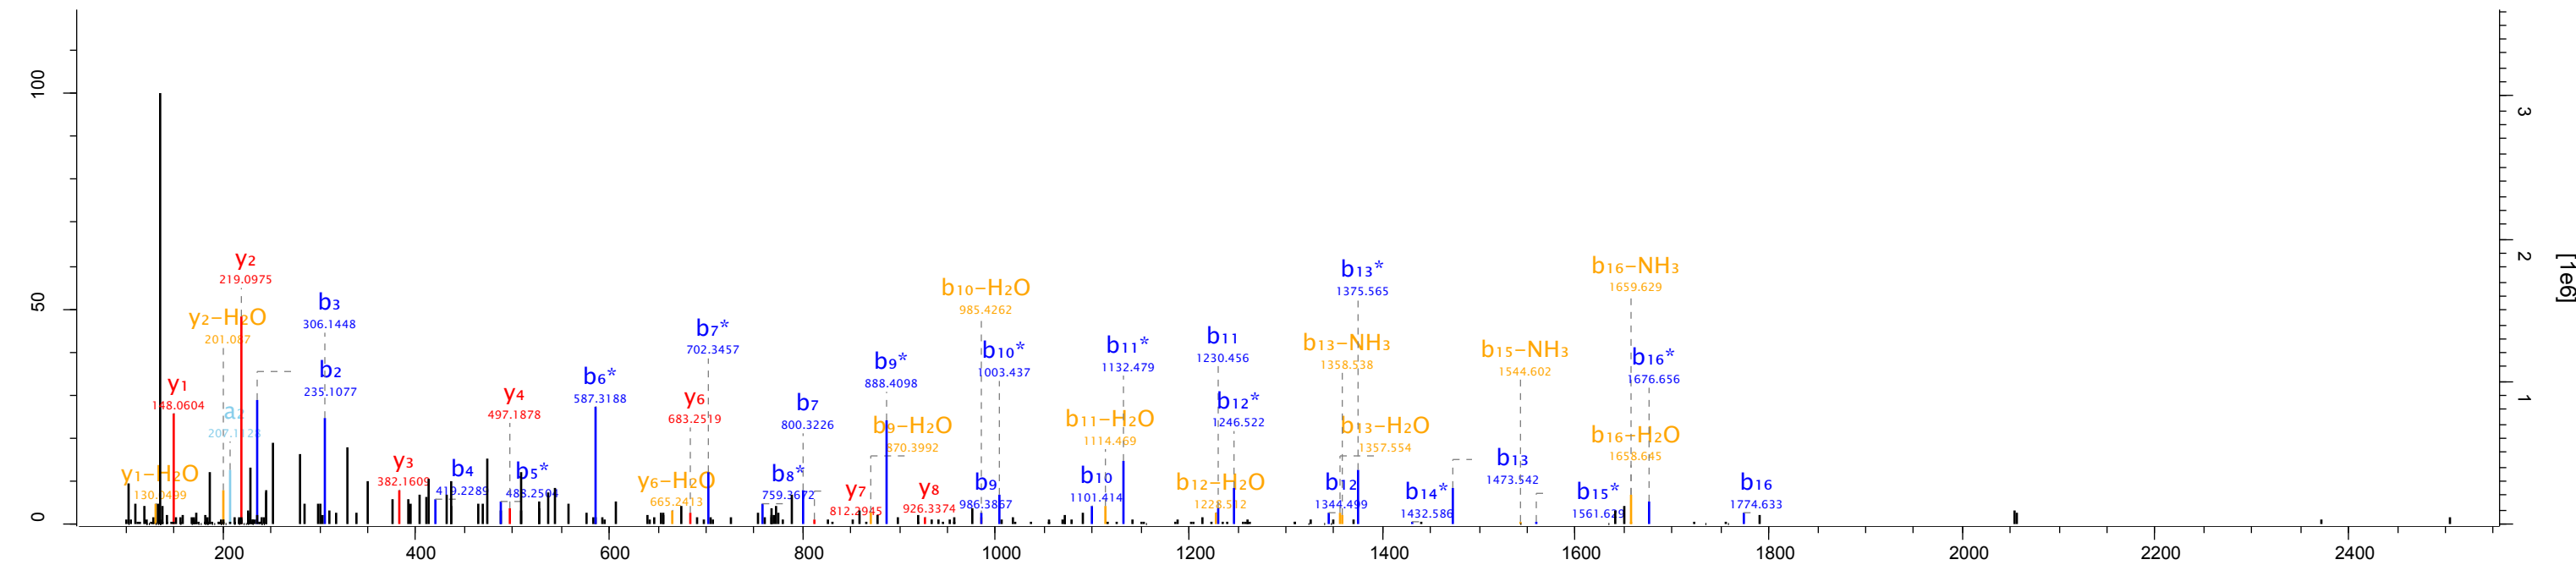

- Y A A L S V D G E D E N E G E D Y A E -

ph

b2 b3 b4 b5\* b6\* b7 b8\* b9 b10 b11 b12 b13 b14\* b15\* b16

y8 y7 y6 y4 y3 y2 y1

Raw file 20150814\_A375SR\_Phospho\_BR2\_04 Scan 17780 Method FTMS; HCD Score 172.5 m/z 840.34 Gene names PPP6R3

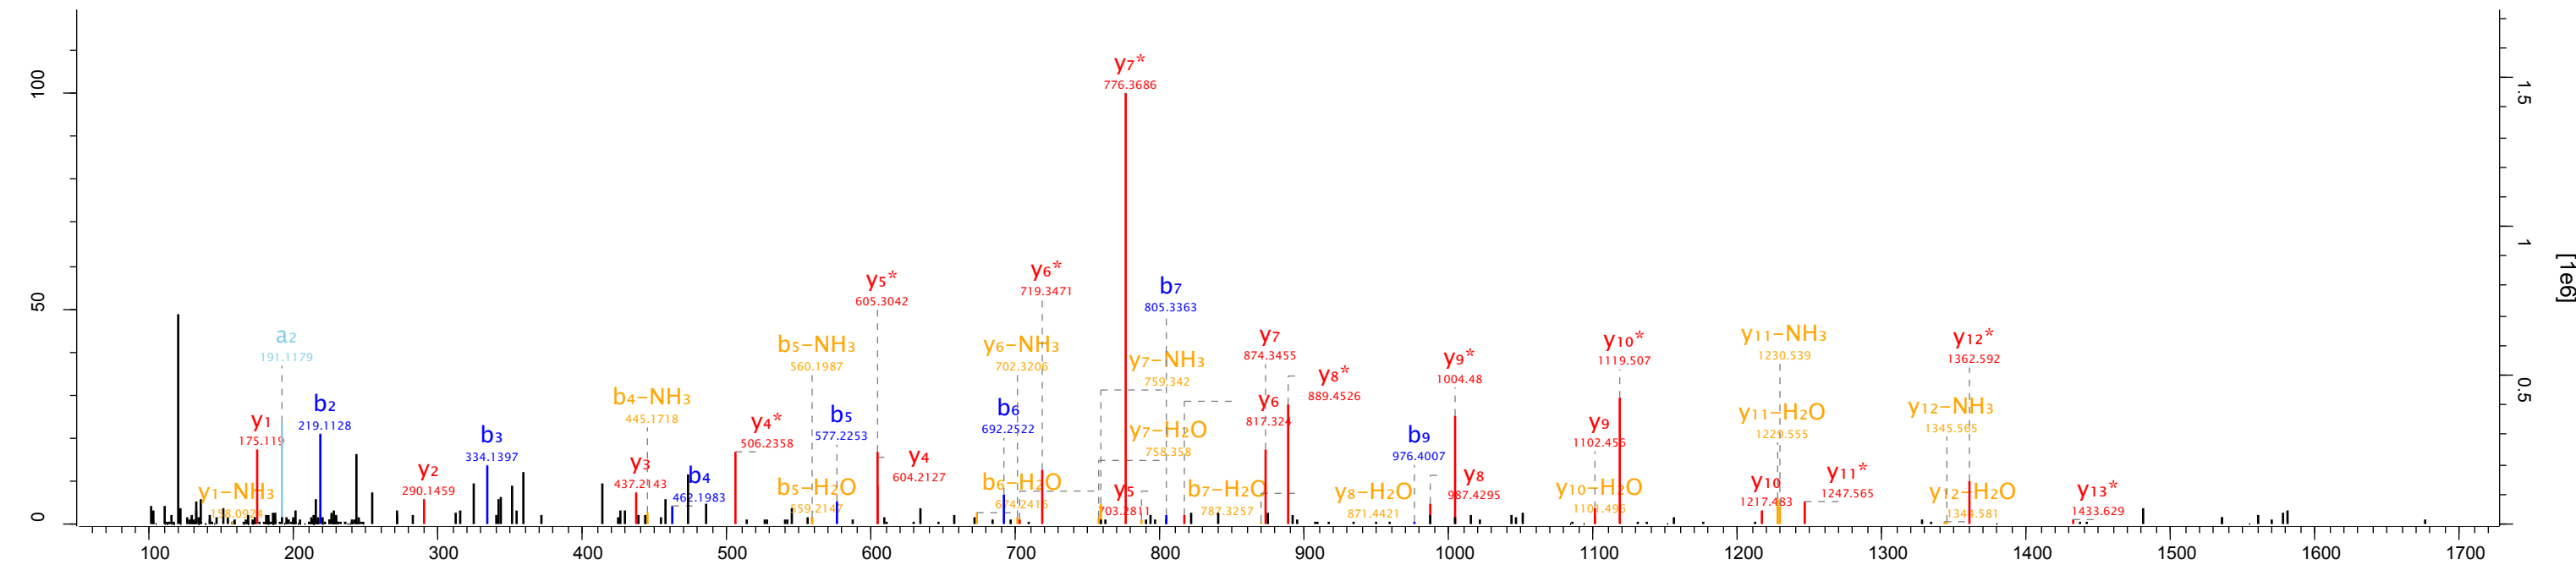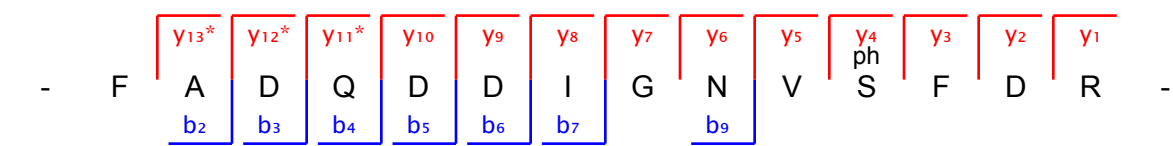

Raw file: 20150814\_A375SR\_Phospho\_BR2\_04  
 Scan: 1780 Method: FTMS; HCD Score: 125.29 m/z: 556.26 Gene names: RNPS1

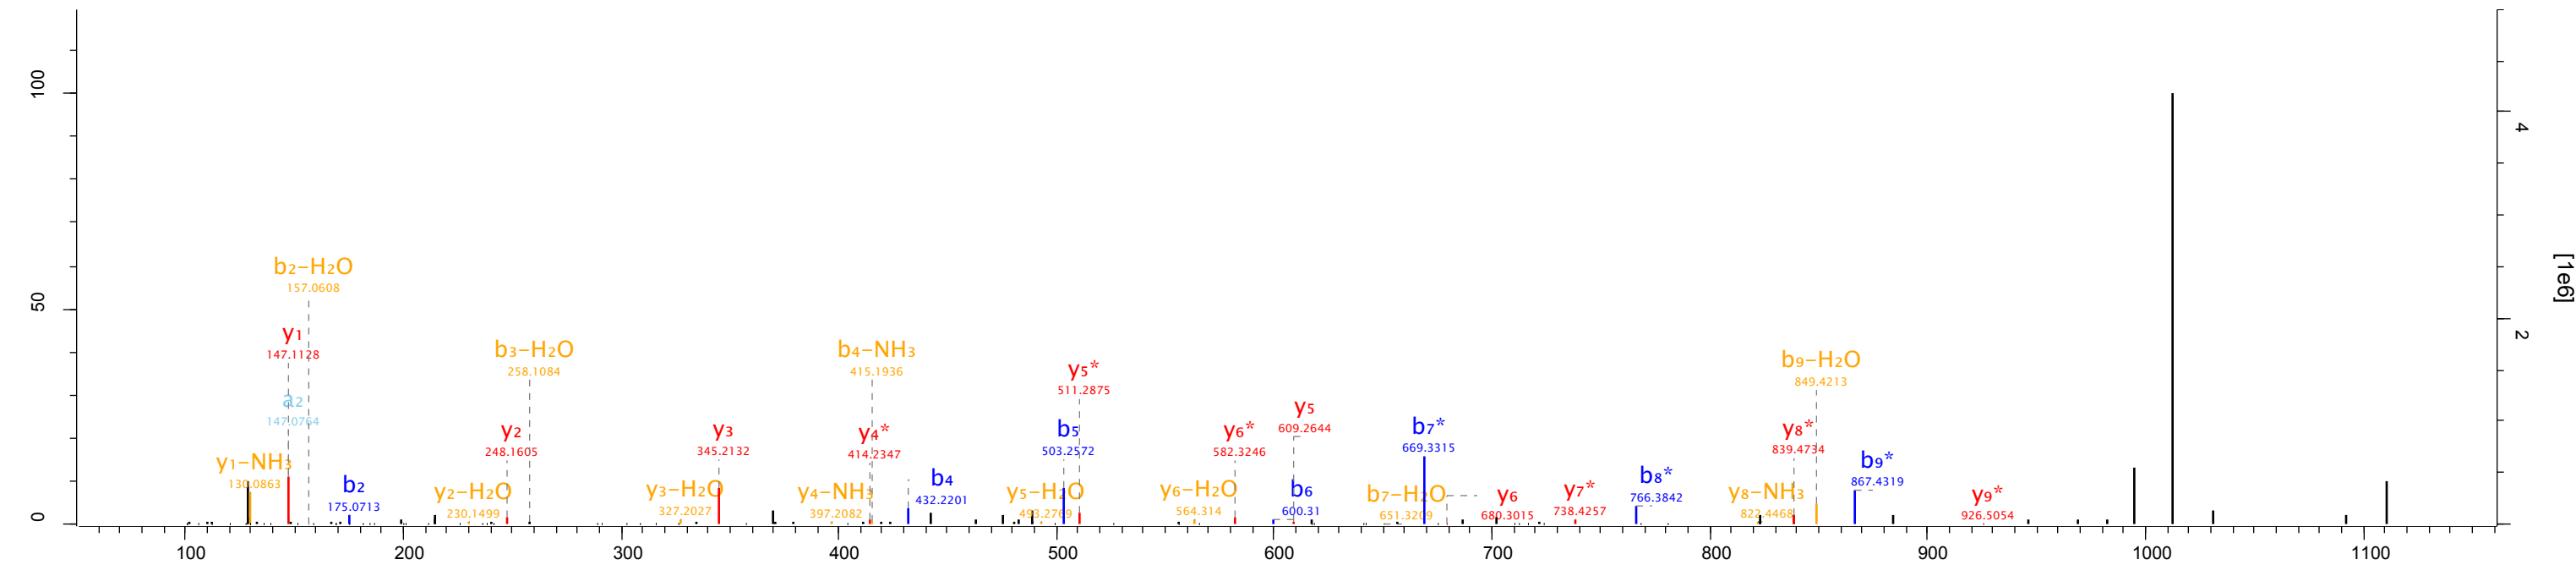

Raw file: 20150814\_A375SR\_Phospho\_BR2\_04  
 Scan: 17800 Method: FTMS; HCD Score: 255.56 m/z: 1018.46 Gene names: KAT7

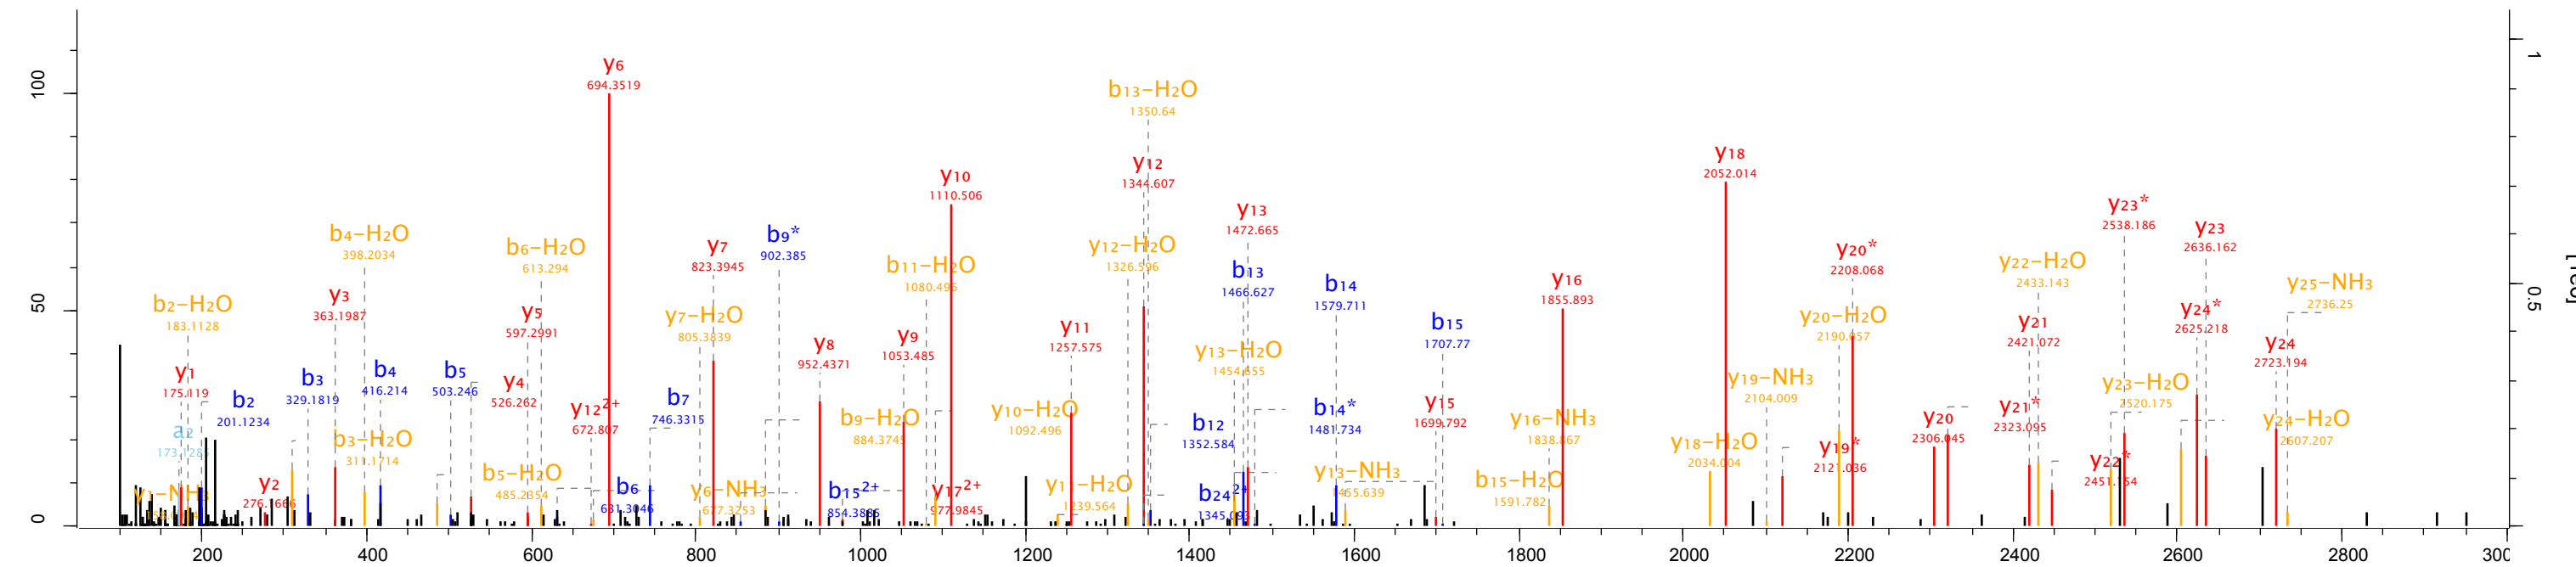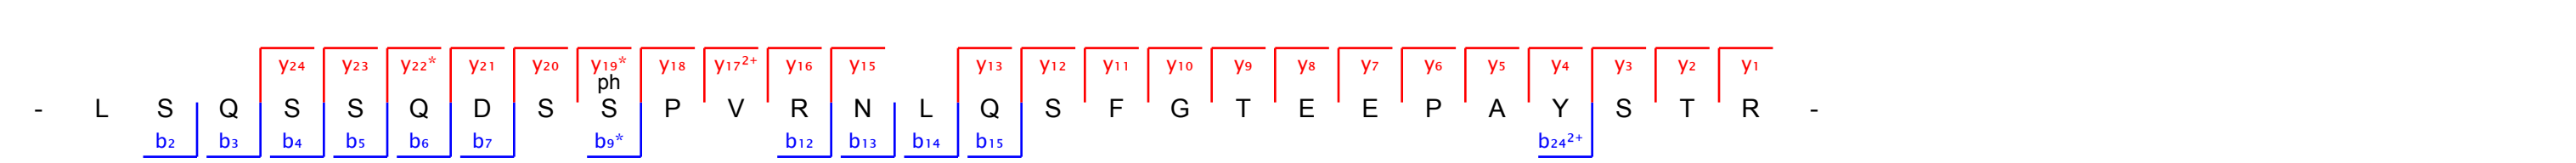

Raw file: 20150814\_A375SR\_Phospho\_BR2\_04  
 Scan: 17810 Method: FTMS; HCD Score: 71.88 m/z: 679.34 Gene names: AFF4

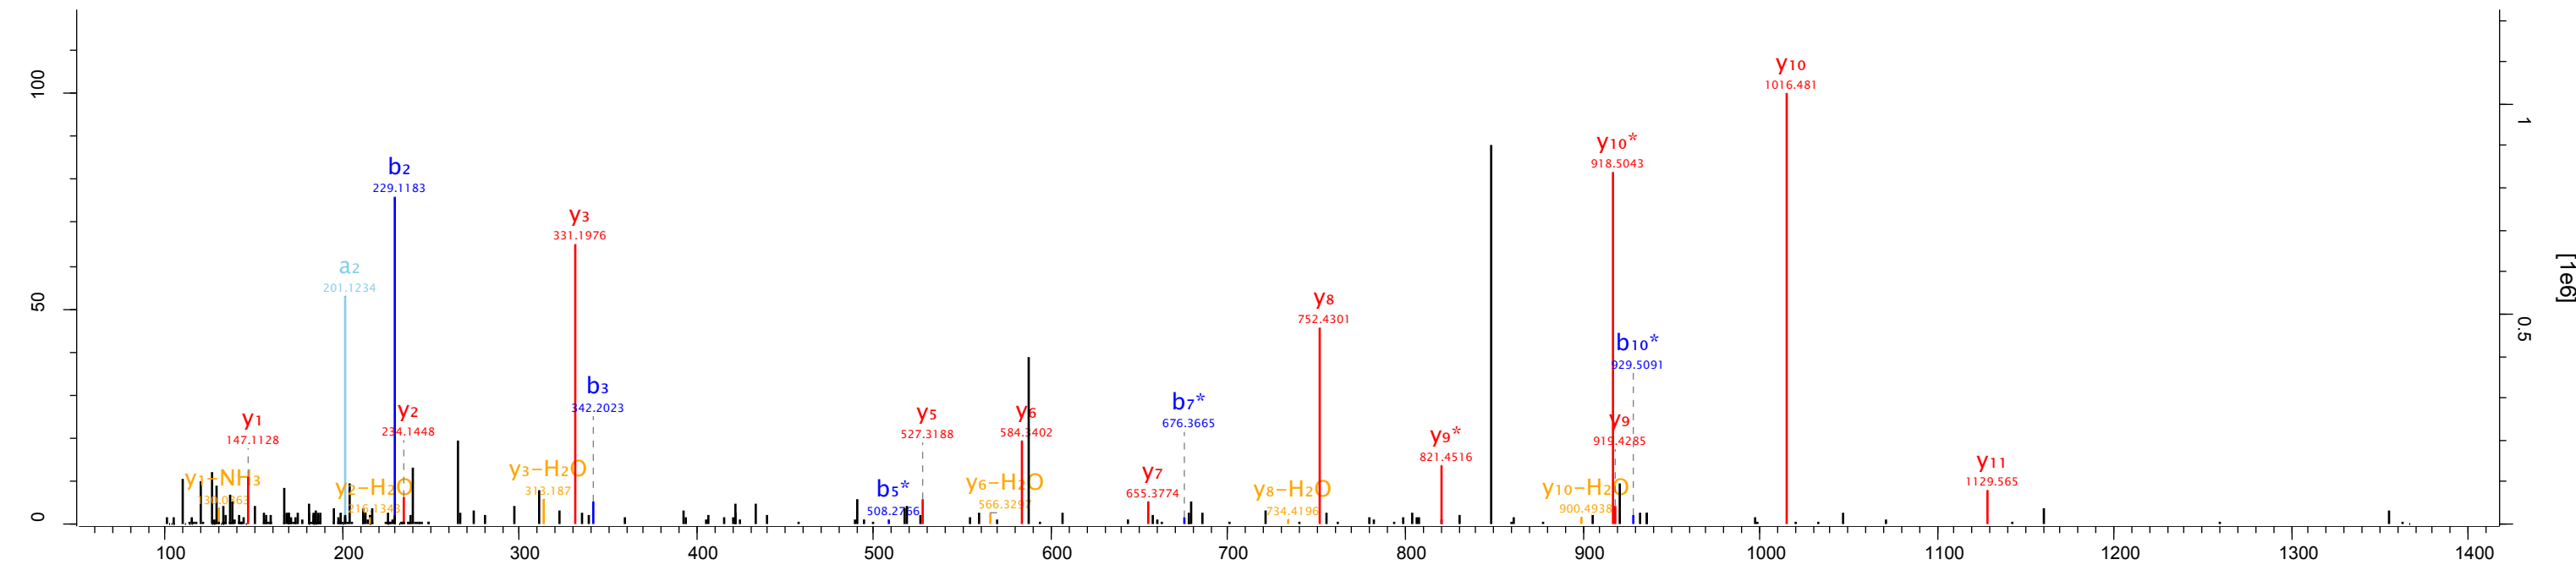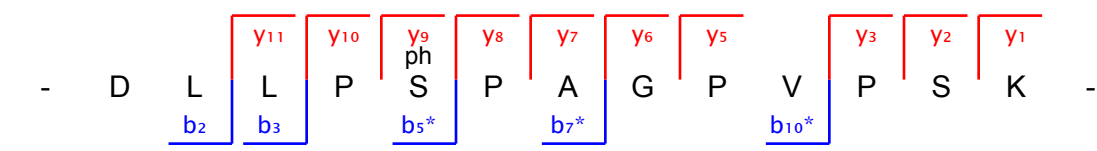

Raw file 20150814\_A375SR\_Phospho\_BR2\_04 Scan 18120 Method FTMS; HCD Score 226.7 m/z 700.31 Gene names UTP14A

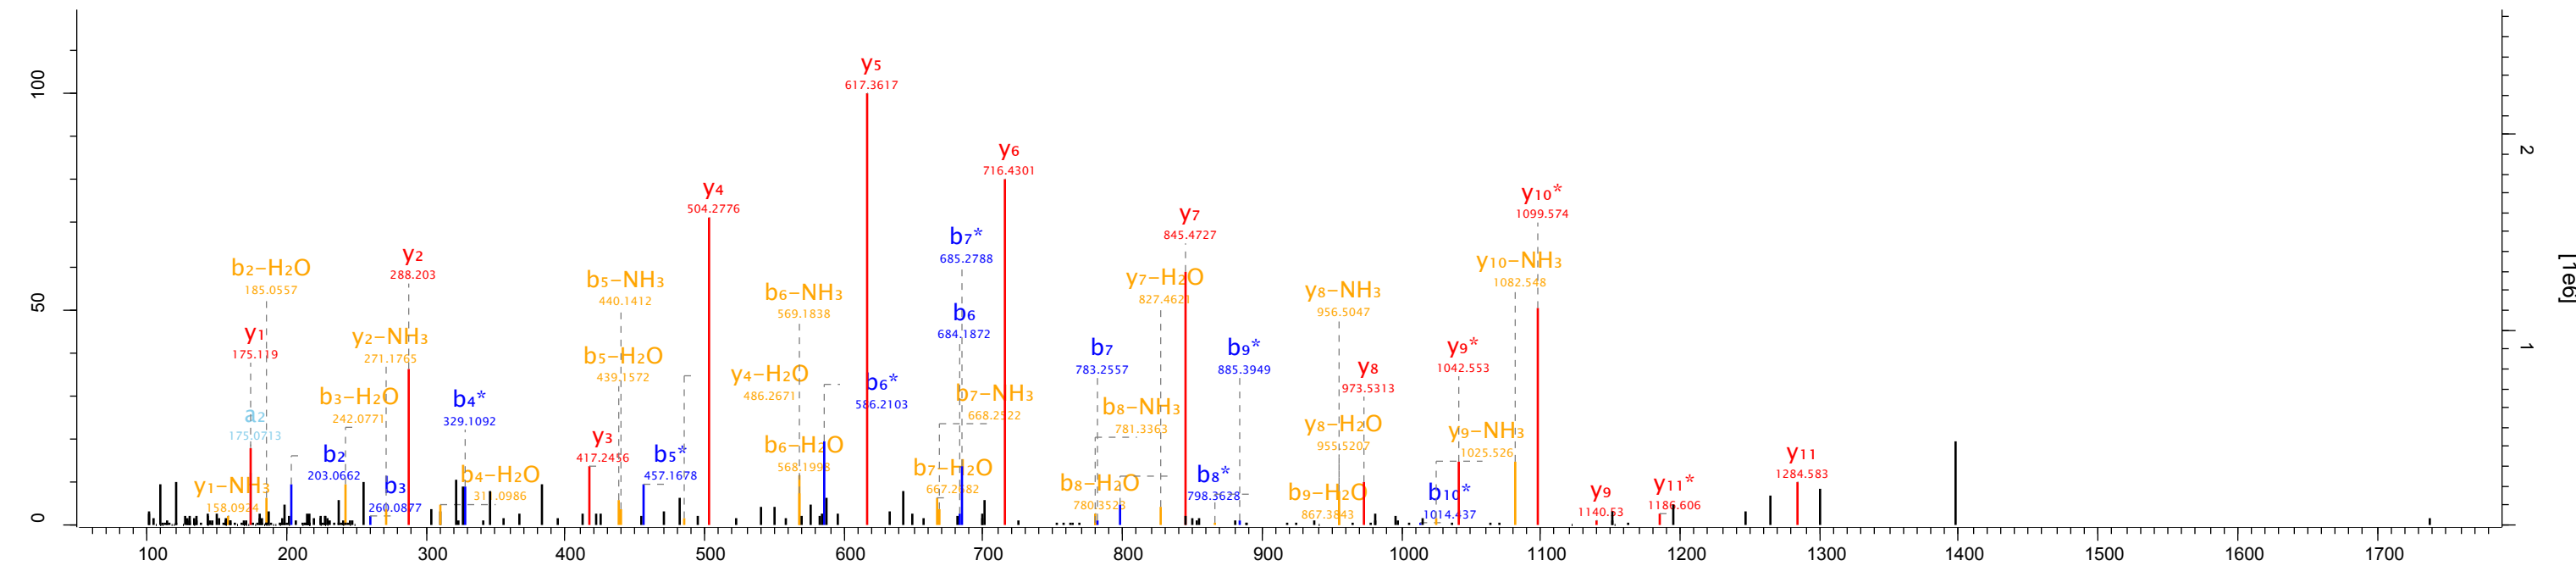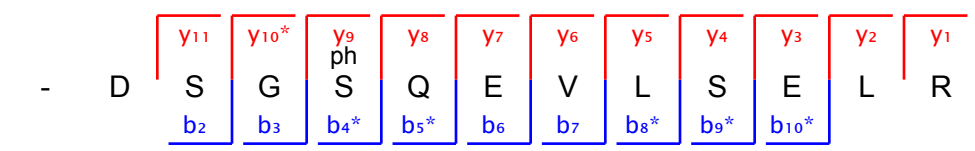

Raw file  
20150814\_A375SR\_Phospho\_BR2\_04

Scan 18320 Method FTMS; HCD Score 201.61 m/z 887.64 Gene names MATR3

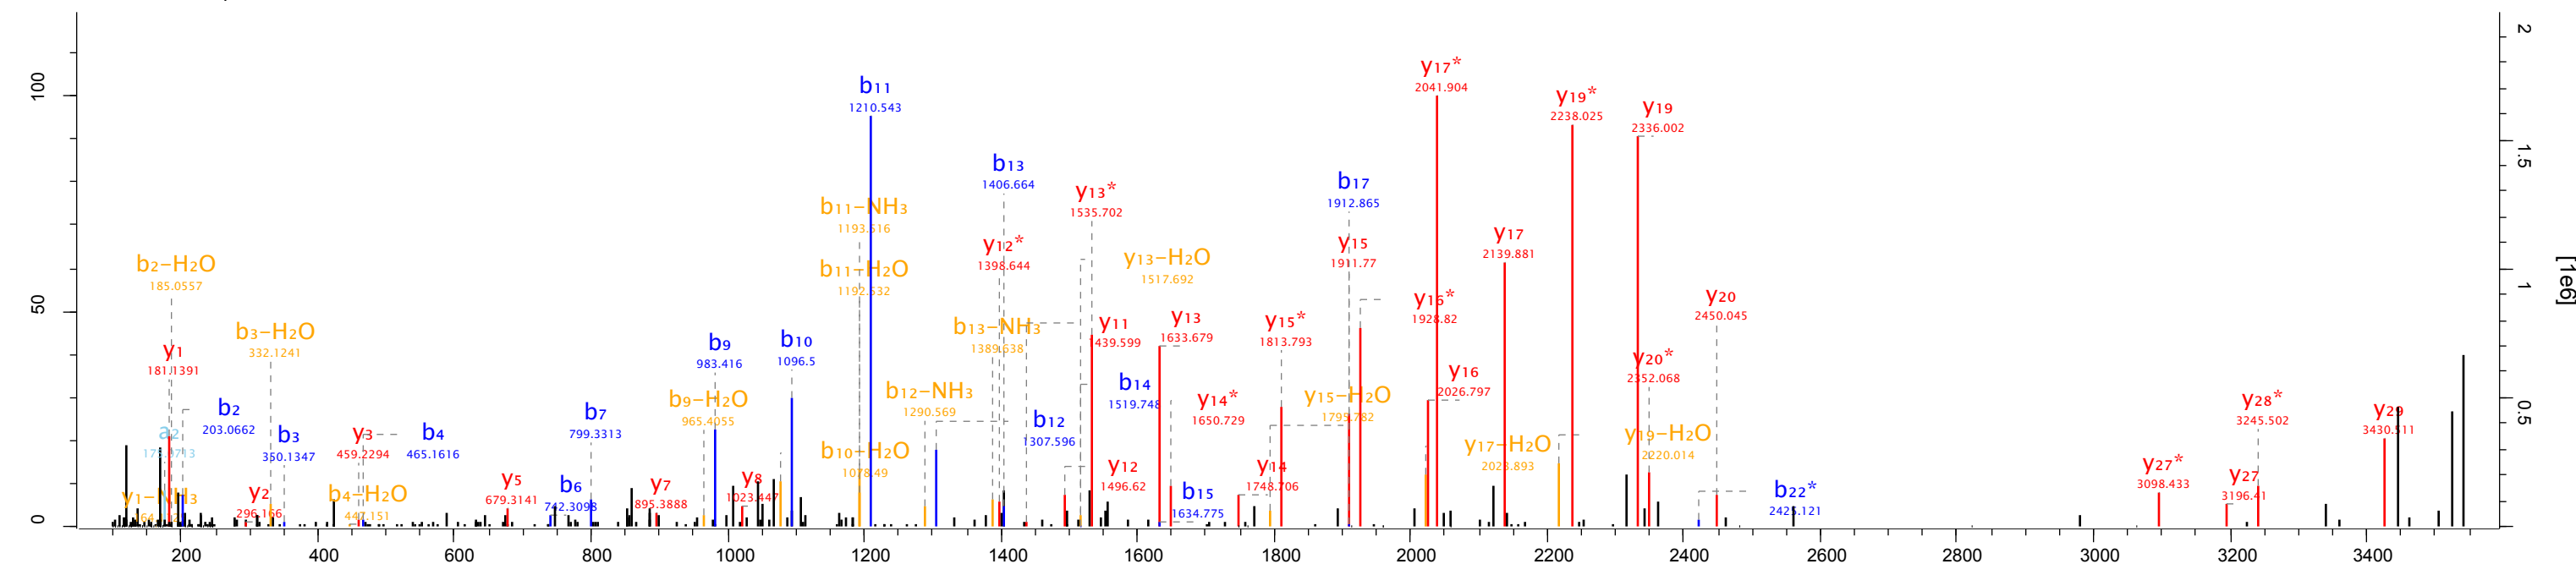

- D S F D D R G P S L N P V L D Y D H G S R S Q E S G Y Y D R -

Fragmentation mapping: b ions (blue) and y ions (red) are mapped to the amino acid sequence. b2, b3, b4, b6, b7, b9, b10, b11, b12, b13, b14, b15, b17, and b22\* are shown in blue boxes. y1, y2, y3, y5, y7, y8, y11, y12, y13, y14, y15, y16, y17, y19, y20, y27, y28, and y29 are shown in red boxes. The 'ph' label is associated with the Serine (S) residue at position 17.



Raw file: 20150814\_A375SR\_Phospho\_BR2\_04  
 Scan: 18530 Method: FTMS; HCD Score: 270 m/z: 1055.42 Gene names: PPID

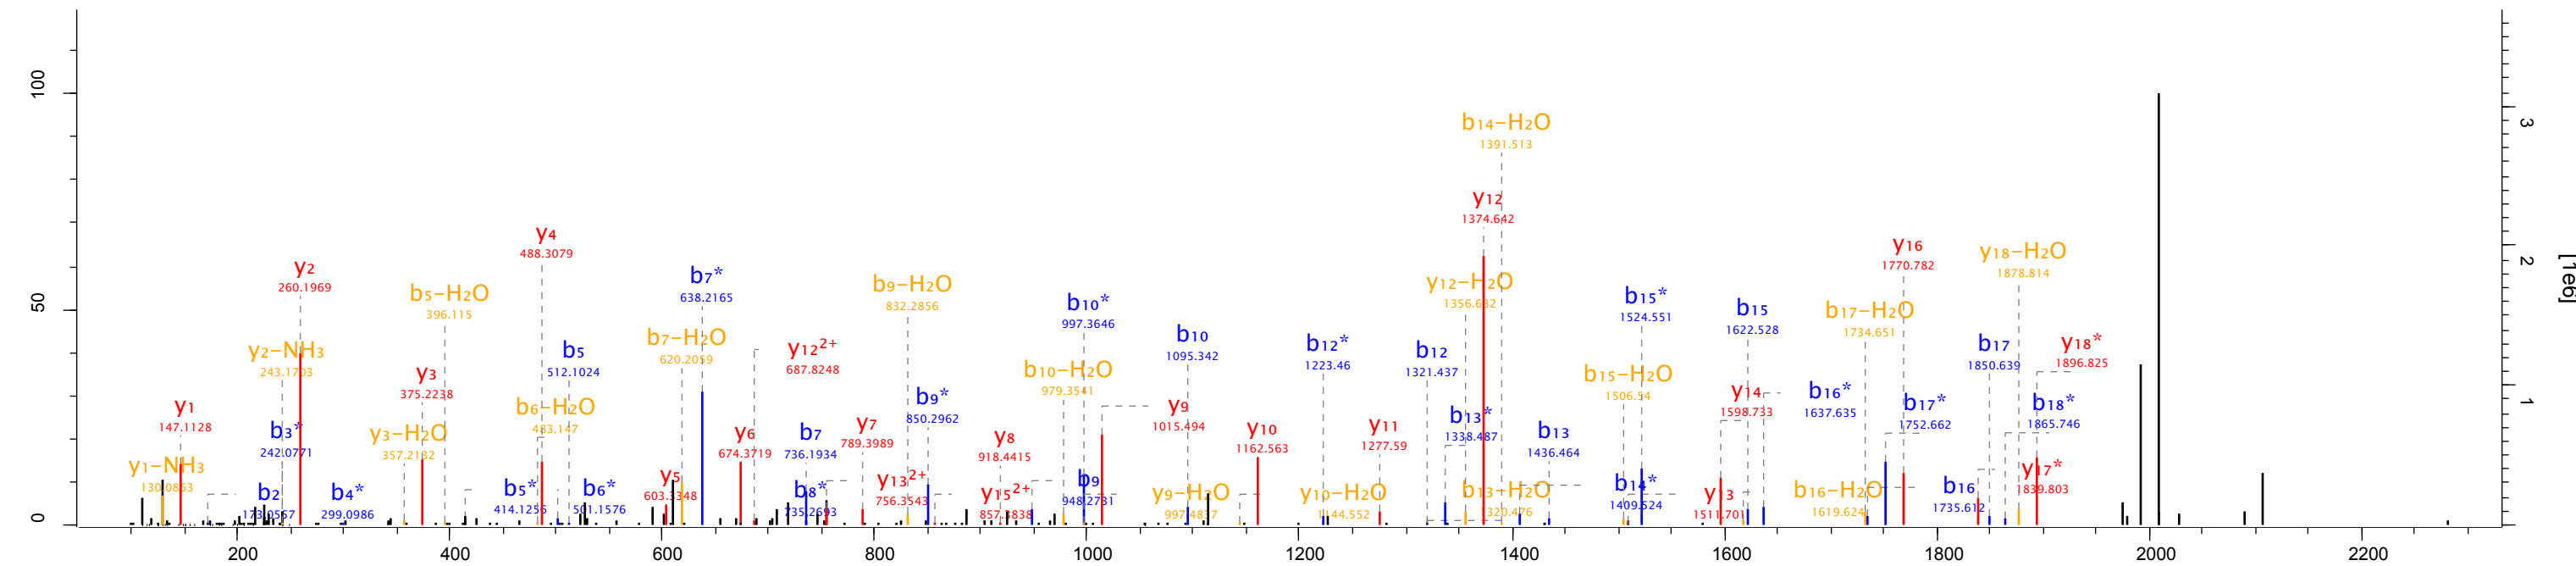

Raw file: 20150814\_A375SR\_Phospho\_BR2\_04  
 Scan: 18740 Method: FTMS; HCD Score: 235.29 m/z: 1351.57 Gene names: ATRX

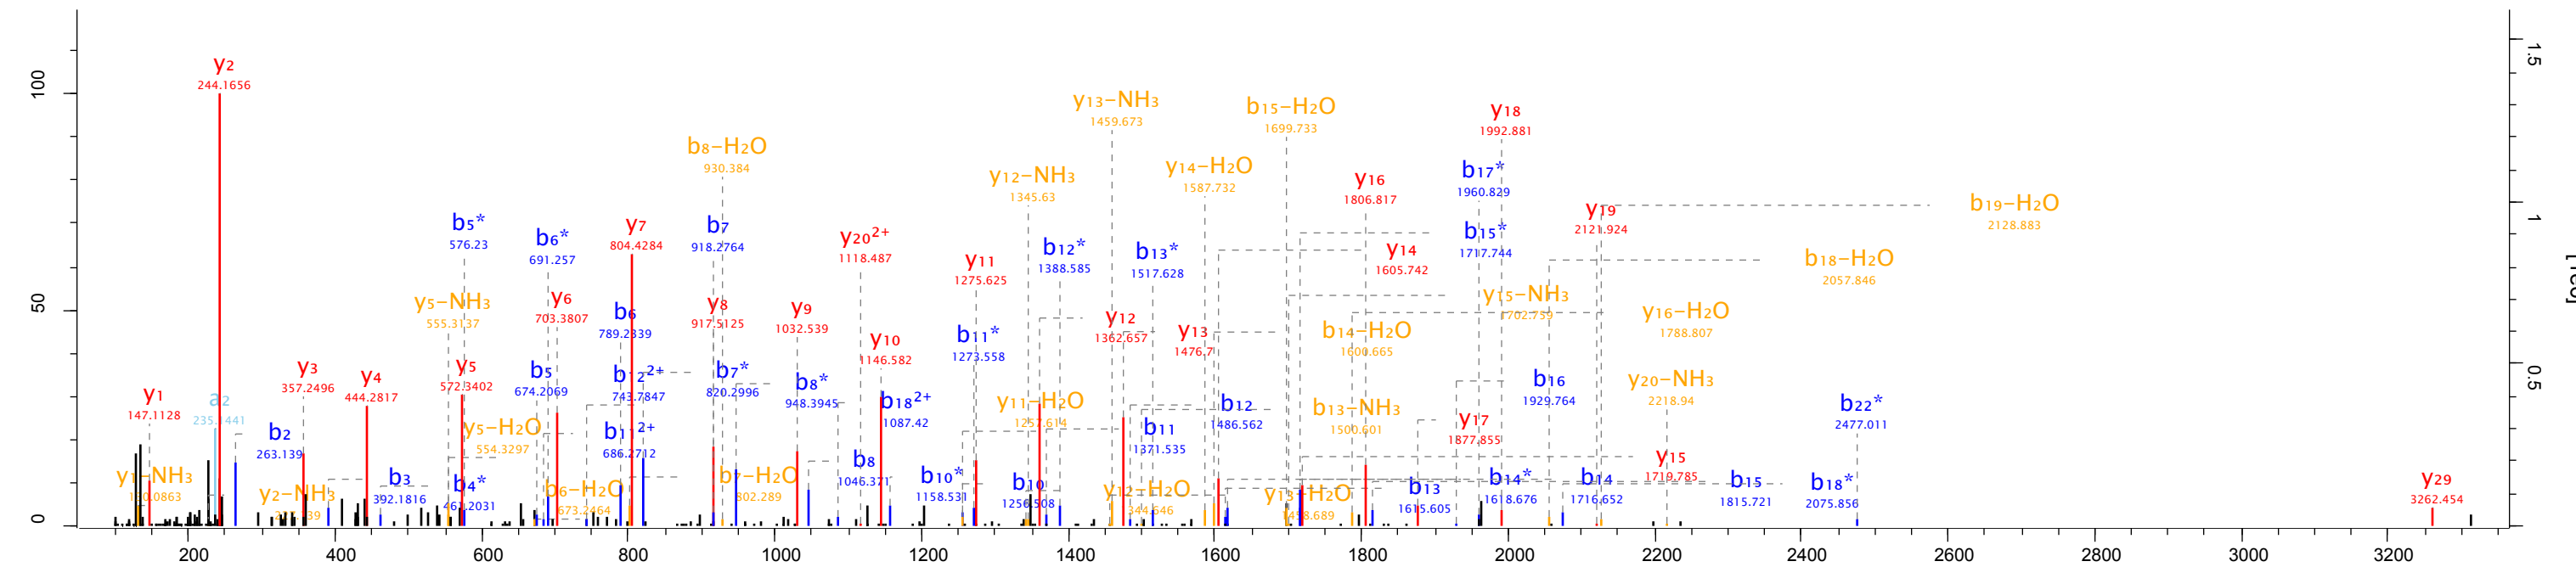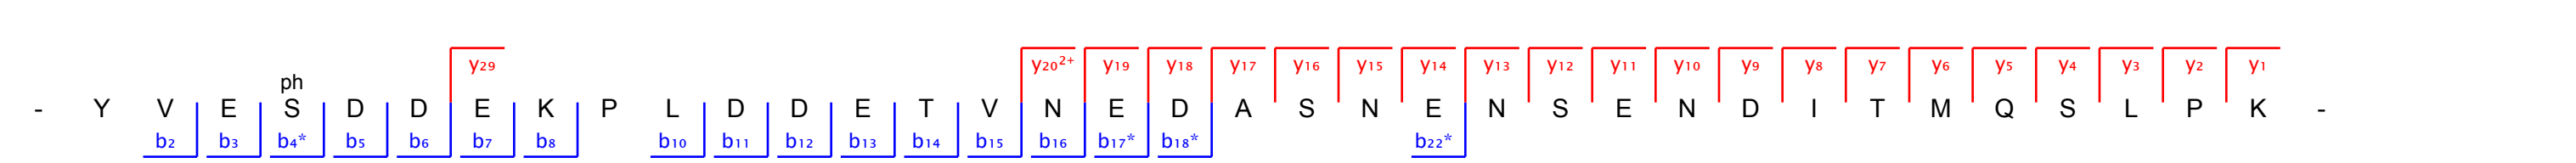

Raw file: 20150814\_A375SR\_Phospho\_BR2\_04  
 Scan: 18840 Method: FTMS; HCD Score: 91.92 m/z: 1267.26 Gene names: TRMT2A

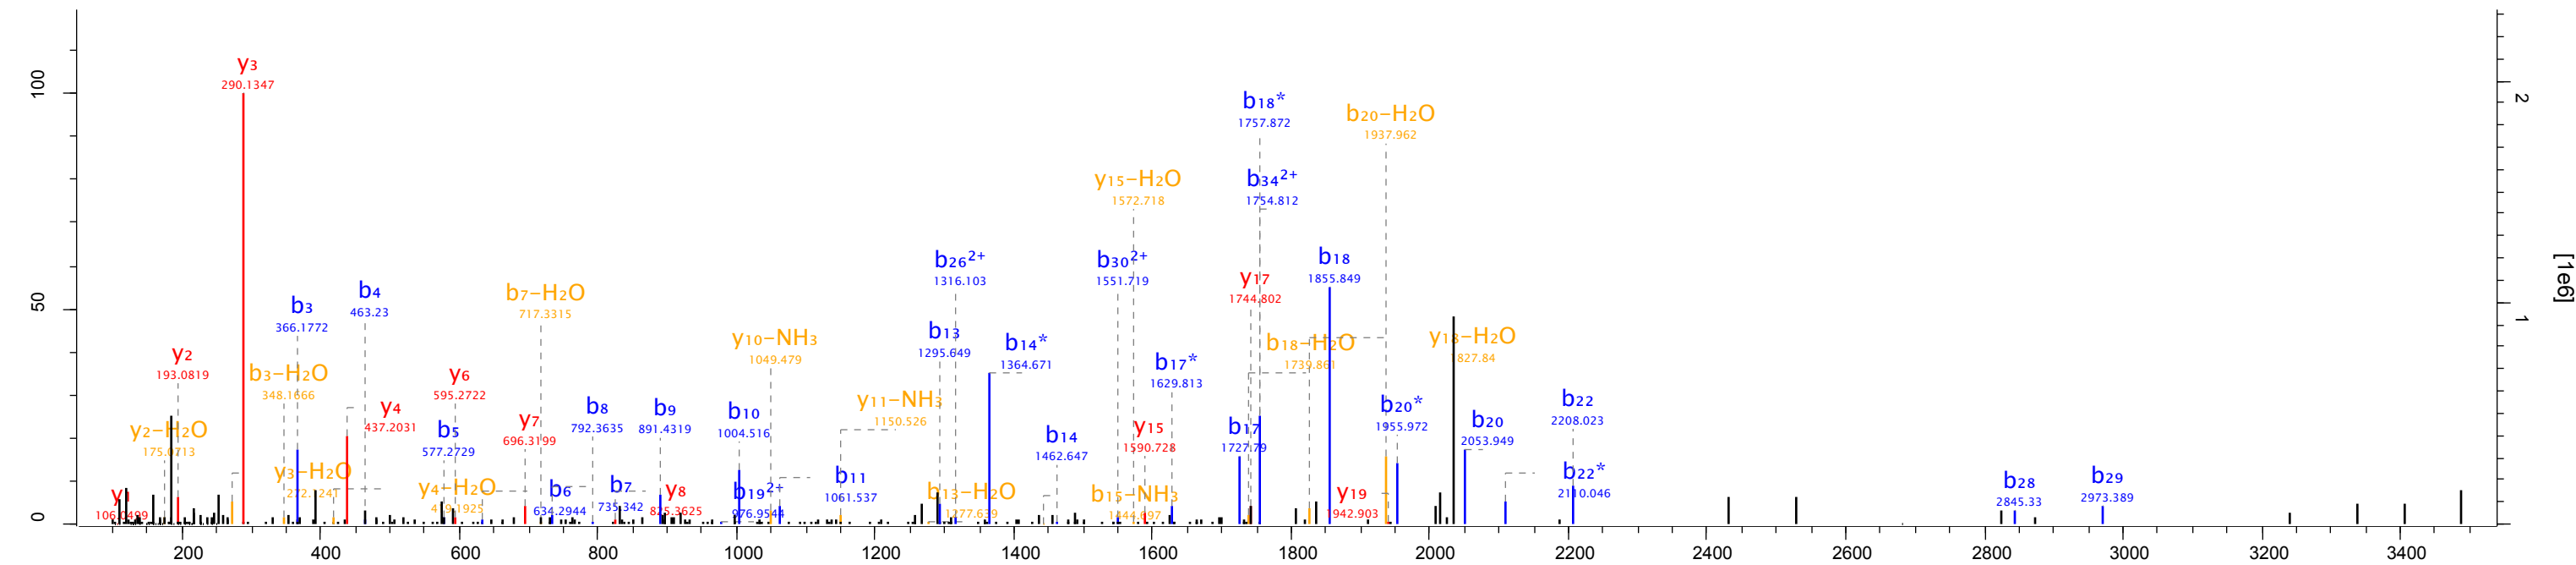

- V E H P N G T G V L G P H S P P A Q P T P G P P D N T L Q E T G T F P S S -

b3 b4 b5 b6 b7 b8 b9 b10 b11 b13 b14 b17 b18 b19<sup>2+</sup> b20 b22 b26<sup>2+</sup> b28 b29 b30<sup>2+</sup> b34<sup>2+</sup>  
 y1 y2 y3 y4 y6 y7 y8 y15 y17 y19

Raw file Scan Method Score m/z Gene names  
 20150814\_A375SR\_Phospho\_BR2\_04 18850 FTMS; HCD 97.1 770.34 NRIP1

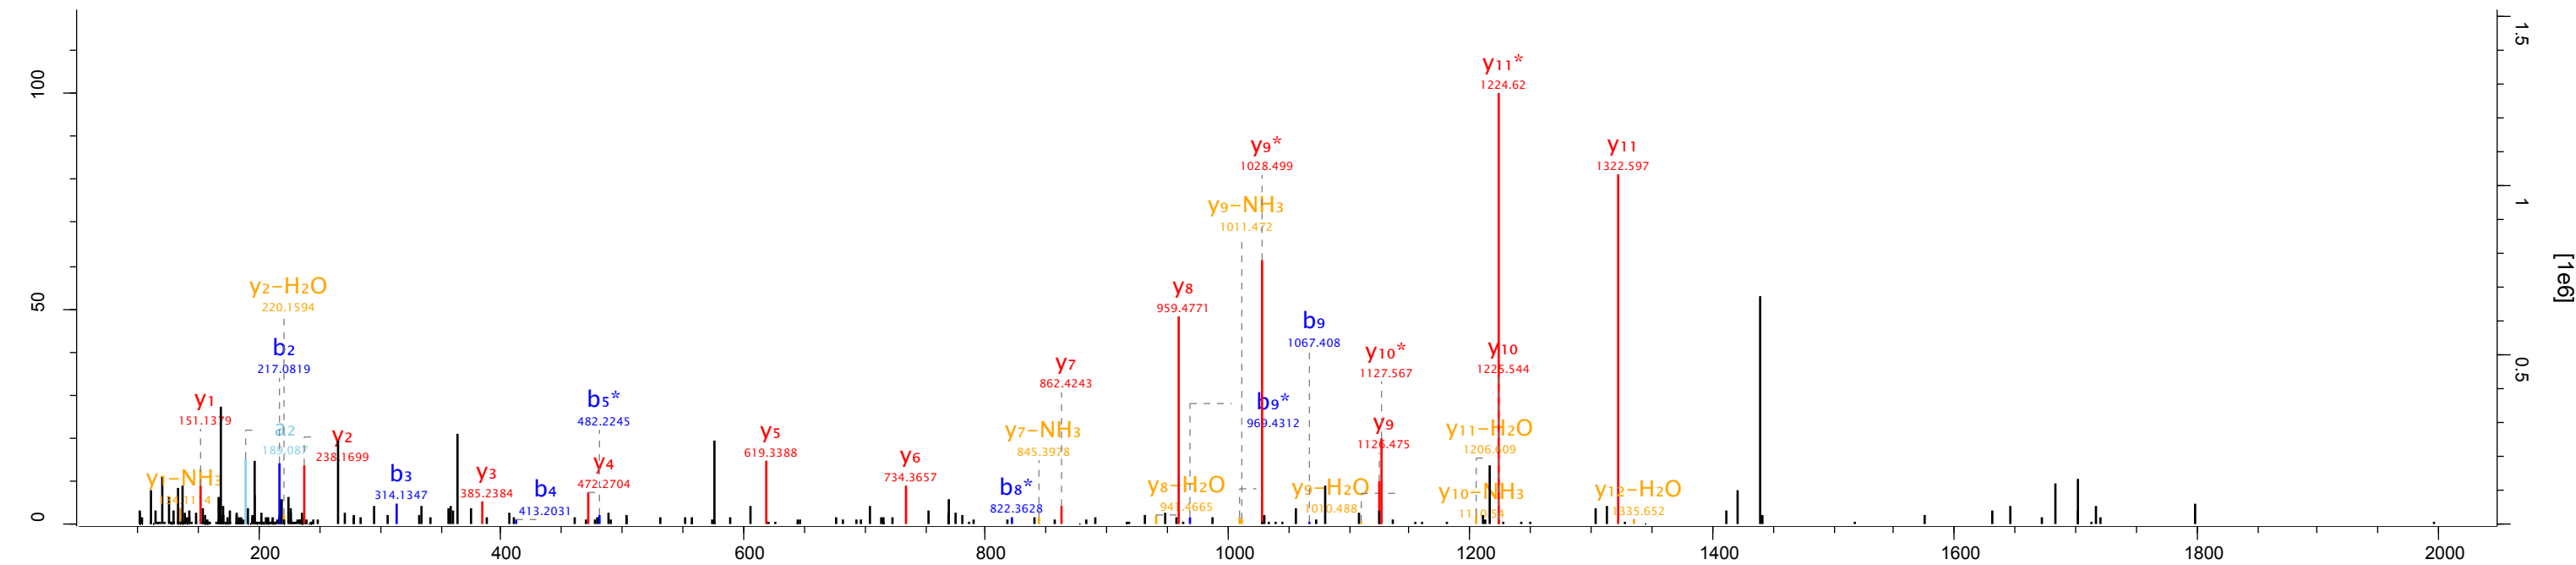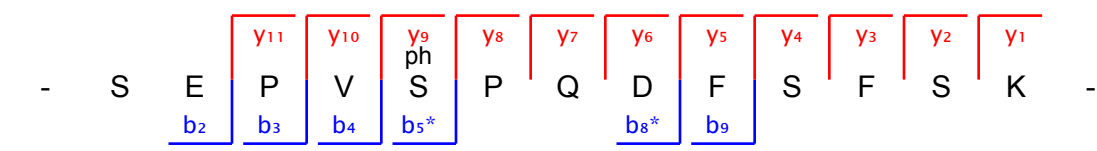

Raw file 20150814\_A375SR\_Phospho\_BR2\_04 Scan 18860 Method FTMS; HCD Score 163.82 m/z 1060.44 Gene names SUPT20H

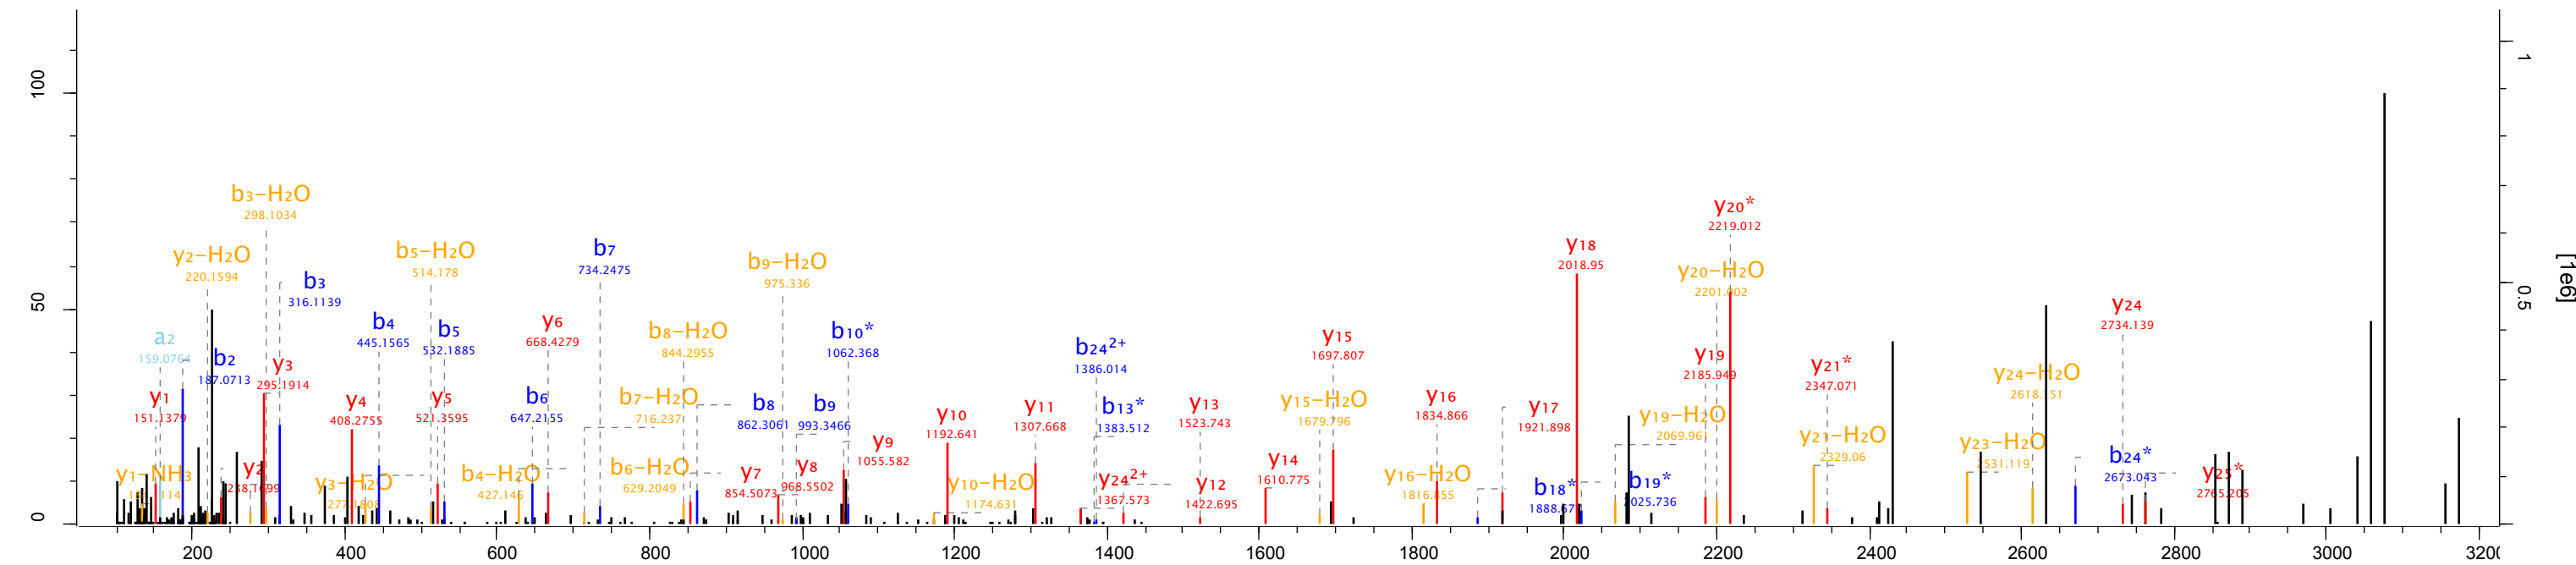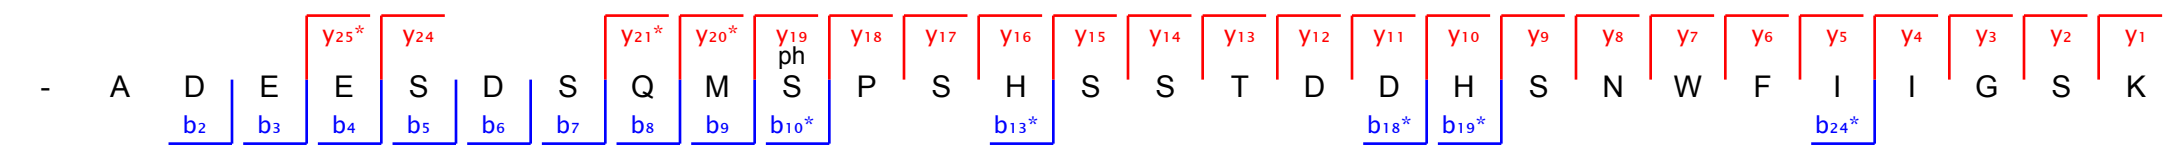

Raw file: 20150814\_A375SR\_Phospho\_BR2\_04  
 Scan: 2020  
 Method: FTMS; HCD  
 Score: 143.7  
 m/z: 511.22  
 Gene names: LIMA1;TRMT1

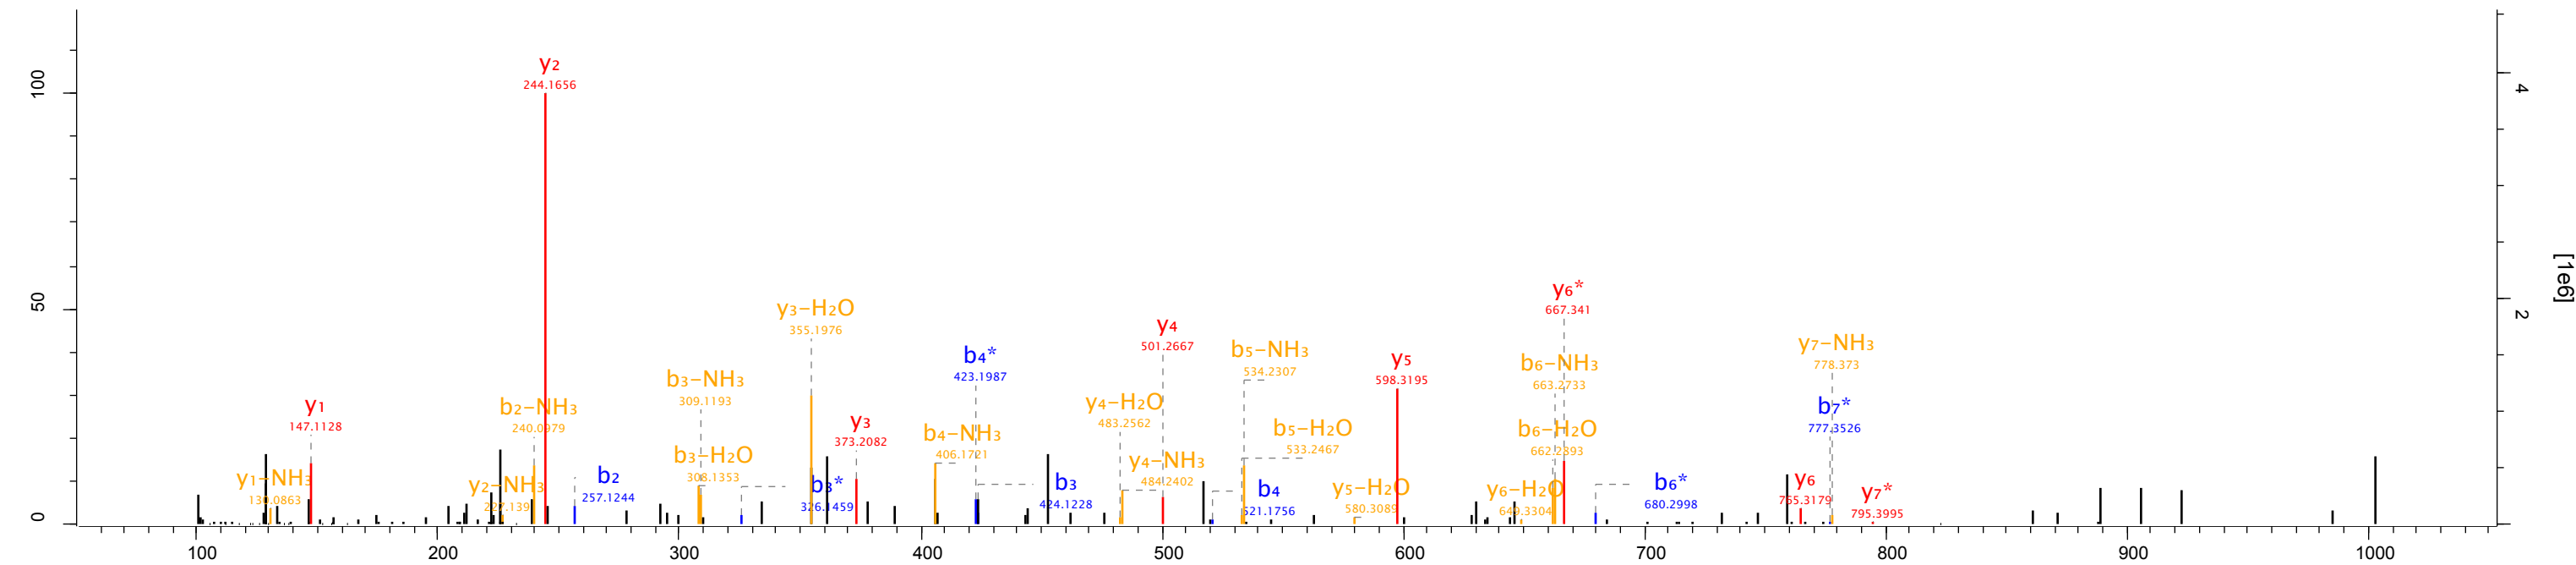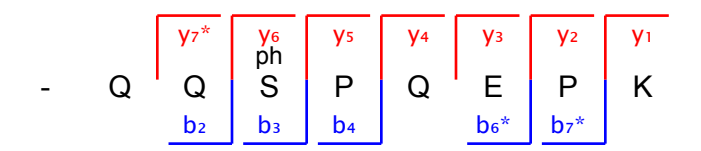

Raw file: 20150814\_A375SR\_Phospho\_BR2\_04  
 Scan: 20640 Method: FTMS; HCD Score: 98.53 m/z: 1092.94 Gene names: CDC37L1

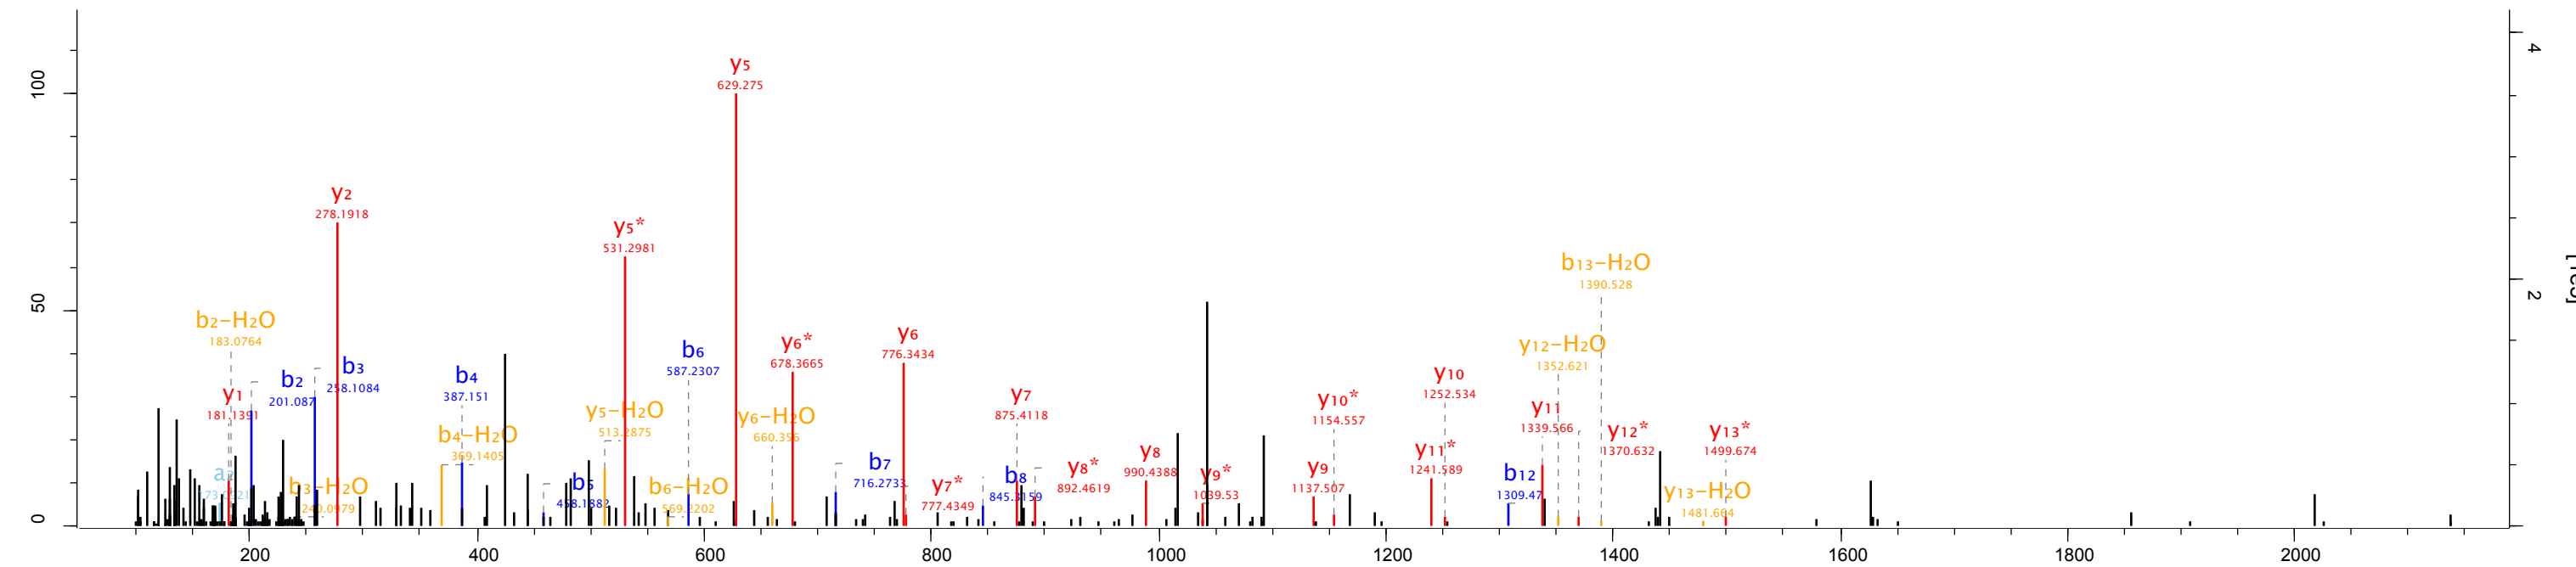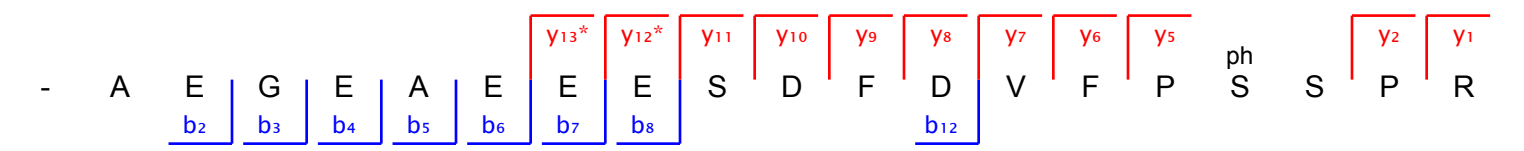

Raw file: 20150814\_A375SR\_Phospho\_BR2\_04  
 Scan: 20770 Method: FTMS; HCD Score: 113.42 m/z: 937.92 Gene names: GKAP1

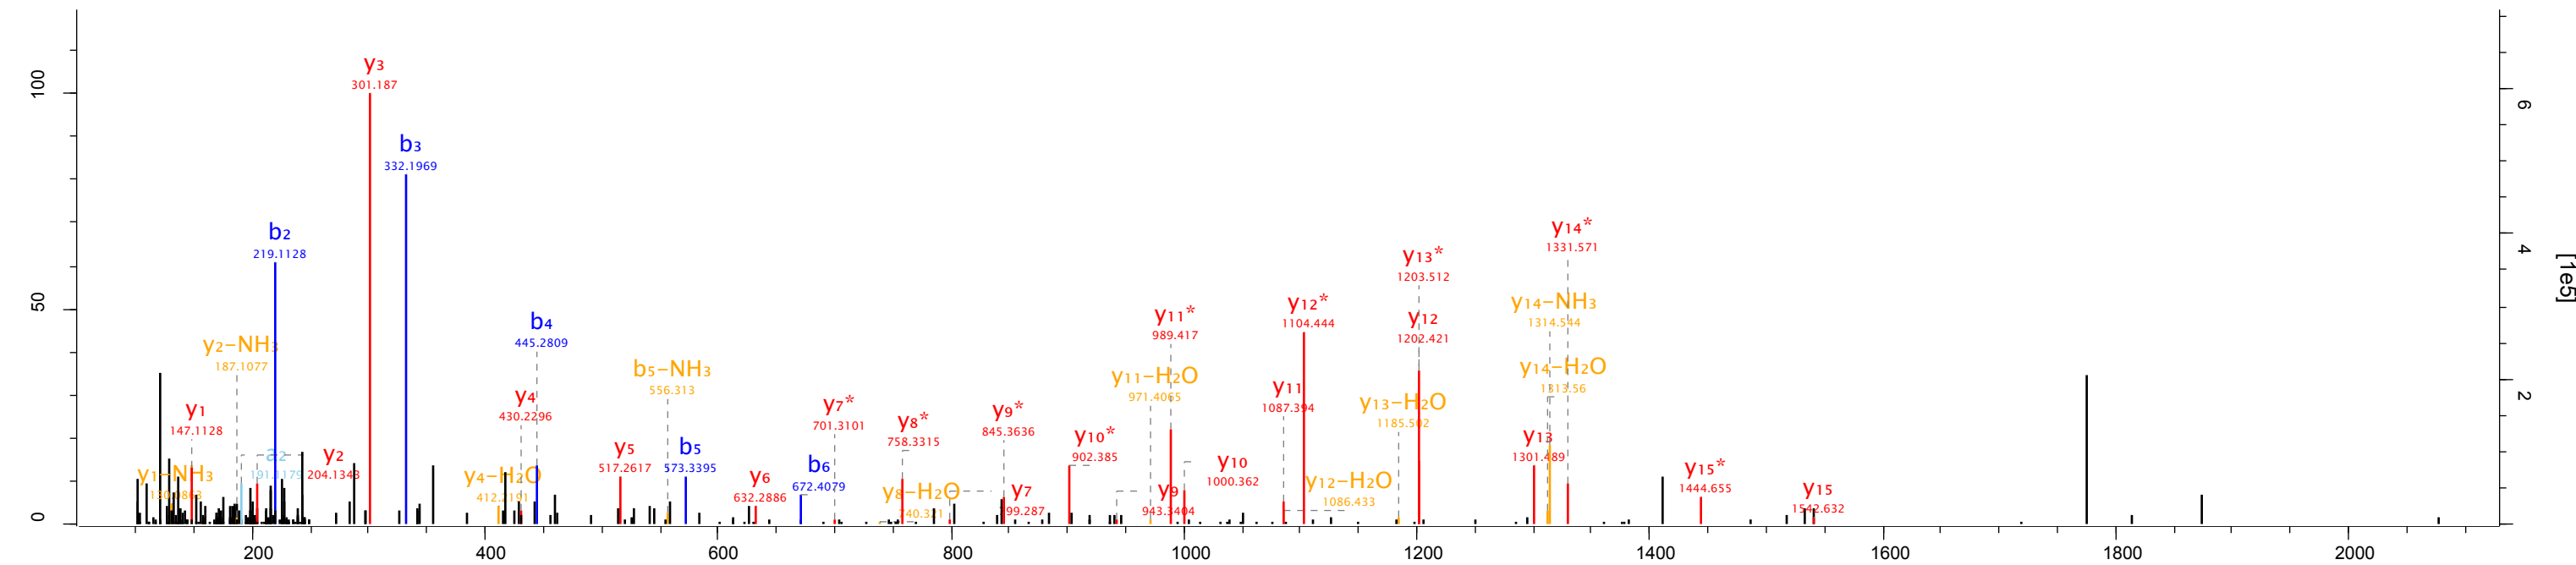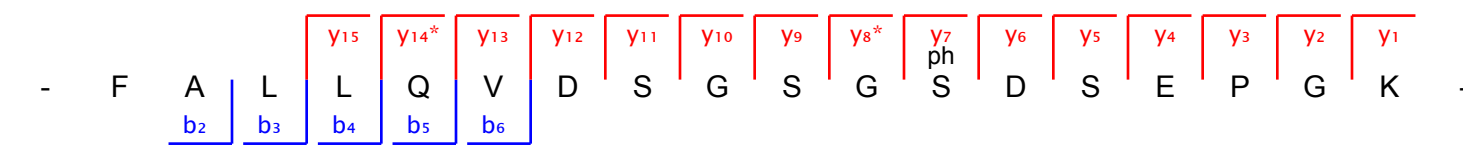



Raw file: 20150814\_A375SR\_Phospho\_BR2\_04  
 Scan: 20880 Method: FTMS; HCD Score: 210.39 m/z: 849.92 Gene names: RFX7

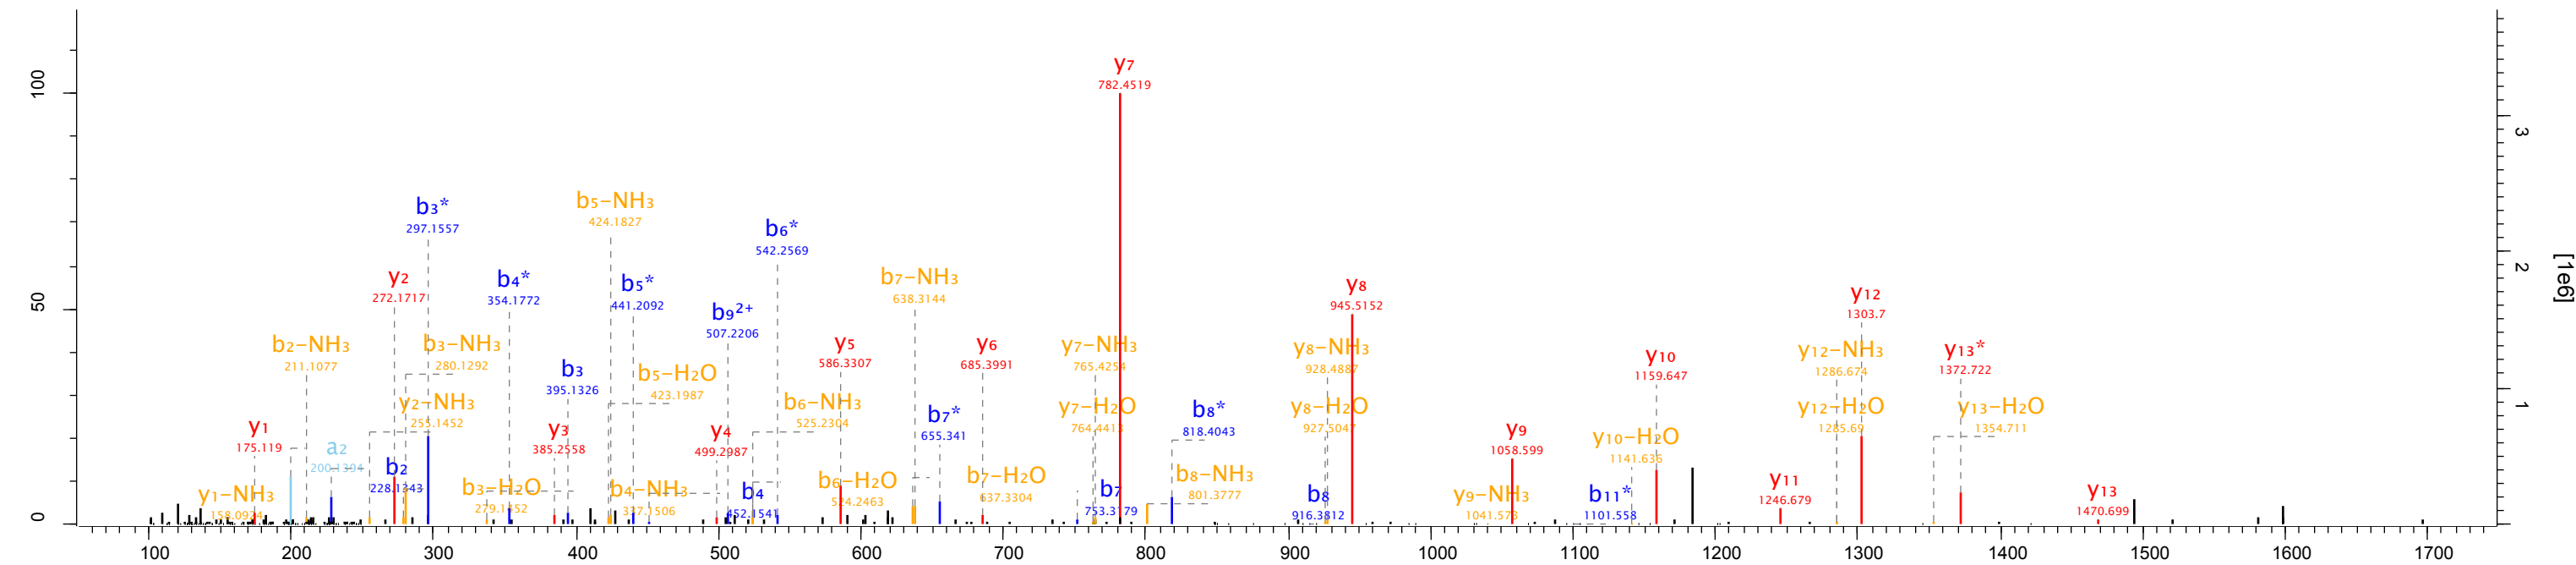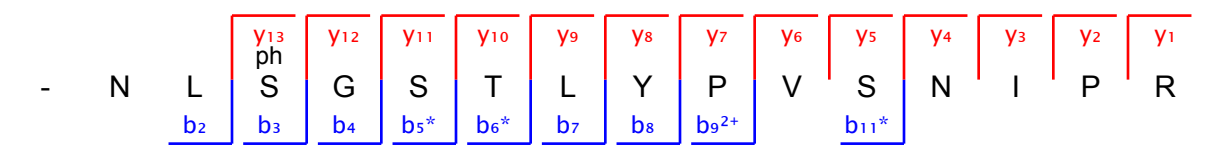

Raw file: 20150814\_A375SR\_Phospho\_BR2\_04  
 Scan: 21050 Method: FTMS; HCD Score: 87.74 m/z: 990.79 Gene names: AFAP1

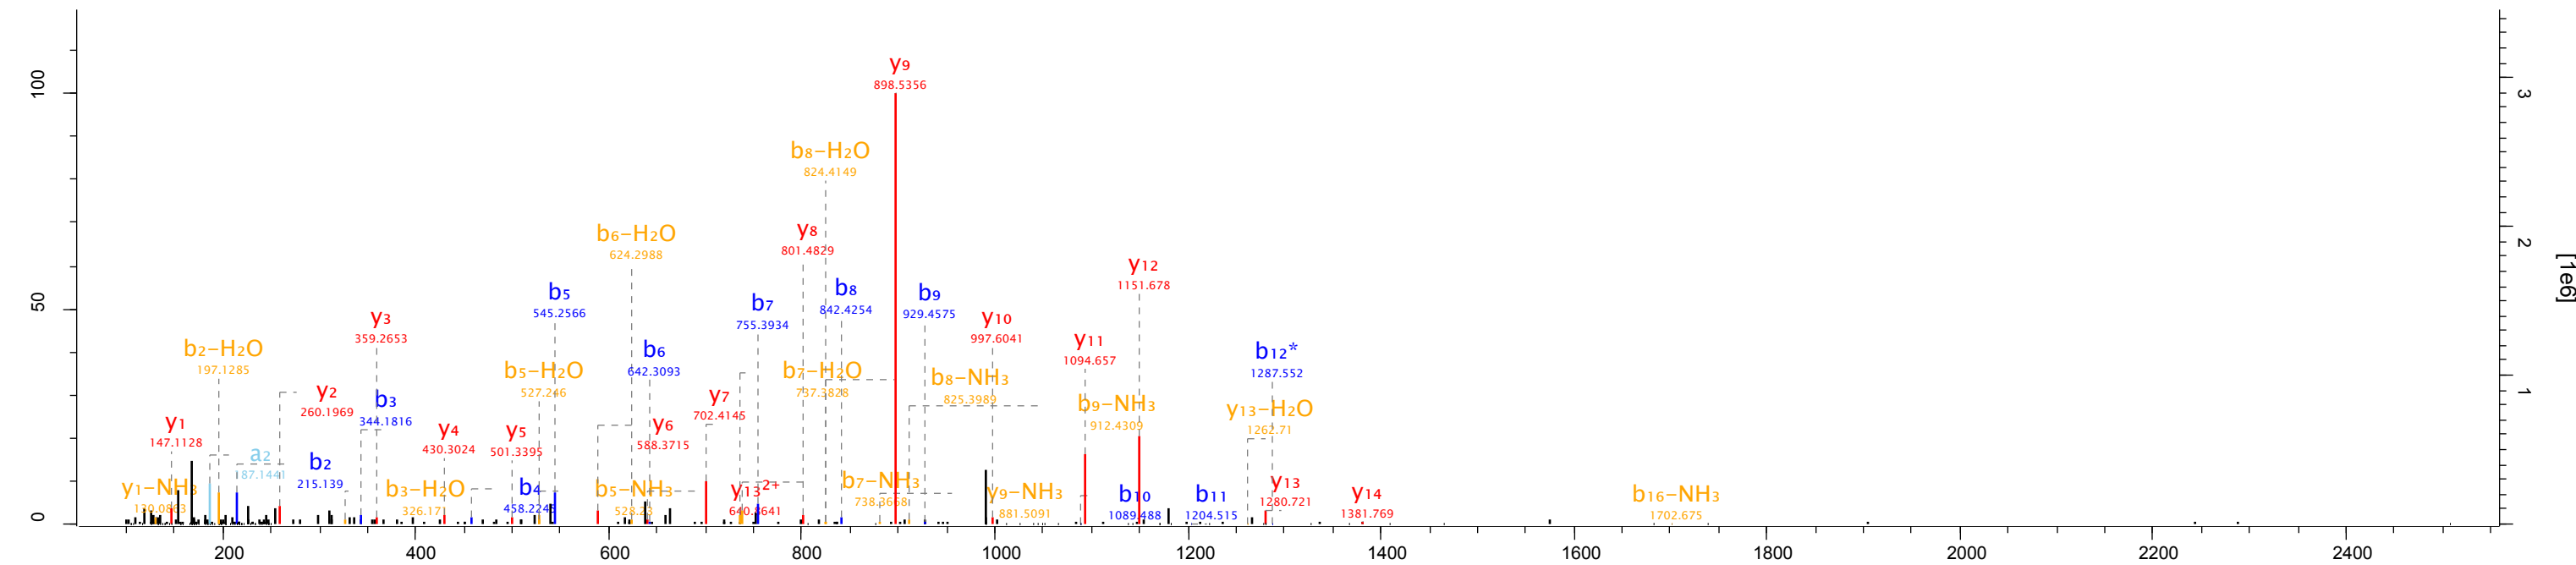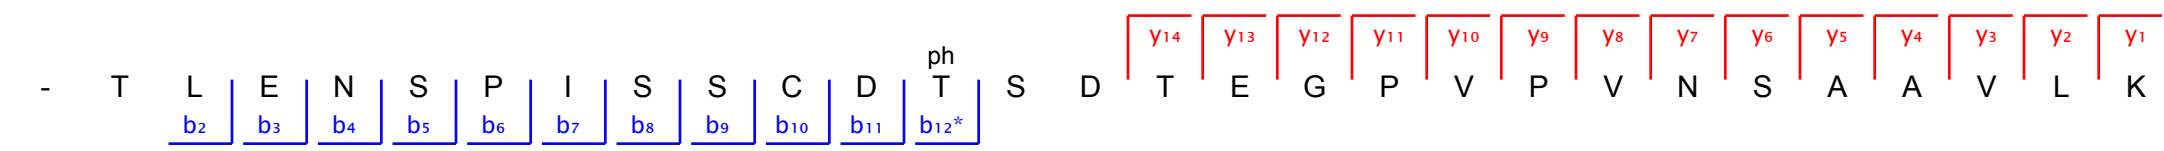

Raw file: 20150814\_A375SR\_Phospho\_BR2\_04  
 Scan: 21160 Method: FTMS; HCD Score: 156.88 m/z: 1164.97 Gene names: KANK2

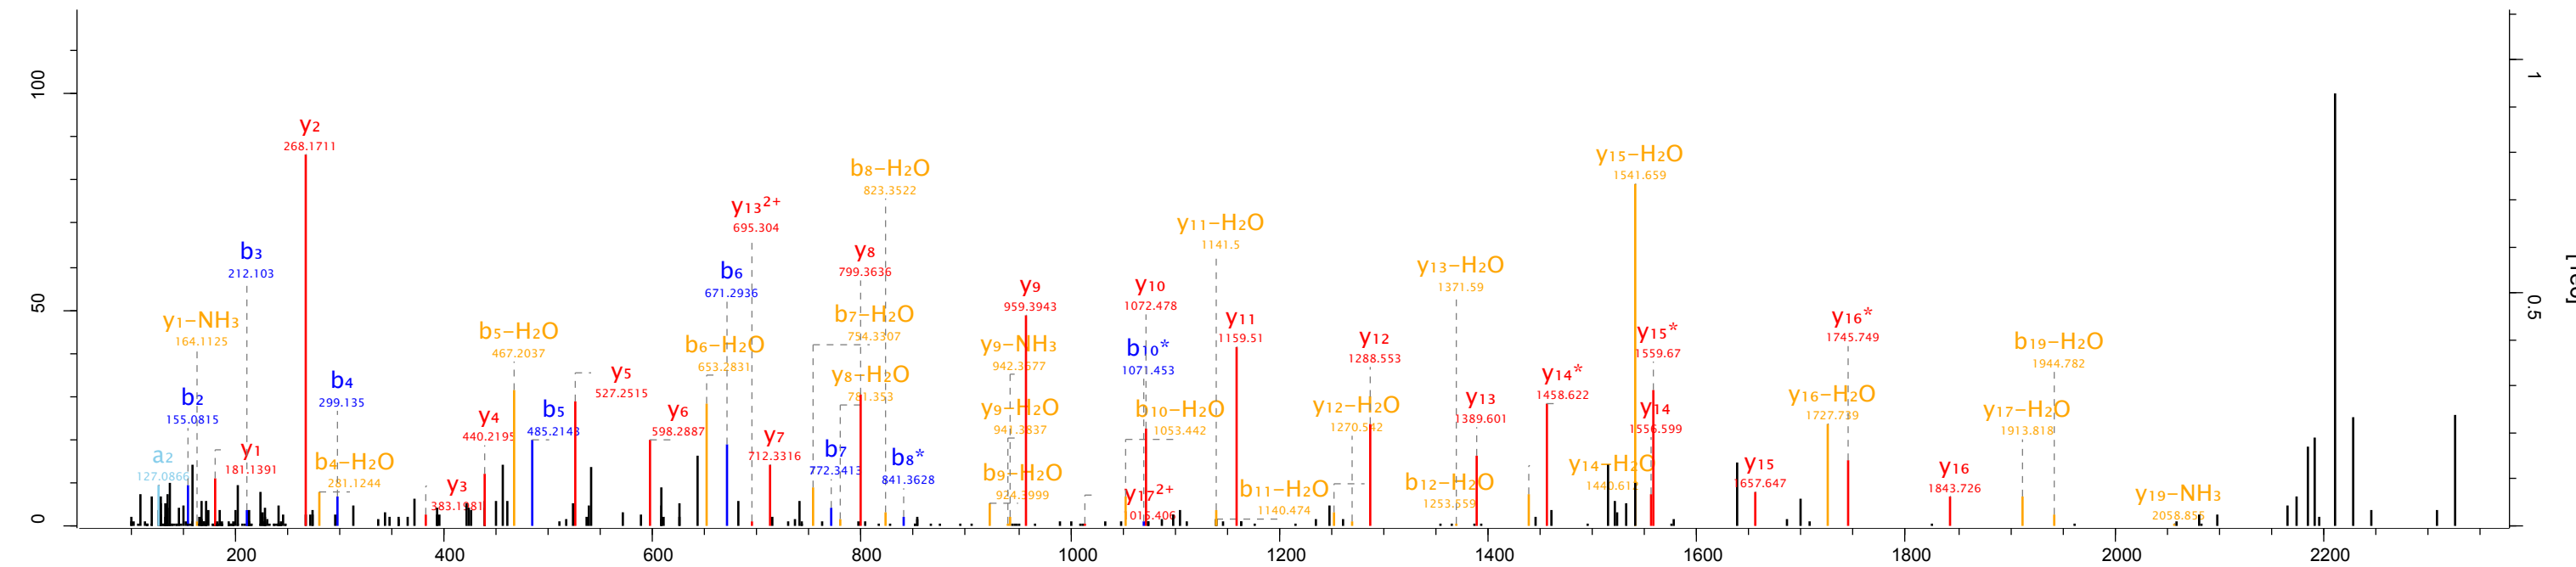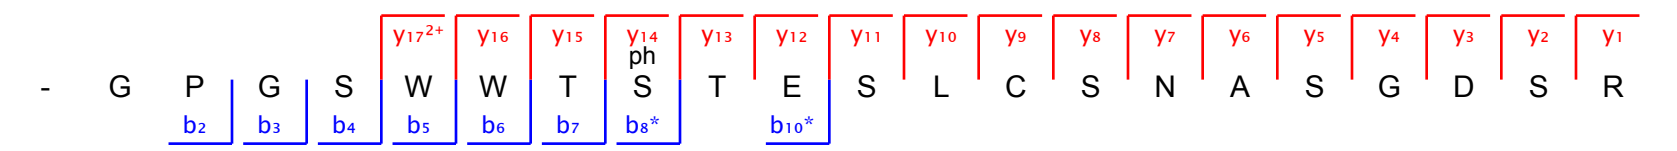

Raw file: 20150814\_A375SR\_Phospho\_BR2\_04  
 Scan: 21250 Method: FTMS; HCD Score: 130.88 m/z: 1469.33 Gene names: GBF1

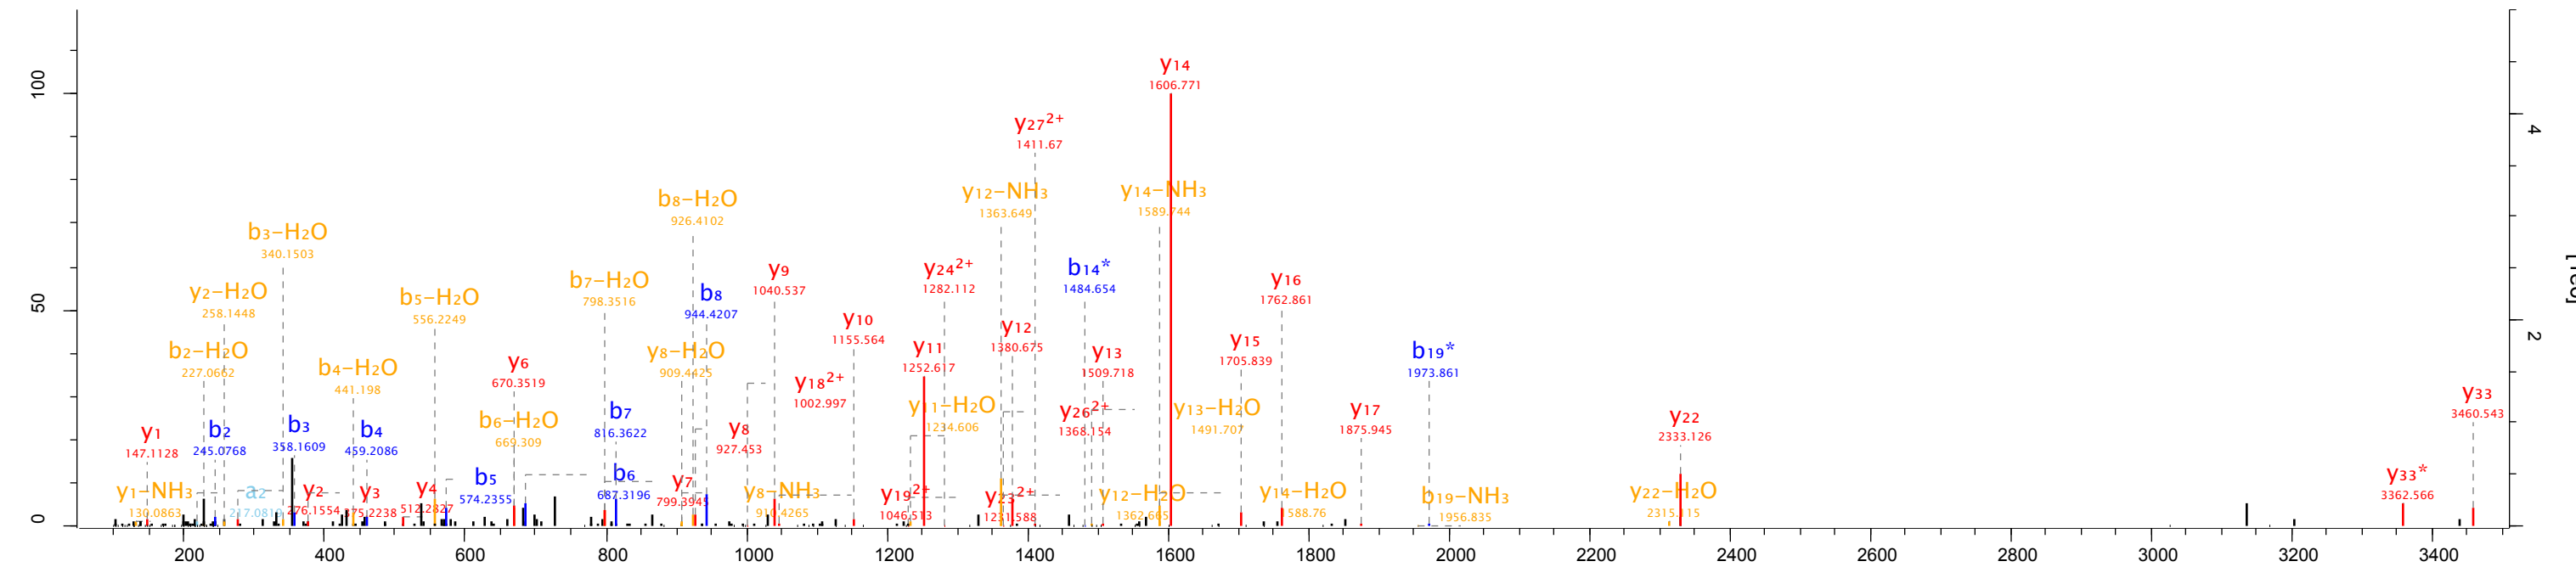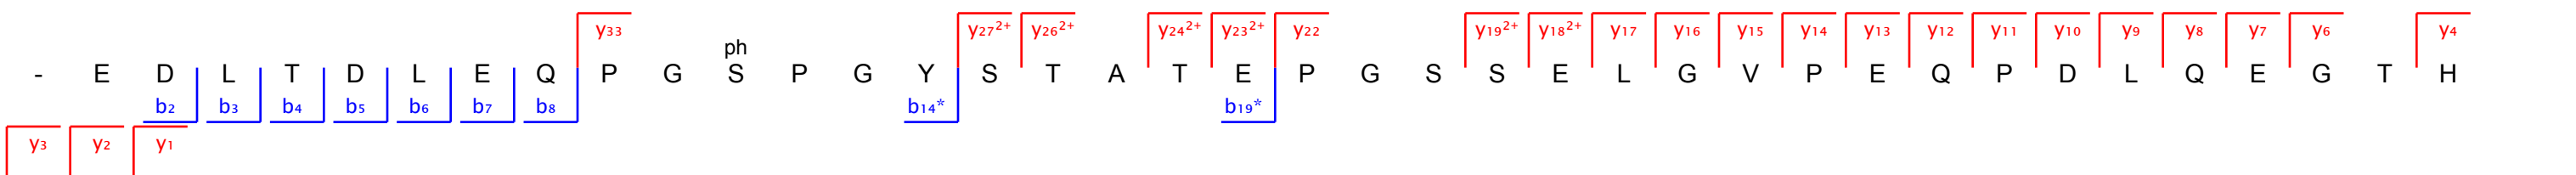

Raw file  
20150814\_A375SR\_Phospho\_BR2\_04

Scan 21570 Method FTMS; HCD Score 163.58 m/z 1077.49 Gene names RB1

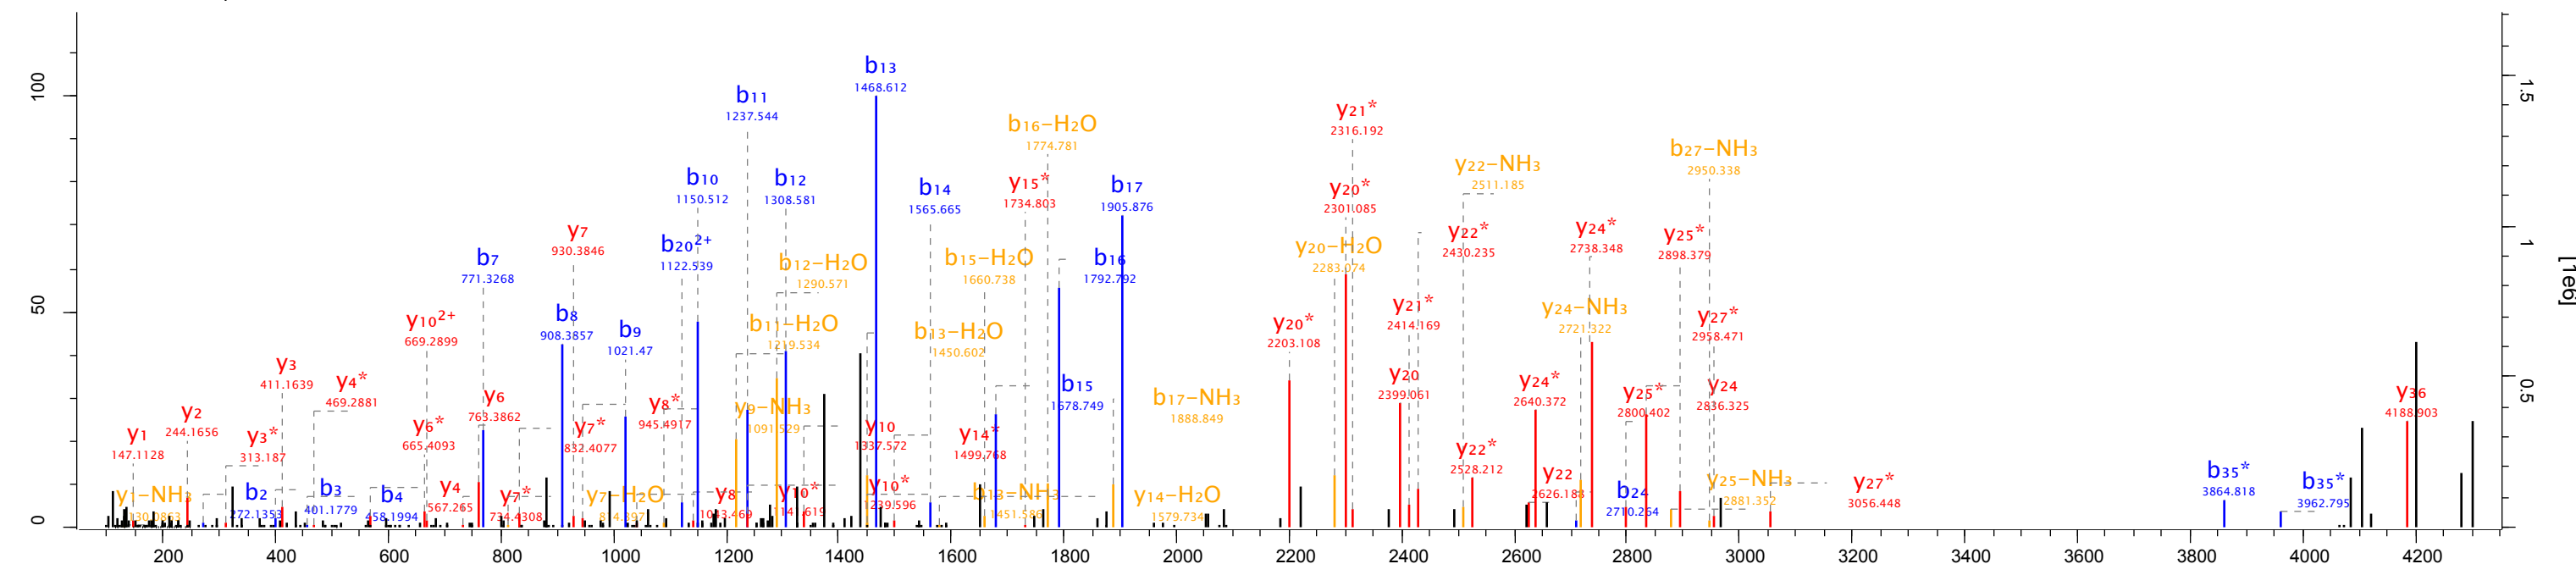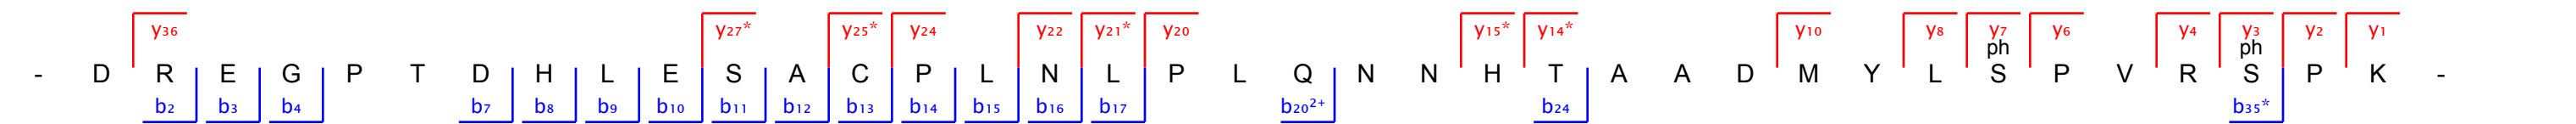



Raw file 20150814\_A375SR\_Phospho\_BR2\_04 Scan 22490 Method FTMS; HCD Score 131.92 m/z 1202.87 Gene names SLAIN2

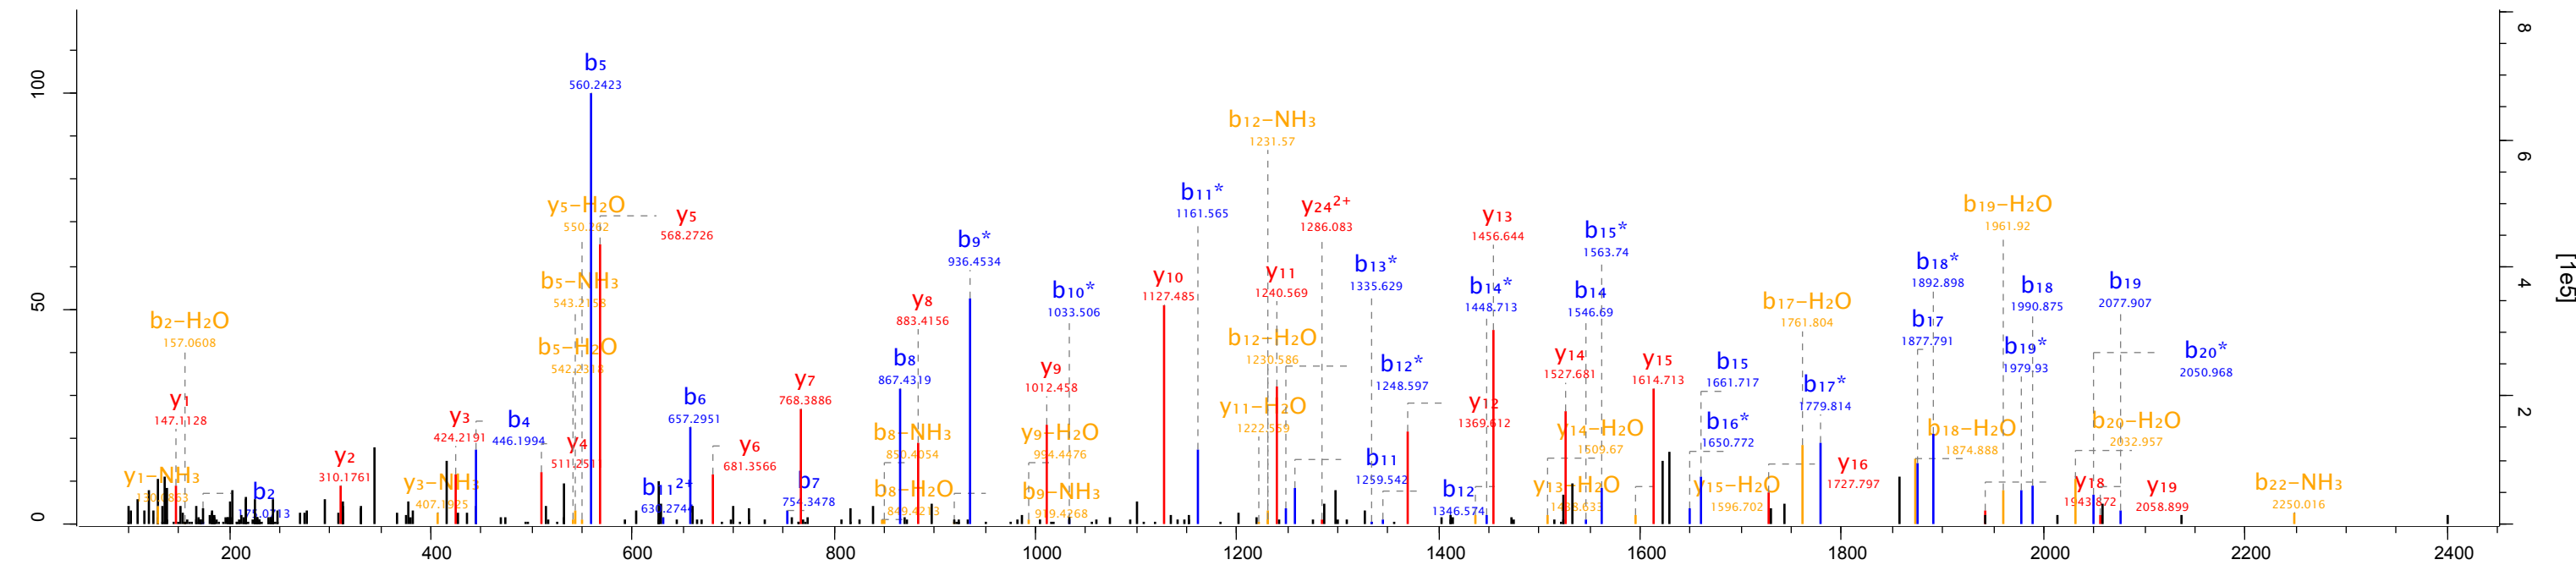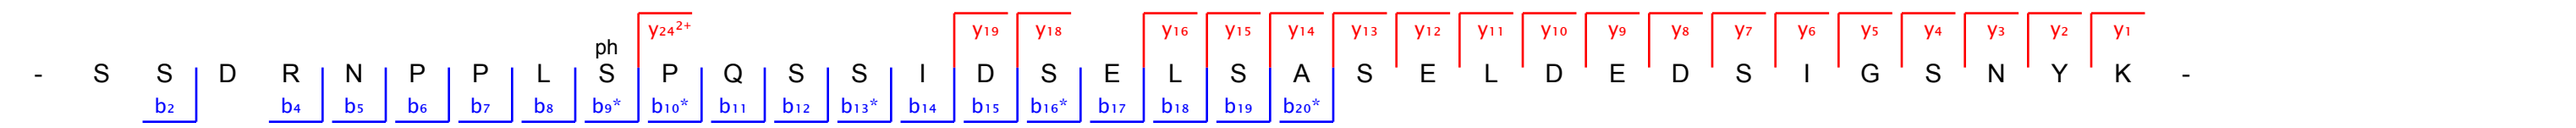

Raw file 20150814\_A375SR\_Phospho\_BR2\_04 Scan 22530 Method FTMS; HCD Score 94.15 m/z 833.75 Gene names SNX30

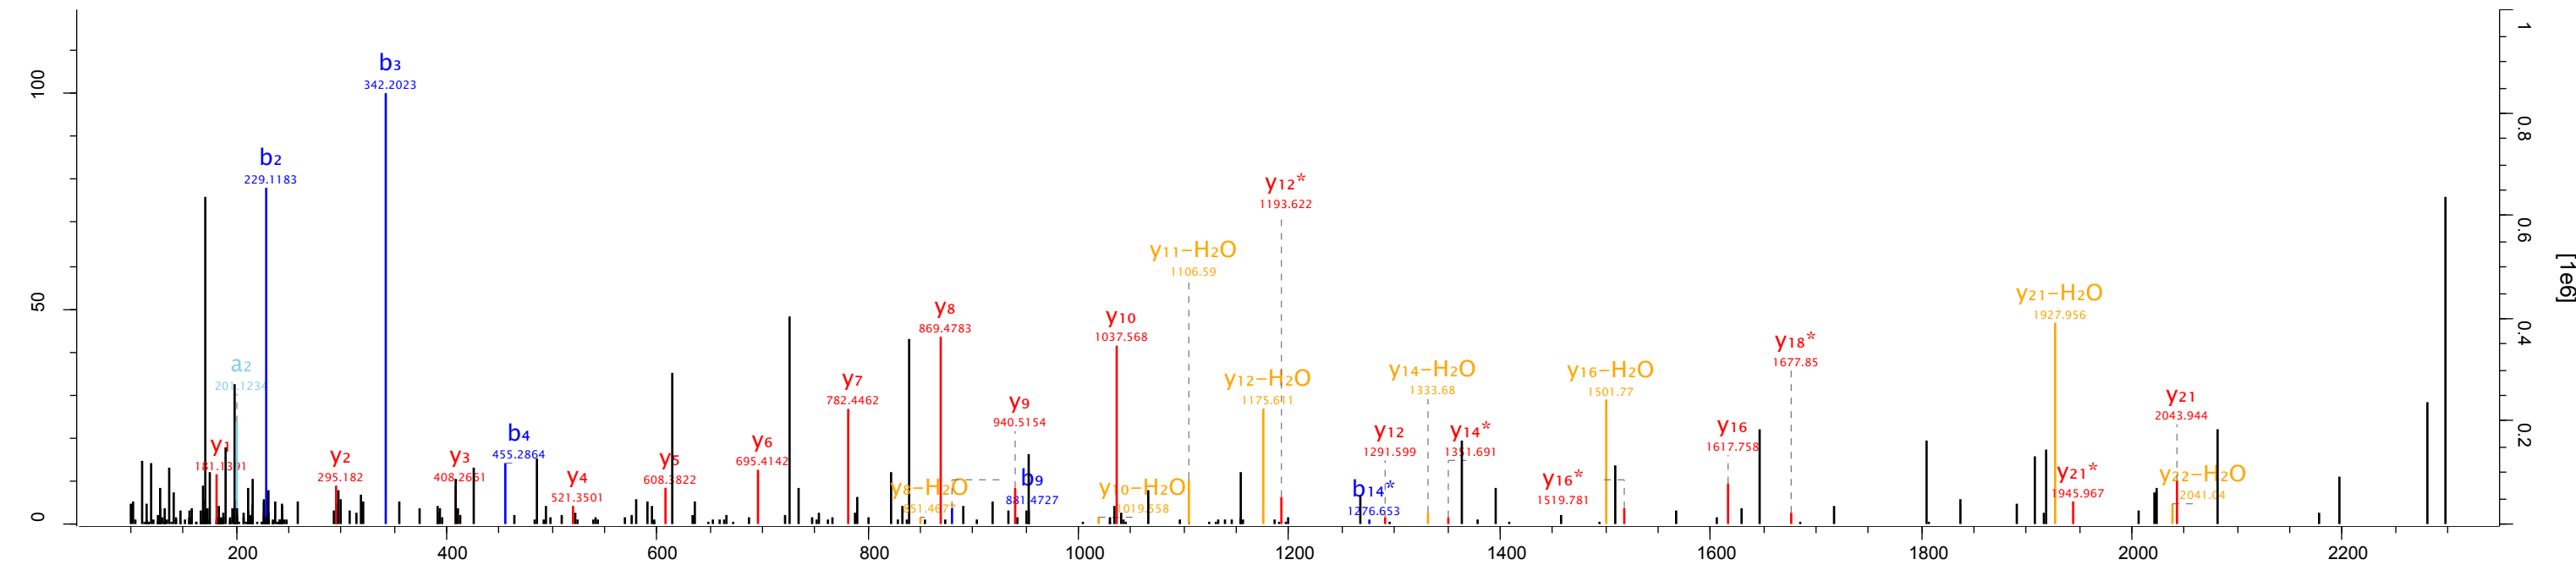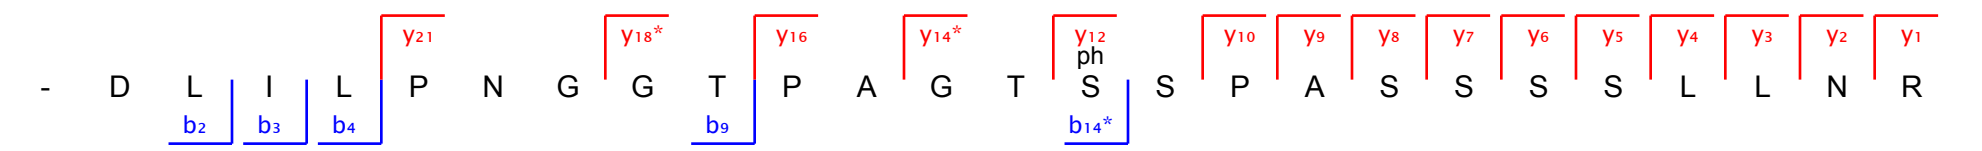



Raw file: 20150814\_A375SR\_Phospho\_BR2\_04  
 Scan: 22630 Method: FTMS; HCD Score: 229.07 m/z: 995.97 Gene names: TPD52L2

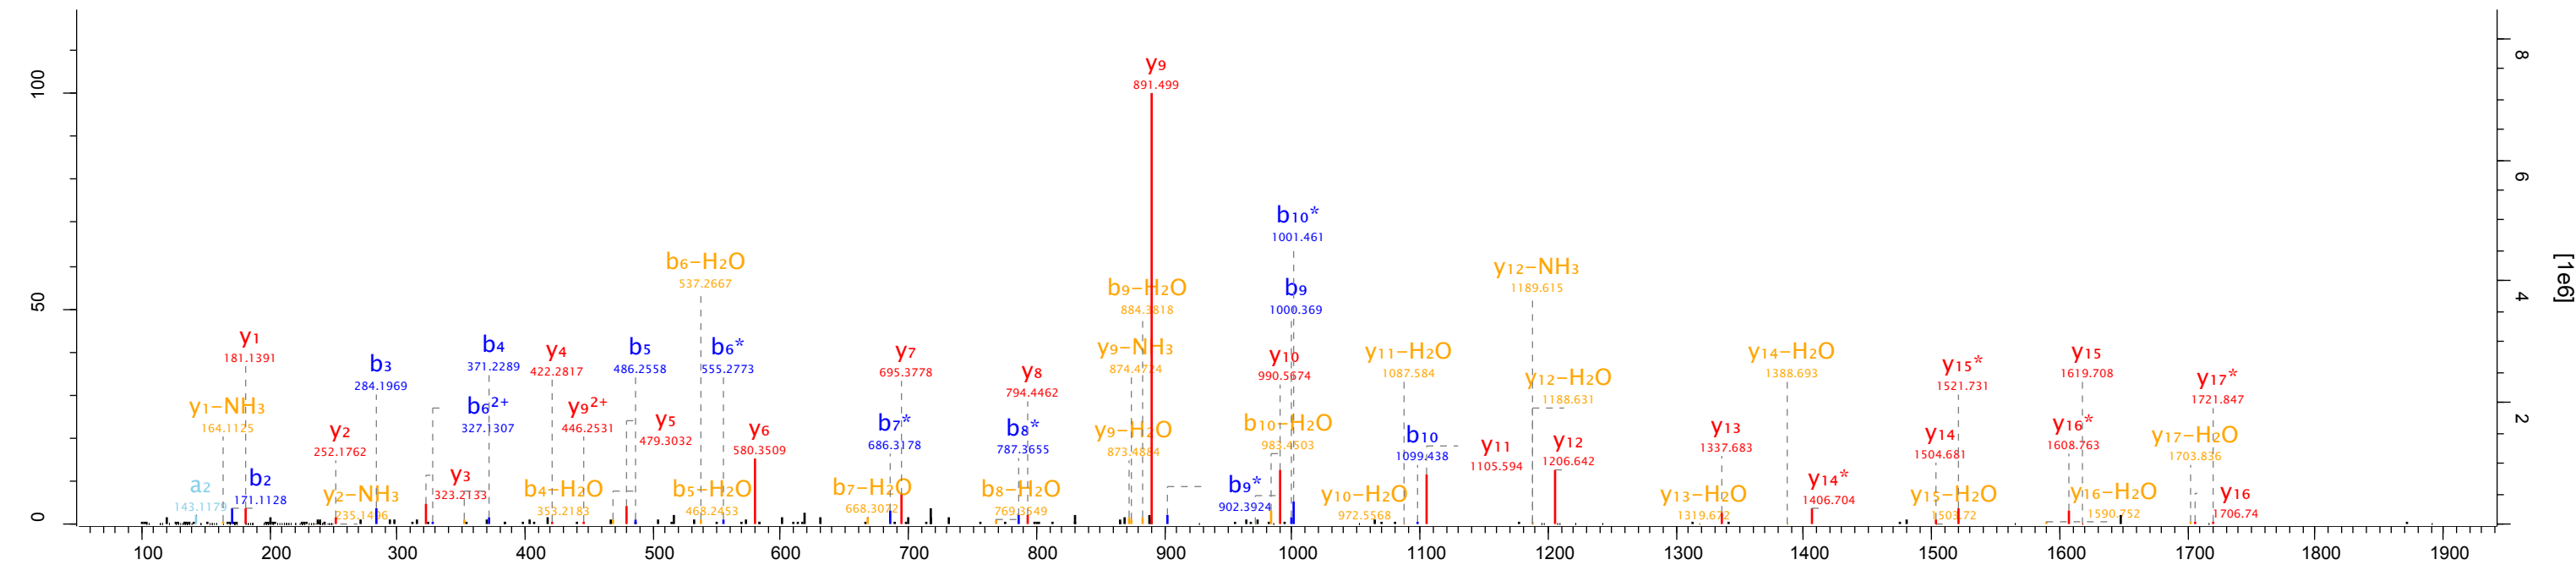

Protein sequence: G L L S D S M T D V P V D T G V A A R -

Fragmentation sites (b ions): b2, b3, b4, b5, b6\*, b7\*, b8\*, b9, b10

Fragmentation sites (y ions): y1, y2, y3, y4, y5, y6, y7, y8, y9, y10, y11, y12, y13, y14, y14\*, y15, y15\*, y16, y16\*, y17, y17\*

Raw file: 20150814\_A375SR\_Phospho\_BR2\_04  
 Scan: 23120 Method: FTMS; HCD Score: 220.48 m/z: 1012.45 Gene names: MAPK6

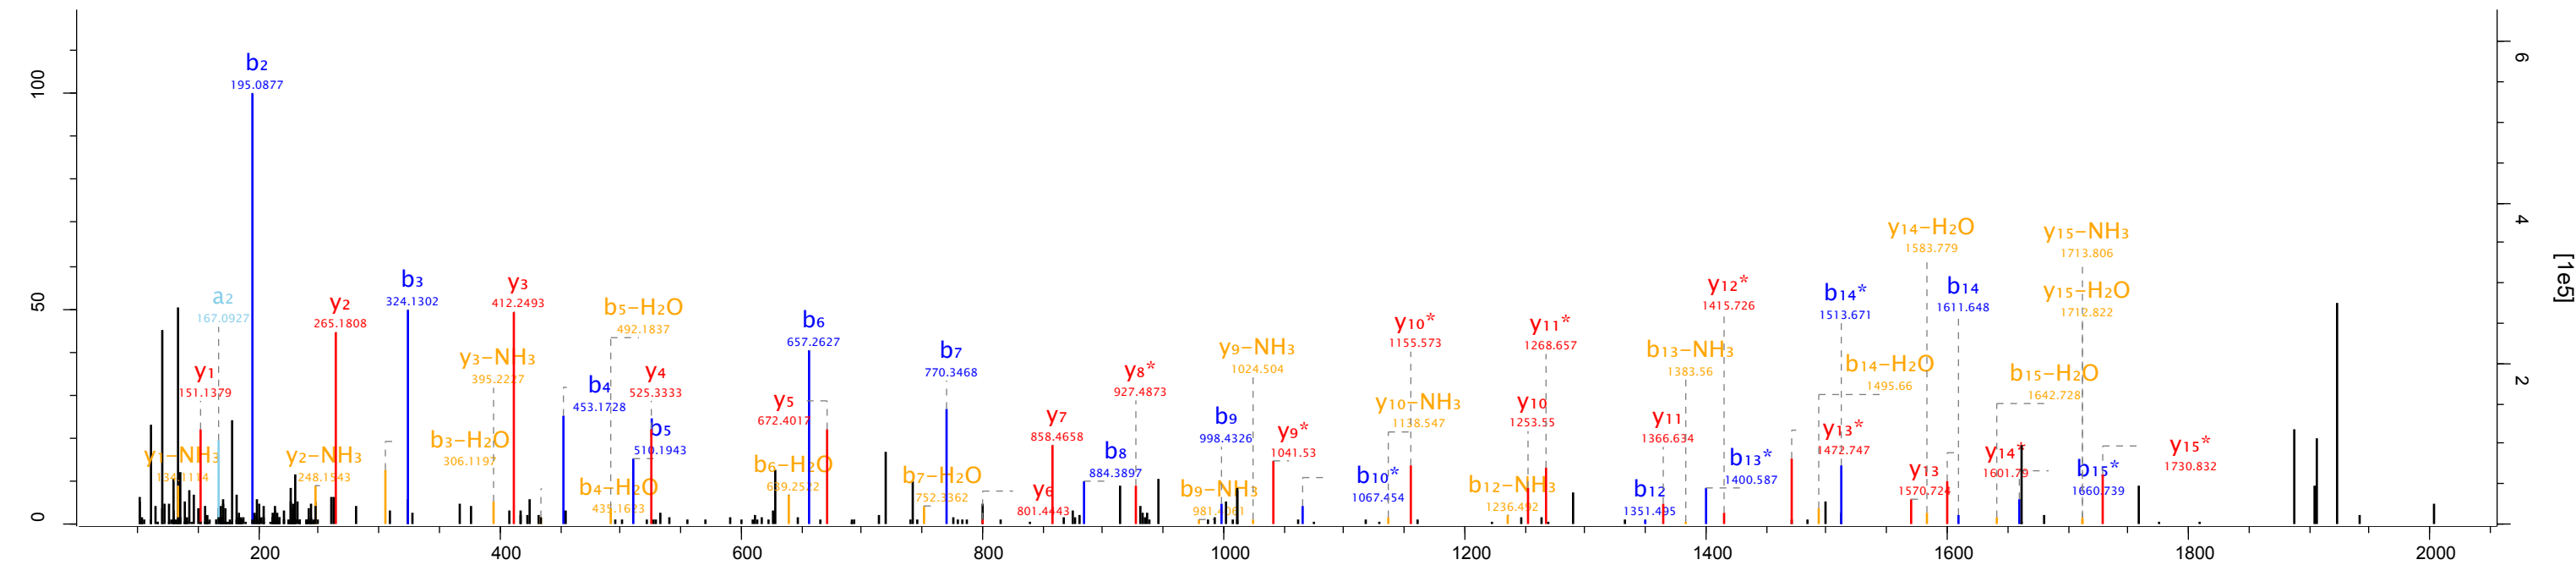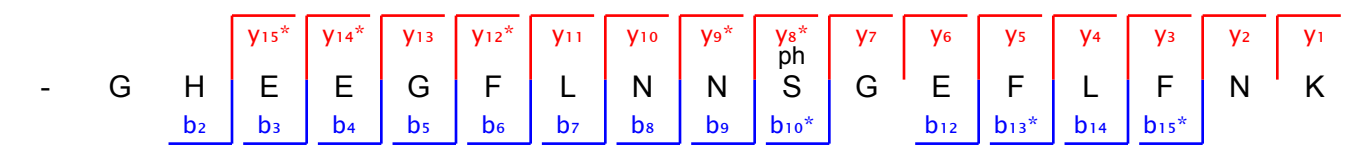

Raw file Scan Method Score m/z Gene names  
 20150814\_A375SR\_Phospho\_BR2\_04 23330 FTMS; HCD 249.8 1106.48 STK3

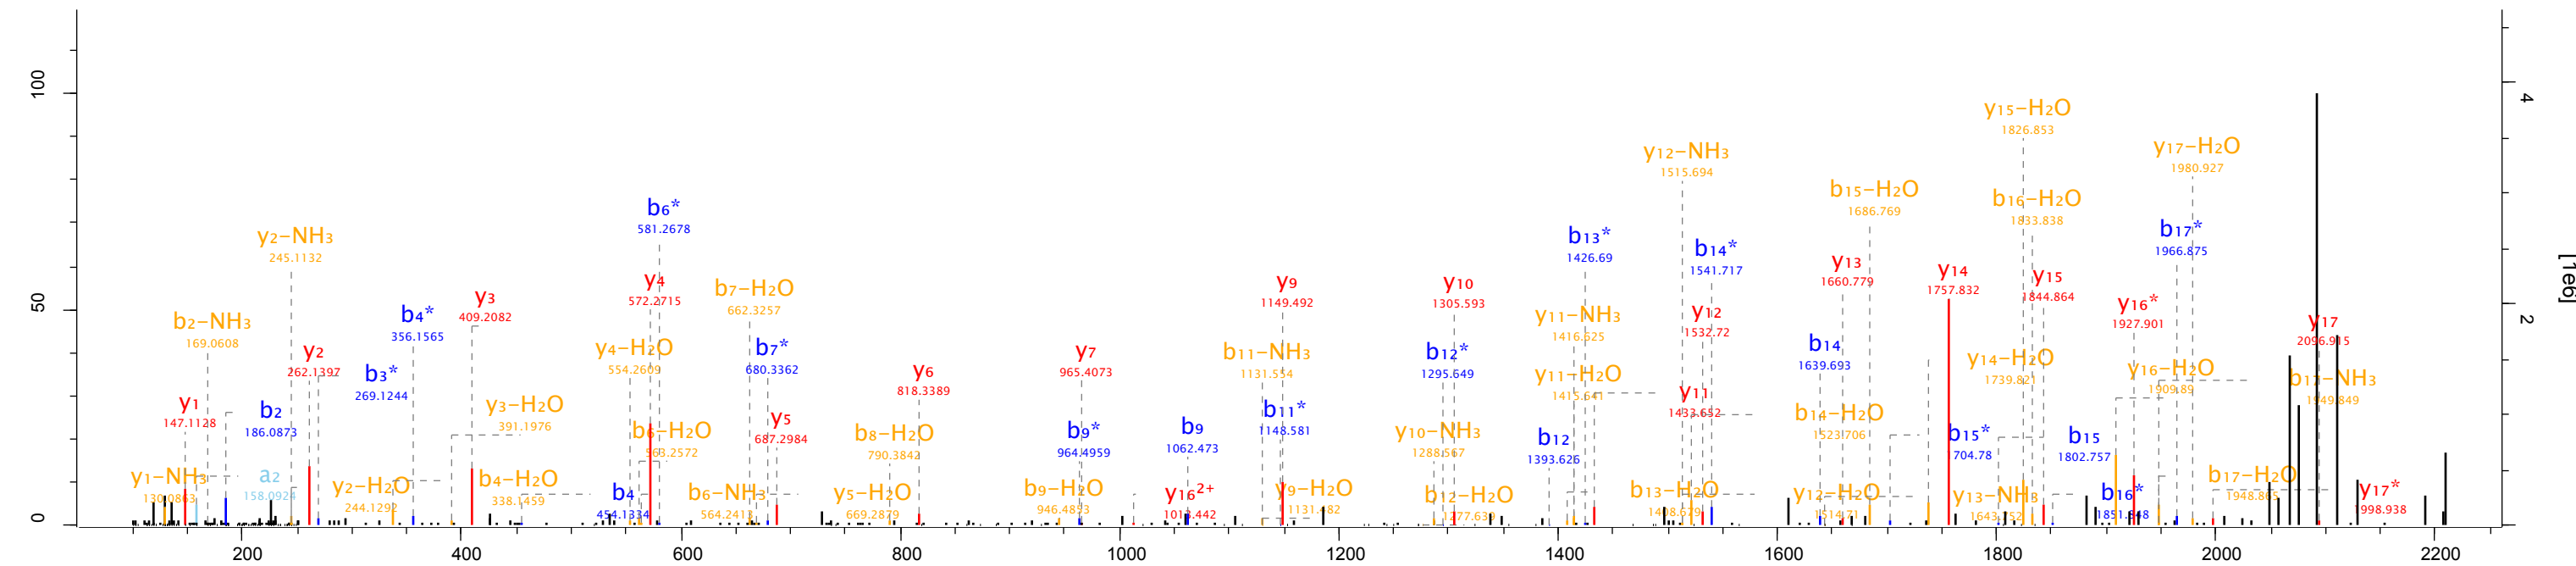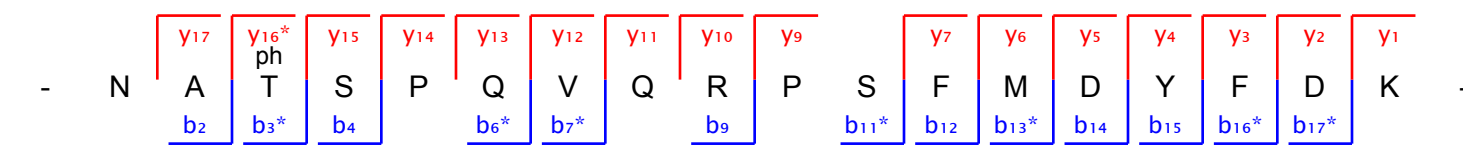

Raw file: 20150814\_A375SR\_Phospho\_BR2\_04  
 Scan: 24520 Method: FTMS; HCD Score: 141.15 m/z: 747.39 Gene names: SMARCA2

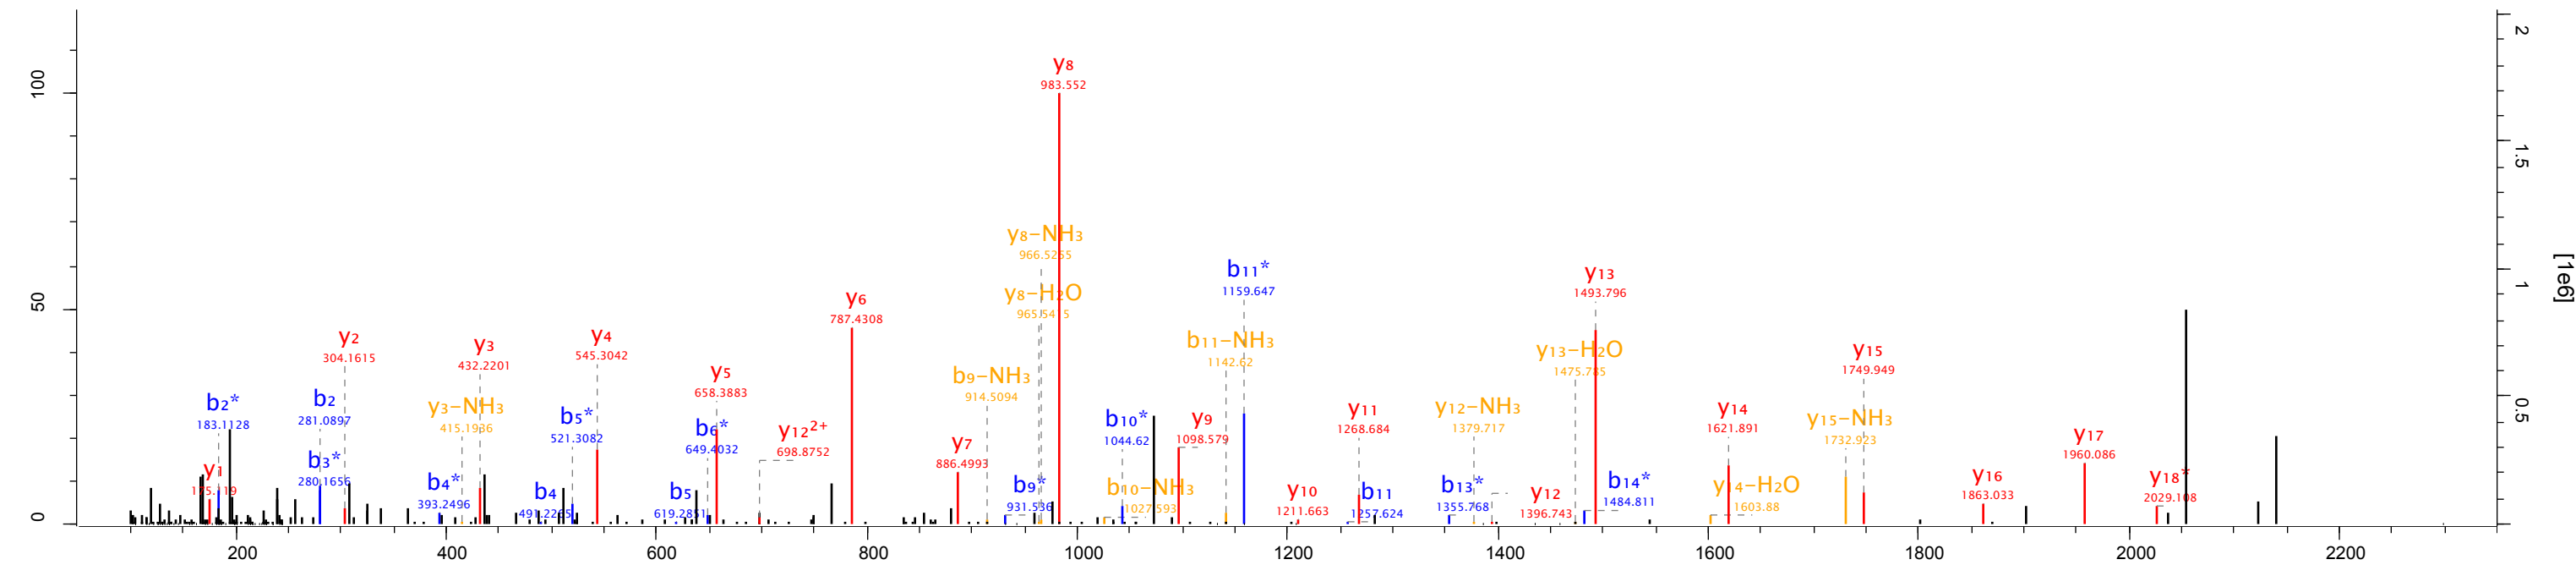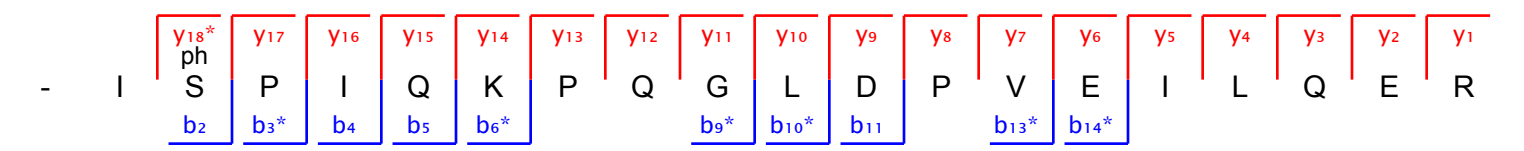

Raw file: 20150814\_A375SR\_Phospho\_BR2\_04  
 Scan: 24540 Method: FTMS; HCD Score: 208.99 m/z: 932.45 Gene names: RANBP2

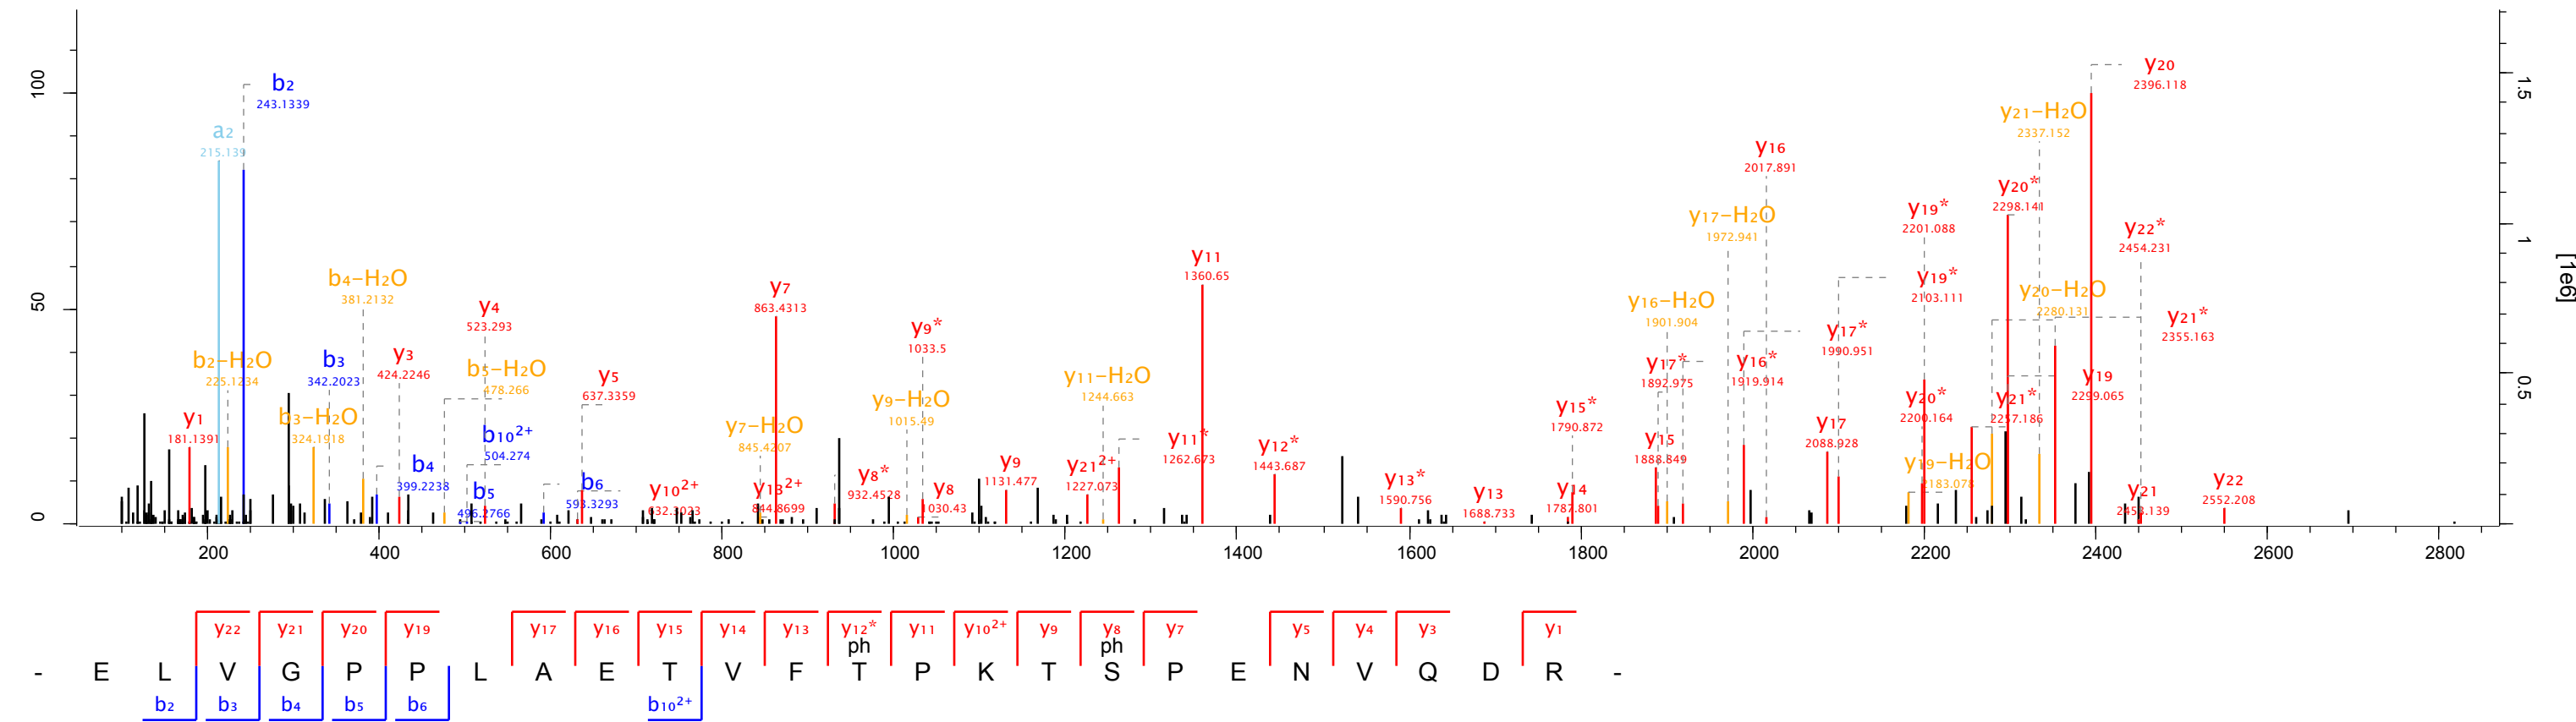

Raw file 20150814\_A375SR\_Phospho\_BR2\_04 Scan 24870 Method FTMS; HCD Score 97.27 m/z 851.94 Gene names DENND1B

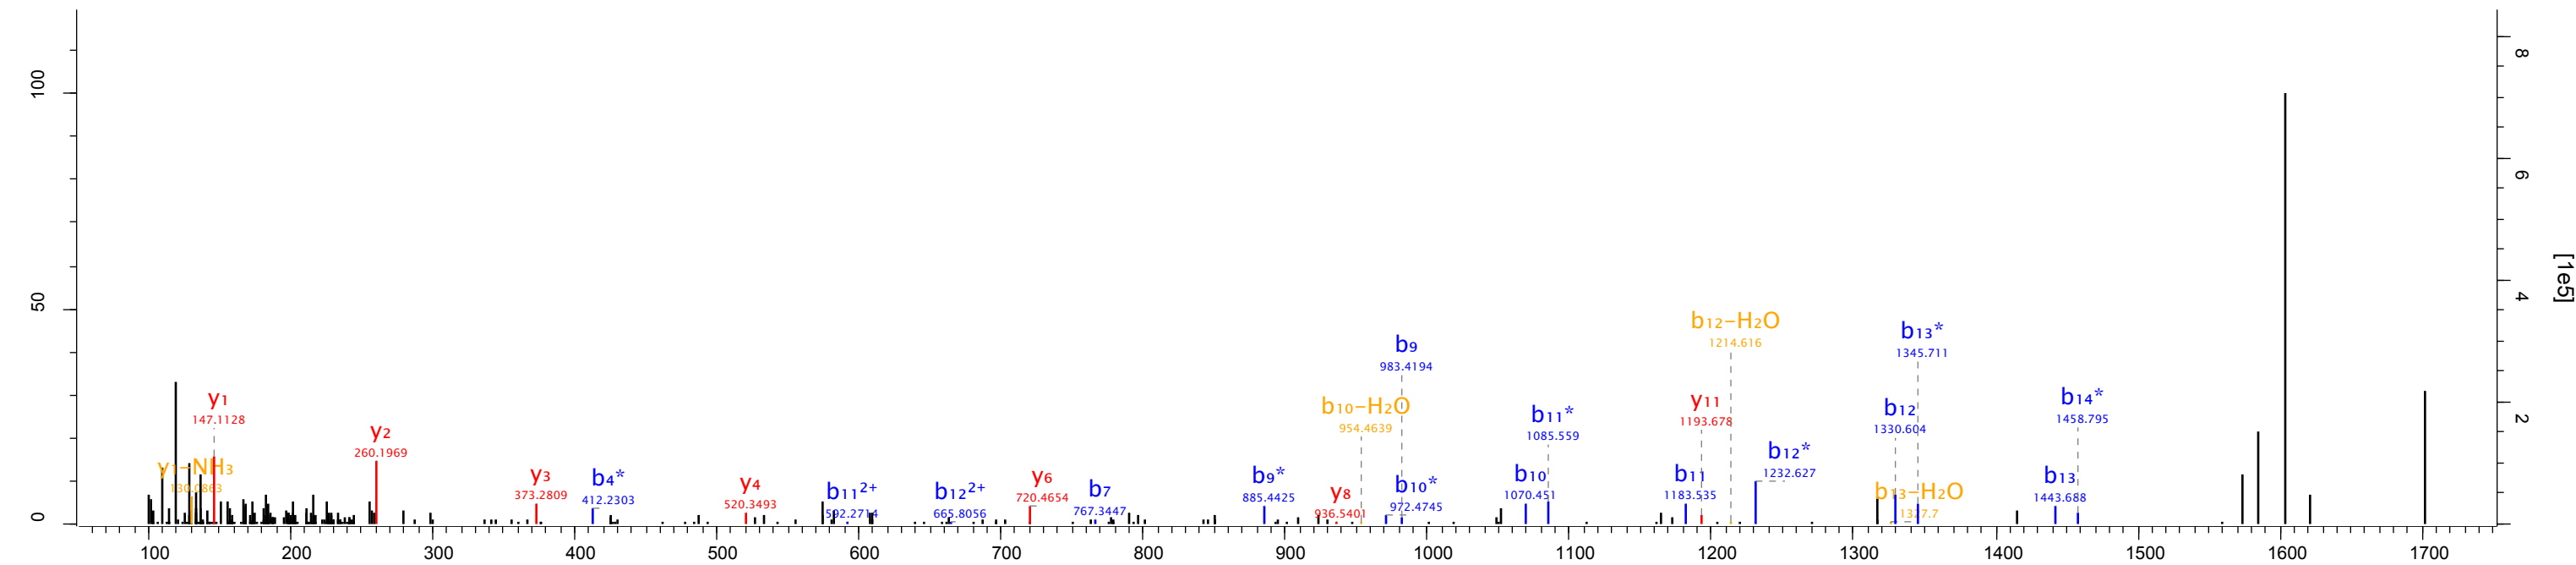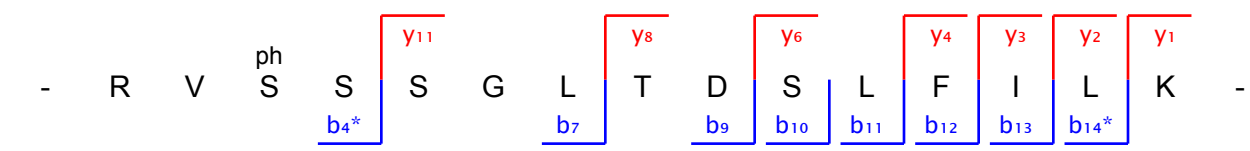

Raw file: 20150814\_A375SR\_Phospho\_BR2\_04  
 Scan: 25070 Method: FTMS; HCD Score: 79.34 m/z: 841.9 Gene names: CHMP5

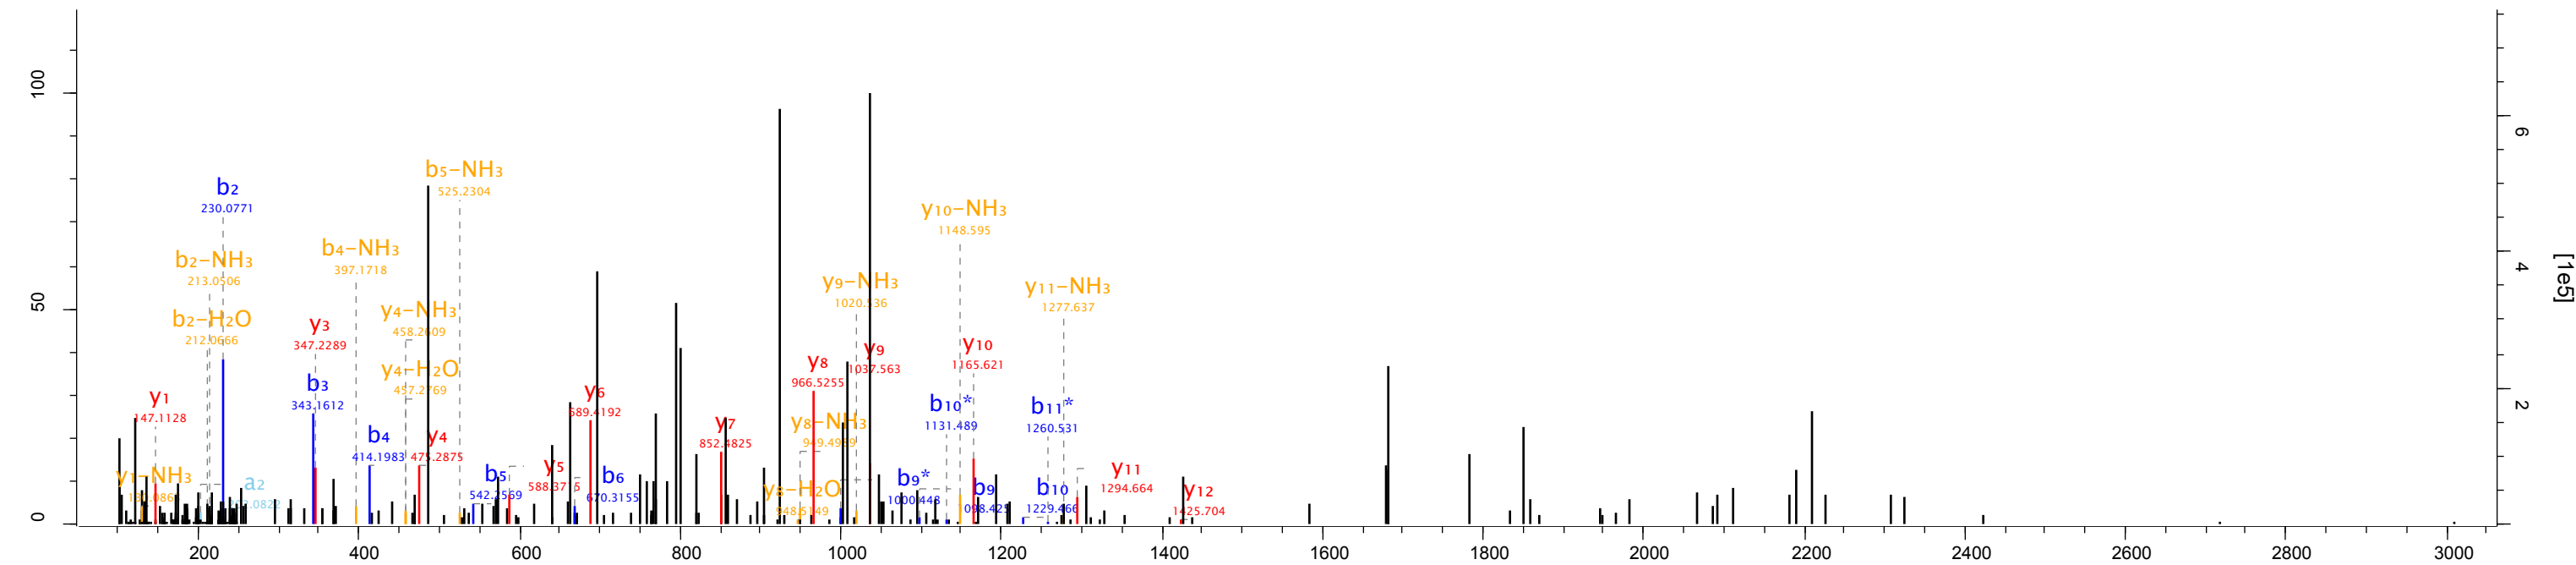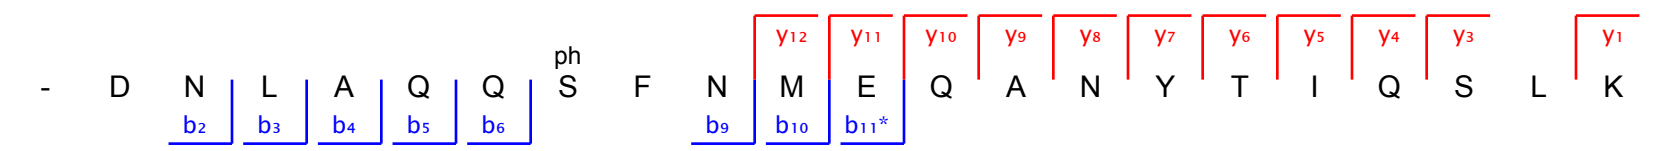

Raw file: 20150814\_A375SR\_Phospho\_BR2\_04  
 Scan: 25250 Method: FTMS; HCD Score: 44.64 m/z: 995.47 Gene names: TSC22D4

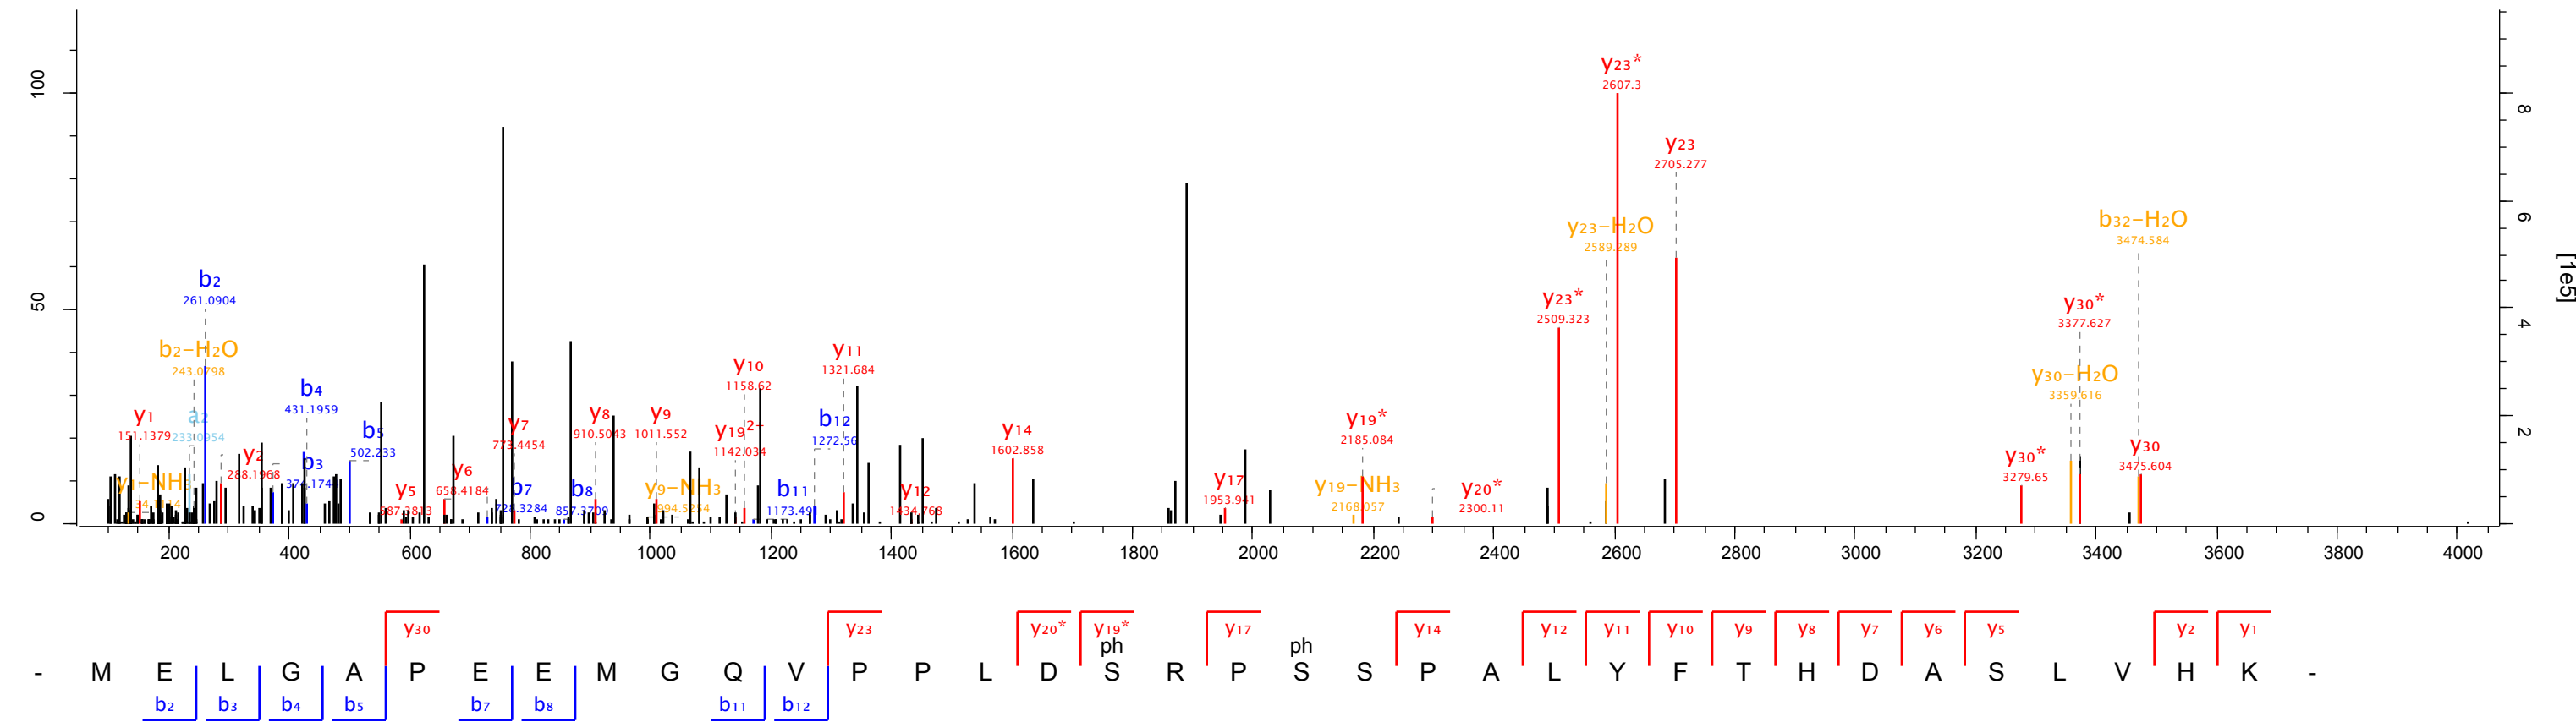



Raw file 20150814\_A375SR\_Phospho\_BR2\_04 Scan 25340 Method FTMS; HCD Score 63.22 m/z 897.94 Gene names HNRNPU

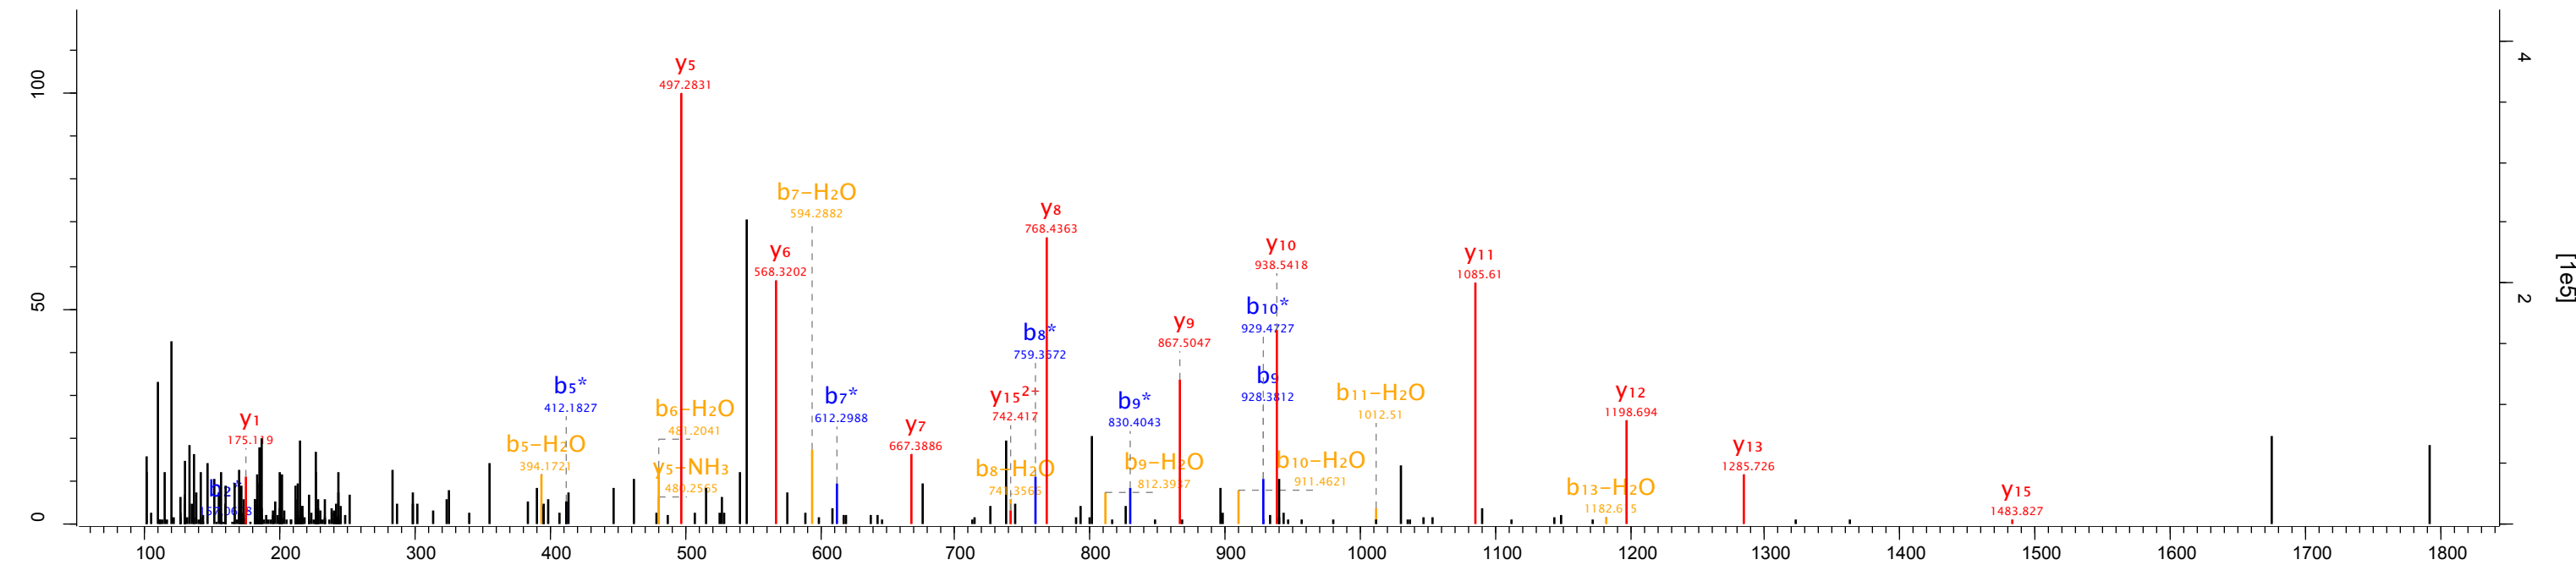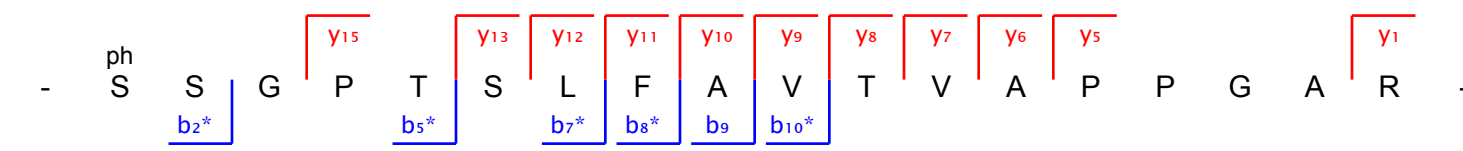

Raw file: 20150814\_A375SR\_Phospho\_BR2\_04  
 Scan: 25460 Method: FTMS; HCD Score: 166.57 m/z: 1043 Gene names: TOMM22

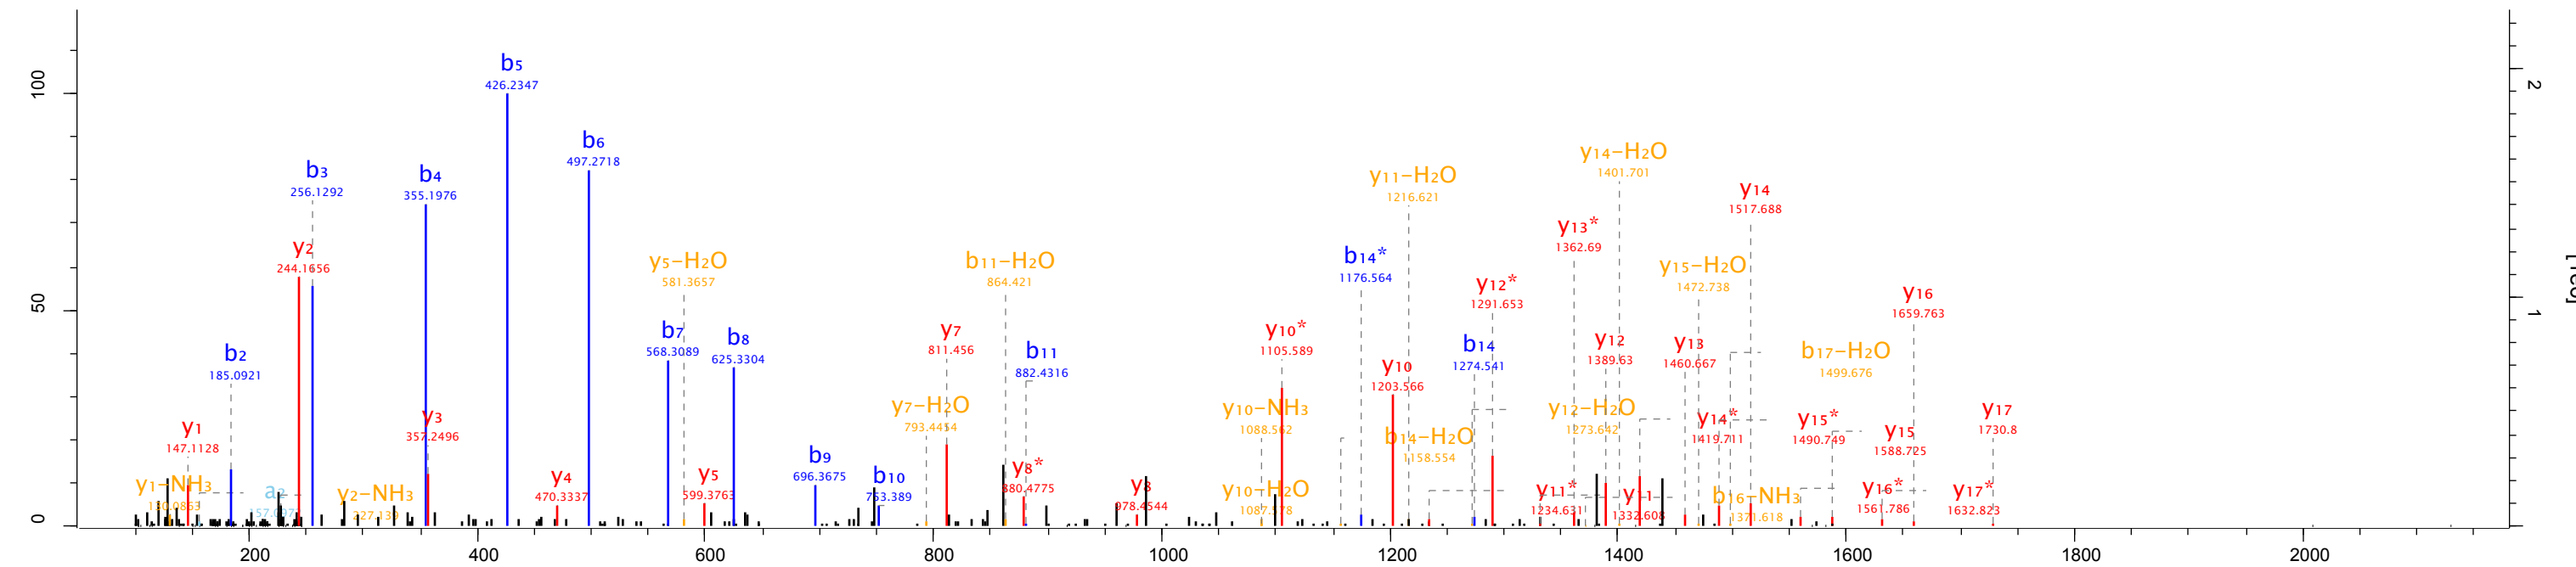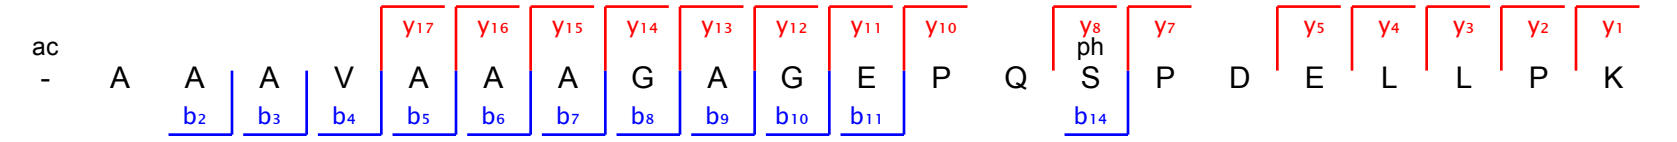

Raw file 20150814\_A375SR\_Phospho\_BR2\_04 Scan 25530 Method FTMS; HCD Score 133.29 m/z 991.76 Gene names INF2

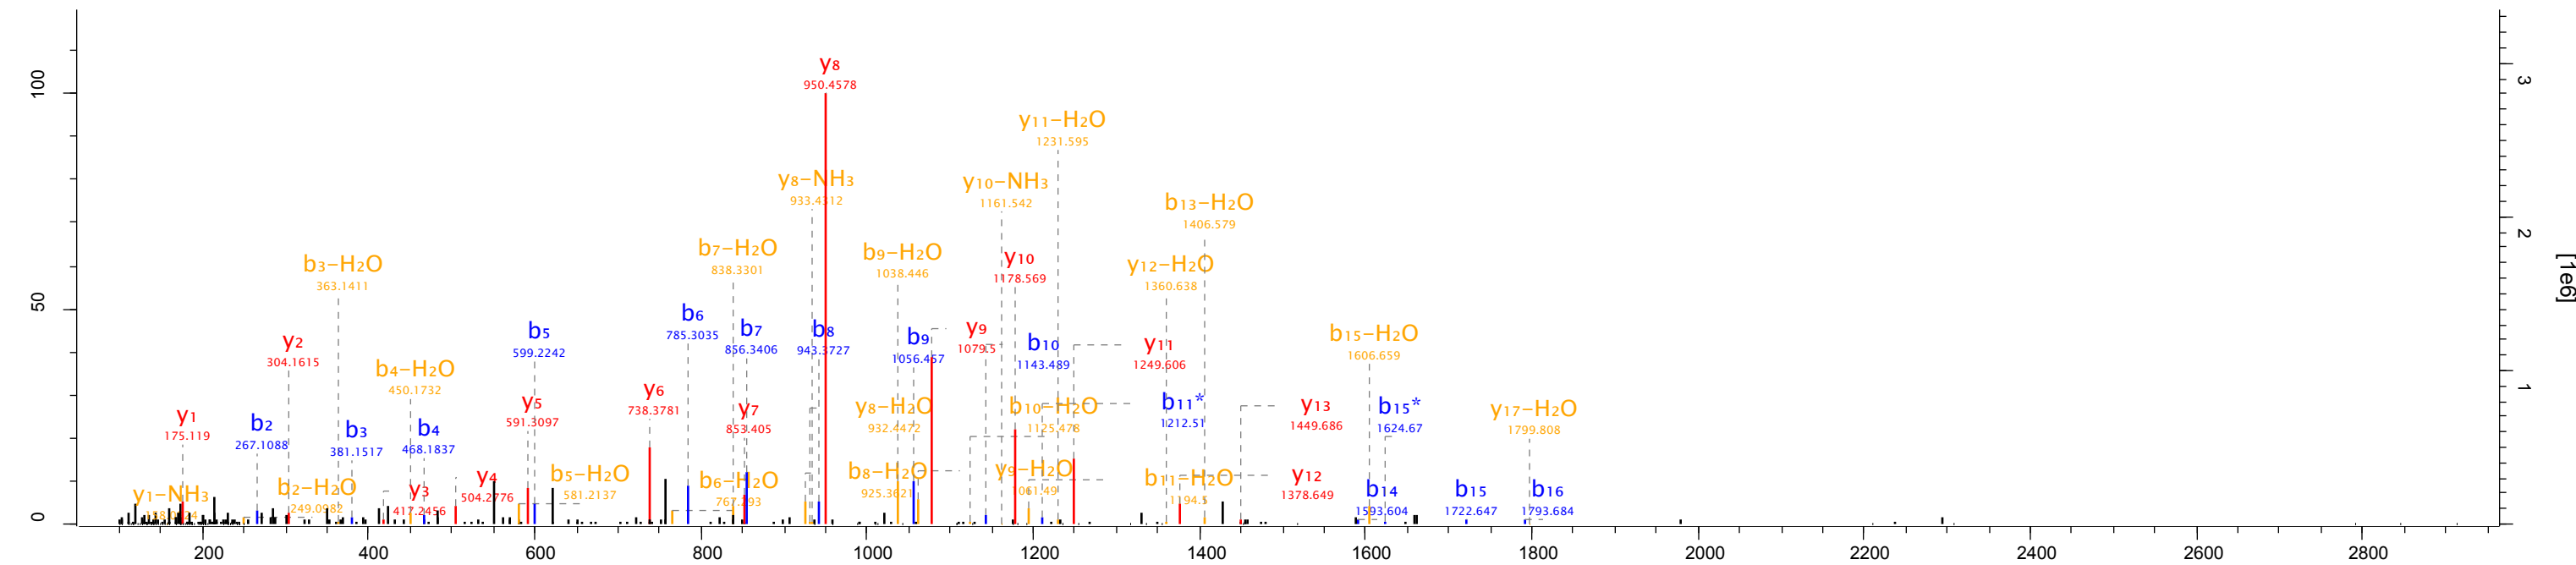

- E H N S M W A S L S S ph P D A E A V E P D F S S I E R -

b<sub>2</sub>
b<sub>3</sub>
b<sub>4</sub>
b<sub>5</sub>
b<sub>6</sub>
b<sub>7</sub>
b<sub>8</sub>
b<sub>9</sub>
b<sub>10</sub>
b<sub>11</sub>\*
y<sub>13</sub>
y<sub>12</sub>
y<sub>11</sub>
y<sub>10</sub>
y<sub>9</sub>
y<sub>8</sub>
y<sub>7</sub>
y<sub>6</sub>
y<sub>5</sub>
y<sub>4</sub>
y<sub>3</sub>
y<sub>2</sub>
y<sub>1</sub>

Raw file 20150814\_A375SR\_Phospho\_BR2\_04 Scan 25860 Method FTMS; HCD Score 126.45 m/z 970.75 Gene names ARHGAP35

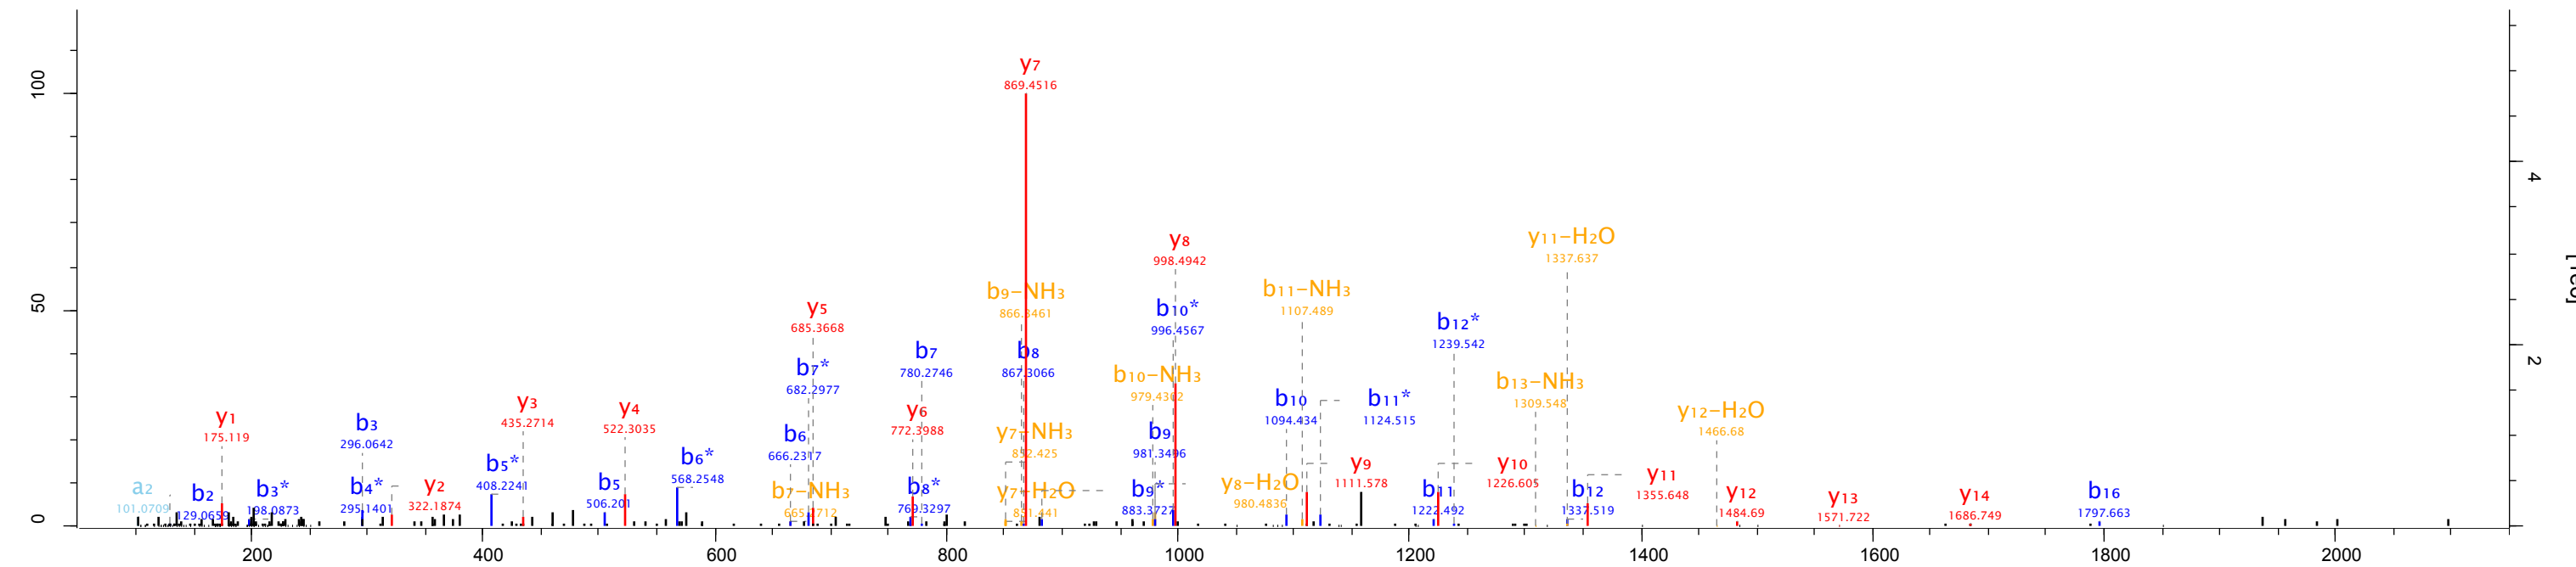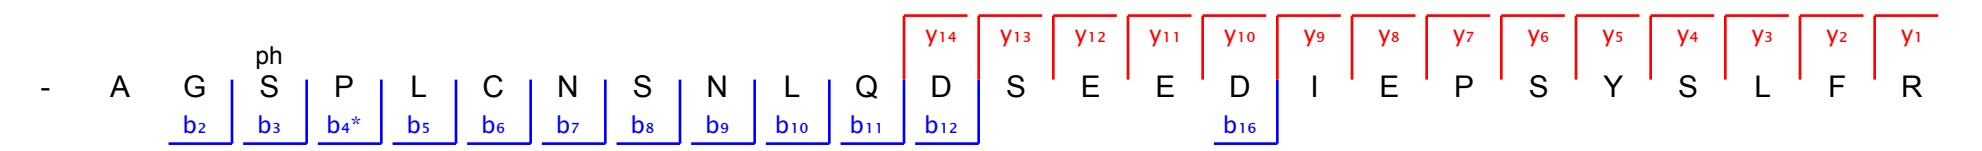

Raw file: 20150814\_A375SR\_Phospho\_BR2\_04  
 Scan: 25920 Method: FTMS; HCD Score: 85.04 m/z: 984.13 Gene names: BCL7C

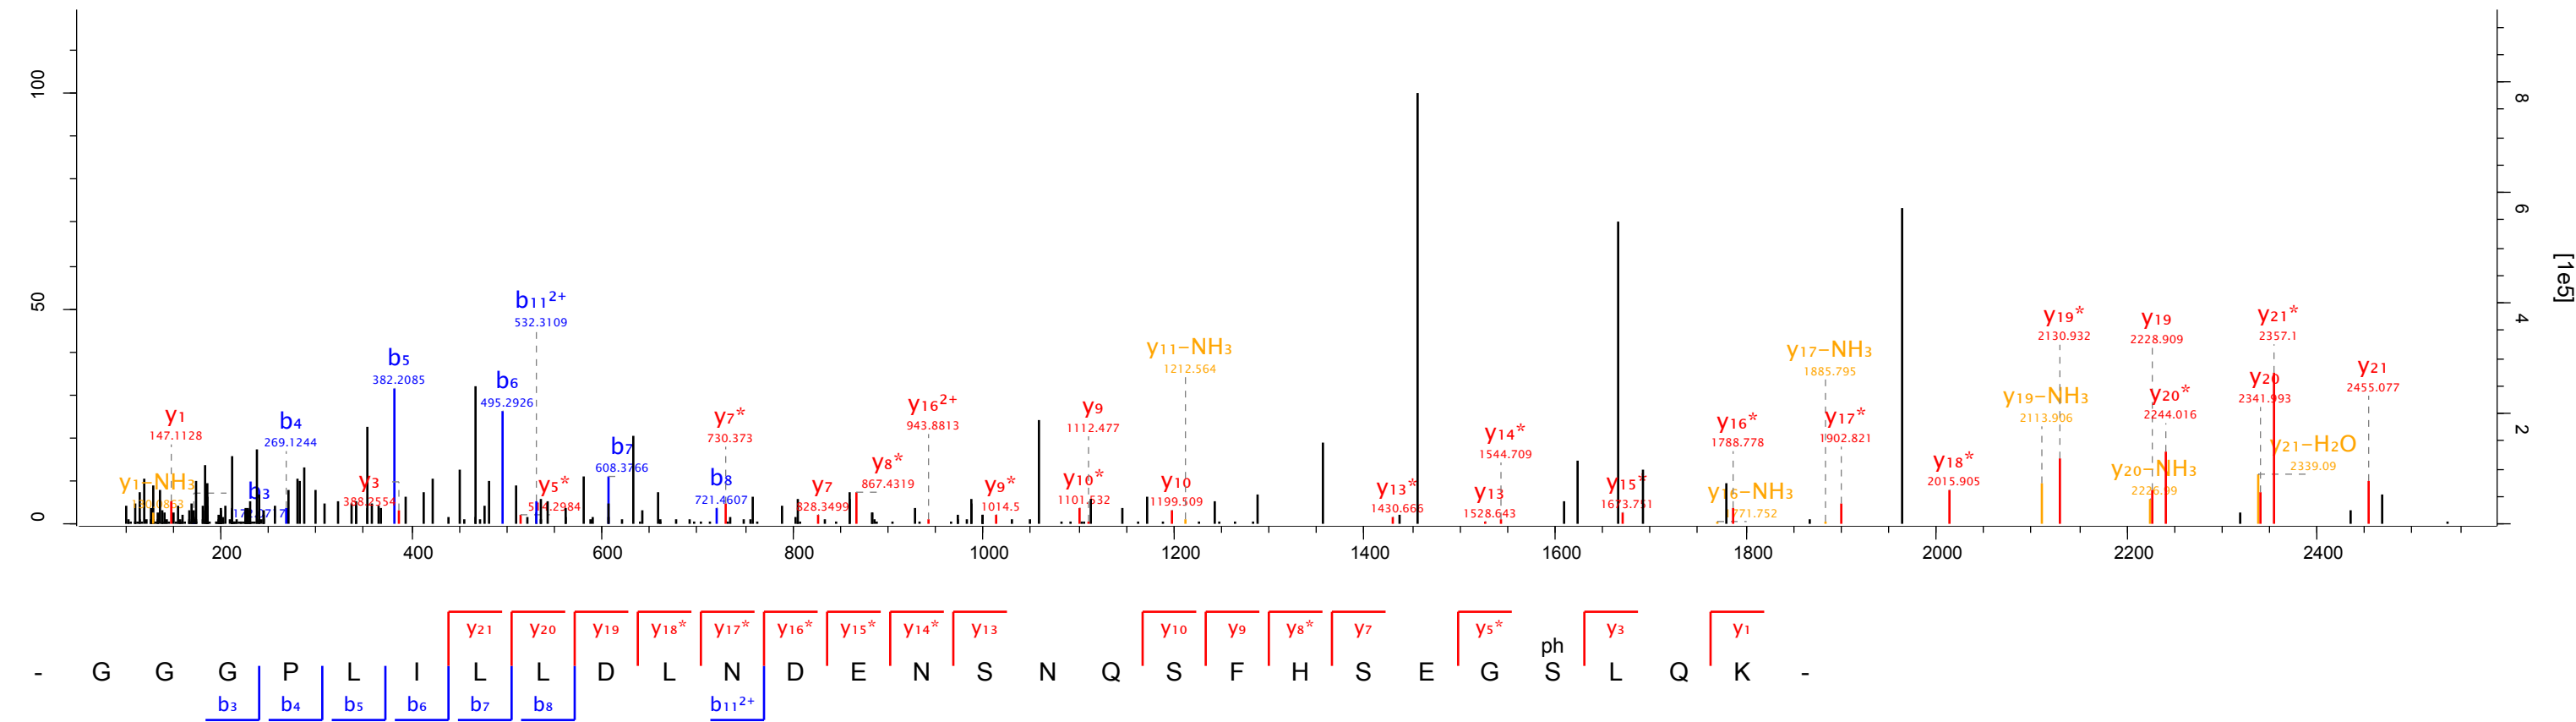

Raw file 20150814\_A375SR\_Phospho\_BR2\_04 Scan 26060 Method FTMS; HCD Score 106.39 m/z 919.78 Gene names RAB11FIP5

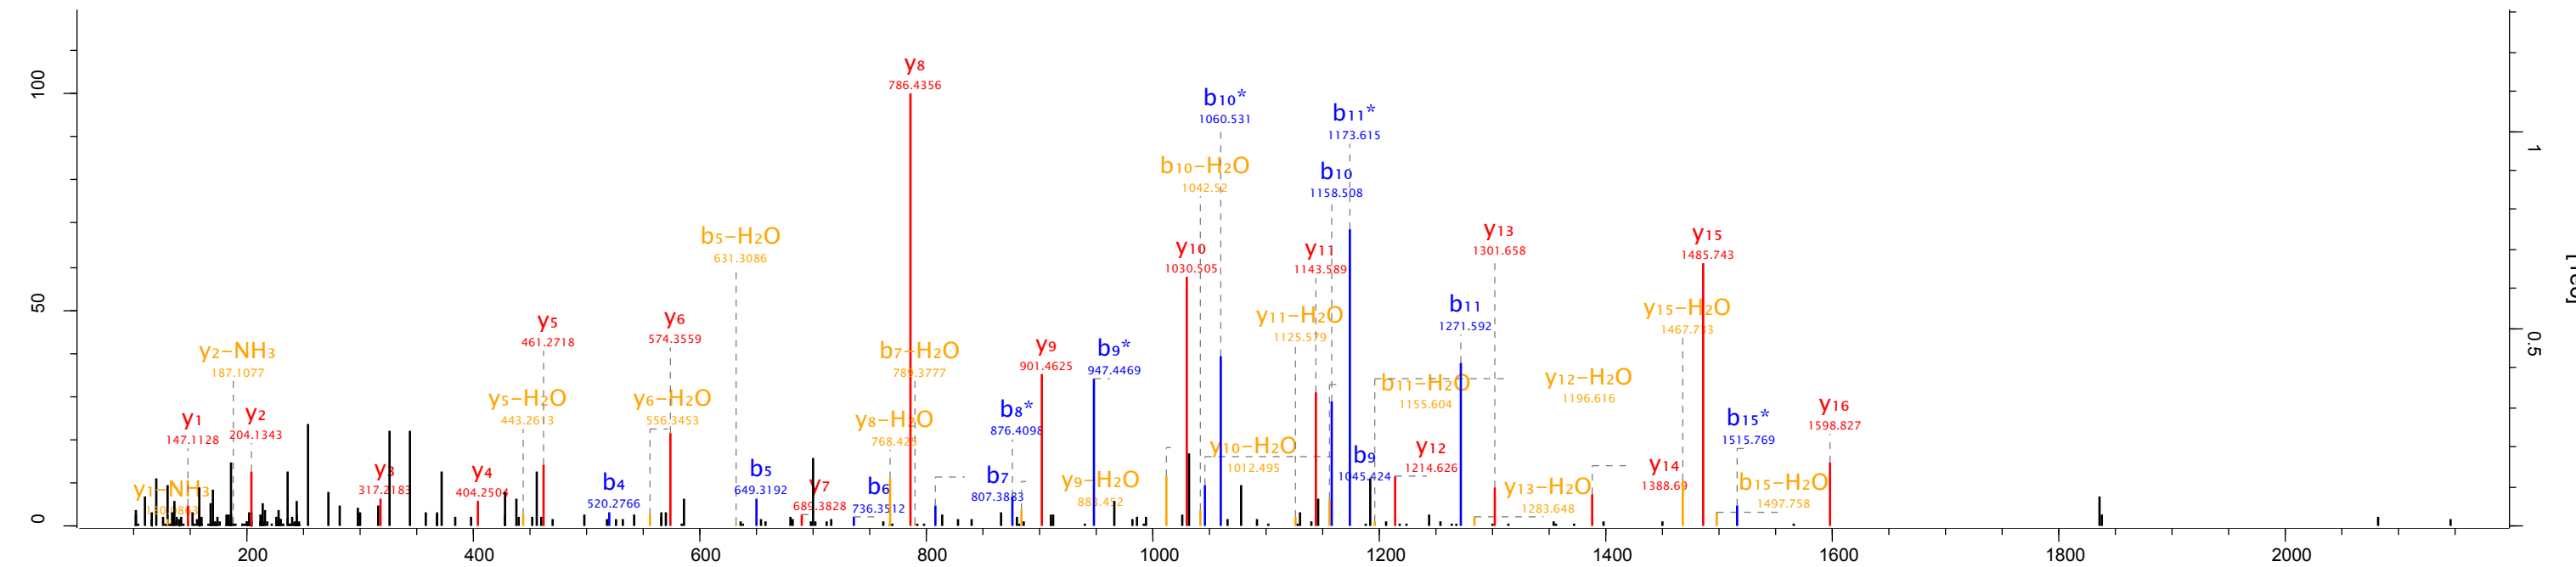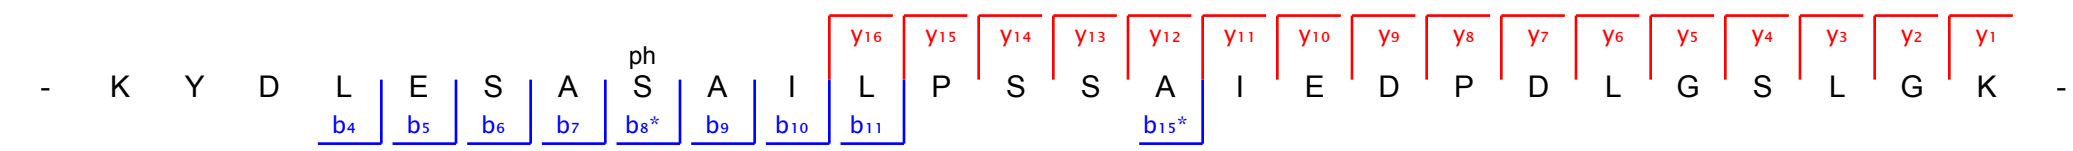

Raw file: 20150814\_A375SR\_Phospho\_BR2\_04  
 Scan: 26160 Method: FTMS; HCD Score: 45.27 m/z: 1083.2 Gene names: MAP4

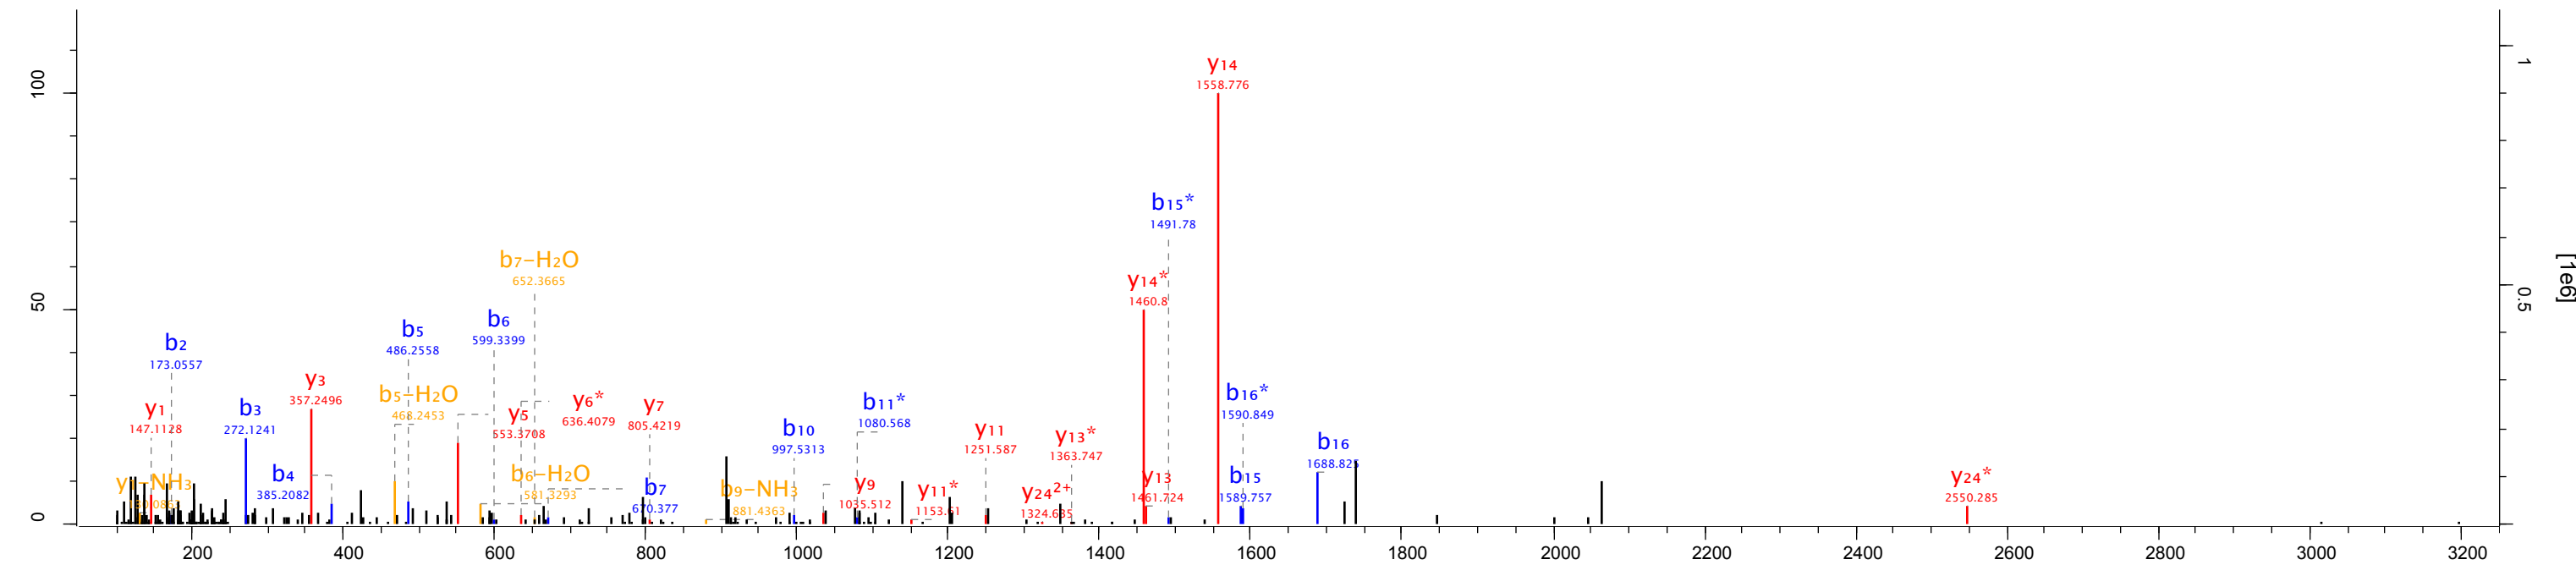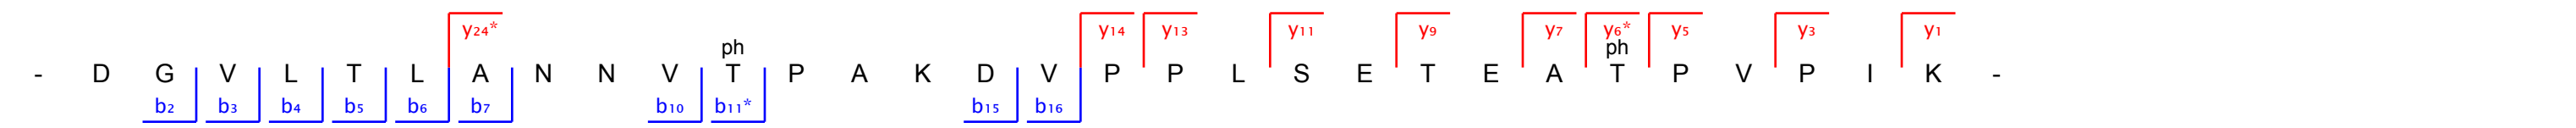

Raw file: 20150814\_A375SR\_Phospho\_BR2\_04  
 Scan: 27410 Method: FTMS; HCD Score: 188.86 m/z: 863.43 Gene names: NCAPD3

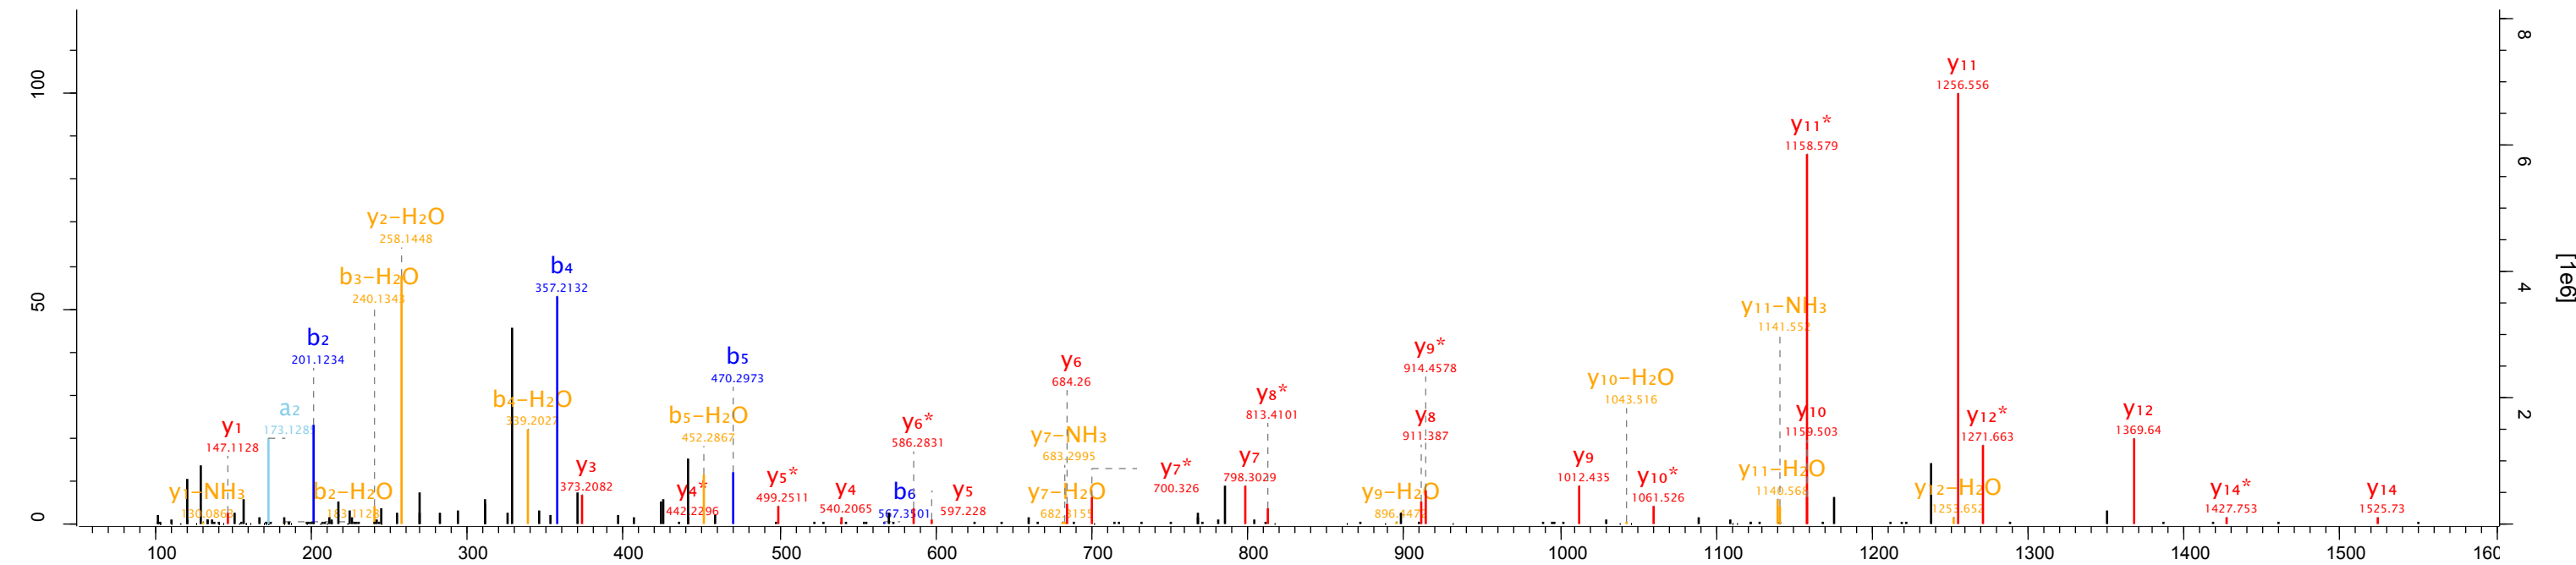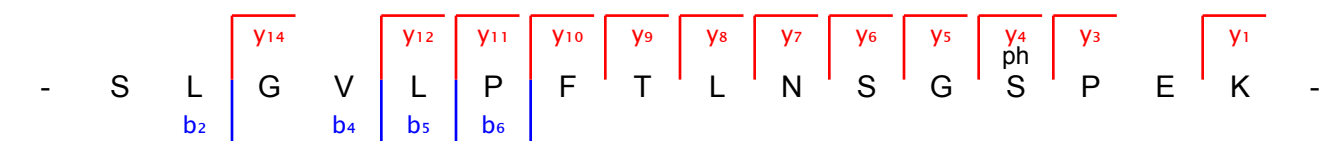



Raw file: 20150814\_A375SR\_Phospho\_BR2\_04  
 Scan: 27820 Method: FTMS; HCD Score: 144.1 m/z: 1465.31 Gene names: SAFB2;SAFB

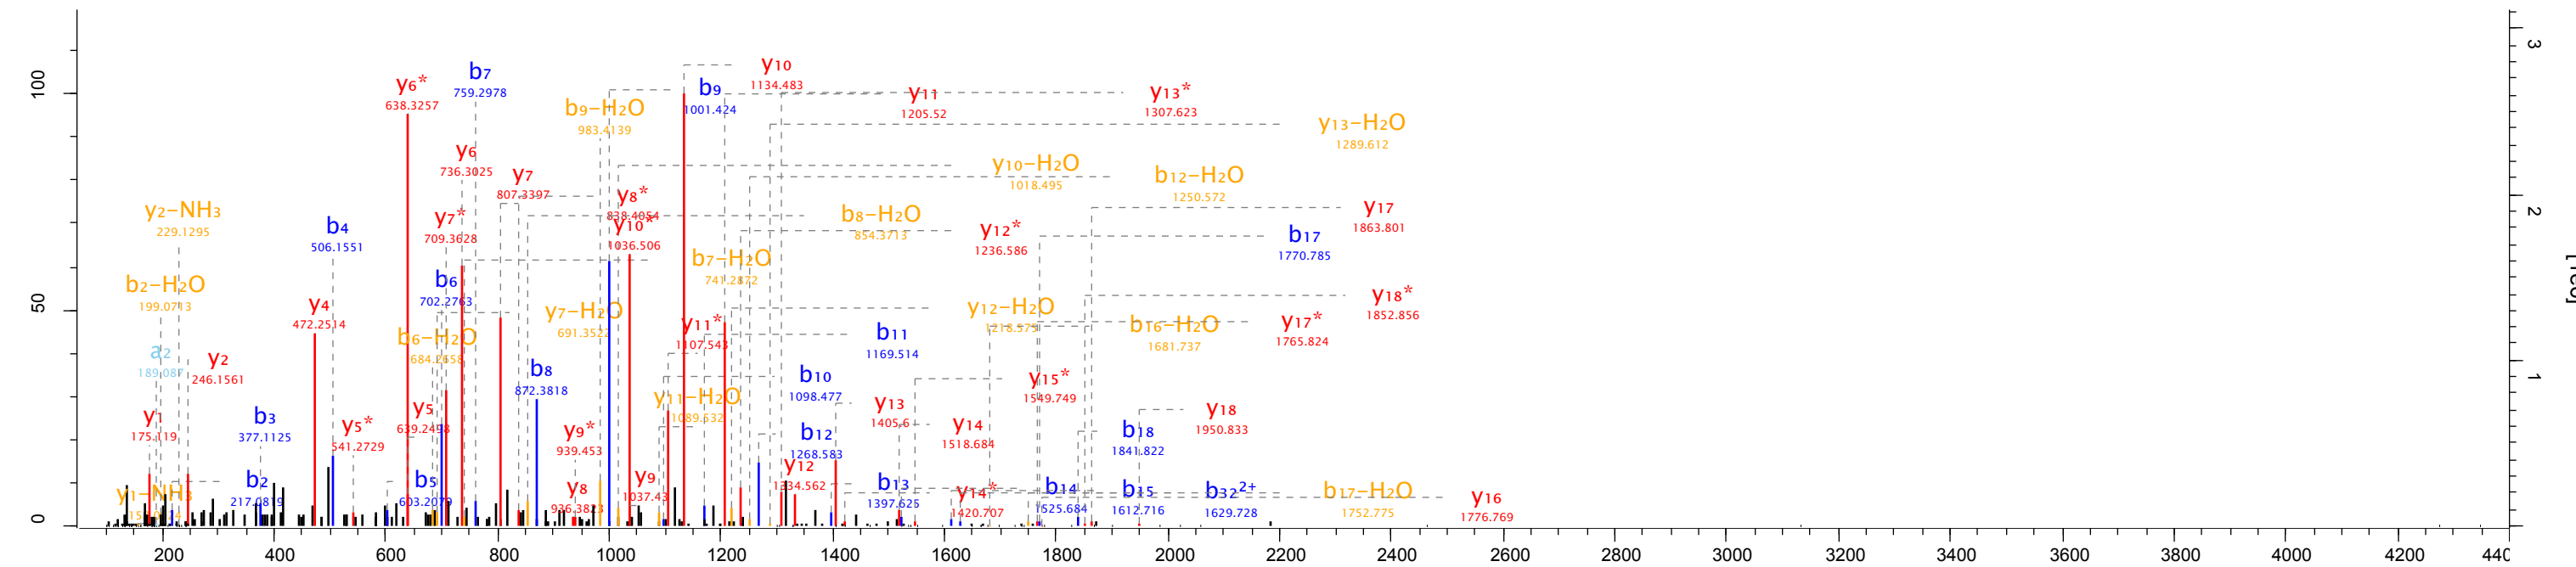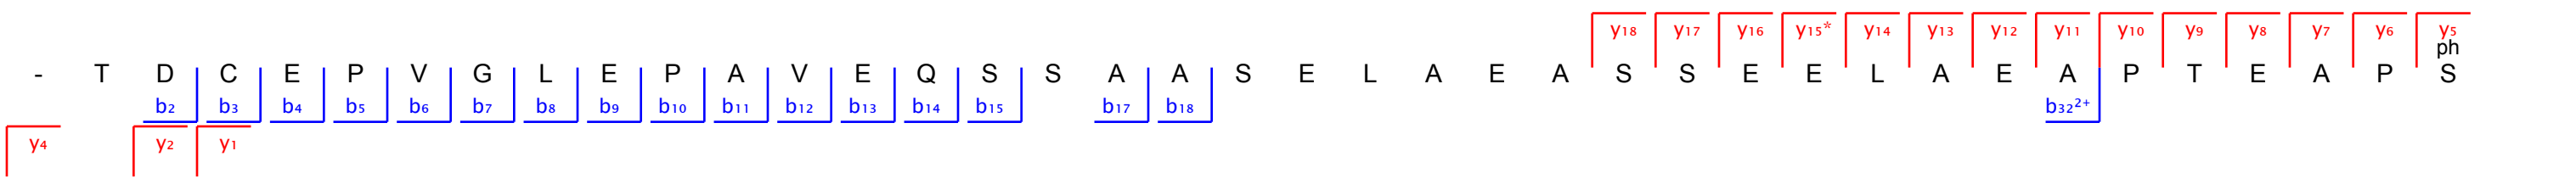

Raw file: 20150814\_A375SR\_Phospho\_BR2\_04  
 Scan: 28010 Method: FTMS; HCD Score: 55.64 m/z: 1065.36 Gene names: UTP14A

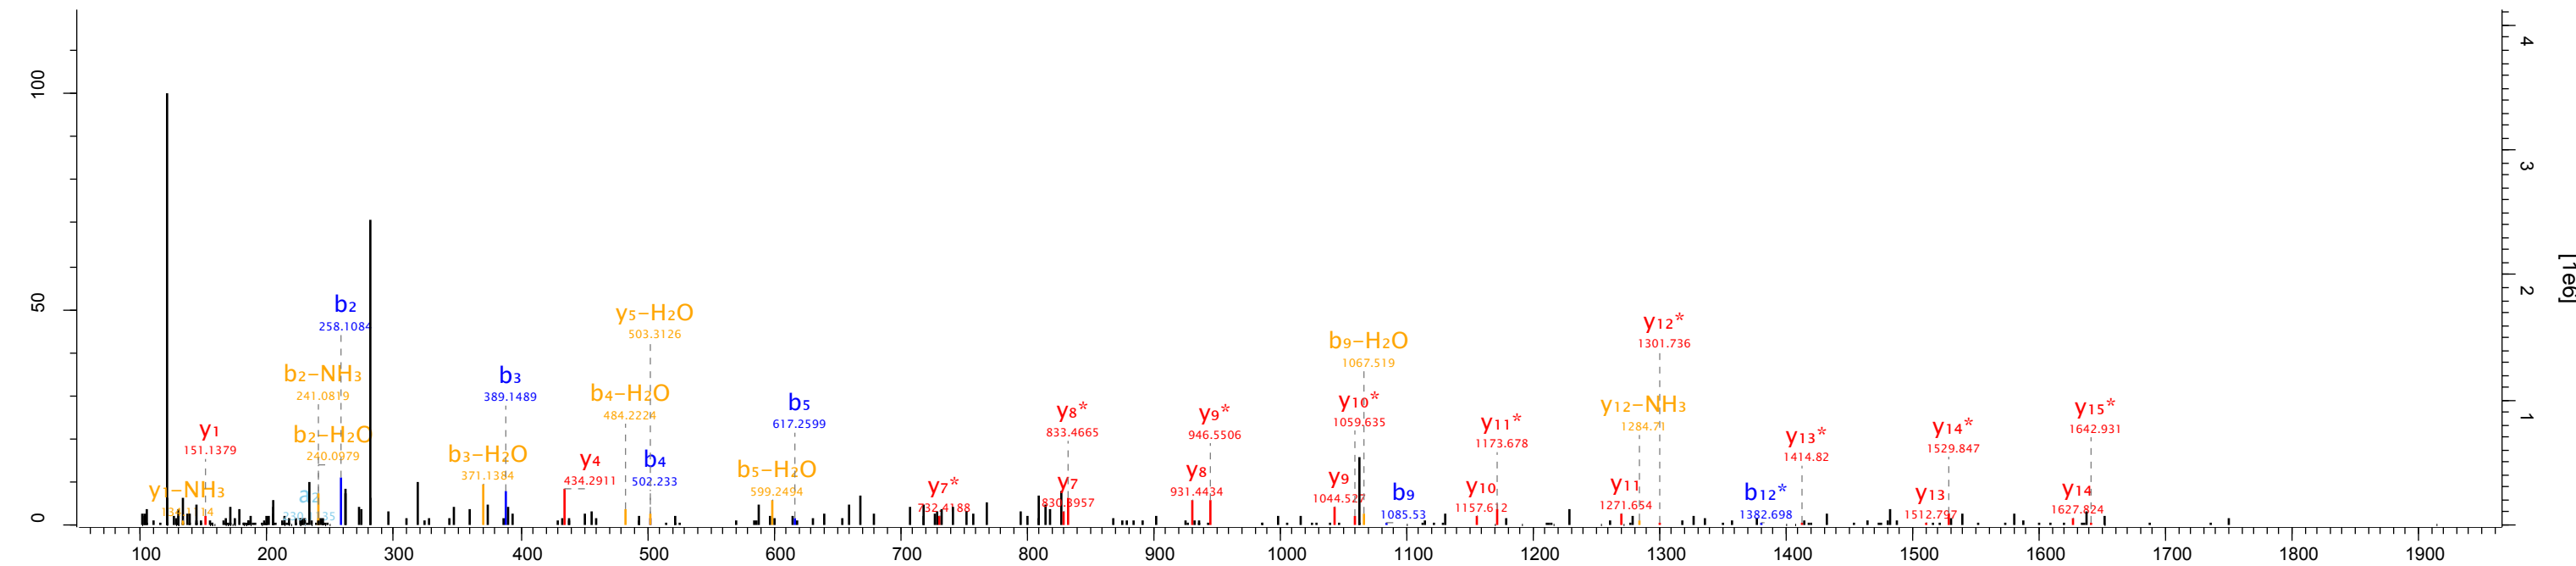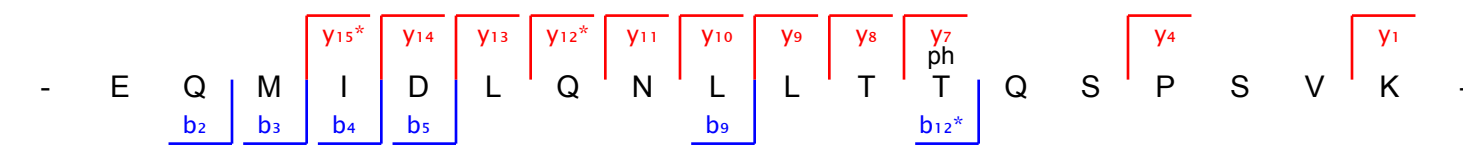

Raw file 20150814\_A375SR\_Phospho\_BR2\_04 Scan 28130 Method FTMS; HCD Score 198.33 m/z 1141.54 Gene names GTF2I

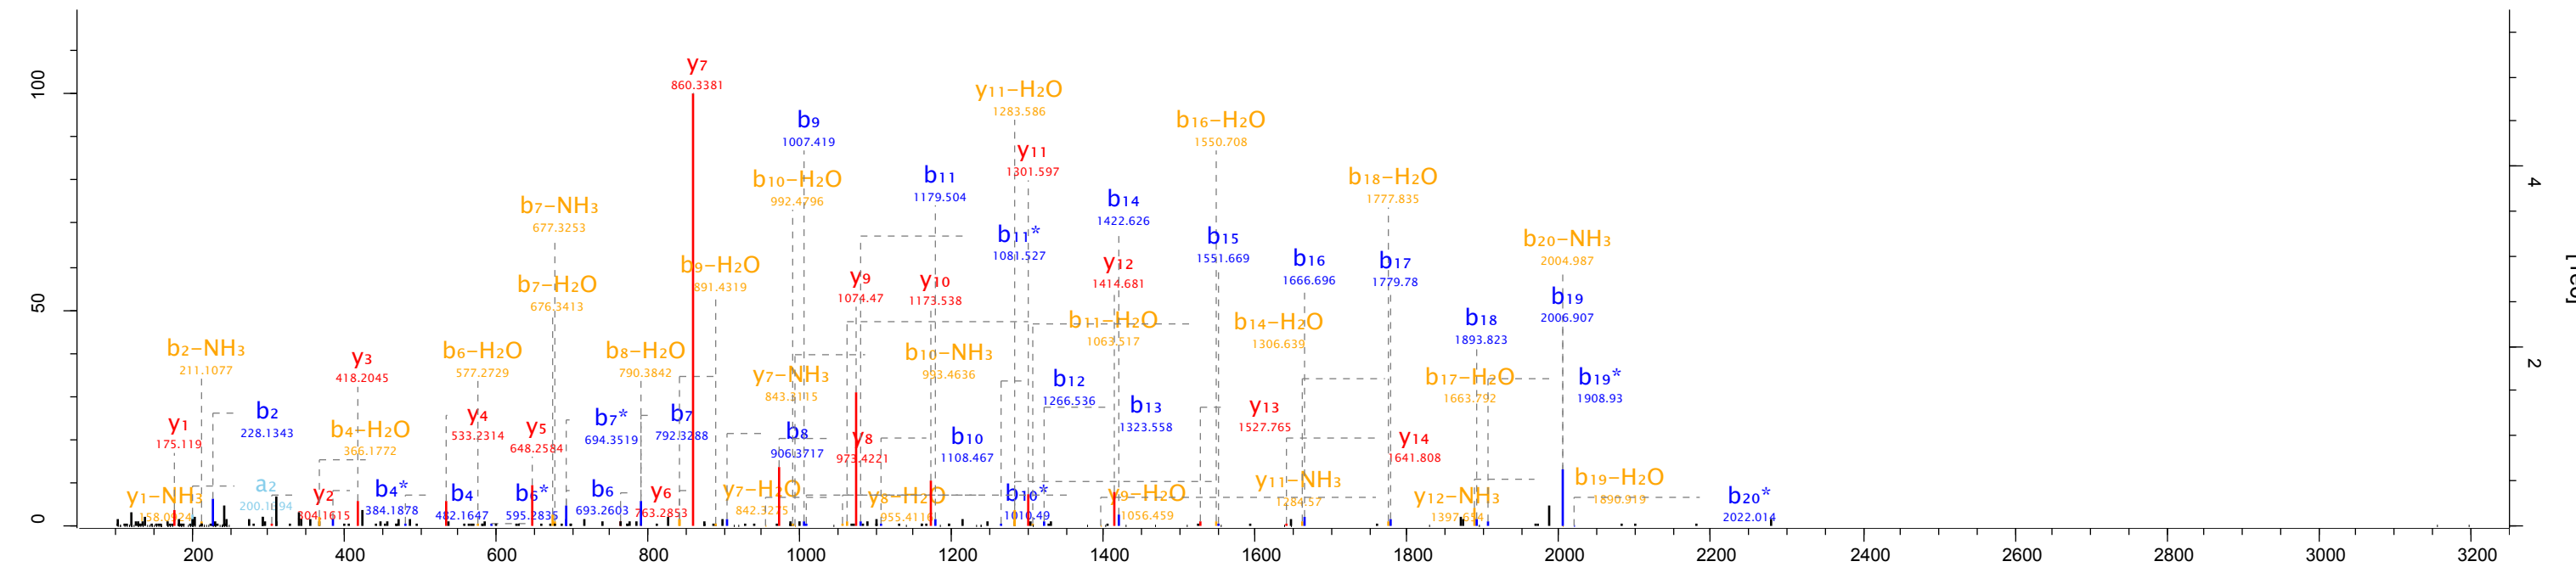

- I N S S P N V N T T A S G V E D L N I I Q V T I P D D D N E R -

ph

b<sub>2</sub> b<sub>4</sub> b<sub>6</sub> b<sub>7</sub> b<sub>8</sub> b<sub>9</sub> b<sub>10</sub> b<sub>11</sub> b<sub>12</sub> b<sub>13</sub> b<sub>14</sub> b<sub>15</sub> b<sub>16</sub> b<sub>17</sub> b<sub>18</sub> b<sub>19</sub> b<sub>20</sub>\*

y<sub>14</sub> y<sub>13</sub> y<sub>12</sub> y<sub>11</sub> y<sub>10</sub> y<sub>9</sub> y<sub>8</sub> y<sub>7</sub> y<sub>6</sub> y<sub>5</sub> y<sub>4</sub> y<sub>3</sub> y<sub>2</sub> y<sub>1</sub>

Raw file Scan Method Score m/z Gene names  
 20150814\_A375SR\_Phospho\_BR2\_04 28200 FTMS; HCD 105.71 960.13 CARD10

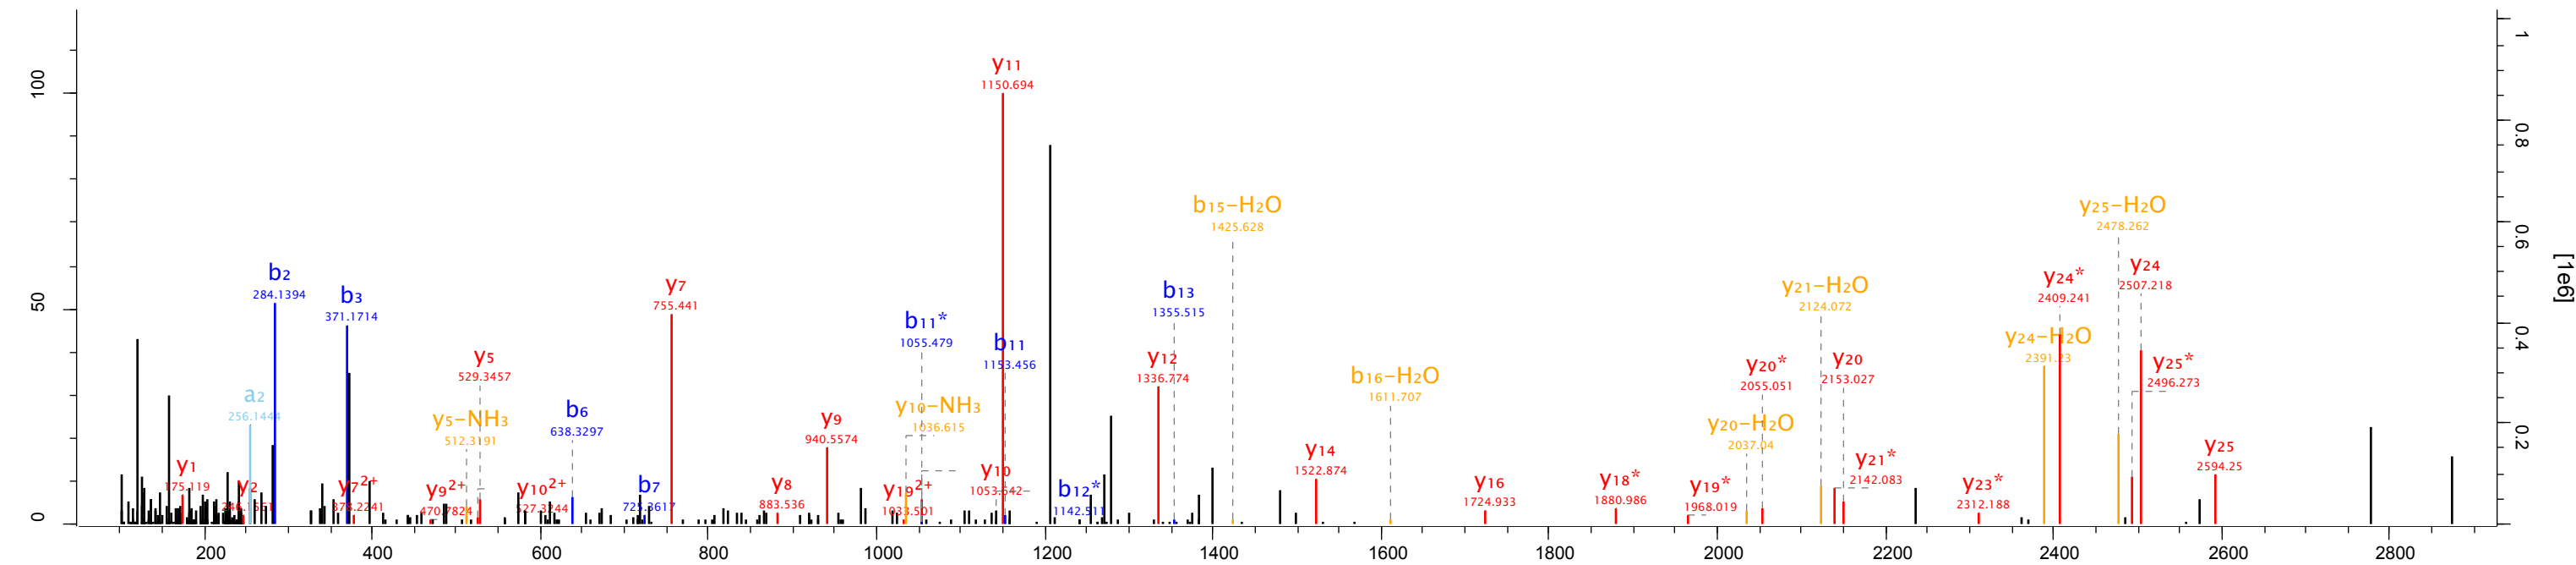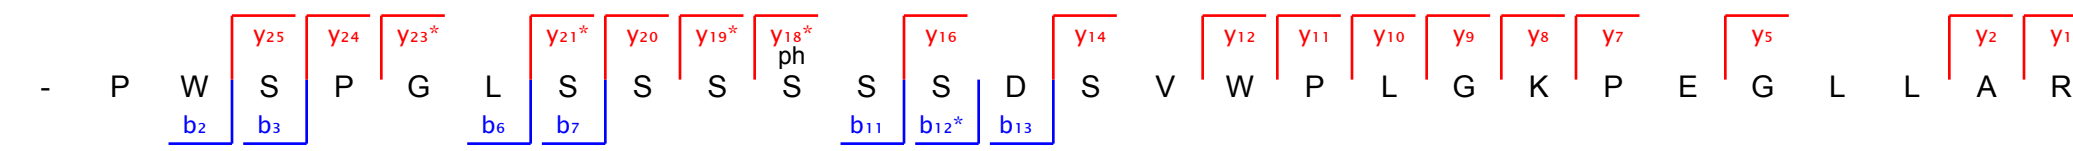

Raw file: 20150814\_A375SR\_Phospho\_BR2\_04  
 Scan: 28230 Method: FTMS; HCD Score: 108.33 m/z: 791.87 Gene names: PKP2

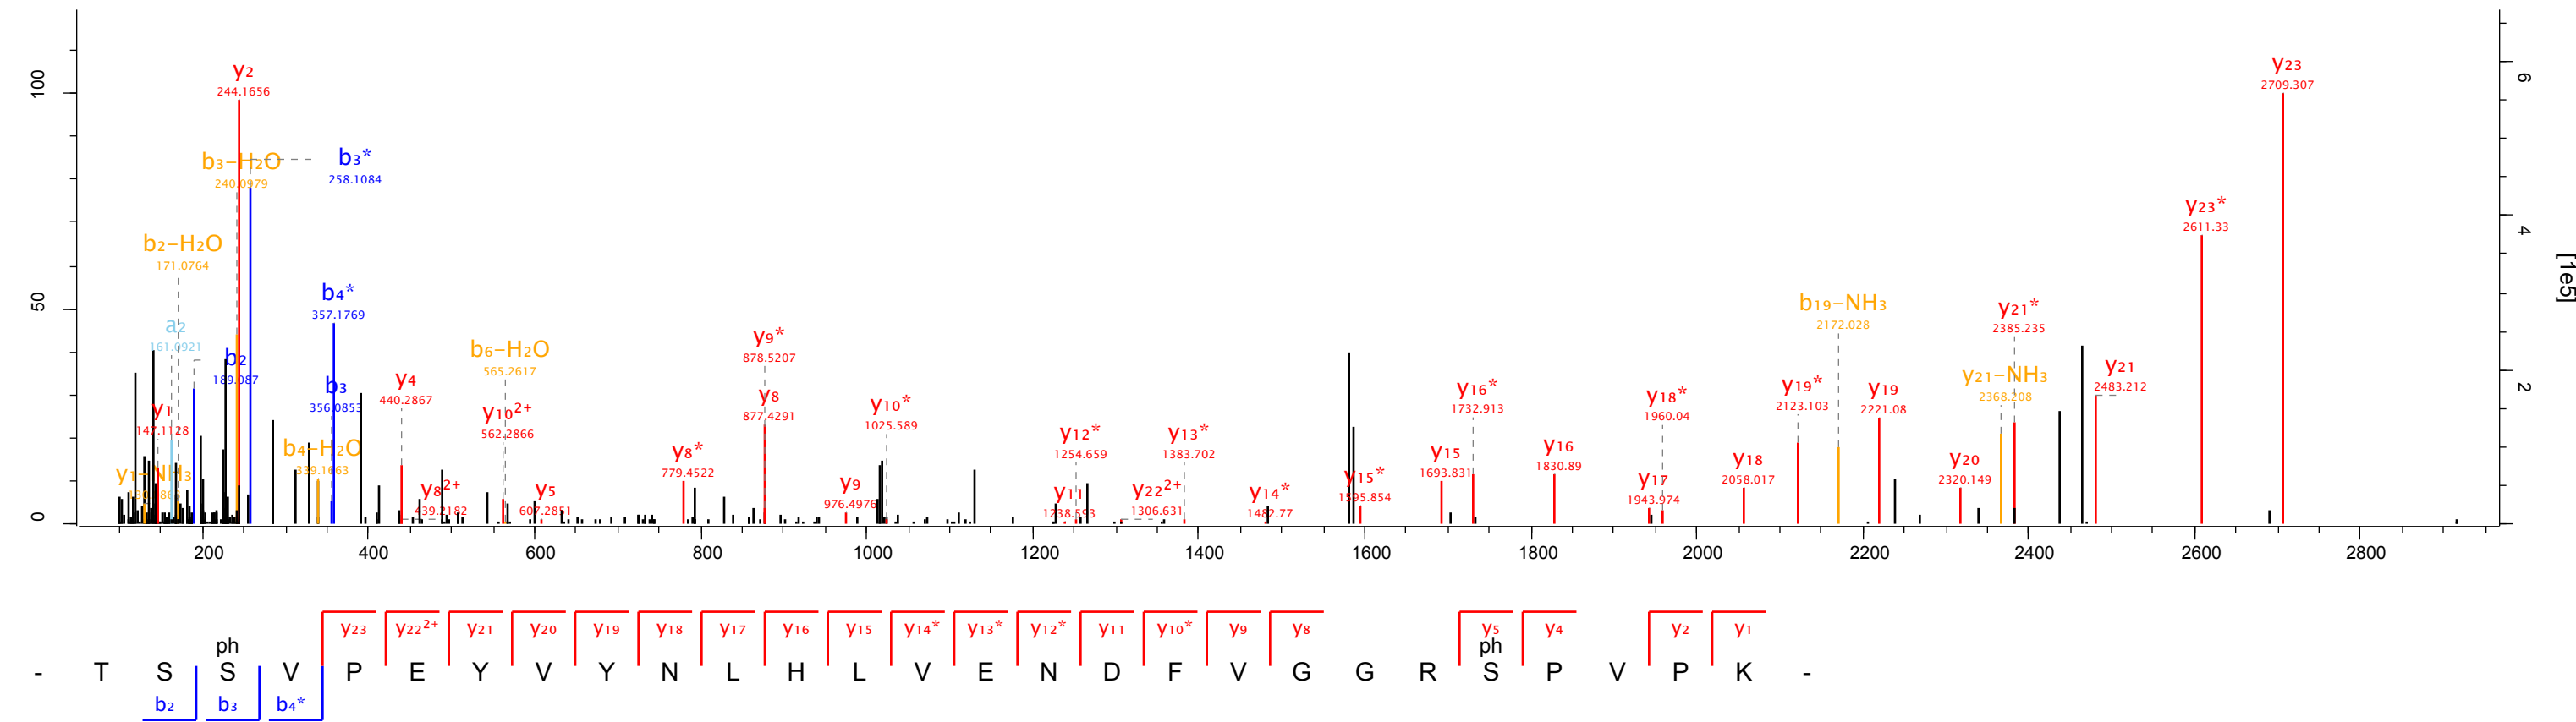

Raw file  
20150814\_A375SR\_Phospho\_BR2\_04

Scan 28280 Method FTMS; HCD Score 92.68 m/z 1440.05 Gene names ATXN2

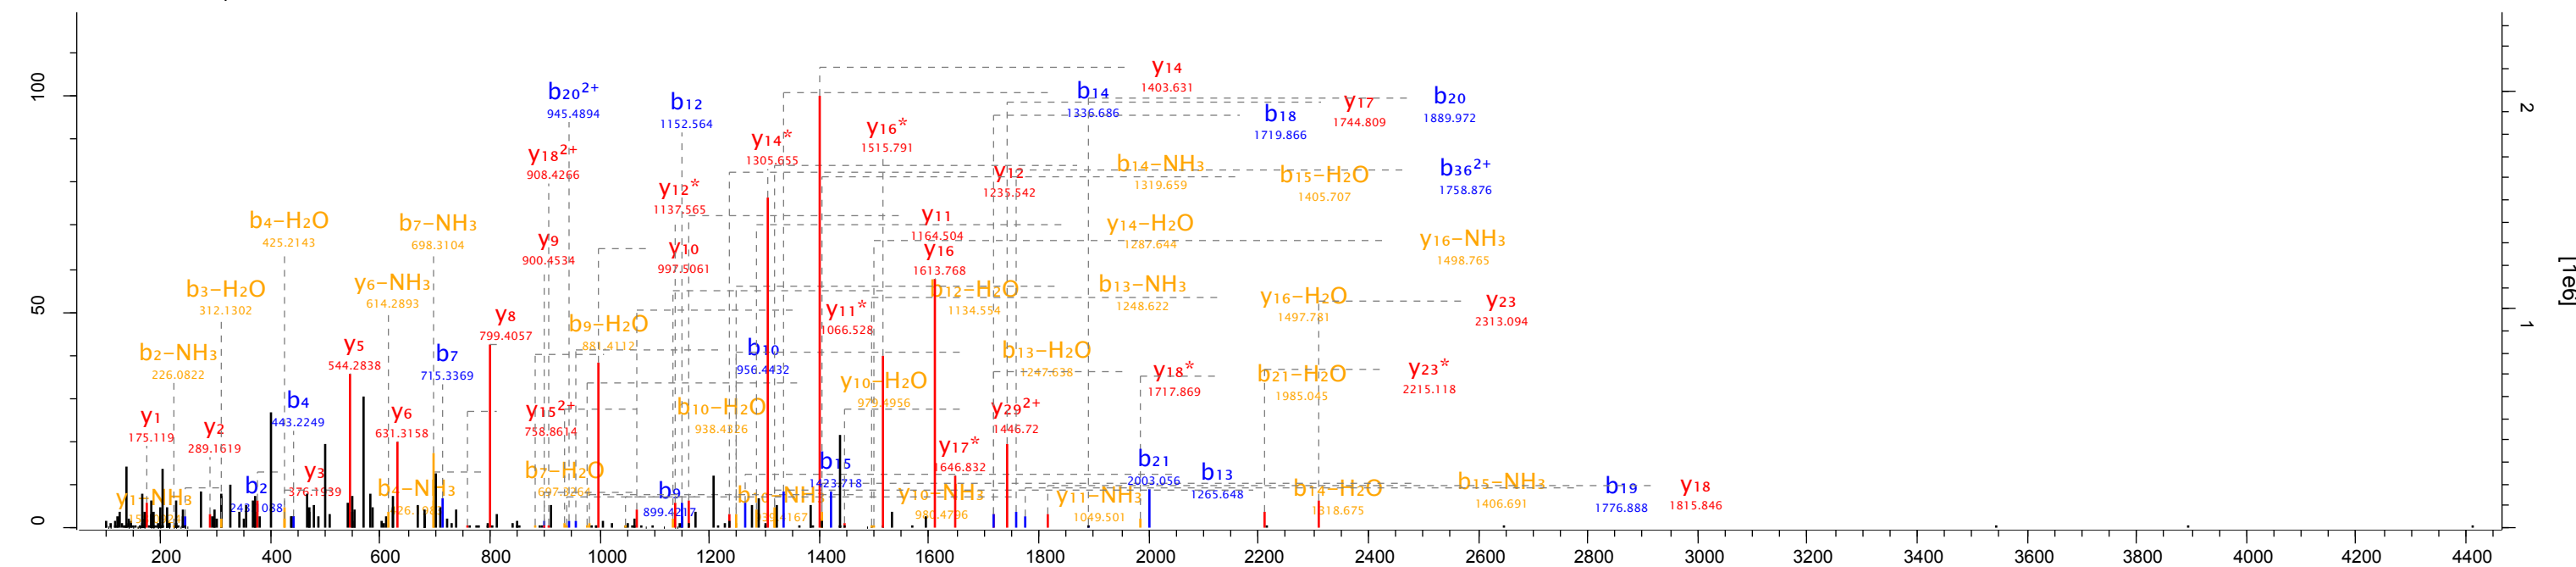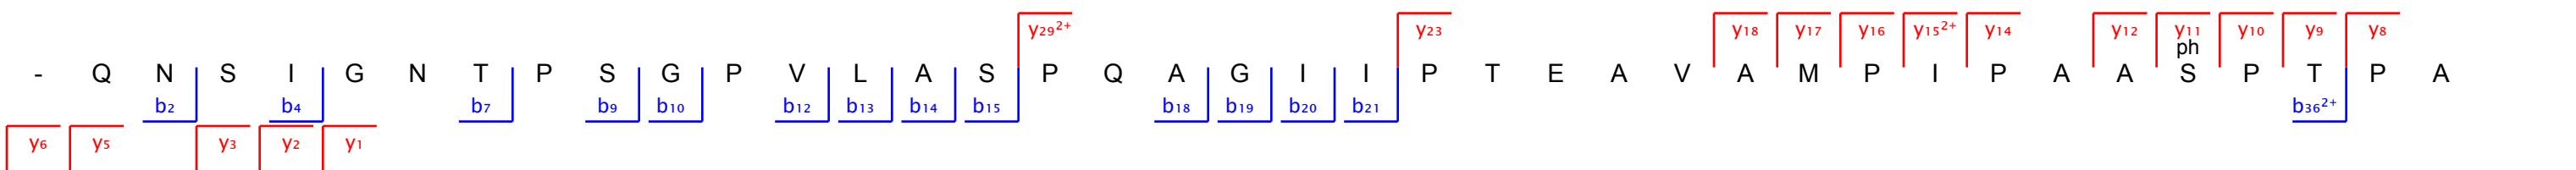

Raw file: 20150814\_A375SR\_Phospho\_BR2\_04  
 Scan: 28290 Method: FTMS; HCD Score: 135.23 m/z: 1011.45 Gene names: GSDMD

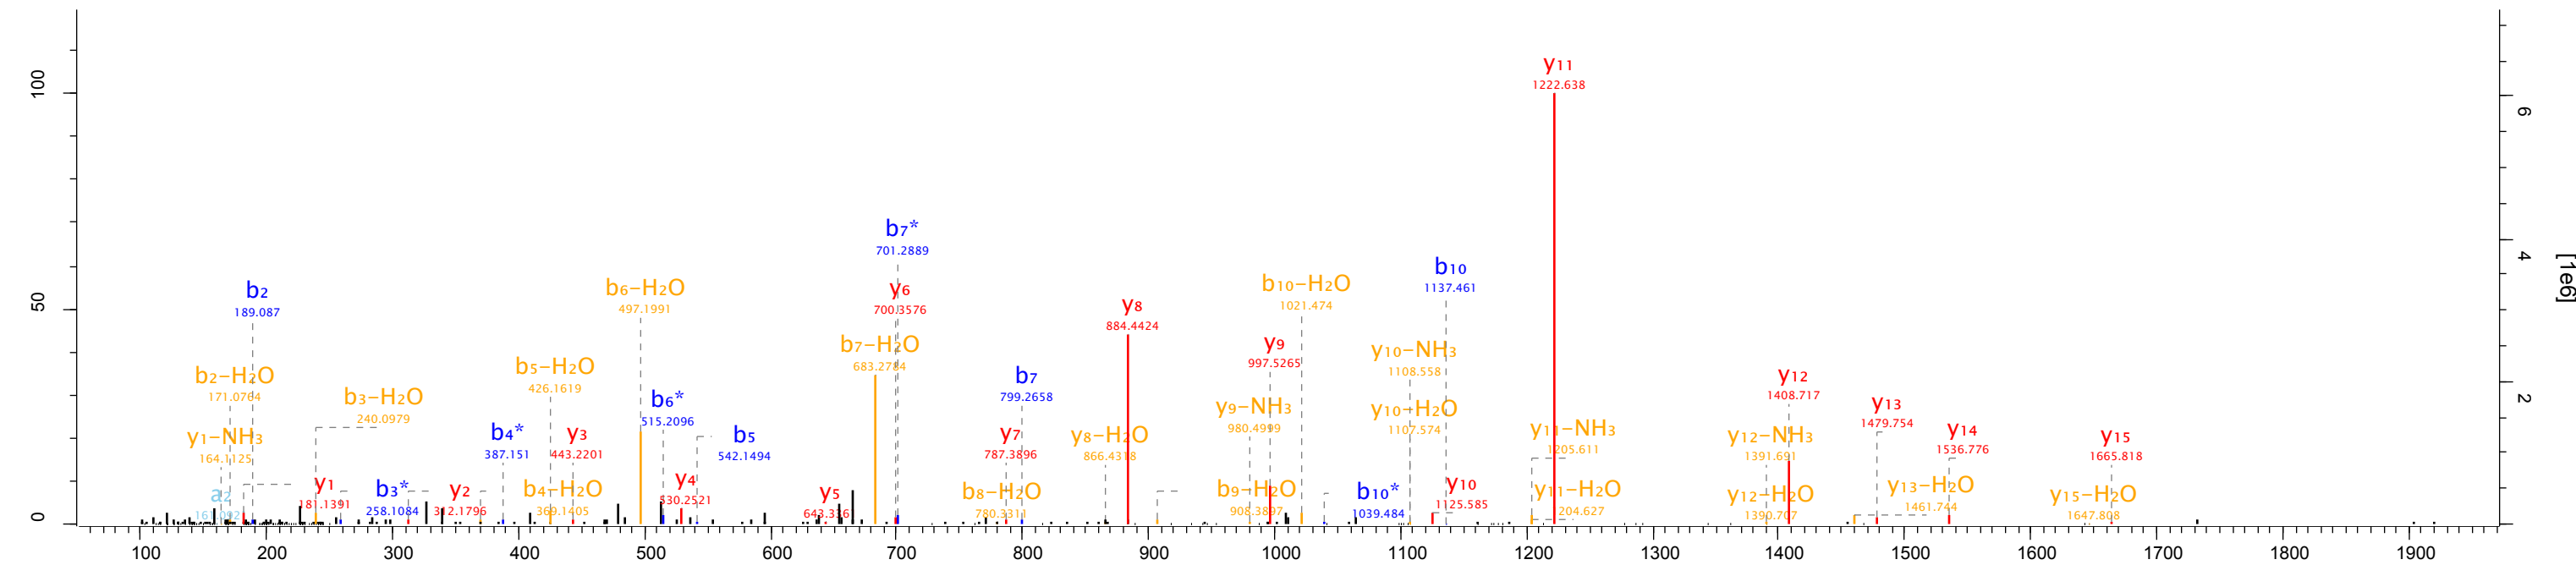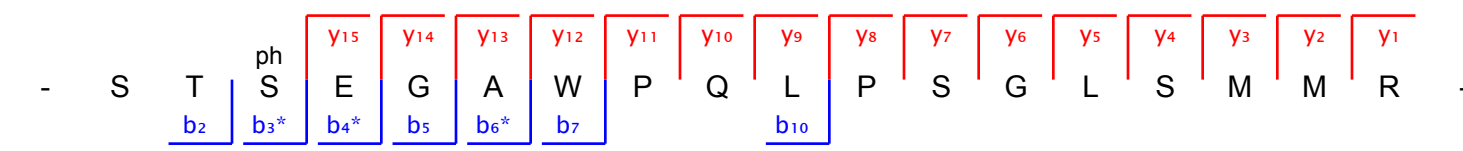

Raw file 20150814\_A375SR\_Phospho\_BR2\_04 Scan 28340 Method FTMS; HCD Score 108.14 m/z 818.38 Gene names RAPH1

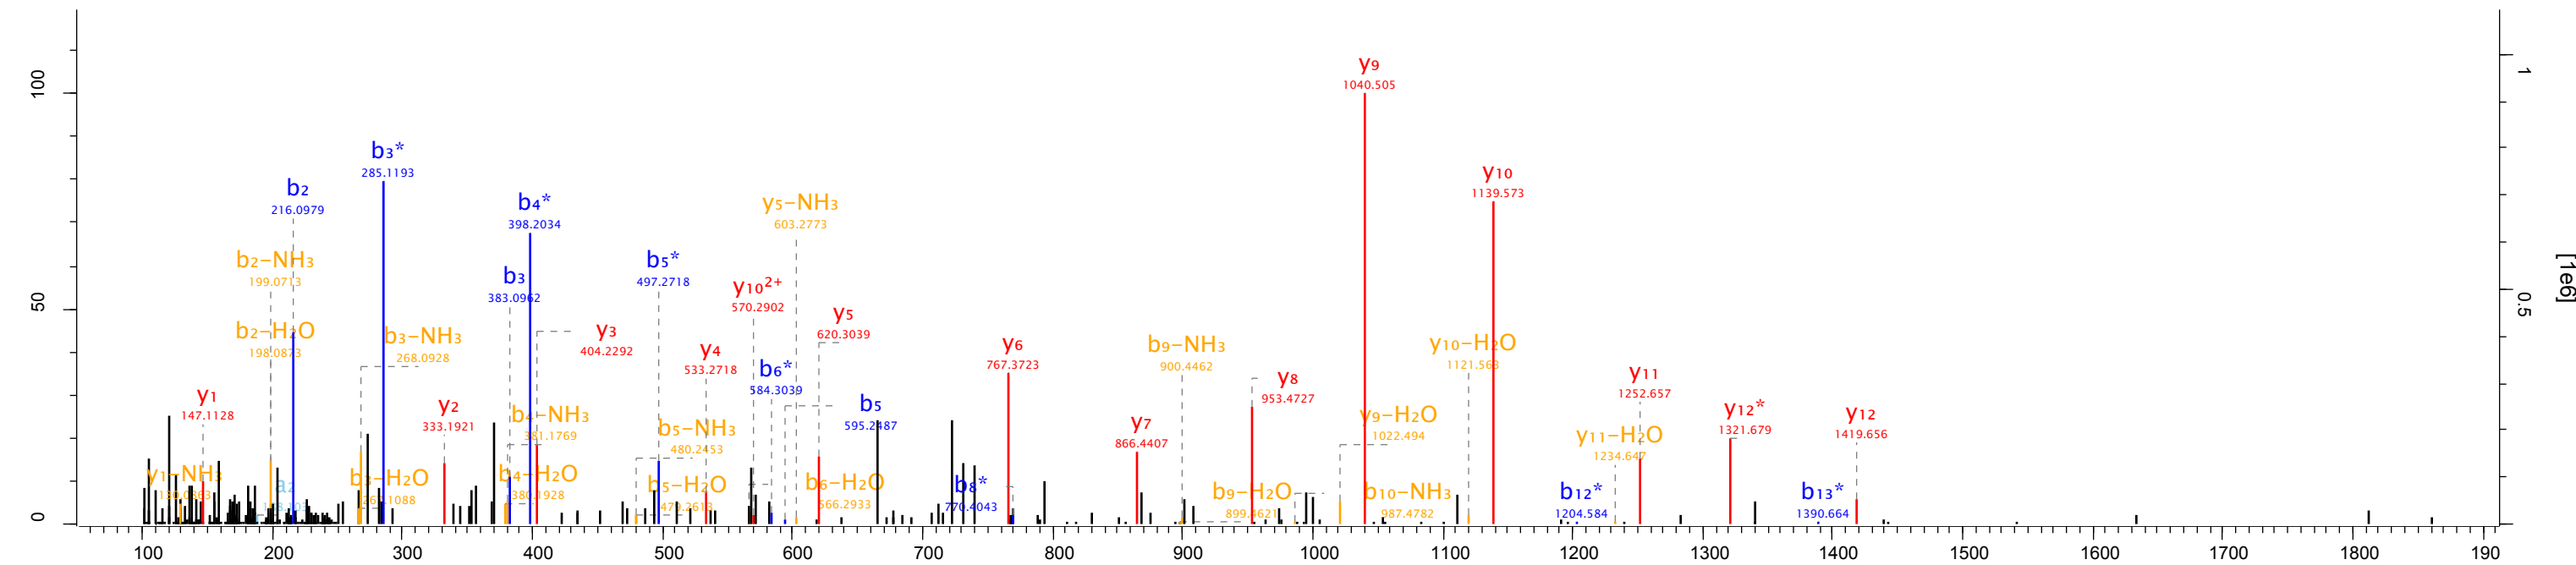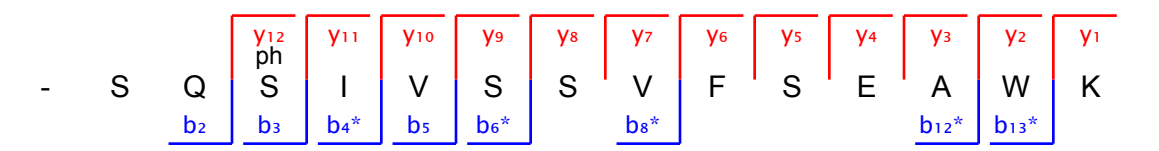



Raw file: 20150814\_A375SR\_Phospho\_BR2\_04  
 Scan: 28870 Method: FTMS; HCD Score: 75.88 m/z: 1049.48 Gene names: N6AMT2

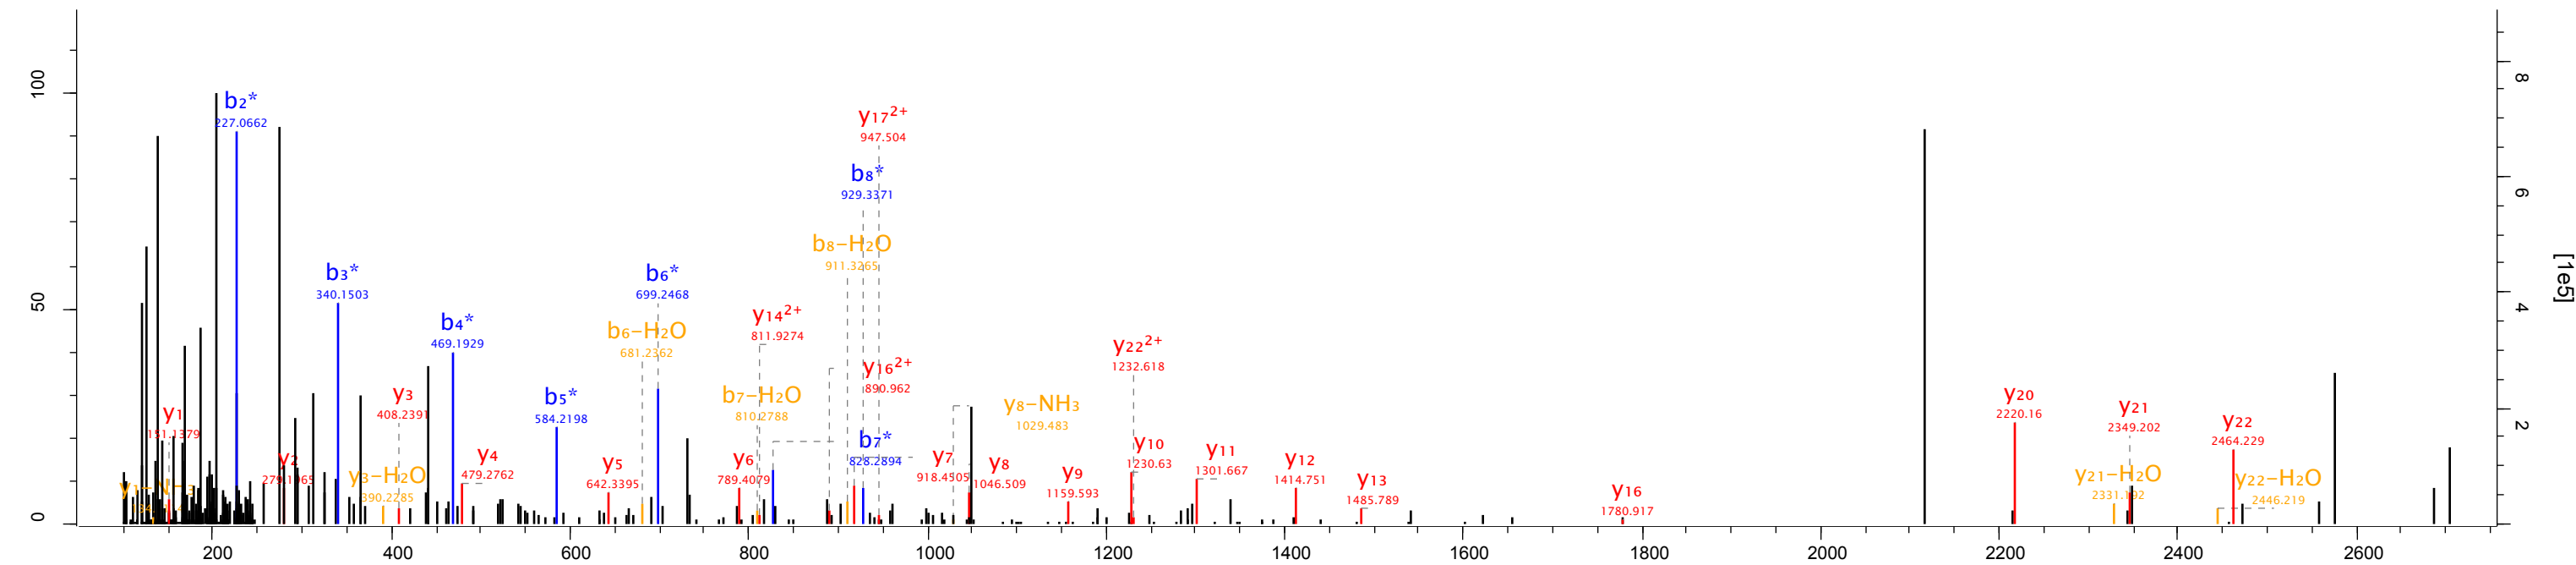

ac - ph S D L E D D E T P Q L S A H A L A A L Q E F Y A E Q K -

Fragmentation mapping (b and y ions):

- b<sub>2</sub><sup>\*</sup>** (D)
- b<sub>3</sub><sup>\*</sup>** (L)
- b<sub>4</sub><sup>\*</sup>** (E)
- b<sub>5</sub><sup>\*</sup>** (D)
- b<sub>6</sub><sup>\*</sup>** (D)
- b<sub>7</sub><sup>\*</sup>** (E)
- b<sub>8</sub><sup>\*</sup>** (T)
- y<sub>22</sub>** (D)
- y<sub>21</sub>** (E)
- y<sub>20</sub>** (T)
- y<sub>17</sub>**<sup>2+</sup> (L)
- y<sub>16</sub>** (S)
- y<sub>14</sub>**<sup>2+</sup> (A)
- y<sub>13</sub>** (H)
- y<sub>12</sub>** (A)
- y<sub>11</sub>** (L)
- y<sub>10</sub>** (A)
- y<sub>9</sub>** (A)
- y<sub>8</sub>** (L)
- y<sub>7</sub>** (Q)
- y<sub>6</sub>** (E)
- y<sub>5</sub>** (F)
- y<sub>4</sub>** (Y)
- y<sub>3</sub>** (A)
- y<sub>2</sub>** (E)
- y<sub>1</sub>** (Q)

Raw file: 20150814\_A375SR\_Phospho\_BR2\_04  
 Scan: 28880 Method: FTMS; HCD Score: 101.34 m/z: 1256.57 Gene names: RBM6

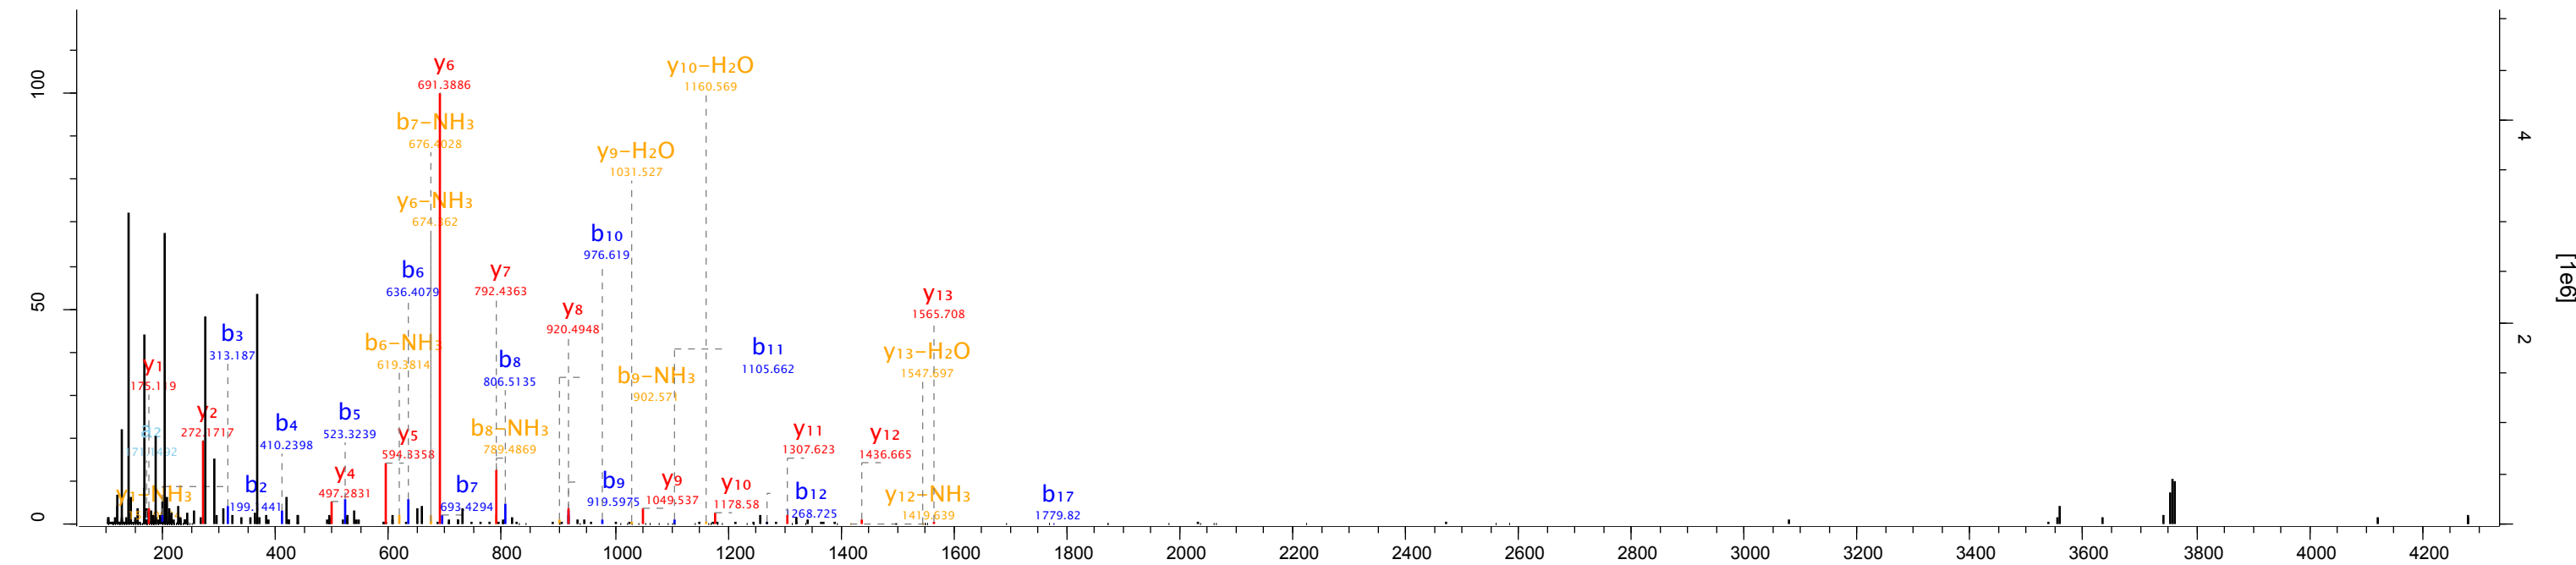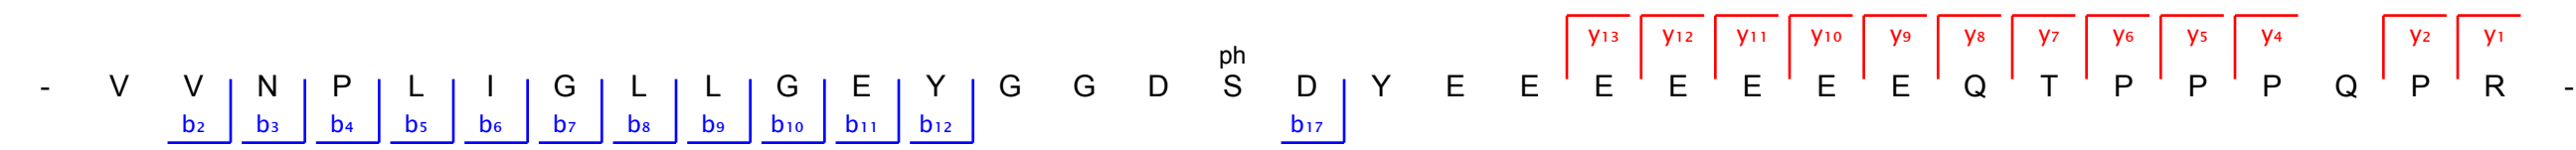

Raw file: 20150814\_A375SR\_Phospho\_BR2\_04  
 Scan: 3160 Method: FTMS; HCD Score: 109.96 m/z: 568.27 Gene names: ZC3H13

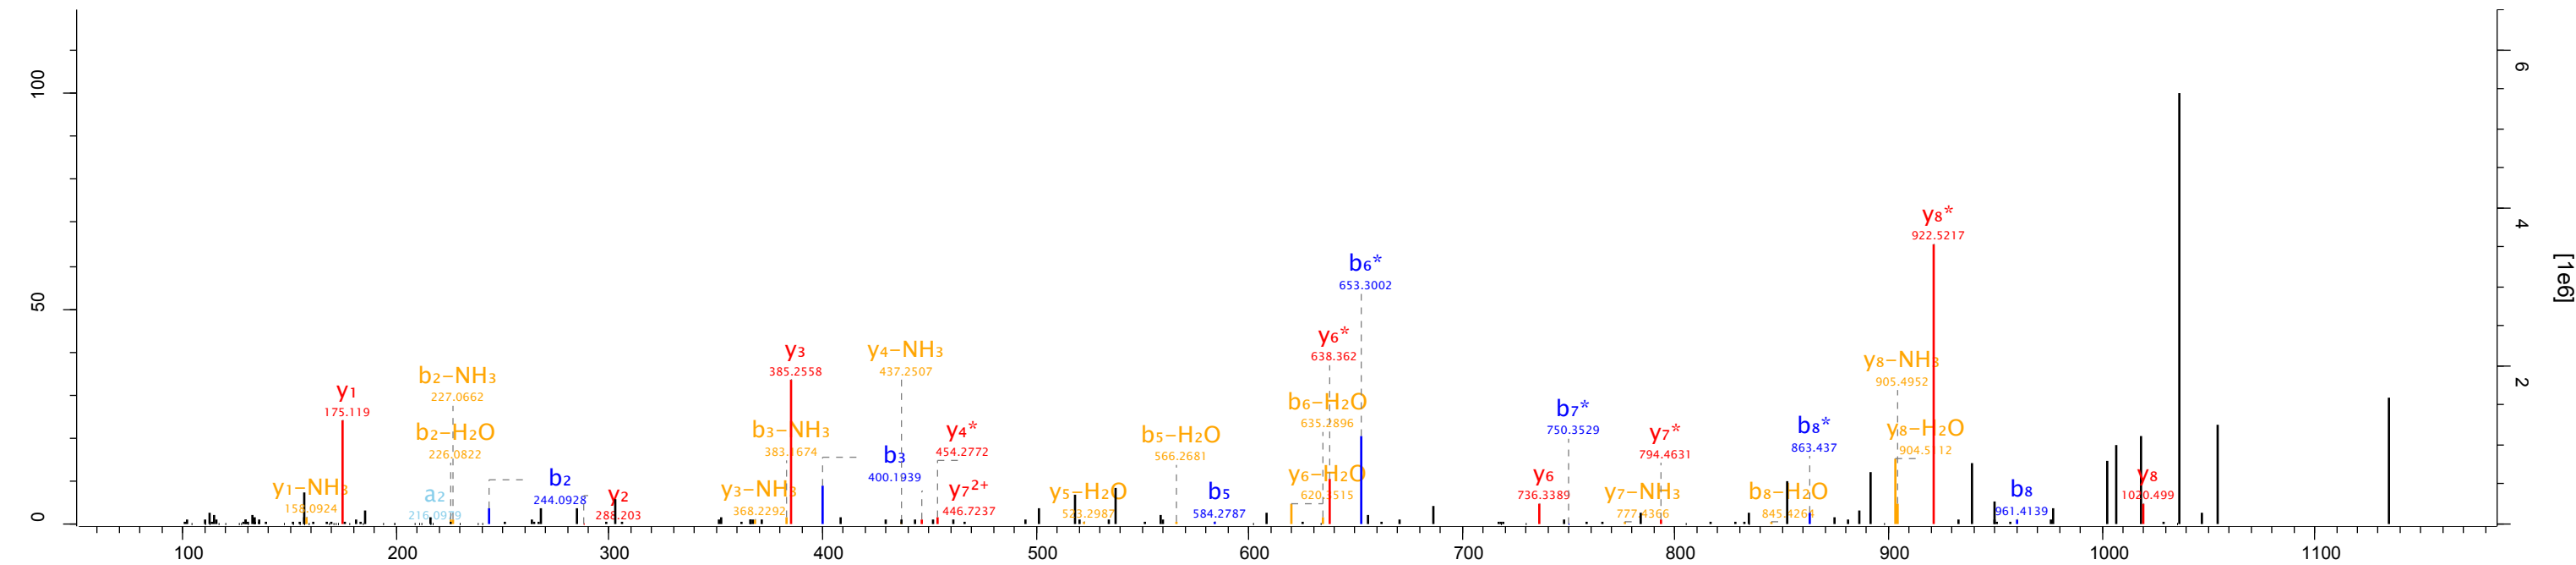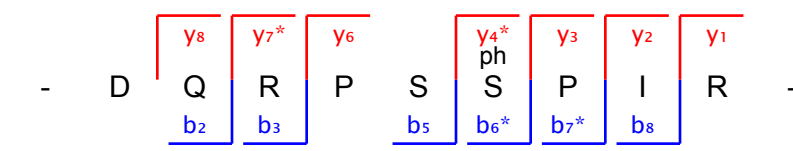

Raw file: 20150814\_A375SR\_Phospho\_BR2\_04  
 Scan: 3310 Method: FTMS; HCD Score: 143.28 m/z: 461.23 Gene names: PHIP

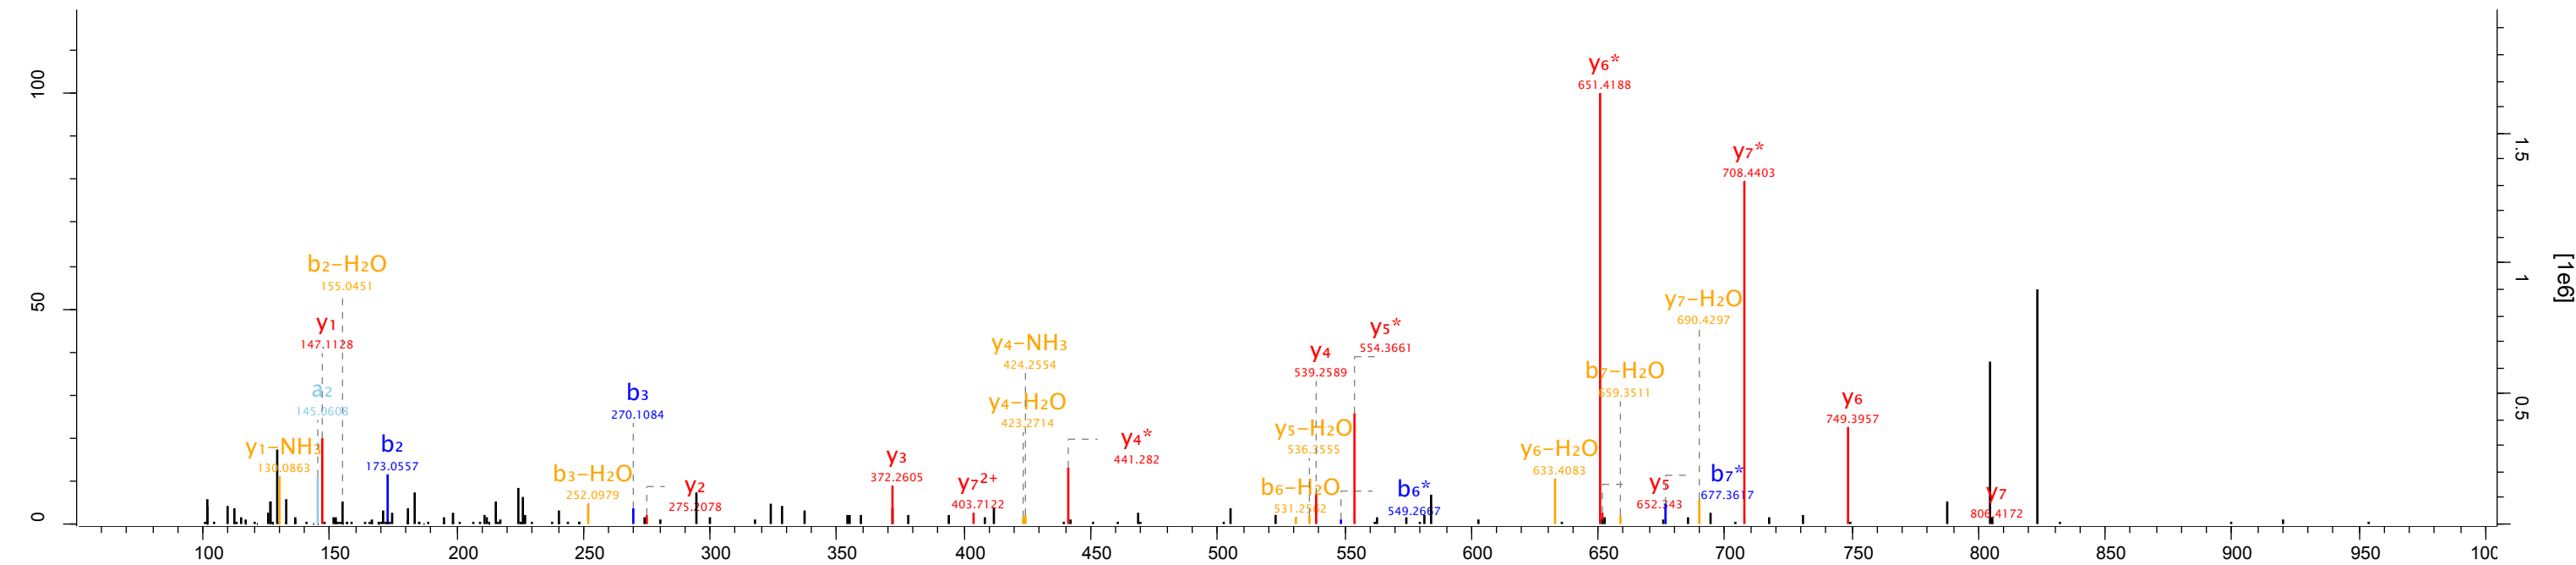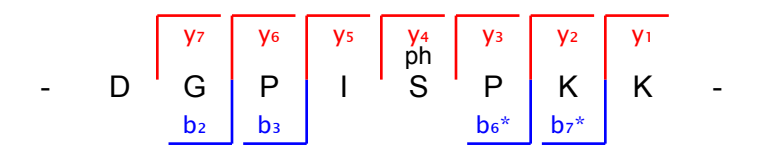

Raw file: 20150814\_A375SR\_Phospho\_BR2\_04  
 Scan: 3320 Method: FTMS; HCD Score: 145.71 m/z: 813.33 Gene names: DLG1

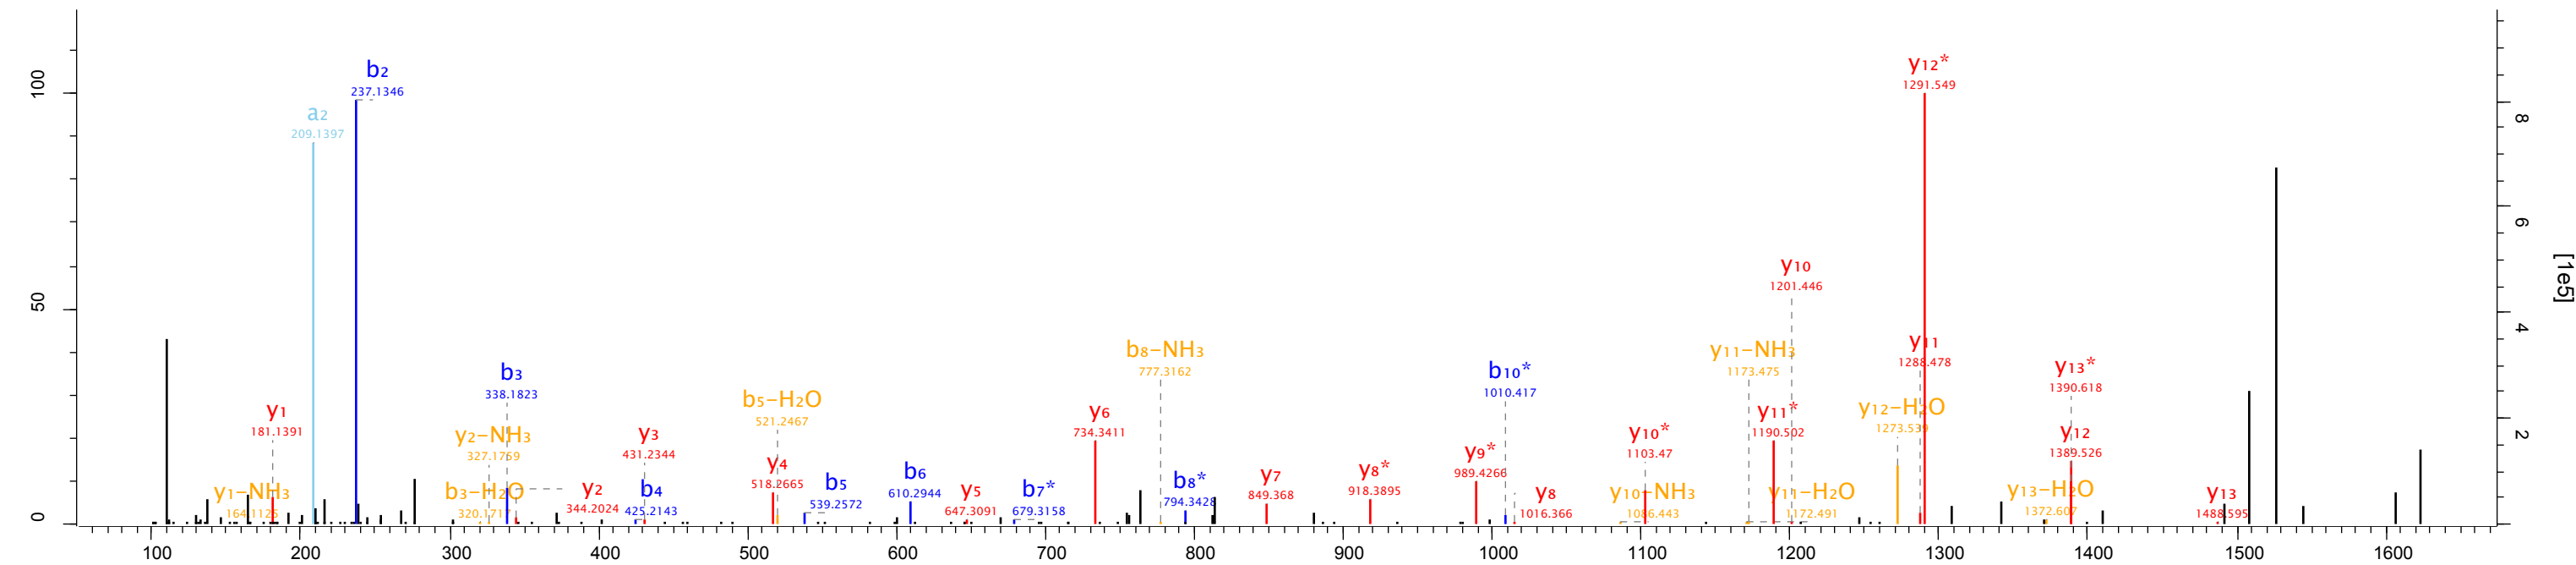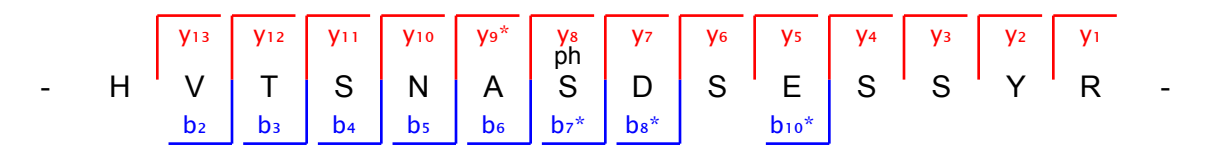

Raw file: 20150814\_A375SR\_Phospho\_BR2\_04  
 Scan: 3400 Method: FTMS; HCD Score: 99.57 m/z: 631.28 Gene names: DTL

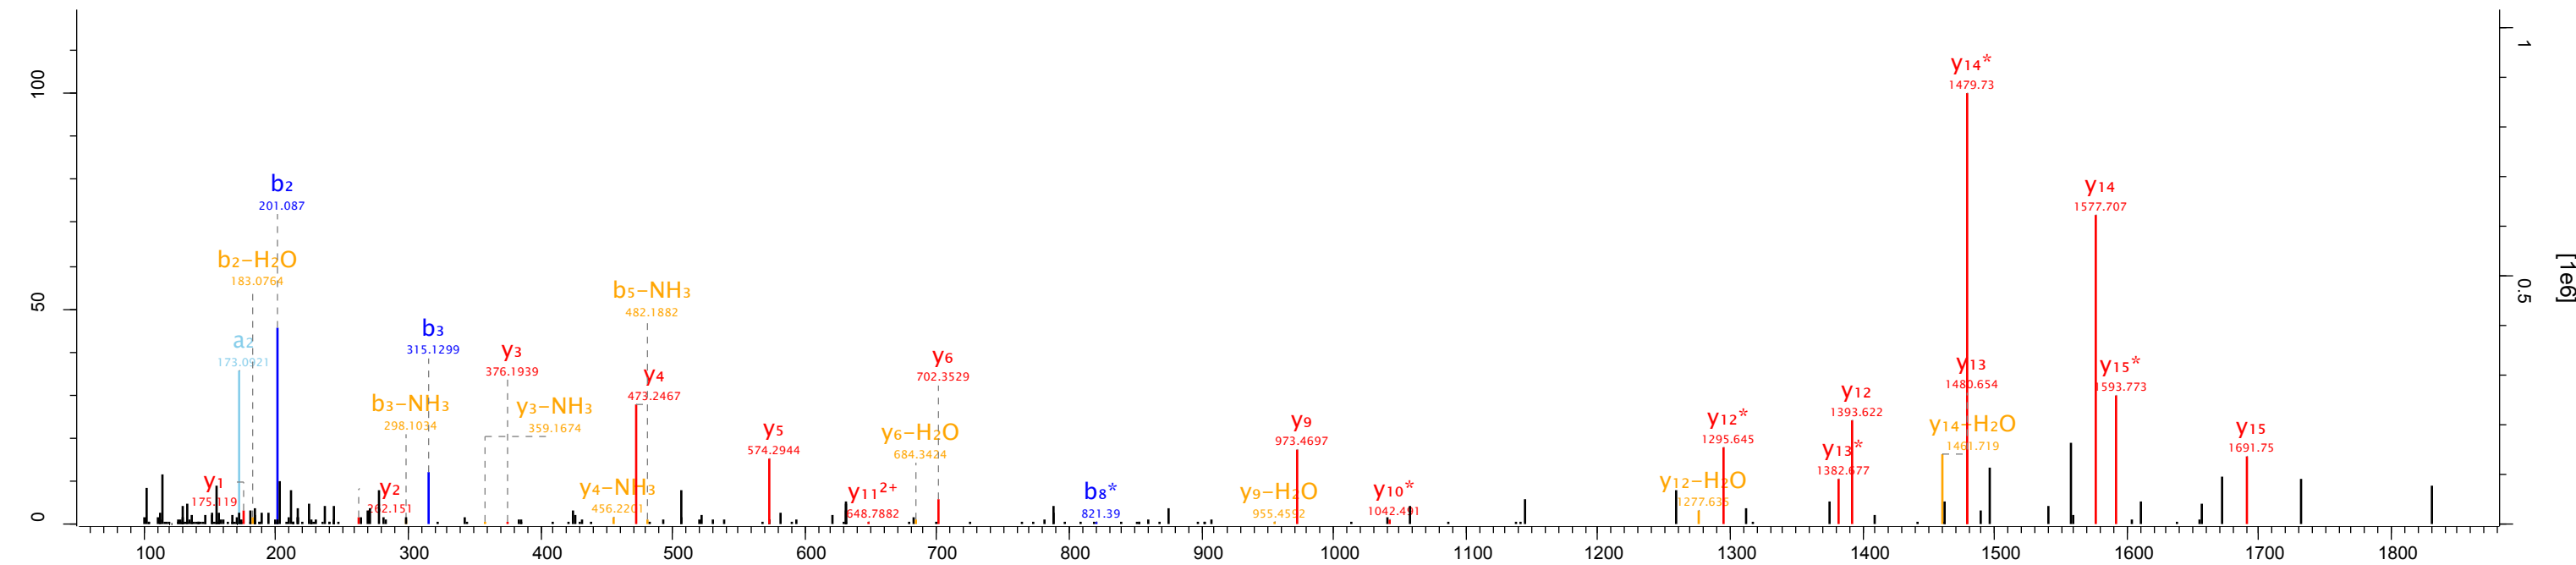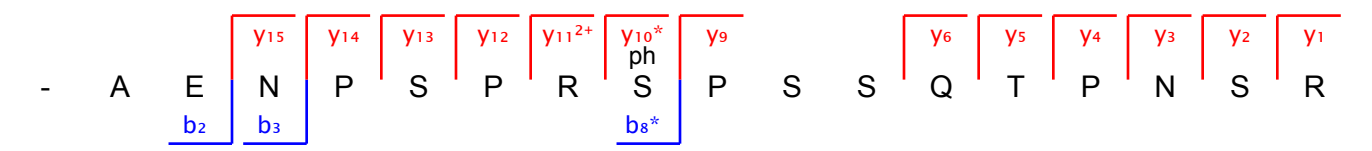

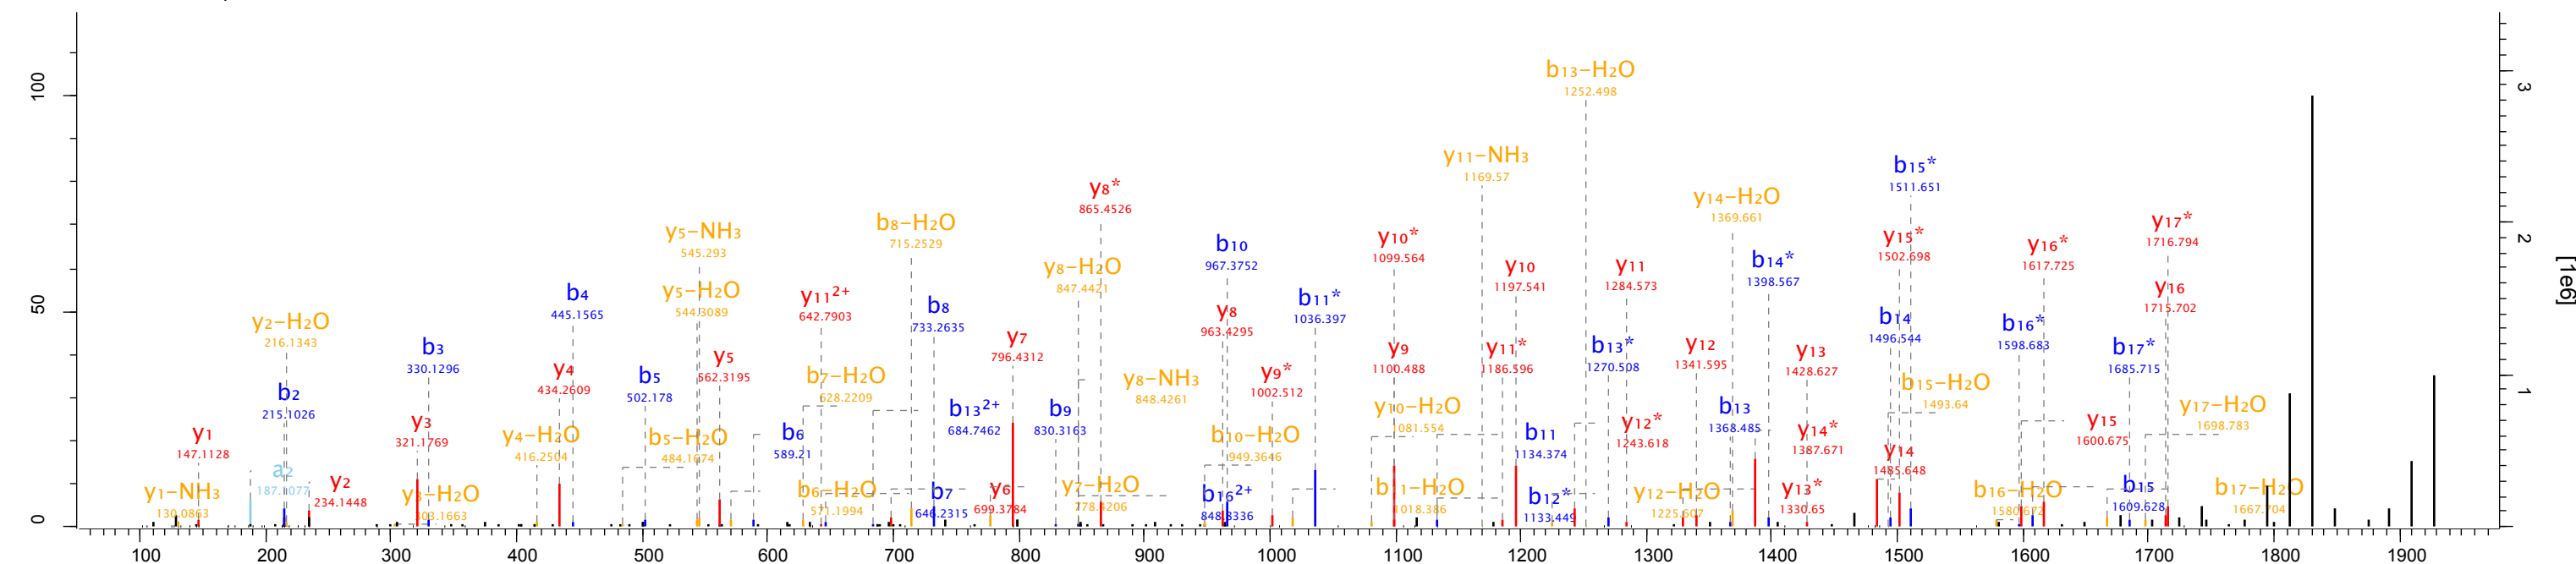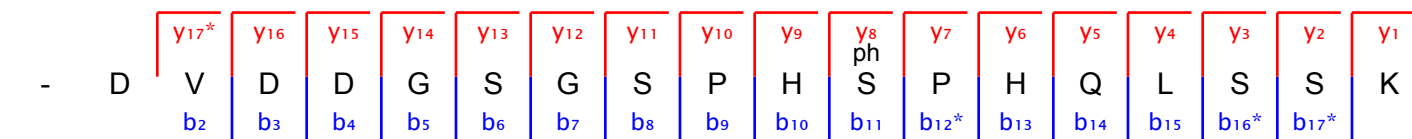

Raw file: 20150814\_A375SR\_Phospho\_BR2\_04  
 Scan: 4600 Method: FTMS; HCD Score: 157.27 m/z: 728.32 Gene names: BRCA1

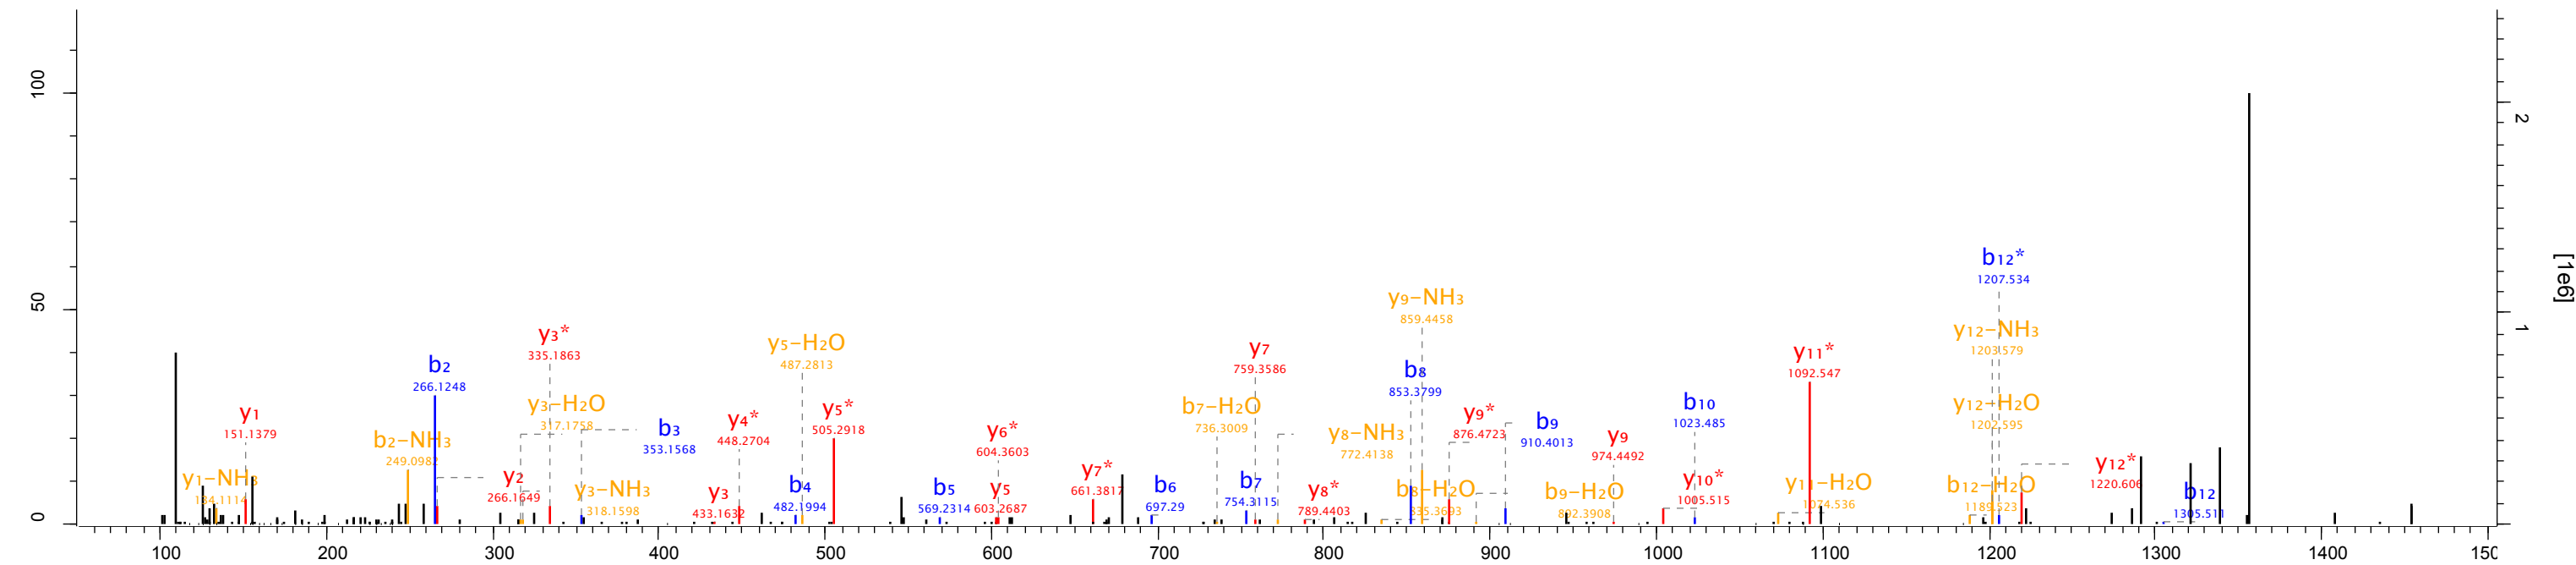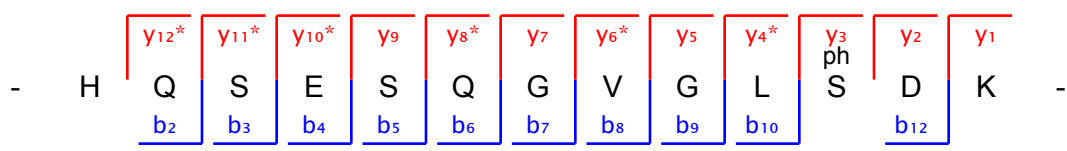



Raw file: 20150814\_A375SR\_Phospho\_BR2\_04  
 Scan: 4660 Method: FTMS; HCD Score: 105.25 m/z: 481.21 Gene names: BRIP1

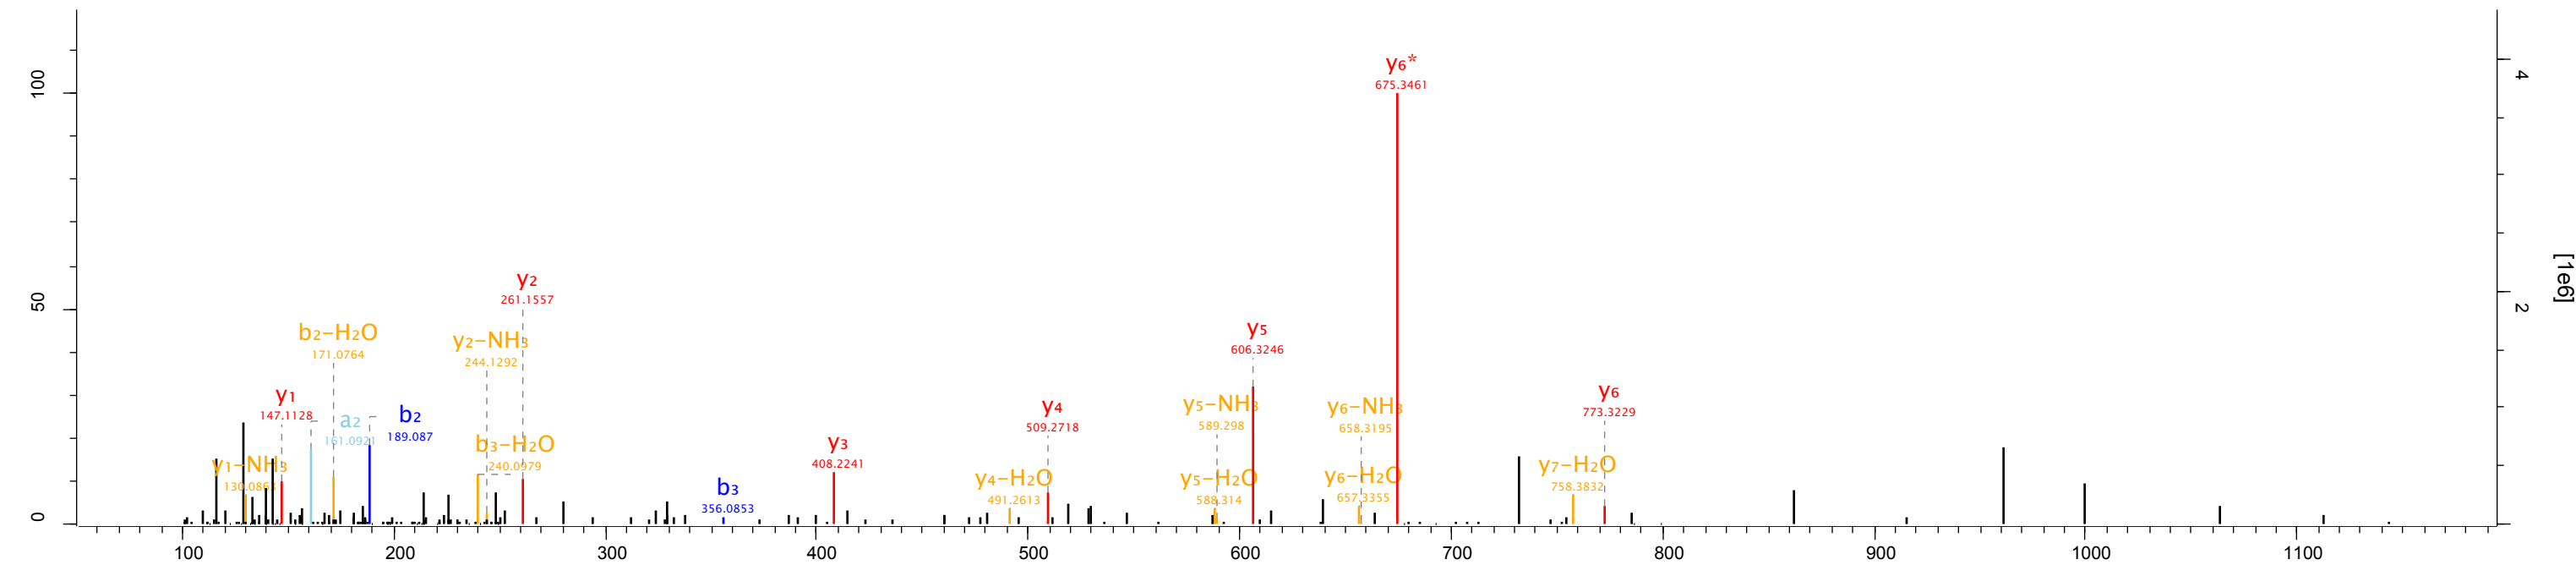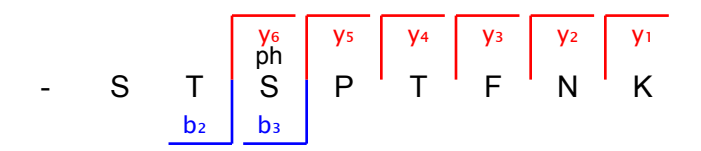

Raw file: 20150814\_A375SR\_Phospho\_BR2\_04  
 Scan: 4810 Method: FTMS; HCD Score: 129.34 m/z: 656.79 Gene names: PNN

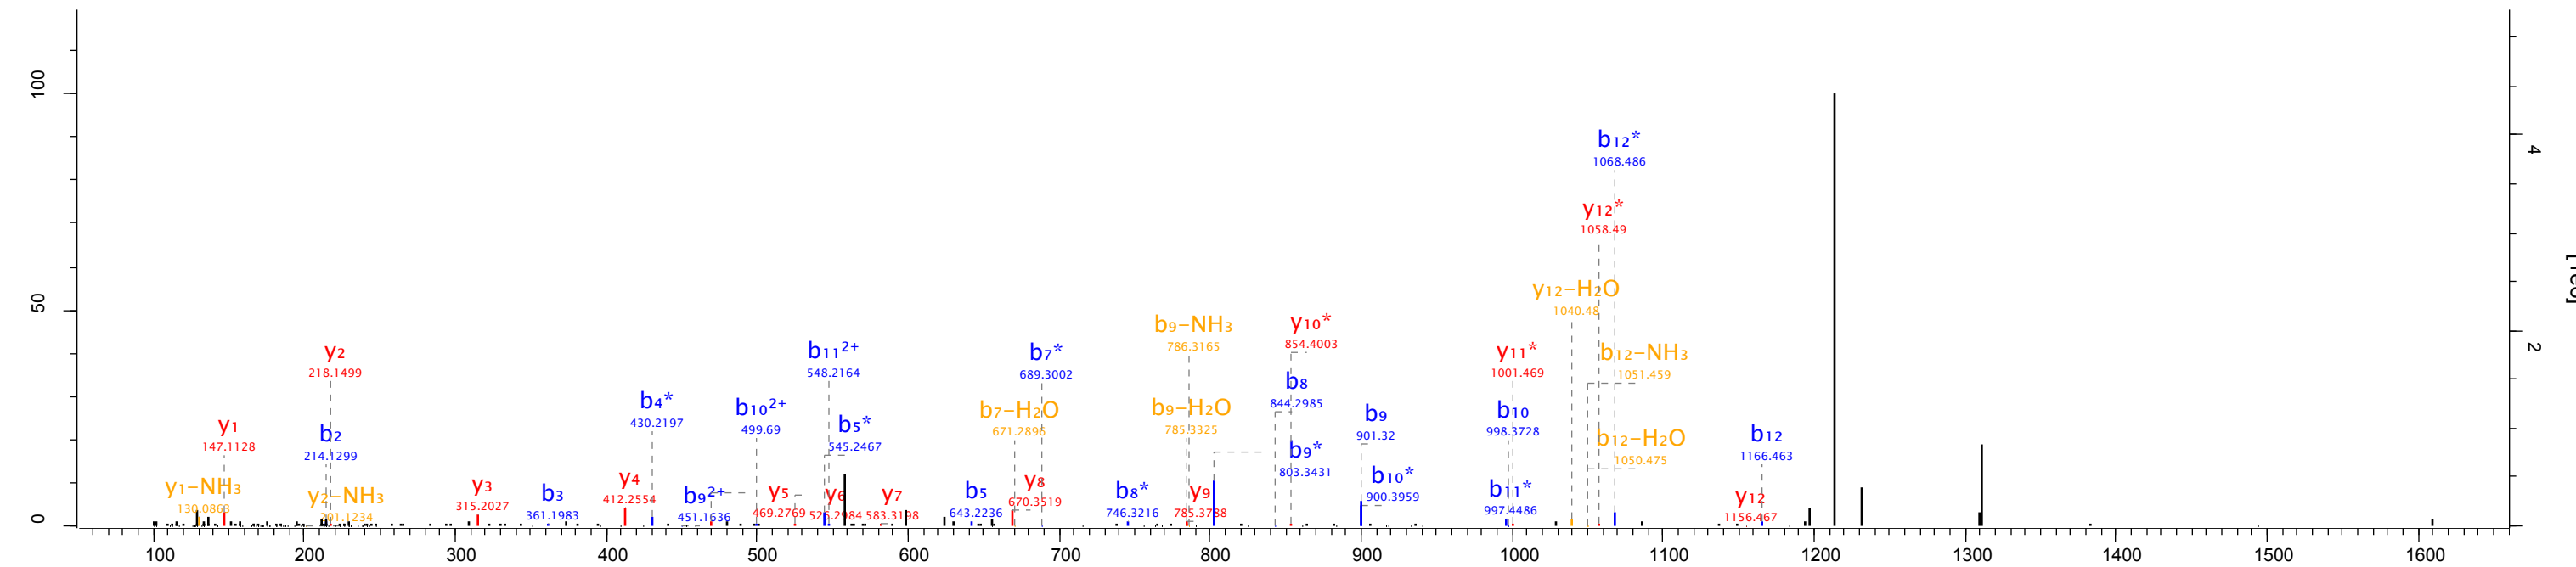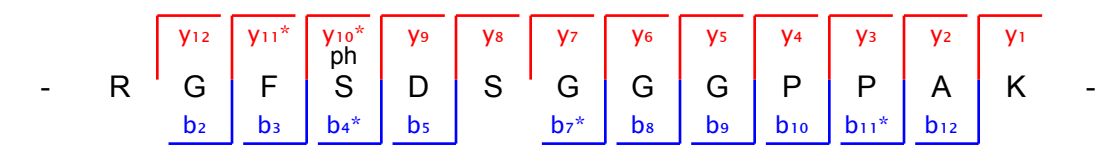

Raw file: 20150814\_A375SR\_Phospho\_BR2\_04  
 Scan: 4830 Method: FTMS; HCD Score: 157.77 m/z: 542.73 Gene names: ERBB2IP

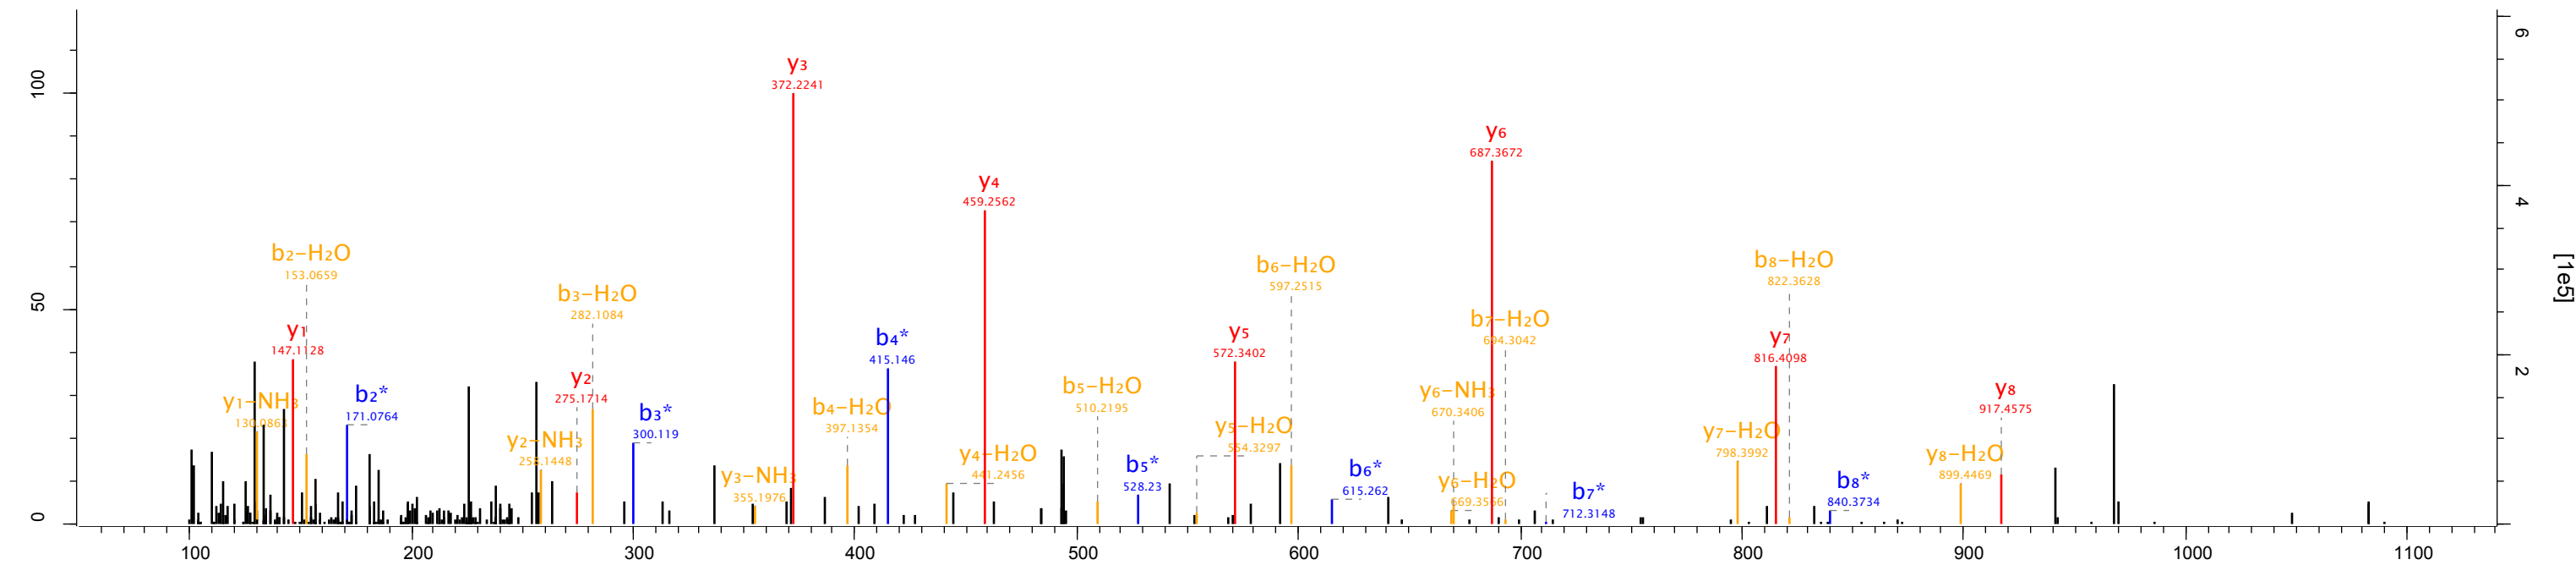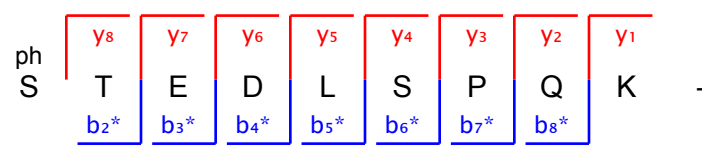

Raw file: 20150814\_A375SR\_Phospho\_BR2\_04  
 Scan: 5150 Method: FTMS; HCD Score: 141.13 m/z: 770.39 Gene names: NUP93

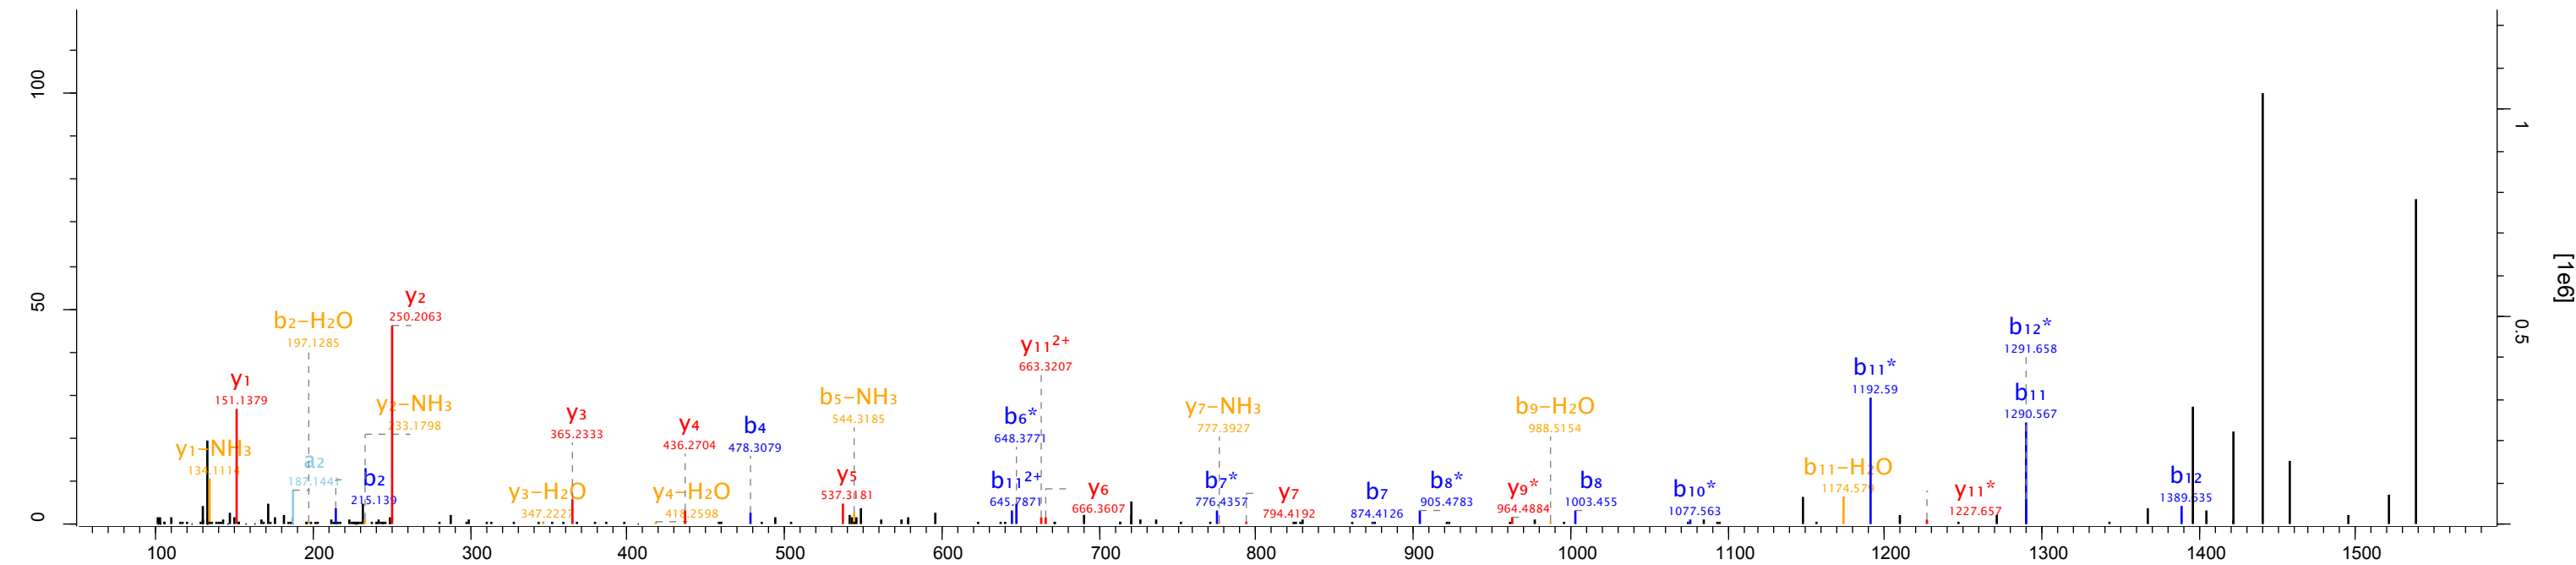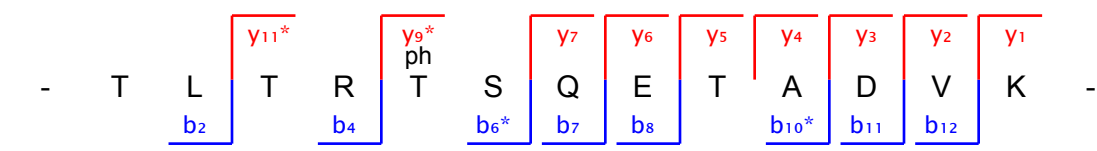

Raw file: 20150814\_A375SR\_Phospho\_BR2\_04  
 Scan: 5170 Method: FTMS; HCD Score: 91.22 m/z: 469.74 Gene names: PRC1

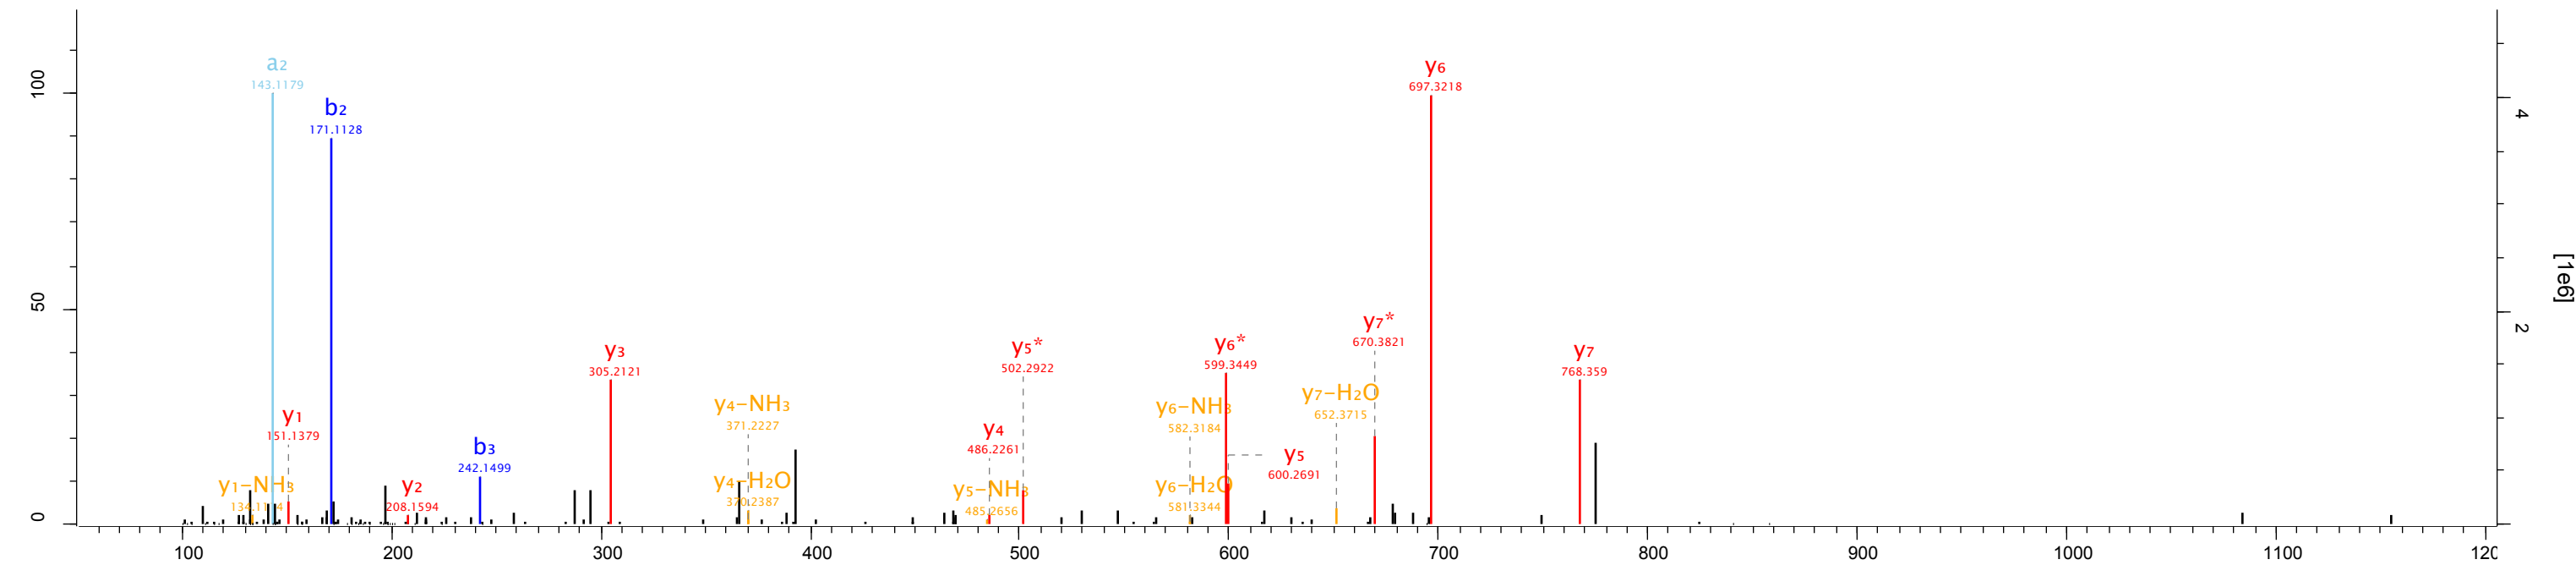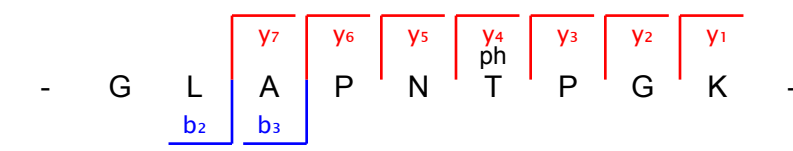

Raw file: 20150814\_A375SR\_Phospho\_BR2\_04  
 Scan: 5180 Method: FTMS; HCD Score: 91.2 m/z: 618.27 Gene names: INTS1

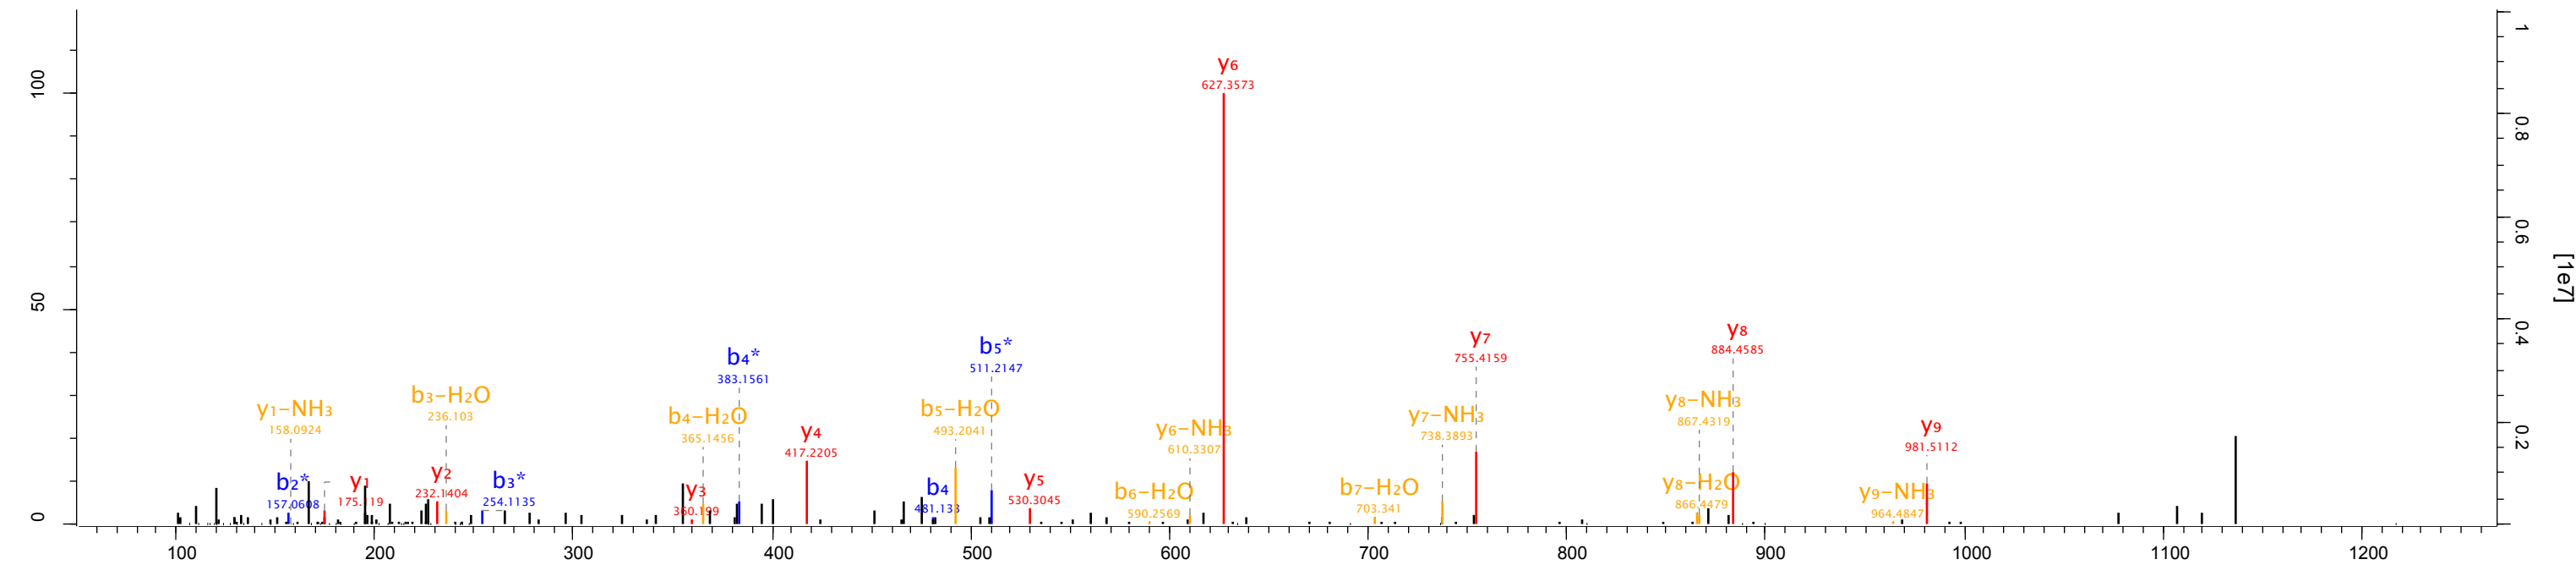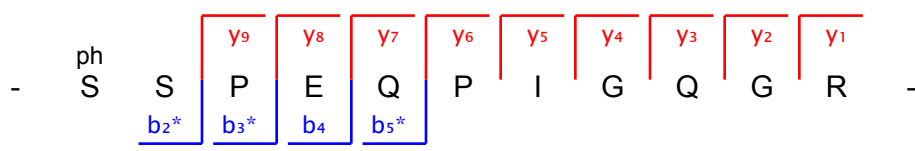

Raw file: 20150814\_A375SR\_Phospho\_BR2\_04  
 Scan: 5200 Method: FTMS; HCD Score: 49.49 m/z: 528.92 Gene names: KMT2B

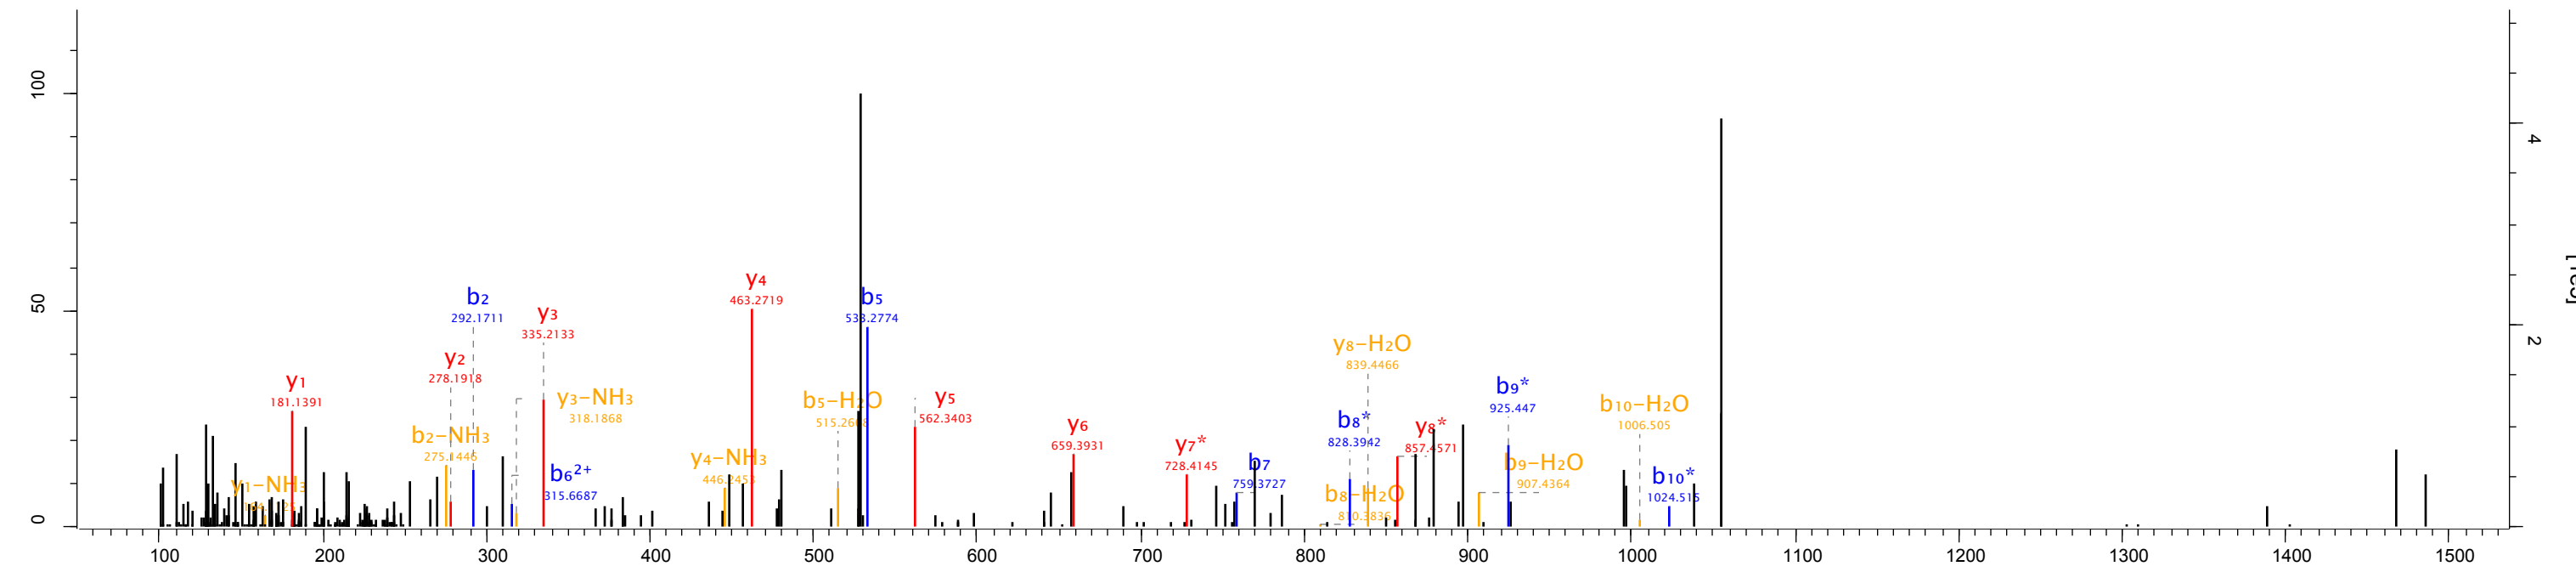

- E R P S G P E S P V Q G P R -  
 (Labels b<sub>2</sub>, b<sub>5</sub>, b<sub>6<sup>2+</sup></sub>, b<sub>7</sub>, b<sub>8<sup>\*</sup></sub>, b<sub>9<sup>\*</sup></sub>, b<sub>10<sup>\*</sup></sub> are underlined in blue; y<sub>8<sup>\*</sup></sub>, y<sub>7<sup>ph</sup></sub>, y<sub>6</sub>, y<sub>5</sub>, y<sub>4</sub>, y<sub>3</sub>, y<sub>2</sub>, y<sub>1</sub> are underlined in red)

Raw file: 20150814\_A375SR\_Phospho\_BR2\_04  
 Scan: 5230 Method: FTMS; HCD Score: 187.78 m/z: 933.43 Gene names: MARCKS

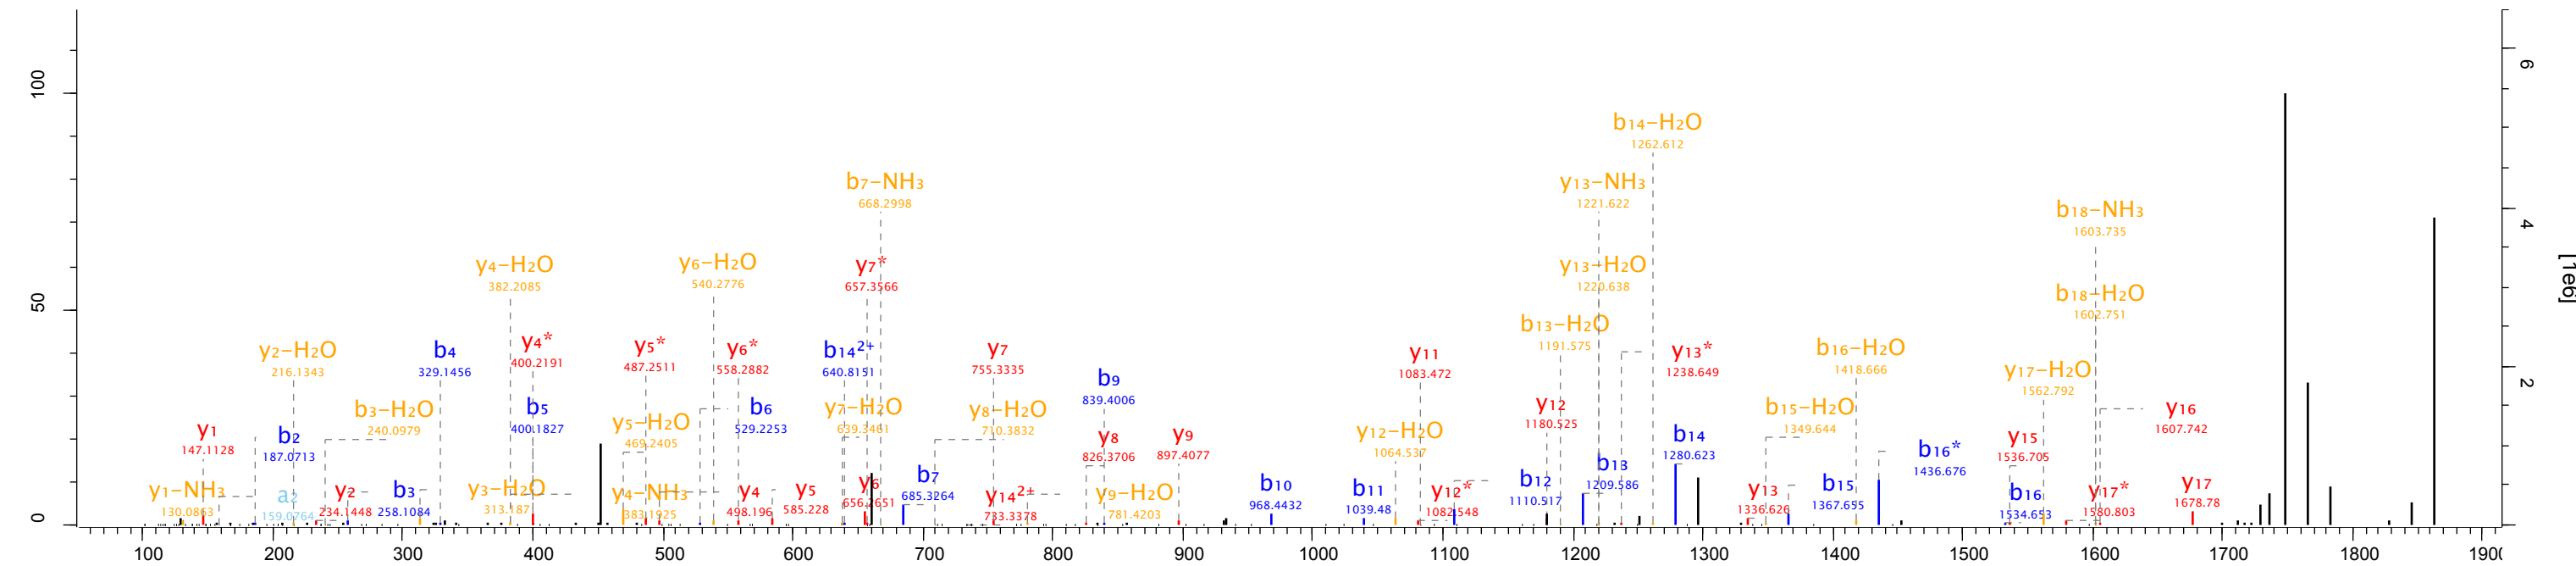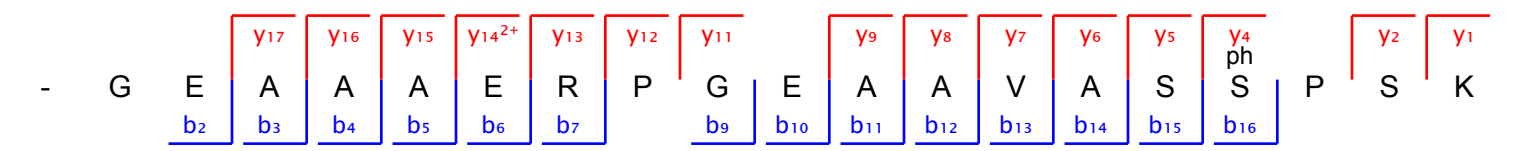



Raw file 20150814\_A375SR\_Phospho\_BR2\_04 Scan 5720 Method FTMS; HCD Score 44.44 m/z 591.26 Gene names UTRN

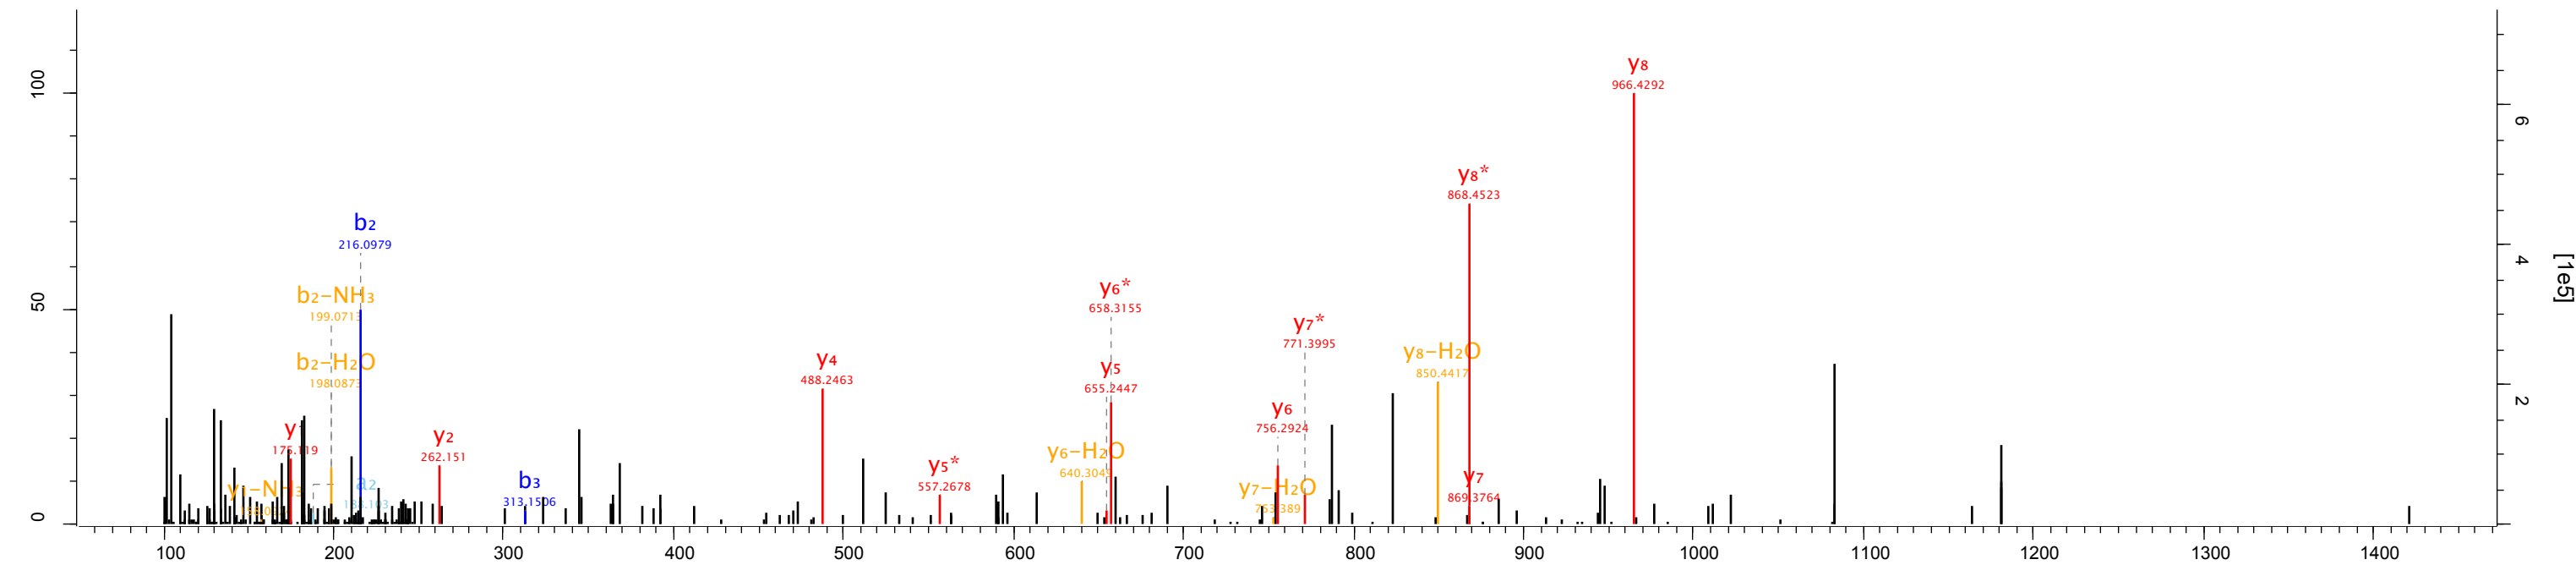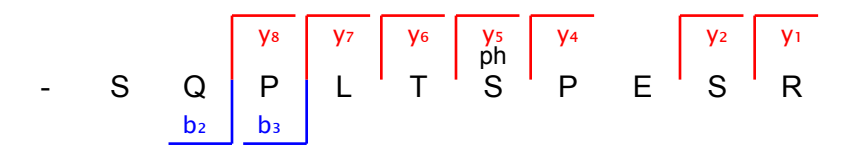

Raw file: 20150814\_A375SR\_Phospho\_BR2\_04  
 Scan: 5750 Method: FTMS; HCD Score: 124.5 m/z: 666.33 Gene names: TMPO

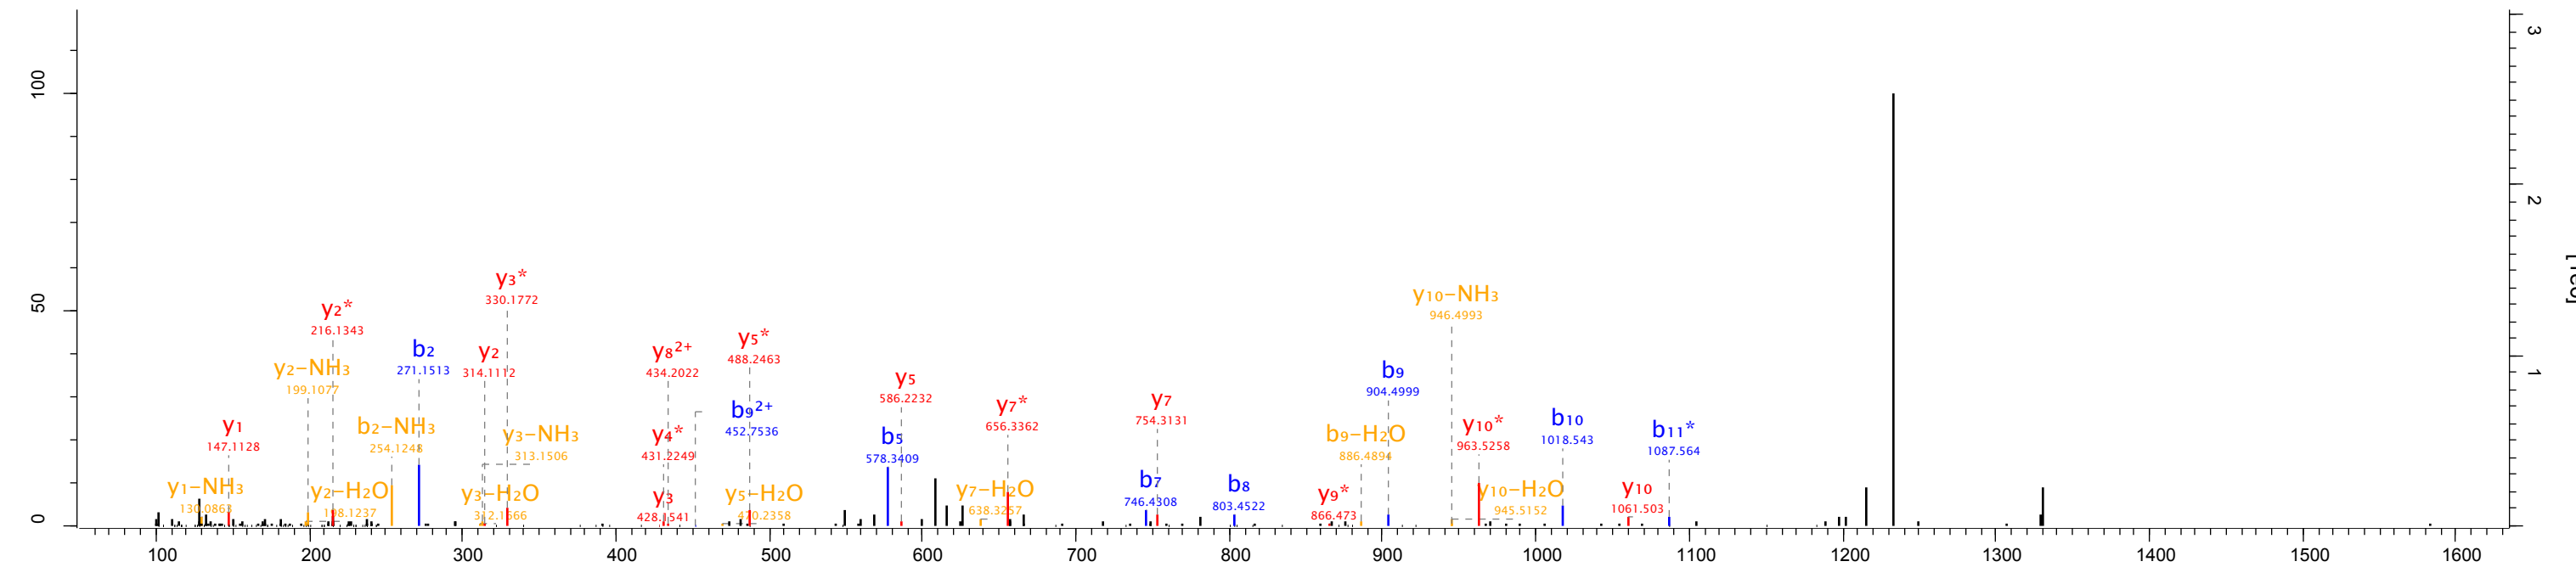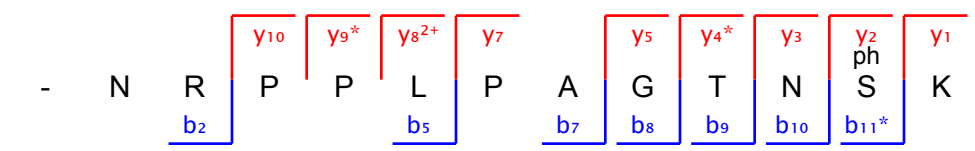

Raw file: 20150814\_A375SR\_Phospho\_BR2\_04  
 Scan: 6140 Method: FTMS; HCD Score: 141.88 m/z: 597.76 Gene names: ATXN2L

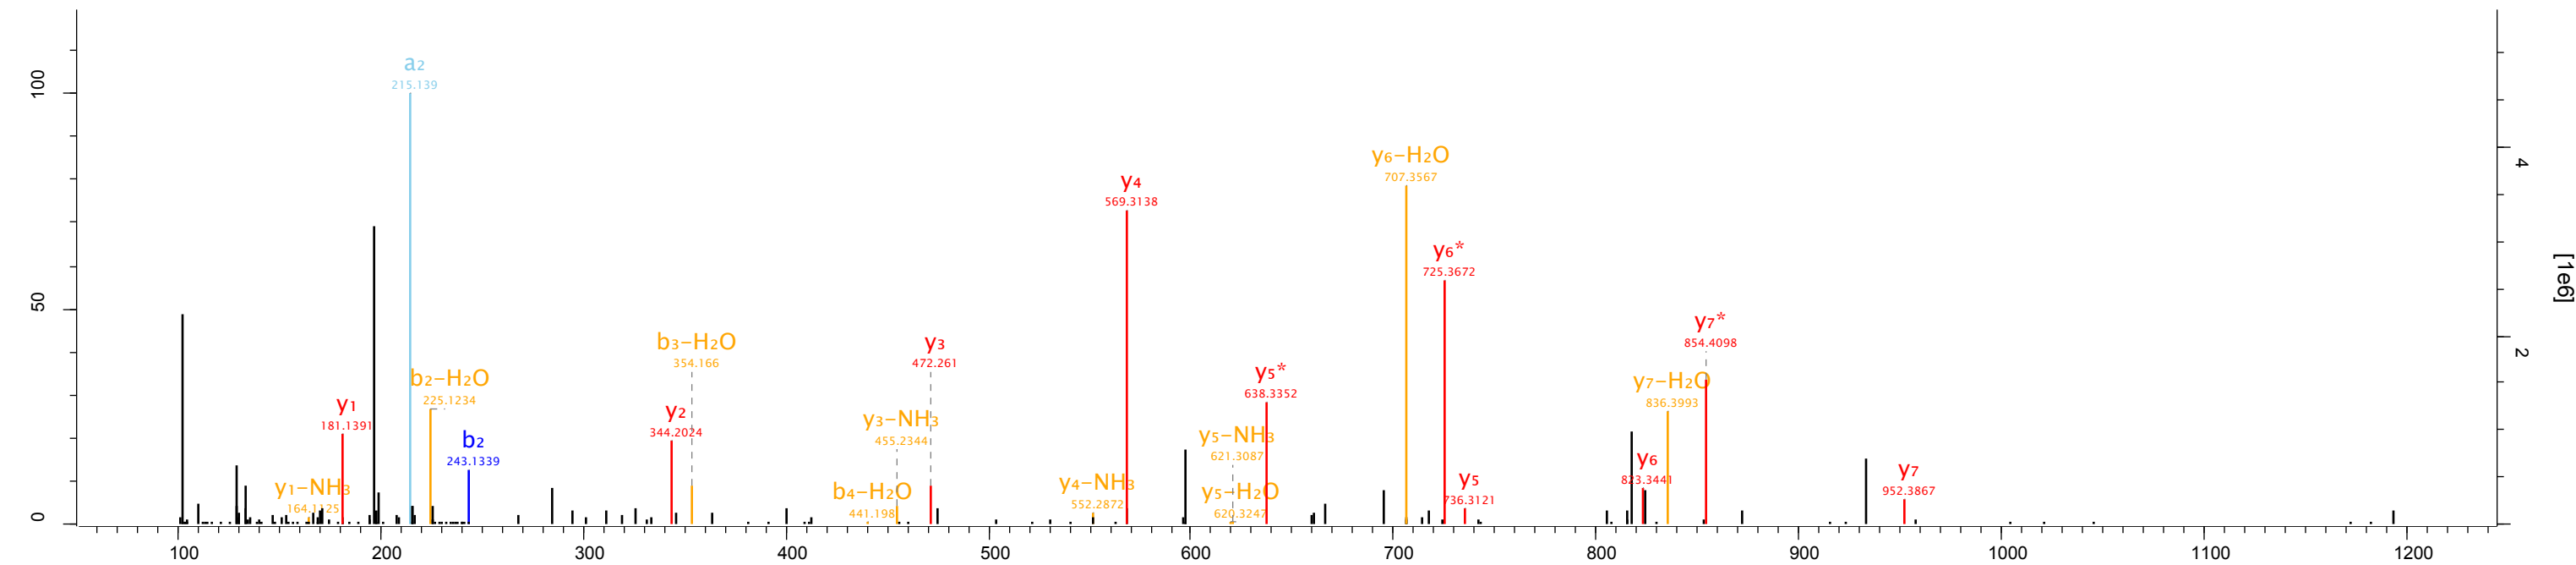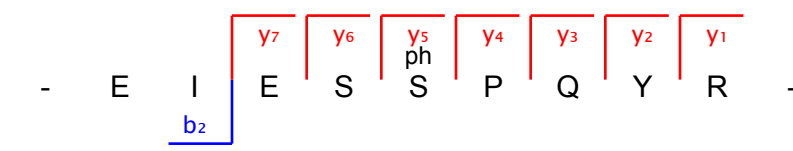

Raw file: 20150814\_A375SR\_Phospho\_BR2\_04  
 Scan: 6270 Method: FTMS; HCD Score: 136.26 m/z: 603.95 Gene names: CHAF1A

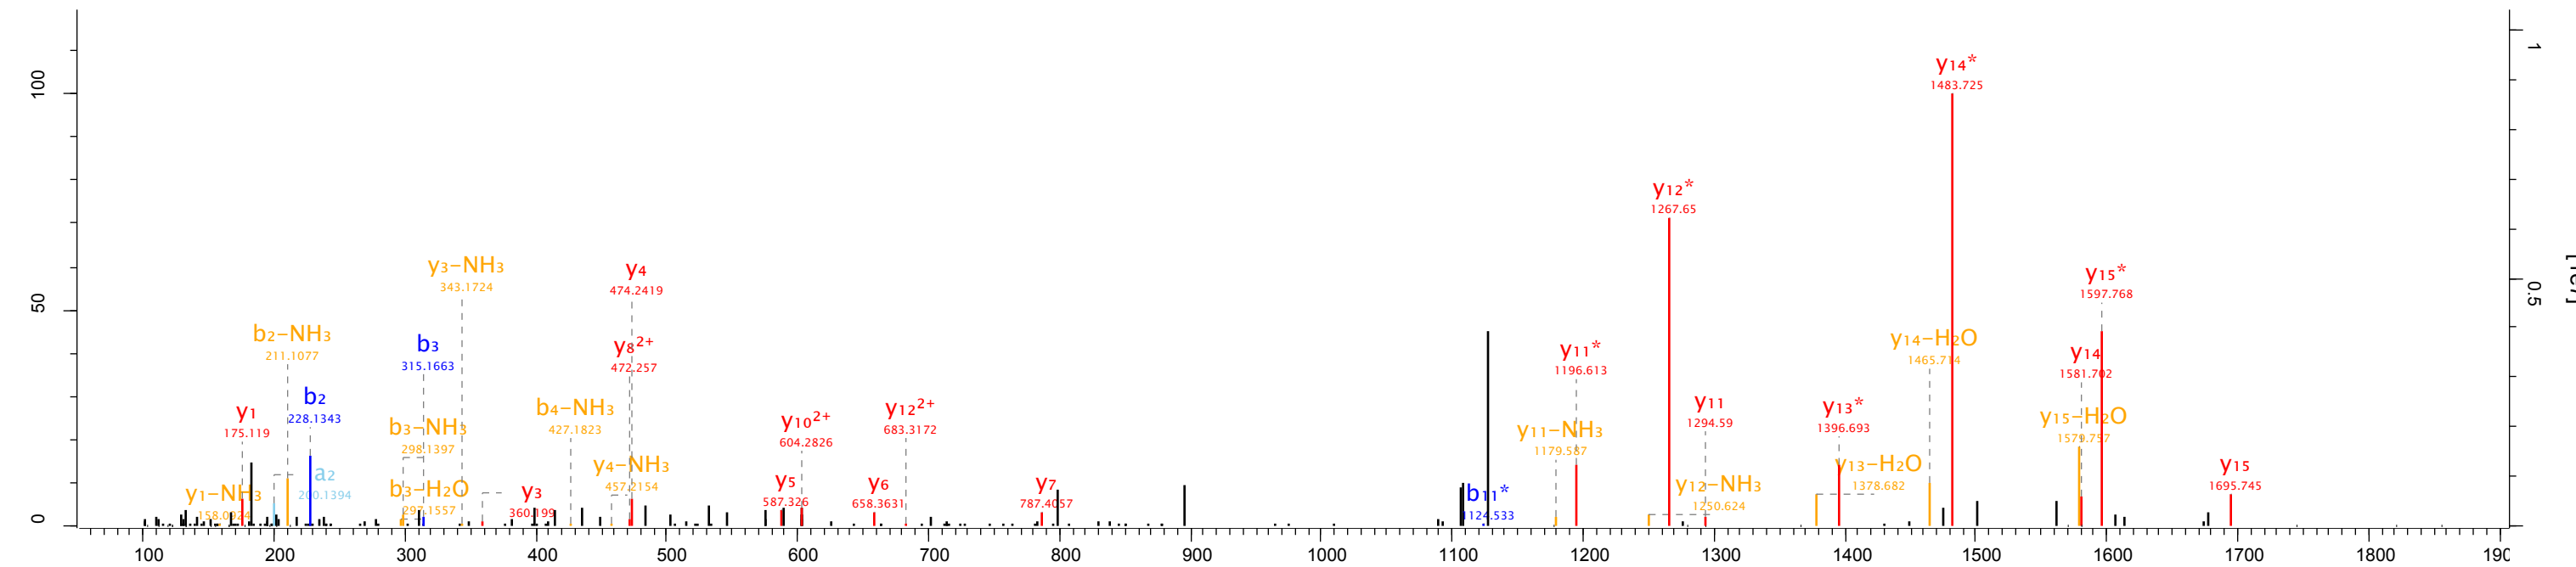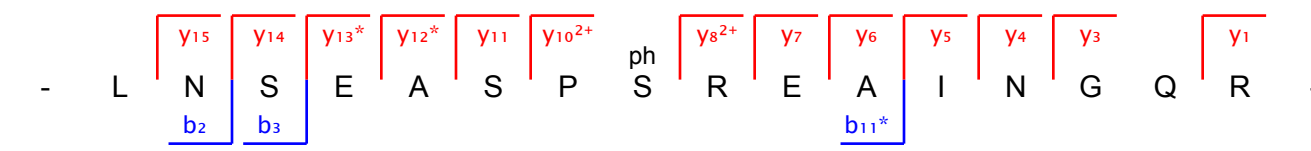

Raw file: 20150814\_A375SR\_Phospho\_BR2\_04  
 Scan: 6290 Method: FTMS; HCD Score: 84.58 m/z: 588.89 Gene names: RBMX;RBMXL1

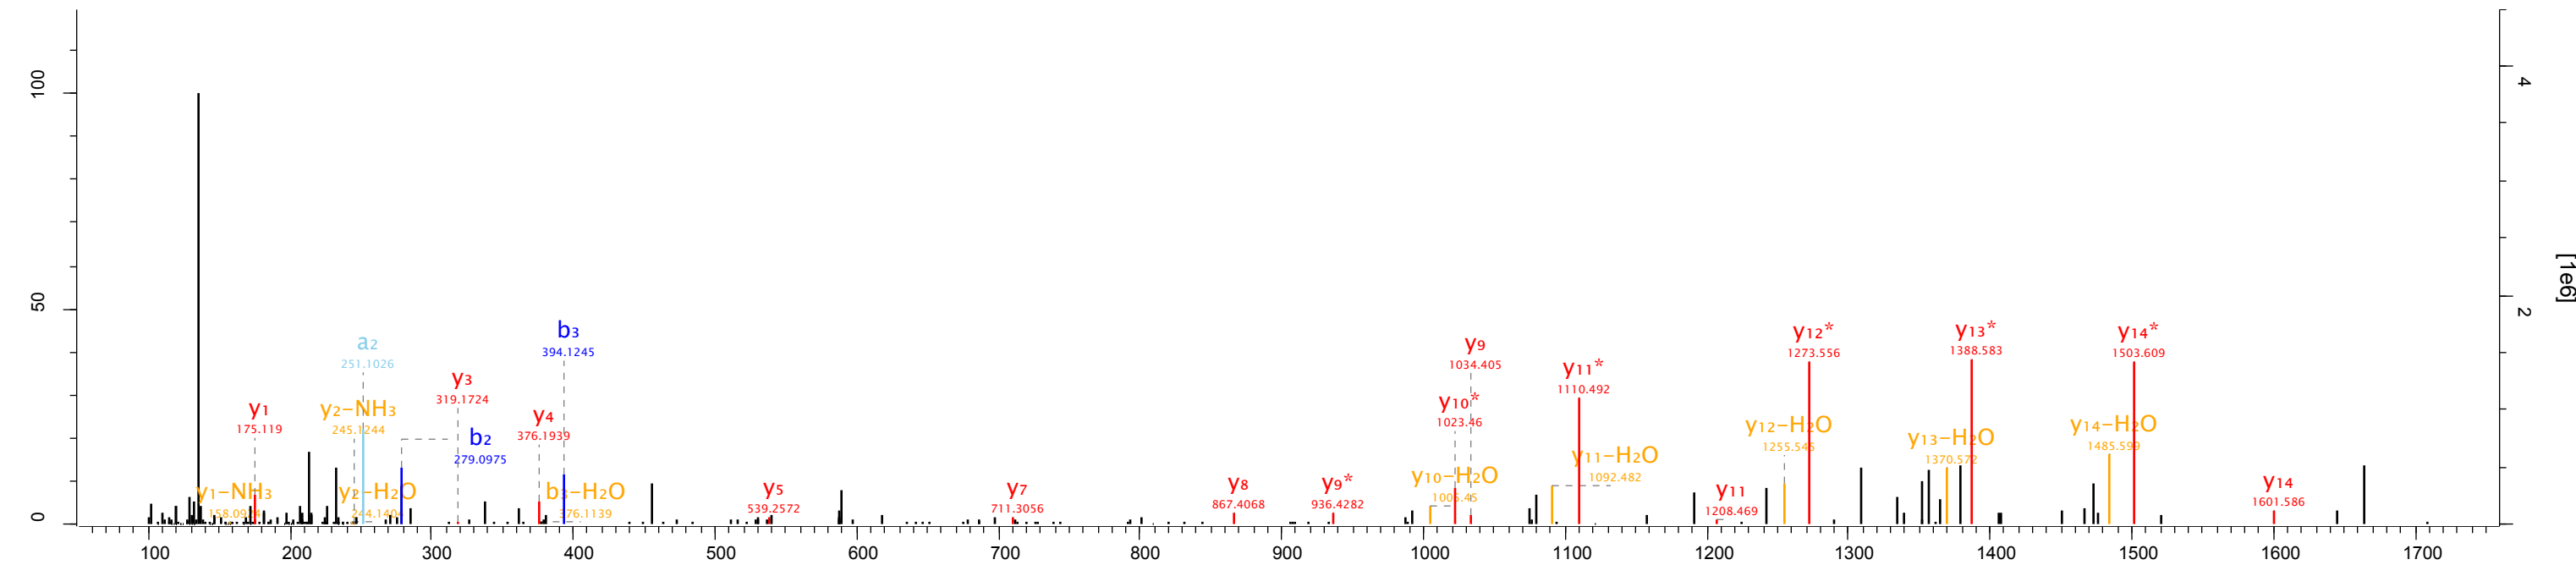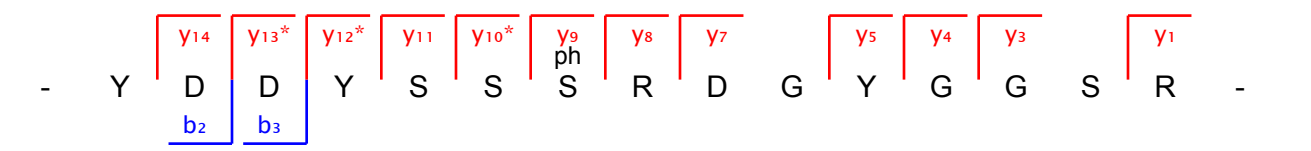

Raw file: 20150814\_A375SR\_Phospho\_BR2\_04  
 Scan: 6410 Method: FTMS; HCD Score: 137.13 m/z: 469.19 Gene names: TJP2

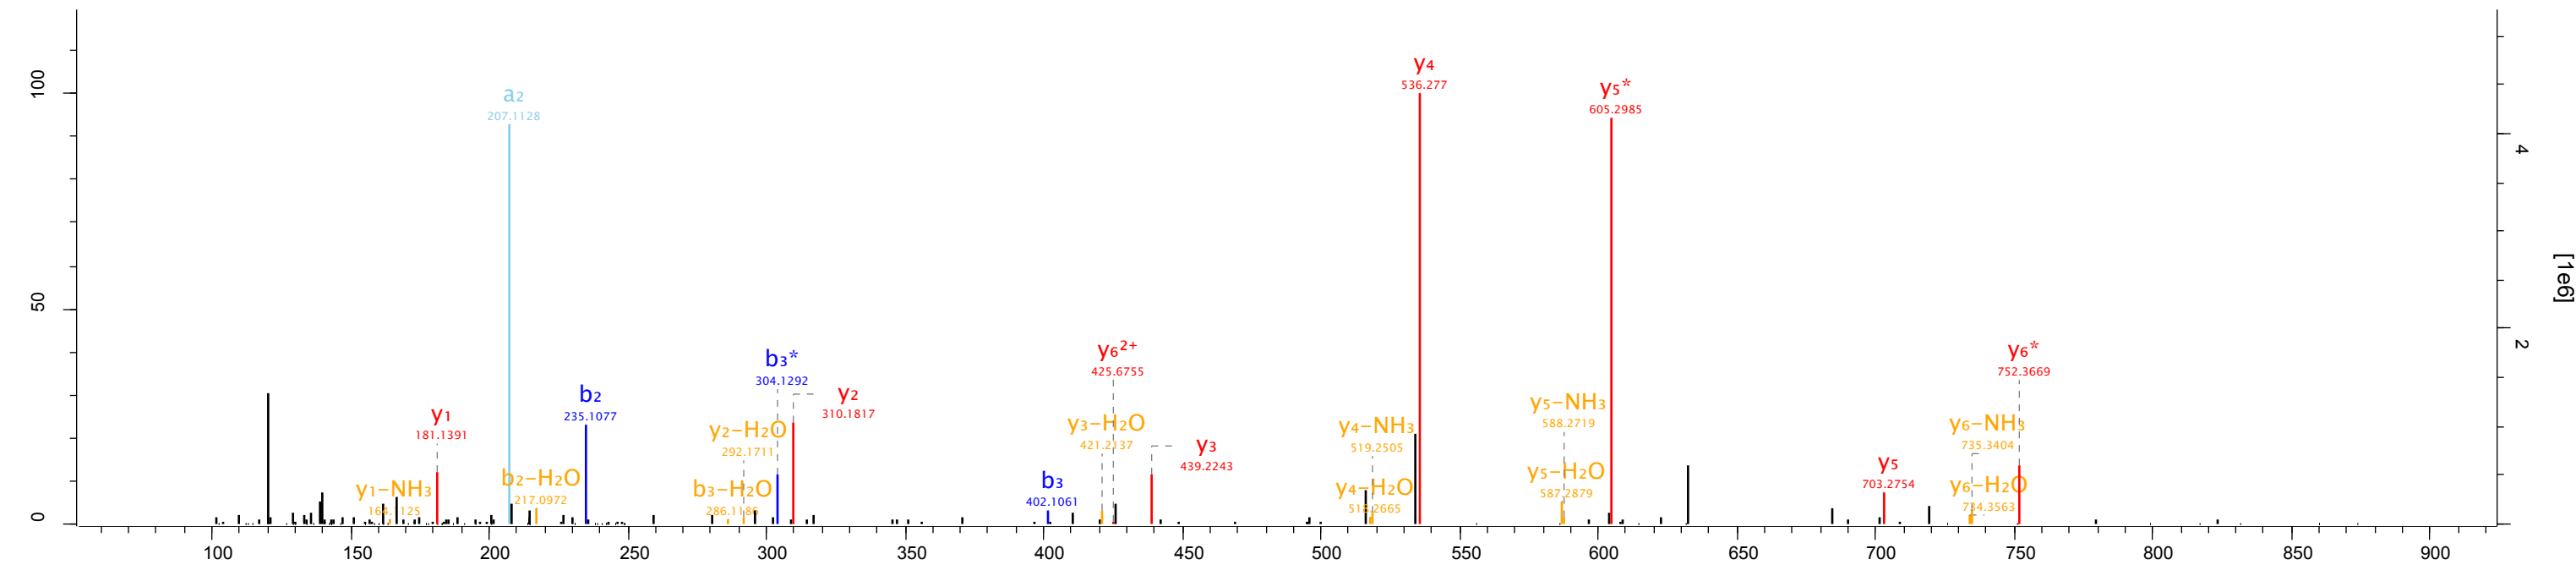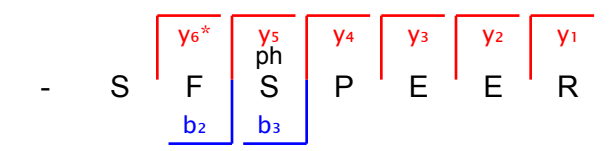

Raw file: 20150814\_A375SR\_Phospho\_BR2\_04  
 Scan: 6590 Method: FTMS; HCD Score: 123.75 m/z: 634.8 Gene names: METAP2

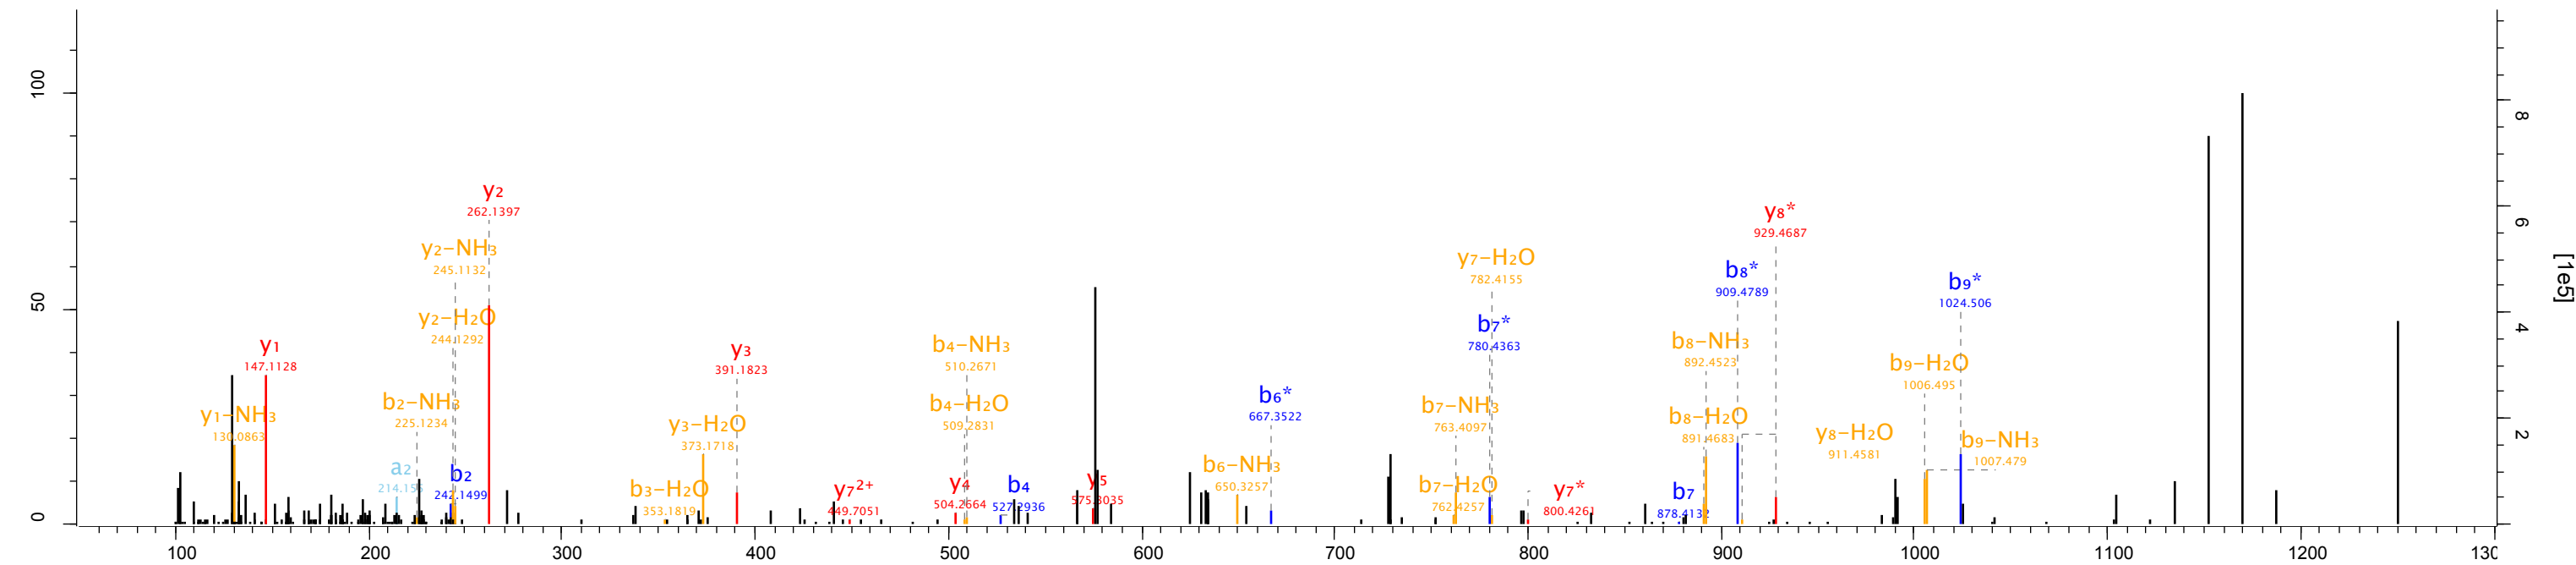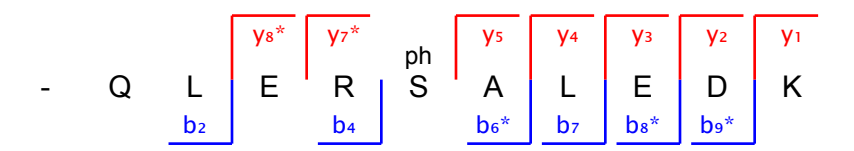

Raw file 20150814\_A375SR\_Phospho\_BR2\_04 Scan 6600 Method FTMS; HCD Score 136.5 m/z 474.21 Gene names ZNF148

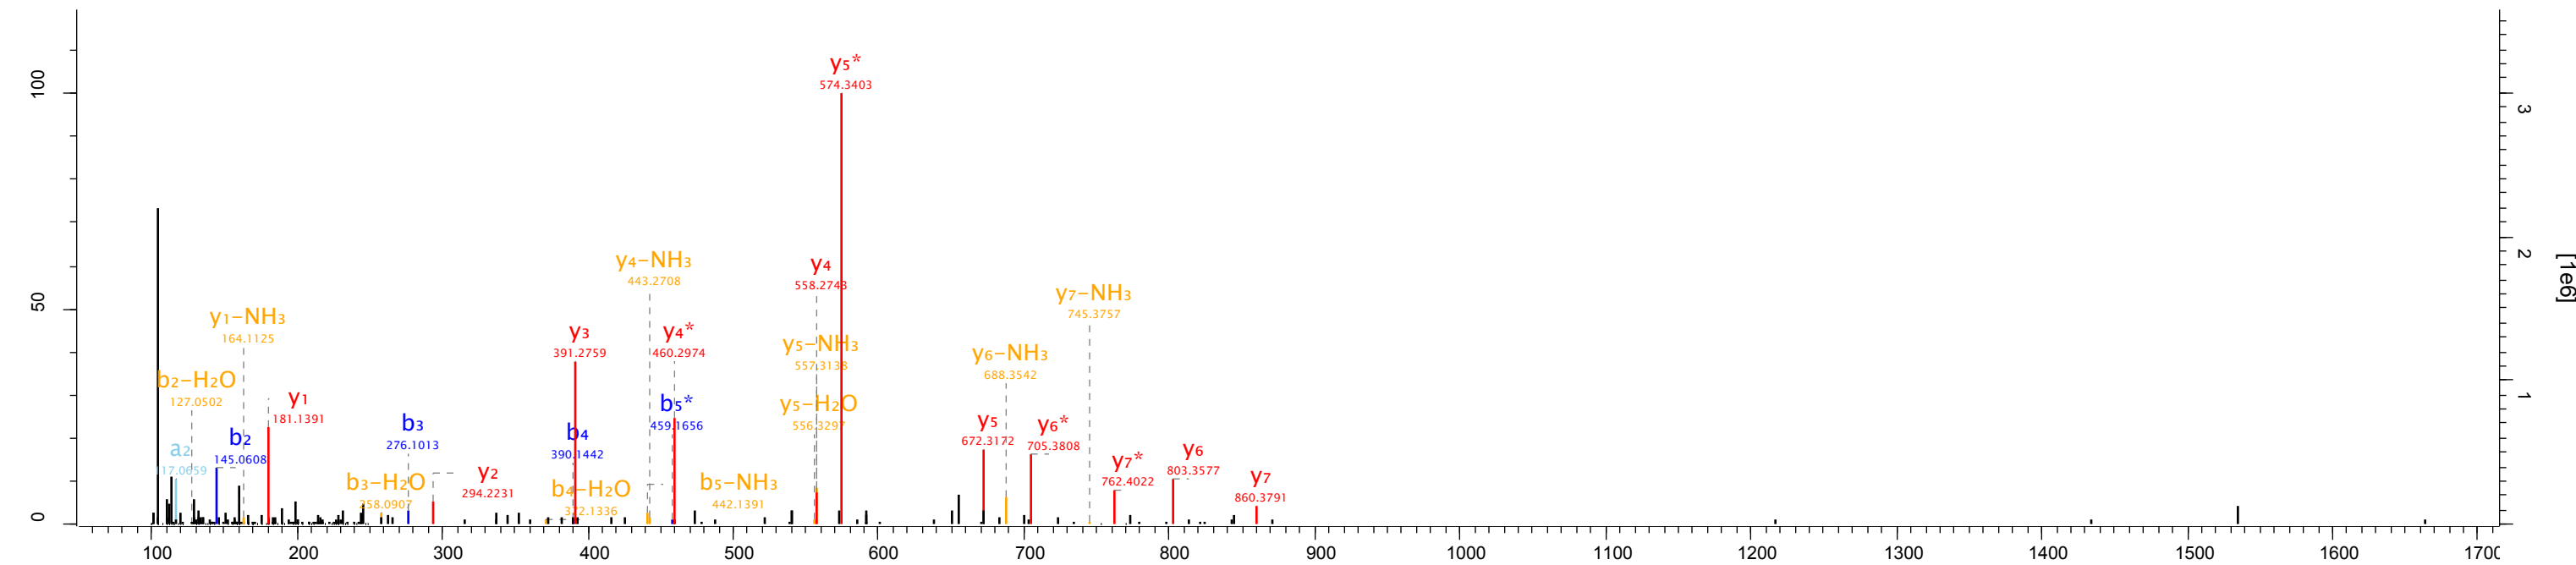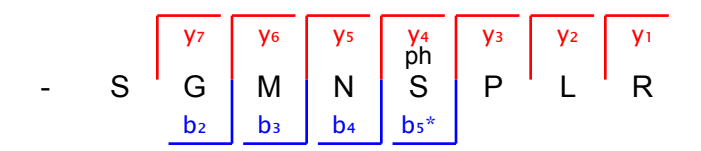



Raw file: 20150814\_A375SR\_Phospho\_BR2\_04  
 Scan: 6680 Method: FTMS; HCD Score: 134.26 m/z: 432.19 Gene names: PCYT1A

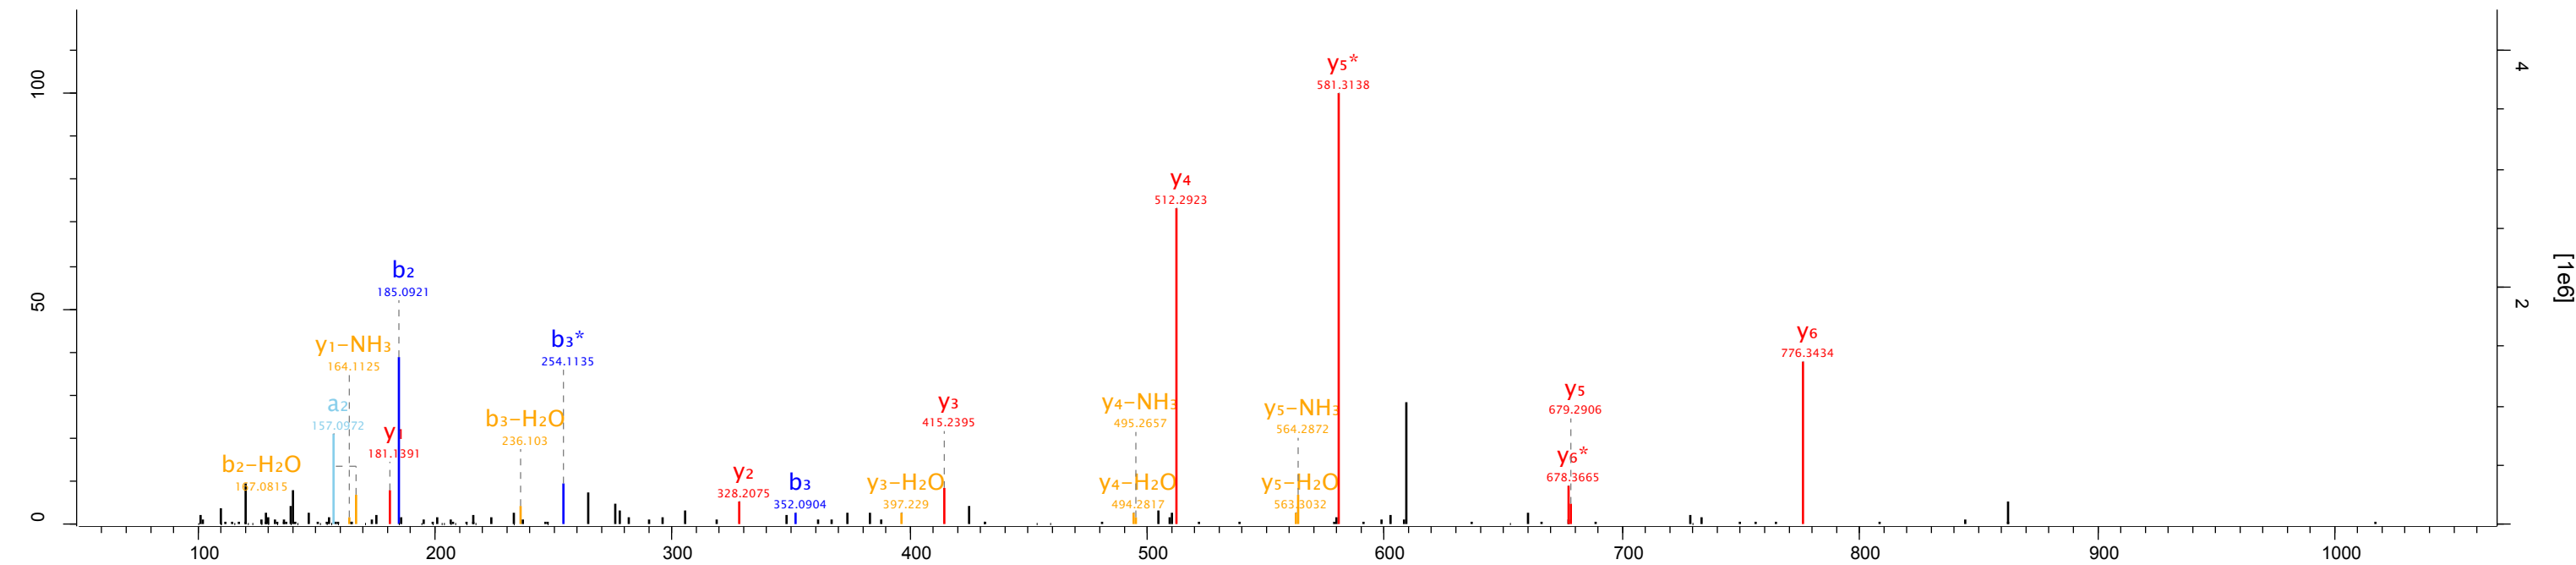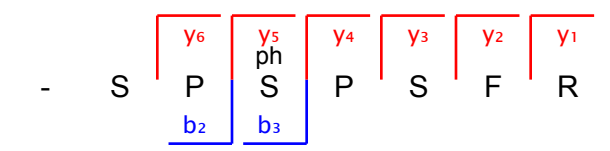

Raw file: 20150814\_A375SR\_Phospho\_BR2\_04  
 Scan: 6830 Method: FTMS; HCD Score: 157.01 m/z: 632.61 Gene names: AFF4

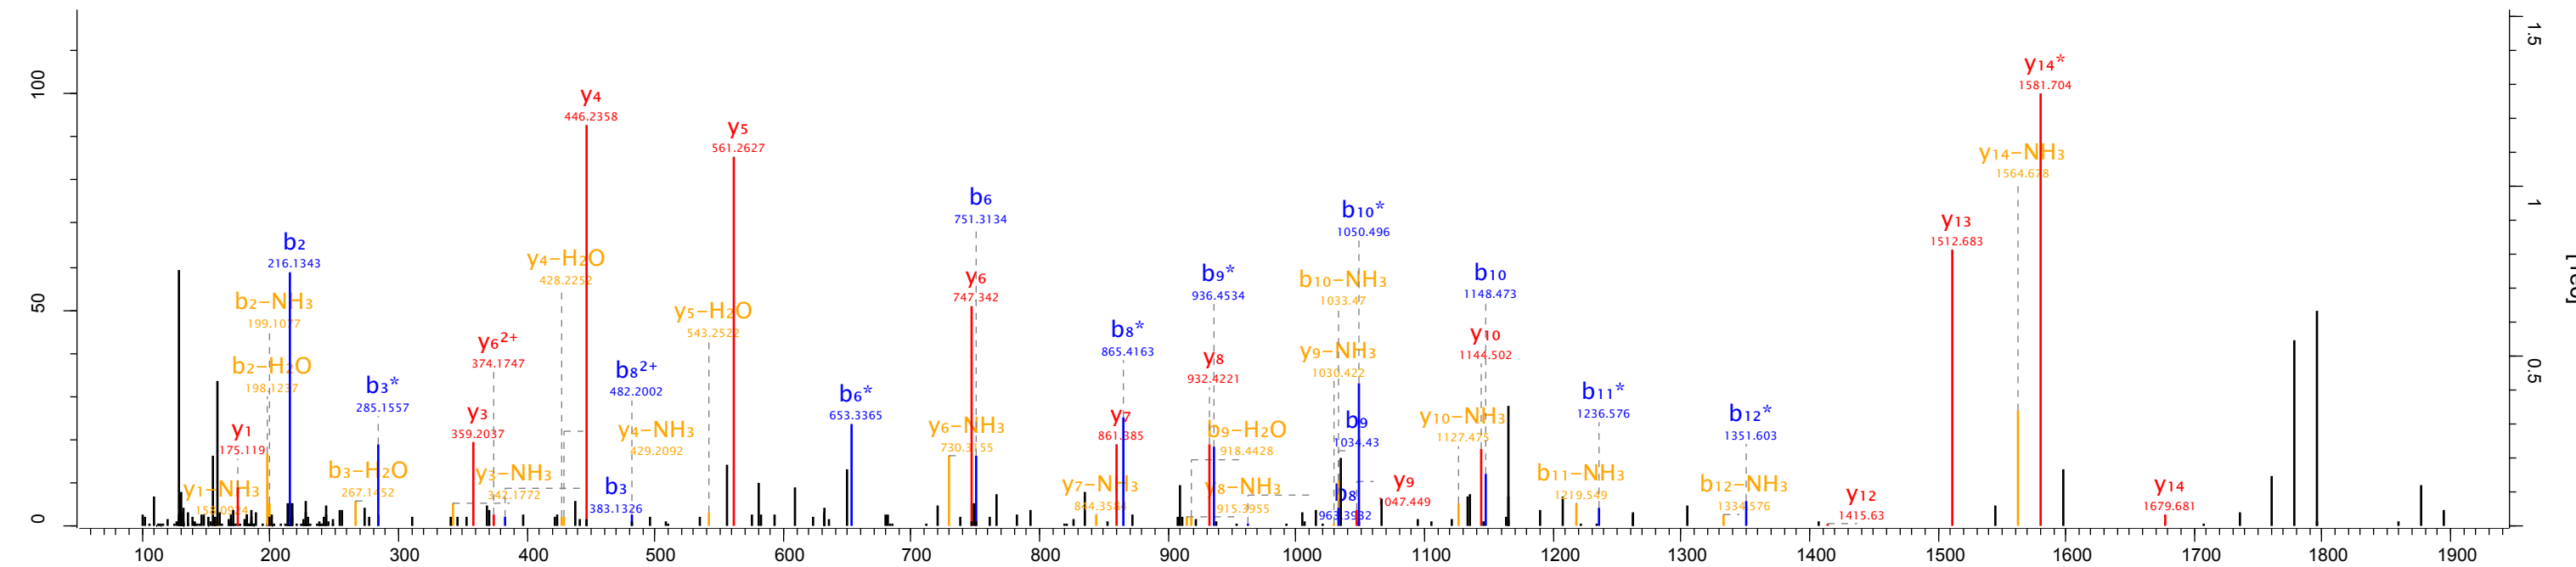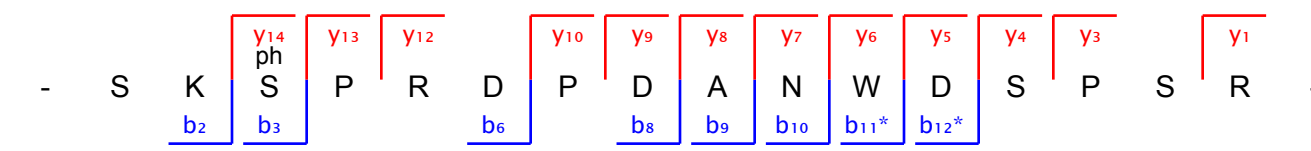

Raw file: 20150814\_A375SR\_Phospho\_BR2\_04  
 Scan: 7260 Method: FTMS; HCD Score: 133.49 m/z: 521.27 Gene names: LMO7

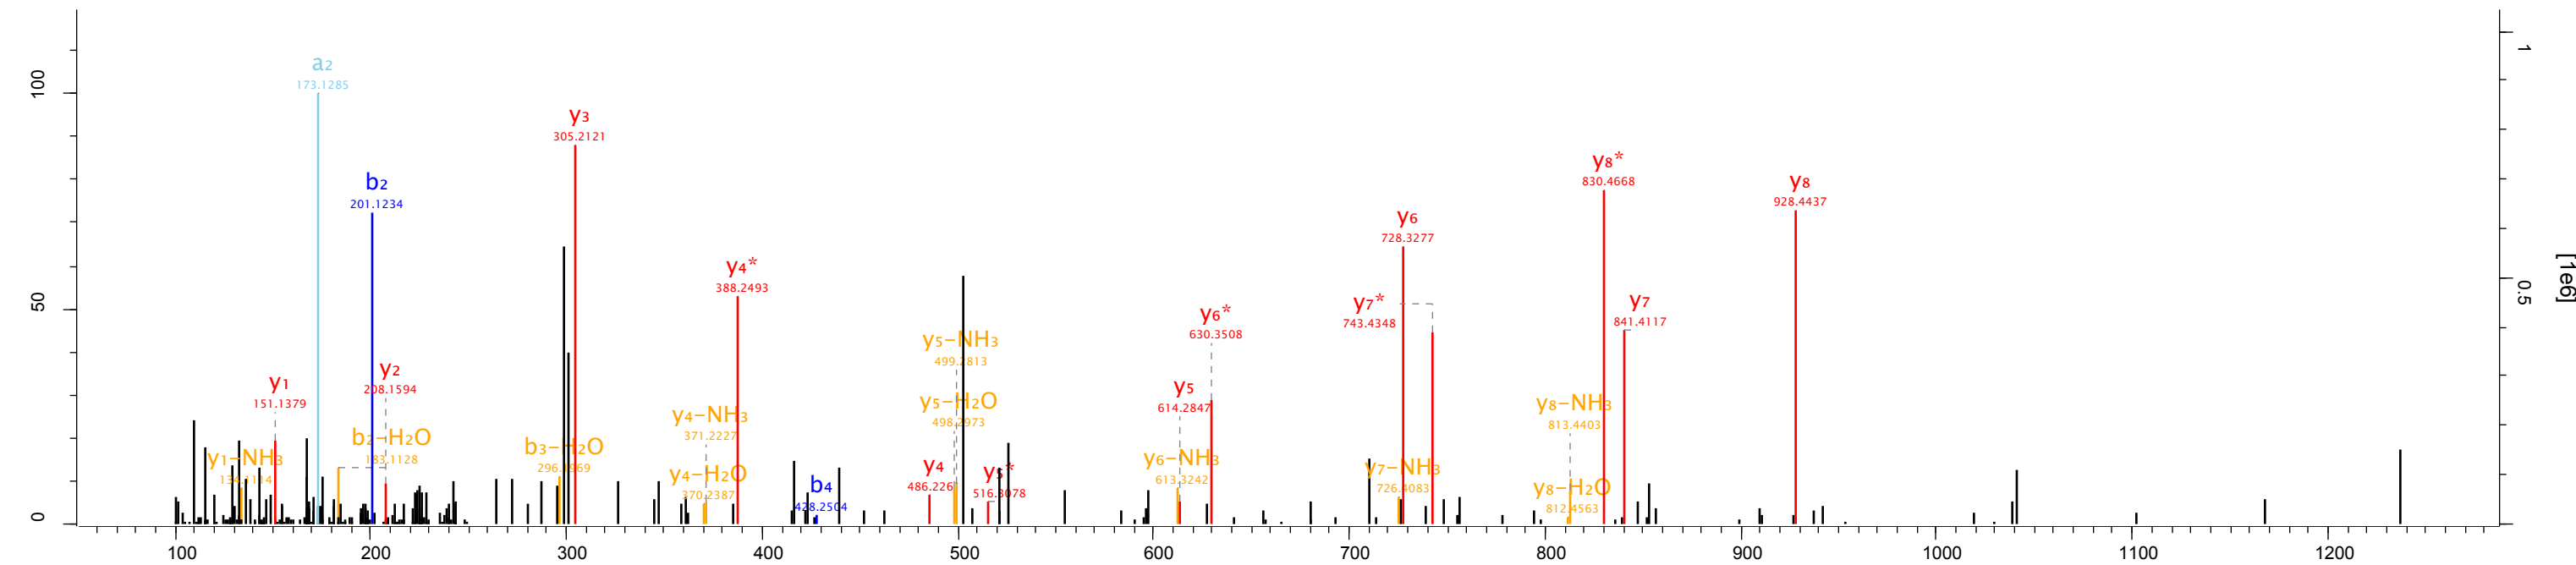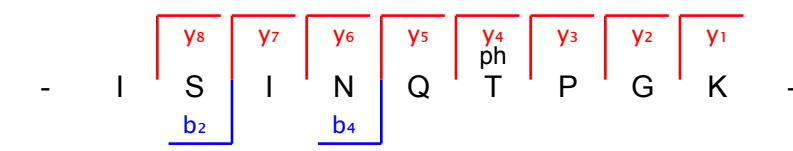

Raw file: 20150814\_A375SR\_Phospho\_BR2\_04  
 Scan: 7560 Method: FTMS; HCD Score: 103.6 m/z: 693.81 Gene names: HOXC10

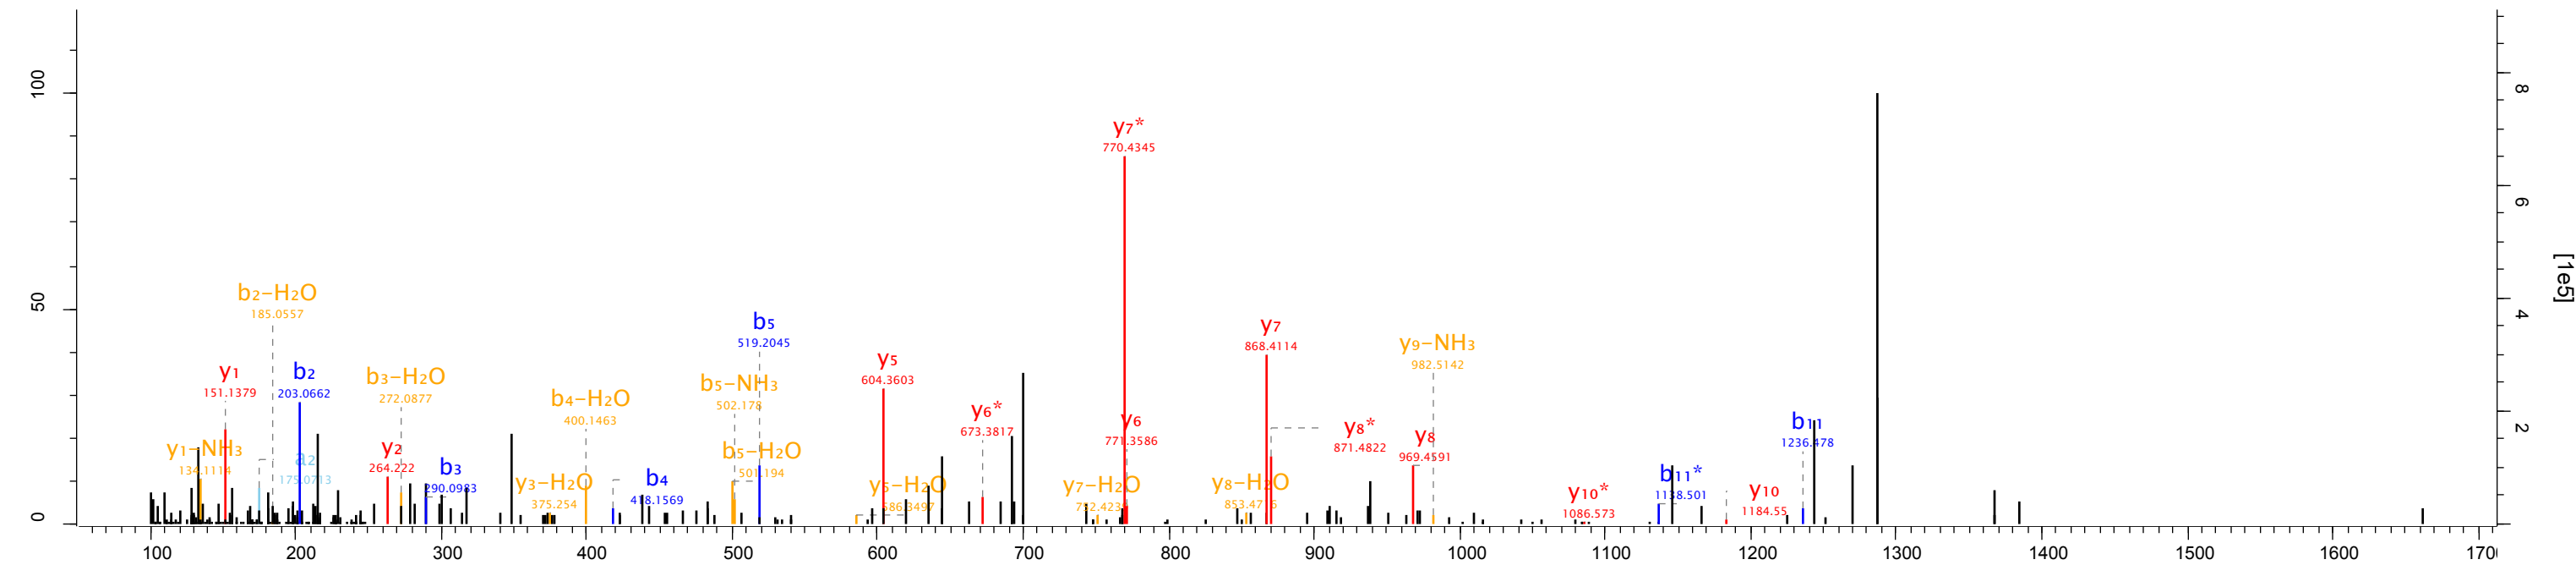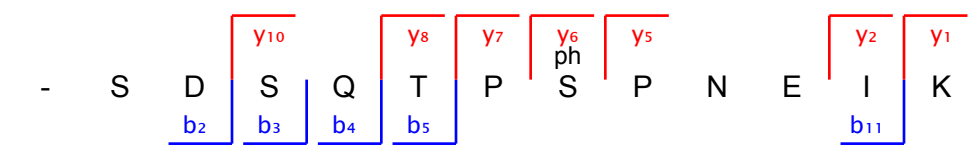

Raw file 20150814\_A375SR\_Phospho\_BR2\_04 Scan 7770 Method FTMS; HCD Score 111.57 m/z 888.38 Gene names PTPN3

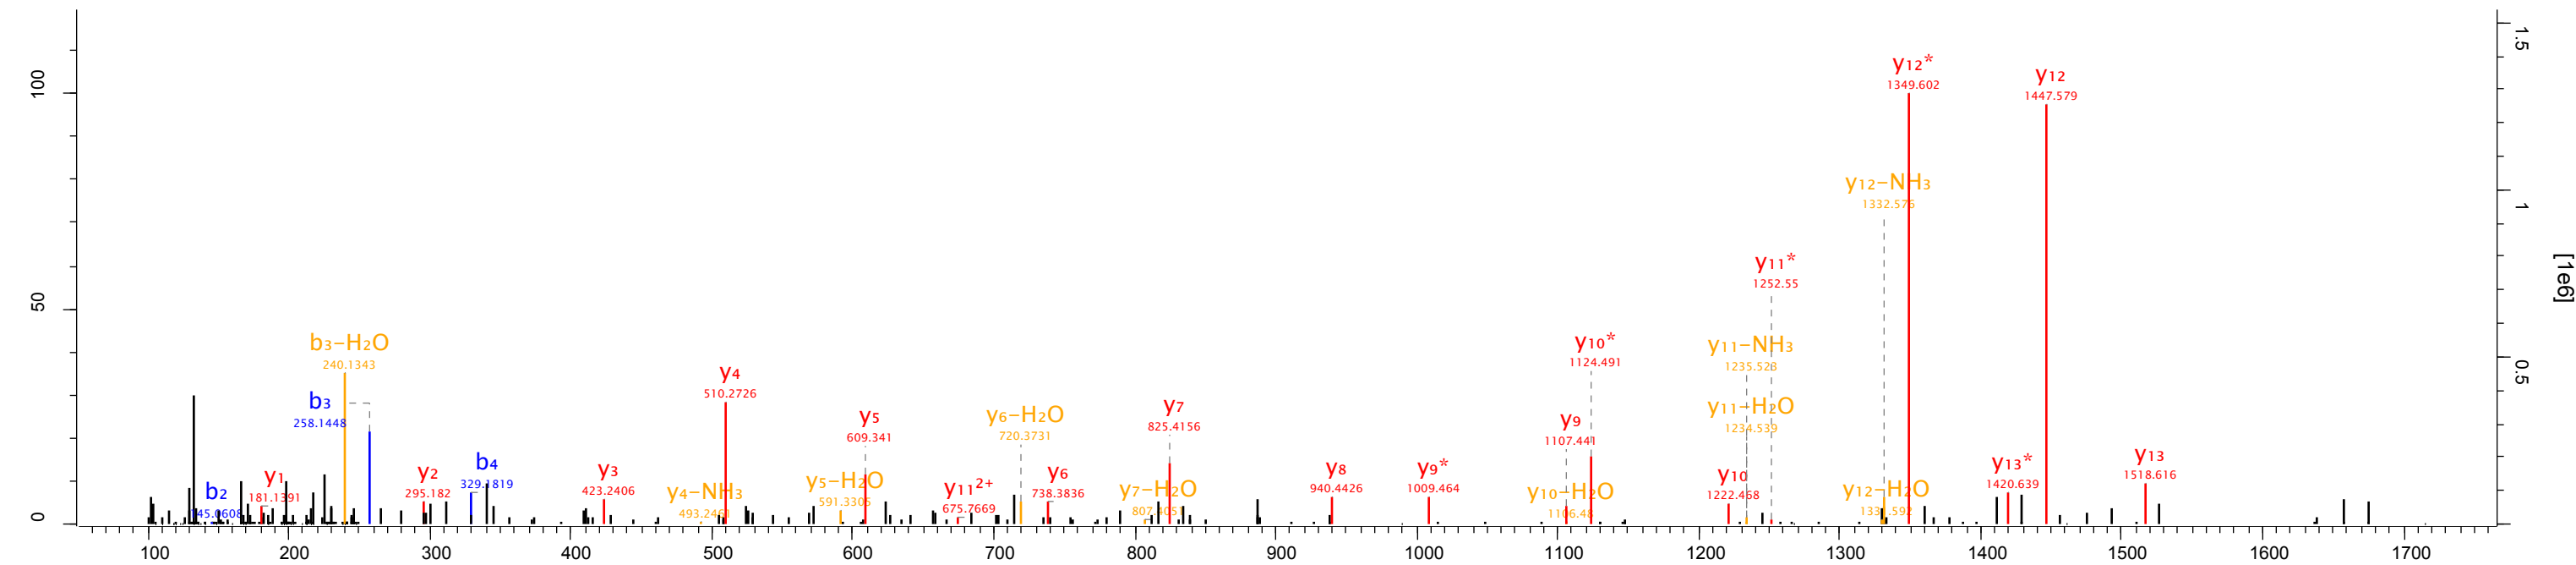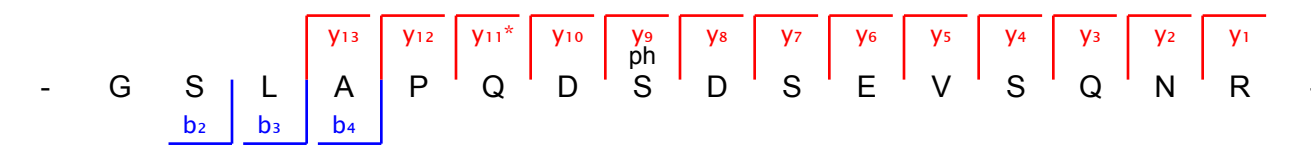

Raw file: 20150814\_A375SR\_Phospho\_BR2\_04  
 Scan: 8150 Method: FTMS; HCD Score: 183.25 m/z: 925.43 Gene names: STAU1

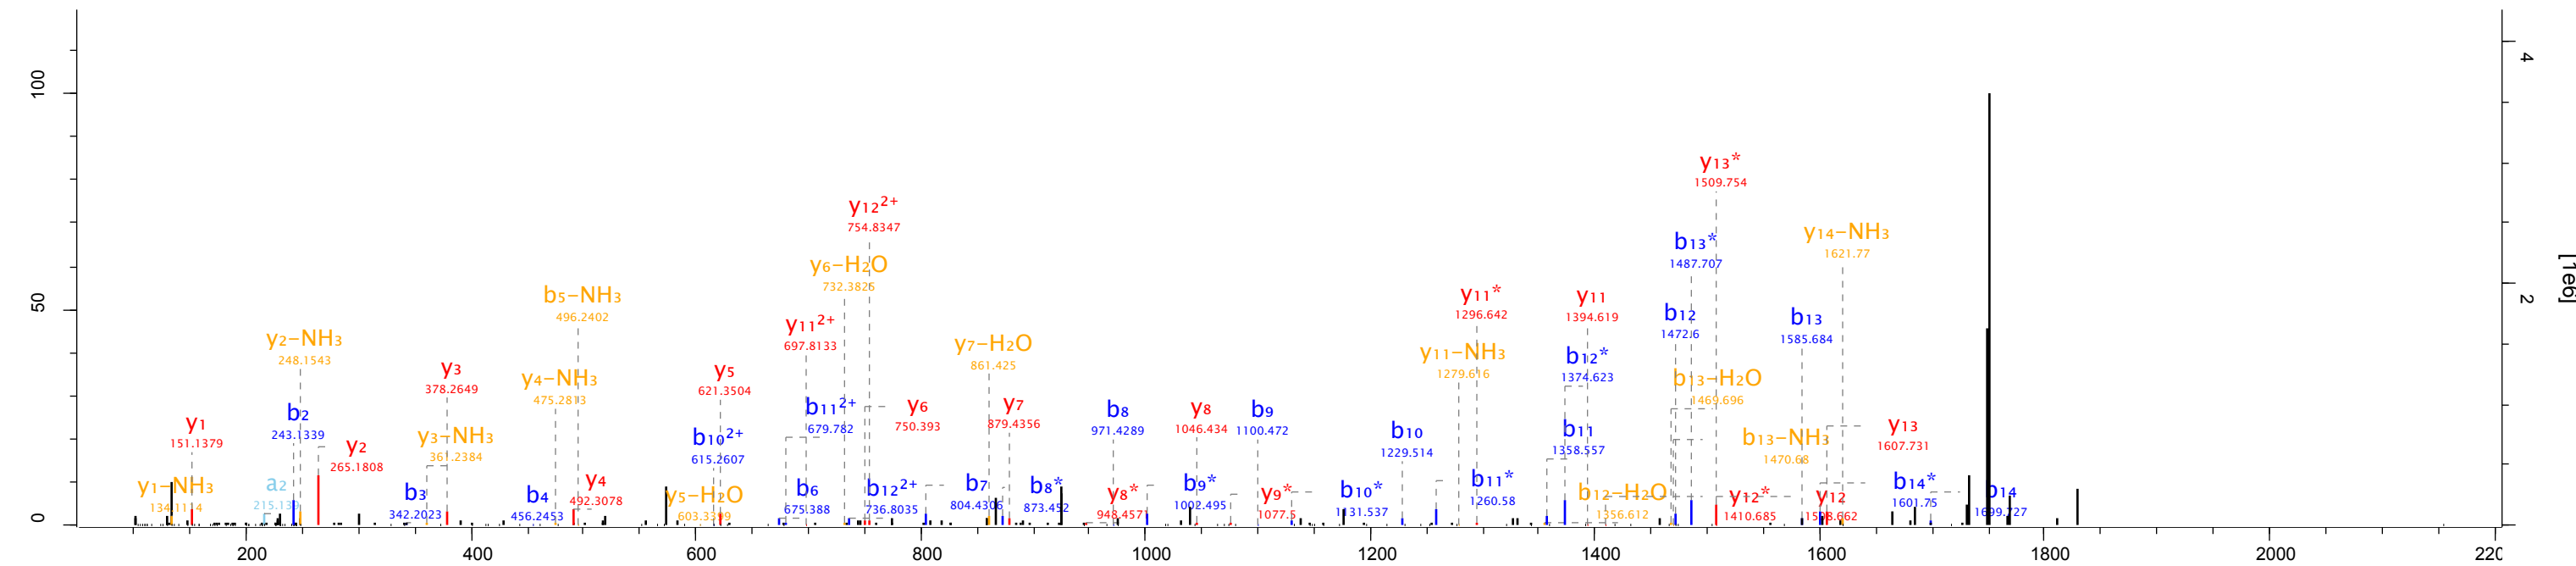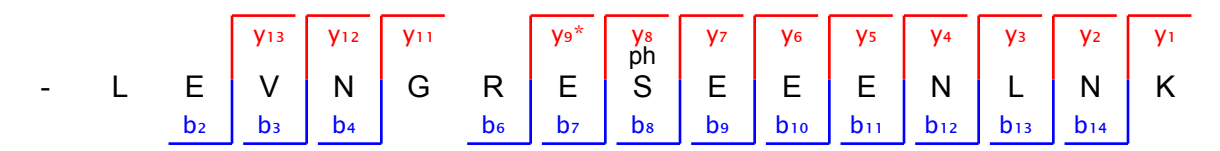

Raw file Scan Method Score m/z Gene names  
 20150814\_A375SR\_Phospho\_BR2\_04 8330 FTMS; HCD 243.23 761.71 SLC16A1

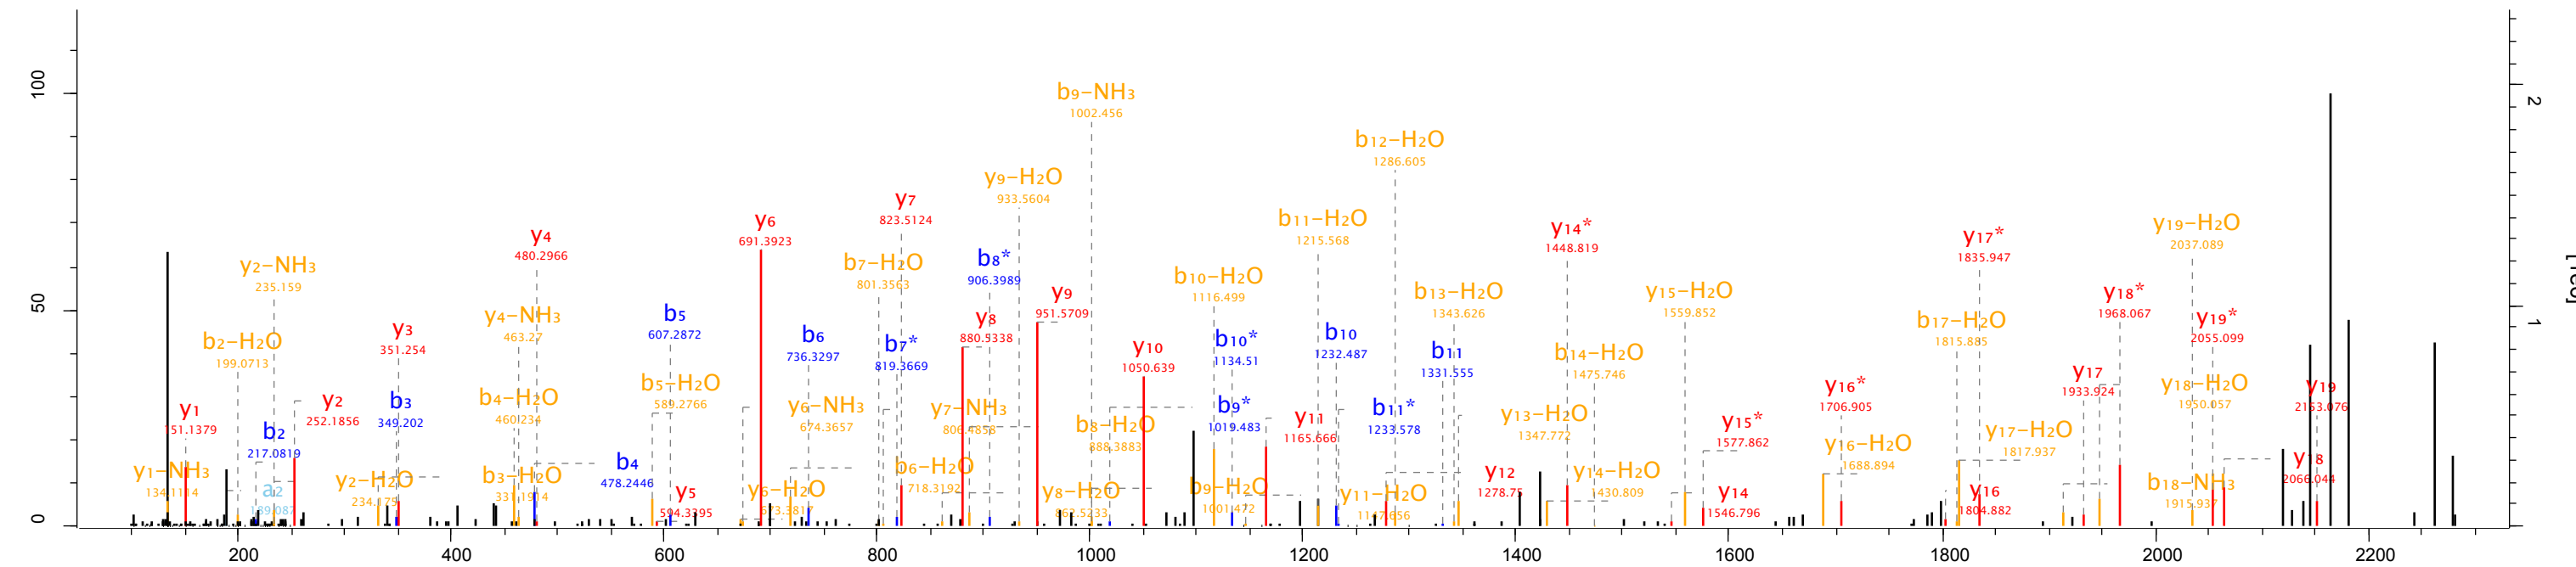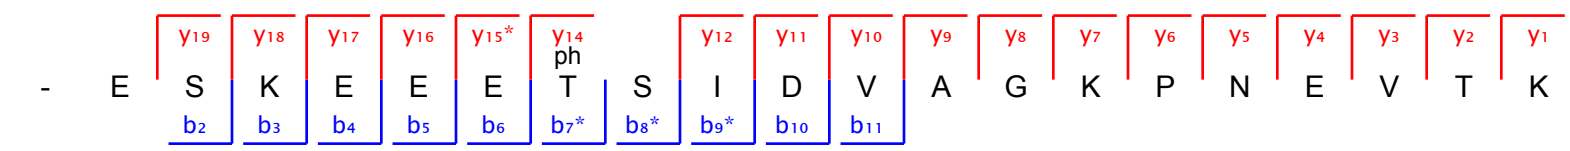

Raw file 20150814\_A375SR\_Phospho\_BR2\_04 Scan 8410 Method FTMS; HCD Score 96 m/z 651.97 Gene names NTHL1

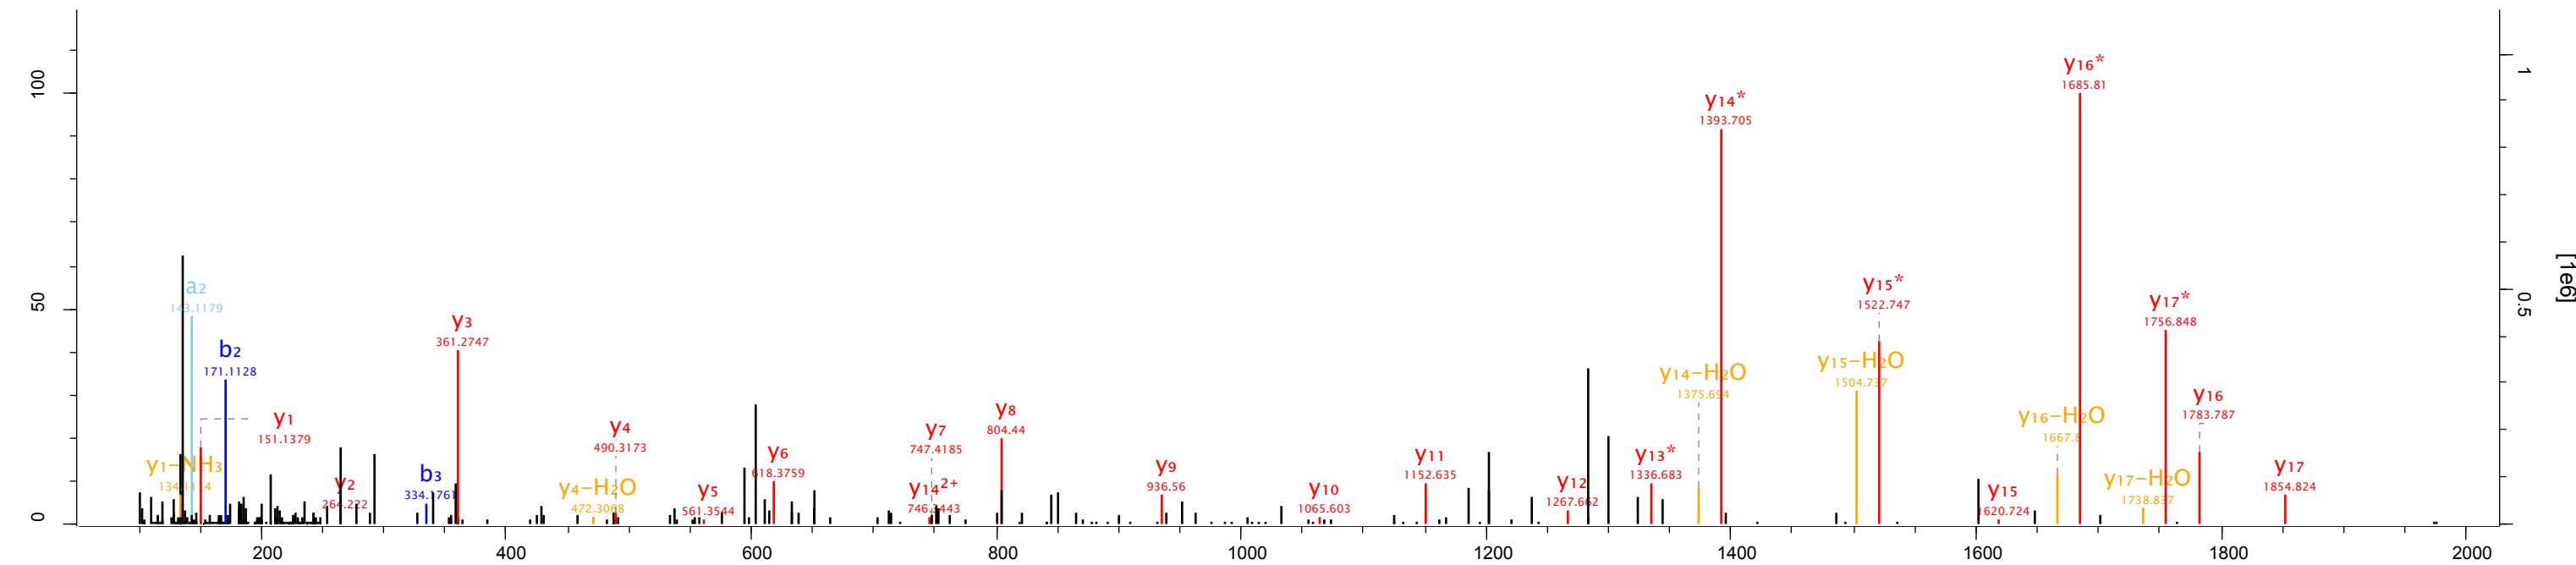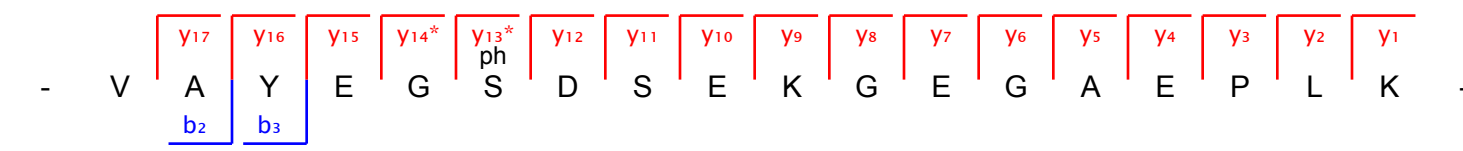



Raw file: 20150814\_A375SR\_Phospho\_BR2\_04  
 Scan: 8620 Method: FTMS; HCD Score: 101.45 m/z: 704.8 Gene names: ZNF768

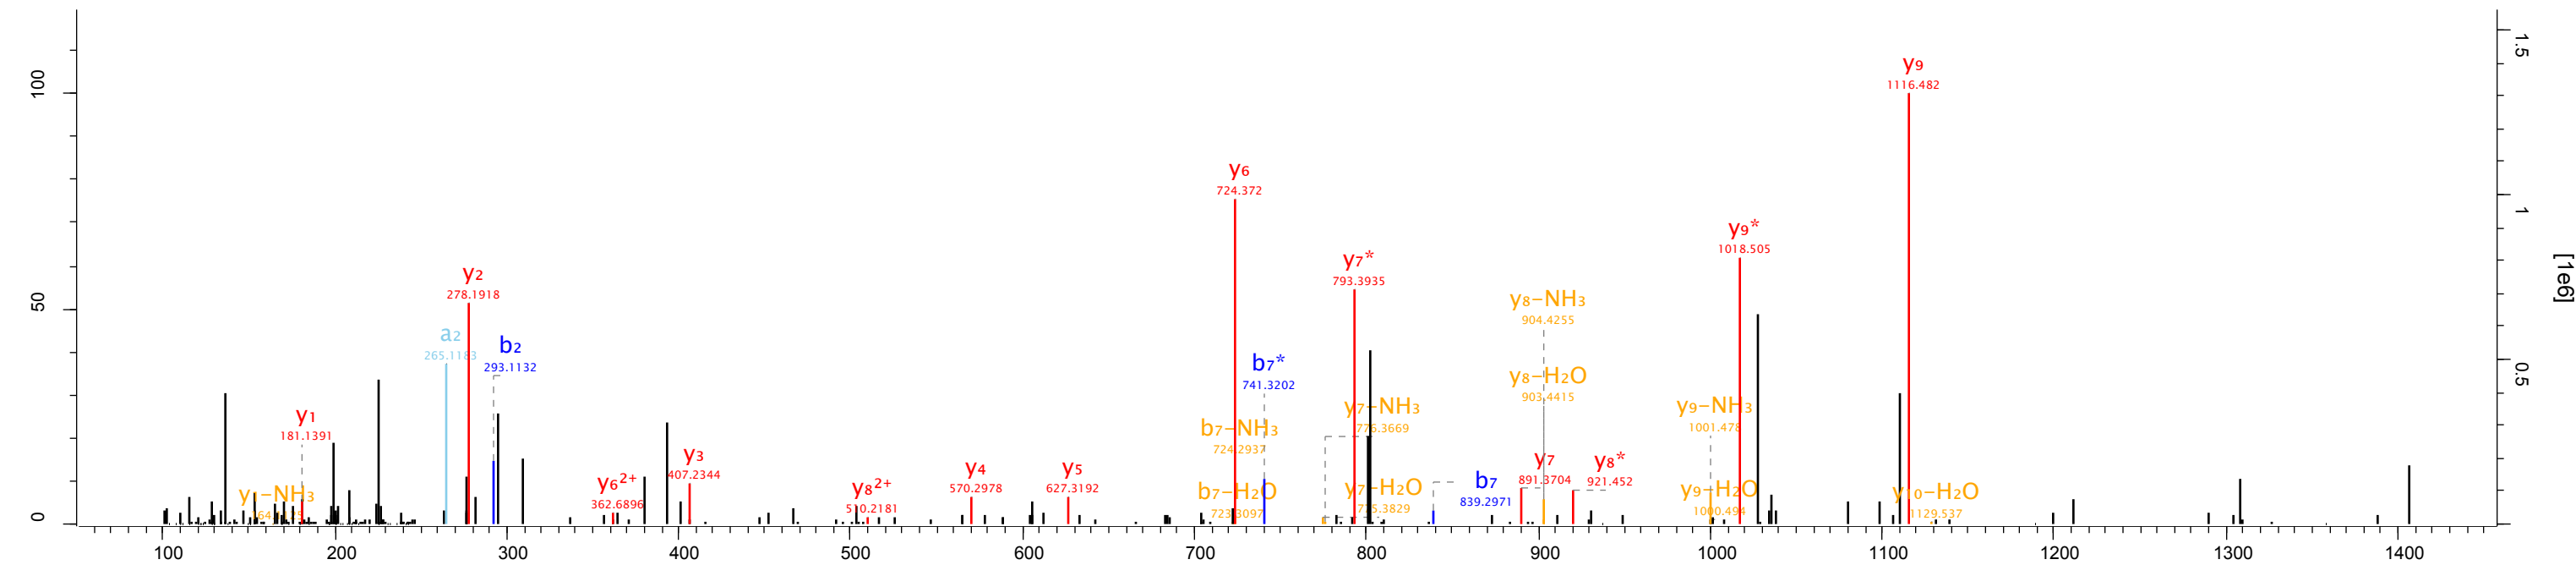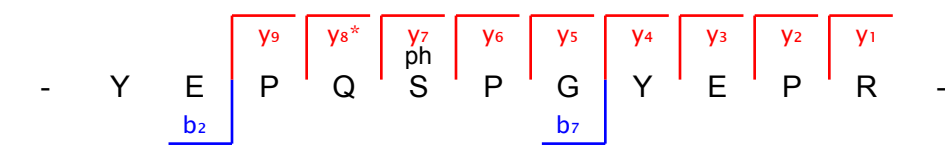

Raw file: 20150814\_A375SR\_Phospho\_BR2\_04  
 Scan: 8970 Method: FTMS; HCD Score: 352.8 m/z: 1188.98 Gene names: PGRMC1

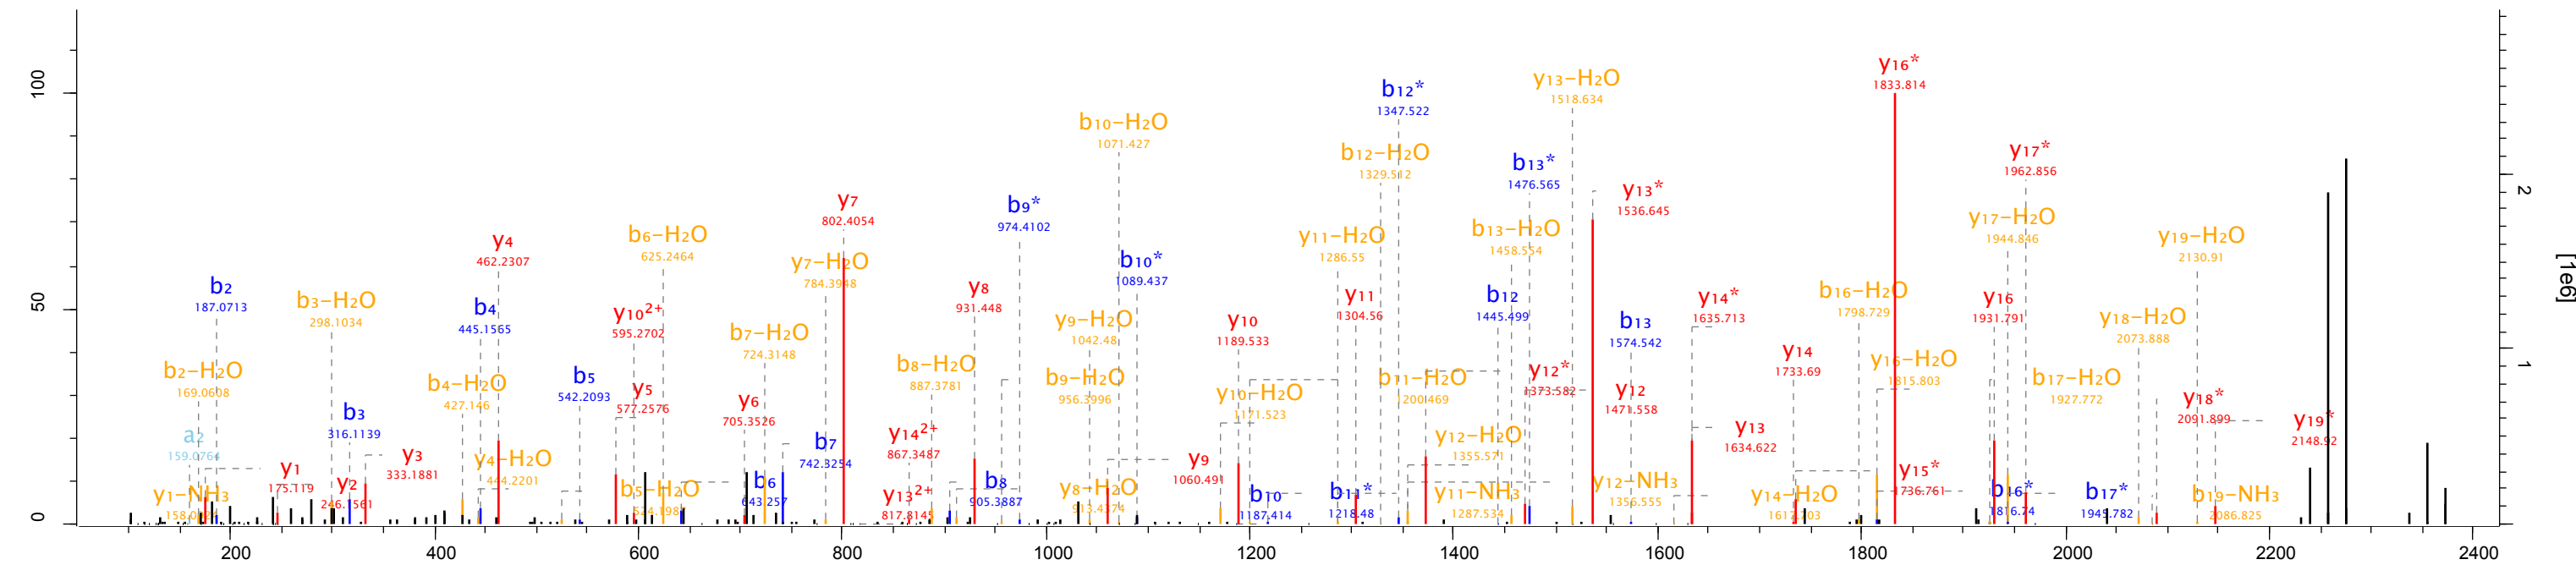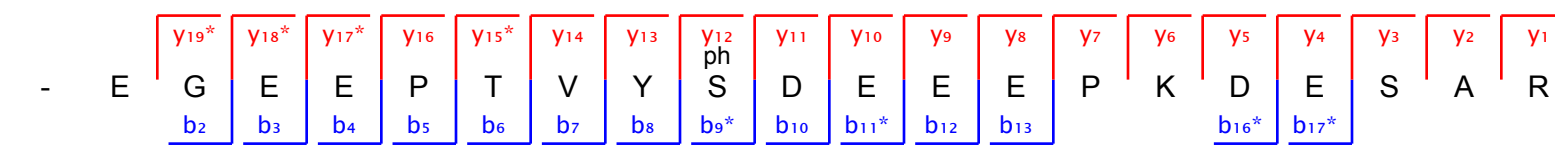

Raw file: 20150814\_A375SR\_Phospho\_BR2\_04  
 Scan: 9010 Method: FTMS; HCD Score: 90.83 m/z: 447.72 Gene names: BICD2

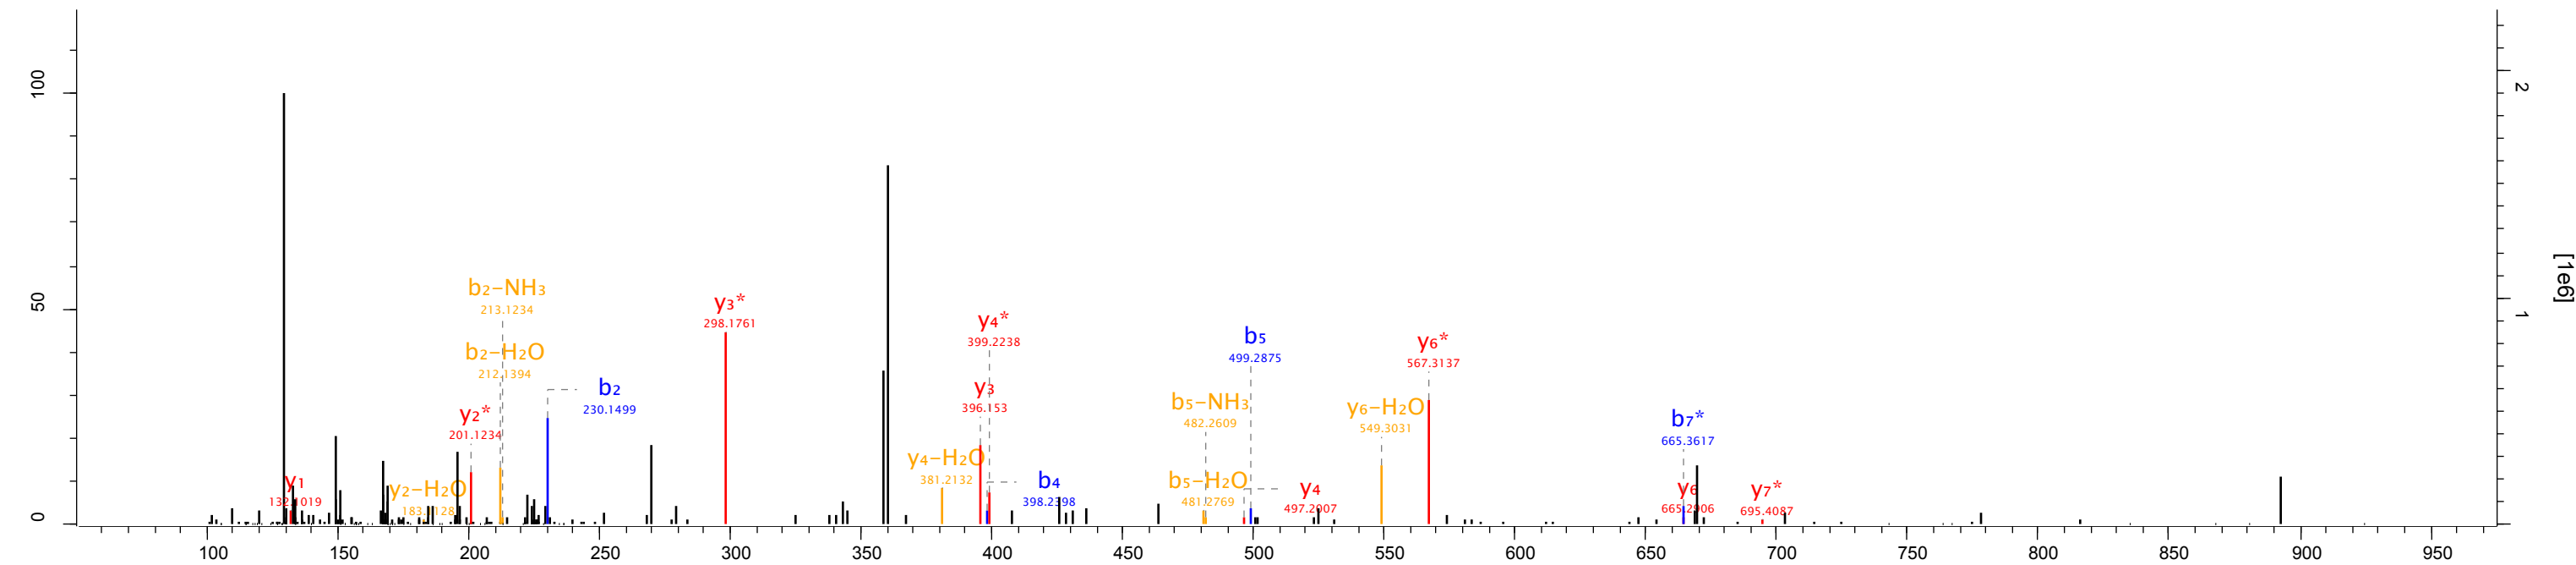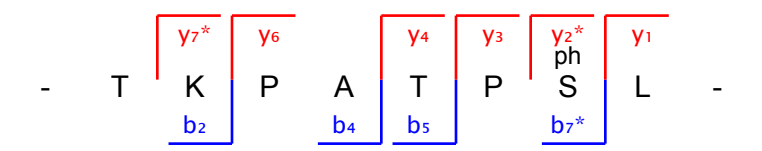

Raw file: 20150814\_A375SR\_Phospho\_BR2\_04  
 Scan: 9180 Method: FTMS; HCD Score: 194.55 m/z: 659.32 Gene names: PPA2

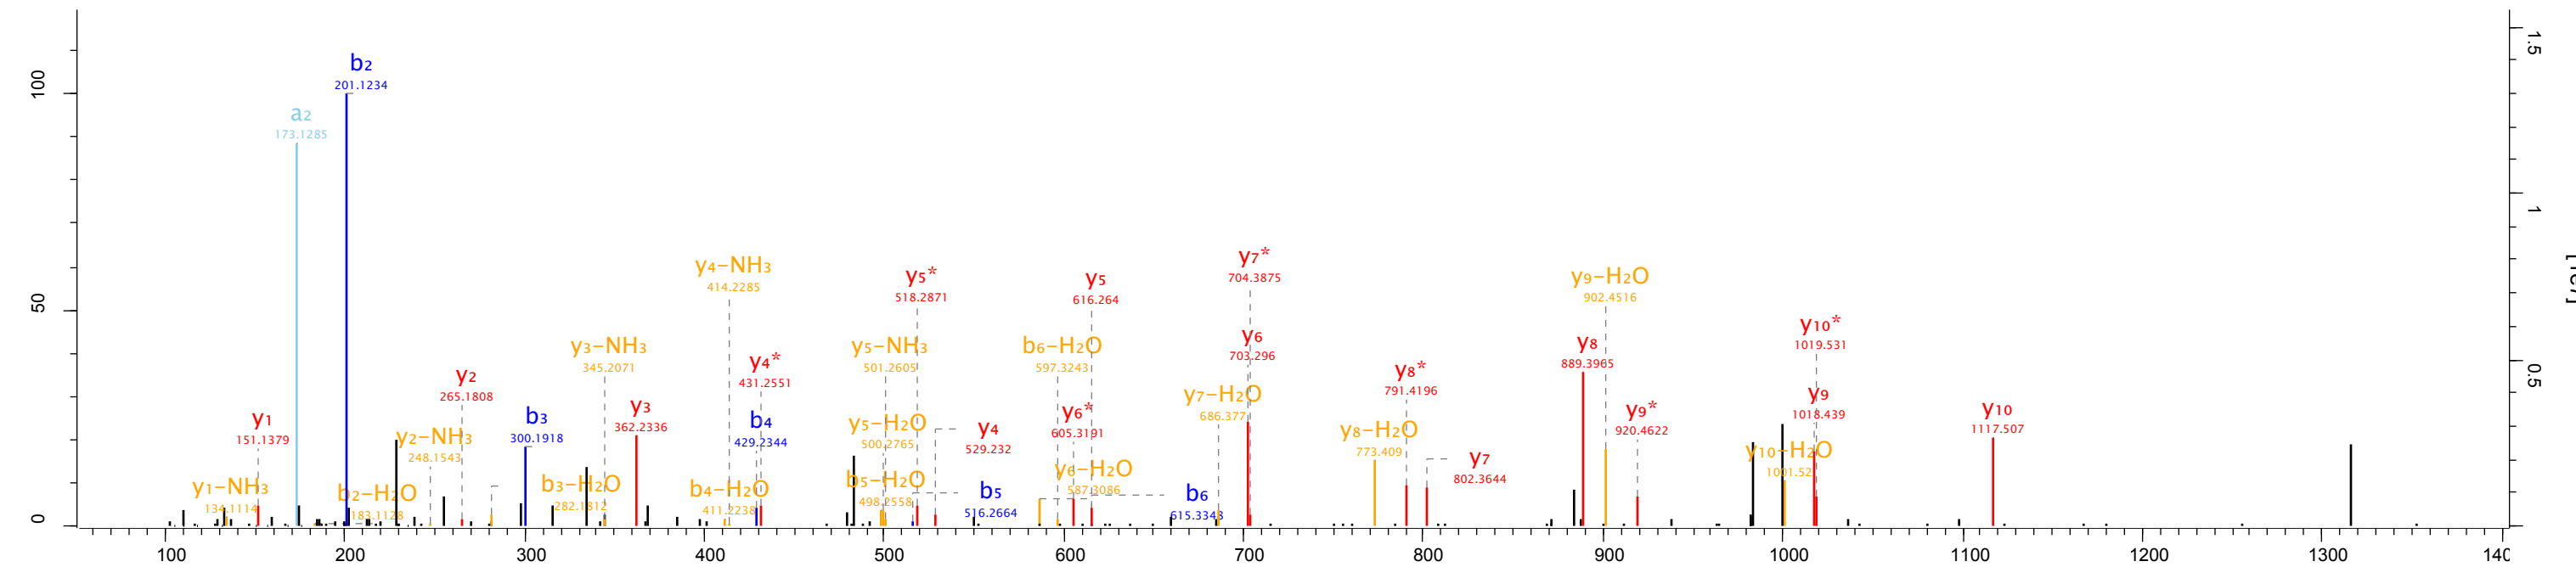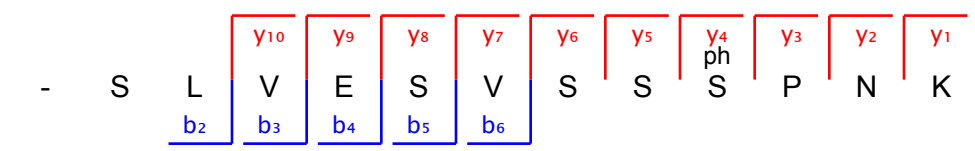

Raw file: 20150814\_A375SR\_Phospho\_BR2\_04  
 Scan: 9940 Method: FTMS; HCD Score: 135.56 m/z: 456.73 Gene names: AKAP1

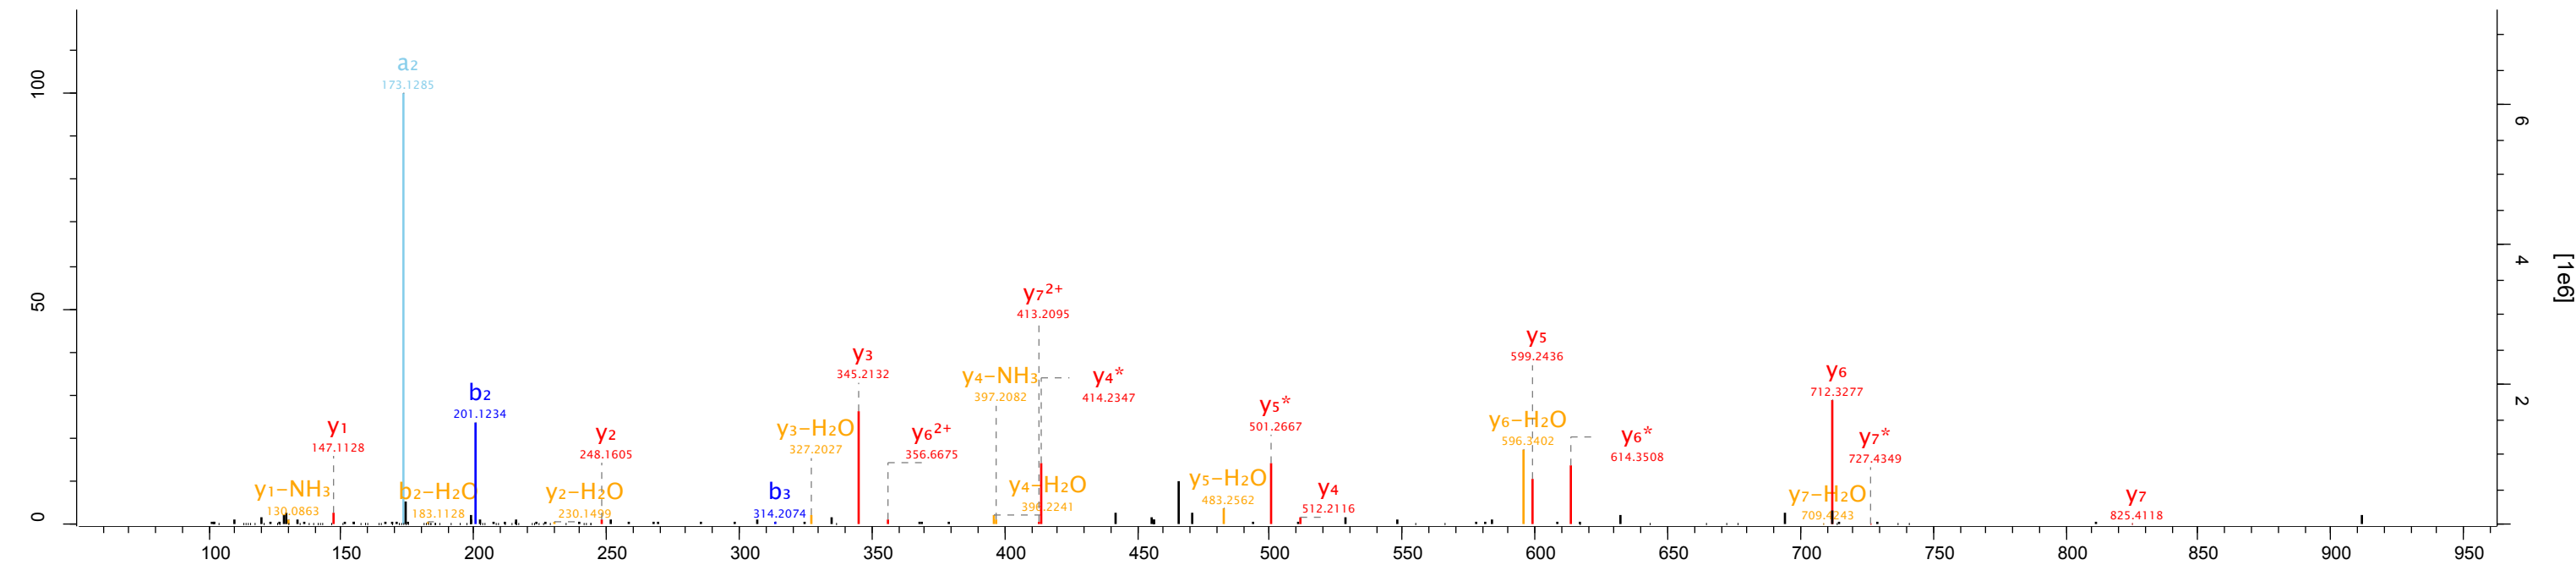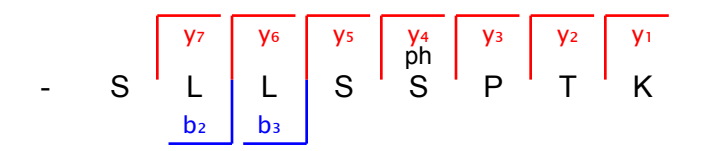

Raw file: 20150814\_A375SR\_Phospho\_BR2\_05  
 Scan: 10220 Method: FTMS; HCD Score: 75.42 m/z: 470.23 Gene names: TOB2

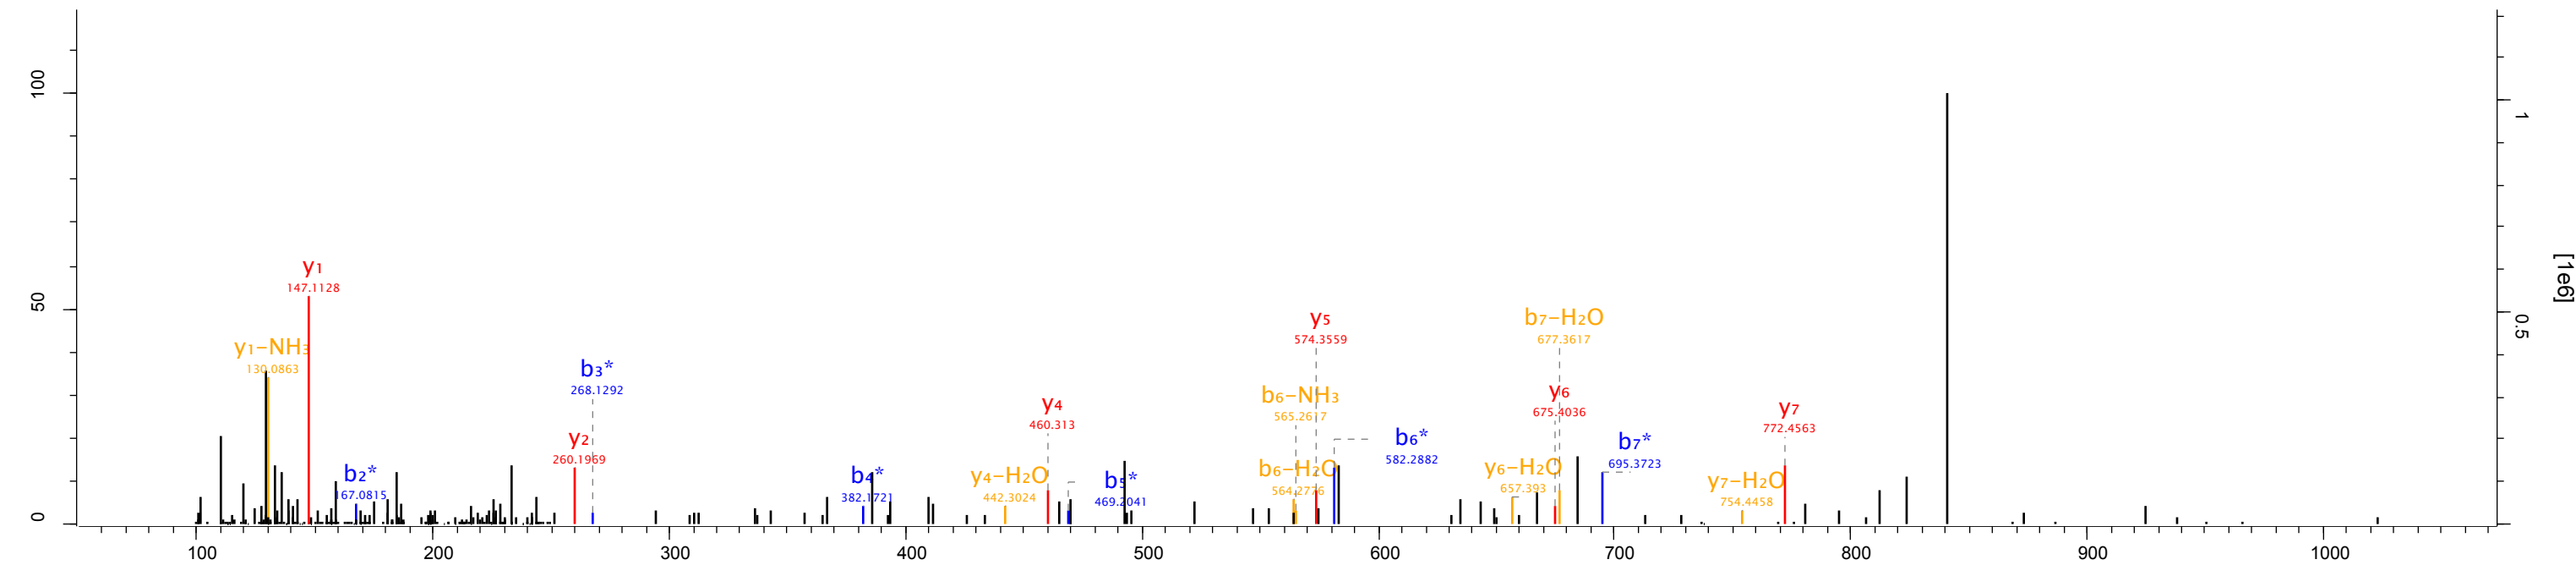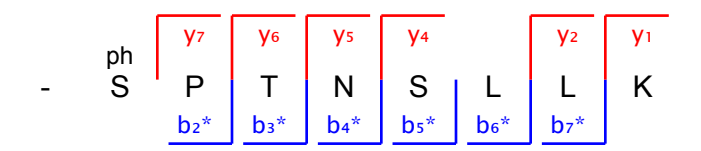

Raw file: 20150814\_A375SR\_Phospho\_BR2\_05  
 Scan: 10940 Method: FTMS; HCD Score: 94.26 m/z: 620.32 Gene names: USP1

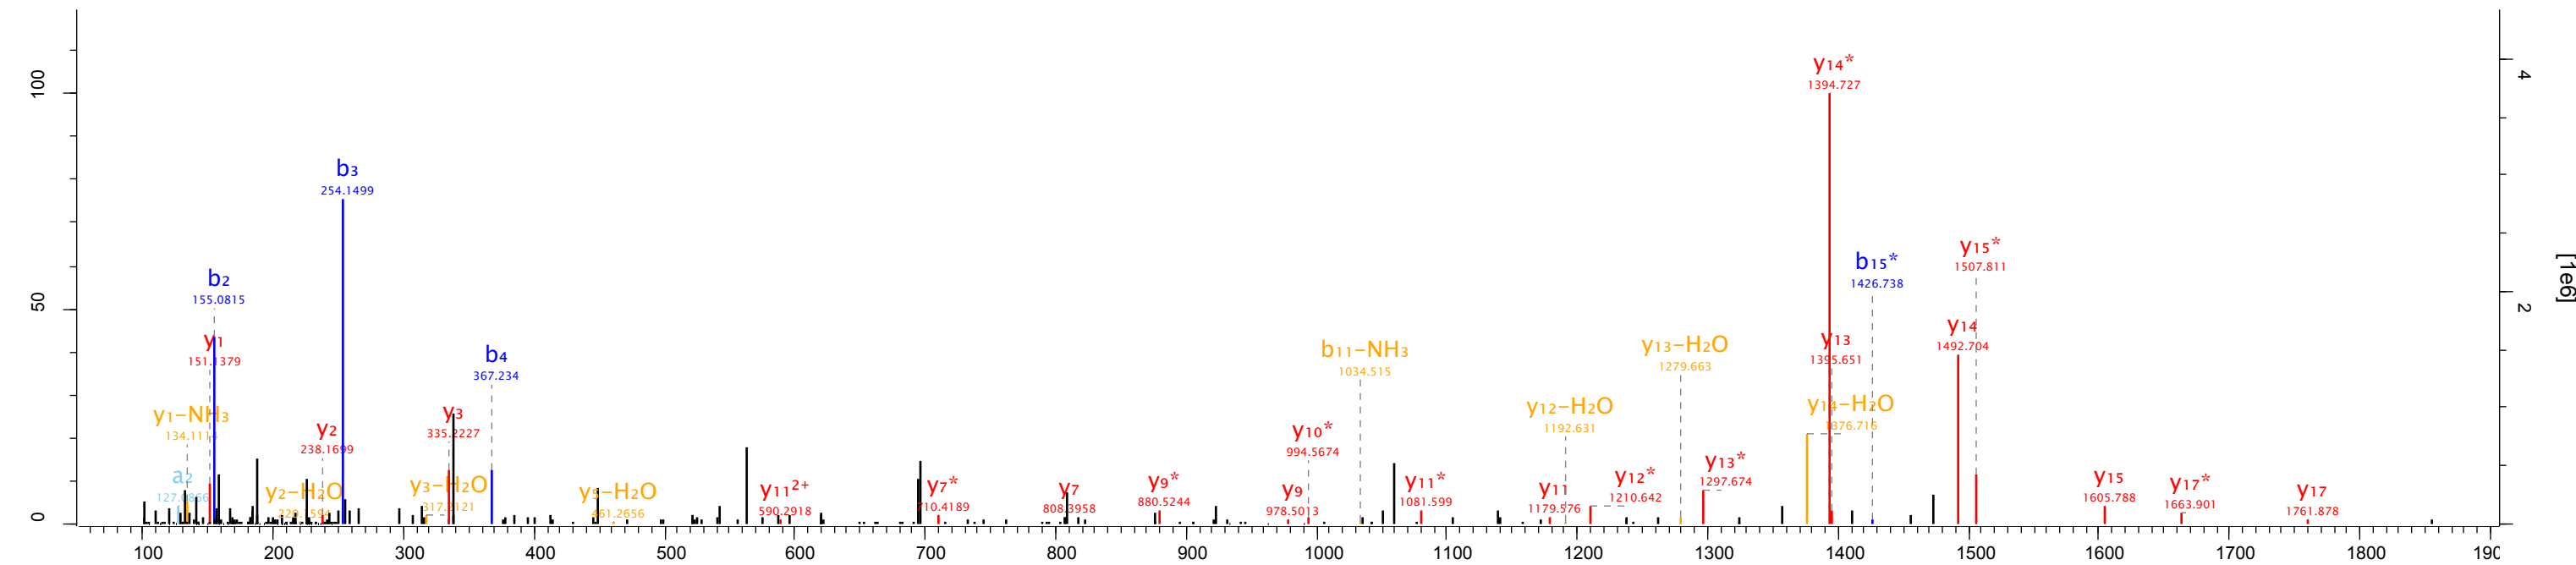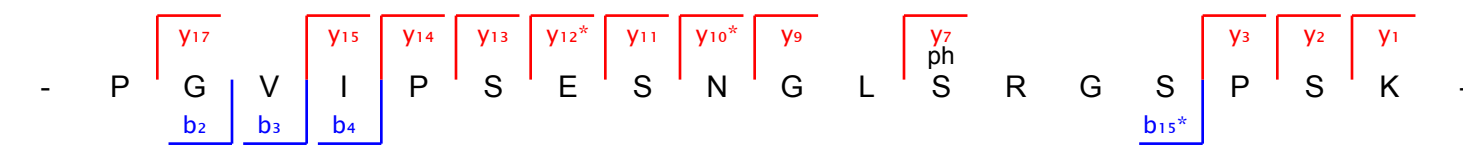

Raw file 20150814\_A375SR\_Phospho\_BR2\_05 Scan 11110 Method FTMS; HCD Score 248.52 m/z 961.94 Gene names TRIP10

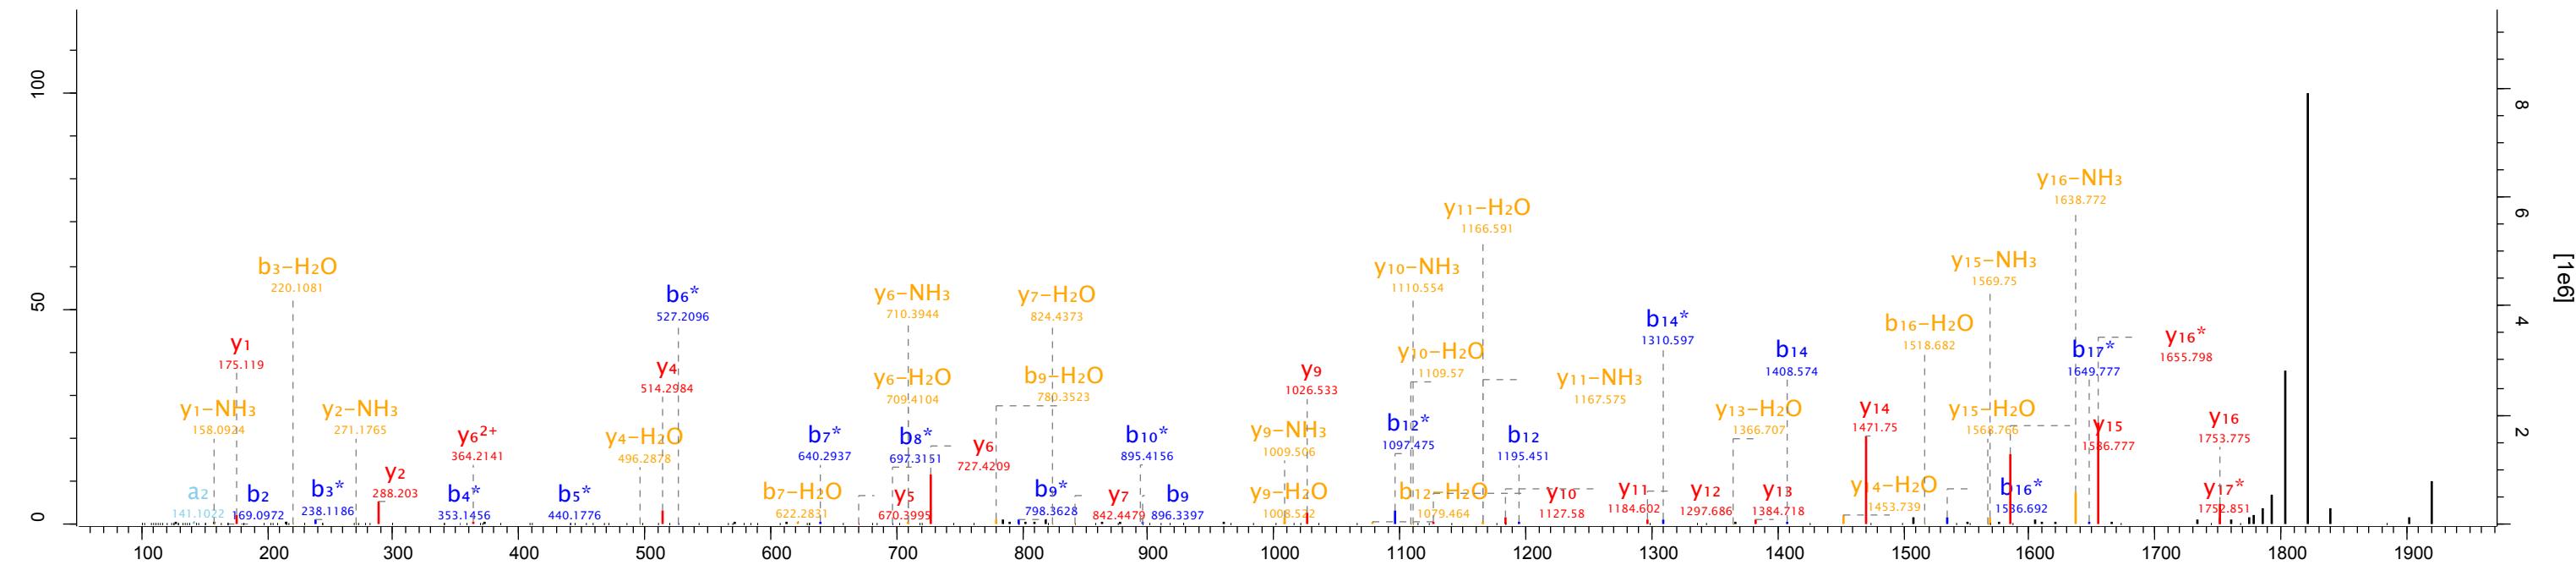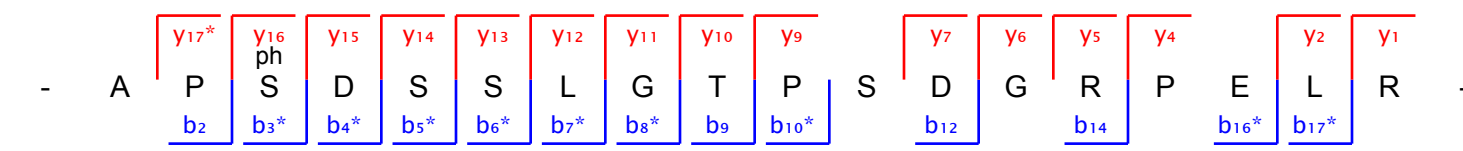



Raw file 20150814\_A375SR\_Phospho\_BR2\_05 Scan 11290 Method FTMS; HCD Score 180.62 m/z 714.82 Gene names LYN

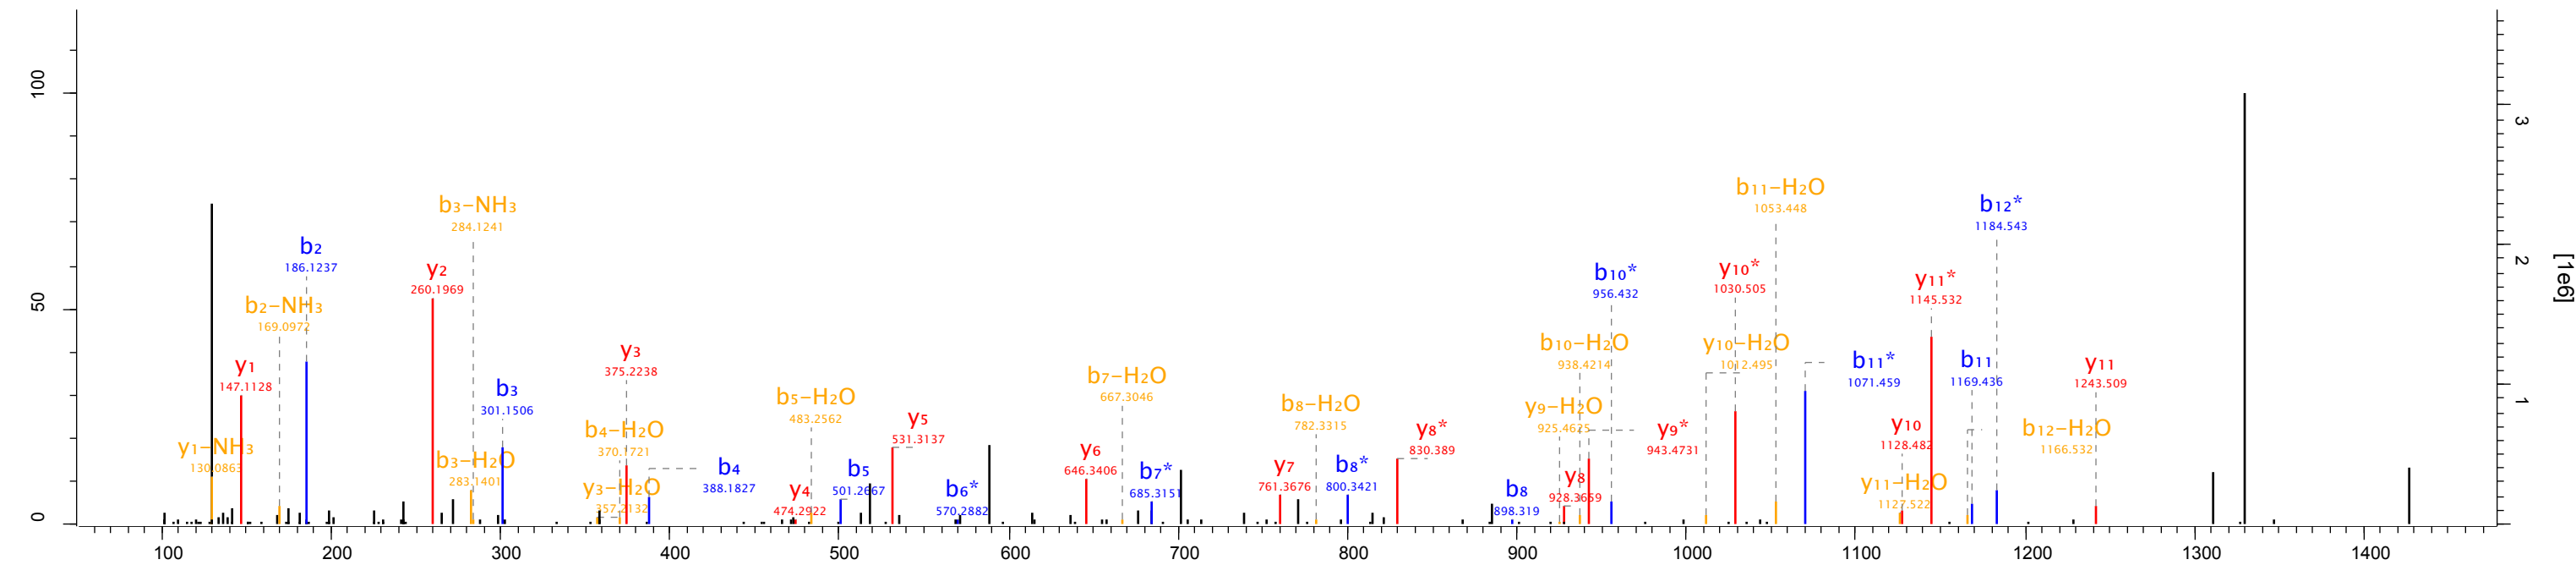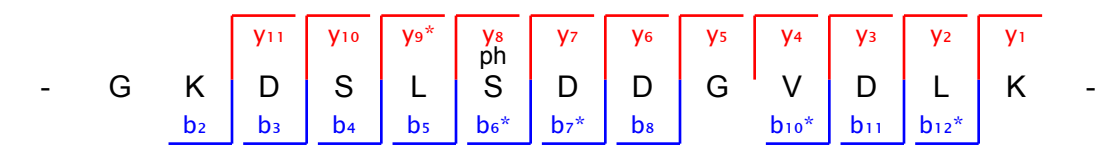

Raw file 20150814\_A375SR\_Phospho\_BR2\_05 Scan 11470 Method FTMS; HCD Score 50.48 m/z 520.24 Gene names MAP1B

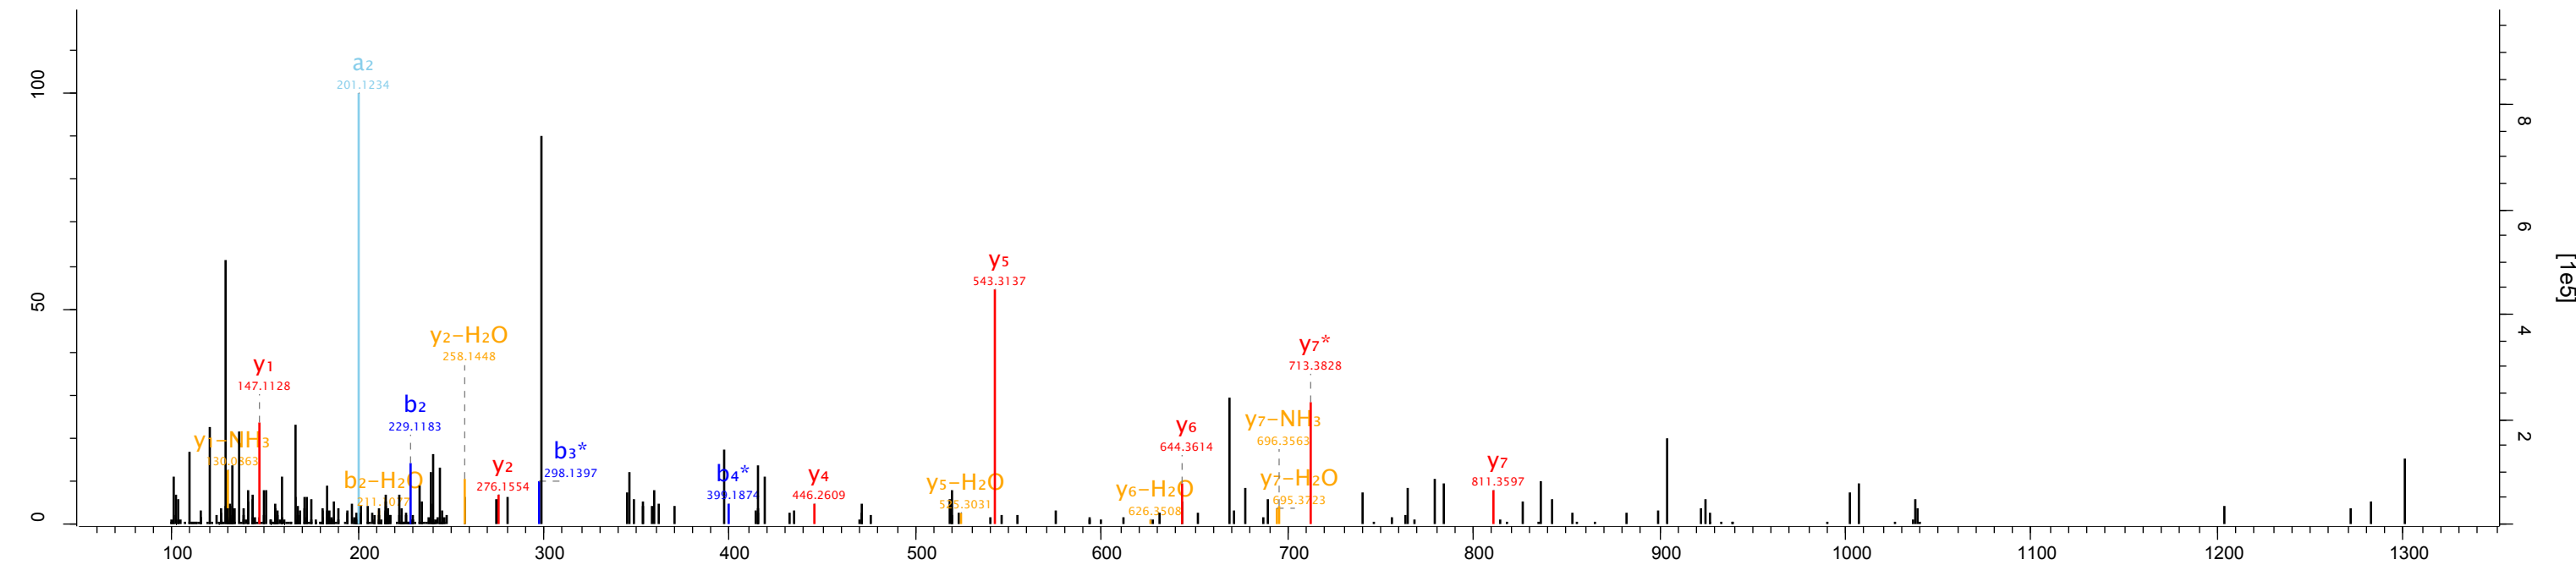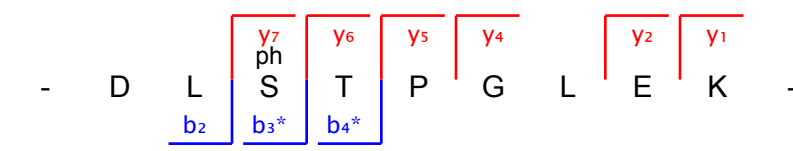

Raw file: 20150814\_A375SR\_Phospho\_BR2\_05  
 Scan: 11870 Method: FTMS; HCD Score: 143.46 m/z: 714.85 Gene names: TFAP4

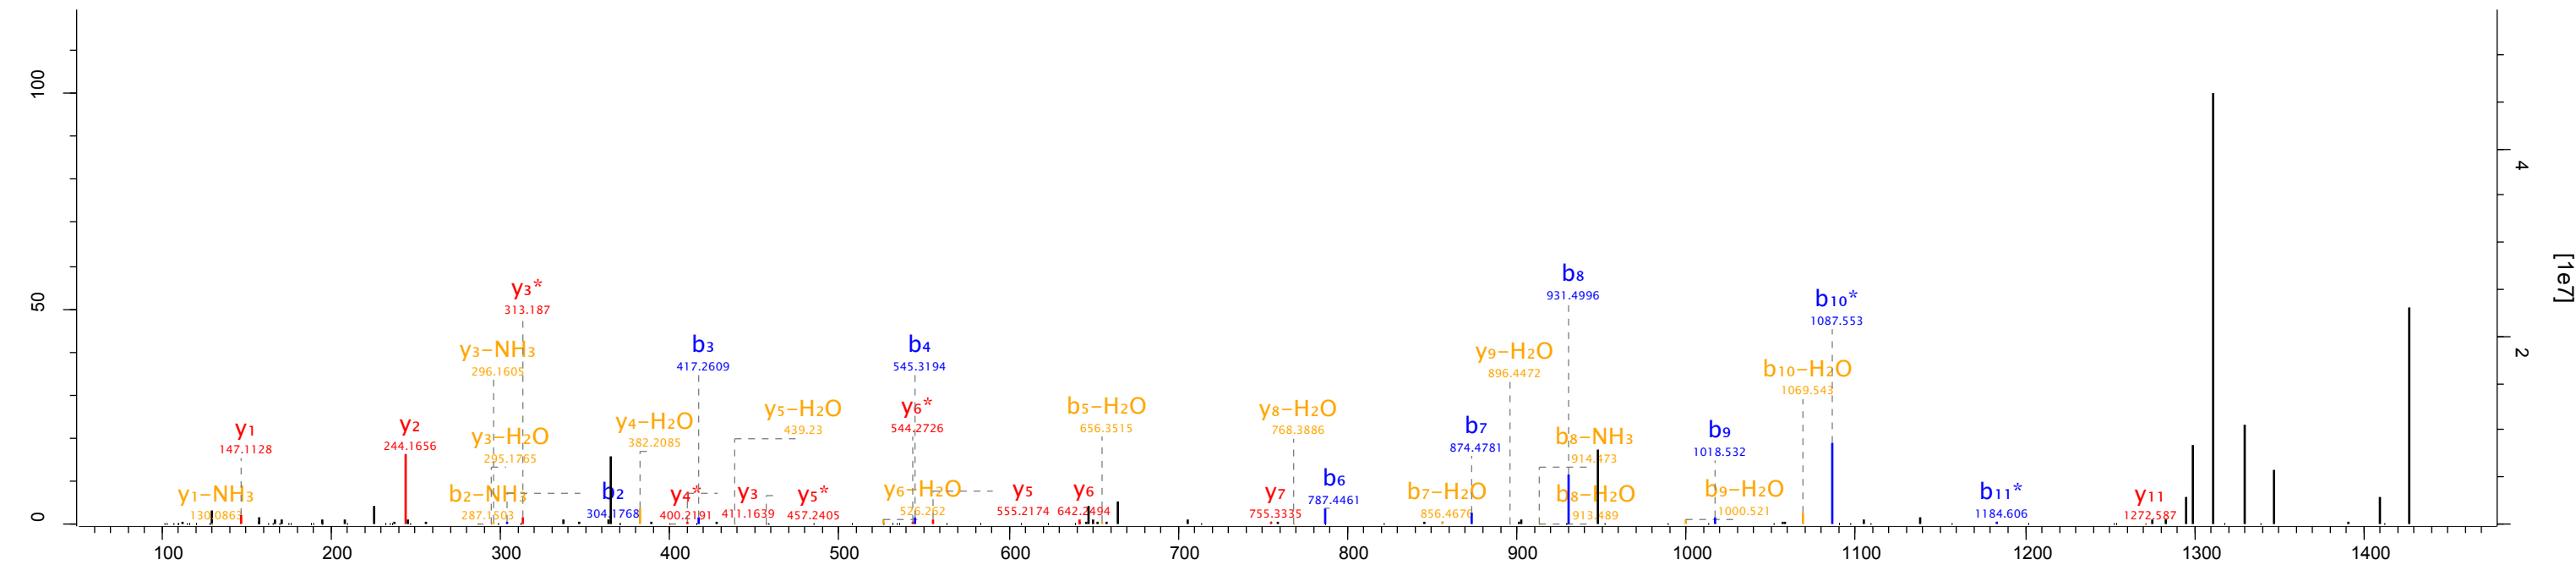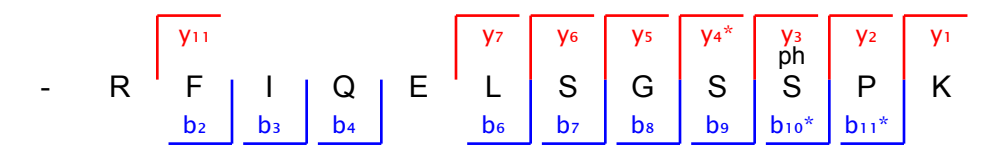

Raw file 20150814\_A375SR\_Phospho\_BR2\_05 Scan 12250 Method FTMS; HCD Score 101.5 m/z 840.85 Gene names NUP153

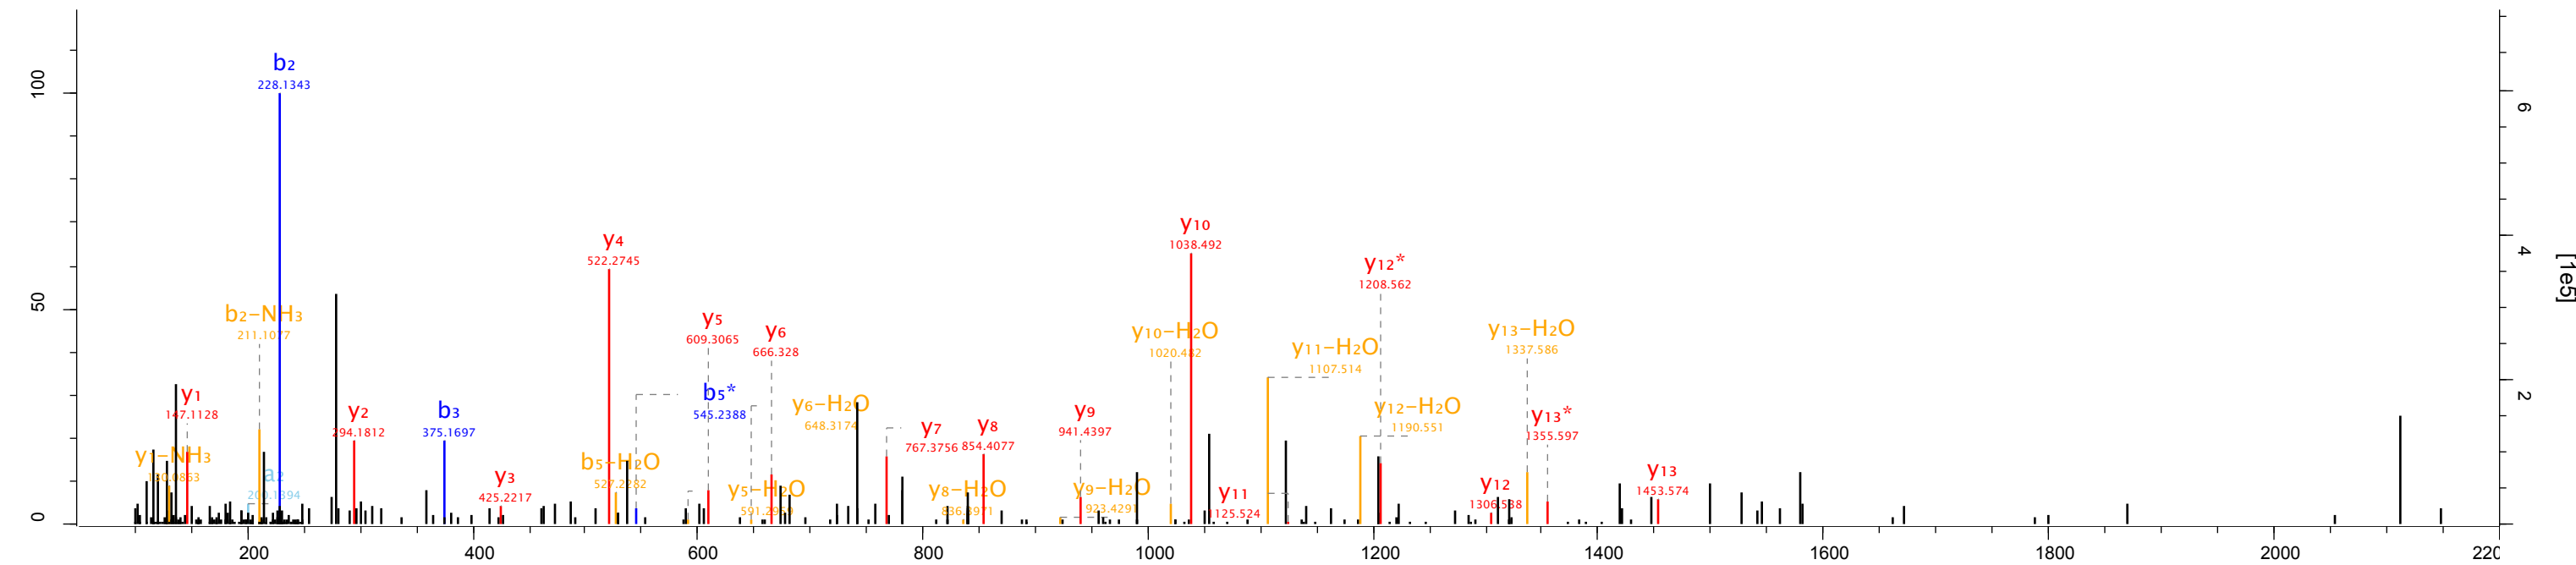

- V Q M S P S S T G S P M F K -

Fragmentation sites are indicated by brackets below the sequence:

- Q (b<sub>2</sub>)
- M (b<sub>3</sub>)
- S (b<sub>5</sub>\*)
- S (y<sub>13</sub> ox)
- T (y<sub>12</sub> ph)
- P (y<sub>11</sub>)
- S (y<sub>10</sub>)
- S (y<sub>9</sub>)
- T (y<sub>8</sub>)
- G (y<sub>7</sub>)
- S (y<sub>6</sub>)
- P (y<sub>5</sub>)
- M (y<sub>4</sub>)
- F (y<sub>3</sub>)
- K (y<sub>2</sub>)
- K (y<sub>1</sub>)

Raw file: 20150814\_A375SR\_Phospho\_BR2\_05  
 Scan: 12550 Method: FTMS; HCD Score: 118.42 m/z: 791.86 Gene names: CEP170

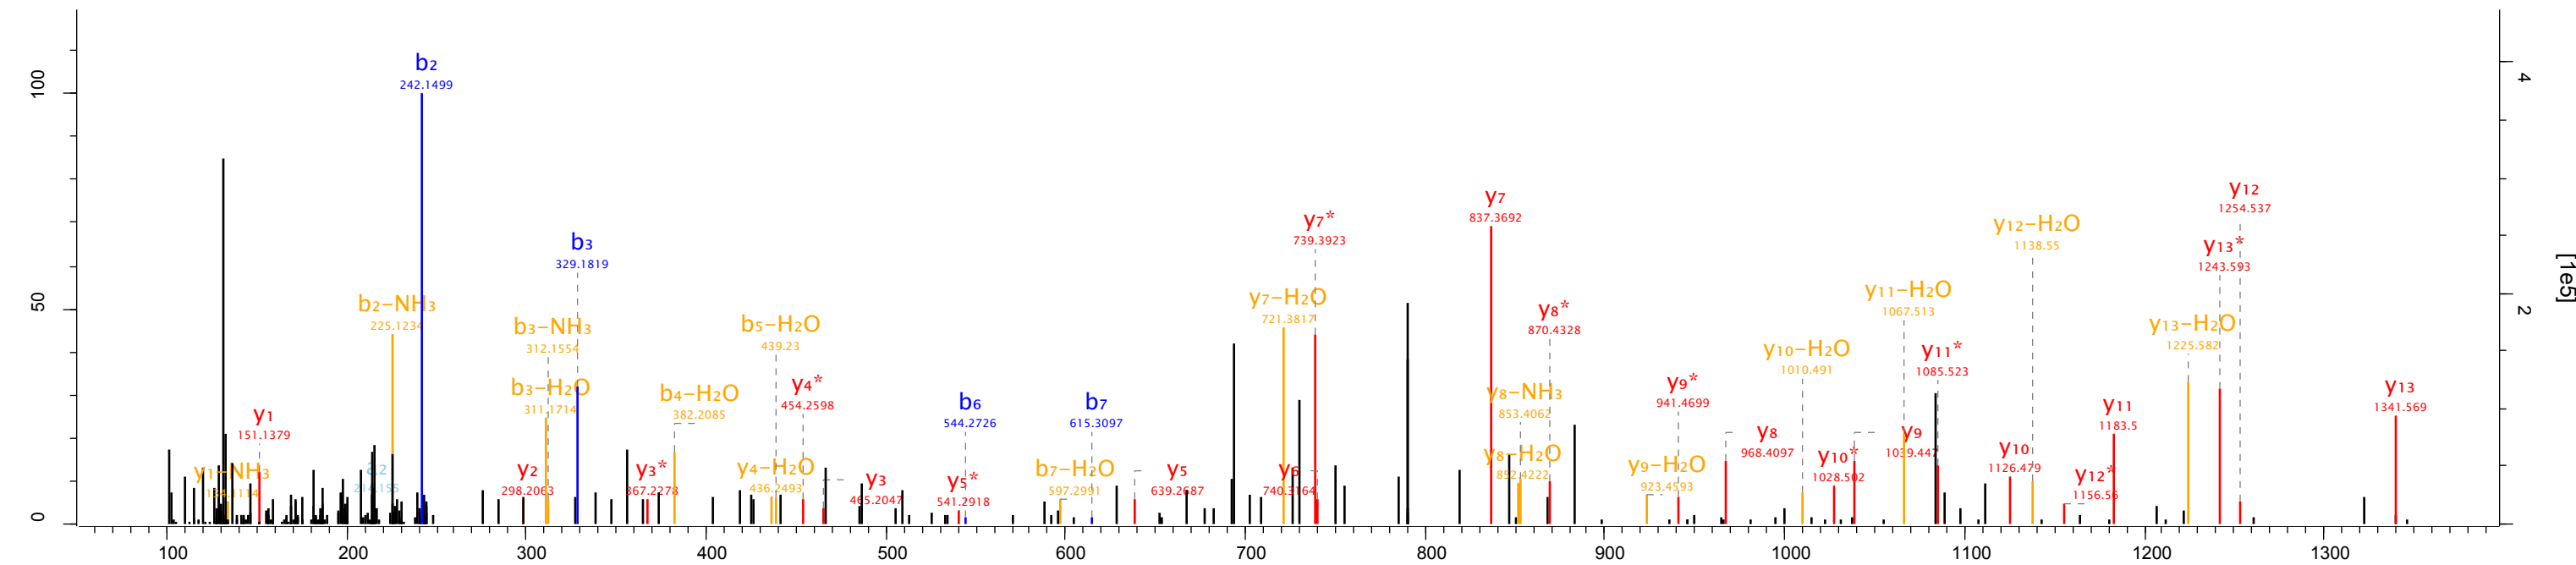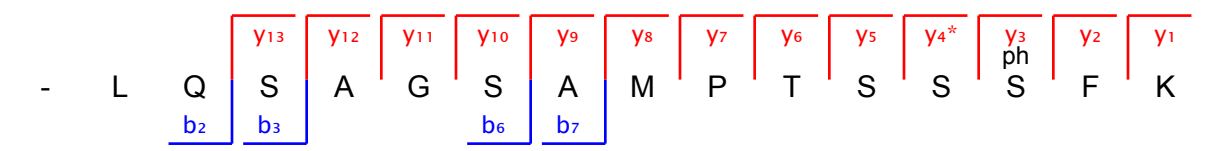

Raw file: 20150814\_A375SR\_Phospho\_BR2\_05  
 Scan: 12630 Method: FTMS; HCD Score: 111.77 m/z: 725.88 Gene names: DOT1L

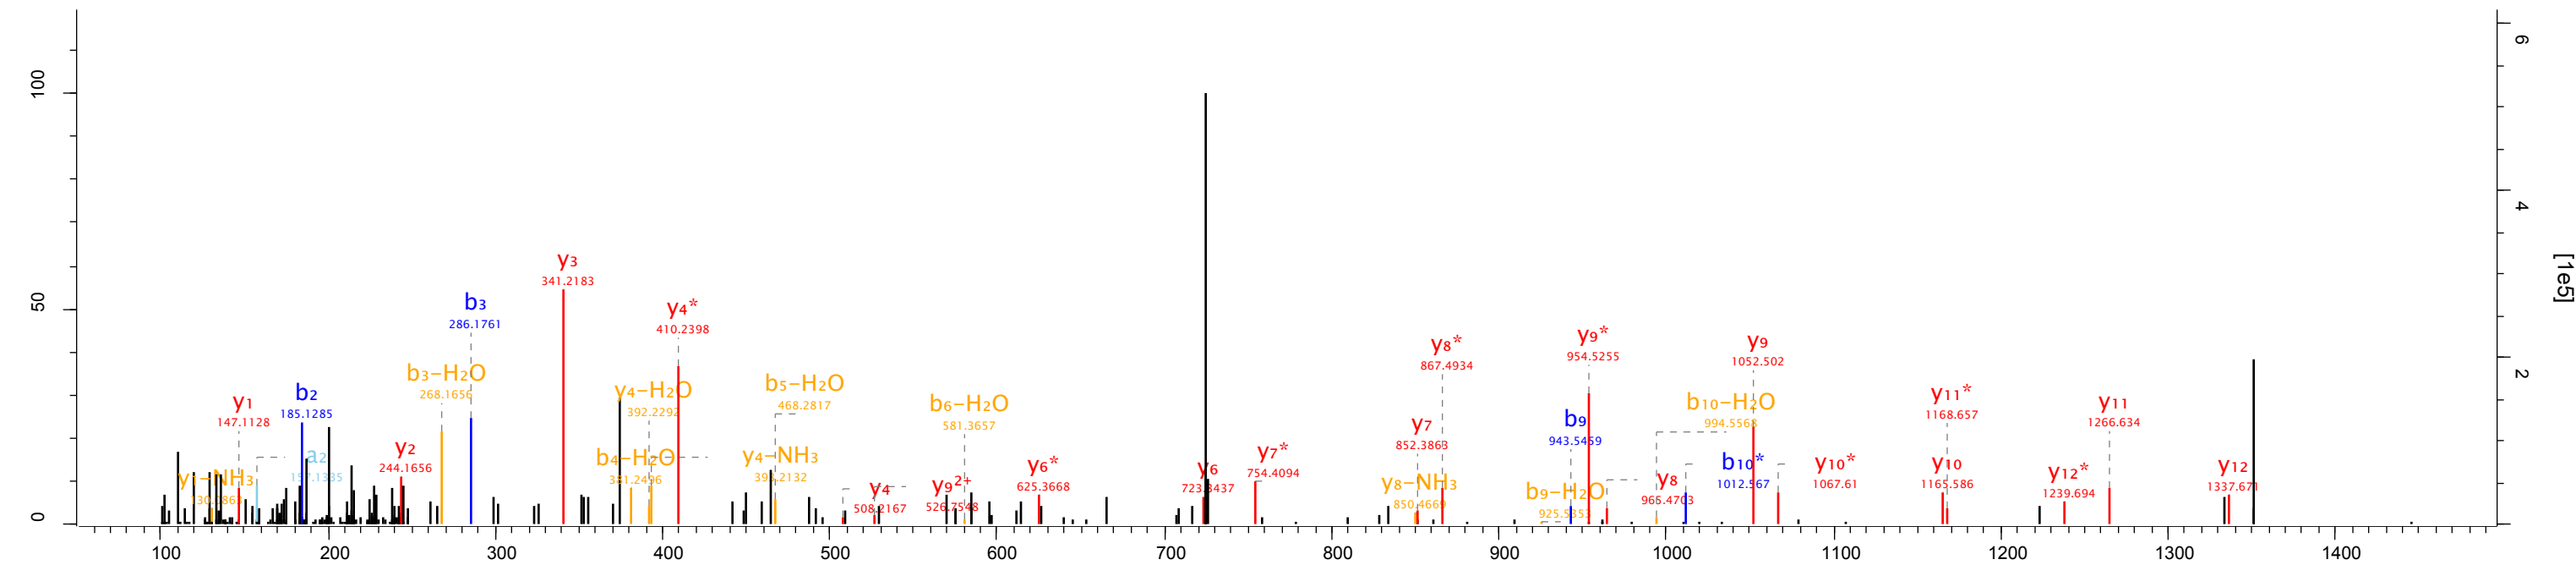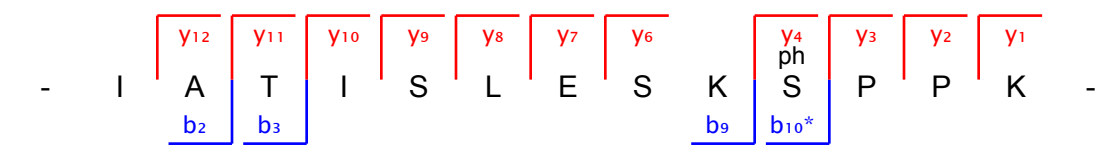

Raw file: 20150814\_A375SR\_Phospho\_BR2\_05  
 Scan: 12650 Method: FTMS; HCD Score: 267.25 m/z: 766.38 Gene names: FMNL2

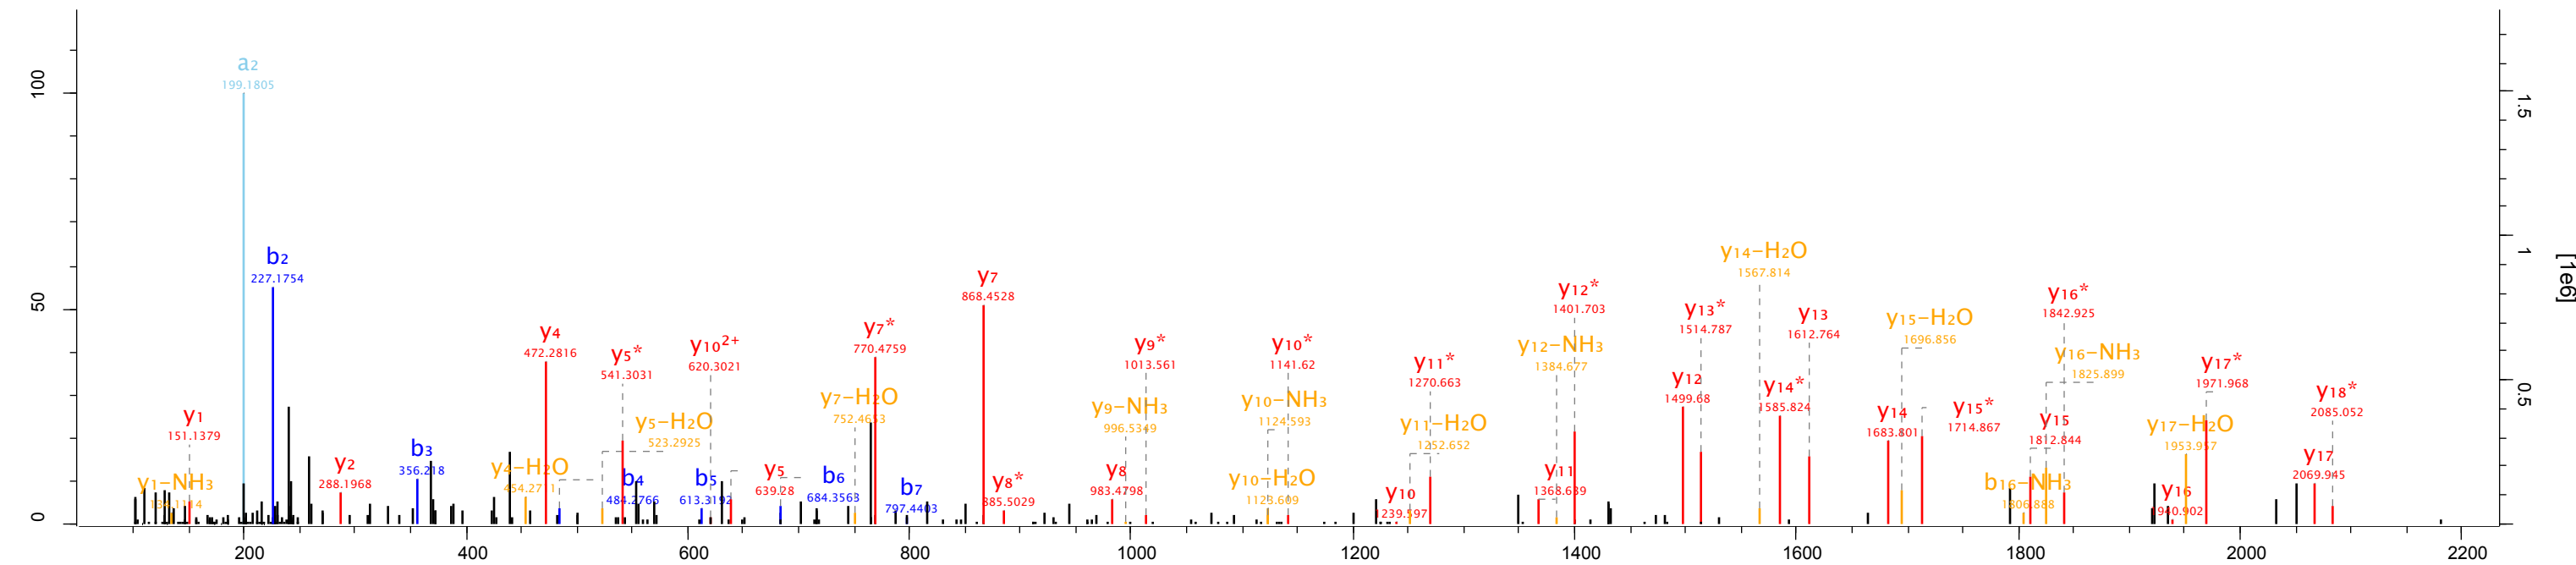

Sequence: L L E Q E A L M E Q Q D P K S P S H K -

Fragmentation sites (b ions): L, E, Q, E, A, L

Fragmentation sites (y ions): M, E, Q, Q, D, P, K, S, P, S, H, K

Raw file: 20150814\_A375SR\_Phospho\_BR2\_05  
 Scan: 1270 Method: FTMS; HCD Score: 69.67 m/z: 498.24 Gene names: HTT

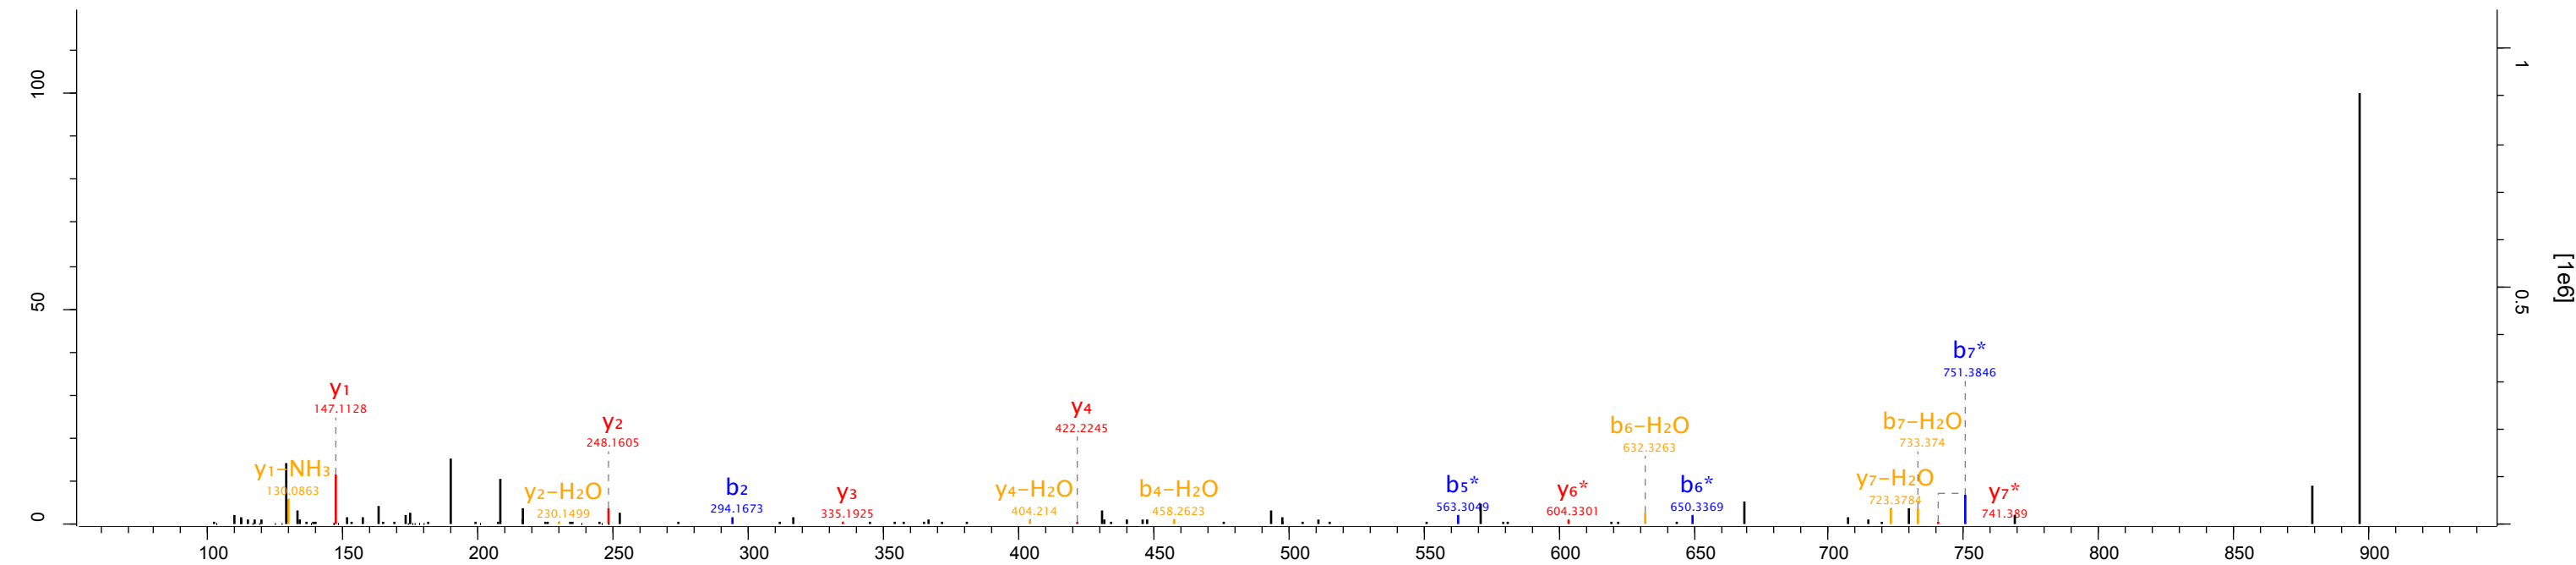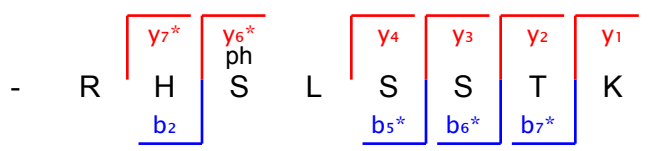



Raw file: 20150814\_A375SR\_Phospho\_BR2\_05  
 Scan: 12750 Method: FTMS; HCD Score: 183.25 m/z: 944.88 Gene names: SNAP23

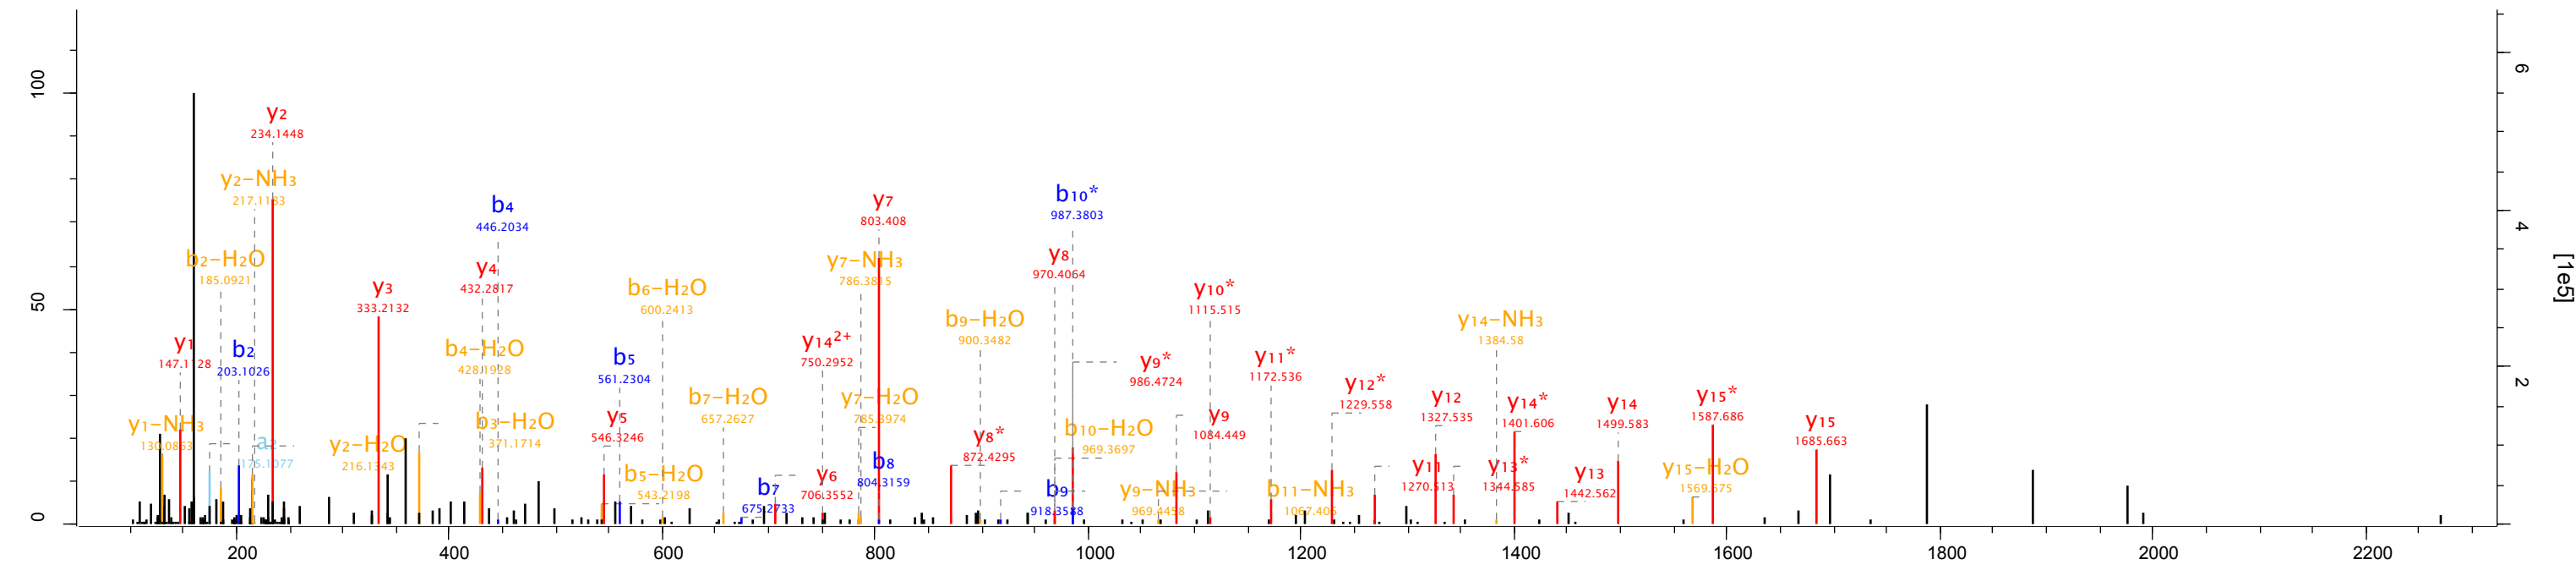

- T T W G D G G E N S P C N V V S K -

Fragmentation scheme below the sequence:

- Red boxes (y-ions): y15, y14, y13, y12, y11, y10\*, y9, y8, y7, y6, y5, y4, y3, y2, y1
- Blue boxes (b-ions): b2, b4, b5, b7, b8, b9, b10\*

Raw file Scan Method Score m/z Gene names  
 20150814\_A375SR\_Phospho\_BR2\_05 12960 FTMS; HCD 153.36 806.9 ARHGEF2

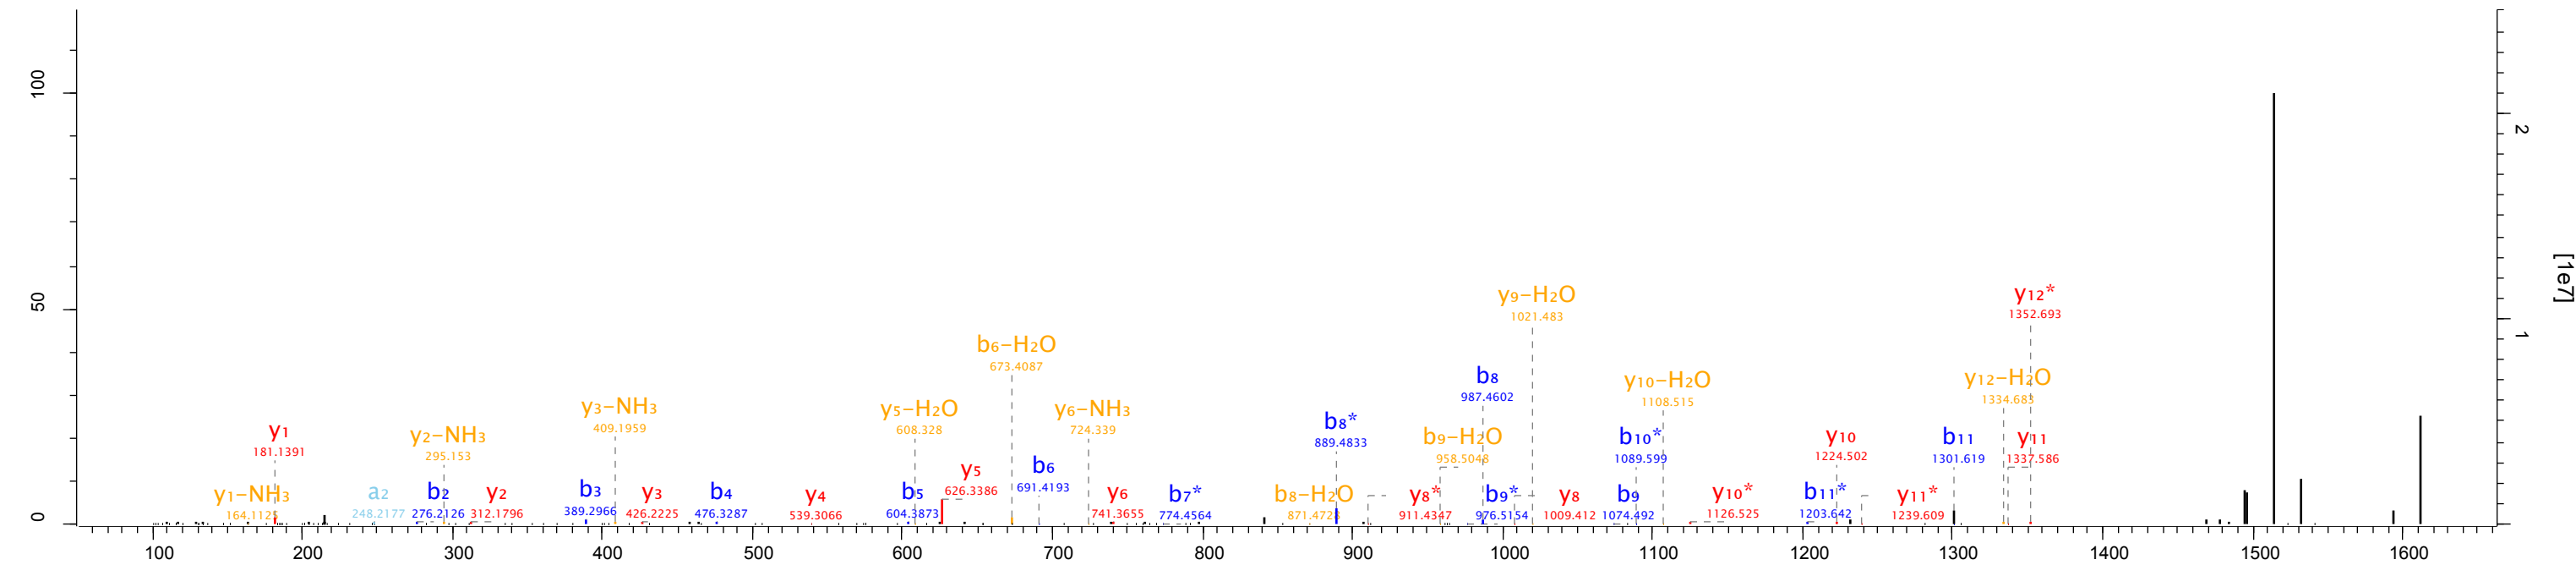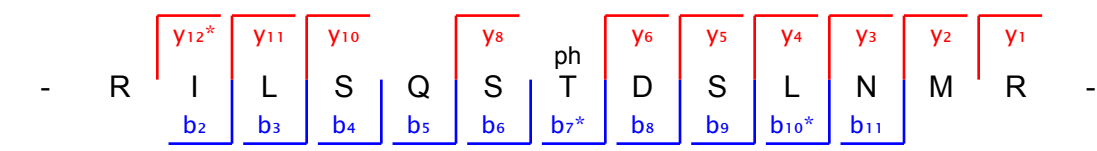

Raw file  
20150814\_A375SR\_Phospho\_BR2\_05

Scan Method Score m/z Gene names  
13070 FTMS; HCD 190.67 886.42 SETDB1

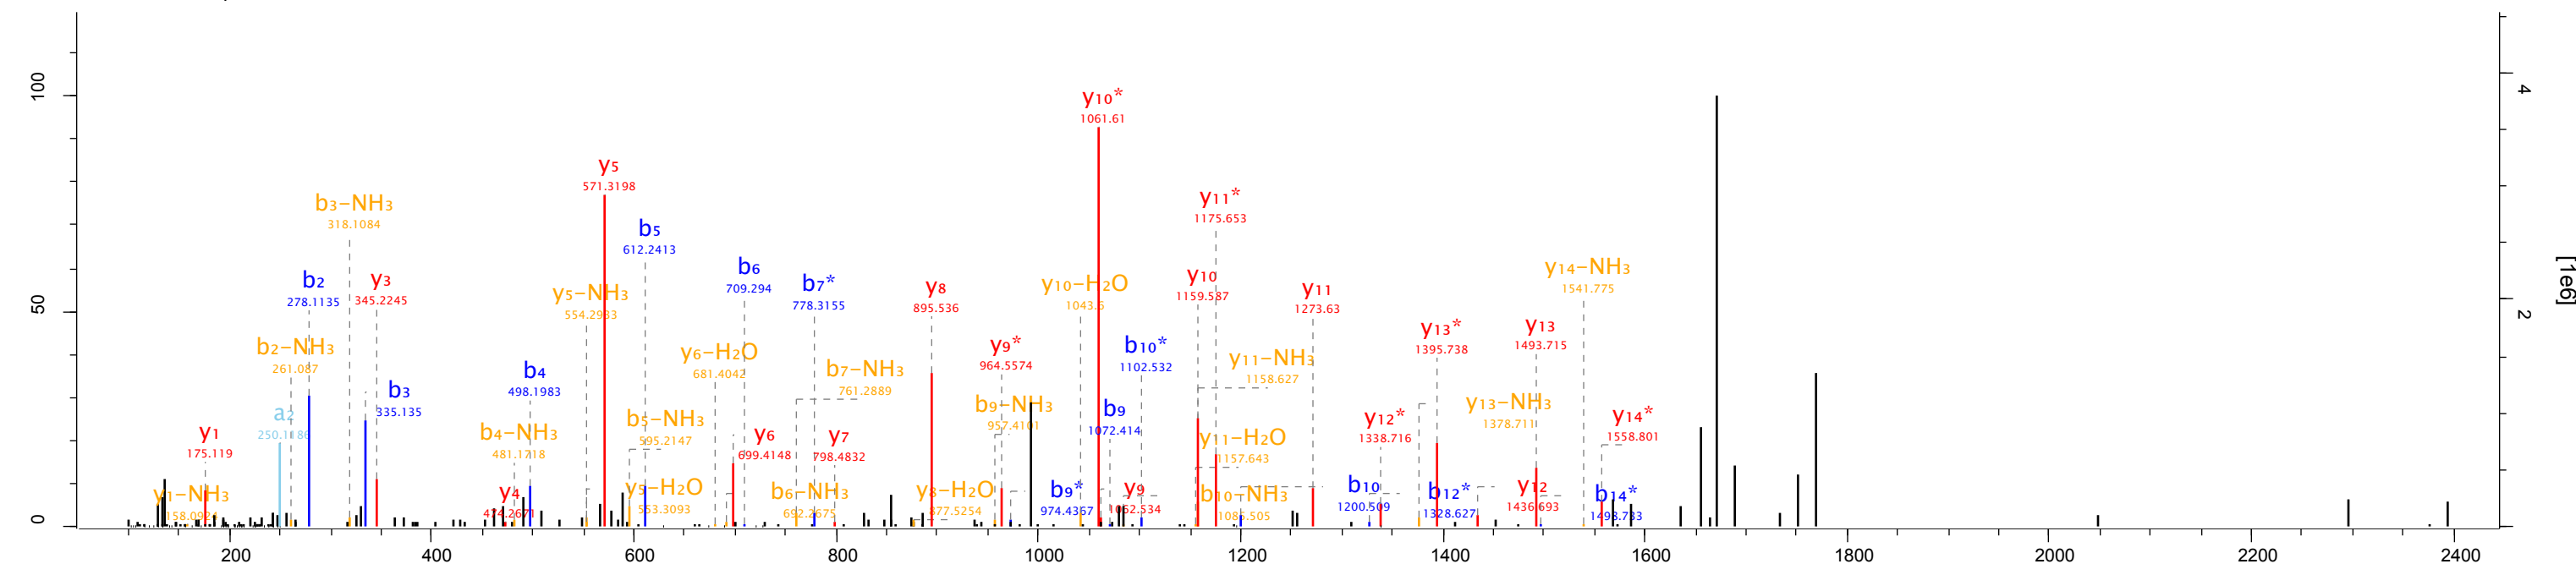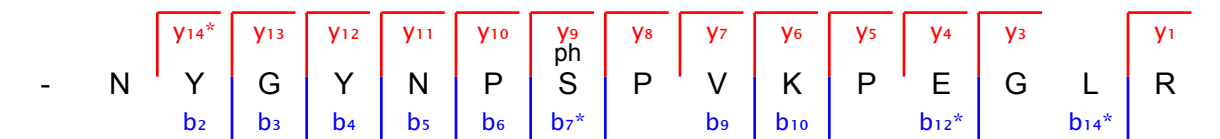

Raw file: 20150814\_A375SR\_Phospho\_BR2\_05  
 Scan: 13230 Method: FTMS; HCD Score: 207.64 m/z: 1058.93 Gene names: PGRMC1

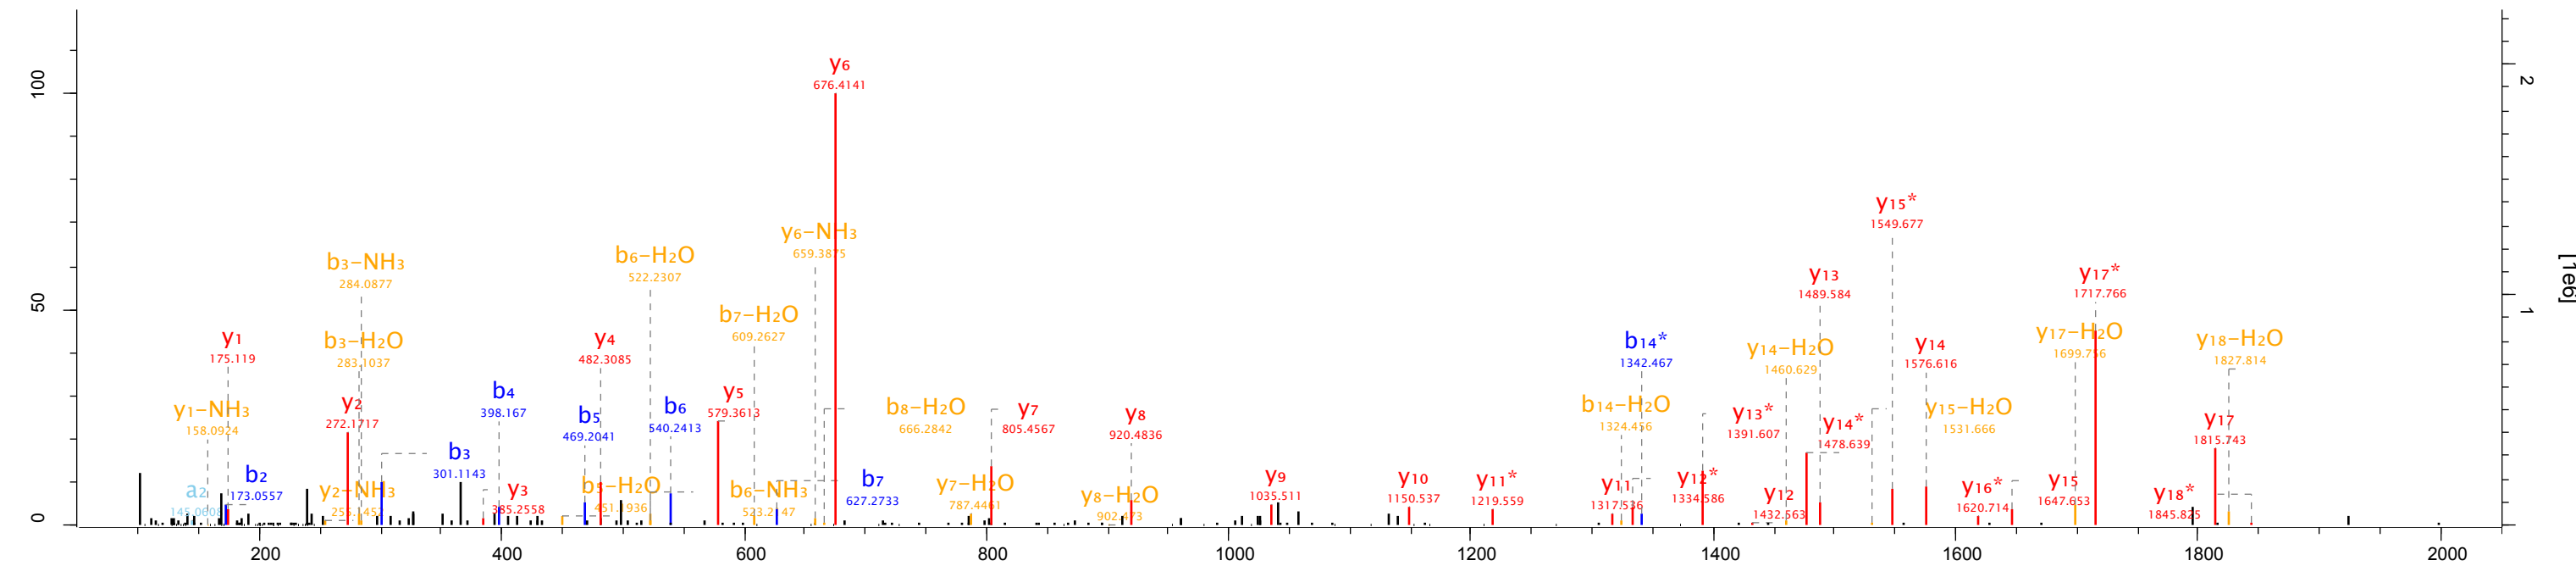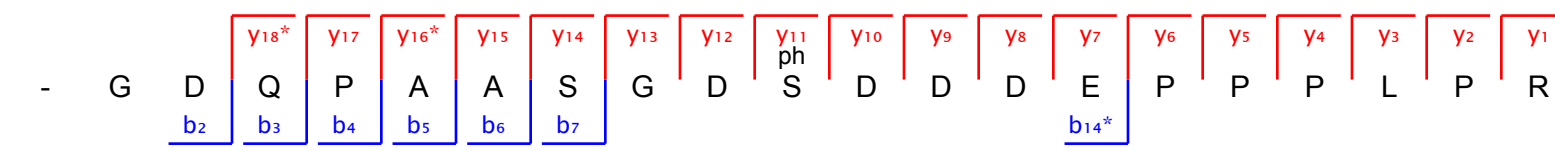

Raw file: 20150814\_A375SR\_Phospho\_BR2\_05  
 Scan: 13480 Method: FTMS; HCD Score: 99.69 m/z: 642.75 Gene names: HSPA1A

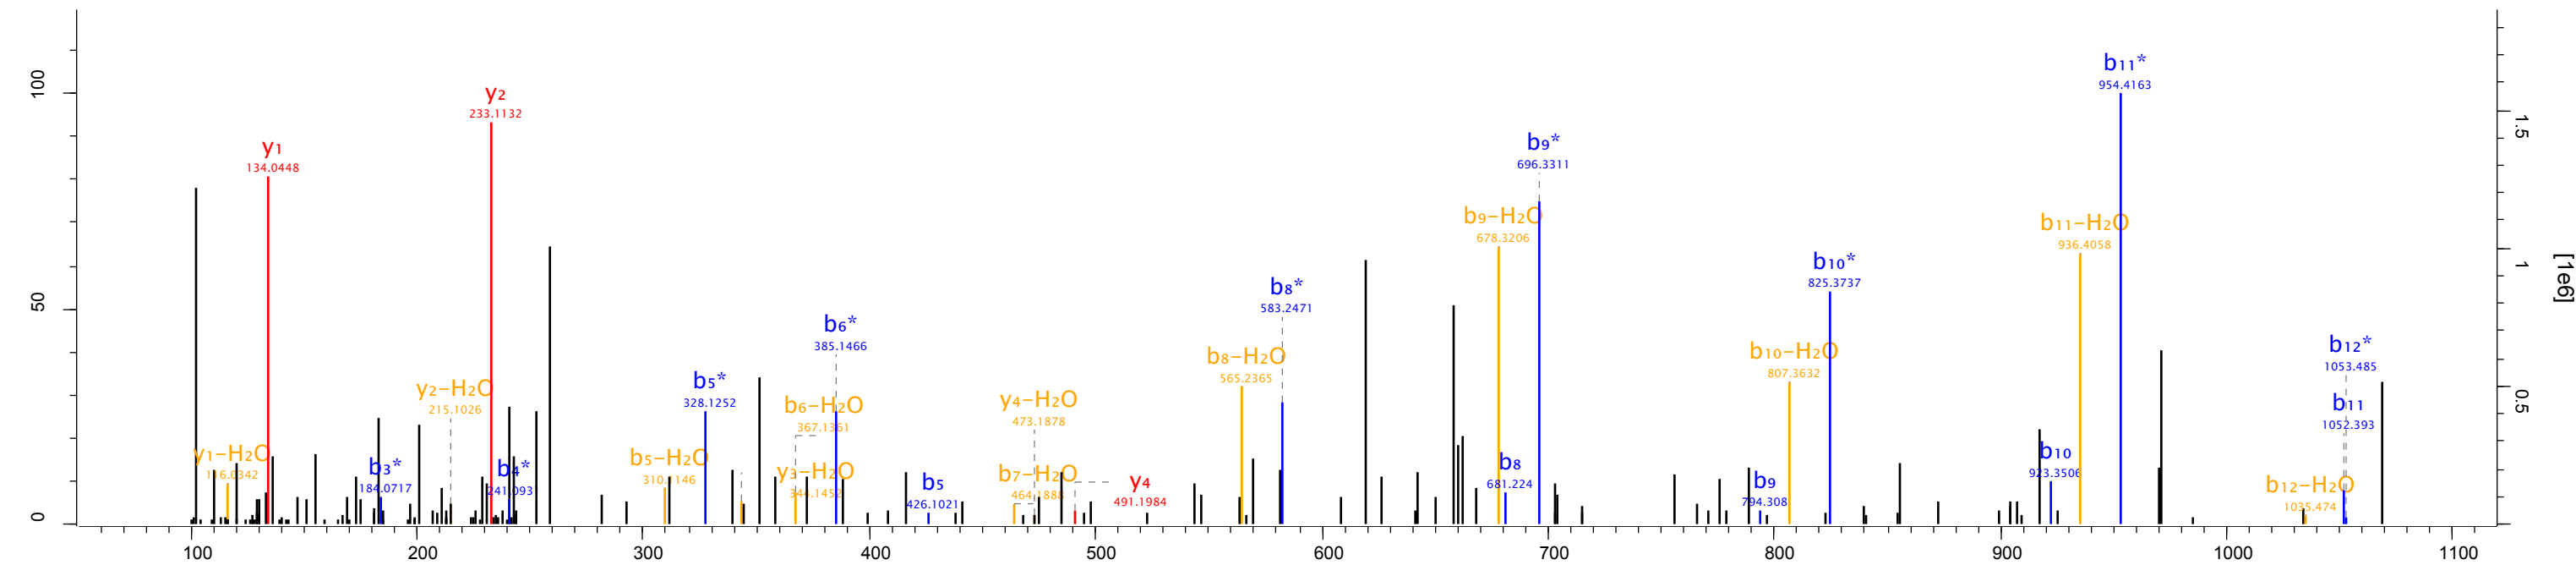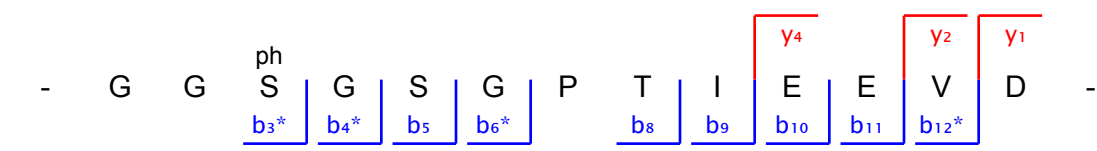

Raw file: 20150814\_A375SR\_Phospho\_BR2\_05  
 Scan: 13680 Method: FTMS; HCD Score: 213.73 m/z: 604.26 Gene names: TRIM28

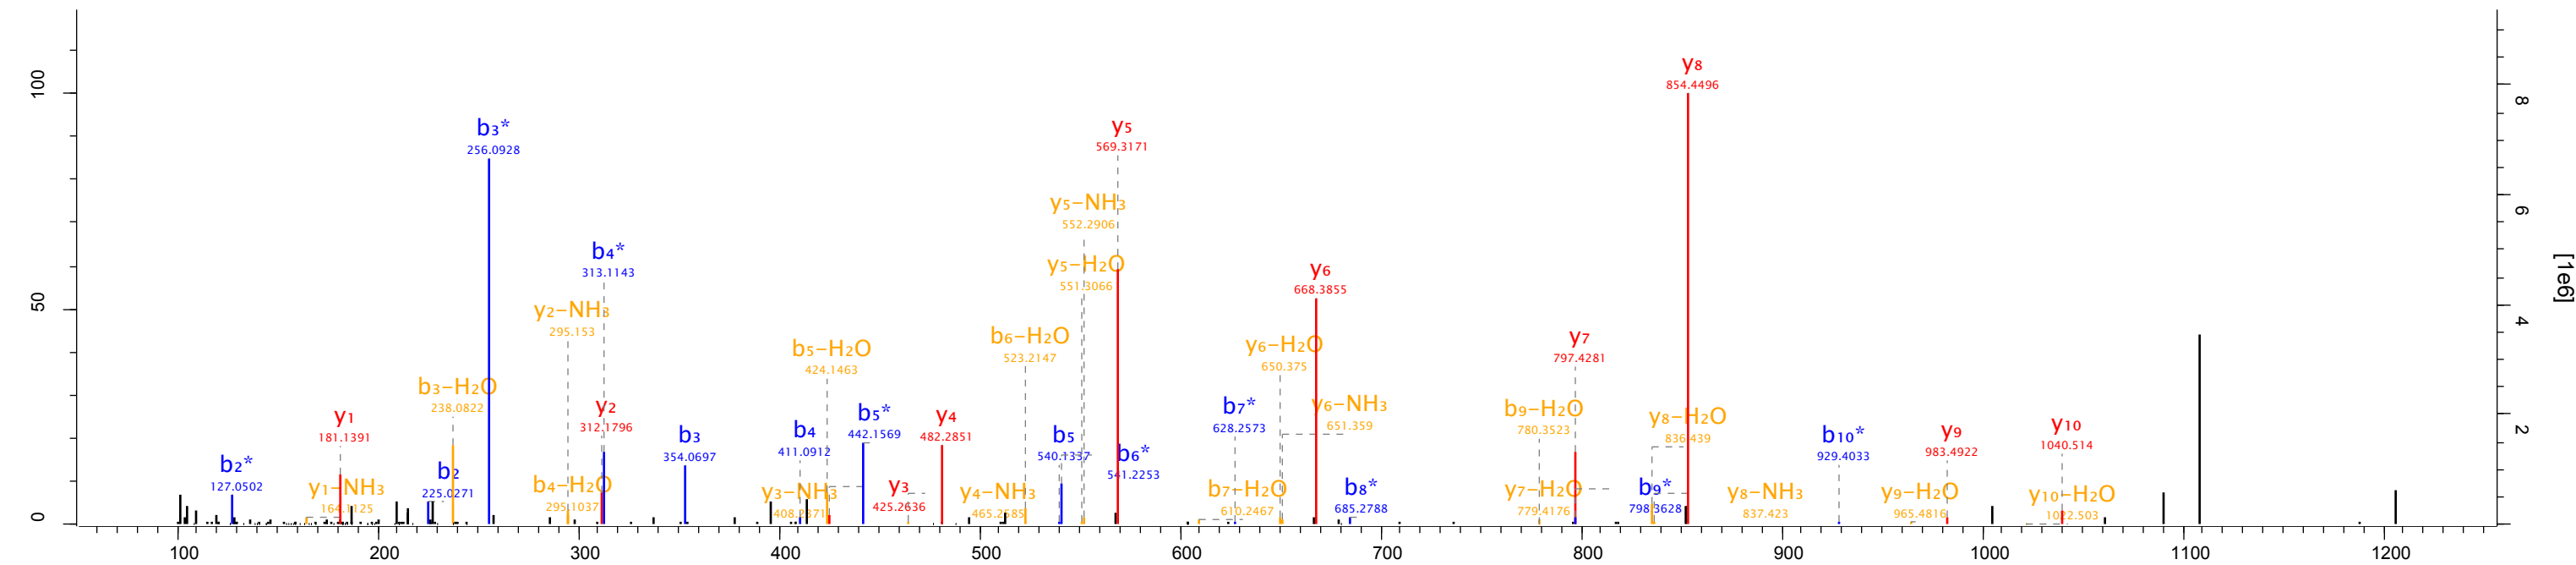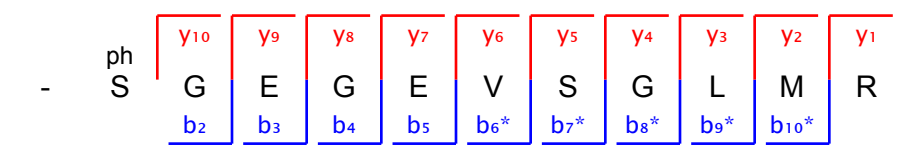

Raw file: 20150814\_A375SR\_Phospho\_BR2\_05  
 Scan: 13720 Method: FTMS; HCD Score: 178.22 m/z: 643.28 Gene names: MAP7D1

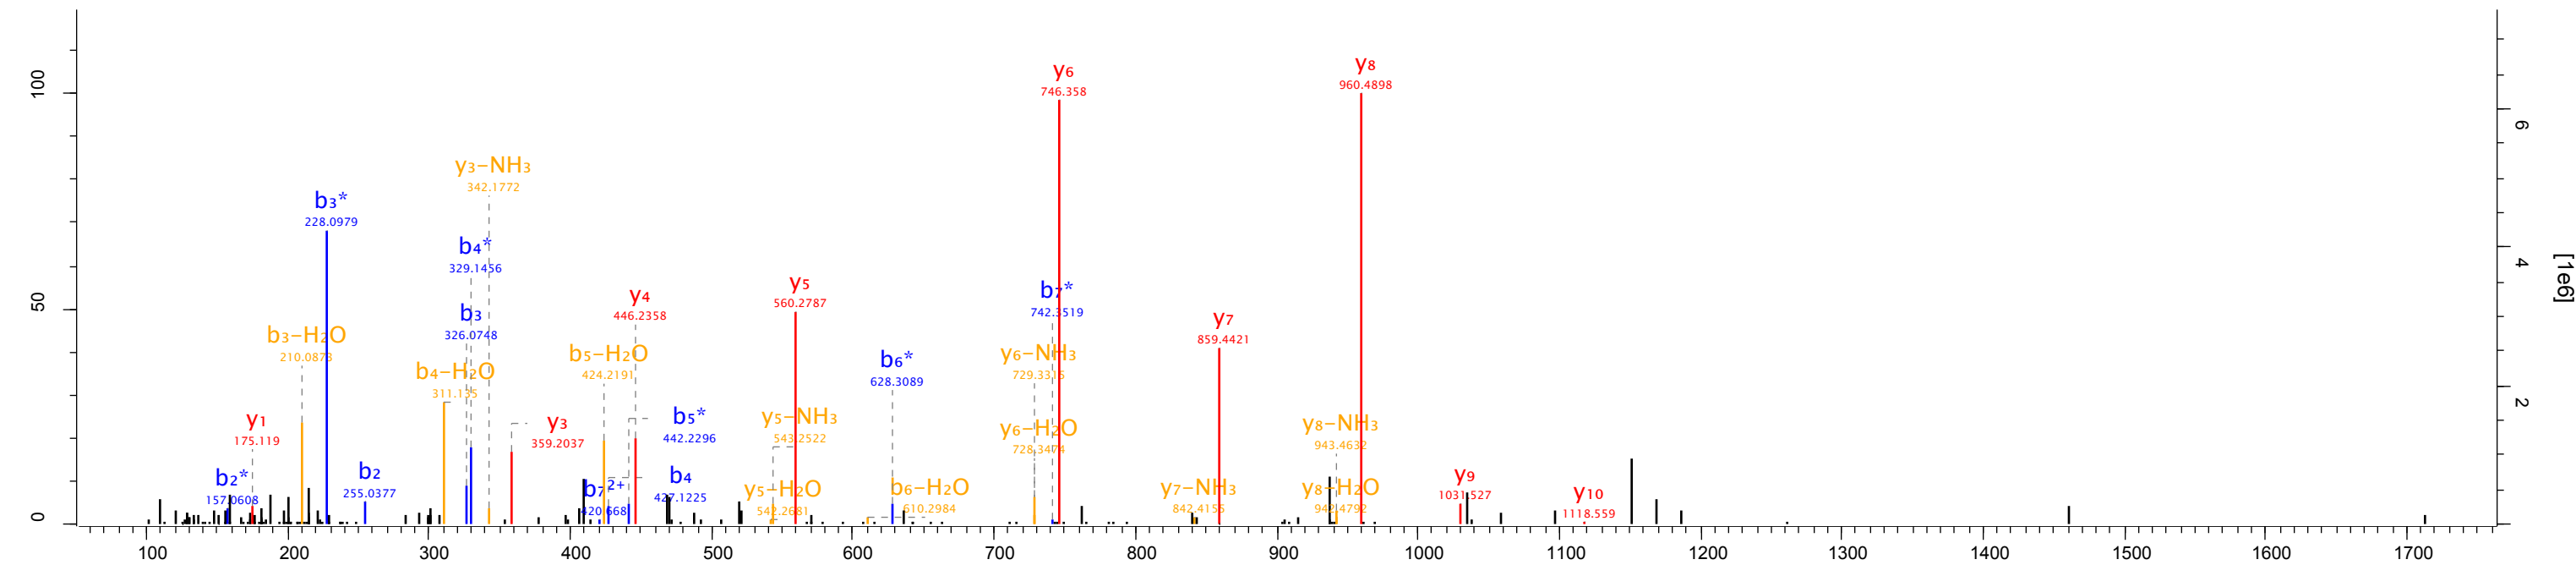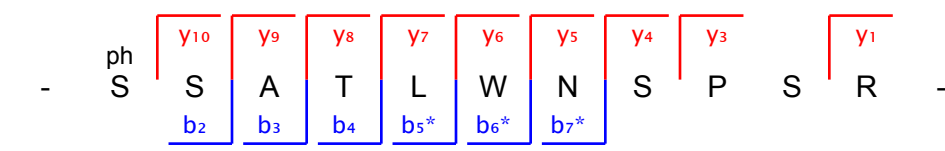

Raw file 20150814\_A375SR\_Phospho\_BR2\_05 Scan 13850 Method FTMS; HCD Score 156.29 m/z 717.88 Gene names DDX5

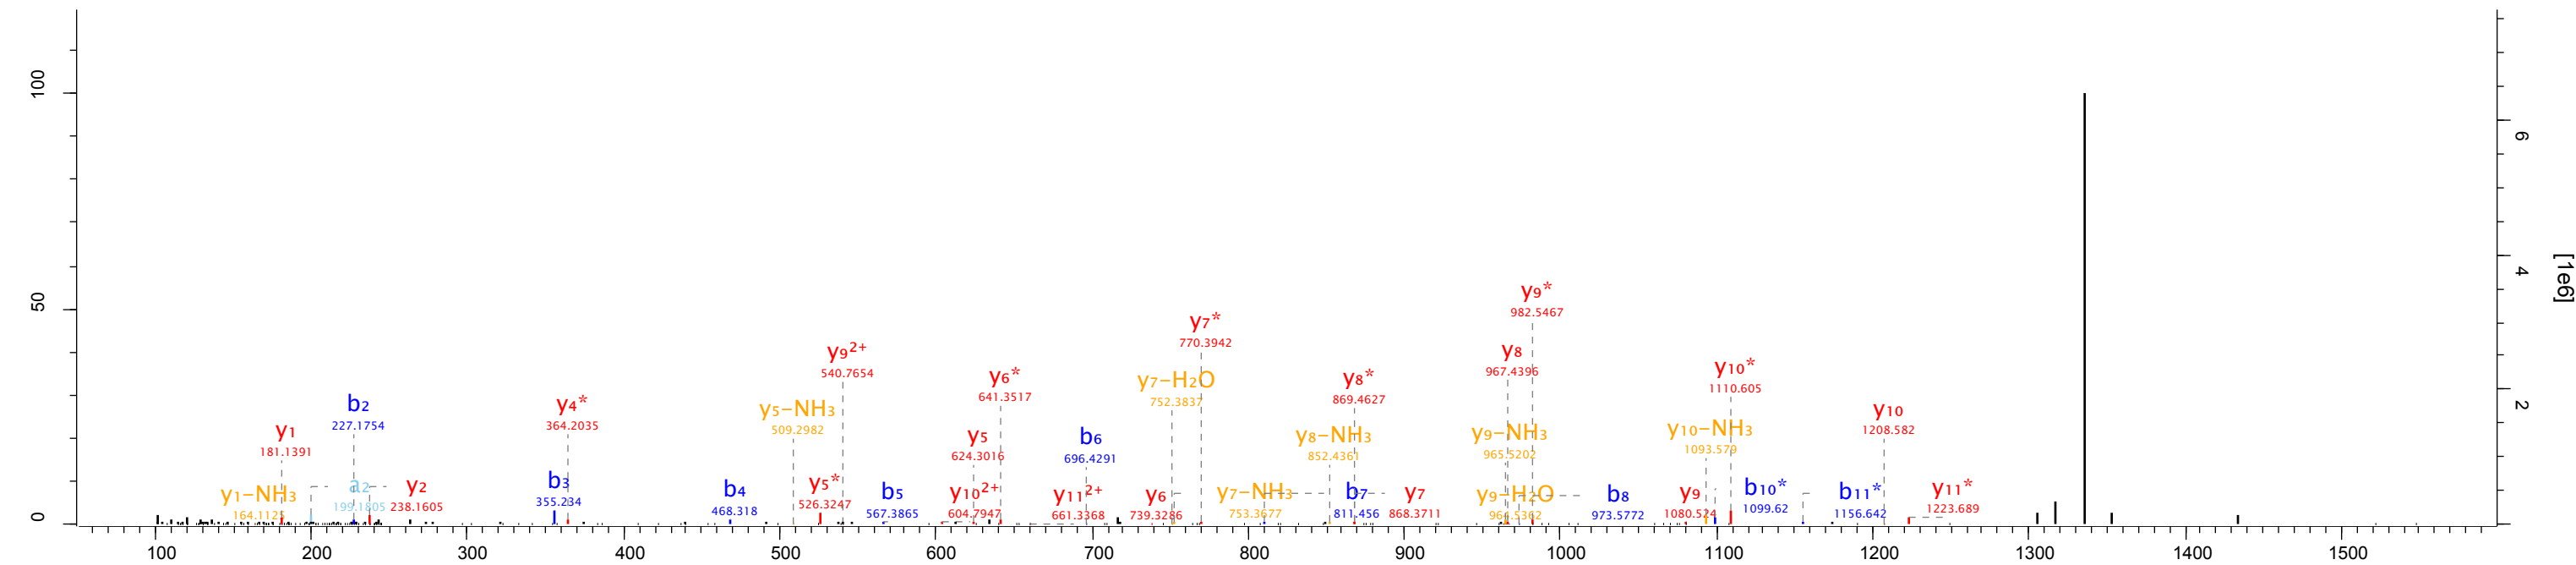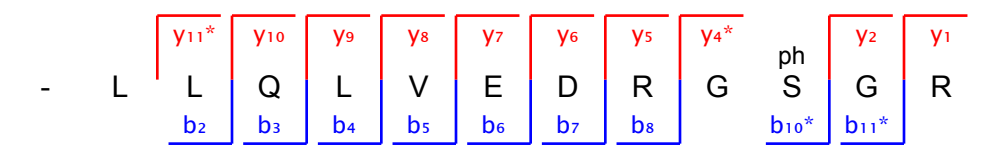



Raw file 20150814\_A375SR\_Phospho\_BR2\_05 Scan 14210 Method FTMS; HCD Score 166.37 m/z 790.32 Gene names RASAL2

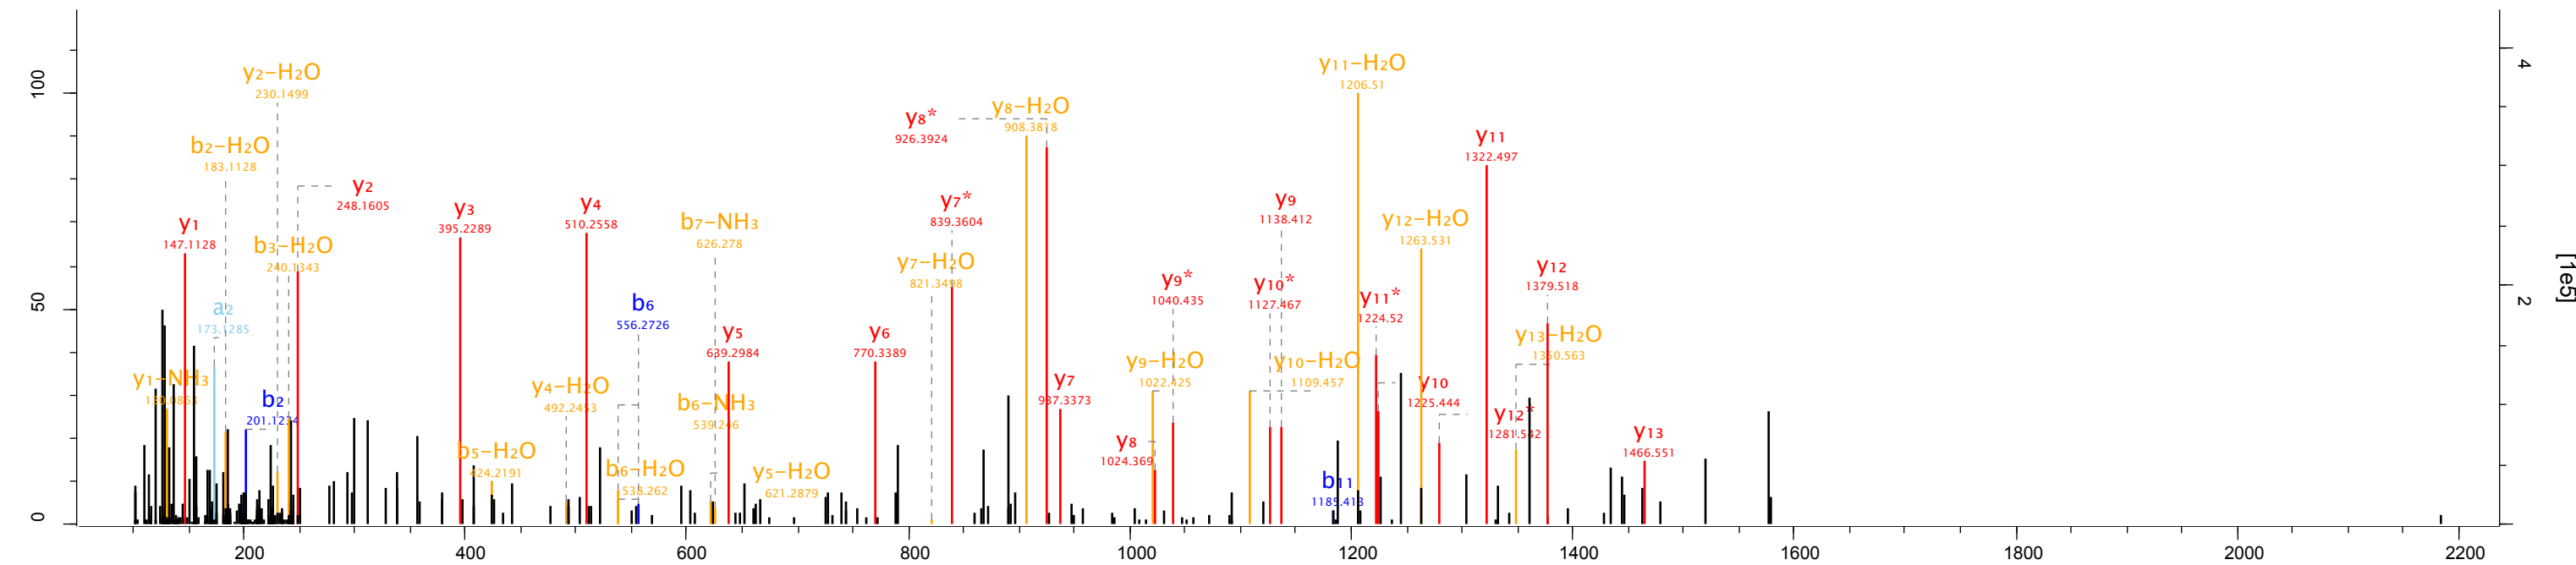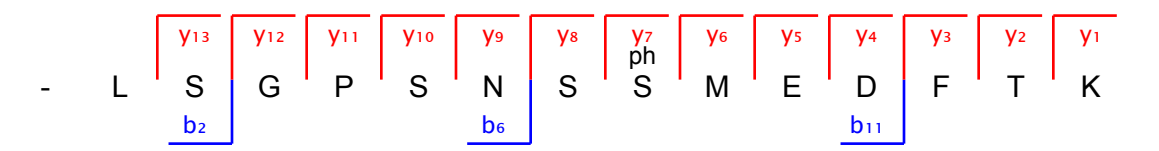

Raw file: 20150814\_A375SR\_Phospho\_BR2\_05  
 Scan: 14570 Method: FTMS; HCD Score: 105.9 m/z: 698.83 Gene names: CCDC86

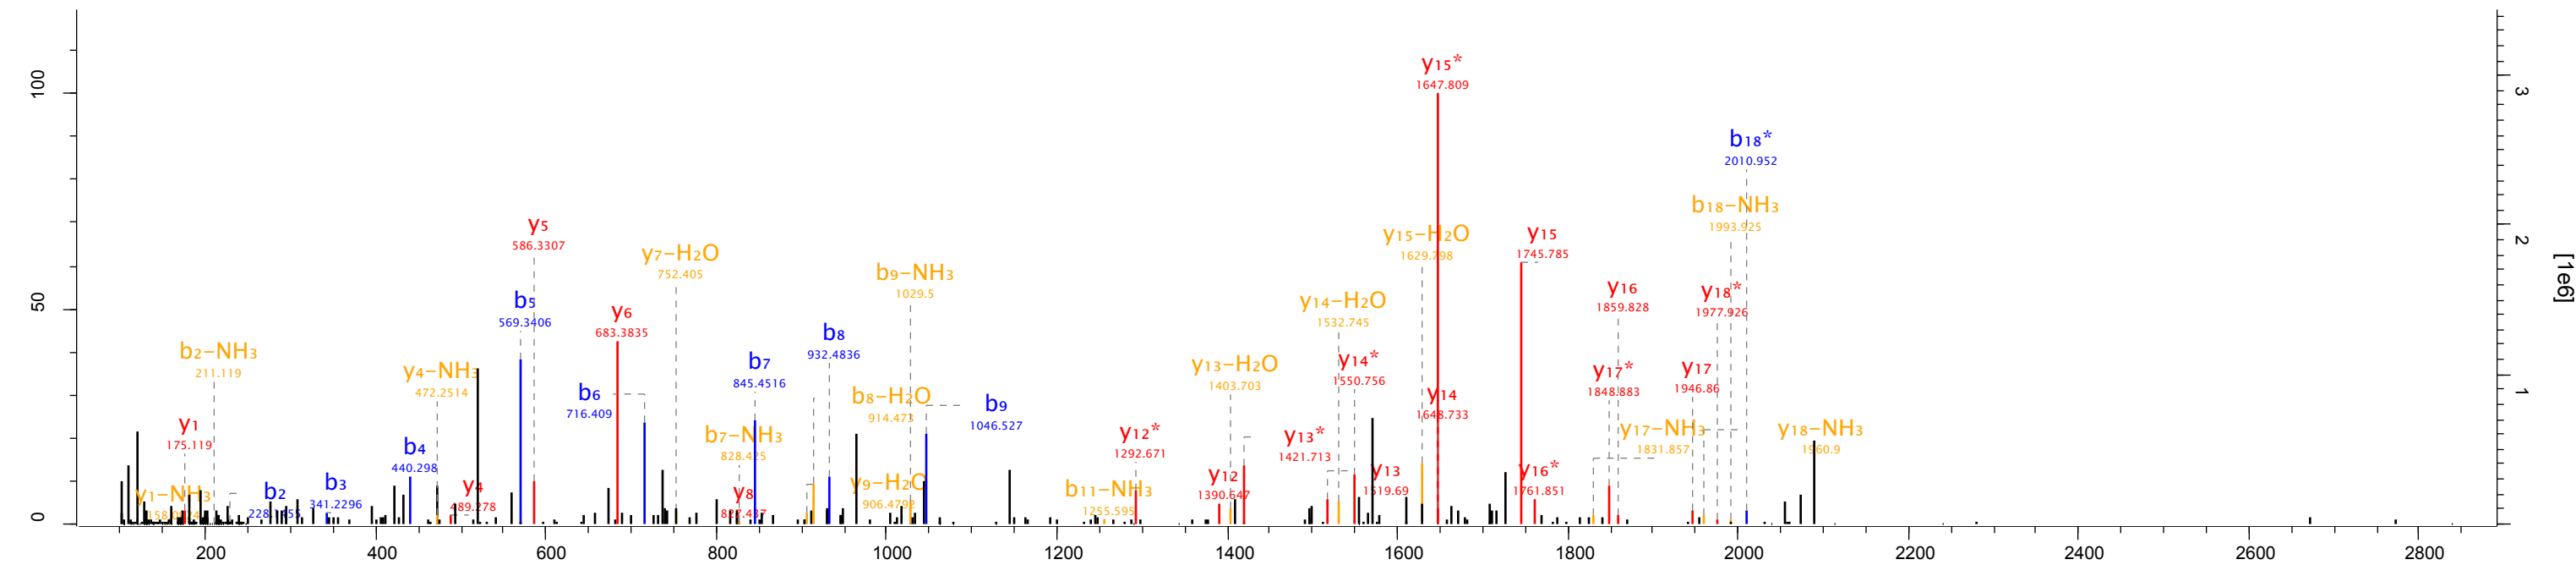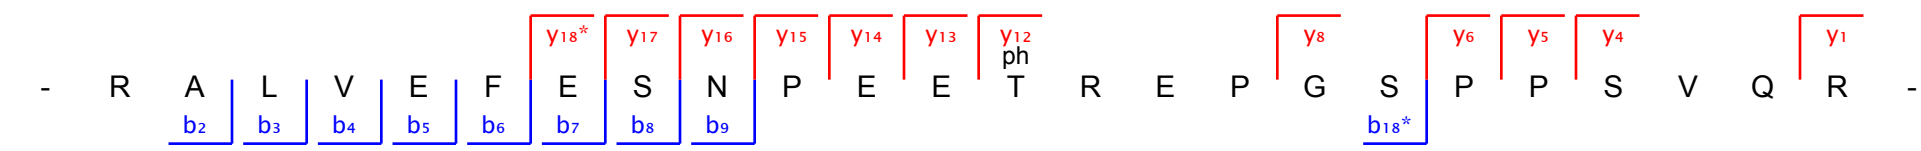

Raw file 20150814\_A375SR\_Phospho\_BR2\_05 Scan 14800 Method FTMS; HCD Score 103.9 m/z 541.95 Gene names TRIM33

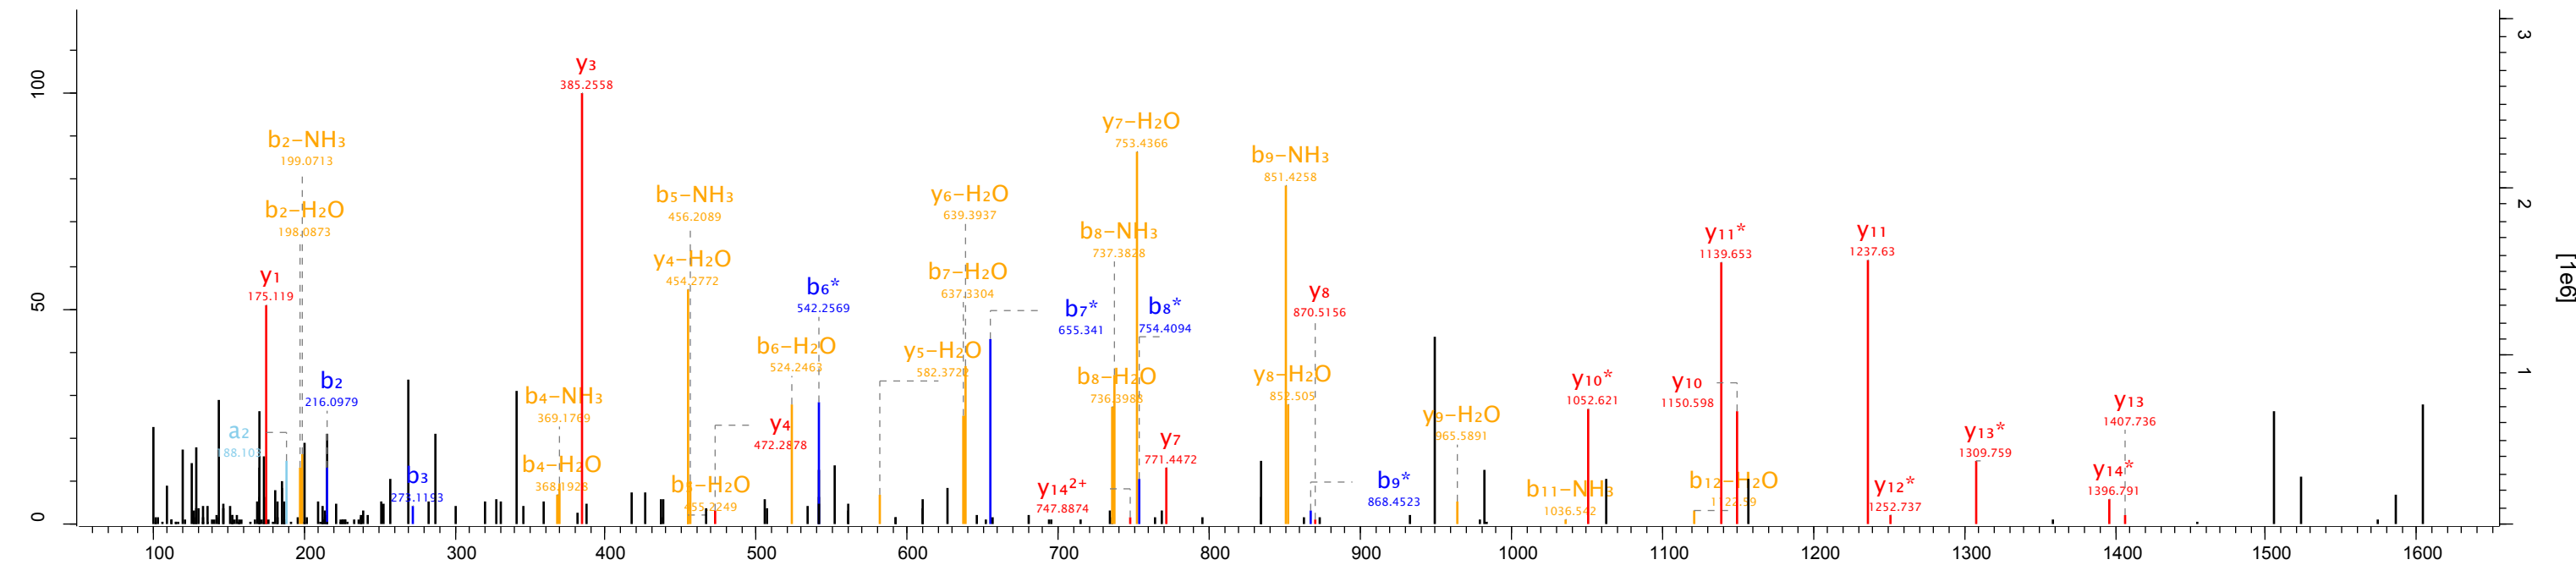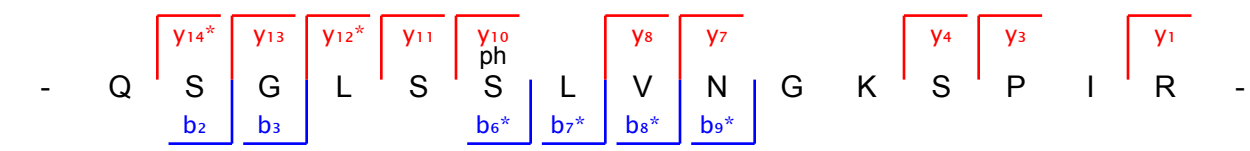

Raw file 20150814\_A375SR\_Phospho\_BR2\_05 Scan 14880 Method FTMS; HCD Score 221.13 m/z 824.37 Gene names OSBPL11

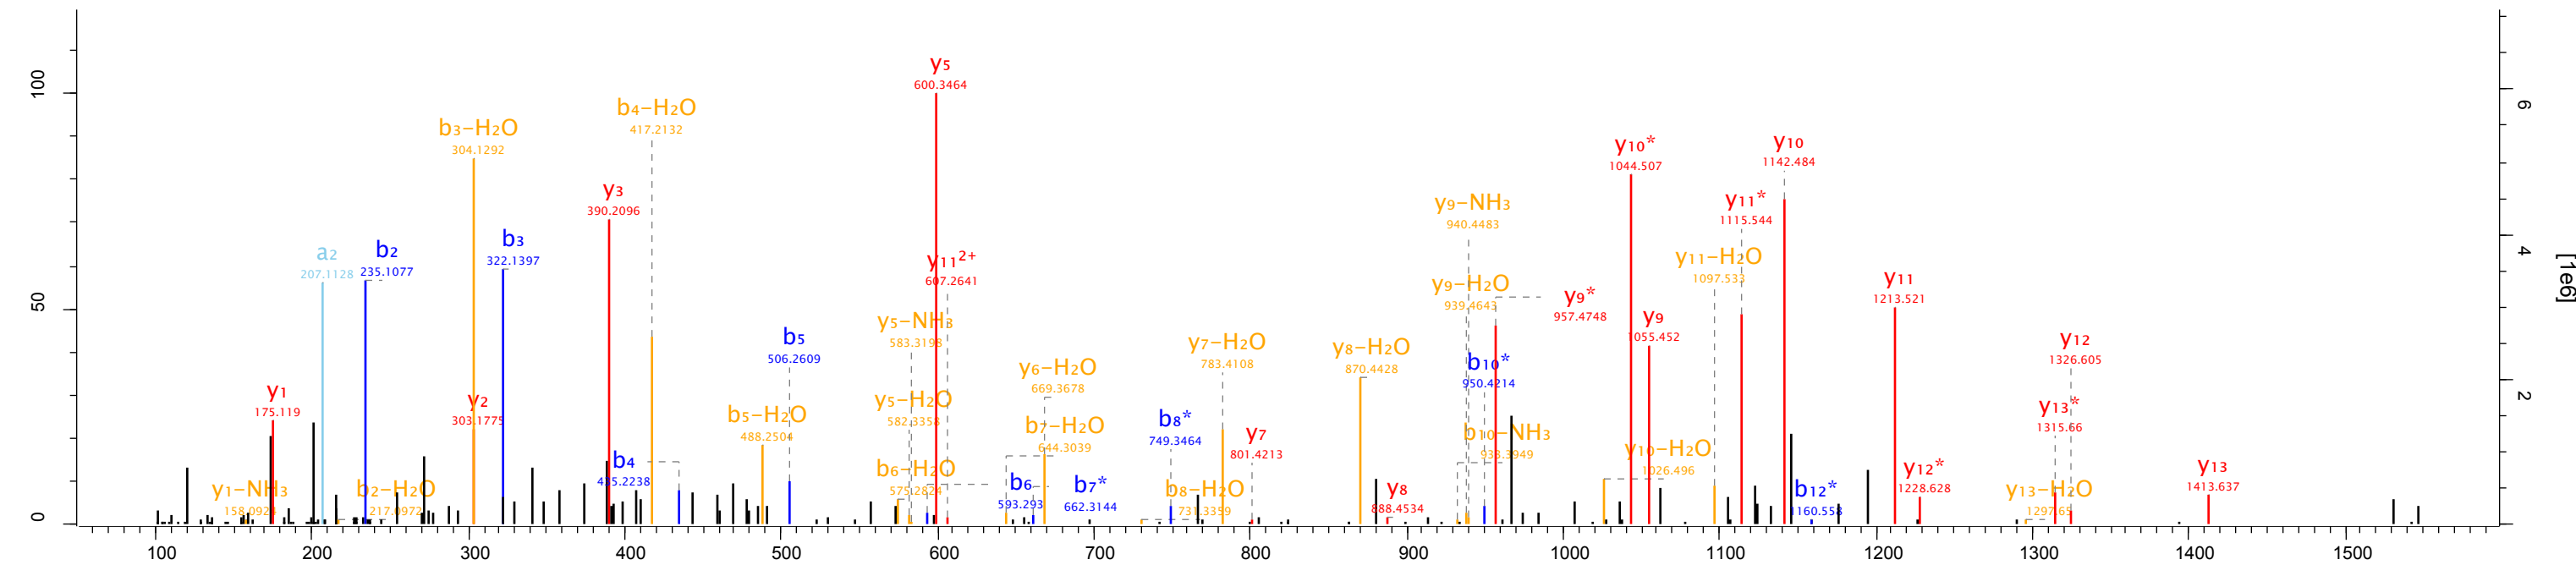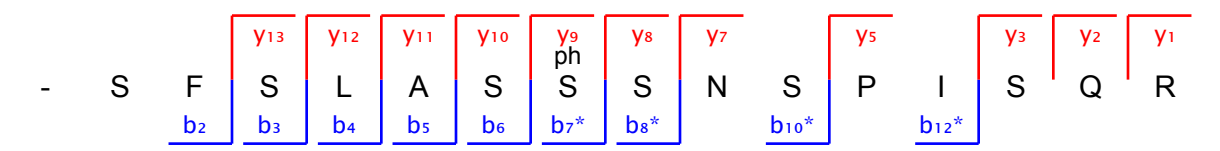

Raw file 20150814\_A375SR\_Phospho\_BR2\_05 Scan 15030 Method FTMS; HCD Score 79.35 m/z 792.33 Gene names ESF1

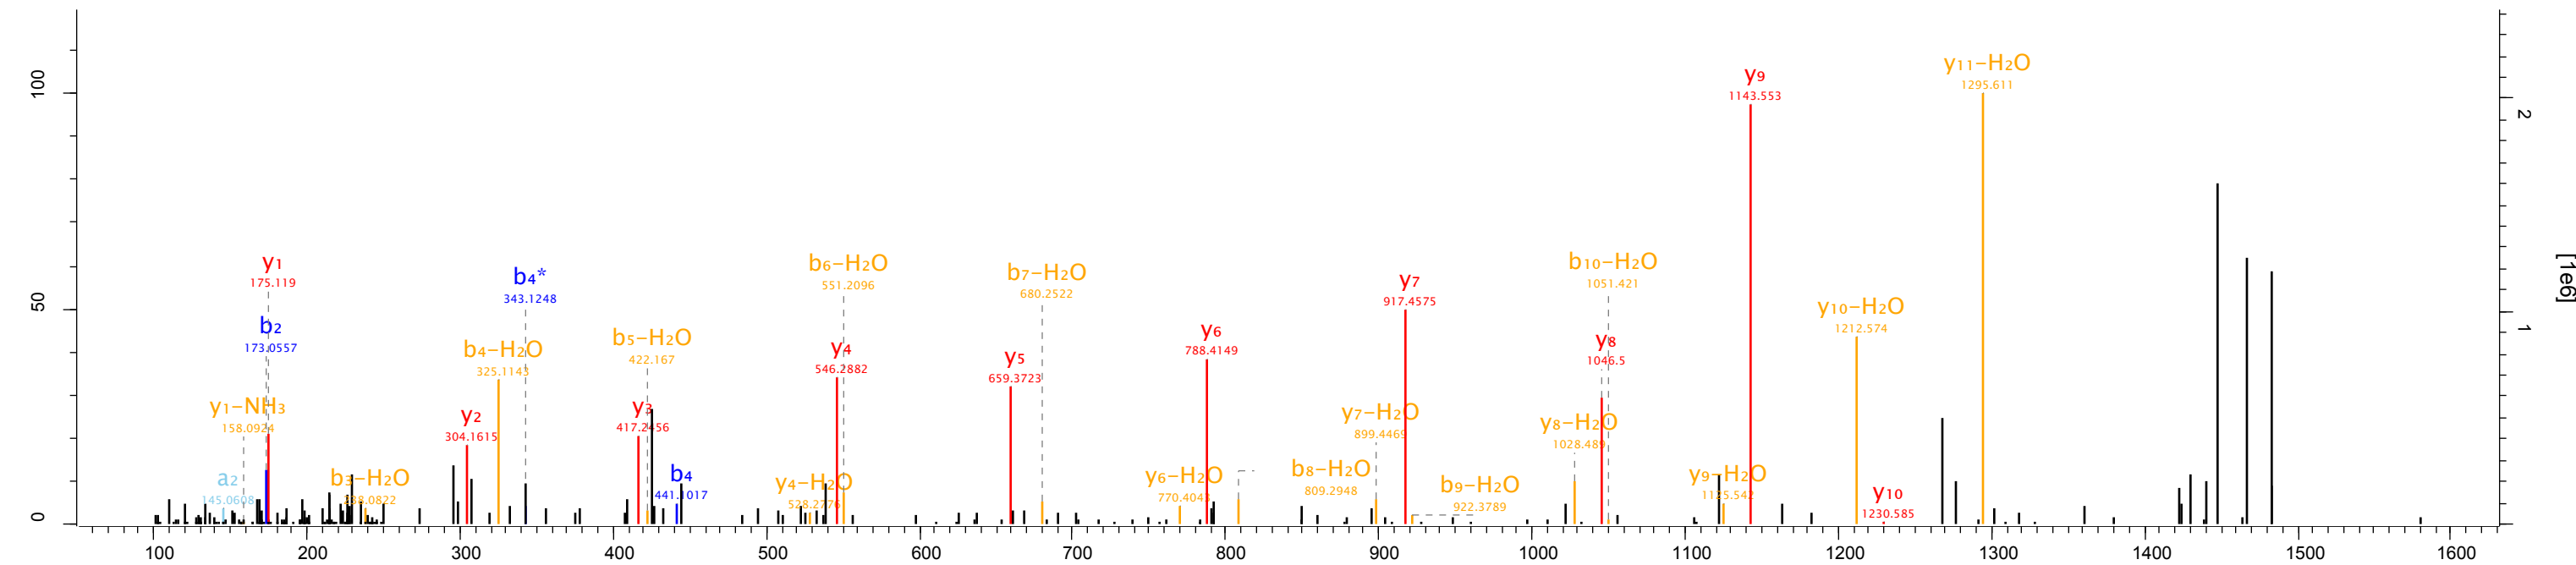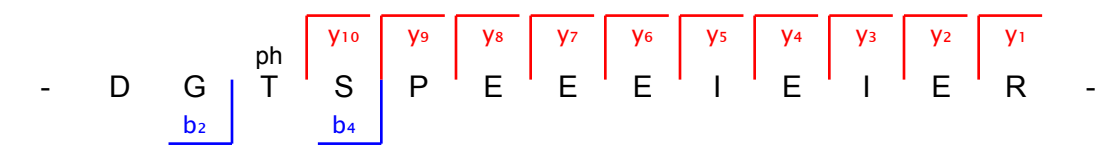

Raw file: 20150814\_A375SR\_Phospho\_BR2\_05  
 Scan: 15060 Method: FTMS; HCD Score: 90.48 m/z: 601.8 Gene names: CENPN

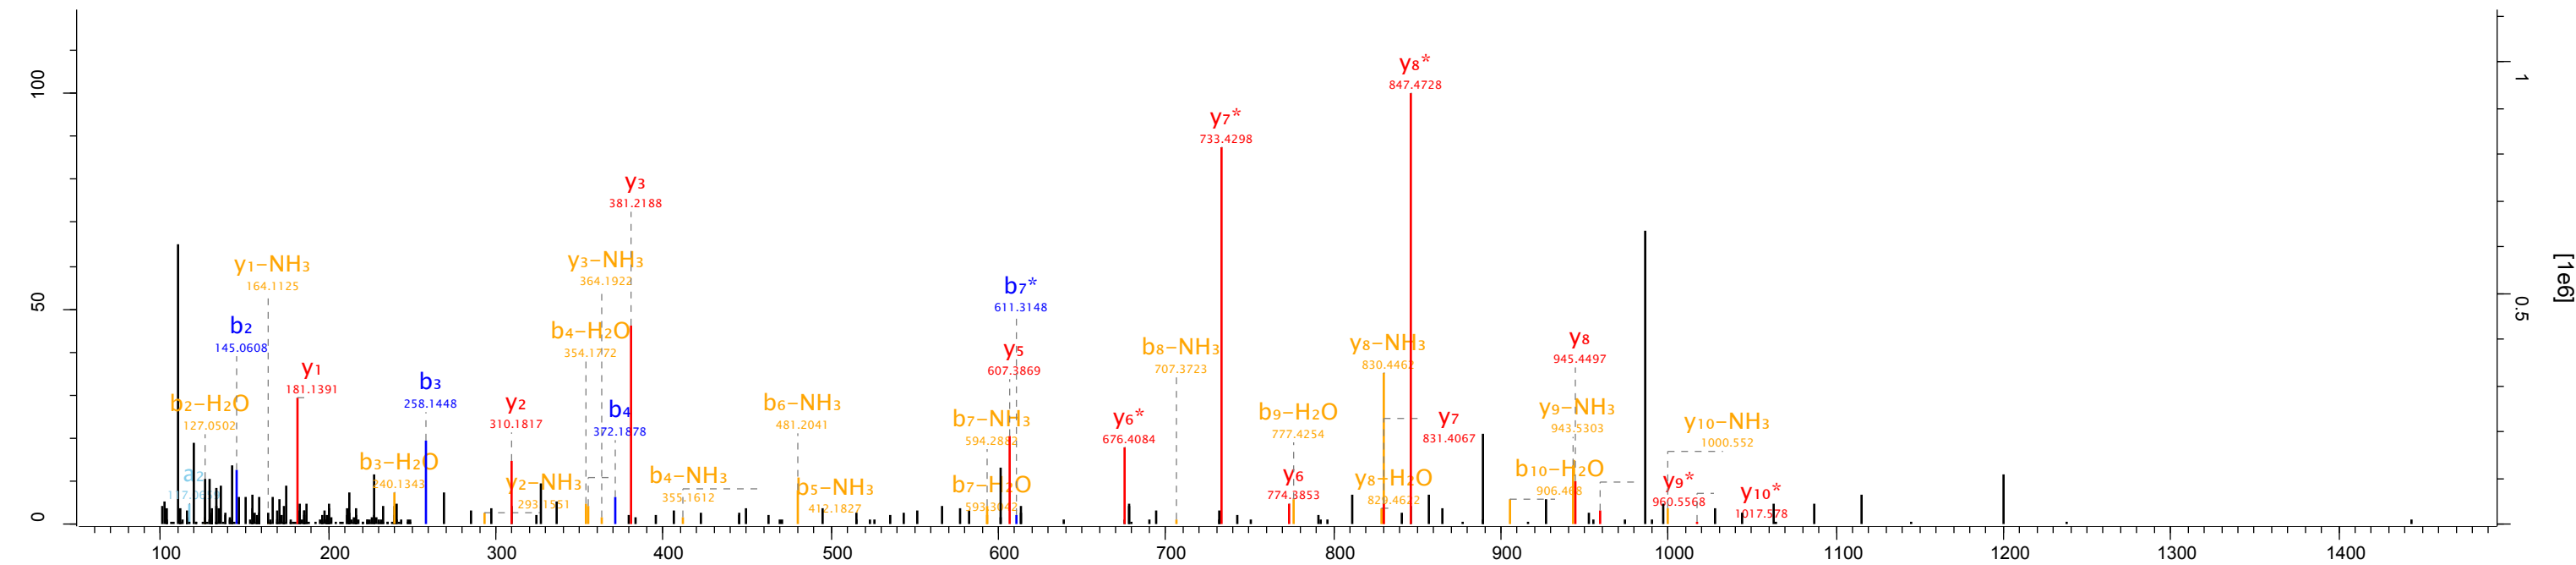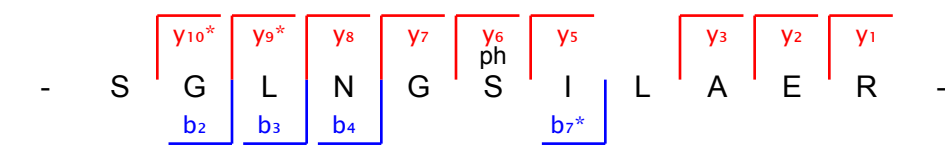

Raw file: 20150814\_A375SR\_Phospho\_BR2\_05  
 Scan: 15120 Method: FTMS; HCD Score: 90.73 m/z: 1079.86 Gene names: TUBA1C

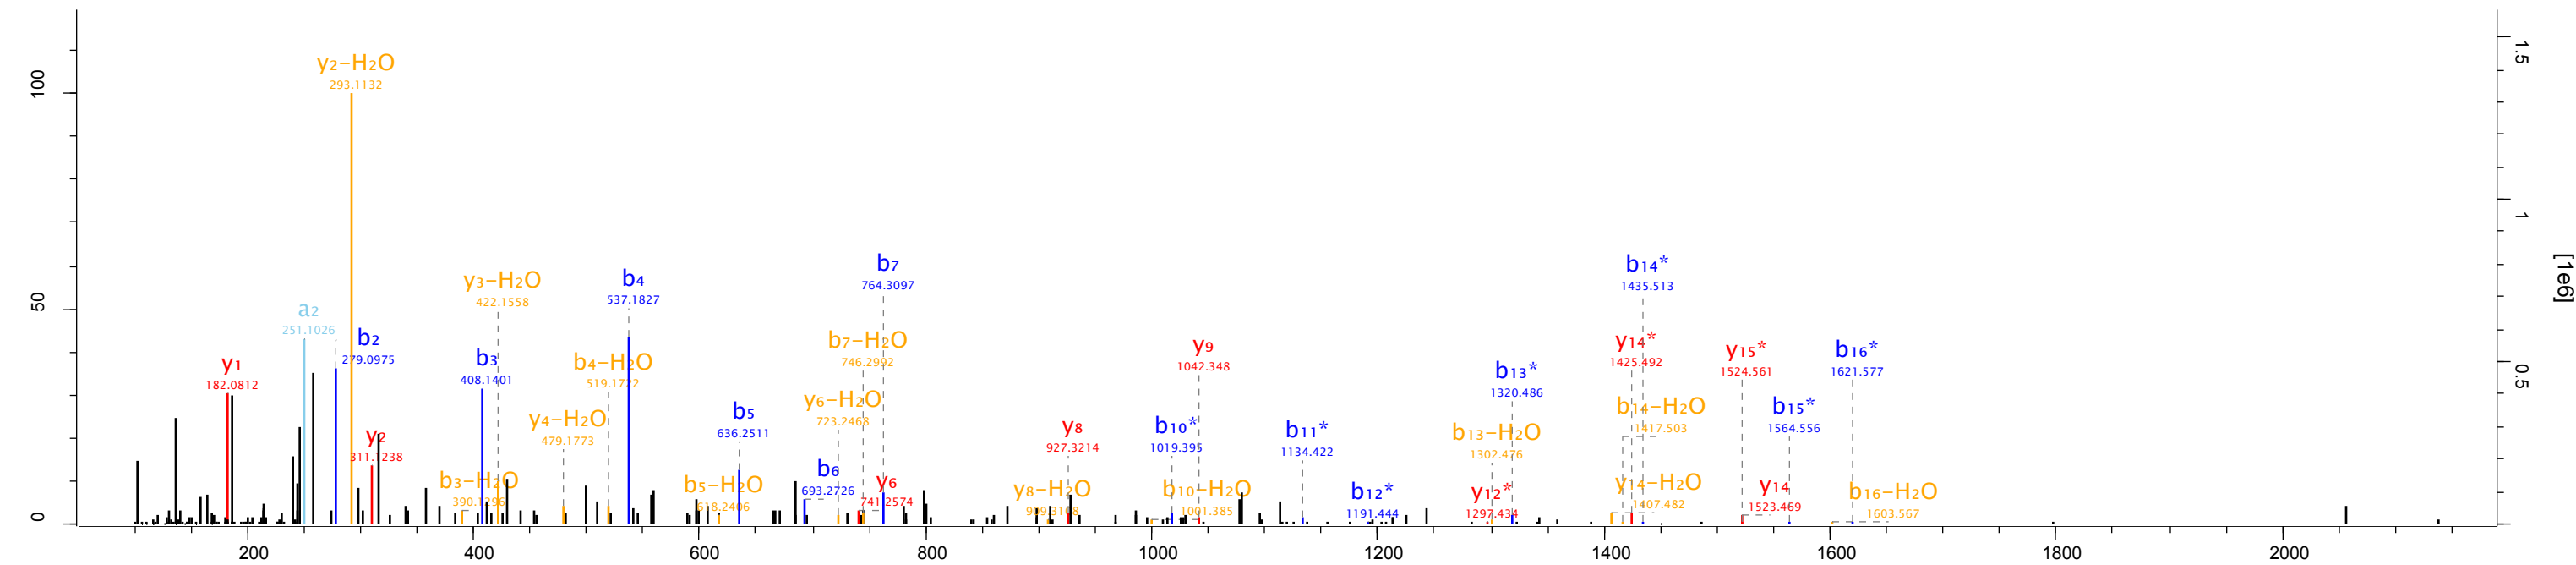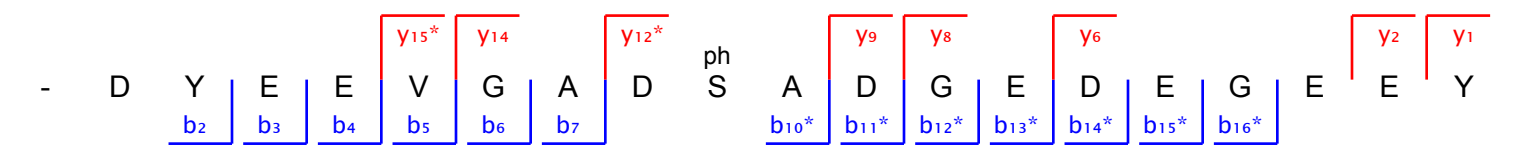

Raw file  
20150814\_A375SR\_Phospho\_BR2\_05

Scan 15260 Method FTMS; HCD Score 329.6 m/z 1165.55 Gene names SDE2

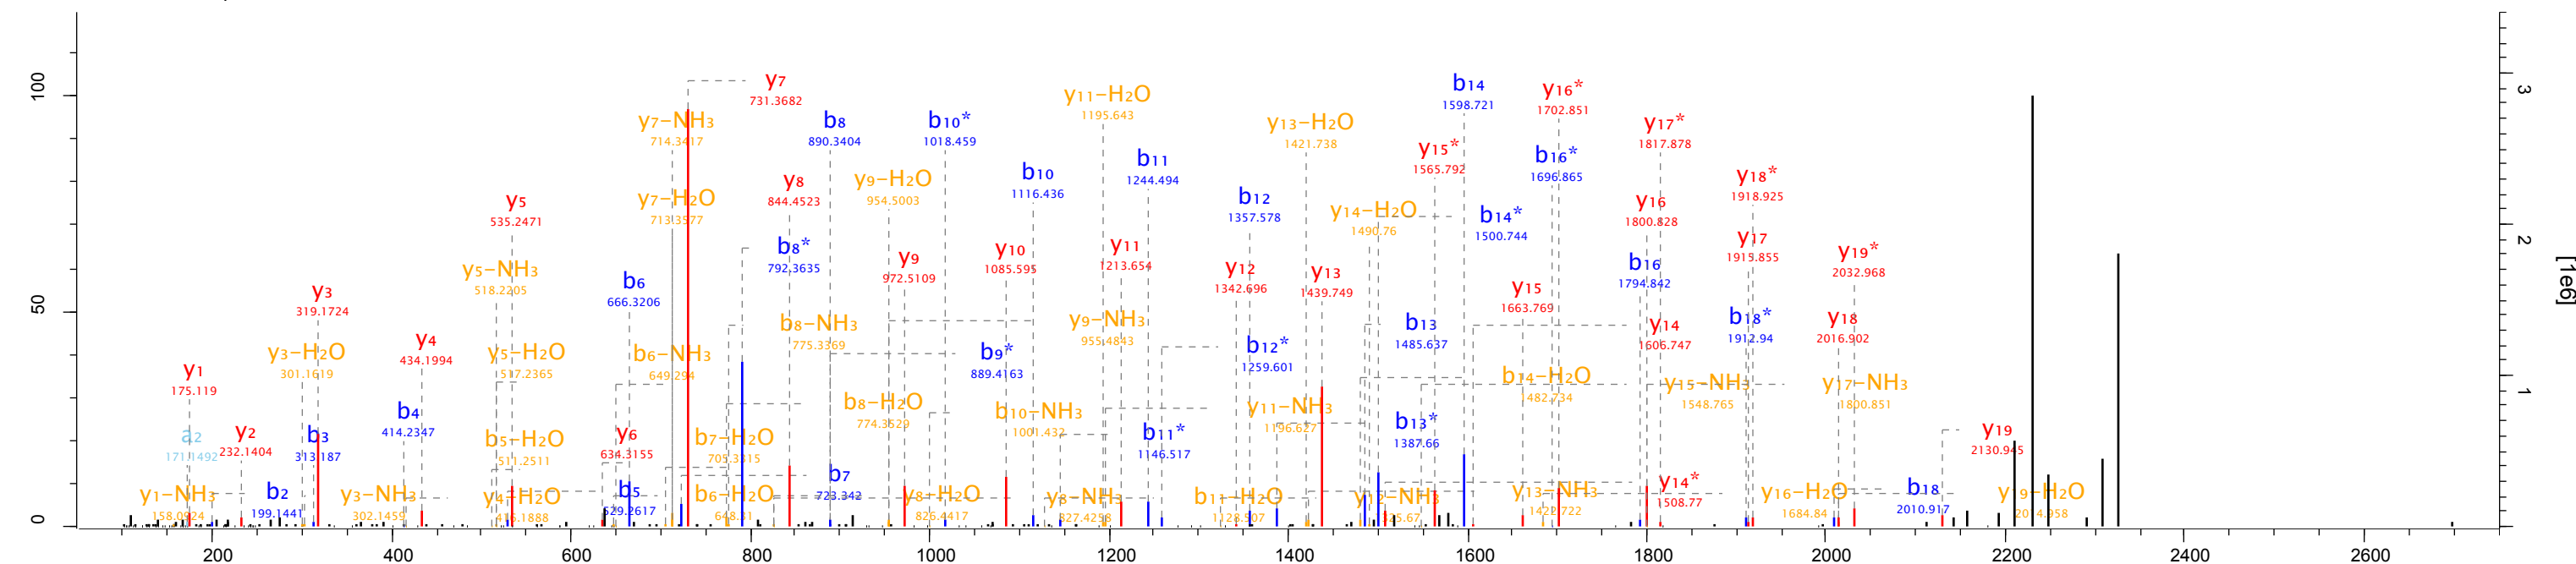

- V V N T D H G S P E Q L Q I P V T D S G R -

b<sub>2</sub>
b<sub>3</sub>
b<sub>4</sub>
b<sub>5</sub>
b<sub>6</sub>
b<sub>7</sub>
b<sub>8</sub>
b<sub>9</sub><sup>\*</sup>
b<sub>10</sub>
b<sub>11</sub>
b<sub>12</sub>
b<sub>13</sub>
b<sub>14</sub>
b<sub>16</sub>
b<sub>18</sub>



Raw file: 20150814\_A375SR\_Phospho\_BR2\_05  
 Scan: 15540 Method: FTMS; HCD Score: 206.37 m/z: 912.89 Gene names: TERF2IP

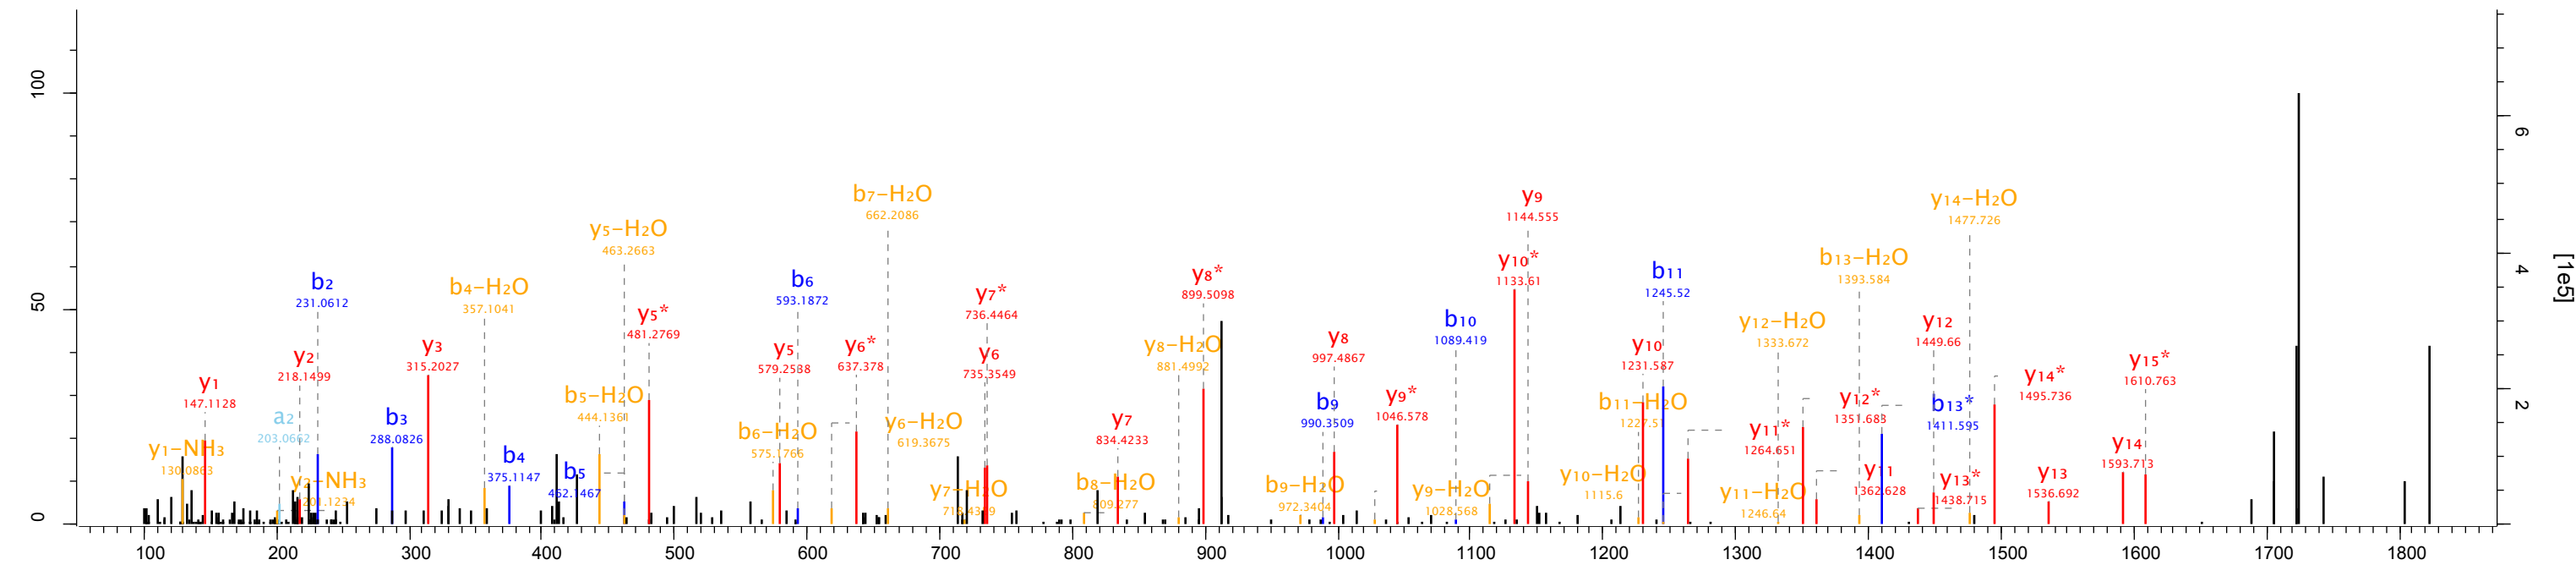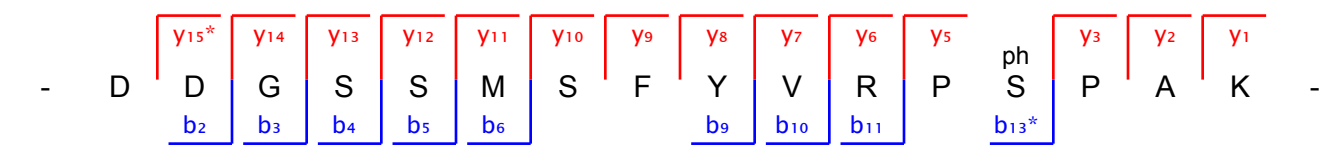

Raw file  
 20150814\_A375SR\_Phospho\_BR2\_05  
 Scan 15730 Method FTMS; HCD Score 167.05 m/z 839.85 Gene names ELMSAN1

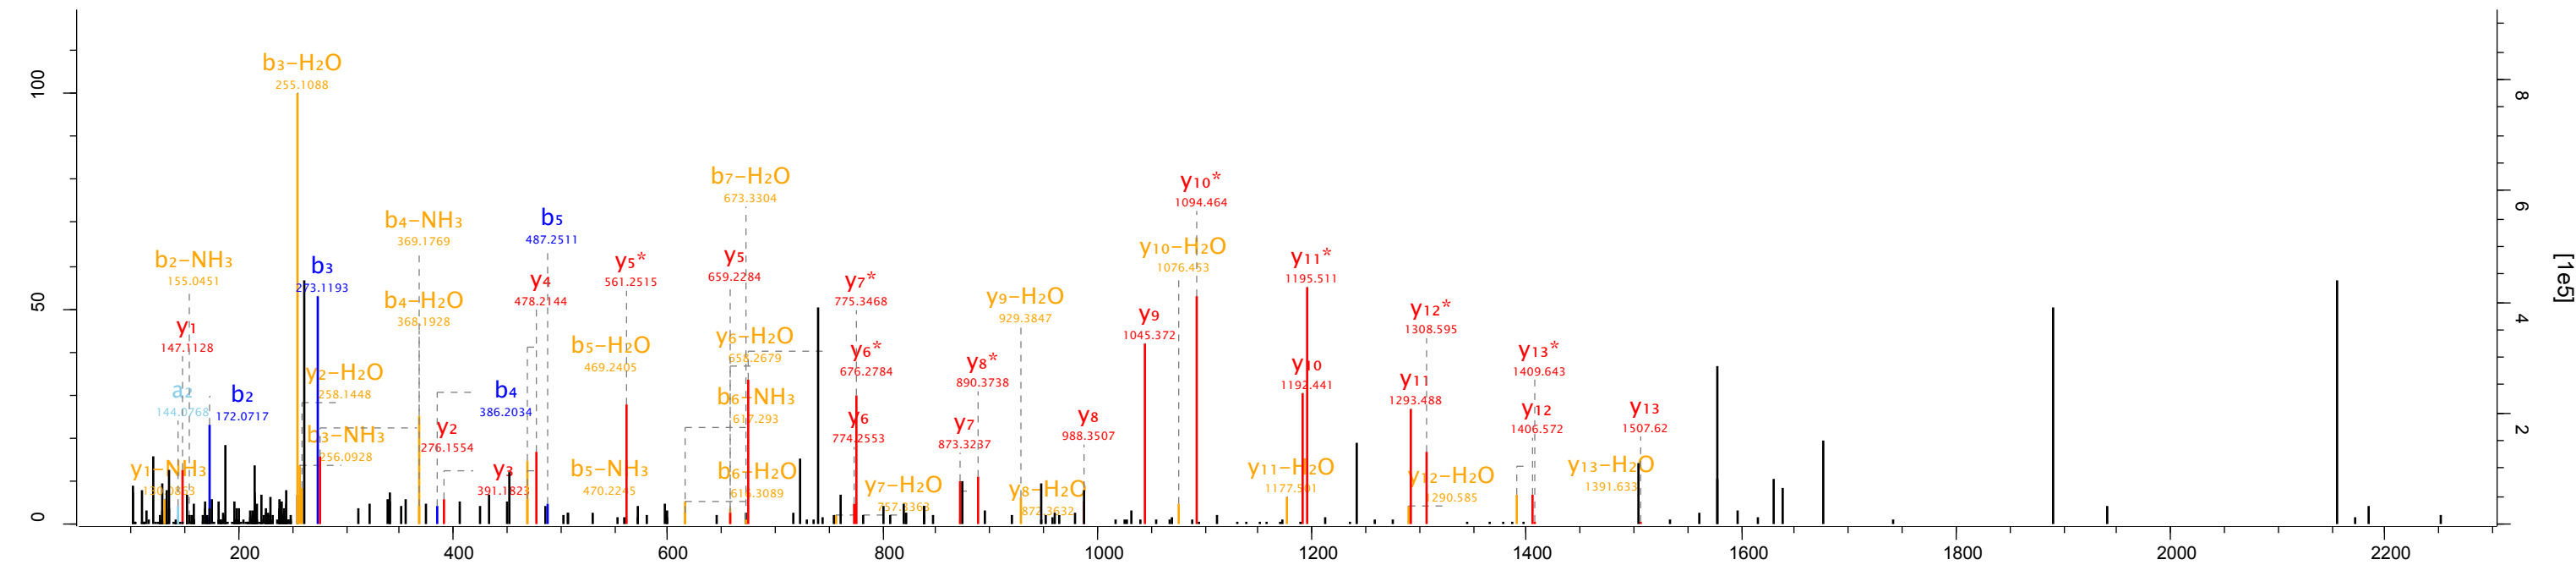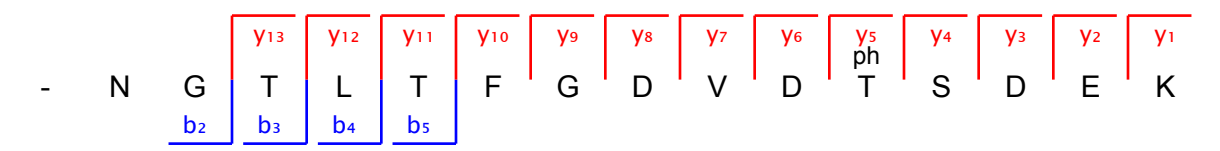

Raw file: 20150814\_A375SR\_Phospho\_BR2\_05  
 Scan: 15970 Method: FTMS; HCD Score: 118.22 m/z: 912.78 Gene names: MSH6

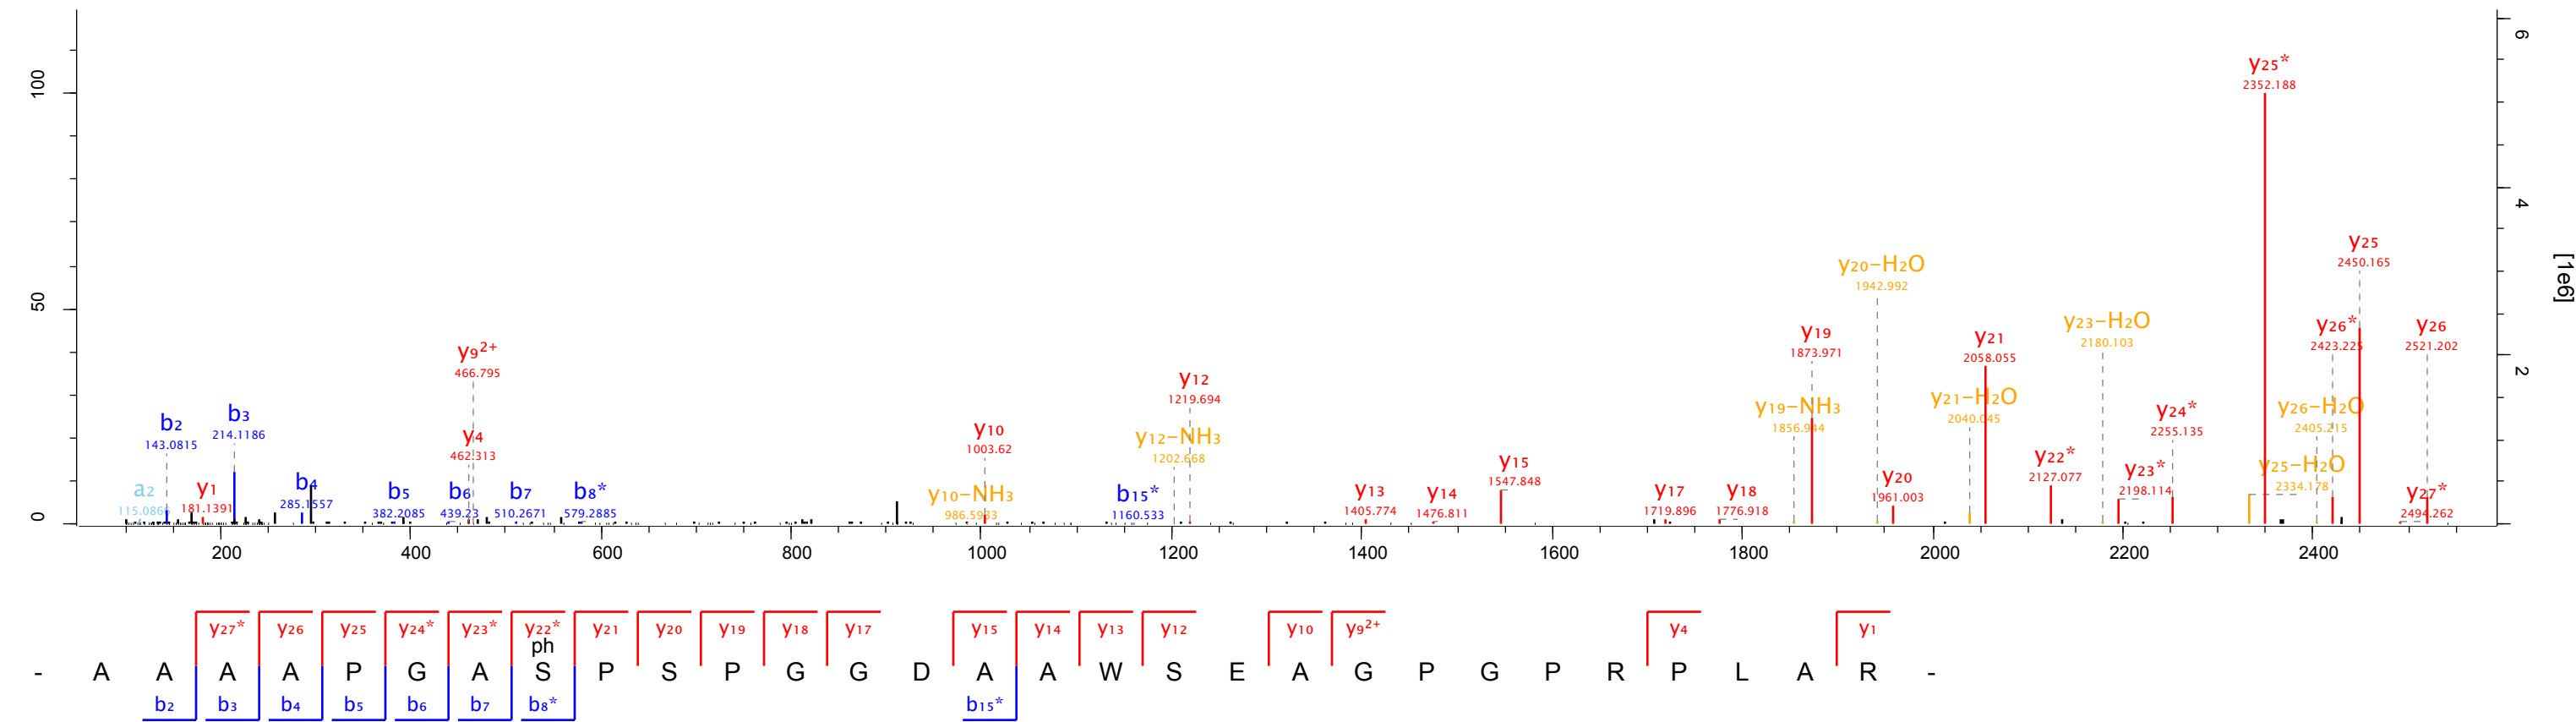

Raw file 20150814\_A375SR\_Phospho\_BR2\_05 Scan 16050 Method FTMS; HCD Score 101.87 m/z 978.87 Gene names TNKS1BP1

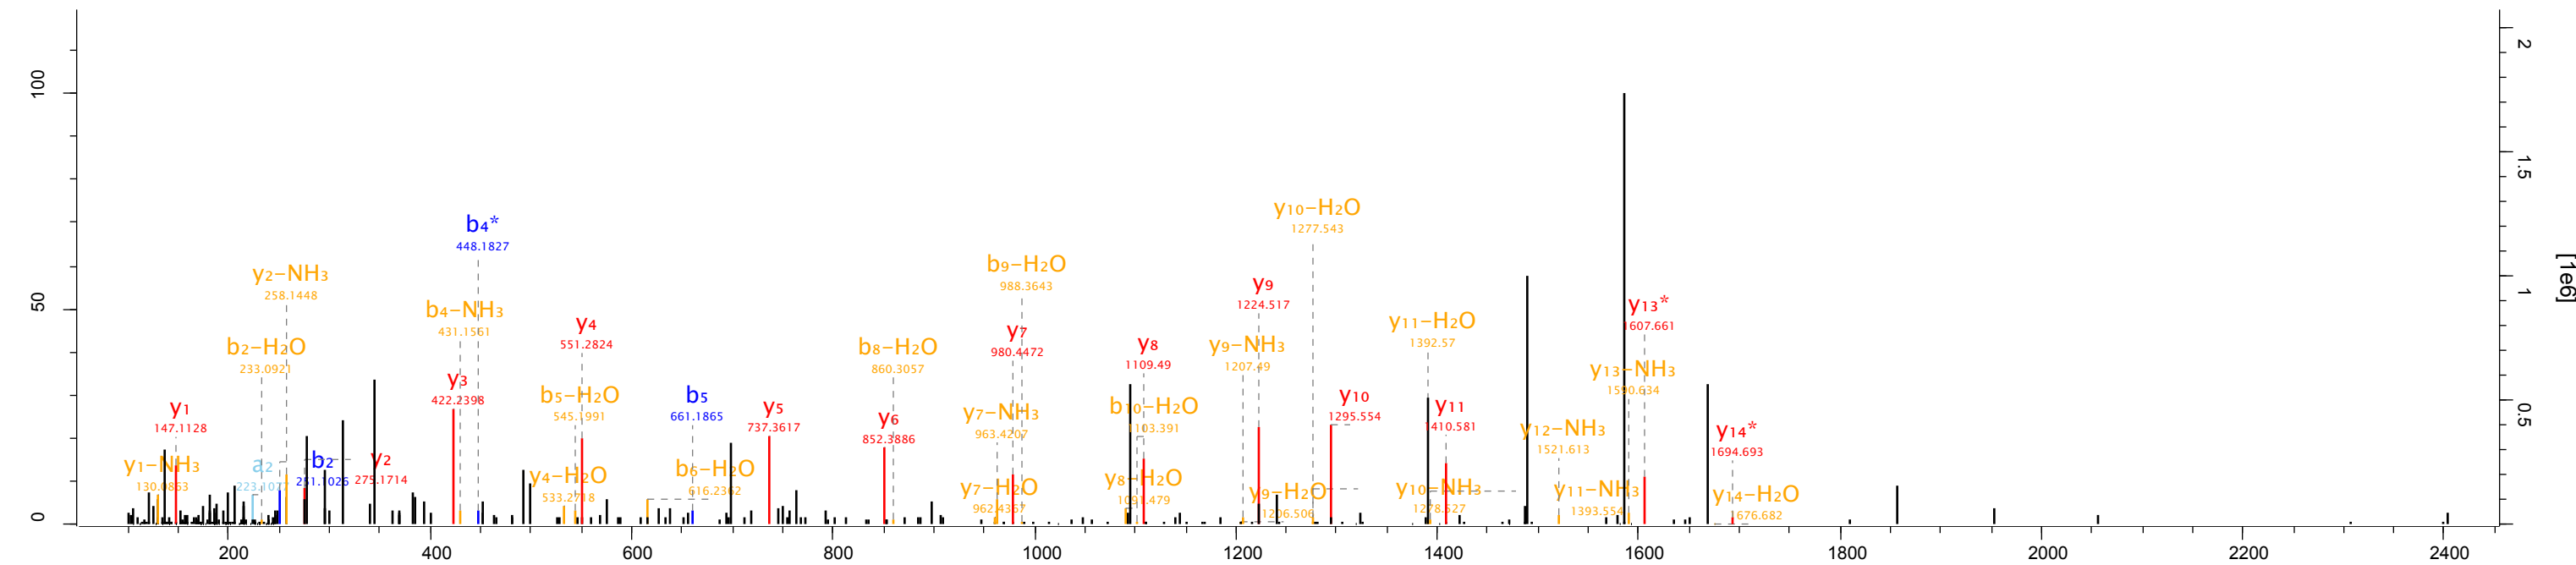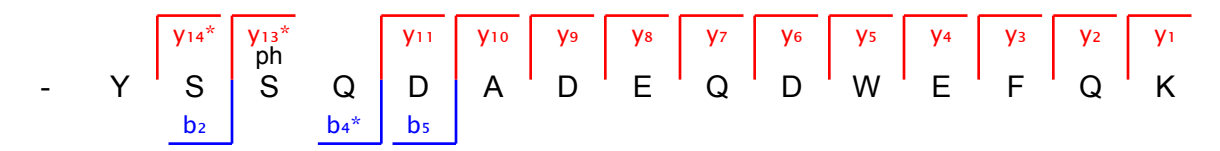

Raw file 20150814\_A375SR\_Phospho\_BR2\_05 Scan 16440 Method FTMS; HCD Score 204.51 m/z 724.4 Gene names CLIP1;CLIP2

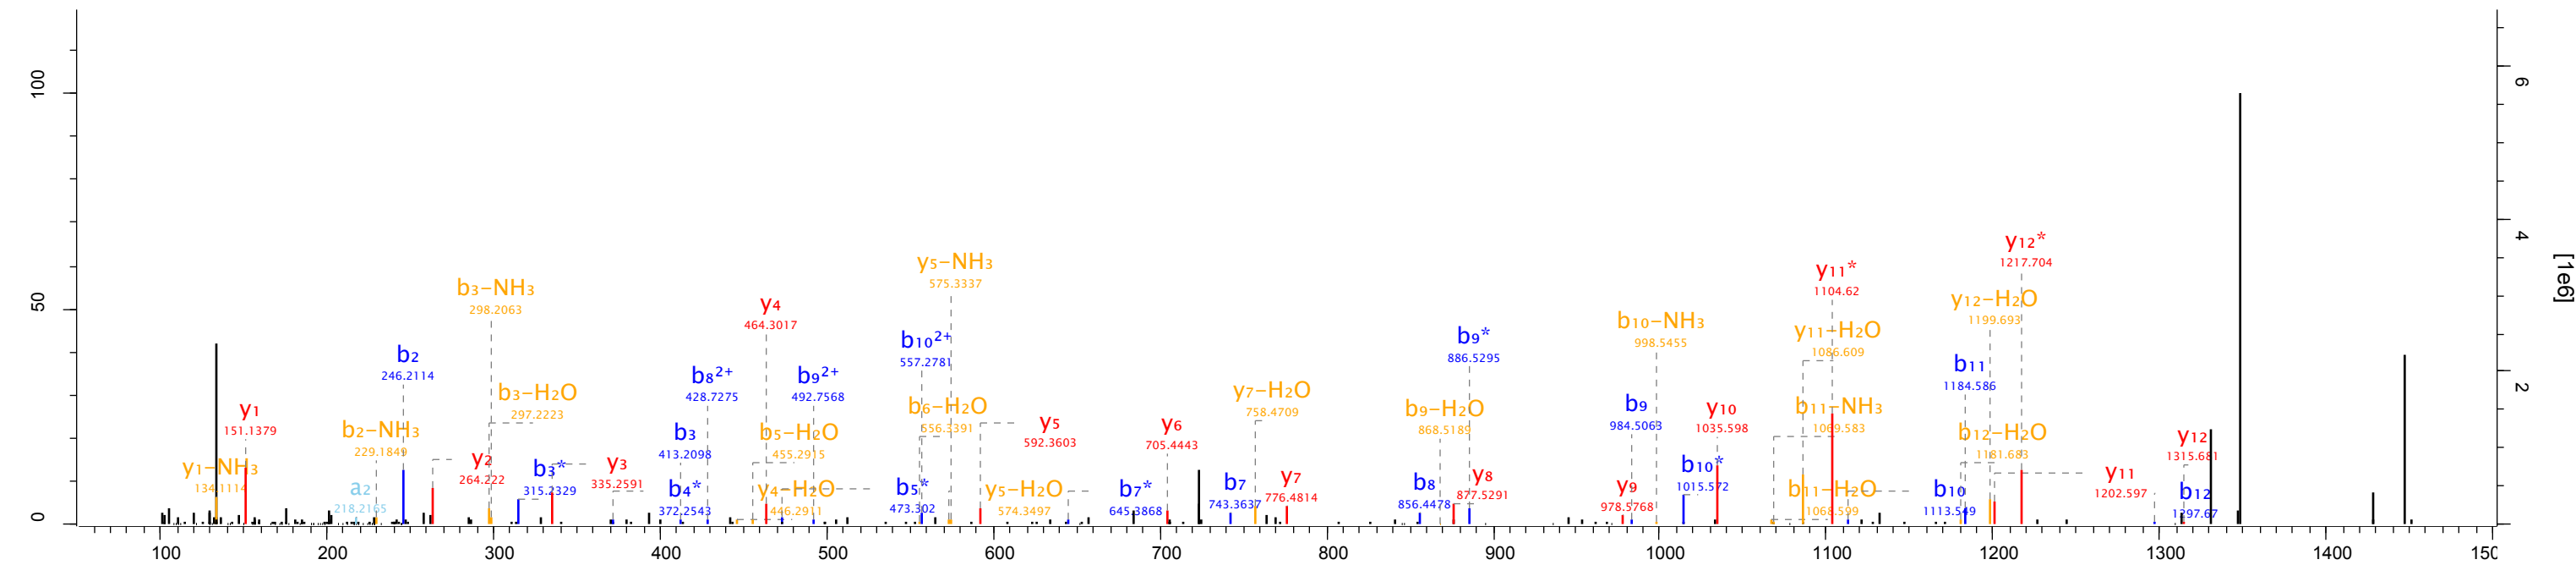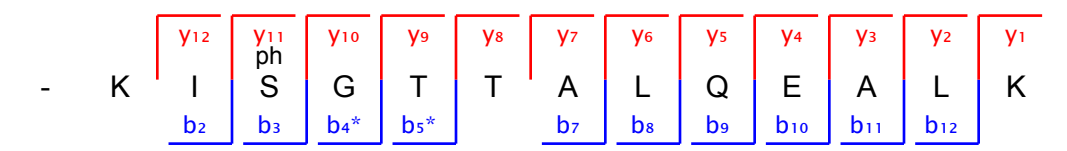

Raw file 20150814\_A375SR\_Phospho\_BR2\_05 Scan 16510 Method FTMS; HCD Score 174.68 m/z 728.84 Gene names ACAP2

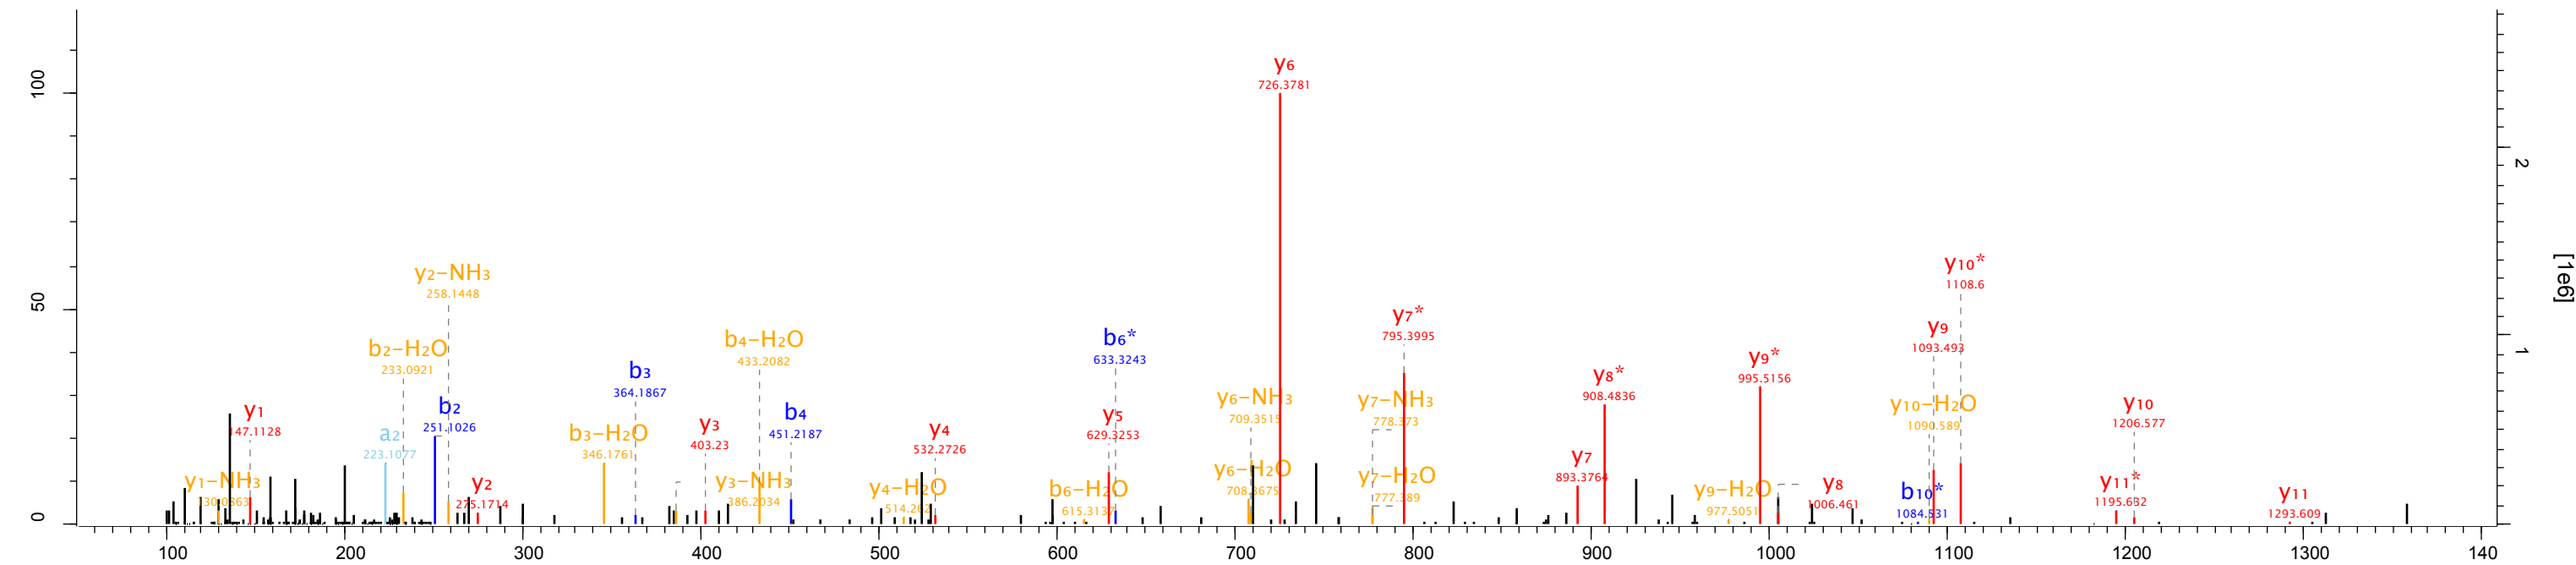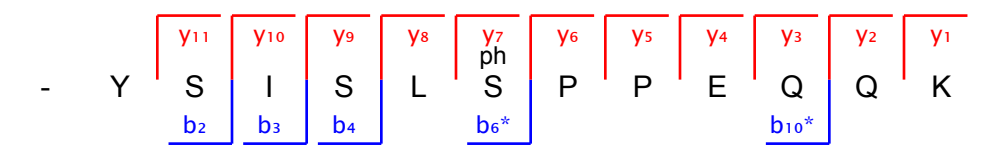

Raw file: 20150814\_A375SR\_Phospho\_BR2\_05  
 Scan: 16850 Method: FTMS; HCD Score: 283.1 m/z: 821.85 Gene names: GPBP1L1

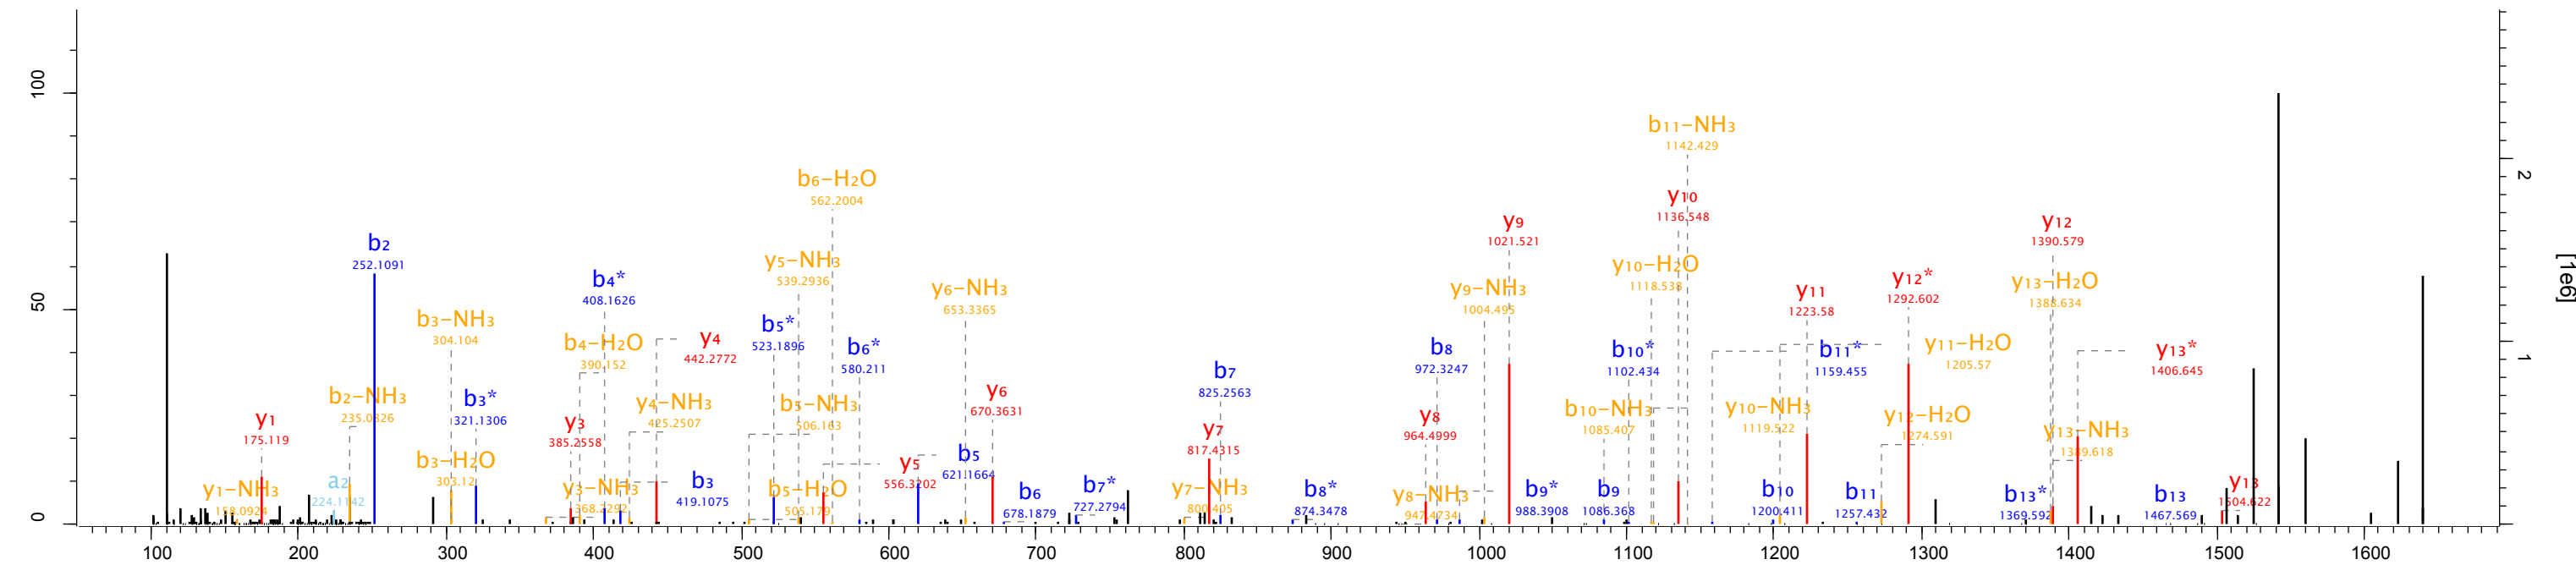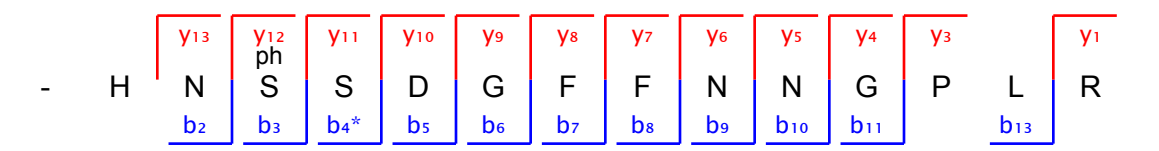

Raw file: 20150814\_A375SR\_Phospho\_BR2\_05  
 Scan: 17130 Method: FTMS; HCD Score: 255.01 m/z: 966.96 Gene names: TPR

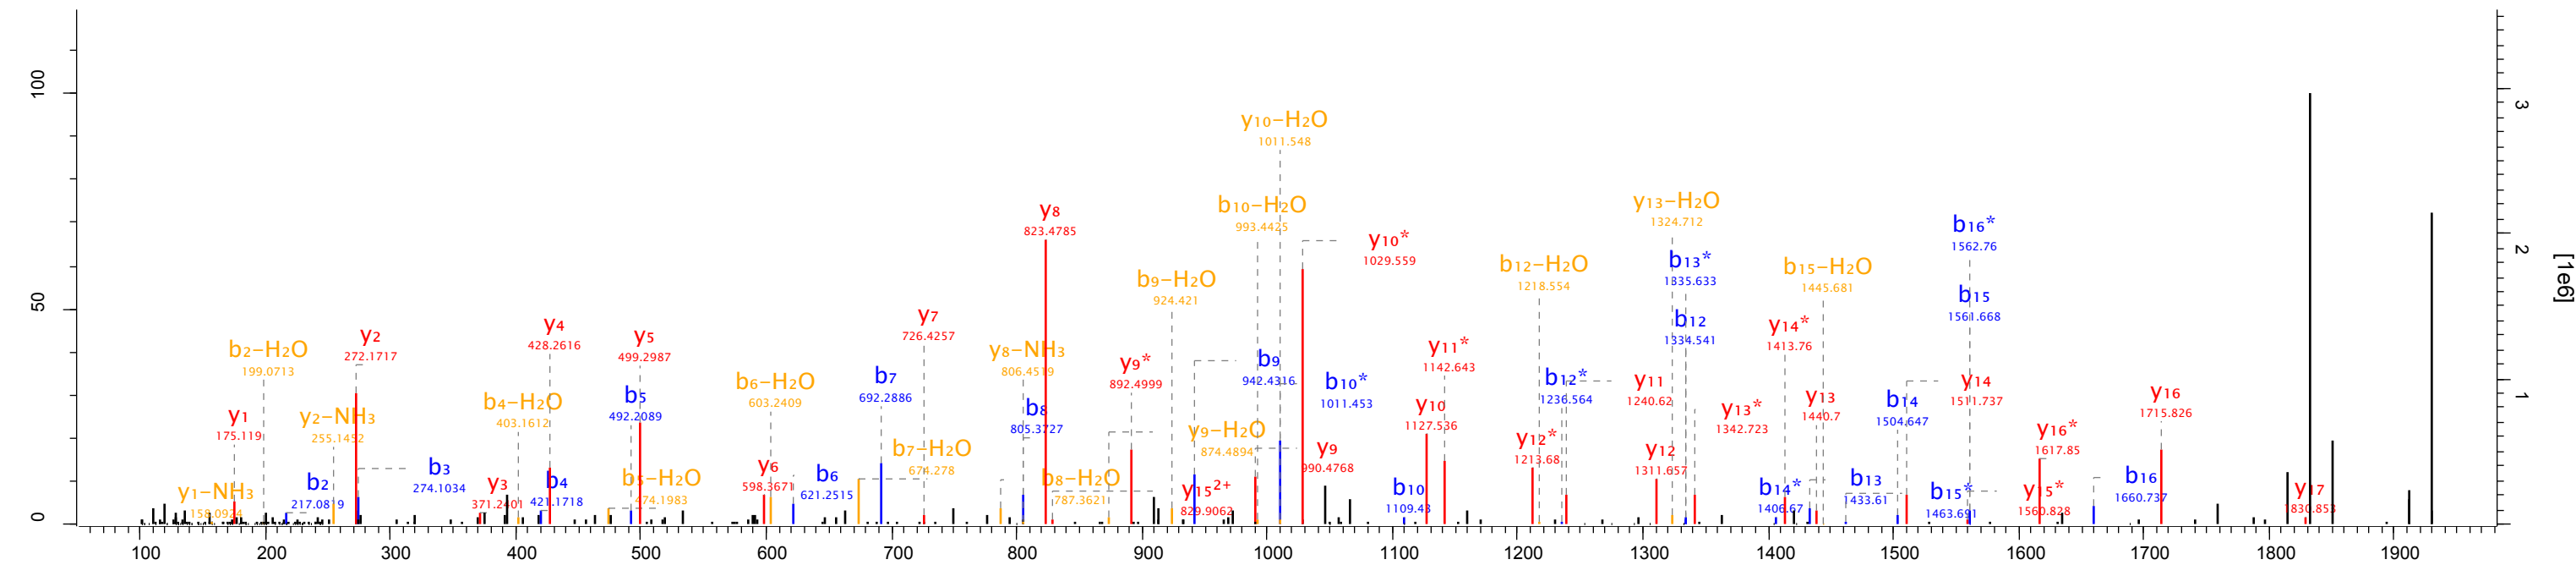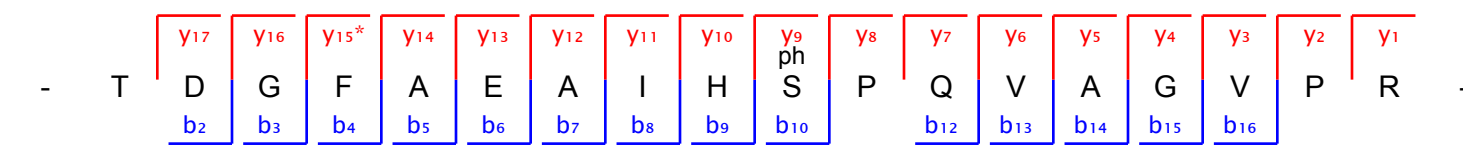



Raw file Scan Method Score m/z Gene names  
 20150814\_A375SR\_Phospho\_BR2\_05 17430 FTMS; HCD 100.7 701.36 PLEKHG2

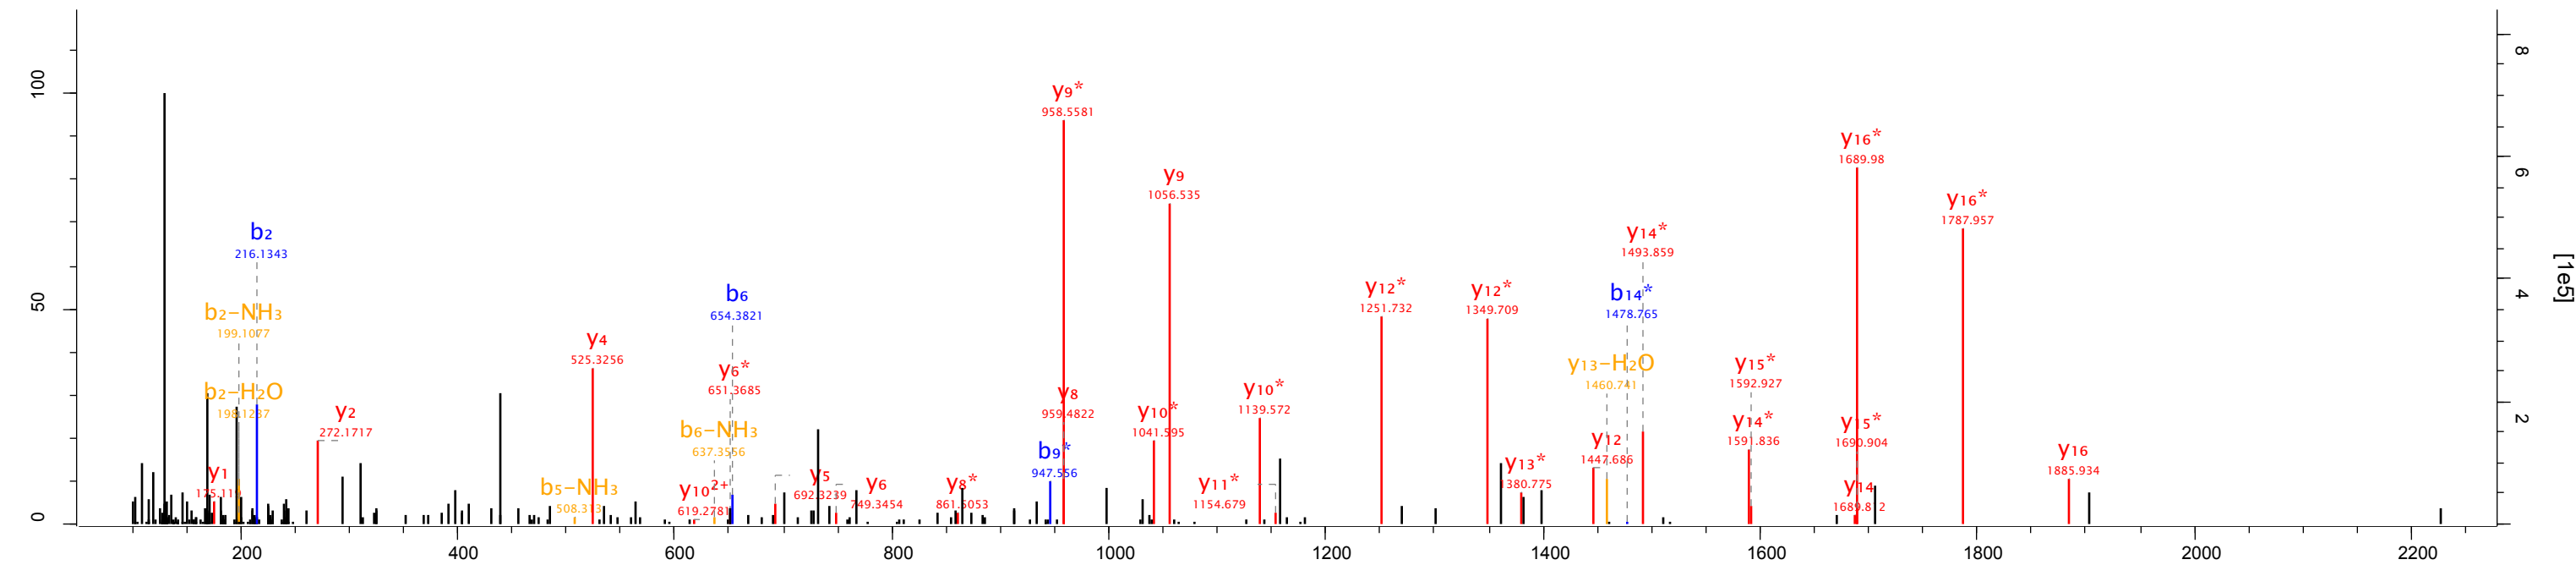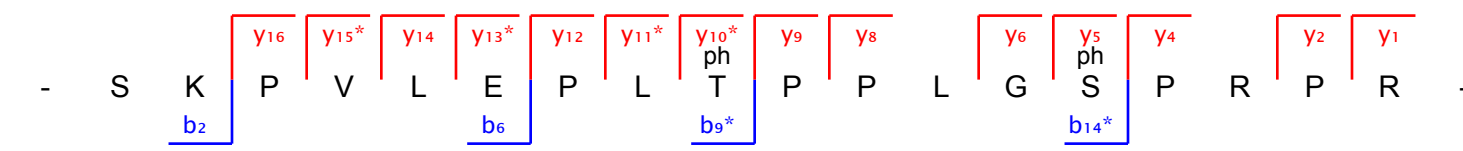

Raw file 20150814\_A375SR\_Phospho\_BR2\_05 Scan 17940 Method FTMS; HCD Score 221.99 m/z 804.9 Gene names TFE3

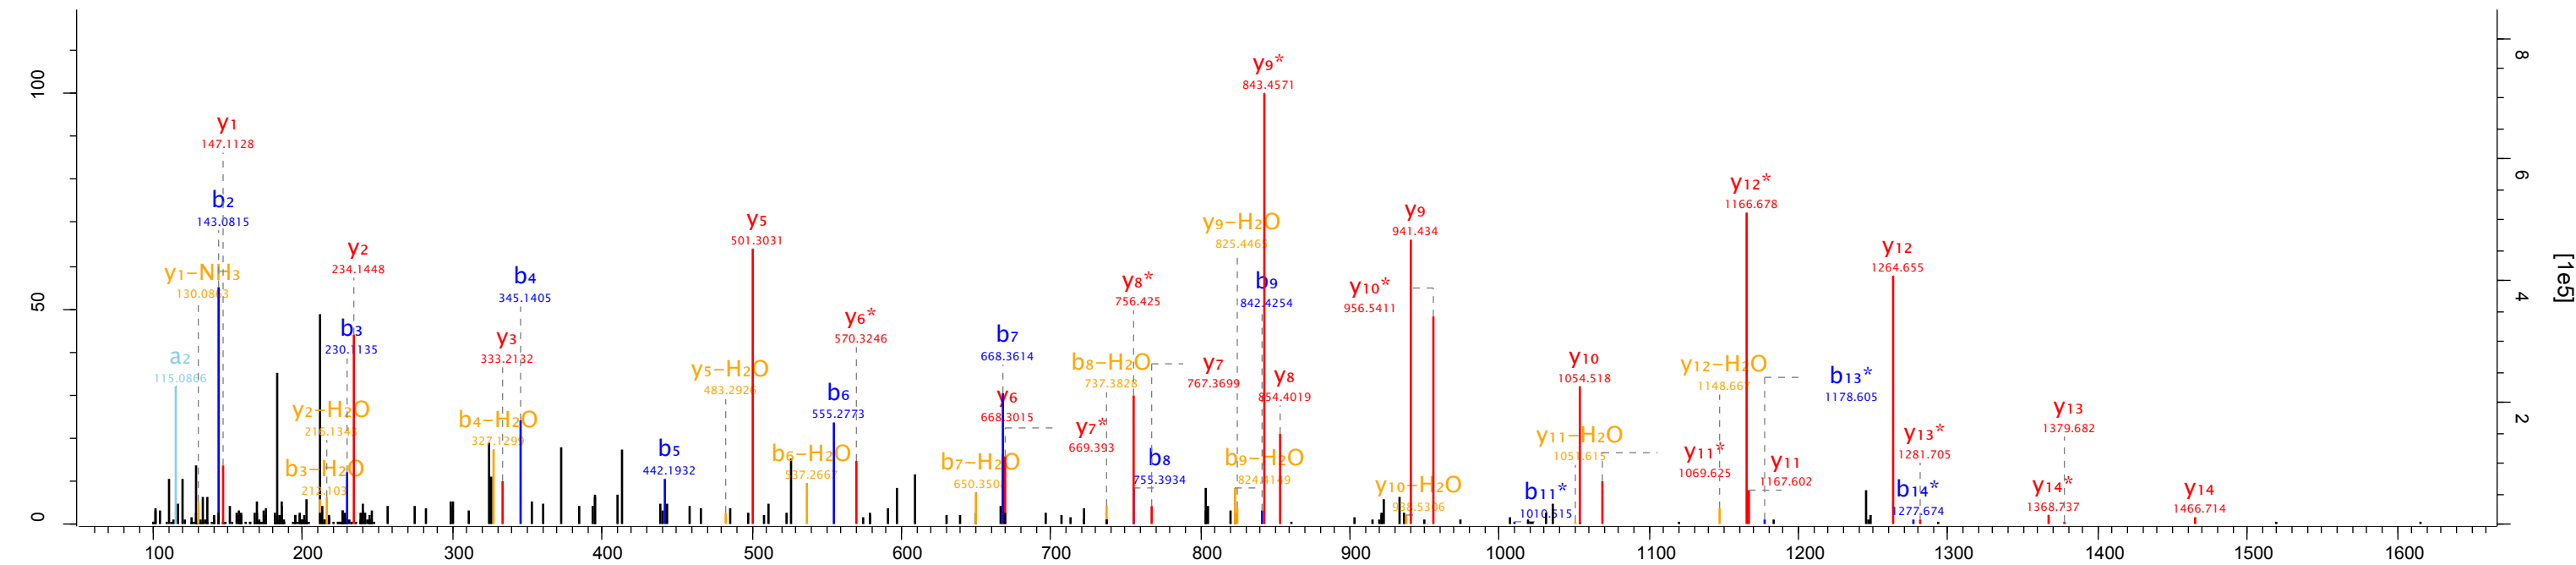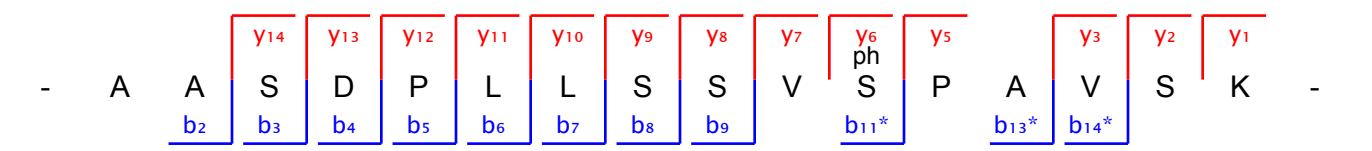

Raw file: 20150814\_A375SR\_Phospho\_BR2\_05  
 Scan: 18600 Method: FTMS; HCD Score: 237.5 m/z: 1027.94 Gene names: USP47

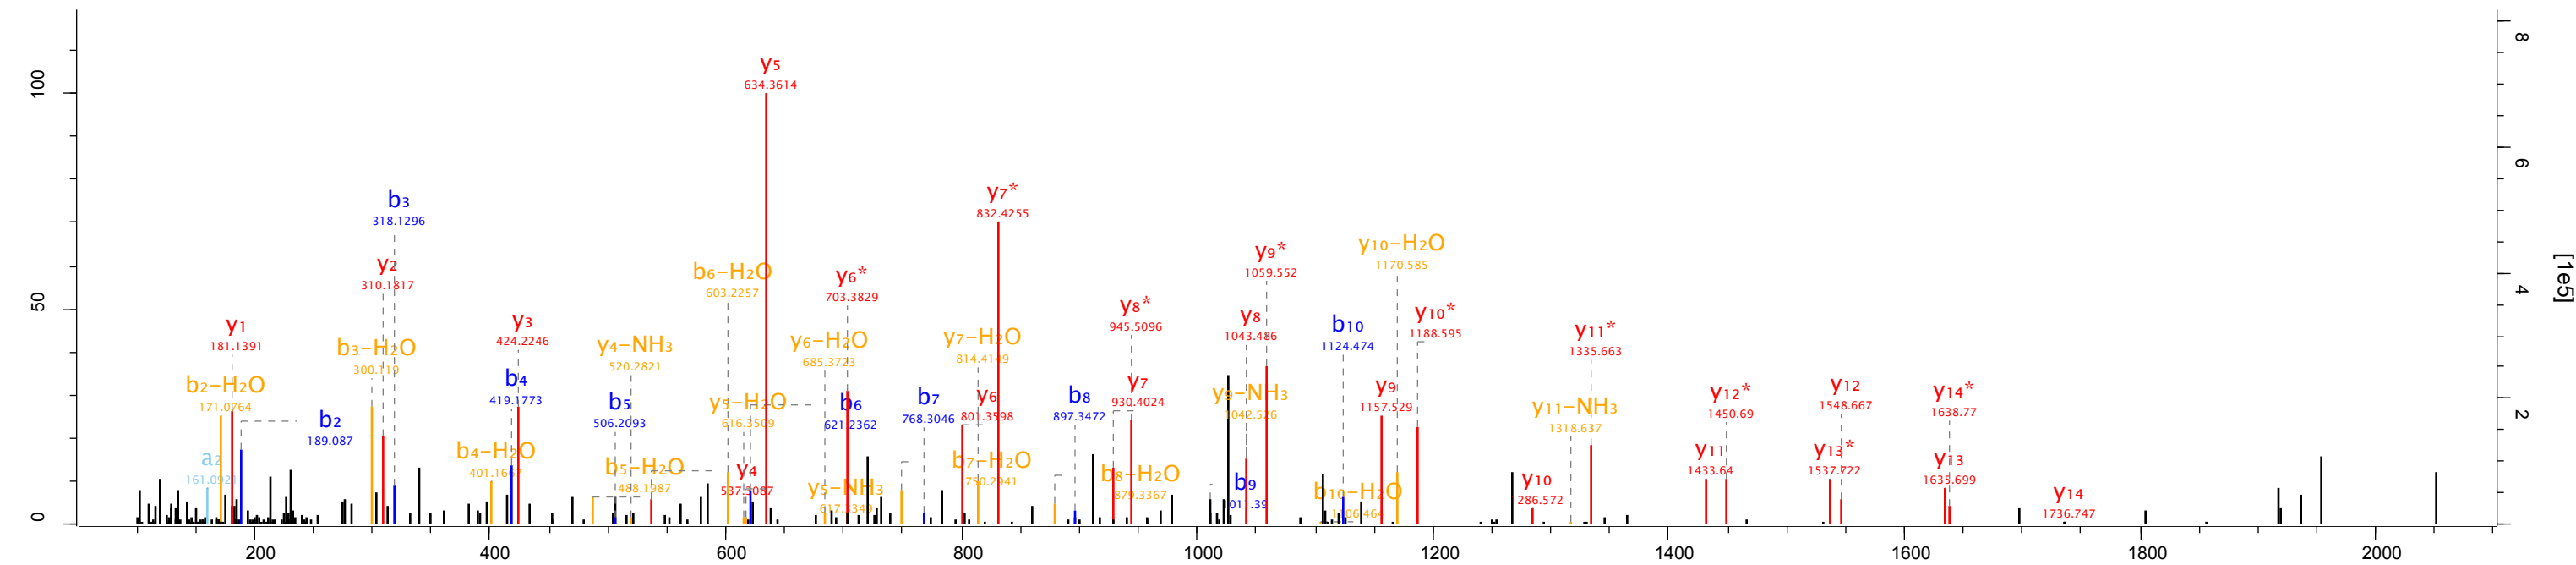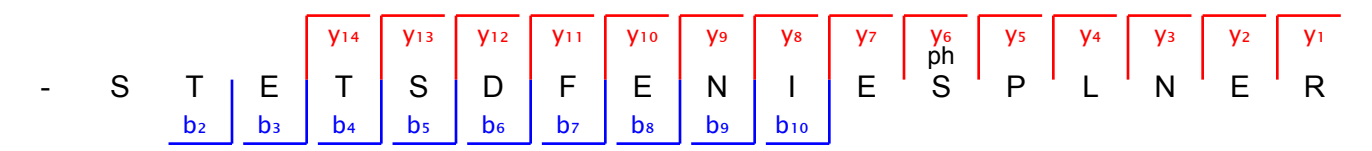

Raw file  
 20150814\_A375SR\_Phospho\_BR2\_05  
 Scan 18990 Method FTMS; HCD Score 153.1 m/z 939.49 Gene names PACSIN3

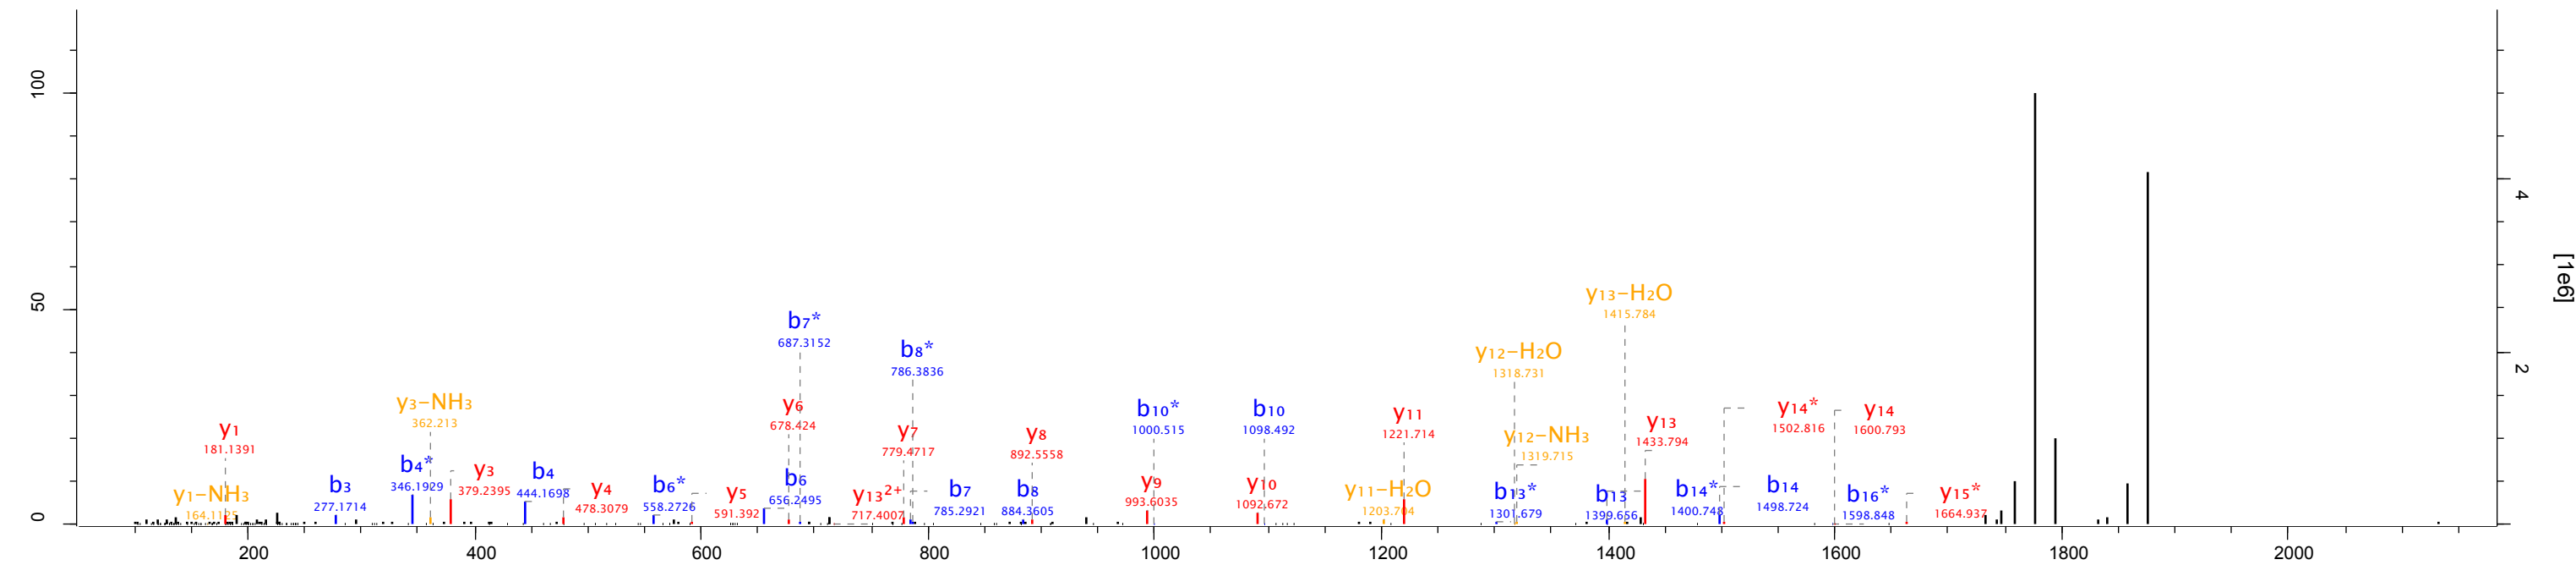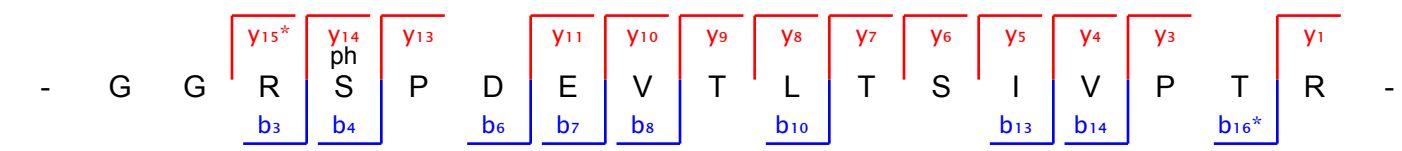

Raw file: 20150814\_A375SR\_Phospho\_BR2\_05  
 Scan: 1910 Method: FTMS; HCD Score: 89.91 m/z: 402.73 Gene names: PBRM1

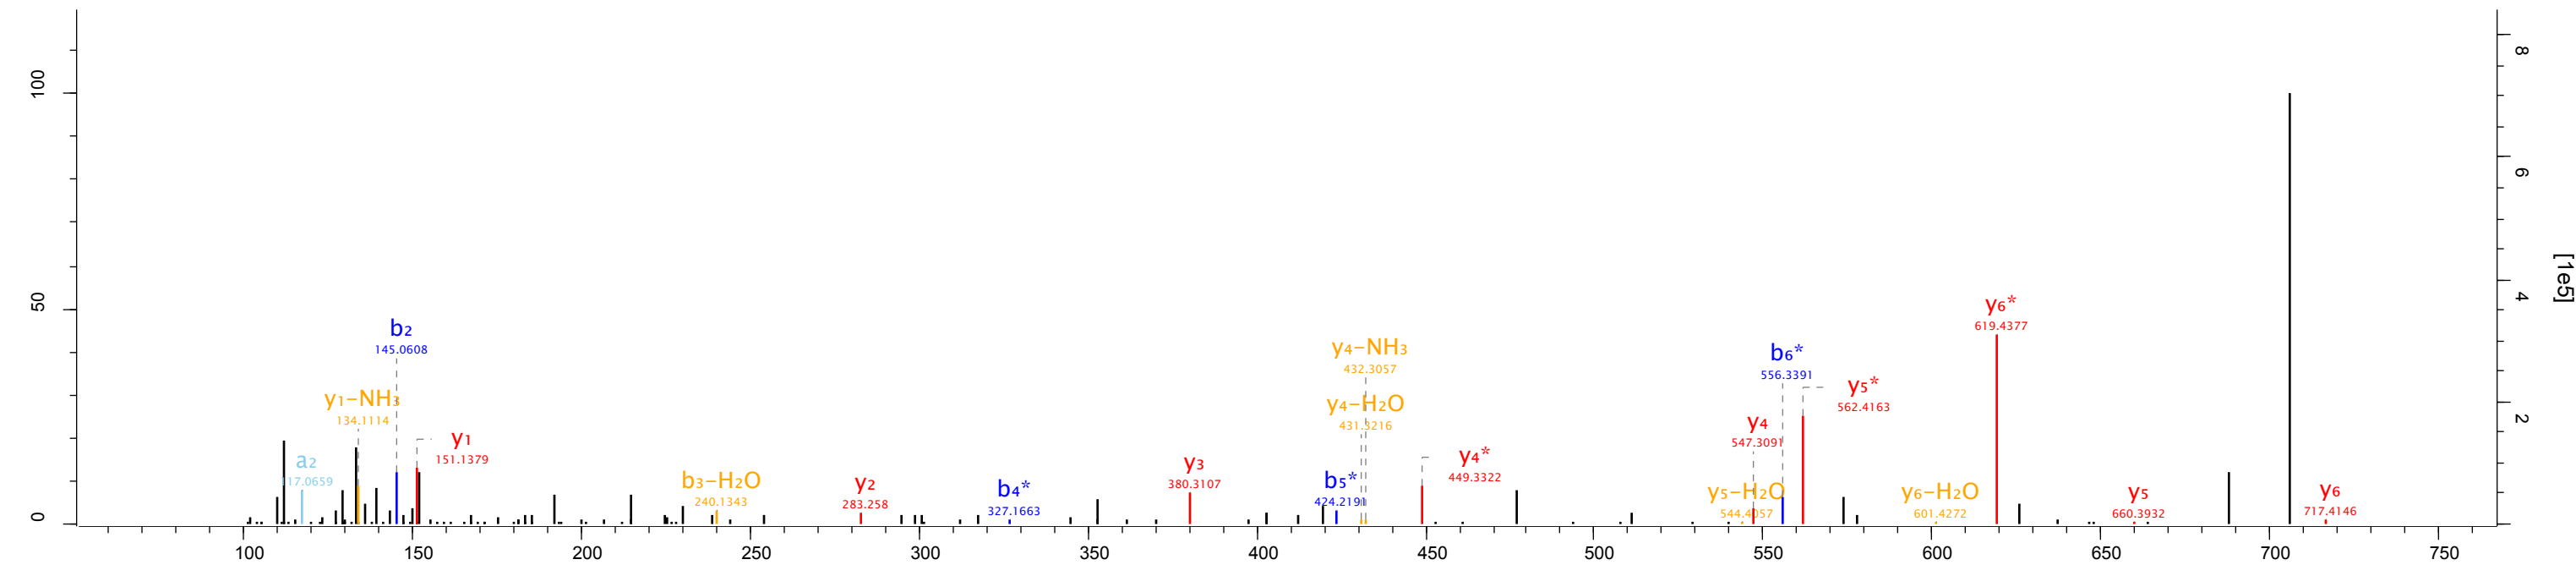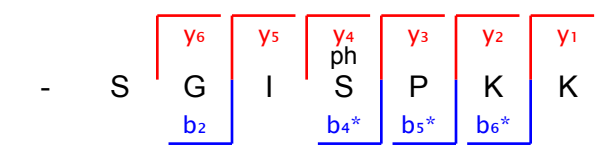

Raw file: 20150814\_A375SR\_Phospho\_BR2\_05  
 Scan: 19240 Method: FTMS; HCD Score: 243.41 m/z: 1033.85 Gene names: STK39

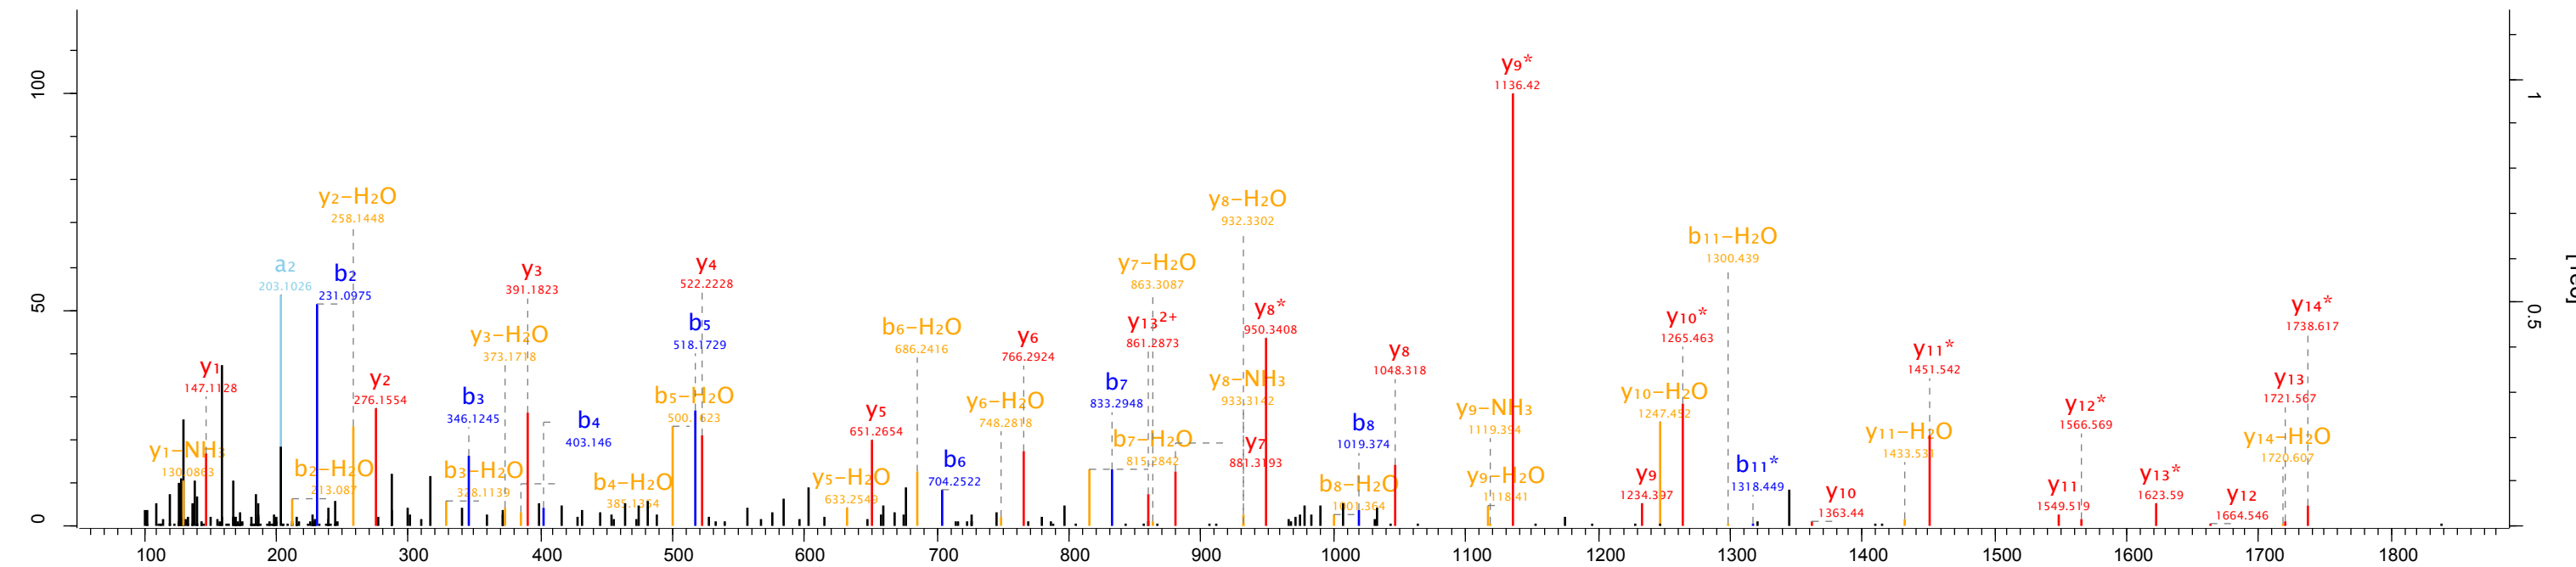

- T E D G D W E W S D D E M D E K -

Peptide sequence: T E D G D W E W S D D E M D E K

Fragmentation sites (b ions): b2, b3, b4, b5, b6, b7, b8, b11\*

Fragmentation sites (y ions): y1, y2, y3, y4, y5, y6, y7, y8, y9, y10, y11, y12, y13, y14\*

Raw file 20150814\_A375SR\_Phospho\_BR2\_05 Scan 19250 Method FTMS; HCD Score 131.04 m/z 841.73 Gene names EPS15L1;SPATA22

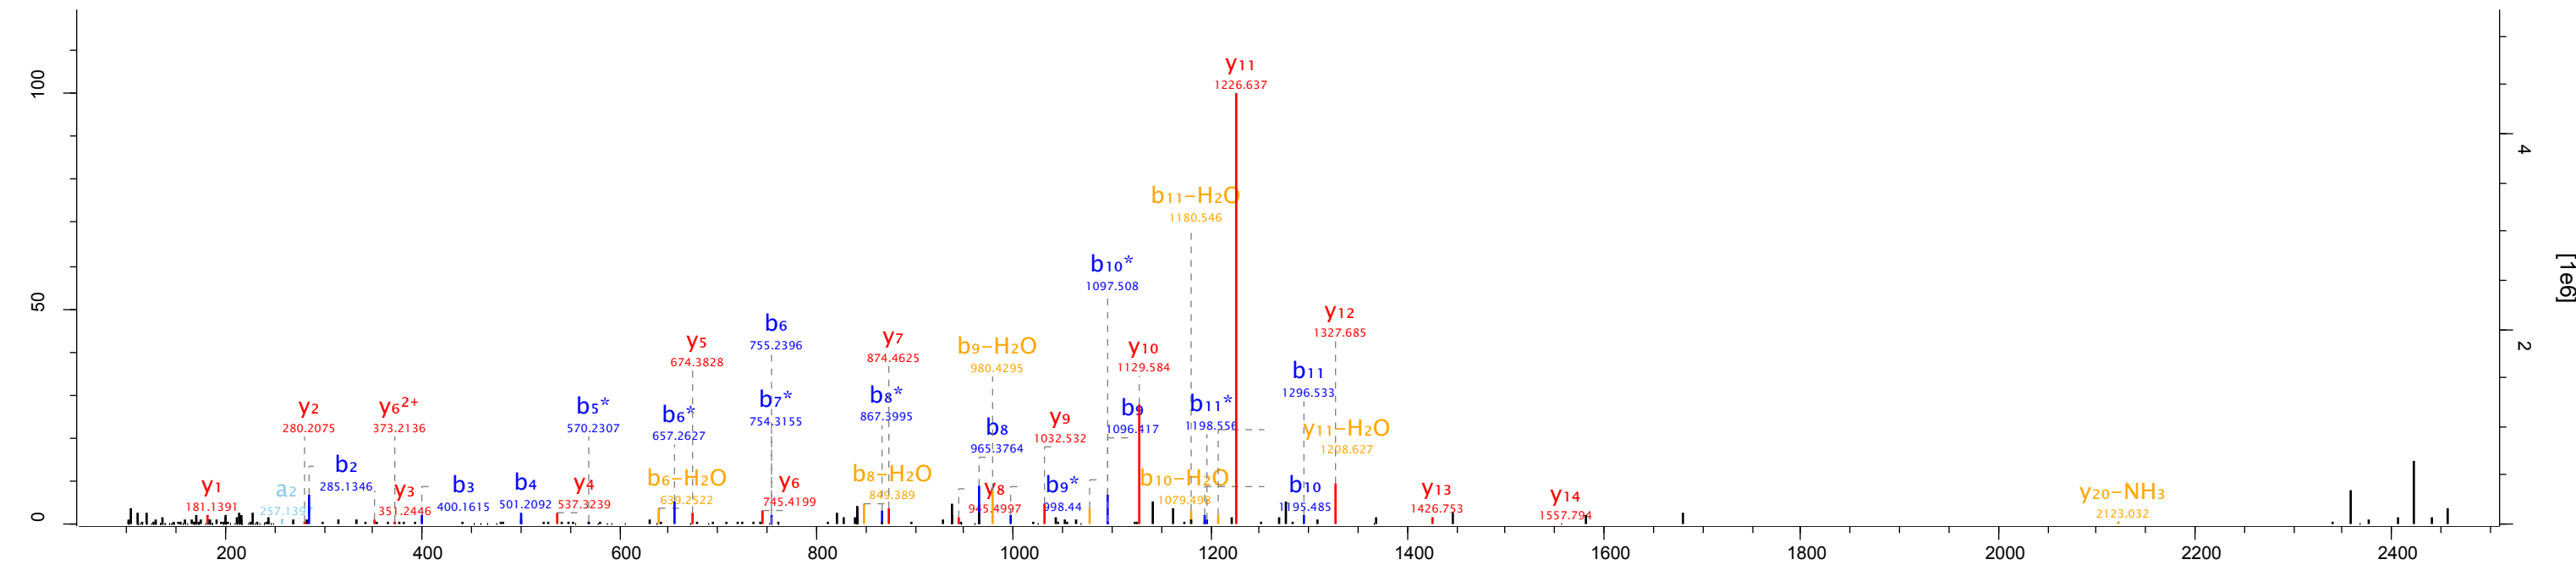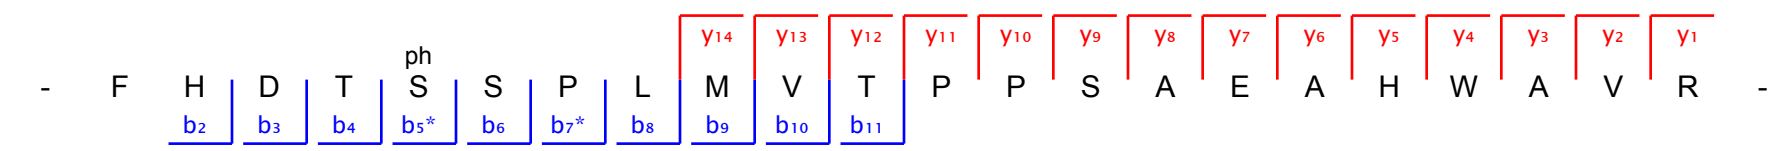

Raw file: 20150814\_A375SR\_Phospho\_BR2\_05  
 Scan: 19370 Method: FTMS; HCD Score: 287.39 m/z: 938.4 Gene names: SON

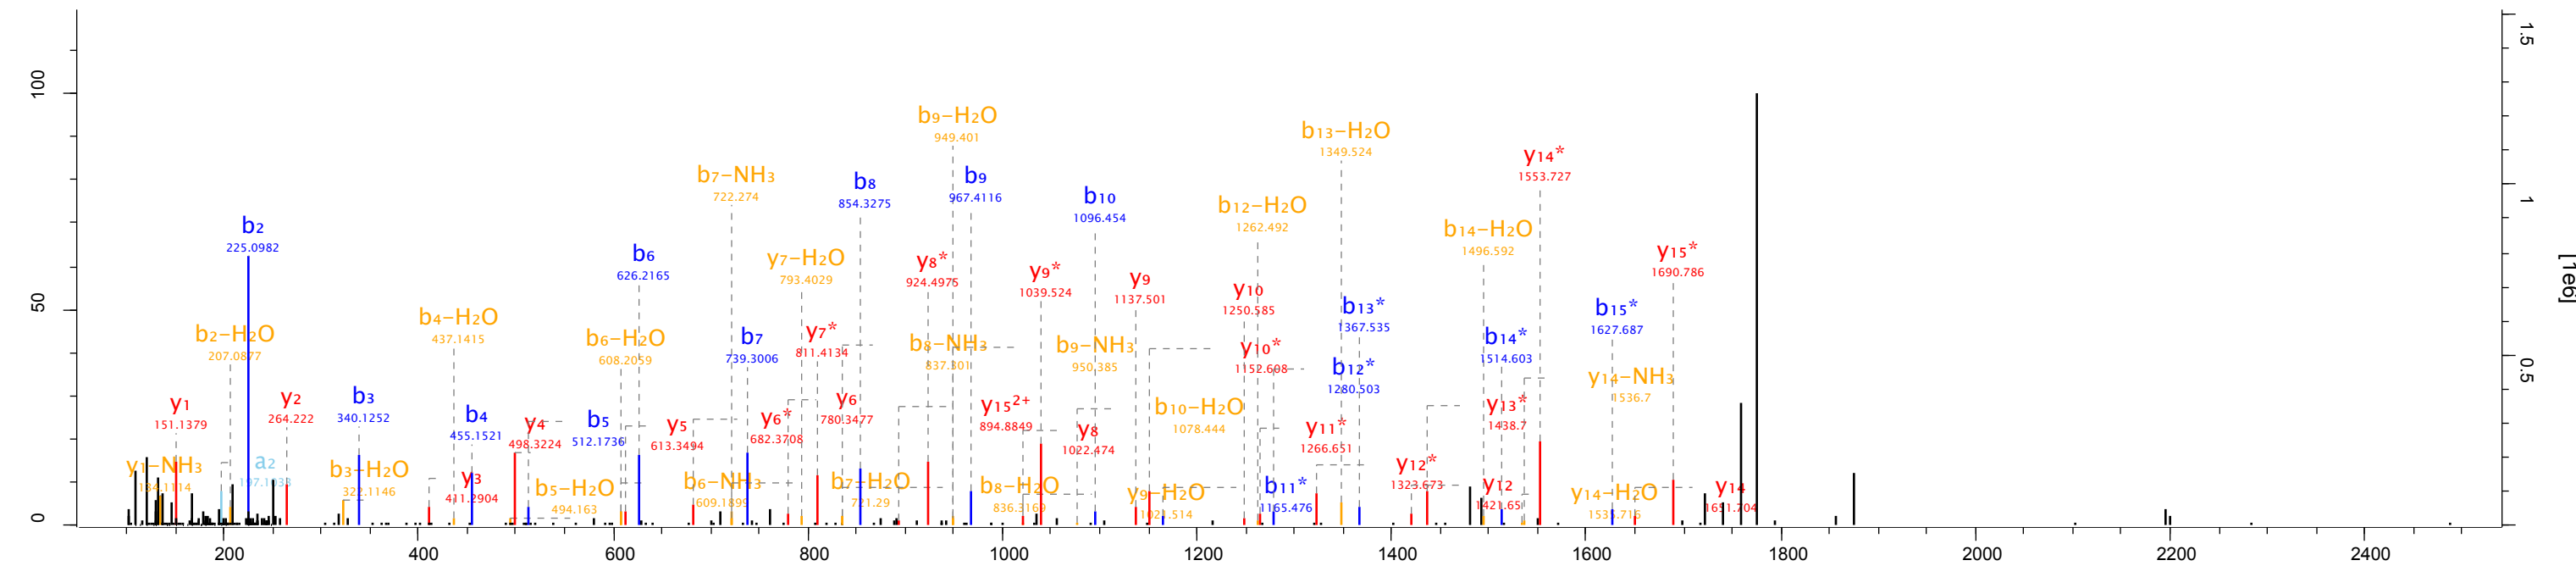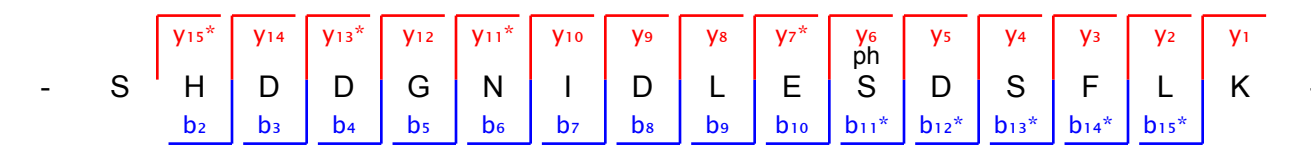



Raw file  
20150814\_A375SR\_Phospho\_BR2\_05

Scan 19470 Method FTMS; HCD Score 295.43 m/z 976.92 Gene names SET

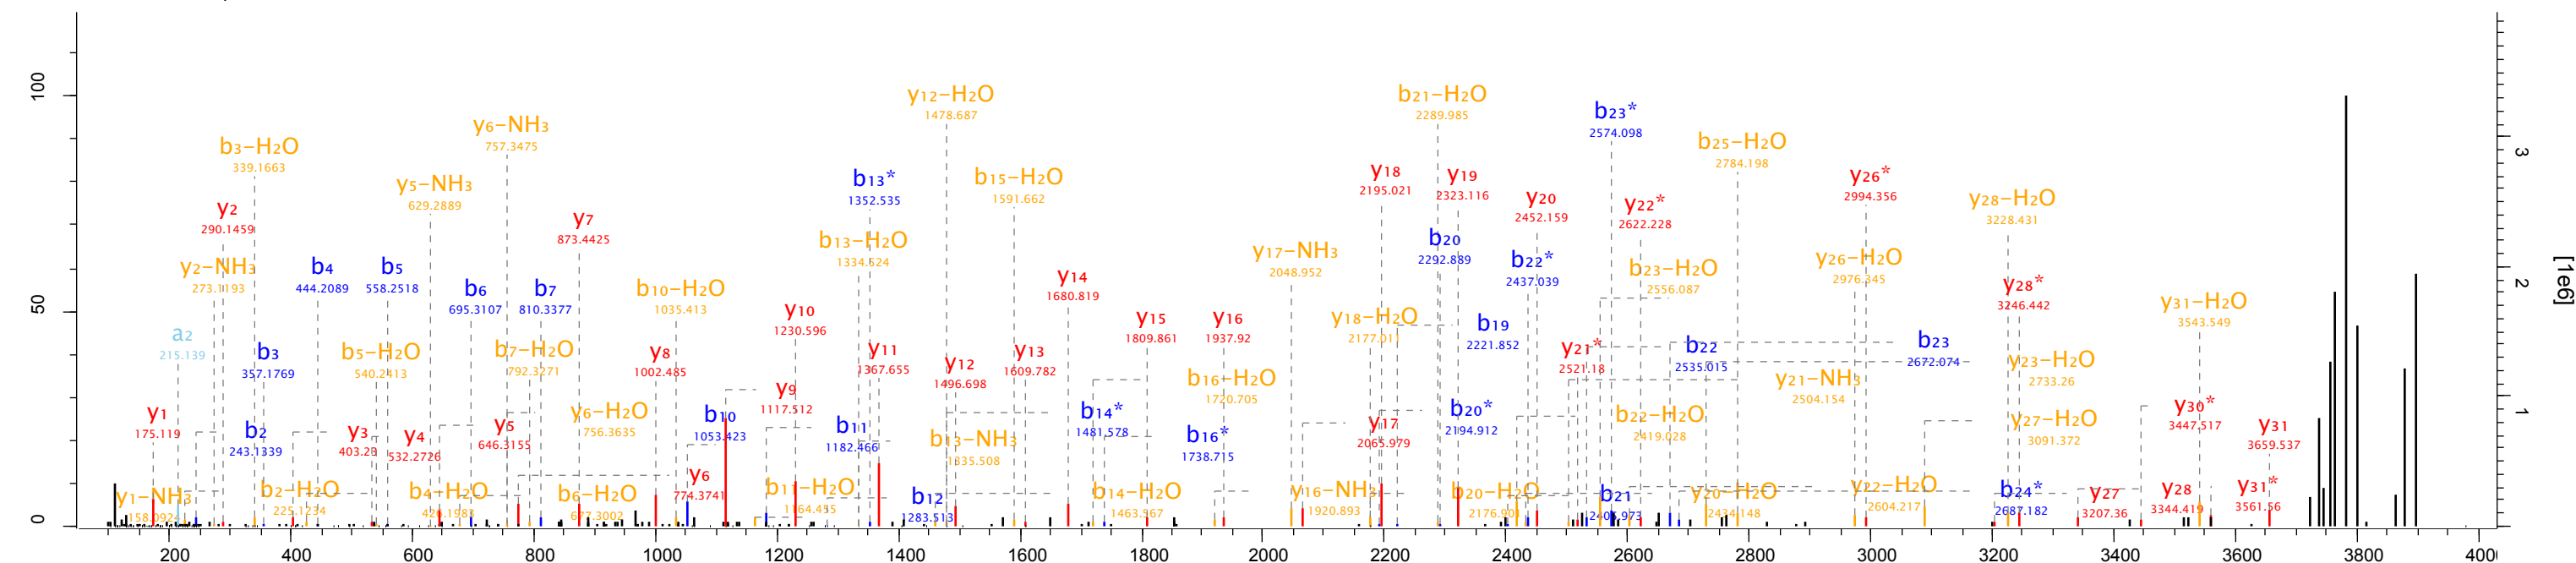

- E L N S N H D G A D E T S E K E Q Q E A I E H I D E V Q N E I D R -

Fragmentation mapping:  
b2 (L), b3 (N), b4 (S), b5 (N), b6 (H), b7 (D), b10 (D), b11 (E), b12 (T), b13\* (S), b14\* (E), b16\* (K), b19 (E), b20 (A), b21 (I), b22 (E), b23 (H), b24\* (I), y1 (D), y2 (E), y3 (V), y4 (Q), y5 (N), y6 (E), y7 (I), y8 (D), y9 (R), y10 (E), y11 (Q), y12 (Q), y13 (E), y14 (A), y15 (I), y16 (E), y17 (S), y18 (T), y19 (D), y20 (G), y21\* (H), y22\* (N), y26\* (S), y27 (D), y28 (E), y30\* (V), y31 (Q), y31\* (N).

Raw file Scan Method Score m/z Gene names  
 20150814\_A375SR\_Phospho\_BR2\_05 19580 FTMS; HCD 125.97 952.76 SAMD4B

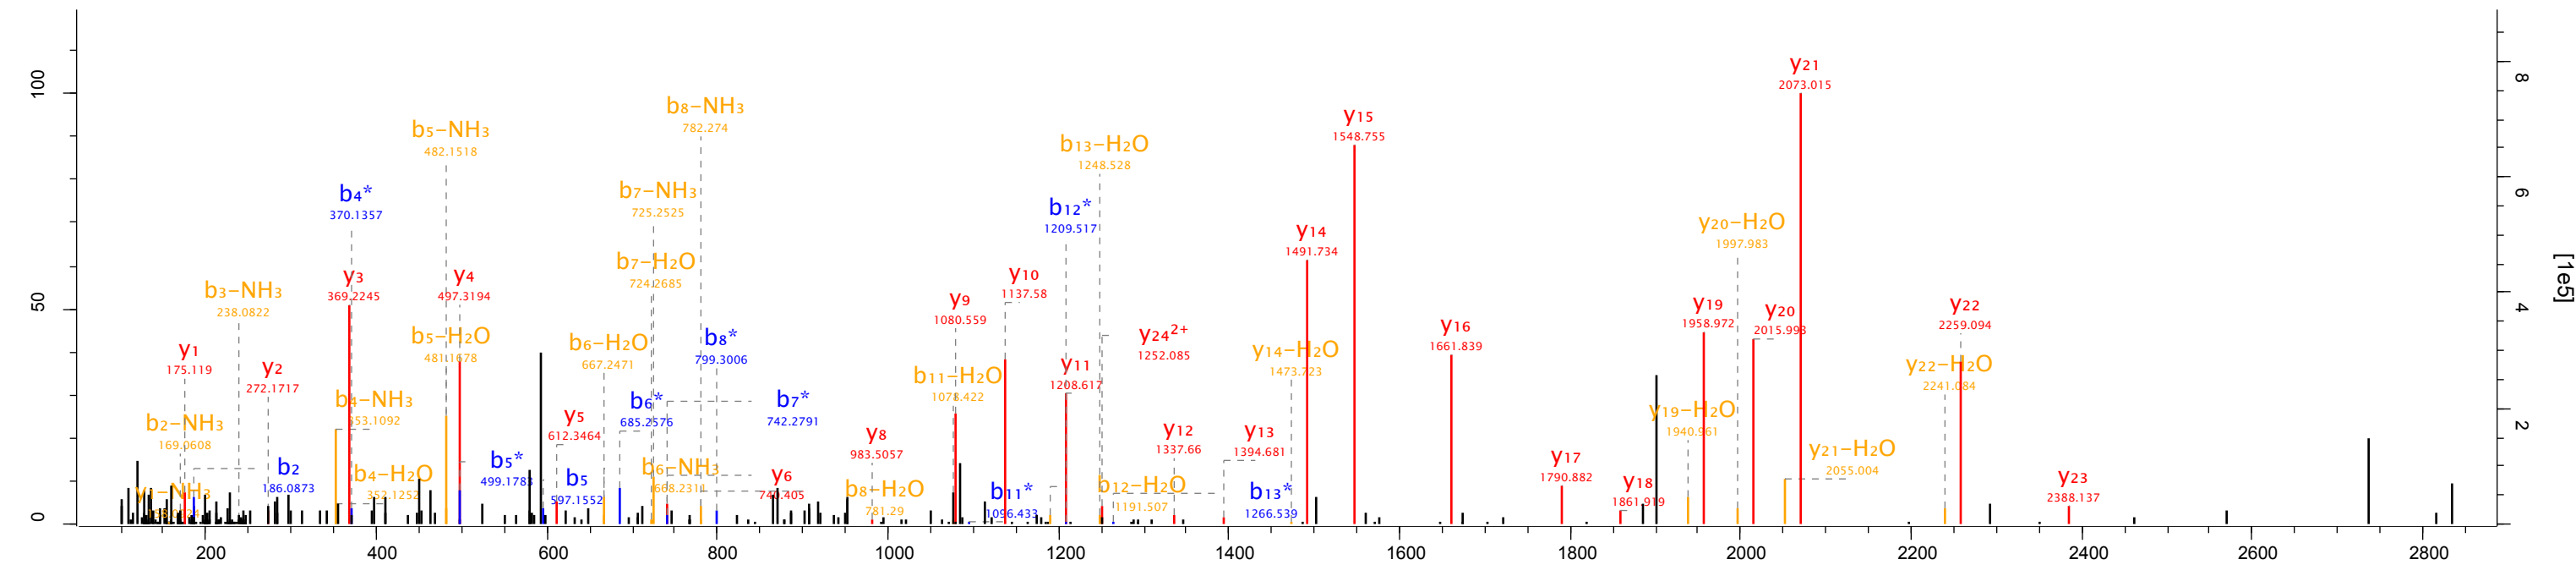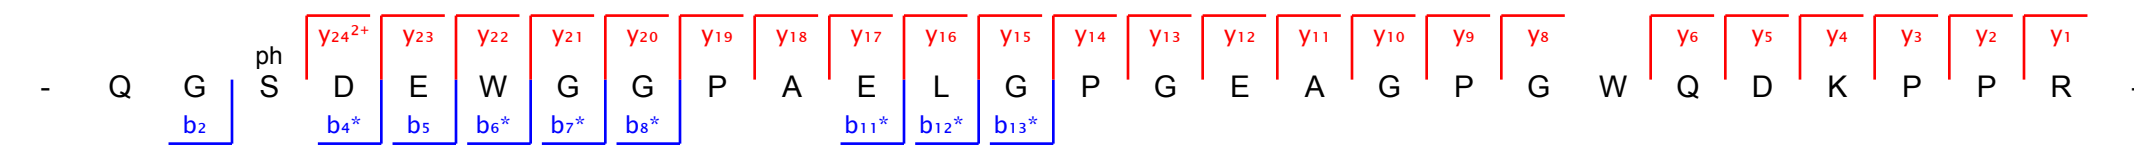

Raw file: 20150814\_A375SR\_Phospho\_BR2\_05  
 Scan: 19950 Method: FTMS; HCD Score: 182.67 m/z: 1140.49 Gene names: CCDC43

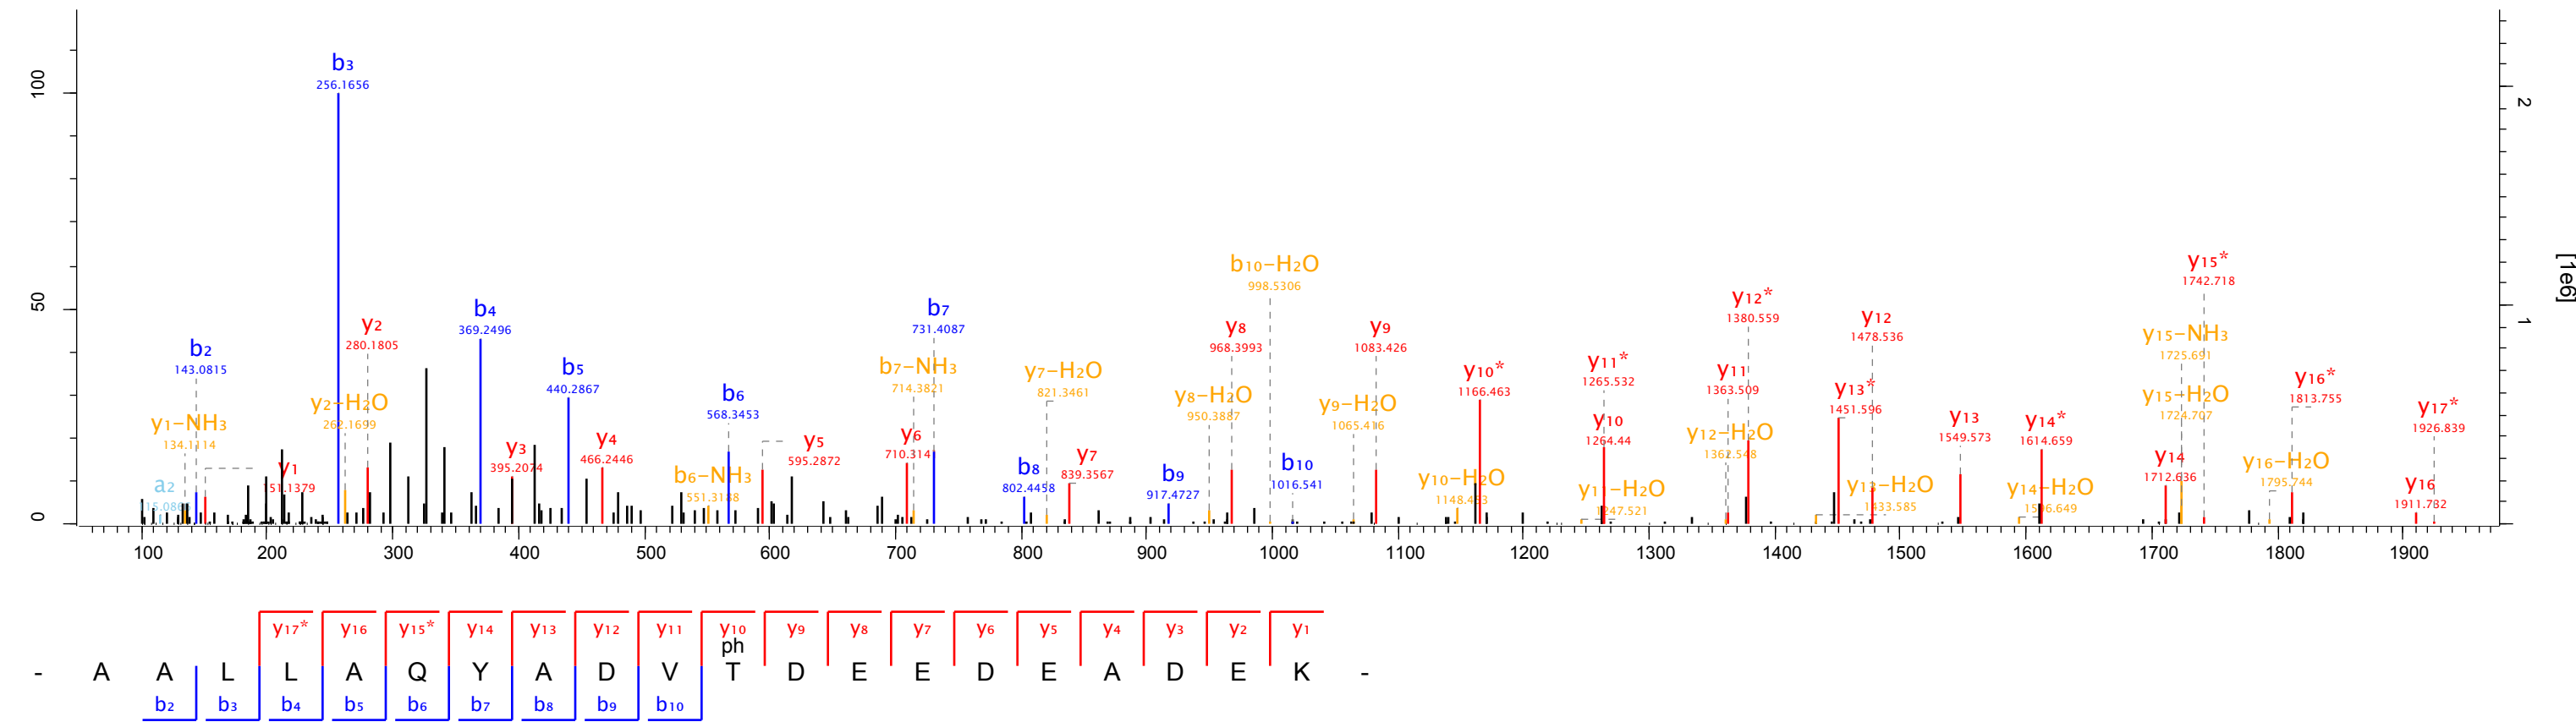

Raw file: 20150814\_A375SR\_Phospho\_BR2\_05  
 Scan: 20080 Method: FTMS; HCD Score: 67.37 m/z: 925.08 Gene names: TOP1

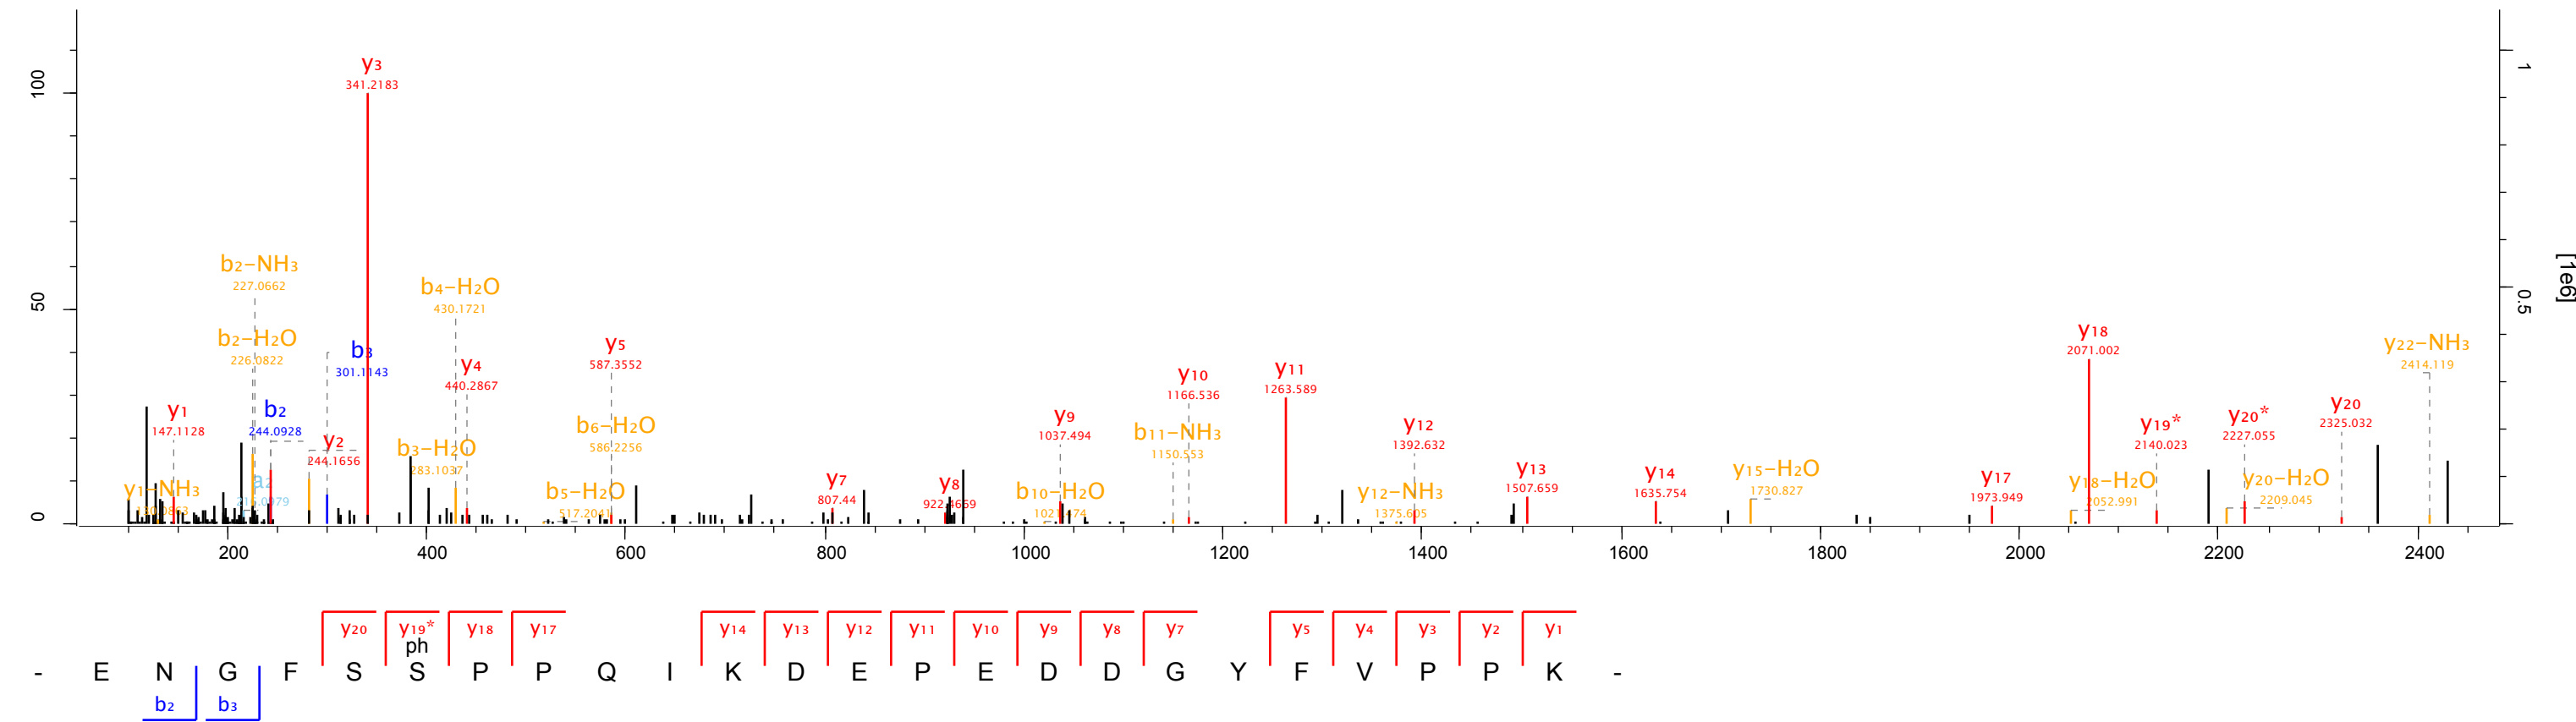

Raw file 20150814\_A375SR\_Phospho\_BR2\_05 Scan 20170 Method FTMS; HCD Score 177.74 m/z 724.31 Gene names RBM15B

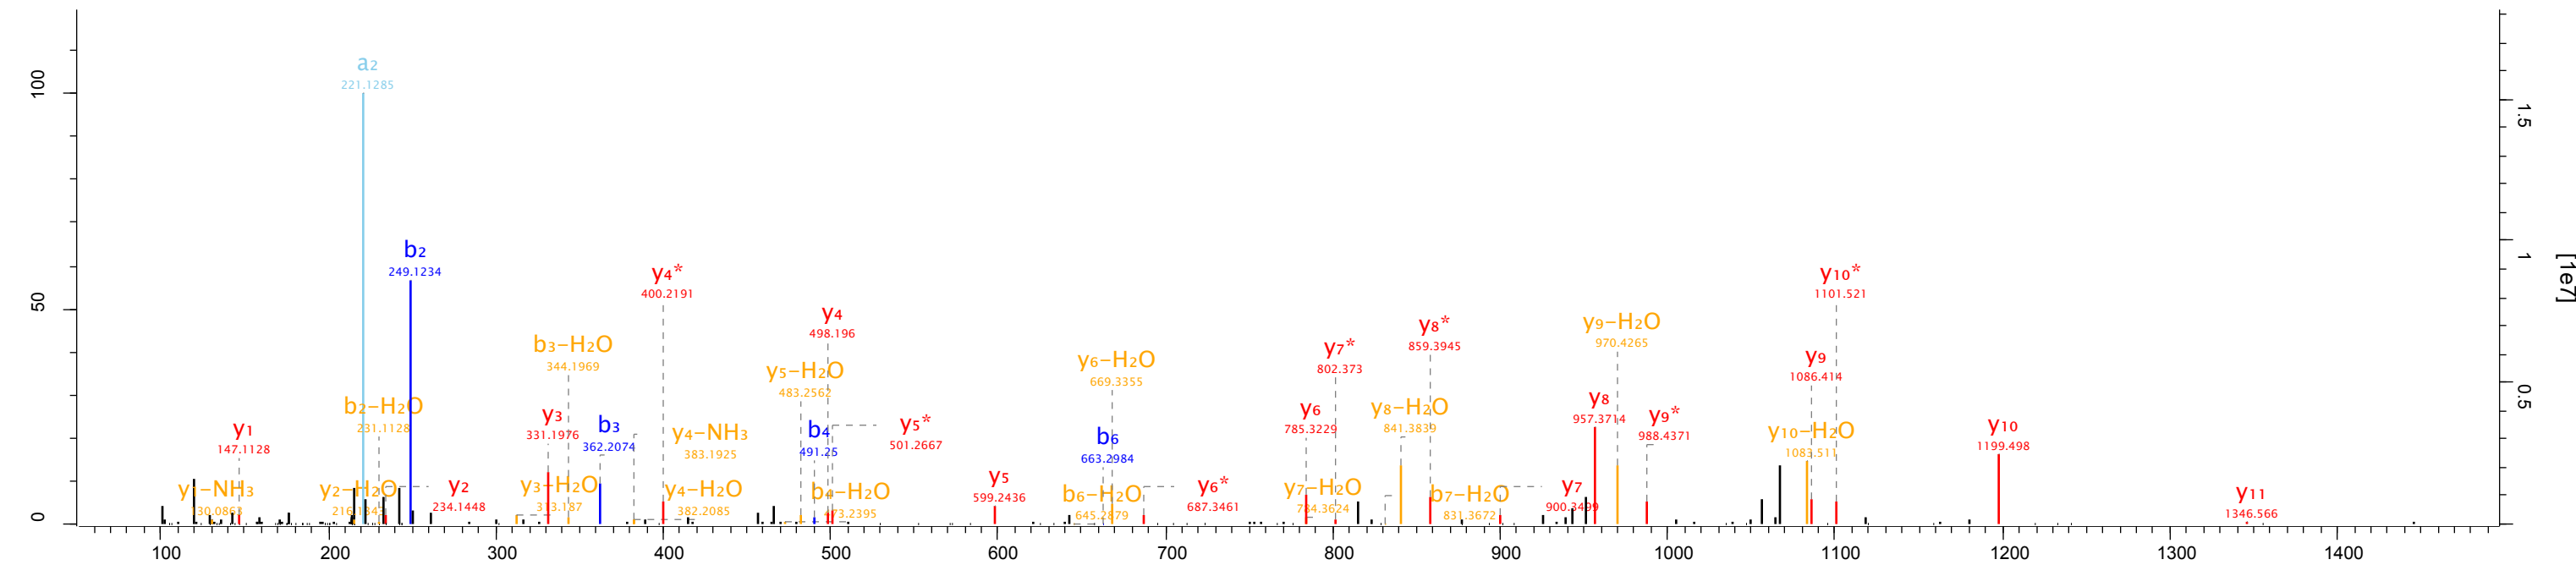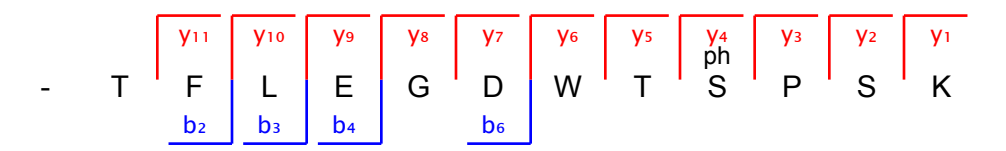

Raw file: 20150814\_A375SR\_Phospho\_BR2\_05  
 Scan: 20560 Method: FTMS; HCD Score: 86.8 m/z: 797.65 Gene names: MPHOSPH8

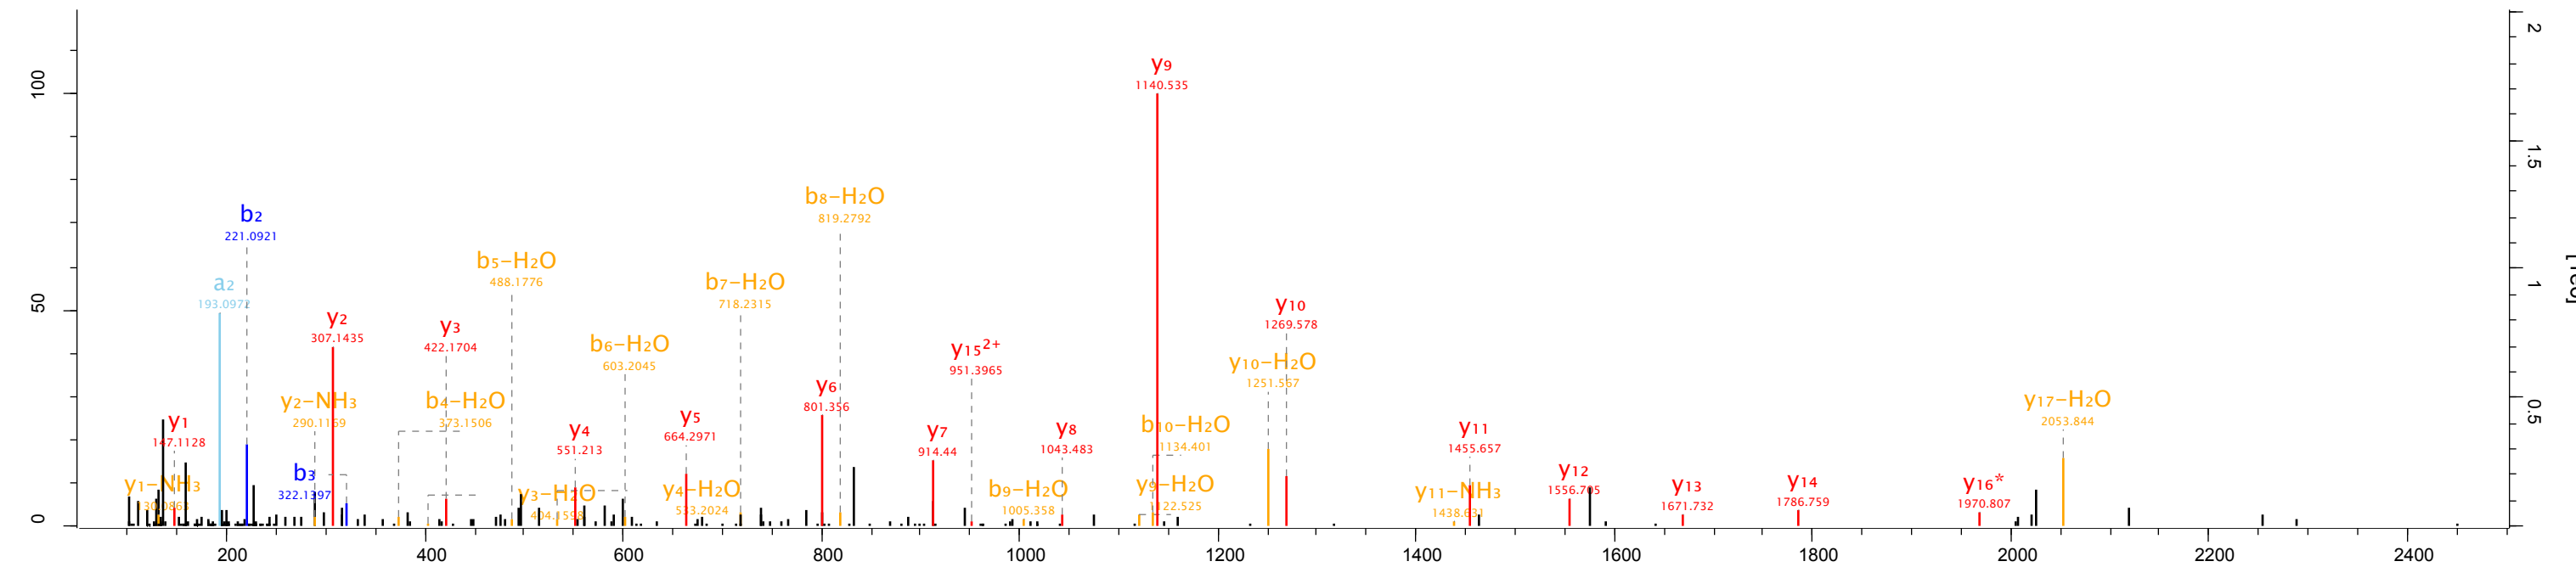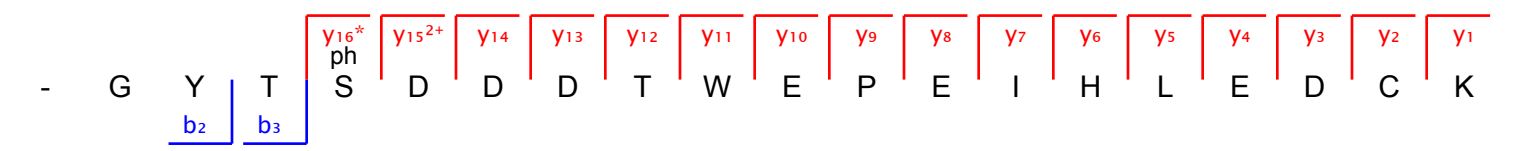

Raw file: 20150814\_A375SR\_Phospho\_BR2\_05  
 Scan: 20650 Method: FTMS; HCD Score: 151.95 m/z: 864.41 Gene names: PNPLA2

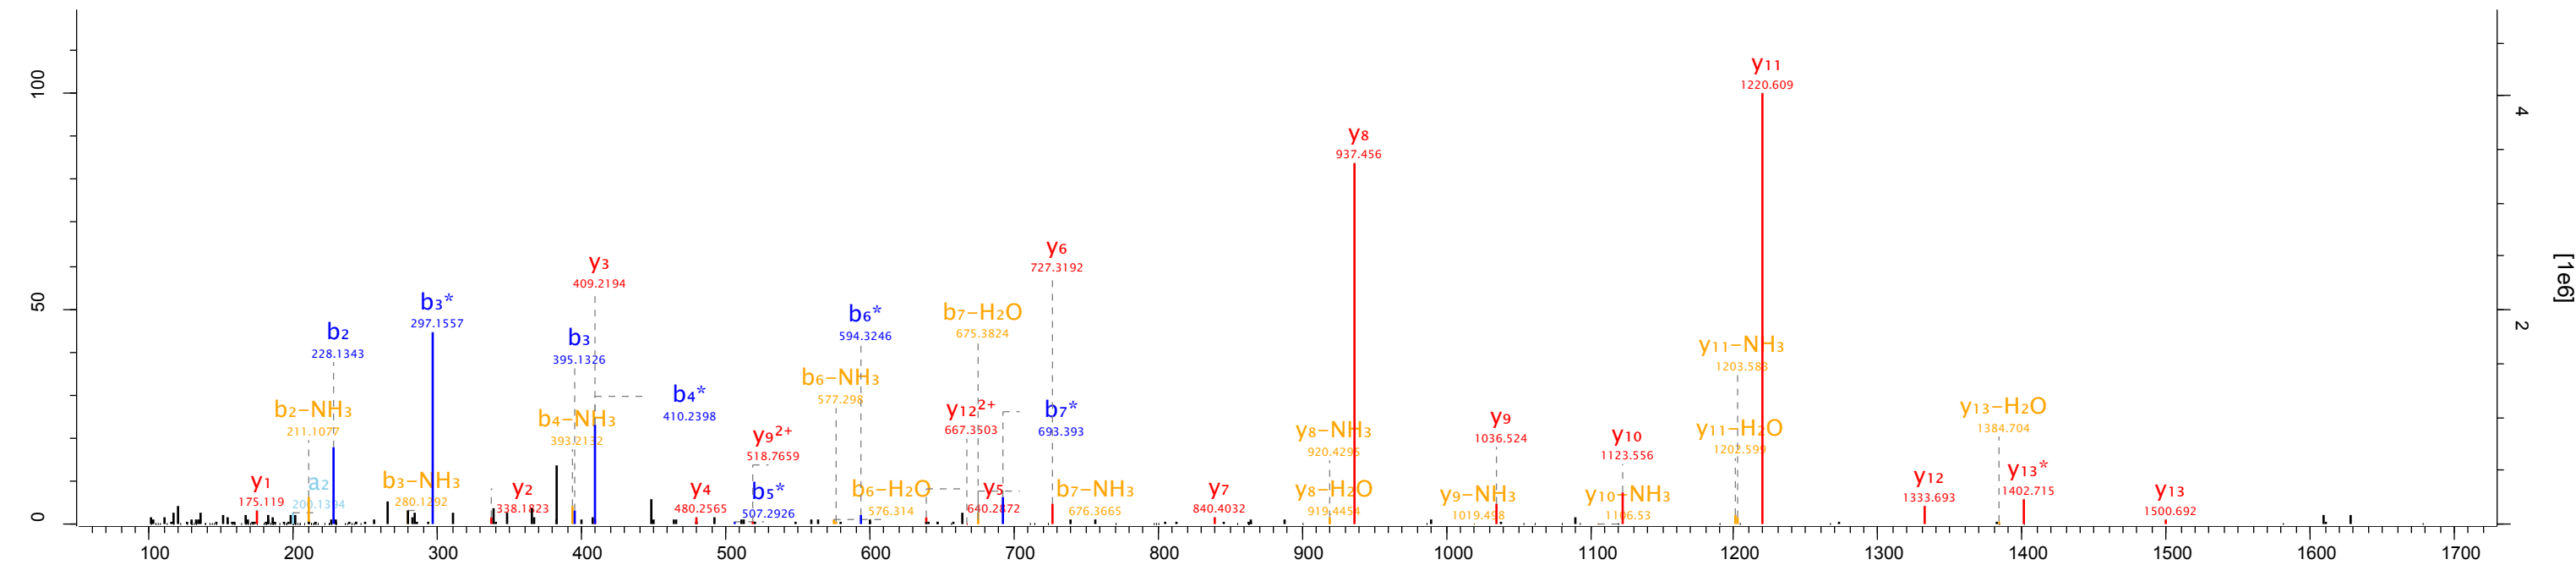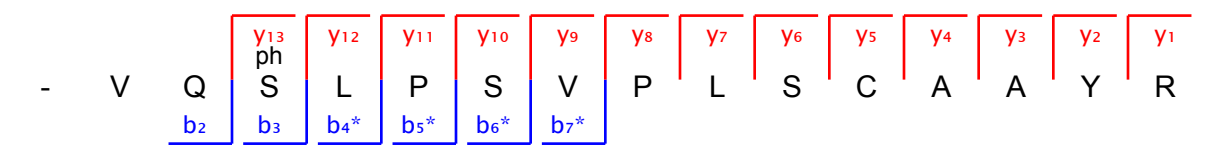

Raw file: 20150814\_A375SR\_Phospho\_BR2\_05  
 Scan: 20710 Method: FTMS; HCD Score: 101.58 m/z: 1251.56 Gene names: PGAM1;PGAM4

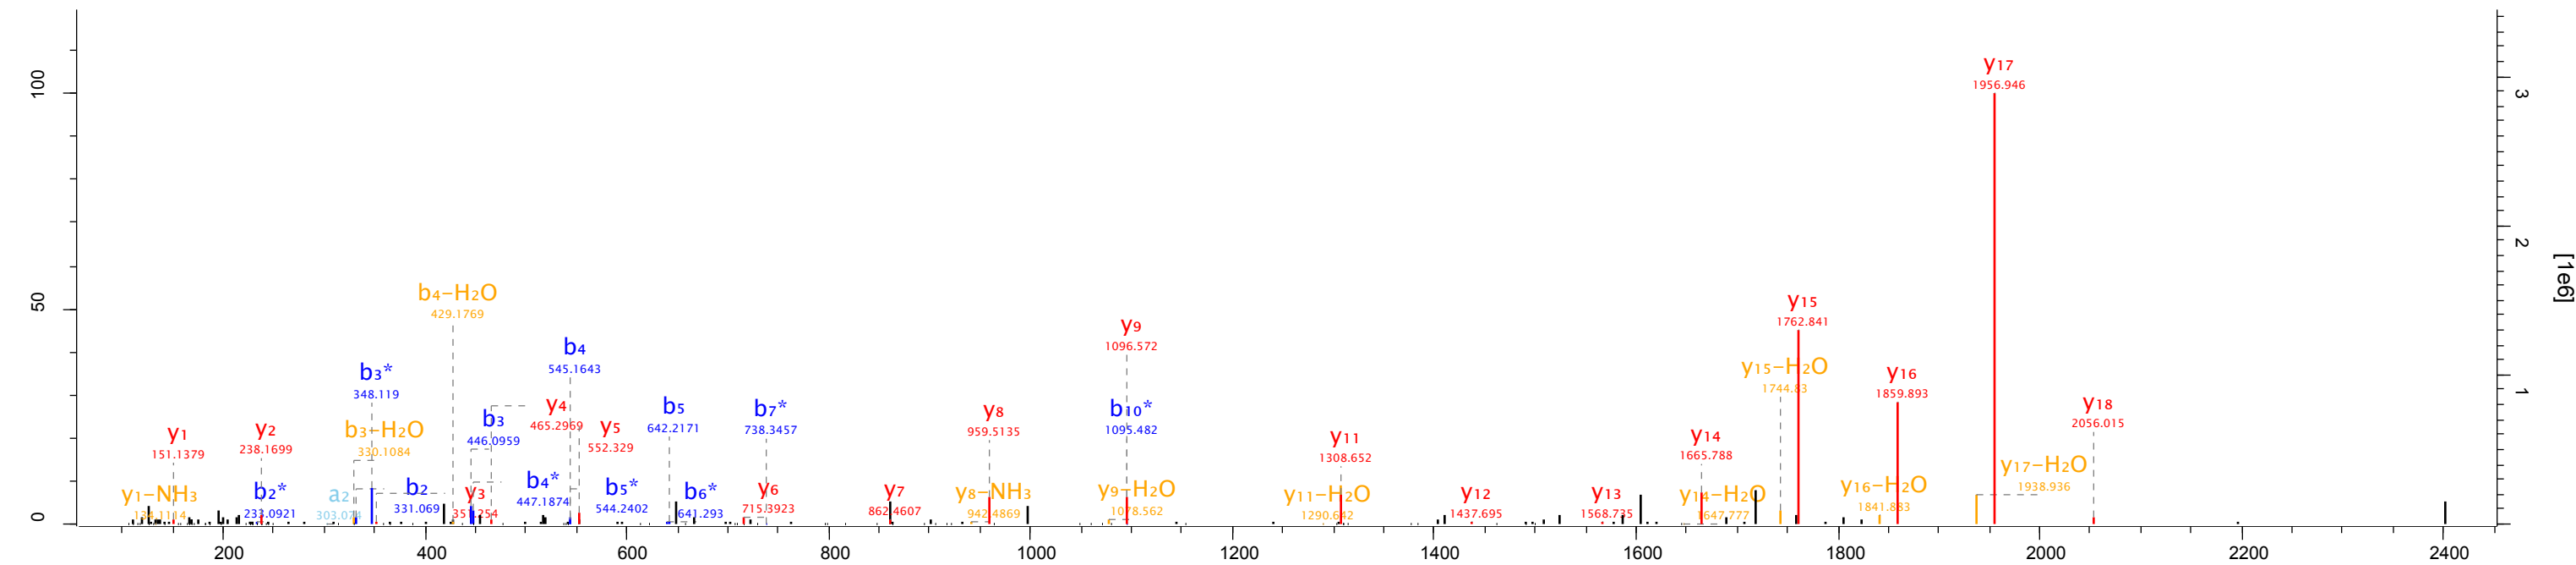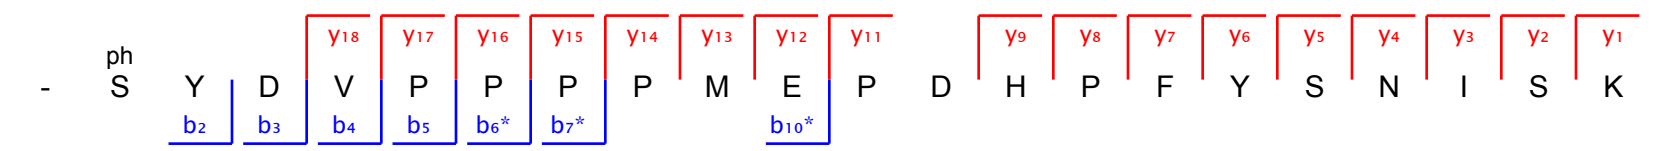



Raw file Scan Method Score m/z Gene names  
 20150814\_A375SR\_Phospho\_BR2\_05 20950 FTMS; HCD 128.31 989.51 PLEKHA5

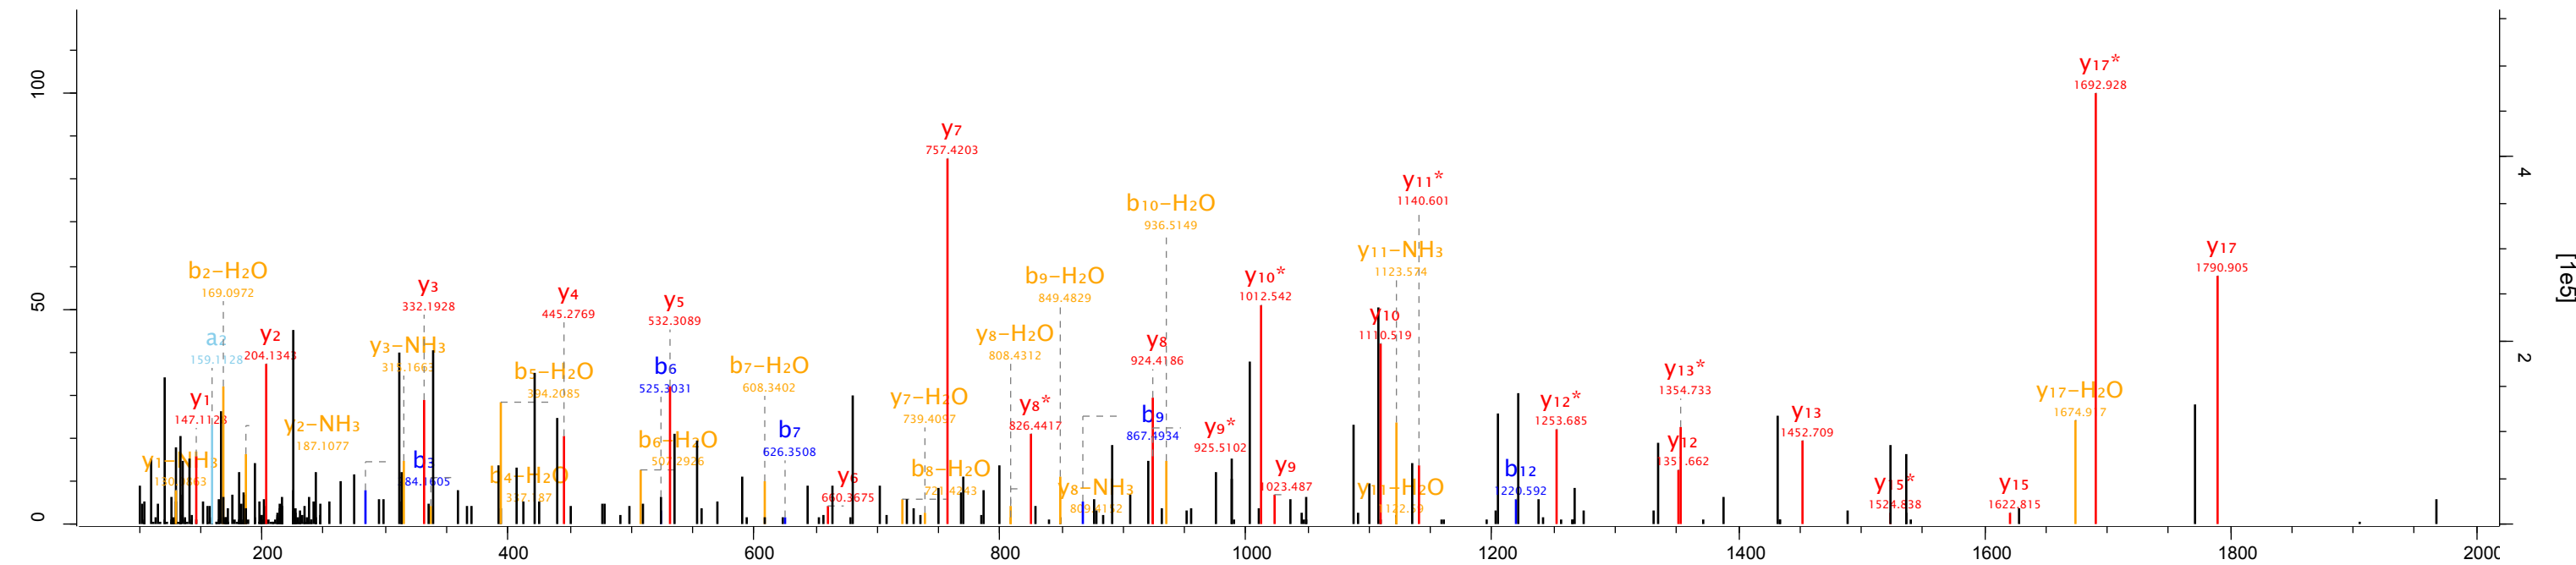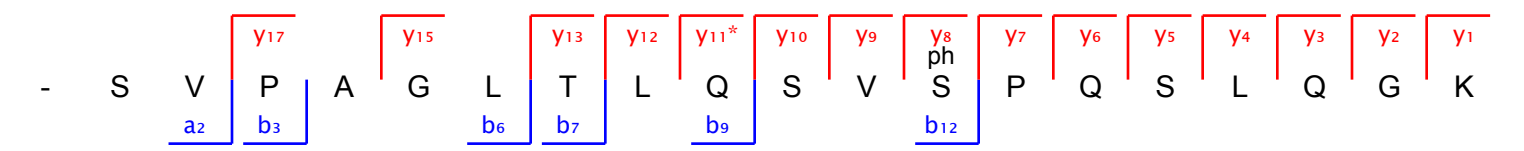

Raw file: 20150814\_A375SR\_Phospho\_BR2\_05  
 Scan: 21140 Method: FTMS; HCD Score: 200.52 m/z: 1444.07 Gene names: MCM3

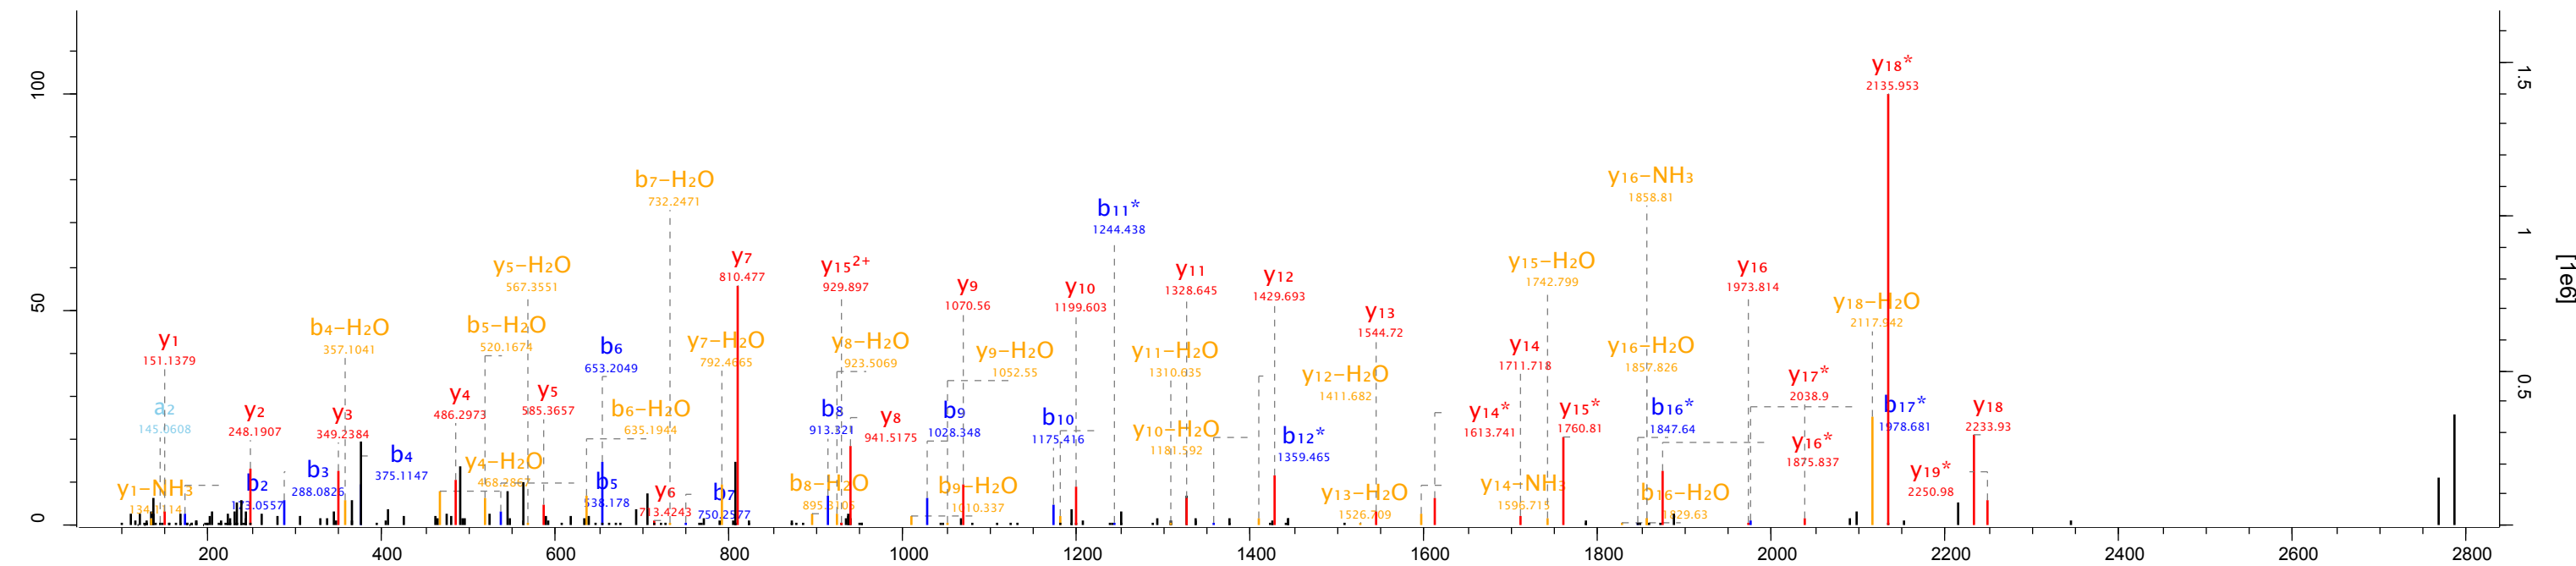

- D G D S Y D P Y D F S D T E E E M P Q V H T P K -

b<sub>2</sub>
b<sub>3</sub>
b<sub>4</sub>
b<sub>5</sub>
b<sub>6</sub>
b<sub>7</sub>
b<sub>8</sub>
b<sub>9</sub>
b<sub>10</sub>
b<sub>11</sub>\*
b<sub>12</sub>\*
b<sub>16</sub>\*
b<sub>17</sub>\*
y<sub>1</sub>
y<sub>2</sub>
y<sub>3</sub>
y<sub>4</sub>
y<sub>5</sub>
y<sub>6</sub>
y<sub>7</sub>
y<sub>8</sub>
y<sub>9</sub>
y<sub>10</sub>
y<sub>11</sub>
y<sub>12</sub>
y<sub>13</sub>
y<sub>14</sub>
y<sub>15</sub>\*
y<sub>16</sub>
y<sub>17</sub>\*
y<sub>18</sub>
y<sub>19</sub>\*

Raw file: 20150814\_A375SR\_Phospho\_BR2\_05  
 Scan: 21280 Method: FTMS; HCD Score: 92.8 m/z: 720.81 Gene names: PLEKHO2

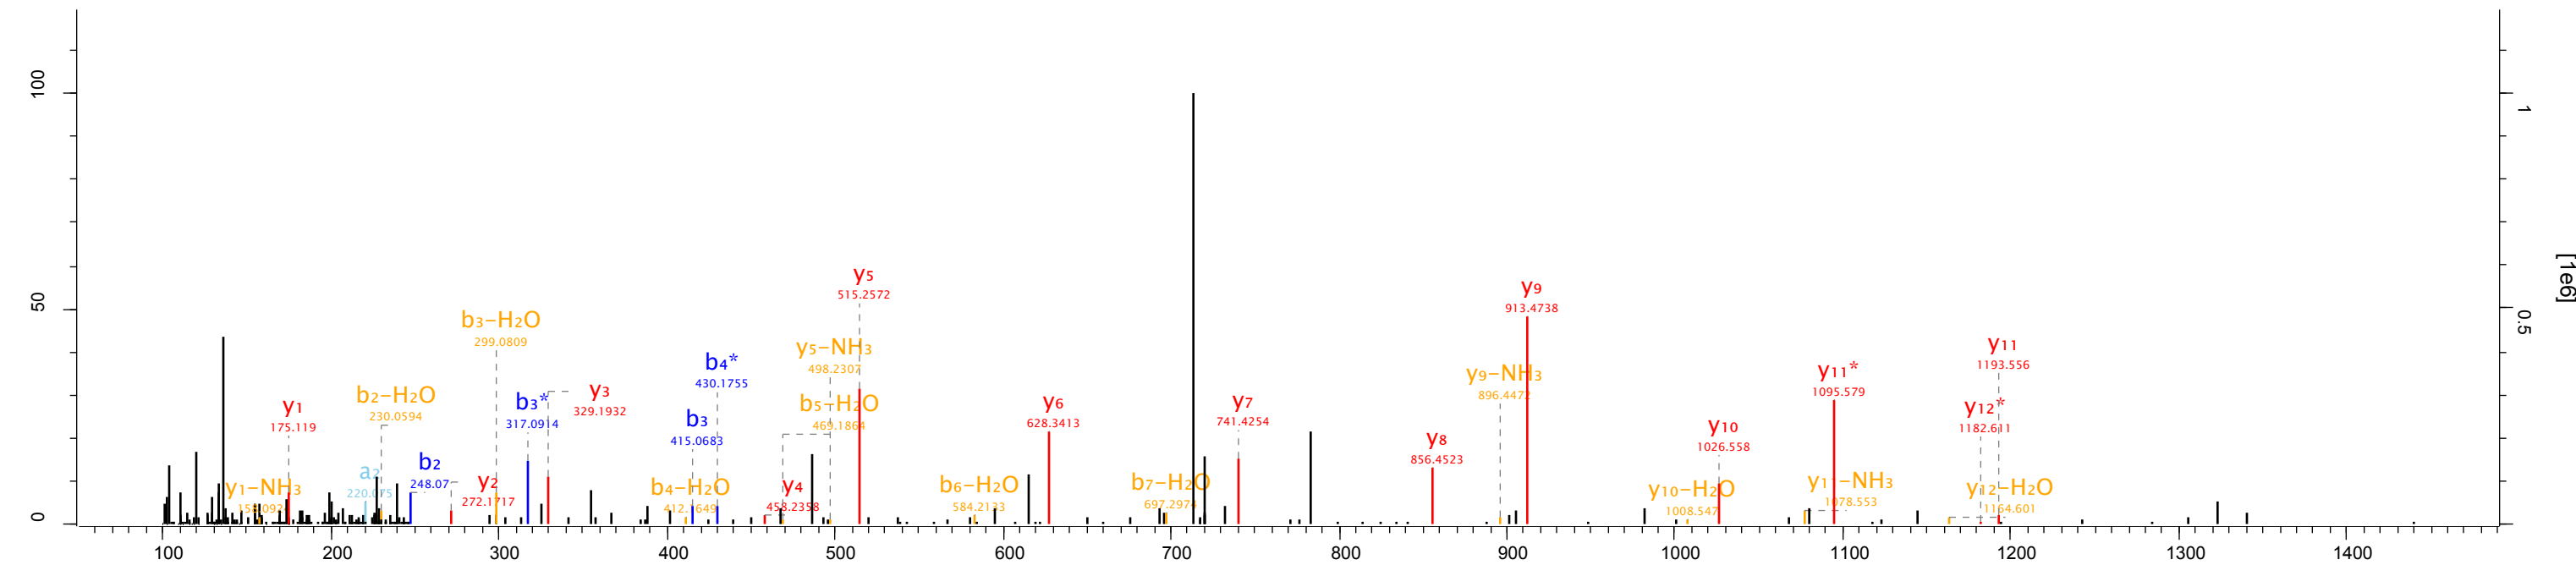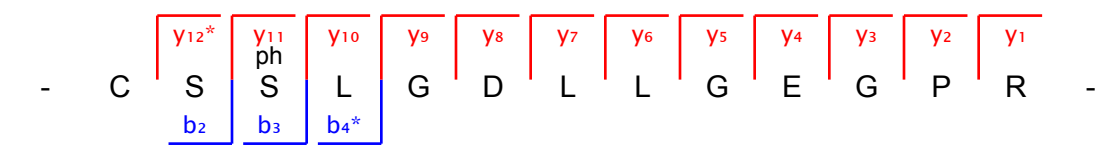

Raw file 20150814\_A375SR\_Phospho\_BR2\_05 Scan 21740 Method FTMS; HCD Score 135.47 m/z 737.84 Gene names TSNA;DISC1;TRAX

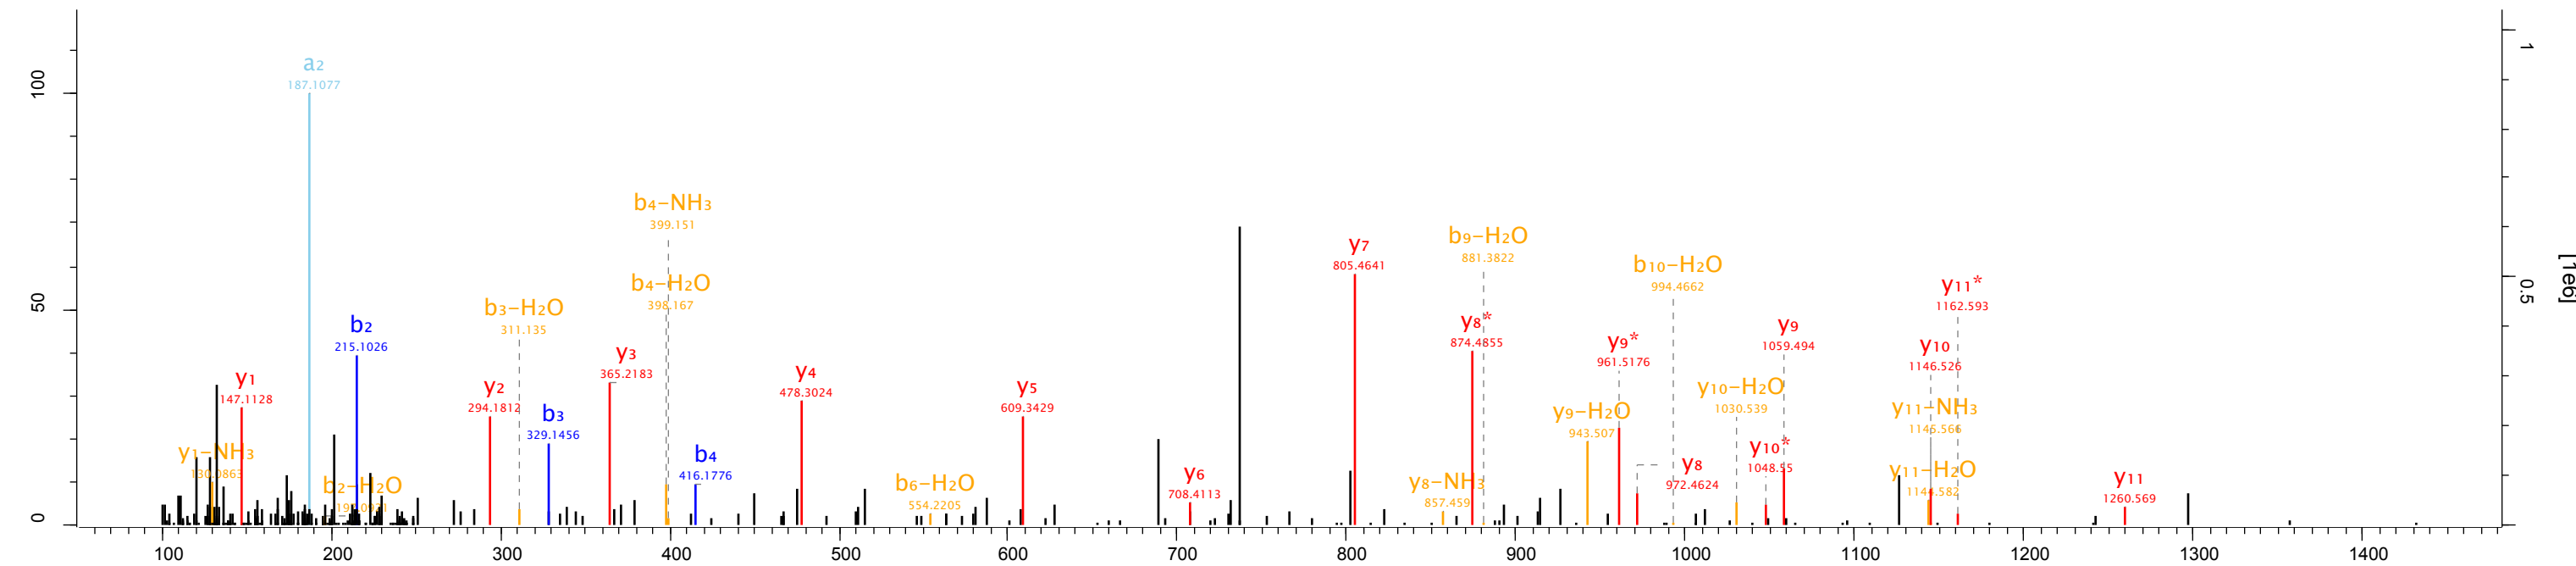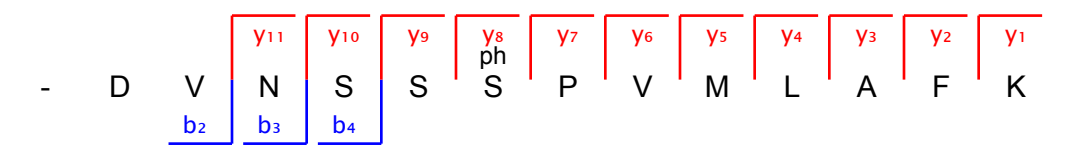

Raw file: 20150814\_A375SR\_Phospho\_BR2\_05  
 Scan: 21780 Method: FTMS; HCD Score: 191.34 m/z: 1188.18 Gene names: PODXL

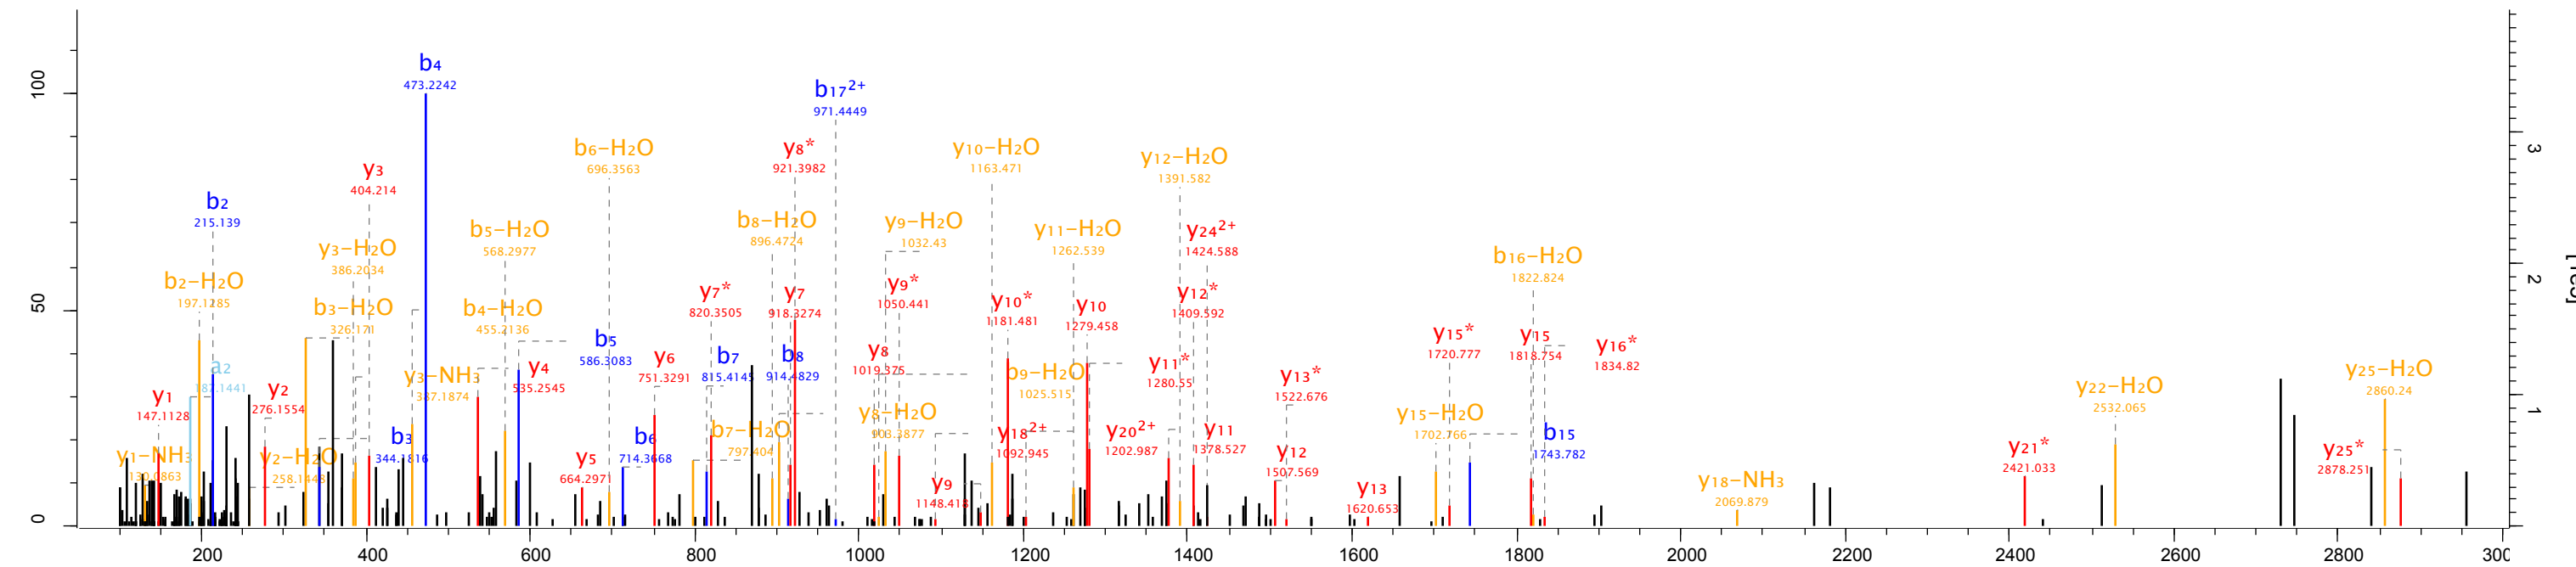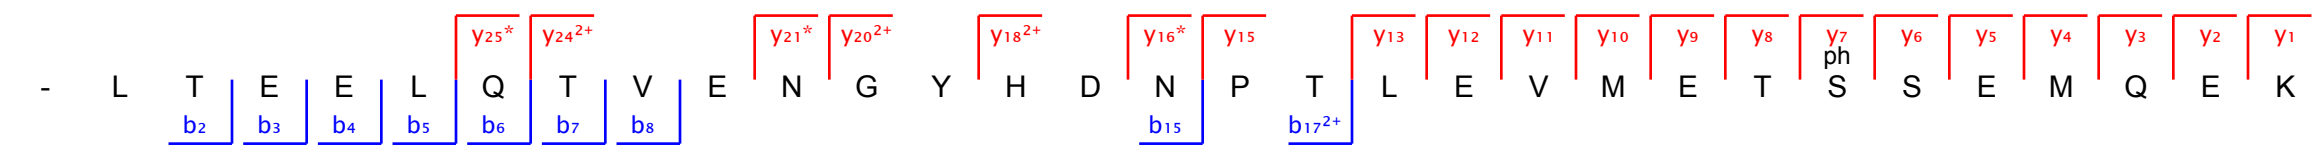

Raw file: 20150814\_A375SR\_Phospho\_BR2\_05  
 Scan: 21980 Method: FTMS; HCD Score: 230.54 m/z: 1114.99 Gene names: AKAP11

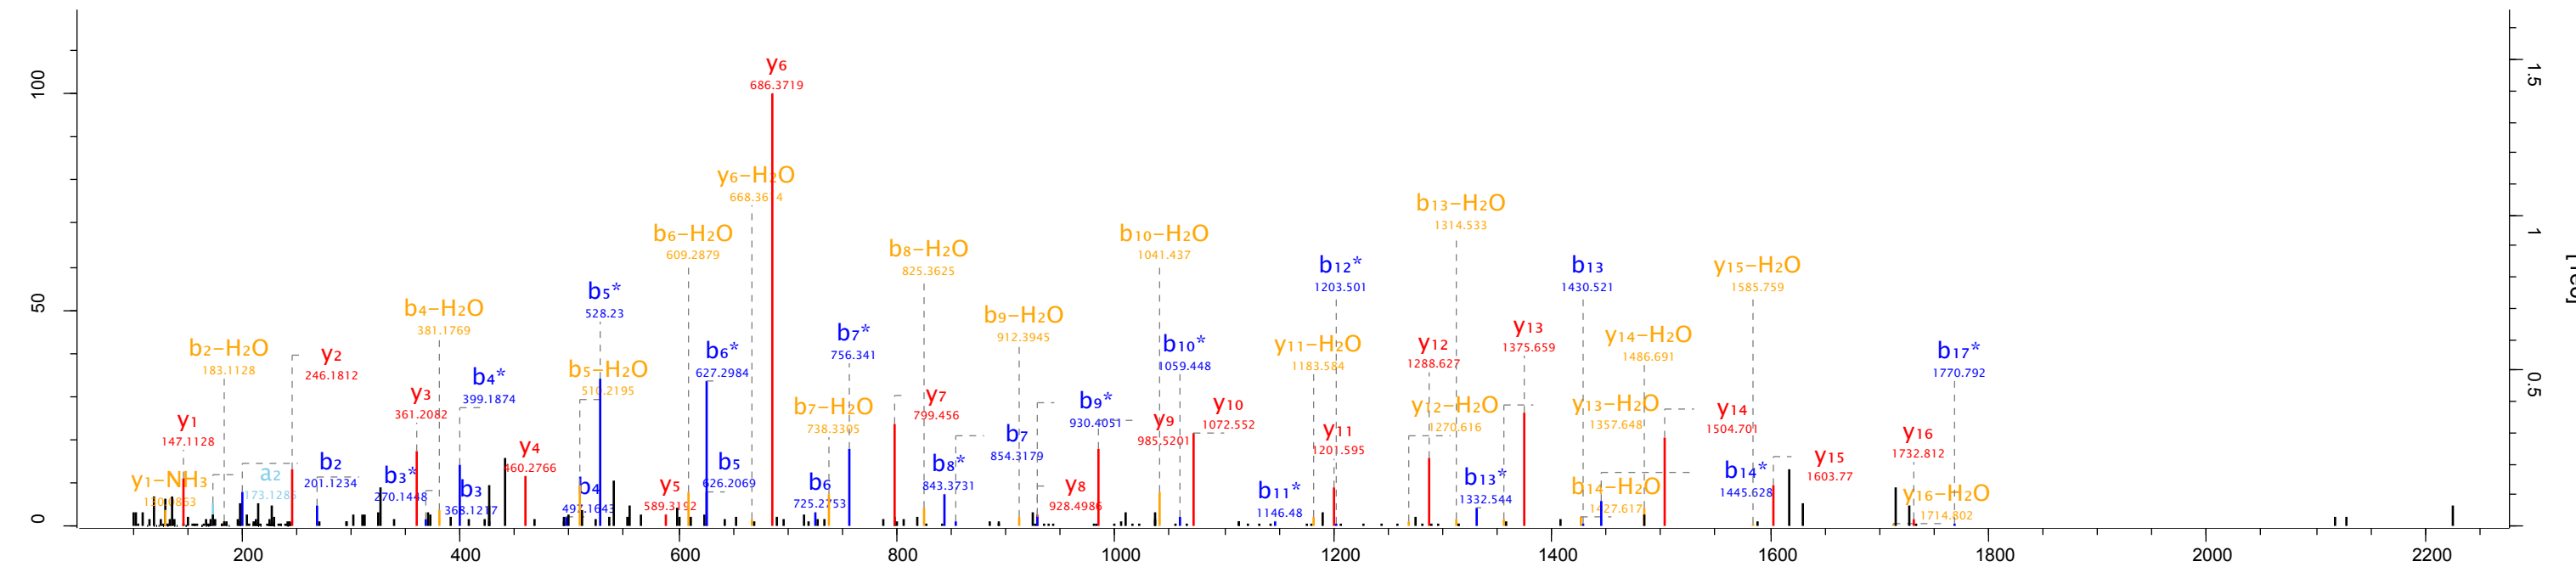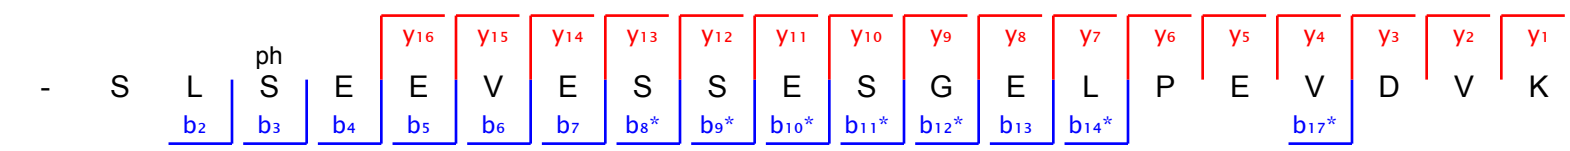

Raw file: 20150814\_A375SR\_Phospho\_BR2\_05  
 Scan: 22170 Method: FTMS; HCD Score: 176.94 m/z: 889.39 Gene names: IVNS1ABP

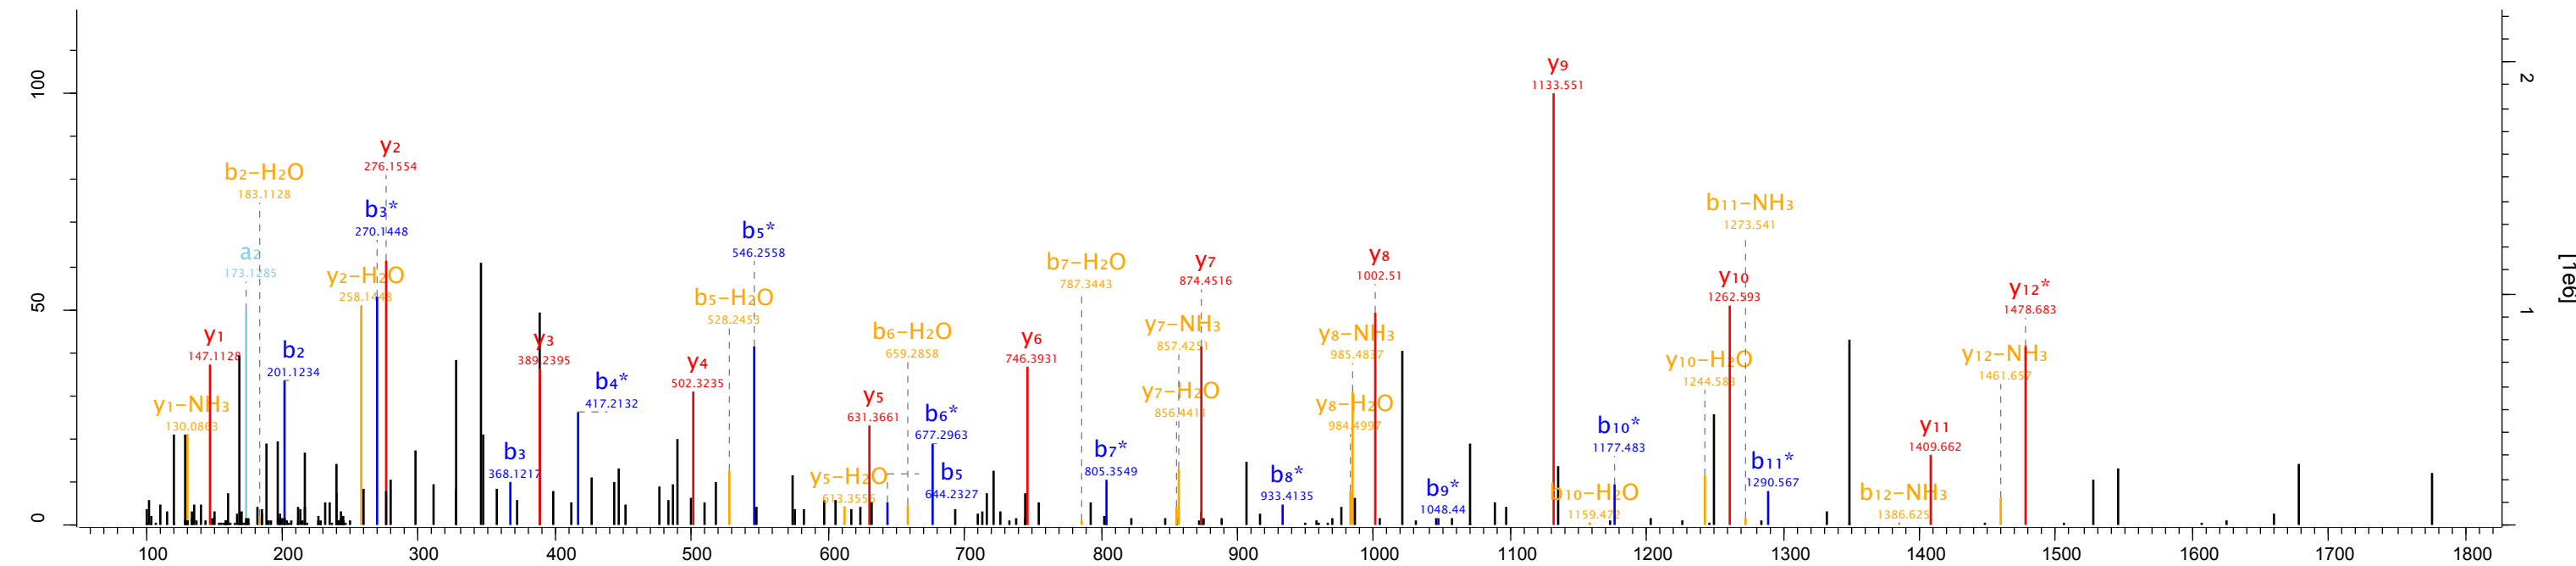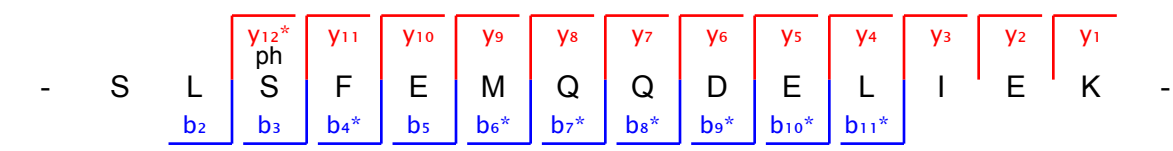

Raw file 20150814\_A375SR\_Phospho\_BR2\_05 Scan 22300 Method FTMS; HCD Score 337.27 m/z 1445.14 Gene names MFAP1

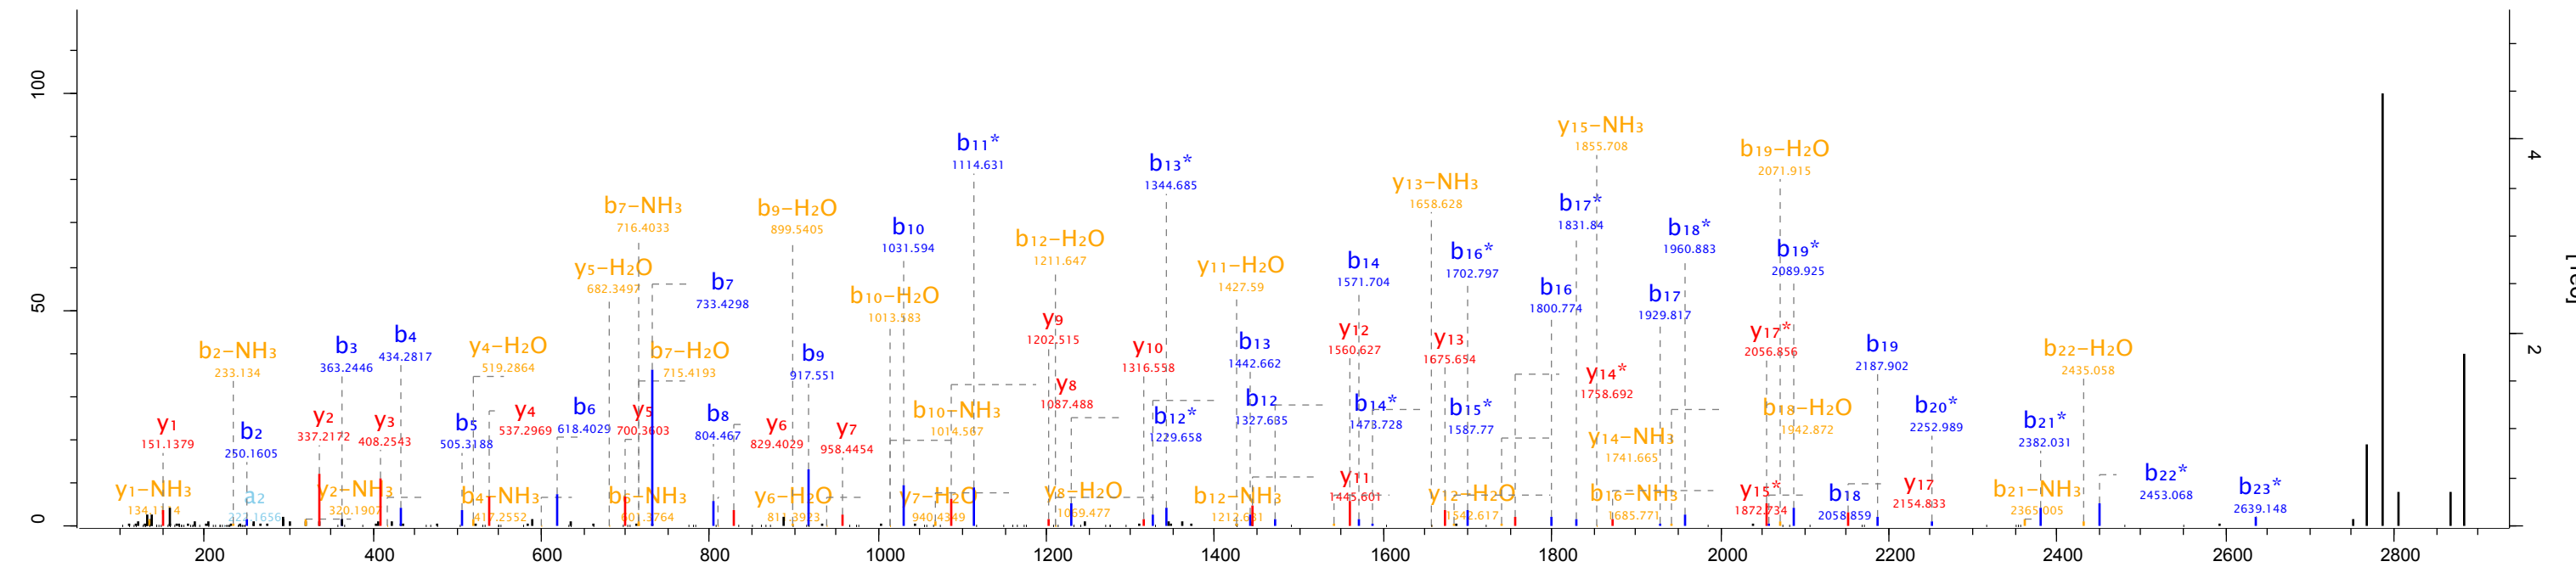

- R S L A A L D A L N T D D E N D E E E Y E A W K -

b<sub>2</sub> b<sub>3</sub> b<sub>4</sub> b<sub>5</sub> b<sub>6</sub> b<sub>7</sub> b<sub>8</sub> b<sub>9</sub> b<sub>10</sub> b<sub>11</sub>\* b<sub>12</sub> b<sub>13</sub> b<sub>14</sub> b<sub>15</sub>\* b<sub>16</sub> b<sub>17</sub> b<sub>18</sub> b<sub>19</sub> b<sub>20</sub>\* b<sub>21</sub>\* b<sub>22</sub>\* b<sub>23</sub>\*

y<sub>17</sub> y<sub>15</sub>\* y<sub>14</sub>\* y<sub>13</sub> y<sub>12</sub> y<sub>11</sub> y<sub>10</sub> y<sub>9</sub> y<sub>8</sub> y<sub>7</sub> y<sub>6</sub> y<sub>5</sub> y<sub>4</sub> y<sub>3</sub> y<sub>2</sub> y<sub>1</sub>



Raw file 20150814\_A375SR\_Phospho\_BR2\_05 Scan 22450 Method FTMS; HCD Score 149.95 m/z 807.89 Gene names DDI2

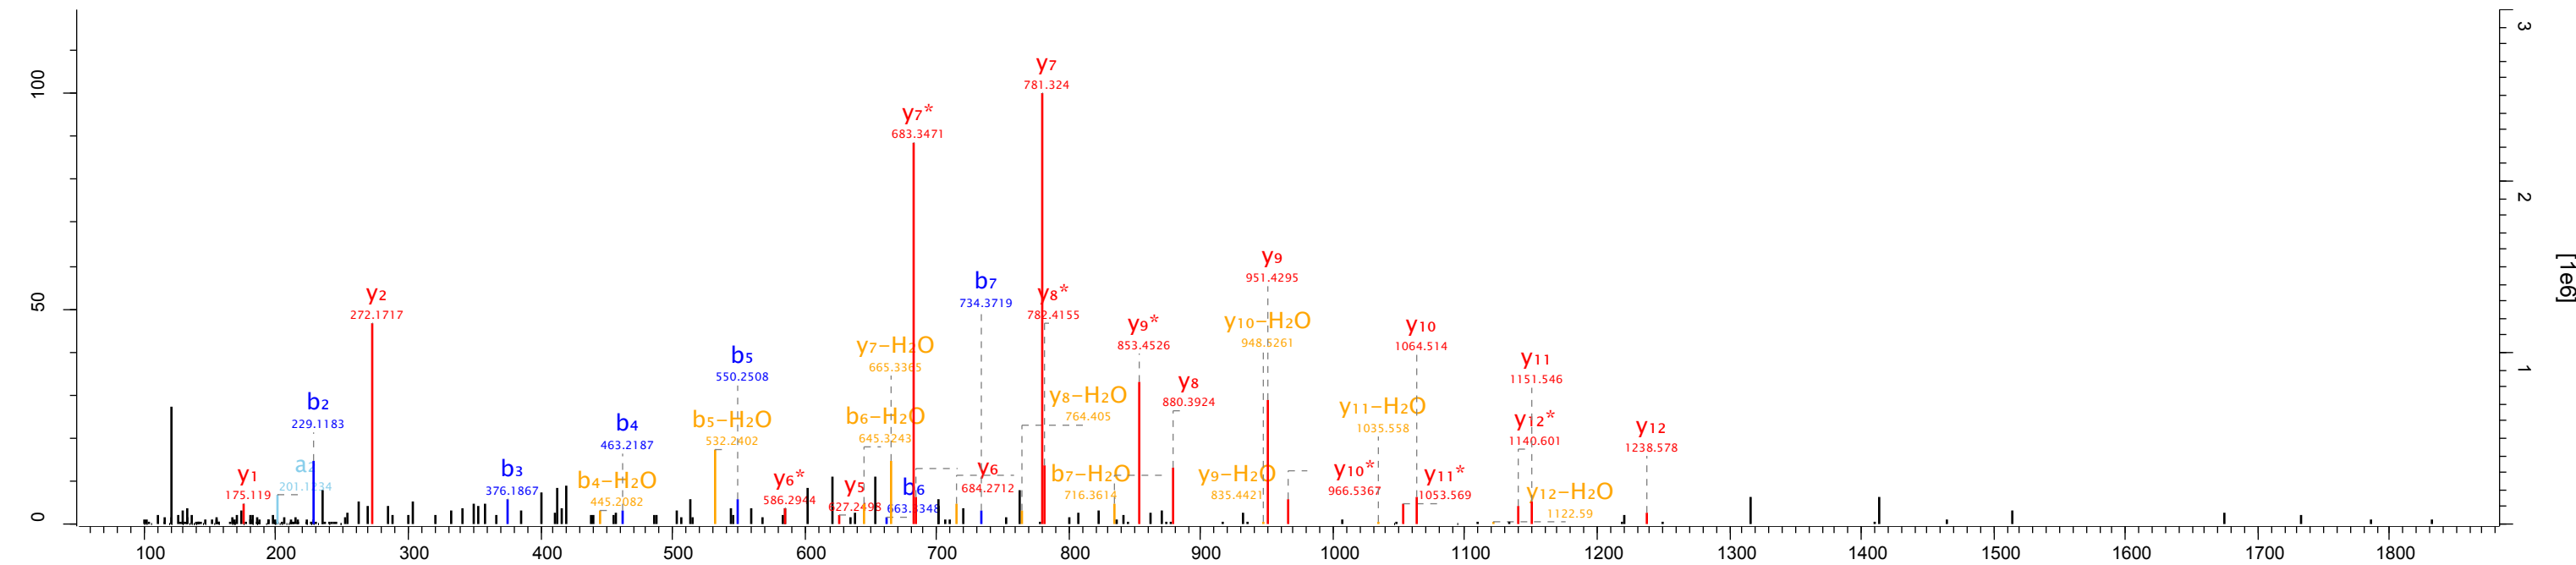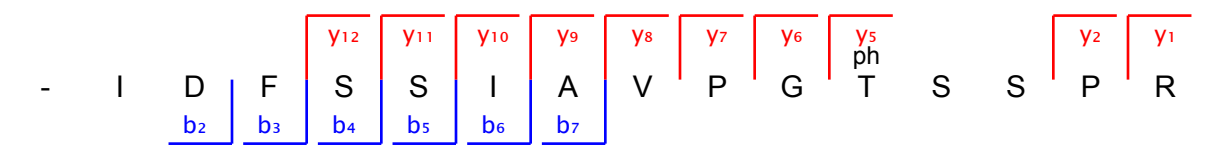

Raw file 20150814\_A375SR\_Phospho\_BR2\_05 Scan 22470 Method FTMS; HCD Score 160.3 m/z 1073.45 Gene names CCNH

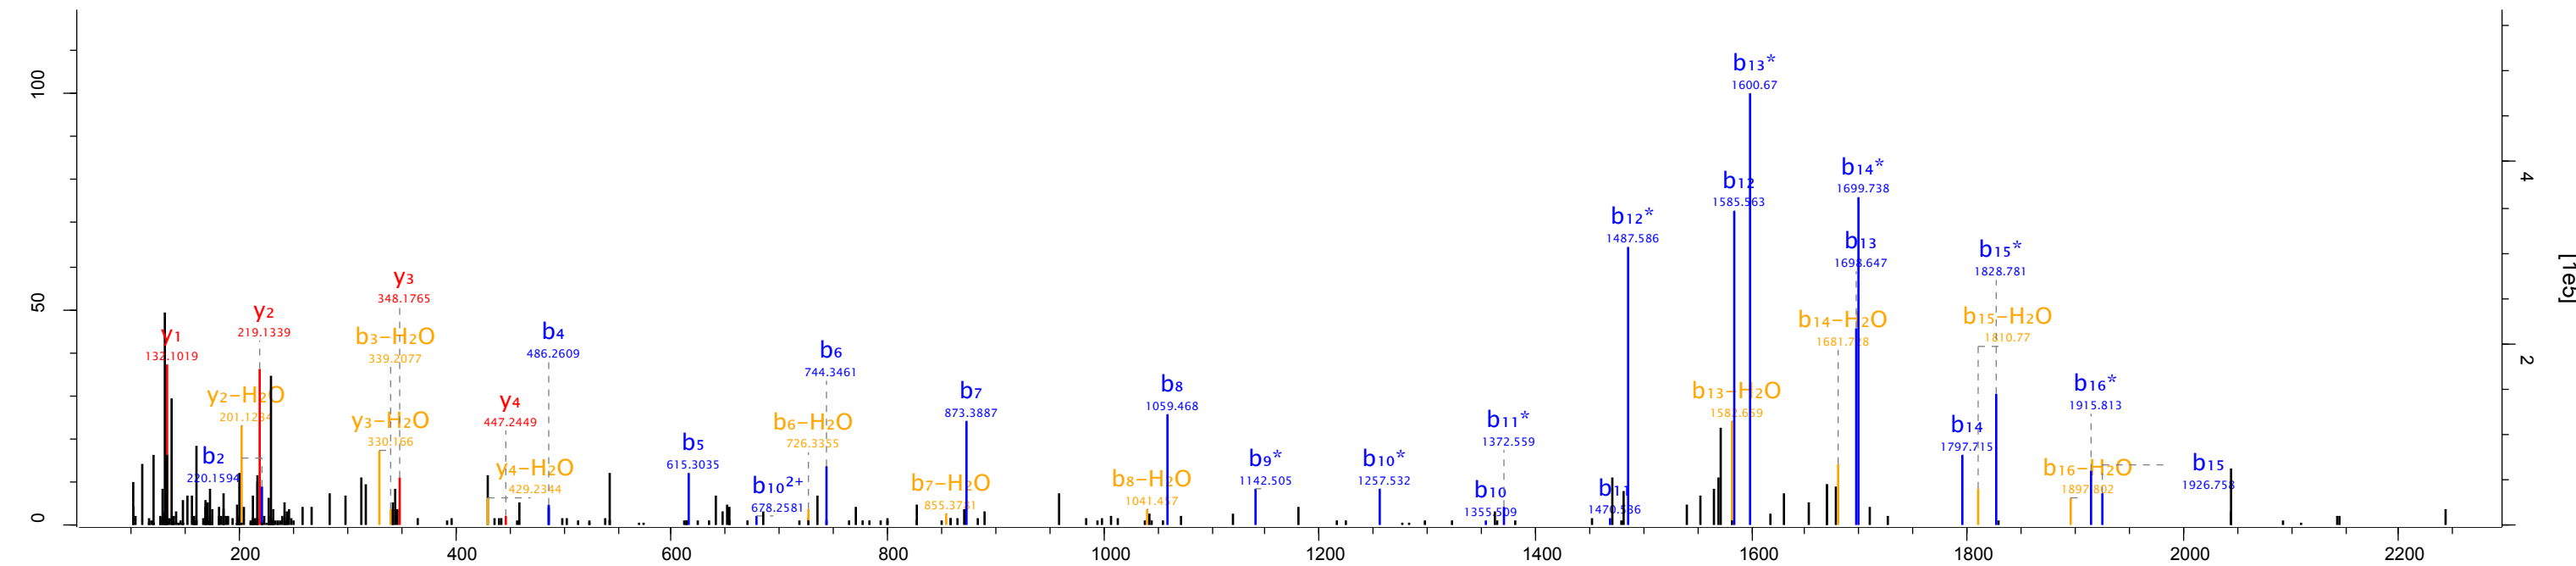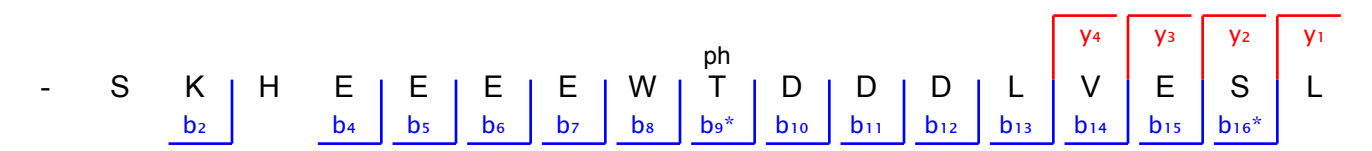

Raw file 20150814\_A375SR\_Phospho\_BR2\_05 Scan 22660 Method FTMS; HCD Score 161.97 m/z 996.44 Gene names PRKAB2

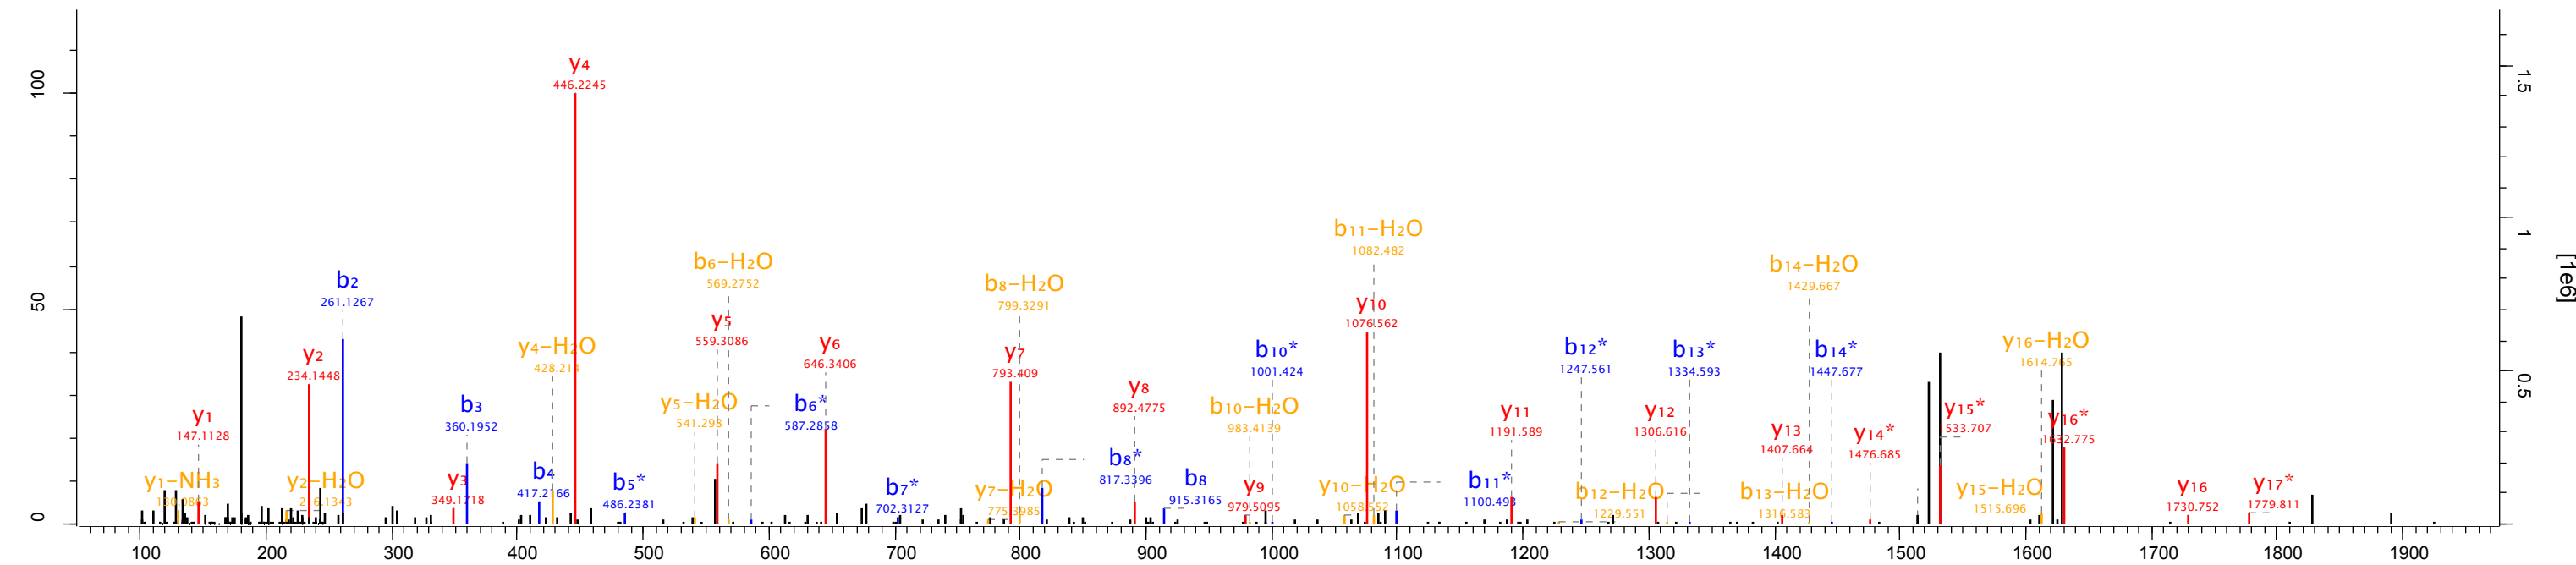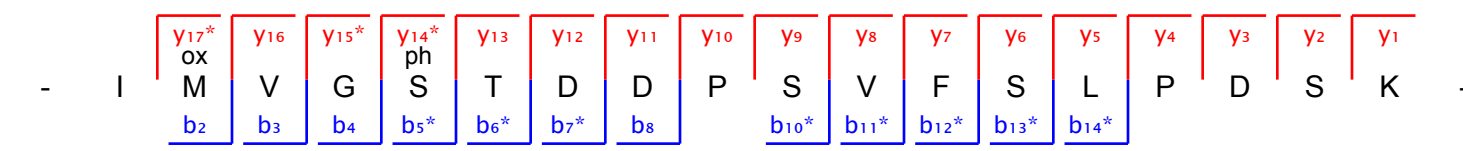

Raw file 20150814\_A375SR\_Phospho\_BR2\_05 Scan 22710 Method FTMS; HCD Score 49.75 m/z 735.04 Gene names SHROOM4

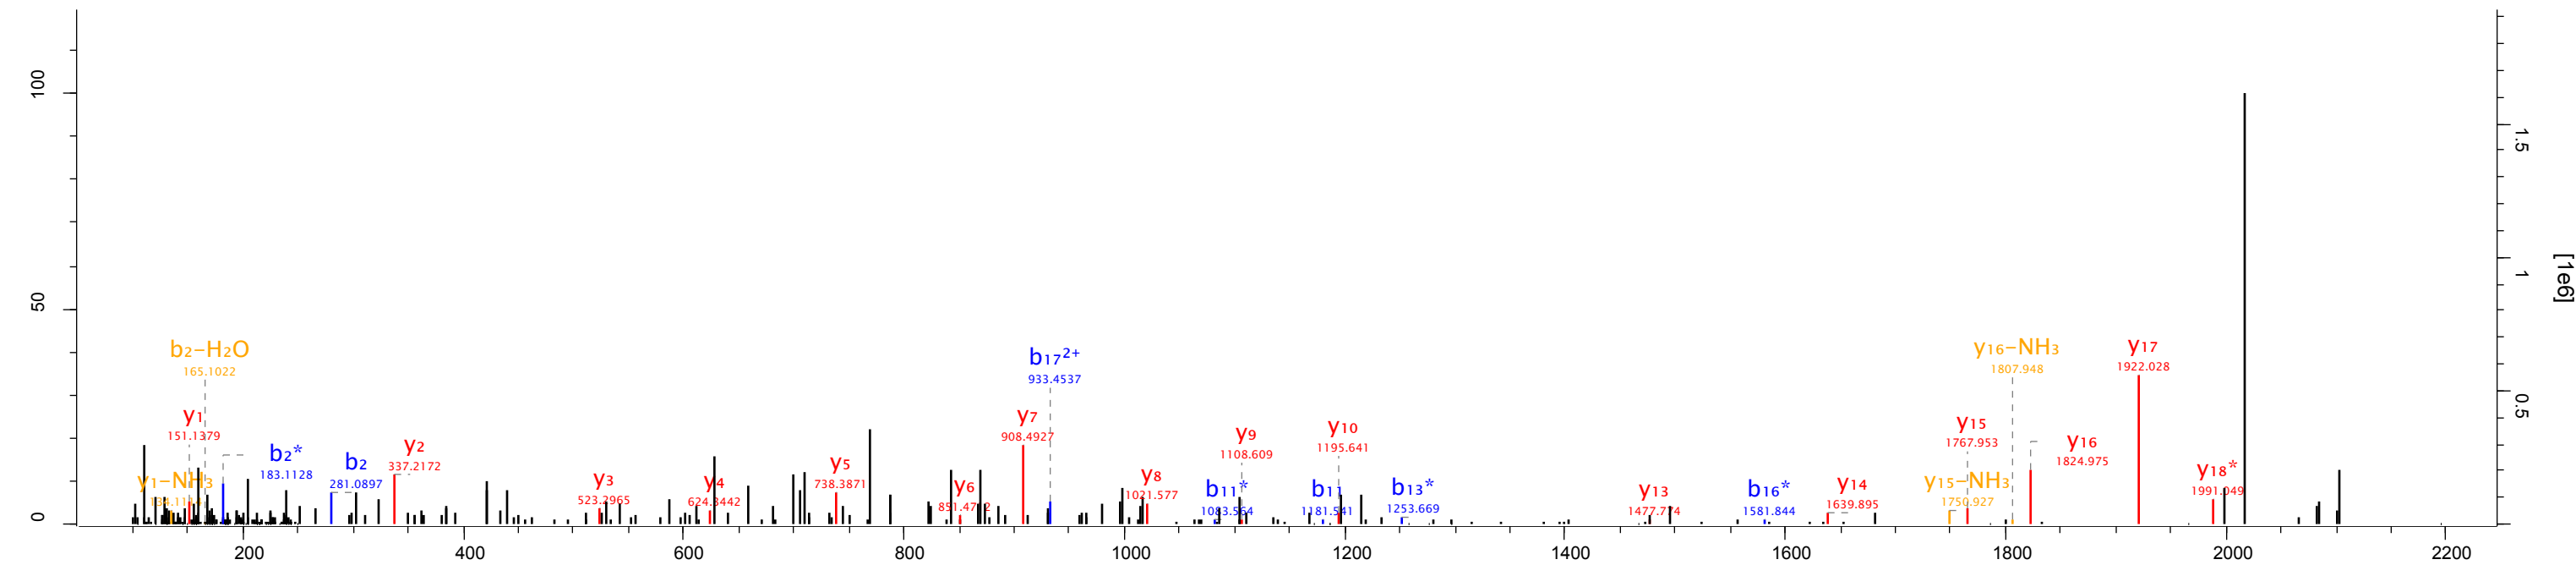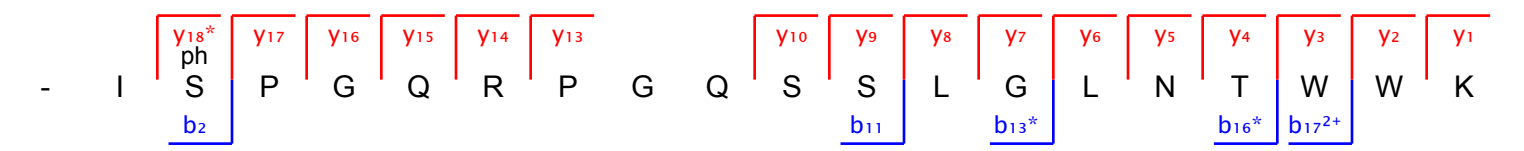

Raw file: 20150814\_A375SR\_Phospho\_BR2\_05  
 Scan: 22900 Method: FTMS; HCD Score: 206.63 m/z: 1051.16 Gene names: RBM5

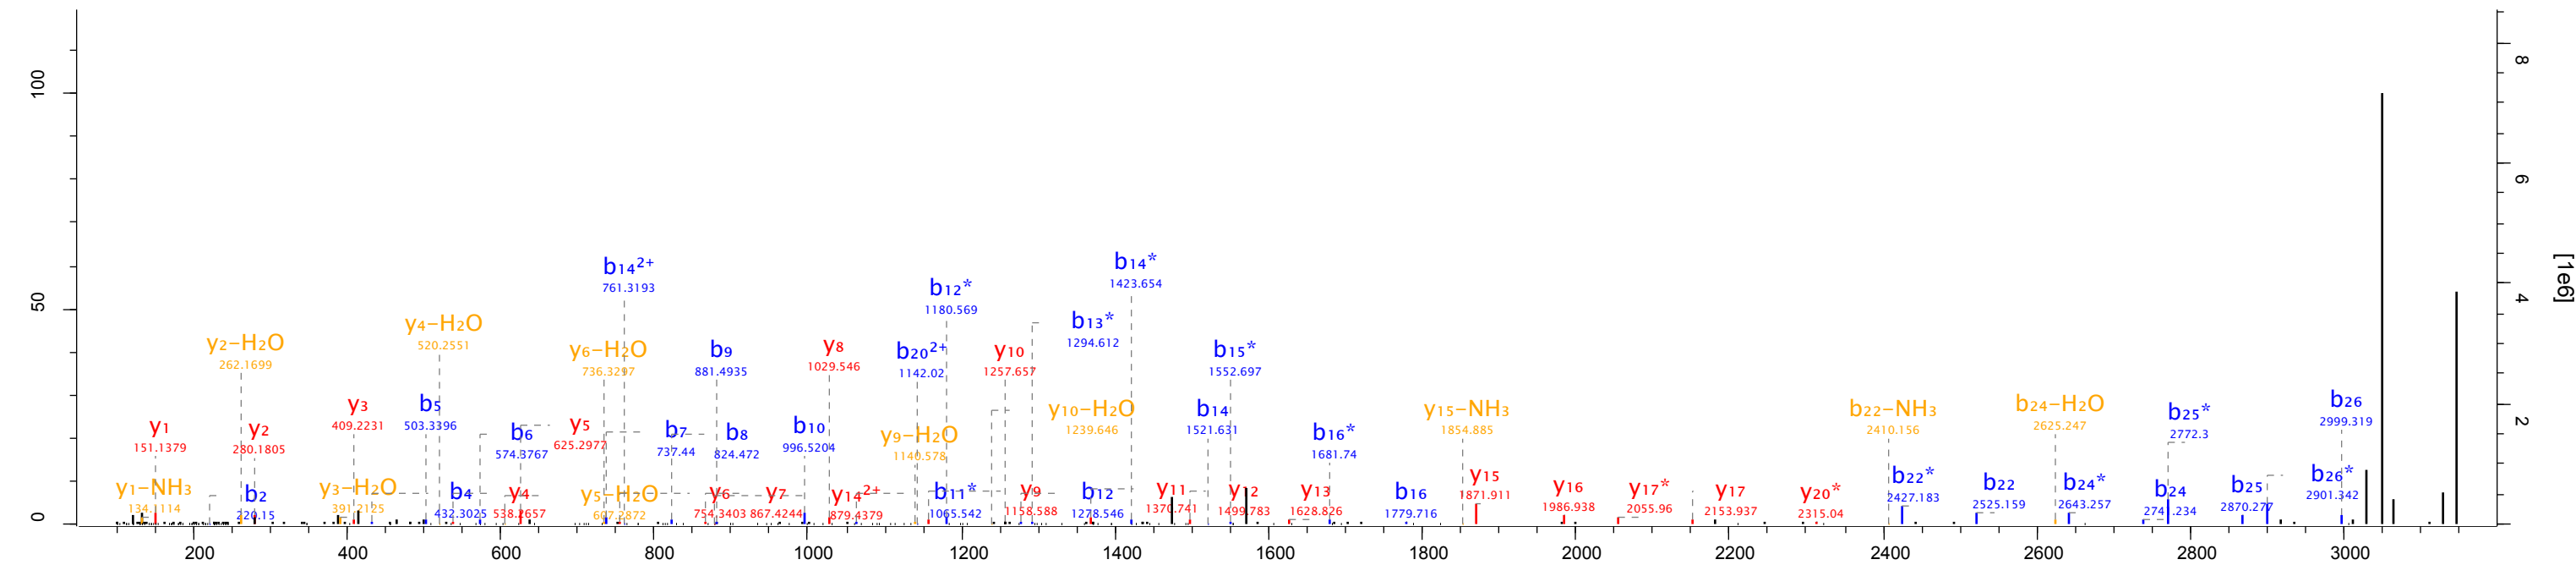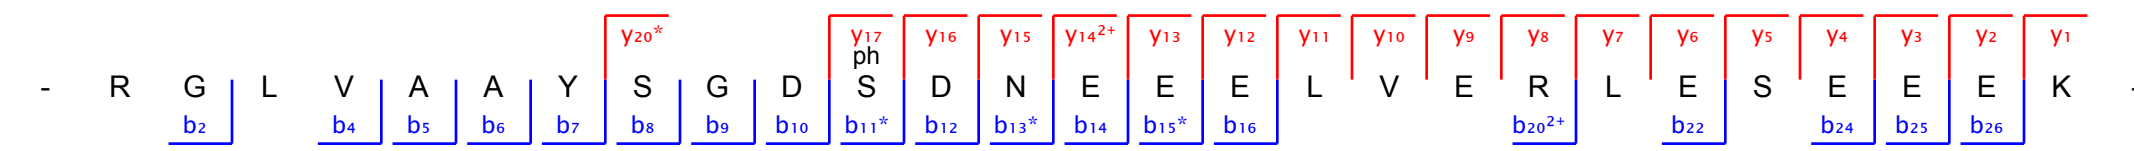

Raw file: 20150814\_A375SR\_Phospho\_BR2\_05  
 Scan: 23020 Method: FTMS; HCD Score: 113.33 m/z: 702.38 Gene names: PALLD

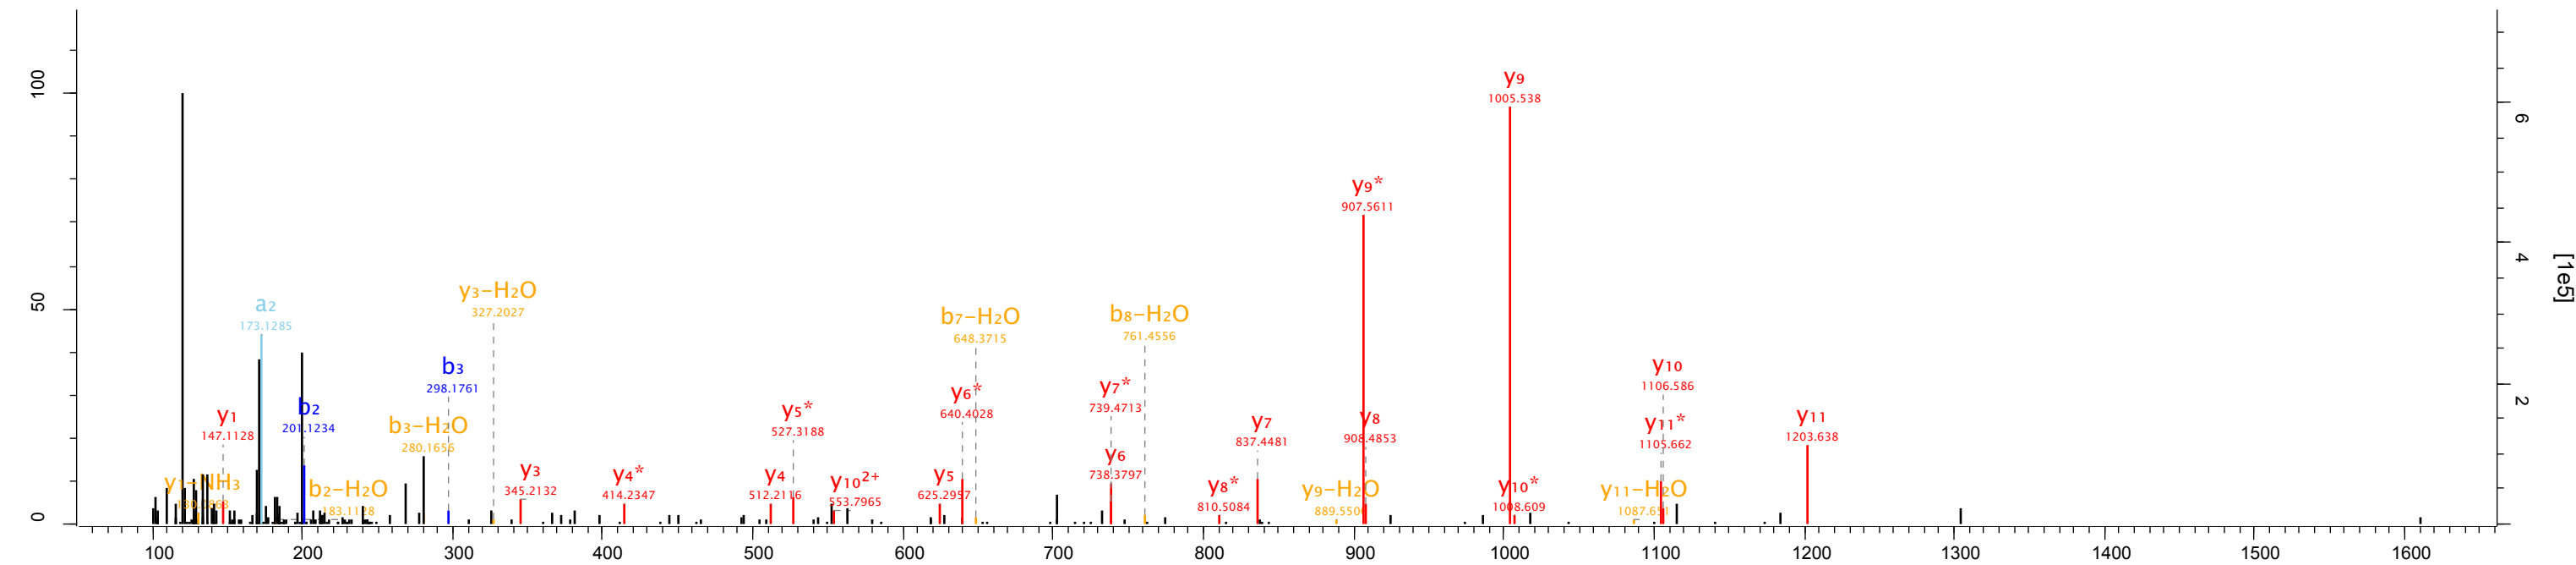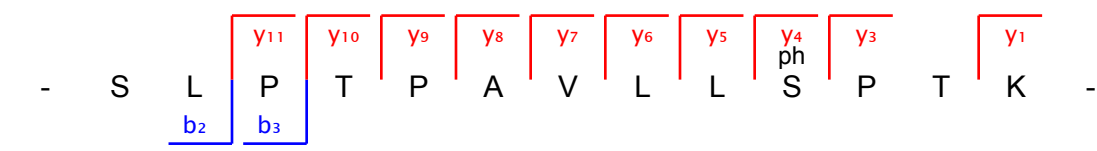

Raw file: 20150814\_A375SR\_Phospho\_BR2\_05  
 Scan: 23210 Method: FTMS; HCD Score: 151.4 m/z: 1104.84 Gene names: MYO9B

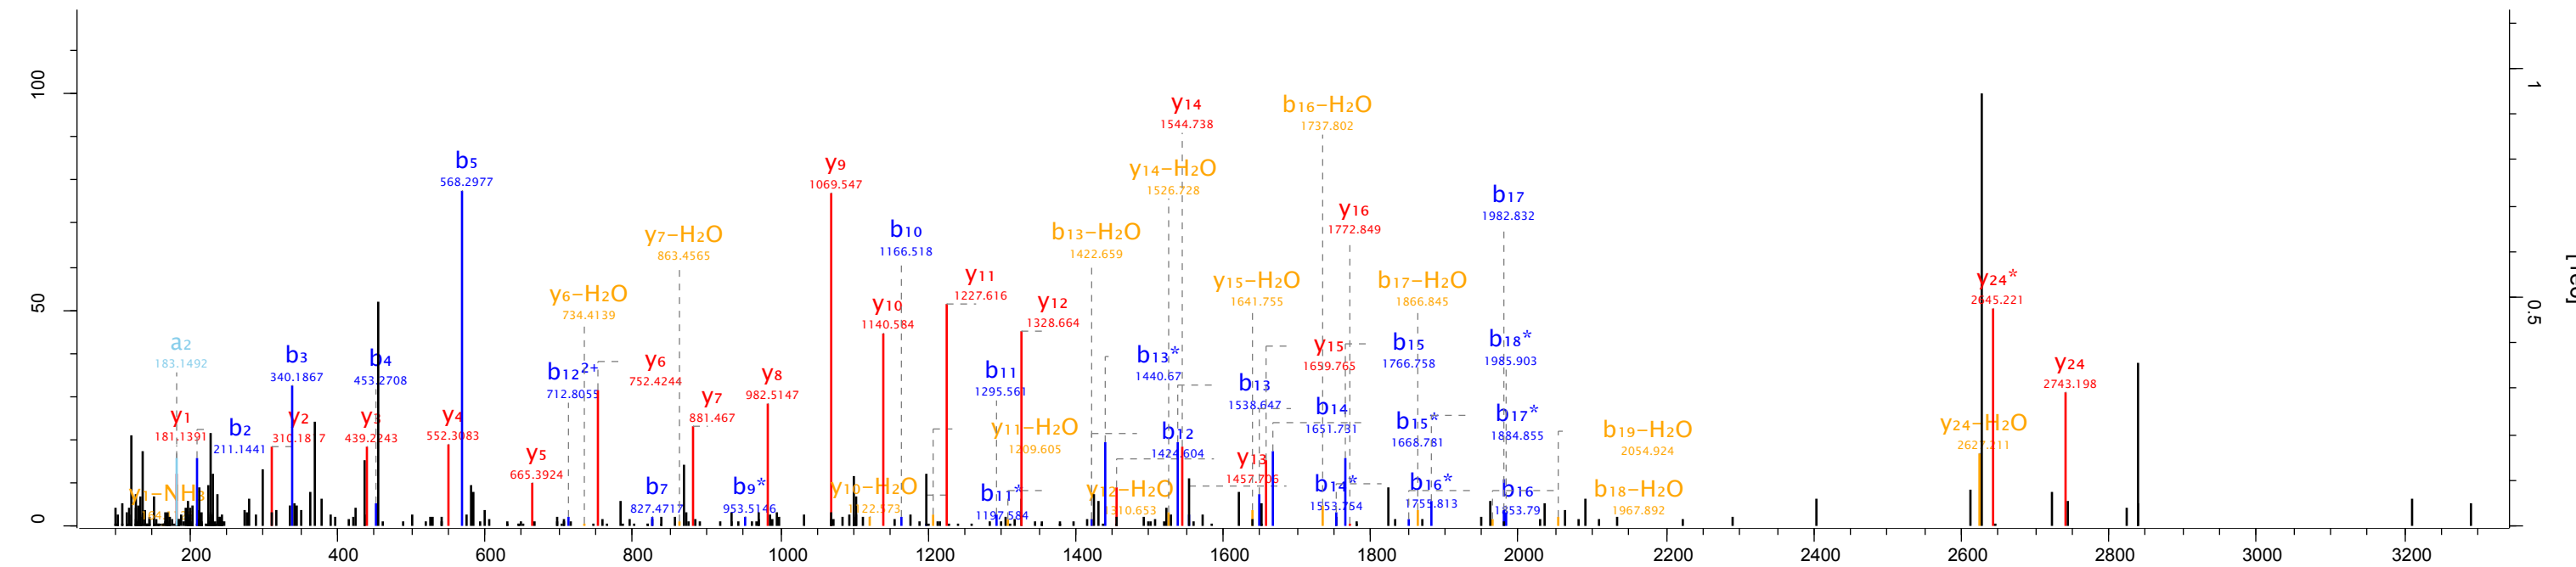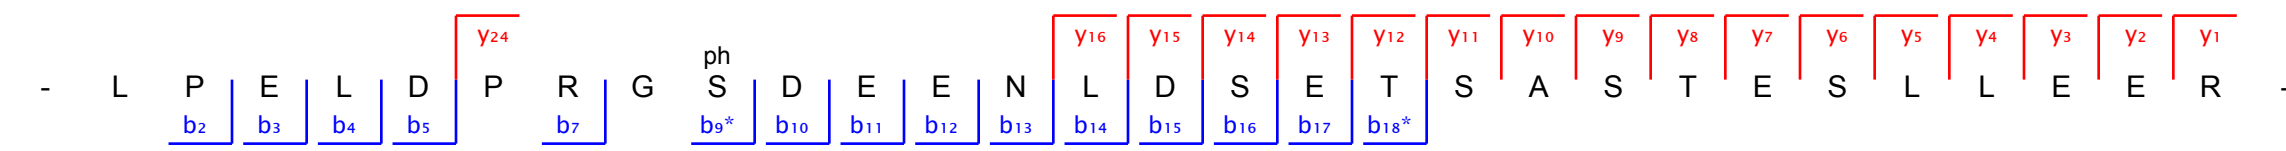

Raw file: 20150814\_A375SR\_Phospho\_BR2\_05  
 Scan: 23260 Method: FTMS; HCD Score: 194.79 m/z: 900.94 Gene names: ACIN1

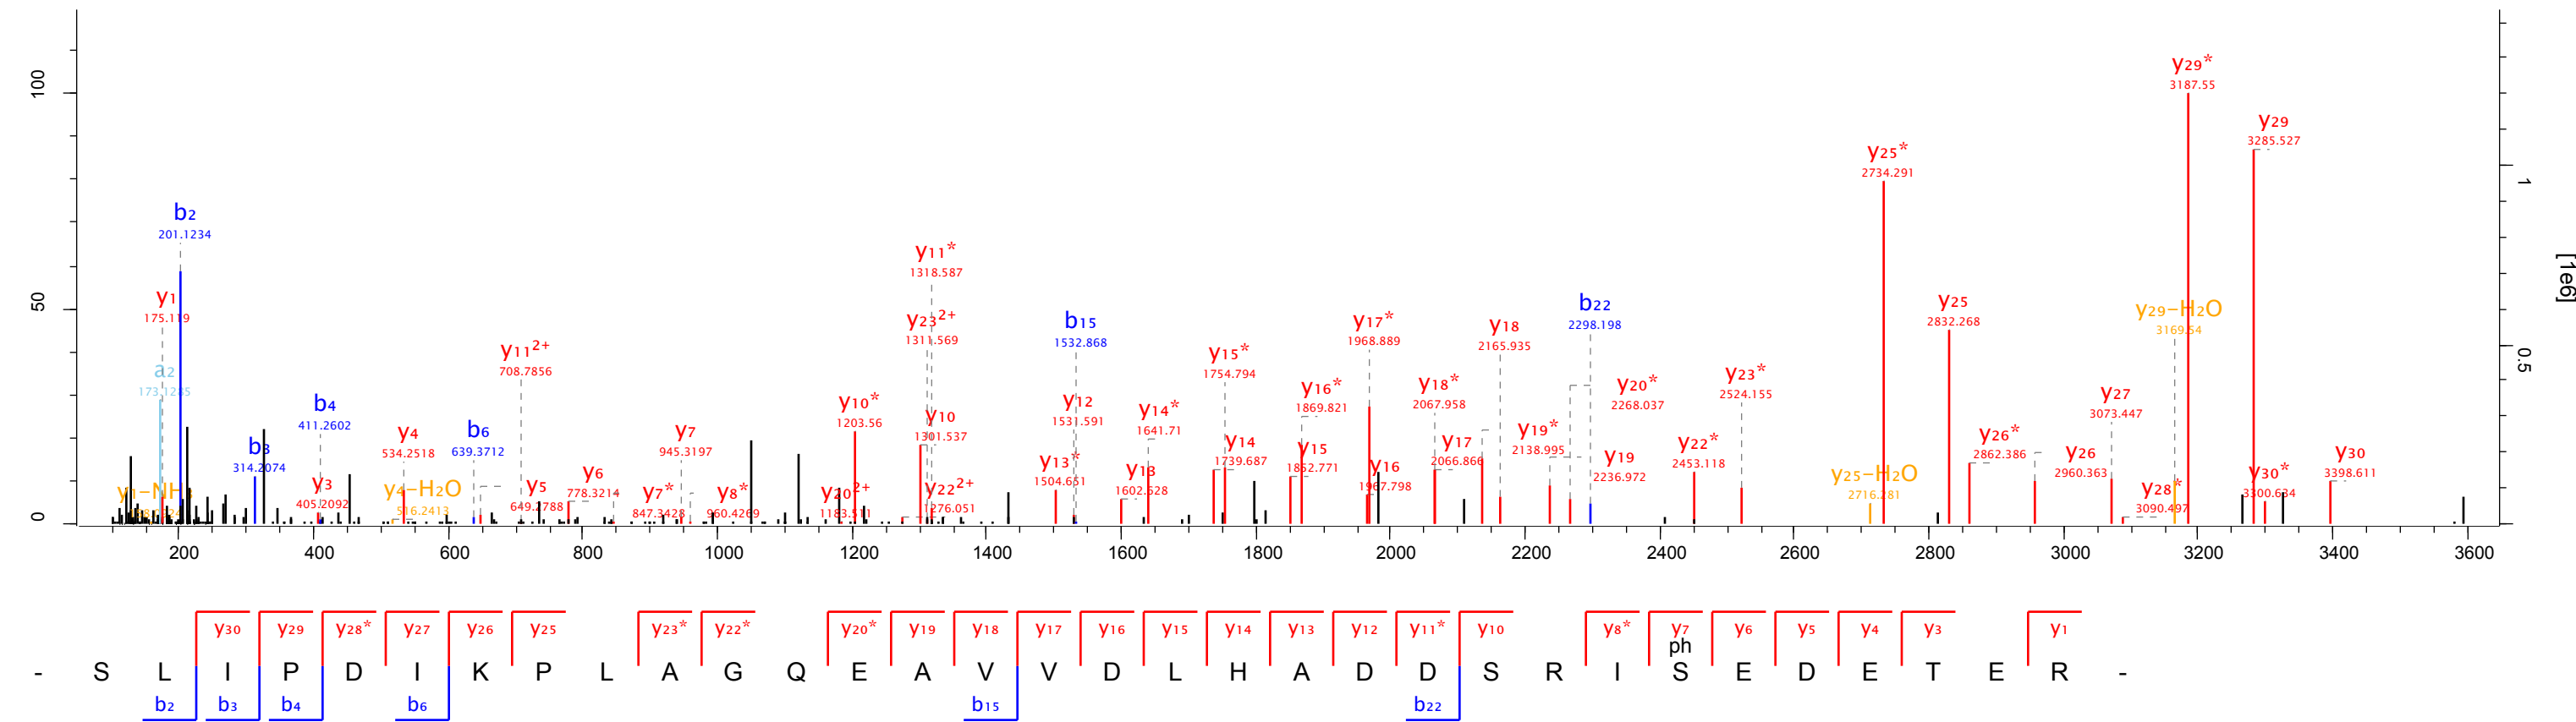



Raw file: 20150814\_A375SR\_Phospho\_BR2\_05  
 Scan: 23290 Method: FTMS; HCD Score: 130.21 m/z: 770.32 Gene names: FEZ1

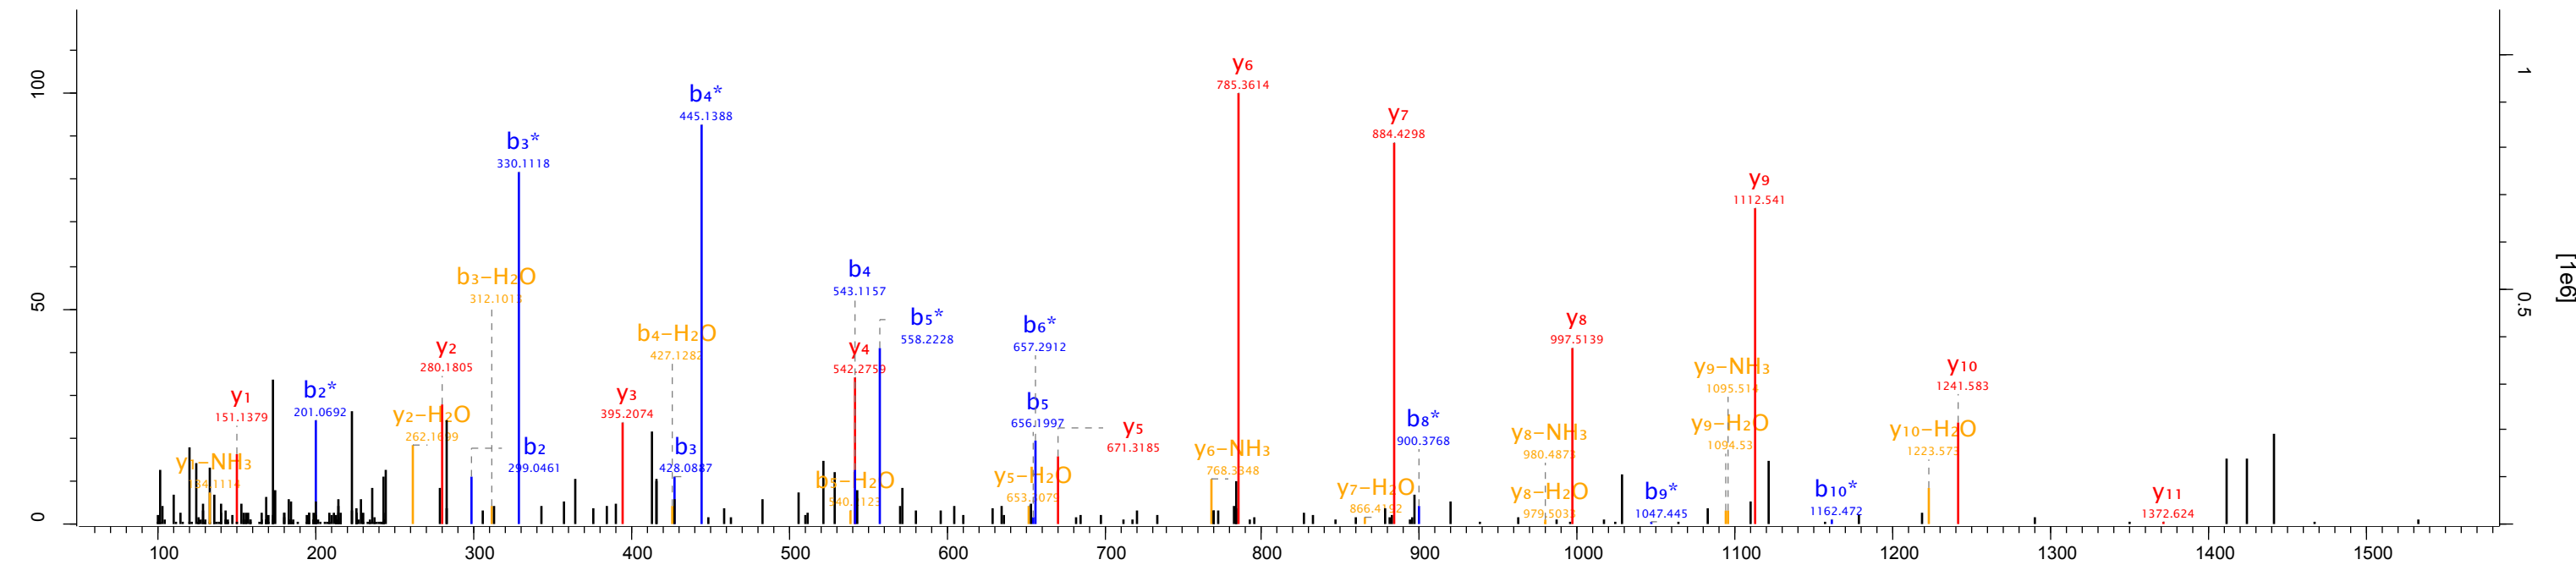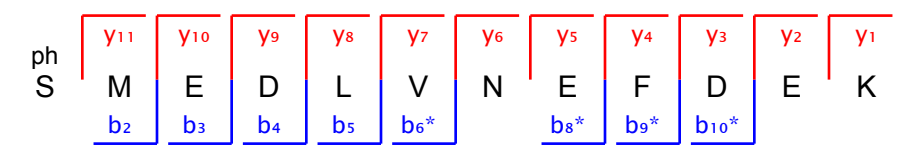

Raw file 20150814\_A375SR\_Phospho\_BR2\_05 Scan 23300 Method FTMS; HCD Score 132.86 m/z 868.4 Gene names GIGYF2

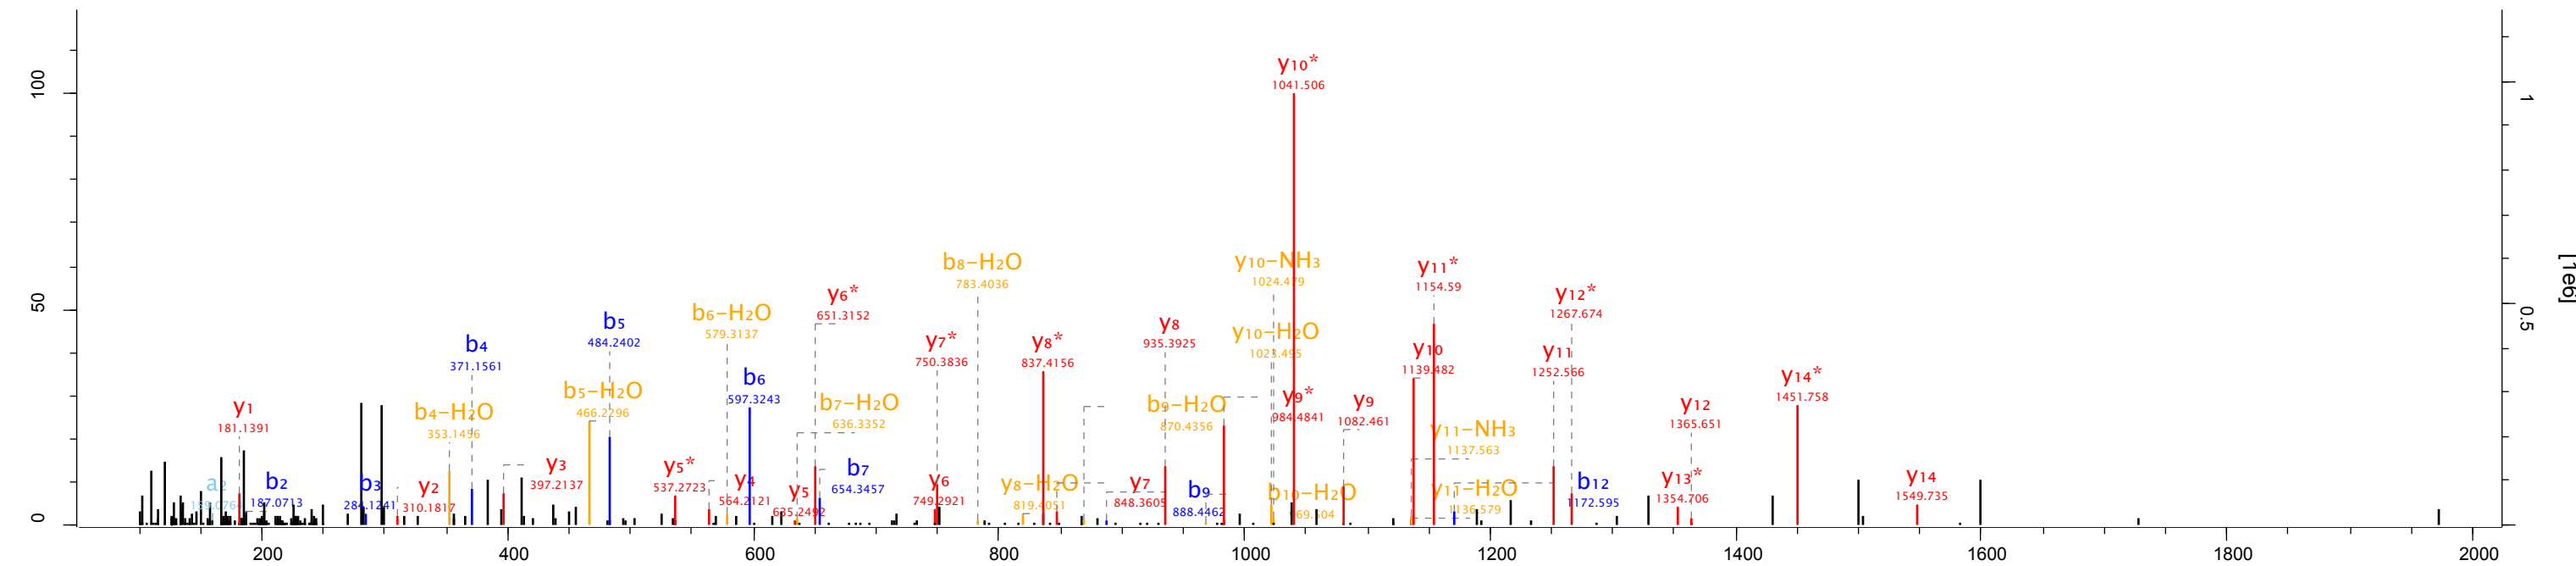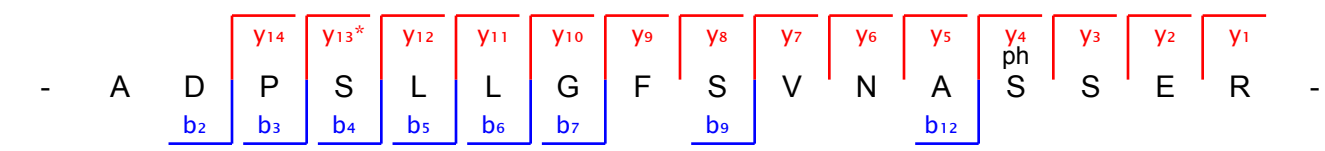

Raw file 20150814\_A375SR\_Phospho\_BR2\_05 Scan 23690 Method FTMS; HCD Score 139.51 m/z 874.94 Gene names DMAP1

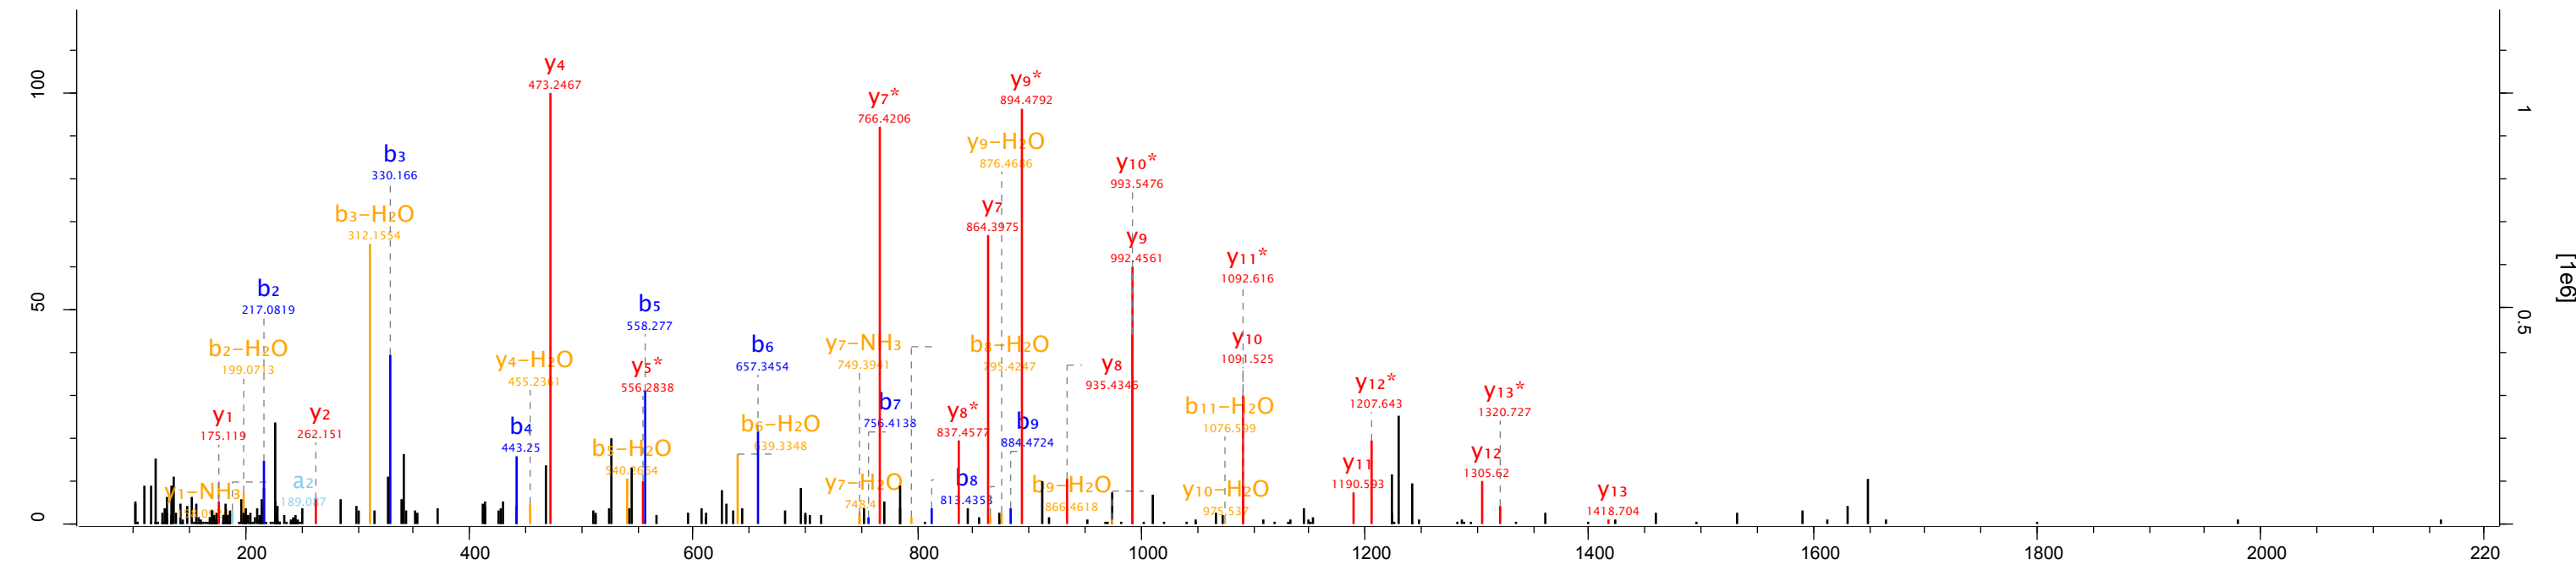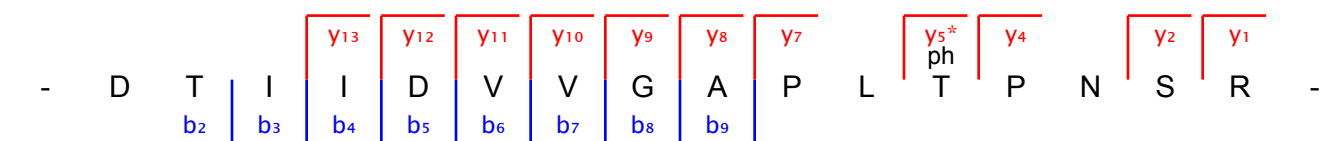

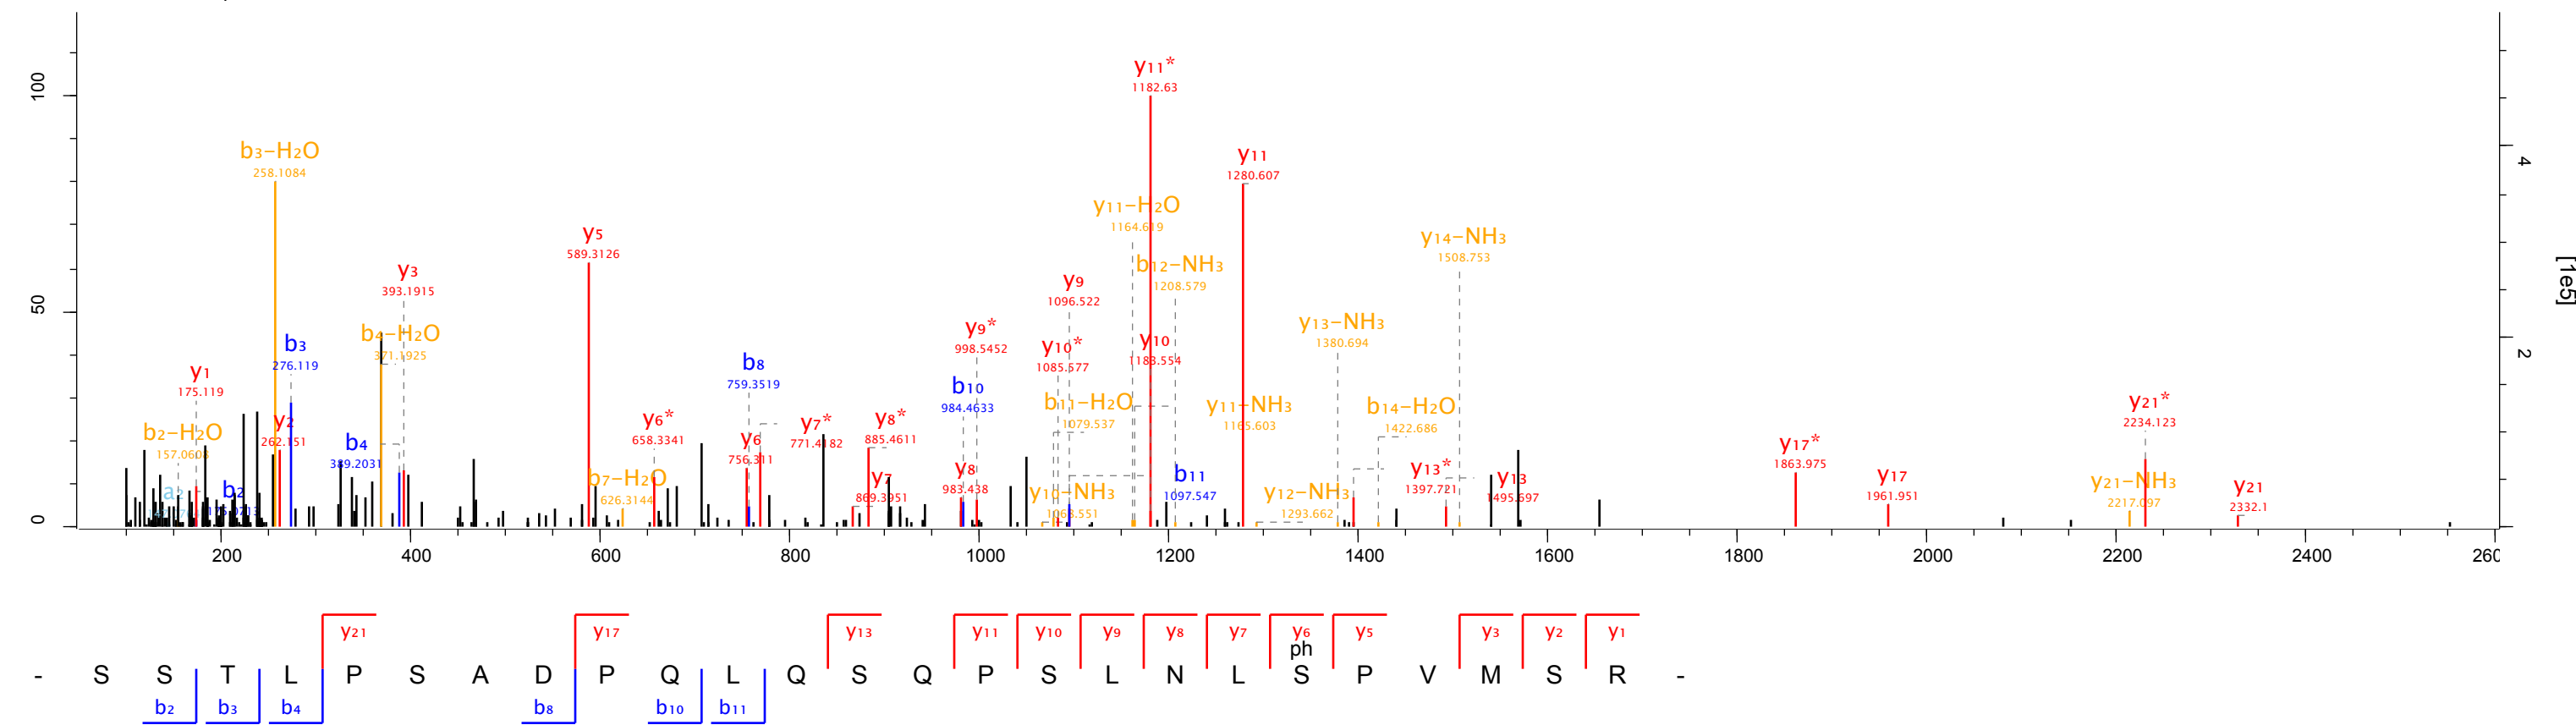

Raw file: 20150814\_A375SR\_Phospho\_BR2\_05  
 Scan: 23830 Method: FTMS; HCD Score: 104.81 m/z: 1093.51 Gene names: AIM1

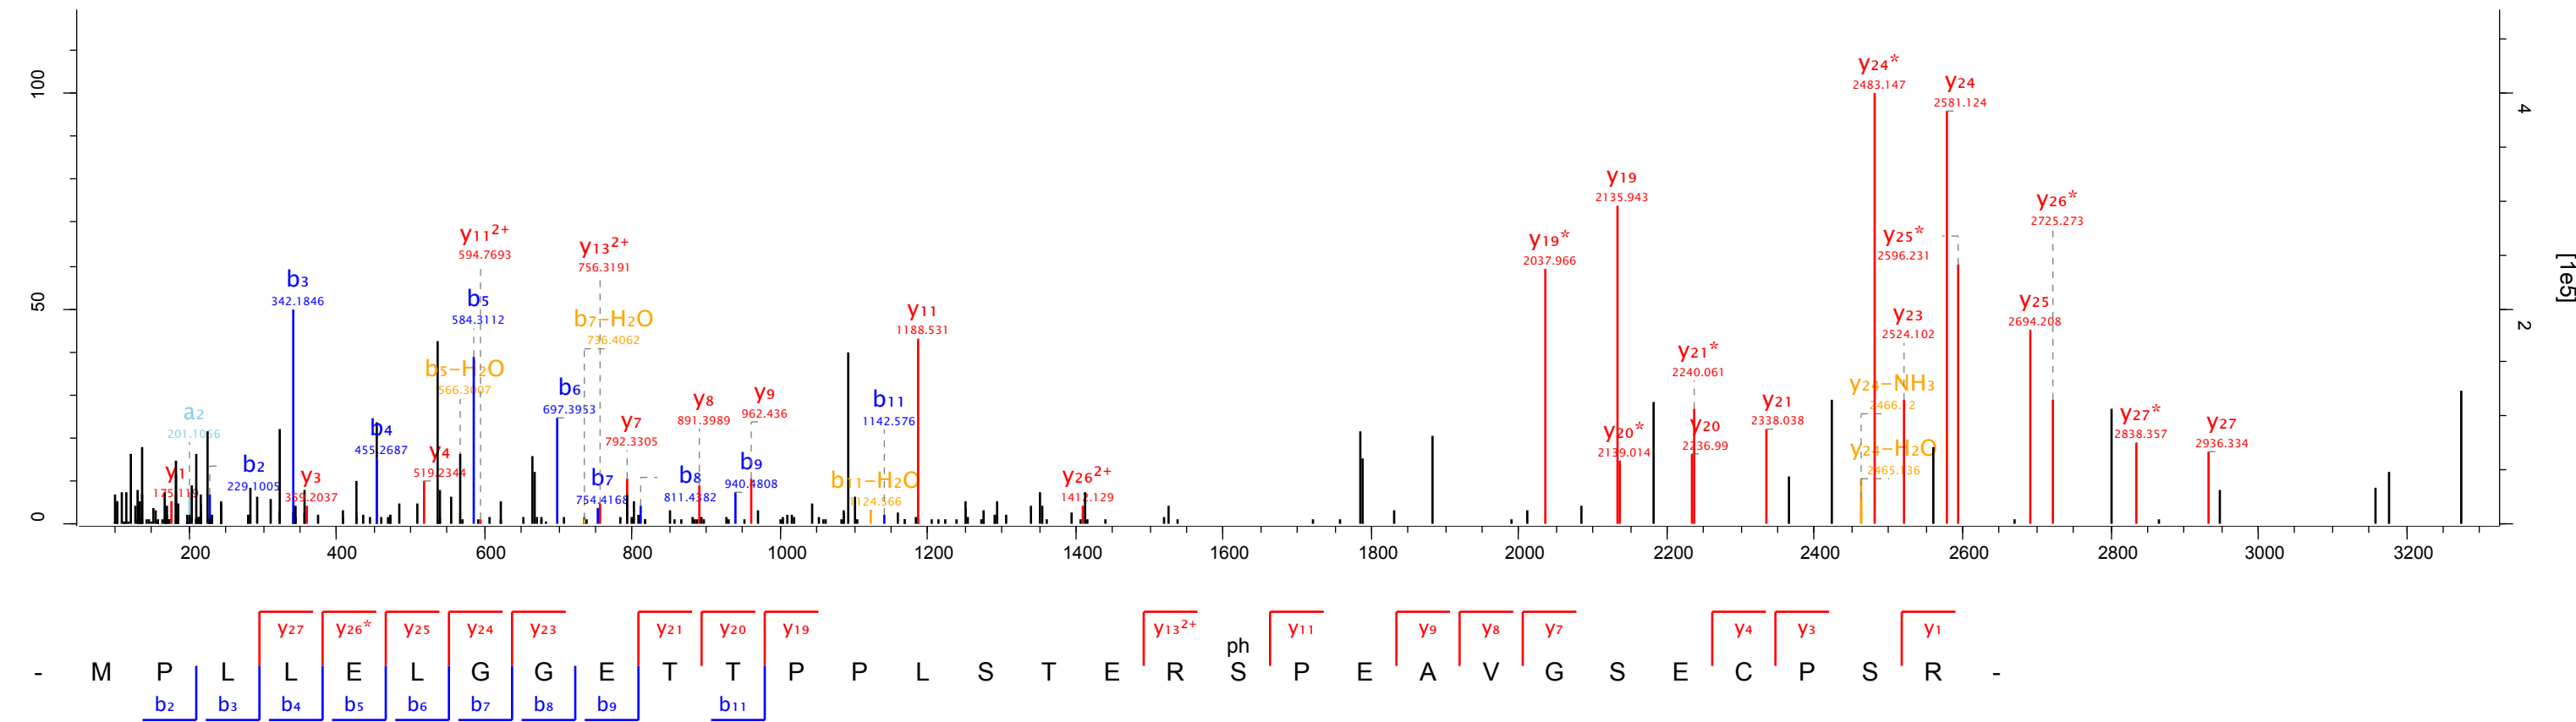

Raw file: 20150814\_A375SR\_Phospho\_BR2\_05  
 Scan: 24210 Method: FTMS; HCD Score: 257.94 m/z: 1358.58 Gene names: EIF3J

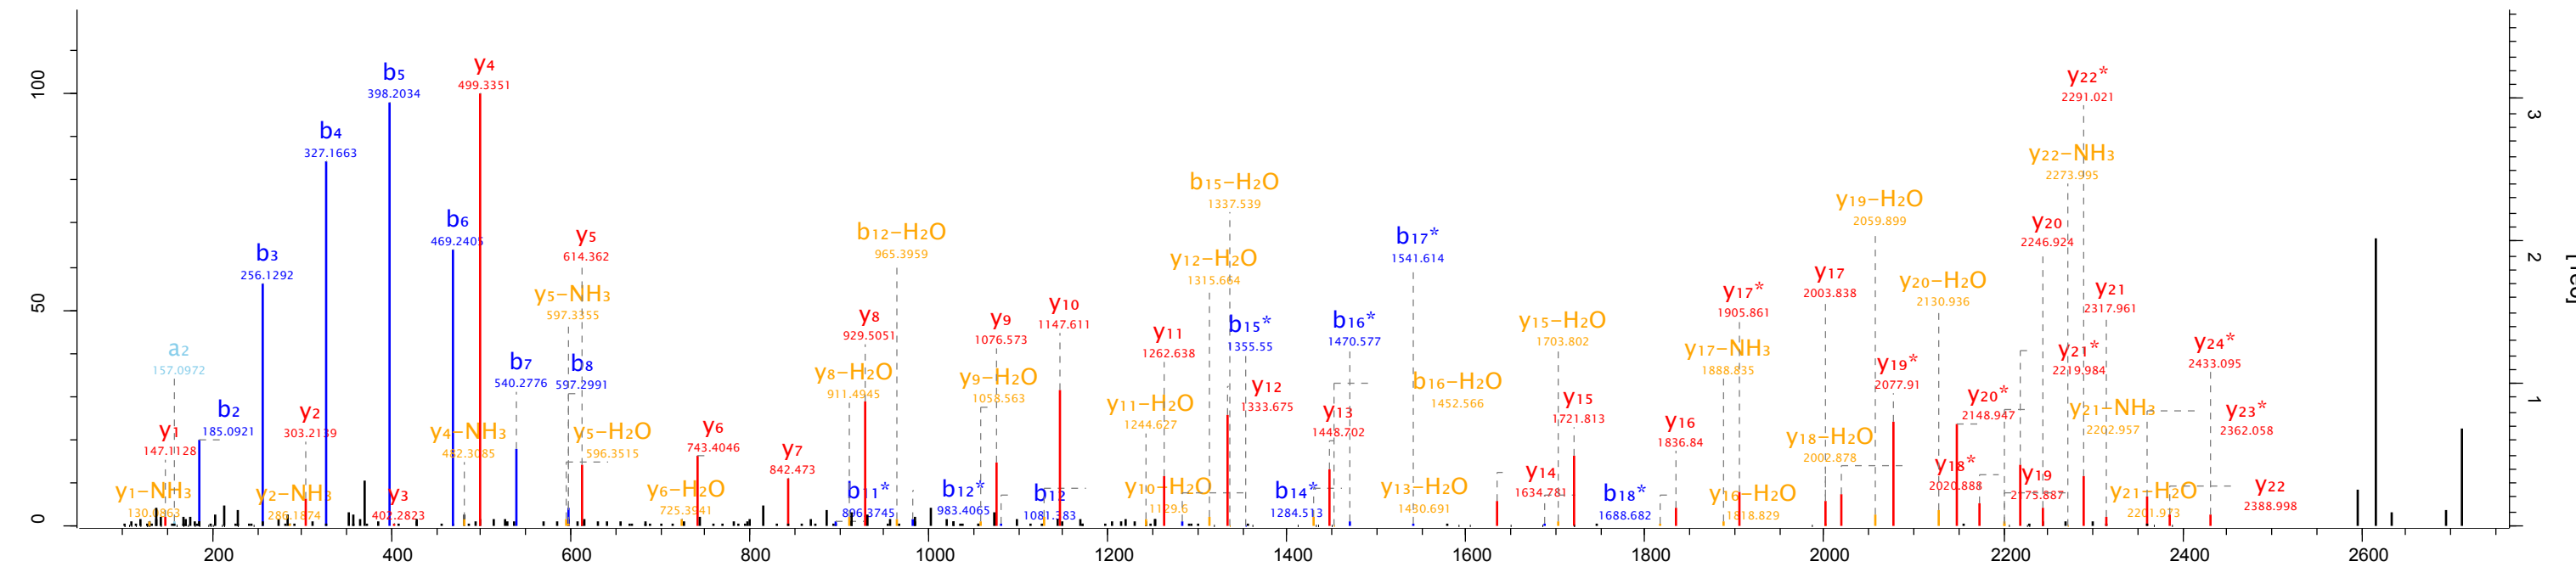

ac - A A A A A A A G D S D S W D A D A F S V E D P V R K -

b<sub>2</sub>
b<sub>3</sub>
b<sub>4</sub>
b<sub>5</sub>
b<sub>6</sub>
b<sub>7</sub>
b<sub>8</sub>
b<sub>11</sub>\*
b<sub>12</sub>
b<sub>14</sub>\*
b<sub>15</sub>\*
b<sub>16</sub>\*
b<sub>17</sub>\*
b<sub>18</sub>\*
y<sub>24</sub>\*
y<sub>23</sub>\*
y<sub>22</sub>
y<sub>21</sub>
y<sub>20</sub>
y<sub>19</sub>
y<sub>18</sub>\*
y<sub>17</sub>
y<sub>16</sub>
y<sub>15</sub>
y<sub>14</sub>
y<sub>13</sub>
y<sub>12</sub>
y<sub>11</sub>
y<sub>10</sub>
y<sub>9</sub>
y<sub>8</sub>
y<sub>7</sub>
y<sub>6</sub>
y<sub>5</sub>
y<sub>4</sub>
y<sub>3</sub>
y<sub>2</sub>
y<sub>1</sub>

Raw file: 20150814\_A375SR\_Phospho\_BR2\_05  
 Scan: 24430 Method: FTMS; HCD Score: 112.91 m/z: 799.9 Gene names: EPS15

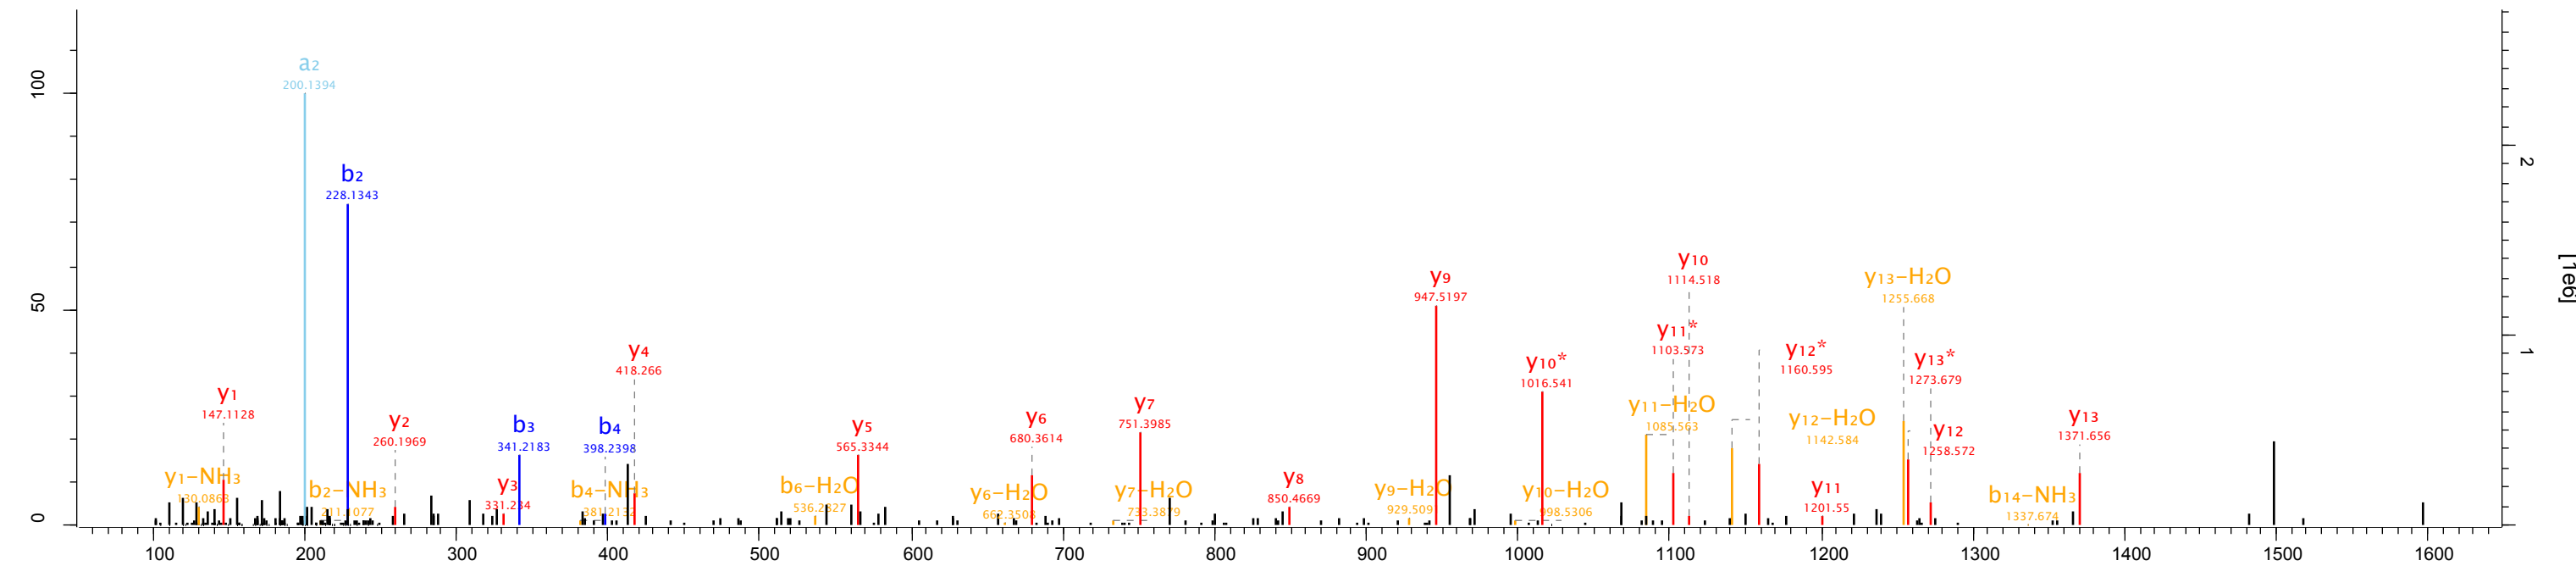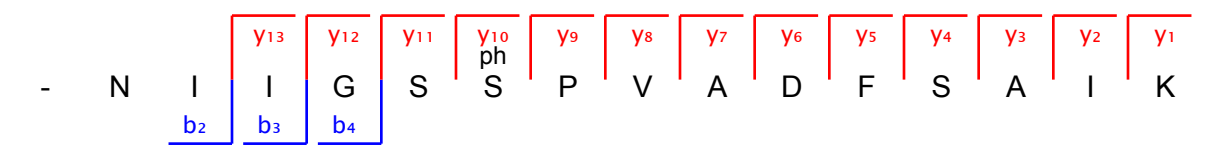

Raw file: 20150814\_A375SR\_Phospho\_BR2\_05  
 Scan: 24570 Method: FTMS; HCD Score: 192.85 m/z: 832.39 Gene names: AHCTF1

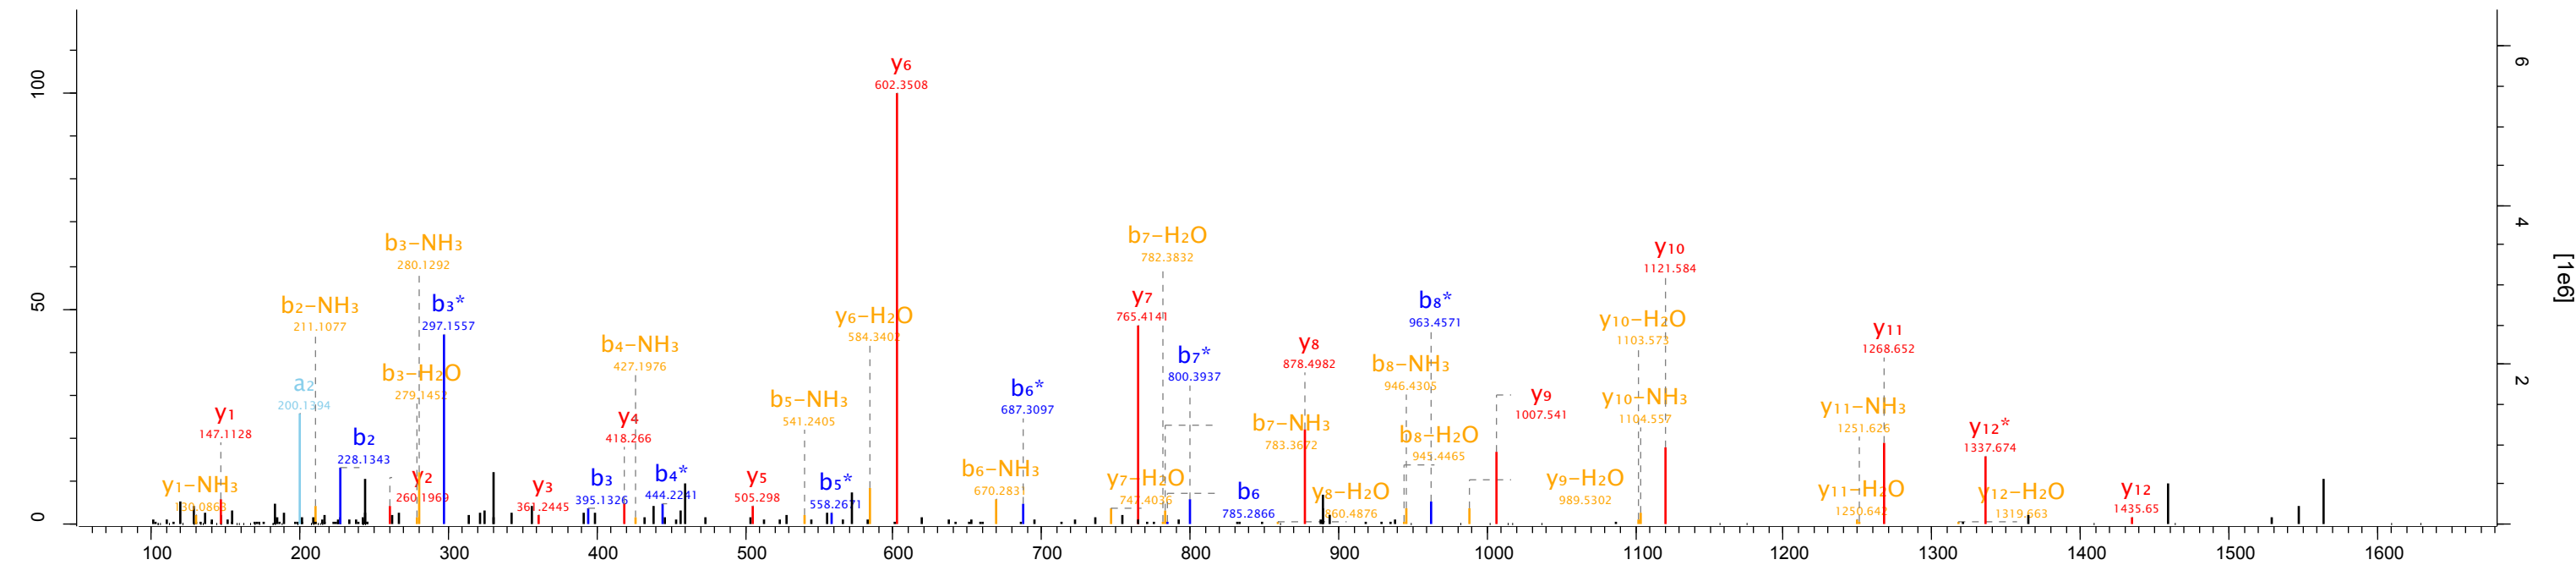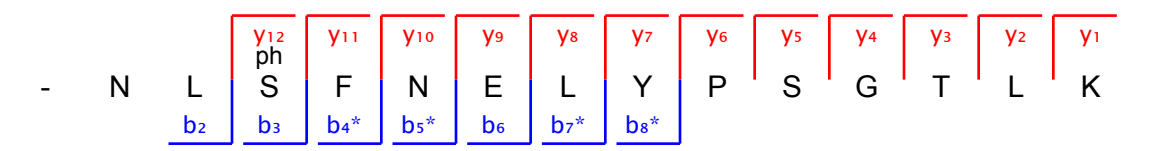



Raw file 20150814\_A375SR\_Phospho\_BR2\_05 Scan 2500 Method FTMS; HCD Score 151.87 m/z 837.4 Gene names PHACTR4

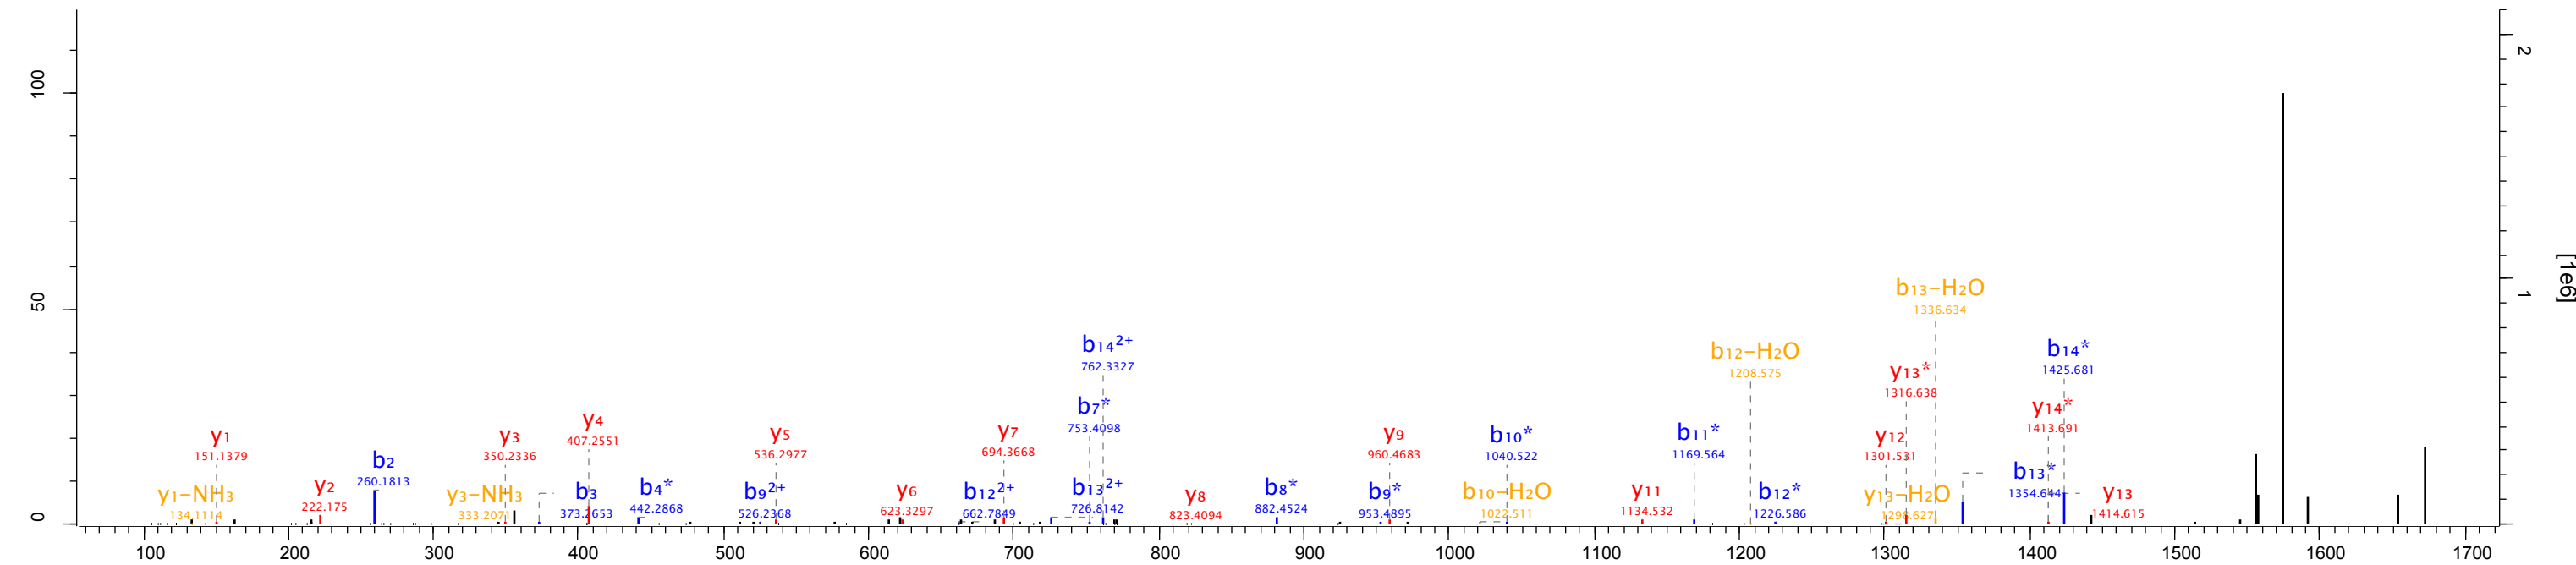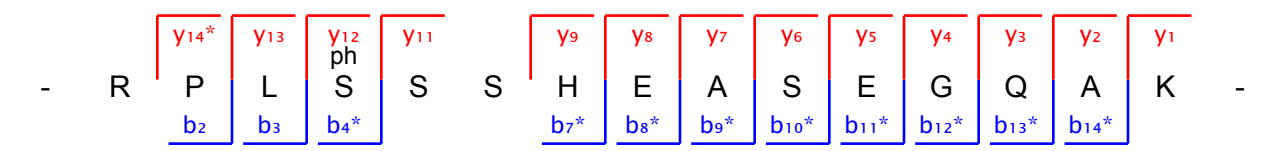

Raw file 20150814\_A375SR\_Phospho\_BR2\_05 Scan 25020 Method FTMS; HCD Score 149.74 m/z 803.06 Gene names MLLT4

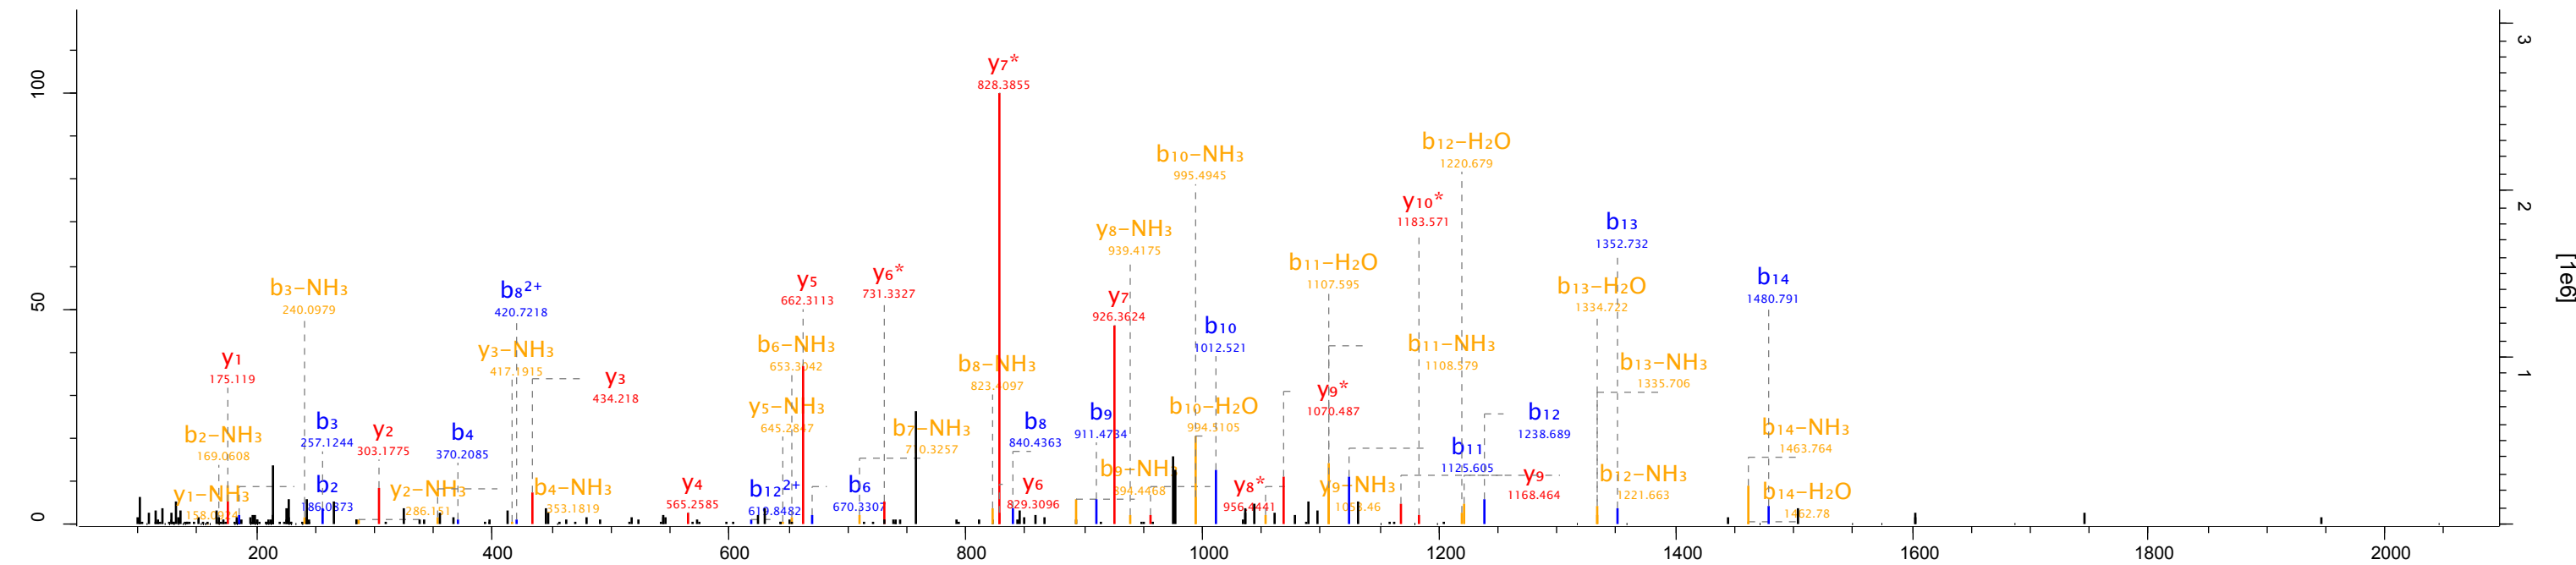

- Q G A I Y H G L A T L L N Q P S P M M Q R -

Fragmentation sites are indicated by boxes below the sequence:

- Blue boxes: b2 (G), b3 (A), b4 (I), b6 (H), b8 (L), b9 (A), b10 (T), b11 (L), b12 (L), b13 (N), b14 (Q)
- Red boxes: y10<sup>\*</sup> (L), y9 (N), y8<sup>\*</sup> (Q), y7 (P), y6<sup>ph</sup> (S), y5 (P), y4 (M), y3 (M), y2 (Q), y1 (R)

Raw file: 20150814\_A375SR\_Phospho\_BR2\_05  
 Scan: 25120 Method: FTMS; HCD Score: 112.03 m/z: 1072.18 Gene names: XPO6

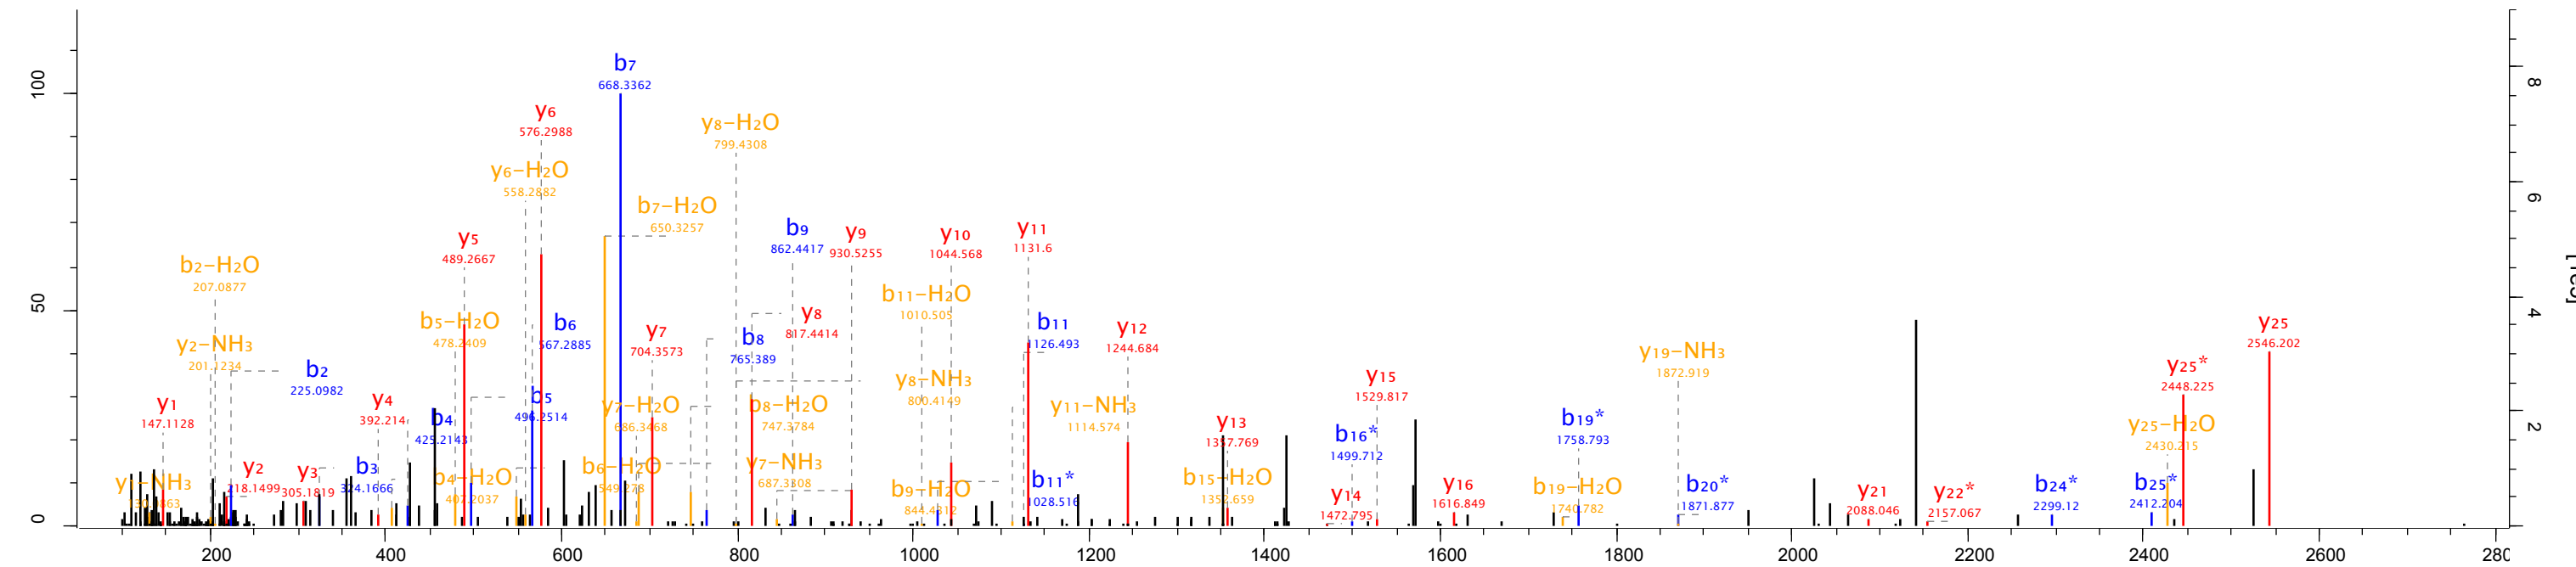

- H S V T A A T P P P S P T S G E S G D L L S N L L Q S P S S A K -

Fragmentation labels below the sequence:

- b<sub>2</sub> (under S), b<sub>3</sub> (under V), b<sub>4</sub> (under T), b<sub>5</sub> (under A), b<sub>6</sub> (under A), b<sub>7</sub> (under T), b<sub>8</sub> (under P), b<sub>9</sub> (under P)
- b<sub>11</sub> (under S), b<sub>16</sub>\* (under E), b<sub>19</sub>\* (under D), b<sub>20</sub>\* (under L), b<sub>24</sub>\* (under L), b<sub>25</sub>\* (under L)
- y<sub>1</sub> (under K), y<sub>2</sub> (under A), y<sub>3</sub> (under S), y<sub>4</sub> (under S), y<sub>5</sub> (under P), y<sub>6</sub> (under S), y<sub>7</sub> (under Q), y<sub>8</sub> (under L), y<sub>9</sub> (under L), y<sub>10</sub> (under N), y<sub>11</sub> (under S), y<sub>12</sub> (under L), y<sub>13</sub> (under D), y<sub>14</sub> (under L), y<sub>15</sub> (under G), y<sub>16</sub> (under S), y<sub>21</sub> (under P), y<sub>22</sub>\* (under S), y<sub>25</sub> (under P)

Raw file: 20150814\_A375SR\_Phospho\_BR2\_05  
 Scan: 25450 Method: FTMS; HCD Score: 360.56 m/z: 965.15 Gene names: DAP

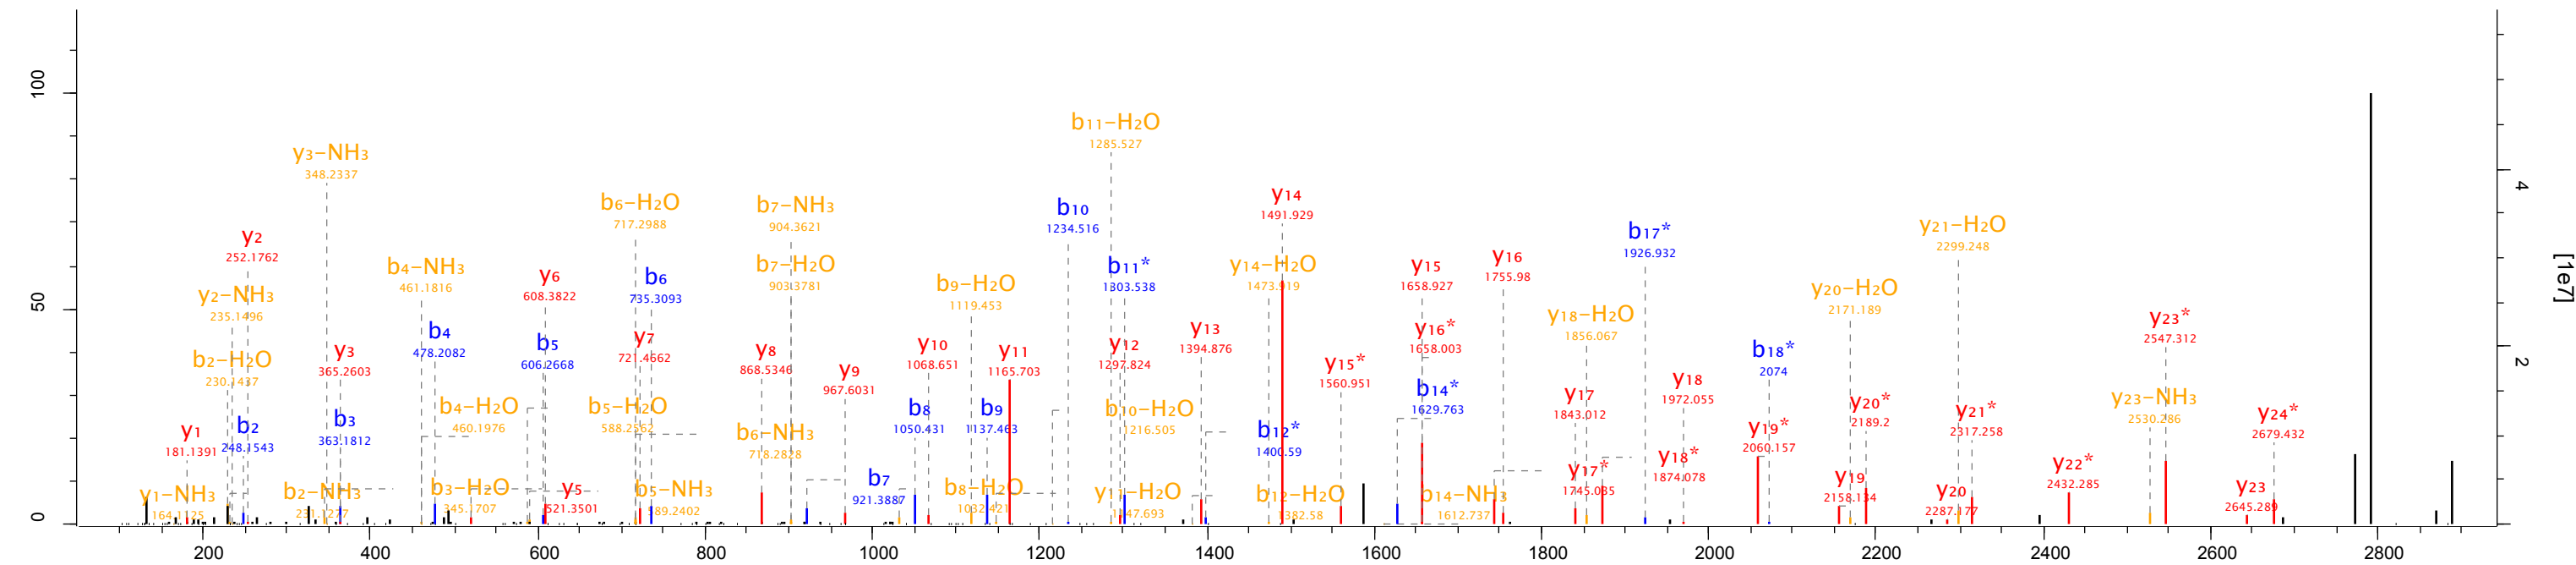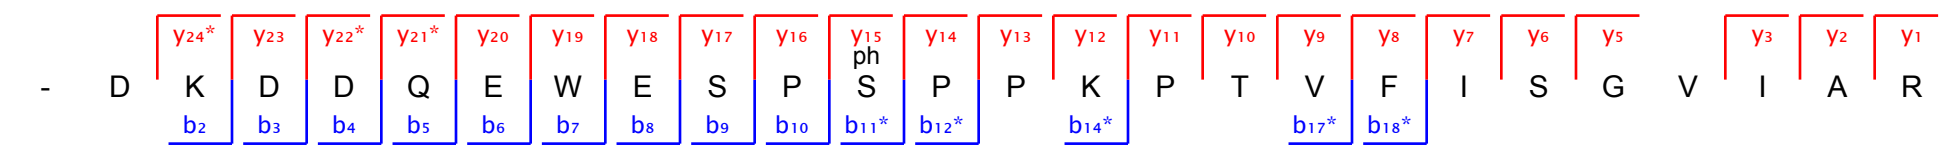

Raw file: 20150814\_A375SR\_Phospho\_BR2\_05  
 Scan: 25990 Method: FTMS; HCD Score: 228.57 m/z: 1191.94 Gene names: SLC4A1AP

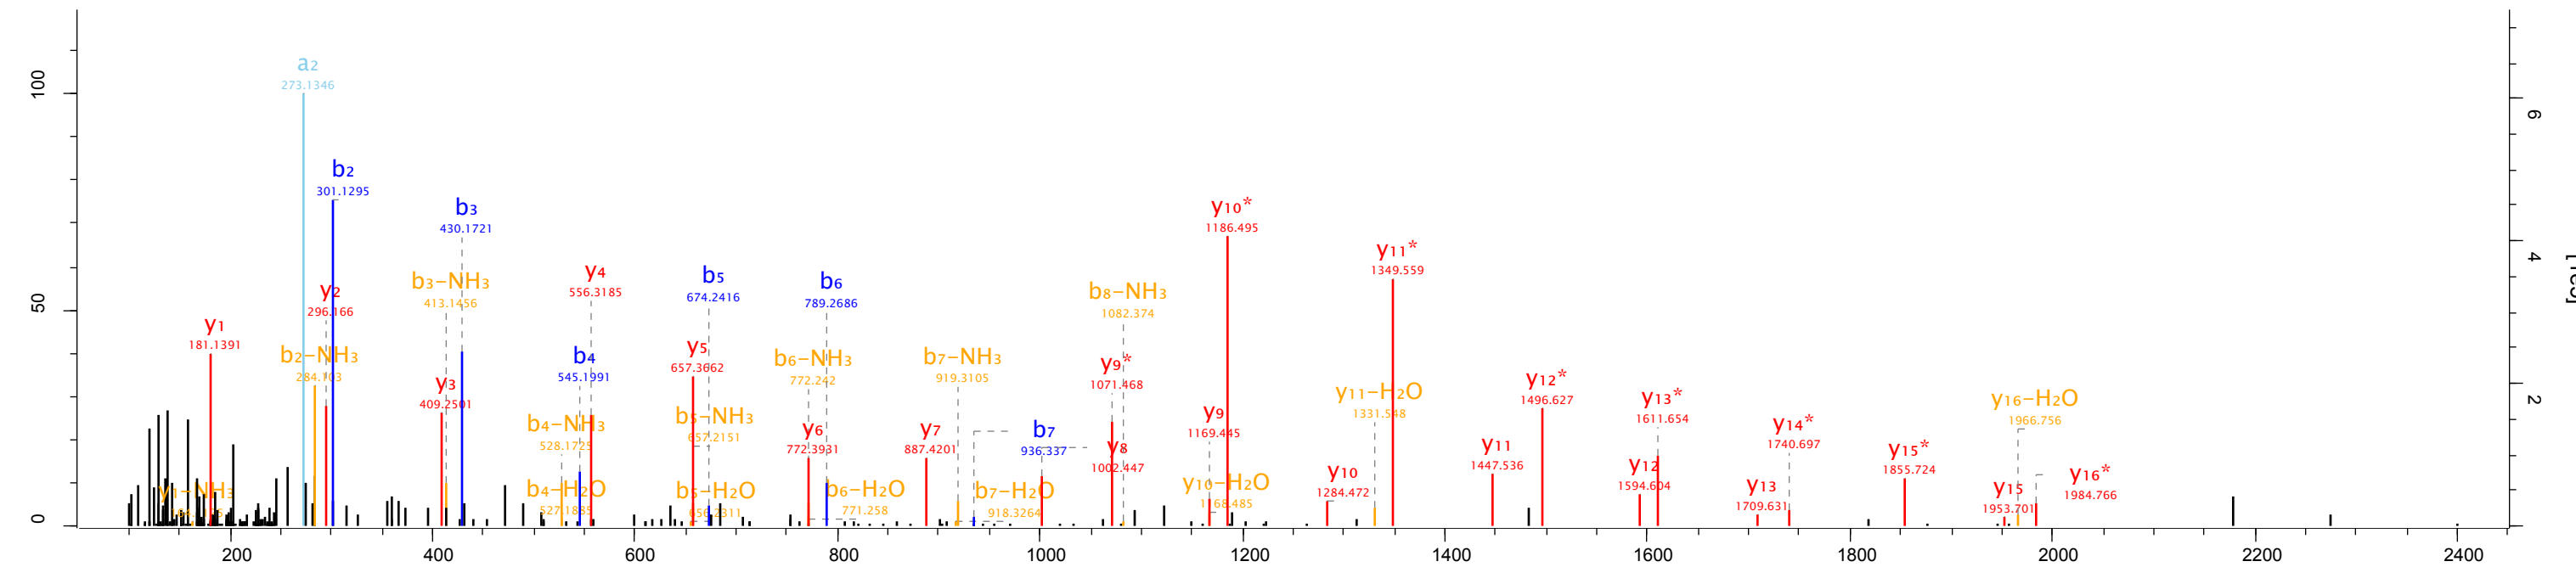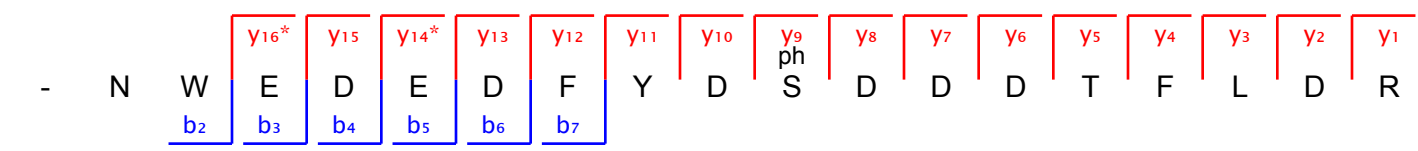

Raw file  
20150814\_A375SR\_Phospho\_BR2\_05

Scan 26110 Method FTMS; HCD Score 228.29 m/z 1076.5 Gene names MAP3K3

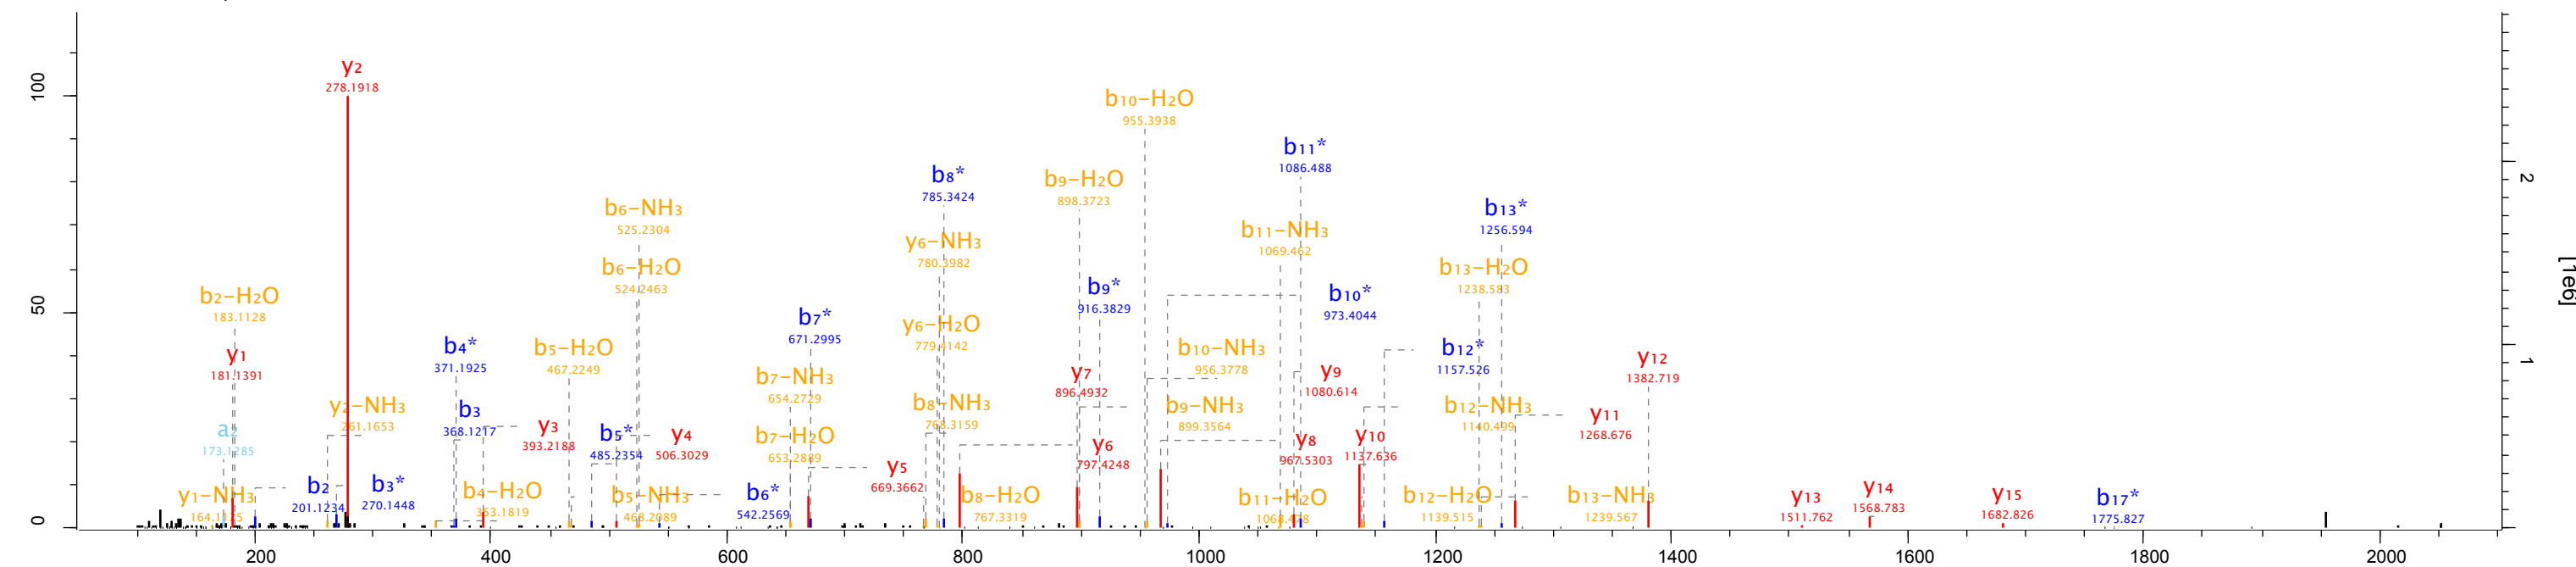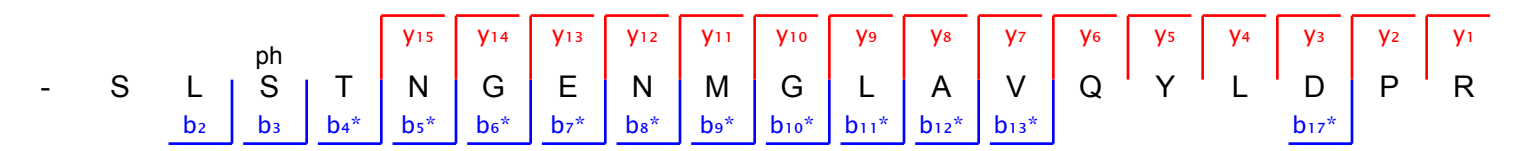

Raw file 20150814\_A375SR\_Phospho\_BR2\_05 Scan 26370 Method FTMS; HCD Score 75.82 m/z 544.22 Gene names ABL2

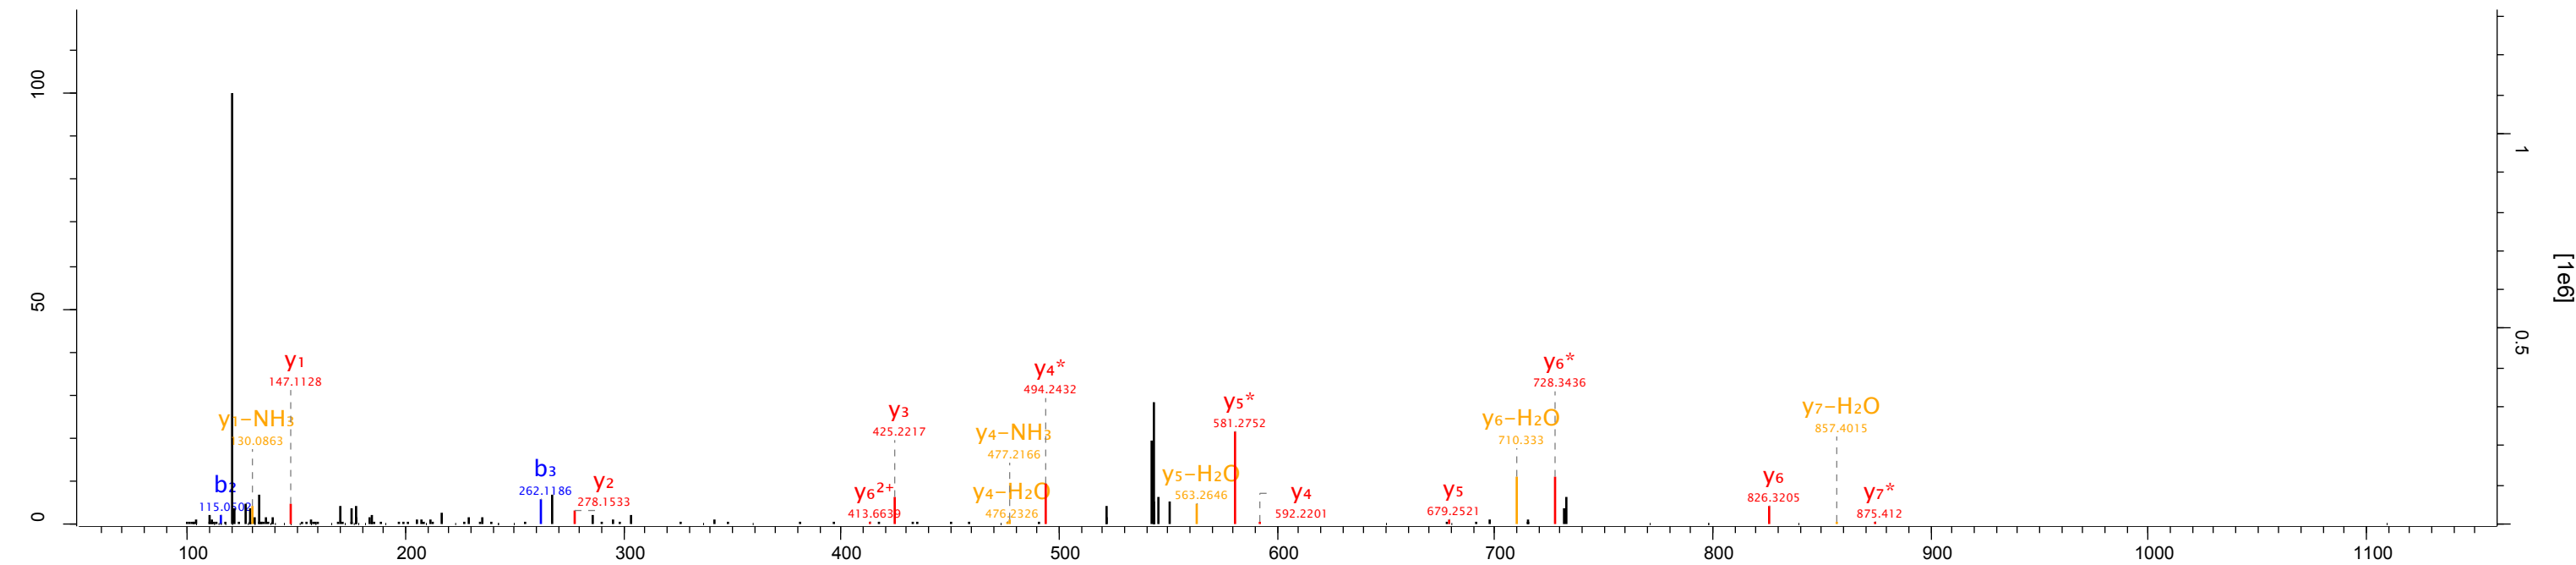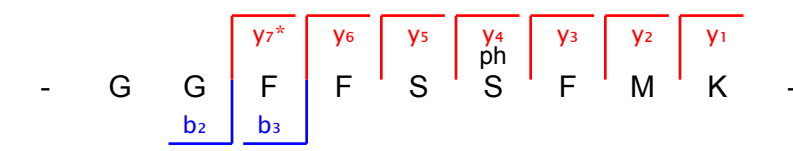

Raw file 20150814\_A375SR\_Phospho\_BR2\_05 Scan 26400 Method FTMS; HCD Score 126.45 m/z 975.77 Gene names SENP3

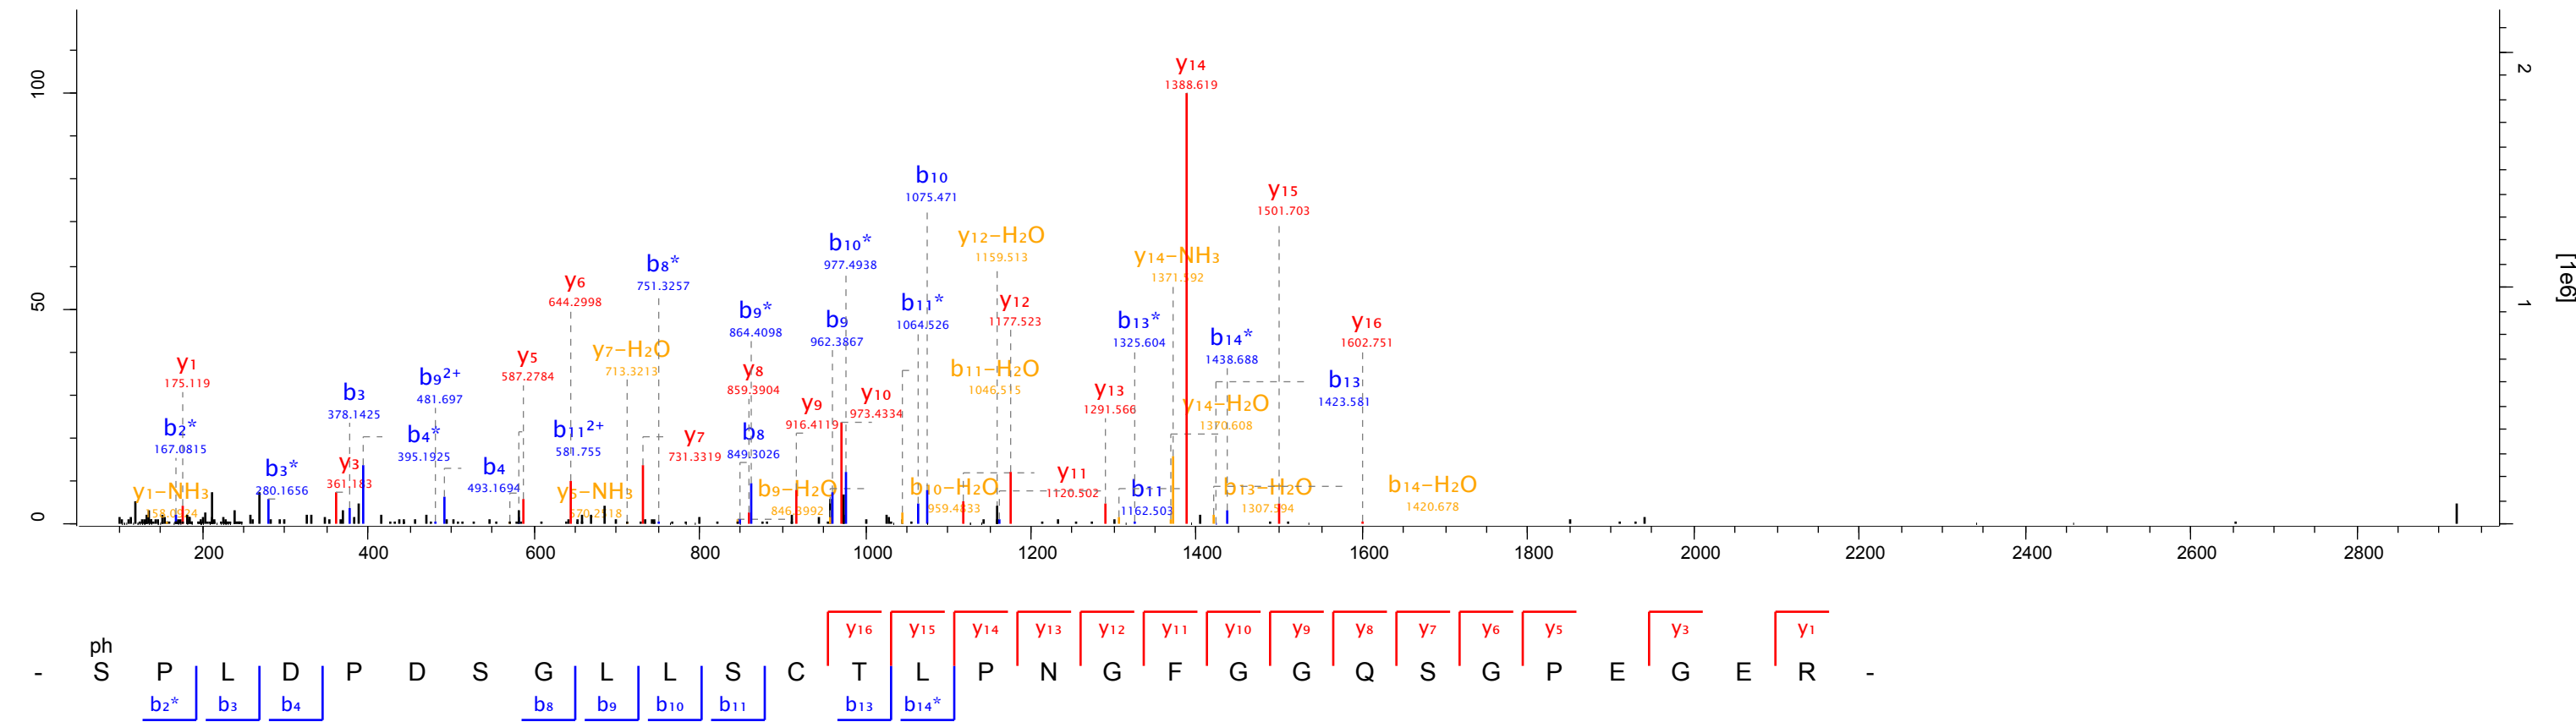



Raw file Scan Method Score m/z Gene names  
 20150814\_A375SR\_Phospho\_BR2\_05 26770 FTMS; HCD 201.29 1081.53 TWf1

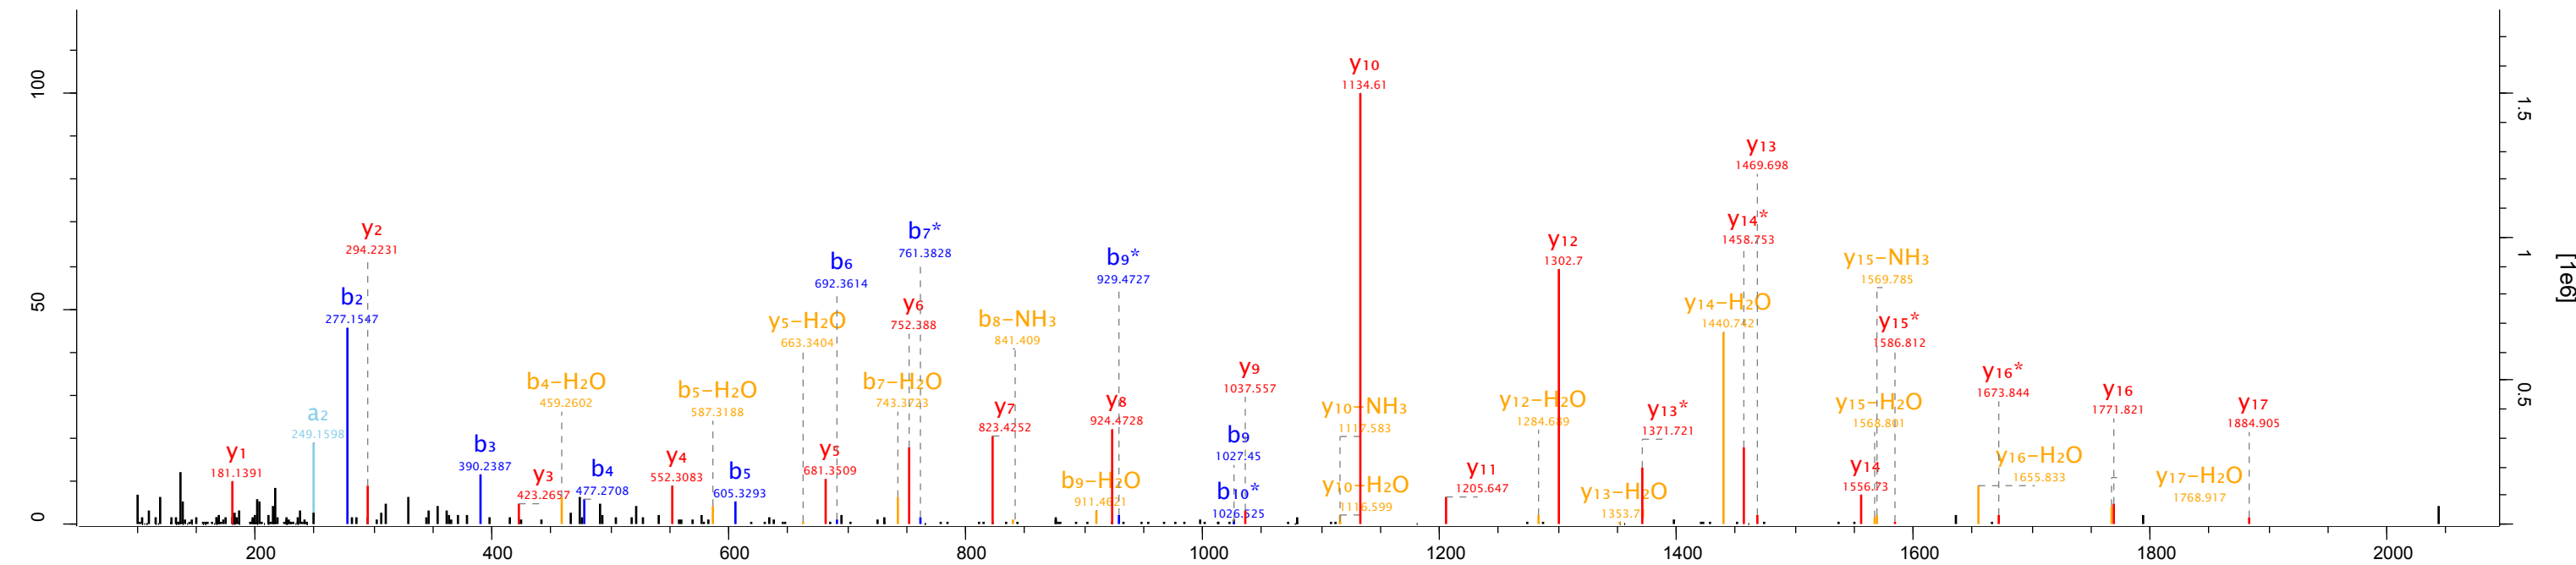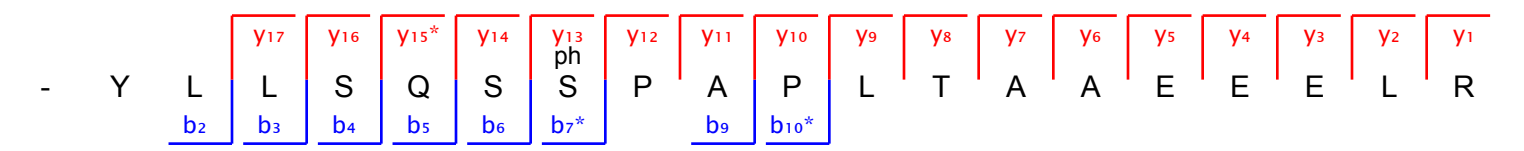

Raw file 20150814\_A375SR\_Phospho\_BR2\_05 Scan 27130 Method FTMS; HCD Score 112.68 m/z 1105.21 Gene names CLUH

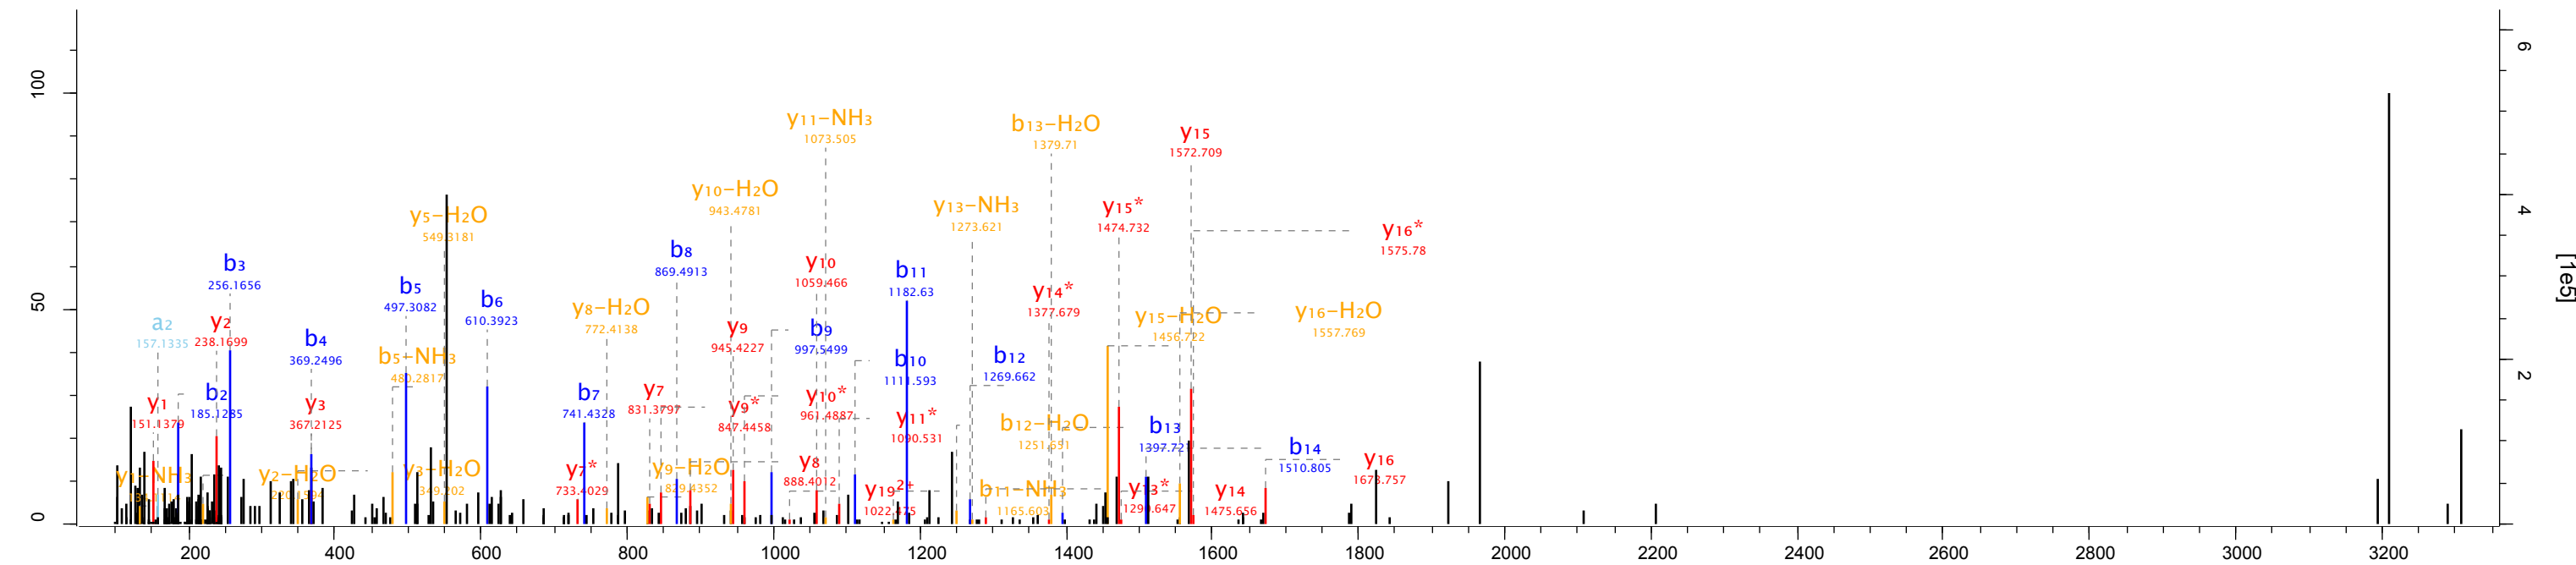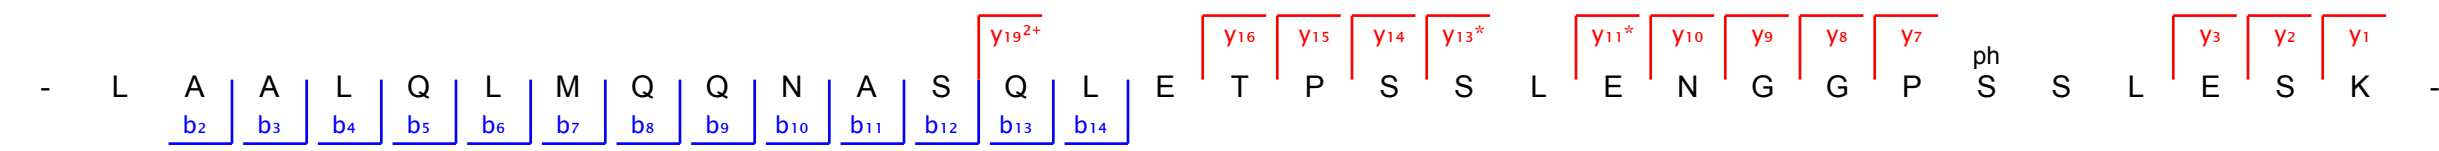

Raw file Scan Method Score m/z Gene names  
 20150814\_A375SR\_Phospho\_BR2\_05 27420 FTMS; HCD 107.38 1185.94 NRBP1

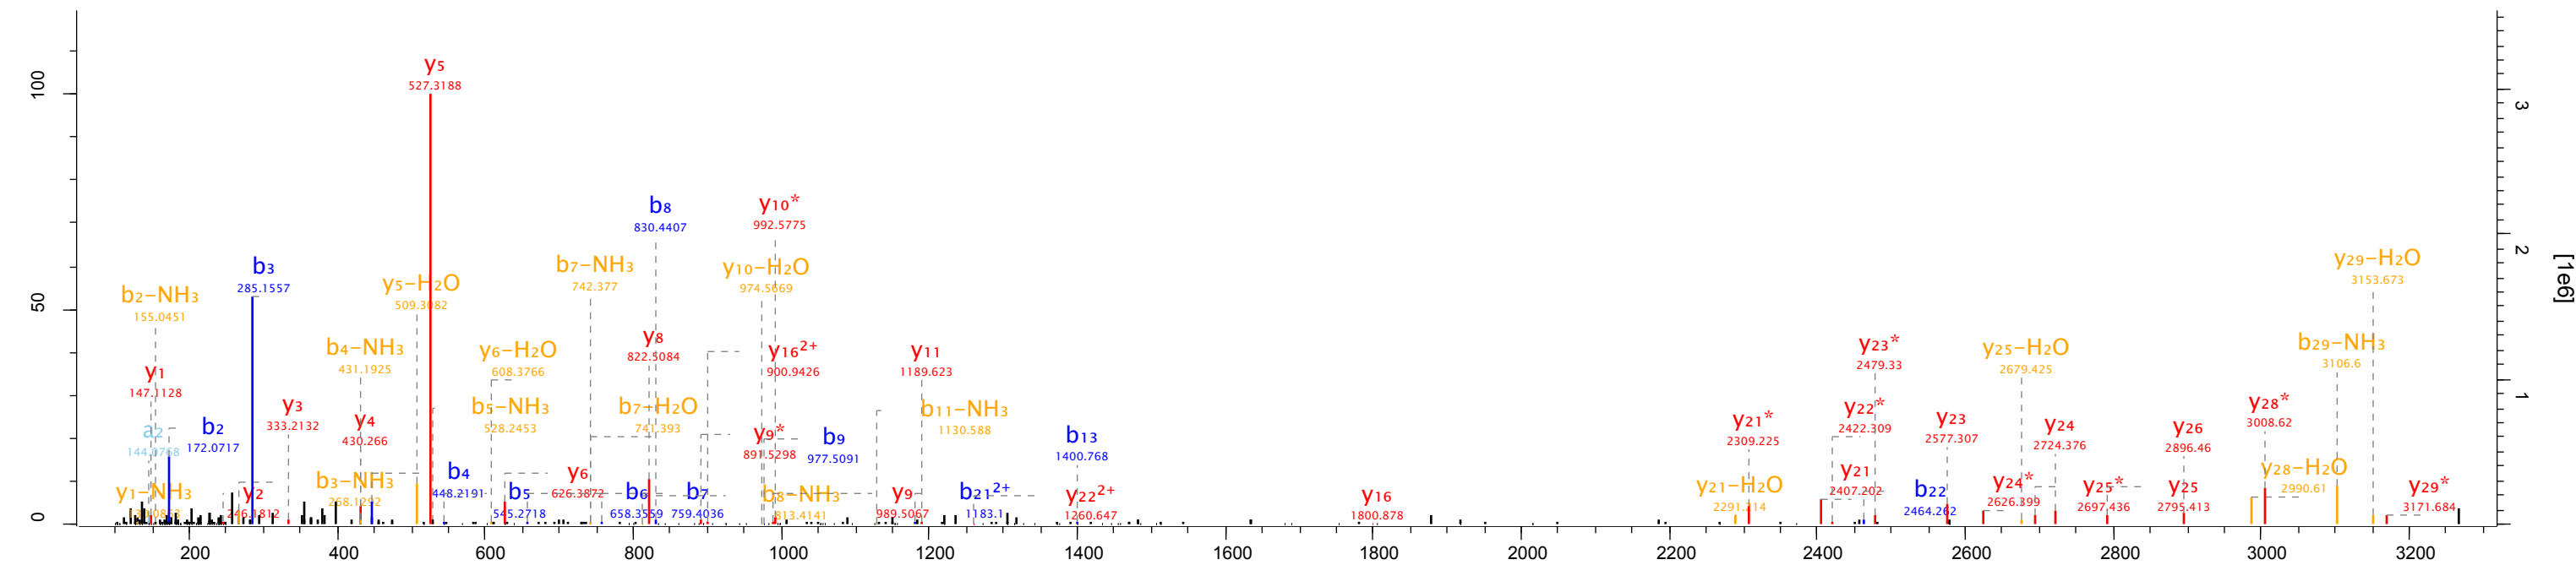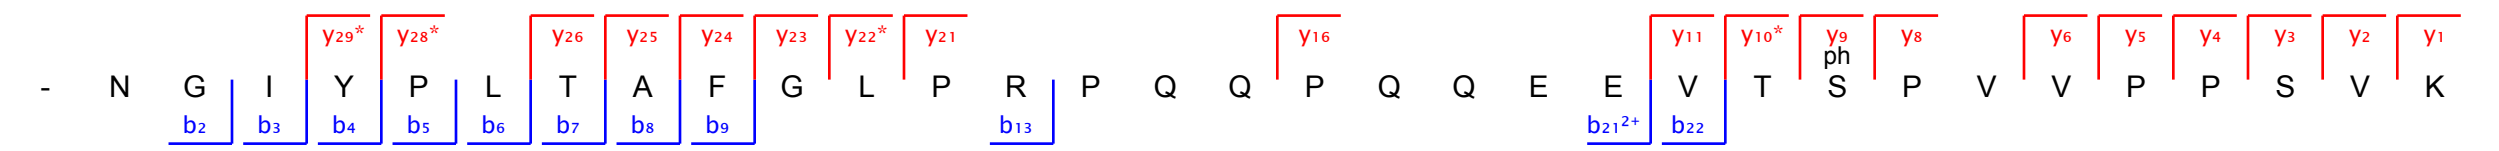

Raw file  
20150814\_A375SR\_Phospho\_BR2\_05

Scan 27470 Method FTMS; HCD Score 336.66 m/z 1031.8 Gene names RAD9A

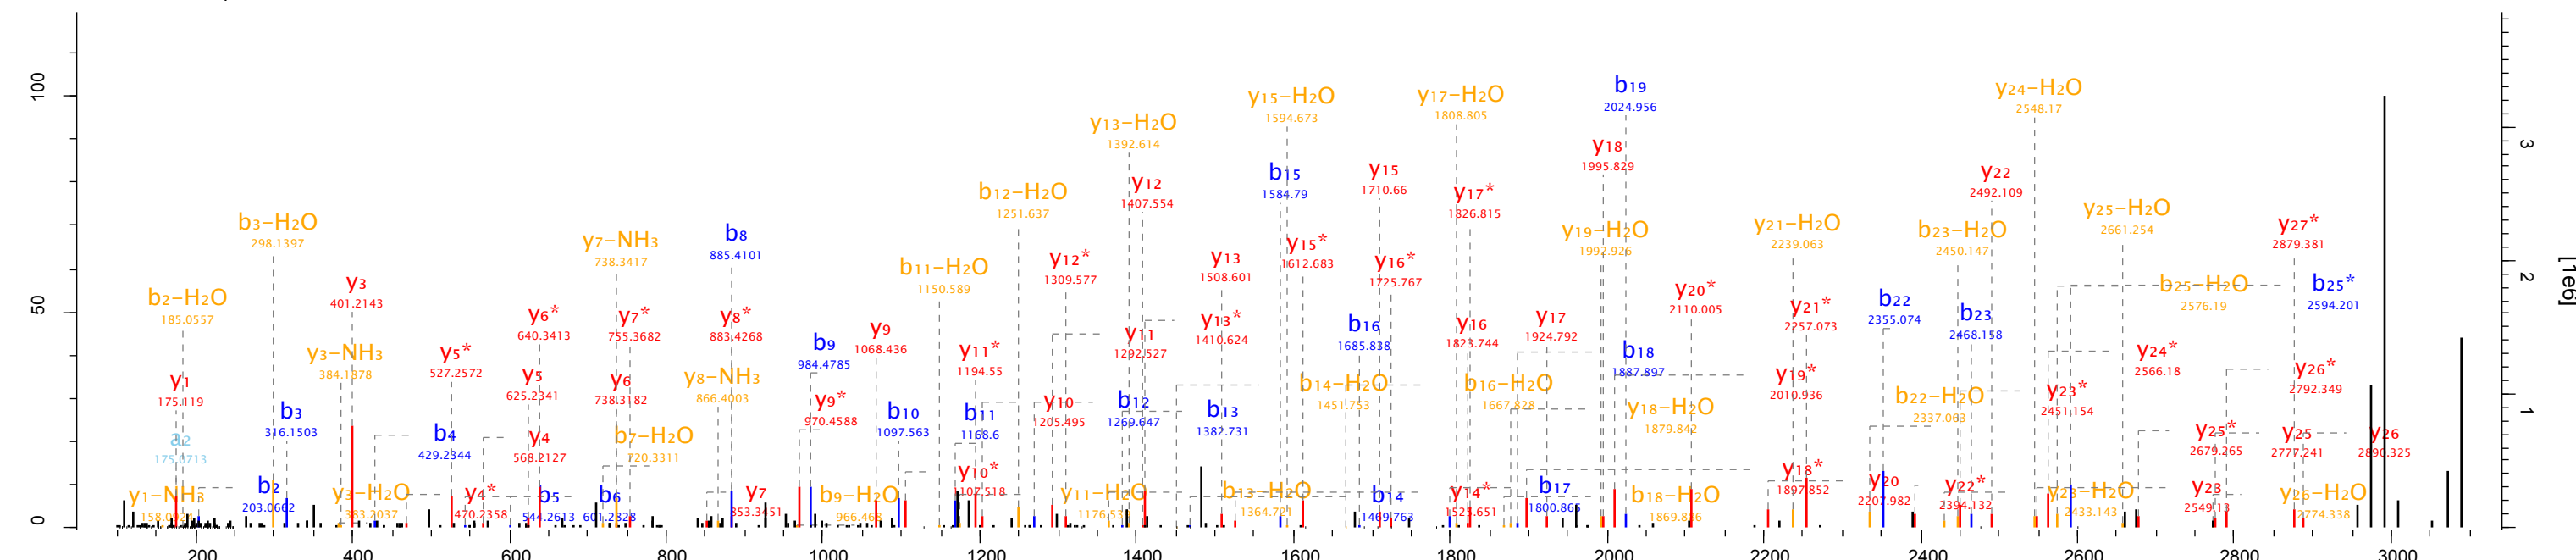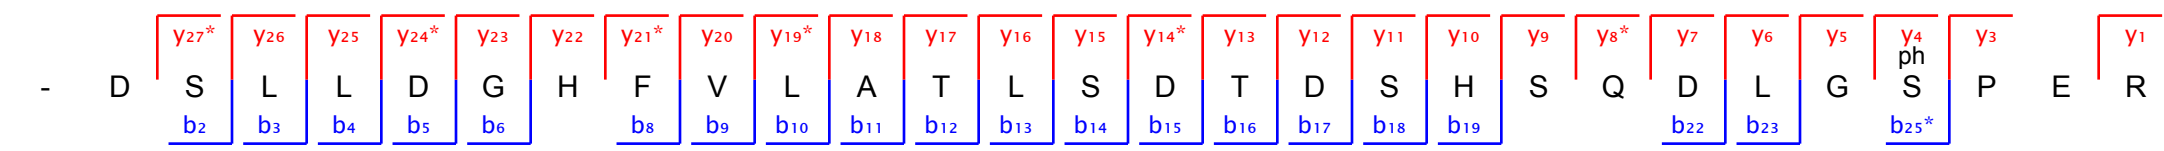

Raw file 20150814\_A375SR\_Phospho\_BR2\_05 Scan 27520 Method FTMS; HCD Score 126.03 m/z 774.03 Gene names GOLGA5

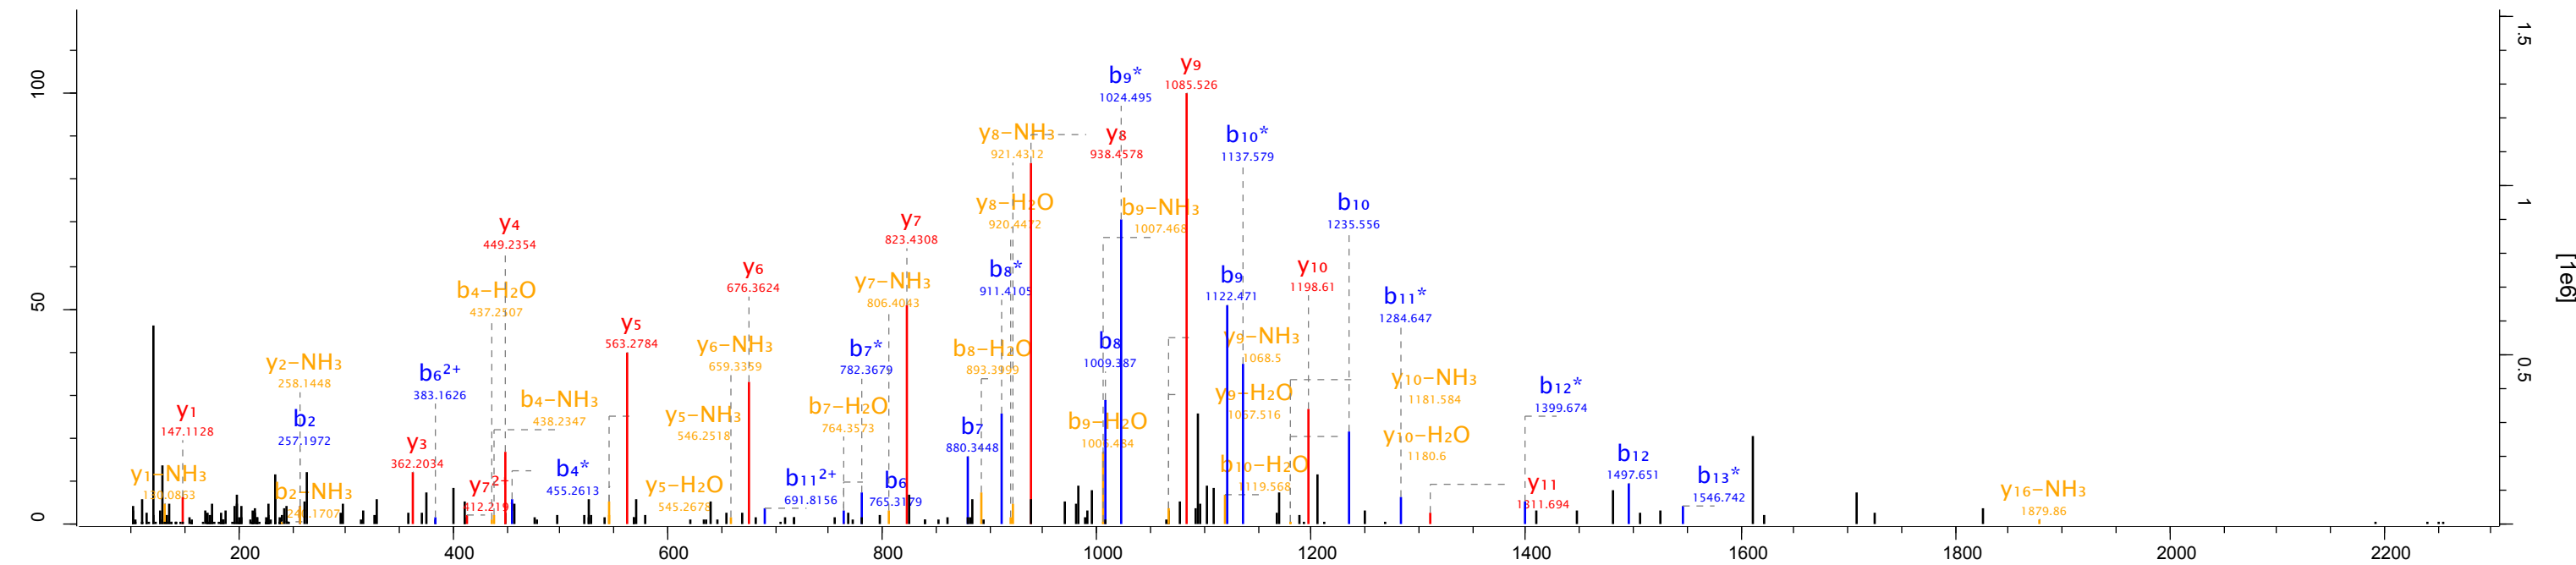

- K K S E P D D E L L F D F L N S S Q K -

ph

b<sub>2</sub> b<sub>4</sub><sup>\*</sup> b<sub>6</sub> b<sub>7</sub> b<sub>8</sub> b<sub>9</sub> b<sub>10</sub> b<sub>11</sub><sup>\*</sup> b<sub>12</sub> b<sub>13</sub><sup>\*</sup> y<sub>11</sub> y<sub>10</sub> y<sub>9</sub> y<sub>8</sub> y<sub>7</sub> y<sub>6</sub> y<sub>5</sub> y<sub>4</sub> y<sub>3</sub> y<sub>1</sub>

Raw file  
 20150814\_A375SR\_Phospho\_BR2\_05  
 Scan 27580 Method FTMS; HCD Score 124.66 m/z 701.33 Gene names NFKB1

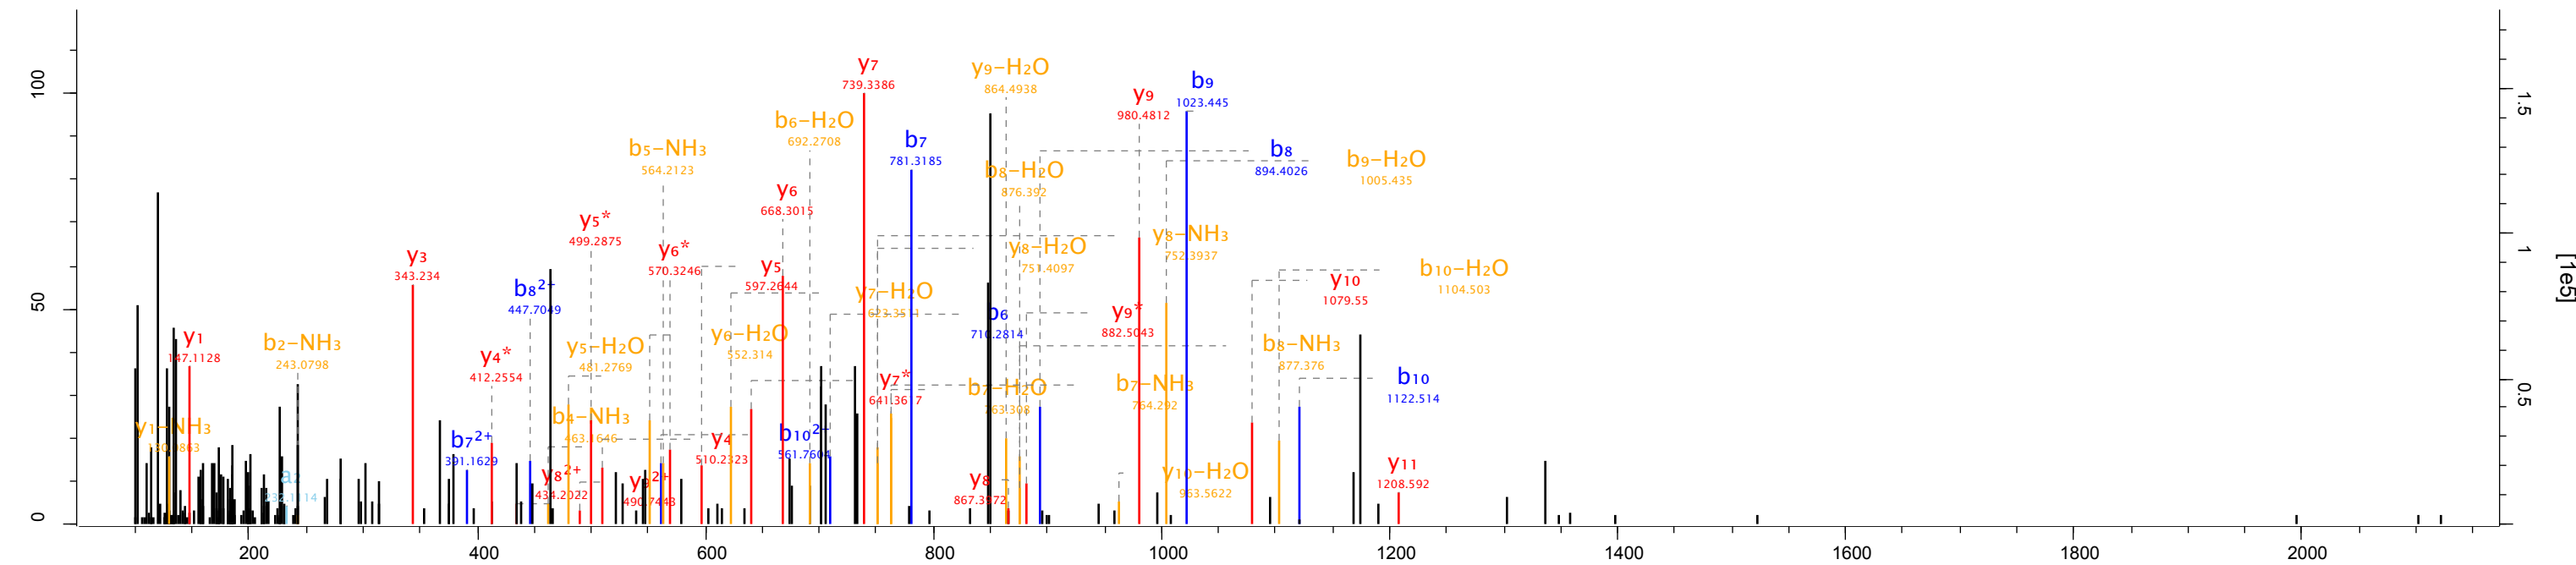

- Q M G Y T E A I E V I Q A A S S P V K -

Fragmentation mapping (b-ions in blue, y-ions in red):

- b2: M
- b6: E
- b7: A
- b8: I
- b9: E
- b10: V
- y1: K
- y3: P
- y4: S
- y5: S
- y6: A
- y7: A
- y8: Q
- y9: I
- y10: V
- y11: E

Raw file 20150814\_A375SR\_Phospho\_BR2\_05 Scan 27900 Method FTMS; HCD Score 136.15 m/z 1035.49 Gene names TDRD3

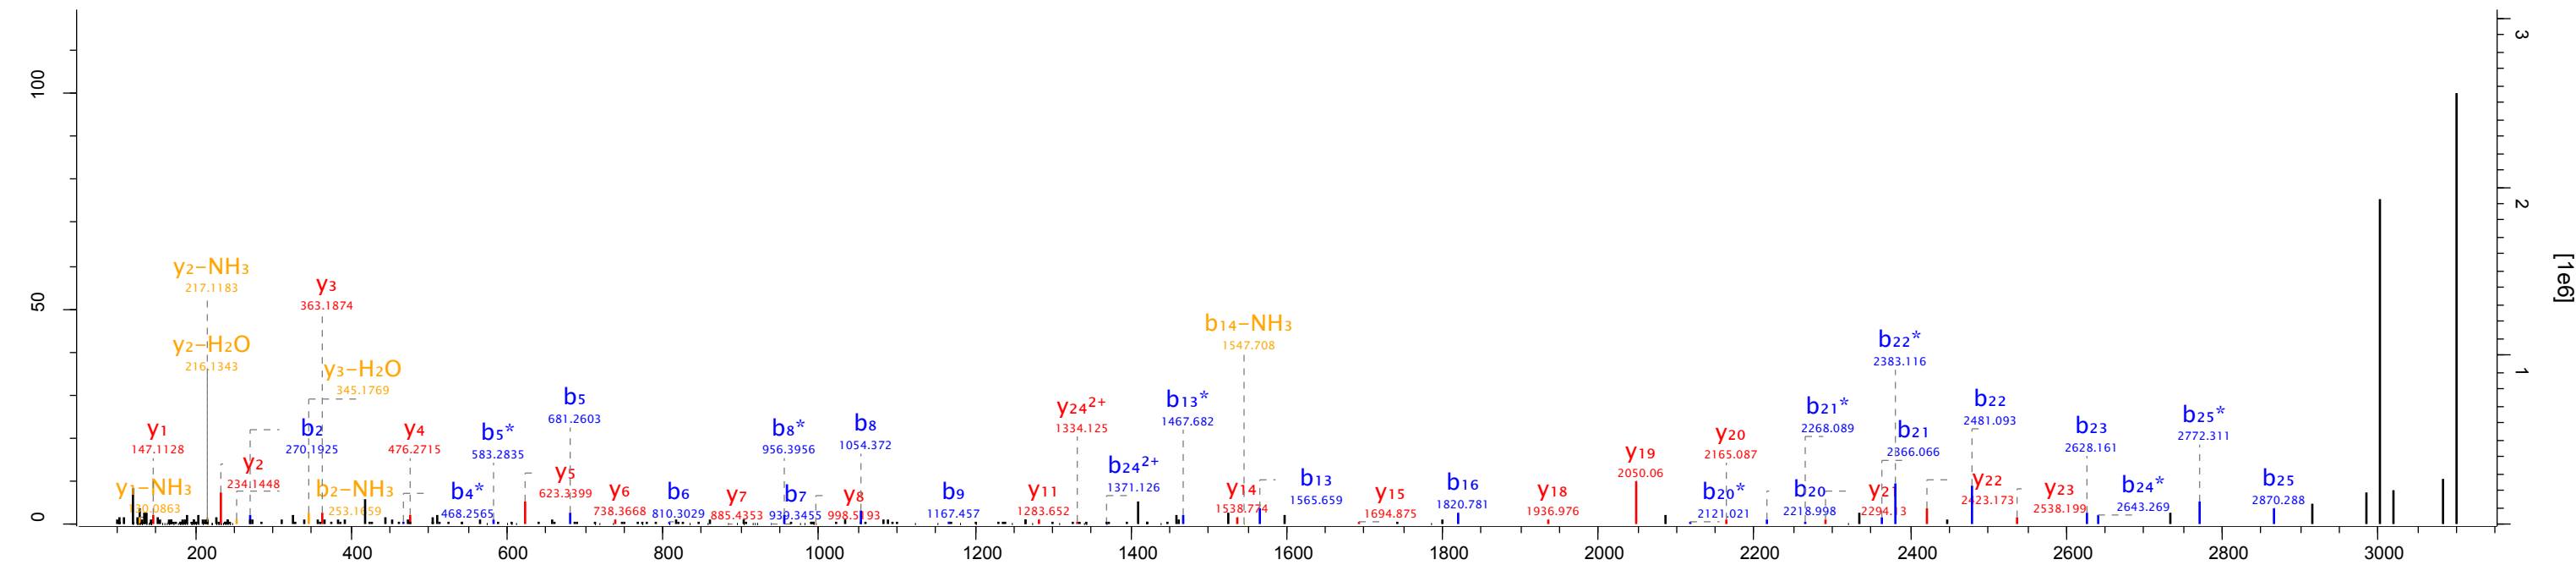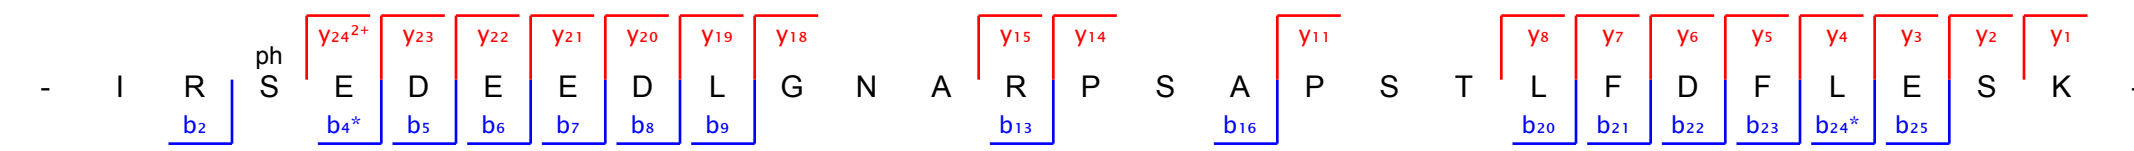

Raw file: 20150814\_A375SR\_Phospho\_BR2\_05  
 Scan: 2800 Method: FTMS; HCD Score: 147.02 m/z: 560.79 Gene names: MAP4

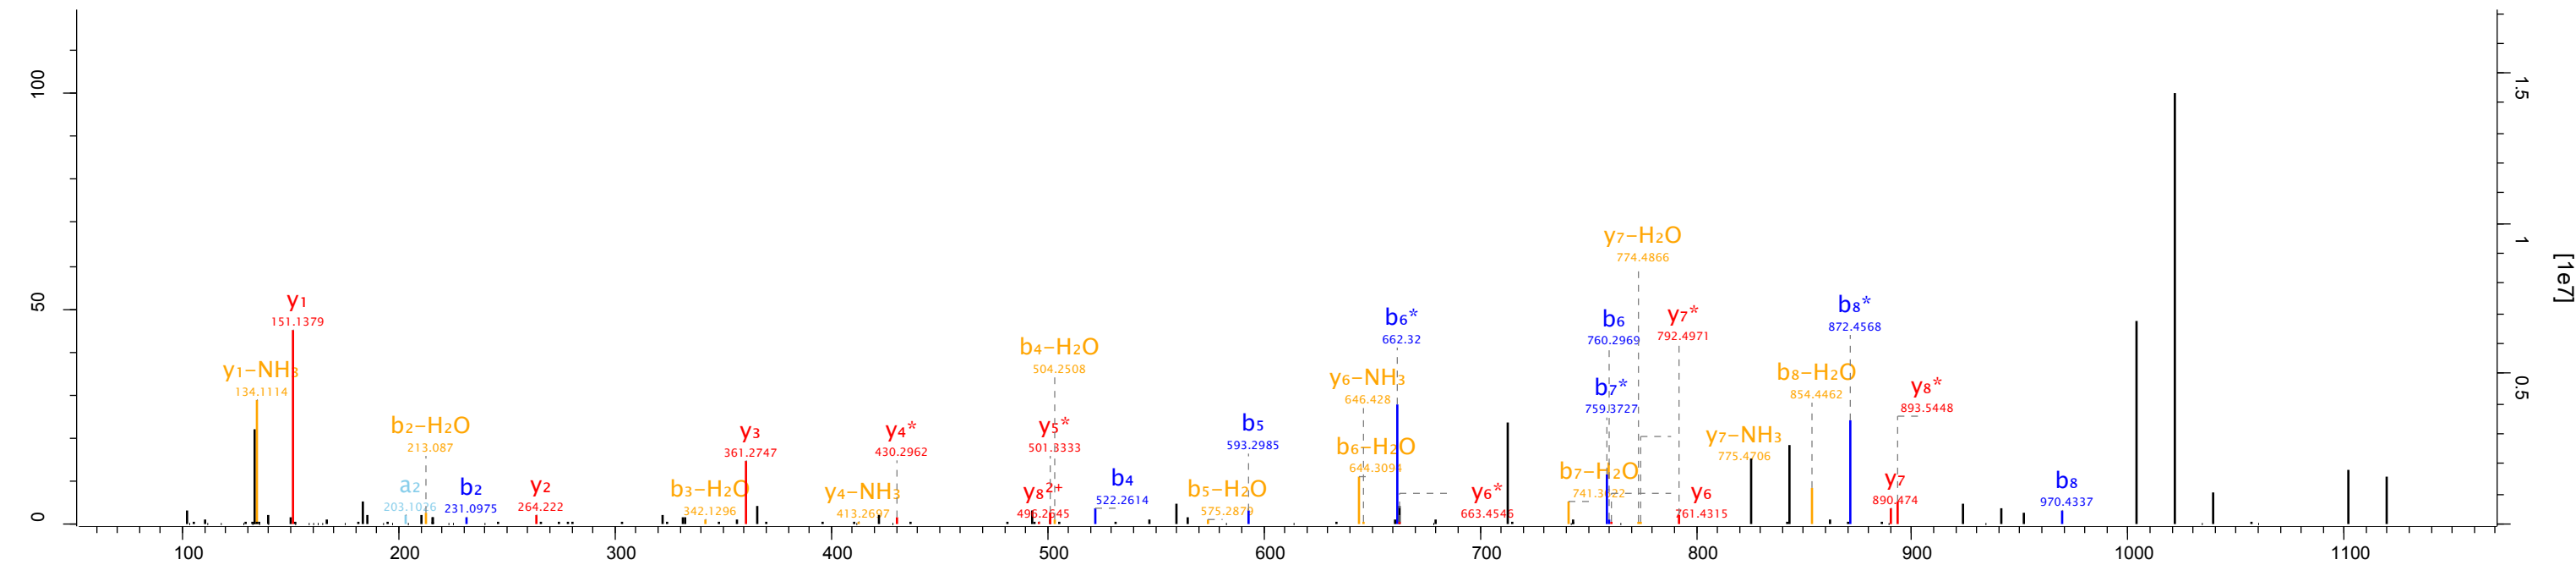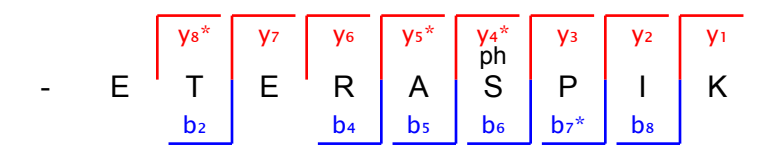



Raw file 20150814\_A375SR\_Phospho\_BR2\_05 Scan 28440 Method FTMS; HCD Score 116.45 m/z 1243.06 Gene names PRKCA;PRKCB;PRKCG

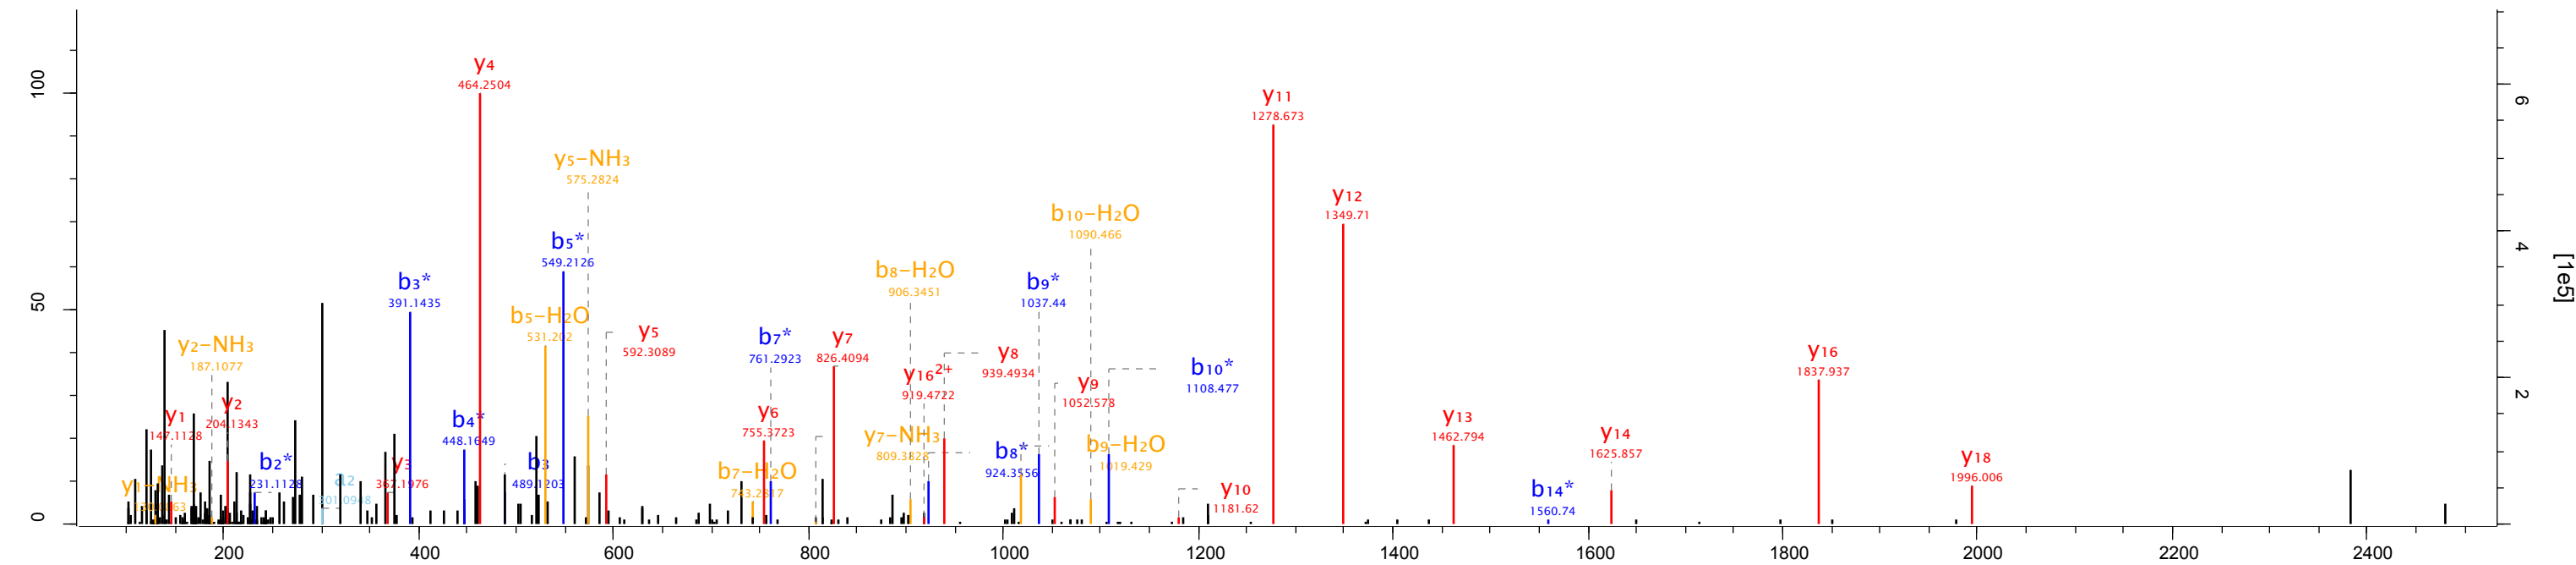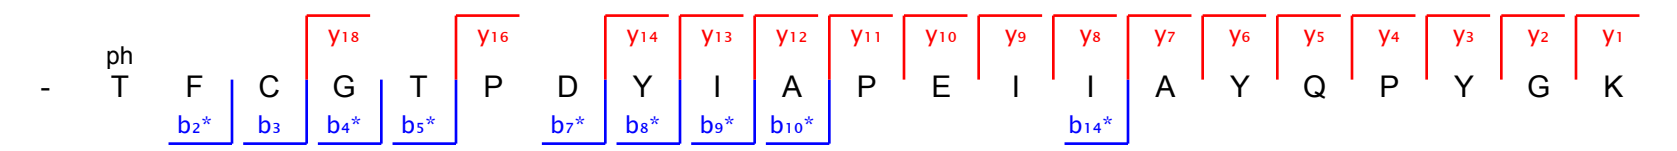

Raw file: 20150814\_A375SR\_Phospho\_BR2\_05  
 Scan: 28500 Method: FTMS; HCD Score: 404.97 m/z: 1481.13 Gene names: CLSPN

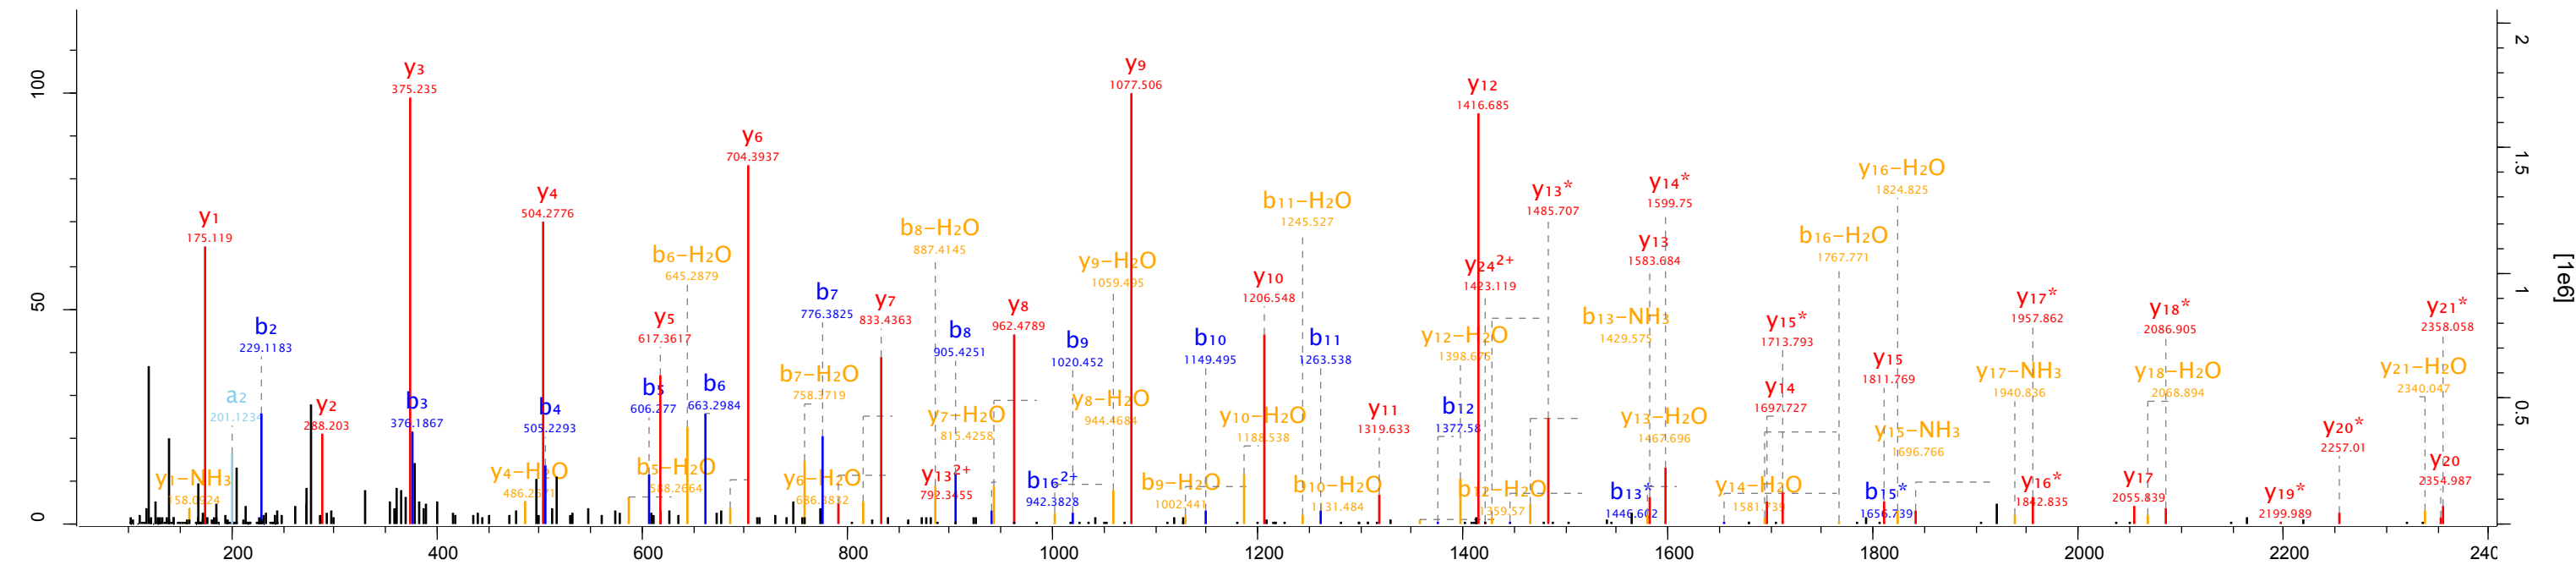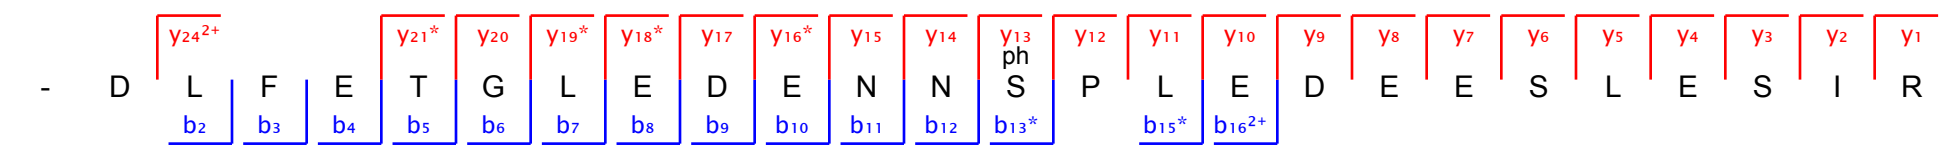

Raw file Scan Method Score m/z Gene names  
 20150814\_A375SR\_Phospho\_BR2\_05 28550 FTMS; HCD 286.82 1215.59 CHTF18

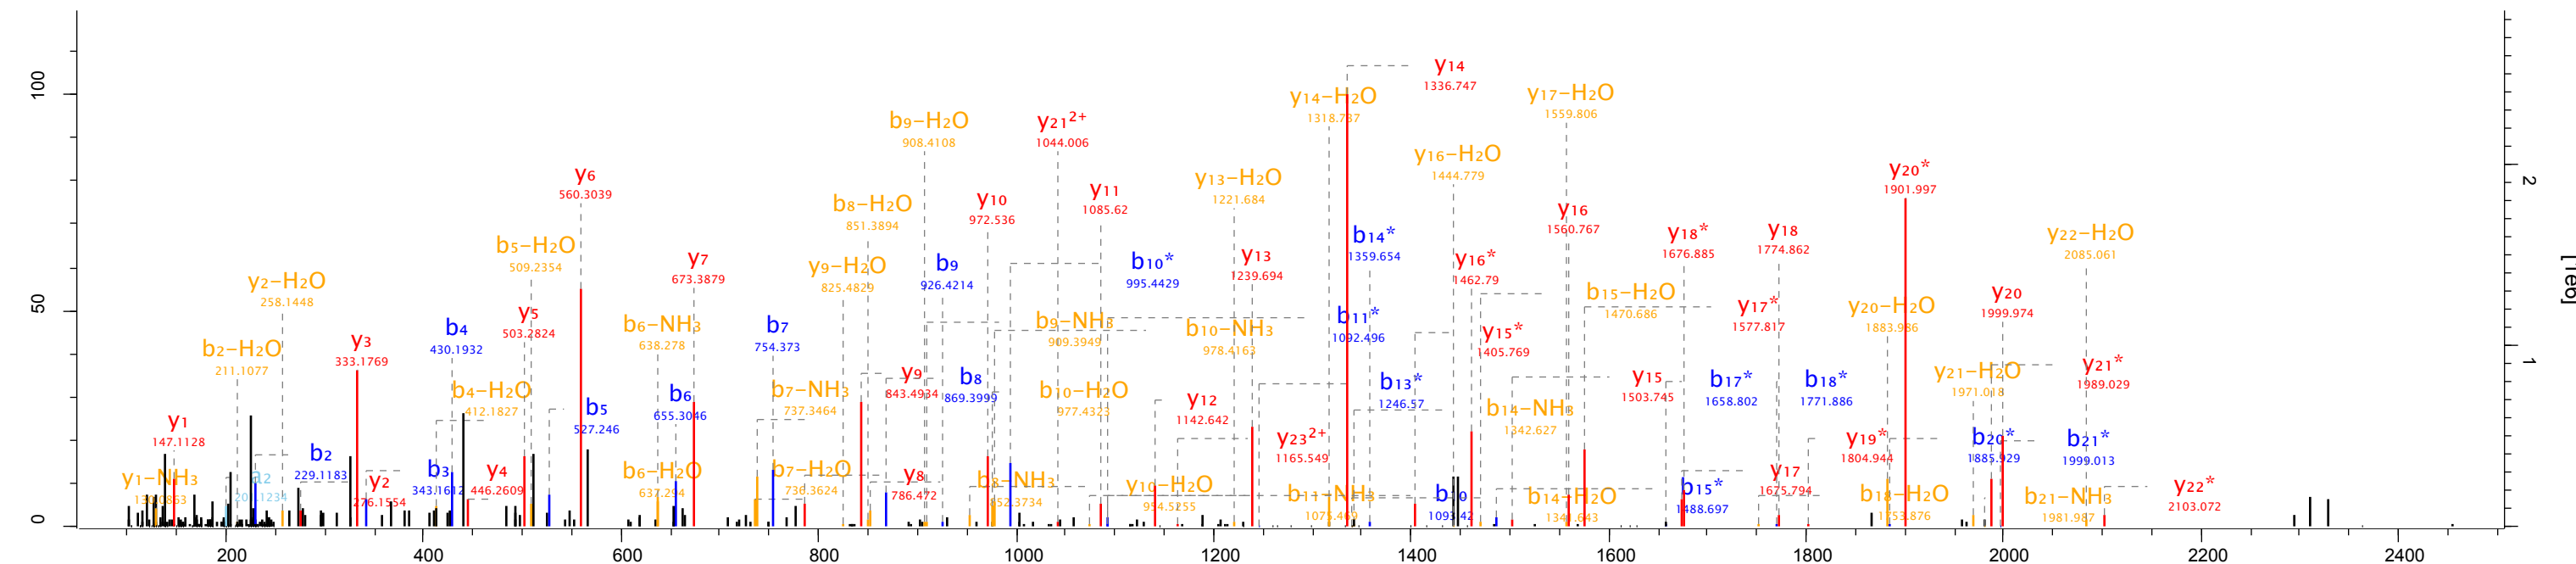

- V E N S P Q V D G S P P G L E G G I G E K -

y<sub>23</sub><sup>2+</sup>
y<sub>22</sub><sup>\*</sup>
y<sub>21</sub><sup>\*</sup>
y<sub>20</sub>
y<sub>19</sub><sup>\*</sup>
y<sub>18</sub>
y<sub>17</sub>
y<sub>16</sub>
y<sub>15</sub><sup>ph</sup>
y<sub>14</sub>
y<sub>13</sub>
y<sub>12</sub>
y<sub>11</sub>
y<sub>10</sub>
y<sub>9</sub>
y<sub>8</sub>
y<sub>7</sub>
y<sub>6</sub>
y<sub>5</sub>
y<sub>4</sub>
y<sub>3</sub>
y<sub>2</sub>
y<sub>1</sub>

b<sub>2</sub>
b<sub>3</sub>
b<sub>4</sub>
b<sub>5</sub>
b<sub>6</sub>
b<sub>7</sub>
b<sub>8</sub>
b<sub>9</sub>
b<sub>10</sub>
b<sub>11</sub><sup>\*</sup>
b<sub>13</sub><sup>\*</sup>
b<sub>14</sub><sup>\*</sup>
b<sub>15</sub><sup>\*</sup>
b<sub>17</sub><sup>\*</sup>
b<sub>18</sub><sup>\*</sup>
b<sub>20</sub><sup>\*</sup>
b<sub>21</sub><sup>\*</sup>

Raw file: 20150814\_A375SR\_Phospho\_BR2\_05  
 Scan: 28590 Method: FTMS; HCD Score: 213.05 m/z: 1333.09 Gene names: PPFIBP1

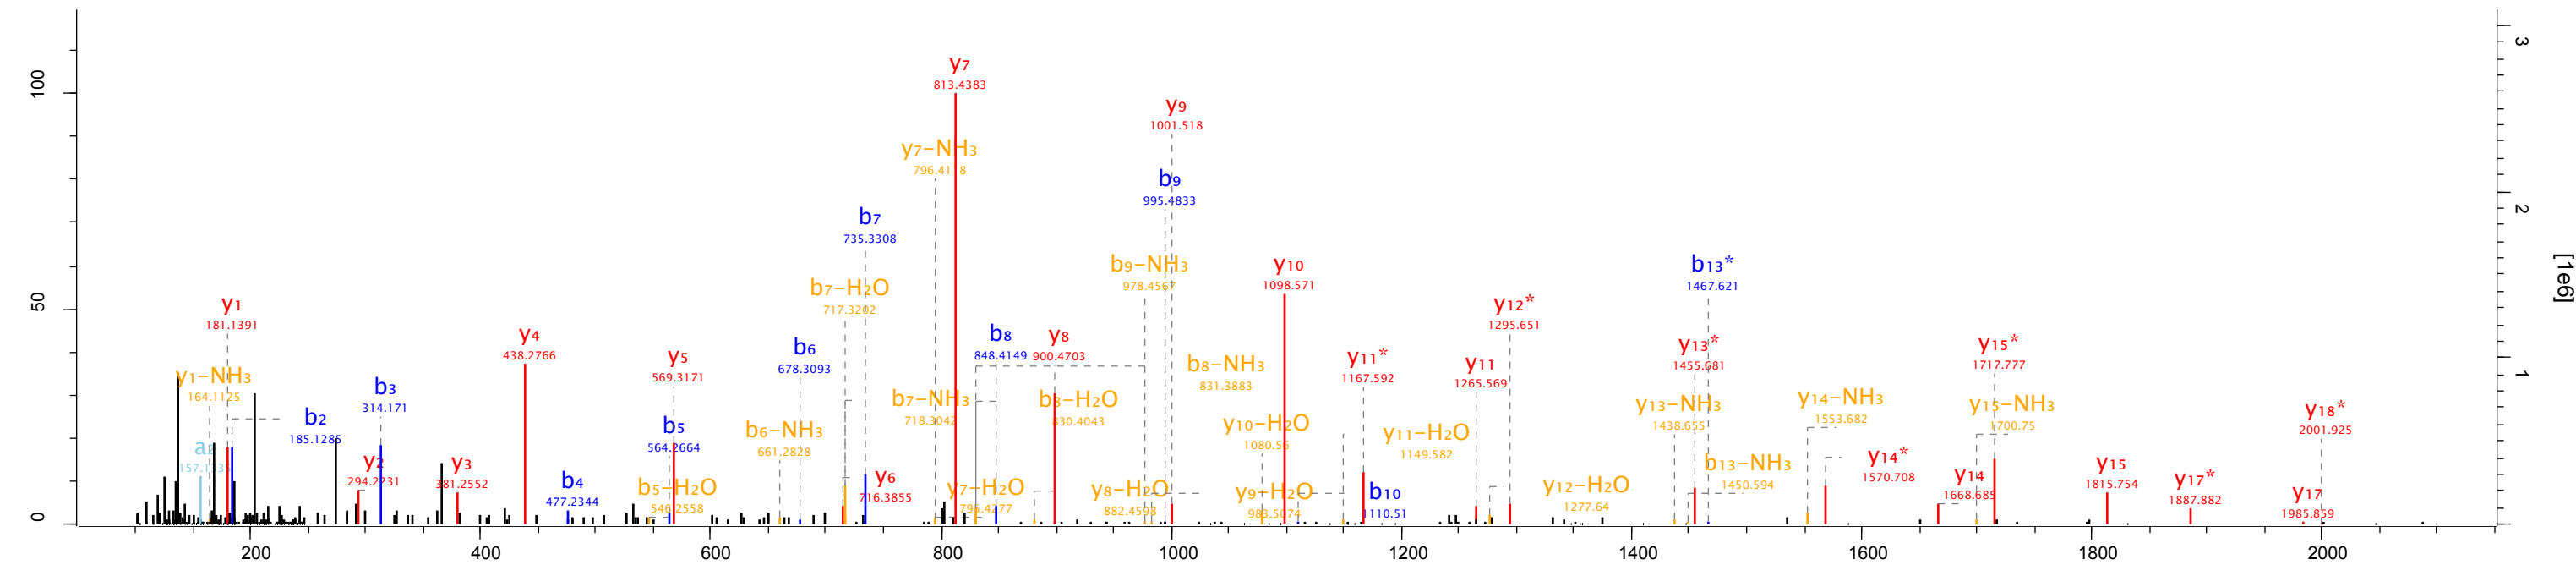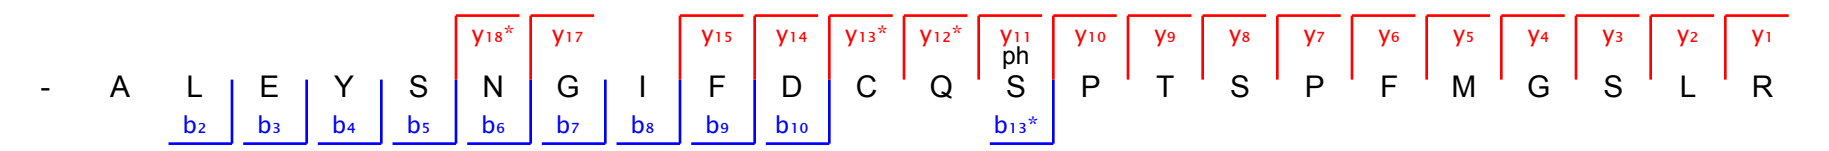

Raw file  
20150814\_A375SR\_Phospho\_BR2\_05

Scan 28660 Method FTMS; HCD Score 235.68 m/z 846.41 Gene names CASP4

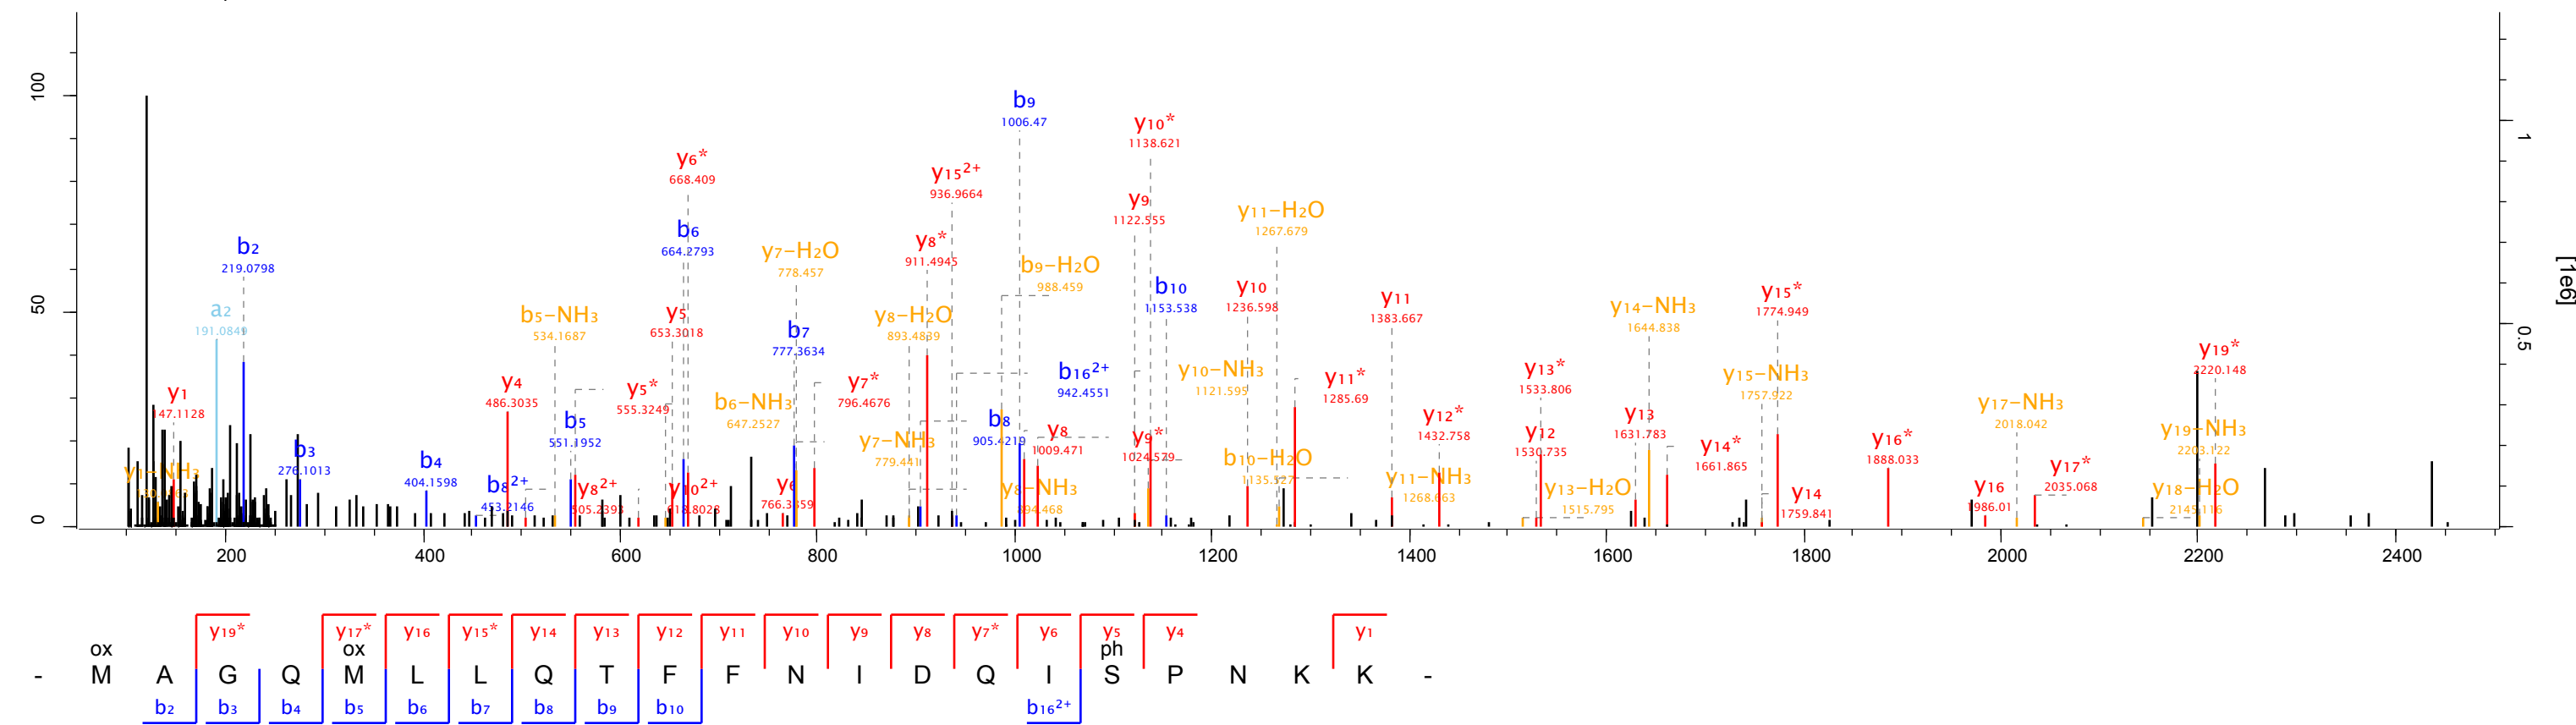

Raw file  
20150814\_A375SR\_Phospho\_BR2\_05

Scan 28710 Method FTMS; HCD Score 17.84 m/z 836.95 Gene names RPS7

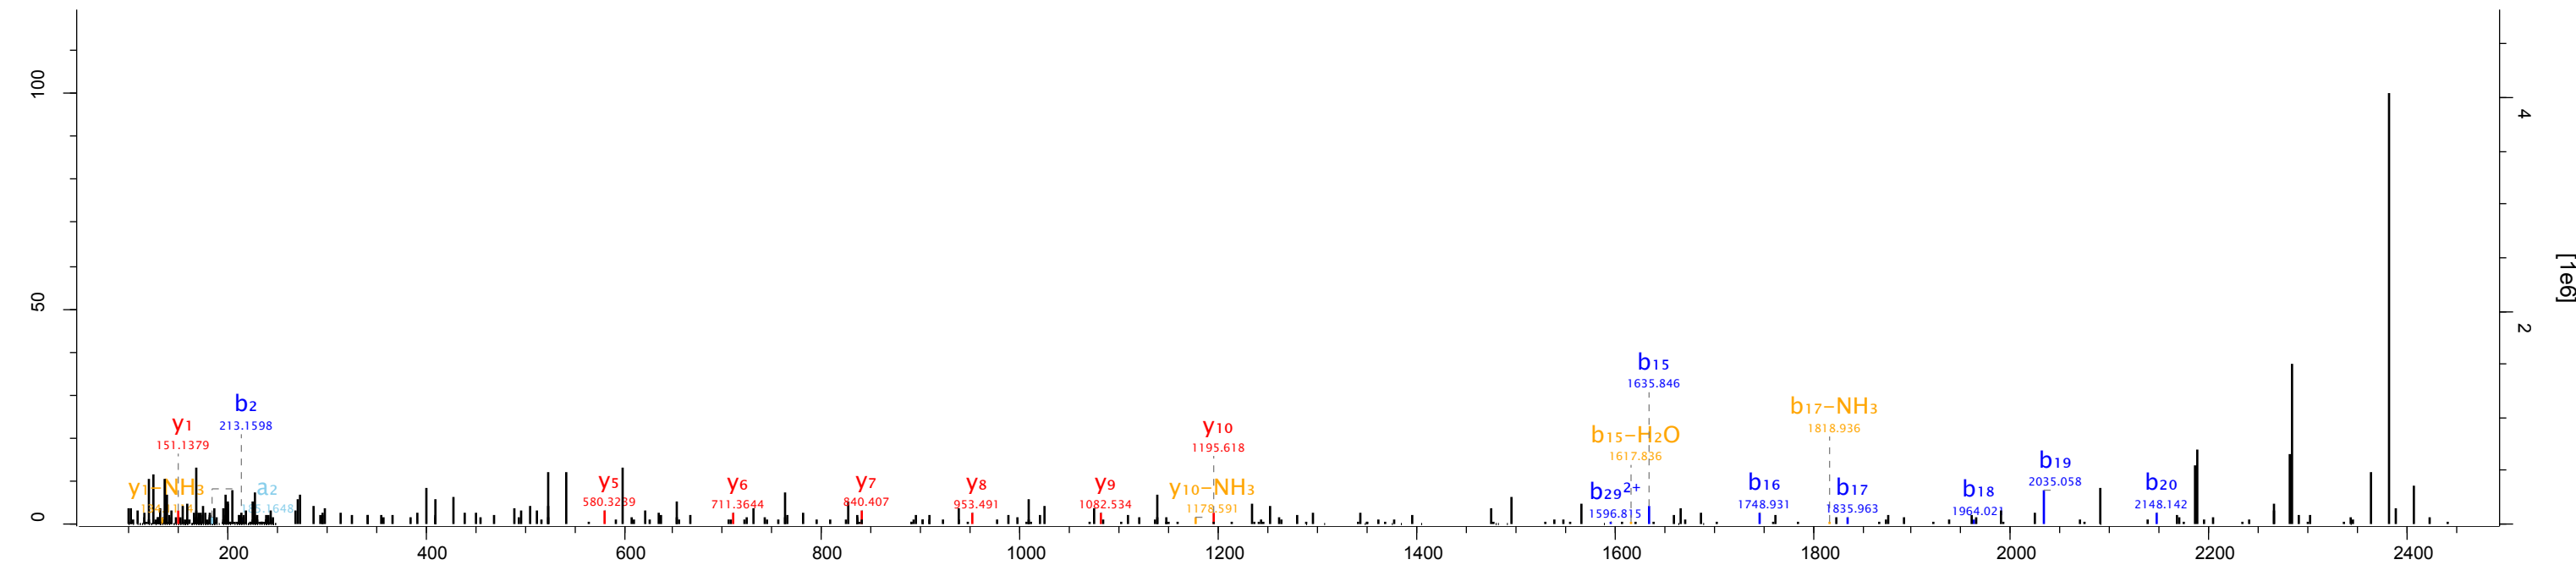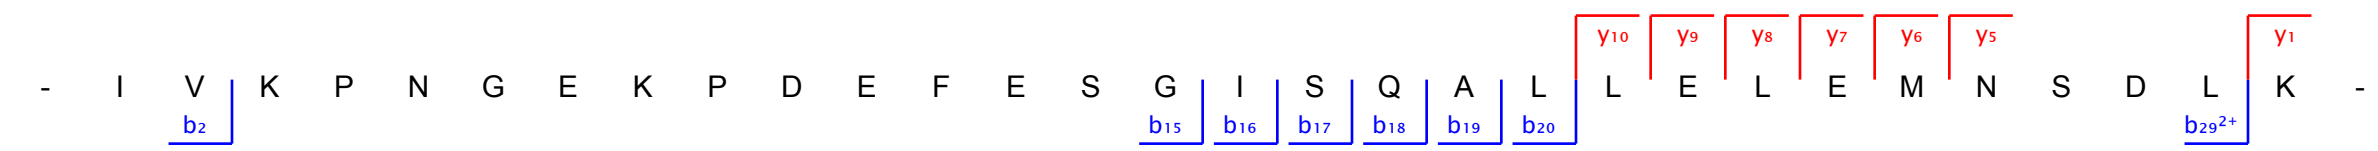

Raw file 20150814\_A375SR\_Phospho\_BR2\_05 Scan 28720 Method FTMS; HCD Score 113.17 m/z 1109.88 Gene names FERMT1

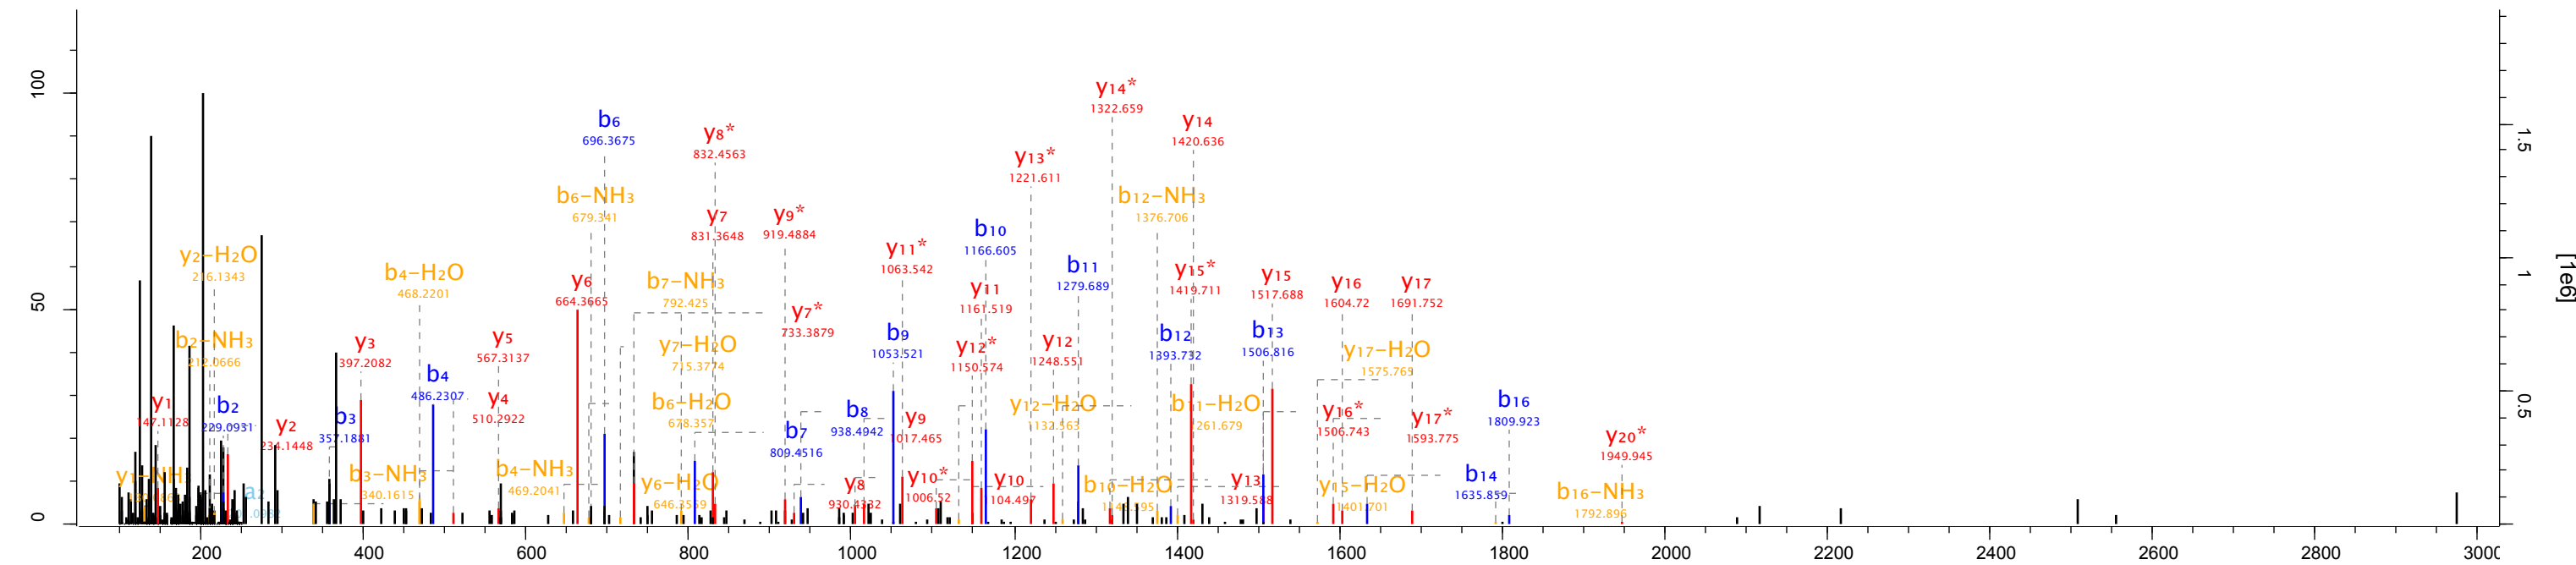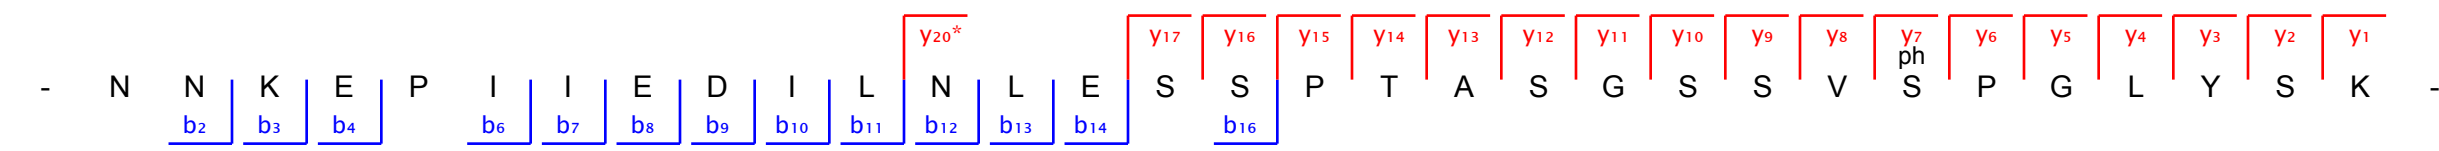

Raw file 20150814\_A375SR\_Phospho\_BR2\_05 Scan 28960 Method FTMS; HCD Score 66.94 m/z 589.29 Gene names PSME3

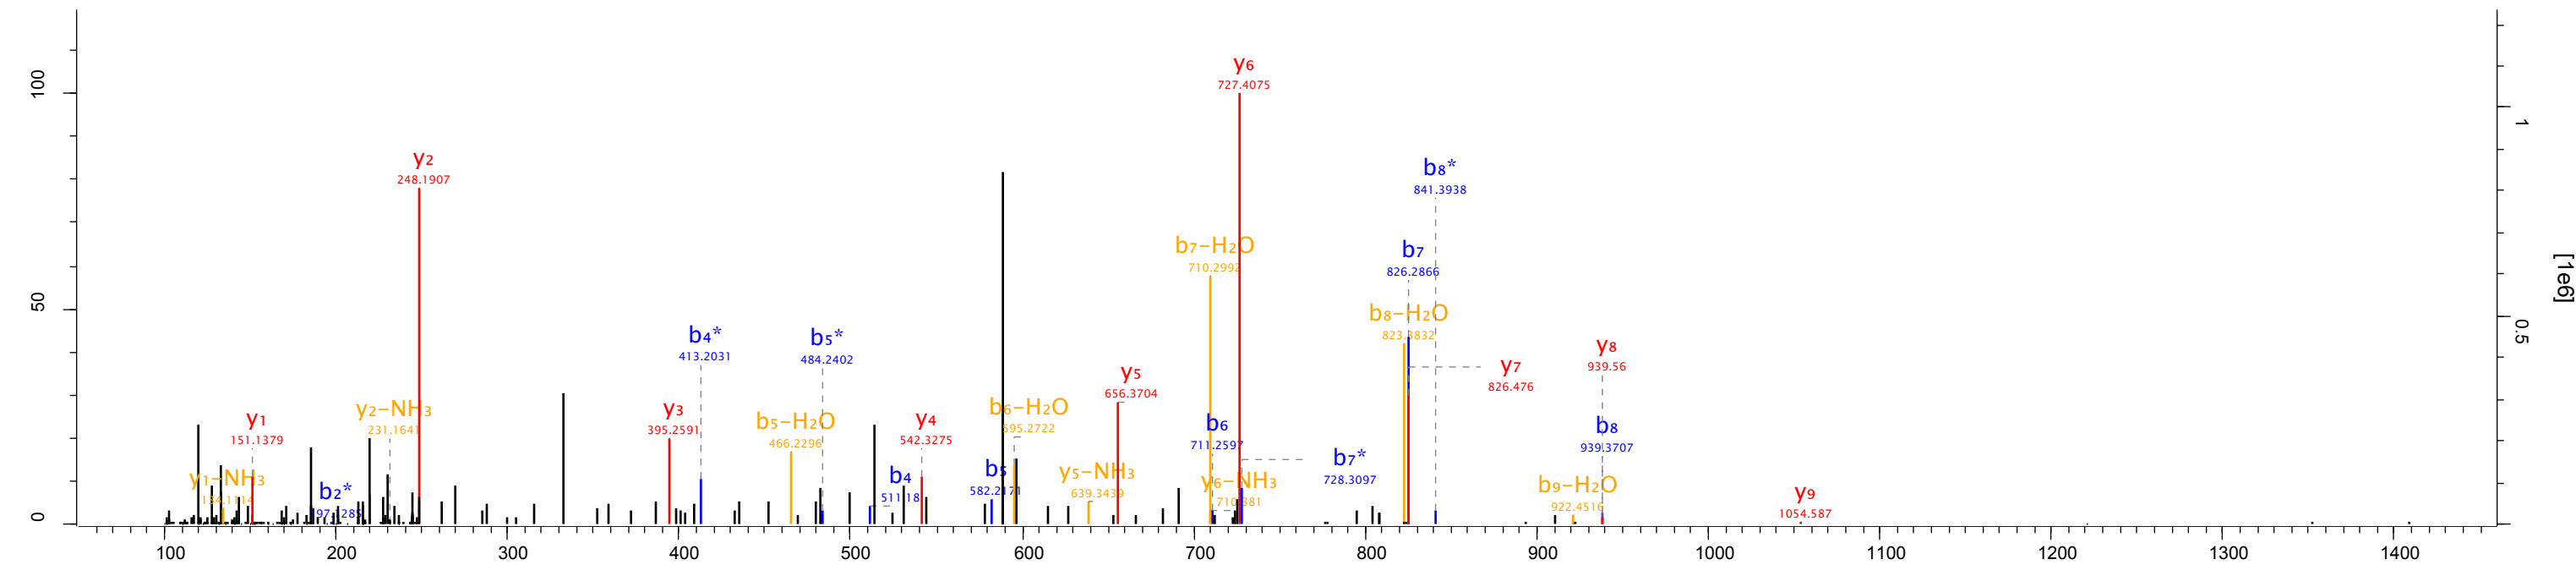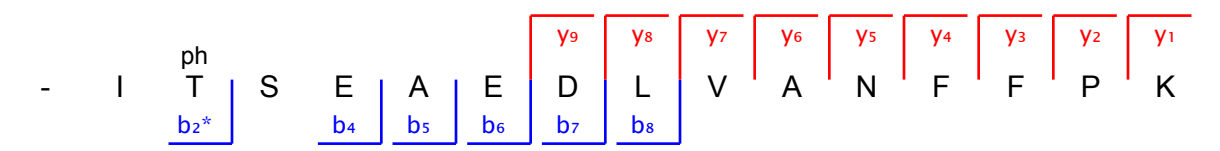



Raw file: 20150814\_A375SR\_Phospho\_BR2\_05  
 Scan: 2980 Method: FTMS; HCD Score: 150.33 m/z: 524.76 Gene names: ZNF318

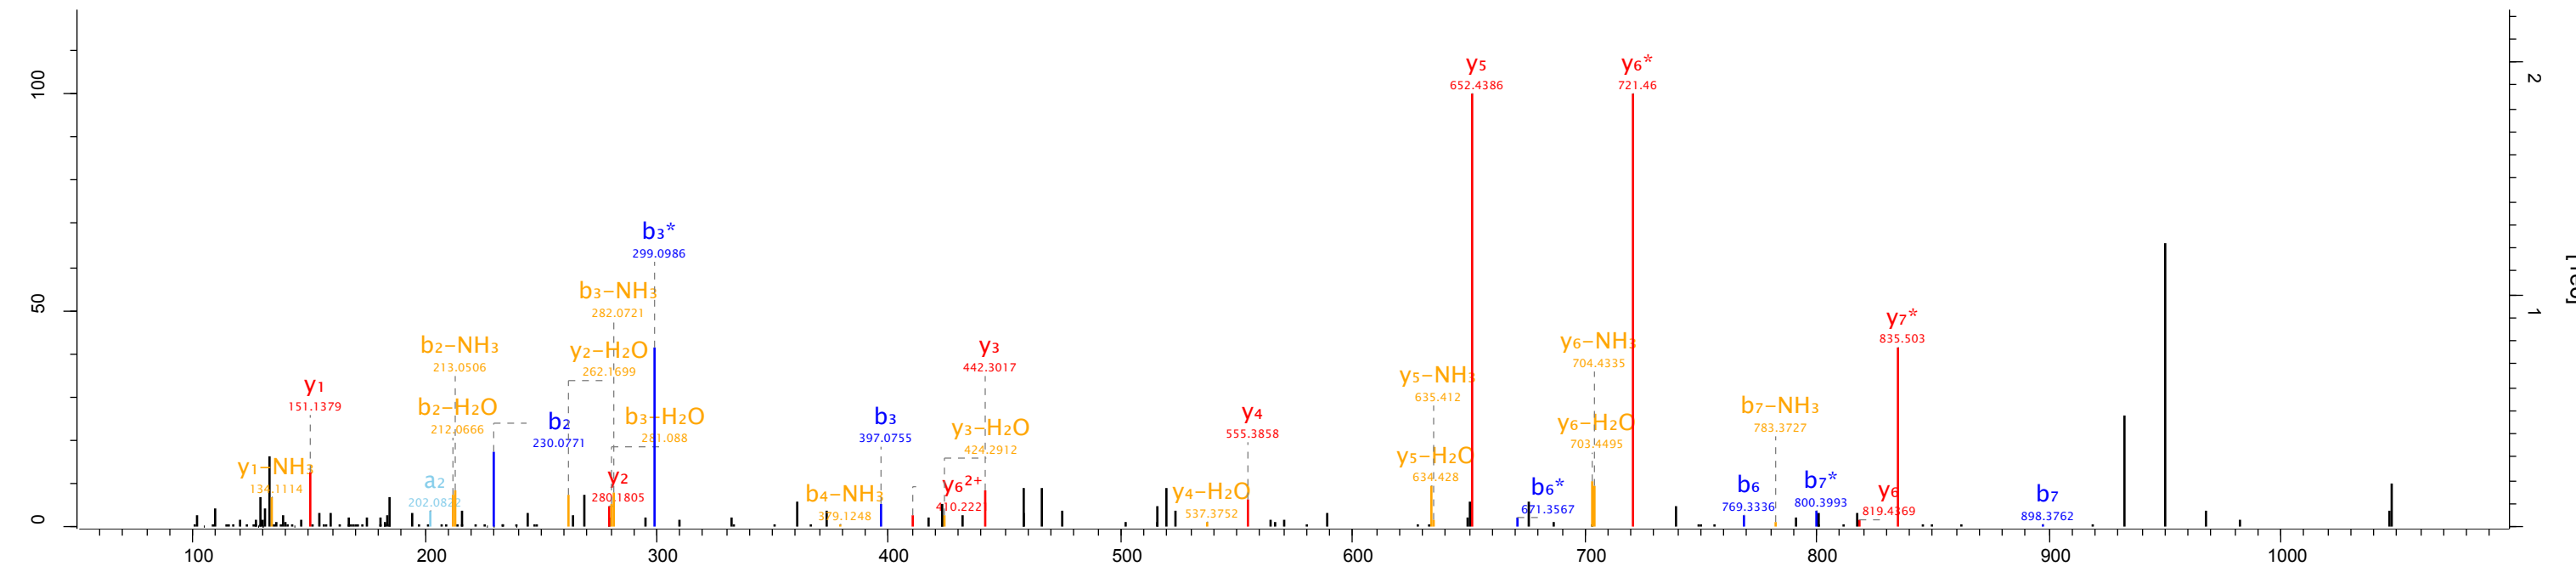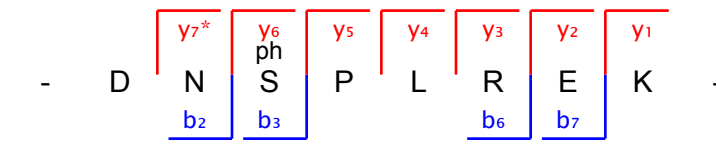

Raw file: 20150814\_A375SR\_Phospho\_BR2\_05  
 Scan: 3860 Method: FTMS; HCD Score: 73.28 m/z: 480.23 Gene names: SRSF4

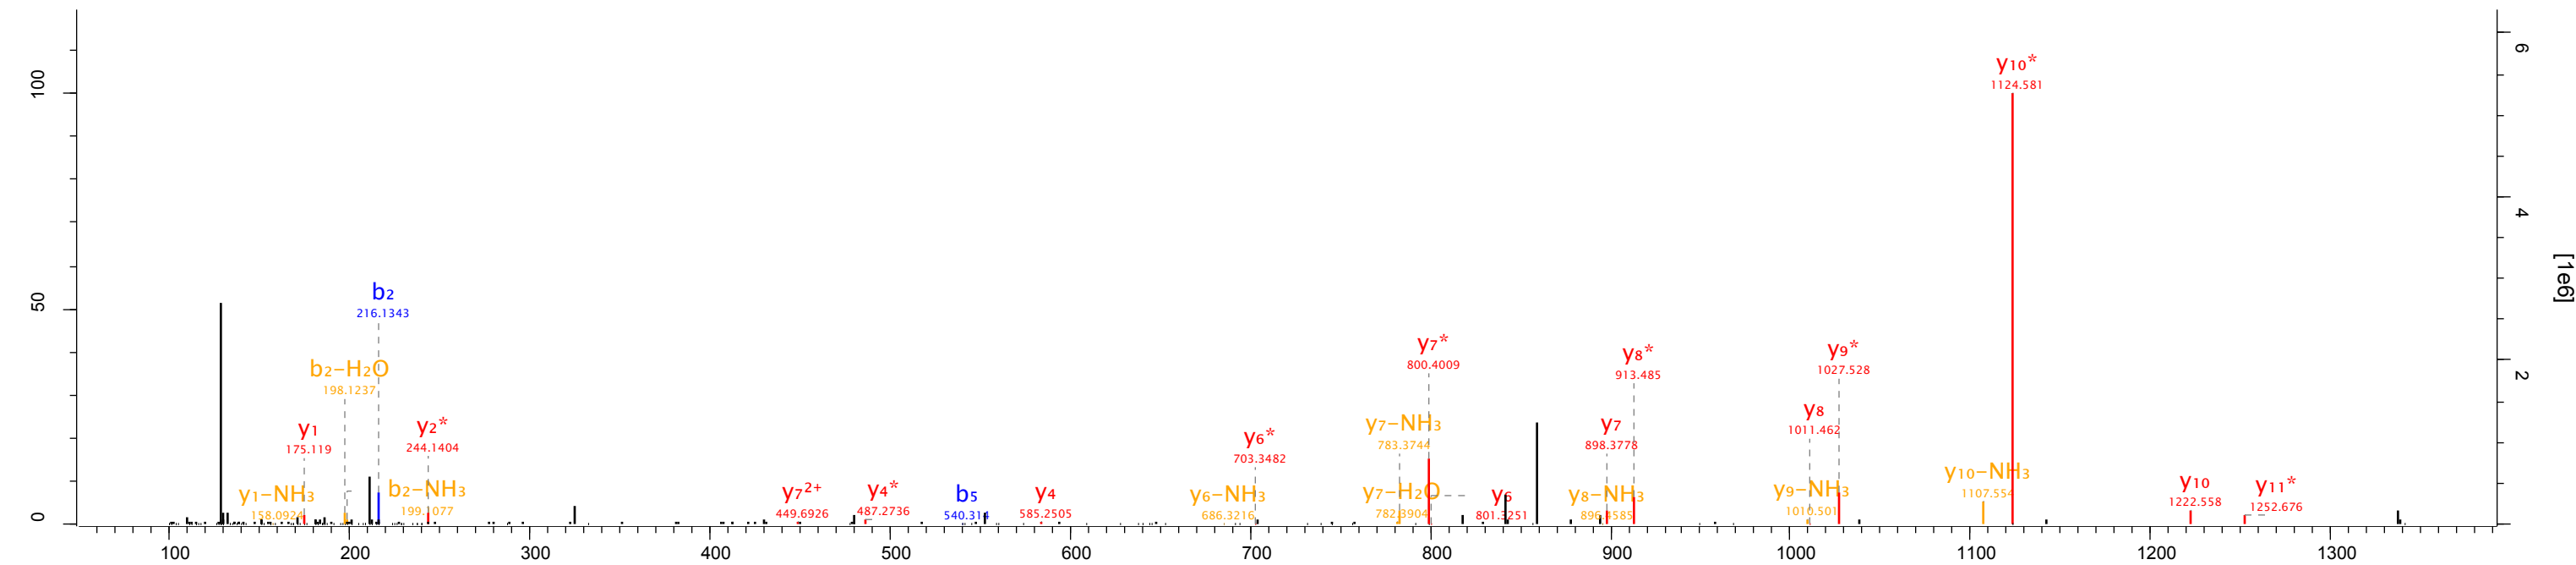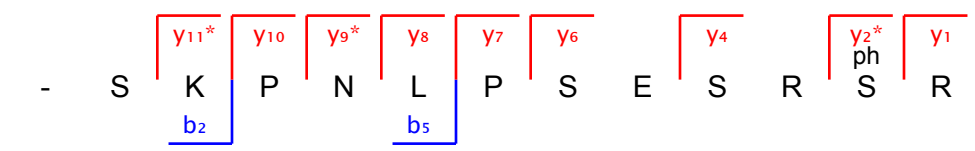

Raw file: 20150814\_A375SR\_Phospho\_BR2\_05  
 Scan: 4060 Method: FTMS; HCD Score: 107.12 m/z: 526.77 Gene names: EIF3A

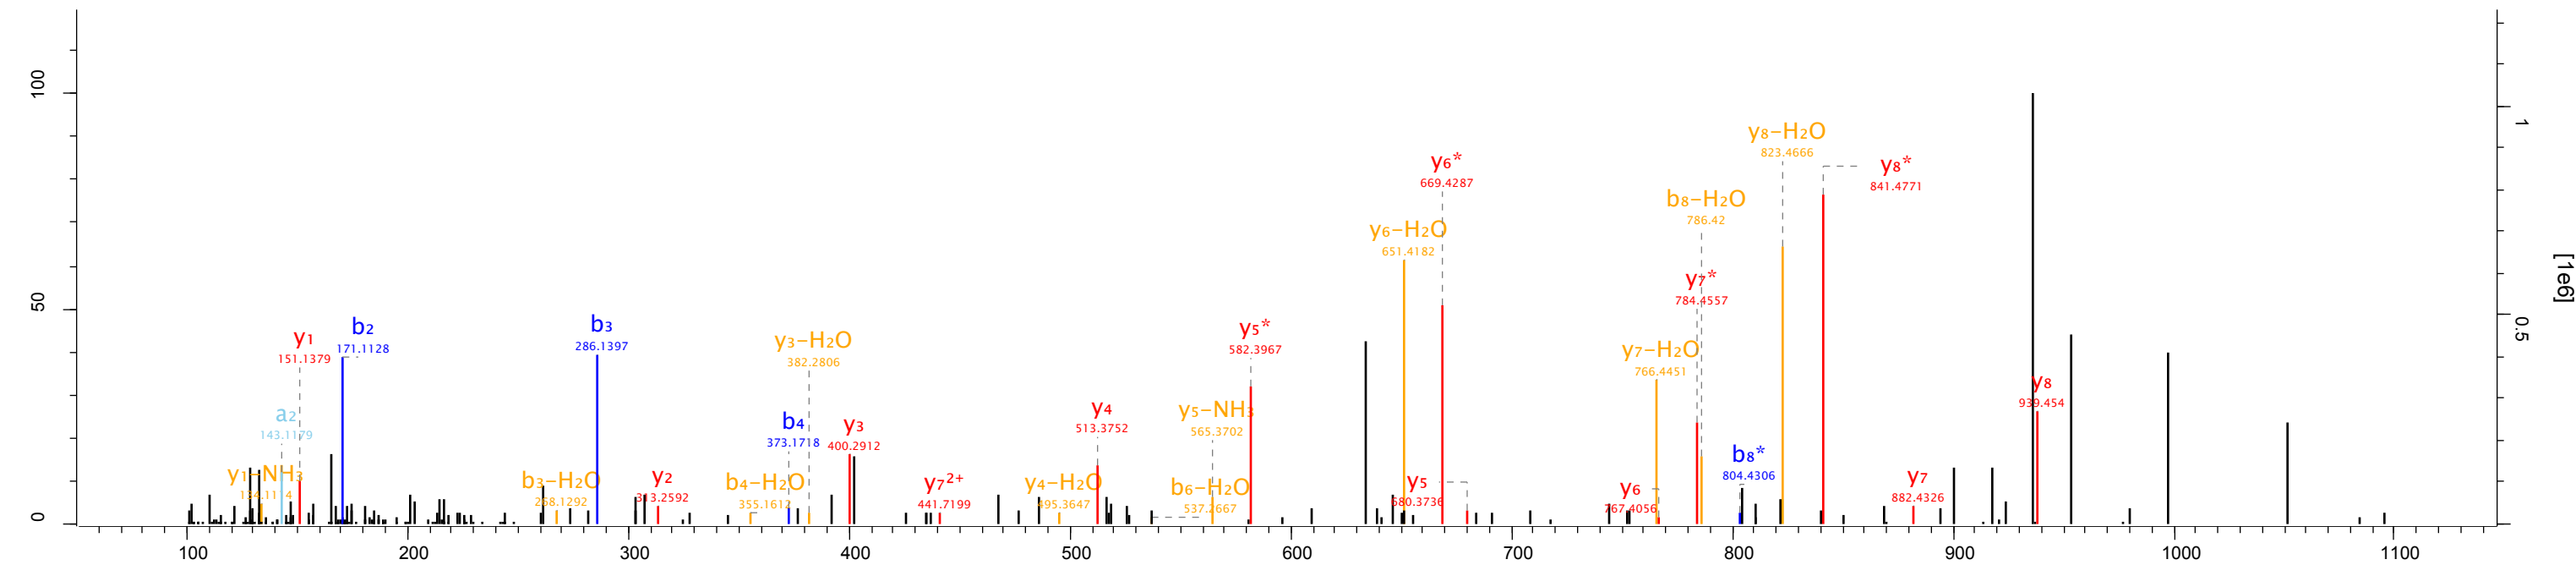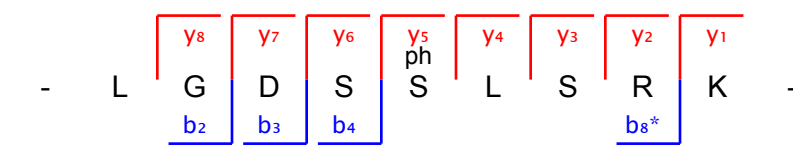

Raw file: 20150814\_A375SR\_Phospho\_BR2\_05  
 Scan: 4730 Method: FTMS; HCD Score: 86.8 m/z: 555.76 Gene names: STK10

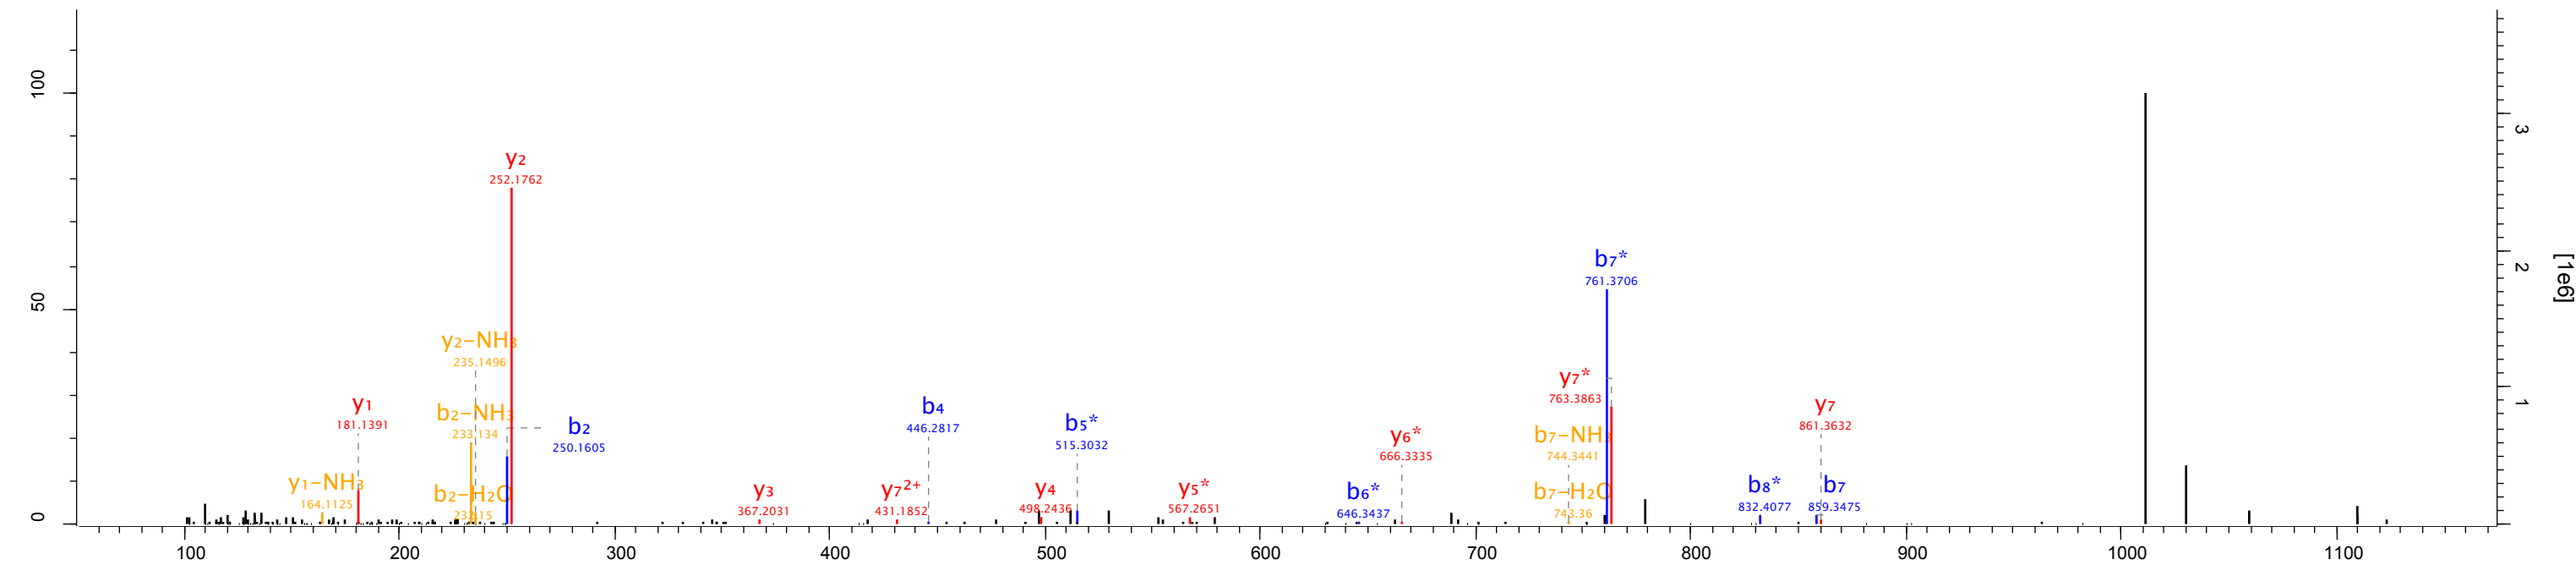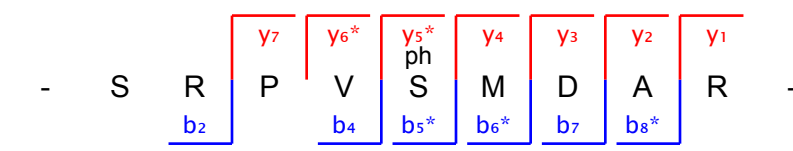

Raw file: 20150814\_A375SR\_Phospho\_BR2\_05  
 Scan: 5590 Method: FTMS; HCD Score: 86.5 m/z: 573.75 Gene names: ERCC5;BIVM-ERCC5

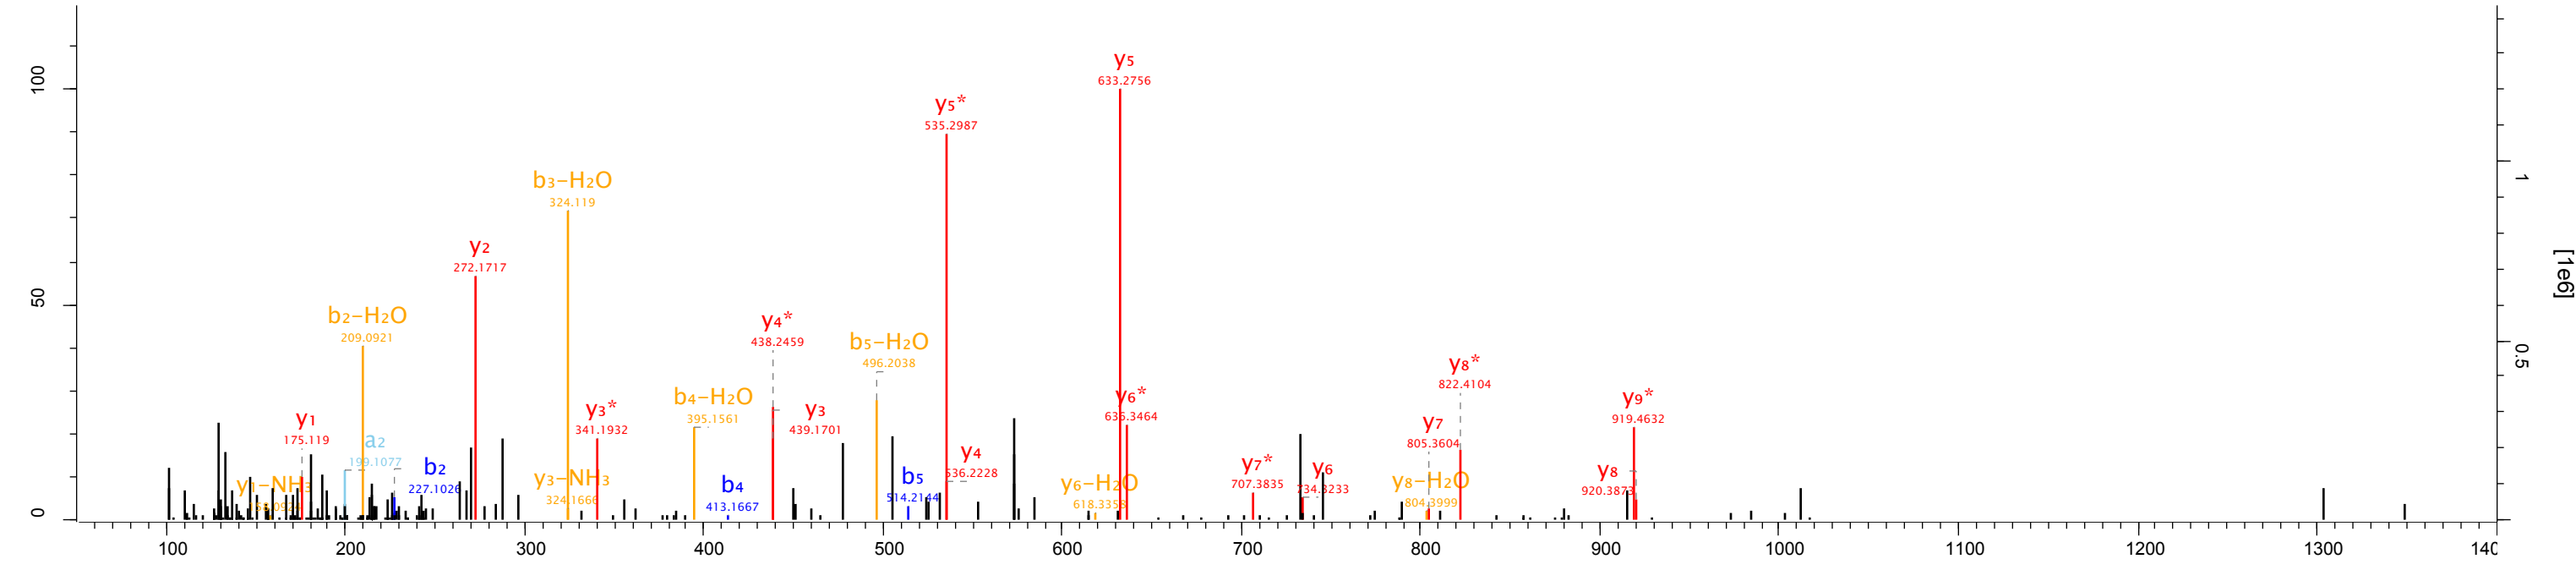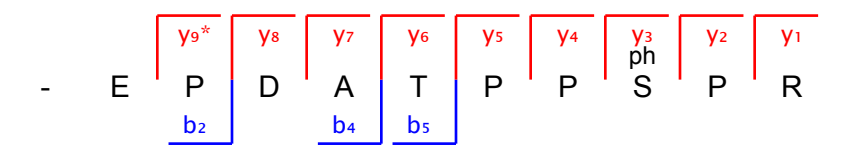

Raw file: 20150814\_A375SR\_Phospho\_BR2\_05  
 Scan: 5720 Method: FTMS; HCD Score: 75.02 m/z: 544.59 Gene names: CHAF1B

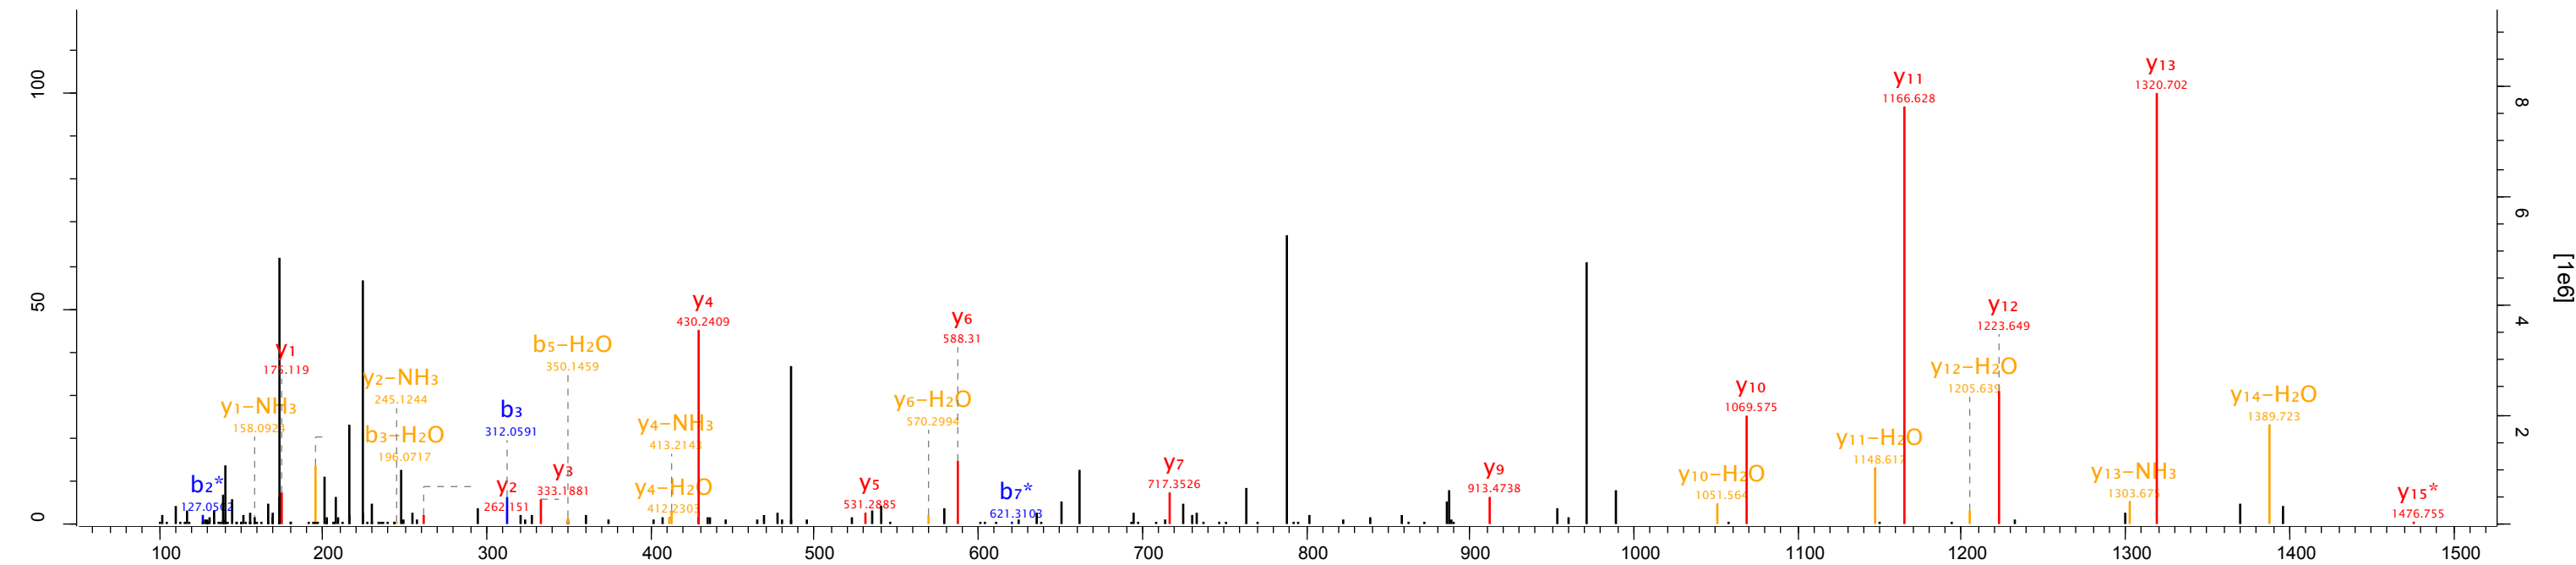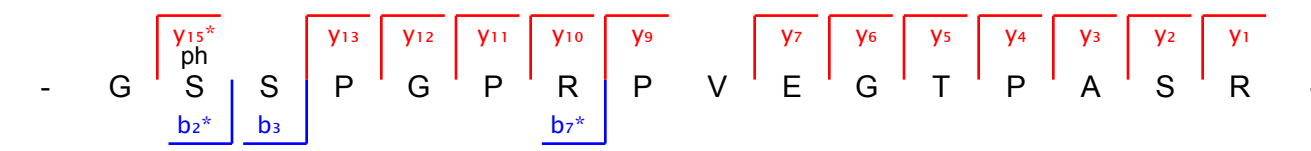

Raw file: 20150814\_A375SR\_Phospho\_BR2\_05  
 Scan: 6160 Method: FTMS; HCD Score: 219.03 m/z: 732.8 Gene names: KHDRBS1

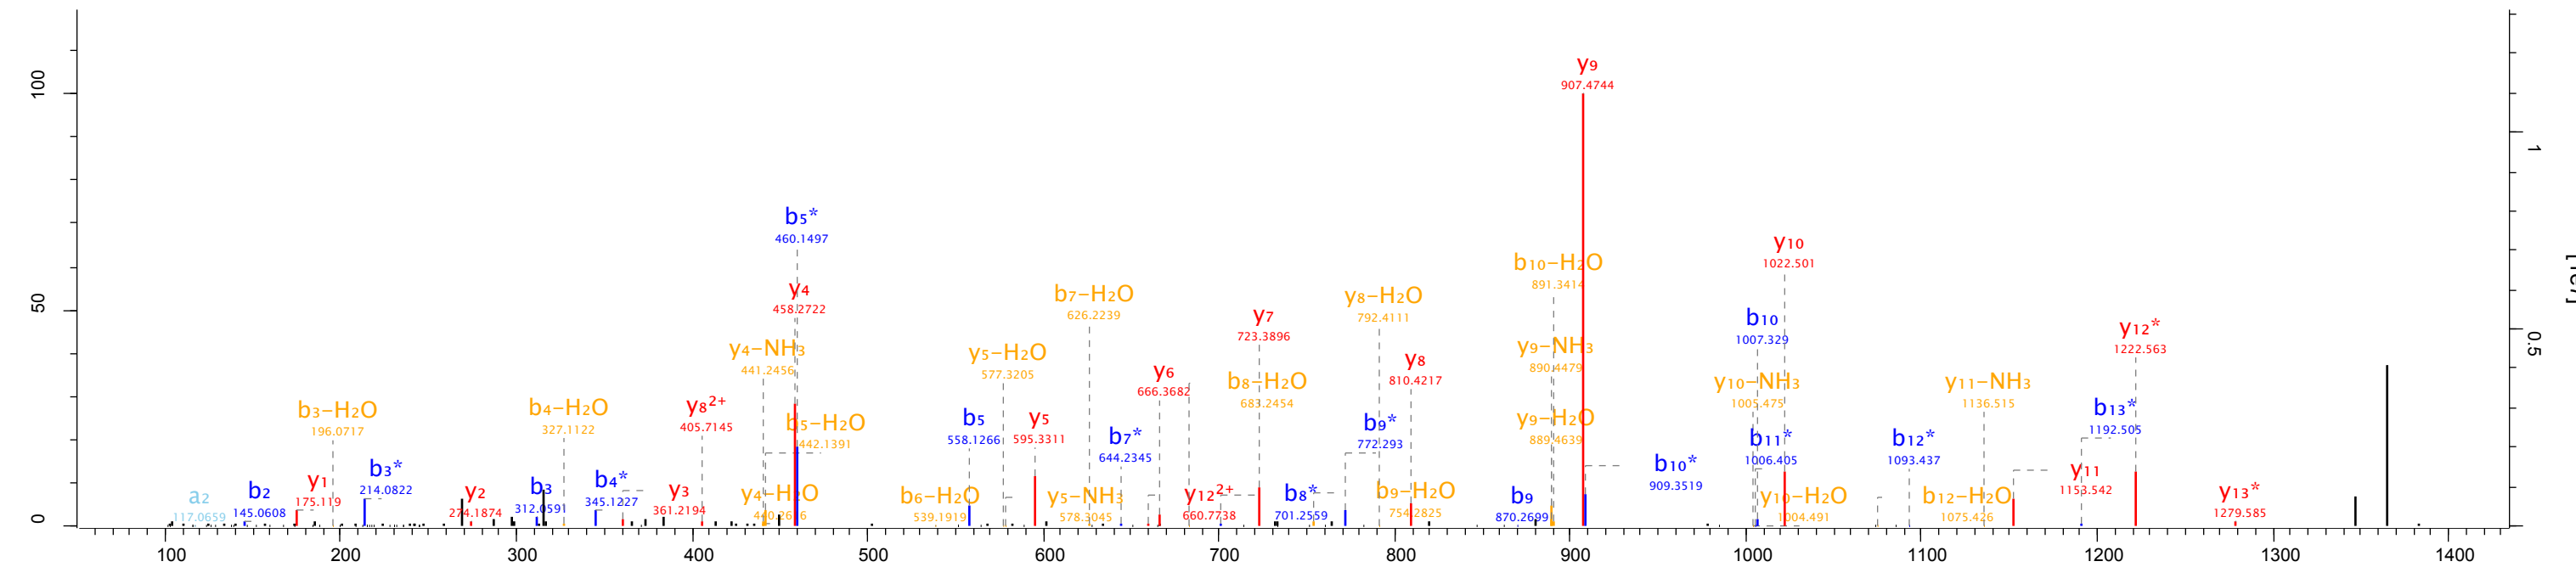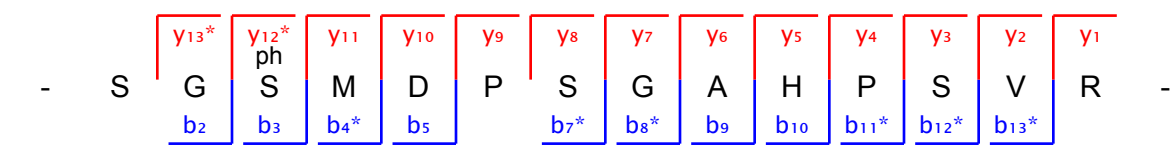

Raw file: 20150814\_A375SR\_Phospho\_BR2\_05  
 Scan: 7260 Method: FTMS; HCD Score: 115.71 m/z: 471.2 Gene names: DLC1

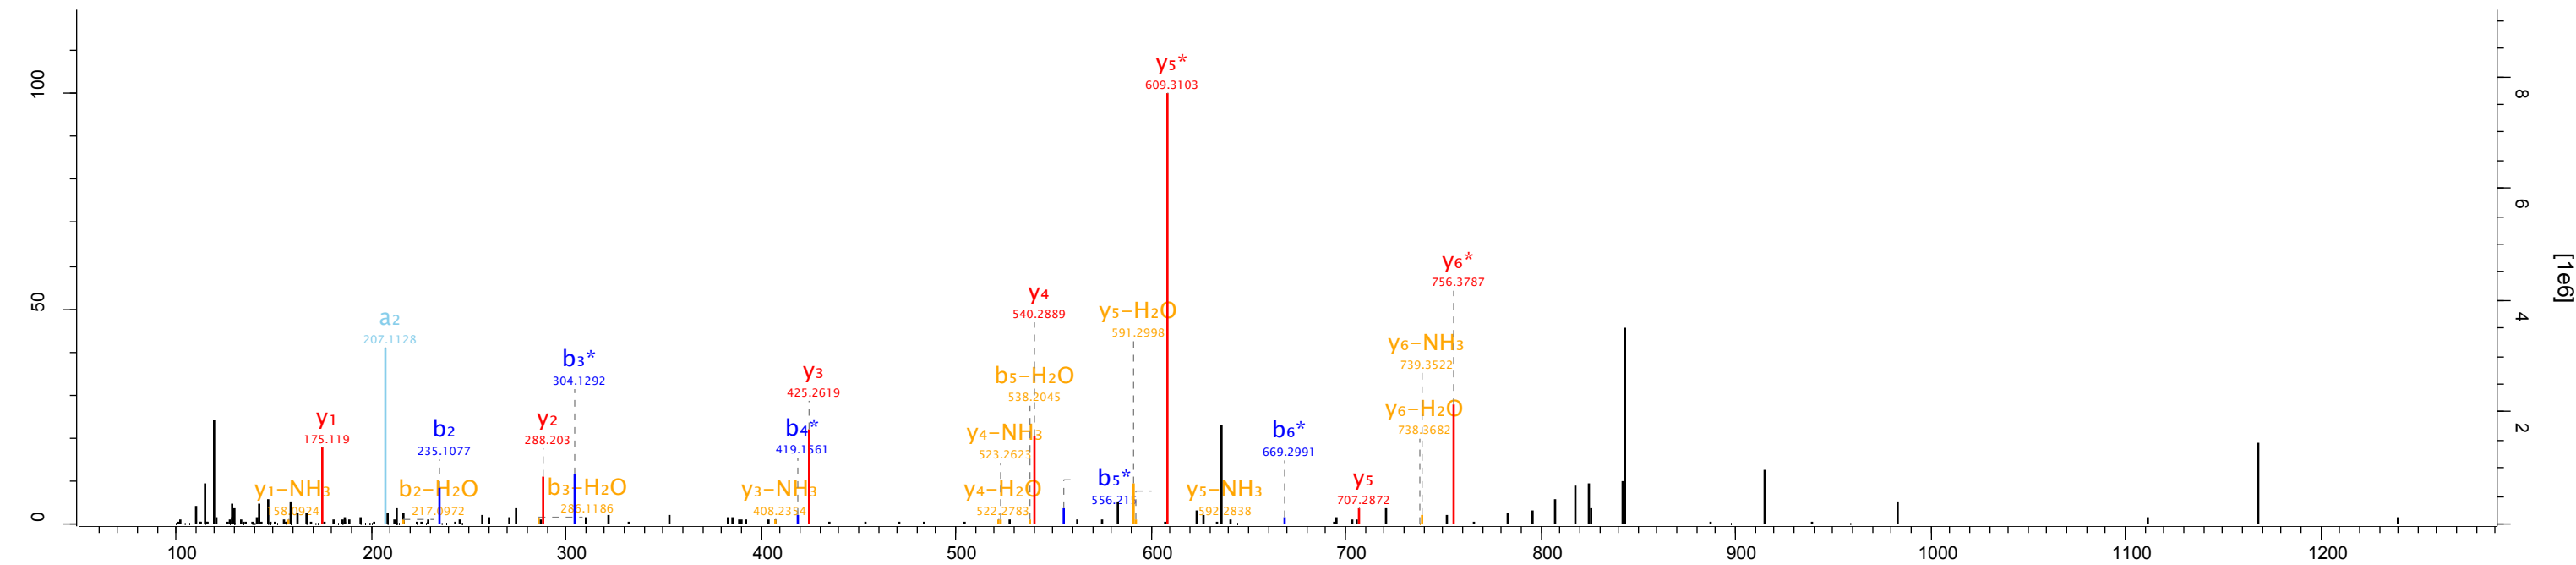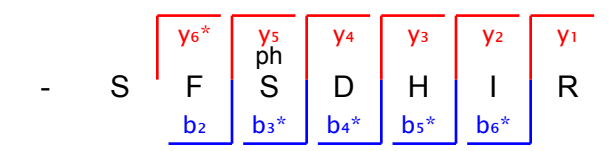



Raw file 20150814\_A375SR\_Phospho\_BR2\_05 Scan 7460 Method FTMS; HCD Score 279.5 m/z 796.86 Gene names STK10

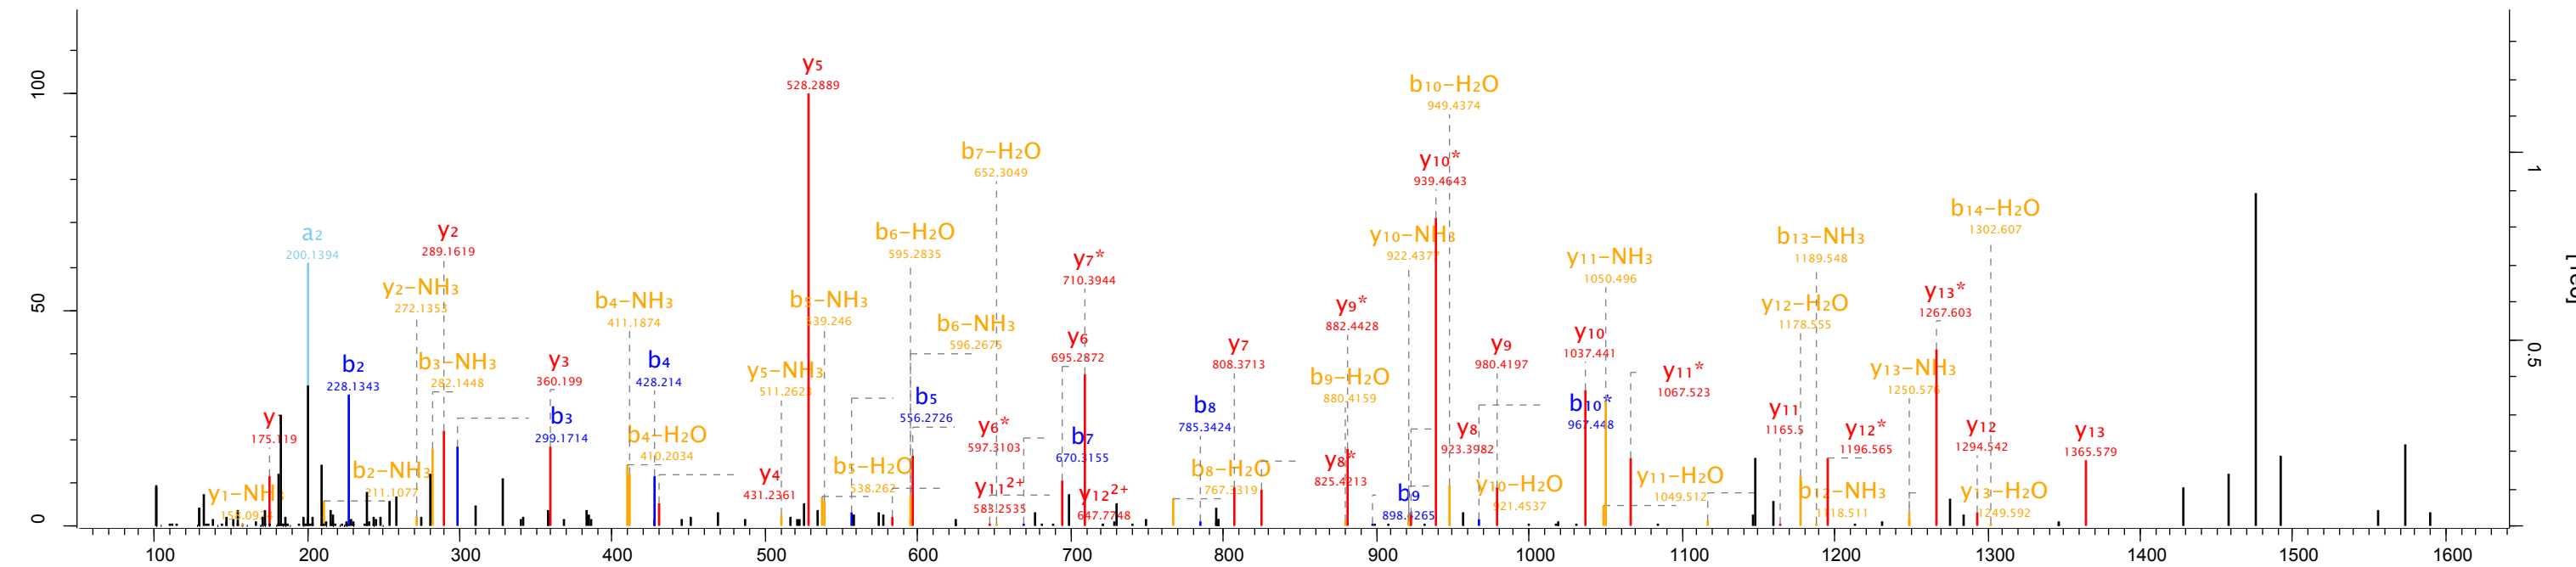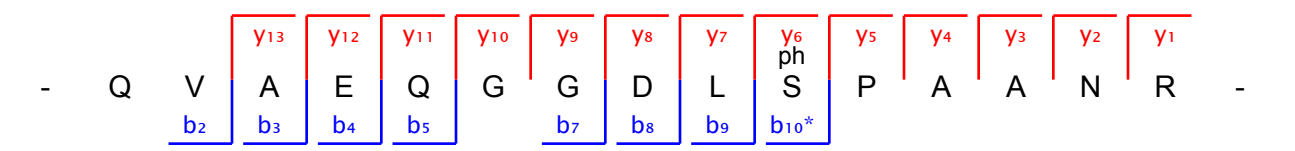

Raw file: 20150814\_A375SR\_Phospho\_BR2\_05  
 Scan: 8310 Method: FTMS; HCD Score: 219.95 m/z: 850.85 Gene names: SART3

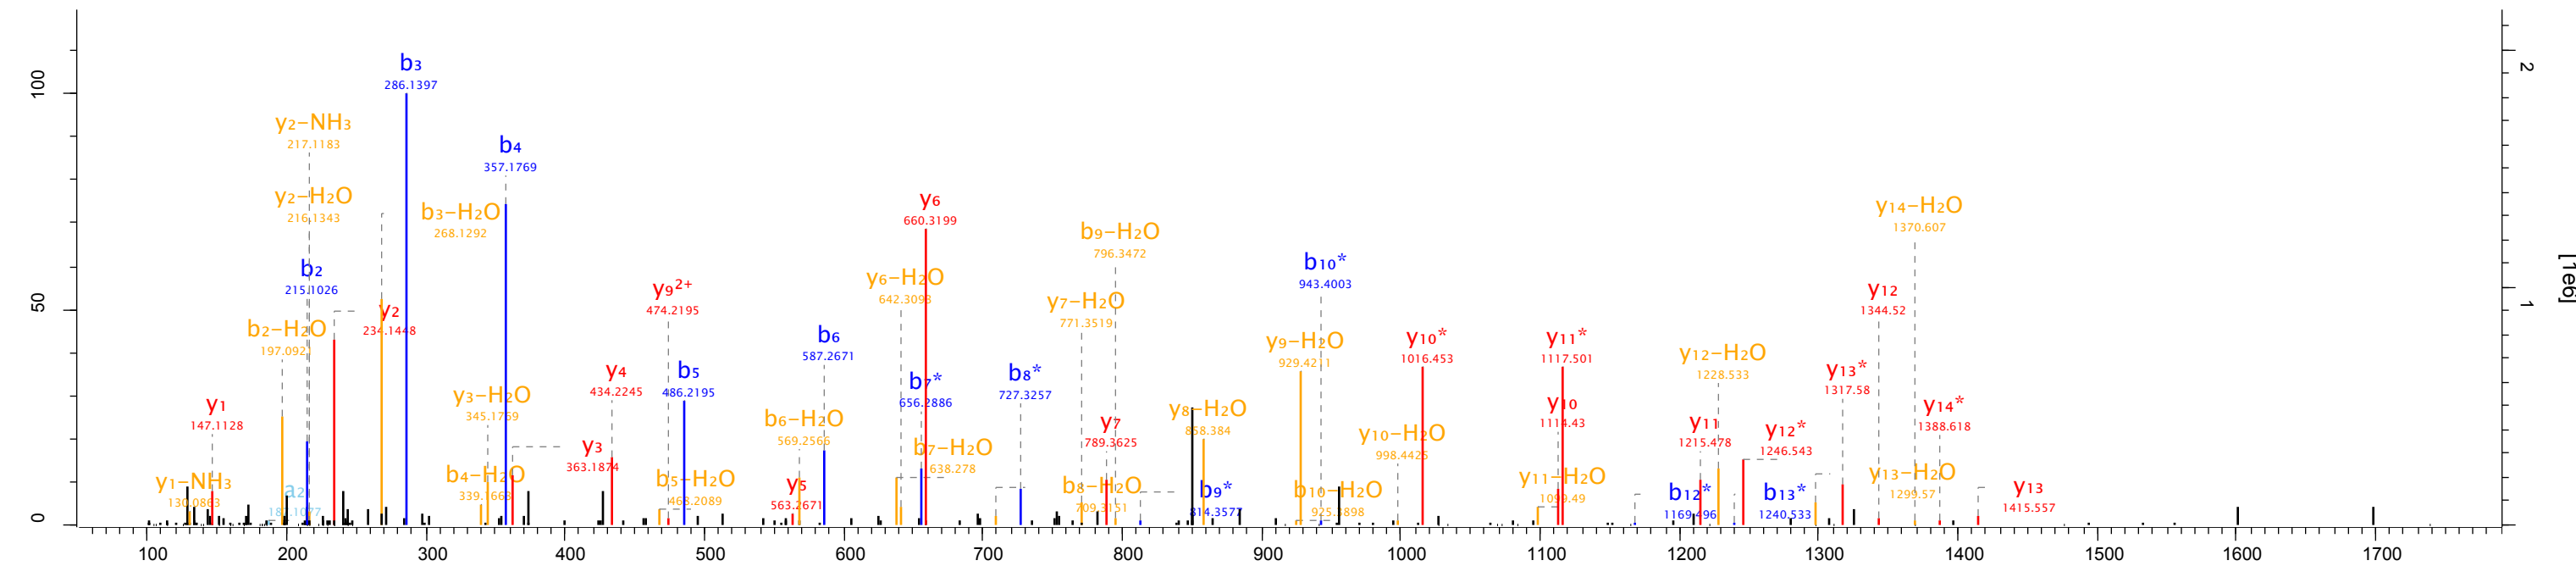

ac  
 - A T A A E T S A S E P E A E S K -  
 b2 b3 b4 b5 b6 b7\* b8\* b9\* b10\* b12\* b13\*

Raw file: 20150814\_A375SR\_Phospho\_BR2\_05  
 Scan: 8950 Method: FTMS; HCD Score: 53.39 m/z: 761.37 Gene names: SRRT

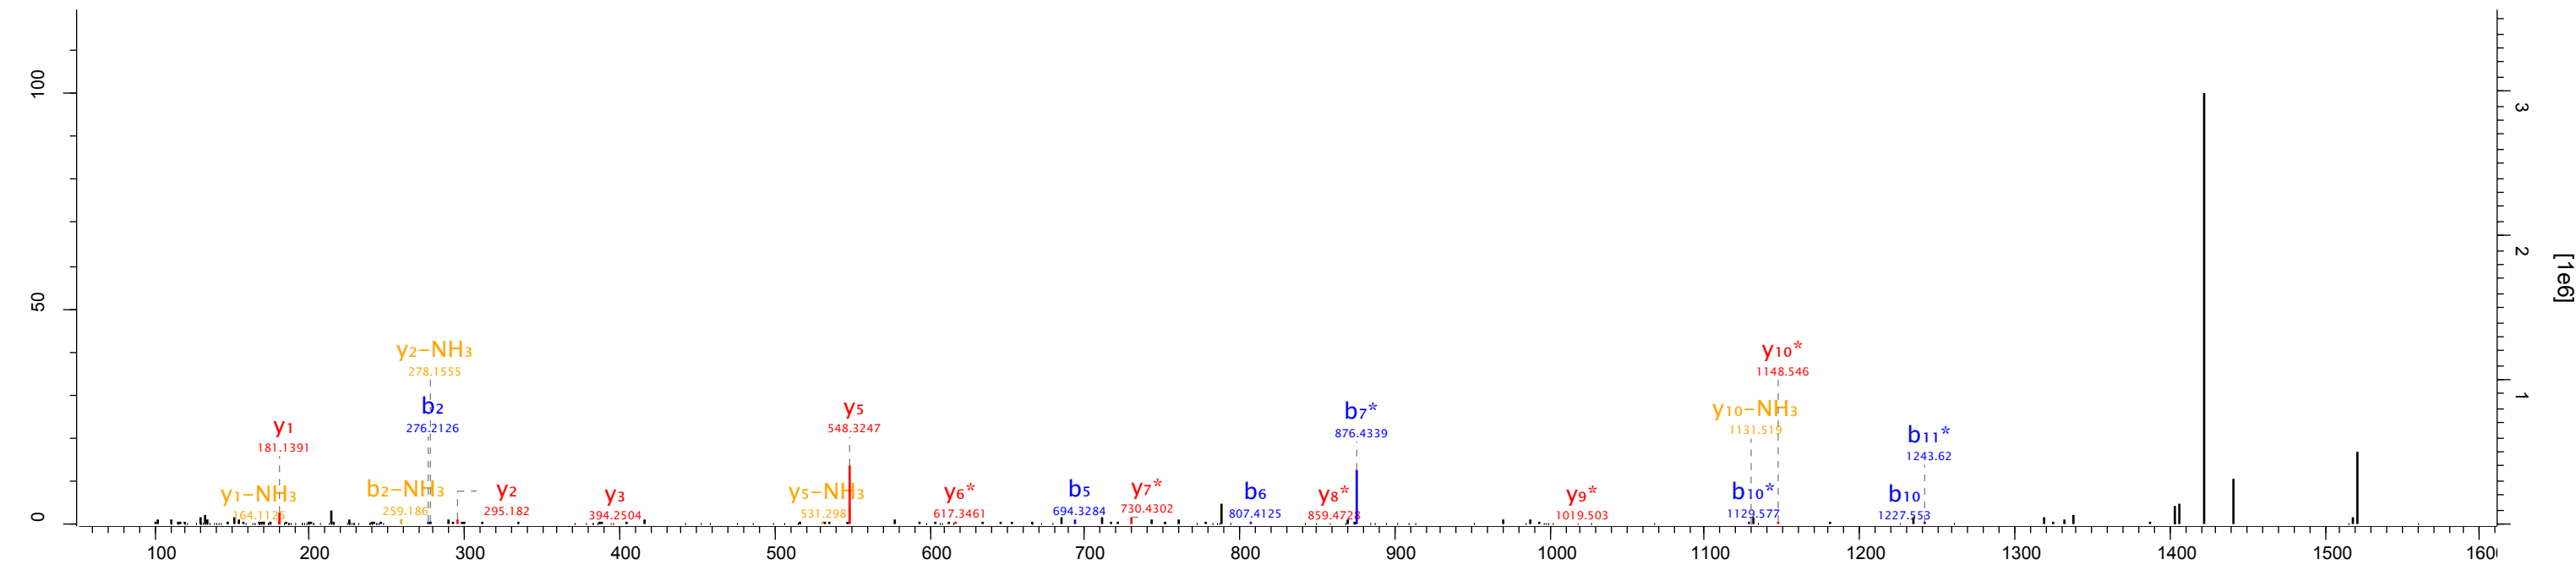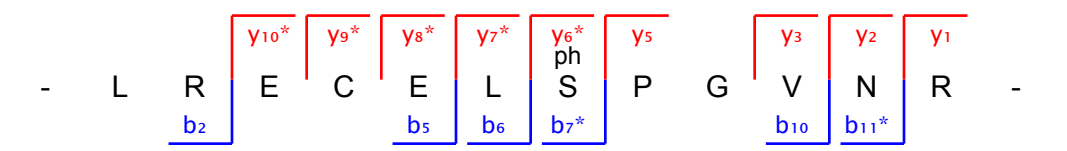

Raw file 20150814\_A375SR\_Phospho\_BR2\_05 Scan 9140 Method FTMS; HCD Score 94.61 m/z 719.35 Gene names NFATC3

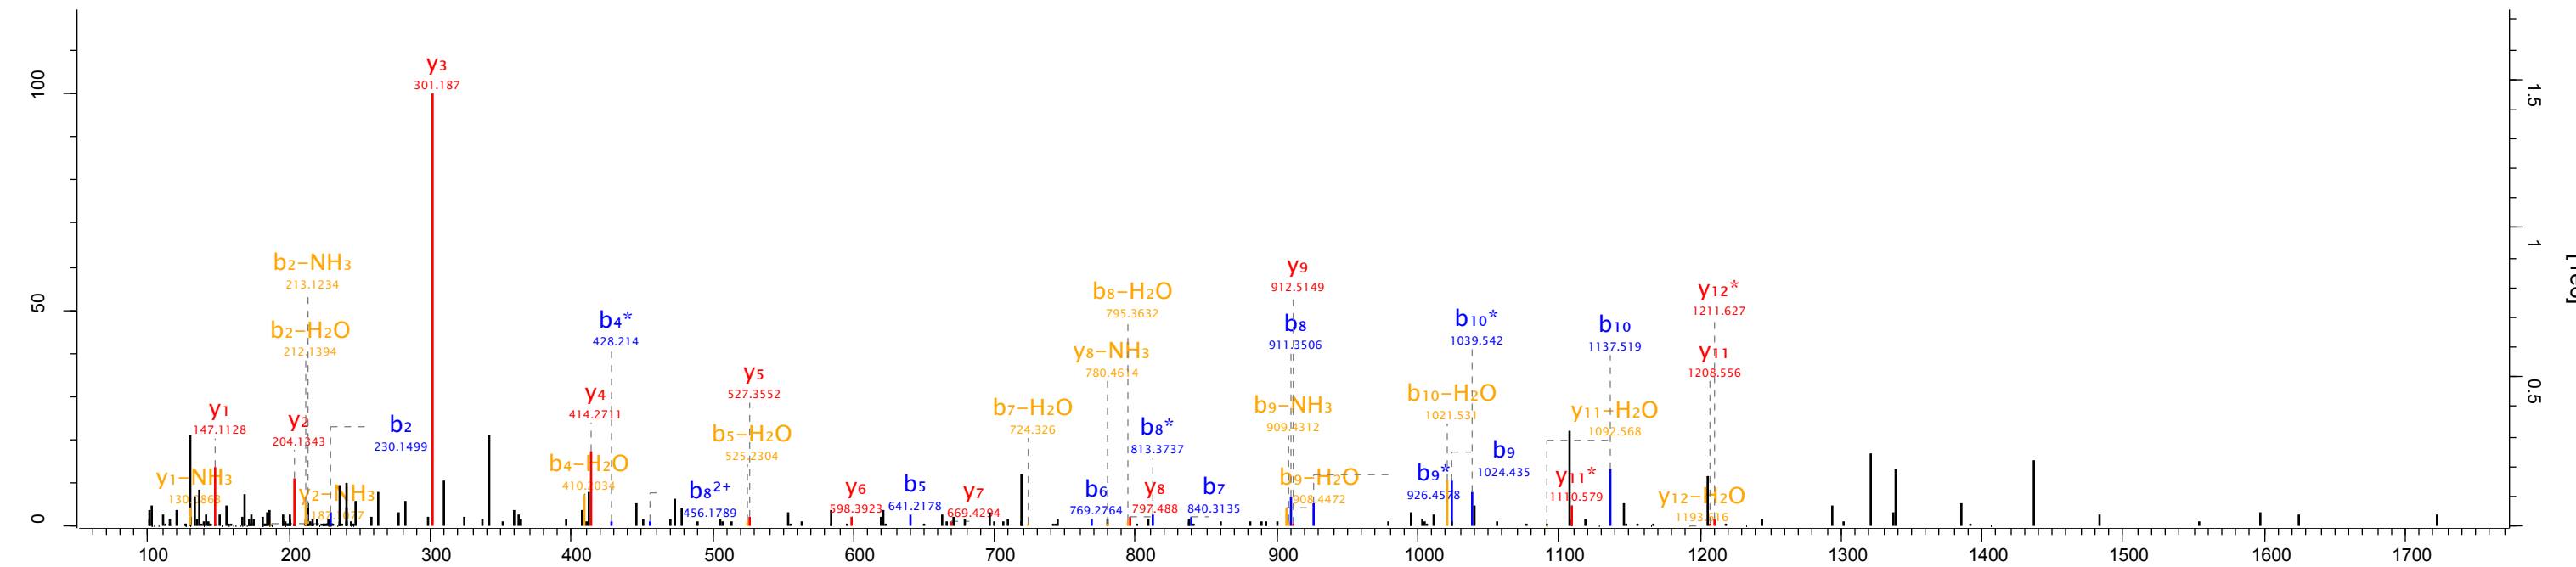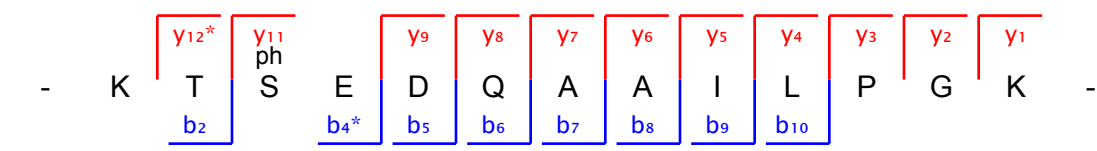

Raw file 20150814\_A375SR\_Phospho\_BR2\_05 Scan 9320 Method FTMS; HCD Score 121.68 m/z 495.73 Gene names NMT2

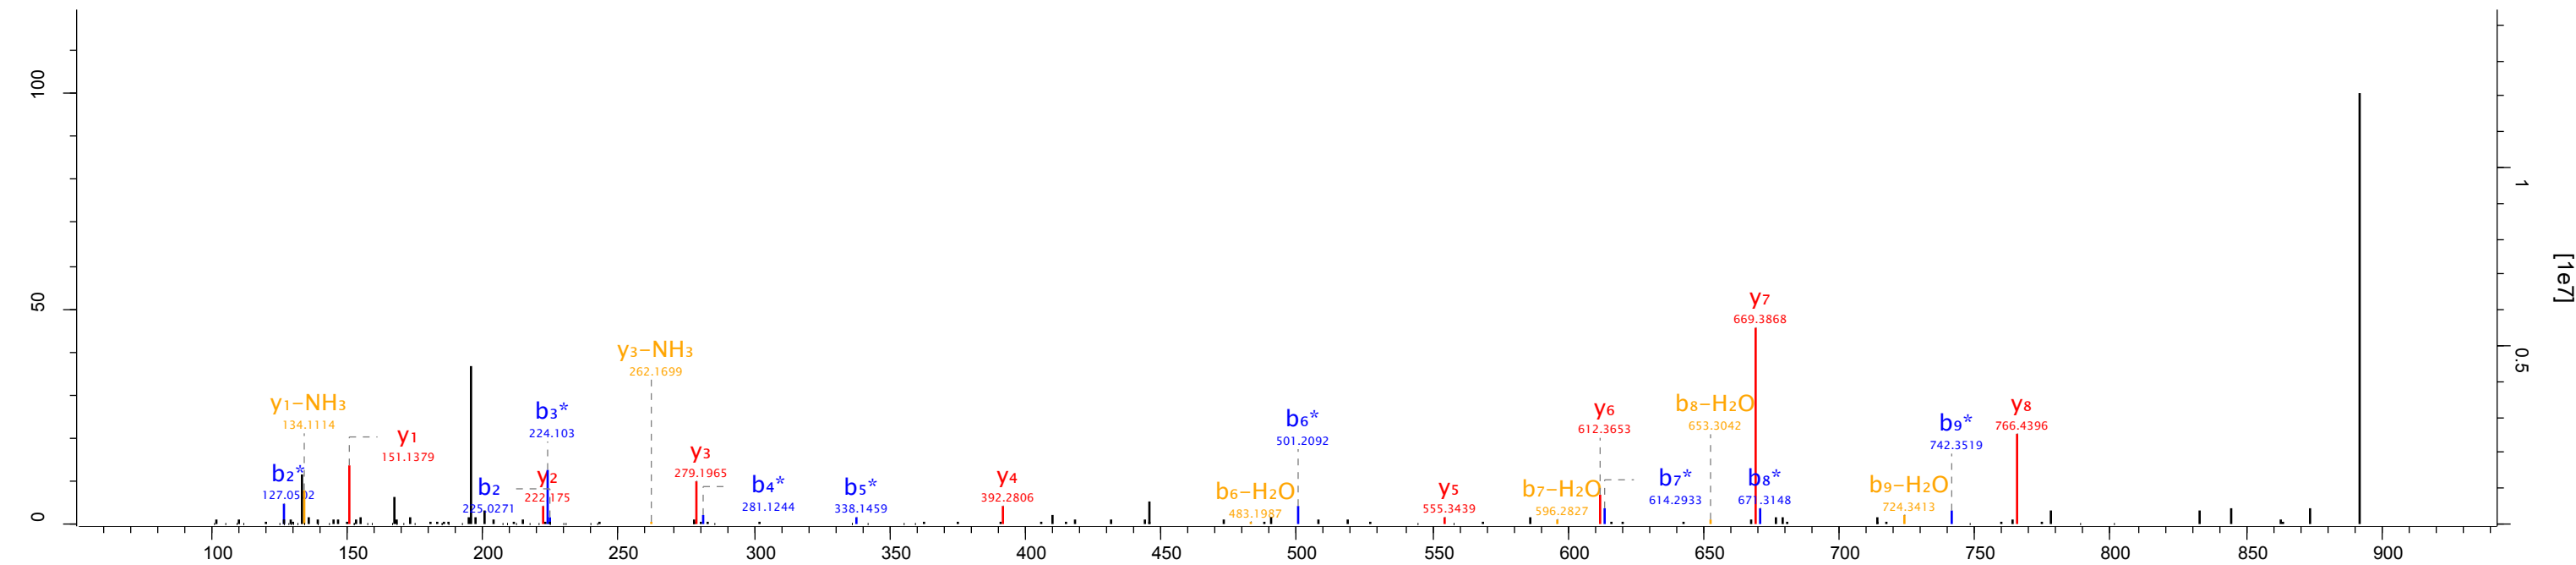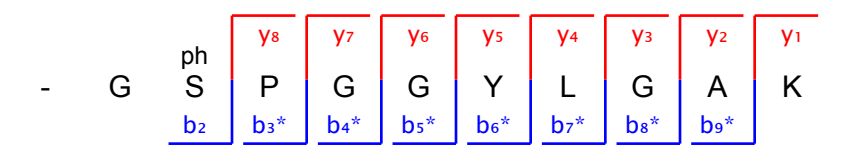

Raw file: 20150814\_A375SR\_Phospho\_BR2\_05  
 Scan: 9670 Method: FTMS; HCD Score: 199.41 m/z: 875.84 Gene names: IRS2

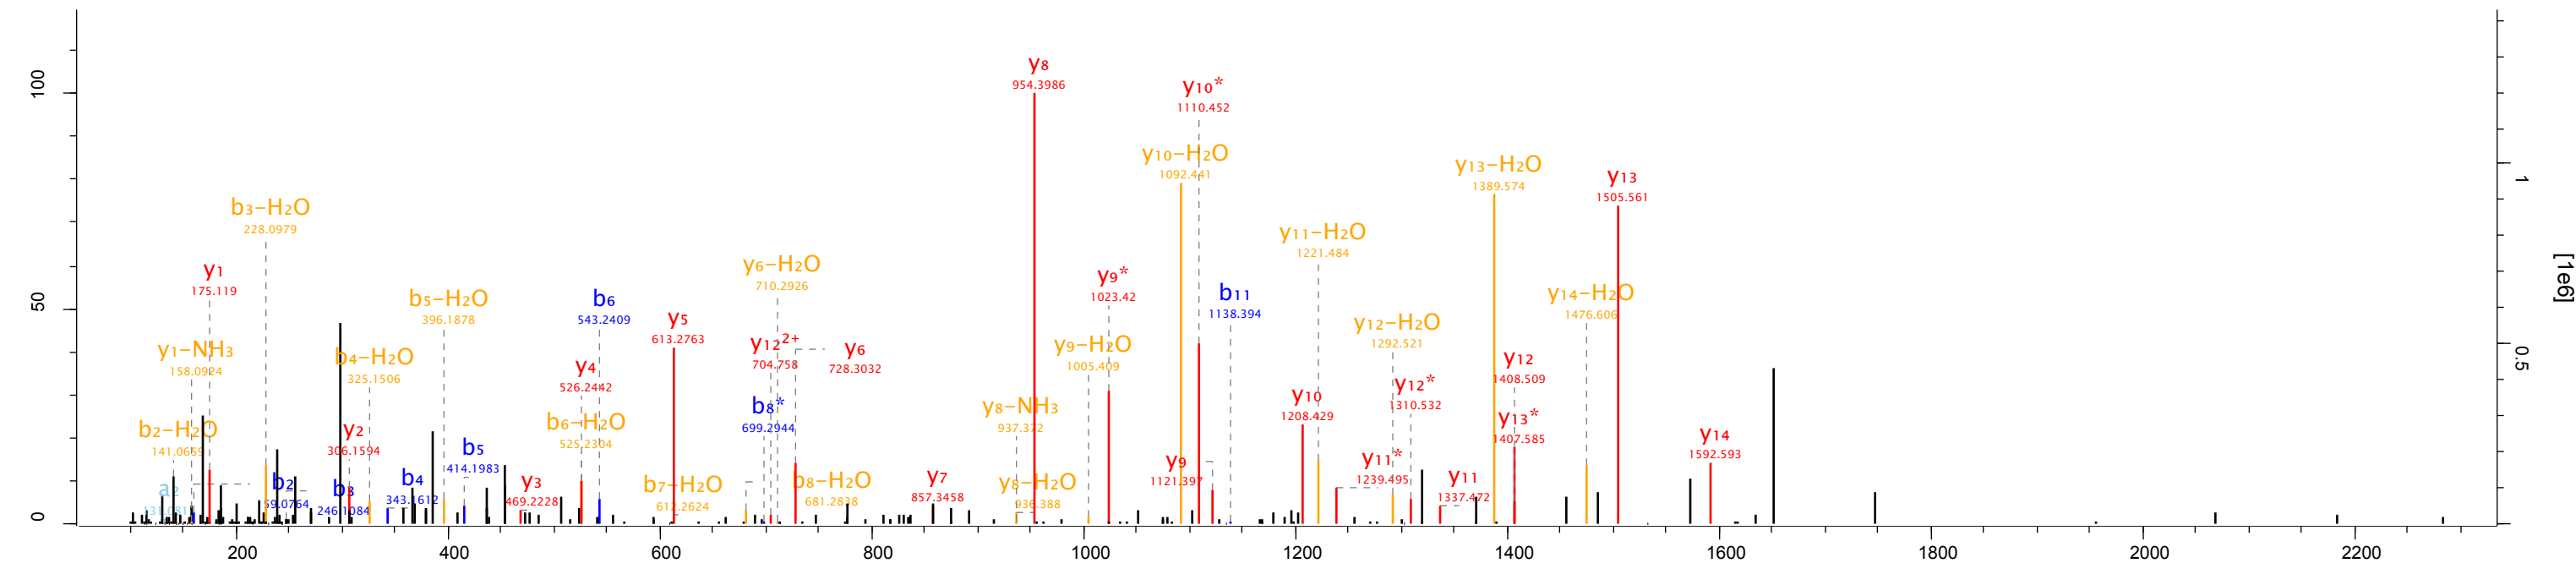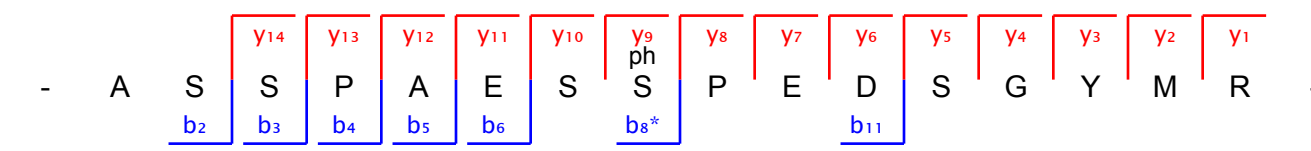

Raw file: 20150814\_A375SR\_Phospho\_BR2\_05  
 Scan: 9720 Method: FTMS; HCD Score: 116.24 m/z: 578.78 Gene names: PDAP1

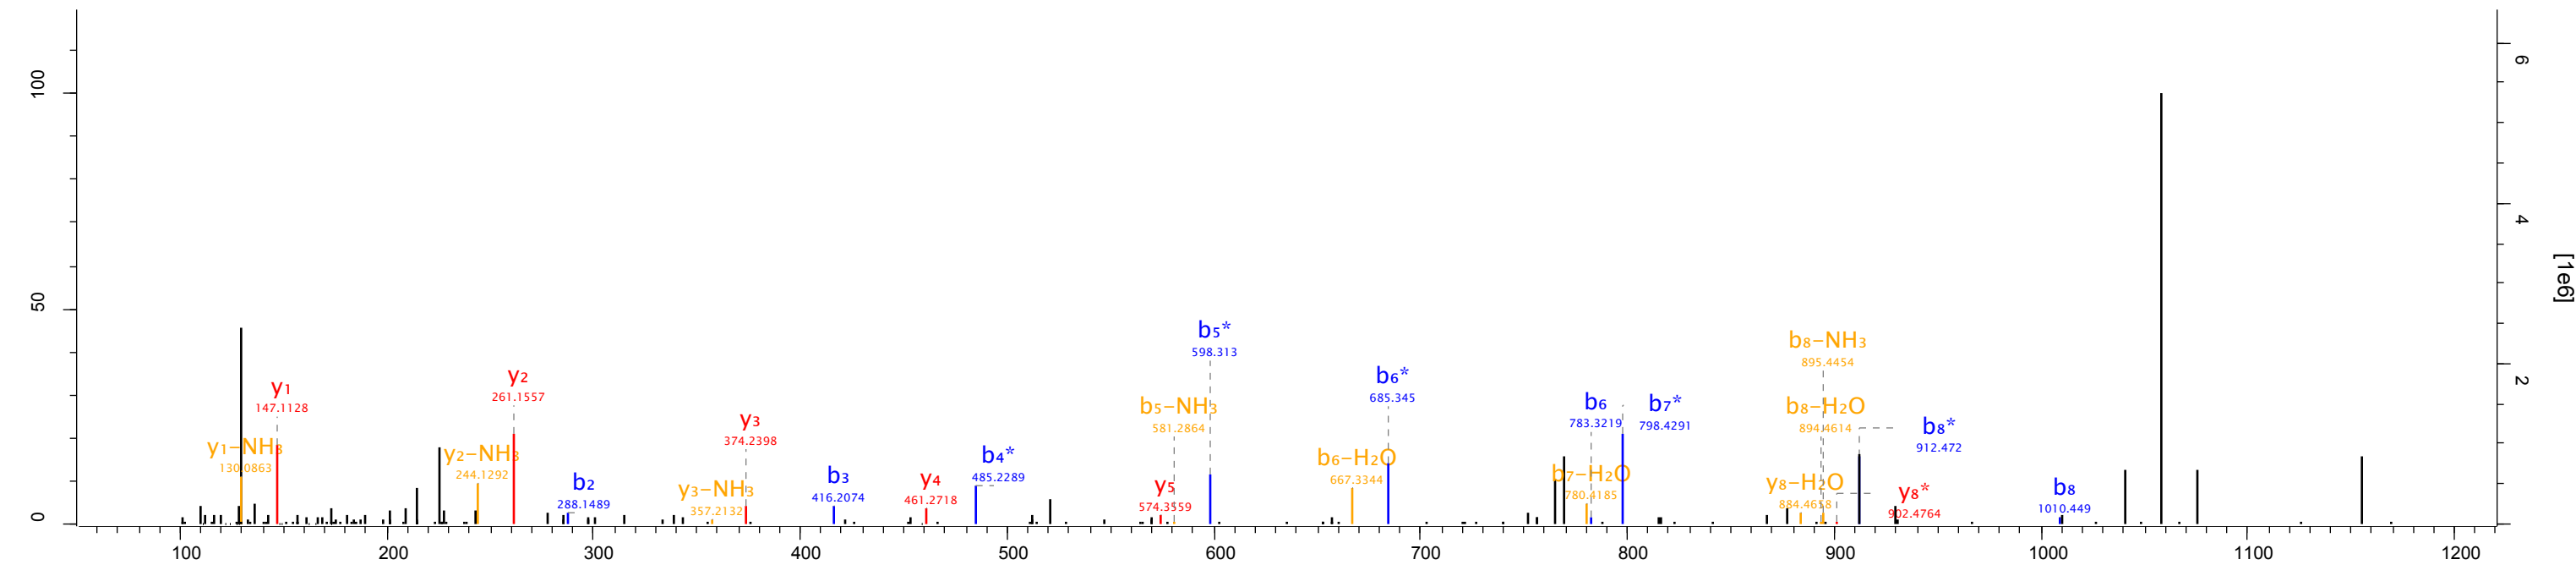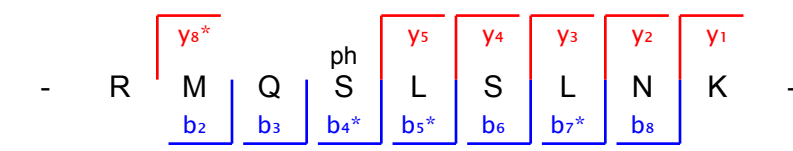

Raw file: 20150814\_A375SR\_Phospho\_BR2\_05  
 Scan: 9920 Method: FTMS; HCD Score: 57.15 m/z: 645.79 Gene names: CAD

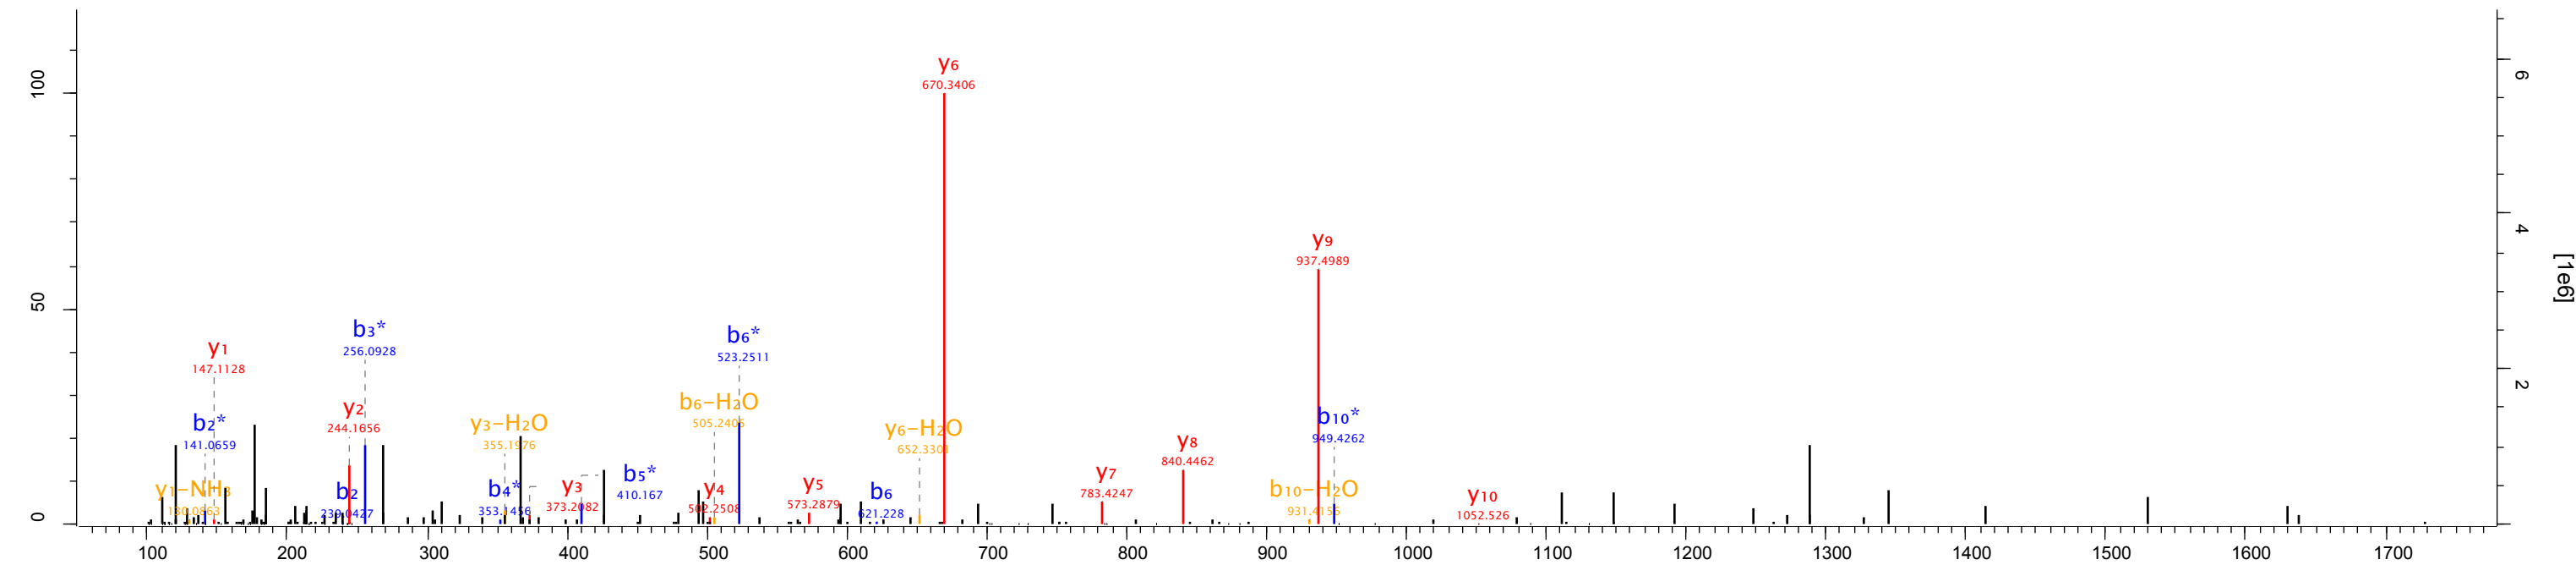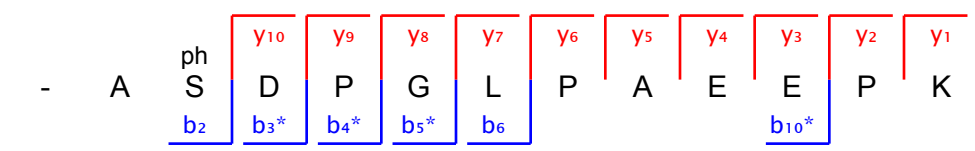



Raw file: 20150814\_A375SR\_Phospho\_BR2\_05  
 Scan: 9980 Method: FTMS; HCD Score: 165.66 m/z: 748.31 Gene names: NFIC

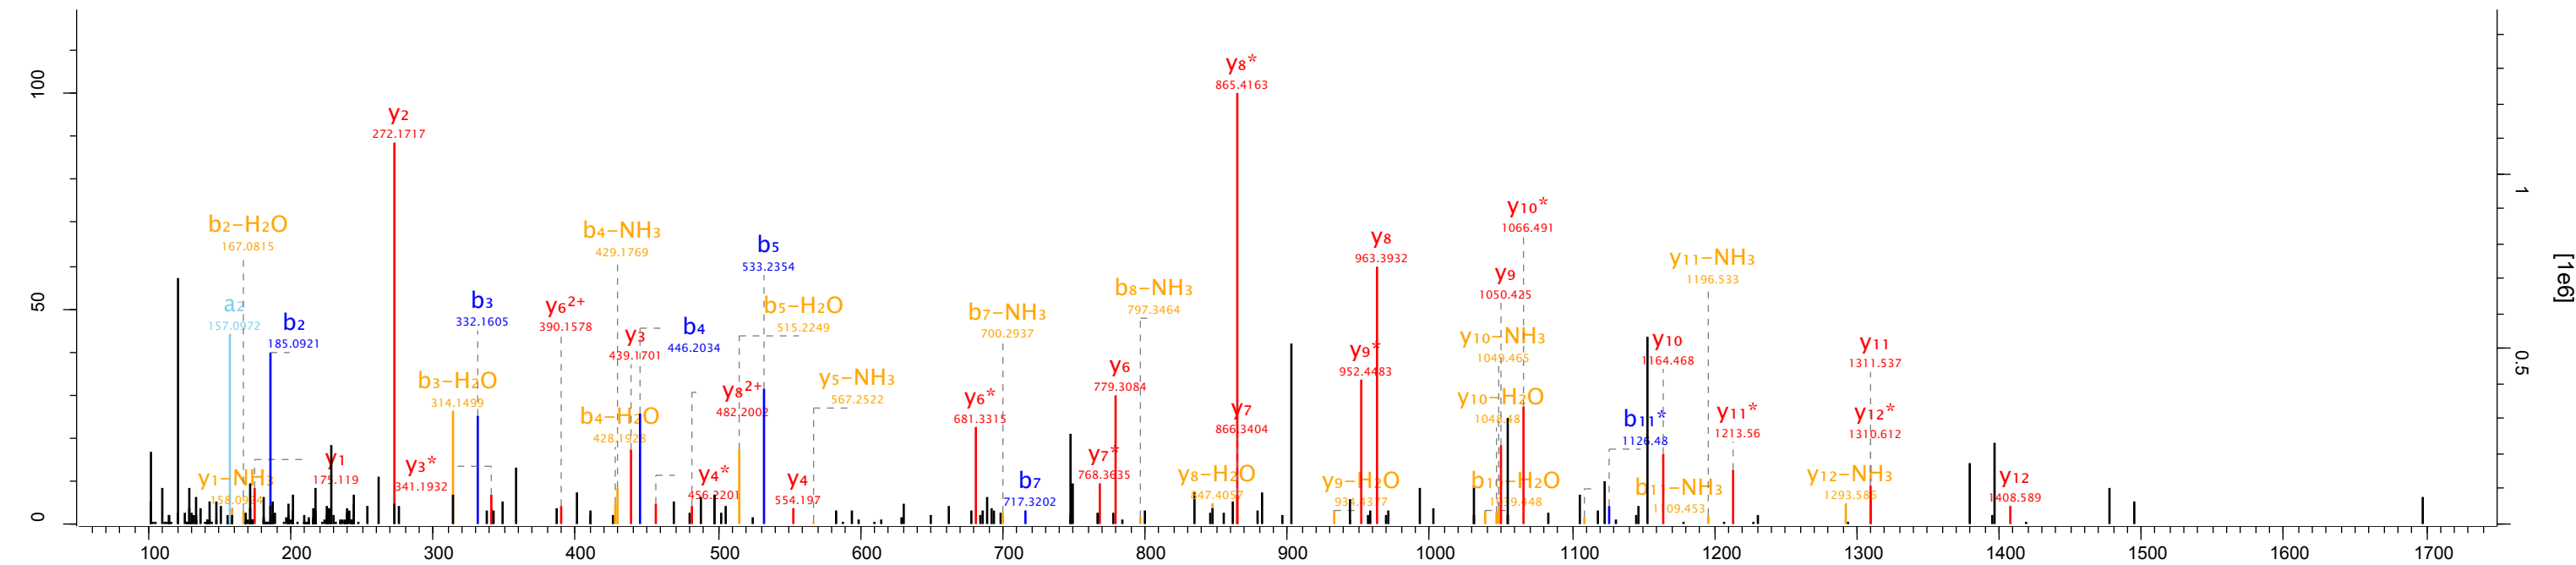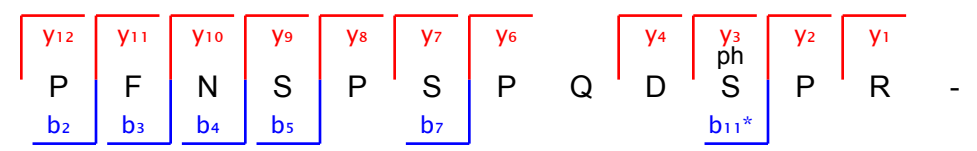

Raw file Scan Method Score m/z Gene names  
 20150814\_A375SR\_Phospho\_BR2\_06 10490 FTMS; HCD 221.81 871.89 POP1

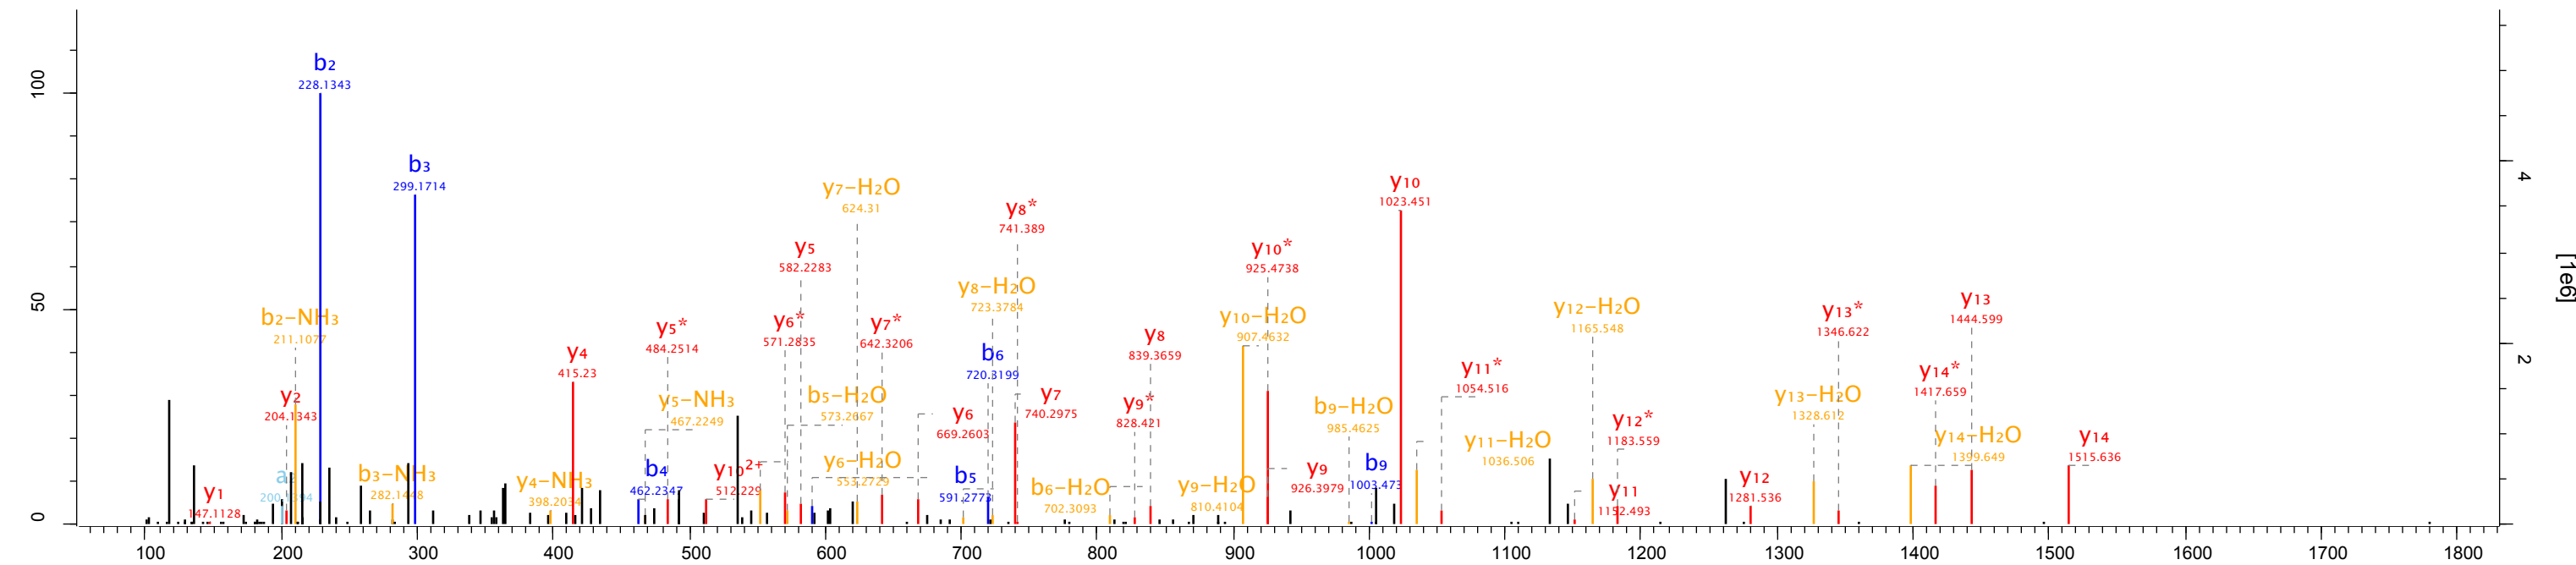

- V Q A Y E E P S V A S S P N G K -  
 b2 b3 b4 b5 b6 b9

Raw file  
 20150814\_A375SR\_Phospho\_BR2\_06  
 Scan 10920 Method FTMS; HCD Score 193.88 m/z 713.97 Gene names BCAR3

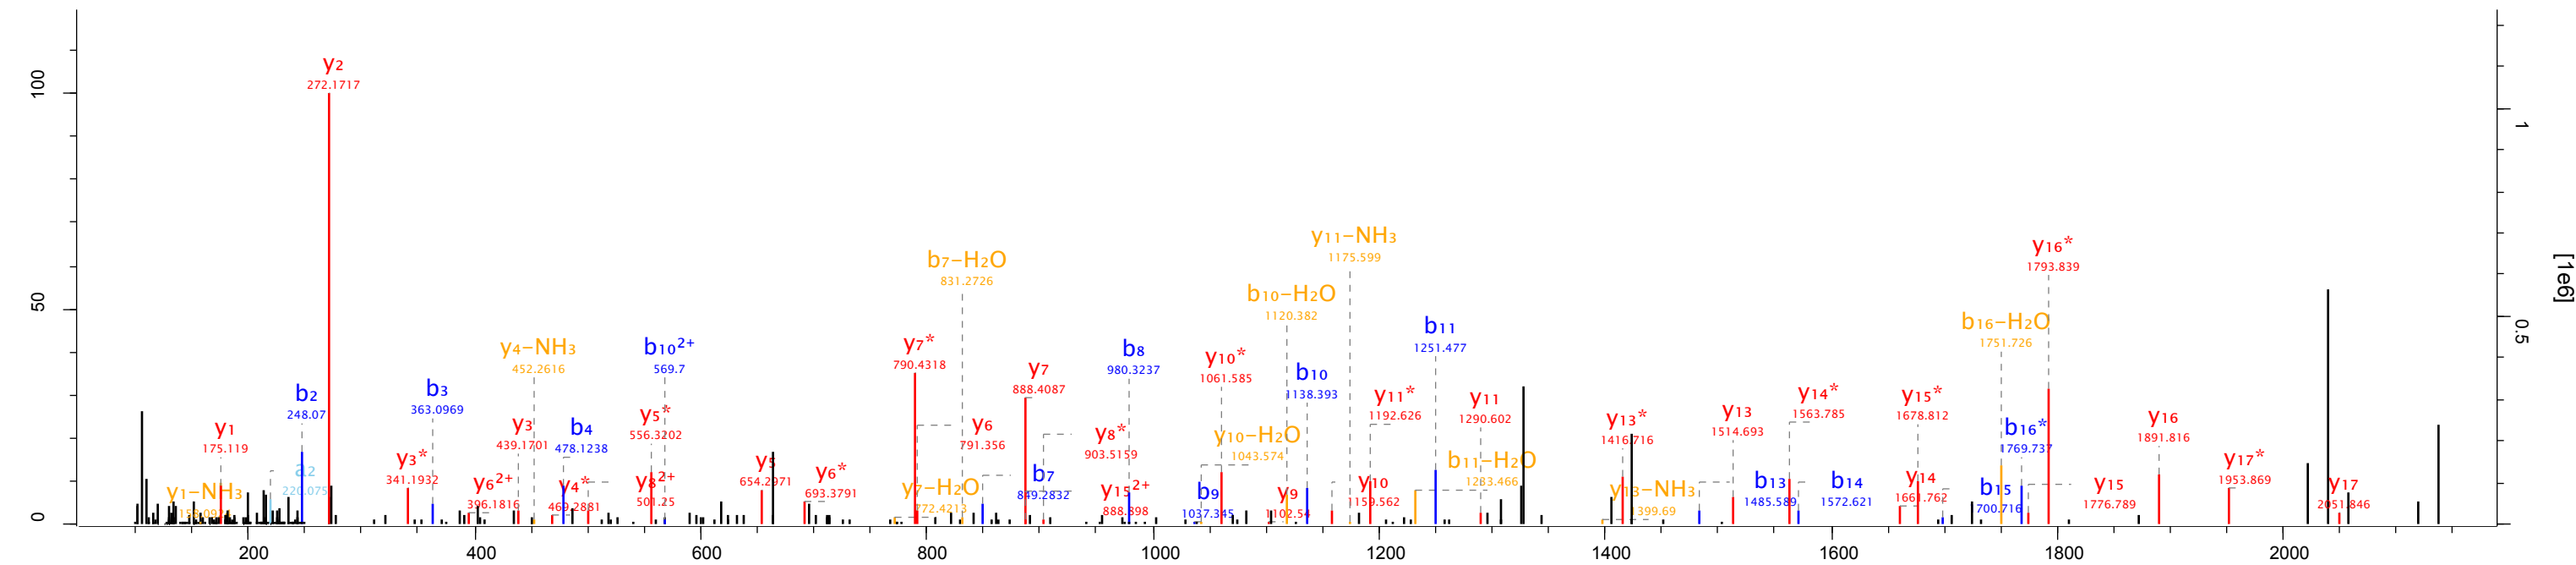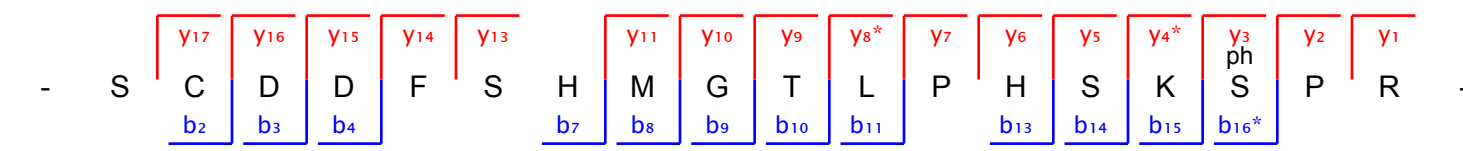

20150814\_A375SR\_Phospho\_BR2\_06 10940 FTMS; HCD 300.38 1053 HIST1H1B

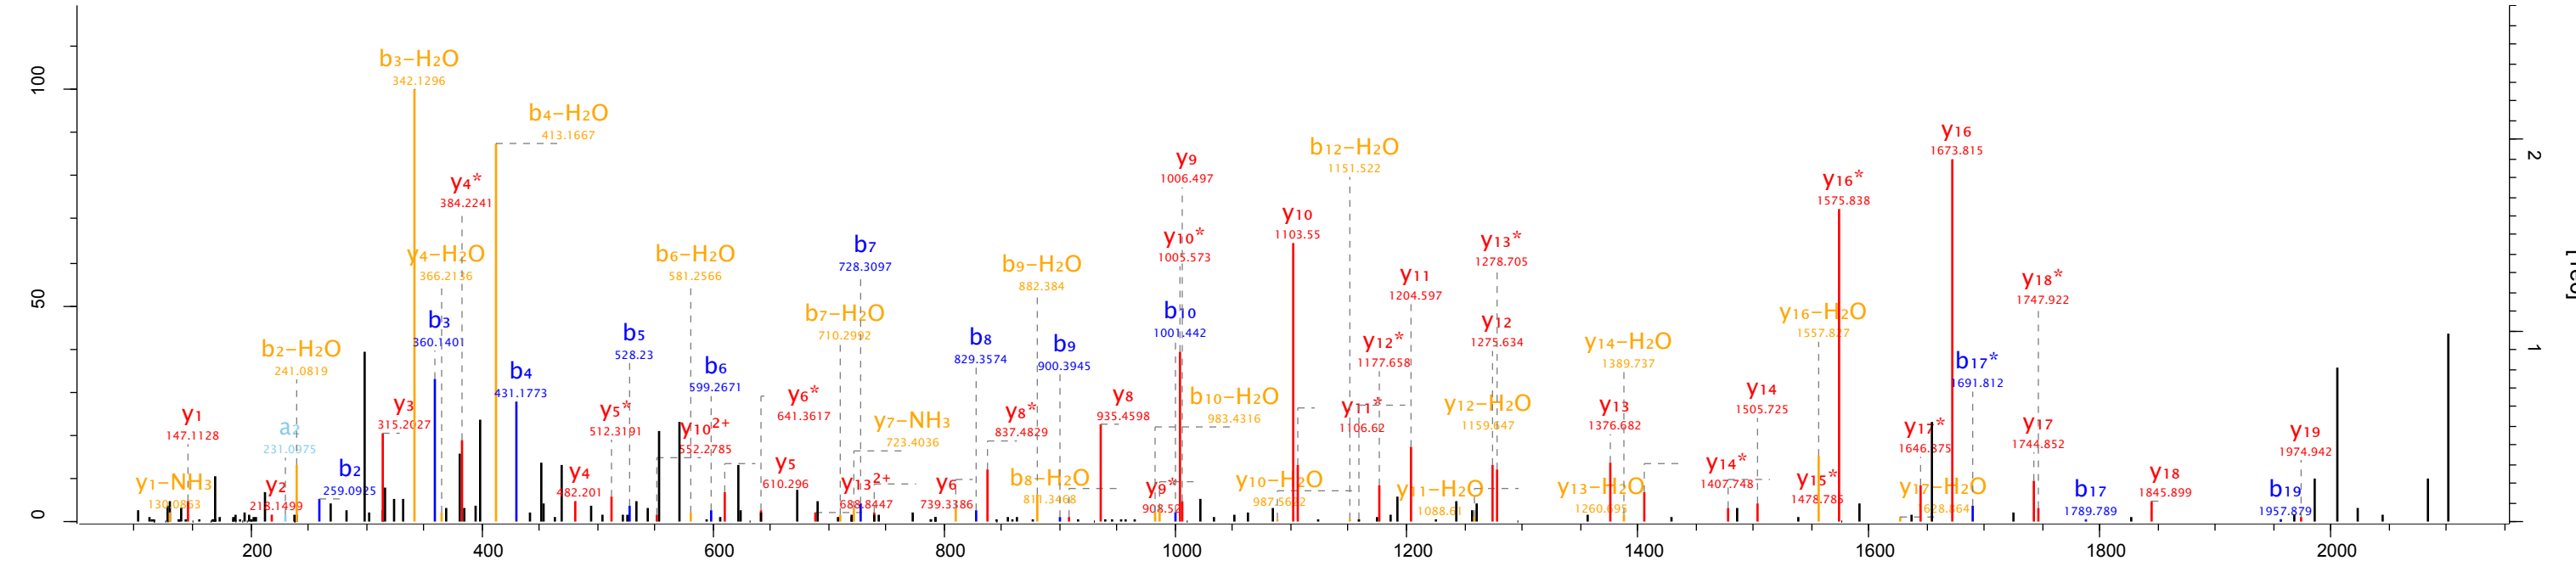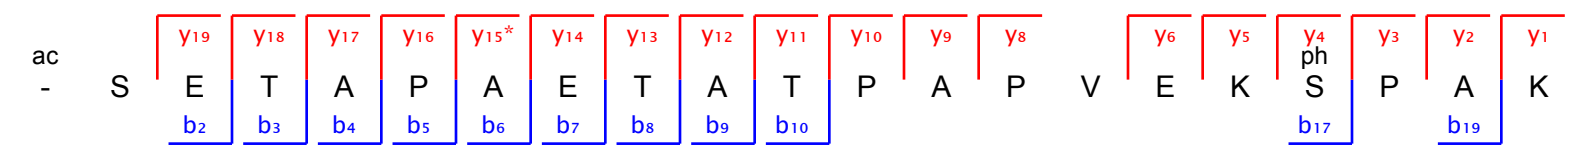

Raw file 20150814\_A375SR\_Phospho\_BR2\_06 Scan 11040 Method FTMS; HCD Score 41.84 m/z 753.34

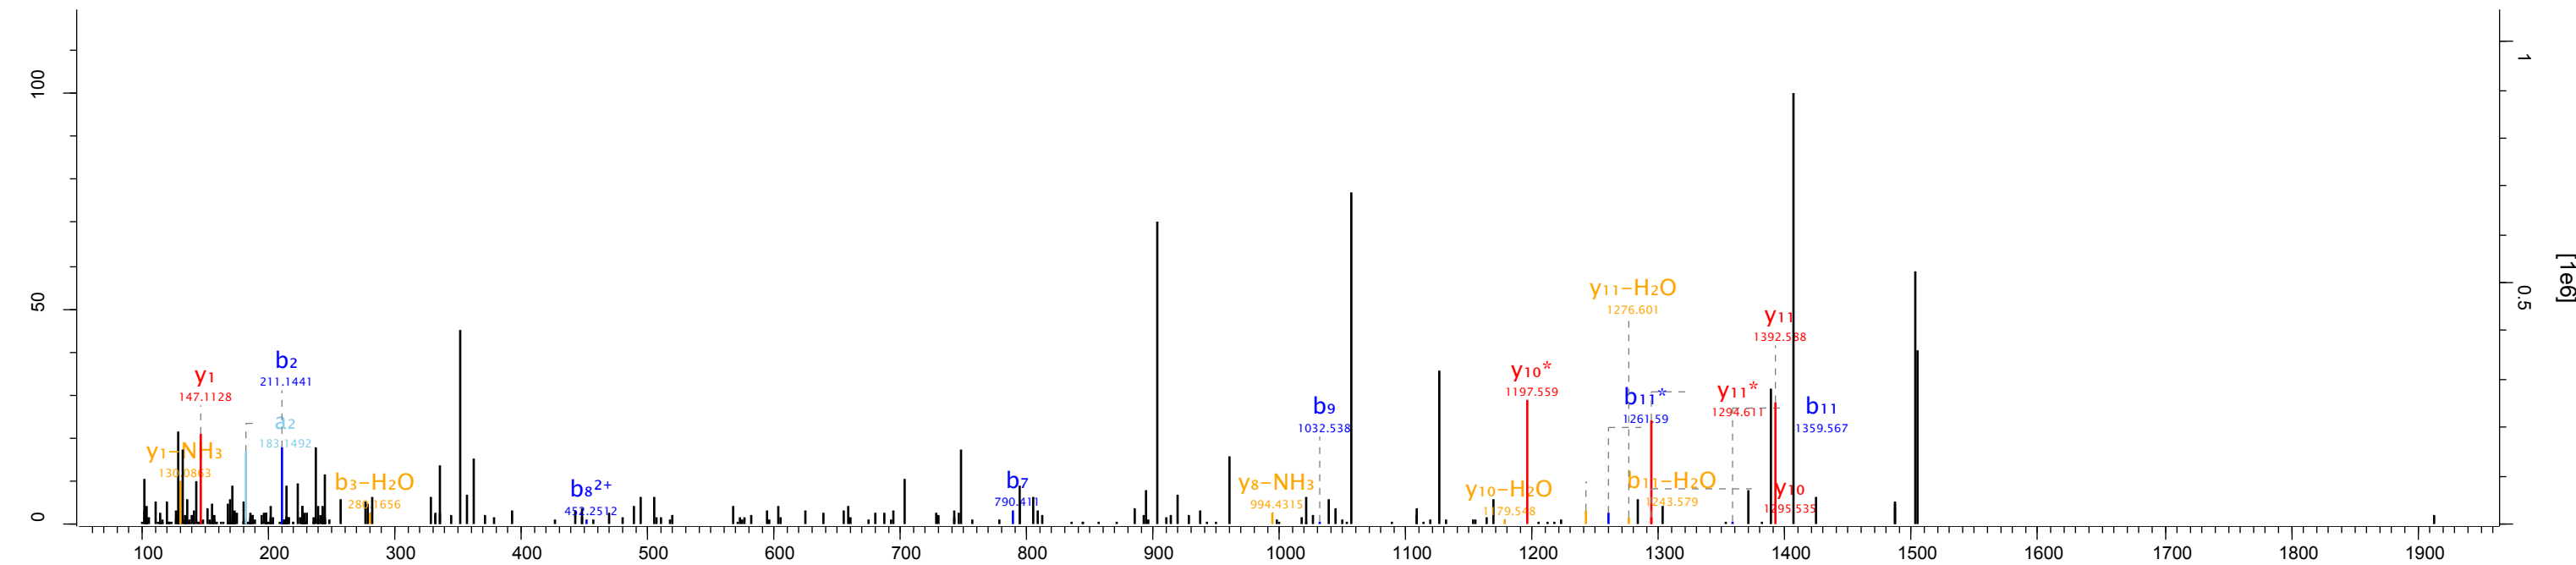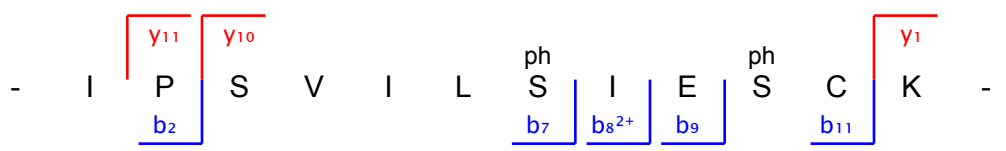

Raw file 20150814\_A375SR\_Phospho\_BR2\_06 Scan 11490 Method FTMS; HCD Score 80.69 m/z 613.81 Gene names CDK12

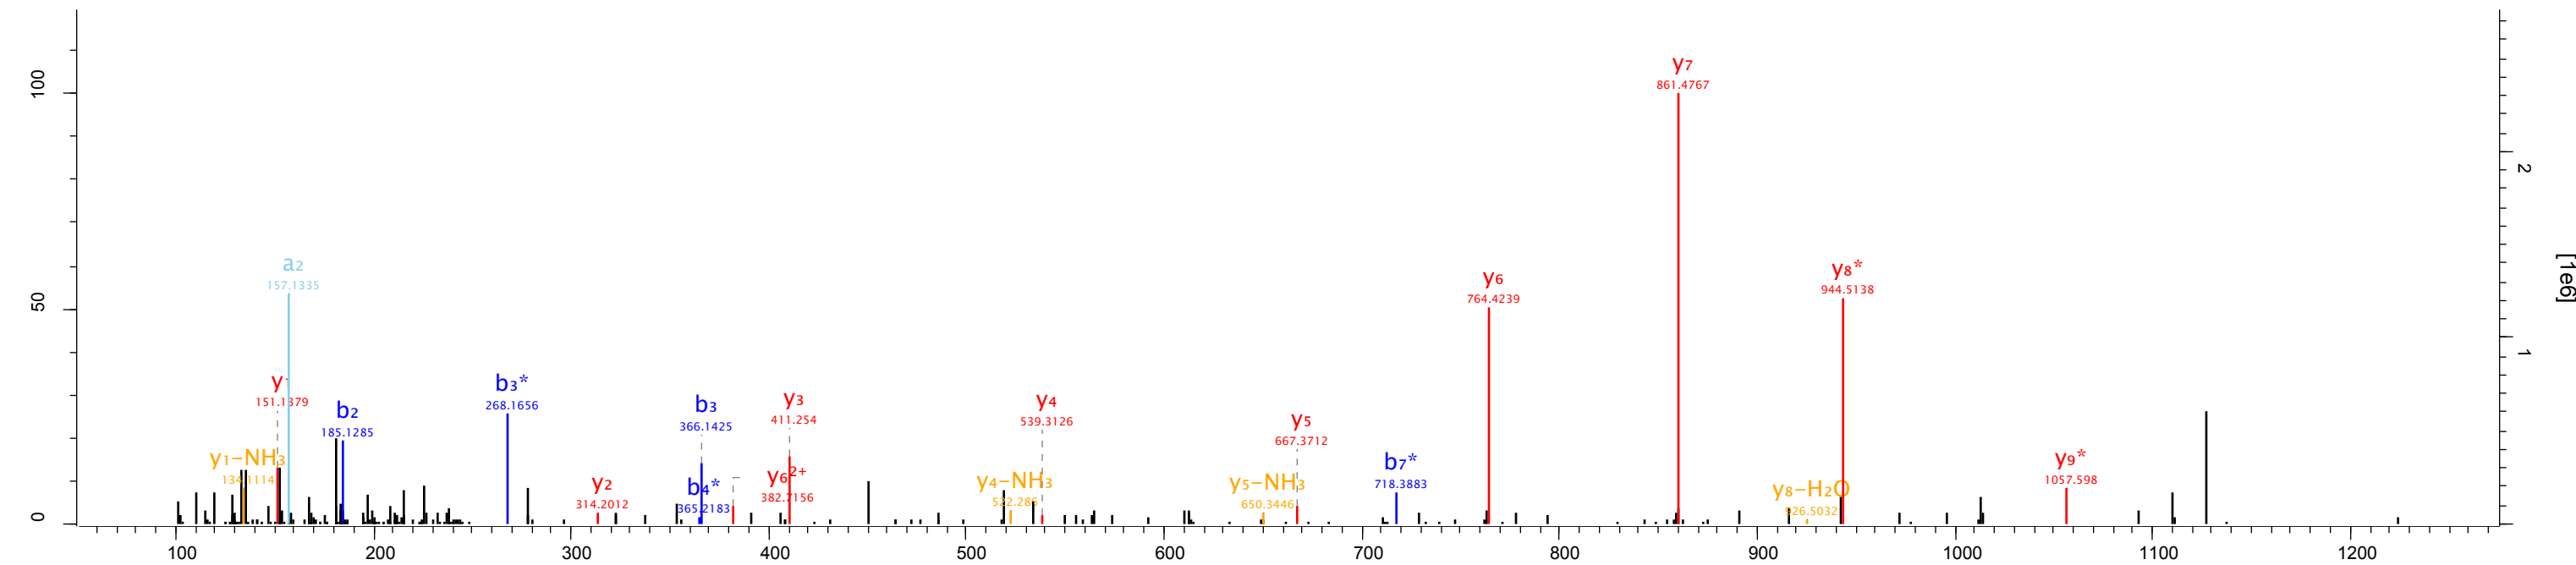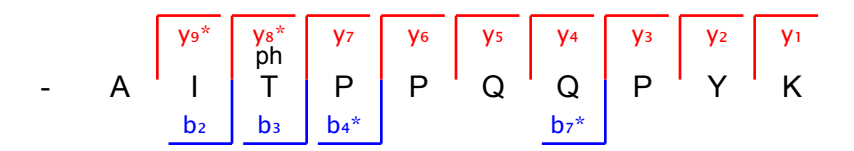

Raw file 20150814\_A375SR\_Phospho\_BR2\_06 Scan 12700 Method FTMS; HCD Score 71.38 m/z 588.27 Gene names GLRX3

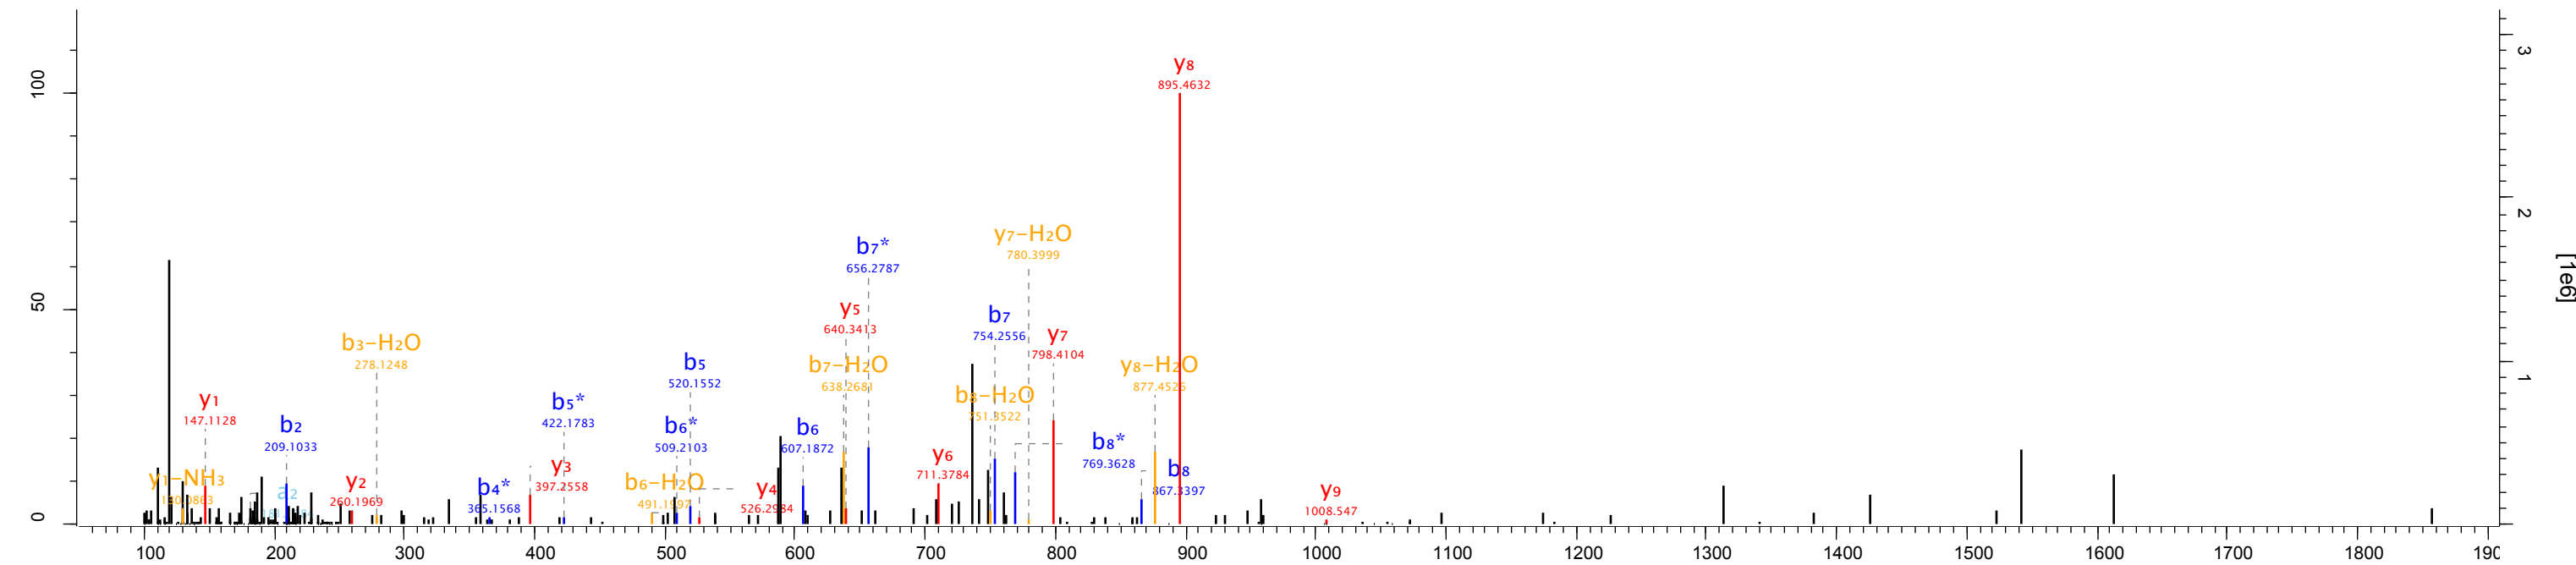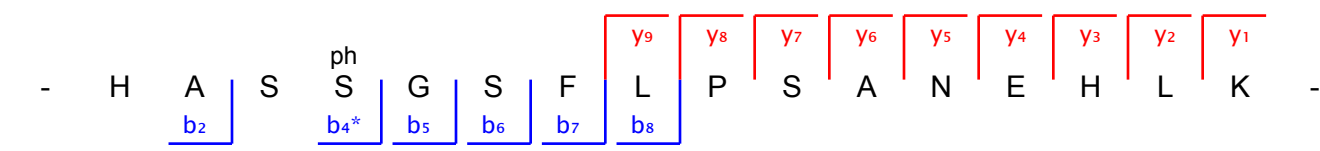

Raw file: 20150814\_A375SR\_Phospho\_BR2\_06  
 Scan: 13070 Method: FTMS; HCD Score: 93.03 m/z: 611.31 Gene names: SPACIA2;FAM122B

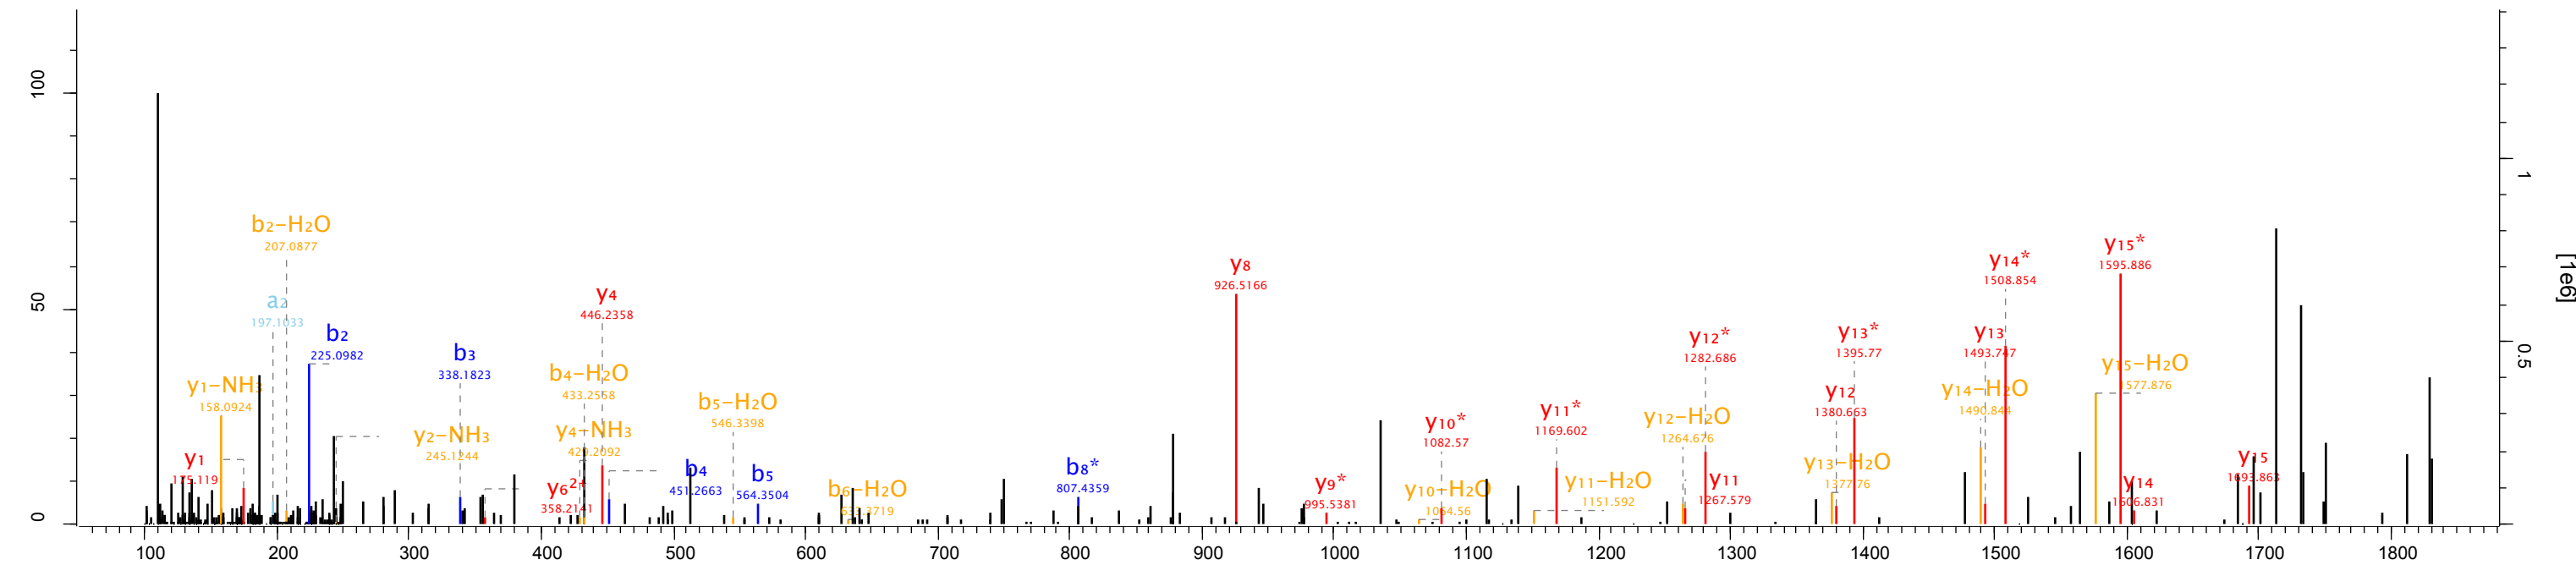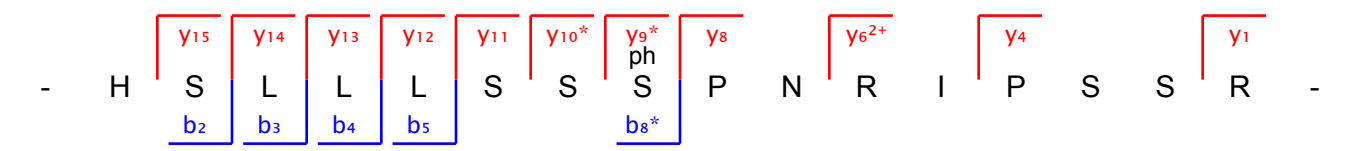



Raw file 20150814\_A375SR\_Phospho\_BR2\_06 Scan 13180 Method FTMS; HCD Score 175.23 m/z 924.41 Gene names BAZ2A

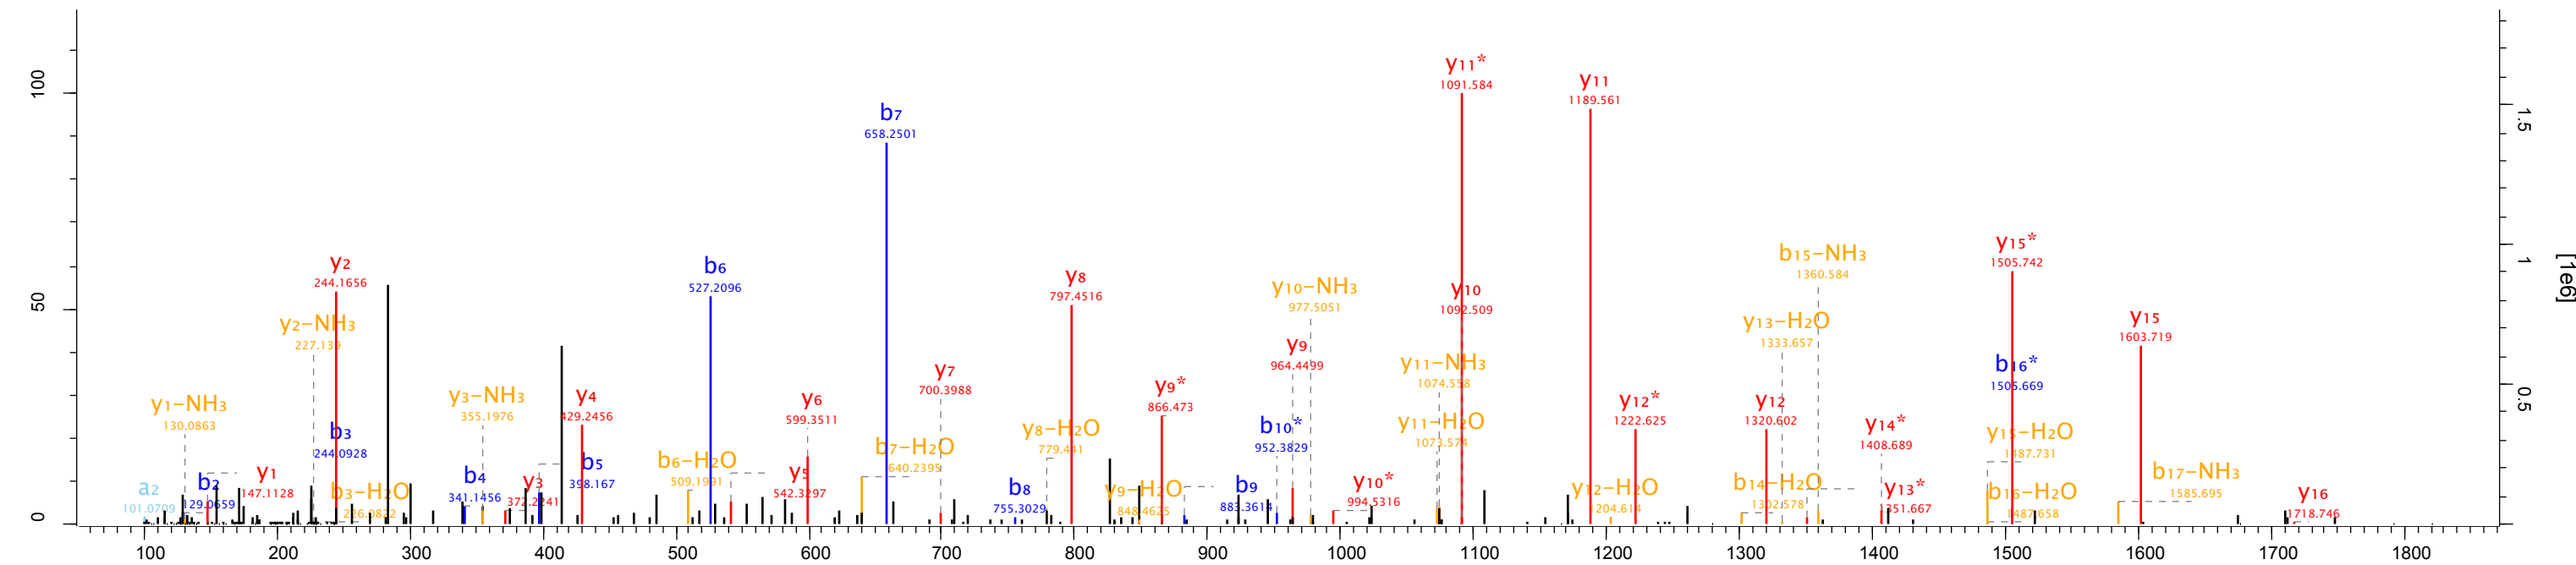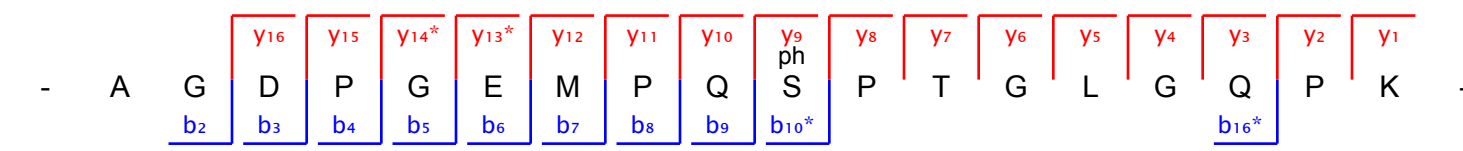

Raw file 20150814\_A375SR\_Phospho\_BR2\_06 Scan 13360 Method FTMS; HCD Score 121.45 m/z 682.8 Gene names SUGT1

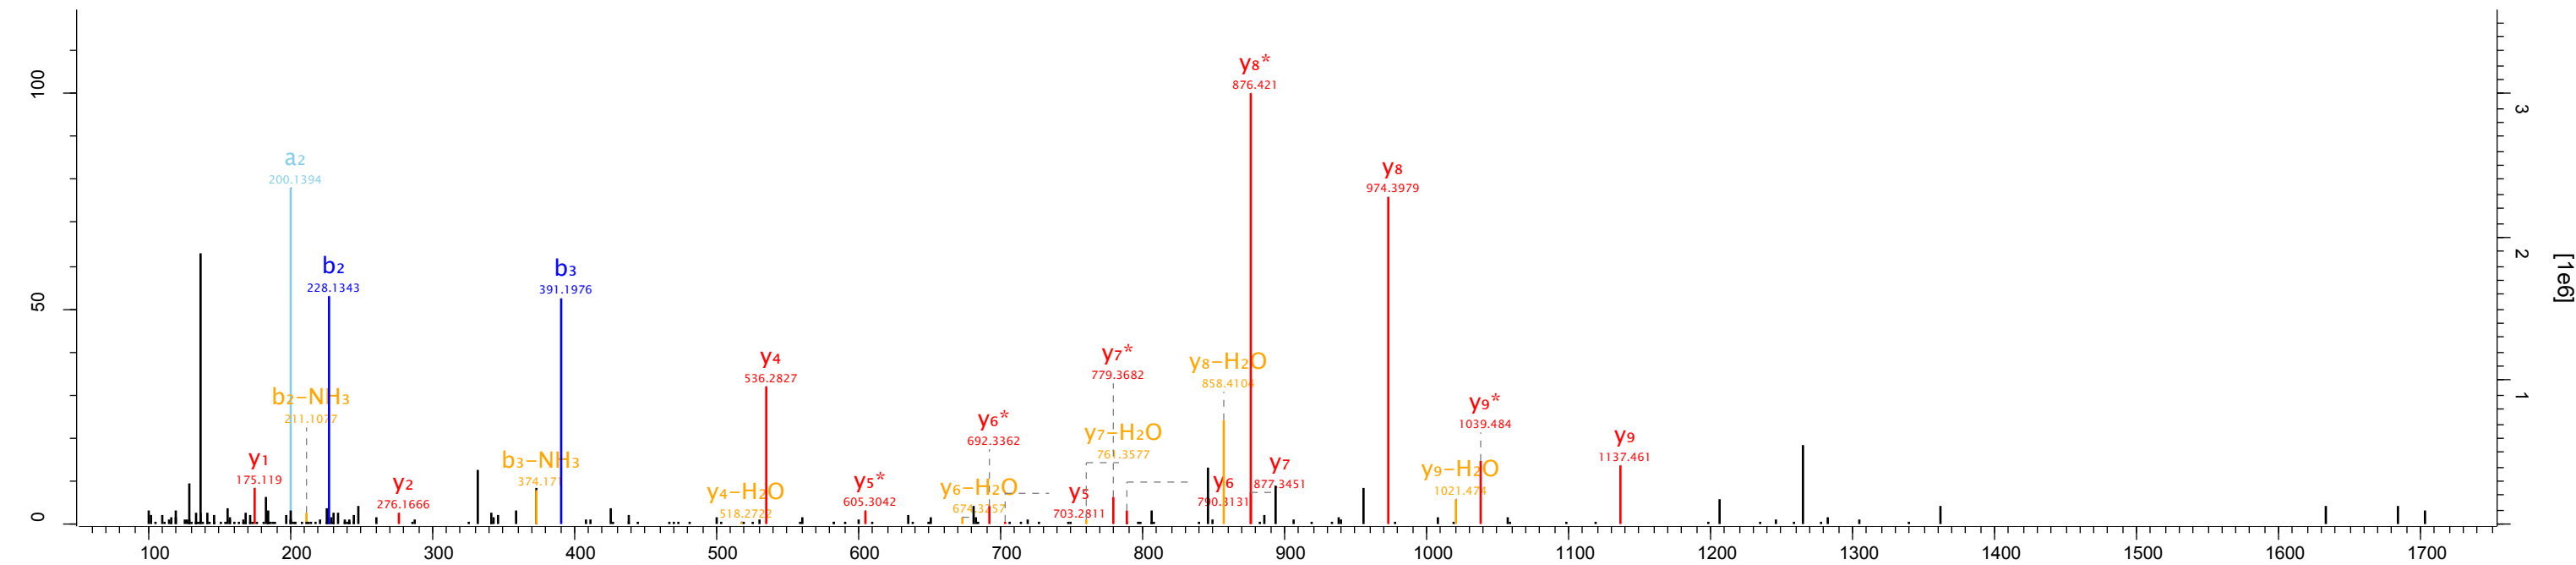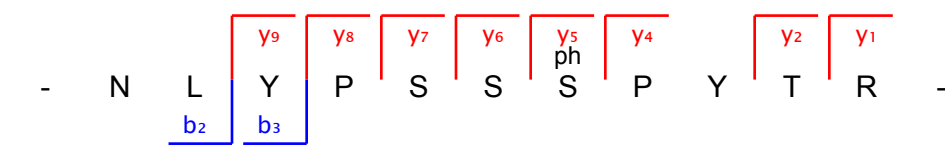

Raw file 20150814\_A375SR\_Phospho\_BR2\_06 Scan 13640 Method FTMS; HCD Score 88.56 m/z 696.79 Gene names MAP7D3

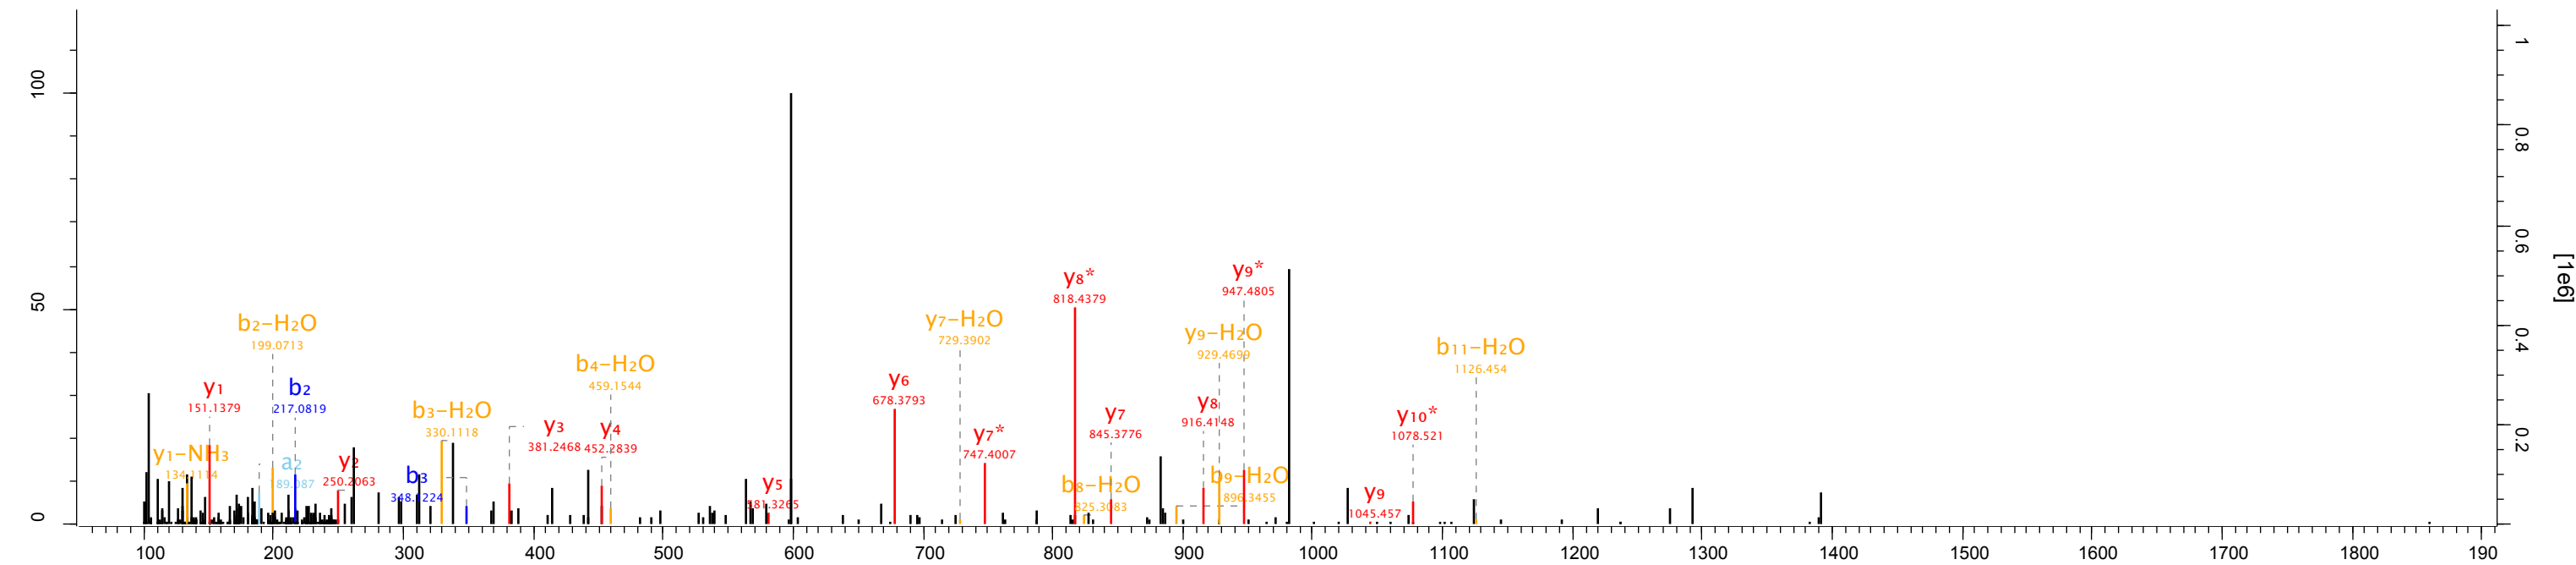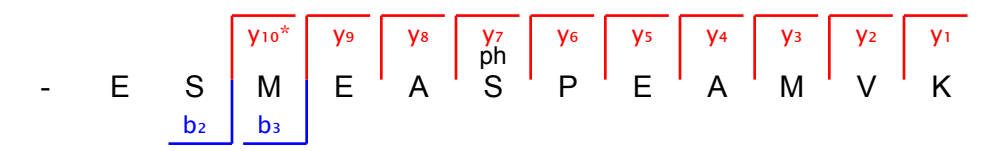

Raw file: 20150814\_A375SR\_Phospho\_BR2\_06  
 Scan: 14110 Method: FTMS; HCD Score: 251.09 m/z: 933.42 Gene names: BSG

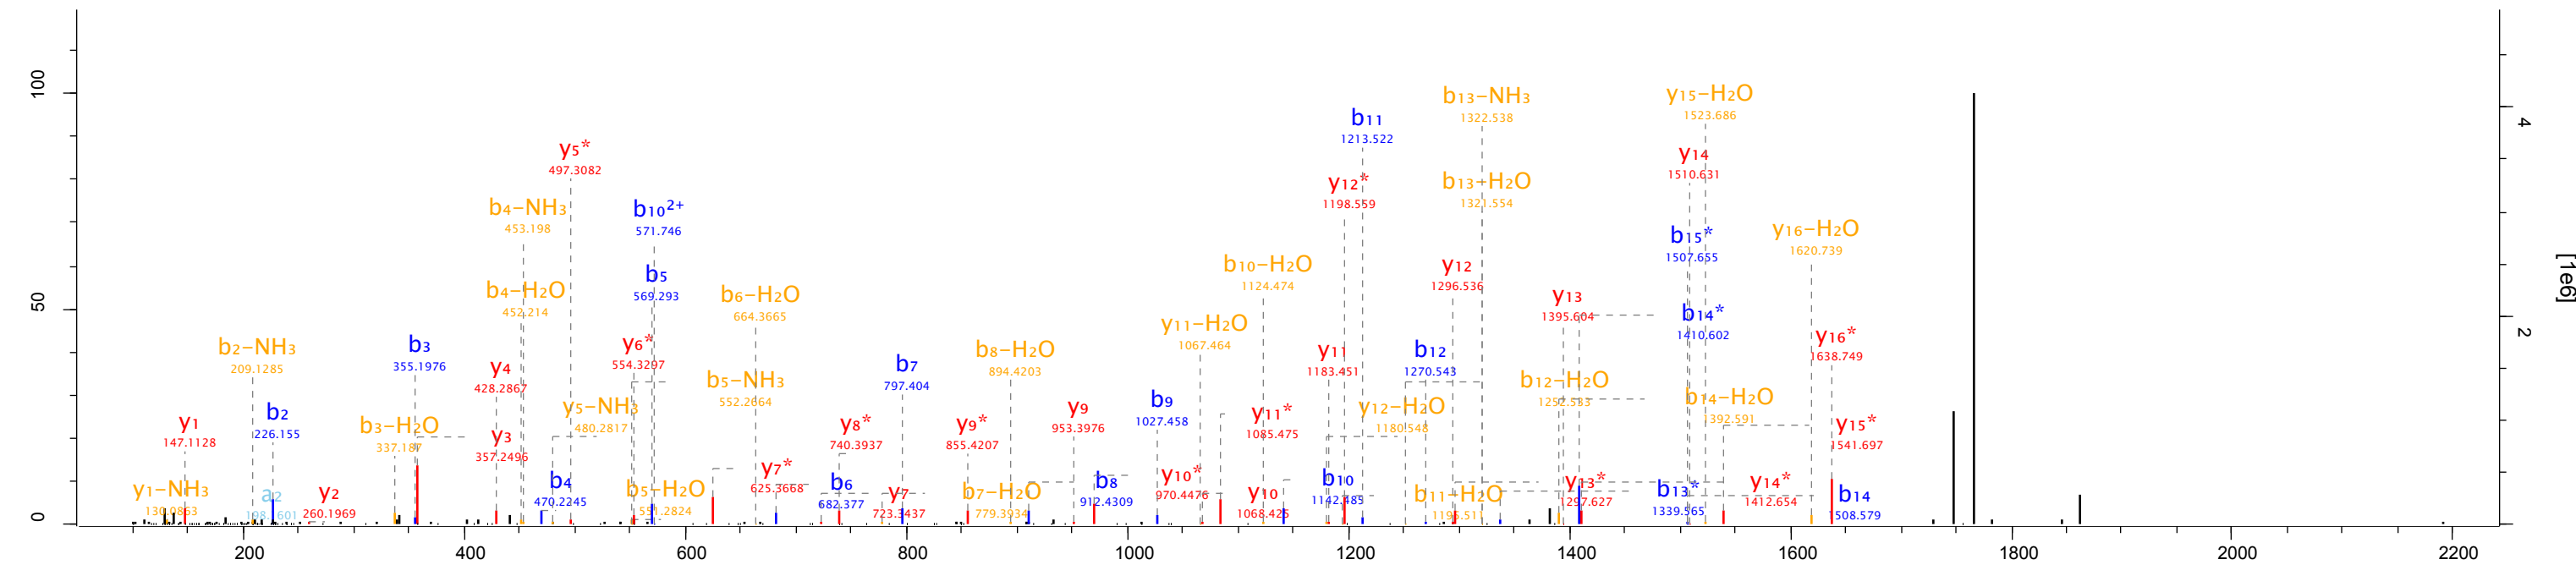

Sequence: - K P E D V L D D D D A G S A P L K -

Fragmentation sites (b ions): b2, b3, b4, b5, b6, b7, b8, b9, b10, b11, b12, b13\*, b14, b15\*

Fragmentation sites (y ions): y1, y2, y3, y4, y5\*, y6\*, y7, y8\*, y9, y10, y11, y12, y13, y14\*, y15\*, y16\*

Raw file: 20150814\_A375SR\_Phospho\_BR2\_06  
 Scan: 14800 Method: FTMS; HCD Score: 340.78 m/z: 971.4 Gene names: NAP1L4

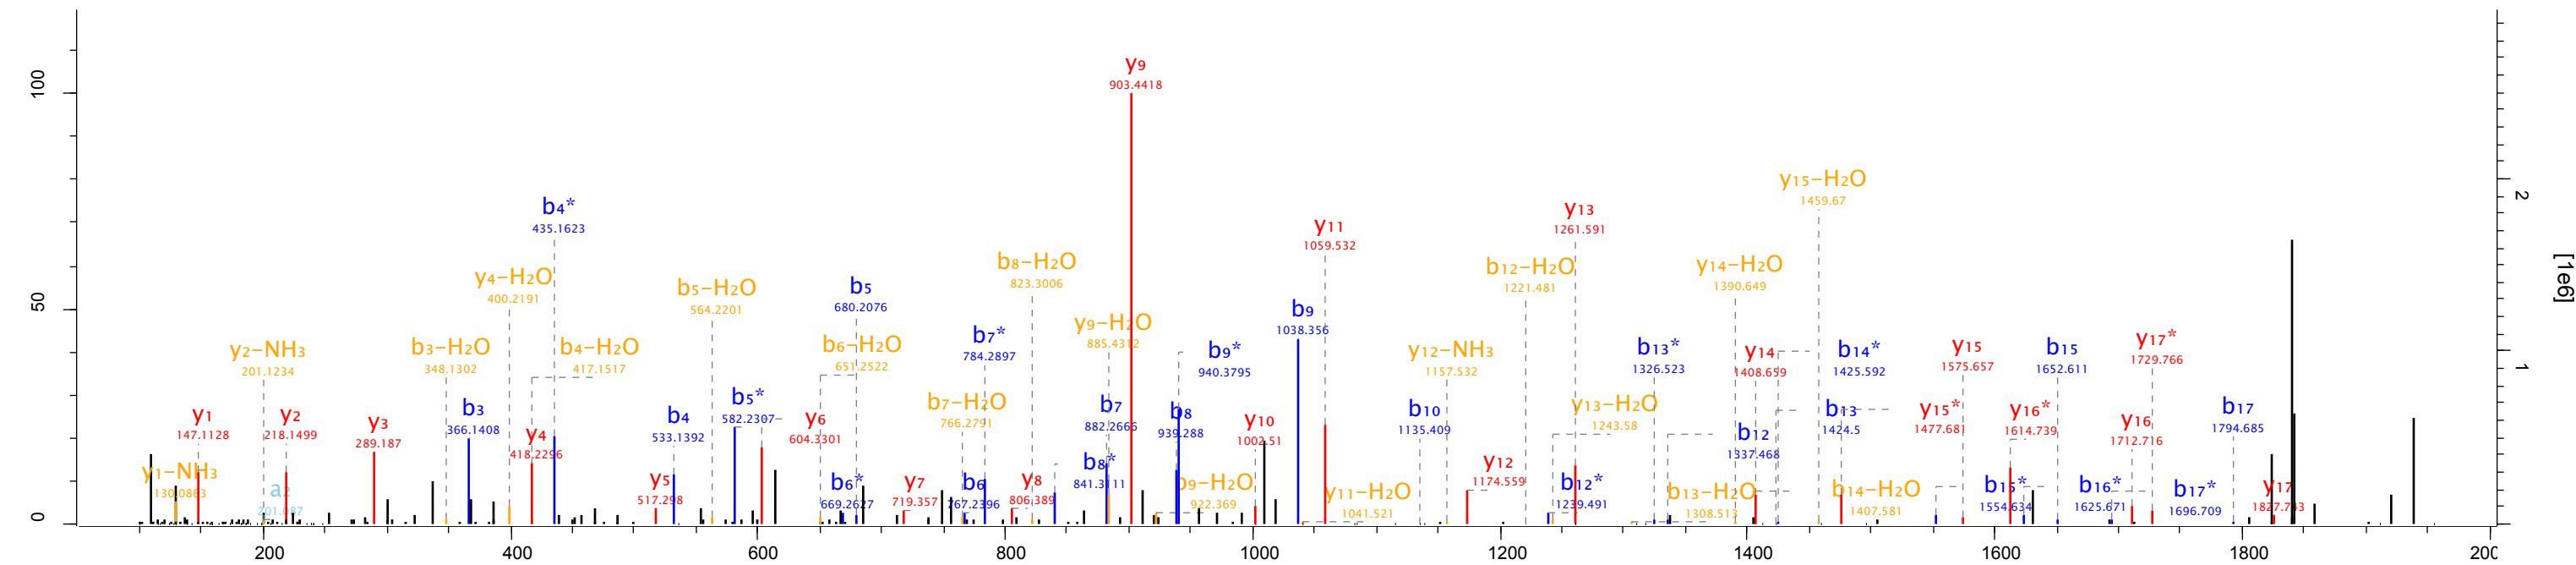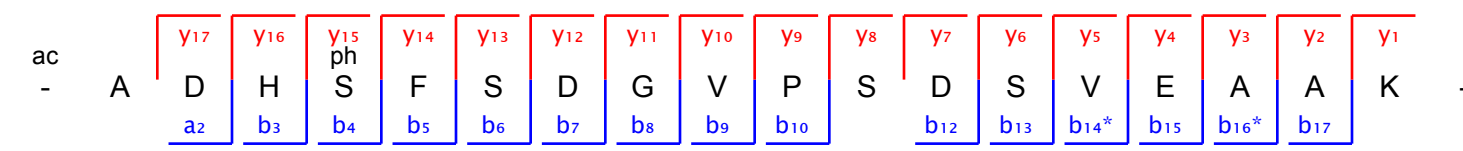

Raw file 20150814\_A375SR\_Phospho\_BR2\_06 Scan 15020 Method FTMS; HCD Score 100.41 m/z 915.08 Gene names ZC3H4

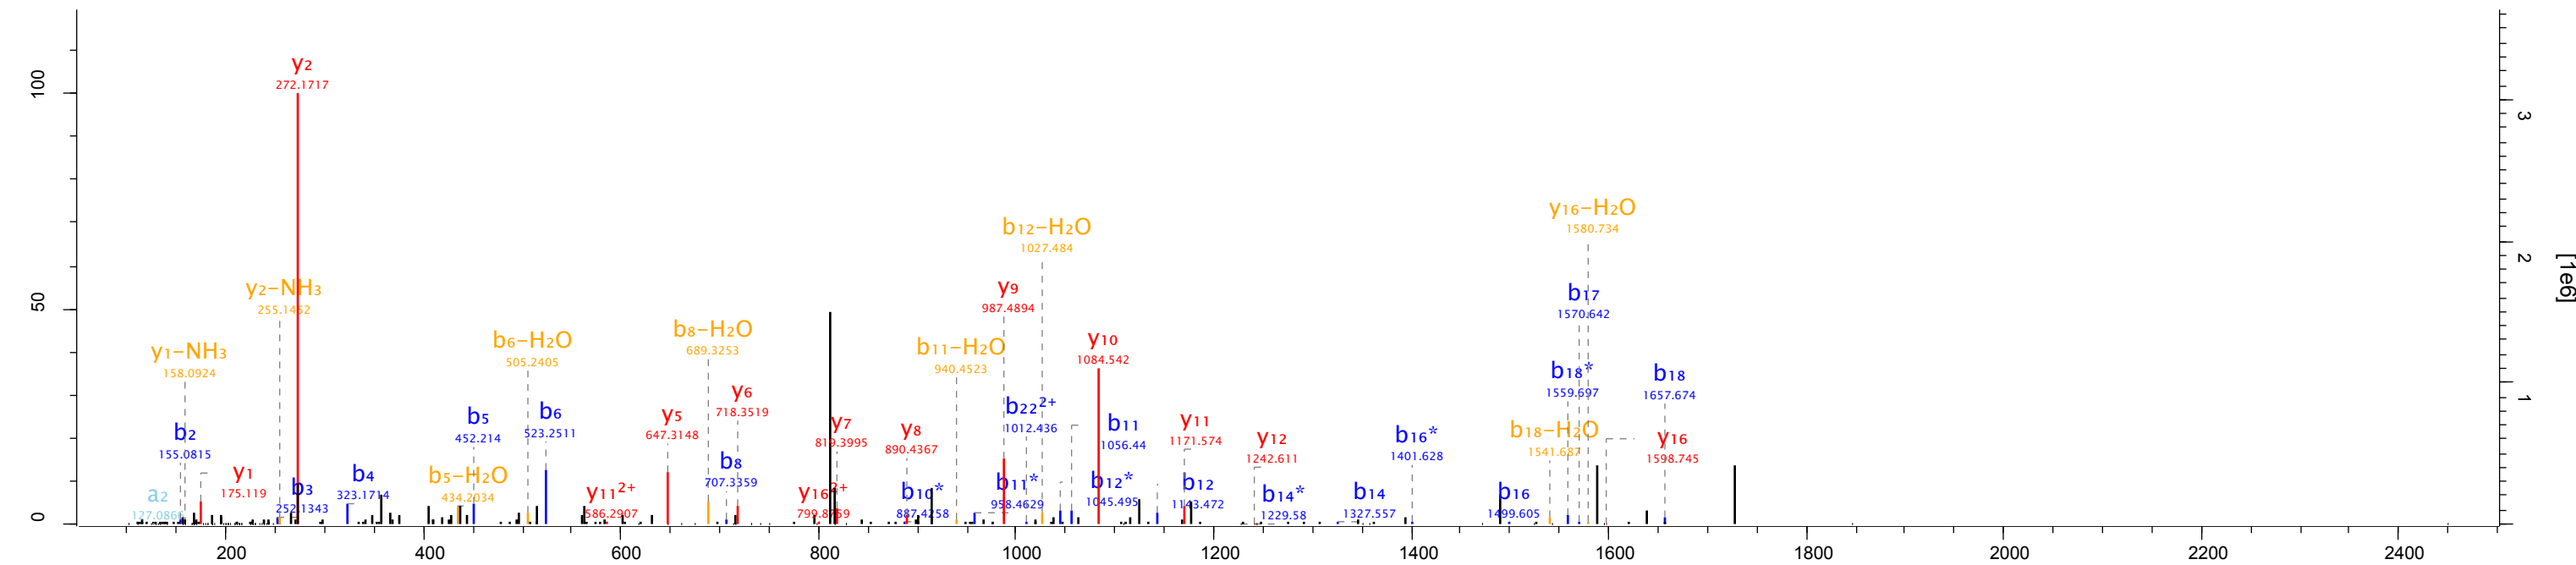

- P G P A E A P S P ph T A S P S G D A S P P P A T A P Y D P R -

b<sub>2</sub>
b<sub>3</sub>
b<sub>4</sub>
b<sub>5</sub>
b<sub>6</sub>
b<sub>8</sub>
b<sub>10</sub>\*
b<sub>11</sub>
b<sub>12</sub>
b<sub>14</sub>
b<sub>16</sub>
b<sub>17</sub>
b<sub>18</sub>
b<sub>22</sub><sup>2+</sup>
y<sub>12</sub>
y<sub>11</sub>
y<sub>10</sub>
y<sub>9</sub>
y<sub>8</sub>
y<sub>7</sub>
y<sub>6</sub>
y<sub>5</sub>
y<sub>2</sub>
y<sub>1</sub>

Raw file  
20150814\_A375SR\_Phospho\_BR2\_06

Scan 15160 Method FTMS; HCD Score 179.71 m/z 982.96 Gene names CTNND1

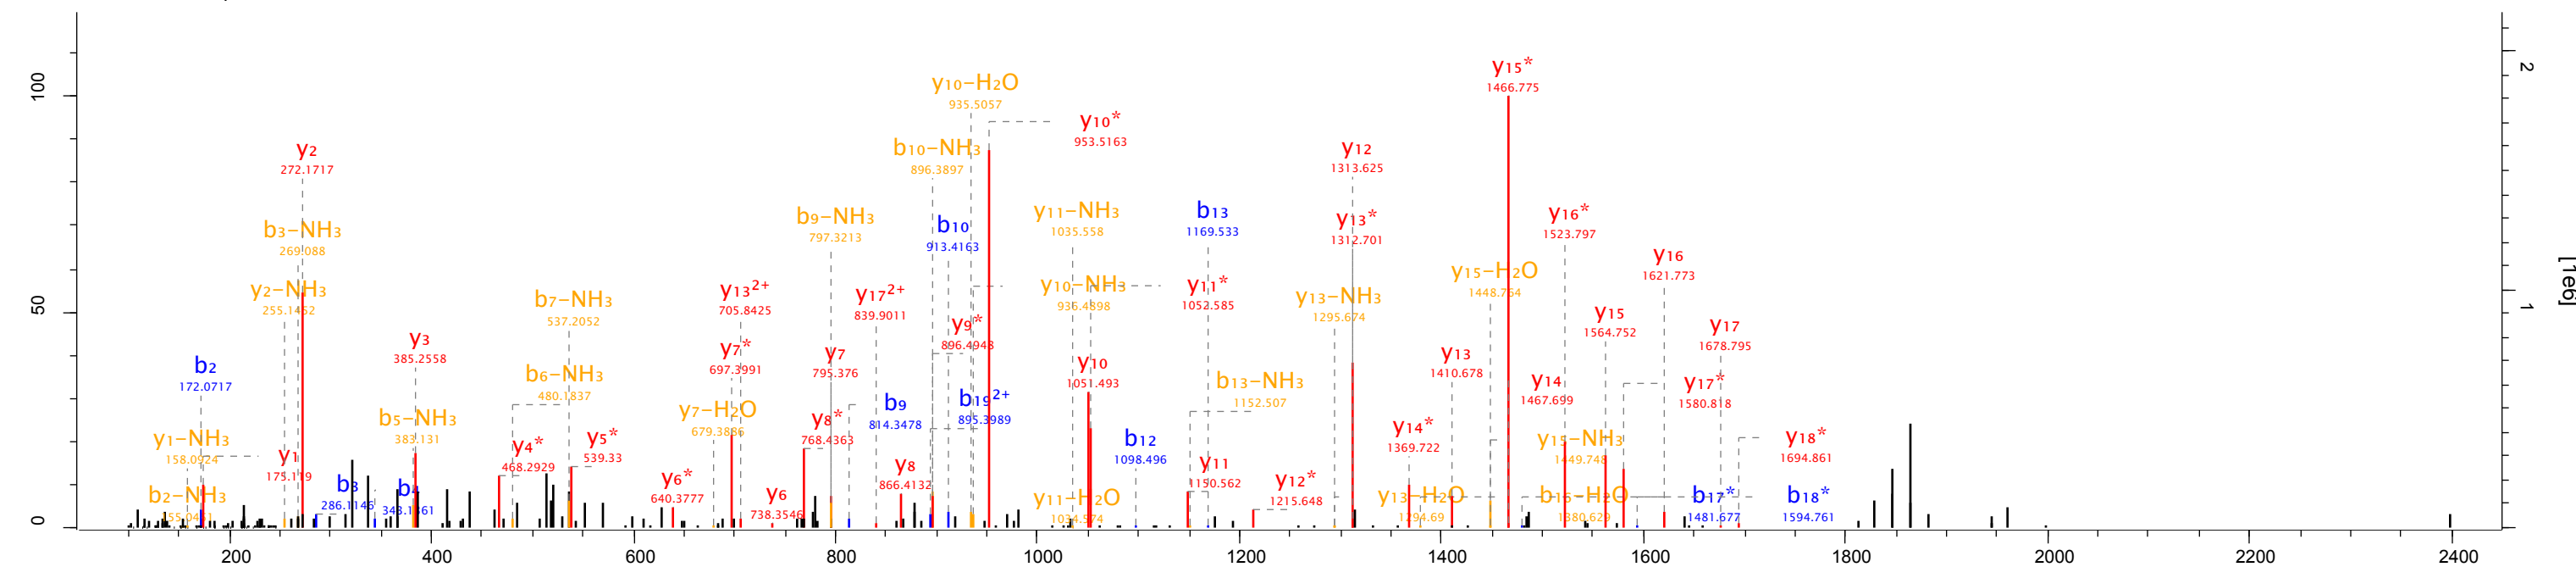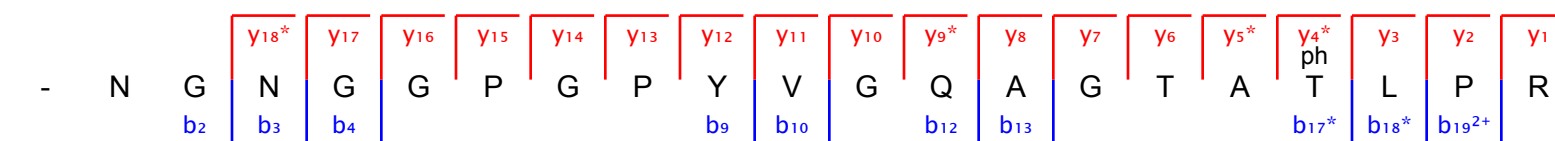

Raw file: 20150814\_A375SR\_Phospho\_BR2\_06  
 Scan: 15850 Method: FTMS; HCD Score: 208.37 m/z: 798.87 Gene names: SORBS3

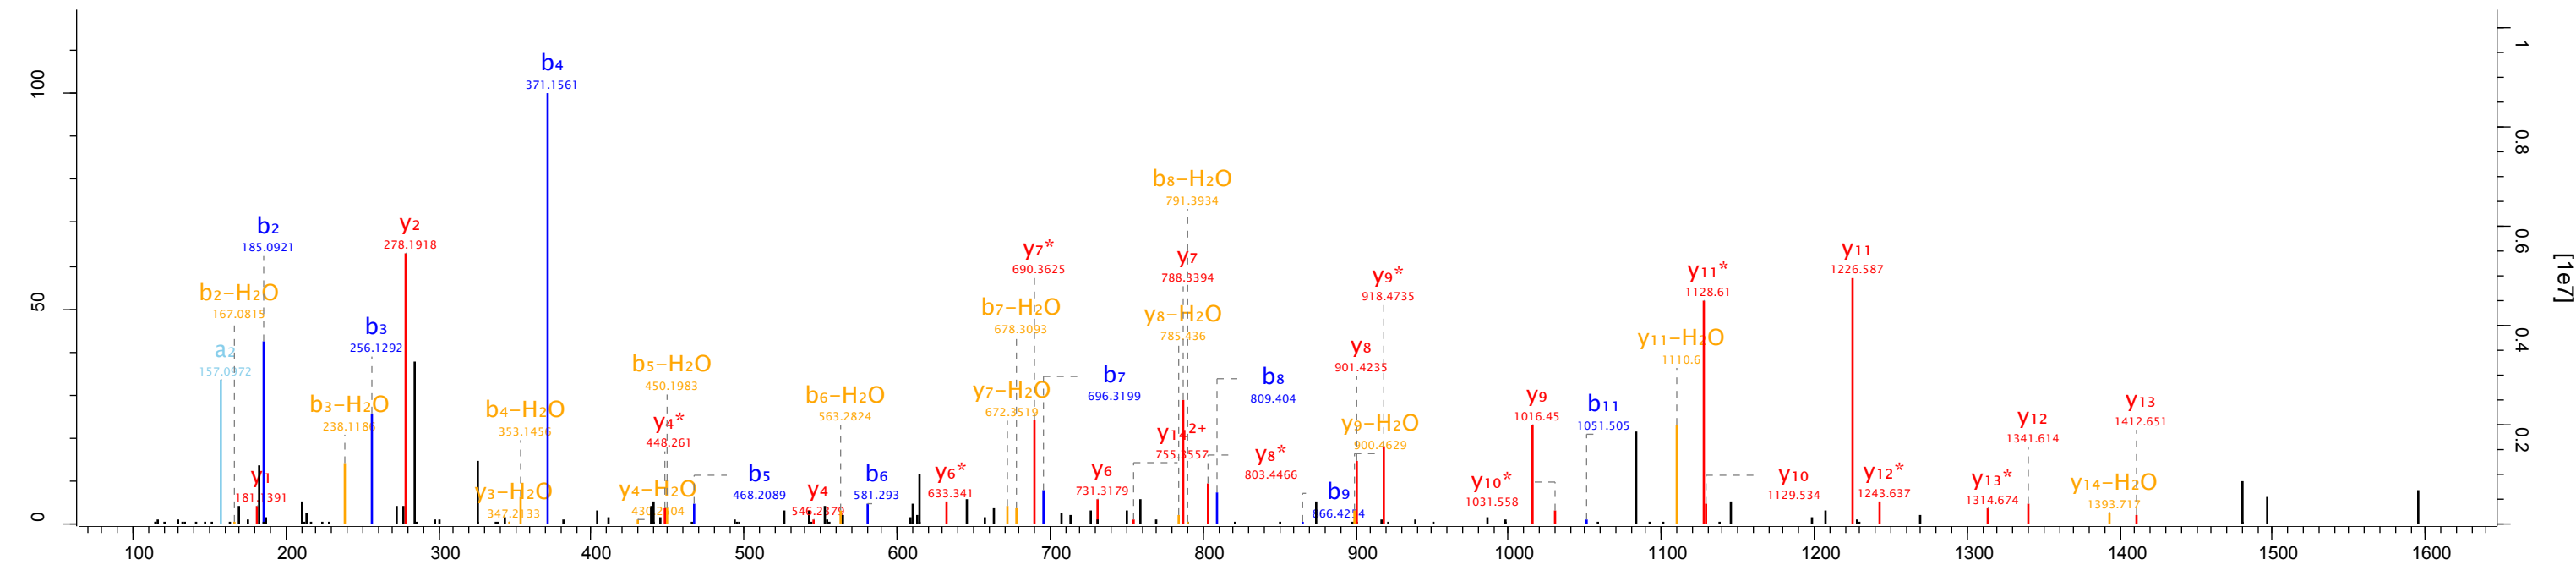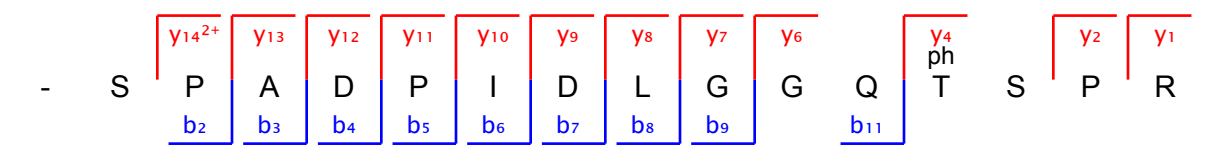



Raw file 20150814\_A375SR\_Phospho\_BR2\_06 Scan 15950 Method FTMS; HCD Score 120.13 m/z 876.1 Gene names CHD4

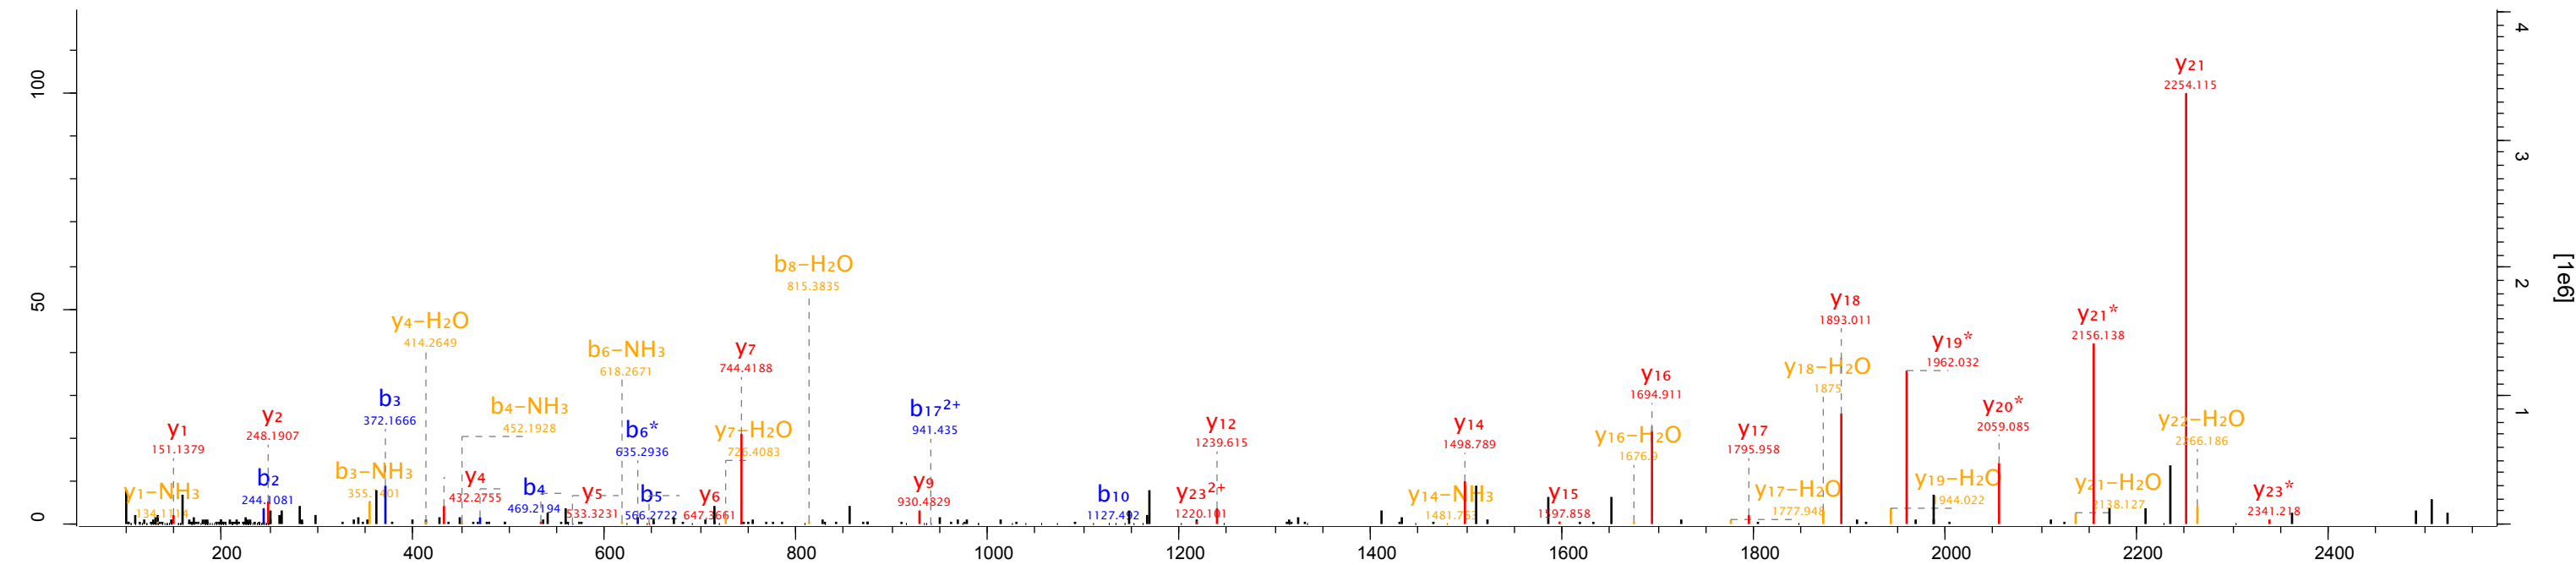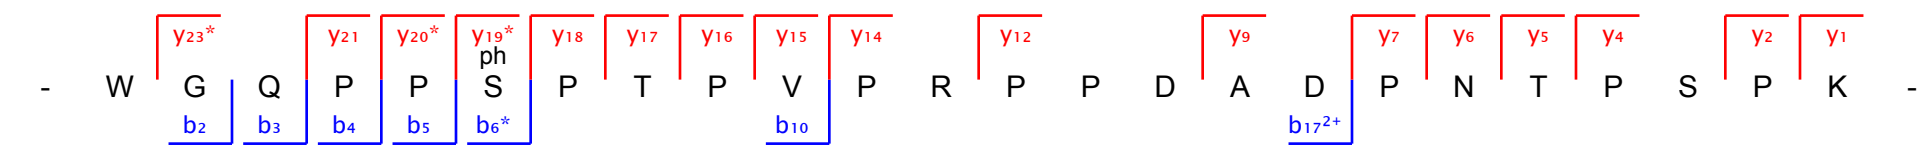

Raw file 20150814\_A375SR\_Phospho\_BR2\_06 Scan 15980 Method FTMS; HCD Score 144.68 m/z 832.86 Gene names NUP153

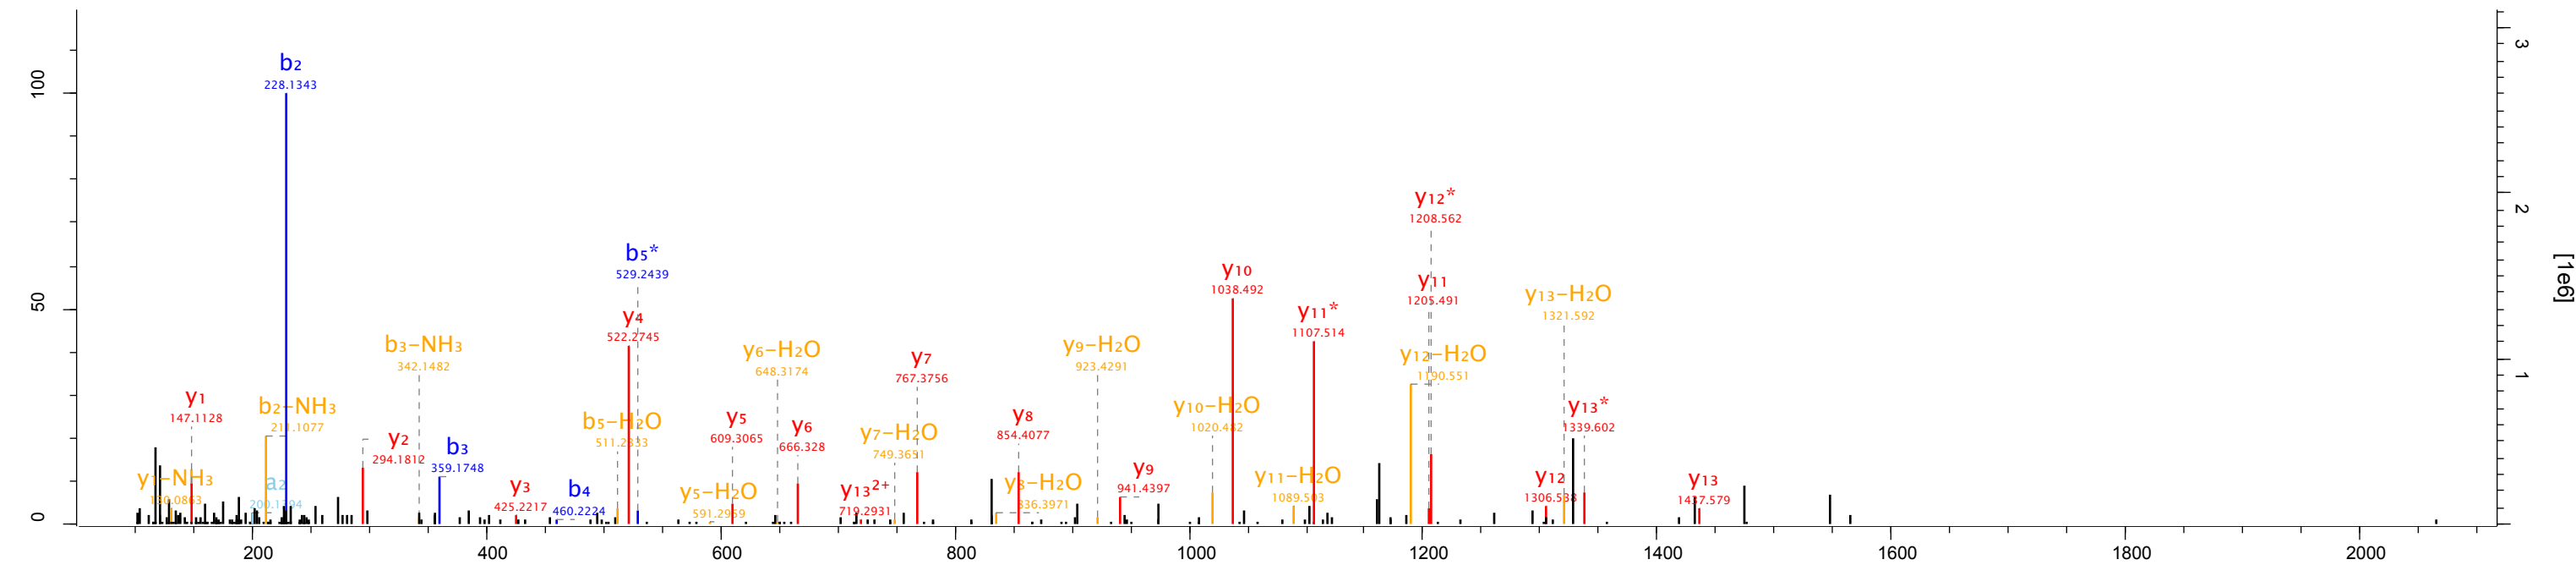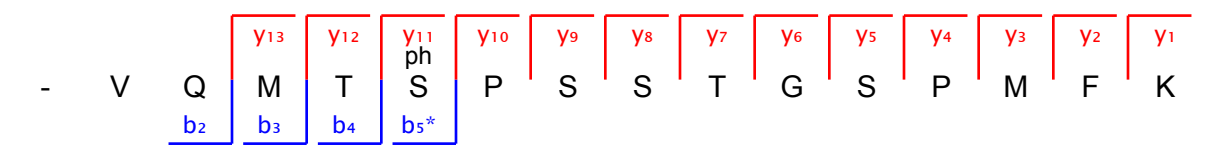

Raw file: 20150814\_A375SR\_Phospho\_BR2\_06  
 Scan: 16090 Method: FTMS; HCD Score: 226.18 m/z: 667.68 Gene names: SIK3

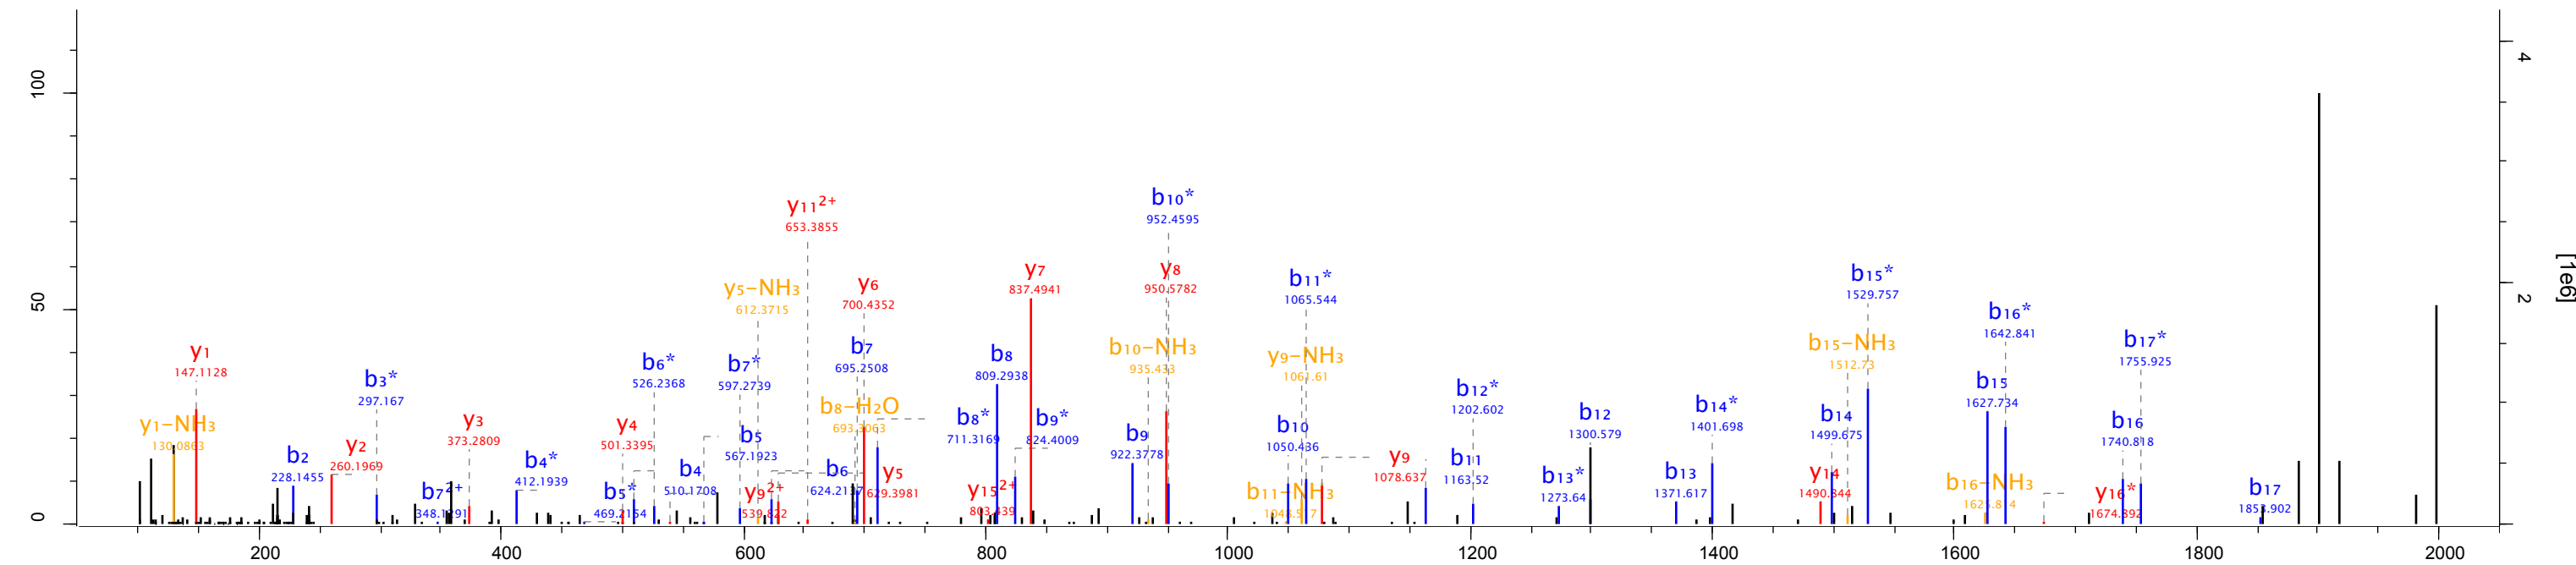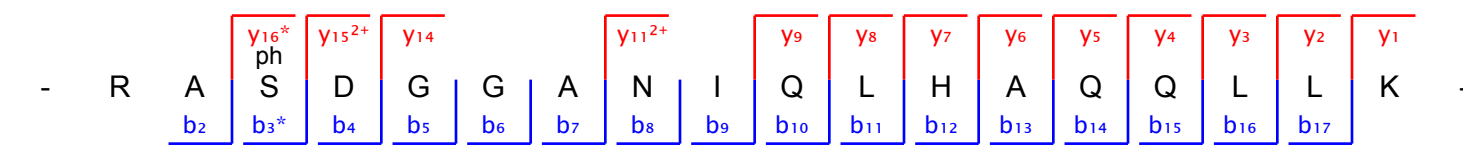

Raw file 20150814\_A375SR\_Phospho\_BR2\_06 Scan 16260 Method FTMS; HCD Score 138.01 m/z 685.75 Gene names NAV1

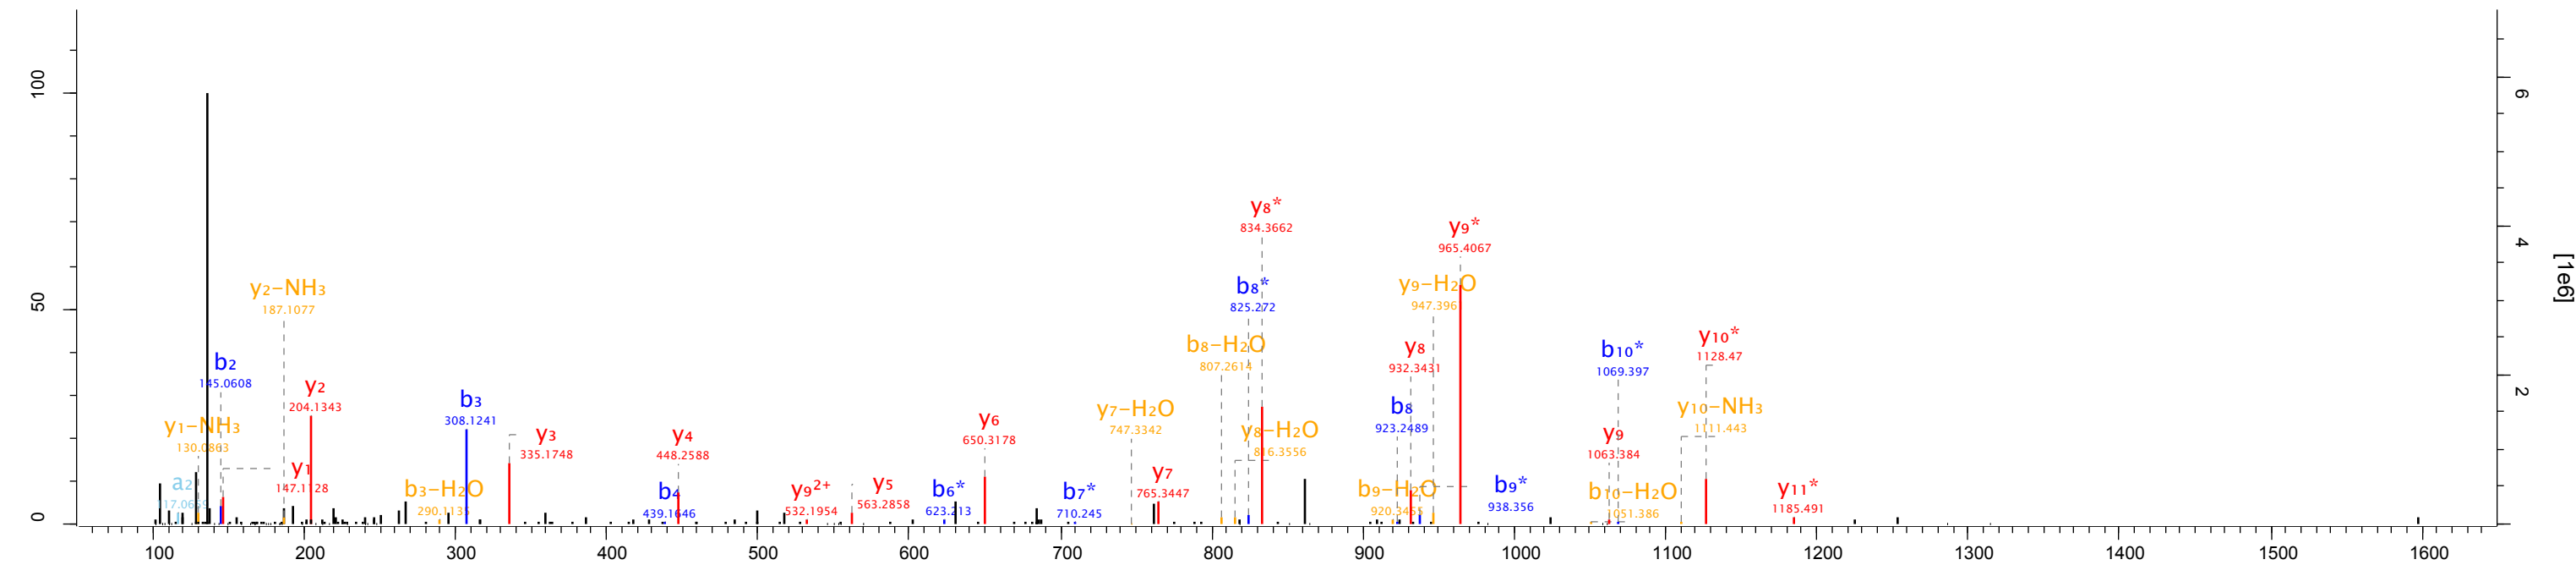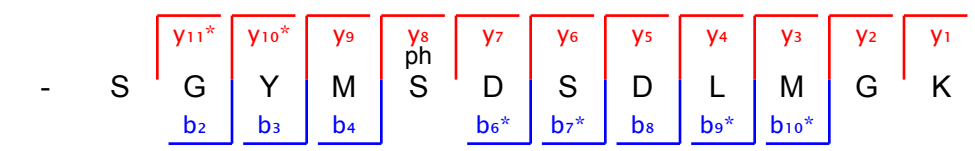

Raw file: 20150814\_A375SR\_Phospho\_BR2\_06  
 Scan: 16390  
 Method: FTMS; HCD  
 Score: 143.57  
 m/z: 804.41  
 Gene names: MAGI3

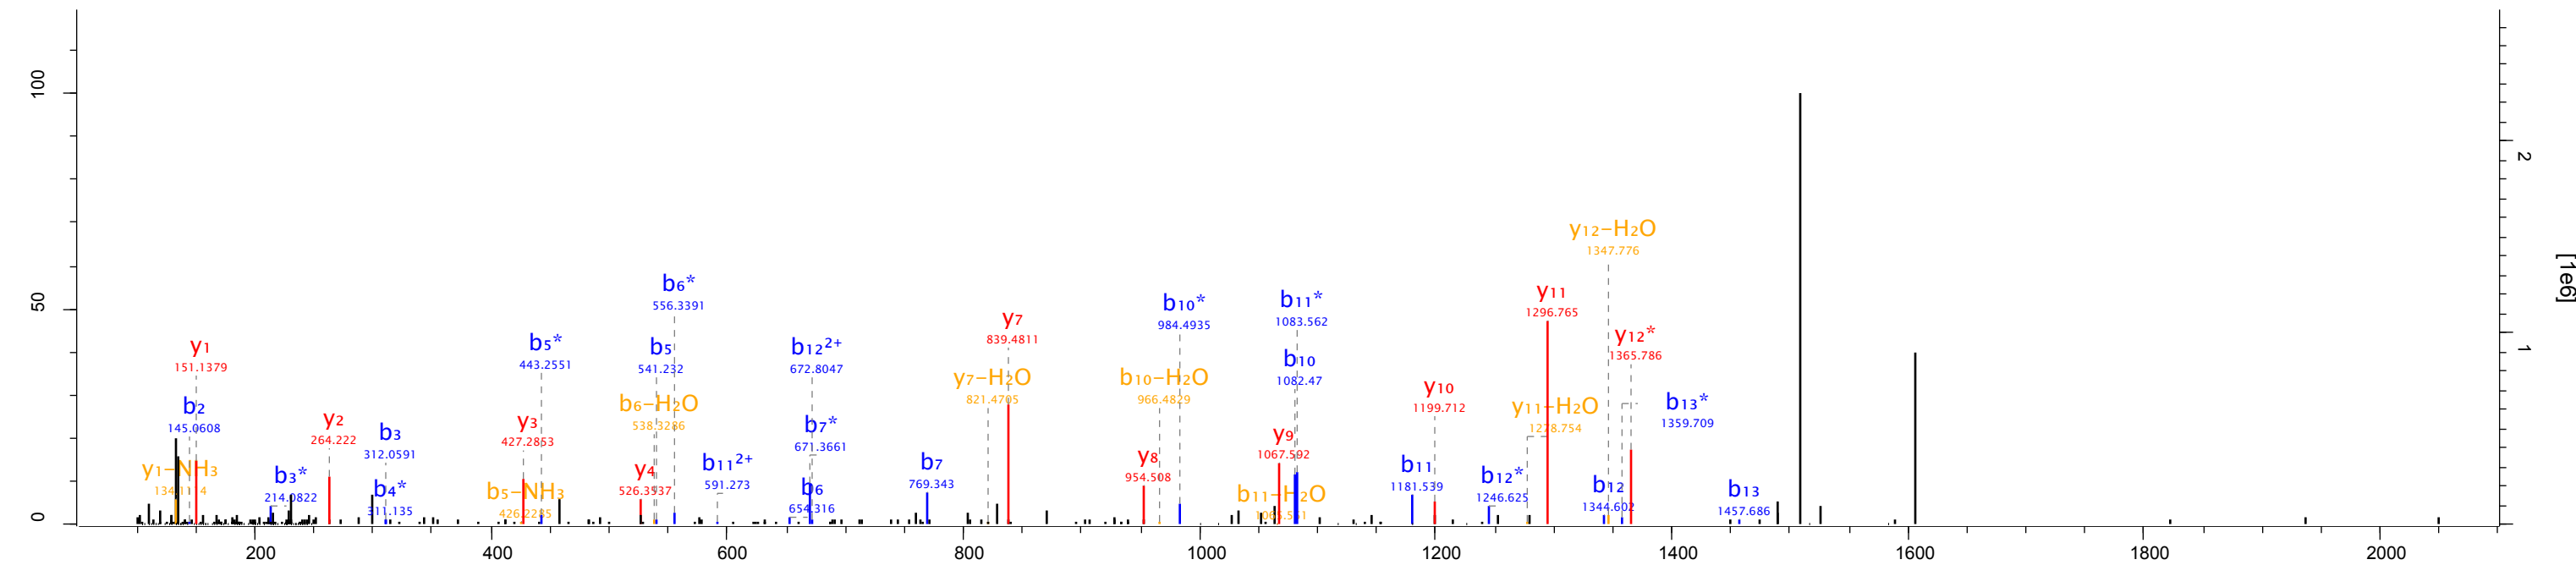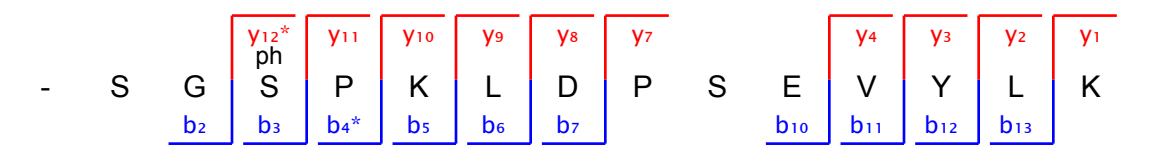

Raw file: 20150814\_A375SR\_Phospho\_BR2\_06  
 Scan: 16560 Method: FTMS; HCD Score: 103.42 m/z: 716.83 Gene names: SP100

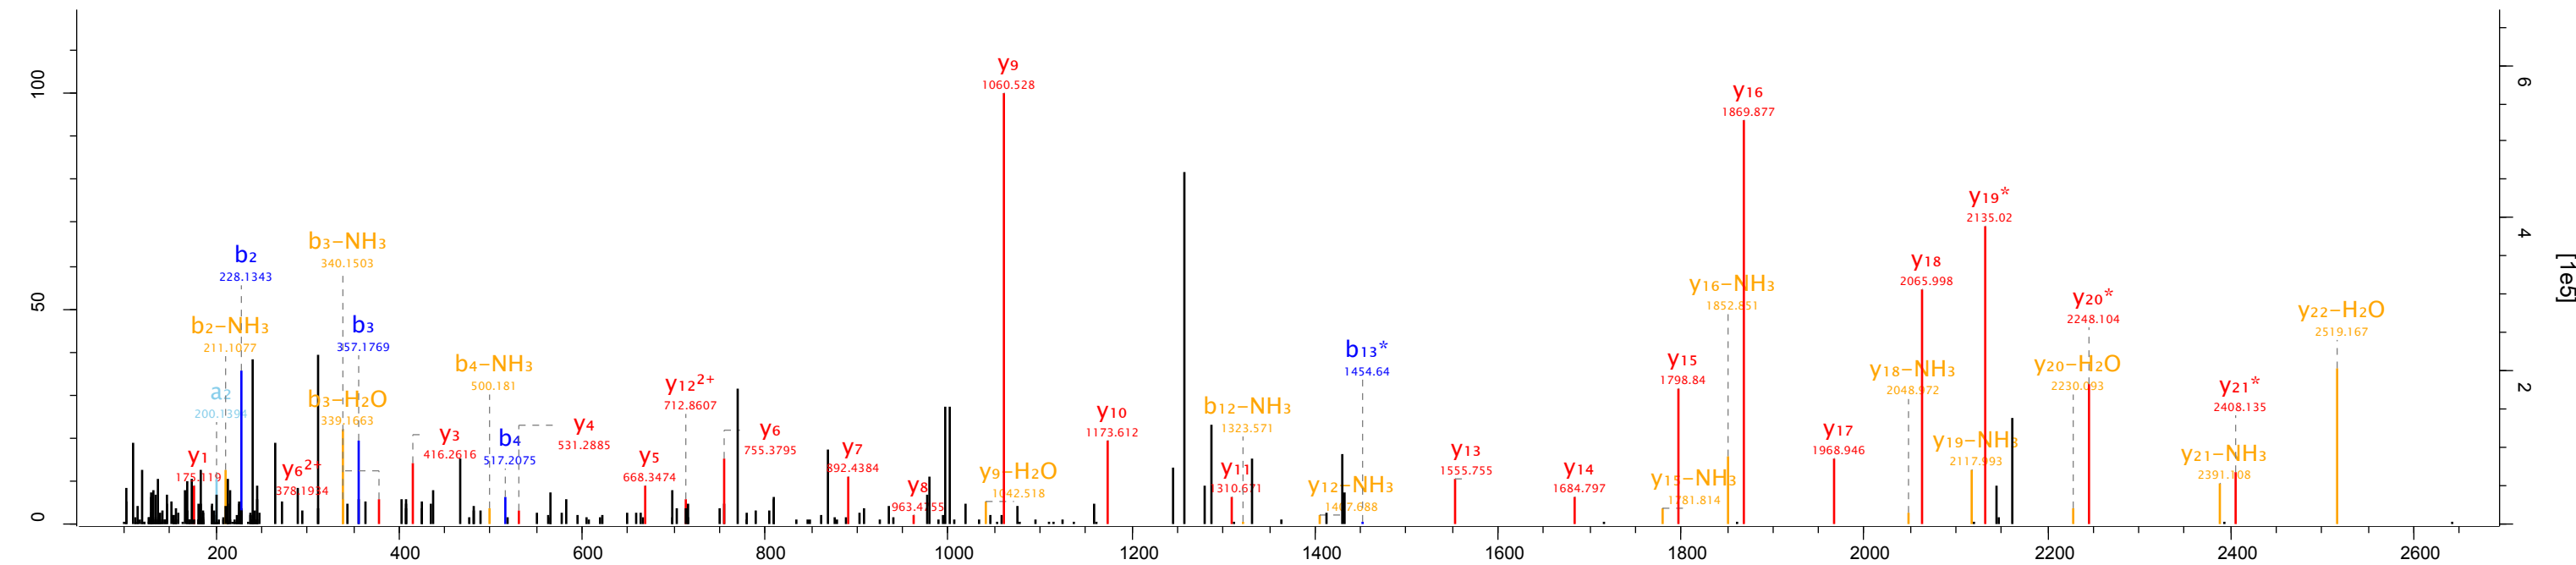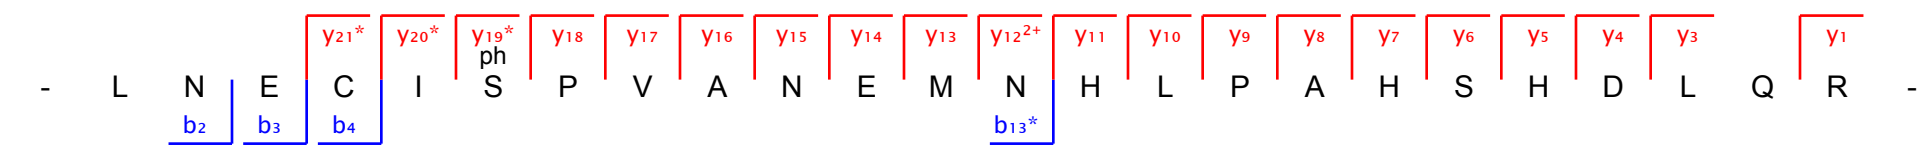

Raw file: 20150814\_A375SR\_Phospho\_BR2\_06  
 Scan: 16670 Method: FTMS; HCD Score: 99.92 m/z: 775.88 Gene names: MEF2A

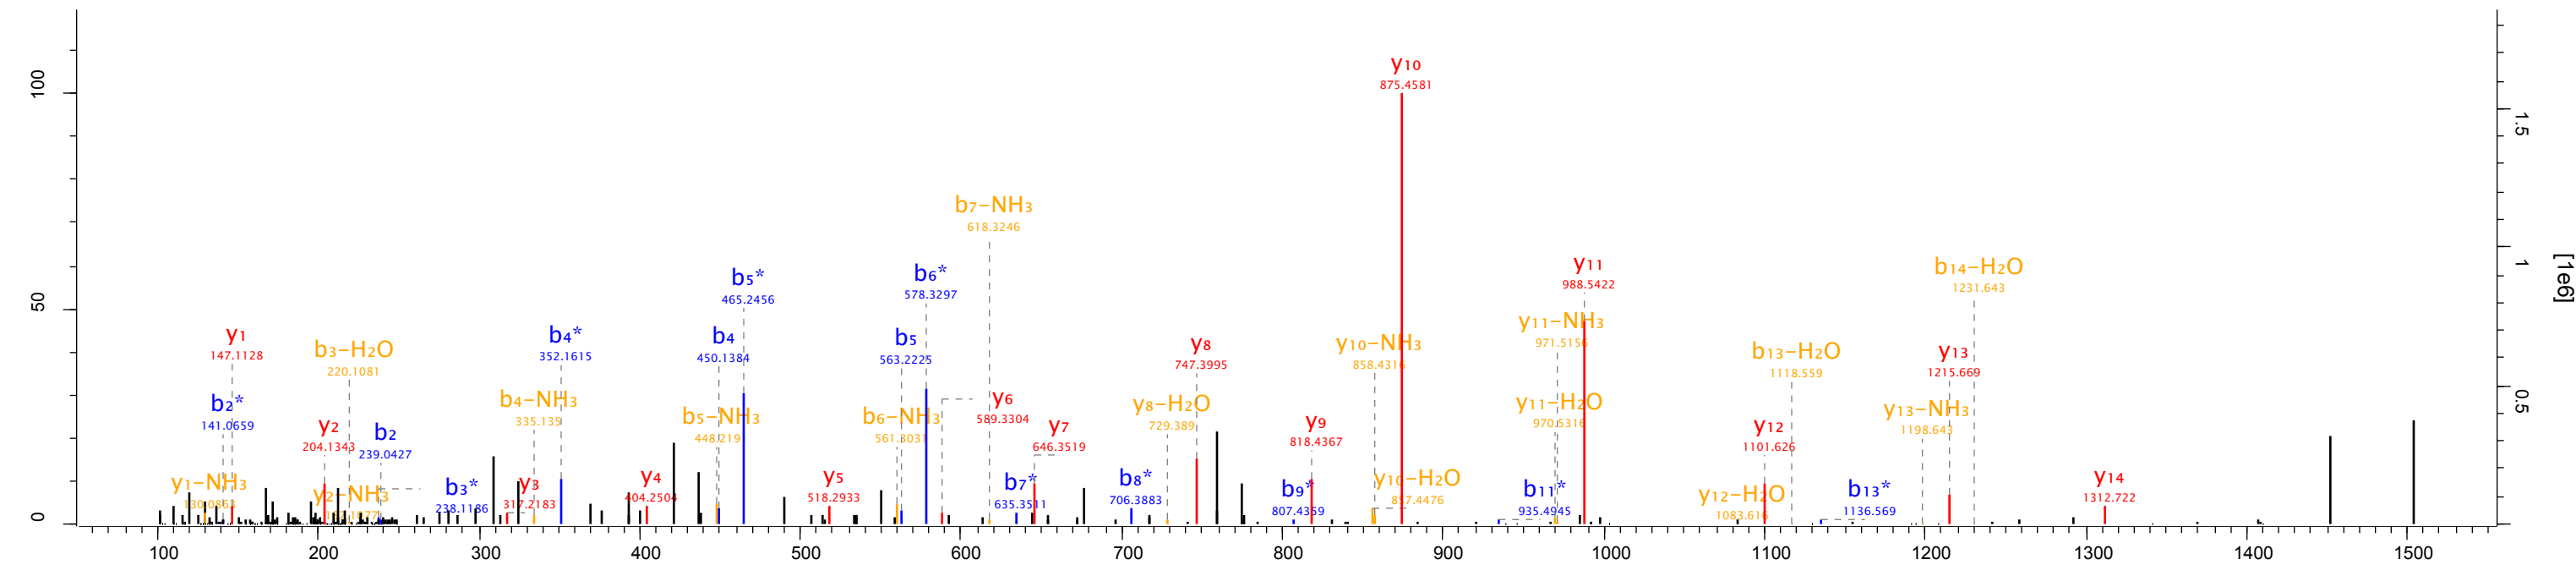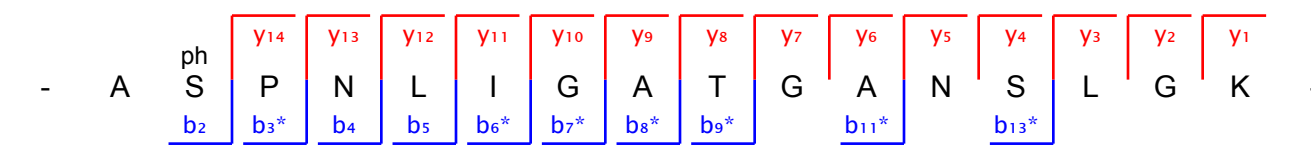

Raw file: 20150814\_A375SR\_Phospho\_BR2\_06  
 Scan: 17030 Method: FTMS; HCD Score: 185.09 m/z: 1055.49 Gene names: RAF1

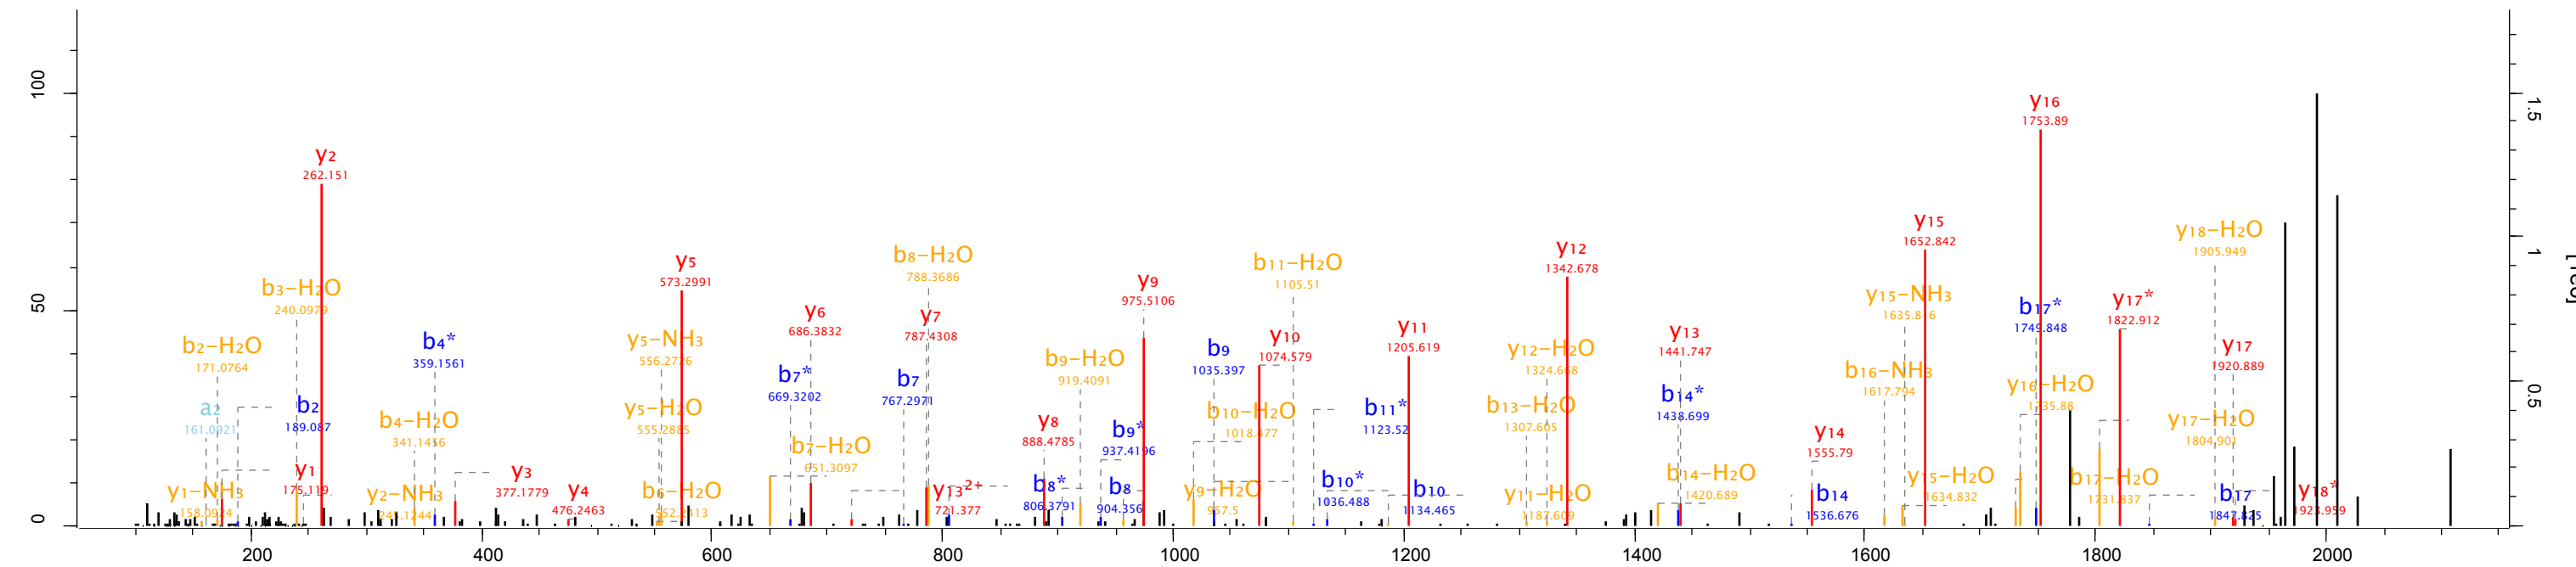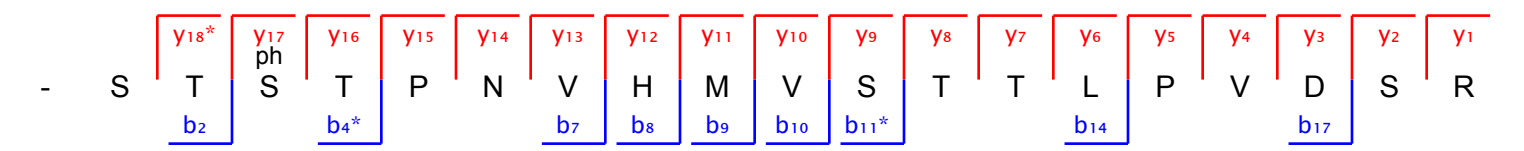



Raw file: 20150814\_A375SR\_Phospho\_BR2\_06  
 Scan: 17260 Method: FTMS; HCD Score: 172.57 m/z: 724.32 Gene names: KRT80

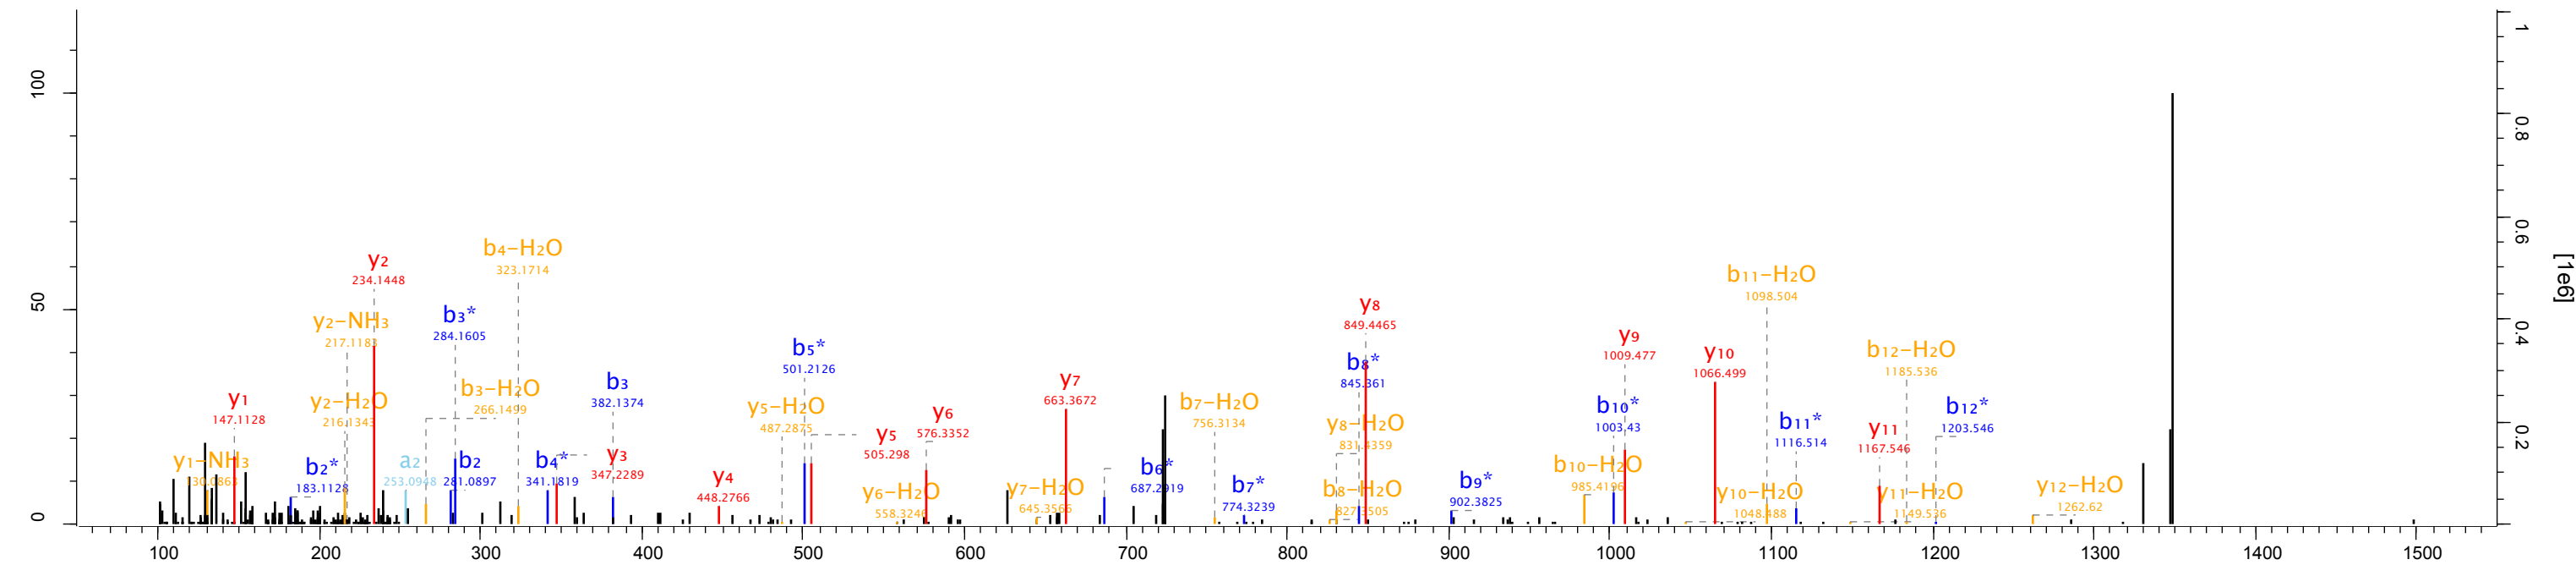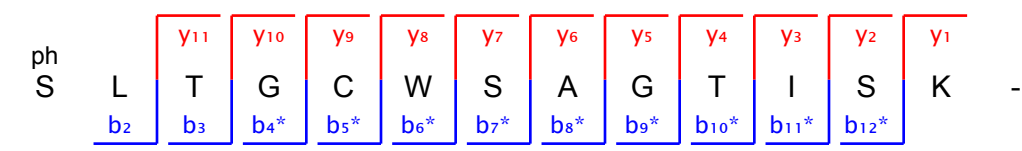

Raw file: 20150814\_A375SR\_Phospho\_BR2\_06  
 Scan: 17270 Method: FTMS; HCD Score: 168.1 m/z: 751.86 Gene names: NUMBL; NUMB

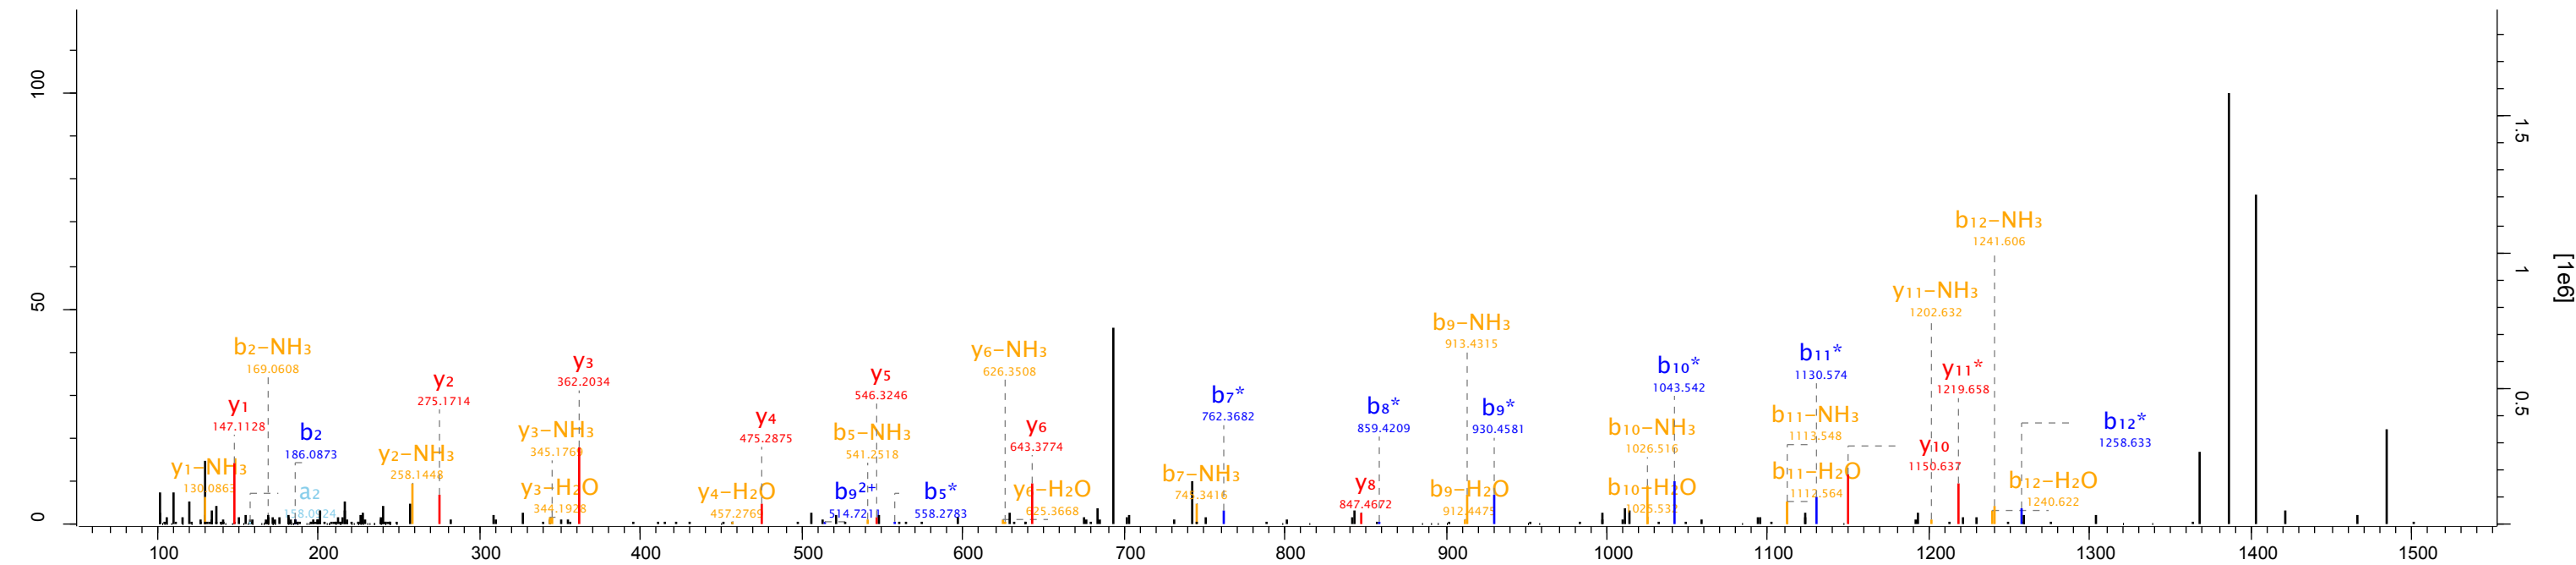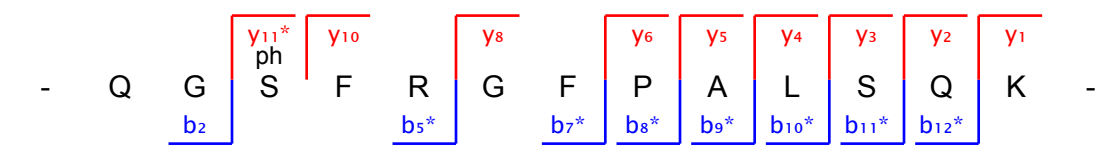

Raw file 20150814\_A375SR\_Phospho\_BR2\_06 Scan 17390 Method FTMS; HCD Score 189.67 m/z 730.83 Gene names PBK

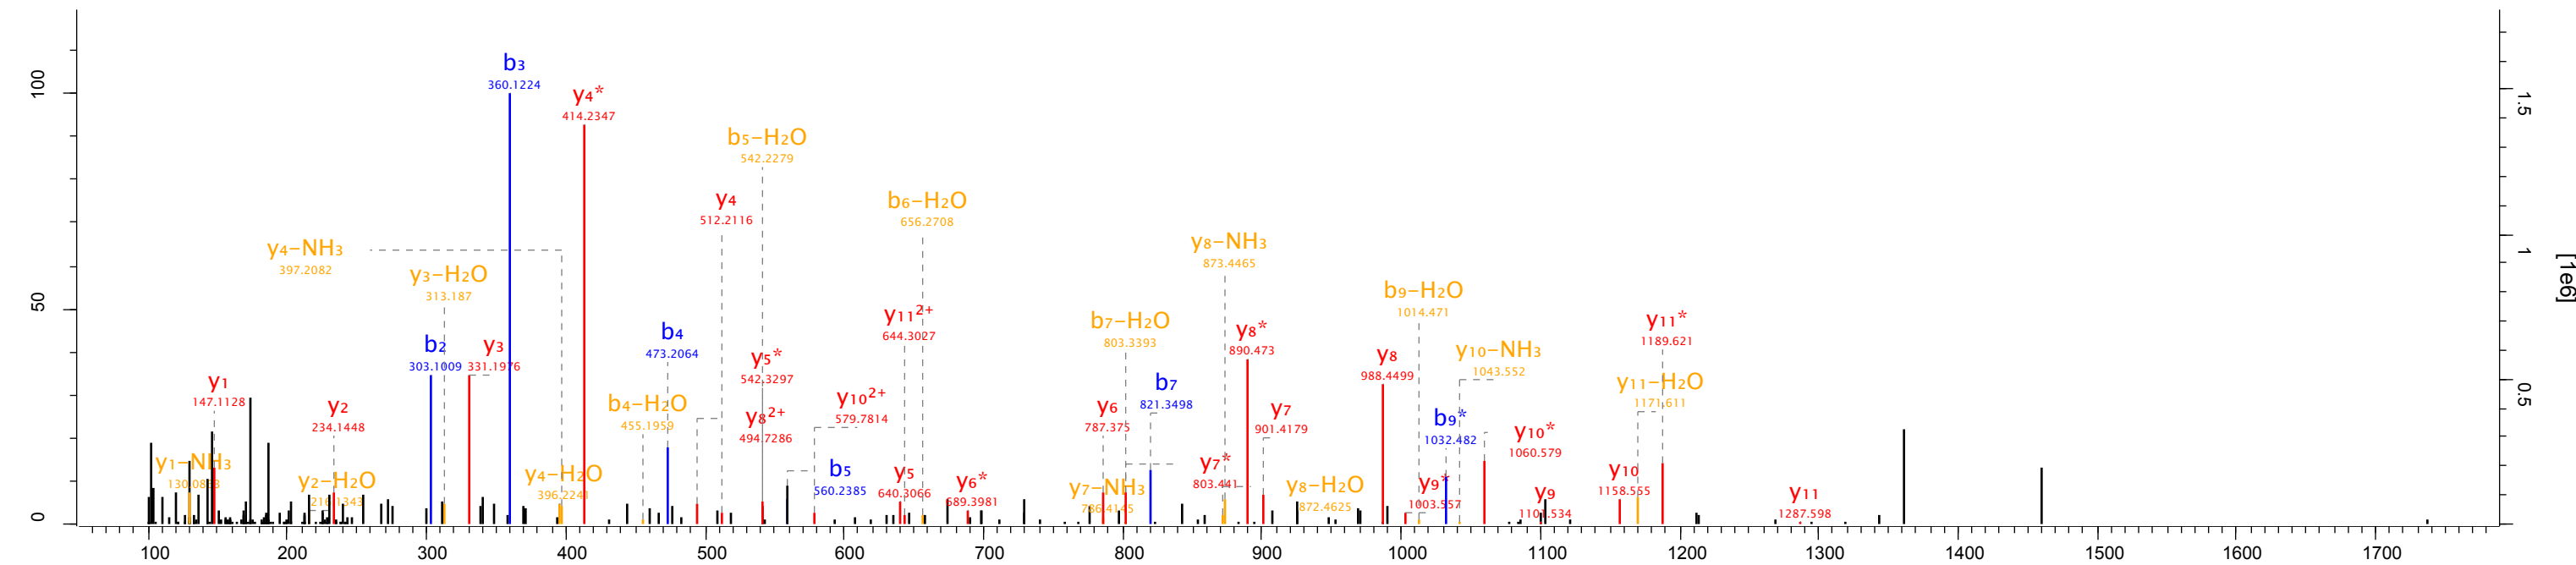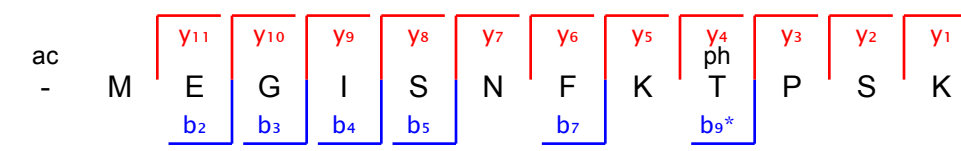

Raw file Scan Method Score m/z Gene names  
 20150814\_A375SR\_Phospho\_BR2\_06 17430 FTMS; HCD 162.15 841.74 NCOR1

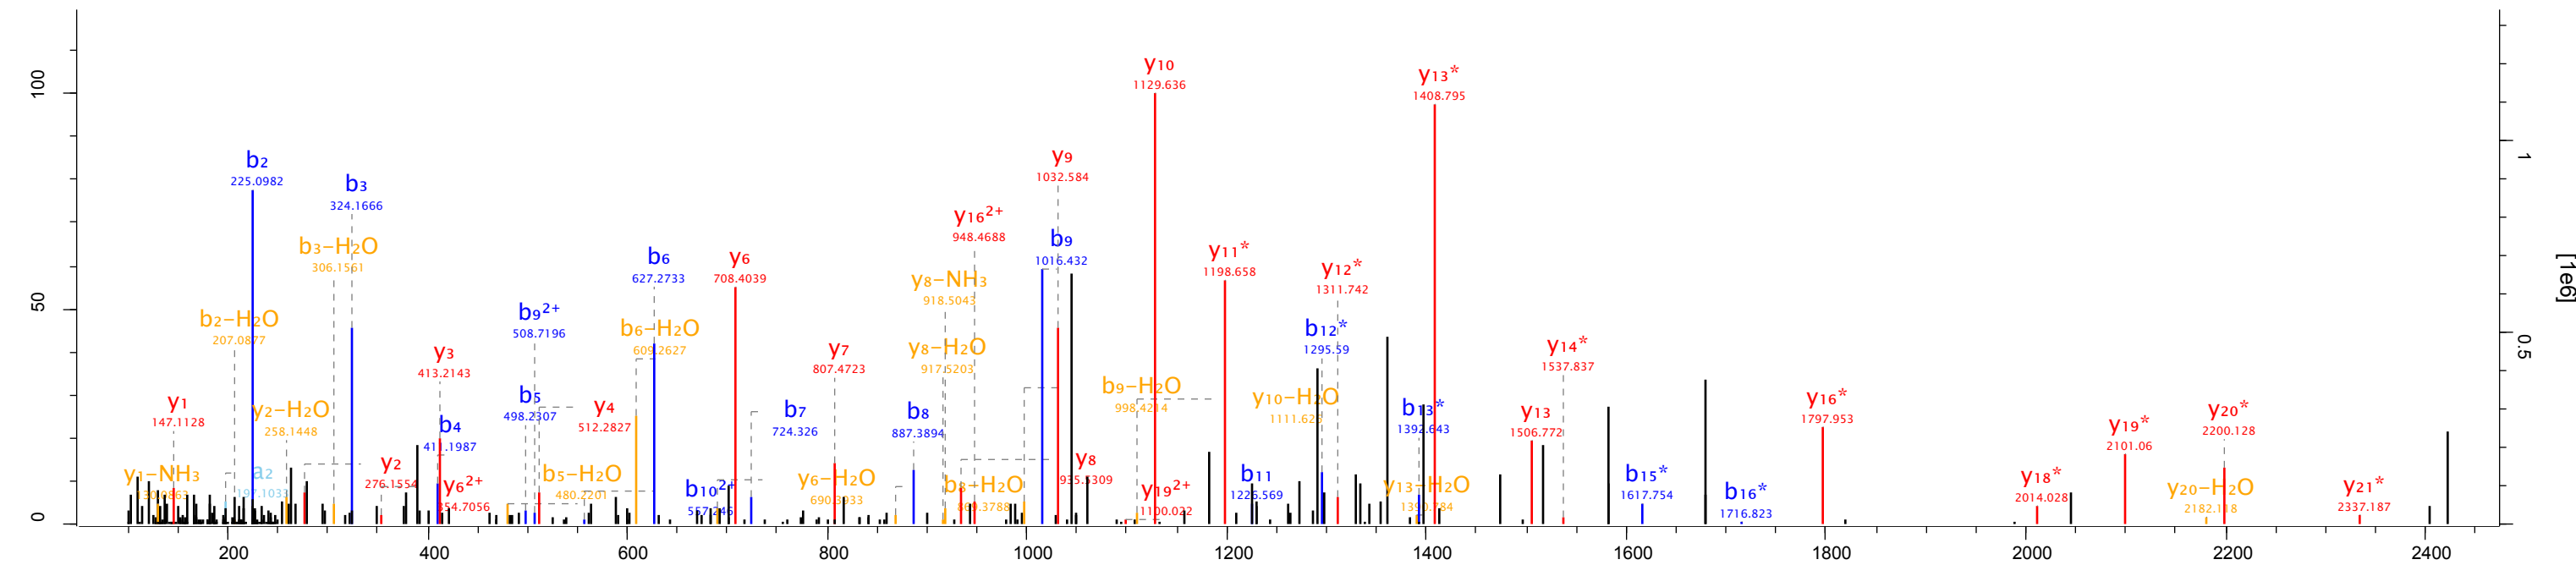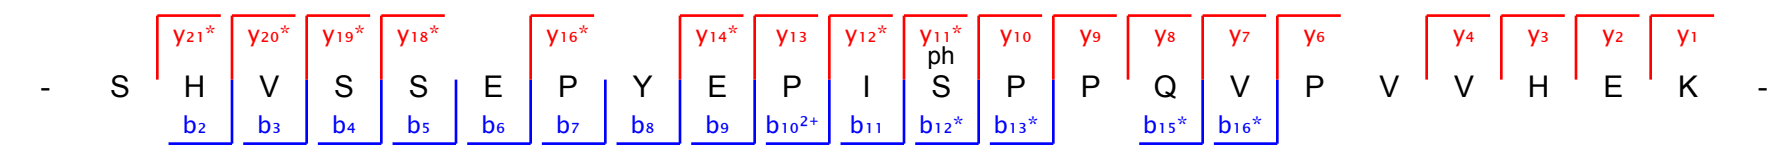

Raw file 20150814\_A375SR\_Phospho\_BR2\_06 Scan 17770 Method FTMS; HCD Score 97.52 m/z 829.39 Gene names IRF2BP2

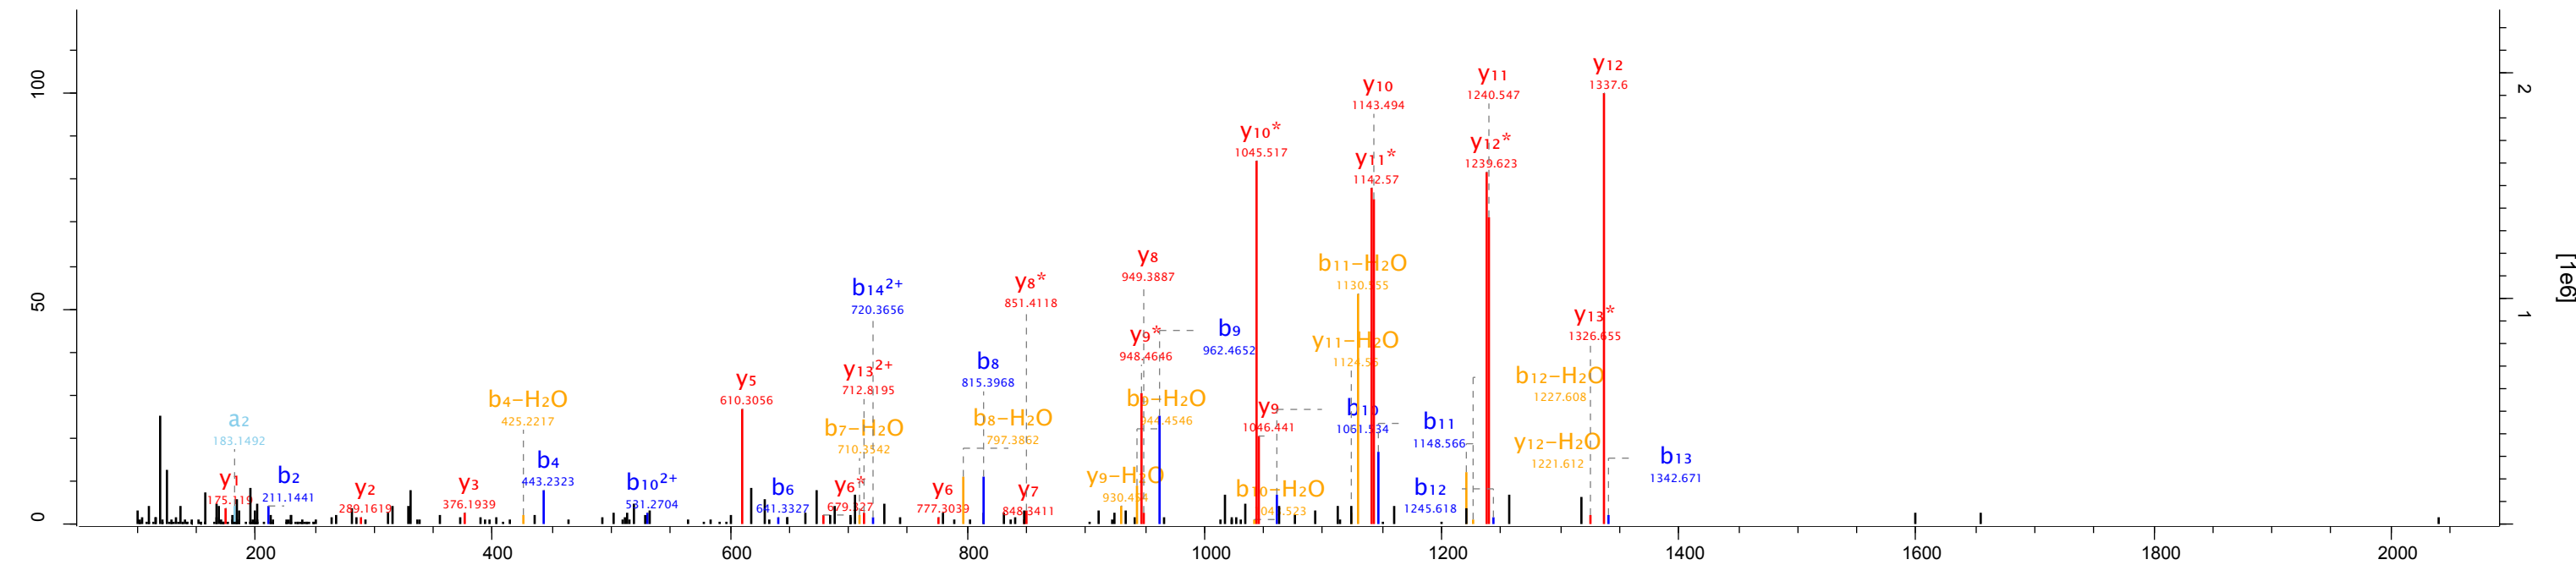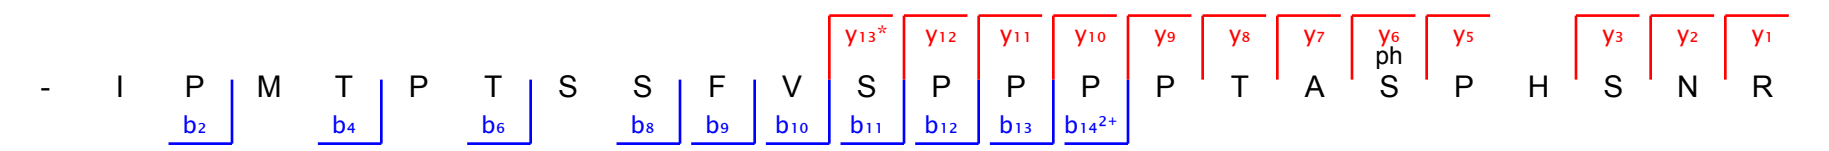

Raw file 20150814\_A375SR\_Phospho\_BR2\_06 Scan 17820 Method FTMS; HCD Score 122.39 m/z 689.02 Gene names RPRD2

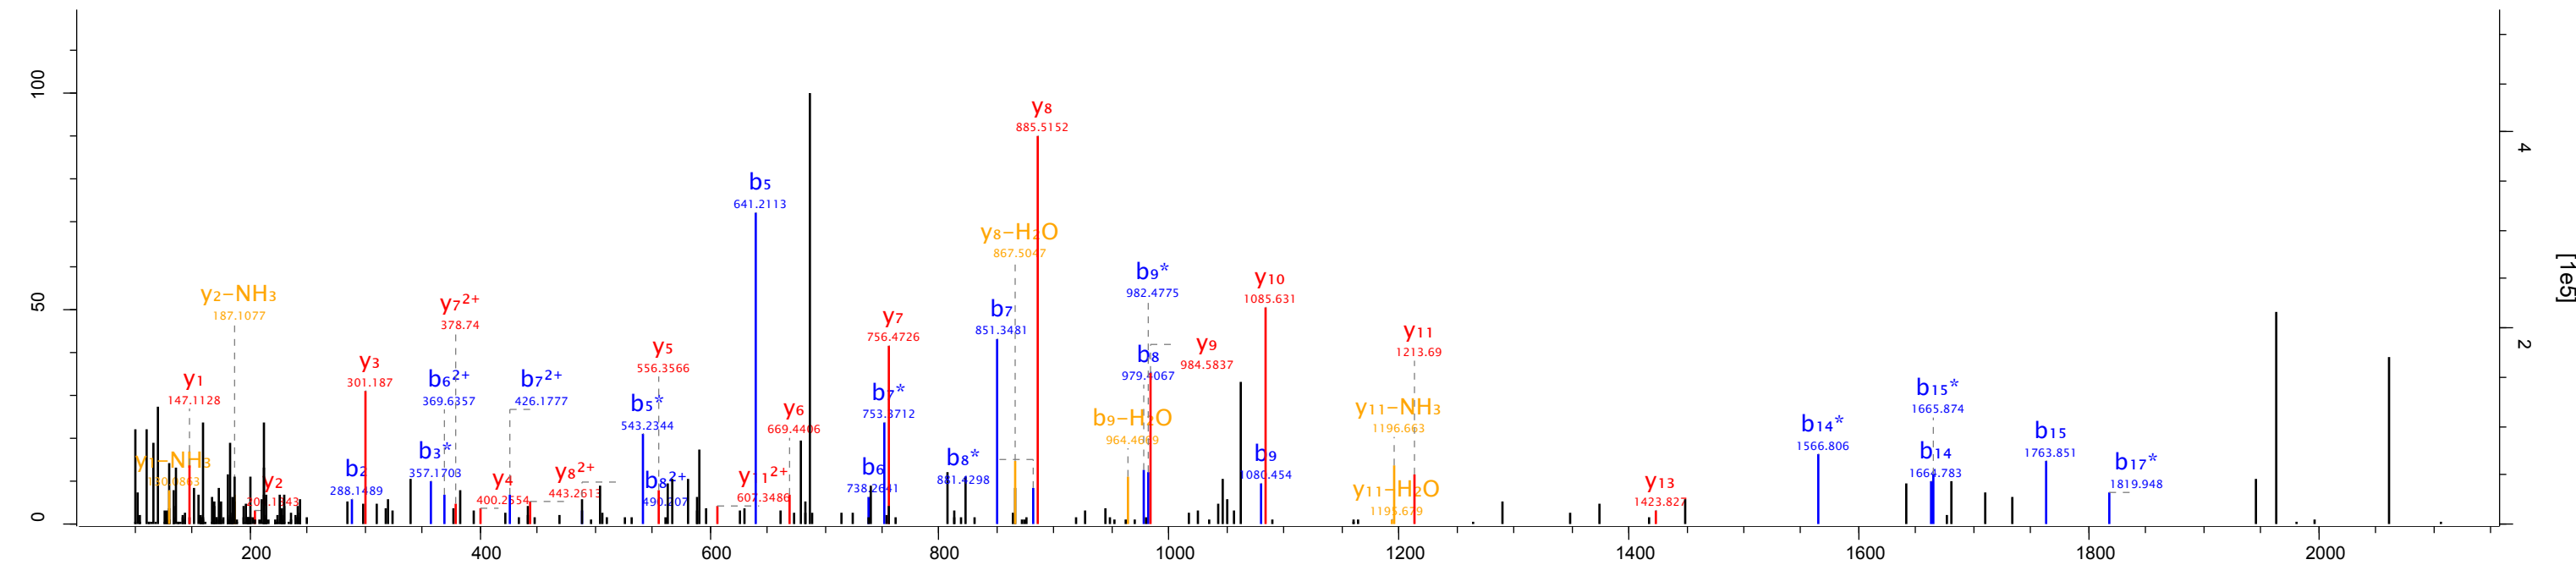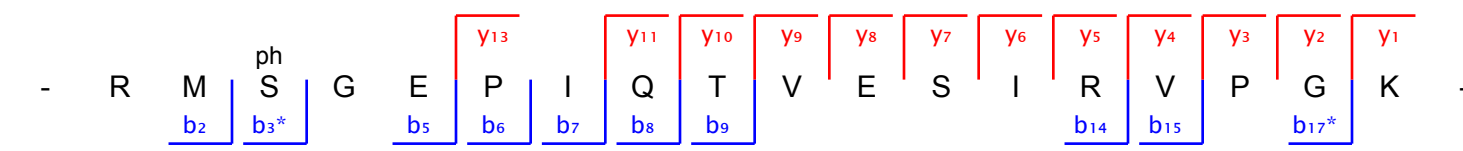

Raw file 20150814\_A375SR\_Phospho\_BR2\_06 Scan 18320 Method FTMS; HCD Score 159.26 m/z 908.46 Gene names NUP88

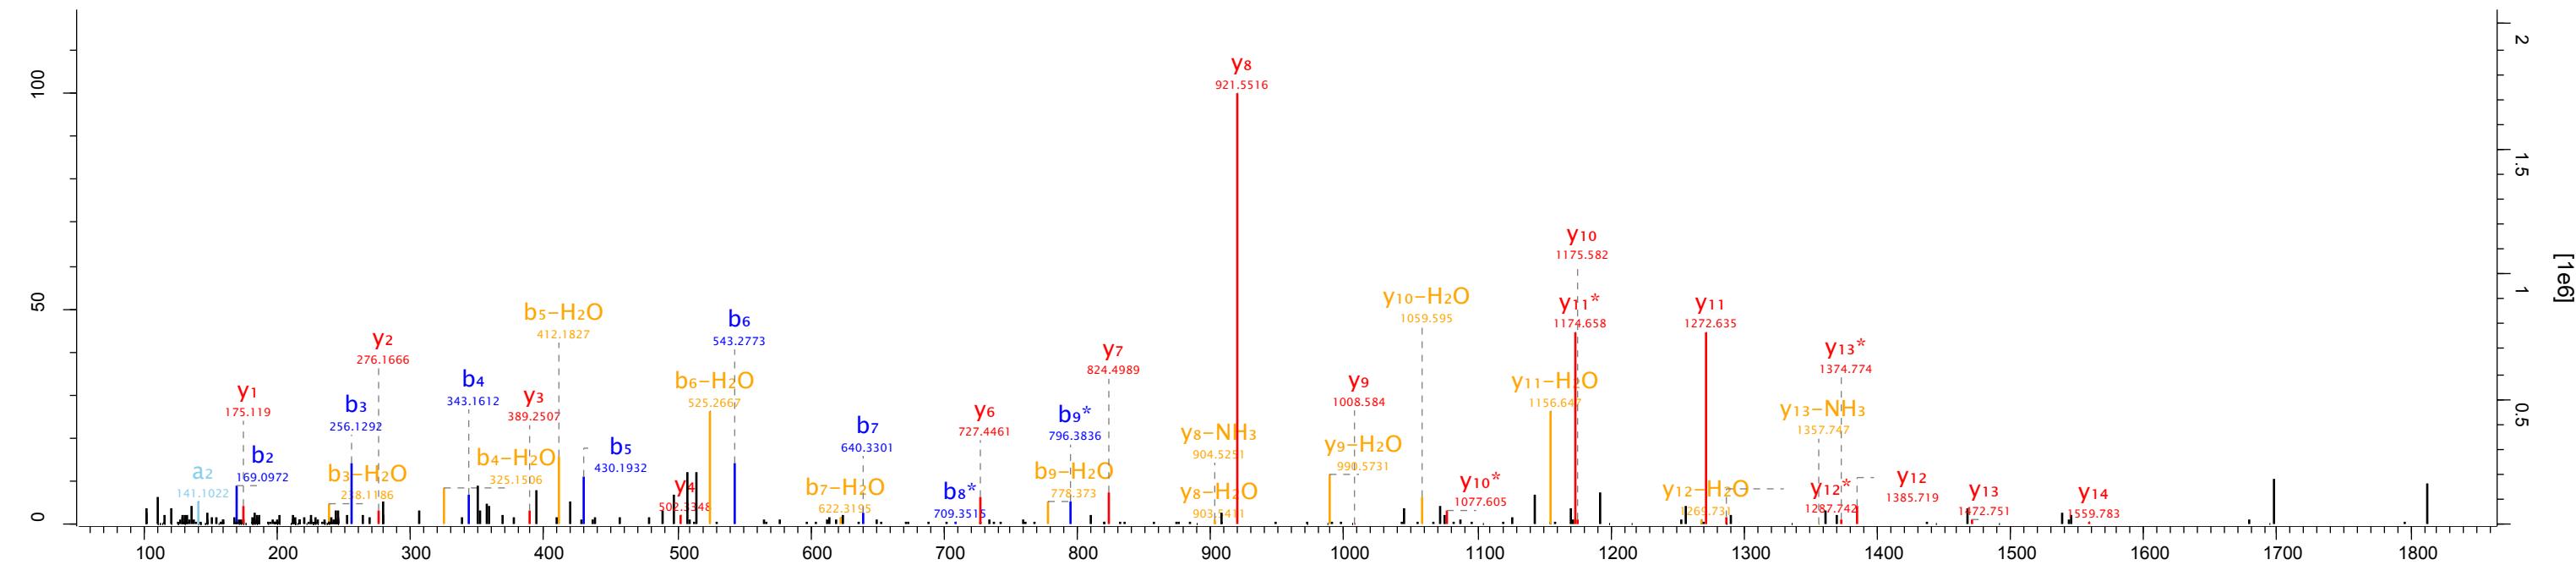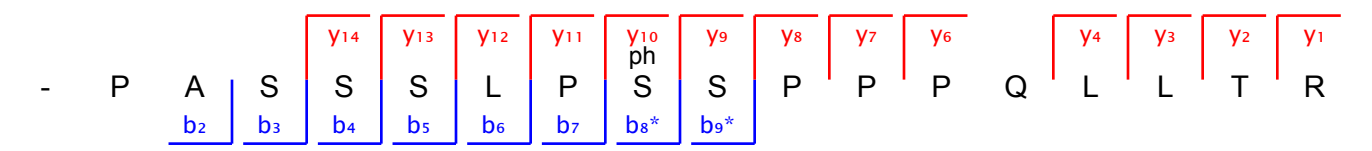

Raw file  
20150814\_A375SR\_Phospho\_BR2\_06

Scan 18340 Method FTMS; HCD Score 291.32 m/z 1323.58 Gene names TP53BP1

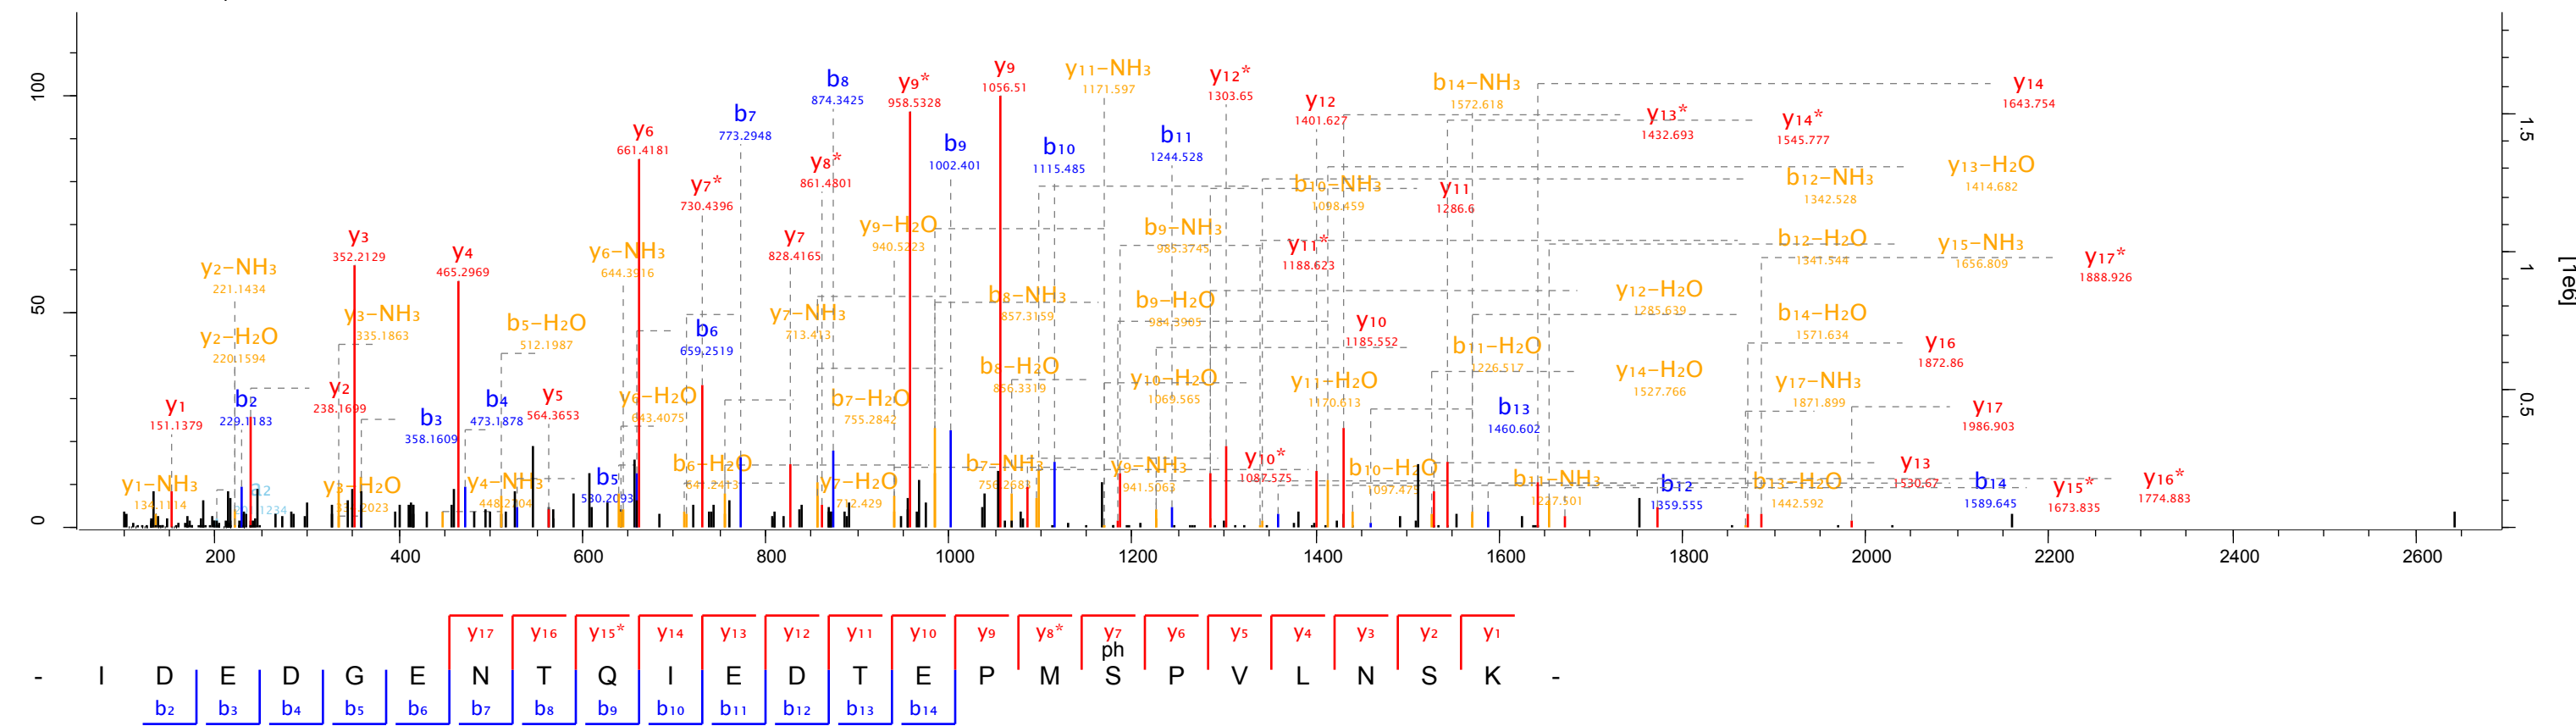



Raw file: 20150814\_A375SR\_Phospho\_BR2\_06  
 Scan: 18900 Method: FTMS; HCD Score: 162.71 m/z: 1042.98 Gene names: AKAP2

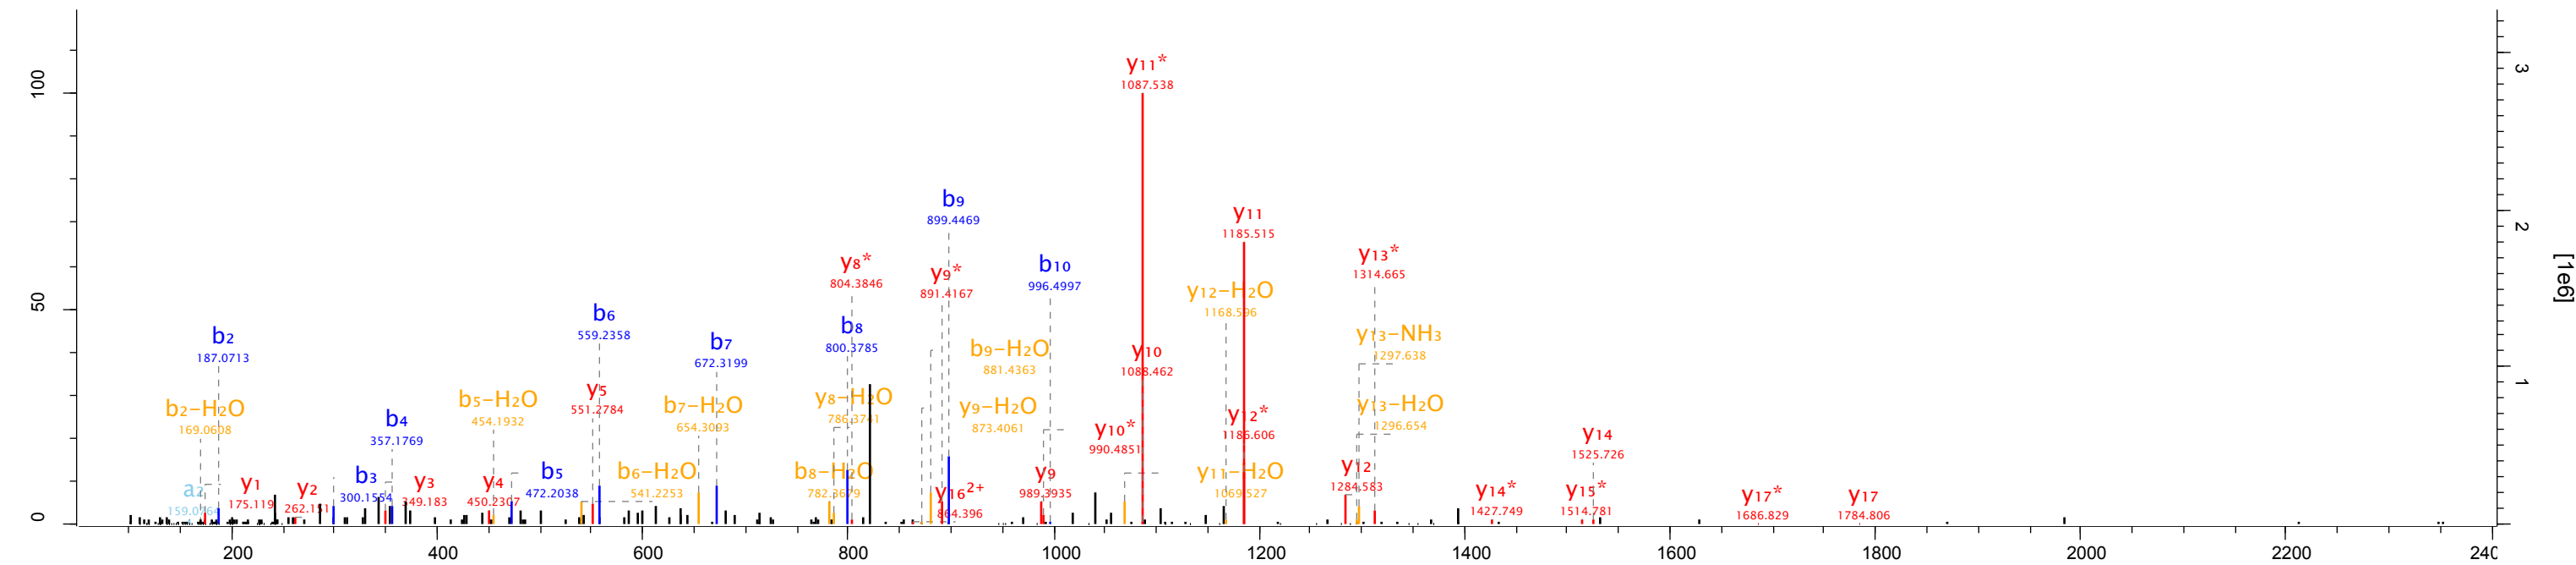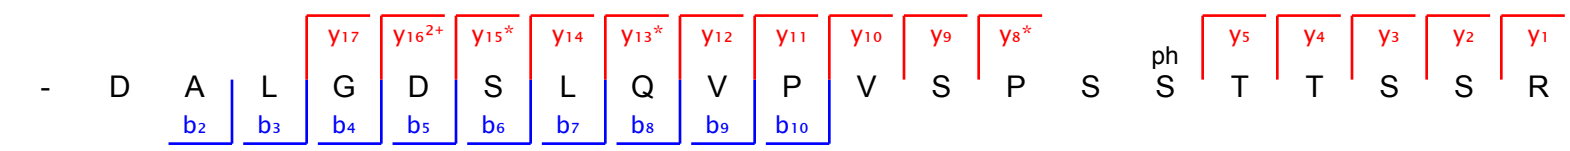

Raw file 20150814\_A375SR\_Phospho\_BR2\_06 Scan 18970 Method FTMS; HCD Score 64.76 m/z 978.32 Gene names FRMD4A

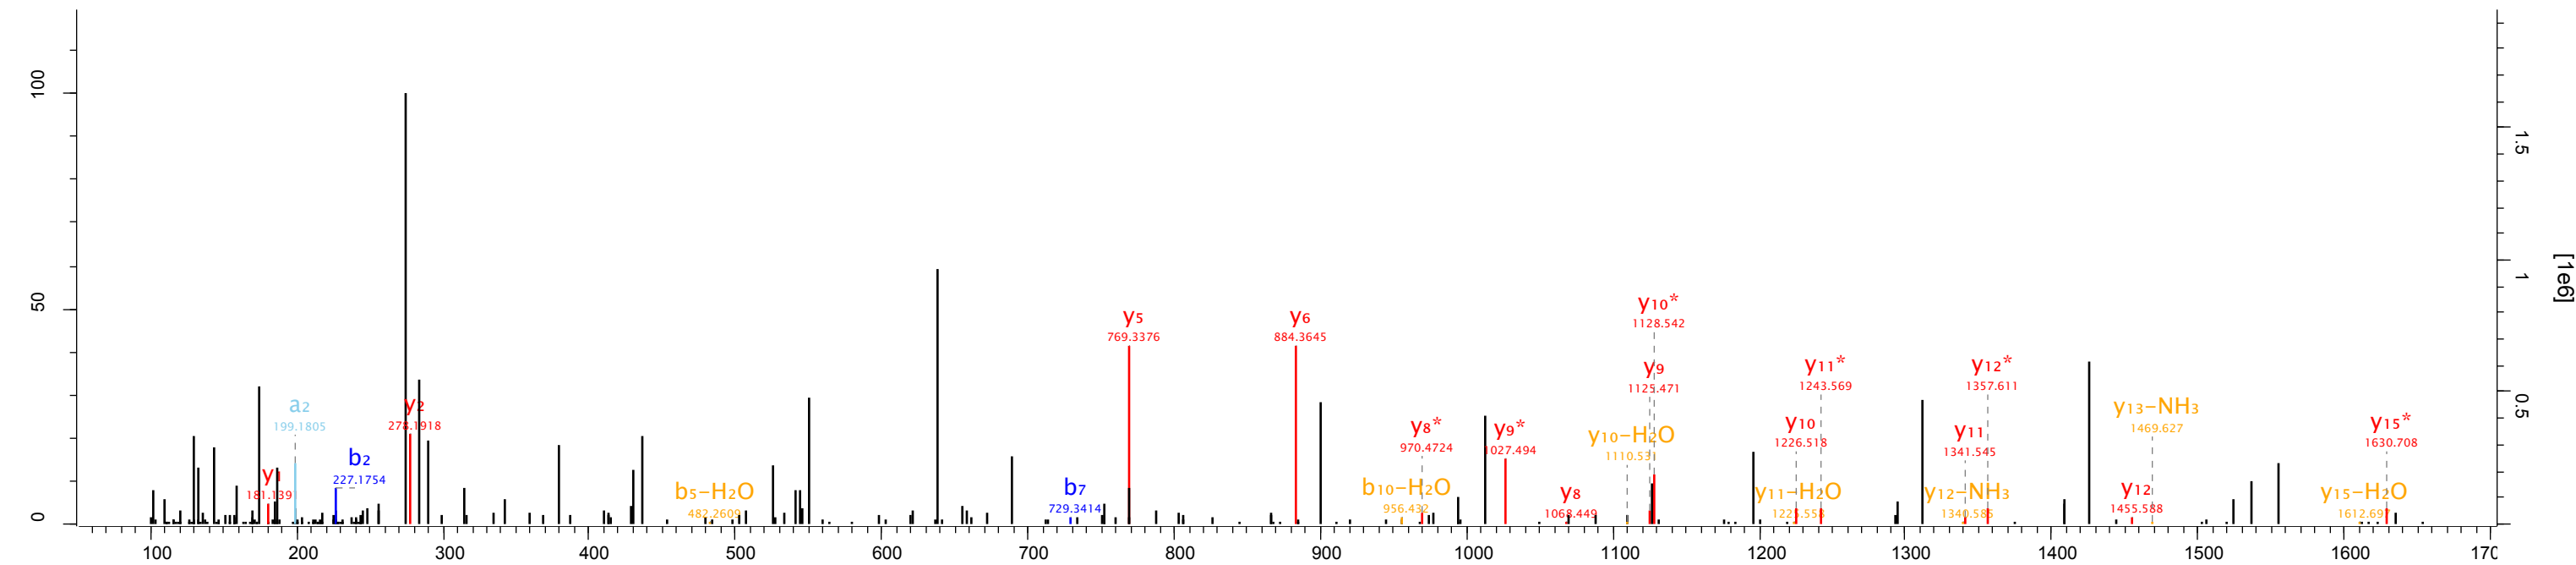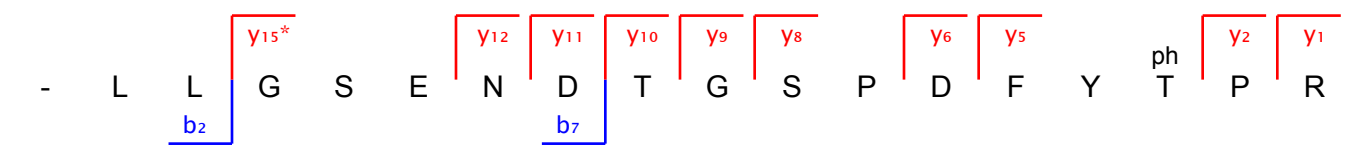

Raw file Scan Method m/z Gene names  
 20150814\_A375SR\_Phospho\_BR2\_06 19170 FTMS; HCD 184.03 910.76 SORBS3

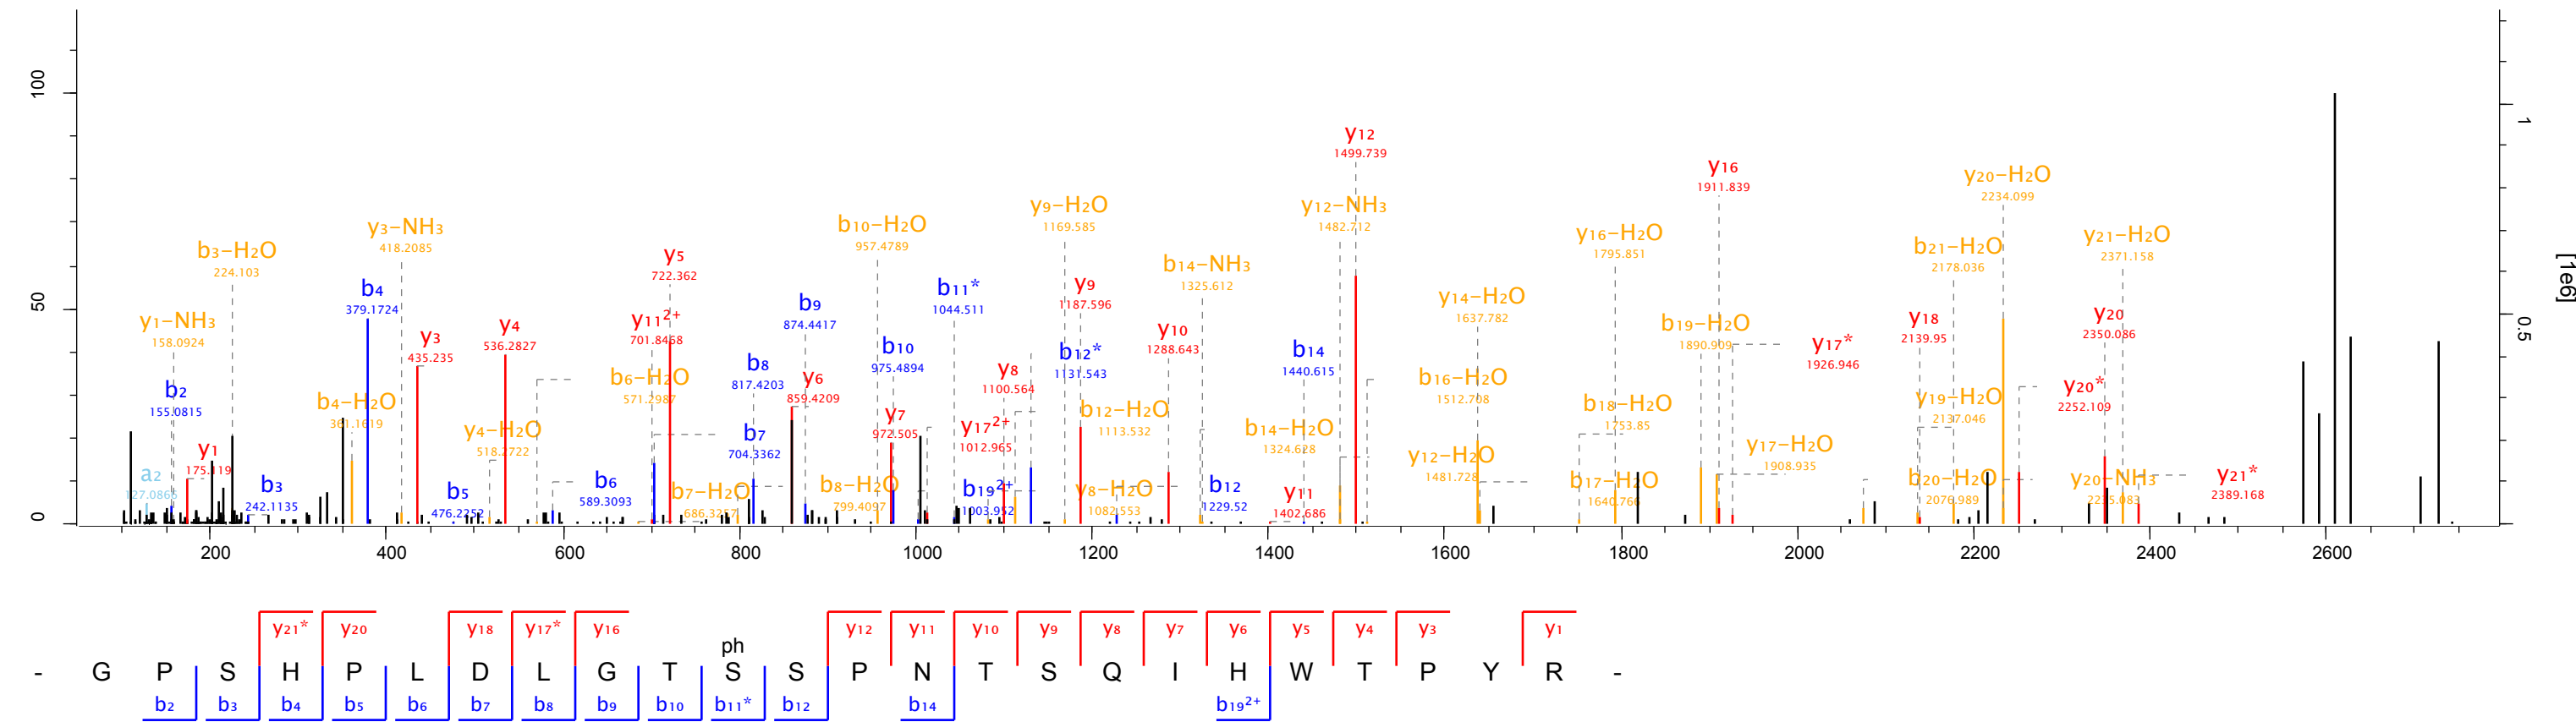

Raw file 20150814\_A375SR\_Phospho\_BR2\_06 Scan 19490 Method FTMS; HCD Score 110.57 m/z 691 Gene names ARHGAP5

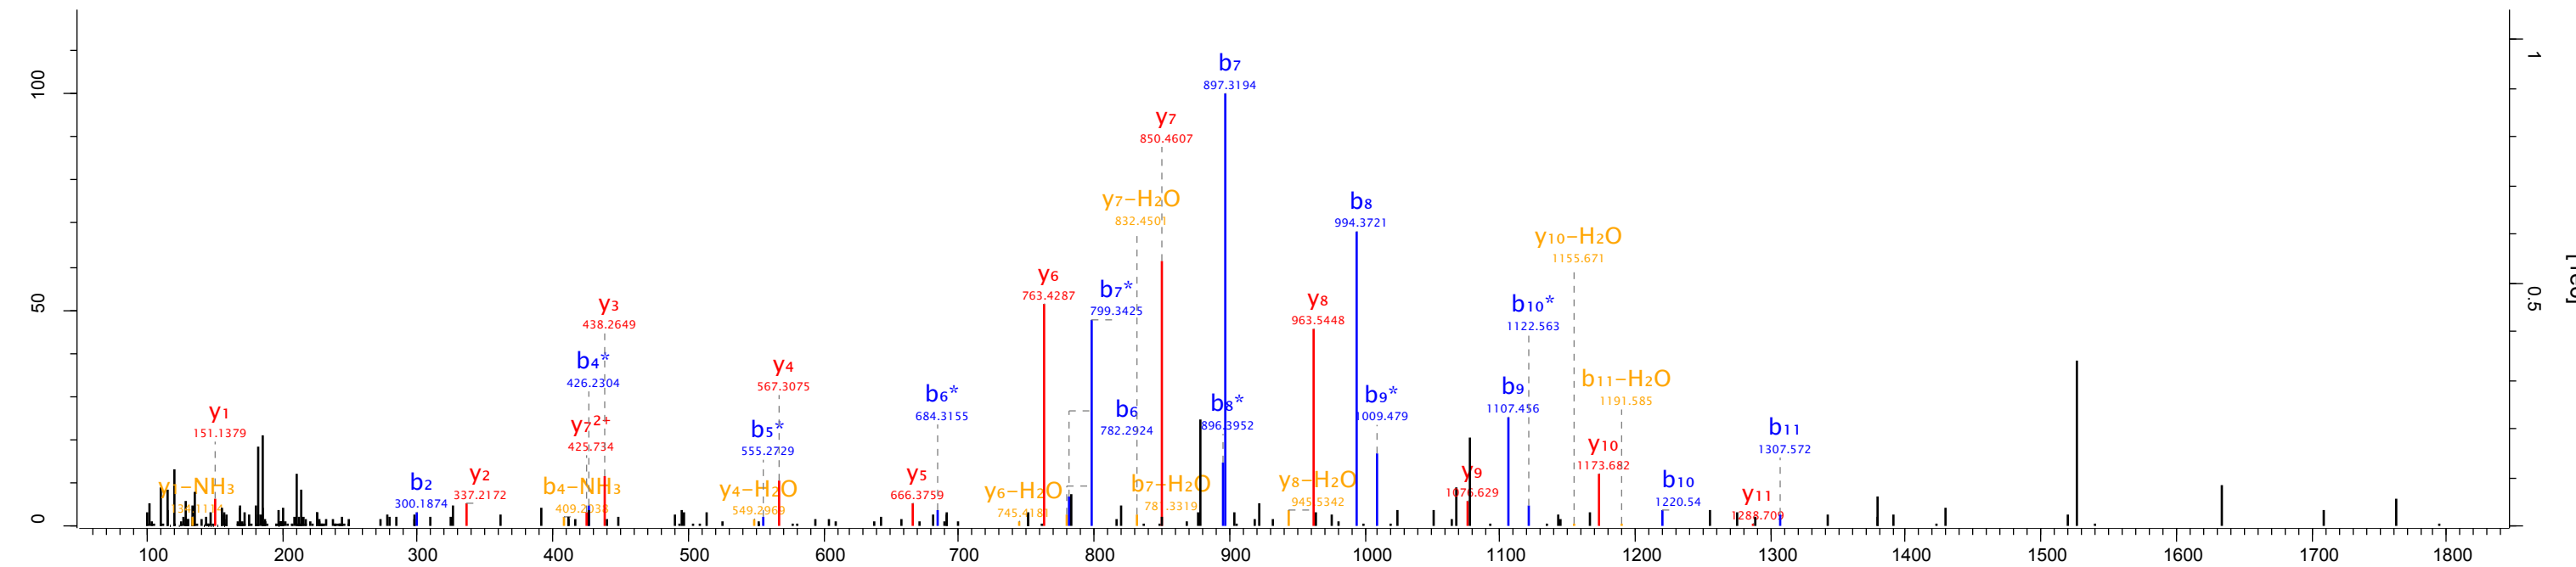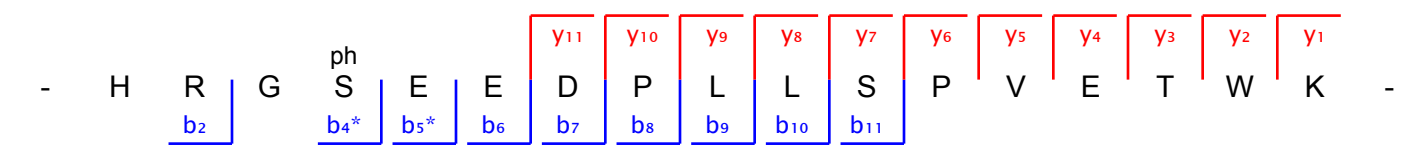

Raw file  
 20150814\_A375SR\_Phospho\_BR2\_06  
 Scan 19560 Method FTMS; HCD Score 57.54 m/z 870.41 Gene names CASKIN2

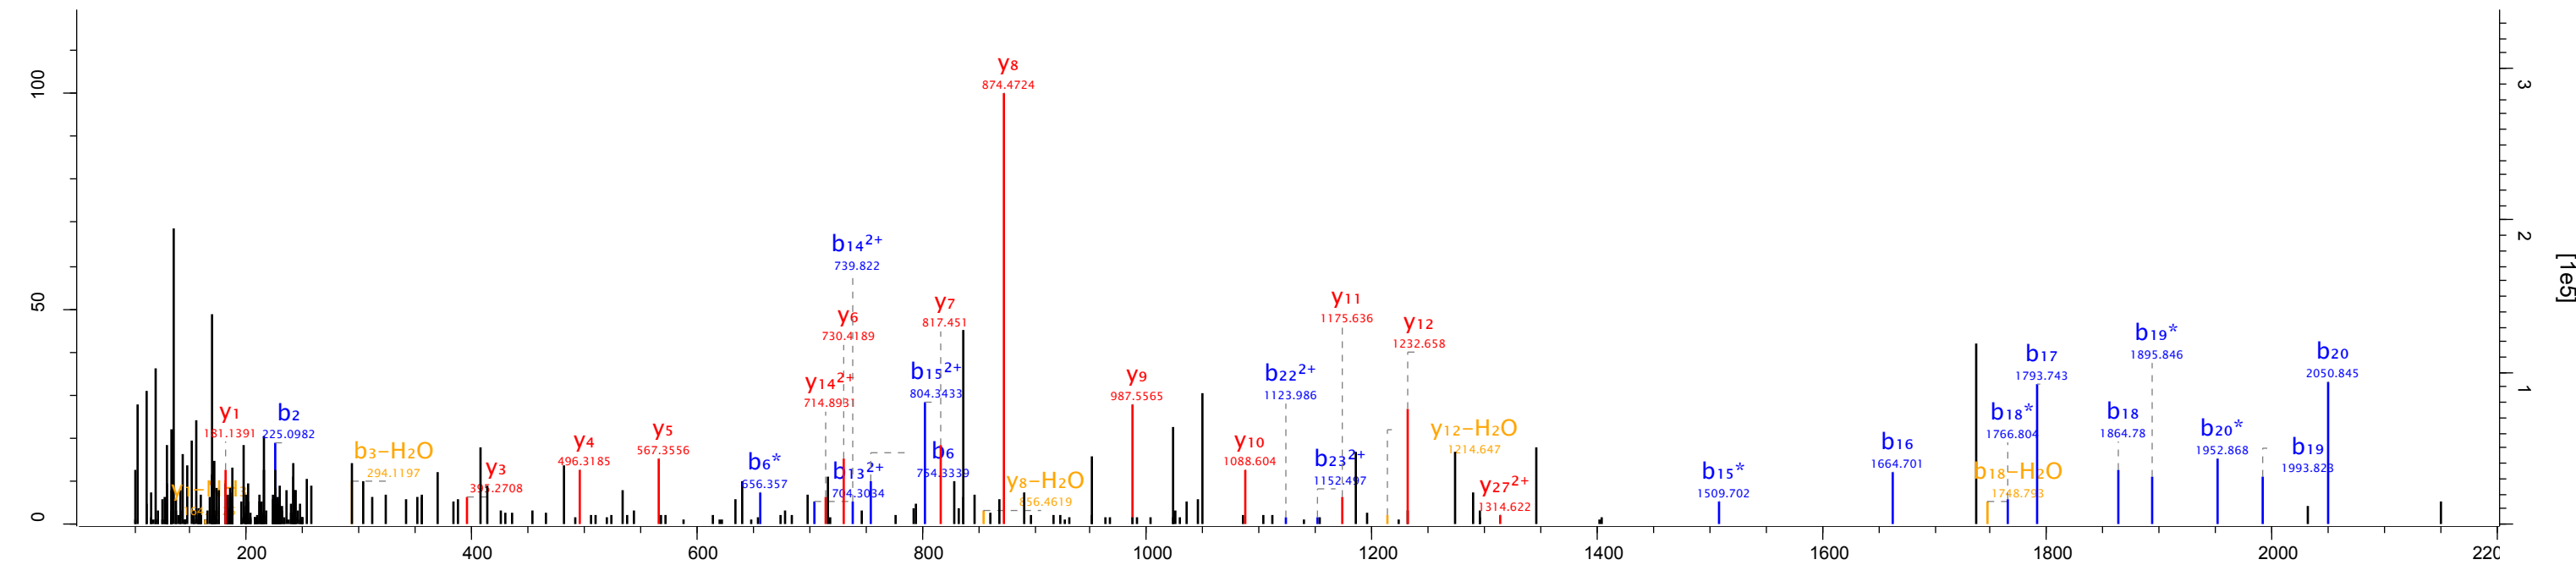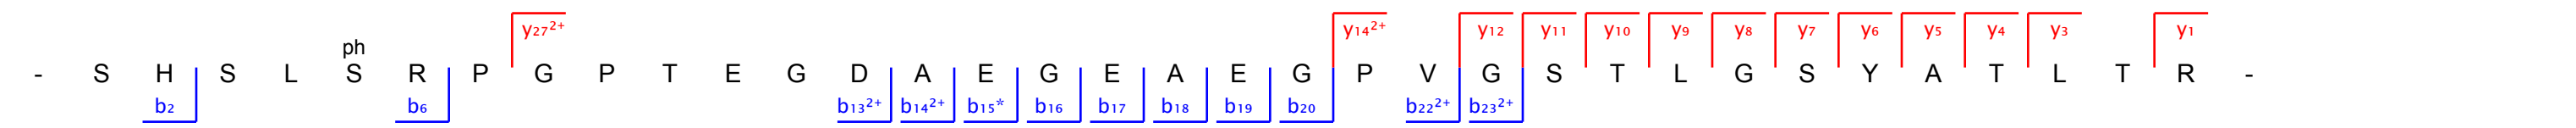

Raw file  
 20150814\_A375SR\_Phospho\_BR2\_06  
 Scan 19850 Method FTMS; HCD Score 159.2 m/z 690.34 Gene names VIPAS39

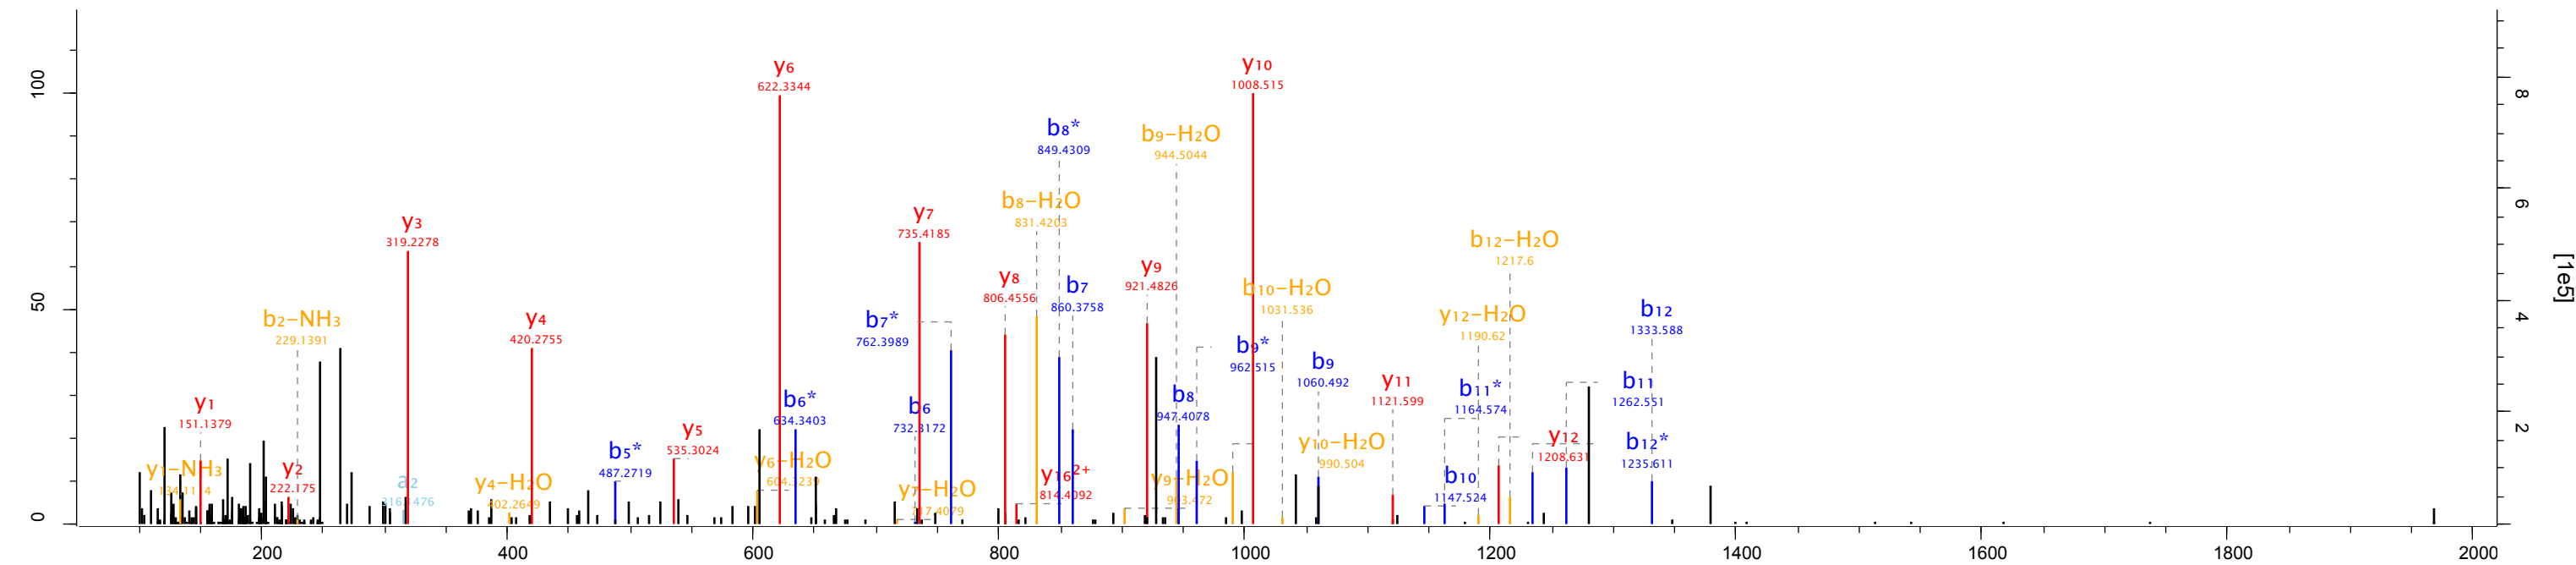

- pH T R P G S F Q S L S D A L S D T P A K -  
 a2 b5\* b6 b7 b8 b9 b10 b11 b12

Raw file: 20150814\_A375SR\_Phospho\_BR2\_06  
 Scan: 20170 Method: FTMS; HCD Score: 122.97 m/z: 709.87 Gene names: PFDN2

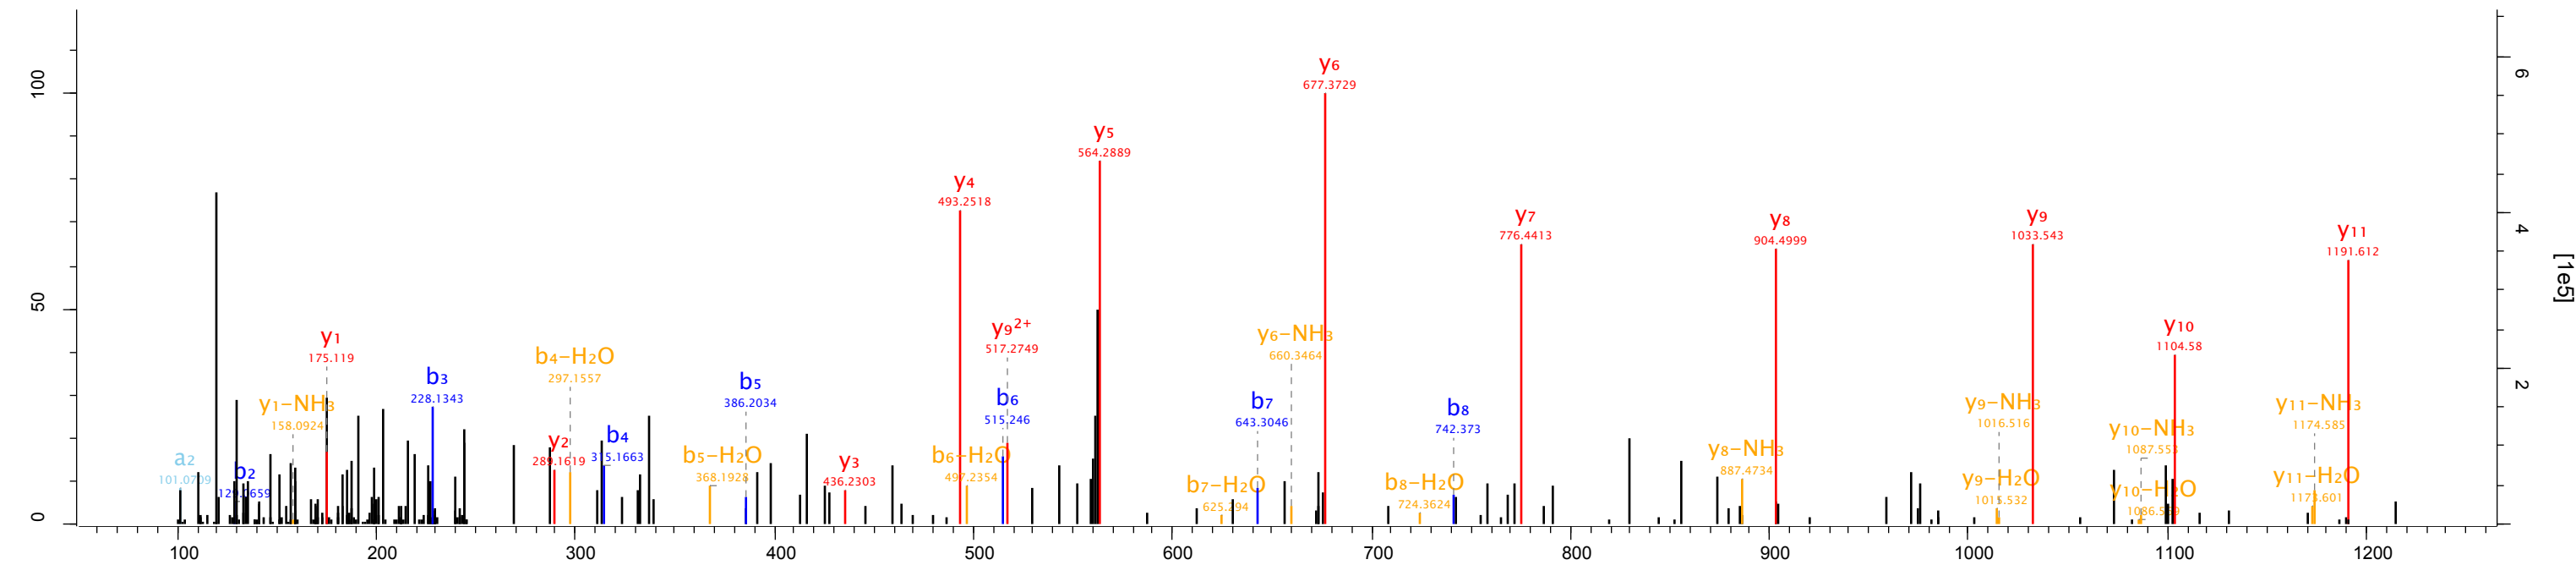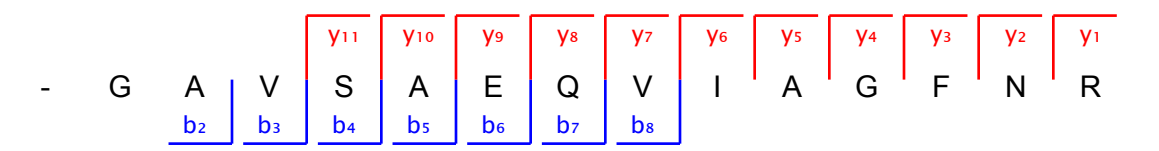

Raw file: 20150814\_A375SR\_Phospho\_BR2\_06  
 Scan: 20240 Method: FTMS; HCD Score: 166.29 m/z: 935.98 Gene names: SMCR8

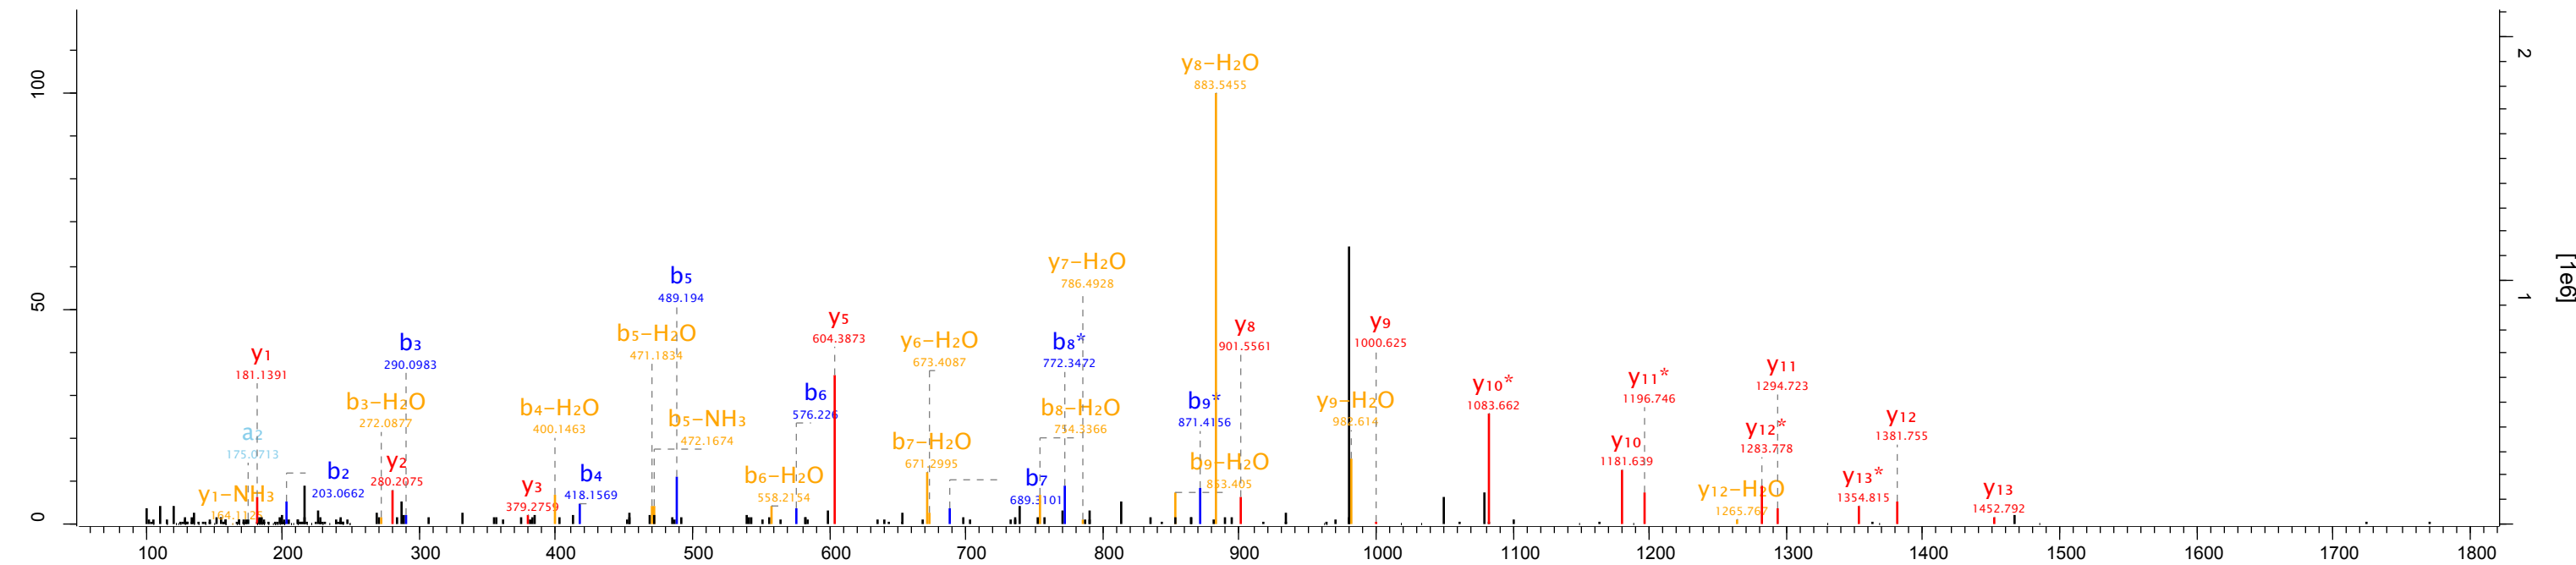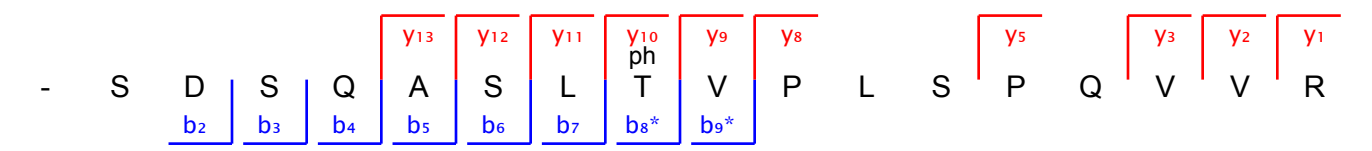



Raw file: 20150814\_A375SR\_Phospho\_BR2\_06  
 Scan: 20460 Method: FTMS; HCD Score: 298.1 m/z: 982.97 Gene names: CDC42EP3

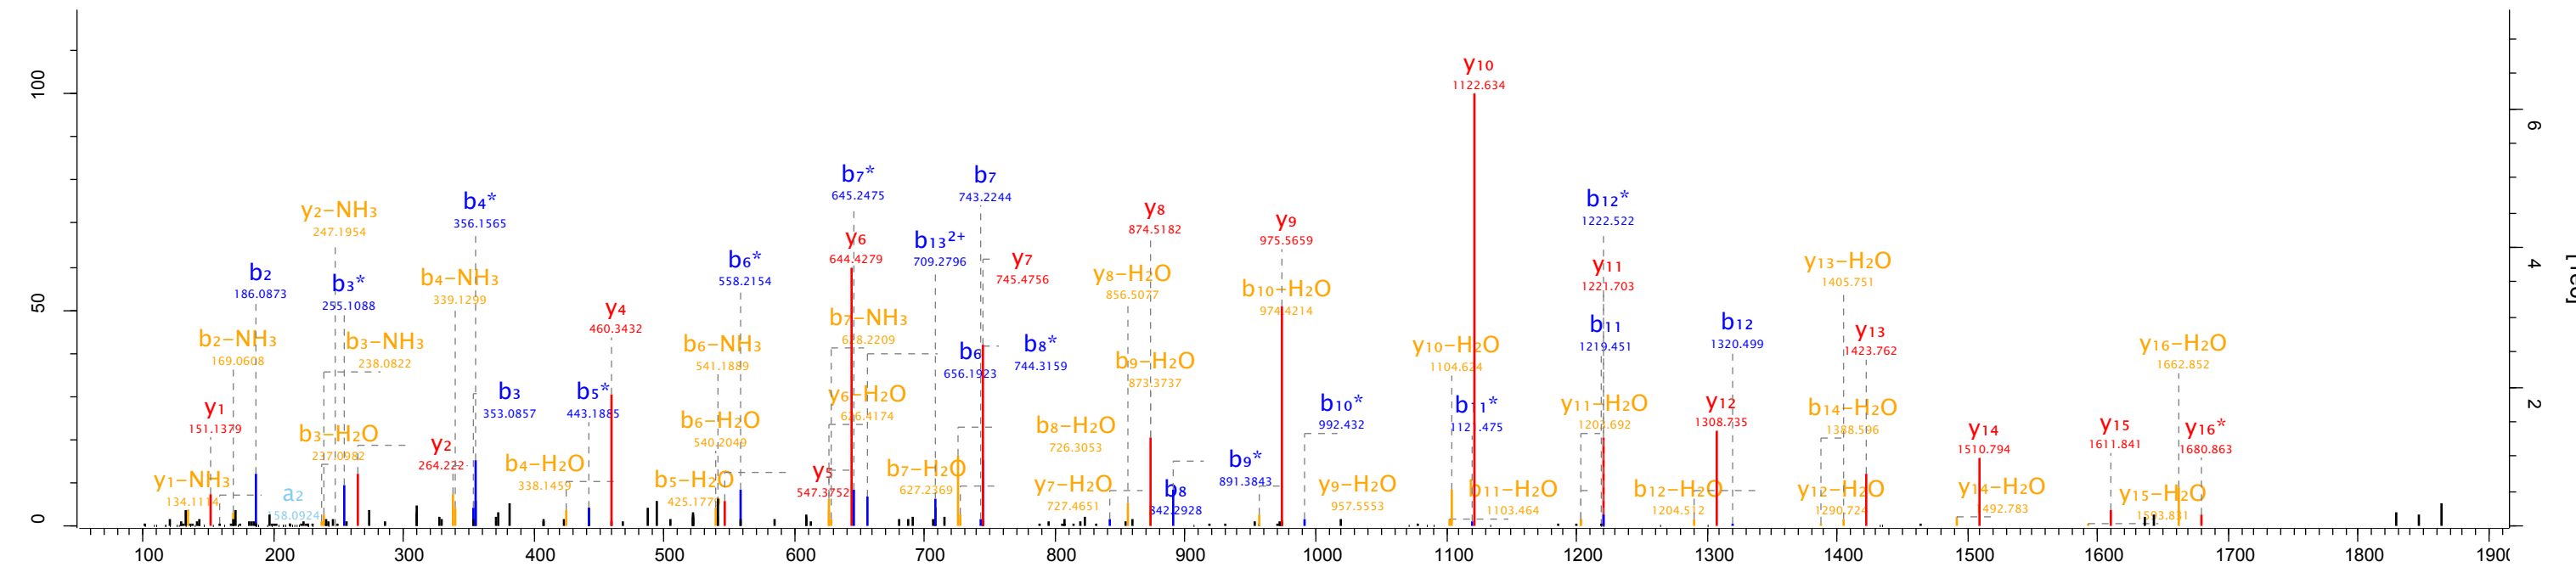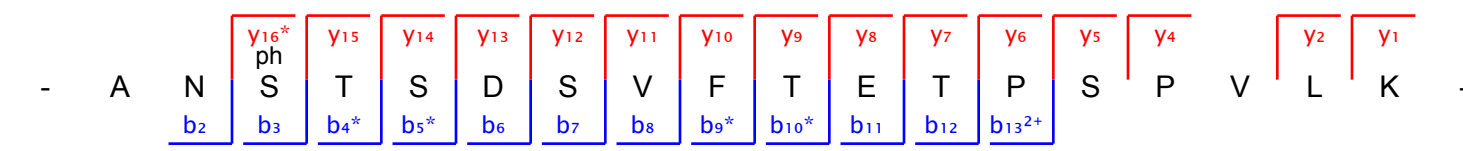

Raw file  
20150814\_A375SR\_Phospho\_BR2\_06

Scan 20990 Method FTMS; HCD Score 320.01 m/z 1060 Gene names TNS3

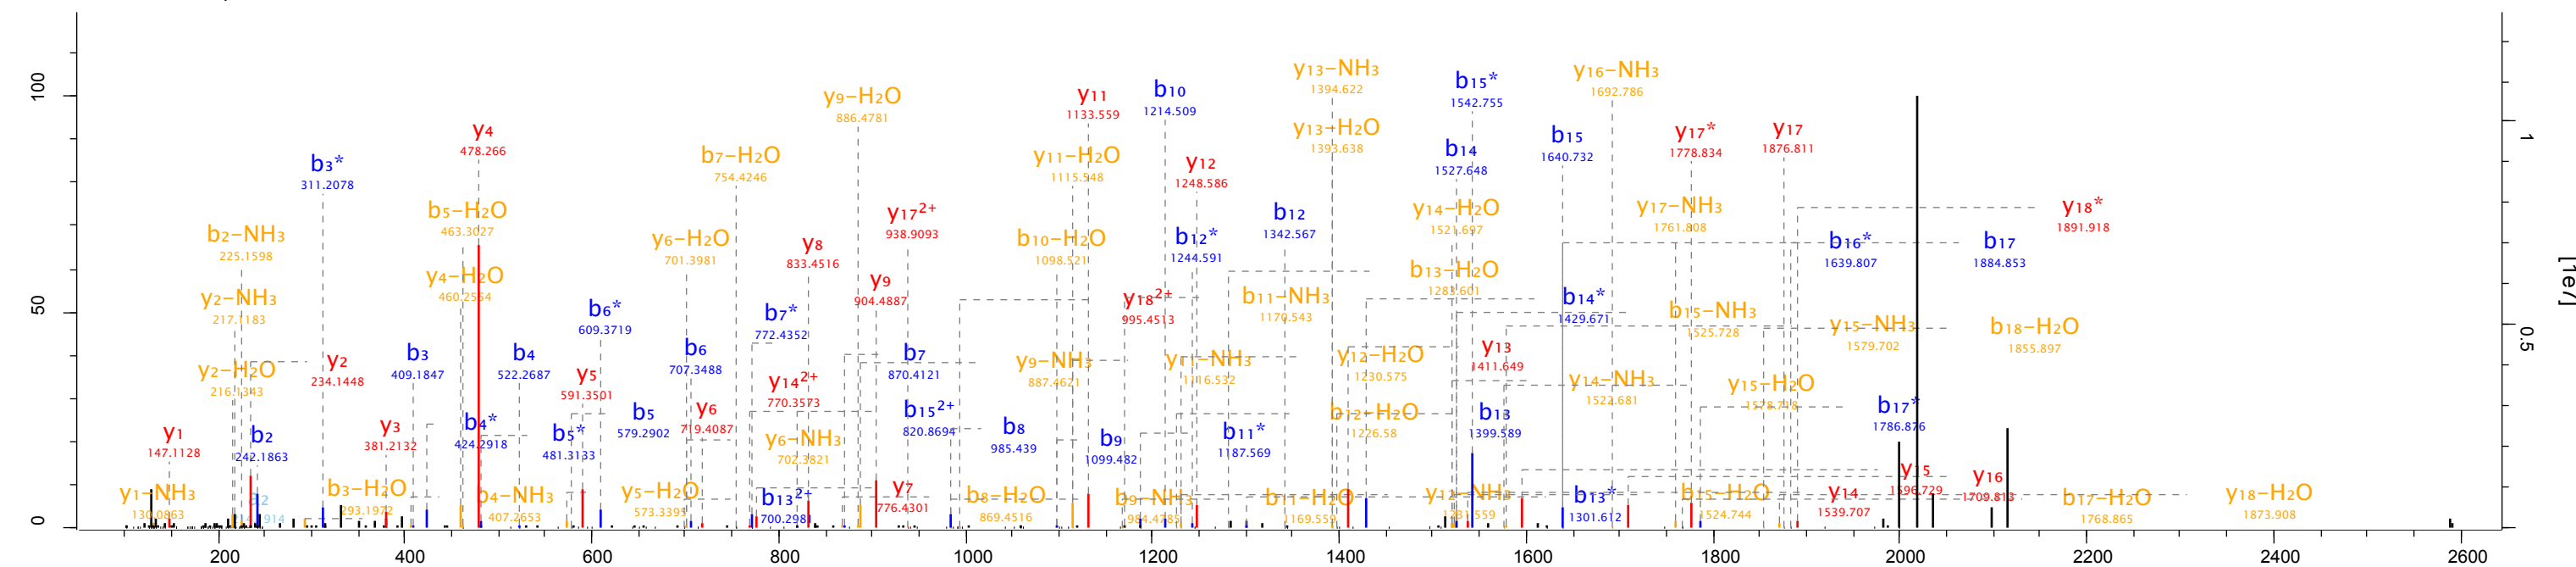

- K L S L G Q Y D N D A G G Q L P F S K -  
b2 b3 b4 b5 b6 b7 b8 b9 b10 b11\* b12 b13 b14 b15 b16\* b17

Raw file 20150814\_A375SR\_Phospho\_BR2\_06 Scan 21000 Method FTMS; HCD Score 164.63 m/z 1020.96 Gene names GAGE2D;GAGE2B;GAGE2E;GAGE2A

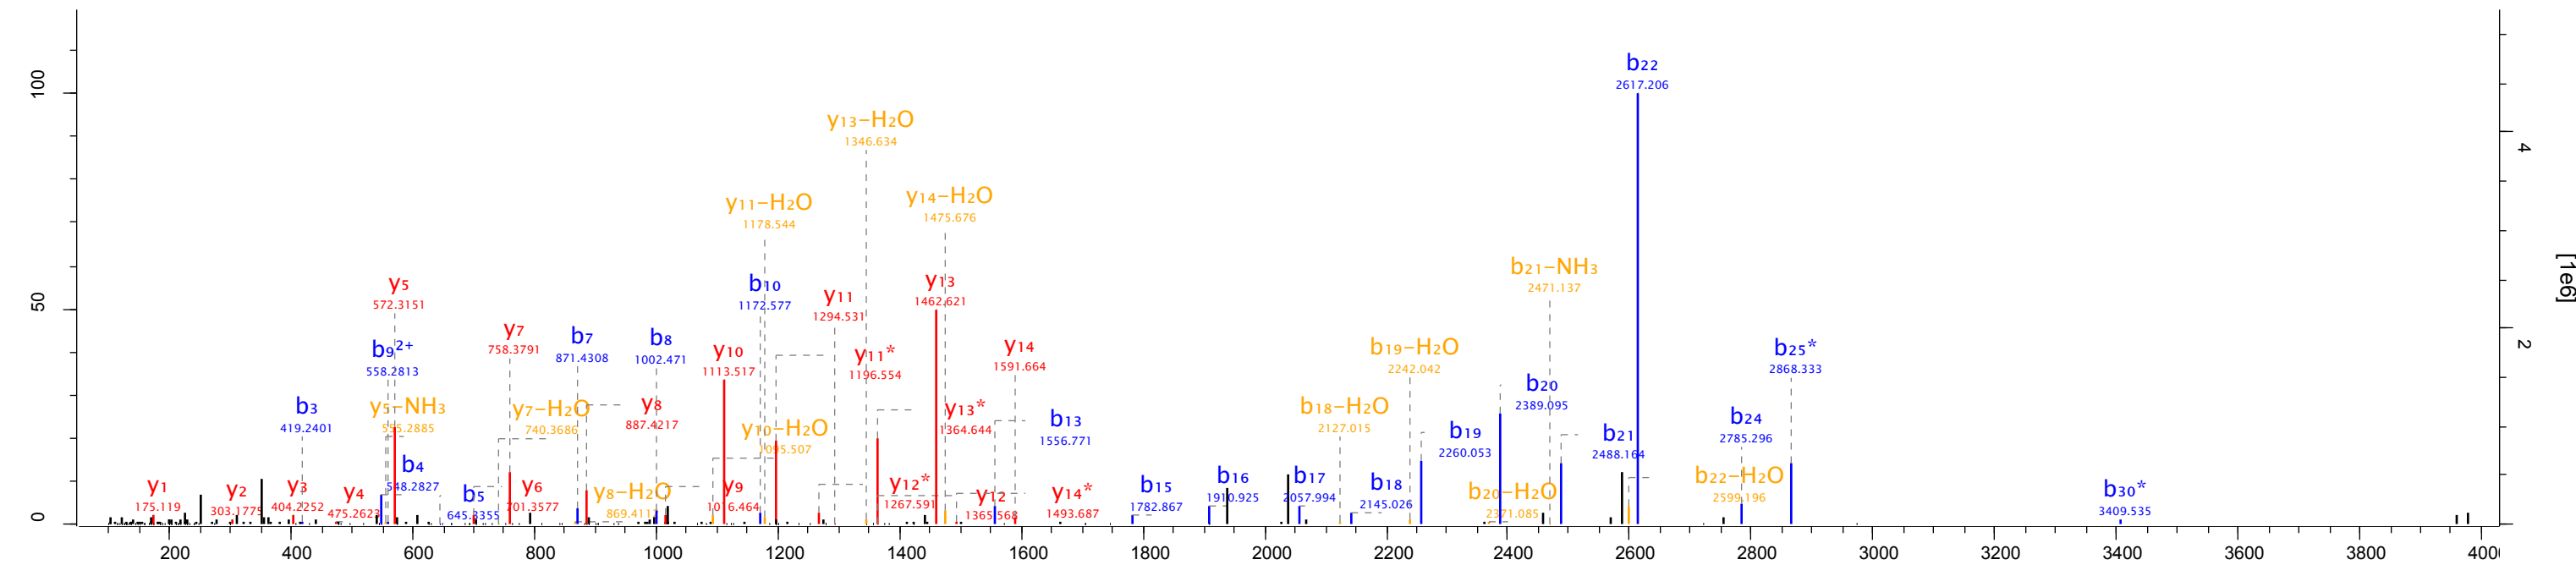

- R Y V E P P E M I G P M R P E Q F S D E V E P A T P E E G E P A T Q R -

Fragmentation mapping (b and y ions) is shown below the sequence:

- b3: V
- b4: VE
- b5: VEP
- b7: E
- b8: EM
- b9<sup>2+</sup>: EMI
- b10: EMIG
- b13: M
- b15: E
- b16: EQ
- b17: EQF
- b18: EQFS
- b19: EQFS D
- b20: EQFS D E
- b21: EQFS D E V
- b22: EQFS D E V E
- b24: P A T
- b25\*: P A T
- b30\*: P A T Q R

Raw file Scan Method Score m/z Gene names  
 20150814\_A375SR\_Phospho\_BR2\_06 21300 FTMS; HCD 155.61 749.06 MAPKBP1

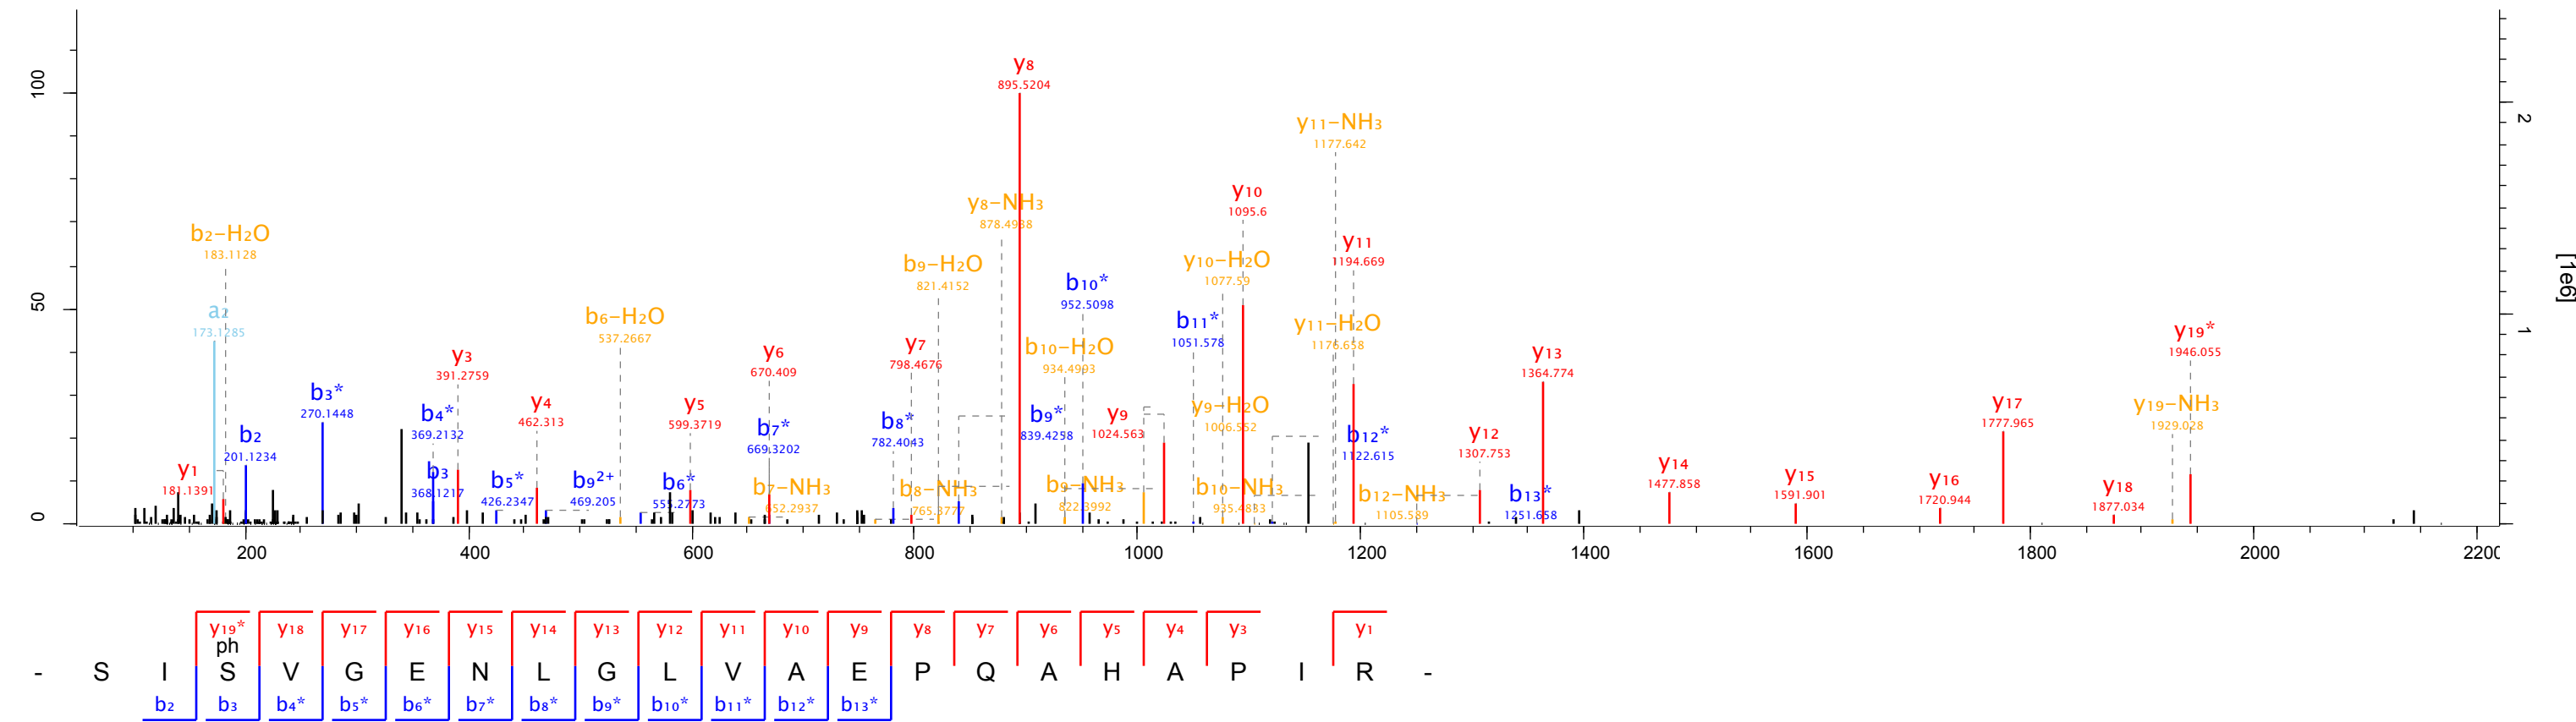

Raw file 20150814\_A375SR\_Phospho\_BR2\_06 Scan 21490 Method FTMS; HCD Score 99.34 m/z 902.93 Gene names GDA

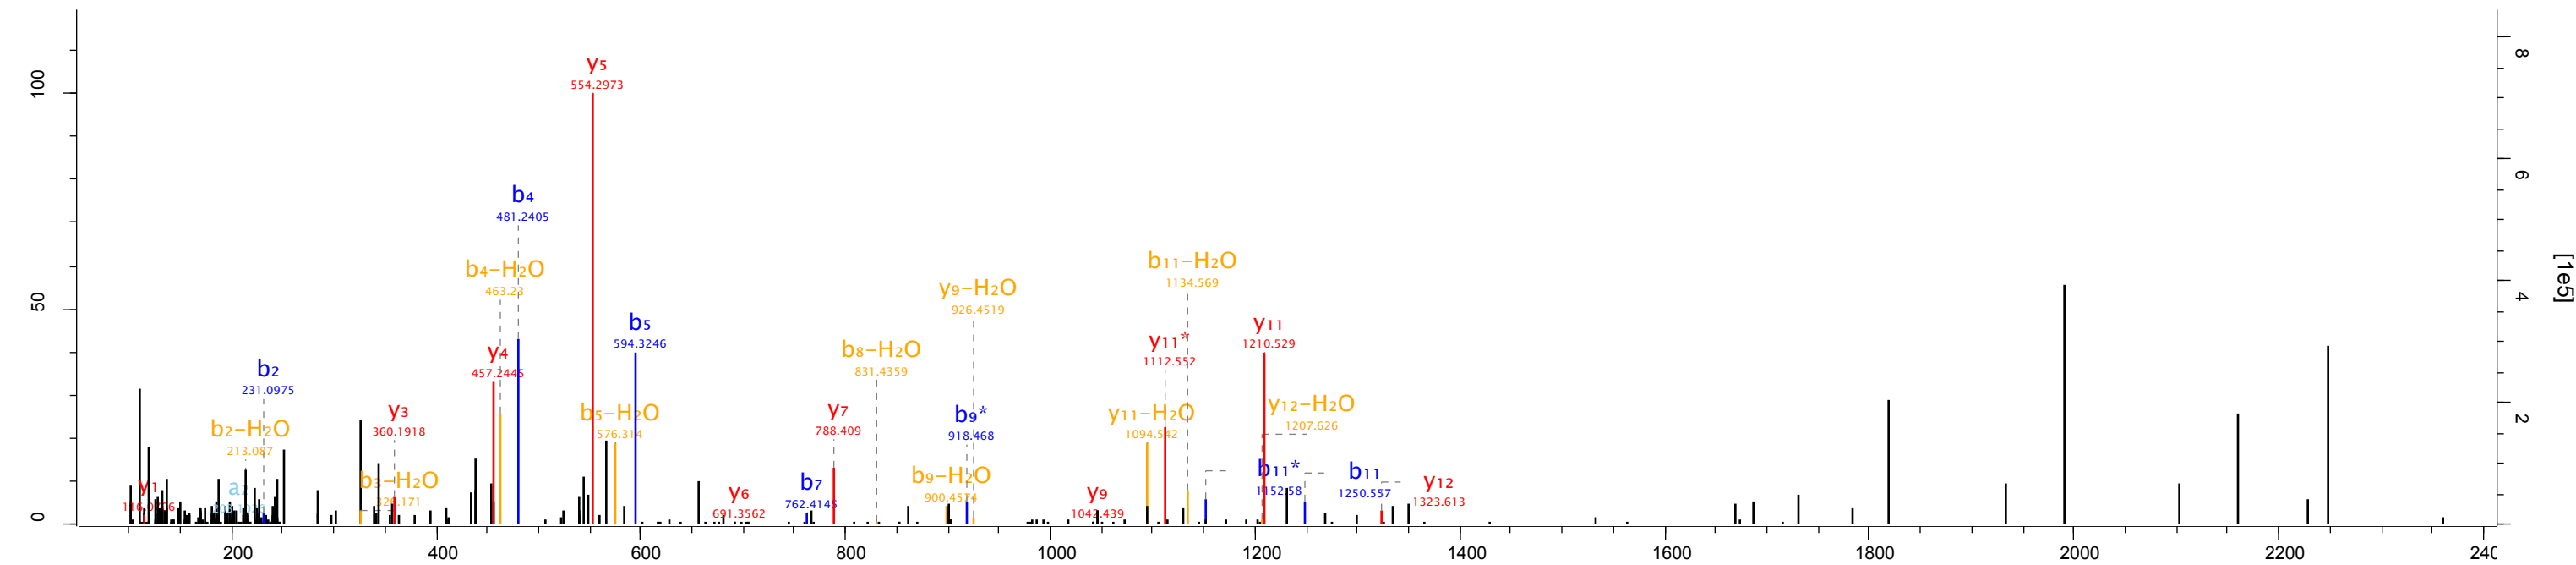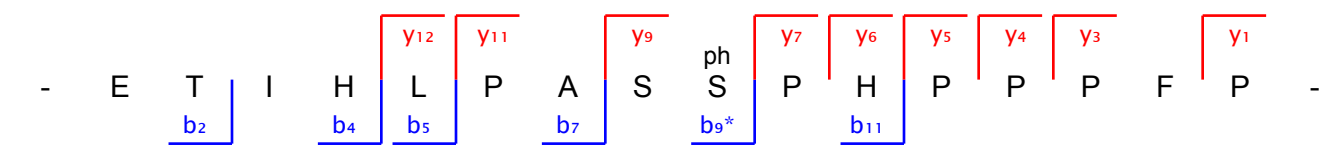

Raw file 20150814\_A375SR\_Phospho\_BR2\_06 Scan 21710 Method FTMS; HCD Score 88.34 m/z 936.11 Gene names ZNF592

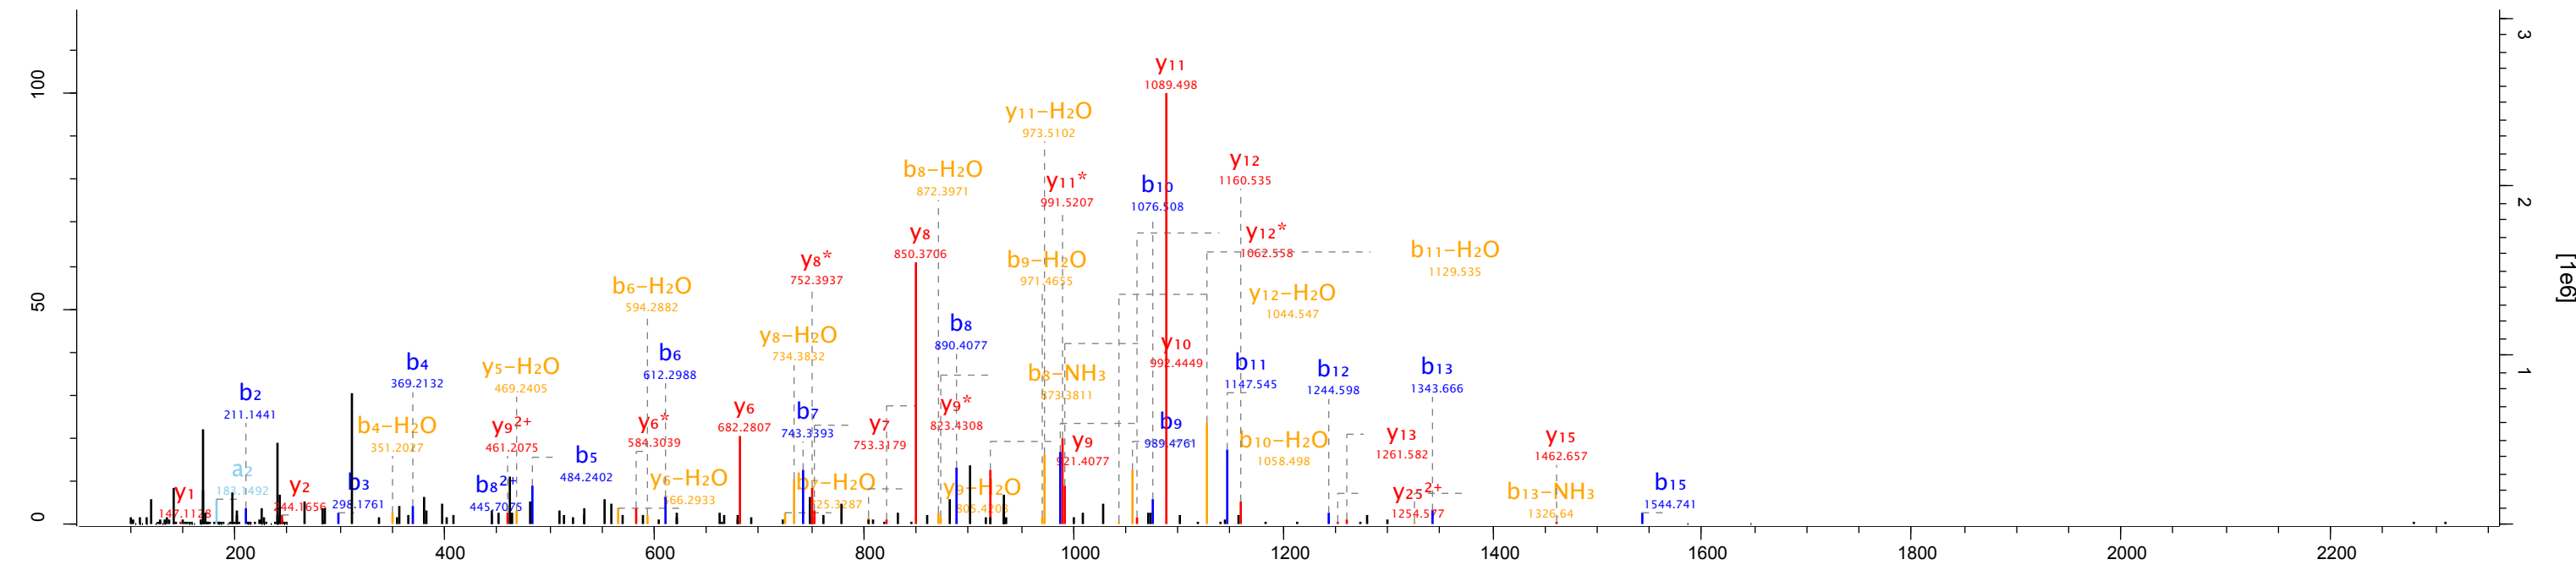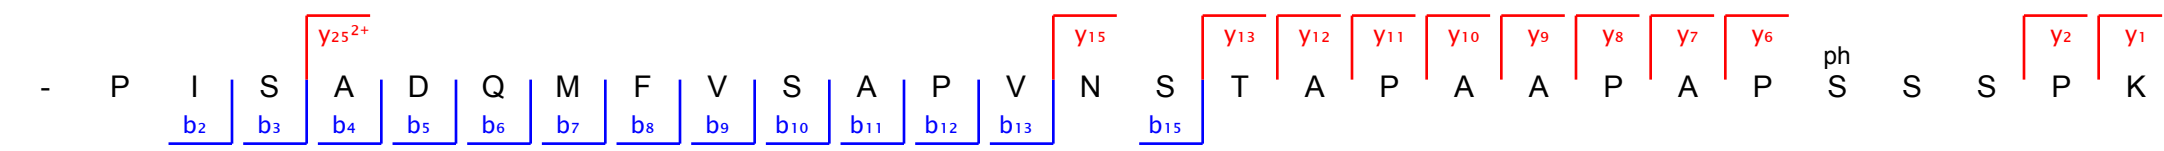

Raw file: 20150814\_A375SR\_Phospho\_BR2\_06  
 Scan: 21780 Method: FTMS; HCD Score: 170.47 m/z: 774.36 Gene names: DNAJA1

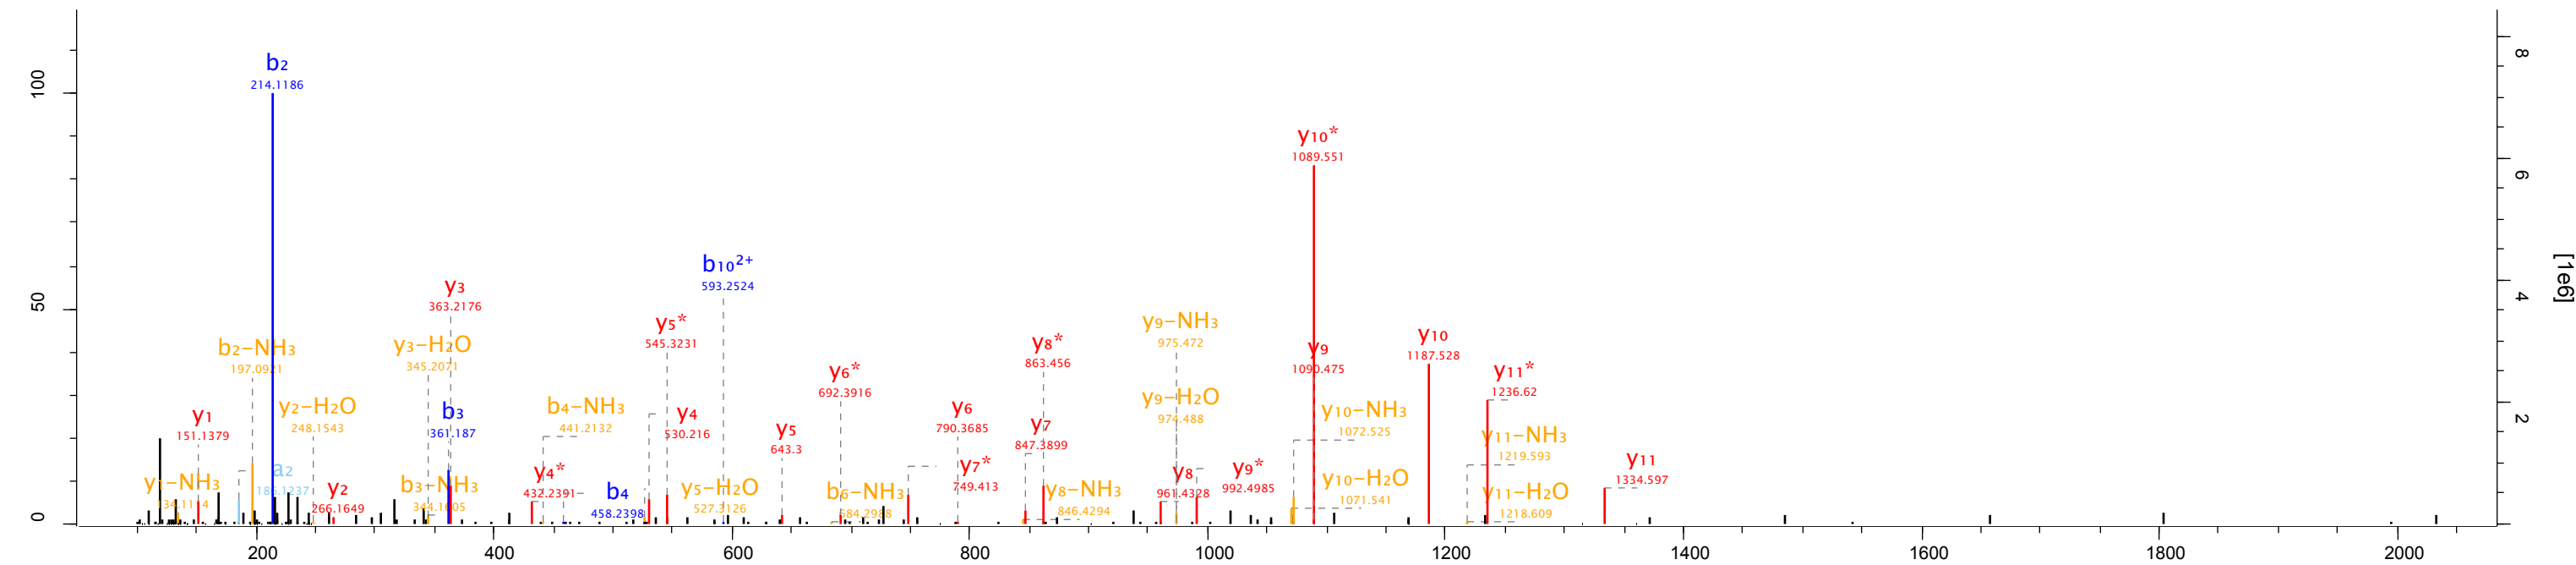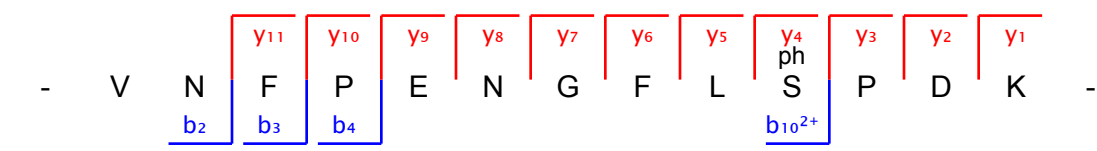

Raw file  
 20150814\_A375SR\_Phospho\_BR2\_06  
 Scan 21980 Method FTMS; HCD Score 154.45 m/z 843.71 Gene names TACC1

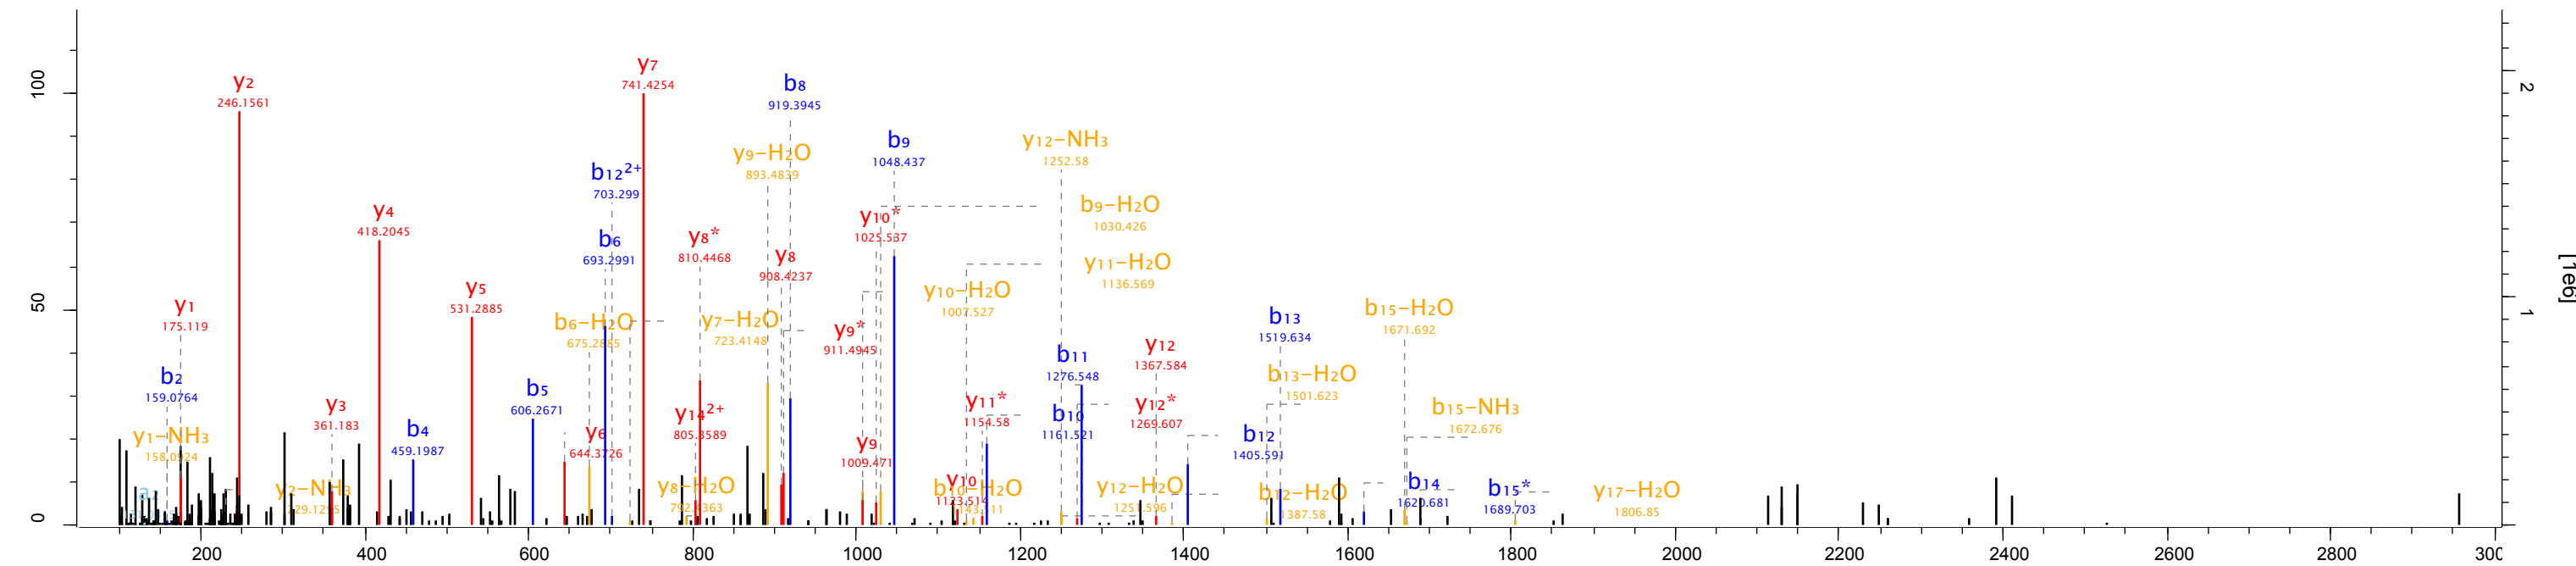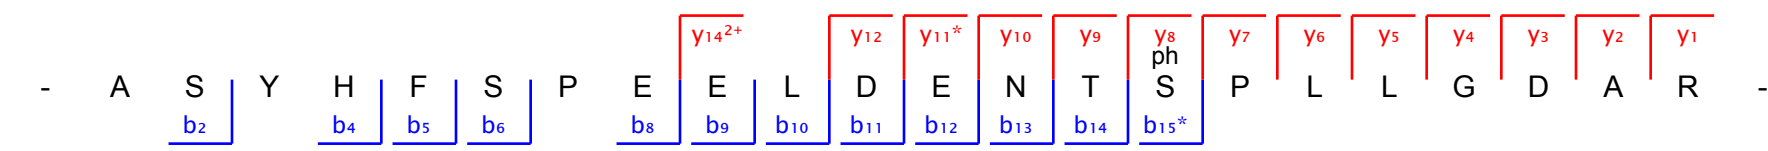



Raw file 20150814\_A375SR\_Phospho\_BR2\_06 Scan 22310 Method FTMS; HCD Score 97.3 m/z 798.39 Gene names PHLDB2

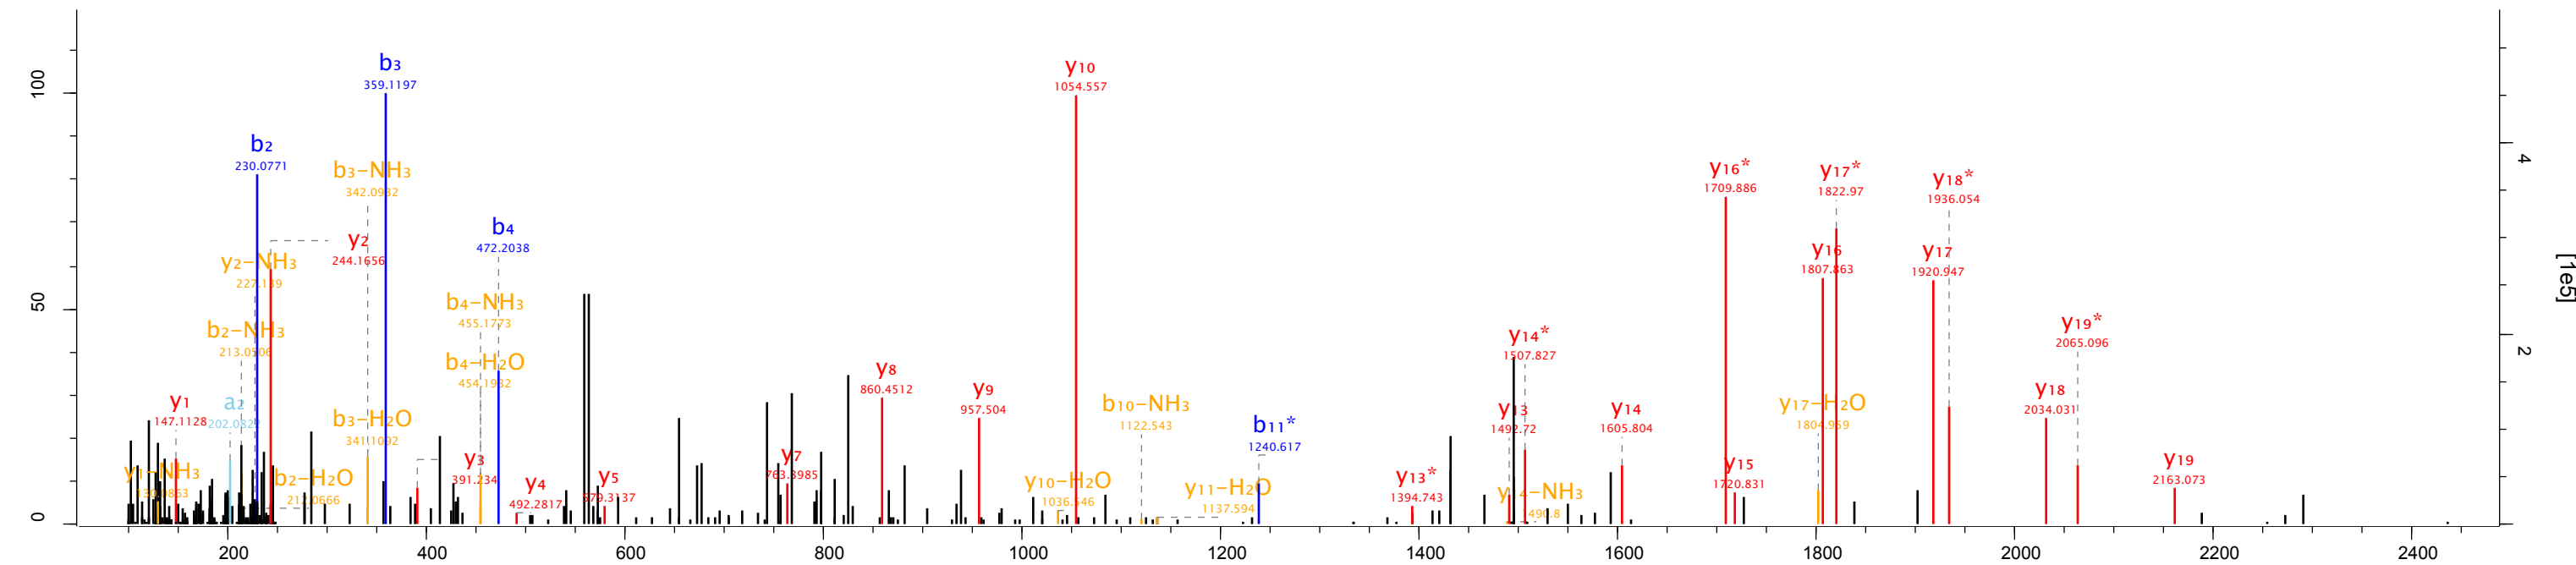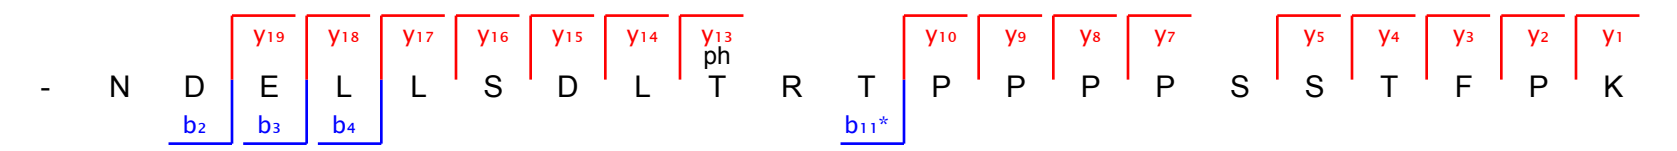

Raw file 20150814\_A375SR\_Phospho\_BR2\_06 Scan 22840 Method FTMS; HCD Score 99.49 m/z 943.77 Gene names EIF4EBP1

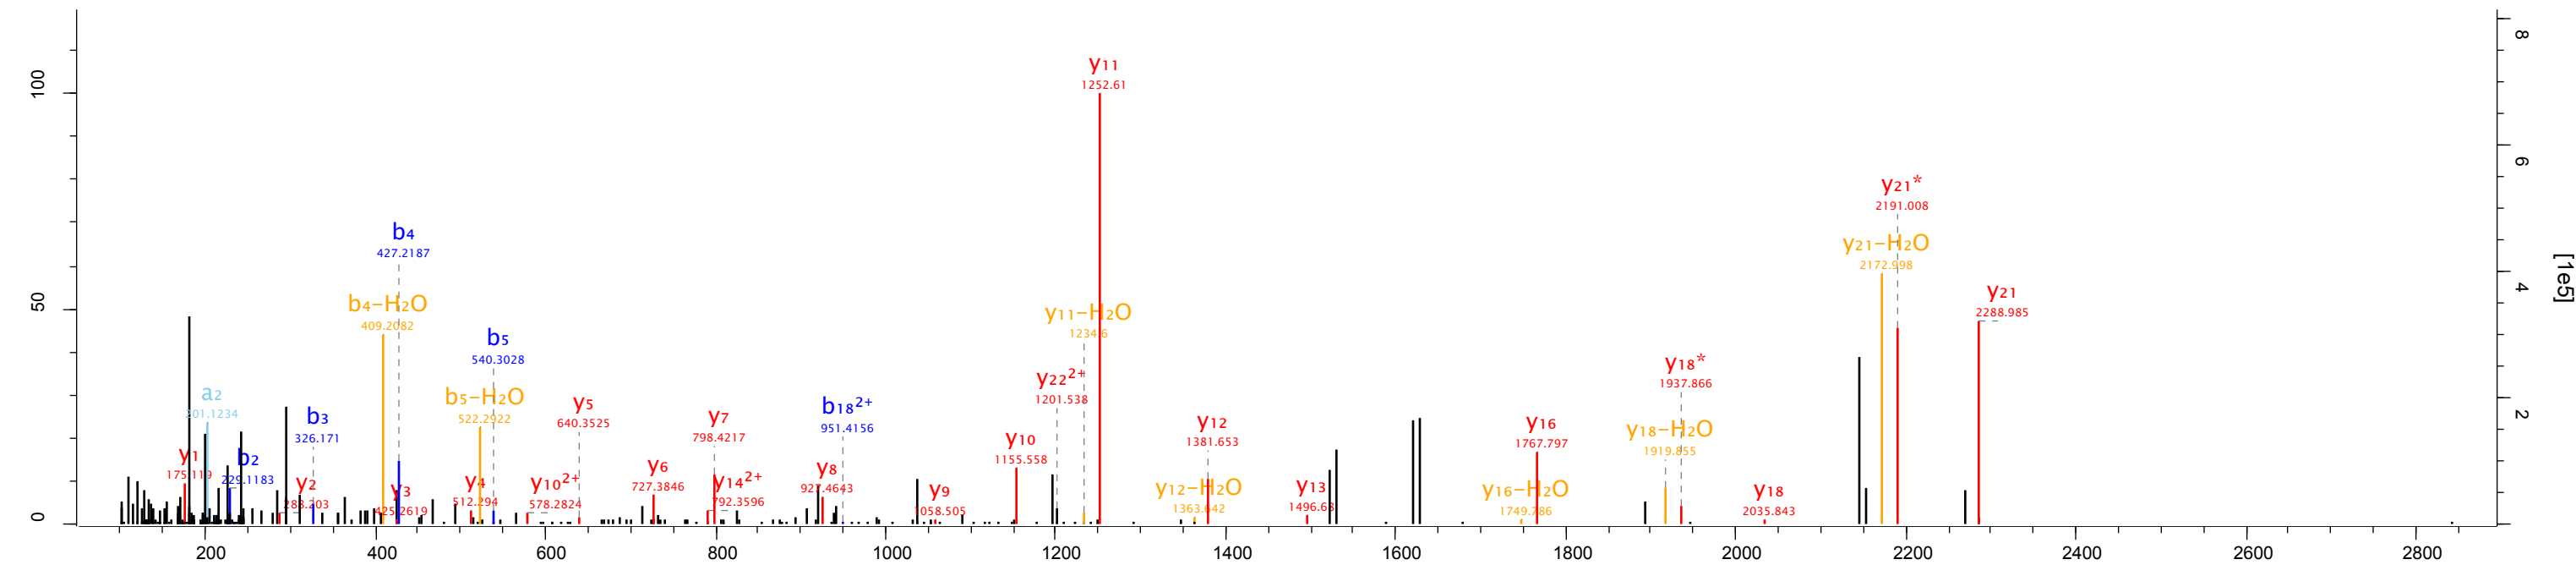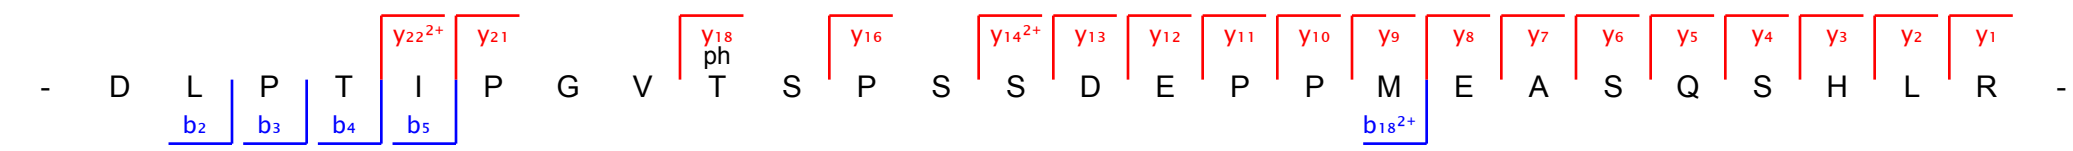

Raw file  
20150814\_A375SR\_Phospho\_BR2\_06

Scan 22870 Method FTMS; HCD Score 203.96 m/z 923.44 Gene names MAP1B

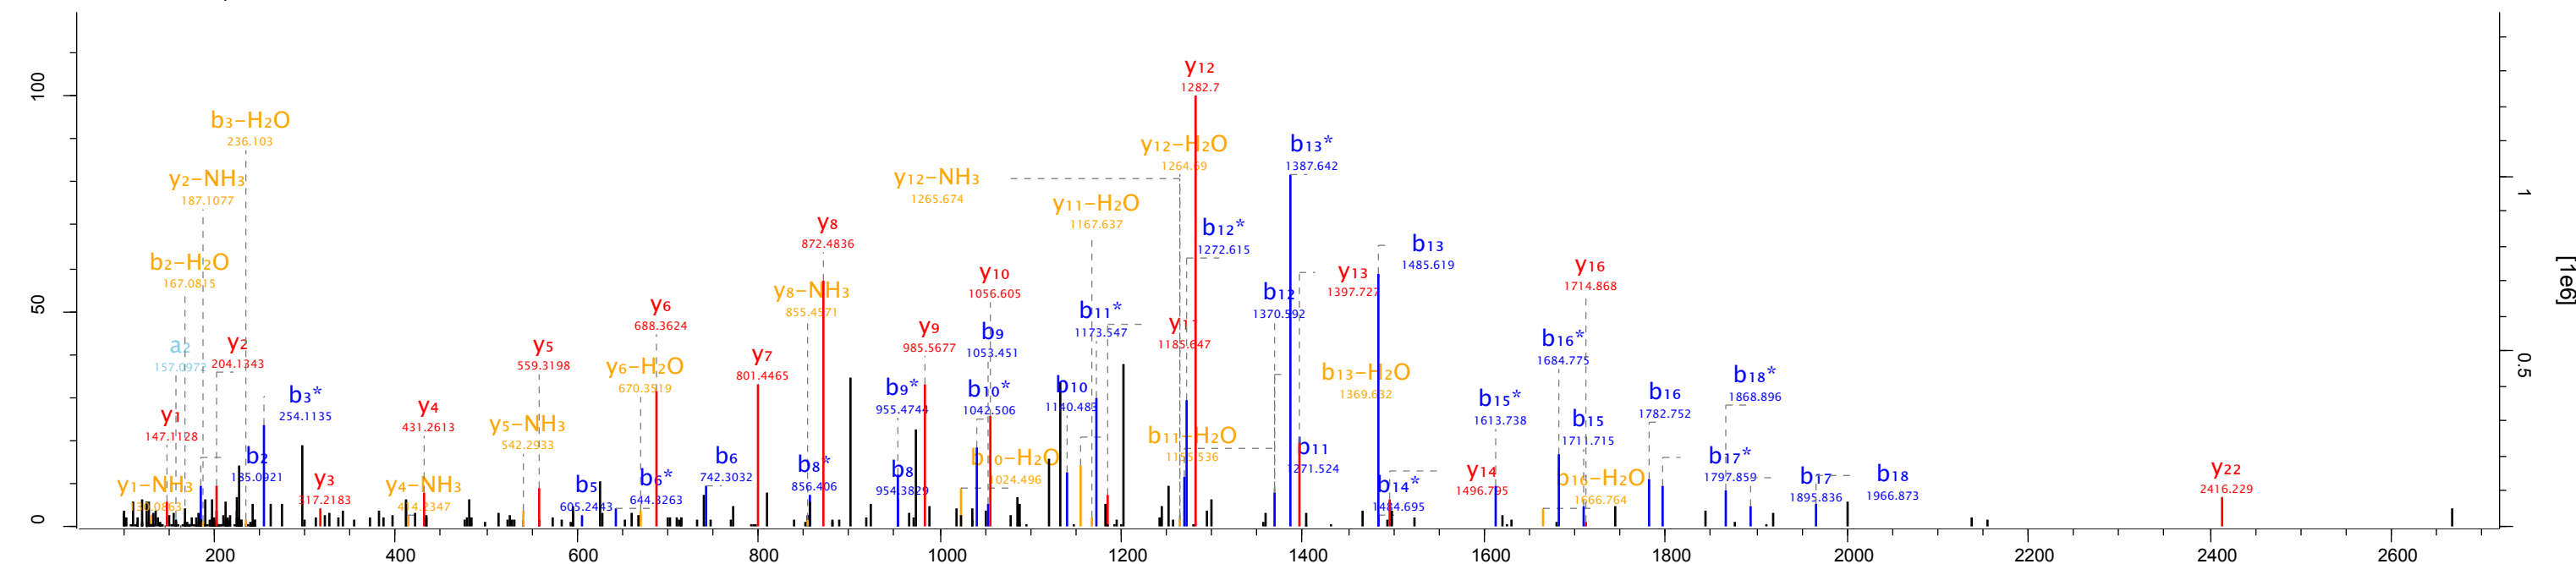

- S P S ph P R H P D V S M V D P E A L A I E Q N L G K -

Peptide sequence: **S P S P R H P D V S M V D P E A L A I E Q N L G K**

Fragmentation sites (b and y ions) are indicated by boxes below the sequence:

- Red boxes (y ions): y1 (S), y2 (ph), y3 (P), y4 (R), y5 (H), y6 (P), y7 (D), y8 (V), y9 (S), y10 (M), y11 (V), y12 (D), y13 (P), y14 (E), y16 (A), y22 (K)
- Blue boxes (b ions): b2 (S), b3\* (ph), b5 (R), b6 (H), b8 (D), b9 (V), b10 (S), b11 (M), b12 (V), b13 (D), b14\* (P), b15 (E), b16 (A), b17 (L), b18 (A)

Raw file 20150814\_A375SR\_Phospho\_BR2\_06 Scan 22980 Method FTMS; HCD Score 117.48 m/z 661.98 Gene names TPD52L2

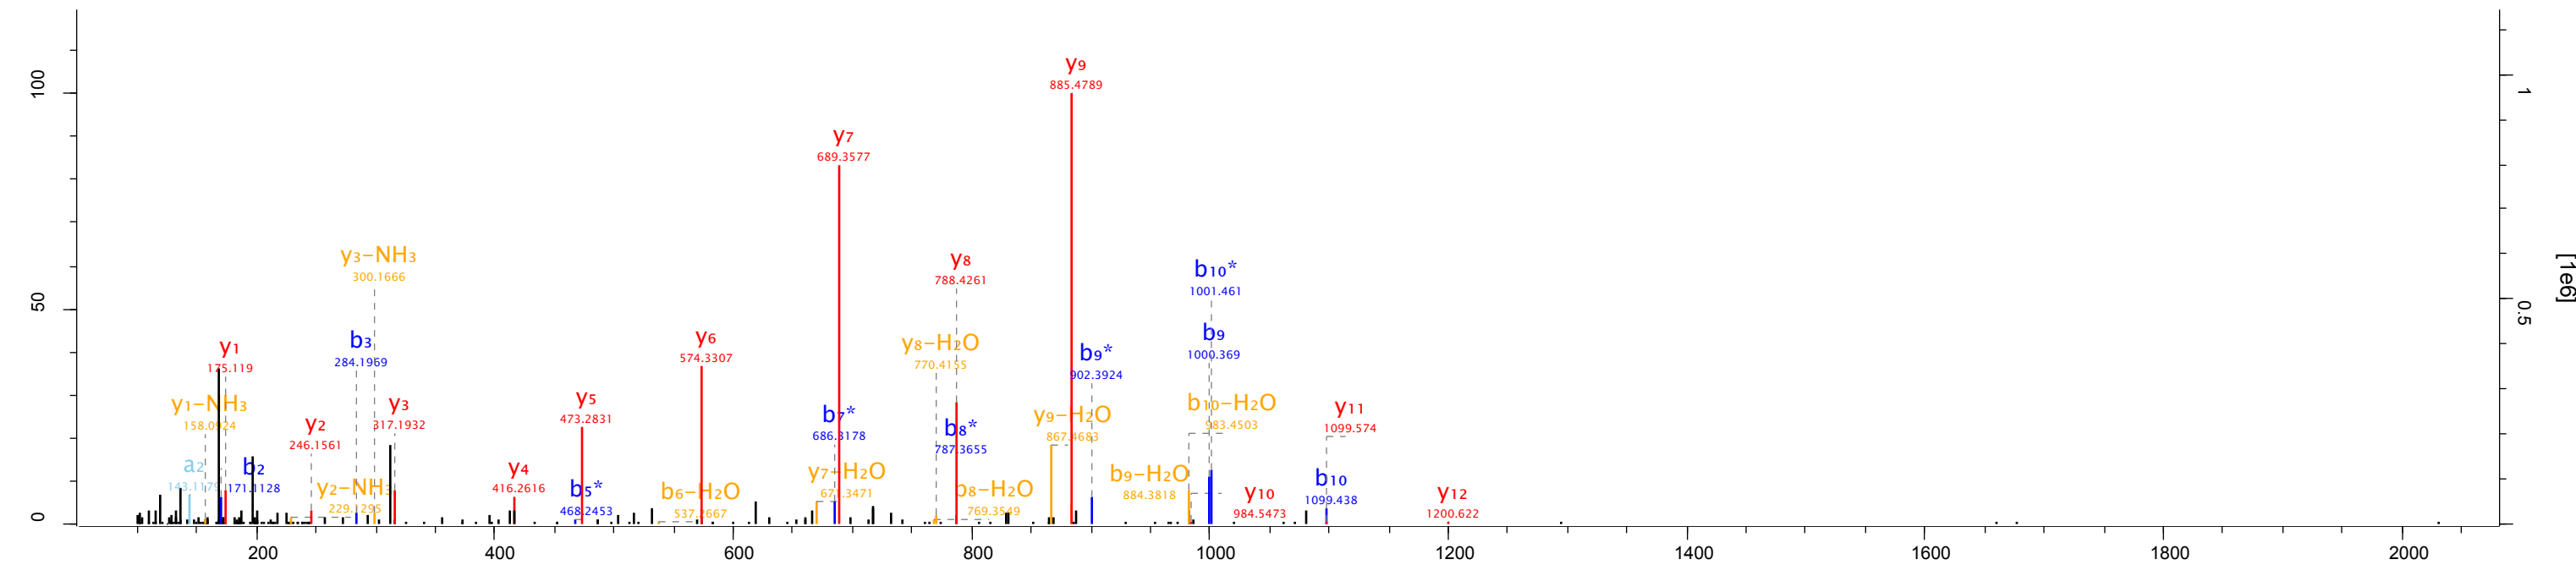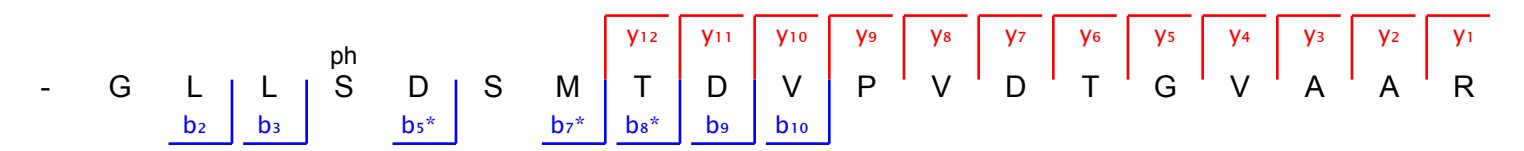

Raw file: 20150814\_A375SR\_Phospho\_BR2\_06  
 Scan: 23280  
 Method: FTMS; HCD  
 Score: 174.73  
 m/z: 1127.84  
 Gene names: PPIP5K2

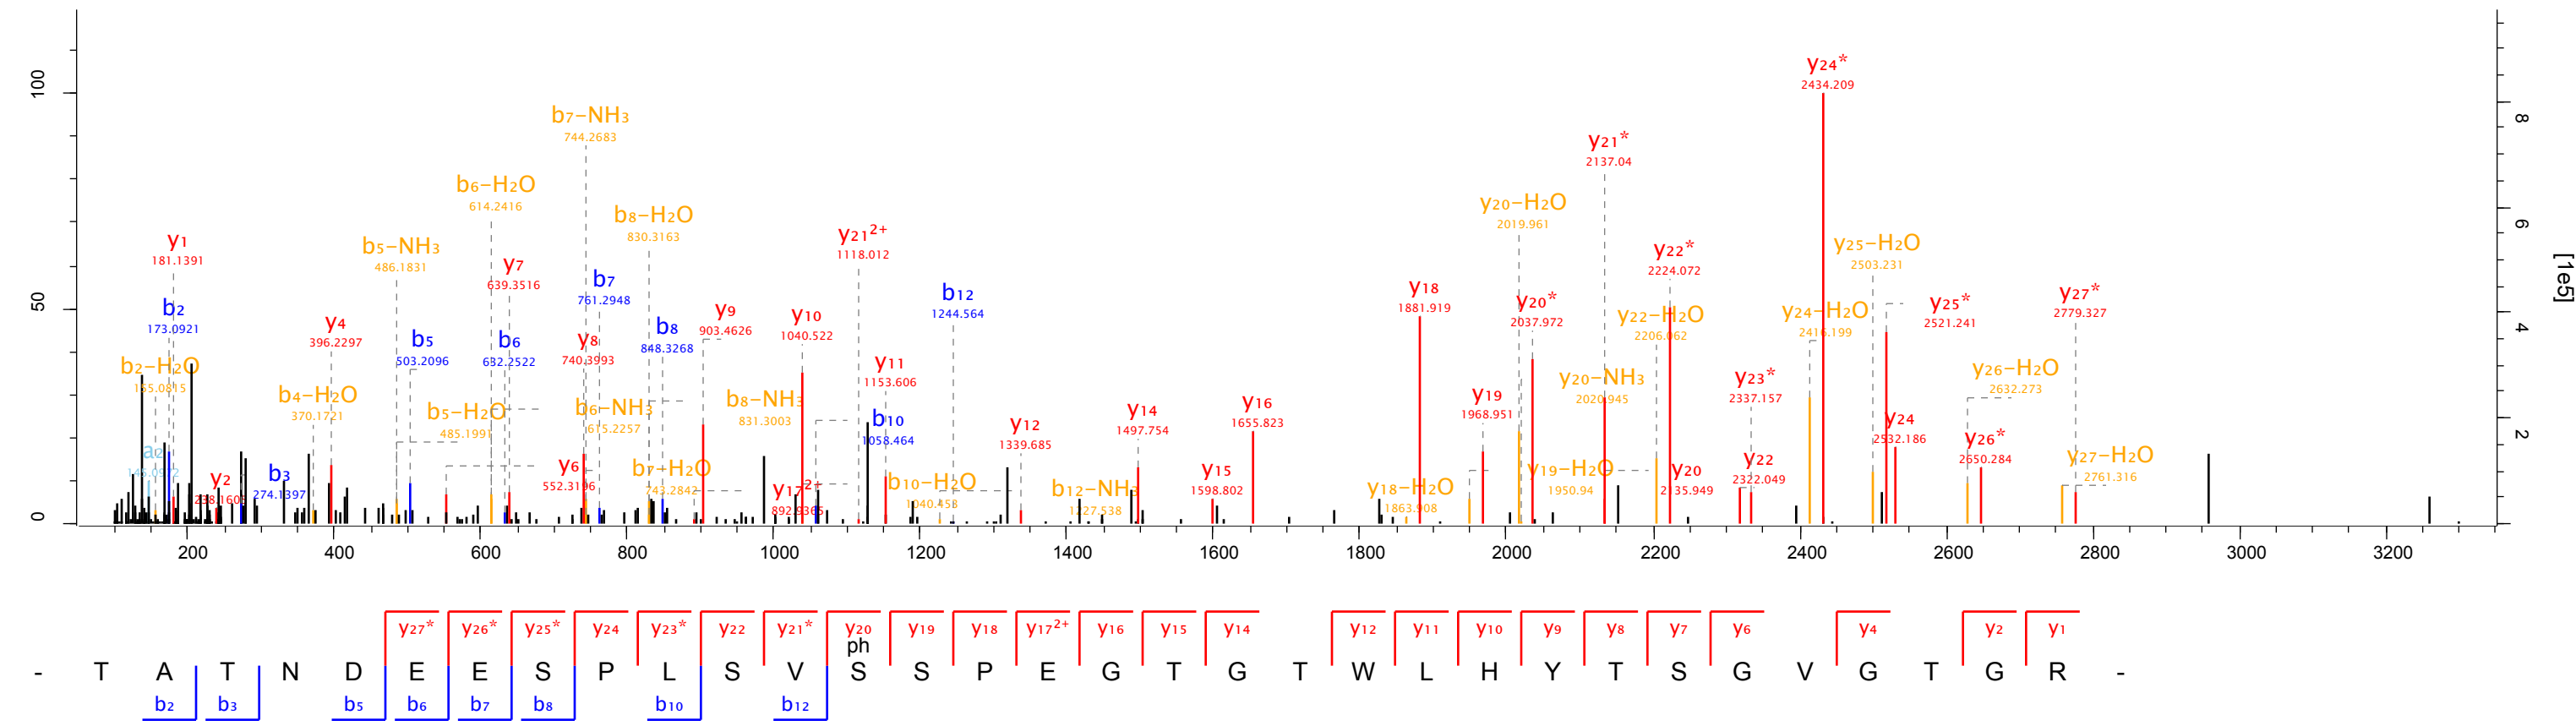

Raw file: 20150814\_A375SR\_Phospho\_BR2\_06  
 Scan: 23340 Method: FTMS; HCD Score: 256.92 m/z: 1010.97 Gene names: UBXN7

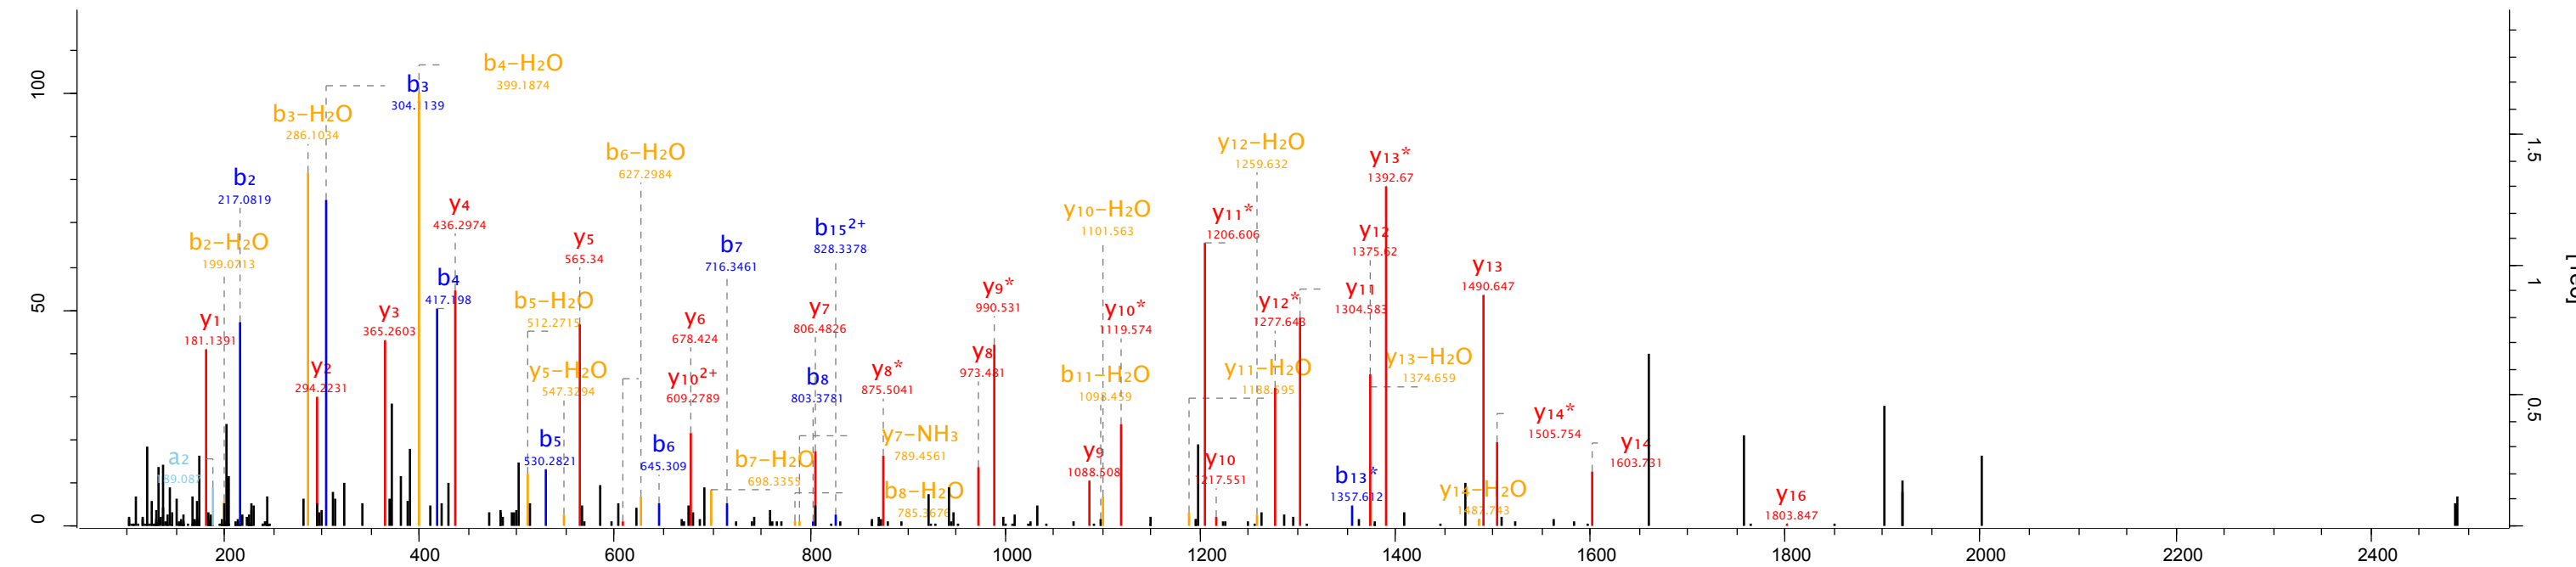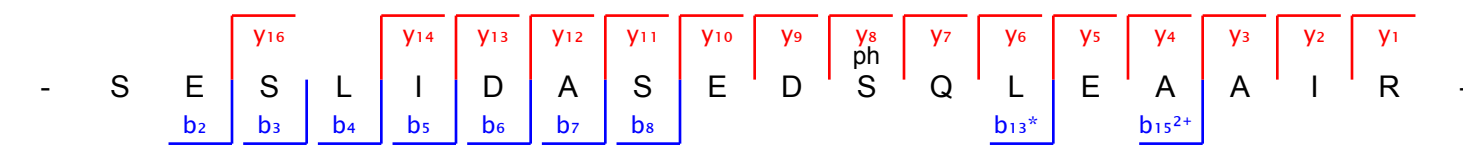

Raw file 20150814\_A375SR\_Phospho\_BR2\_06 Scan 23470 Method FTMS; HCD Score 146.6 m/z 705.34 Gene names NEDD4L;ZNF227

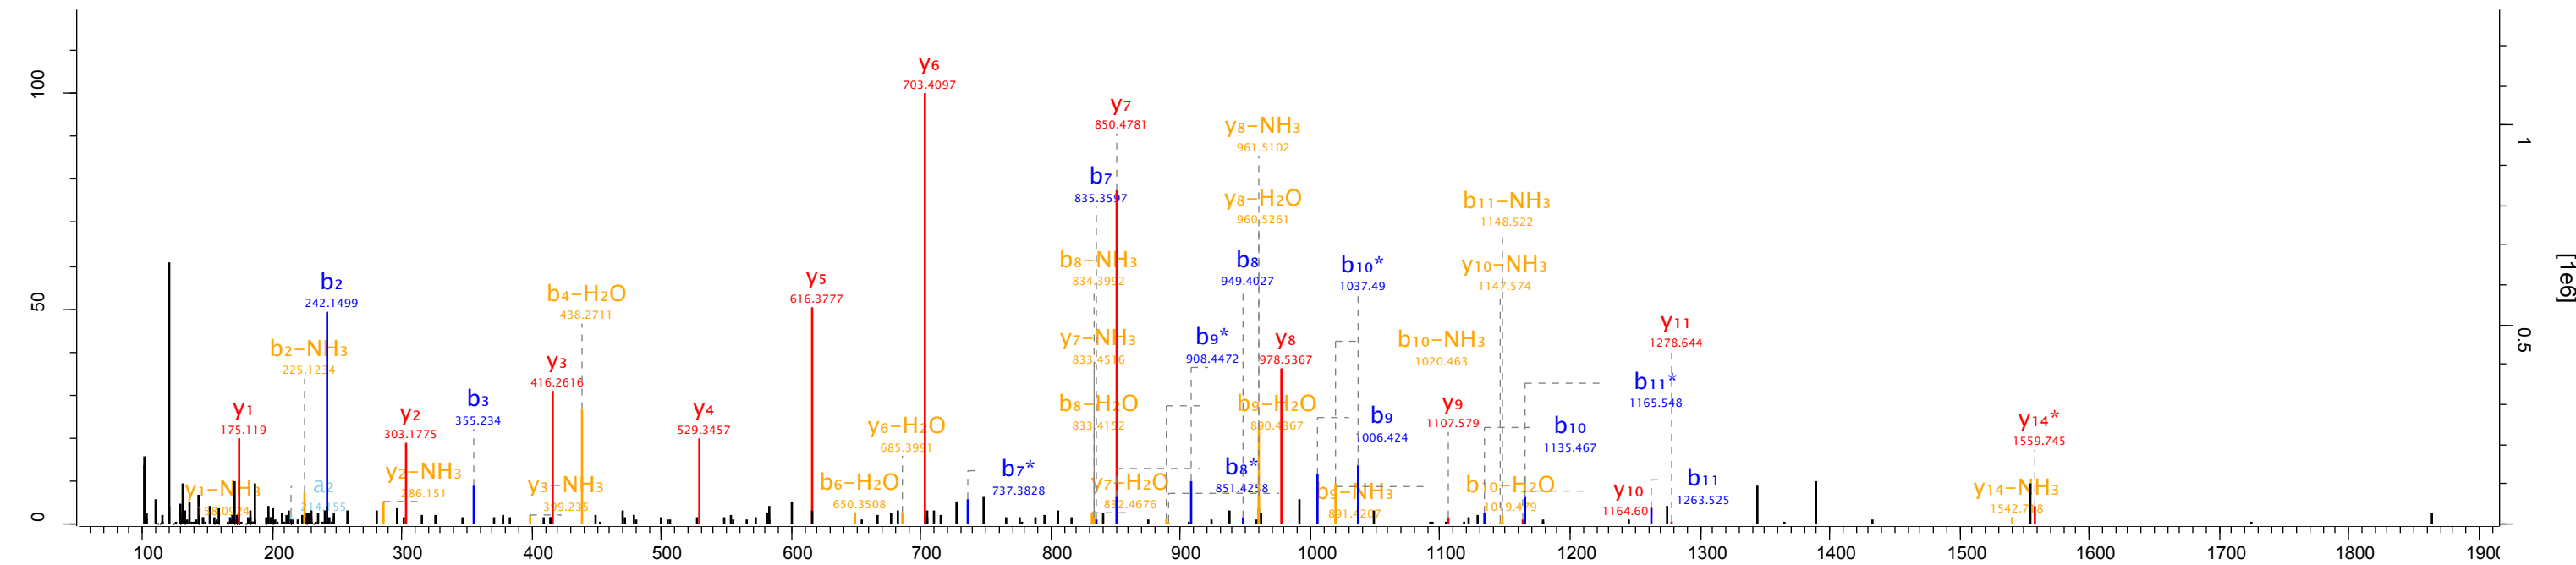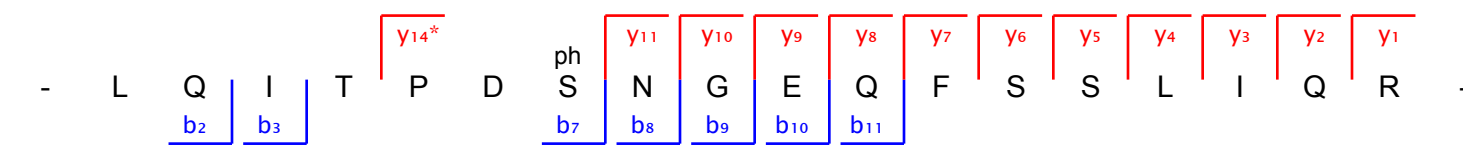

Raw file 20150814\_A375SR\_Phospho\_BR2\_06 Scan 23650 Method FTMS; HCD Score 102.69 m/z 712.89 Gene names CFL1

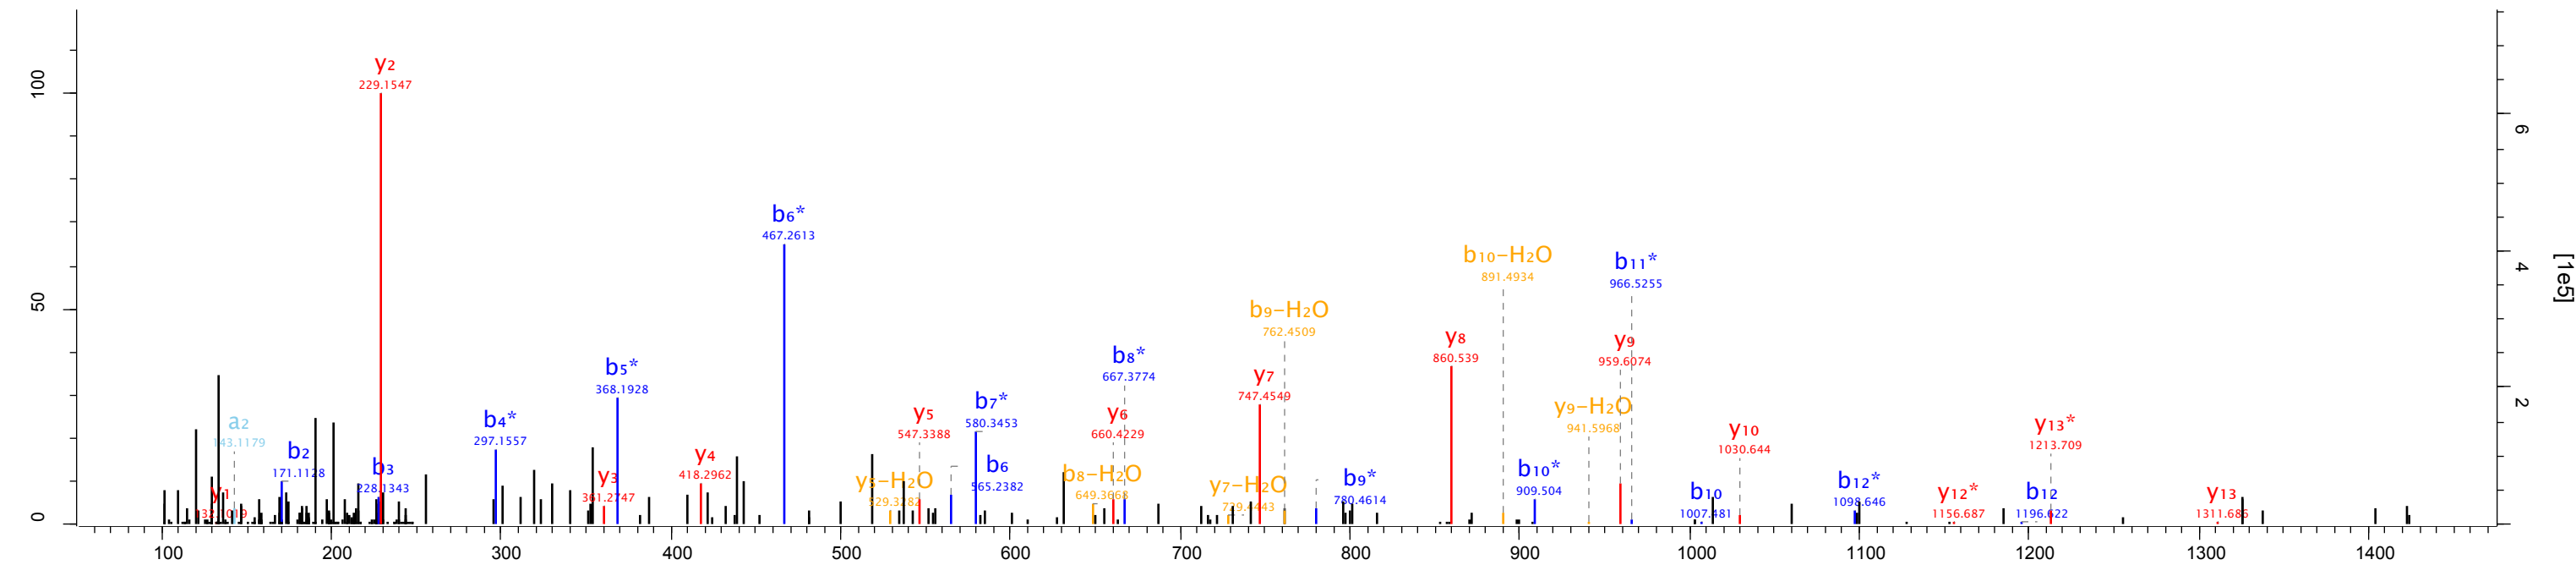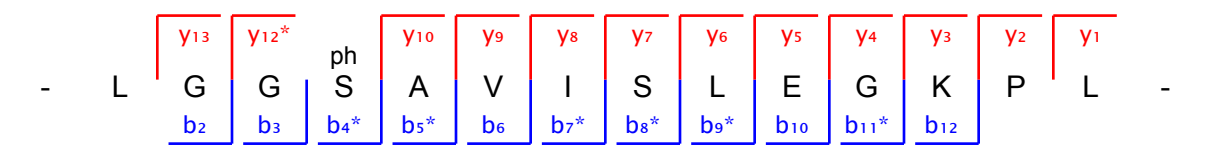



Raw file: 20150814\_A375SR\_Phospho\_BR2\_06  
 Scan: 23670 Method: FTMS; HCD Score: 67.11 m/z: 741.34 Gene names: STK3

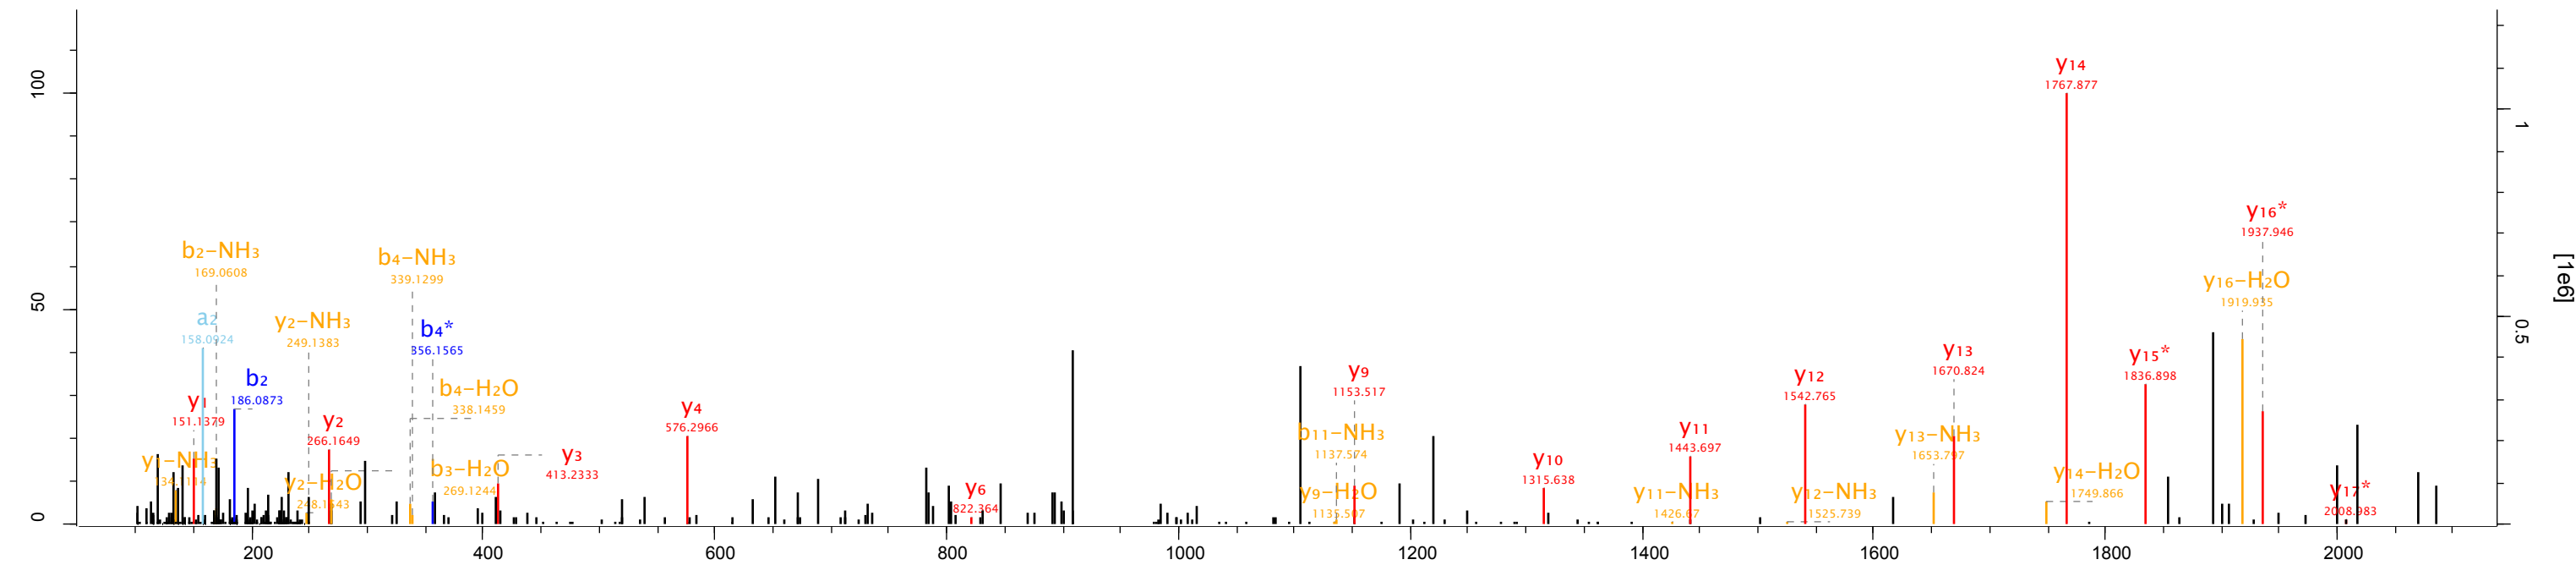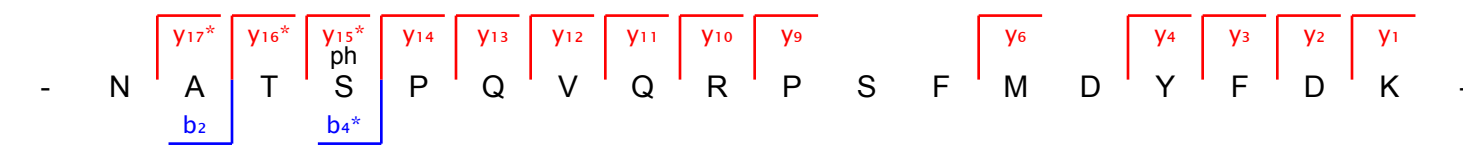

Raw file: 20150814\_A375SR\_Phospho\_BR2\_06  
 Scan: 23680 Method: FTMS; HCD Score: 66.14 m/z: 669.67 Gene names: DR1

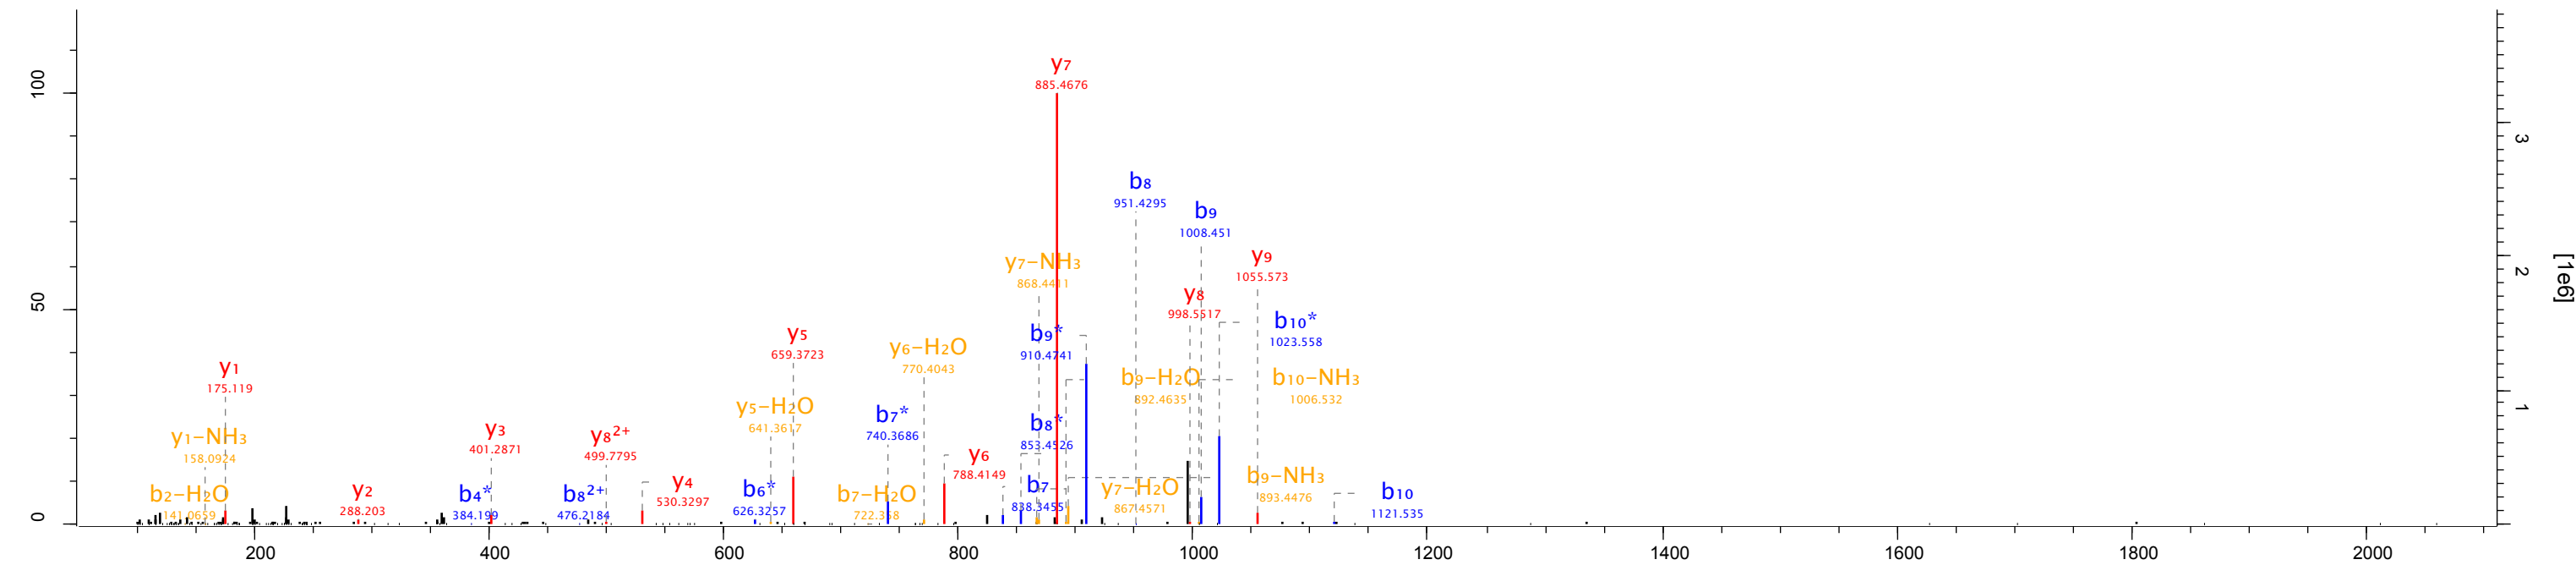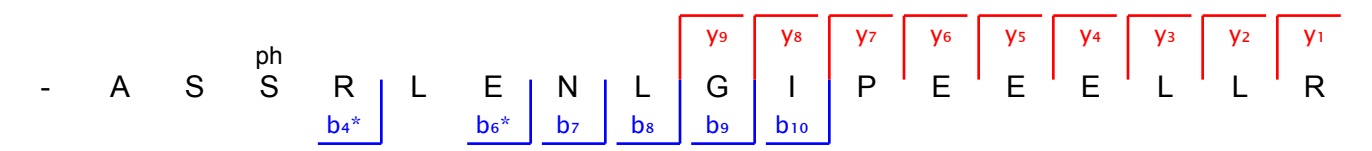

Raw file 20150814\_A375SR\_Phospho\_BR2\_06 Scan 23950 Method FTMS; HCD Score 225.65 m/z 1068.51 Gene names WDR75

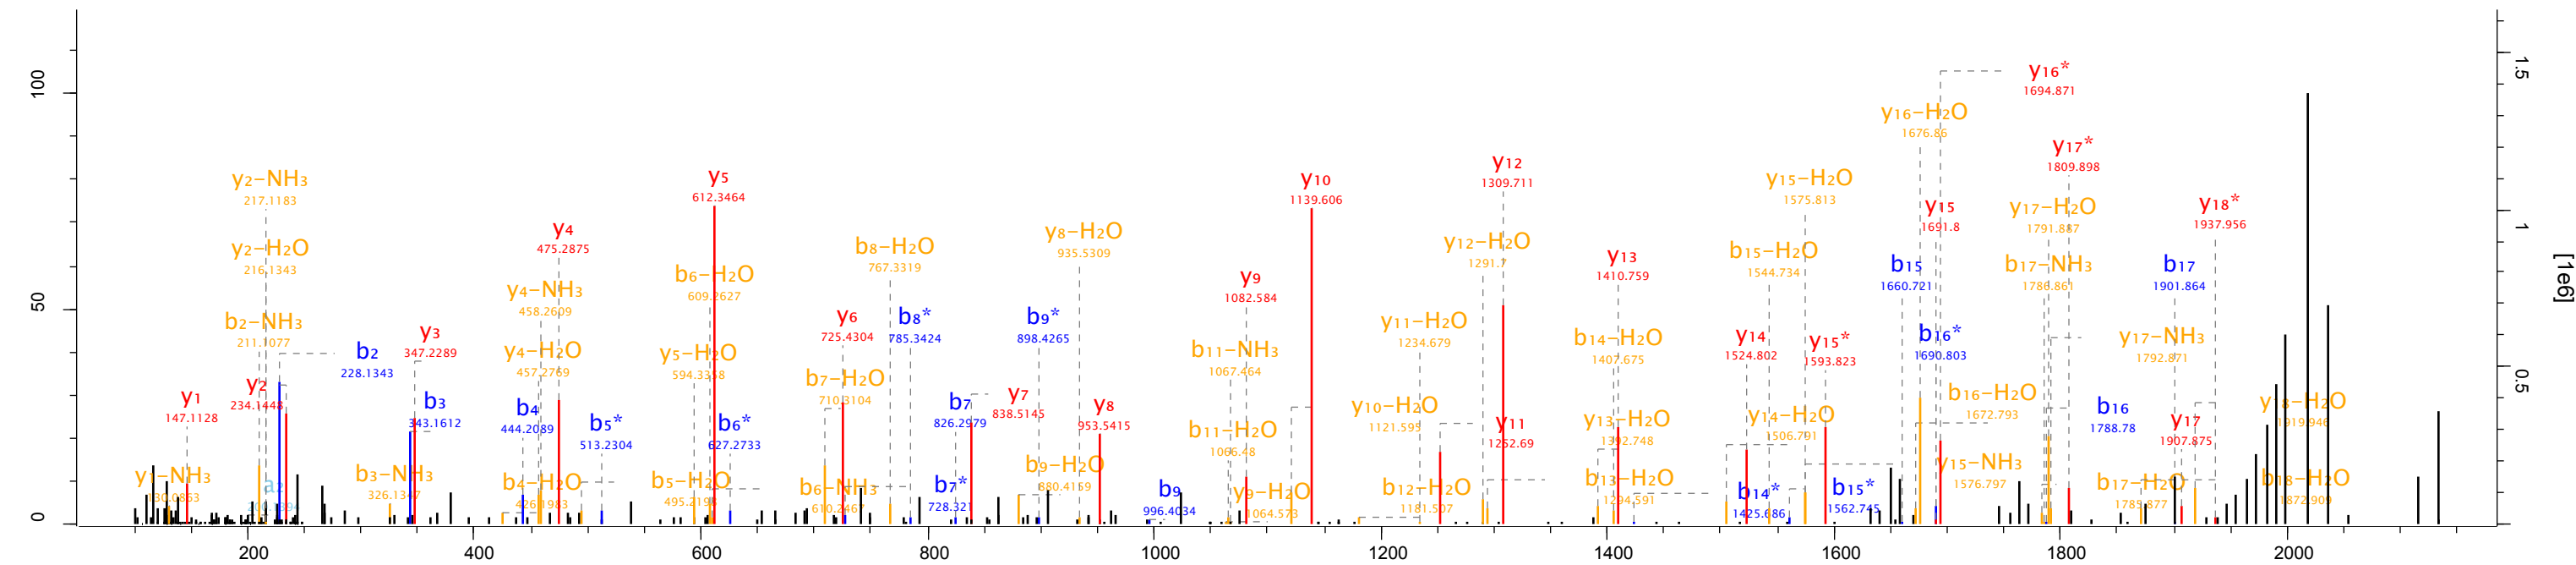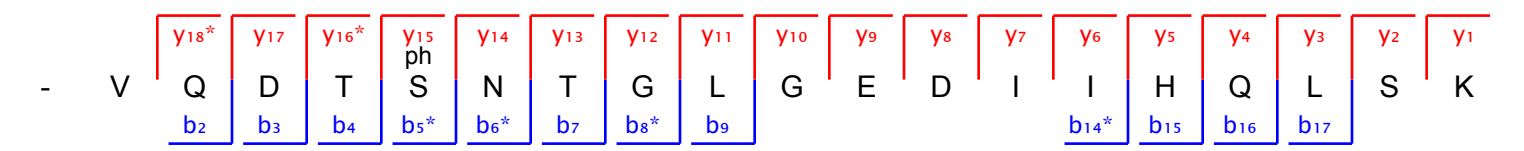

Raw file: 20150814\_A375SR\_Phospho\_BR2\_06  
 Scan: 2420 Method: FTMS; HCD Score: 164.06 m/z: 565.27 Gene names: LMNB1

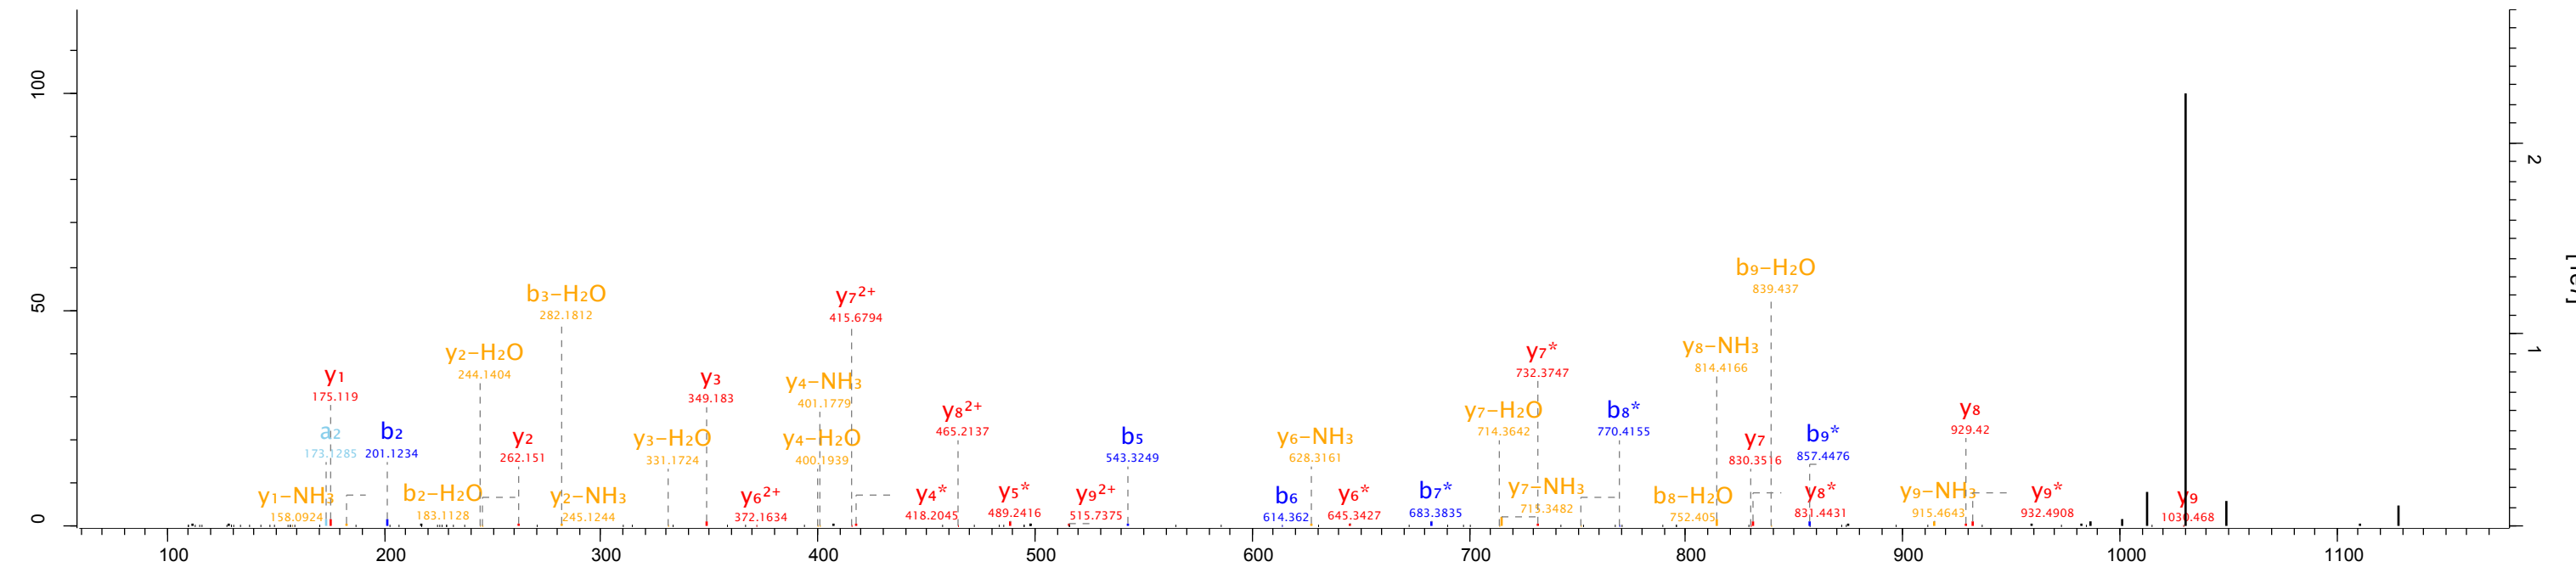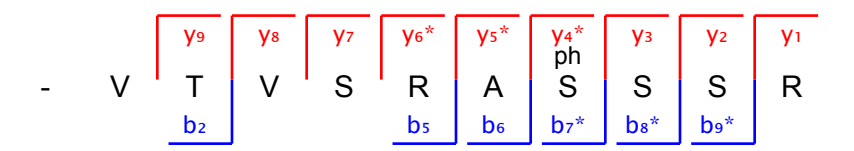

Raw file: 20150814\_A375SR\_Phospho\_BR2\_06  
 Scan: 26280 Method: FTMS; HCD Score: 60.32 m/z: 743.68 Gene names: GPRASP2

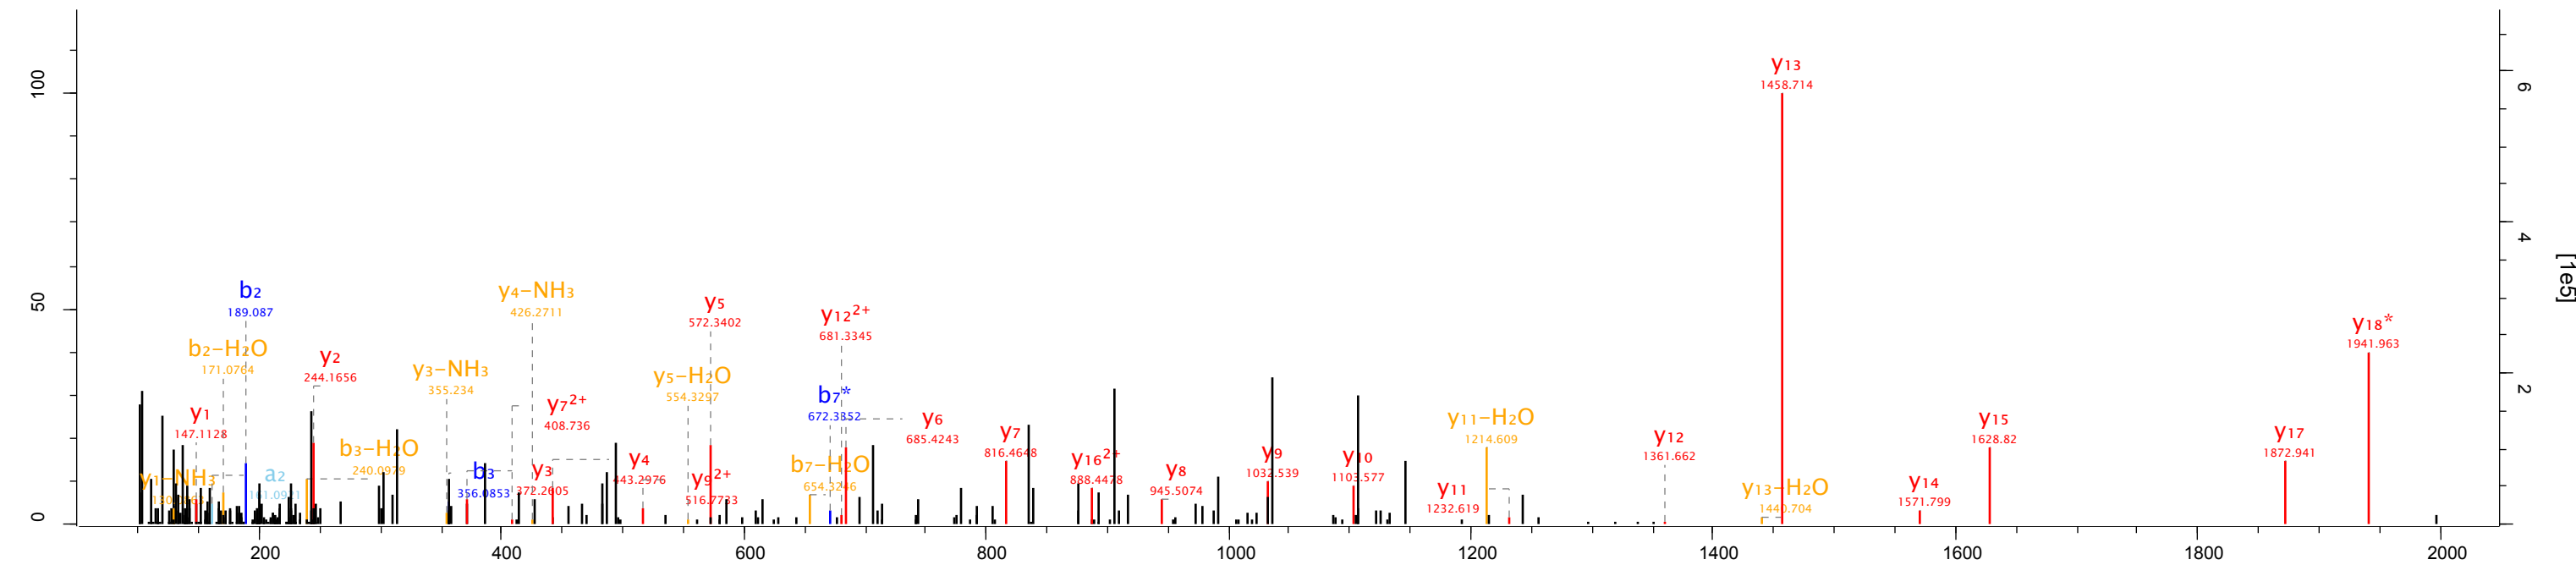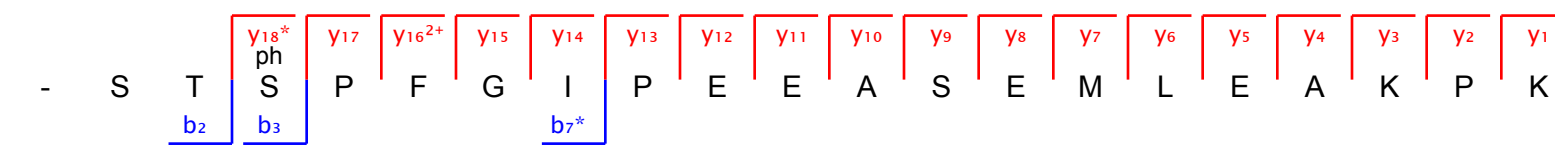

Raw file Scan Method Score m/z Gene names  
 20150814\_A375SR\_Phospho\_BR2\_06 28320 FTMS; HCD 165.86 693.36 CREBBP

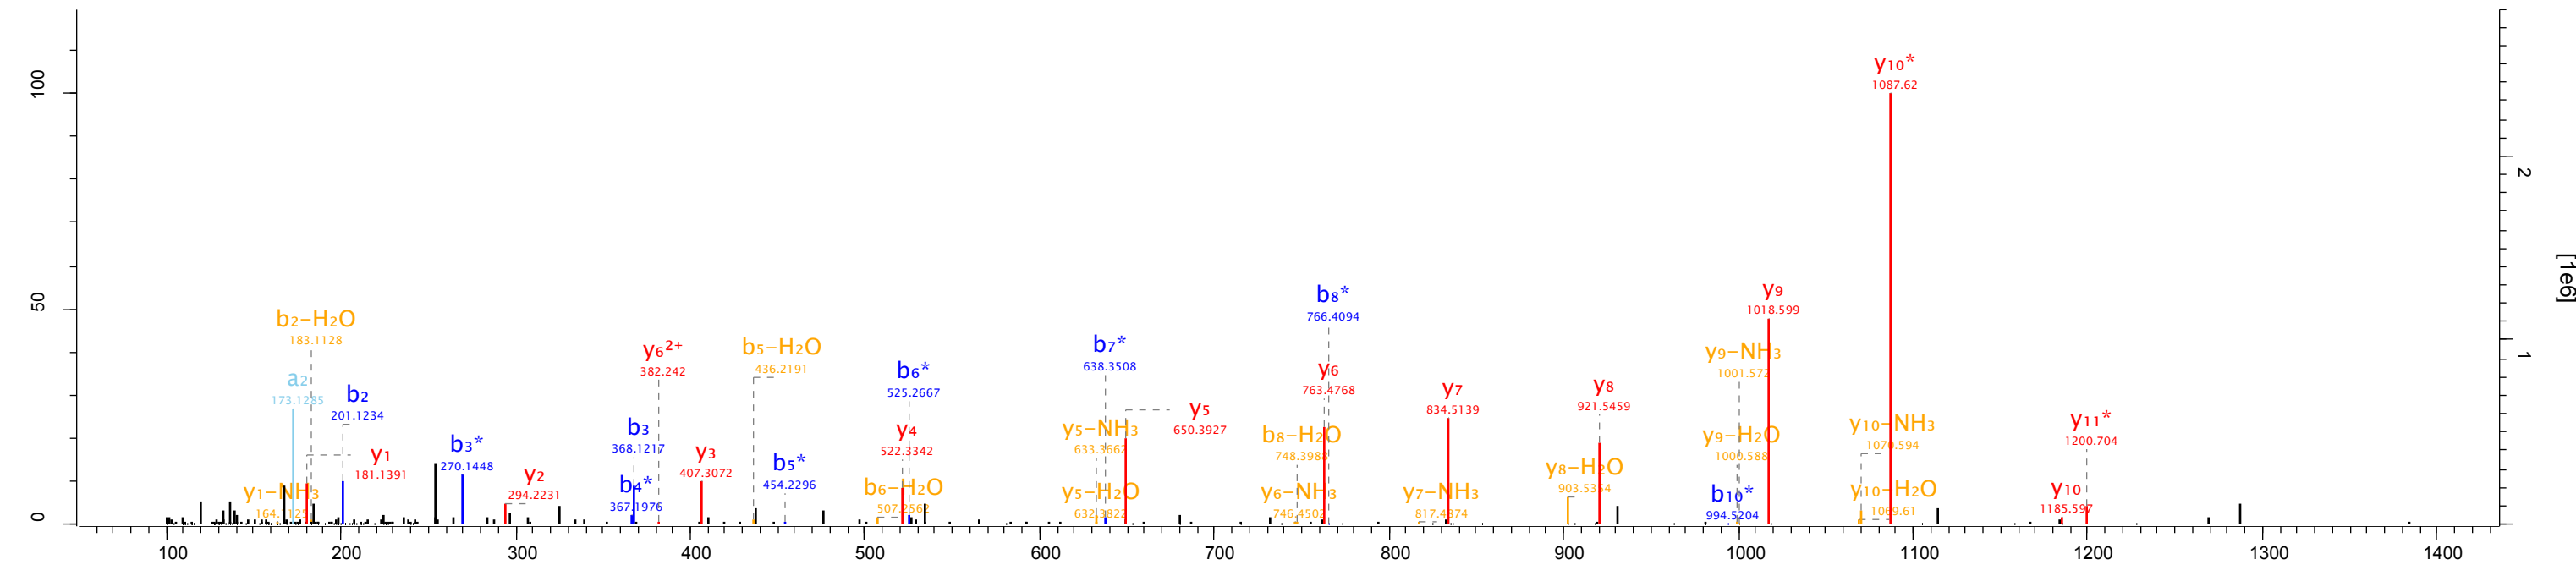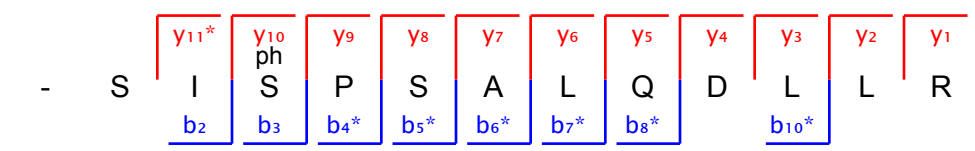

Raw file: 20150814\_A375SR\_Phospho\_BR2\_06  
 Scan: 28430 Method: FTMS; HCD Score: 119.76 m/z: 987.96 Gene names: EIF1

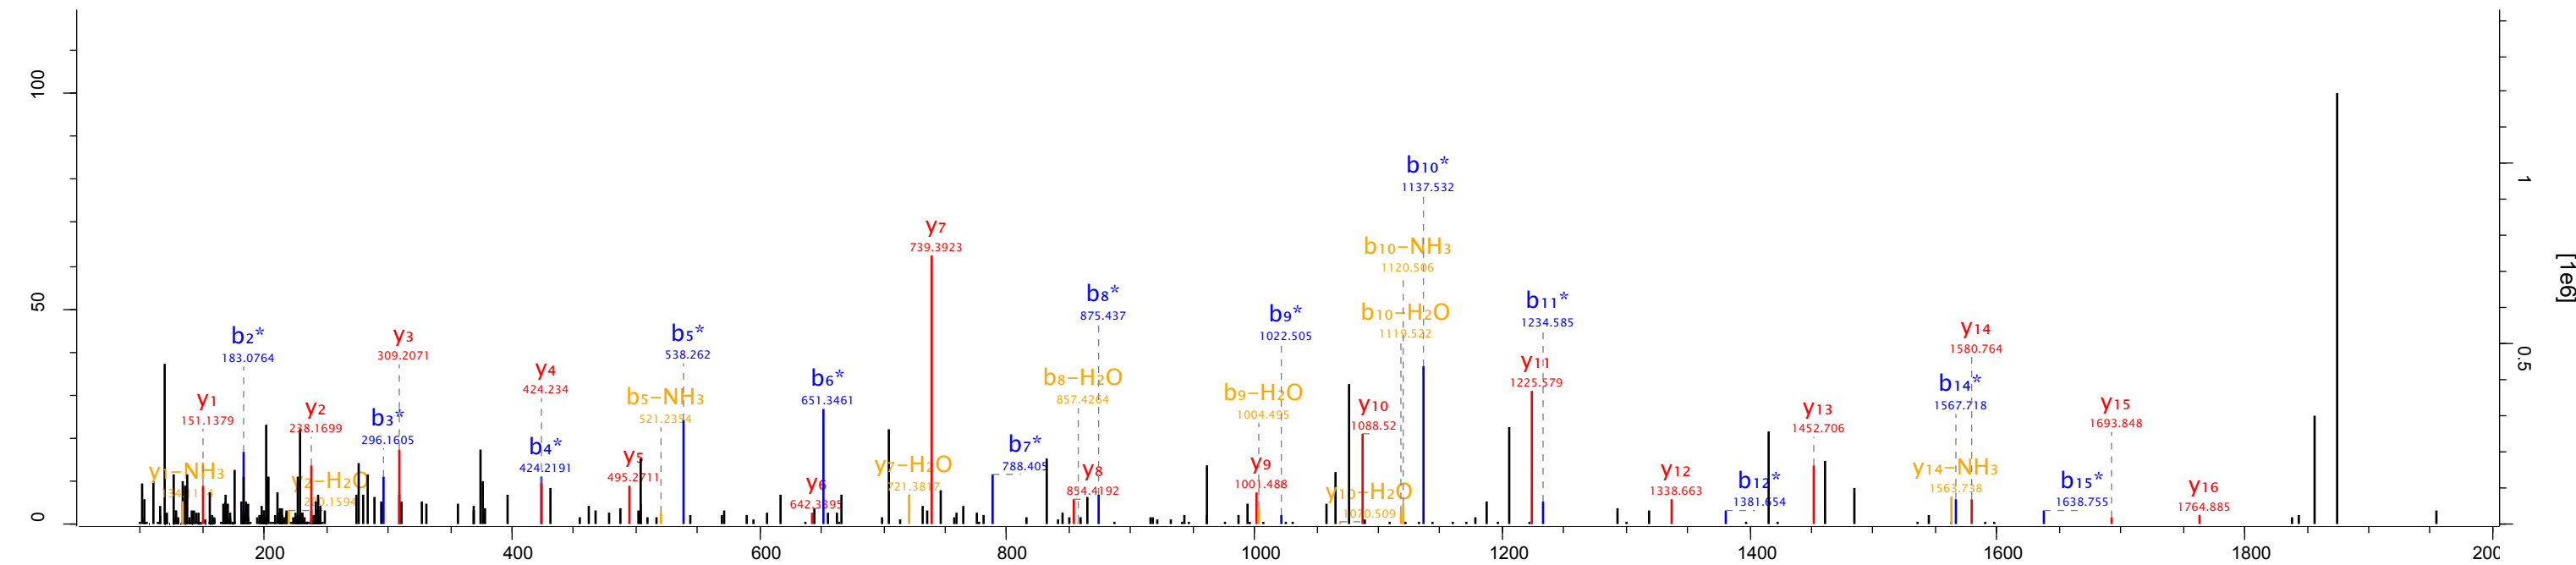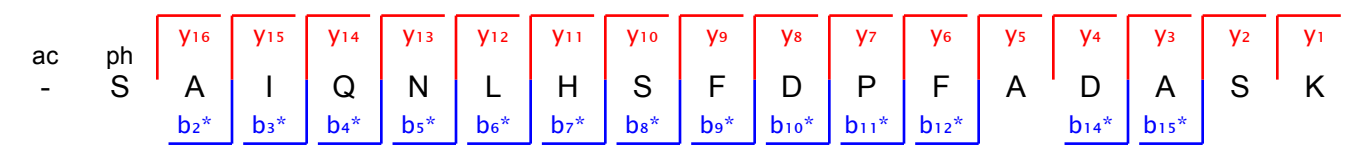

Raw file: 20150814\_A375SR\_Phospho\_BR2\_06  
 Scan: 28810 Method: FTMS; HCD Score: 119.82 m/z: 866.44 Gene names: SPACIA2;FAM122B

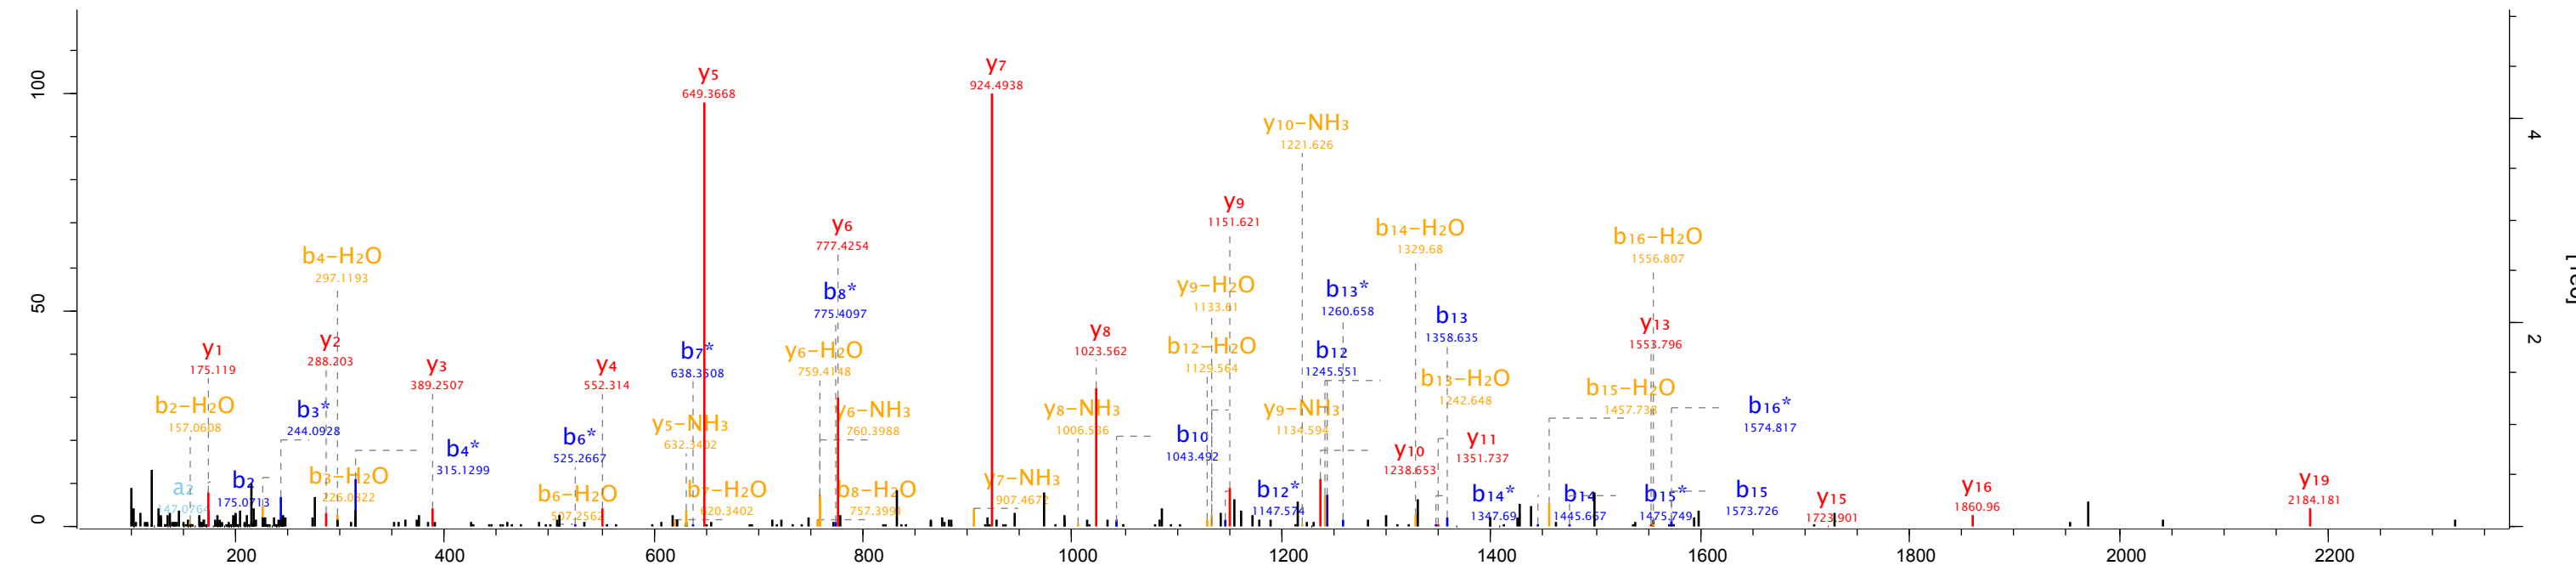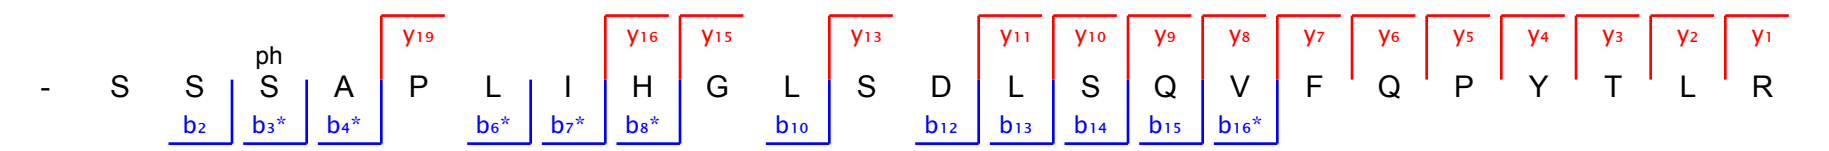



Raw file: 20150814\_A375SR\_Phospho\_BR2\_06  
 Scan: 3030 Method: FTMS; HCD Score: 66.66 m/z: 440.7 Gene names: TXNRD3

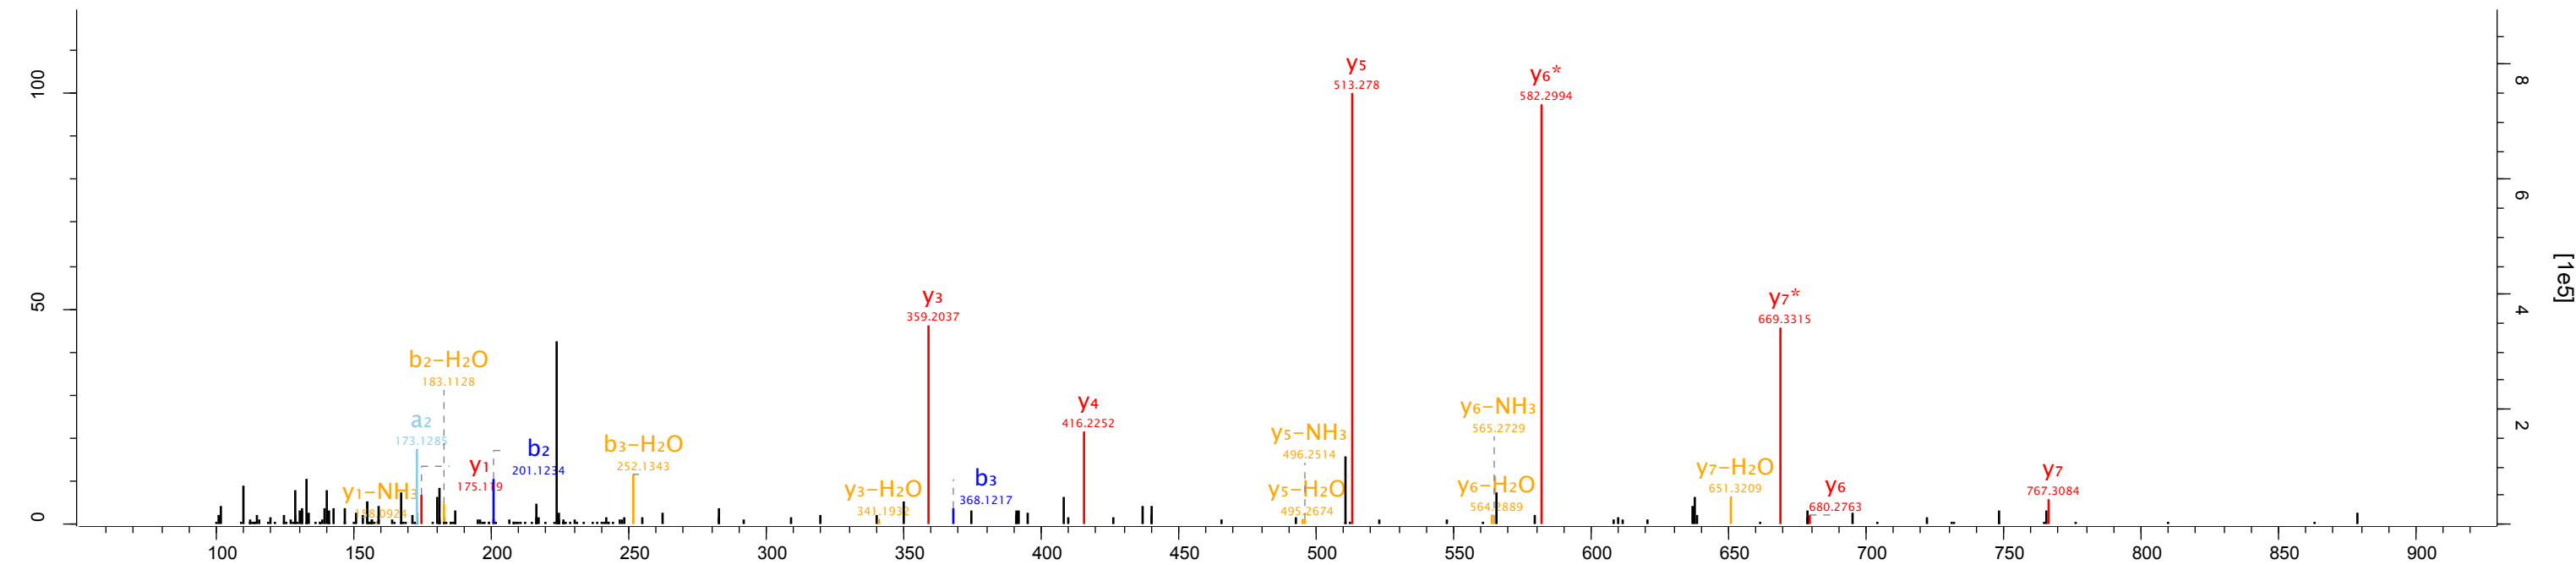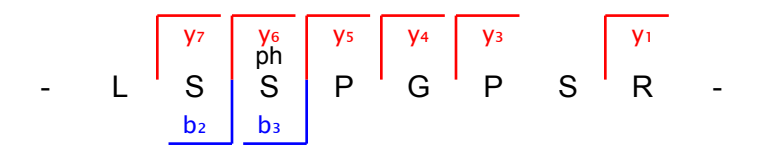

Raw file 20150814\_A375SR\_Phospho\_BR2\_06 Scan 3300 Method FTMS; HCD Score 126.96 m/z 466.88 Gene names SRRM2

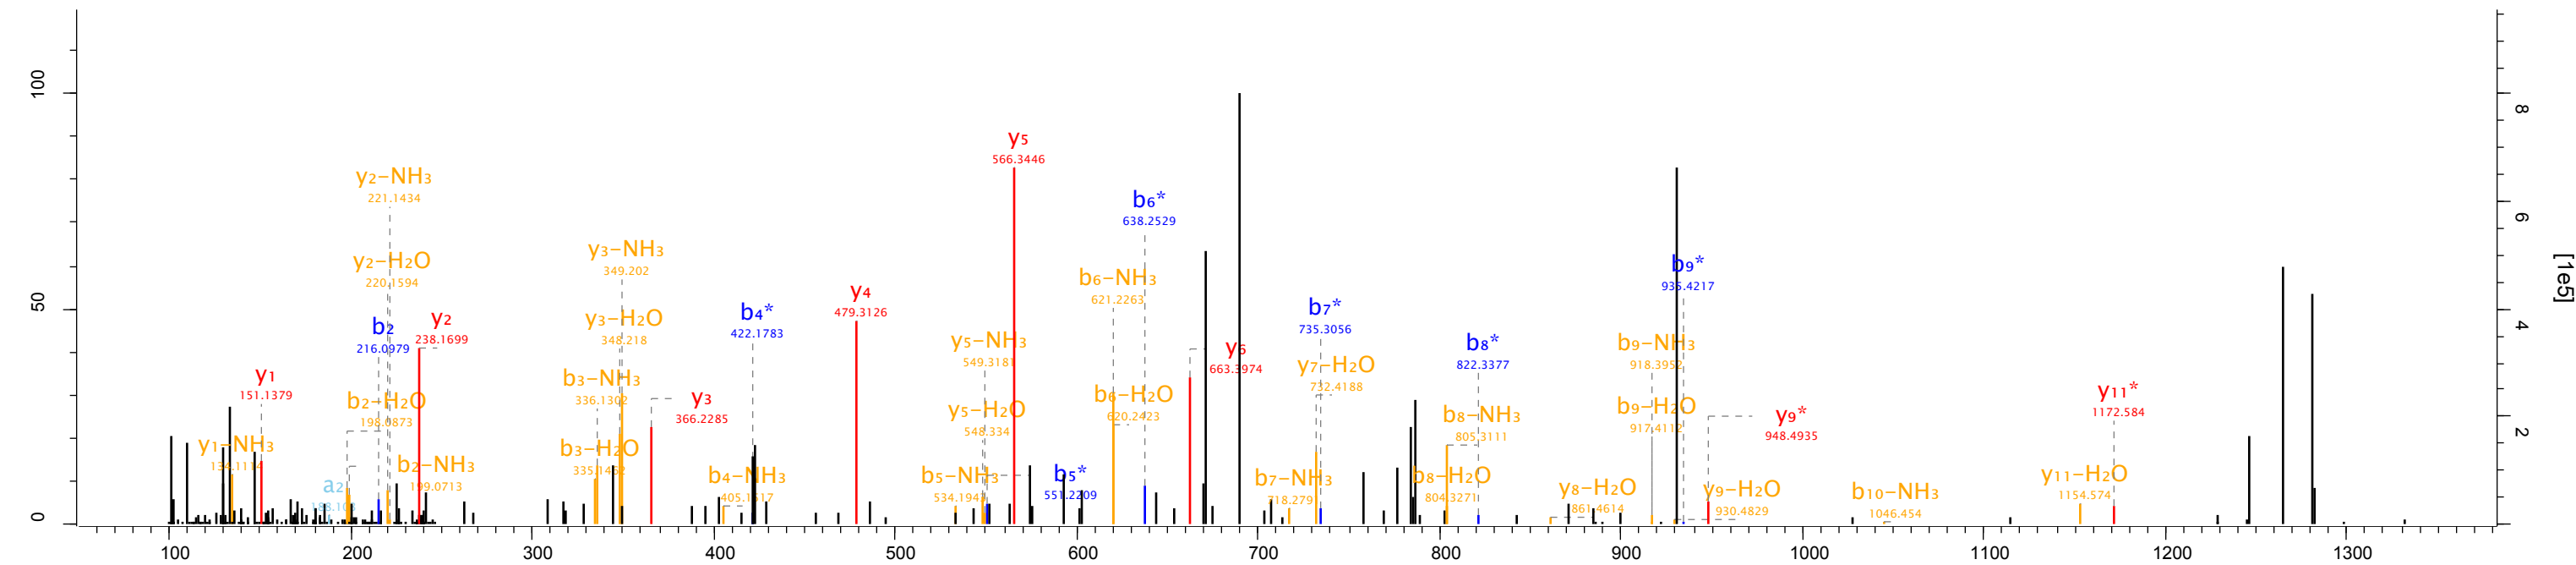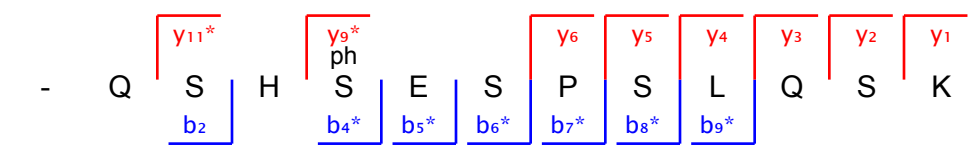

Raw file 20150814\_A375SR\_Phospho\_BR2\_06 Scan 3400 Method FTMS; HCD Score 89.46 m/z 546.8 Gene names FSCN1

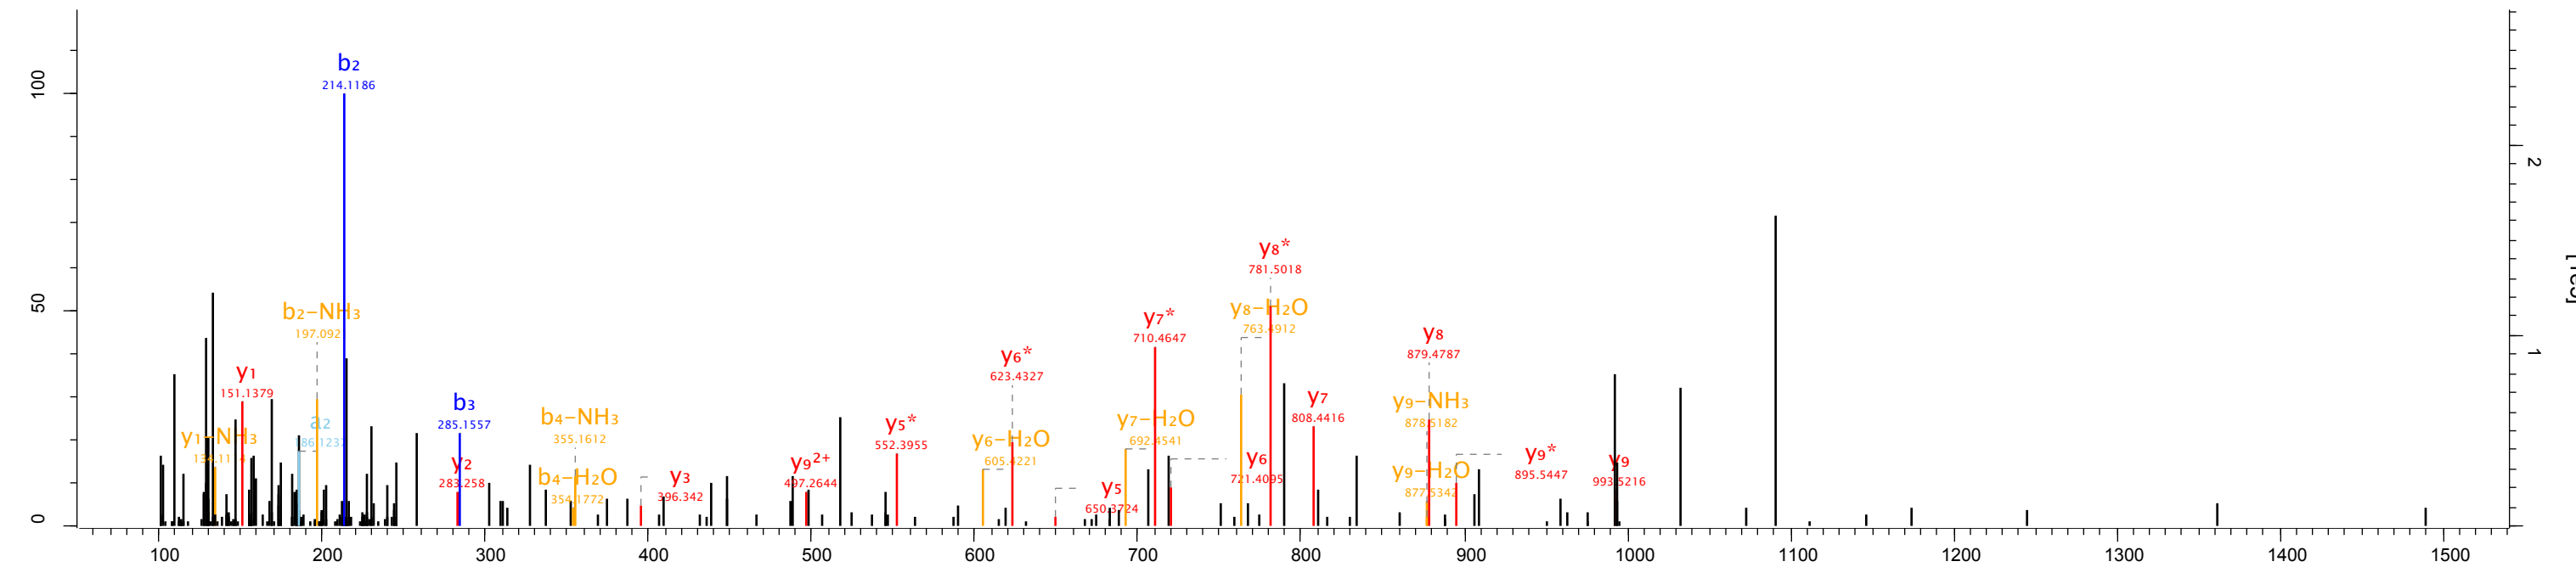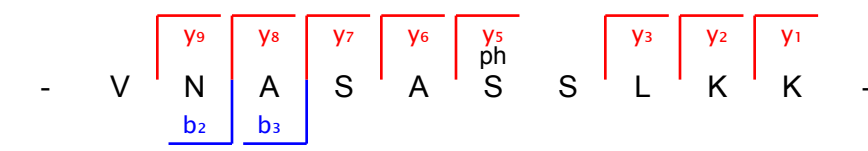

Raw file  
20150814\_A375SR\_Phospho\_BR2\_06

| Scan | Method    | Score | m/z    | Gene names |
|------|-----------|-------|--------|------------|
| 3550 | FTMS; HCD | 48.79 | 563.28 | ATXN7L2    |

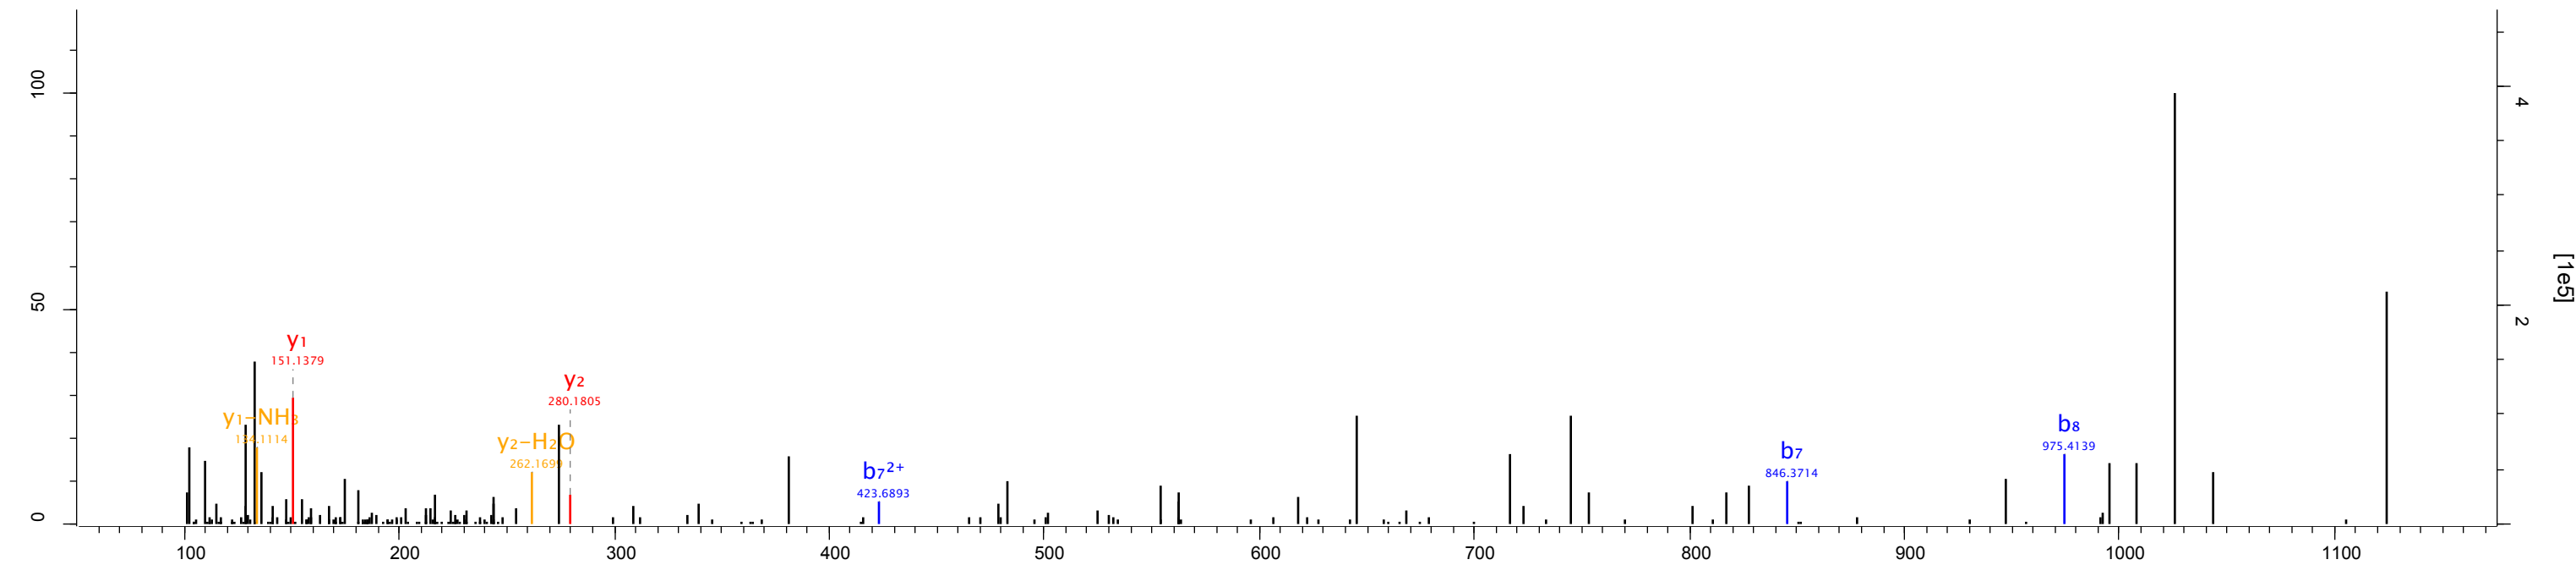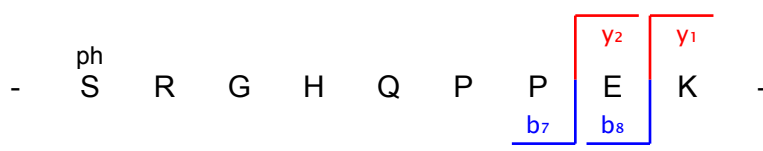

Raw file: 20150814\_A375SR\_Phospho\_BR2\_06  
 Scan: 3790 Method: FTMS; HCD Score: 105.1 m/z: 436.21 Gene names: NUF2

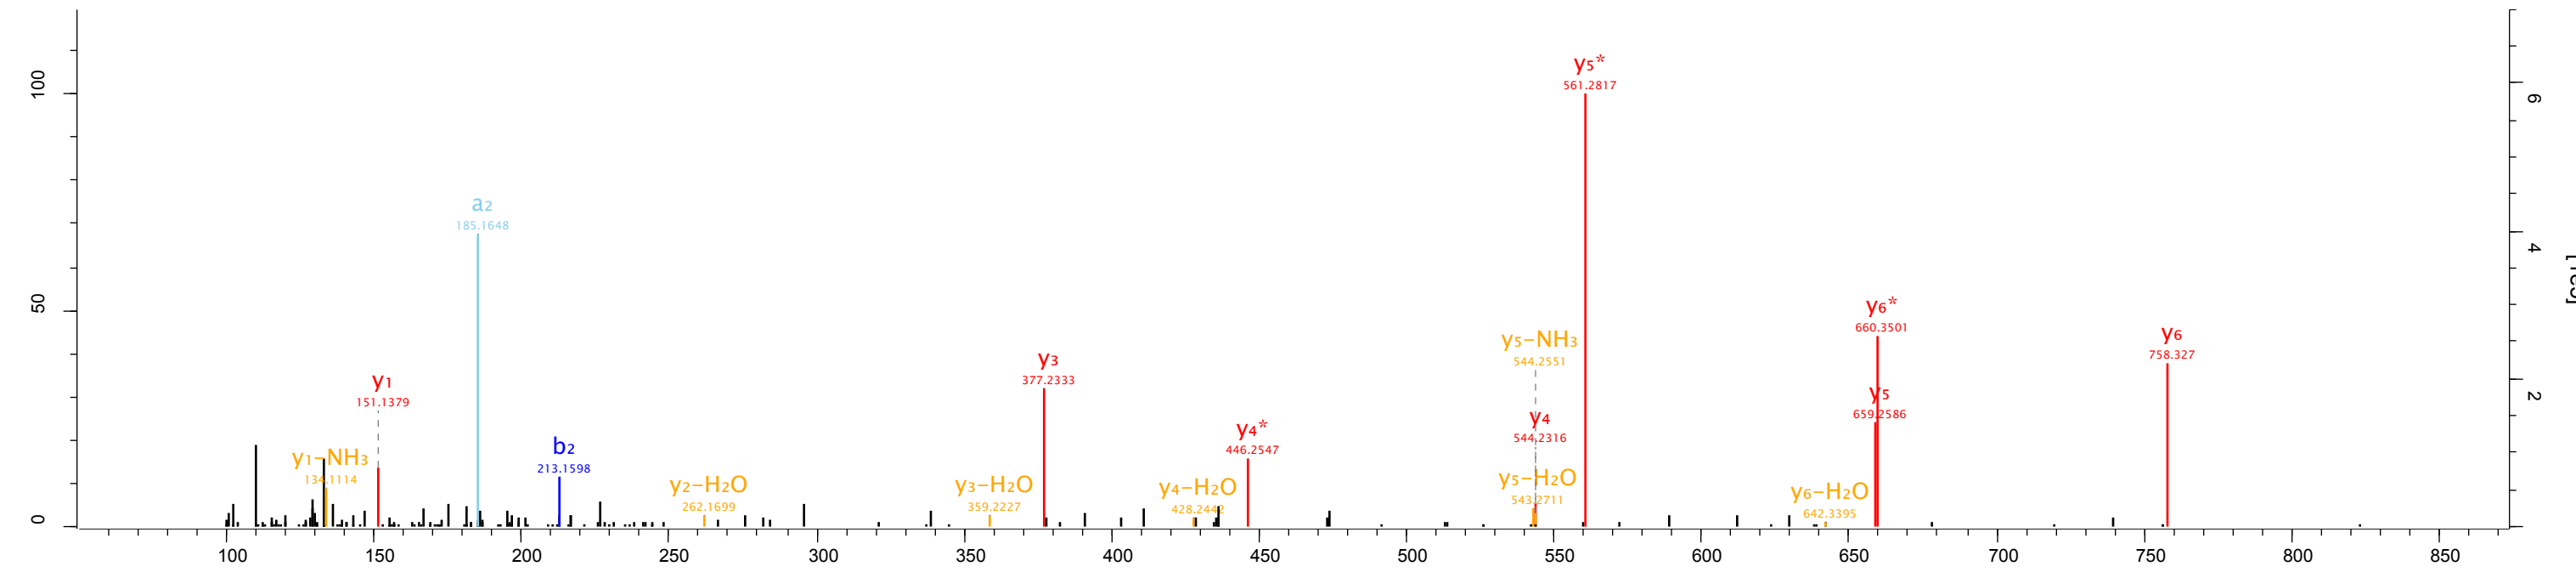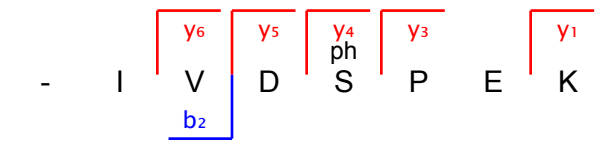

Raw file: 20150814\_A375SR\_Phospho\_BR2\_06  
 Scan: 4230 Method: FTMS; HCD Score: 42.63 m/z: 412.88 Gene names: SLBP

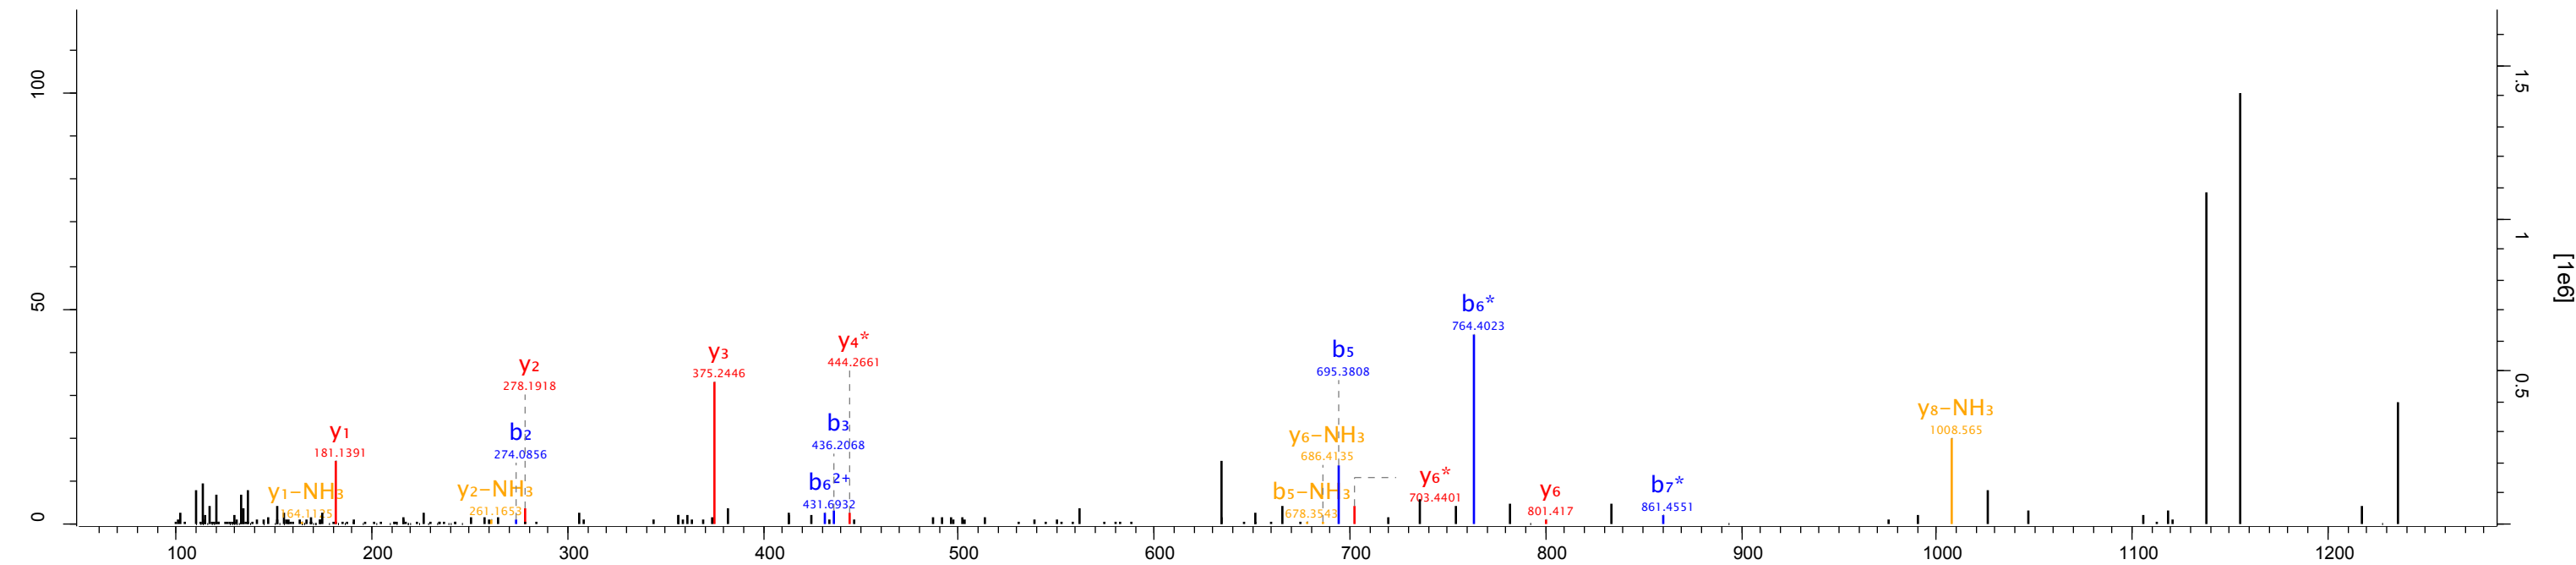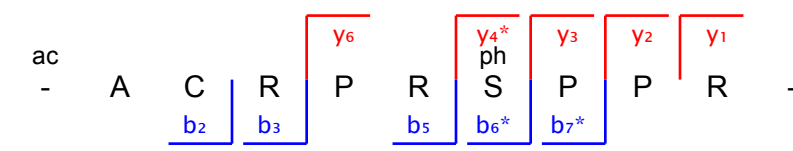

Raw file  
20150814\_A375SR\_Phospho\_BR2\_06

Scan 4760 Method FTMS; HCD Score 224.36 m/z 939.94 Gene names IRF2BP1

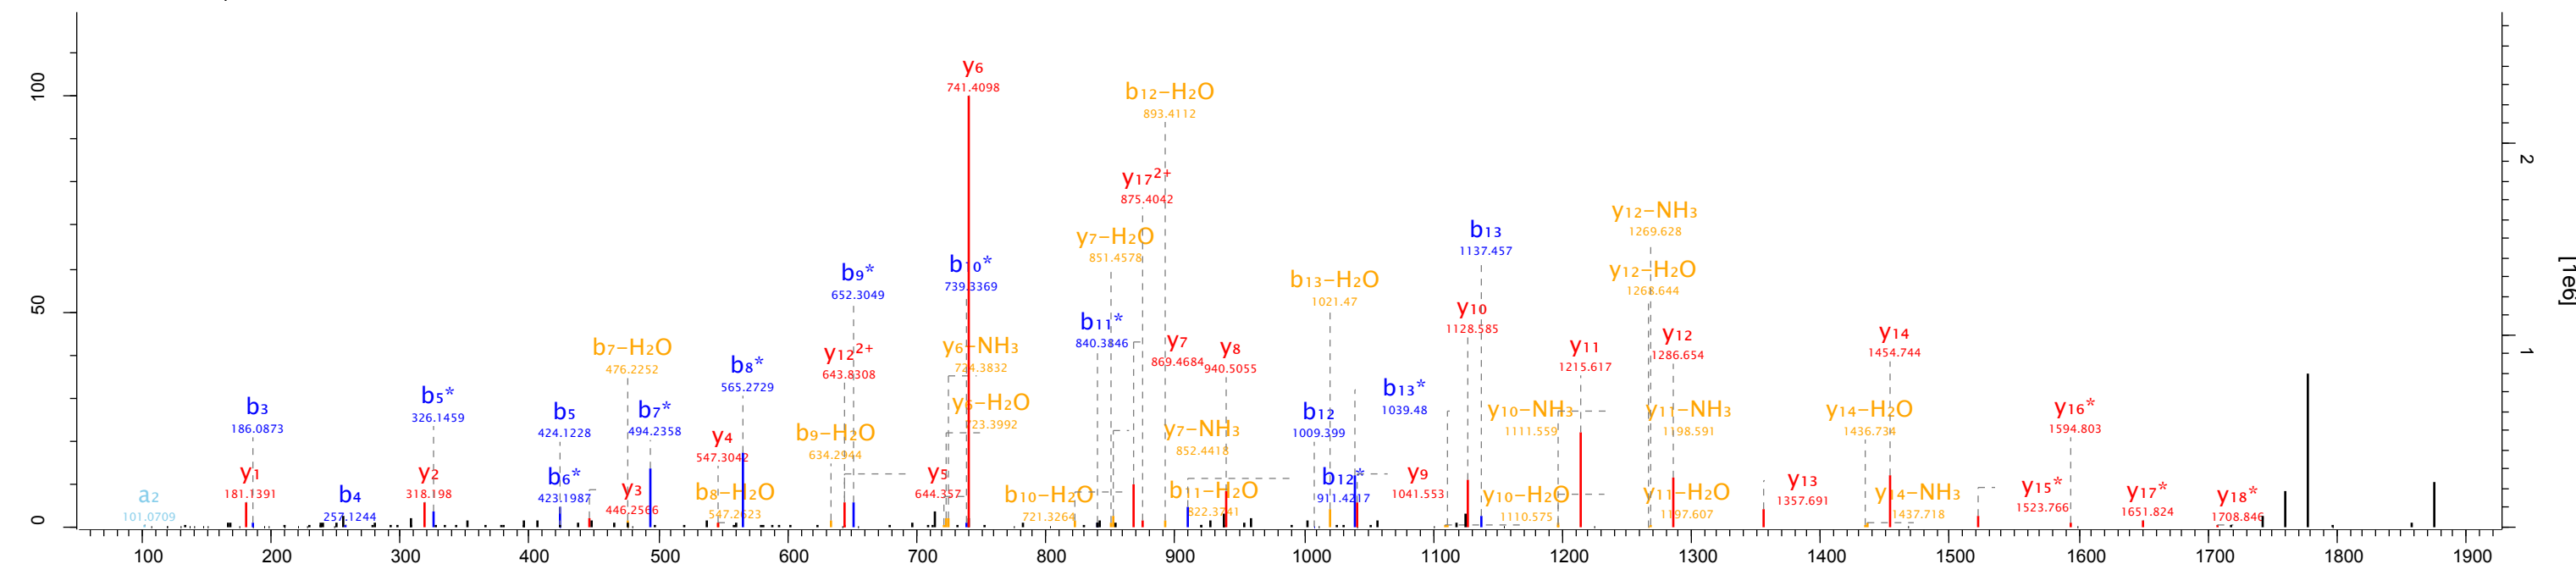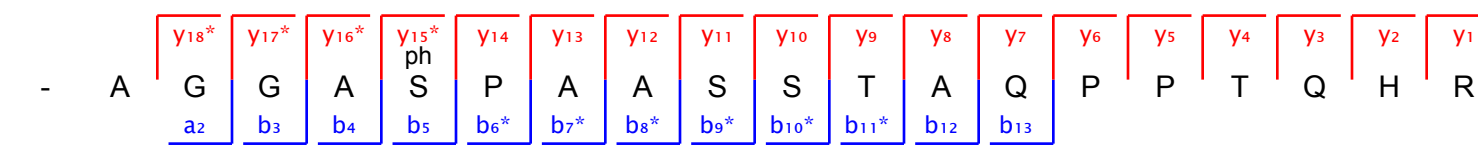

Raw file: 20150814\_A375SR\_Phospho\_BR2\_06  
 Scan: 5030 Method: FTMS; HCD Score: 63.08 m/z: 323.18 Gene names: SRRM2

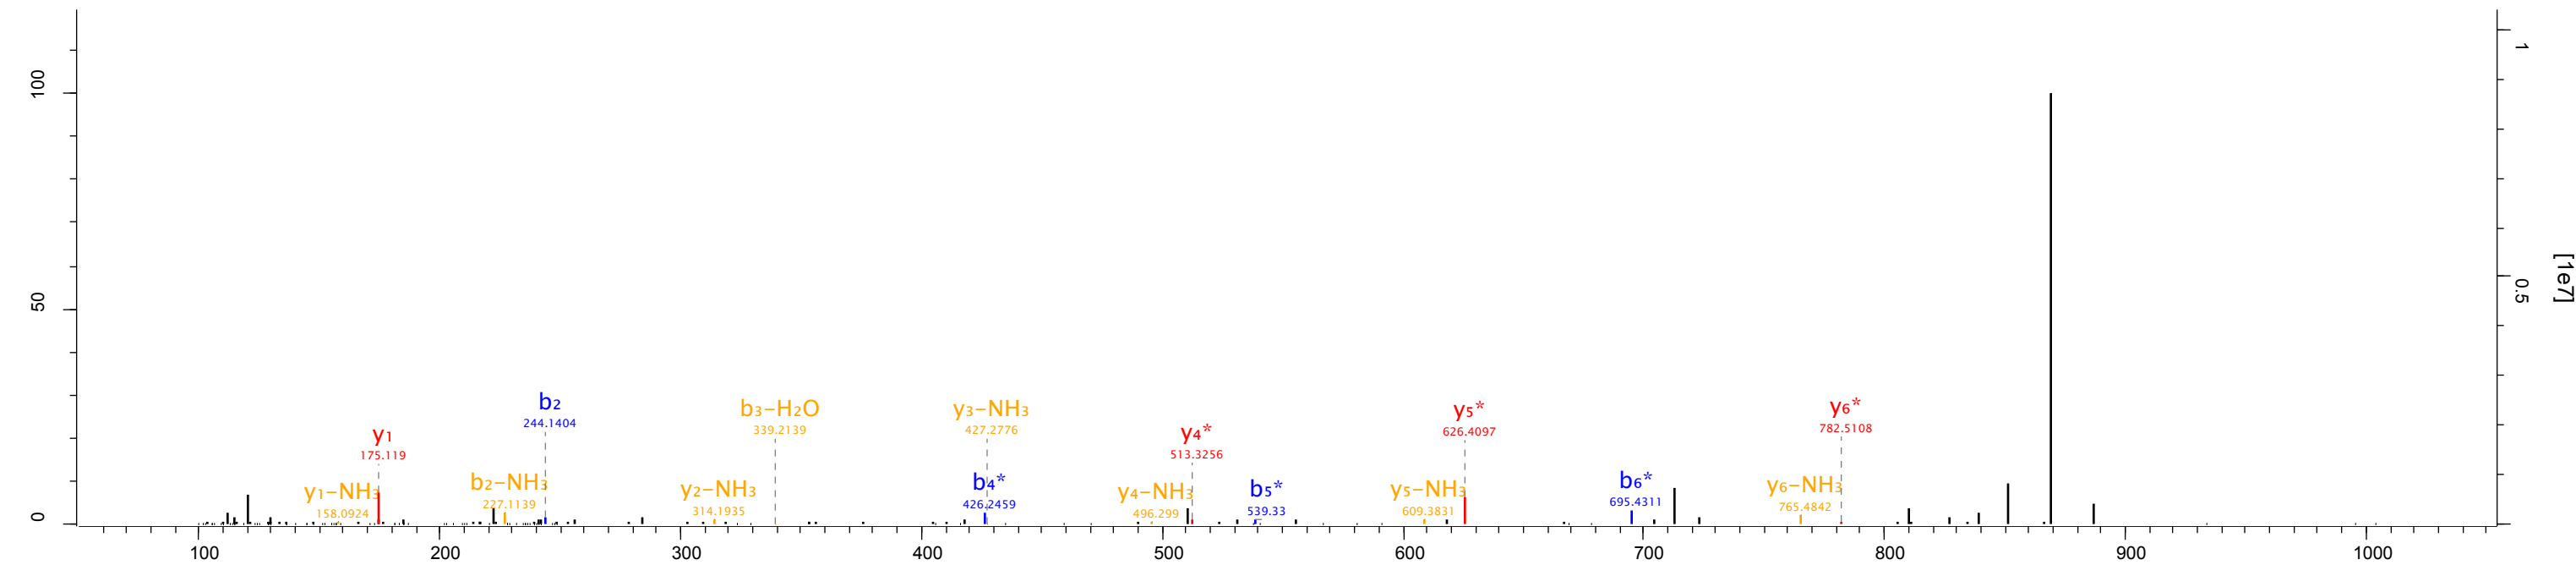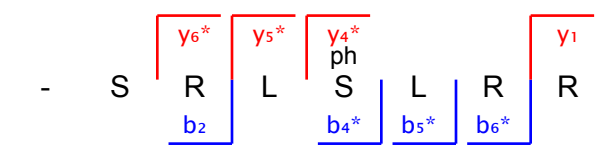



Raw file: 20150814\_A375SR\_Phospho\_BR2\_06  
 Scan: 5960 Method: FTMS; HCD Score: 165.58 m/z: 713.35 Gene names: TBC1D5

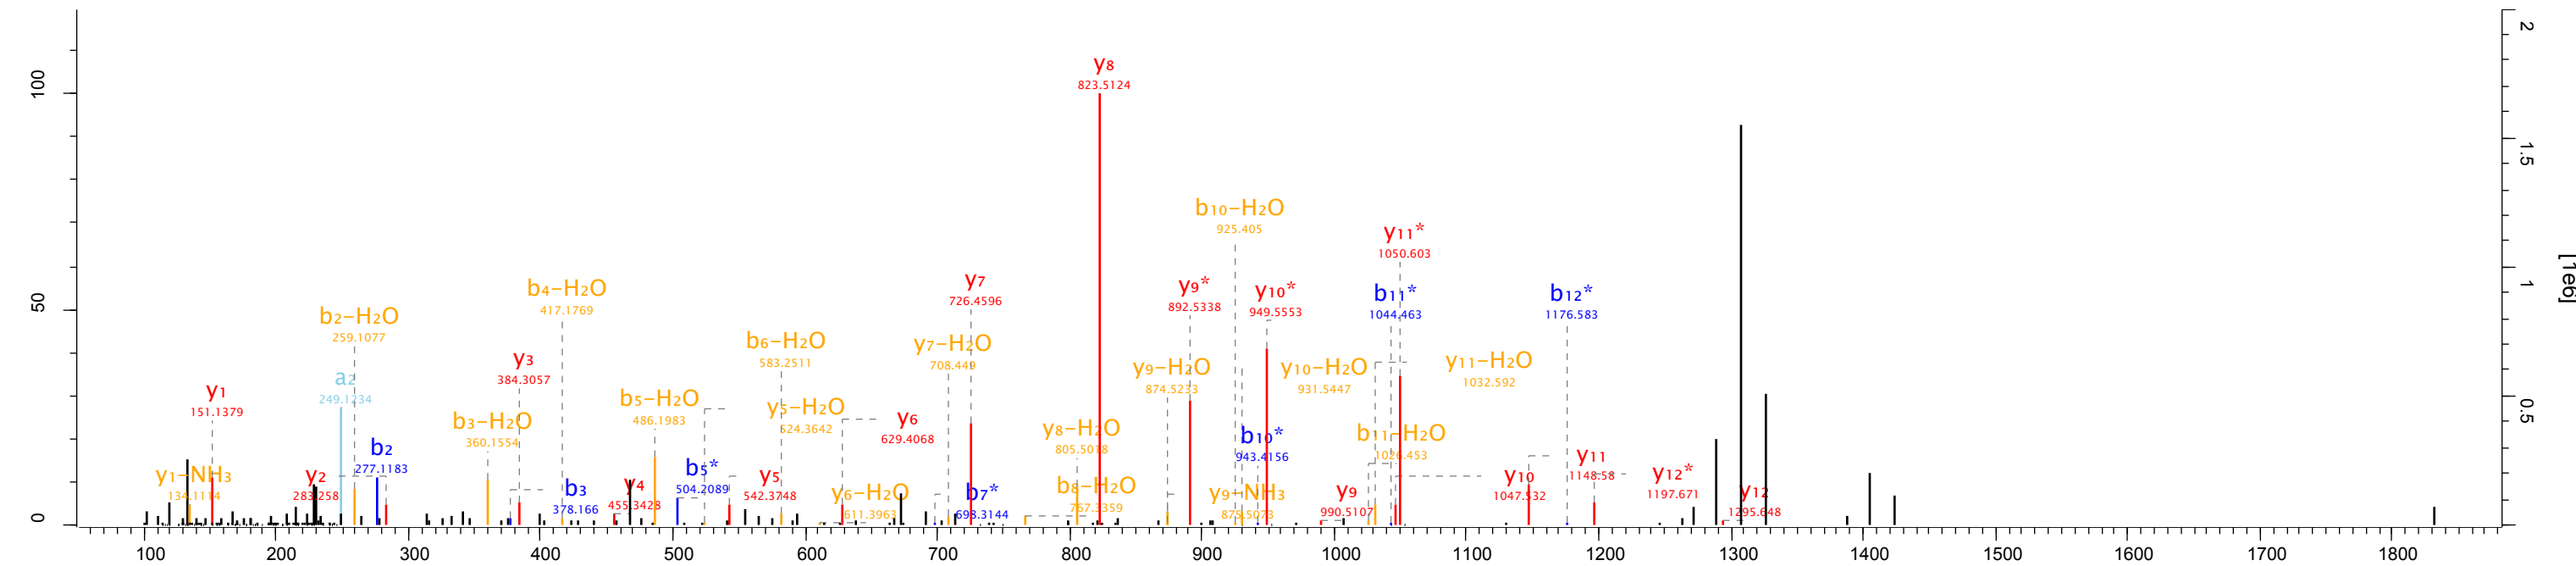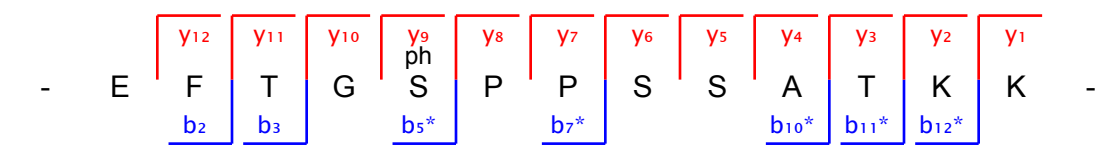

Raw file 20150814\_A375SR\_Phospho\_BR2\_06 Scan 7380 Method FTMS; HCD Score 163.18 m/z 720.84 Gene names PPF1BP1

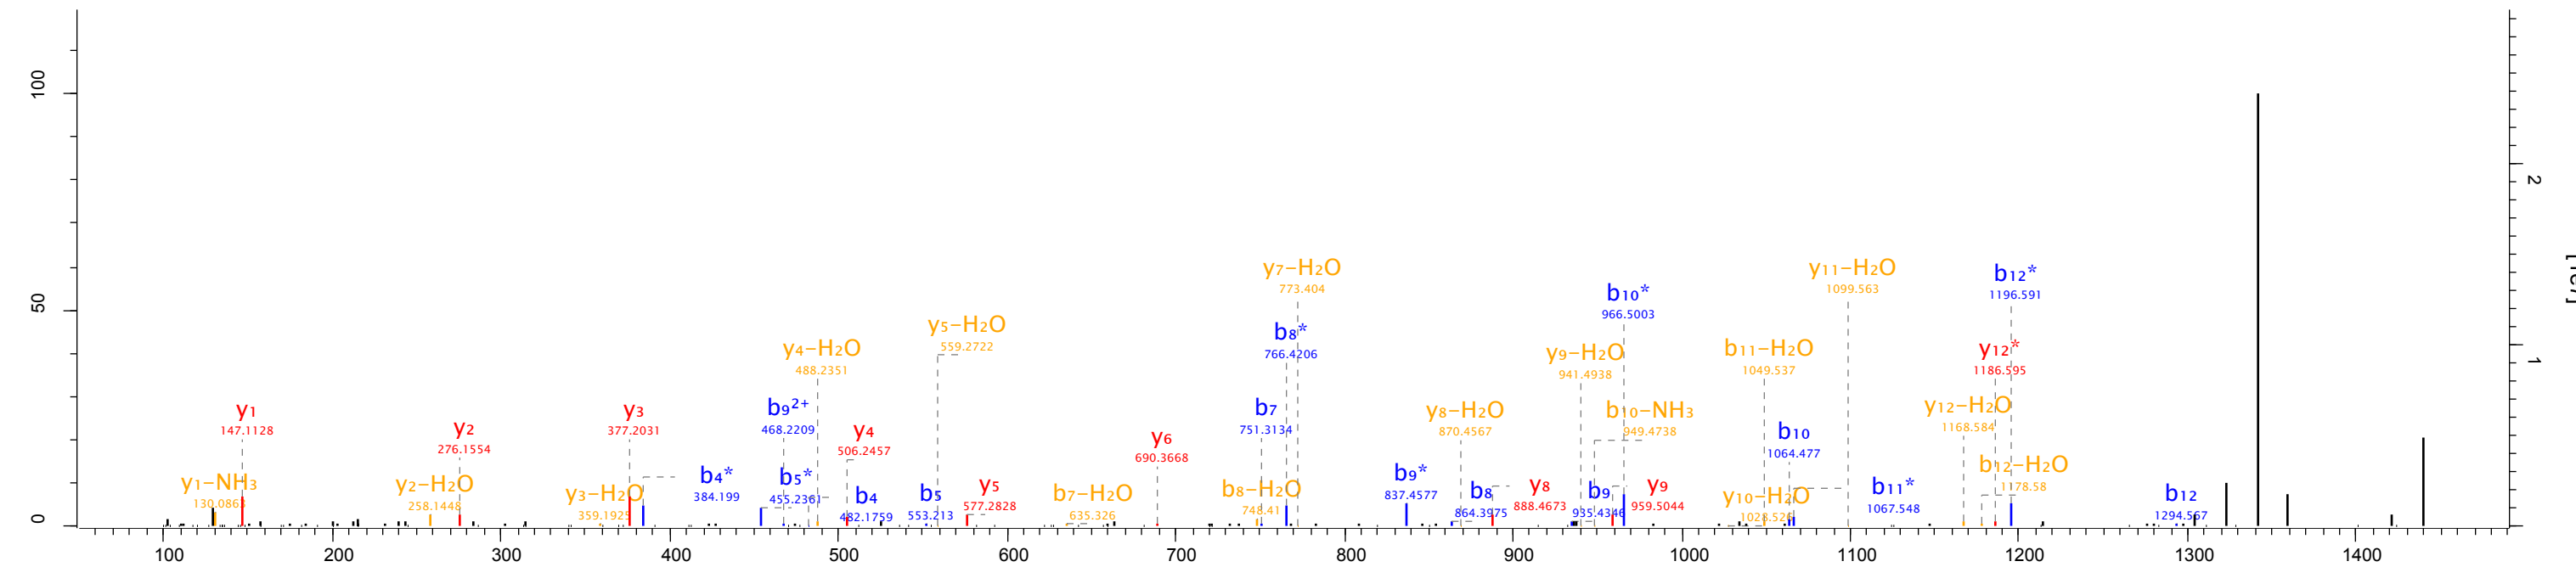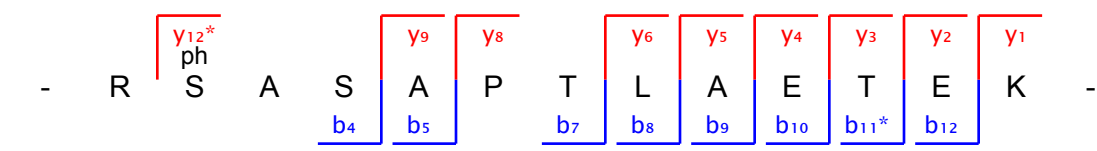

Raw file: 20150814\_A375SR\_Phospho\_BR2\_06  
 Scan: 7440 Method: FTMS; HCD Score: 130.81 m/z: 674.83 Gene names: PARVA

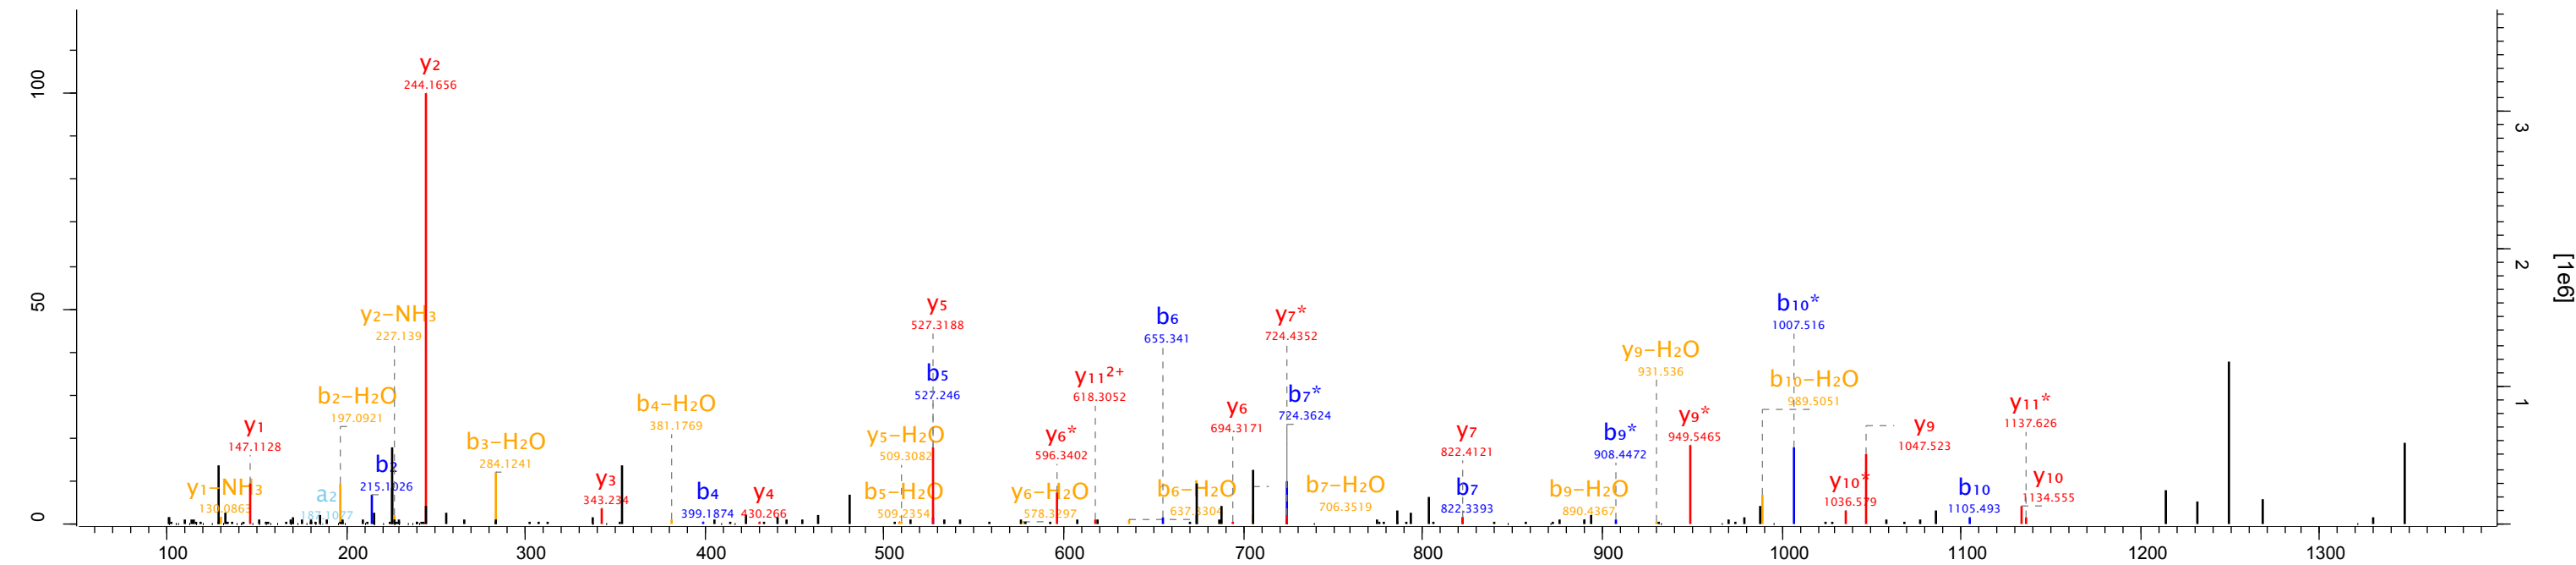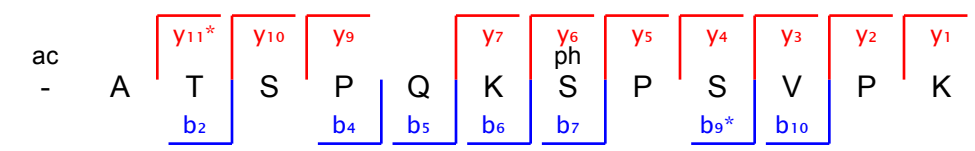

Raw file 20150814\_A375SR\_Phospho\_BR2\_06 Scan 7560 Method FTMS; HCD Score 171.79 m/z 846.42 Gene names ASXL2

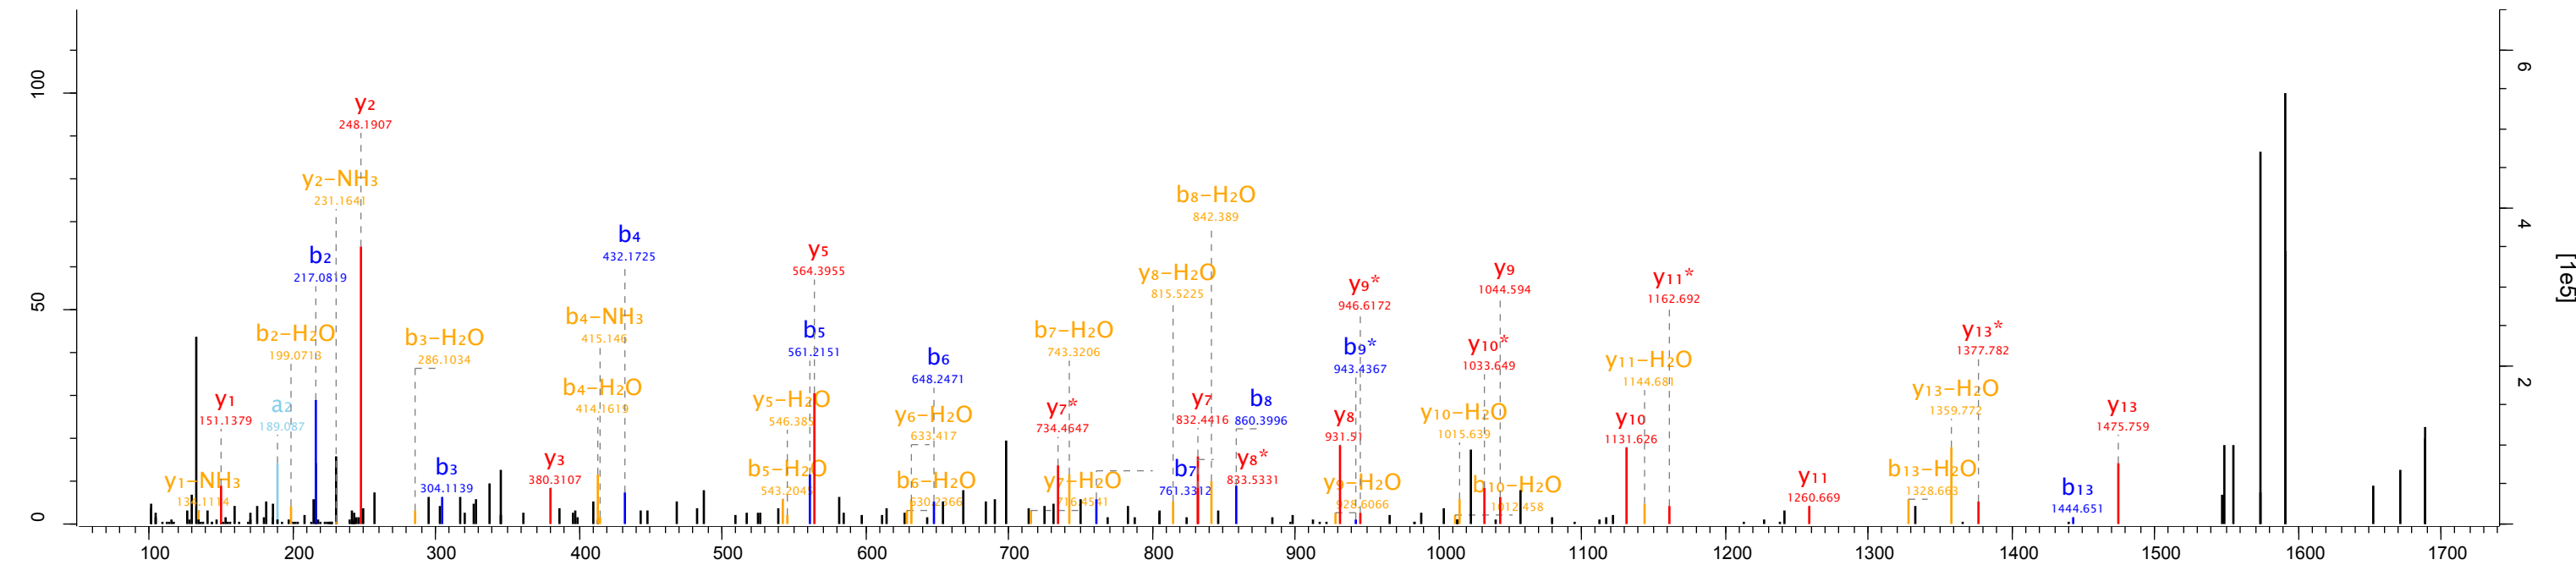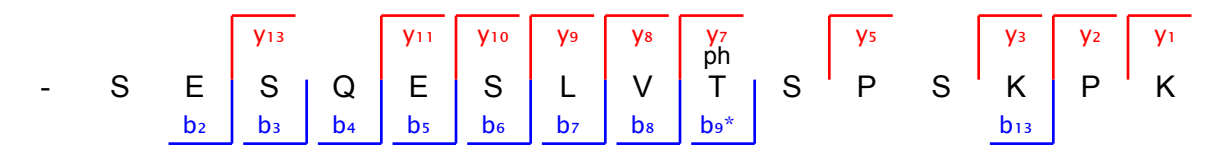

Raw file 20150814\_A375SR\_Phospho\_BR2\_06 Scan 7850 Method FTMS; HCD Score 542.27 m/z 1214.98 Gene names ZRANB2

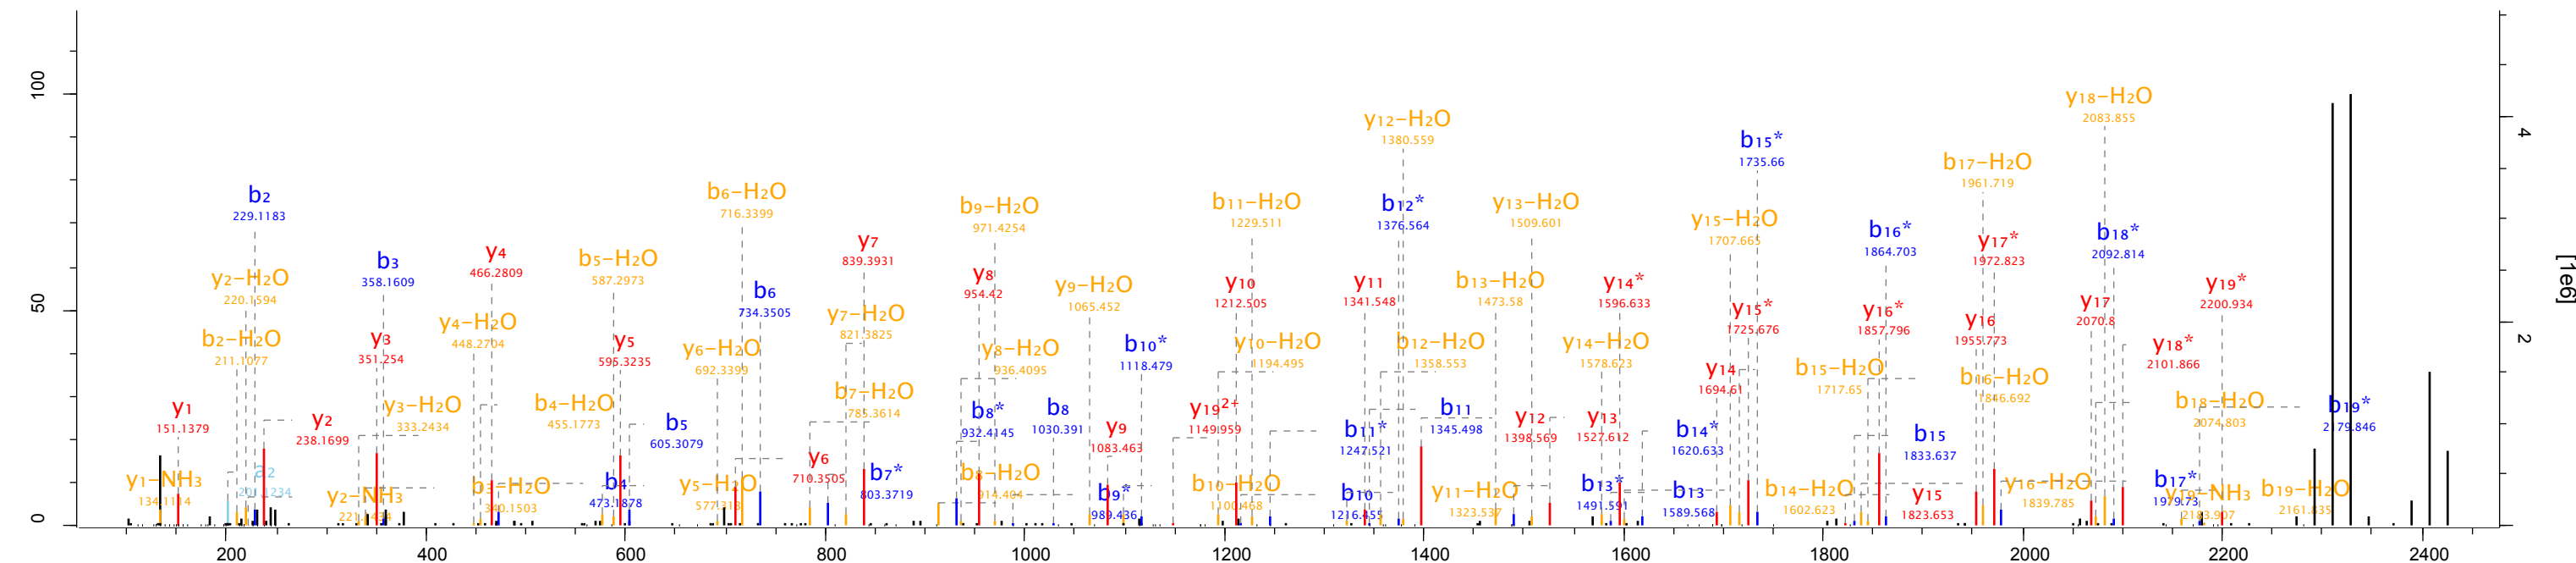

- E V E D K E S E G E E E D E D E L S K -

|                   |                   |                 |                 |                 |                    |                 |                  |                 |                 |                   |                 |                   |                 |                   |                   |                   |                   |                |
|-------------------|-------------------|-----------------|-----------------|-----------------|--------------------|-----------------|------------------|-----------------|-----------------|-------------------|-----------------|-------------------|-----------------|-------------------|-------------------|-------------------|-------------------|----------------|
| y <sub>19</sub> * | y <sub>18</sub> * | y <sub>17</sub> | y <sub>16</sub> | y <sub>15</sub> | y <sub>14</sub> ph | y <sub>13</sub> | y <sub>12</sub>  | y <sub>11</sub> | y <sub>10</sub> | y <sub>9</sub>    | y <sub>8</sub>  | y <sub>7</sub>    | y <sub>6</sub>  | y <sub>5</sub>    | y <sub>4</sub>    | y <sub>3</sub>    | y <sub>2</sub>    | y <sub>1</sub> |
| b <sub>2</sub>    | b <sub>3</sub>    | b <sub>4</sub>  | b <sub>5</sub>  | b <sub>6</sub>  | b <sub>7</sub> *   | b <sub>8</sub>  | b <sub>9</sub> * | b <sub>10</sub> | b <sub>11</sub> | b <sub>12</sub> * | b <sub>13</sub> | b <sub>14</sub> * | b <sub>15</sub> | b <sub>16</sub> * | b <sub>17</sub> * | b <sub>18</sub> * | b <sub>19</sub> * |                |

Raw file: 20150814\_A375SR\_Phospho\_BR2\_06  
 Scan: 8190 Method: FTMS; HCD Score: 70.12 m/z: 735.34 Gene names: WNK4

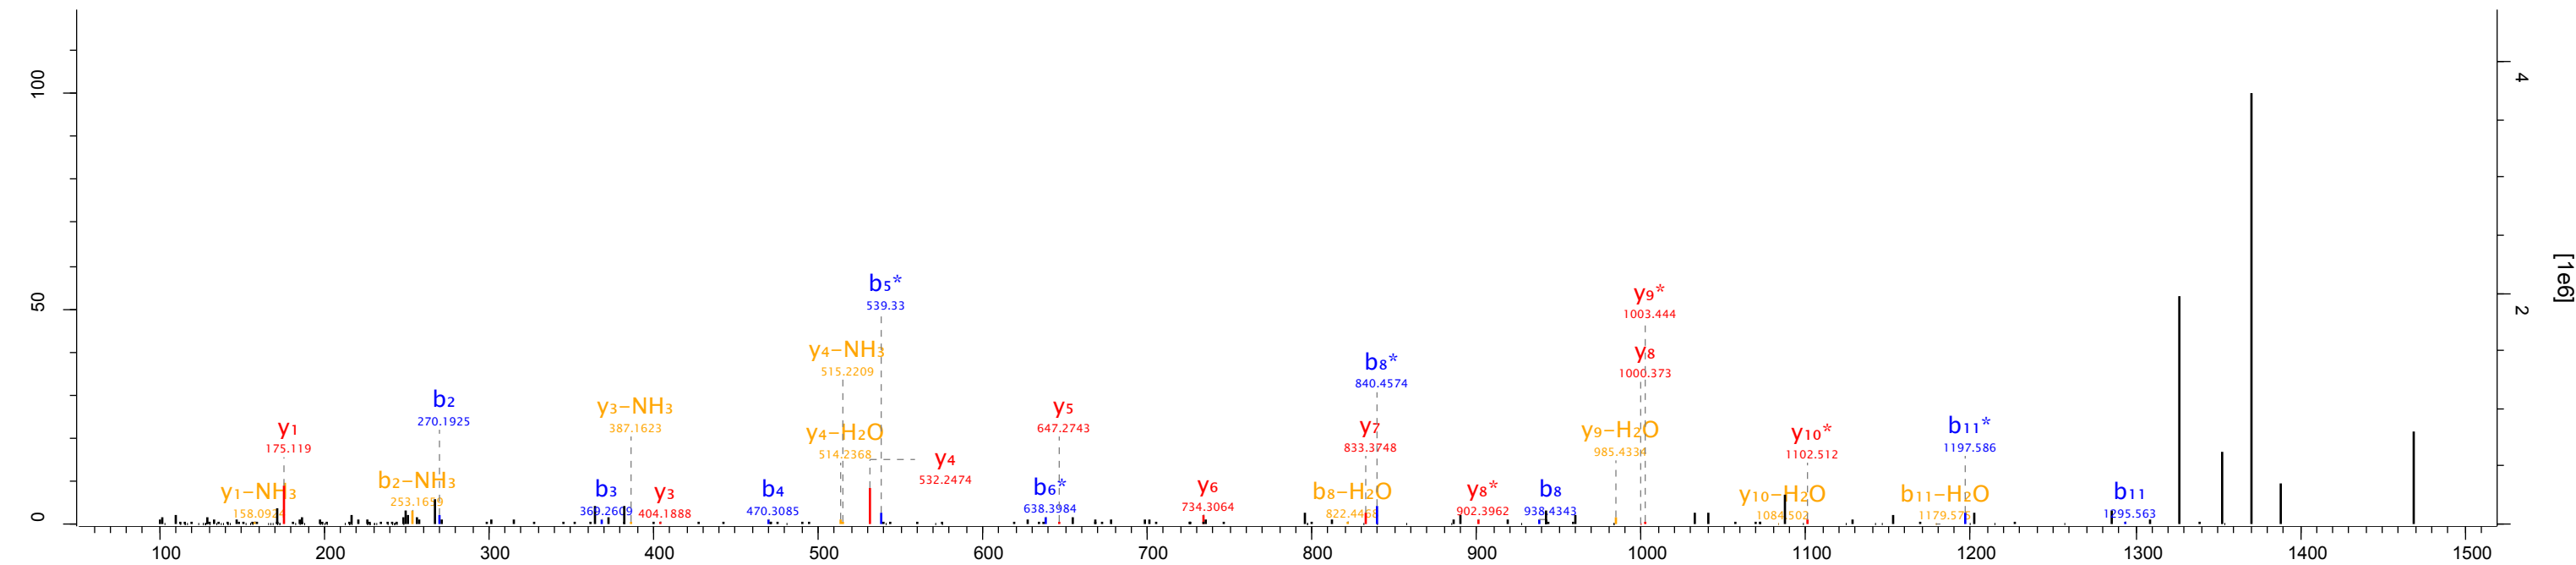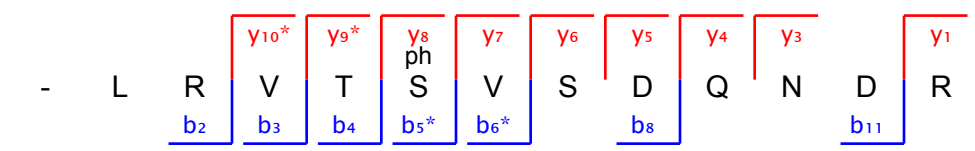

Raw file: 20150814\_A375SR\_Phospho\_BR2\_06  
 Scan: 9090 Method: FTMS; HCD Score: 80.32 m/z: 587.27 Gene names: PPP1R18

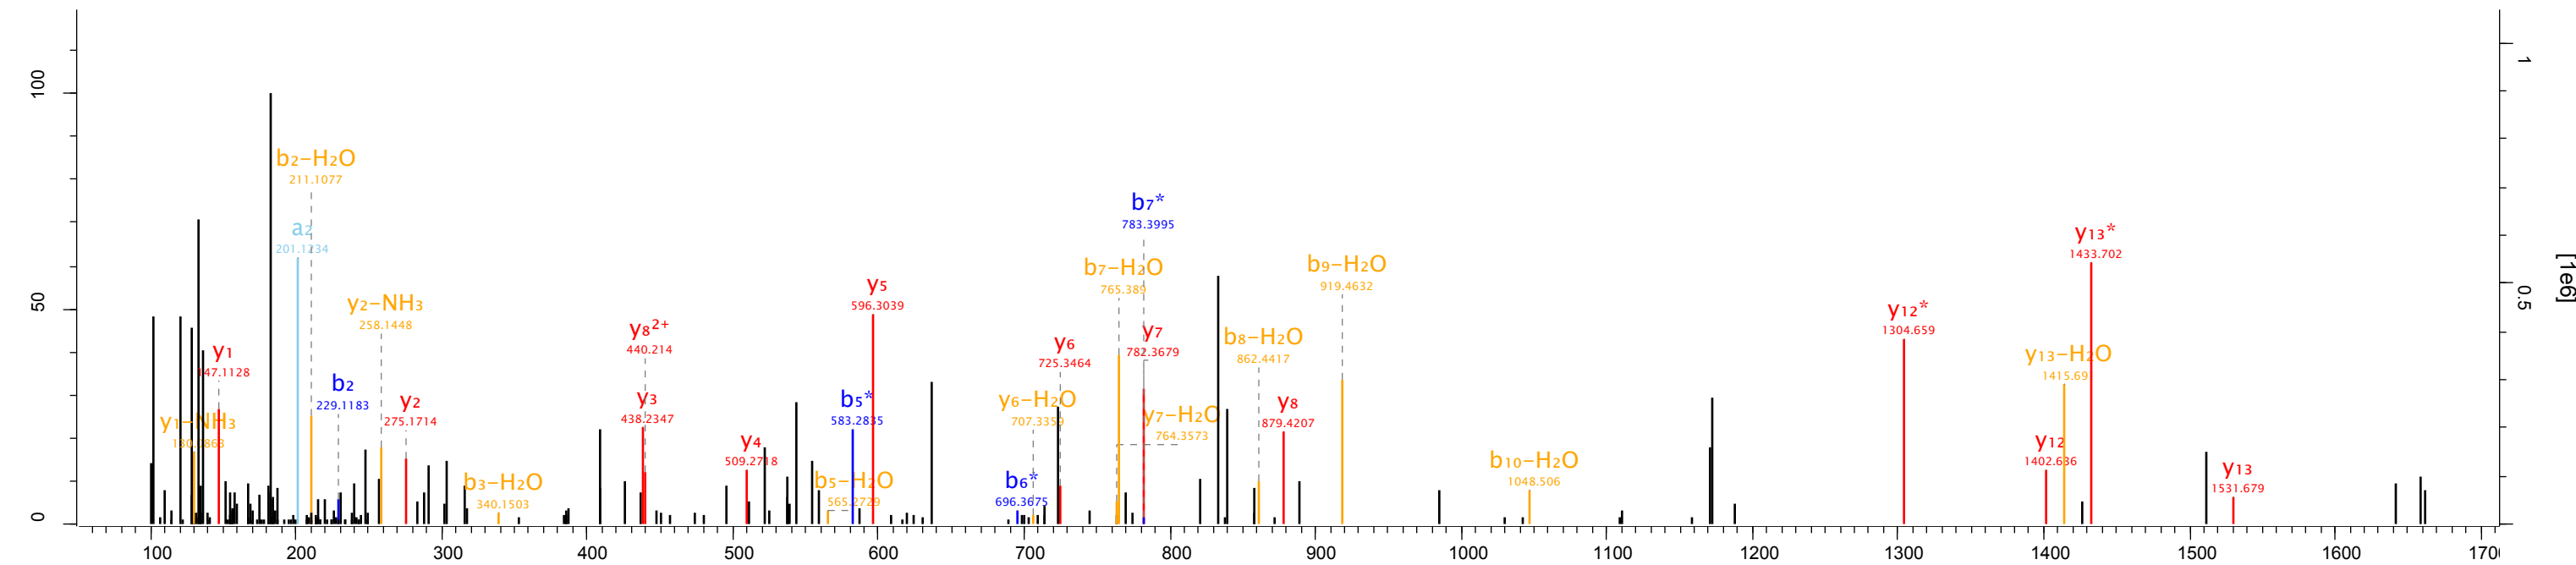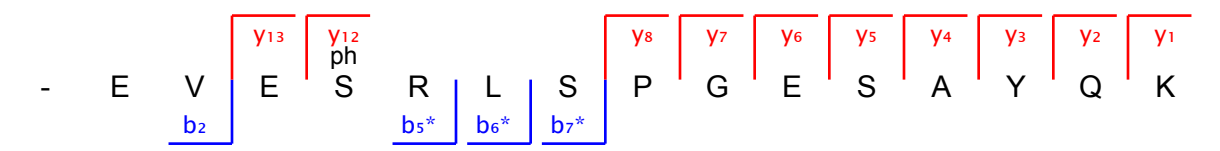

Raw file: 20150814\_A375SR\_Phospho\_BR2\_06  
 Scan: 9760 Method: FTMS; HCD Score: 232.13 m/z: 836.42 Gene names: TCOF1

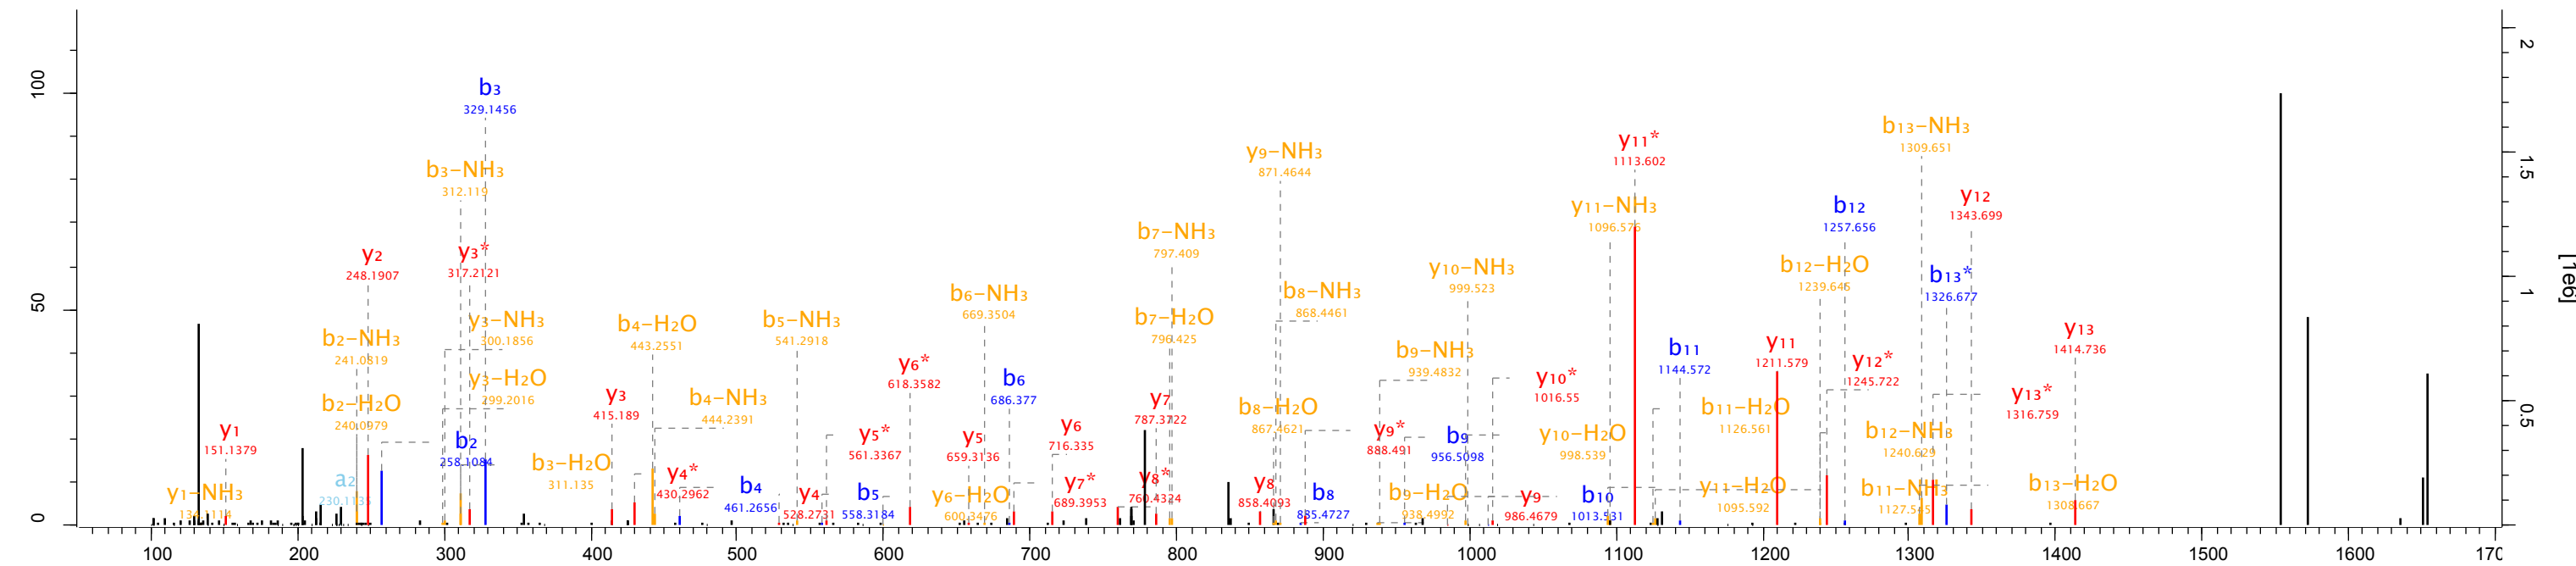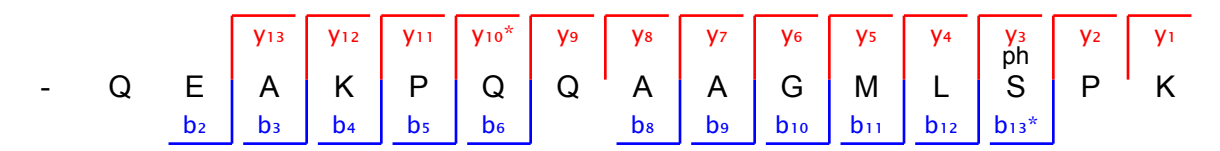



Raw file: 20150814\_A375SR\_Phospho\_BR2\_06  
 Scan: 9820 Method: FTMS; HCD Score: 232.07 m/z: 757.02 Gene names: DENND4C

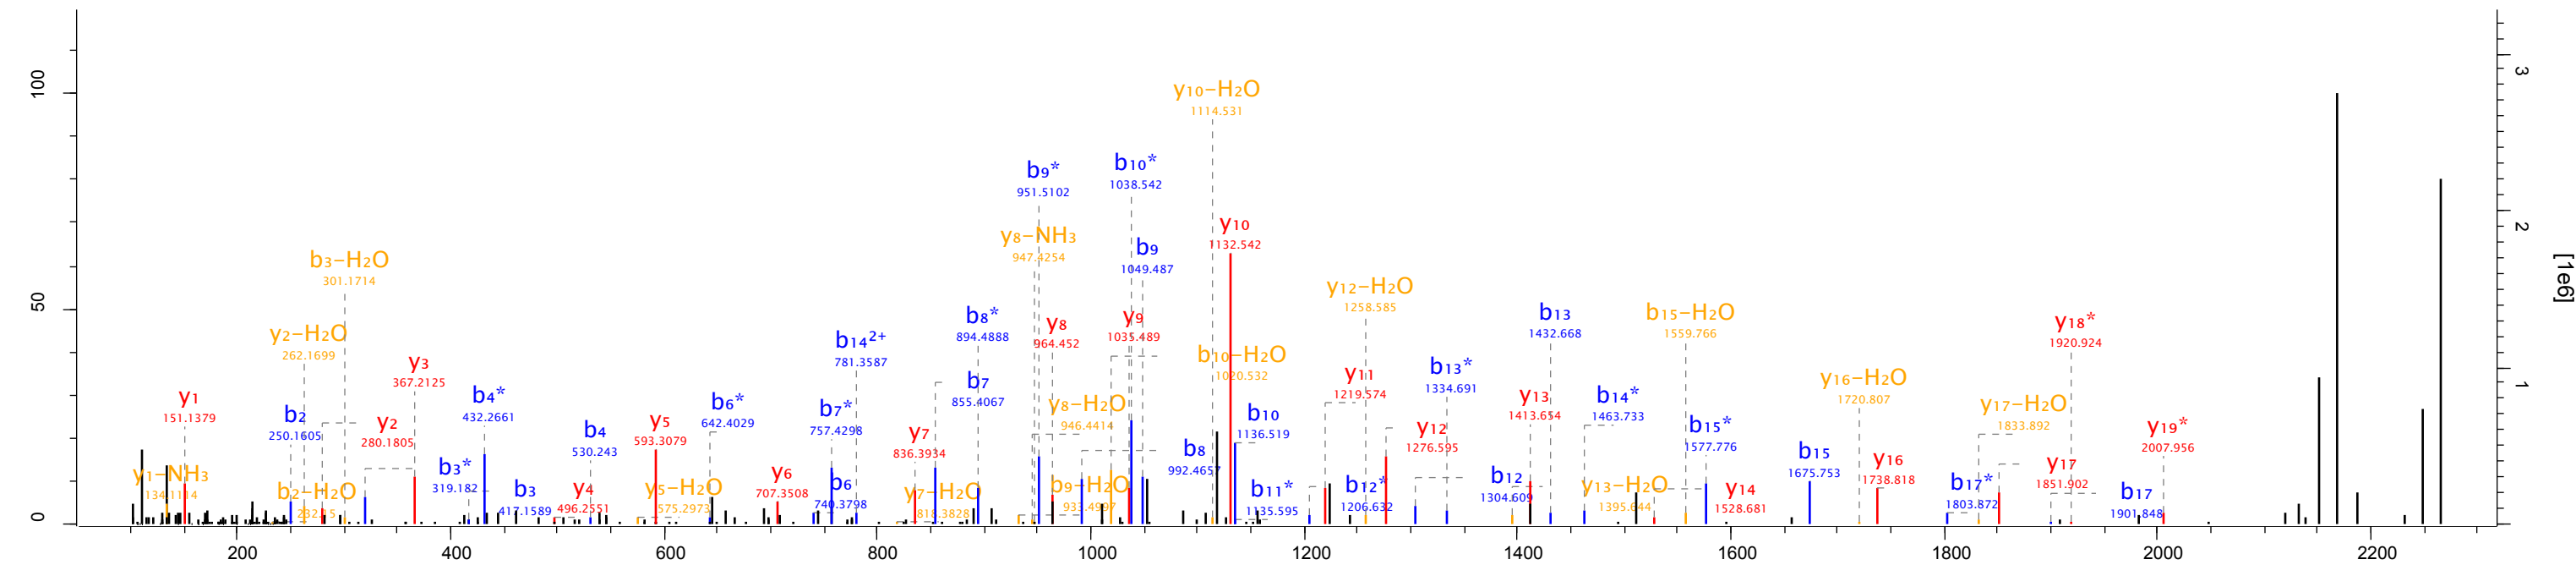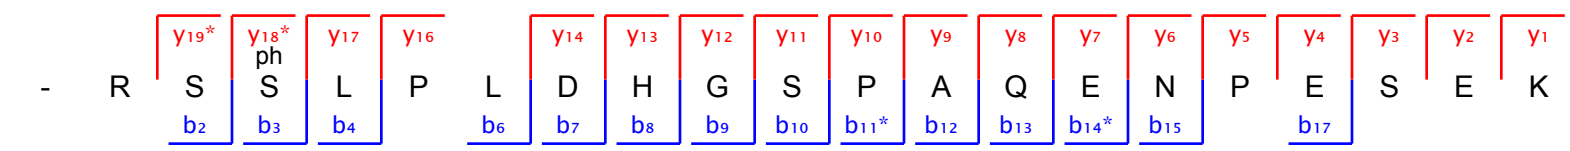

Raw file: 20150814\_A375SR\_Phospho\_BR2\_07  
 Scan: 10140 Method: FTMS; HCD Score: 120.87 m/z: 638.78 Gene names: LARP7

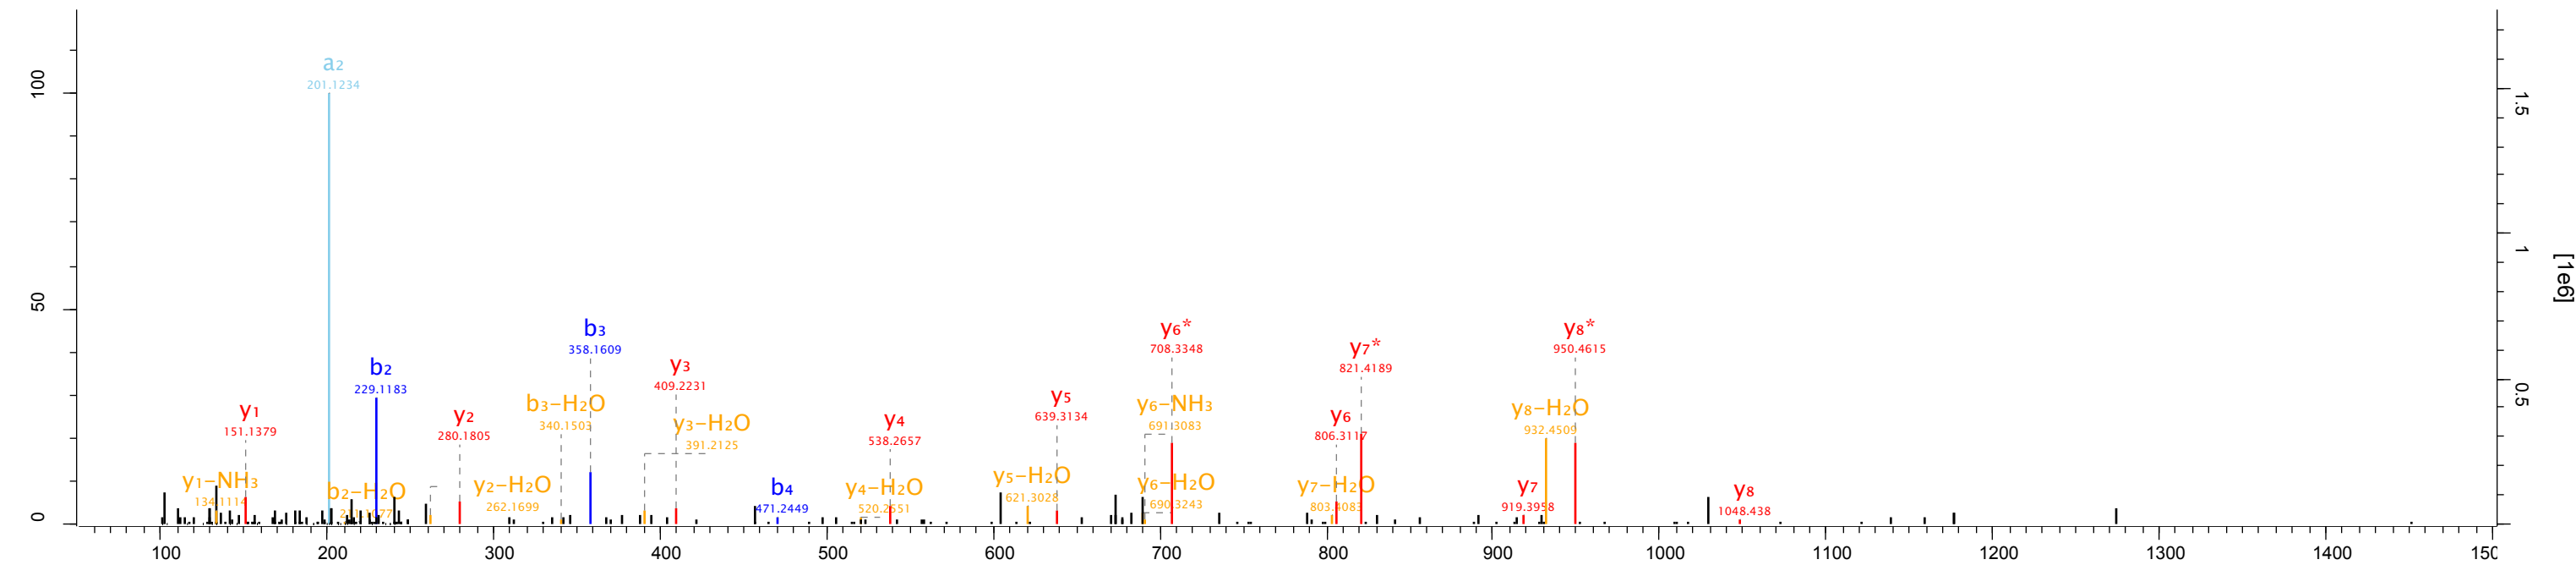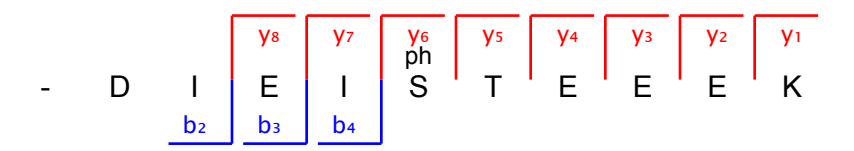

Raw file: 20150814\_A375SR\_Phospho\_BR2\_07  
 Scan: 10930 Method: FTMS; HCD Score: 207.69 m/z: 694.58 Gene names: WWTR1

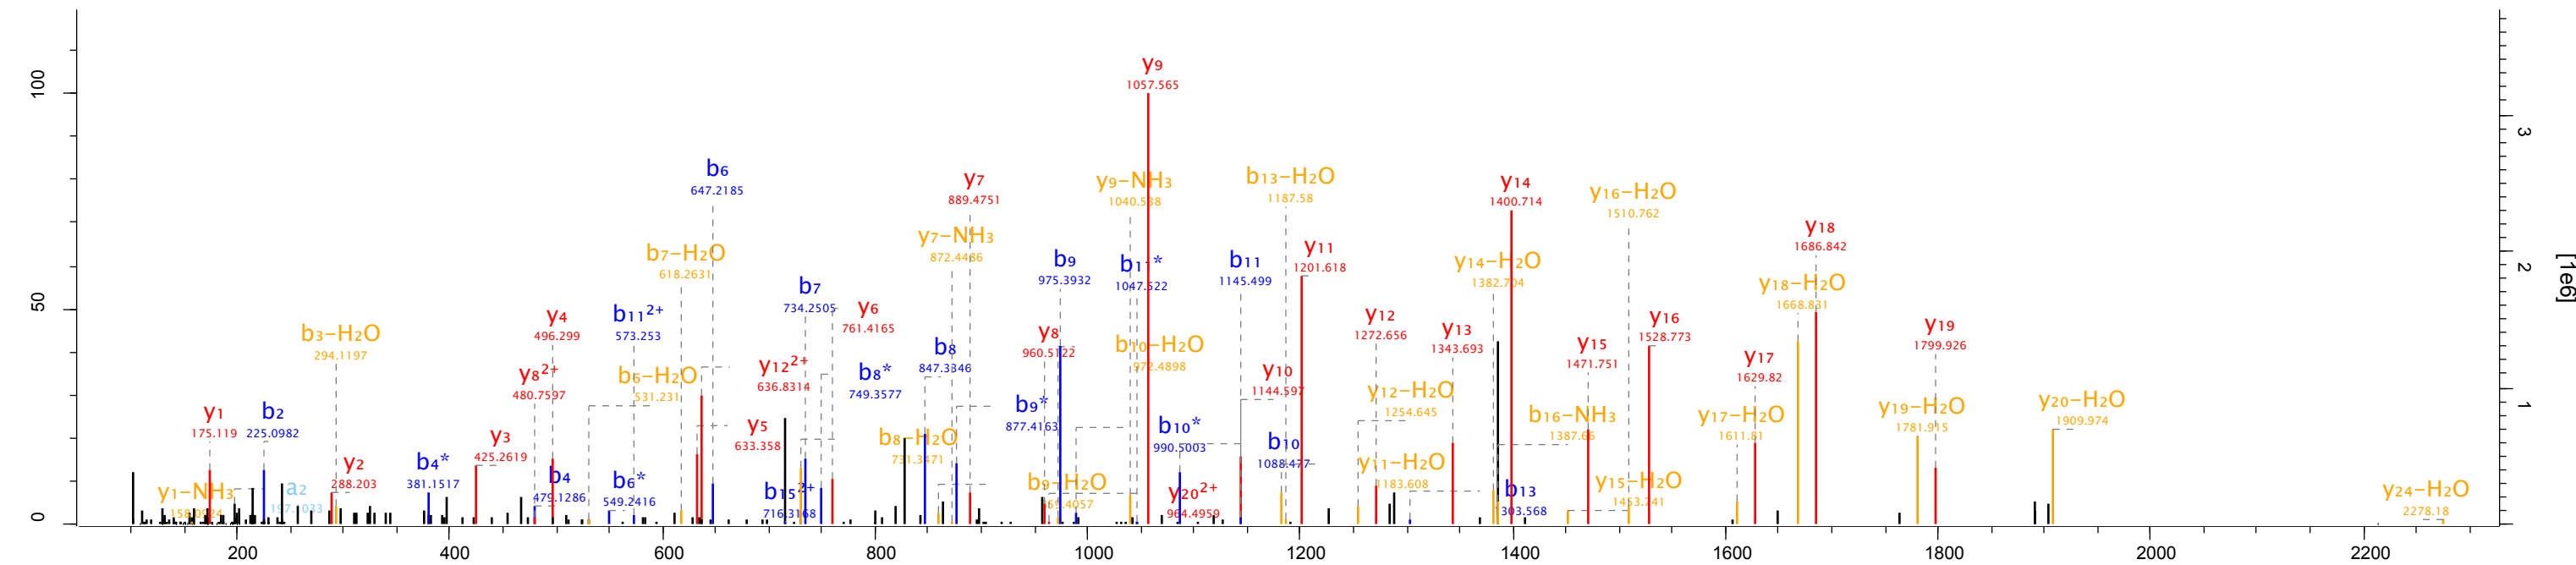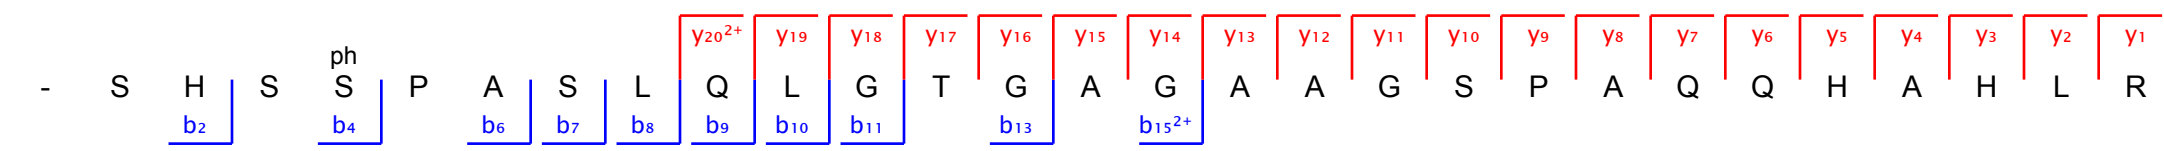

Raw file Scan Method Score m/z Gene names  
 20150814\_A375SR\_Phospho\_BR2\_07 10960 FTMS; HCD 106.57 539.61 BOD1L1

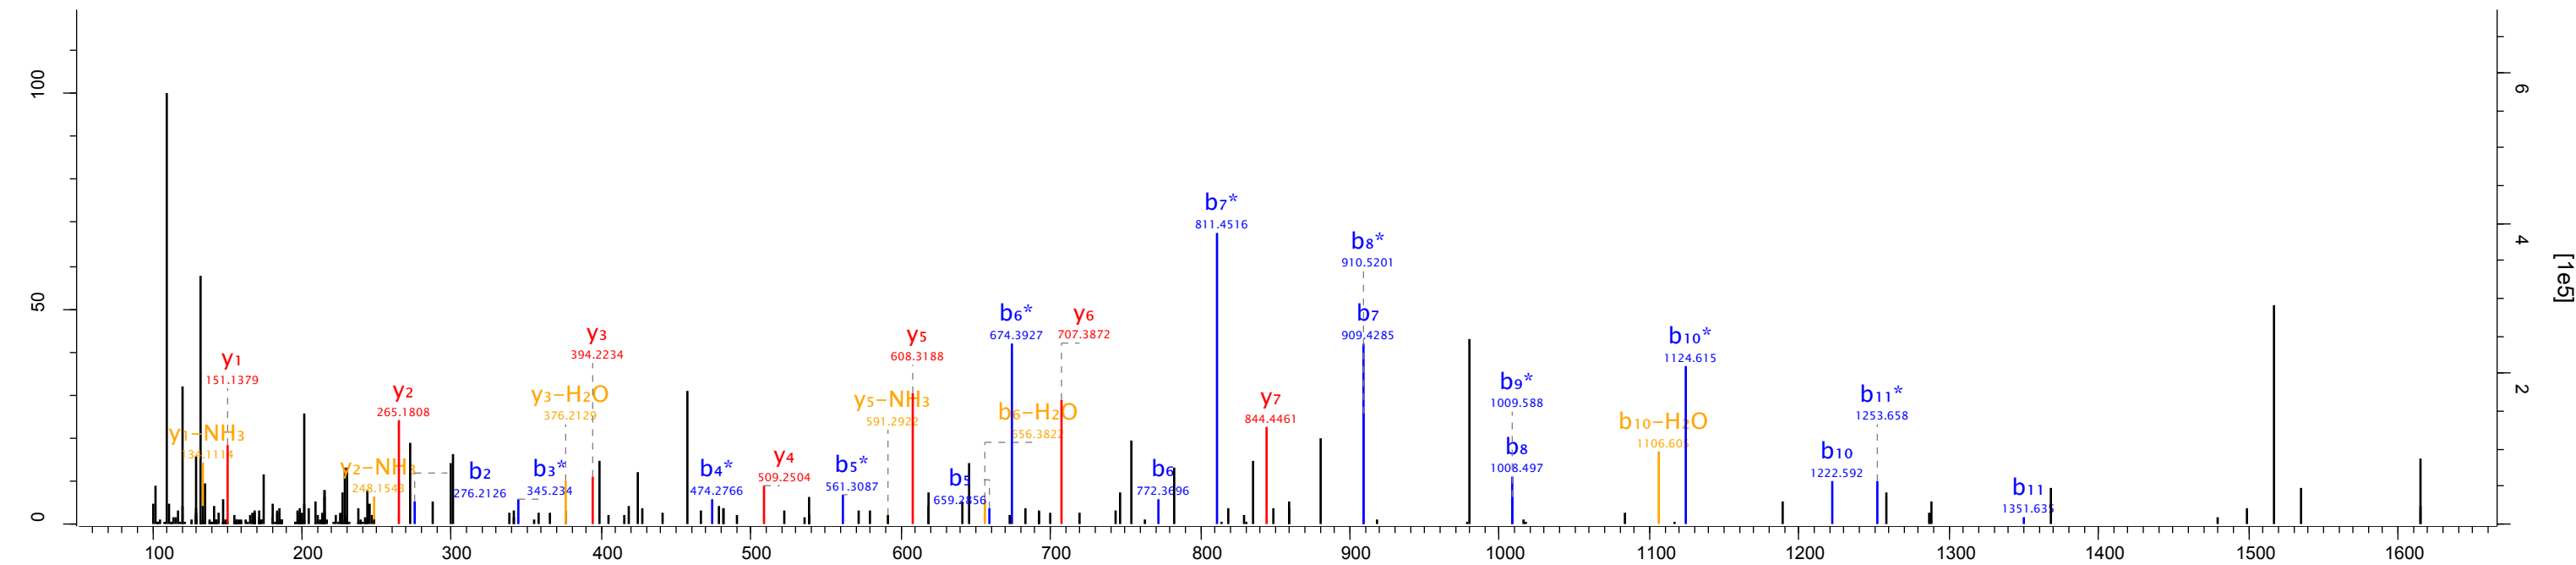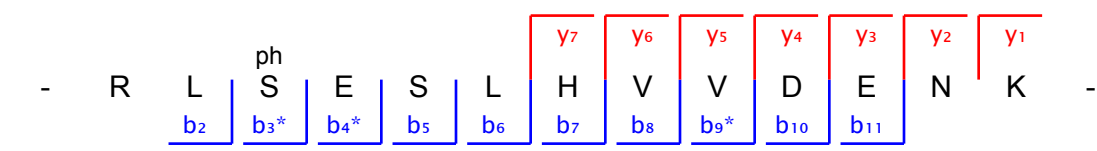

Raw file: 20150814\_A375SR\_Phospho\_BR2\_07  
 Scan: 11570 Method: FTMS; HCD Score: 42.82 m/z: 627.29 Gene names: FMNL2

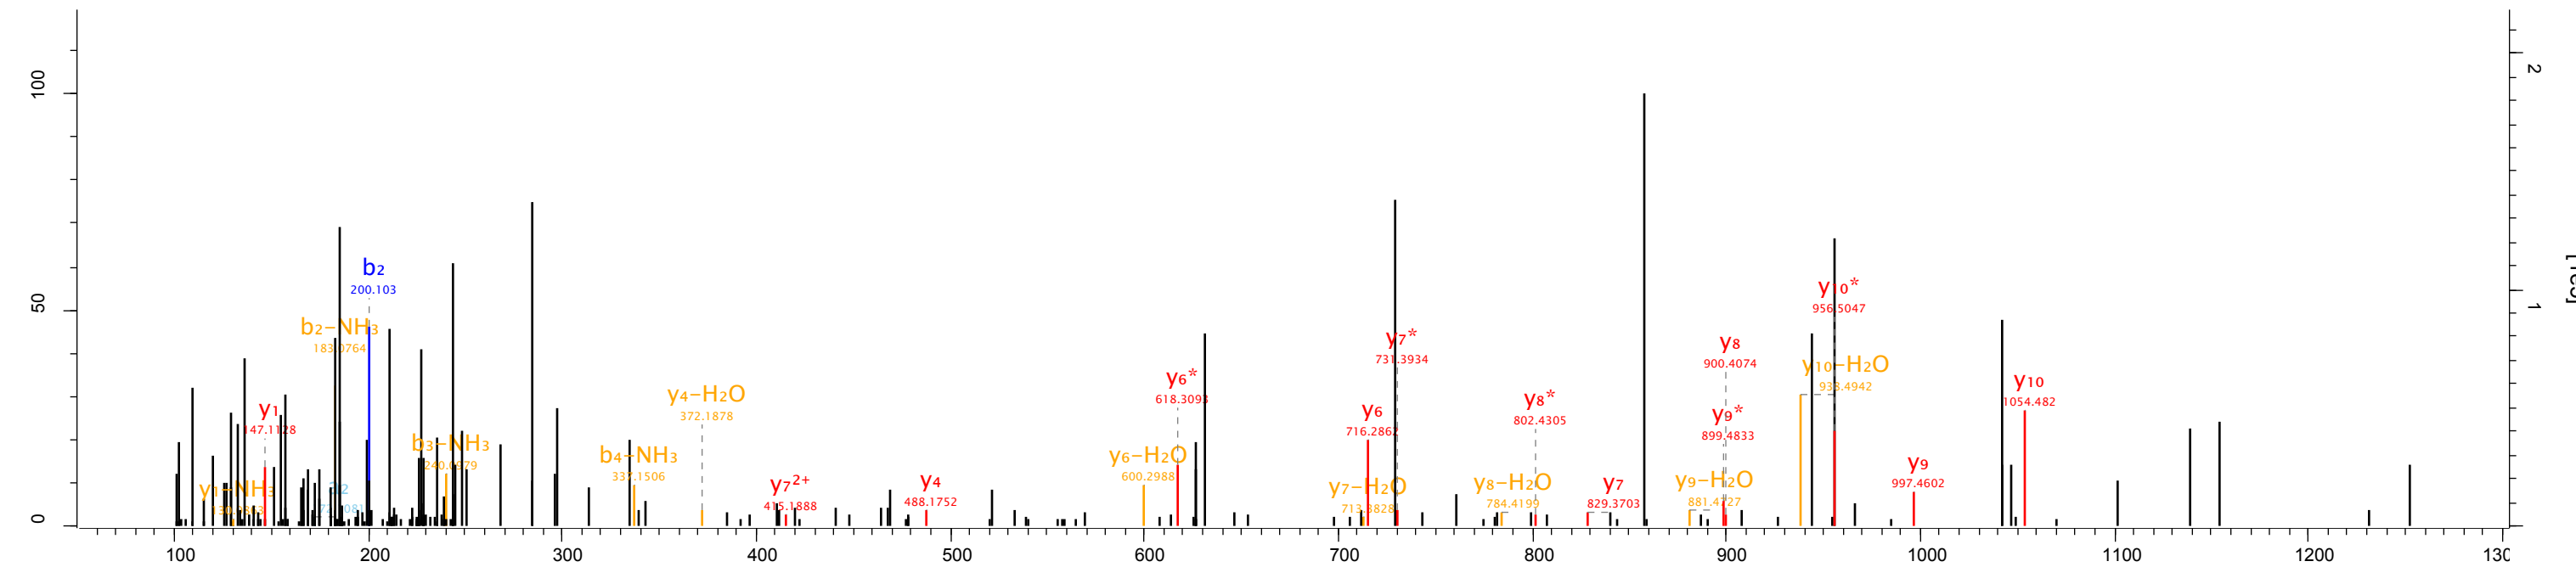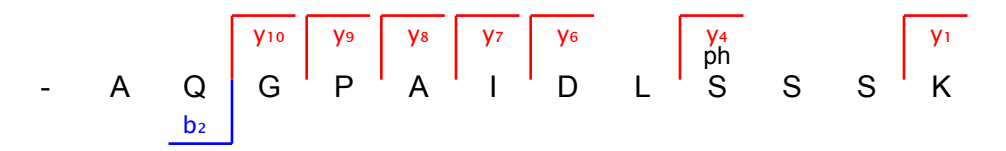

Raw file: 20150814\_A375SR\_Phospho\_BR2\_07  
 Scan: 11740 Method: FTMS; HCD Score: 131.42 m/z: 768.68 Gene names: ARHGEF10

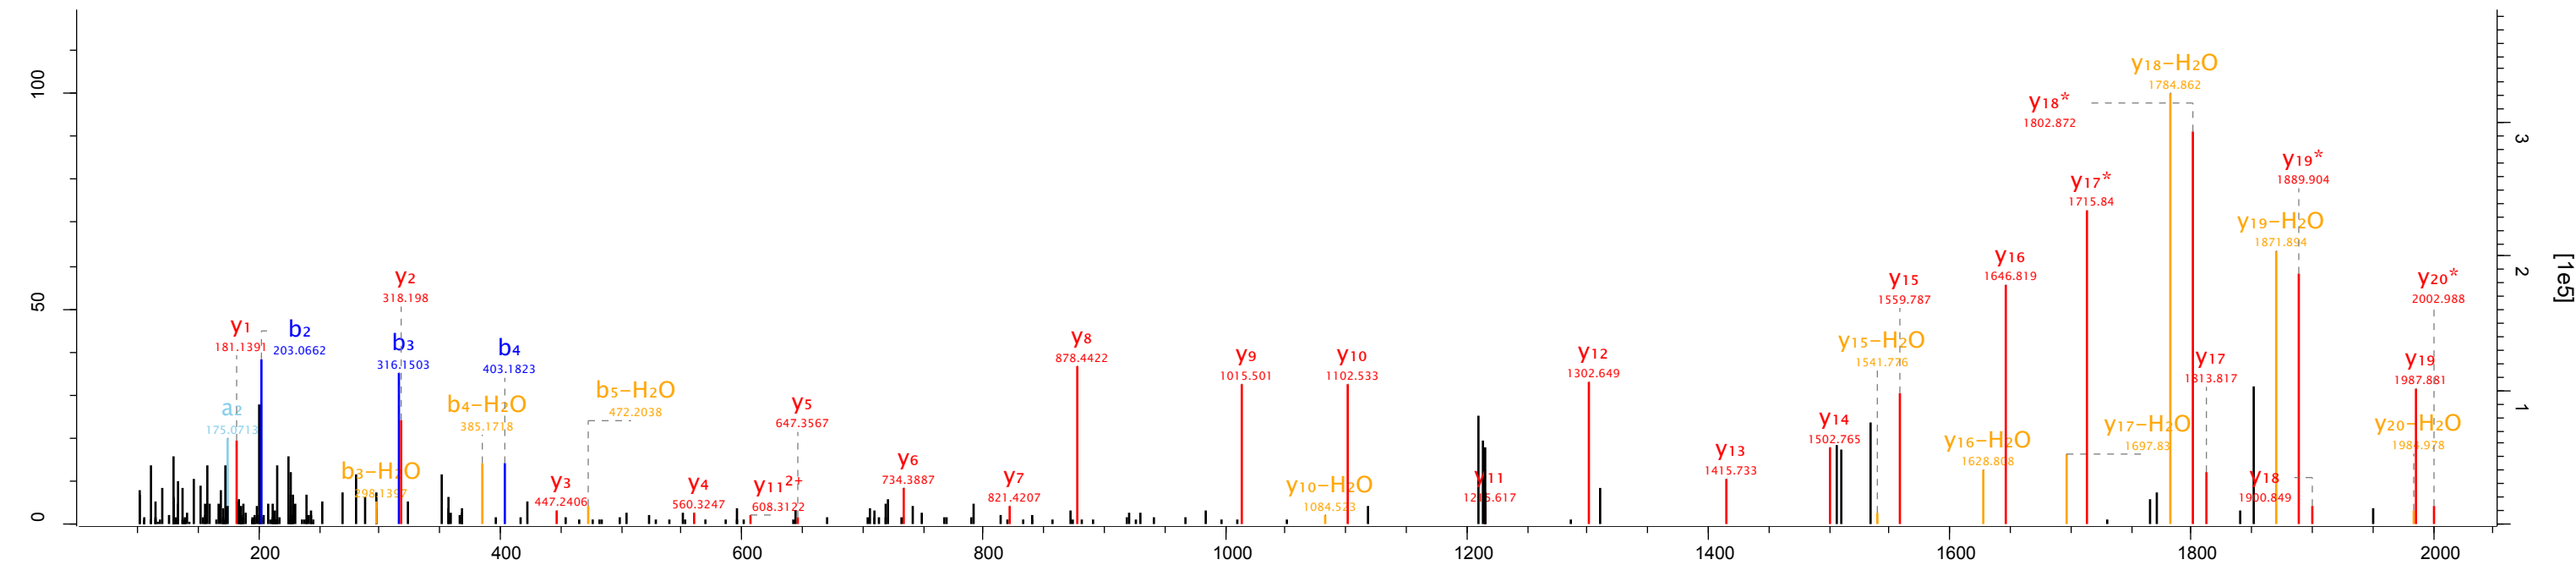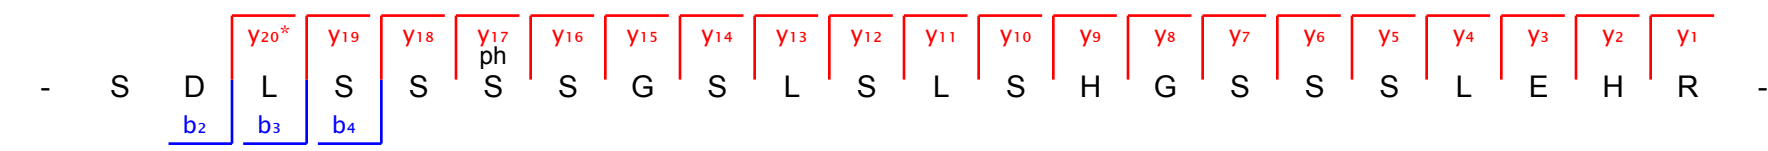

Raw file 20150814\_A375SR\_Phospho\_BR2\_07 Scan 13650 Method FTMS; HCD Score 187.45 m/z 1020.18 Gene names UNG

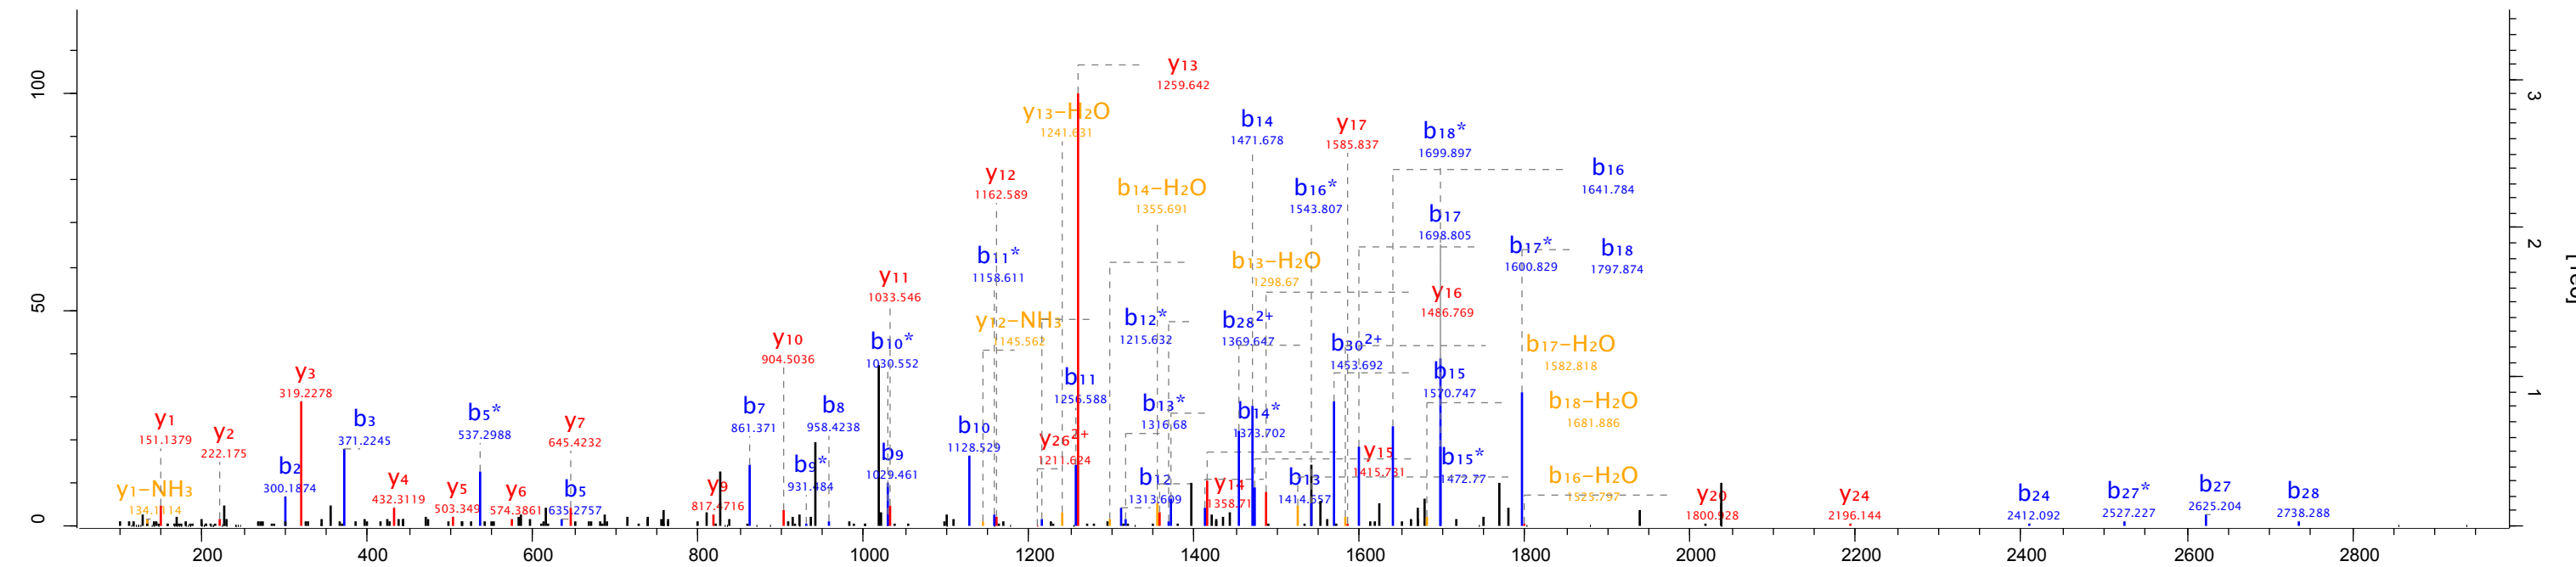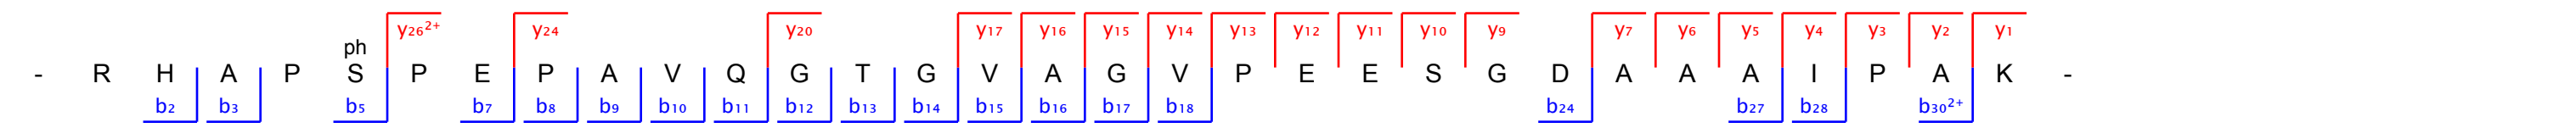

Raw file: 20150814\_A375SR\_Phospho\_BR2\_07  
 Scan: 1570 Method: FTMS; HCD Score: 126.09 m/z: 576.27 Gene names: NUCKS1

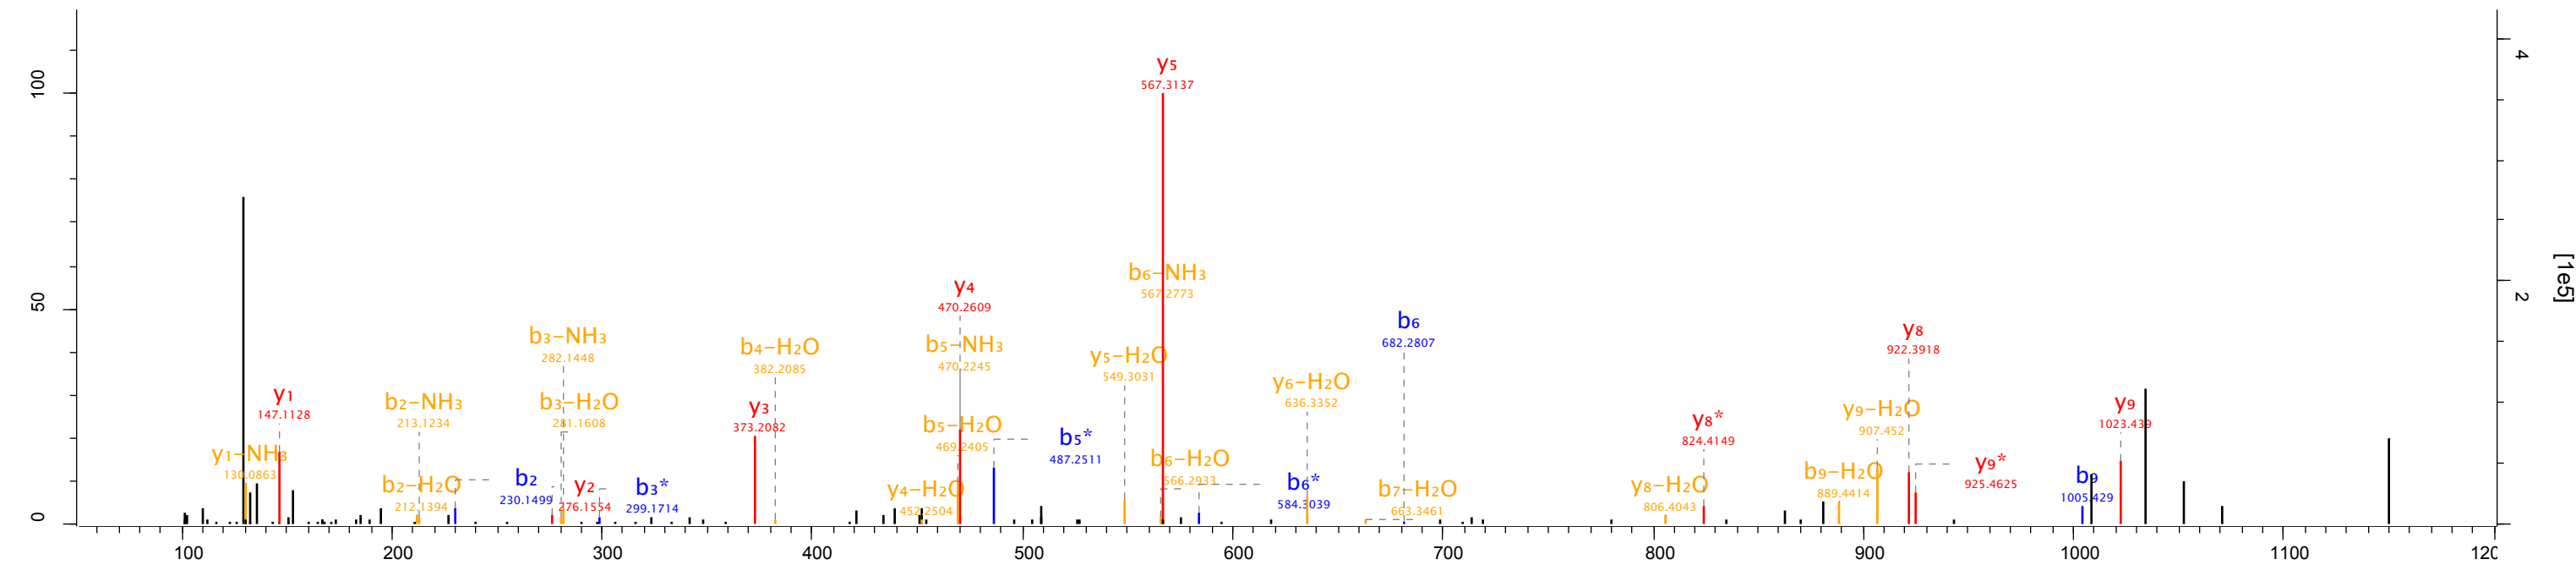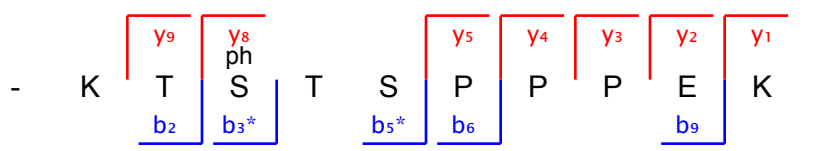



Raw file 20150814\_A375SR\_Phospho\_BR2\_07 Scan 17540 Method FTMS; HCD Score 250.18 m/z 1022.48 Gene names FASN

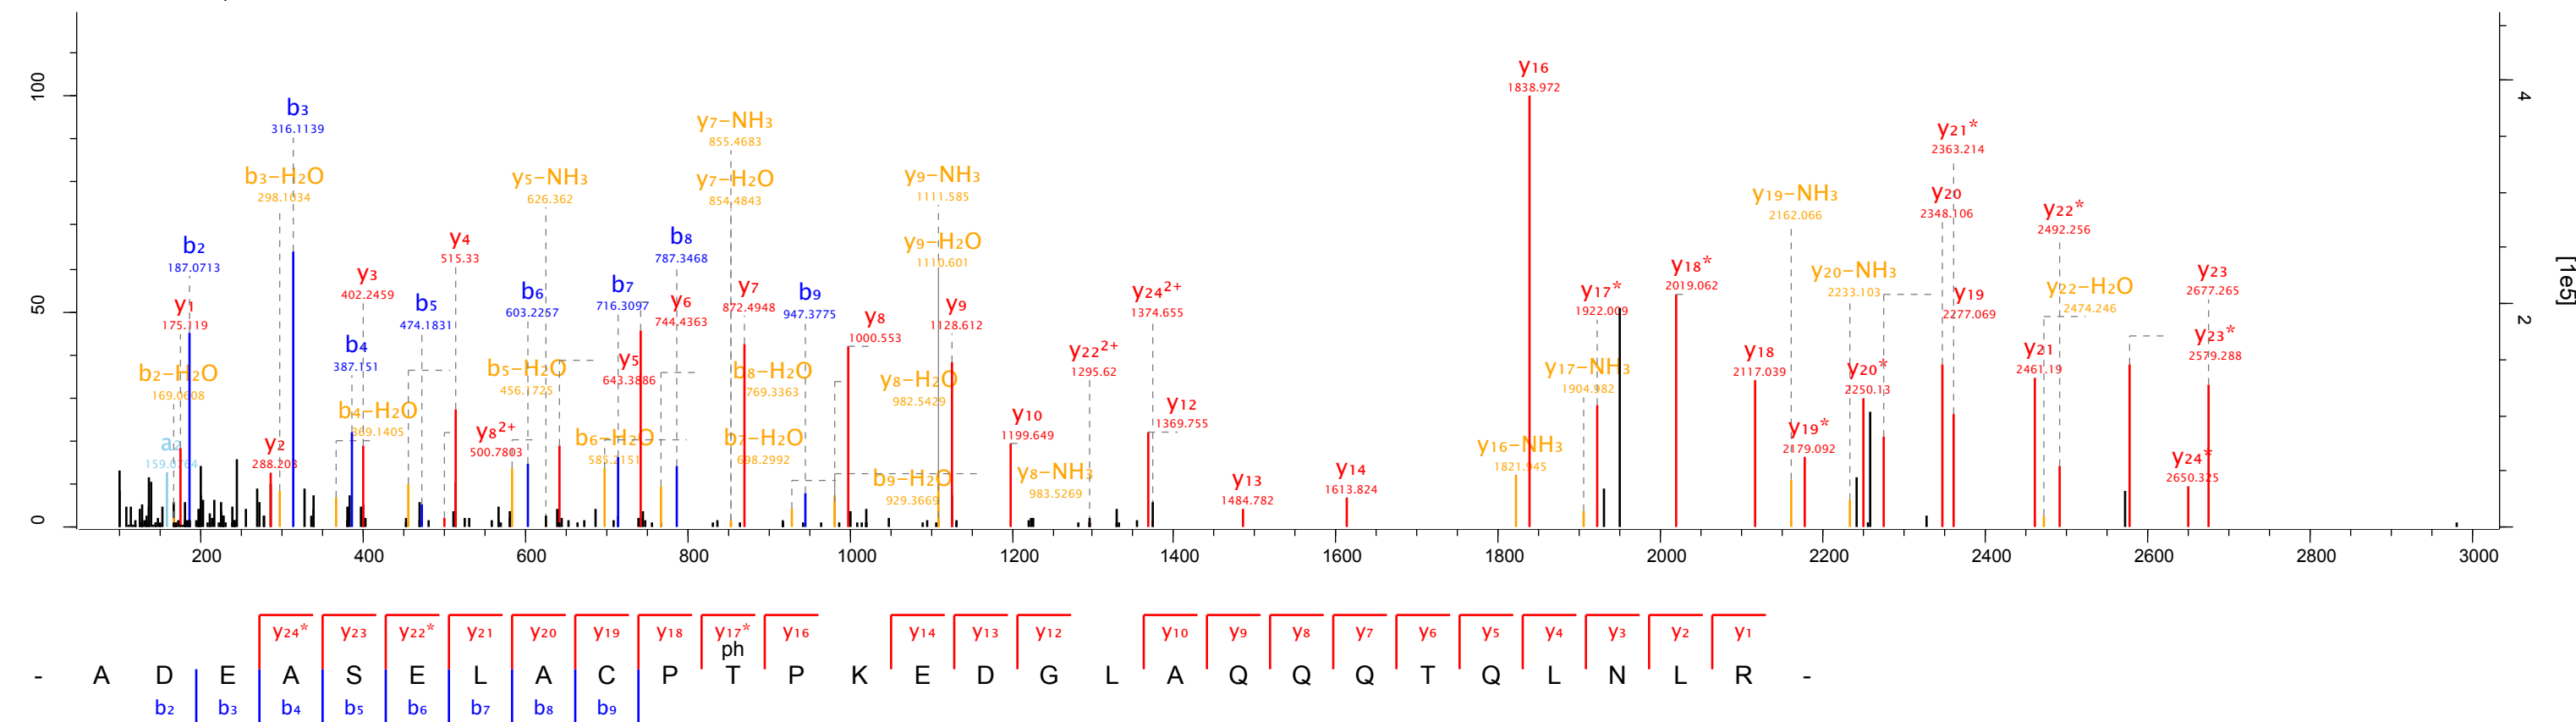

Raw file: 20150814\_A375SR\_Phospho\_BR2\_07  
 Scan: 21080 Method: FTMS; HCD Score: 110.79 m/z: 1469.33 Gene names: GBF1

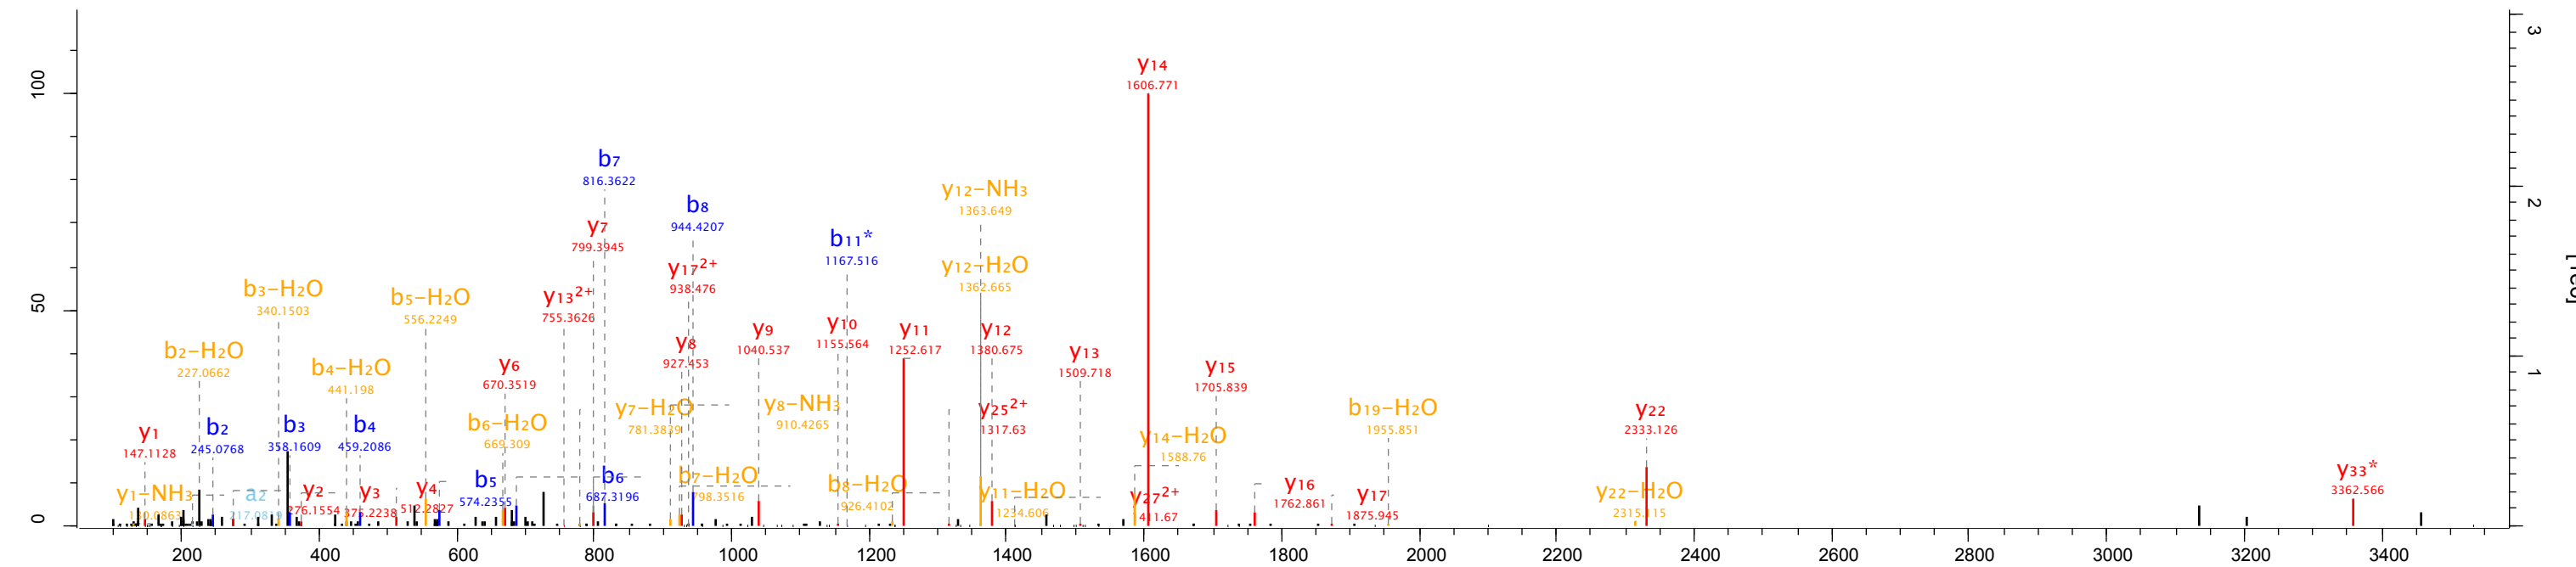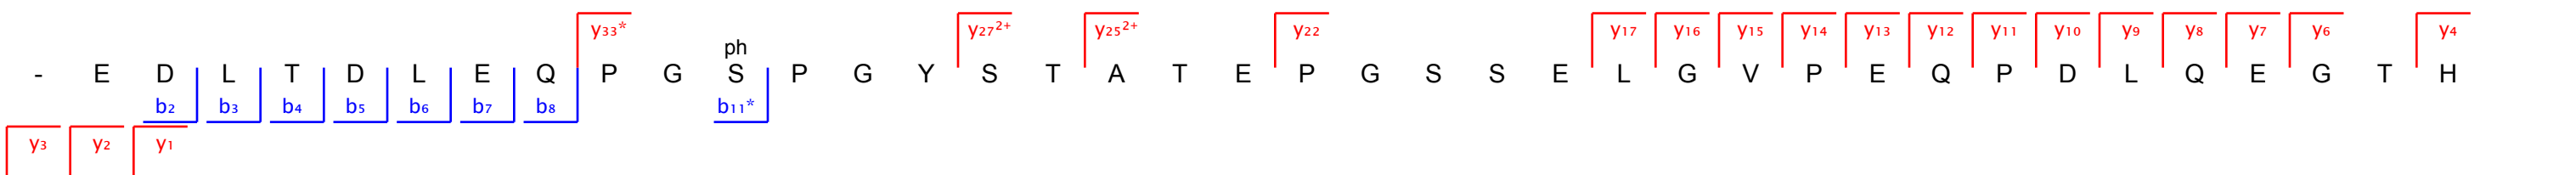

Raw file  
 20150814\_A375SR\_Phospho\_BR2\_07  
 Scan 21490 Method FTMS; HCD Score 197.7 m/z 929.44 Gene names SAFB

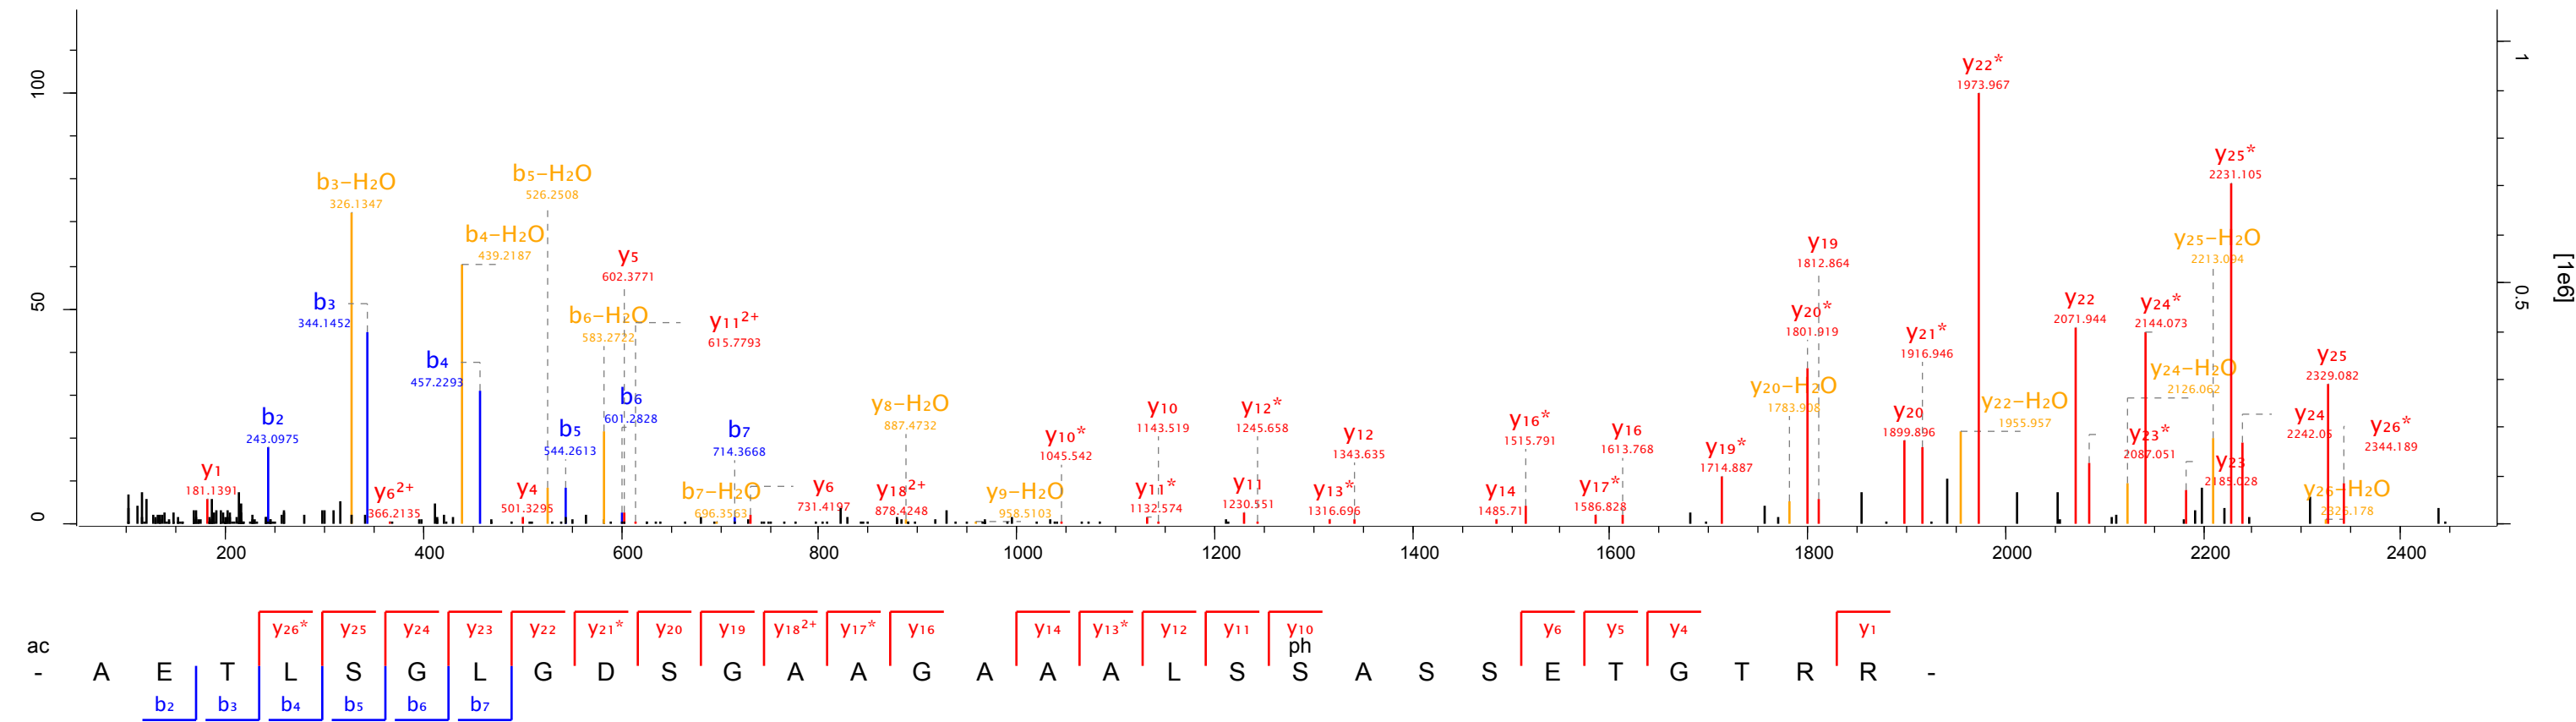

Raw file 20150814\_A375SR\_Phospho\_BR2\_07 Scan 22530 Method FTMS; HCD Score 71.3 m/z 761.05 Gene names NF1

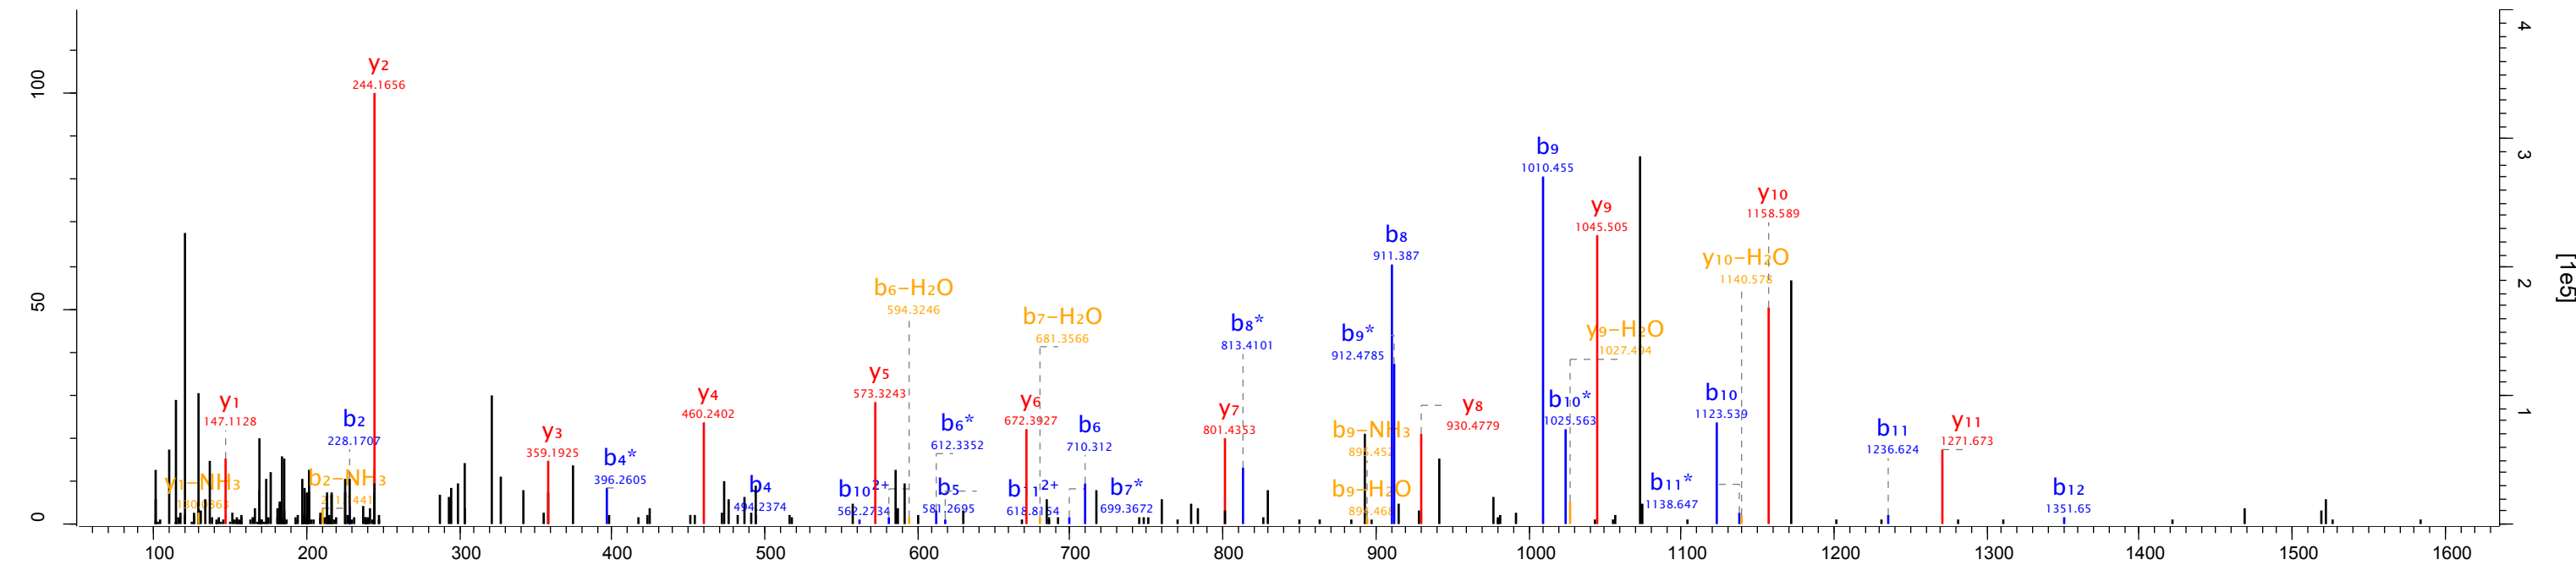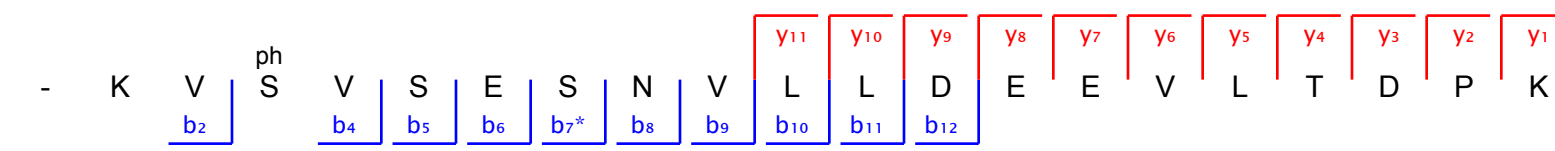

Raw file: 20150814\_A375SR\_Phospho\_BR2\_07  
 Scan: 27730 Method: FTMS; HCD Score: 144.26 m/z: 1317.92 Gene names: SYAP1

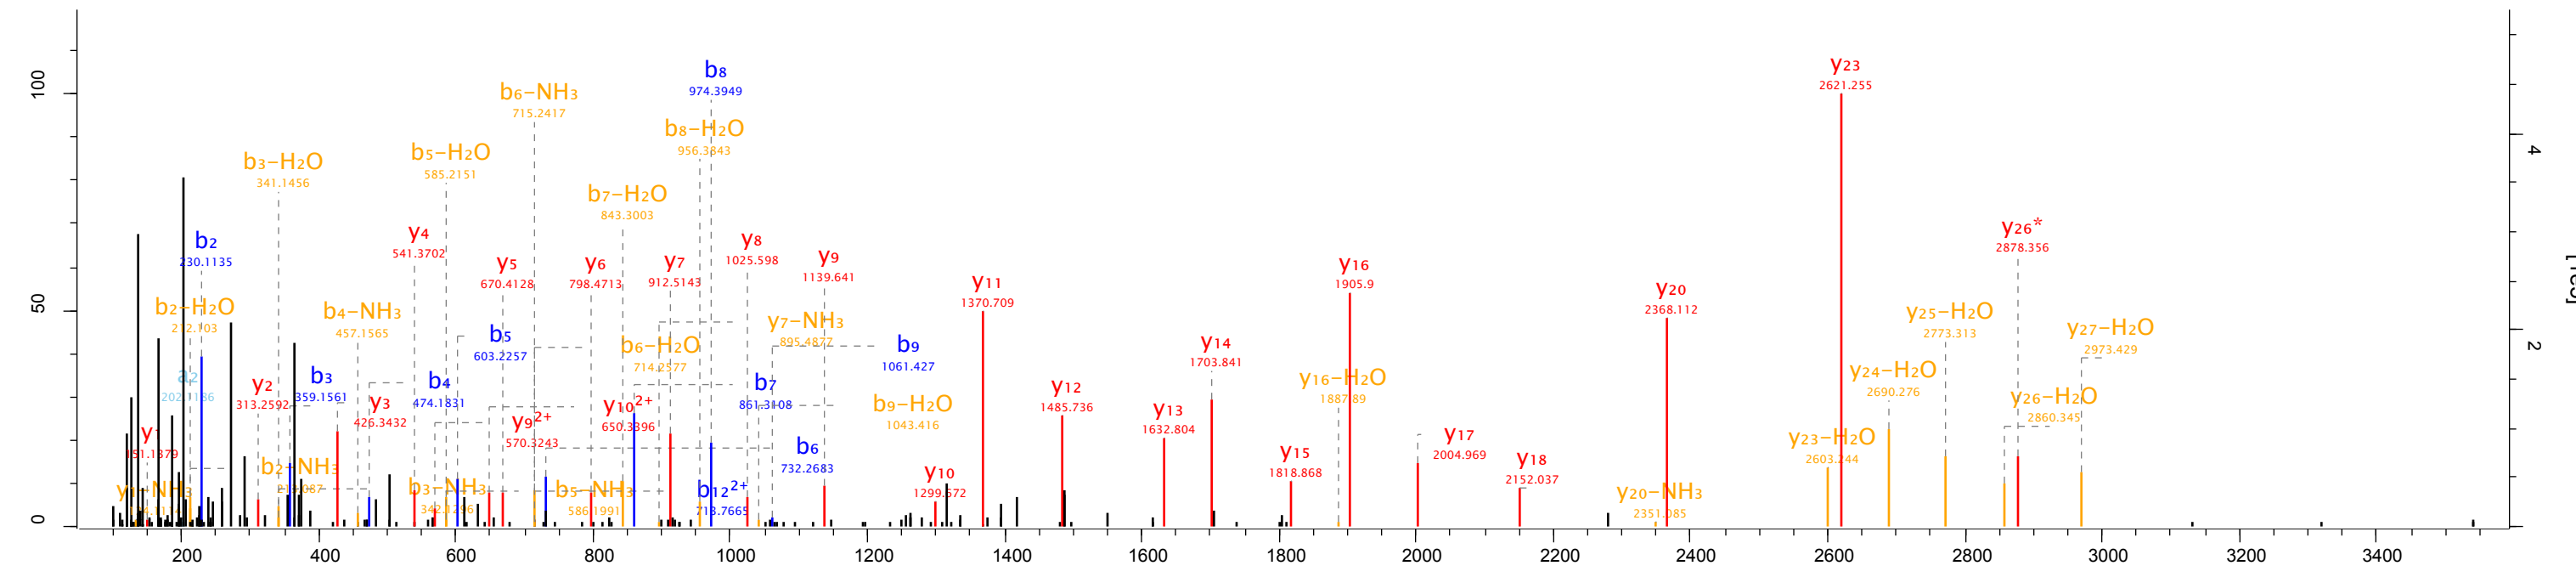

Protein sequence: - T Q E D E E E I S T S P G V S E F V S D A F D A C N L N Q E D L R K -

Fragmentation sites (b ions): b2 (Q), b3 (E), b4 (D), b5 (E), b6 (E), b7 (E), b8 (I), b9 (S)

Fragmentation sites (y ions): y23 (P), y20 (S), y18 (F), y17 (V), y16 (S), y15 (D), y14 (A), y13 (F), y12 (D), y11 (A), y10 (C), y9 (N), y8 (L), y7 (N), y6 (Q), y5 (E), y4 (D), y3 (L), y2 (R), y1 (K)

Phosphorylation site: S (ph)

Raw file 20150814\_A375SR\_Phospho\_BR2\_07 Scan 3660 Method FTMS; HCD Score 121.69 m/z 589.78 Gene names MAP1A

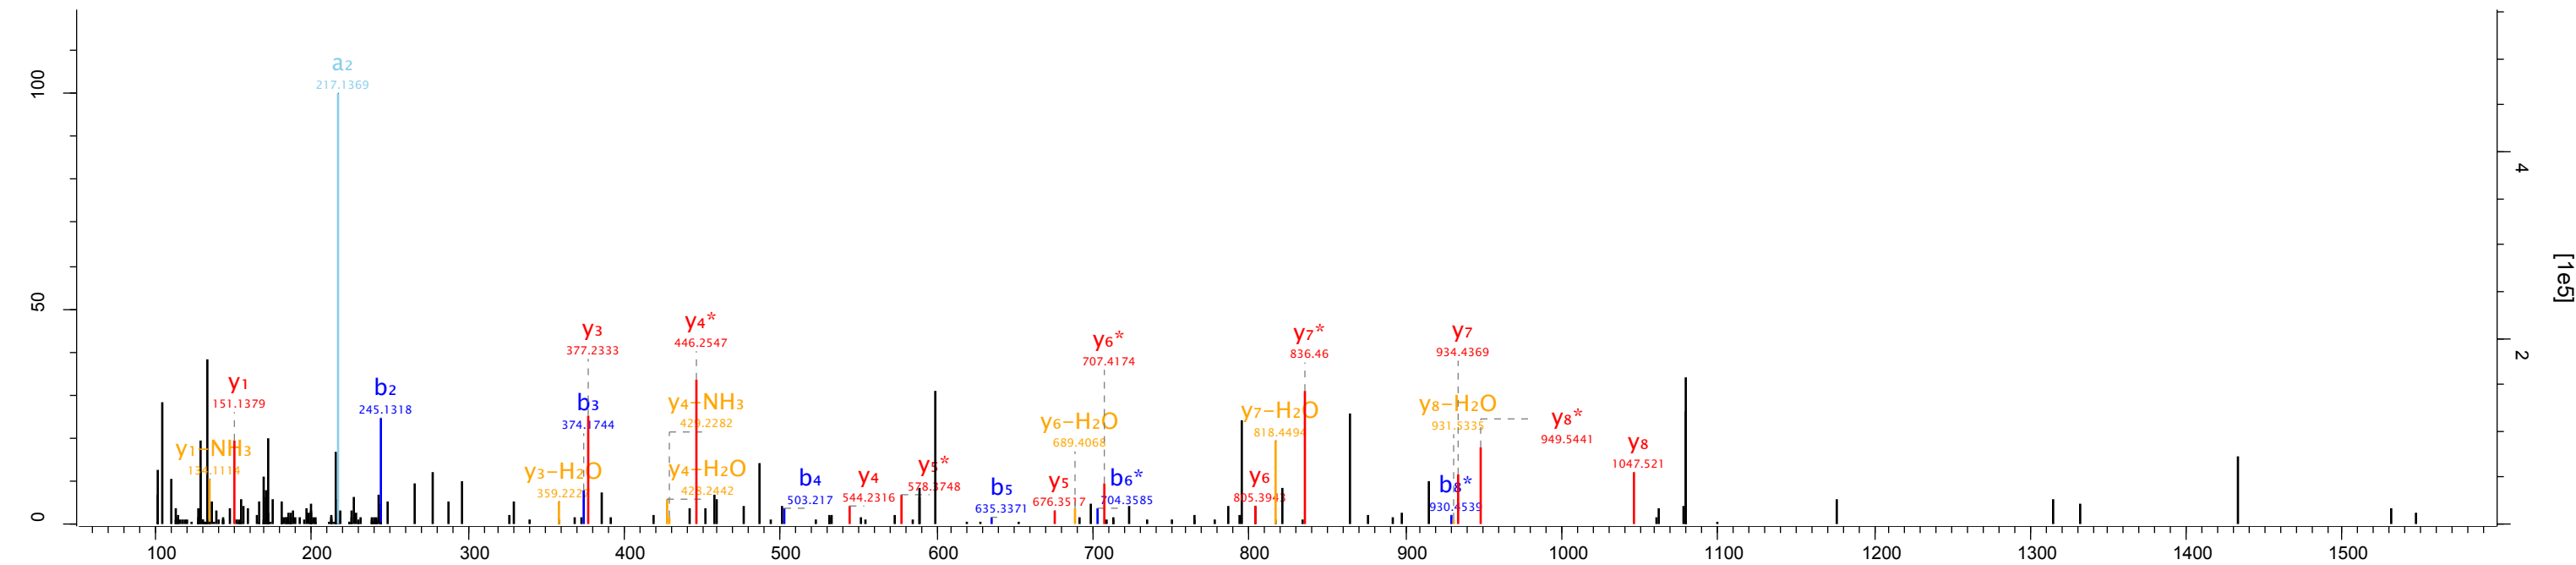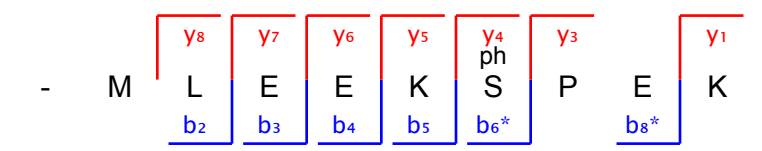

Raw file 20150814\_A375SR\_Phospho\_BR2\_07 Scan 3760 Method FTMS; HCD Score 91.97 m/z 466.25 Gene names FRMD4A

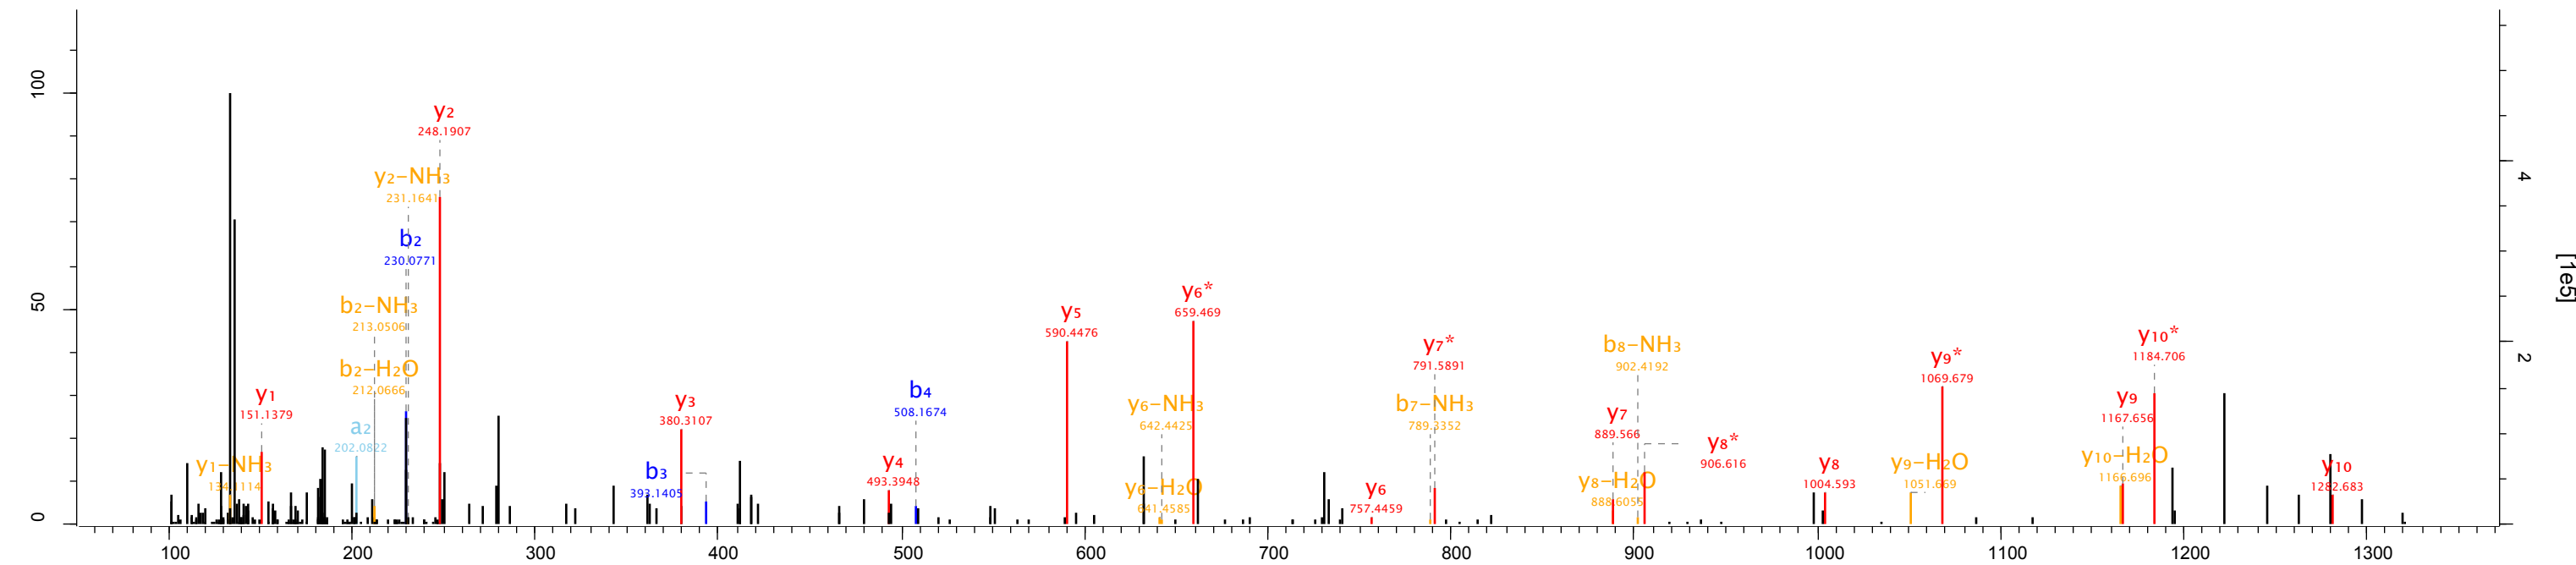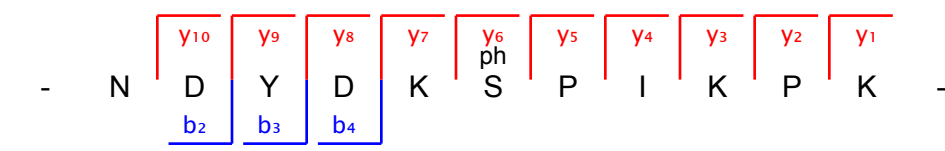

Raw file: 20150814\_A375SR\_Phospho\_BR2\_07  
 Scan: 5320 Method: FTMS; HCD Score: 67.64 m/z: 541.61 Gene names: RAI14

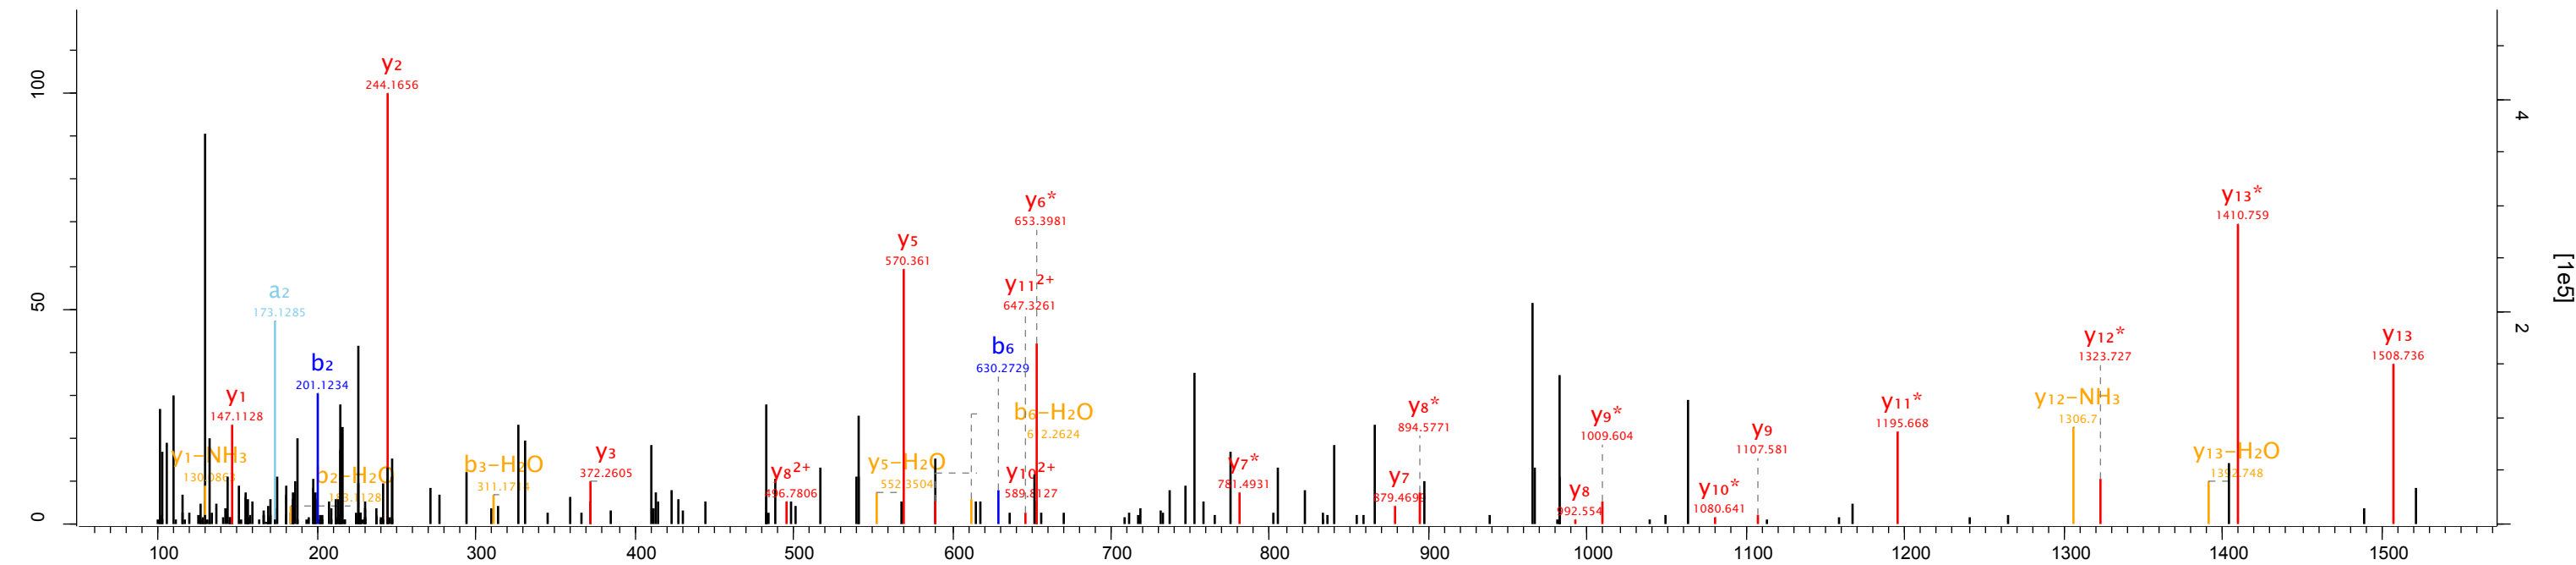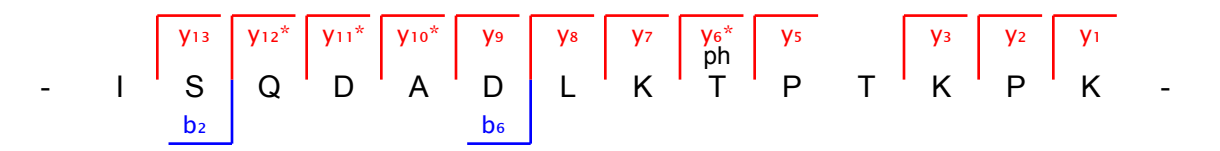



Raw file: 20150814\_A375SR\_Phospho\_BR2\_07  
 Scan: 5880 Method: FTMS; HCD Score: 213.39 m/z: 762.71 Gene names: TJP2

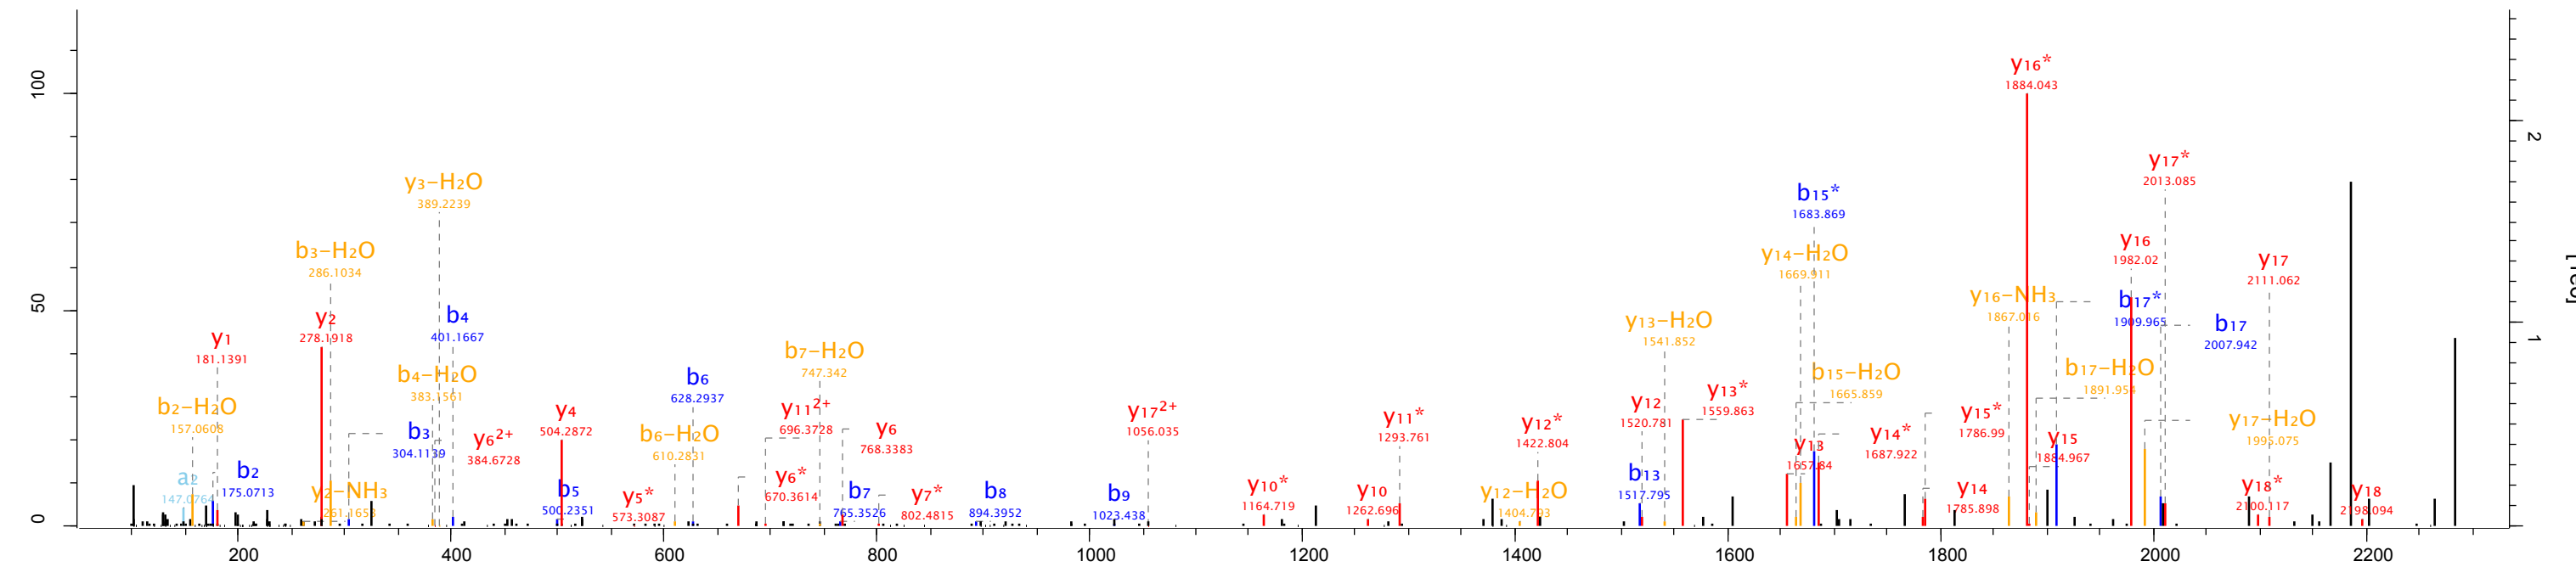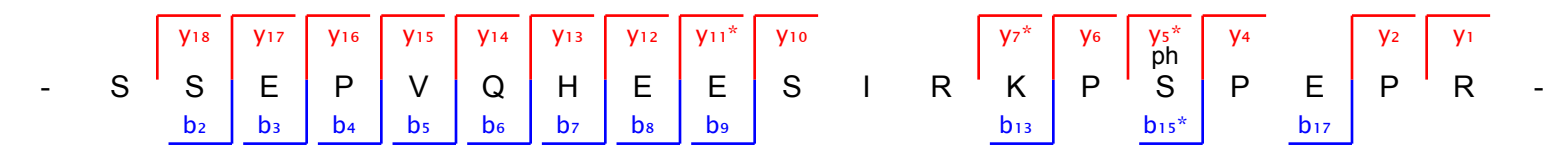

Raw file: 20150814\_A375SR\_Phospho\_BR2\_07  
 Scan: 6890 Method: FTMS; HCD Score: 146.77 m/z: 679.81 Gene names: EME1

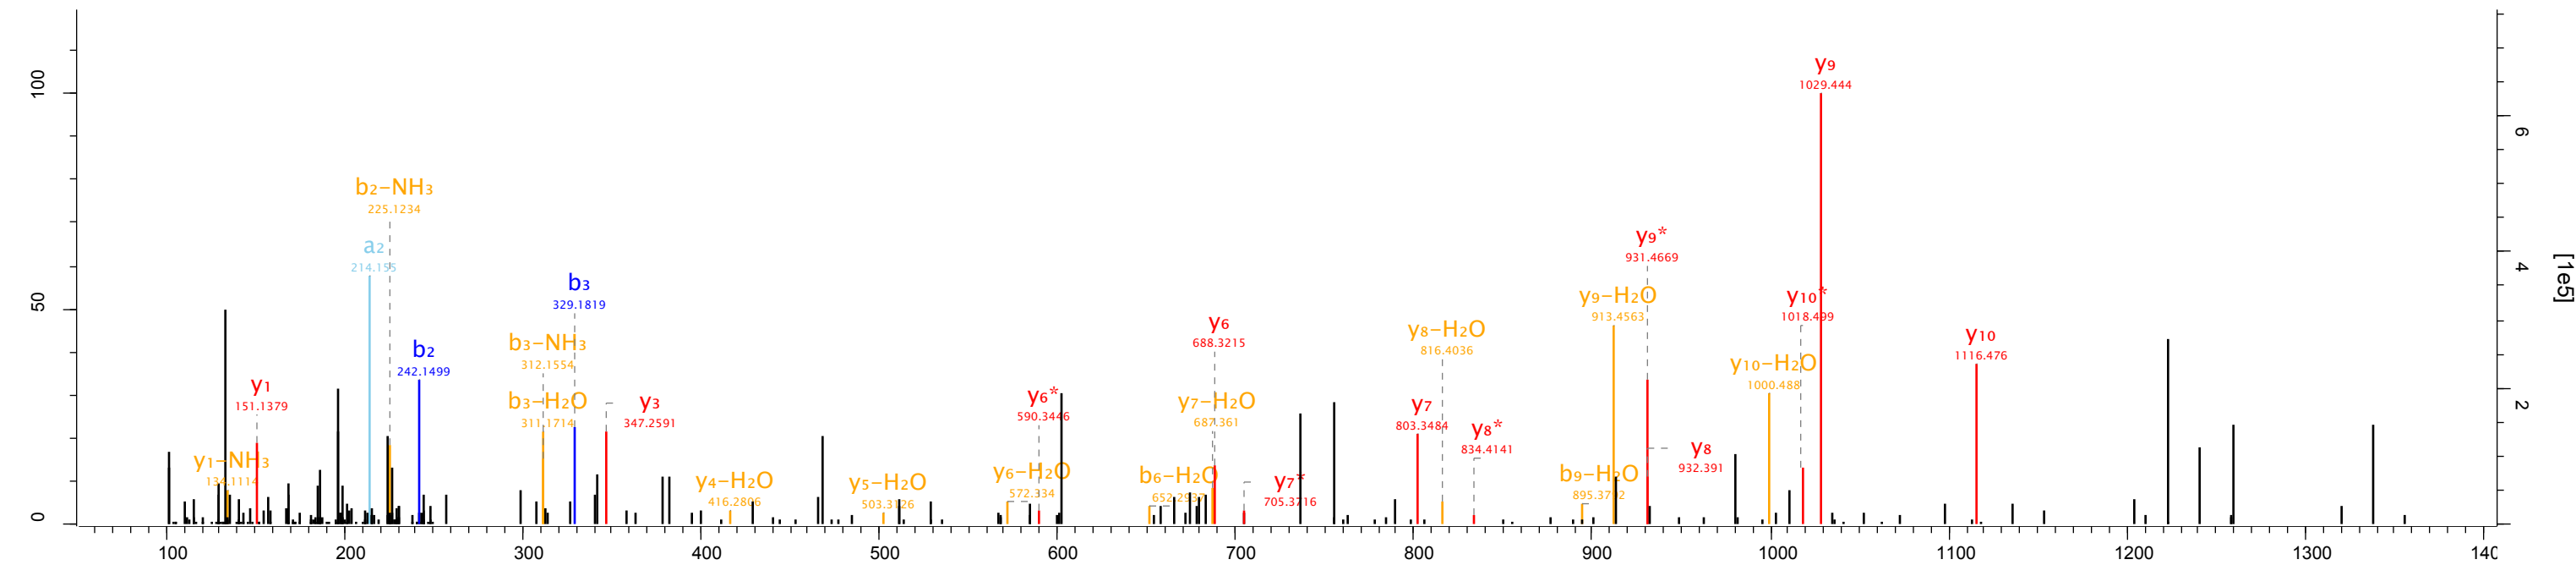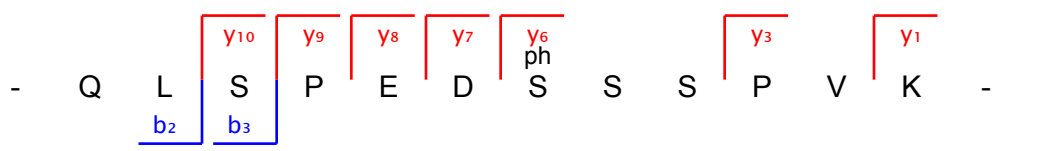

Raw file: 20150814\_A375SR\_Phospho\_BR2\_07  
 Scan: 8290 Method: FTMS; HCD Score: 96.67 m/z: 623.8 Gene names: SRPK2

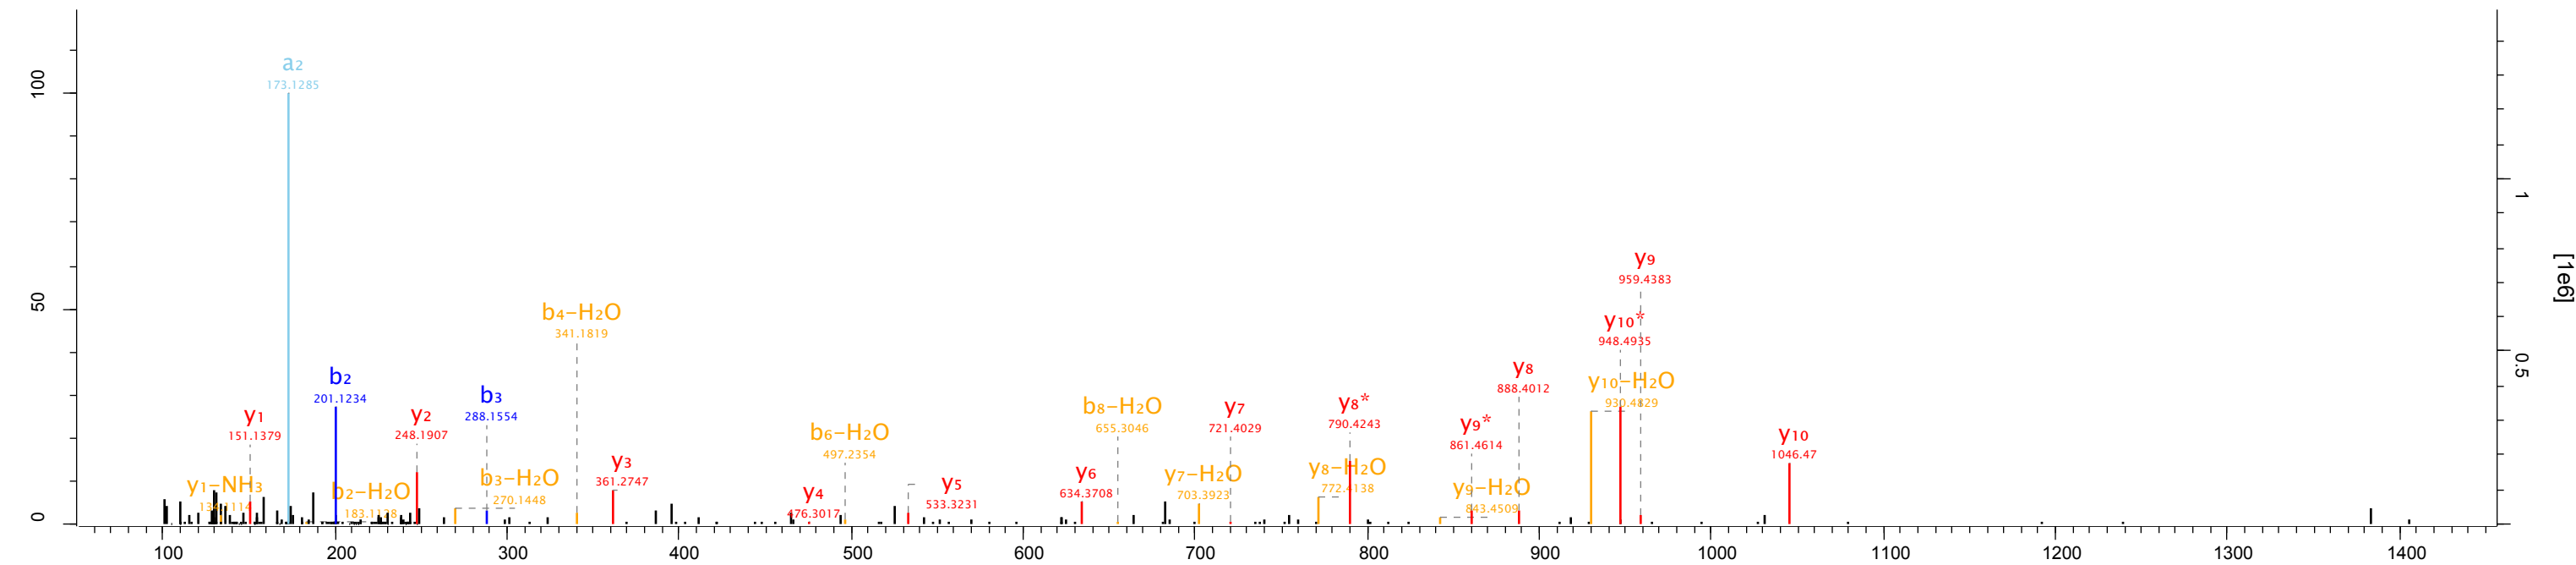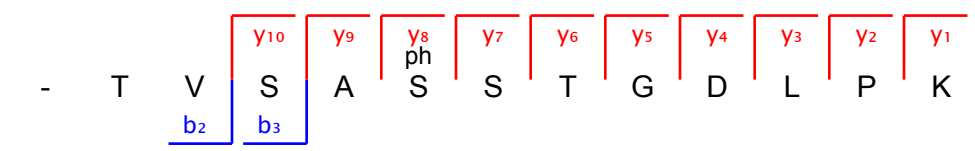

Raw file 20150814\_A375SR\_Phospho\_BR2\_07 Scan 8800 Method FTMS; HCD Score 52.2 m/z 842.72 Gene names MICALL1

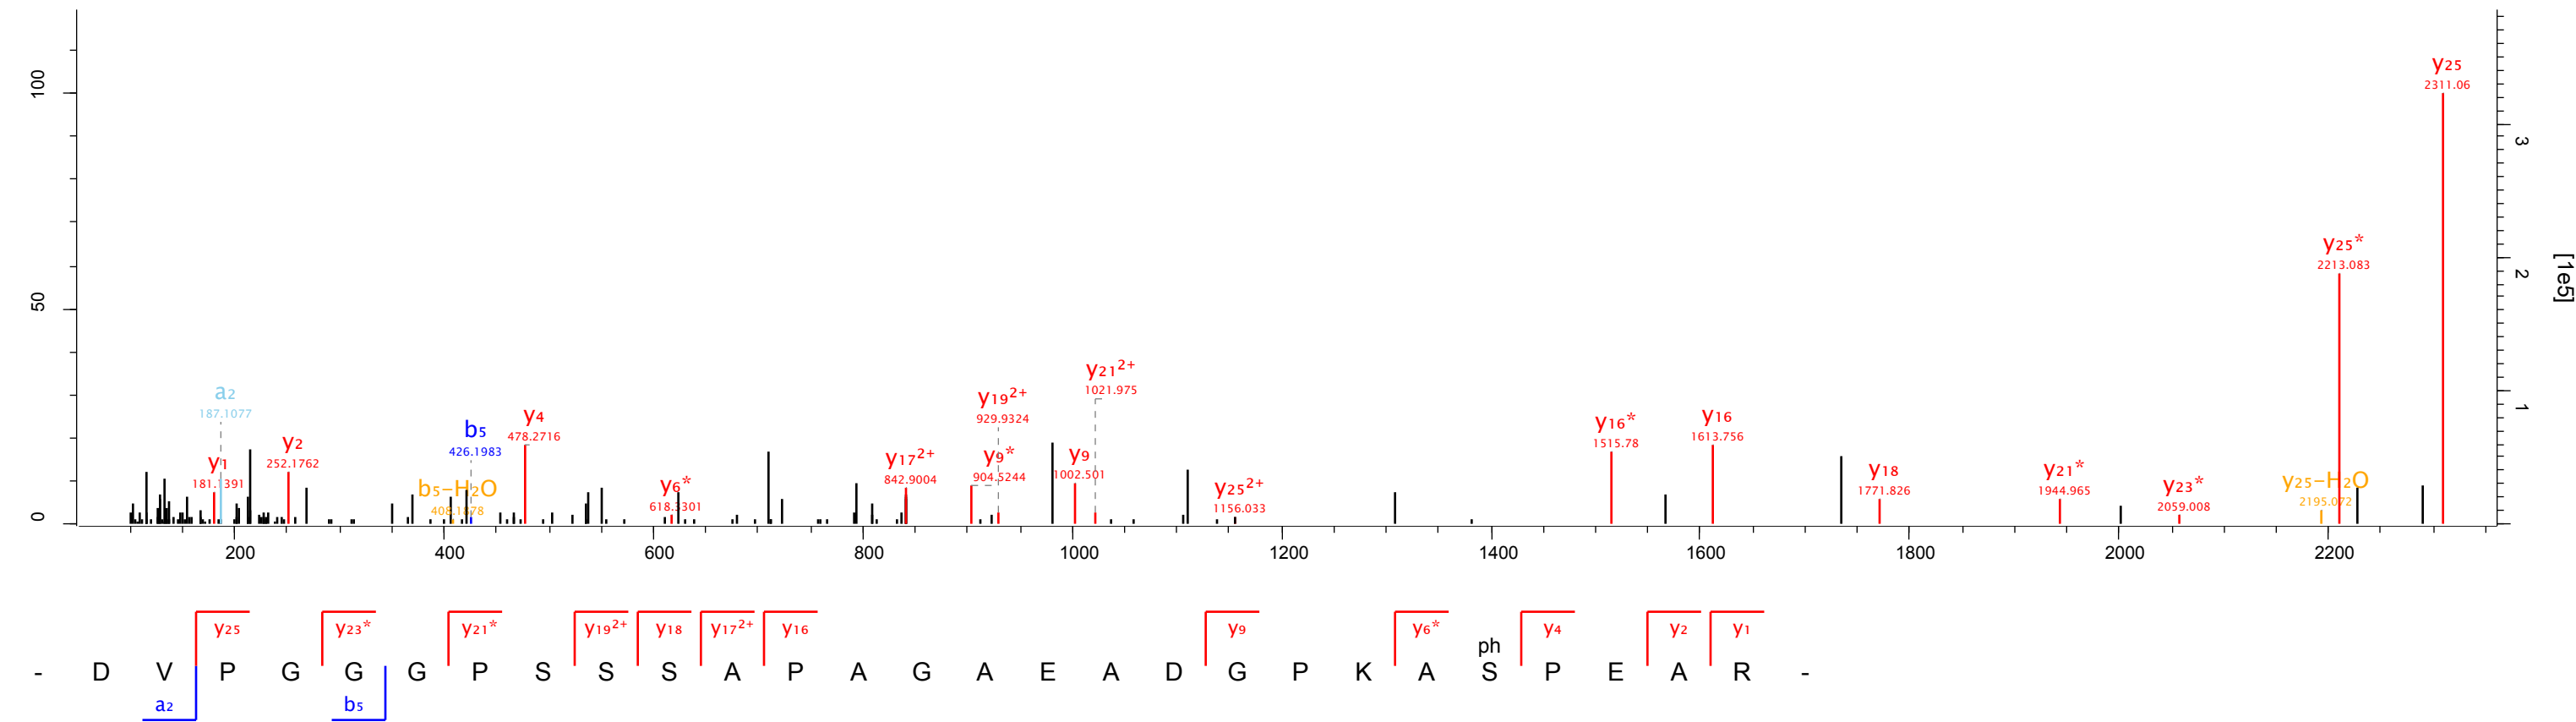

Raw file 20150814\_A375SR\_Phospho\_BR2\_07 Scan 9460 Method FTMS; HCD Score 116.93 m/z 642.32 Gene names DTL

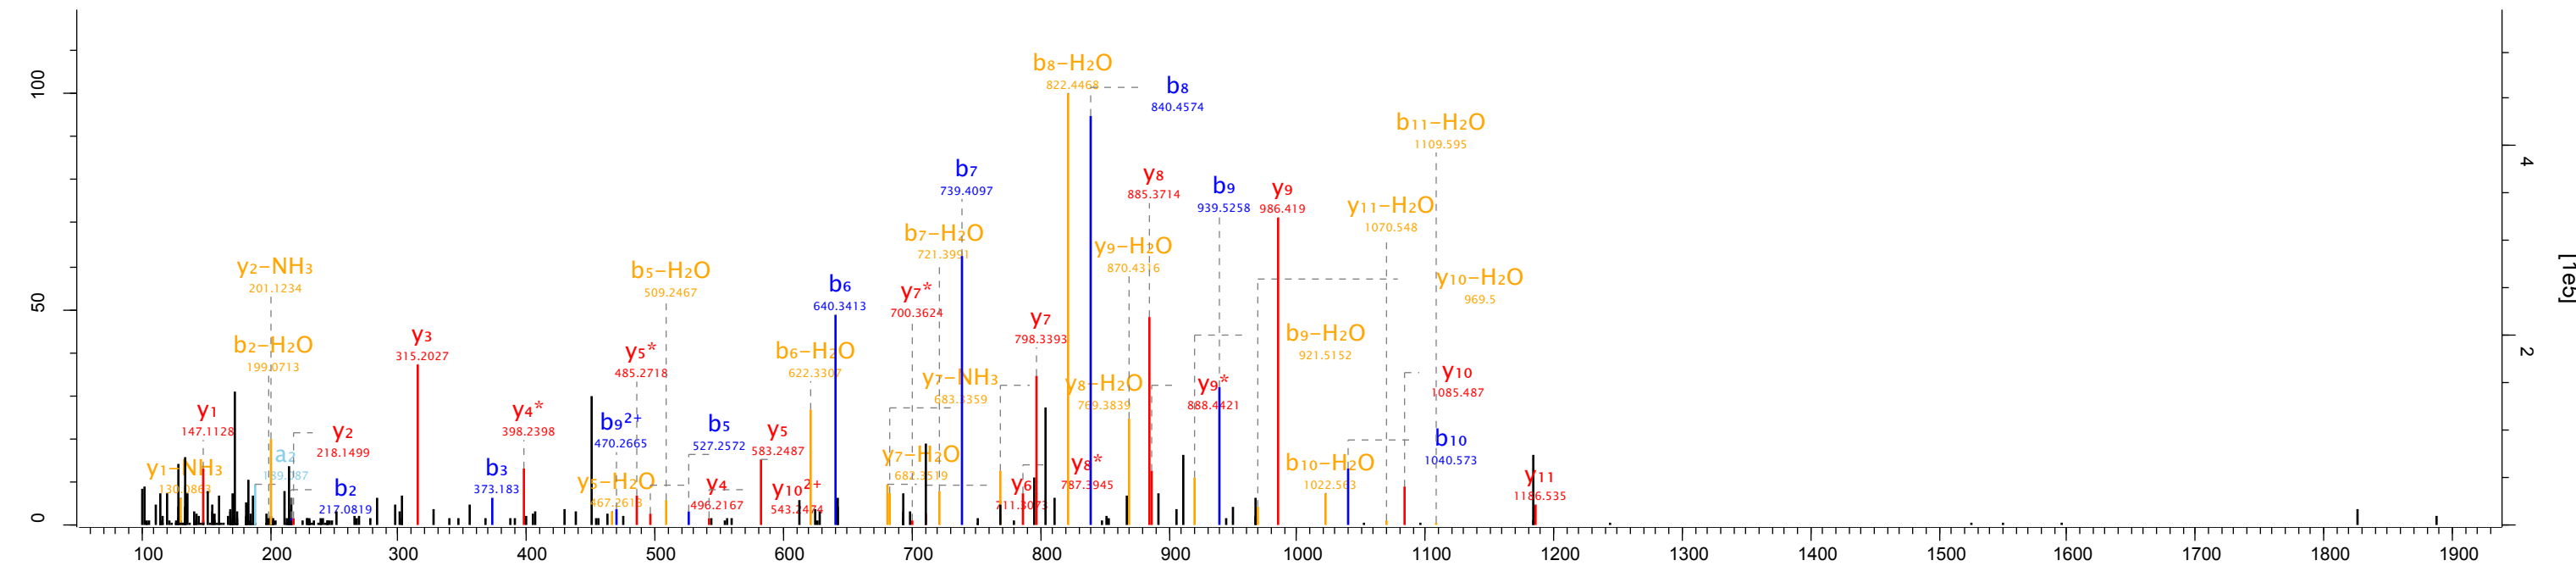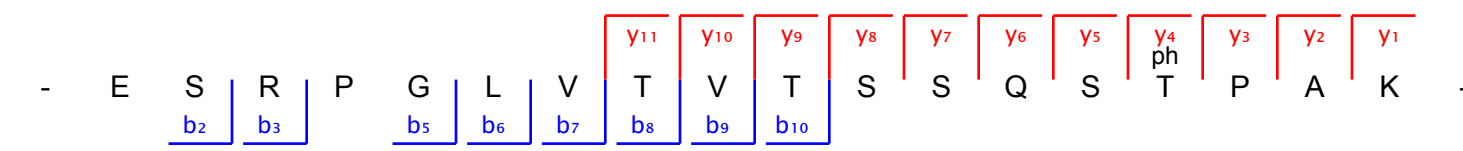

Raw file: 20150814\_A375SR\_Phospho\_BR2\_07  
 Scan: 9580 Method: FTMS; HCD Score: 62.8 m/z: 506.24 Gene names: DICER1

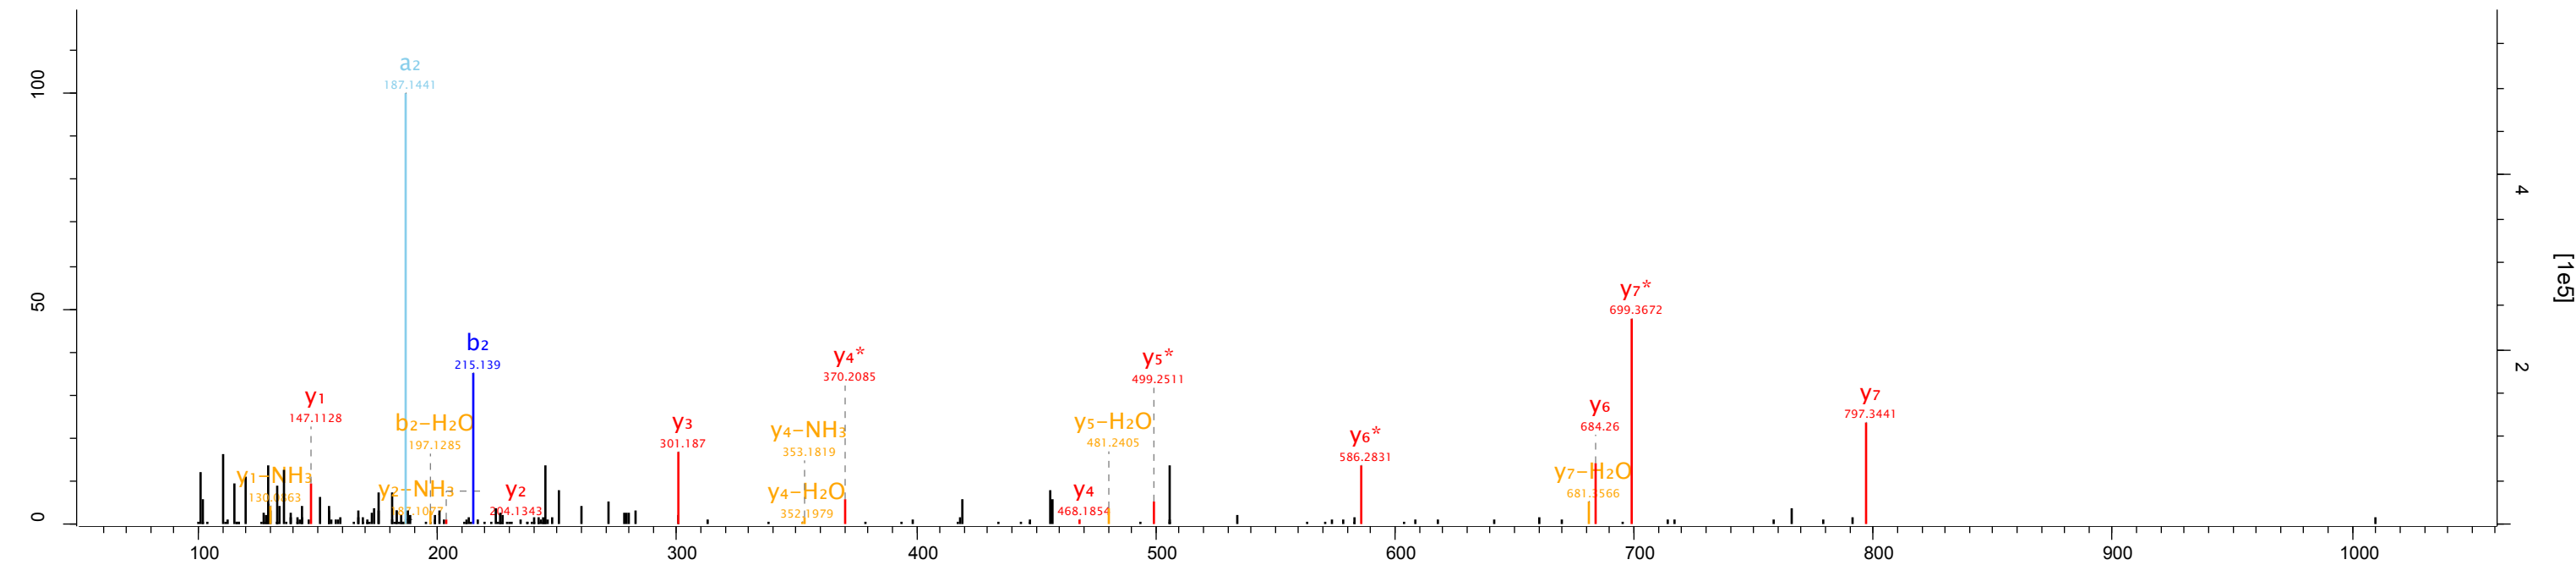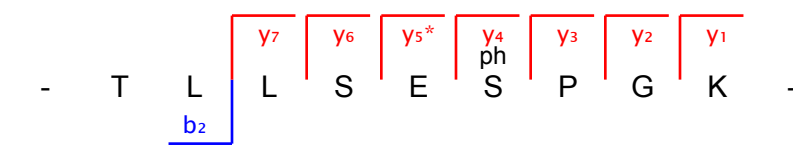

Raw file 20150814\_A375SR\_Phospho\_BR2\_08 Scan 12640 Method FTMS; HCD Score 105.51 m/z 762.01 Gene names RIOK1

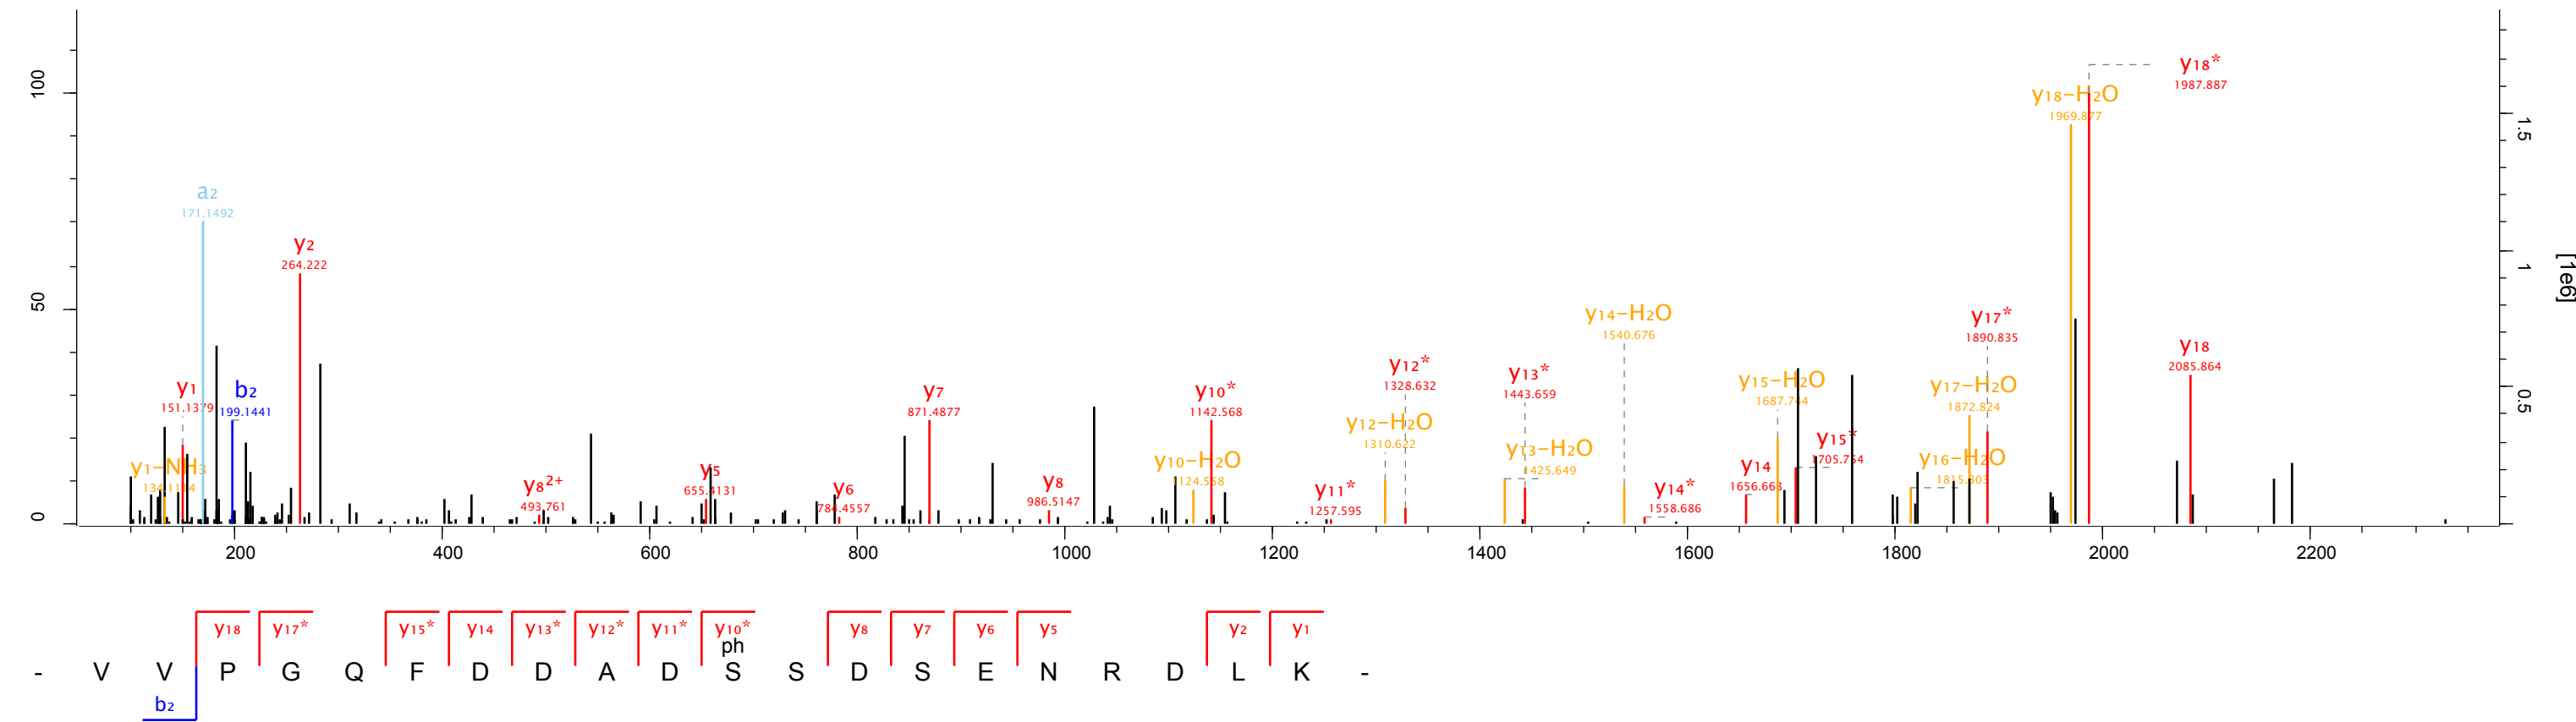

Raw file: 20150814\_A375SR\_Phospho\_BR2\_08  
 Scan: 12970 Method: FTMS; HCD Score: 125.98 m/z: 813.34 Gene names: MAP1B

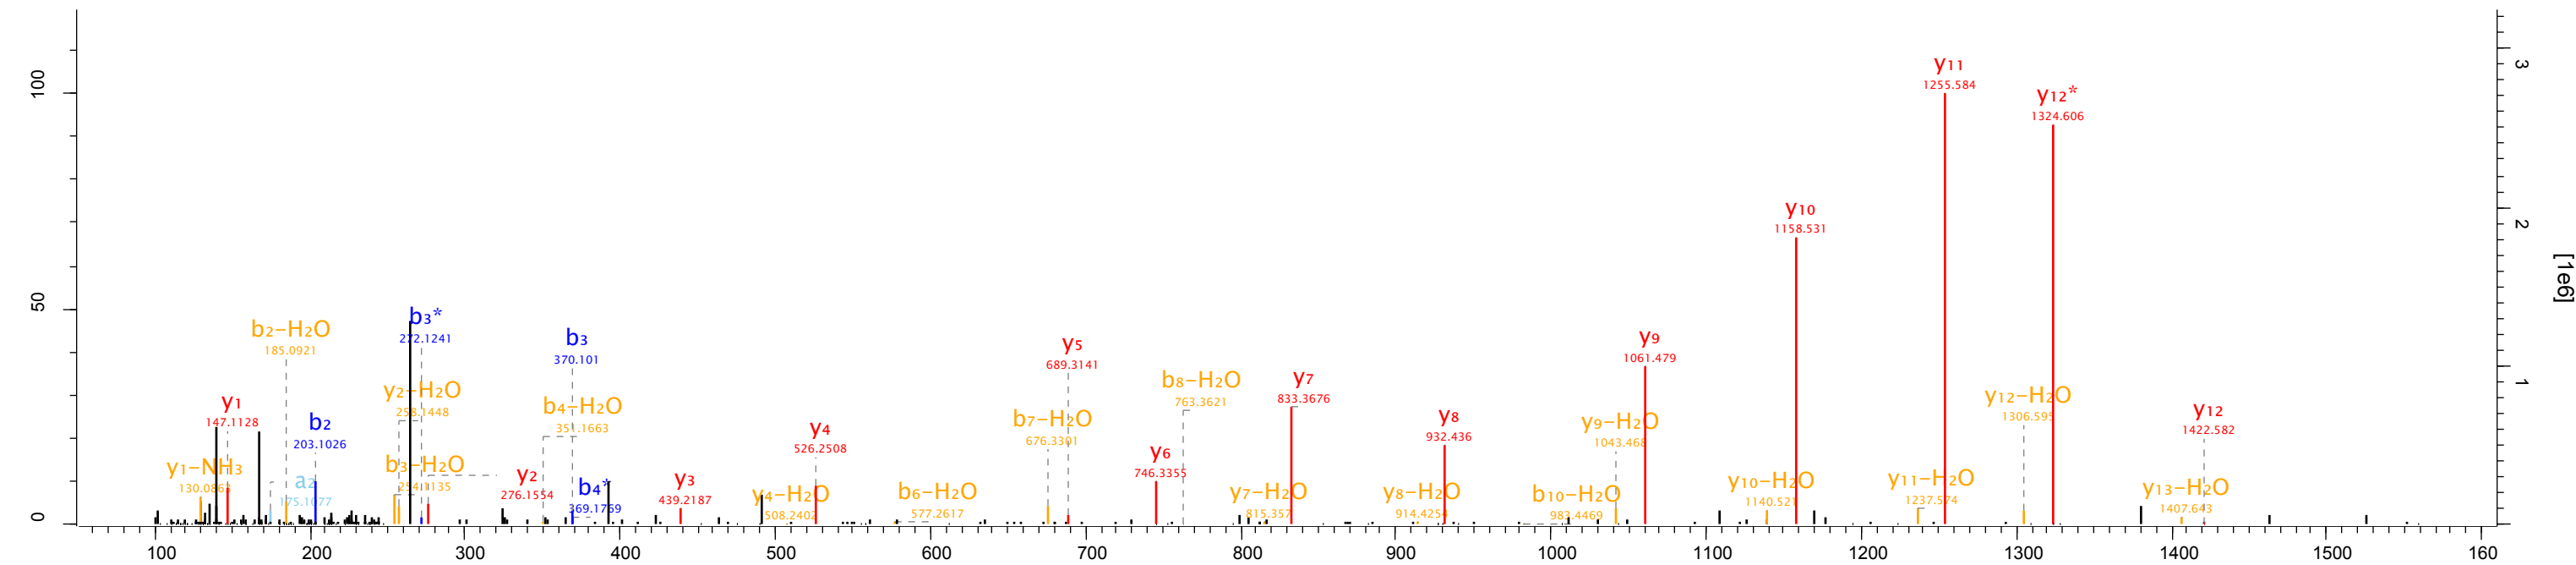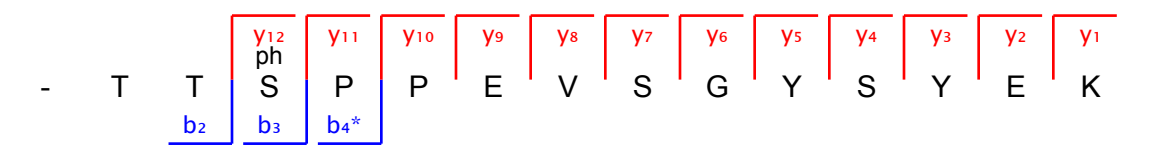



Raw file 20150814\_A375SR\_Phospho\_BR2\_08 Scan 13590 Method FTMS; HCD Score 45.43 m/z 641.85 Gene names GGA3

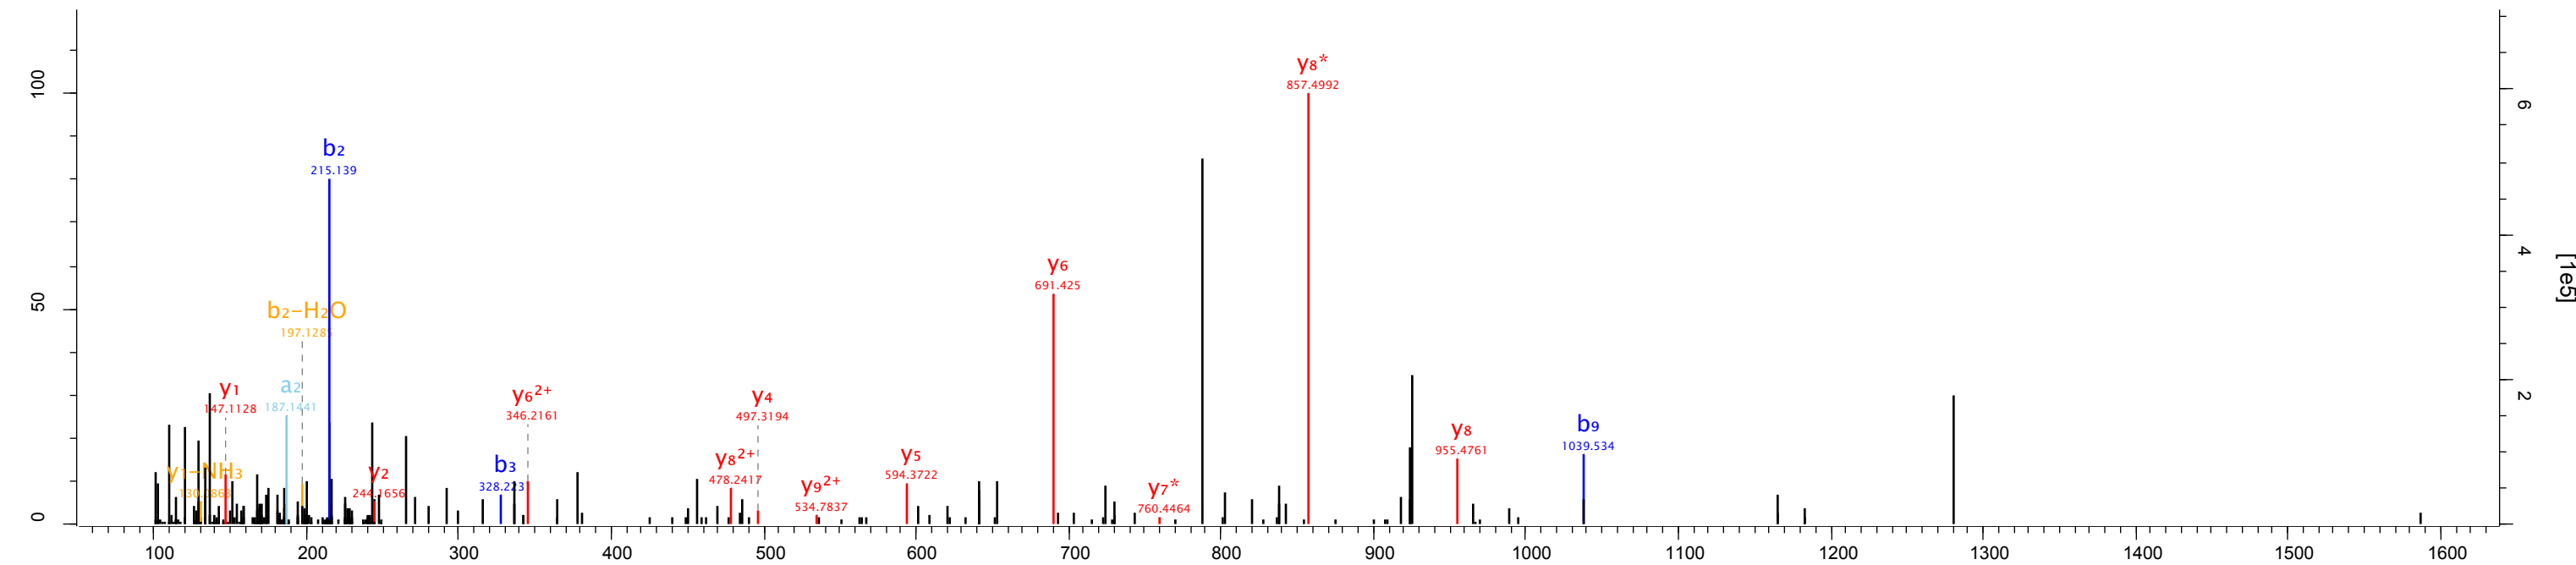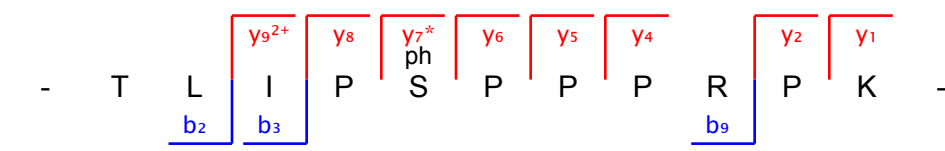

Raw file  
 20150814\_A375SR\_Phospho\_BR2\_08  
 Scan 15120 Method FTMS; HCD Score 102.39 m/z 671.68 Gene names ADAM9

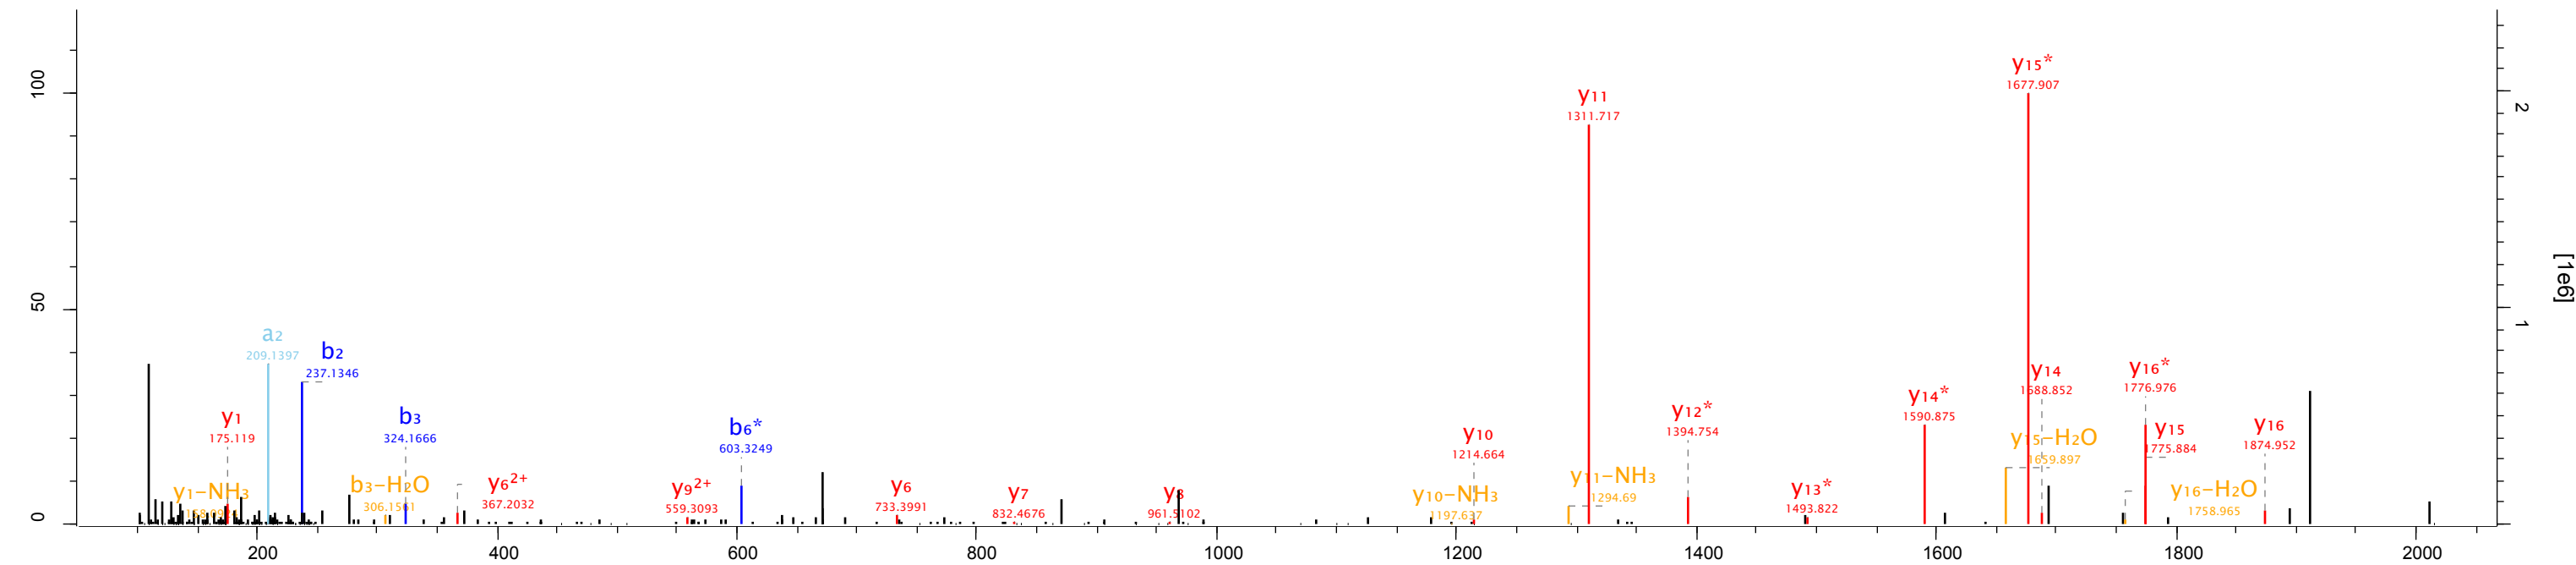

- H V S P V T P P R E V P I Y A N R -

Fragmentation mapping (b-ions in blue, y-ions in red):

- b2: V
- b3: S
- b6\*: T
- y1: R
- y6: P
- y7: V
- y8: E
- y9<sup>2+</sup>: R
- y10: P
- y11: P
- y12\*: T
- y13\*: V
- y14: P
- y15: S
- y16: V

Raw file 20150814\_A375SR\_Phospho\_BR2\_08 Scan 15270 Method FTMS; HCD Score 106.28 m/z 860.4 Gene names PPP1R14B

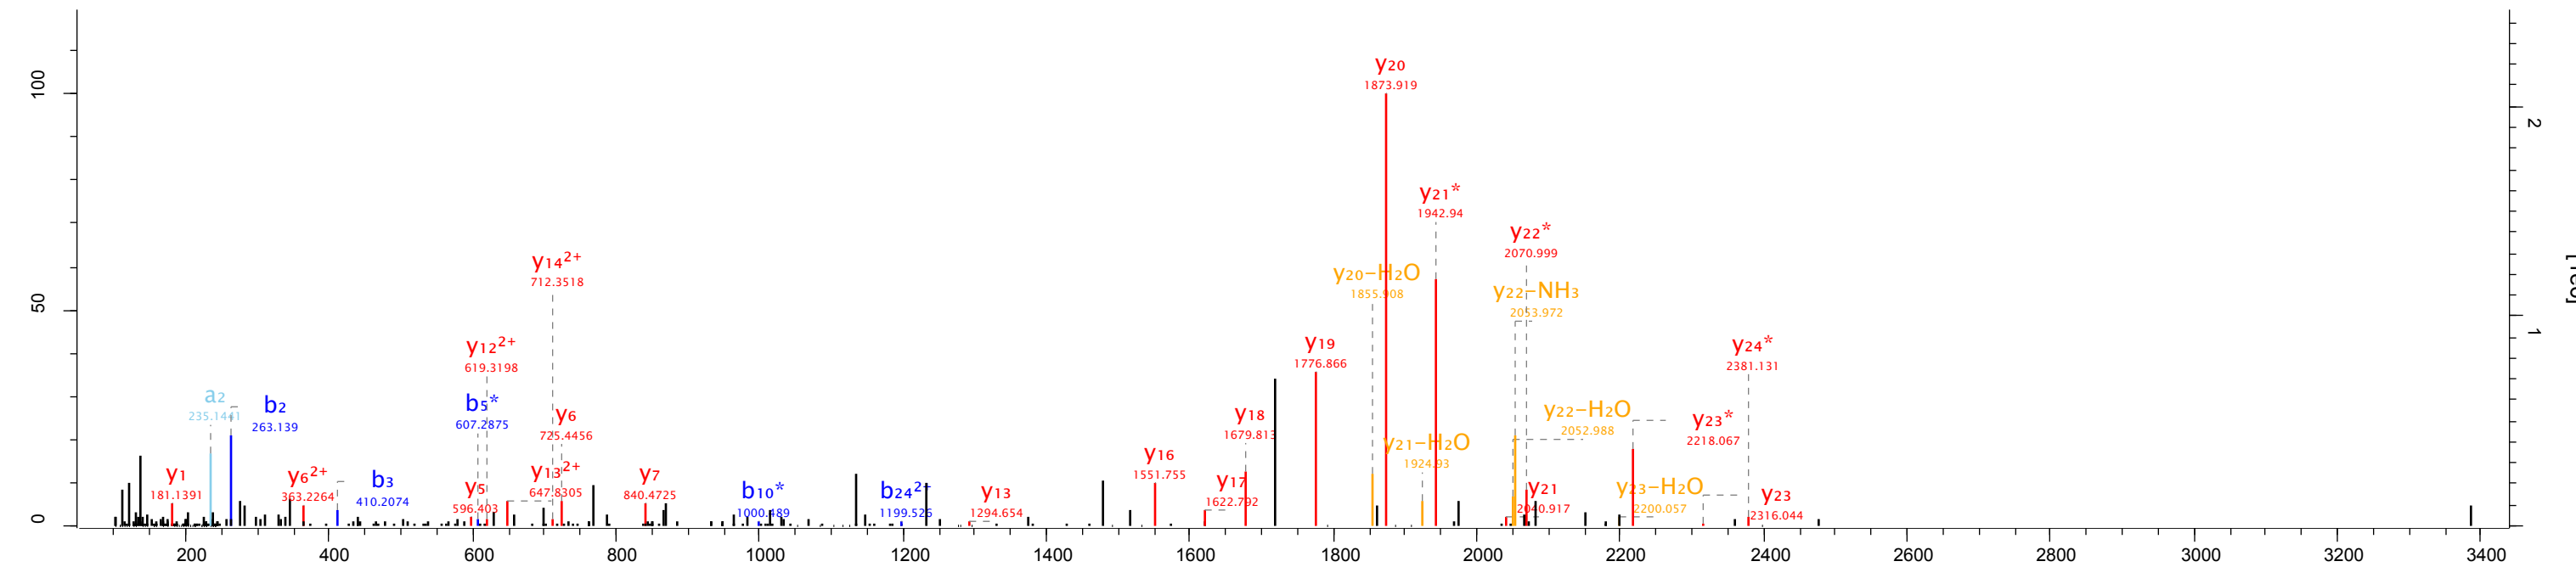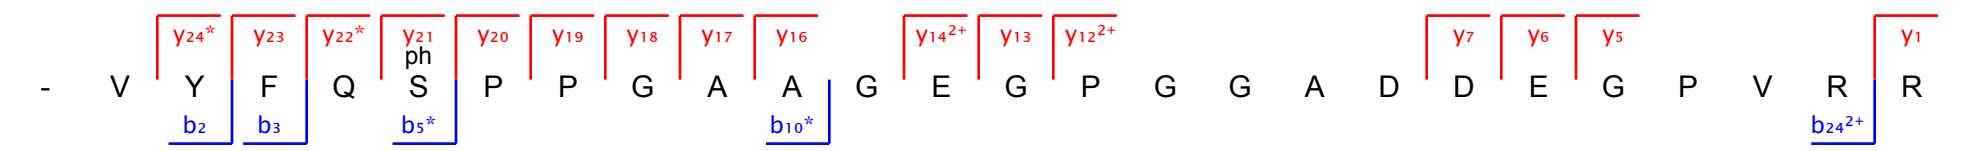

Raw file: 20150814\_A375SR\_Phospho\_BR2\_08  
 Scan: 16790 Method: FTMS; HCD Score: 91.08 m/z: 550.95 Gene names: ANLN

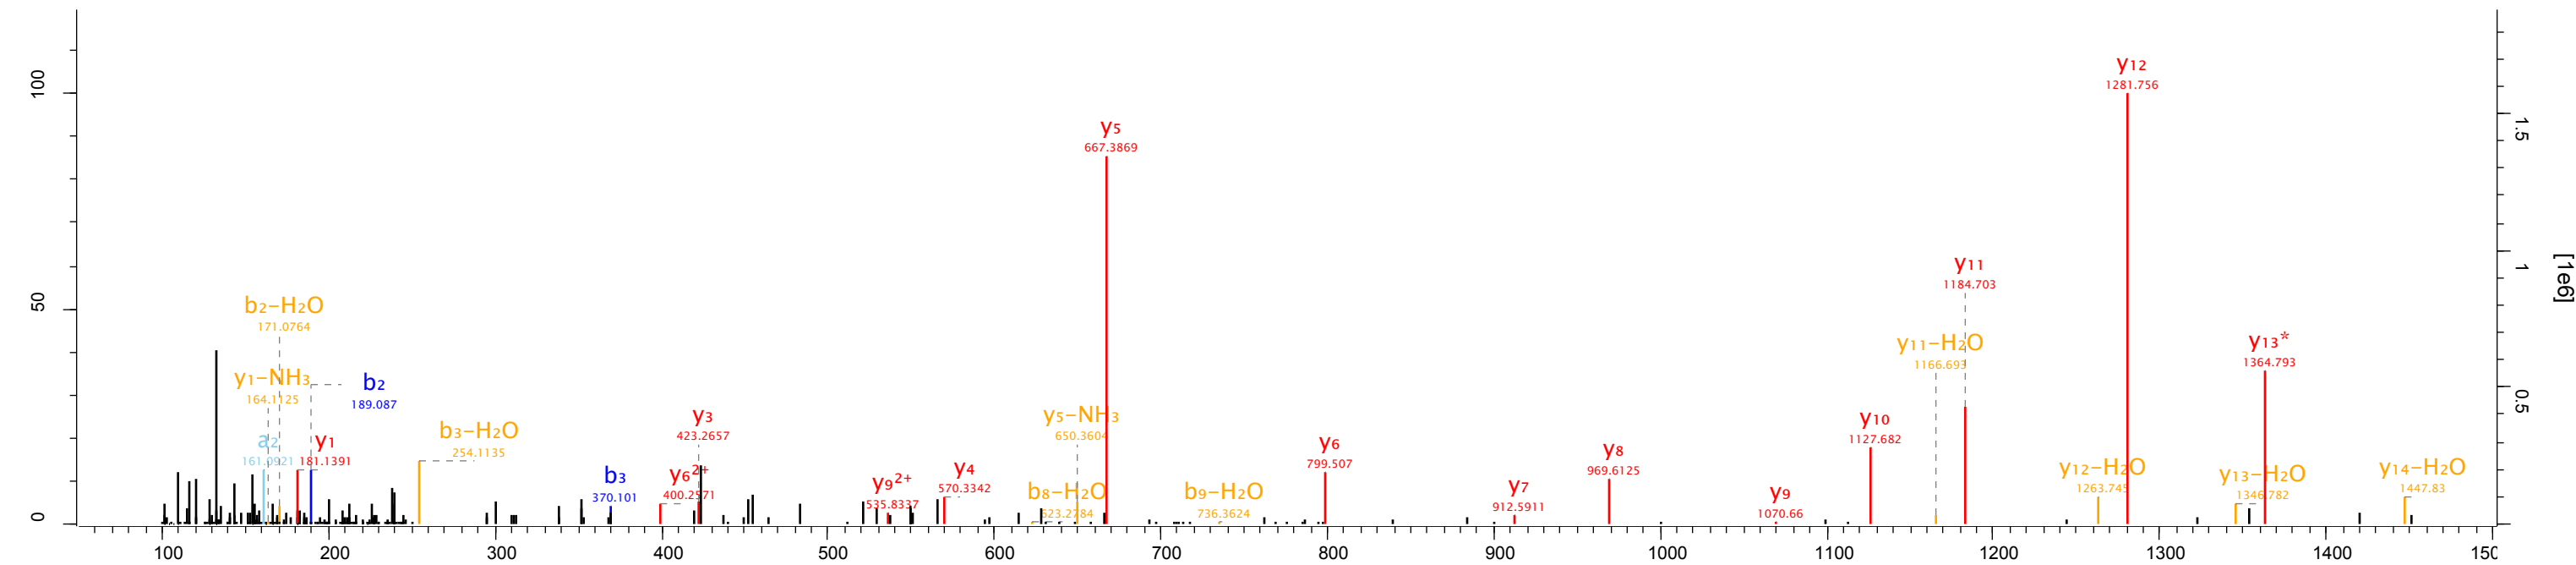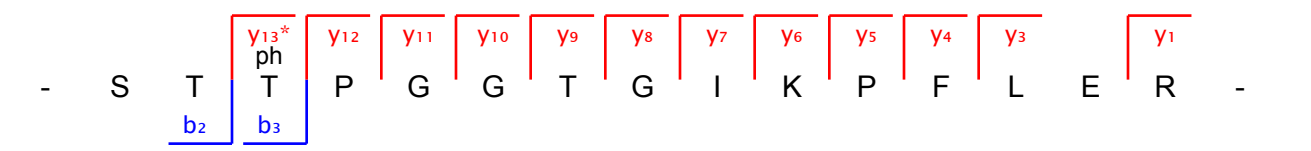

Raw file Scan Method Score m/z Gene names  
 20150814\_A375SR\_Phospho\_BR2\_08 17230 FTMS; HCD 111.09 528.62 PRKD1

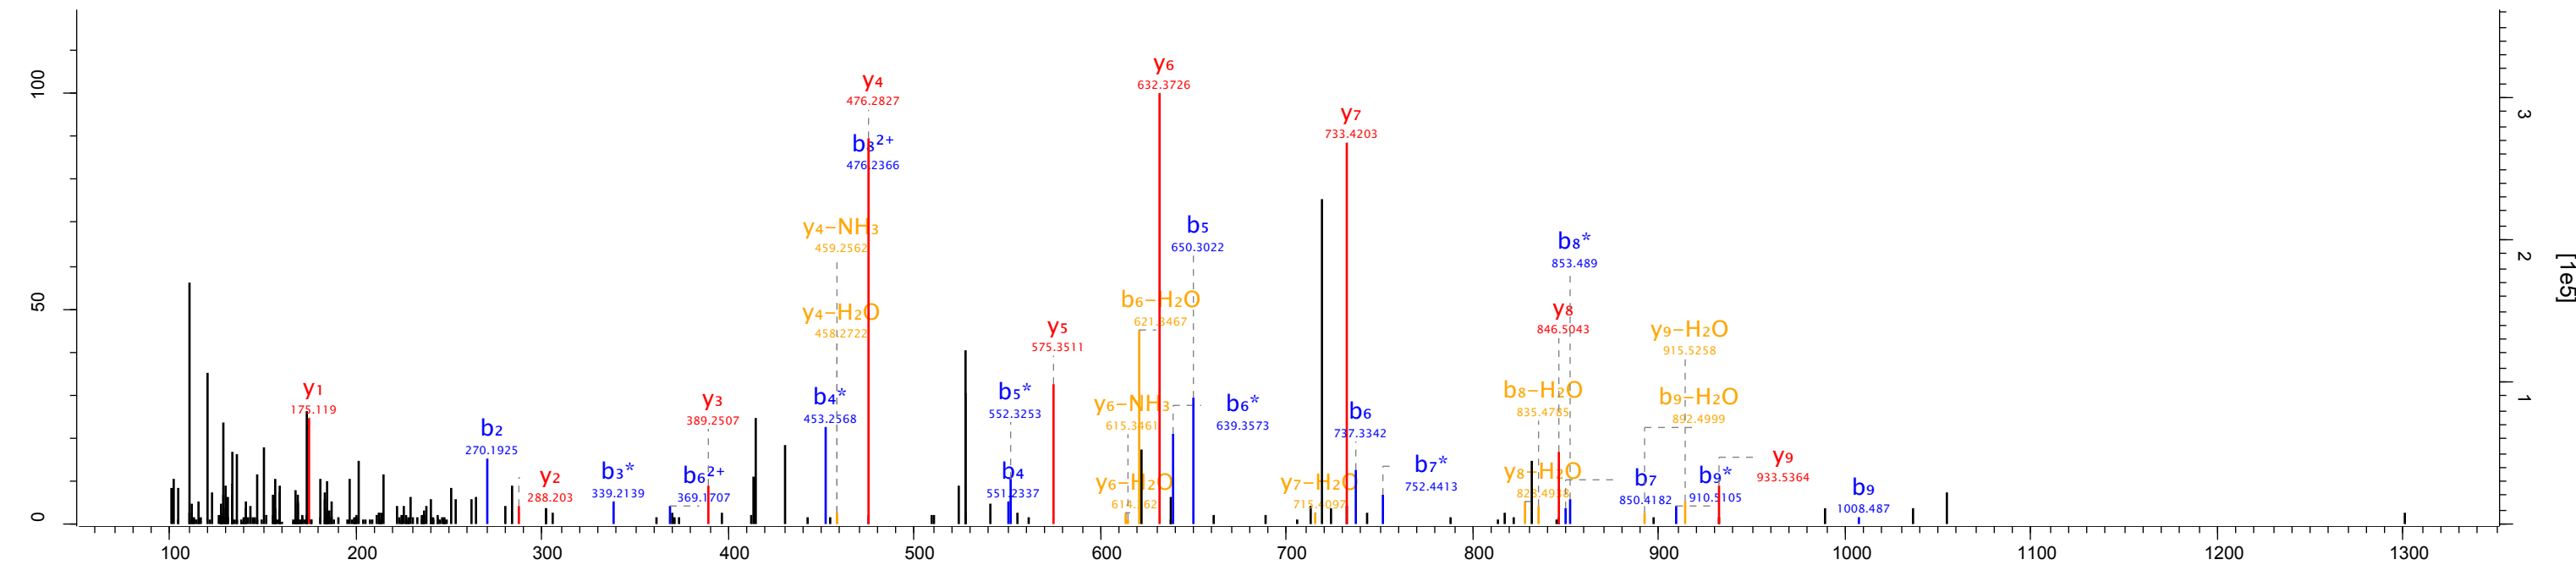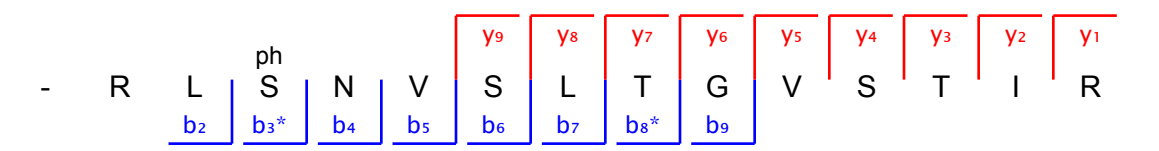

Raw file 20150814\_A375SR\_Phospho\_BR2\_08 Scan 17510 Method FTMS; HCD Score 112.88 m/z 652.32 Gene names DLG5

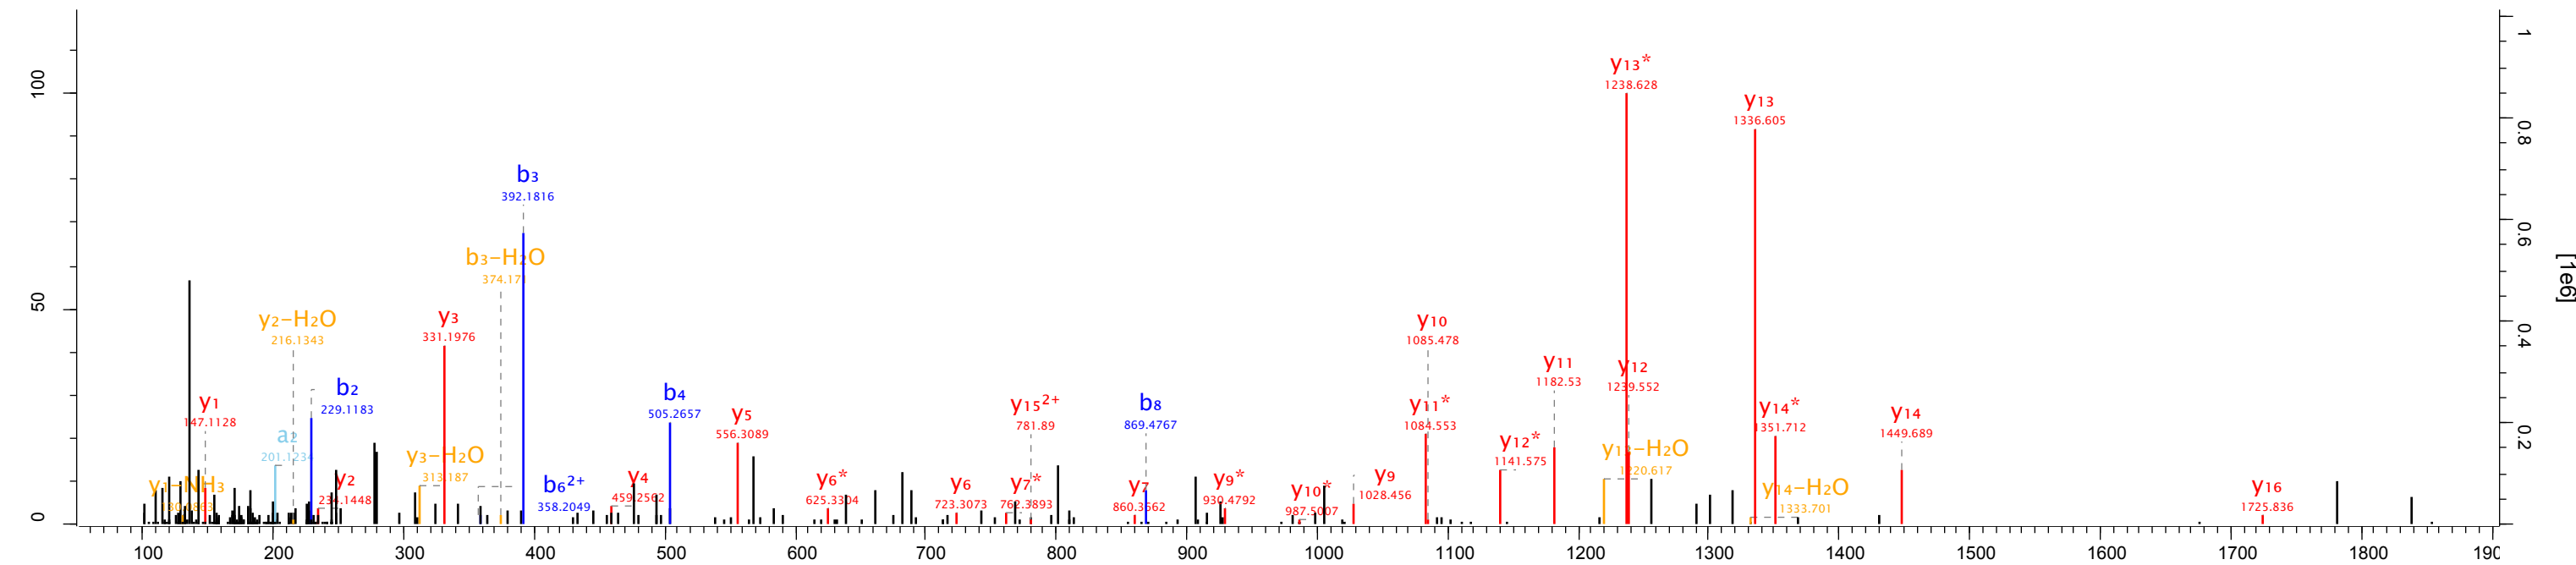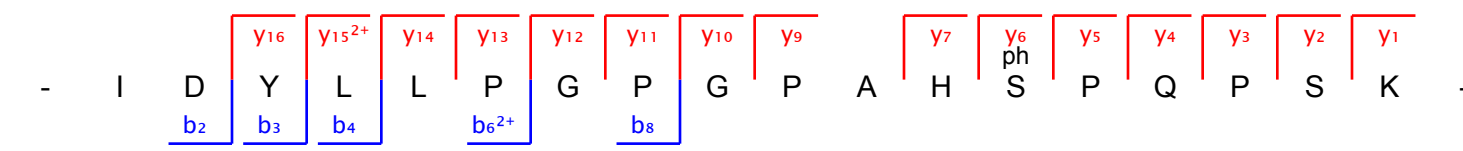

Raw file: 20150814\_A375SR\_Phospho\_BR2\_08  
 Scan: 19000 Method: FTMS; HCD Score: 153.06 m/z: 786.9 Gene names: PCBP2

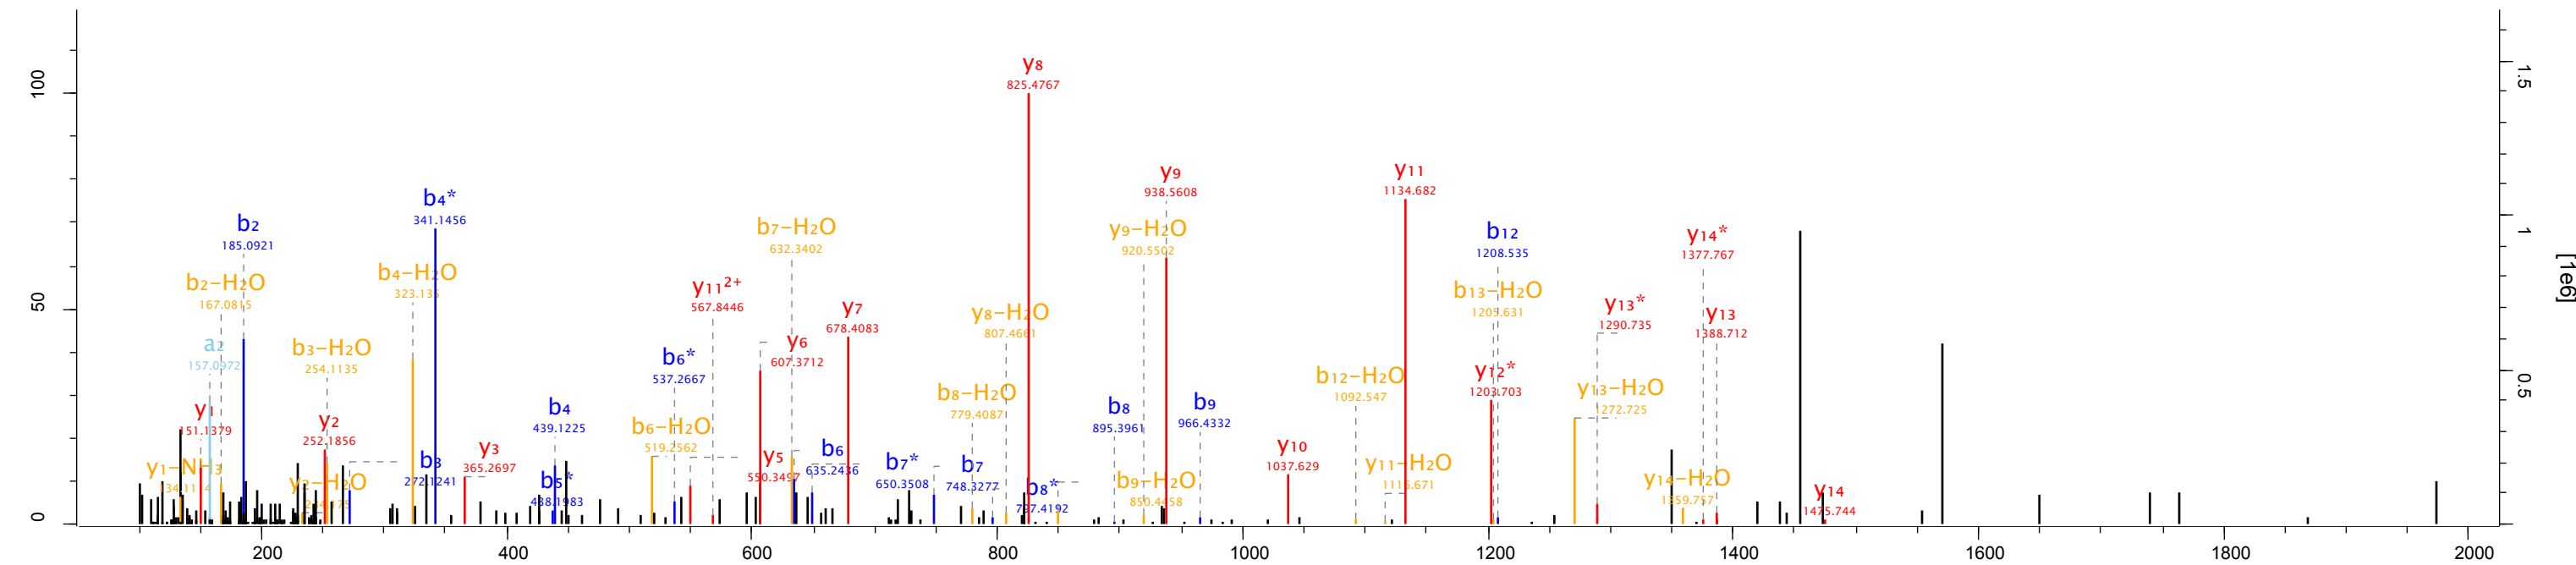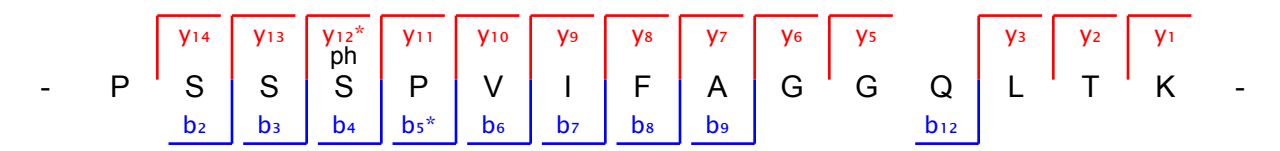

Raw file 20150814\_A375SR\_Phospho\_BR2\_08 Scan 19100 Method FTMS; HCD Score 49.12 m/z 757.03 Gene names ITPR3

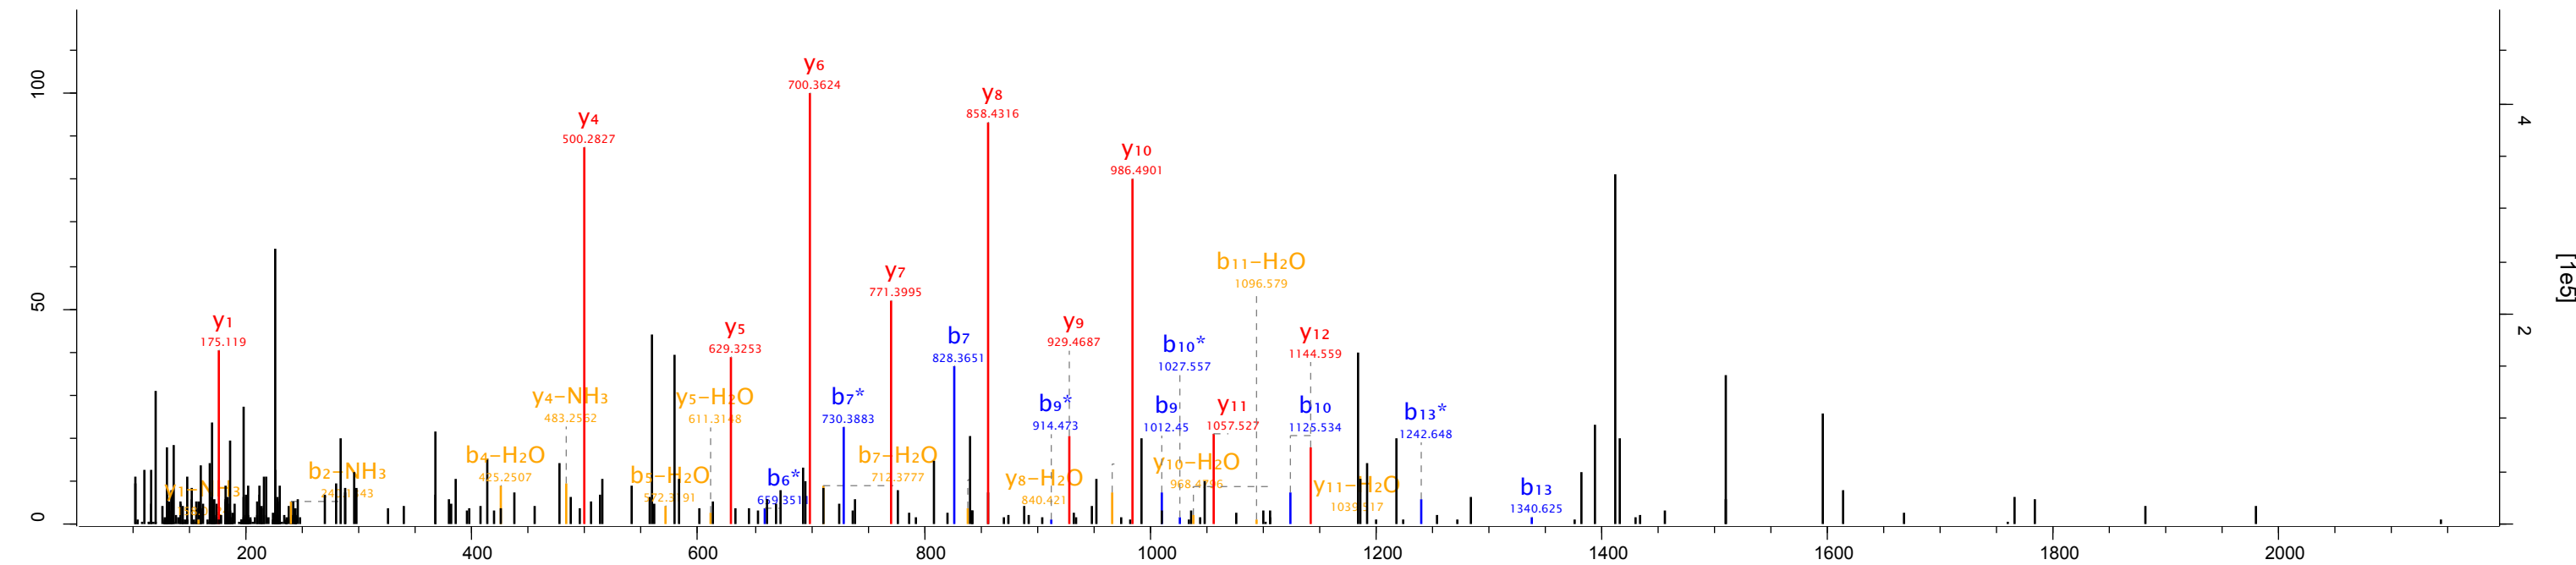

- K Q S V F S A P S L S A G A S A A E P L D R -

ph  
S A P S L S A G A S A A E P L D R

b6\* b7 b9 b10 b13

y12 y11 y10 y9 y8 y7 y6 y5 y4 y1



Raw file: 20150814\_A375SR\_Phospho\_BR2\_08  
 Scan: 19680 Method: FTMS; HCD Score: 111.81 m/z: 762.38 Gene names: SPHK2

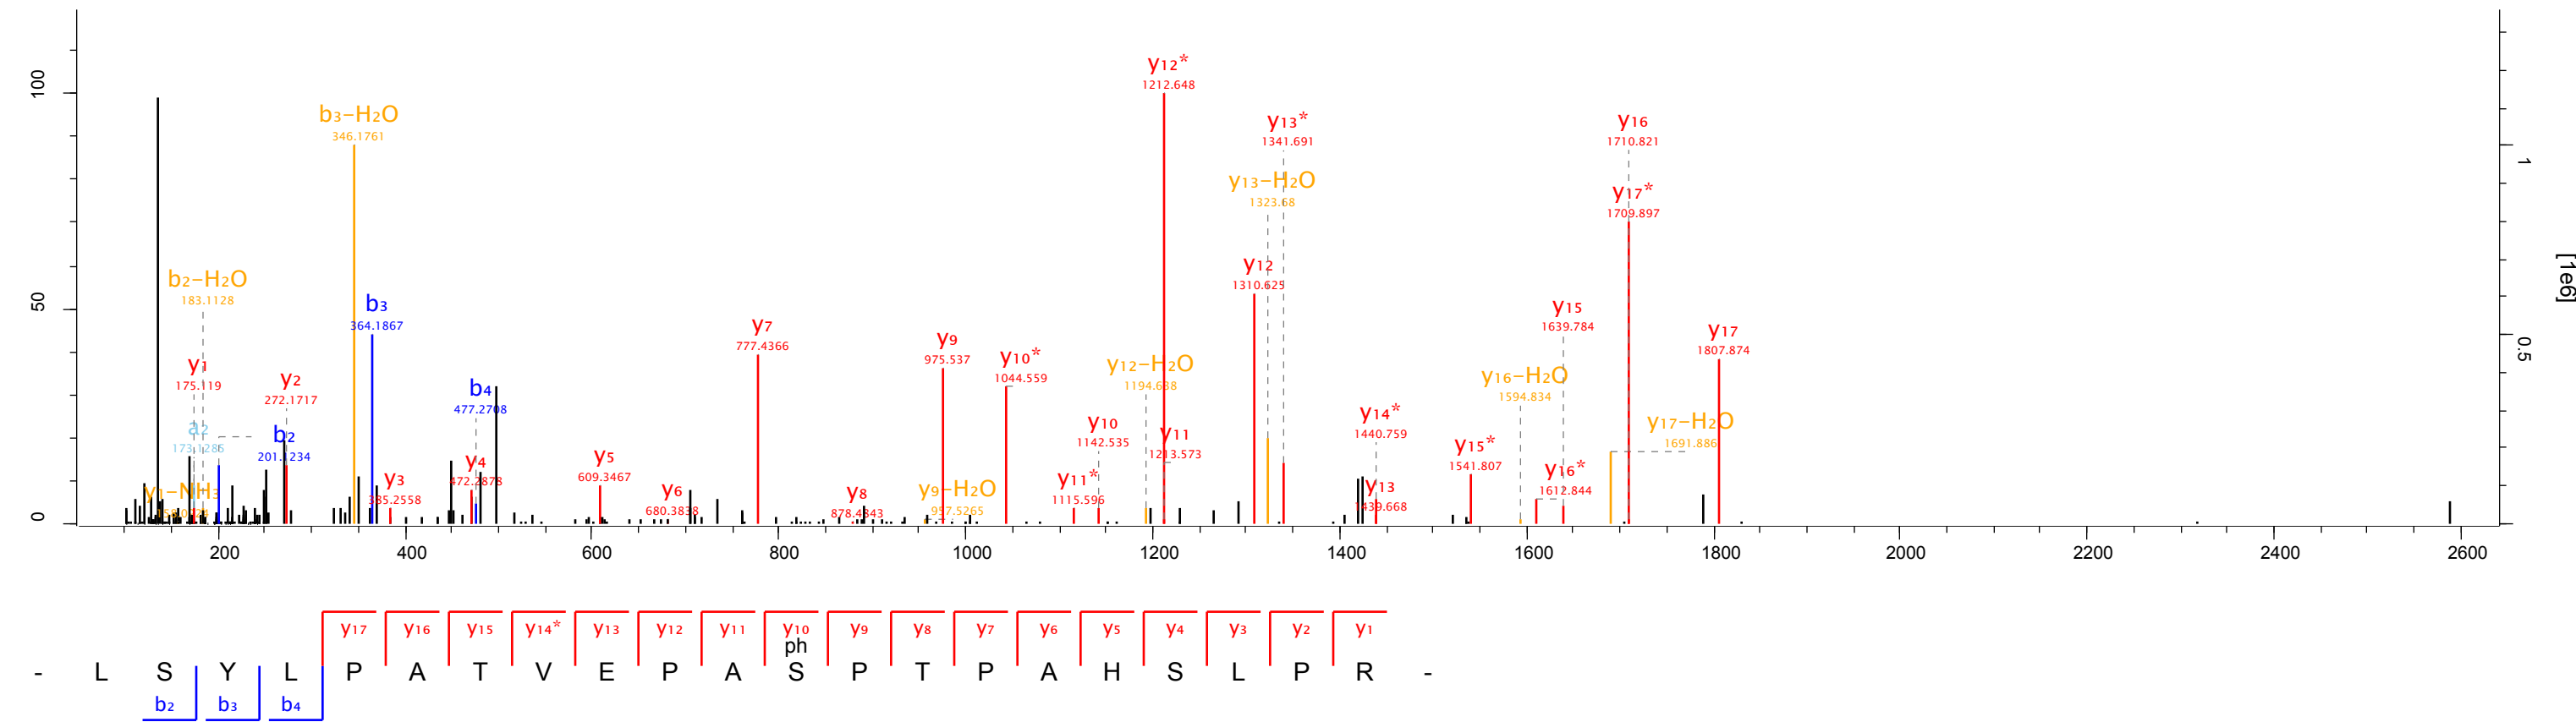

Raw file 20150814\_A375SR\_Phospho\_BR2\_08 Scan 20630 Method FTMS; HCD Score 187.76 m/z 942.1 Gene names MAP4

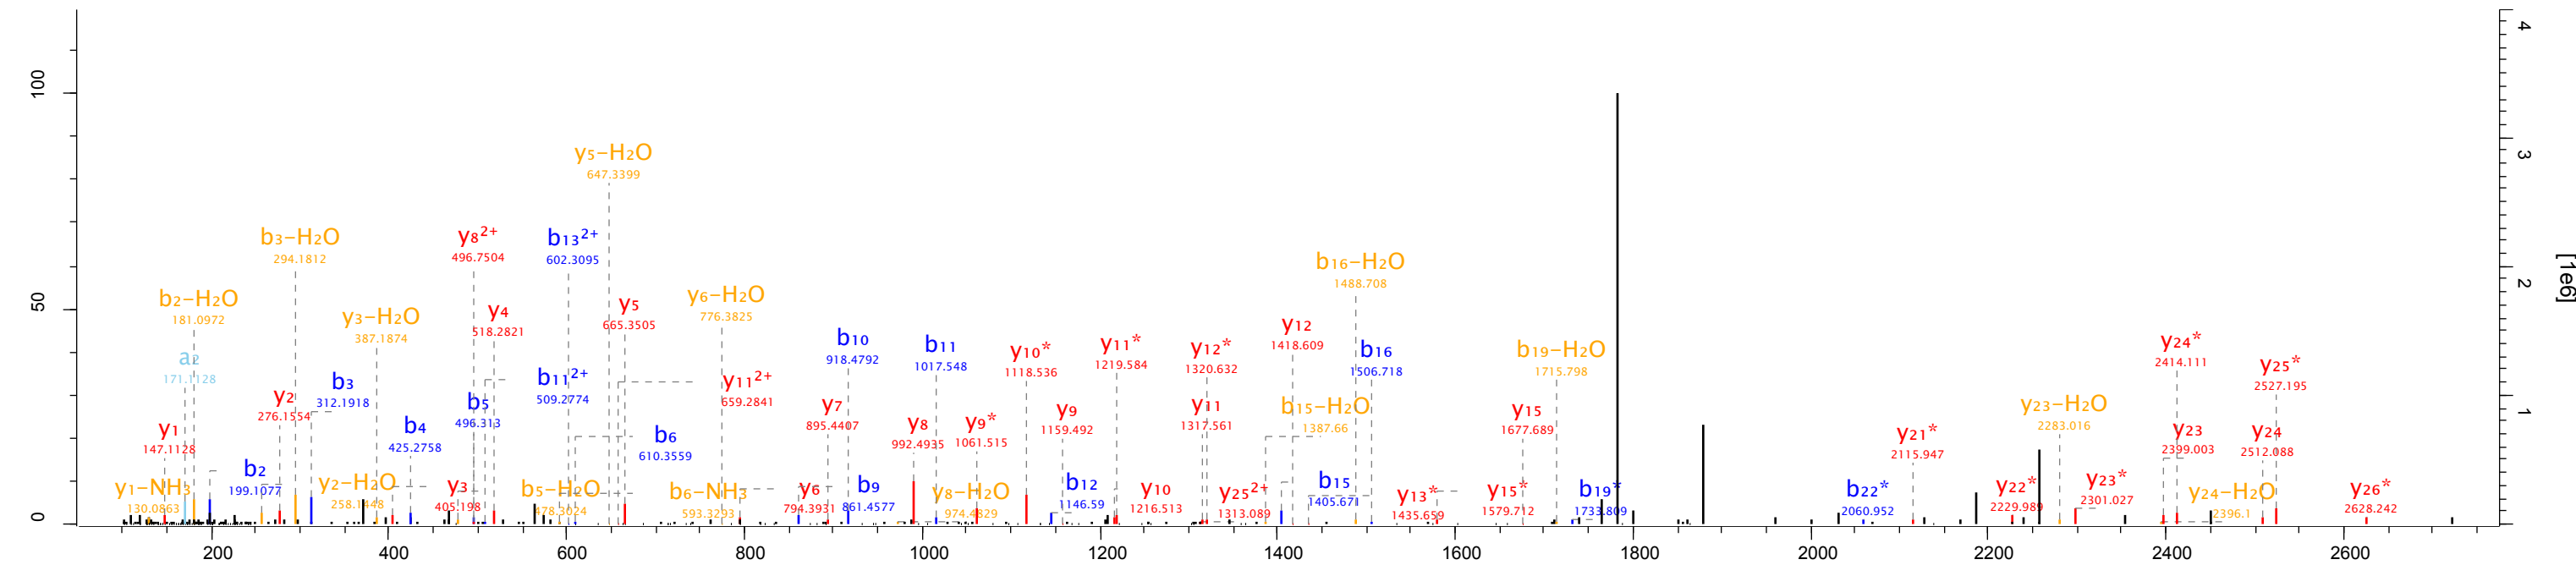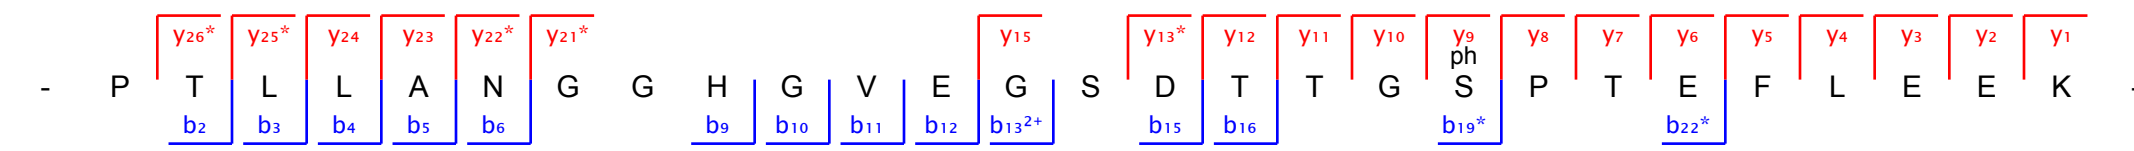

Raw file: 20150814\_A375SR\_Phospho\_BR2\_08  
 Scan: 21040 Method: FTMS; HCD Score: 76.94 m/z: 987.79 Gene names: ARHGEF18

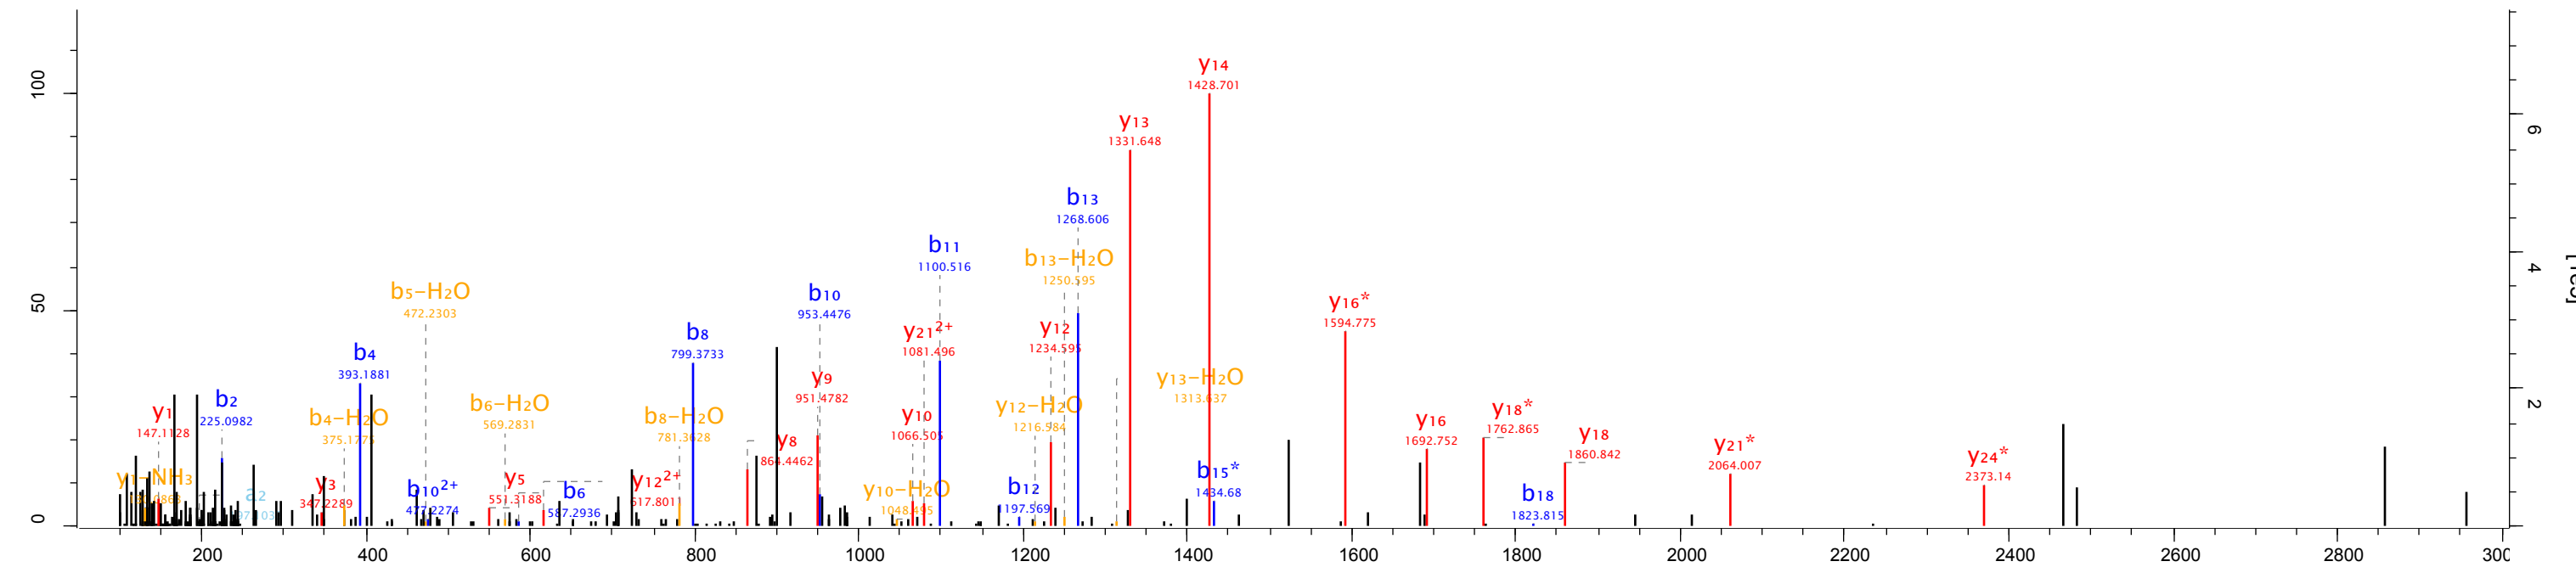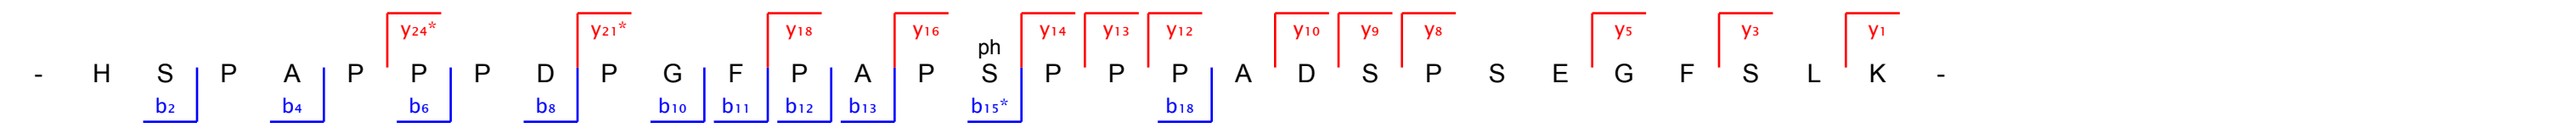

Raw file 20150814\_A375SR\_Phospho\_BR2\_08 Scan 23140 Method FTMS; HCD Score 88.57 m/z 641.98 Gene names RSL1D1

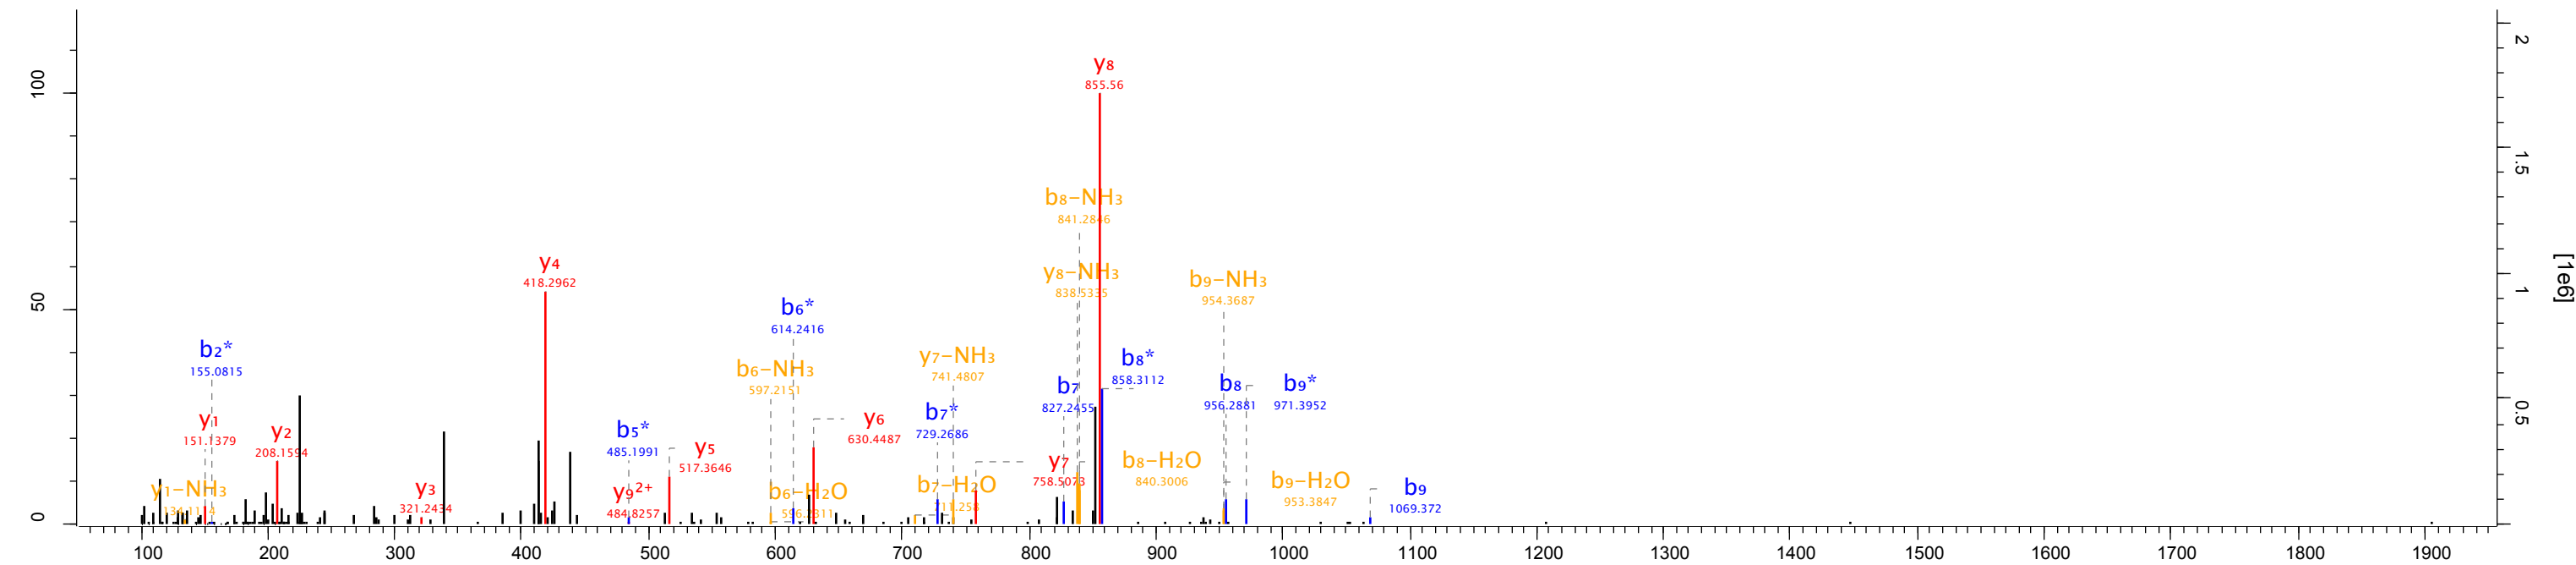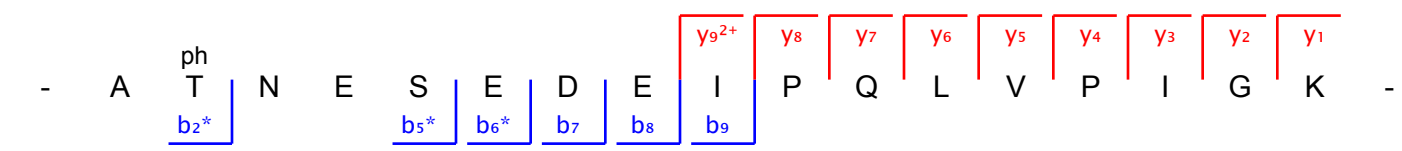

Raw file: 20150814\_A375SR\_Phospho\_BR2\_08  
 Scan: 27400 Method: FTMS; HCD Score: 58.6 m/z: 889.46 Gene names: SOBP

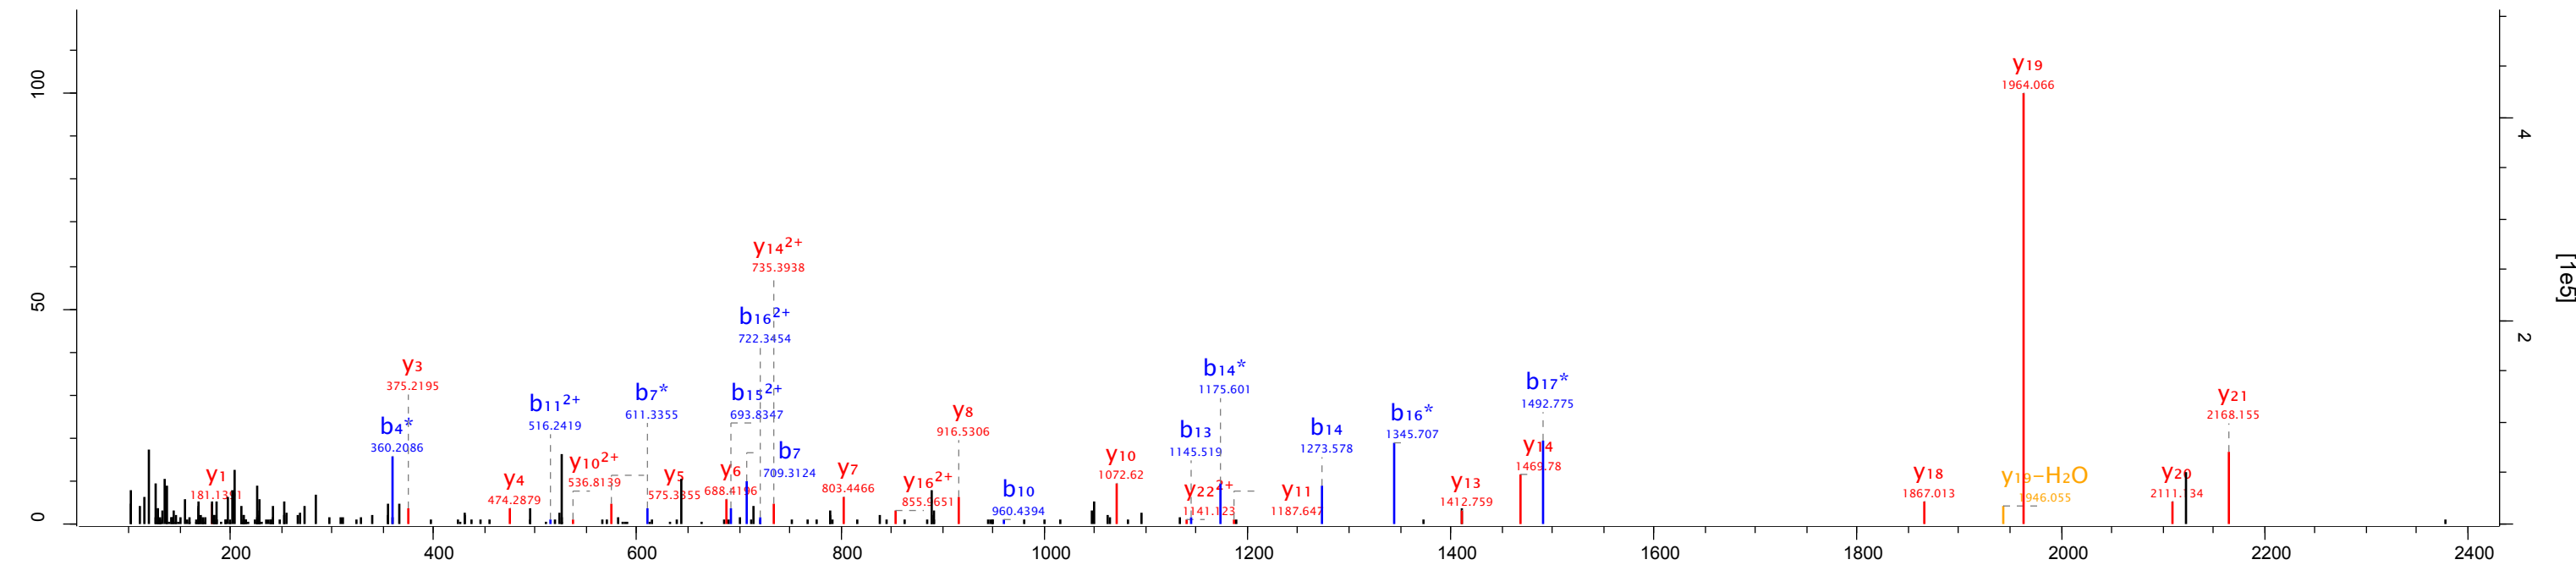

- R A G S P P G P P G A G G Q L G F P G V L Q G P Q D G V I D L T V G H R -  
 (Note: S, G, A, L, G, F, P, G, V, L, Q, G, P, D, G, V, I, D, L, T, V, G, H, R are highlighted with blue boxes in the original image, corresponding to b-ion fragmentation sites.)  
 (Note: L, G, F, P, G, V, L, Q, G, P, D, G, V, I, D, L, T, V, G, H, R are highlighted with red boxes in the original image, corresponding to y-ion fragmentation sites.)

Raw file Scan Method m/z Gene names  
 20150814\_A375SR\_Phospho\_BR2\_08 28040 FTMS; HCD 117.94 1111.21 SYNM

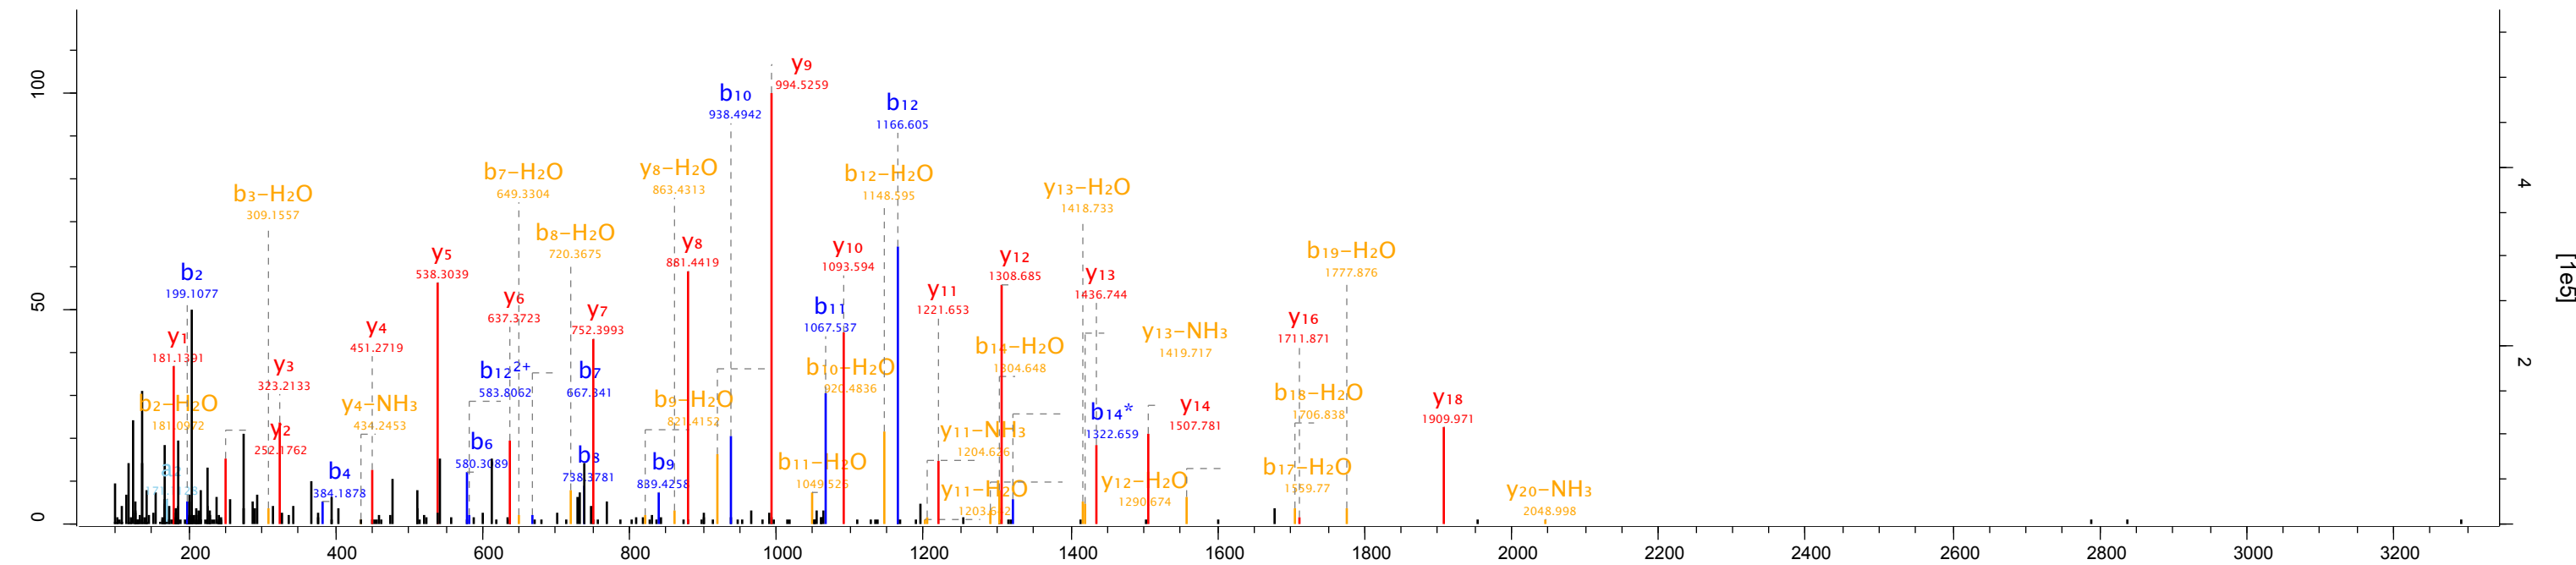

- T P Q G P V S A T V E V S P T G F A Q S Q V L E D V S Q A A R -

ph S

b<sub>2</sub> b<sub>4</sub> b<sub>6</sub> b<sub>7</sub> b<sub>8</sub> b<sub>9</sub> b<sub>10</sub> b<sub>11</sub> b<sub>12</sub> b<sub>14</sub>\*

y<sub>18</sub> y<sub>16</sub> y<sub>14</sub> y<sub>13</sub> y<sub>12</sub> y<sub>11</sub> y<sub>10</sub> y<sub>9</sub> y<sub>8</sub> y<sub>7</sub> y<sub>6</sub> y<sub>5</sub> y<sub>4</sub> y<sub>3</sub> y<sub>2</sub> y<sub>1</sub>

Raw file: 20150814\_A375SR\_Phospho\_BR2\_08  
 Scan: 4160 Method: FTMS; HCD Score: 132.25 m/z: 468.23 Gene names: UBTF

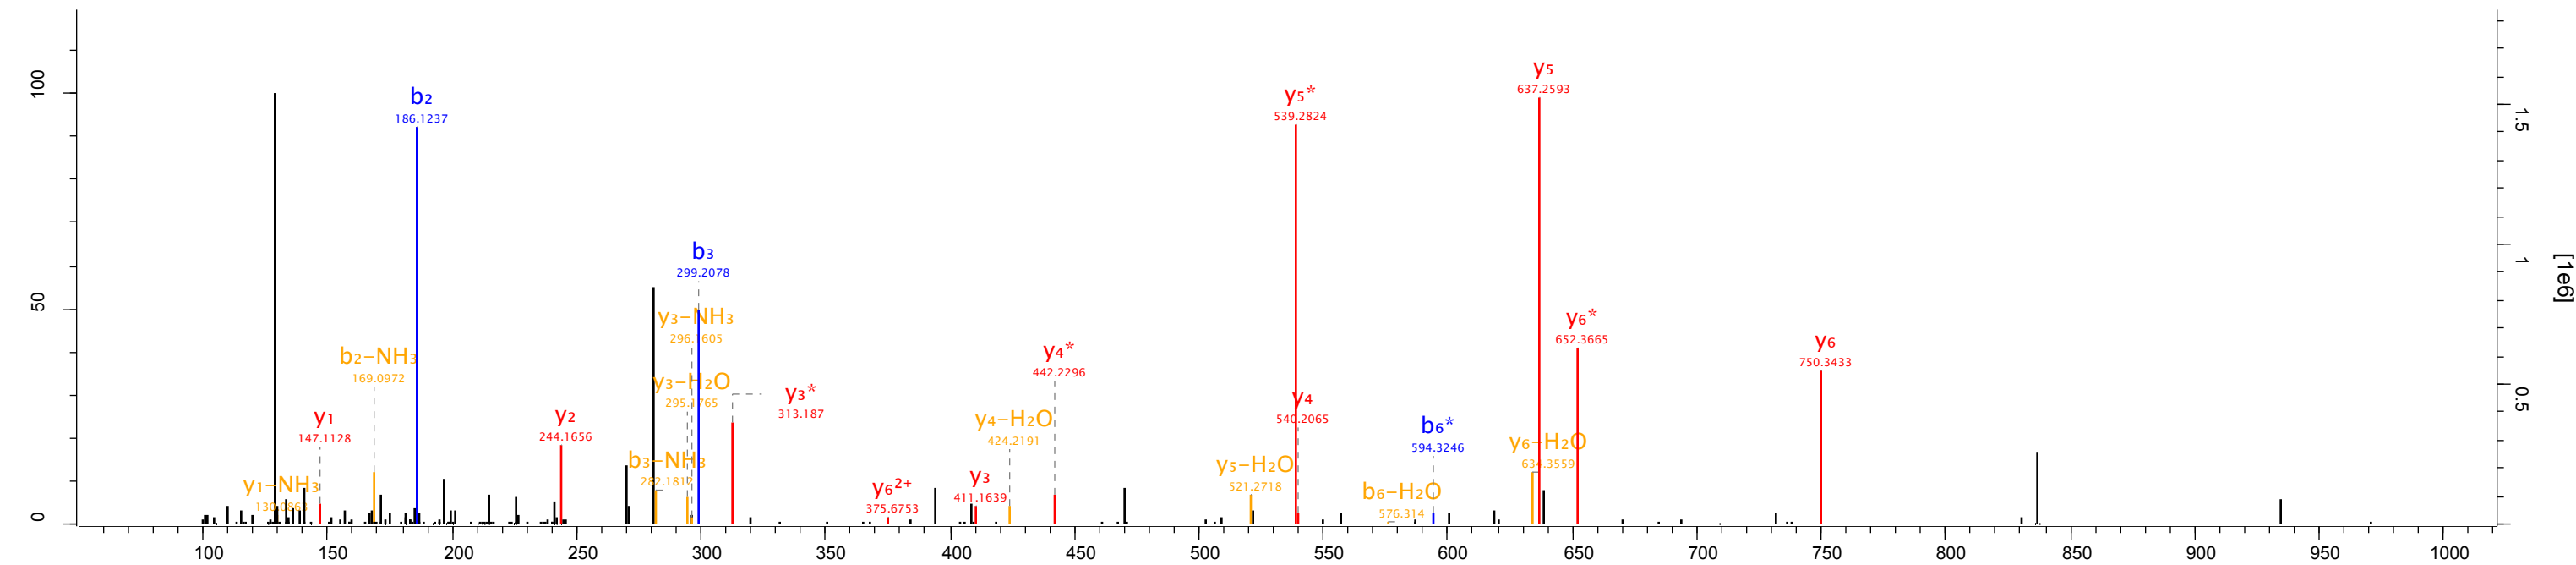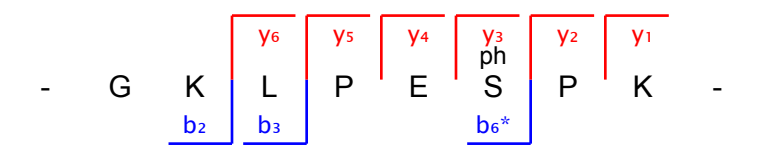

Raw file: 20150814\_A375SR\_Phospho\_BR2\_08  
 Scan: 4840 Method: FTMS; HCD Score: 170.22 m/z: 662.33 Gene names: COIL

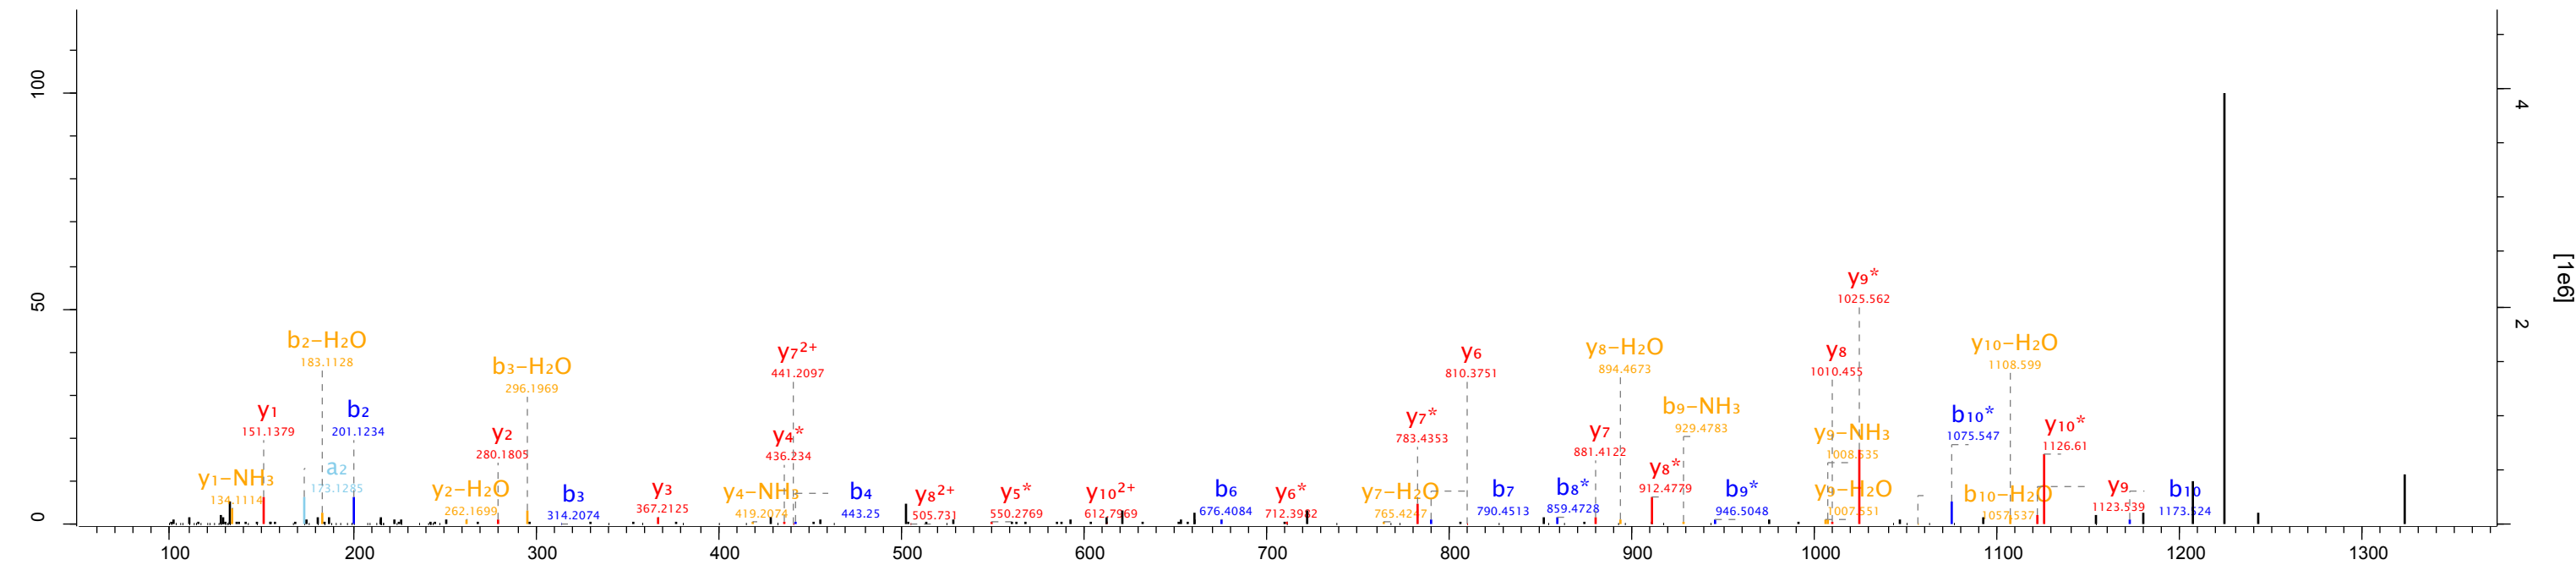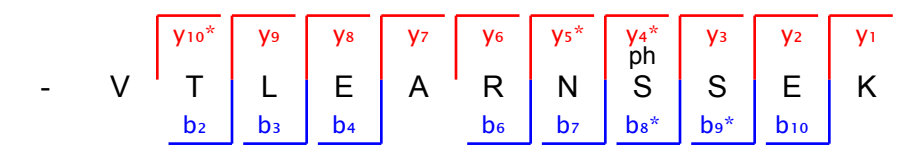



Raw file: 20150814\_A375SR\_Phospho\_BR2\_08  
 Scan: 5120 Method: FTMS; HCD Score: 131.61 m/z: 725.35 Gene names: CHD1

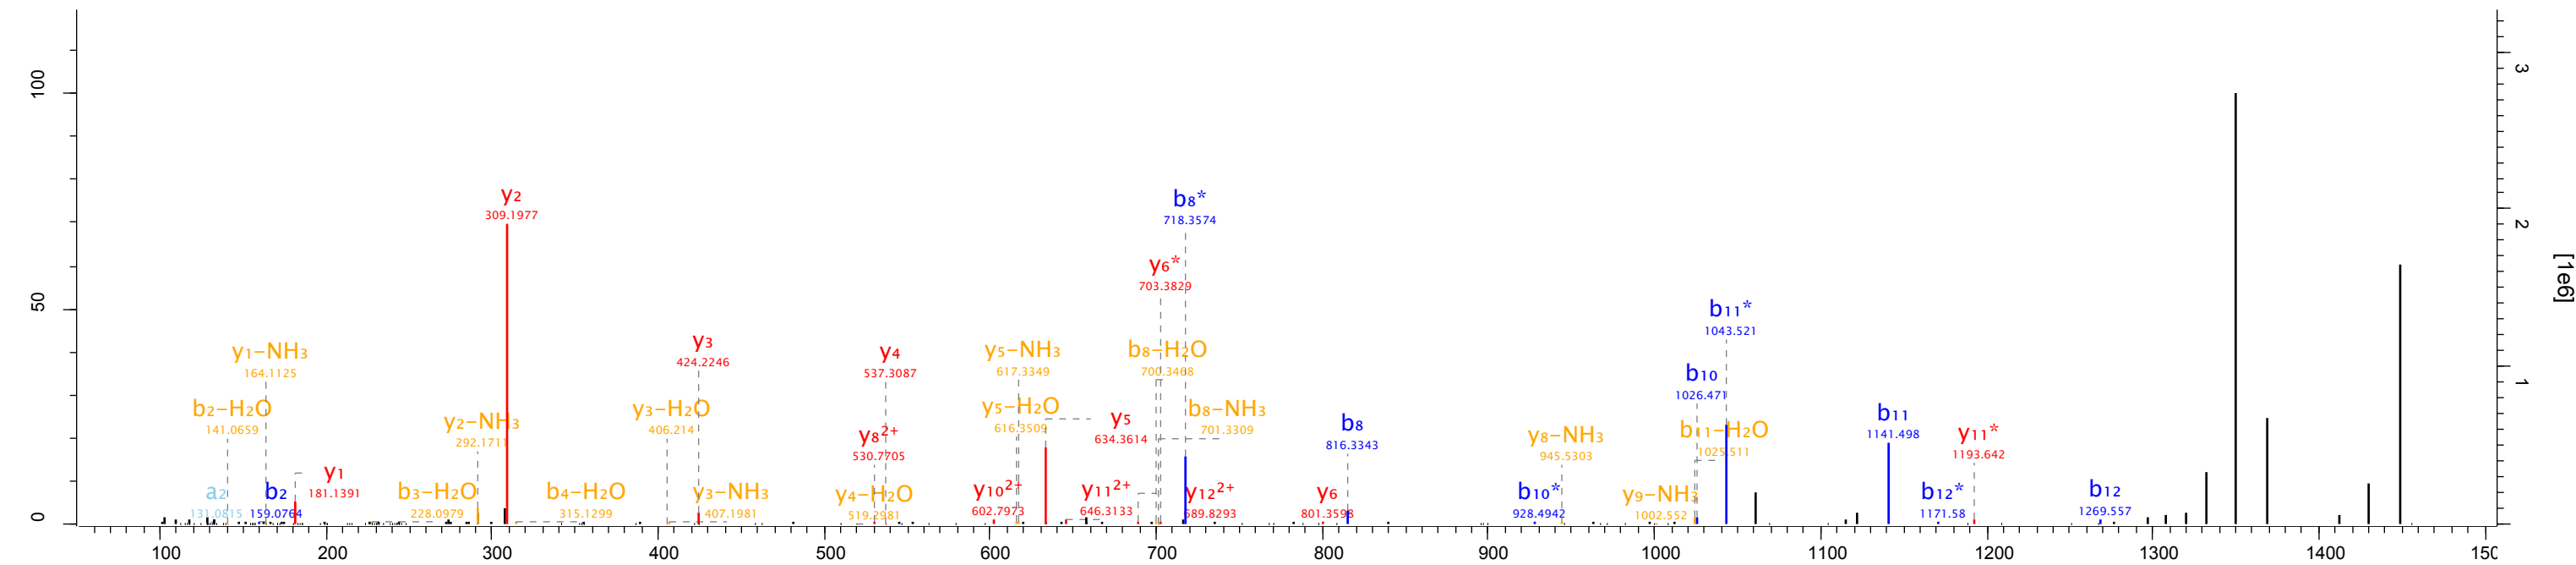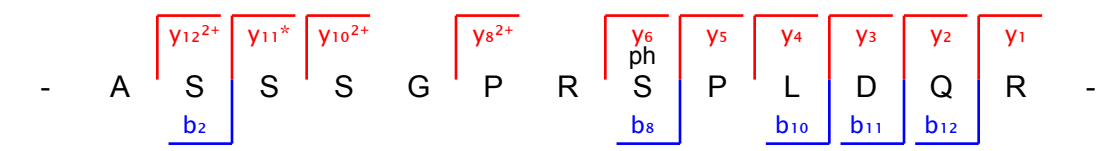

Raw file 20150814\_A375SR\_Phospho\_BR2\_08 Scan 5830 Method FTMS; HCD Score 54.49 m/z 405.17 Gene names PHF3

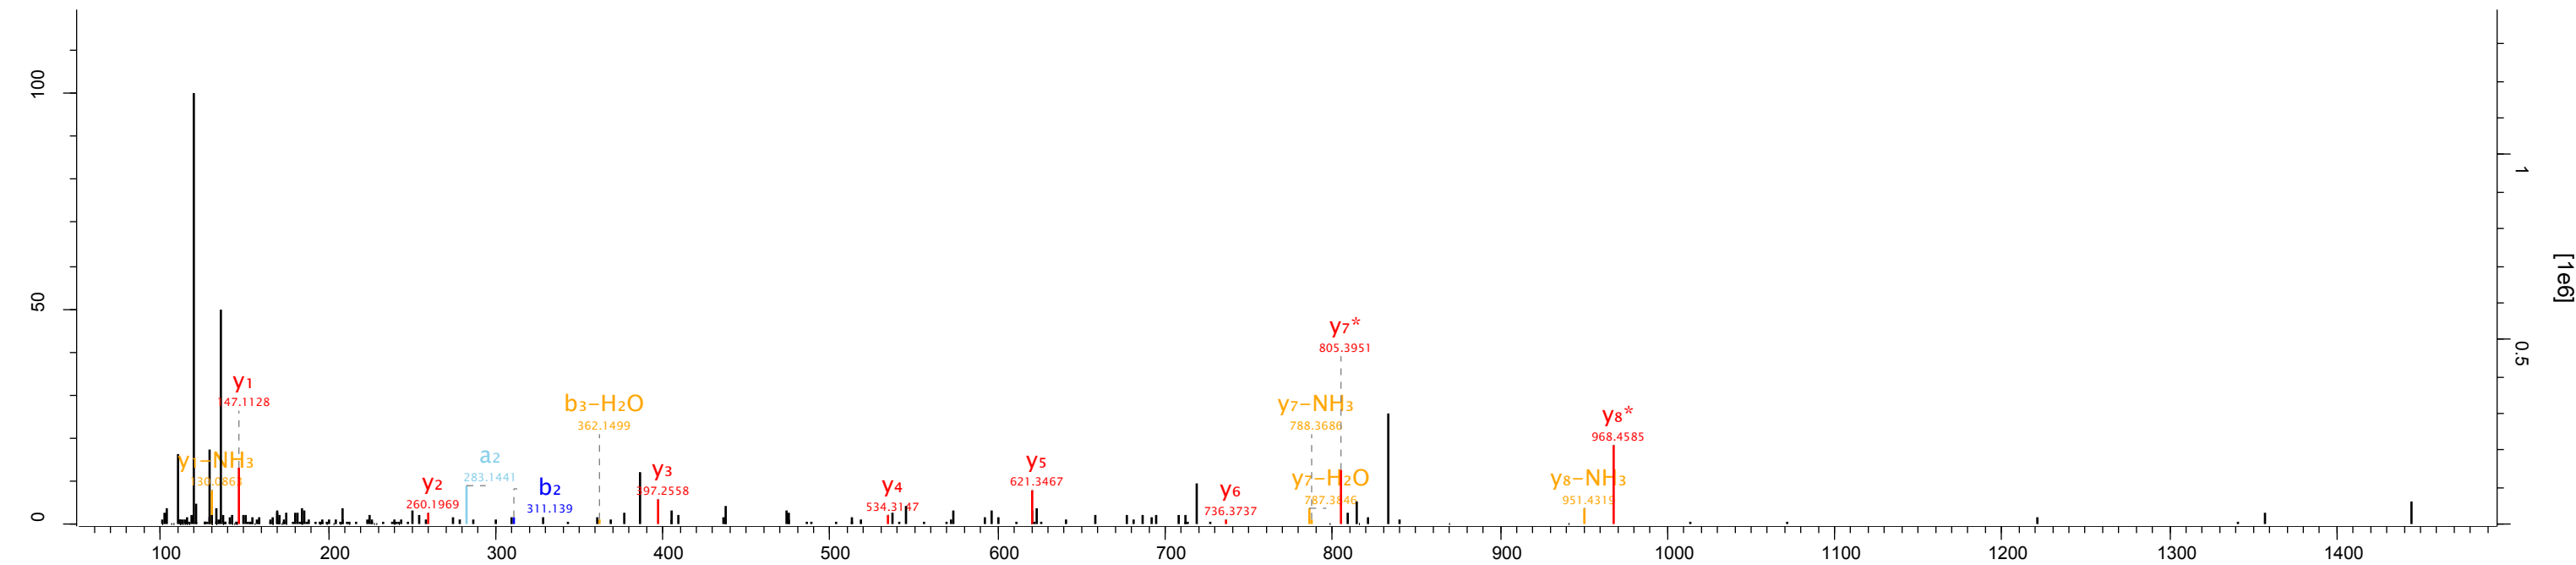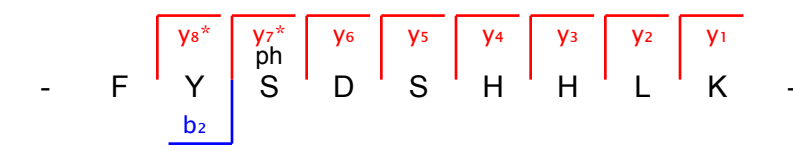

Raw file: 20150814\_A375SR\_Phospho\_BR2\_08  
 Scan: 6830 Method: FTMS; HCD Score: 83.07 m/z: 779.33 Gene names: C9orf40

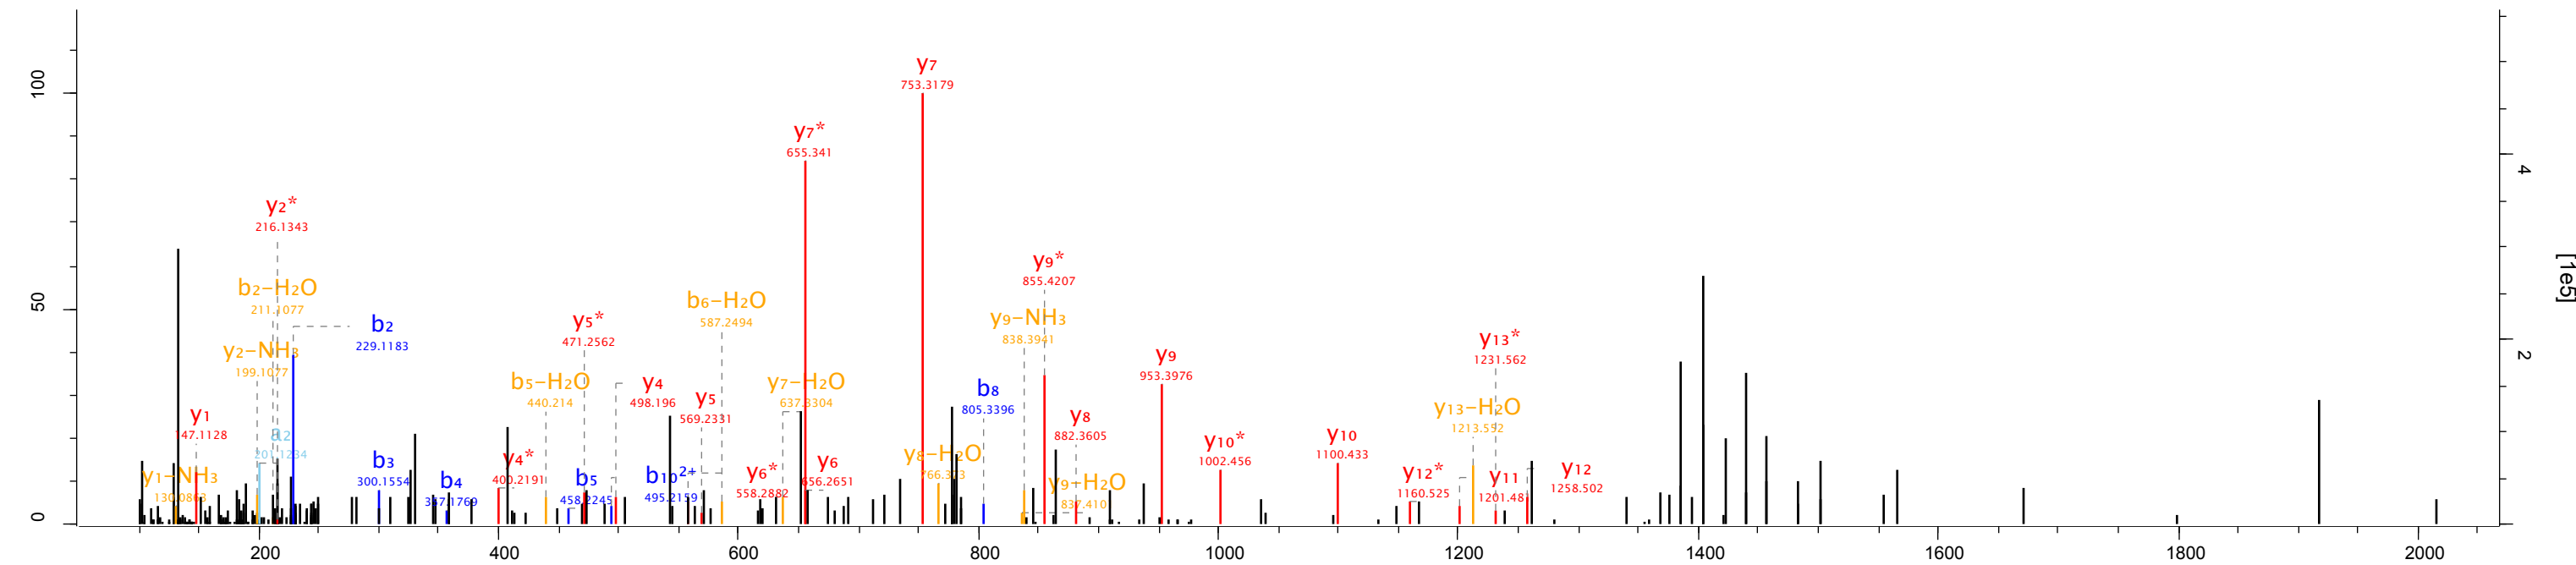

Protein sequence: - I D A G T M A E P S A S P S K -

Fragmentation mapping (b-ions in blue, y-ions in red):

- b<sub>2</sub> (D)
- b<sub>3</sub> (A)
- b<sub>4</sub> (G)
- b<sub>5</sub> (T)
- b<sub>8</sub> (E)
- b<sub>10<sup>2+</sup></sub> (S)
- y<sub>1</sub> (K)
- y<sub>2\*</sub> (S)
- y<sub>4</sub> (S)
- y<sub>5</sub> (A)
- y<sub>6</sub> (S)
- y<sub>7</sub> (P)
- y<sub>8</sub> (E)
- y<sub>9</sub> (A)
- y<sub>10</sub> (M)
- y<sub>11</sub> (T)
- y<sub>12</sub> (G)
- y<sub>13\*</sub> (A)

Raw file: 20150814\_A375SR\_Phospho\_BR2\_08  
 Scan: 7490 Method: FTMS; HCD Score: 144.29 m/z: 732.3 Gene names: PAWR

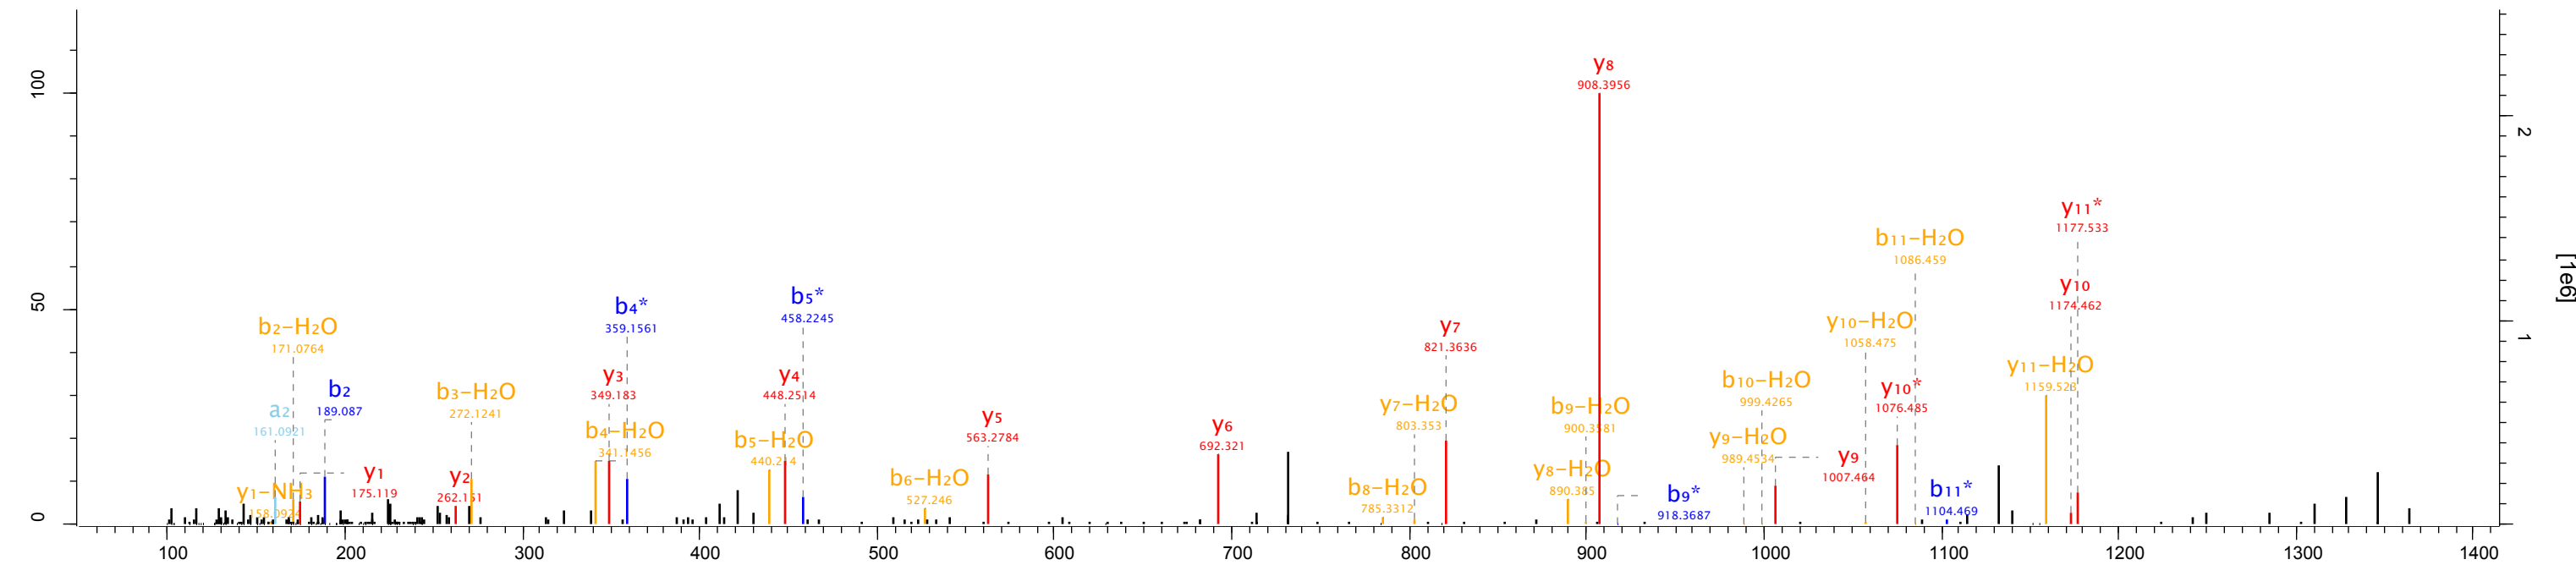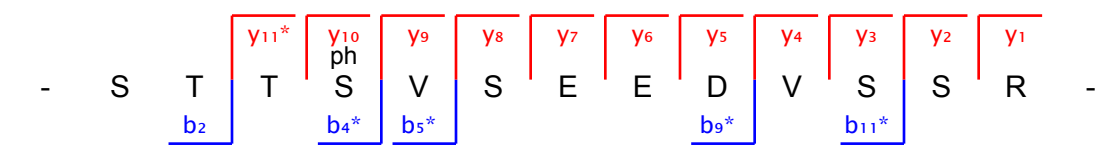

Raw file: 20150814\_A375SR\_Phospho\_BR2\_08  
 Scan: 8310 Method: FTMS; HCD Score: 83.86 m/z: 613.27 Gene names: USP1

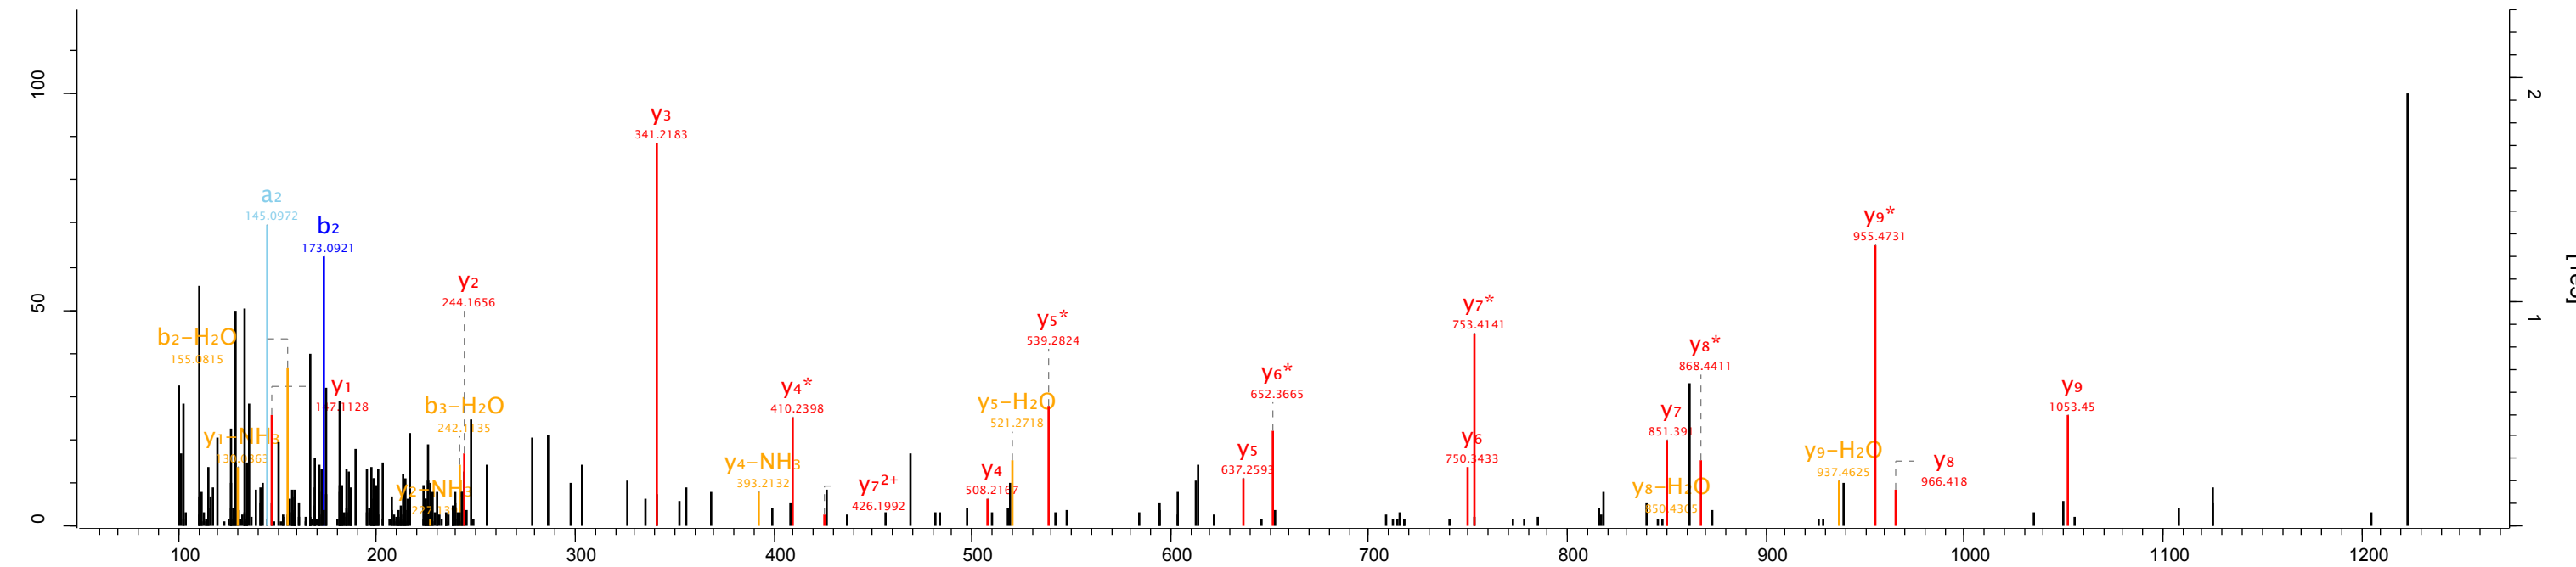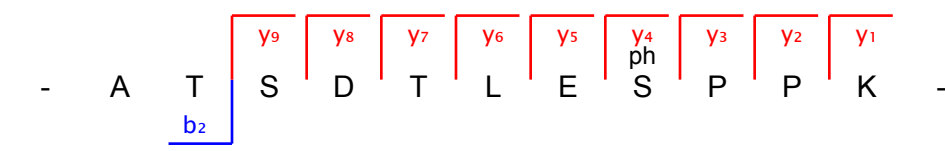

20150814\_A375SR\_Phospho\_BR2\_08

9320 FTMS; HCD 177.44 531.27 DDB2

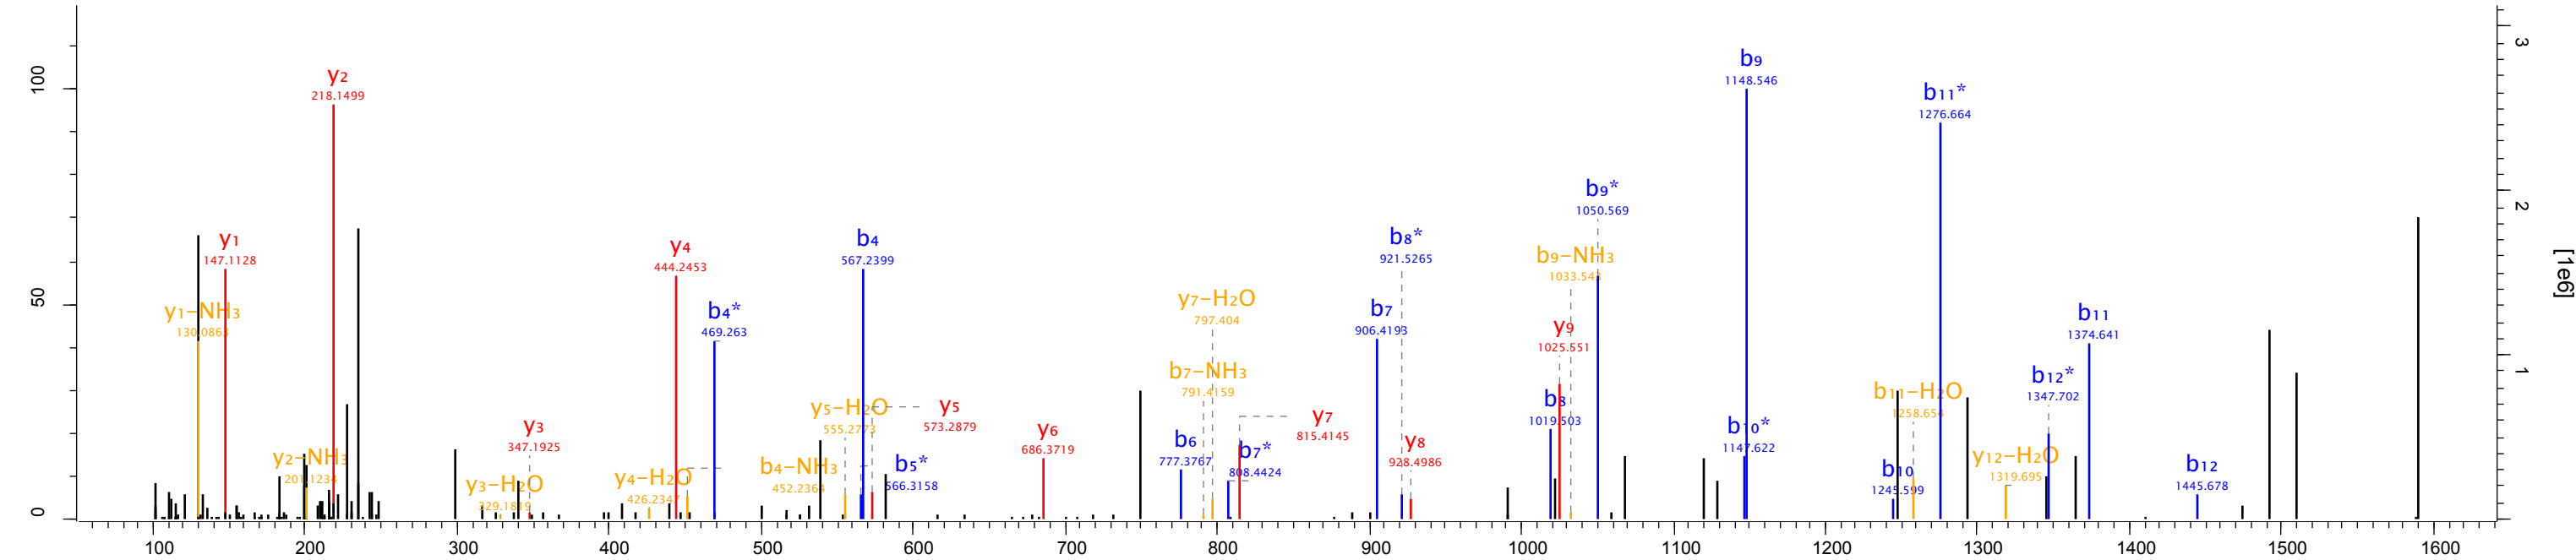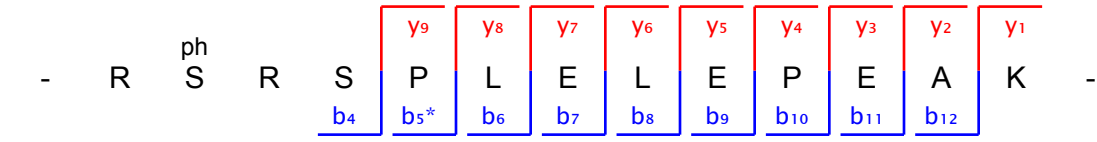

Raw file: 20150814\_A375SR\_Phospho\_BR2\_08  
 Scan: 9510 Method: FTMS; HCD Score: 199.15 m/z: 862.91 Gene names: FNBP4

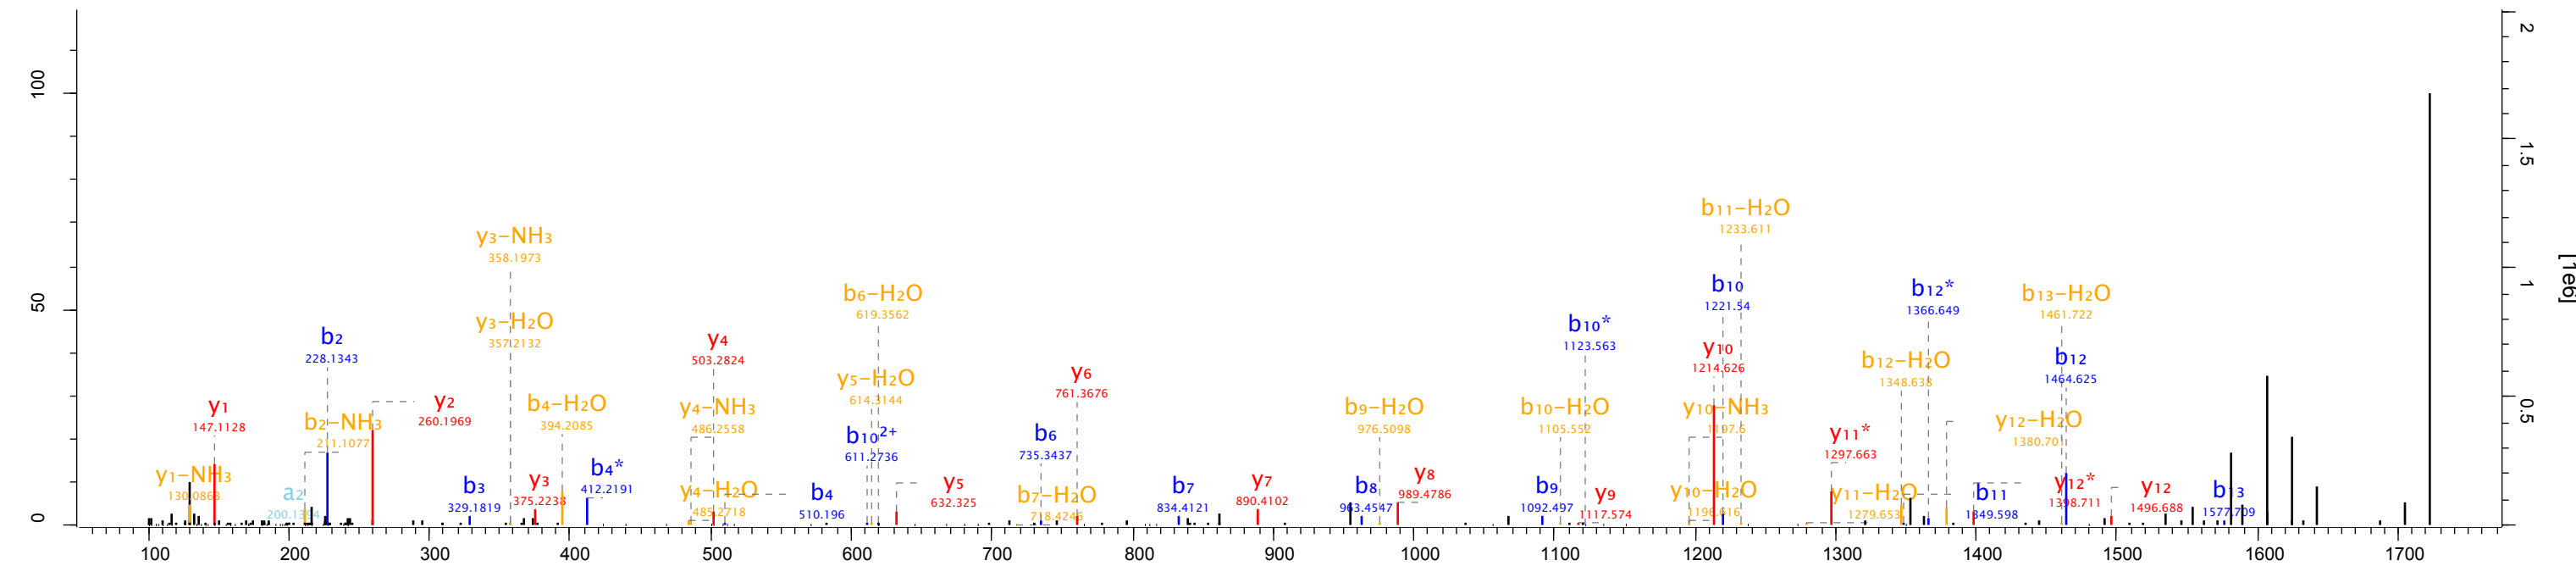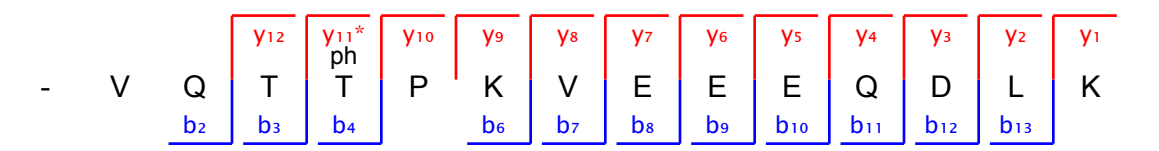

Raw file 20150814\_A375SR\_Phospho\_BR2\_08 Scan 9800 Method FTMS; HCD Score 125.73 m/z 761.88 Gene names SGPP1

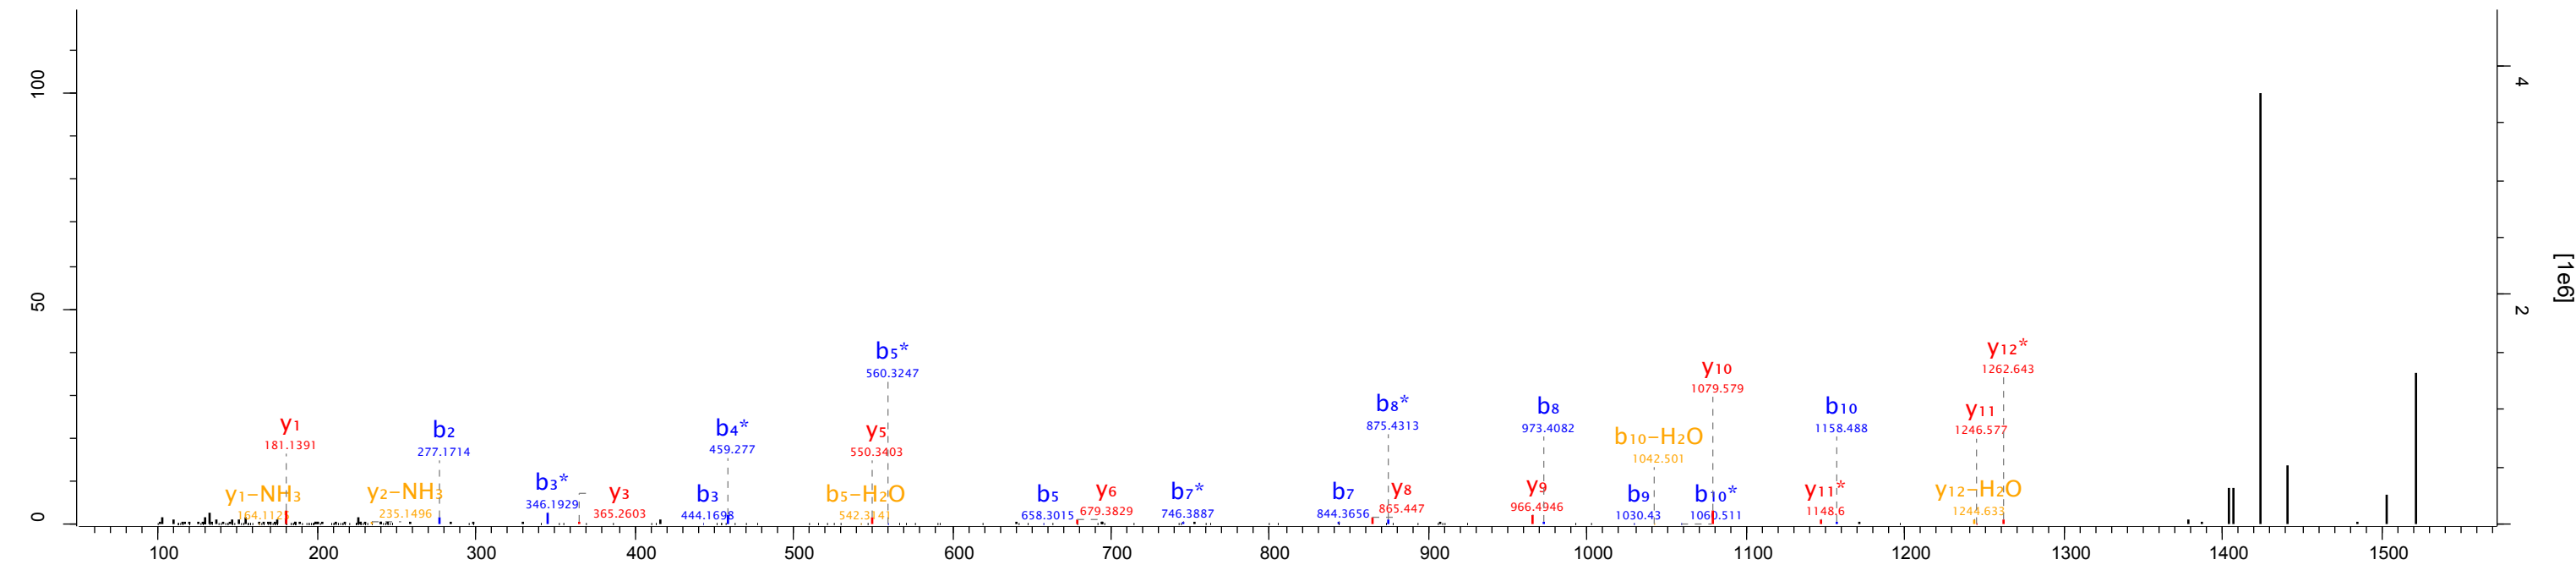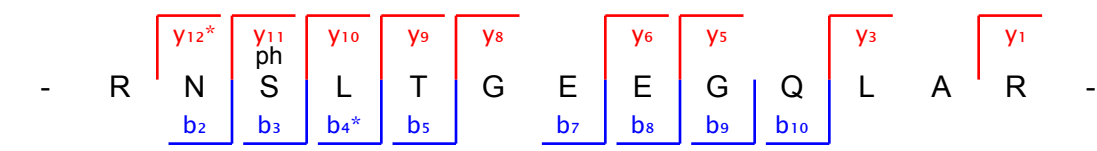



Raw file: 20150814\_A375SR\_Phospho\_BR2\_09  
 Scan: 11390  
 Method: FTMS; HCD  
 Score: 225.26  
 m/z: 828.03  
 Gene names: C1orf52

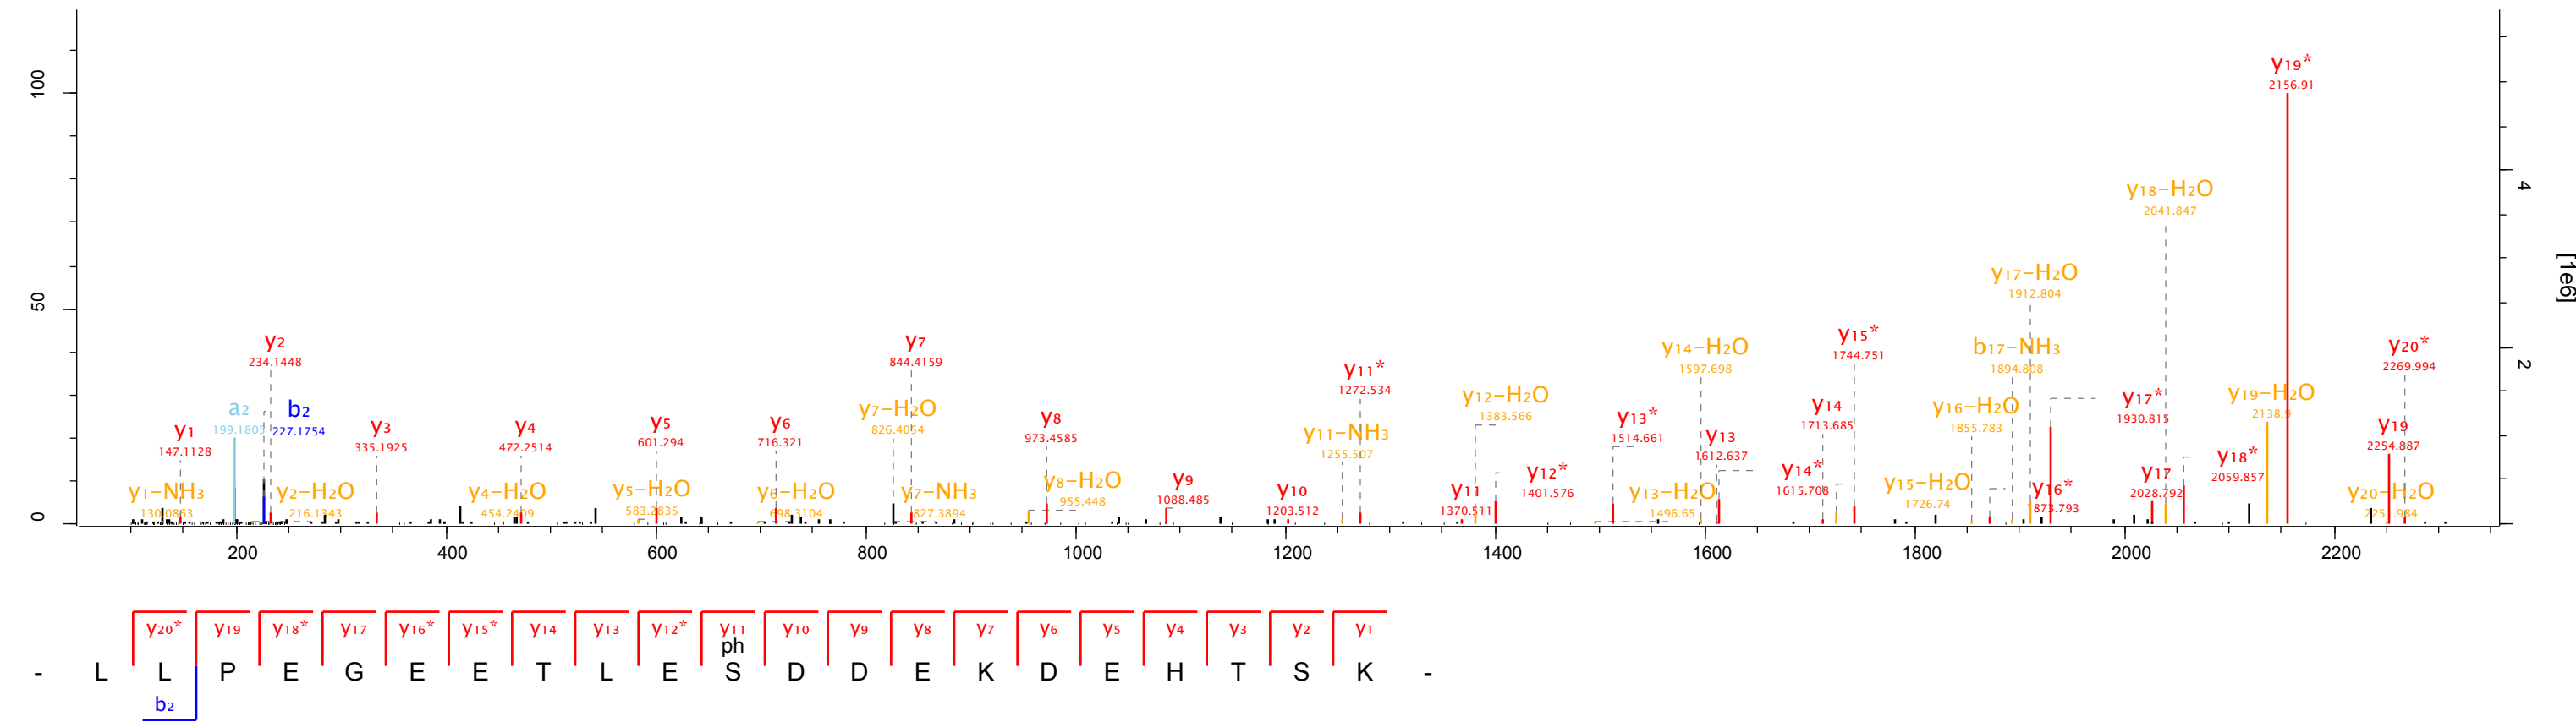

Raw file 20150814\_A375SR\_Phospho\_BR2\_09 Scan 11730 Method FTMS; HCD Score 110.74 m/z 590.3 Gene names CLIP2

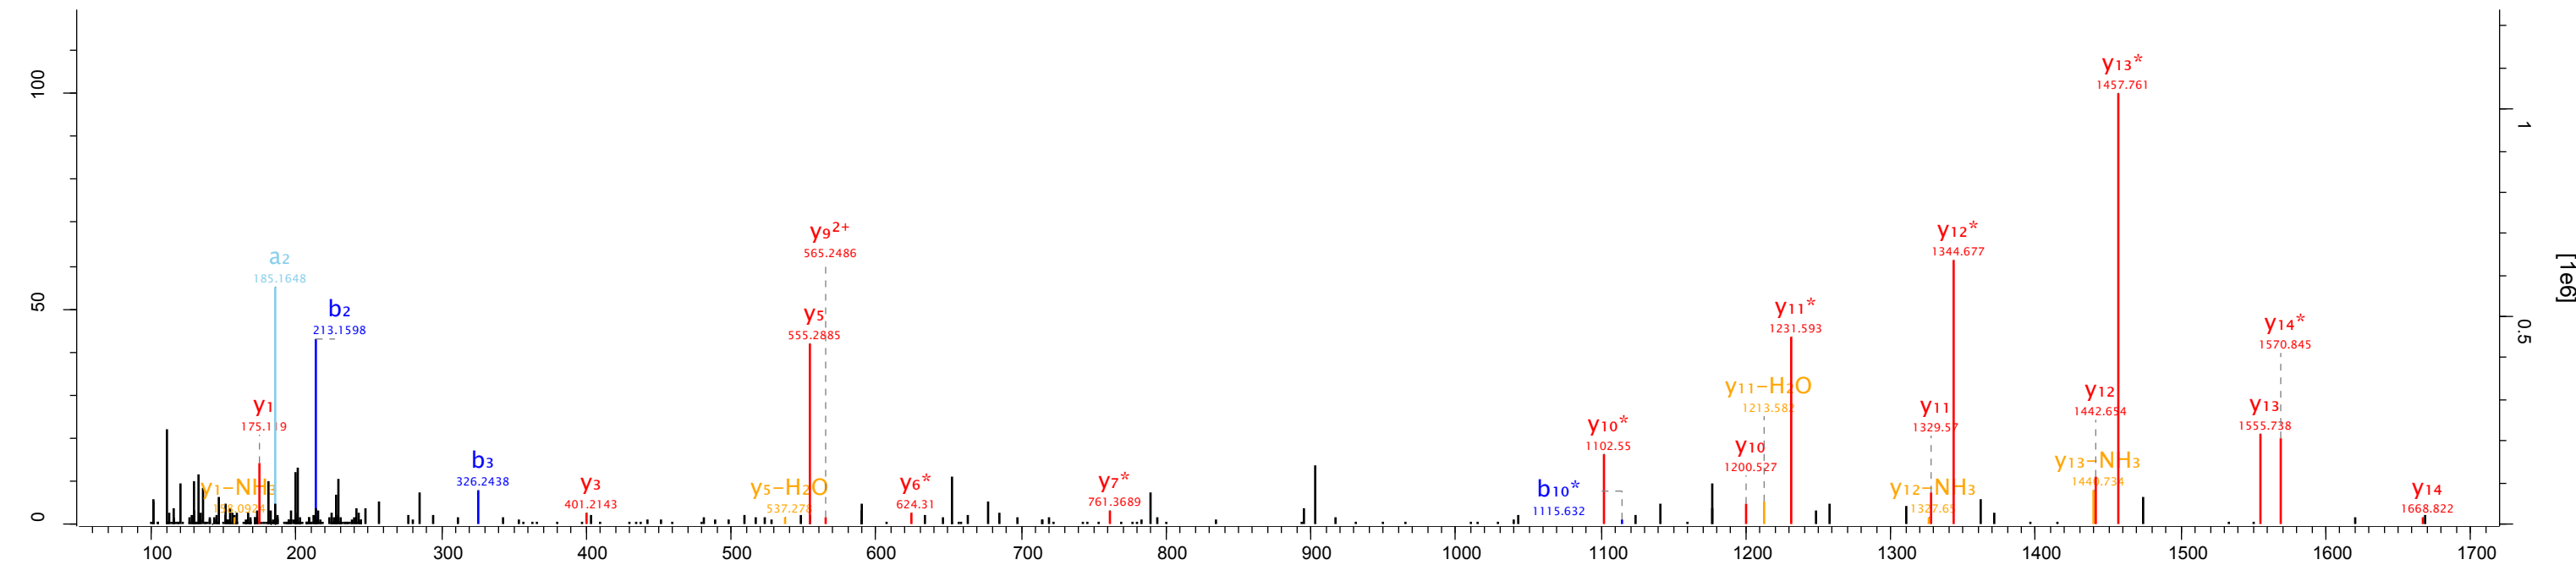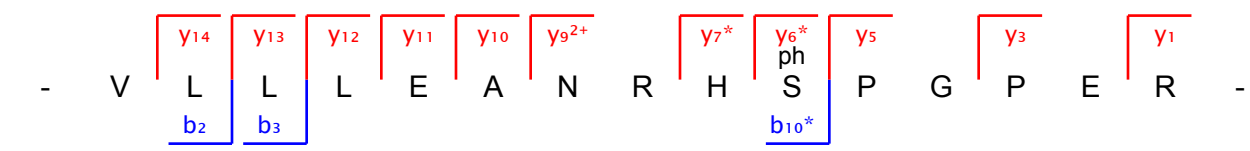

Raw file: 20150814\_A375SR\_Phospho\_BR2\_09  
 Scan: 15450 Method: FTMS; HCD Score: 140.81 m/z: 675.35 Gene names: WIZ

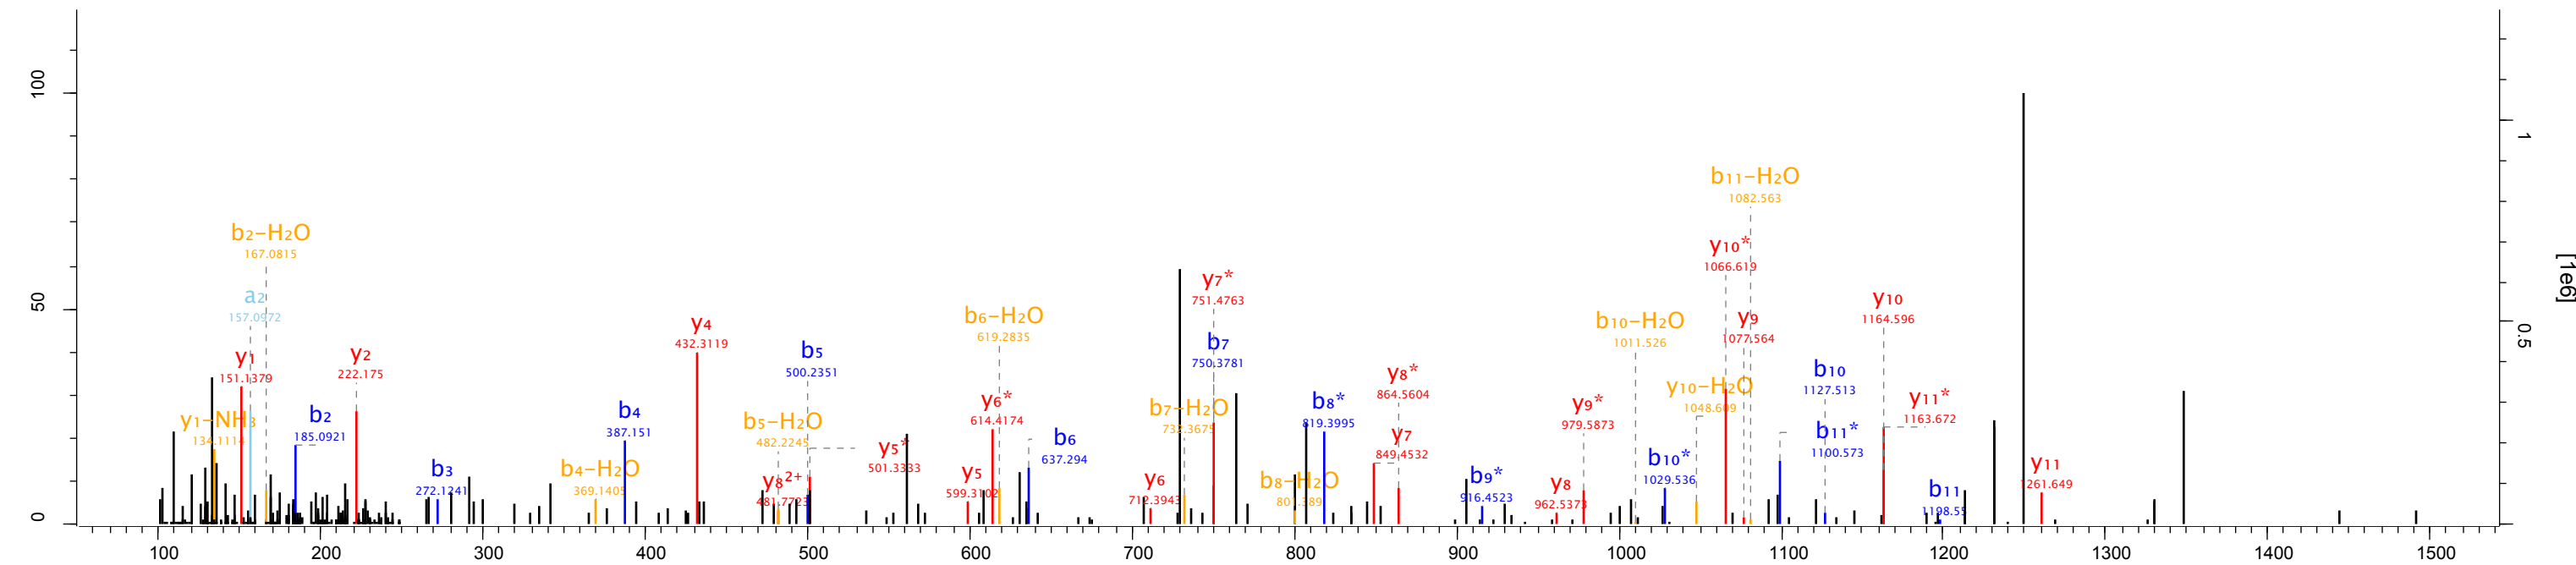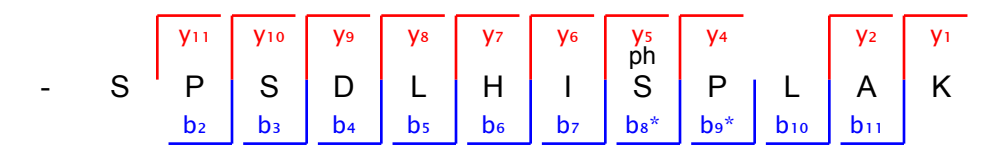

Raw file 20150814\_A375SR\_Phospho\_BR2\_09 Scan 16500 Method FTMS; HCD Score 51.5 m/z 515.28 Gene names TAGLN2

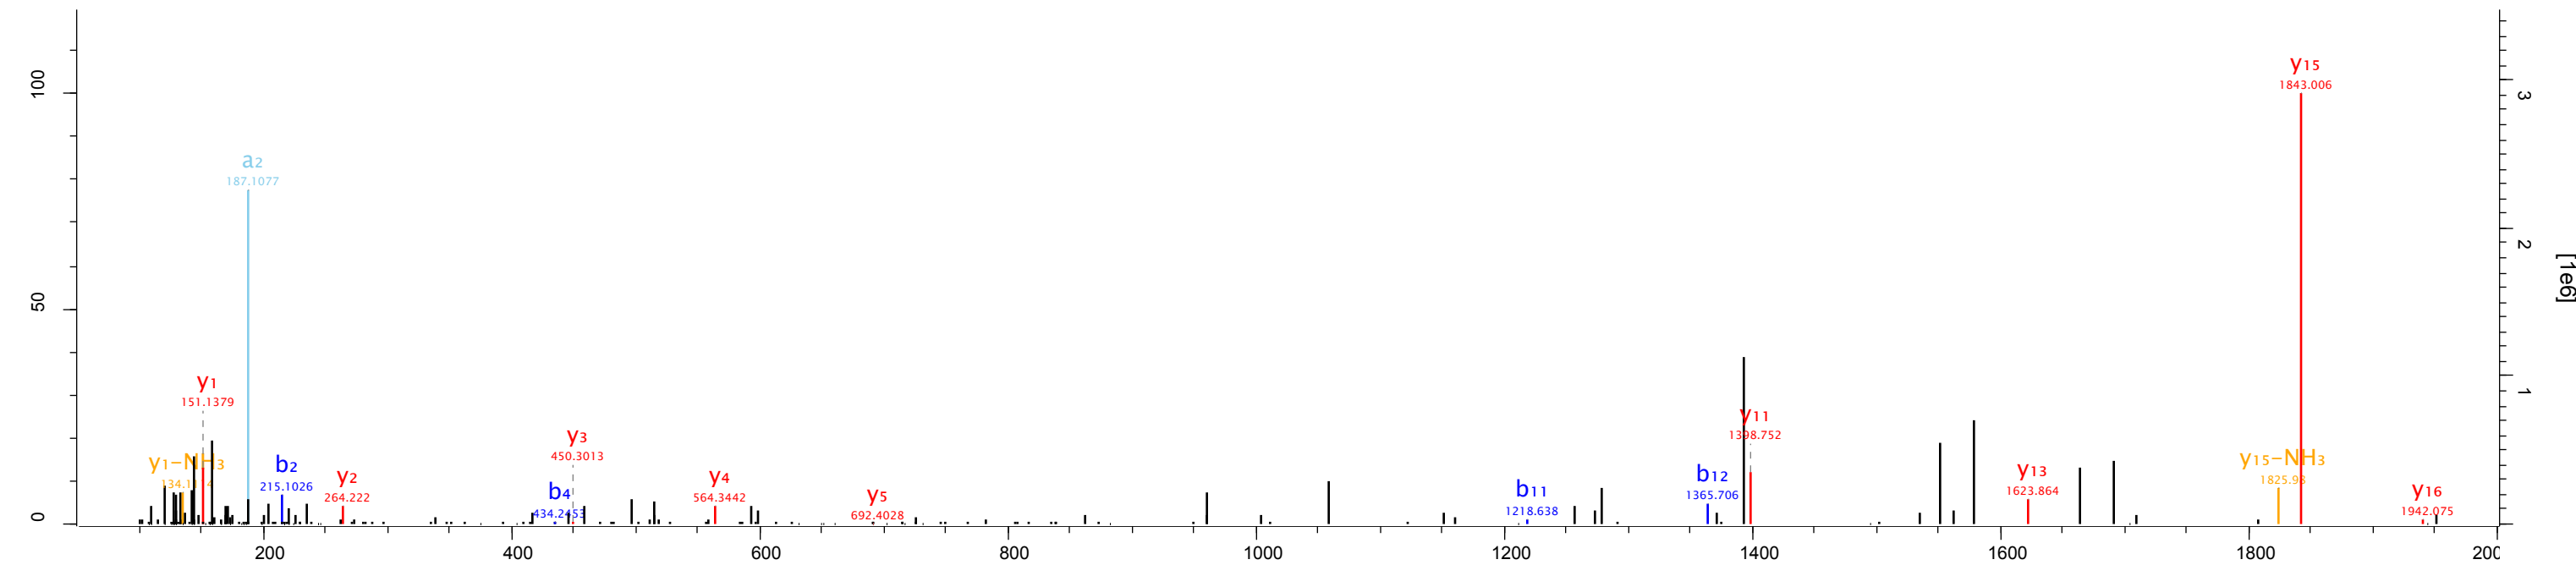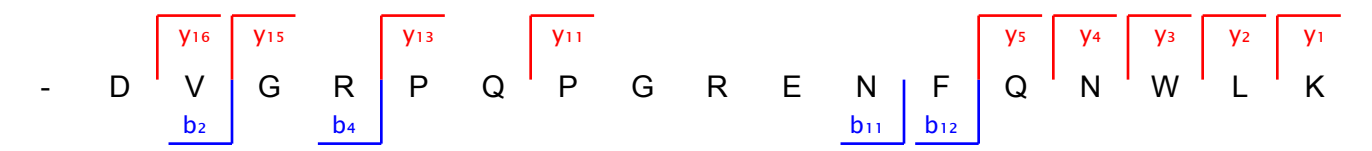

Raw file 20150814\_A375SR\_Phospho\_BR2\_09 Scan 16670 Method FTMS; HCD Score 231.93 m/z 1031.99 Gene names PLEC

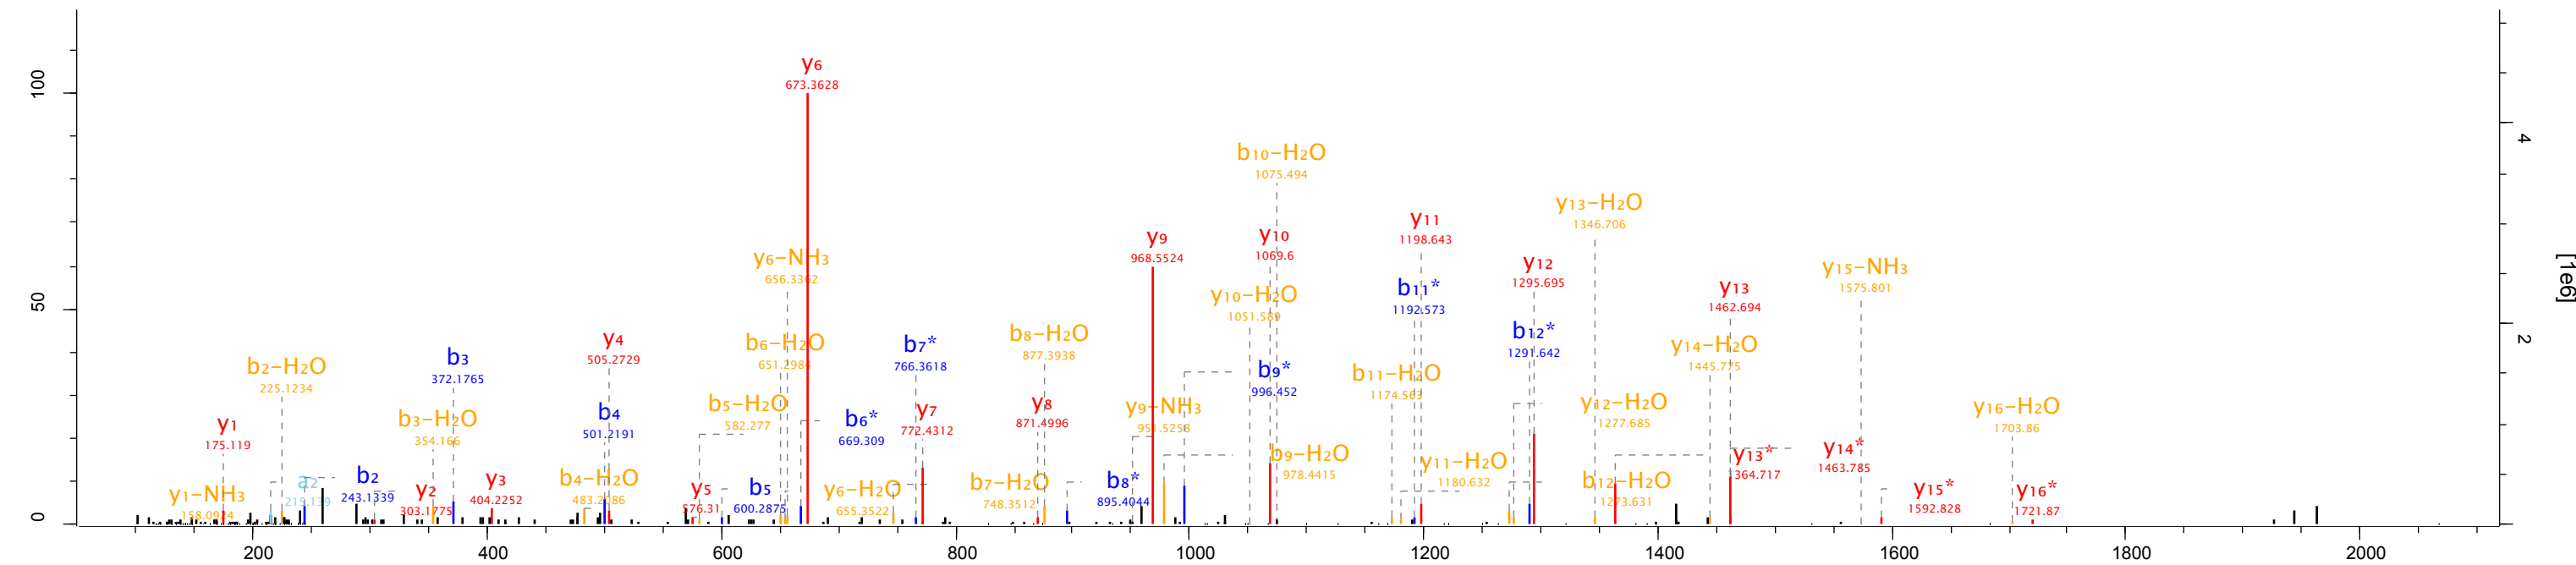

- E L E E V S P E T P V V P A T T Q R -  
 b2 b3 b4 b5 b6\* b7\* b8\* b9\* b11\* b12\*

Raw file 20150814\_A375SR\_Phospho\_BR2\_09 Scan 18240 Method FTMS; HCD Score 273.43 m/z 998.19 Gene names RPS3

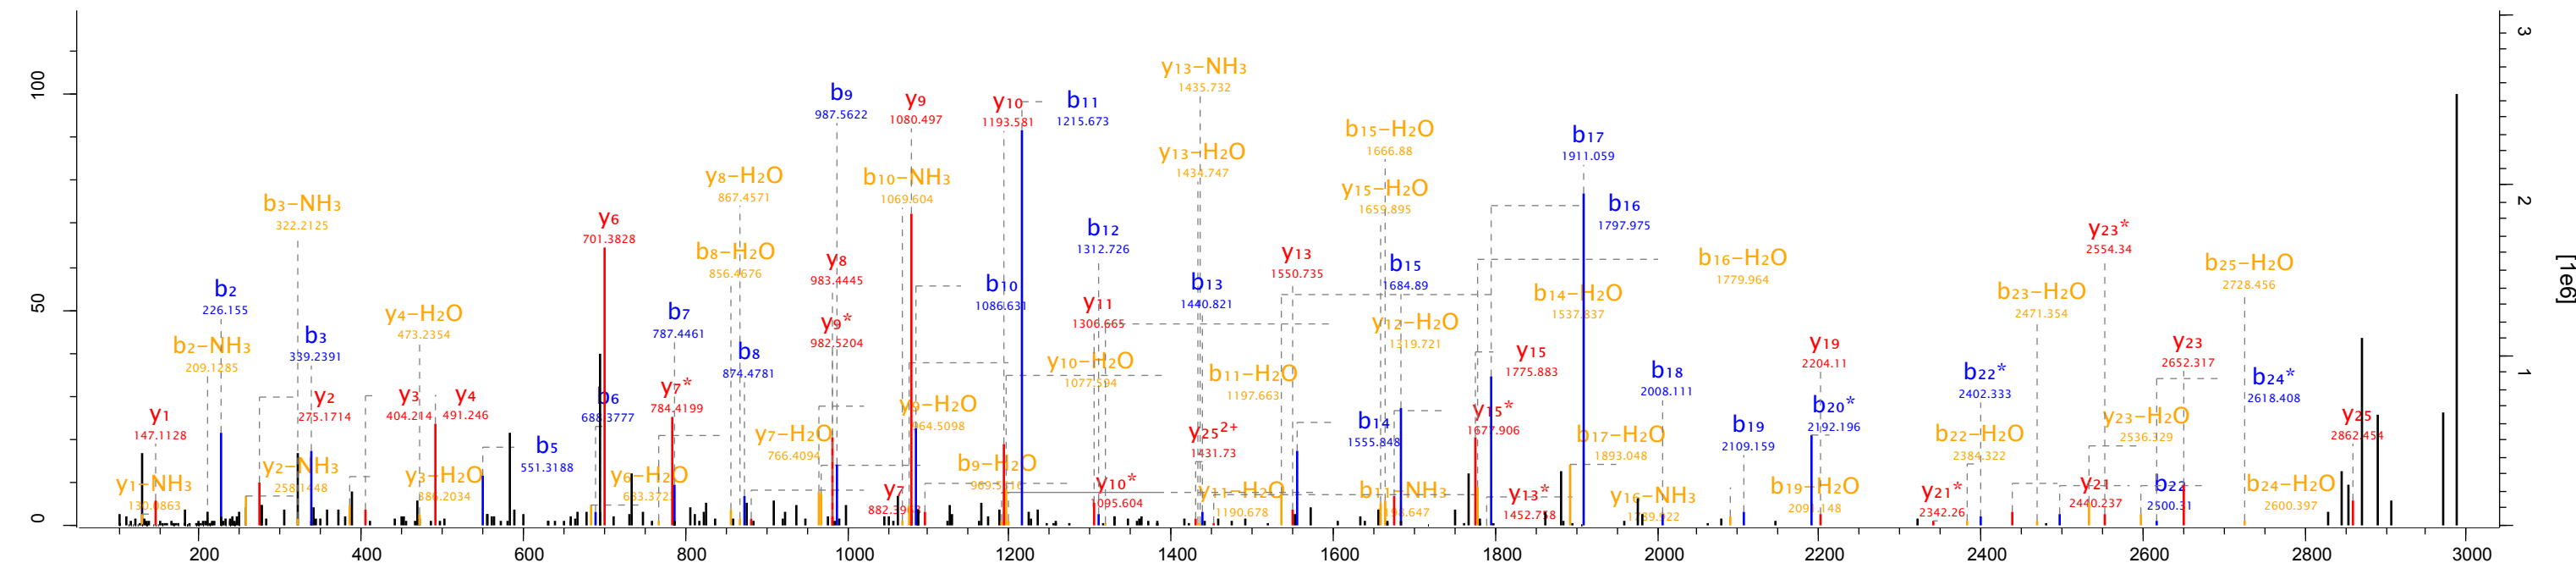

- K P L P D H V S I V E P K D E I L P T P I S E Q K -

y<sub>25</sub> y<sub>23</sub> y<sub>21</sub> y<sub>19</sub> y<sub>15</sub> y<sub>13</sub> y<sub>11</sub> y<sub>10</sub> y<sub>9</sub> y<sub>8</sub> y<sub>7</sub> y<sub>6</sub> y<sub>4</sub> y<sub>3</sub> y<sub>2</sub> y<sub>1</sub>  
b<sub>2</sub> b<sub>3</sub> b<sub>5</sub> b<sub>6</sub> b<sub>7</sub> b<sub>8</sub> b<sub>9</sub> b<sub>10</sub> b<sub>11</sub> b<sub>12</sub> b<sub>13</sub> b<sub>14</sub> b<sub>15</sub> b<sub>16</sub> b<sub>17</sub> b<sub>18</sub> b<sub>19</sub> b<sub>20</sub>\* b<sub>22</sub> b<sub>24</sub>\*

Raw file 20150814\_A375SR\_Phospho\_BR2\_09 Scan 18320 Method FTMS; HCD Score 44.6 m/z 810.07 Gene names DLG1

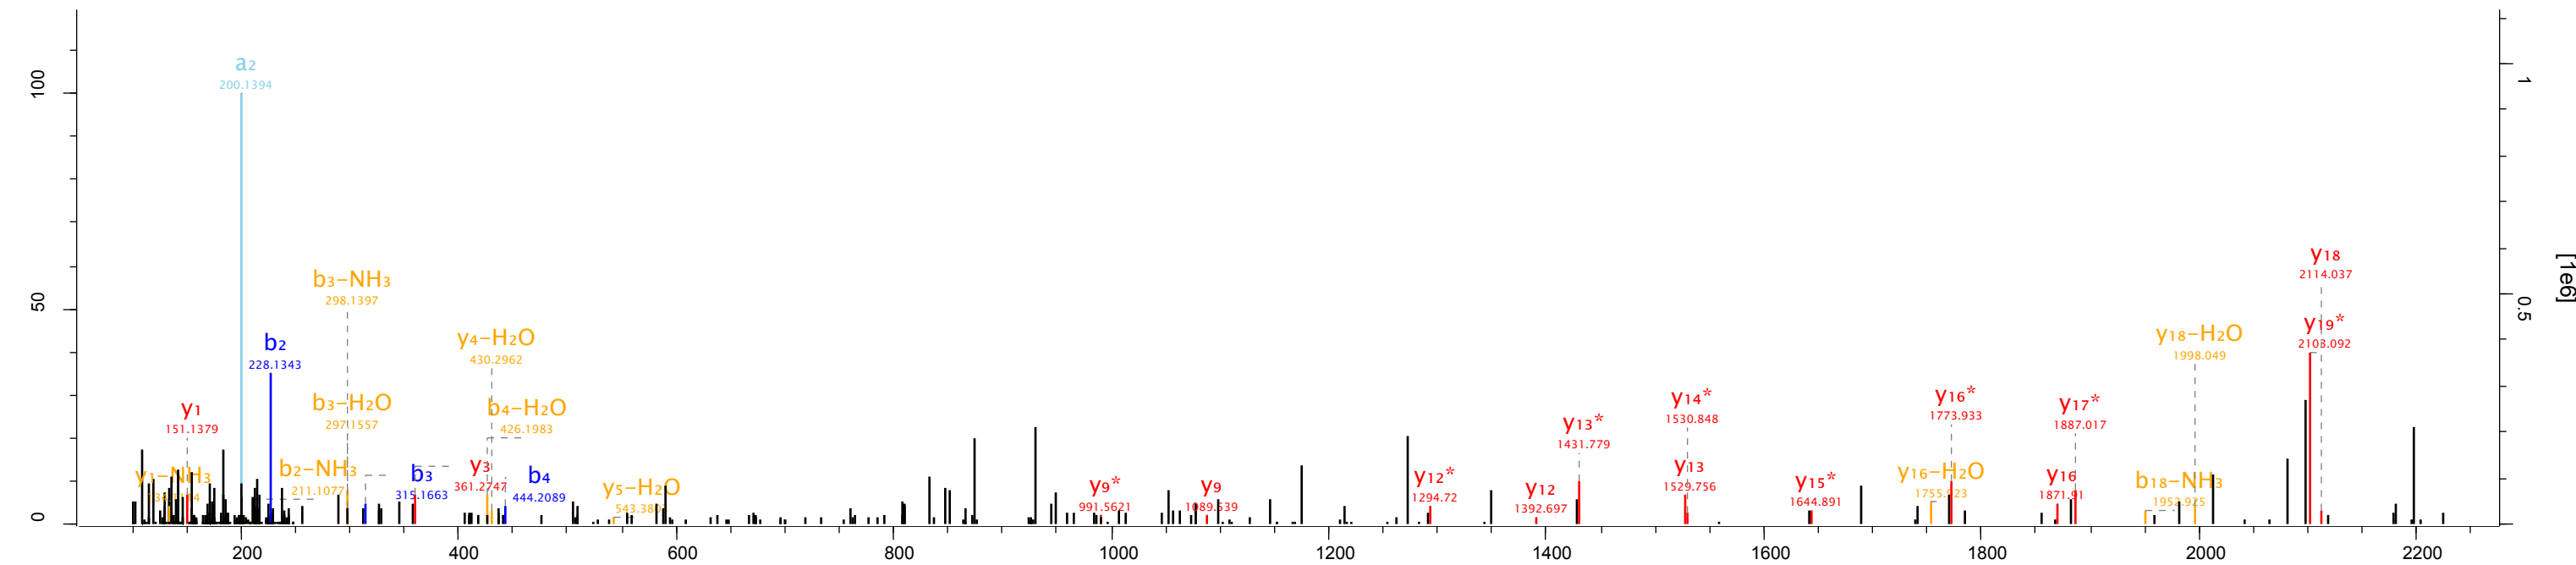

- N L S E I E N V H G F V S H S H I S P I K -

Annotations below the sequence:

- b2 (under L)
- b3 (under S)
- b4 (under E)
- y19\* (above S)
- y18 (above E)
- y17\* (above I)
- y16 (above E)
- y15\* (above N)
- y14\* (above V)
- y13 (above H)
- y12 (above G)
- y9 (above S)
- y9-ph (above S)
- y3 (above P)
- y1 (above I)

Raw file 20150814\_A375SR\_Phospho\_BR2\_09 Scan 18490 Method FTMS; HCD Score 55.62 m/z 675.36 Gene names IRS2

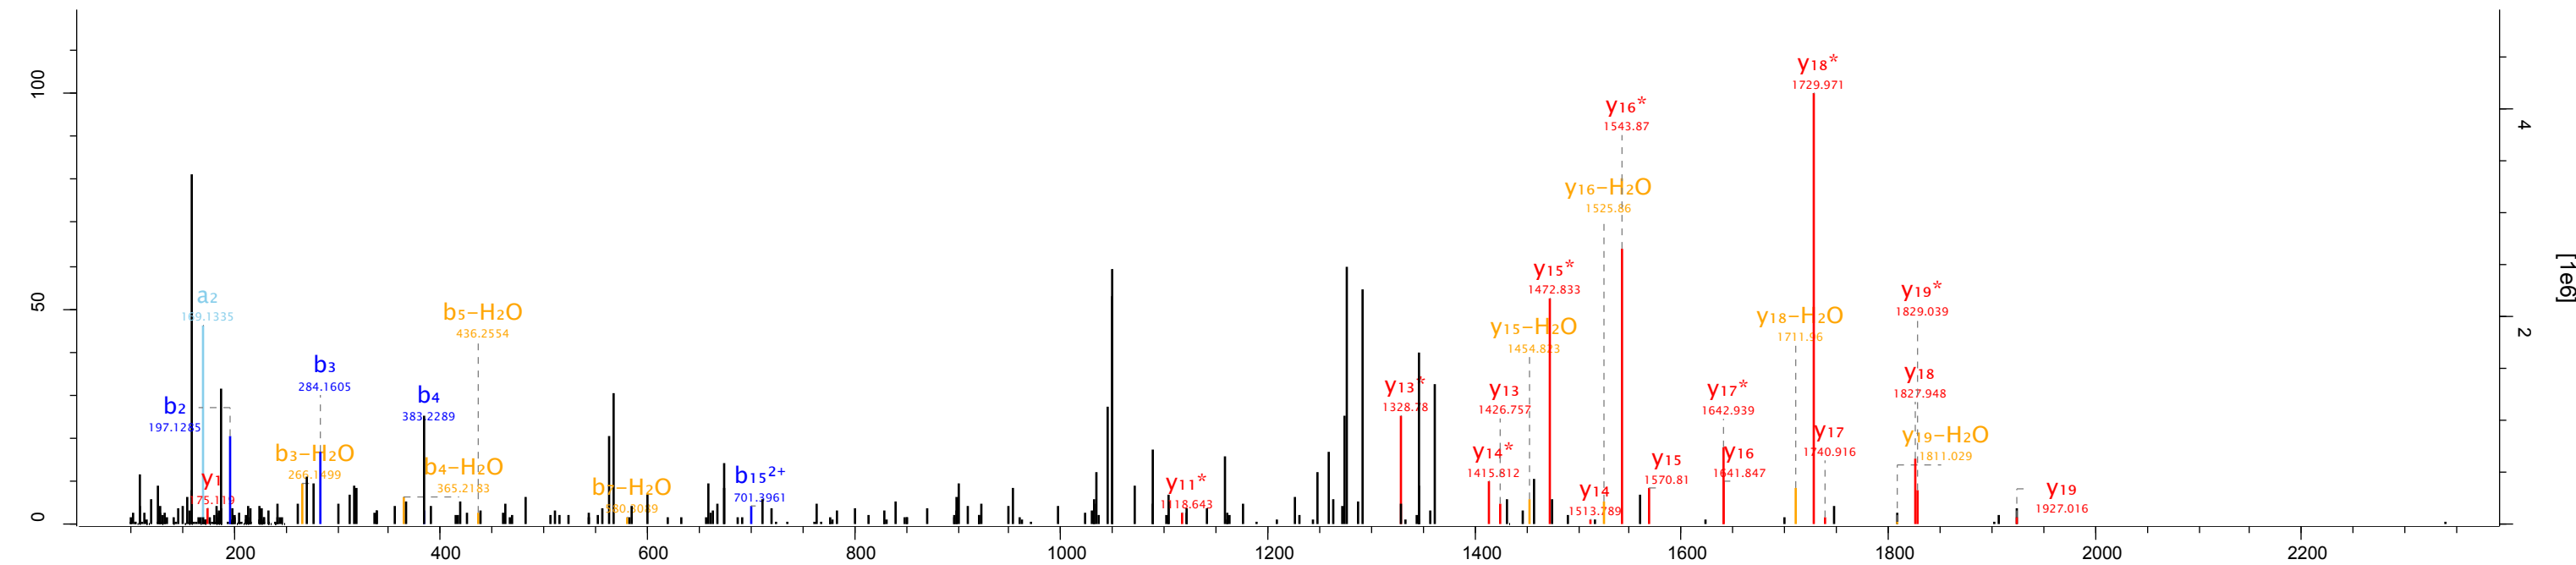

- P V S V A G S P L S P G P V R A P L S R -  
 b<sub>2</sub> b<sub>3</sub> b<sub>4</sub> b<sub>15</sub><sup>2+</sup> y<sub>19</sub> y<sub>18</sub> y<sub>17</sub> y<sub>16</sub> y<sub>15</sub> y<sub>14</sub> y<sub>13</sub> y<sub>11</sub><sup>\*</sup> y<sub>1</sub>



Raw file Scan Method Score m/z Gene names  
 20150814\_A375SR\_Phospho\_BR2\_09 18540 FTMS; HCD 151.13 515.25 COIL

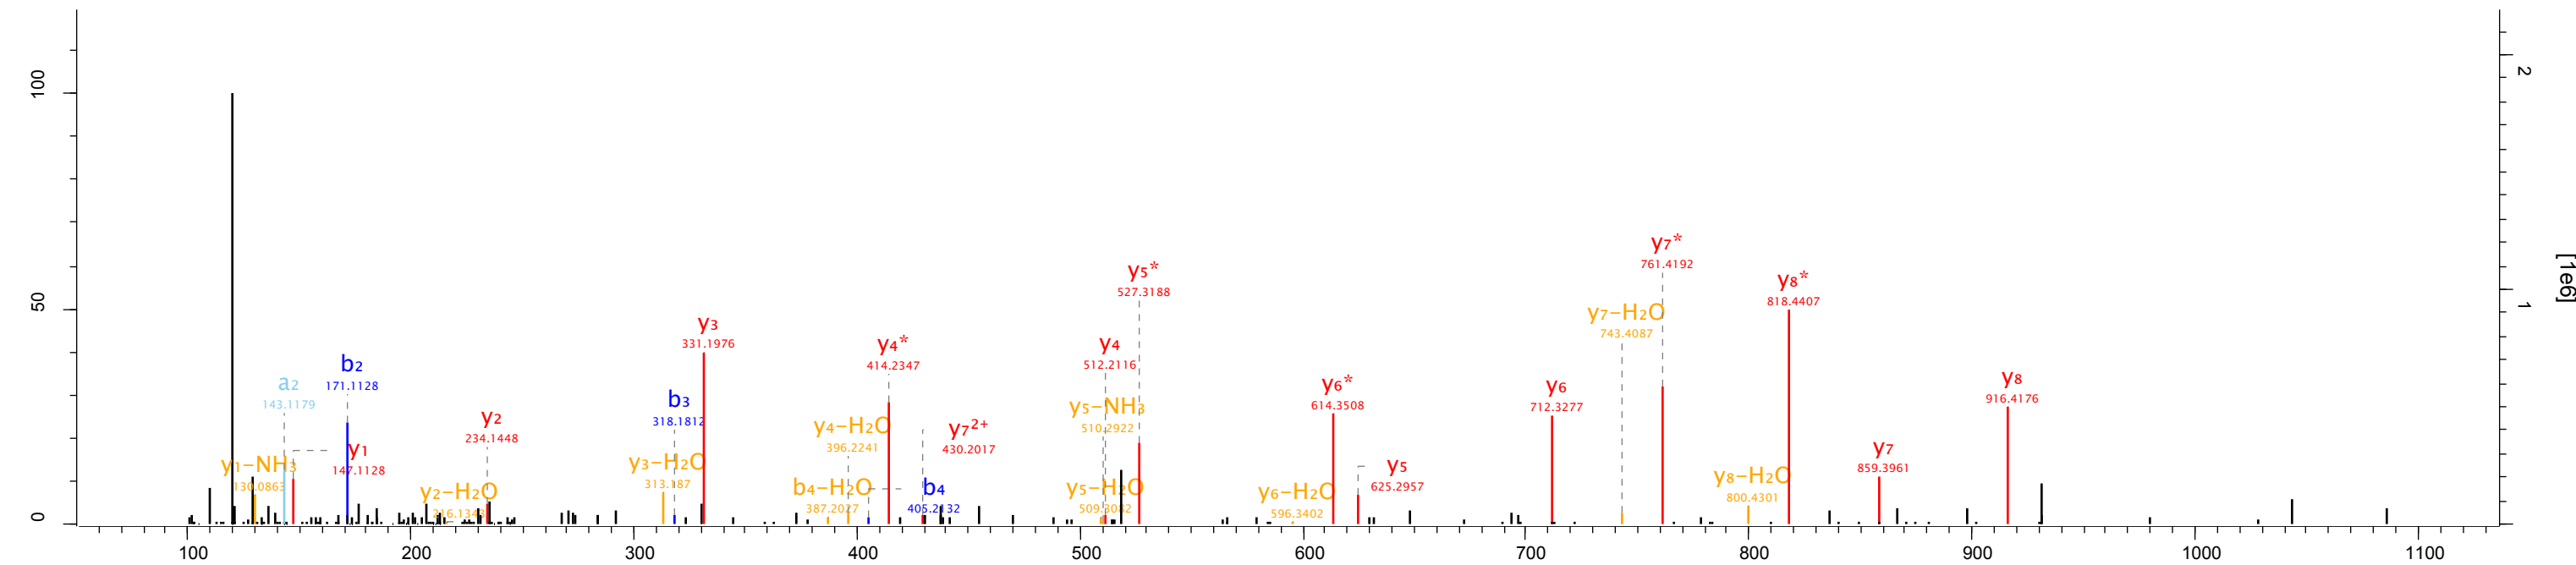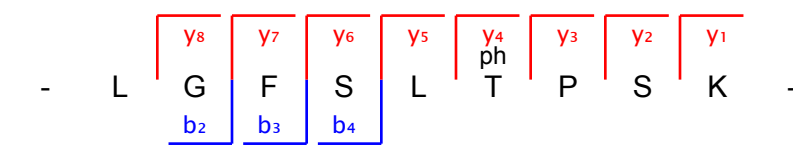

Raw file  
 20150814\_A375SR\_Phospho\_BR2\_09  
 Scan 18690 Method FTMS; HCD Score 252.77 m/z 943.8 Gene names REPS1

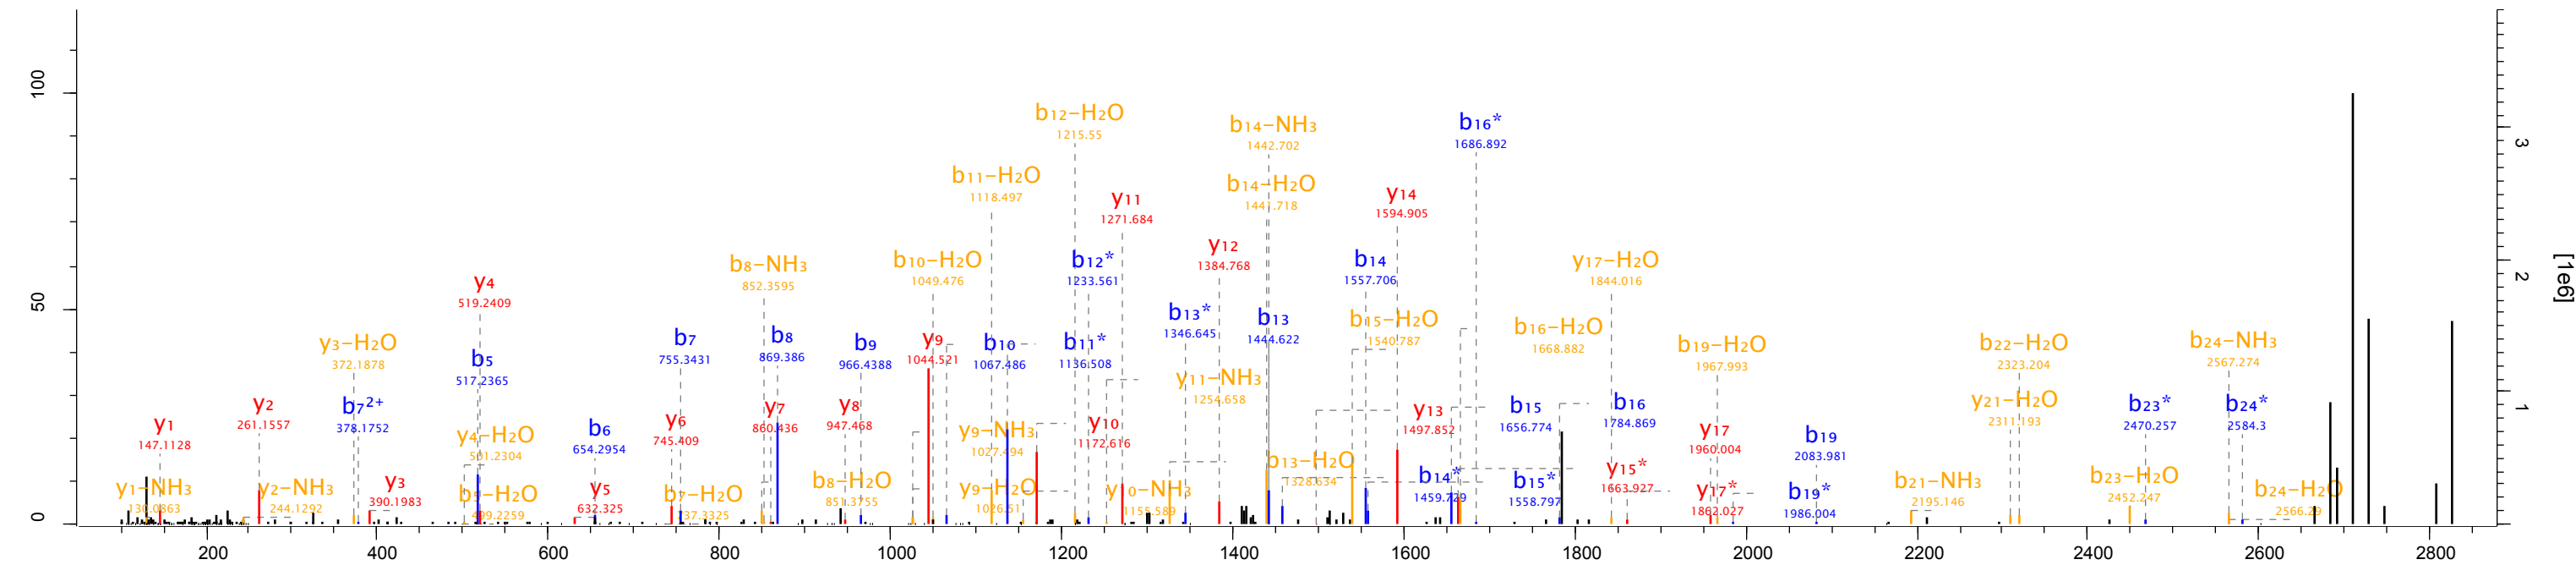

- R T G S D H T N P T Y17 ph S Y14 Y13 Y12 Y11 Y10 Y9 Y8 Y7 Y6 Y5 Y4 Y3 Y2 Y1 -

b5 b6 b7 b8 b9 b10 b11\* b12\* b13 b14 b15 b16 b19 b23\* b24\*

Raw file

20150814\_A375SR\_Phospho\_BR2\_09

Scan 2000 Method FTMS; HCD Score 133.85 m/z 492.24 Gene names SRRM2

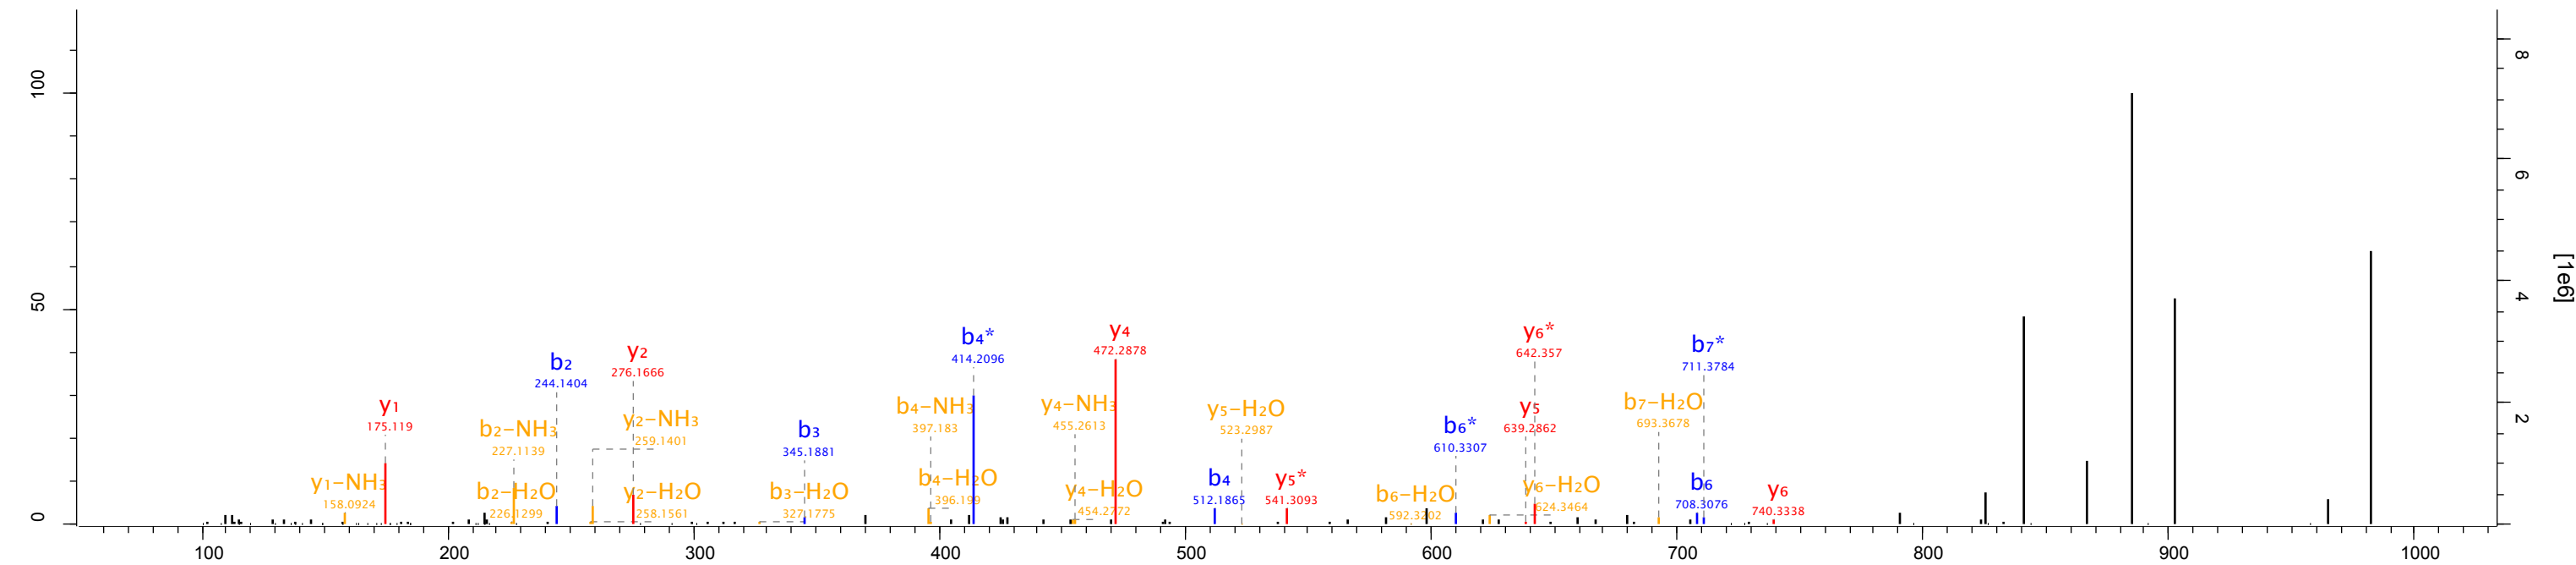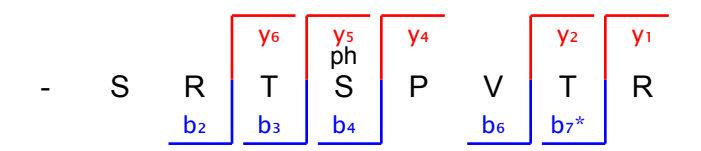

Raw file 20150814\_A375SR\_Phospho\_BR2\_09 Scan 20810 Method FTMS; HCD Score 149.32 m/z 673.32 Gene names INO80B

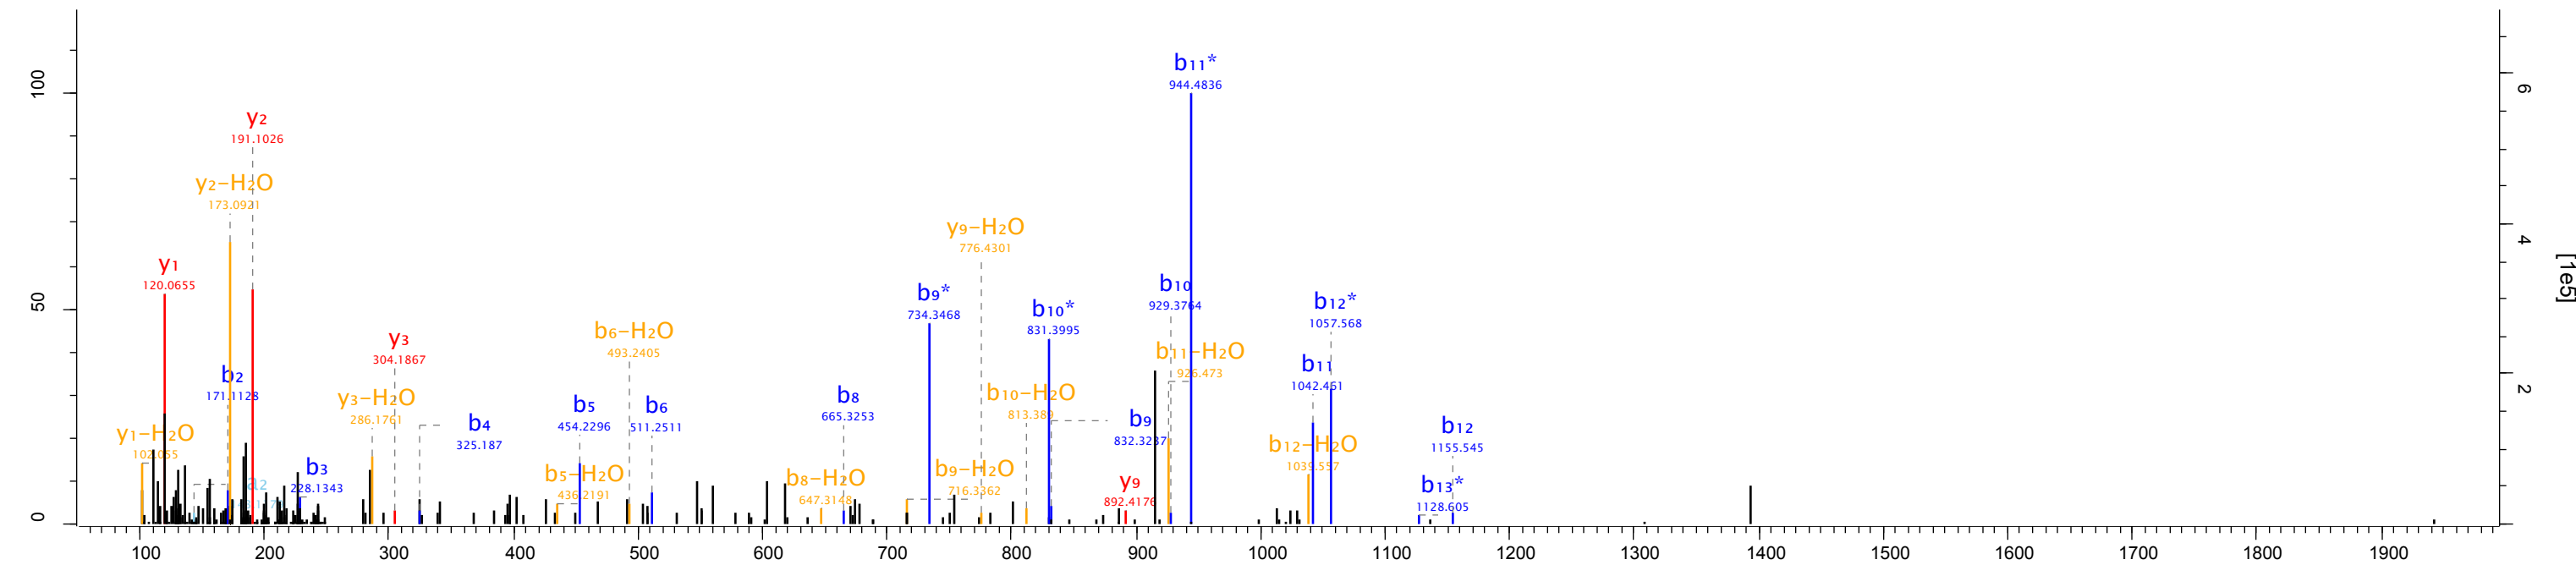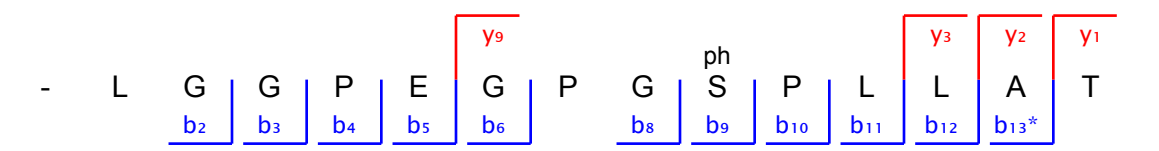

Raw file 20150814\_A375SR\_Phospho\_BR2\_09 Scan 21180 Method FTMS; HCD Score 115.54 m/z 951.48 Gene names ELMSAN1

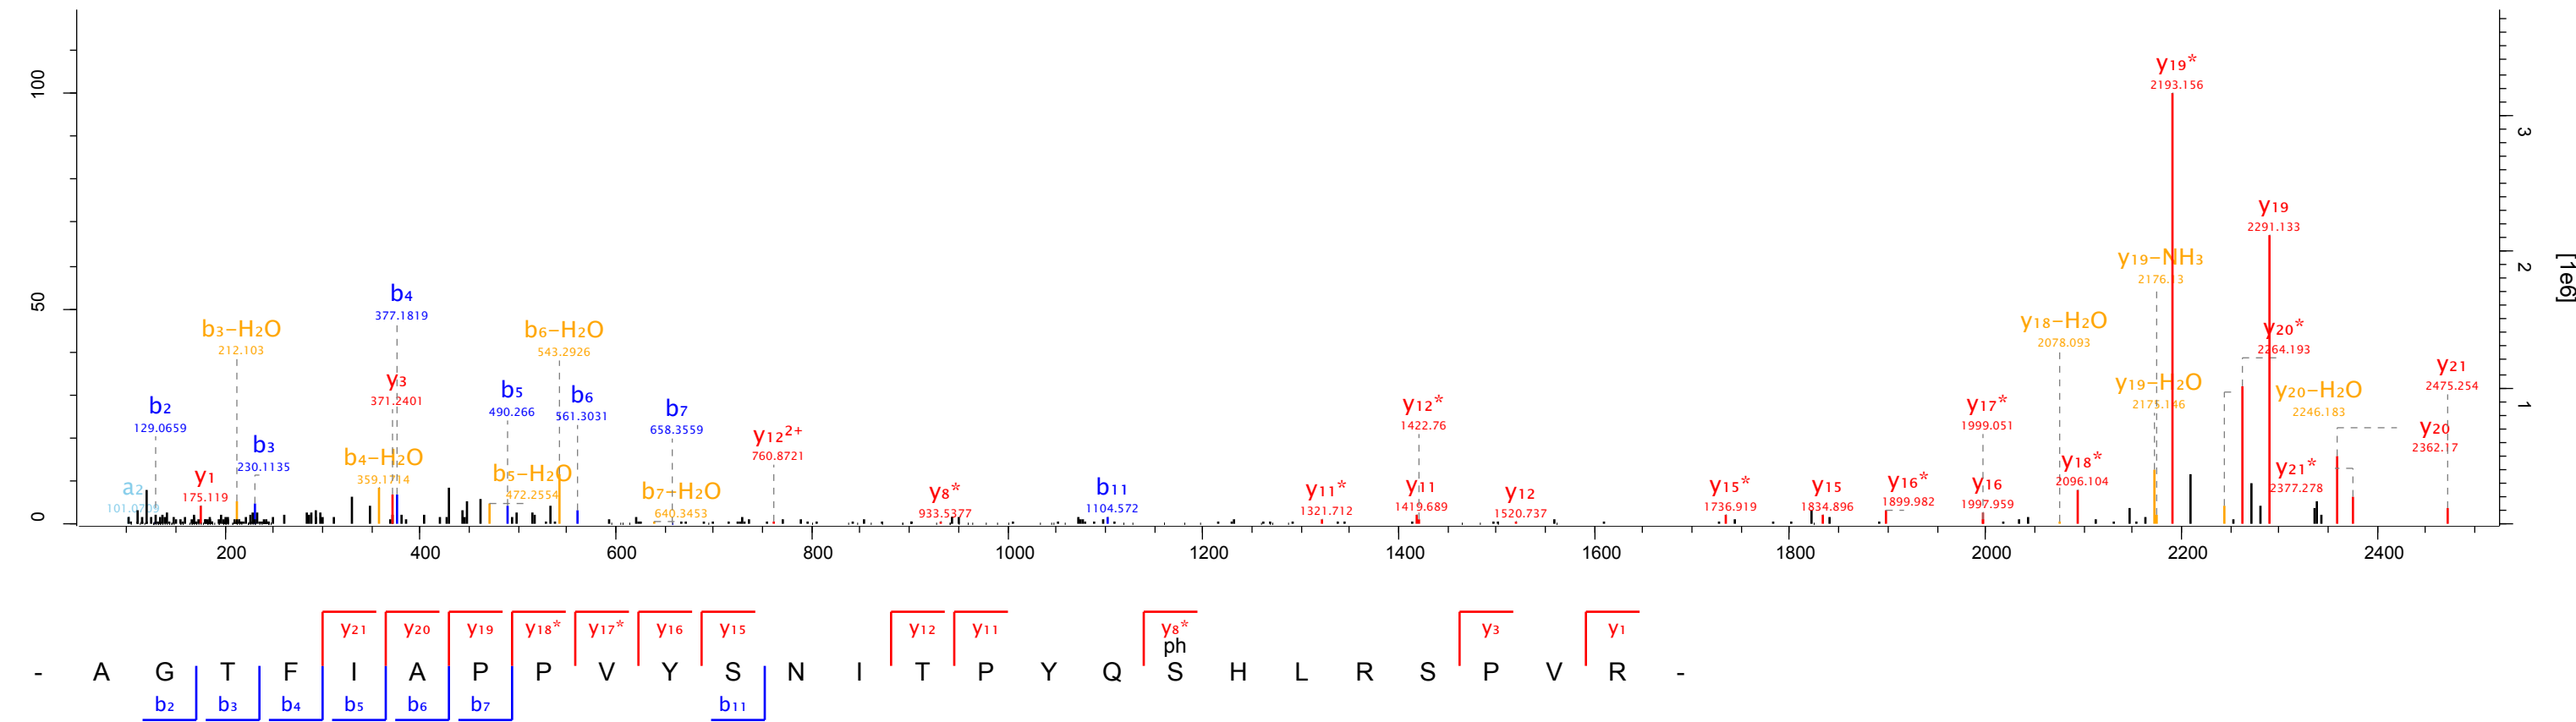

Raw file: 20150814\_A375SR\_Phospho\_BR2\_09  
 Scan: 2170 Method: FTMS; HCD Score: 174.68 m/z: 659.35 Gene names: SRRM1

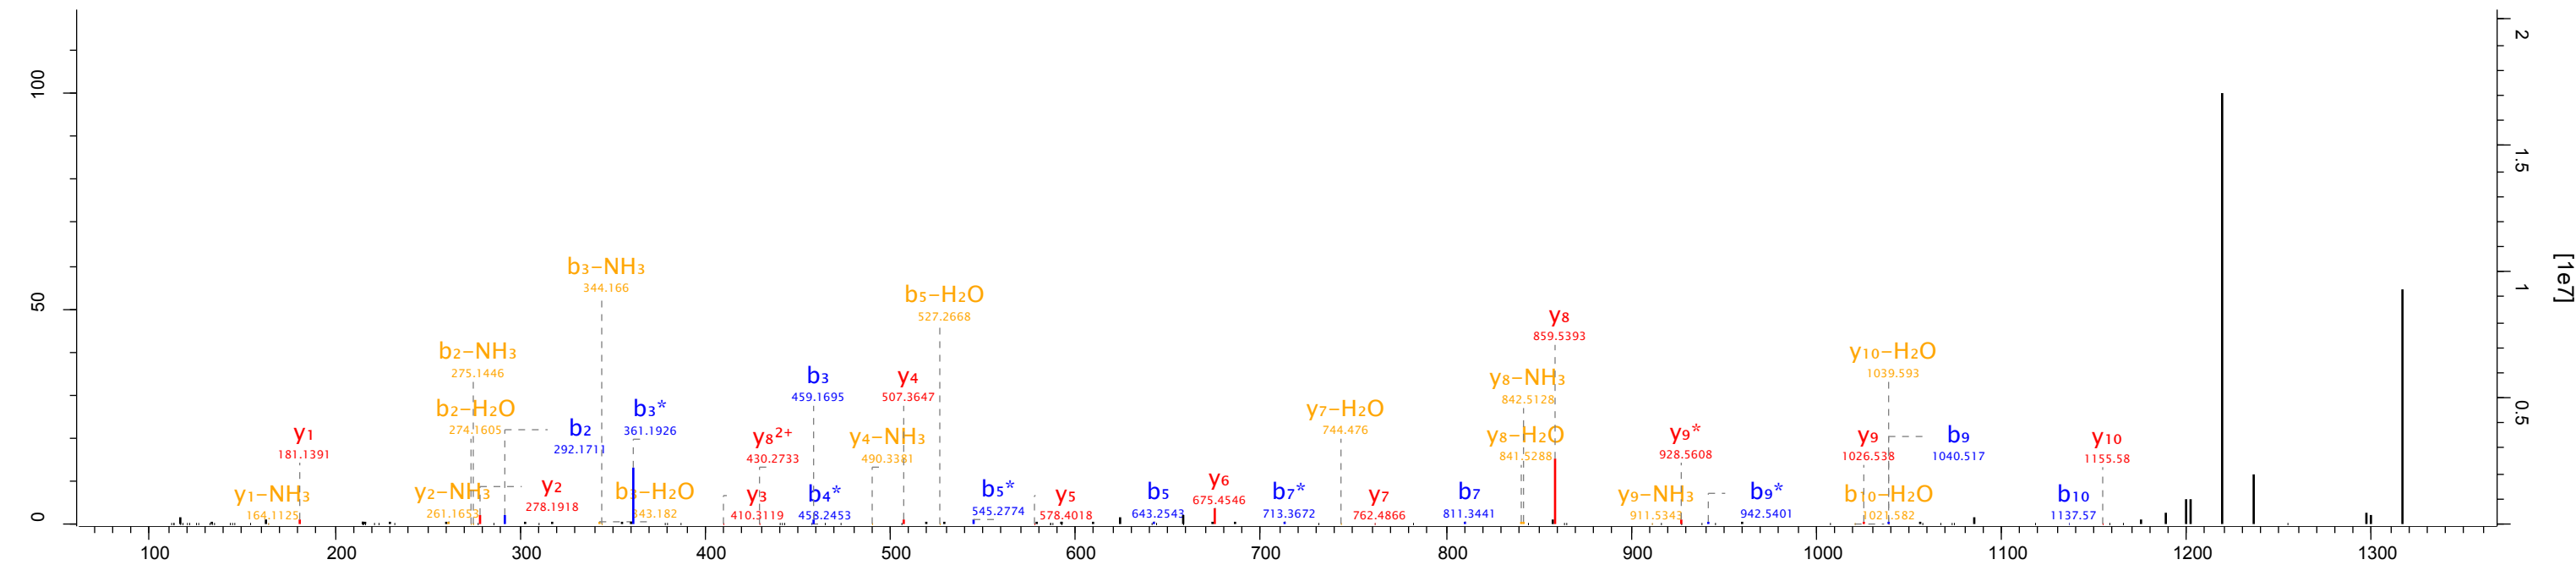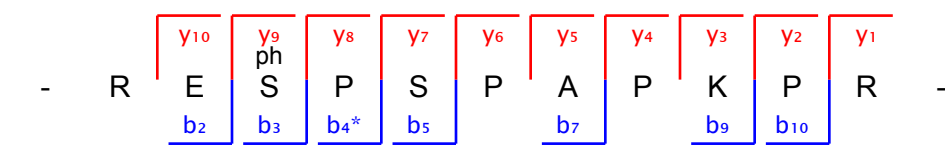

Raw file 20150814\_A375SR\_Phospho\_BR2\_09 Scan 21800 Method FTMS; HCD Score 118.44 m/z 619.32 Gene names NUP214

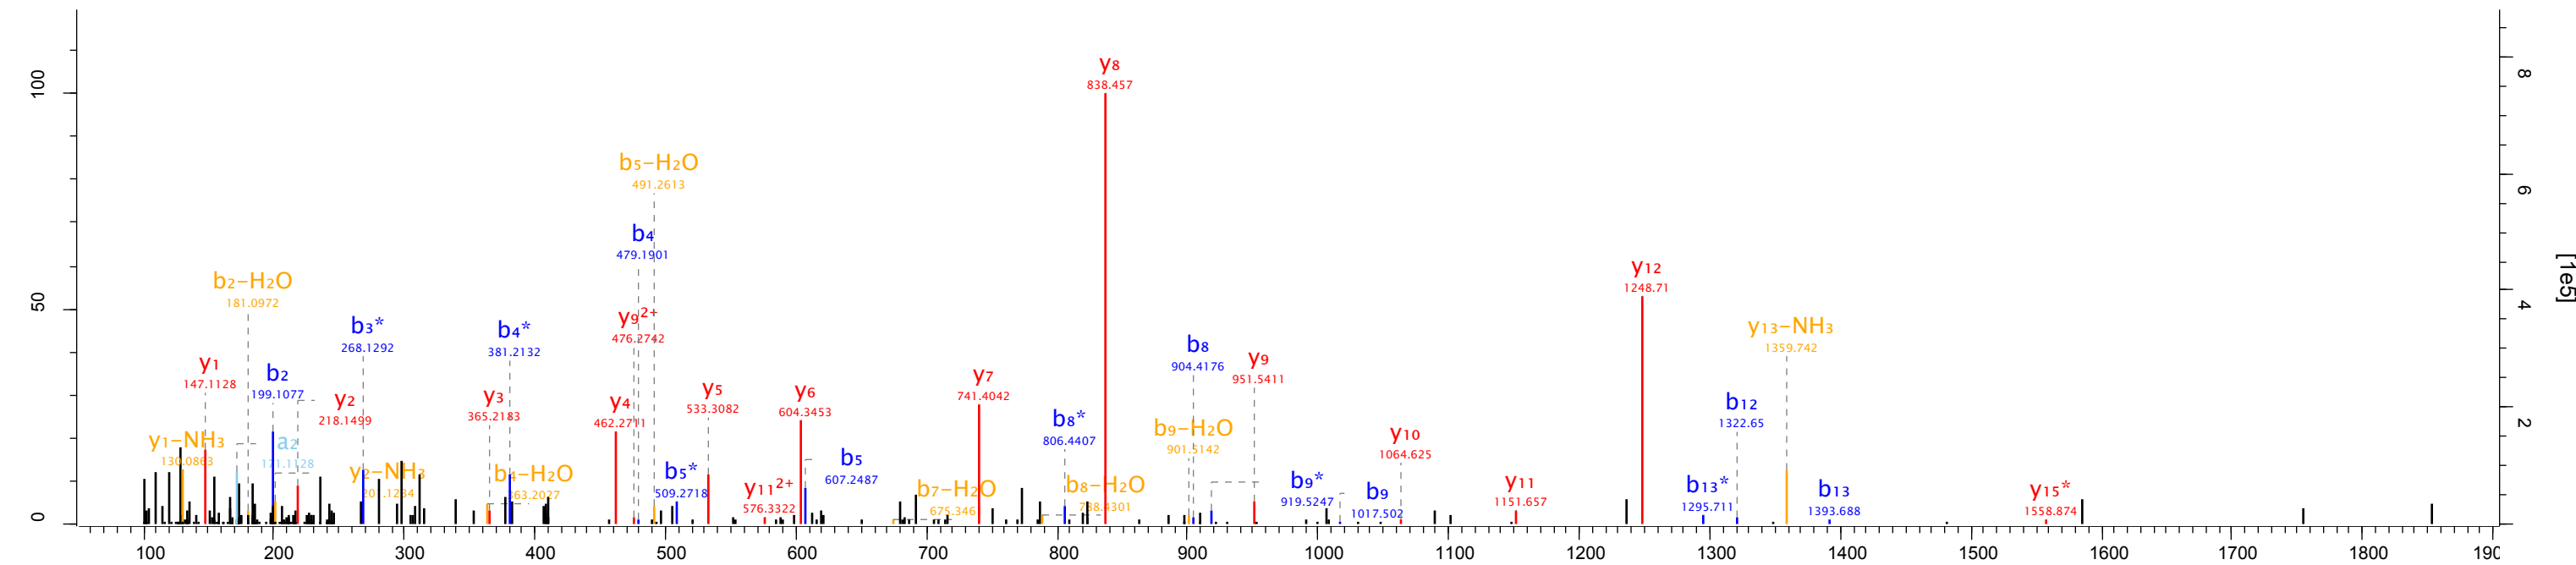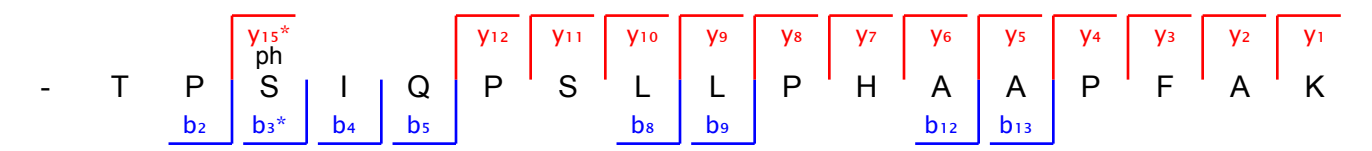

Raw file  
20150814\_A375SR\_Phospho\_BR2\_09

Scan 23040 Method FTMS; HCD Score 126.02 m/z 691.7 Gene names MOCS2

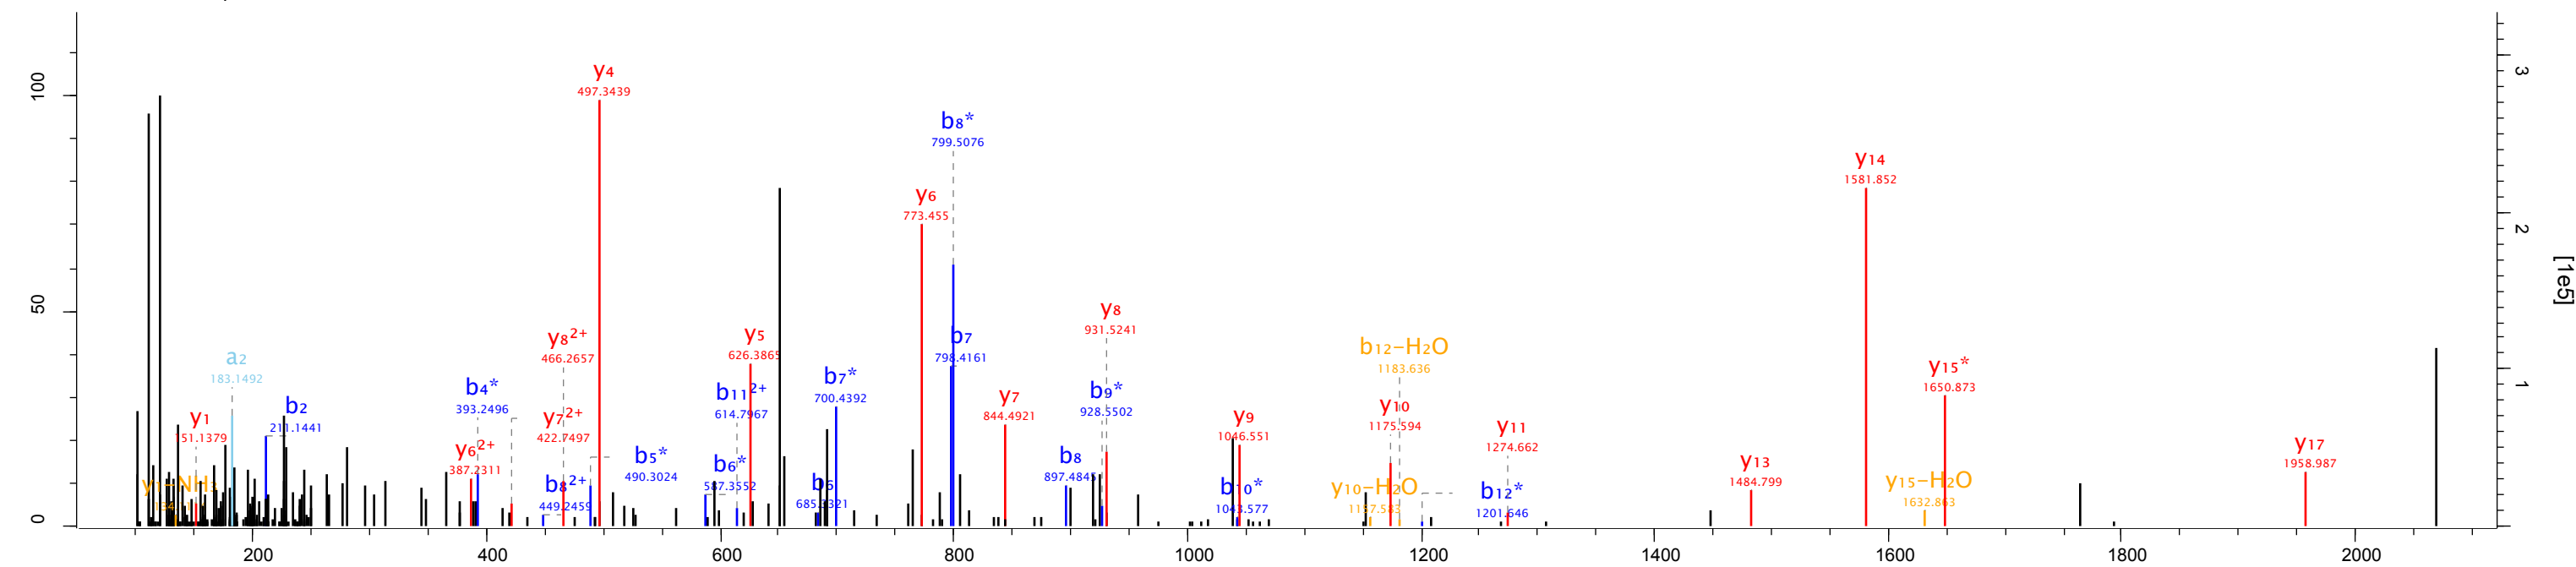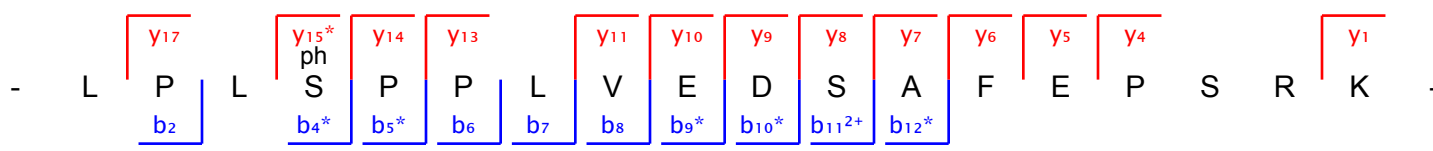



Raw file 20150814\_A375SR\_Phospho\_BR2\_09 Scan 25410 Method FTMS; HCD Score 183.18 m/z 1136.61 Gene names CD3EAP

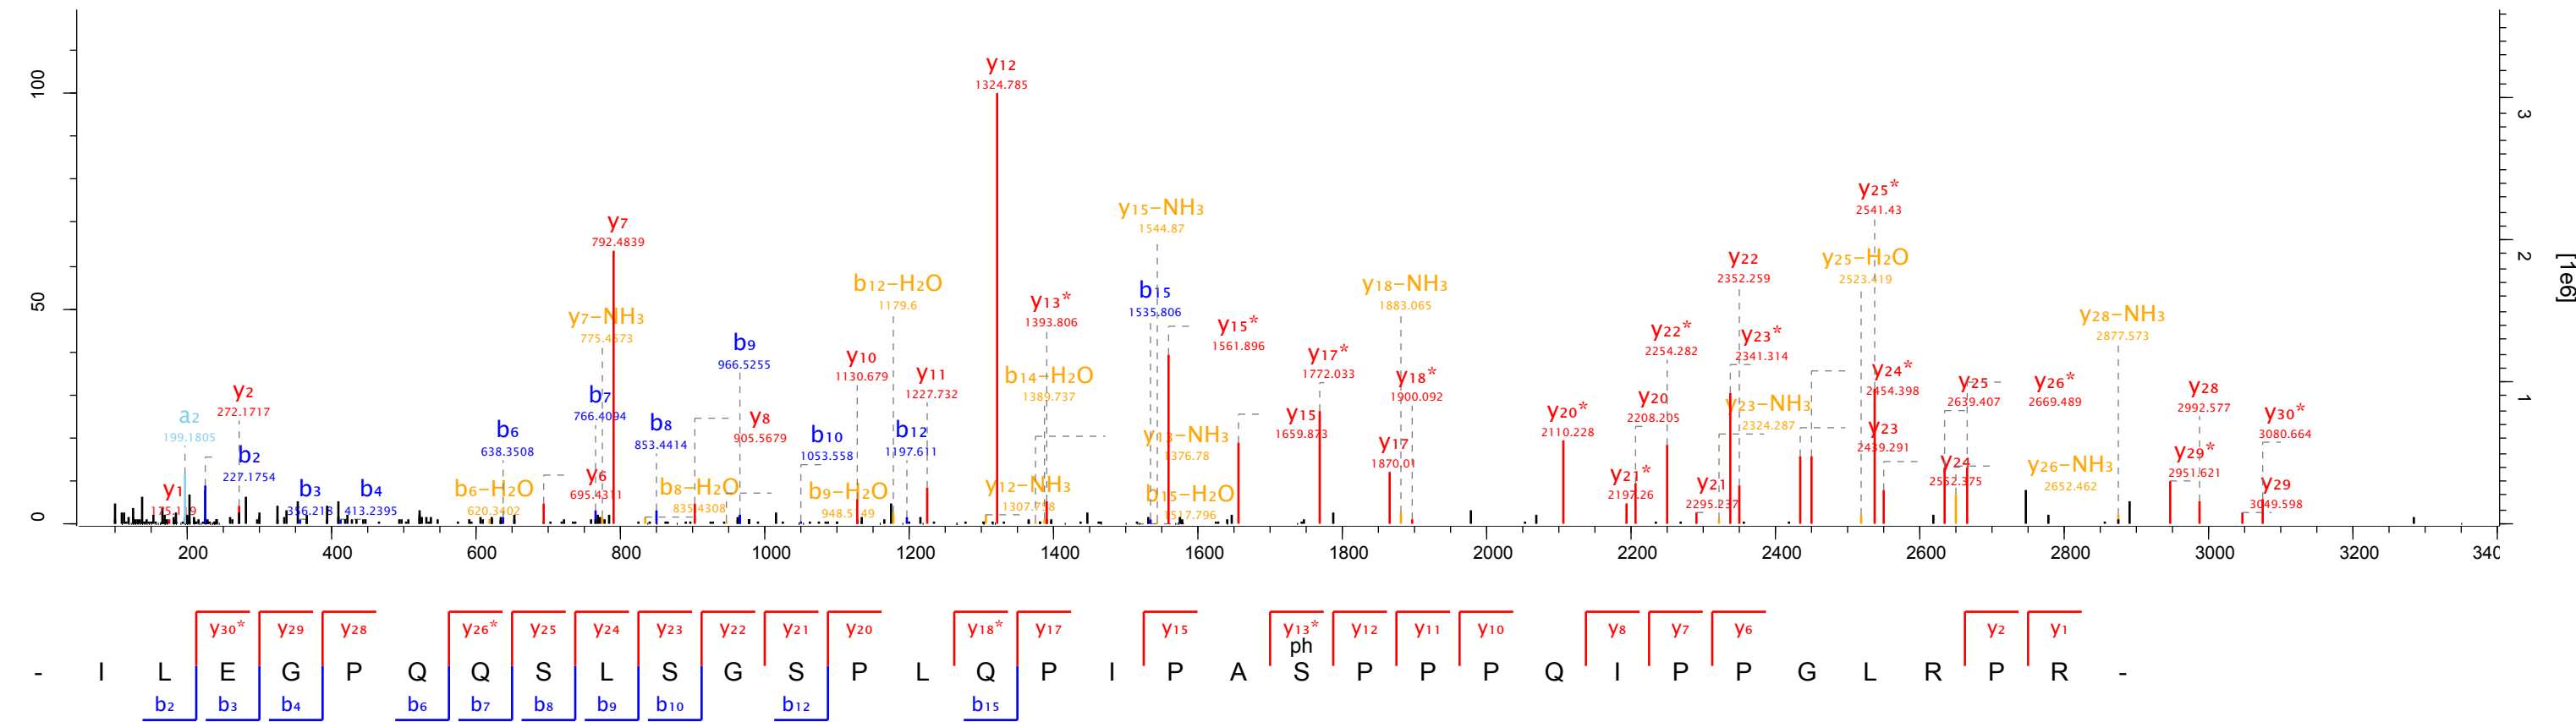

Raw file  
20150814\_A375SR\_Phospho\_BR2\_09

Scan 25500 Method FTMS; HCD Score 115.78 m/z 879.42 Gene names OTUD5

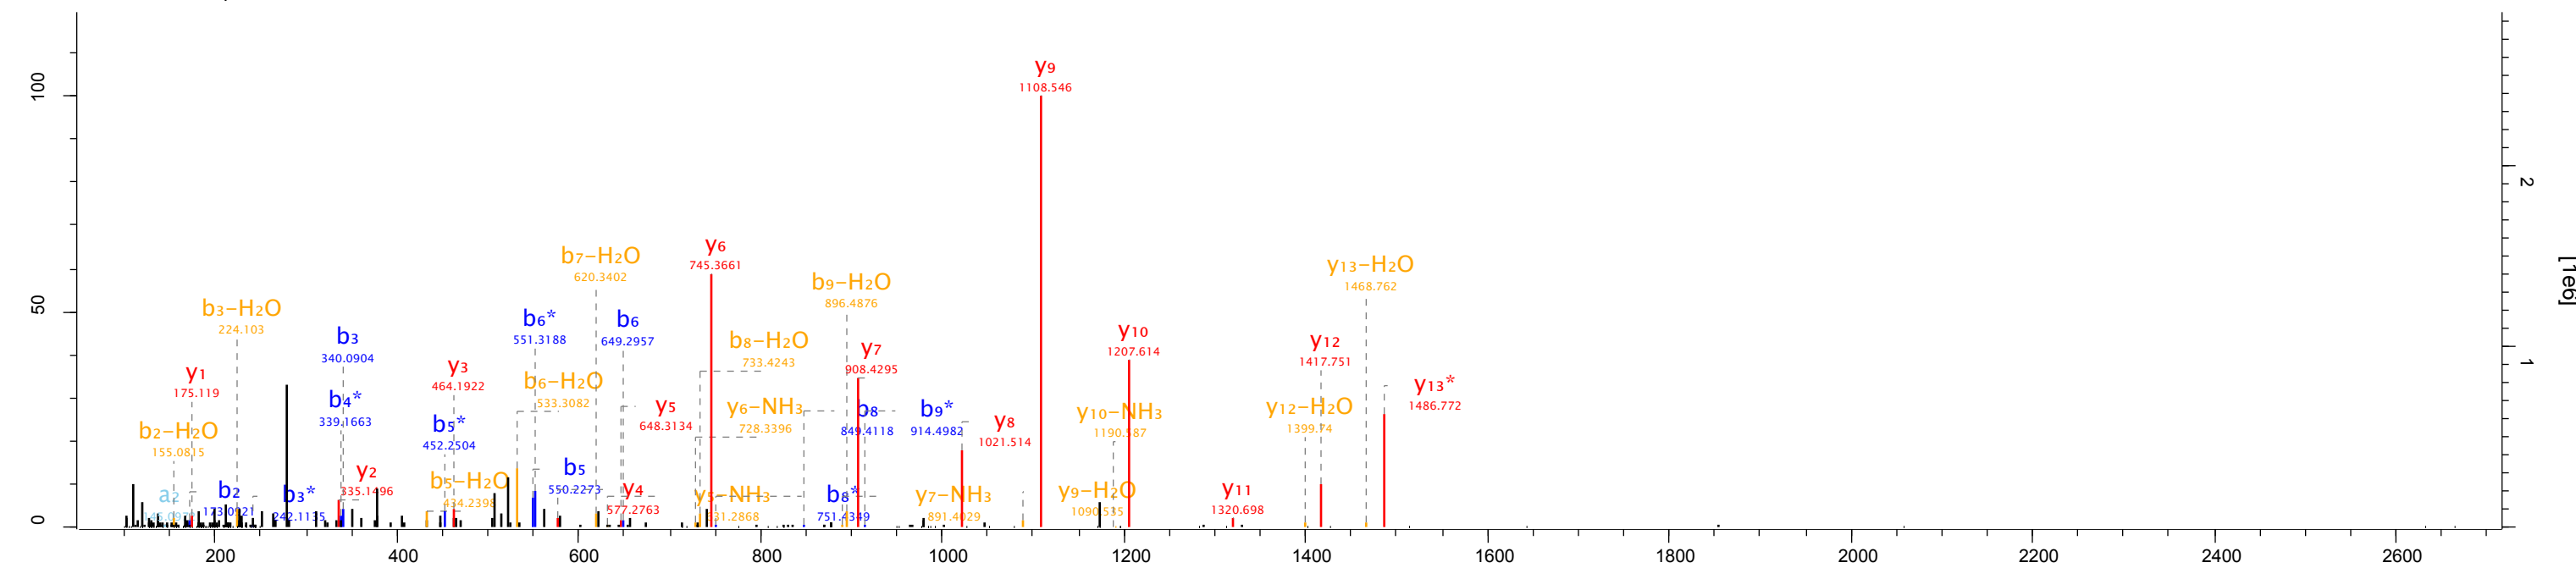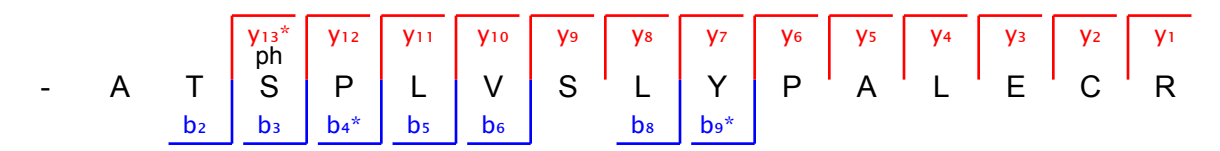

Raw file: 20150814\_A375SR\_Phospho\_BR2\_09  
 Scan: 25900 Method: FTMS; HCD Score: 122.79 m/z: 1037.47 Gene names: PUM1

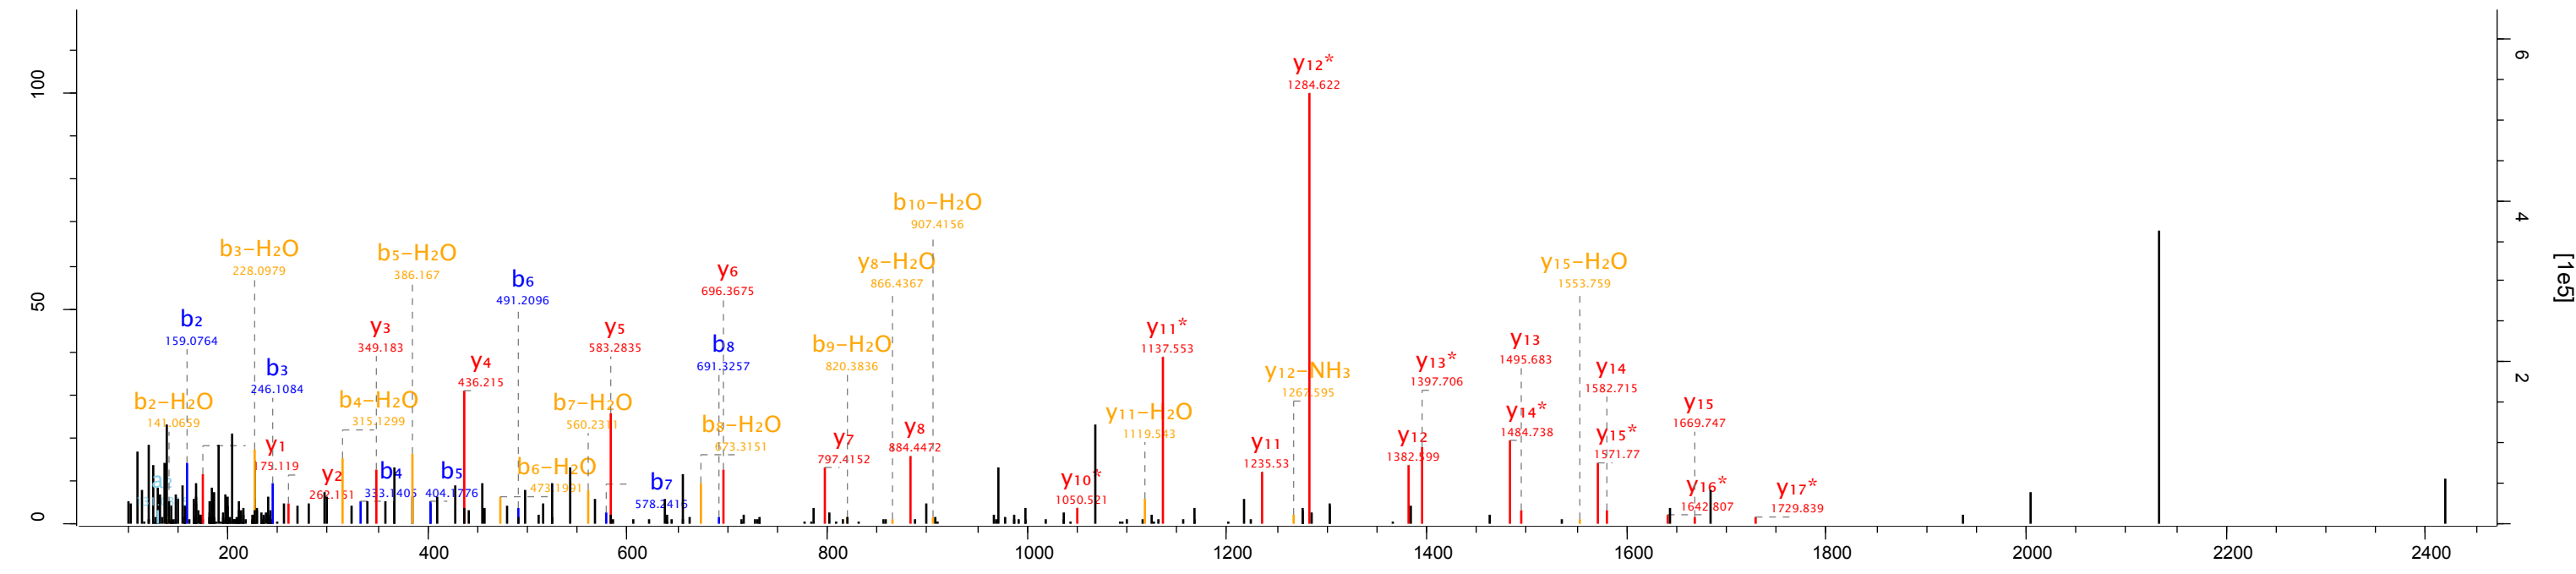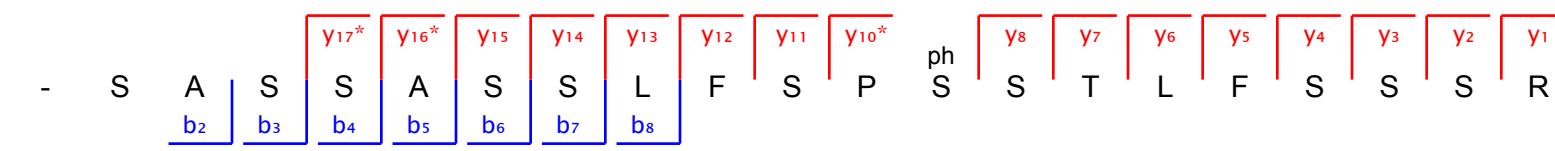

Raw file Scan Method Score m/z Gene names  
 20150814\_A375SR\_Phospho\_BR2\_09 26220 FTMS; HCD 69.98 757.39 ZNF462

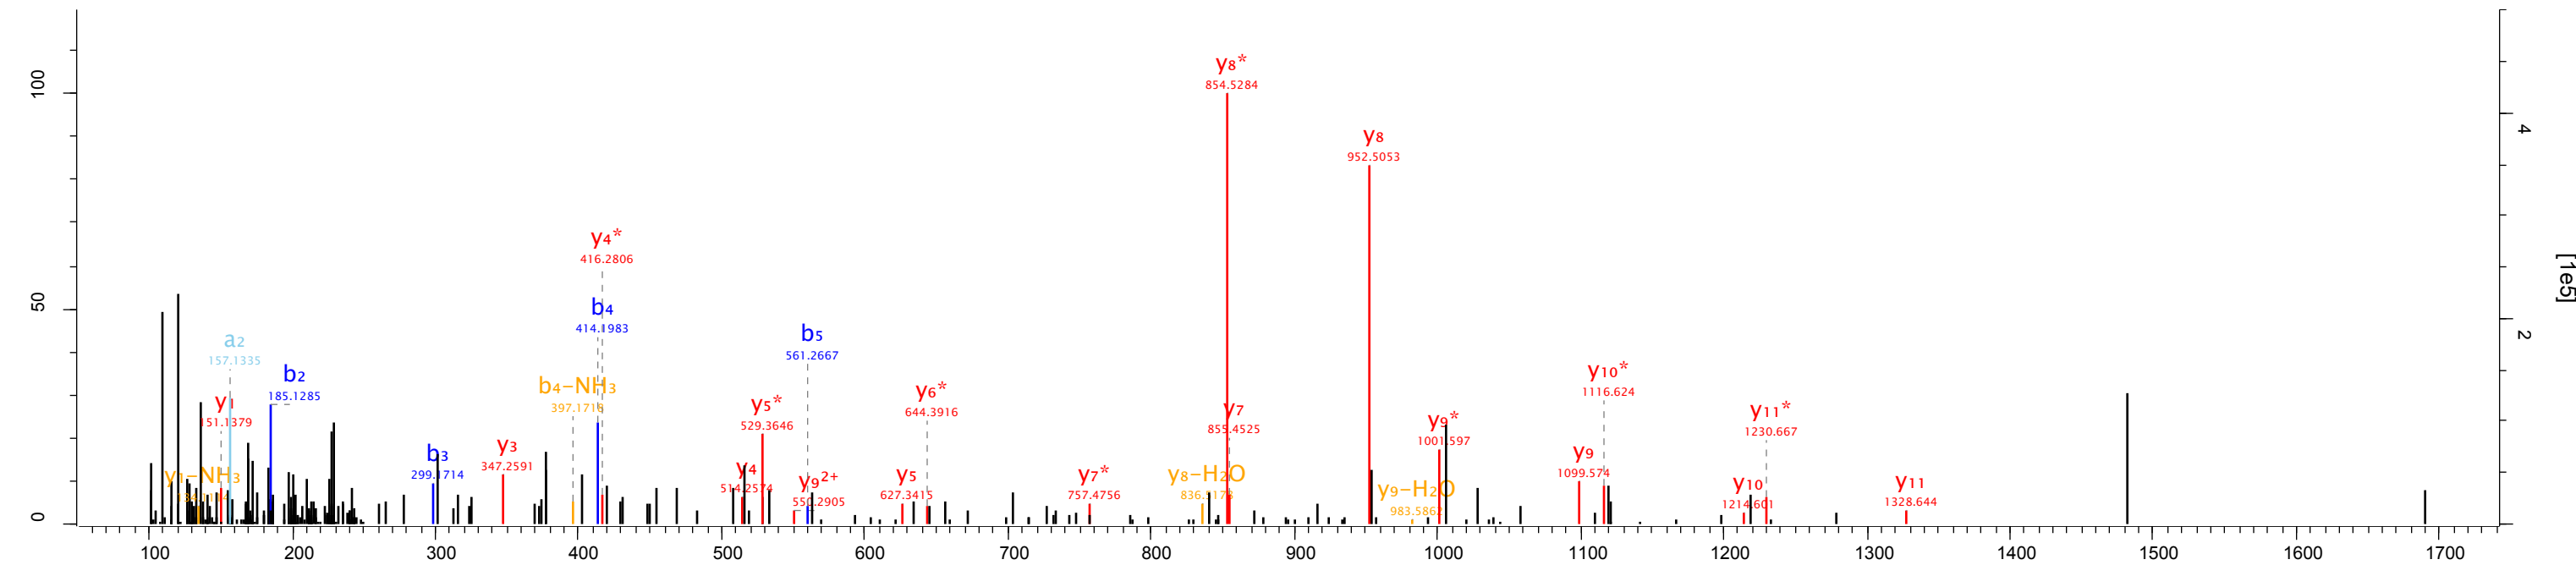

- L A N D F P L D L S P V K -  
 b2 b3 b4 b5

Raw file 20150814\_A375SR\_Phospho\_BR2\_09 Scan 27330 Method FTMS; HCD Score 115.54 m/z 833.65 Gene names CAMSAP2

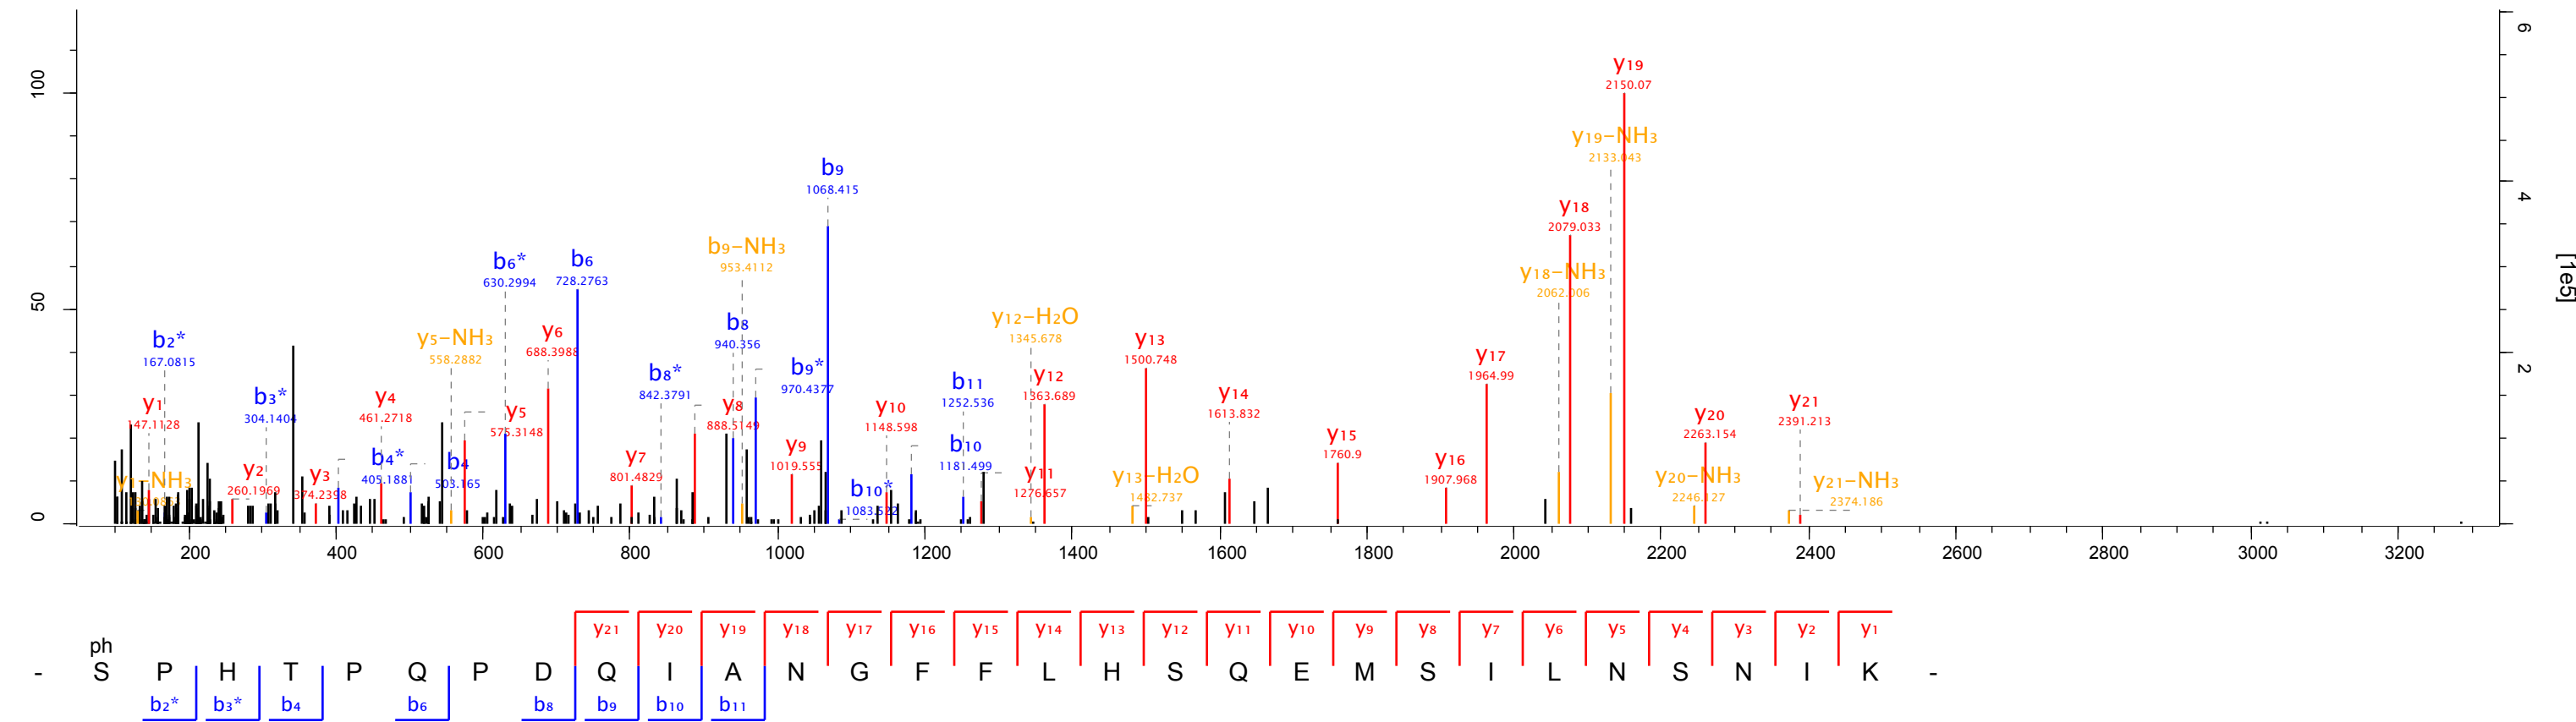

Raw file 20150814\_A375SR\_Phospho\_BR2\_09 Scan 3270 Method FTMS; HCD Score 97.46 m/z 532.75 Gene names FRYL

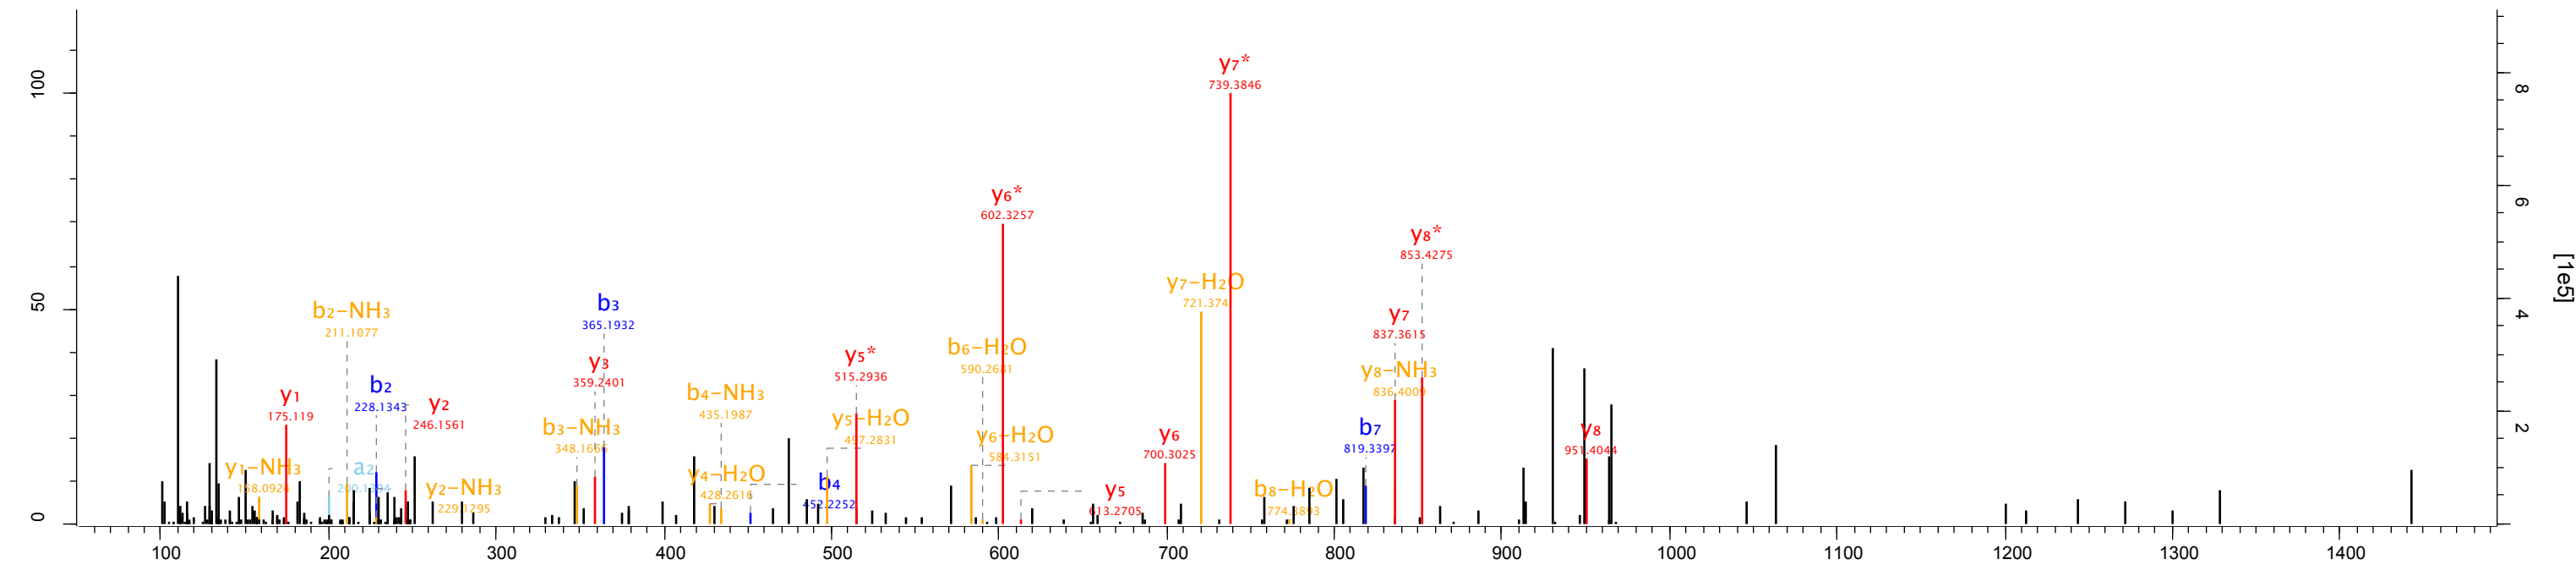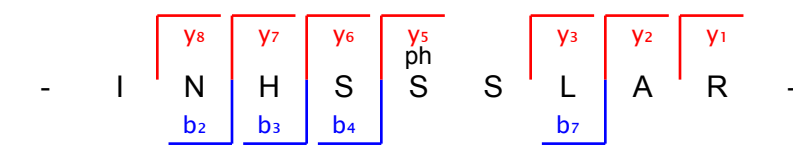

Raw file: 20150814\_A375SR\_Phospho\_BR2\_09  
 Scan: 4230 Method: FTMS; HCD Score: 101.75 m/z: 455.22 Gene names: ZC3H13

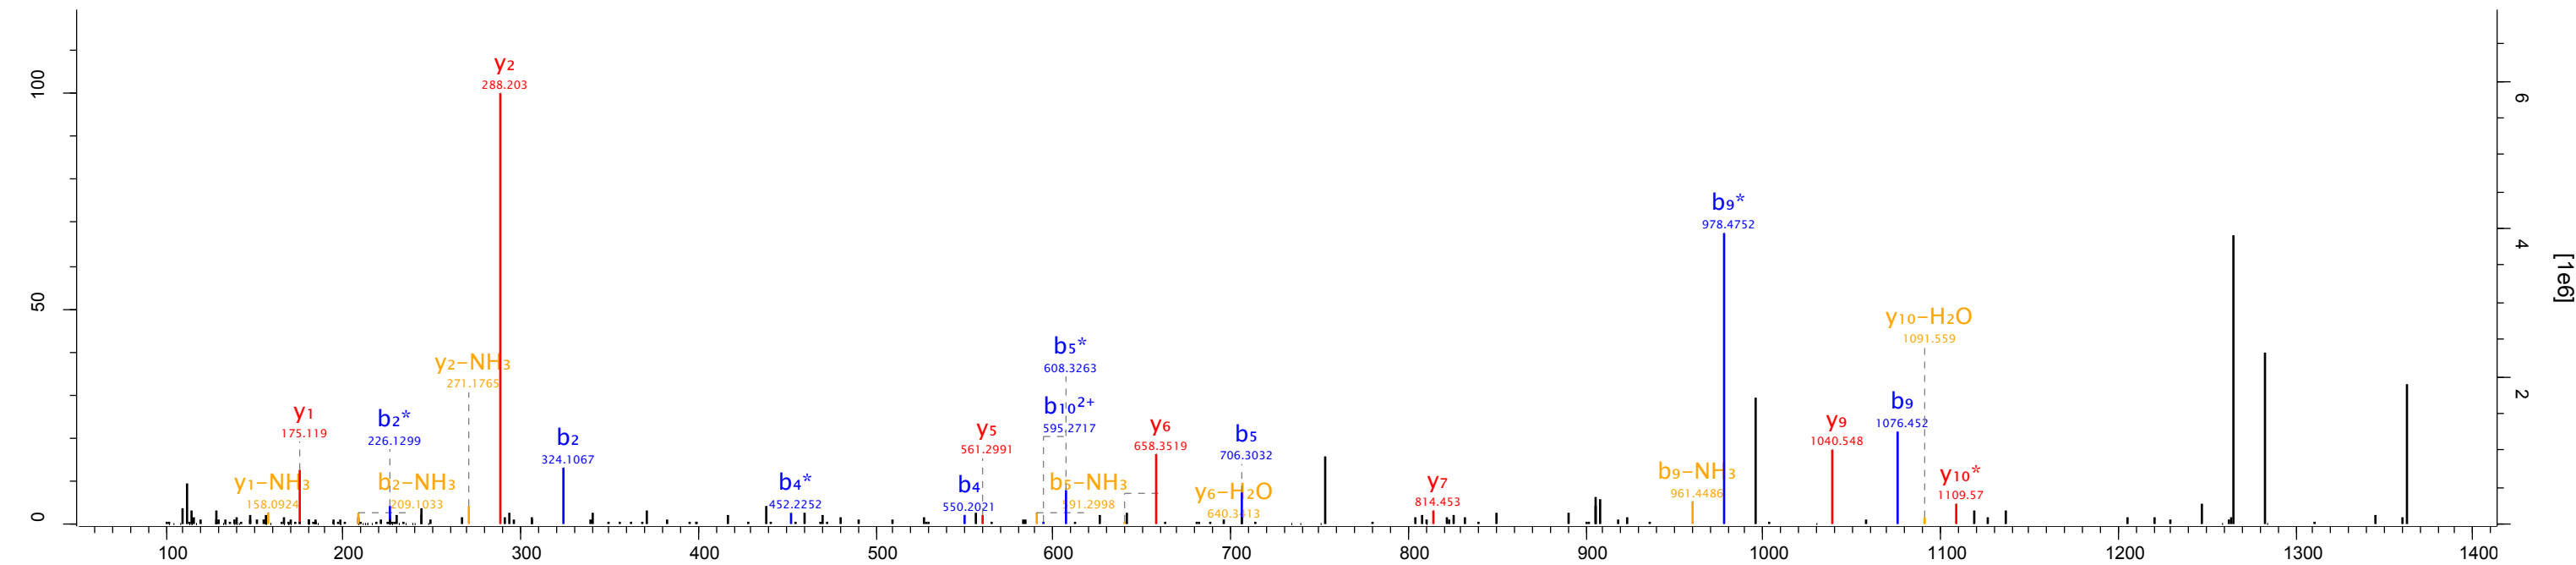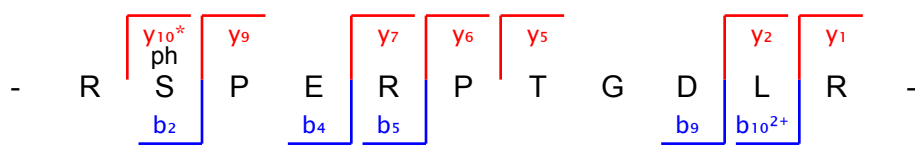

Raw file: 20150814\_A375SR\_Phospho\_BR2\_09  
 Scan: 4310 Method: FTMS; HCD Score: 192.46 m/z: 733.33 Gene names: ADD1

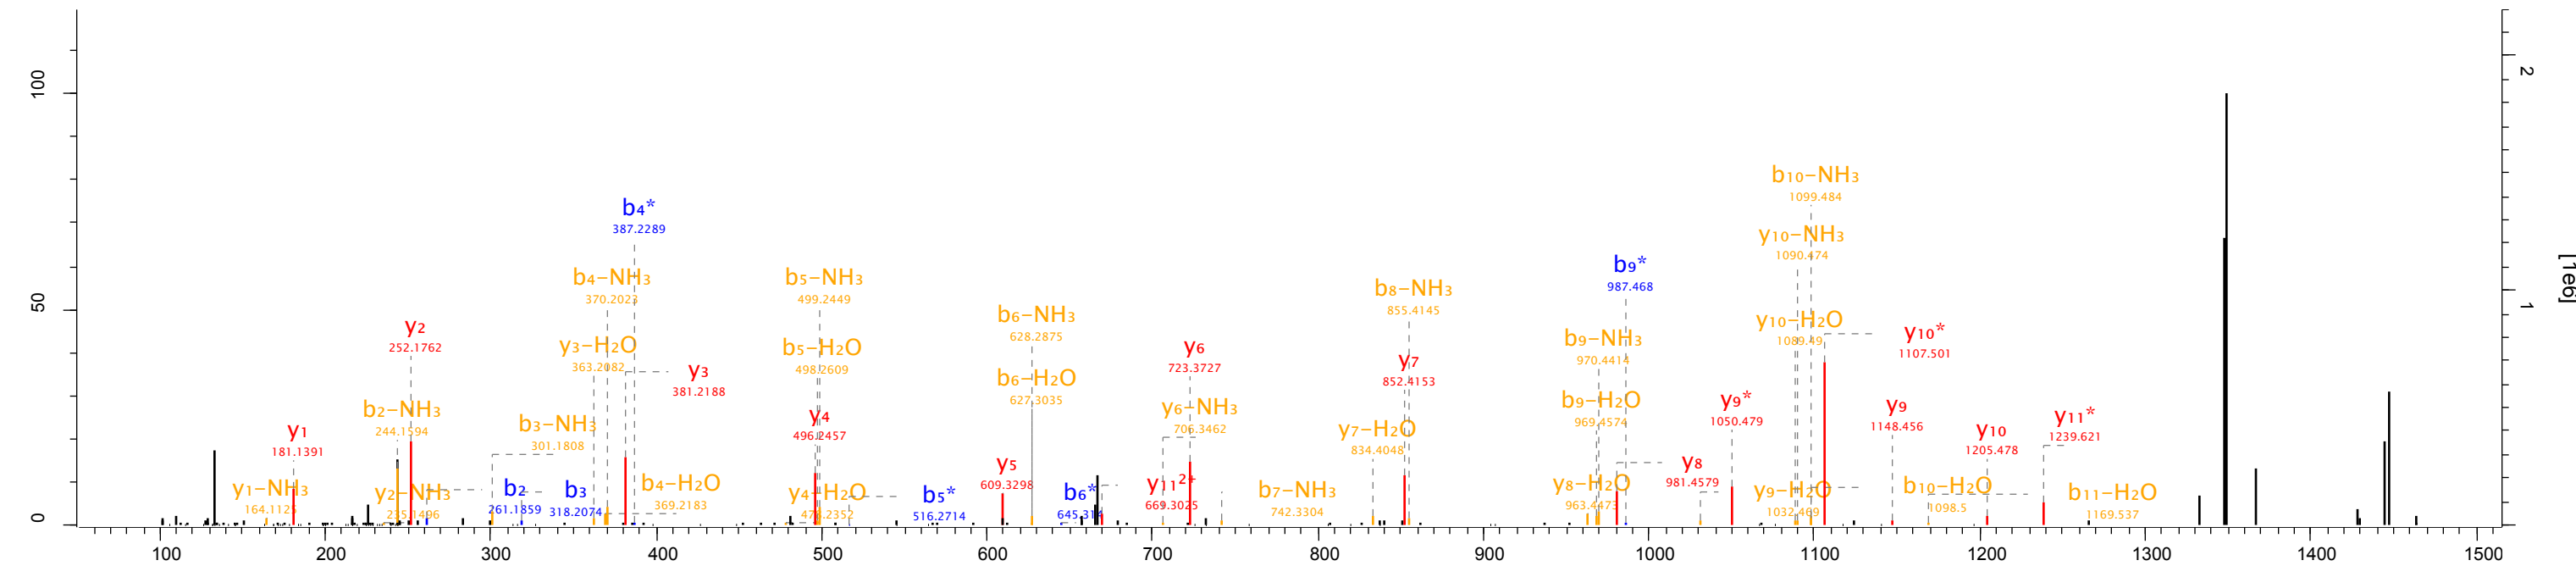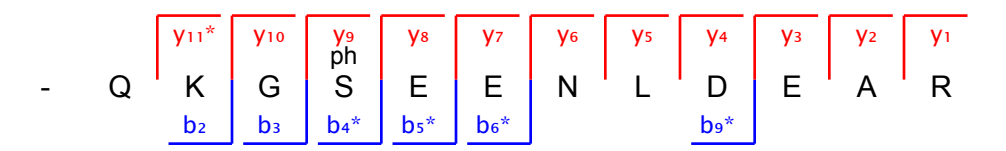



Raw file: 20150814\_A375SR\_Phospho\_BR2\_09  
 Scan: 4690 Method: FTMS; HCD Score: 75.96 m/z: 405.92 Gene names: DENND4A

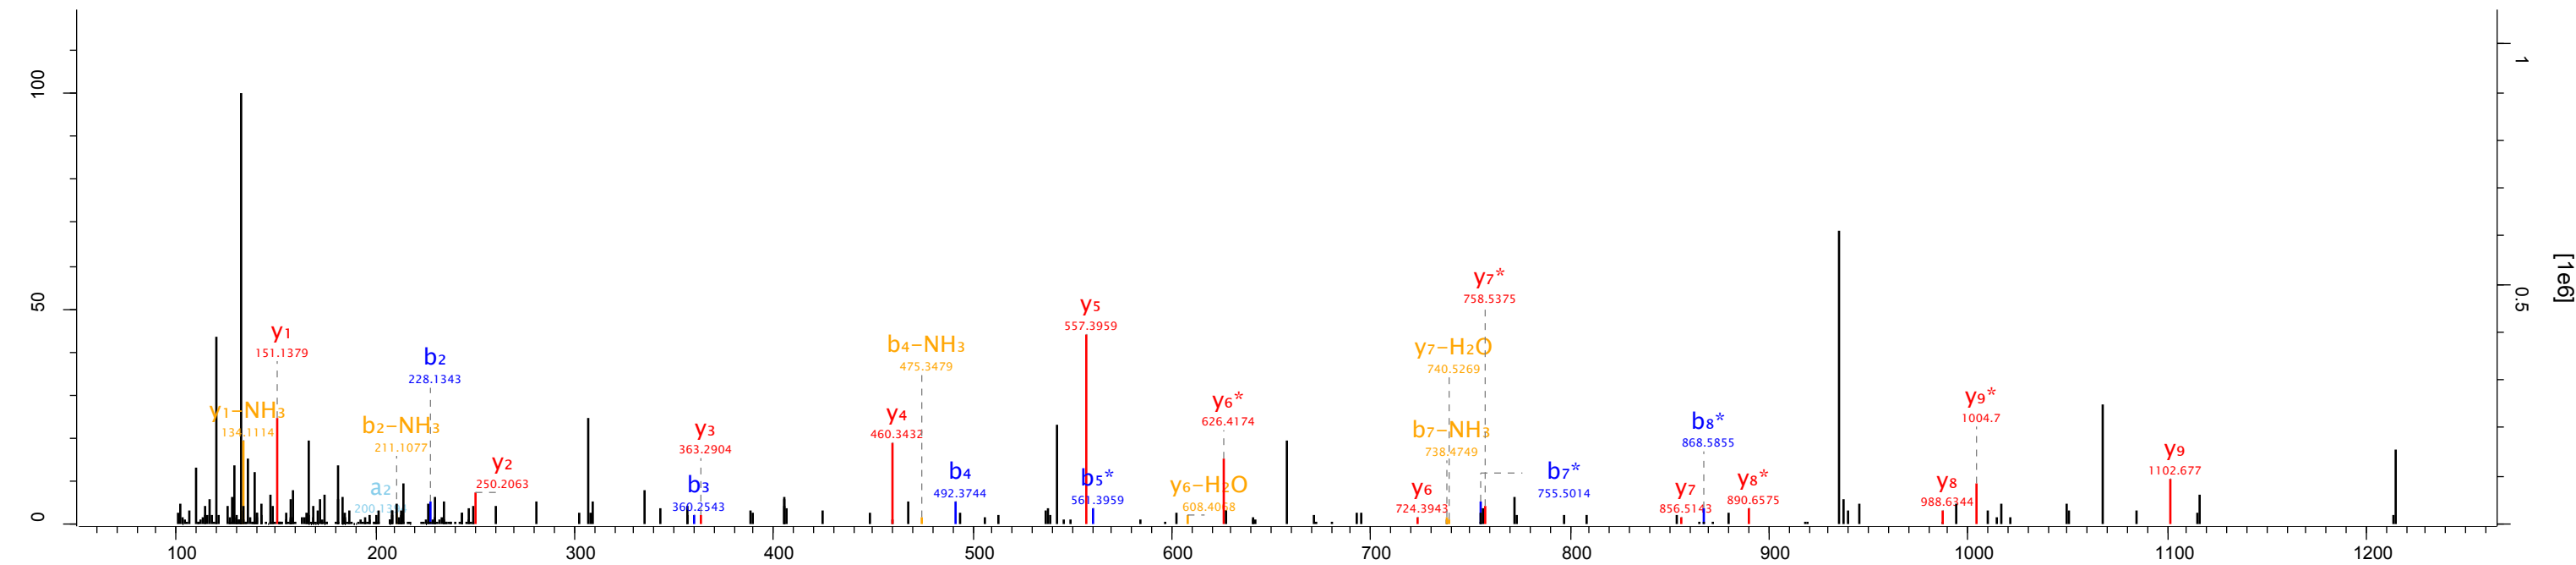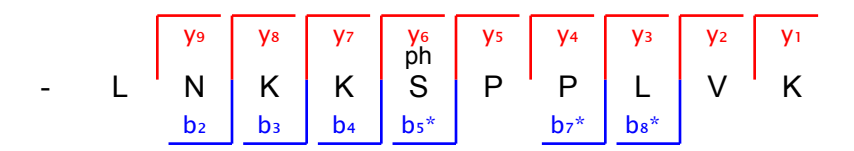

Raw file

20150814\_A375SR\_Phospho\_BR2\_09

Scan 5690 Method FTMS; HCD Score 42.38 m/z 682.3 Gene names NASP

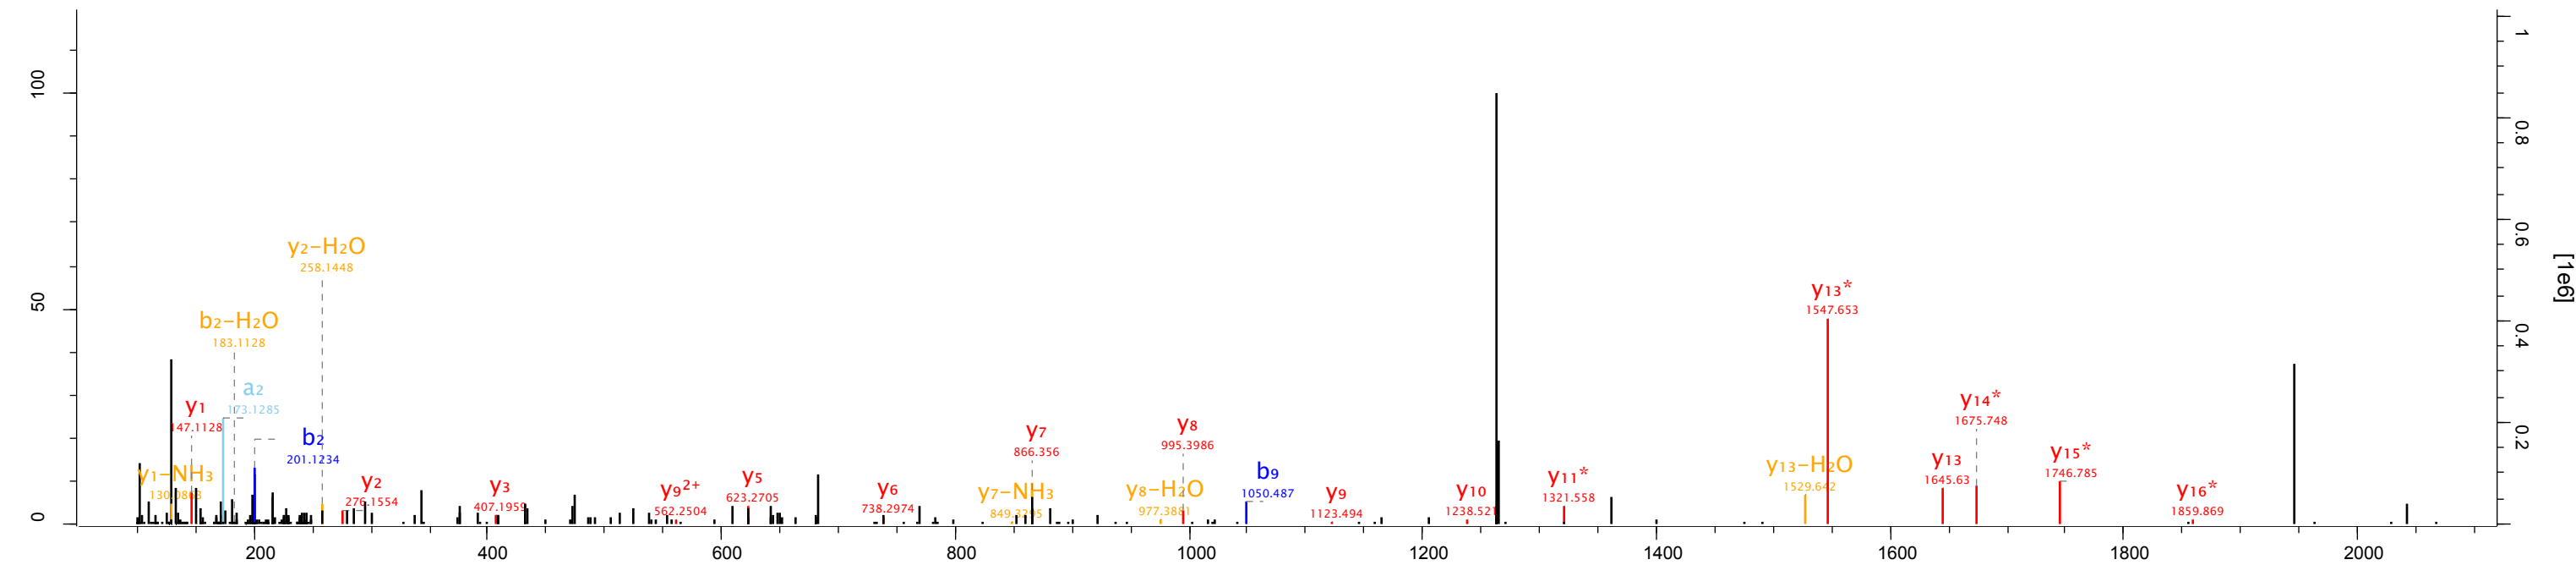

- S L A K P E T D K E Q D S E M E K -

Annotations: b<sub>2</sub> (under L), b<sub>9</sub> (under K), y<sub>16</sub>\* (over L), y<sub>15</sub>\* (over A), y<sub>14</sub>\* (over K), y<sub>13</sub> (over P), y<sub>11</sub>\* (over T), y<sub>10</sub> (over D), y<sub>9</sub> (over K), y<sub>8</sub> (over E), y<sub>7</sub> (over Q), y<sub>6</sub> (over D), y<sub>5</sub> (over S), y<sub>3</sub> (over M), y<sub>2</sub> (over E), y<sub>1</sub> (over K).

Raw file: 20150814\_A375SR\_Phospho\_BR2\_09  
 Scan: 7710  
 Method: FTMS; HCD  
 Score: 58.29  
 m/z: 655  
 Gene names: GIPC1

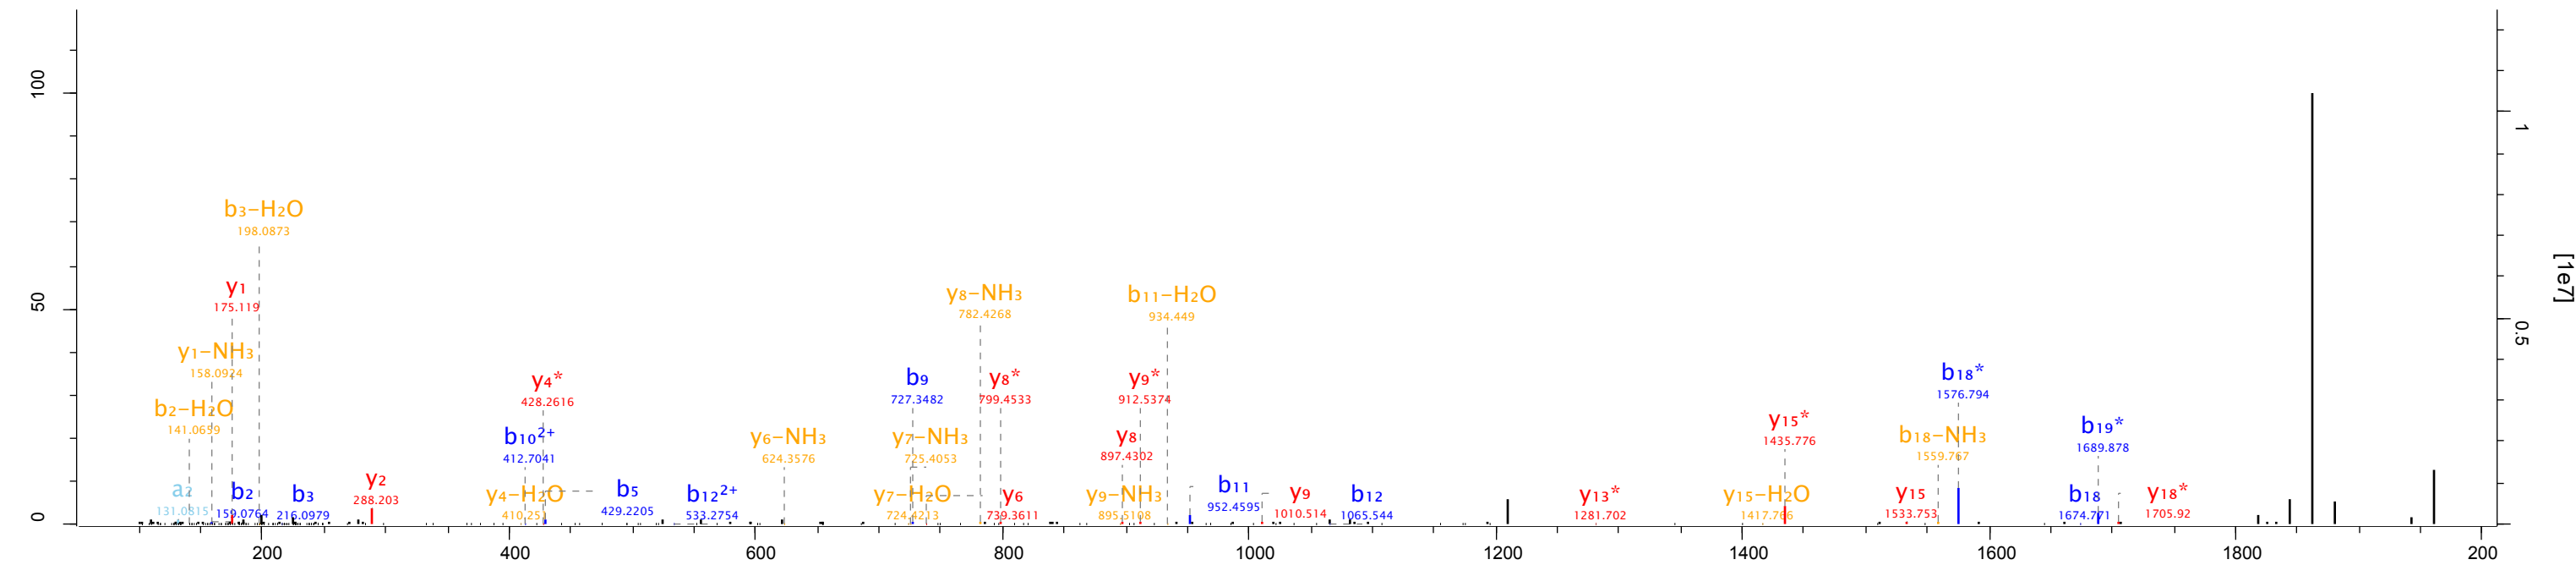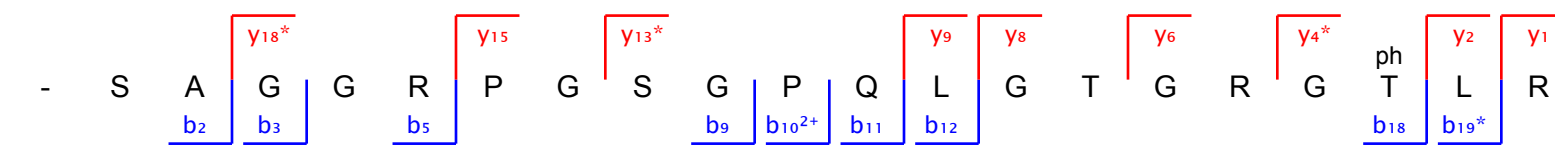

Raw file: 20150814\_A375SR\_Phospho\_BR2\_09  
 Scan: 8430 Method: FTMS; HCD Score: 71.18 m/z: 617.3 Gene names: RASAL2

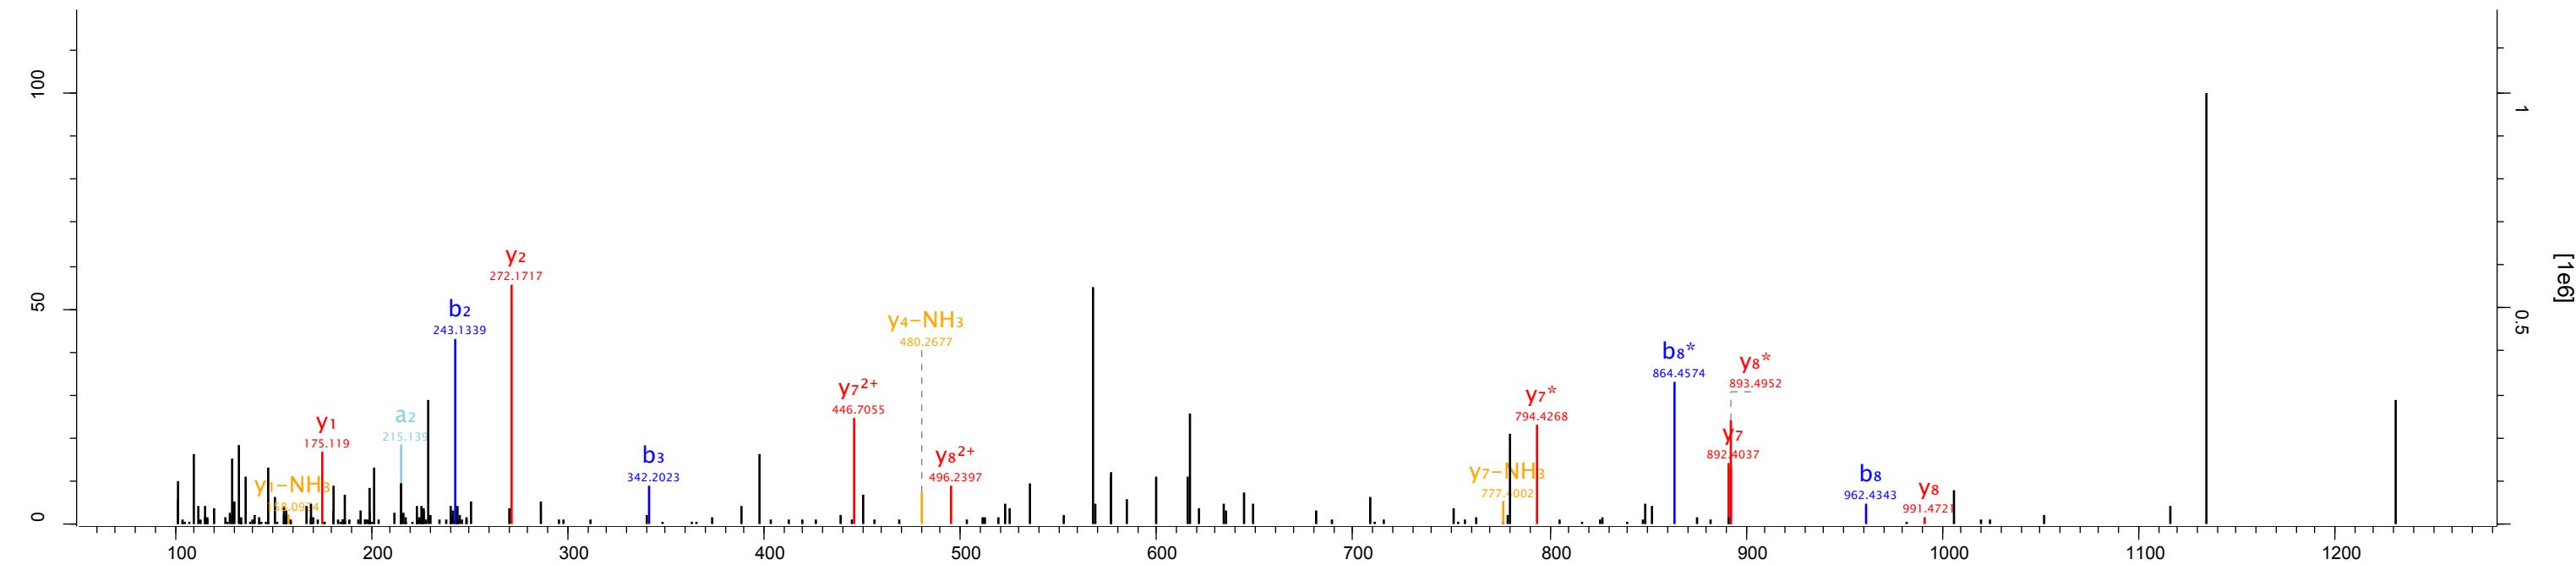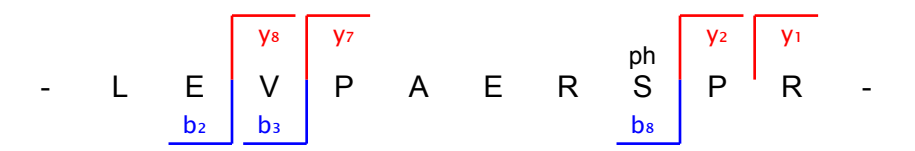

Raw file Scan Method Score m/z Gene names  
 20150814\_A375SR\_Phospho\_BR2\_09 8630 FTMS; HCD 103.4 610.64 PSMF1

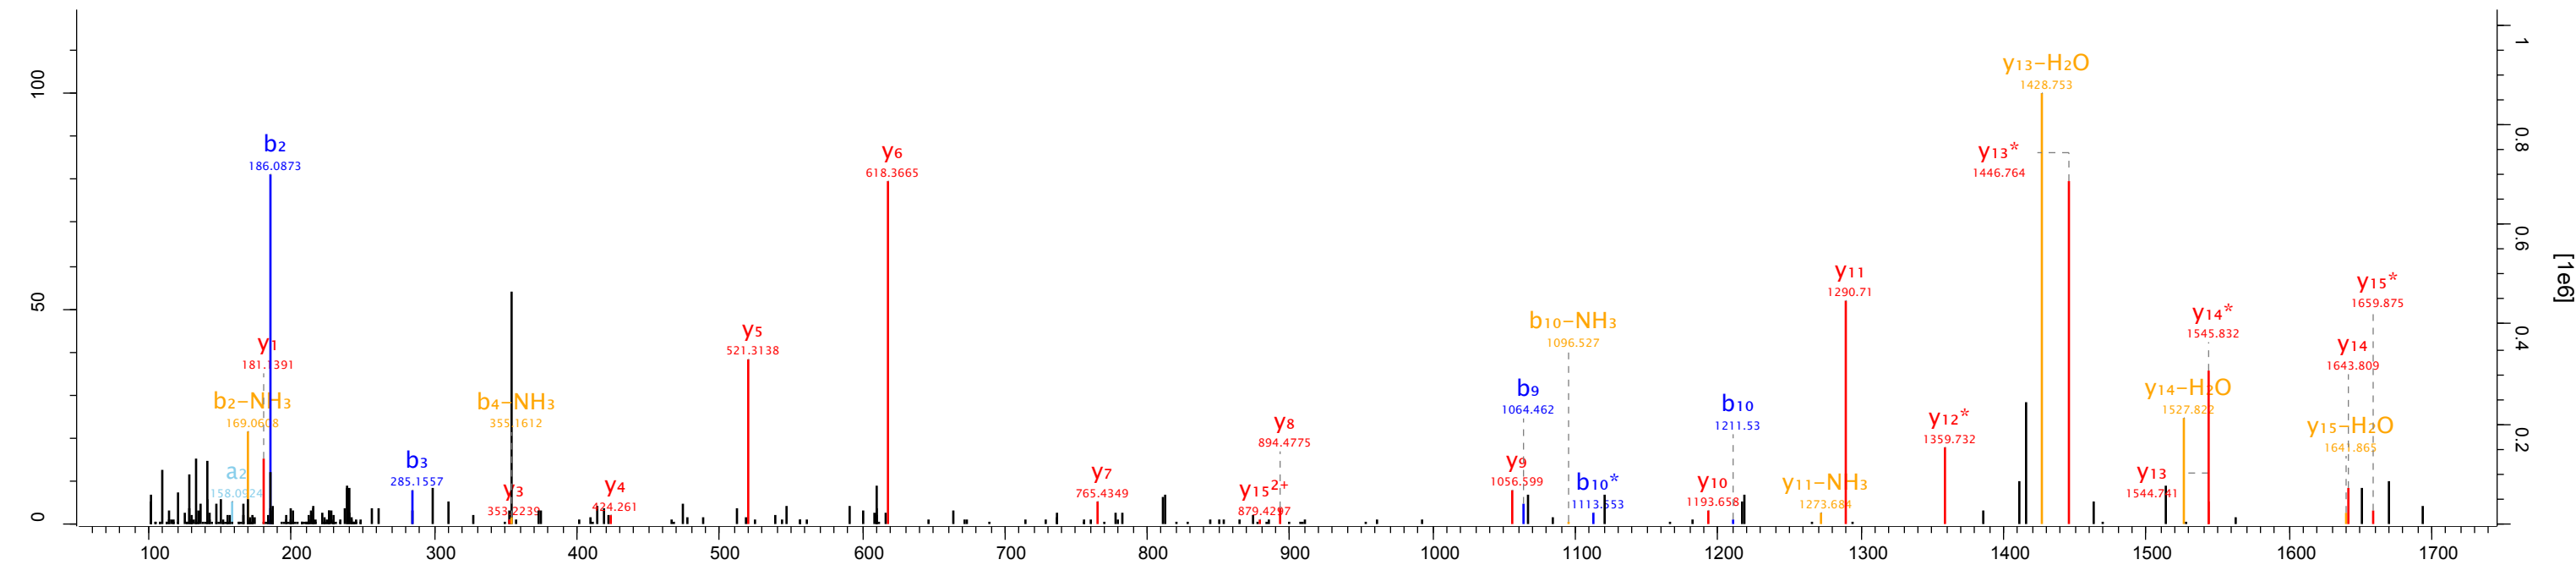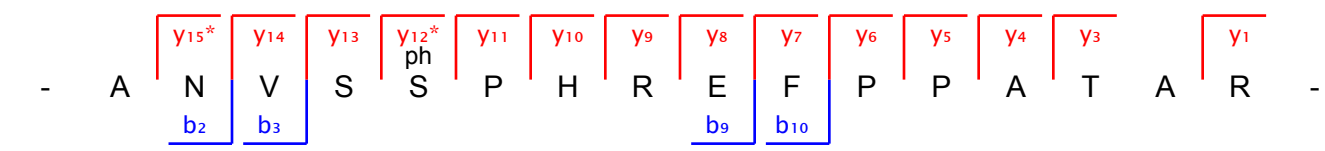

Raw file: 20150814\_A375SR\_Phospho\_BR2\_09  
 Scan: 9260 Method: FTMS; HCD Score: 147.78 m/z: 639.97 Gene names: KNOX1

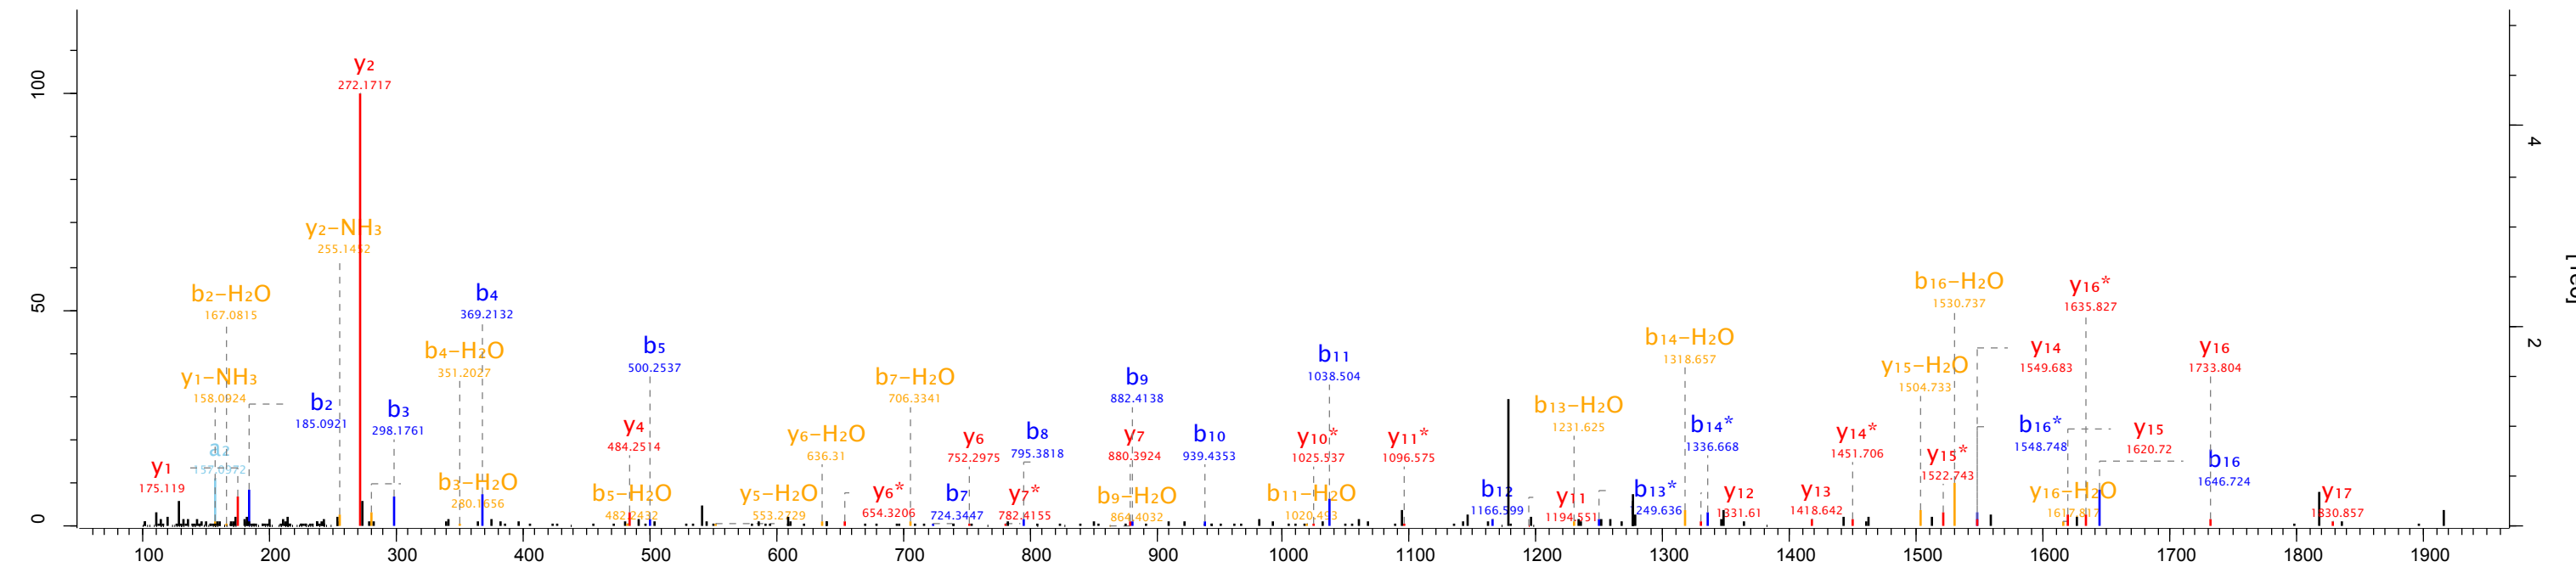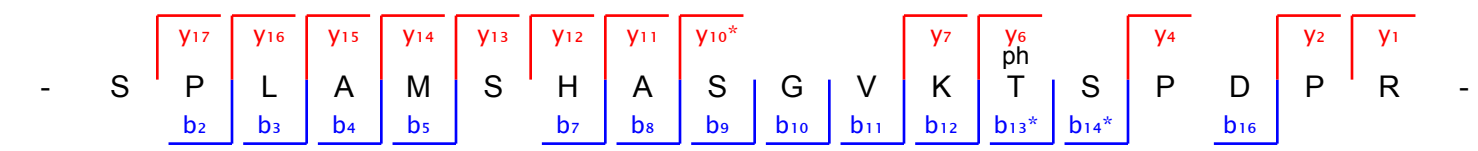

Raw file: 20150814\_A375SR\_Phospho\_BR2\_09  
 Scan: 9690 Method: FTMS; HCD Score: 164.53 m/z: 849.88 Gene names: DNTTIP2

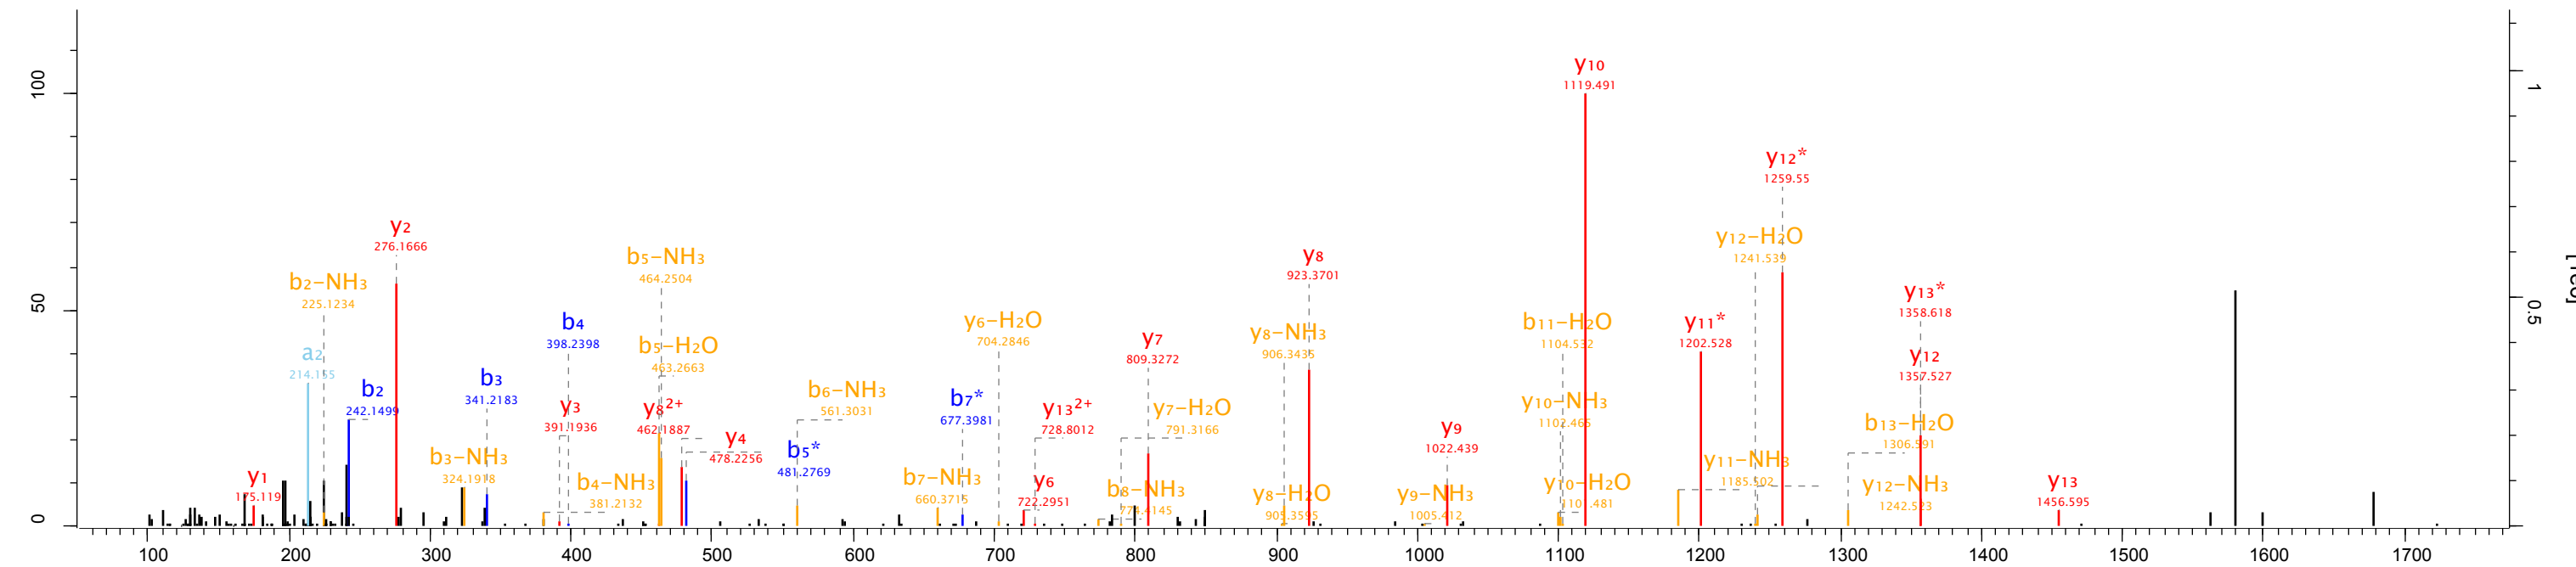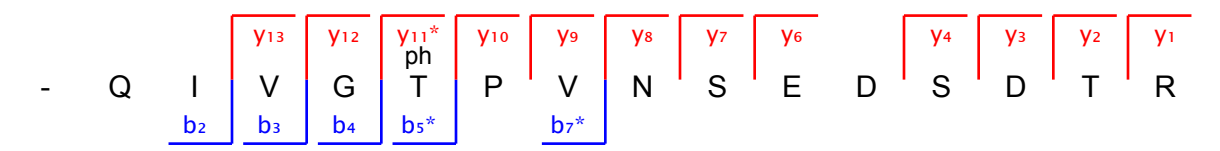

Raw file: 20150814\_A375SR\_Phospho\_BR2\_09  
 Scan: 9740 Method: FTMS; HCD Score: 115.29 m/z: 516.25 Gene names: LMNB1

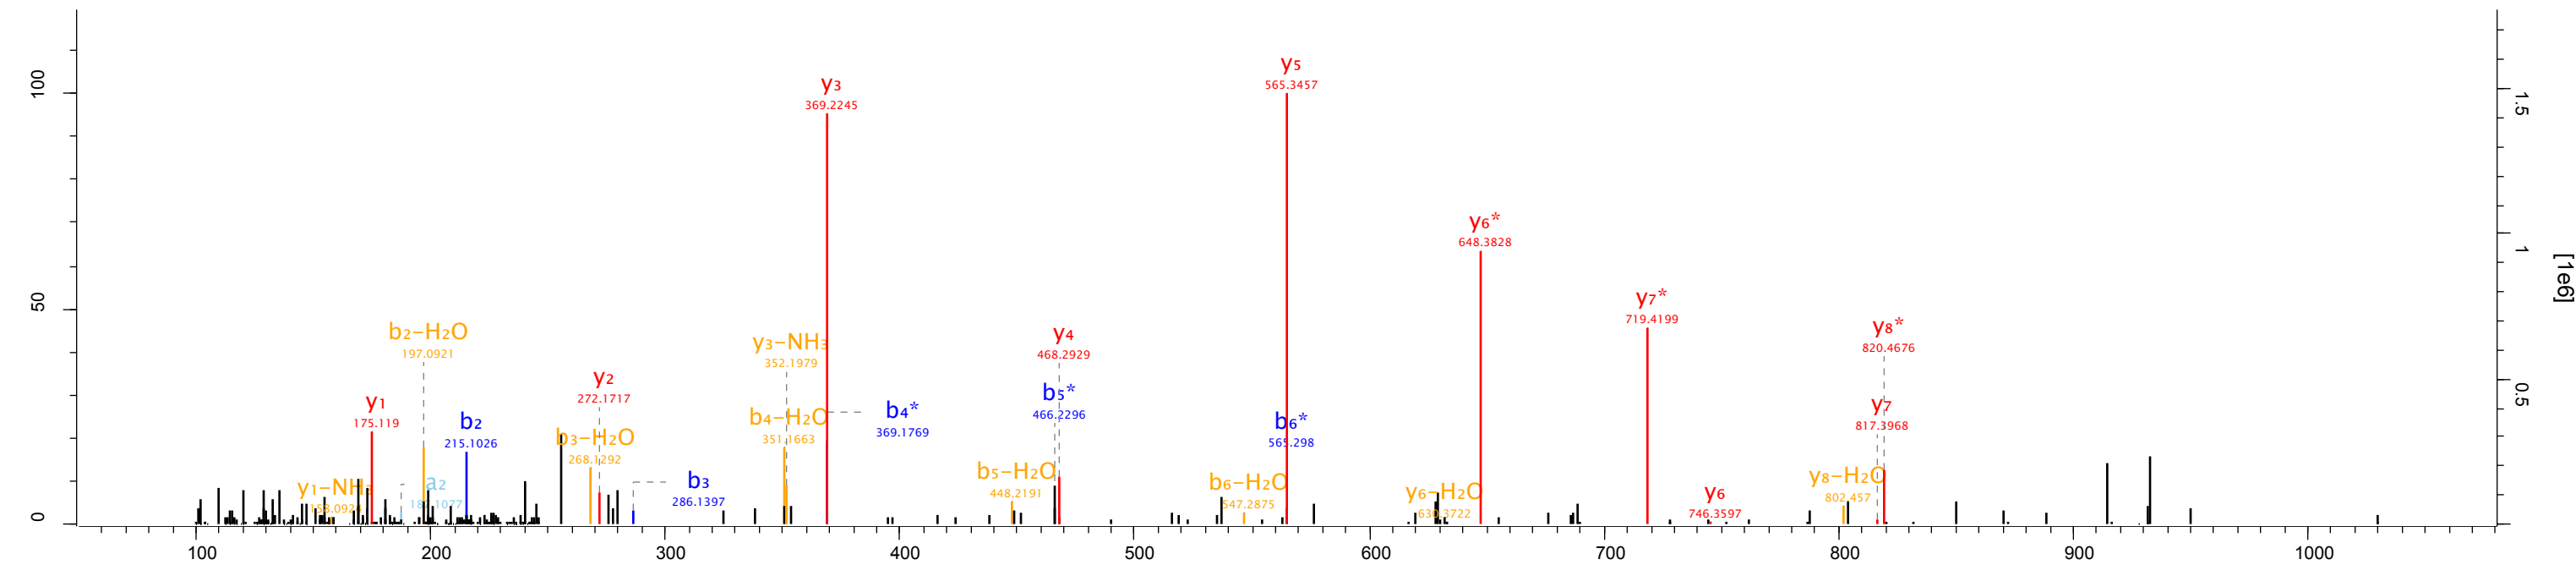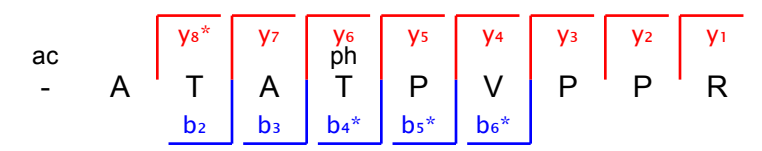



Raw file: 20150814\_A375SR\_Phospho\_BR2\_02  
 Scan: 11711 Method: FTMS; HCD Score: 85.47 m/z: 639.75 Gene names: TLE4

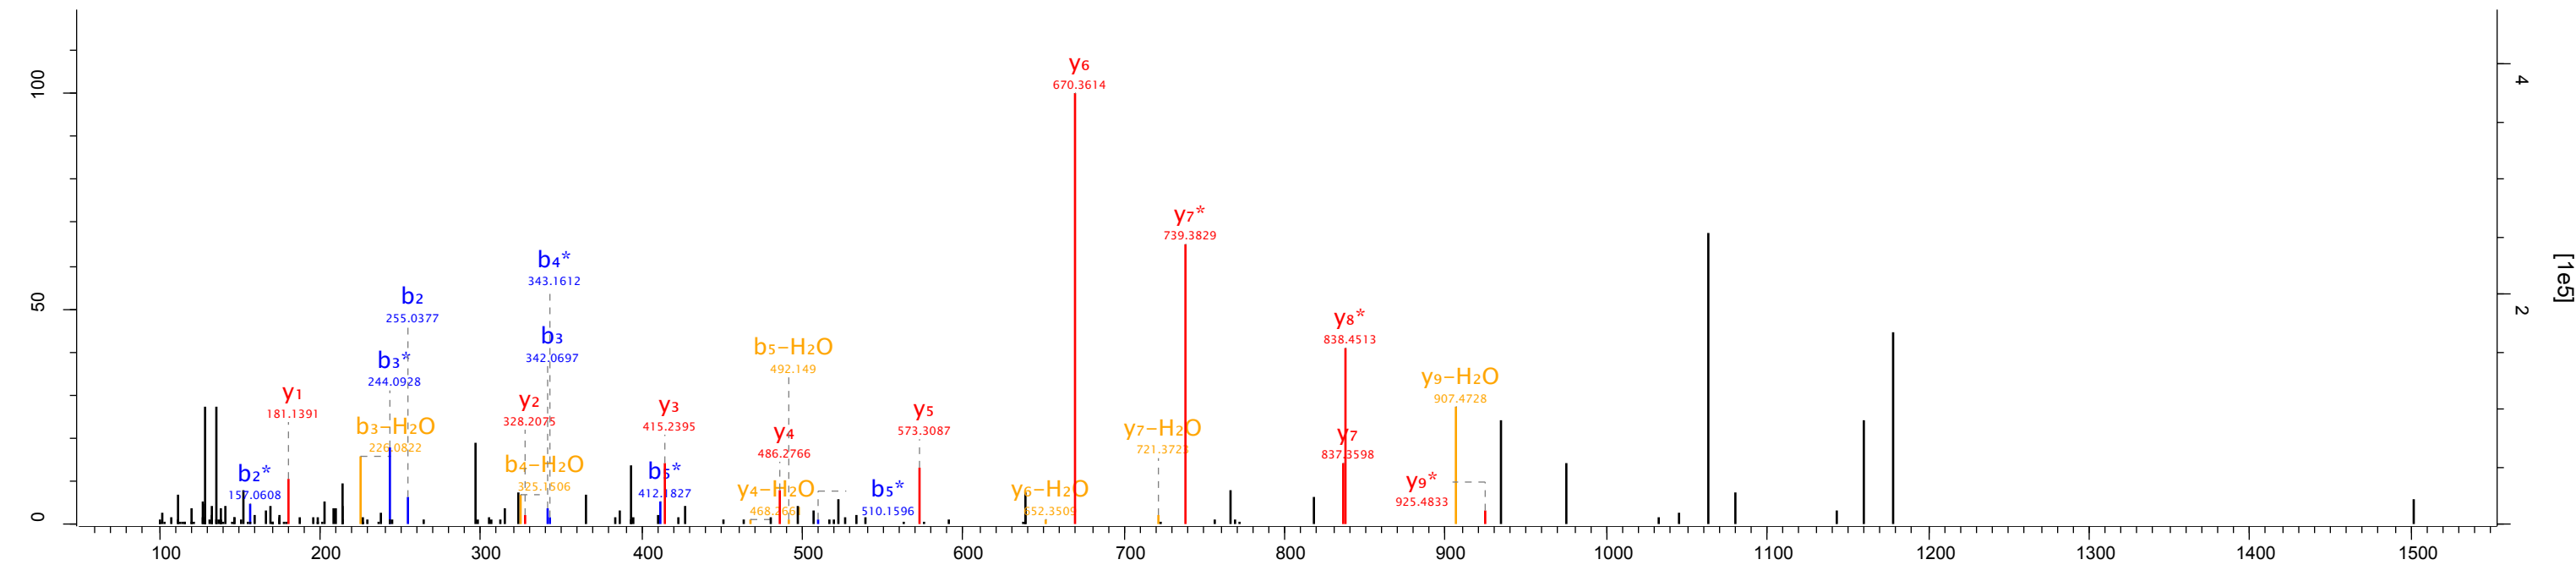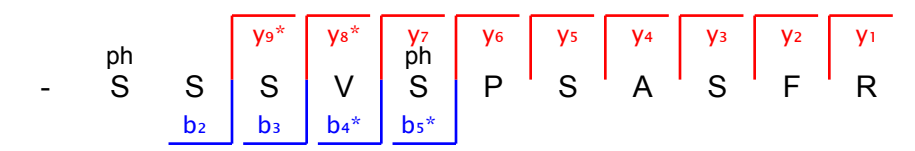

Raw file: 20150814\_A375SR\_Phospho\_BR2\_02  
 Scan: 11801 Method: FTMS; HCD Score: 84.68 m/z: 982.9 Gene names: C2CD3

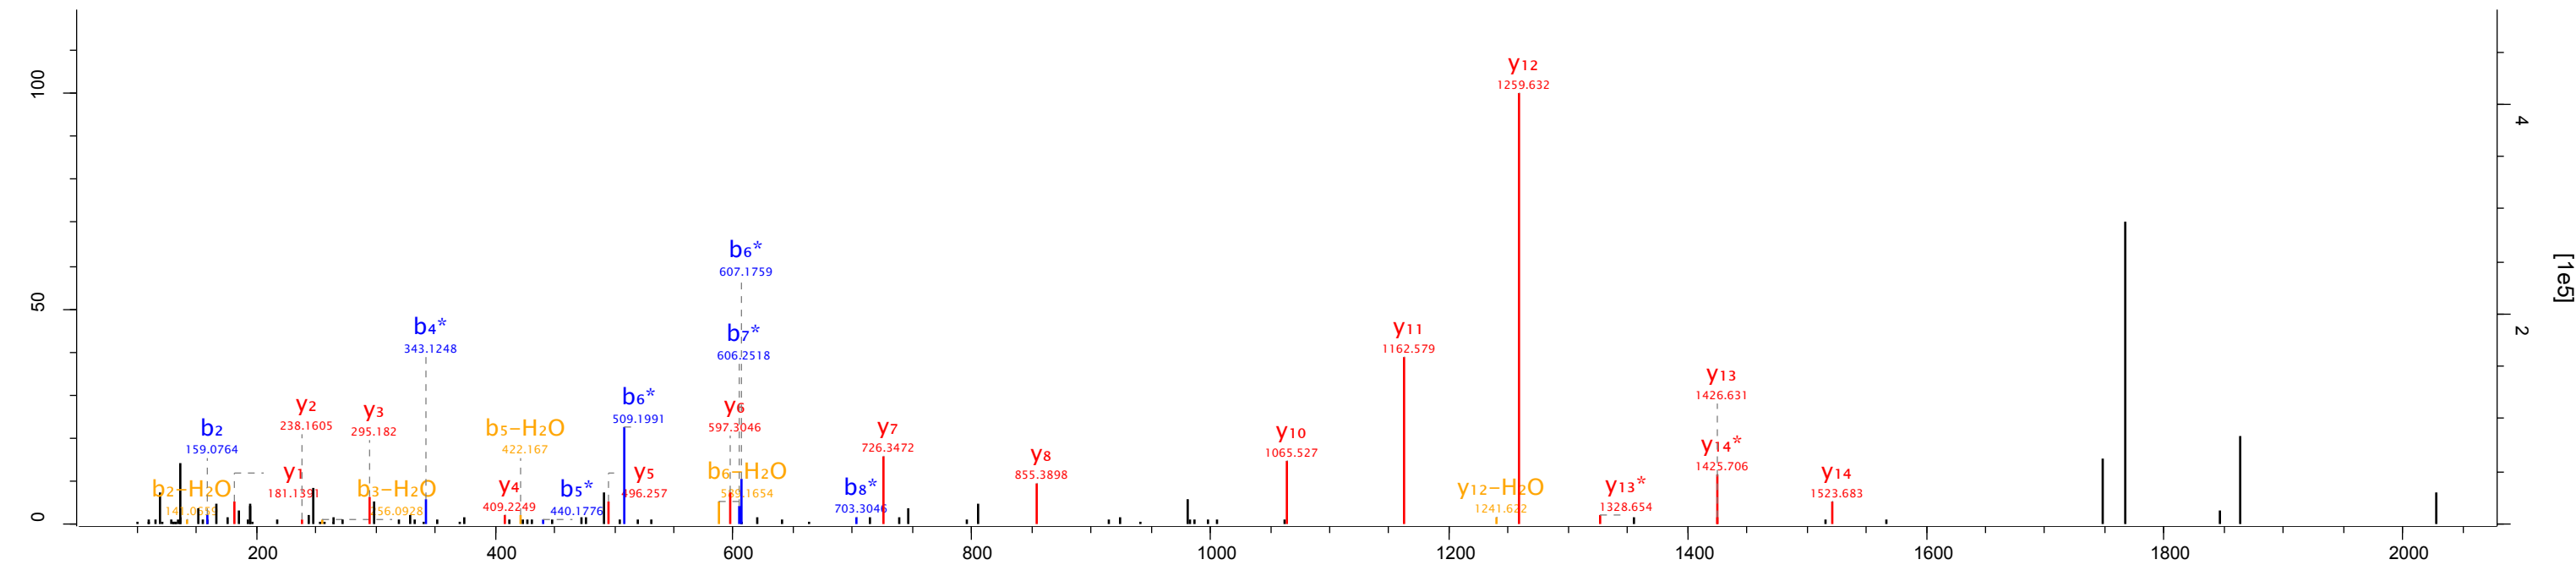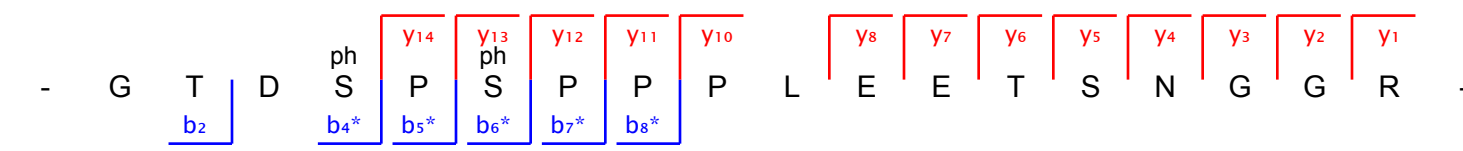

Raw file 20150814\_A375SR\_Phospho\_BR2\_02 Scan 11821 Method FTMS; HCD Score 107.24 m/z 1334.98 Gene names NCAPG

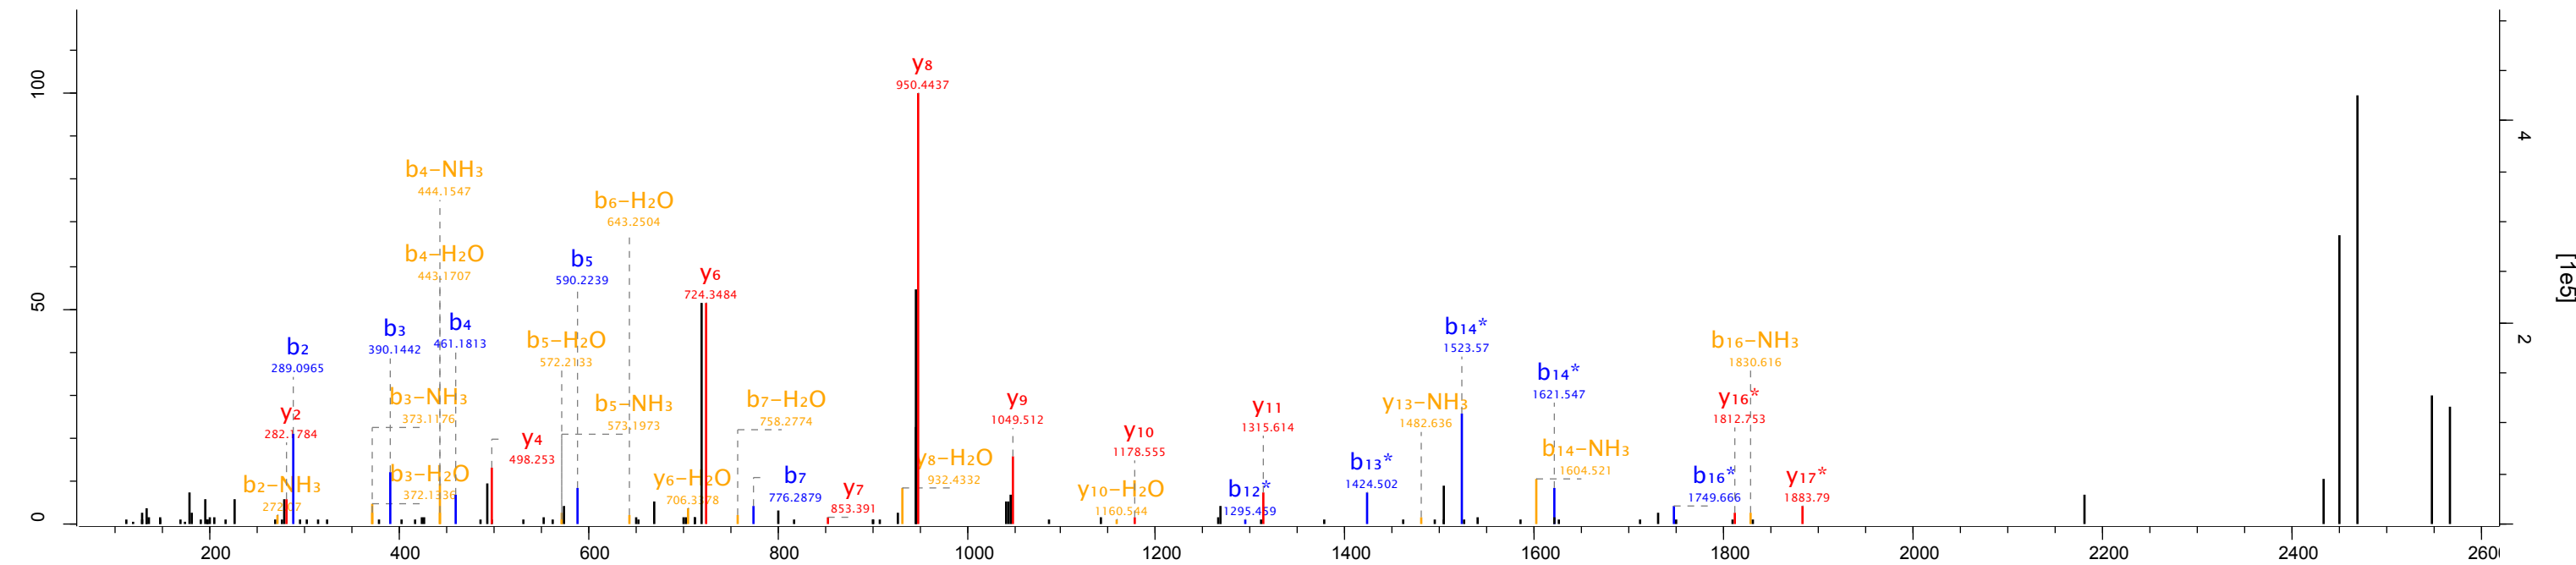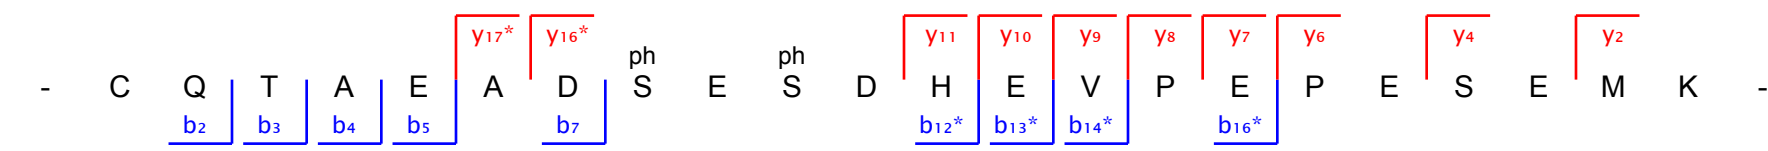

Raw file: 20150814\_A375SR\_Phospho\_BR2\_02  
 Scan: 11951 Method: FTMS; HCD Score: 139.69 m/z: 930.35 Gene names: CHD7

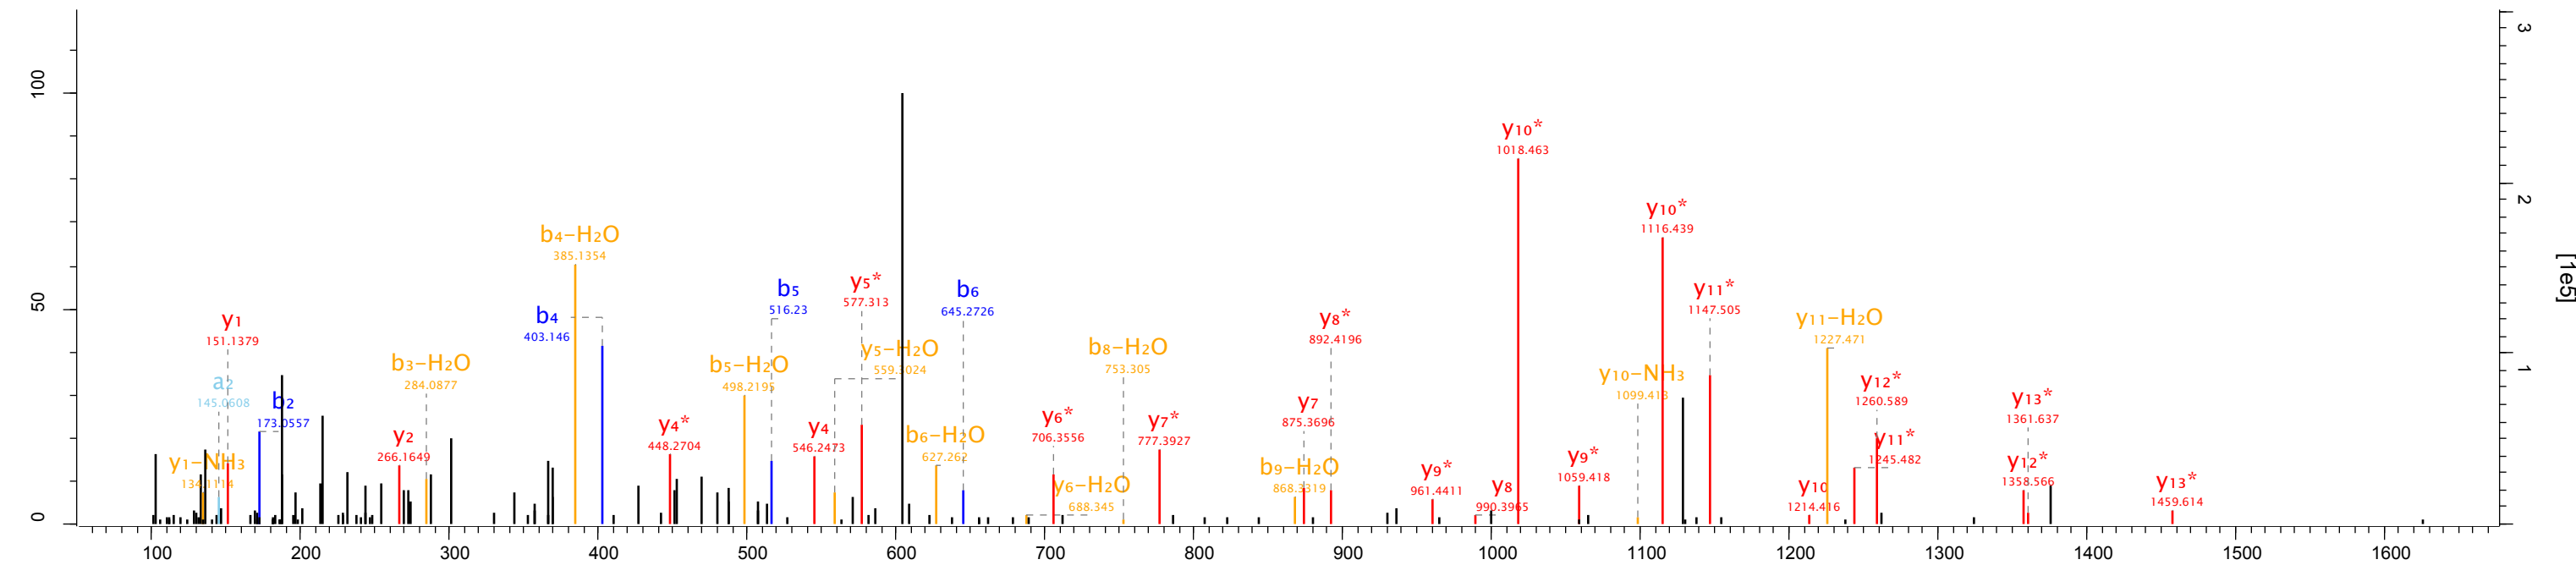

- D G E T L E G S D A E E S L D K -

Fragmentation sites (b and y ions) are indicated by brackets below the amino acid sequence:

- b2: G
- b4: T
- b5: L
- b6: E
- y13\*: T
- y12\*: L
- y11\*: E
- y10: G
- y9\*ph: S
- y8: D
- y7: A
- y6\*: E
- y5\*: E
- y4\*ph: S
- y2: D
- y1: K

Raw file: 20150814\_A375SR\_Phospho\_BR2\_02  
 Scan: 12721 Method: FTMS; HCD Score: 71.85 m/z: 875.82 Gene names: CCDC14

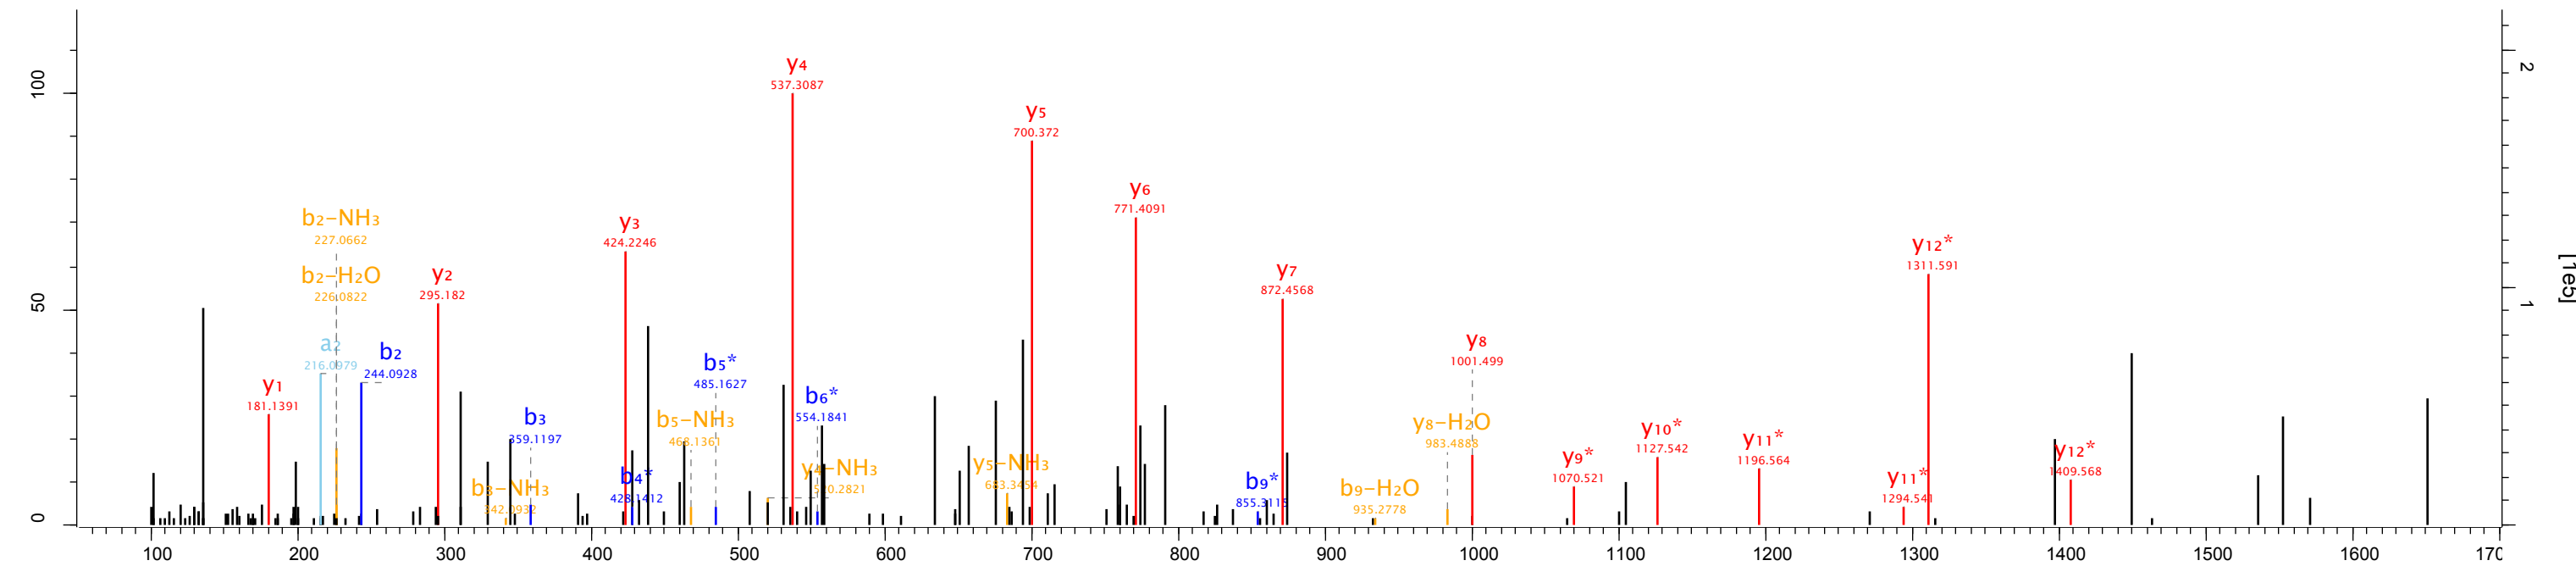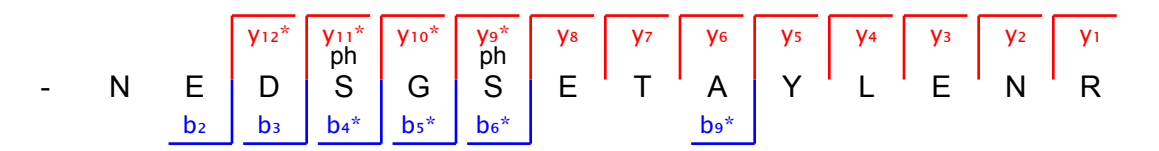

Raw file 20150814\_A375SR\_Phospho\_BR2\_02 Scan 12931 Method FTMS; HCD Score 65.89 m/z 631.61 Gene names FRMD6

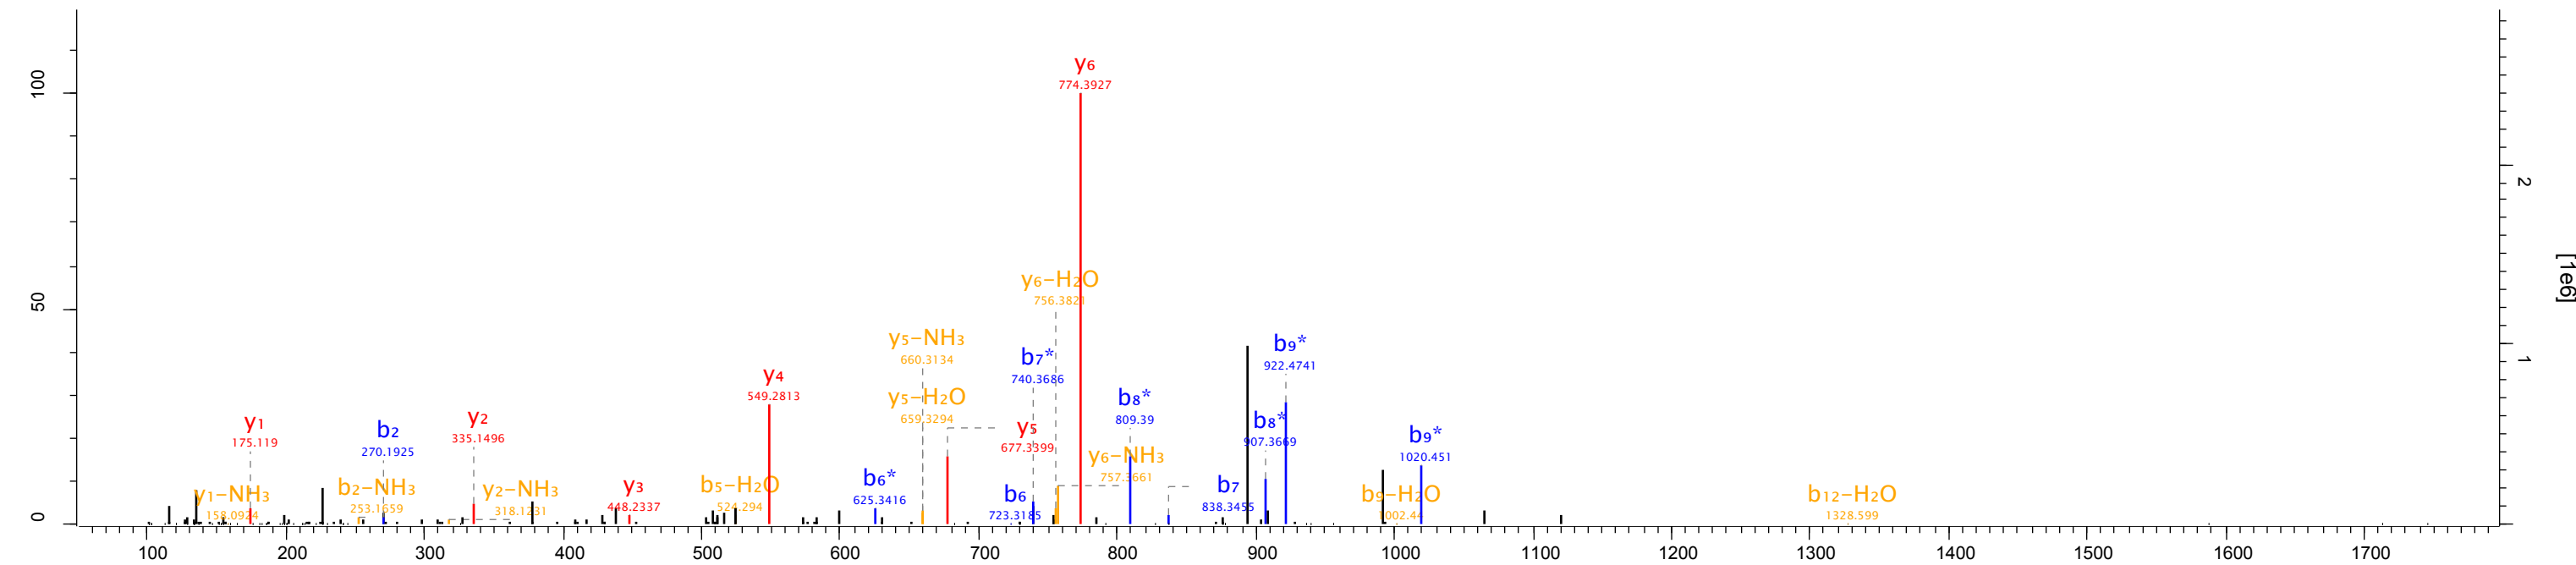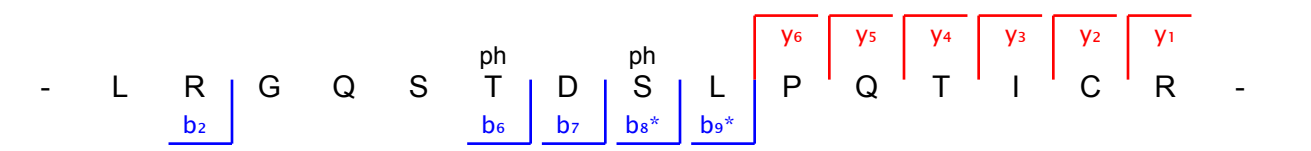

Raw file  
20150814\_A375SR\_Phospho\_BR2\_02

Scan 13301 Method FTMS; HCD Score 178.44 m/z 1025.92 Gene names GLE1

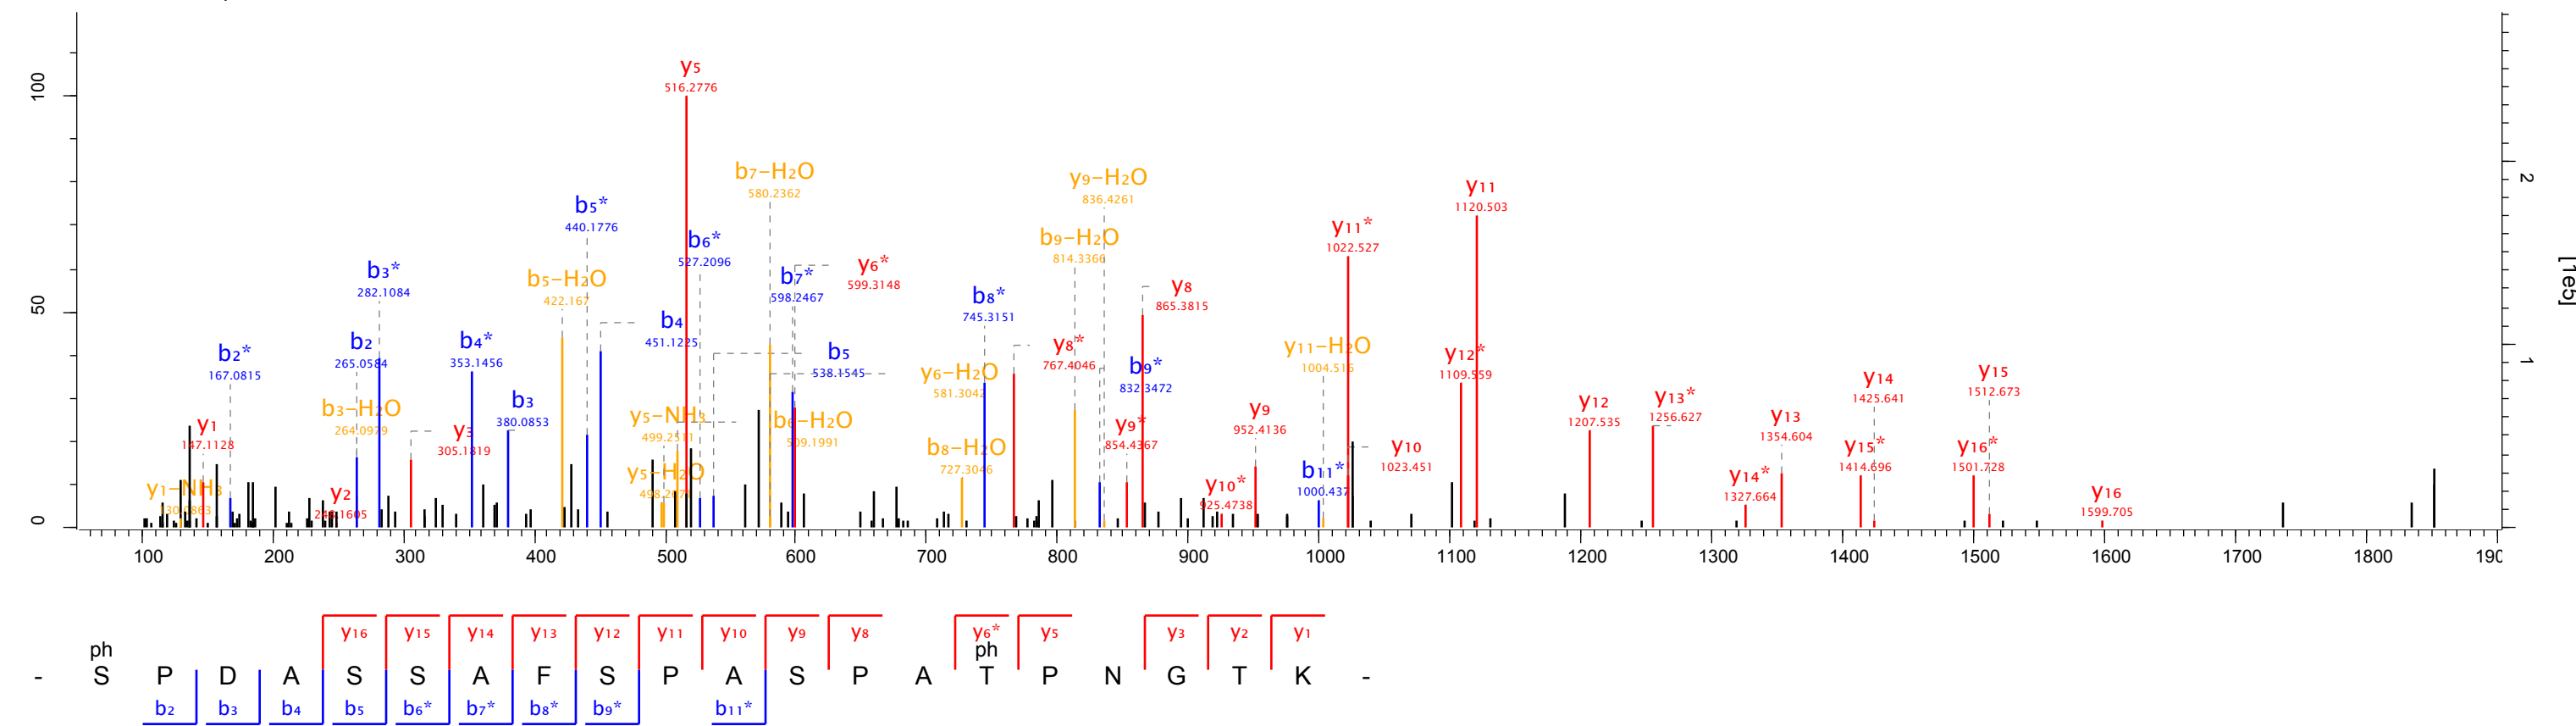

Raw file: 20150814\_A375SR\_Phospho\_BR2\_02  
 Scan: 13901 Method: FTMS; HCD Score: 193.06 m/z: 1245.99 Gene names: SCAF11

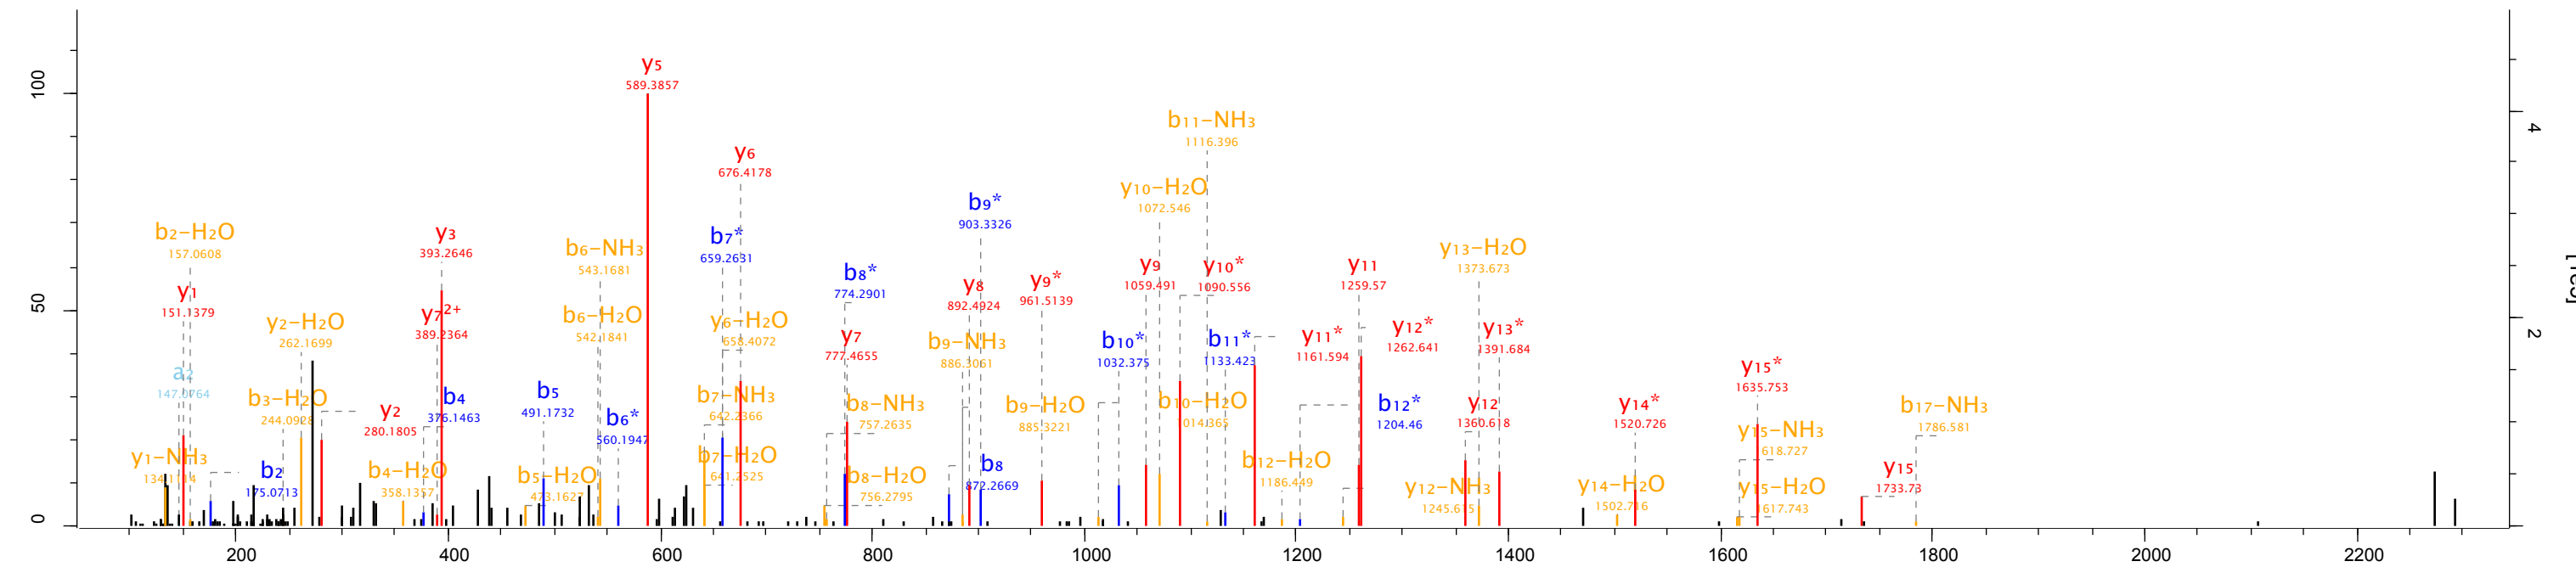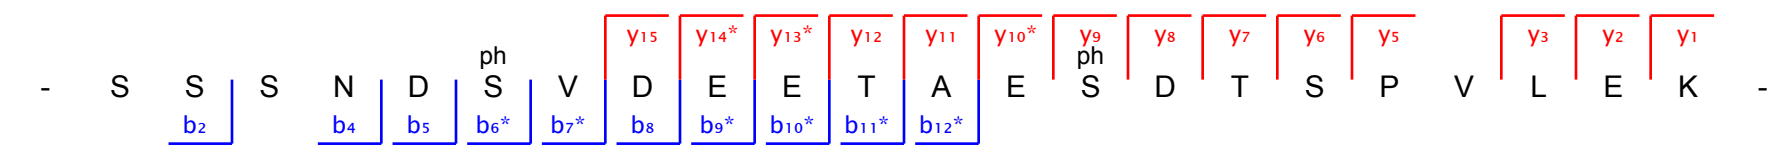



Raw file 20150814\_A375SR\_Phospho\_BR2\_02 Scan 14471 Method FTMS; HCD Score 93.5 m/z 691.79 Gene names NCOA5

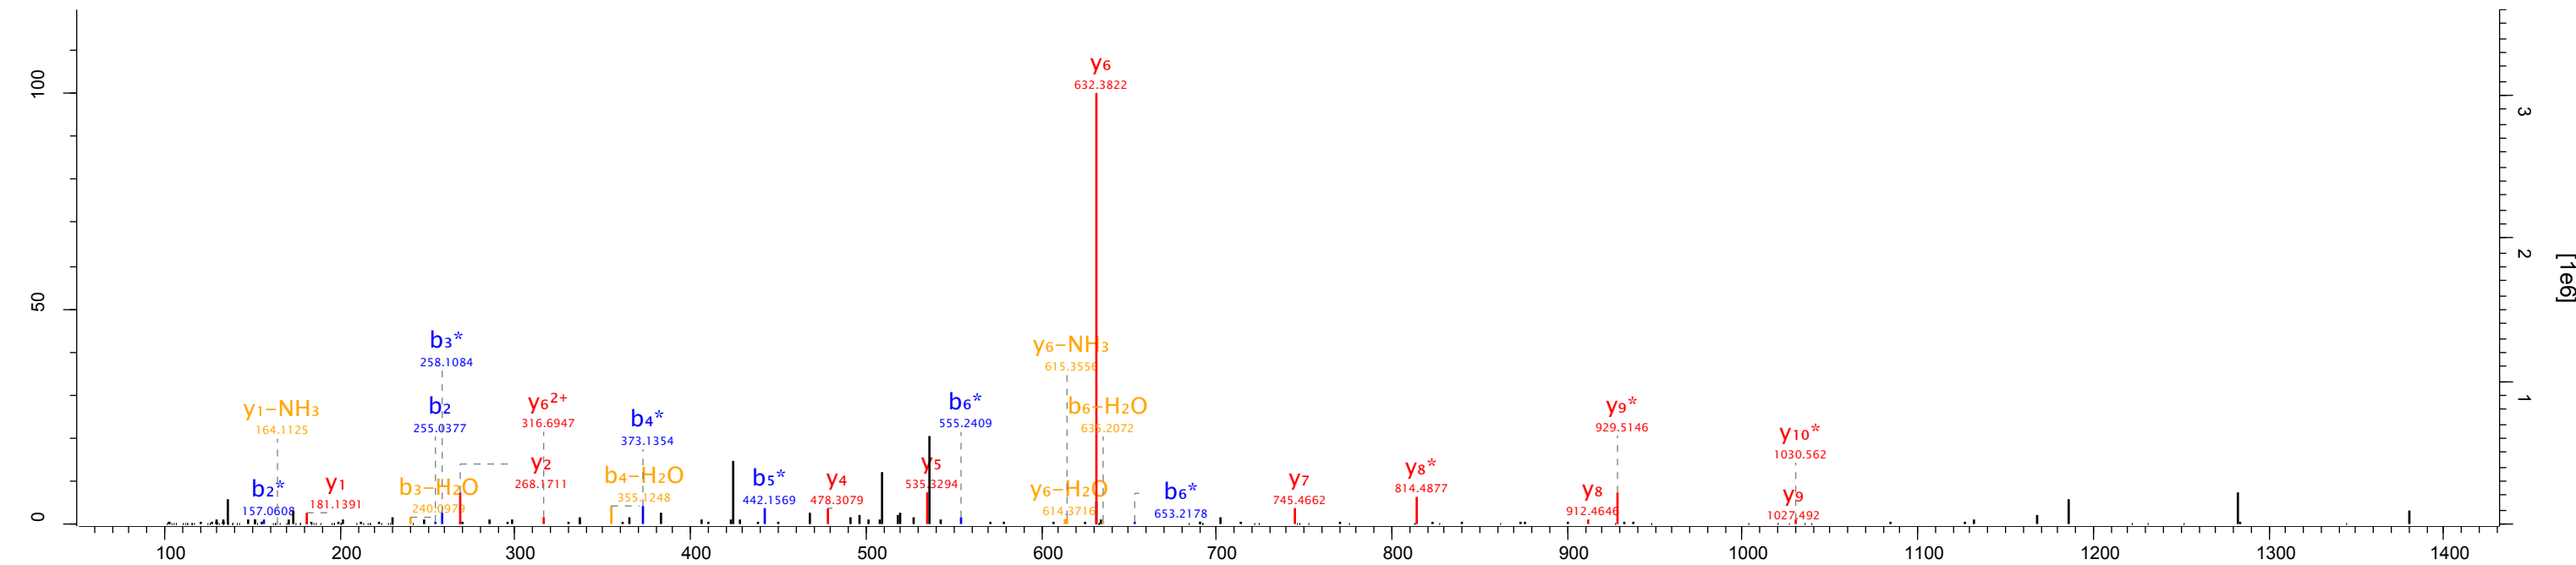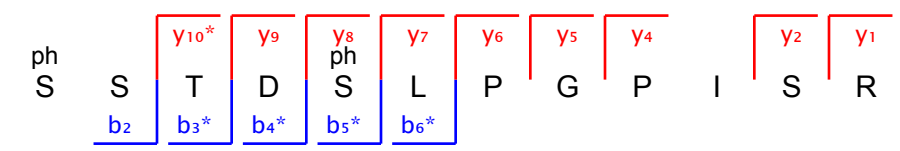

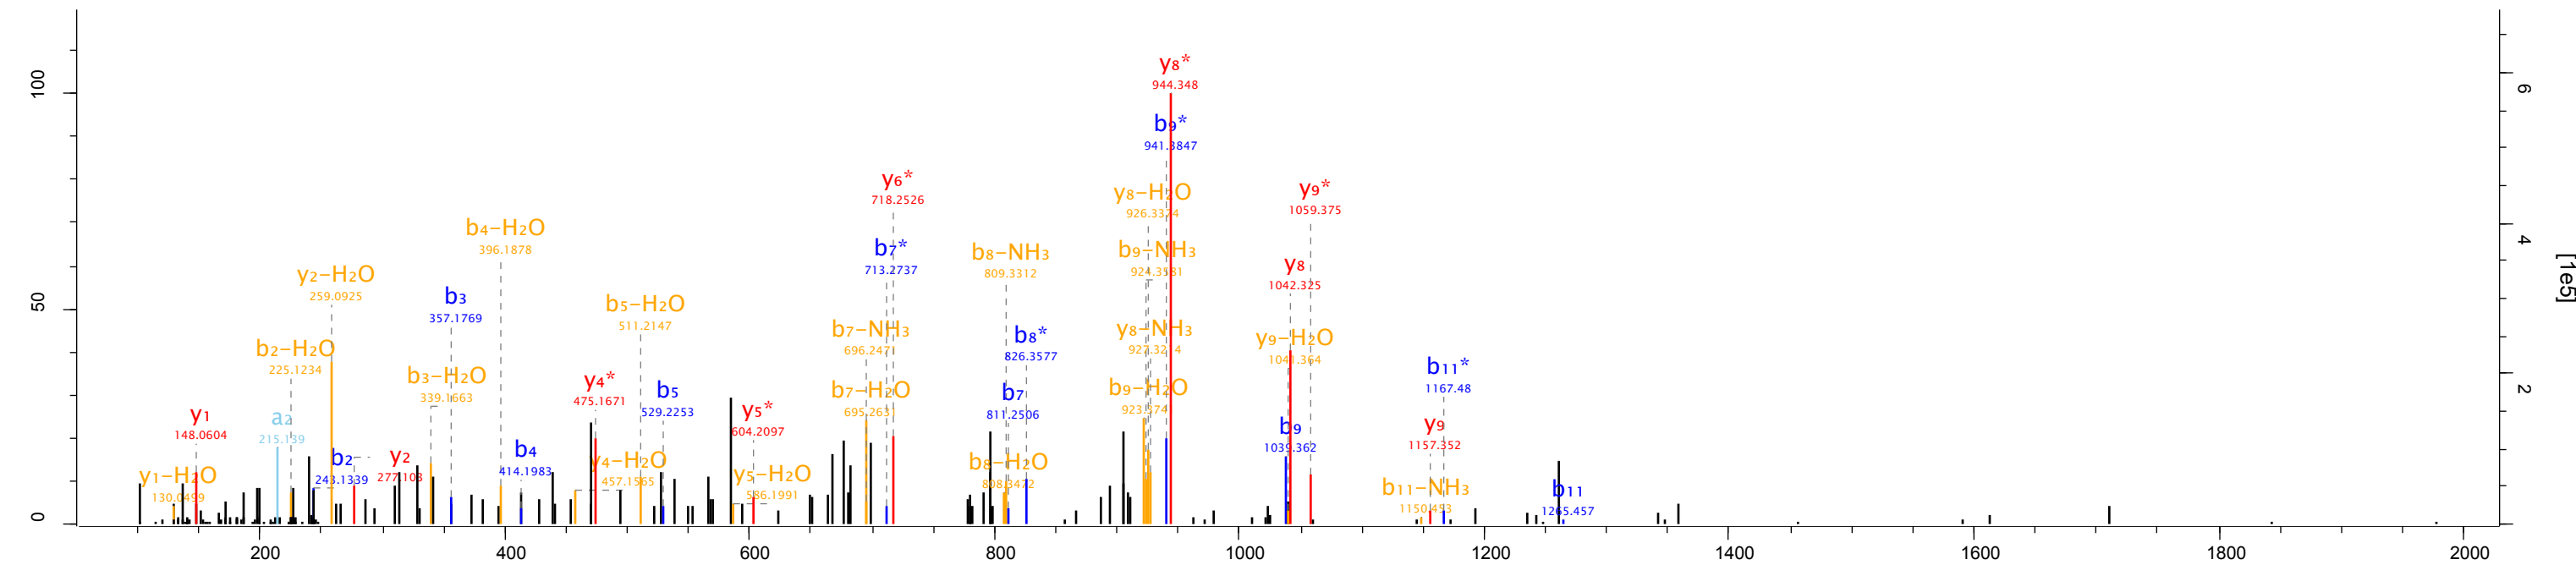

- E L N G D S D L D P E N E S E E E -

b<sub>2</sub>
b<sub>3</sub>
b<sub>4</sub>
b<sub>5</sub>
b<sub>7</sub>
b<sub>8</sub>\*
b<sub>9</sub>
b<sub>11</sub>
y<sub>9</sub>
y<sub>8</sub>
y<sub>6</sub>\*
y<sub>5</sub>\*
y<sub>4</sub>\*
y<sub>2</sub>
y<sub>1</sub>

Raw file 20150814\_A375SR\_Phospho\_BR2\_02 Scan 15261 Method FTMS; HCD Score 120.32 m/z 880.31 Gene names EEF2K

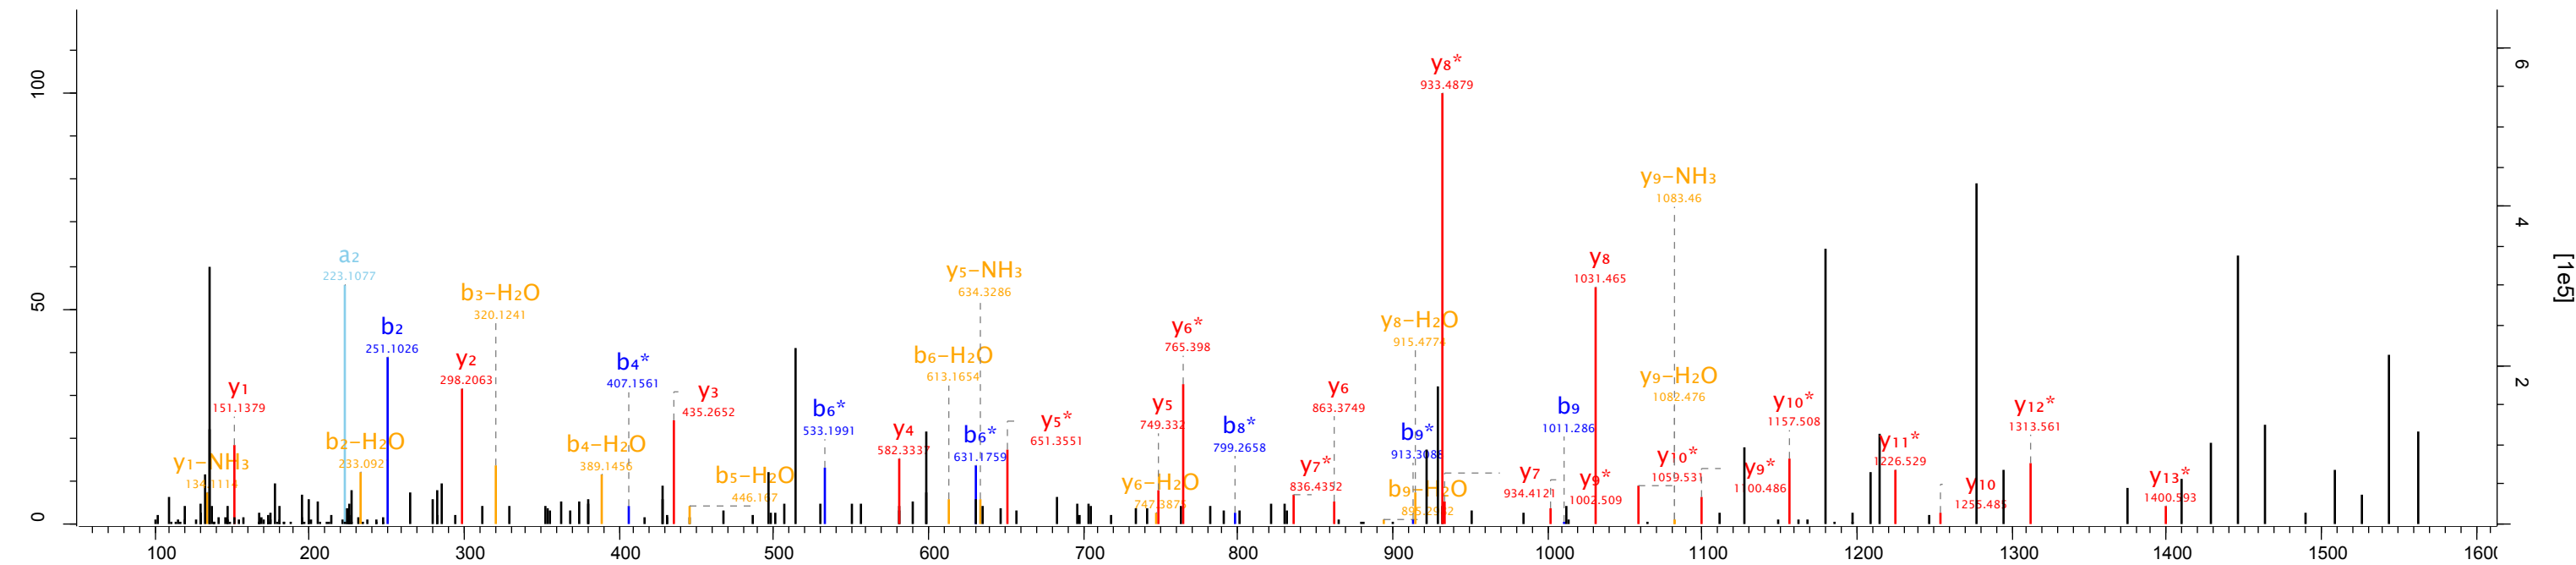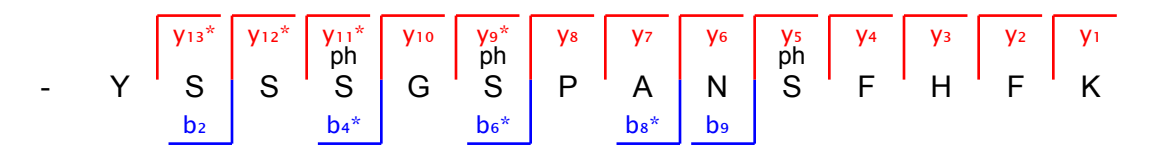

Raw file 20150814\_A375SR\_Phospho\_BR2\_02 Scan 15471 Method FTMS; HCD Score 149.44 m/z 927.85 Gene names ATRX

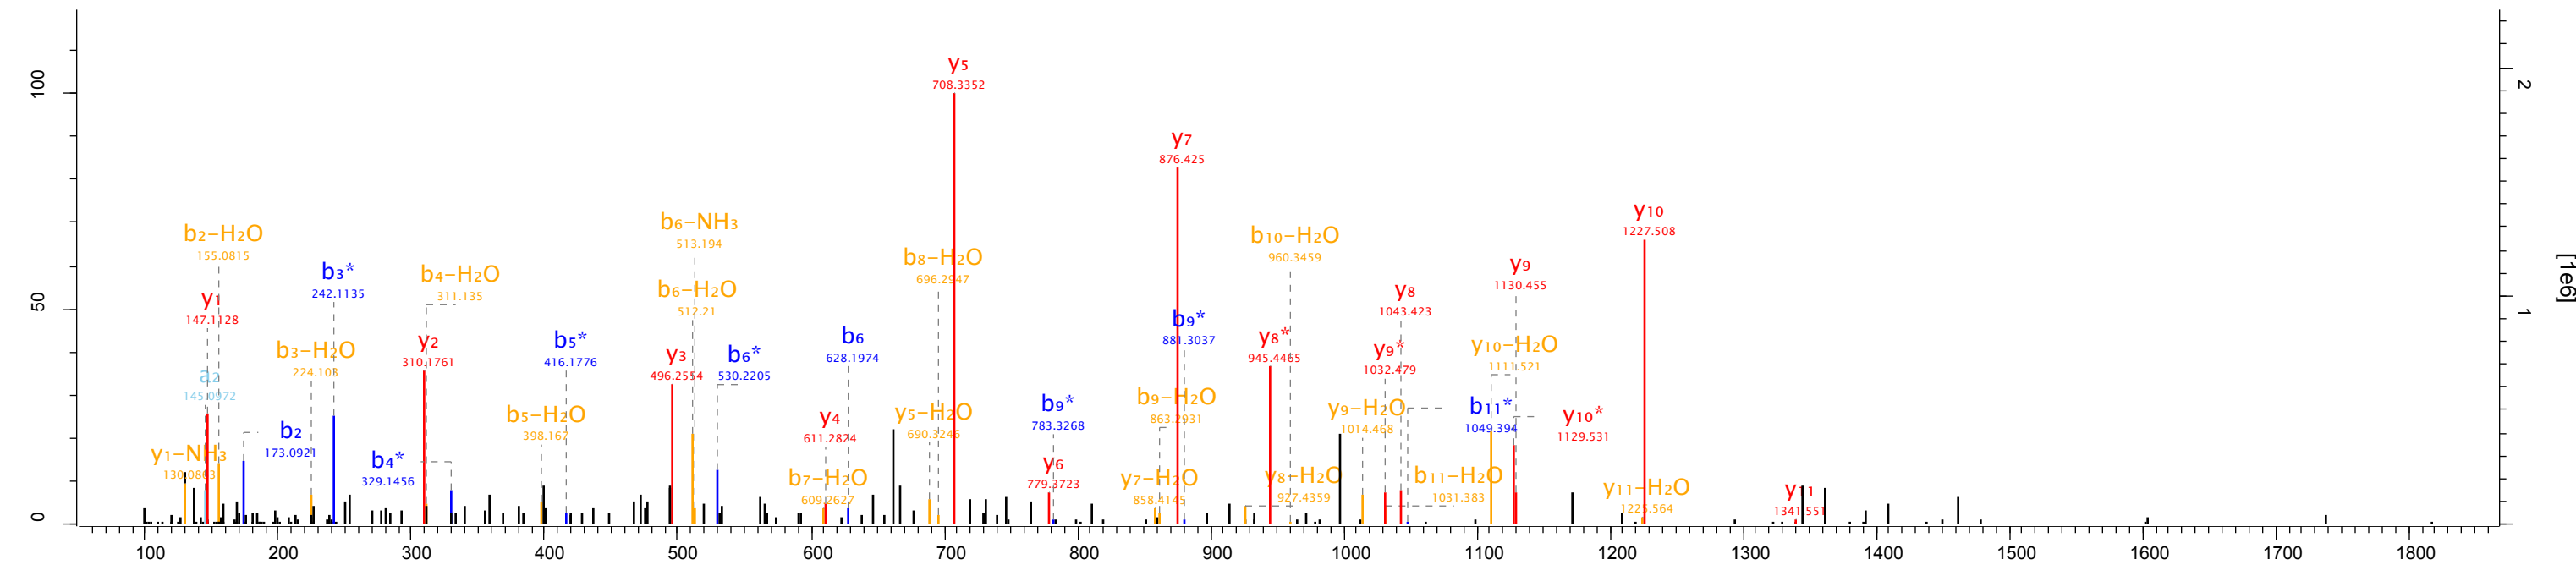

- A T S ph S S N P S y8 ph S P A P D W Y K -

Fragmentation mapping (b and y ions) is shown below the sequence:

- b2 (under T)
- b3\* (under S)
- b4\* (under S)
- b5\* (under S)
- b6 (under N)
- b9\* (under S)
- b11\* (under A)

Raw file 20150814\_A375SR\_Phospho\_BR2\_02 Scan 15701 Method FTMS; HCD Score 100.47 m/z 981.93 Gene names KPNA2;POU2F2

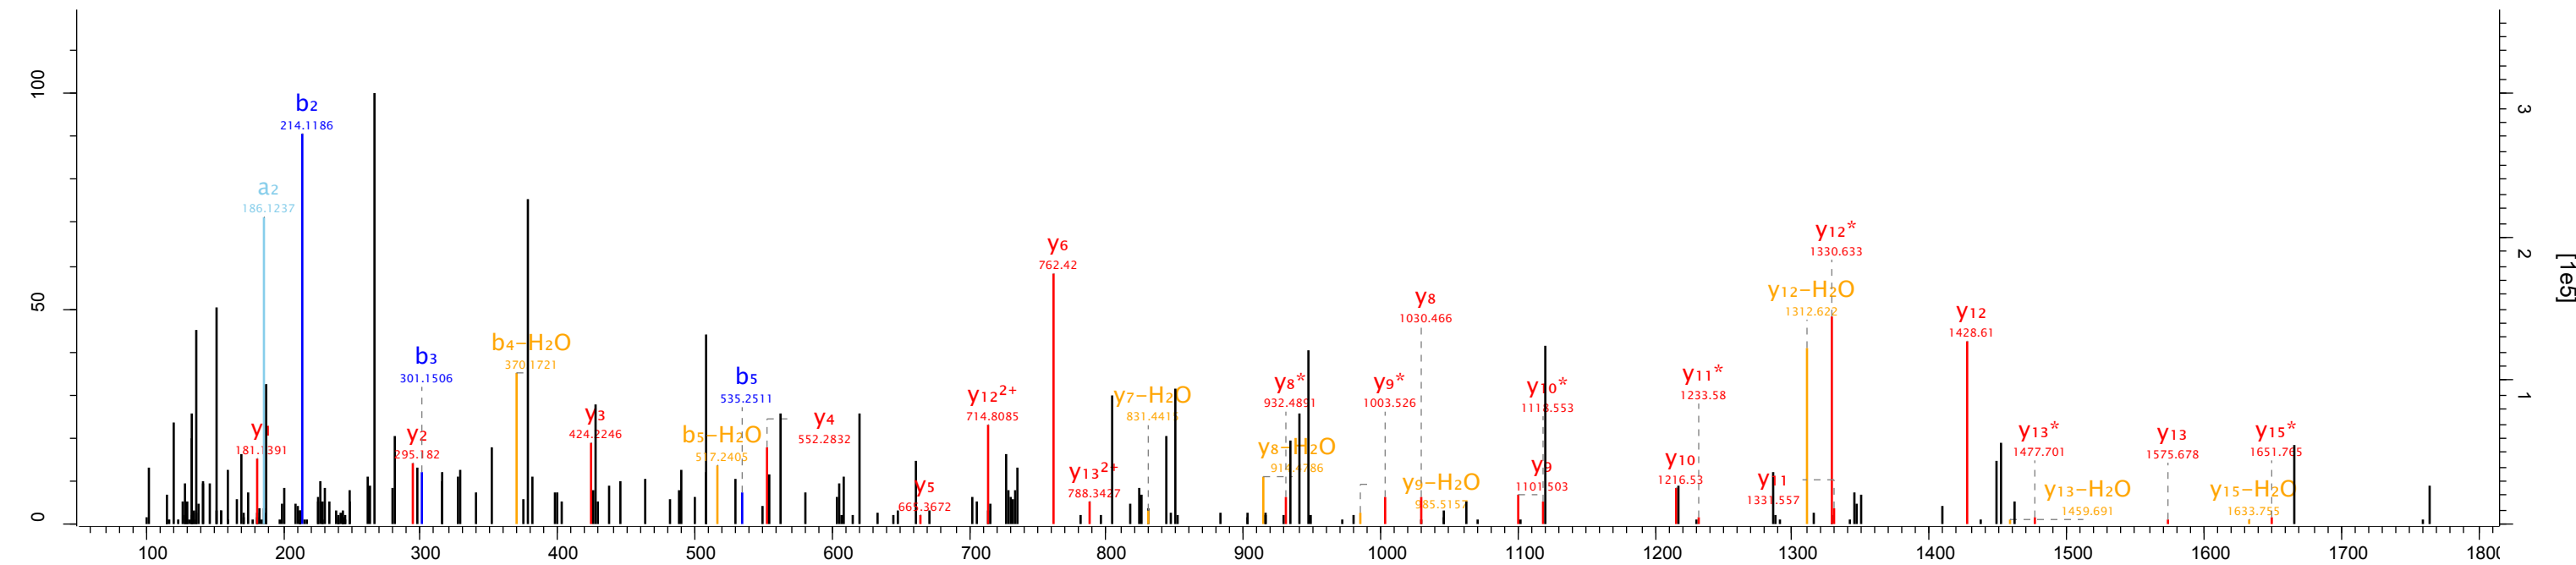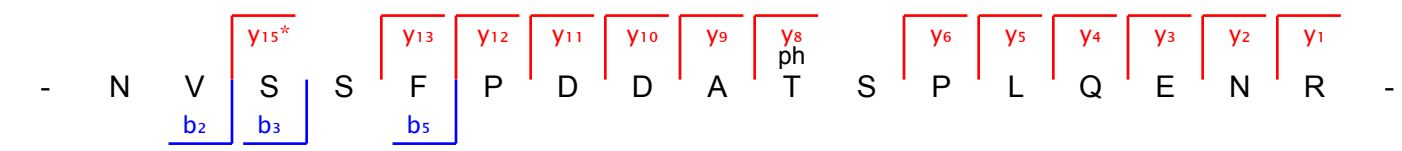

Raw file: 20150814\_A375SR\_Phospho\_BR2\_02  
 Scan: 15901 Method: FTMS; HCD Score: 67.35 m/z: 999.94 Gene names: RNF20

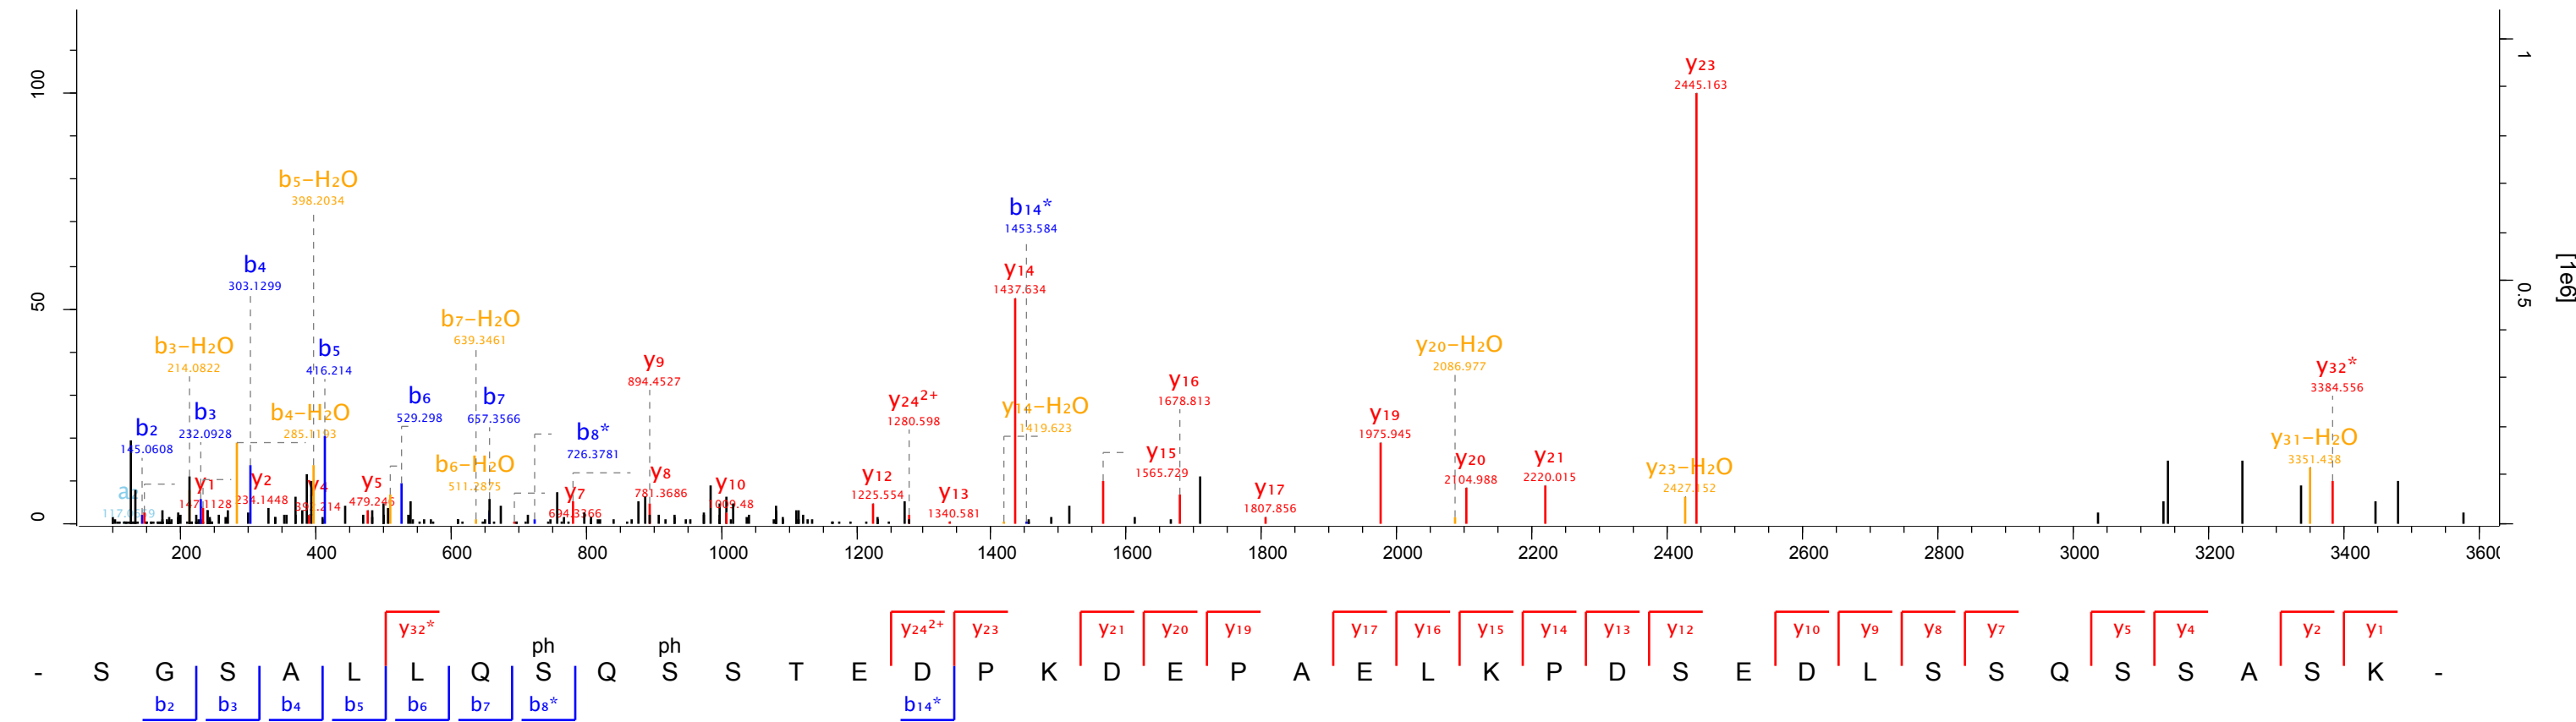

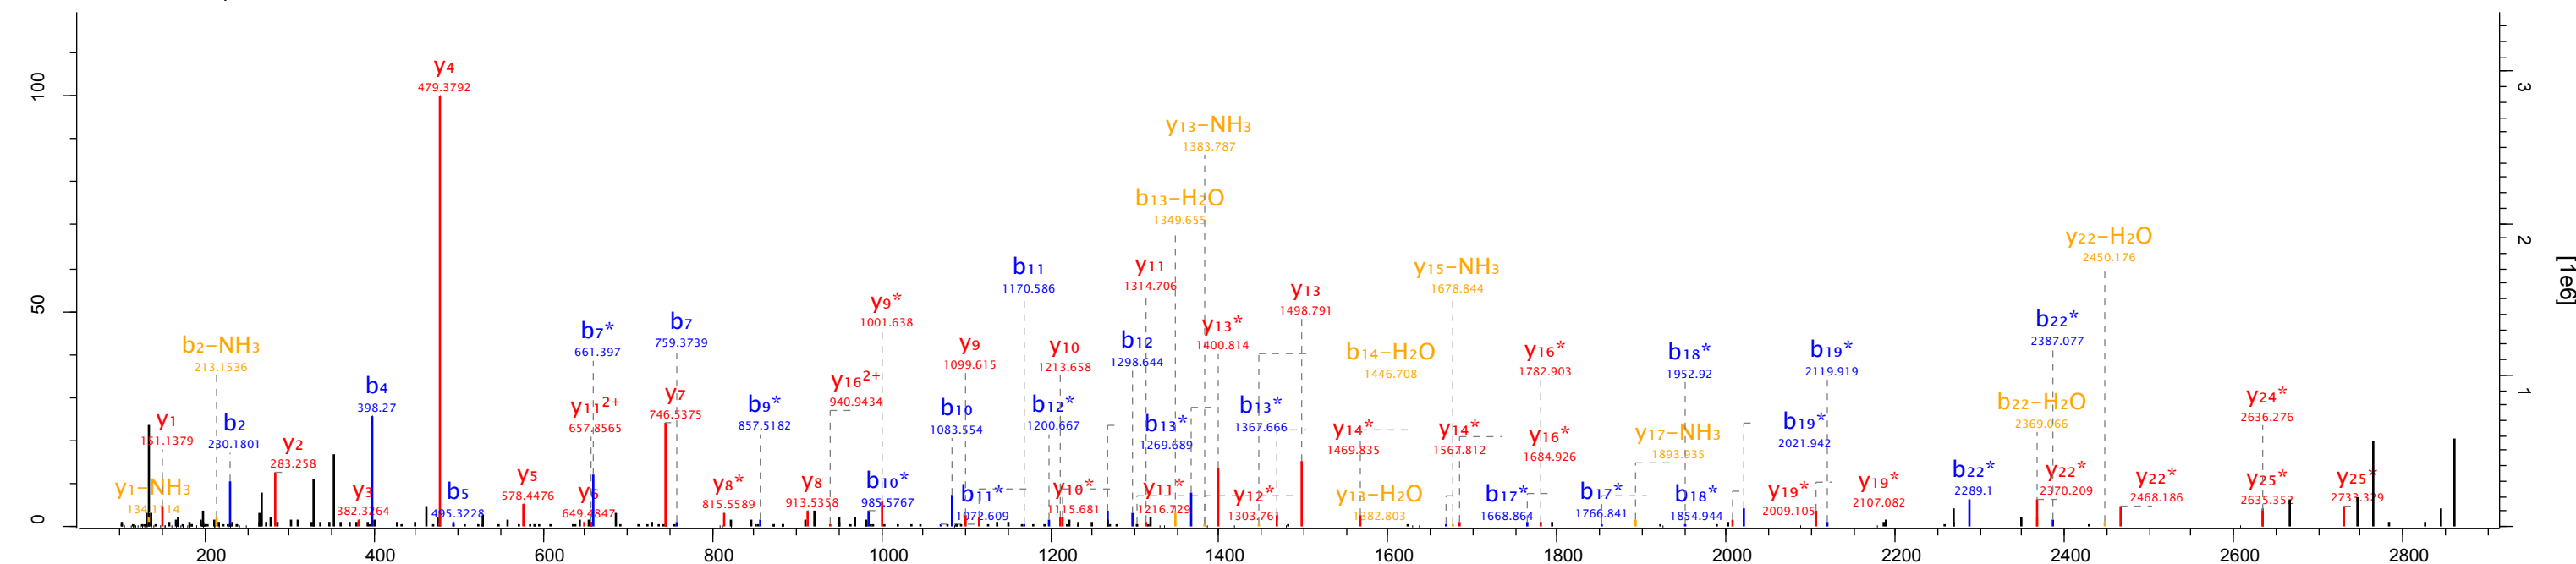

- K Y25\* Y24\* A Y22\* P Y19\* P Y16\* V Y14\* Q Y13 Y12\* Y11 Y10 Y9 Y8 Y7 Y6 Y5 Y4 Y3 Y2 Y1 -

b2 b4 b5 b7 b9\* b10 b11 b12 b13\* b17\* b18\* b19\* b22\*

Raw file: 20150814\_A375SR\_Phospho\_BR2\_02  
 Scan: 16231 Method: FTMS; HCD Score: 82.13 m/z: 888.04 Gene names: SETD1A

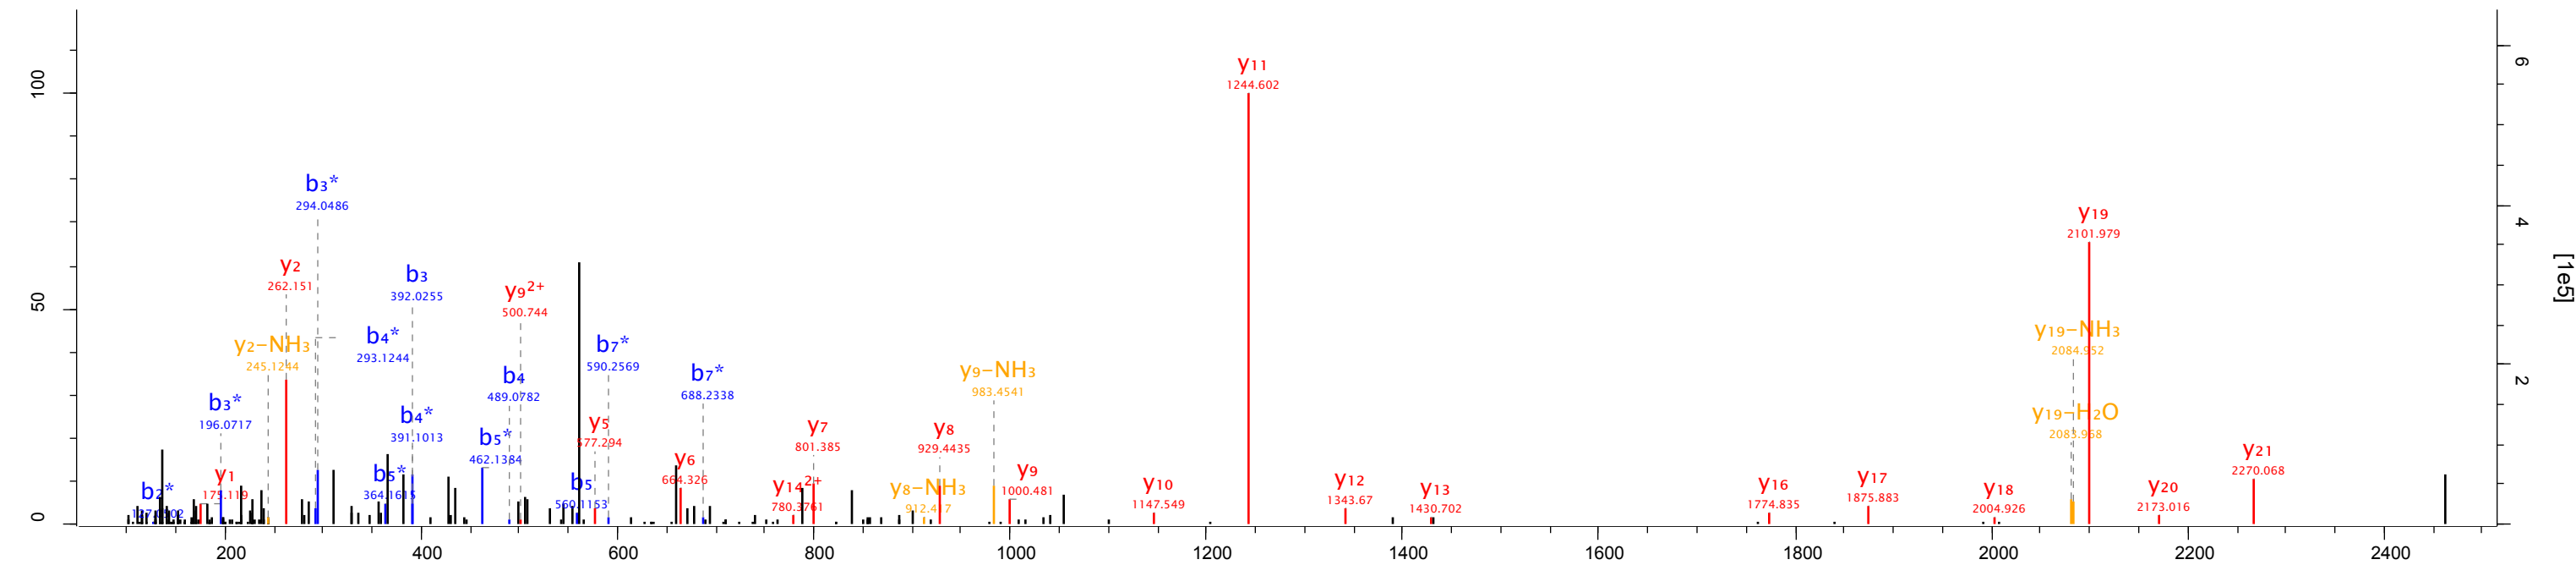

Protein sequence: - ph S G ph S P A P E T T N E S V P F A Q H S S L D S R -

Fragmentation sites (b and y ions) are indicated by brackets below the sequence:

- b2\* (under G)
- b3 (under S)
- b4 (under P)
- b5 (under A)
- b7\* (under E)
- y1 (under R)
- y2 (under S)
- y5 (under S)
- y6 (under S)
- y7 (under H)
- y8 (under Q)
- y9 (under A)
- y10 (under F)
- y11 (under P)
- y12 (under V)
- y13 (under S)
- y14<sup>2+</sup> (under E)
- y16 (under T)
- y17 (under T)
- y18 (under E)
- y19 (under P)
- y20 (under A)
- y21 (under P)



Raw file: 20150814\_A375SR\_Phospho\_BR2\_02  
 Scan: 16251 Method: FTMS; HCD Score: 216.67 m/z: 987.86 Gene names: CTDP1

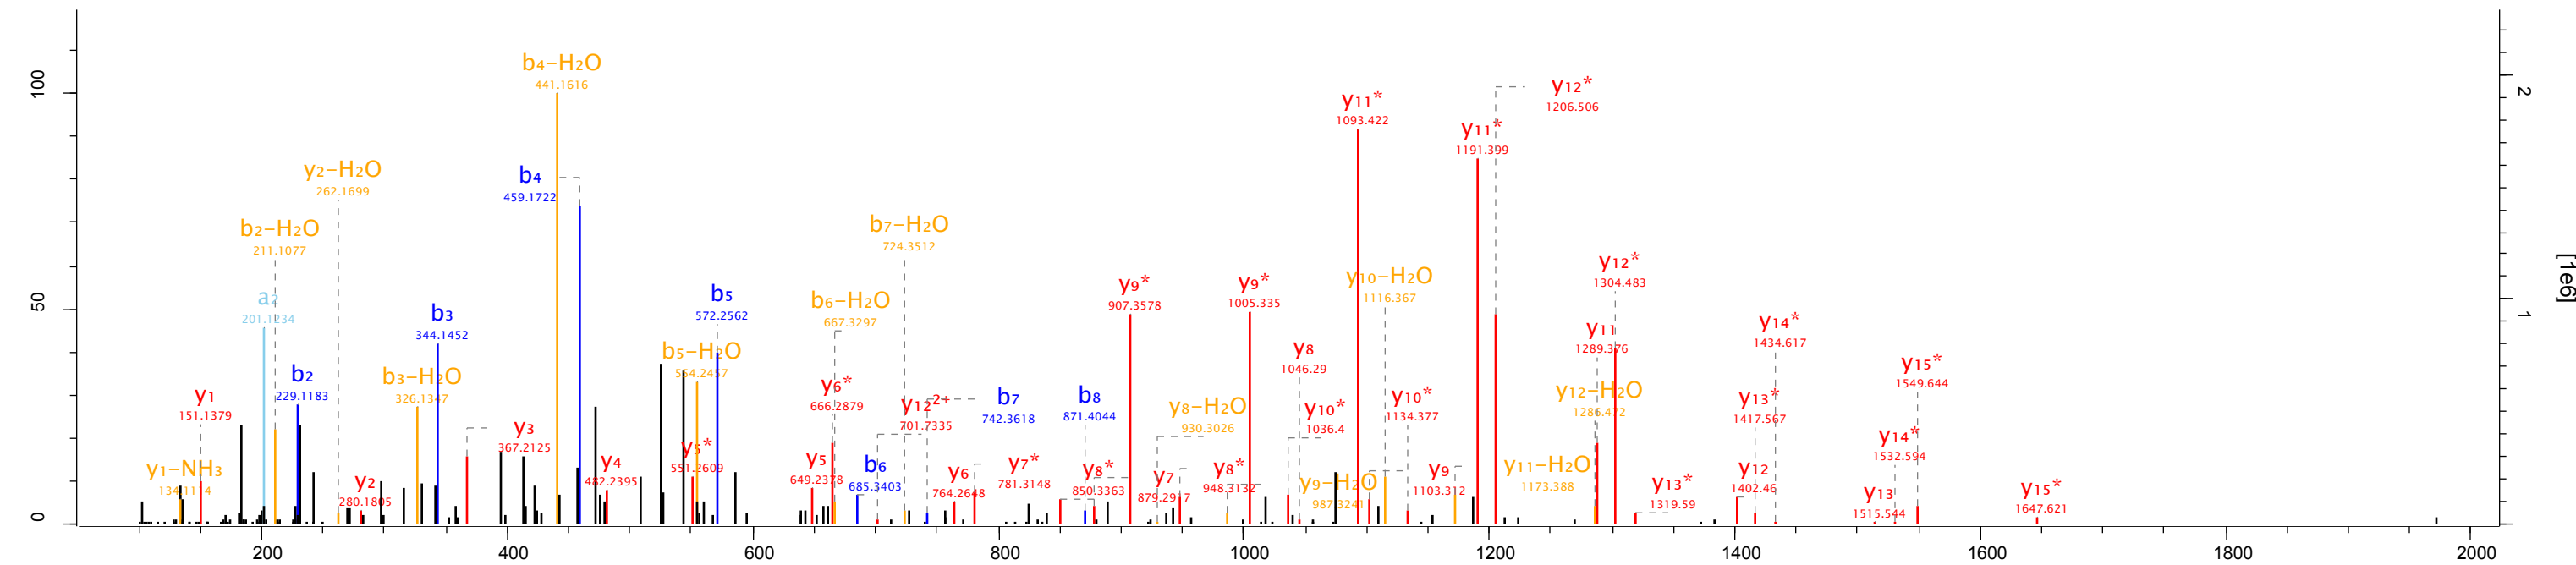

- E V D D I L G E G S D D S D S E K -

b<sub>2</sub>
b<sub>3</sub>
b<sub>4</sub>
b<sub>5</sub>
b<sub>6</sub>
b<sub>7</sub>
b<sub>8</sub>
y<sub>15</sub>\*
y<sub>14</sub>\*
y<sub>13</sub>
y<sub>12</sub>
y<sub>11</sub>
y<sub>10</sub>\*
y<sub>9</sub>
y<sub>8</sub><sub>ph</sub>
y<sub>7</sub>
y<sub>6</sub>
y<sub>5</sub><sub>ph</sub>
y<sub>4</sub>
y<sub>3</sub>
y<sub>2</sub>
y<sub>1</sub>

Raw file: 20150814\_A375SR\_Phospho\_BR2\_02  
 Scan: 17271 Method: FTMS; HCD Score: 102.67 m/z: 774.34 Gene names: USP32

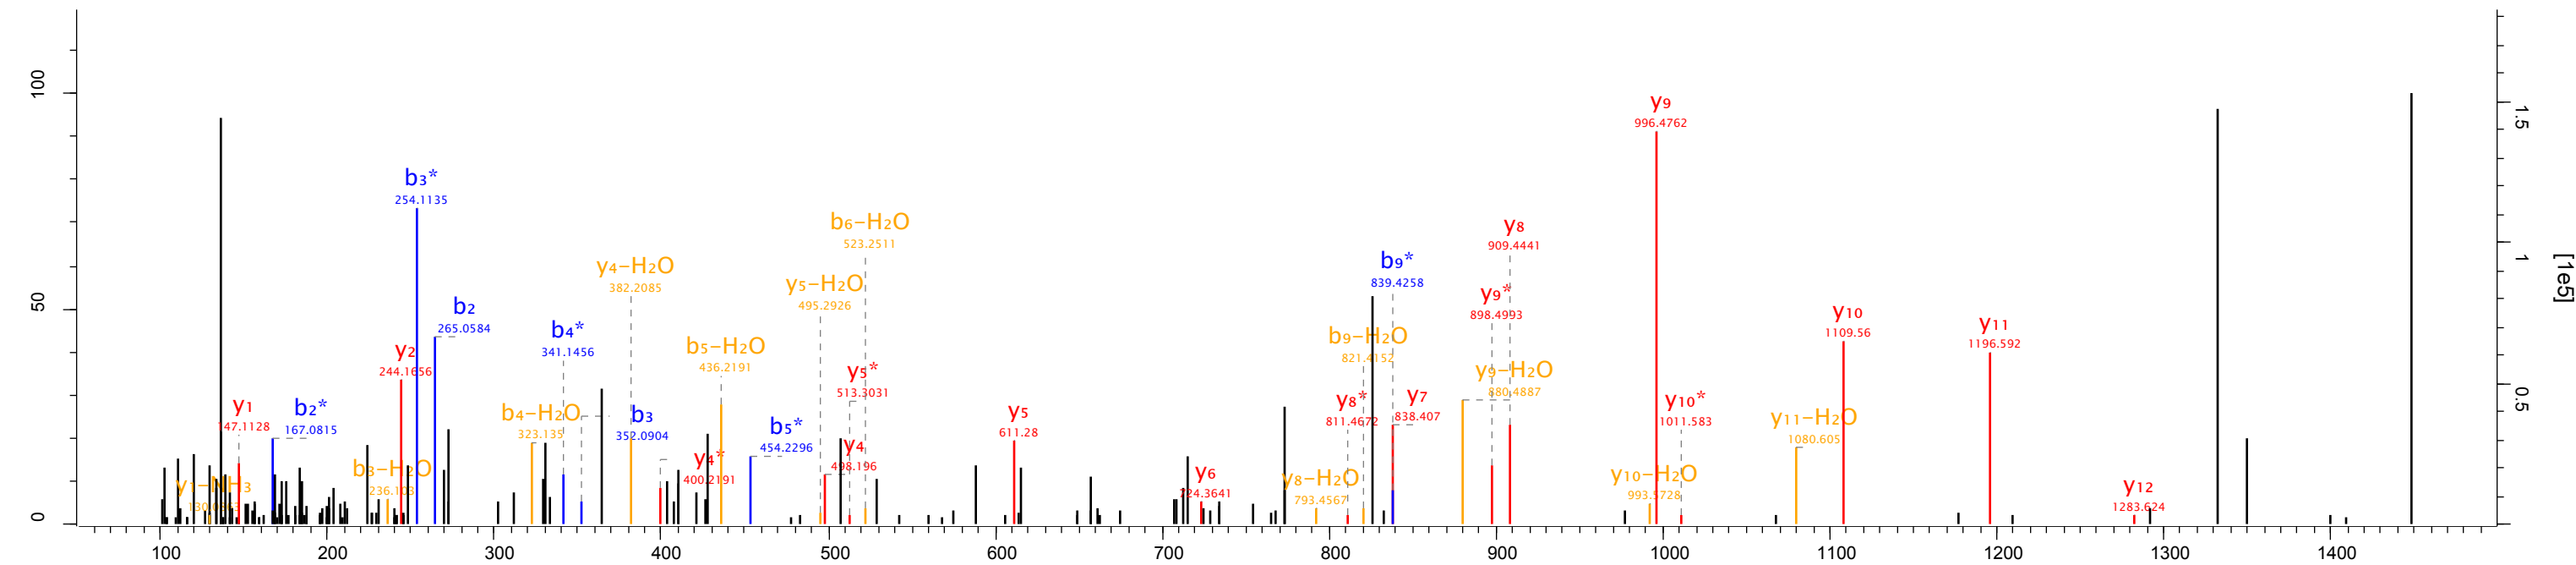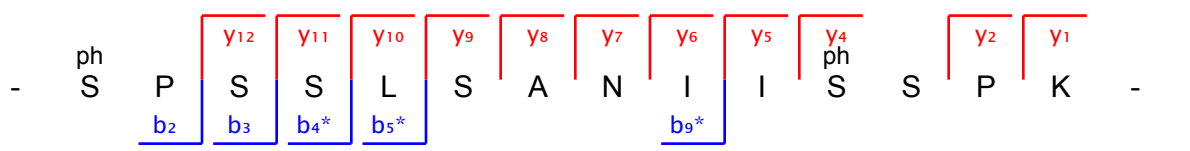

Raw file 20150814\_A375SR\_Phospho\_BR2\_02 Scan 19221 Method FTMS; HCD Score 148.98 m/z 1535.07 Gene names EEF1D

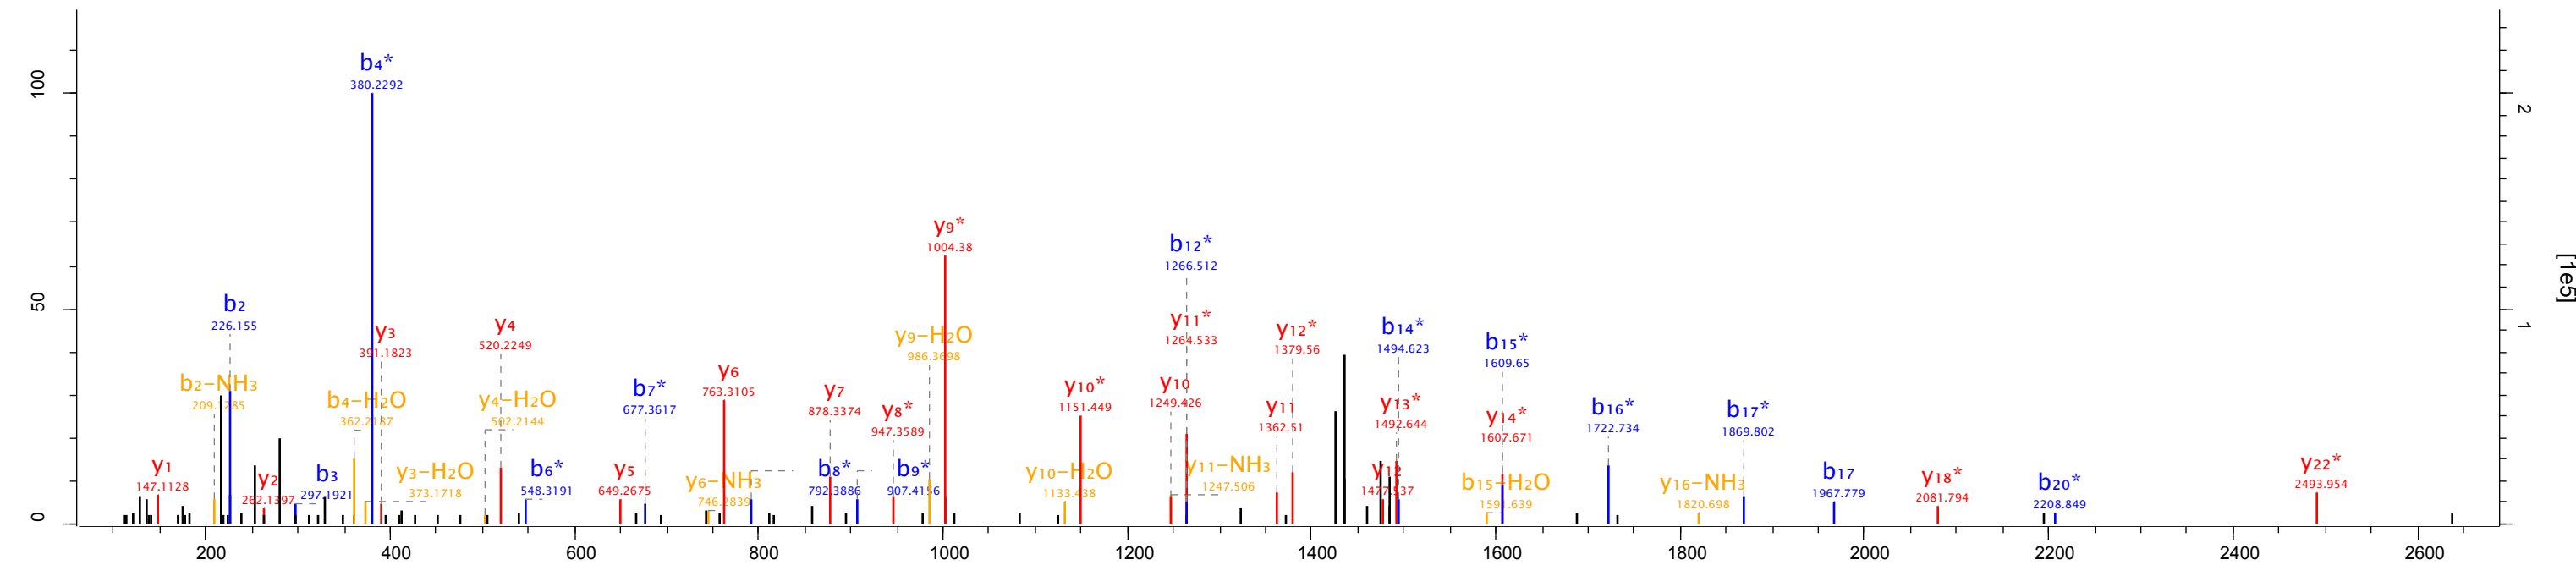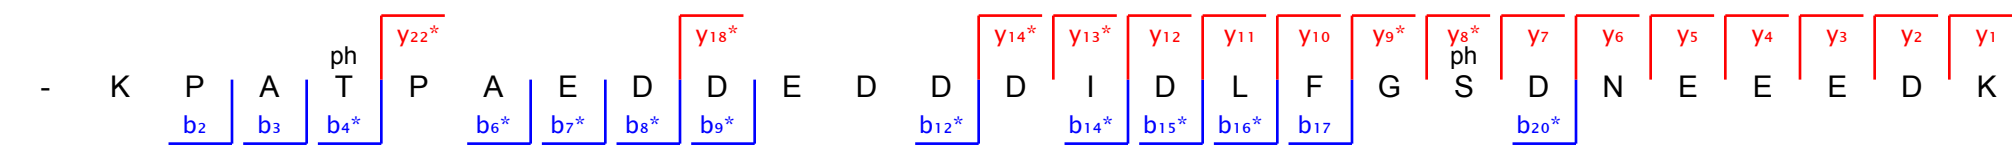



Raw file: 20150814\_A375SR\_Phospho\_BR2\_02  
 Scan: 22771 Method: FTMS; HCD Score: 54.28 m/z: 1018.42 Gene names: XRN2

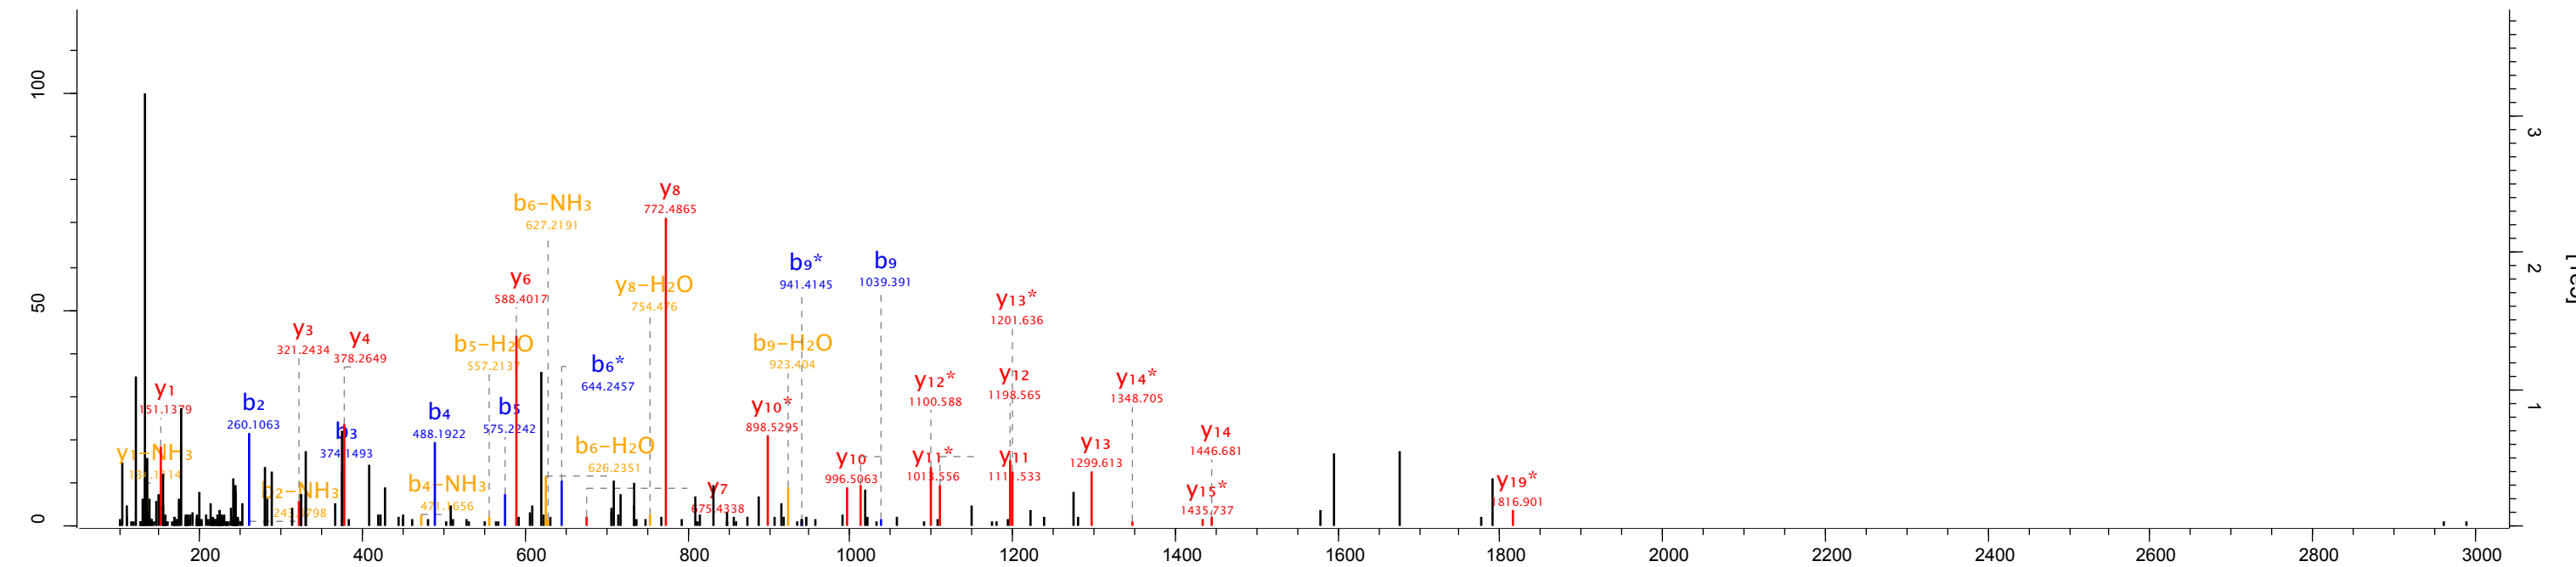

Peptide sequence: - M Q N N S S<sup>ph</sup> P S I S P N T S F T S D G S P S P L G G I K -

Fragmentation sites (b ions): b<sub>2</sub> (under Q), b<sub>3</sub> (under N), b<sub>4</sub> (under N), b<sub>5</sub> (under S), b<sub>6</sub><sup>\*</sup> (under S<sup>ph</sup>), b<sub>9</sub> (under I)

Fragmentation sites (y ions): y<sub>1</sub> (under K), y<sub>3</sub> (under G), y<sub>4</sub> (under G), y<sub>6</sub> (under P), y<sub>7</sub> (under S), y<sub>8</sub> (under P), y<sub>10</sub> (under G), y<sub>11</sub> (under D), y<sub>12</sub> (under T), y<sub>13</sub> (under T), y<sub>14</sub> (under F), y<sub>15</sub><sup>\*</sup> (under S)

Raw file: 20150814\_A375SR\_Phospho\_BR2\_02  
 Scan: 23121 Method: FTMS; HCD Score: 67.17 m/z: 1267.78 Gene names: PTGES3

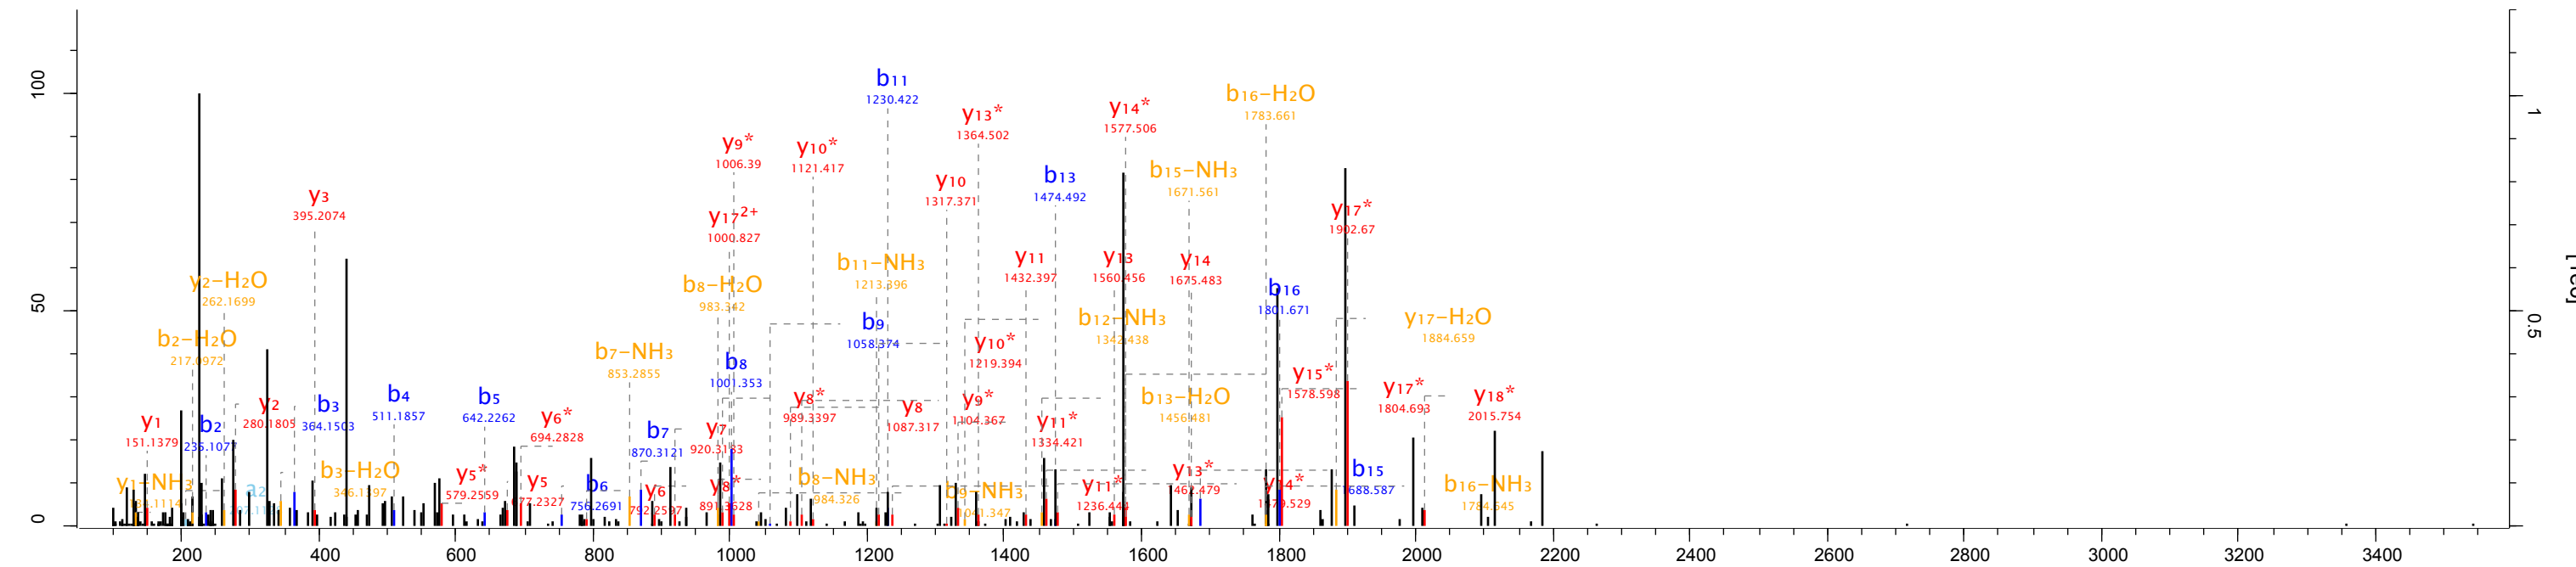

Protein sequence: - F S E M M N N M G G D E D V D L P E V D G A D D D S Q D S D D E K -

Fragmentation sites (b ions): b2, b3, b4, b5, b6, b7, b8, b9, b11, b13, b15, b16

Fragmentation sites (y ions): y1, y2, y3, y5, y6, y7, y8, y9, y10, y11, y13, y14, y15, y17, y18

Raw file  
20150814\_A375SR\_Phospho\_BR2\_02

Scan 26181 Method FTMS; HCD Score 46.14 m/z 1419.33 Gene names KDM3B

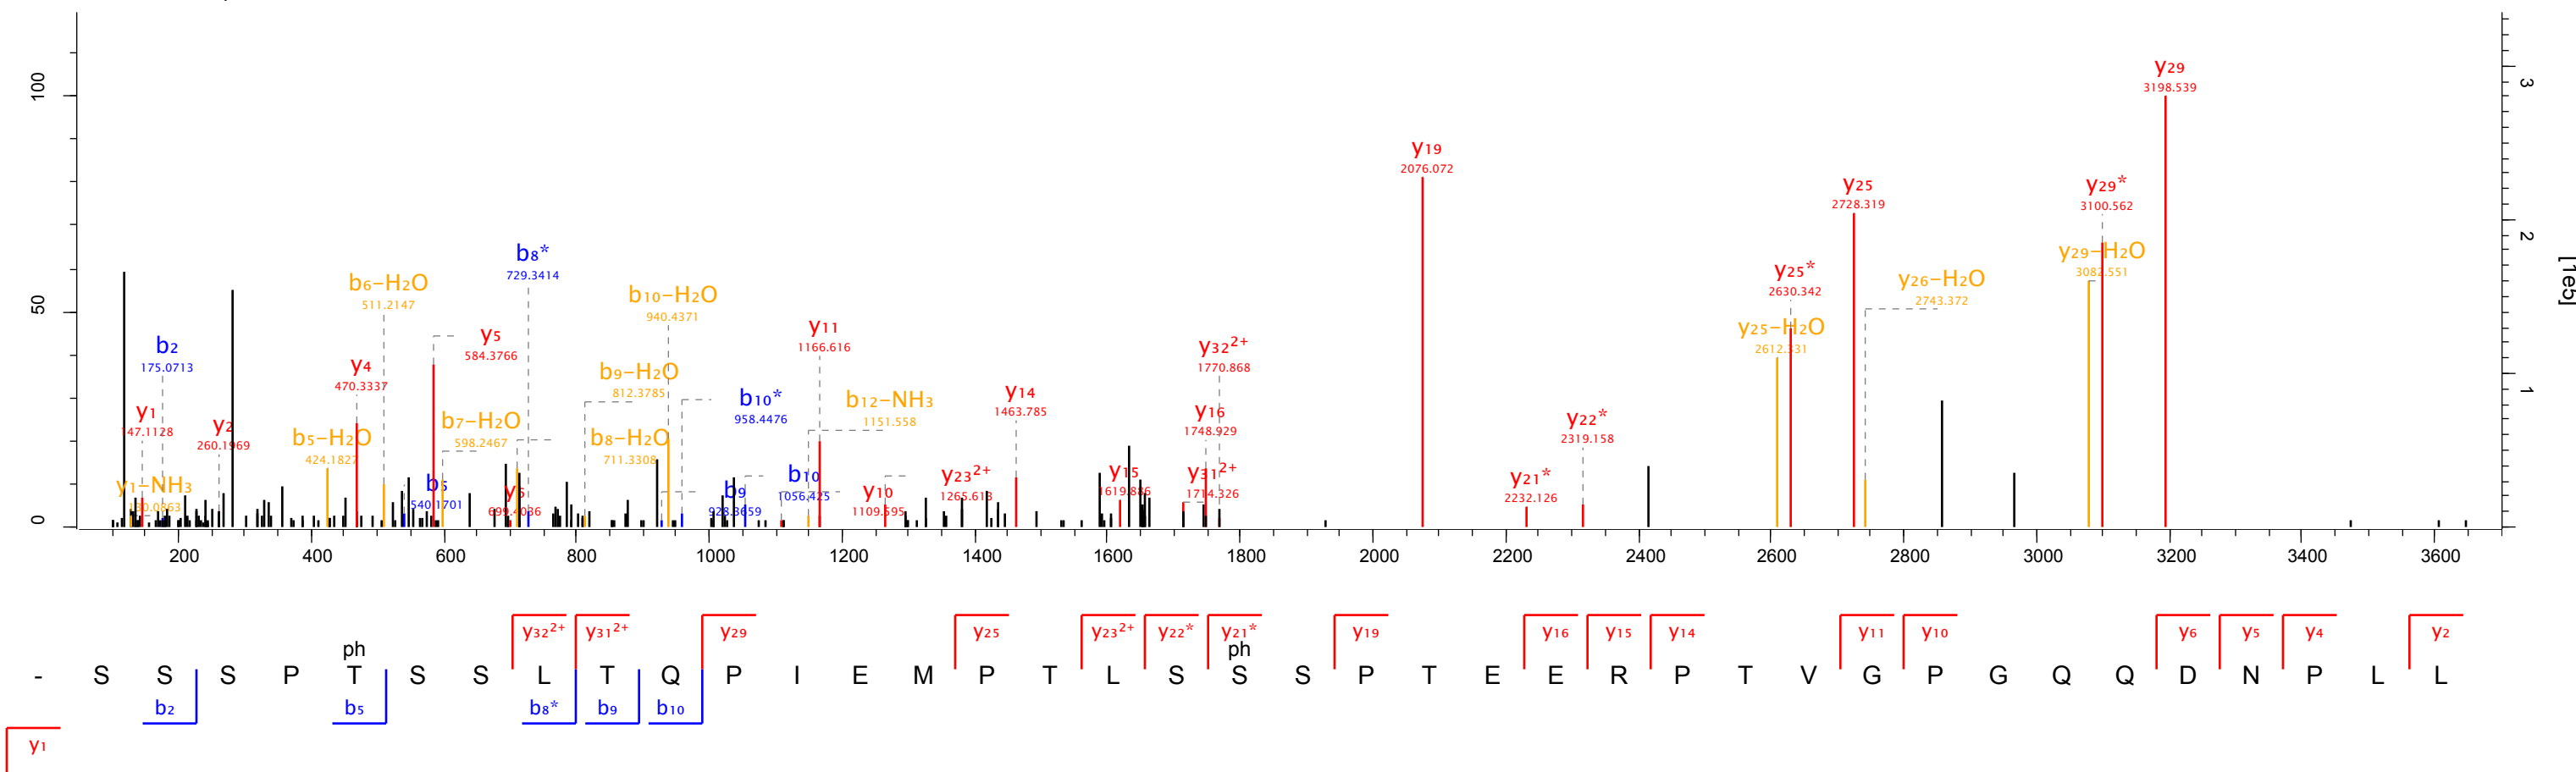

Raw file: 20150814\_A375SR\_Phospho\_BR2\_02  
 Scan: 2721 Method: FTMS; HCD Score: 81.7 m/z: 611.28 Gene names: LMNB1

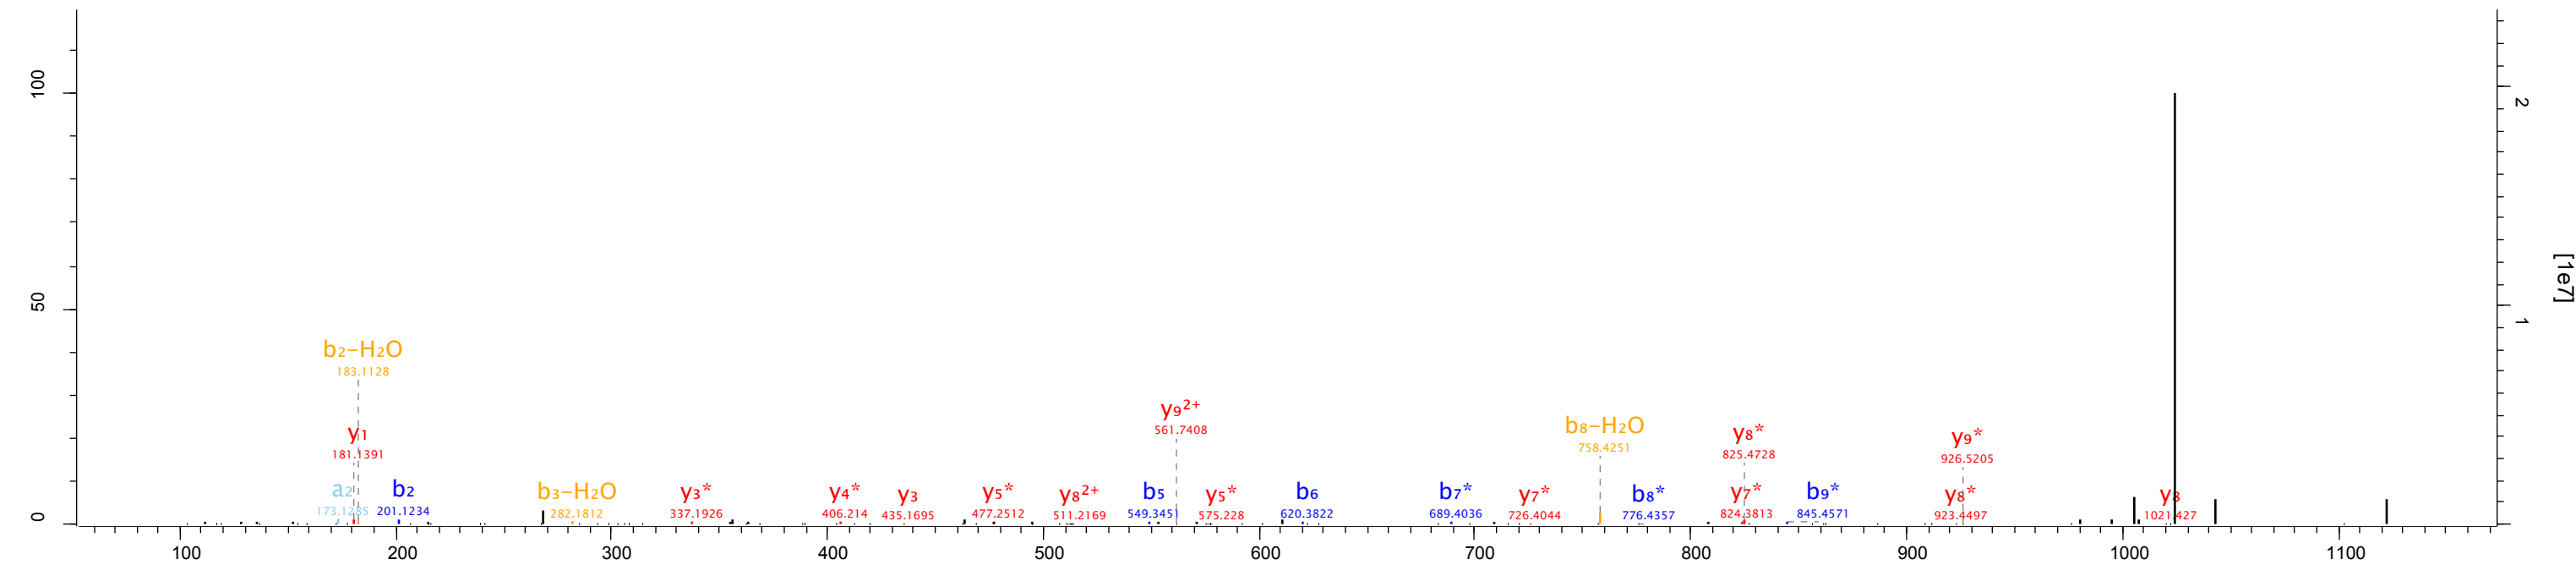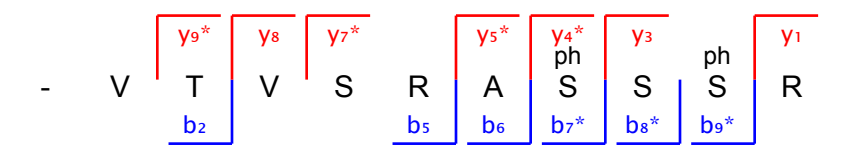



Raw file 20150814\_A375SR\_Phospho\_BR2\_02 Scan 3491 Method FTMS; HCD Score 135.75 m/z 753.34 Gene names DPYSL2

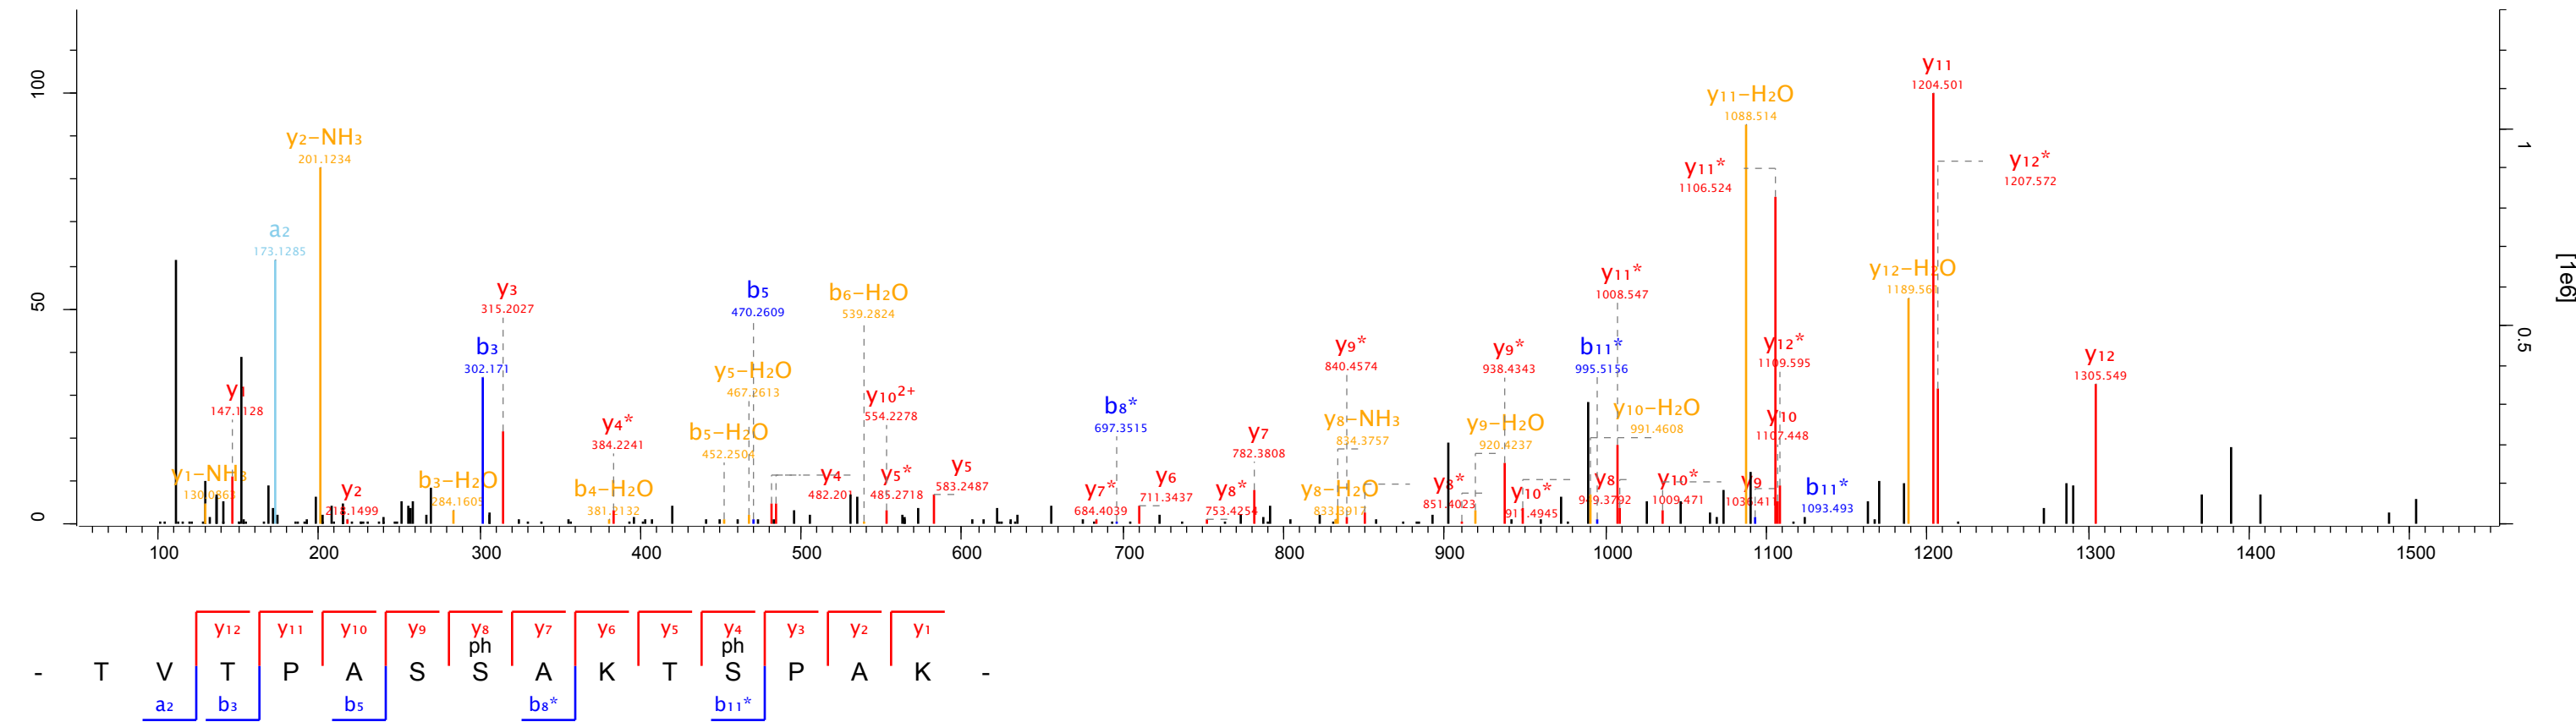

Raw file: 20150814\_A375SR\_Phospho\_BR2\_02  
 Scan: 3721 Method: FTMS; HCD Score: 107.17 m/z: 683.29 Gene names: S100A16

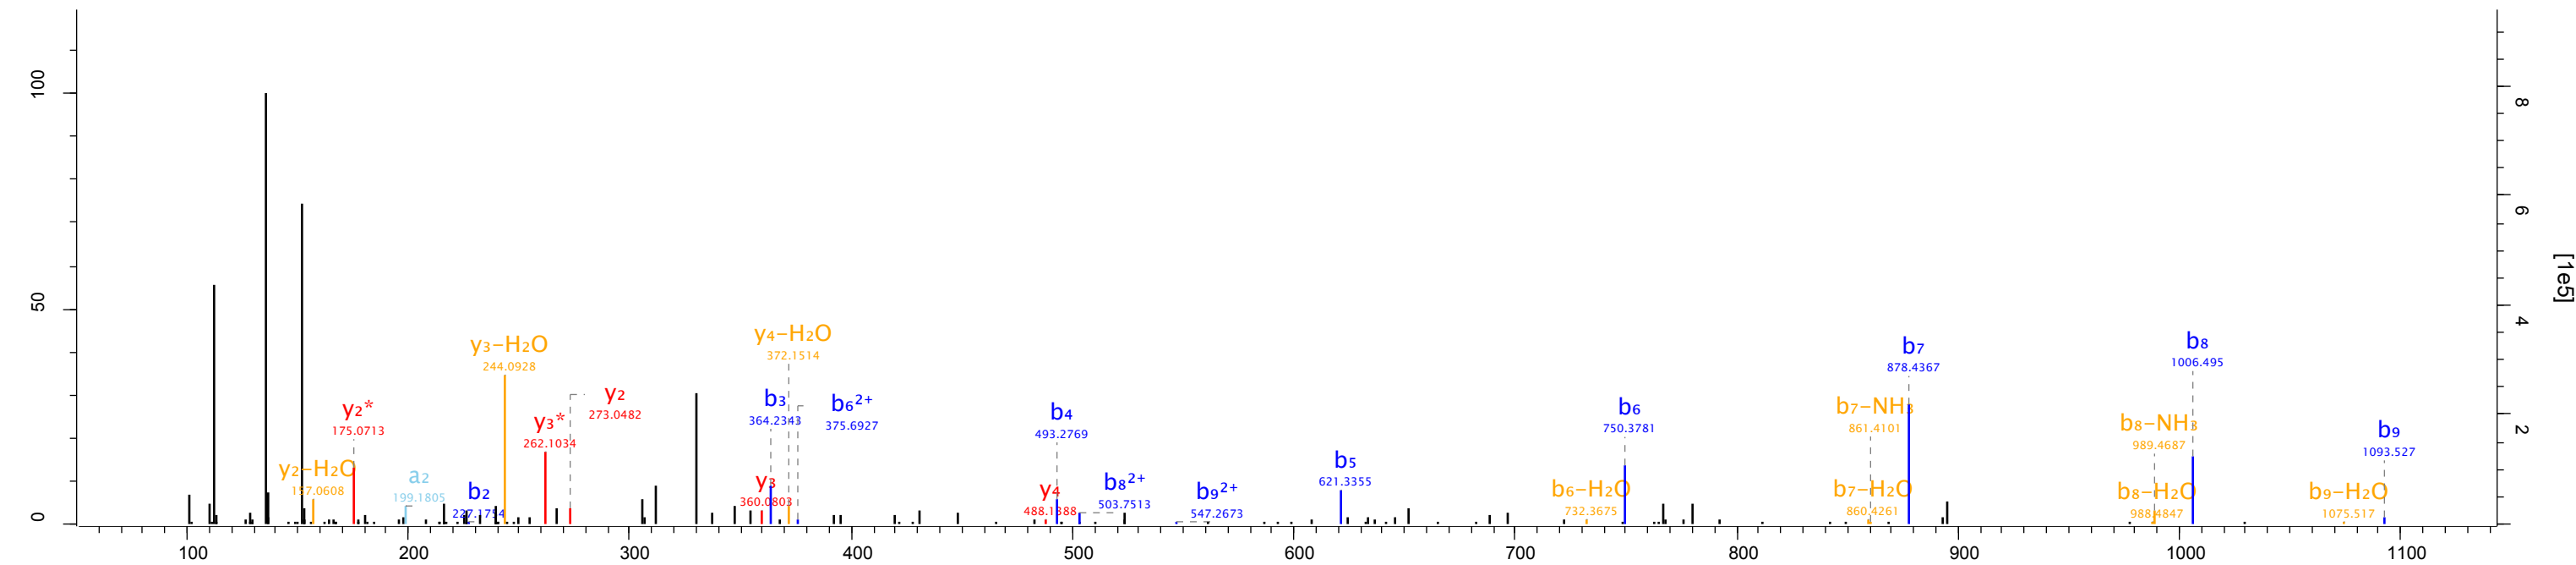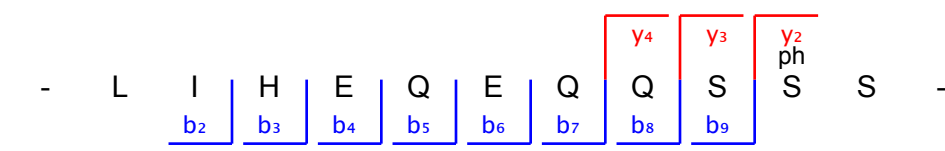

Raw file 20150814\_A375SR\_Phospho\_BR2\_02 Scan 4211 Method FTMS; HCD Score 168.2 m/z 774.97 Gene names SRRM2

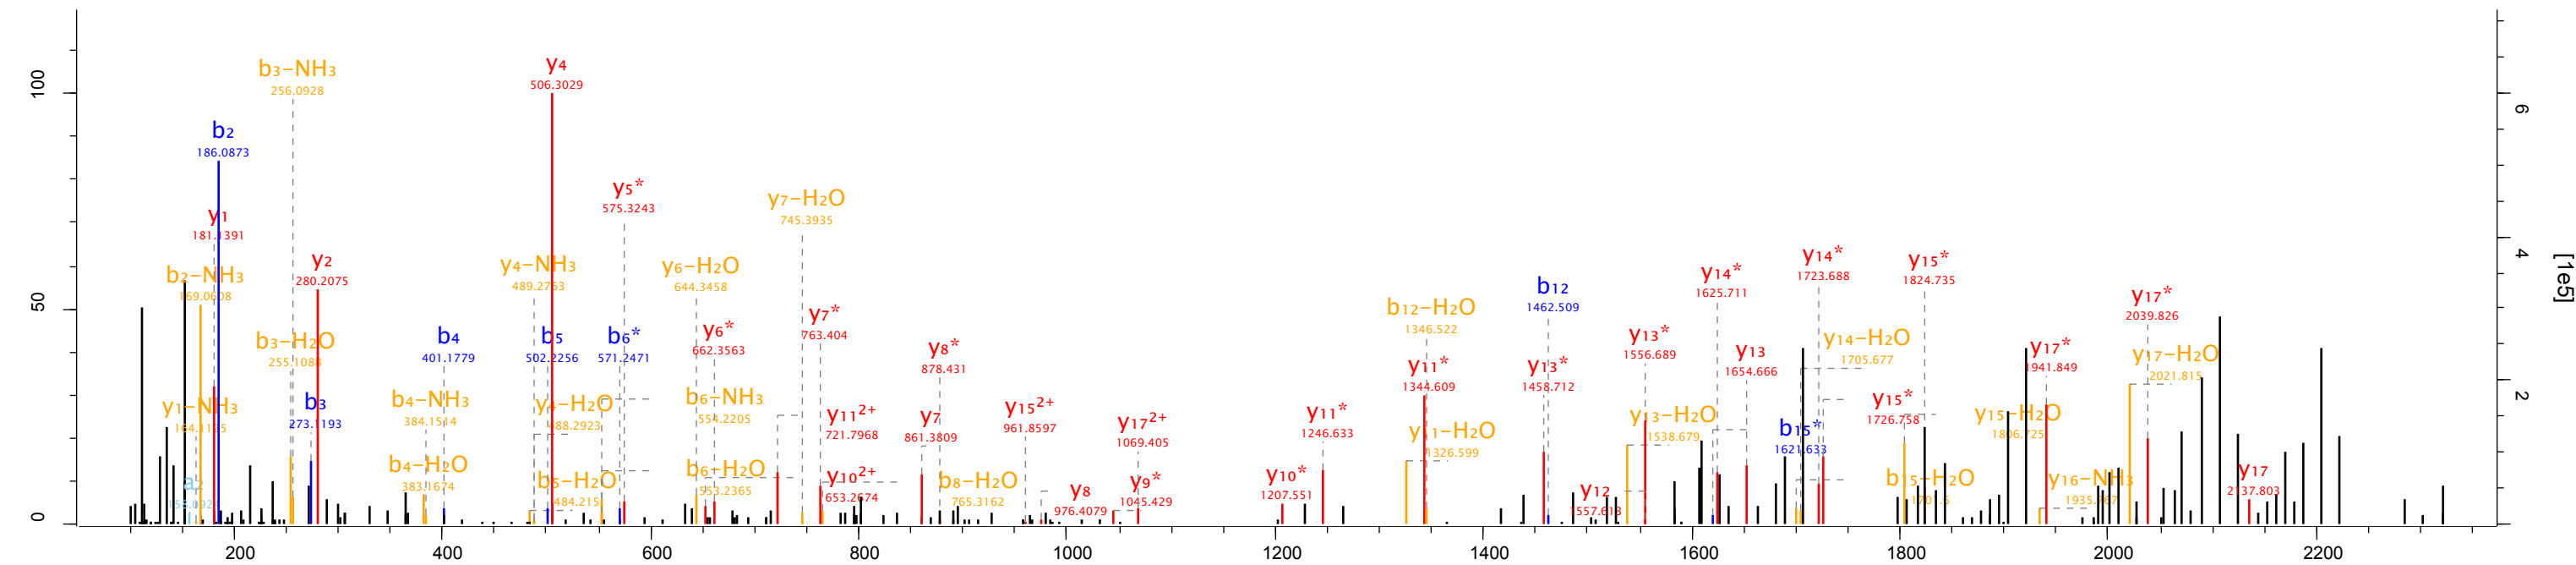

- G Q S Q T S P D H R S D T S S P E V R -

b<sub>2</sub>
b<sub>3</sub>
b<sub>4</sub>
b<sub>5</sub>
b<sub>6</sub><sup>\*</sup>
b<sub>12</sub>
b<sub>15</sub><sup>\*</sup>

y<sub>17</sub>
y<sub>15</sub><sup>\*</sup>
y<sub>14</sub><sup>\*</sup>
y<sub>13</sub>
y<sub>12</sub>
y<sub>11</sub><sup>\*</sup>
y<sub>10</sub><sup>\*</sup>
y<sub>9</sub><sup>\*</sup>
y<sub>8</sub>
y<sub>7</sub>
y<sub>6</sub><sup>\*</sup>
y<sub>5</sub><sup>\*</sup>
y<sub>4</sub>
y<sub>2</sub>
y<sub>1</sub>

Raw file: 20150814\_A375SR\_Phospho\_BR2\_02  
 Scan: 4751 Method: FTMS; HCD Score: 49.43 m/z: 726.29 Gene names: KAT7

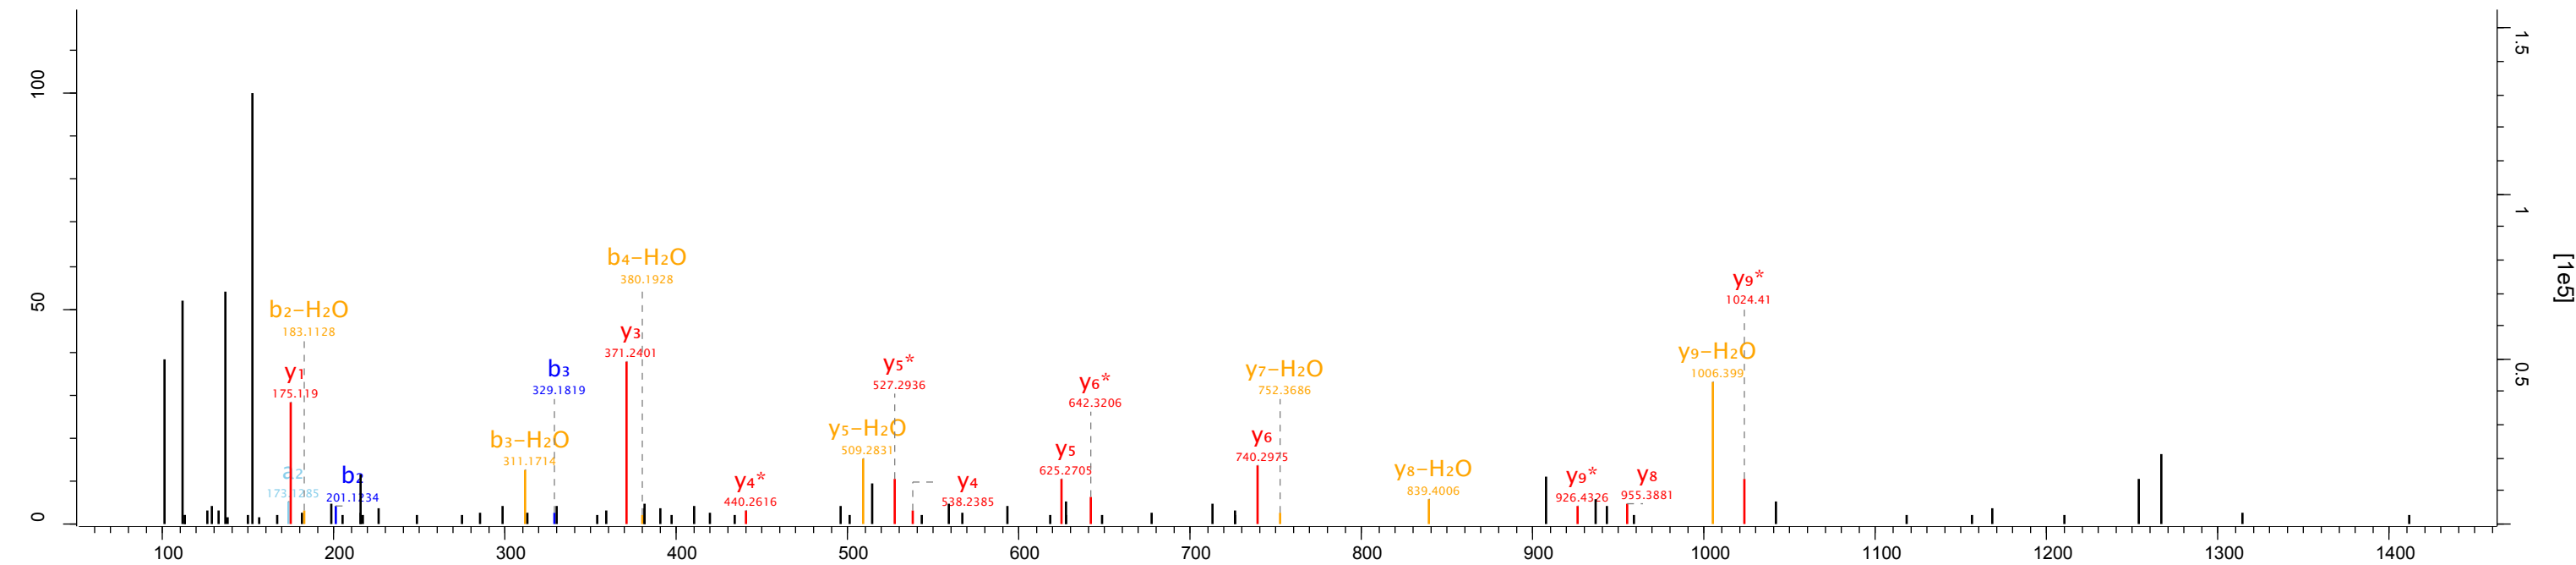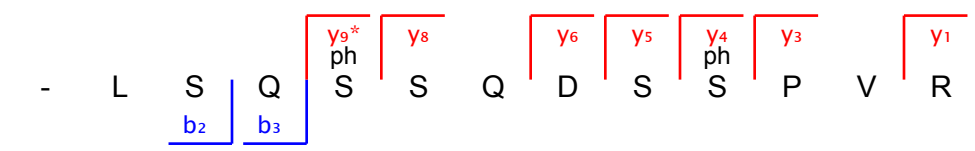

Raw file: 20150814\_A375SR\_Phospho\_BR2\_02  
 Scan: 5371 Method: FTMS; HCD Score: 63.06 m/z: 604.72 Gene names: BUD13

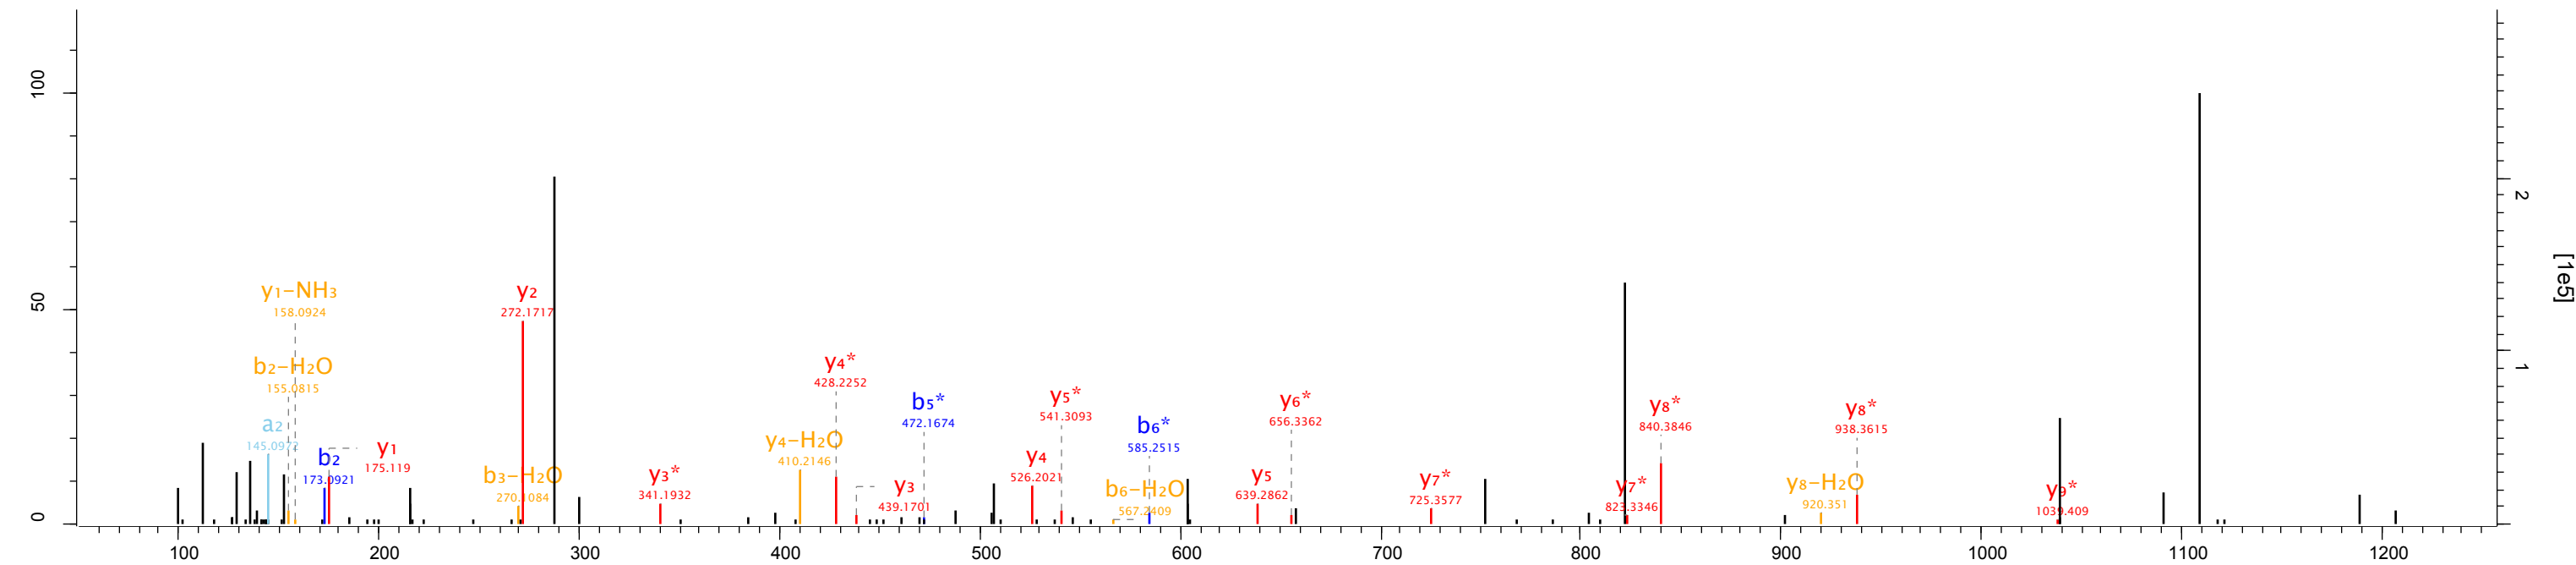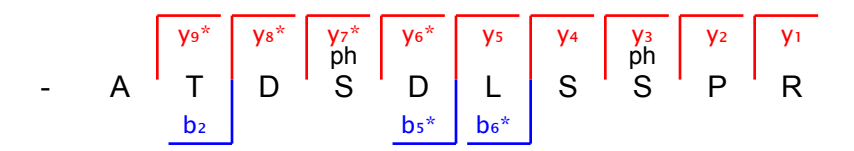

Raw file 20150814\_A375SR\_Phospho\_BR2\_02 Scan 5641 Method FTMS; HCD Score 246.14 m/z 916.38 Gene names NUP214

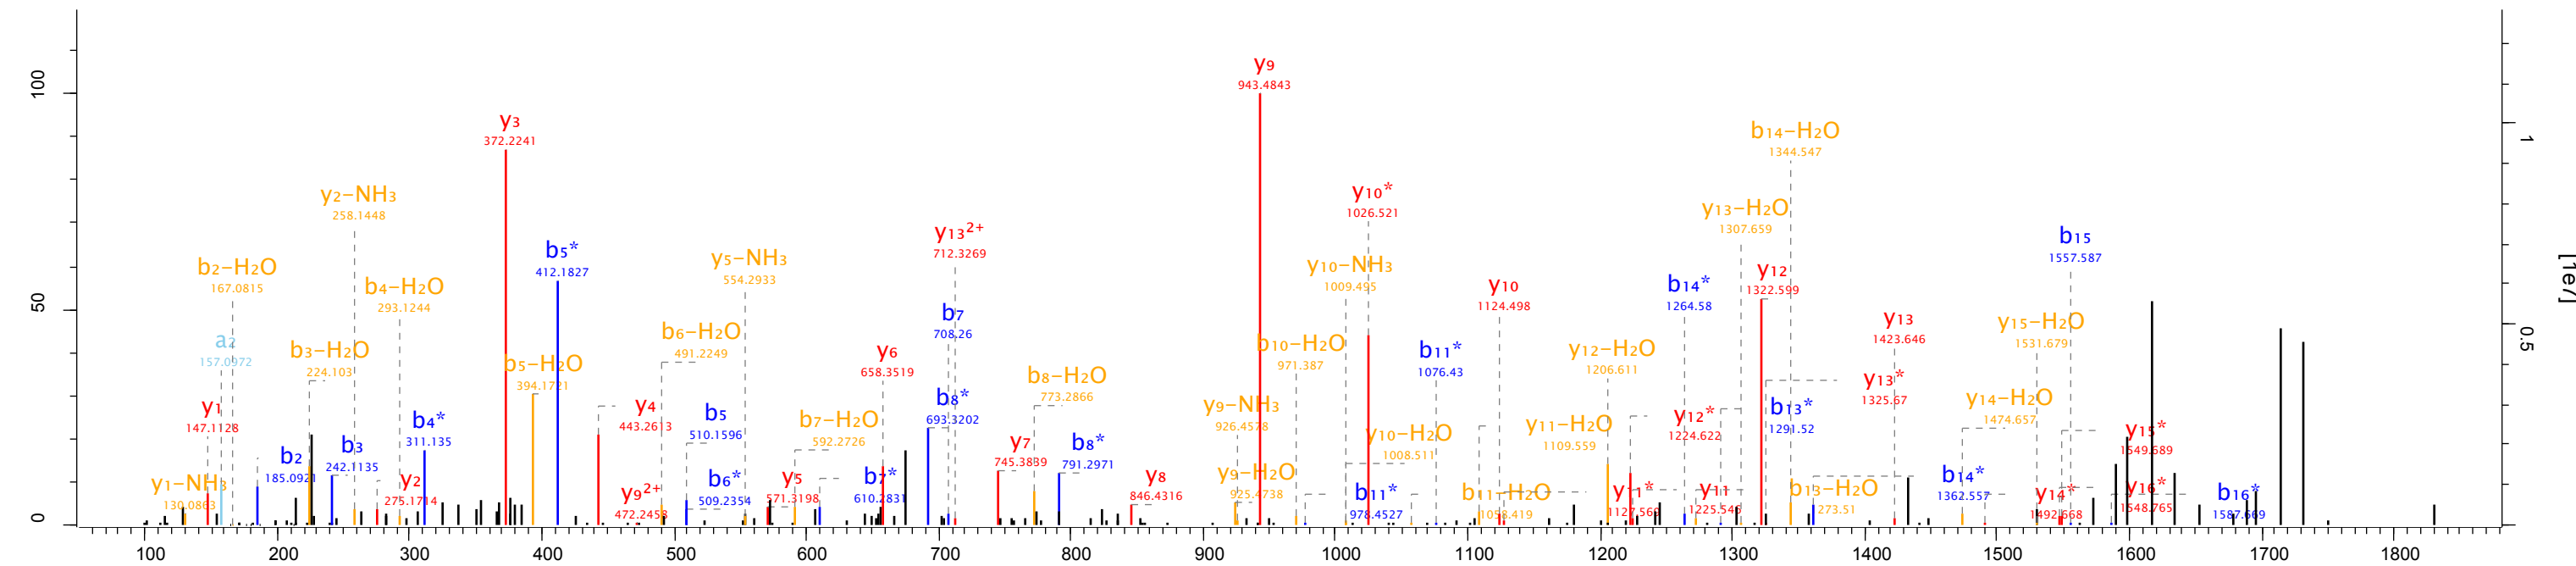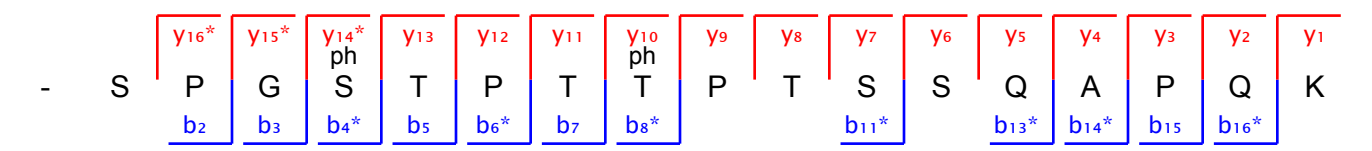

Raw file: 20150814\_A375SR\_Phospho\_BR2\_02  
 Scan: 6491 Method: FTMS; HCD Score: 86.49 m/z: 744.8 Gene names: FKBP4

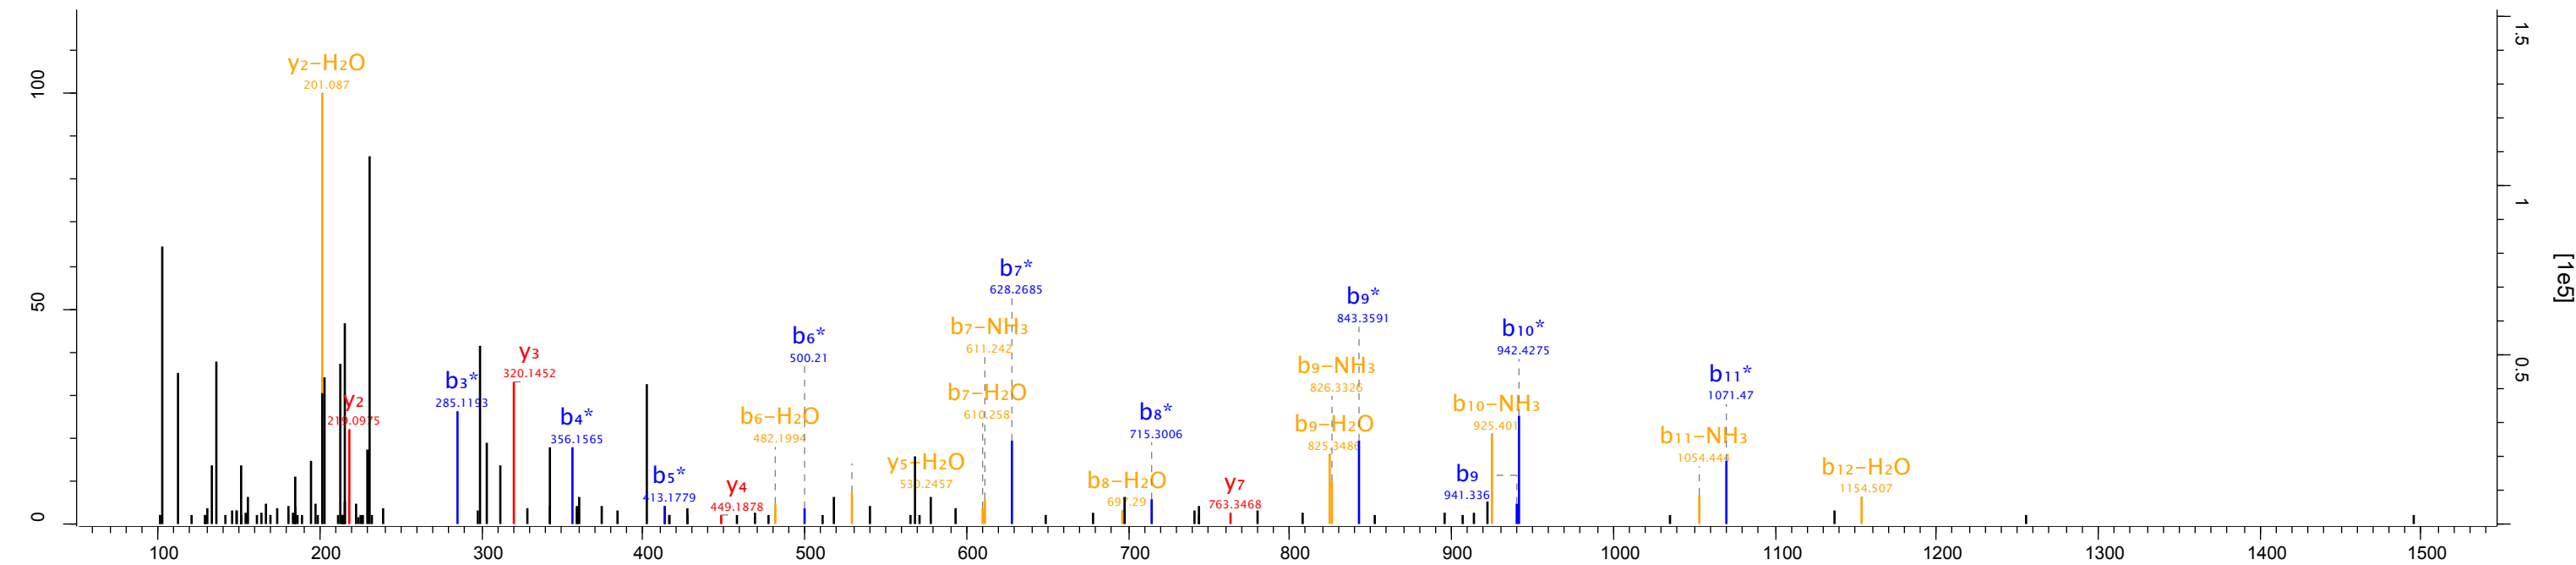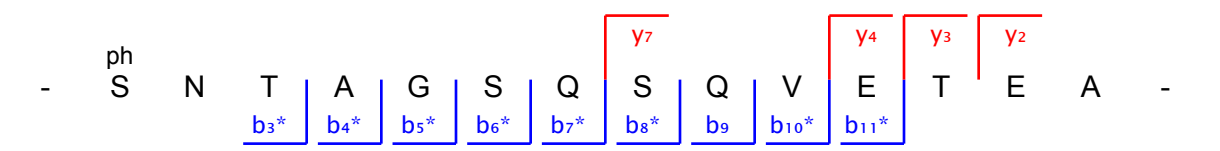

Raw file: 20150814\_A375SR\_Phospho\_BR2\_02  
 Scan: 6531 Method: FTMS; HCD Score: 90.58 m/z: 837.8 Gene names: C17orf75

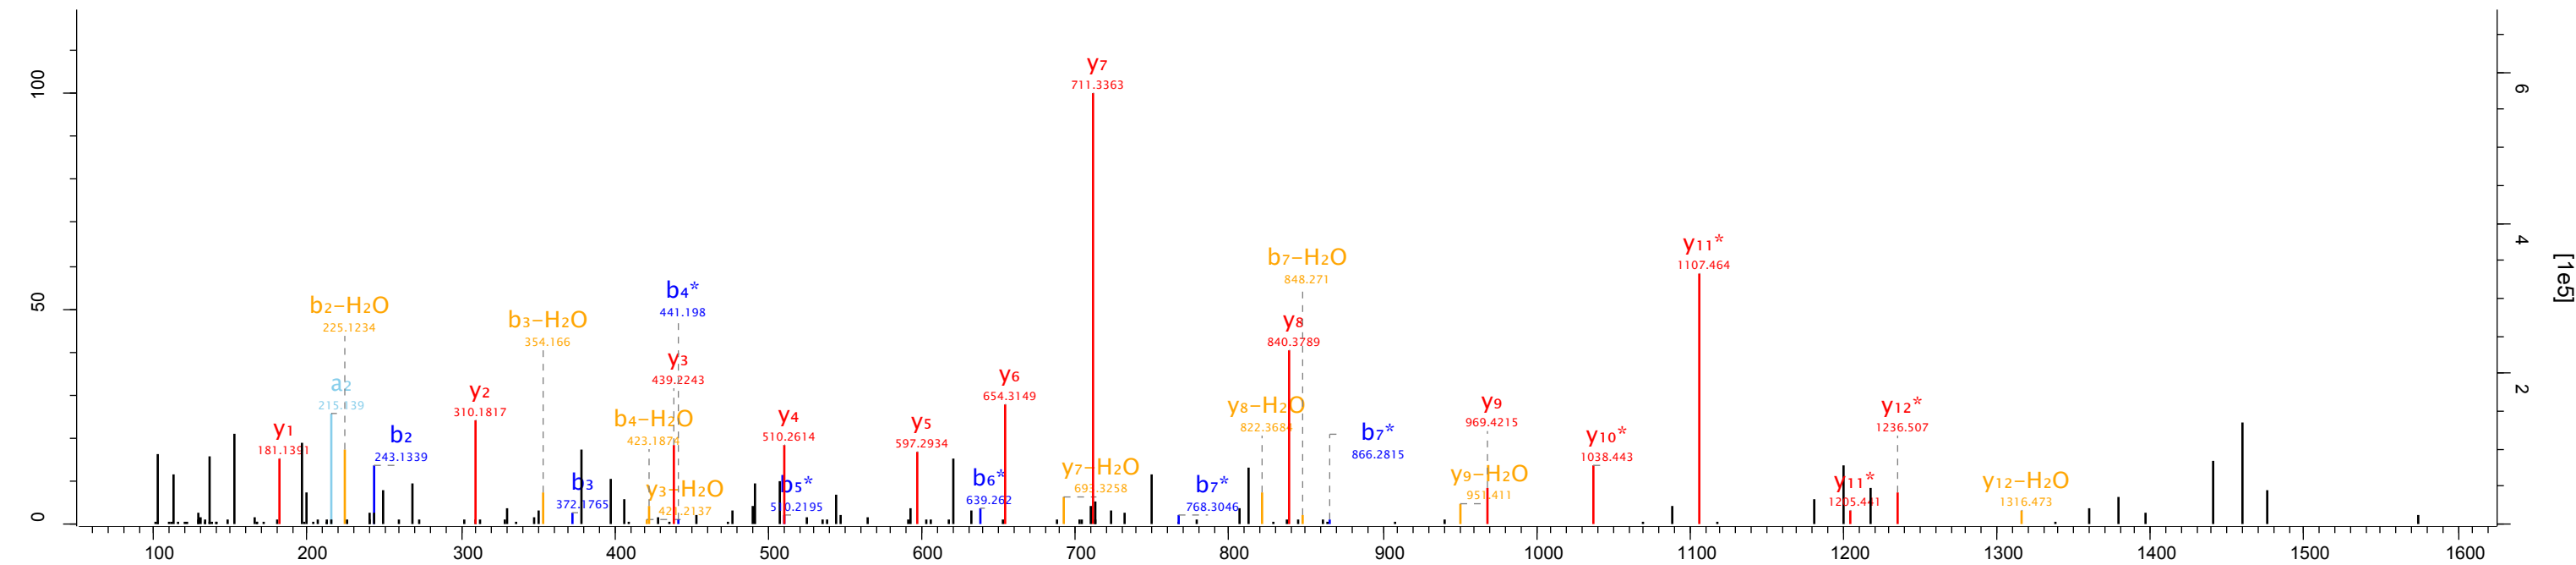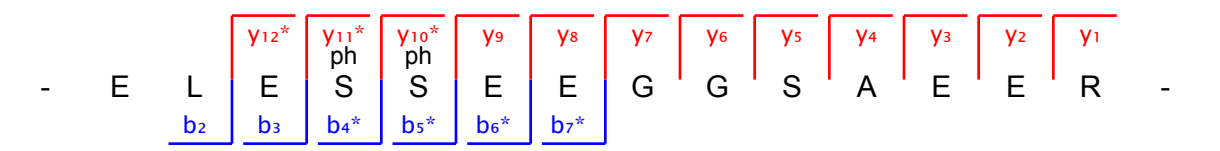



Raw file: 20150814\_A375SR\_Phospho\_BR2\_02  
 Scan: 6931 Method: FTMS; HCD Score: 114.88 m/z: 581.73 Gene names: NAV1

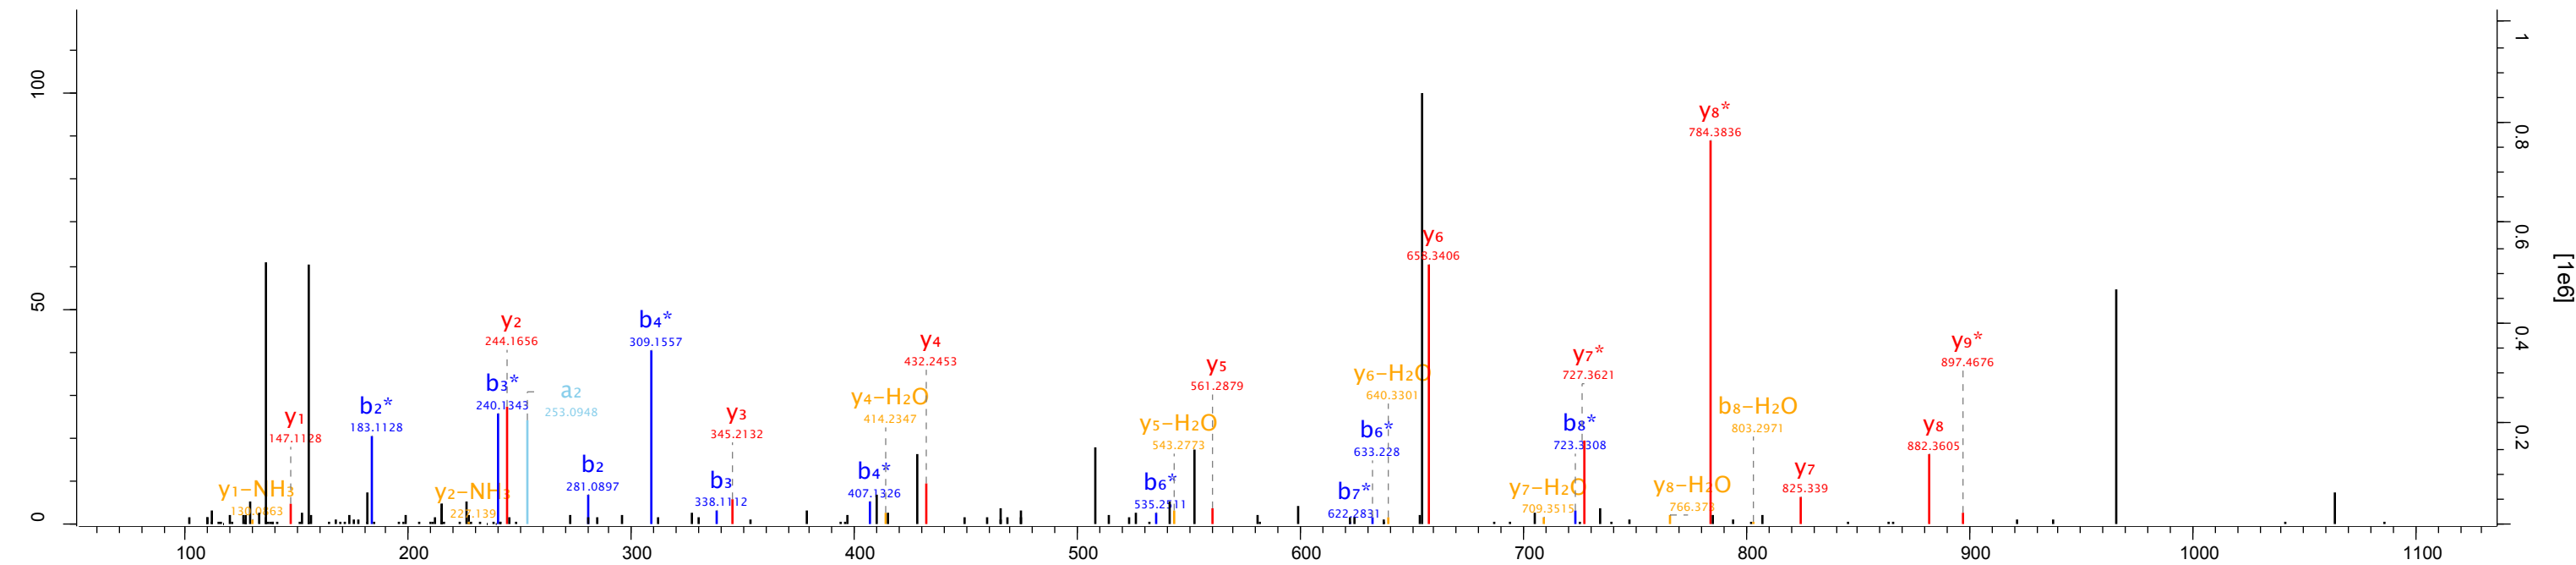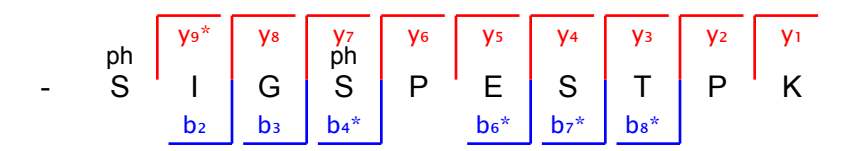

Raw file: 20150814\_A375SR\_Phospho\_BR2\_02  
 Scan: 7581 Method: FTMS; HCD Score: 135.38 m/z: 749.8 Gene names: GMIP

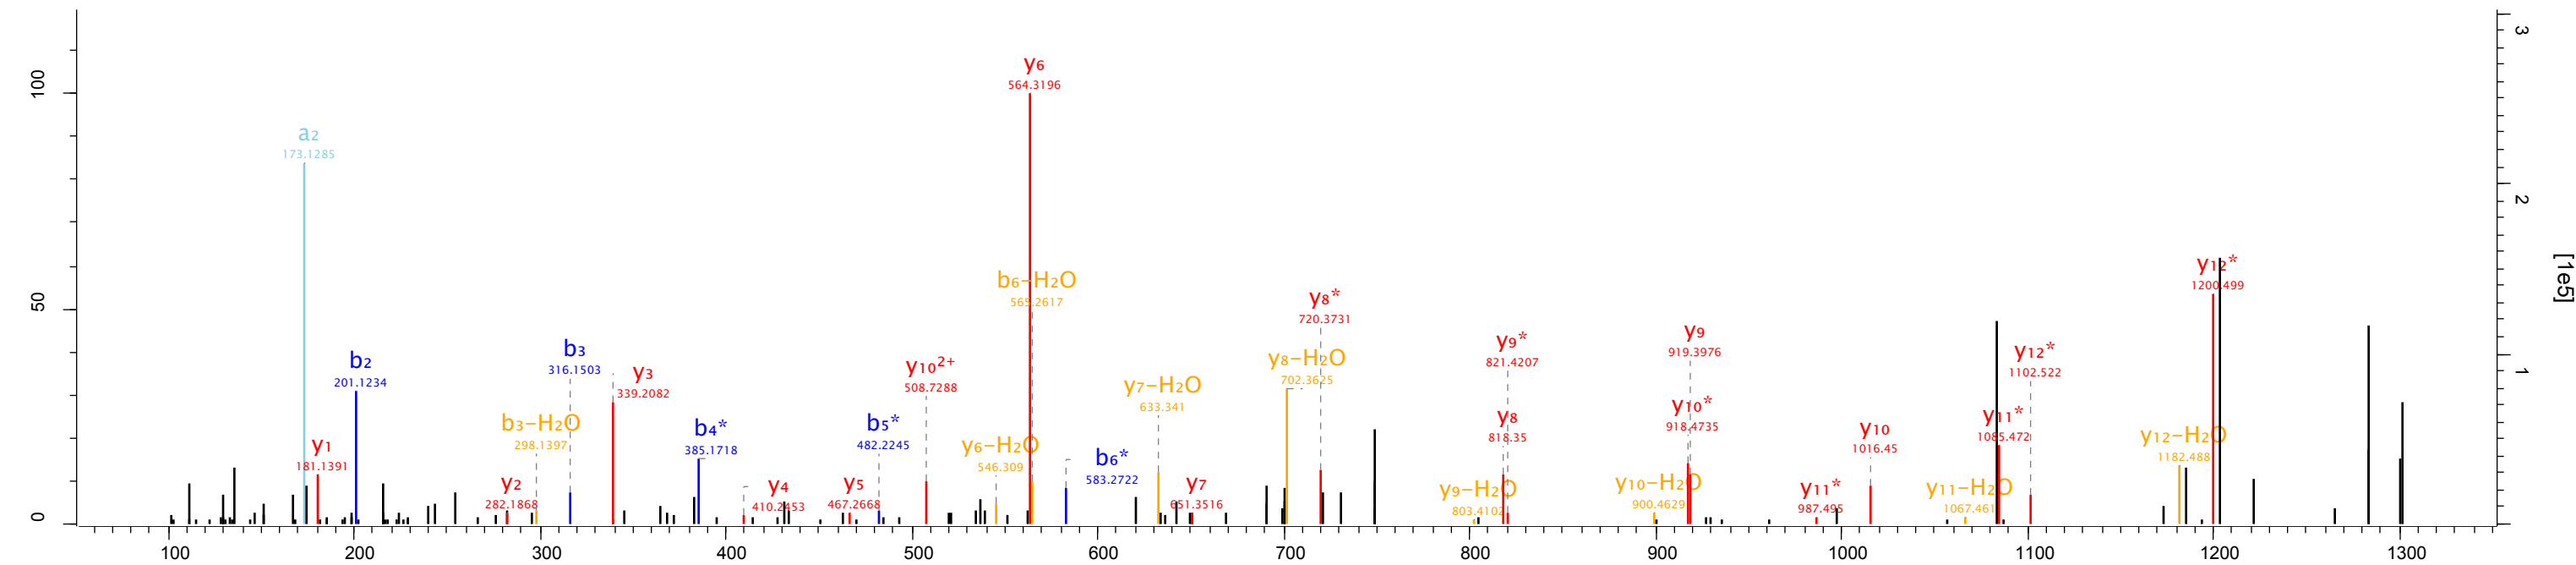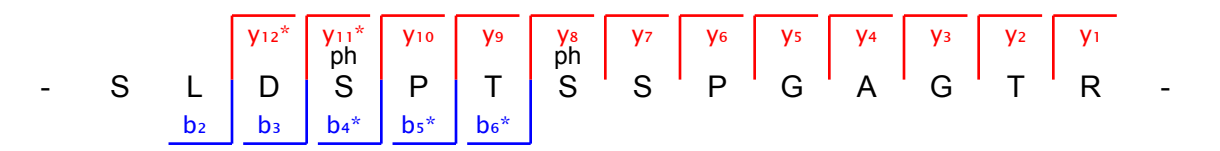

Raw file: 20150814\_A375SR\_Phospho\_BR2\_02  
 Scan: 7661 Method: FTMS; HCD Score: 79.47 m/z: 872.31 Gene names: TCF20

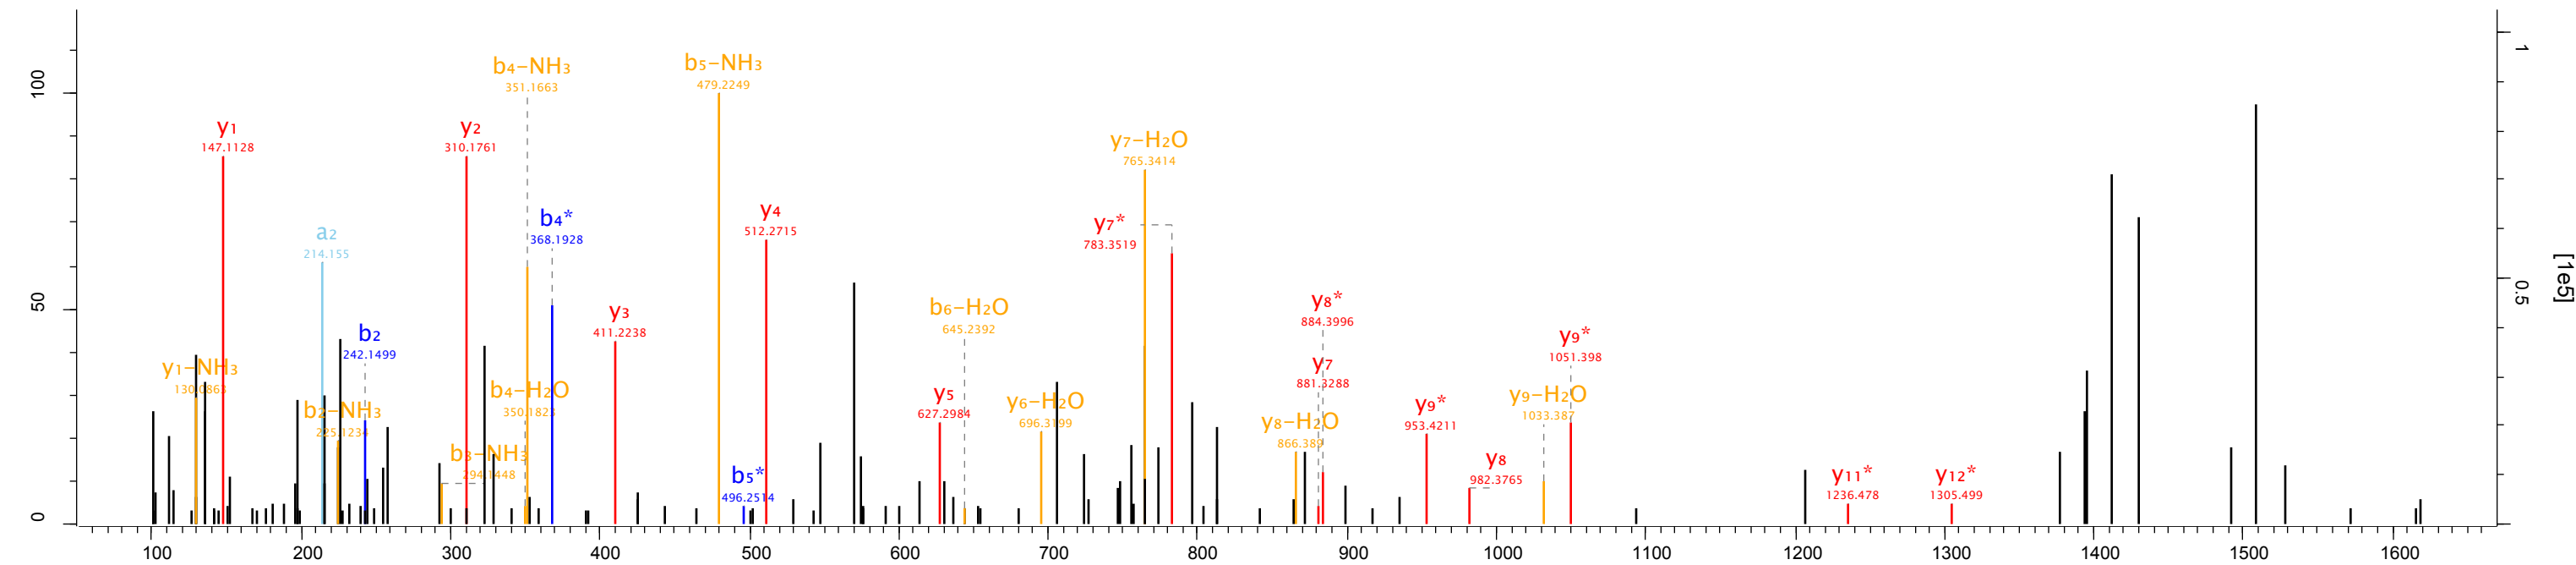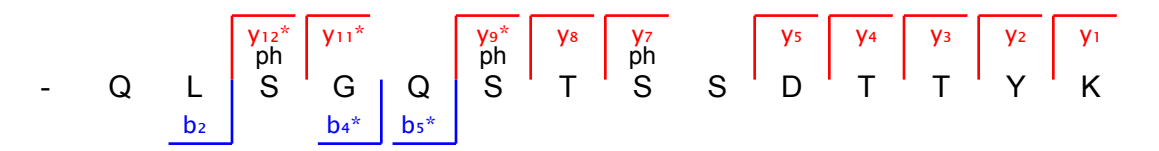

Raw file: 20150814\_A375SR\_Phospho\_BR2\_02  
 Scan: 7771 Method: FTMS; HCD Score: 79.93 m/z: 970.4 Gene names: SOS1

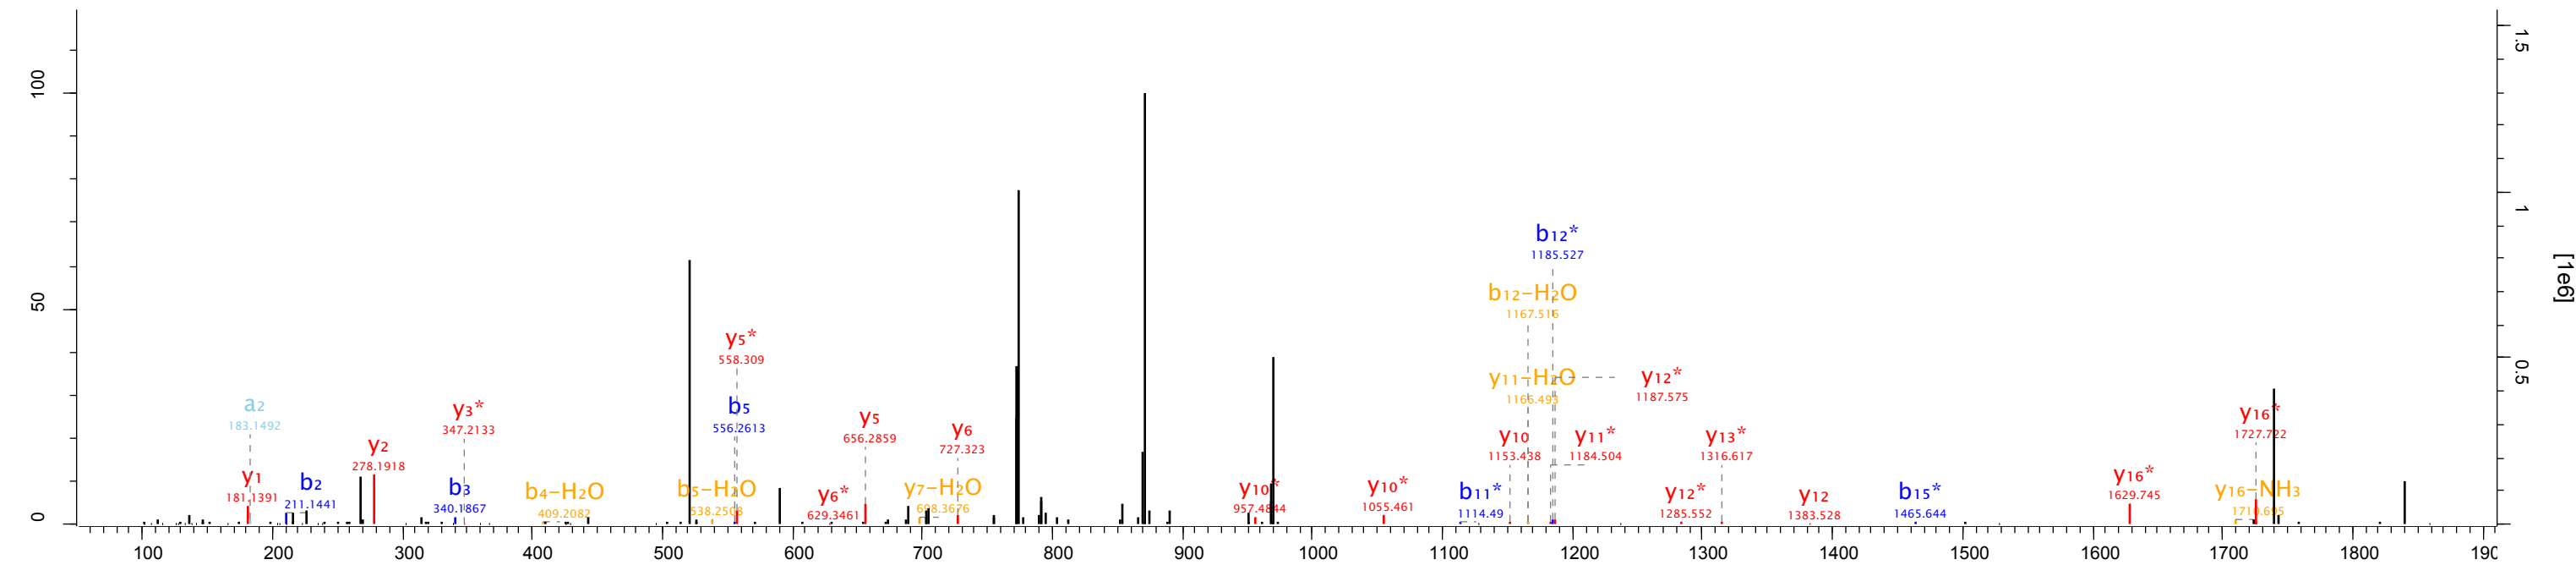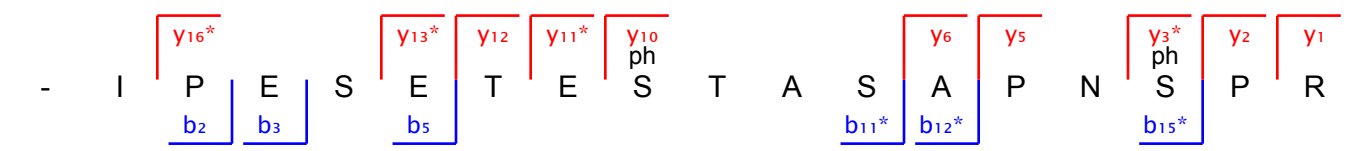

Raw file Scan Method Score m/z Gene names  
 20150814\_A375SR\_Phospho\_BR2\_02 8181 FTMS; HCD 75.59 521.21 SASH1

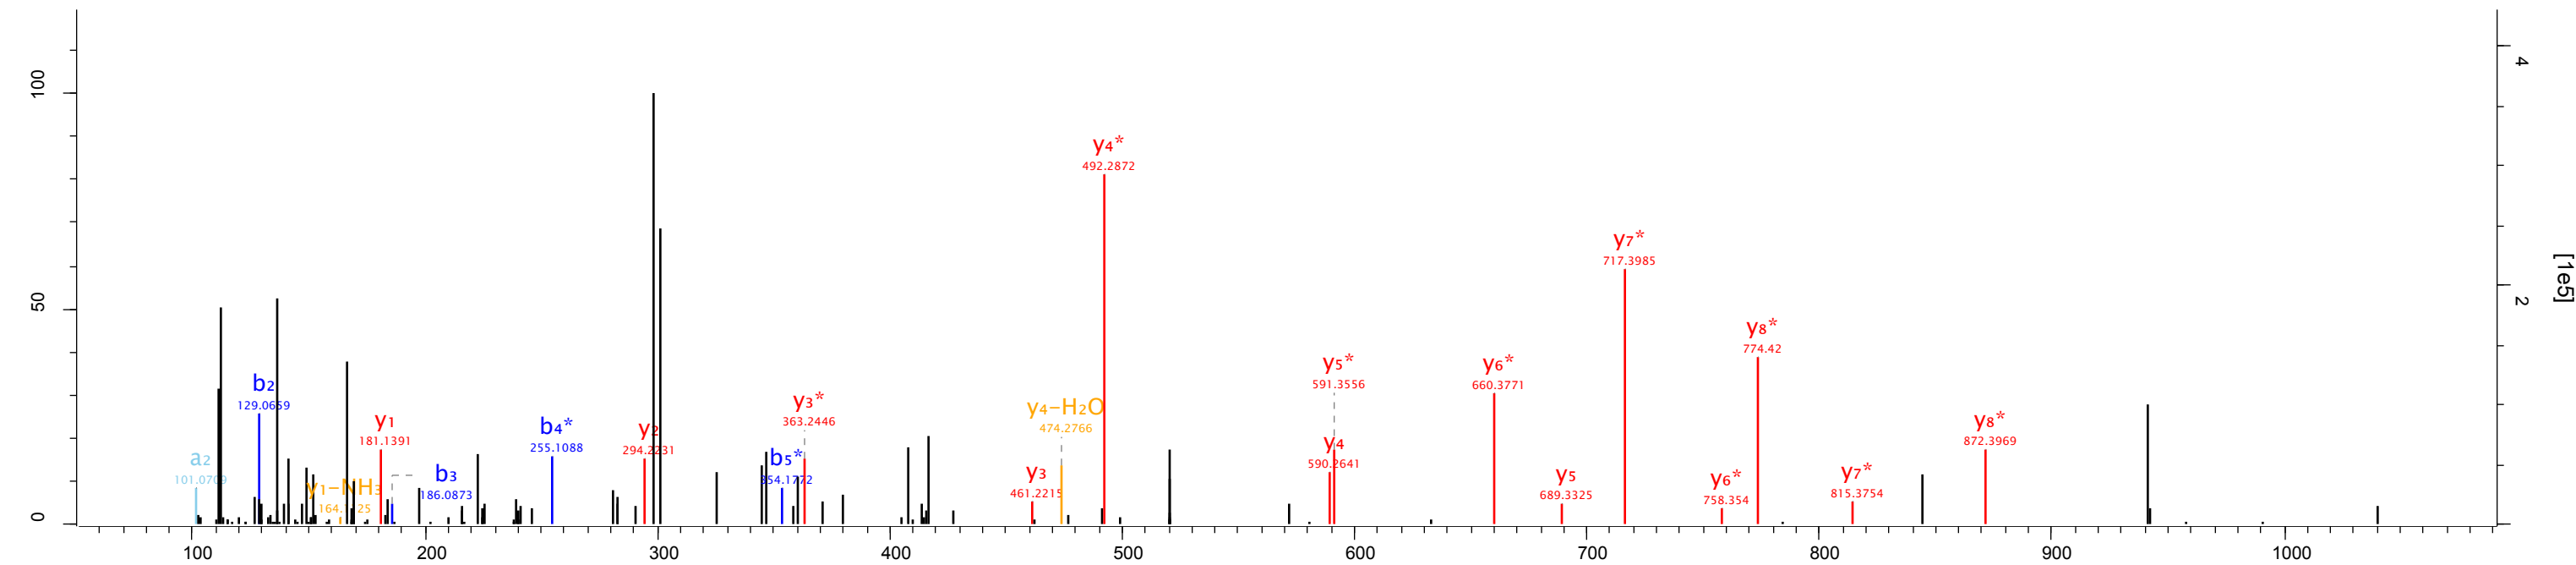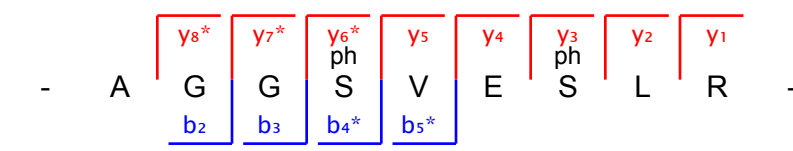

Raw file: 20150814\_A375SR\_Phospho\_BR2\_02  
 Scan: 8221 Method: FTMS; HCD Score: 153.12 m/z: 739.93 Gene names: SUDS3

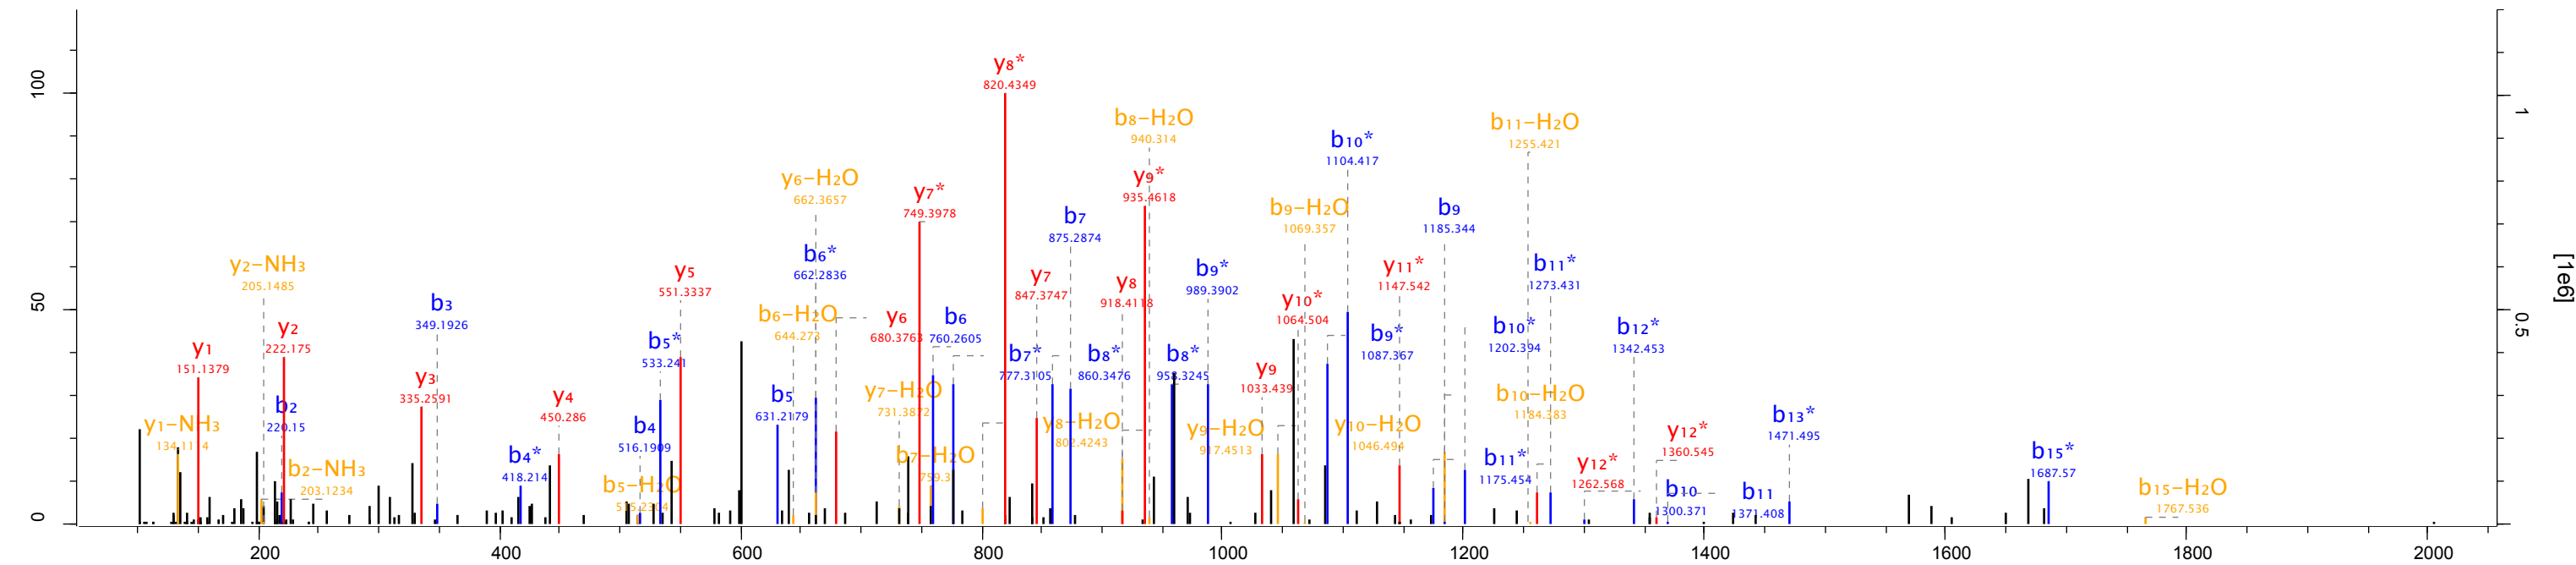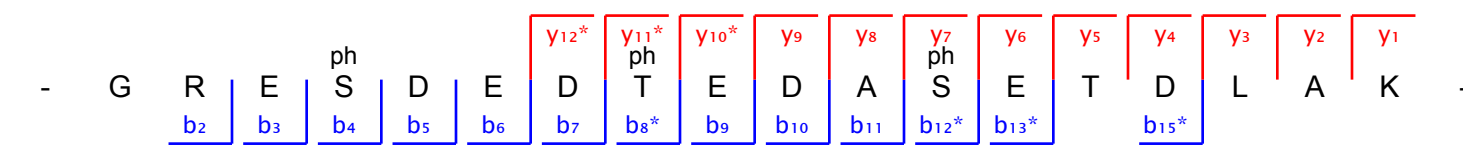

Raw file: 20150814\_A375SR\_Phospho\_BR2\_02  
 Scan: 8411 Method: FTMS; HCD Score: 71.69 m/z: 650.21 Gene names: CDC42BPA

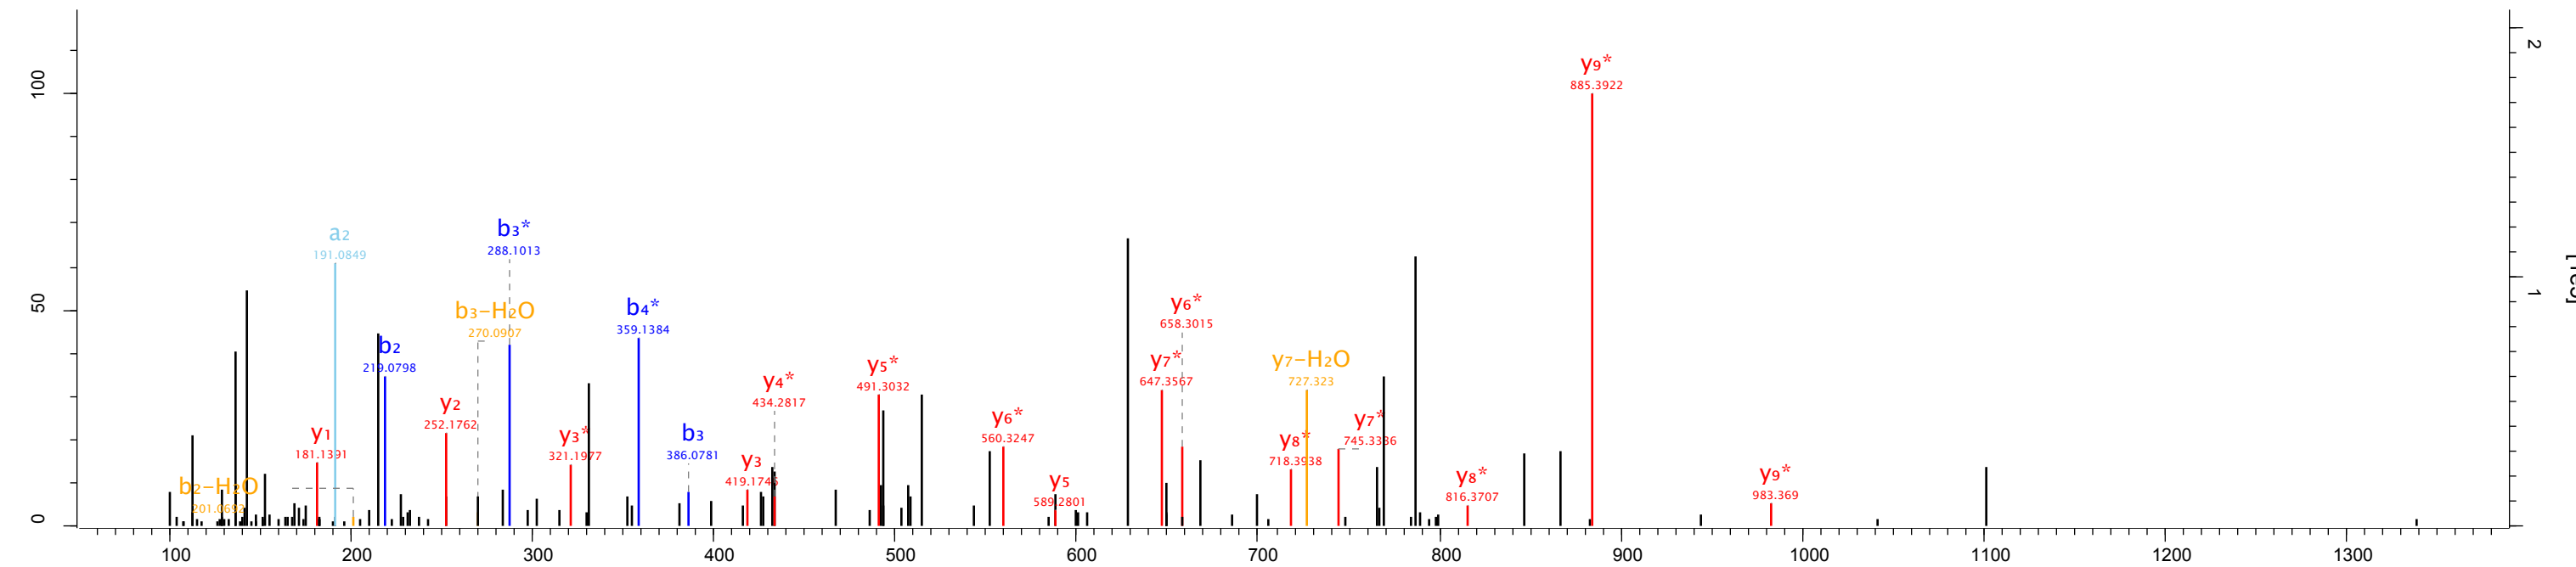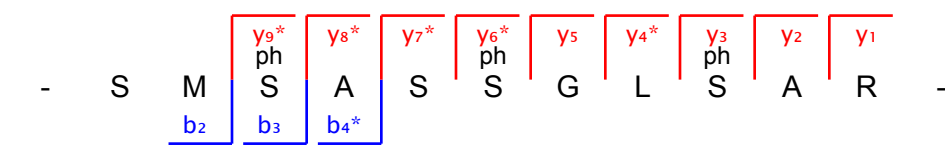

Raw file: 20150814\_A375SR\_Phospho\_BR2\_02  
 Scan: 8711 Method: FTMS; HCD Score: 161.56 m/z: 1035.45 Gene names: MAP7D1

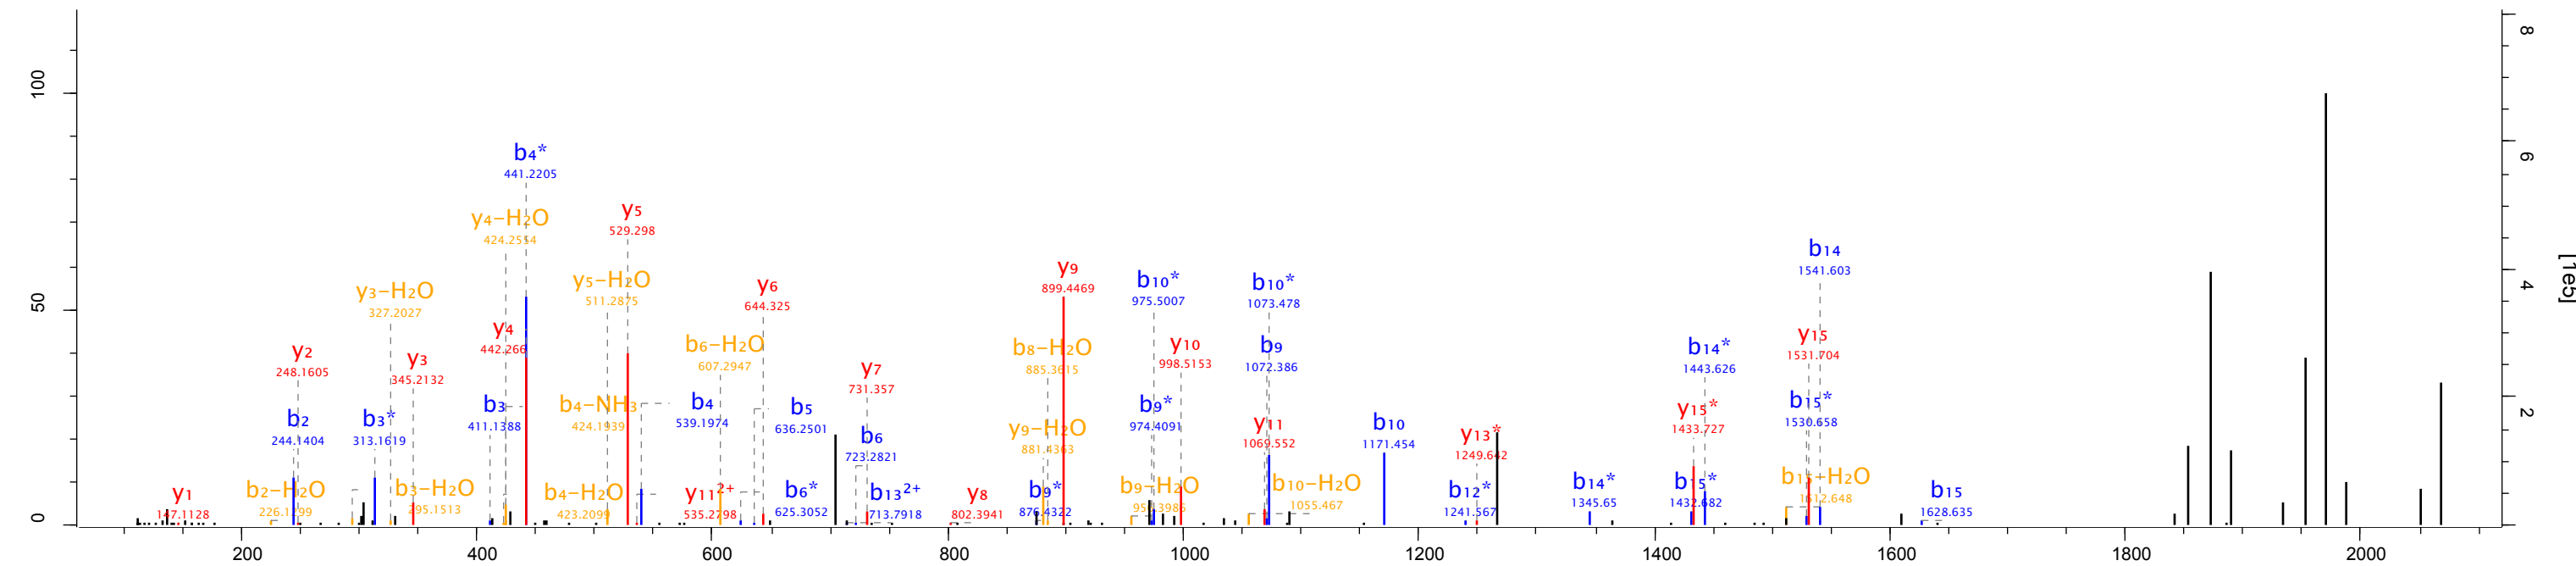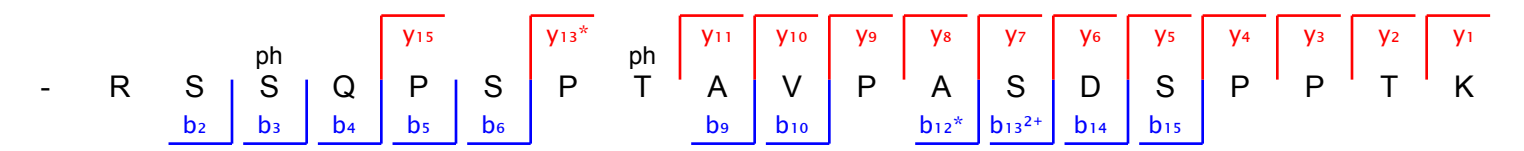



Raw file 20150814\_A375SR\_Phospho\_BR2\_02 Scan 9051 Method FTMS; HCD Score 73.94 m/z 1058.89 Gene names SYNPO

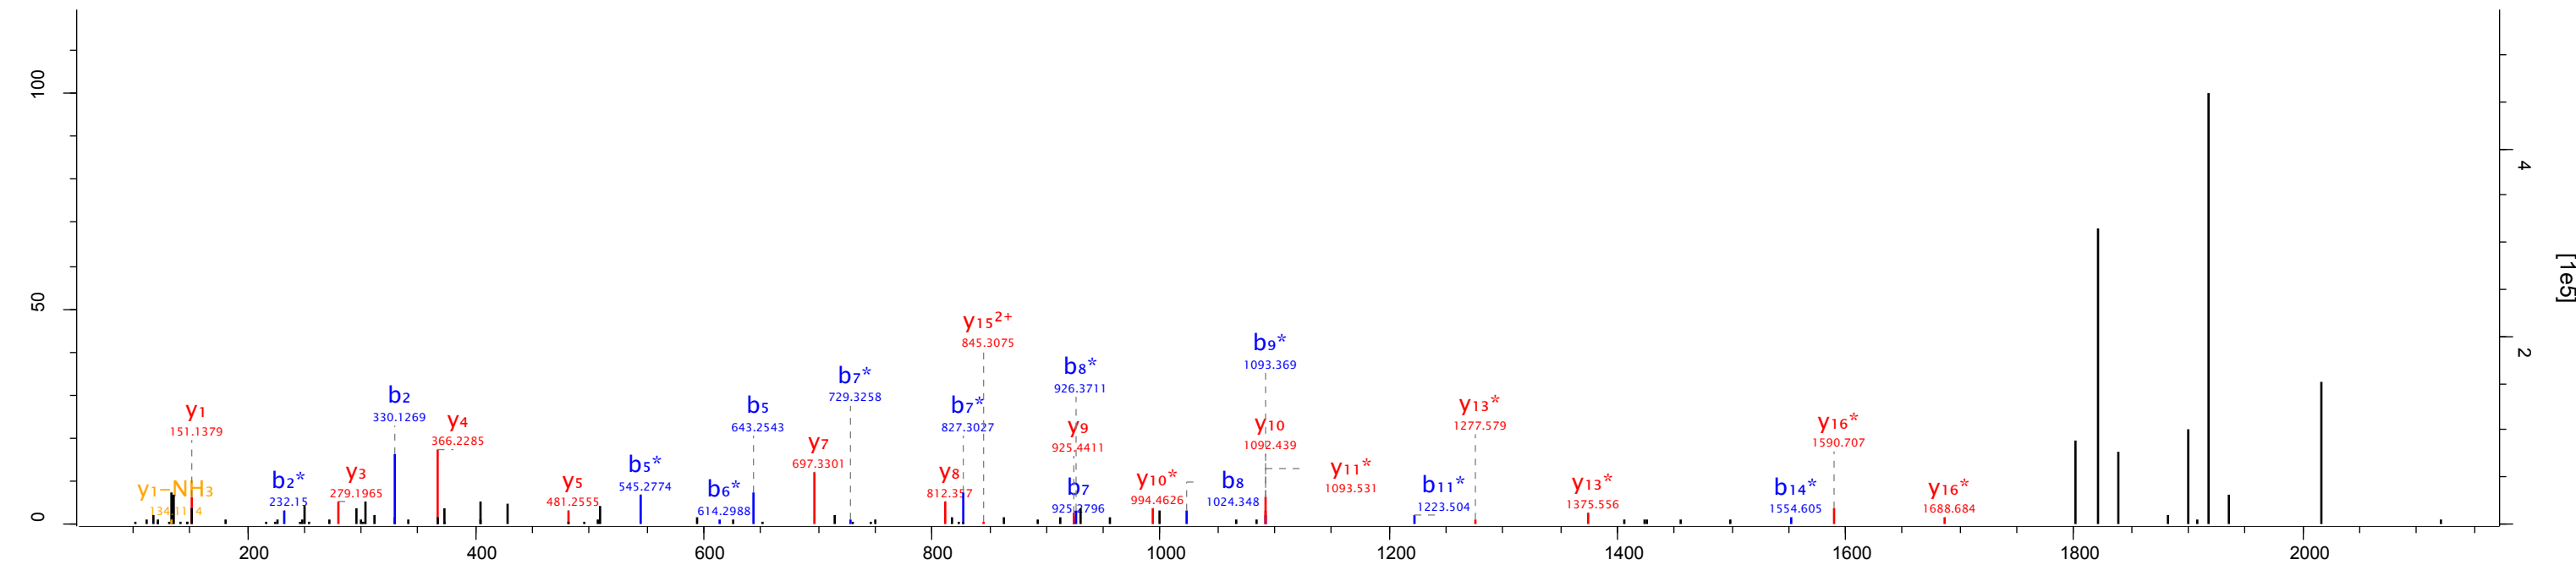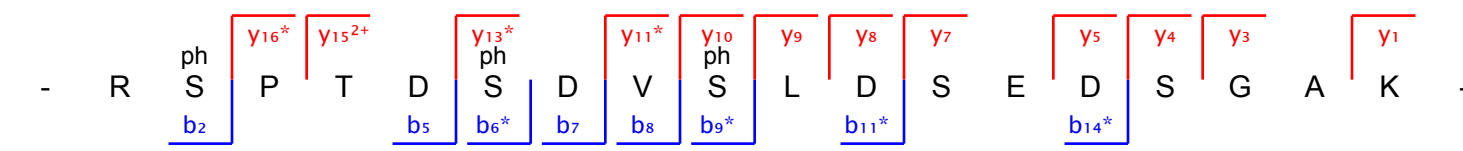

Raw file: 20150814\_A375SR\_Phospho\_BR2\_02  
 Scan: 9511 Method: FTMS; HCD Score: 163.38 m/z: 741.33 Gene names: SRRM2

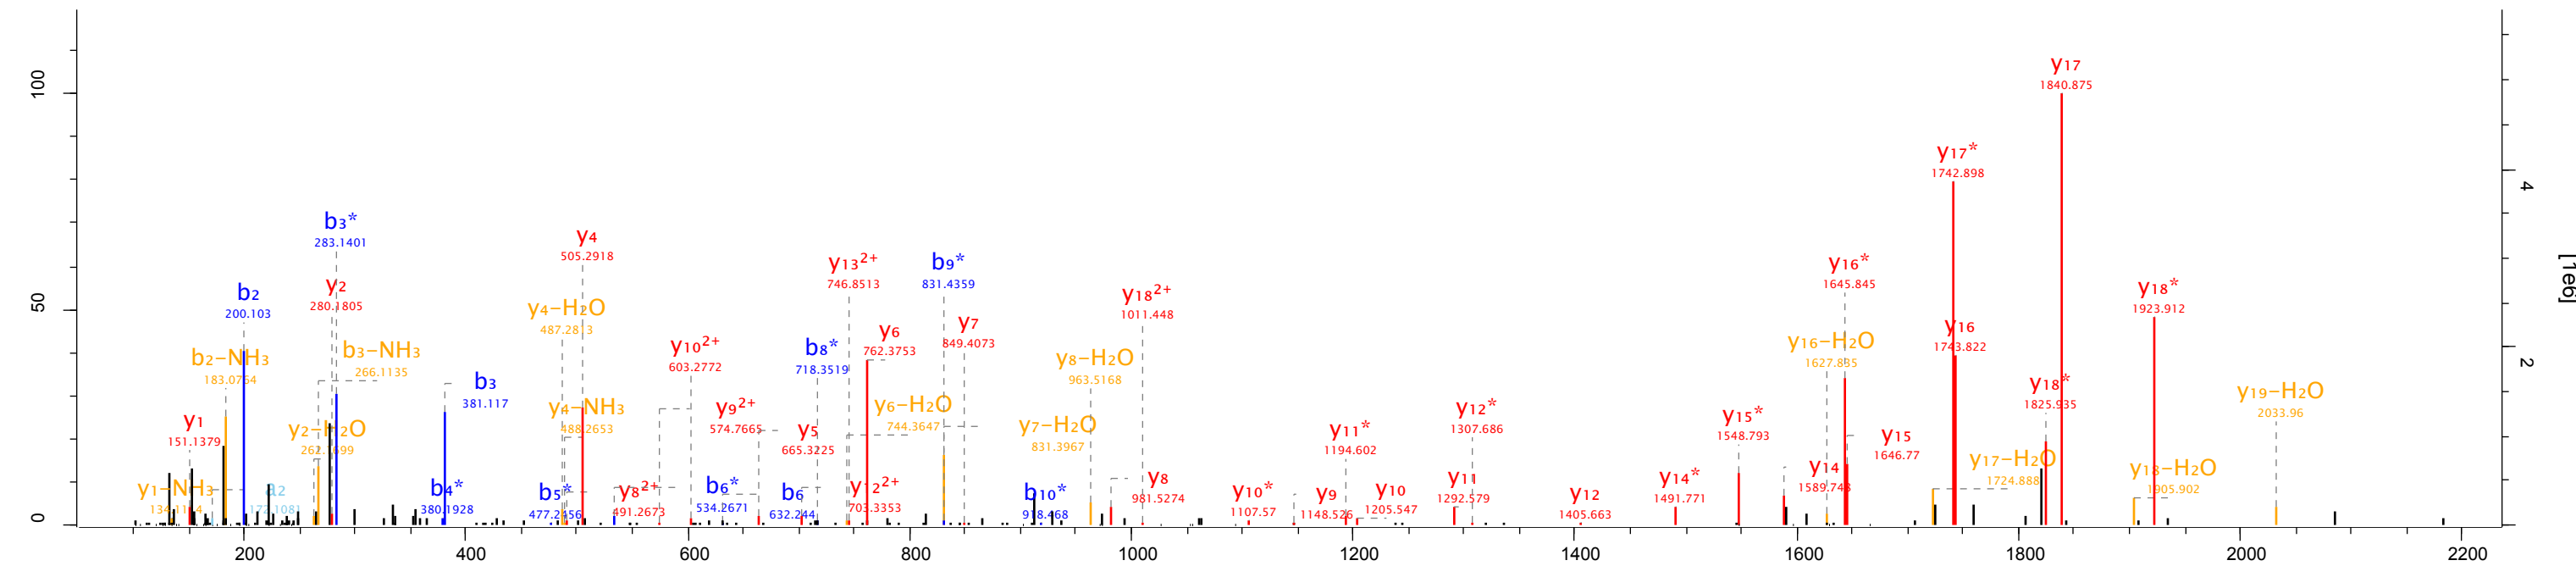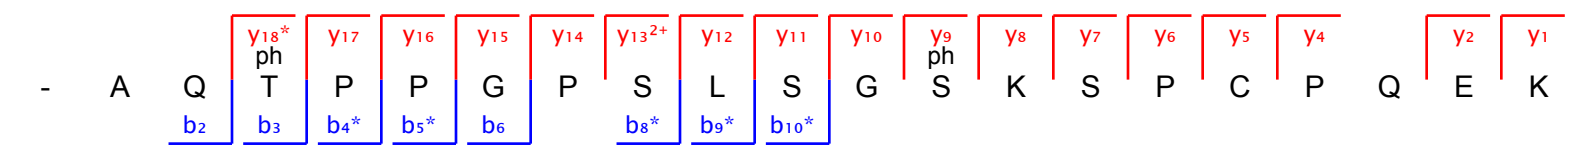

Raw file Scan Method Score m/z Gene names  
 20150814\_A375SR\_Phospho\_BR2\_02 9661 FTMS; HCD 201.75 963.72 PNISR

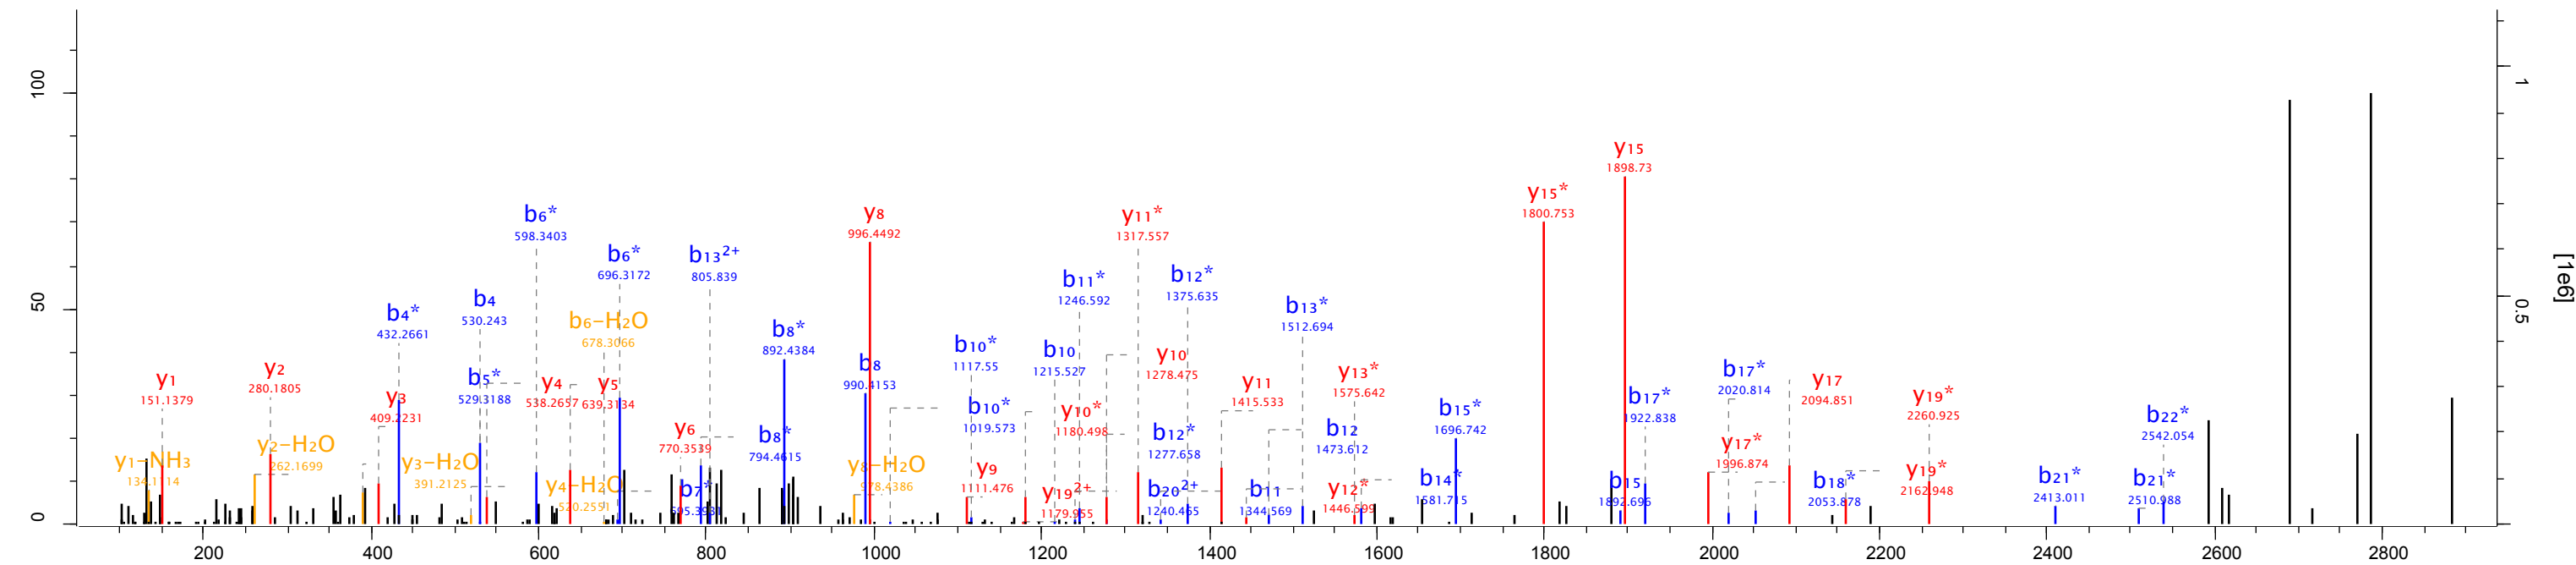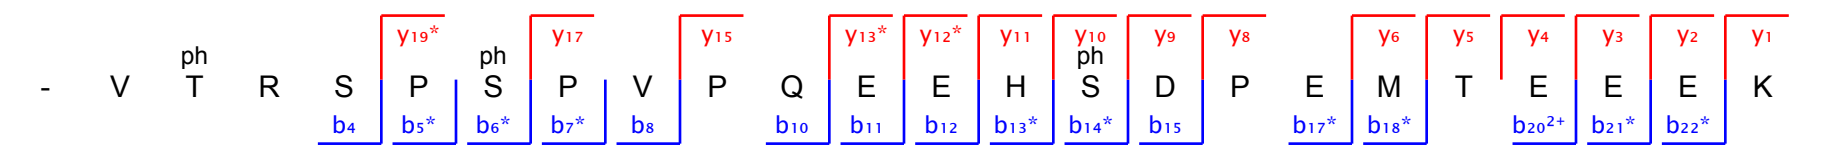

Raw file: 20150814\_A375SR\_Phospho\_BR2\_02  
 Scan: 9881 Method: FTMS; HCD Score: 151.38 m/z: 600.3 Gene names: ZC3H18

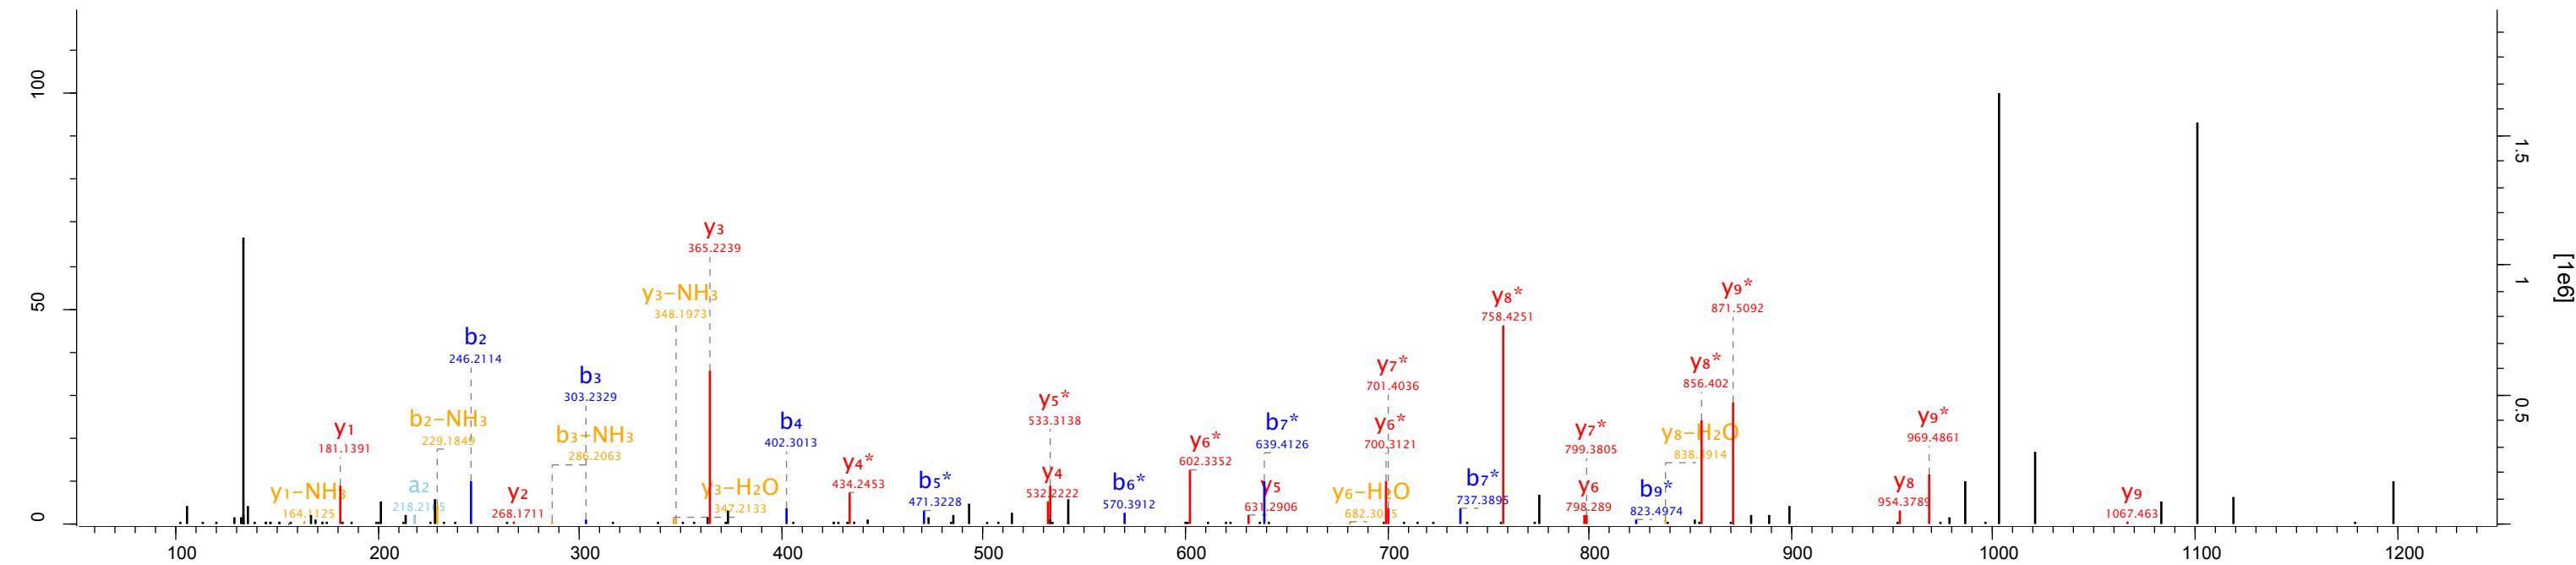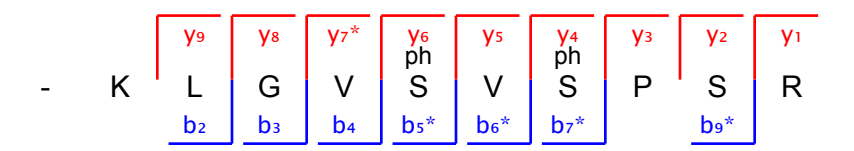

Raw file 20150814\_A375SR\_Phospho\_BR2\_03 Scan 10141 Method FTMS; HCD Score 60.19 m/z 841.9 Gene names MSL1

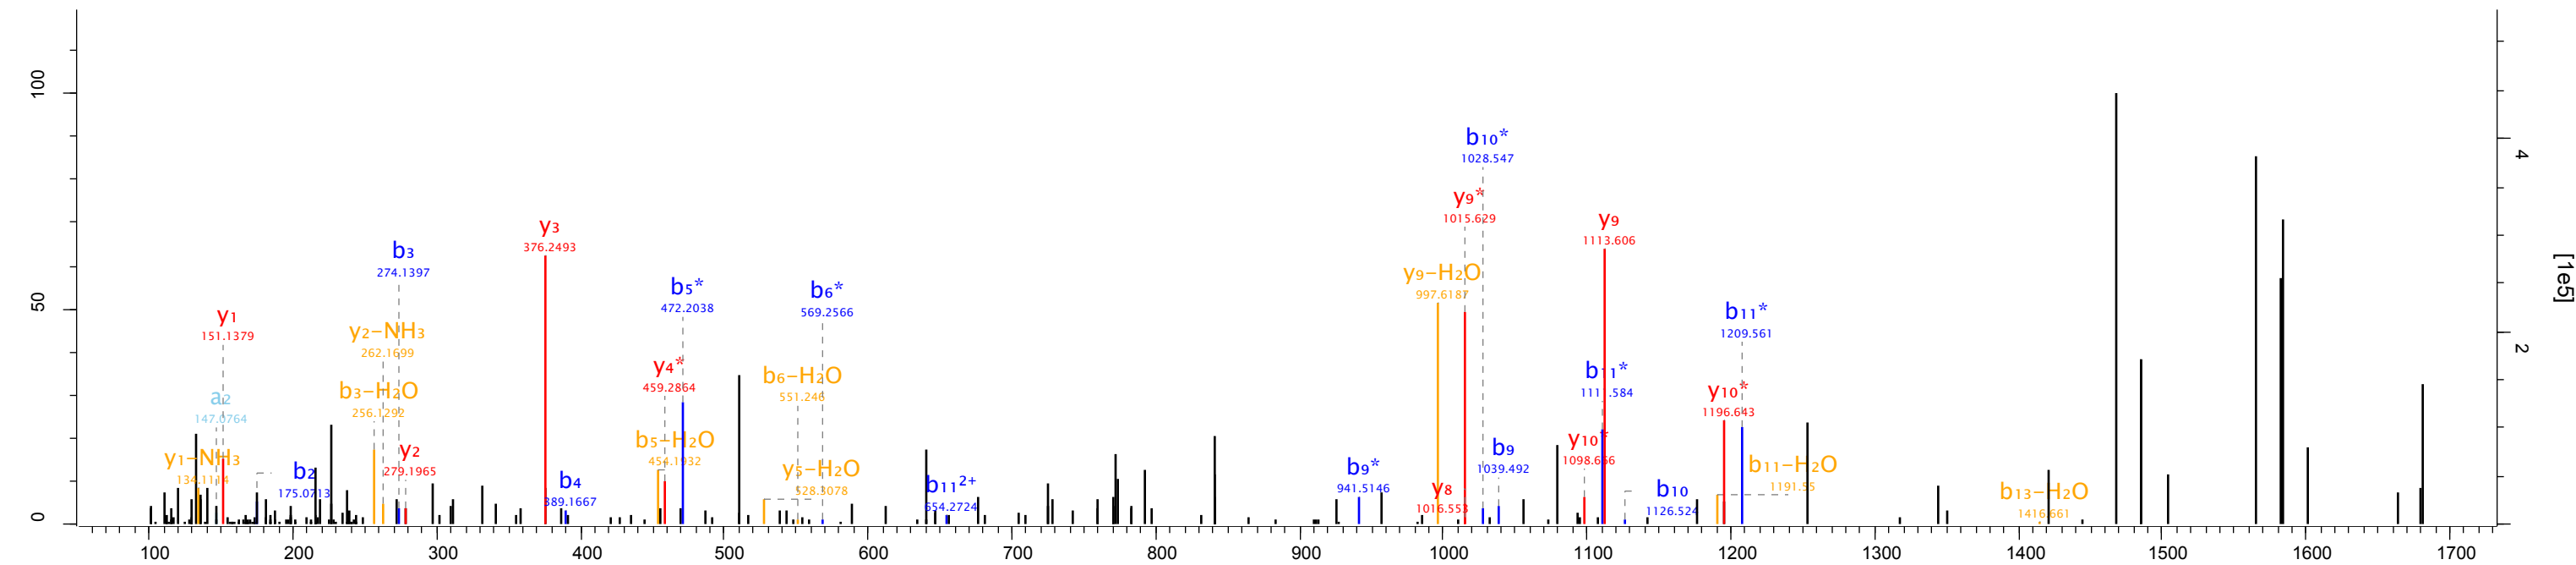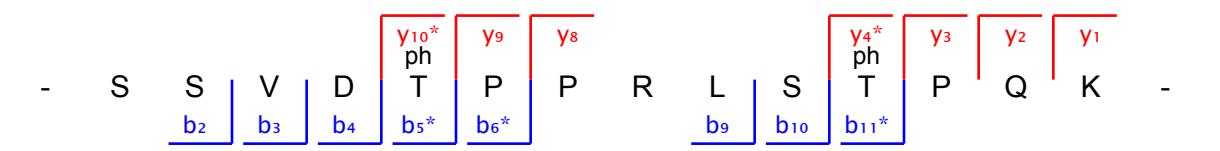

Raw file  
 20150814\_A375SR\_Phospho\_BR2\_03  
 Scan 10281 Method FTMS; HCD Score 244.27 m/z 890.36 Gene names PPP1R7

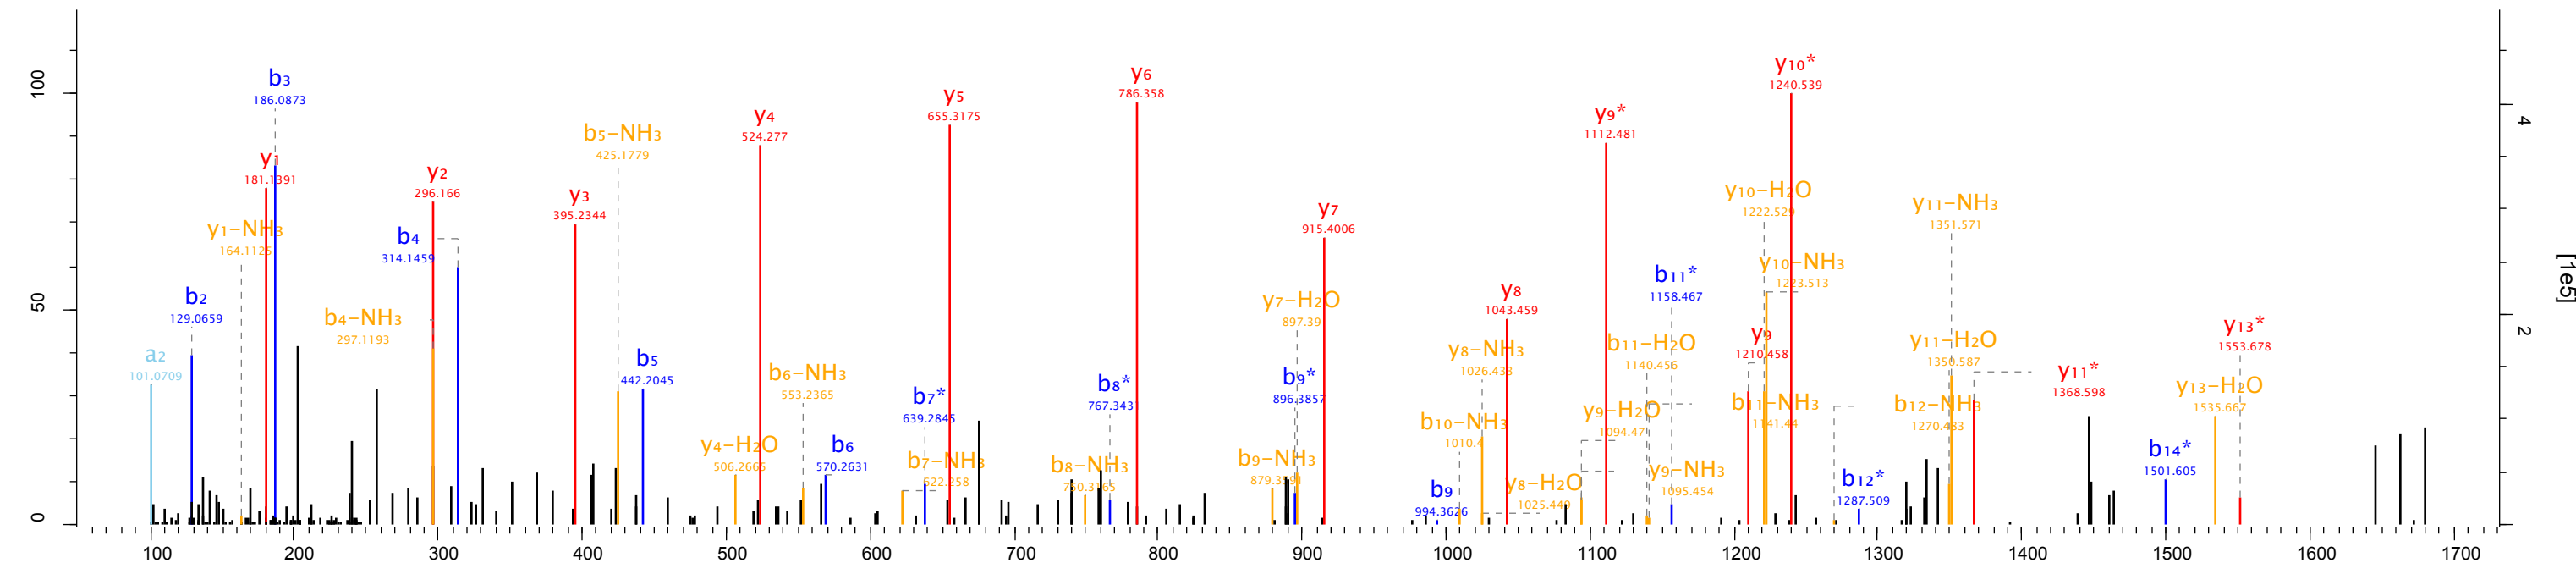

- G A G Q Q Q S Q E M M E V D R -

Fragmentation mapping (b and y ions) is shown below the sequence:

- b2: A
- b3: G
- b4: Q
- b5: Q
- b6: Q
- b7\*: S
- b8\*: Q
- b9: E
- b11\*: M
- b12\*: E
- b14\*: D
- y1: R
- y2: V
- y3: E
- y4: M
- y5: M
- y6: M
- y7: E
- y8: Q
- y9: S
- y10: Q
- y11: Q
- y13\*: R

Raw file 20150814\_A375SR\_Phospho\_BR2\_03 Scan 10351 Method FTMS; HCD Score 102.65 m/z 727.26 Gene names CAND1

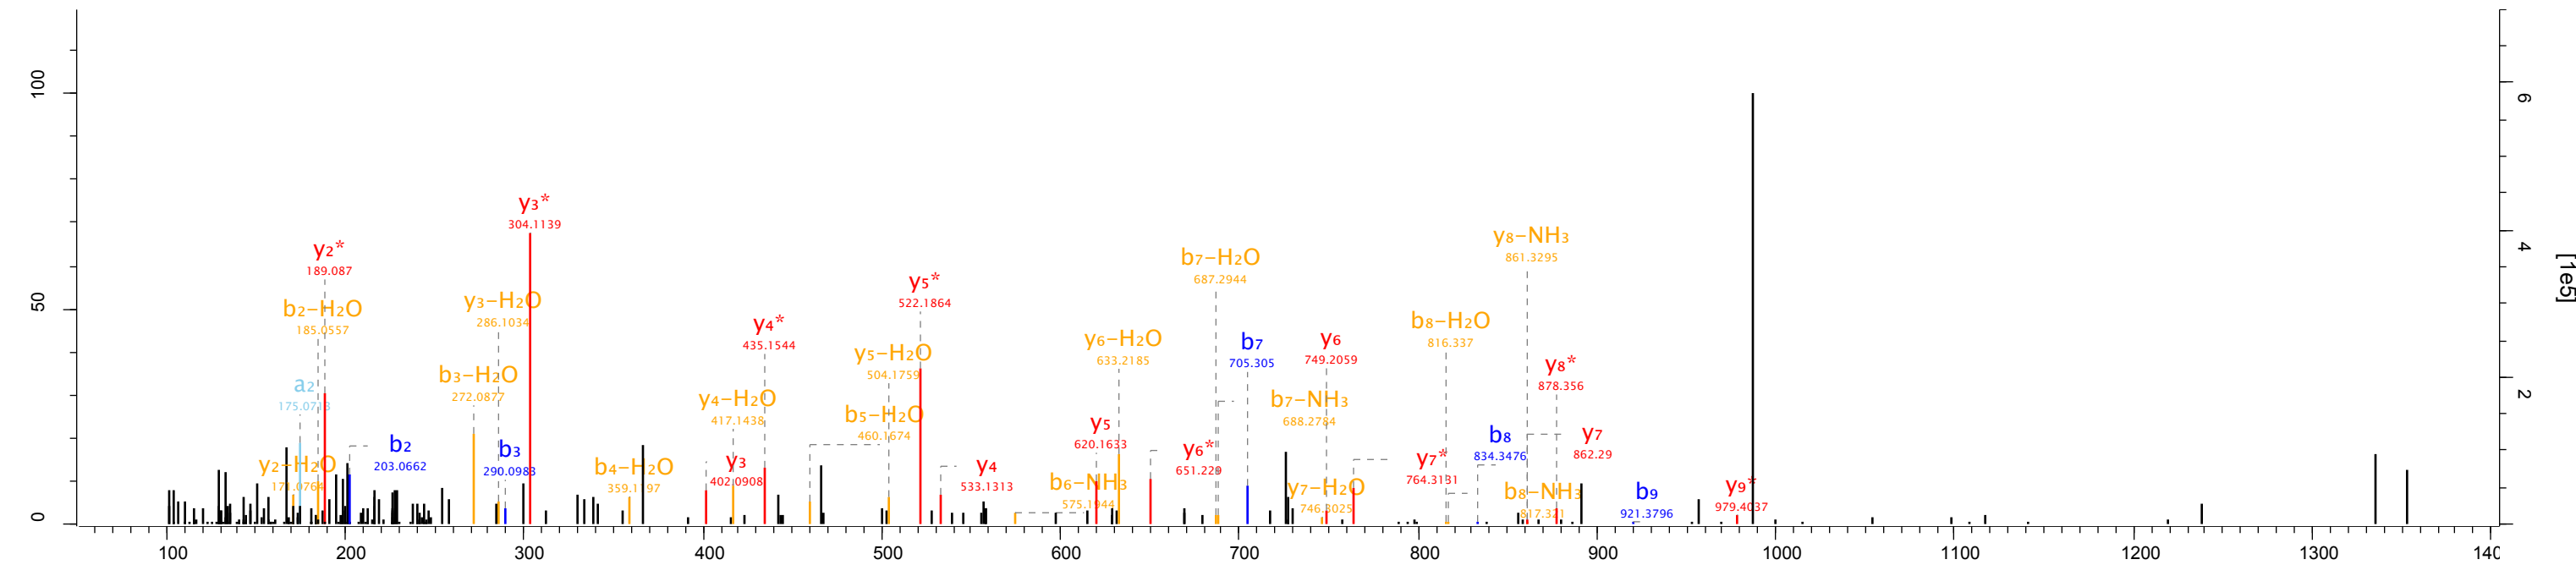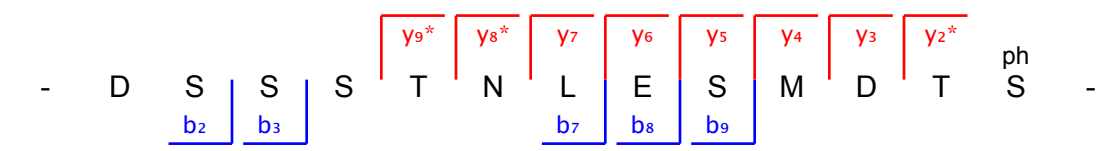

Raw file: 20150814\_A375SR\_Phospho\_BR2\_03  
 Scan: 10561 Method: FTMS; HCD Score: 132.52 m/z: 860.83 Gene names: ITGB4

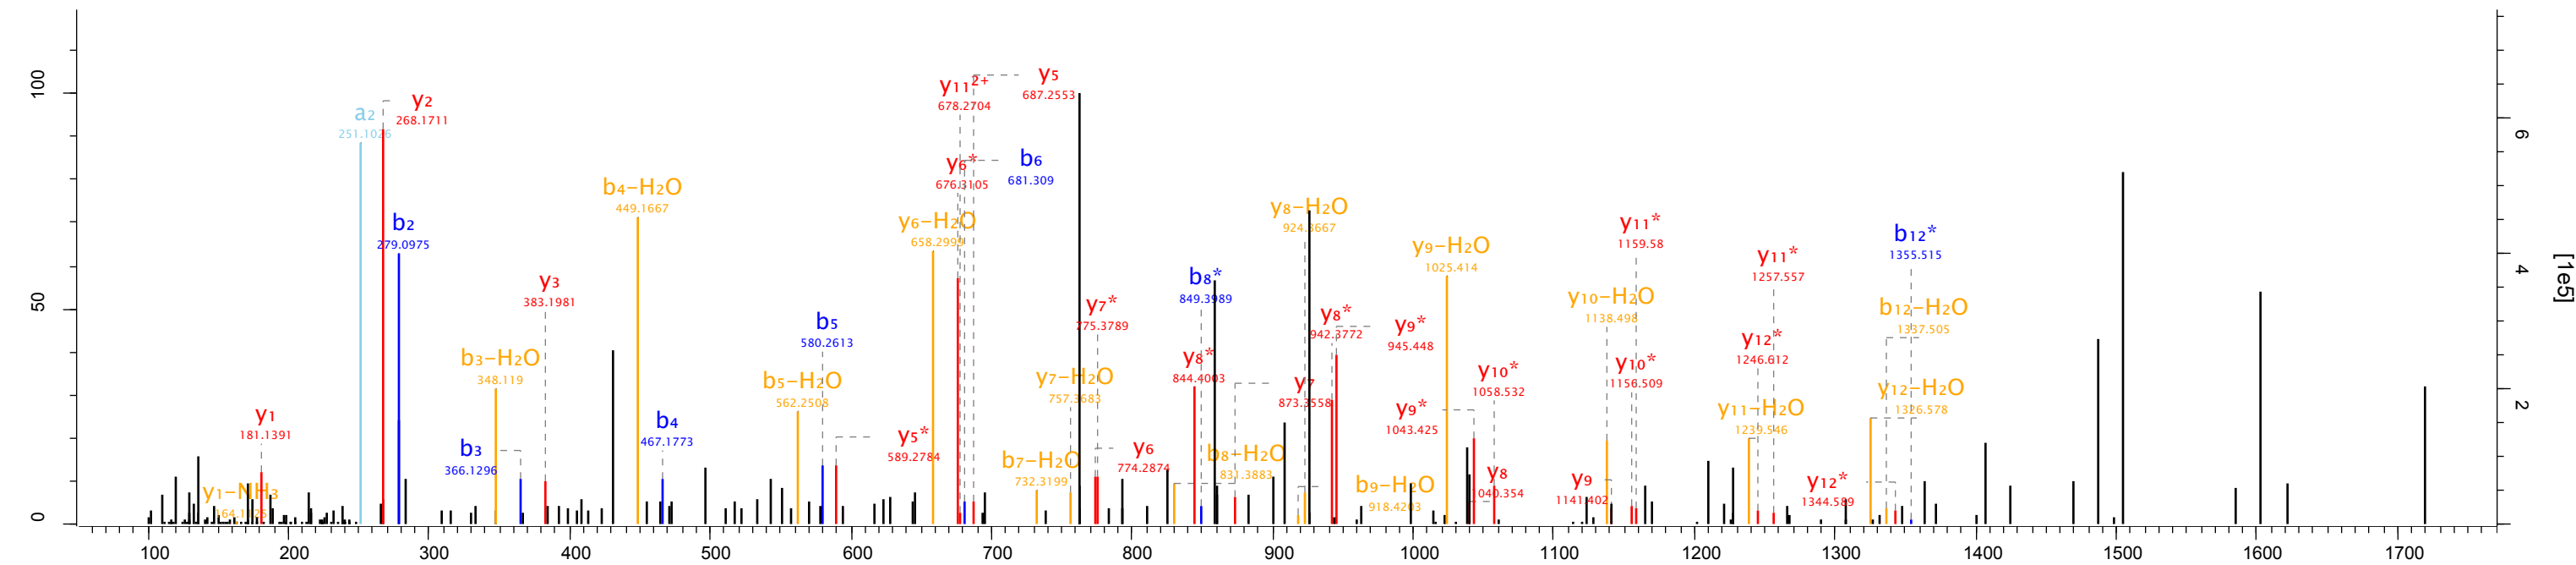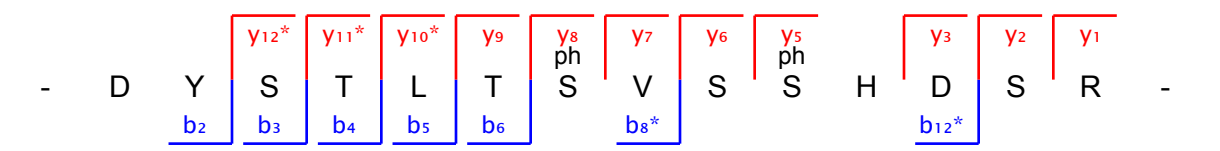



Raw file: 20150814\_A375SR\_Phospho\_BR2\_03  
 Scan: 10591  
 Method: FTMS; HCD  
 Score: 70.94  
 m/z: 500.73  
 Gene names: PDAP1

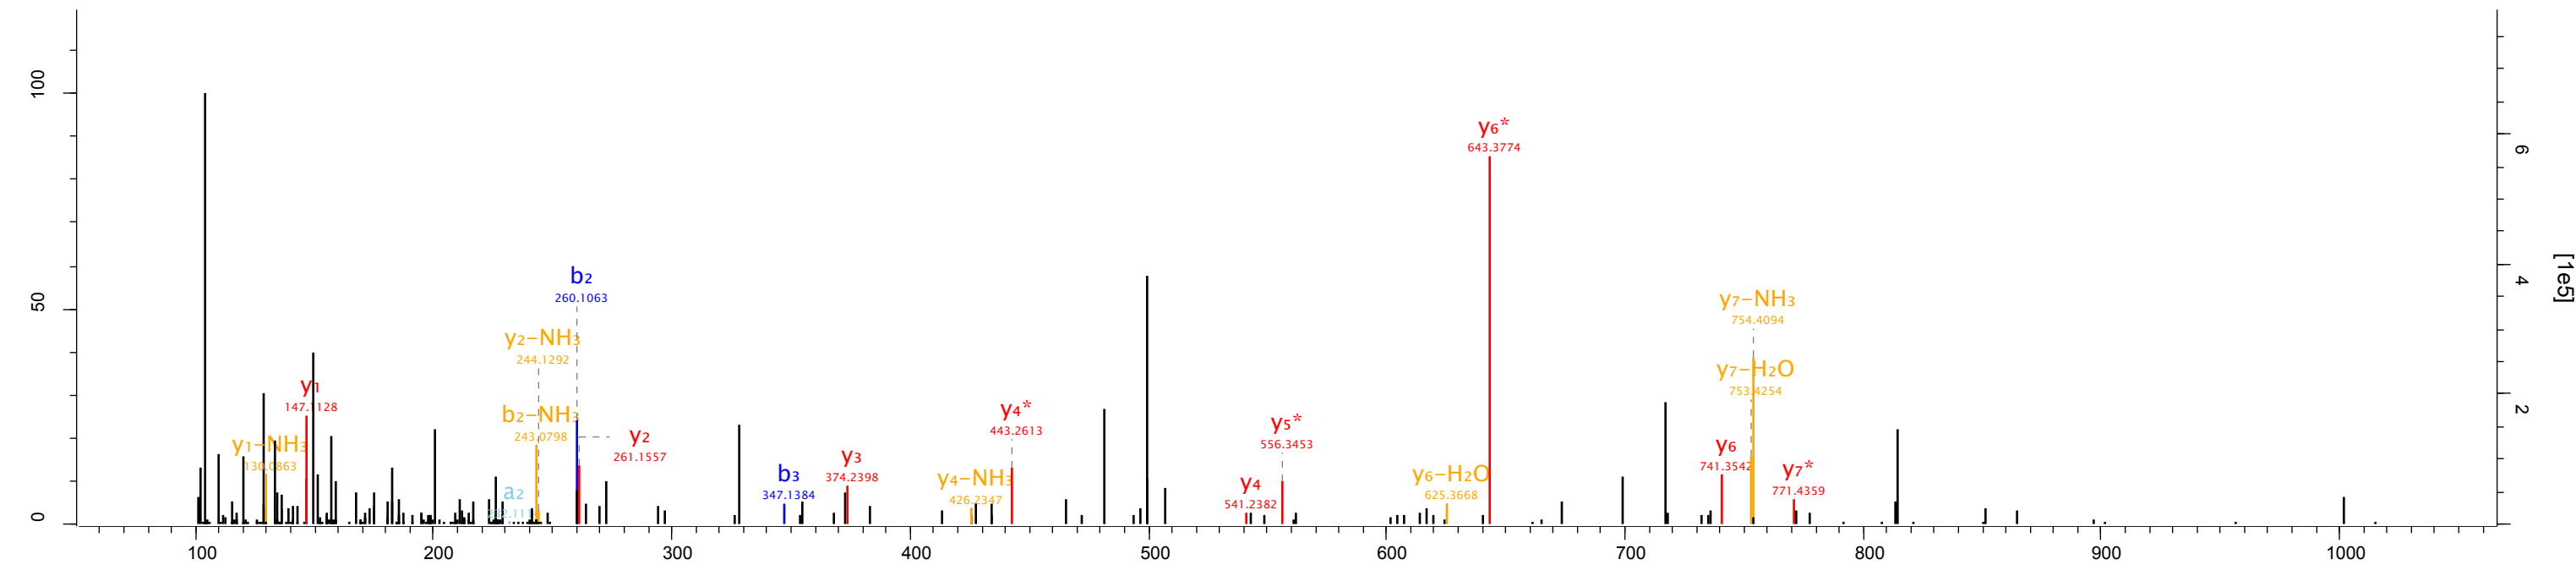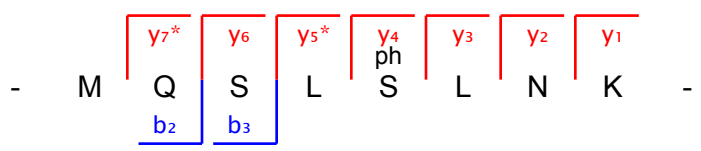

Raw file: 20150814\_A375SR\_Phospho\_BR2\_03  
 Scan: 10741 Method: FTMS; HCD Score: 104.81 m/z: 835.37 Gene names: EIF2A

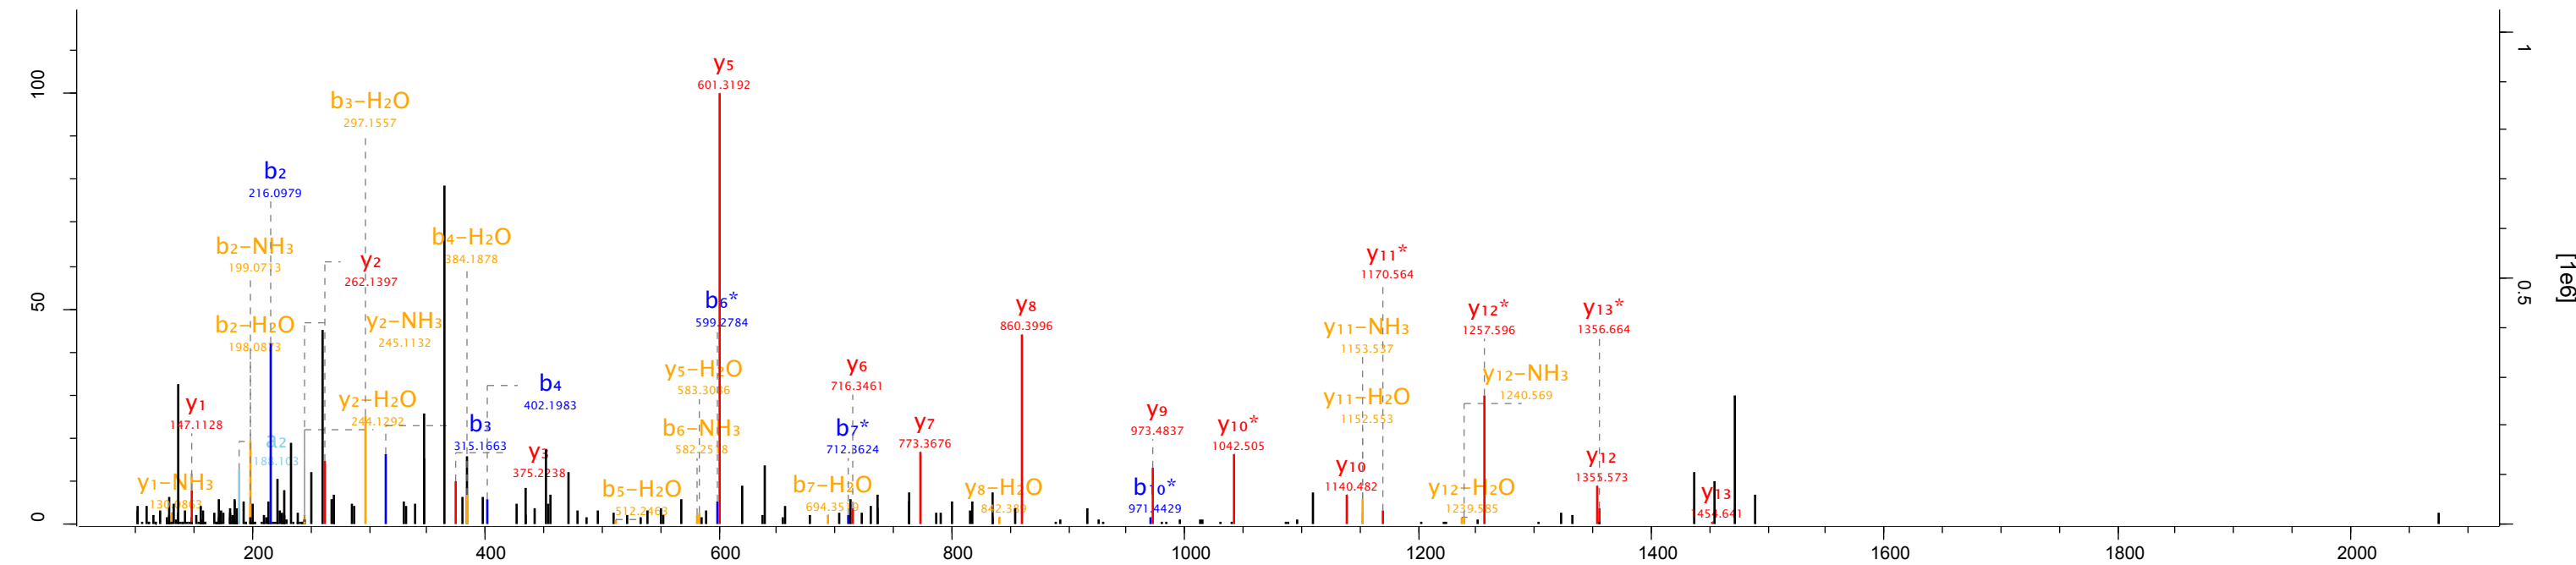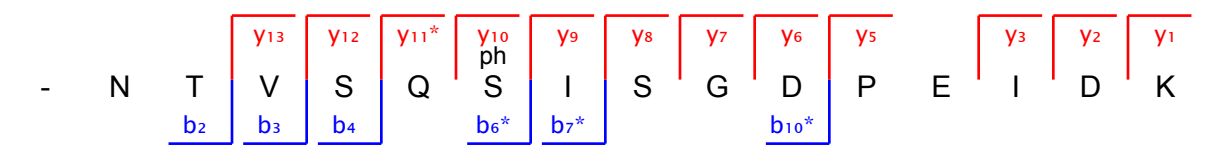

Raw file: 20150814\_A375SR\_Phospho\_BR2\_03  
 Scan: 11051 Method: FTMS; HCD Score: 298.6 m/z: 749.83 Gene names: C2orf44

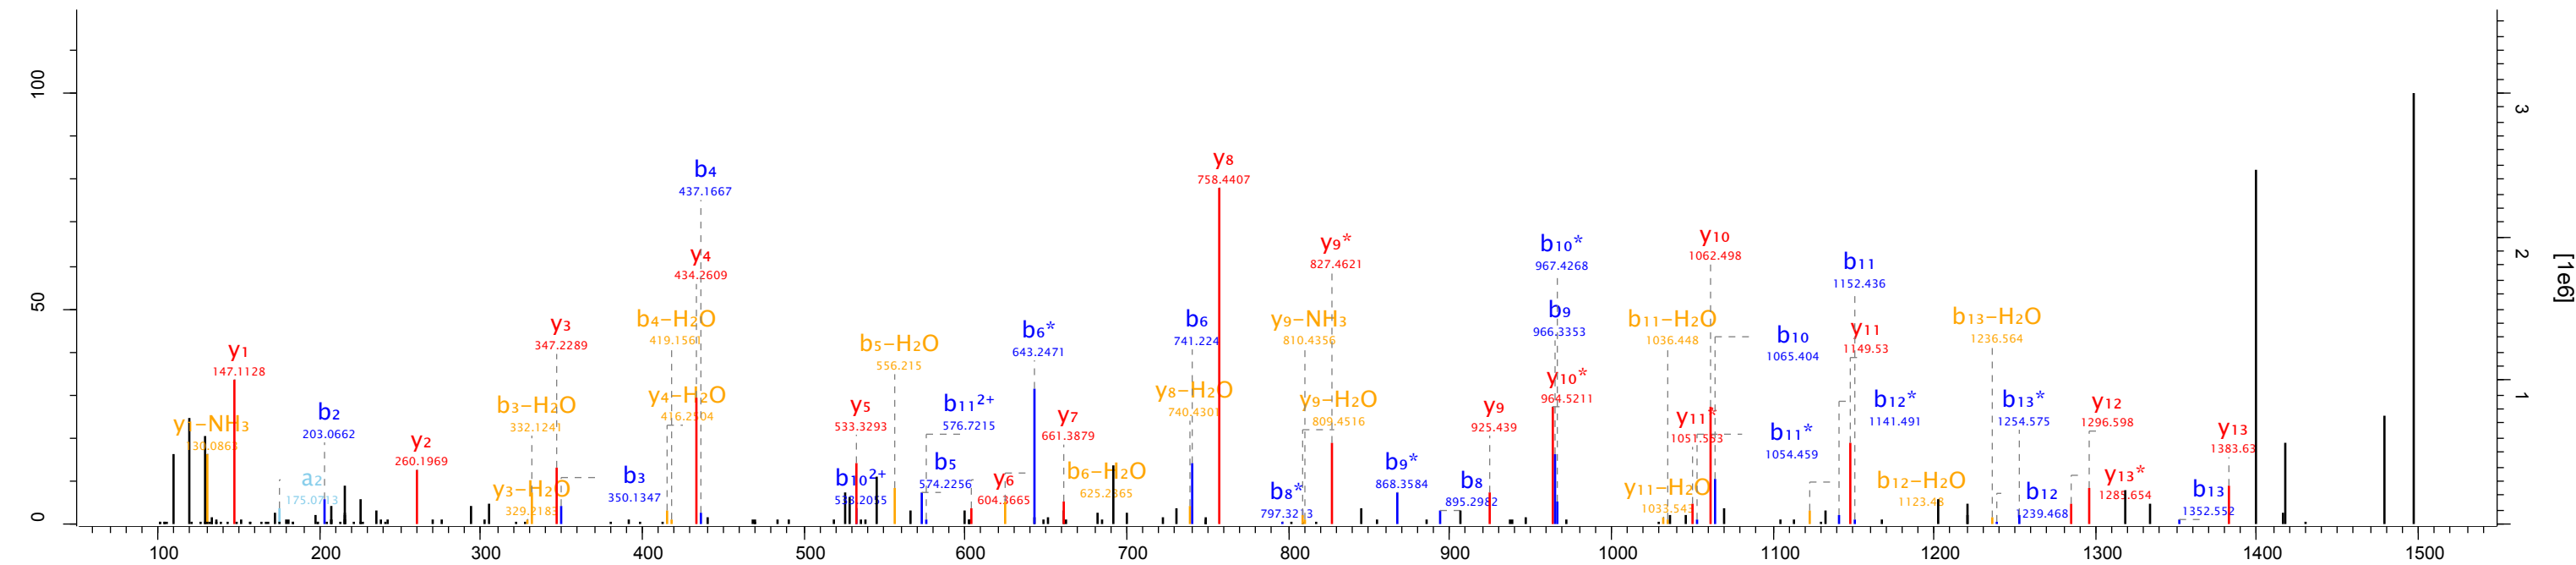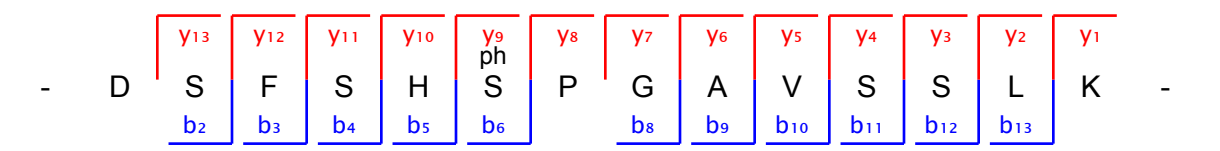

Raw file 20150814\_A375SR\_Phospho\_BR2\_03 Scan 11071 Method FTMS; HCD Score 95.62 m/z 565.72 Gene names PCIF1

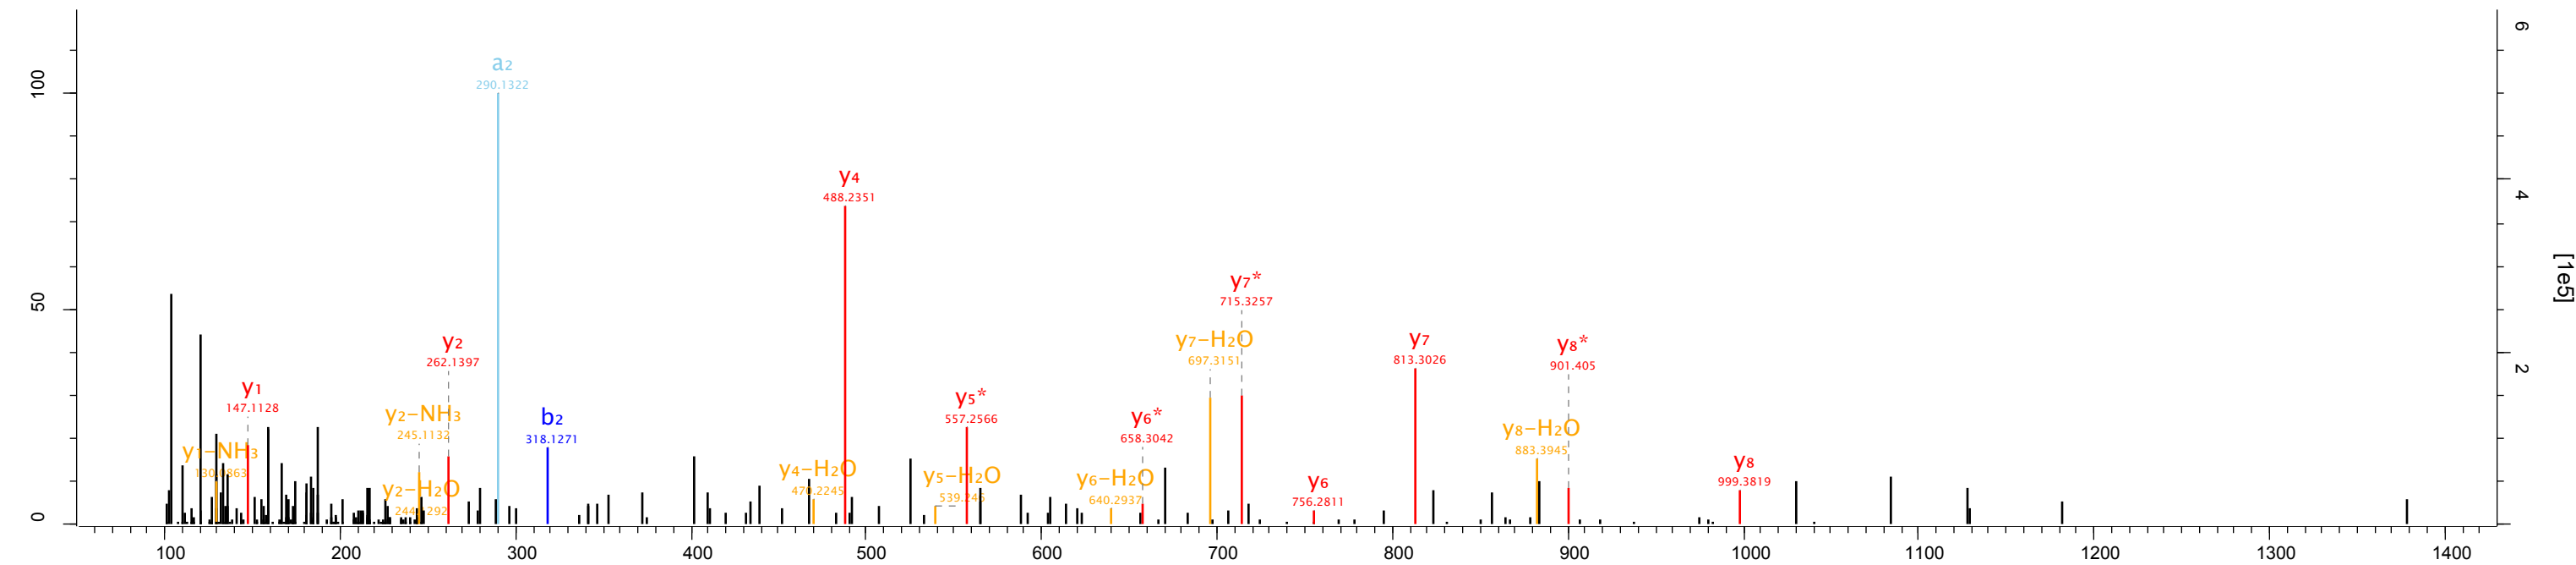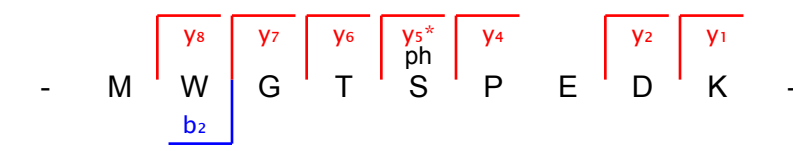

Raw file 20150814\_A375SR\_Phospho\_BR2\_03 Scan 11281 Method FTMS; HCD Score 148.55 m/z 833.33 Gene names CCDC14

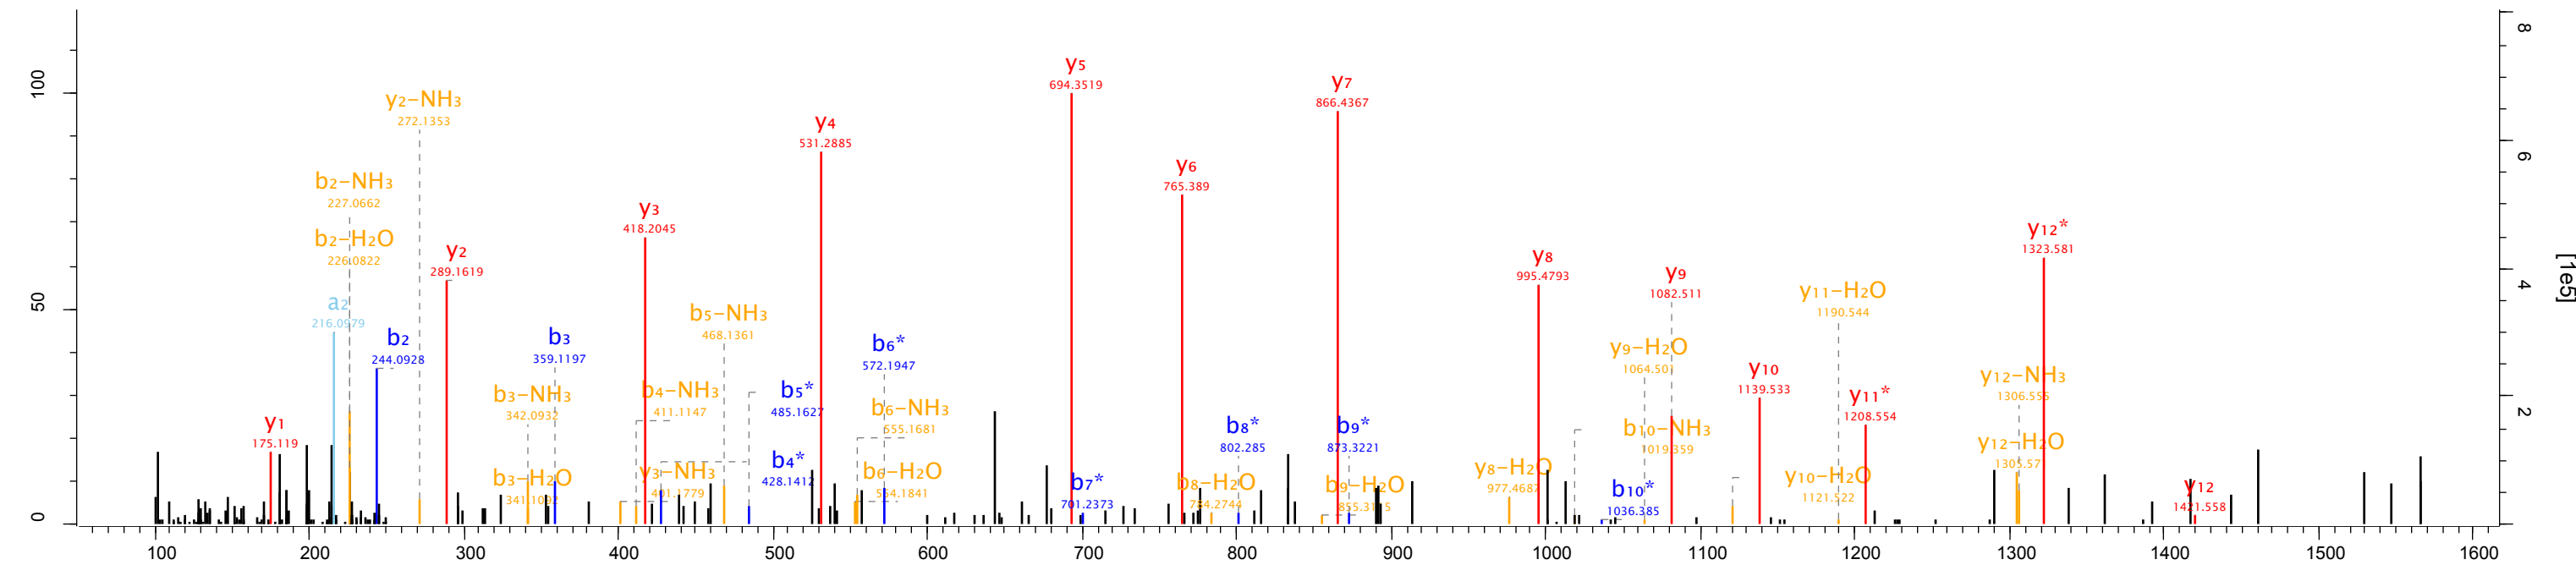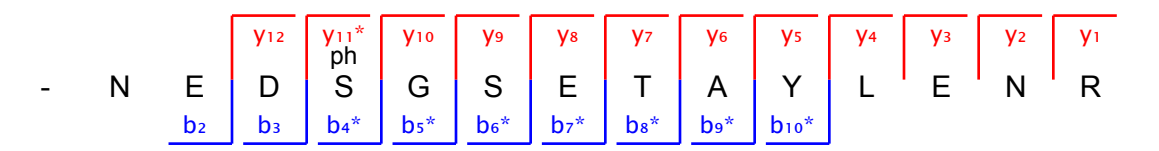

Raw file 20150814\_A375SR\_Phospho\_BR2\_03 Scan 11701 Method FTMS; HCD Score 328.29 m/z 1031.92

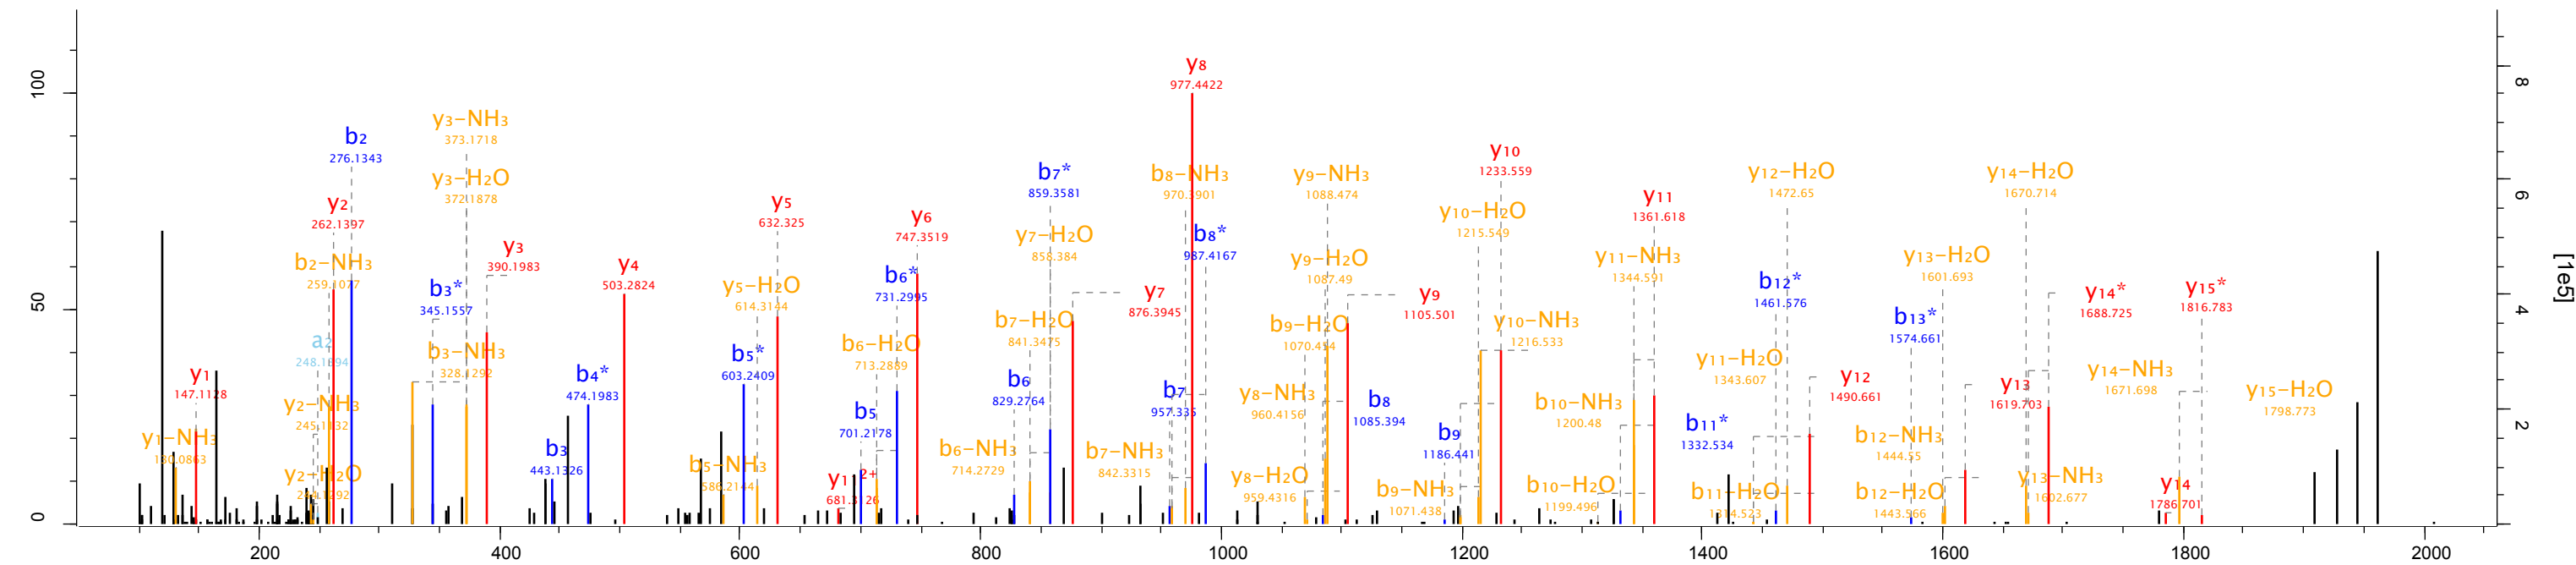

- F Q S E E Q Q Q T E D E L Q D K -

y15\*
y14 ph
y13
y12
y11
y10
y9
y8
y7
y6
y5
y4
y3
y2
y1

b2
b3
b4\*
b5
b6
b7
b8
b9
b11\*
b12\*
b13\*

Raw file  
 20150814\_A375SR\_Phospho\_BR2\_03  
 Scan 11981 Method FTMS; HCD Score 131.77 m/z 657.3 Gene names ASAP1

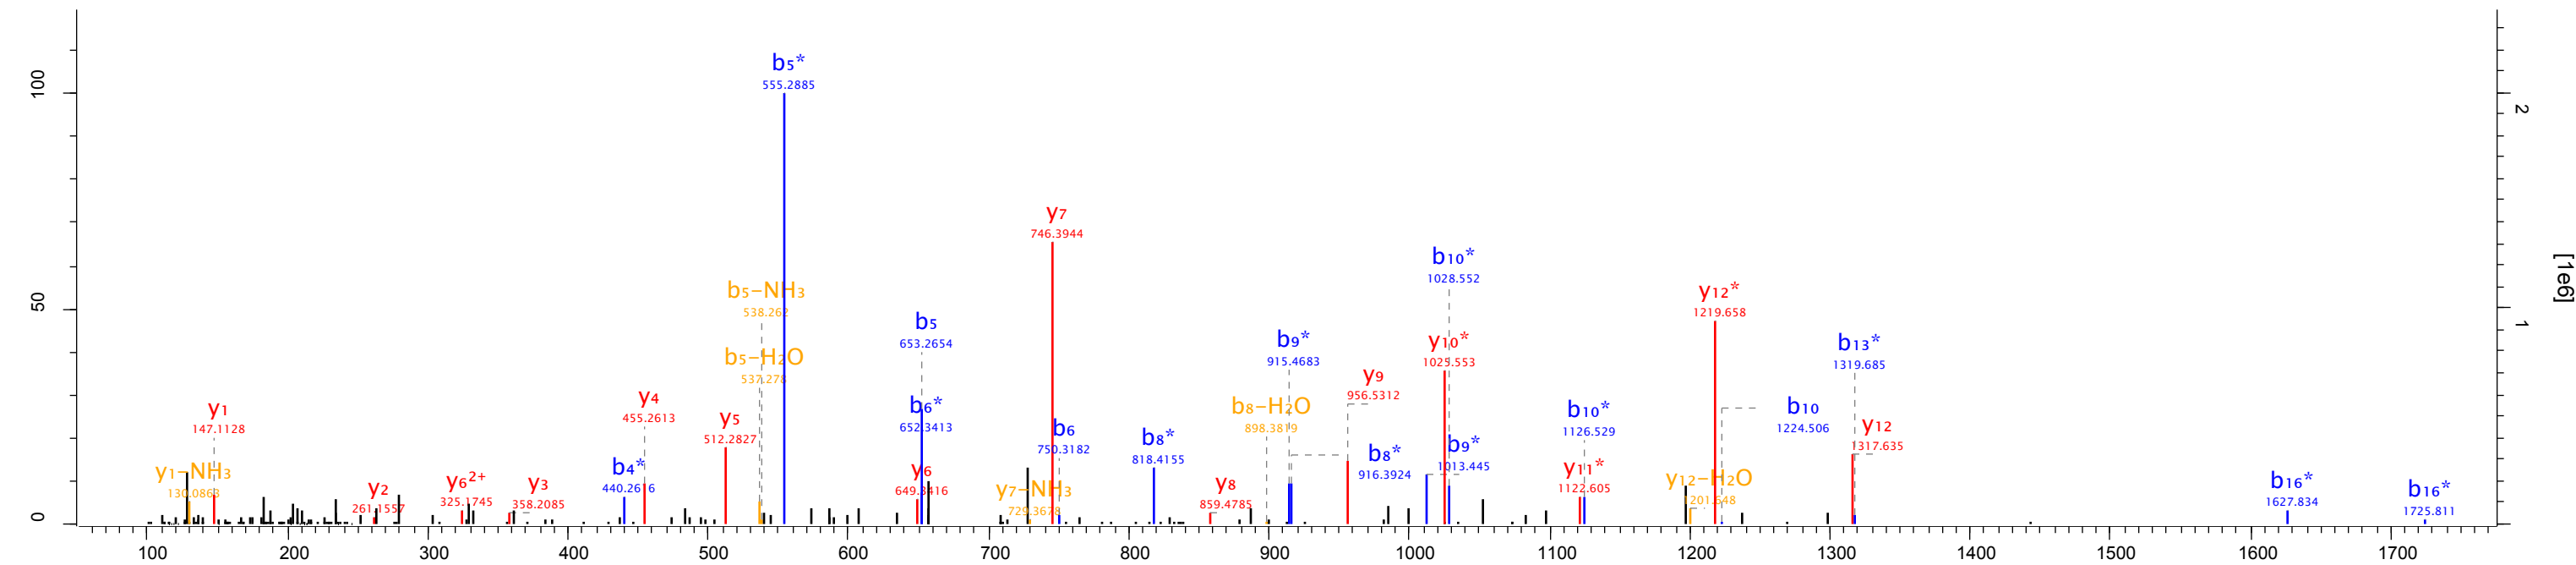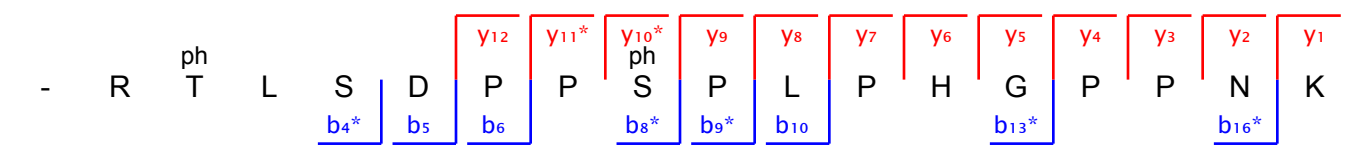

Raw file: 20150814\_A375SR\_Phospho\_BR2\_03  
 Scan: 12261 Method: FTMS; HCD Score: 53.62 m/z: 833.05 Gene names: BIN1

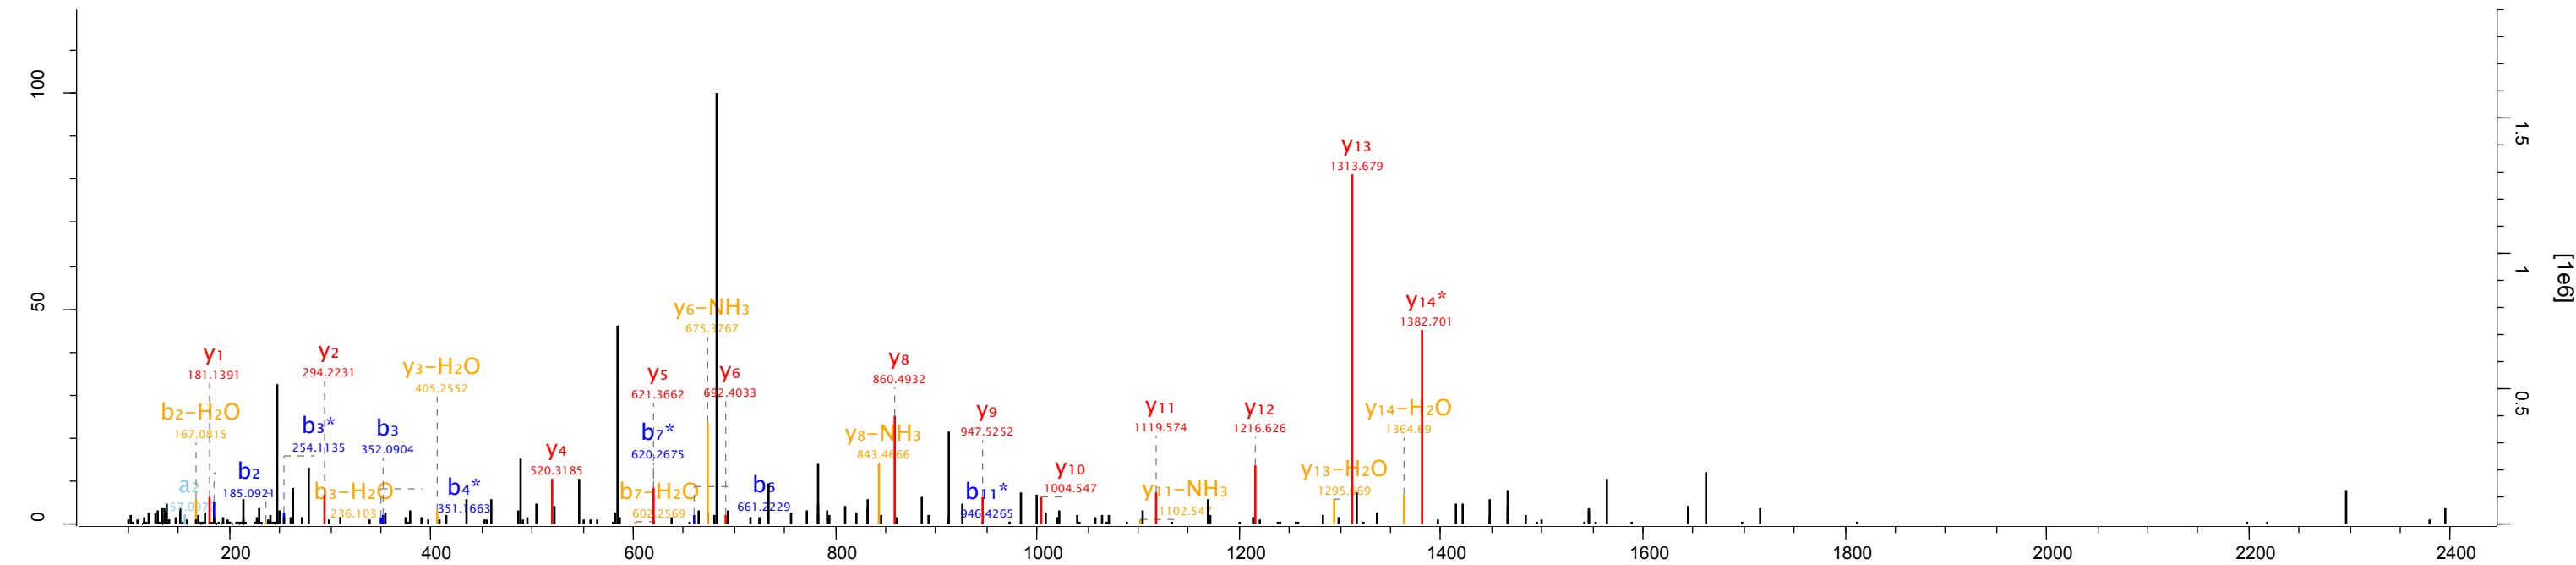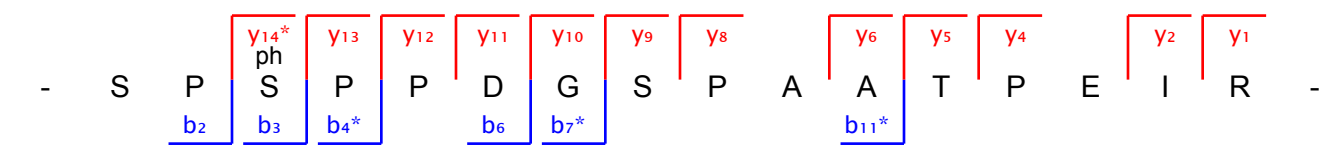



Raw file 20150814\_A375SR\_Phospho\_BR2\_03 Scan 12601 Method FTMS; HCD Score 98.08 m/z 680.32 Gene names WHSC1

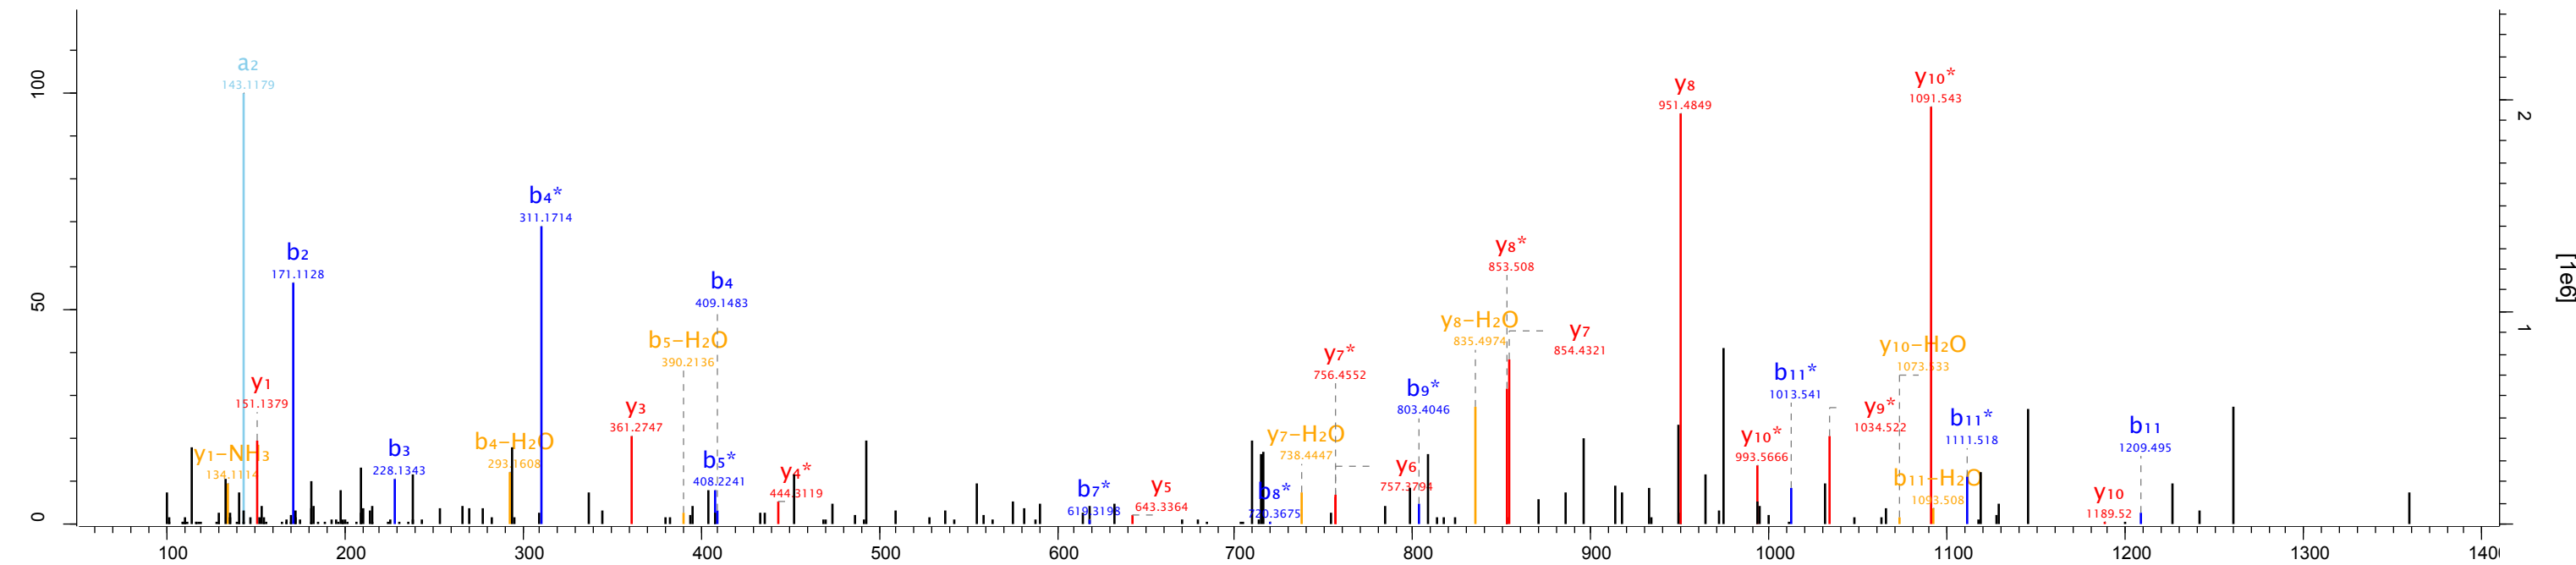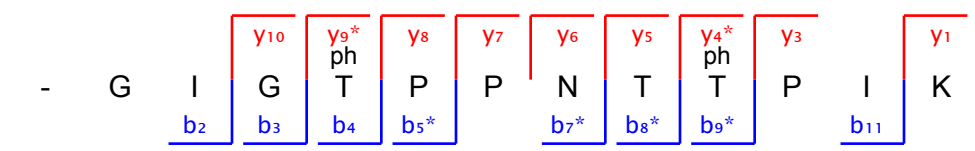

Raw file 20150814\_A375SR\_Phospho\_BR2\_03 Scan 12781 Method FTMS; HCD Score 75.68 m/z 546.94 Gene names BCLAF1

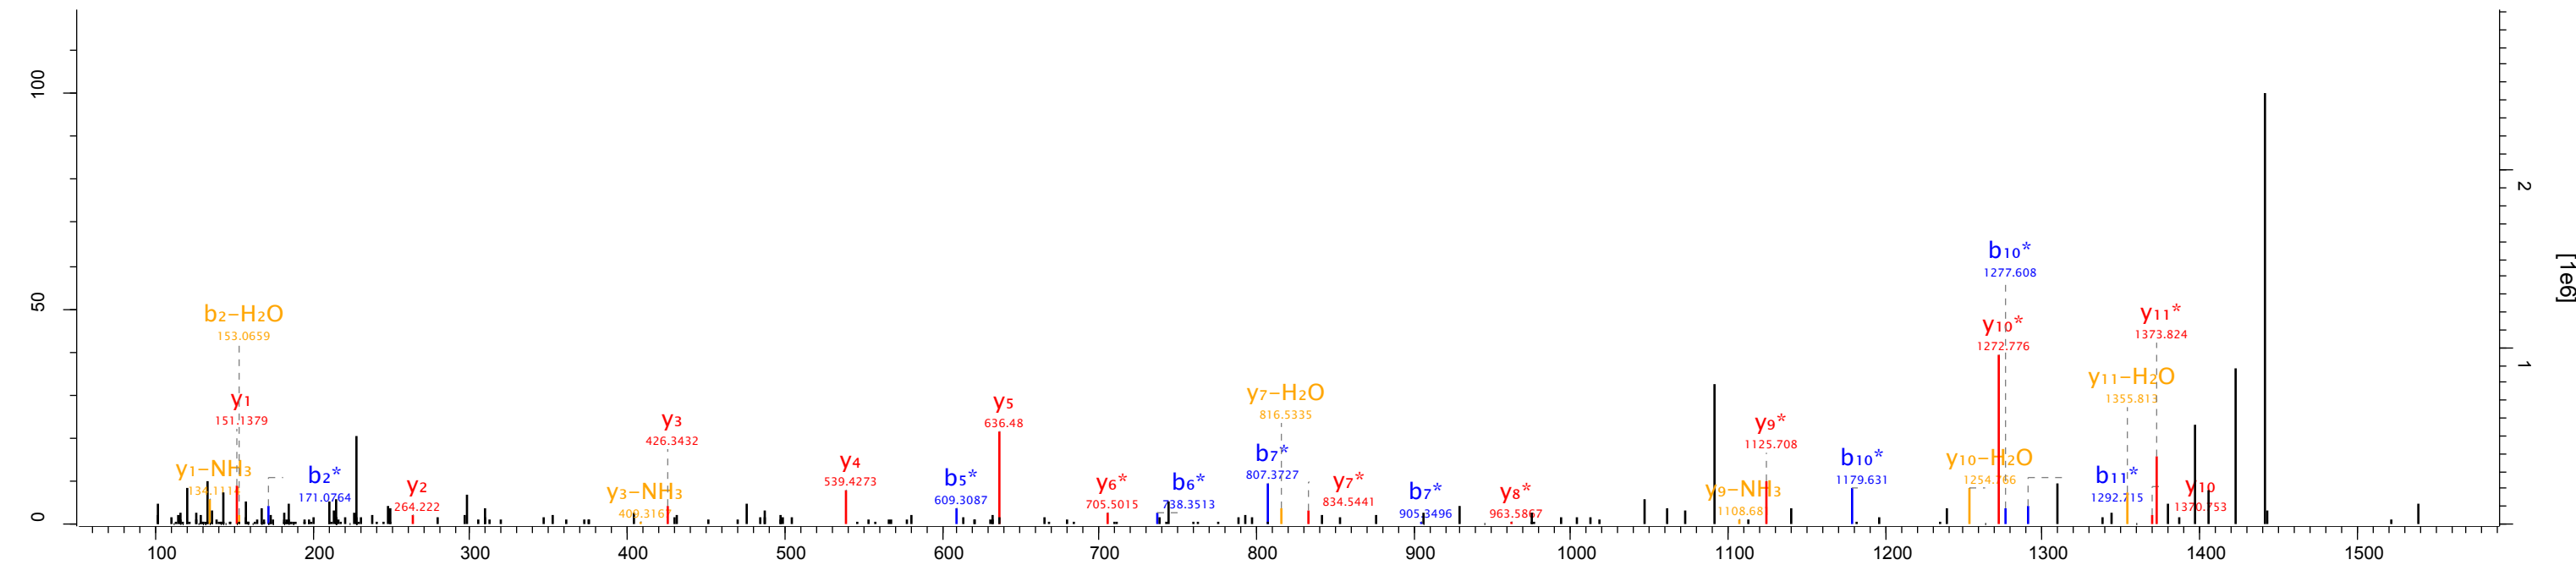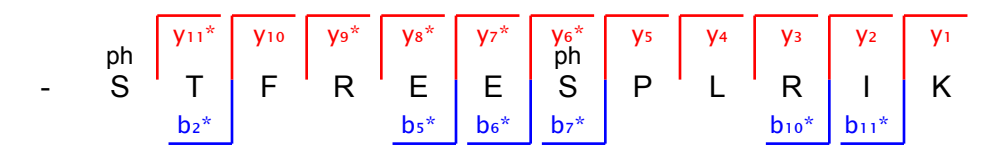

Raw file 20150814\_A375SR\_Phospho\_BR2\_03 Scan 12901 Method FTMS; HCD Score 115.83 m/z 751.86 Gene names ULK1

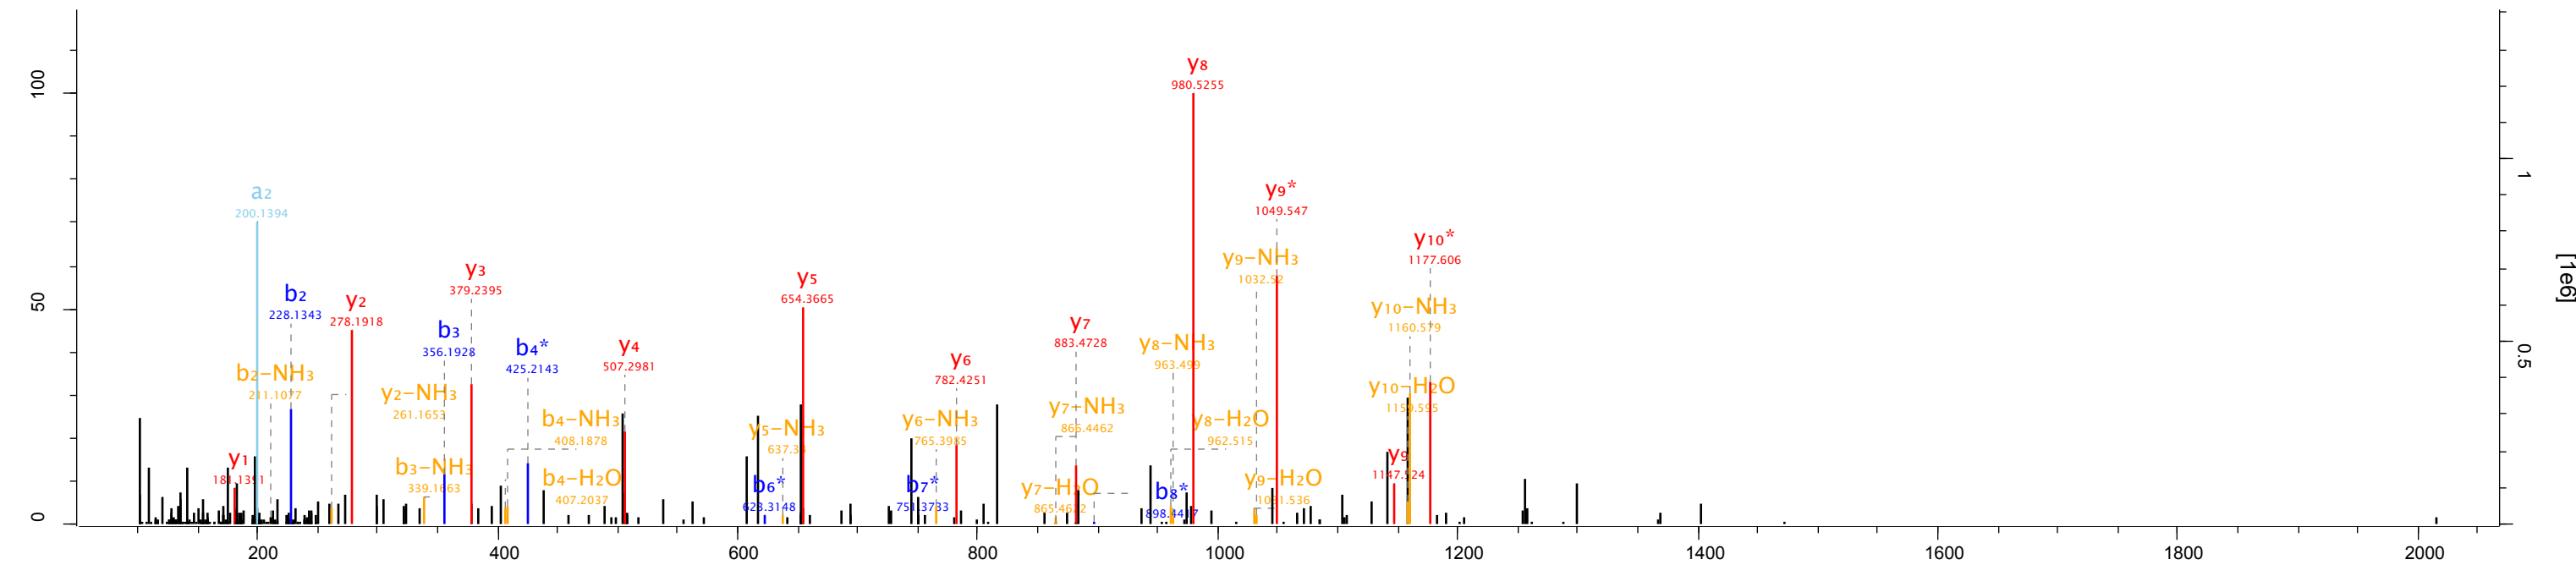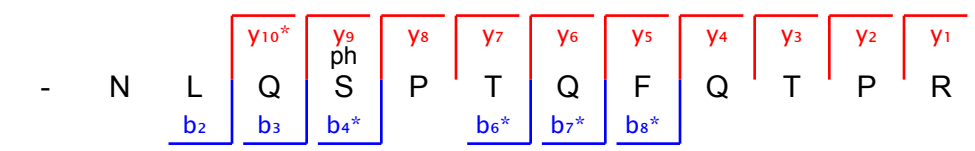

Raw file 20150814\_A375SR\_Phospho\_BR2\_03 Scan 13431 Method FTMS; HCD Score 126.91 m/z 878.86 Gene names TRAFD1

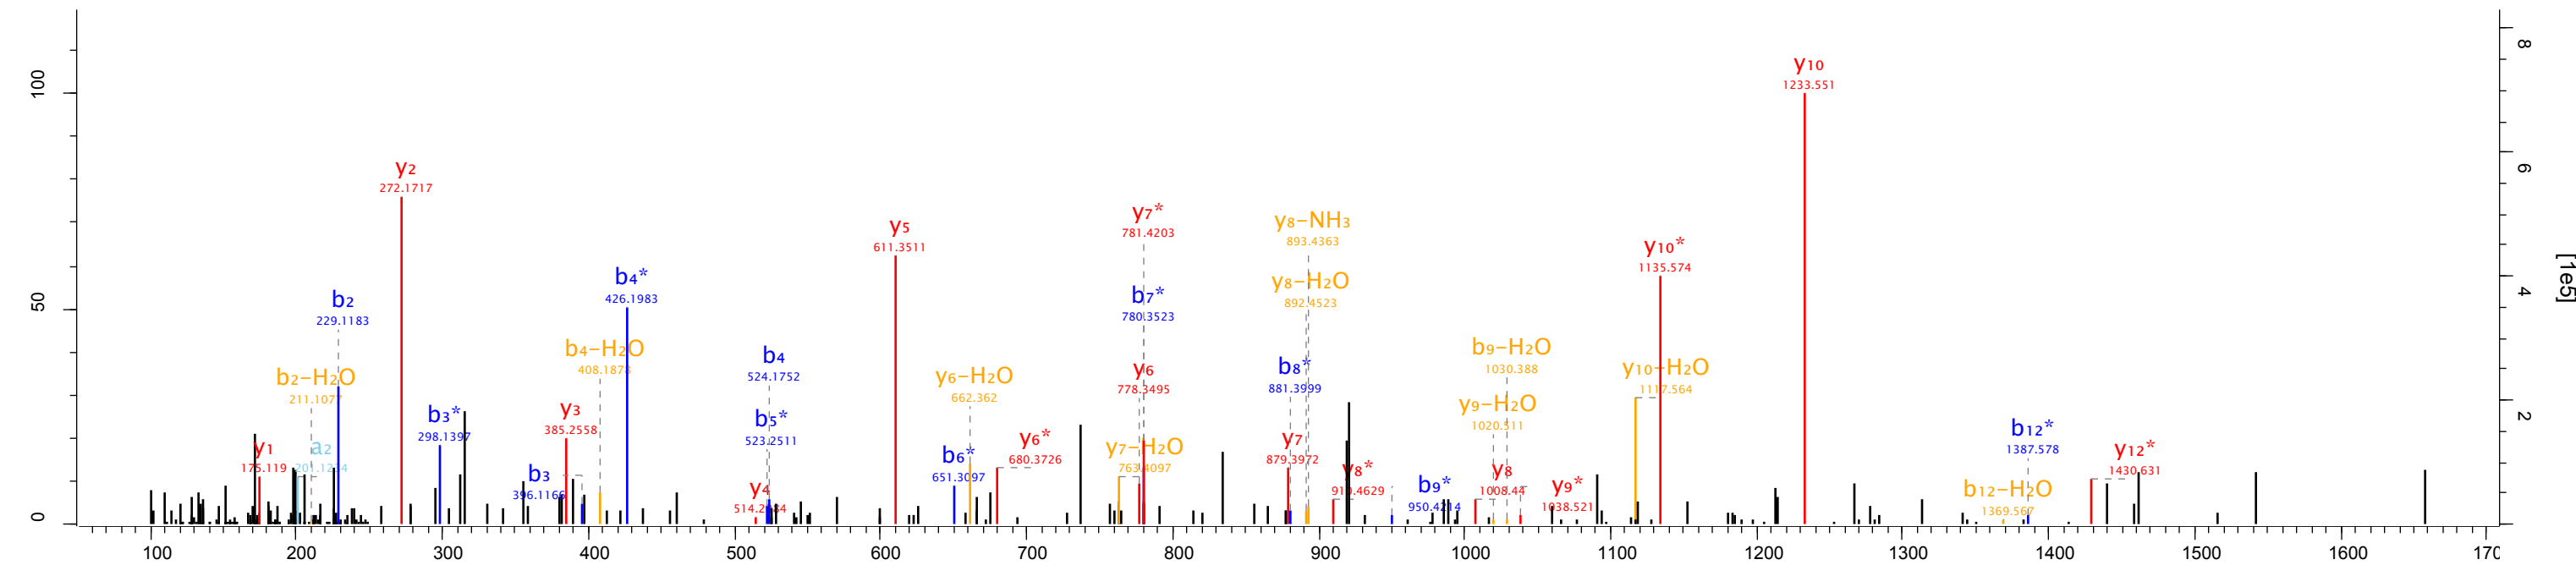

- L D S Q P Q E T S P E L P R -

Fragmentation mapping (b and y ions):

- b2: D
- b3: S
- b4: Q
- b5\*: P
- b6\*: Q
- b7\*: E
- b8\*: T
- b9\*: S
- b12\*: L
- y1: R
- y2: P
- y3: L
- y4: E
- y5: P
- y6: S
- y7: T
- y8: E
- y9: Q
- y10: P
- y12: R

Raw file 20150814\_A375SR\_Phospho\_BR2\_03 Scan 13441 Method FTMS; HCD Score 118.08 m/z 855.88 Gene names NUP188

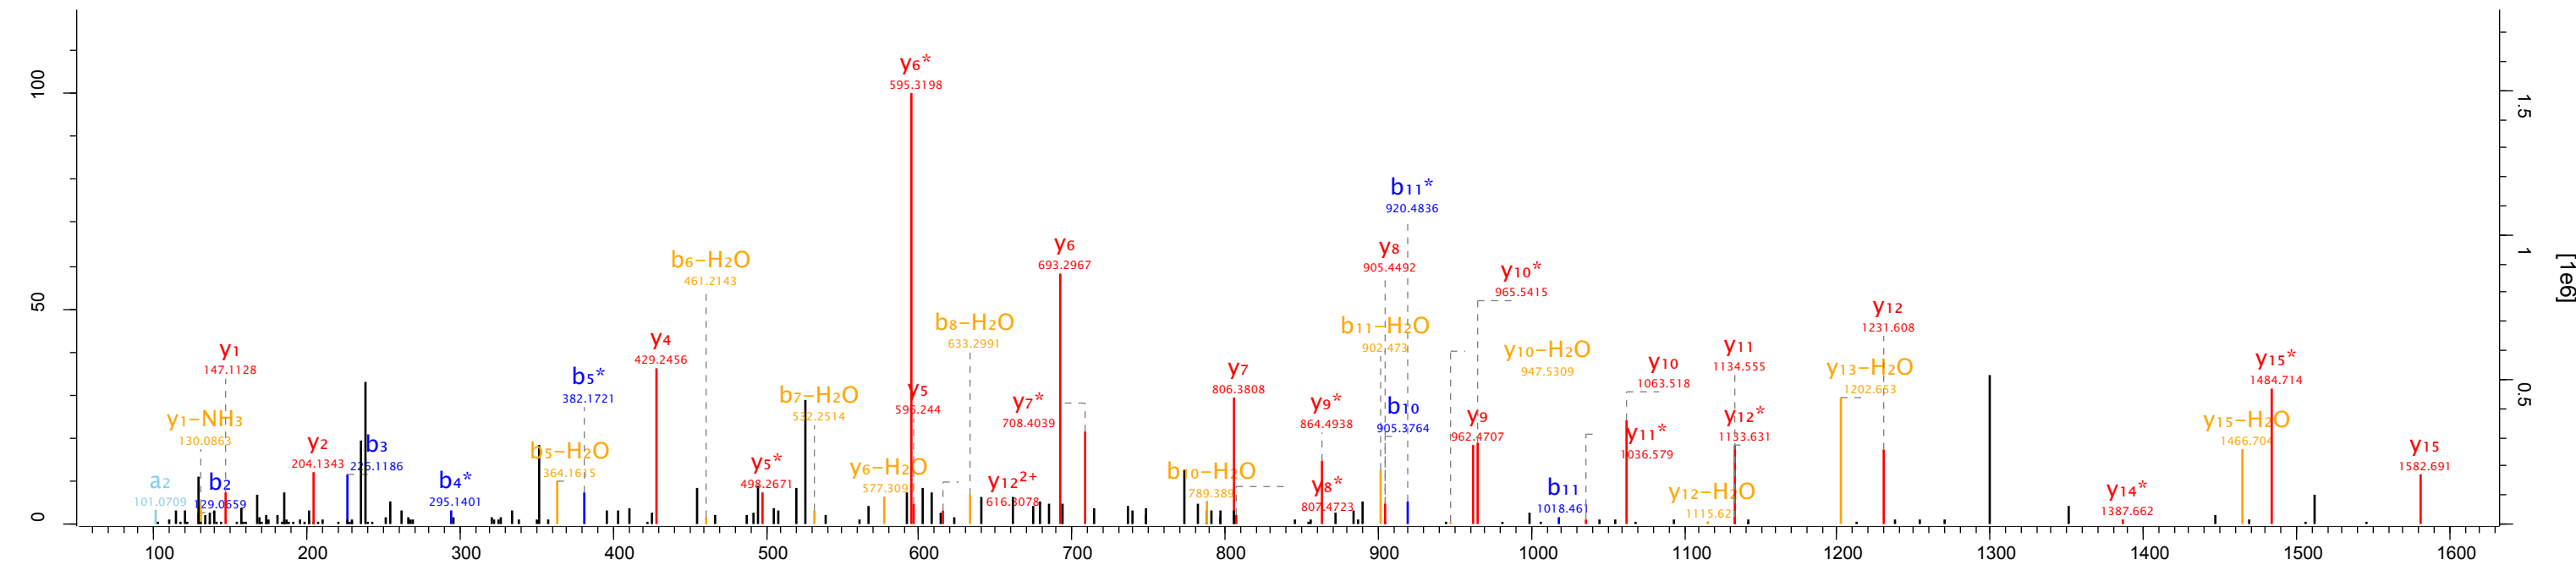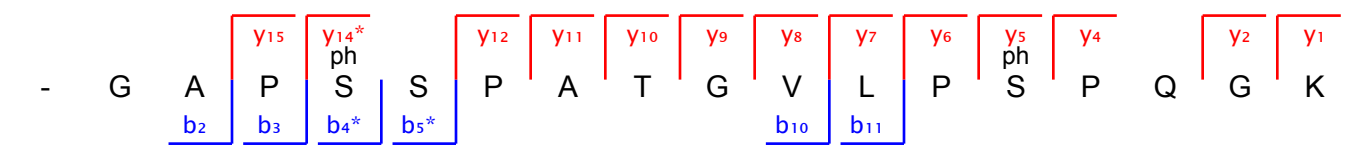

Raw file 20150814\_A375SR\_Phospho\_BR2\_03 Scan 13841 Method FTMS; HCD Score 93.12 m/z 719.28 Gene names PSEN2

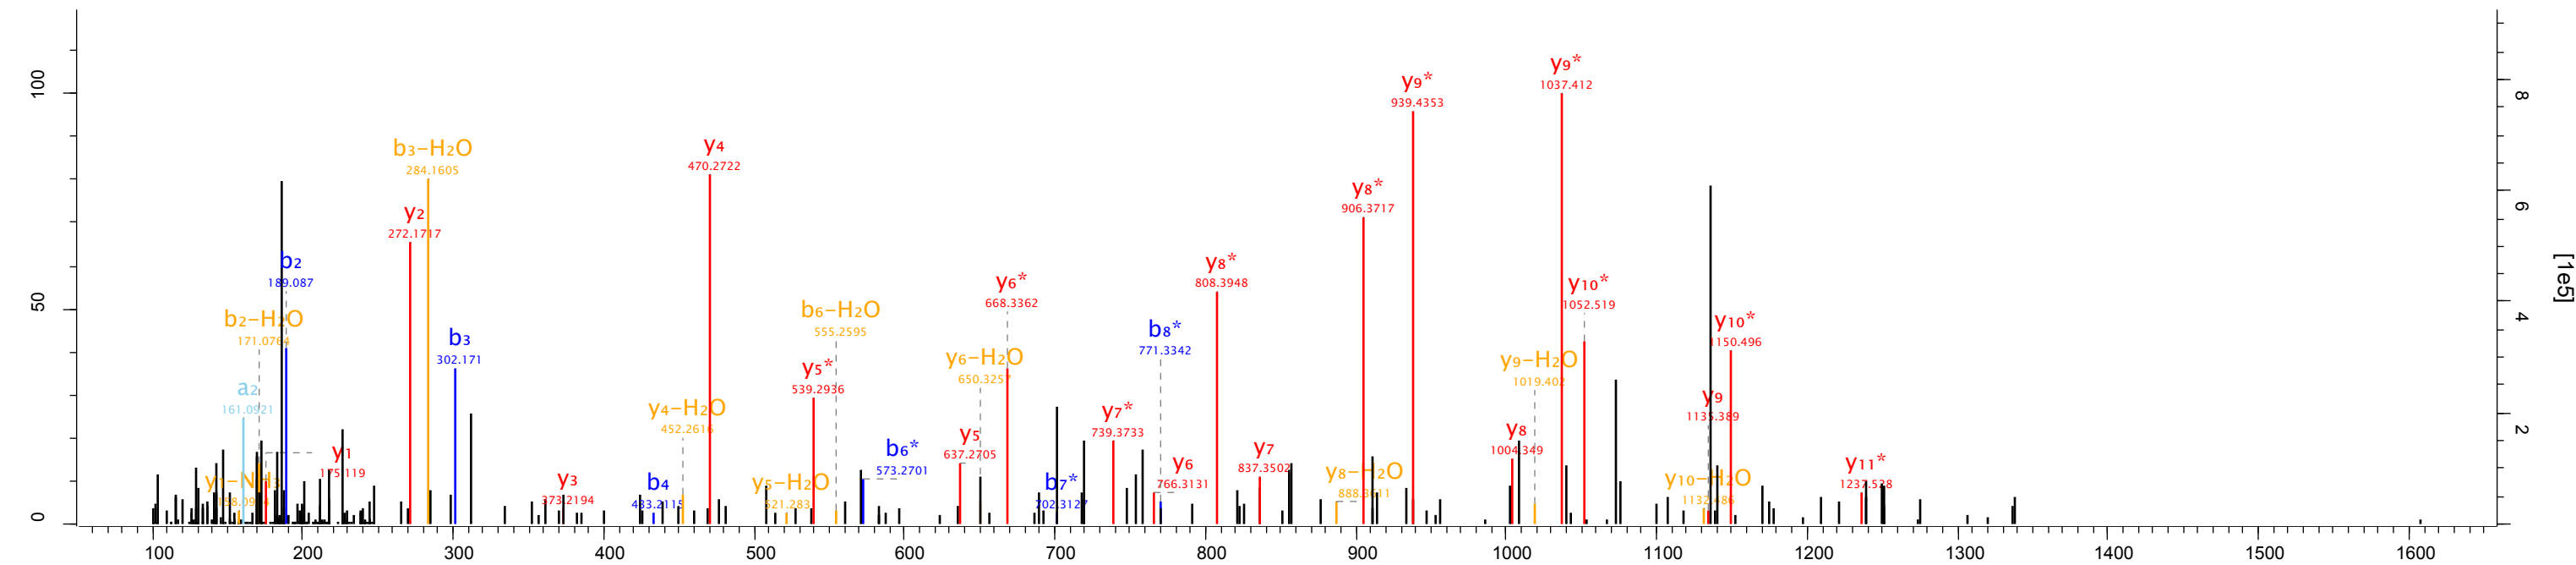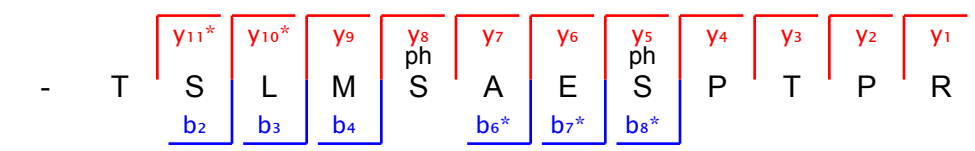

Raw file 20150814\_A375SR\_Phospho\_BR2\_03 Scan 14001 Method FTMS; HCD Score 143.32 m/z 936.92 Gene names GIGYF1

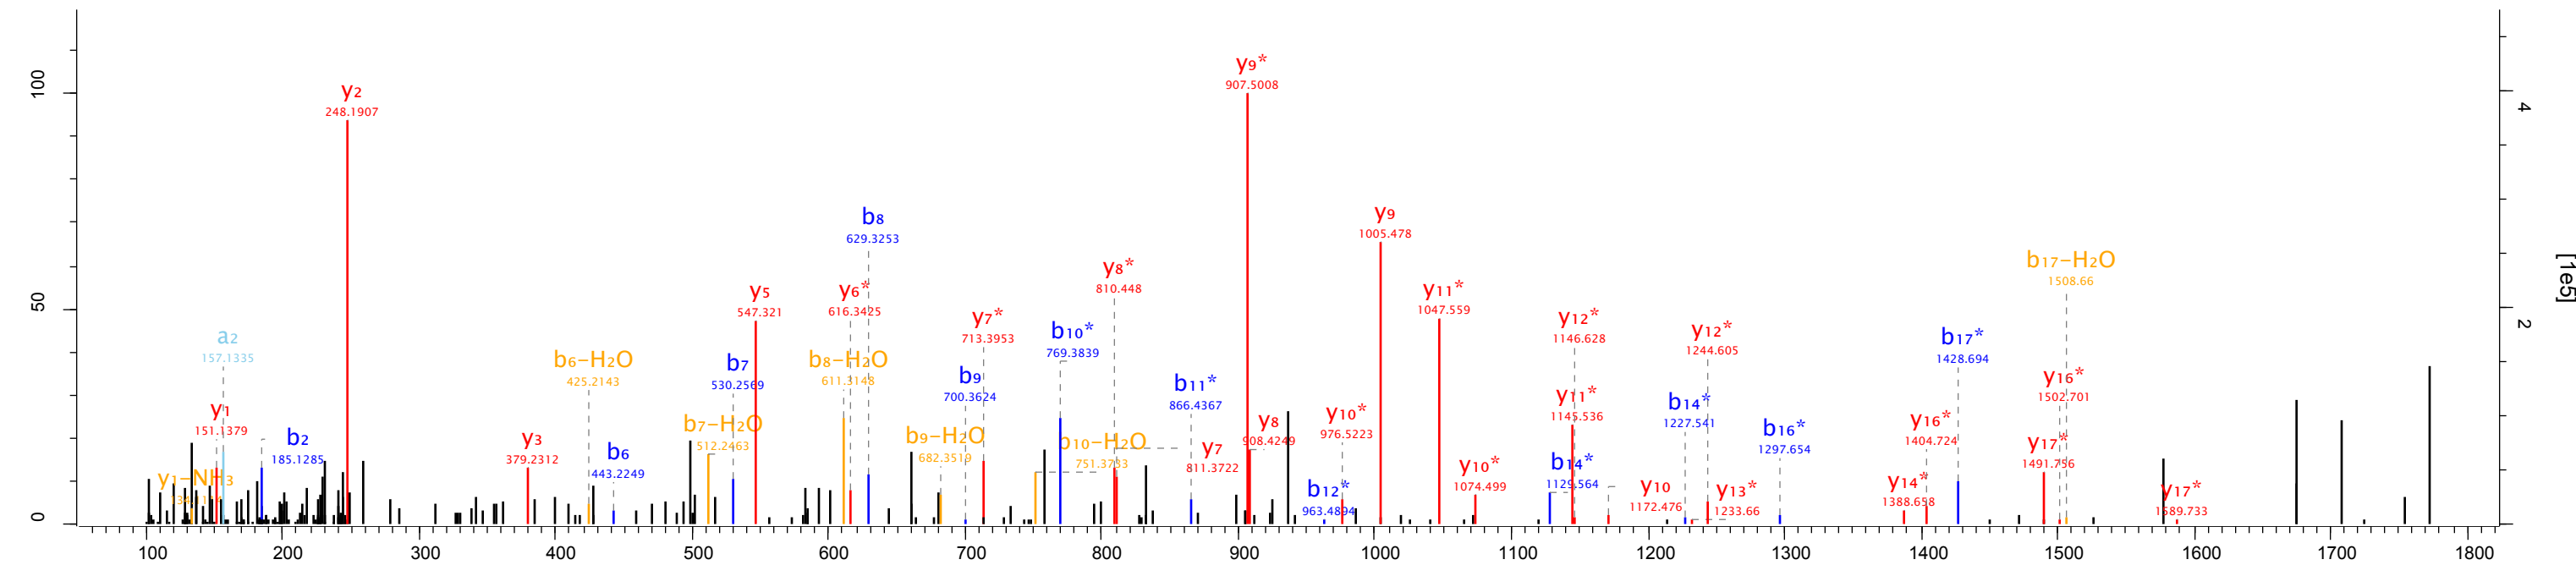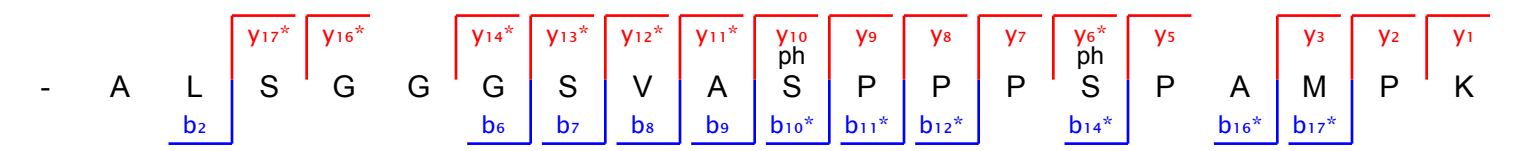

Raw file Scan Method Score m/z Gene names  
 20150814\_A375SR\_Phospho\_BR2\_03 14201 FTMS; HCD 192.62 1076.93 TTF1

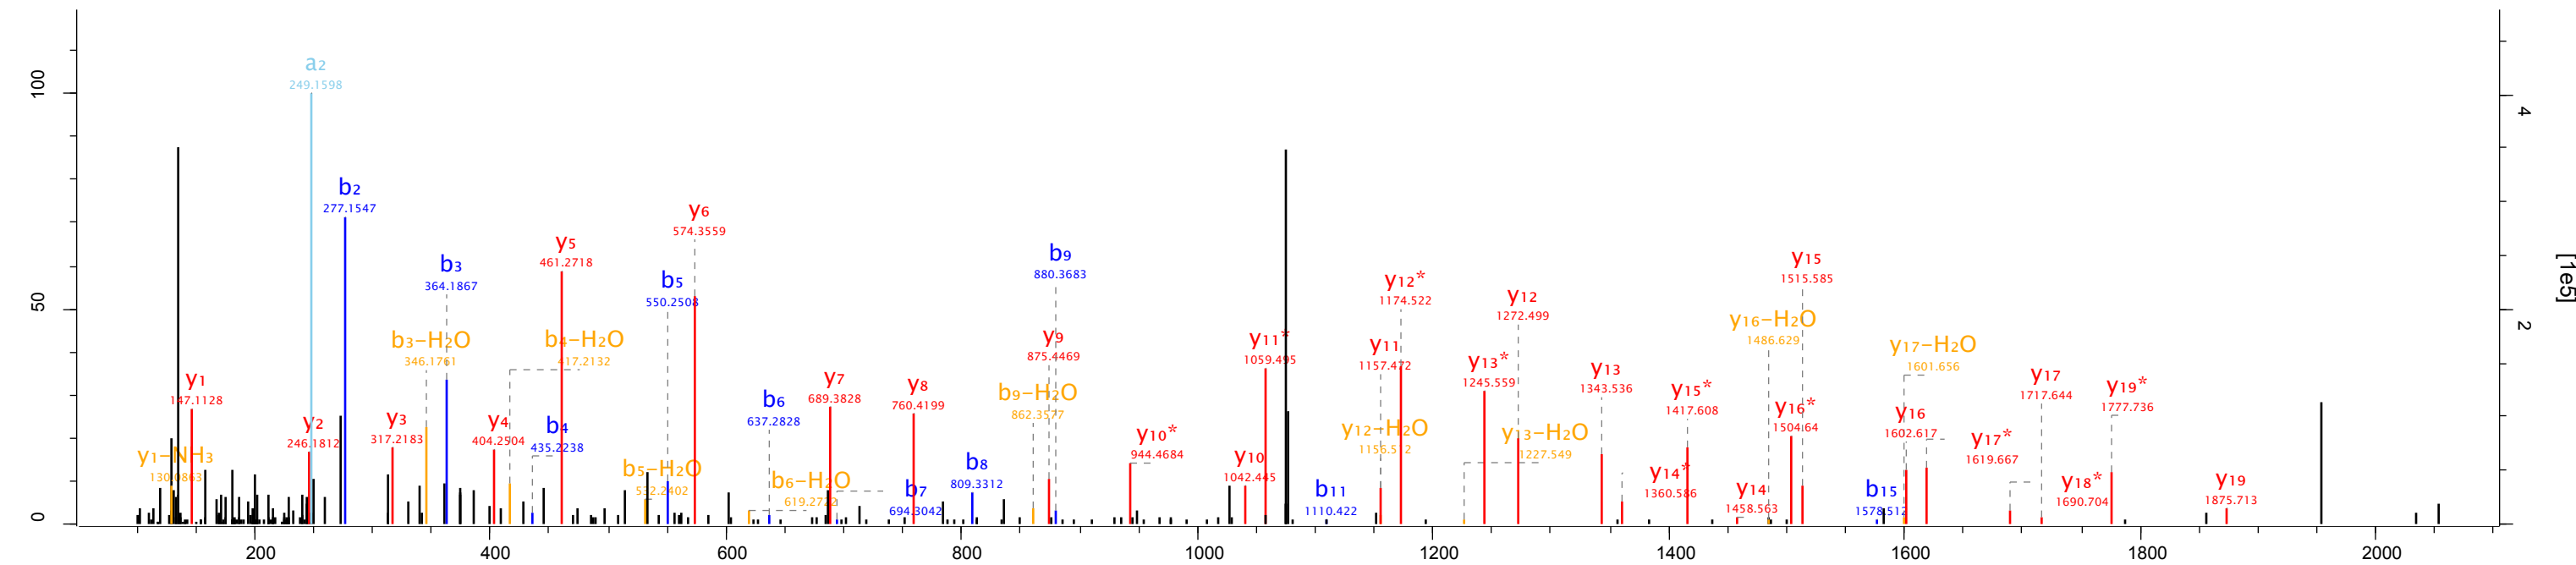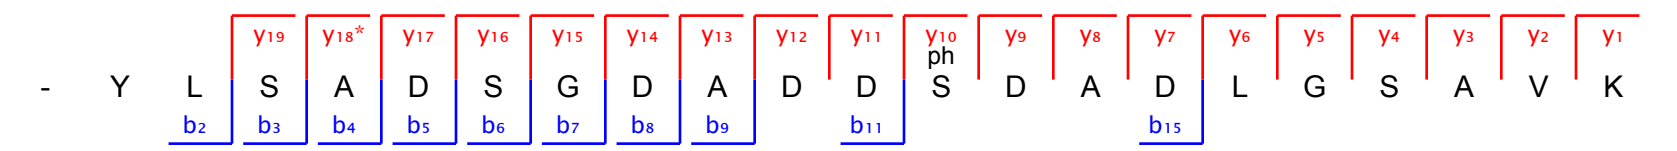



Raw file 20150814\_A375SR\_Phospho\_BR2\_03 Scan 14261 Method FTMS; HCD Score 304.42 m/z 1170.44 Gene names MAP1B

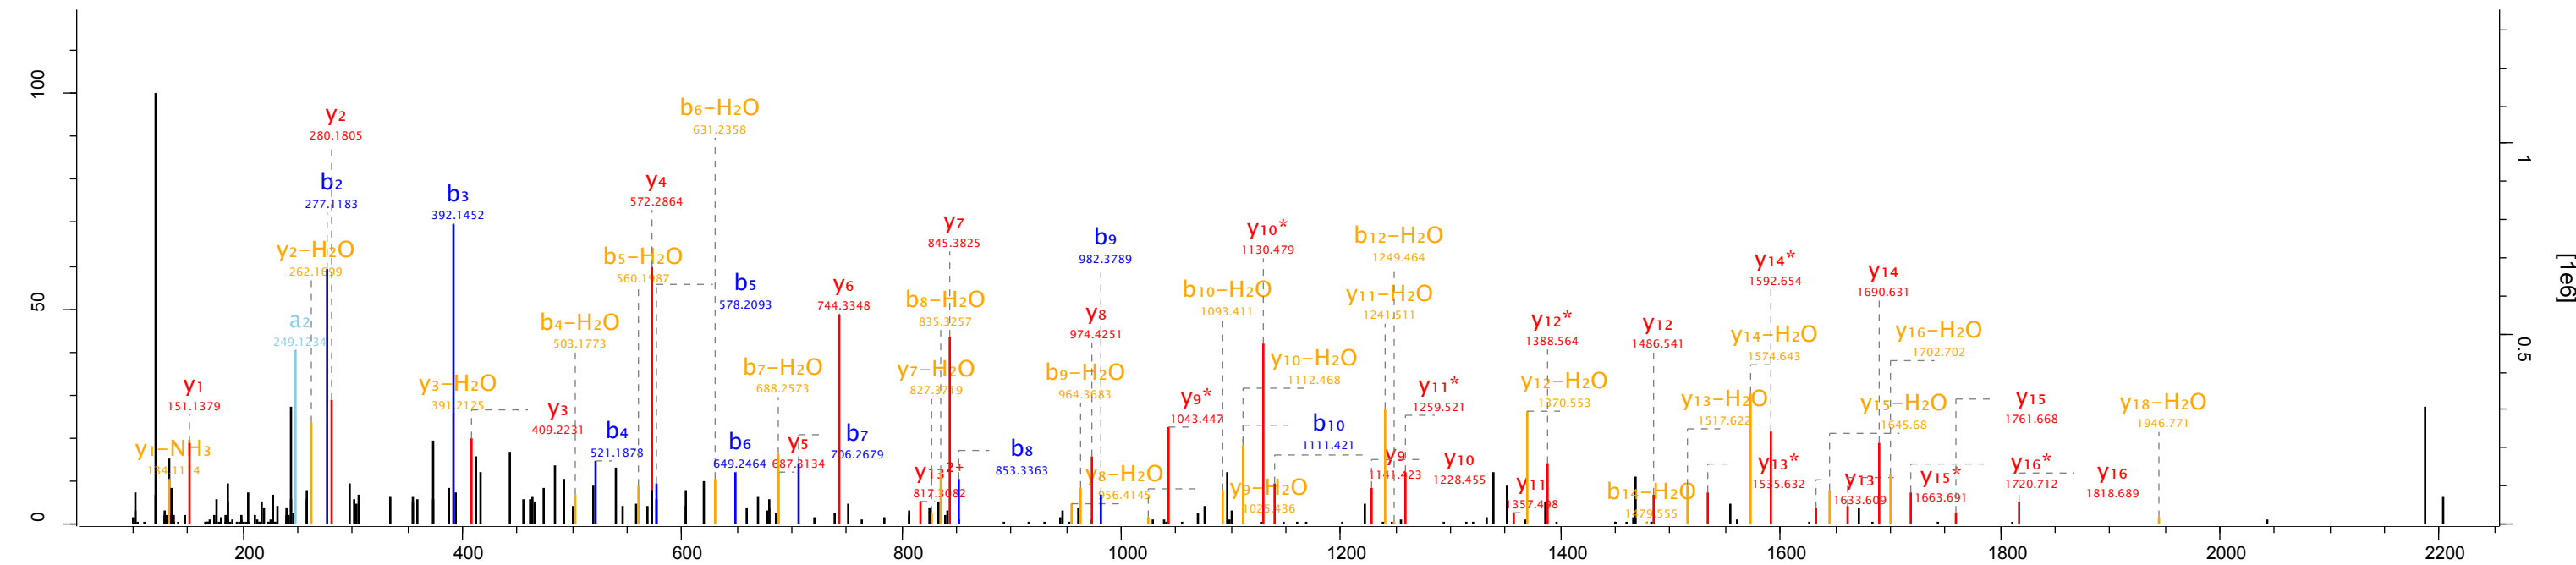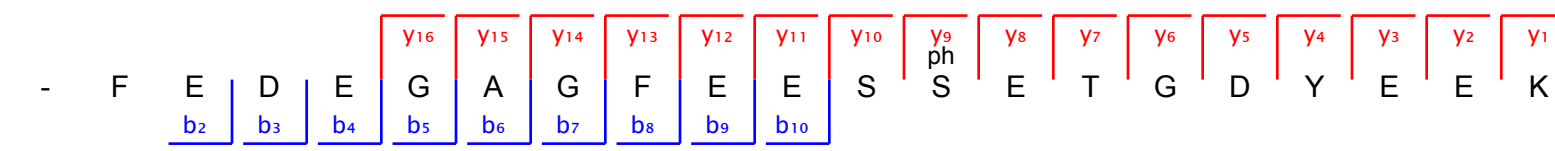

Raw file: 20150814\_A375SR\_Phospho\_BR2\_03  
 Scan: 14431 Method: FTMS; HCD Score: 153.57 m/z: 928.36 Gene names: SFMBT1

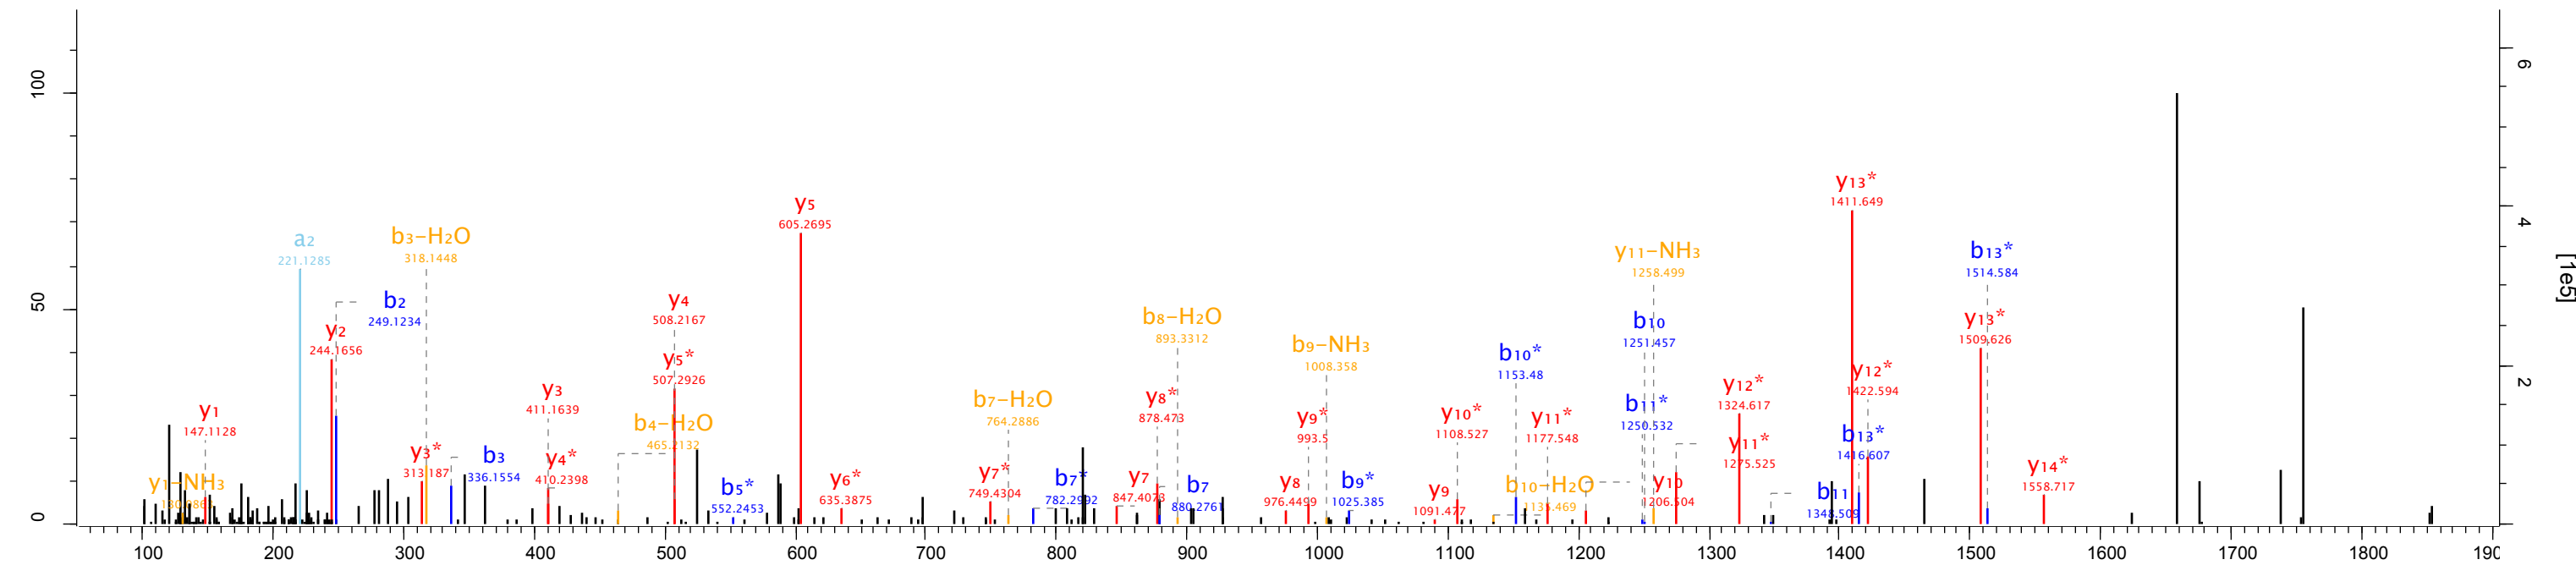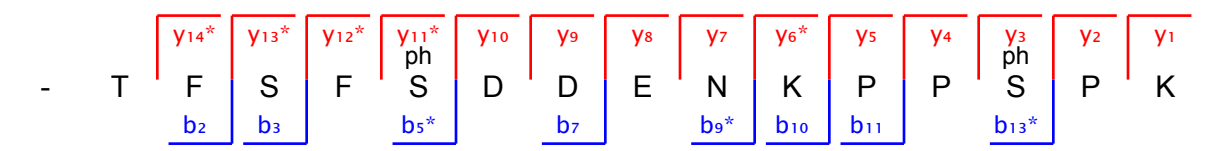

Raw file: 20150814\_A375SR\_Phospho\_BR2\_03  
 Scan: 14441 Method: FTMS; HCD Score: 124.08 m/z: 663.63 Gene names: MYO18A

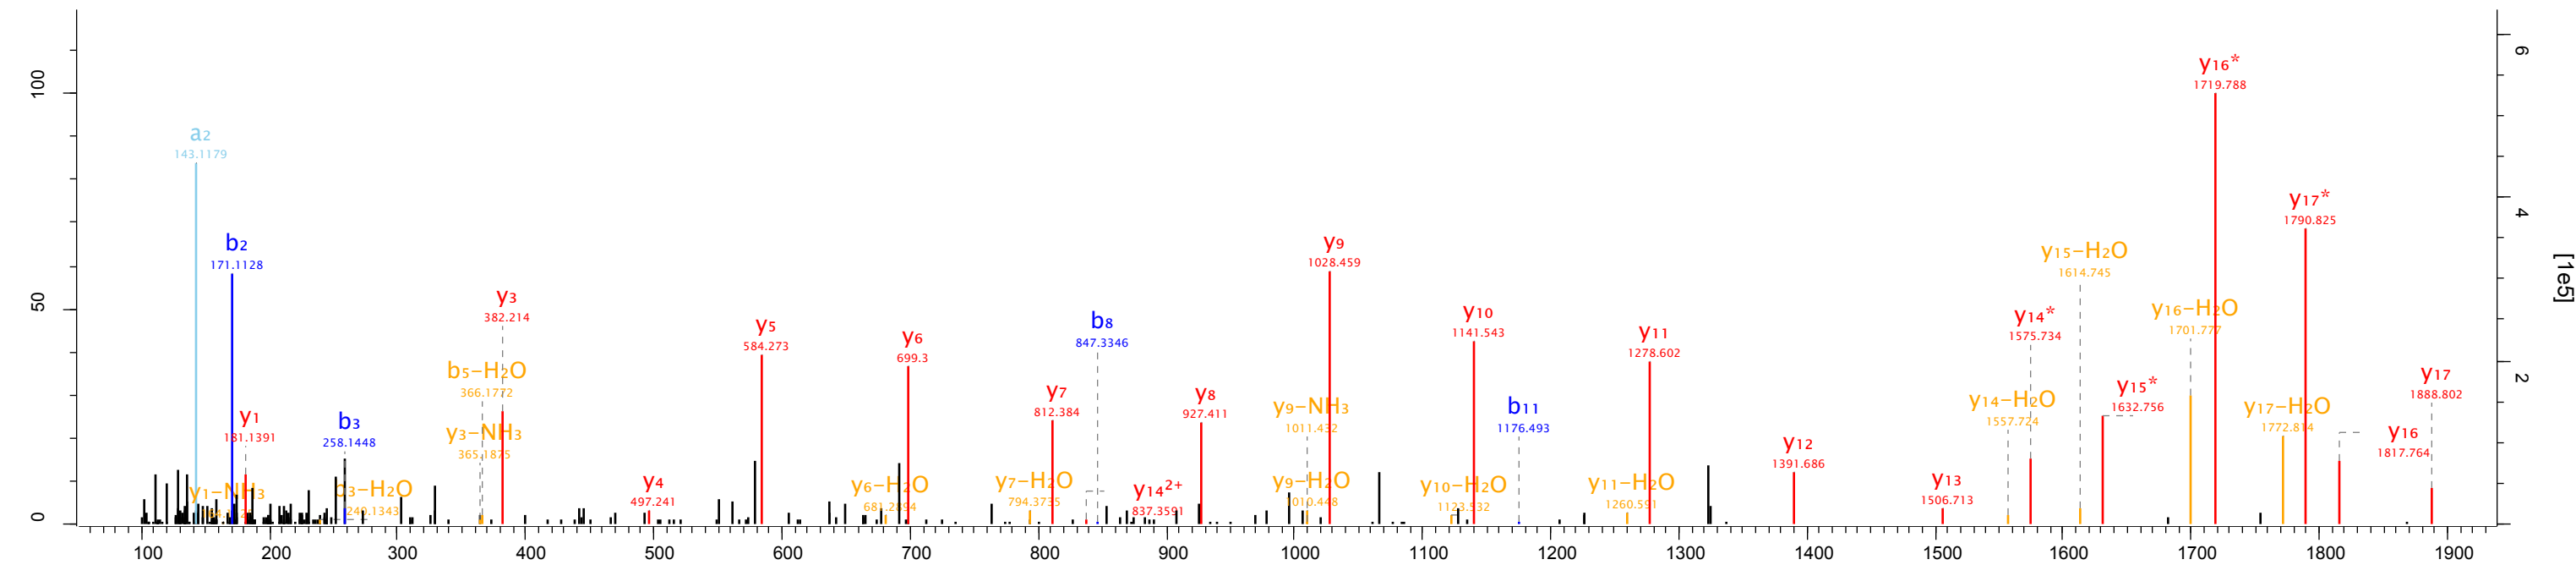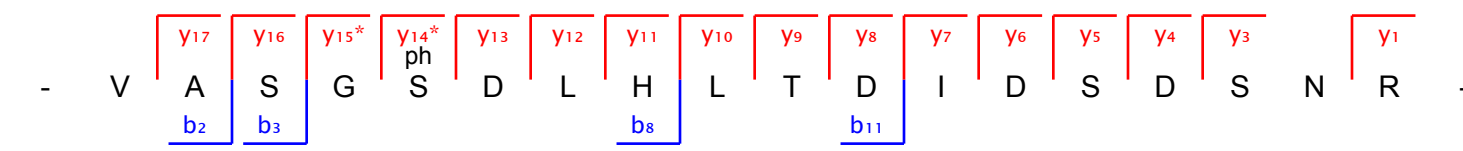

Raw file: 20150814\_A375SR\_Phospho\_BR2\_03  
 Scan: 14531 Method: FTMS; HCD Score: 167.03 m/z: 695.76 Gene names: ARPP19;ENSA

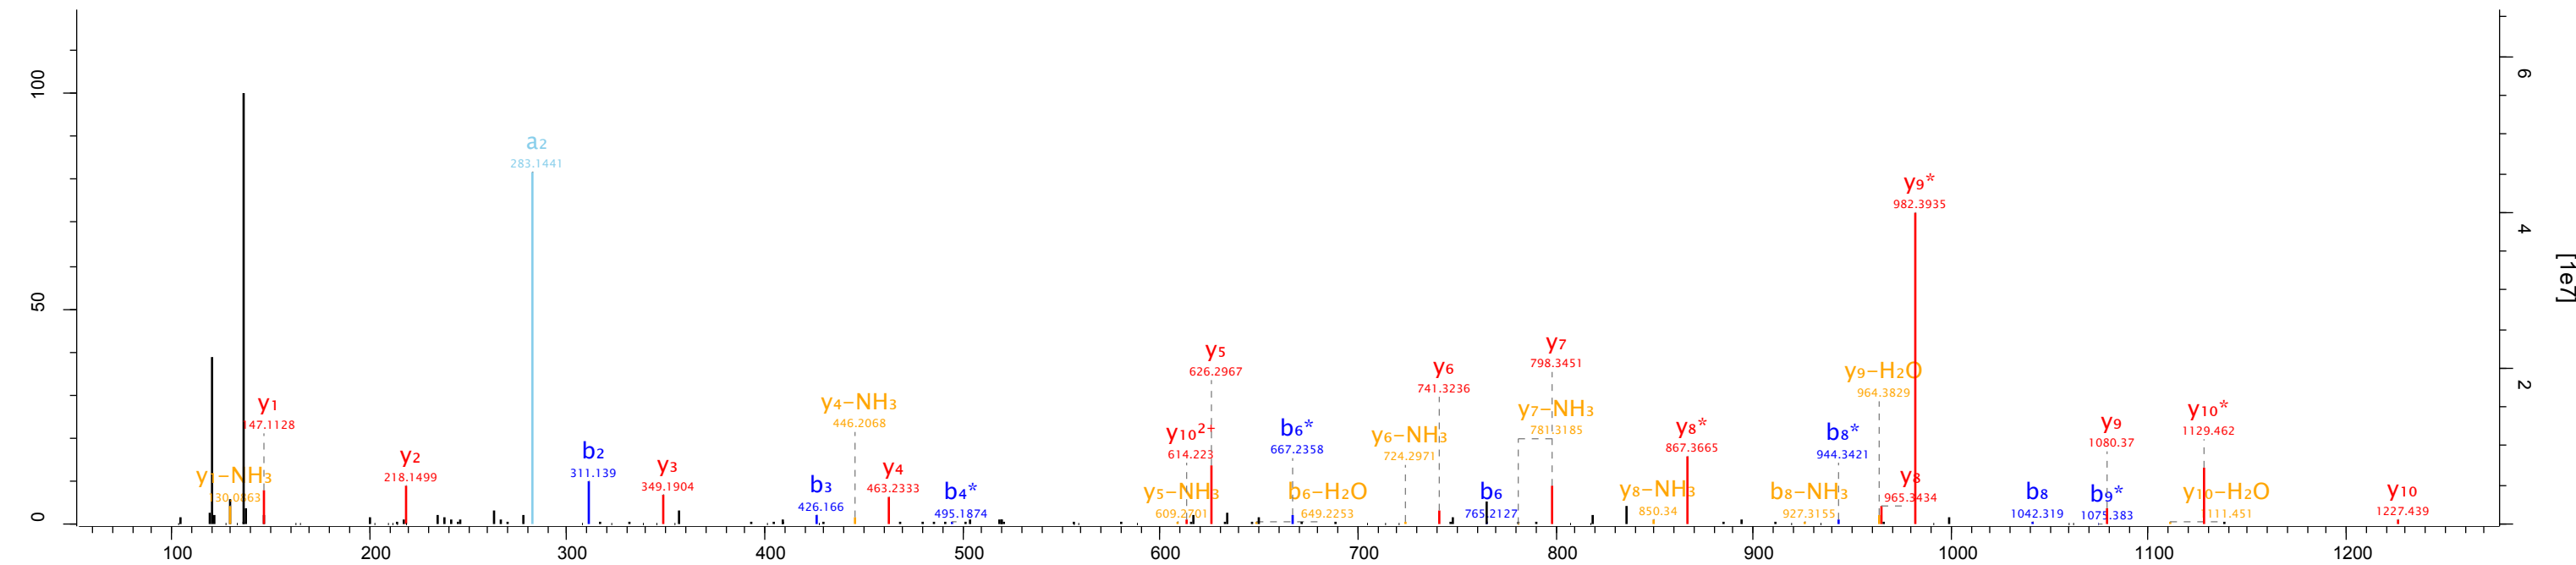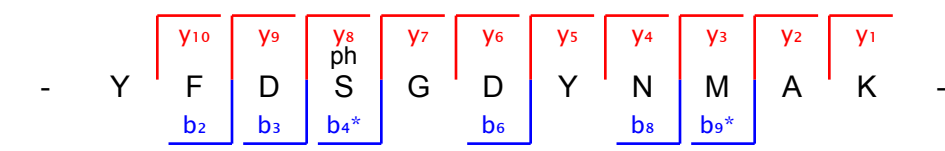

Raw file 20150814\_A375SR\_Phospho\_BR2\_03 Scan 14591 Method FTMS; HCD Score 149.95 m/z 795.37 Gene names TPD52L2

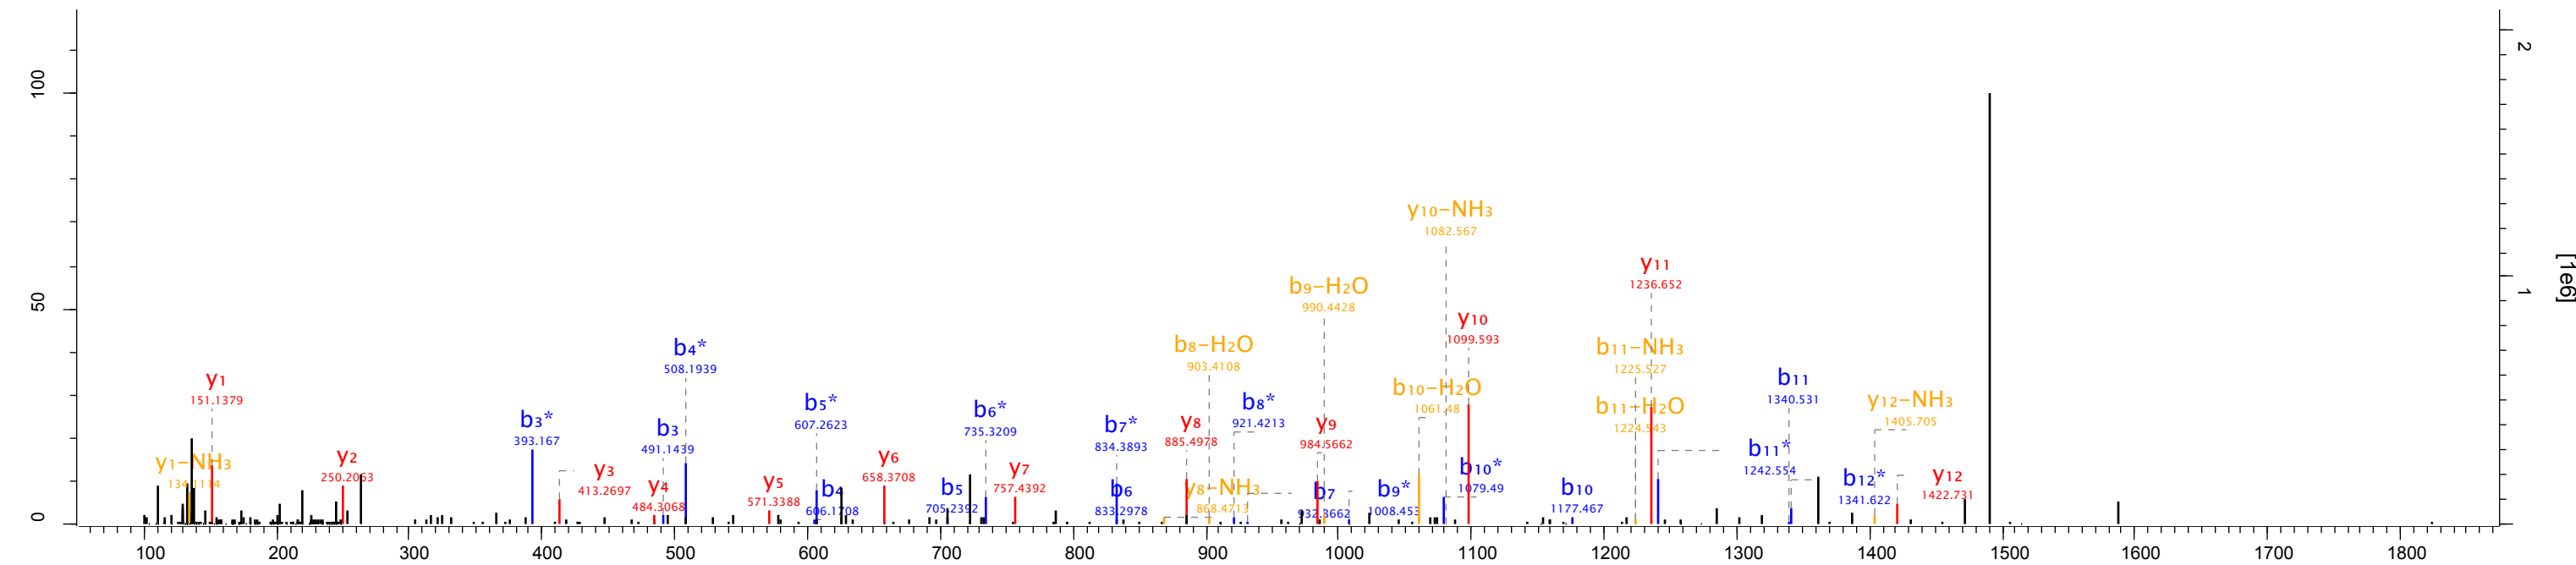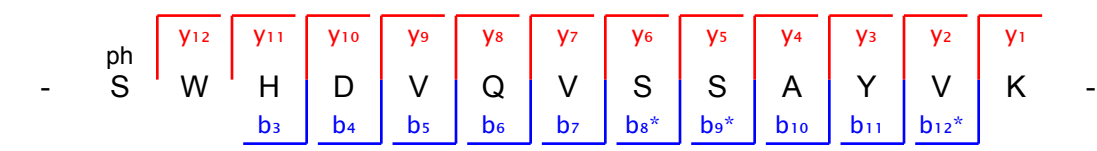

Raw file 20150814\_A375SR\_Phospho\_BR2\_03 Scan 14701 Method FTMS; HCD Score 45.65 m/z 856.14 Gene names BCL7C

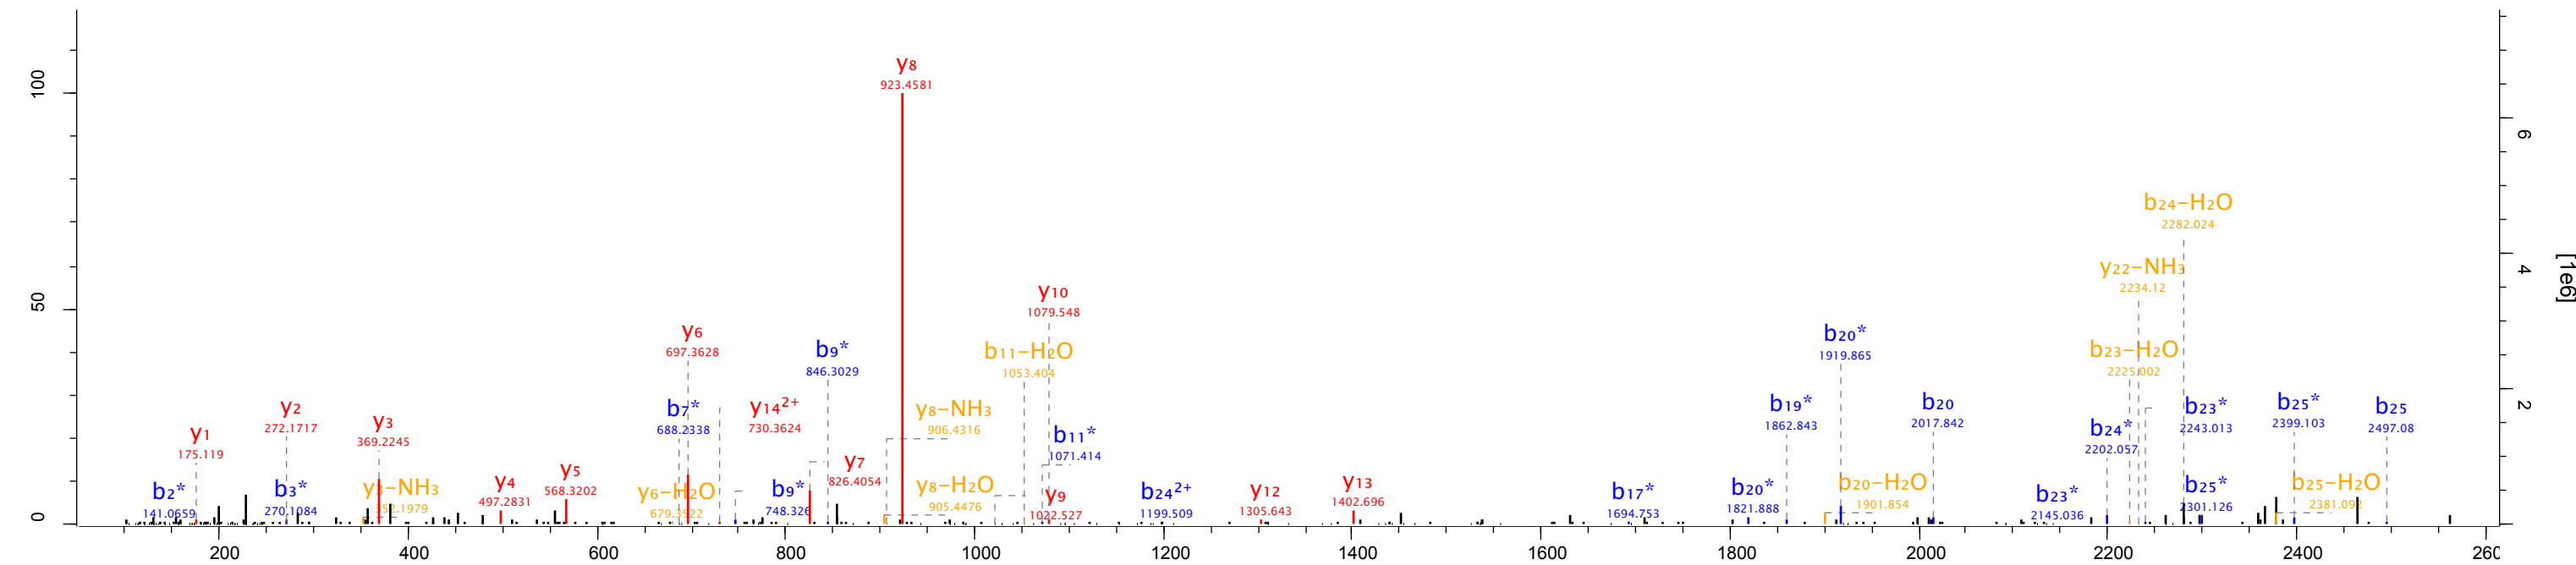

- G ph T E P ph S P G G T P Q P S R P V S P A G P P E G V P E E A Q P P R -

Fragmentation sites are indicated by brackets below the amino acid sequence:

- ph T E P
- G T P Q P
- S R P V S P
- A G P P
- E G V P
- E E A Q P P R

Raw file Scan Method Score m/z Gene names  
 20150814\_A375SR\_Phospho\_BR2\_03 14761 FTMS; HCD 116.96 622.81 CDK17

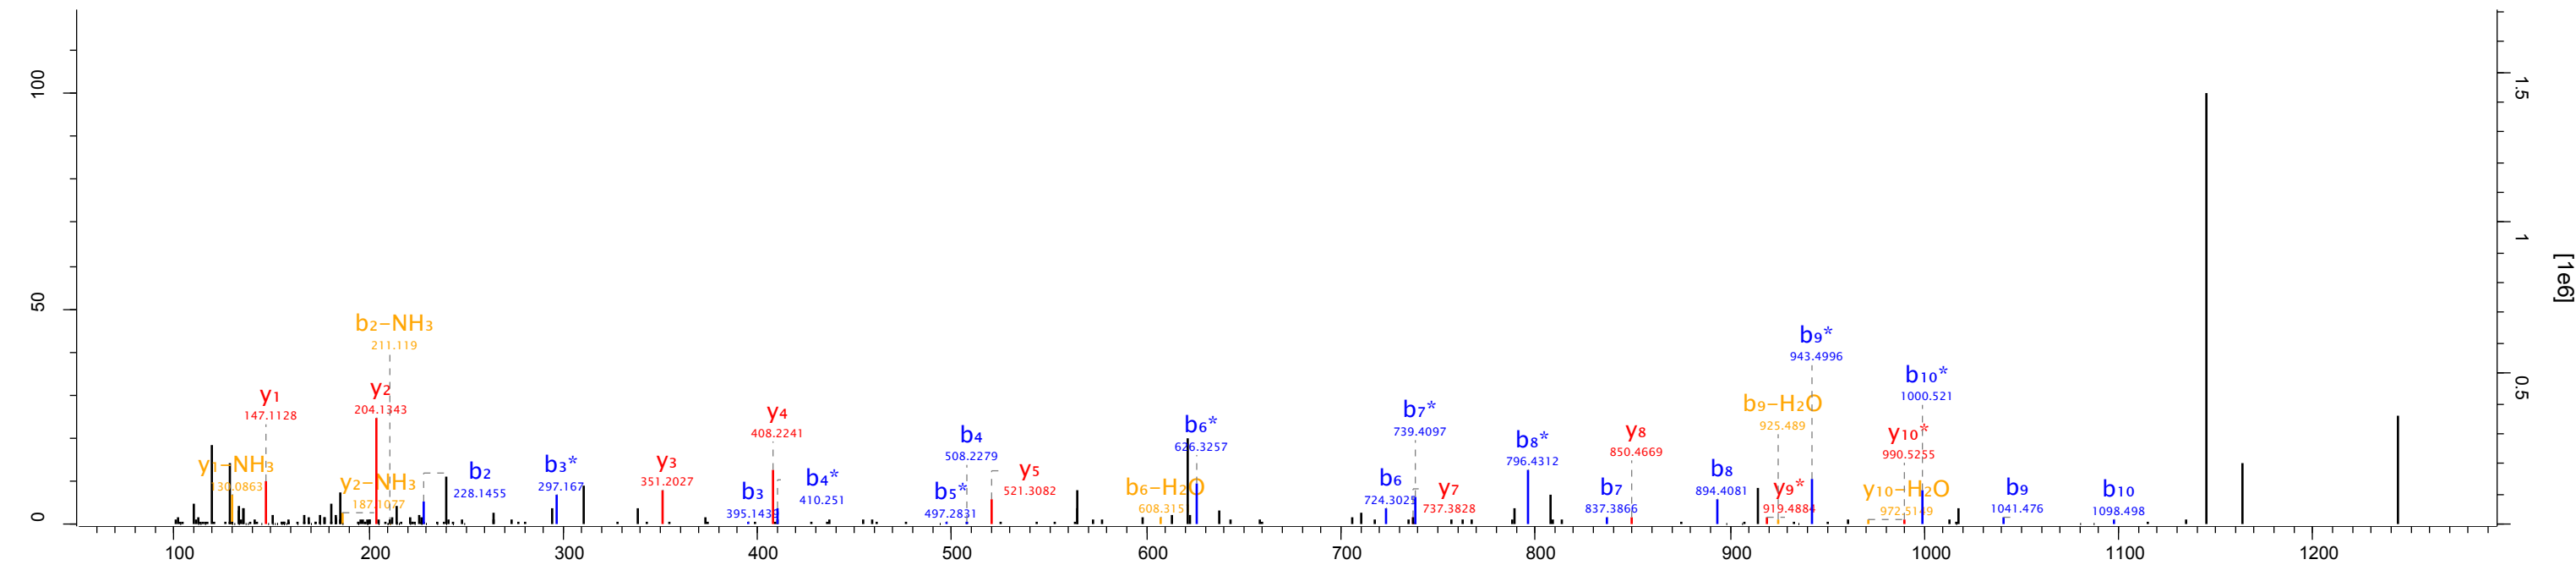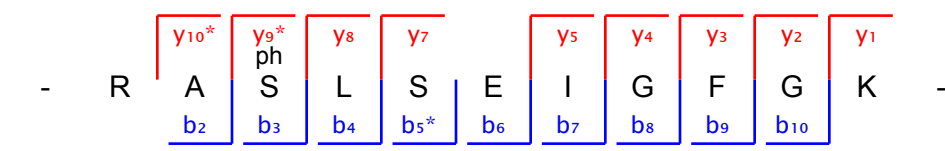

Raw file  
20150814\_A375SR\_Phospho\_BR2\_03

Scan 14831 Method FTMS; HCD Score 284.8 m/z 1113.15 Gene names RABL6

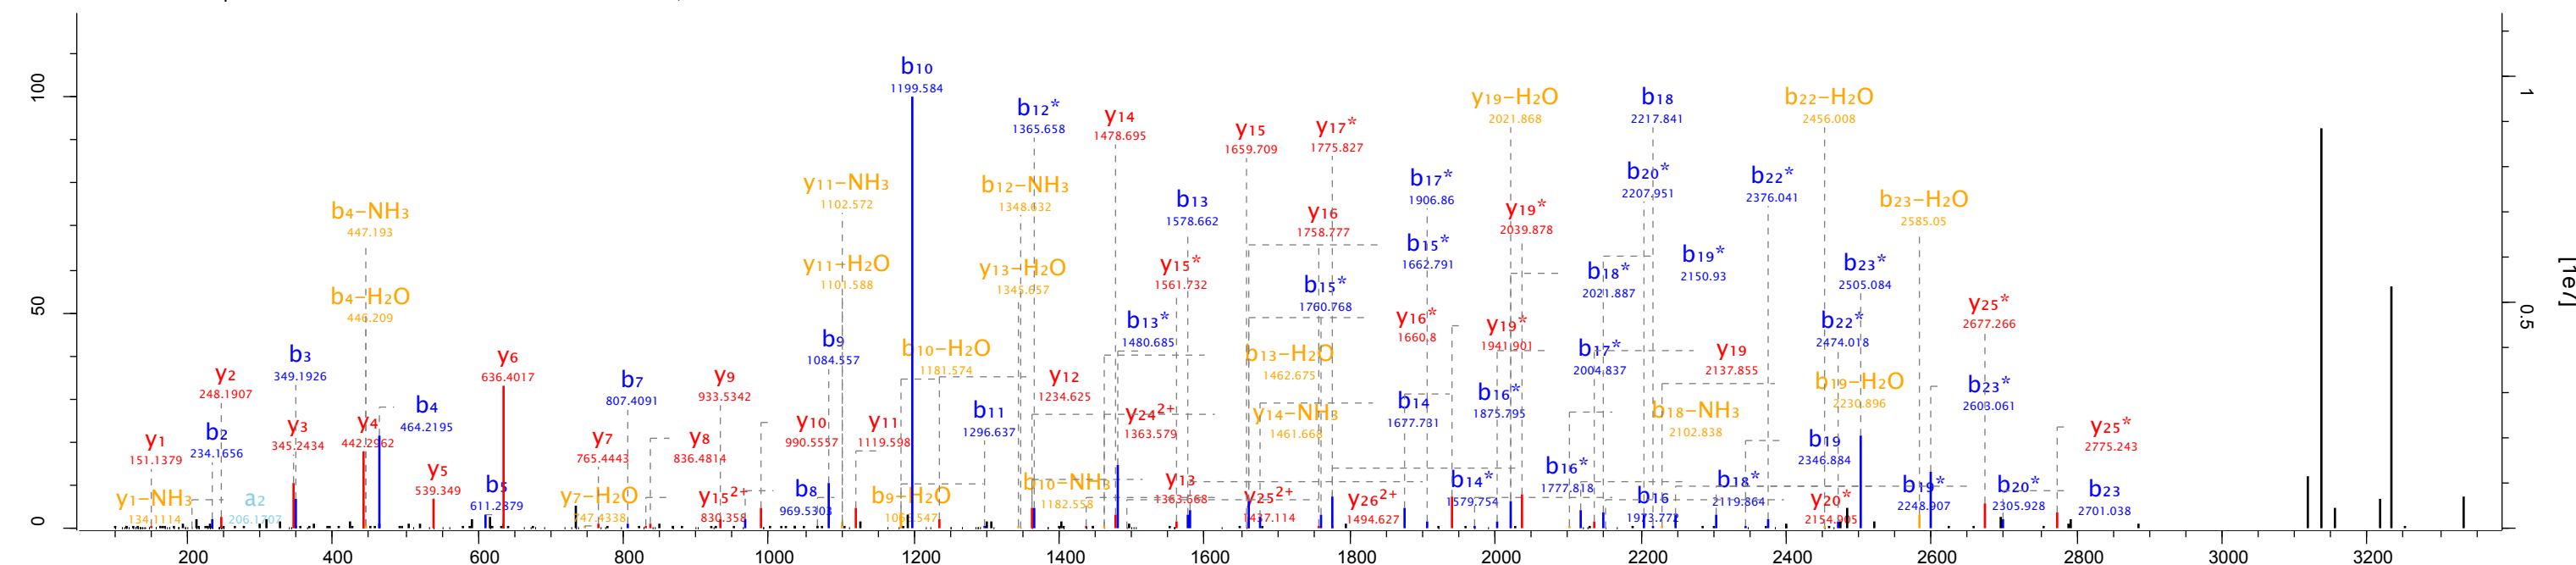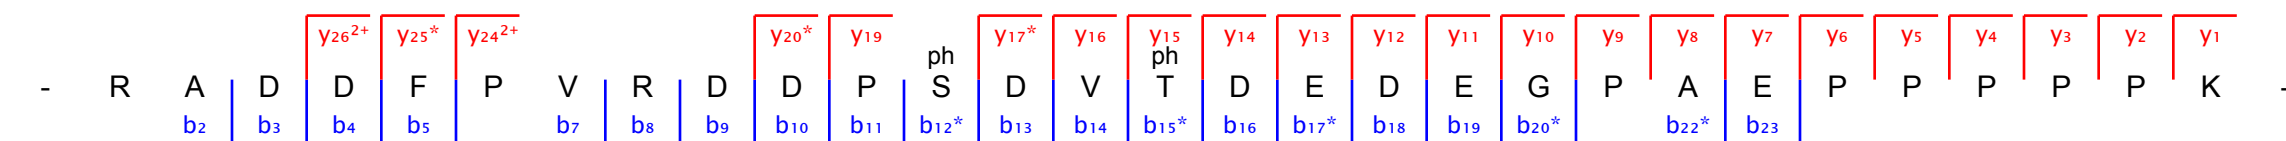



Raw file: 20150814\_A375SR\_Phospho\_BR2\_03  
 Scan: 14911 Method: FTMS; HCD Score: 188.84 m/z: 873.39 Gene names: SMG9

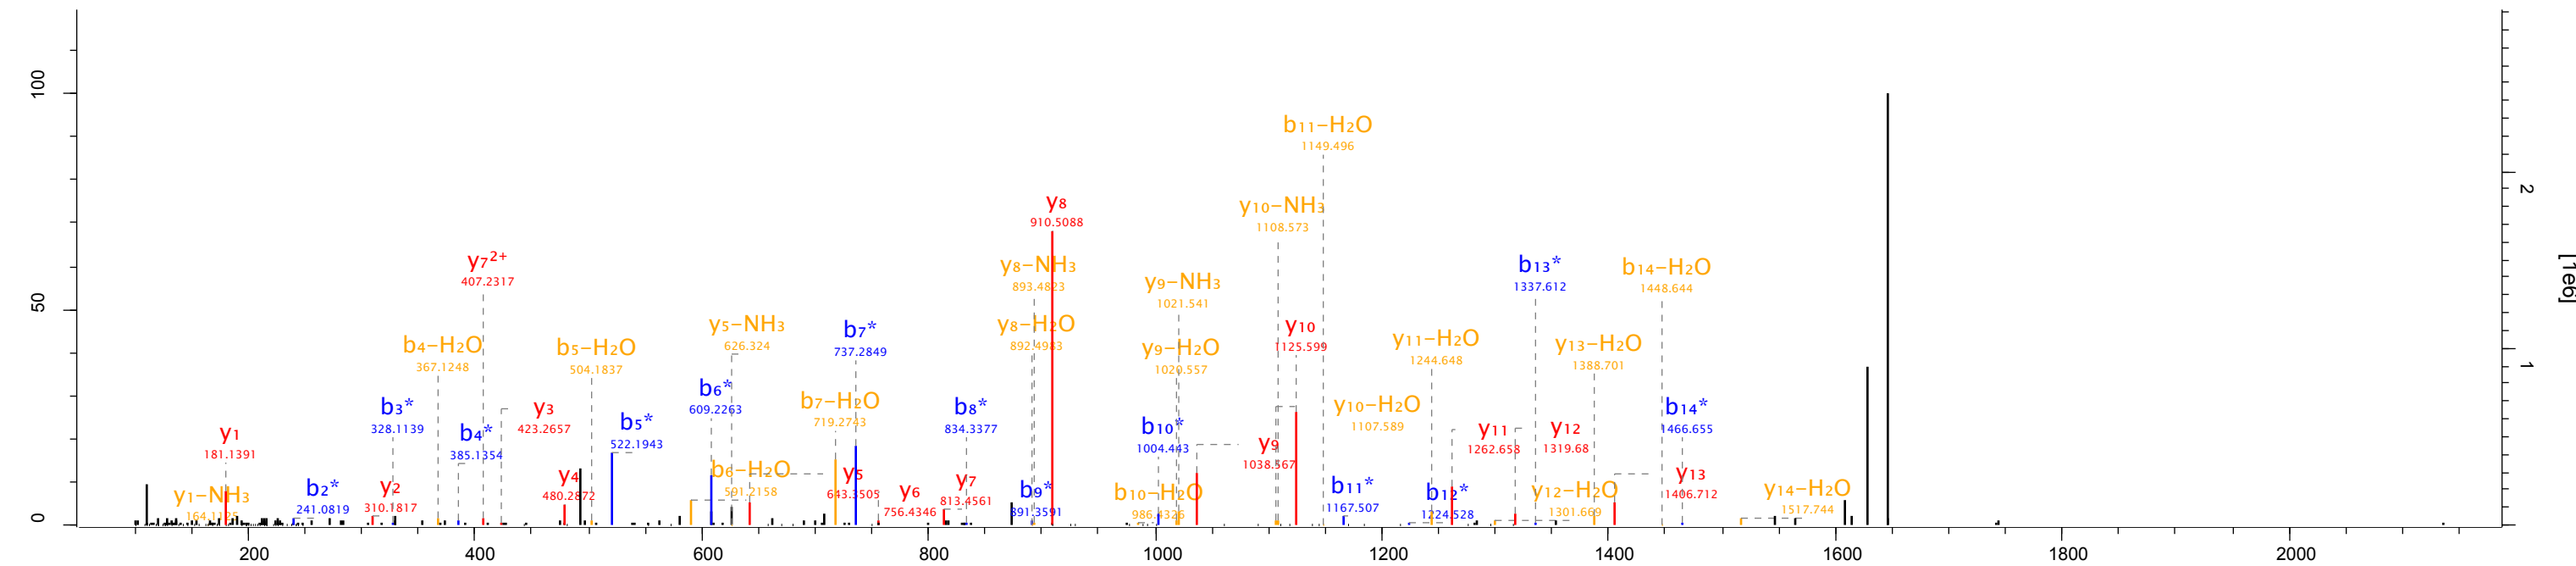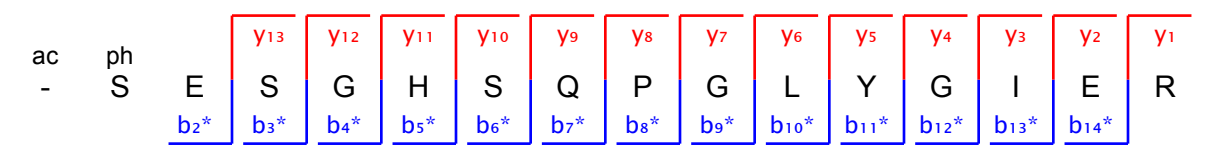

Raw file 20150814\_A375SR\_Phospho\_BR2\_03 Scan 14931 Method FTMS; HCD Score 182.13 m/z 894.91 Gene names NCOA5

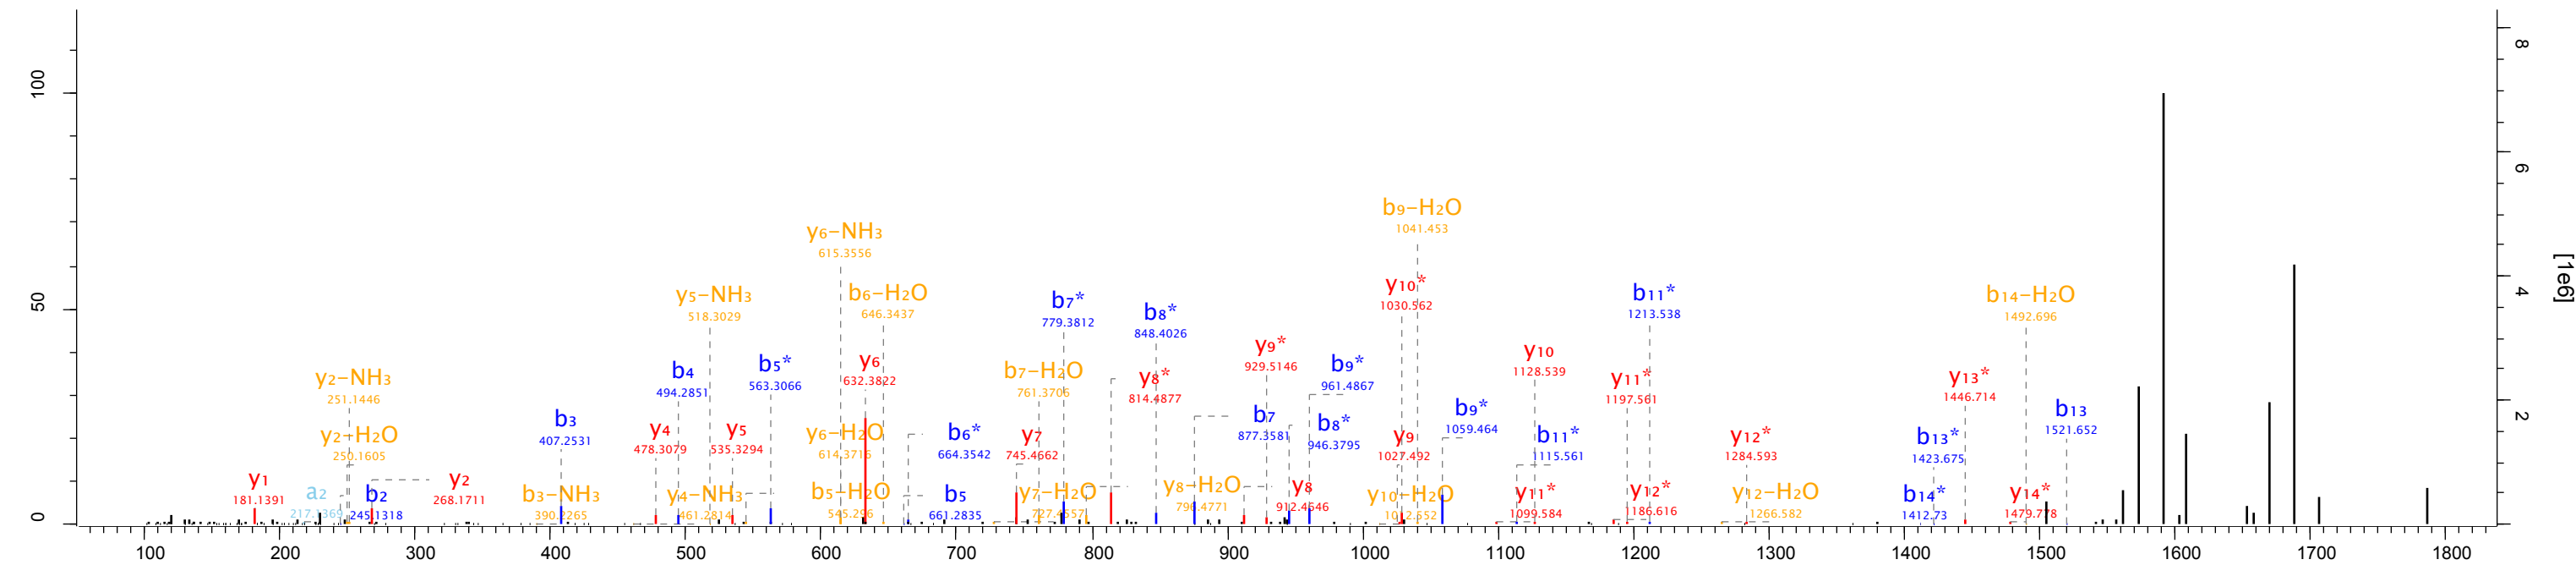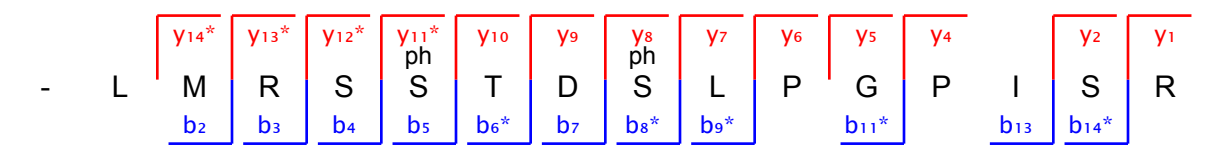

Raw file 20150814\_A375SR\_Phospho\_BR2\_03 Scan 14981 Method FTMS; HCD Score 104.12 m/z 825.03 Gene names AAK1

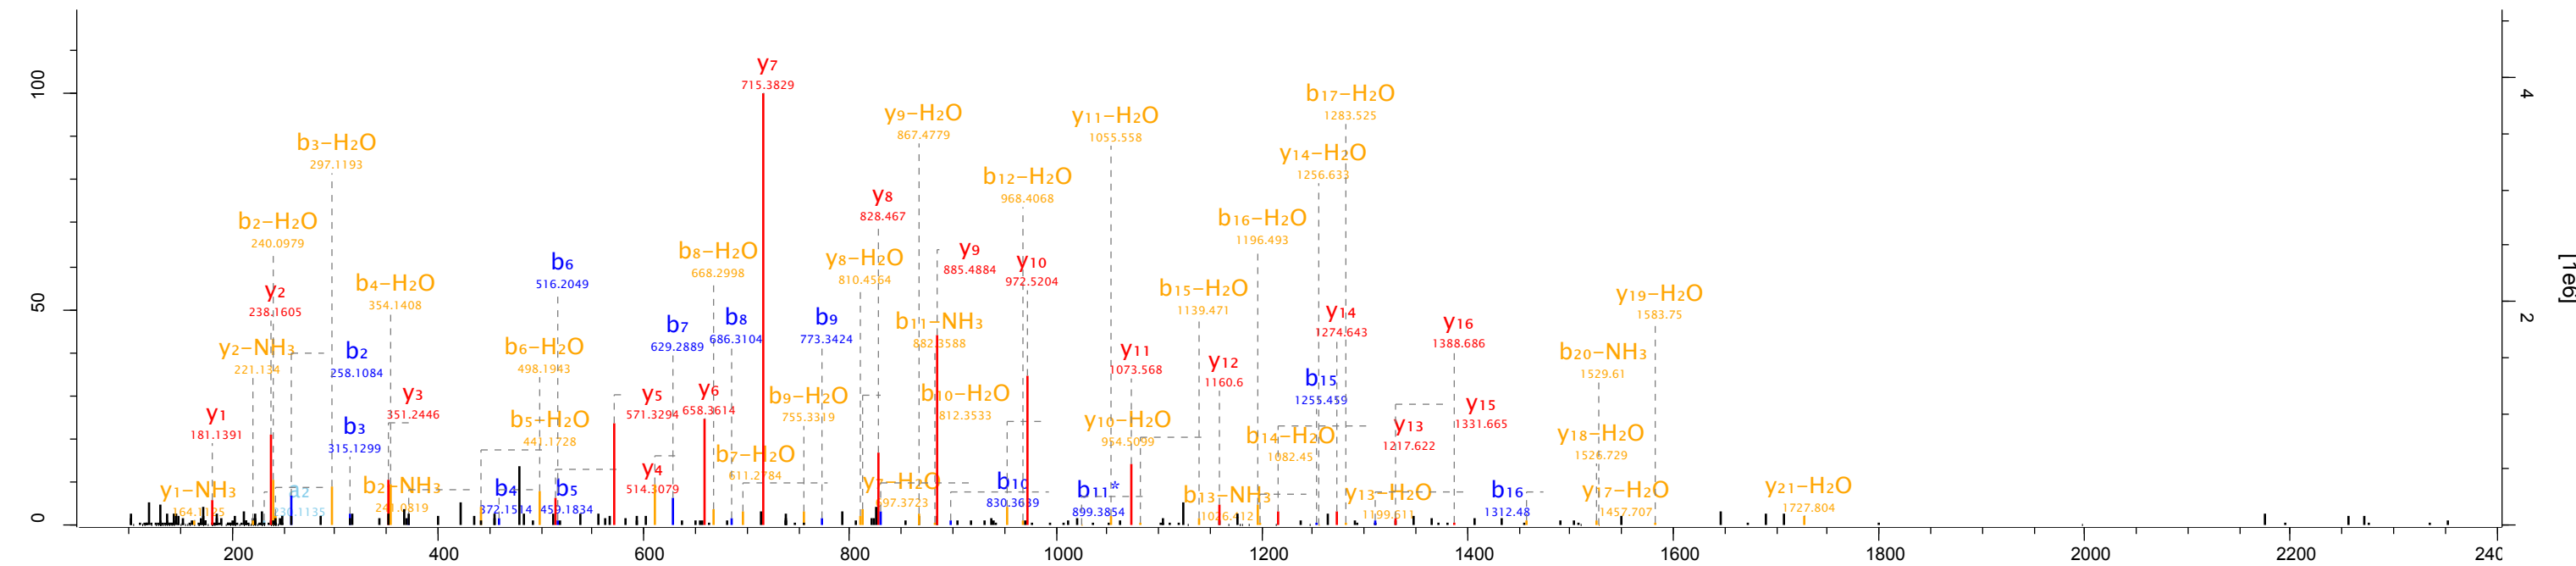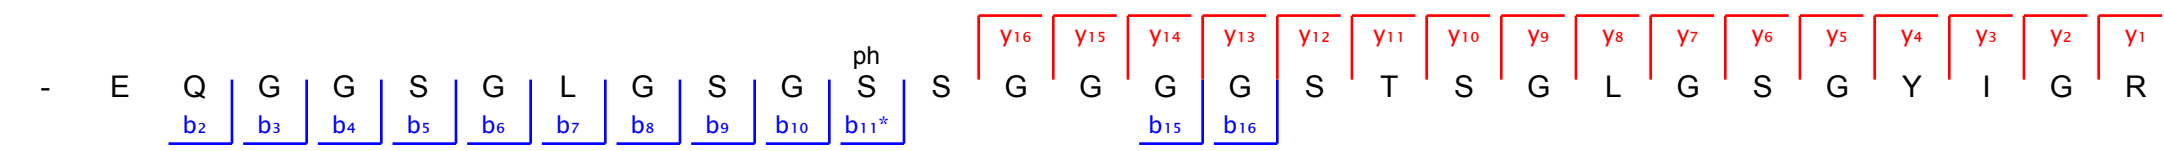

Raw file Scan Method Score m/z Gene names  
 20150814\_A375SR\_Phospho\_BR2\_03 15161 FTMS; HCD 132.48 894.89 DCP1A

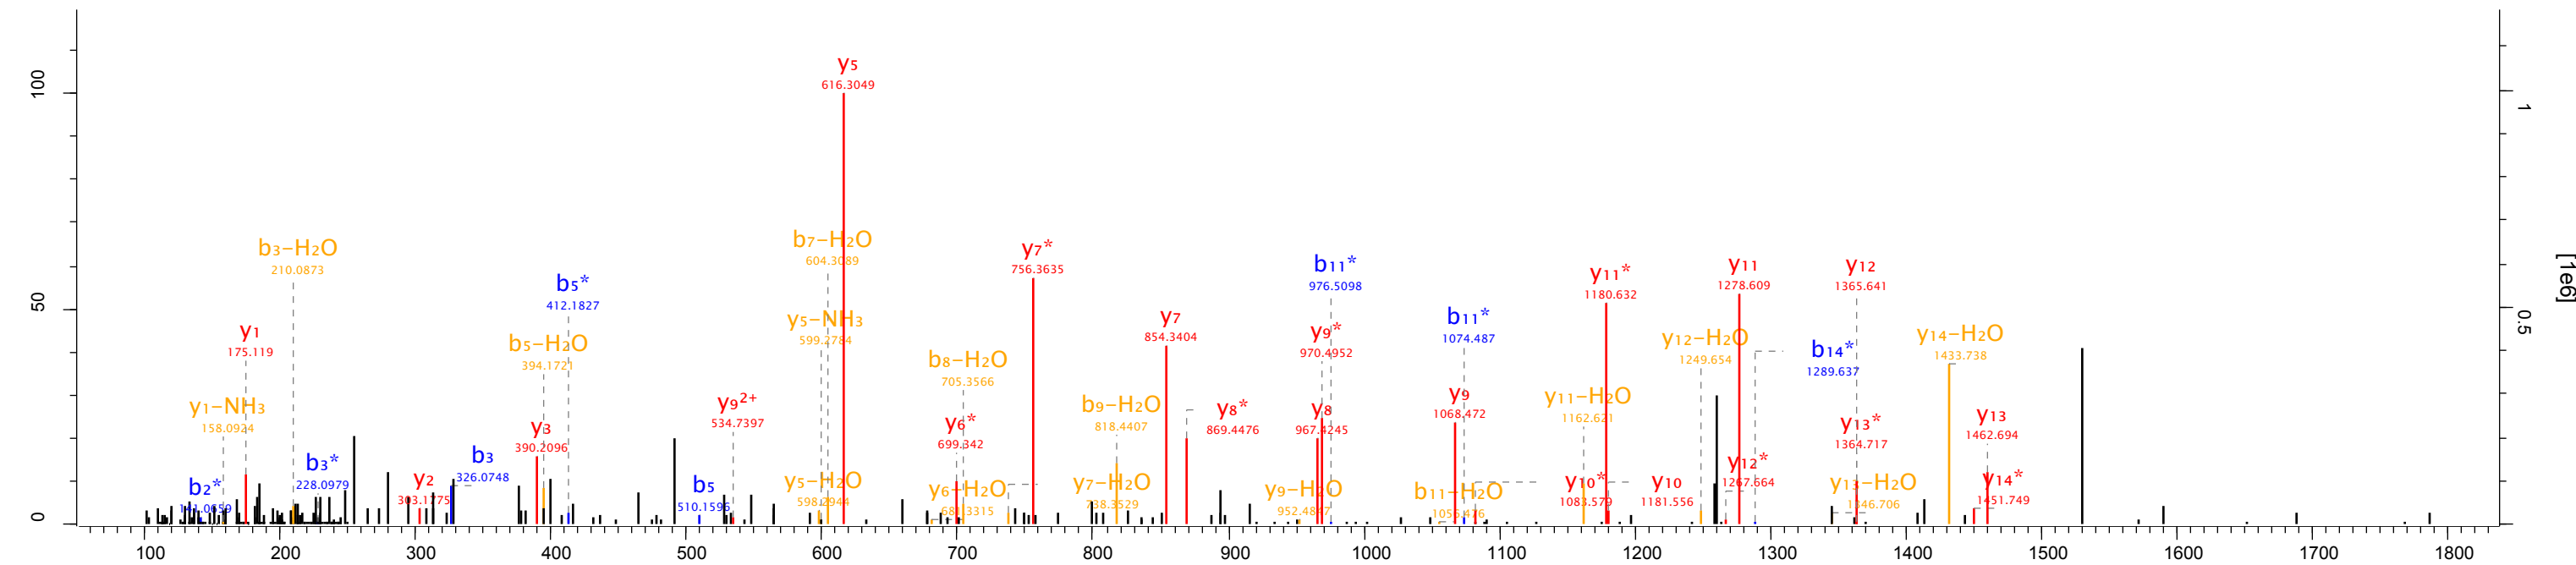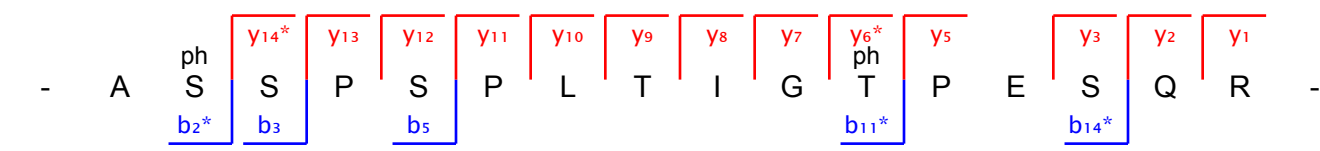

Raw file 20150814\_A375SR\_Phospho\_BR2\_03 Scan 15181 Method FTMS; HCD Score 103.13 m/z 679.29 Gene names UBR4

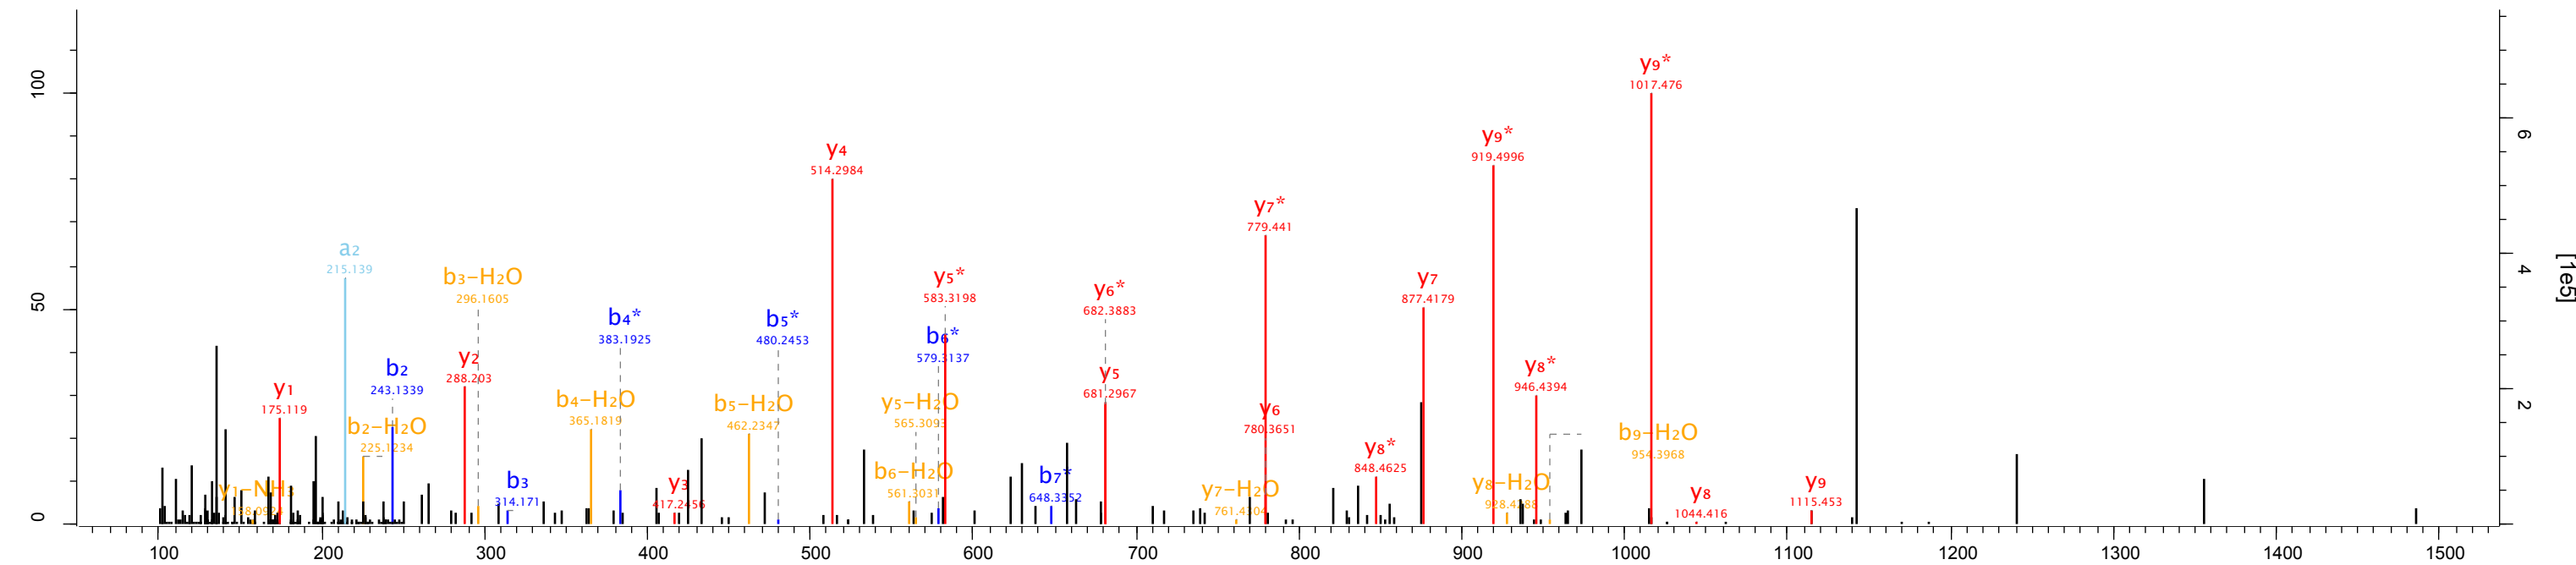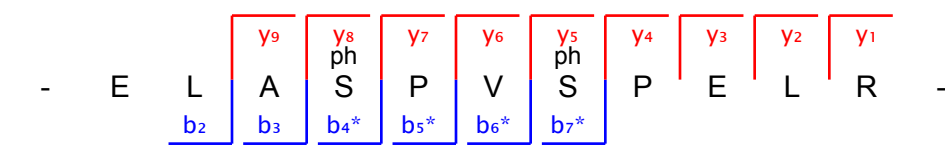

Raw file: 20150814\_A375SR\_Phospho\_BR2\_03  
 Scan: 15301 Method: FTMS; HCD Score: 101.38 m/z: 700.31 Gene names: SLCO4A1

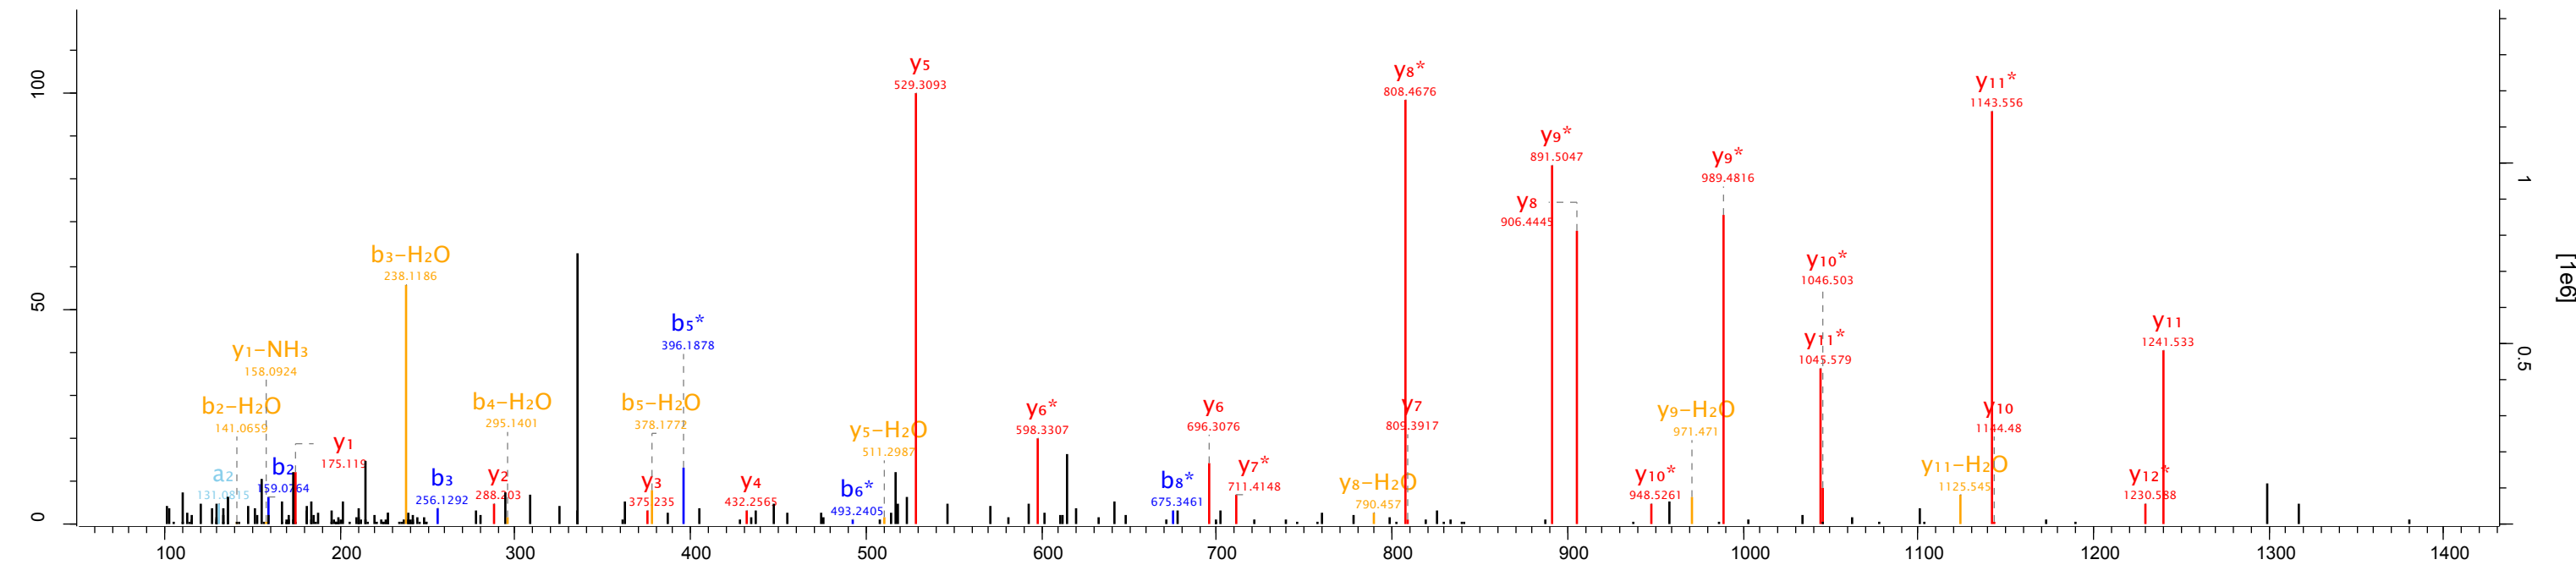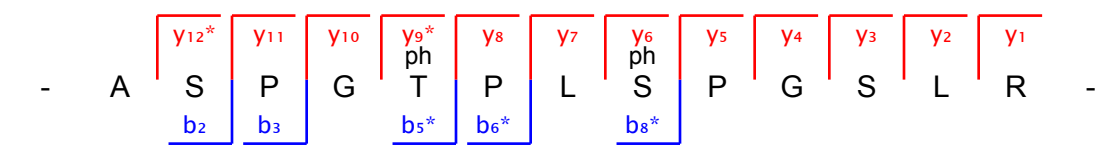

Raw file: 20150814\_A375SR\_Phospho\_BR2\_03  
 Scan: 15511 Method: FTMS; HCD Score: 254.72 m/z: 1196.98 Gene names: UBR4

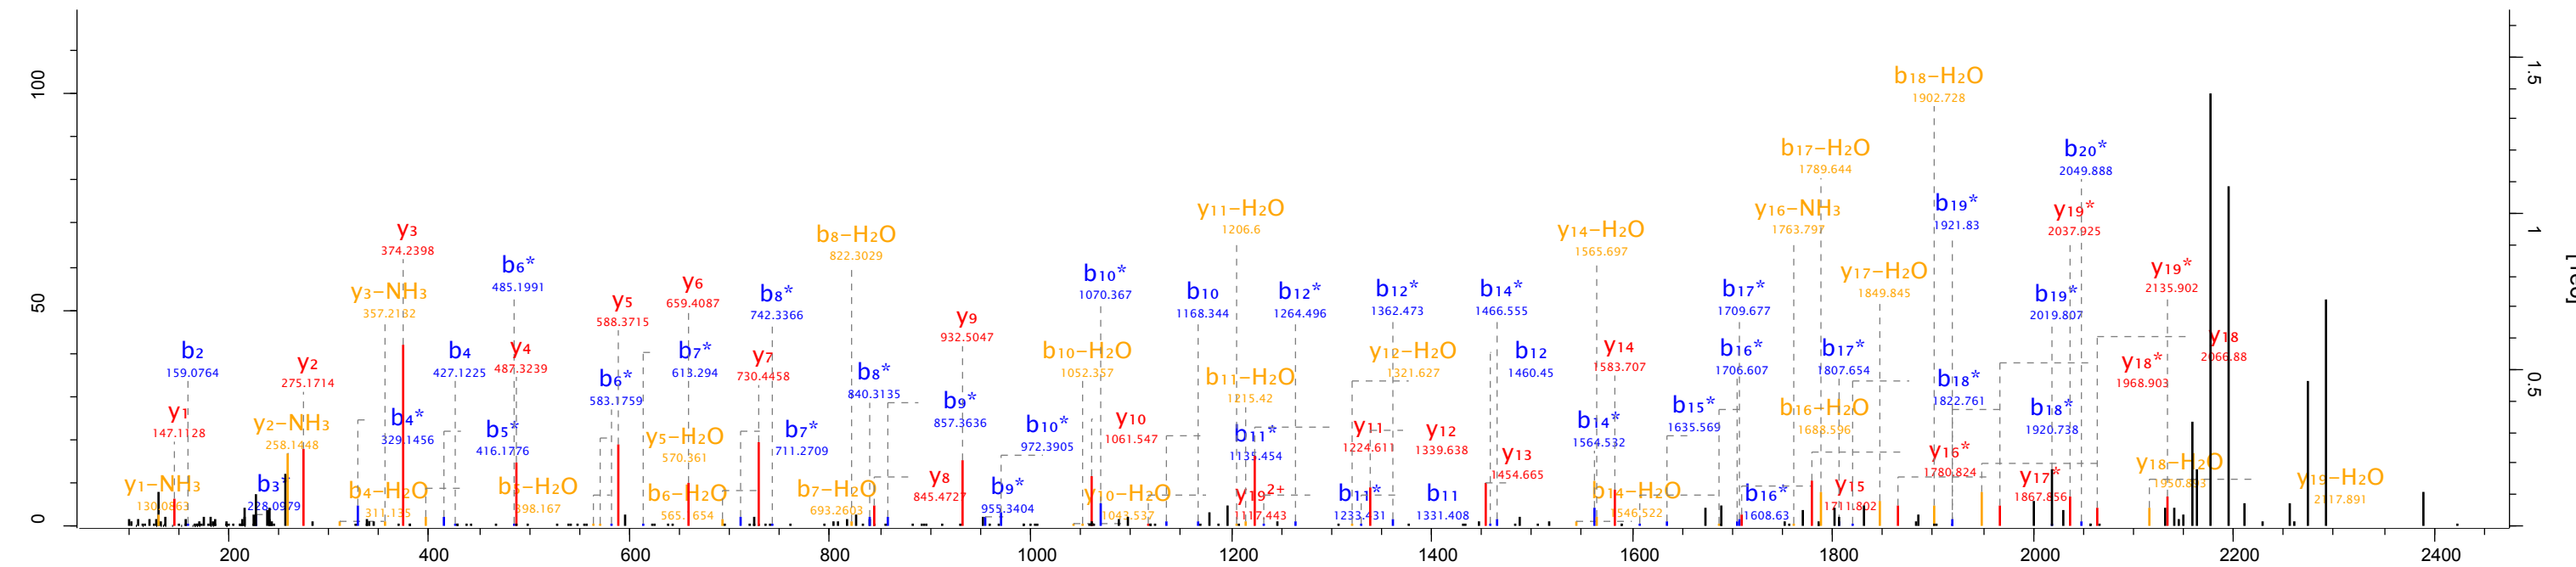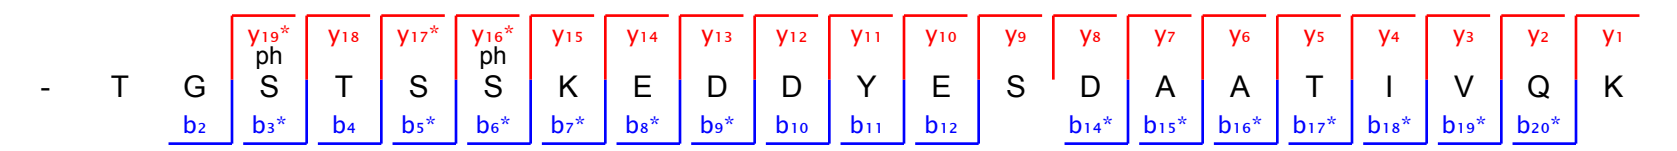

Raw file Scan Method Score m/z Gene names  
 20150814\_A375SR\_Phospho\_BR2\_03 15531 FTMS; HCD 95.34 775.64 NUCKS1

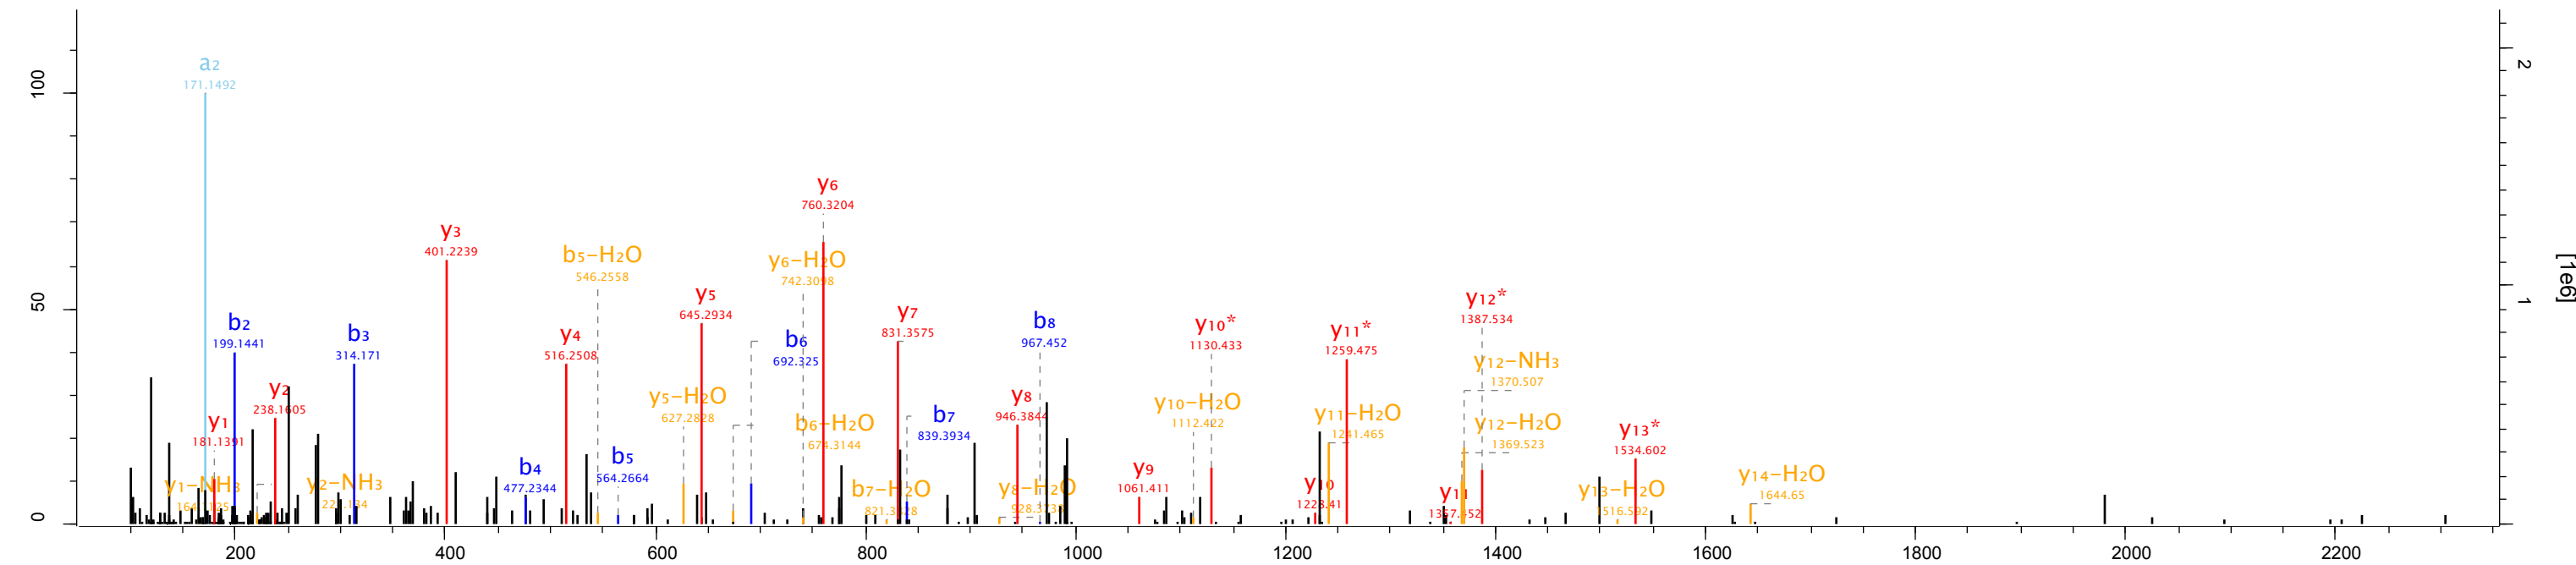

- V V D Y S Q F Q E S D D A D E D Y G R -  
 b<sub>2</sub> b<sub>3</sub> b<sub>4</sub> b<sub>5</sub> b<sub>6</sub> b<sub>7</sub> b<sub>8</sub> y<sub>13</sub>\* y<sub>12</sub>\* y<sub>11</sub> y<sub>10</sub>ph y<sub>9</sub> y<sub>8</sub> y<sub>7</sub> y<sub>6</sub> y<sub>5</sub> y<sub>4</sub> y<sub>3</sub> y<sub>2</sub> y<sub>1</sub>



Raw file: 20150814\_A375SR\_Phospho\_BR2\_03  
 Scan: 15541  
 Method: FTMS; HCD  
 Score: 197.89  
 m/z: 1231.06  
 Gene names: TACC2

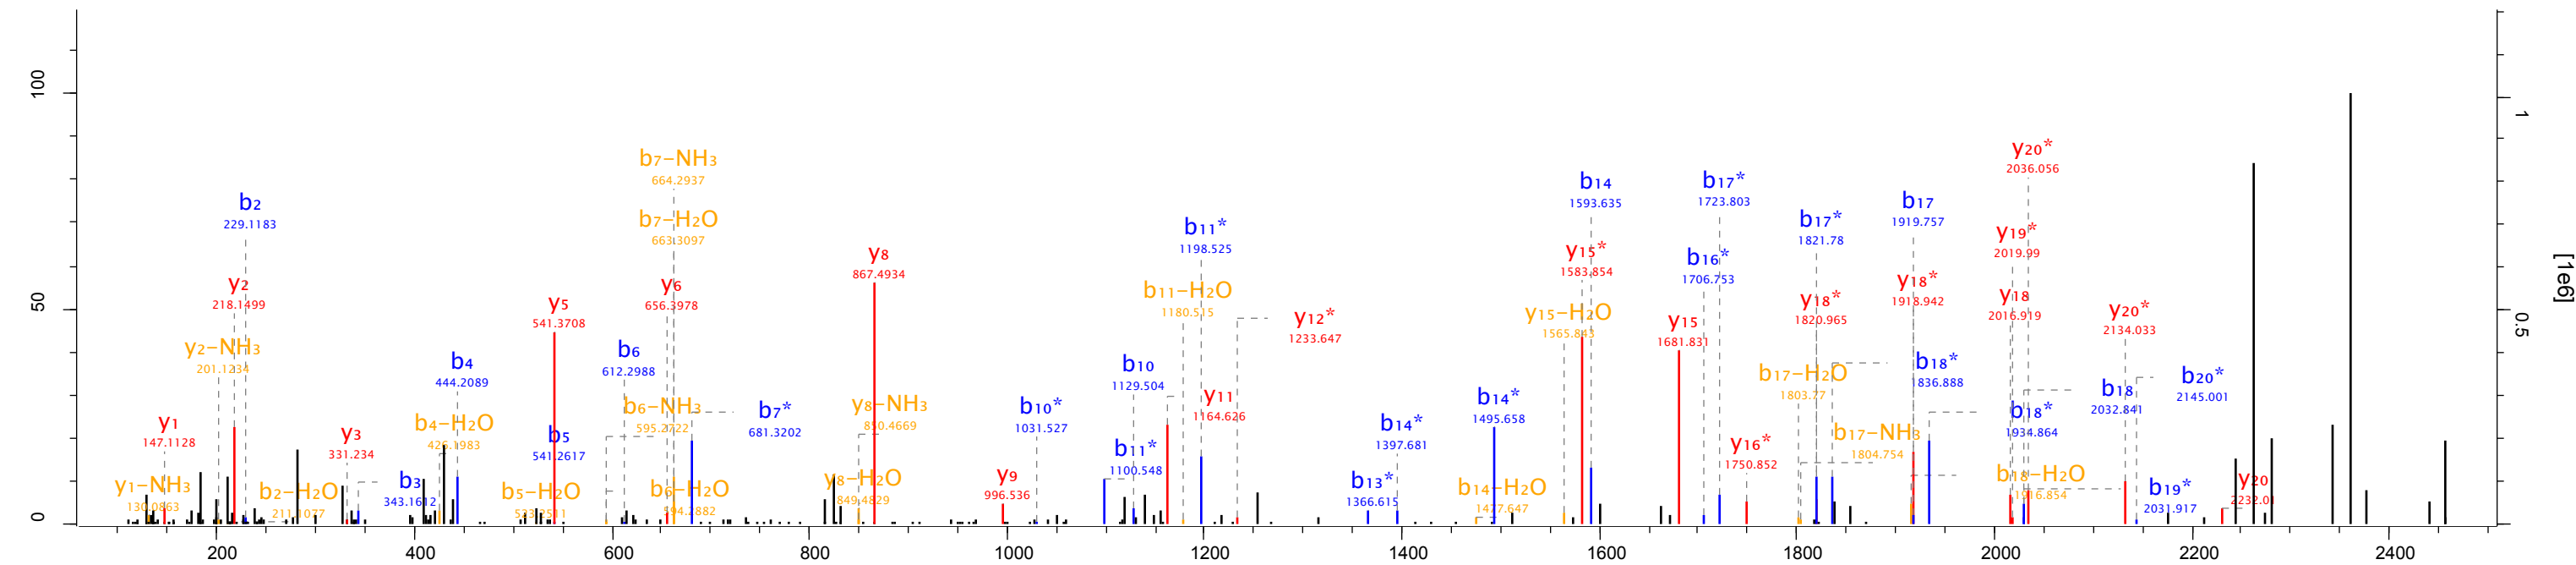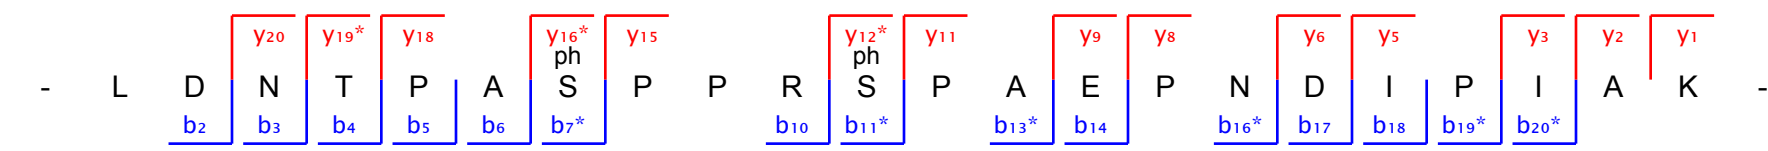

Raw file Scan Method Score m/z Gene names  
 20150814\_A375SR\_Phospho\_BR2\_03 15601 FTMS; HCD 165.64 631.81 PIKFYVE

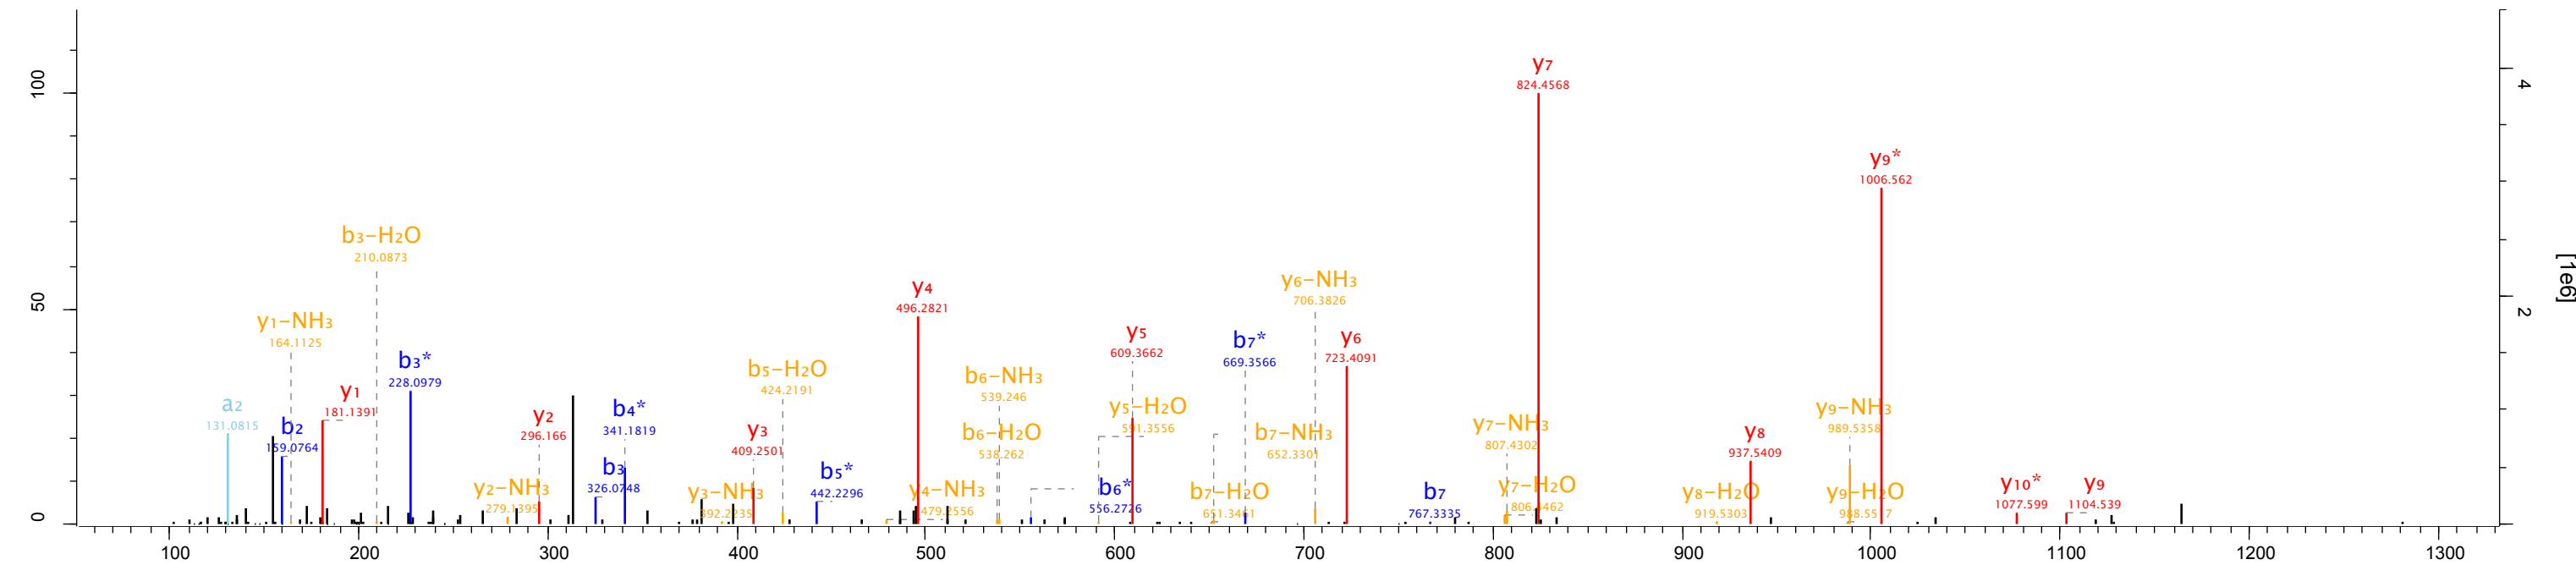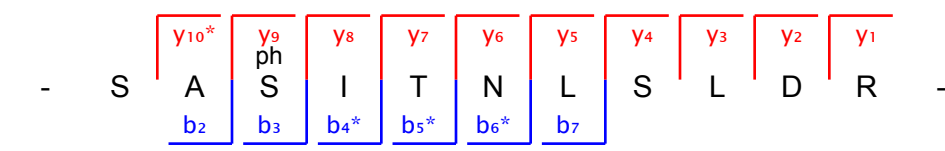

Raw file 20150814\_A375SR\_Phospho\_BR2\_03 Scan 15831 Method FTMS; HCD Score 121.58 m/z 886.9 Gene names KLF3

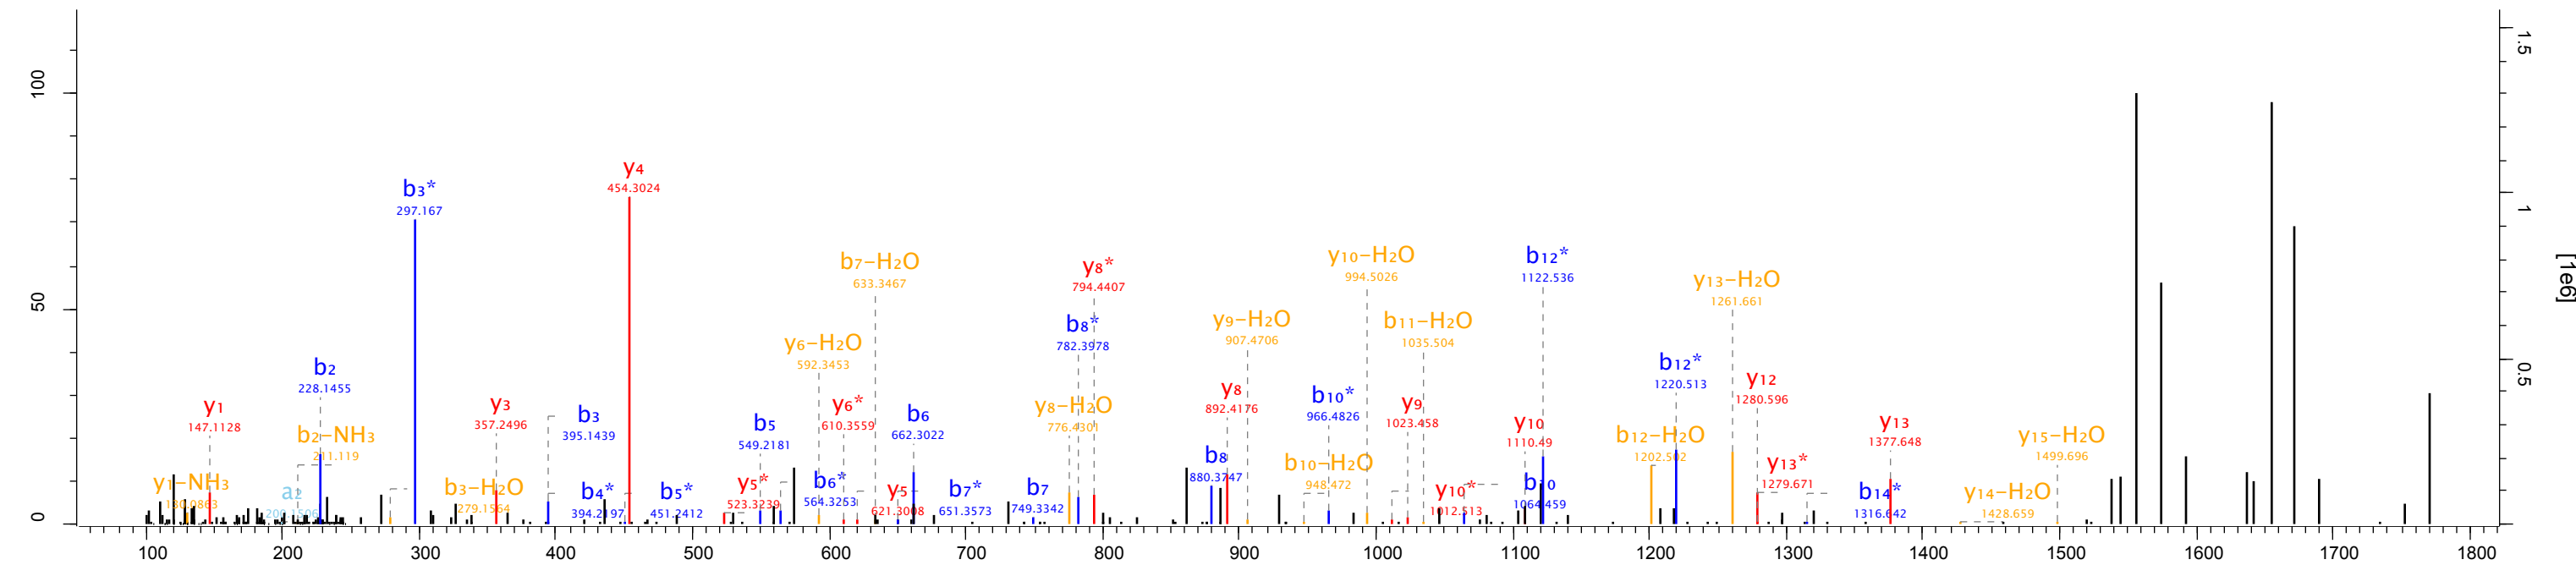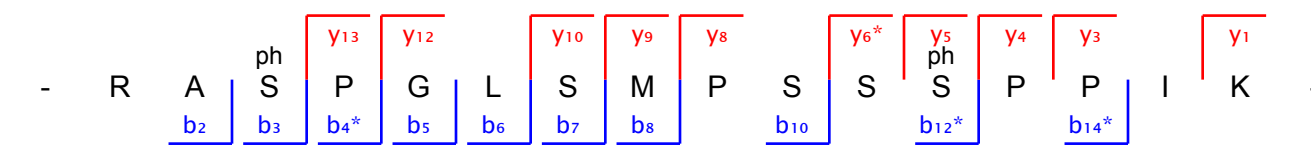

Raw file 20150814\_A375SR\_Phospho\_BR2\_03 Scan 15921 Method FTMS; HCD Score 186.75 m/z 653.79 Gene names CTNND1

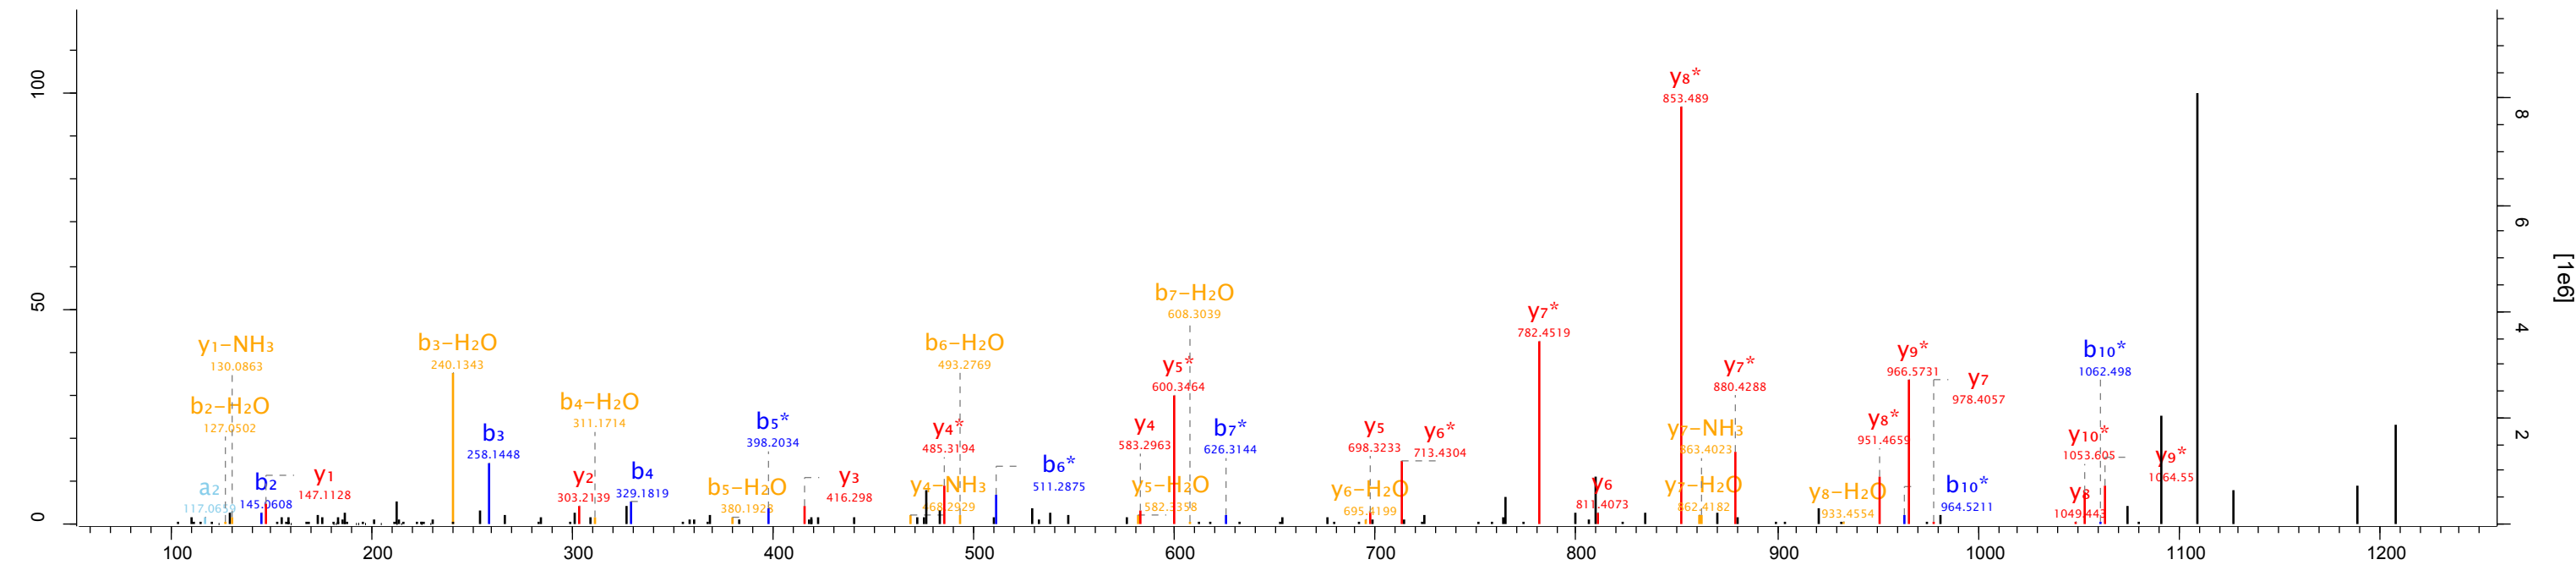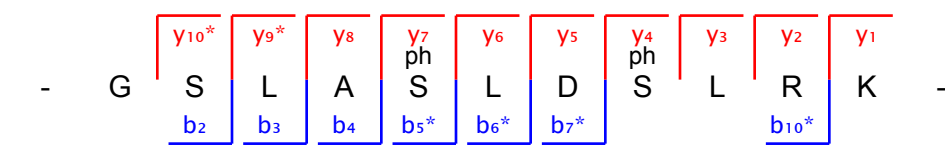

Raw file Scan Method Score m/z Gene names  
 20150814\_A375SR\_Phospho\_BR2\_03 16021 FTMS; HCD 232.7 1066.4 NOL8

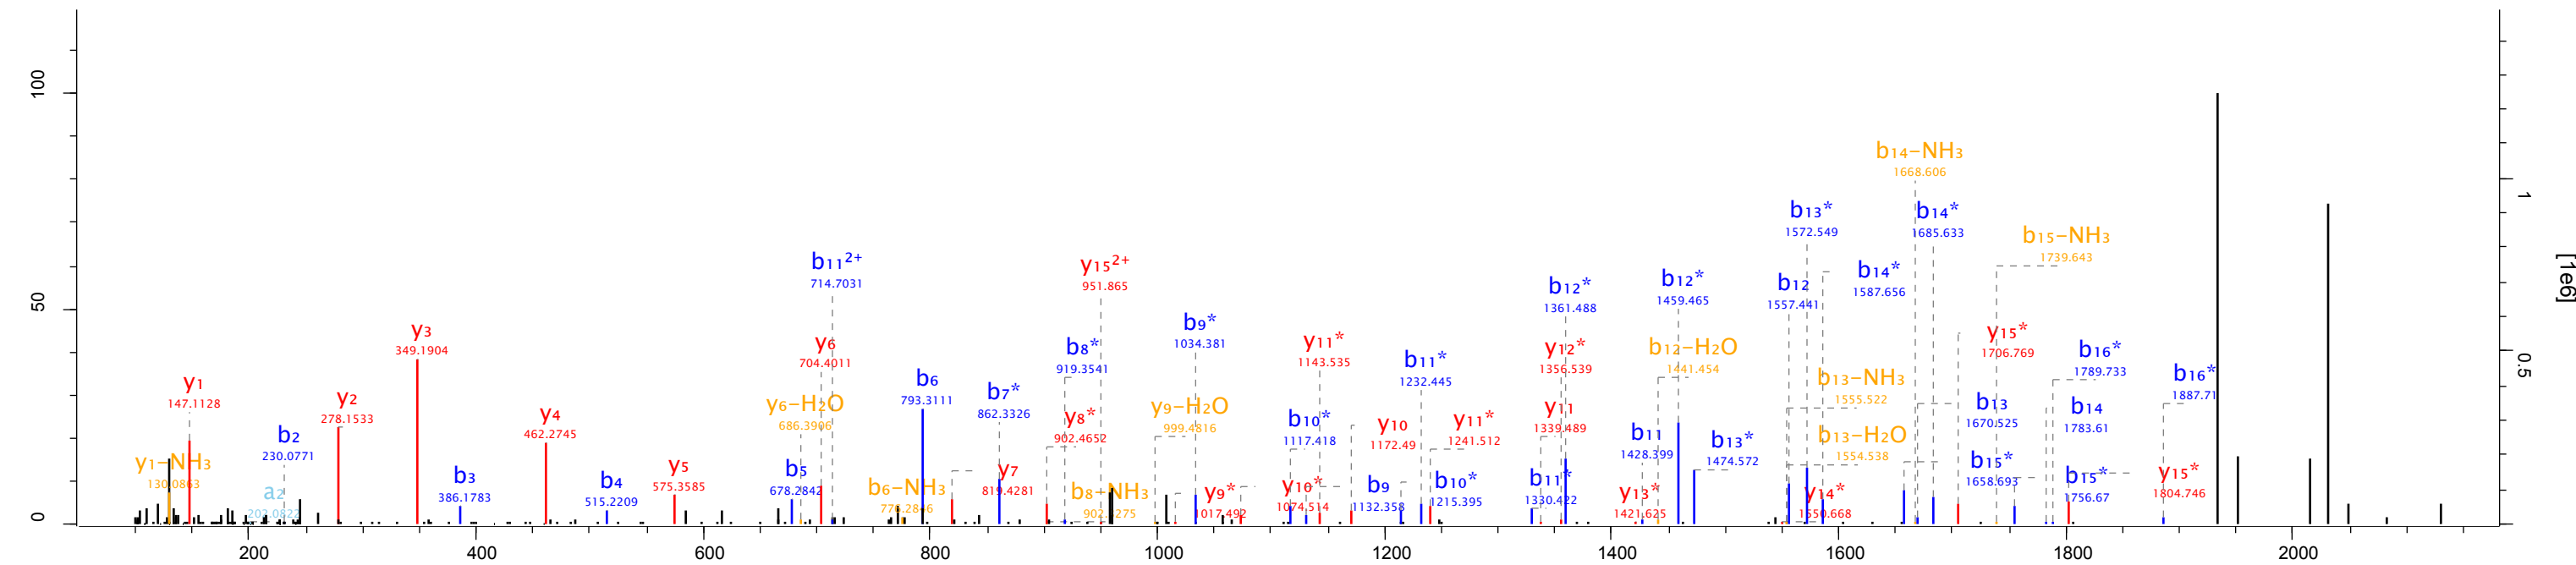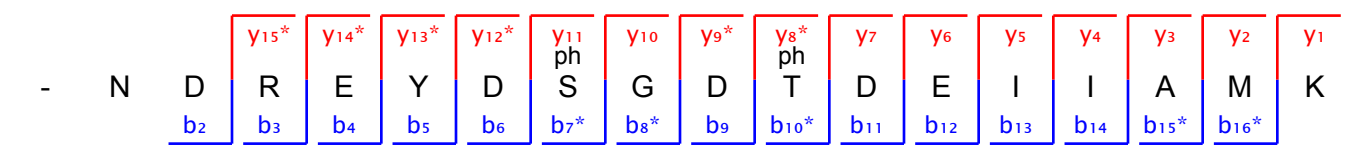

Raw file Scan Method Score m/z Gene names  
 20150814\_A375SR\_Phospho\_BR2\_03 16061 FTMS; HCD 95.2 612.3 PLEKHA4

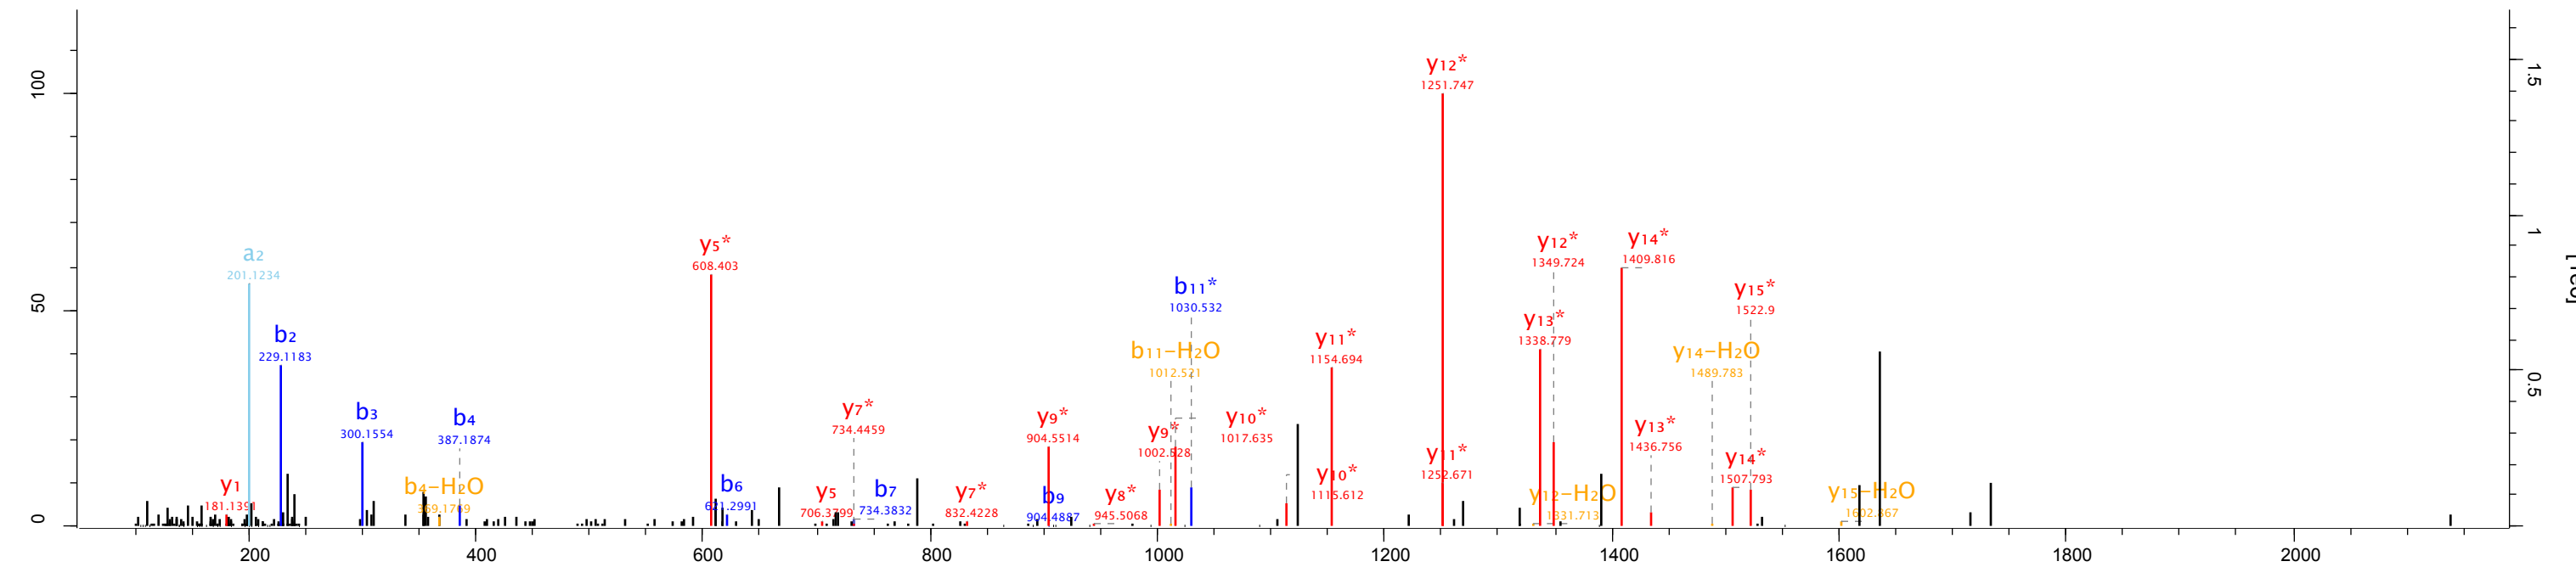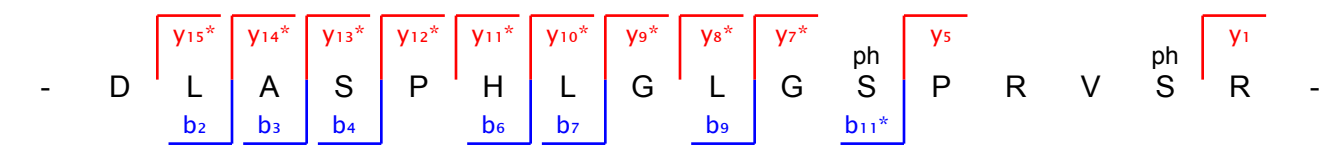

Raw file 20150814\_A375SR\_Phospho\_BR2\_03 Scan 16401 Method FTMS; HCD Score 75.89 m/z 631.25 Gene names DPH2

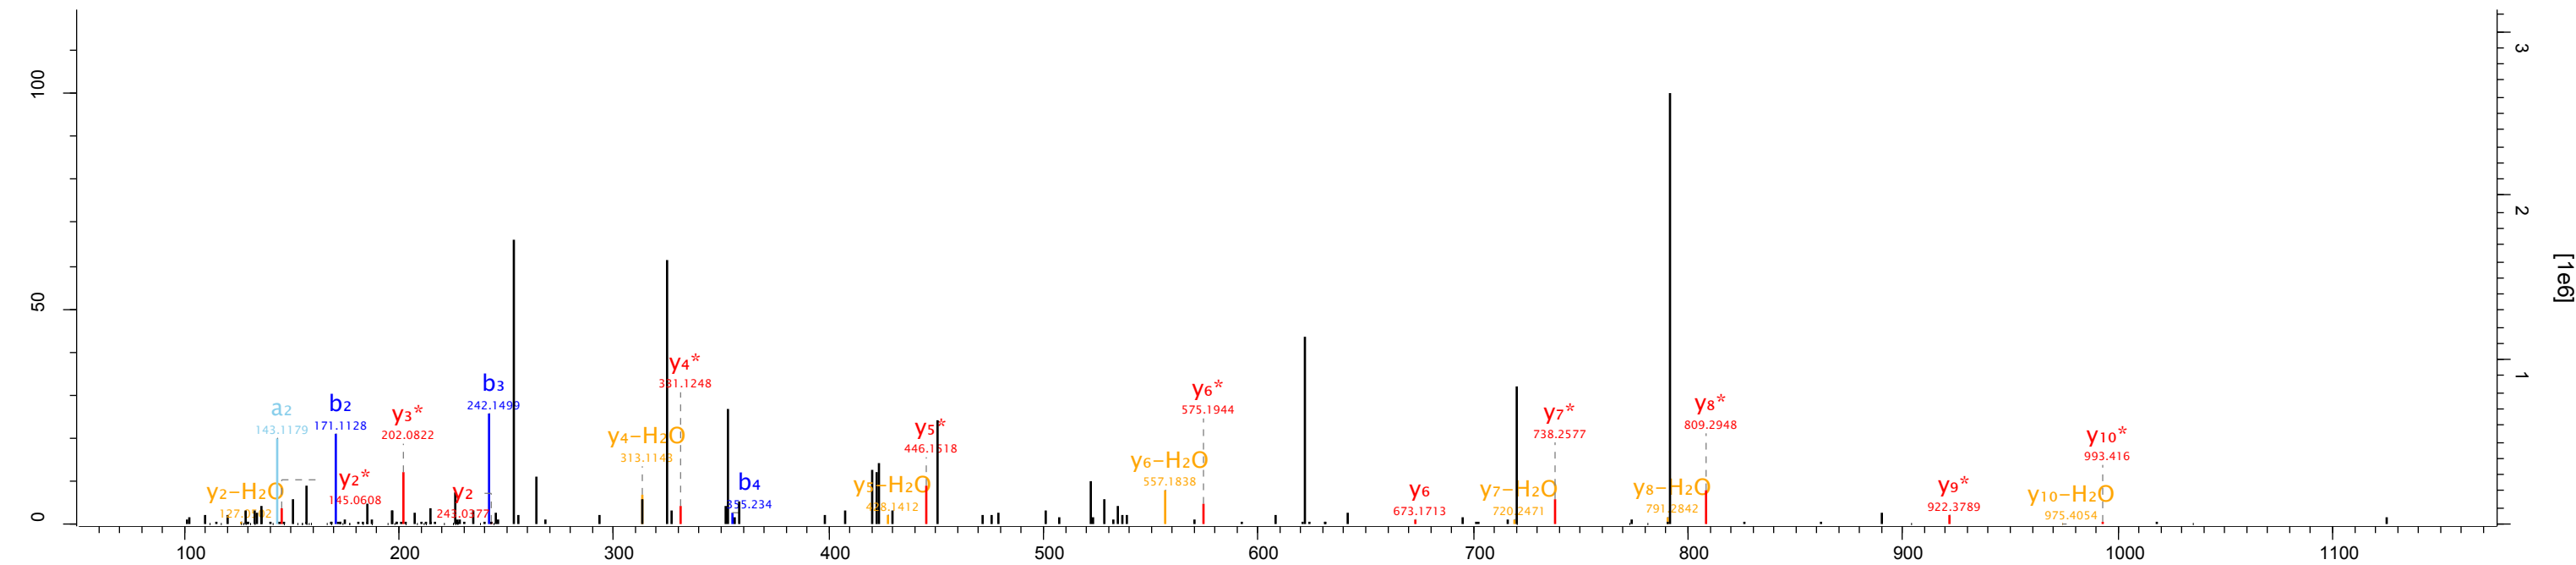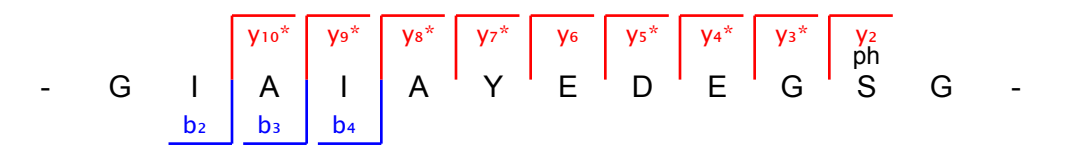

Raw file Scan Method Score m/z Gene names  
 20150814\_A375SR\_Phospho\_BR2\_03 16591 FTMS; HCD 142.55 732 C2orf44

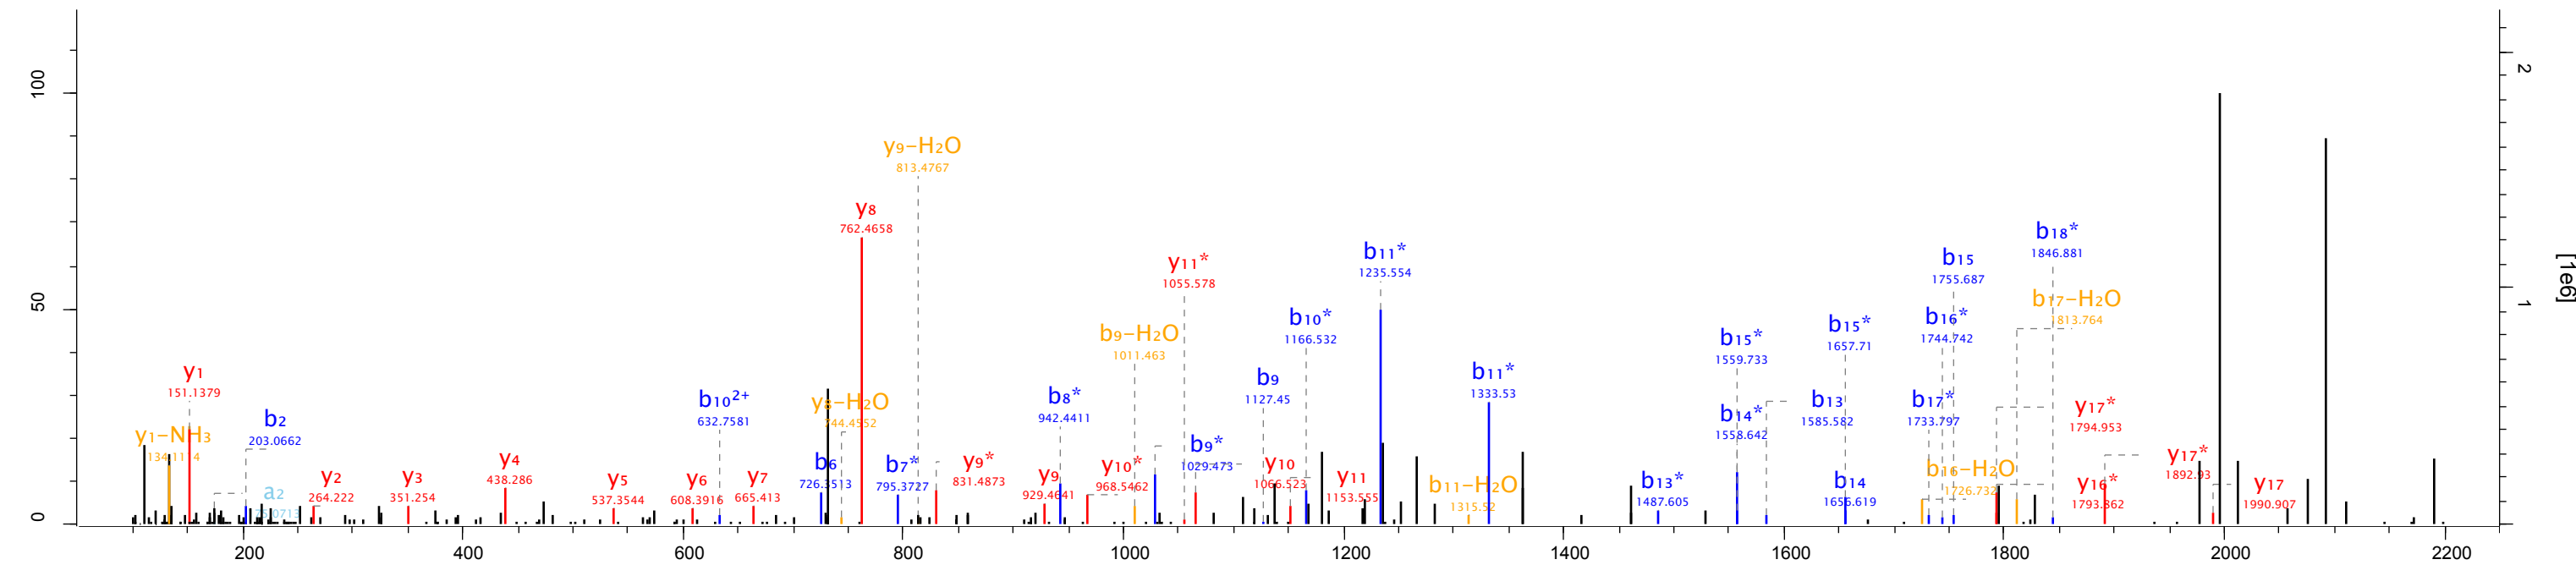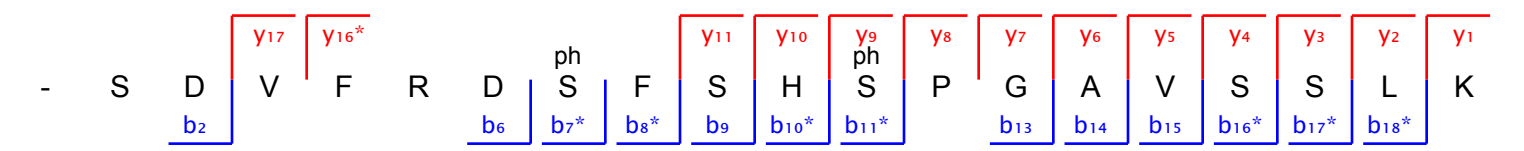



Raw file 20150814\_A375SR\_Phospho\_BR2\_03 Scan 16741 Method FTMS; HCD Score 111.81 m/z 825.04 Gene names SF3B1

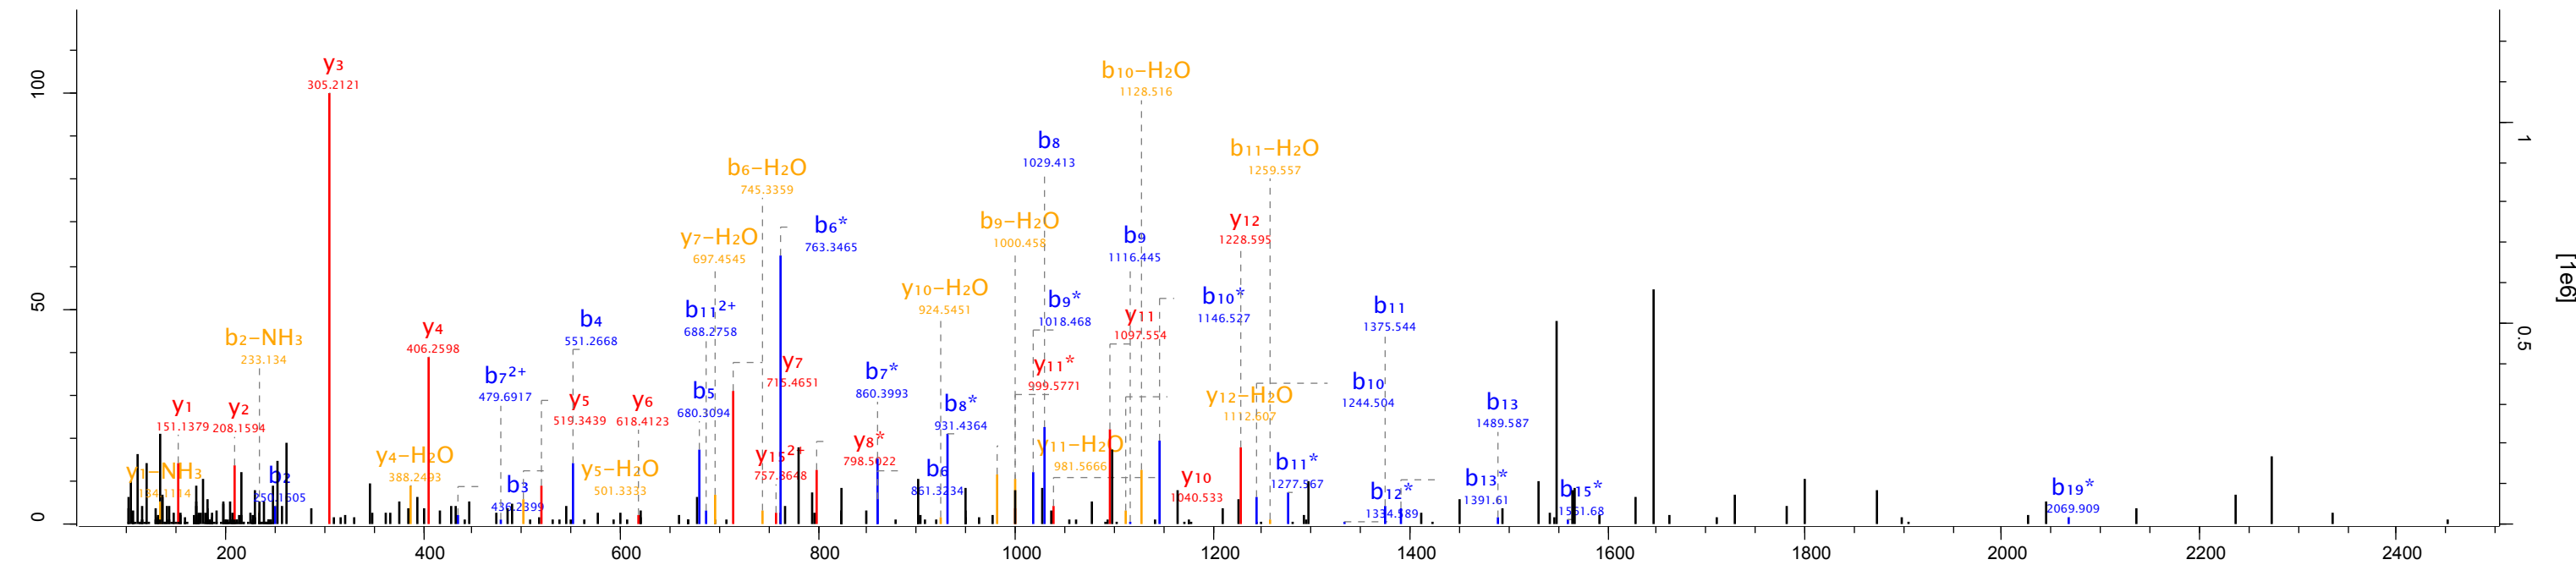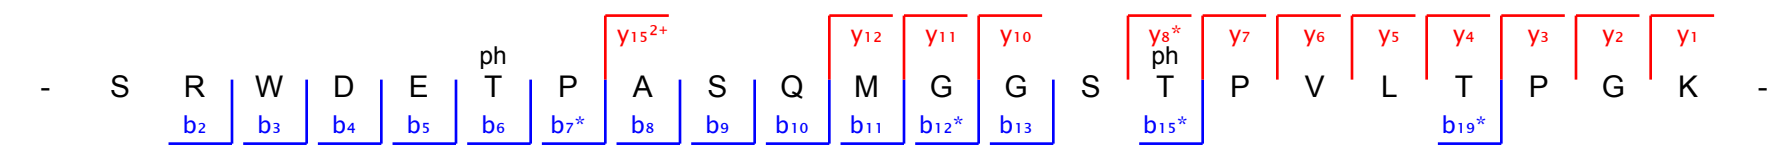

Raw file: 20150814\_A375SR\_Phospho\_BR2\_03  
 Scan: 16961 Method: FTMS; HCD Score: 163.84 m/z: 828.76 Gene names: SLC7A6OS

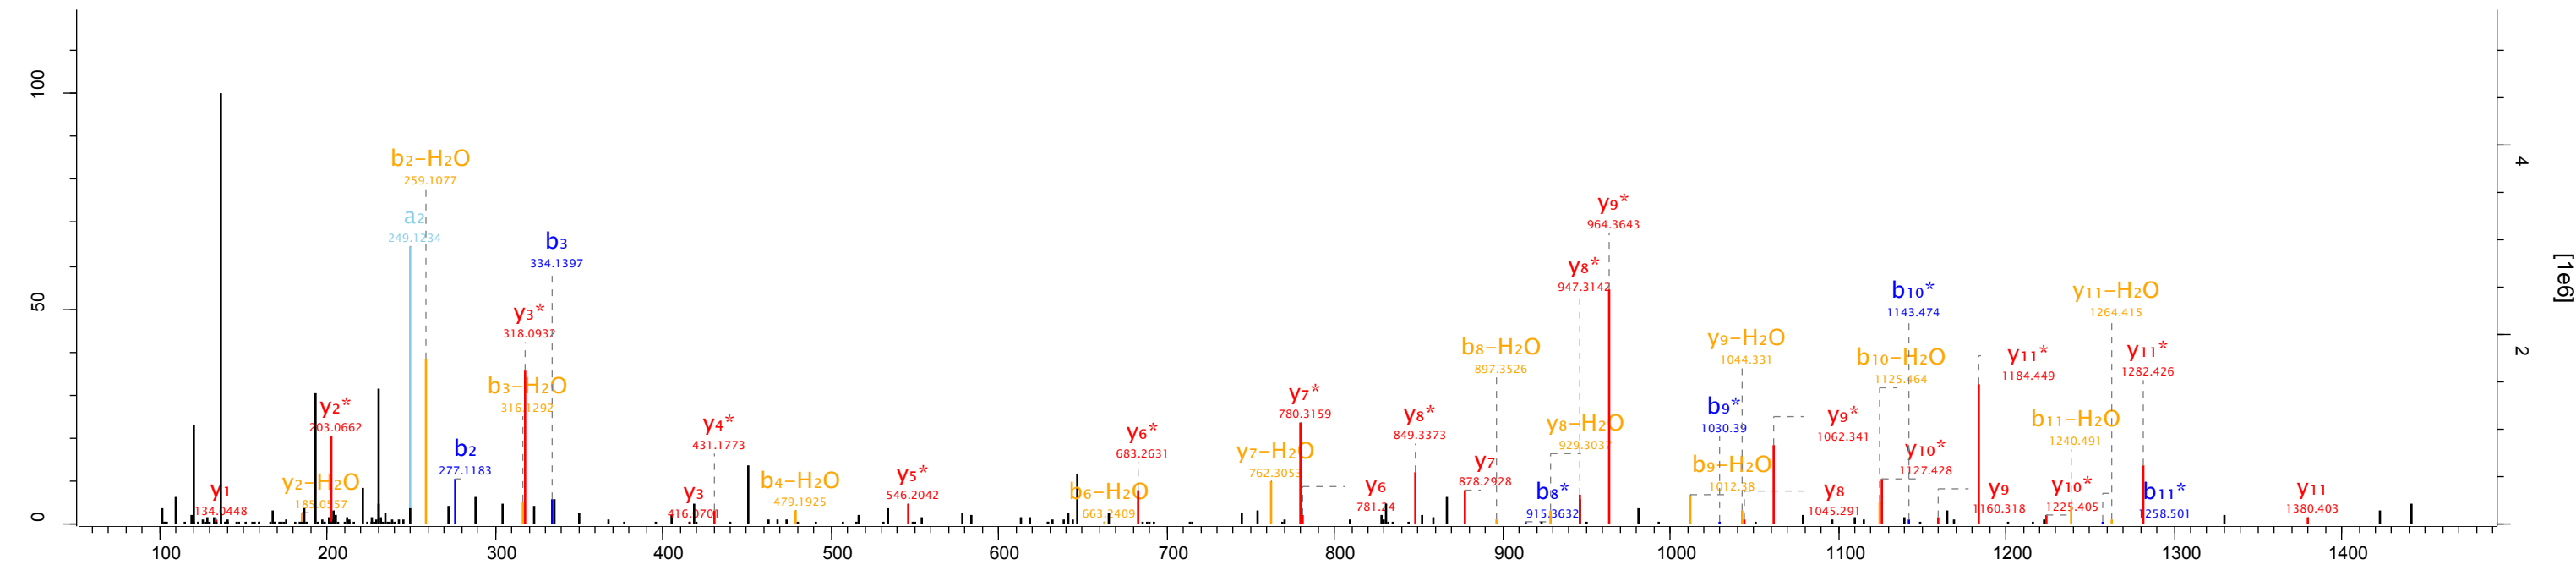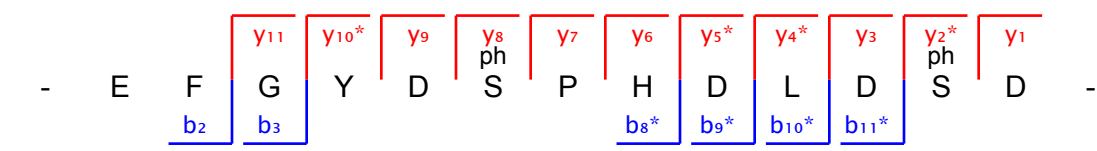

Raw file: 20150814\_A375SR\_Phospho\_BR2\_03  
 Scan: 17211 Method: FTMS; HCD Score: 192.6 m/z: 764.85 Gene names: EPS15

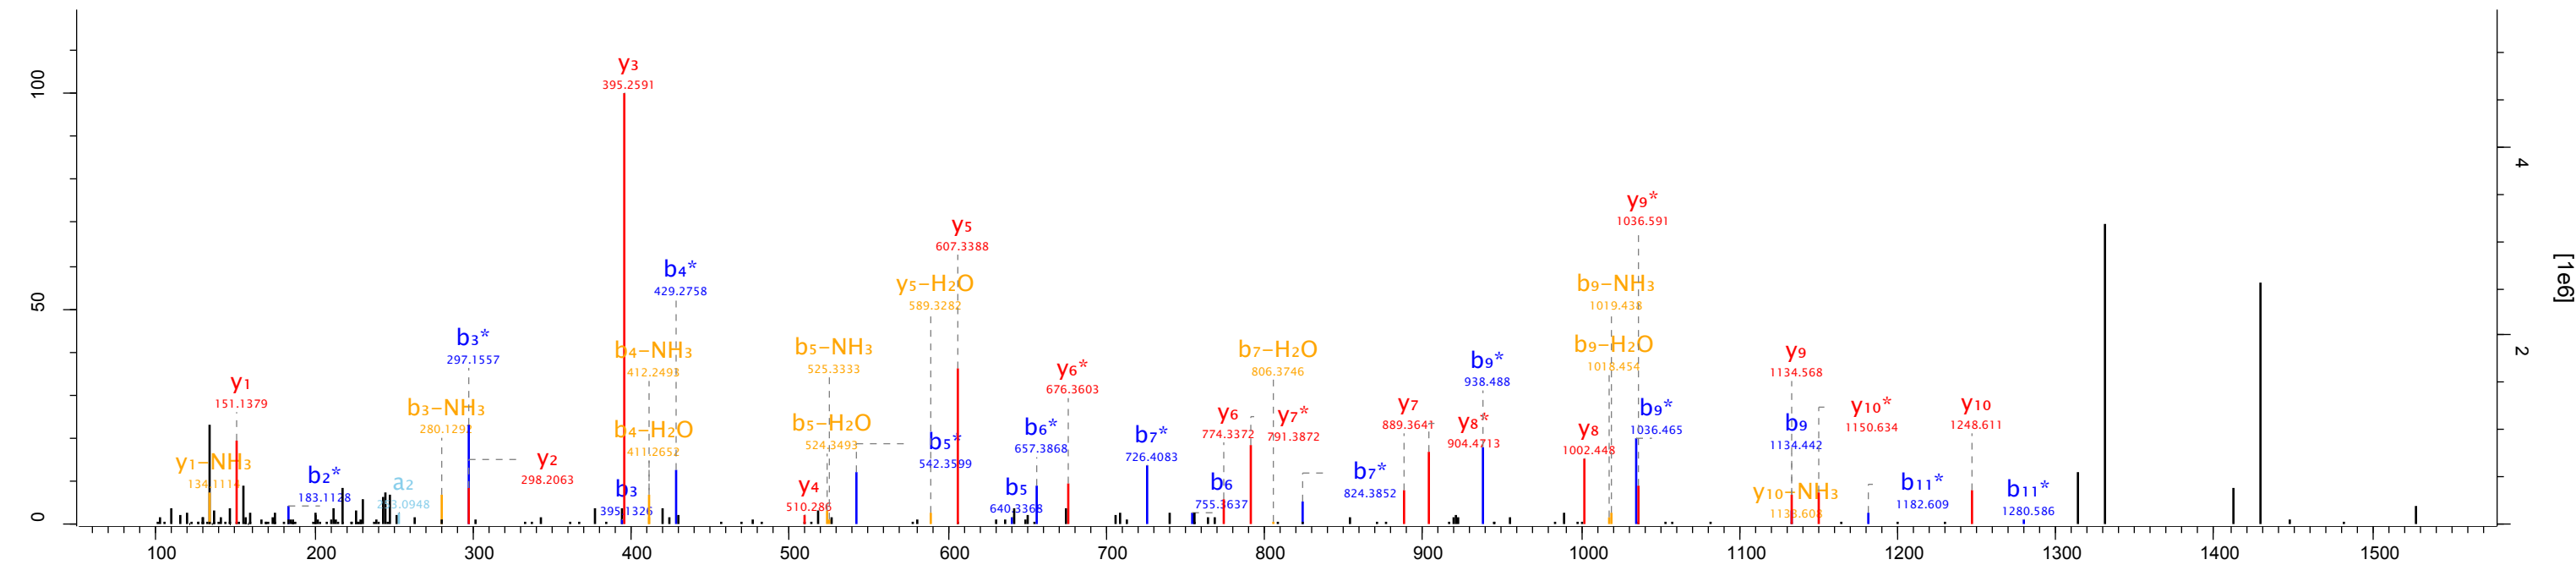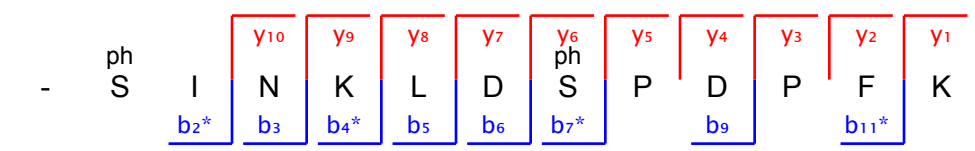

Raw file: 20150814\_A375SR\_Phospho\_BR2\_03  
 Scan: 17231 Method: FTMS; HCD Score: 87.3 m/z: 1053.78 Gene names: SFSWAP

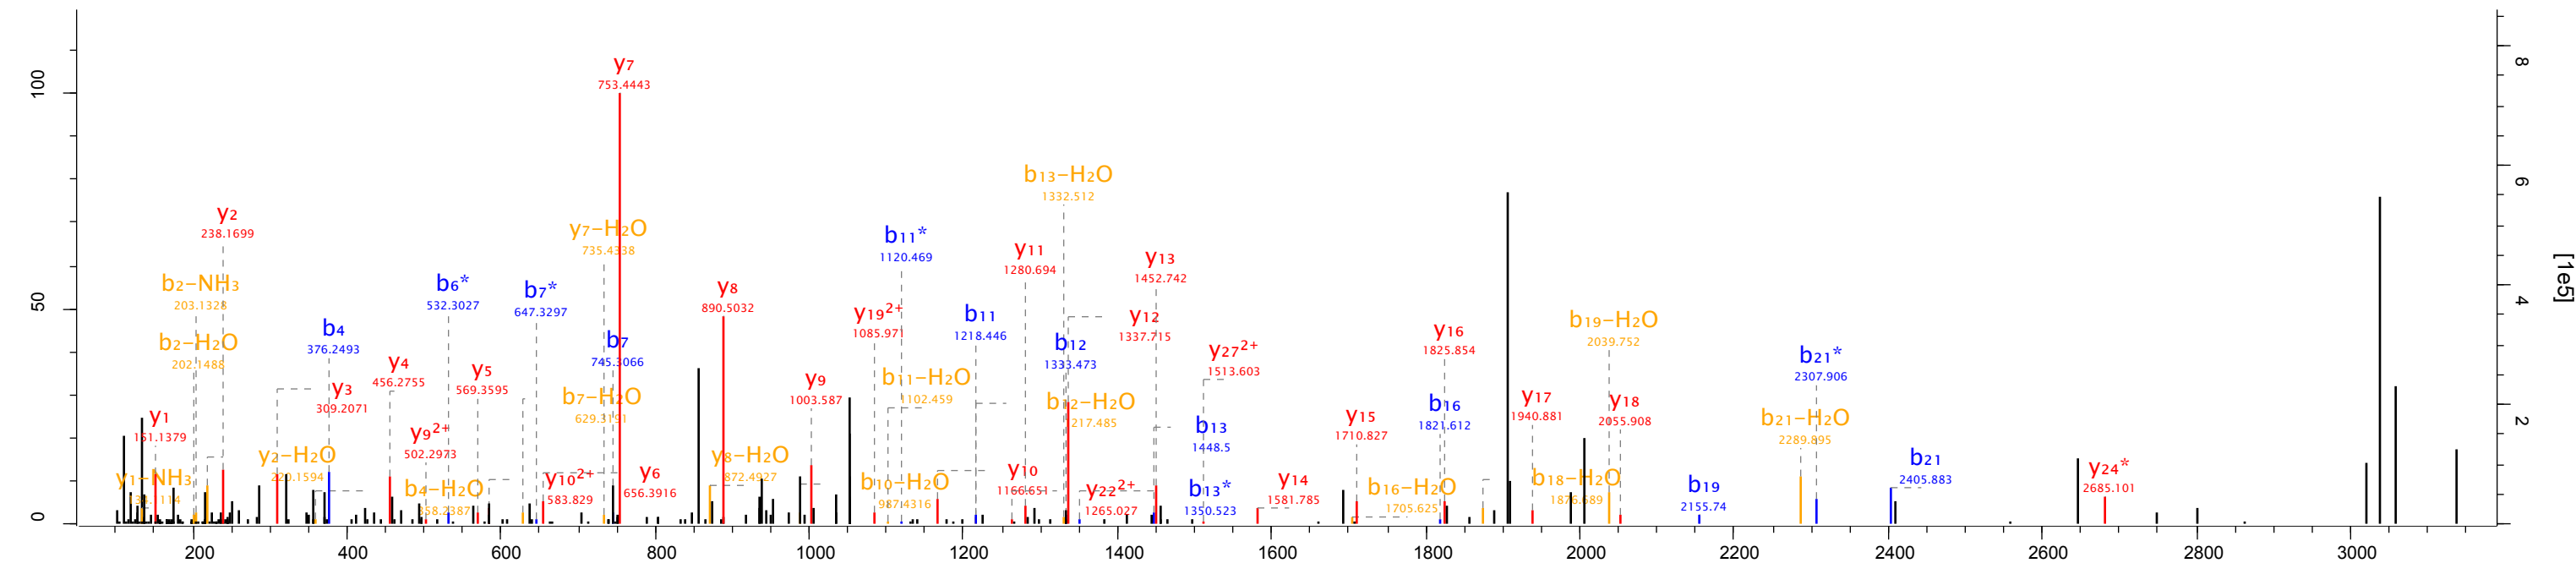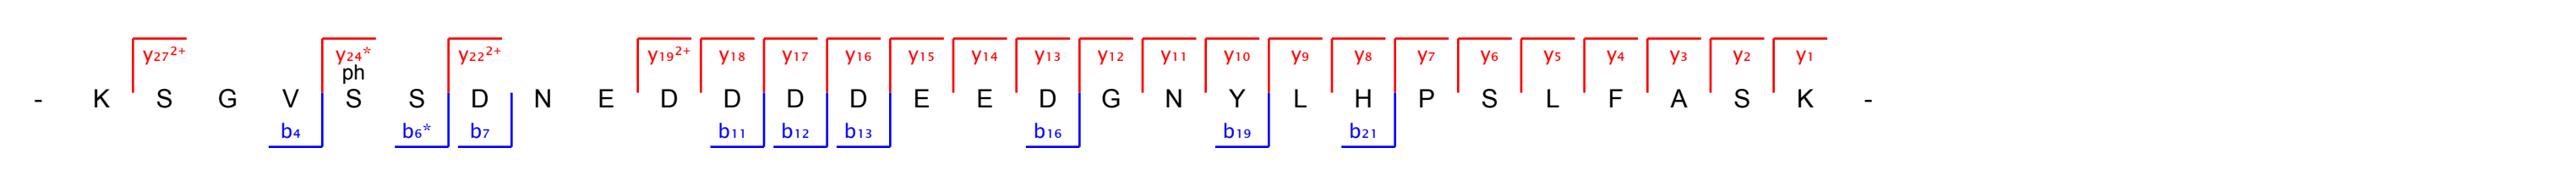

Raw file 20150814\_A375SR\_Phospho\_BR2\_03 Scan 17361 Method FTMS; HCD Score 221.6 m/z 868.88 Gene names FOXC2

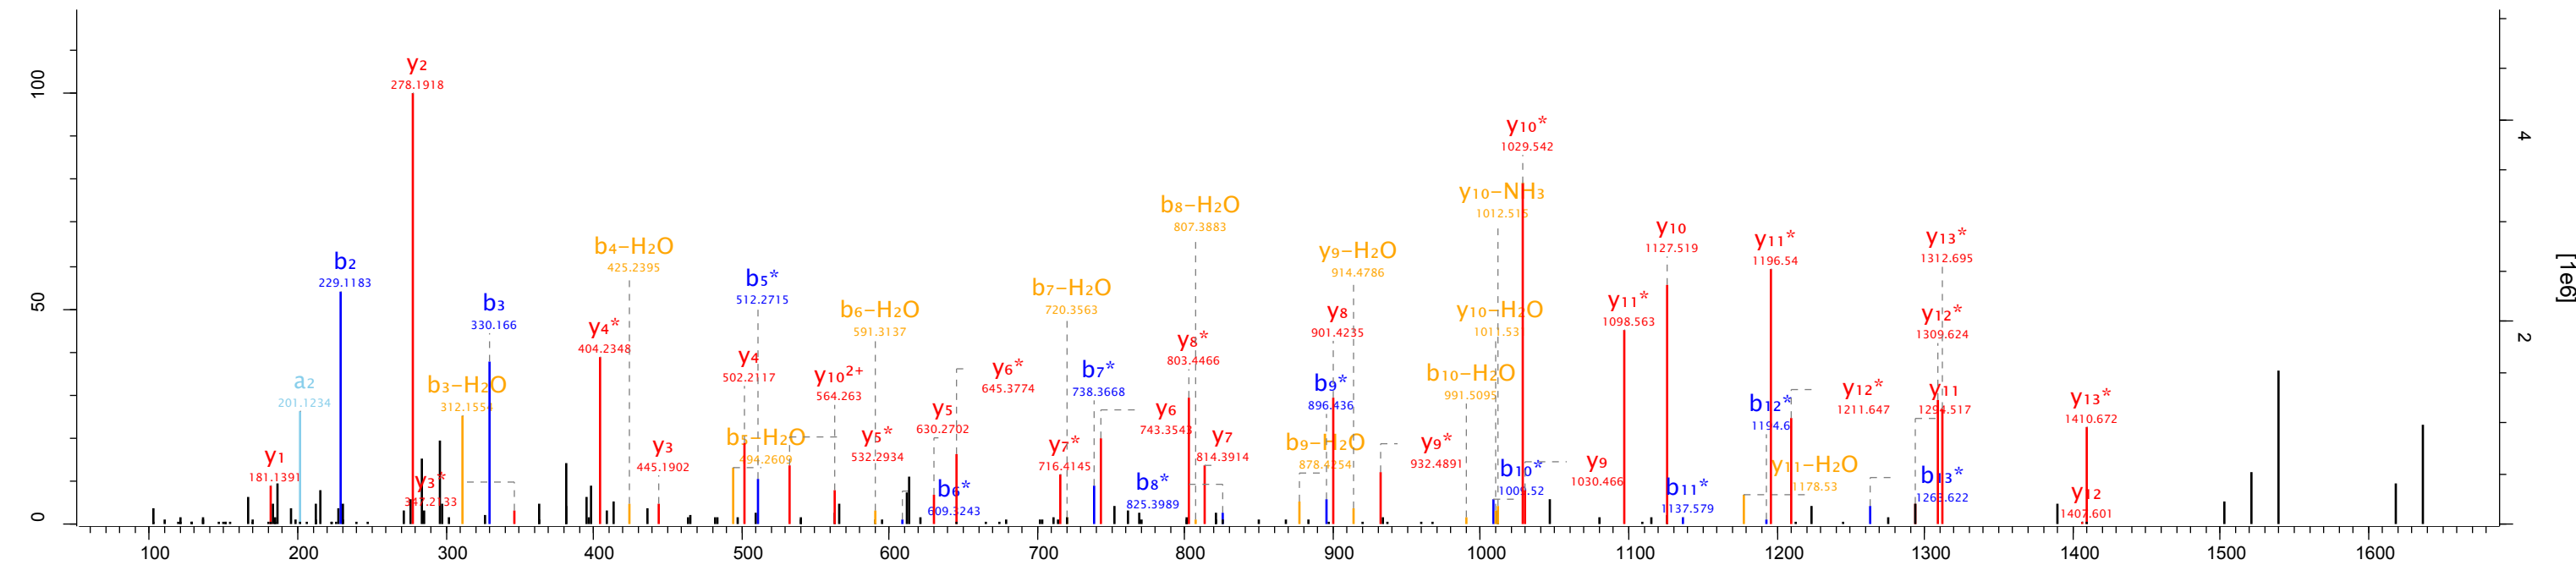

- V E T L S P E S A L Q G S P R -

Fragmentation mapping (b and y ions):

- Red boxes (y ions):** y13\* (T), y12 (L), y11 ph (S), y10 (P), y9 (E), y8 (S), y7 (A), y6 (L), y5 (Q), y4 (G), y3 ph (S), y2 (P), y1 (R).
- Blue boxes (b ions):** b2 (E), b3 (T), b5\* (S), b6\* (P), b7\* (E), b8\* (S), b9\* (A), b10\* (L), b11\* (Q), b12\* (G), b13\* (S).

Raw file 20150814\_A375SR\_Phospho\_BR2\_03 Scan 17721 Method FTMS; HCD Score 138.84 m/z 821.36

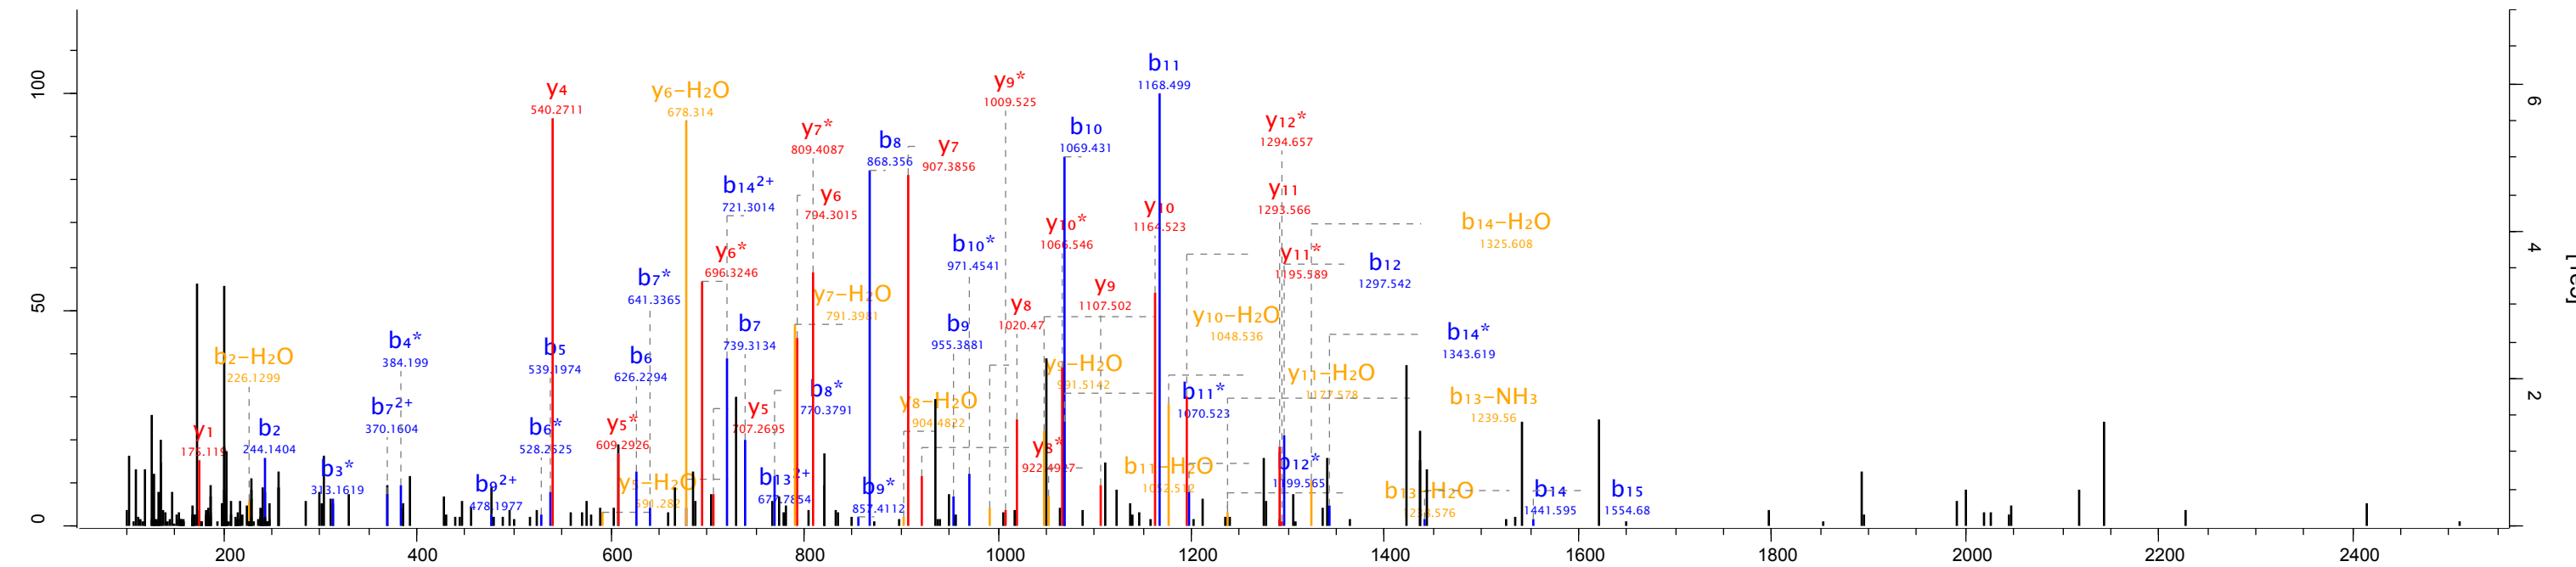

- R S S ph A G S L E S N V E G S I I S S ph S P H M R -

b<sub>2</sub> b<sub>3</sub>\* b<sub>4</sub>\* b<sub>5</sub> b<sub>6</sub> b<sub>7</sub> b<sub>8</sub> b<sub>9</sub> b<sub>10</sub> b<sub>11</sub> b<sub>12</sub> b<sub>13</sub><sup>2+</sup> b<sub>14</sub> b<sub>15</sub> y<sub>12</sub>\* y<sub>11</sub> y<sub>10</sub> y<sub>9</sub> y<sub>8</sub> y<sub>7</sub> y<sub>6</sub> y<sub>5</sub> ph y<sub>4</sub> y<sub>1</sub>

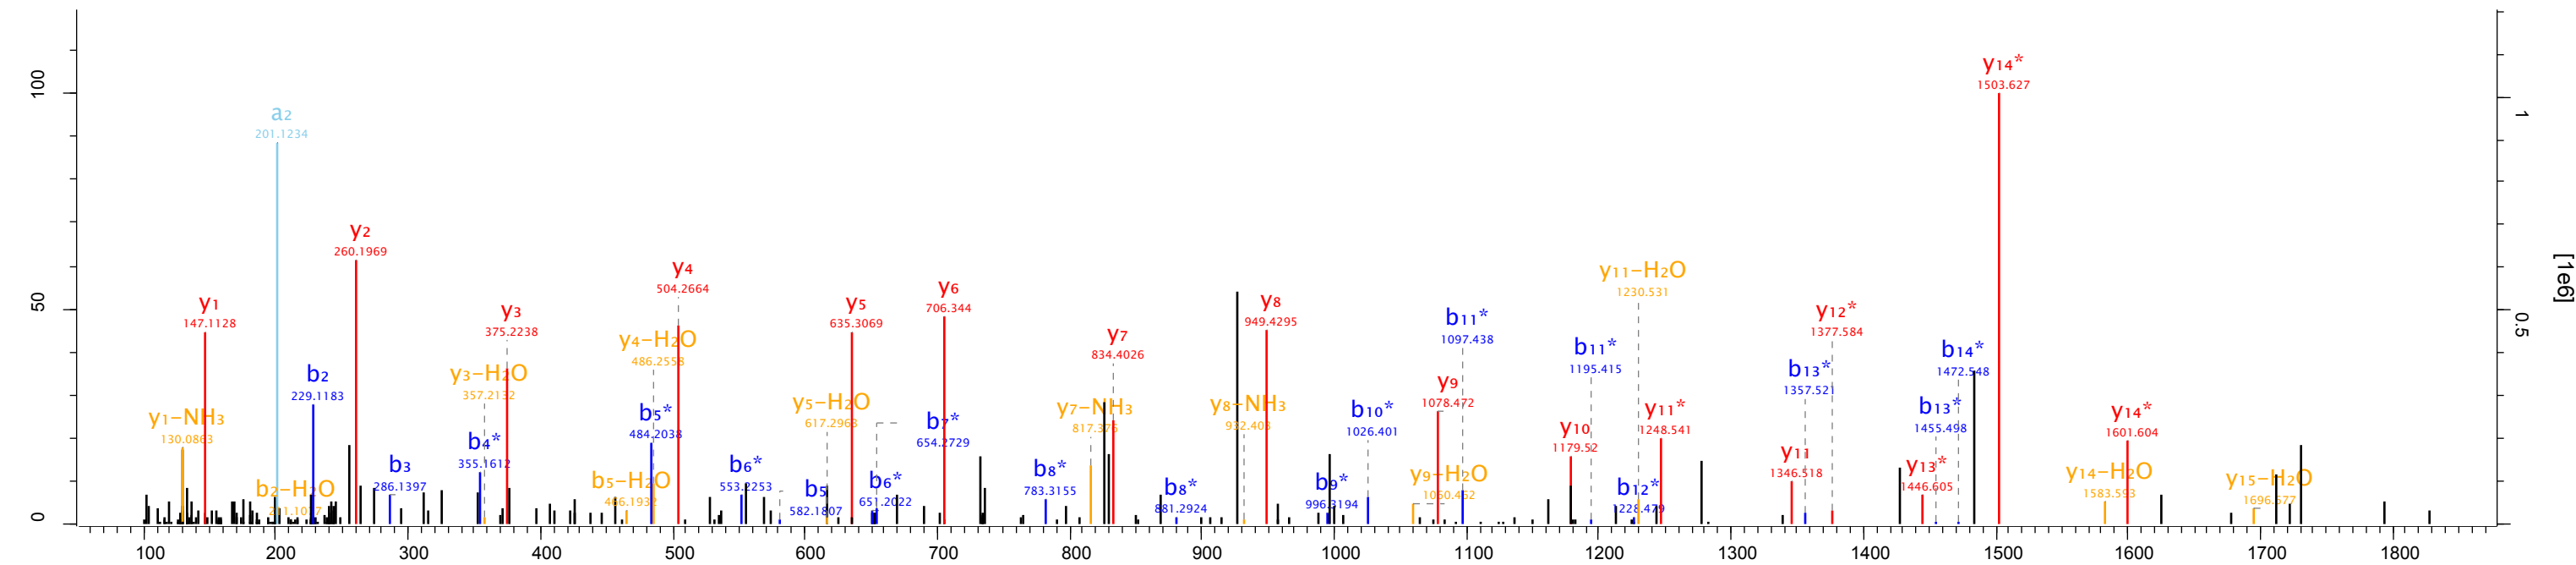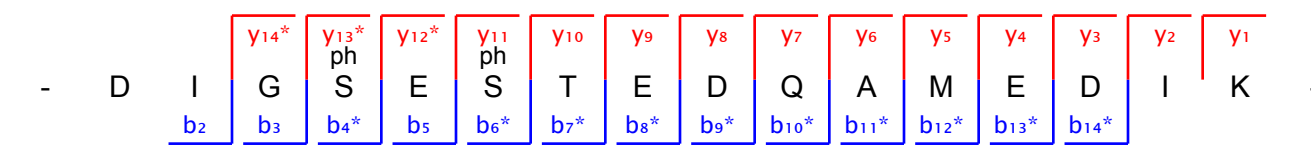

Raw file

20150814\_A375SR\_Phospho\_BR2\_03

Scan Method Score m/z Gene names  
1831 FTMS; HCD 57.17 532.73 MAPKBP1

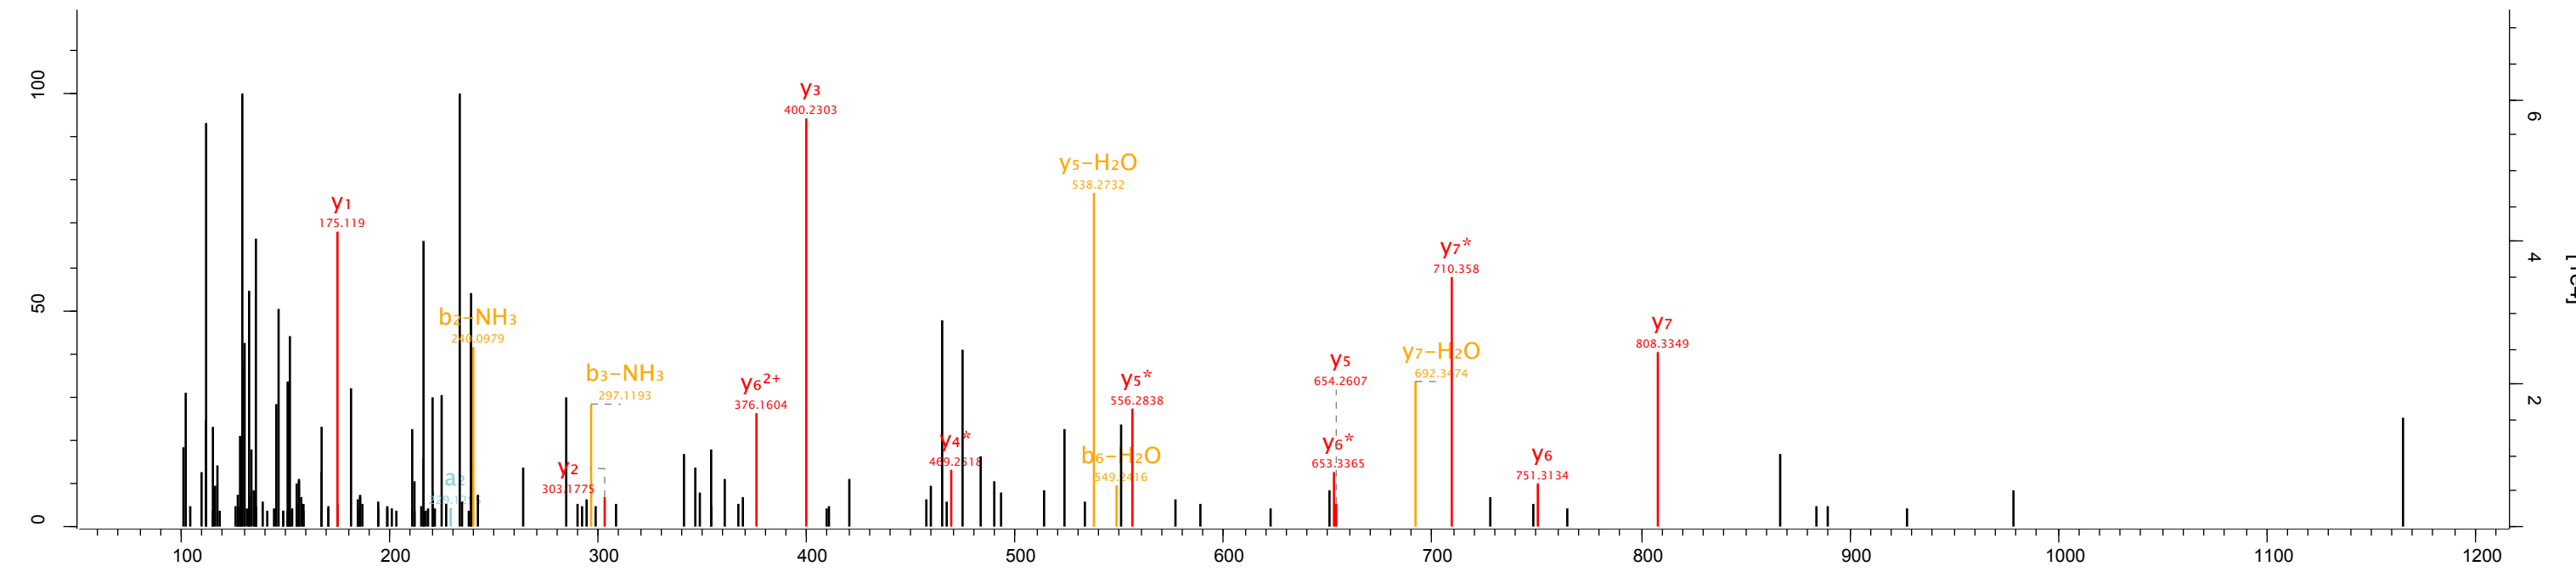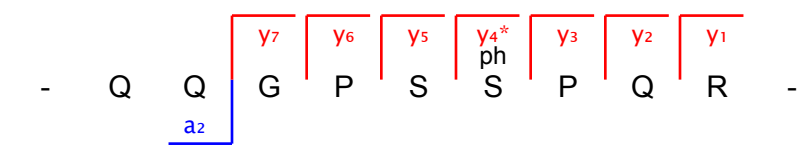



Raw file 20150814\_A375SR\_Phospho\_BR2\_03 Scan 18461 Method FTMS; HCD Score 68.88 m/z 891.32 Gene names OSTF1

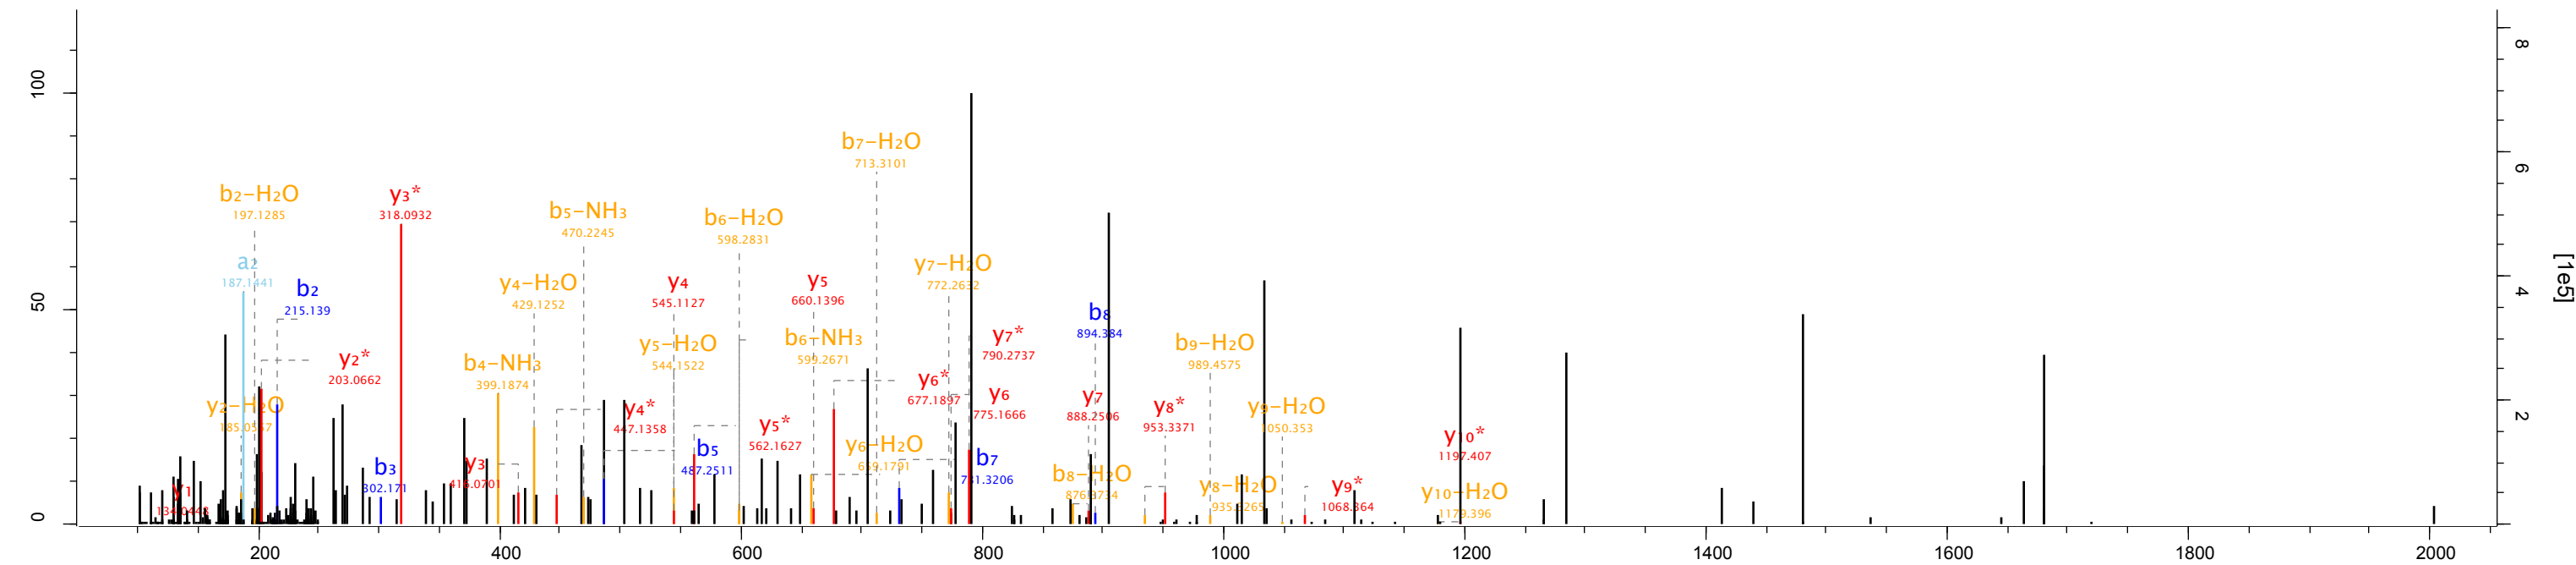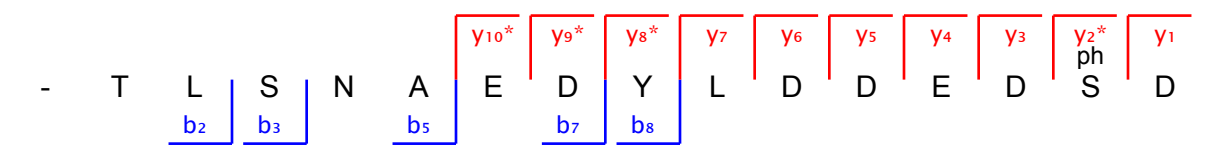

Raw file 20150814\_A375SR\_Phospho\_BR2\_03 Scan 18871 Method FTMS; HCD Score 122.08 m/z 728.32 Gene names TOMM20

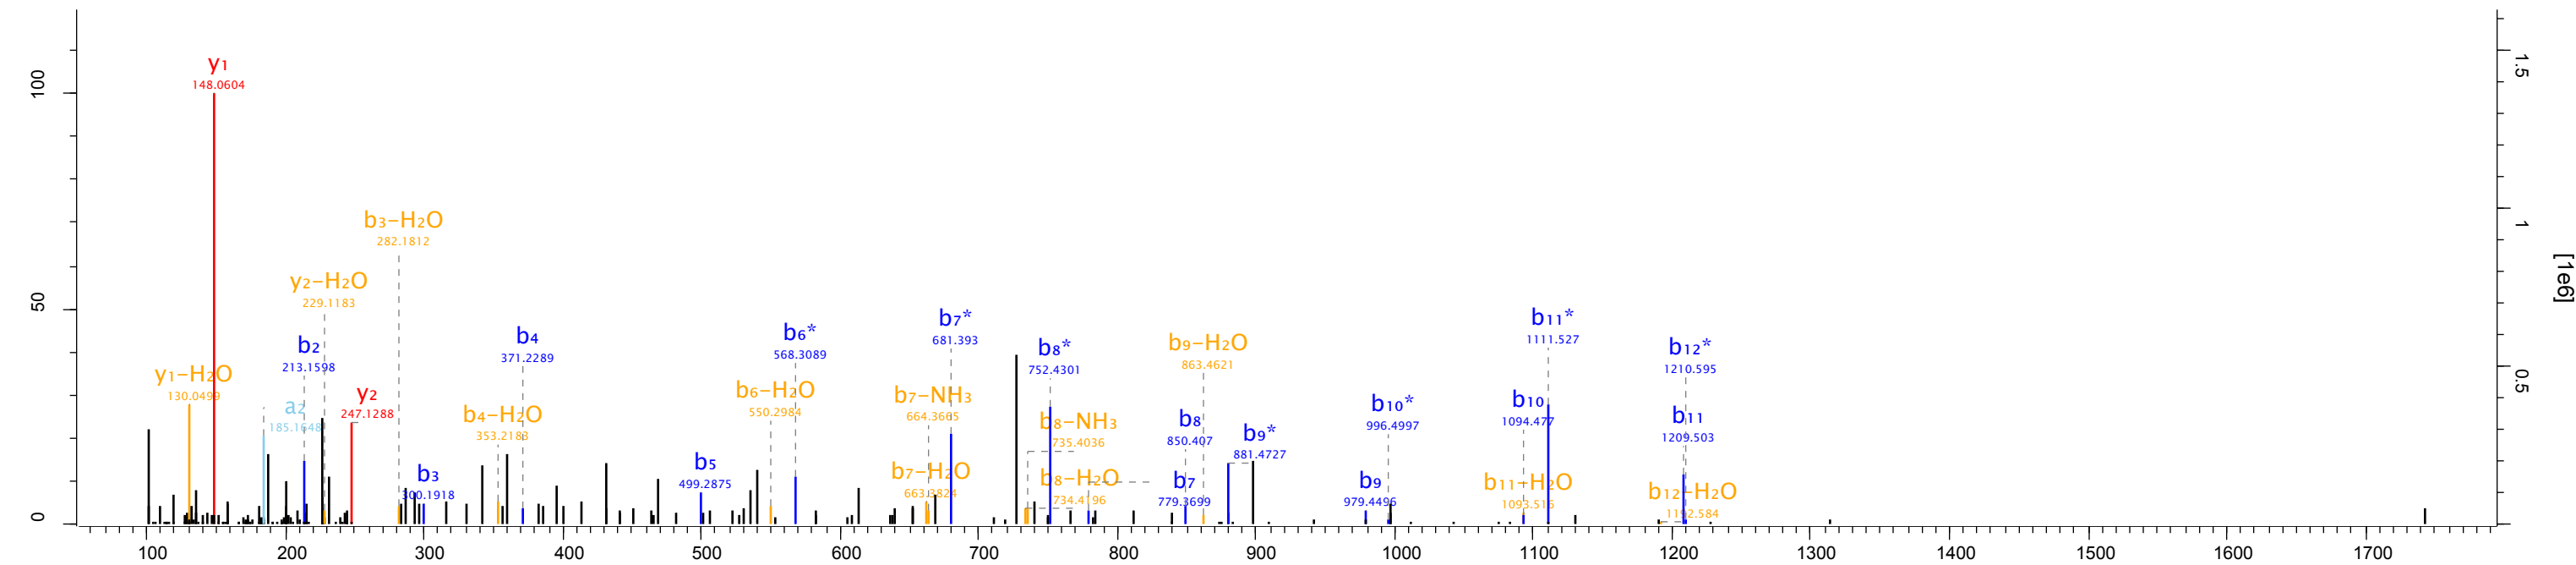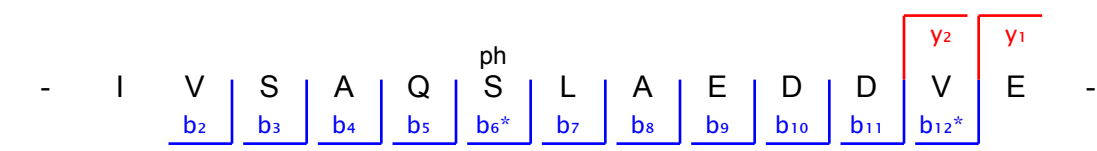

20150814\_A375SR\_Phospho\_BR2\_03 18941 FTMS; HCD 94.99 893.4 RANBP9

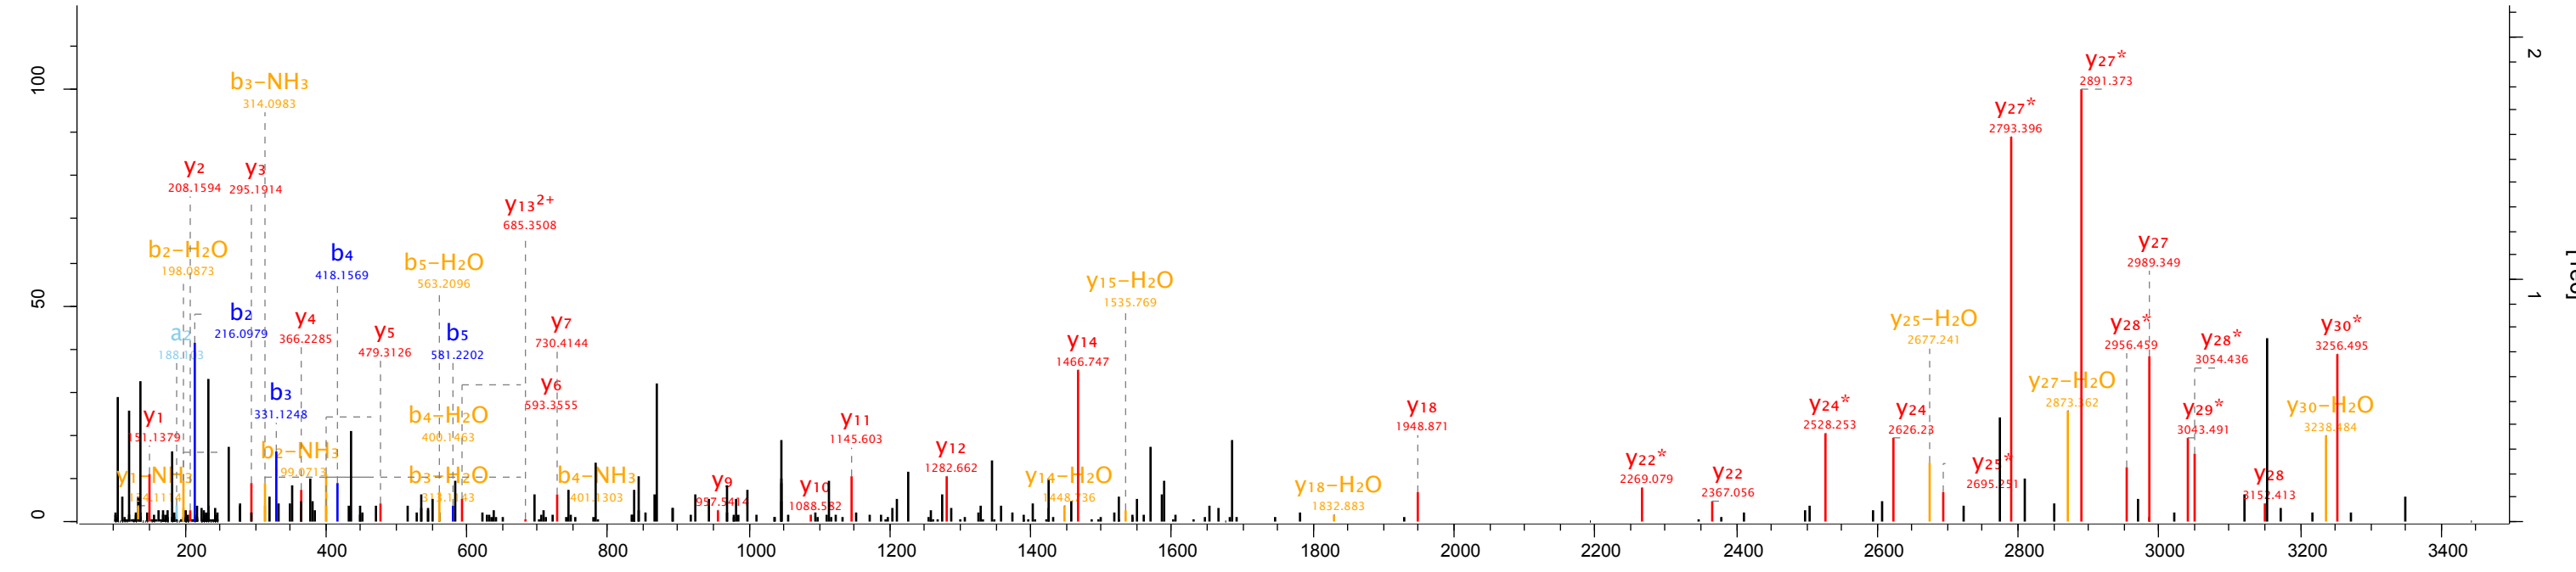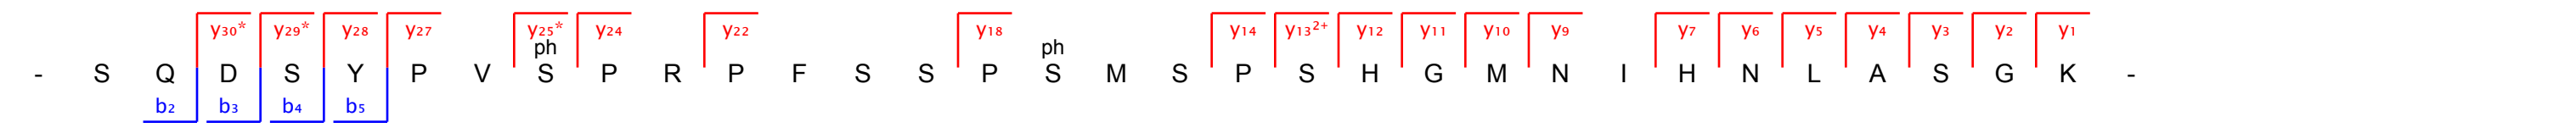

Raw file: 20150814\_A375SR\_Phospho\_BR2\_03  
 Scan: 18961 Method: FTMS; HCD Score: 89.56 m/z: 863.33 Gene names: EGFR

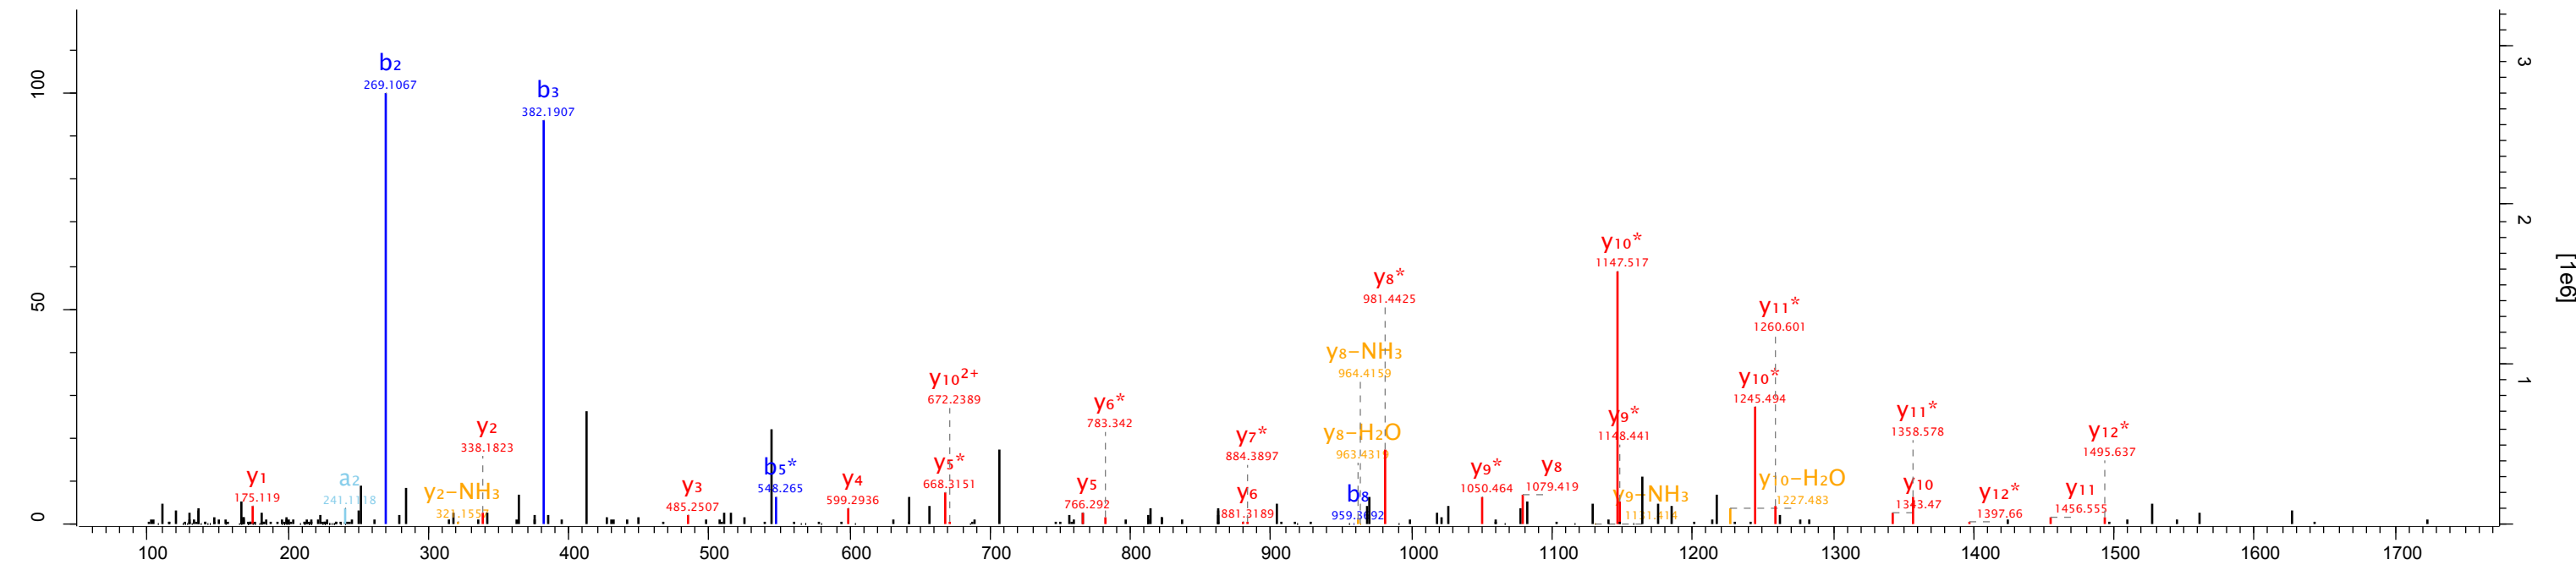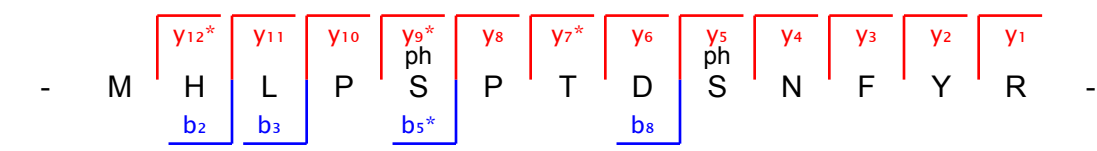

Raw file 20150814\_A375SR\_Phospho\_BR2\_03 Scan 19141 Method FTMS; HCD Score 114.26 m/z 996.82 Gene names TAF9

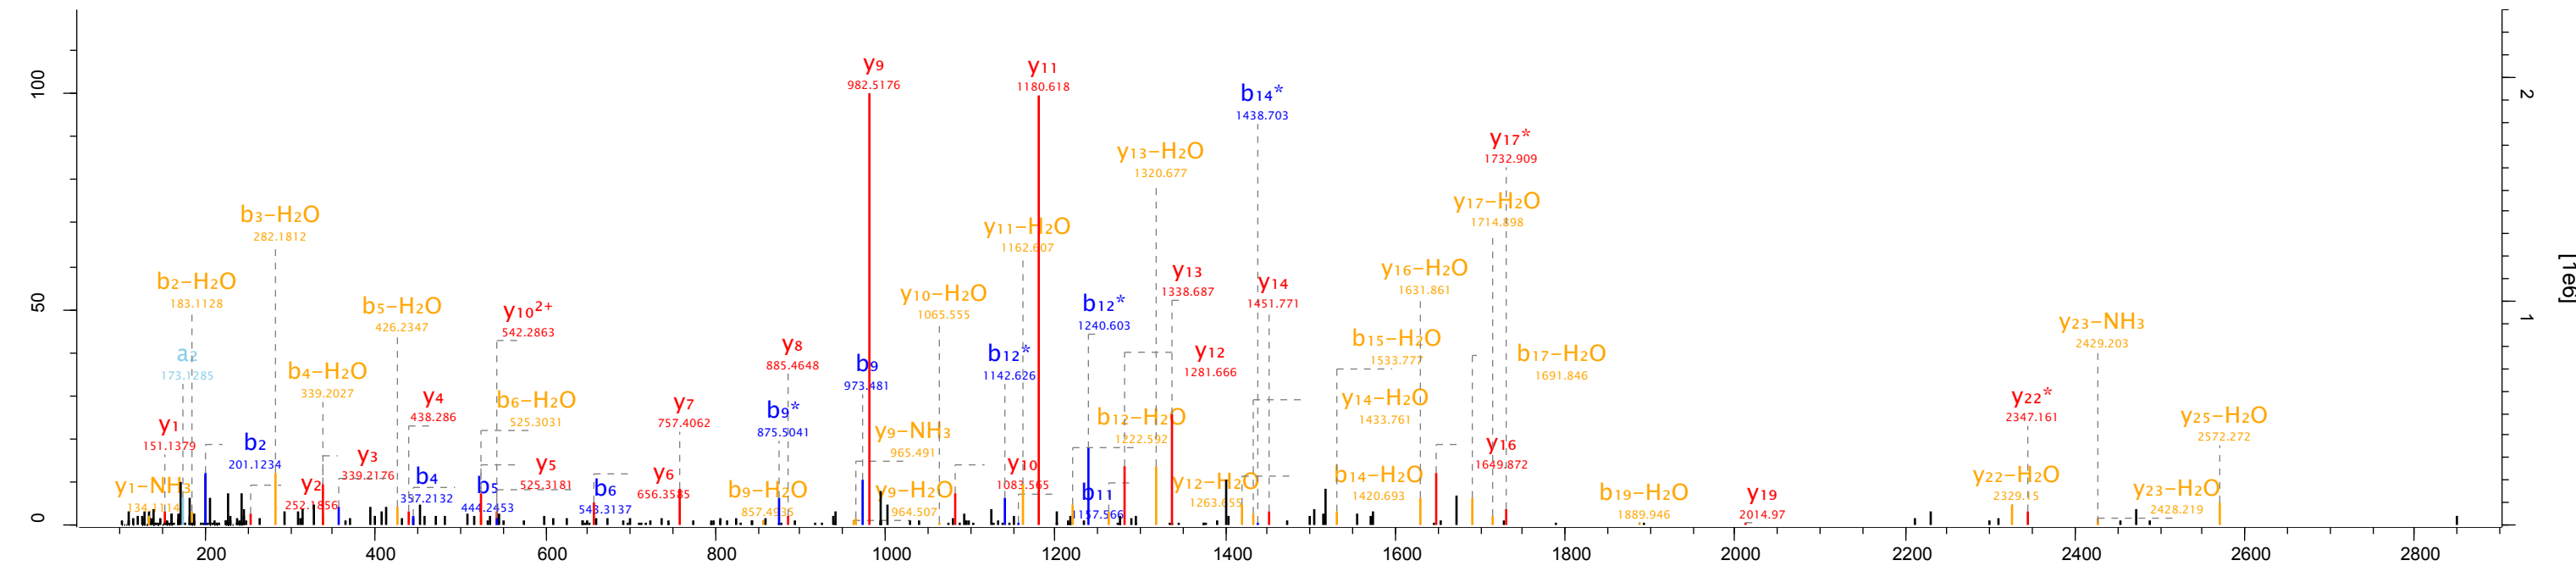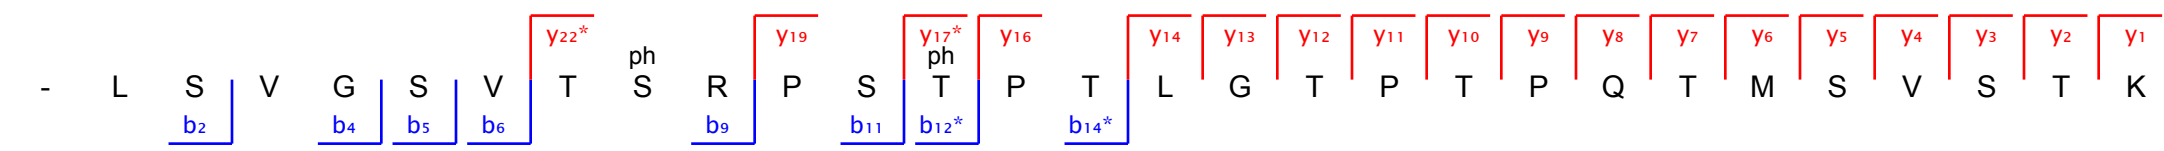

Raw file 20150814\_A375SR\_Phospho\_BR2\_03 Scan 19221 Method FTMS; HCD Score 152 m/z 865.87 Gene names SUGP1

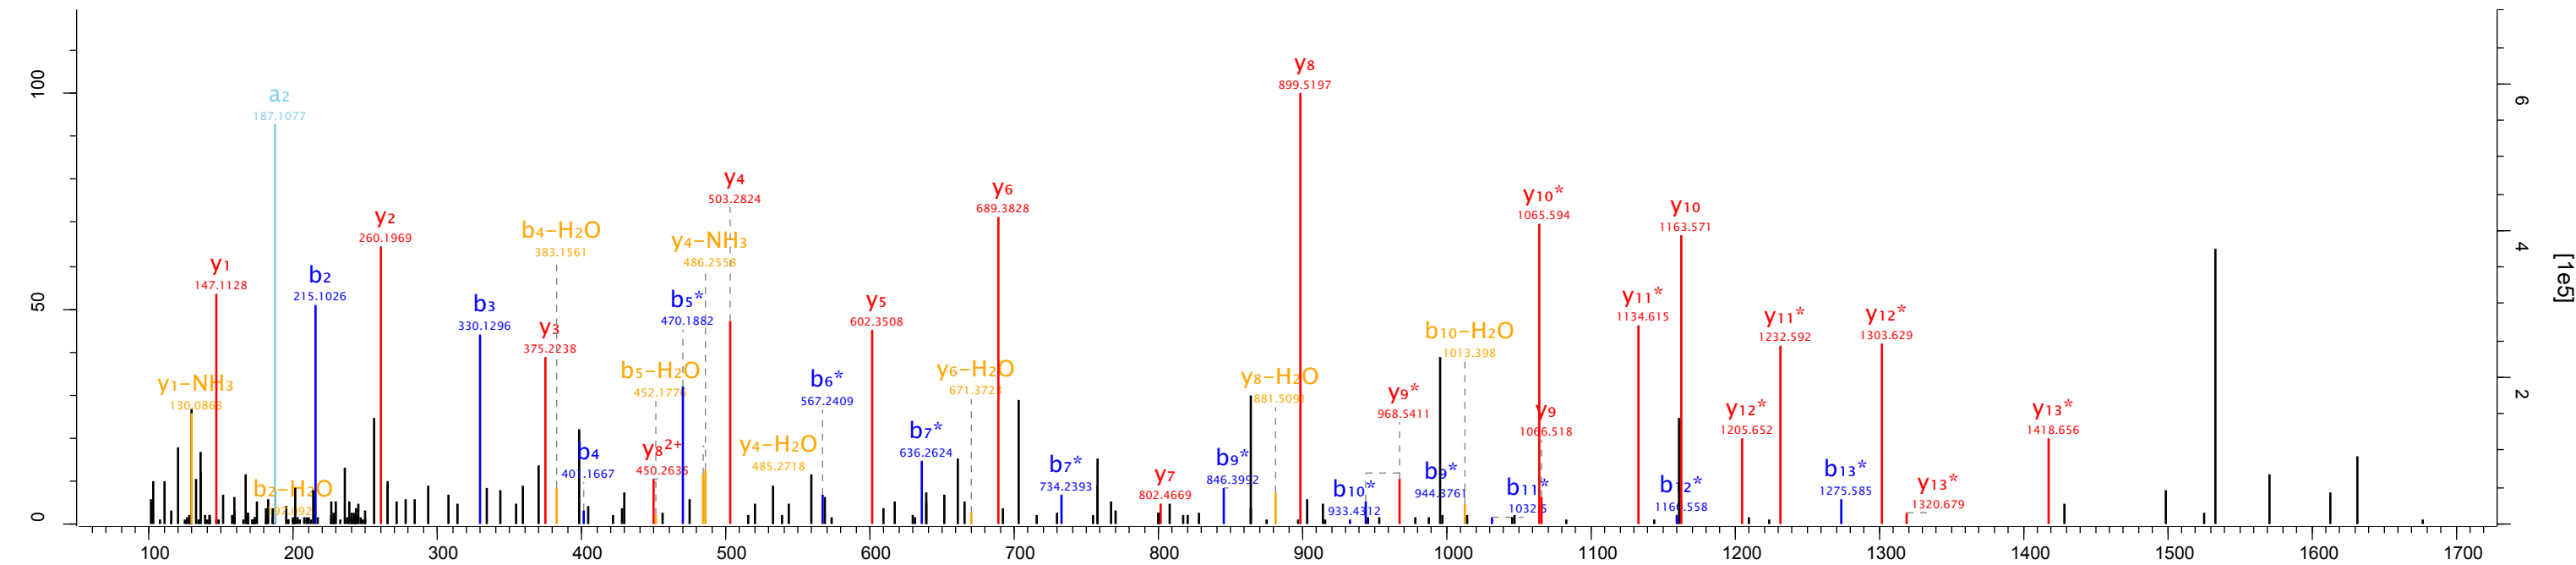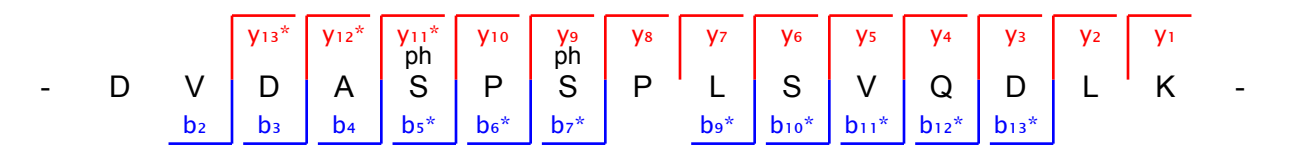

Raw file 20150814\_A375SR\_Phospho\_BR2\_03 Scan 19421 Method FTMS; HCD Score 49.12 m/z 916.39 Gene names NUP133

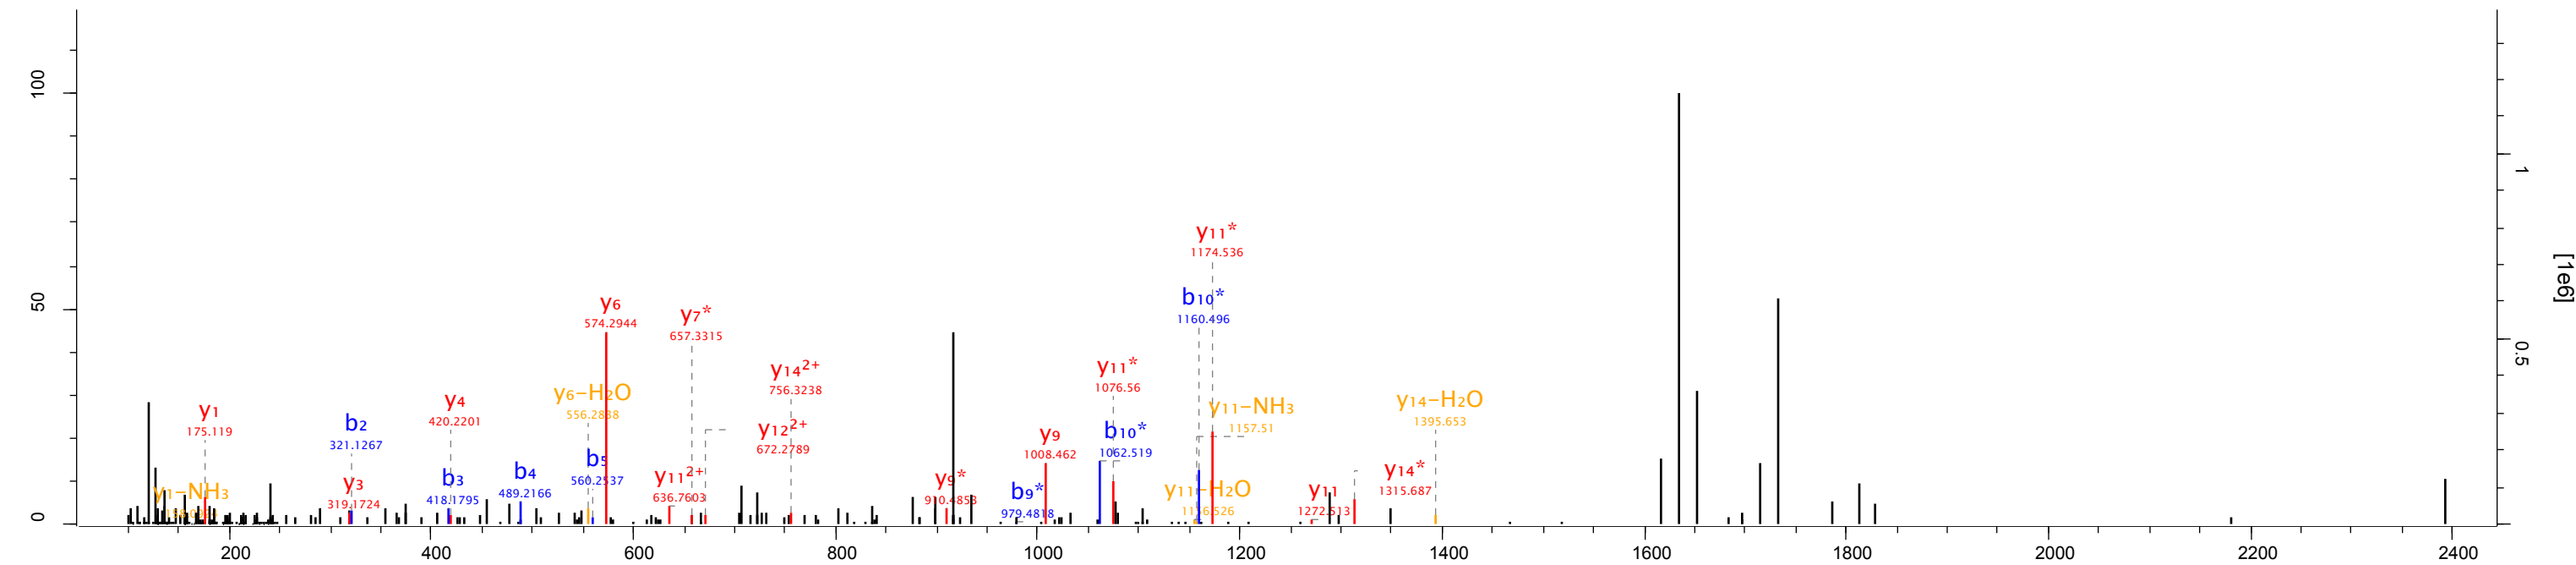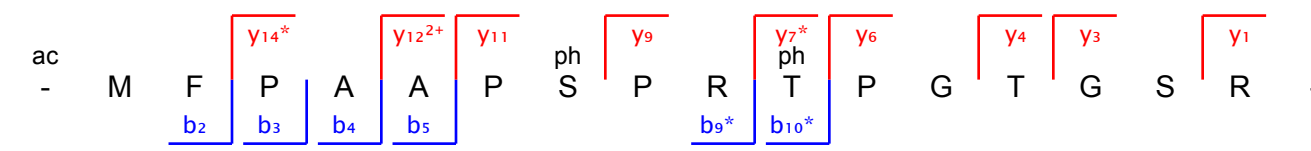

Raw file: 20150814\_A375SR\_Phospho\_BR2\_03  
 Scan: 19601 Method: FTMS; HCD Score: 84.95 m/z: 690 Gene names: PEAK1

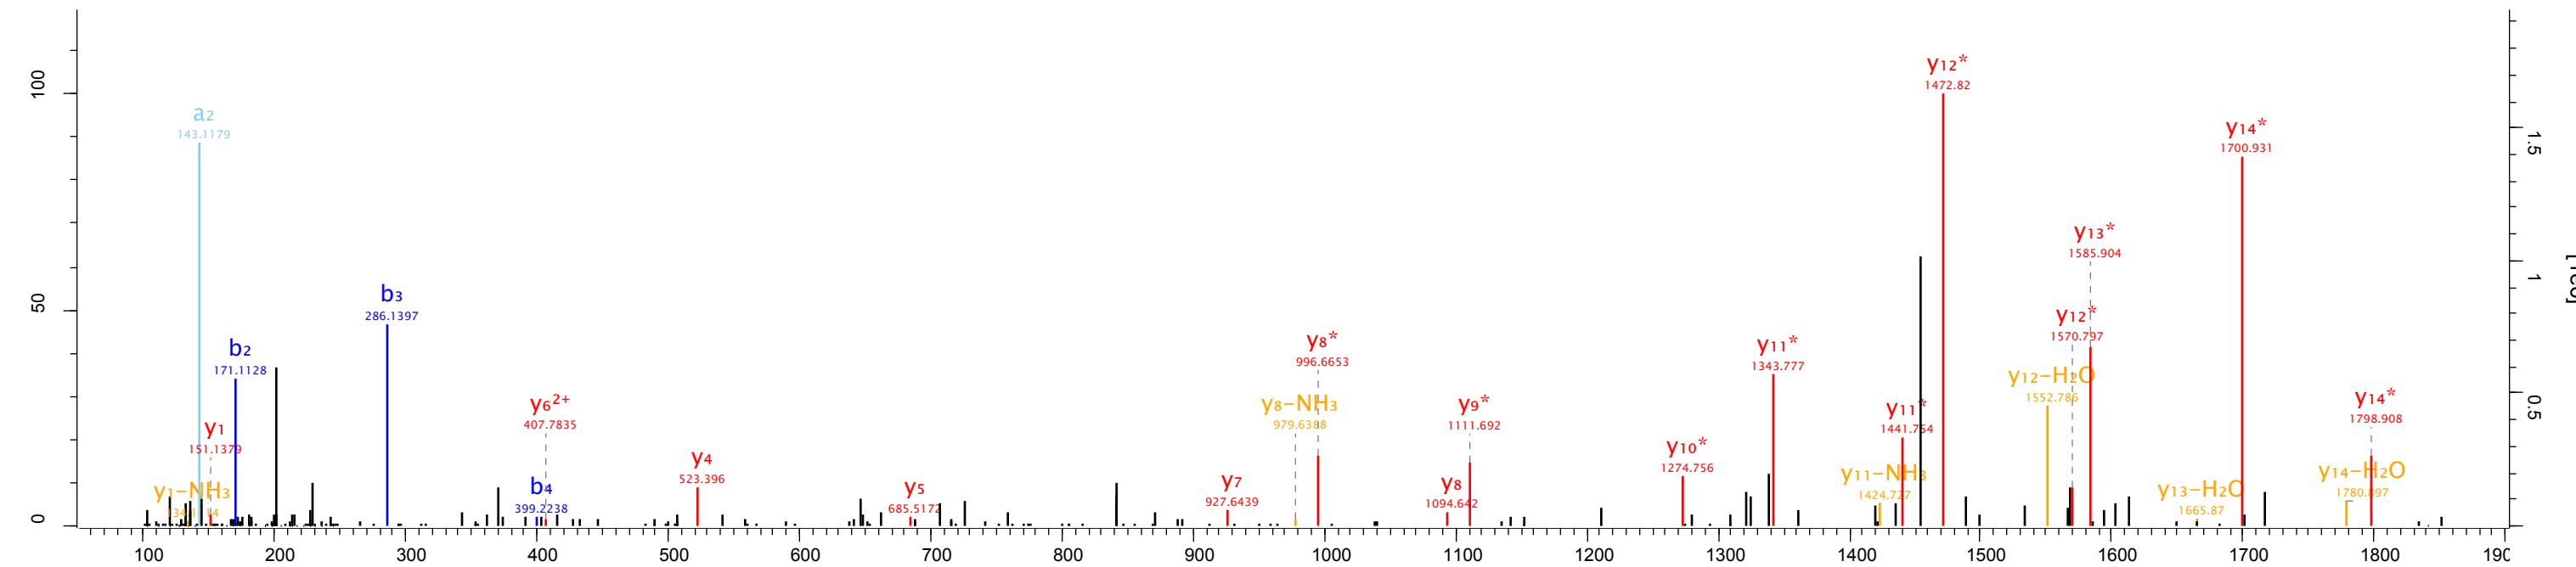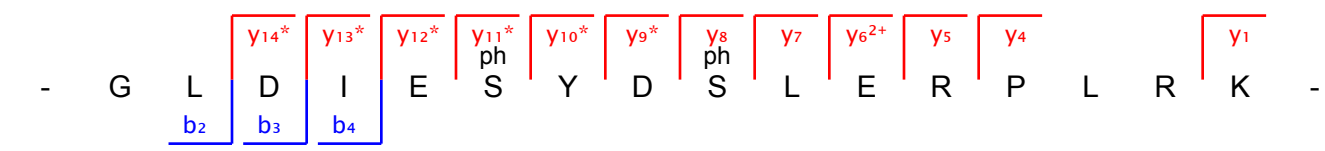



Raw file Scan Method Score m/z Gene names  
 20150814\_A375SR\_Phospho\_BR2\_03 19621 FTMS; HCD 145.2 1349.96 EIF4EBP1

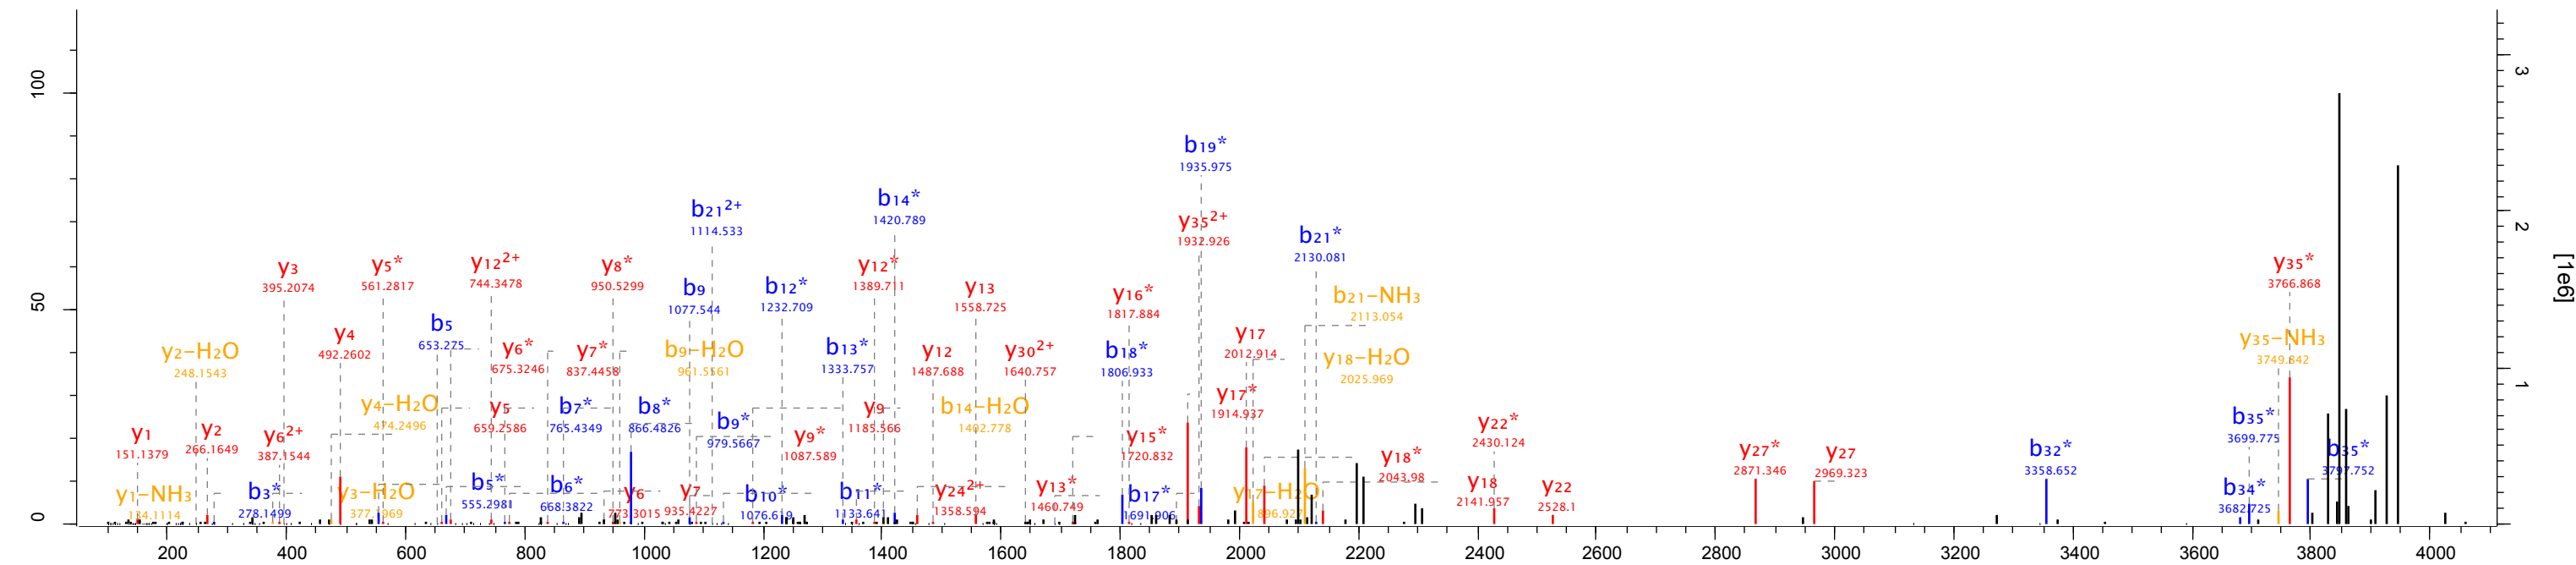

ph  
 - T P P R D L P T I P G V T S P S S D E P P M E A S Q S H L R N S P E D K -

Fragmentation labels (b and y ions) are shown below the amino acid sequence, indicating the cleavage sites. For example, b3\* is below the second P, b5 is below D, b6\* is below L, b7\* is below the first P, b8\* is below T, b9 is below I, b10\* is below the second P, b11\* is below G, b12\* is below V, b13\* is below the first T, b14\* is below S, b17\* is below the first S, b18\* is below D, b19\* is below E, b21\* is below the second P, b32\* is below S, b34\* is below P, and b35\* is below E. Red boxes highlight y-ion fragmentation labels: y35\* (above P), y30<sup>2+</sup> (above the first P), y27 (above P), y24<sup>2+</sup> (above T), y22 (above S), y18 (above E), y17 (above P), y16\* (above P), and y15\* (above M).

Raw file 20150814\_A375SR\_Phospho\_BR2\_03 Scan 19681 Method FTMS; HCD Score 169.72 m/z 1080.48 Gene names PCYT1A

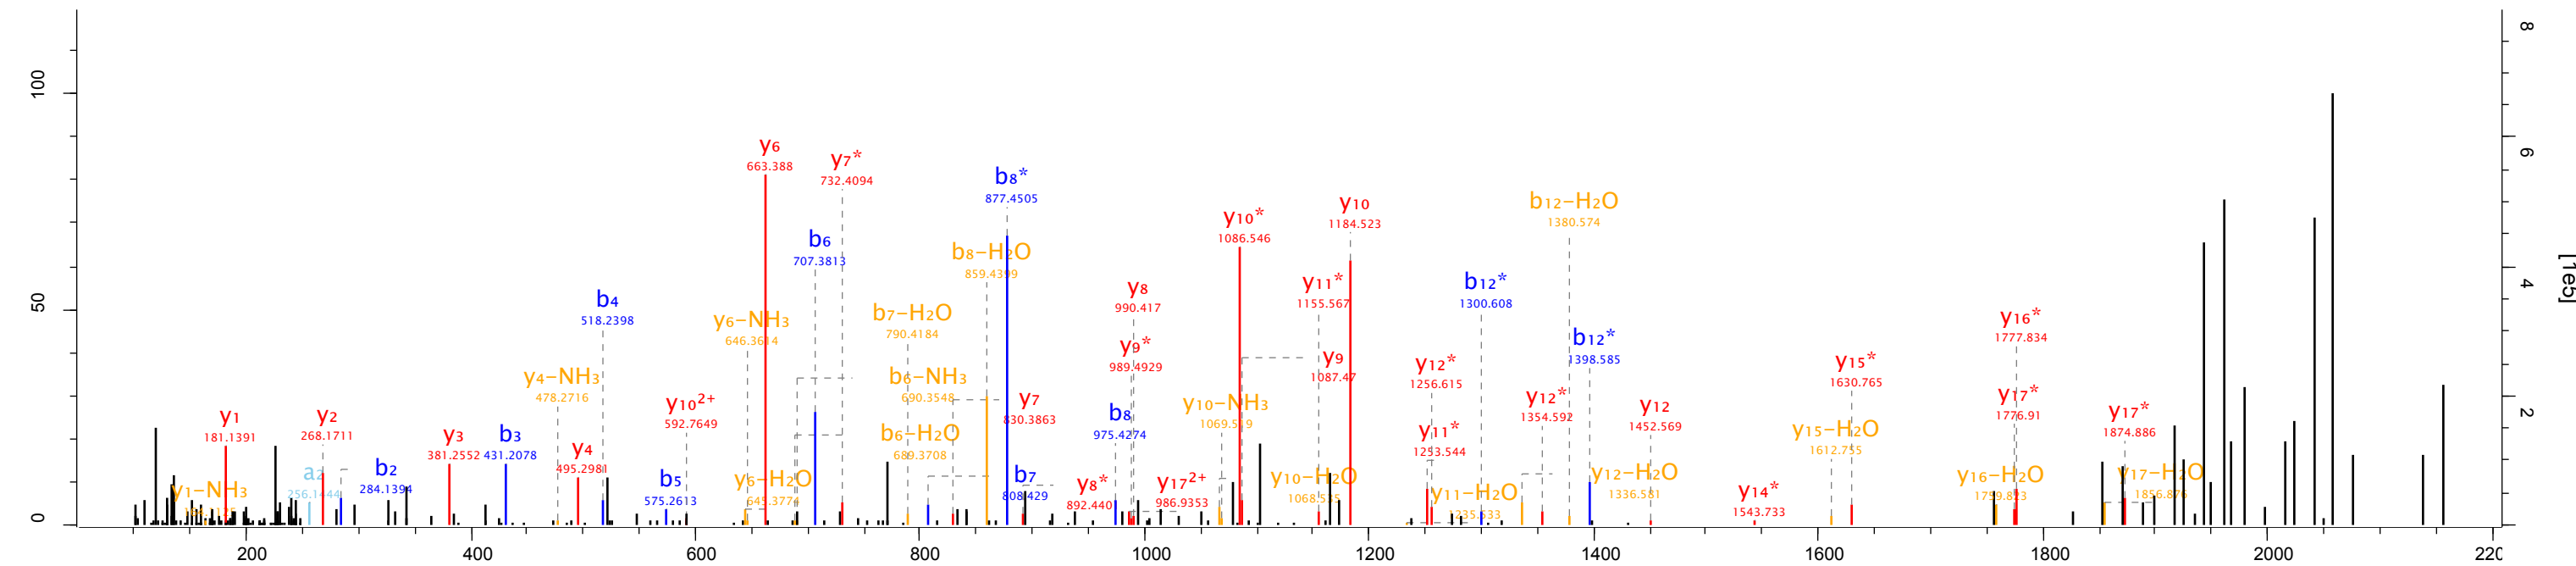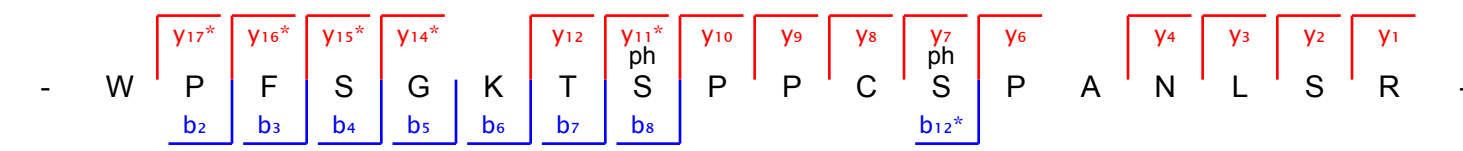

Raw file 20150814\_A375SR\_Phospho\_BR2\_03 Scan 19871 Method FTMS; HCD Score 42.39 m/z 979.45 Gene names TP53BP1

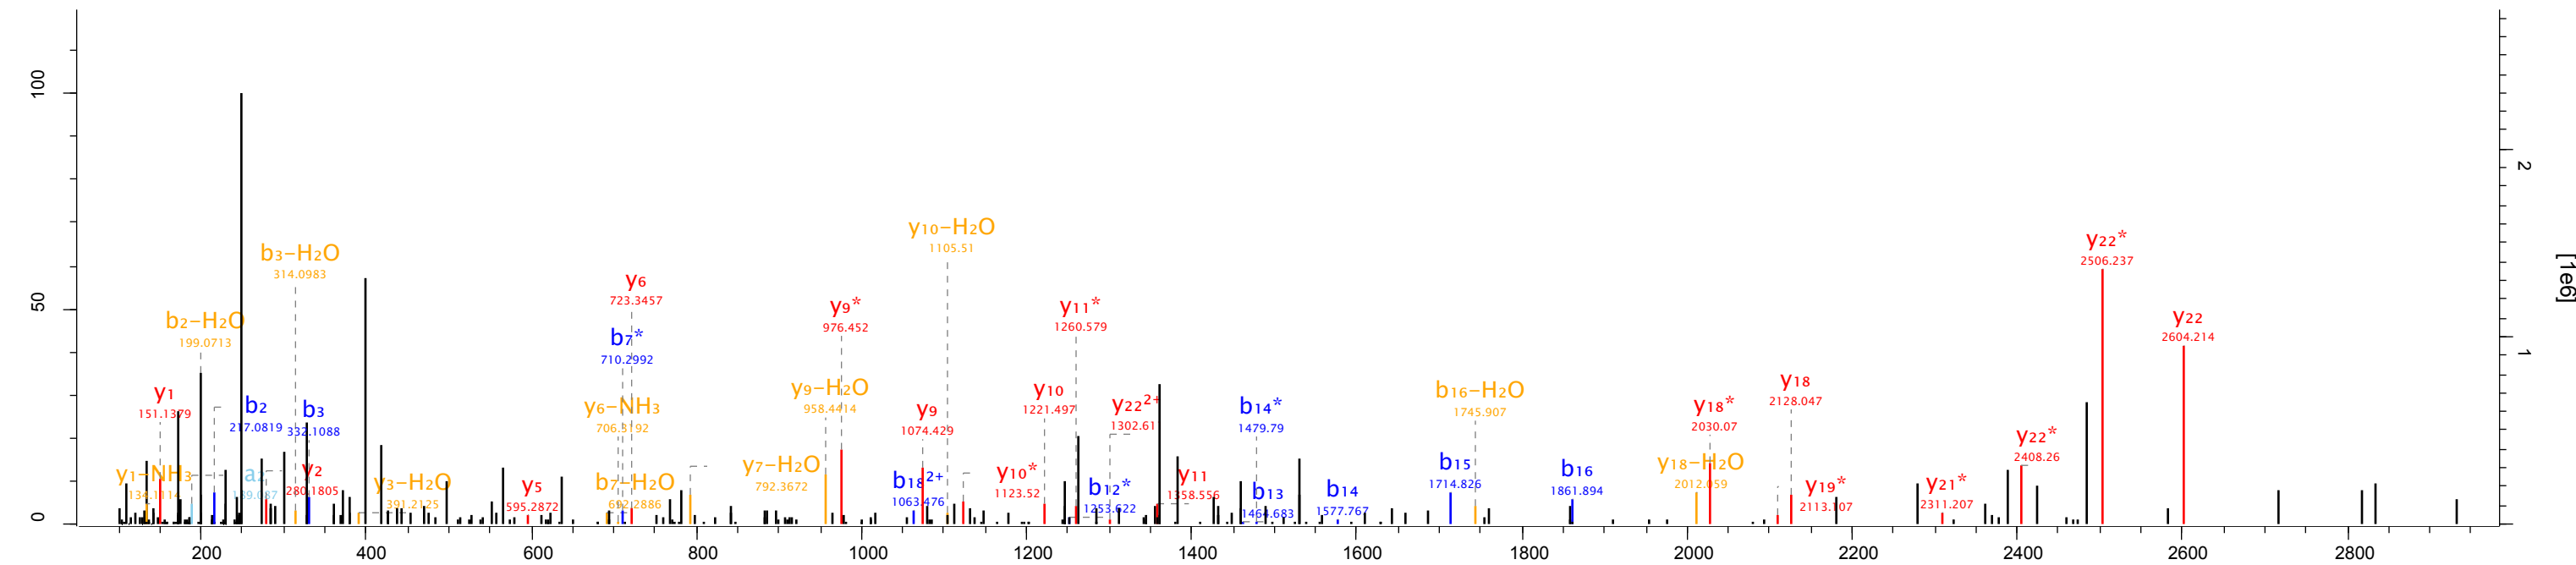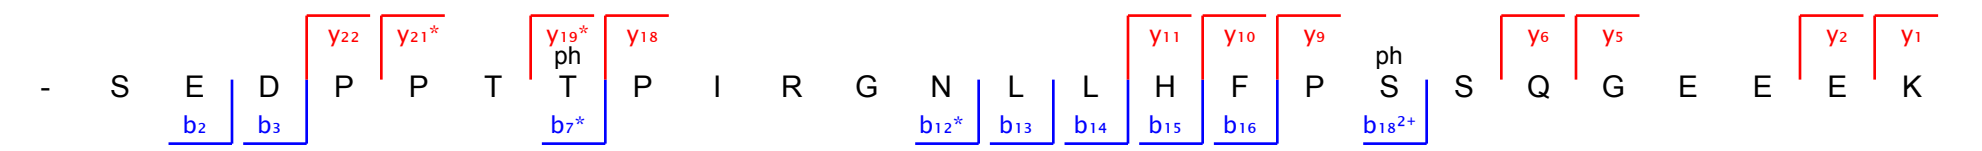

Raw file 20150814\_A375SR\_Phospho\_BR2\_03 Scan 19901 Method FTMS; HCD Score 146.78 m/z 844.07 Gene names DOCK5

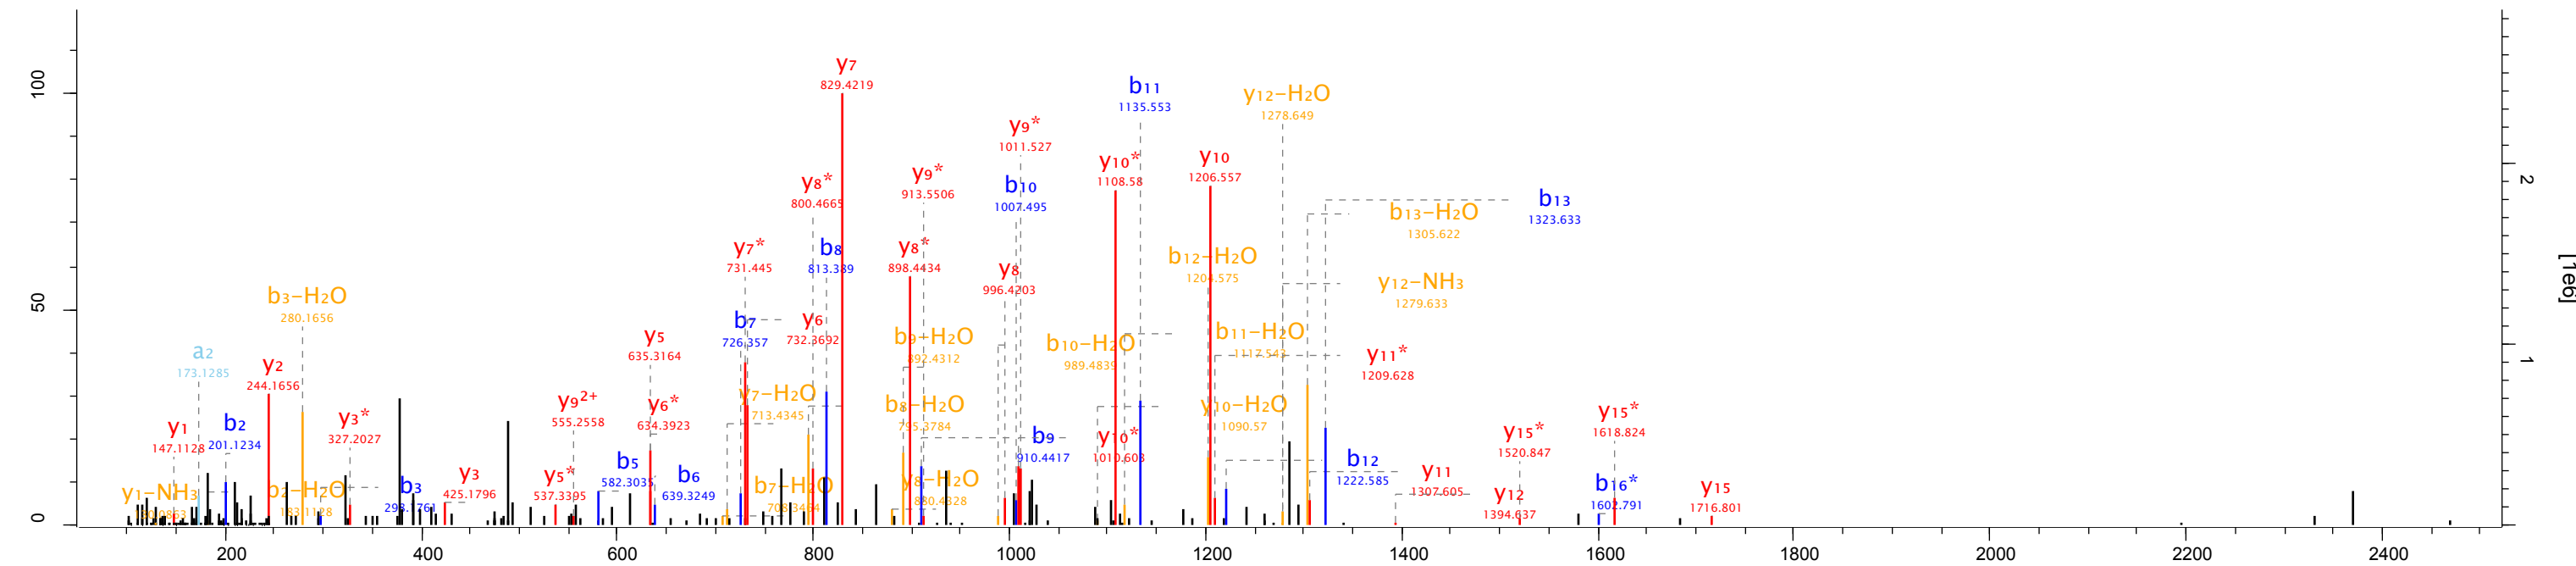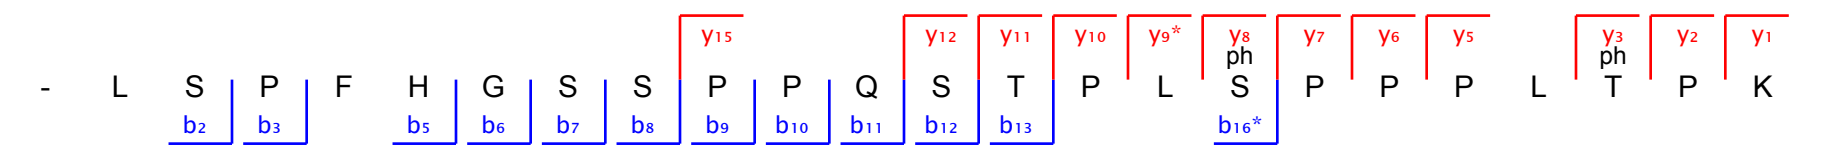

Raw file 20150814\_A375SR\_Phospho\_BR2\_03 Scan 20081 Method FTMS; HCD Score 91.77 m/z 818.4 Gene names ATG2B

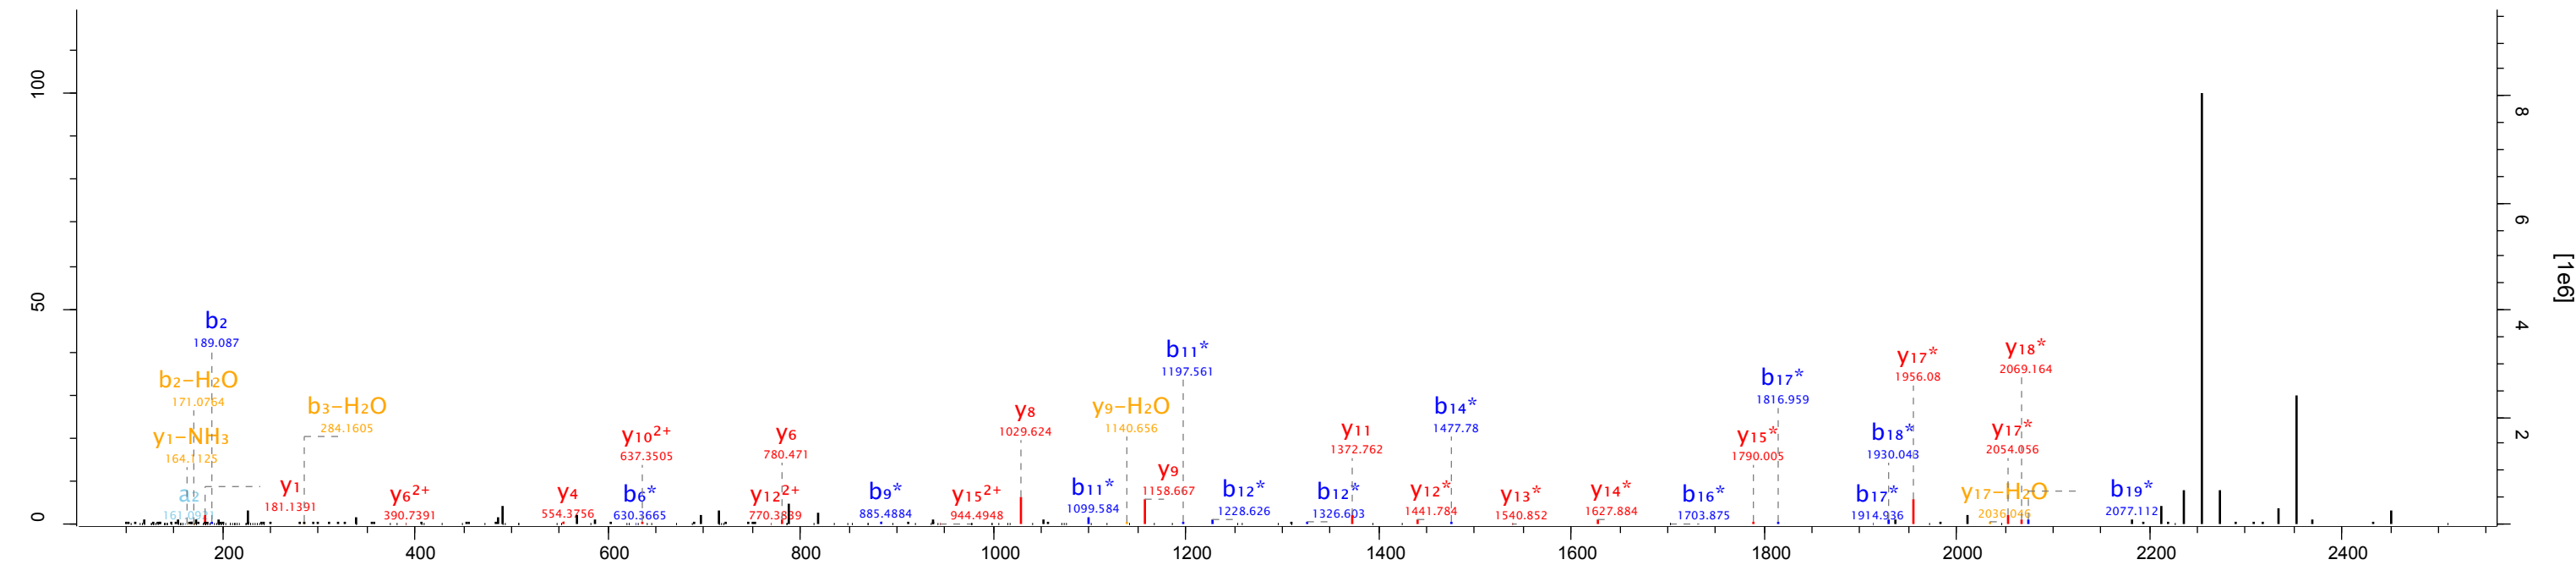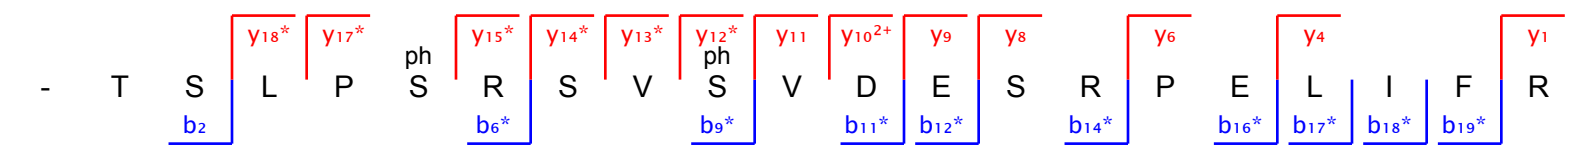

Raw file: 20150814\_A375SR\_Phospho\_BR2\_03  
 Scan: 20181 Method: FTMS; HCD Score: 52.93 m/z: 909.41 Gene names: RPRD1A

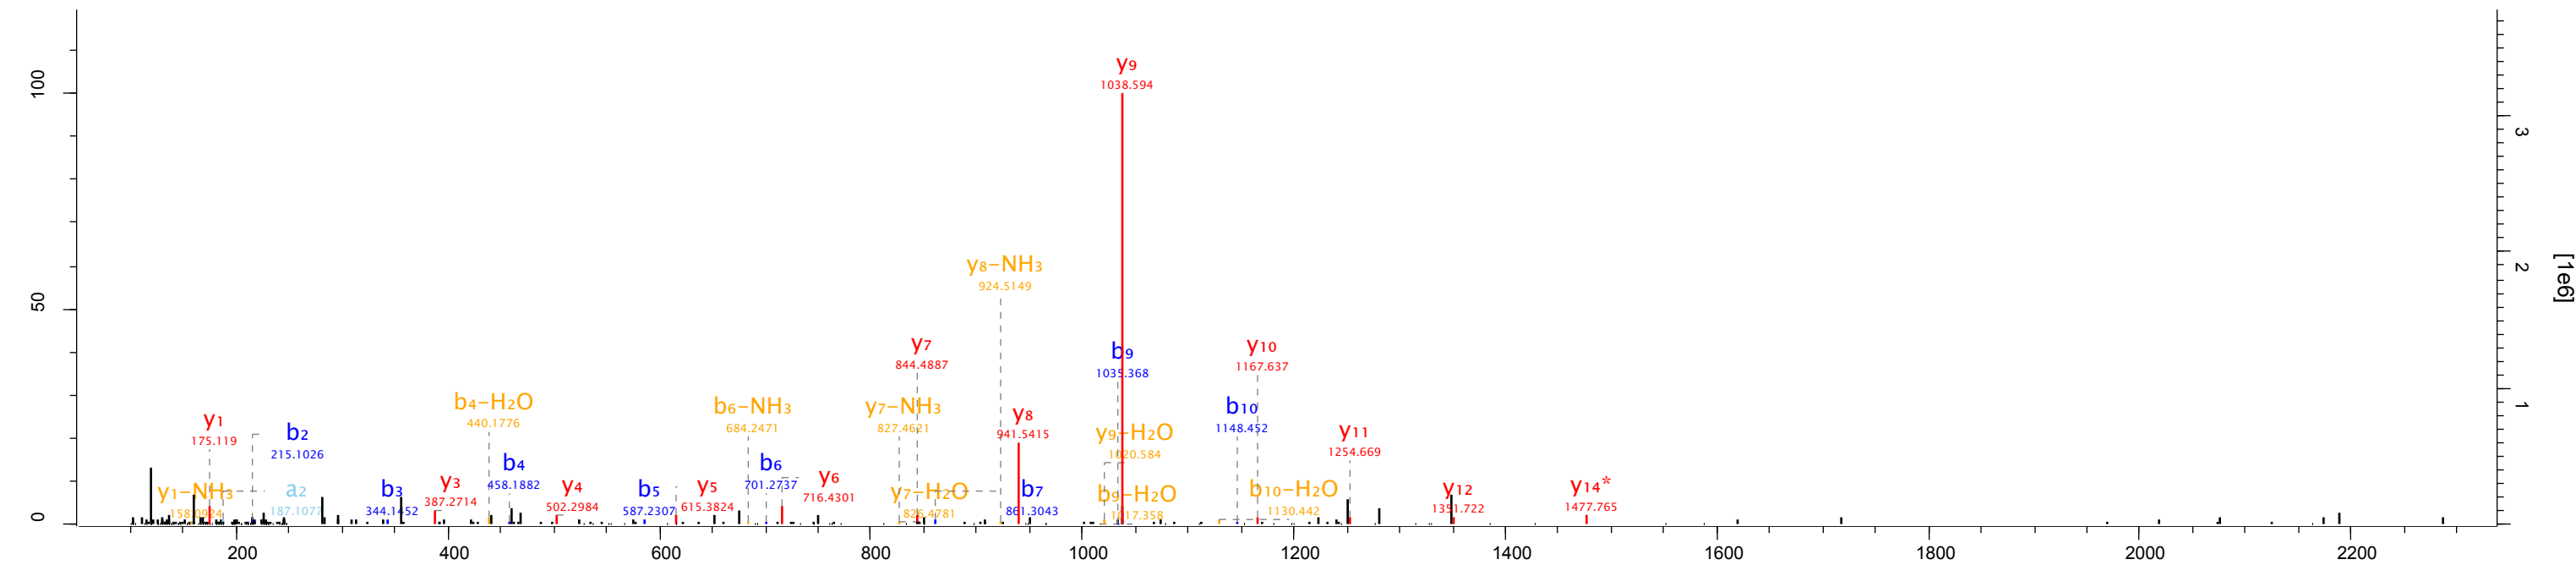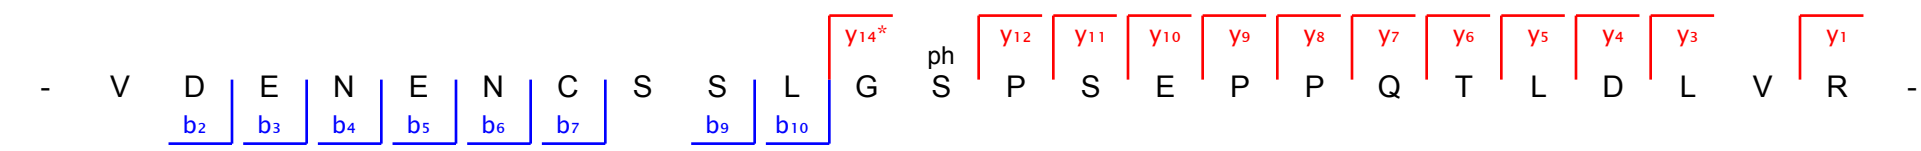

Raw file: 20150814\_A375SR\_Phospho\_BR2\_03  
 Scan: 20301 Method: FTMS; HCD Score: 139.02 m/z: 830.36 Gene names: MISP

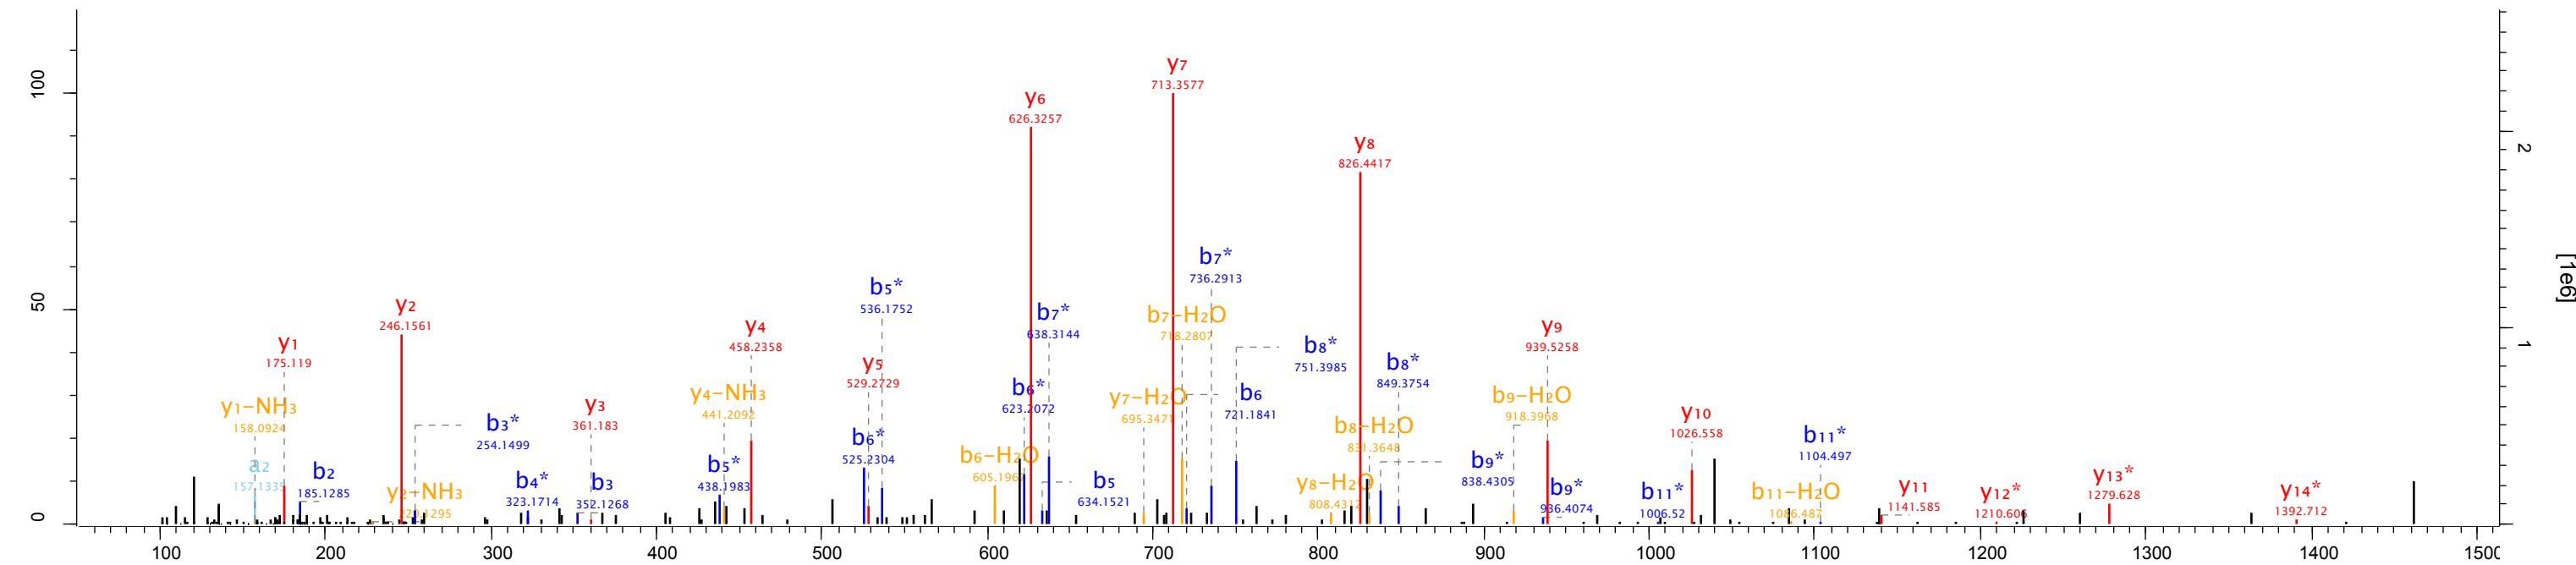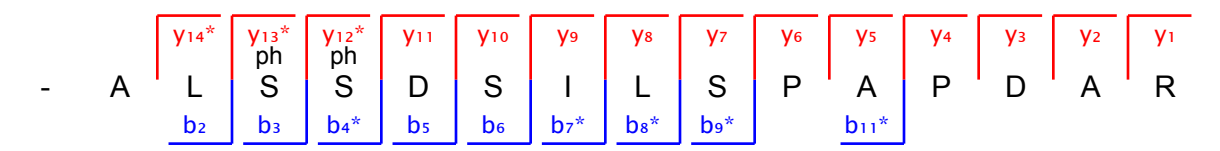

Raw file 20150814\_A375SR\_Phospho\_BR2\_03 Scan 20481 Method FTMS; HCD Score 151.3 m/z 826.87 Gene names NUMA1

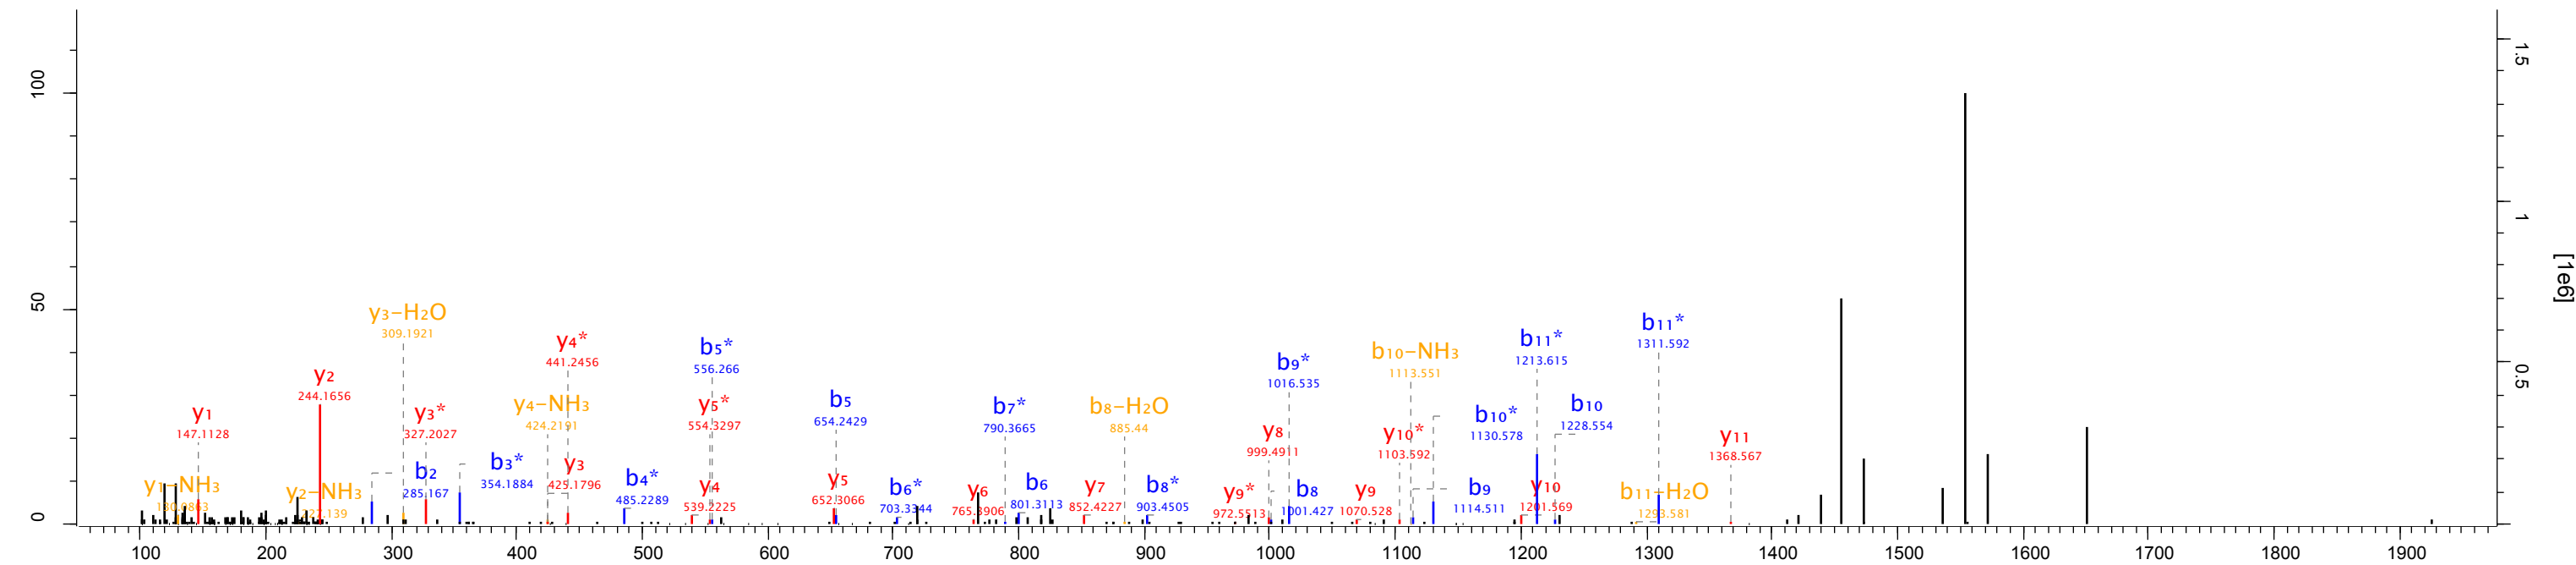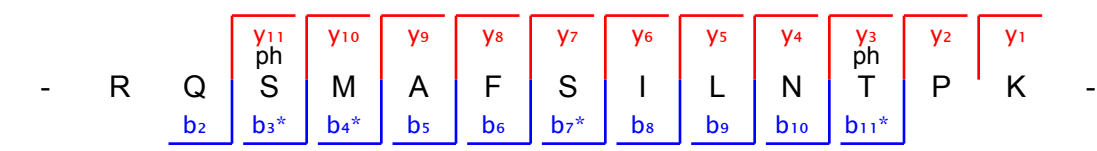



Raw file: 20150814\_A375SR\_Phospho\_BR2\_03  
 Scan: 21521 Method: FTMS; HCD Score: 100.22 m/z: 906.68 Gene names: GTSE1

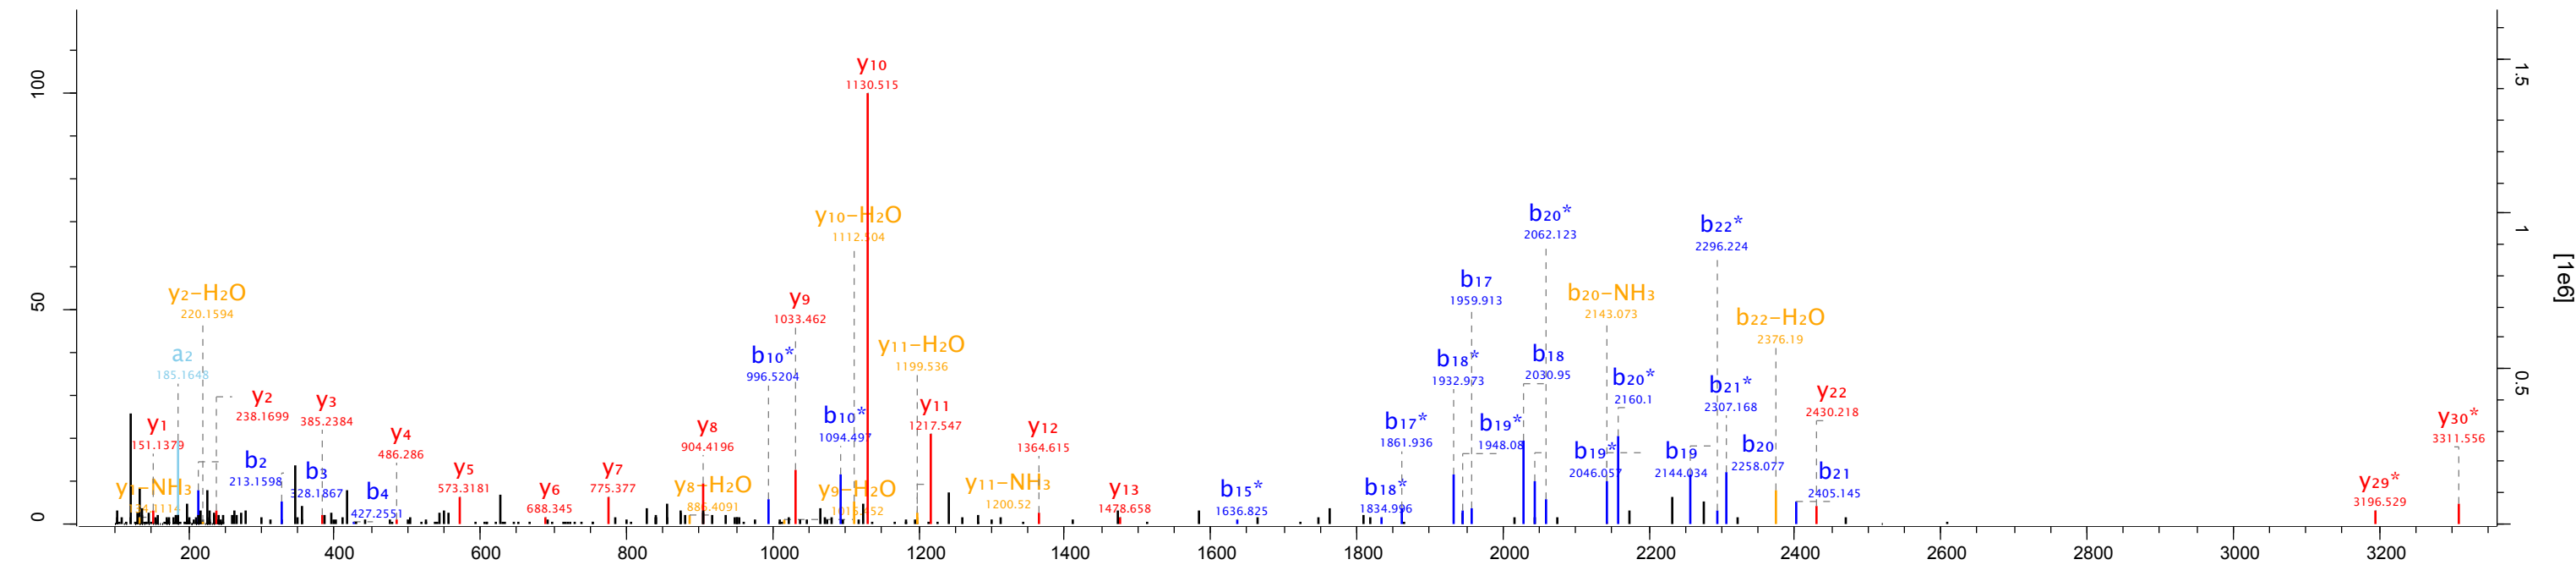

Sequence: - L V D V ph S P D R G S P P S R V P Q A L N F S P E E S D S T F S K -

Fragmentation sites (b and y ions) are indicated by brackets below the sequence:

- b2: V
- b3: D
- b4: V
- b10\*: S
- b15\*: V
- b17: Q
- b18: A
- b19: L
- b20: N
- b21: F
- b22\*: S
- y1: S
- y2: F
- y3: T
- y4: S
- y5: D
- y6: S
- y7: E
- y8: E
- y9: P
- y10: P
- y11: S
- y12: F
- y13: N
- y22: P
- y29\*: S
- y30\*: K

Raw file: 20150814\_A375SR\_Phospho\_BR2\_03  
 Scan: 21761 Method: FTMS; HCD Score: 293.88 m/z: 1227.48 Gene names: CHD8

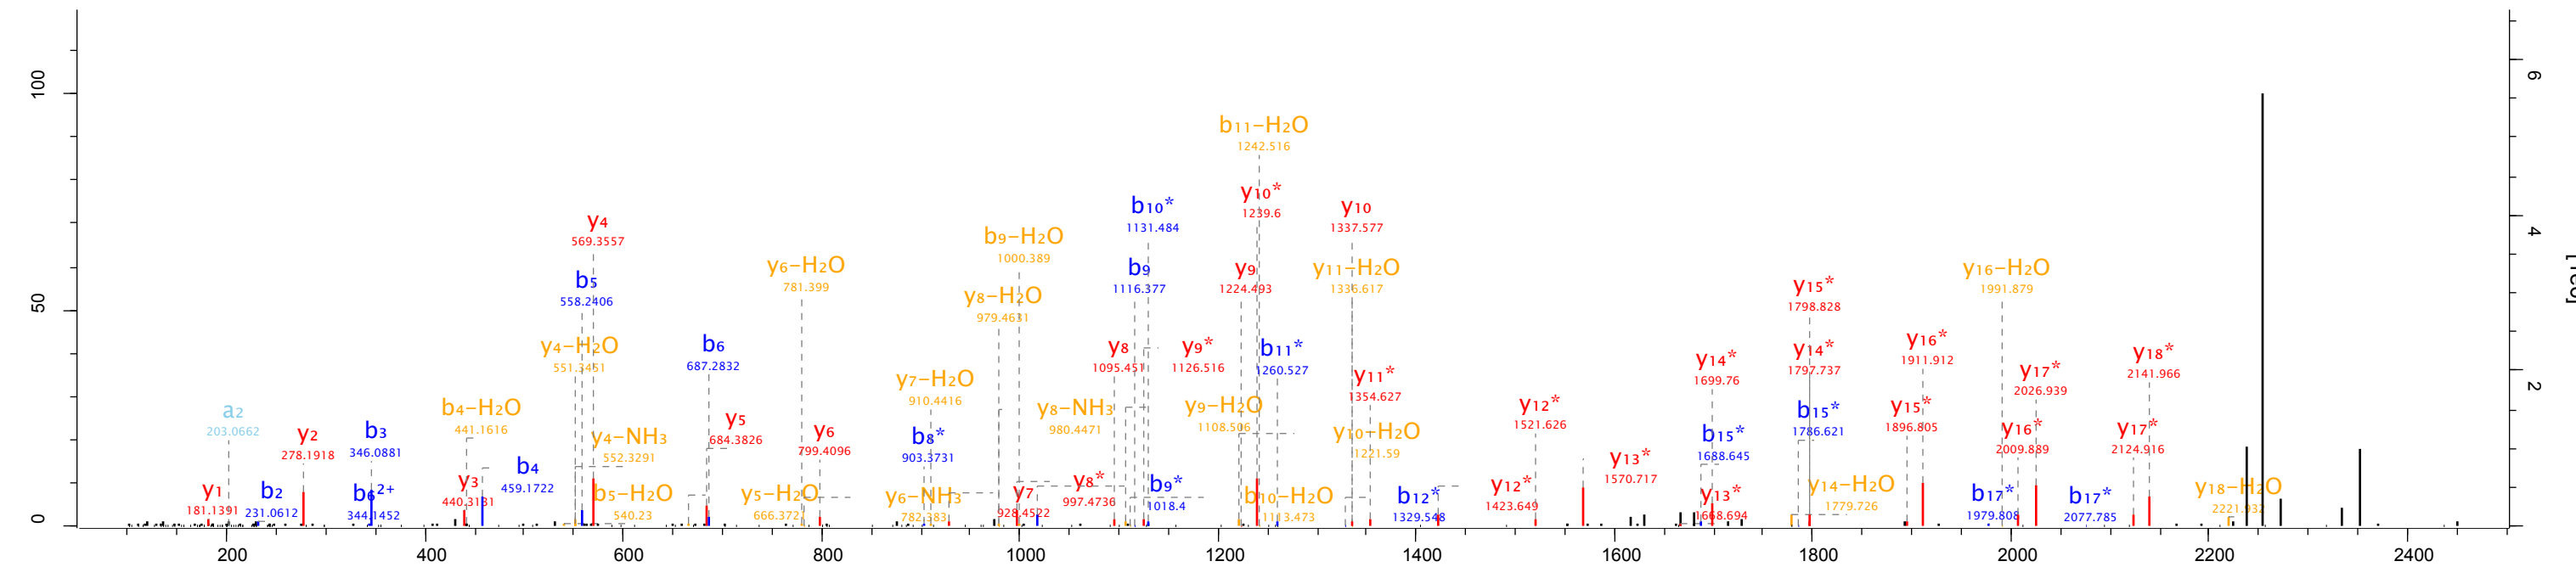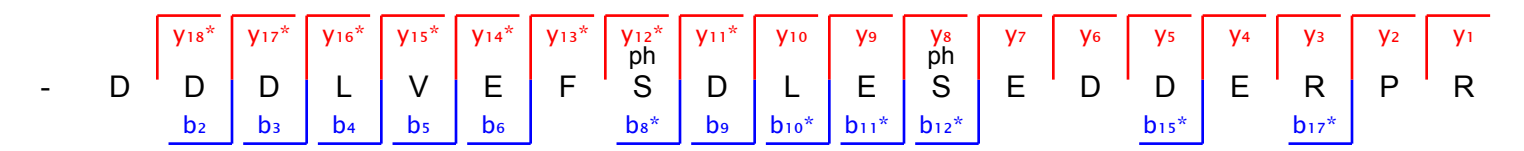

Raw file: 20150814\_A375SR\_Phospho\_BR2\_03  
 Scan: 21791 Method: FTMS; HCD Score: 221.85 m/z: 1091.97 Gene names: ETV3

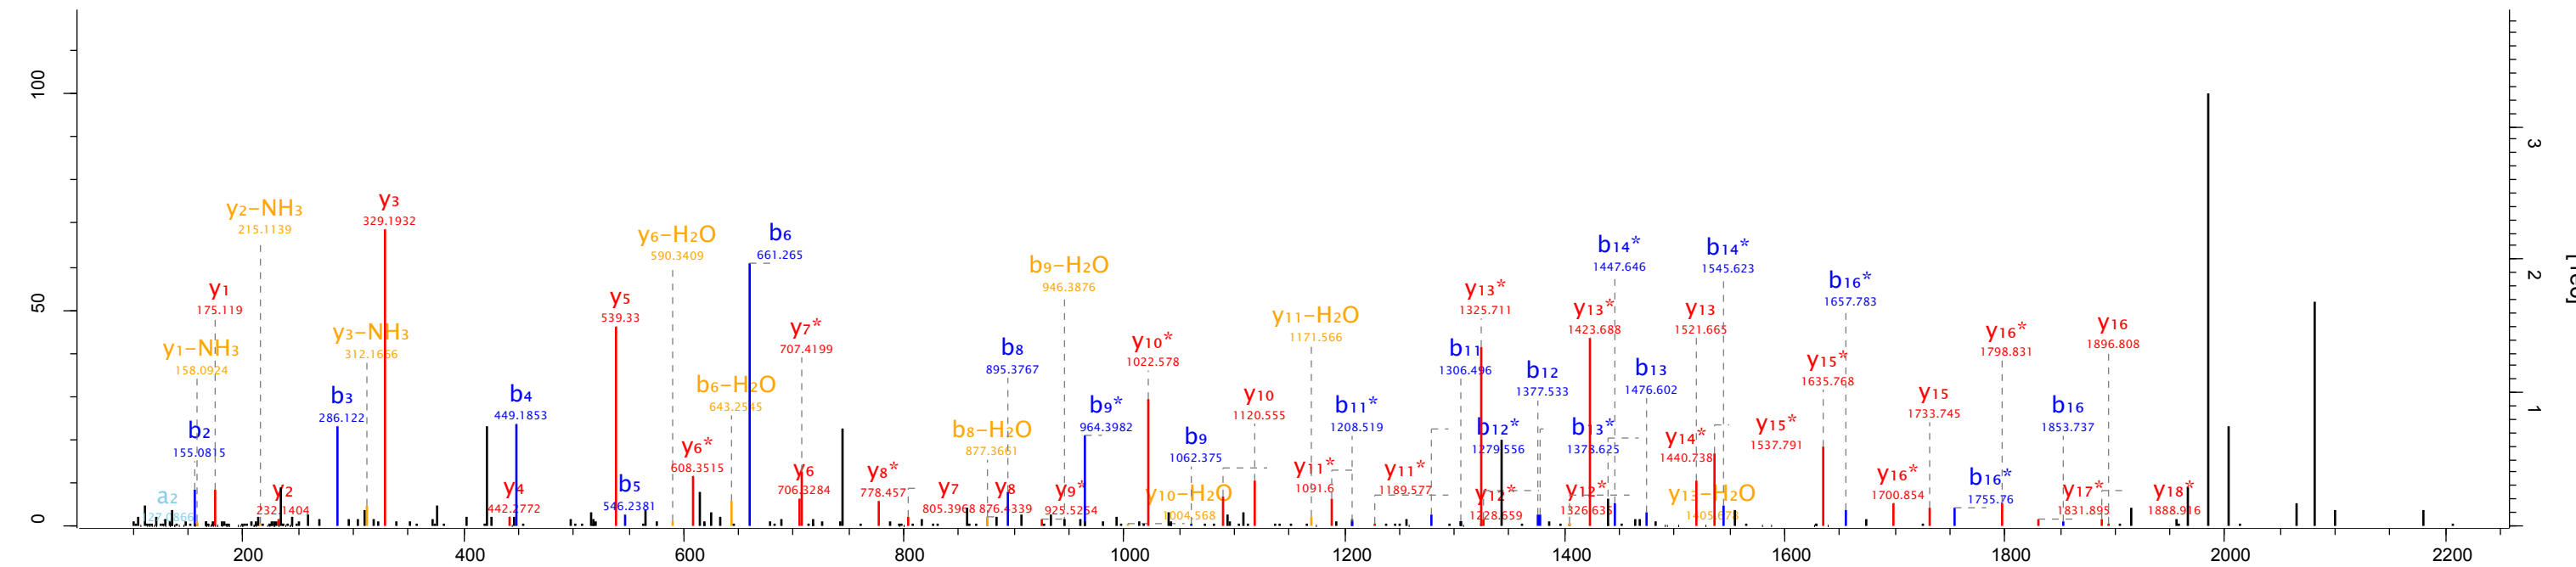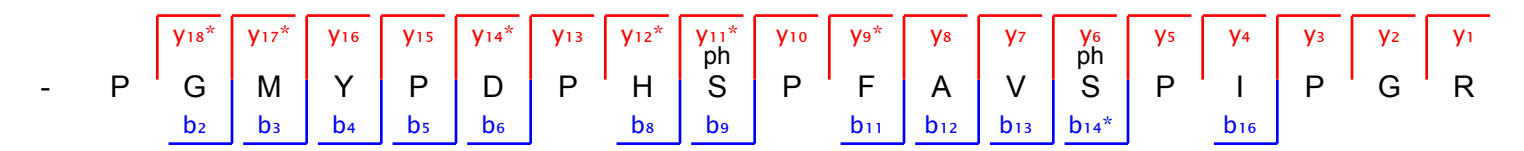

Raw file: 20150814\_A375SR\_Phospho\_BR2\_03  
 Scan: 21861 Method: FTMS; HCD Score: 169.85 m/z: 1041.96 Gene names: SRRM2

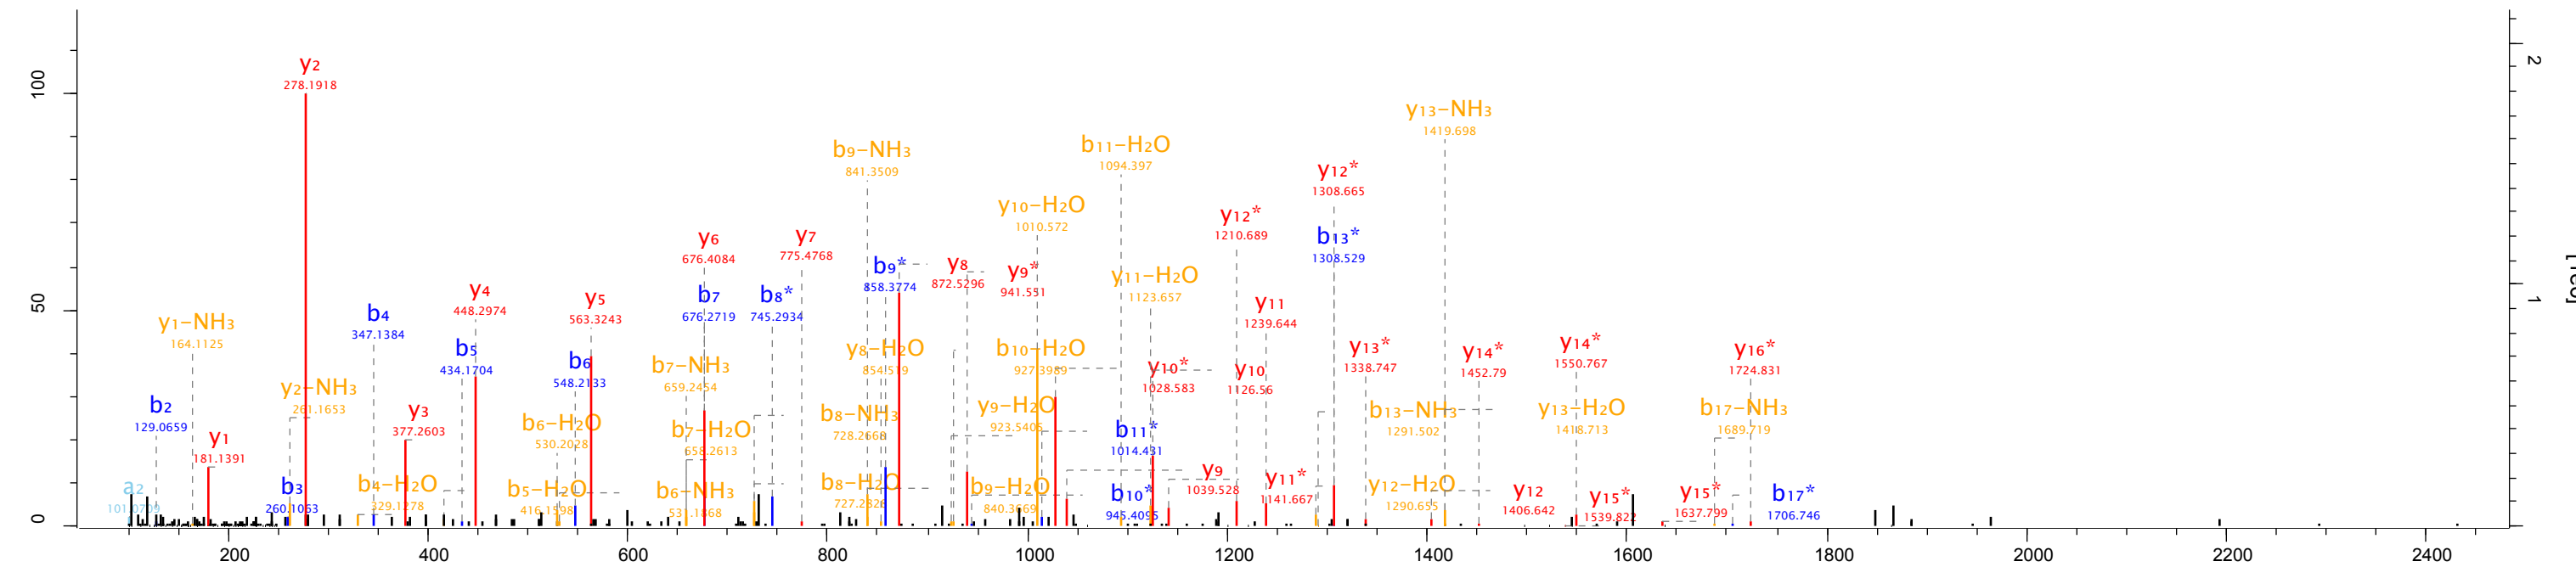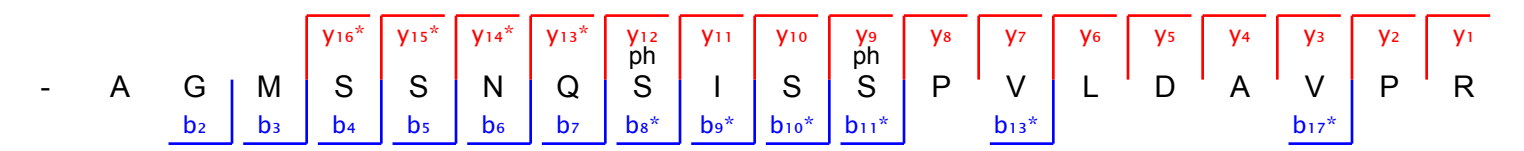

Raw file: 20150814\_A375SR\_Phospho\_BR2\_03  
 Scan: 22111 Method: FTMS; HCD Score: 133.68 m/z: 991.52 Gene names: PLEKHA5

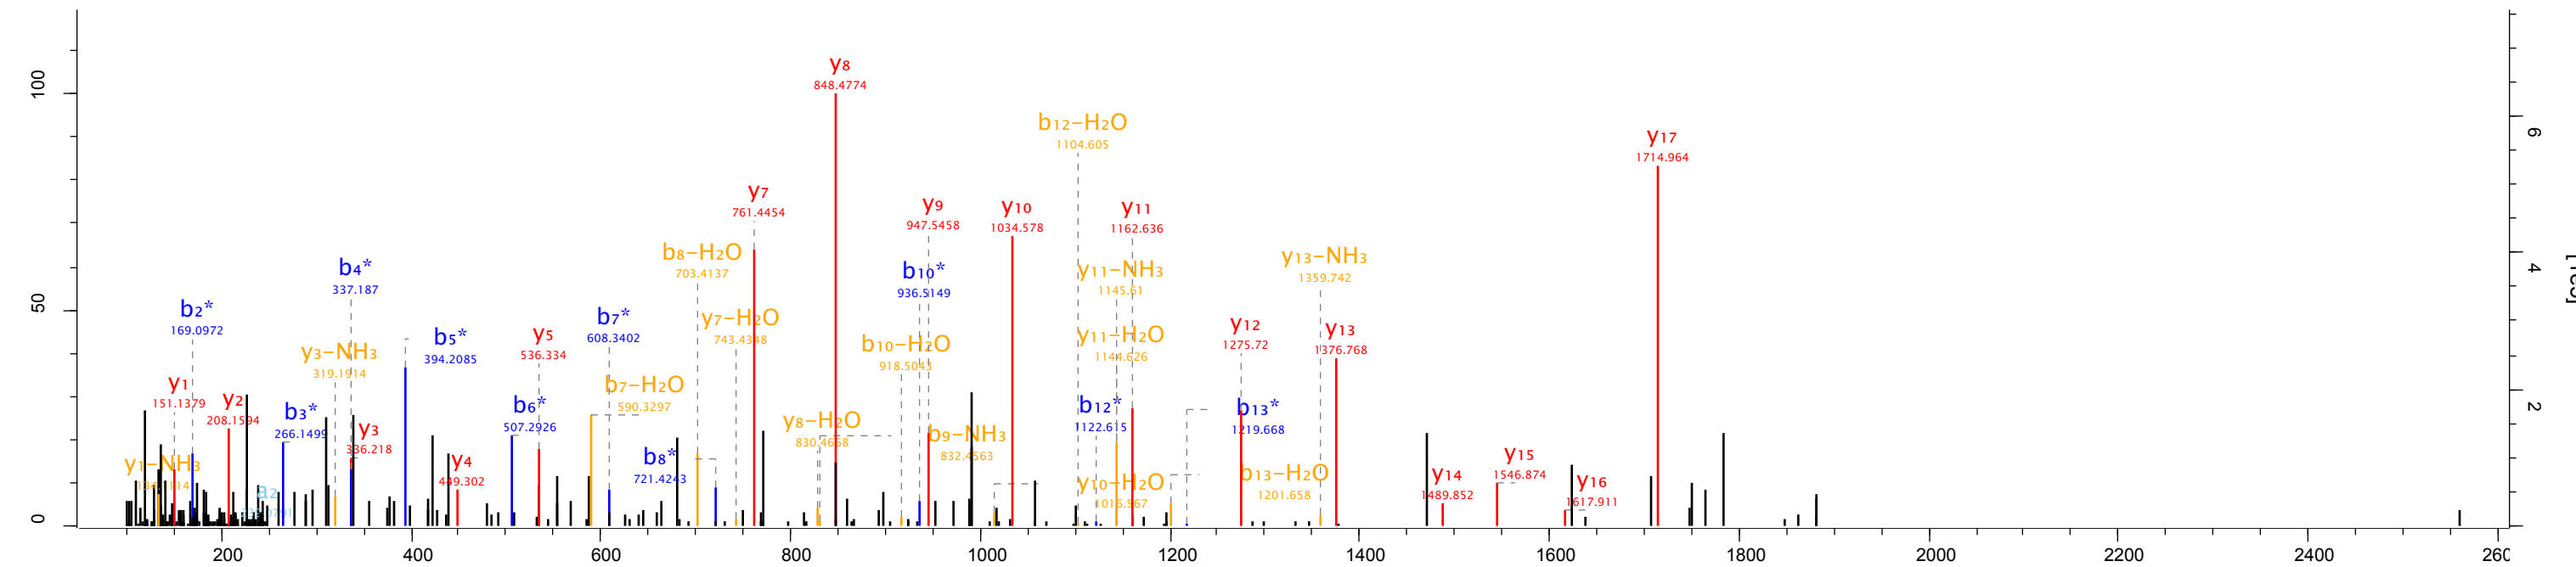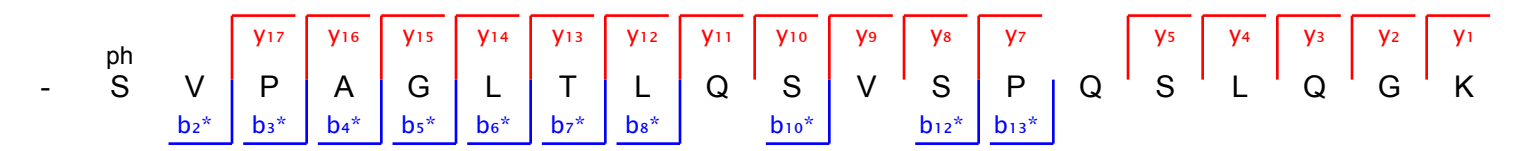

Raw file: 20150814\_A375SR\_Phospho\_BR2\_03  
 Scan: 22301 Method: FTMS; HCD Score: 63.42 m/z: 481.72 Gene names: PTPN13

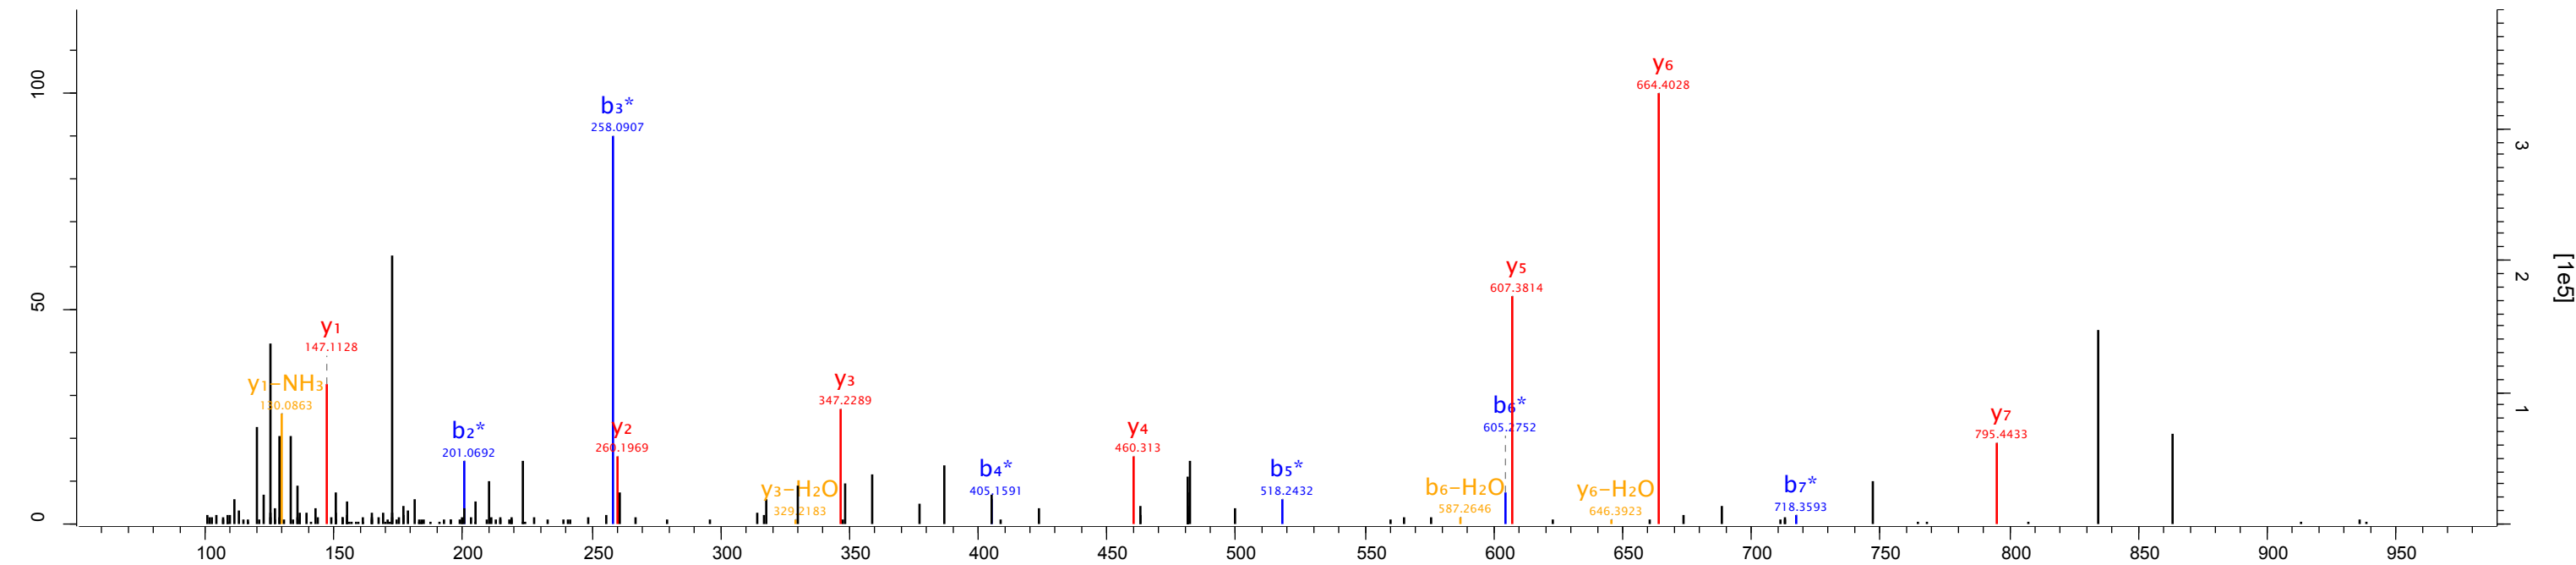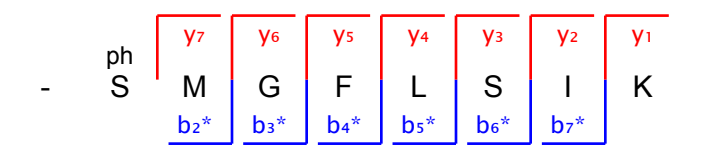

Raw file 20150814\_A375SR\_Phospho\_BR2\_03 Scan 22351 Method FTMS; HCD Score 140.8 m/z 902.36 Gene names NUP205

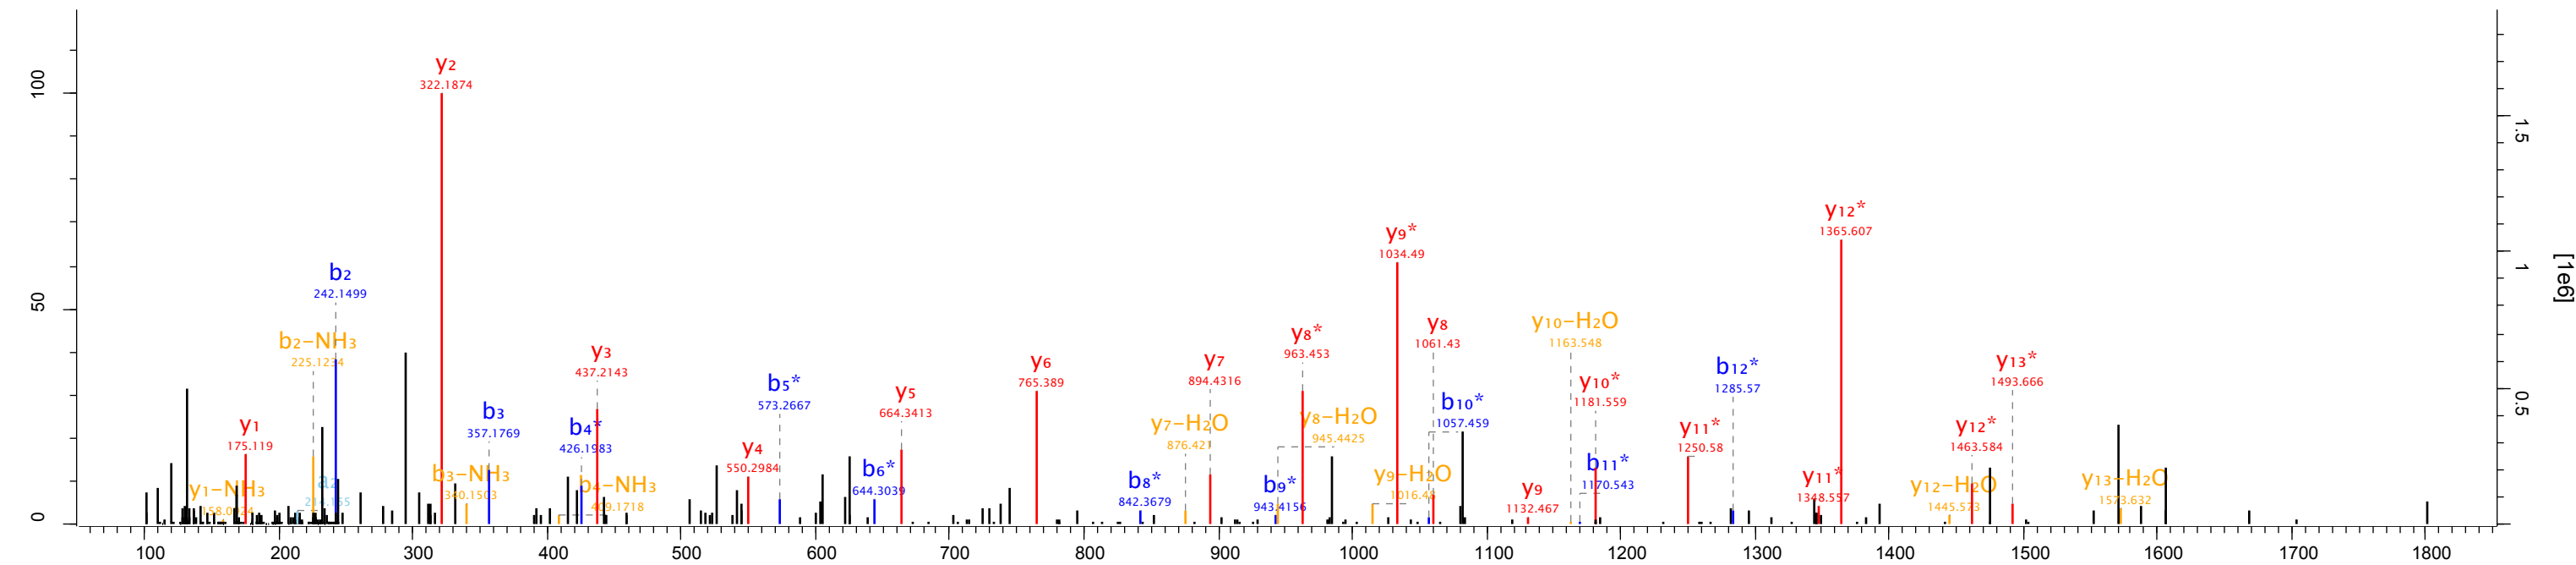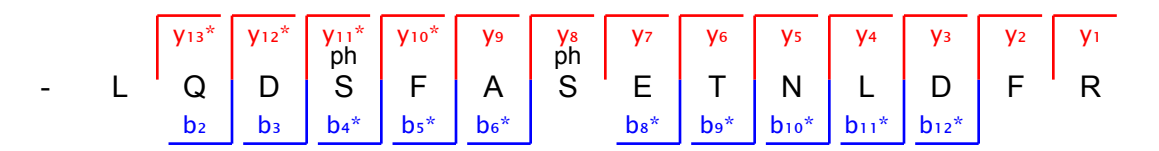

Raw file: 20150814\_A375SR\_Phospho\_BR2\_03

Scan: 22901  
 Method: FTMS; HCD  
 Score: 264.82  
 m/z: 1076.49  
 Gene names: PML

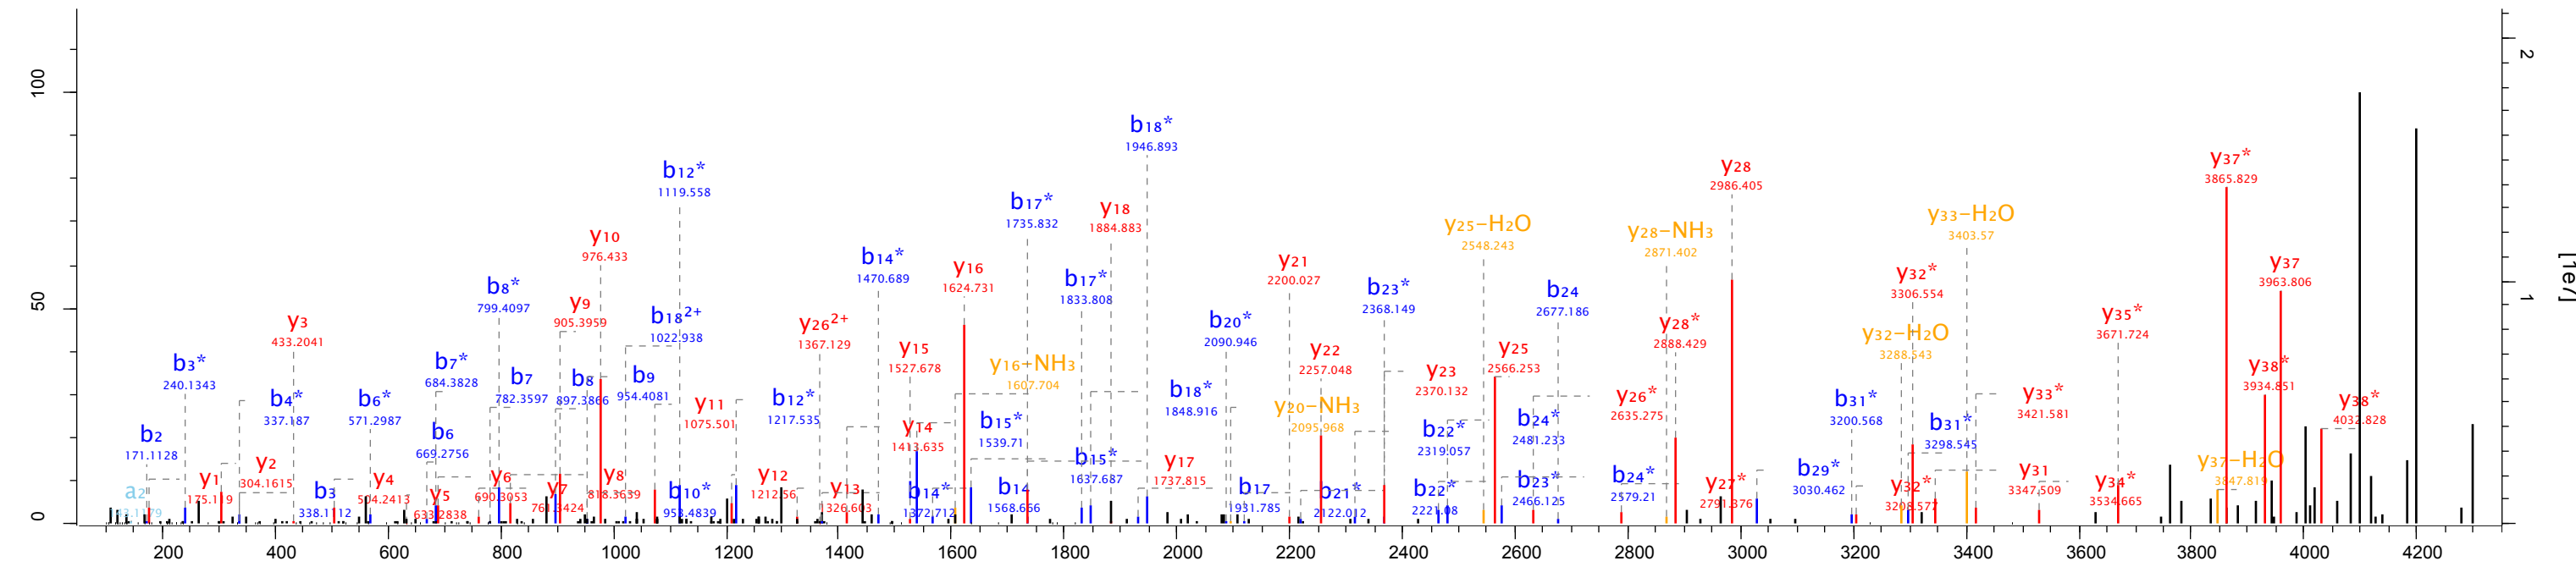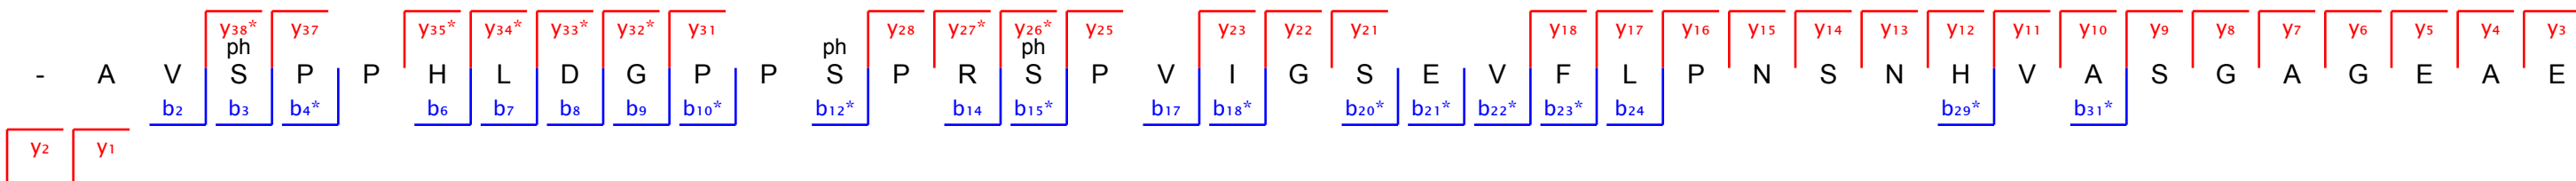



Raw file Scan Method Score m/z Gene names  
 20150814\_A375SR\_Phospho\_BR2\_03 23031 FTMS; HCD 79.24 1059.91 DAGLB

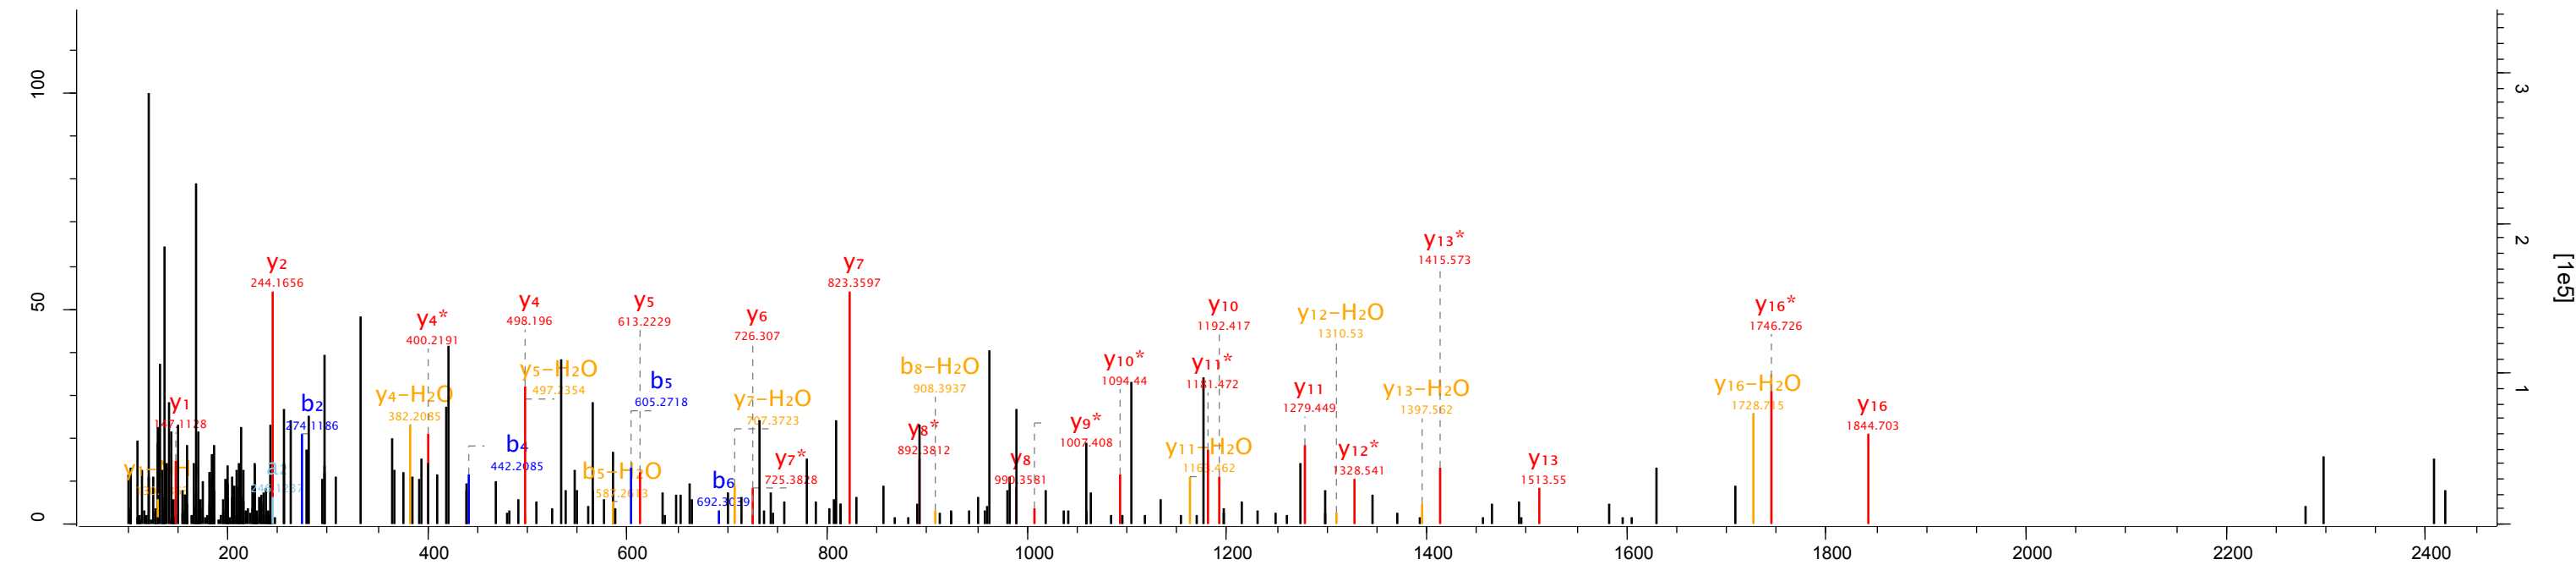

- W S P A Y S F S S D S P L D S S P K -  
 b<sub>2</sub> b<sub>4</sub> b<sub>5</sub> b<sub>6</sub> y<sub>16</sub> y<sub>13</sub> y<sub>12</sub>\* y<sub>11</sub> y<sub>10</sub> y<sub>9</sub>\* y<sub>8</sub> y<sub>7</sub> y<sub>6</sub> y<sub>5</sub> y<sub>4</sub> y<sub>2</sub> y<sub>1</sub>

Raw file: 20150814\_A375SR\_Phospho\_BR2\_03  
 Scan: 23141 Method: FTMS; HCD Score: 83.44 m/z: 685.3 Gene names: PLEKHN1

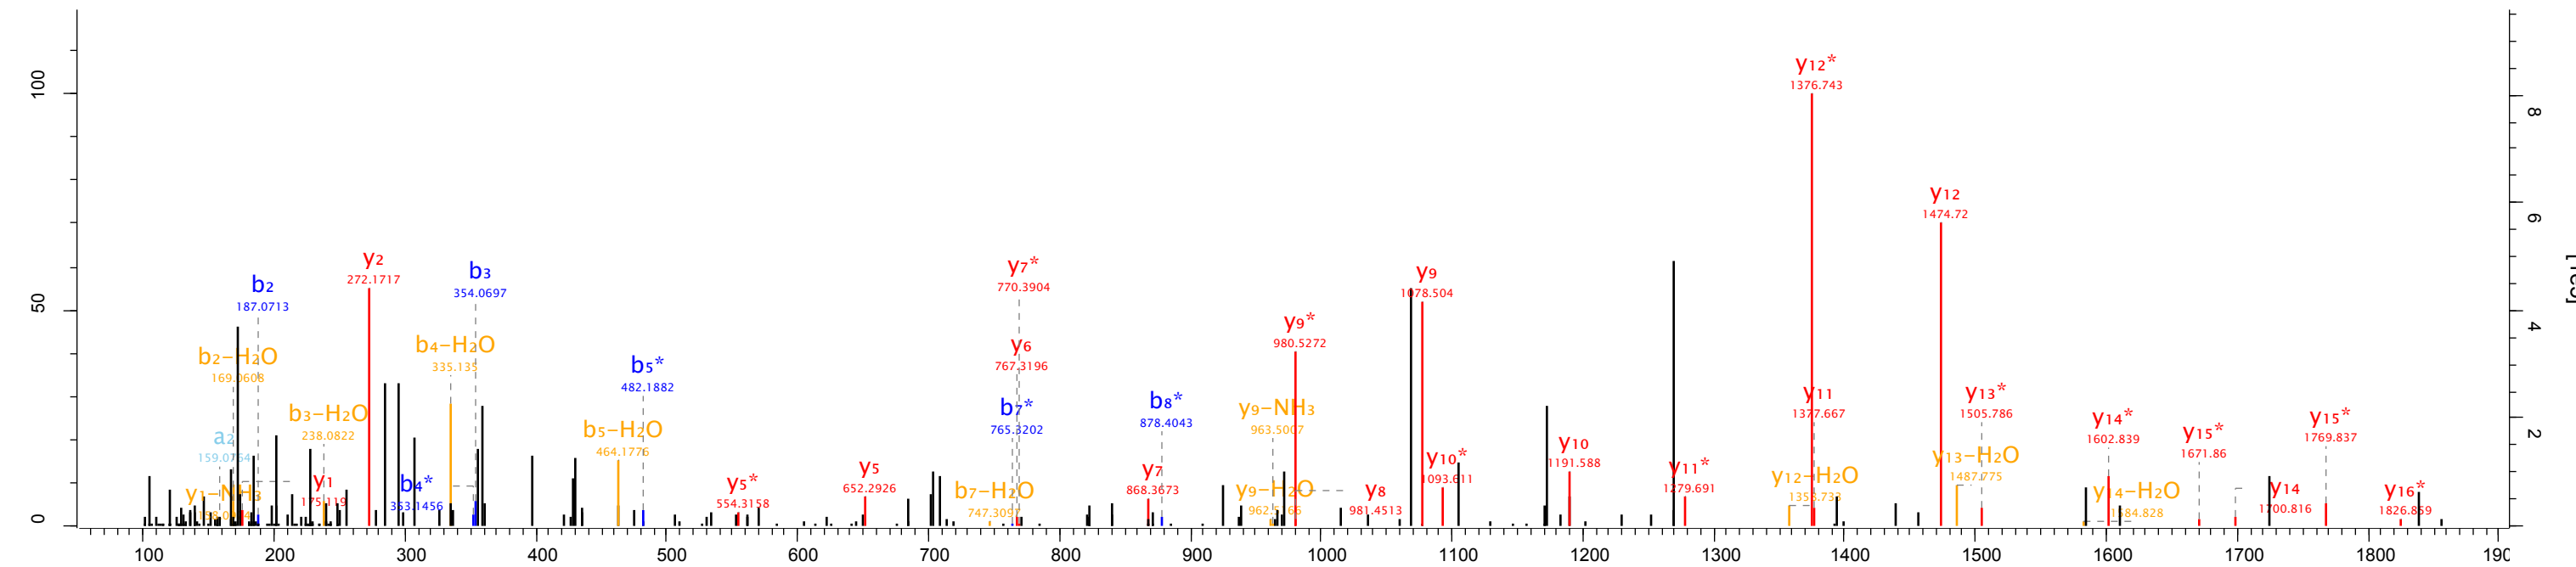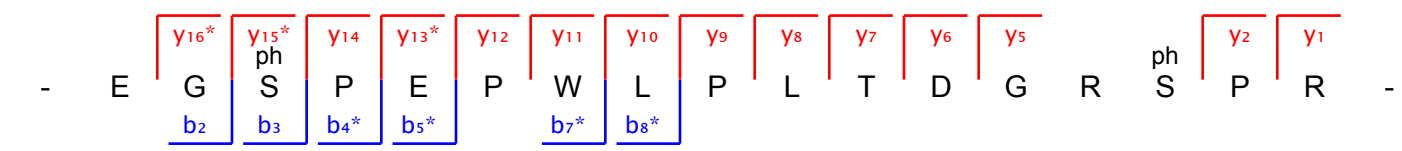

Raw file: 20150814\_A375SR\_Phospho\_BR2\_03  
 Scan: 23261 Method: FTMS; HCD Score: 200.6 m/z: 695.3 Gene names: PRKAB2

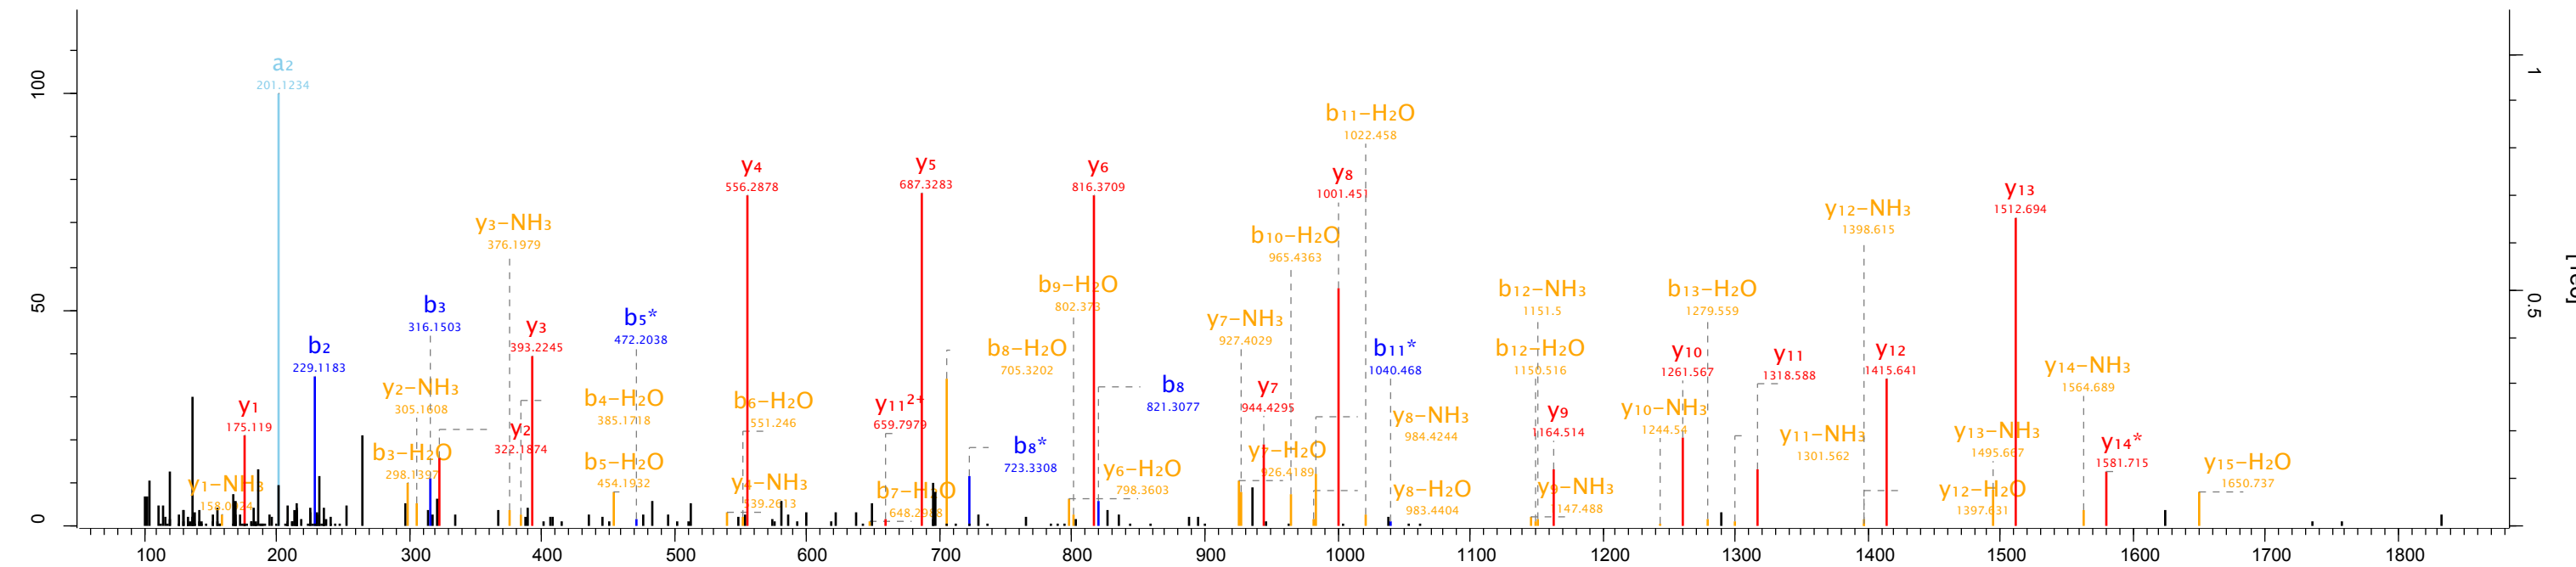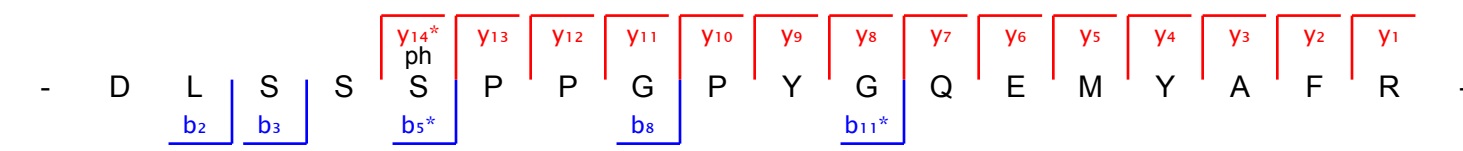

Raw file: 20150814\_A375SR\_Phospho\_BR2\_03  
 Scan: 2331 Method: FTMS; HCD Score: 130.4 m/z: 687.28 Gene names: DNMI

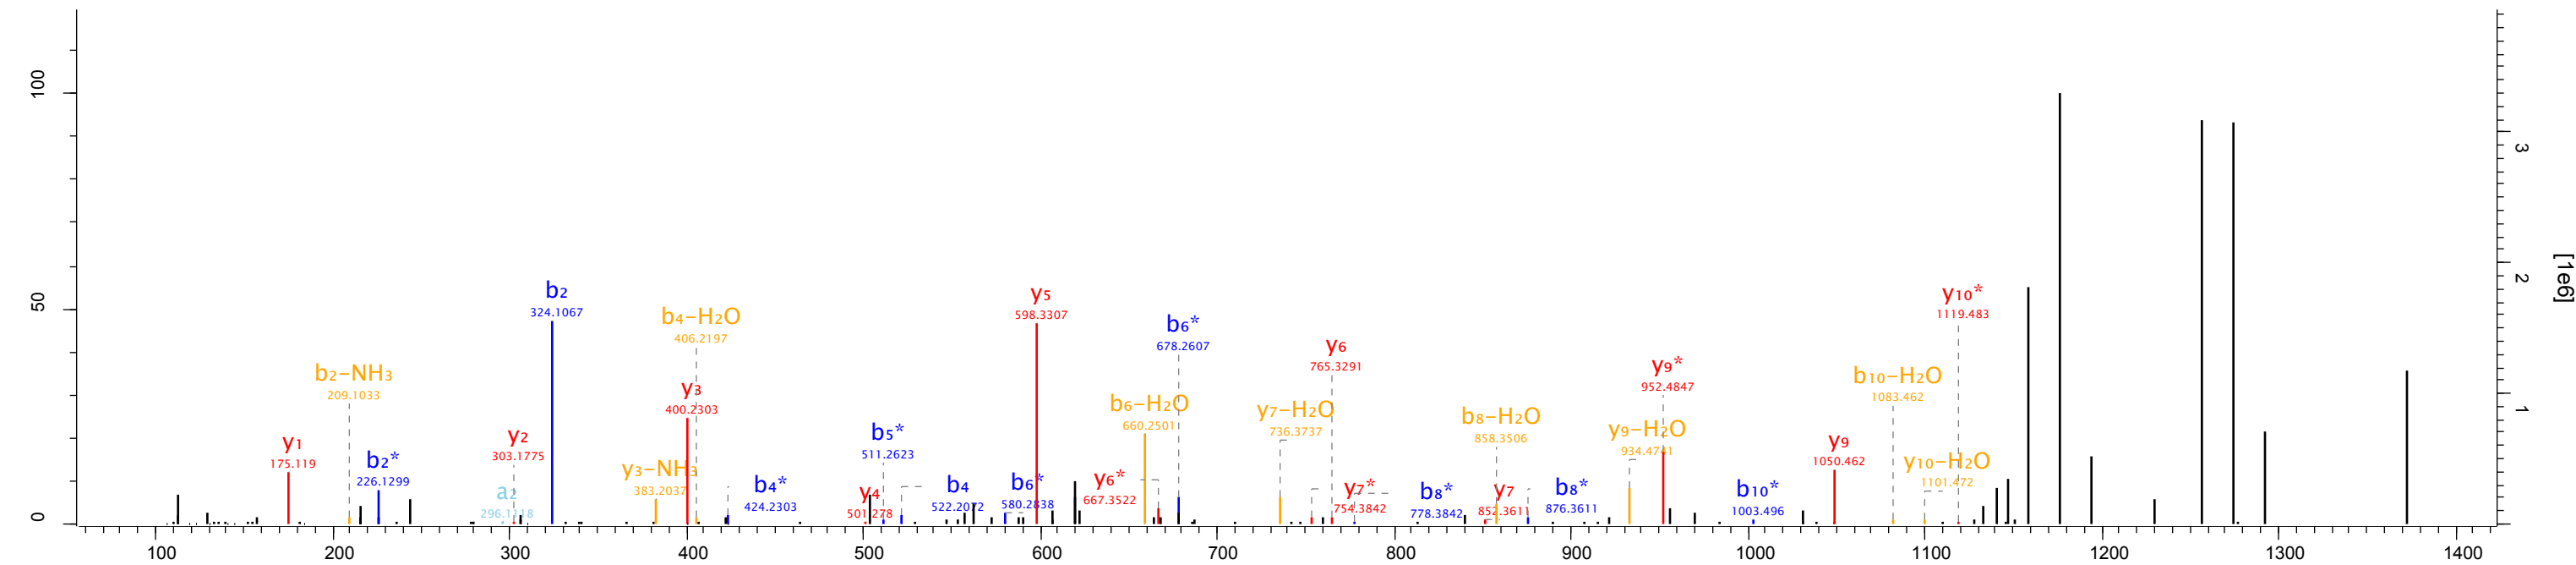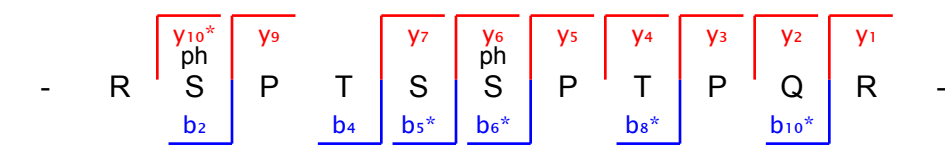

Raw file: 20150814\_A375SR\_Phospho\_BR2\_03  
 Scan: 23511 Method: FTMS; HCD Score: 89.08 m/z: 1098.02 Gene names: EGFR

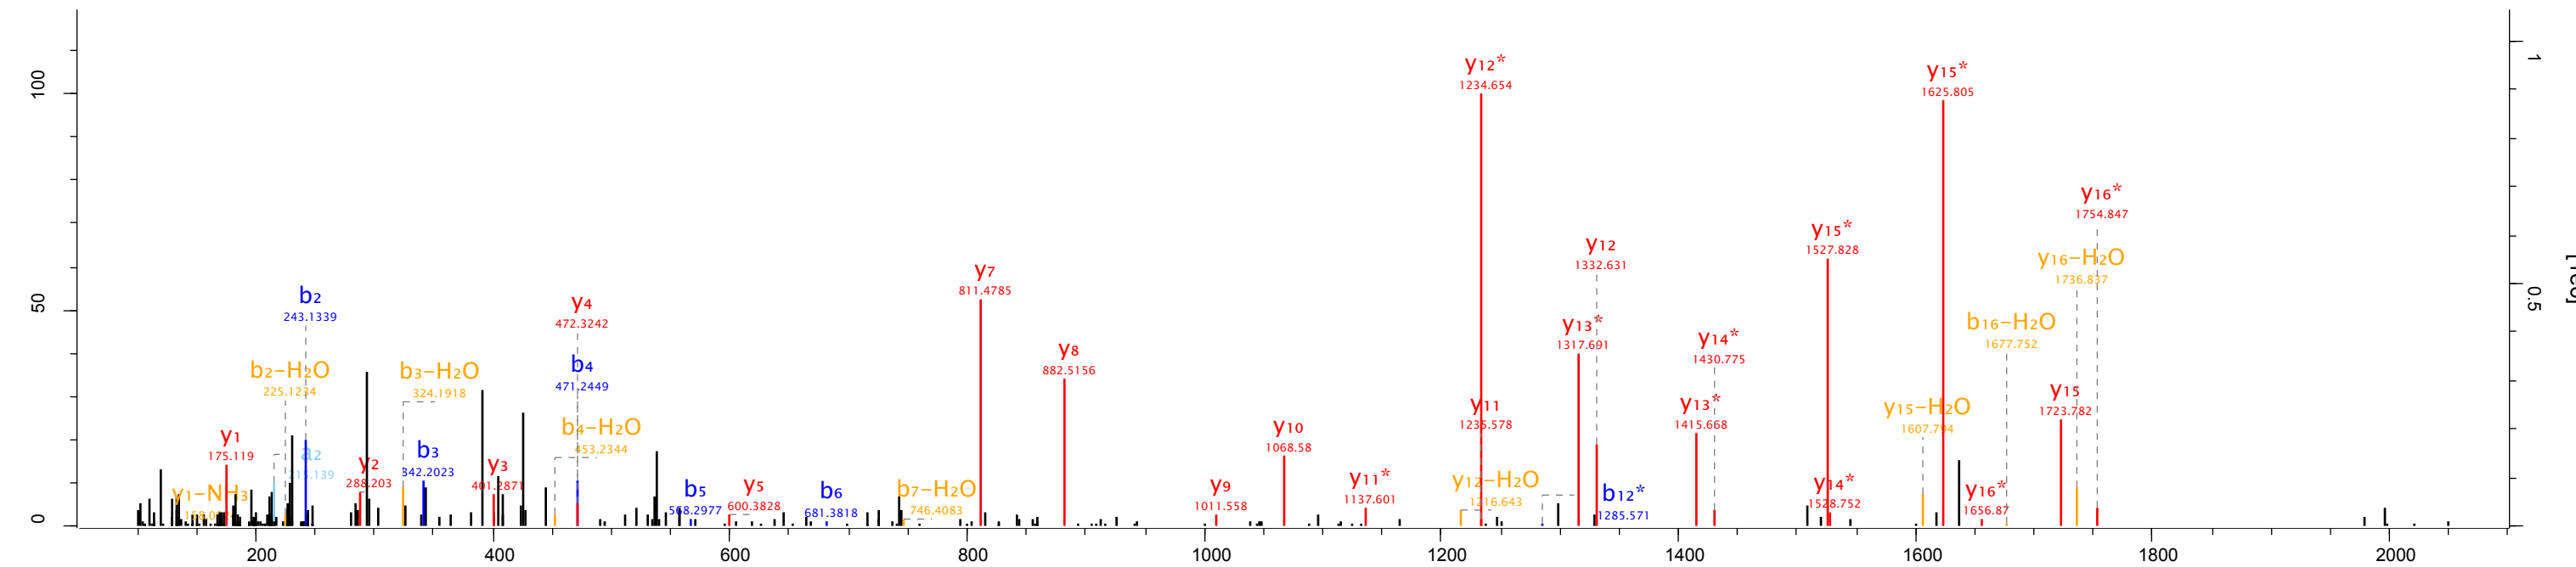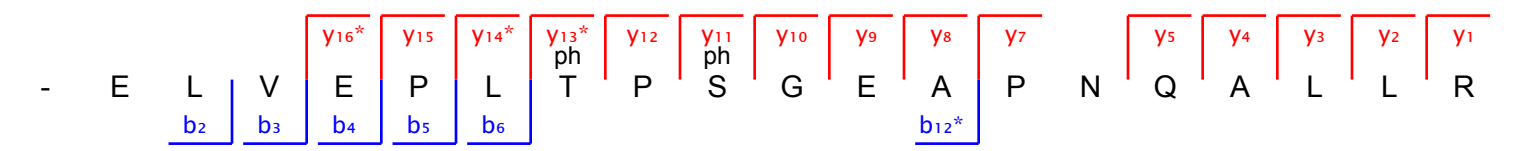

Raw file: 20150814\_A375SR\_Phospho\_BR2\_03  
 Scan: 23551 Method: FTMS; HCD Score: 201.54 m/z: 1042.04 Gene names: MKL2

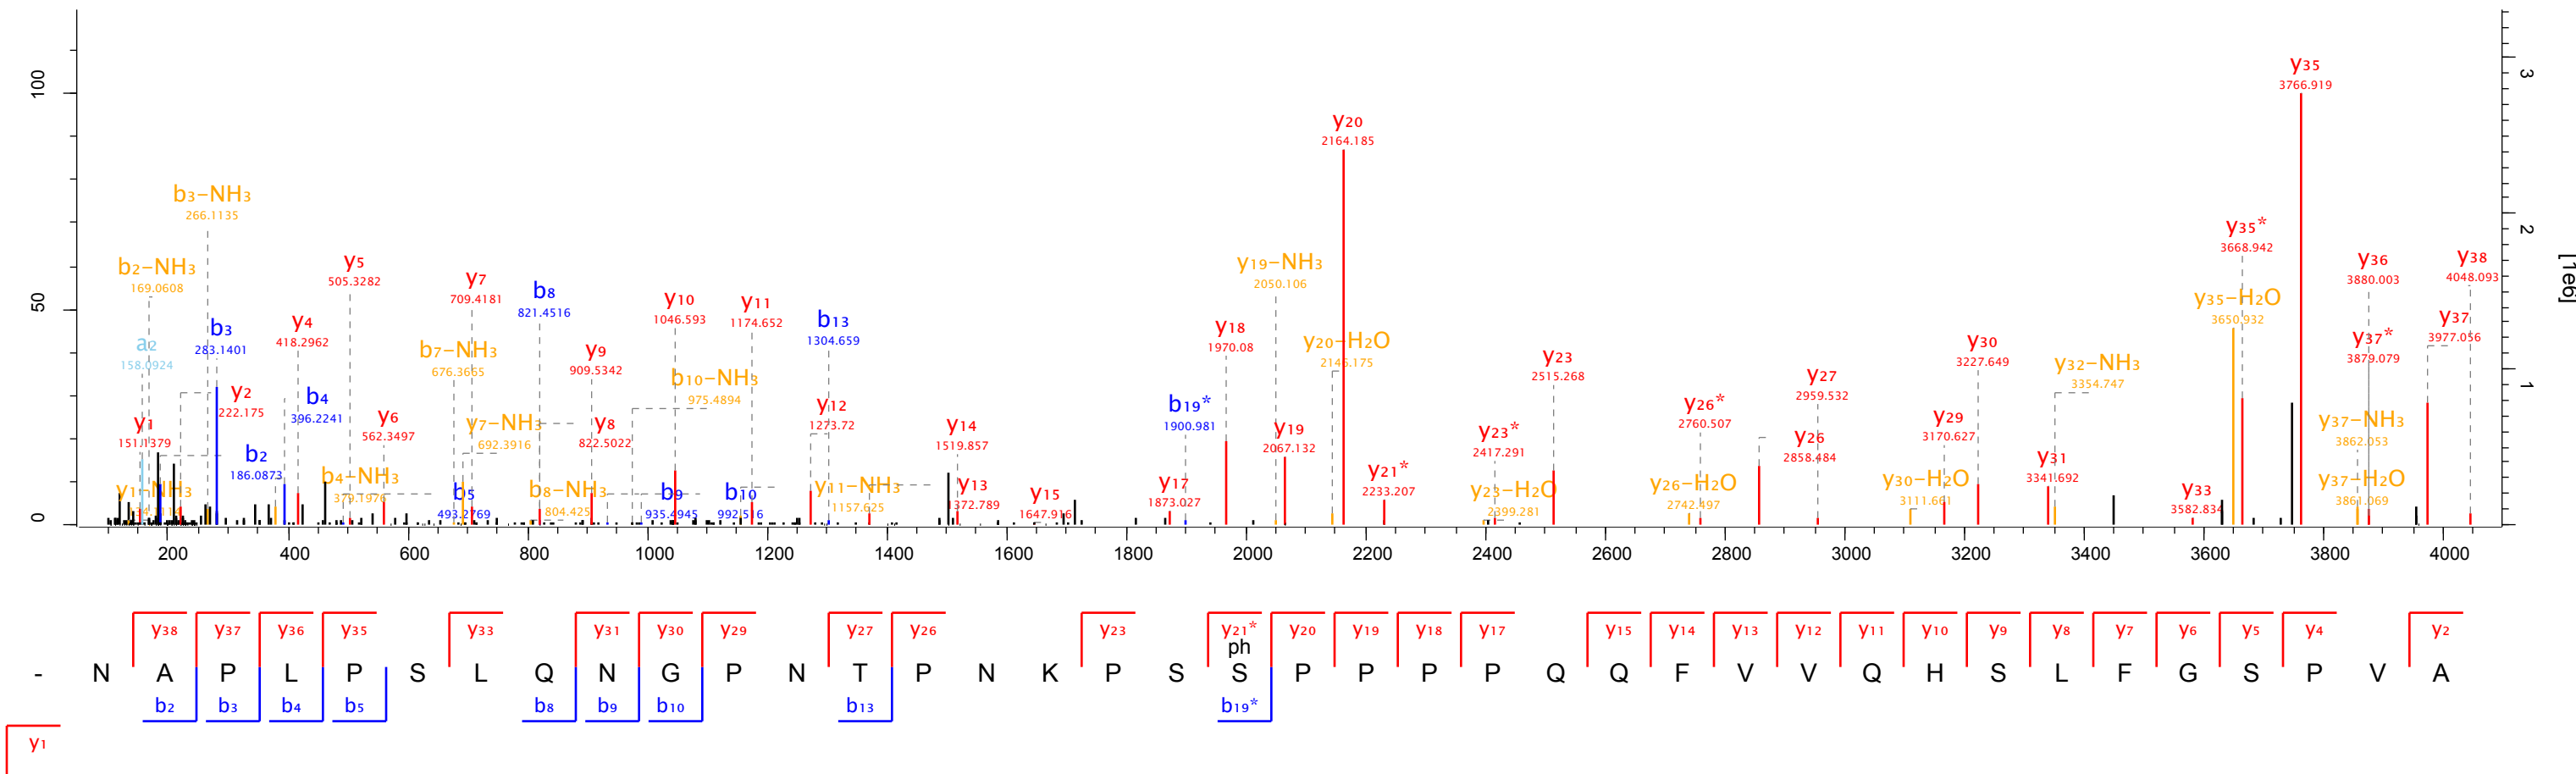

Raw file 20150814\_A375SR\_Phospho\_BR2\_03 Scan 23701 Method FTMS; HCD Score 95.65 m/z 641.8 Gene names NCOR2

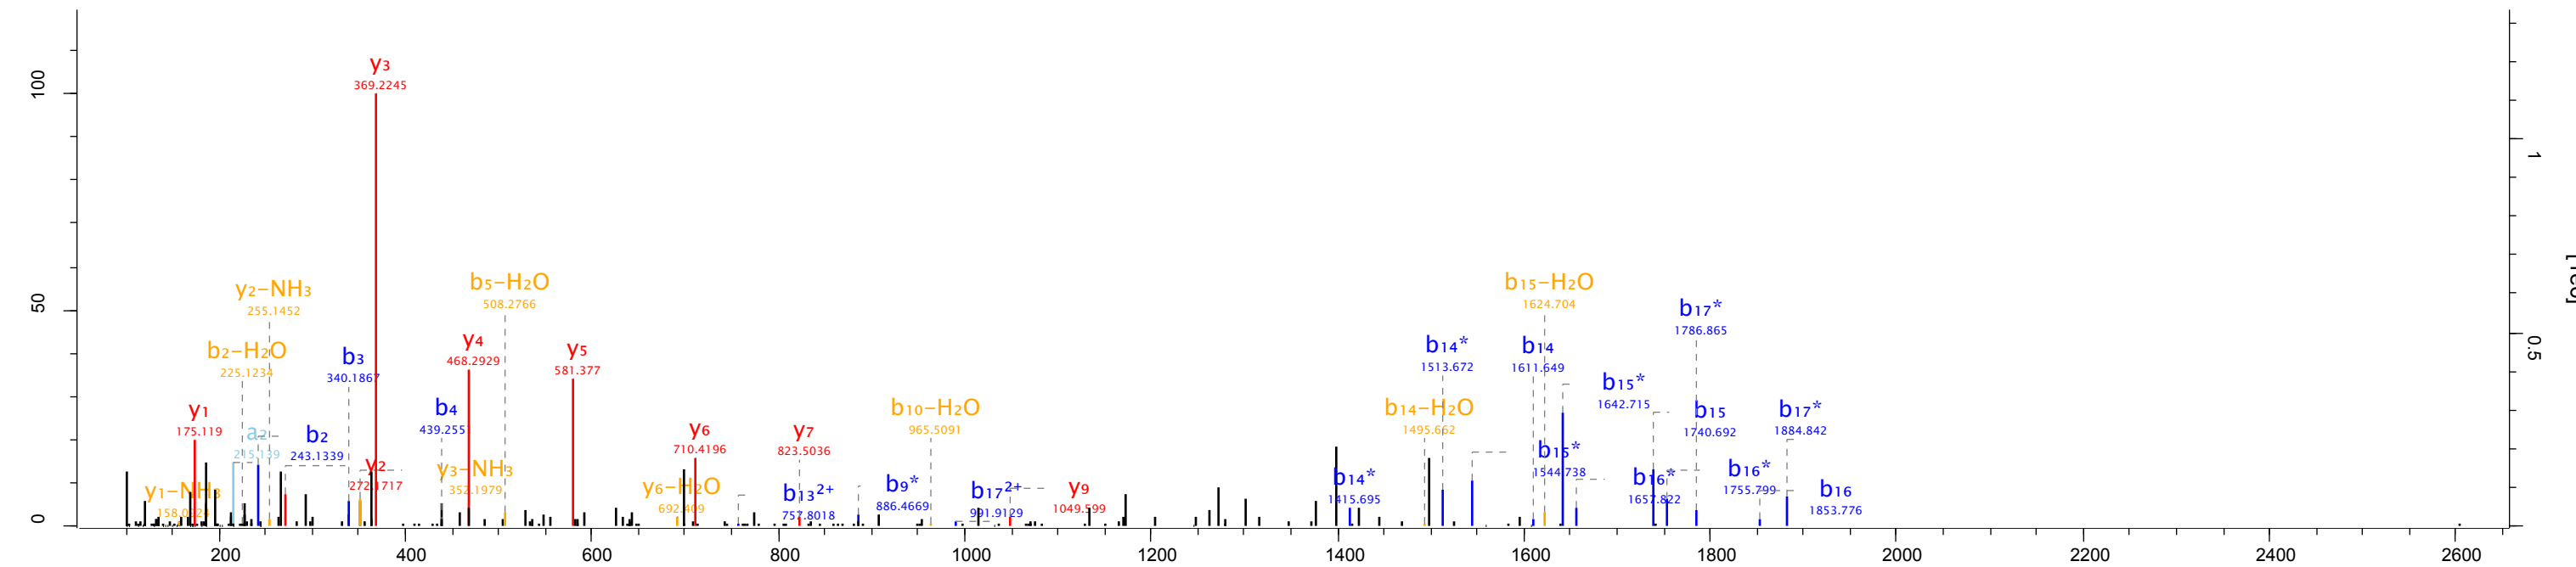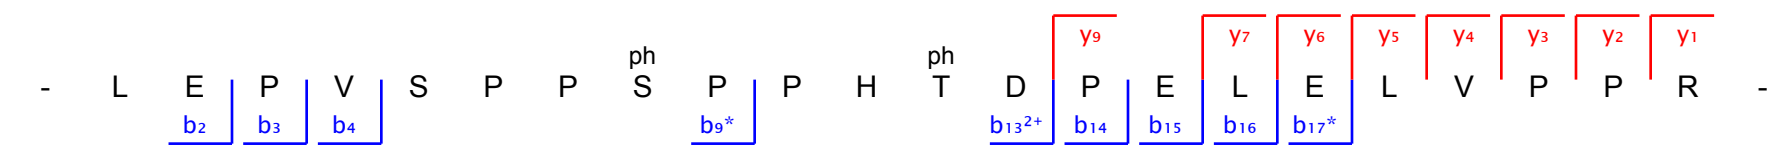

Raw file: 20150814\_A375SR\_Phospho\_BR2\_03  
 Scan: 23721 Method: FTMS; HCD Score: 201.04 m/z: 735.37 Gene names: TSC22D4

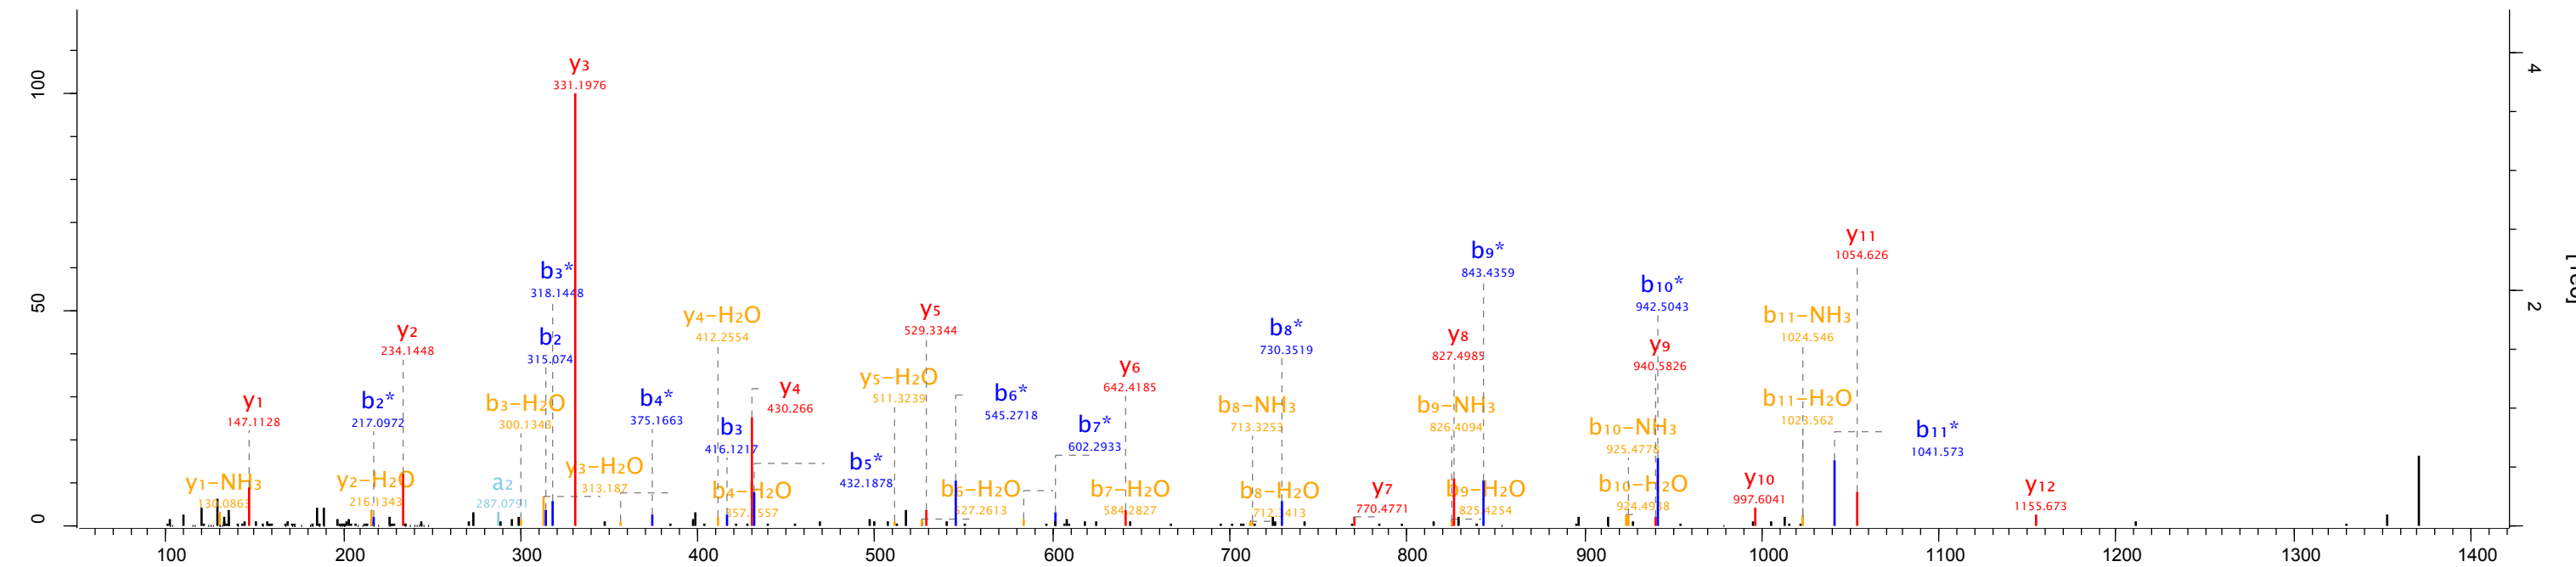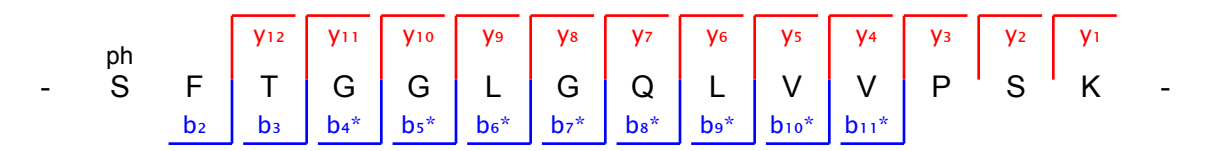



Raw file  
20150814\_A375SR\_Phospho\_BR2\_03

Scan 23831 Method FTMS; HCD Score 115.66 m/z 802.73 Gene names TRIM56

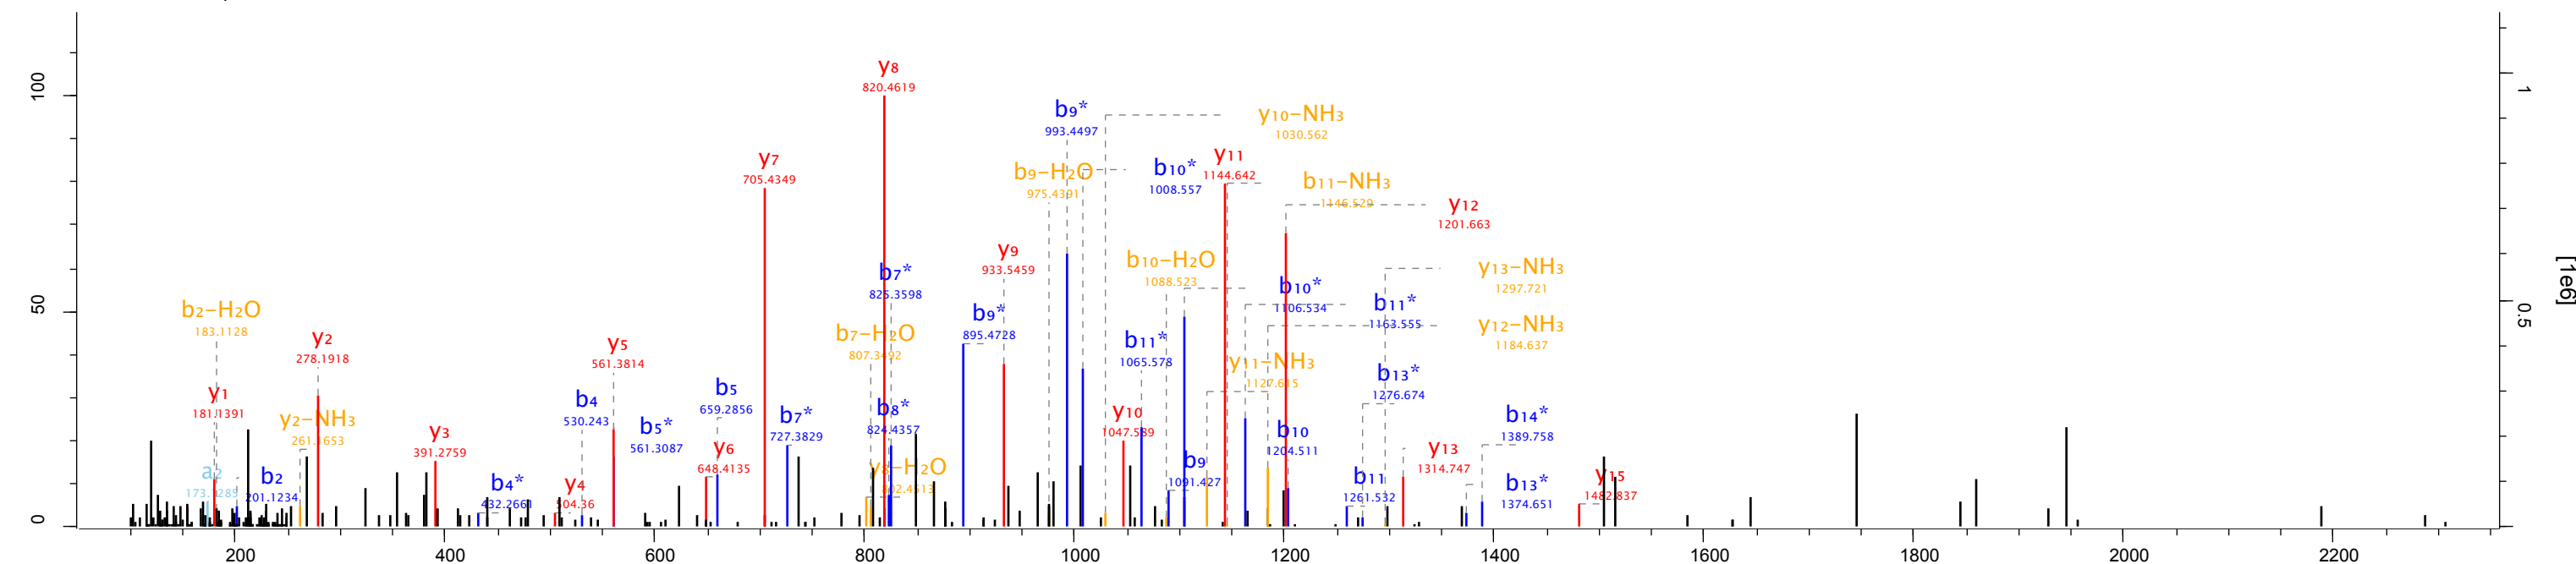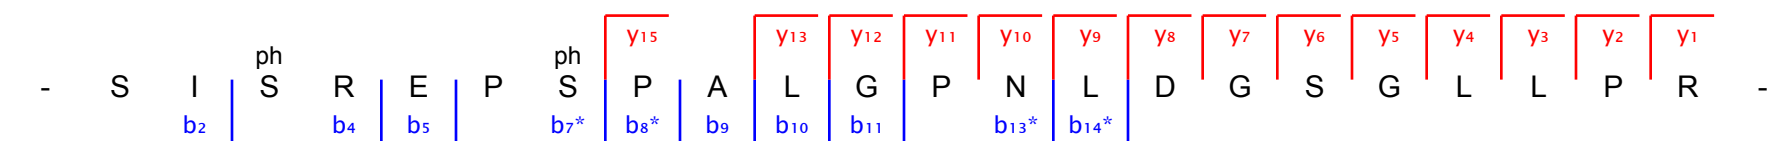

Raw file  
20150814\_A375SR\_Phospho\_BR2\_03

Scan 23881 Method FTMS; HCD Score 140.81 m/z 977.78 Gene names NAB2

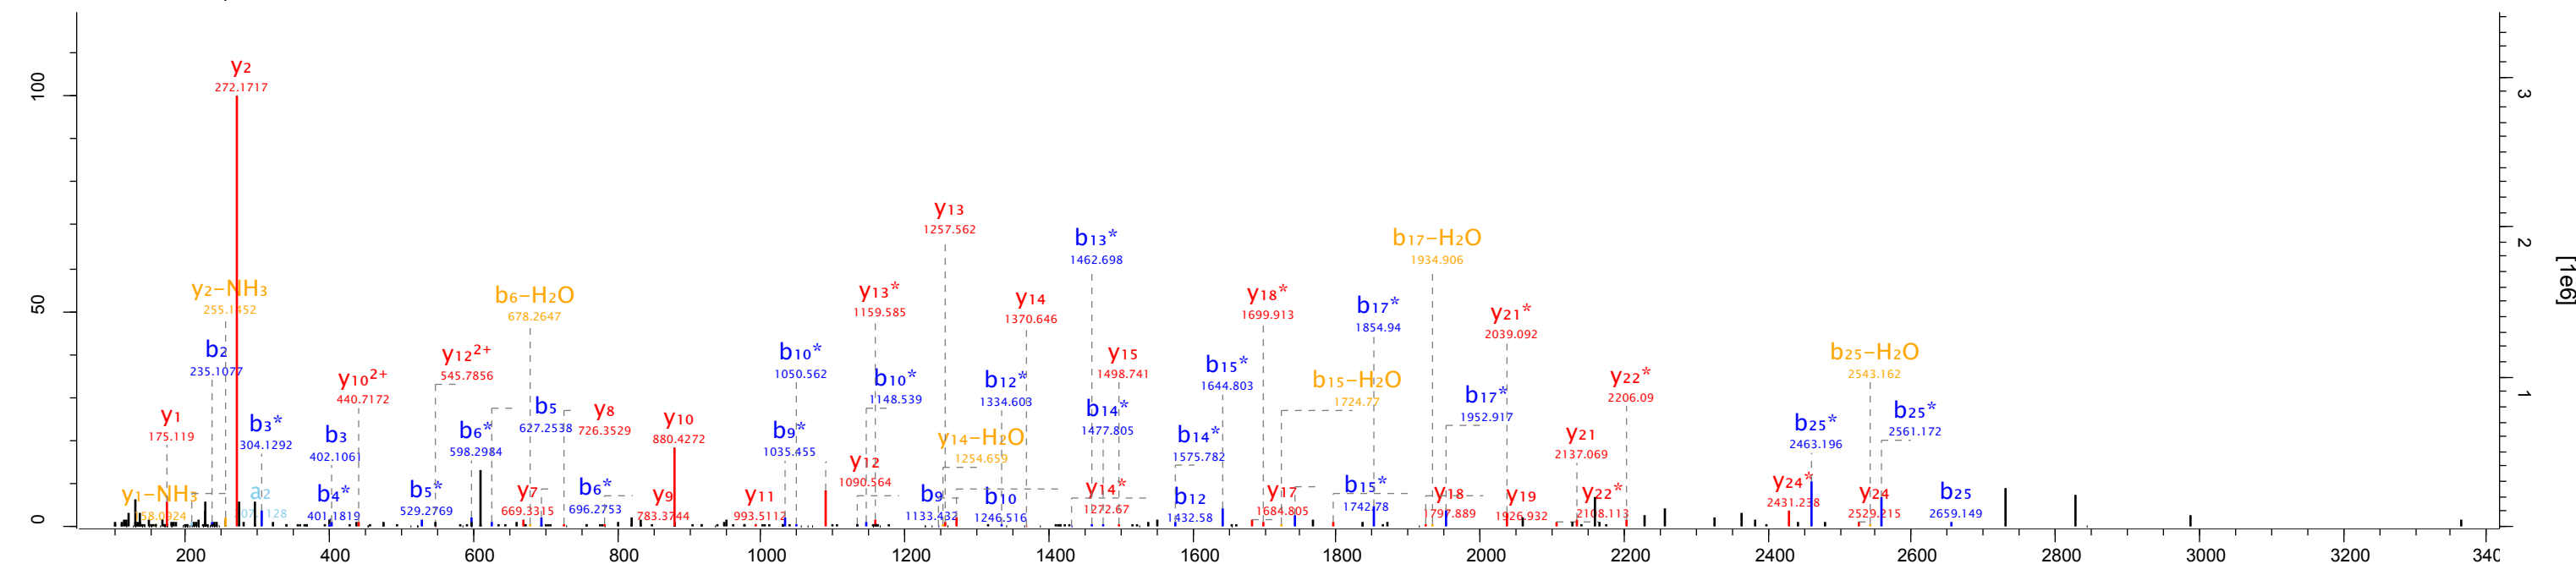

- S F S P K S P L E L G E K L S P L P G G P G A G D P R -

b<sub>2</sub> b<sub>3</sub> b<sub>4</sub>\* b<sub>5</sub> b<sub>6</sub>\* b<sub>9</sub> b<sub>10</sub> b<sub>12</sub> b<sub>13</sub>\* b<sub>14</sub>\* b<sub>15</sub>\* b<sub>17</sub>\* b<sub>25</sub>

y<sub>24</sub> y<sub>22</sub>\* y<sub>21</sub> y<sub>19</sub> y<sub>18</sub> y<sub>17</sub> y<sub>15</sub> y<sub>14</sub> y<sub>13</sub> y<sub>12</sub> y<sub>11</sub> y<sub>10</sub> y<sub>9</sub> y<sub>8</sub> y<sub>7</sub> y<sub>2</sub> y<sub>1</sub>

Raw file 20150814\_A375SR\_Phospho\_BR2\_03 Scan 24101 Method FTMS; HCD Score 140.3 m/z 789.32 Gene names NCAPH

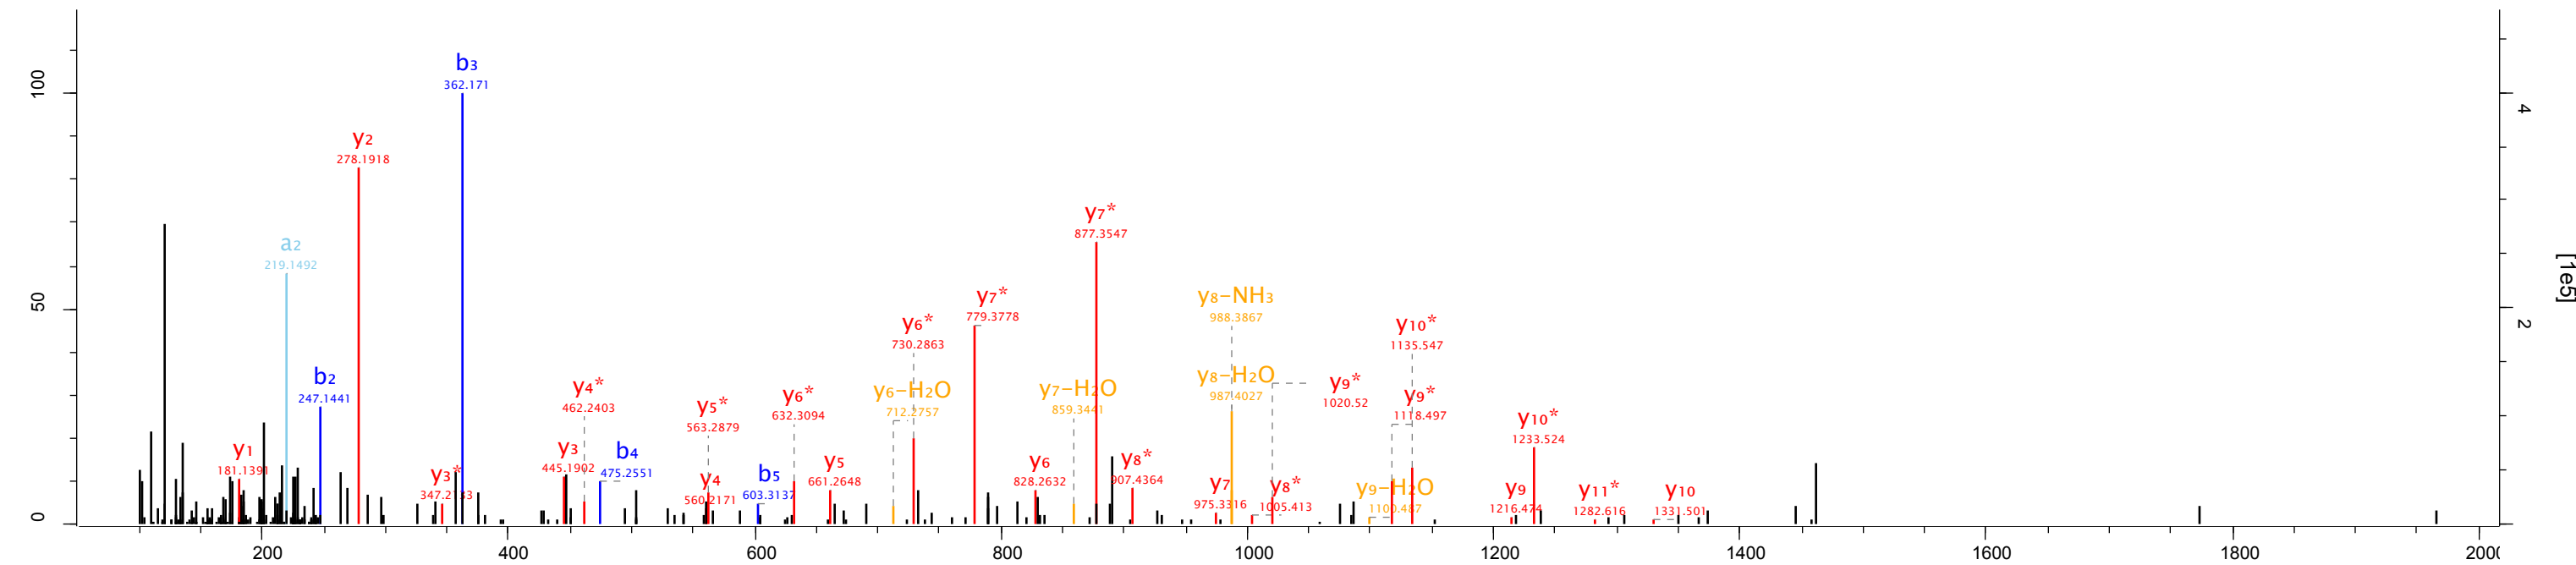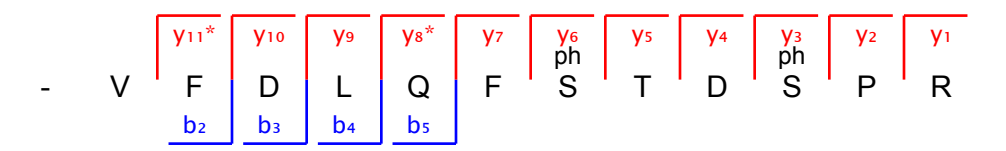

Raw file  
20150814\_A375SR\_Phospho\_BR2\_03

Scan 24301 Method FTMS; HCD Score 202.65 m/z 929.1 Gene names RANBP2

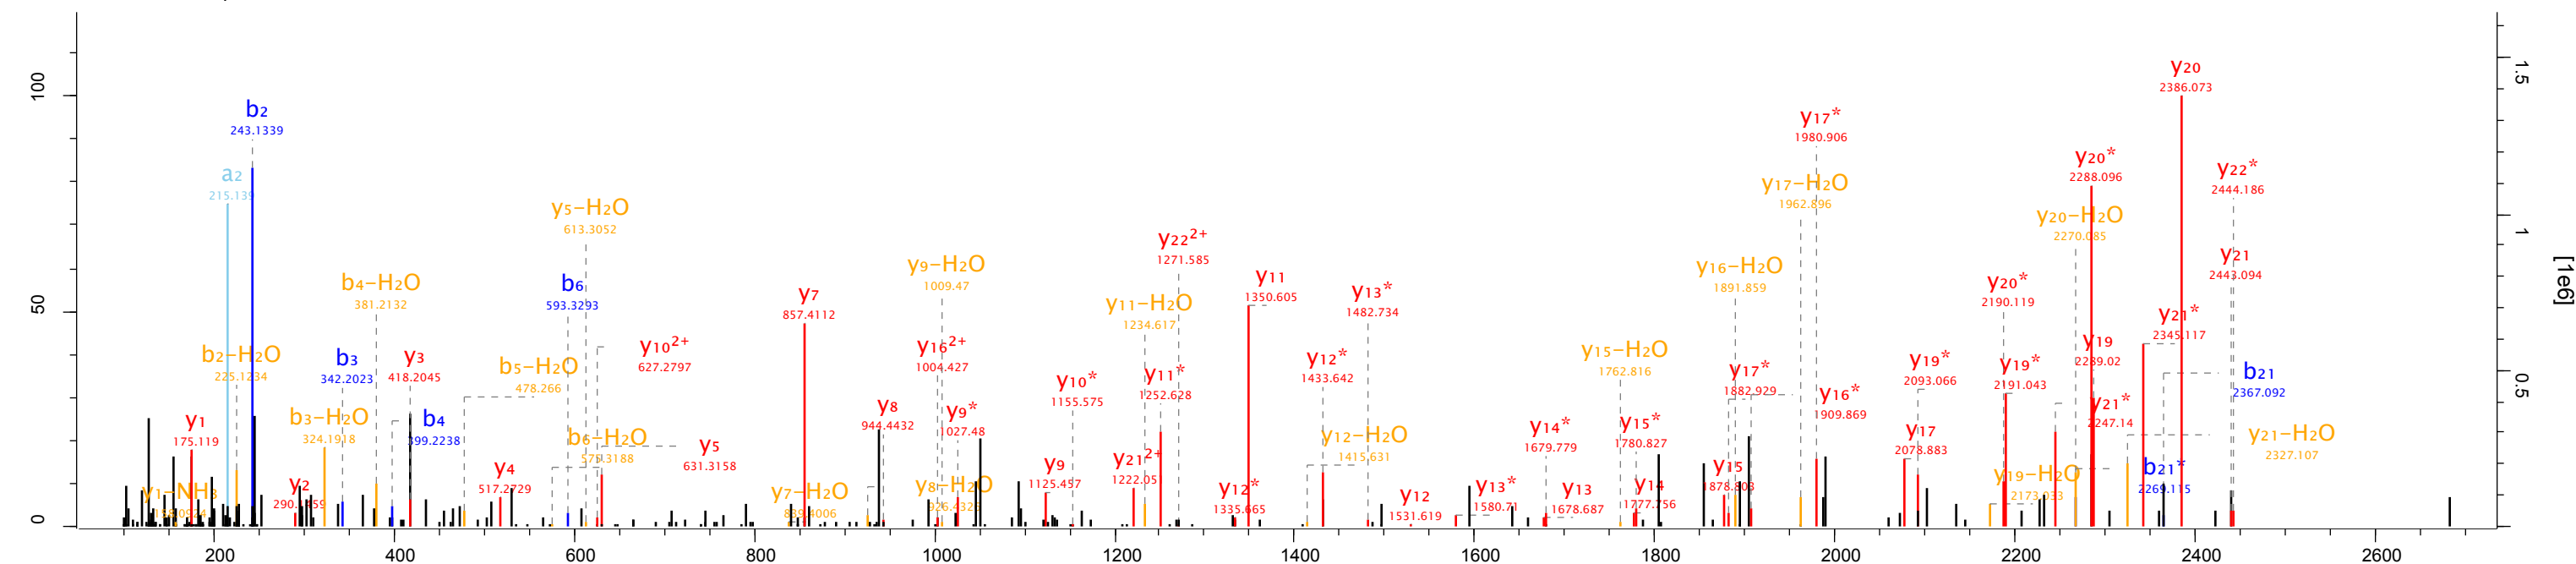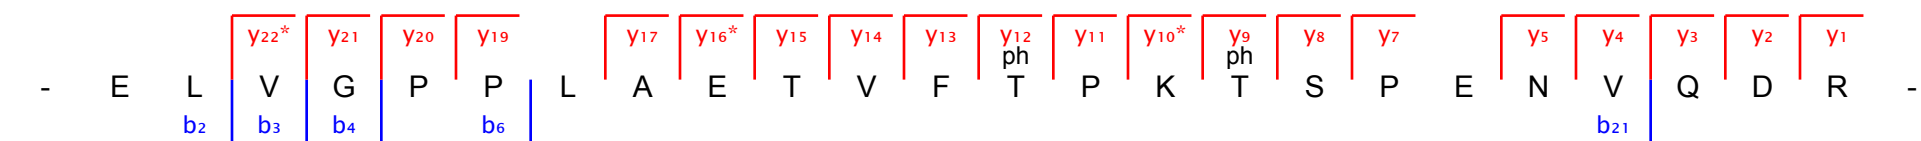

Raw file: 20150814\_A375SR\_Phospho\_BR2\_03  
 Scan: 24581 Method: FTMS; HCD Score: 252.1 m/z: 985.96 Gene names: G3BP1

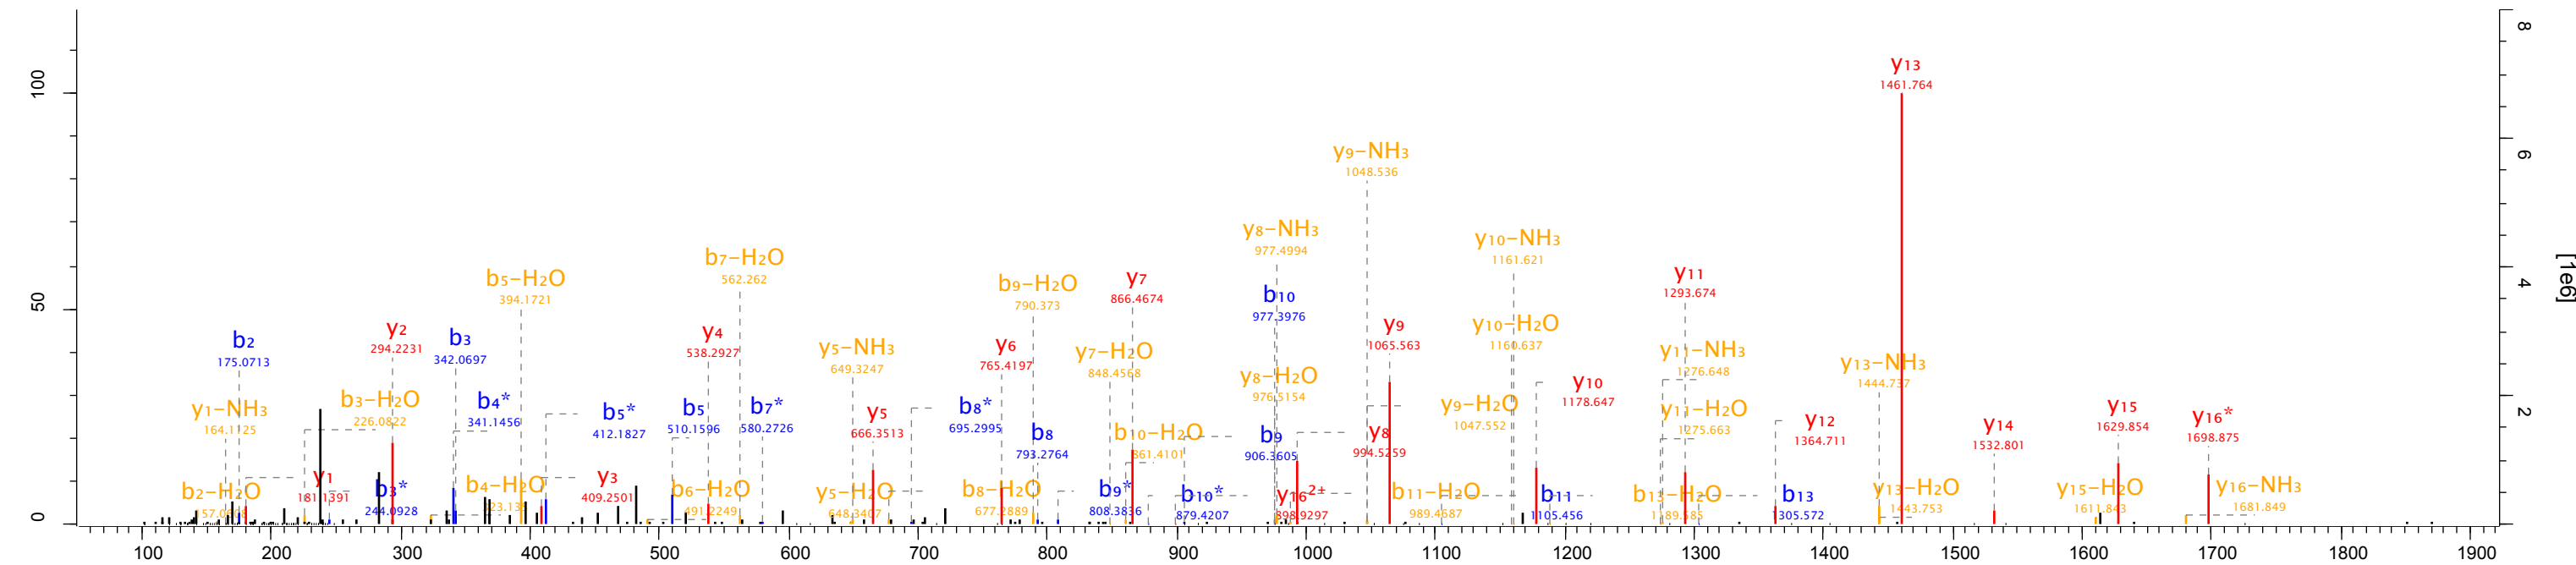

Protein sequence: - S S Y16\*  
ph Y15 Y14 Y13 Y12 Y11 Y10 Y9 Y8 Y7 Y6 Y5 Y4 Y3 Y2 Y1 -  
 S S b2 b3 b4\* b5 P b7\* b8 b9 b10 b11 T b13 Q E D L R -

Raw file  
20150814\_A375SR\_Phospho\_BR2\_03

Scan 24761 Method FTMS; HCD Score 61.6 m/z 925.41 Gene names IRAK4

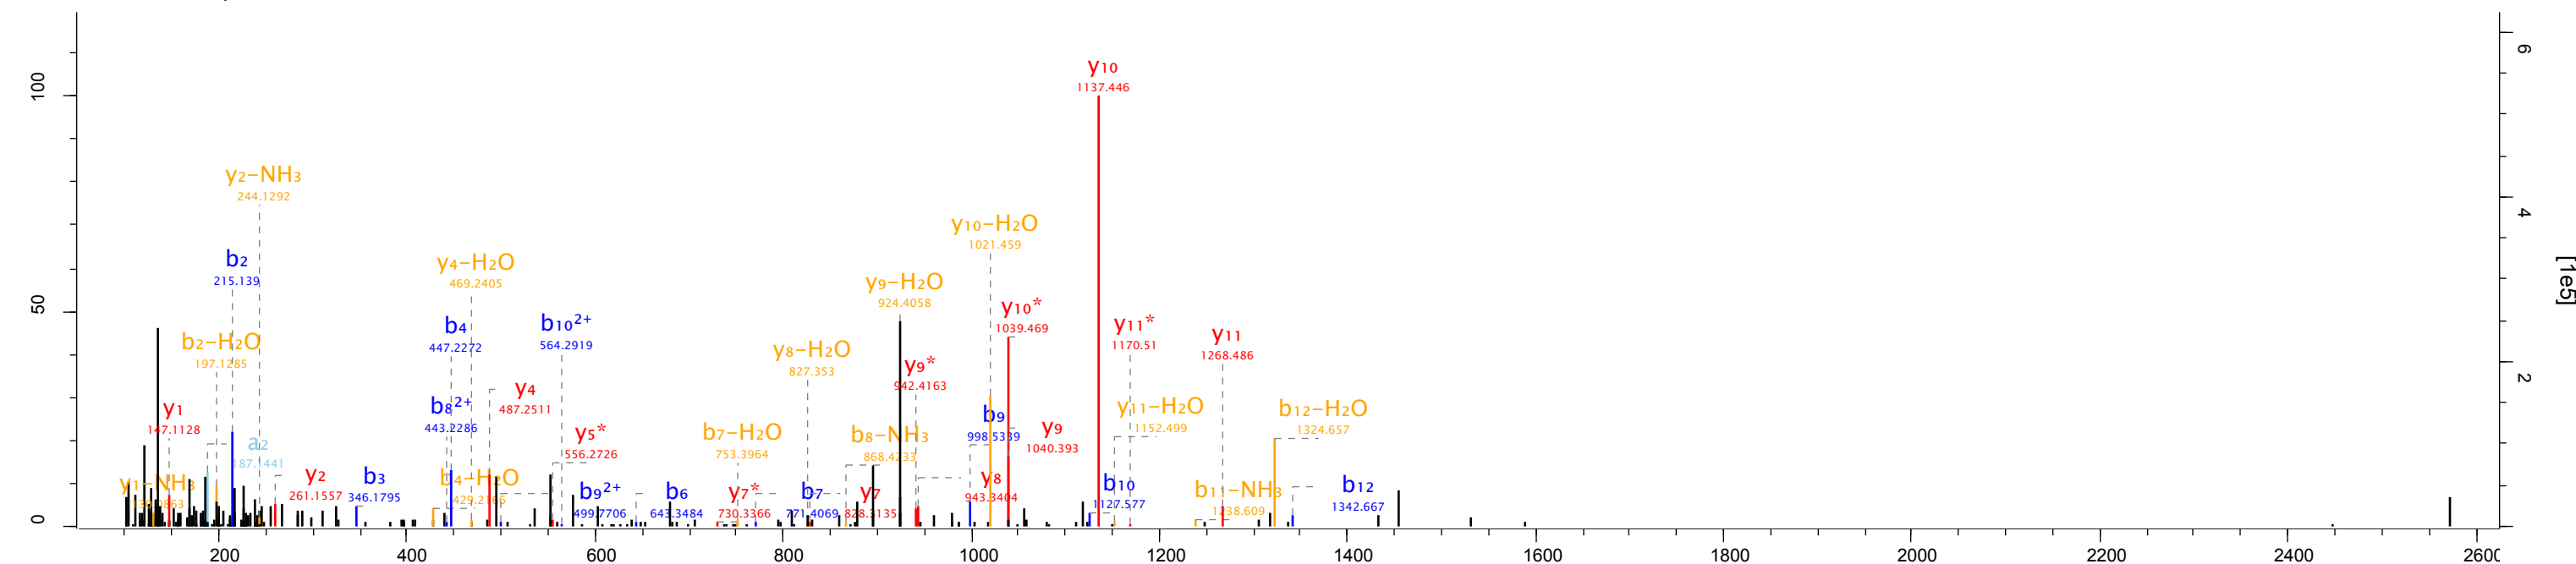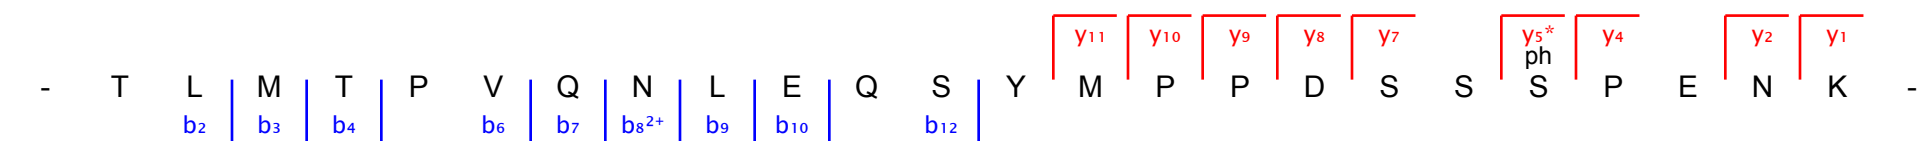

Raw file 20150814\_A375SR\_Phospho\_BR2\_03 Scan 24821 Method FTMS; HCD Score 170.62 m/z 1033.5 Gene names ANAPC4

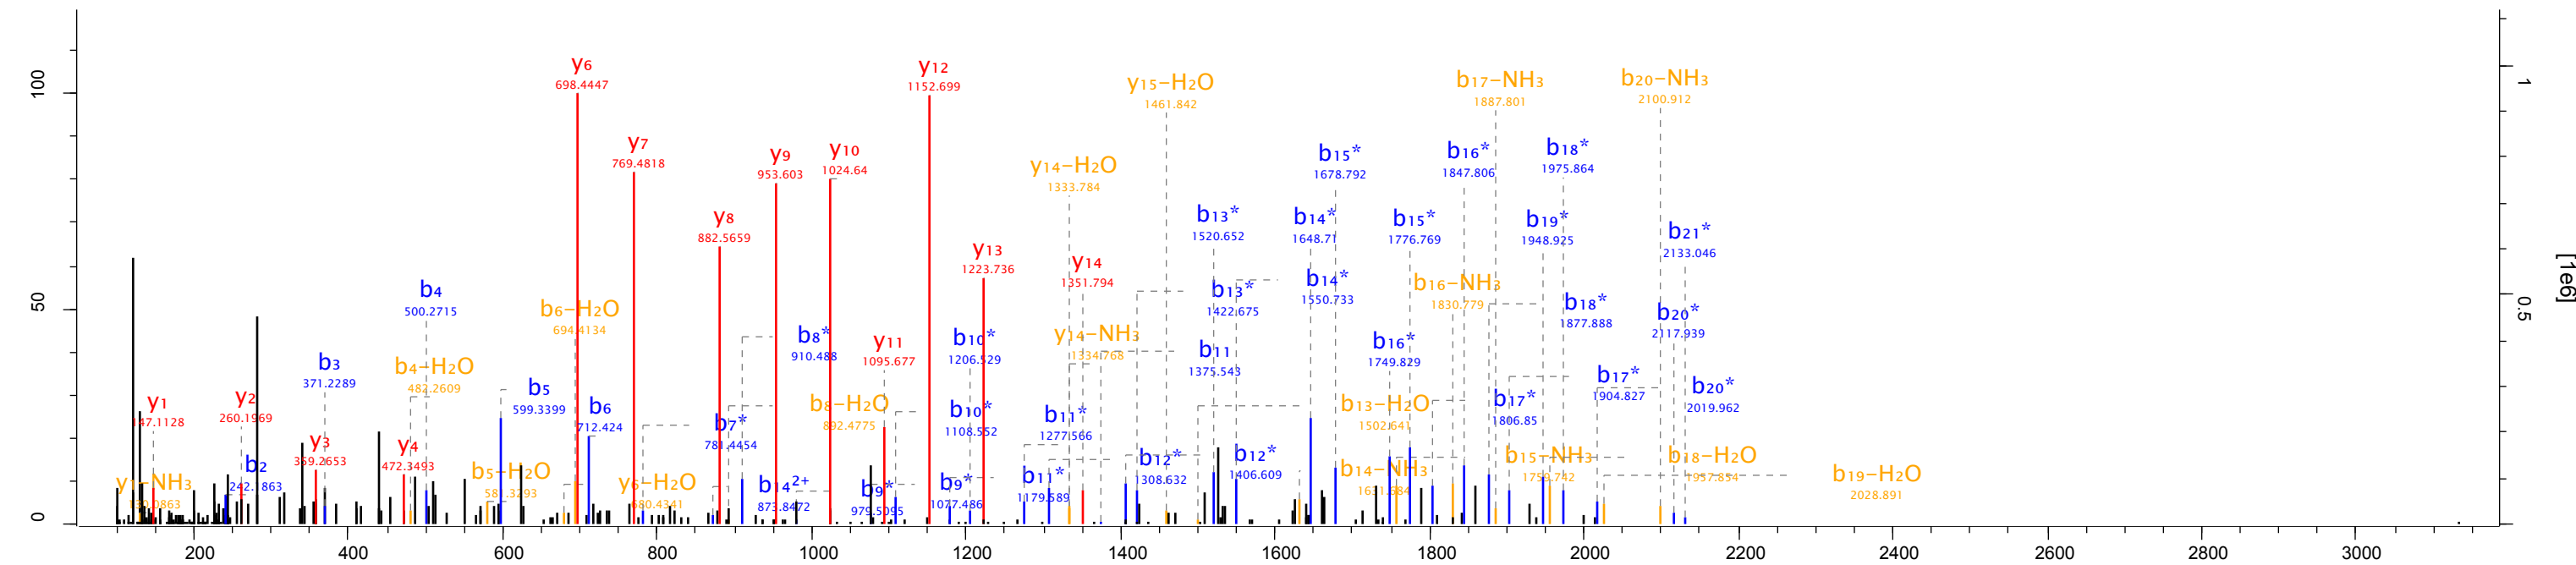

- I K E E V L S E S E A E N Q Q A G A A A L A P E I V I K -

b<sub>2</sub>
b<sub>3</sub>
b<sub>4</sub>
b<sub>5</sub>
b<sub>6</sub>
b<sub>7</sub><sup>\*</sup>
b<sub>8</sub><sup>\*</sup>
b<sub>9</sub><sup>\*</sup>
b<sub>10</sub><sup>\*</sup>
b<sub>11</sub>
b<sub>12</sub><sup>\*</sup>
b<sub>13</sub><sup>\*</sup>
b<sub>14</sub><sup>\*</sup>
b<sub>15</sub><sup>\*</sup>
b<sub>16</sub><sup>\*</sup>
b<sub>17</sub><sup>\*</sup>
b<sub>18</sub><sup>\*</sup>
b<sub>19</sub><sup>\*</sup>
b<sub>20</sub><sup>\*</sup>
b<sub>21</sub><sup>\*</sup>

y<sub>14</sub>
y<sub>13</sub>
y<sub>12</sub>
y<sub>11</sub>
y<sub>10</sub>
y<sub>9</sub>
y<sub>8</sub>
y<sub>7</sub>
y<sub>6</sub>
y<sub>4</sub>
y<sub>3</sub>
y<sub>2</sub>
y<sub>1</sub>

Raw file 20150814\_A375SR\_Phospho\_BR2\_03 Scan 25281 Method FTMS; HCD Score 102.65 m/z 687.34 Gene names NCAPD3

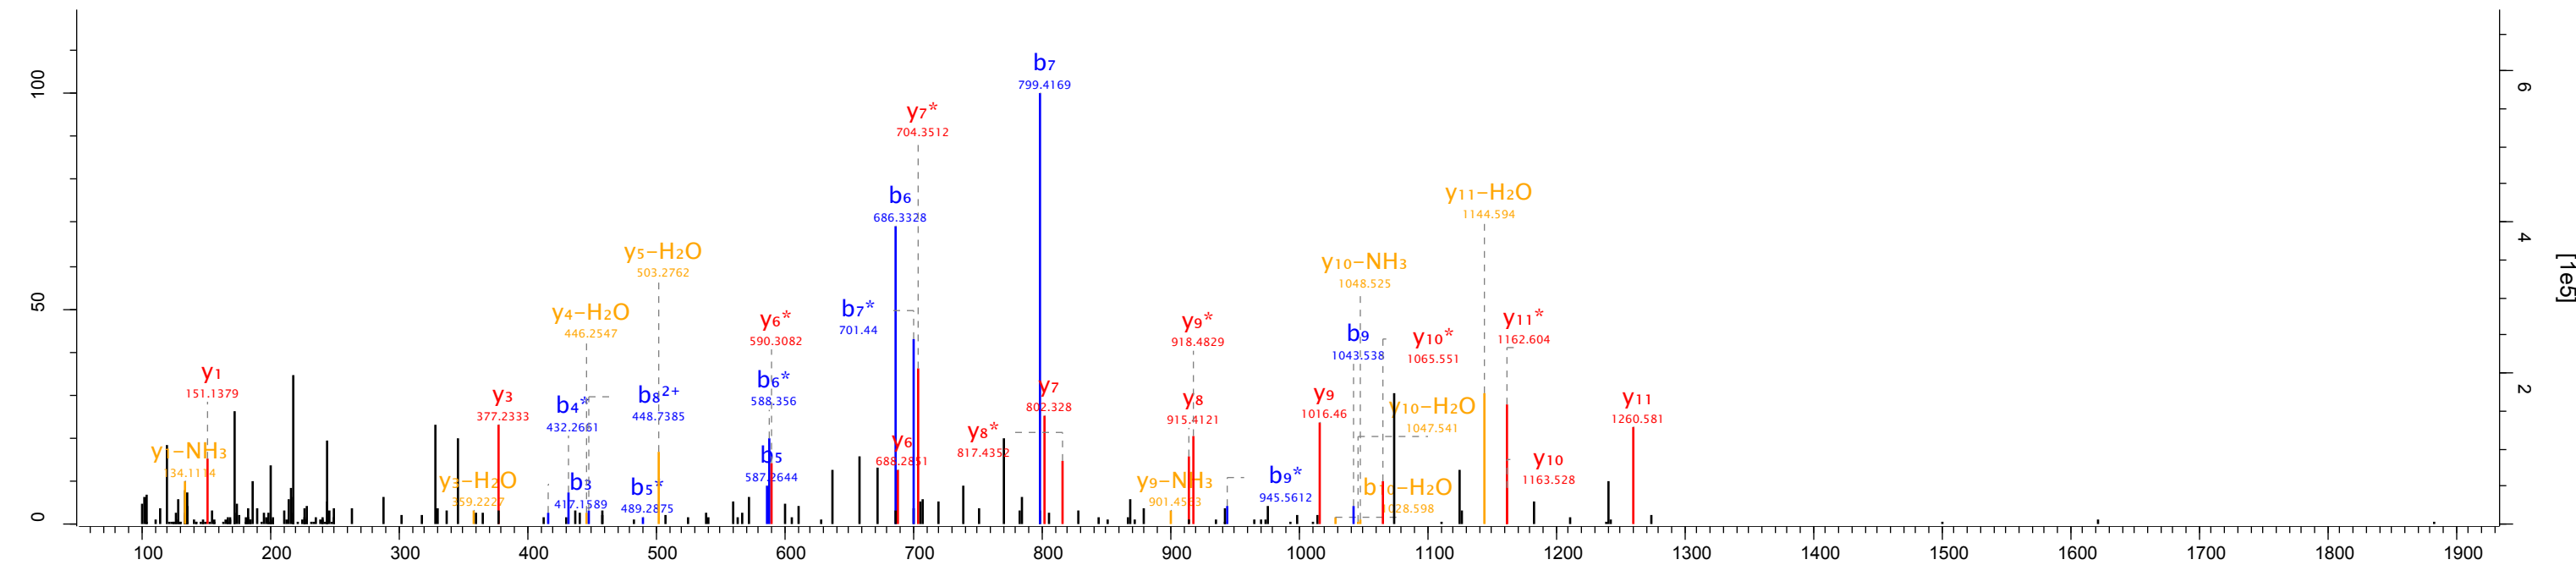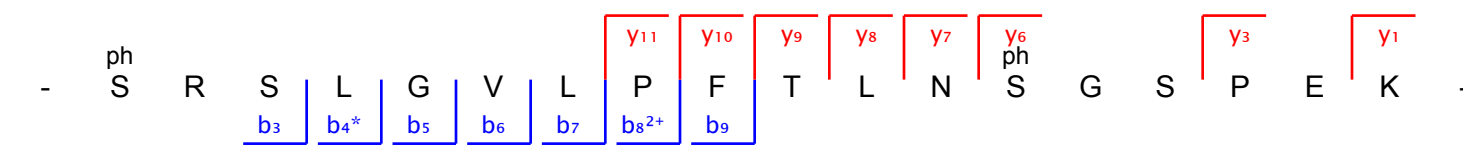



Raw file 20150814\_A375SR\_Phospho\_BR2\_03 Scan 25411 Method FTMS; HCD Score 58.96 m/z 853.42 Gene names WDR44

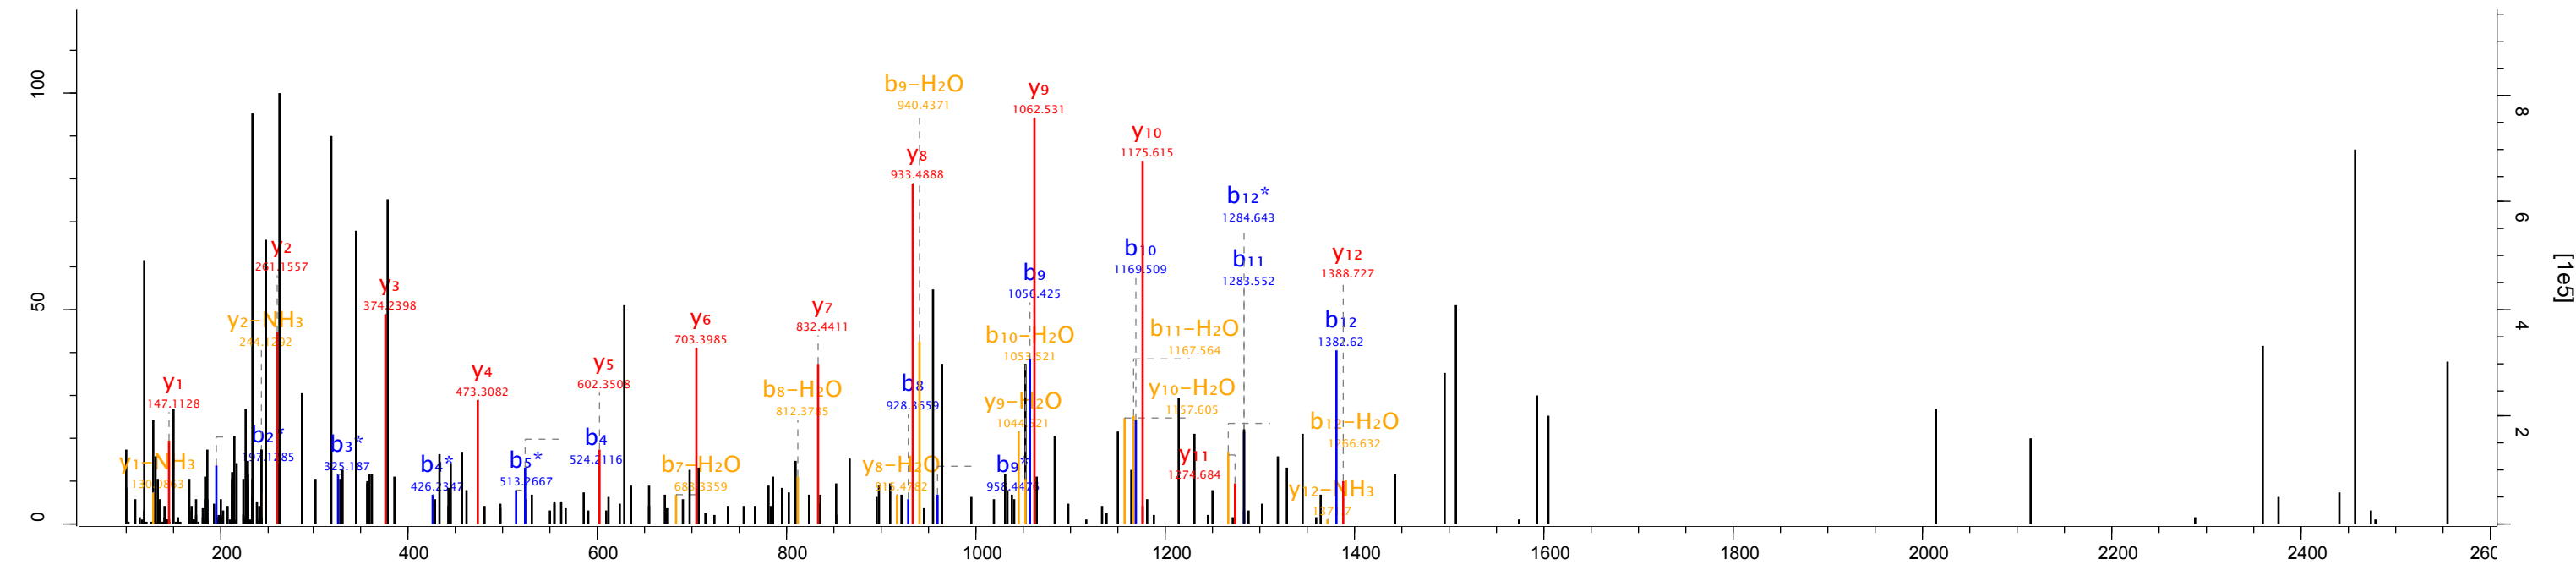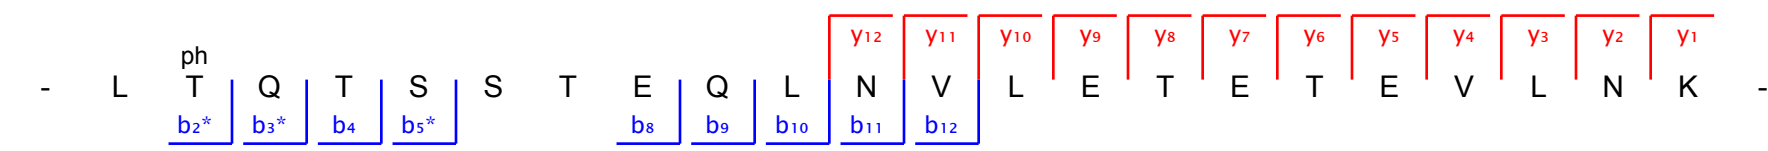

Raw file: 20150814\_A375SR\_Phospho\_BR2\_03  
 Scan: 25581 Method: FTMS; HCD Score: 160.63 m/z: 724.86 Gene names: ZFP36L2;ZFP36L1

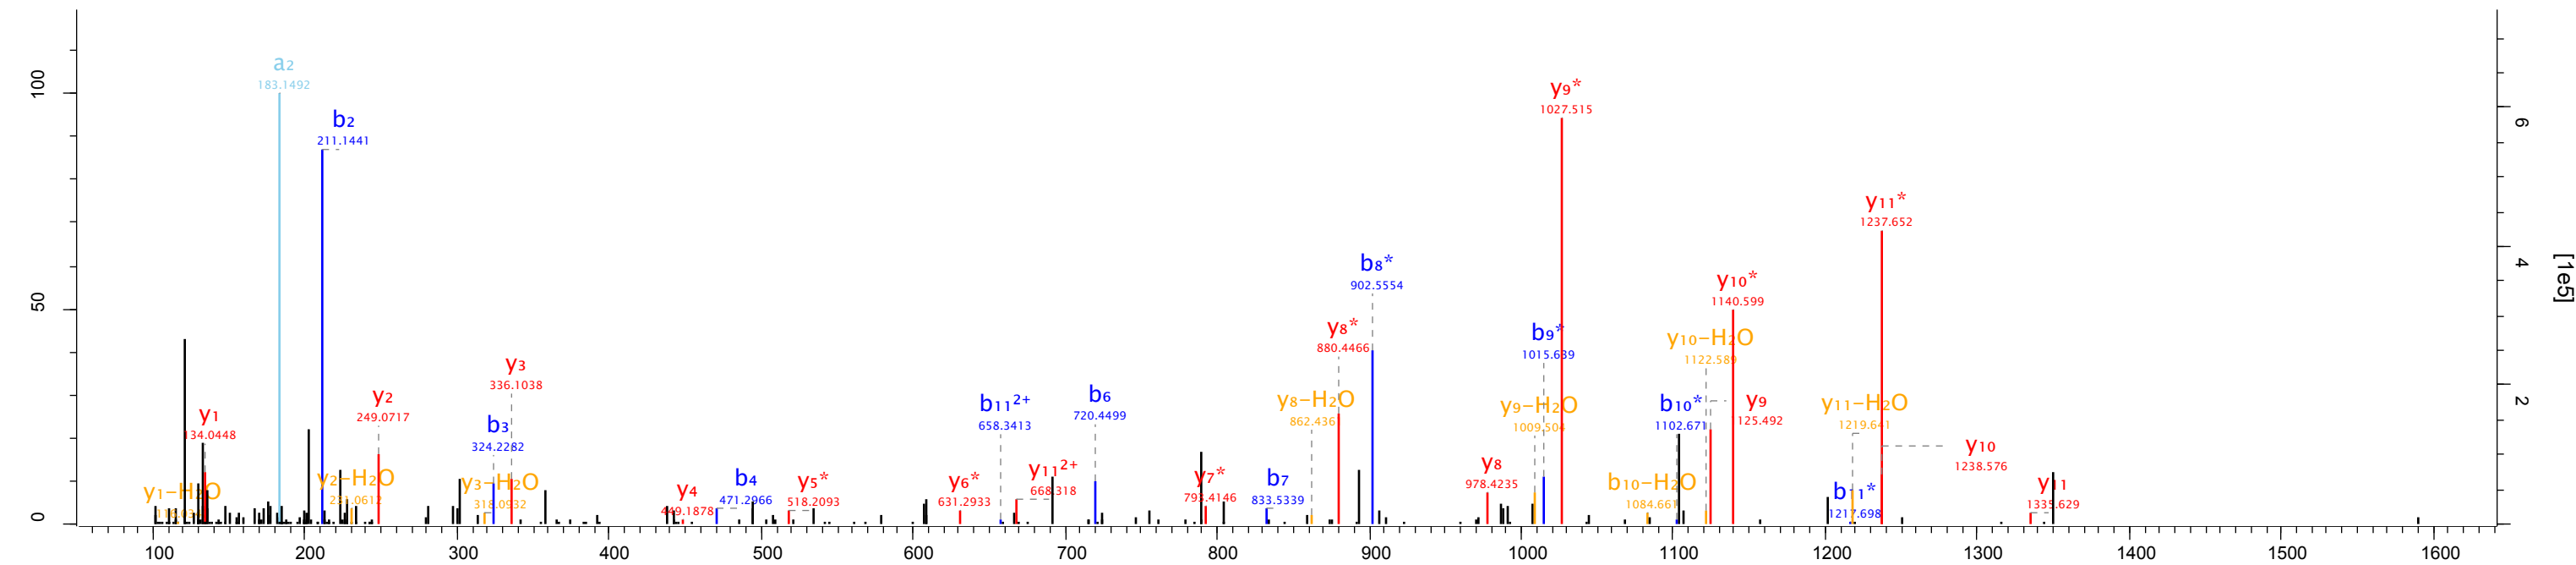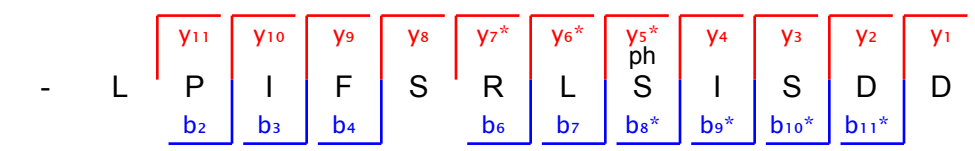

Raw file: 20150814\_A375SR\_Phospho\_BR2\_03  
 Scan: 25911 Method: FTMS; HCD Score: 131.56 m/z: 963.41 Gene names: TTC7A

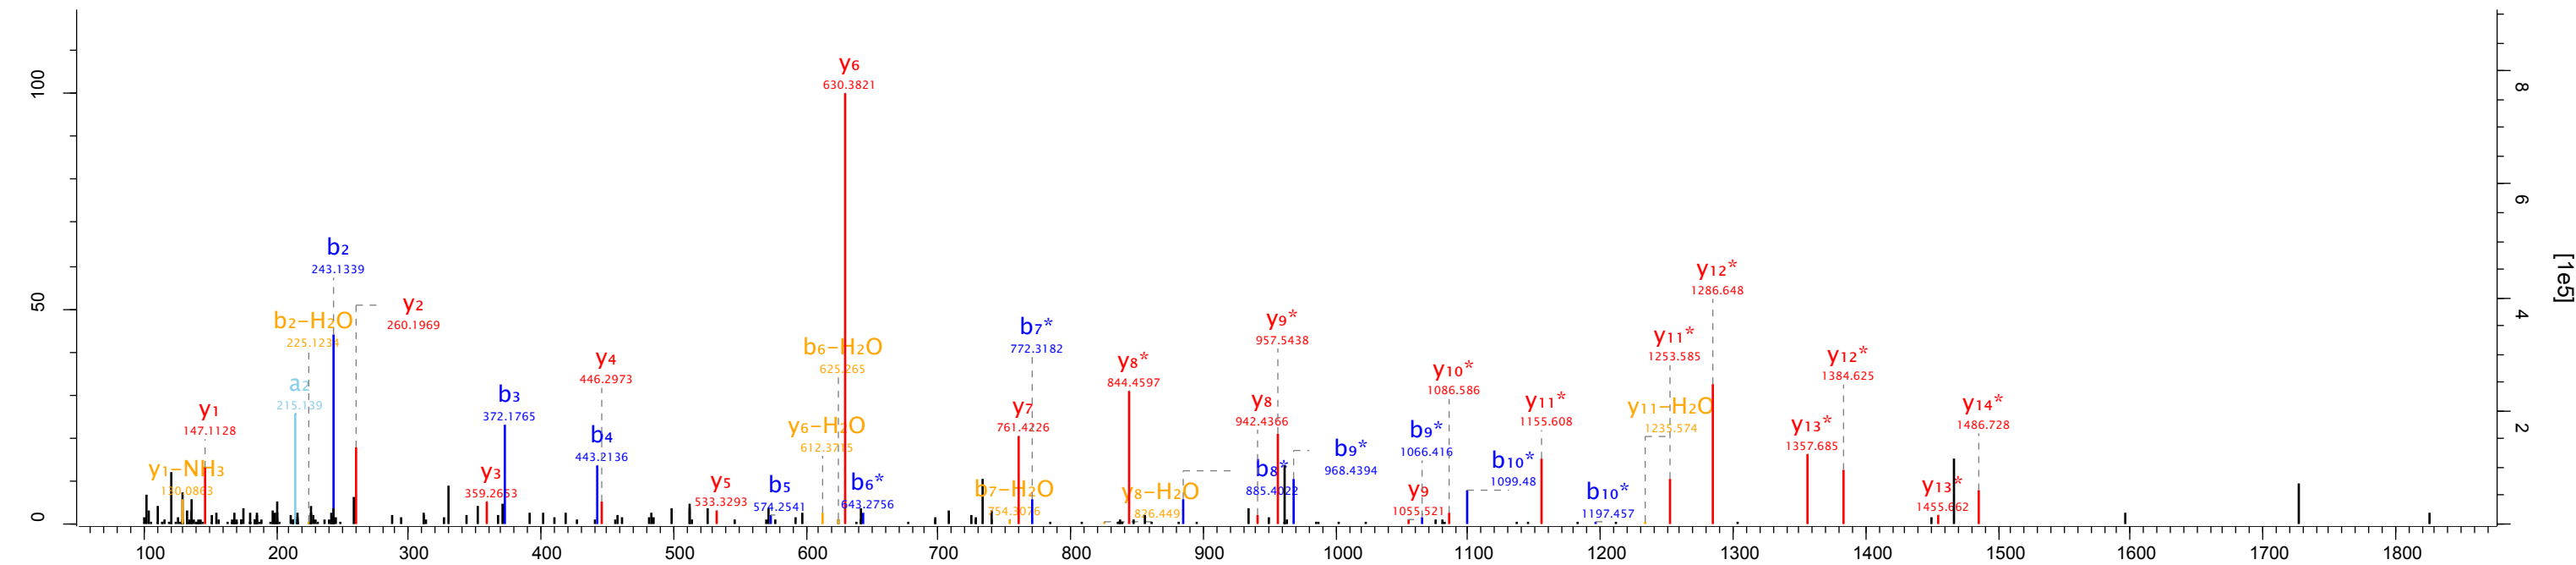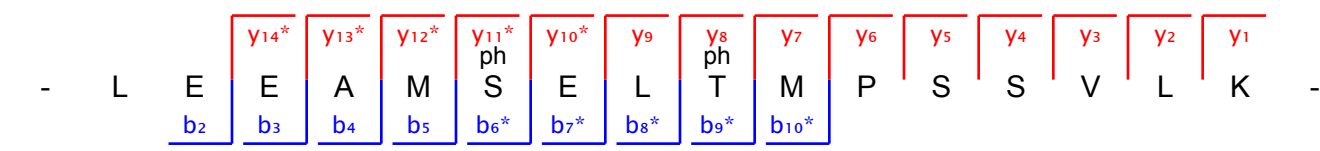

Raw file 20150814\_A375SR\_Phospho\_BR2\_03 Scan 25991 Method FTMS; HCD Score 137.64 m/z 1157.48 Gene names PHF2

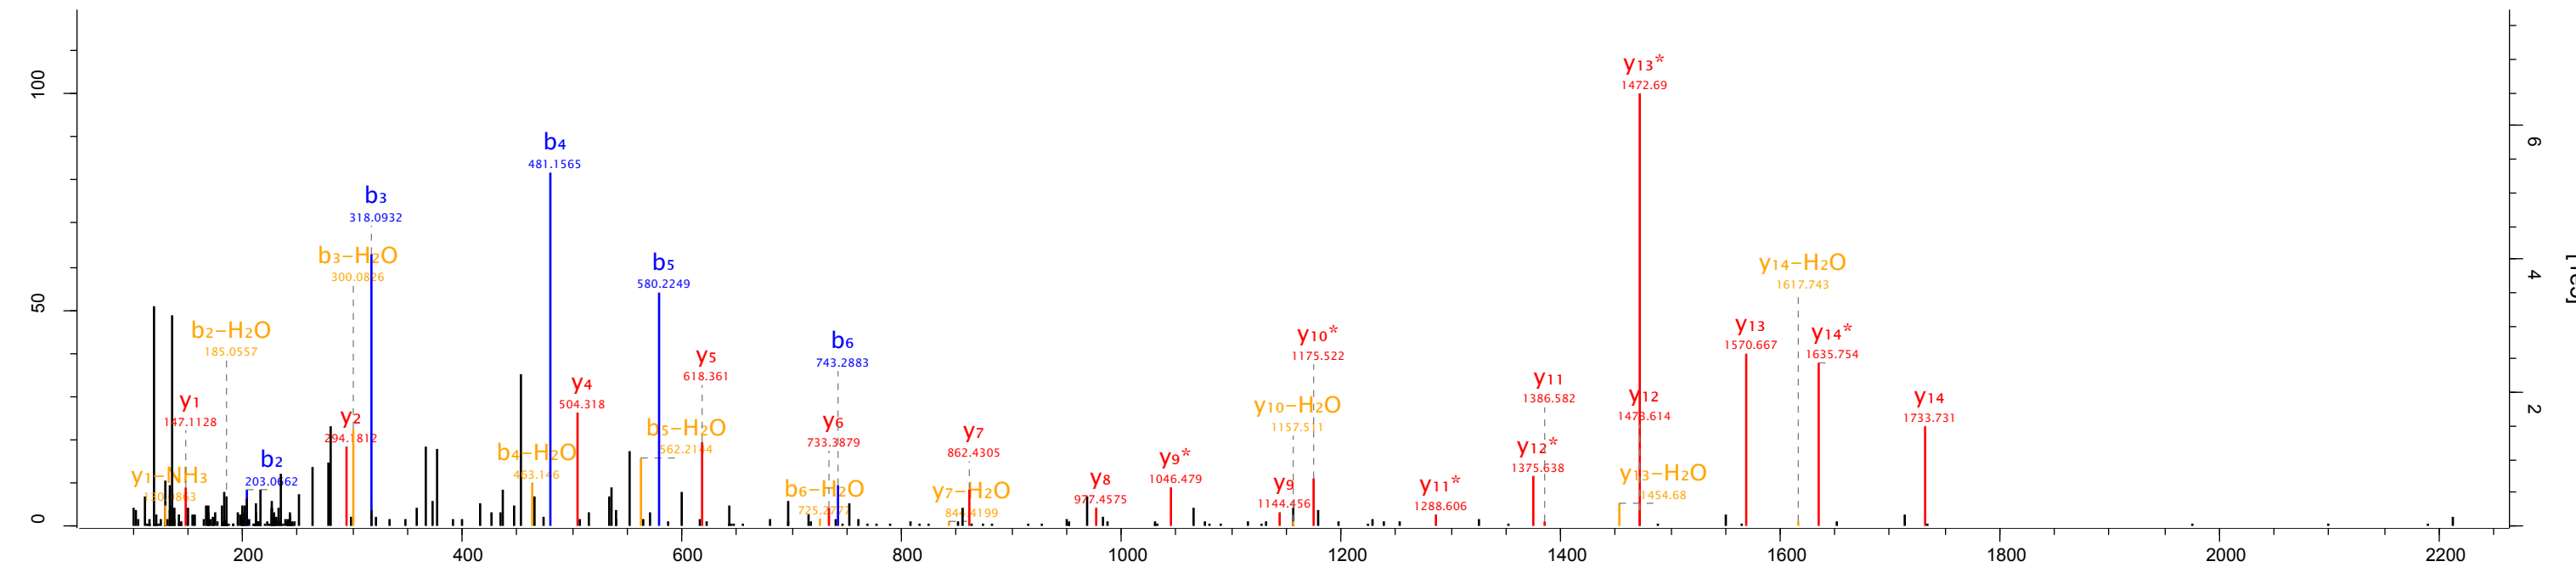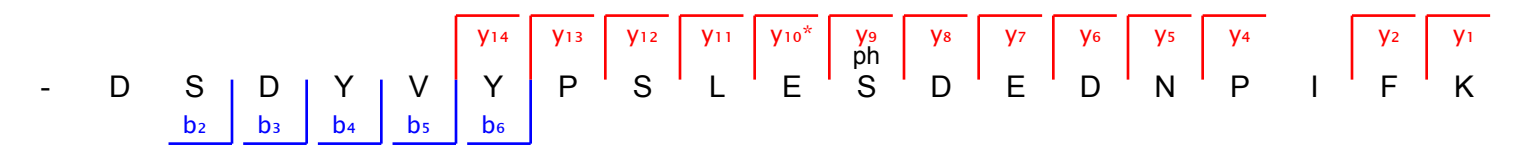

Raw file 20150814\_A375SR\_Phospho\_BR2\_03 Scan 2601 Method FTMS; HCD Score 143.33 m/z 889.84 Gene names RABGAP1

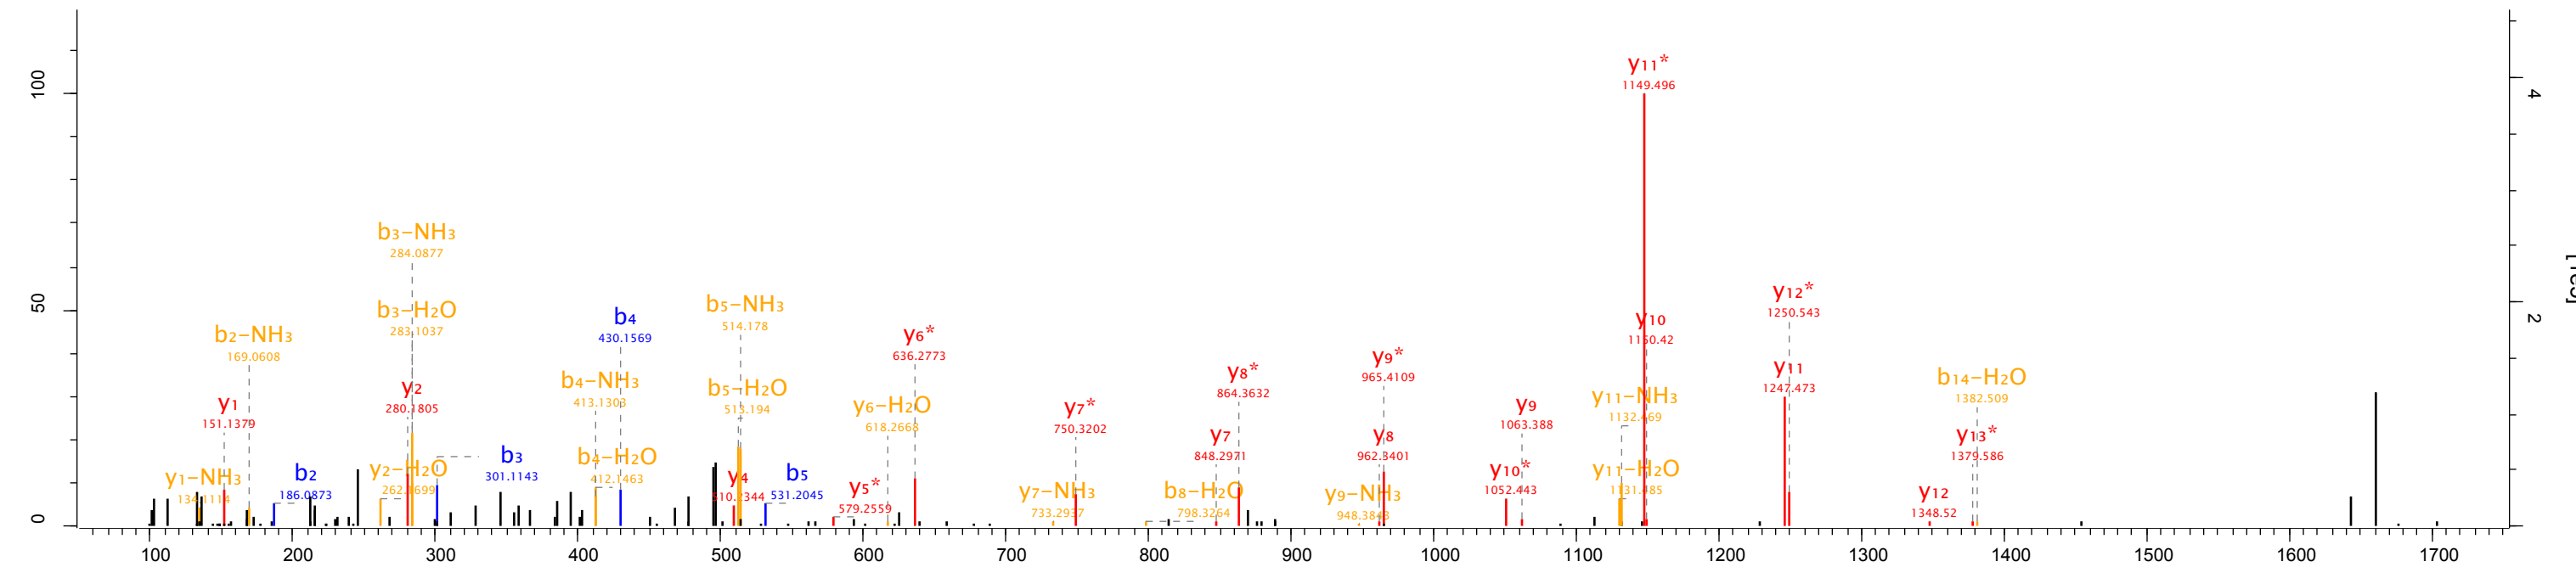

- Q G D E T P S T N N G S D D E K -

b<sub>2</sub>
b<sub>3</sub>
b<sub>4</sub>
b<sub>5</sub>
y<sub>13</sub>\*
y<sub>12</sub>
y<sub>11</sub>
y<sub>10</sub>
y<sub>9</sub>
y<sub>8</sub>
y<sub>7</sub>
y<sub>6</sub>\*
y<sub>5</sub>\*
y<sub>4</sub>
y<sub>2</sub>
y<sub>1</sub>

Raw file: 20150814\_A375SR\_Phospho\_BR2\_03  
 Scan: 26671 Method: FTMS; HCD Score: 95.17 m/z: 1213.84 Gene names: CHMP3

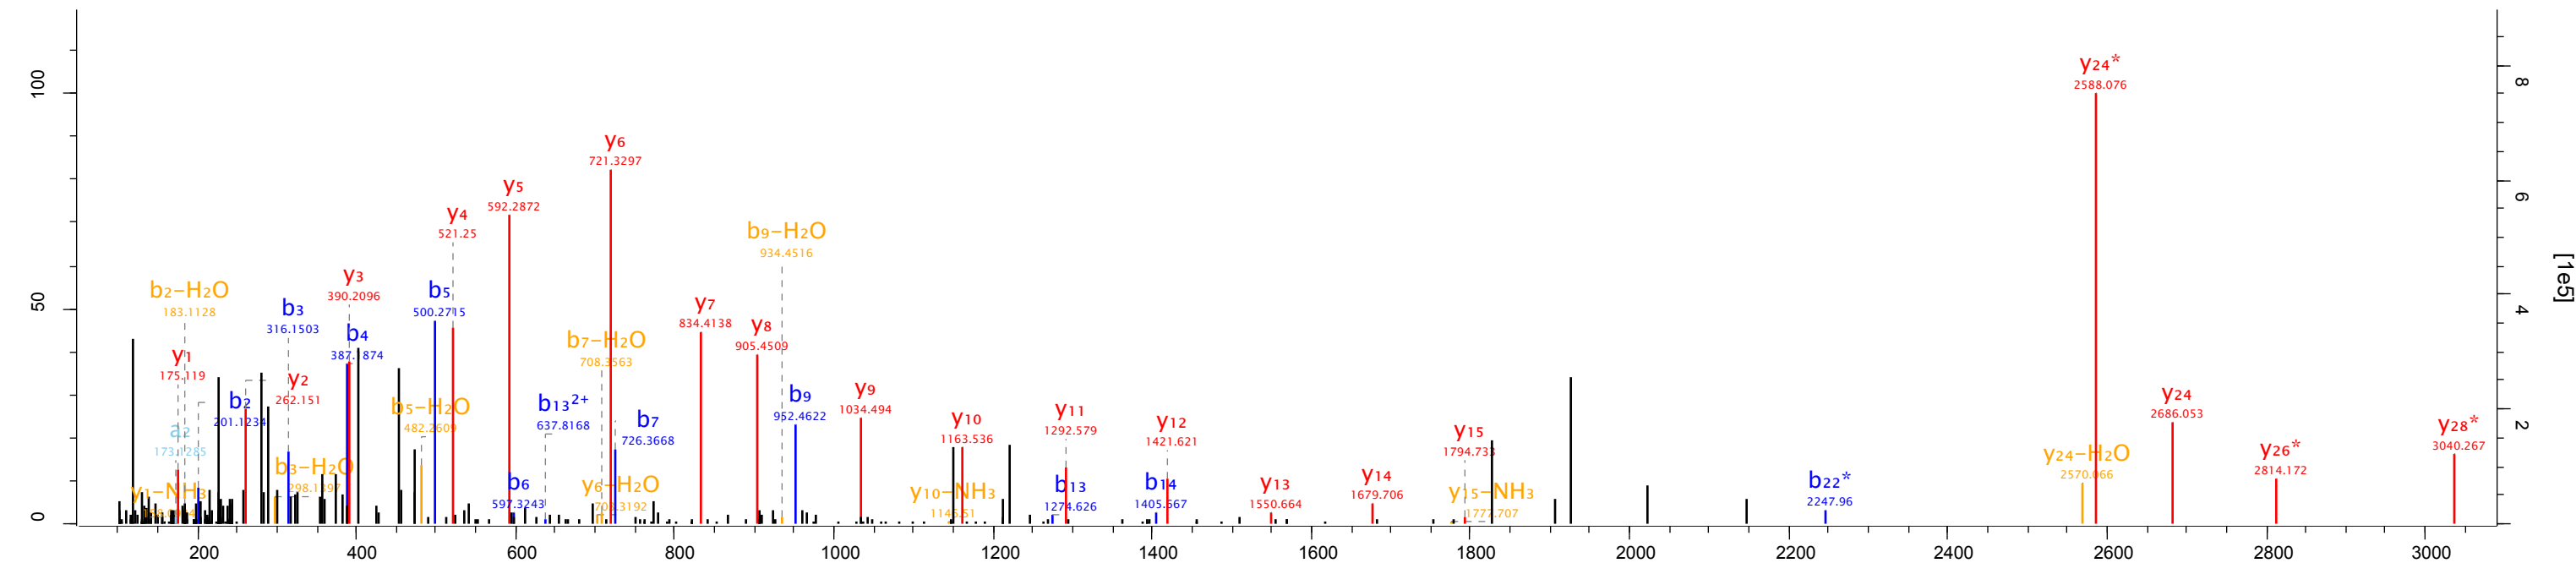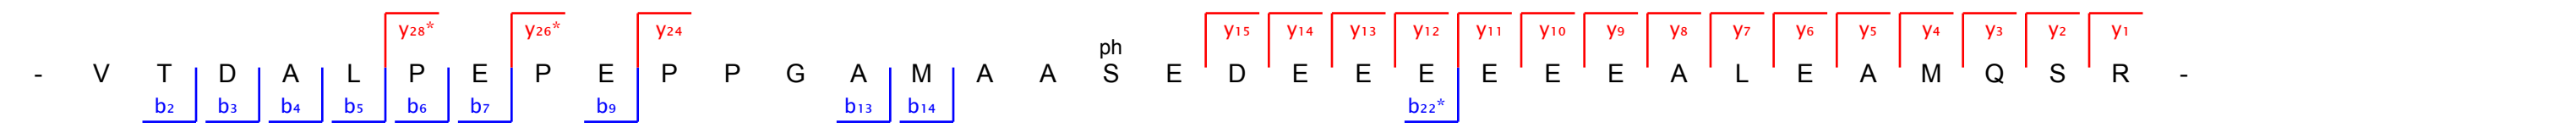

Raw file 20150814\_A375SR\_Phospho\_BR2\_03 Scan 26691 Method FTMS; HCD Score 183.54 m/z 938.07 Gene names ZNF830

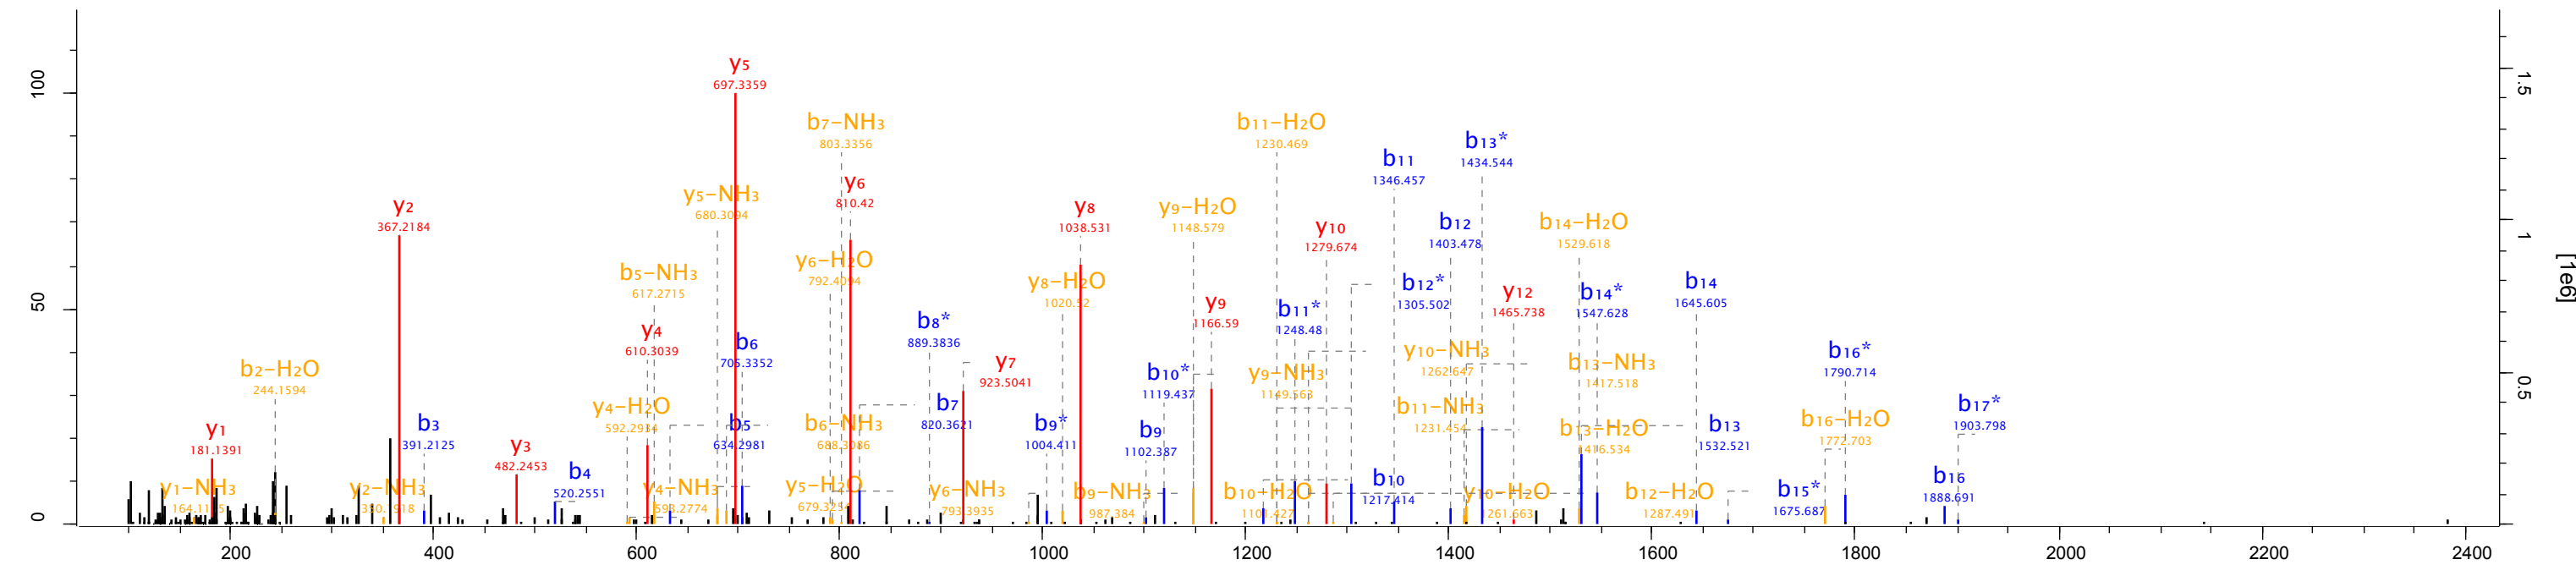

- K E E E N A D S D D E G E L Q D L L S Q D W R -

Fragmentation mapping (b-ions in blue, y-ions in red):

- b3: E
- b4: E
- b5: N
- b6: A
- b7: D
- b8\*: S
- b9: D
- b10: D
- b11: E
- b12: G
- b13: E
- b14: L
- b15\*: Q
- b16: D
- b17\*: L
- y1: R
- y2: W
- y3: D
- y4: Q
- y5: S
- y6: L
- y7: L
- y8: D
- y9: Q
- y10: L
- y12: G

Raw file  
 20150814\_A375SR\_Phospho\_BR2\_03  
 Scan 26801 Method FTMS; HCD Score 190.58 m/z 1058.14 Gene names TNKS1BP1

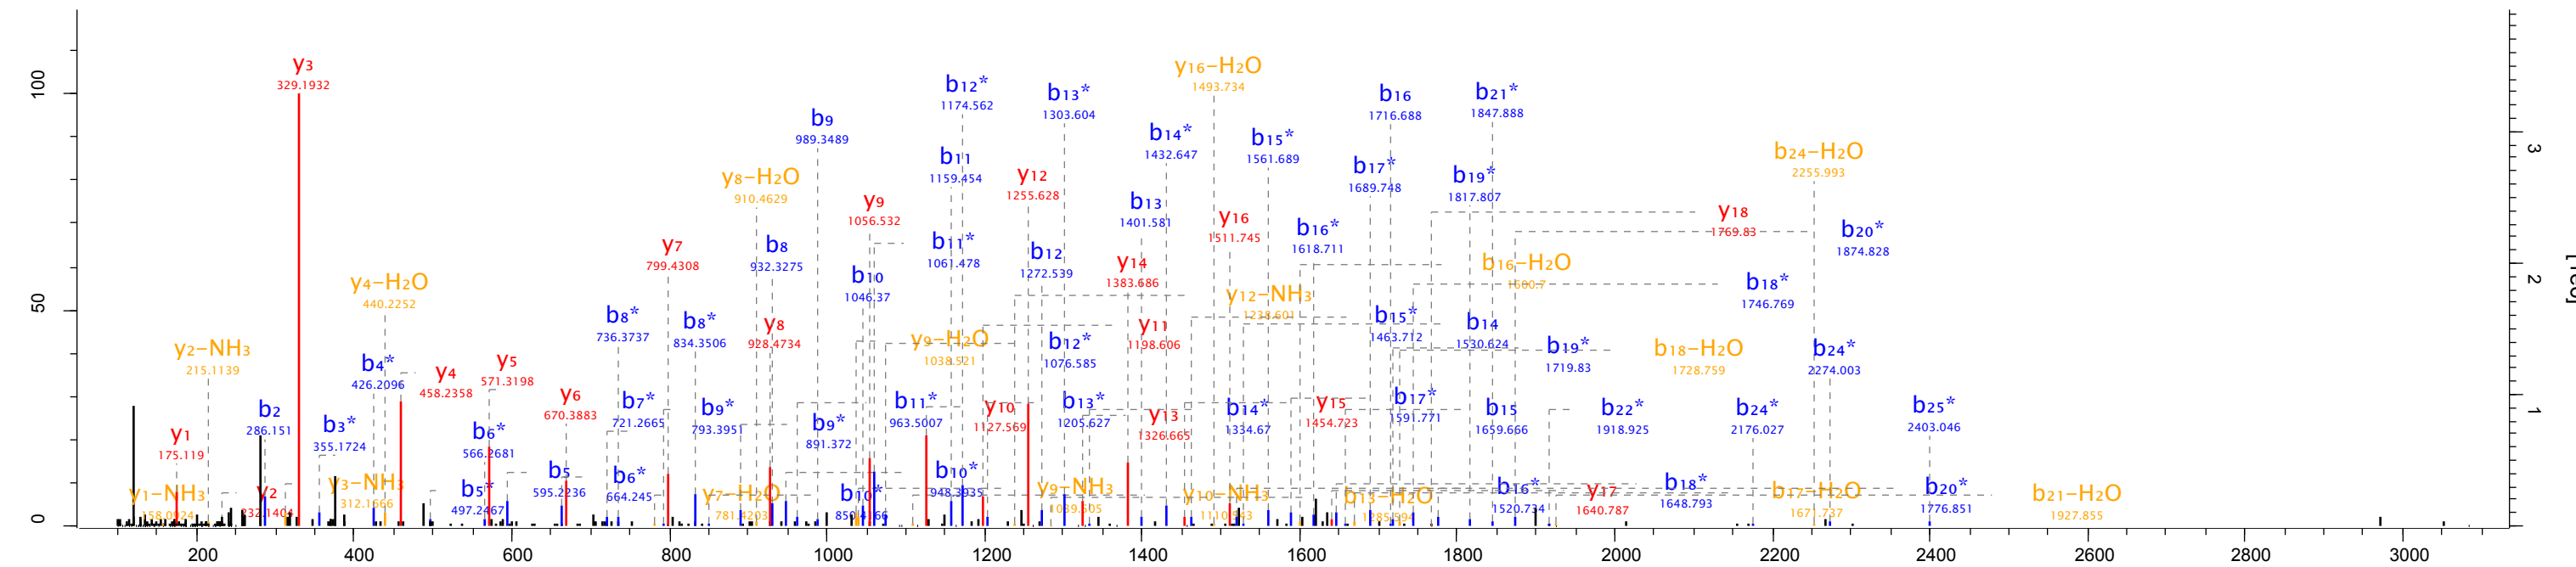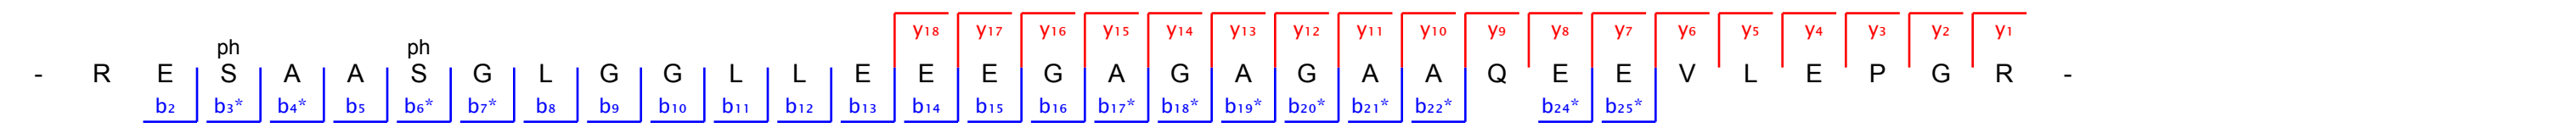



Raw file  
 20150814\_A375SR\_Phospho\_BR2\_03  
 Scan 26901 Method FTMS; HCD Score 104.84 m/z 1131.04 Gene names TNFRSF21

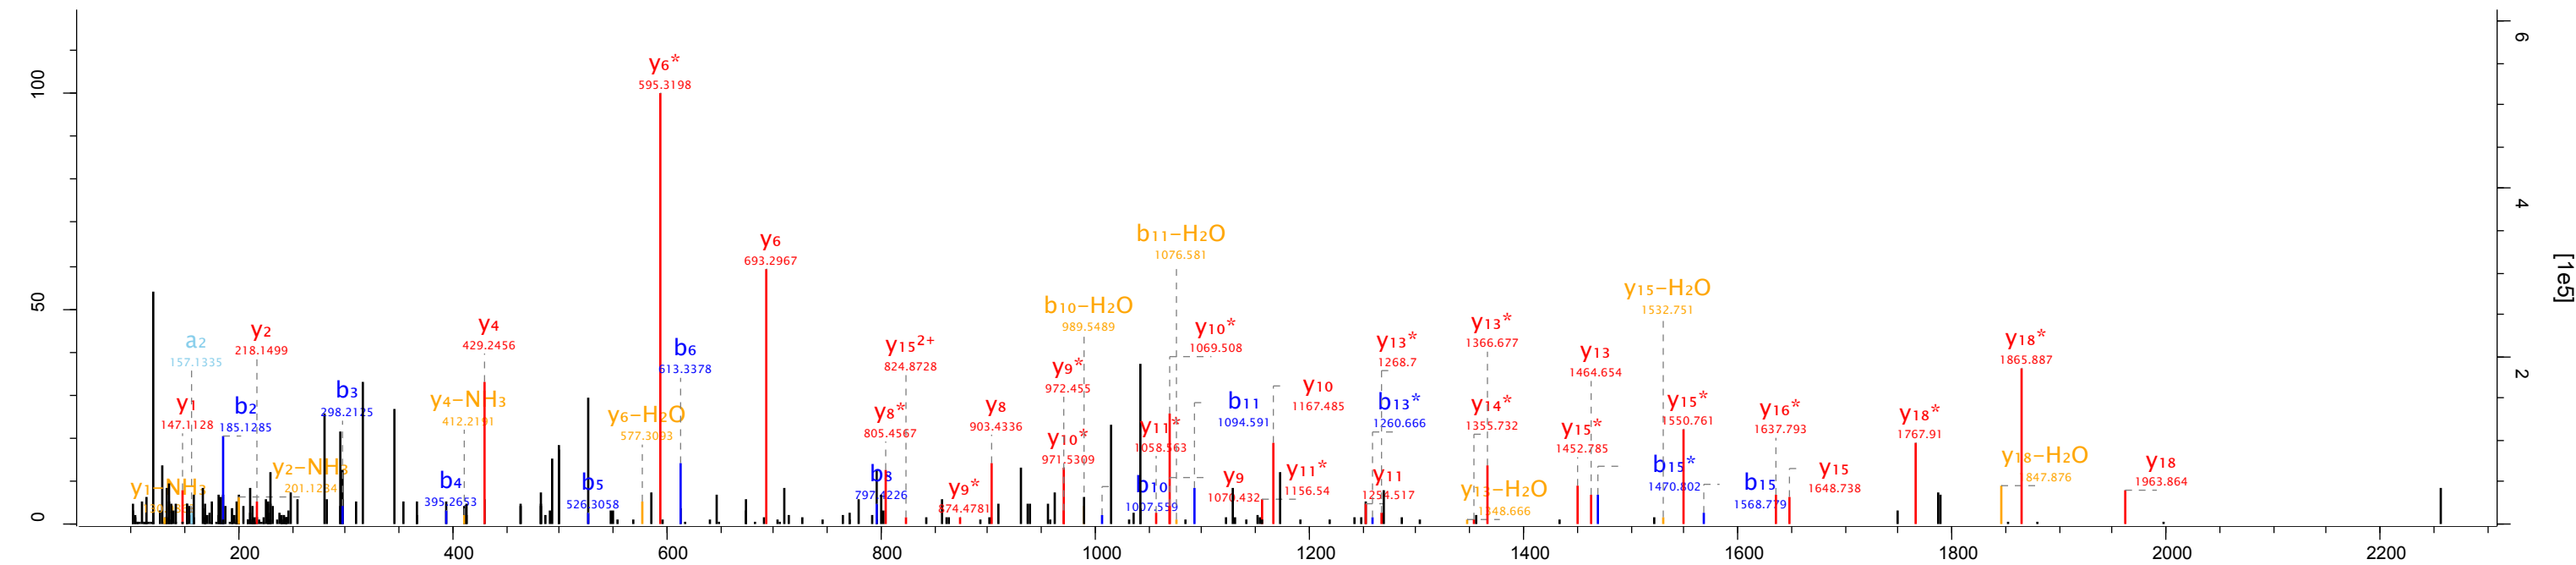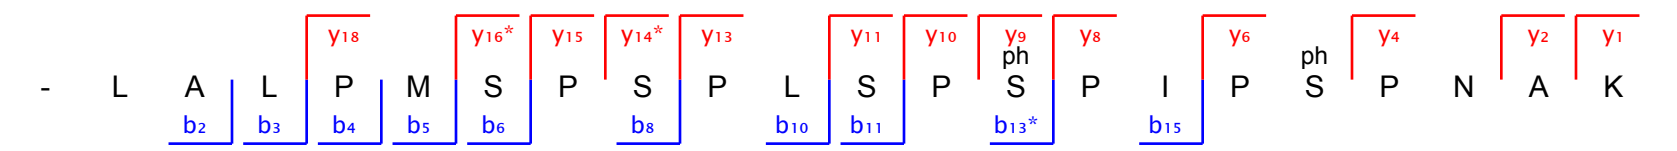

Raw file: 20150814\_A375SR\_Phospho\_BR2\_03  
 Scan: 26991 Method: FTMS; HCD Score: 88.19 m/z: 993.94 Gene names: FOXM1

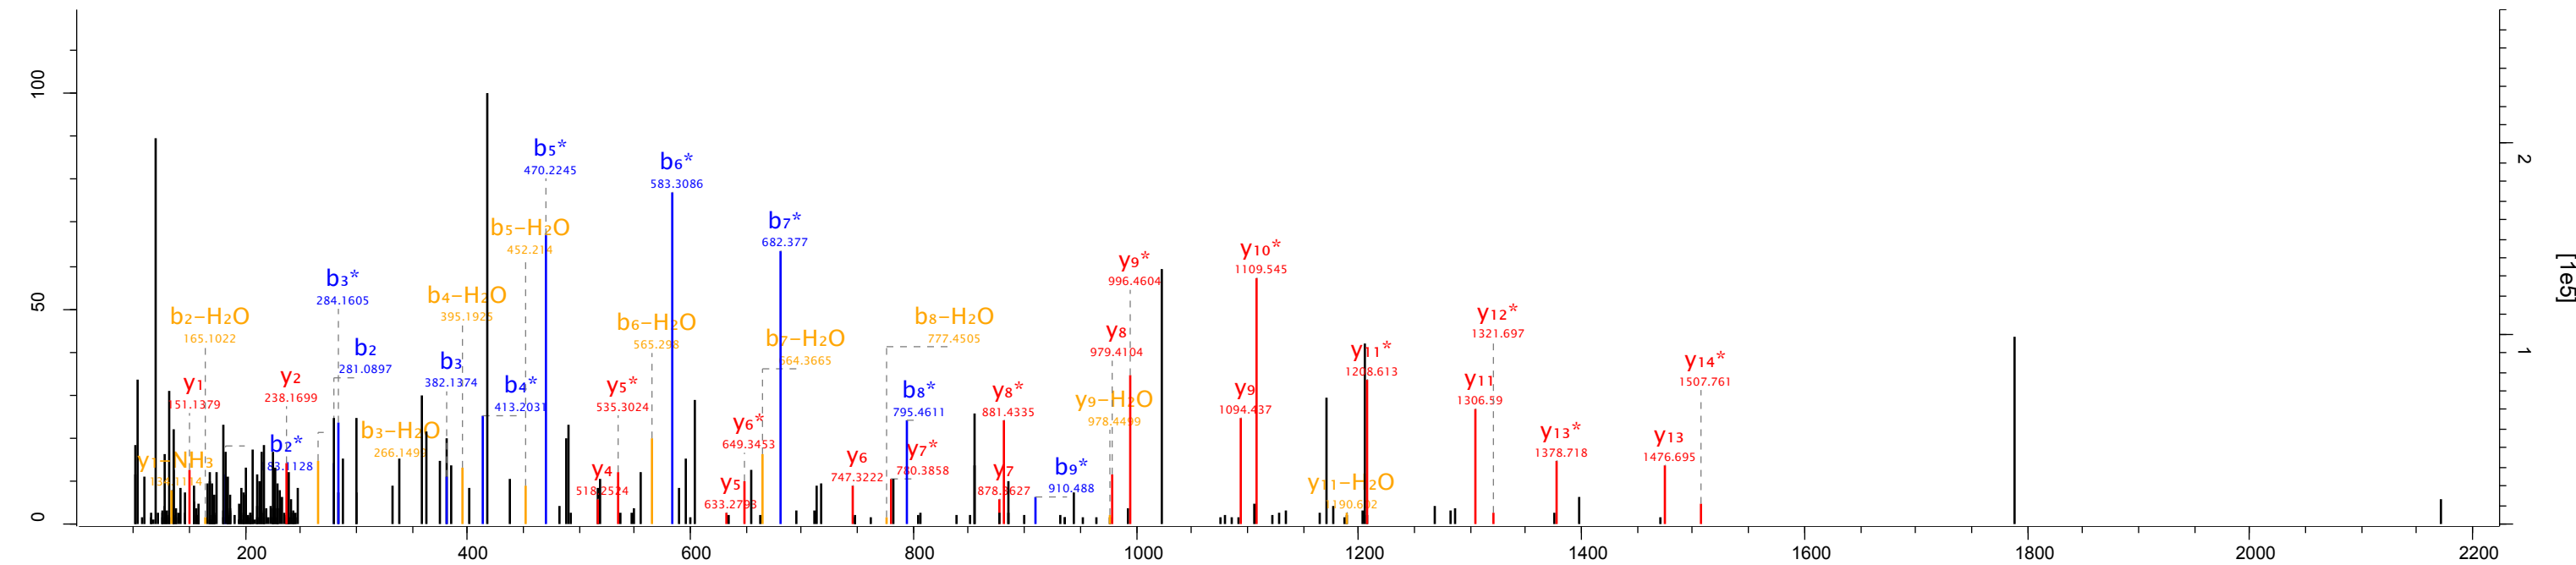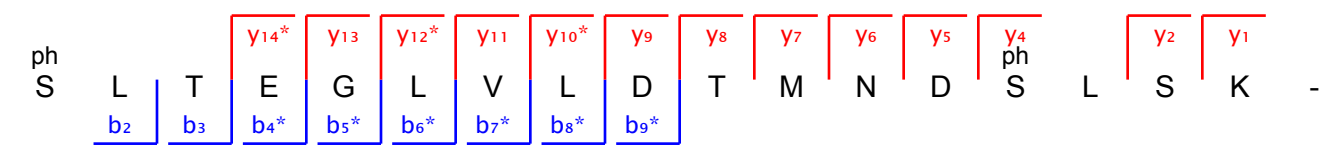

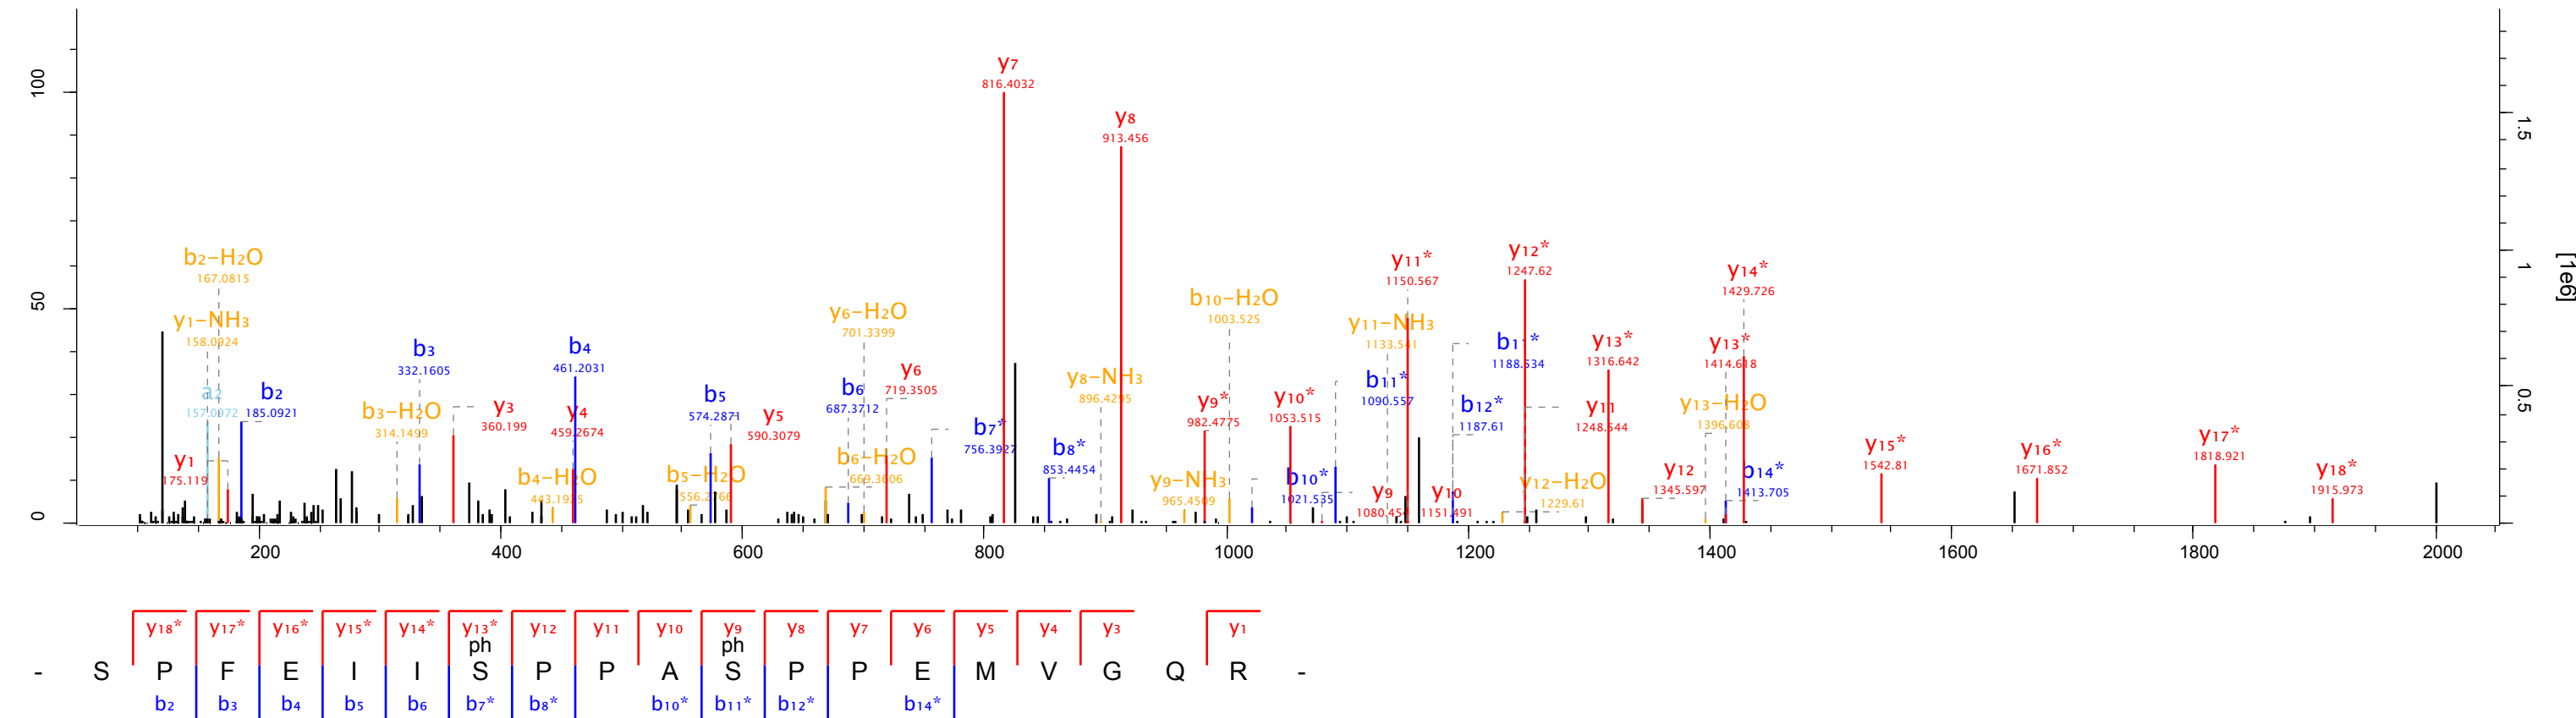

Raw file: 20150814\_A375SR\_Phospho\_BR2\_03  
 Scan: 27501 Method: FTMS; HCD Score: 44.72 m/z: 1156.5 Gene names: MLLT4

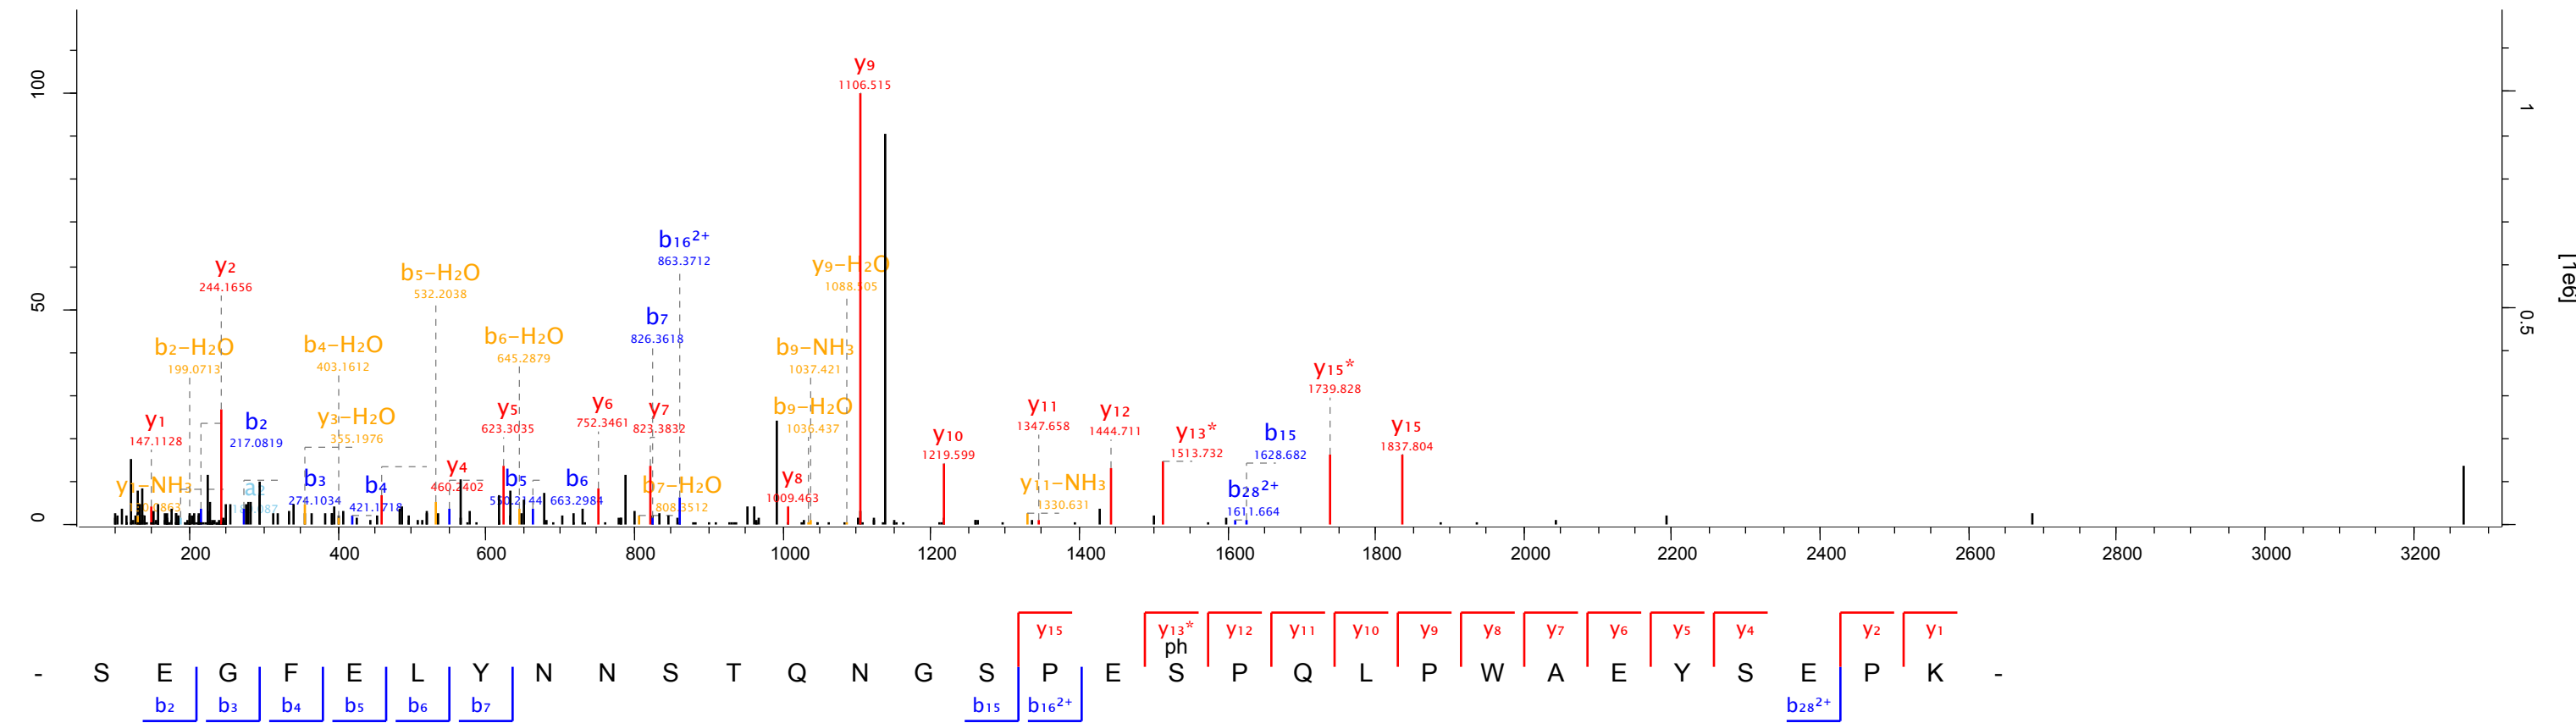

Raw file: 20150814\_A375SR\_Phospho\_BR2\_03  
 Scan: 27681 Method: FTMS; HCD Score: 218.64 m/z: 958.38 Gene names: IGF2R

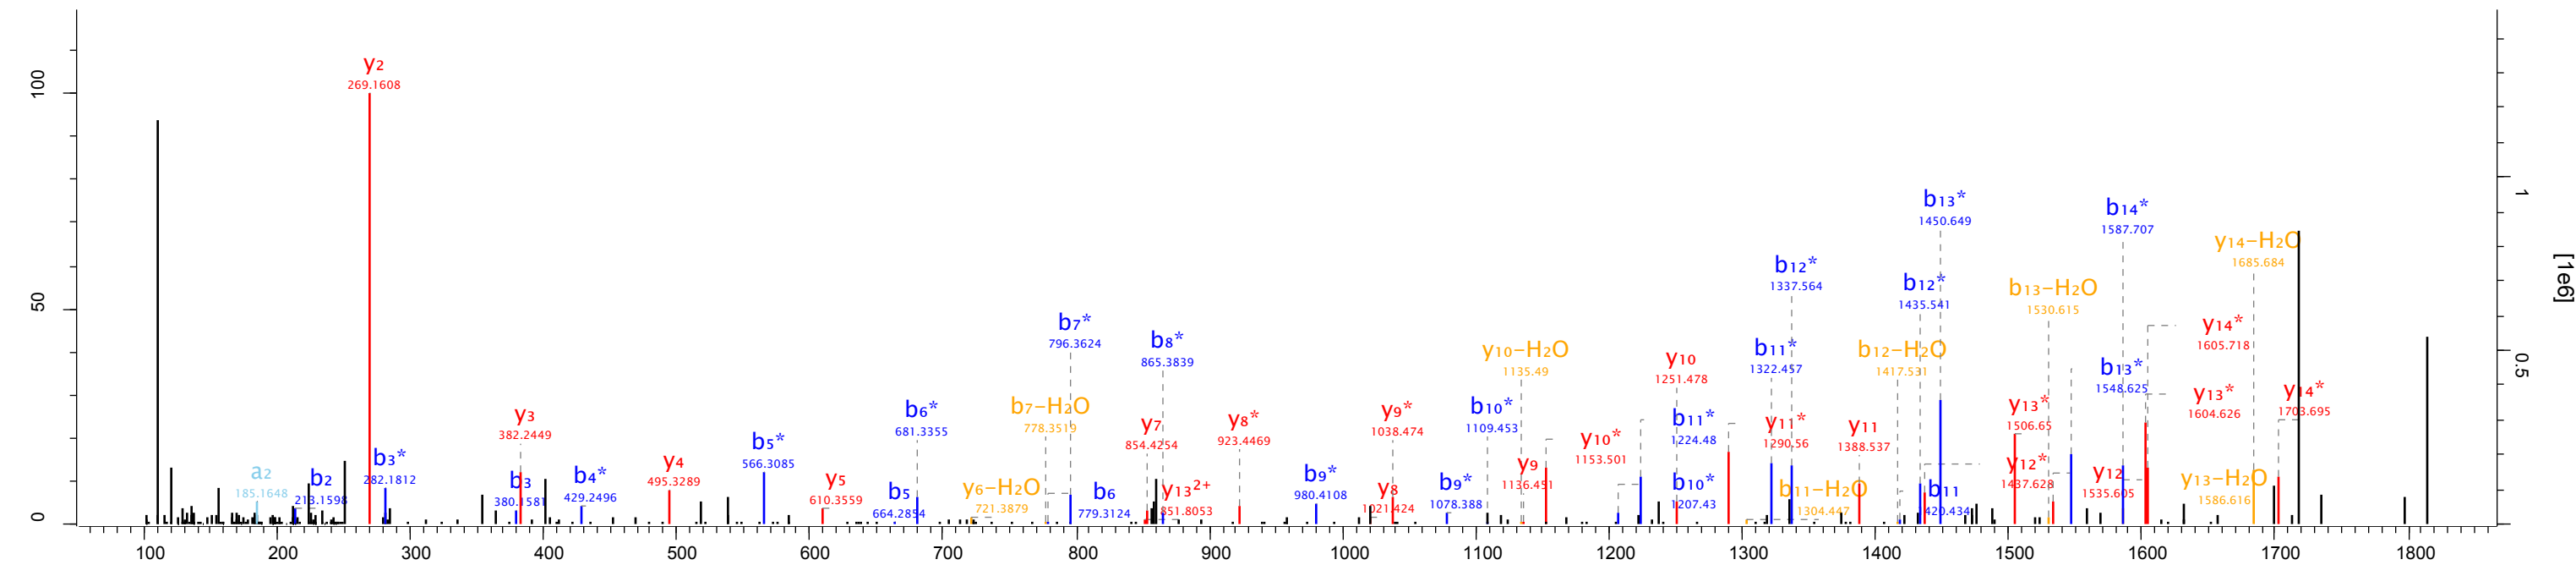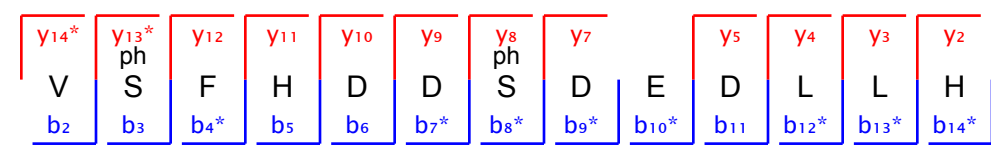

Raw file 20150814\_A375SR\_Phospho\_BR2\_03 Scan 27911 Method FTMS; HCD Score 113.31 m/z 960.07 Gene names DPF2

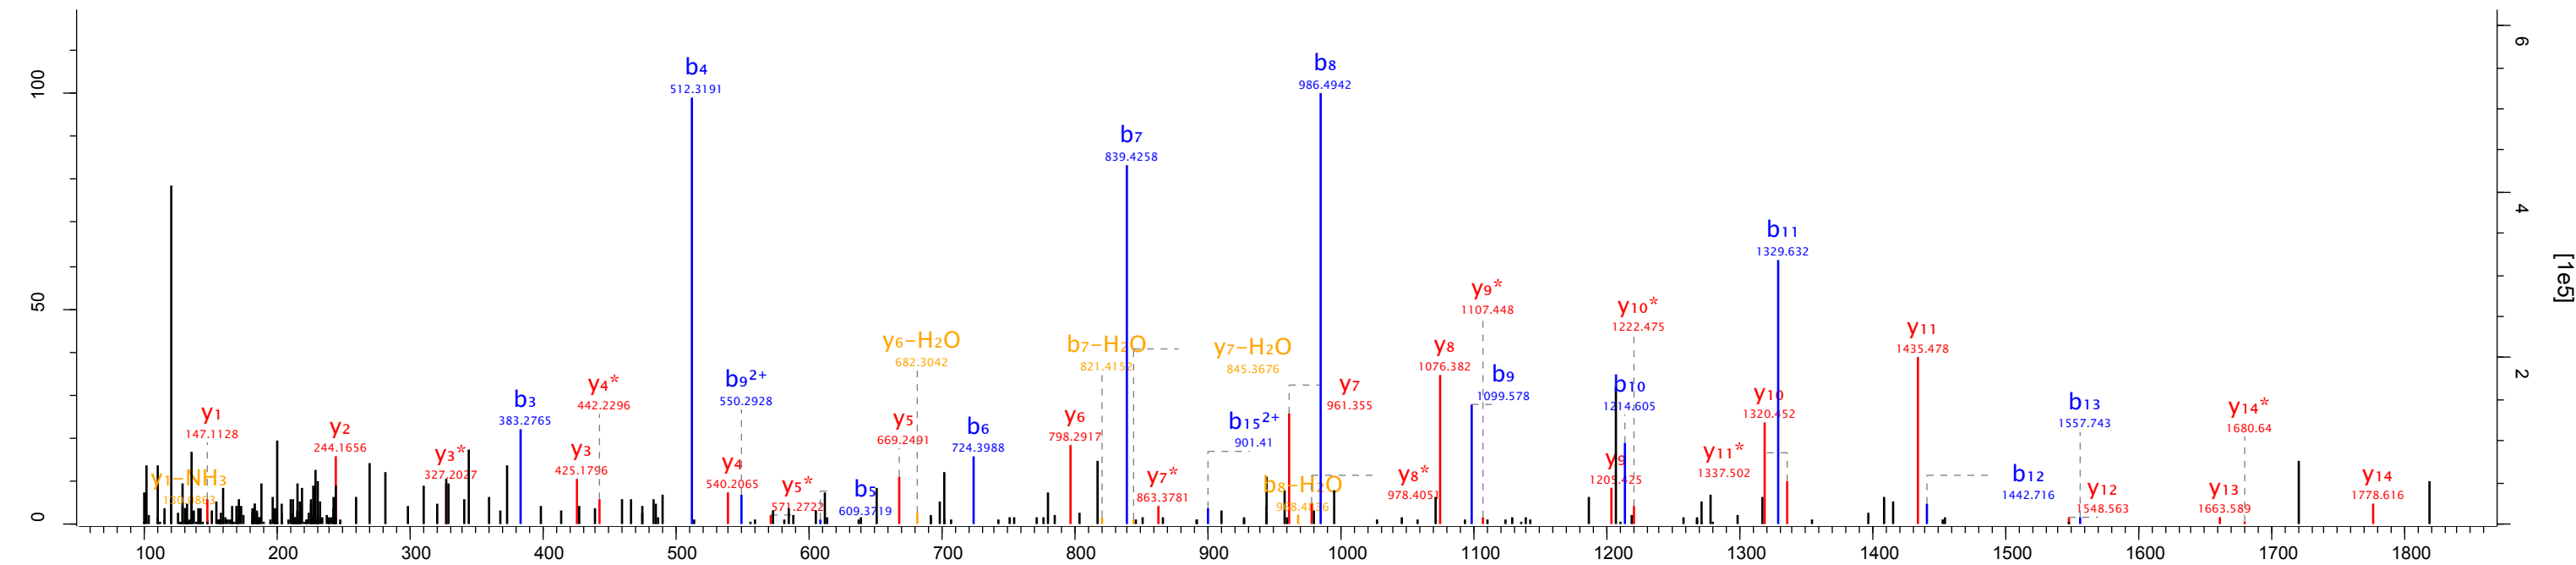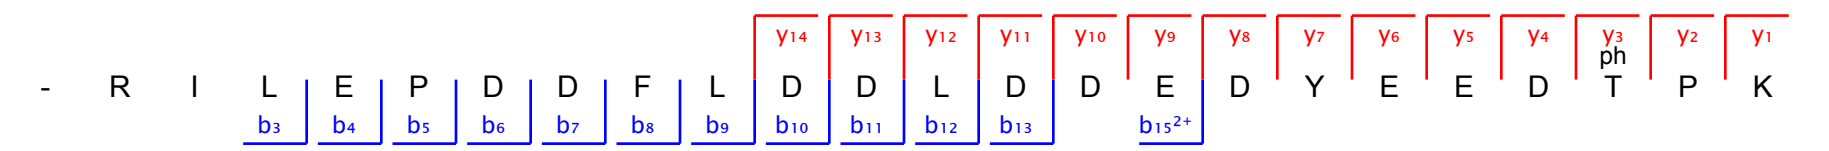

Raw file: 20150814\_A375SR\_Phospho\_BR2\_03  
 Scan: 28271 Method: FTMS; HCD Score: 170.06 m/z: 1033.92 Gene names: VAMP4

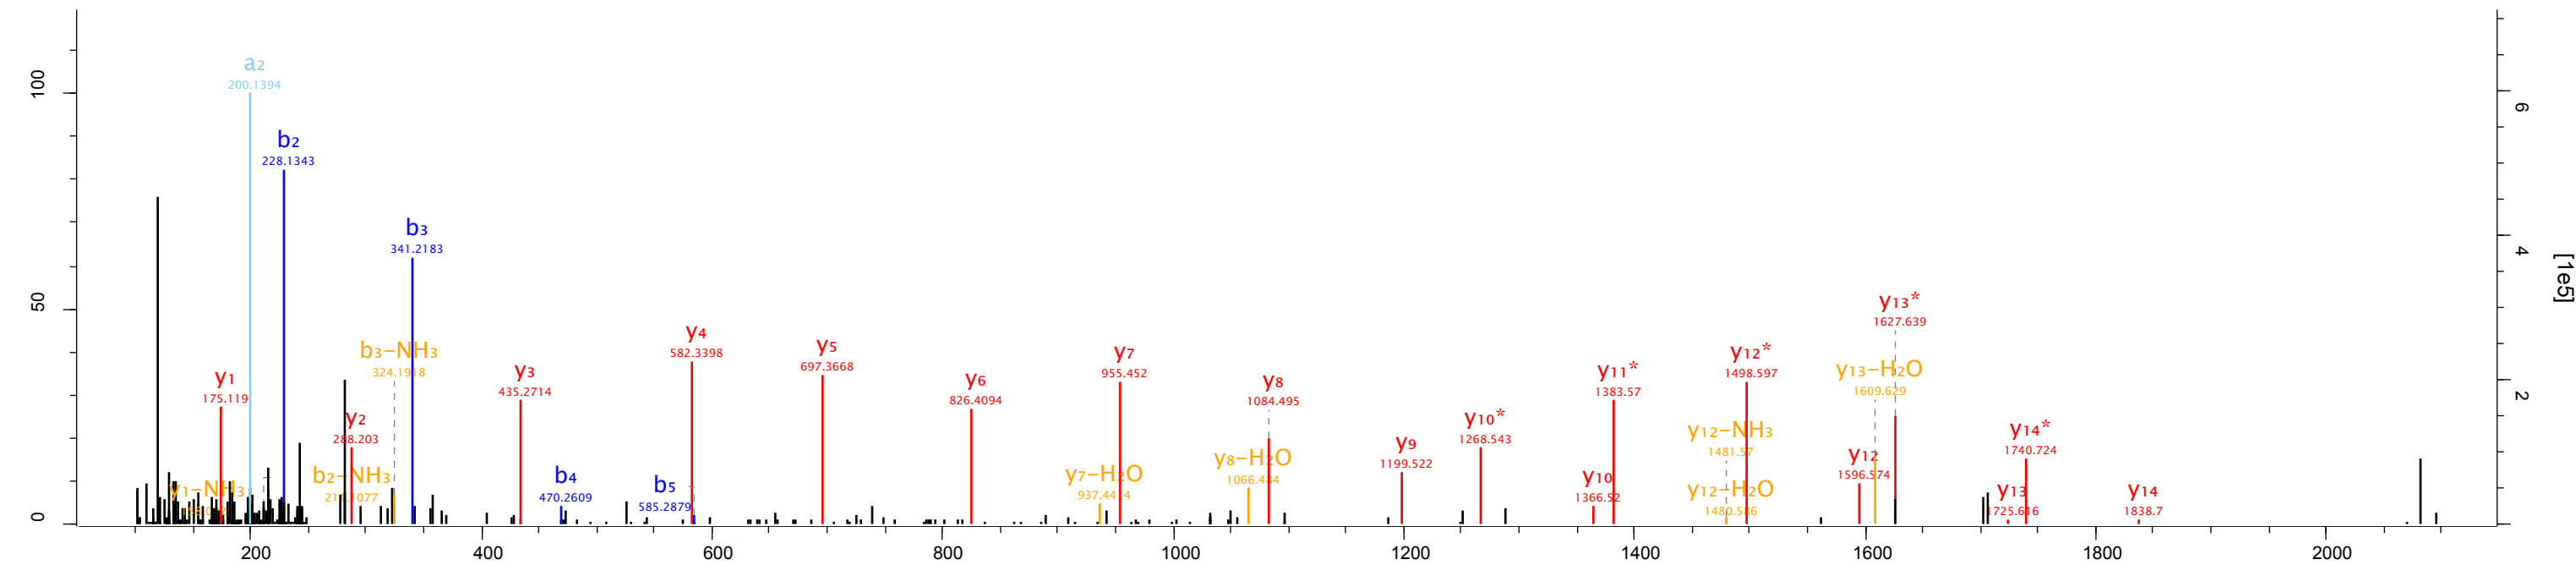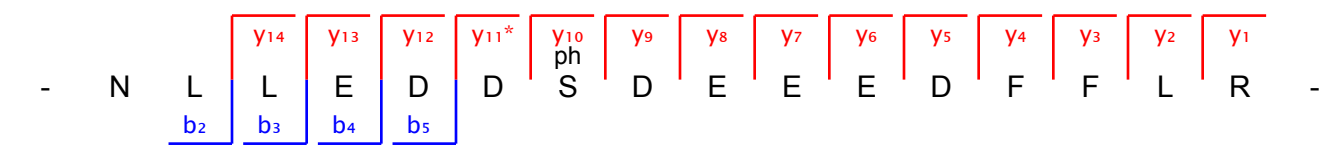

Raw file: 20150814\_A375SR\_Phospho\_BR2\_03  
 Scan: 28371 Method: FTMS; HCD Score: 82.4 m/z: 1090.5 Gene names: ARHGAP35

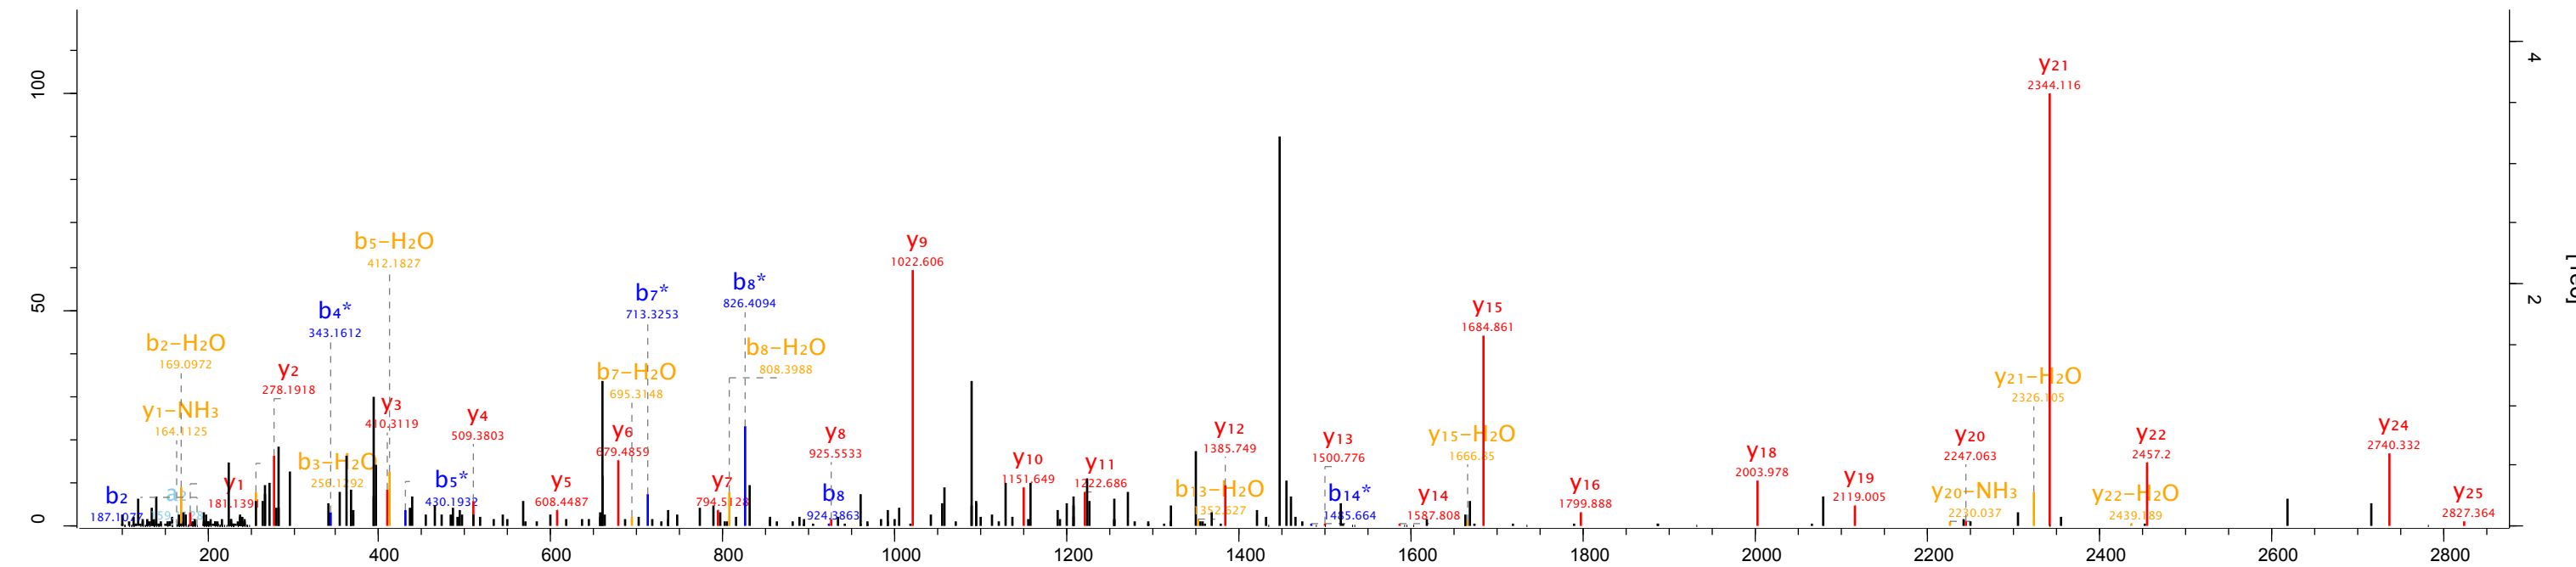

Sequence: - S V S ph S S P W L P Q D G F D P S D Y A E P M D A V V K P R -

Fragmentation sites (b and y ions):

- b2 (under V)
- b4\* (under ph)
- b5\* (under S)
- b7\* (under W)
- b8 (under L)
- b14\* (under D)
- y1 (under R)
- y2 (under P)
- y3 (under V)
- y4 (under V)
- y5 (under A)
- y6 (under D)
- y7 (under M)
- y8 (under P)
- y9 (under E)
- y10 (under A)
- y11 (under Y)
- y12 (under D)
- y13 (under S)
- y14 (under P)
- y15 (under P)
- y16 (under D)
- y18 (under S)
- y19 (under D)
- y20 (under Q)
- y21 (under P)
- y22 (under L)
- y24 (under P)
- y25 (under S)



Raw file 20150814\_A375SR\_Phospho\_BR2\_03 Scan 28511 Method FTMS; HCD Score 86.52 m/z 813.03 Gene names MAP1A

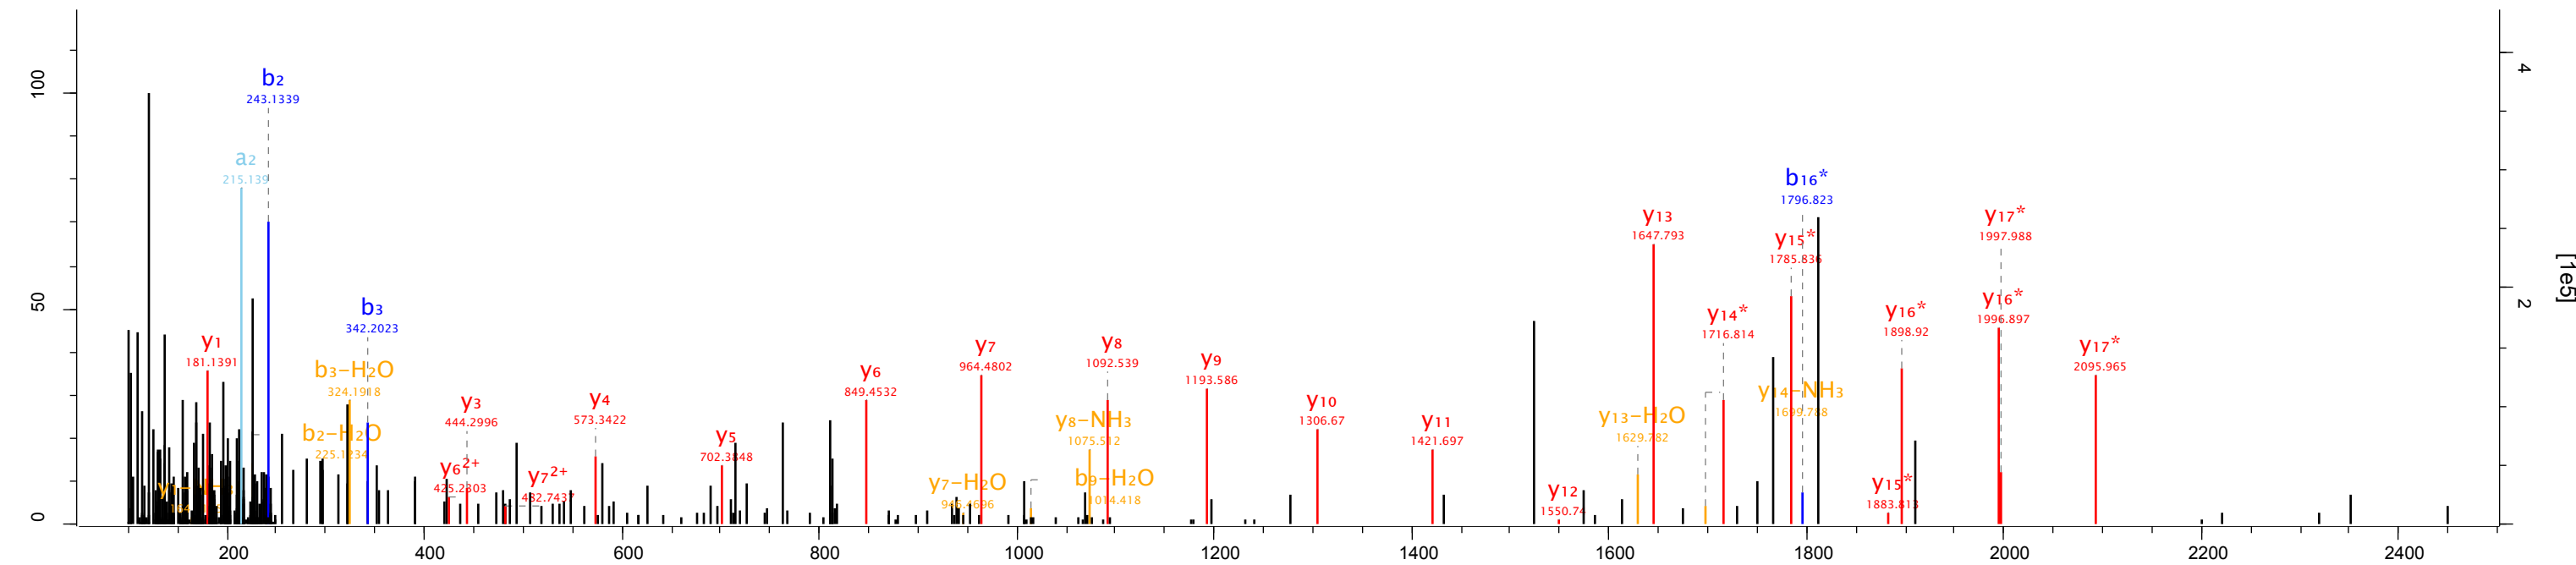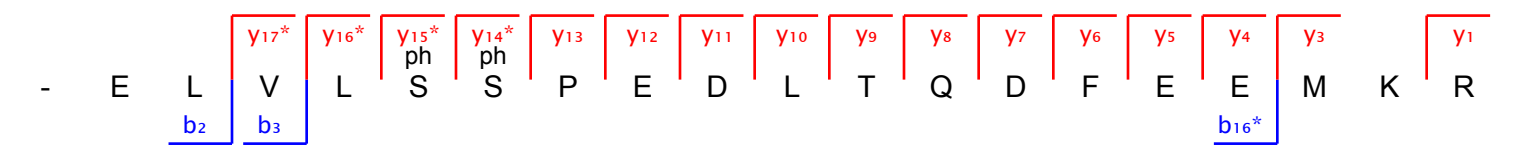

Raw file: 20150814\_A375SR\_Phospho\_BR2\_03  
 Scan: 28621 Method: FTMS; HCD Score: 168.62 m/z: 1019.01 Gene names: RING1

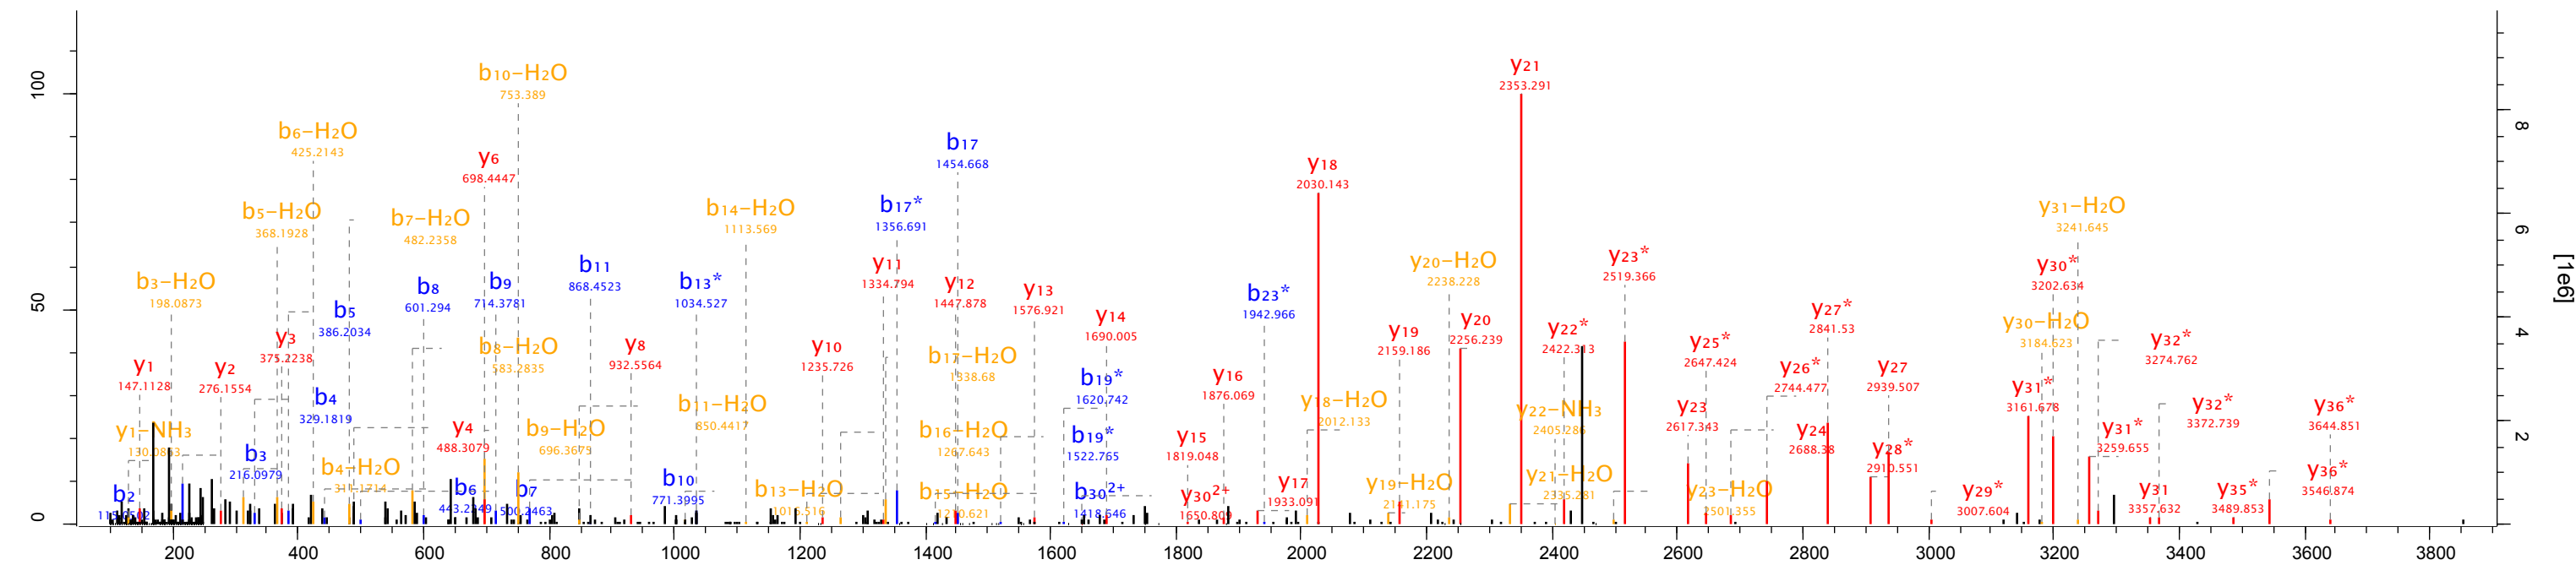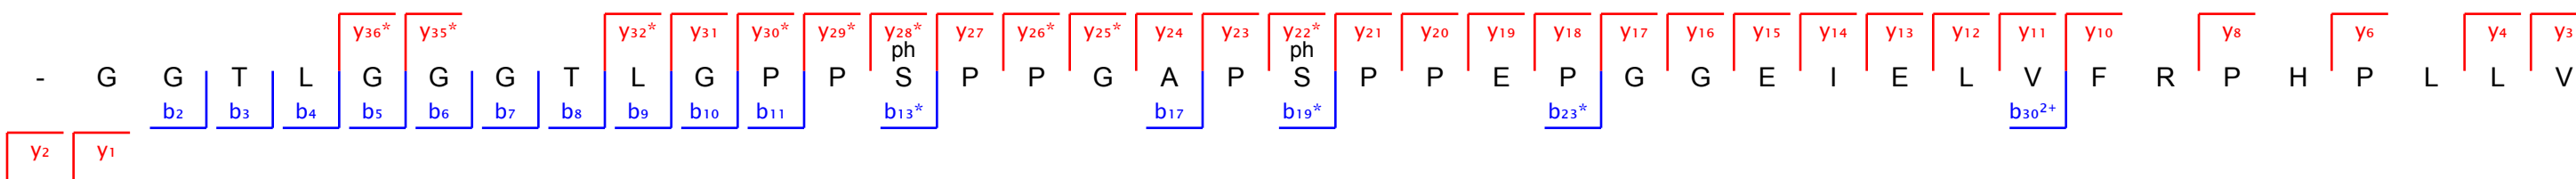

Raw file 20150814\_A375SR\_Phospho\_BR2\_03 Scan 28691 Method FTMS; HCD Score 151.8 m/z 660.66 Gene names TBC1D10B

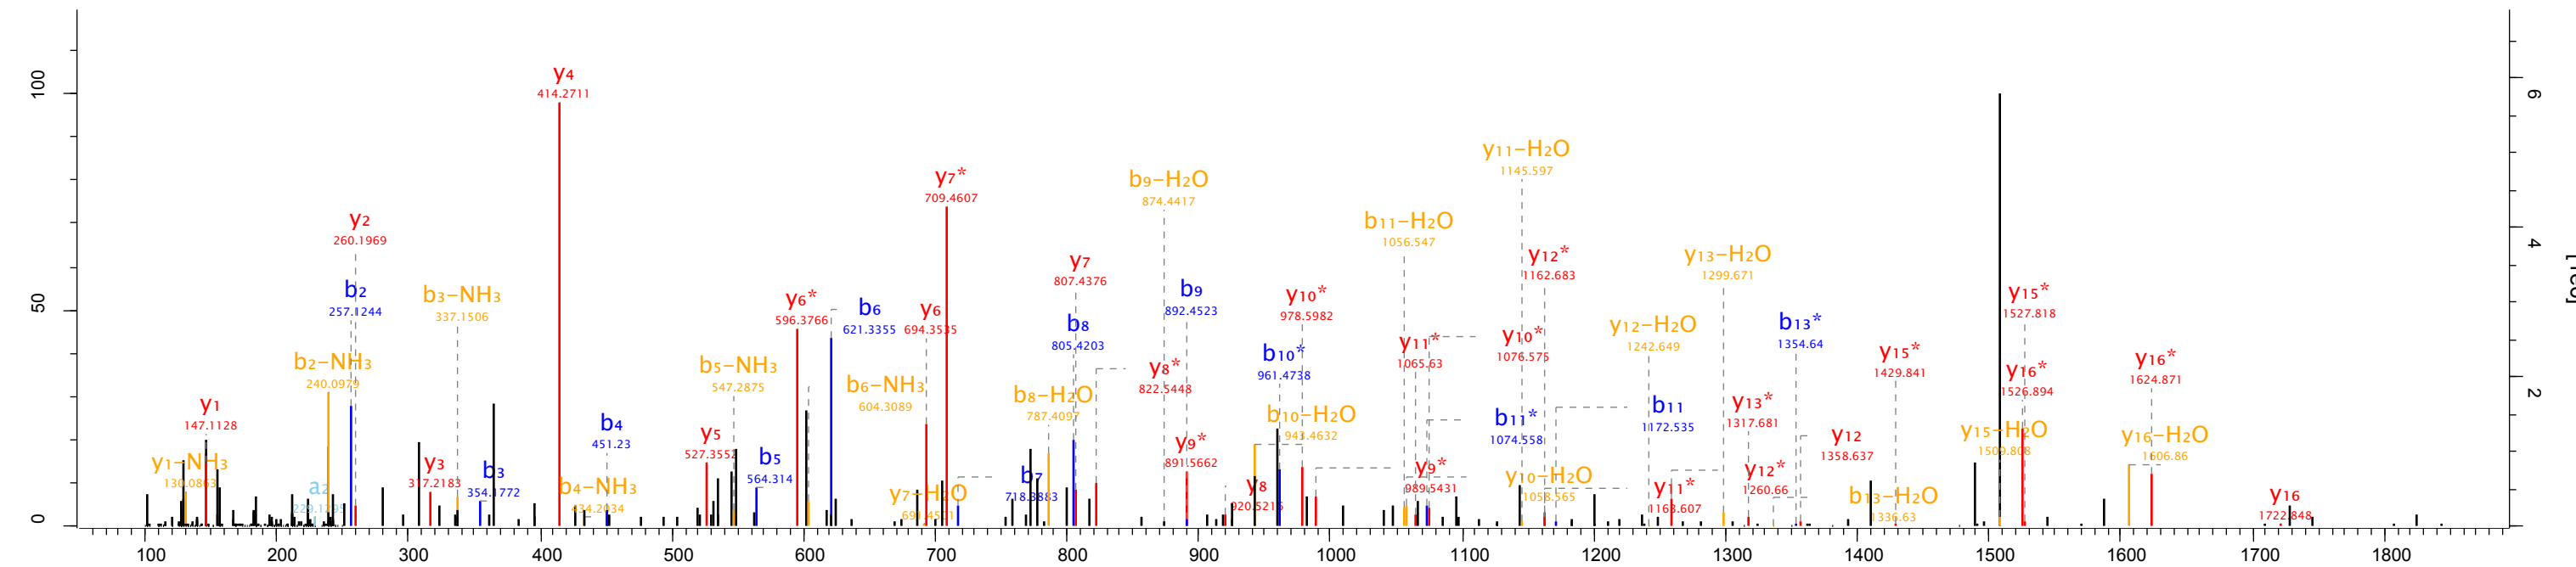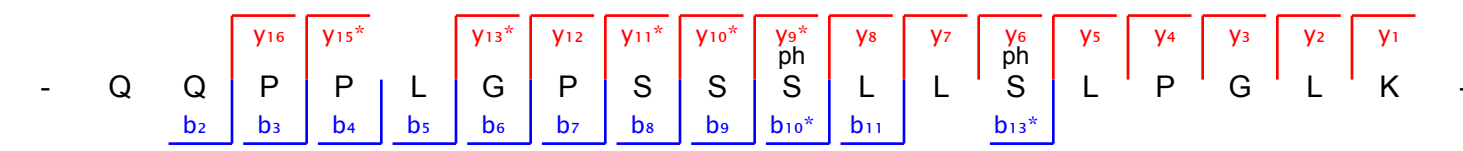

Raw file: 20150814\_A375SR\_Phospho\_BR2\_03  
 Scan: 28701 Method: FTMS; HCD Score: 75.18 m/z: 982.98 Gene names: LARP4B

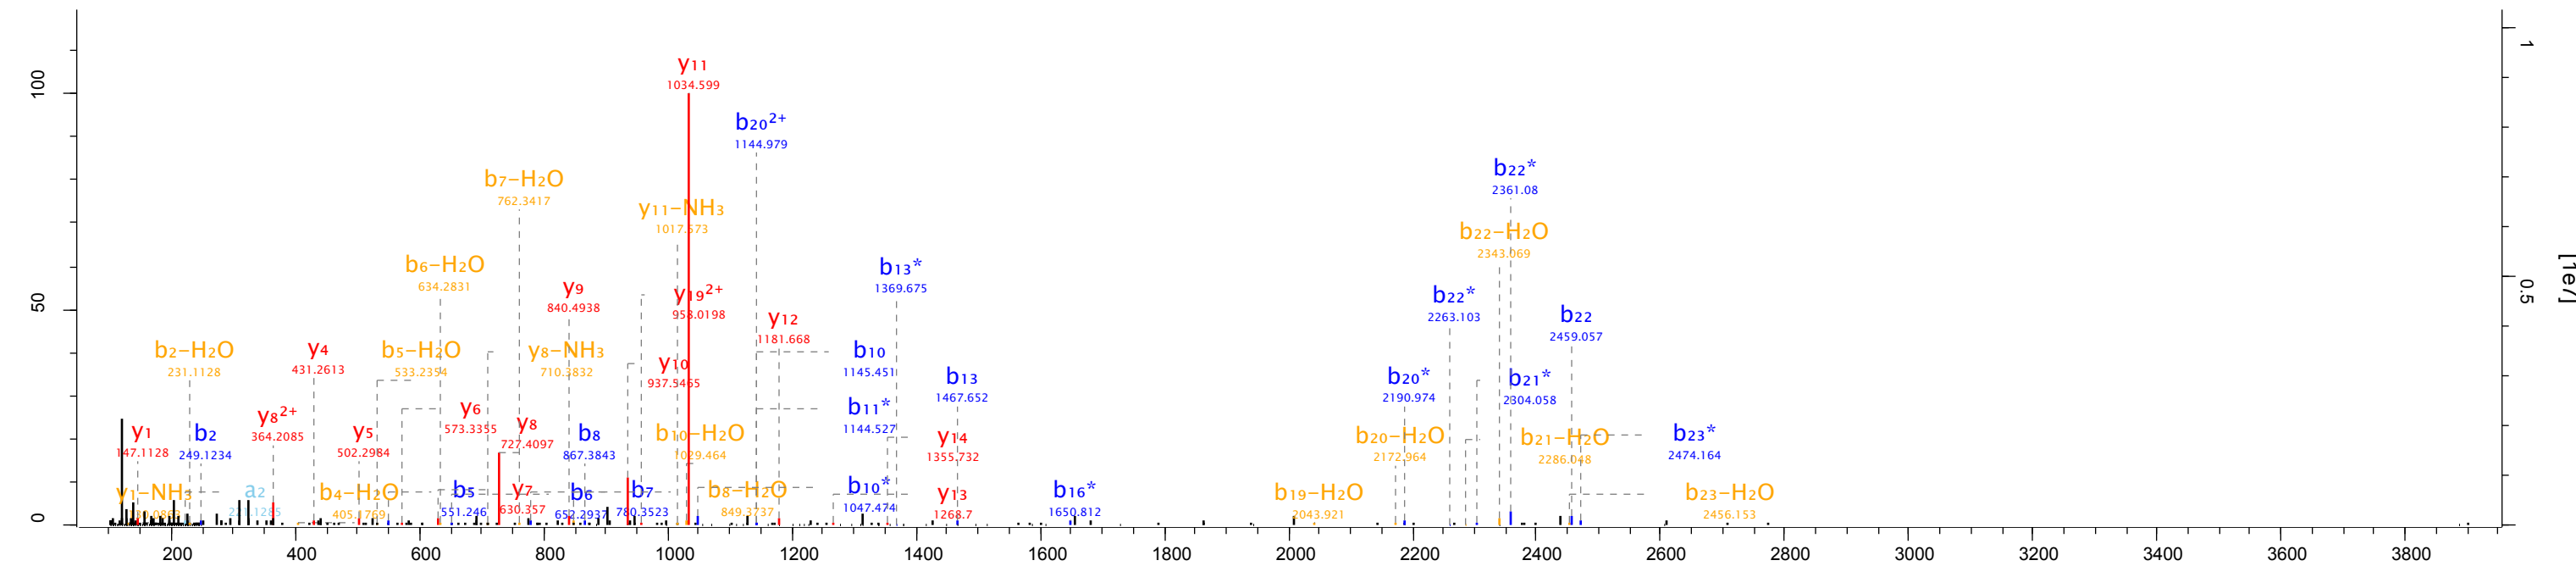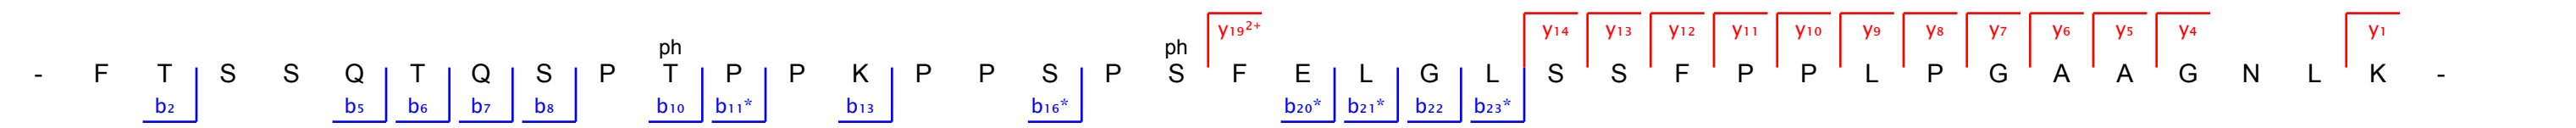

Raw file: 20150814\_A375SR\_Phospho\_BR2\_03  
 Scan: 28731 Method: FTMS; HCD Score: 92.4 m/z: 996.97 Gene names: IRS2

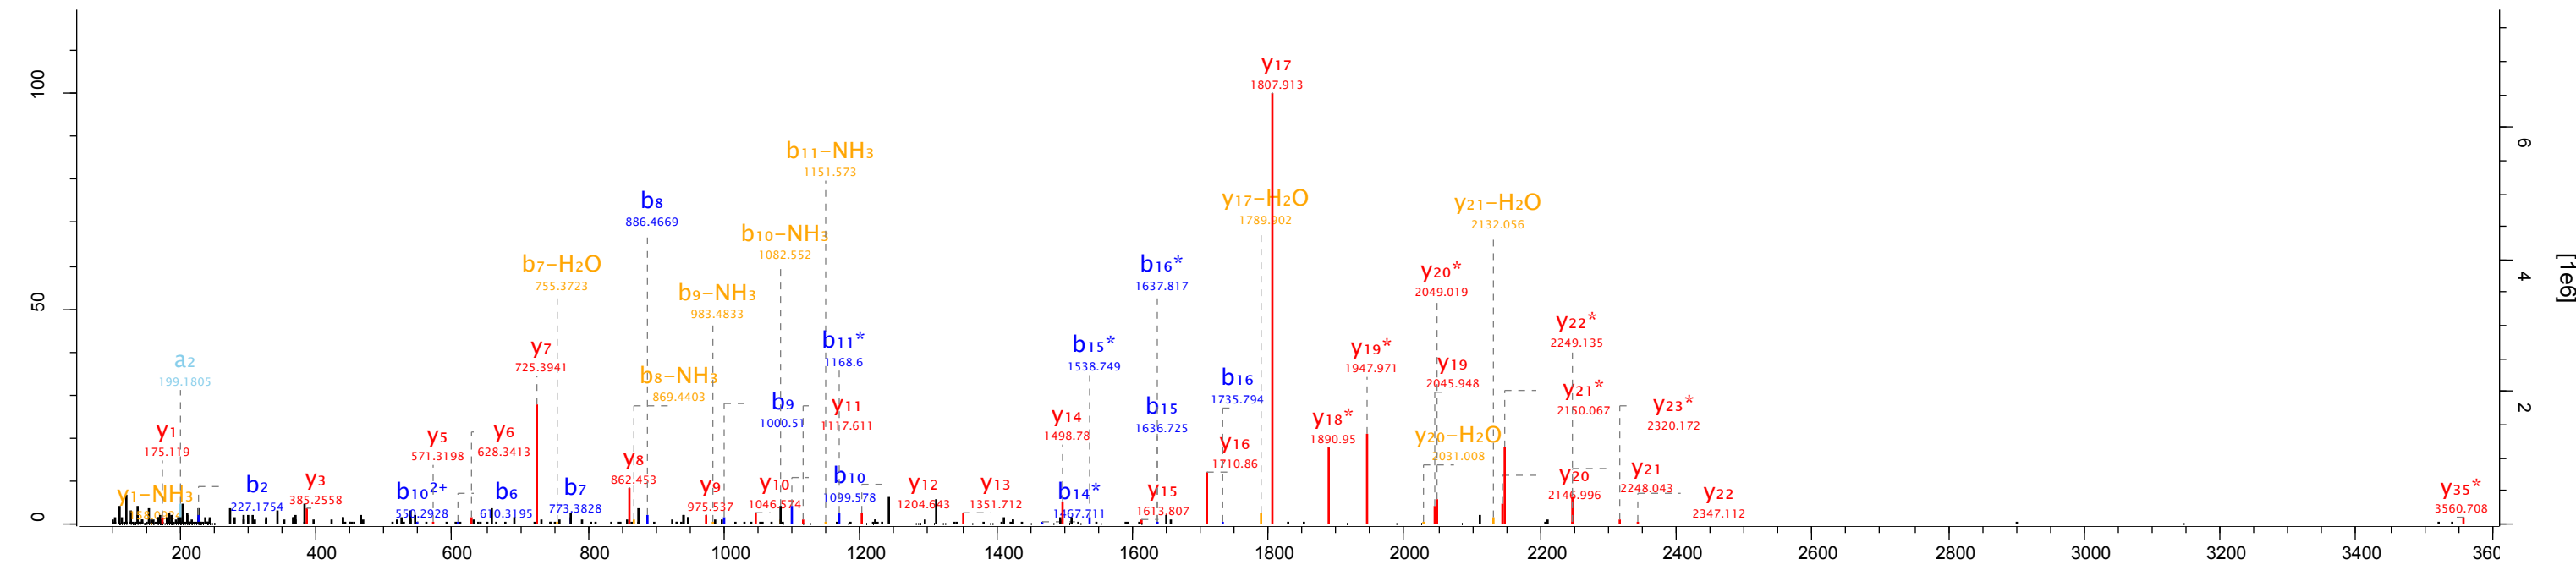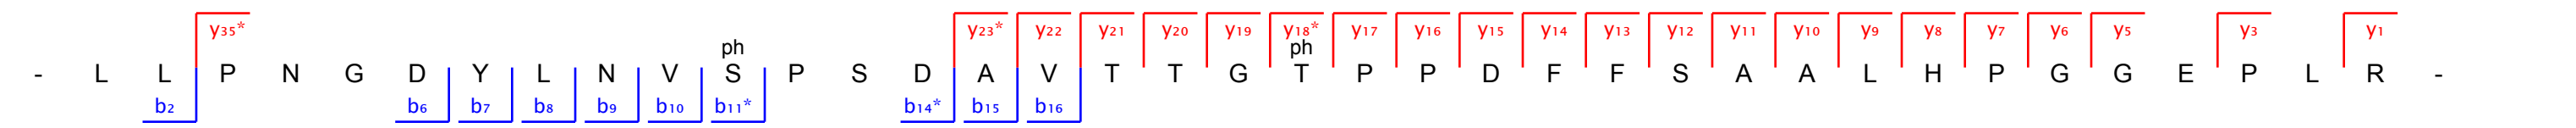

Raw file 20150814\_A375SR\_Phospho\_BR2\_03 Scan 3181 Method FTMS; HCD Score 62.28 m/z 670.28 Gene names CCDC61

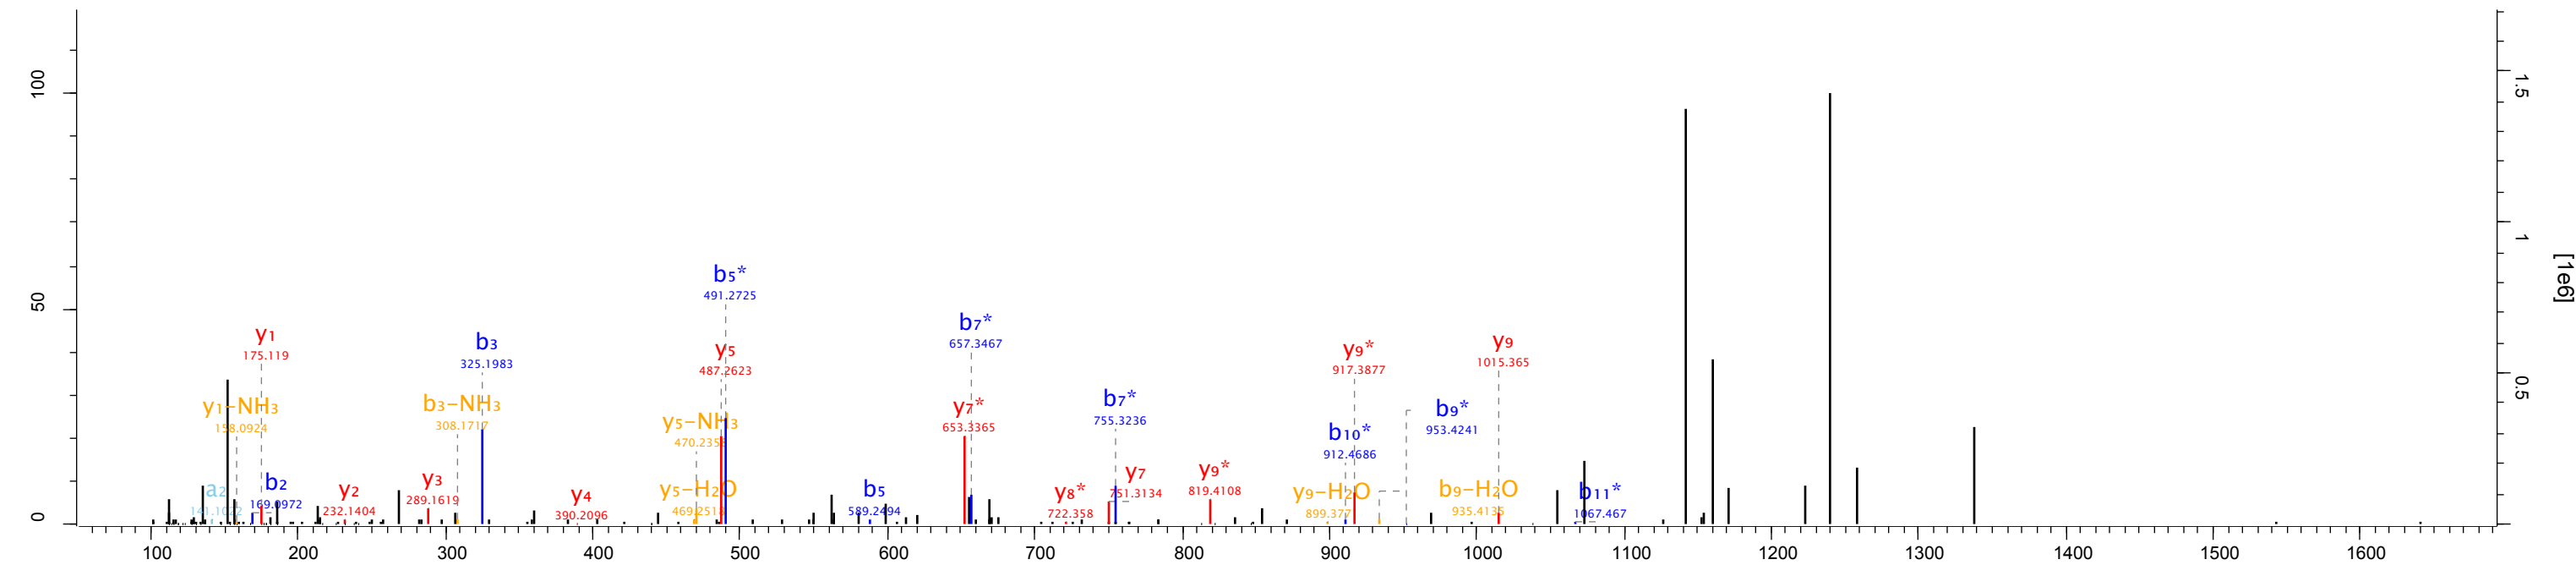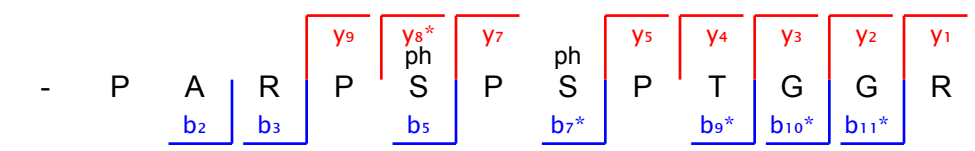

Raw file 20150814\_A375SR\_Phospho\_BR2\_03 Scan 3361 Method FTMS; HCD Score 134.01 m/z 539.79 Gene names CSDE1

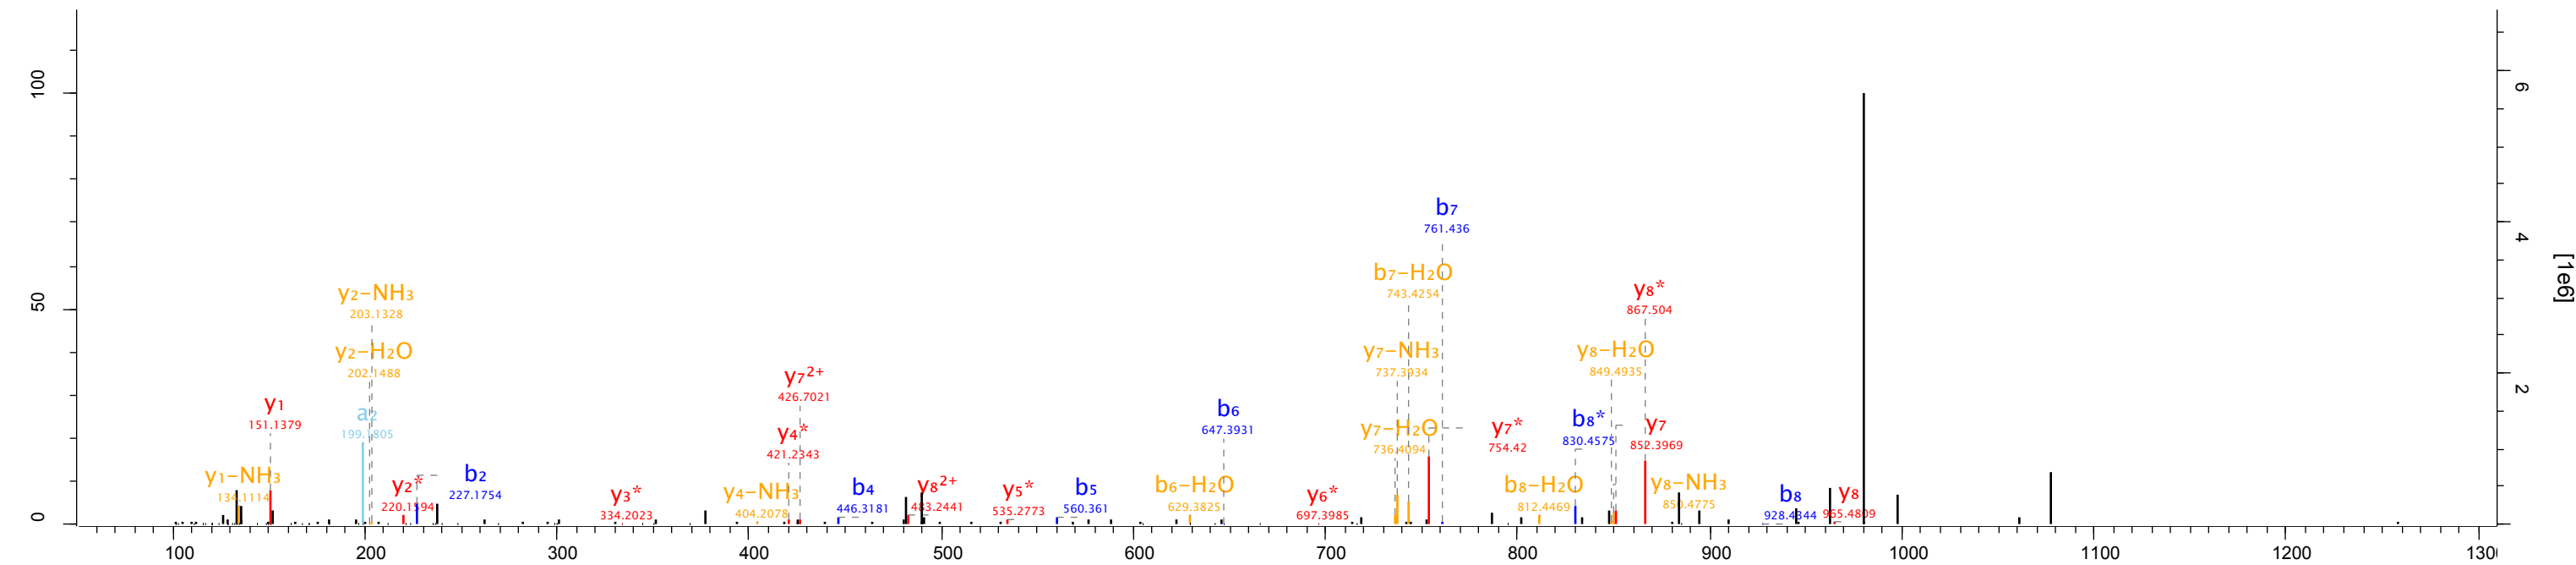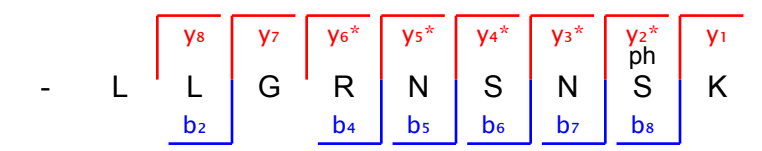

Raw file: 20150814\_A375SR\_Phospho\_BR2\_03  
 Scan: 3421 Method: FTMS; HCD Score: 145.88 m/z: 804.32 Gene names: JMJD1C

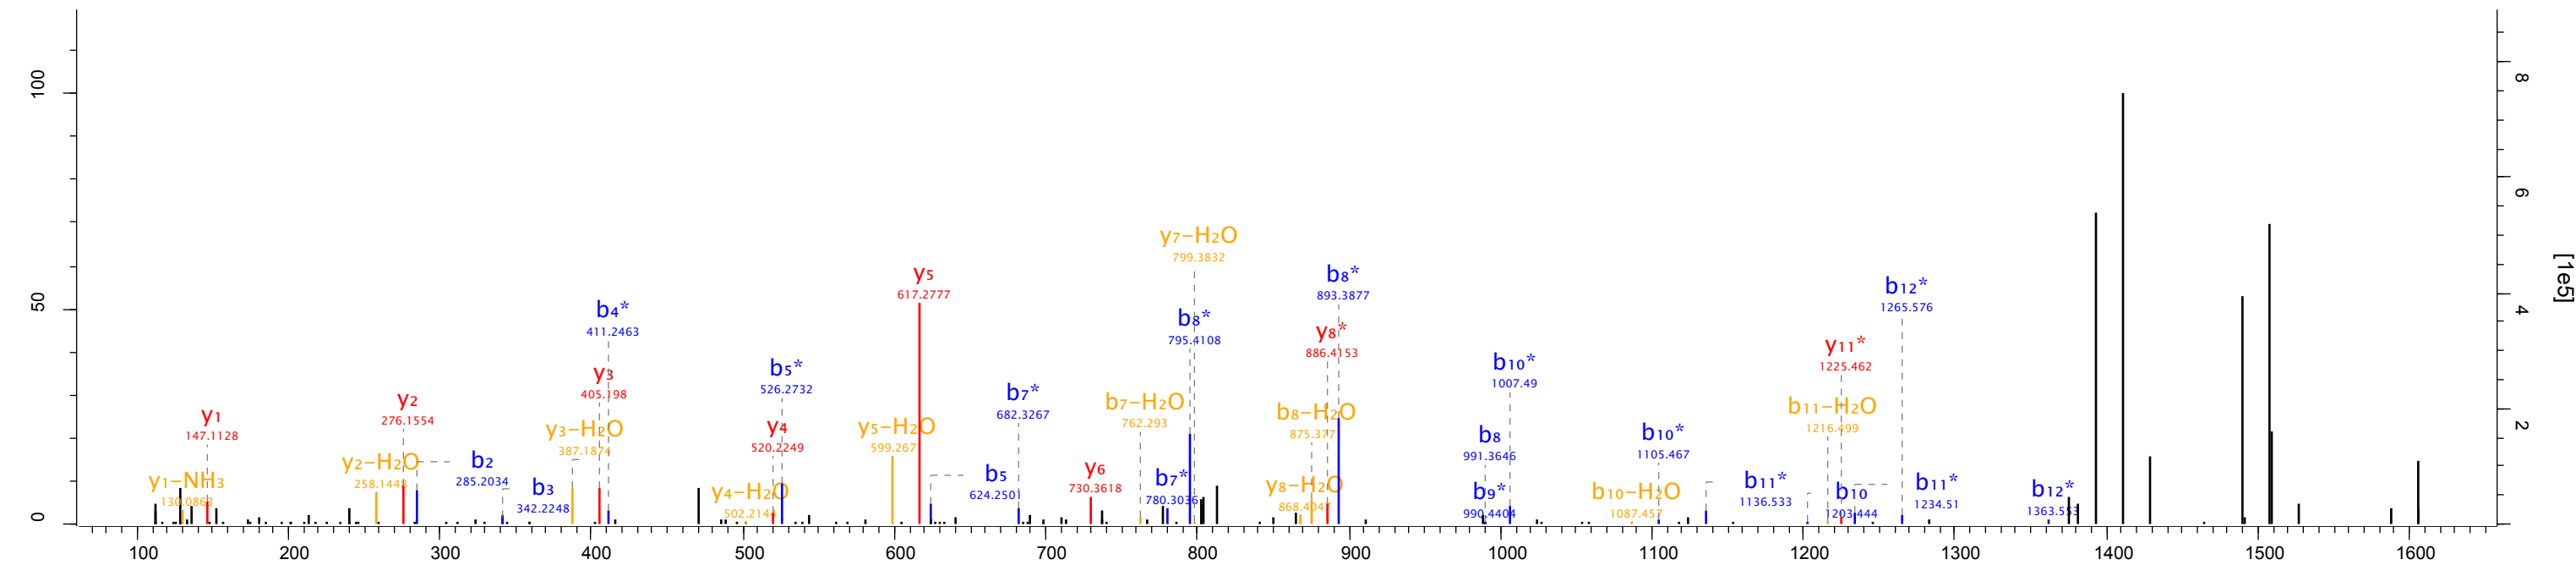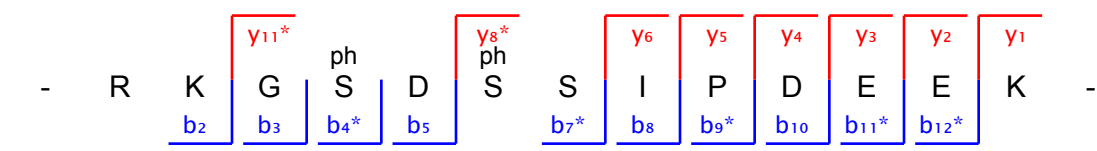



Raw file: 20150814\_A375SR\_Phospho\_BR2\_03  
 Scan: 3661 Method: FTMS; HCD Score: 104.94 m/z: 591.77 Gene names: RASAL2

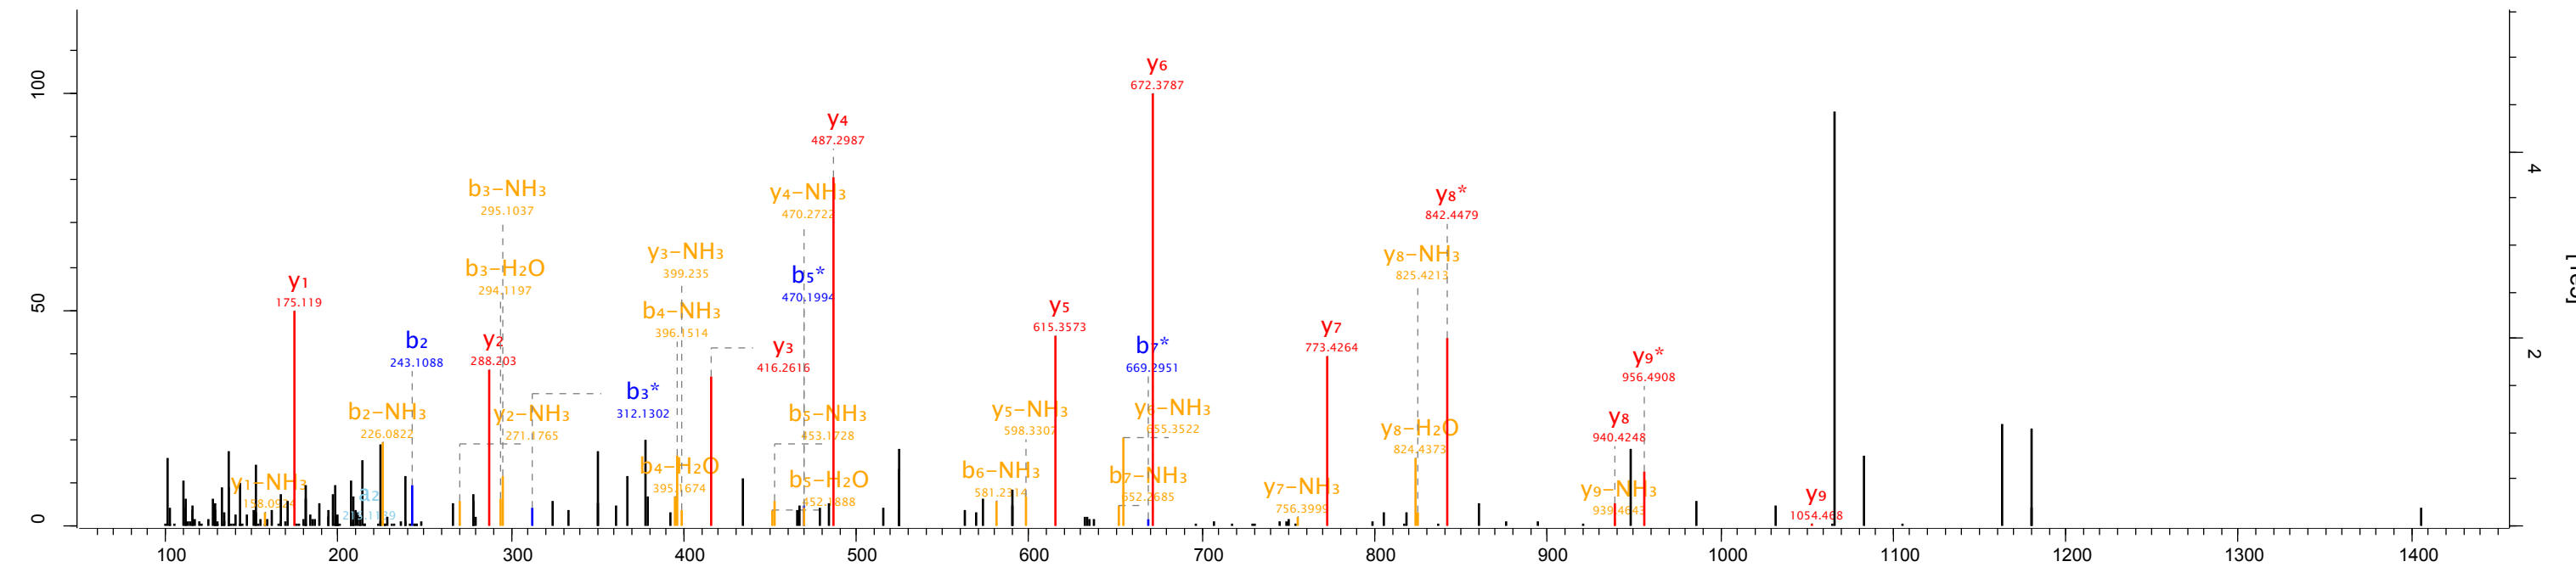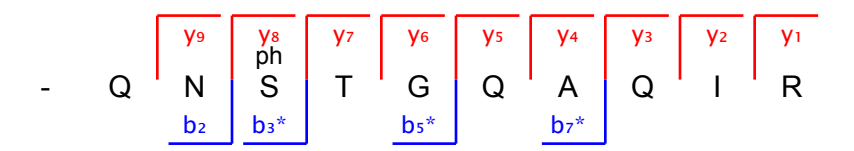

Raw file Scan Method Score m/z Gene names  
 20150814\_A375SR\_Phospho\_BR2\_03 4351 FTMS; HCD 99.91 671.81 ZFC3H1

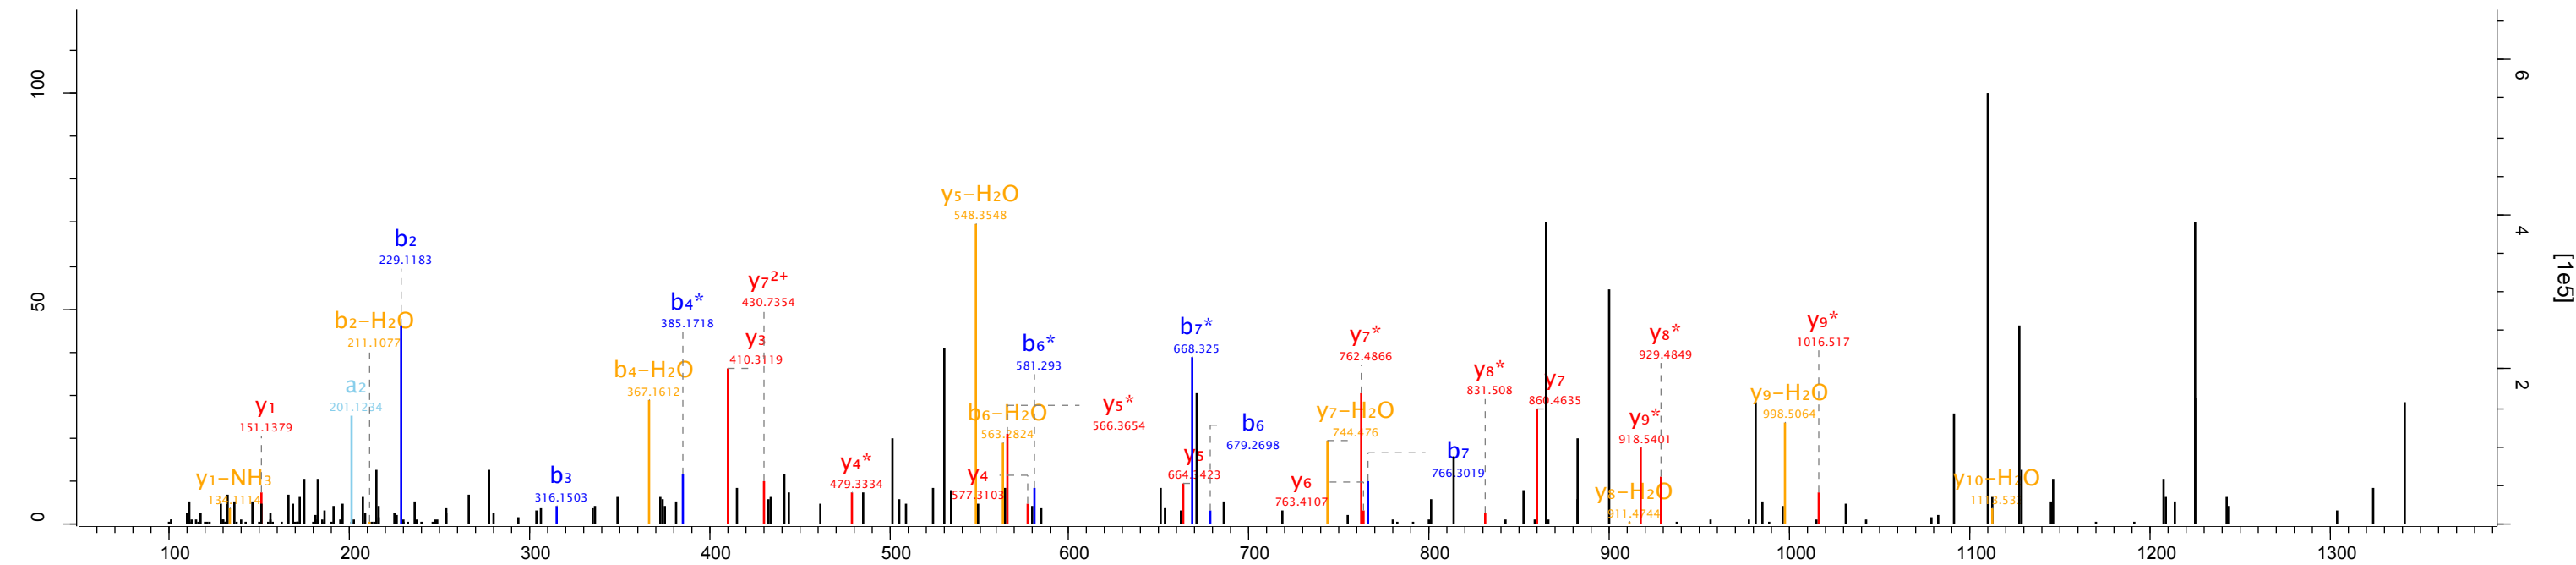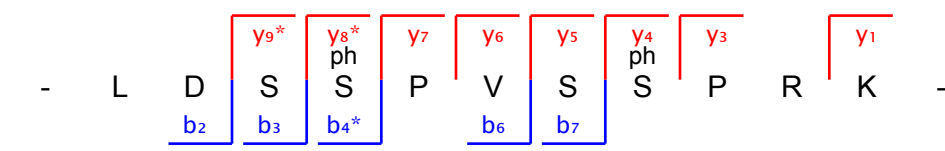

Raw file Scan Method Score m/z Gene names  
 20150814\_A375SR\_Phospho\_BR2\_03 4421 FTMS; HCD 440.38 1008.85 CD2BP2

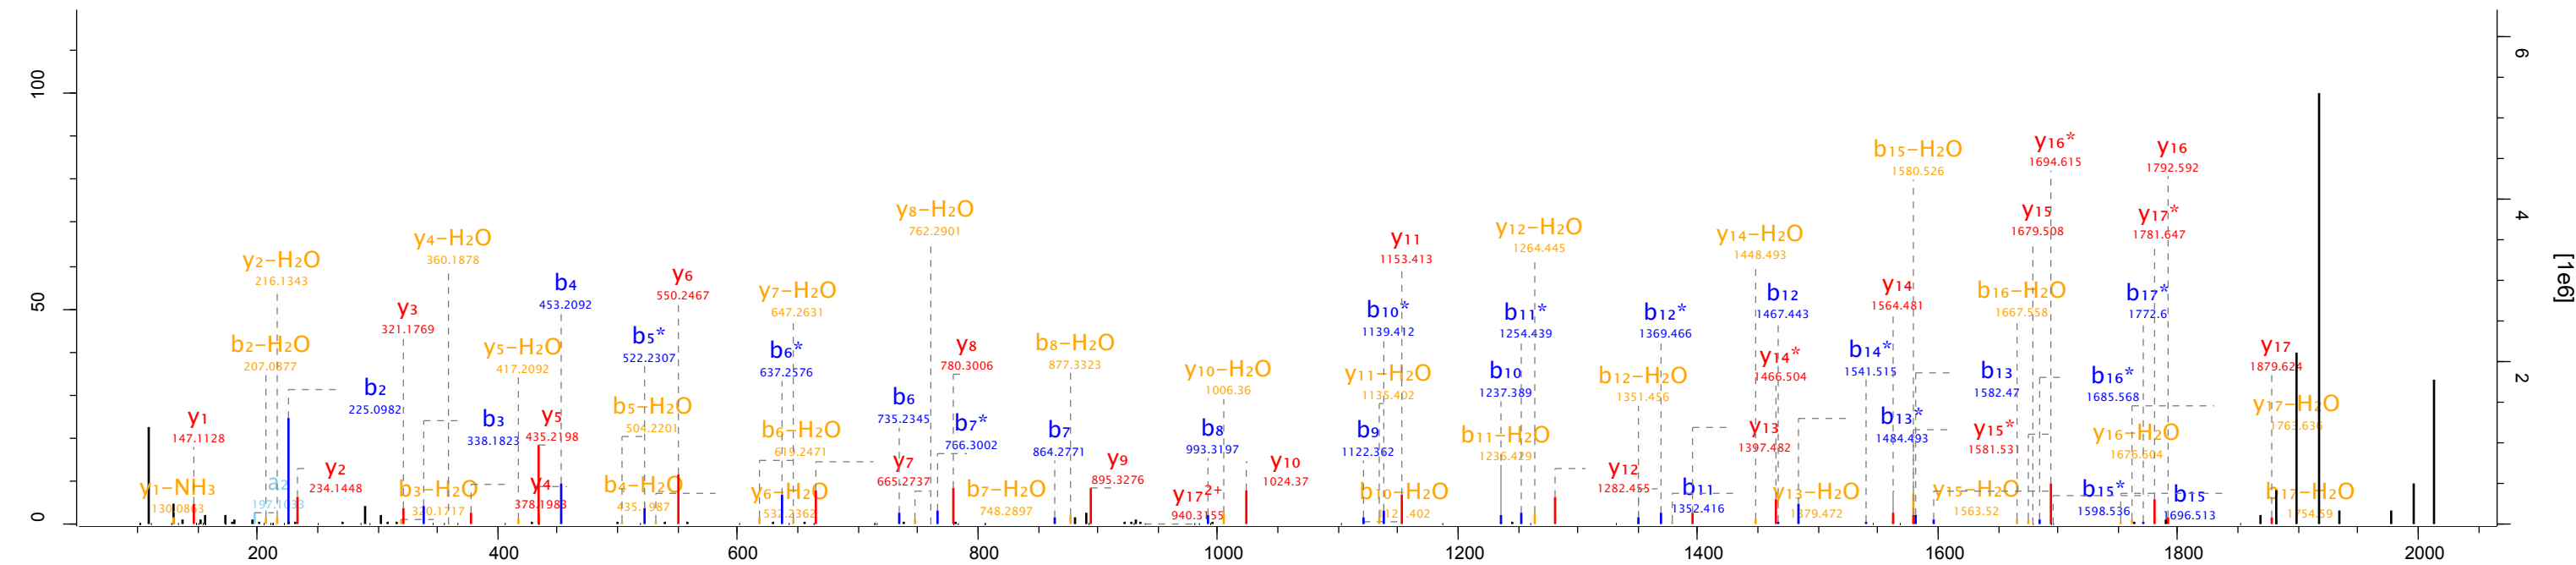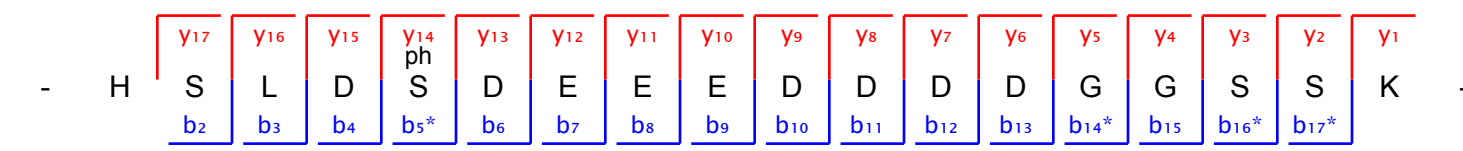

Raw file: 20150814\_A375SR\_Phospho\_BR2\_03  
 Scan: 4521 Method: FTMS; HCD Score: 91.47 m/z: 512.23 Gene names: RAPGEF2

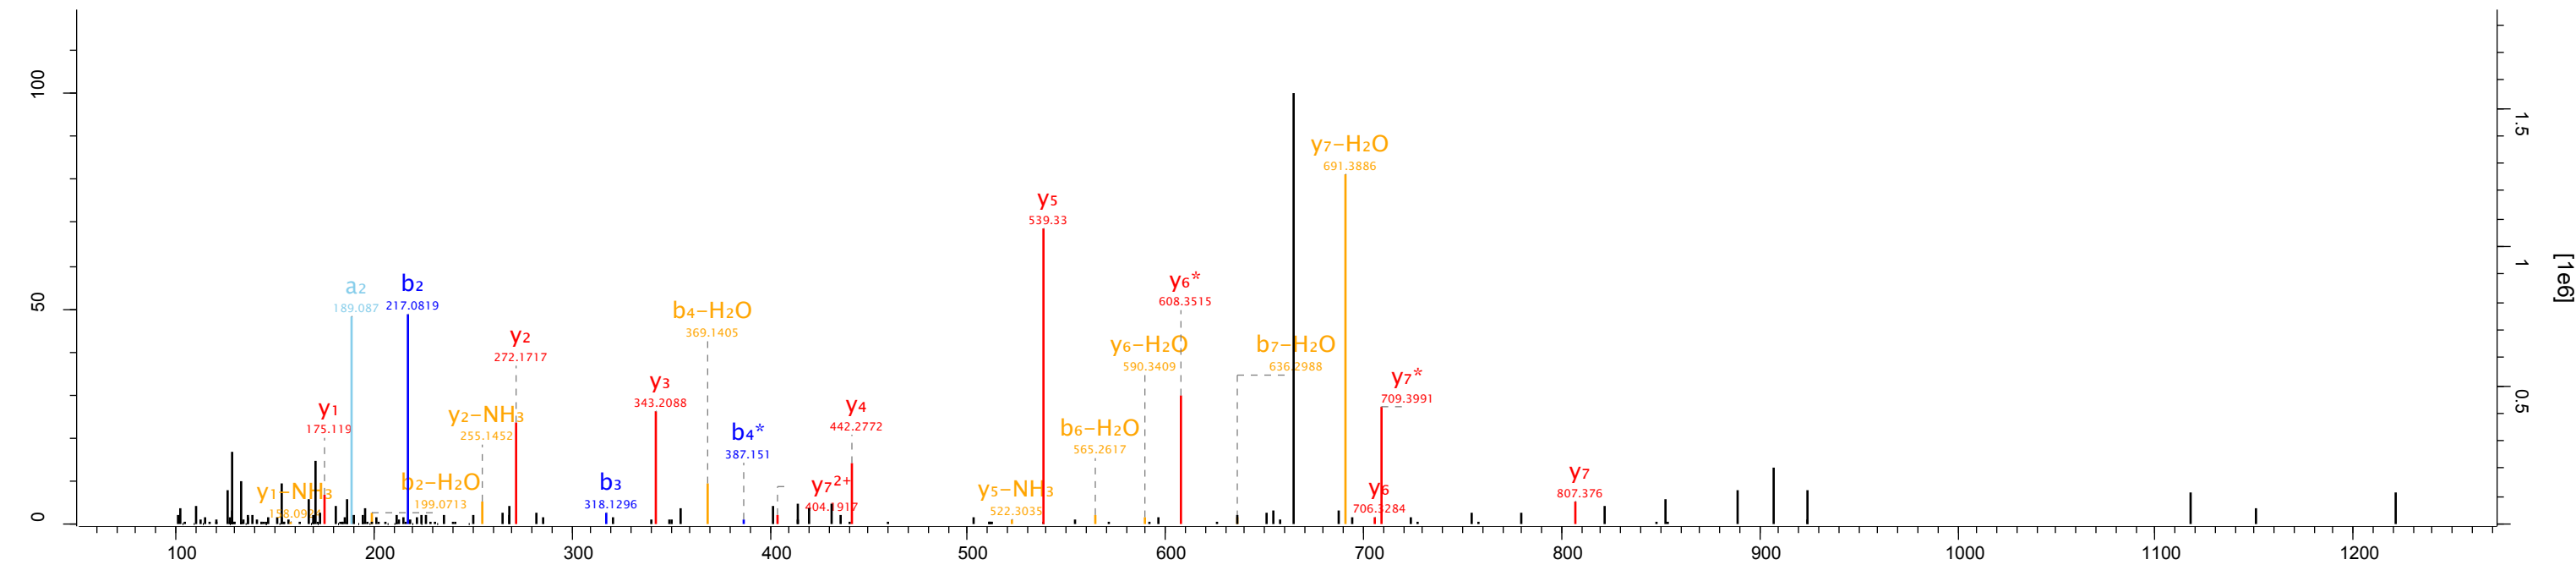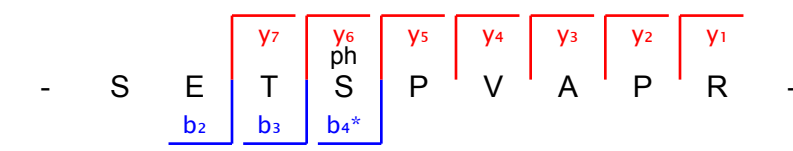

Raw file: 20150814\_A375SR\_Phospho\_BR2\_03  
 Scan: 4941 Method: FTMS; HCD Score: 111.64 m/z: 636.28 Gene names: PPP1R3D

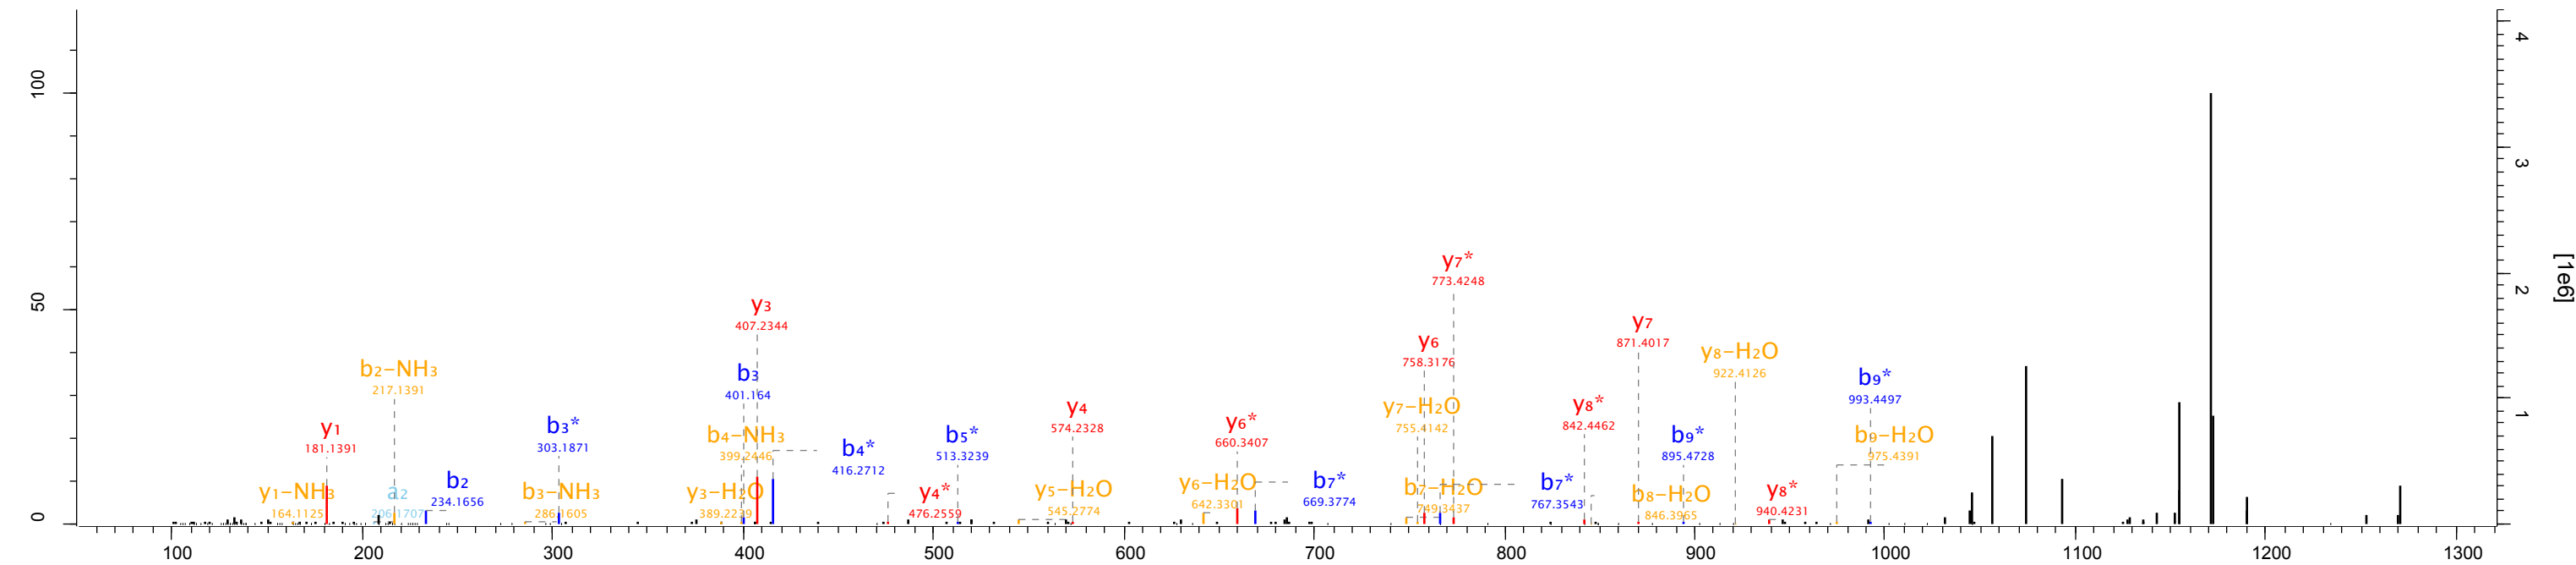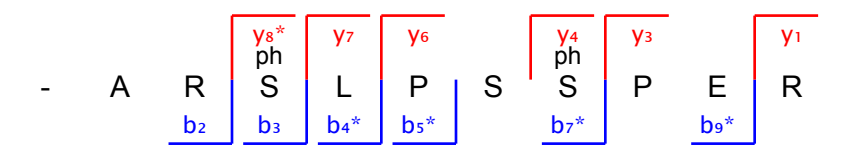

Raw file: 20150814\_A375SR\_Phospho\_BR2\_03  
 Scan: 5251 Method: FTMS; HCD Score: 101.2 m/z: 632.28 Gene names: MAP4K4

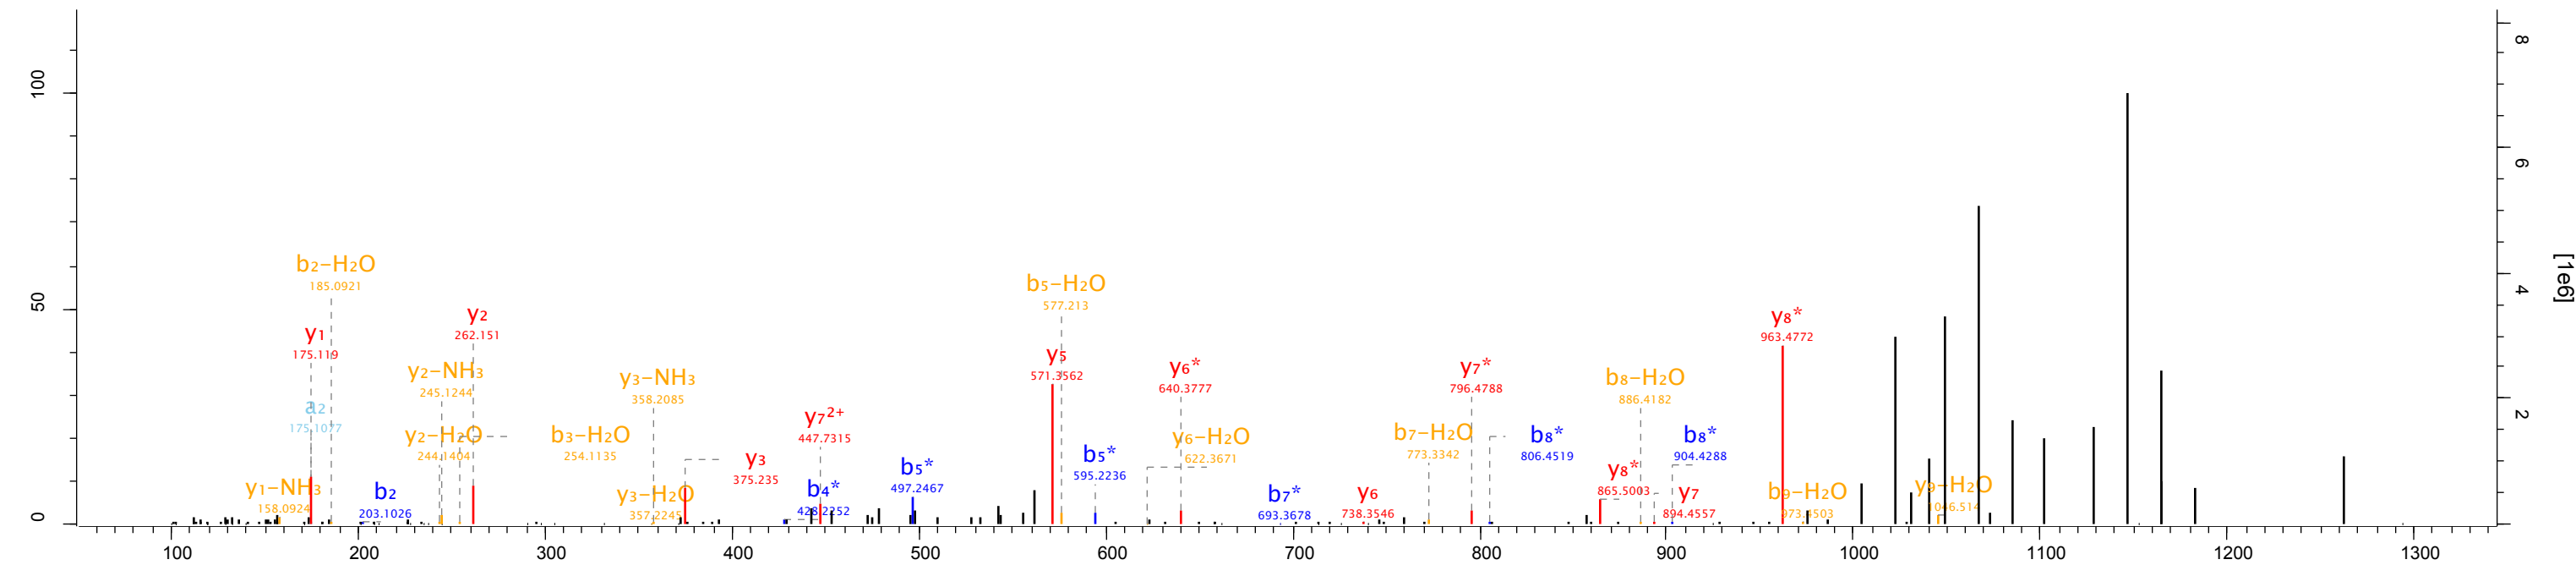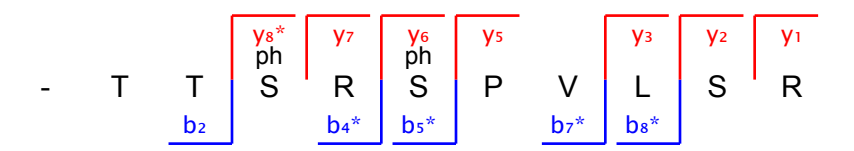

Raw file: 20150814\_A375SR\_Phospho\_BR2\_03  
 Scan: 5311 Method: FTMS; HCD Score: 211.68 m/z: 957.42 Gene names: UTP14A

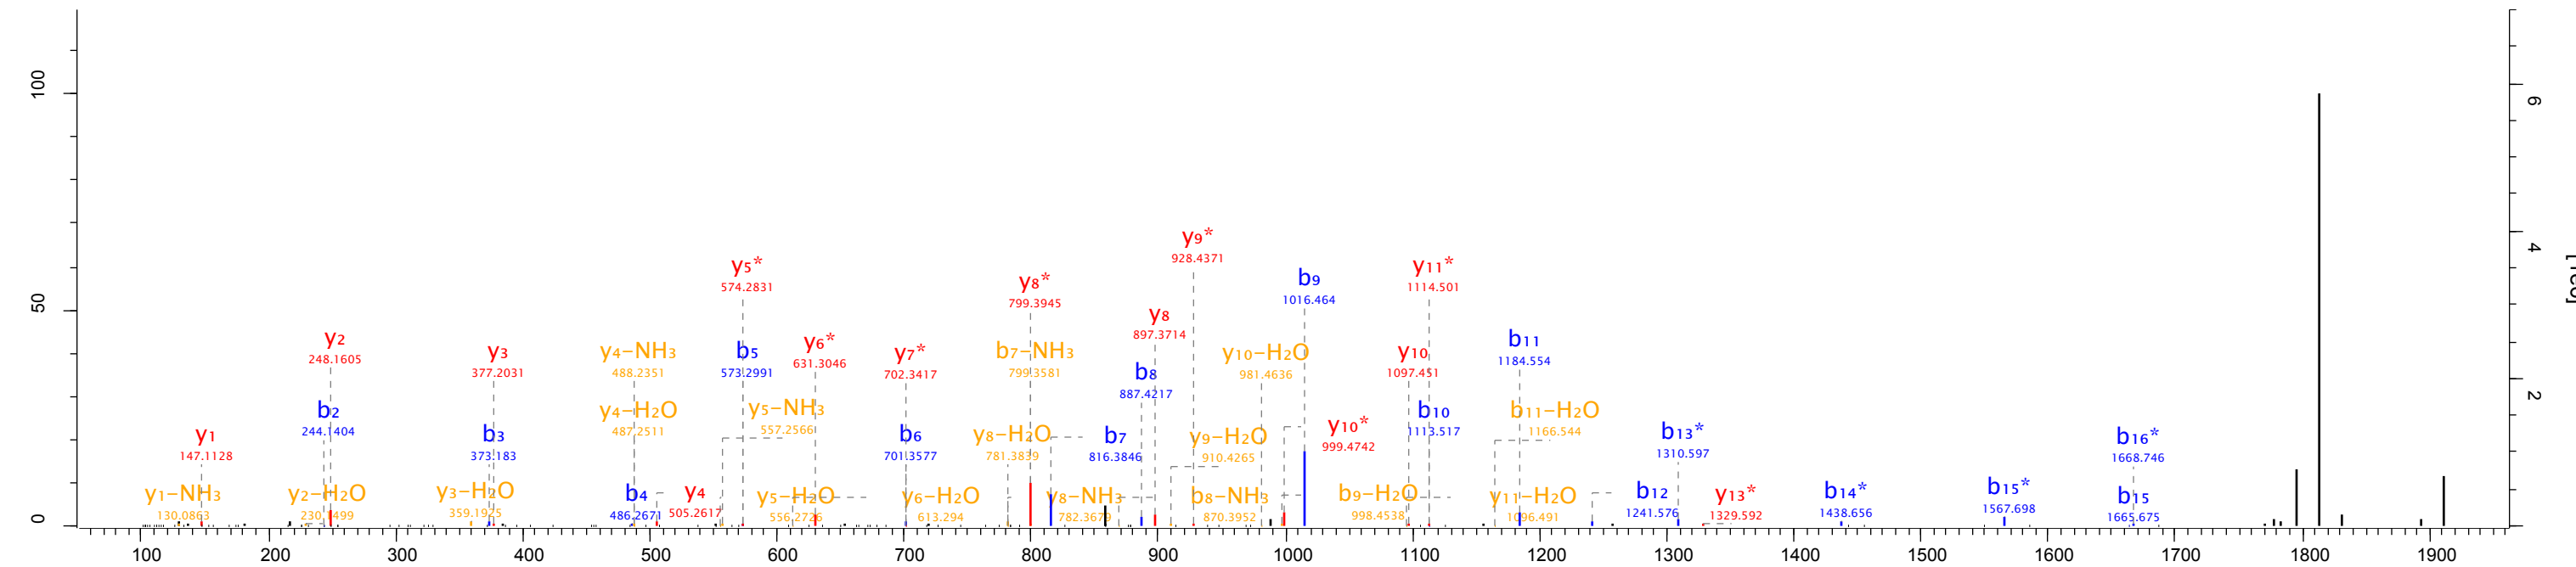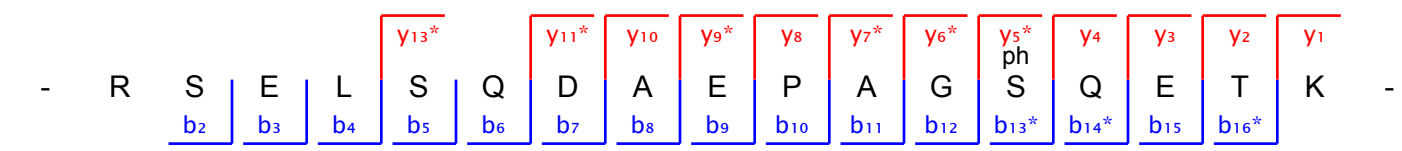

Raw file: 20150814\_A375SR\_Phospho\_BR2\_03  
 Scan: 5491 Method: FTMS; HCD Score: 268.65 m/z: 876.4 Gene names: NUP214

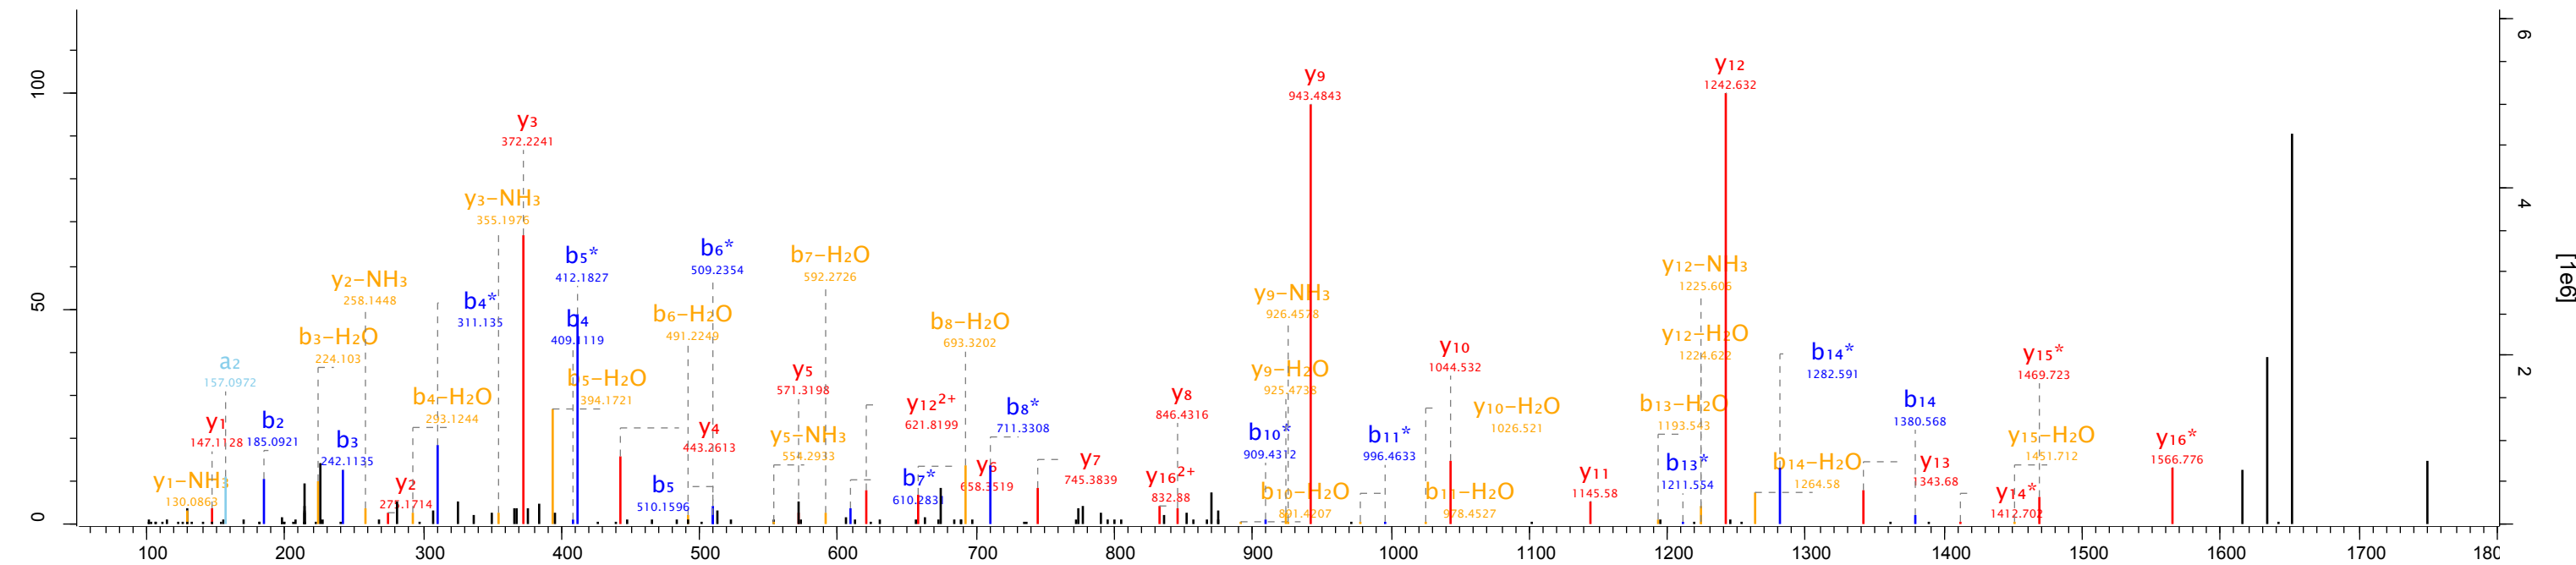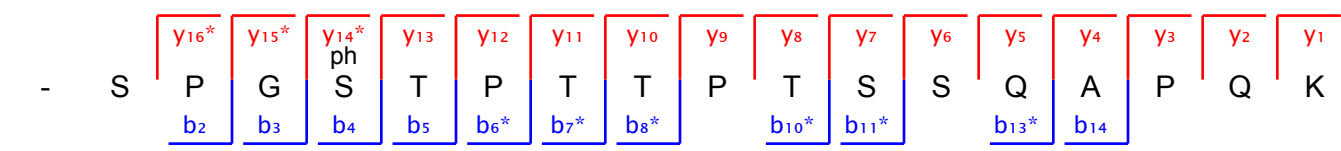



Raw file: 20150814\_A375SR\_Phospho\_BR2\_03  
 Scan: 5631 Method: FTMS; HCD Score: 234.03 m/z: 958.88 Gene names: AJUBA

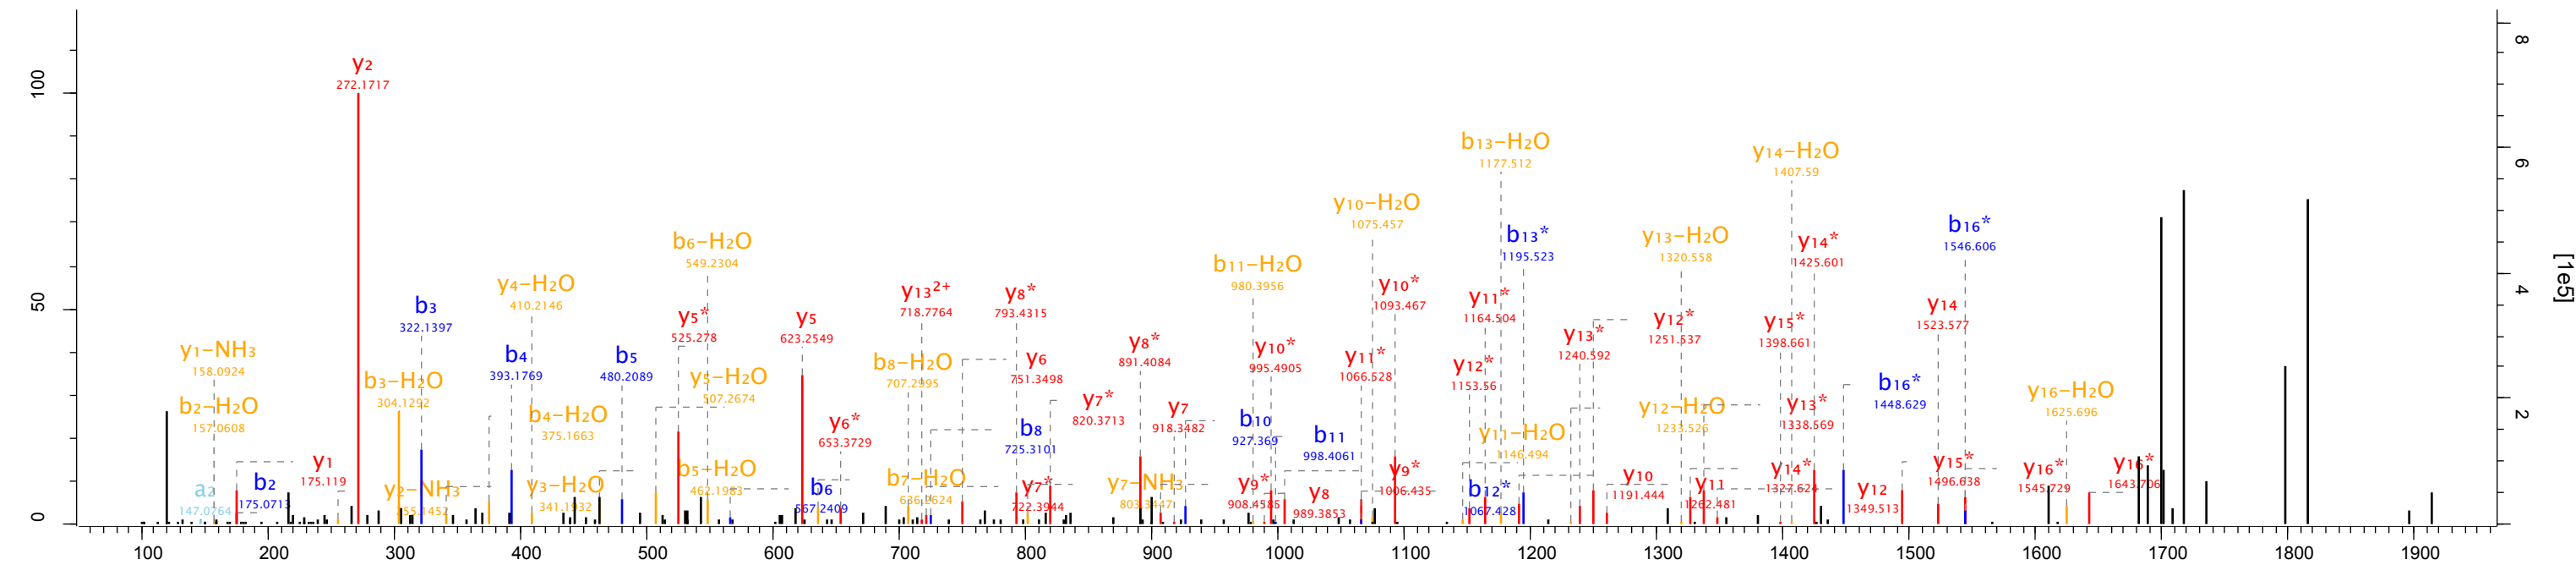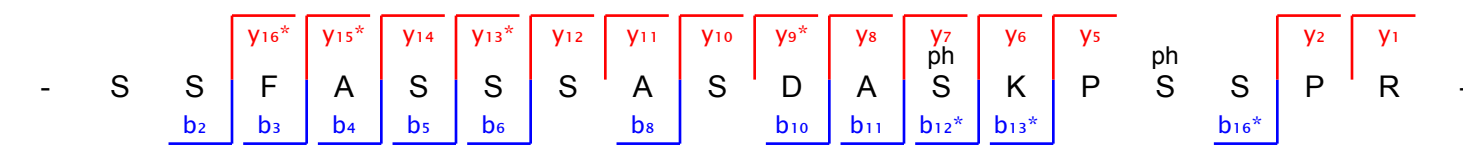

Raw file 20150814\_A375SR\_Phospho\_BR2\_03 Scan 5801 Method FTMS; HCD Score 74.52 m/z 471.23 Gene names MAP7D1

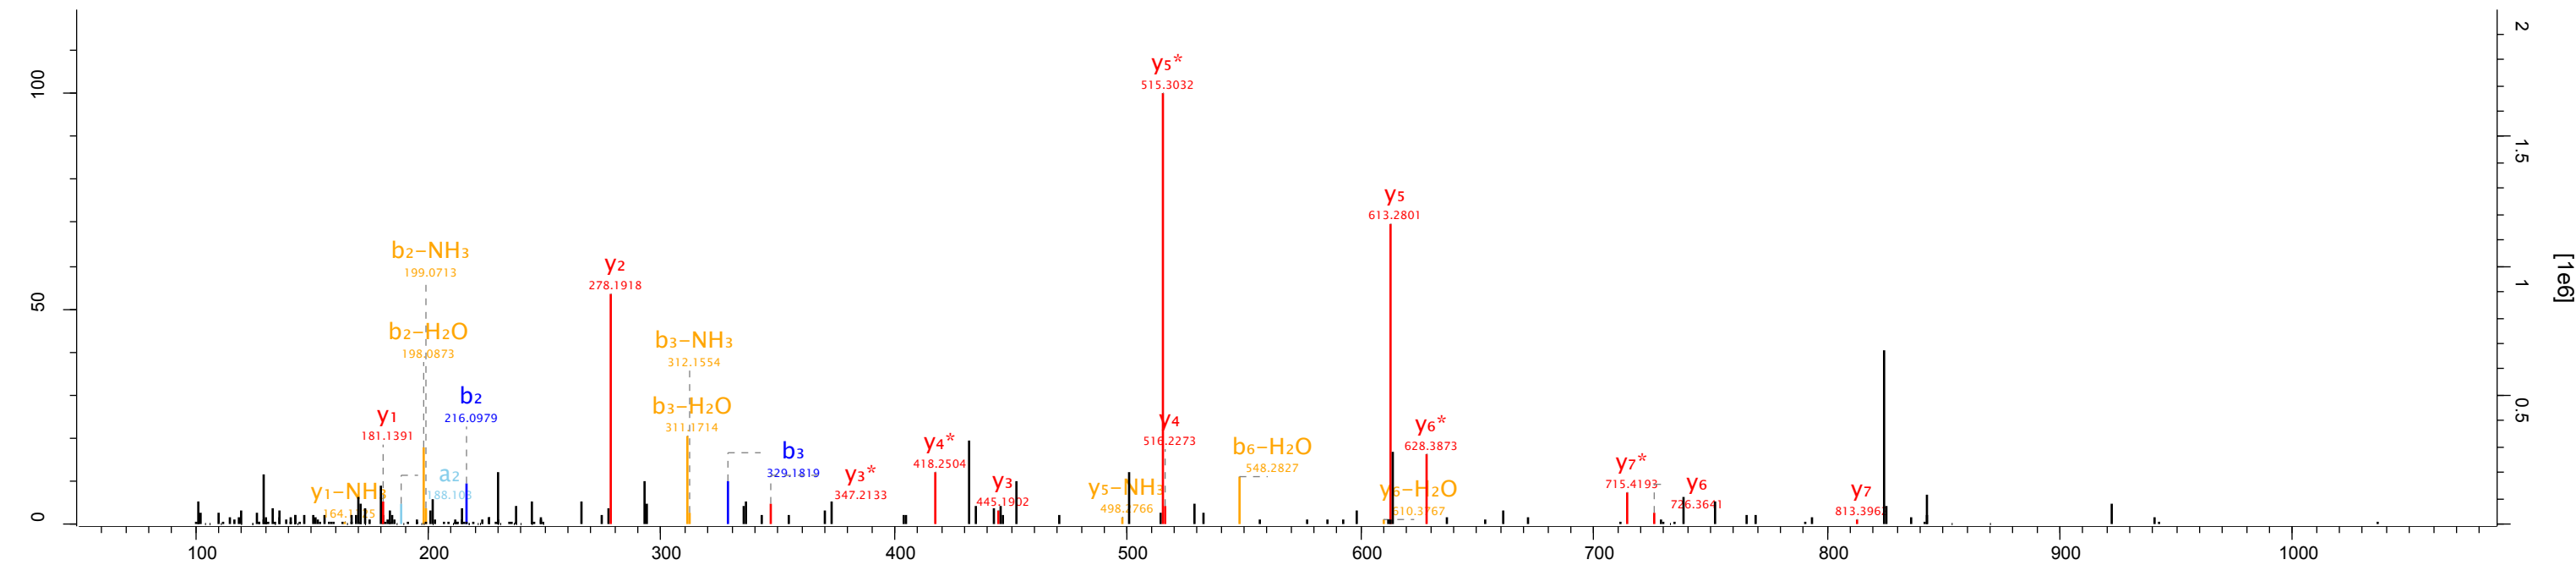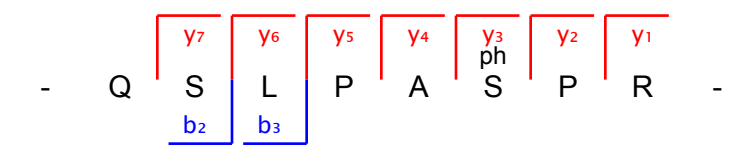

Raw file 20150814\_A375SR\_Phospho\_BR2\_03 Scan 6001 Method FTMS; HCD Score 155.94 m/z 749.31 Gene names TBC1D5

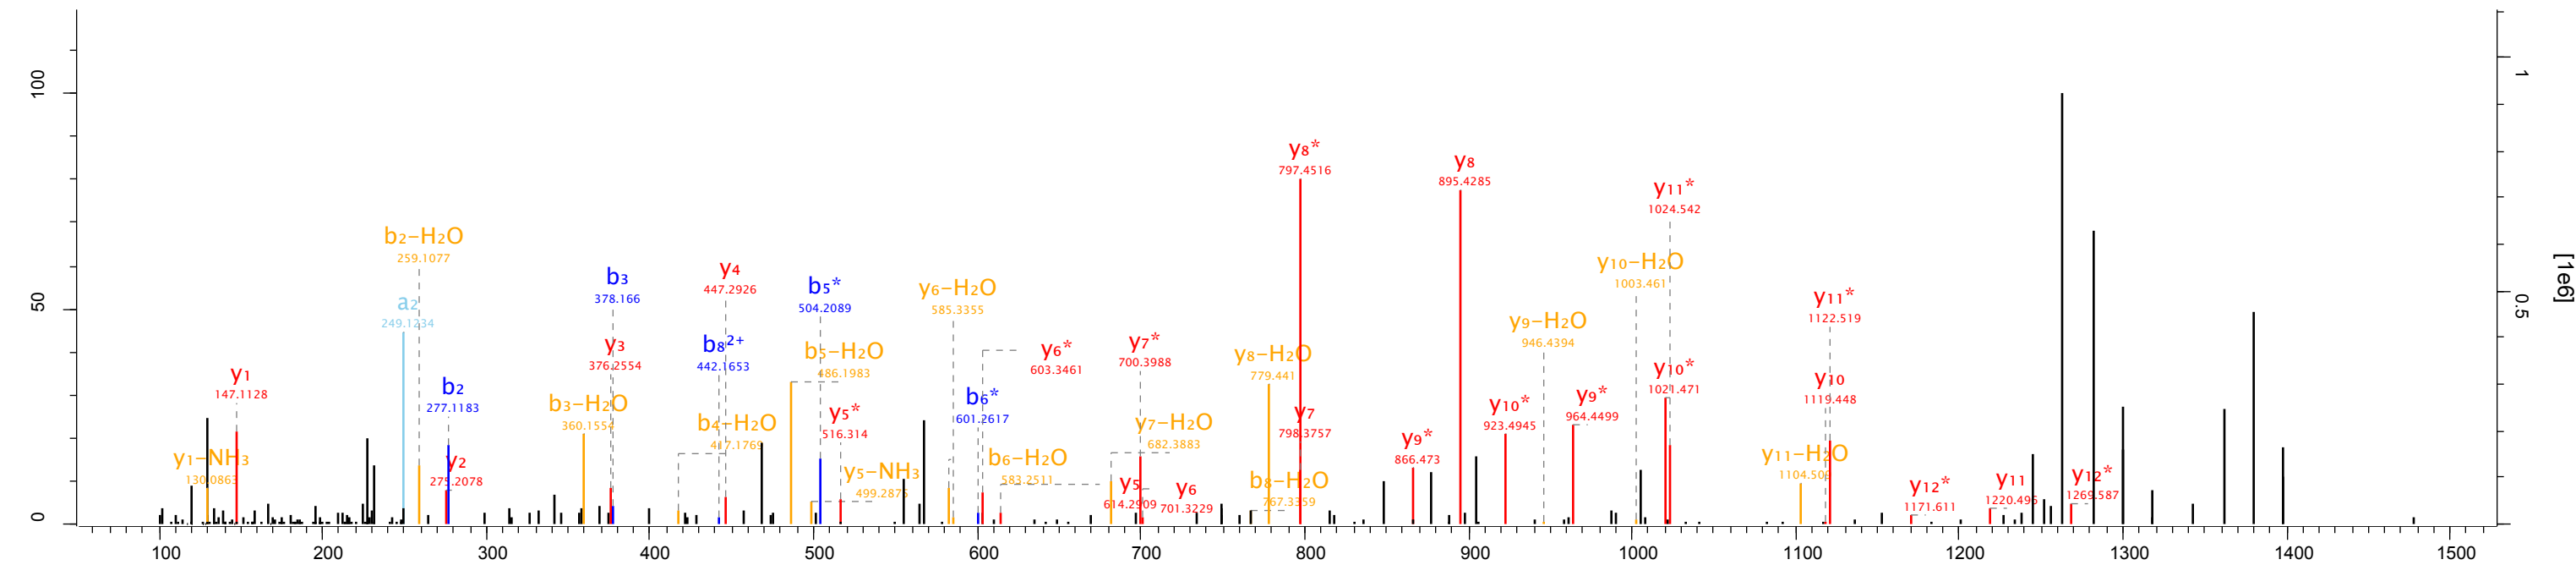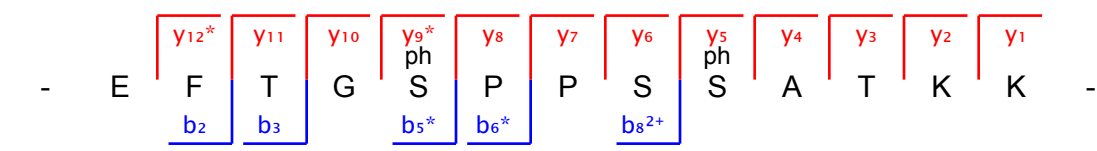

Raw file Scan Method Score m/z Gene names

20150814\_A375SR\_Phospho\_BR2\_03 6191 FTMS; HCD 137.86 739.65 CDK12

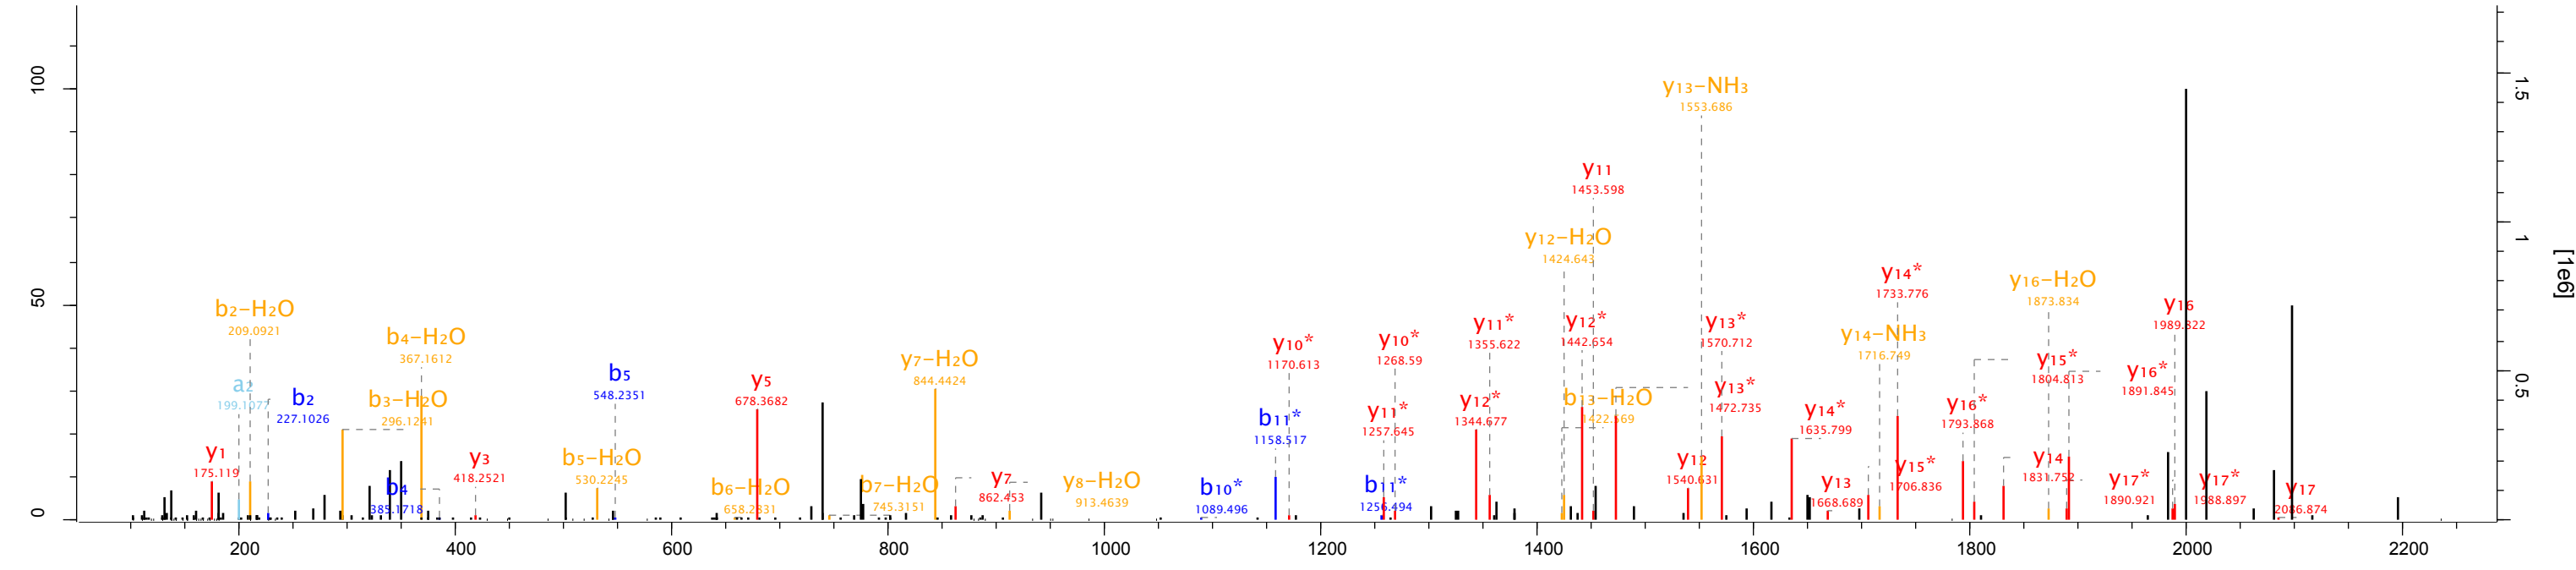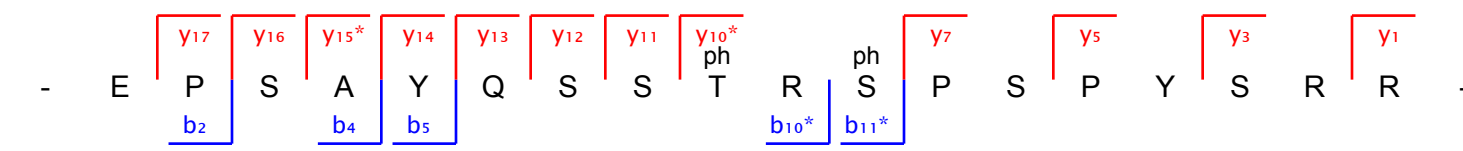

Raw file: 20150814\_A375SR\_Phospho\_BR2\_03  
 Scan: 6341 Method: FTMS; HCD Score: 94.35 m/z: 680.26 Gene names: SRSF8

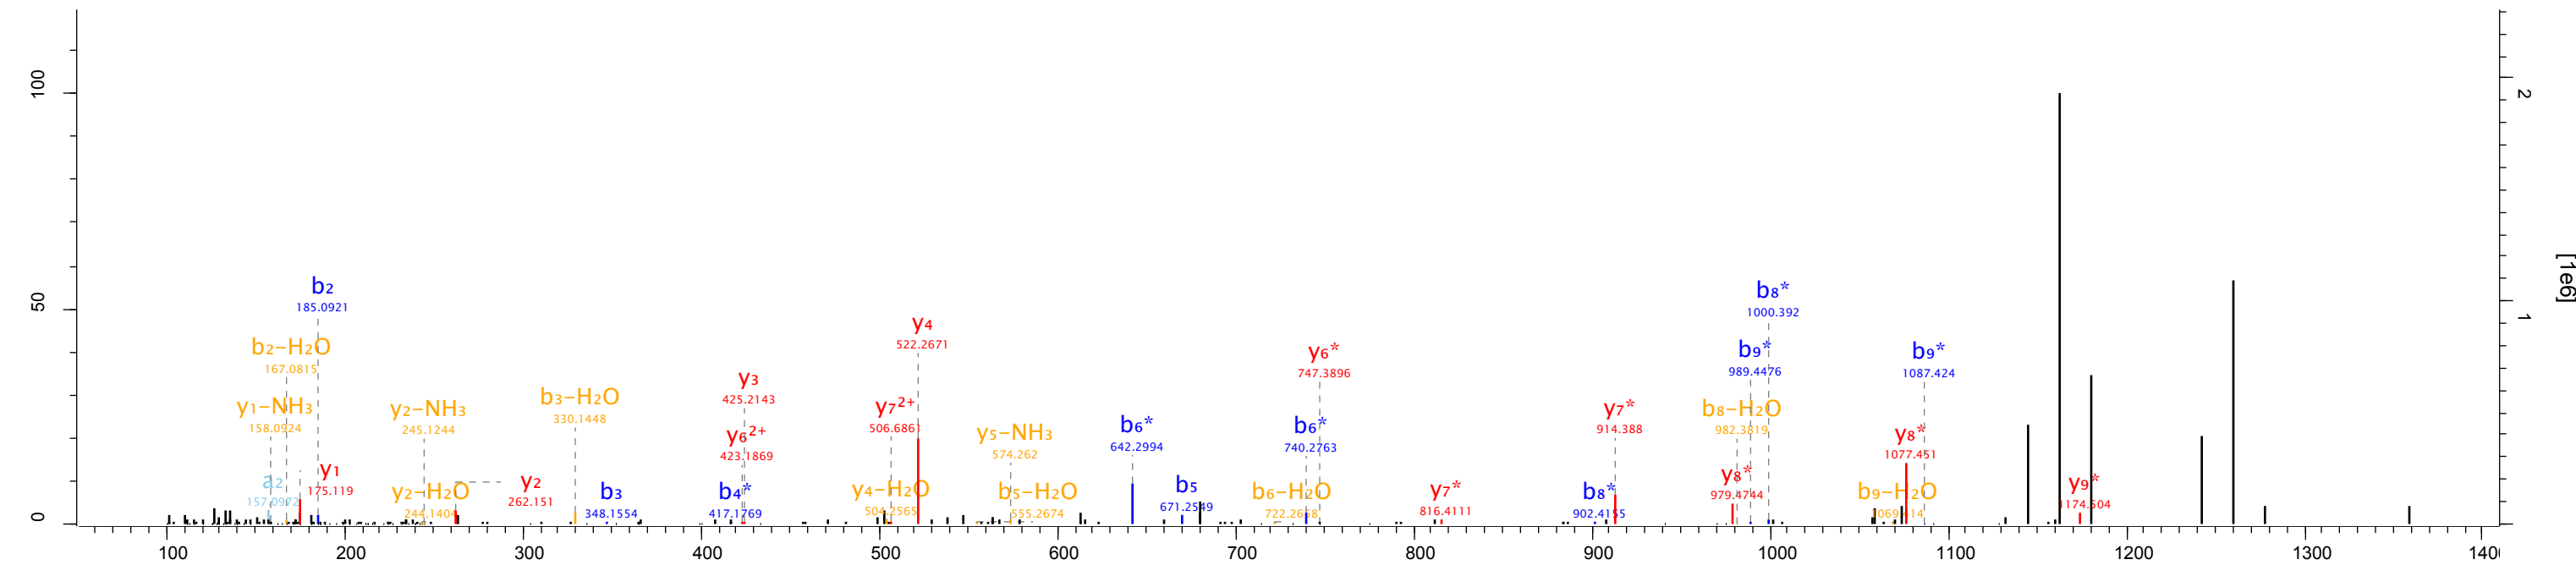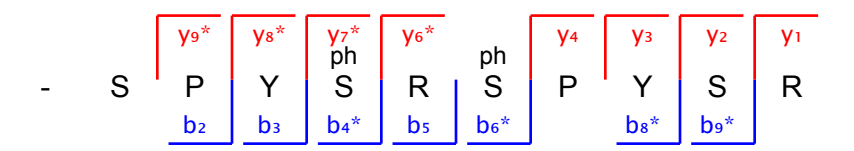

Raw file: 20150814\_A375SR\_Phospho\_BR2\_03  
 Scan: 6391 Method: FTMS; HCD Score: 123.65 m/z: 632.63 Gene names: EPB41L1

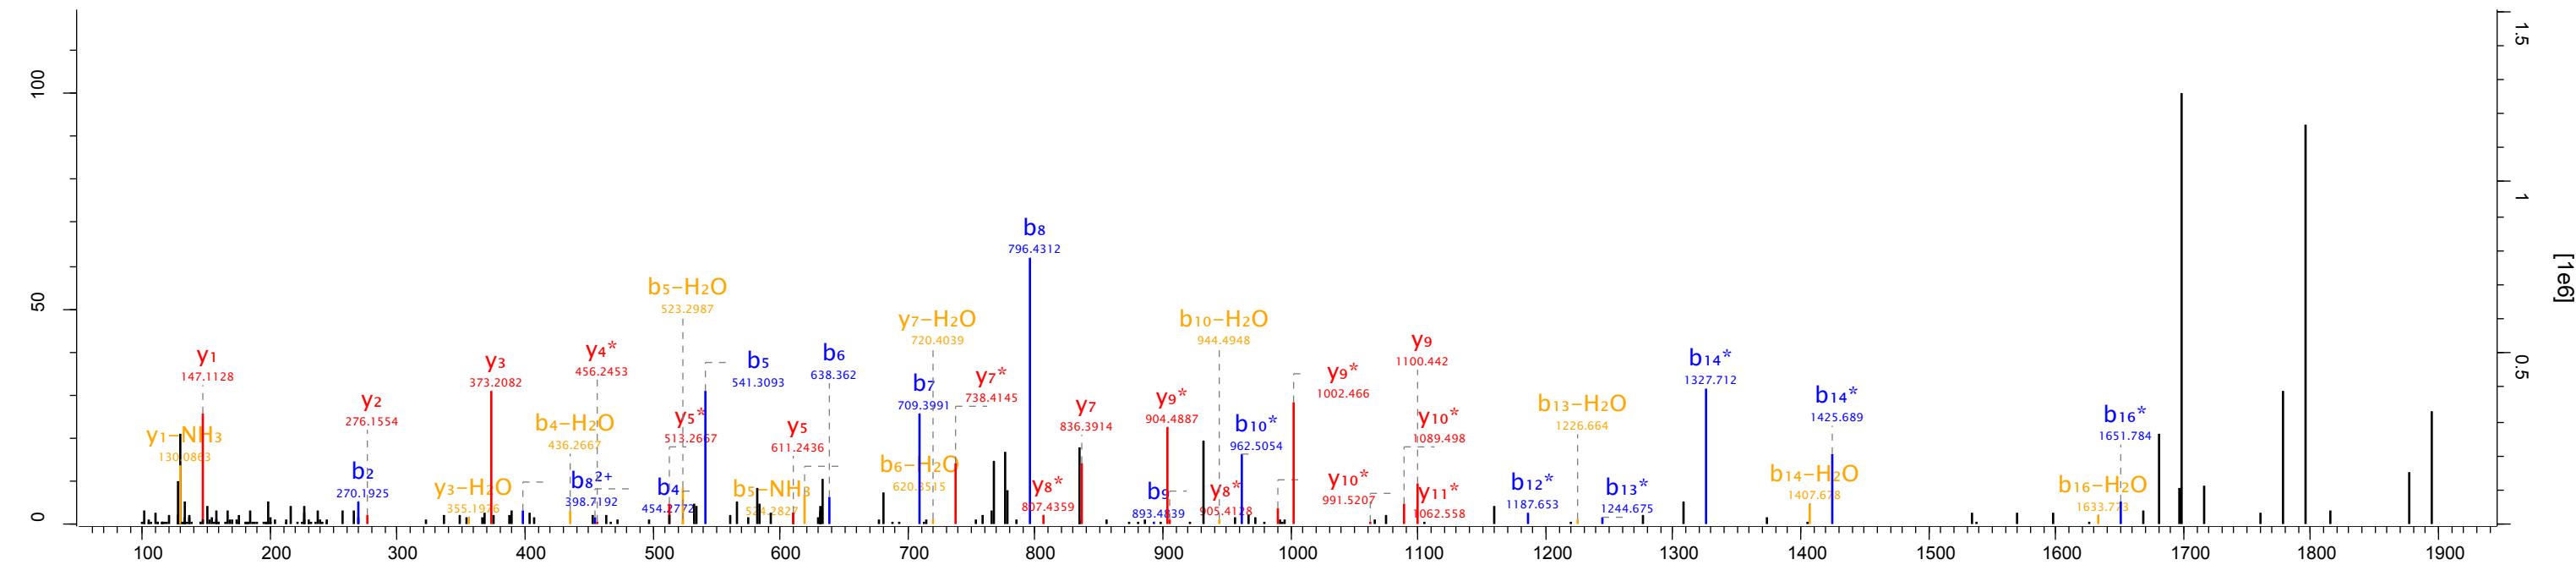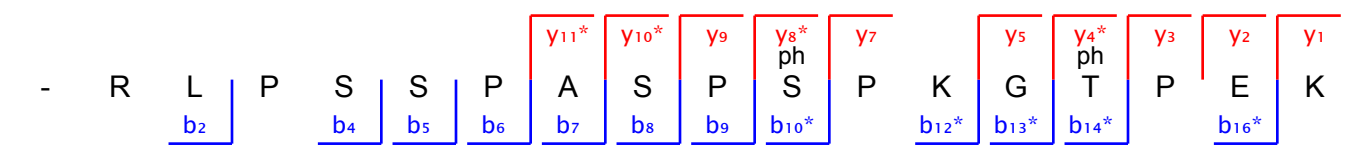

Raw file: 20150814\_A375SR\_Phospho\_BR2\_03  
 Scan: 6571 Method: FTMS; HCD Score: 142.38 m/z: 596.75 Gene names: CTNND1

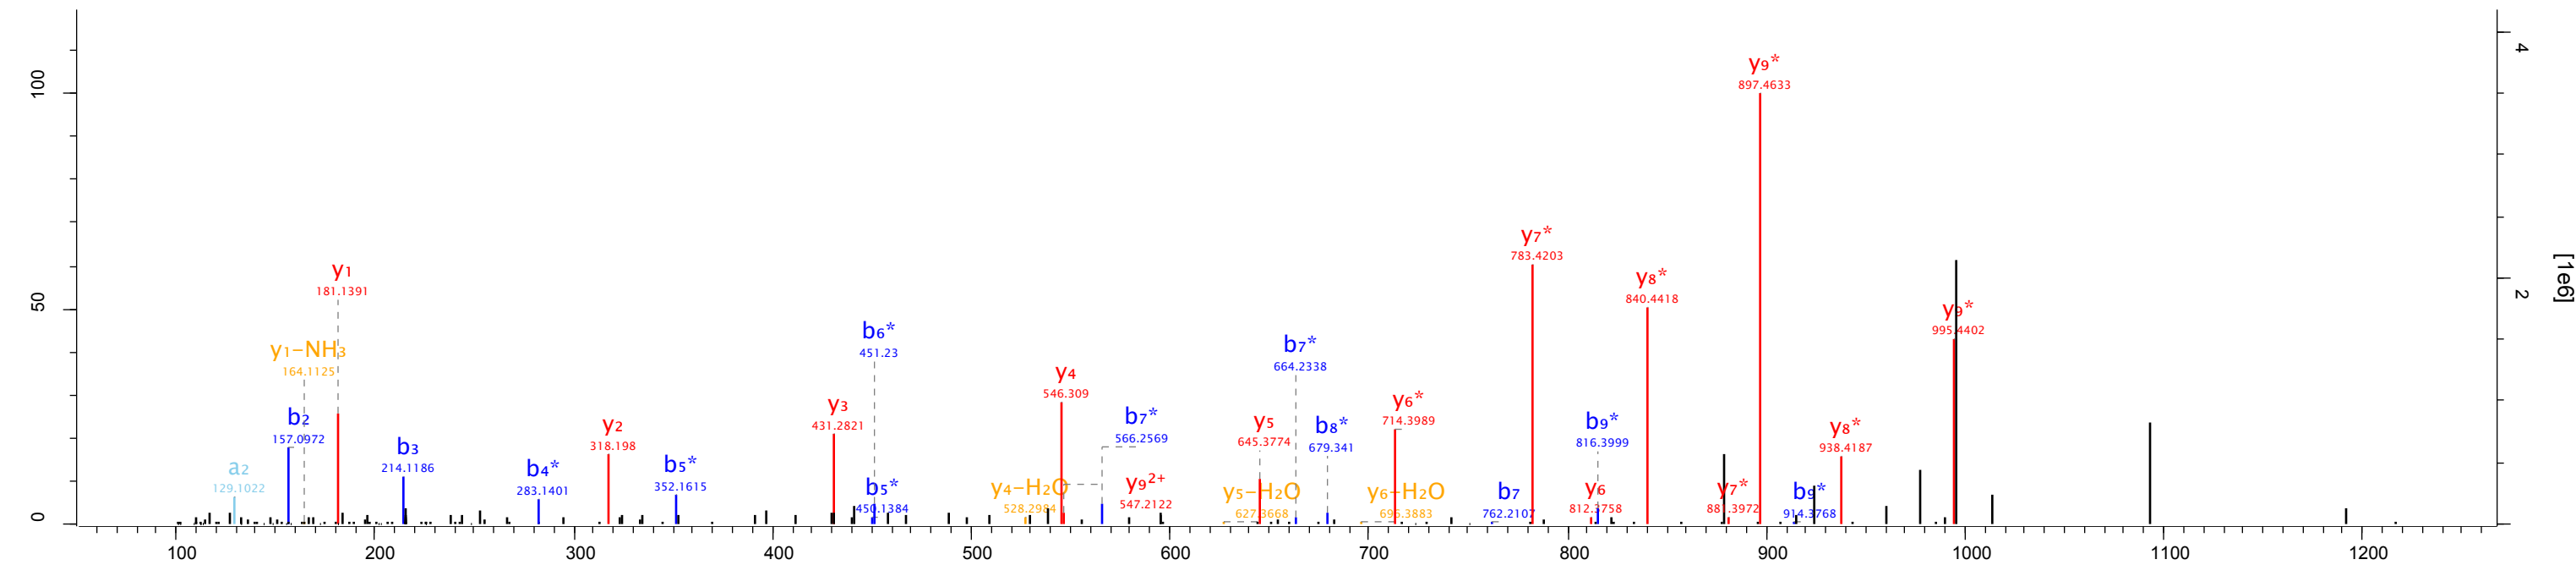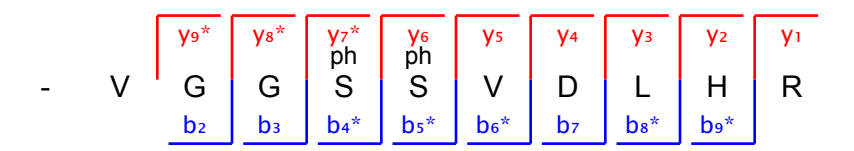

Raw file: 20150814\_A375SR\_Phospho\_BR2\_03  
 Scan: 7631 Method: FTMS; HCD Score: 168.84 m/z: 961.87 Gene names: FXR2

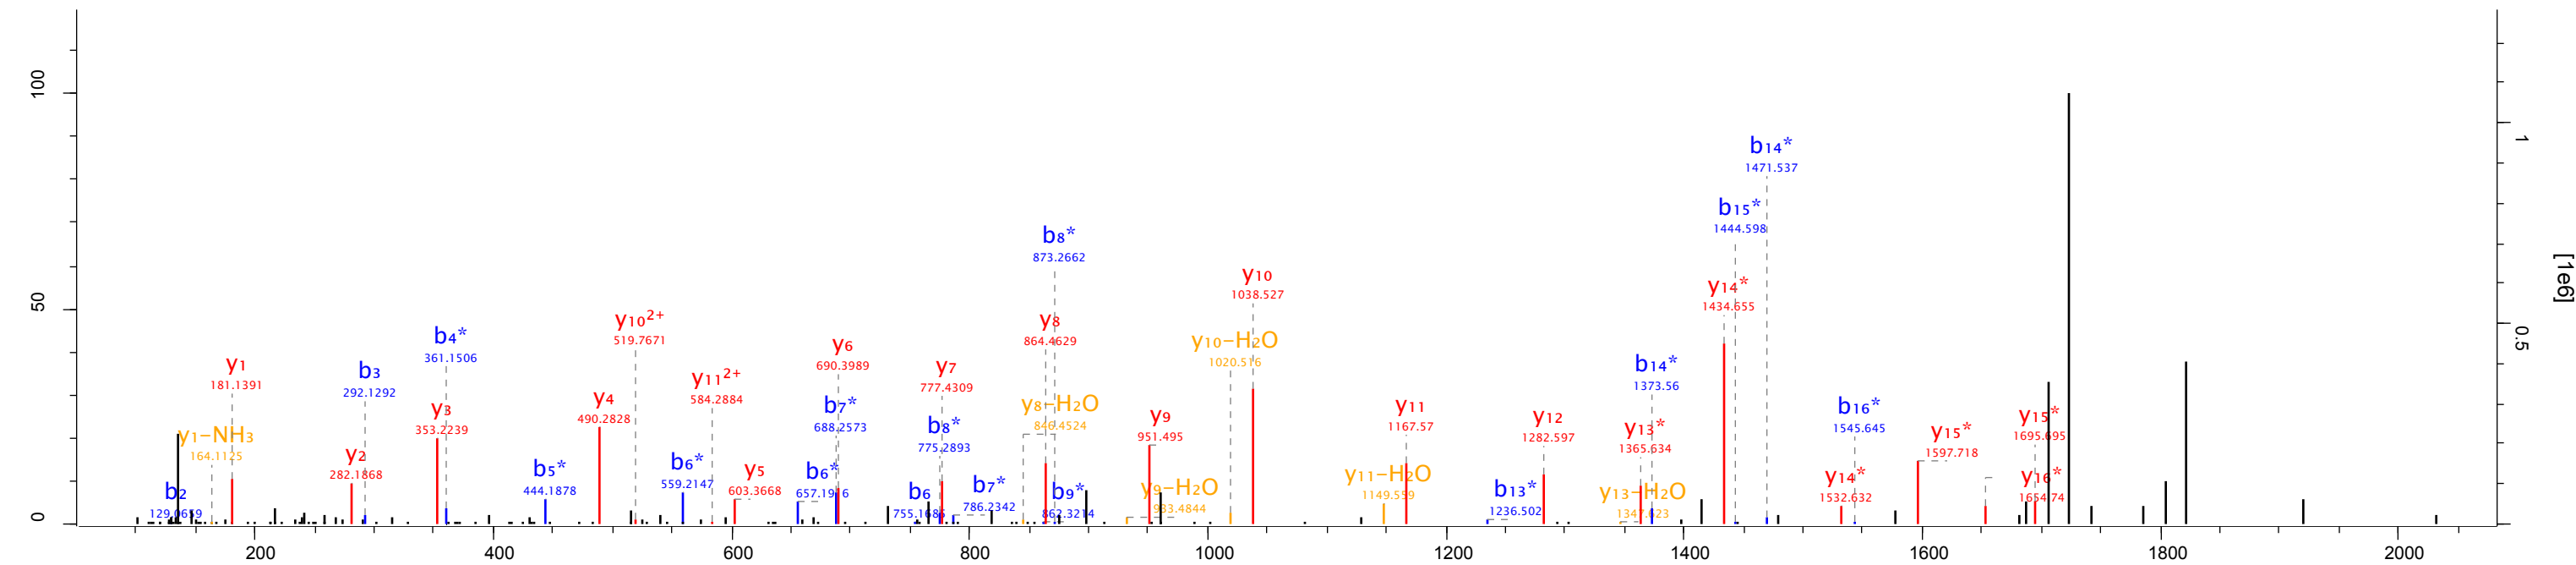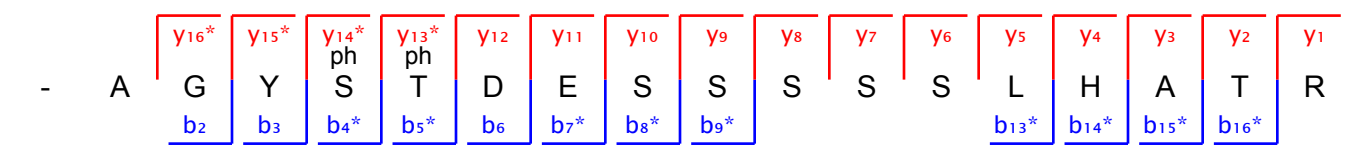



Raw file: 20150814\_A375SR\_Phospho\_BR2\_03  
 Scan: 7911 Method: FTMS; HCD Score: 110.97 m/z: 594.74 Gene names: BOD1L1

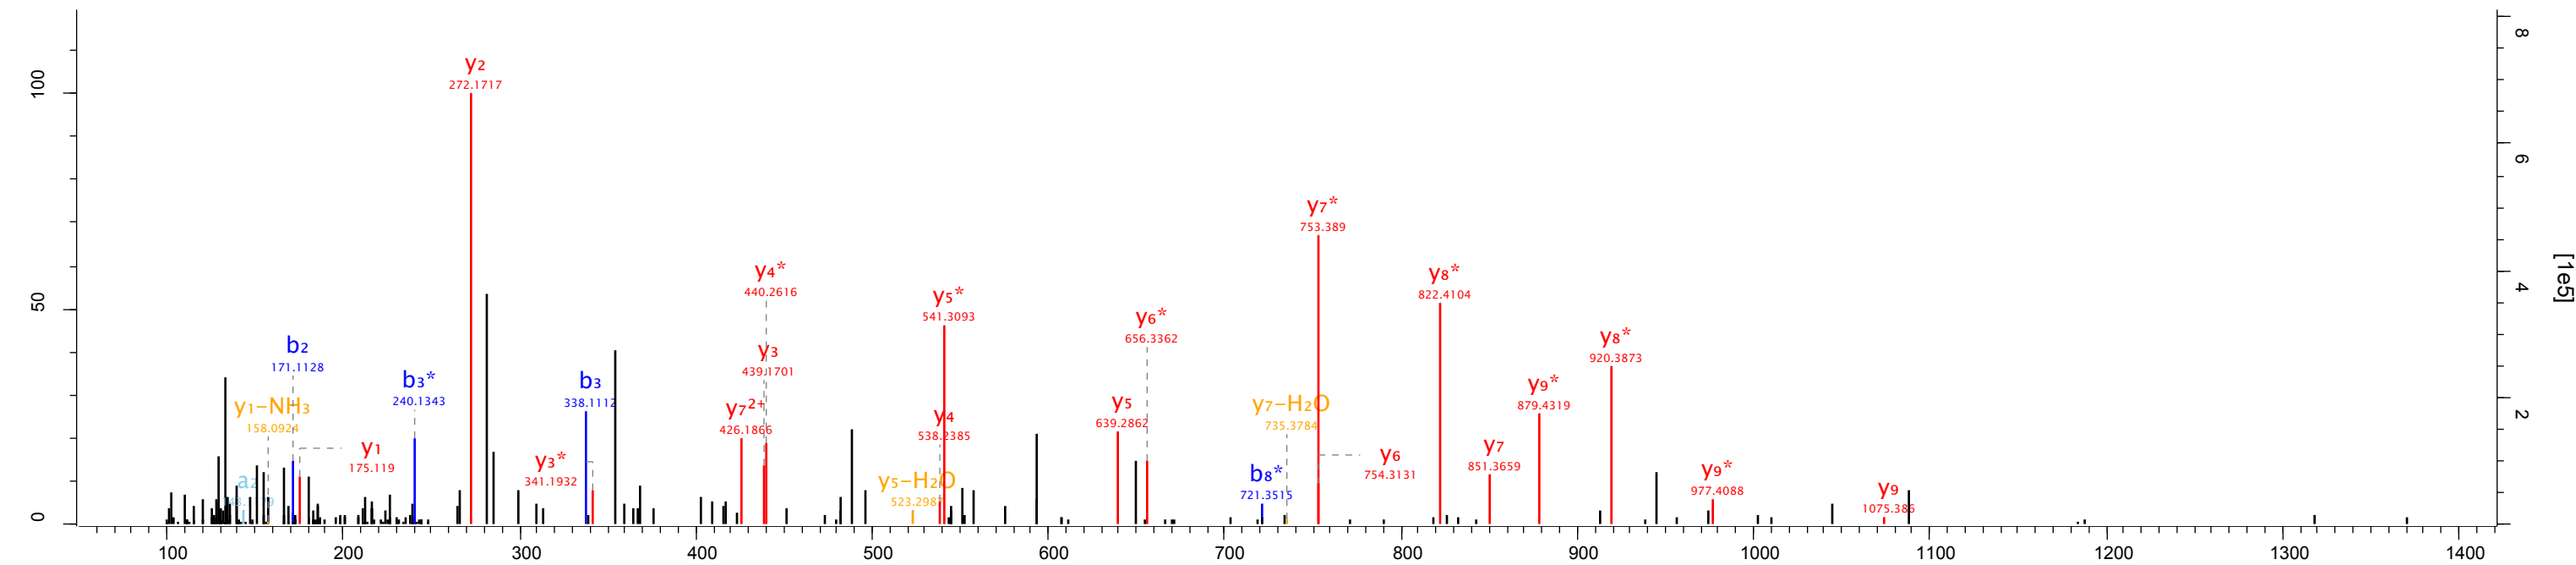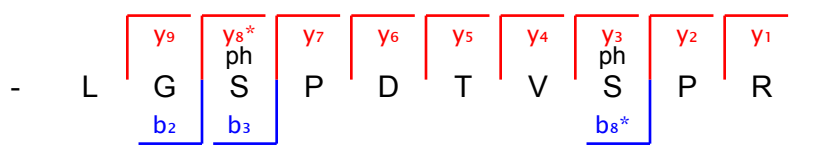

Raw file 20150814\_A375SR\_Phospho\_BR2\_03 Scan 8481 Method FTMS; HCD Score 113.27 m/z 523.73 Gene names PLCB3

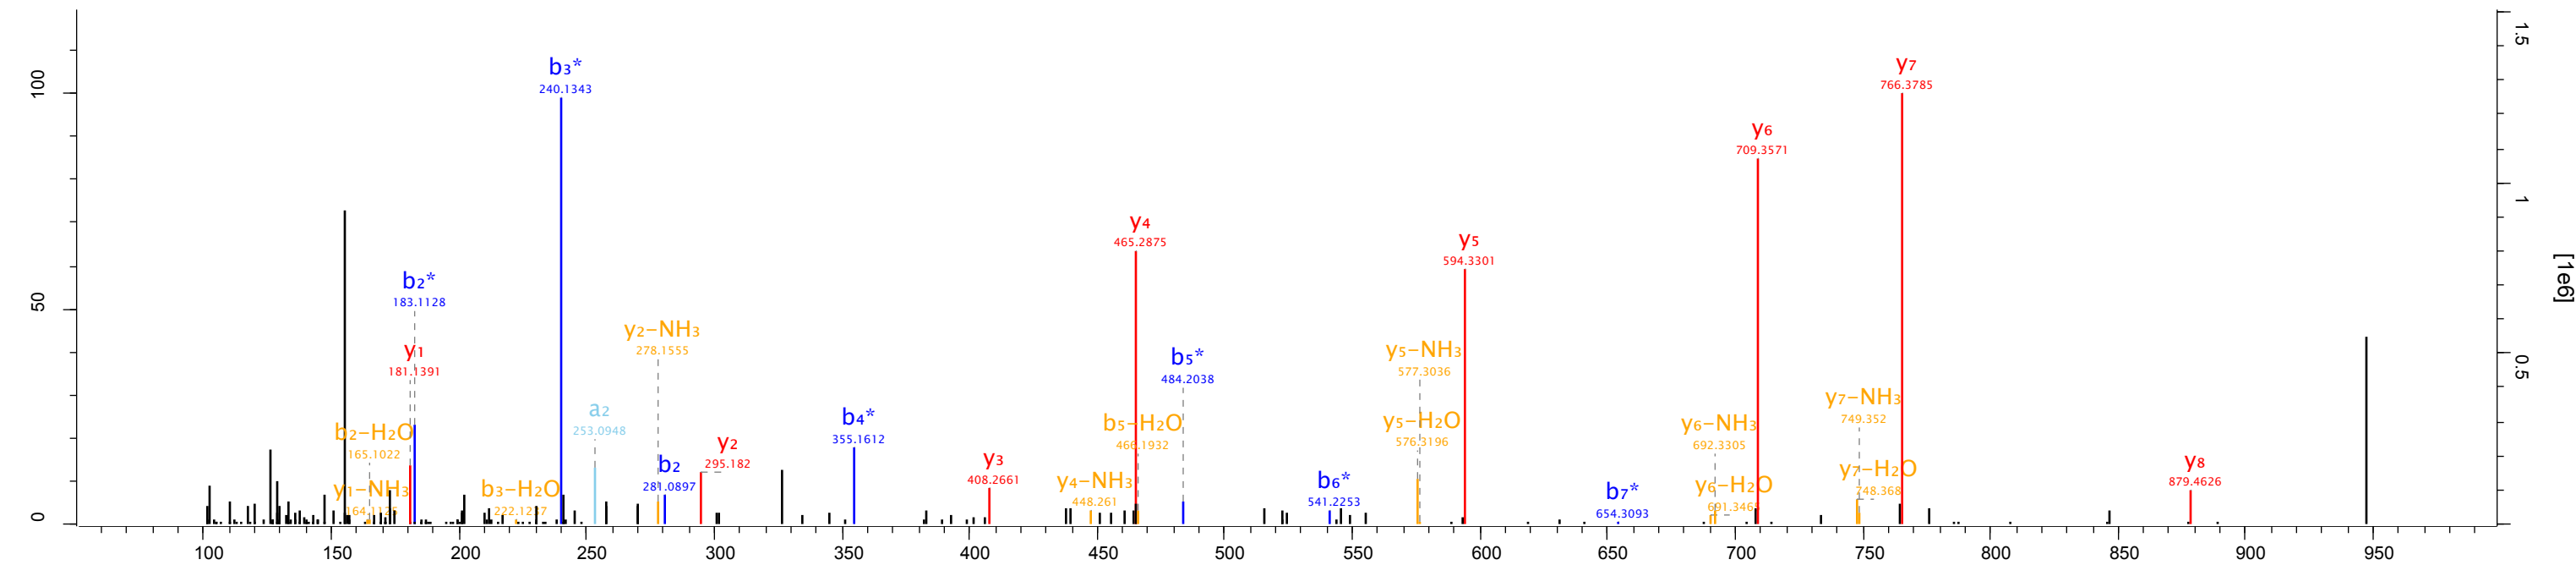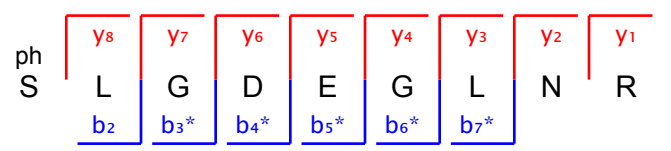

Raw file 20150814\_A375SR\_Phospho\_BR2\_03 Scan 8591 Method FTMS; HCD Score 68.92 m/z 889.43 Gene names MED1

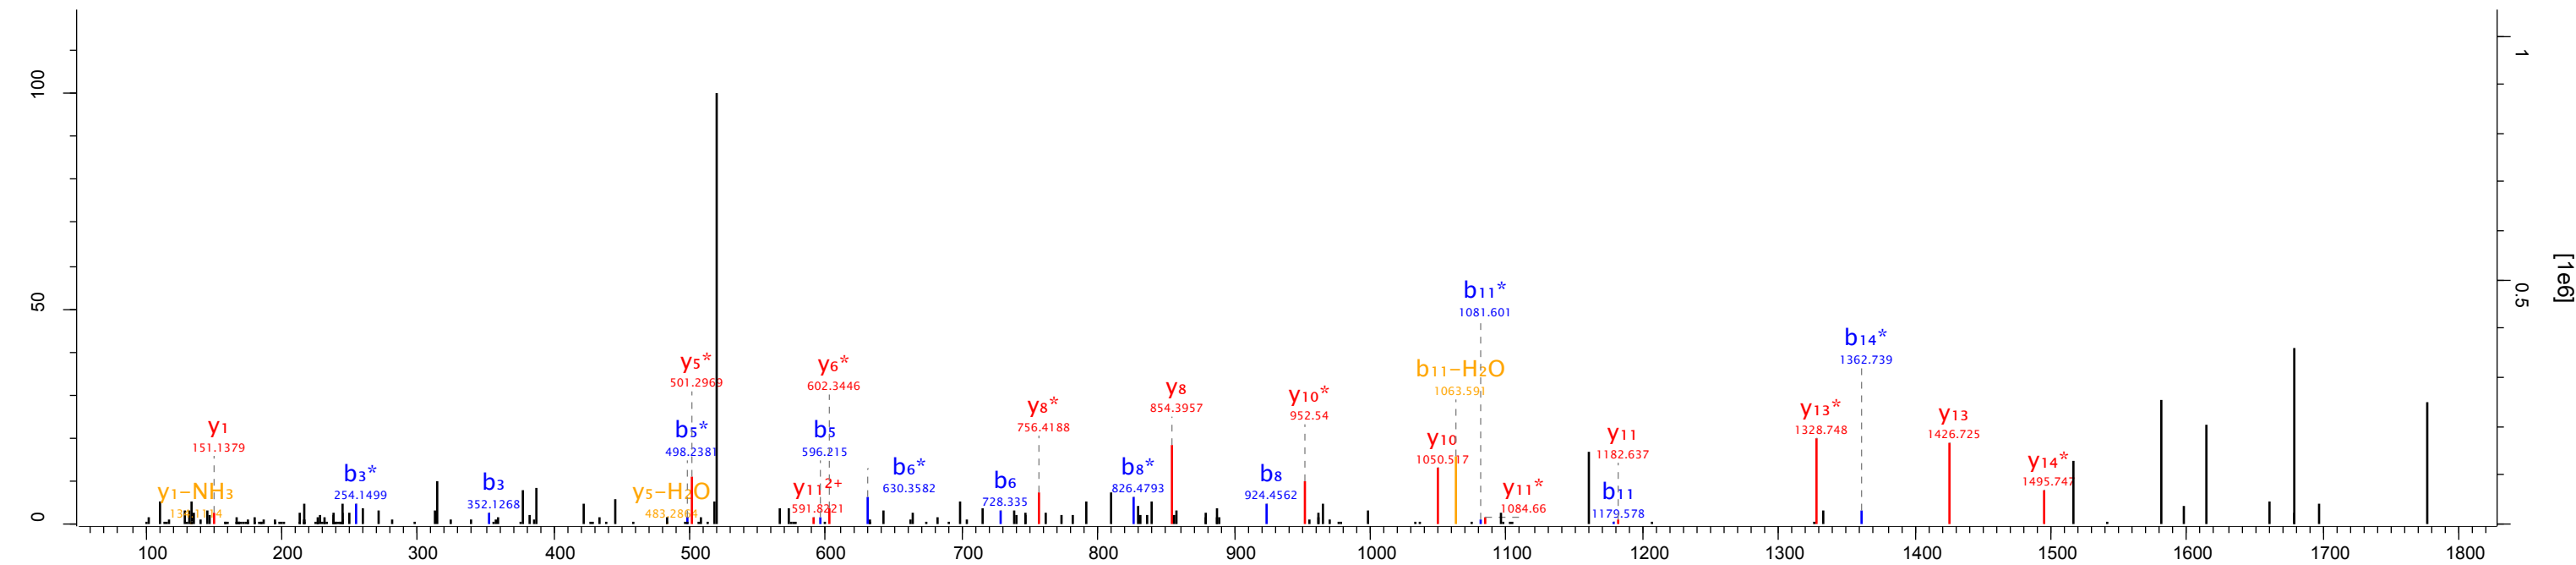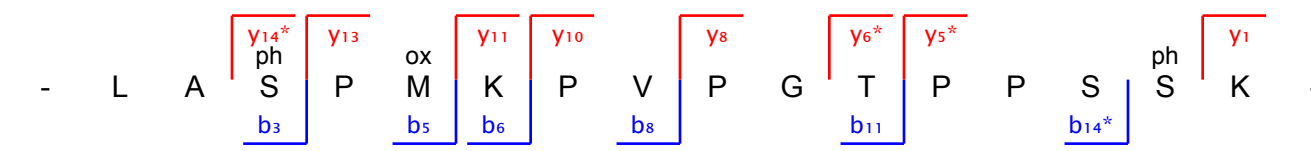

Raw file 20150814\_A375SR\_Phospho\_BR2\_03 Scan 8631 Method FTMS; HCD Score 103.14 m/z 577.24 Gene names UBR4

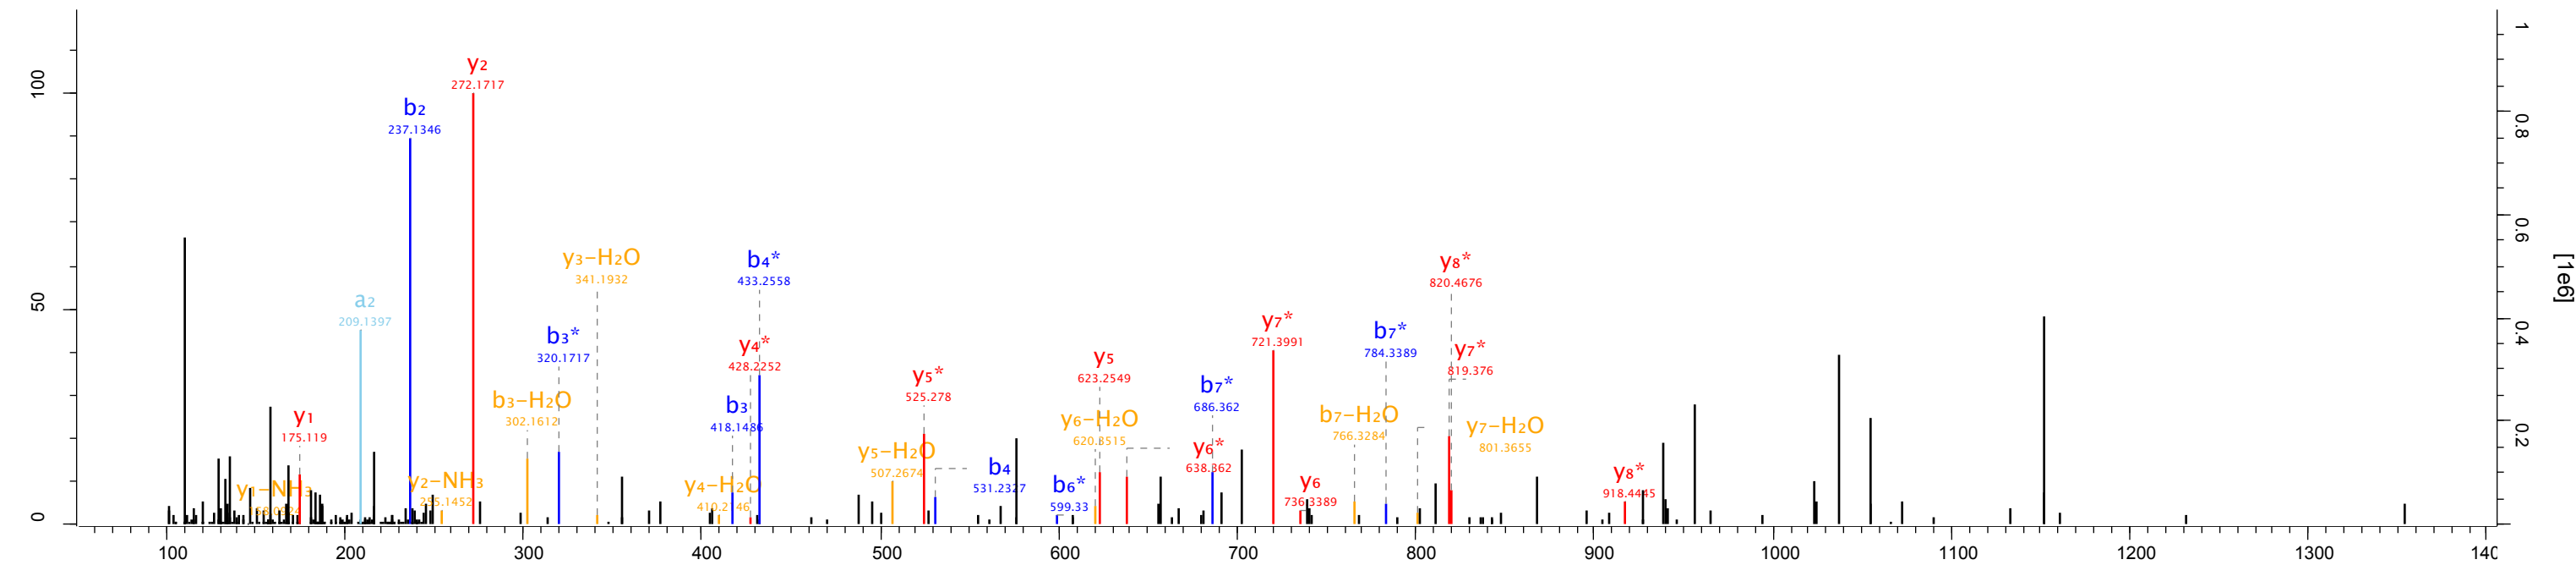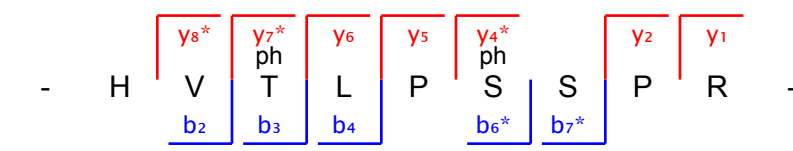

Raw file: 20150814\_A375SR\_Phospho\_BR2\_03  
 Scan: 8711 Method: FTMS; HCD Score: 84.38 m/z: 465.87 Gene names: MAP7D1

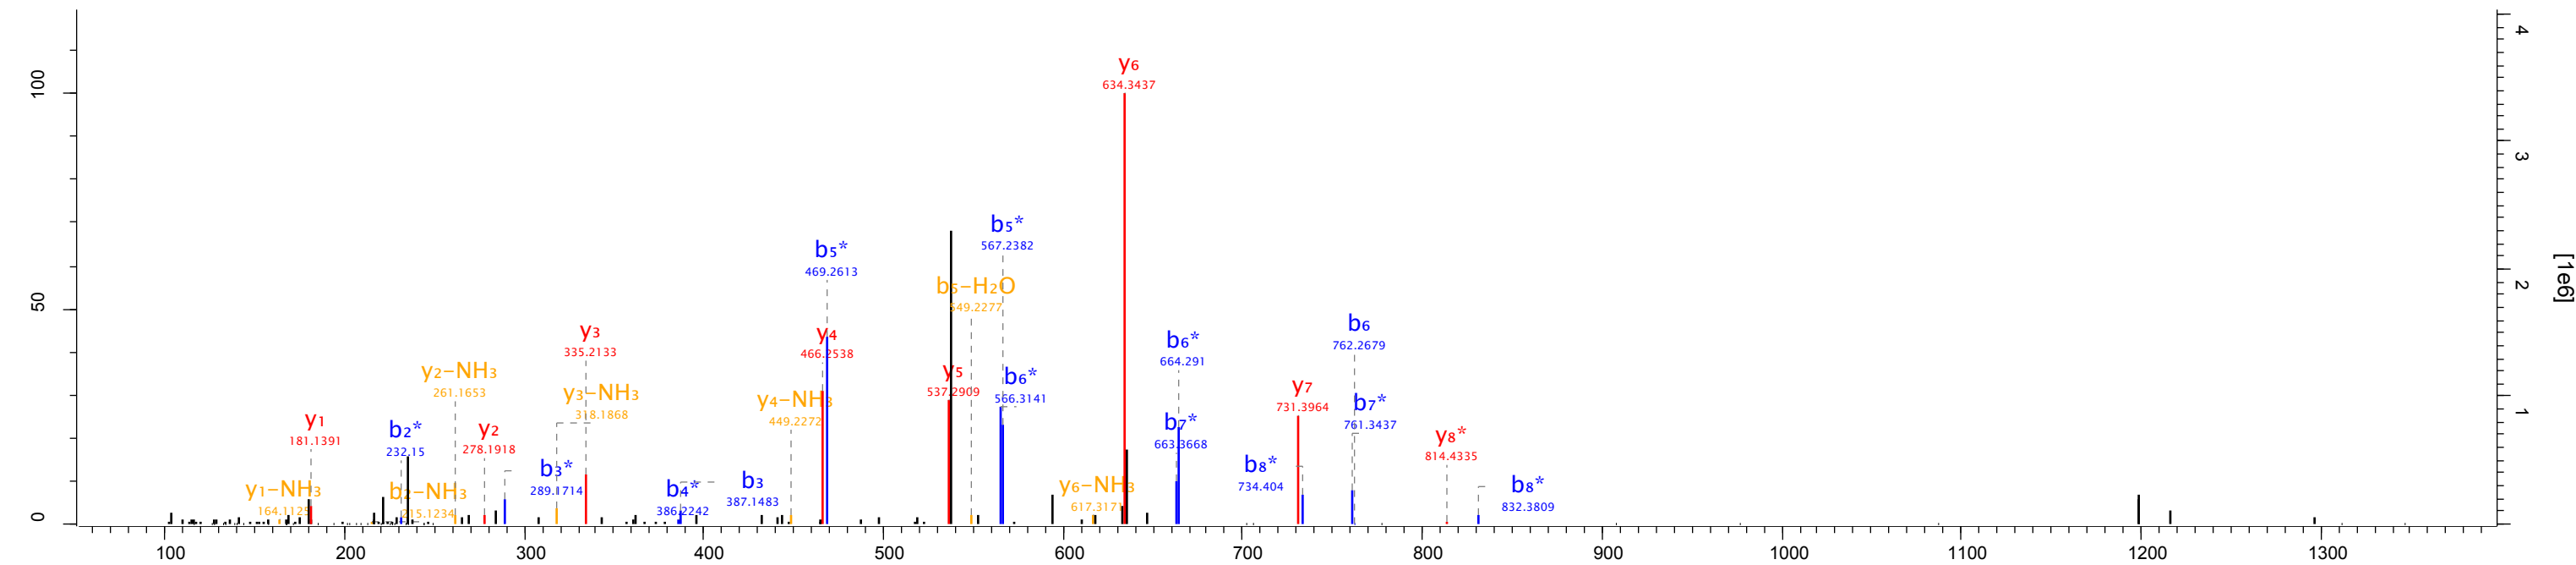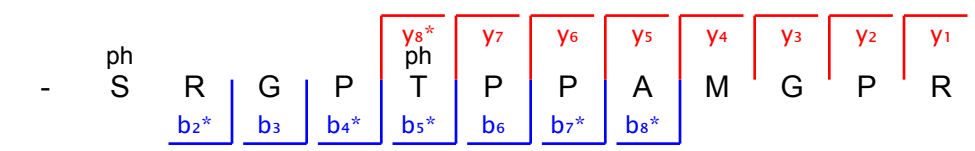

Raw file 20150814\_A375SR\_Phospho\_BR2\_03 Scan 9001 Method FTMS; HCD Score 103.18 m/z 1139.97 Gene names ZNRF2

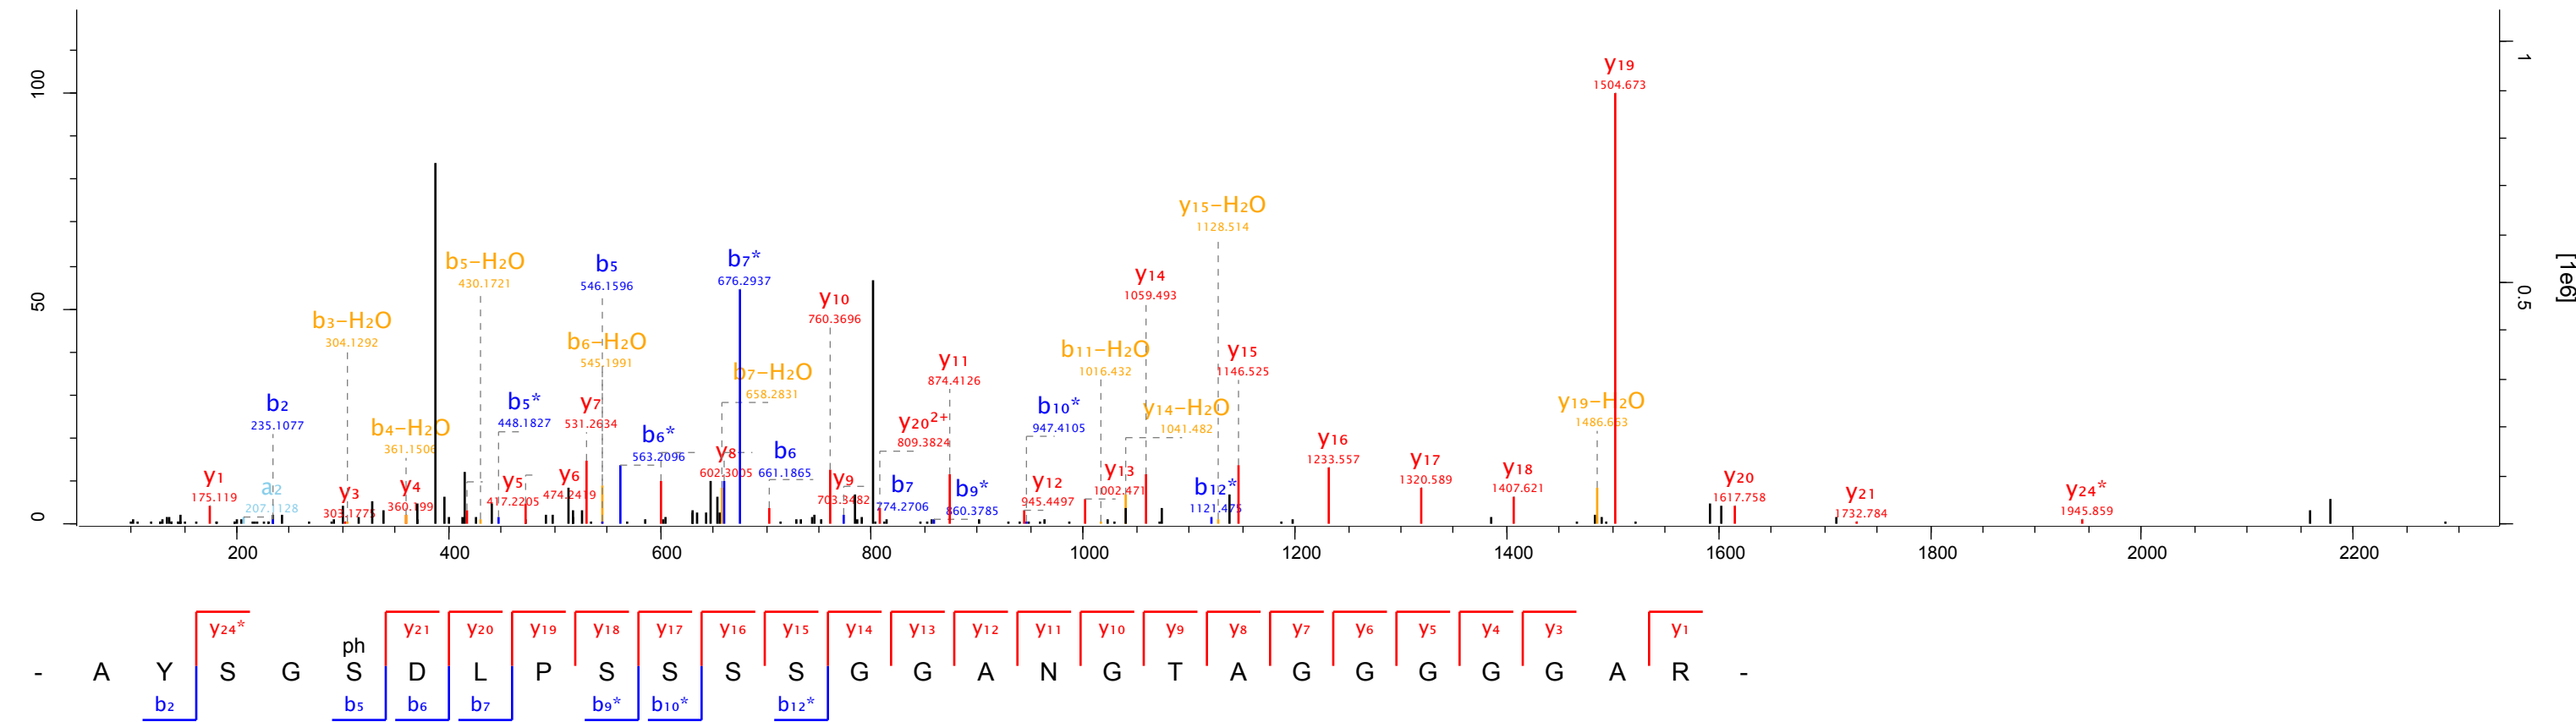

Raw file: 20150814\_A375SR\_Phospho\_BR2\_03  
 Scan: 9031 Method: FTMS; HCD Score: 121.24 m/z: 963.4 Gene names: EPB41L1

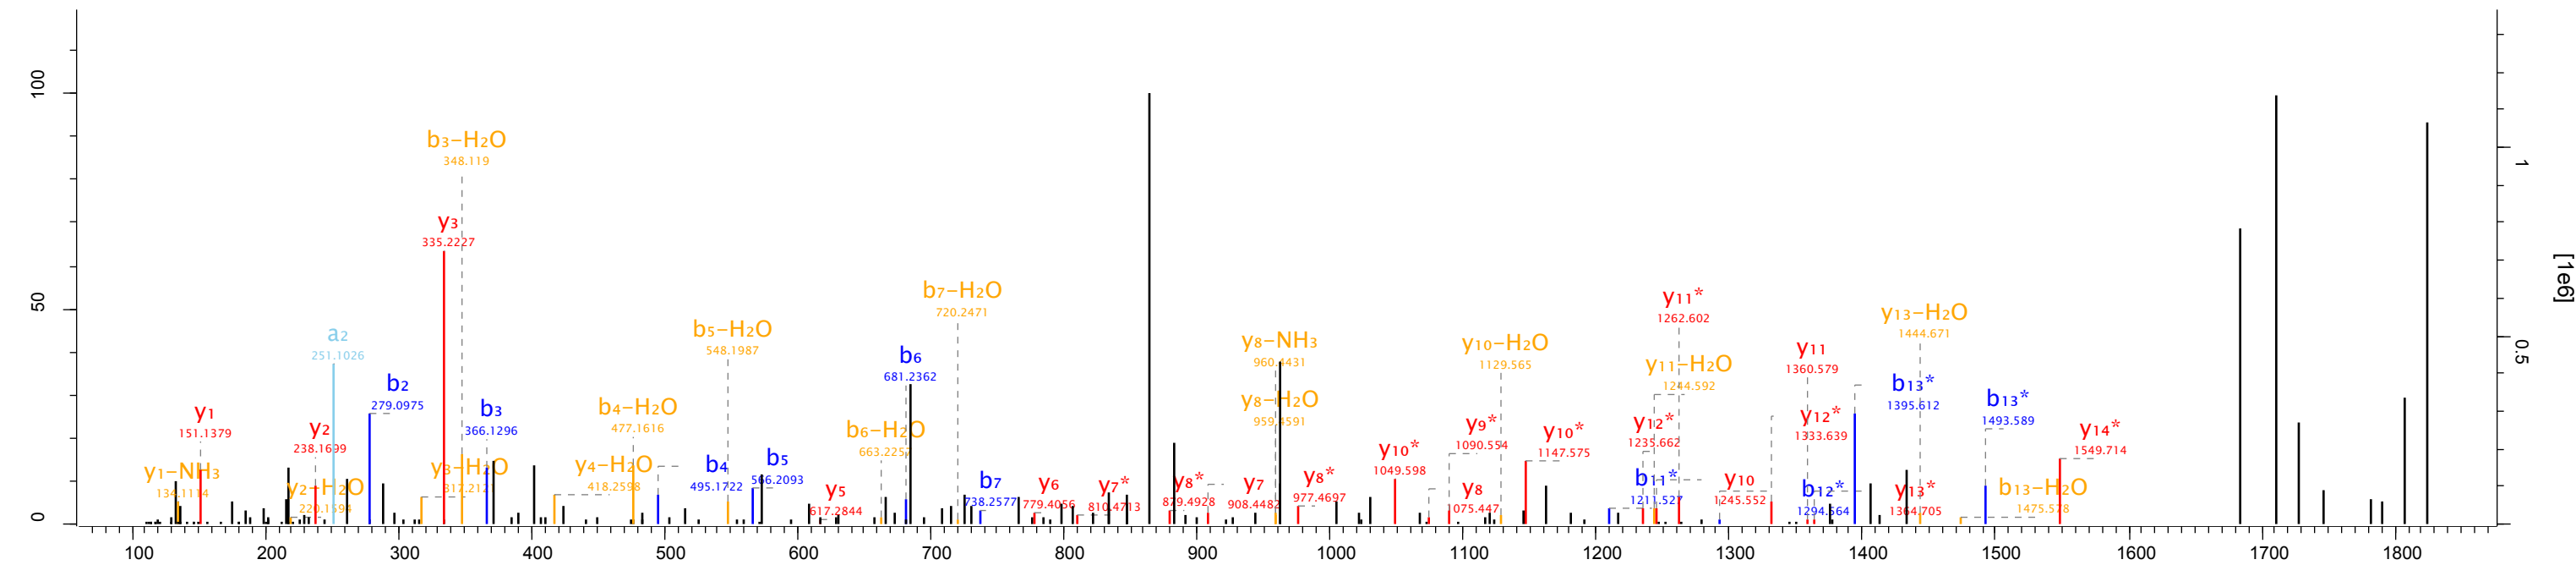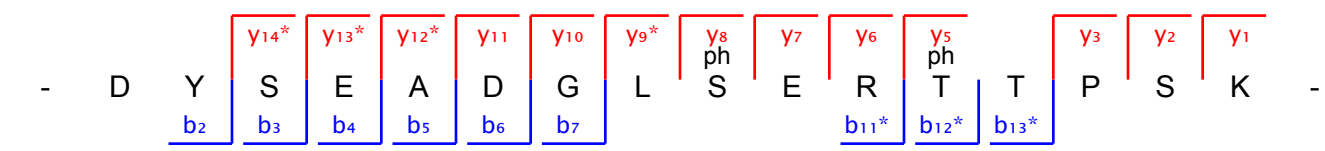

Raw file 20150814\_A375SR\_Phospho\_BR2\_03 Scan 9061 Method FTMS; HCD Score 302.01 m/z 1043.47 Gene names PPP1R12A

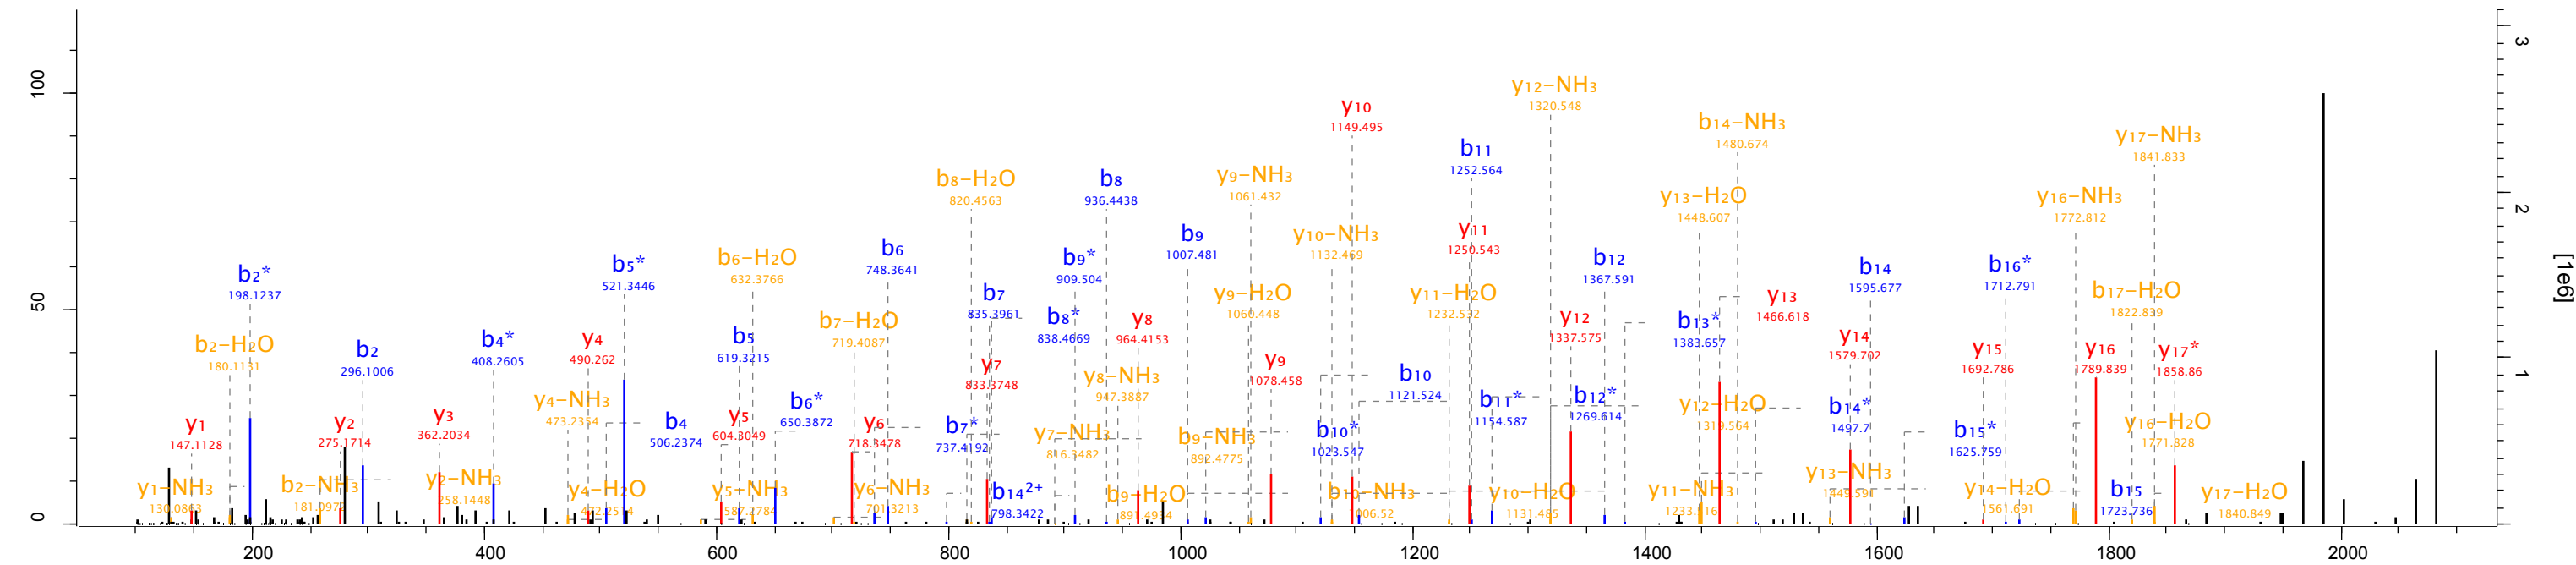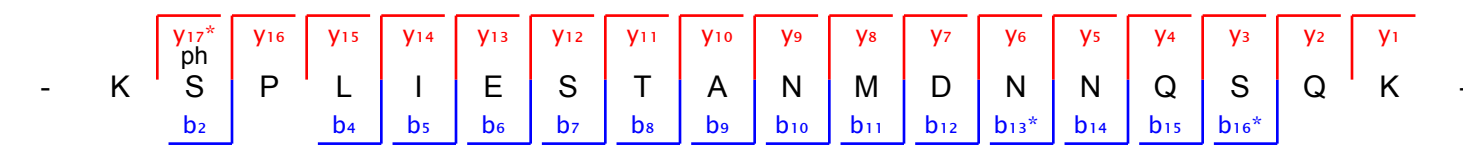



Raw file 20150814\_A375SR\_Phospho\_BR2\_03 Scan 9071 Method FTMS; HCD Score 85.84 m/z 626.8 Gene names ATN1

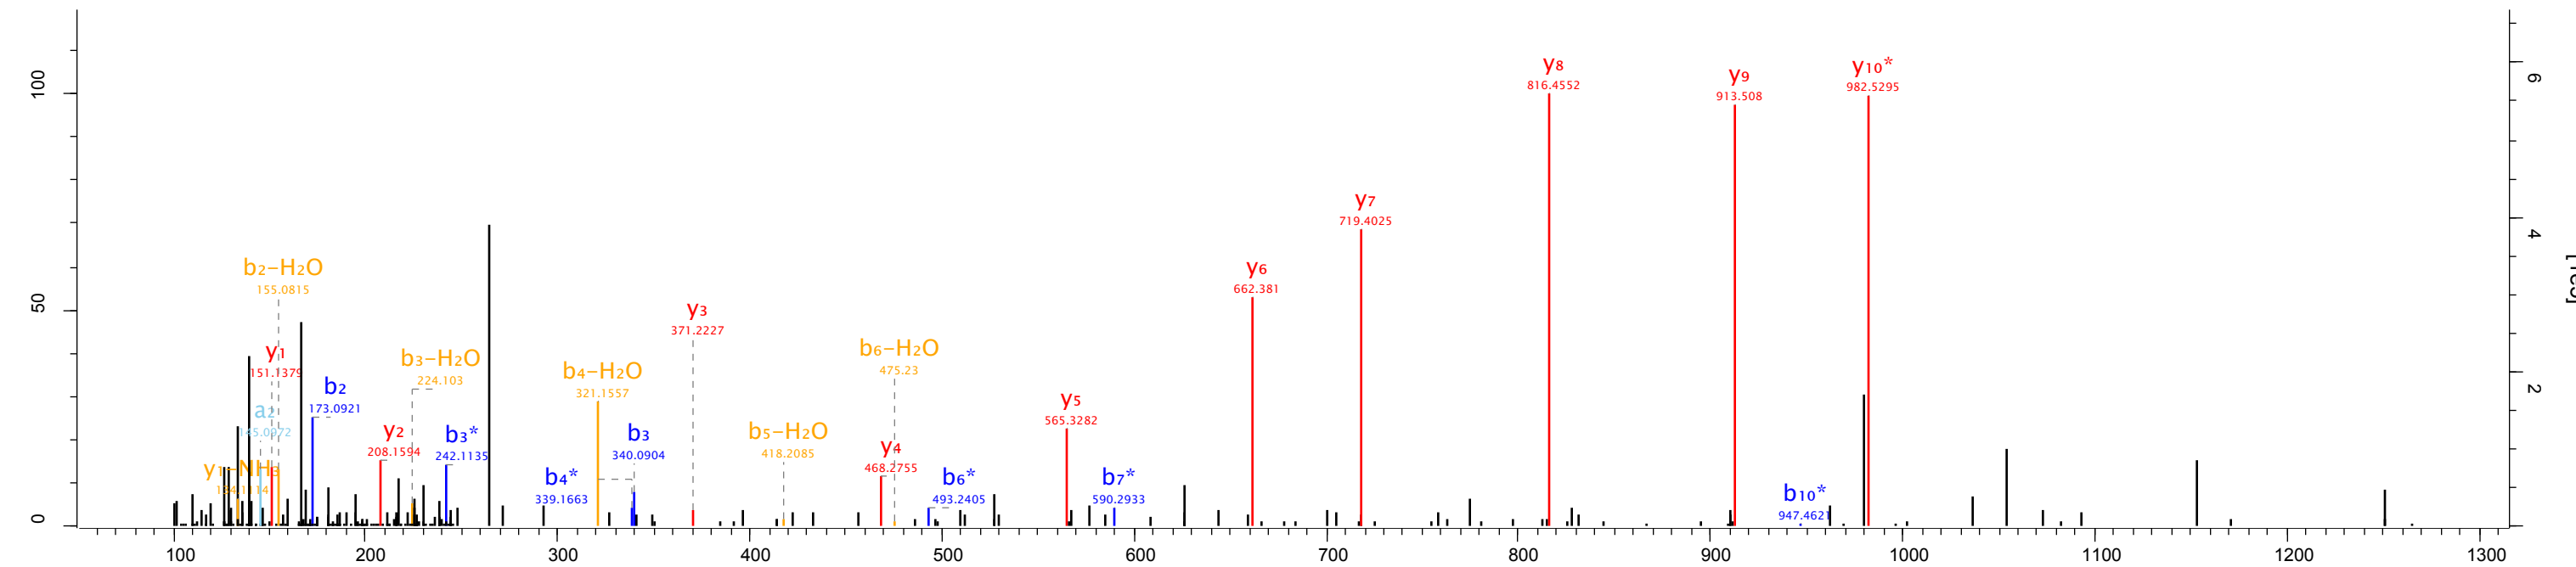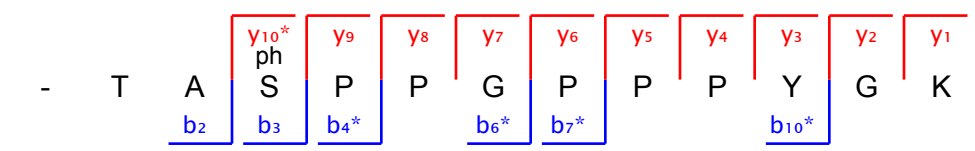

Raw file 20150814\_A375SR\_Phospho\_BR2\_03 Scan 9181 Method FTMS; HCD Score 257.54 m/z 1018.91 Gene names PDS5B

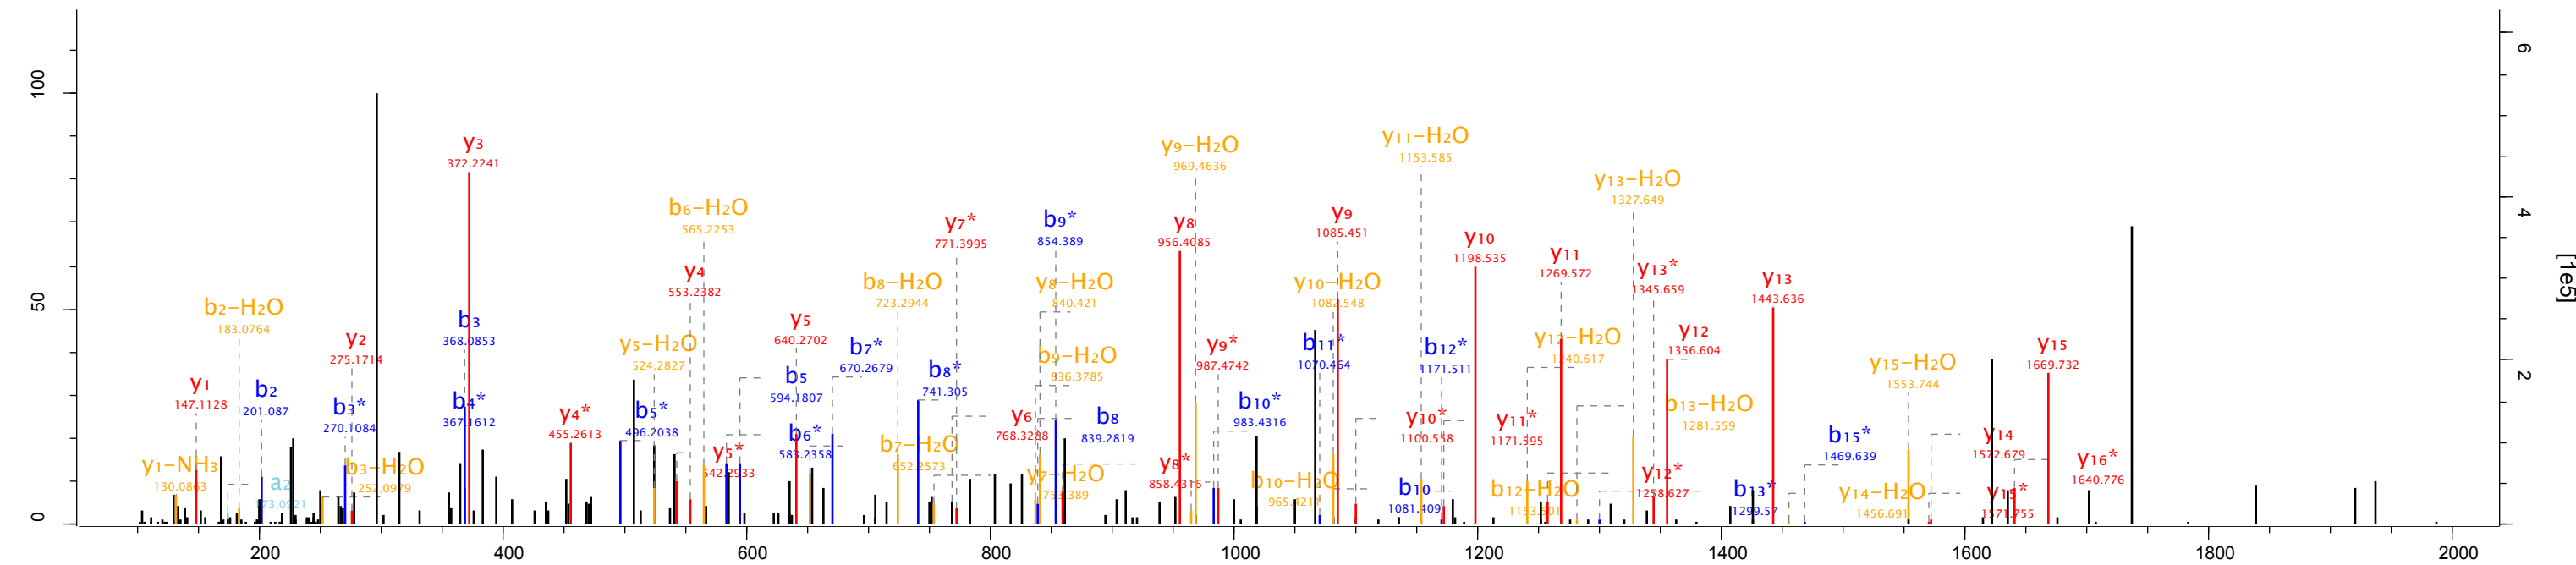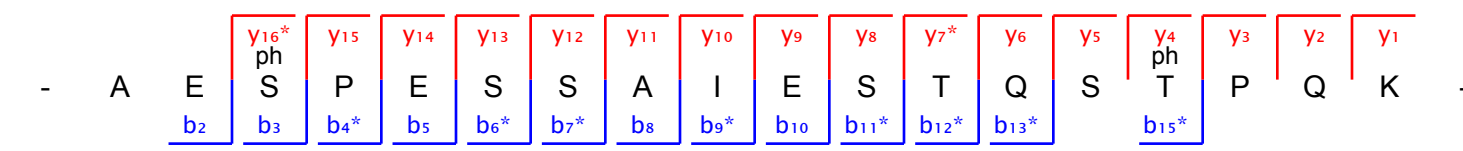

Raw file  
20150814\_A375SR\_Phospho\_BR2\_03

Scan 9221 Method FTMS; HCD Score 342.15 m/z 1169 Gene names PRCC

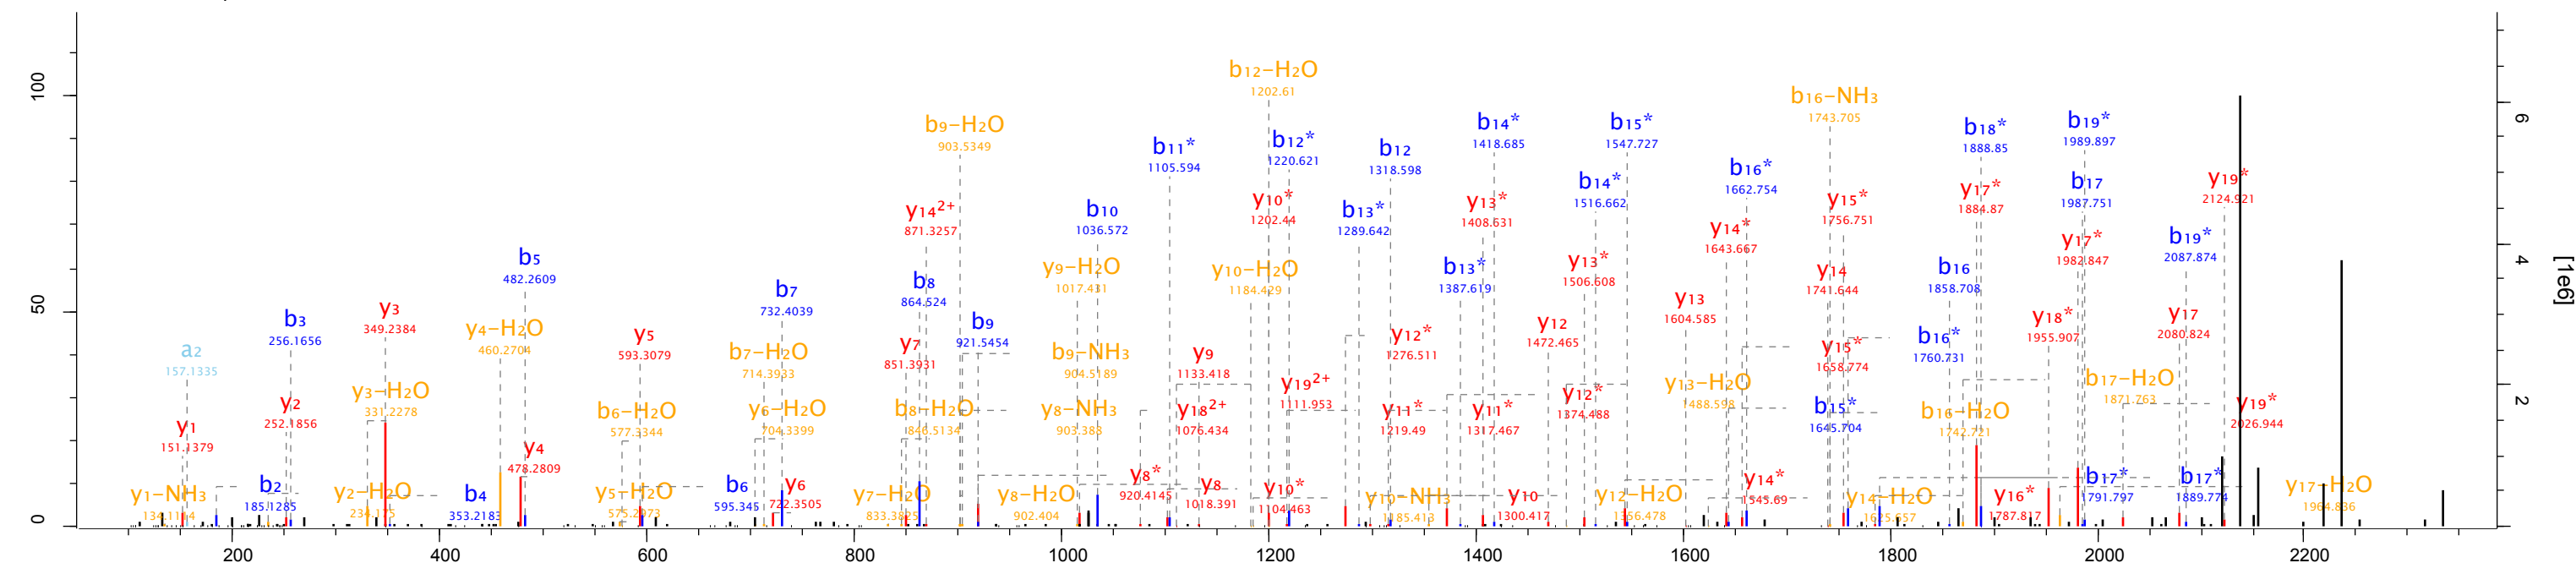

- I 

|      |      |     |      |      |     |     |     |      |      |     |      |      |      |     |     |      |      |    |
|------|------|-----|------|------|-----|-----|-----|------|------|-----|------|------|------|-----|-----|------|------|----|
| y19* | y18* | y17 | y16* | y15* | y14 | y13 | y12 | y11* | y10  | y9  | y8   | y7   | y6   | y5  | y4  | y3   | y2   | y1 |
| A    | A    | P   | E    | L    | H   | K   | G   | D    | S    | D   | S    | E    | E    | D   | E   | P    | T    | K  |
| b2   | b3   | b4  | b5   | b6   | b7  | b8  | b9  | b10  | b11* | b12 | b13* | b14* | b15* | b16 | b17 | b18* | b19* |    |

 -

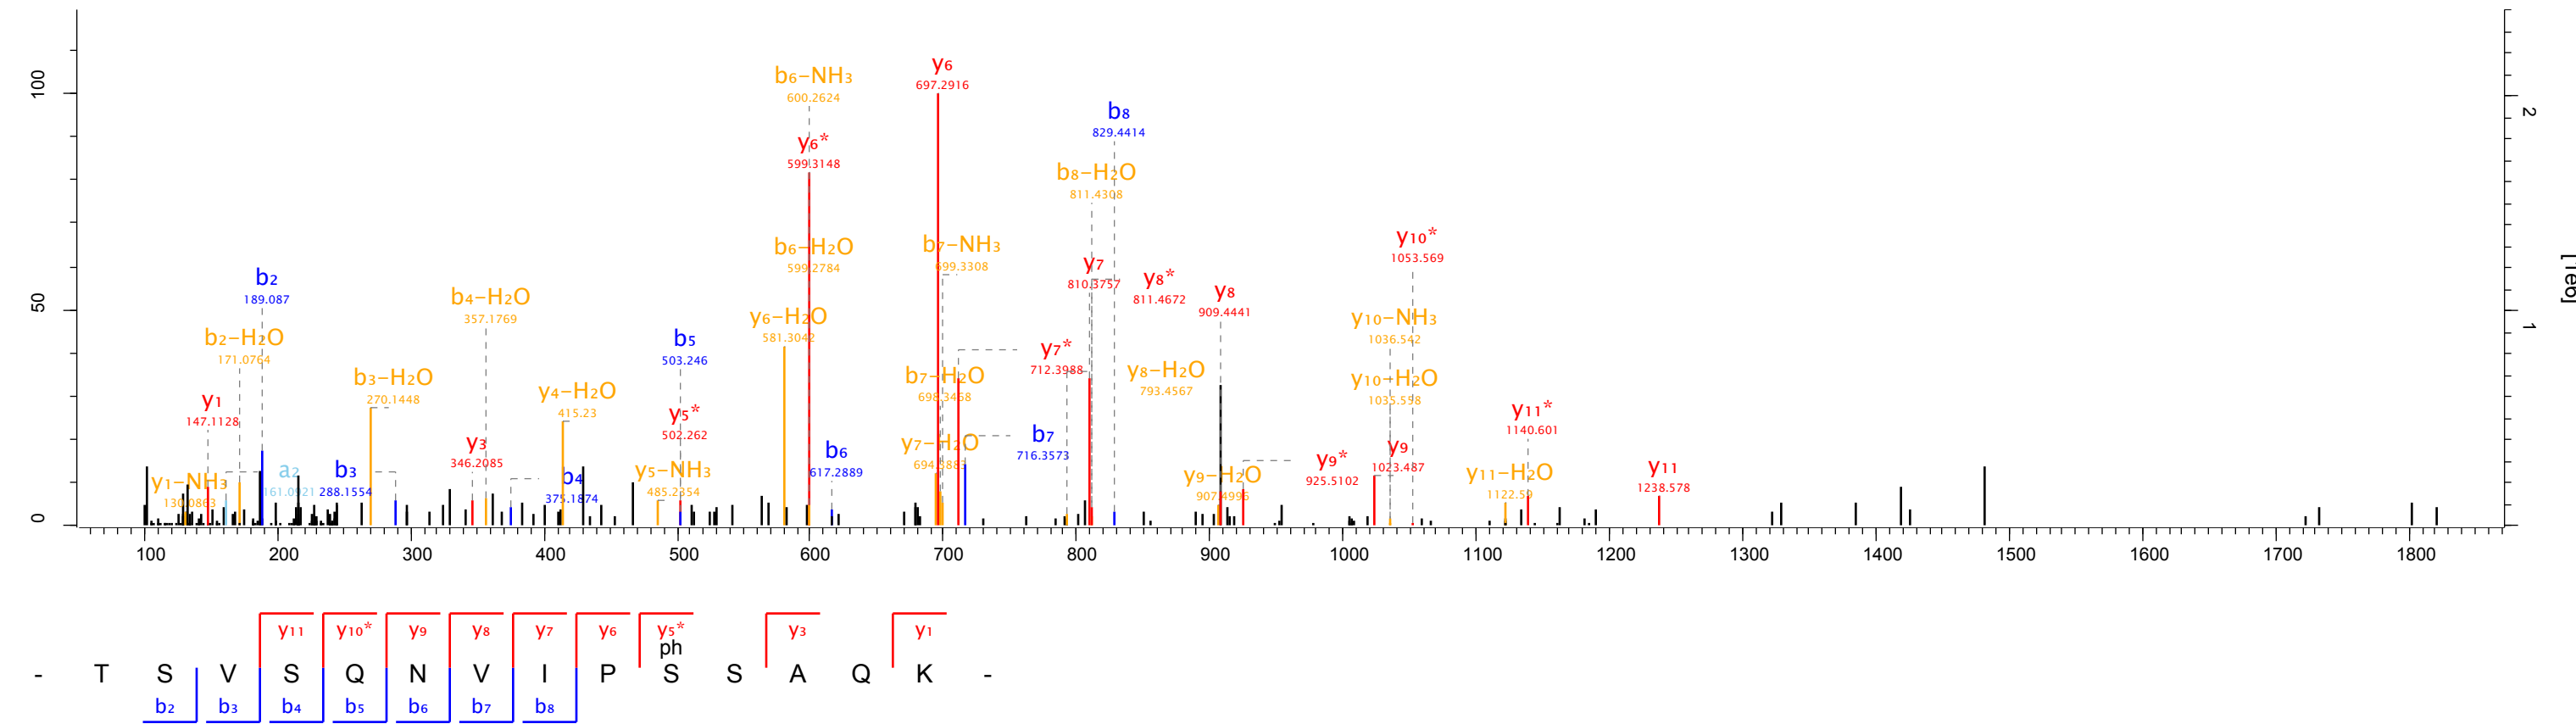

Raw file  
20150814\_A375SR\_Phospho\_BR2\_04

Scan 10511 Method FTMS; HCD Score 328.81 m/z 901.41 Gene names AFAP1

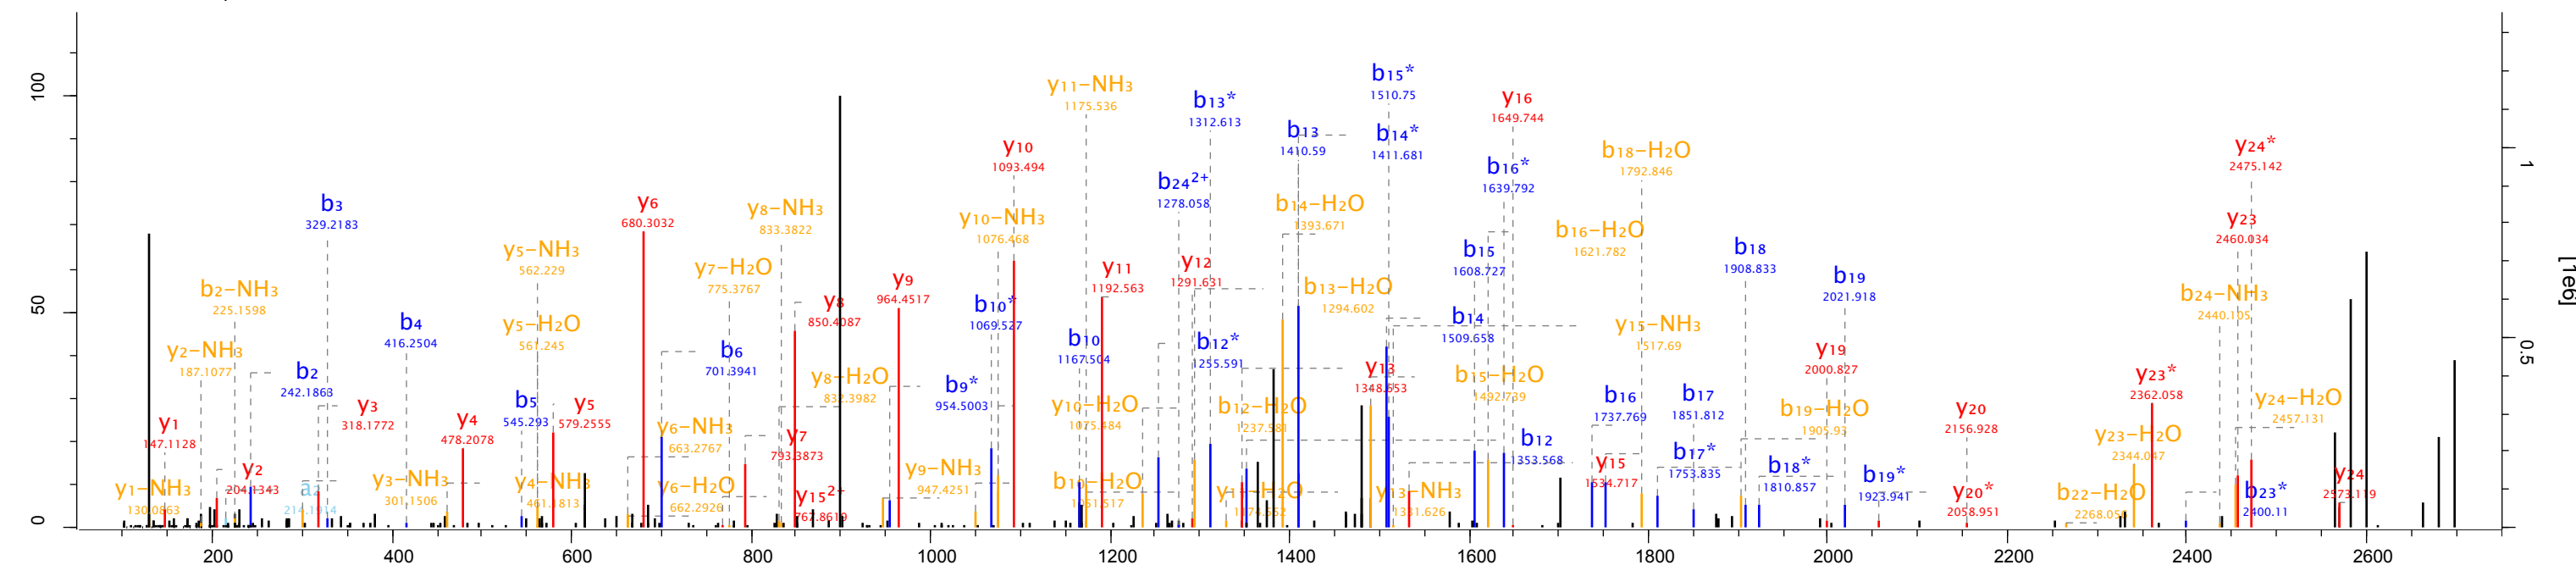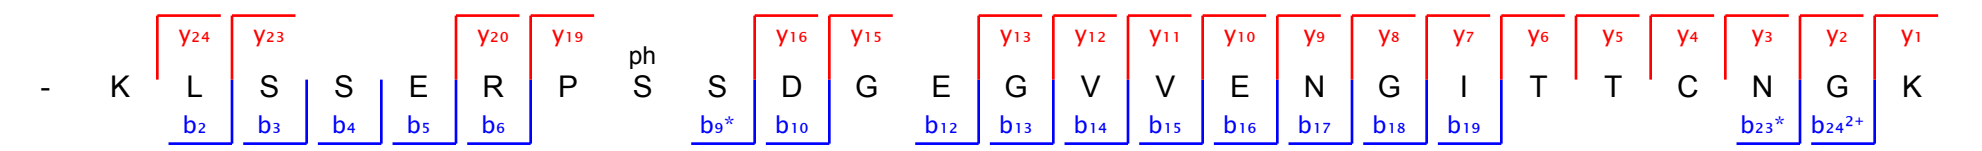

Raw file: 20150814\_A375SR\_Phospho\_BR2\_04  
 Scan: 10541  
 Method: FTMS; HCD  
 Score: 66.27  
 m/z: 542.77  
 Gene names: CDK16

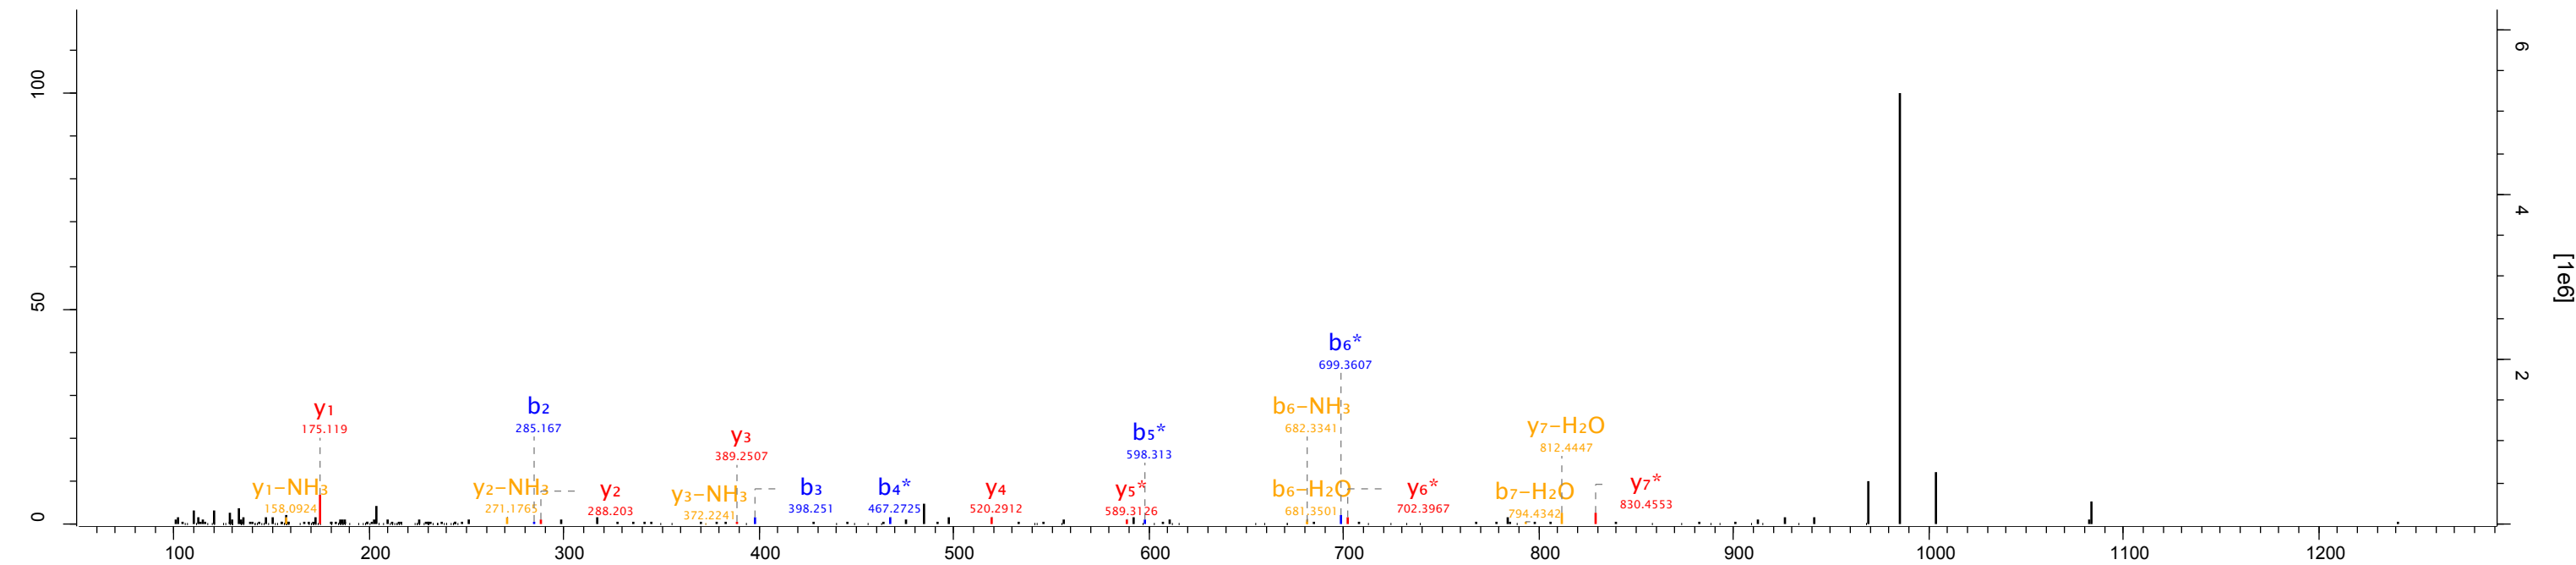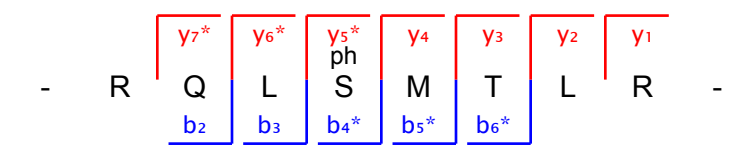

Raw file: 20150814\_A375SR\_Phospho\_BR2\_04  
 Scan: 10901 Method: FTMS; HCD Score: 262.44 m/z: 785.35 Gene names: BSDC1

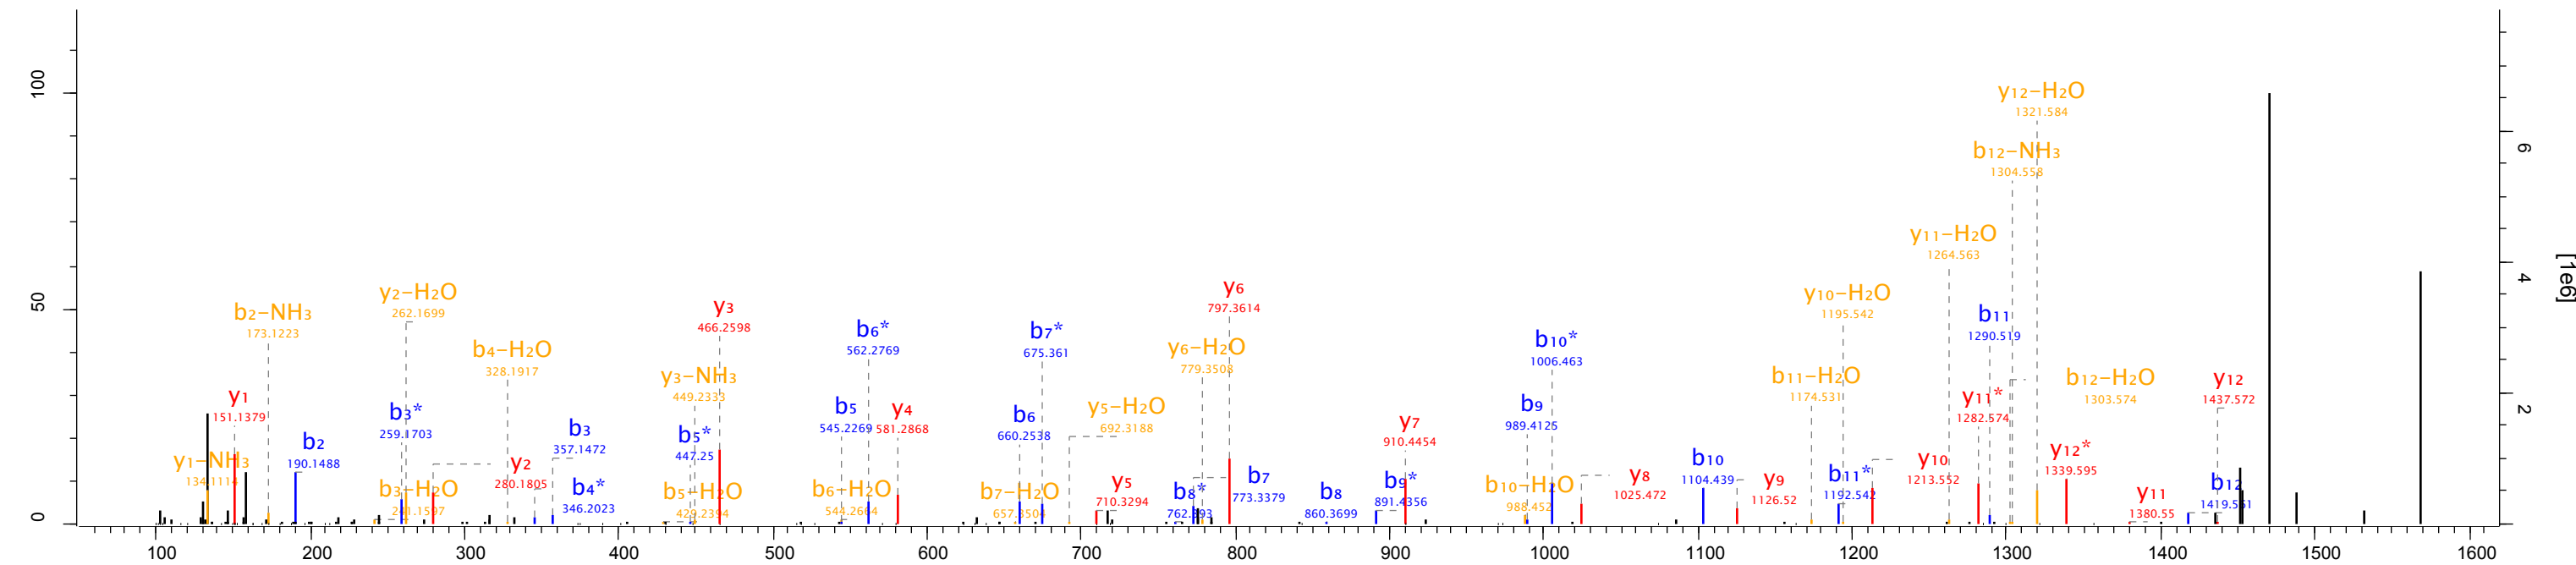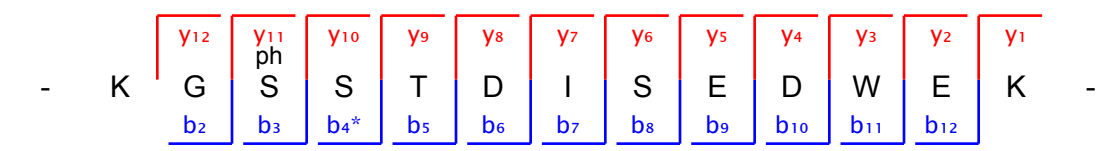

Raw file: 20150814\_A375SR\_Phospho\_BR2\_04  
 Scan: 10911 Method: FTMS; HCD Score: 86.21 m/z: 405.2 Gene names: LMO7

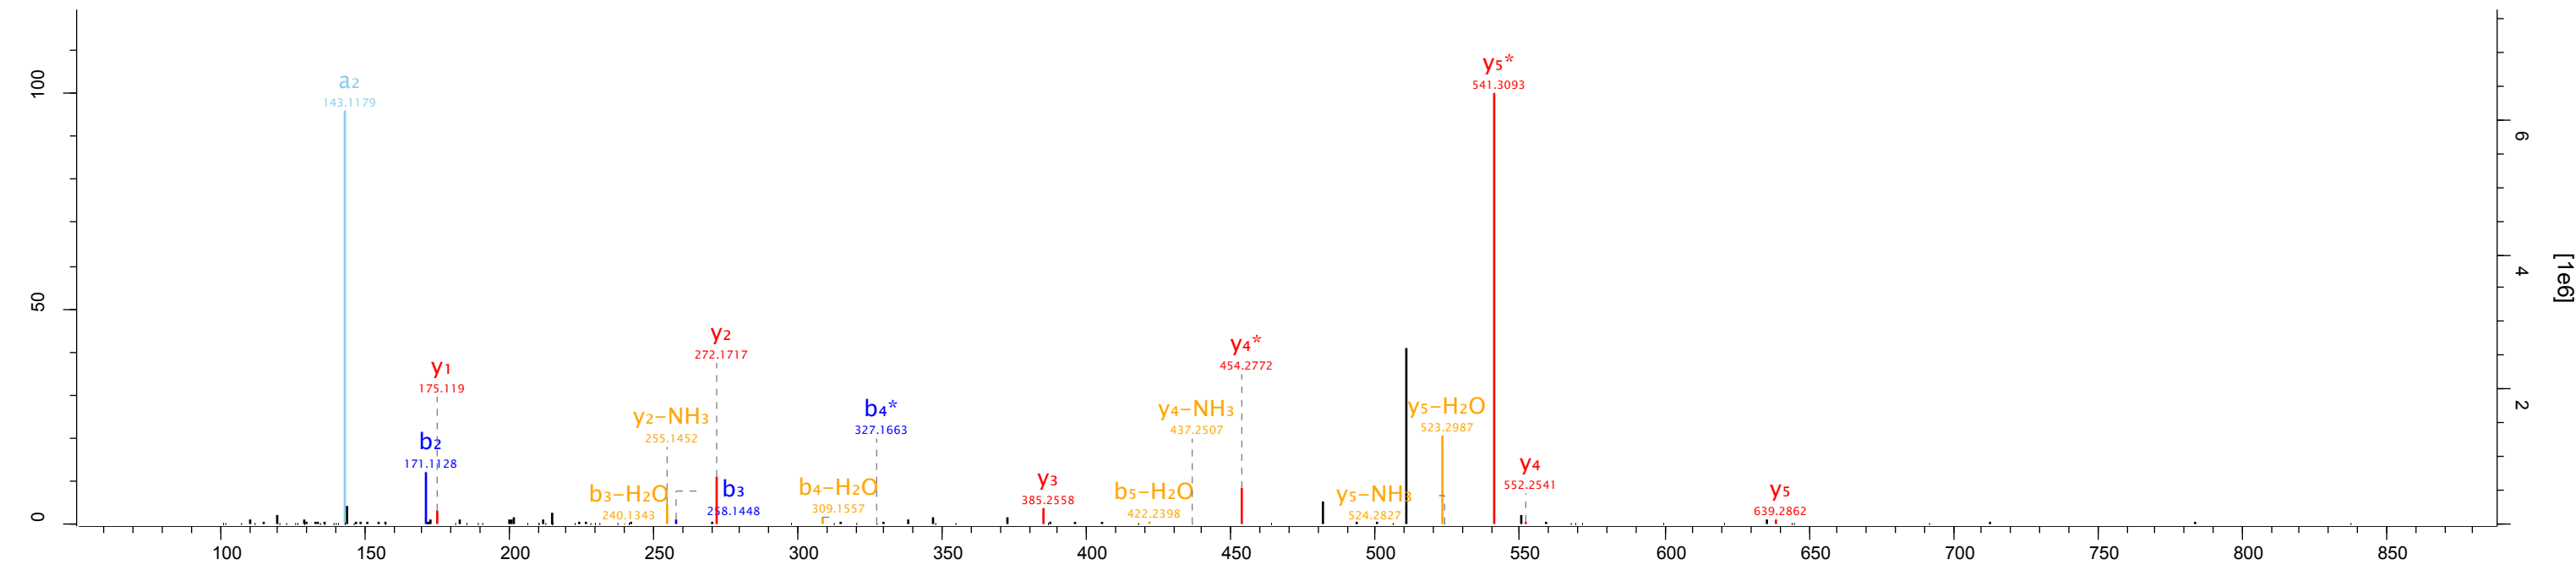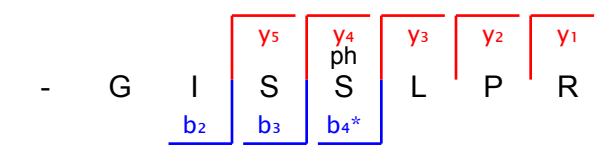





Raw file  
20150814\_A375SR\_Phospho\_BR2\_04

Scan 11391 Method FTMS; HCD Score 169.77 m/z 881.87 Gene names EPHA2

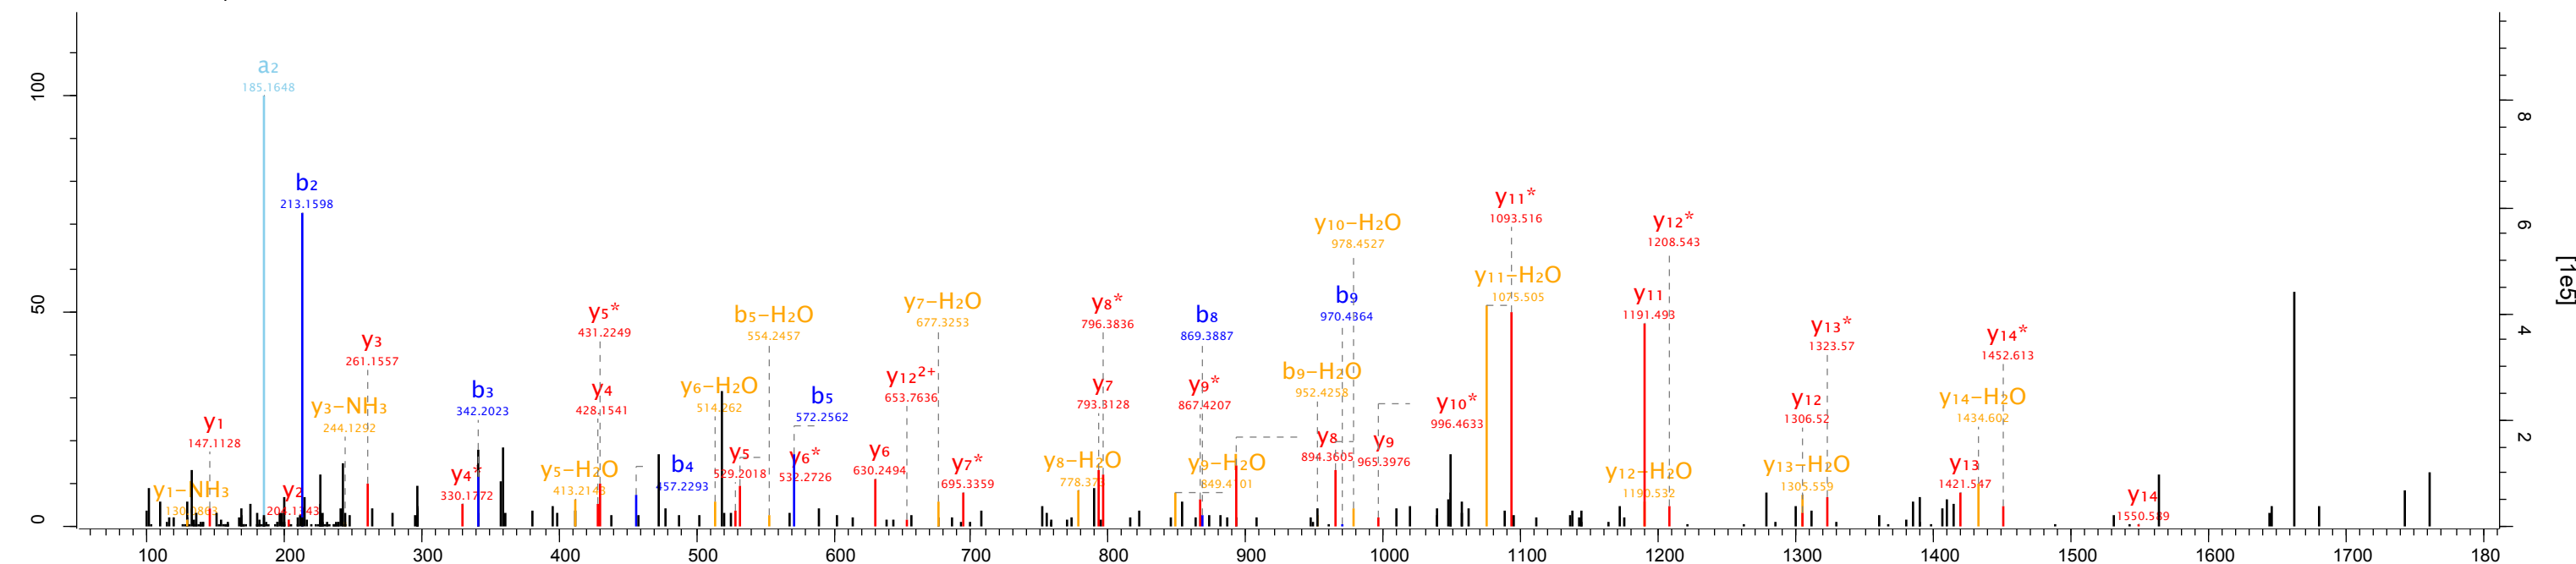

- V L E D D P E A T Y T T S G G K -

Fragmentation sites are indicated by boxes below the sequence:

- b<sub>2</sub> (L)
- b<sub>3</sub> (E)
- b<sub>4</sub> (D)
- b<sub>5</sub> (D)
- b<sub>8</sub> (A)
- b<sub>9</sub> (T)

Fragmentation sites are also indicated by boxes above the sequence:

- y<sub>14</sub> (E)
- y<sub>13</sub> (D)
- y<sub>12</sub> (D)
- y<sub>11</sub> (P)
- y<sub>10</sub>\* (E)
- y<sub>9</sub> (A)
- y<sub>8</sub> (T)
- y<sub>7</sub> (Y)
- y<sub>6</sub> (T)
- y<sub>5</sub> (T)
- y<sub>4</sub><sup>ph</sup> (S)
- y<sub>3</sub> (G)
- y<sub>2</sub> (G)
- y<sub>1</sub> (K)

Raw file: 20150814\_A375SR\_Phospho\_BR2\_04  
 Scan: 11611 Method: FTMS; HCD Score: 192.93 m/z: 1064.98 Gene names: ZEB1

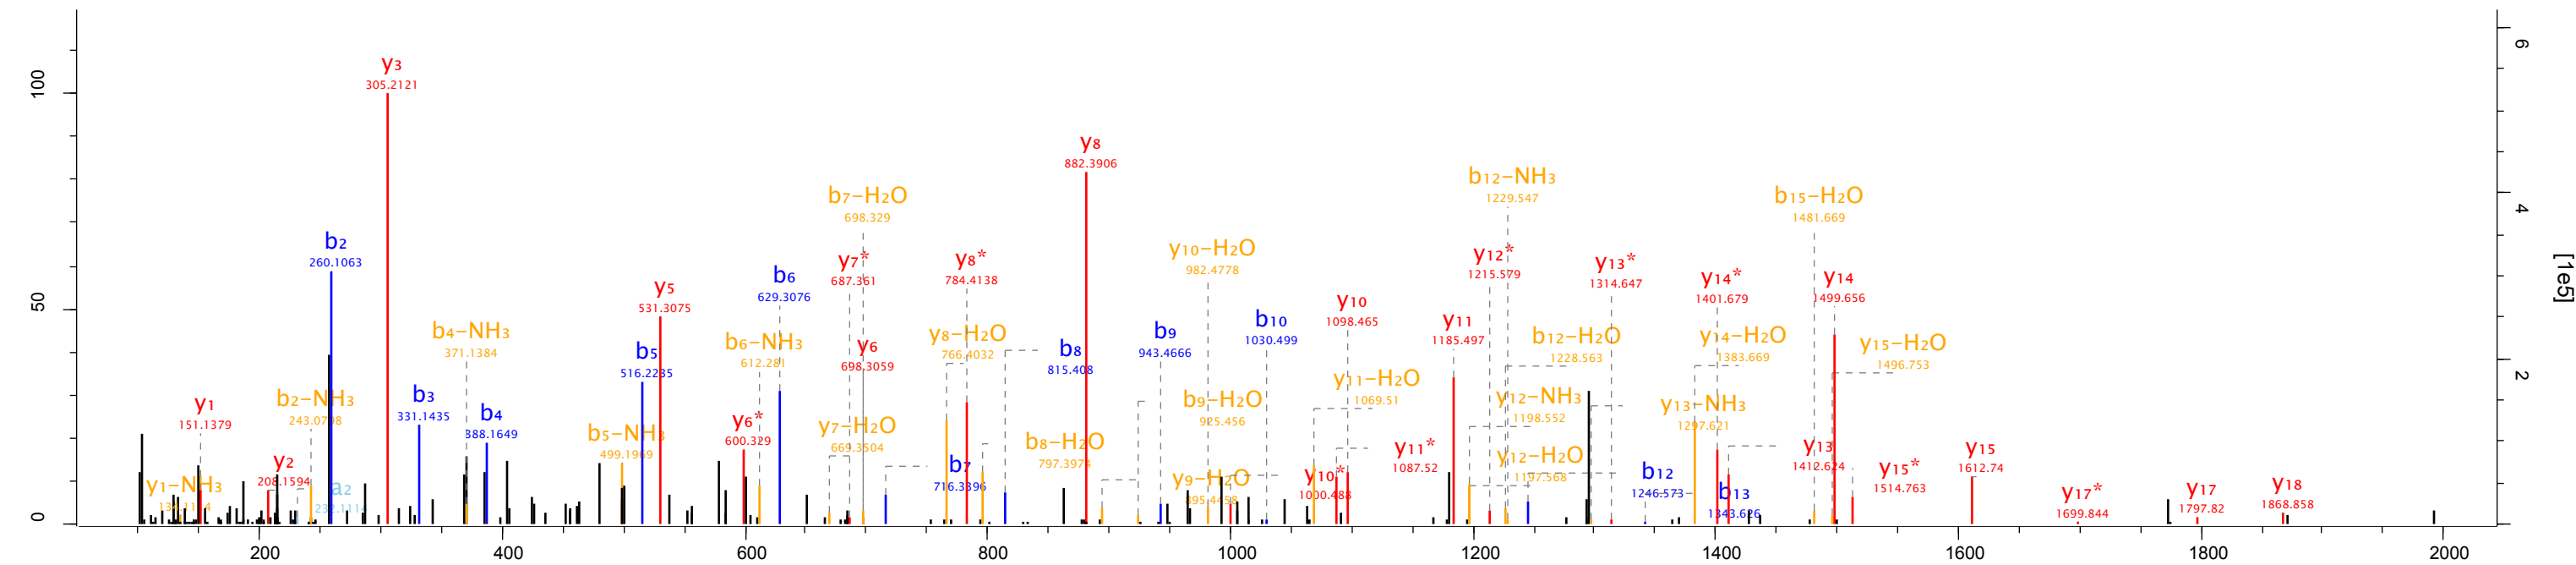

- M Q A G Q I S V Q S S E P S S P E P G K -

b<sub>2</sub>
b<sub>3</sub>
b<sub>4</sub>
b<sub>5</sub>
b<sub>6</sub>
b<sub>7</sub>
b<sub>8</sub>
b<sub>9</sub>
b<sub>10</sub>
b<sub>12</sub>
b<sub>13</sub>
y<sub>10</sub>
y<sub>11</sub>
y<sub>12</sub><sup>\*</sup>
y<sub>13</sub>
y<sub>14</sub>
y<sub>15</sub>
y<sub>17</sub>
y<sub>18</sub>

Raw file 20150814\_A375SR\_Phospho\_BR2\_04 Scan 11711 Method FTMS; HCD Score 155.92 m/z 525.59 Gene names CDK17

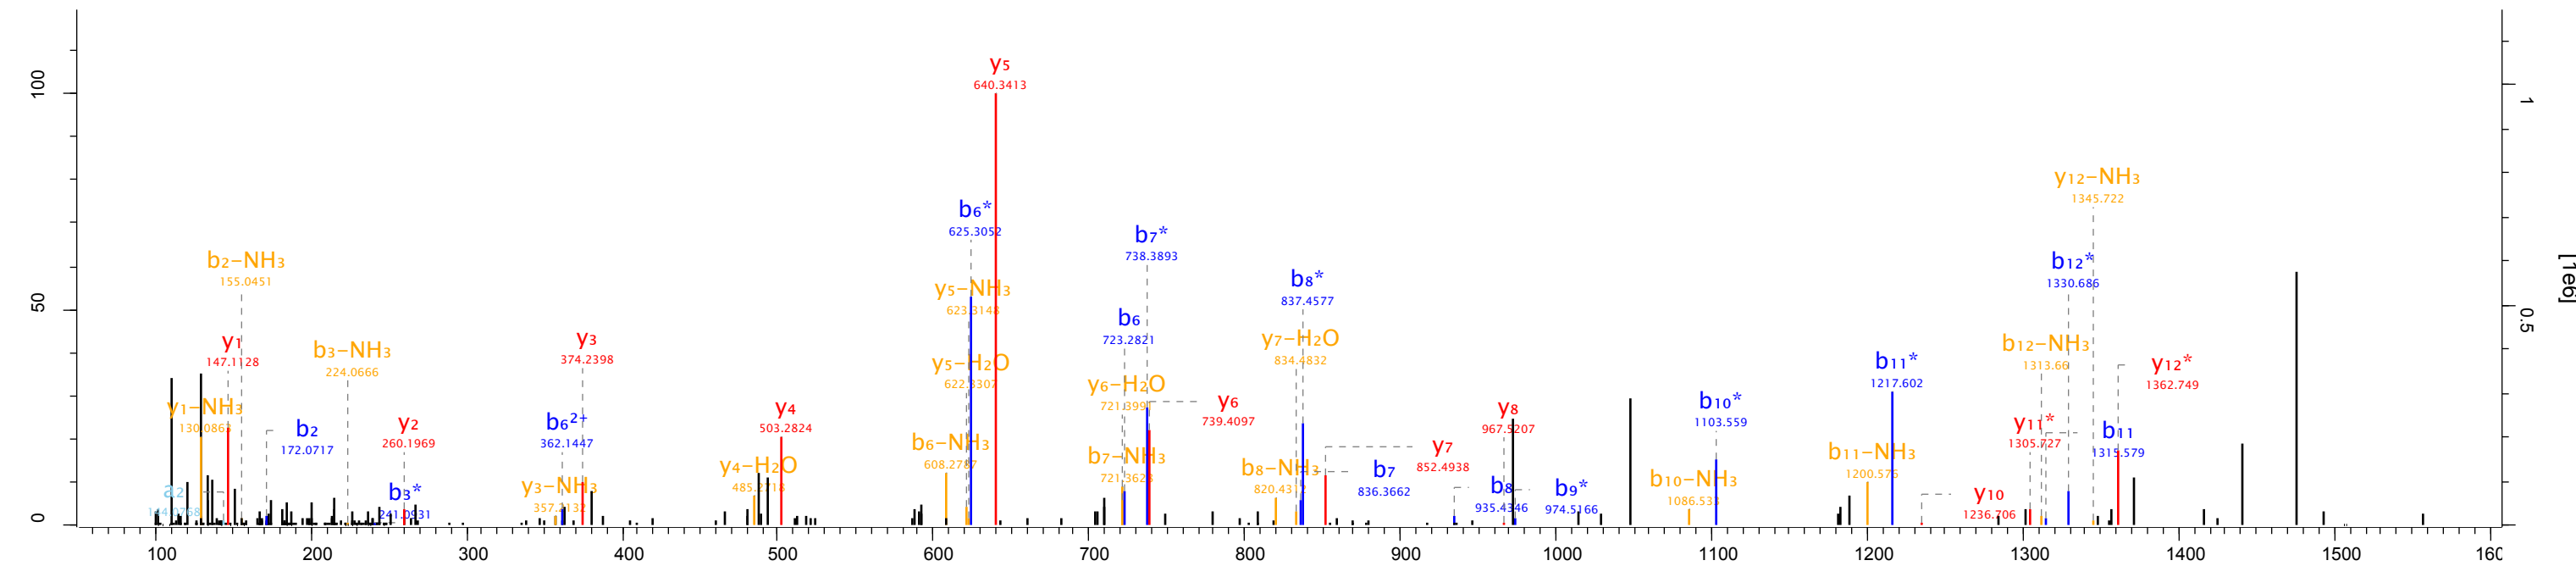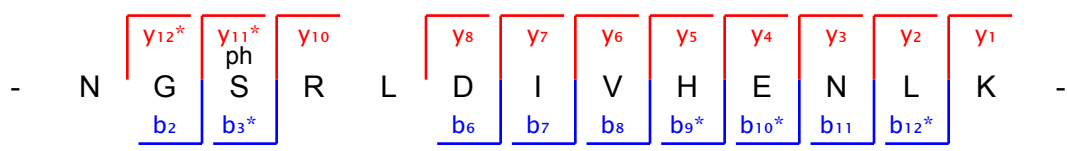

Raw file: 20150814\_A375SR\_Phospho\_BR2\_04  
 Scan: 11791 Method: FTMS; HCD Score: 164.83 m/z: 881.73 Gene names: HDAC4

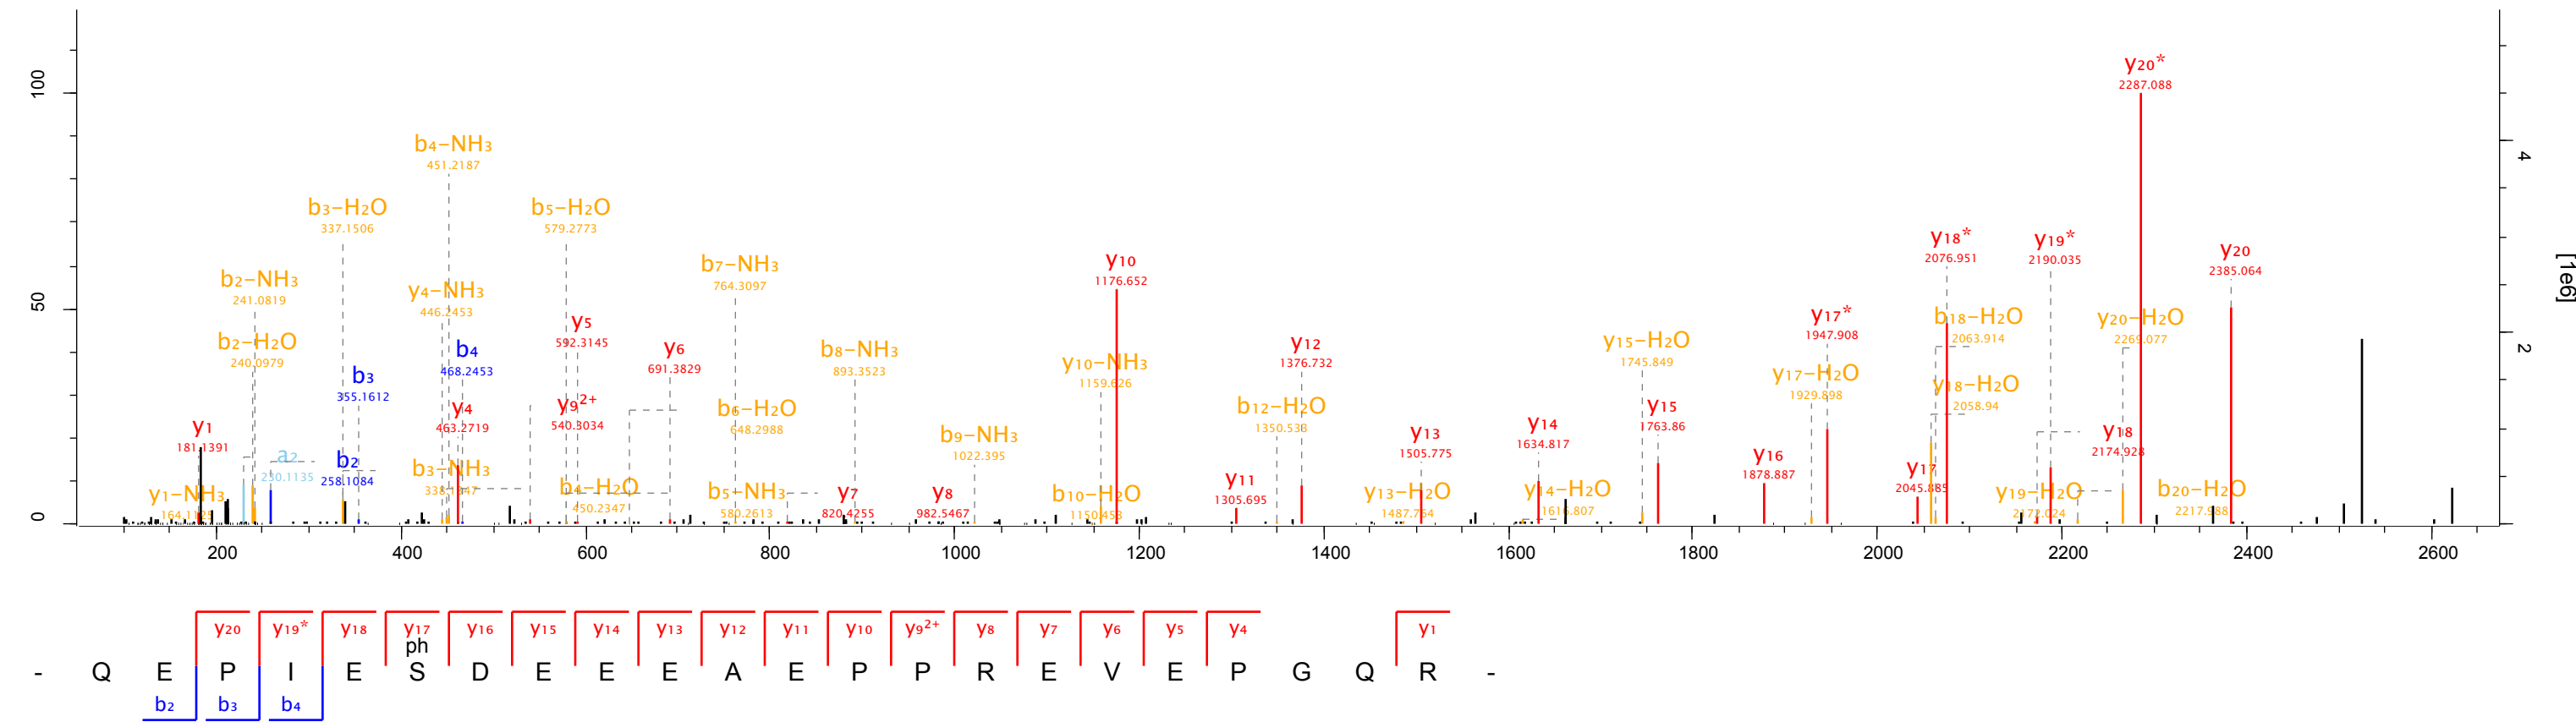

Raw file 20150814\_A375SR\_Phospho\_BR2\_04 Scan 12431 Method FTMS; HCD Score 251.57 m/z 1172.04 Gene names MICALL1

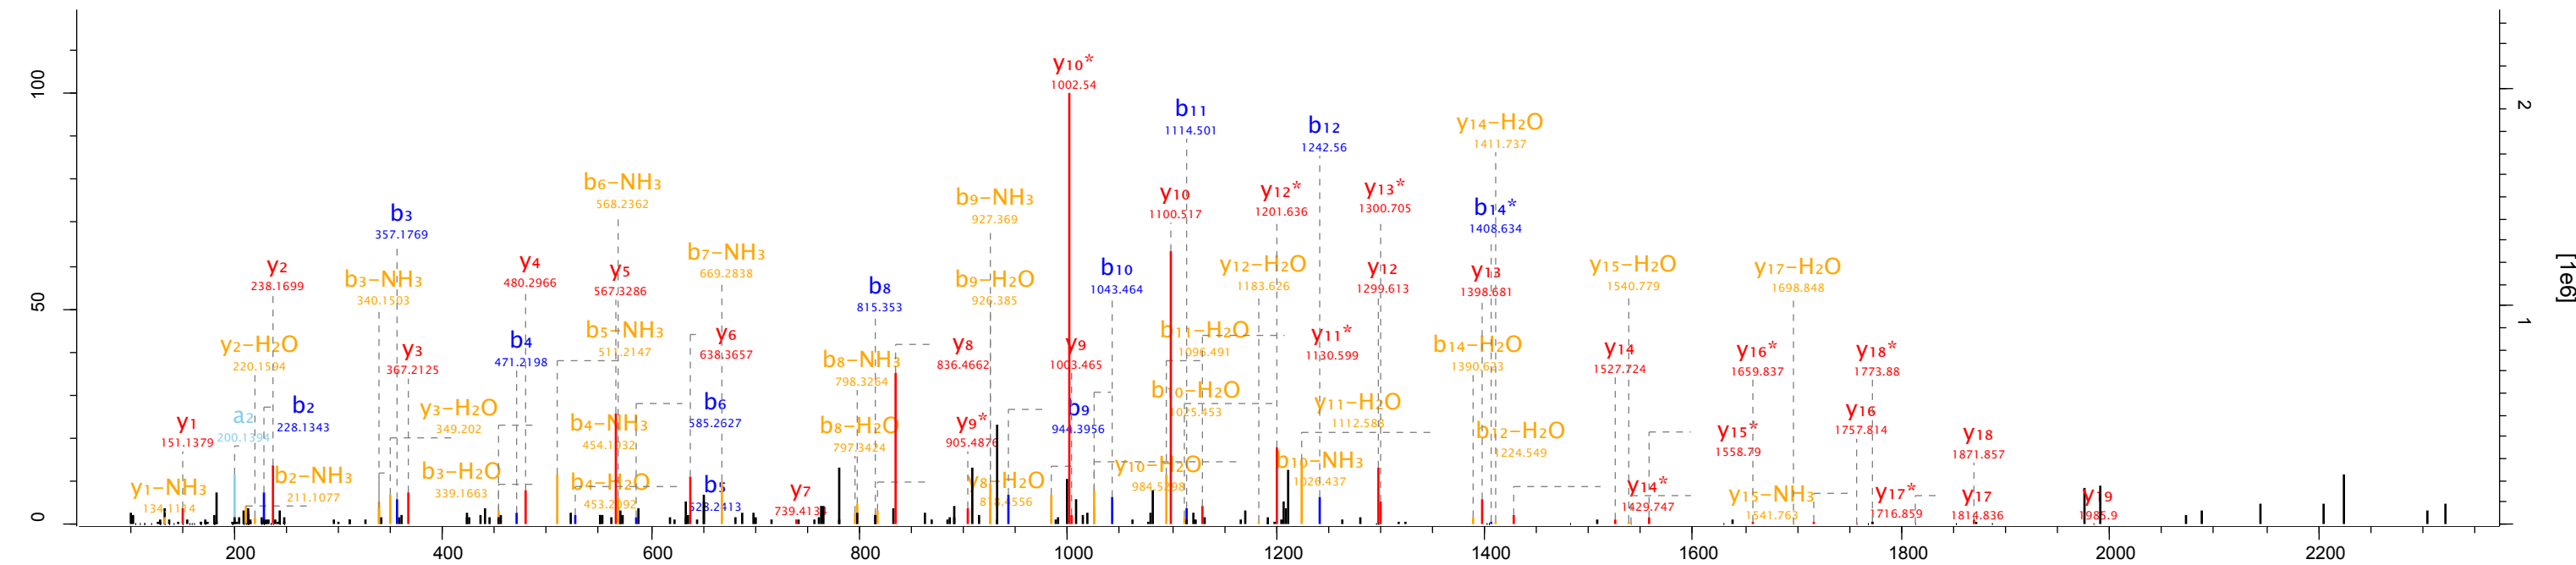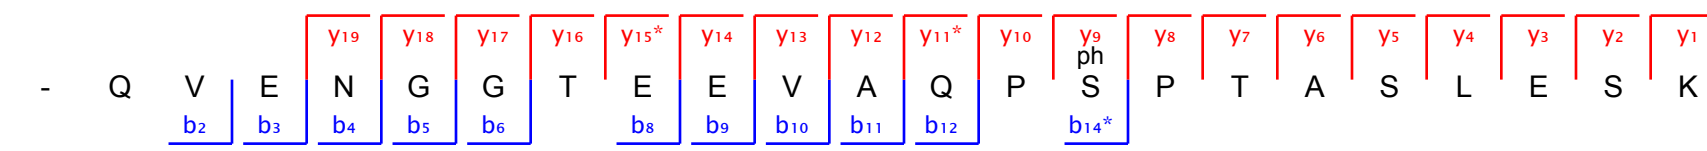

Raw file 20150814\_A375SR\_Phospho\_BR2\_04 Scan 12541 Method FTMS; HCD Score 312.43 m/z 971.92 Gene names ZHX3

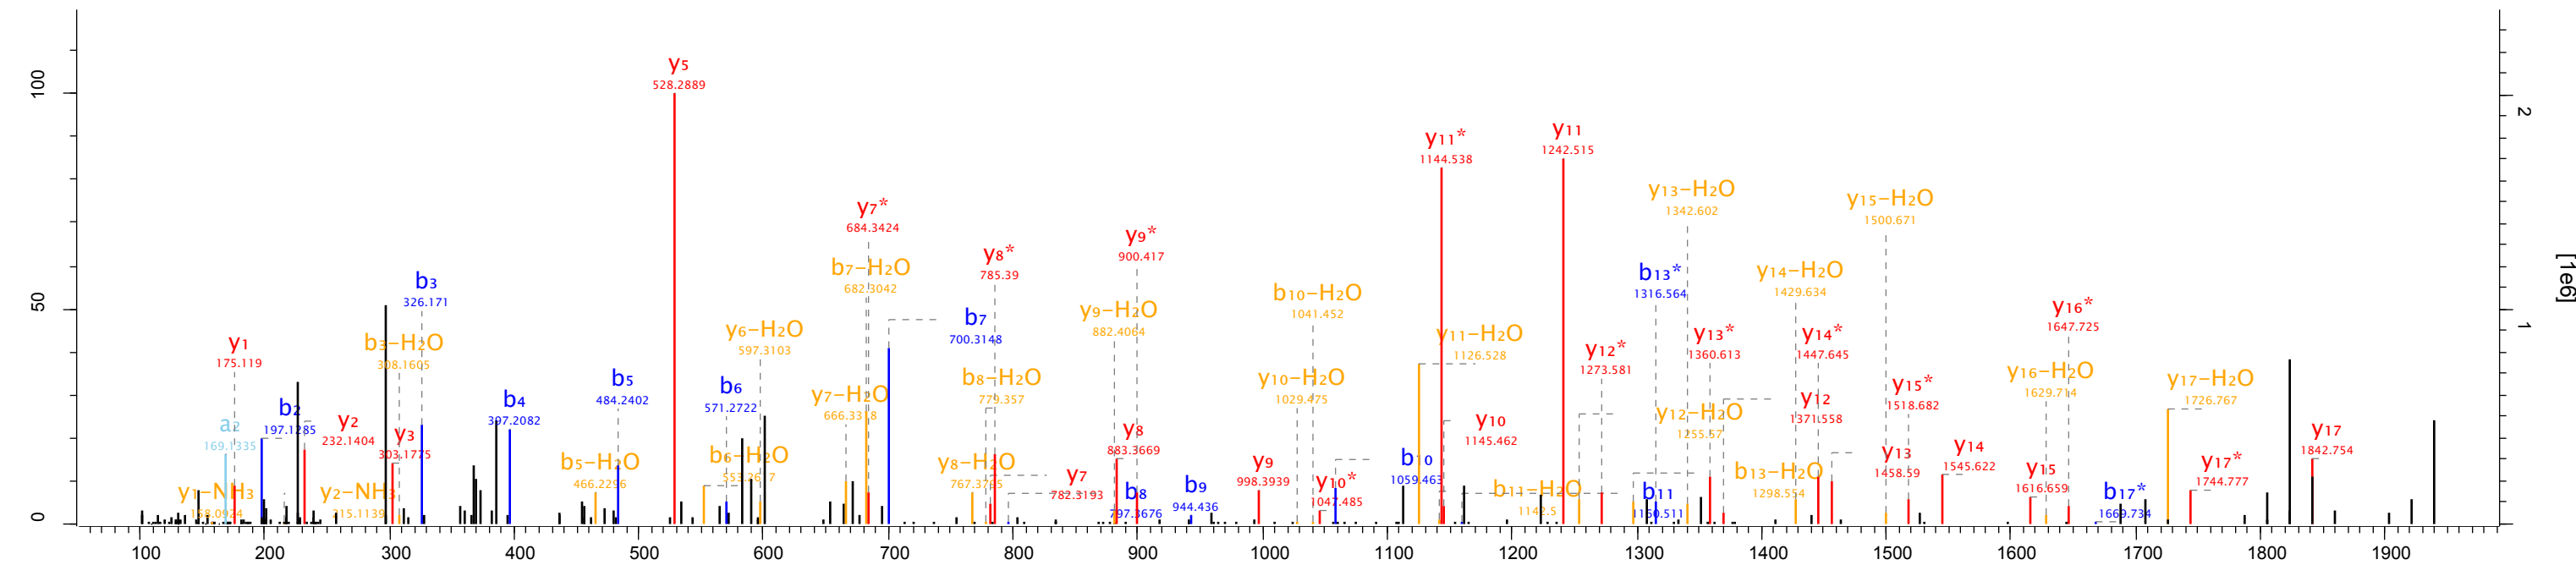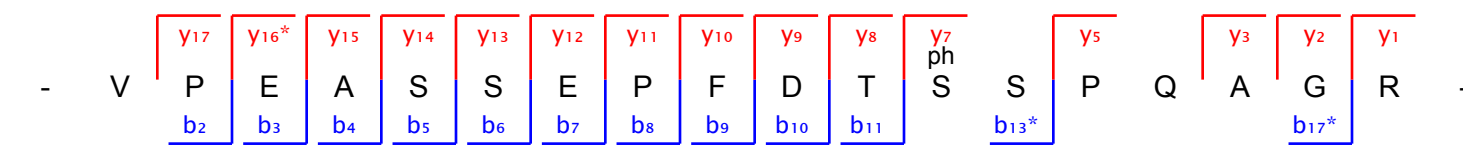

Raw file 20150814\_A375SR\_Phospho\_BR2\_04 Scan 12591 Method FTMS; HCD Score 235.86 m/z 1223.57 Gene names LMNA

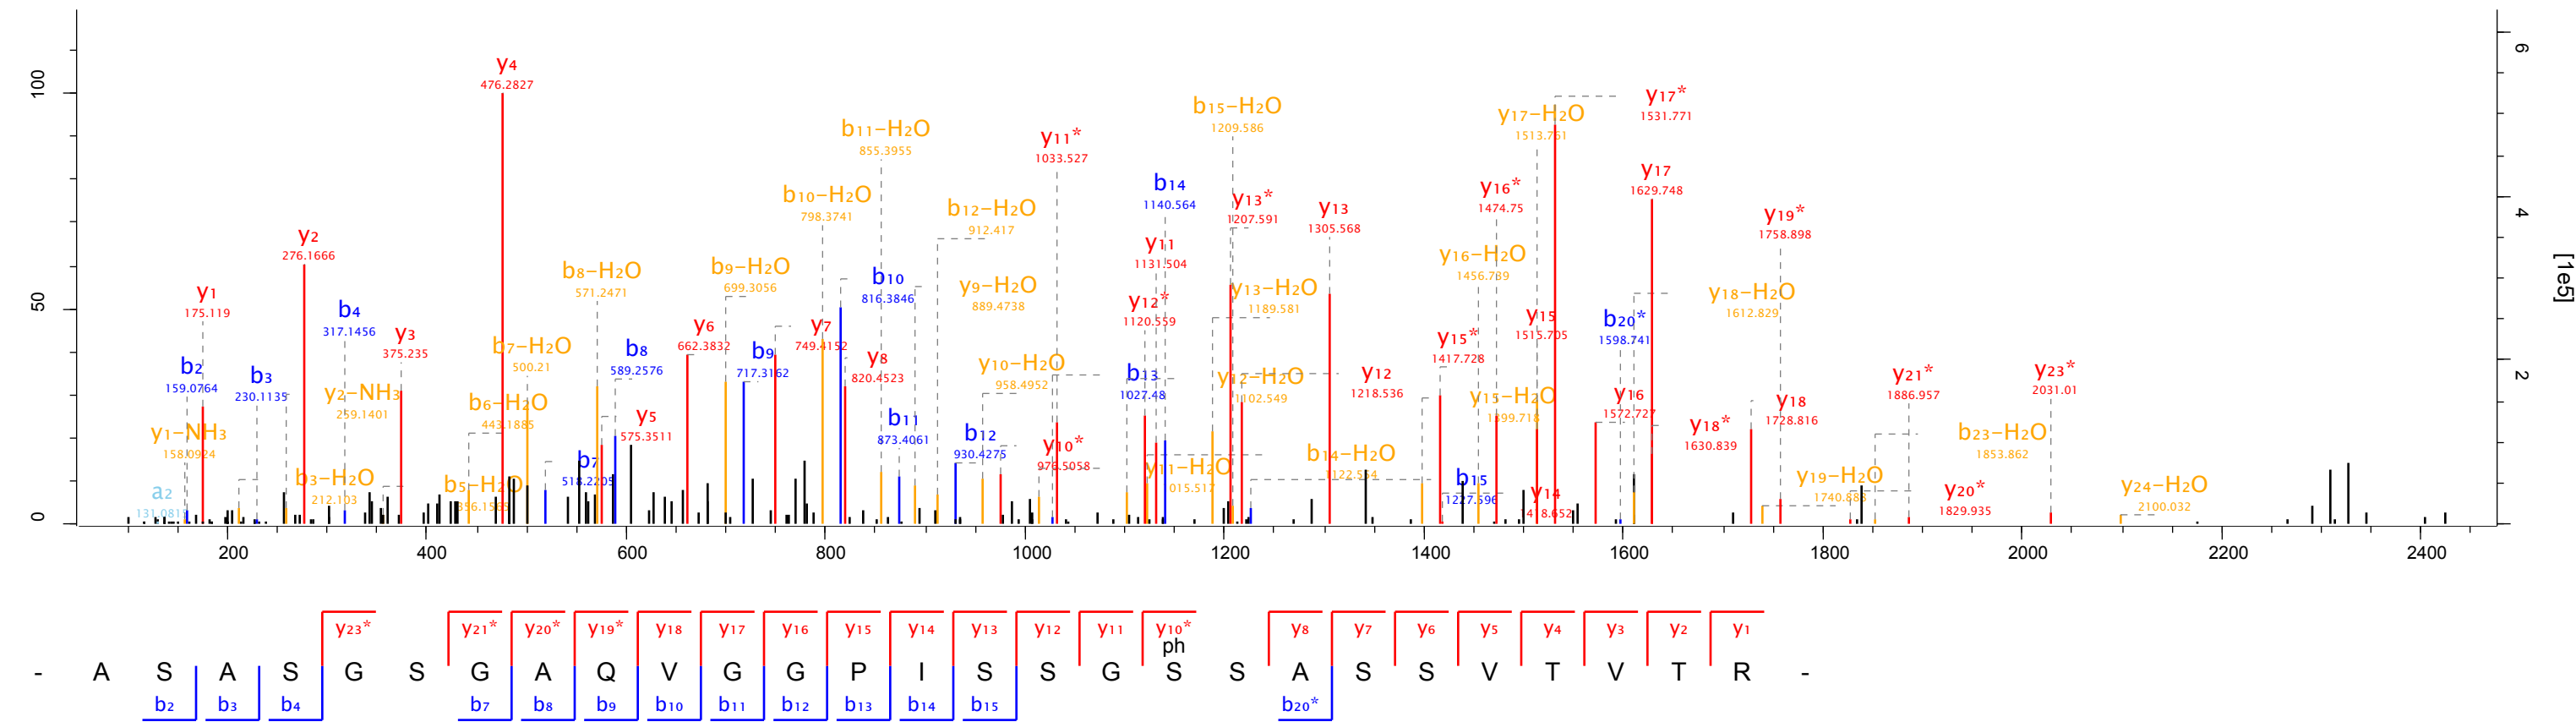



Raw file 20150814\_A375SR\_Phospho\_BR2\_04 Scan 12621 Method FTMS; HCD Score 131.18 m/z 743.35 Gene names ARHGAP39

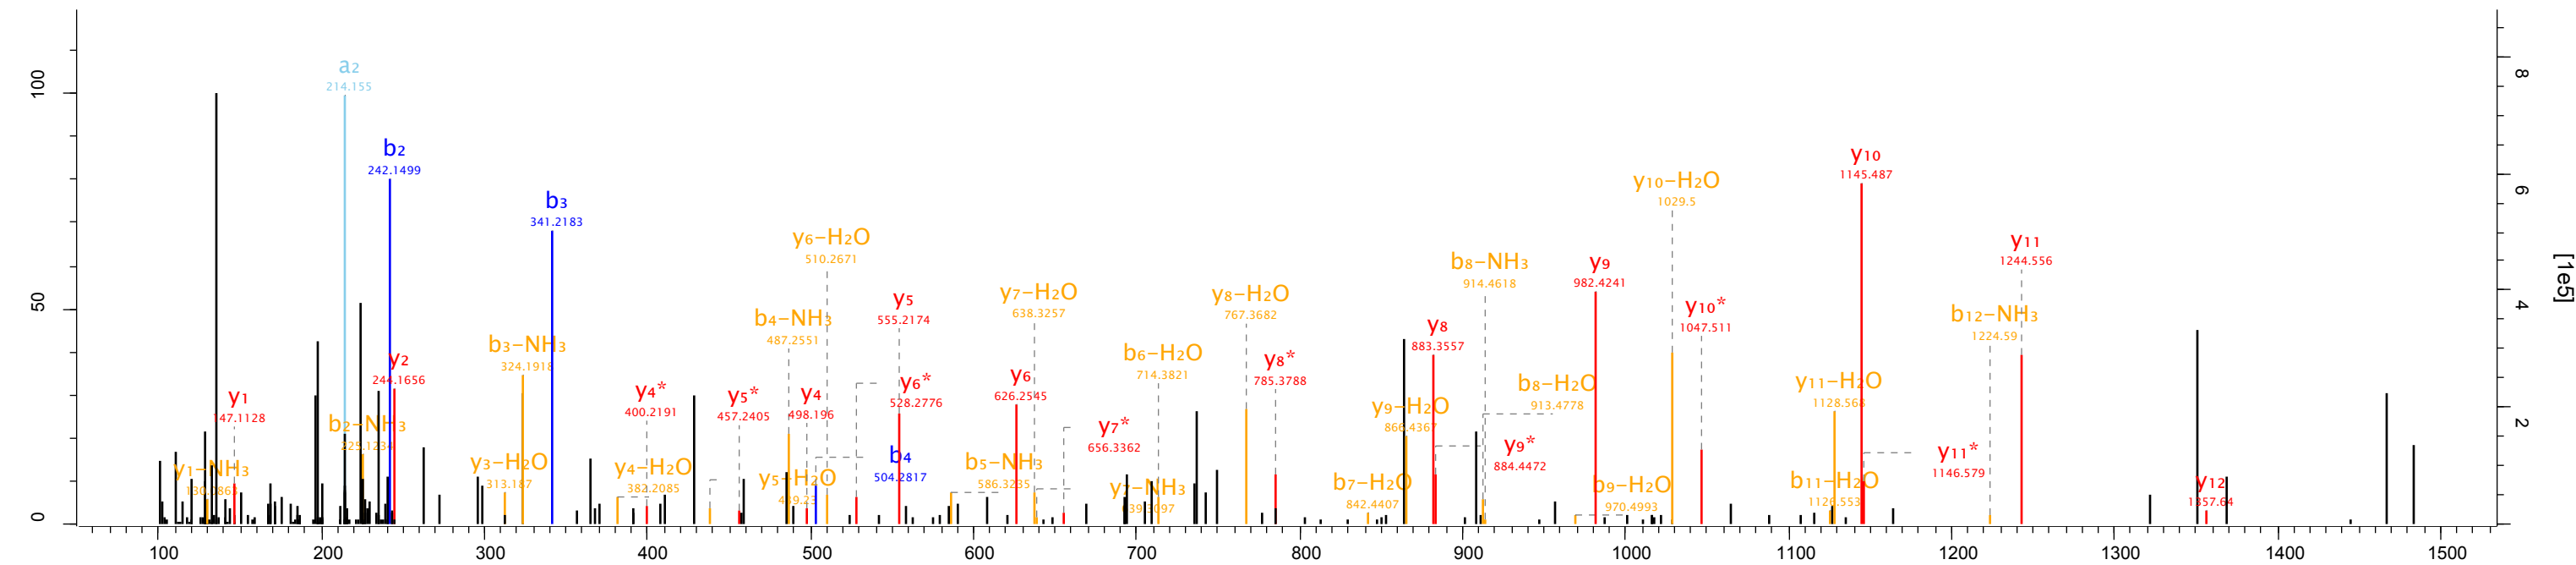

- Q L V Y V E Q A G S S P K -

Fragmentation mapping (b and y ions):

- b2: L
- b3: V
- b4: Y
- y1: K
- y2: P
- y3: S
- y4: G
- y5: A
- y6: Q
- y7: E
- y8: V
- y9: V
- y10: Y
- y11: V
- y12: L

Raw file 20150814\_A375SR\_Phospho\_BR2\_04 Scan 12631 Method FTMS; HCD Score 116.24 m/z 539.22 Gene names KPNA6

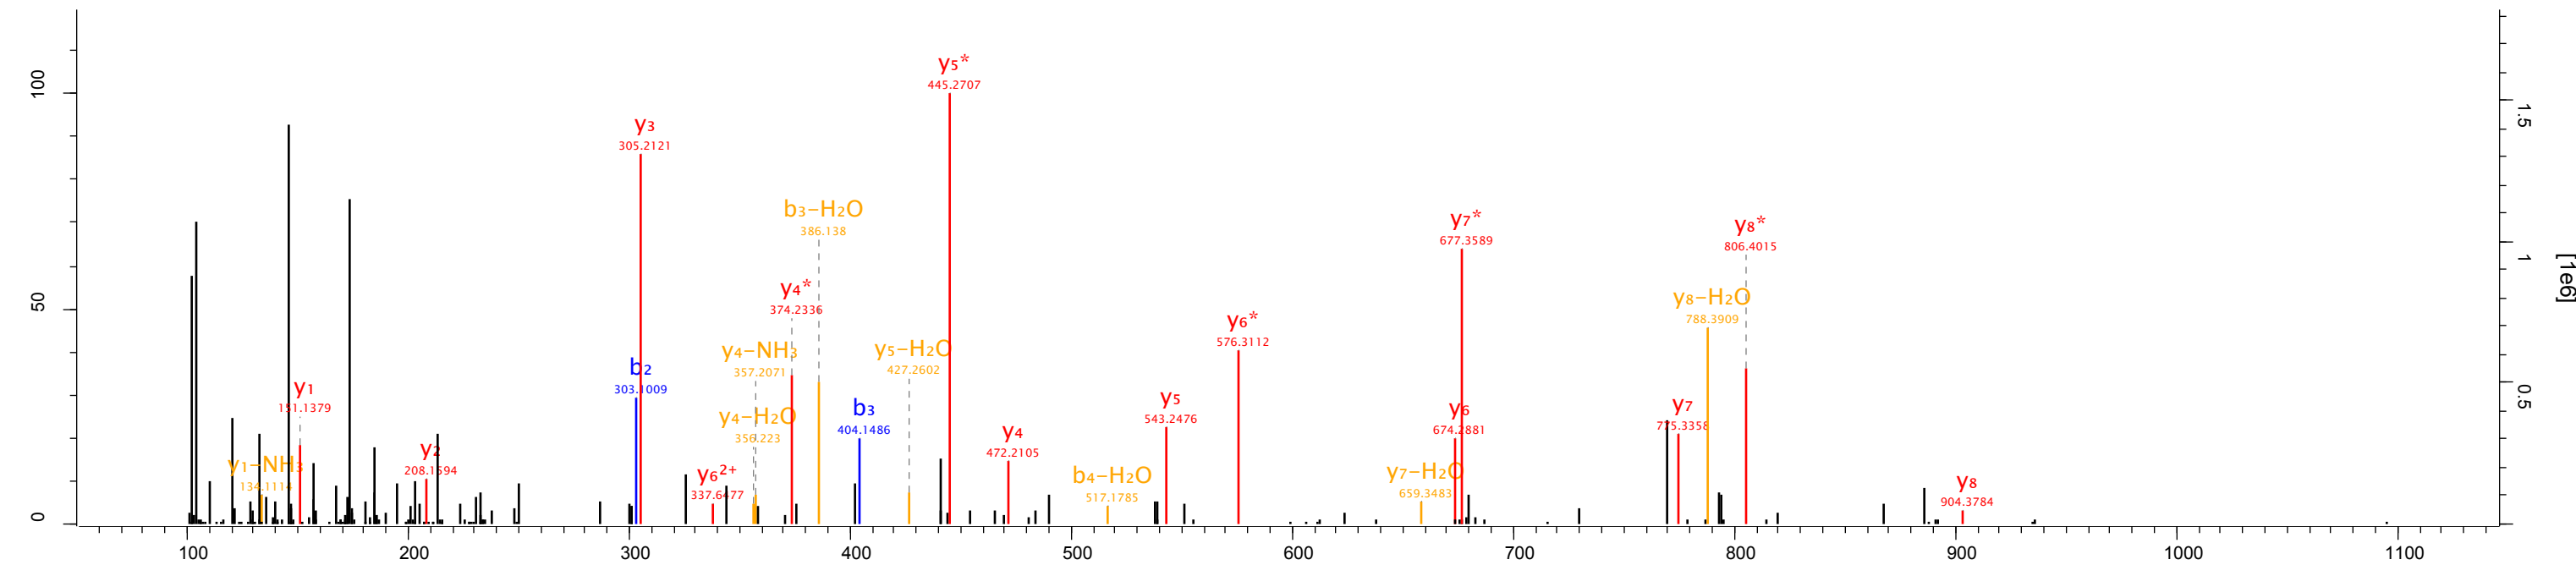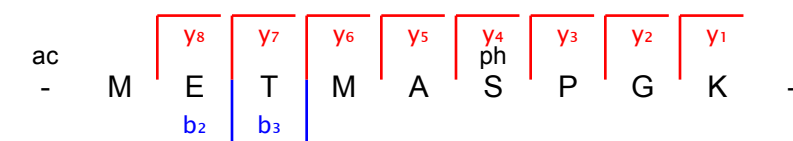

Raw file 20150814\_A375SR\_Phospho\_BR2\_04 Scan 12711 Method FTMS; HCD Score 136.32 m/z 641.31 Gene names SLTM

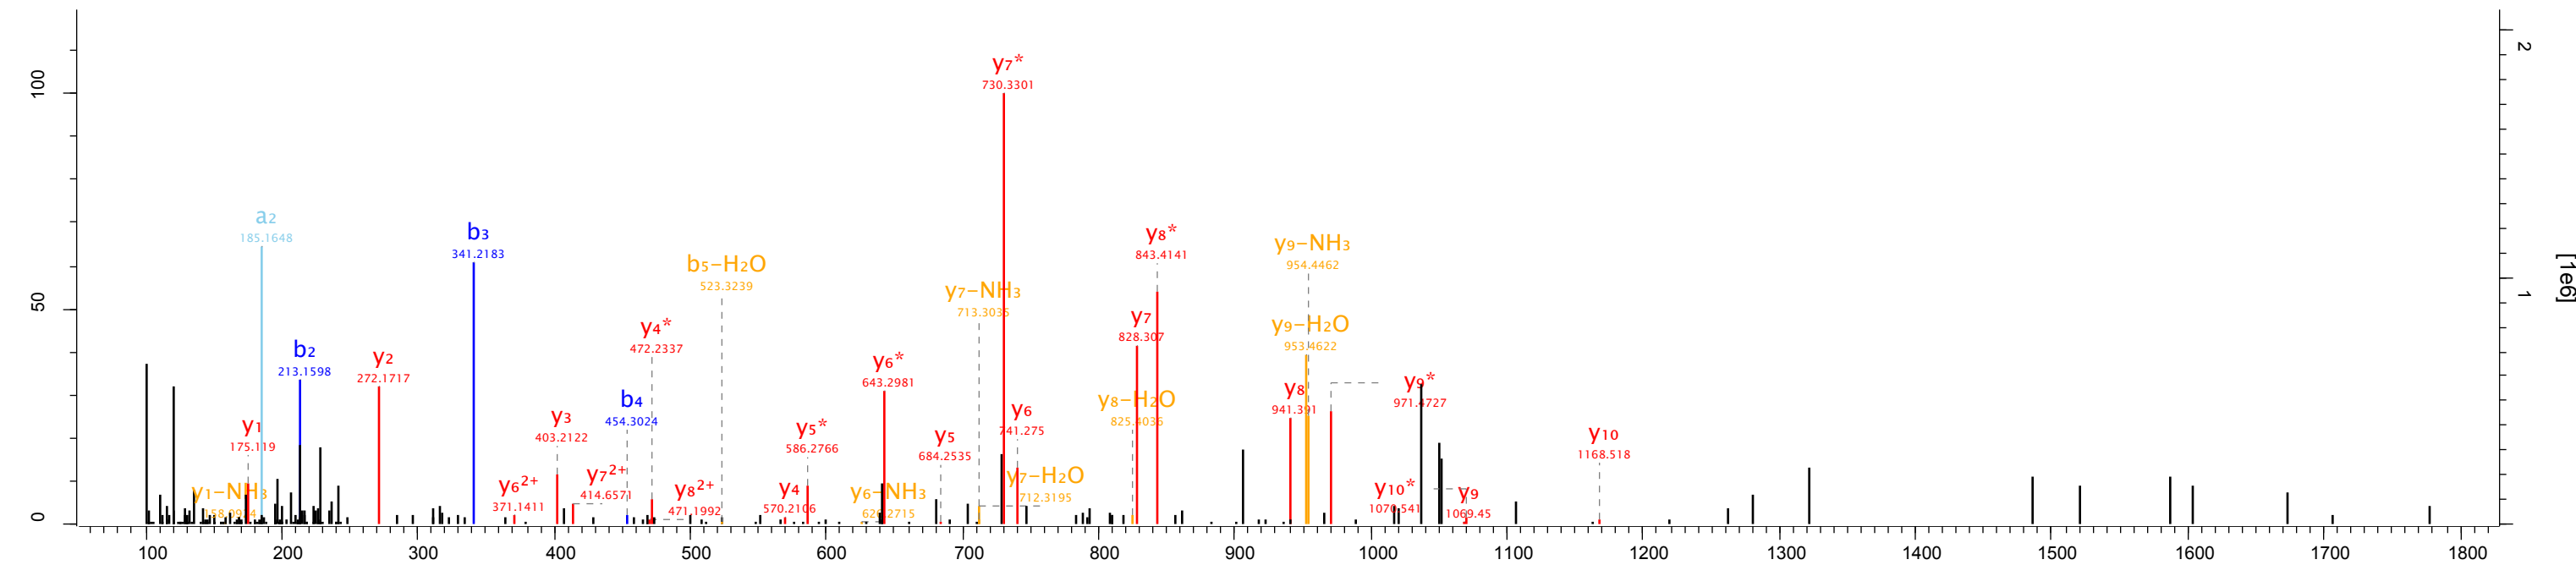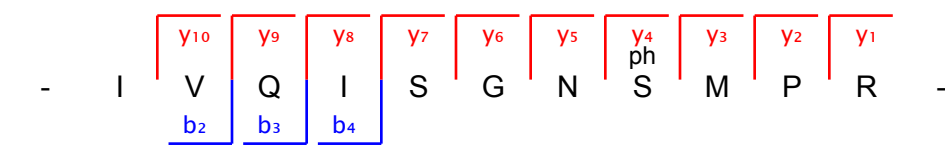

Raw file: 20150814\_A375SR\_Phospho\_BR2\_04  
 Scan: 12731 Method: FTMS; HCD Score: 145.2 m/z: 748.32 Gene names: GPBP1

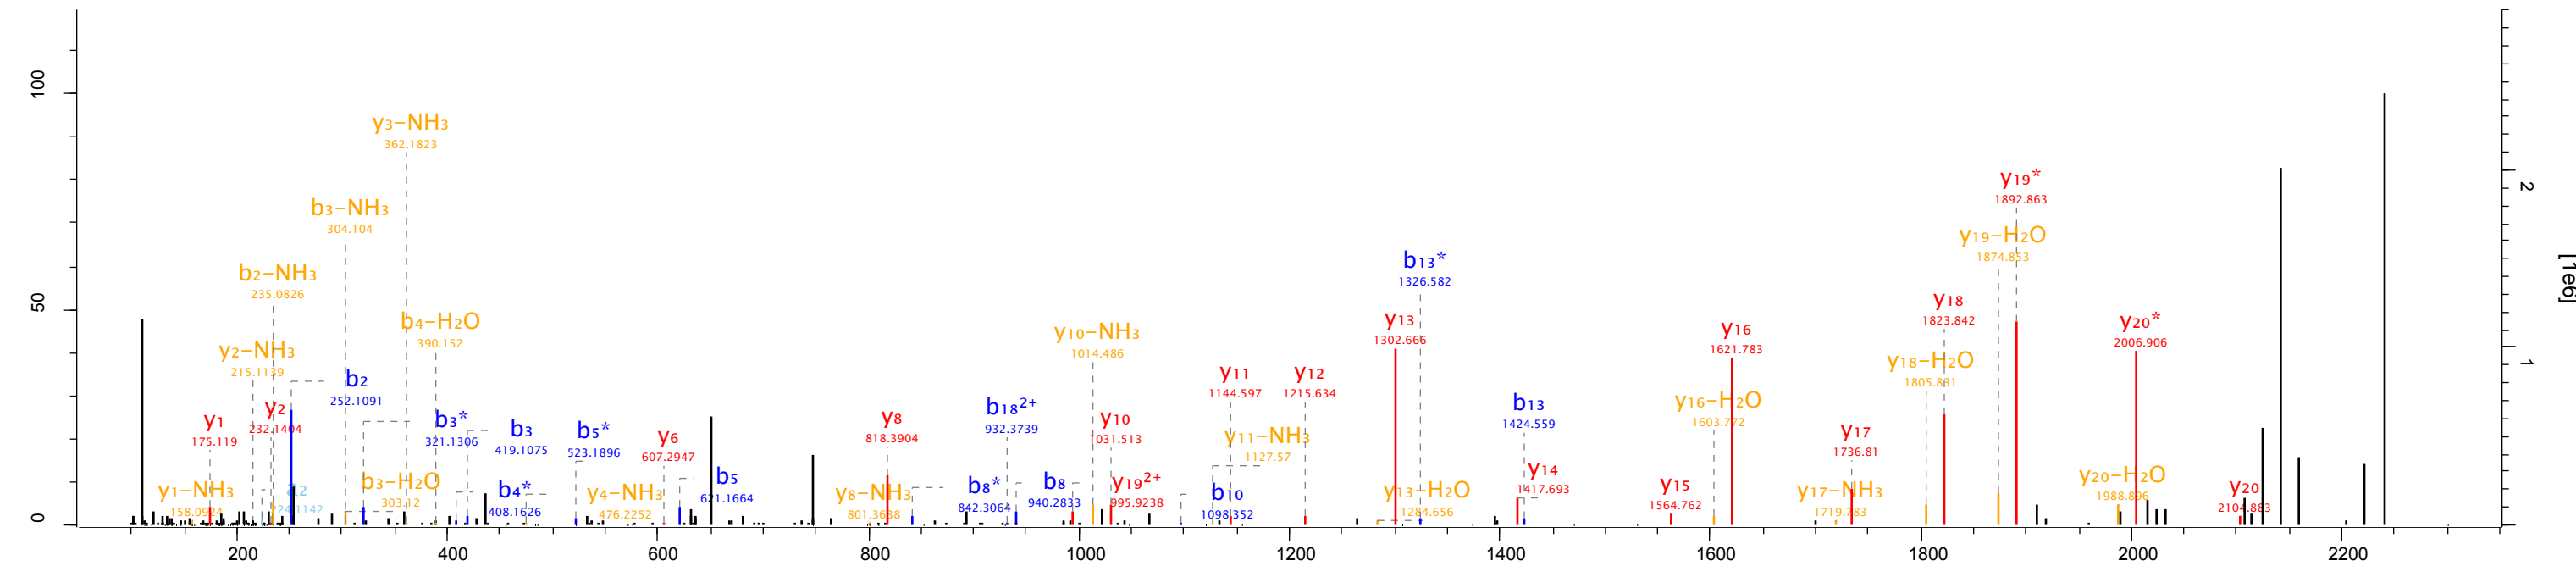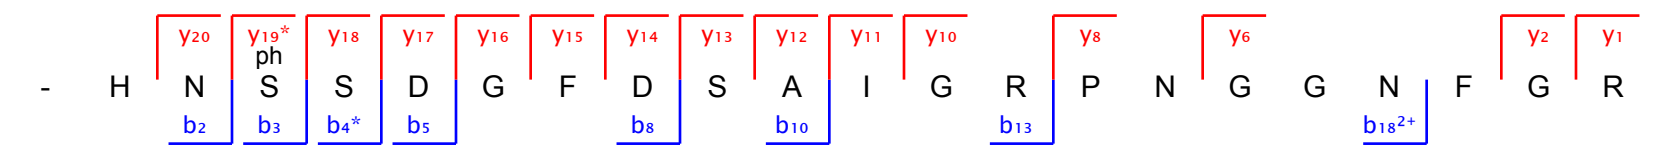

Raw file: 20150814\_A375SR\_Phospho\_BR2\_04  
 Scan: 12901 Method: FTMS; HCD Score: 127.38 m/z: 767.37 Gene names: BAD

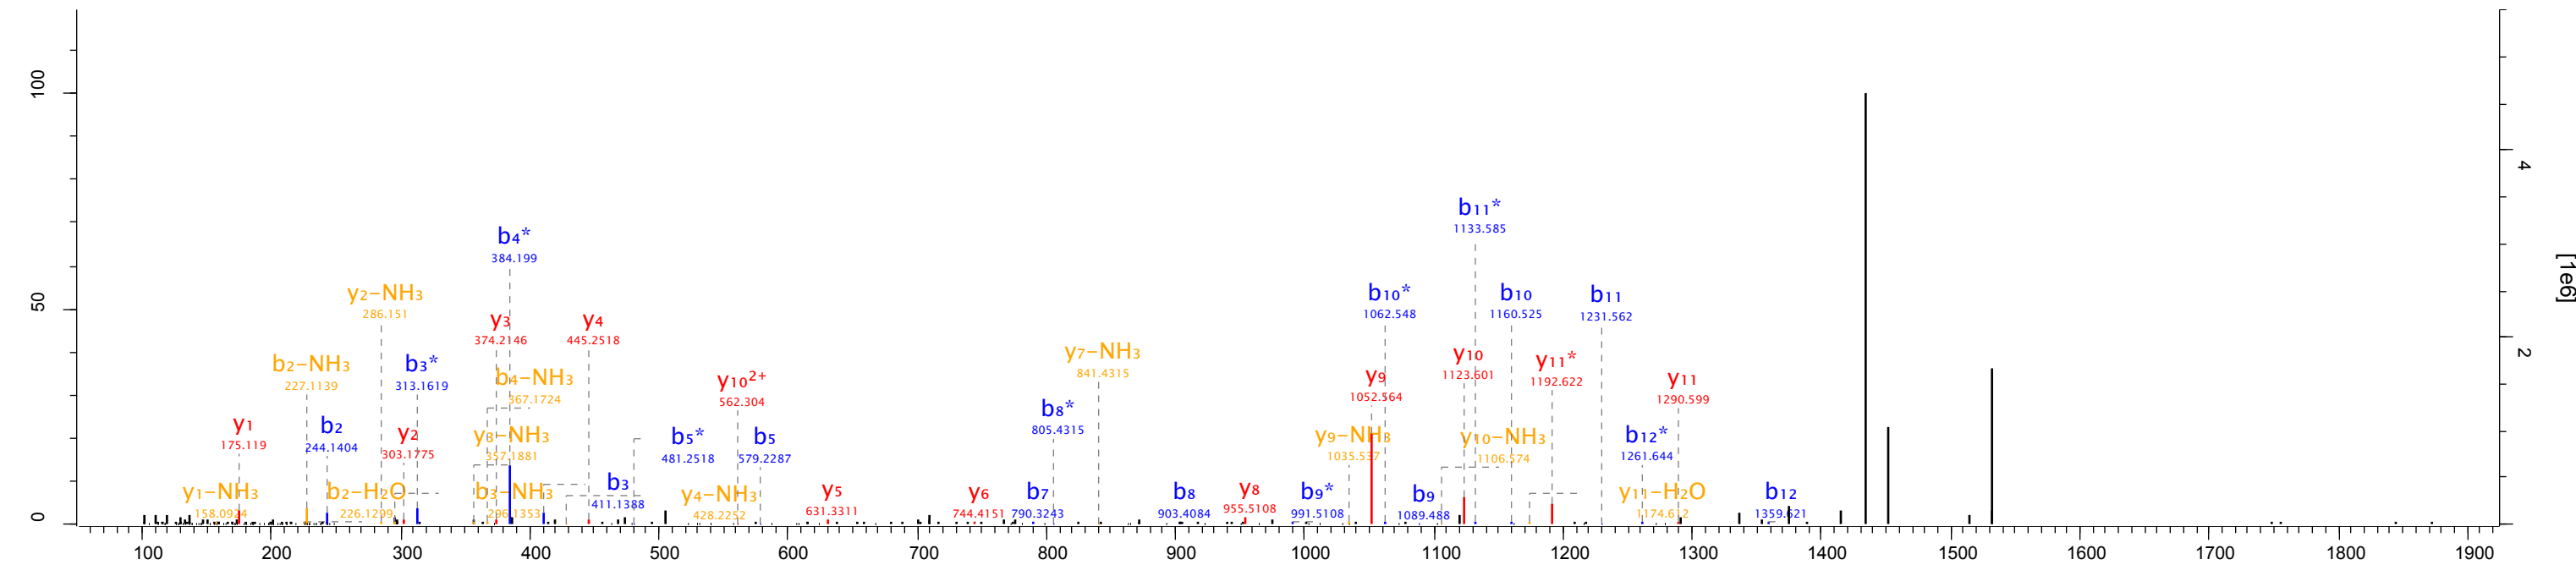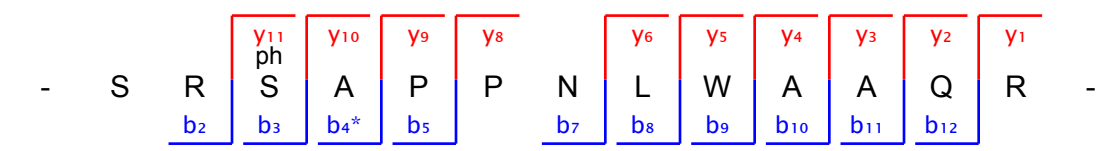

Raw file 20150814\_A375SR\_Phospho\_BR2\_04 Scan 13051 Method FTMS; HCD Score 125.98 m/z 754.33 Gene names TMEM200A

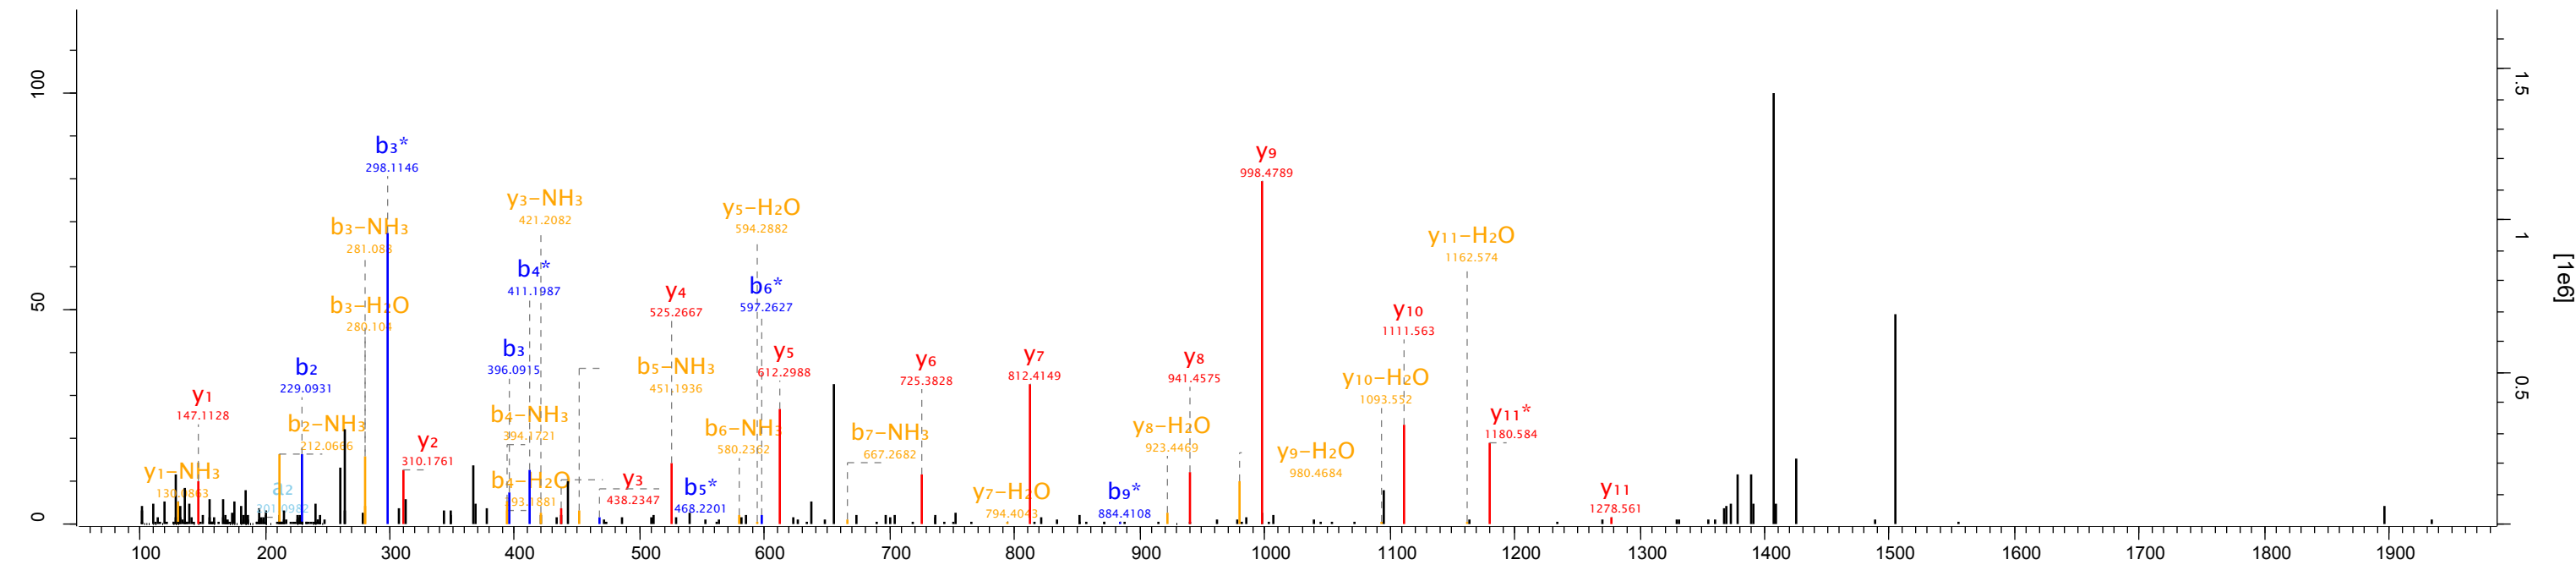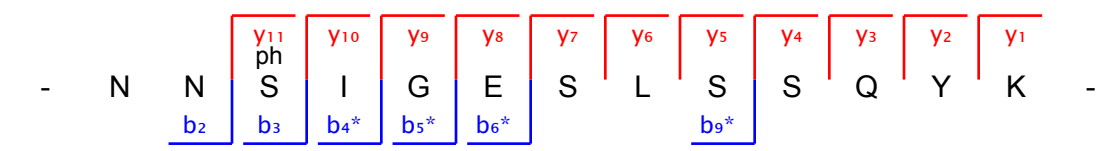

Raw file: 20150814\_A375SR\_Phospho\_BR2\_04  
 Scan: 13061 Method: FTMS; HCD Score: 128.95 m/z: 671.3 Gene names: ARIH1

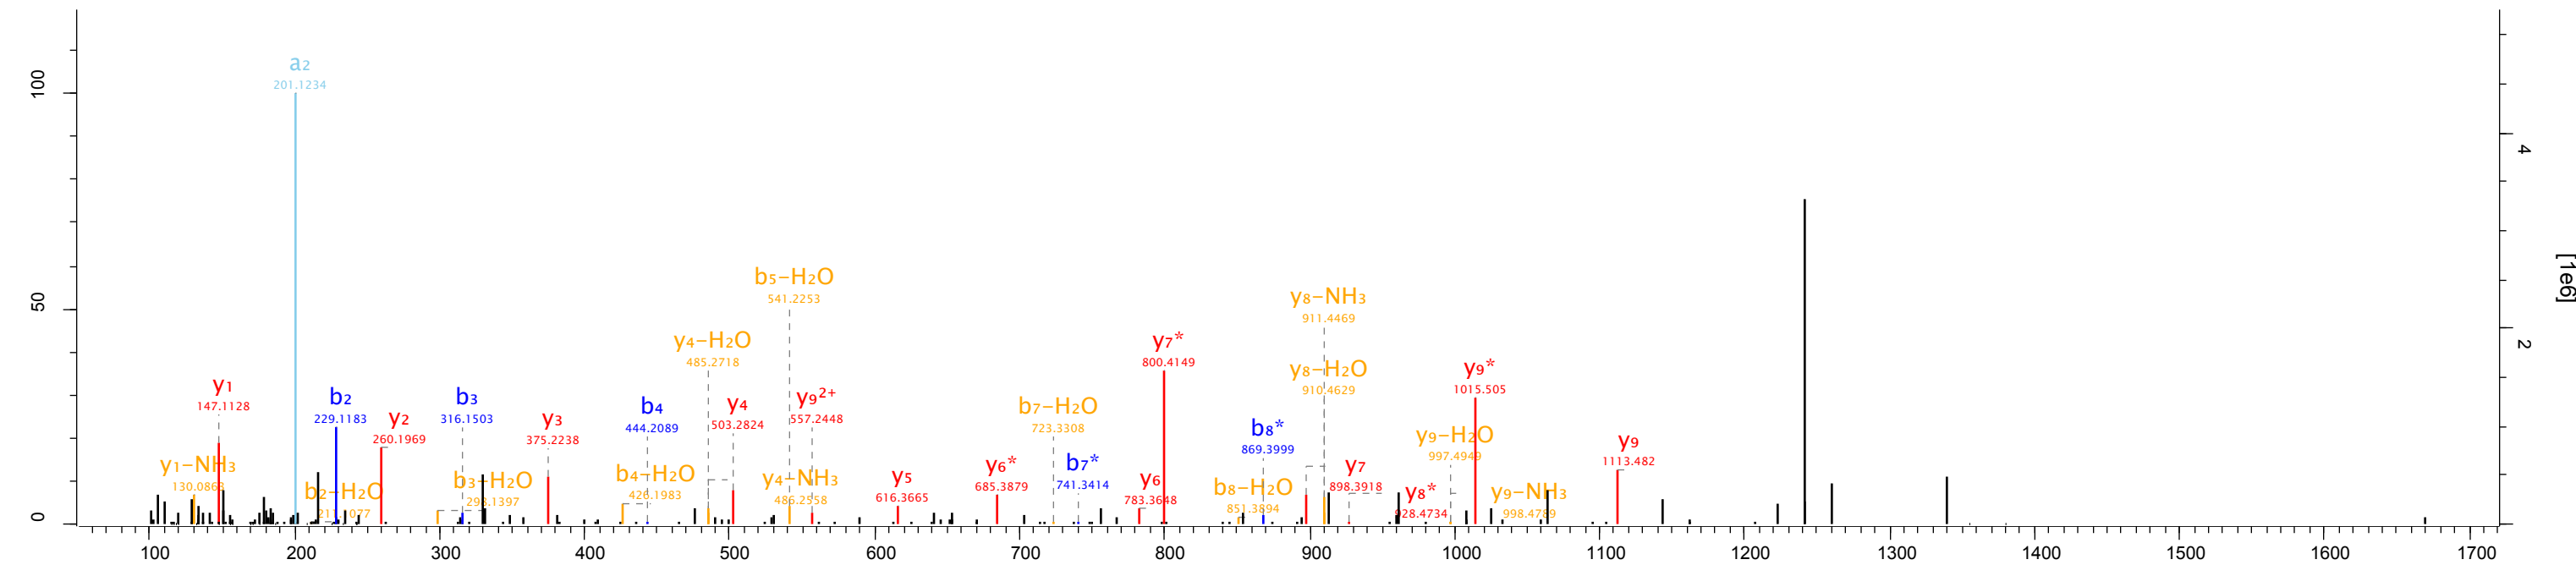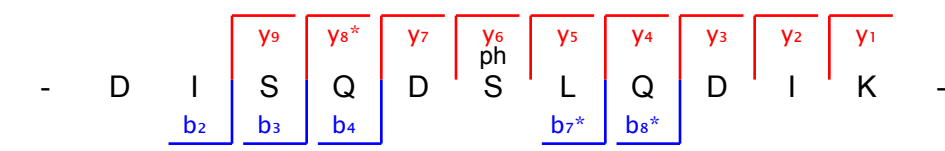

Raw file 20150814\_A375SR\_Phospho\_BR2\_04 Scan 13131 Method FTMS; HCD Score 110.74 m/z 545.74 Gene names SH3BP4

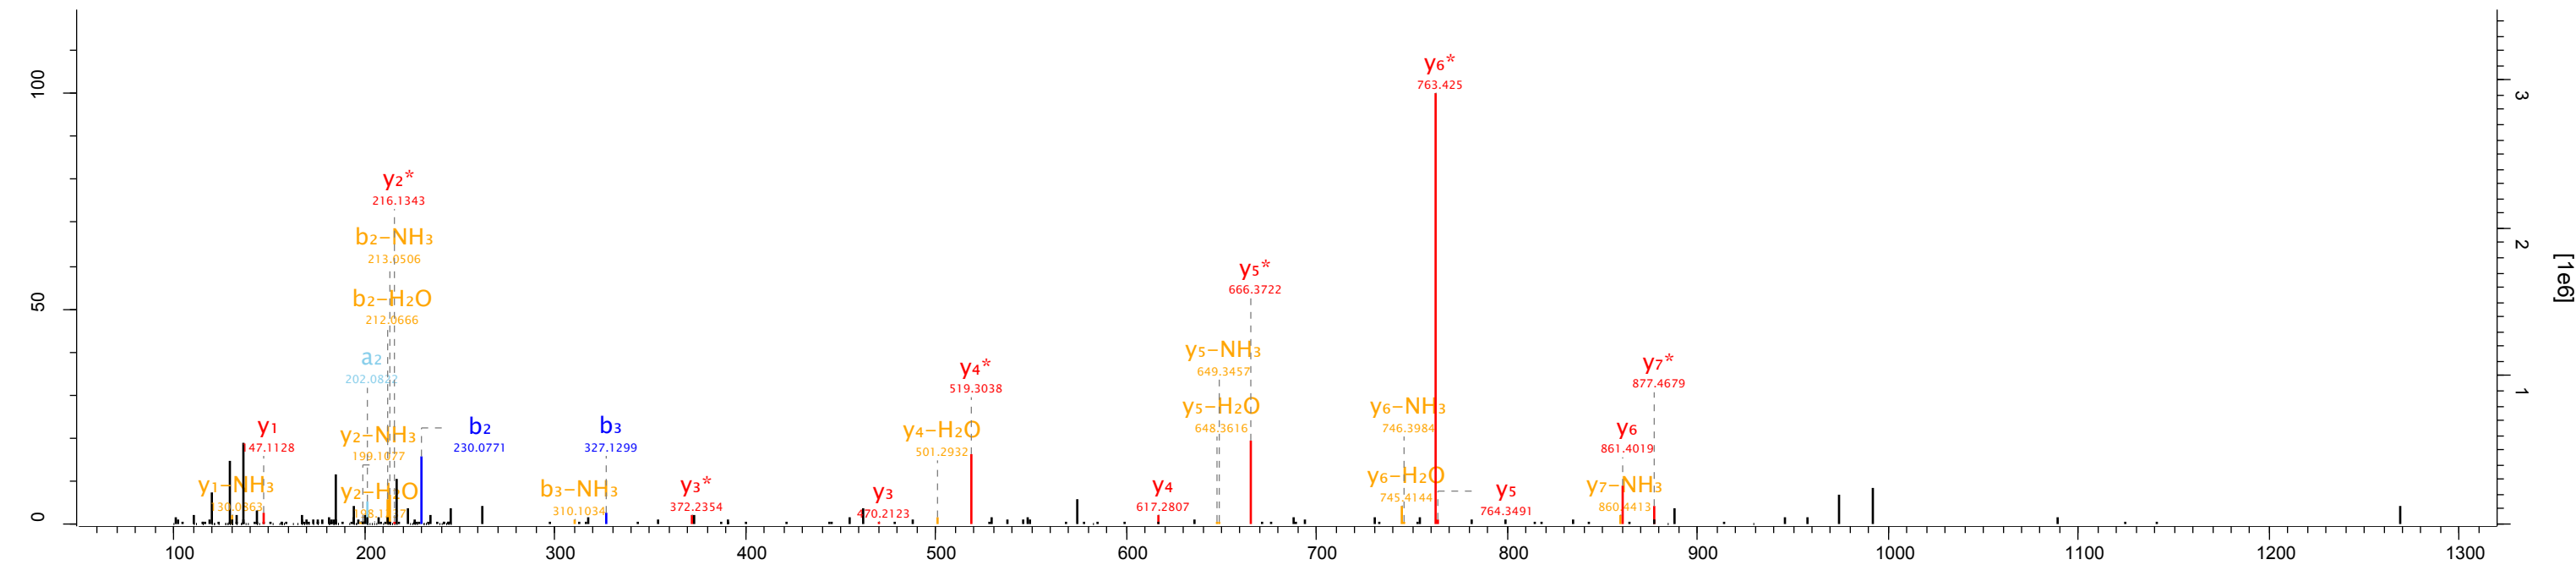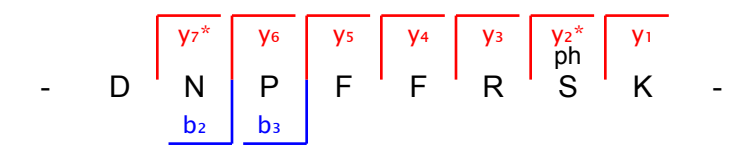



Raw file 20150814\_A375SR\_Phospho\_BR2\_04 Scan 13231 Method FTMS; HCD Score 95.15 m/z 754.4 Gene names CAMSAP2

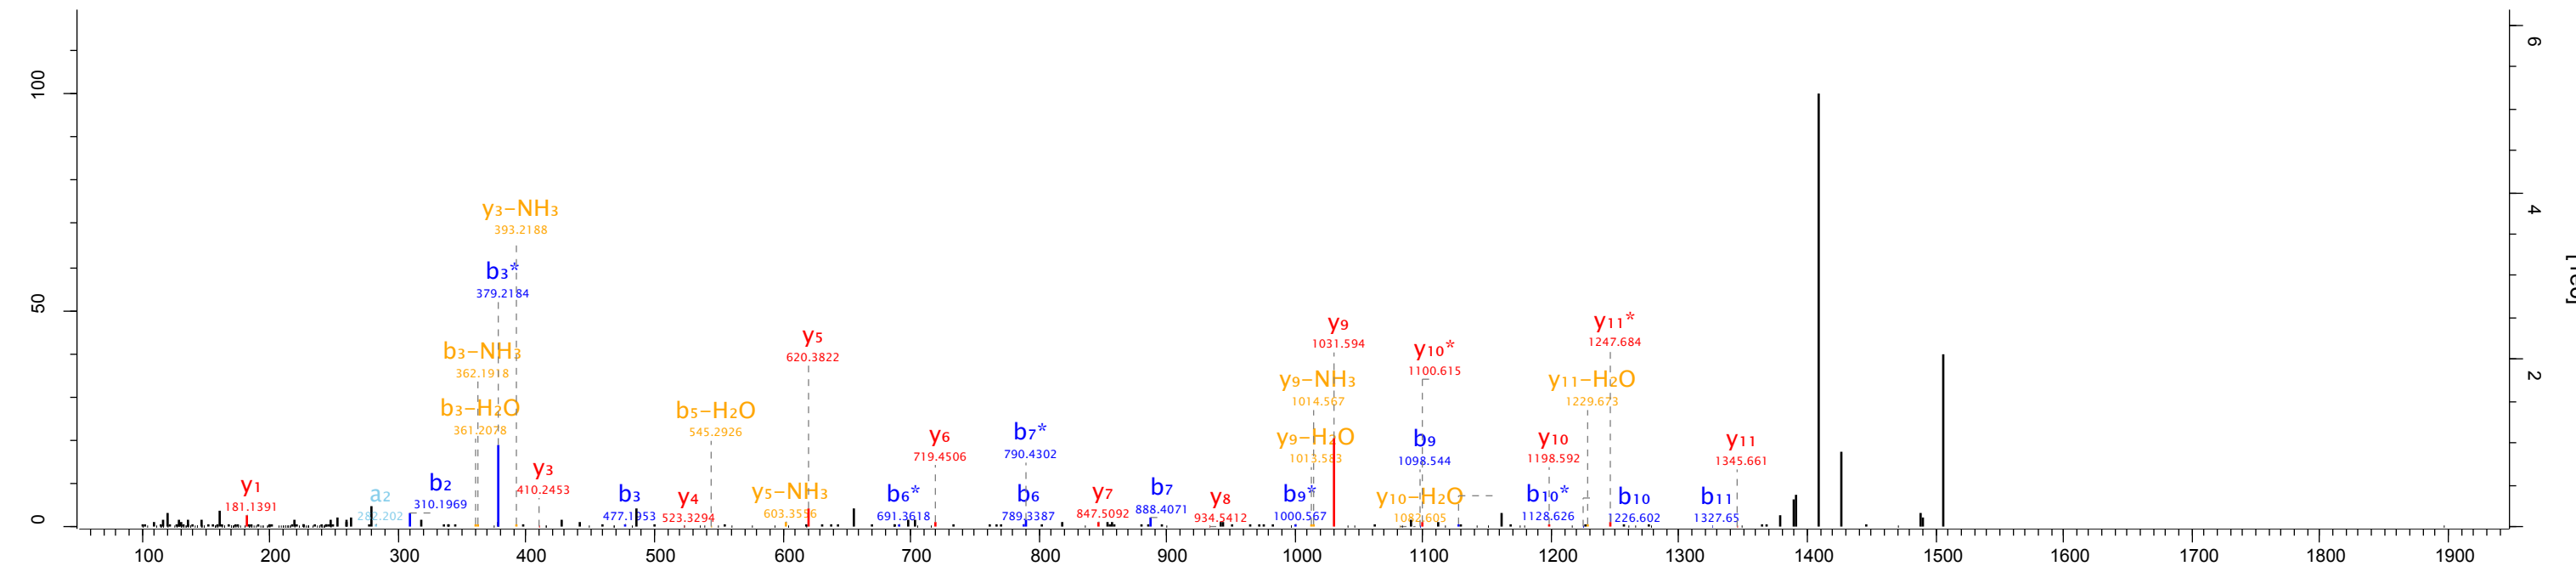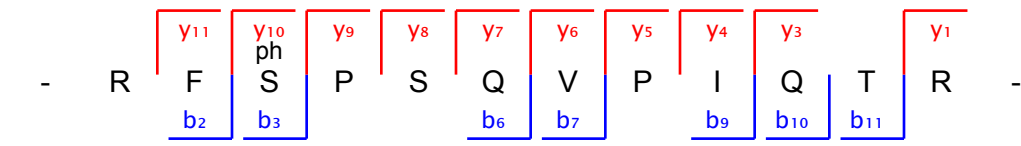

Raw file 20150814\_A375SR\_Phospho\_BR2\_04 Scan 13271 Method FTMS; HCD Score 108.68 m/z 1029.44 Gene names CTAG1A

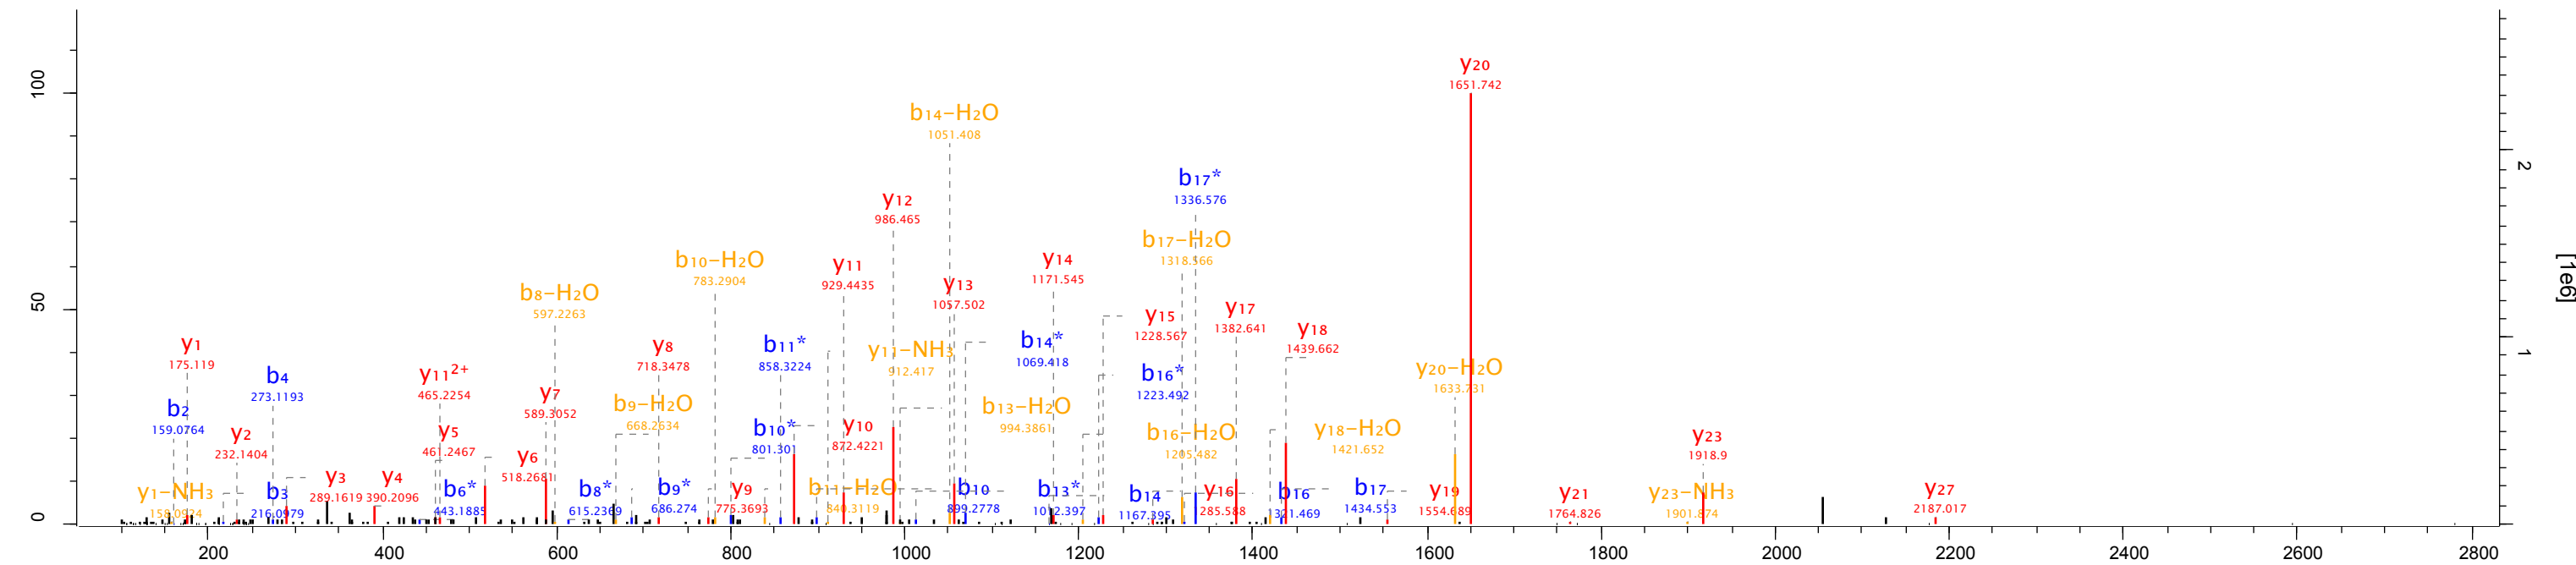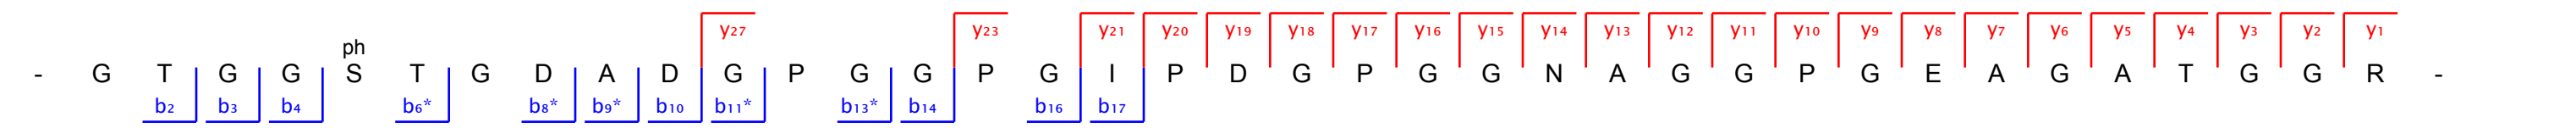

Raw file: 20150814\_A375SR\_Phospho\_BR2\_04  
 Scan: 13311 Method: FTMS; HCD Score: 194.7 m/z: 956.93 Gene names: ARHGAP21

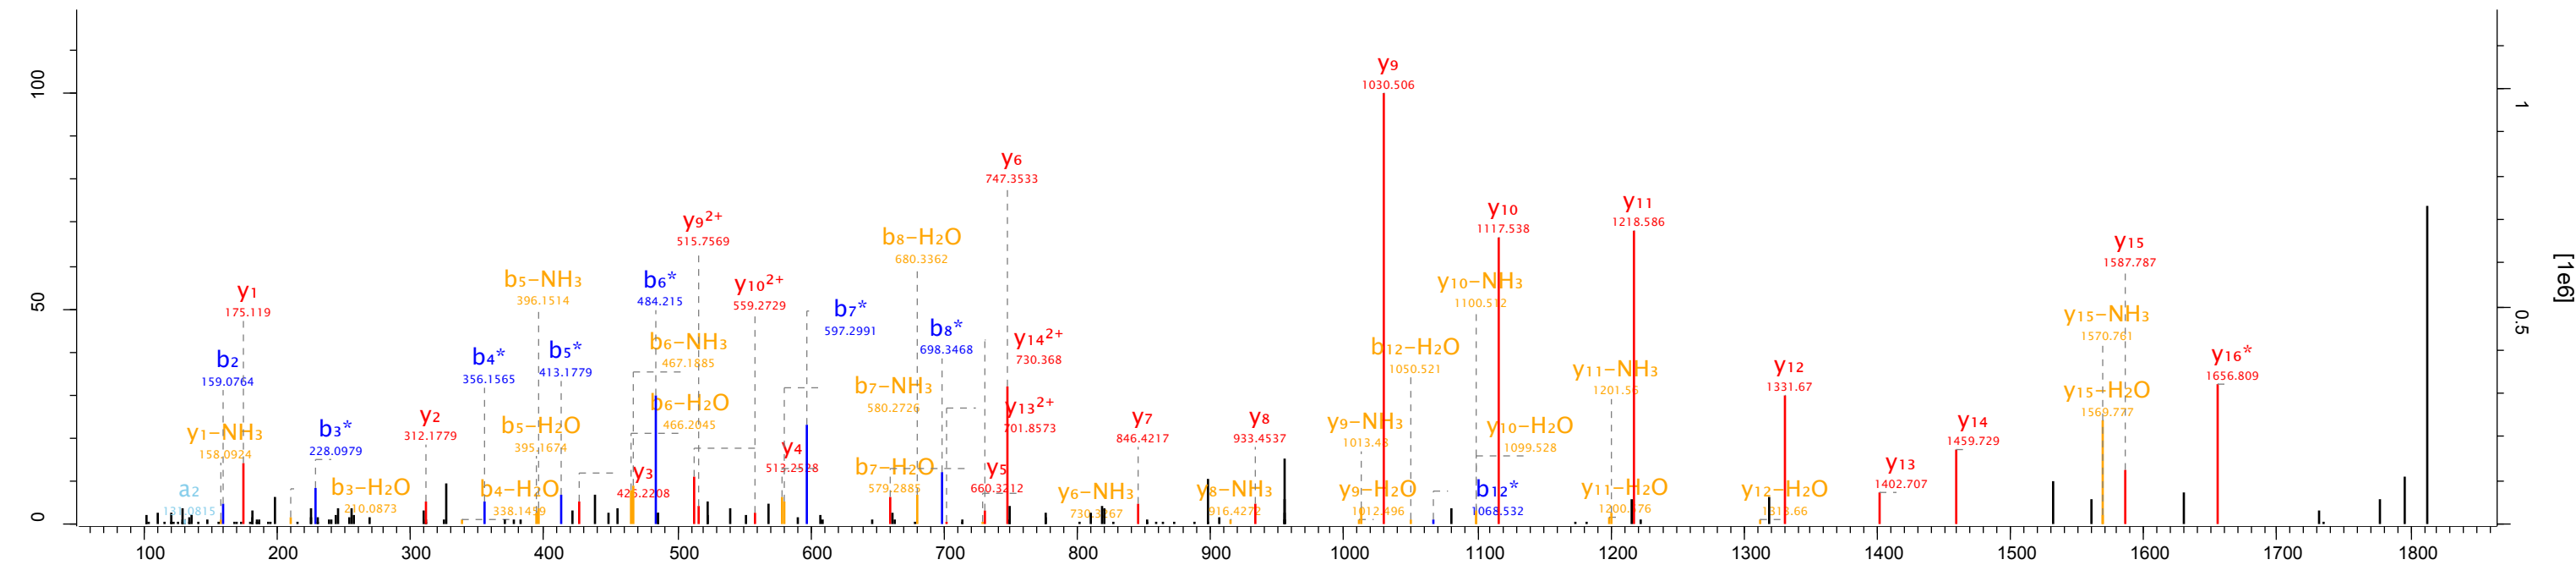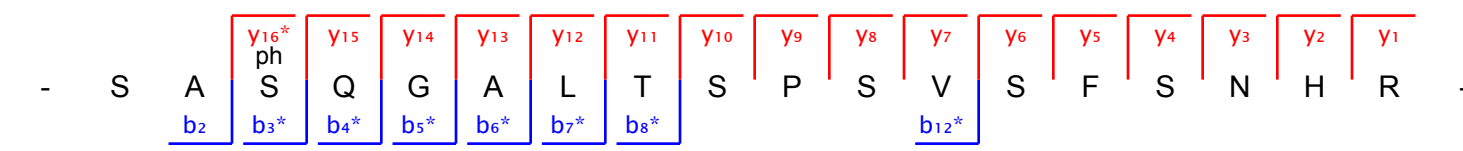

Raw file: 20150814\_A375SR\_Phospho\_BR2\_04  
 Scan: 13511 Method: FTMS; HCD Score: 121.19 m/z: 894.74 Gene names: TENC1

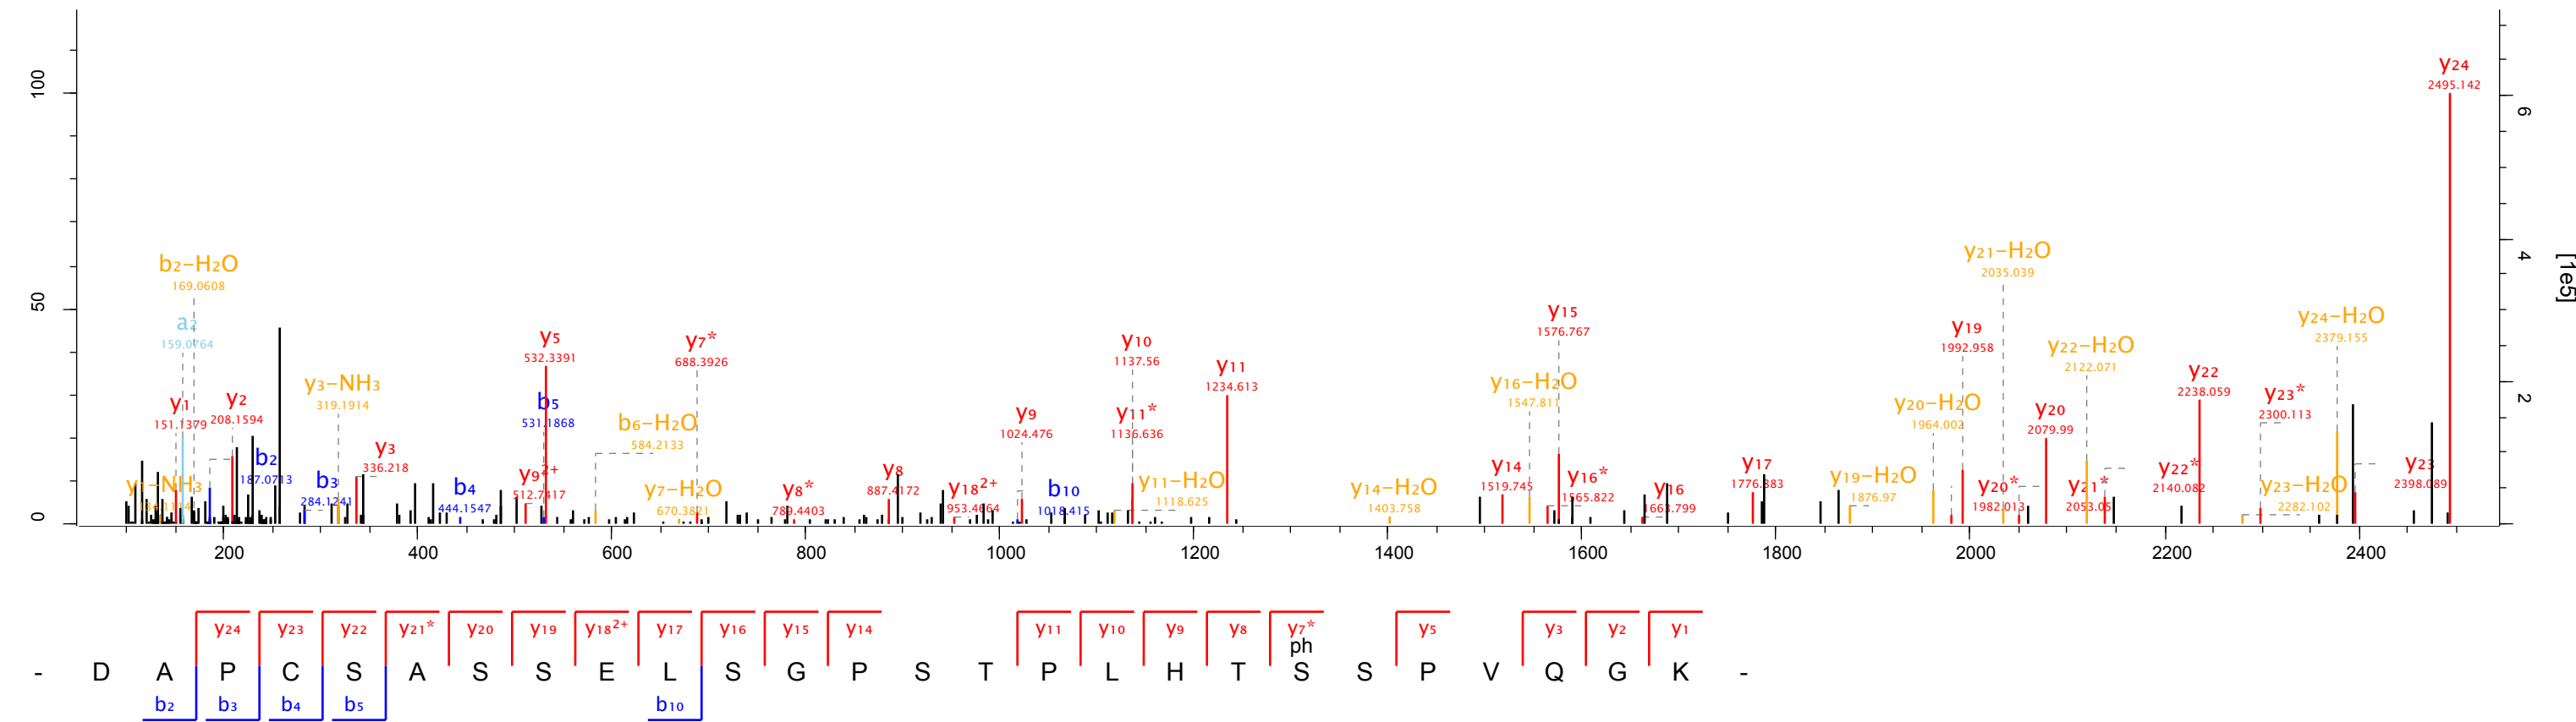

Raw file: 20150814\_A375SR\_Phospho\_BR2\_04  
 Scan: 13571 Method: FTMS; HCD Score: 83.25 m/z: 676.32 Gene names: GIGYF1

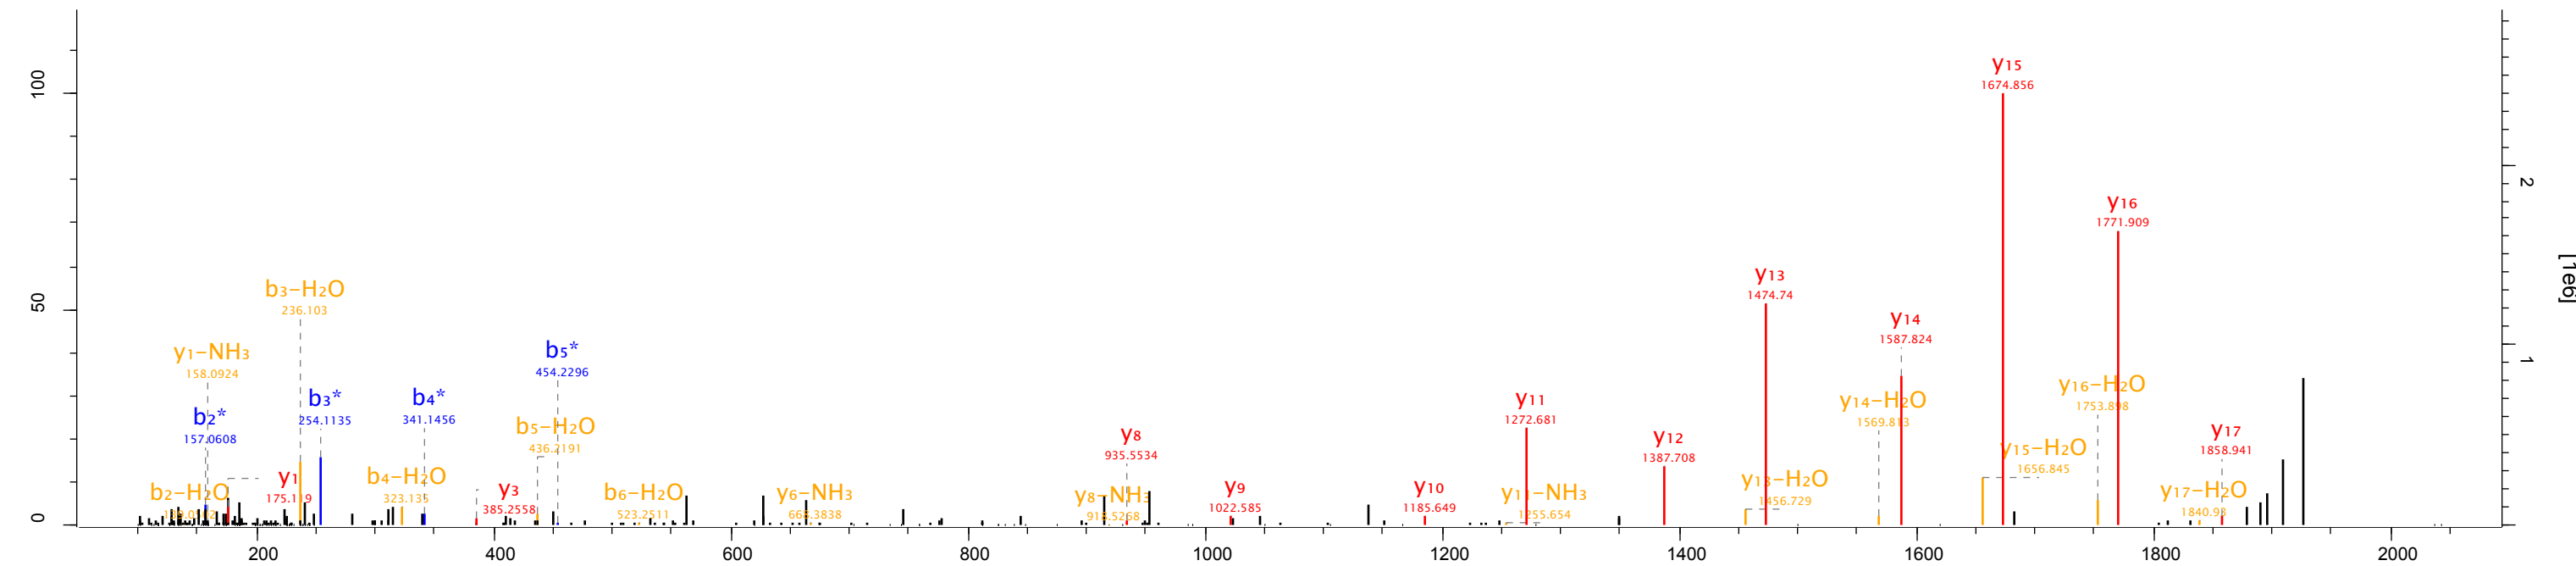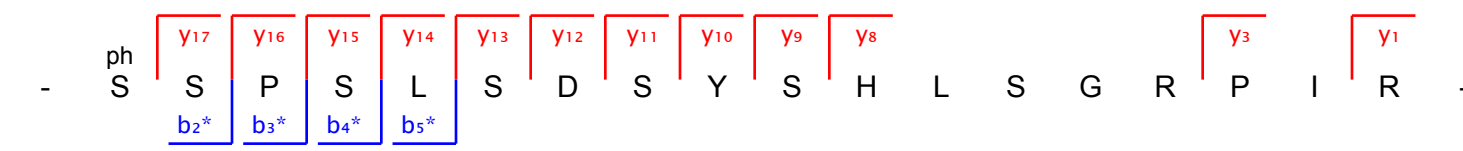

Raw file: 20150814\_A375SR\_Phospho\_BR2\_04  
 Scan: 13611 Method: FTMS; HCD Score: 203.2 m/z: 1121.95 Gene names: MDN1

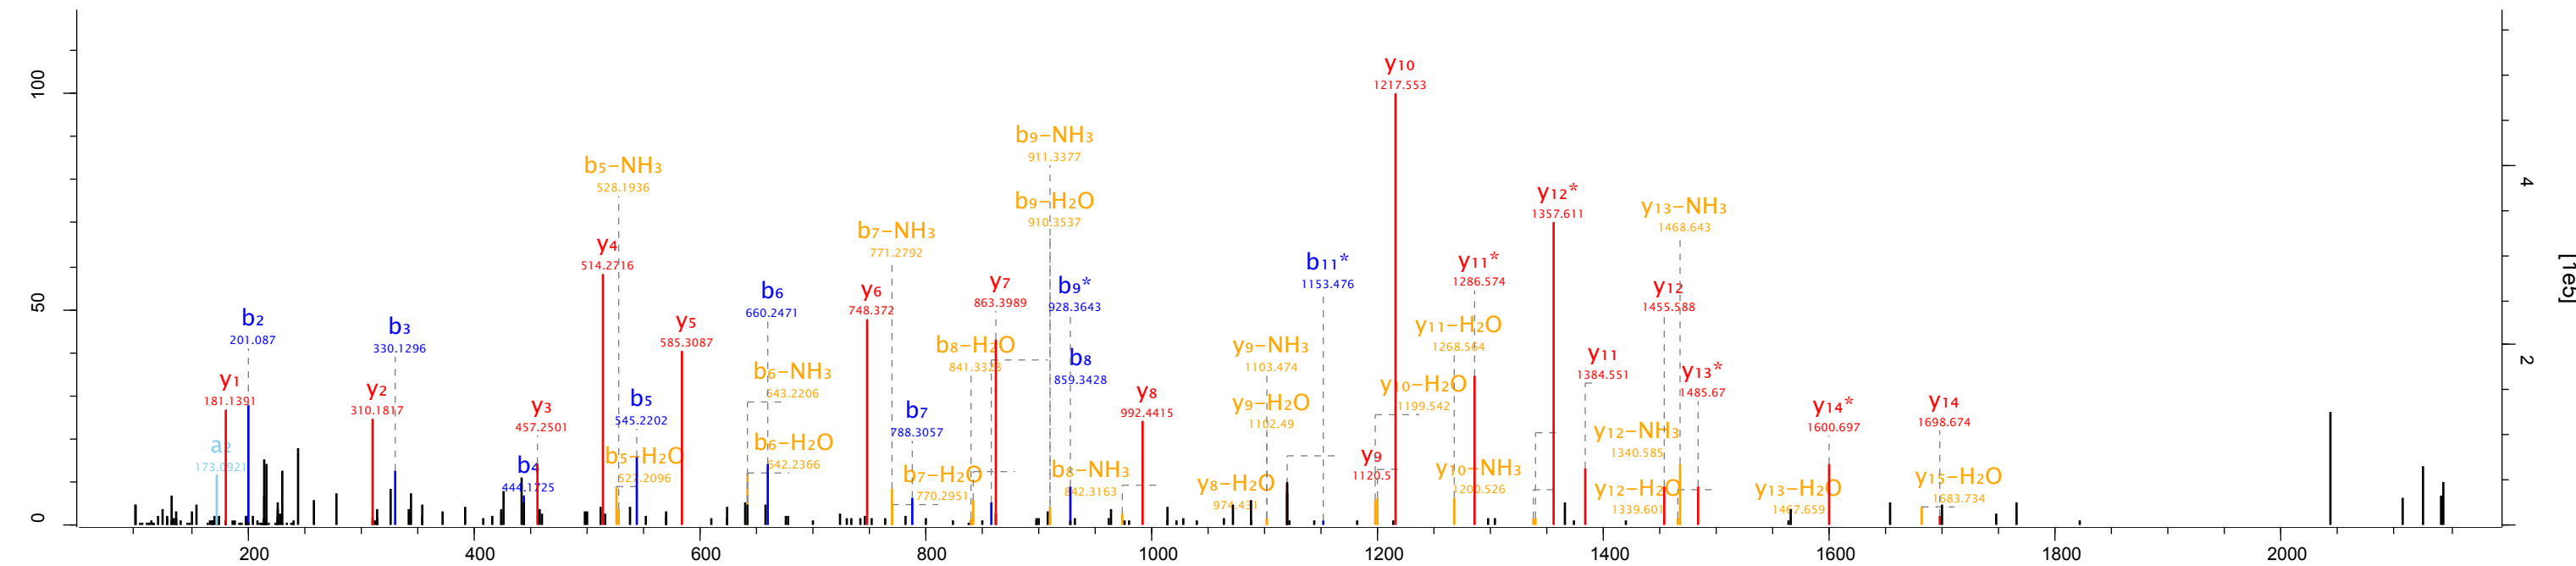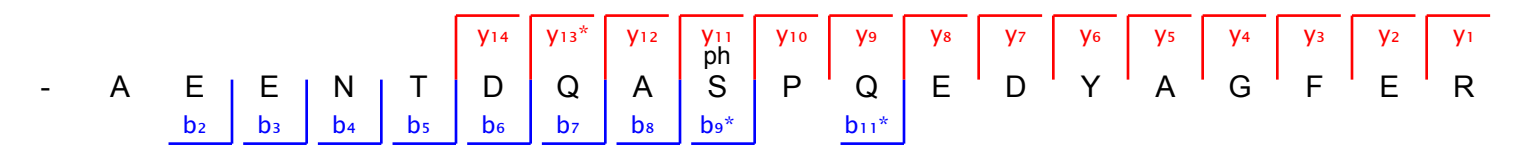

Raw file: 20150814\_A375SR\_Phospho\_BR2\_04  
 Scan: 13621 Method: FTMS; HCD Score: 148.15 m/z: 706.84 Gene names: ALDOA

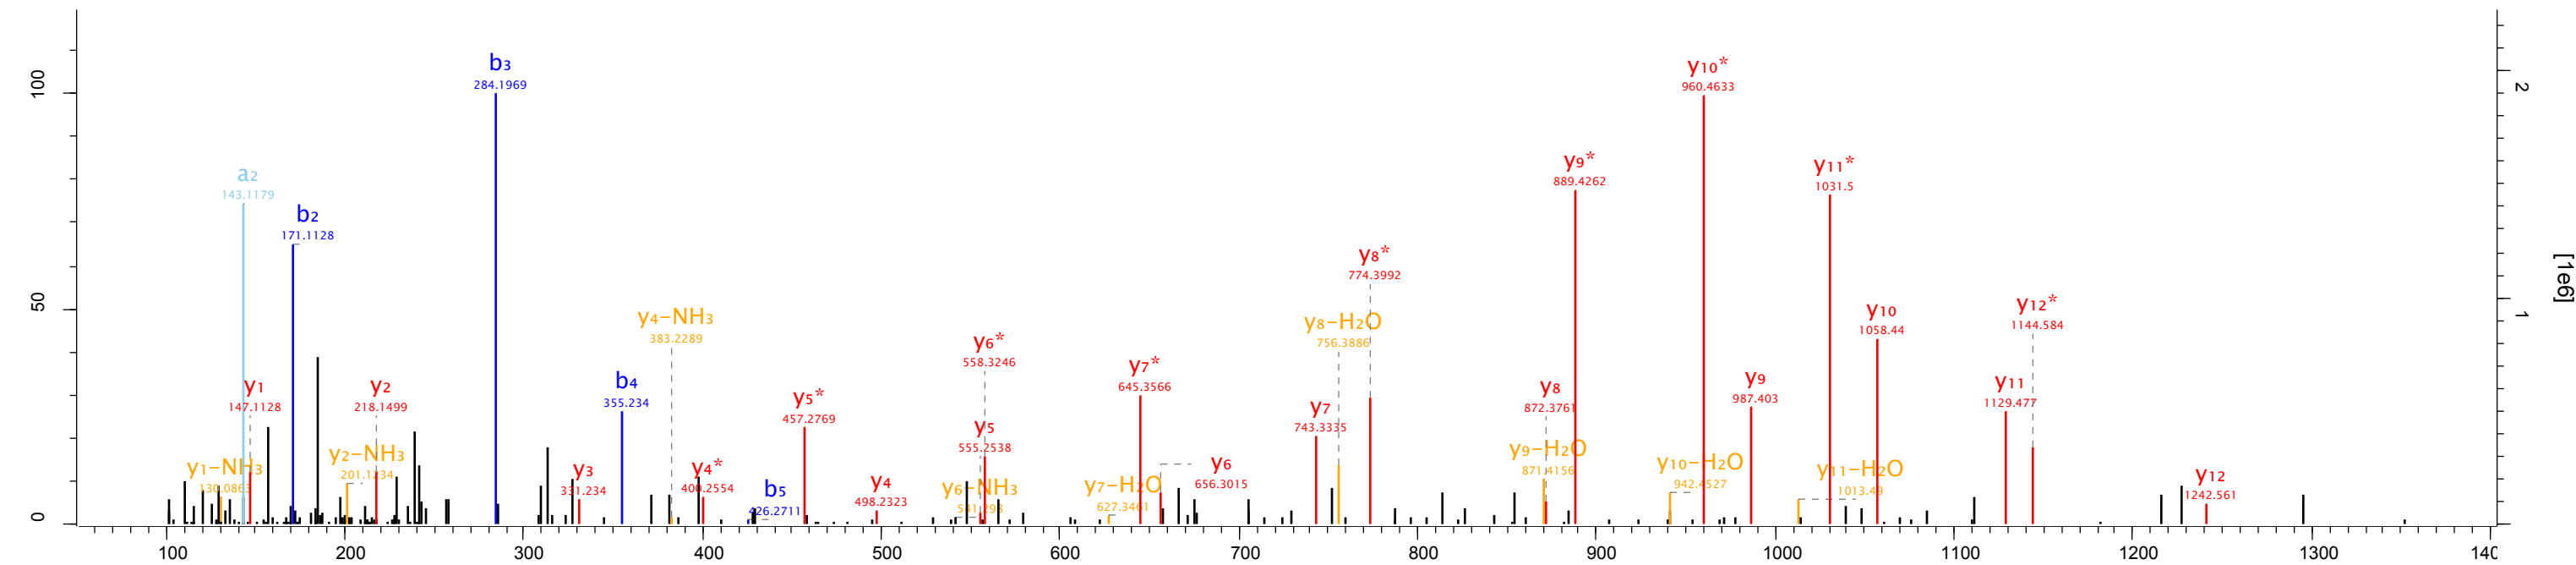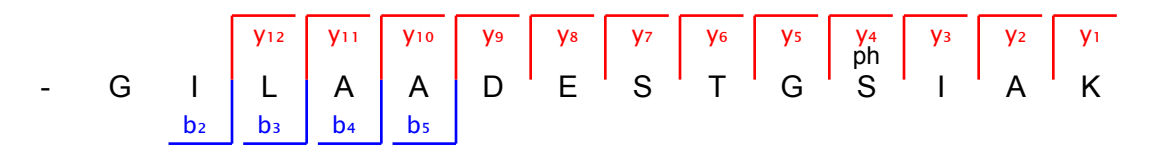

Raw file 20150814\_A375SR\_Phospho\_BR2\_04 Scan 13651 Method FTMS; HCD Score 107.2 m/z 668.78 Gene names AGO2

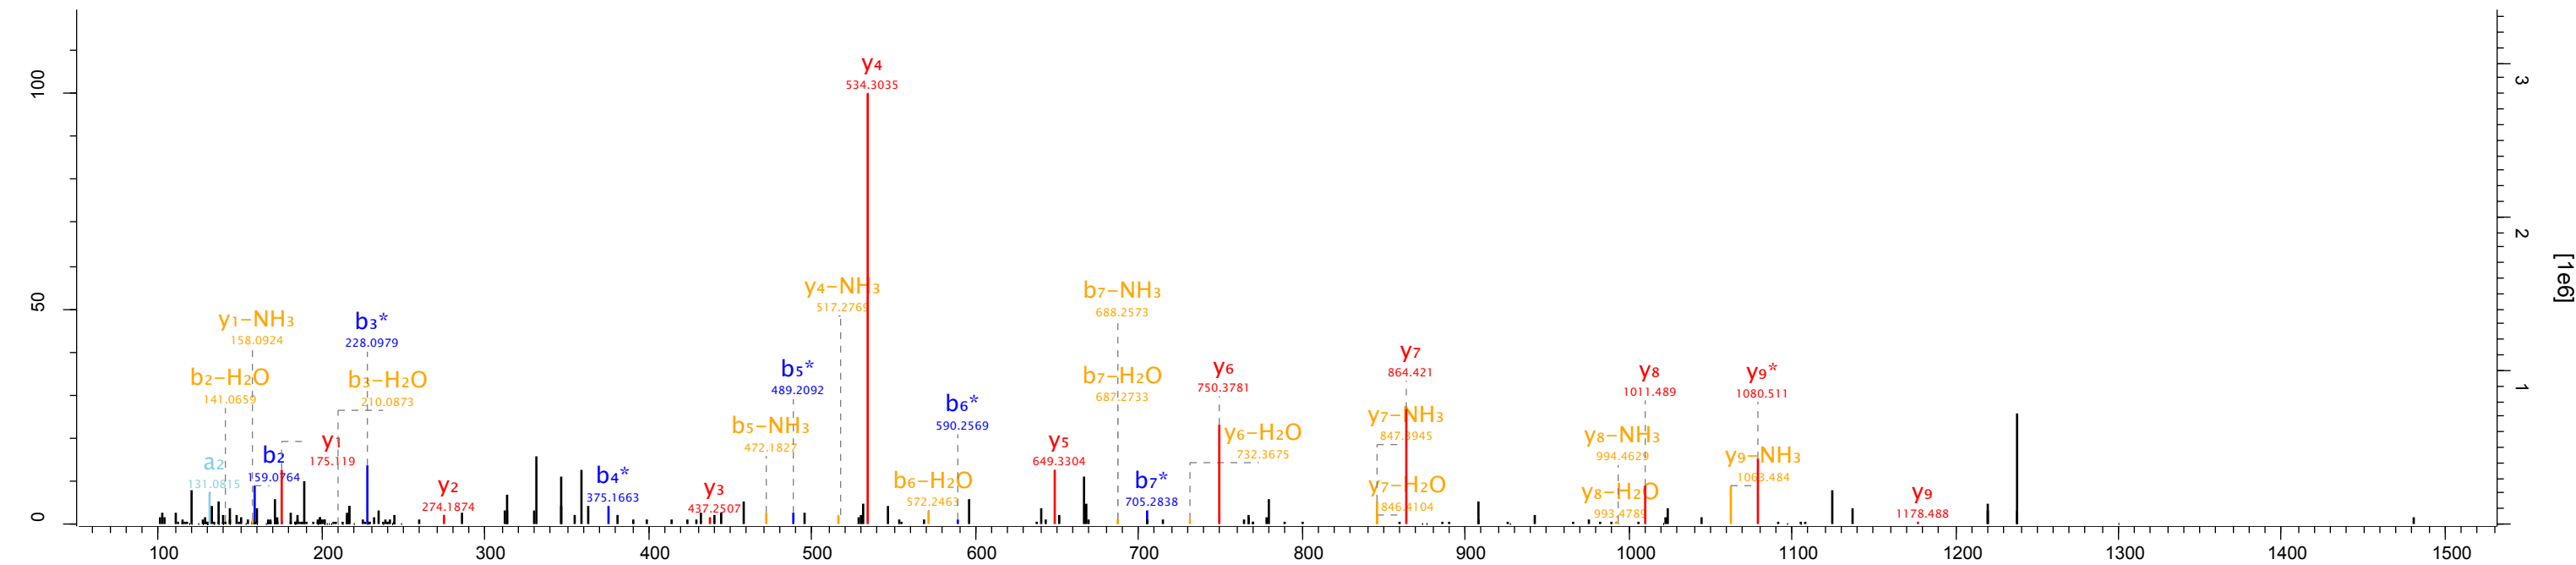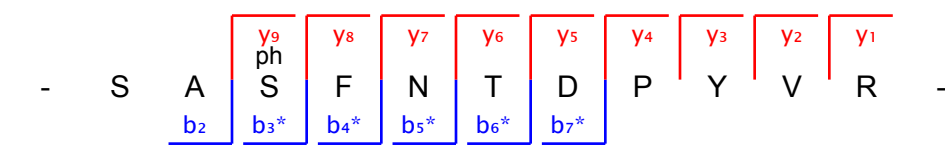



Raw file: 20150814\_A375SR\_Phospho\_BR2\_04  
 Scan: 14131 Method: FTMS; HCD Score: 214.3 m/z: 903.74 Gene names: MAP1A

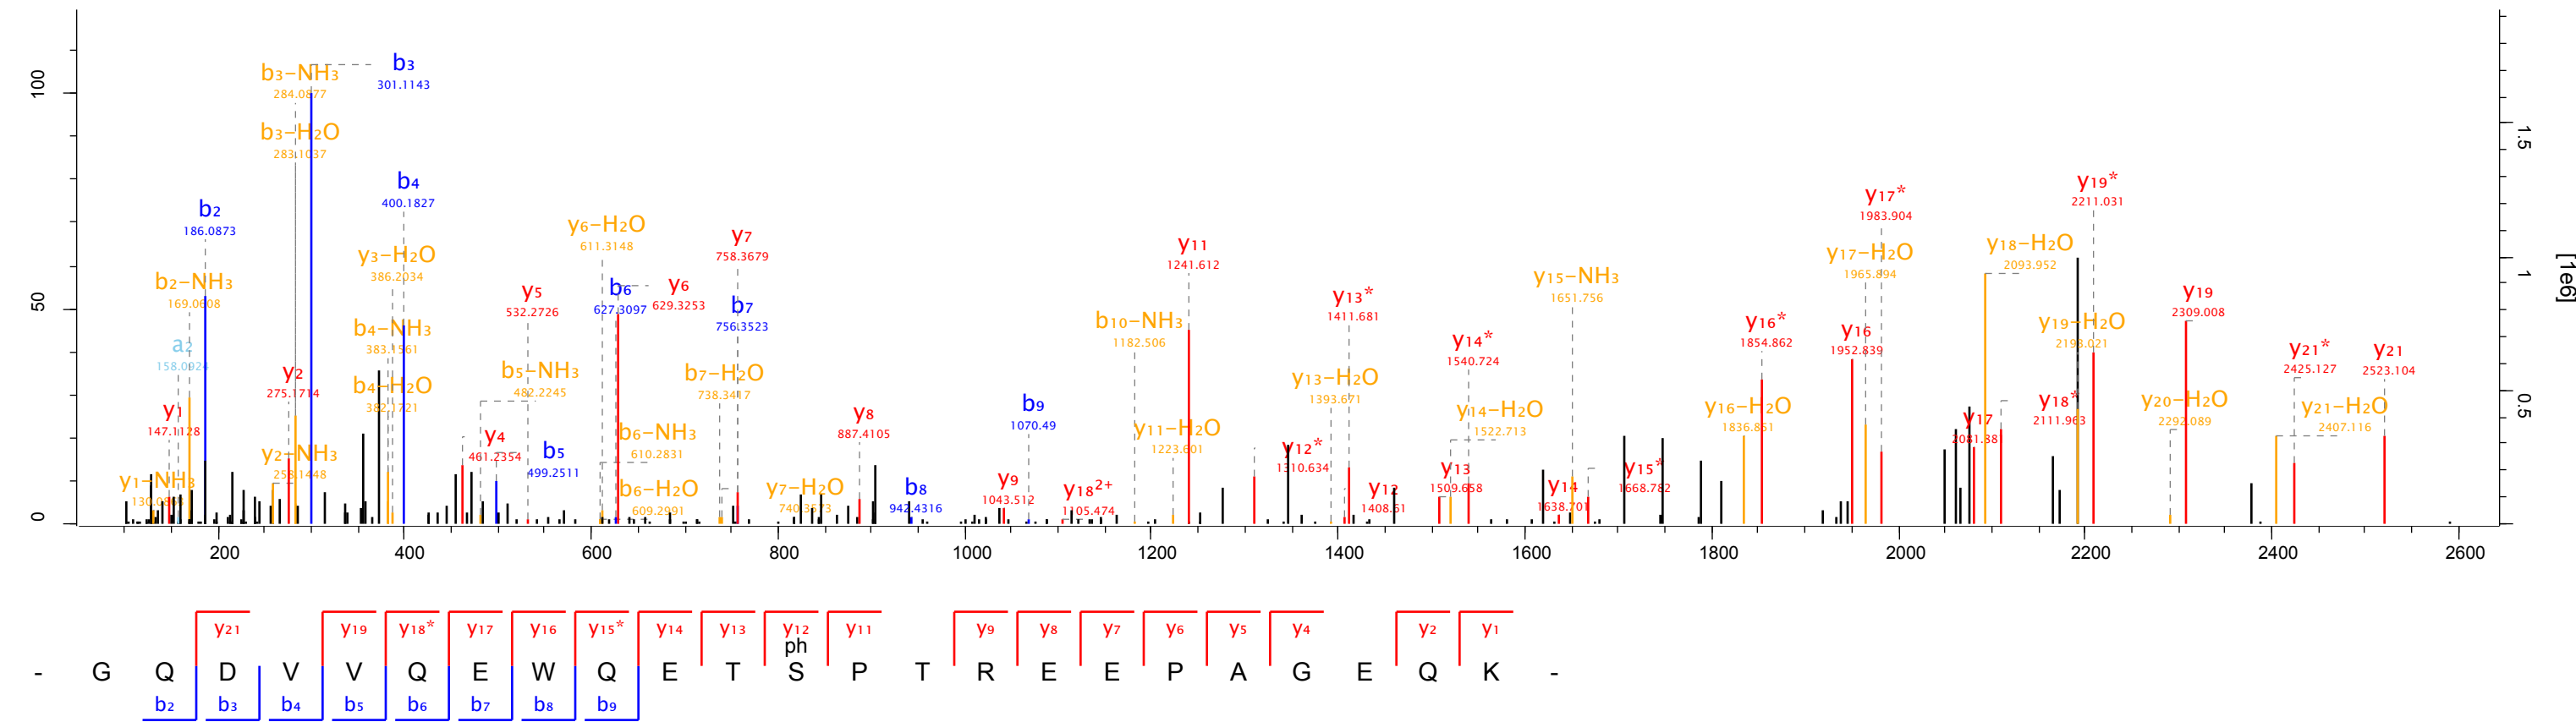

Raw file: 20150814\_A375SR\_Phospho\_BR2\_04  
 Scan: 14891 Method: FTMS; HCD Score: 107.34 m/z: 666.01 Gene names: SLAIN2

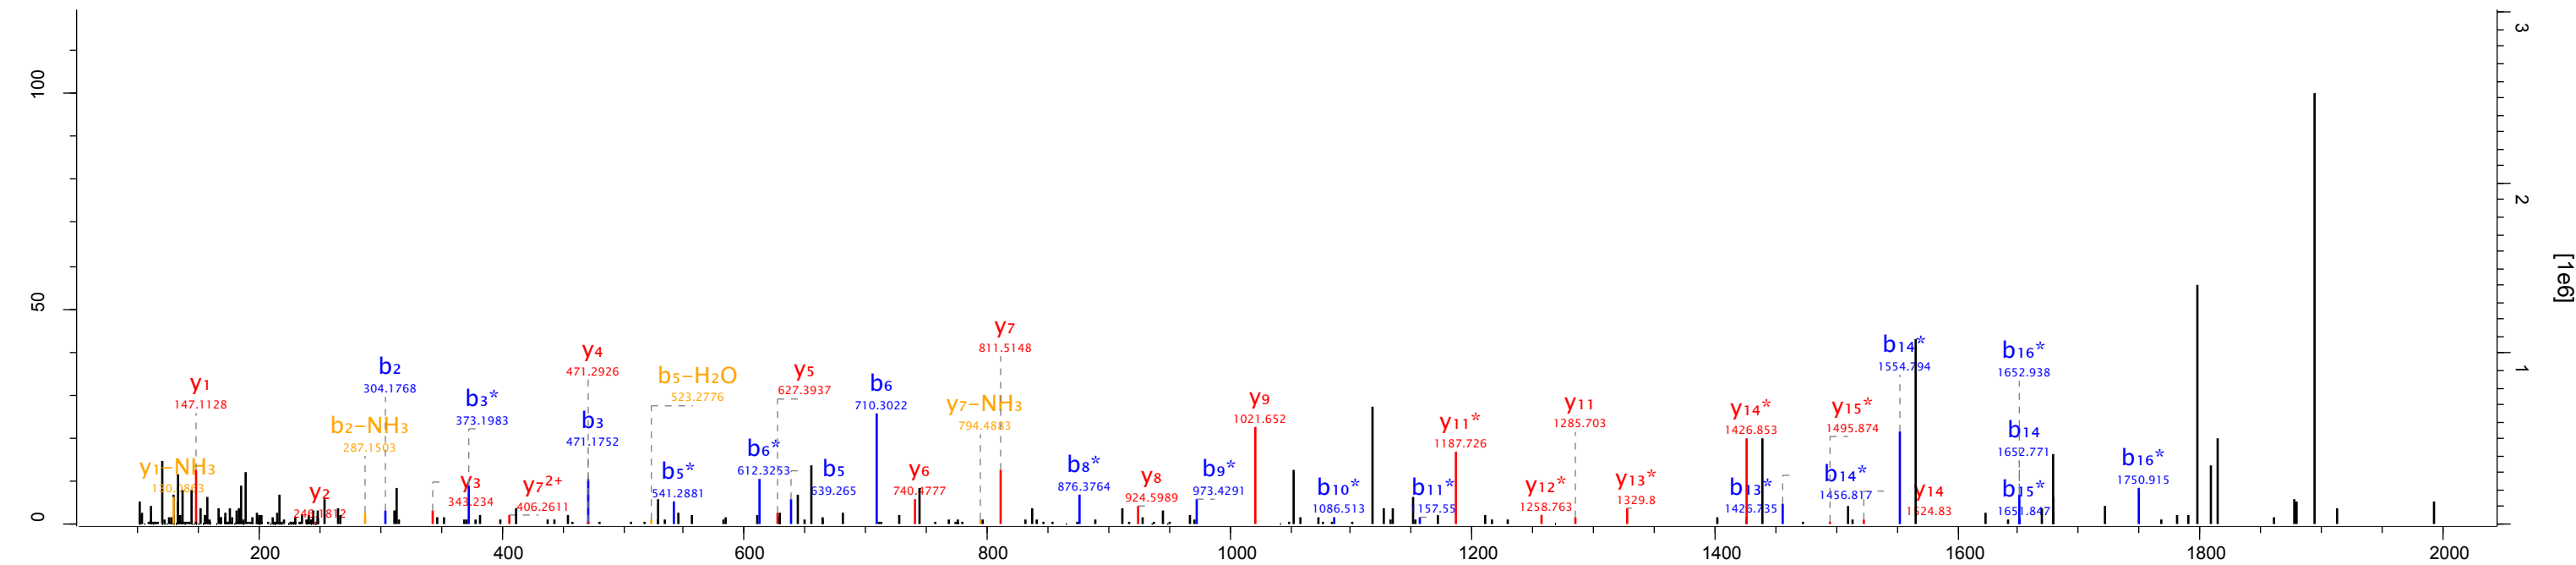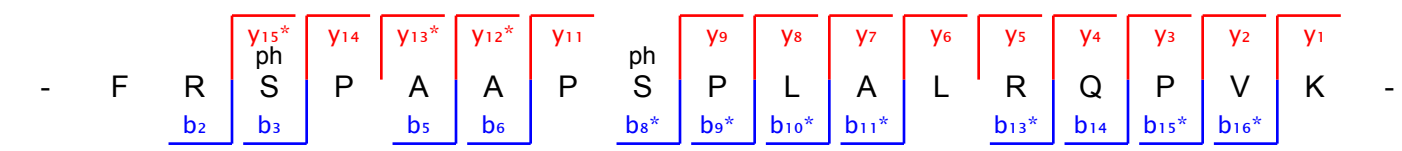

Raw file Scan Method Score m/z Gene names  
 20150814\_A375SR\_Phospho\_BR2\_04 14931 FTMS; HCD 57.14 878.86 RYBP

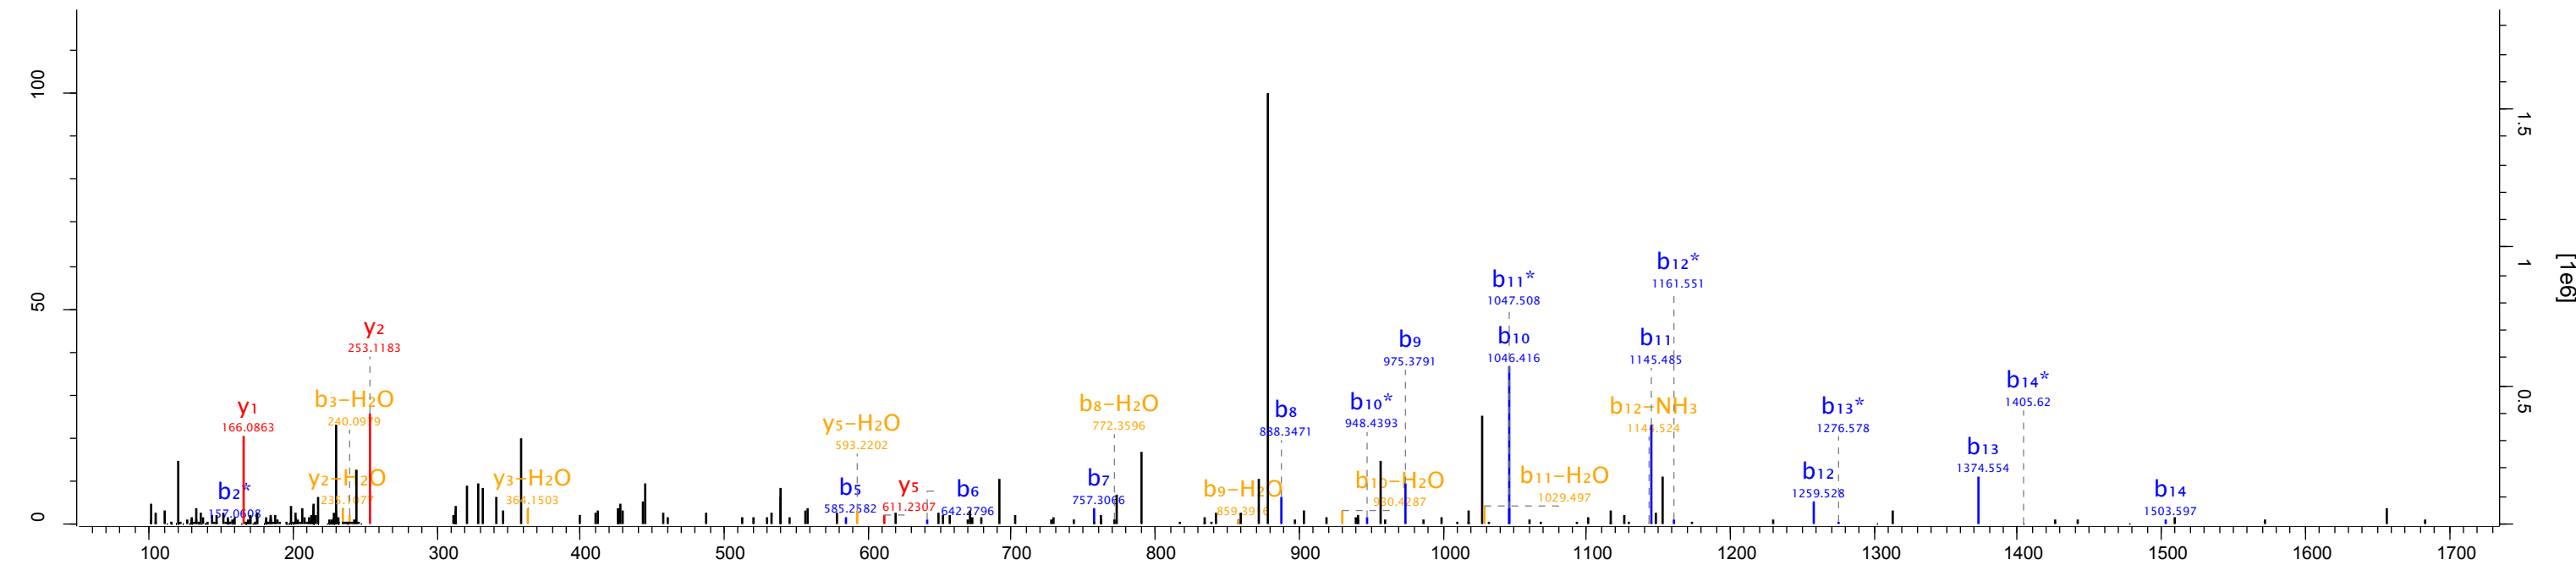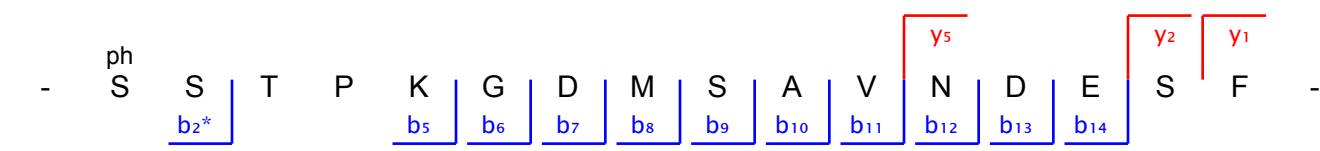

Raw file 20150814\_A375SR\_Phospho\_BR2\_04 Scan 15101 Method FTMS; HCD Score 285.46 m/z 992.45 Gene names UPF1

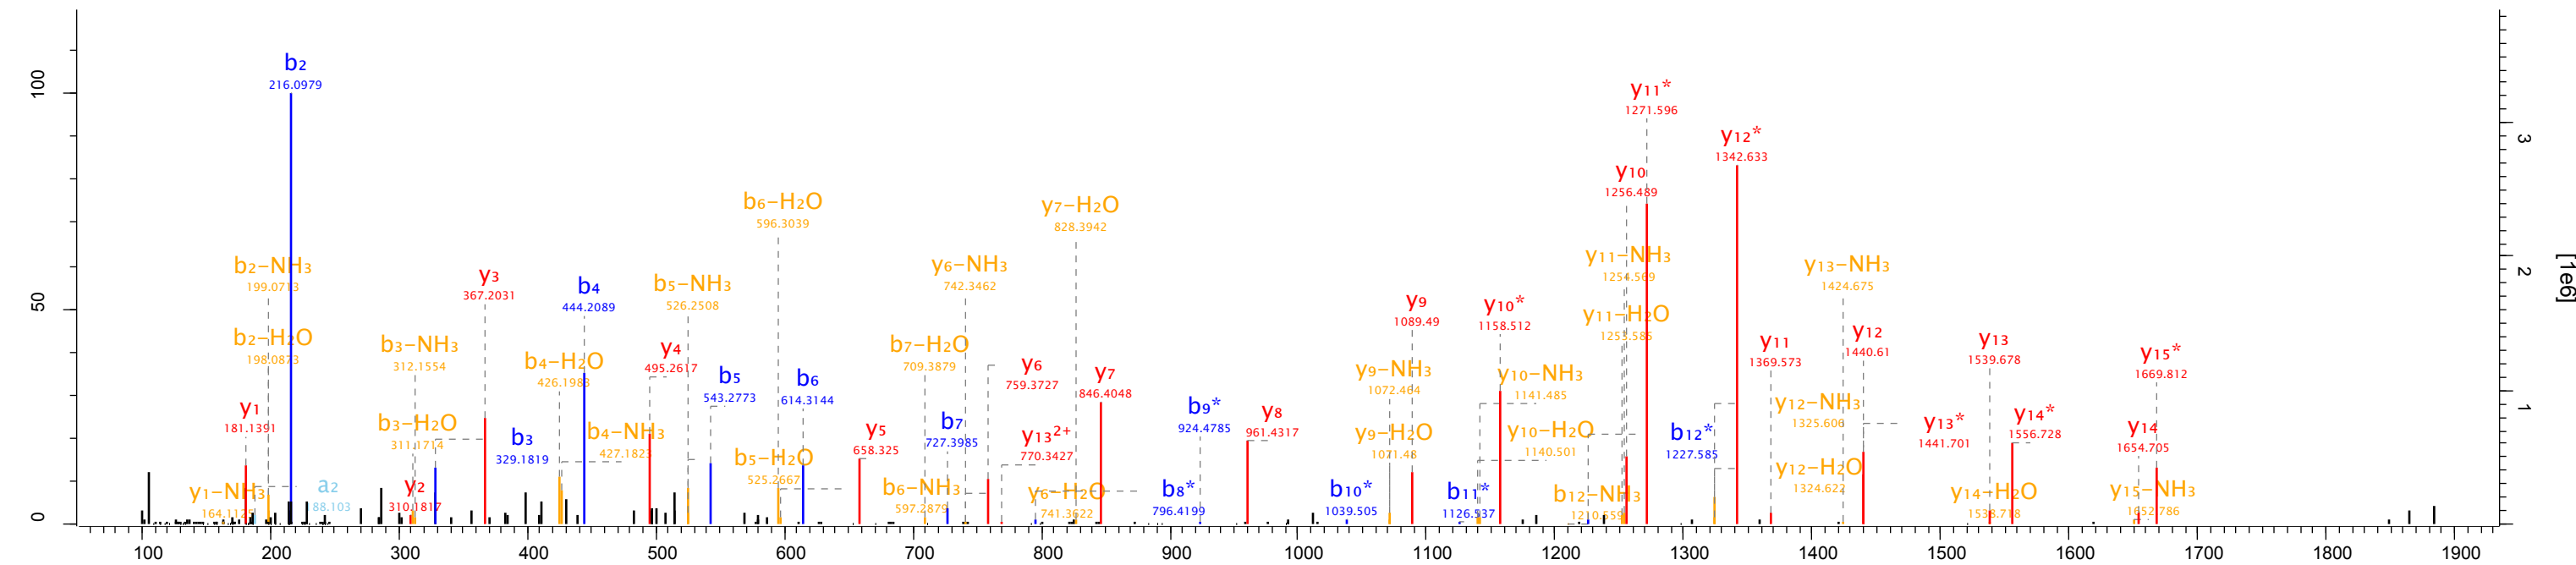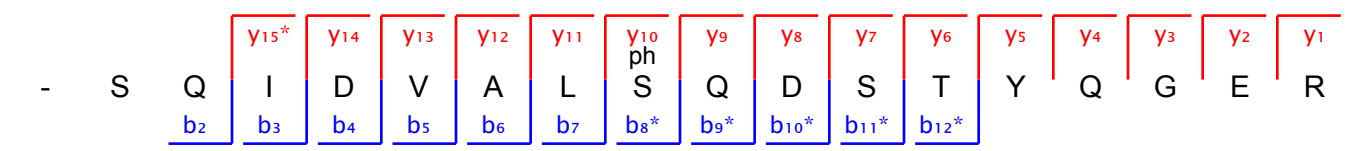

Raw file 20150814\_A375SR\_Phospho\_BR2\_04 Scan 15251 Method FTMS; HCD Score 123.55 m/z 818.91 Gene names ARHGAP39

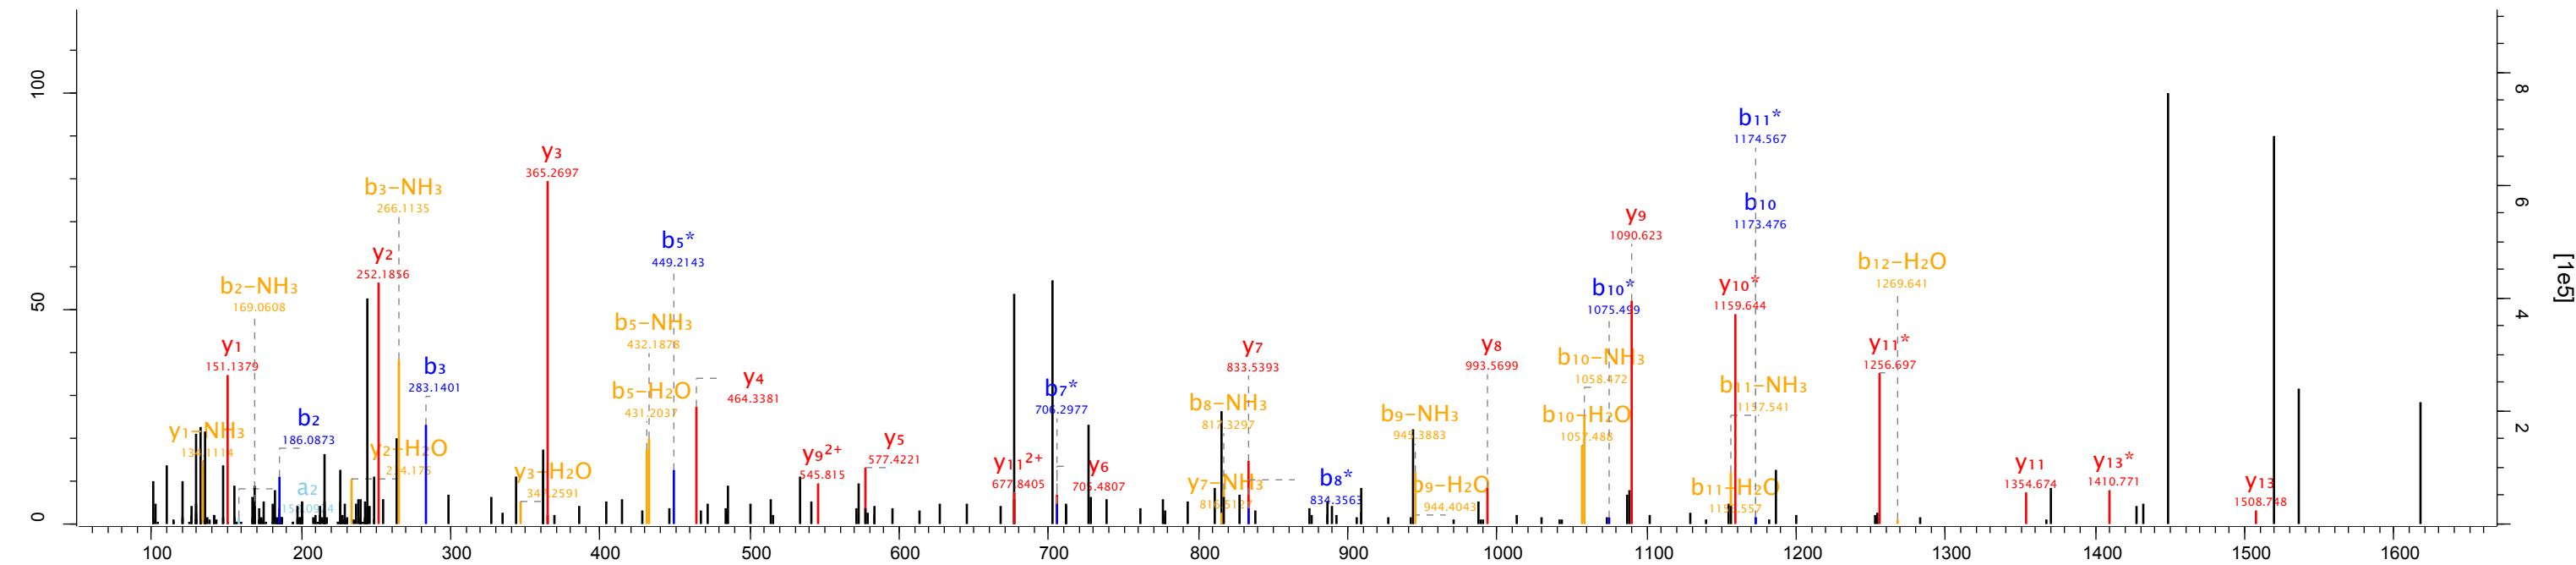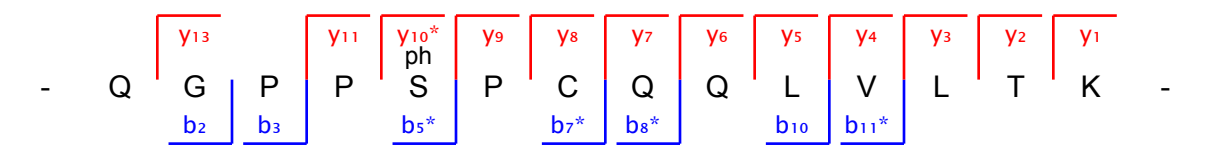

Raw file: 20150814\_A375SR\_Phospho\_BR2\_04  
 Scan: 15341 Method: FTMS; HCD Score: 211.63 m/z: 943.45 Gene names: CNOT4

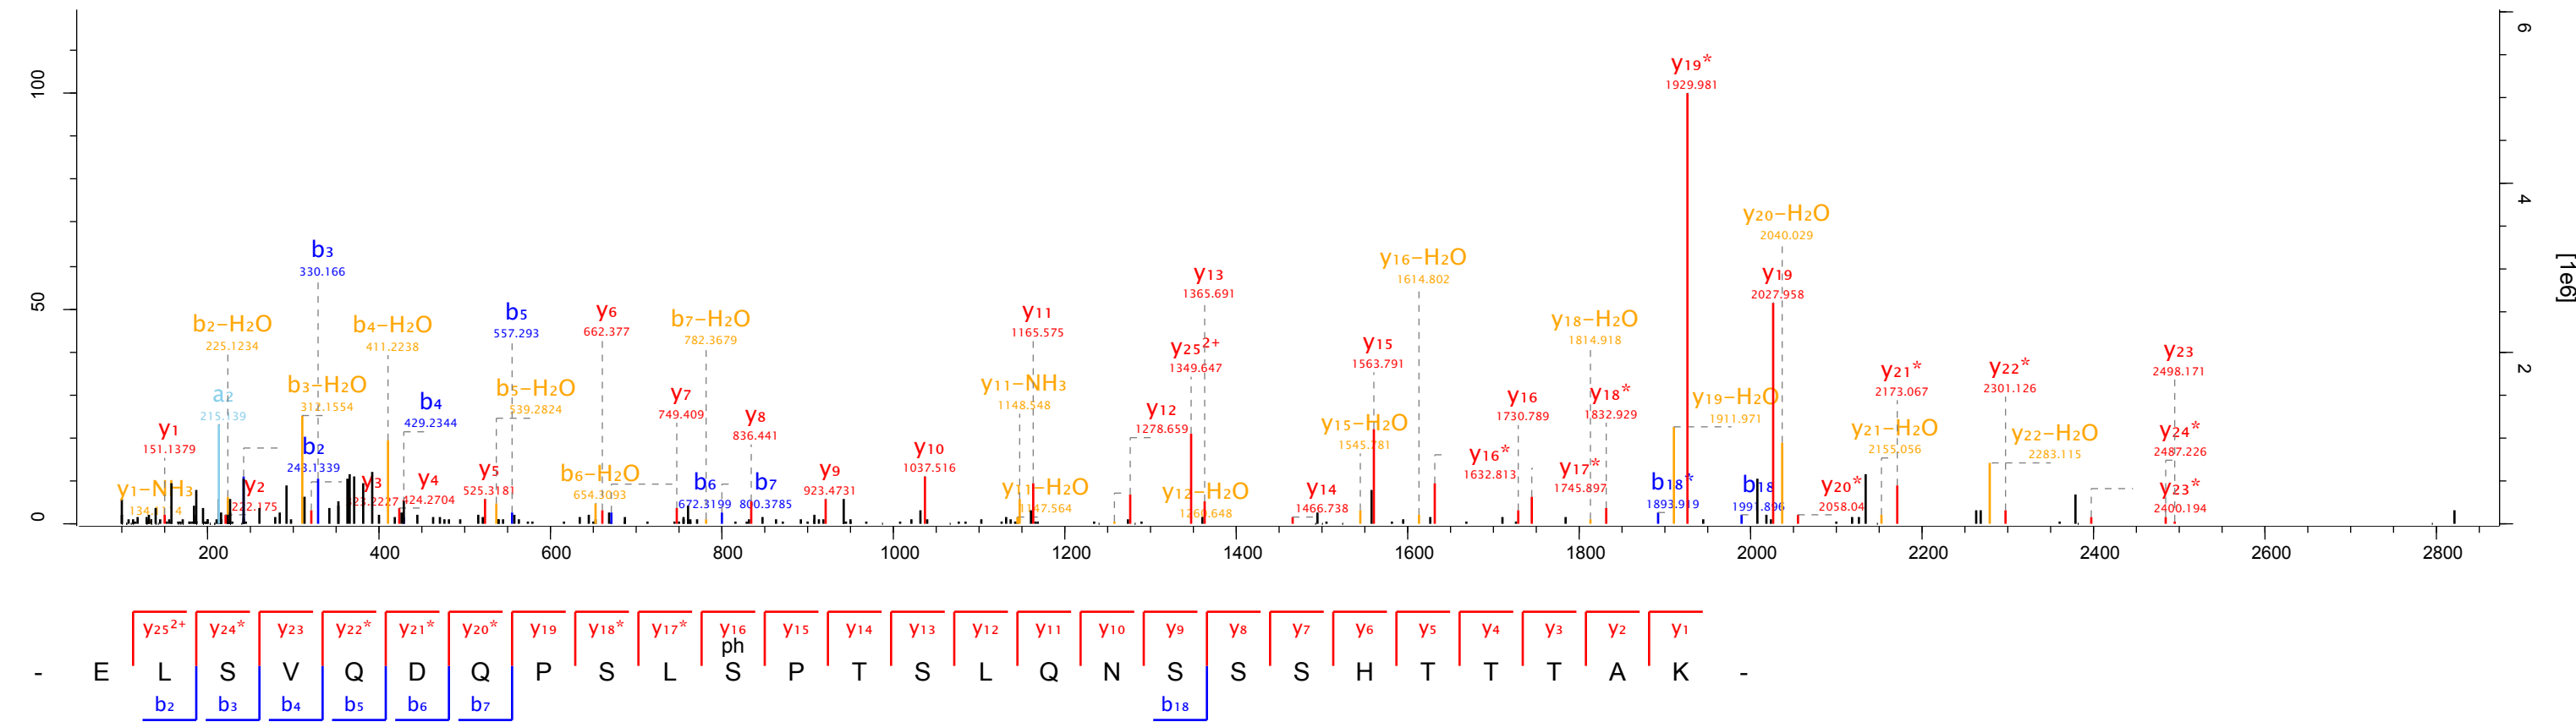

Raw file: 20150814\_A375SR\_Phospho\_BR2\_04  
 Scan: 15581 Method: FTMS; HCD Score: 337.98 m/z: 868.77 Gene names: NES

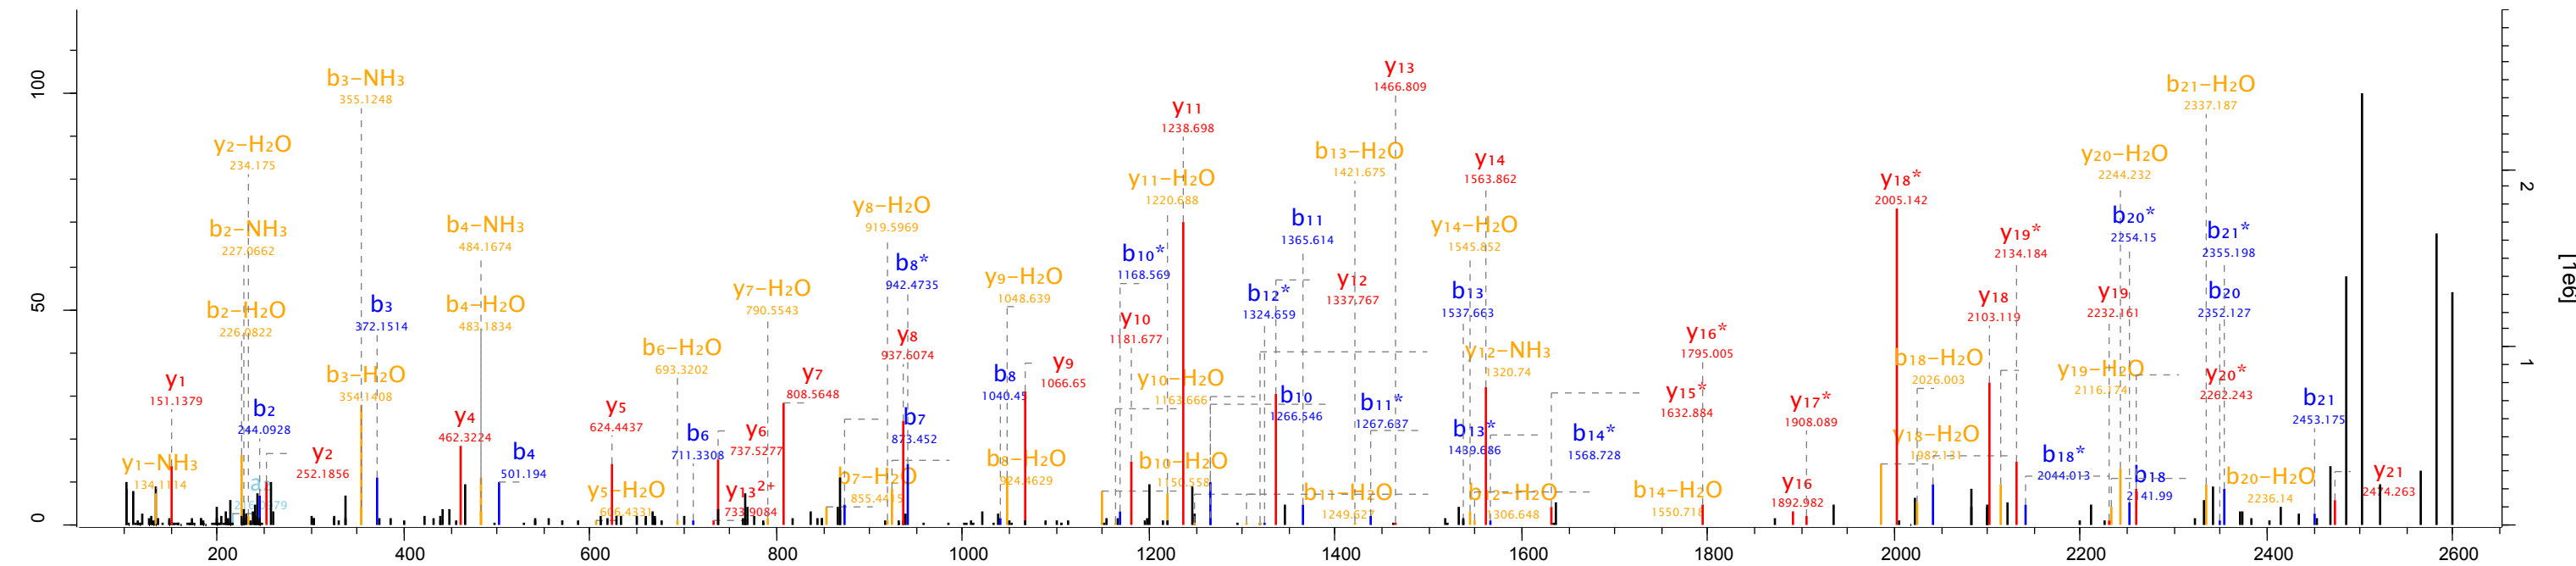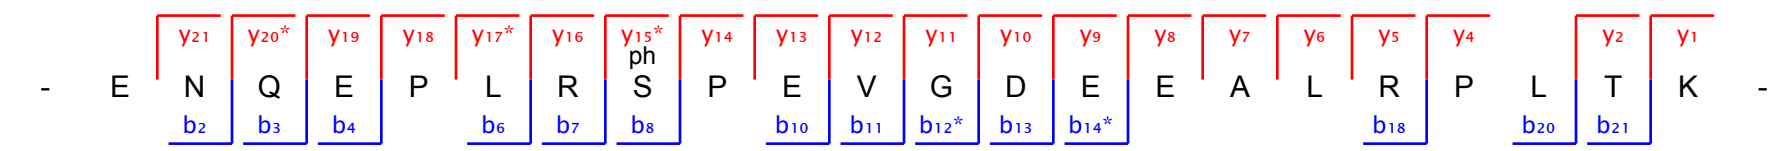

Raw file 20150814\_A375SR\_Phospho\_BR2\_04 Scan 15671 Method FTMS; HCD Score 116.9 m/z 675.84 Gene names TBXA2R

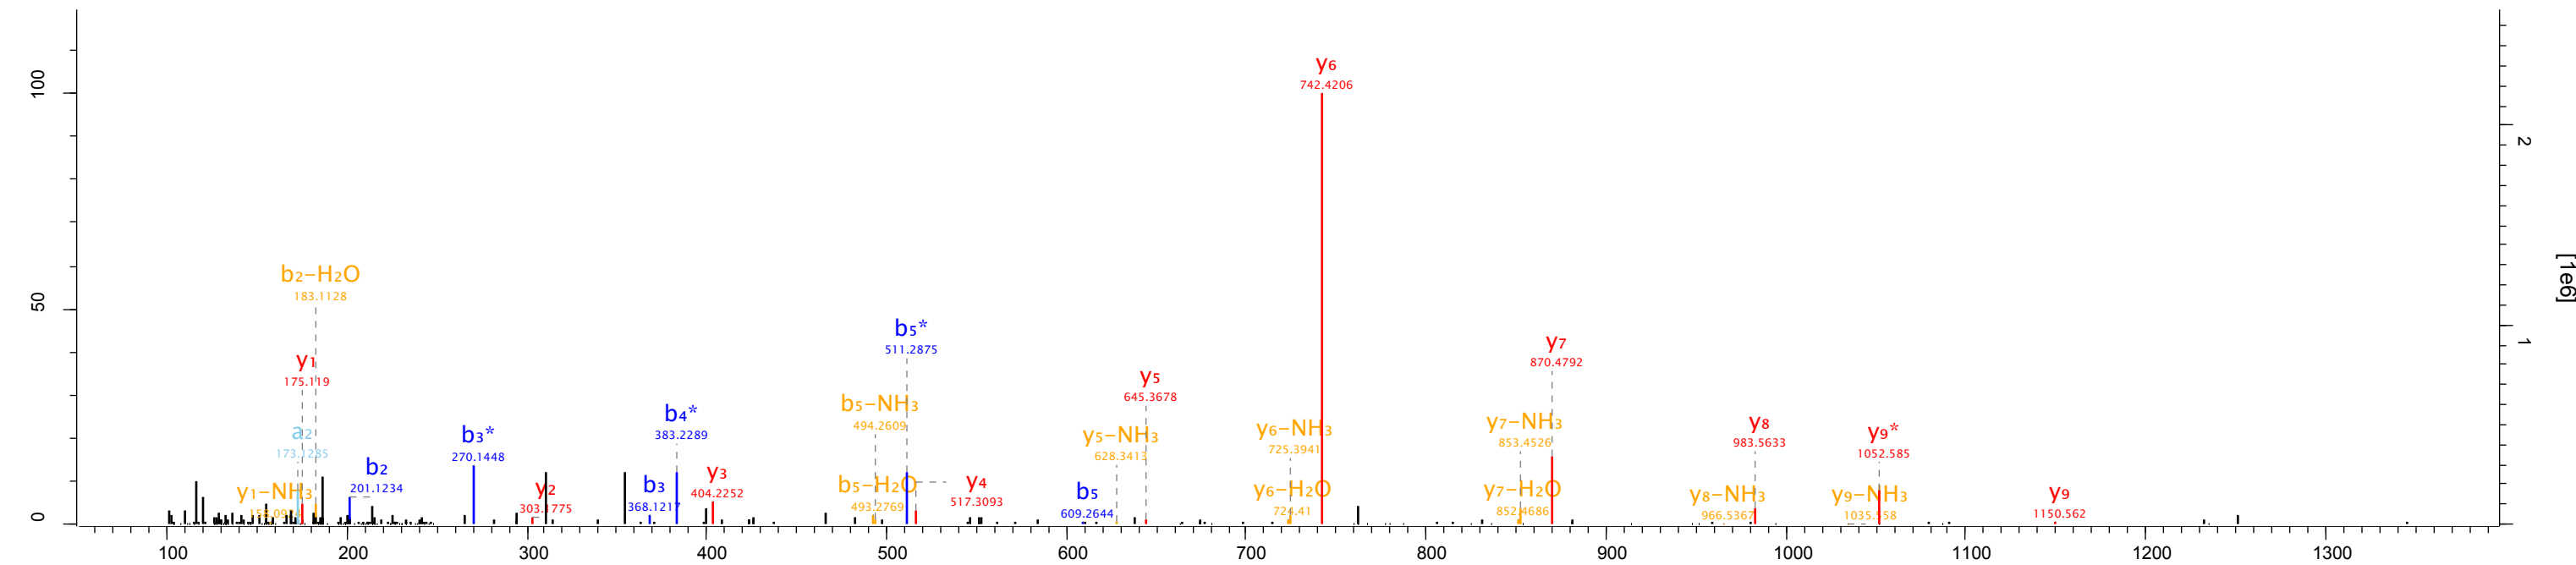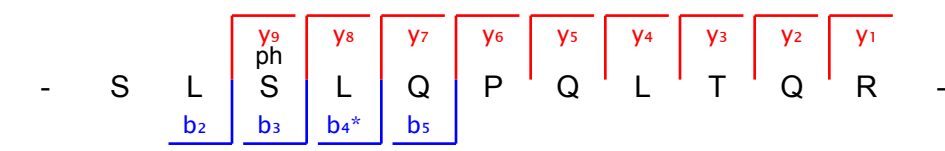



Raw file: 20150814\_A375SR\_Phospho\_BR2\_04  
 Scan: 15951 Method: FTMS; HCD Score: 160.93 m/z: 812.88 Gene names: FOSL1

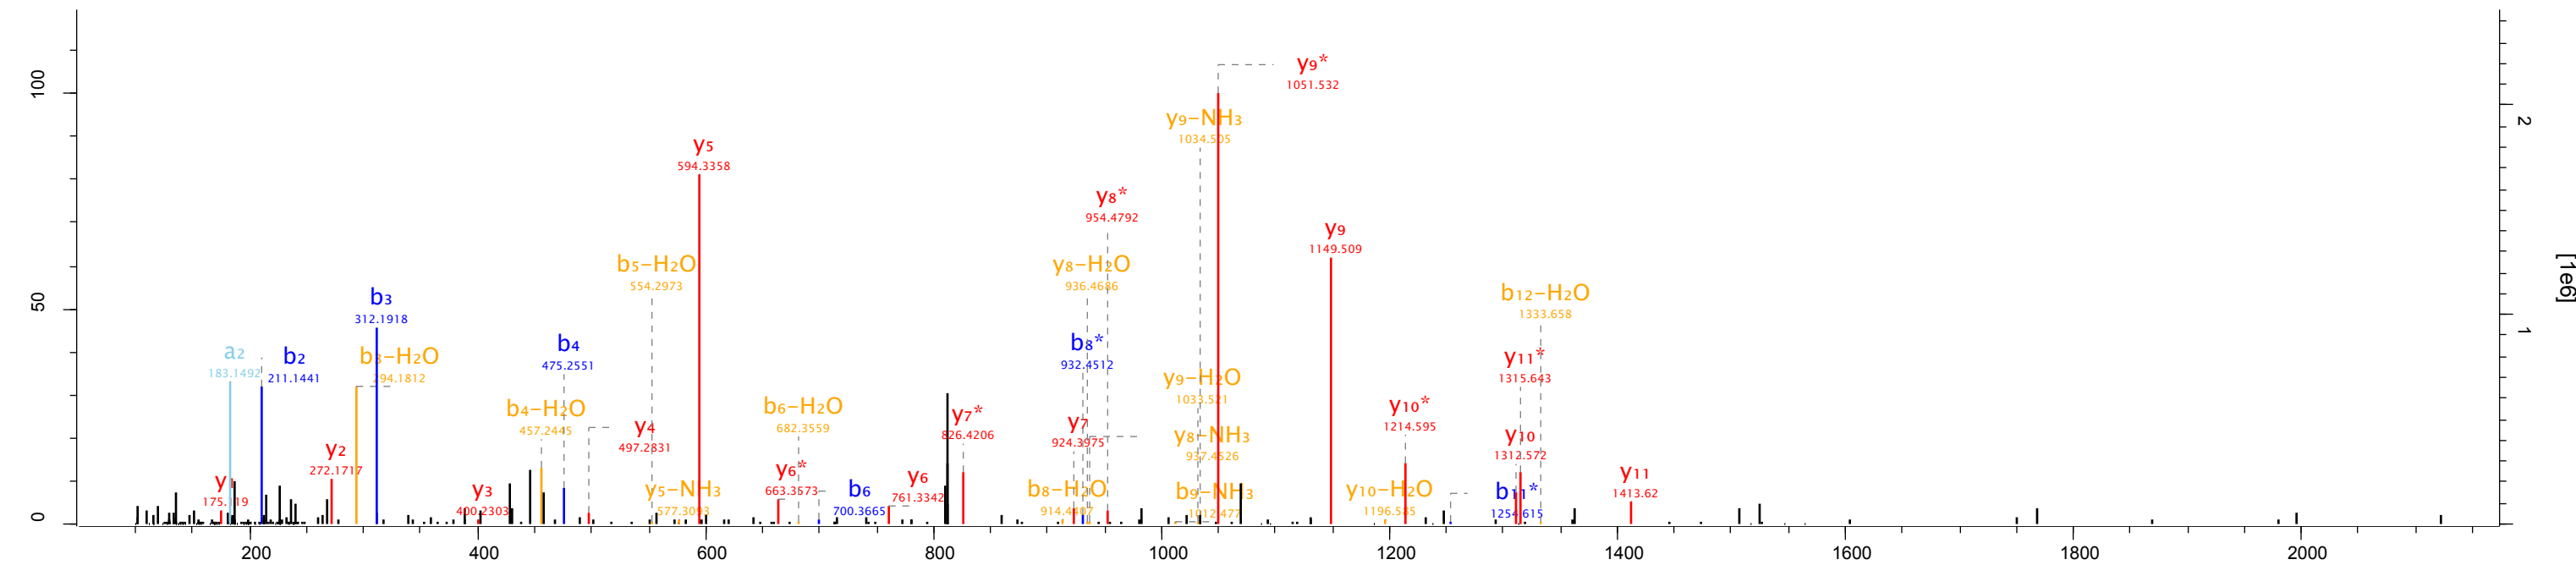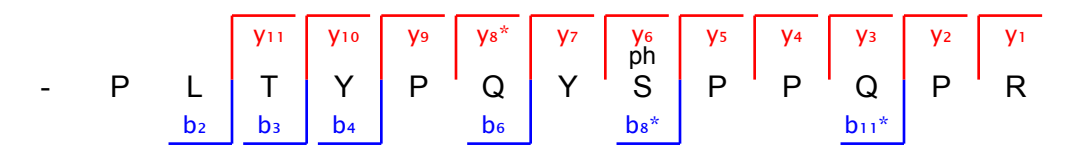

Raw file Scan Method Score m/z Gene names  
 20150814\_A375SR\_Phospho\_BR2\_04 15981 FTMS; HCD 206.94 750.05 RRP1B

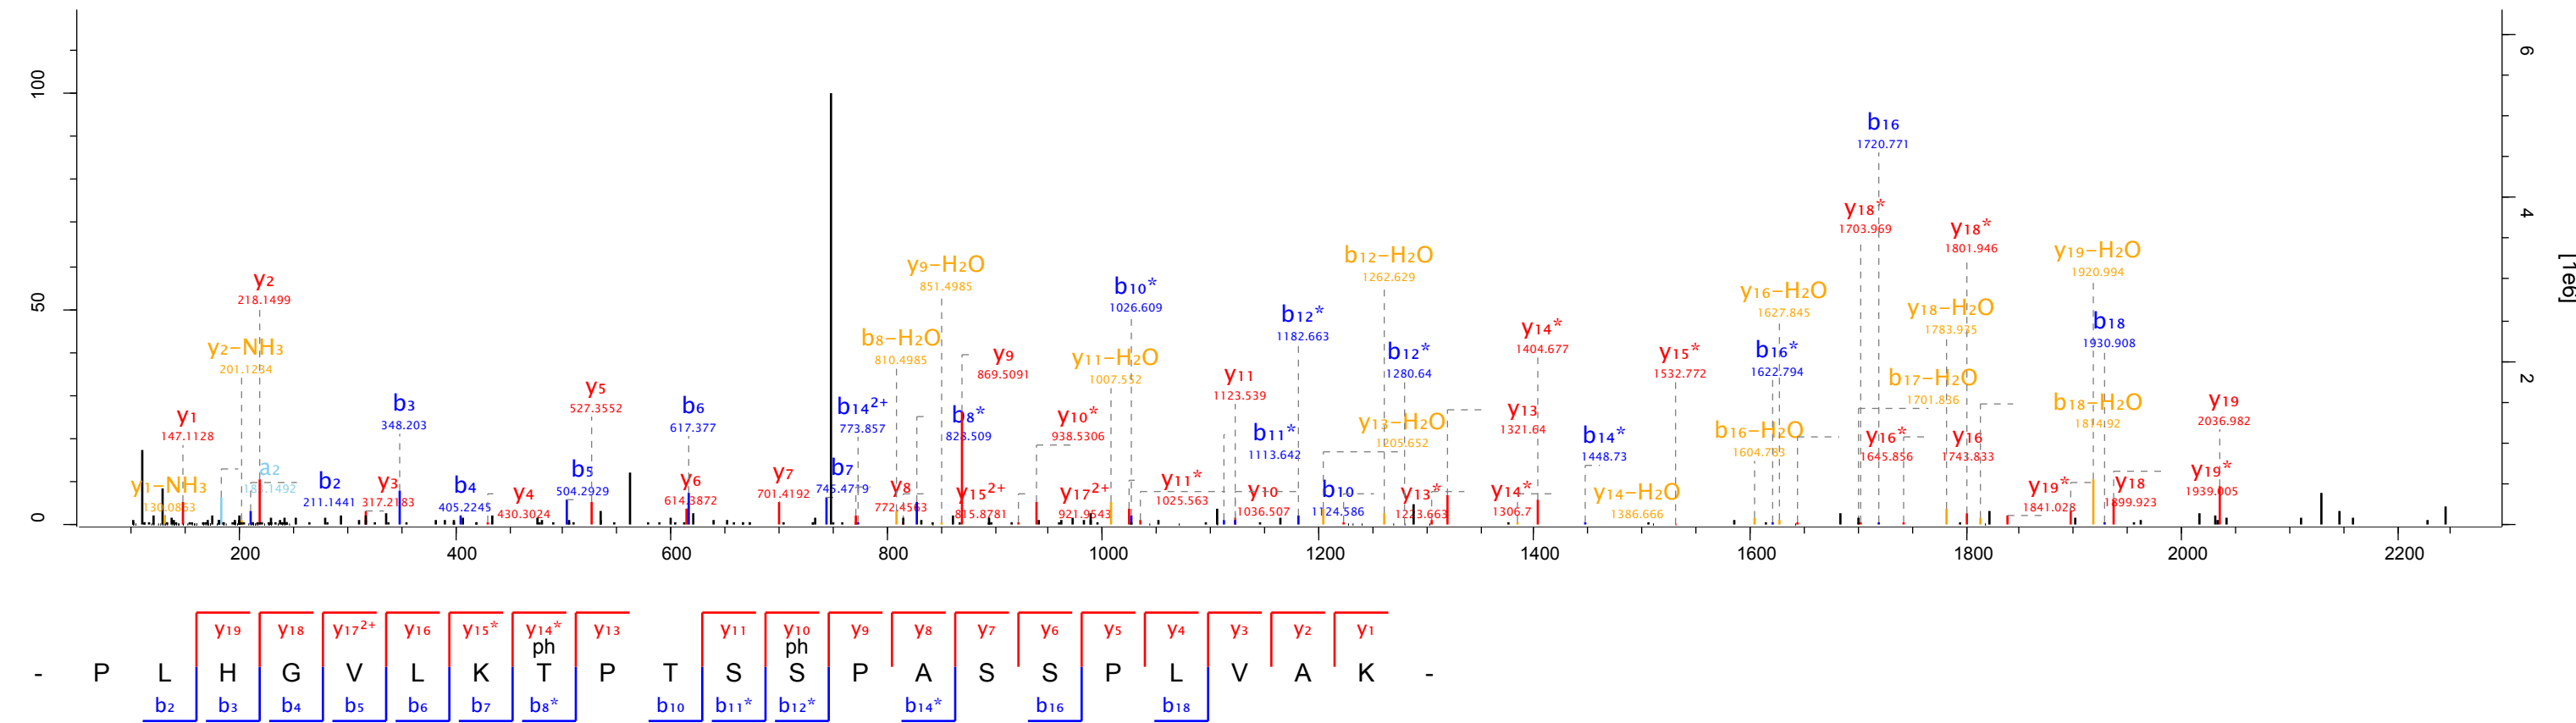

Raw file: 20150814\_A375SR\_Phospho\_BR2\_04  
 Scan: 16051 Method: FTMS; HCD Score: 127.9 m/z: 851.39 Gene names: HMGXB4

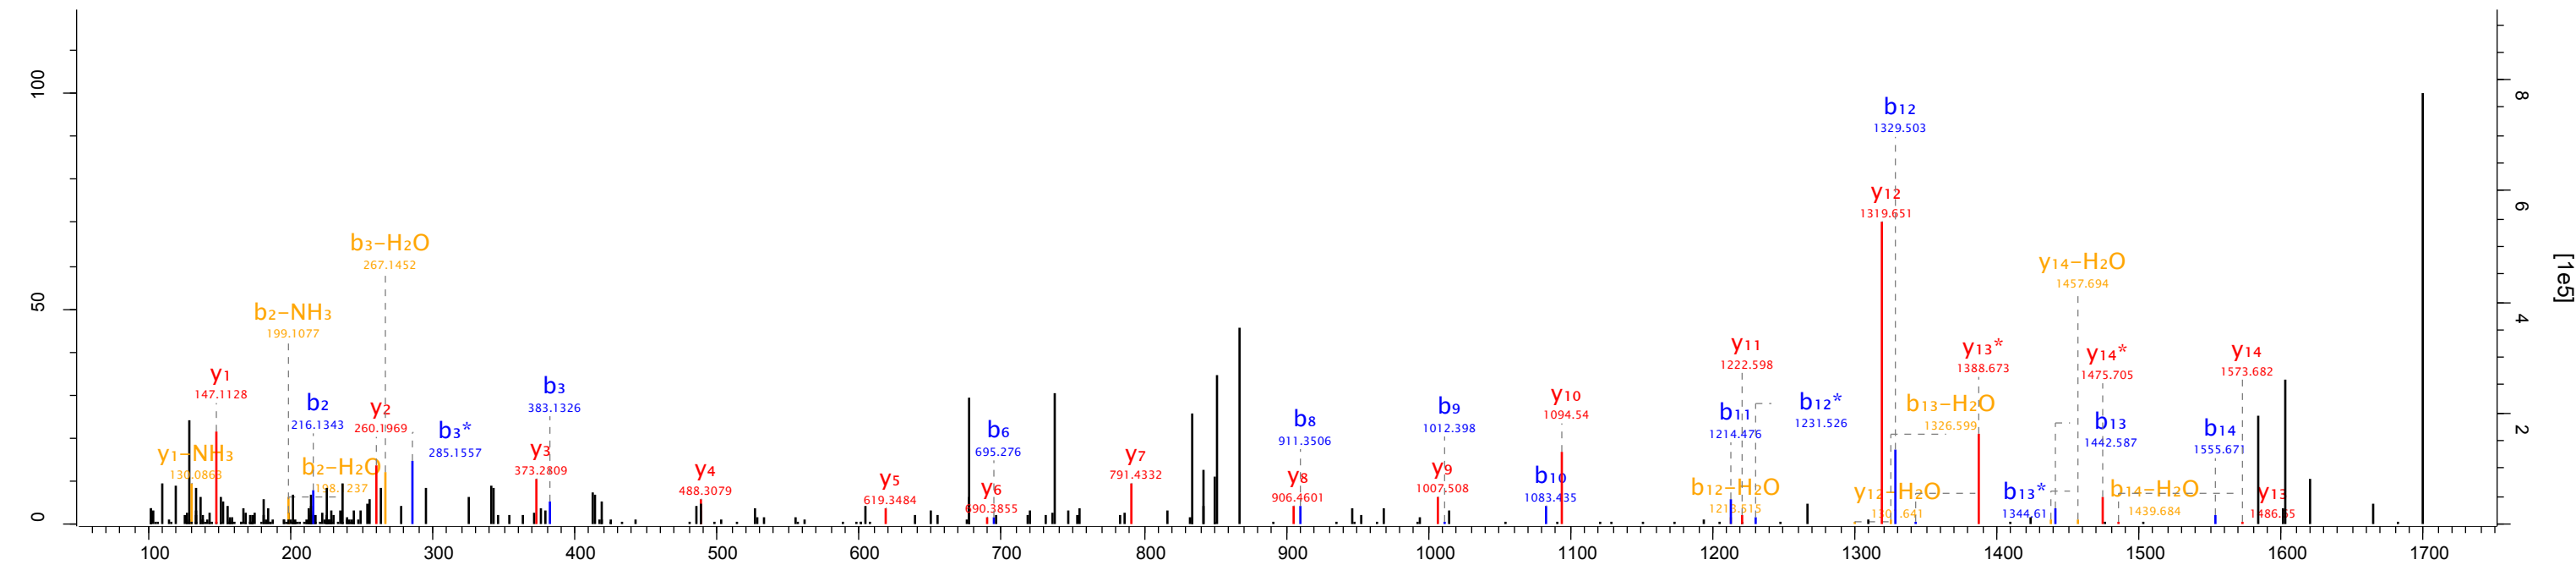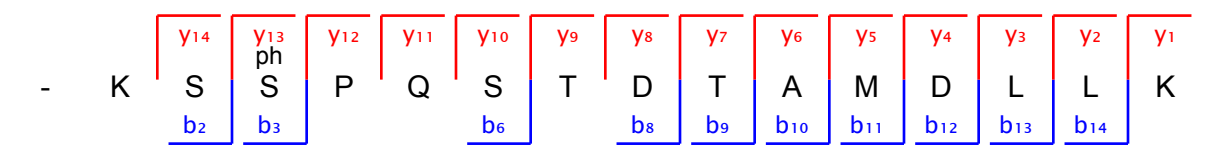

Raw file: 20150814\_A375SR\_Phospho\_BR2\_04  
 Scan: 16141  
 Method: FTMS; HCD  
 Score: 155.87  
 m/z: 743.03  
 Gene names: MAP3K2

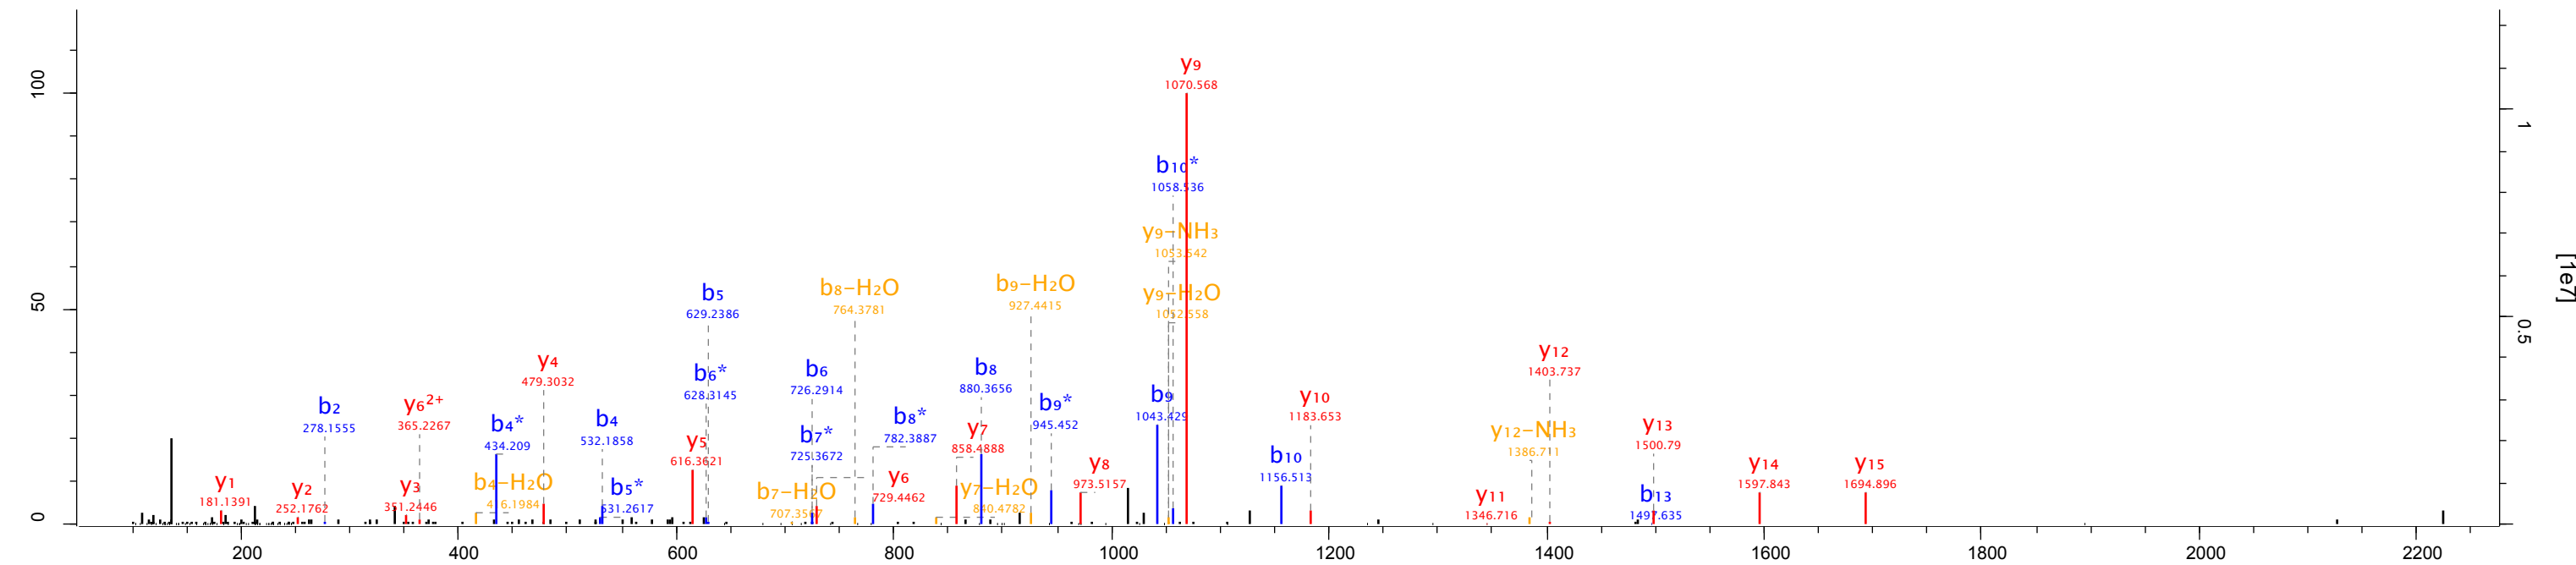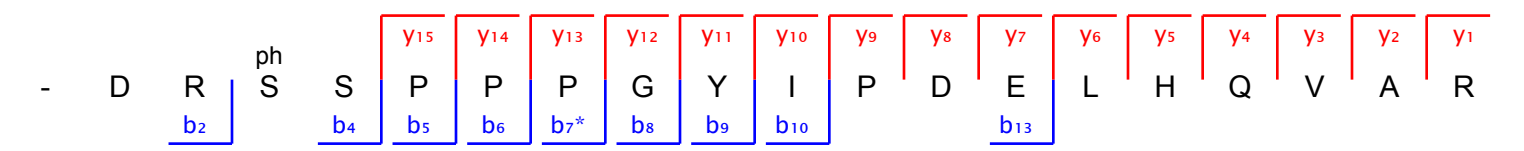

Raw file 20150814\_A375SR\_Phospho\_BR2\_04 Scan 16951 Method FTMS; HCD Score 224.88 m/z 1094.5 Gene names PHLDB2

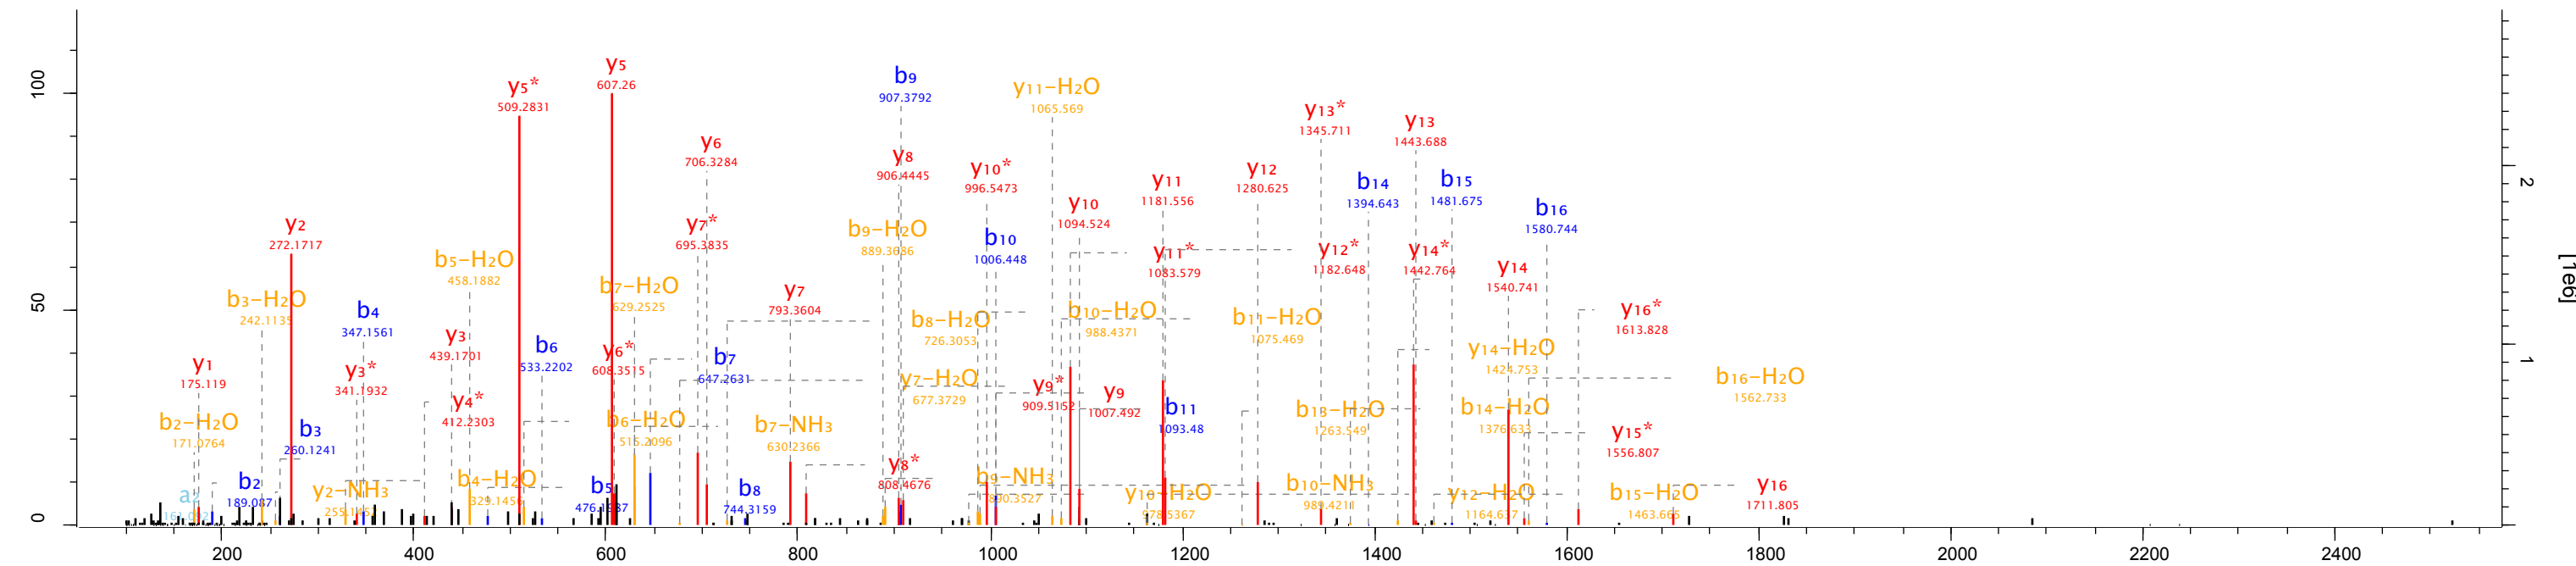

- T S A S E G N P Y V S S T L S V P A S P R -

b<sub>2</sub>
b<sub>3</sub>
b<sub>4</sub>
b<sub>5</sub>
b<sub>6</sub>
b<sub>7</sub>
b<sub>8</sub>
b<sub>9</sub>
b<sub>10</sub>
b<sub>11</sub>
b<sub>14</sub>
b<sub>15</sub>
b<sub>16</sub>
y<sub>16</sub>
y<sub>15</sub>\*
y<sub>14</sub>
y<sub>13</sub>
y<sub>12</sub>
y<sub>11</sub>
y<sub>10</sub>
y<sub>9</sub>
y<sub>8</sub>
y<sub>7</sub>
y<sub>6</sub>
y<sub>5</sub>
y<sub>4</sub>\*
y<sub>3</sub>ph
y<sub>2</sub>
y<sub>1</sub>

Raw file: 20150814\_A375SR\_Phospho\_BR2\_04  
 Scan: 17141 Method: FTMS; HCD Score: 127.25 m/z: 852.88 Gene names: NIN

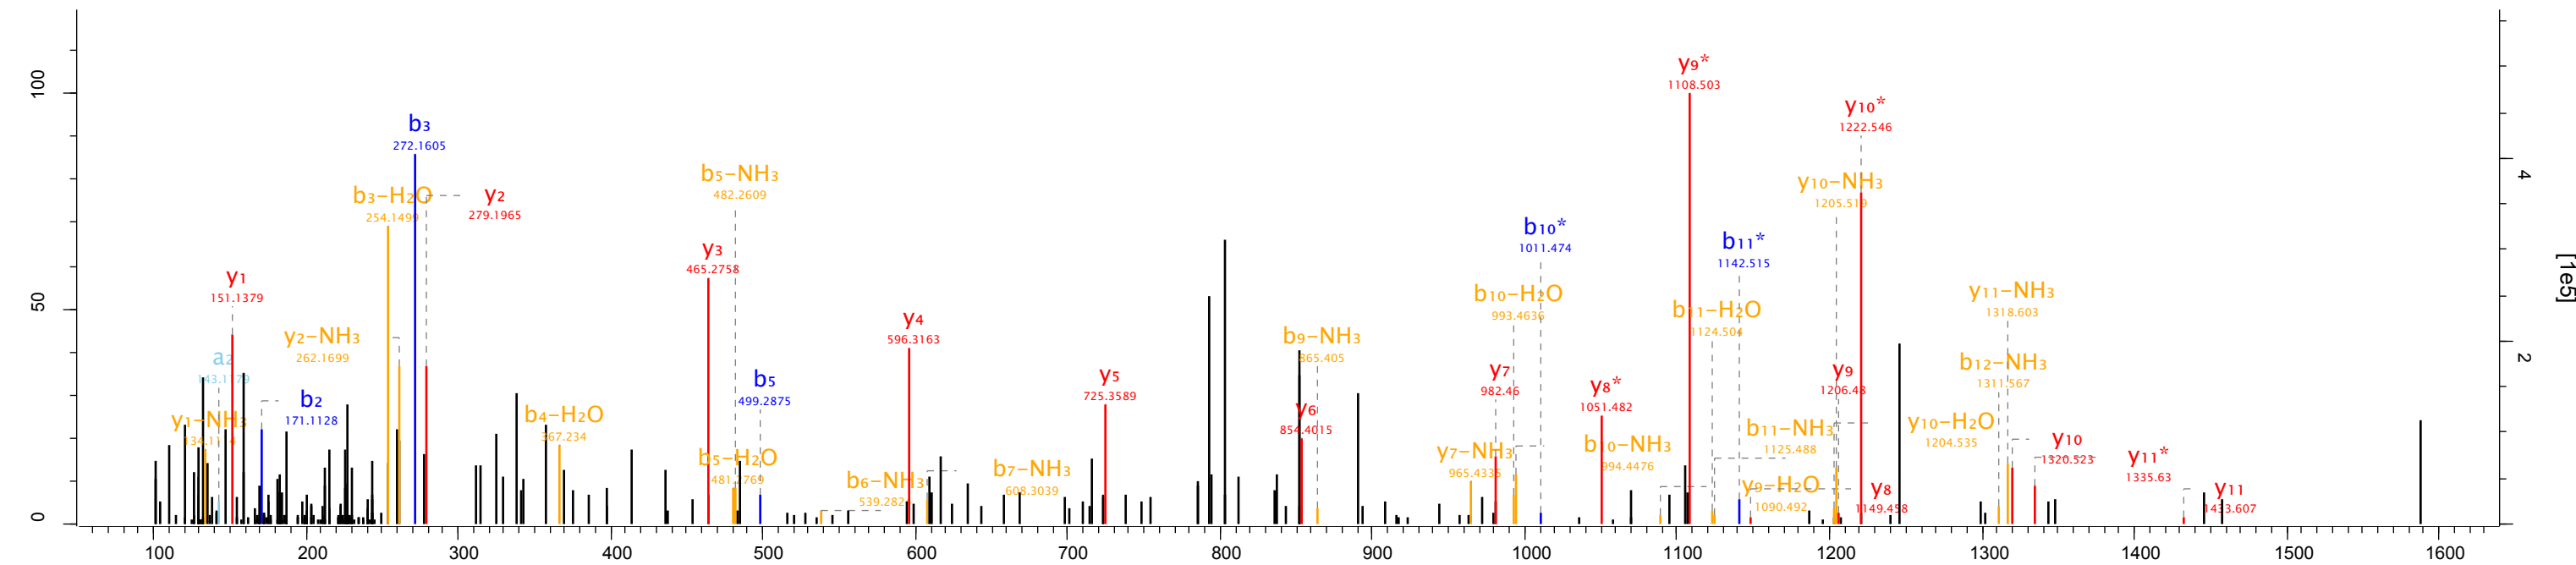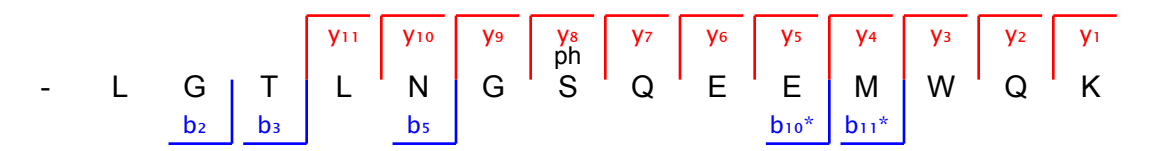

Raw file 20150814\_A375SR\_Phospho\_BR2\_04 Scan 17881 Method FTMS; HCD Score 290.41 m/z 1070.14 Gene names HNRNPU

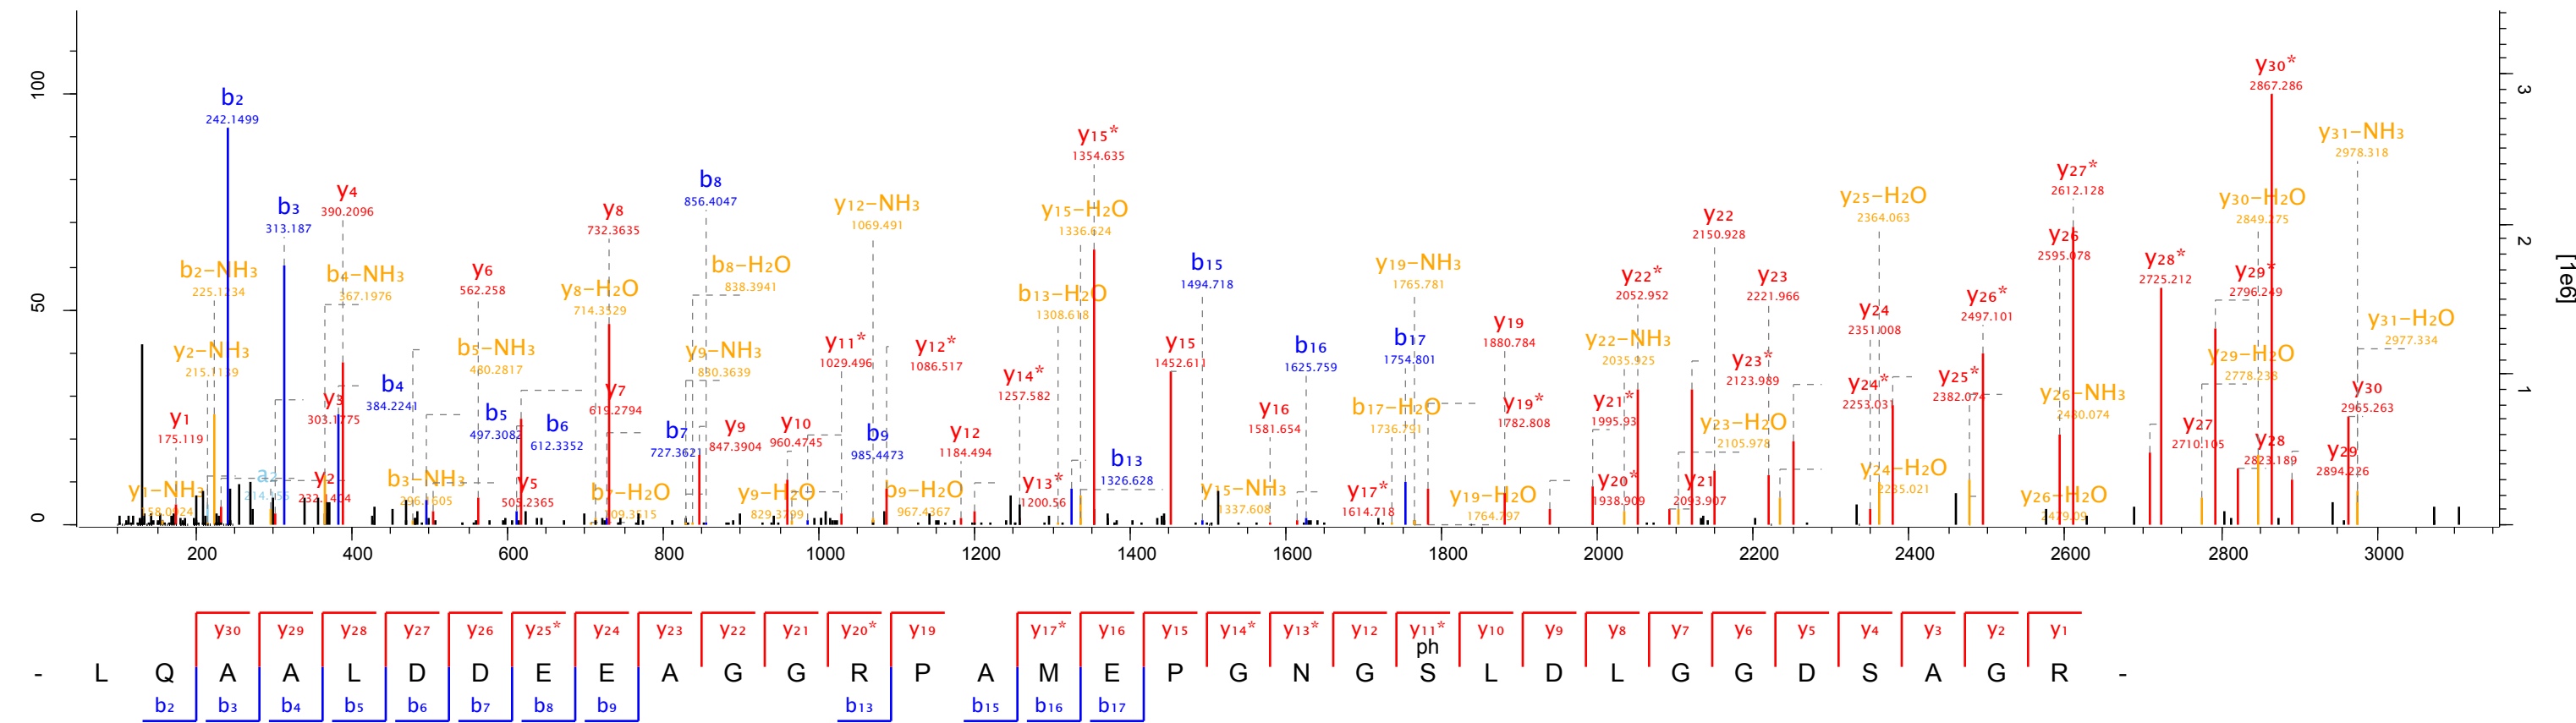

Raw file: 20150814\_A375SR\_Phospho\_BR2\_04  
 Scan: 18191 Method: FTMS; HCD Score: 65.2 m/z: 889.4 Gene names: MISP

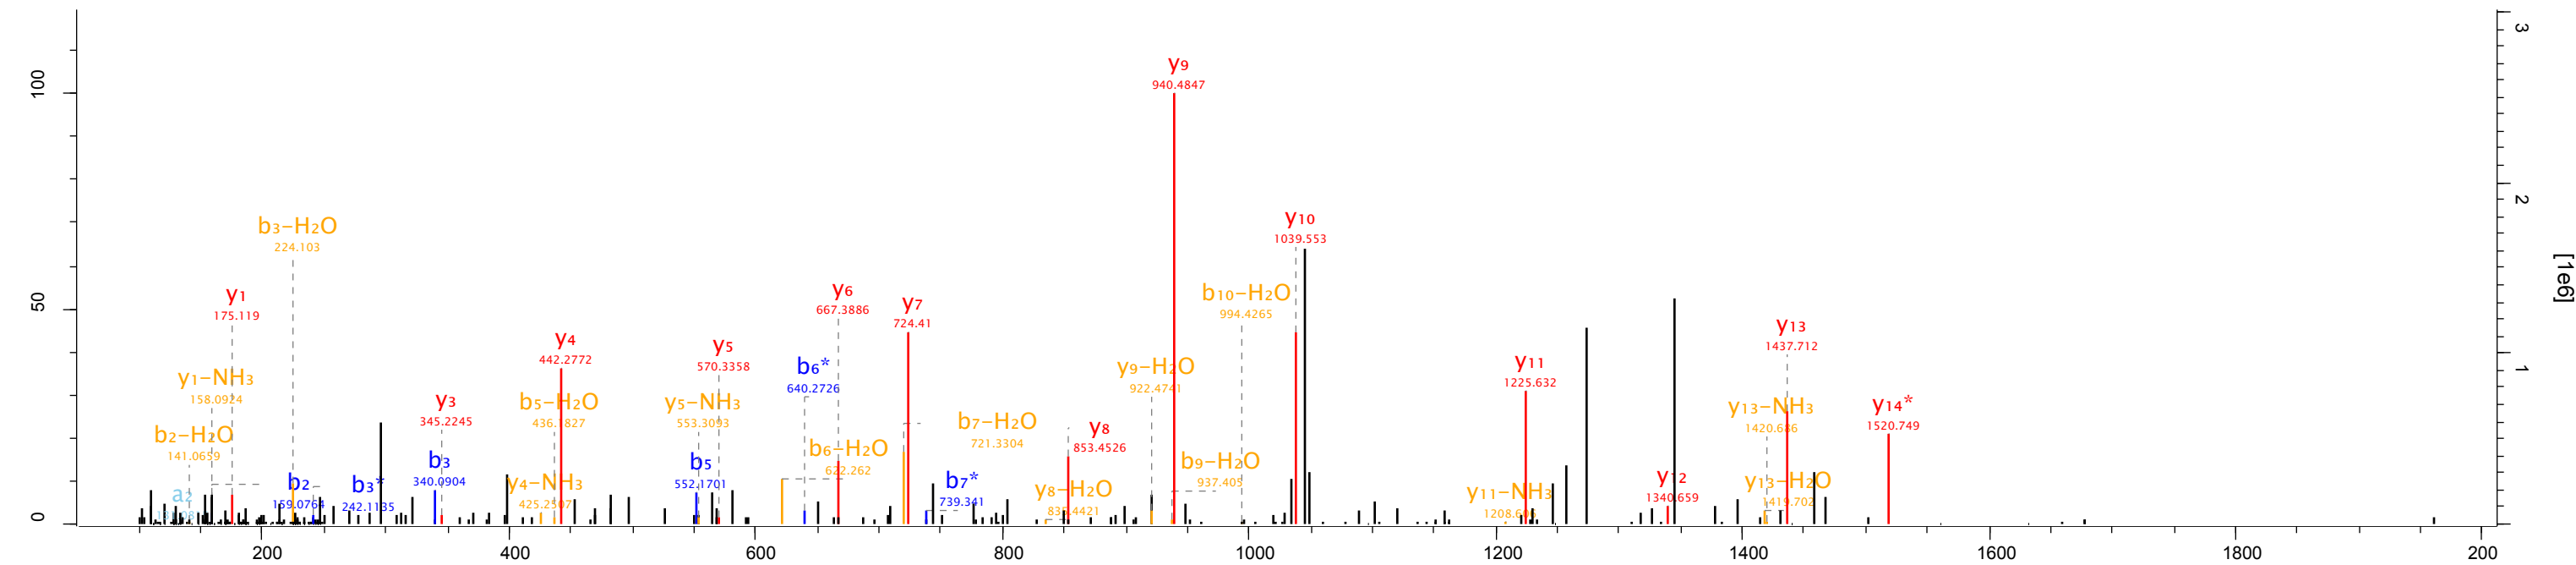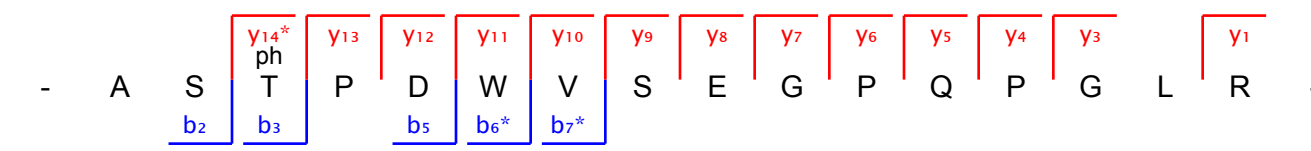



Raw file: 20150814\_A375SR\_Phospho\_BR2\_04  
 Scan: 18861 Method: FTMS; HCD Score: 127.29 m/z: 985.1 Gene names: CD3EAP

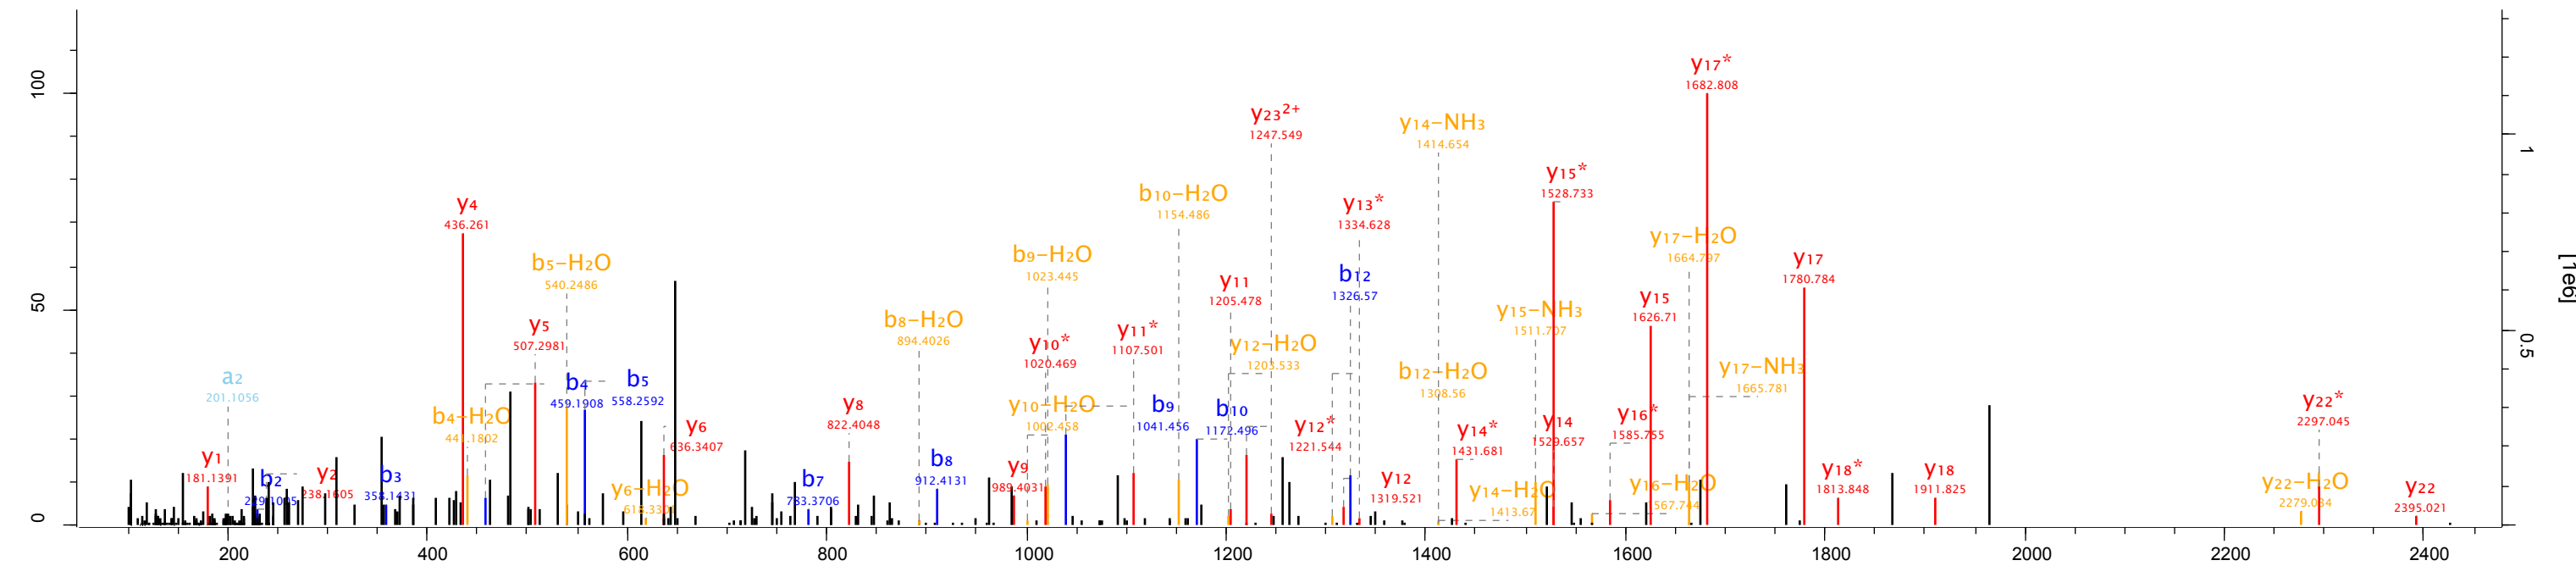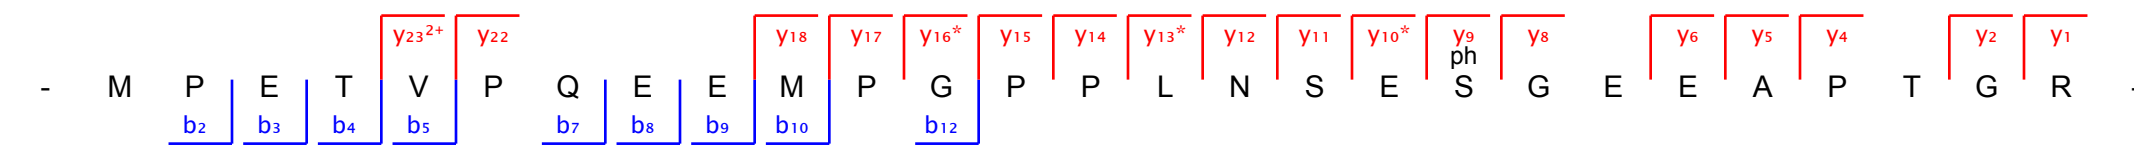

Raw file 20150814\_A375SR\_Phospho\_BR2\_04 Scan 18901 Method FTMS; HCD Score 45.74 m/z 680.98 Gene names PTK2

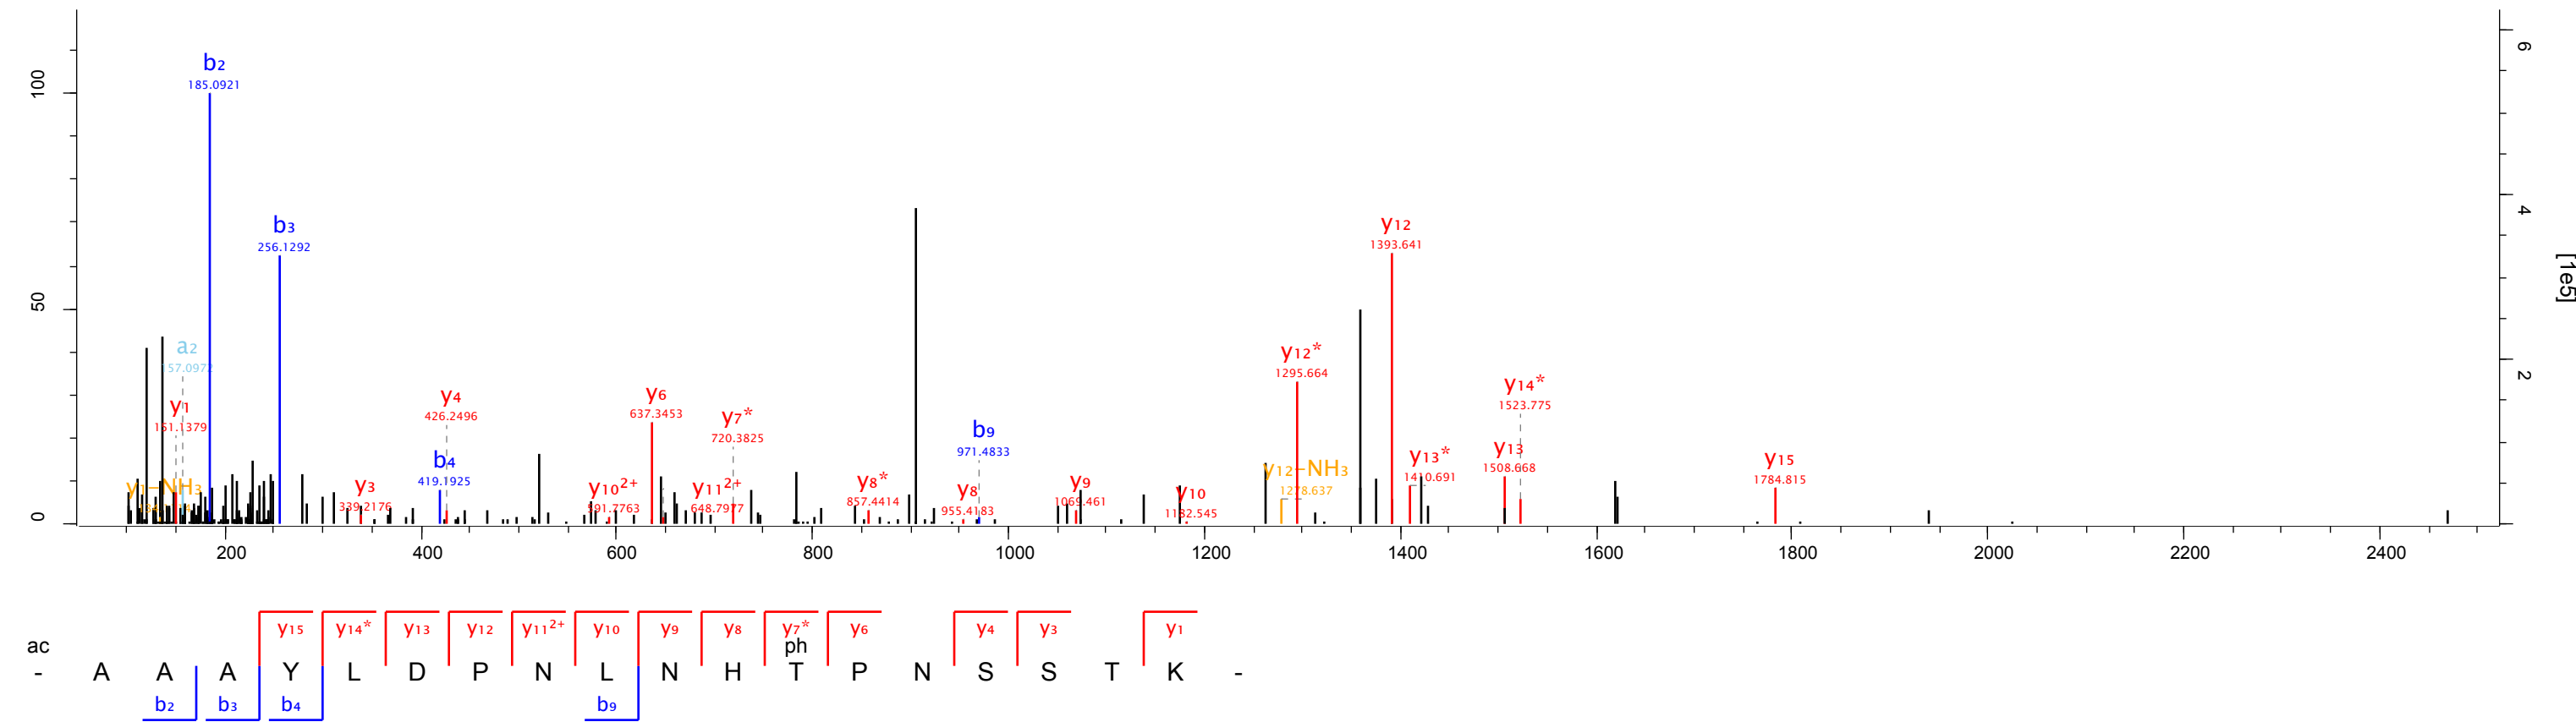

Raw file 20150814\_A375SR\_Phospho\_BR2\_04 Scan 18941 Method FTMS; HCD Score 104.66 m/z 703.66 Gene names DPYSL3

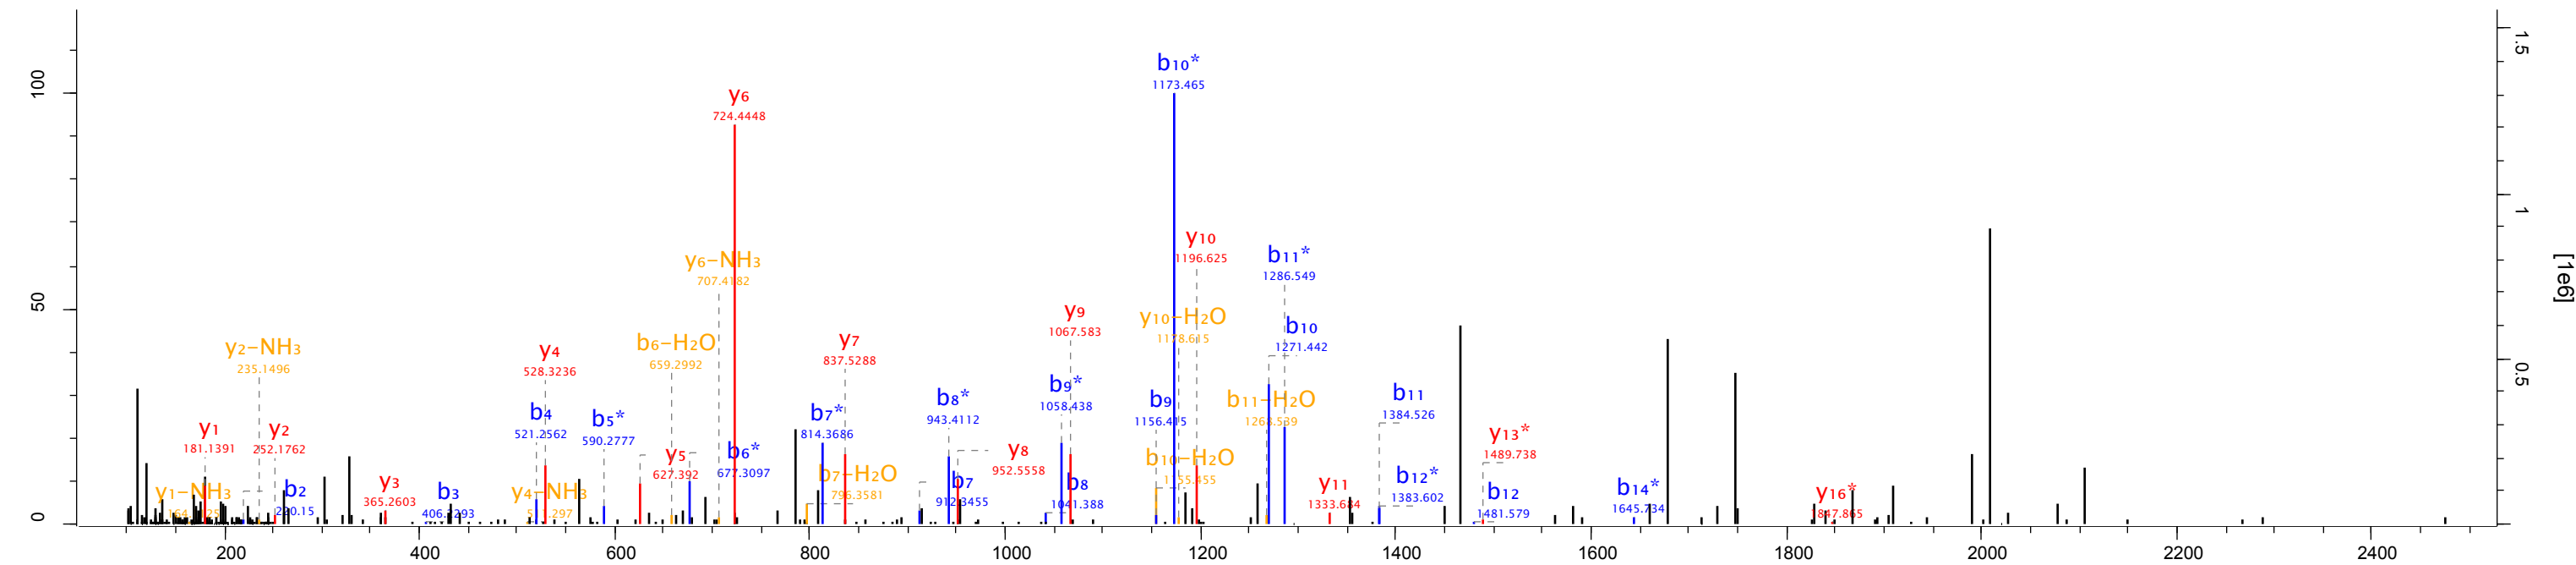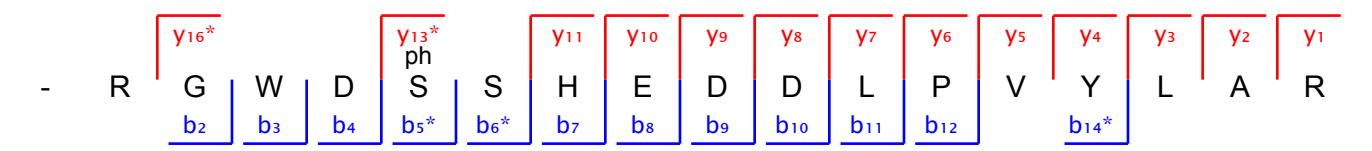

Raw file 20150814\_A375SR\_Phospho\_BR2\_04 Scan 19241 Method FTMS; HCD Score 191.44 m/z 738.33 Gene names DIP2B

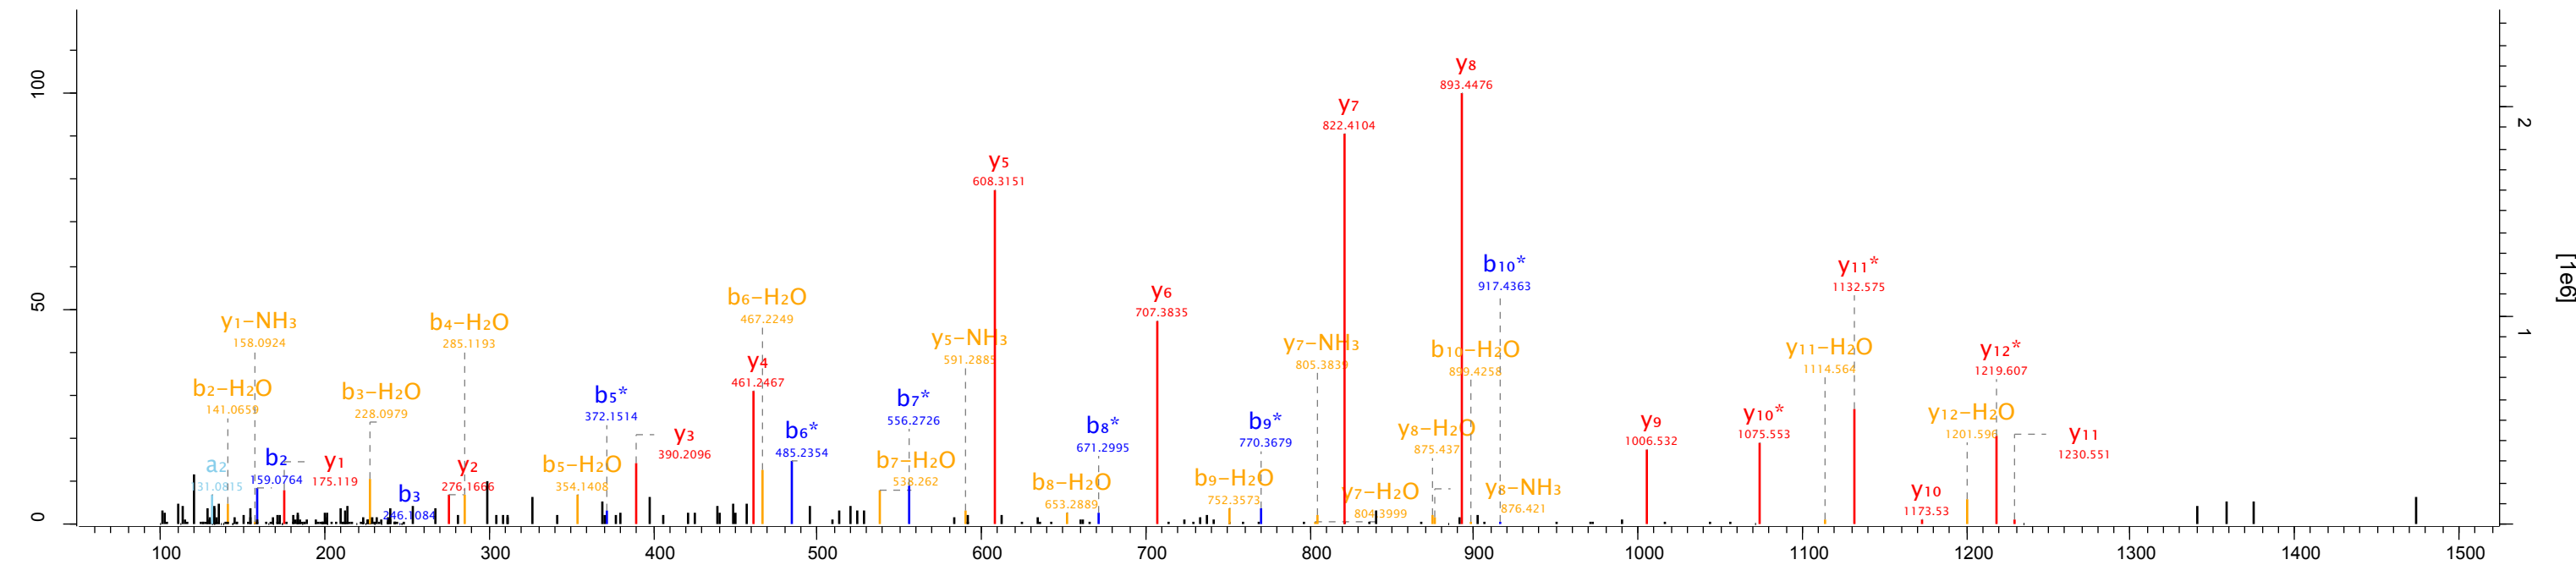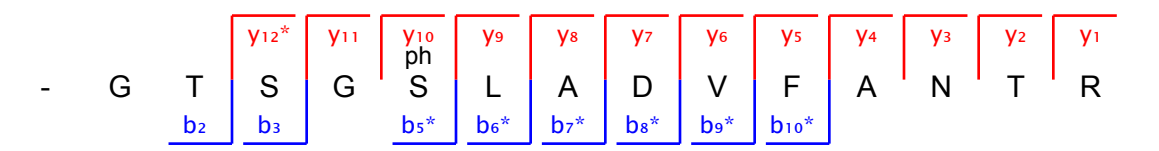

Raw file: 20150814\_A375SR\_Phospho\_BR2\_04  
 Scan: 19381 Method: FTMS; HCD Score: 86.01 m/z: 569.76 Gene names: CCDC125

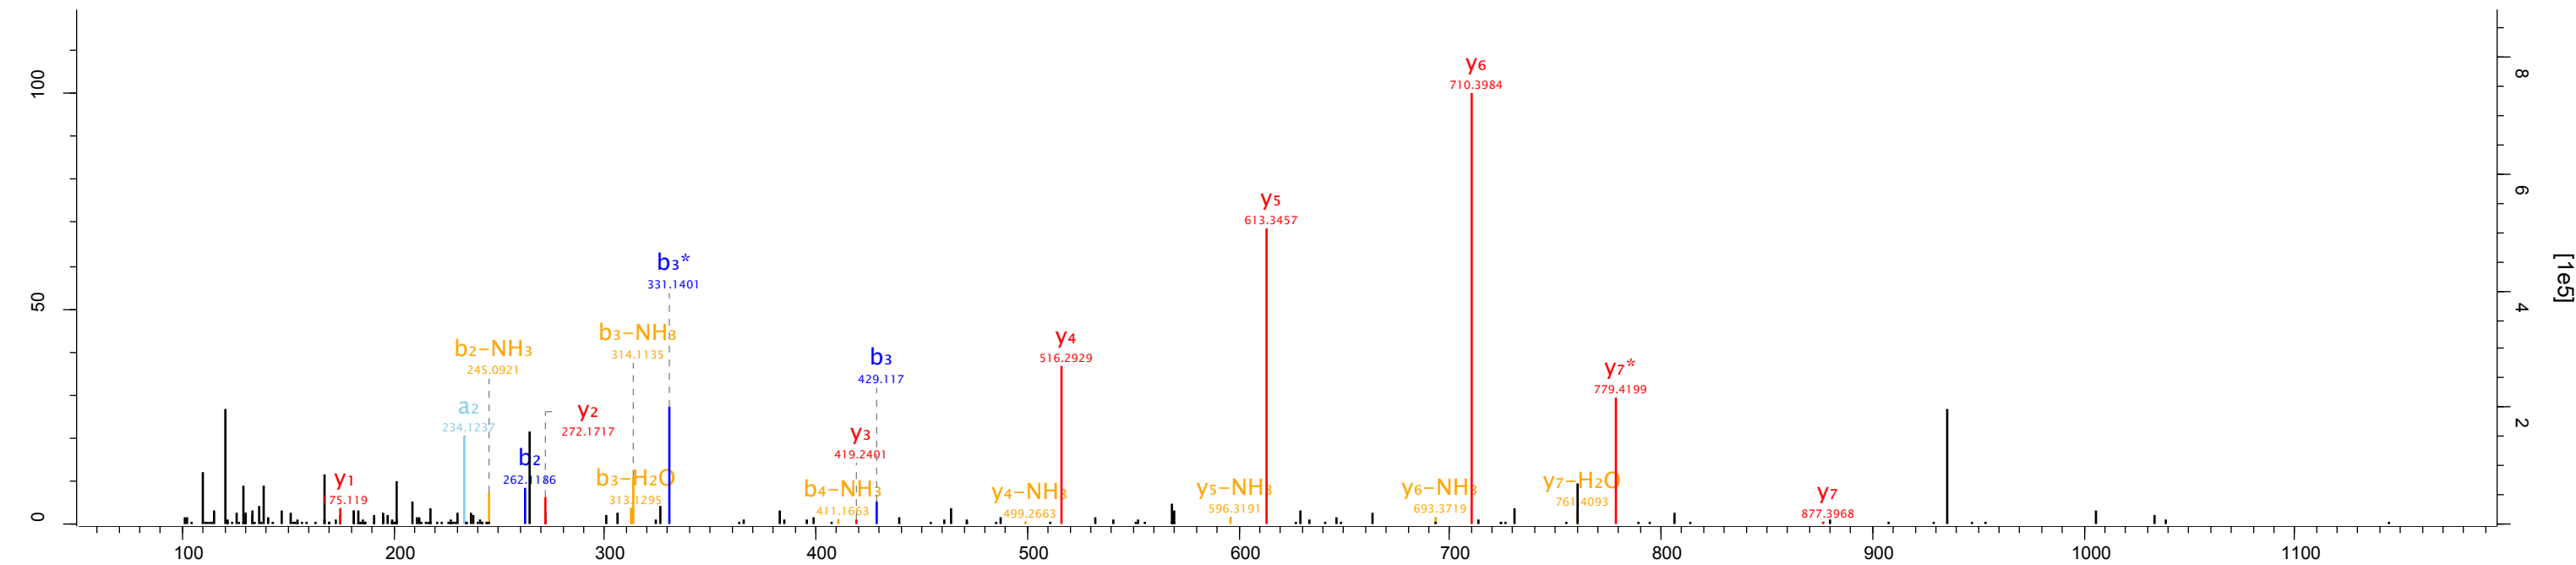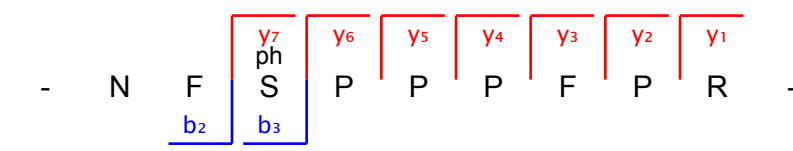

Raw file: 20150814\_A375SR\_Phospho\_BR2\_04  
 Scan: 19661 Method: FTMS; HCD Score: 141.69 m/z: 974 Gene names: FAM122A

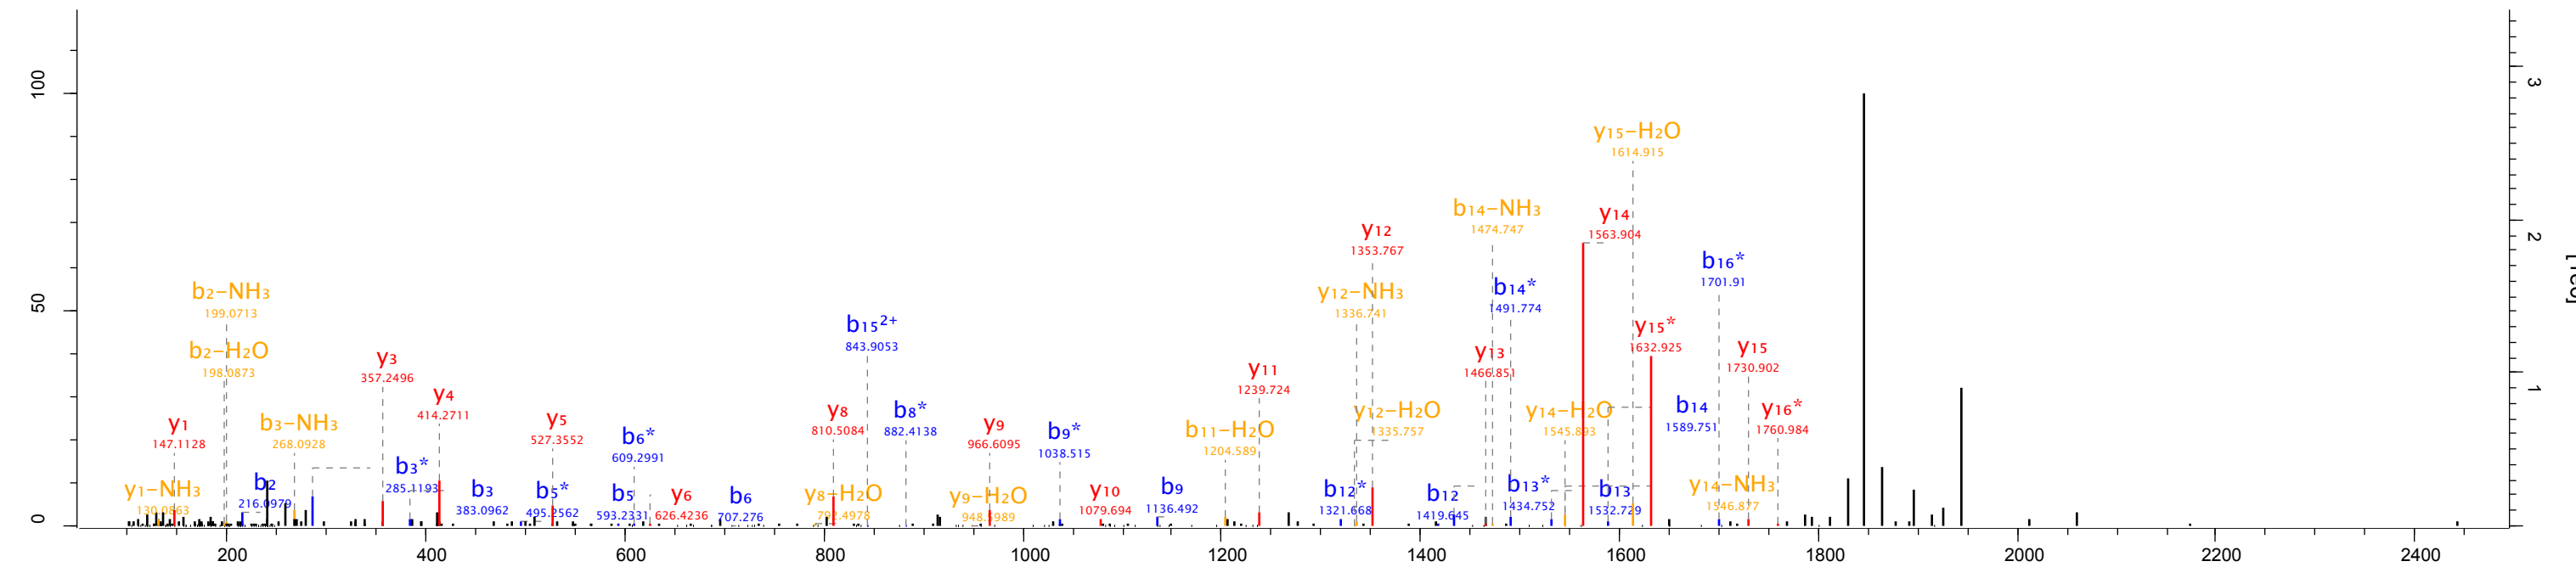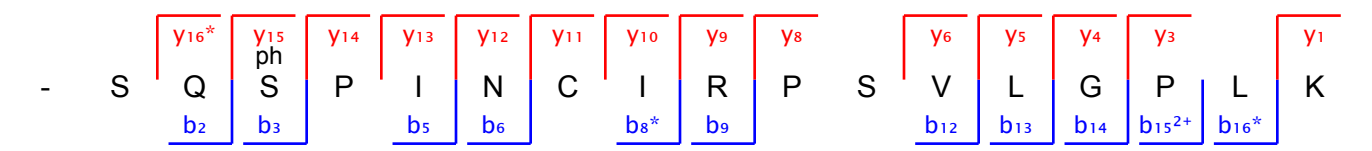



Raw file: 20150814\_A375SR\_Phospho\_BR2\_04  
 Scan: 20081 Method: FTMS; HCD Score: 201.58 m/z: 1010.02 Gene names: KCTD1

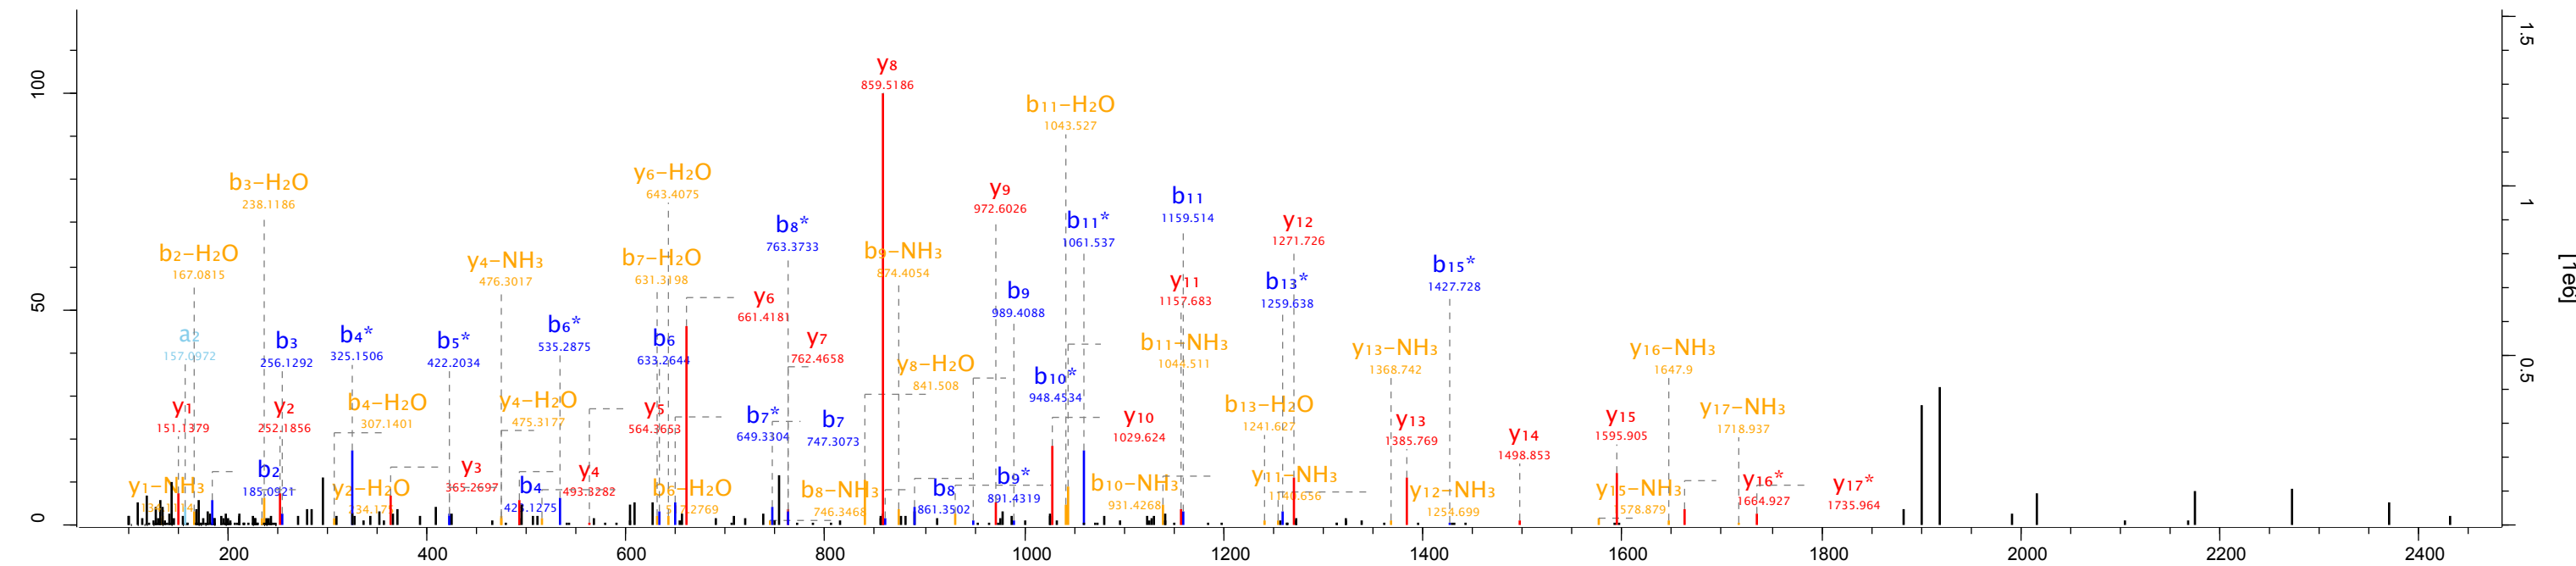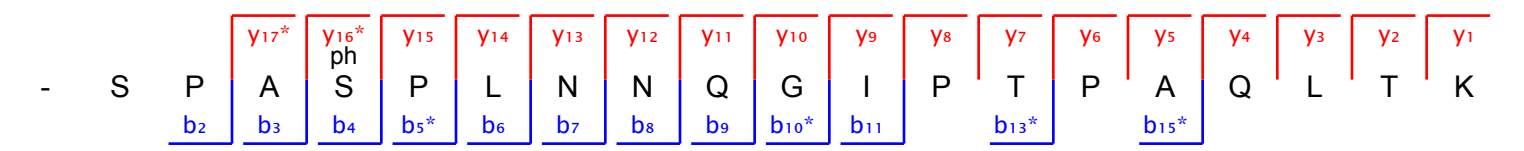



Raw file  
20150814\_A375SR\_Phospho\_BR2\_04

Scan 2021 Method FTMS; HCD Score 315.56 m/z 835.85 Gene names ILF3

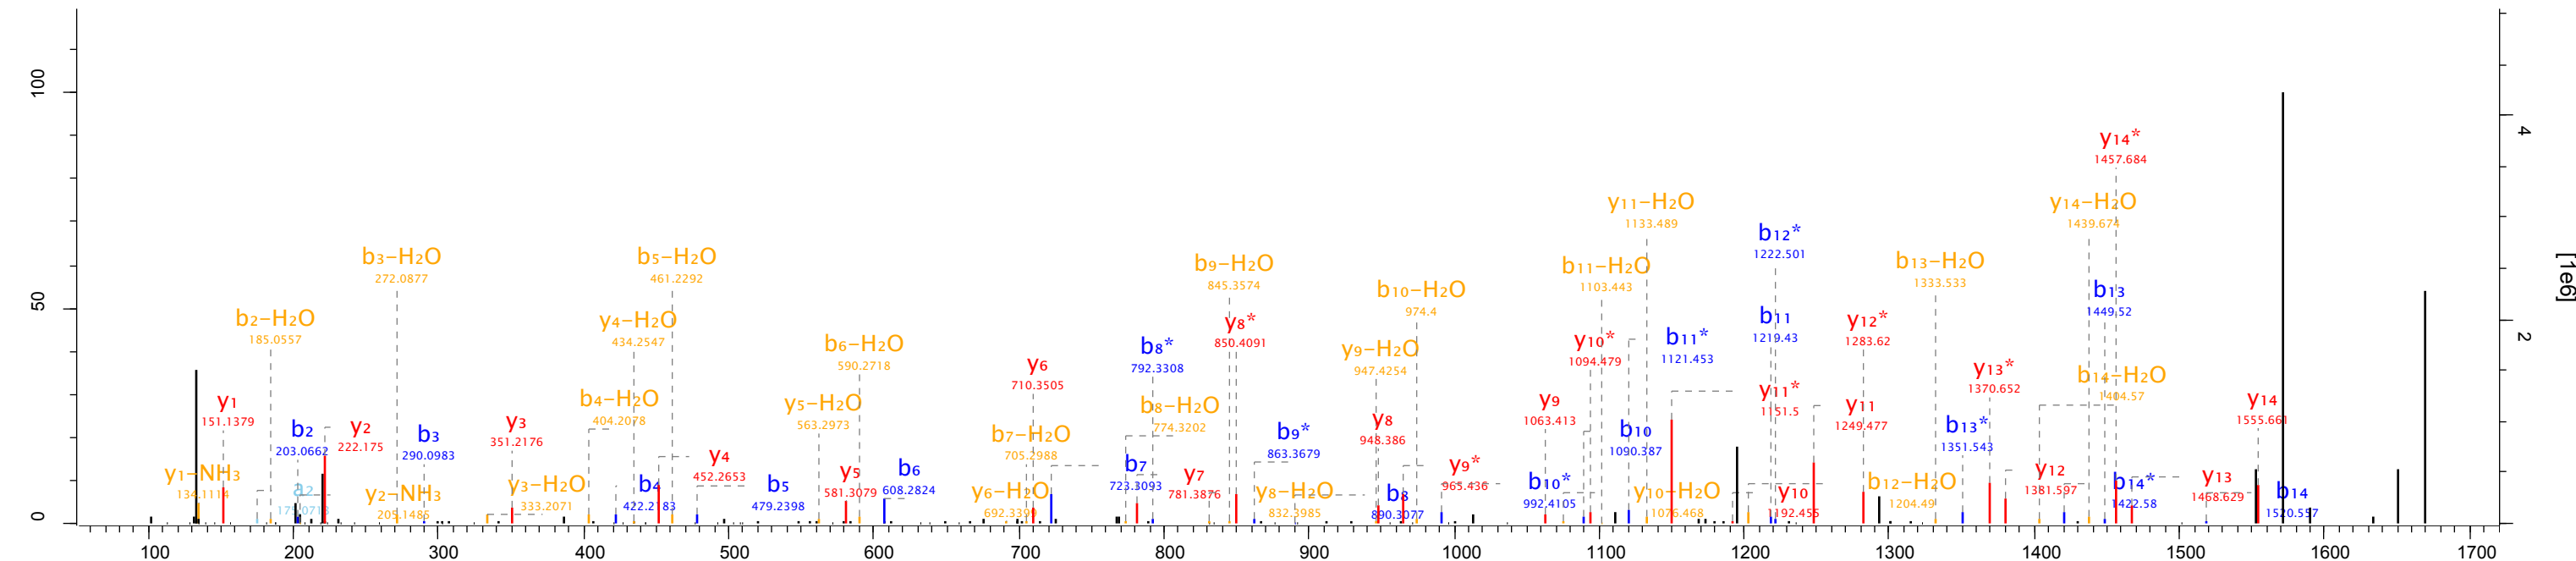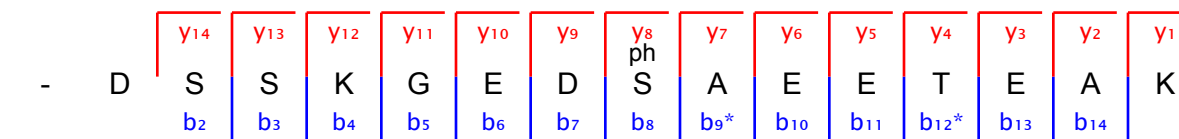

Raw file  
 20150814\_A375SR\_Phospho\_BR2\_04  
 Scan 20241 Method FTMS; HCD Score 191.61 m/z 863.39 Gene names CAMSAP1

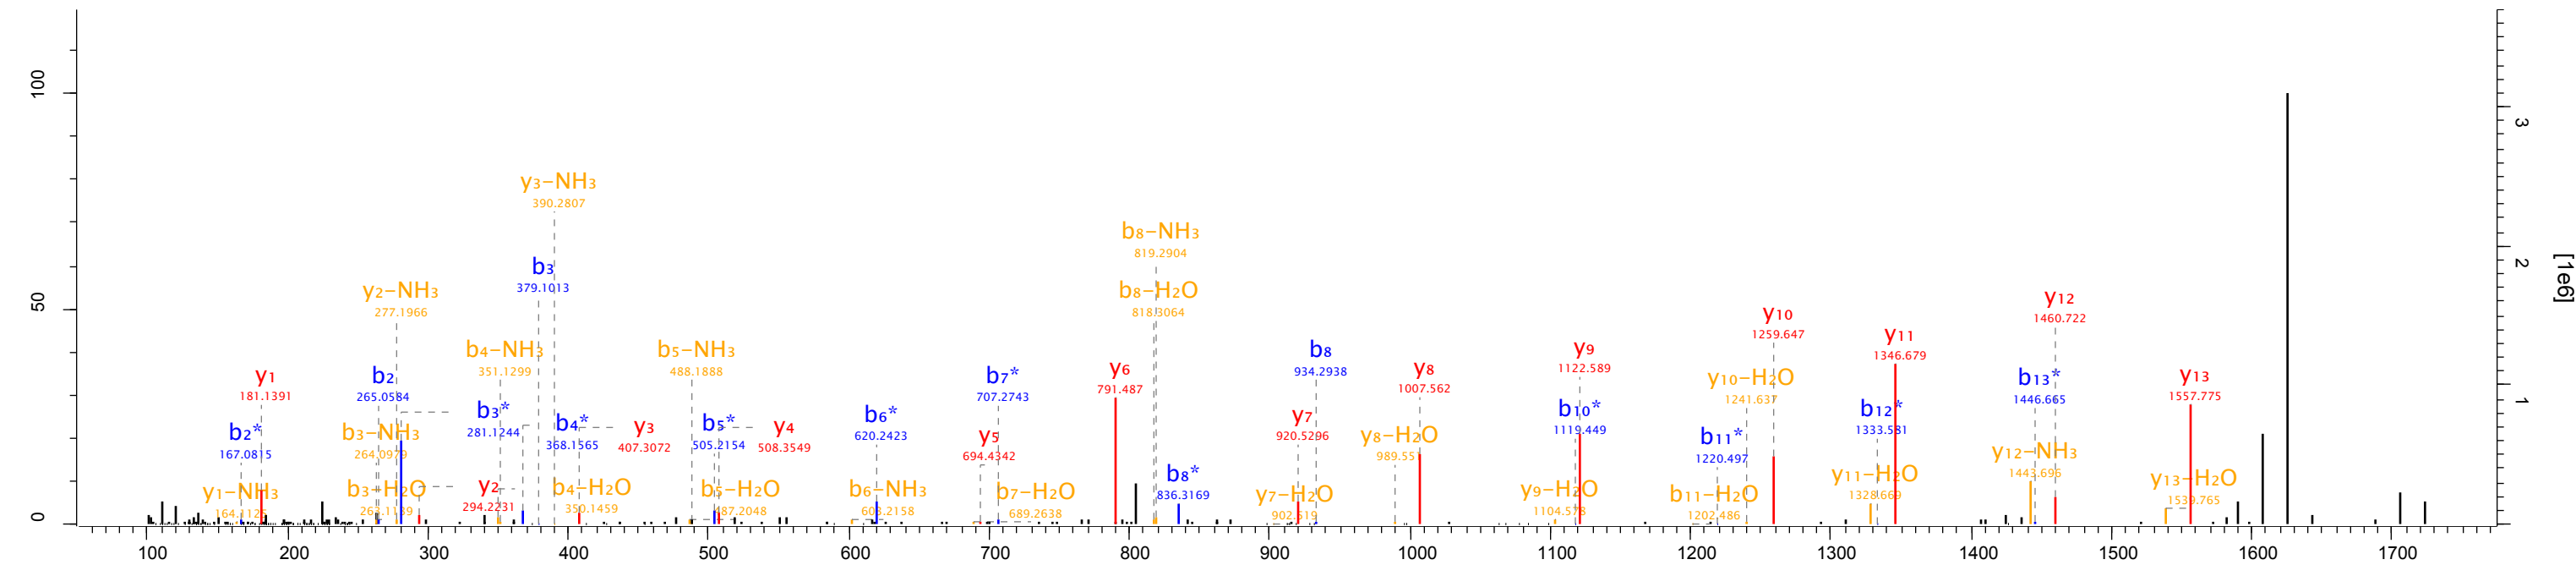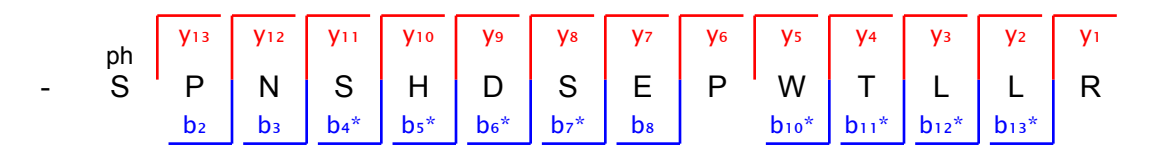

Raw file 20150814\_A375SR\_Phospho\_BR2\_04 Scan 20261 Method FTMS; HCD Score 115.57 m/z 558.71 Gene names CHMP4B

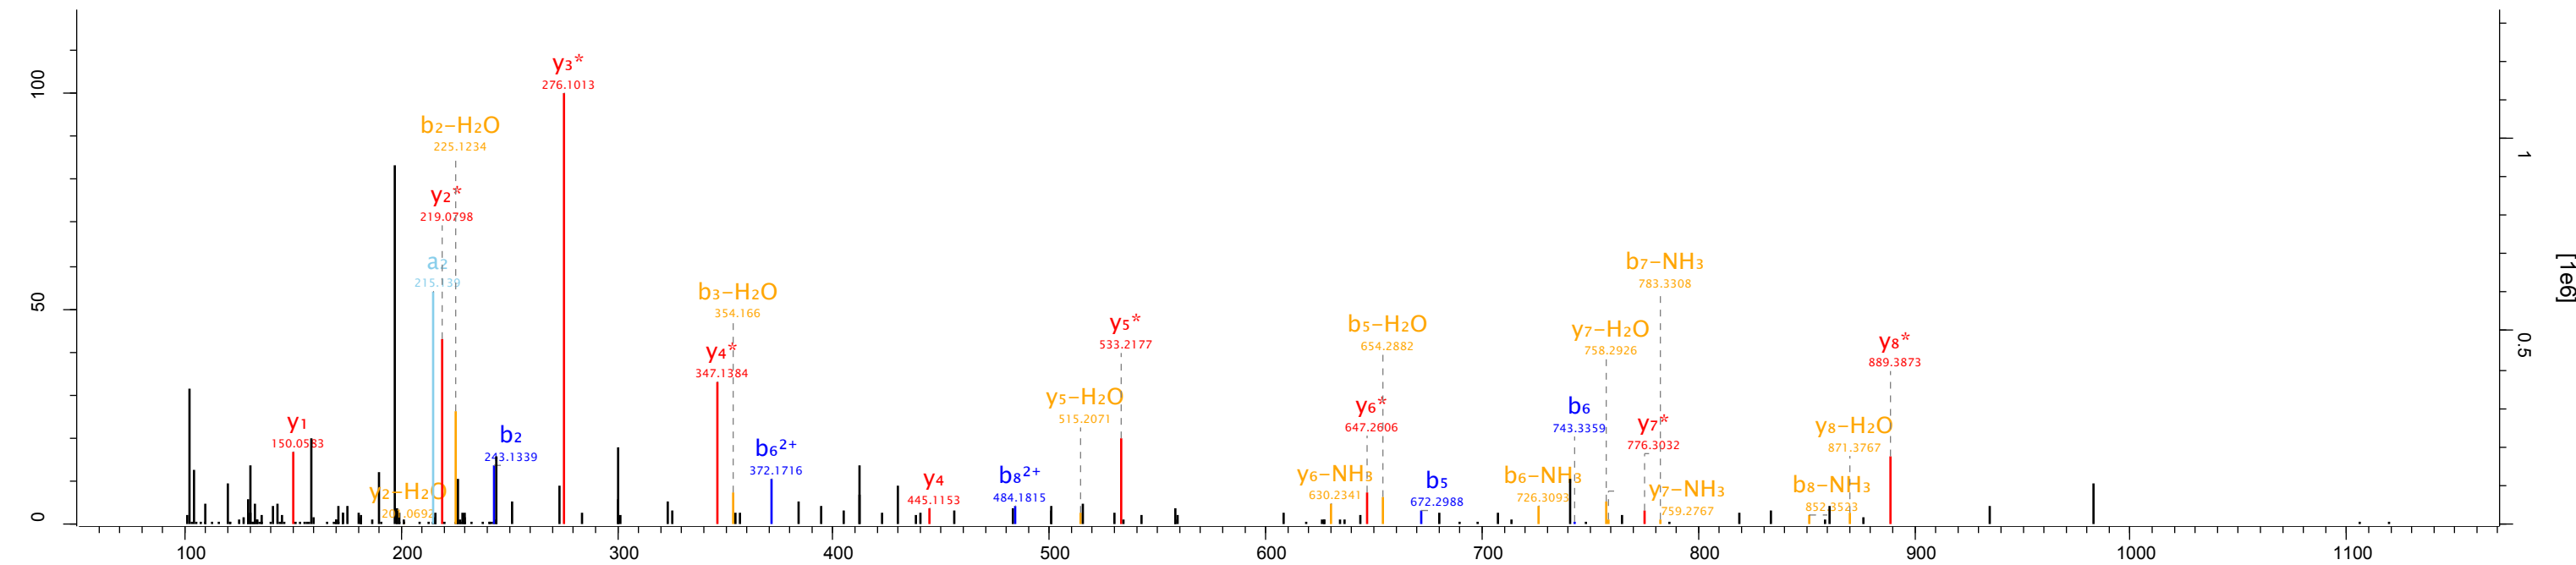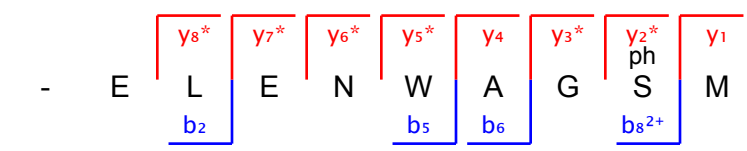

Raw file 20150814\_A375SR\_Phospho\_BR2\_04 Scan 20581 Method FTMS; HCD Score 121.91 m/z 968.76 Gene names XRN2

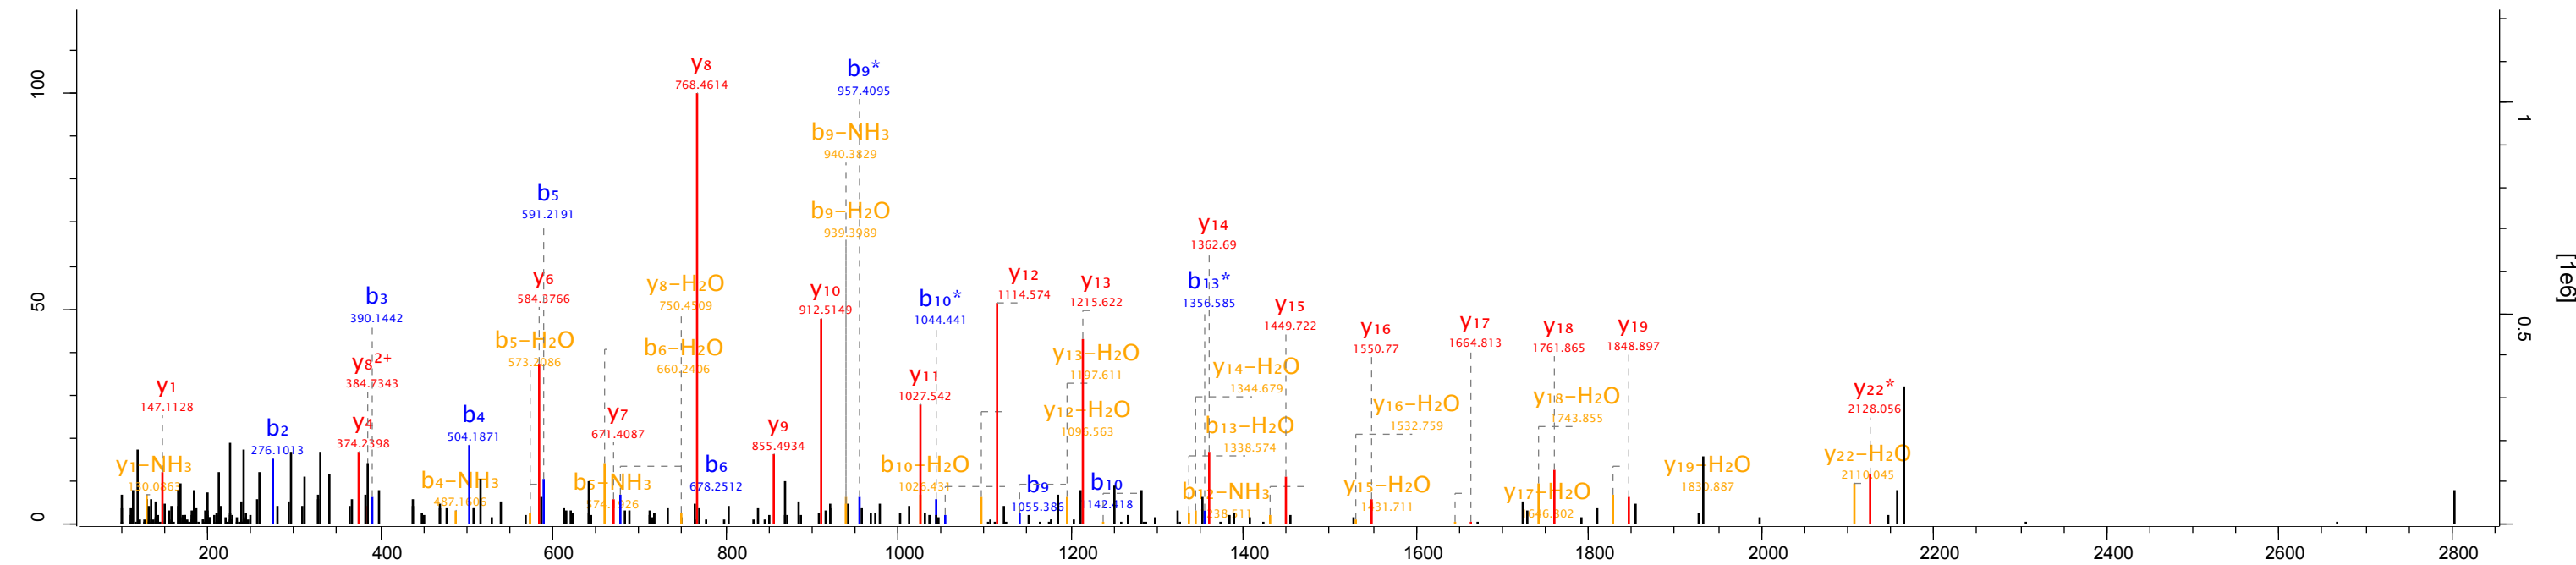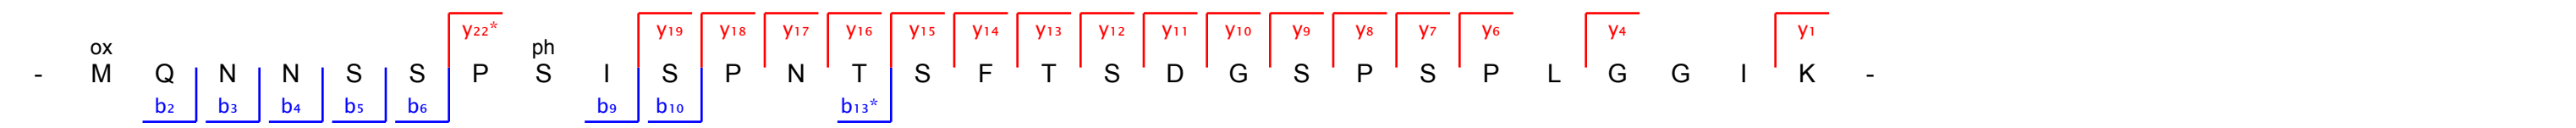

Raw file  
 20150814\_A375SR\_Phospho\_BR2\_04  
 Scan 20631 Method FTMS; HCD Score 121.07 m/z 926.13 Gene names TPR

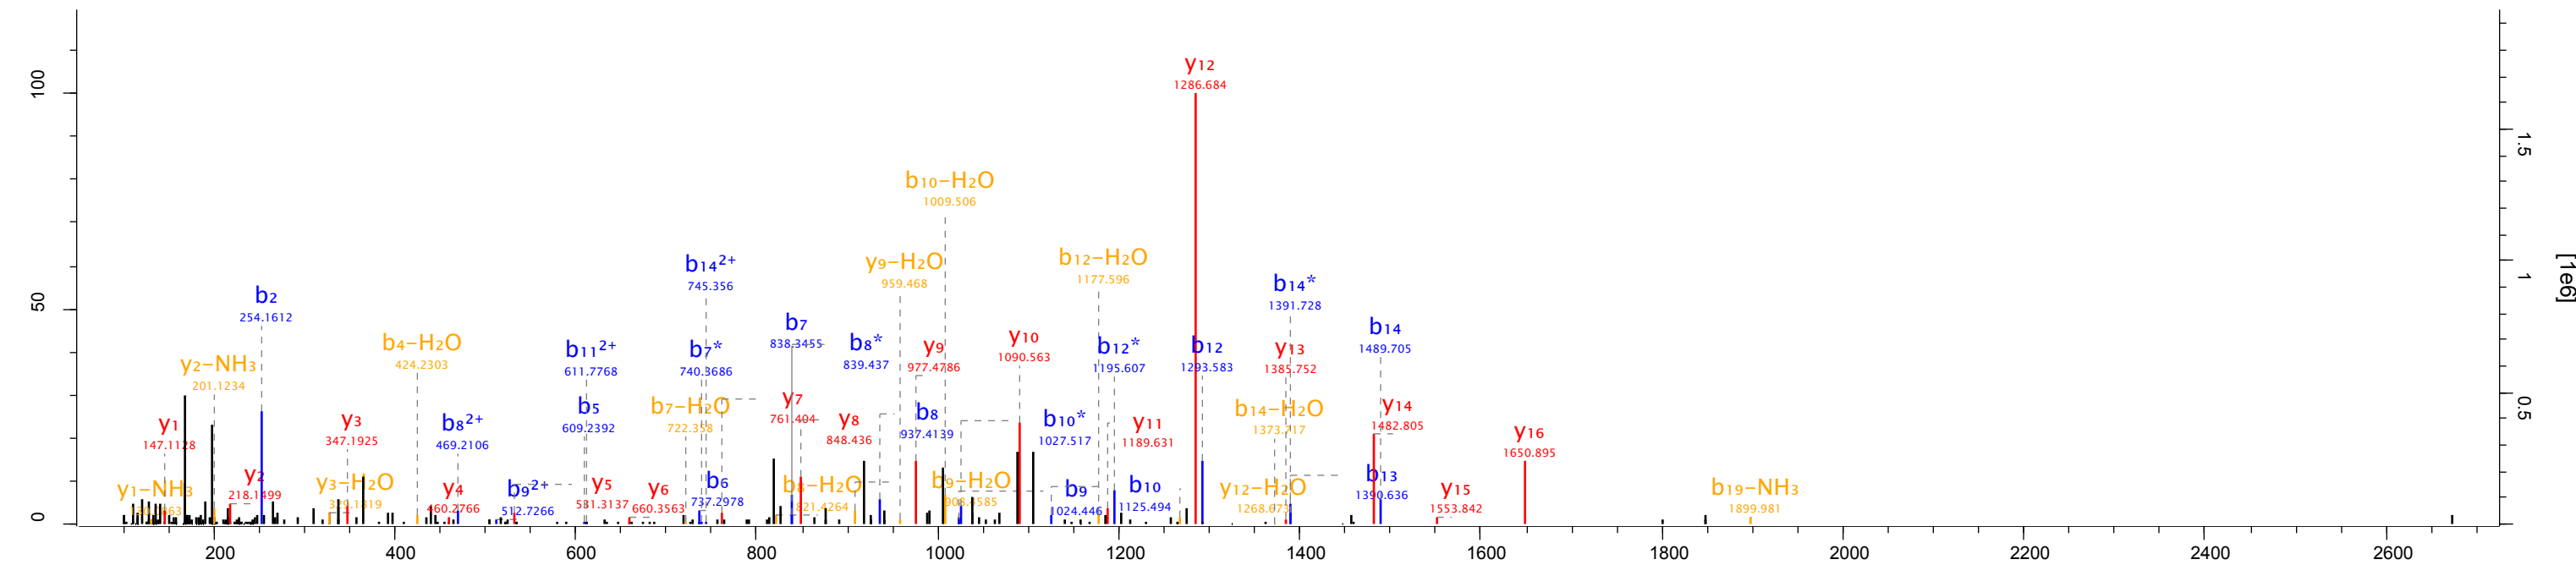

- R P S T ph S Q T V S T y16 y15 y14 y13 y12 y11 y10 y9 y8 y7 y6 y5 y4 y3 y2 y1 -  
 b2 b5 b6 b7 b8 b9 b10 b11<sup>2+</sup> b12 b13 b14

Raw file  
20150814\_A375SR\_Phospho\_BR2\_04

Scan 20801 Method FTMS; HCD Score 139.02 m/z 1259.22 Gene names RBM14

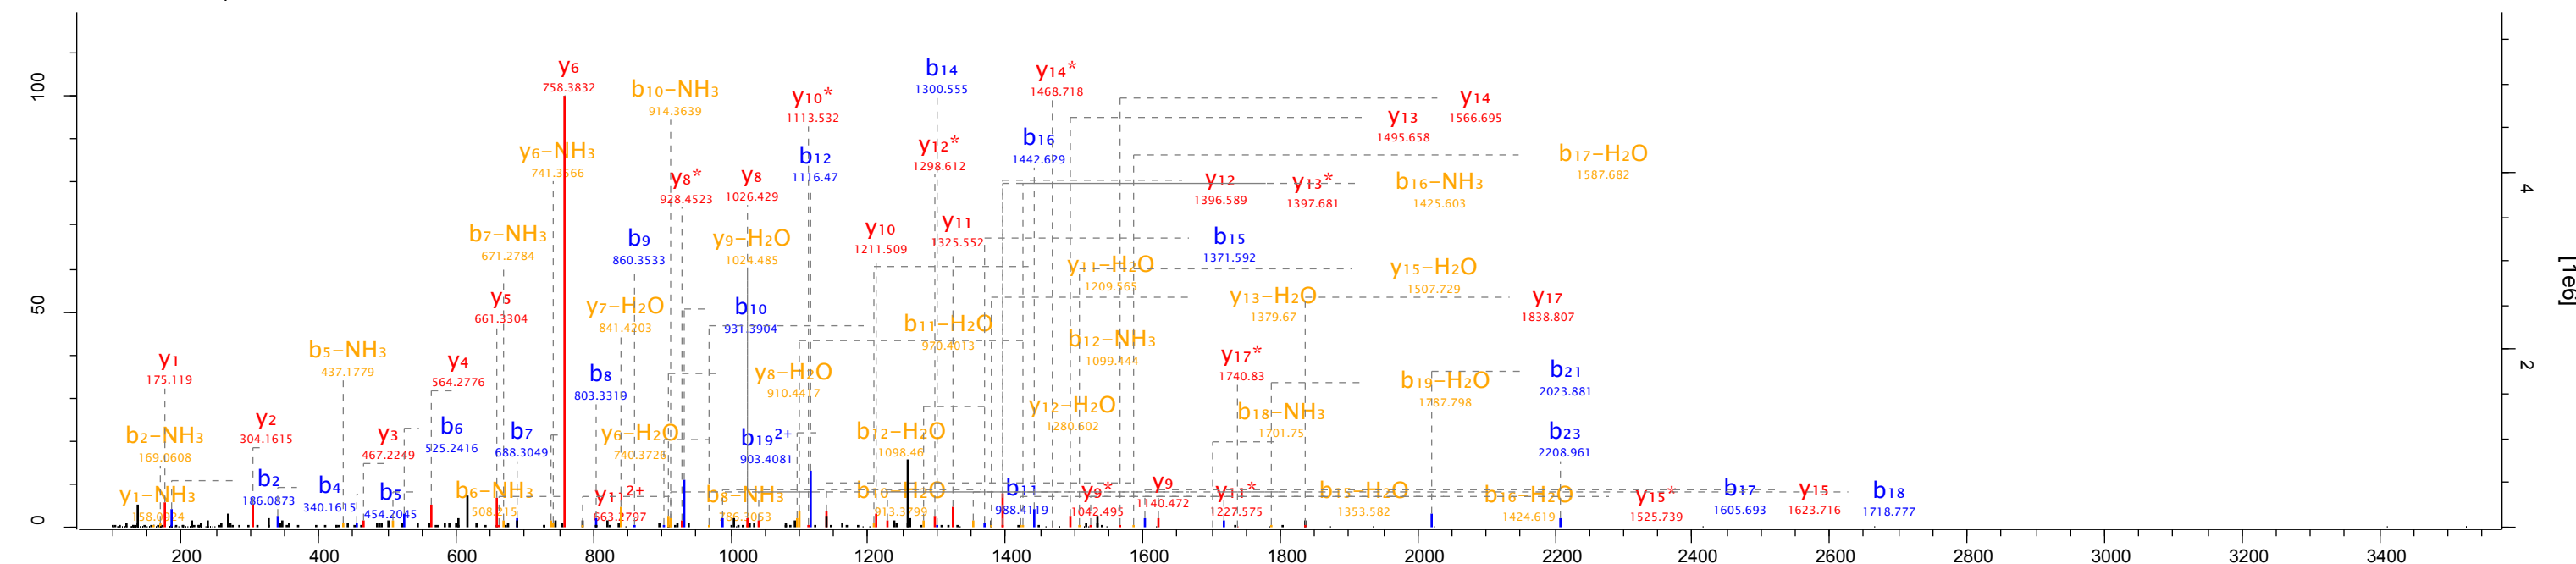

- G Q P G N A Y D G A G Q P S A A Y L S M S Q G A V A N A N S T P P P Y E R -

b<sub>2</sub>
b<sub>4</sub>
b<sub>5</sub>
b<sub>6</sub>
b<sub>7</sub>
b<sub>8</sub>
b<sub>9</sub>
b<sub>10</sub>
b<sub>11</sub>
b<sub>12</sub>
b<sub>14</sub>
b<sub>15</sub>
b<sub>16</sub>
b<sub>17</sub>
b<sub>18</sub>
b<sub>19<sup>2+</sup></sub>
b<sub>21</sub>
b<sub>23</sub>
y<sub>1</sub>
y<sub>2</sub>
y<sub>3</sub>
y<sub>4</sub>
y<sub>5</sub>
y<sub>6</sub>
y<sub>8</sub>
y<sub>8</sub><sup>ph</sup>
y<sub>9</sub>
y<sub>10</sub>
y<sub>11</sub>
y<sub>12</sub>
y<sub>13</sub>
y<sub>14</sub>
y<sub>15</sub>
y<sub>17</sub>

Raw file: 20150814\_A375SR\_Phospho\_BR2\_04  
 Scan: 20881 Method: FTMS; HCD Score: 198.68 m/z: 1320.01 Gene names: RRP12

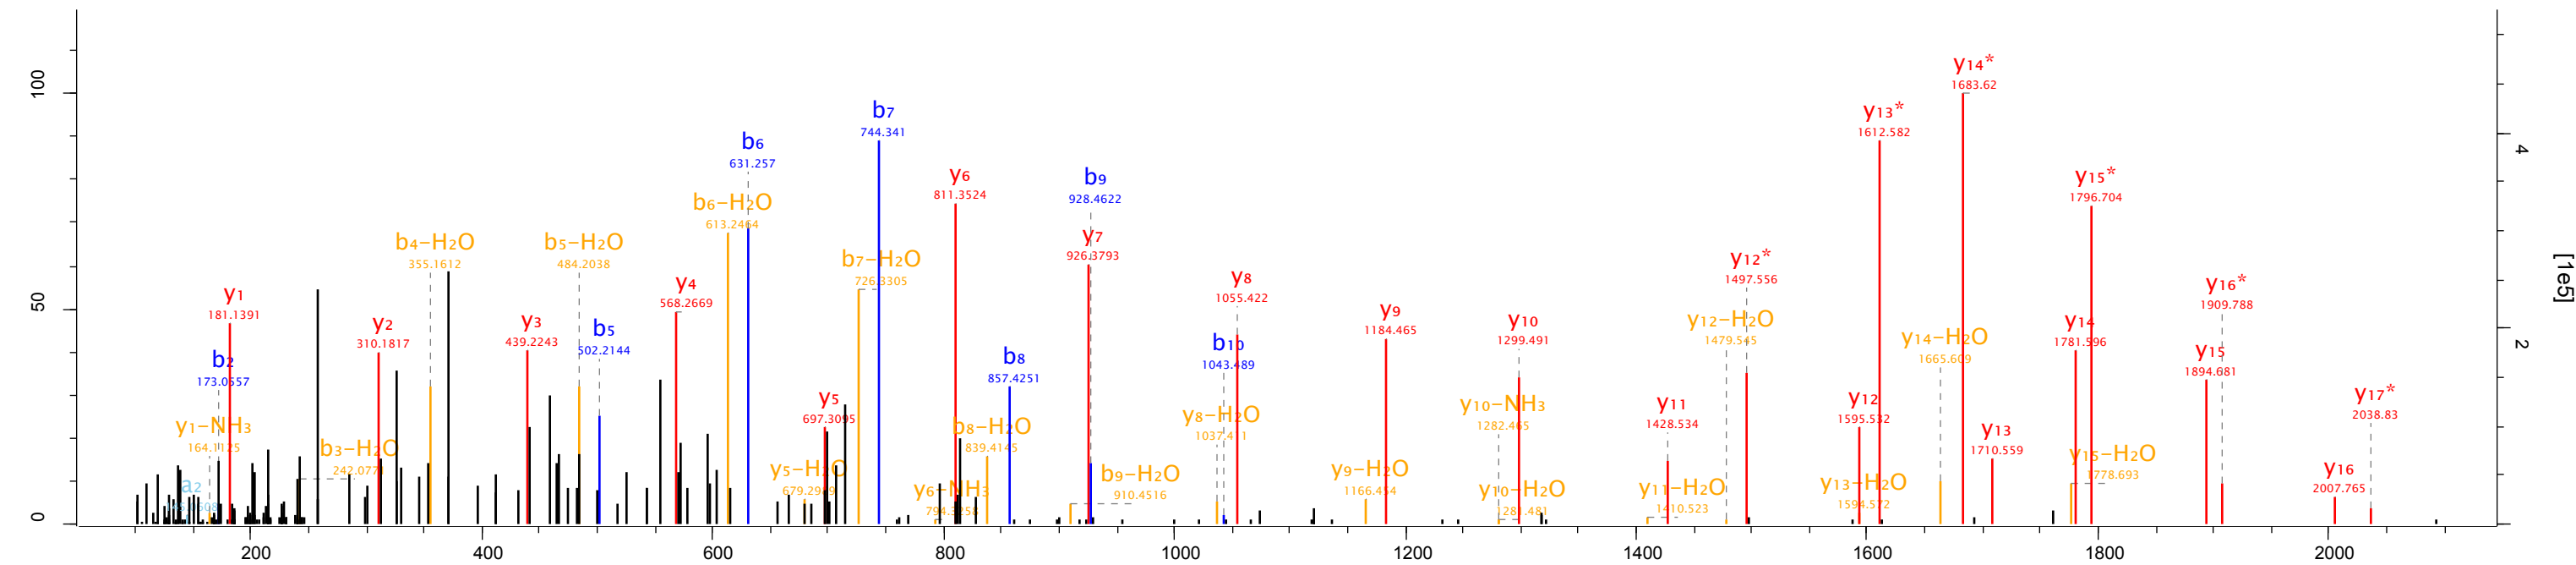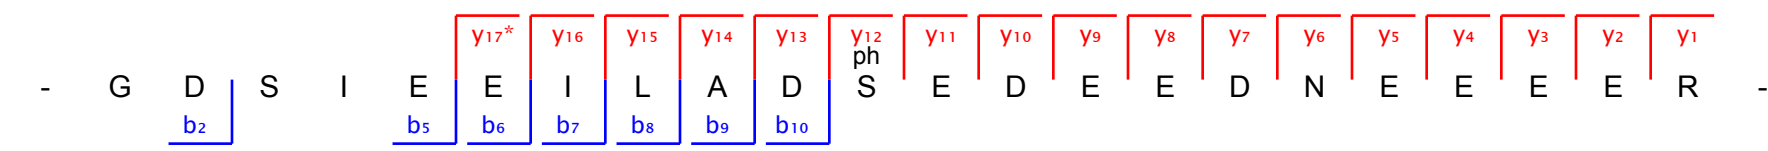

Raw file: 20150814\_A375SR\_Phospho\_BR2\_04  
 Scan: 2141 Method: FTMS; HCD Score: 155.66 m/z: 588.26 Gene names: AFAP1

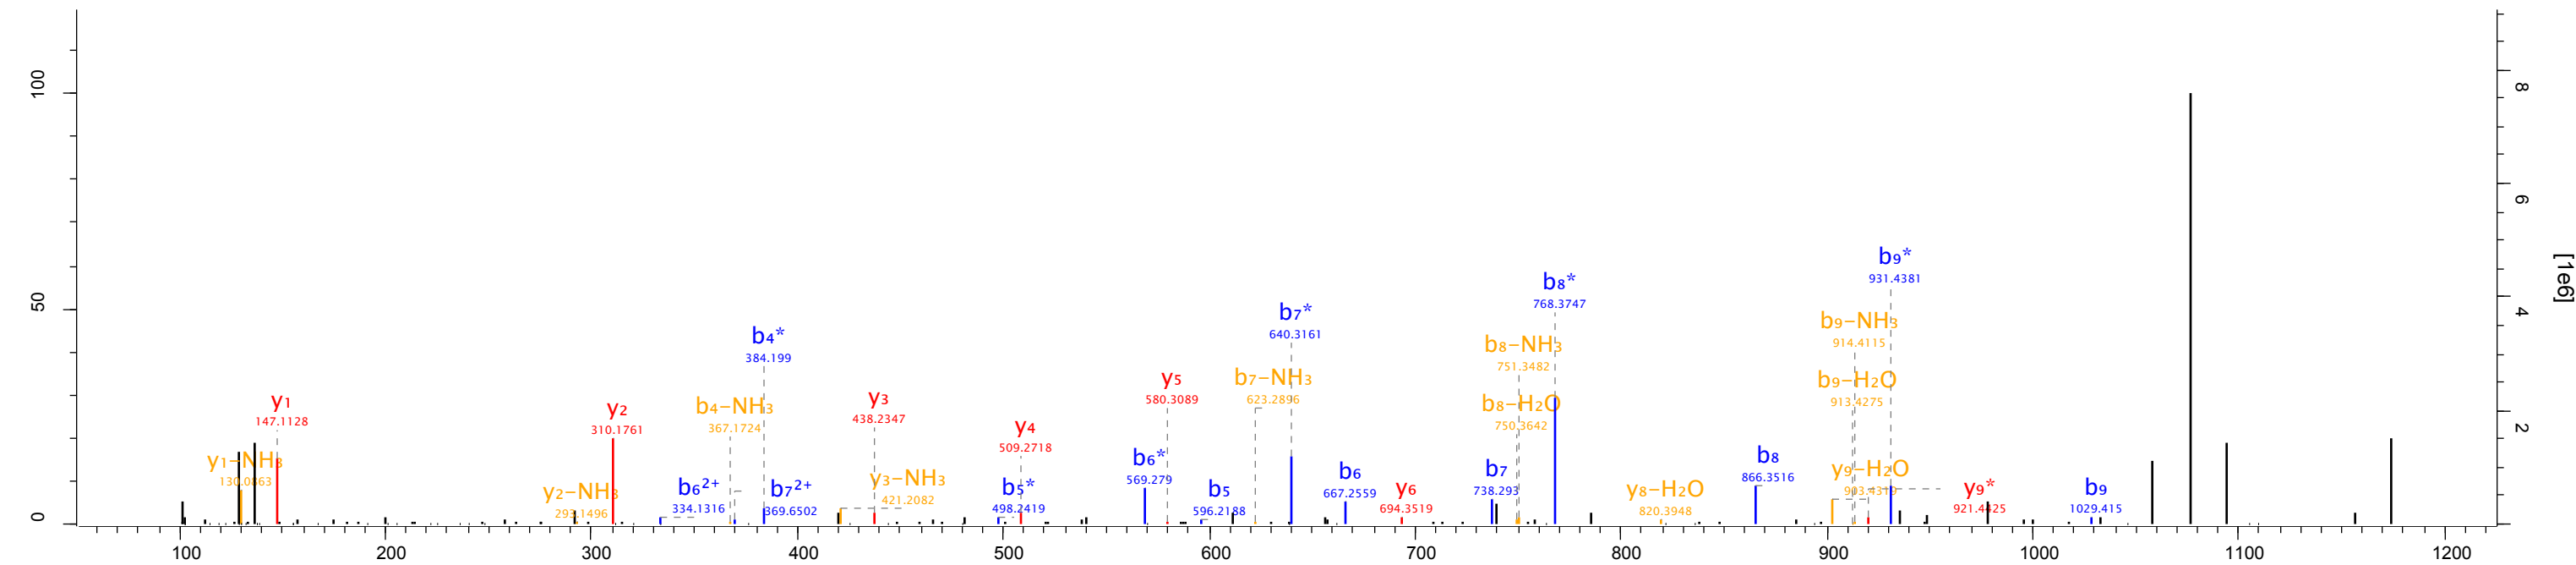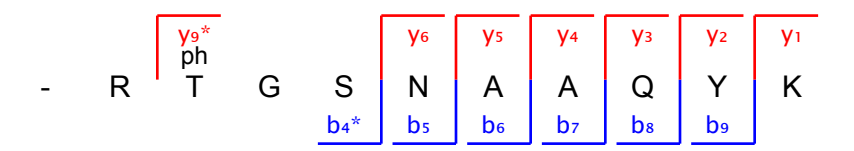



Raw file 20150814\_A375SR\_Phospho\_BR2\_04 Scan 21801 Method FTMS; HCD Score 162.42 m/z 850.38 Gene names MAP3K11

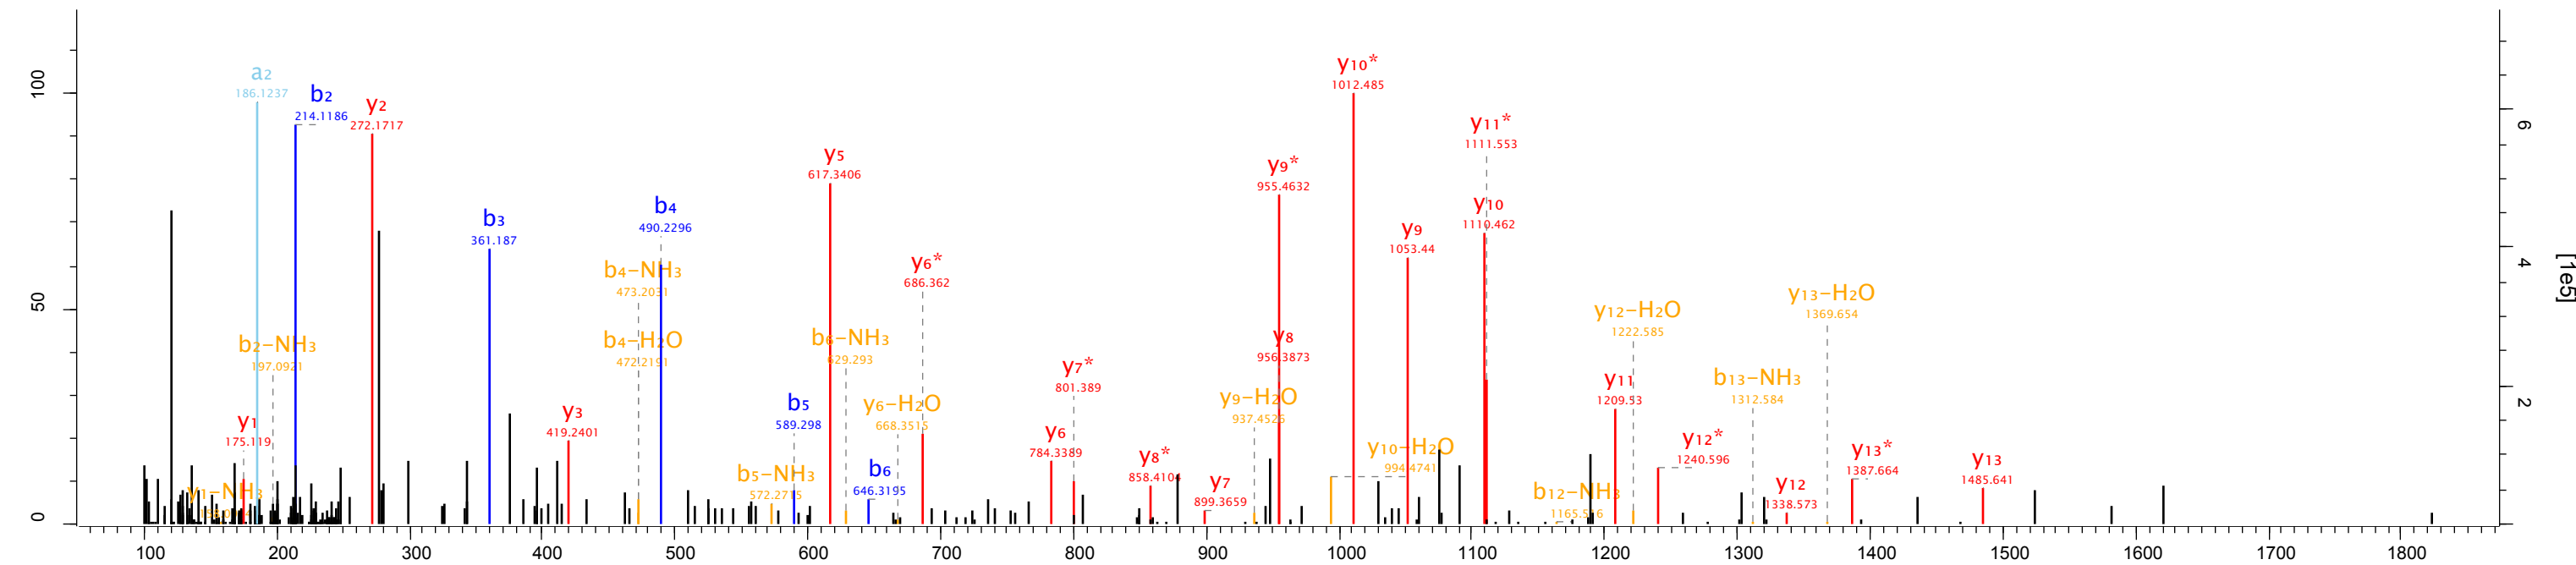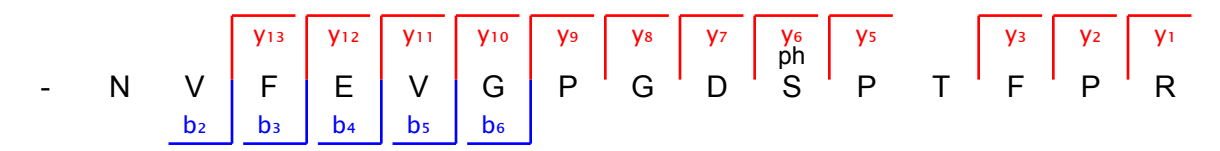

Raw file 20150814\_A375SR\_Phospho\_BR2\_04 Scan 22241 Method FTMS; HCD Score 233.63 m/z 1356.62 Gene names FRYL

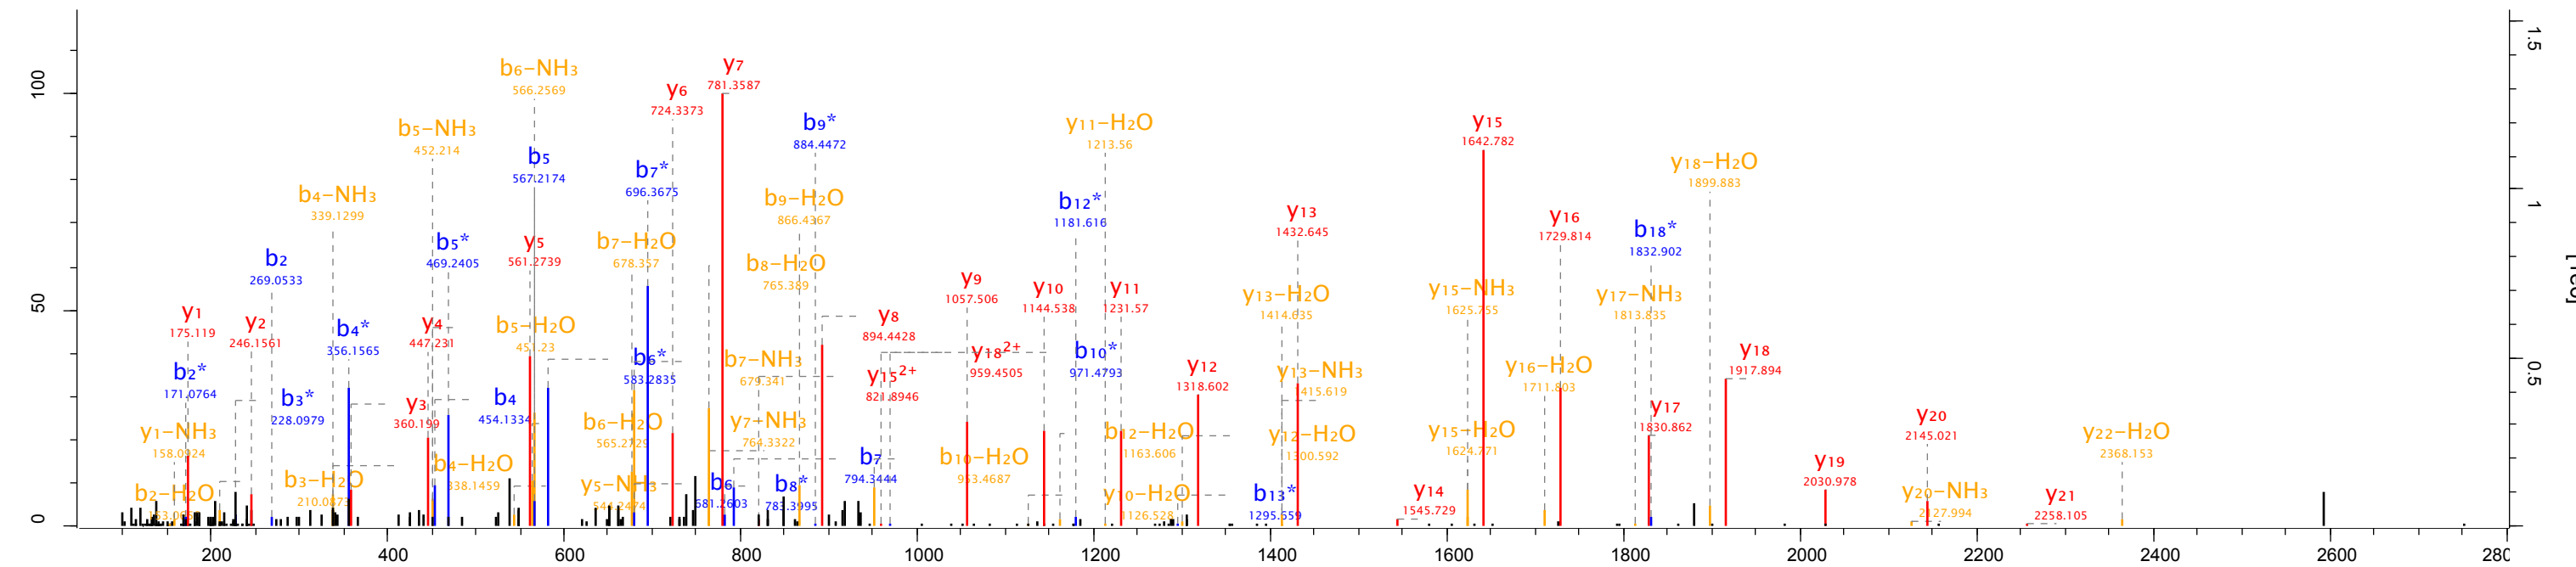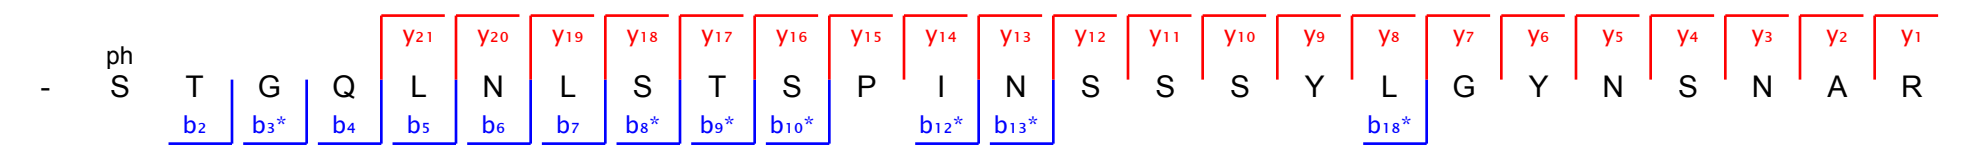

Raw file: 20150814\_A375SR\_Phospho\_BR2\_04  
 Scan: 2251 Method: FTMS; HCD Score: 240.45 m/z: 697.32 Gene names: CALD1

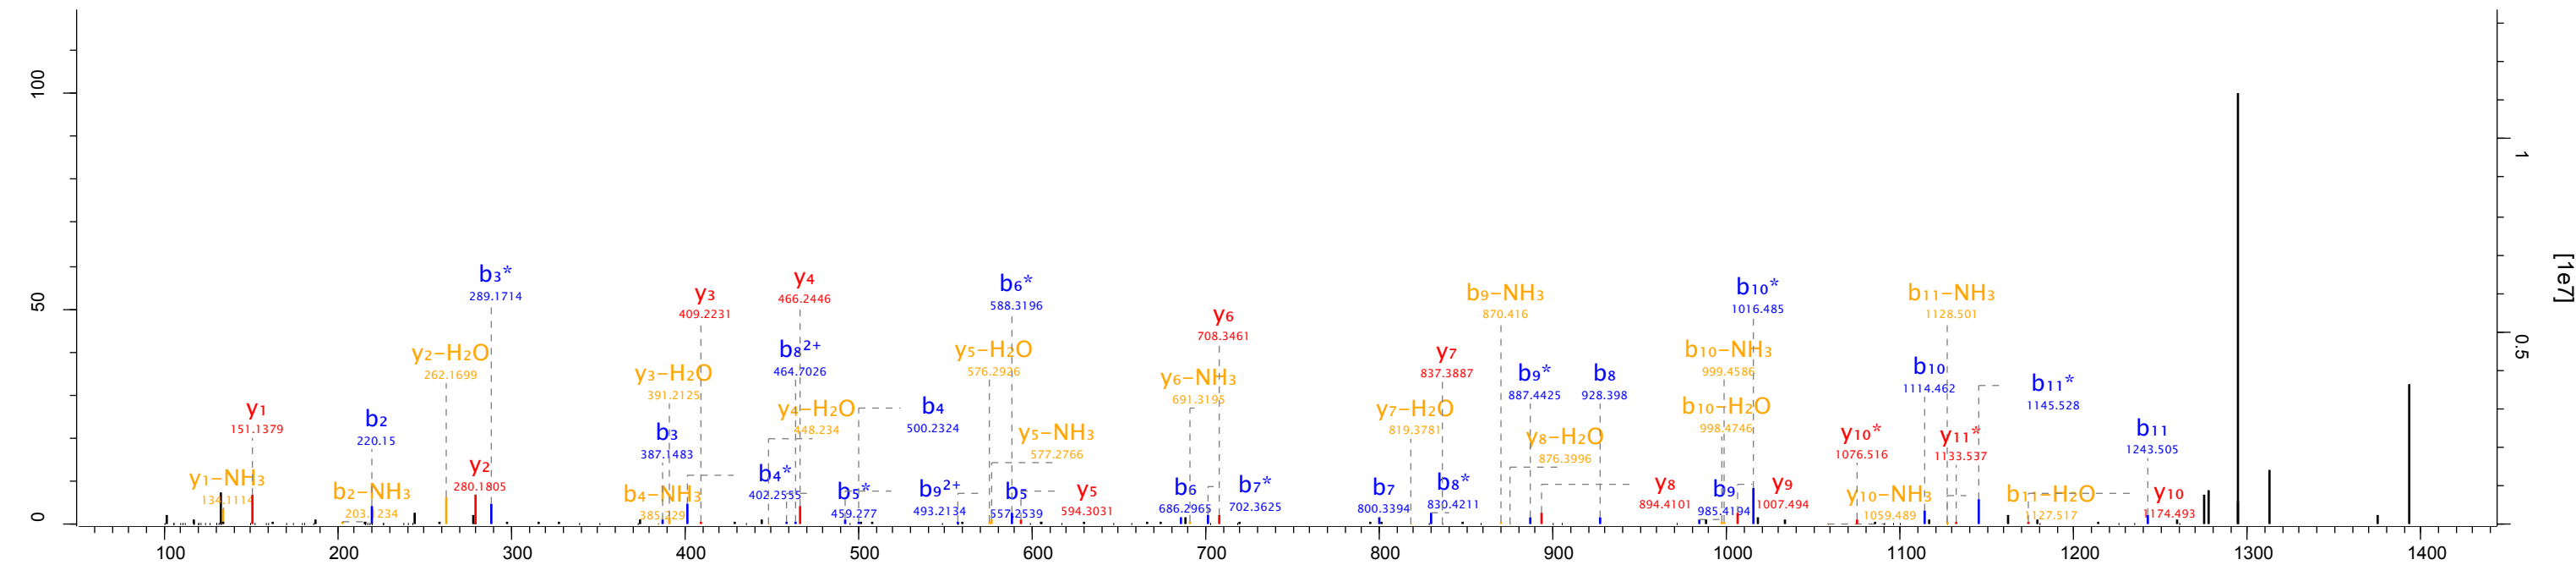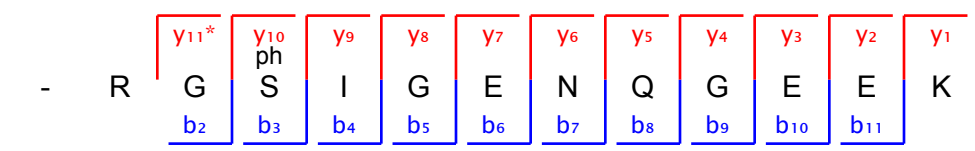

Raw file: 20150814\_A375SR\_Phospho\_BR2\_04  
 Scan: 23061 Method: FTMS; HCD Score: 157.63 m/z: 1195.18 Gene names: RAB11FIP2

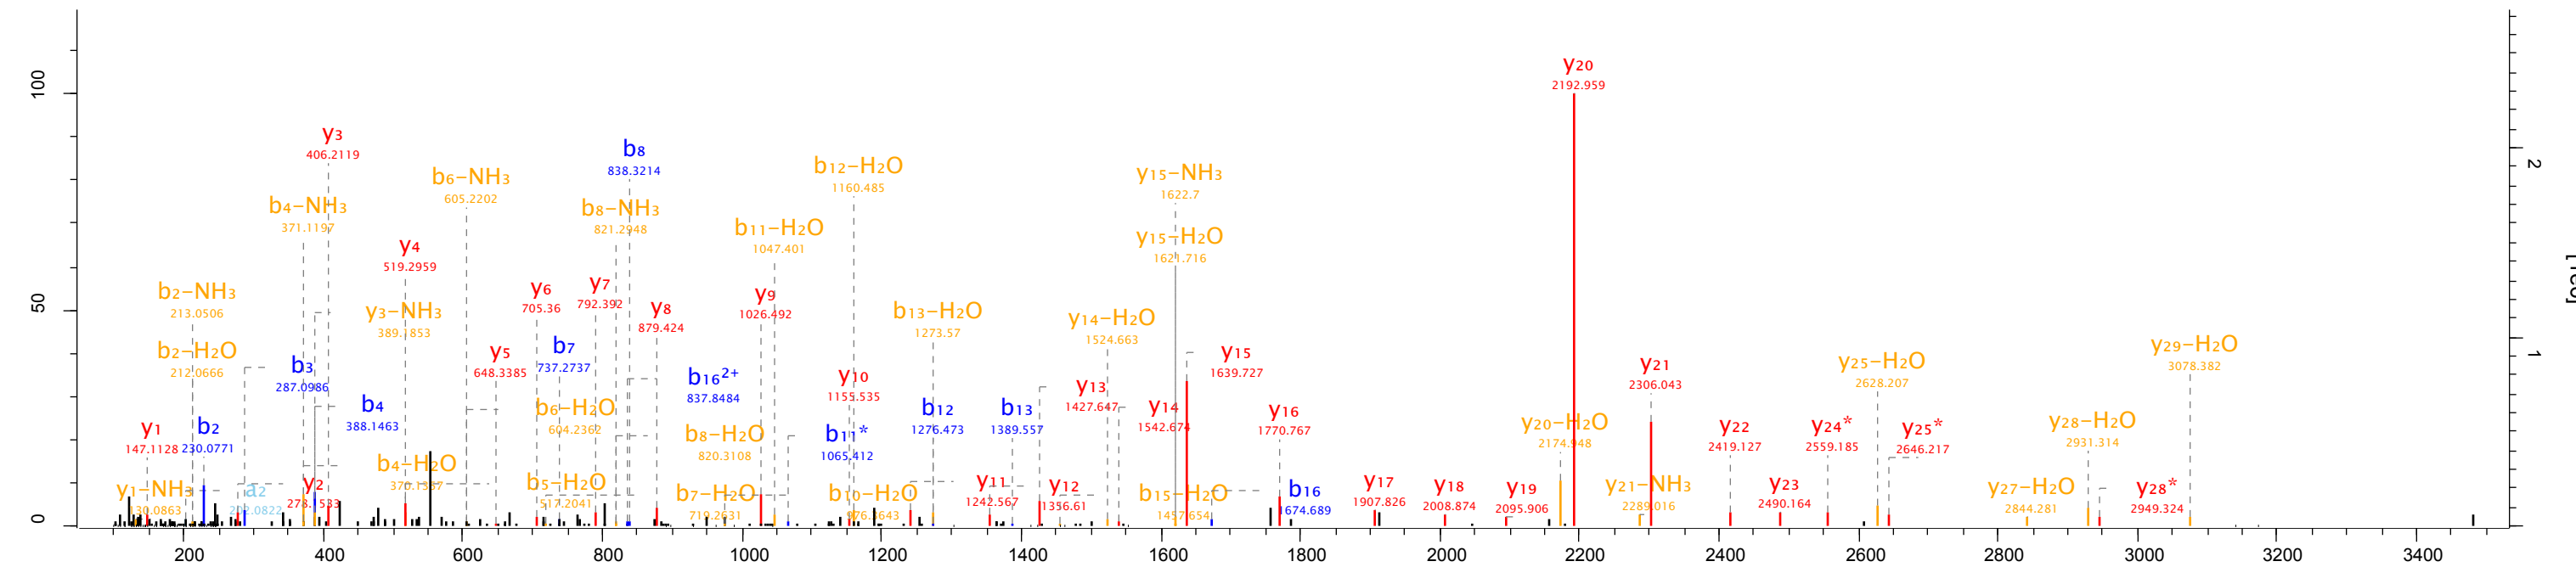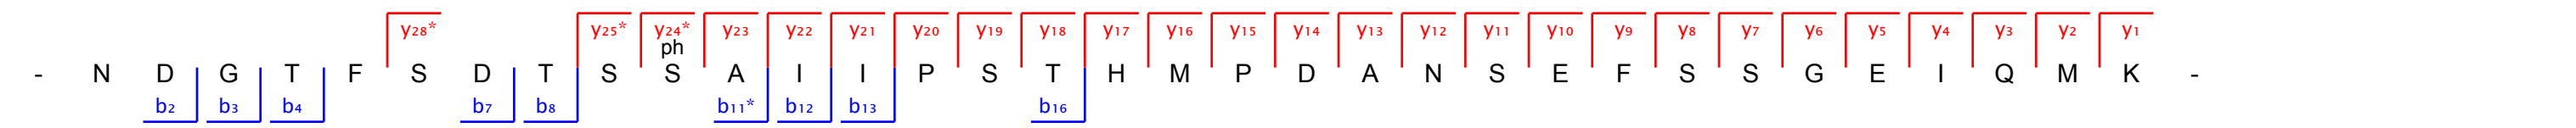

Raw file 20150814\_A375SR\_Phospho\_BR2\_04 Scan 23311 Method FTMS; HCD Score 222.06 m/z 1020.49 Gene names DNTTIP2

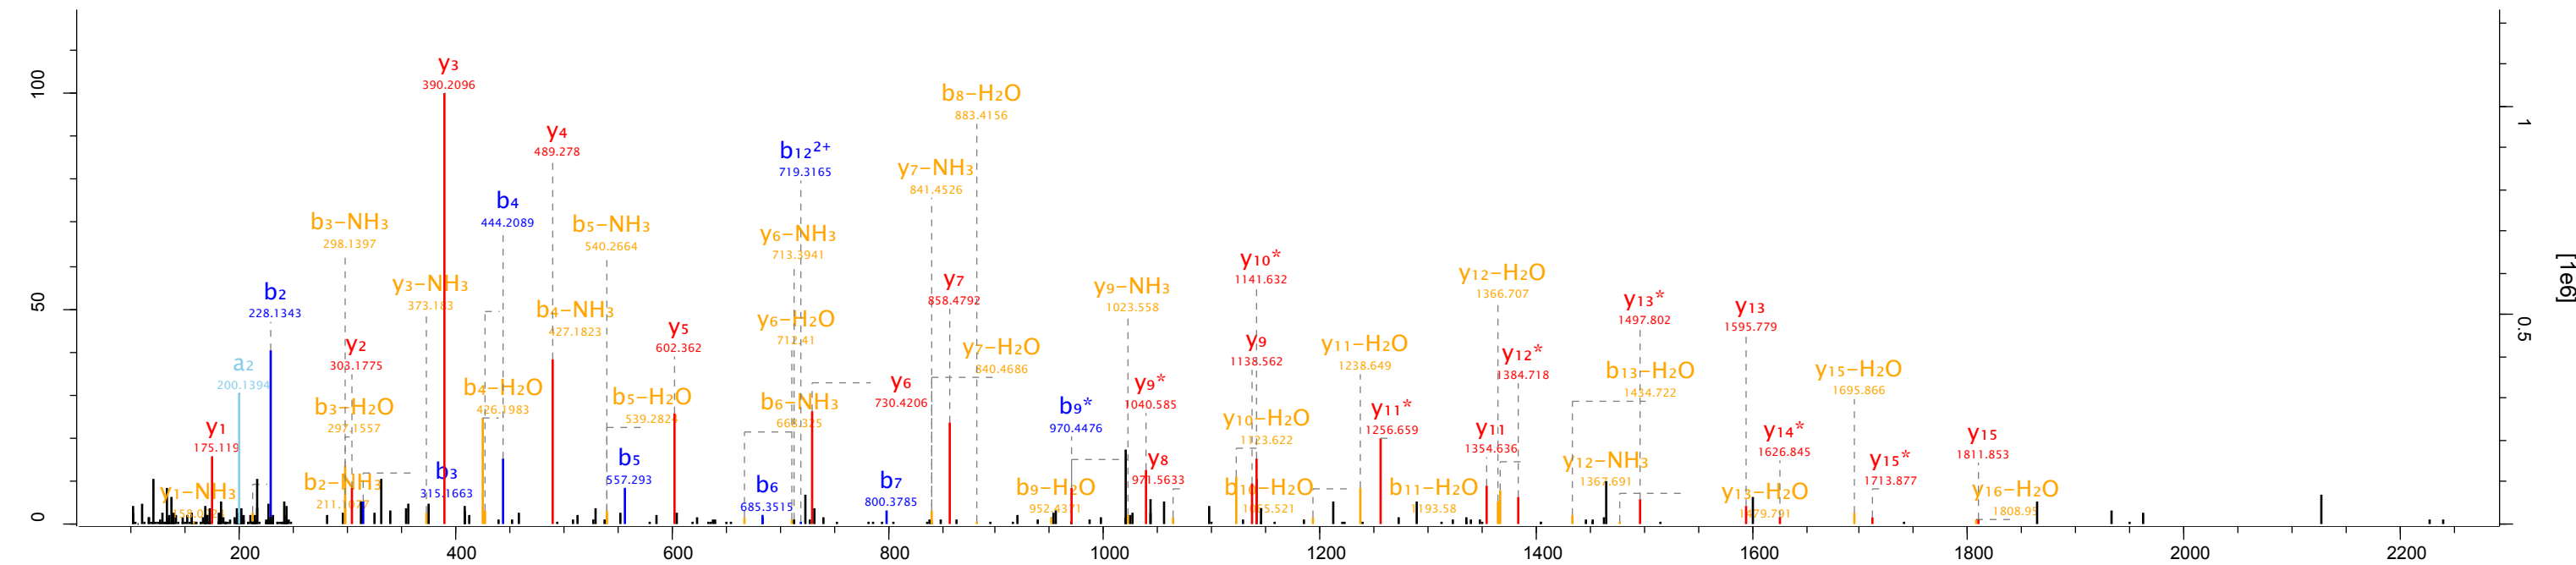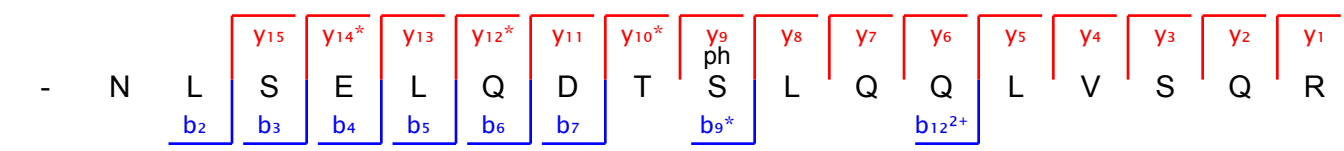

Raw file: 20150814\_A375SR\_Phospho\_BR2\_04  
 Scan: 23441 Method: FTMS; HCD Score: 76.68 m/z: 1297.63 Gene names: SASH1

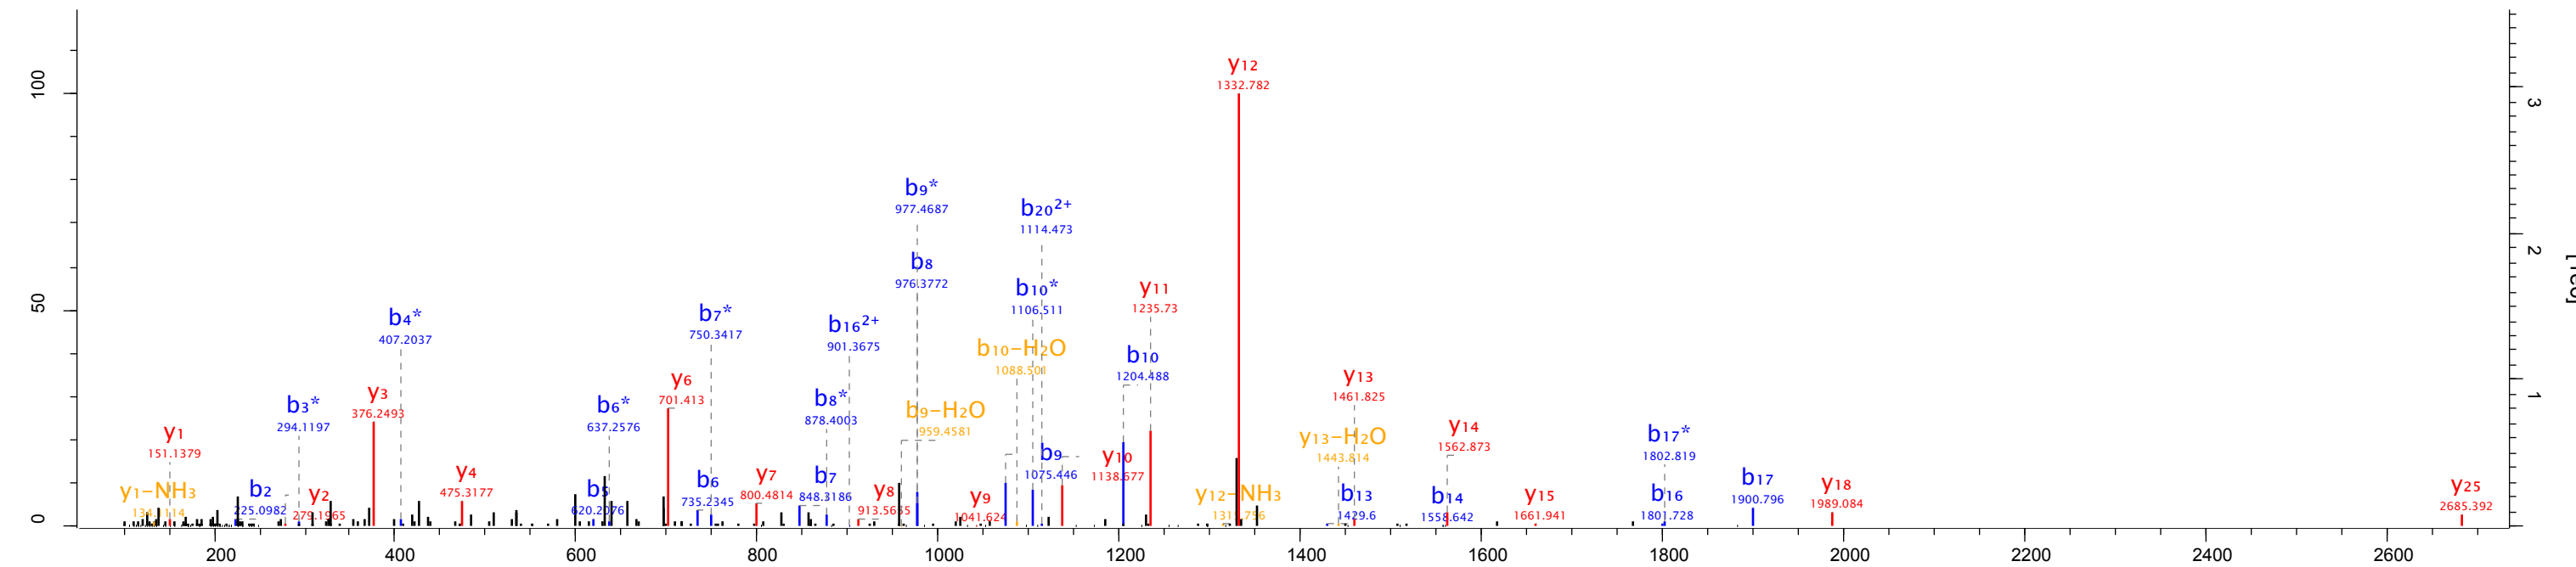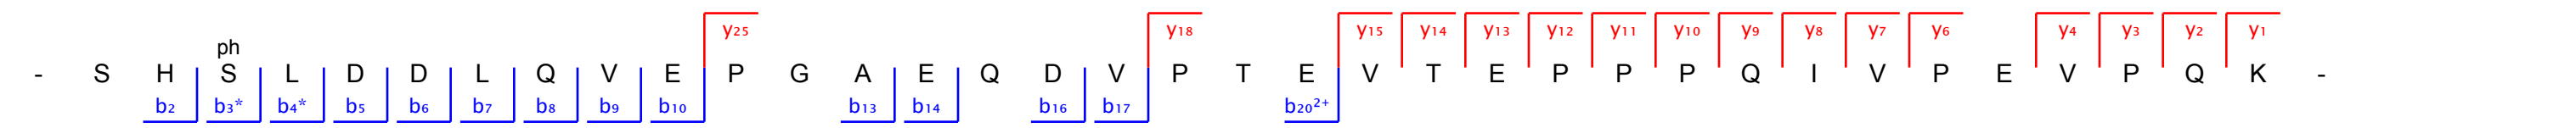

Raw file 20150814\_A375SR\_Phospho\_BR2\_04 Scan 23461 Method FTMS; HCD Score 87.54 m/z 992.16 Gene names MRE11A

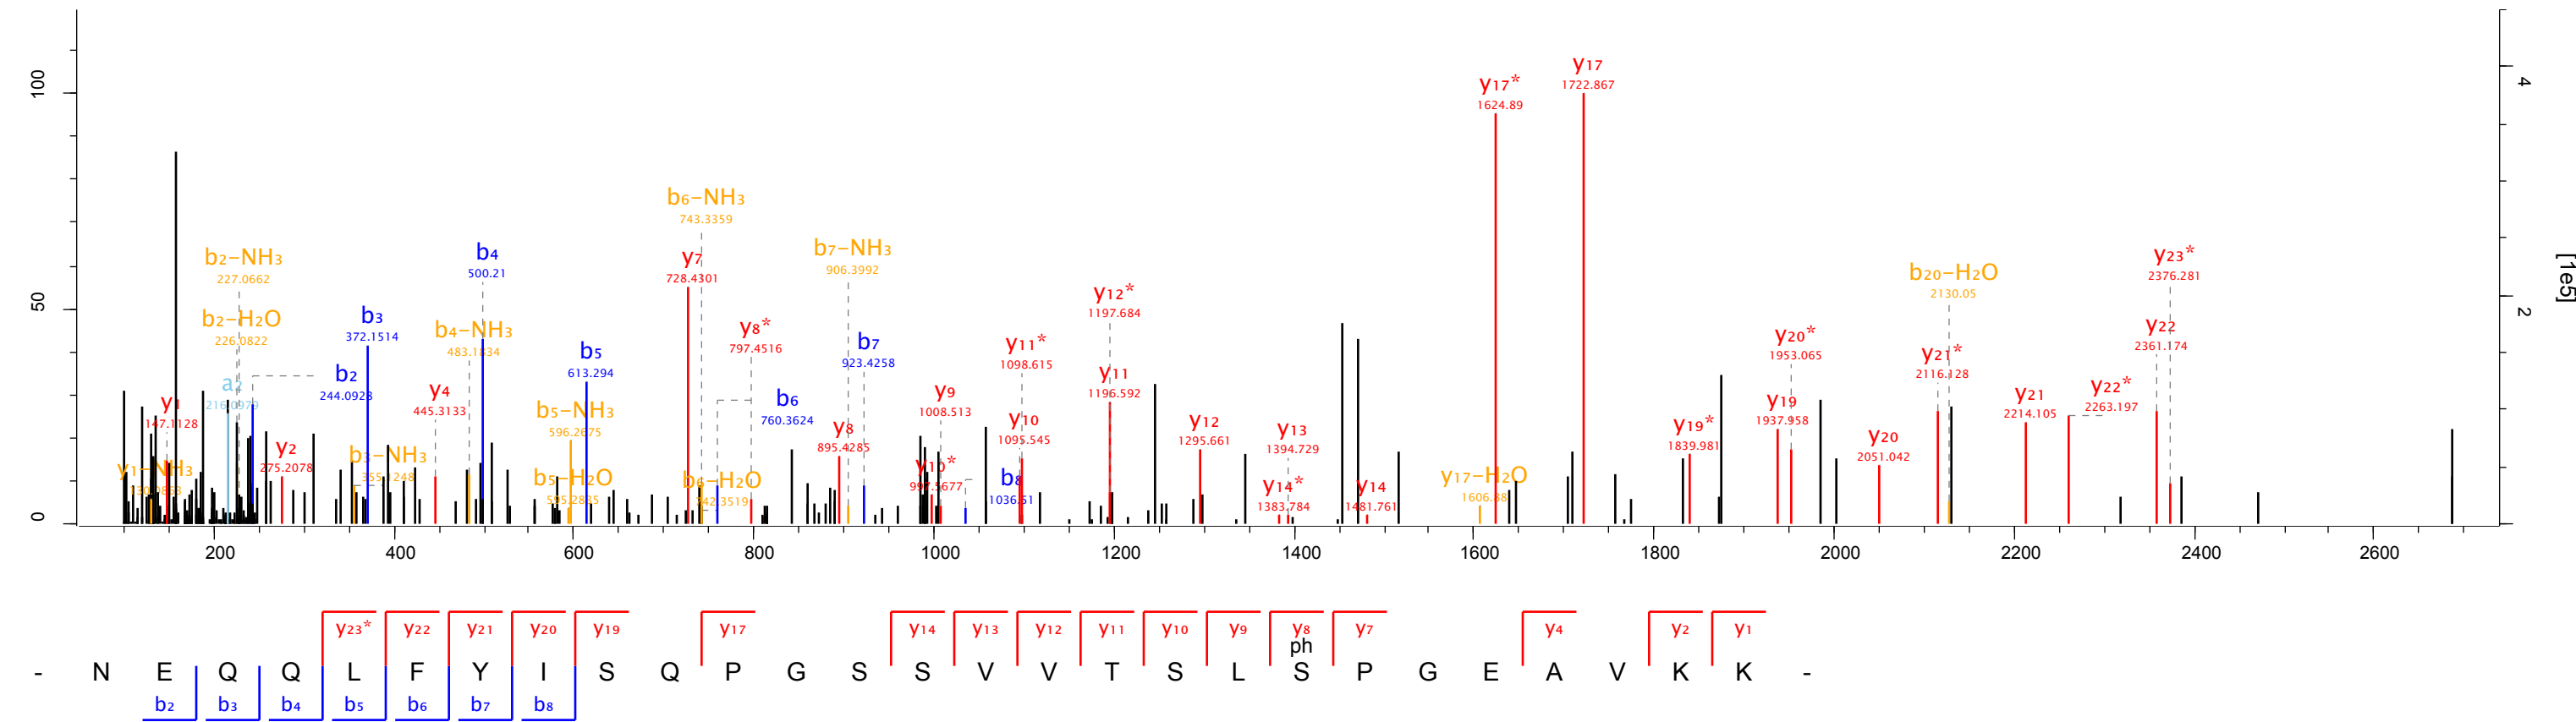

Raw file 20150814\_A375SR\_Phospho\_BR2\_04 Scan 24061 Method FTMS; HCD Score 158.12 m/z 1284.24 Gene names ARHGEF11

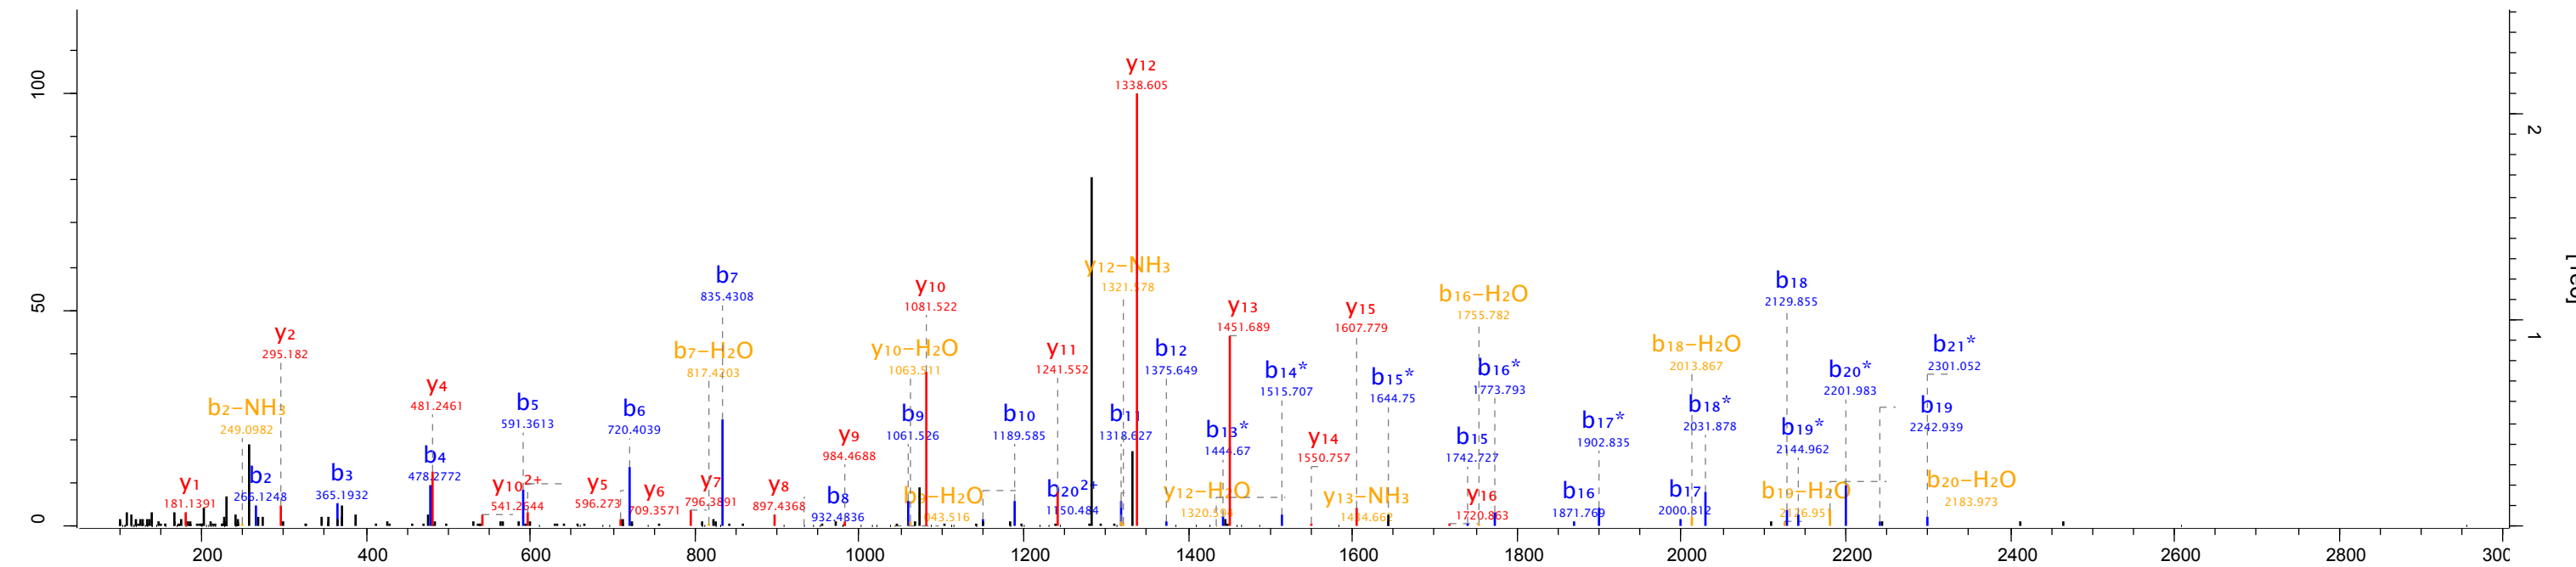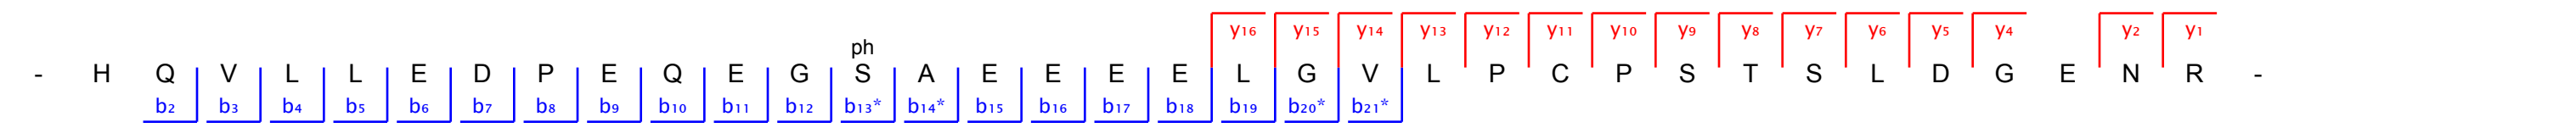



Raw file 20150814\_A375SR\_Phospho\_BR2\_04 Scan 24311 Method FTMS; HCD Score 181.94 m/z 863.89 Gene names DPYSL3

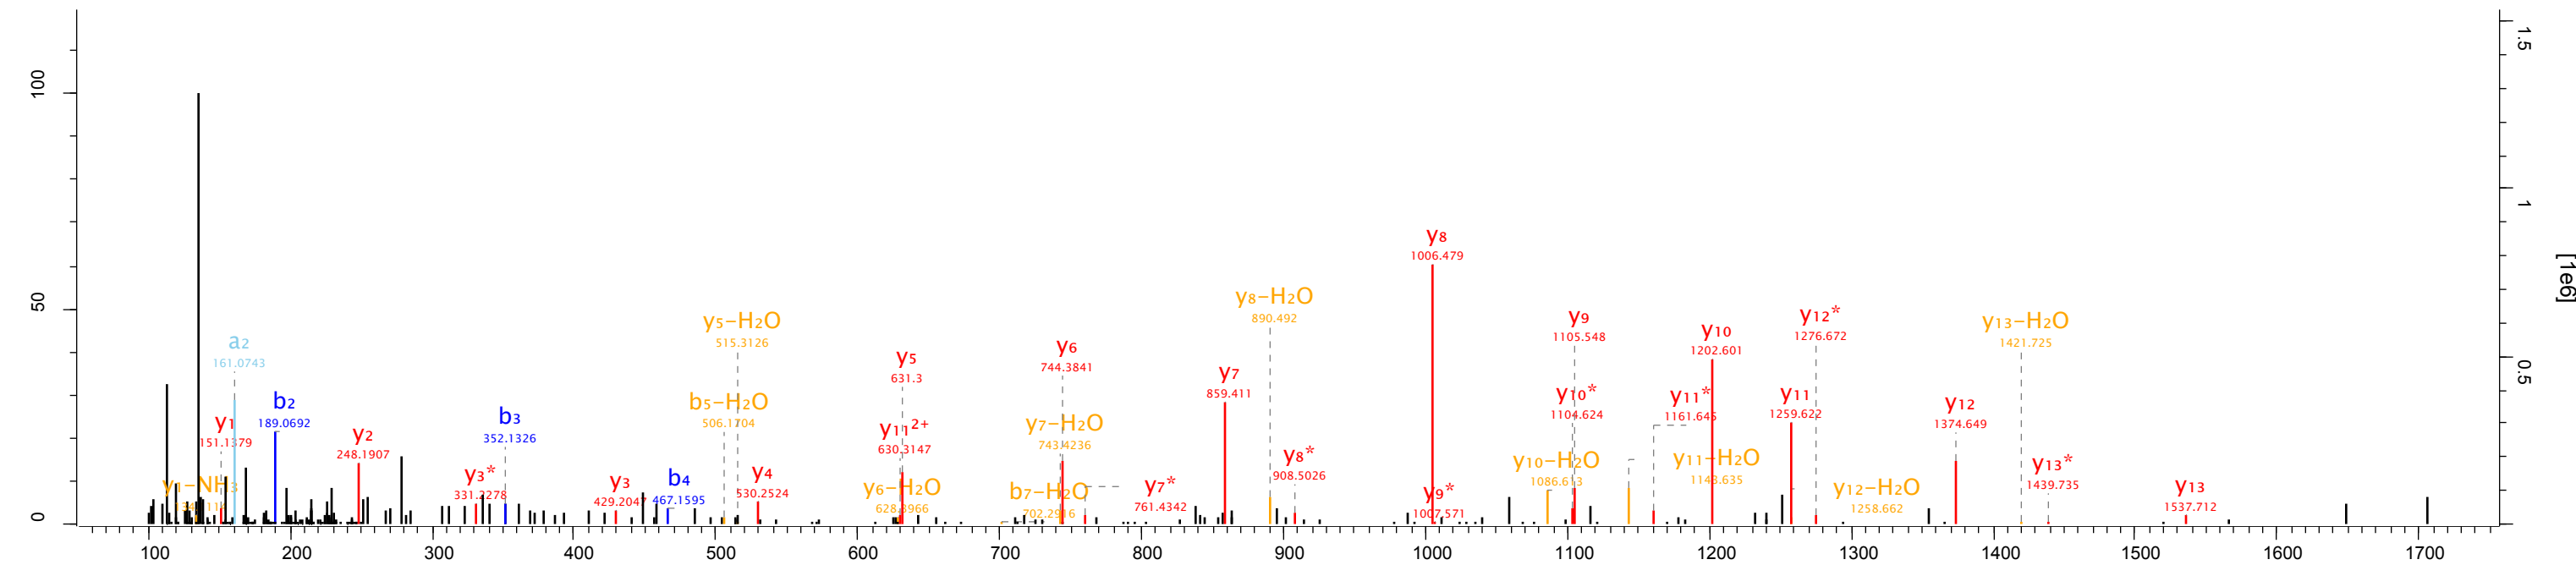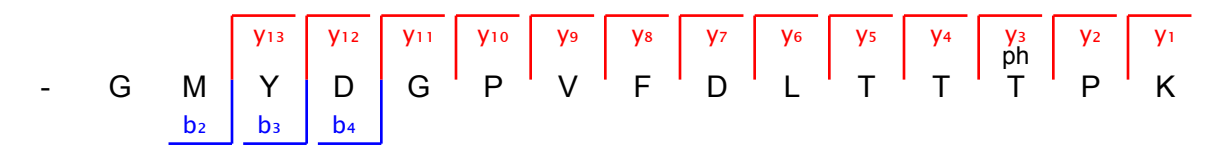

Raw file 20150814\_A375SR\_Phospho\_BR2\_04 Scan 24551 Method FTMS; HCD Score 109.04 m/z 820.38 Gene names PLEKHN1

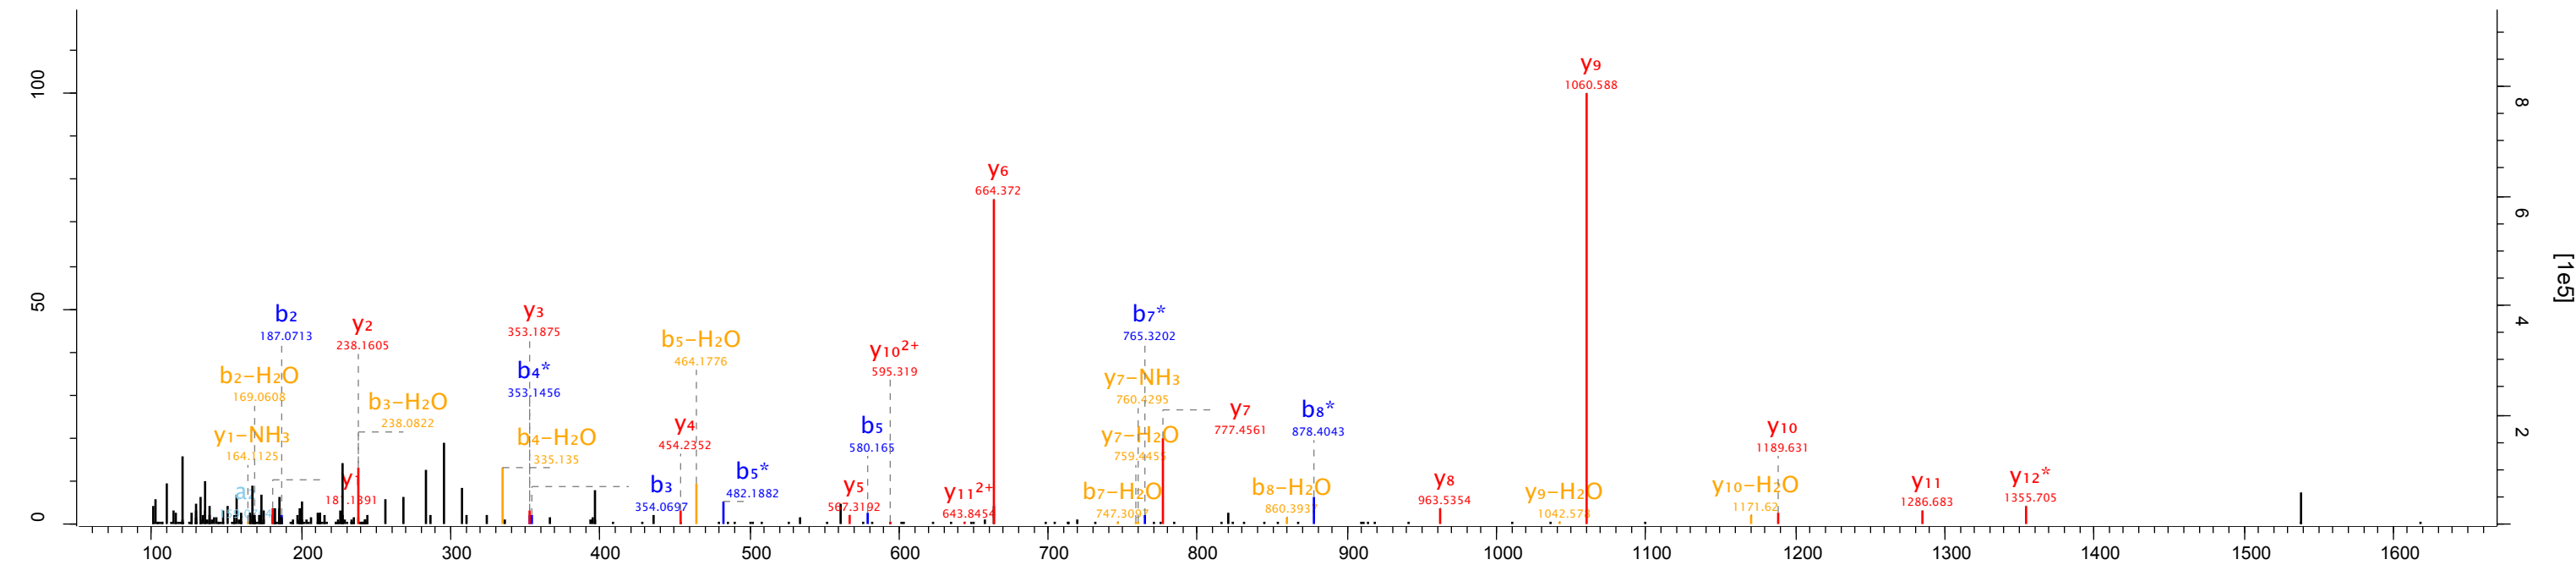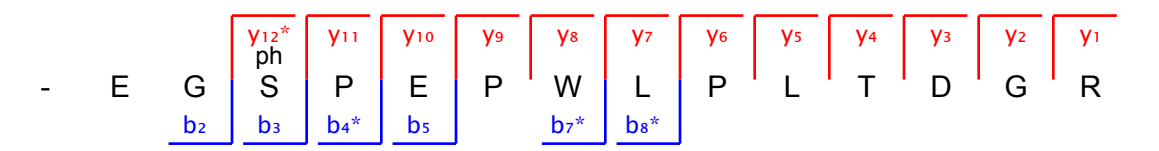

Raw file 20150814\_A375SR\_Phospho\_BR2\_04 Scan 2461 Method FTMS; HCD Score 110.74 m/z 487.26 Gene names ZC3H18

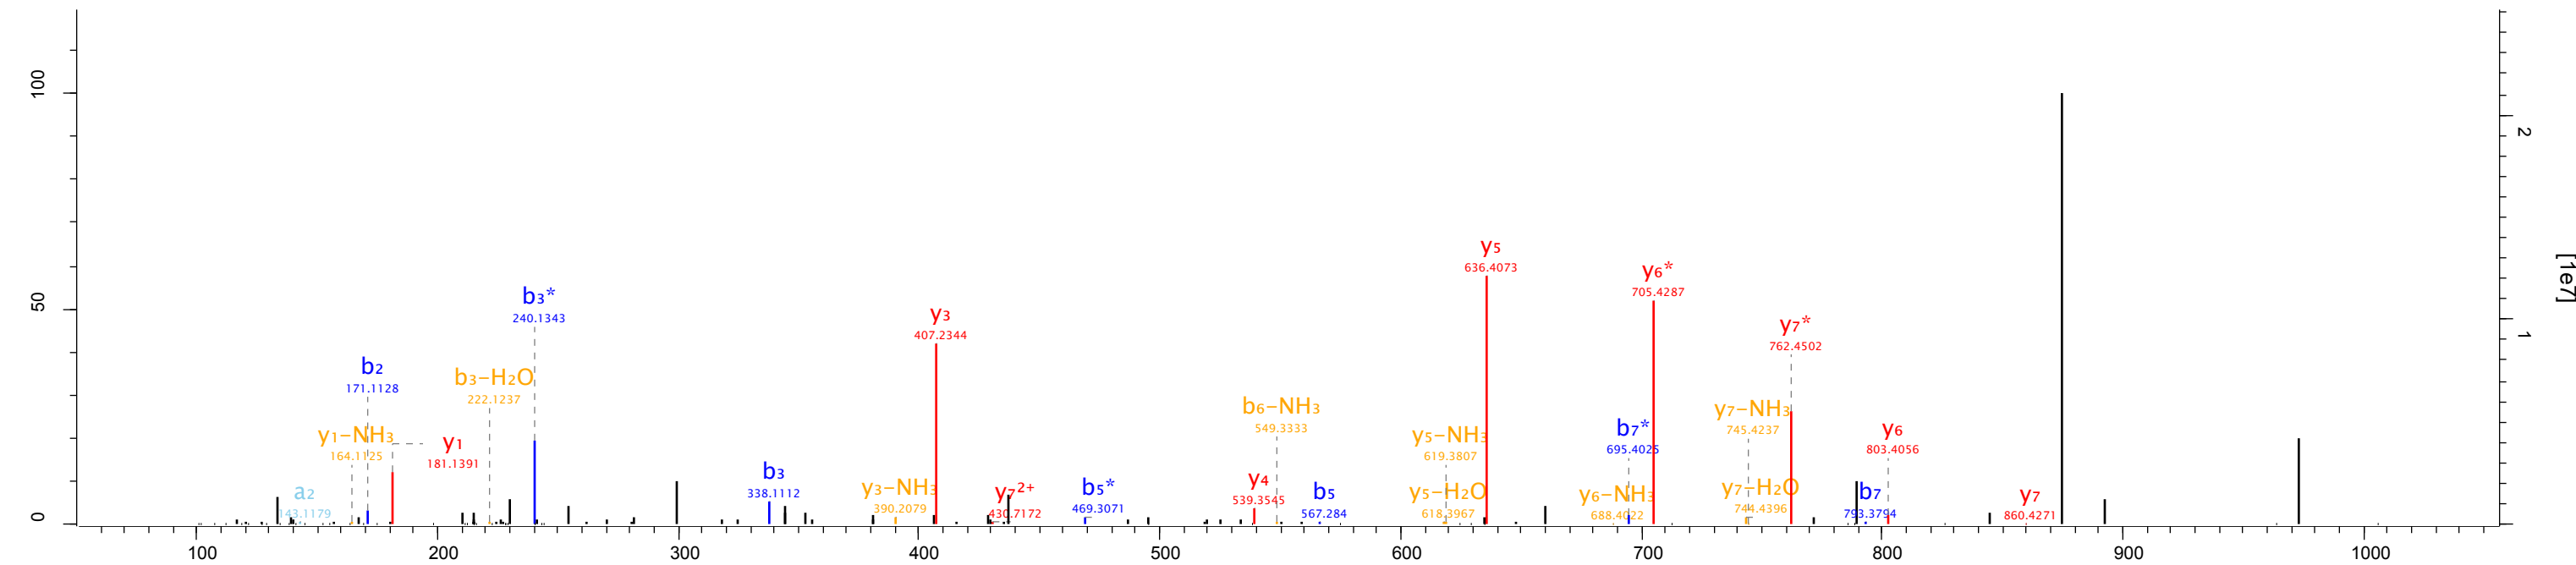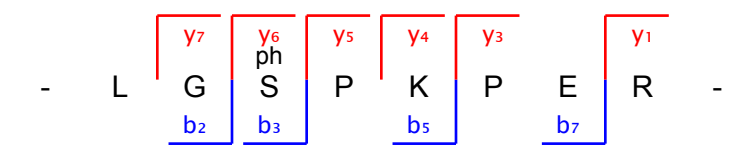

Raw file: 20150814\_A375SR\_Phospho\_BR2\_04  
 Scan: 2471 Method: FTMS; HCD Score: 84.19 m/z: 508.22 Gene names: SRRM2

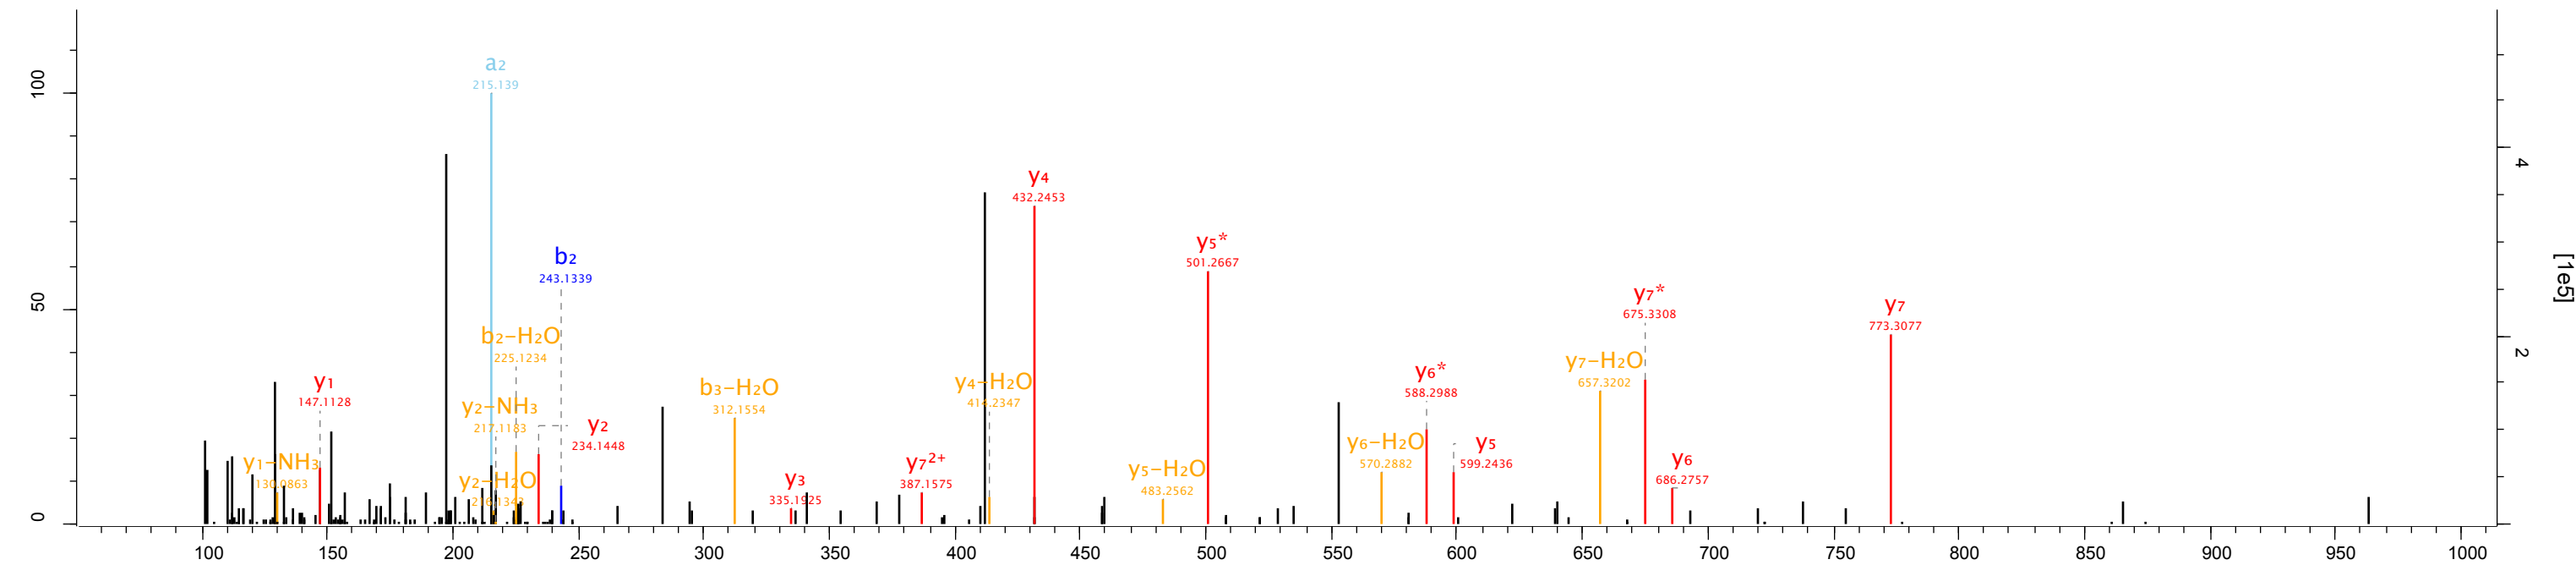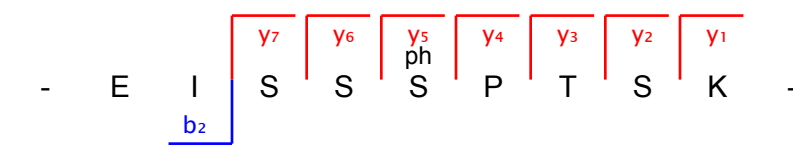

Raw file: 20150814\_A375SR\_Phospho\_BR2\_04  
 Scan: 25491 Method: FTMS; HCD Score: 173.2 m/z: 849.39 Gene names: SF3B1

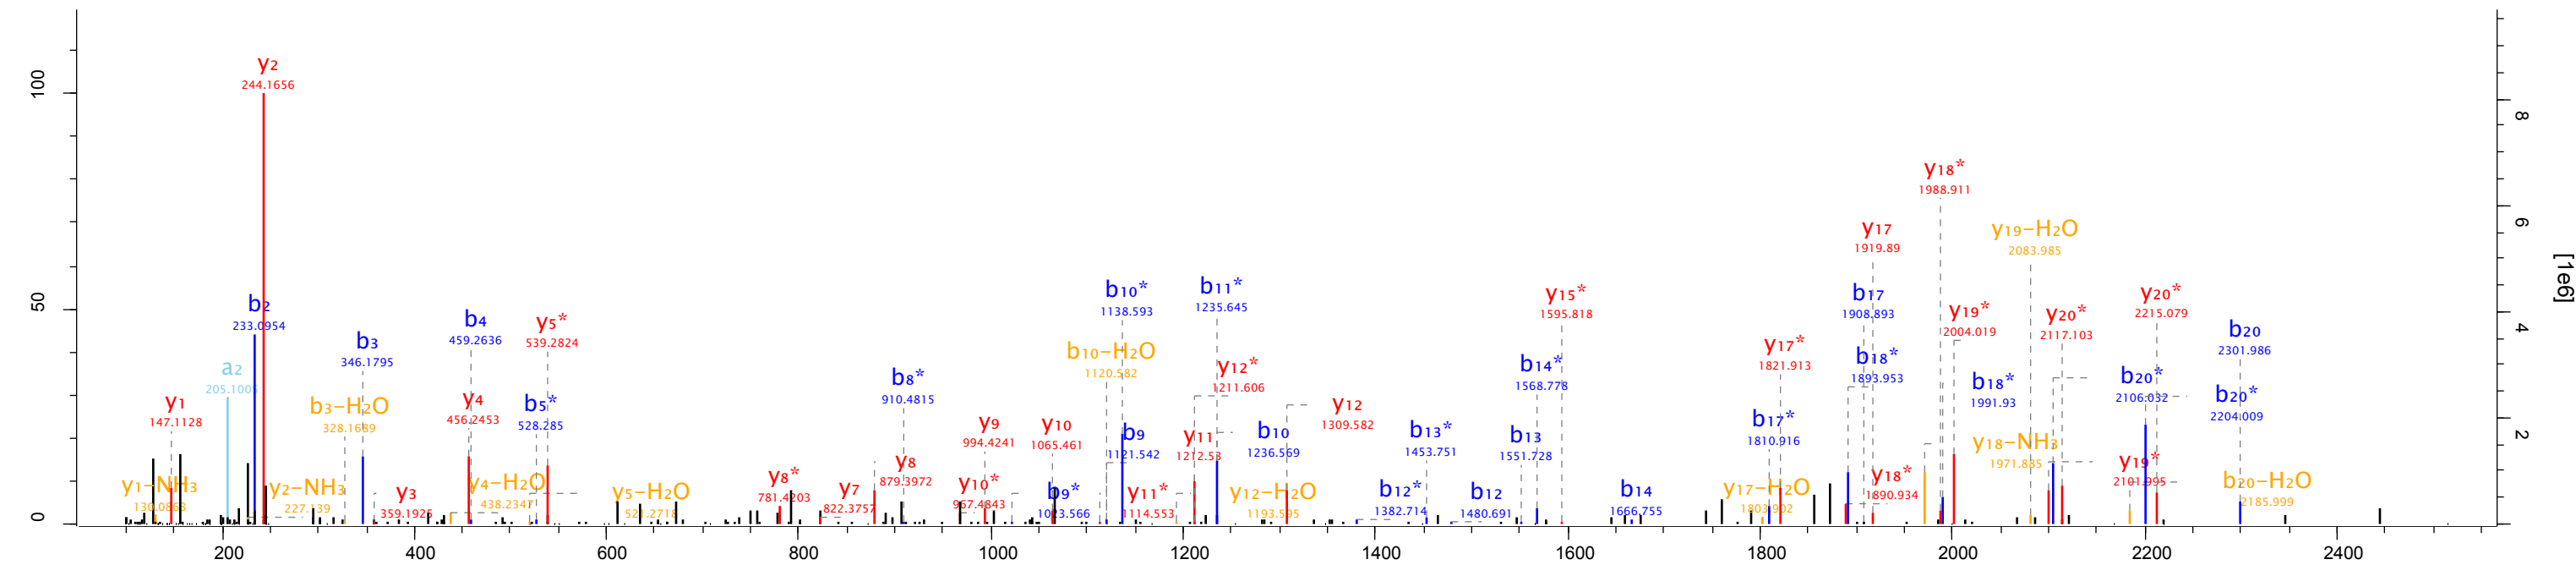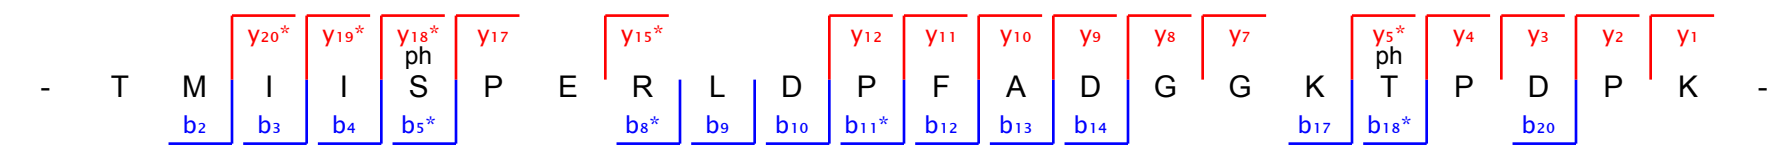

Raw file: 20150814\_A375SR\_Phospho\_BR2\_04  
 Scan: 25861 Method: FTMS; HCD Score: 95.44 m/z: 1299.56 Gene names: PRKAG1

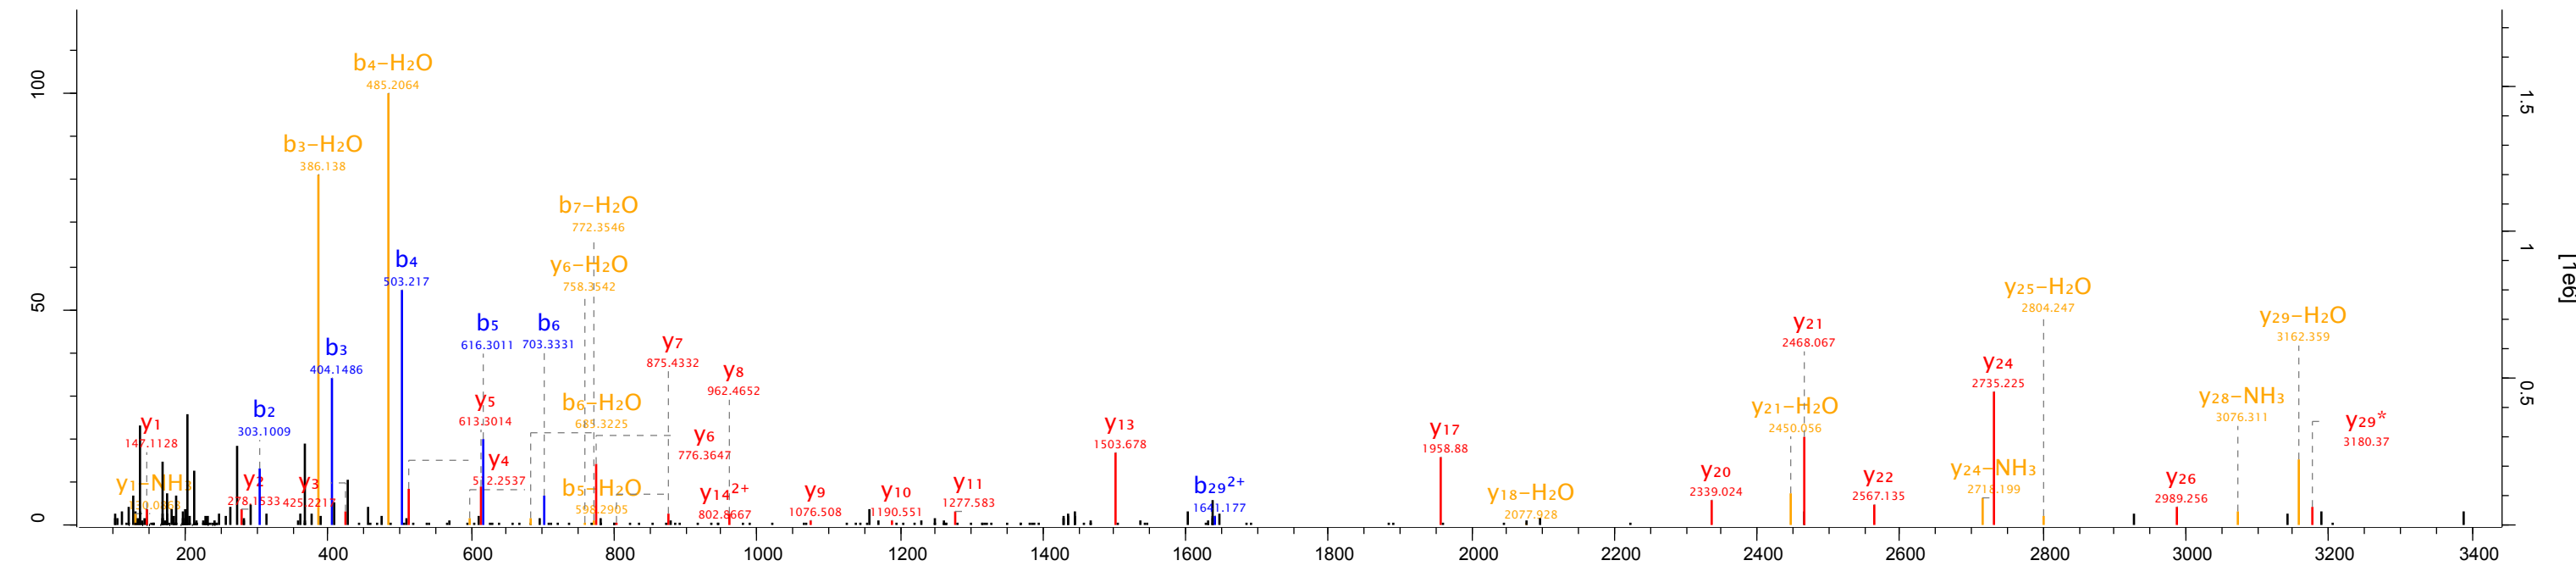

ac - M E T V I S S D S S P A V E N E H P Q E T P E S N N S V Y T S F M K -

Fragmentation sites (b ions): E, T, V, I, S (b<sub>2</sub> to b<sub>6</sub>)

Fragmentation sites (y ions): S, S, P, A, V, E, N, H, P, Q, E, T, P, E, S, N, N, S, V, Y, T, S, F, M, K (y<sub>1</sub> to y<sub>29</sub>)

Raw file 20150814\_A375SR\_Phospho\_BR2\_04 Scan 25891 Method FTMS; HCD Score 251.07 m/z 1270.58 Gene names TP53BP1

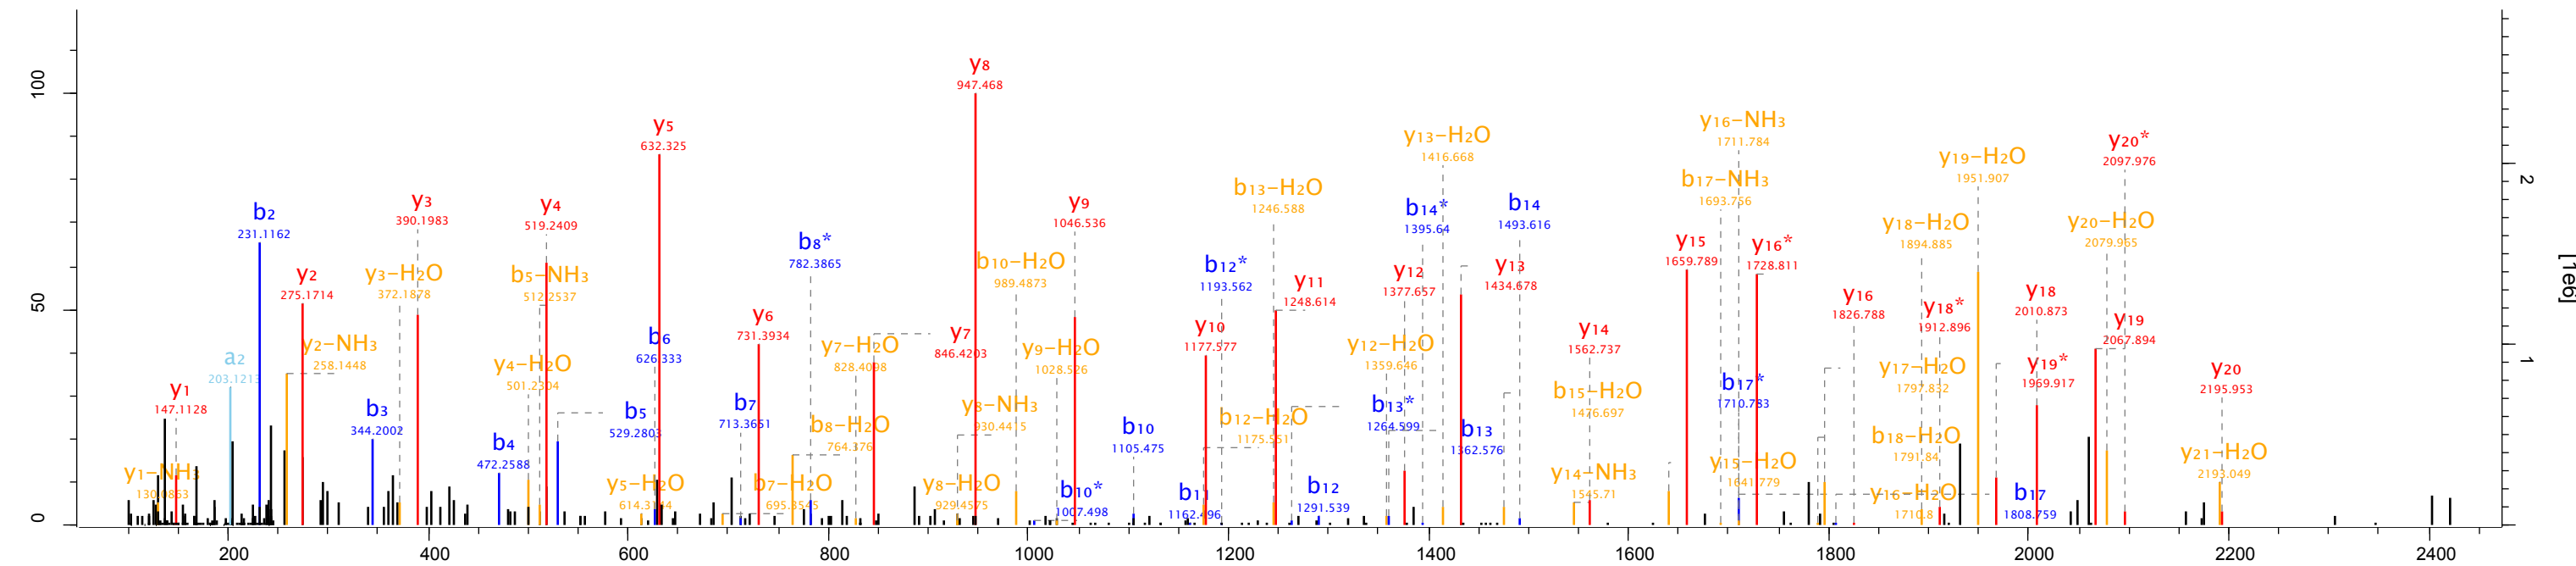

- M V I Q G P S S P Q G E A M V T D V L E D Q K -

Fragmentation mapping (b and y ions) is shown below the sequence:

- b<sub>2</sub> (V), b<sub>3</sub> (I), b<sub>4</sub> (Q), b<sub>5</sub> (G), b<sub>6</sub> (P), b<sub>7</sub> (S), b<sub>8</sub><sup>\*</sup> (S), b<sub>10</sub> (Q), b<sub>11</sub> (G), b<sub>12</sub> (E), b<sub>13</sub> (A), b<sub>14</sub> (M), b<sub>17</sub> (D)
- y<sub>1</sub> (Q), y<sub>2</sub> (D), y<sub>3</sub> (E), y<sub>4</sub> (L), y<sub>5</sub> (V), y<sub>6</sub> (D), y<sub>7</sub> (T), y<sub>8</sub> (V), y<sub>9</sub> (M), y<sub>10</sub> (A), y<sub>11</sub> (E), y<sub>12</sub> (G), y<sub>13</sub> (Q), y<sub>14</sub> (P), y<sub>15</sub> (S), y<sub>16</sub> (S), y<sub>18</sub> (P), y<sub>19</sub> (G), y<sub>20</sub> (Q)

Raw file: 20150814\_A375SR\_Phospho\_BR2\_04  
 Scan: 25961 Method: FTMS; HCD Score: 121.72 m/z: 711.33 Gene names: L3MBTL2

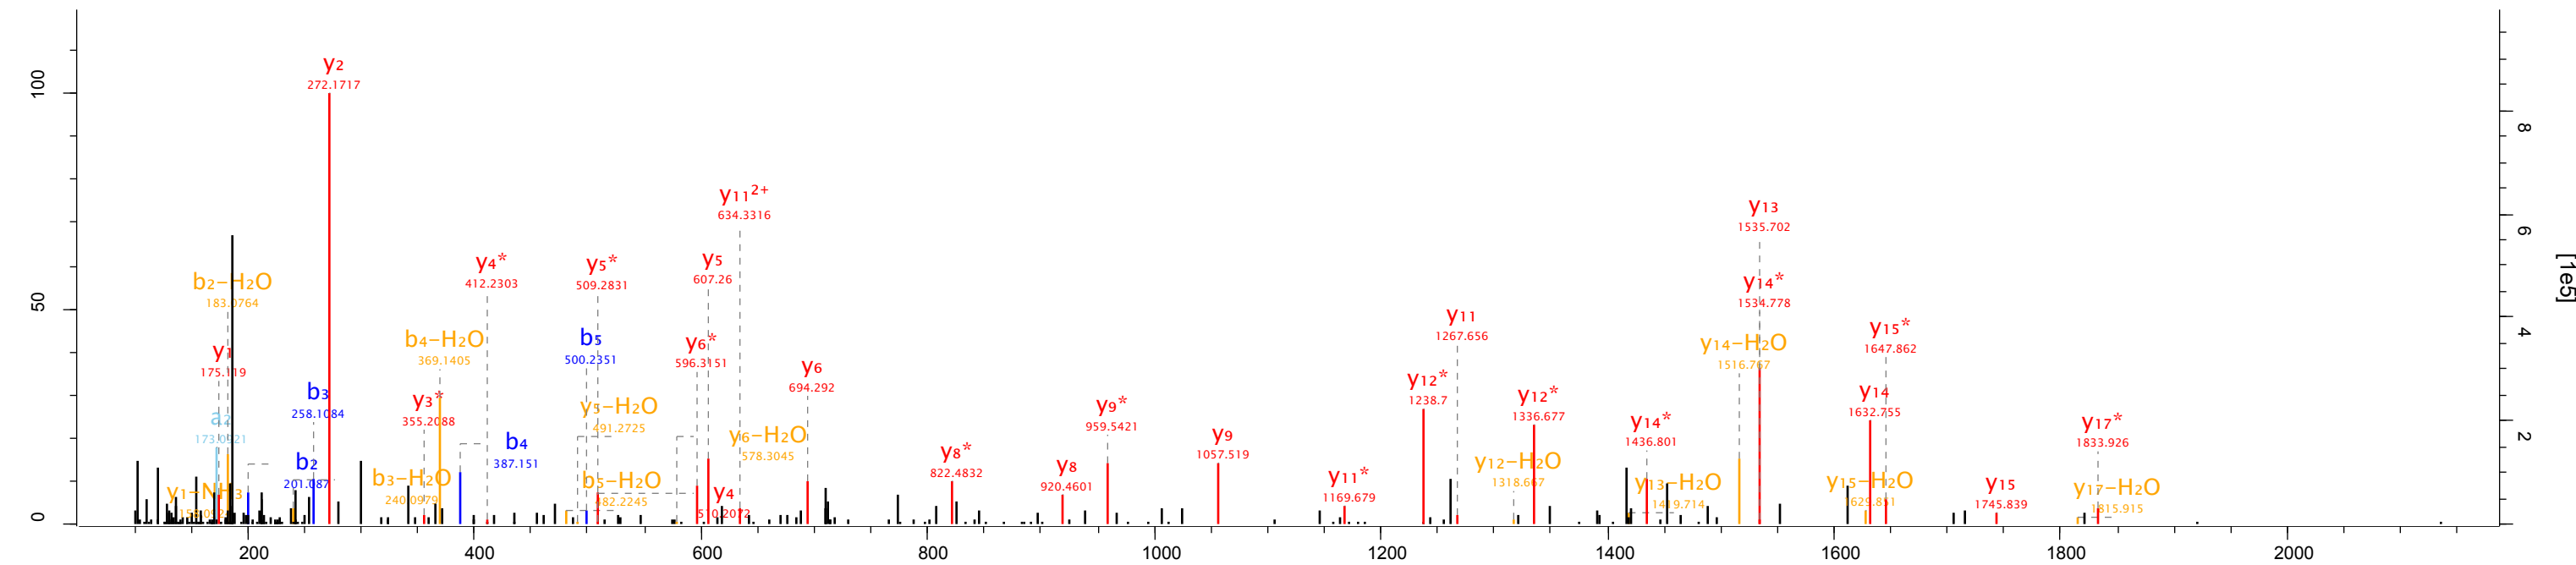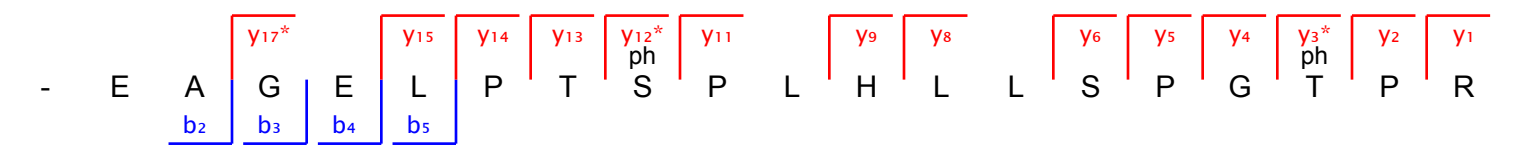



Raw file: 20150814\_A375SR\_Phospho\_BR2\_04  
 Scan: 26001  
 Method: FTMS; HCD  
 Score: 171.26  
 m/z: 1044.99  
 Gene names: SCRIB

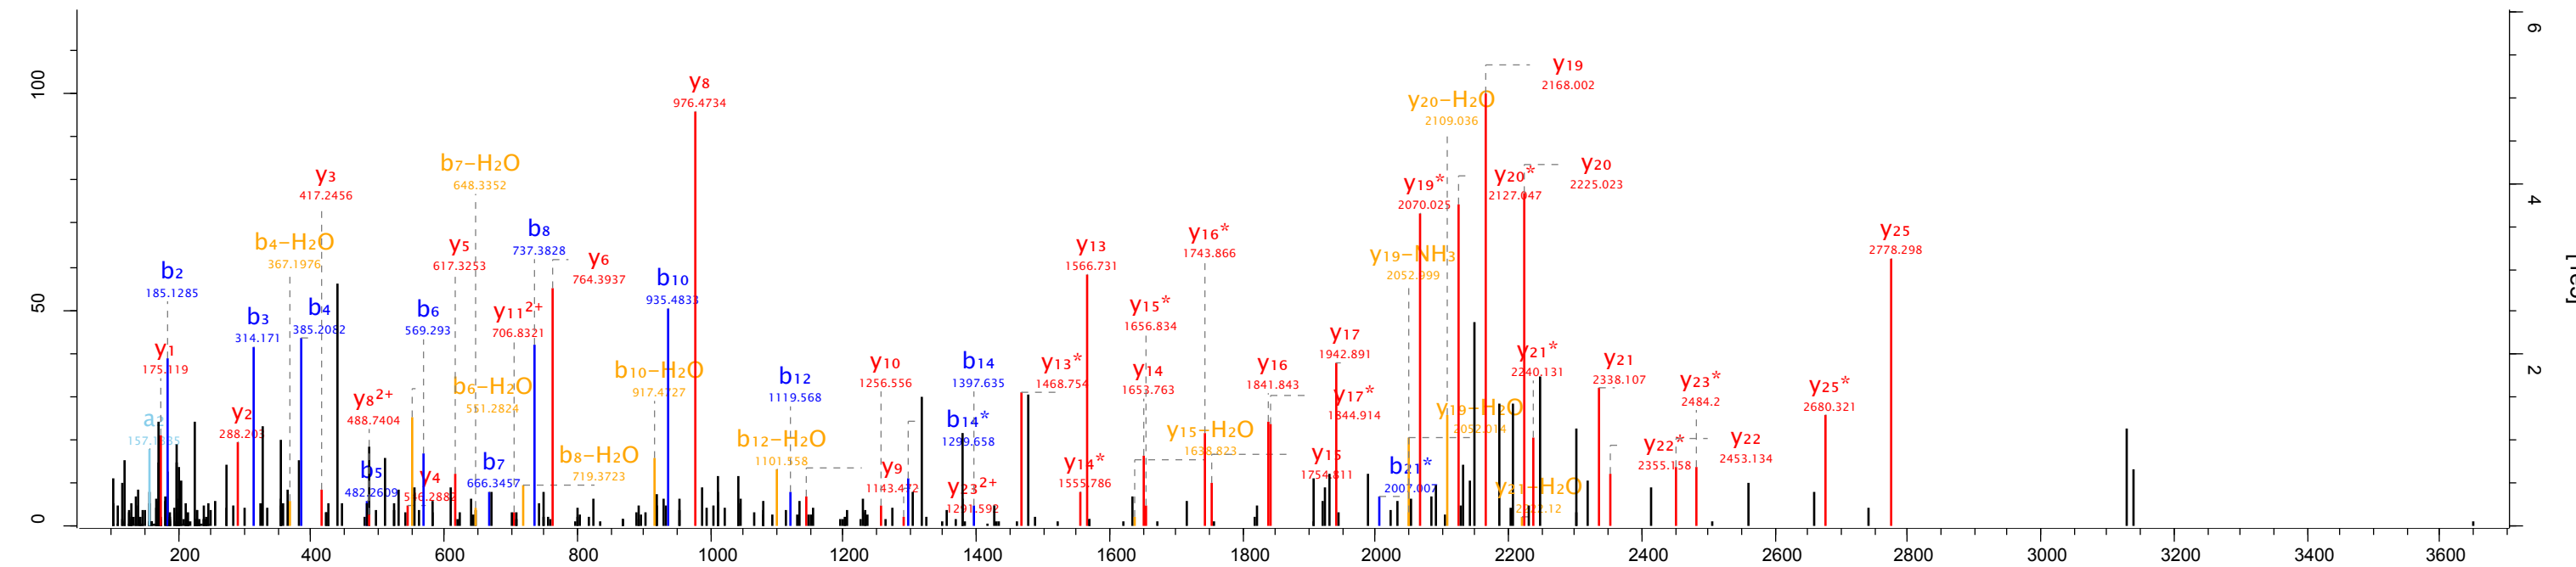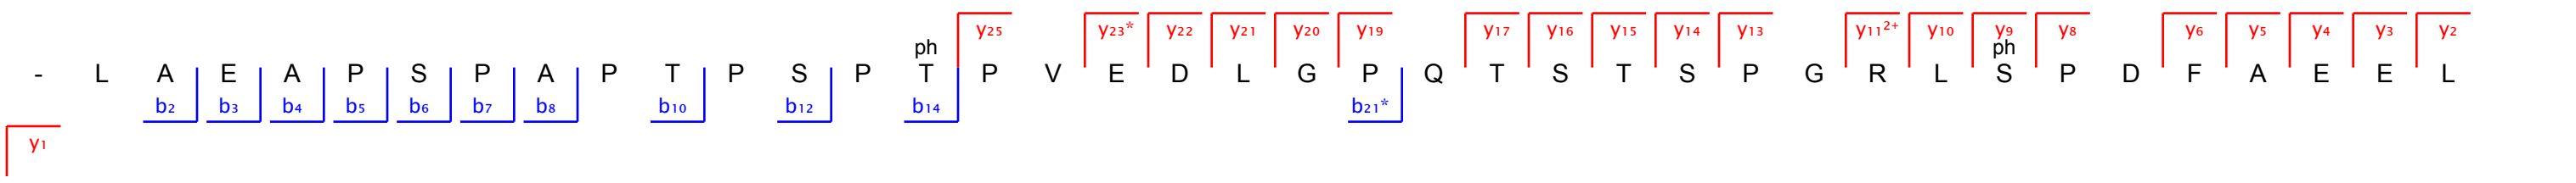

Raw file  
20150814\_A375SR\_Phospho\_BR2\_04

Scan 26211 Method FTMS; HCD Score 227.57 m/z 984.13 Gene names BCL7C

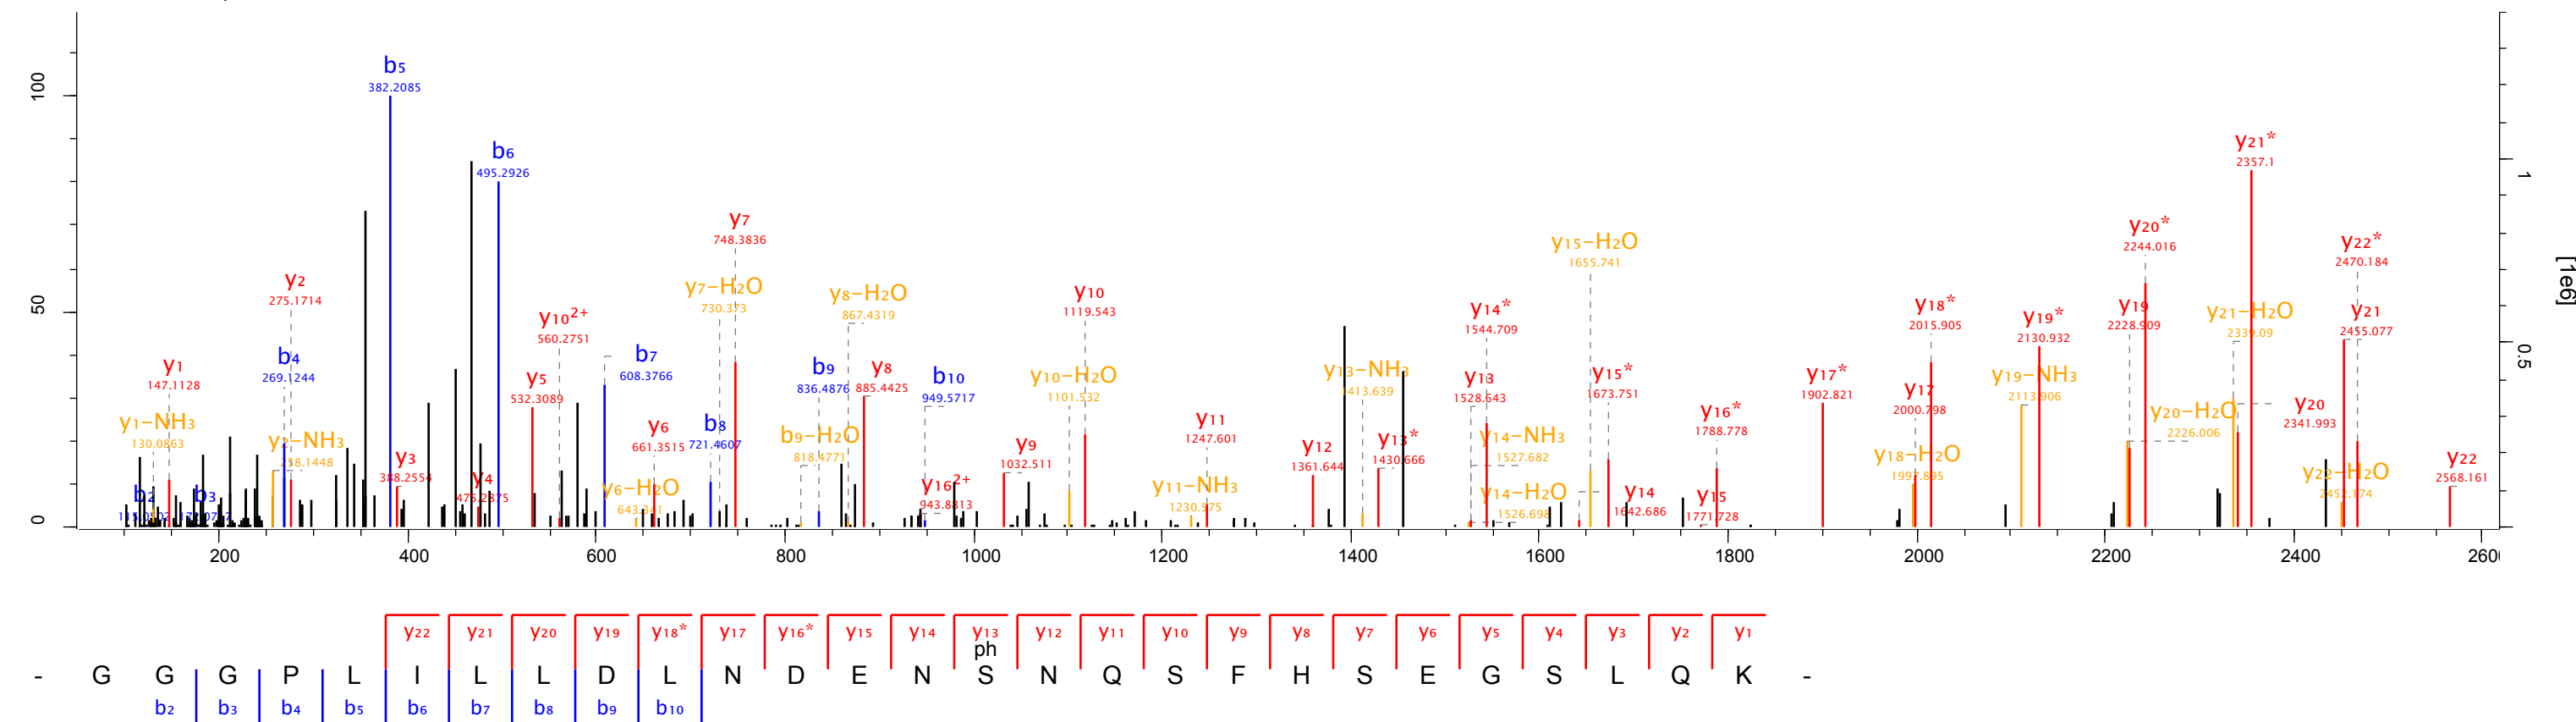

Raw file 20150814\_A375SR\_Phospho\_BR2\_04 Scan 27101 Method FTMS; HCD Score 136.86 m/z 1088.5 Gene names TAB1

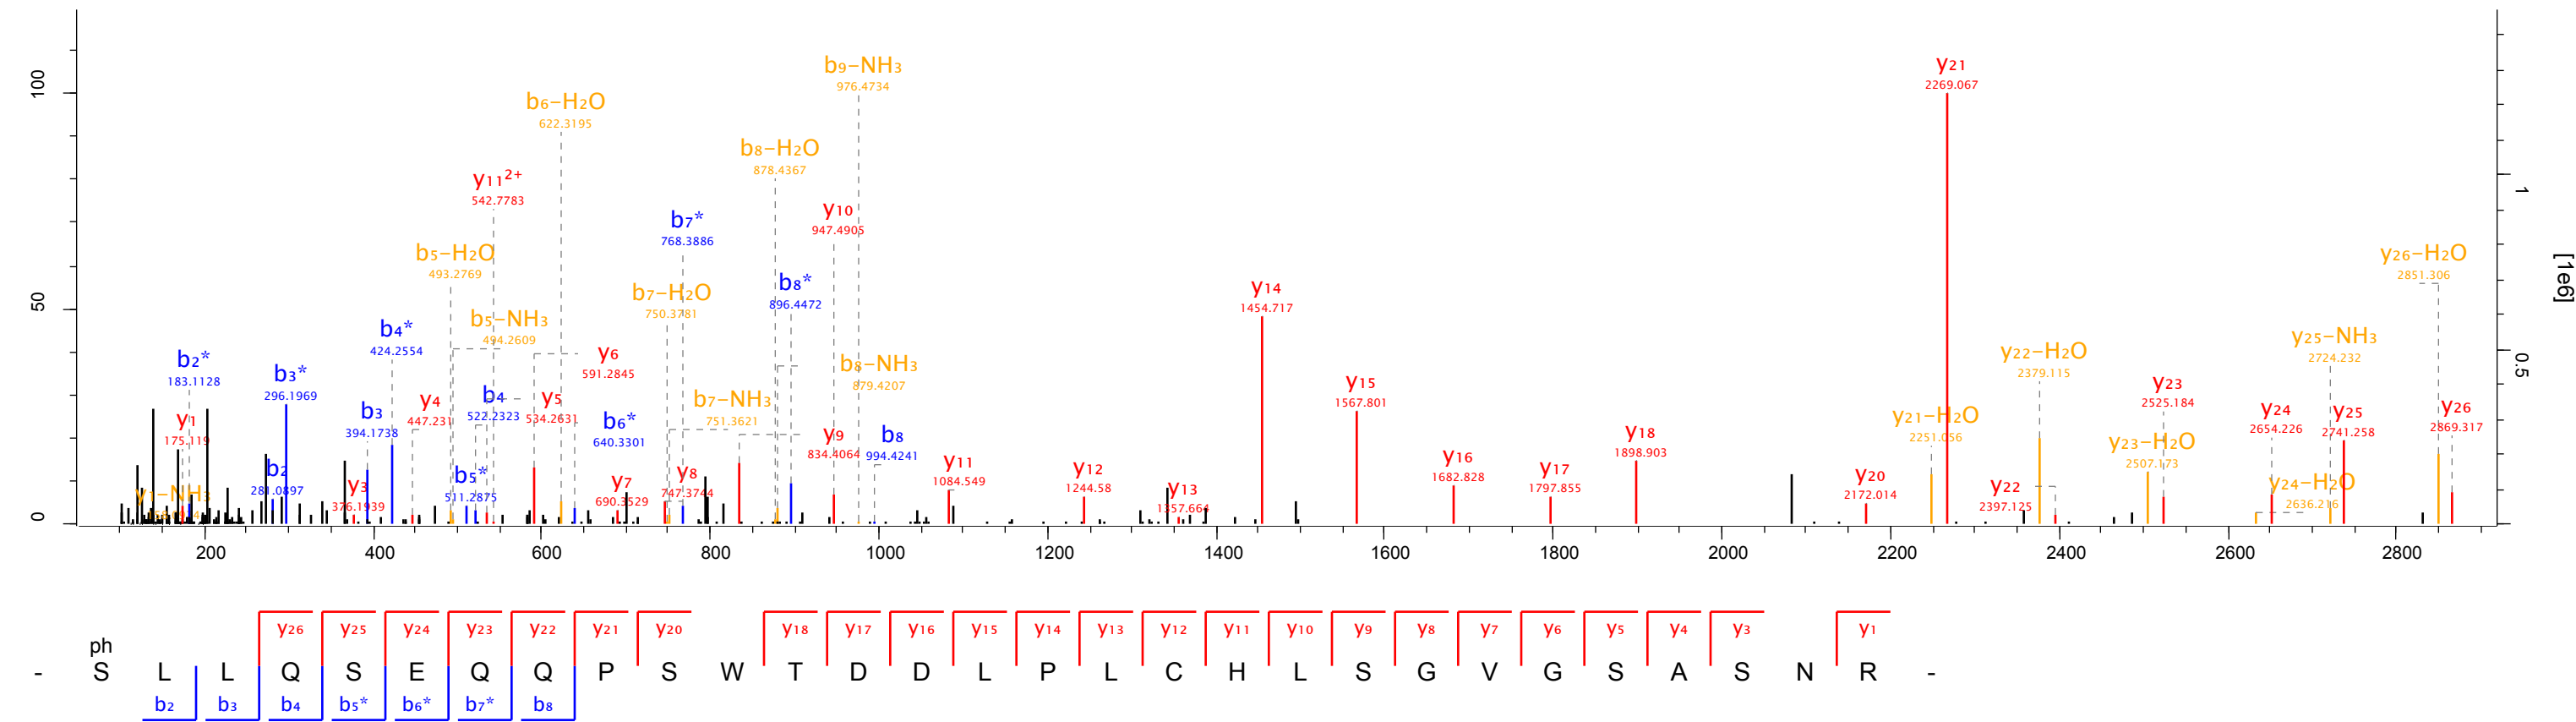

Raw file 20150814\_A375SR\_Phospho\_BR2\_04 Scan 27601 Method FTMS; HCD Score 109.08 m/z 836.41 Gene names NR2C2

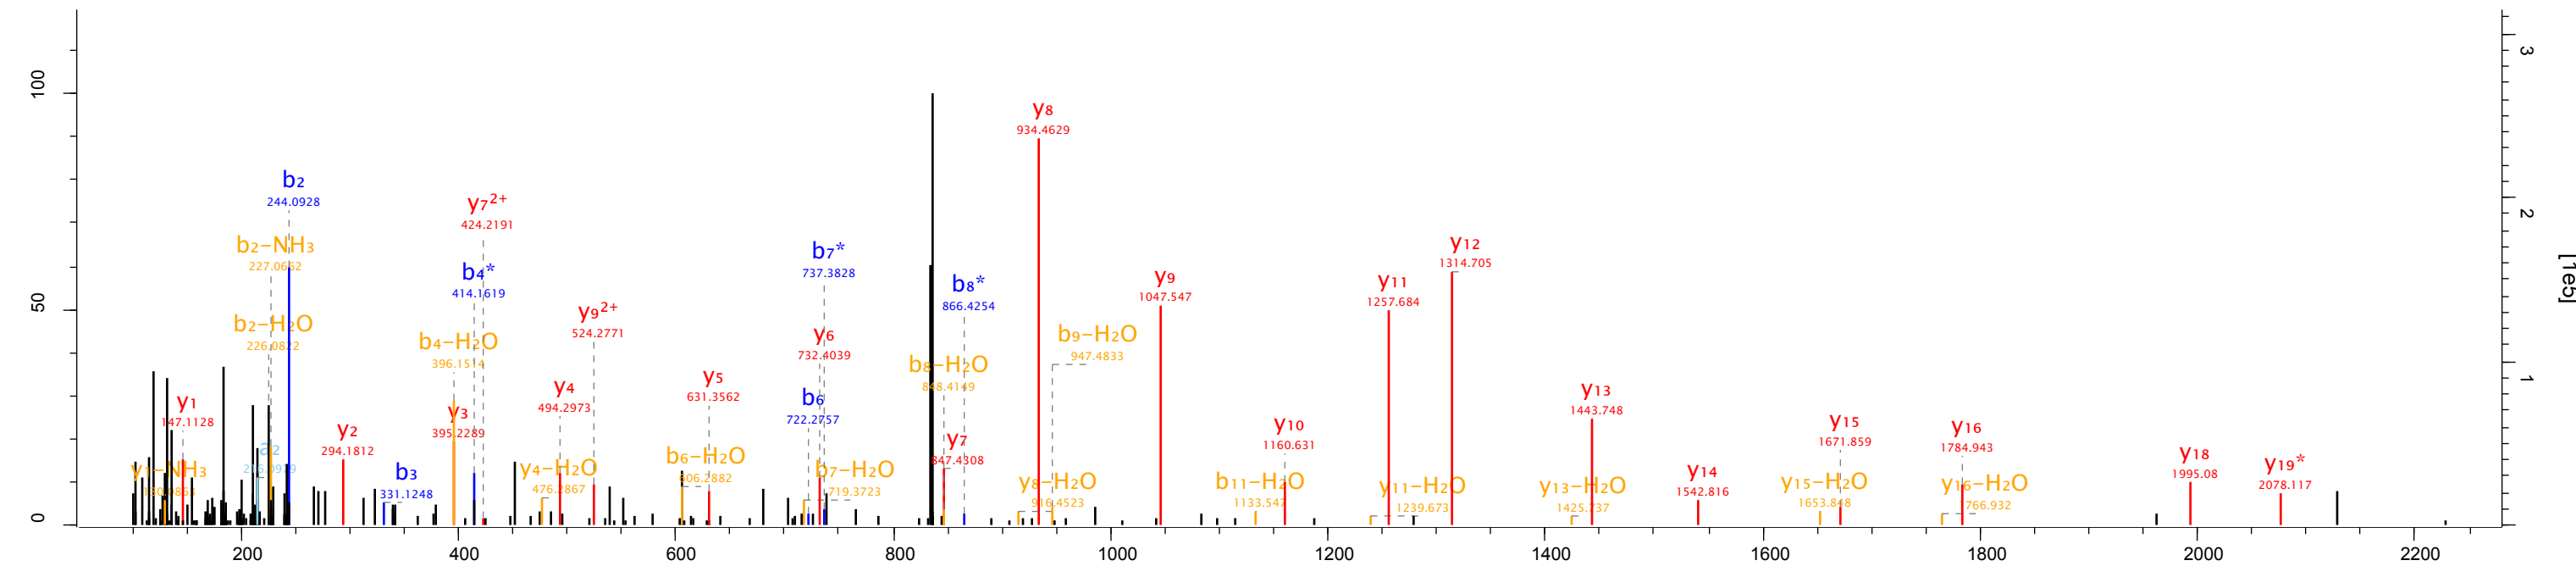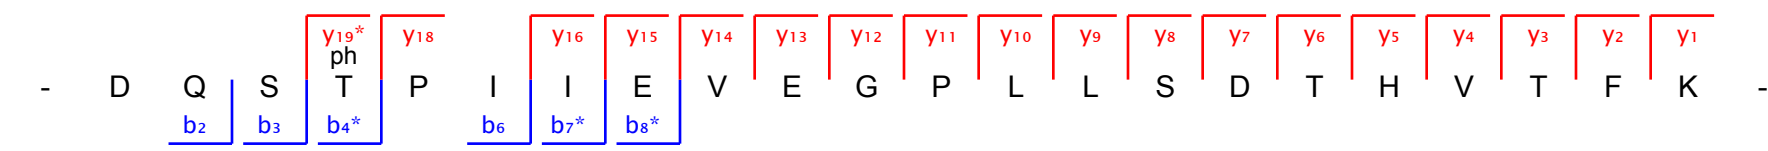

Raw file 20150814\_A375SR\_Phospho\_BR2\_04 Scan 27701 Method FTMS; HCD Score 146.45 m/z 876.73 Gene names RAB11FIP1

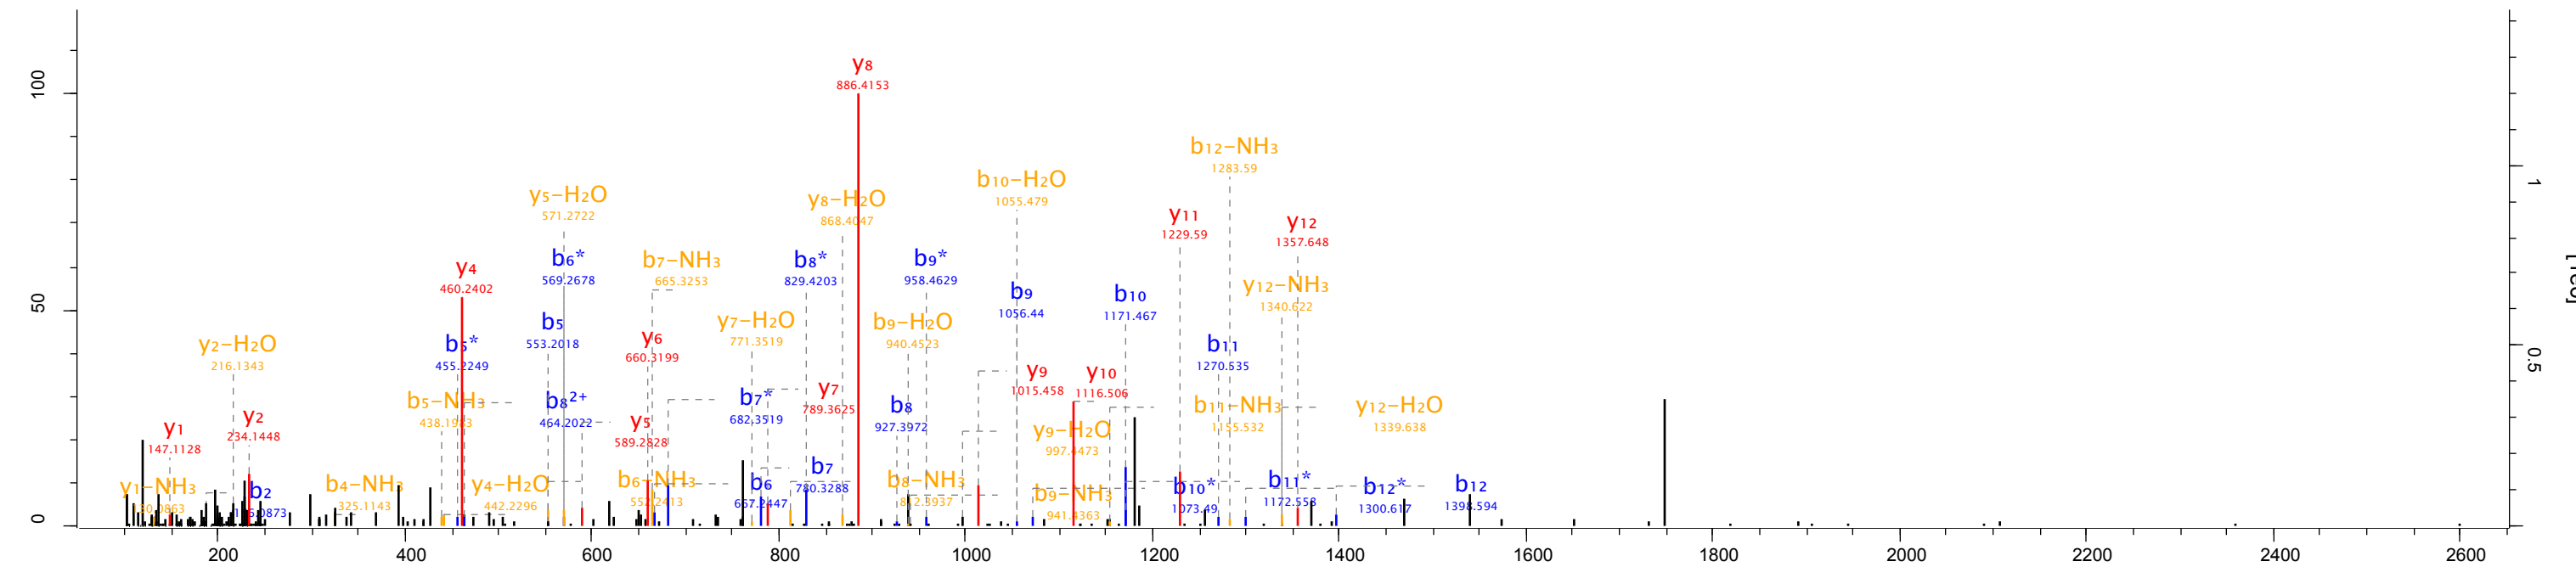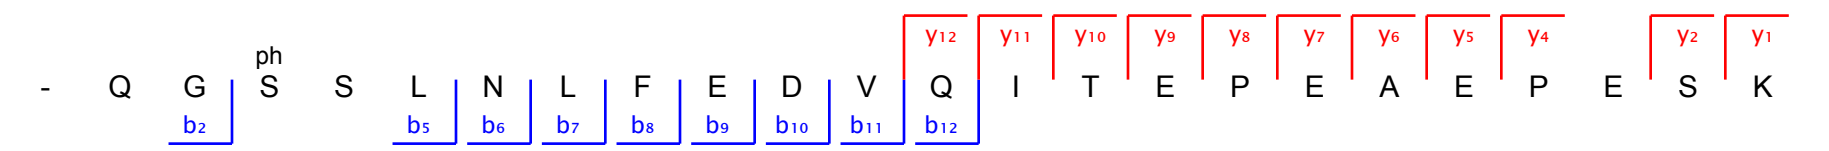

Raw file 20150814\_A375SR\_Phospho\_BR2\_04 Scan 28001 Method FTMS; HCD Score 145.71 m/z 869.96 Gene names MCM7

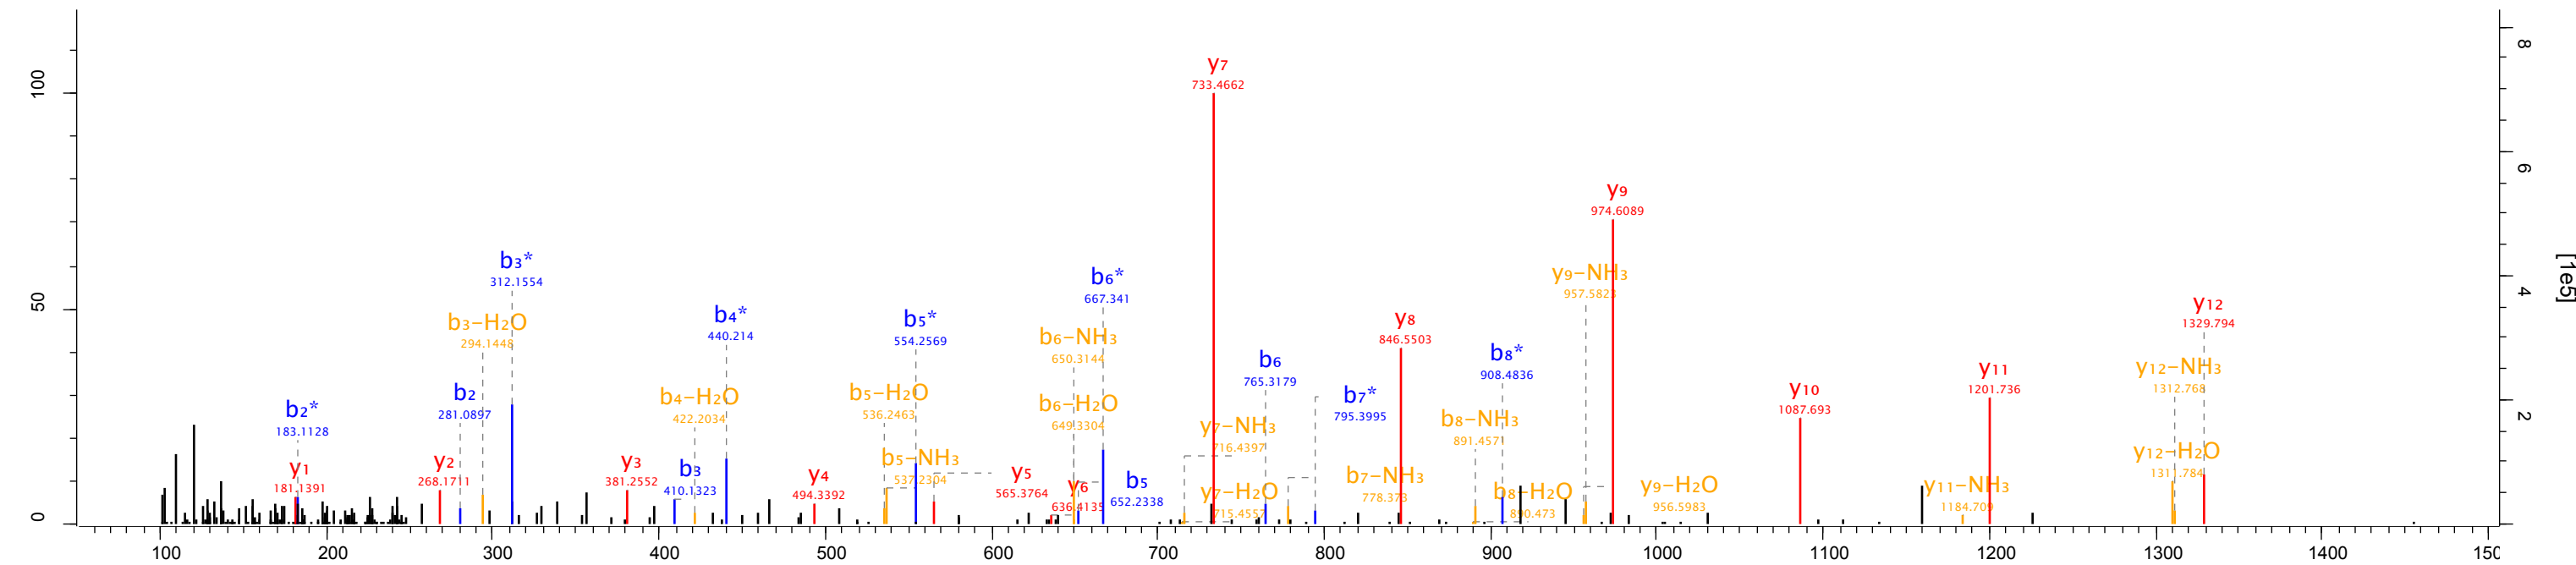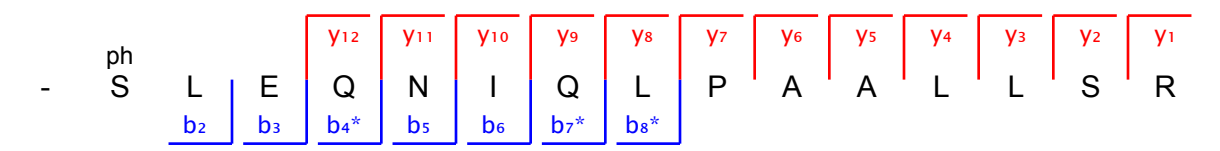

Raw file 20150814\_A375SR\_Phospho\_BR2\_04 Scan 28081 Method FTMS; HCD Score 158.61 m/z 932.96 Gene names PRR12

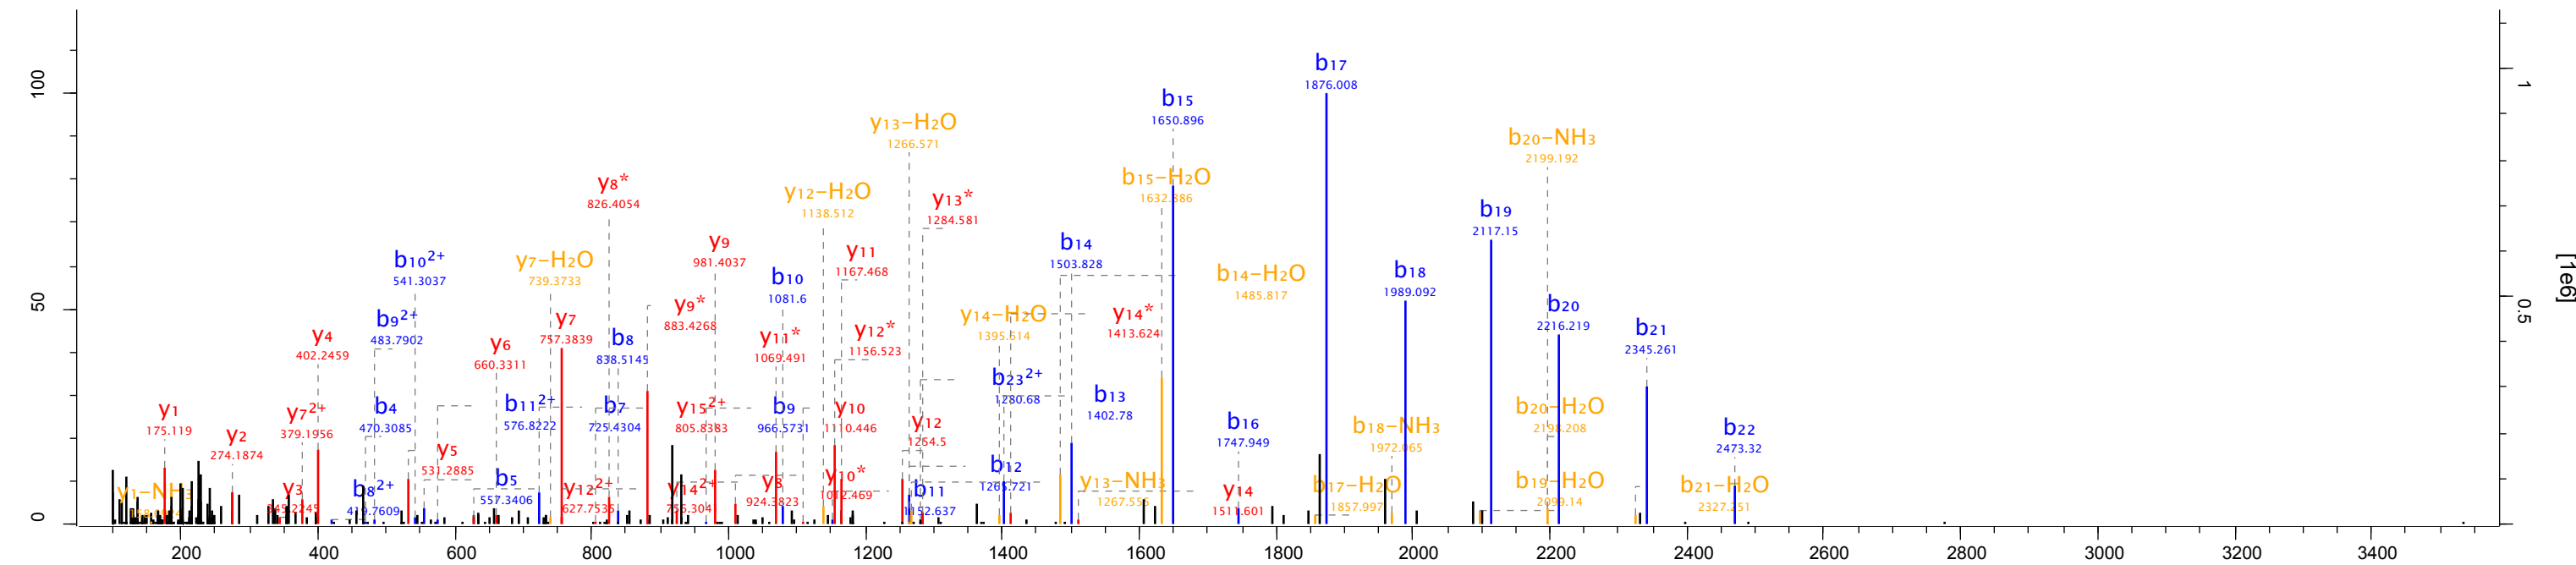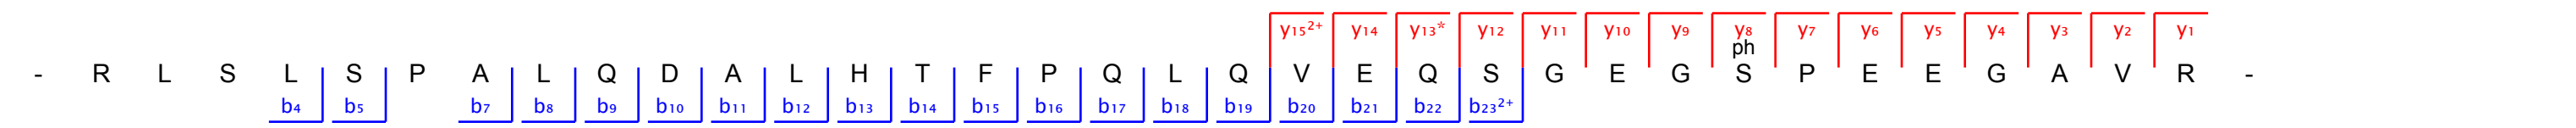

Raw file: 20150814\_A375SR\_Phospho\_BR2\_04  
 Scan: 28091  
 Method: FTMS; HCD  
 Score: 109.55  
 m/z: 1269.57  
 Gene names: KRT8

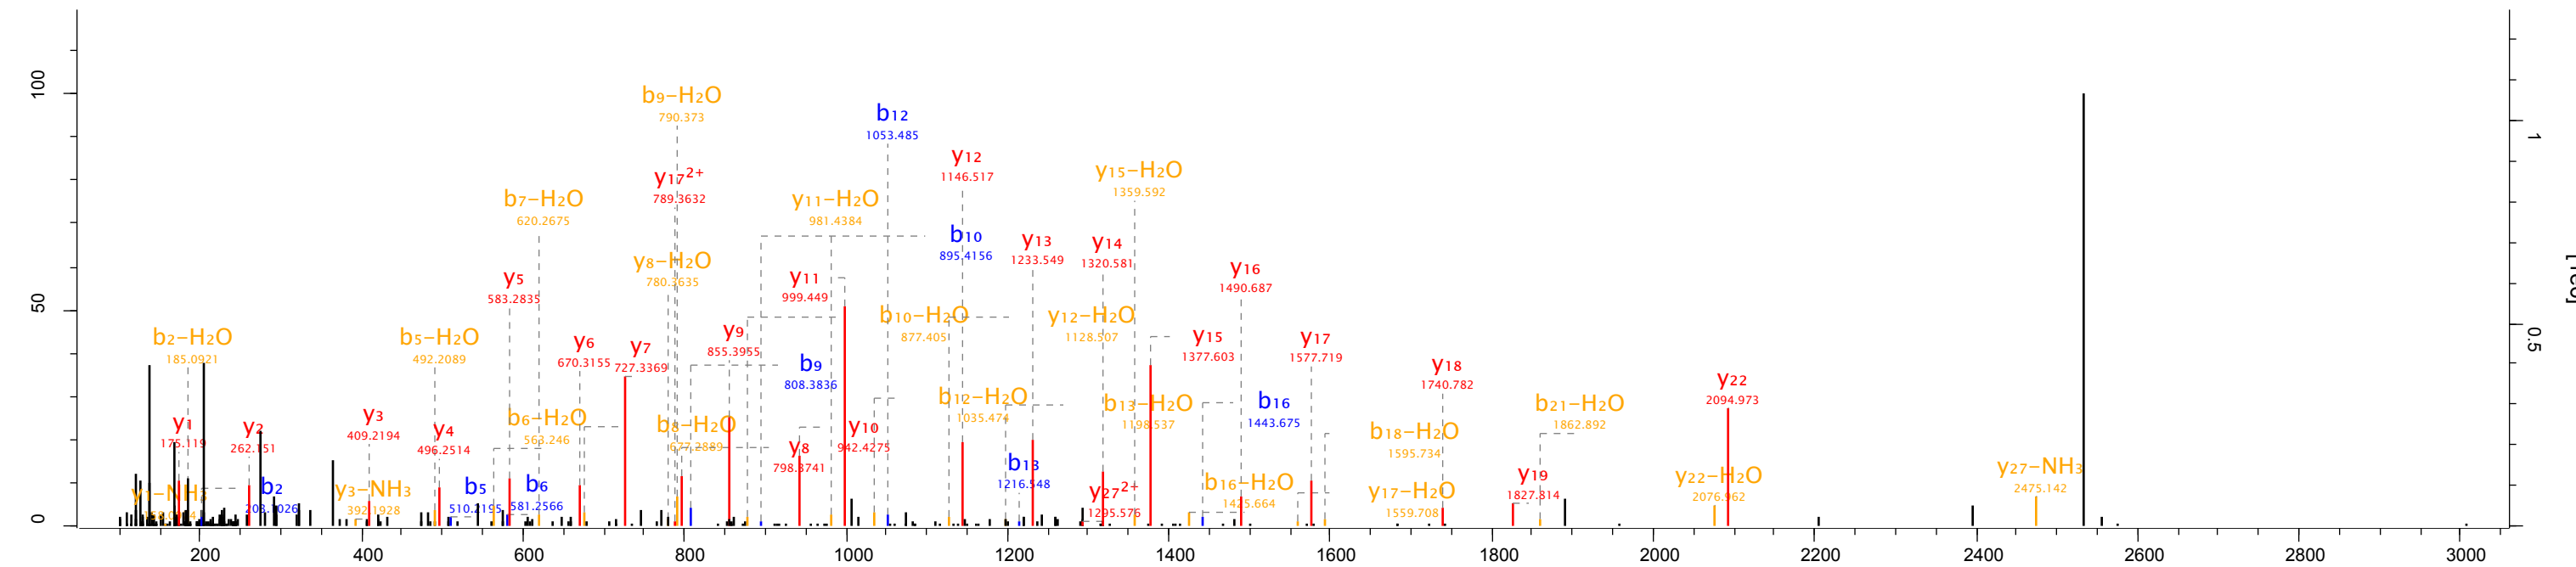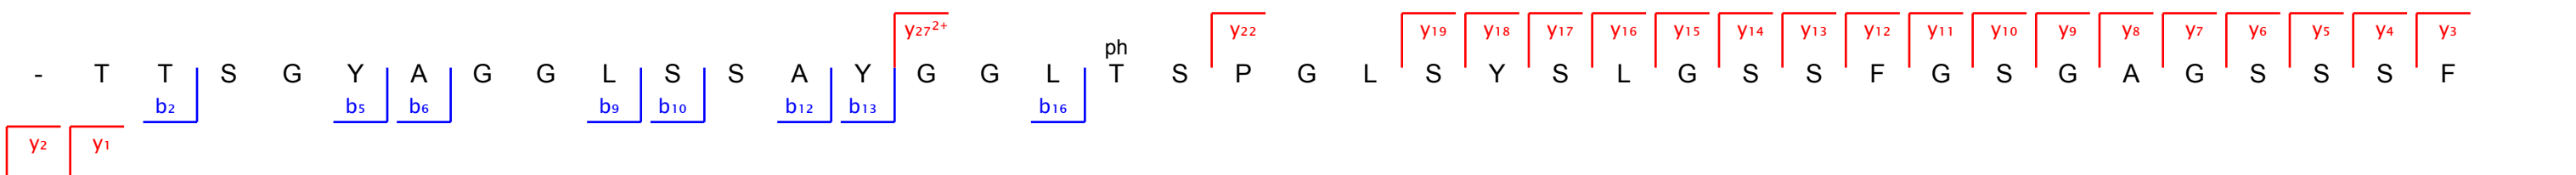



Raw file  
20150814\_A375SR\_Phospho\_BR2\_04

Scan 28361 Method FTMS; HCD Score 140.6 m/z 940.98 Gene names SHROOM1

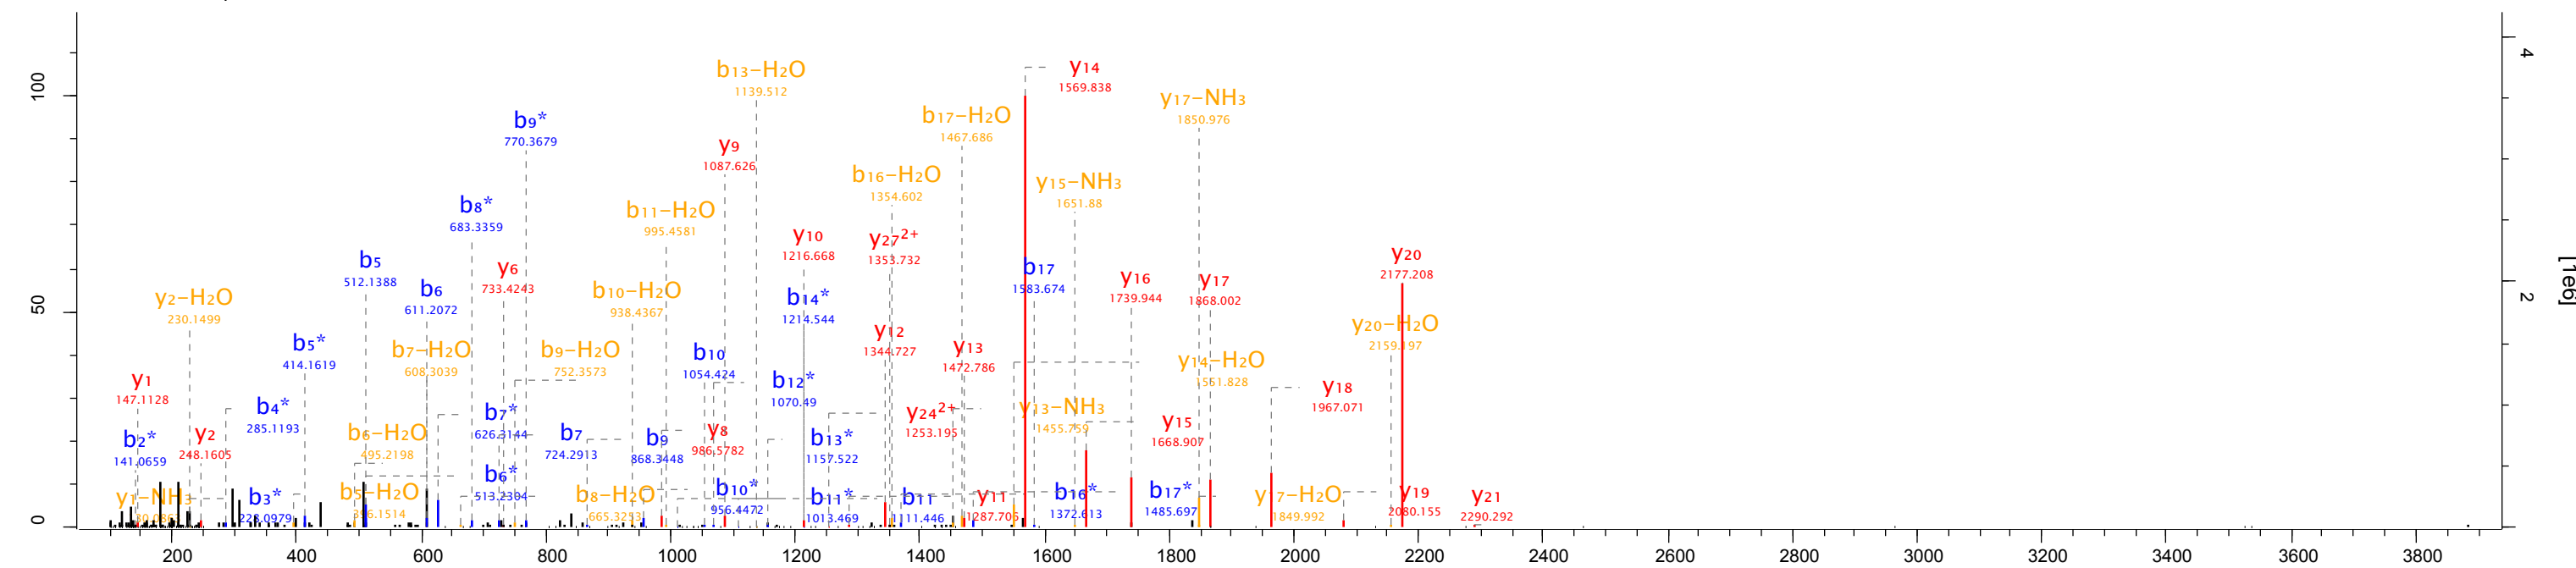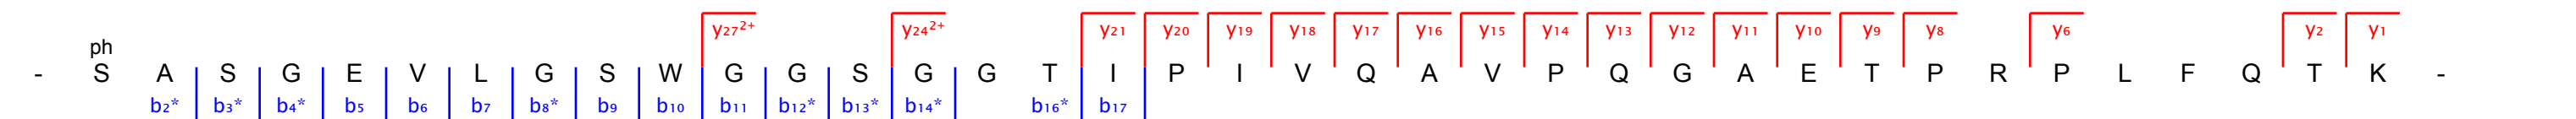

Raw file Scan Method Score m/z Gene names  
 20150814\_A375SR\_Phospho\_BR2\_04 28401 FTMS; HCD 184.66 815.72 AMOTL2

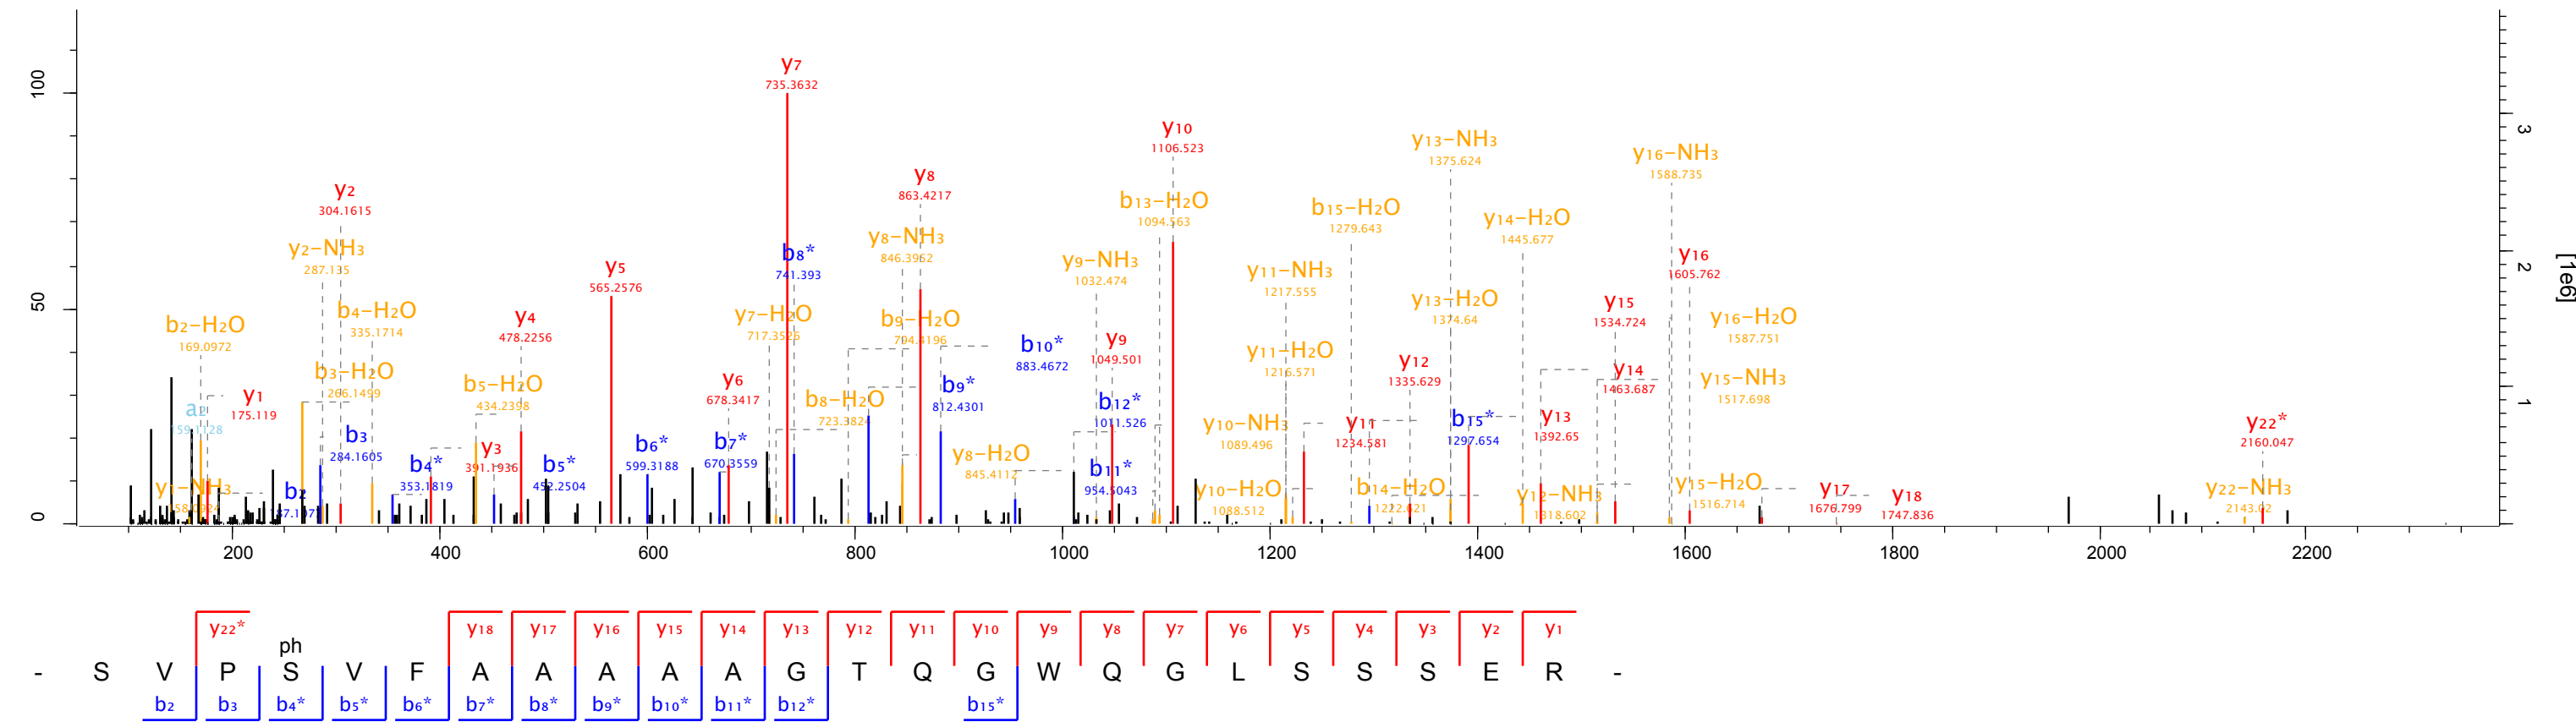

Raw file  
20150814\_A375SR\_Phospho\_BR2\_04

Scan 28741 Method FTMS; HCD Score 100.58 m/z 742.06 Gene names CEP170

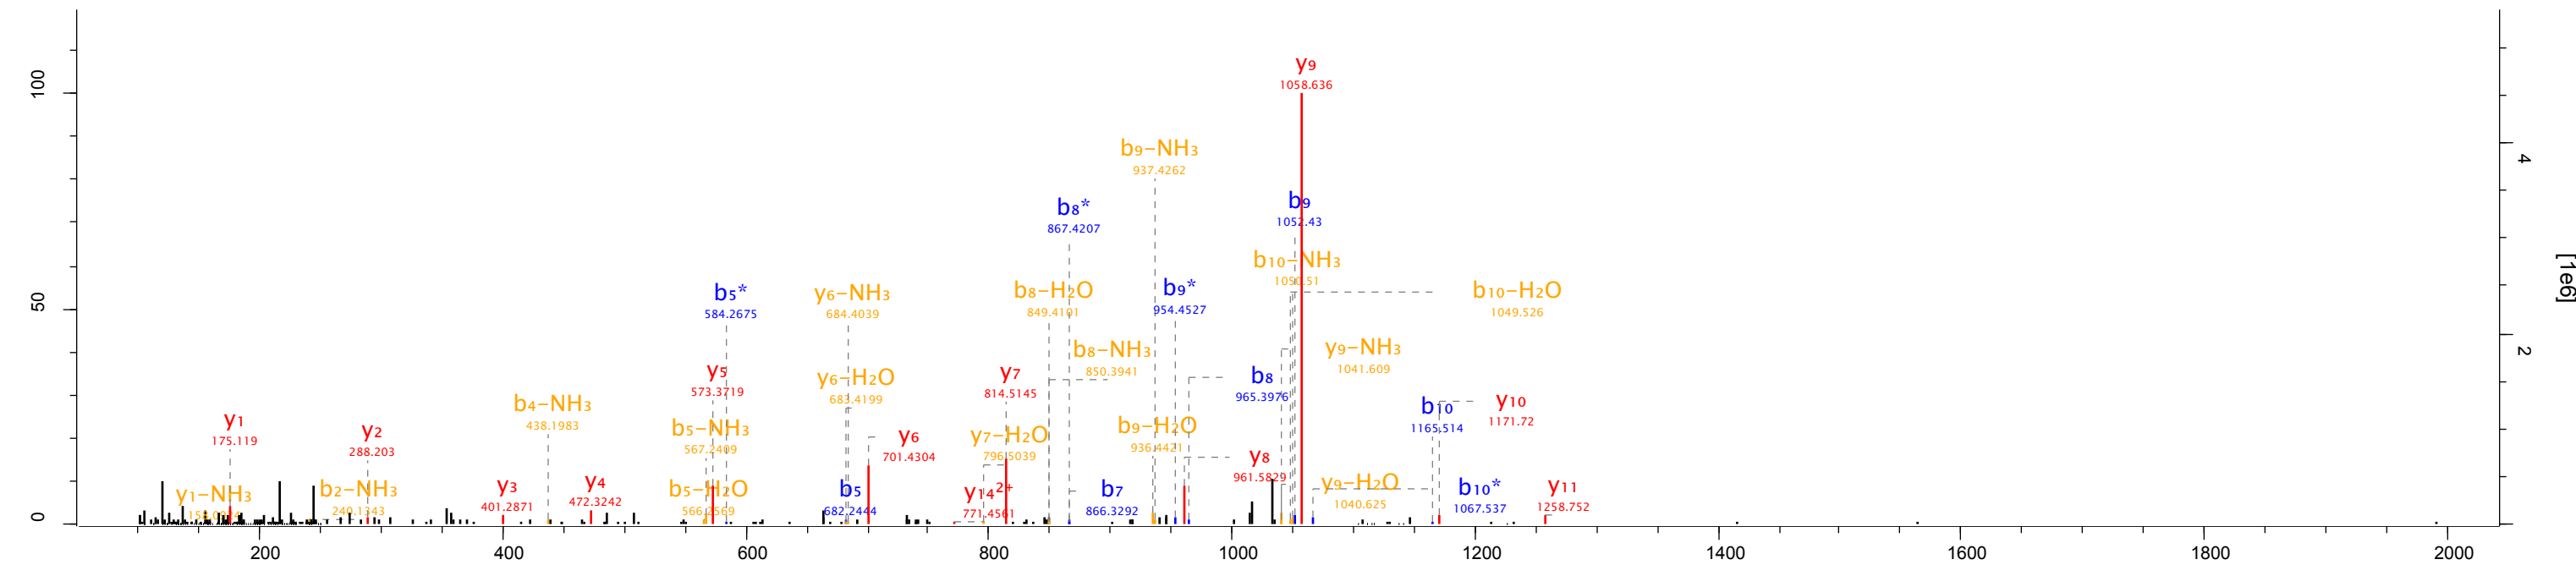

- Q K S ph E E P S V S I P F L Q T A L L R -  
b5 b7 b8 b9 b10 y14<sup>2+</sup> y11 y10 y9 y8 y7 y6 y5 y4 y3 y2 y1

Raw file Scan Method m/z Gene names  
 20150814\_A375SR\_Phospho\_BR2\_04 28781 FTMS; HCD 299.42 1017.87 PHACTR4

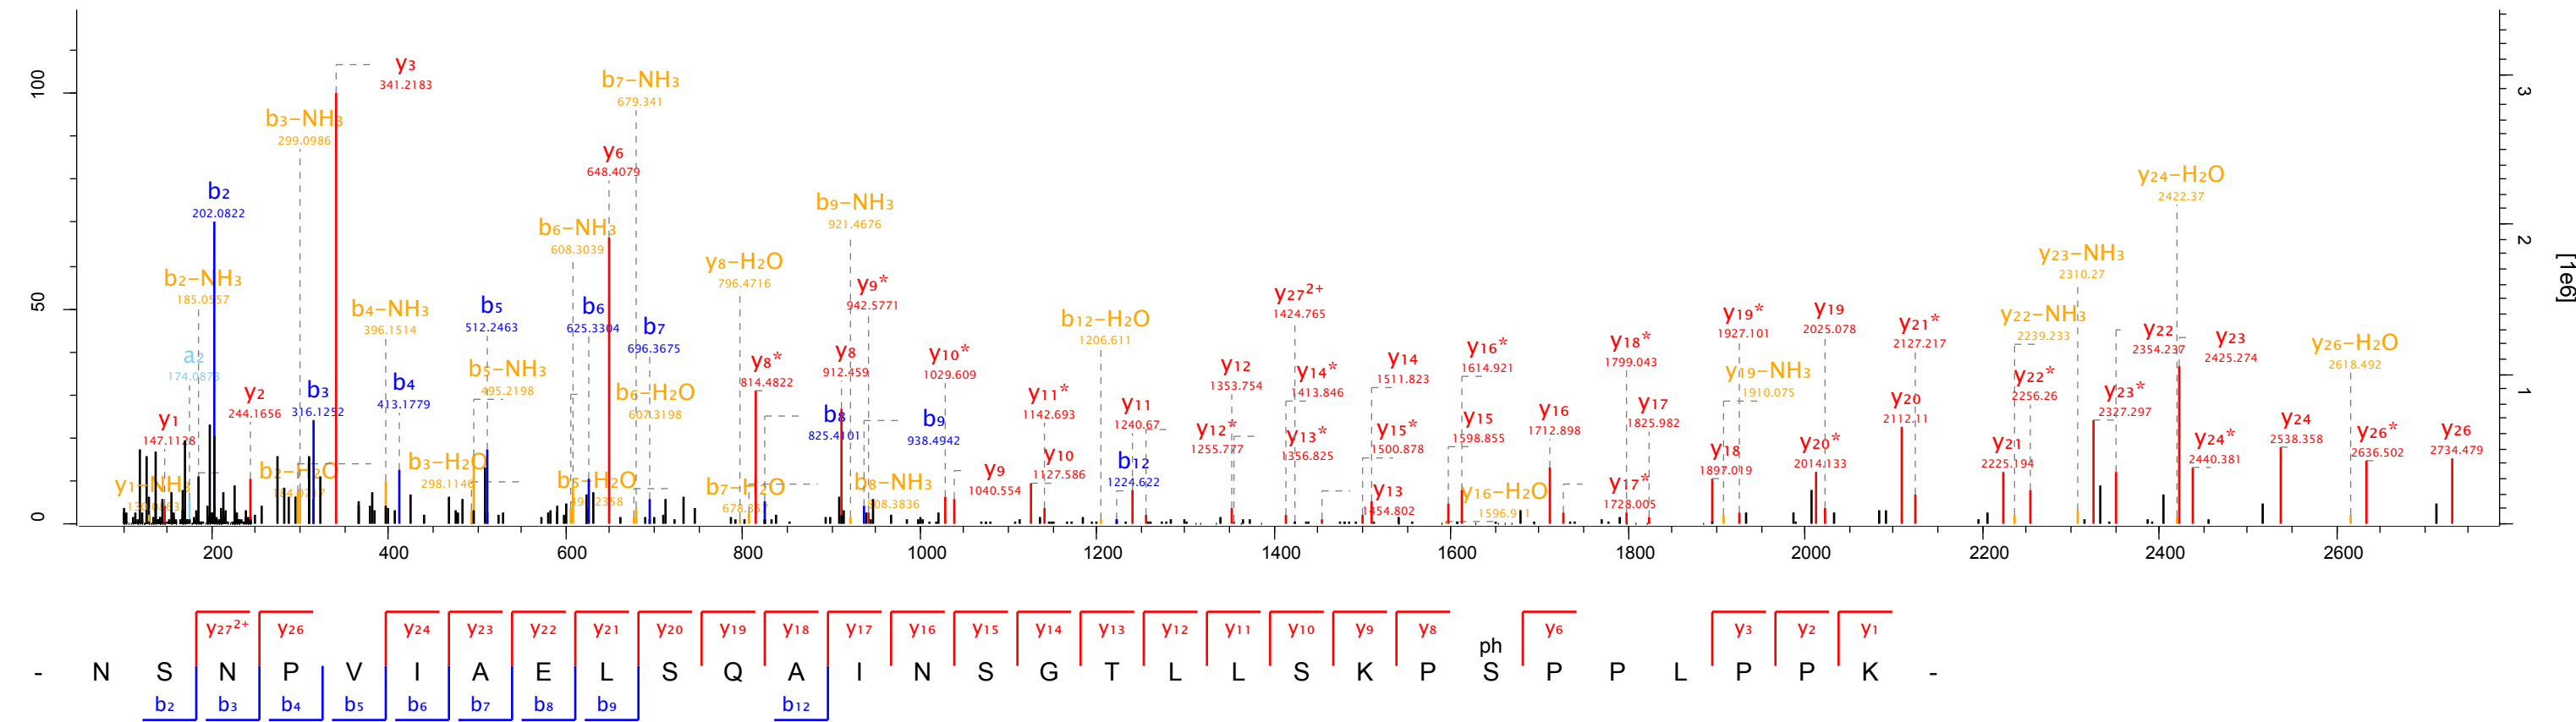

Raw file 20150814\_A375SR\_Phospho\_BR2\_04 Scan 2891 Method FTMS; HCD Score 99.09 m/z 842.84 Gene names NAA10

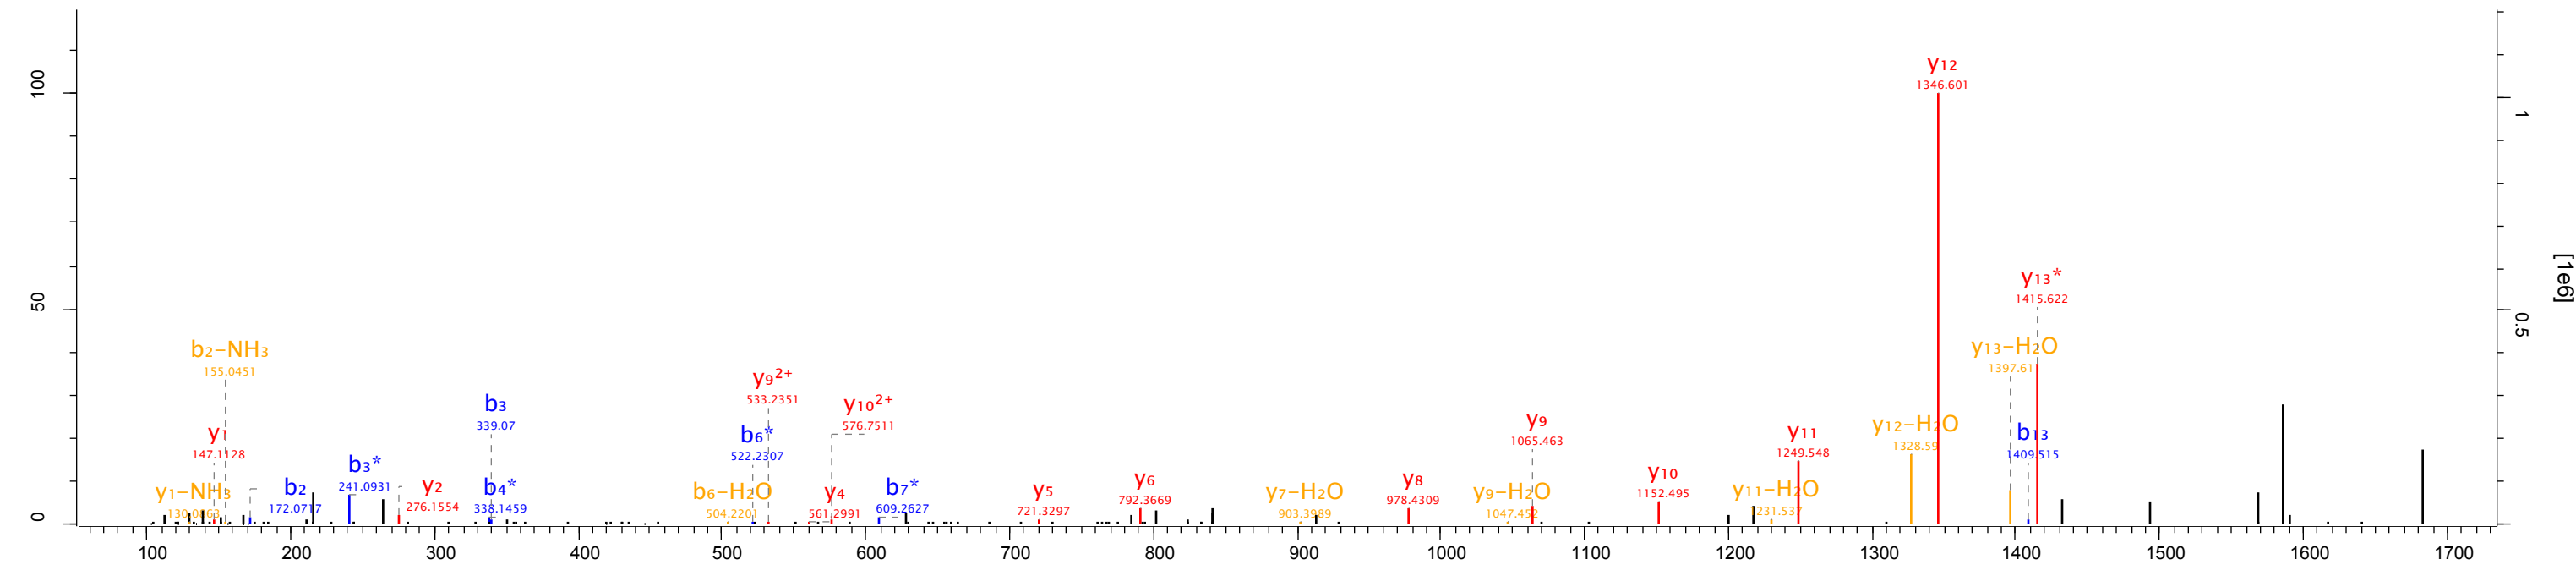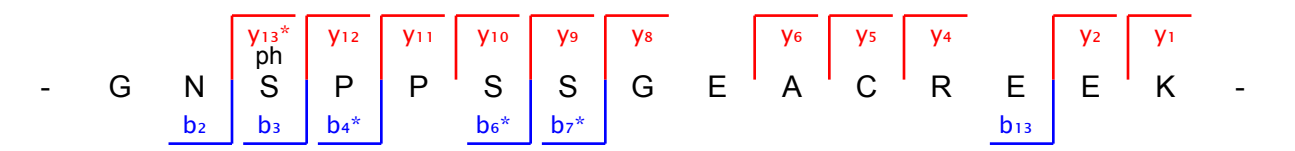

Raw file: 20150814\_A375SR\_Phospho\_BR2\_04  
 Scan: 3111 Method: FTMS; HCD Score: 173.57 m/z: 597.77 Gene names: MYO9B

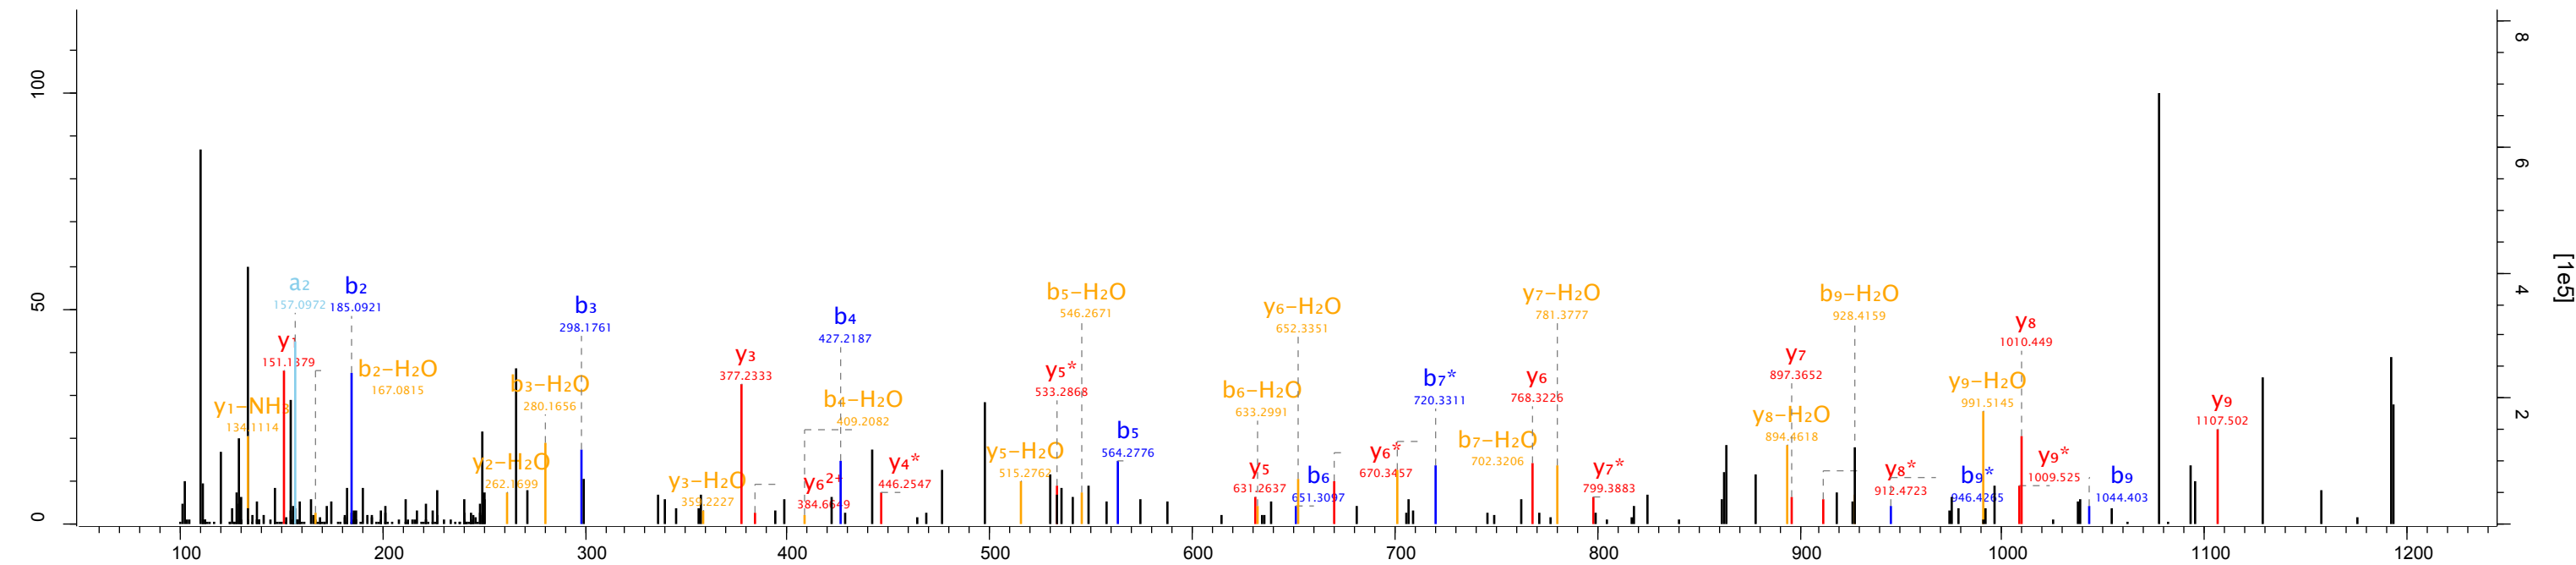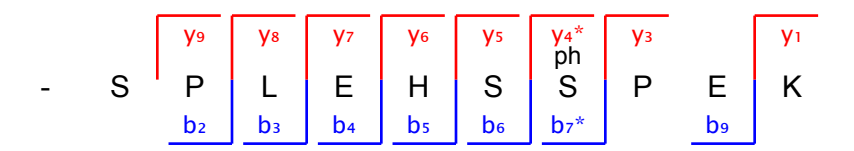

Raw file: 20150814\_A375SR\_Phospho\_BR2\_04  
 Scan: 3221 Method: FTMS; HCD Score: 107.75 m/z: 709.31 Gene names: BAZ2A

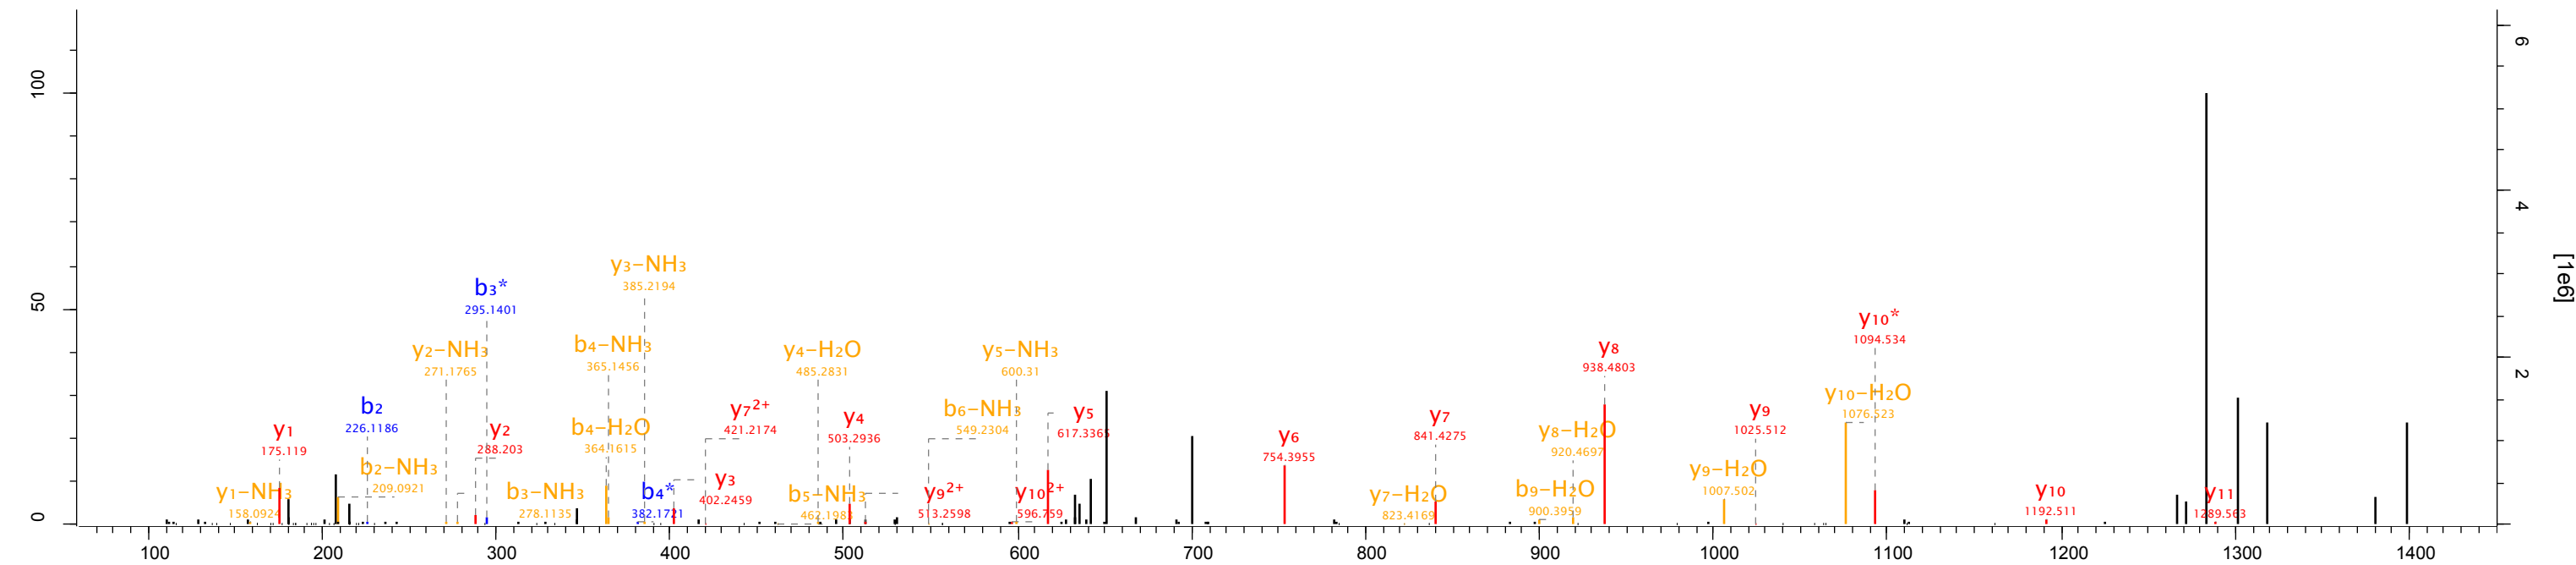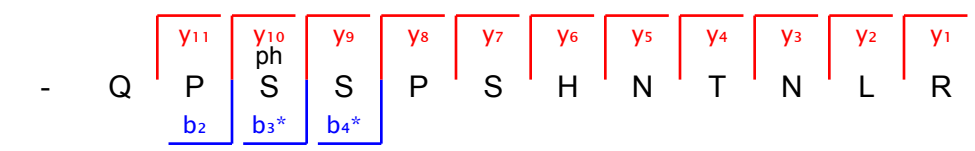

Raw file 20150814\_A375SR\_Phospho\_BR2\_04 Scan 3551 Method FTMS; HCD Score 111.83 m/z 631.8 Gene names MAP4K4

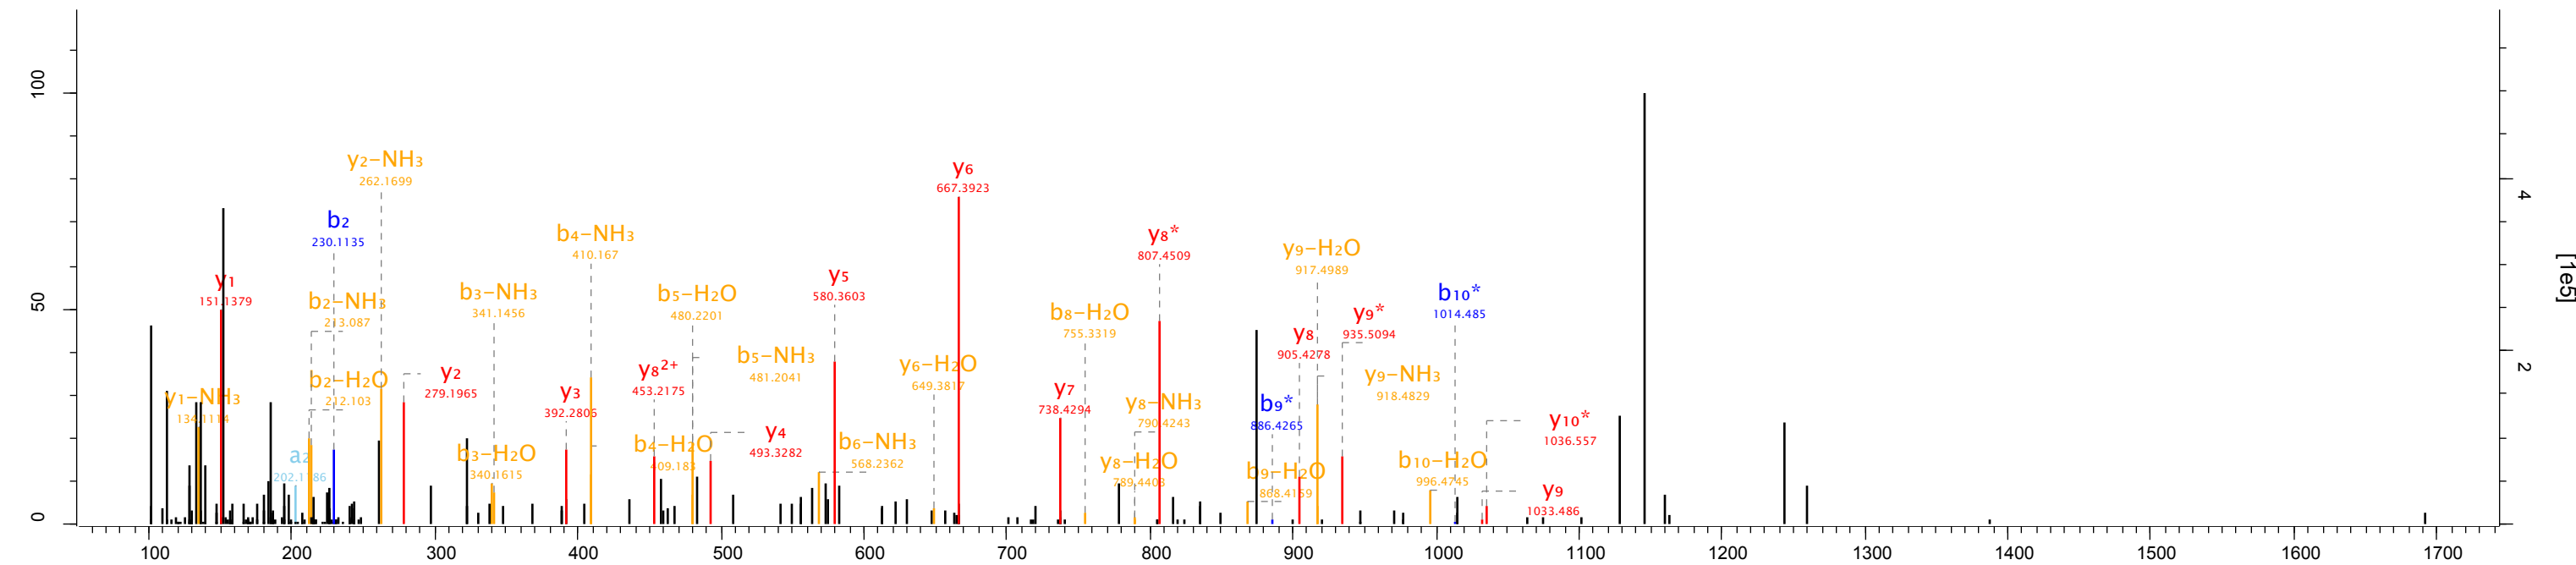

- Q y<sub>10</sub>\* y<sub>9</sub> y<sub>8</sub>  
ph y<sub>7</sub> y<sub>6</sub> y<sub>5</sub> y<sub>4</sub> y<sub>3</sub> y<sub>2</sub> y<sub>1</sub> -  
b<sub>2</sub> Q S A S T L Q K -  
b<sub>9</sub>\* b<sub>10</sub>\*



Raw file

20150814\_A375SR\_Phospho\_BR2\_04

Scan 5101 Method FTMS; HCD Score 123.28 m/z 727.85 Gene names LARP1

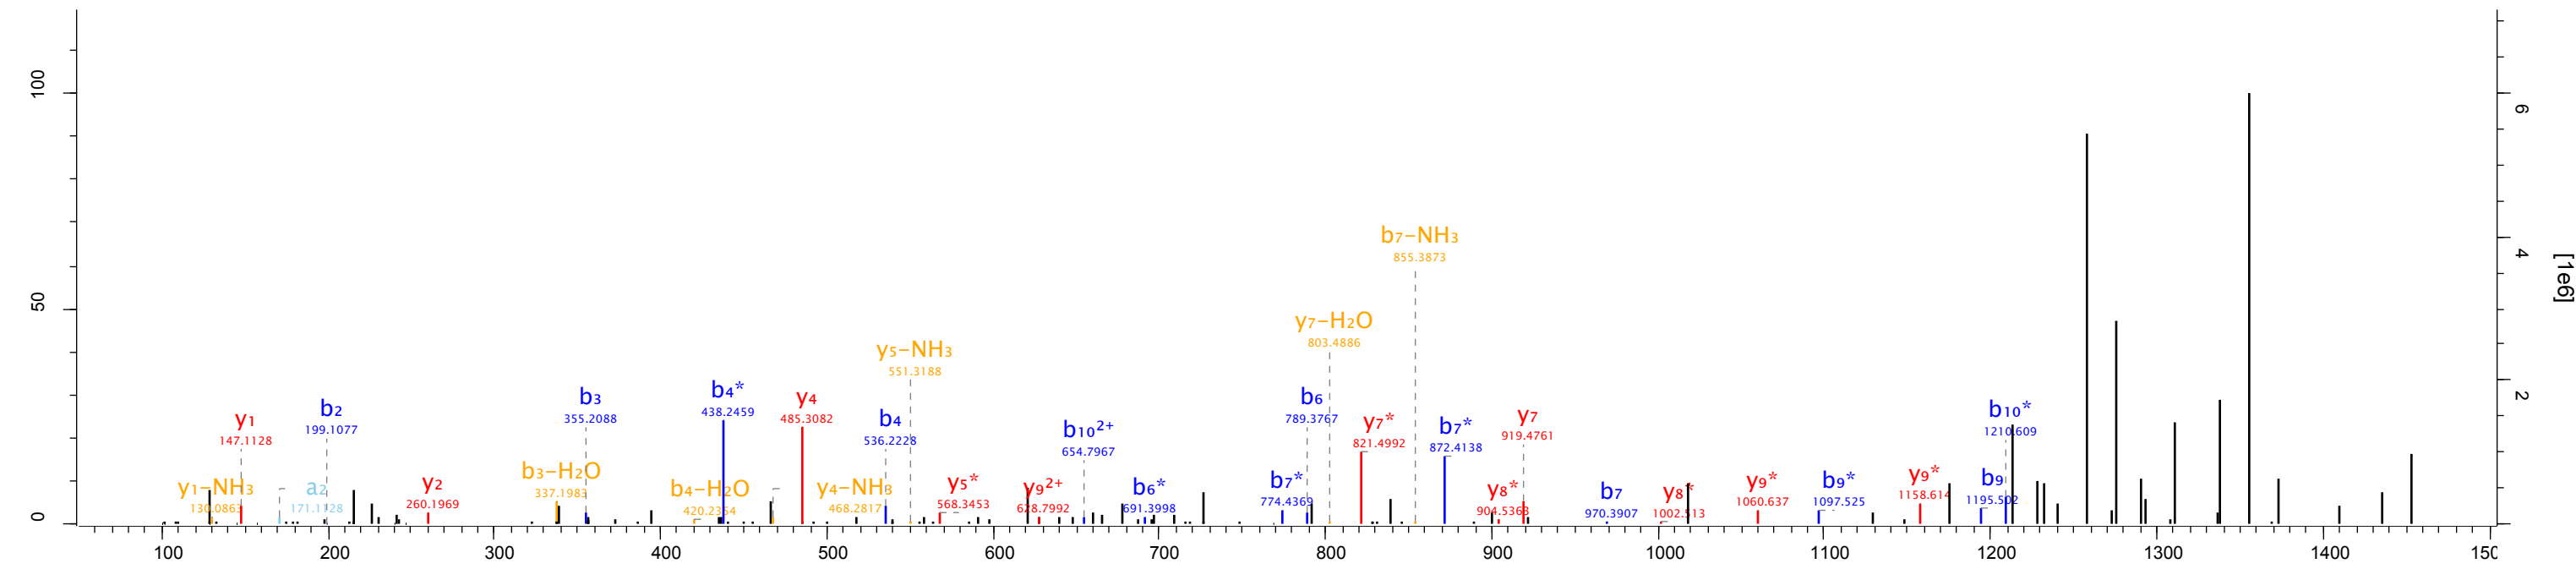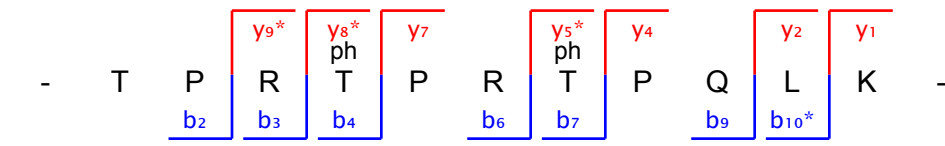

Raw file: 20150814\_A375SR\_Phospho\_BR2\_04  
 Scan: 5151 Method: FTMS; HCD Score: 123.6 m/z: 782.83 Gene names: AEBP2

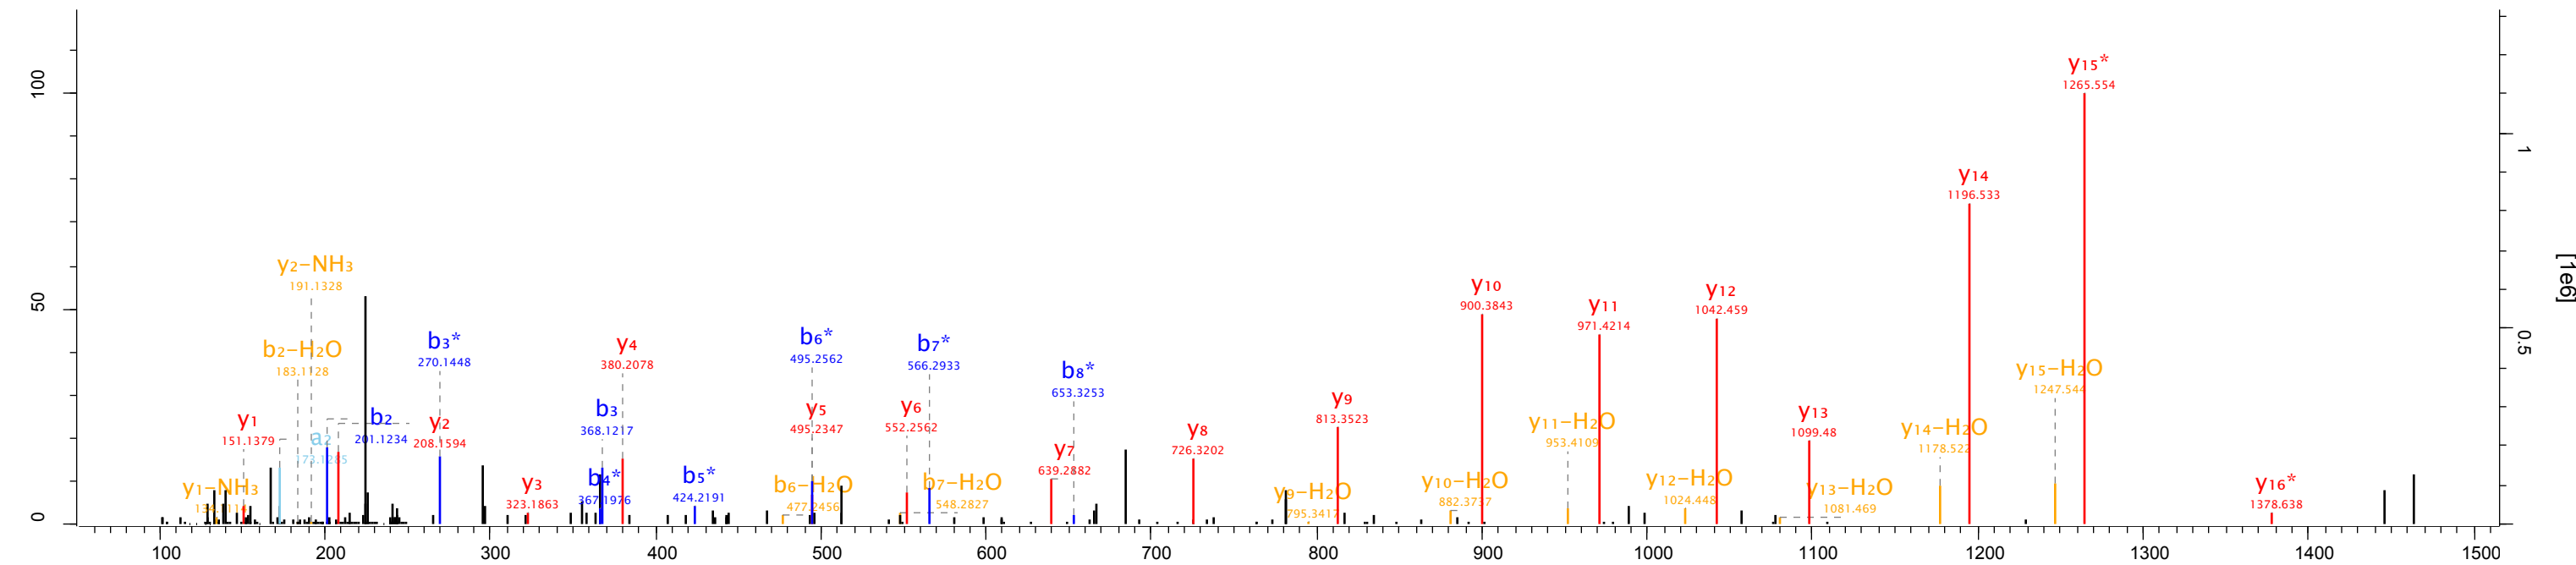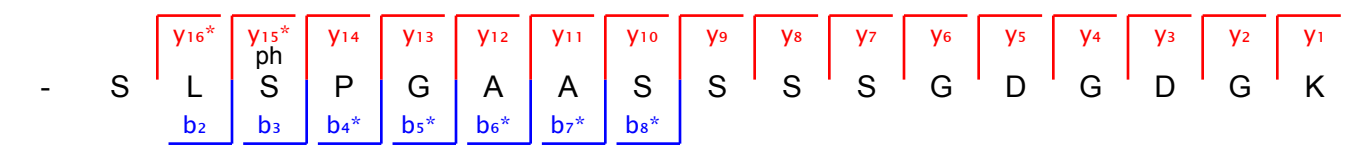

Raw file: 20150814\_A375SR\_Phospho\_BR2\_04  
 Scan: 5291 Method: FTMS; HCD Score: 377.86 m/z: 950.89 Gene names: TCEAL3;TCEAL5;TCEAL6

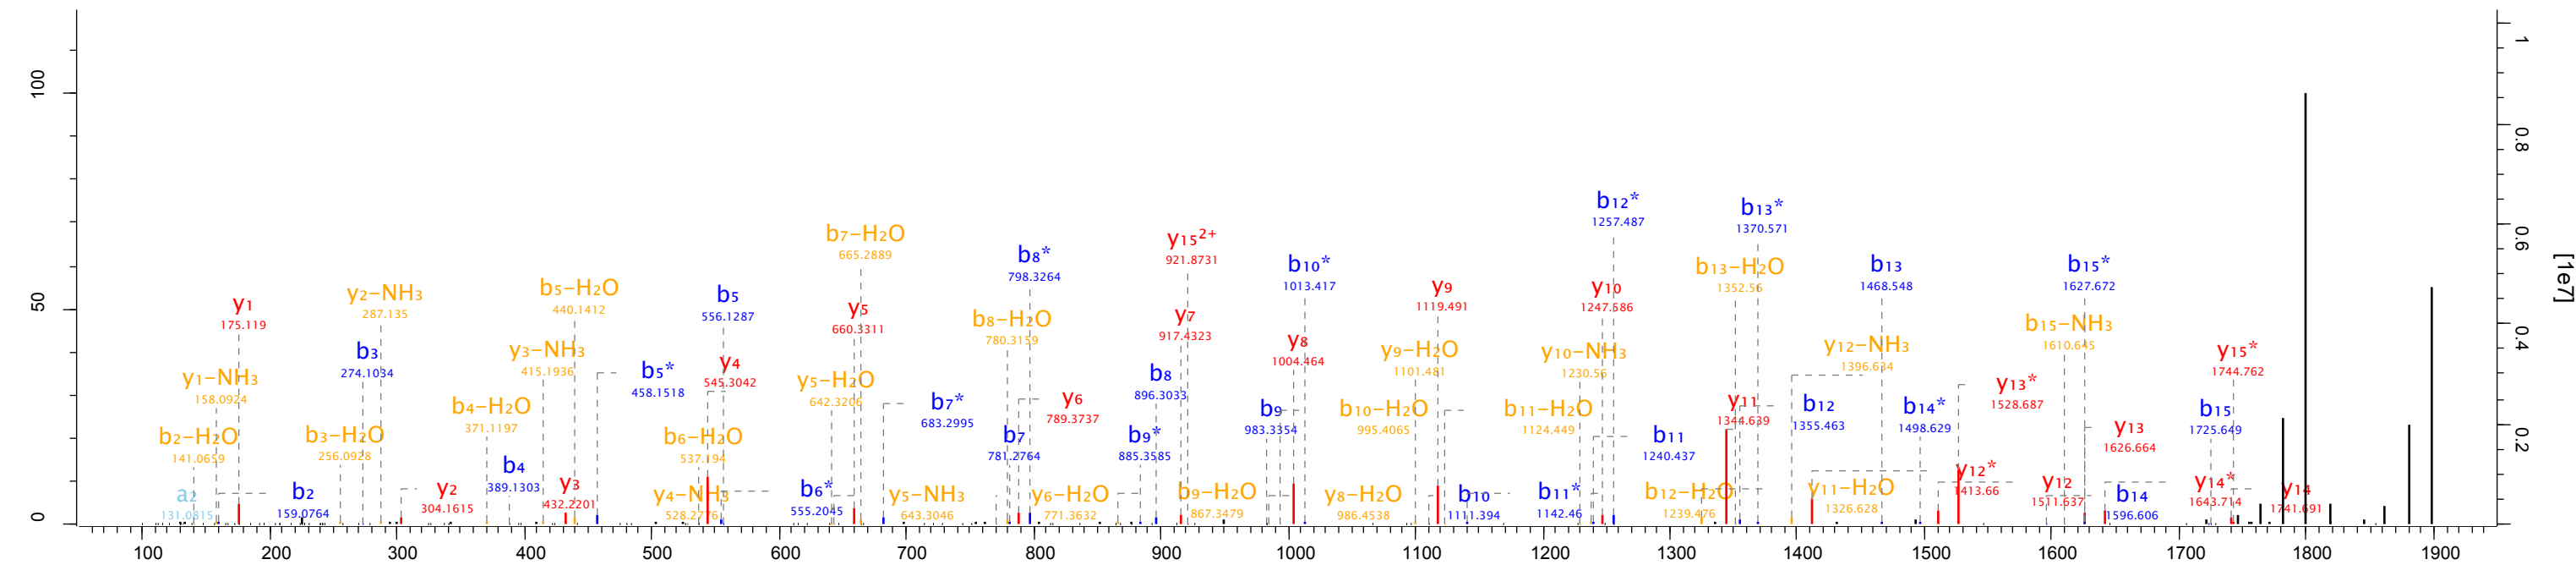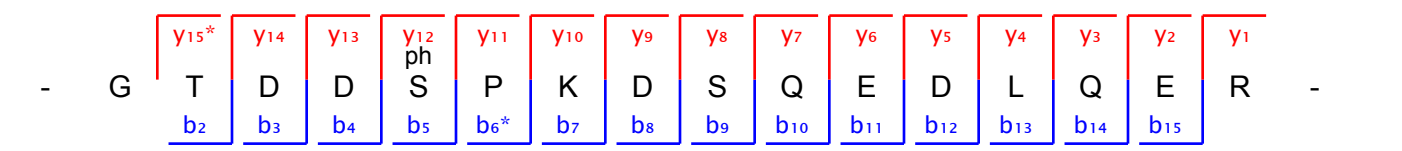

Raw file Scan Method Score m/z Gene names

20150814\_A375SR\_Phospho\_BR2\_04 5391 FTMS; HCD 210.71 863.84 NUFIP2

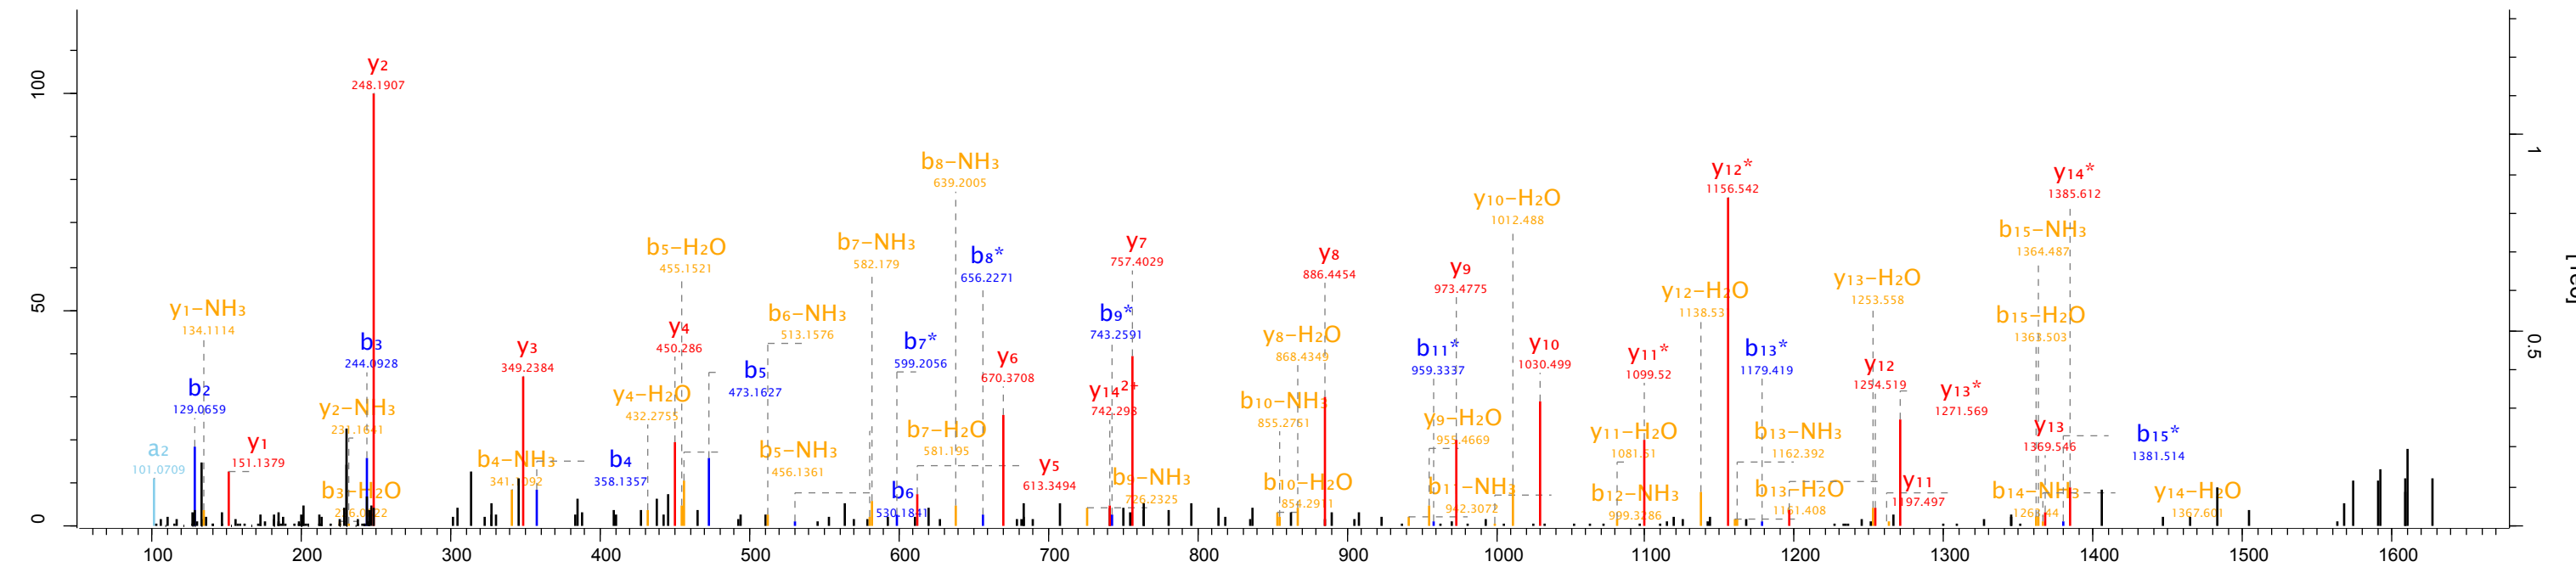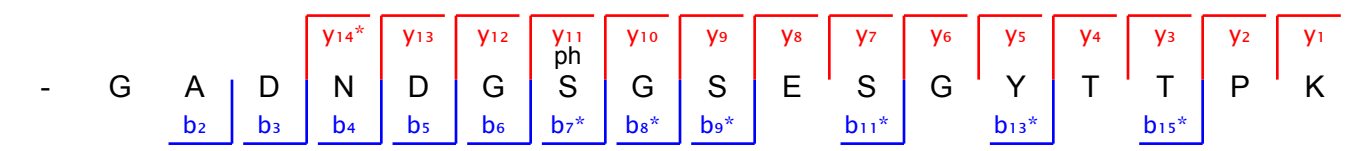

Raw file 20150814\_A375SR\_Phospho\_BR2\_04 Scan 5591 Method FTMS; HCD Score 81.65 m/z 664.8 Gene names COPRS

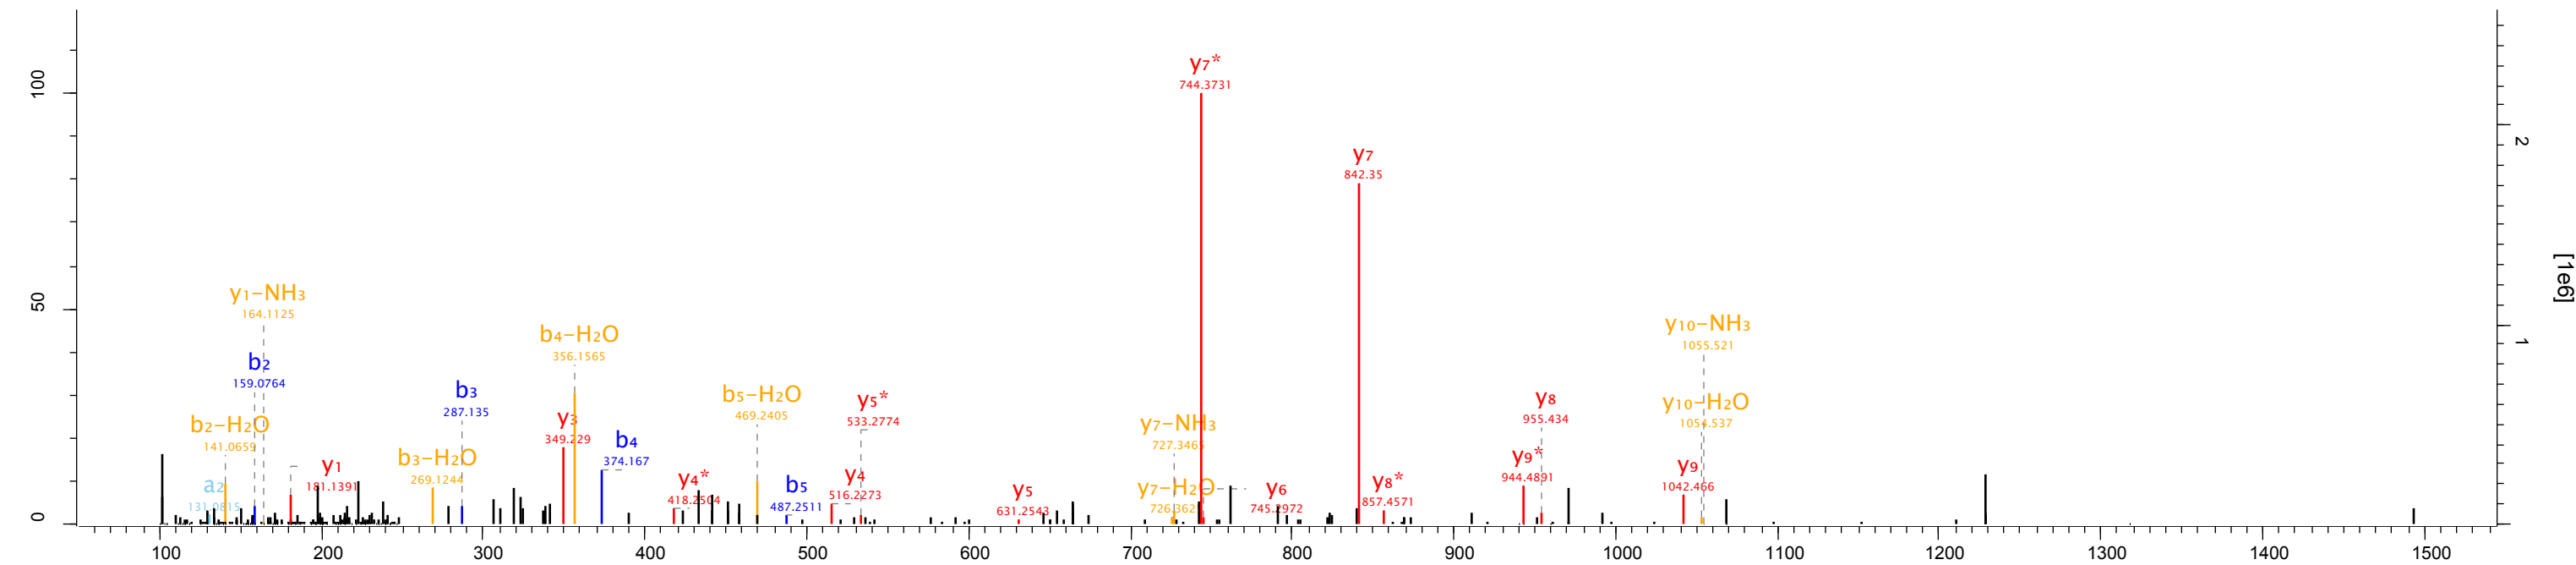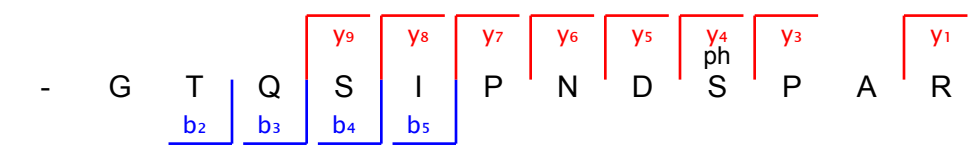

Raw file: 20150814\_A375SR\_Phospho\_BR2\_04  
 Scan: 5651 Method: FTMS; HCD Score: 202.79 m/z: 816.35 Gene names: SYTL5

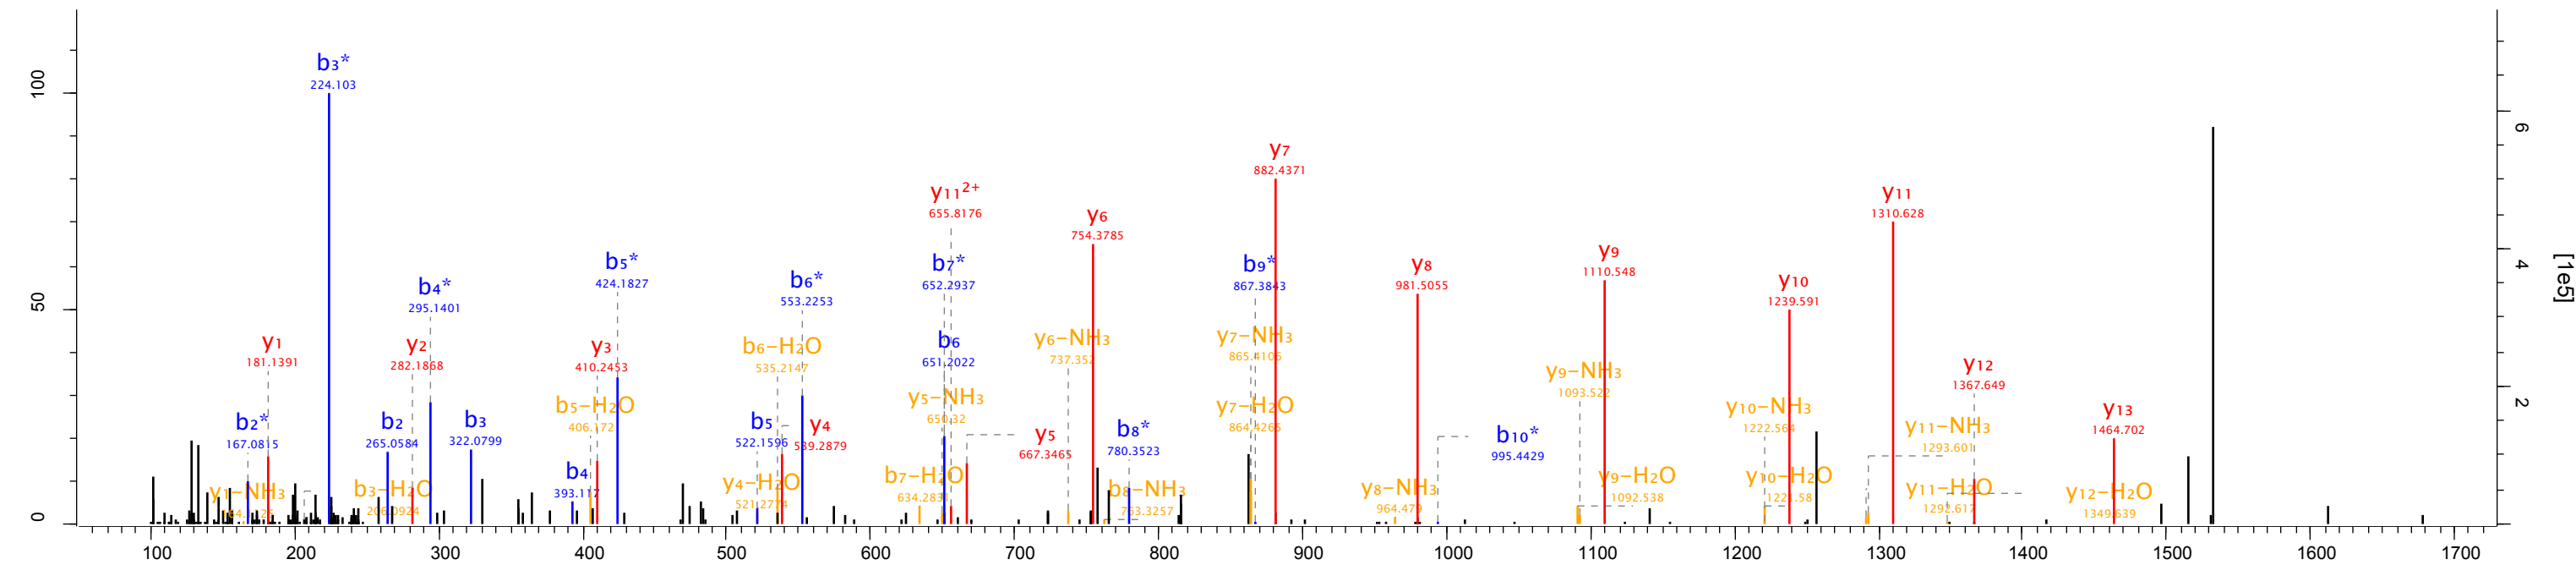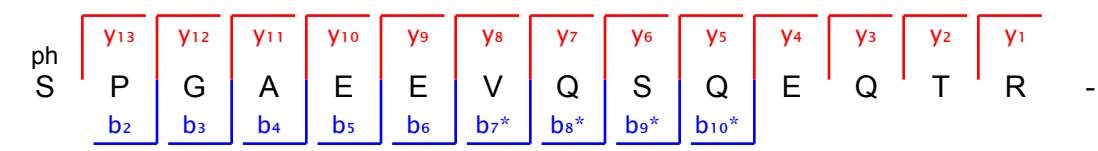

Raw file: 20150814\_A375SR\_Phospho\_BR2\_04  
 Scan: 5751 Method: FTMS; HCD Score: 58.82 m/z: 517.89 Gene names: LRRFIP2

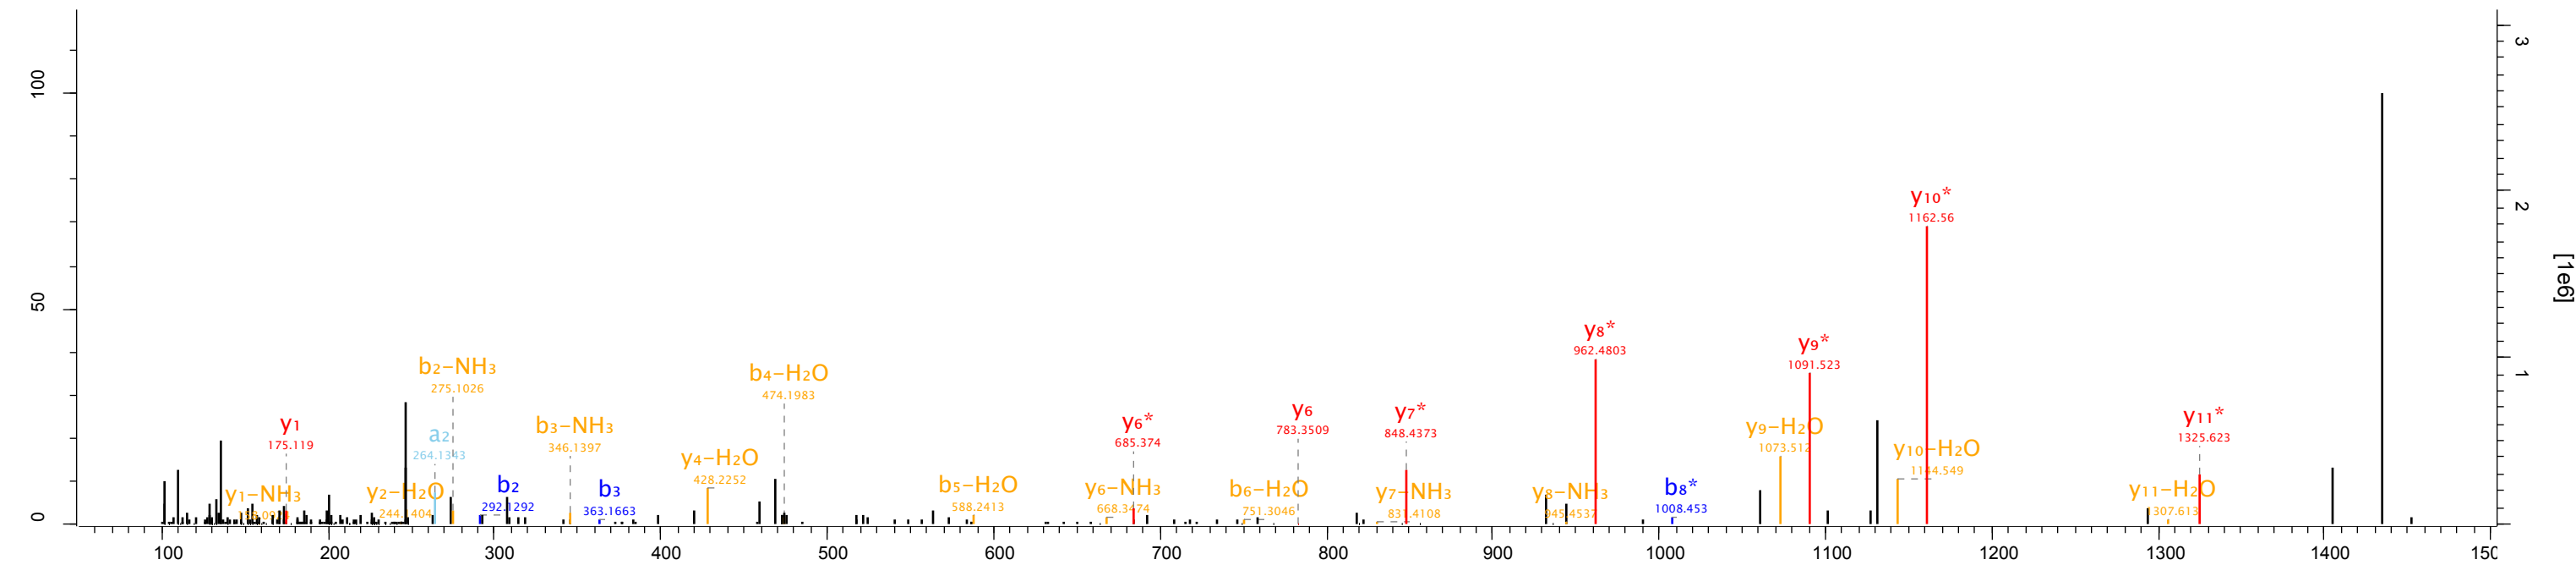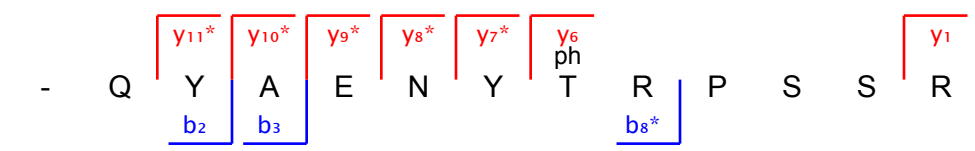

Raw file: 20150814\_A375SR\_Phospho\_BR2\_04  
 Scan: 5991 Method: FTMS; HCD Score: 72.43 m/z: 627.27 Gene names: PSMD2

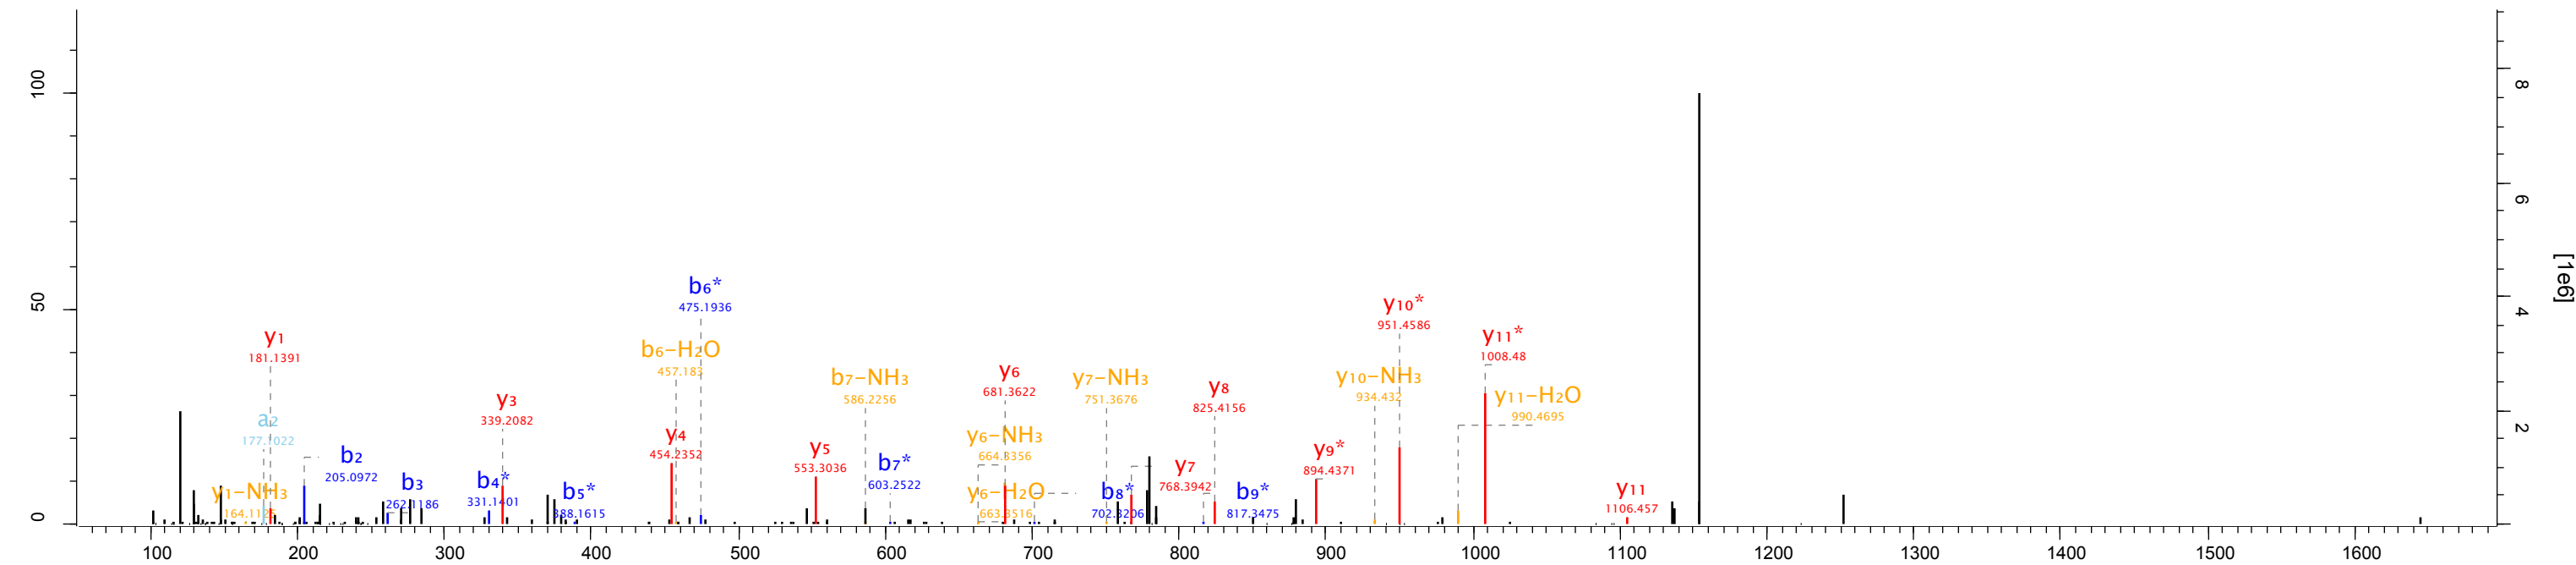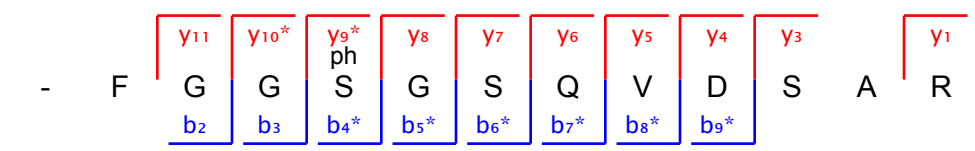



Raw file 20150814\_A375SR\_Phospho\_BR2\_04 Scan 6011 Method FTMS; HCD Score 214.67 m/z 647.65 Gene names THRAP3

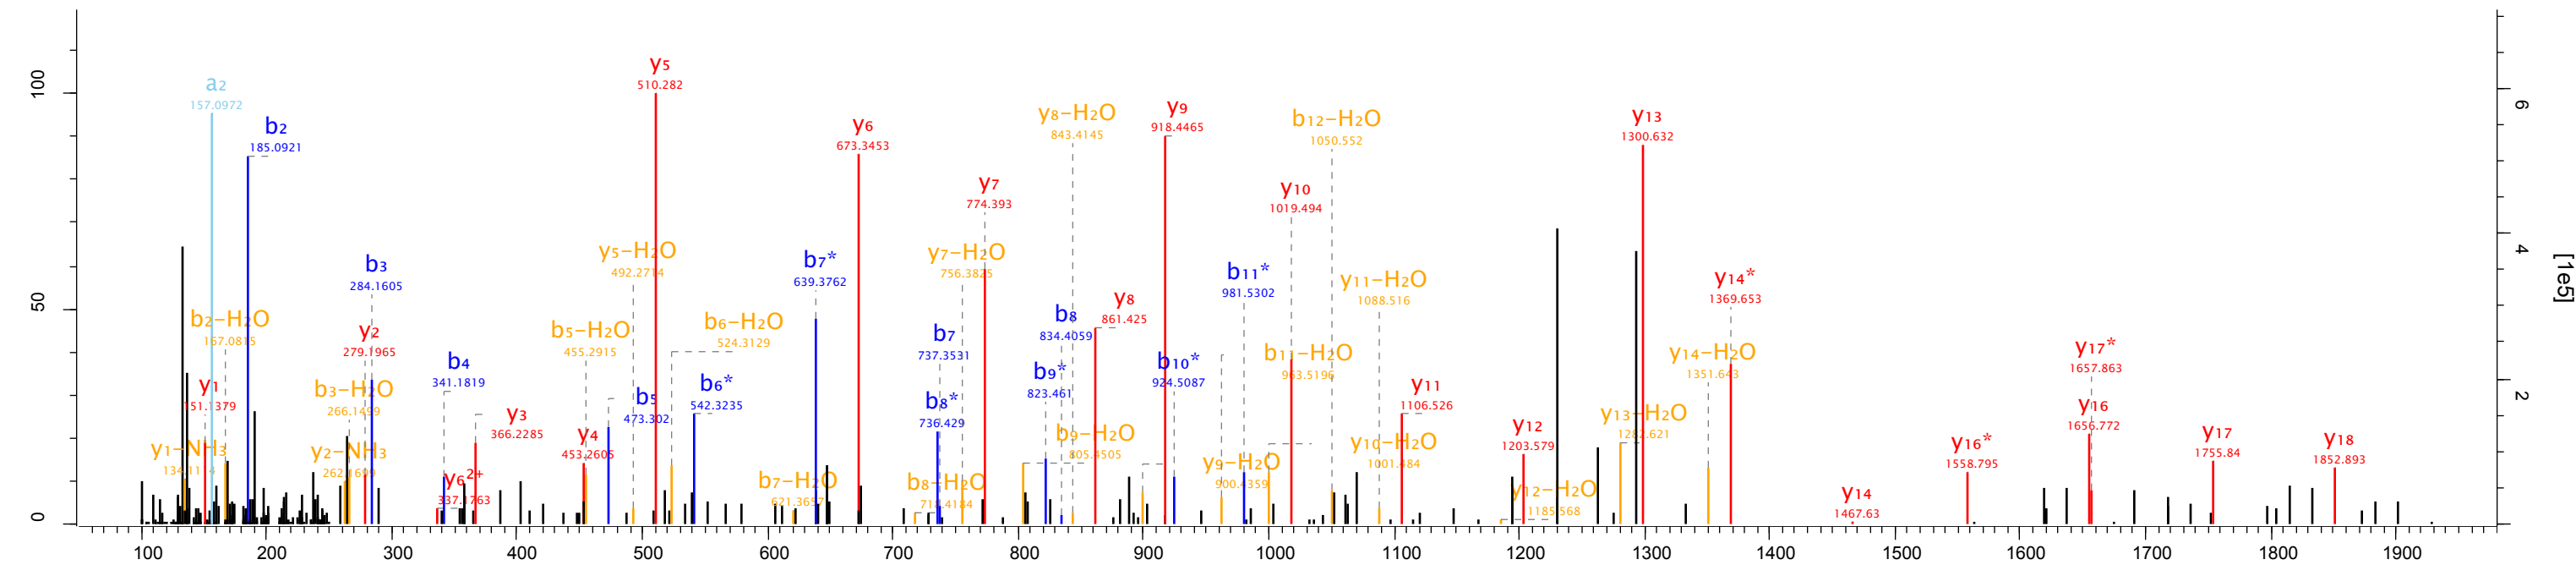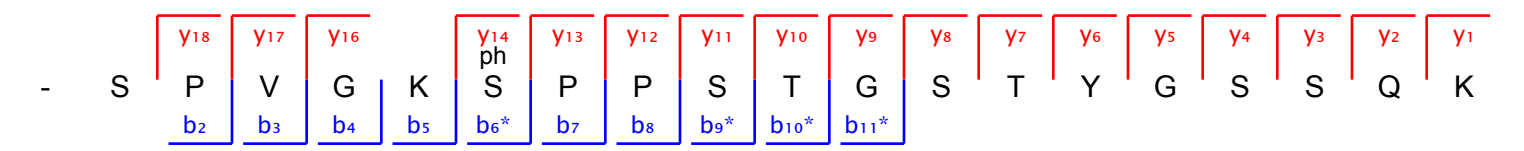

20150814\_A375SR\_Phospho\_BR2\_04 6051 FTMS; HCD 149.04 966.94 THRAP3

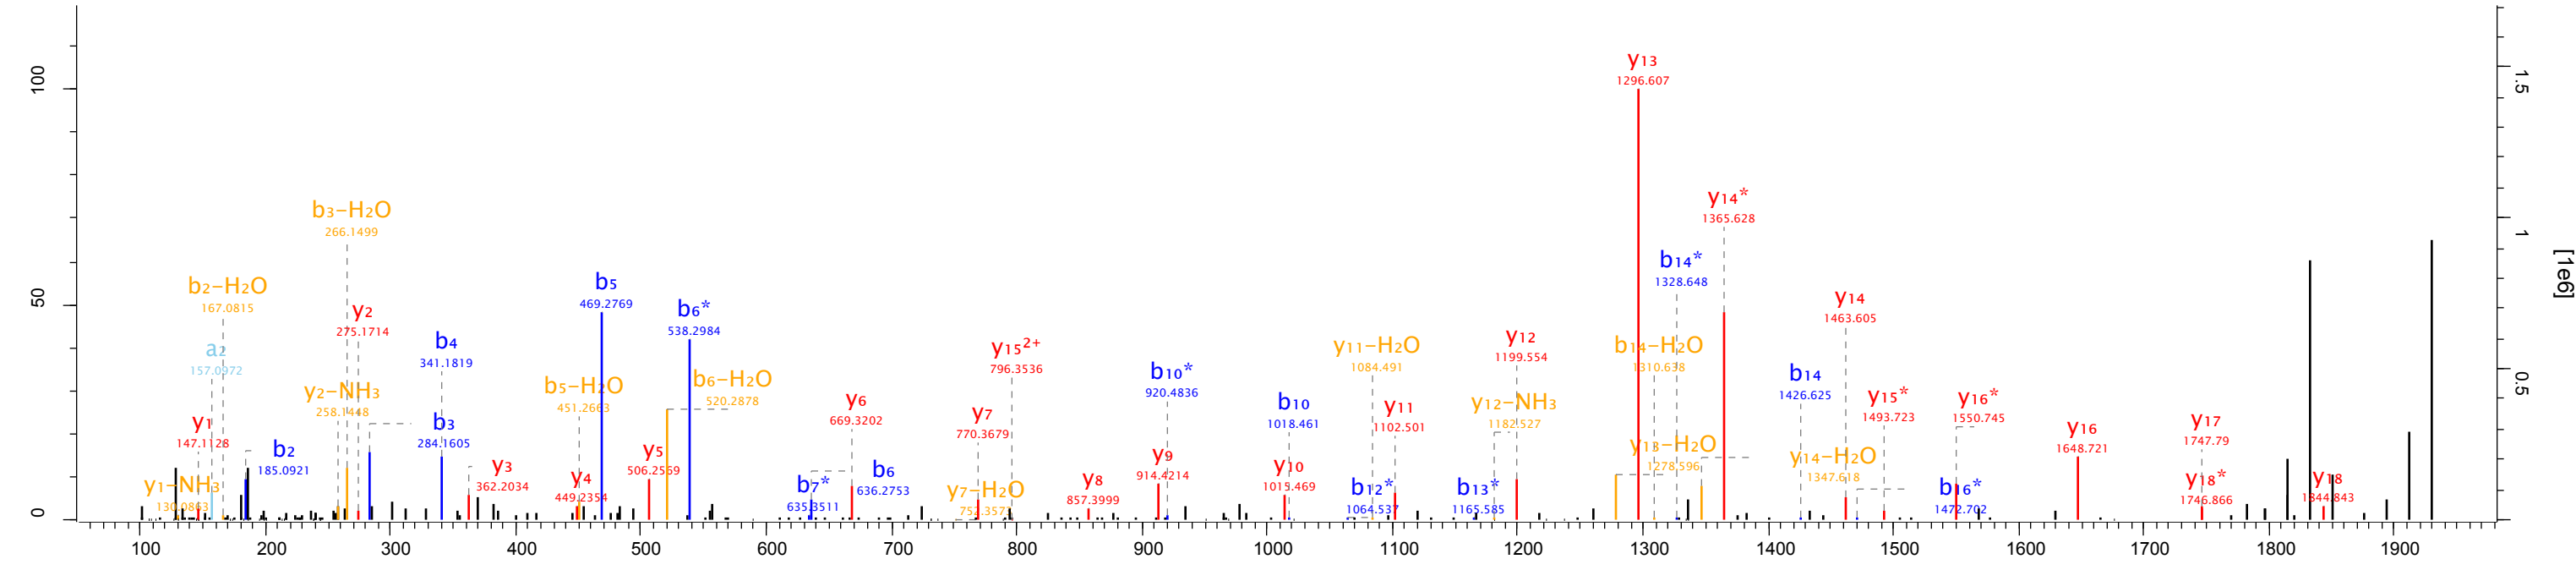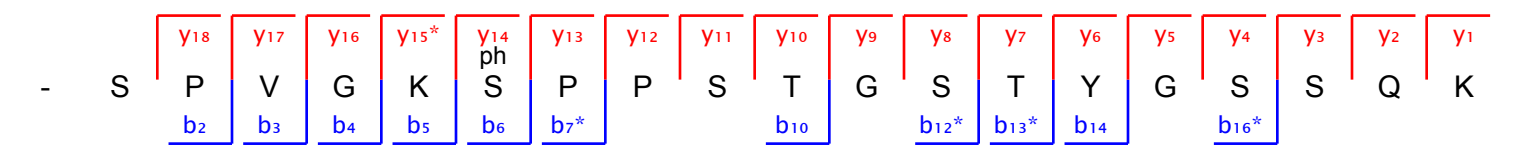

Raw file: 20150814\_A375SR\_Phospho\_BR2\_04  
 Scan: 6141 Method: FTMS; HCD Score: 217.65 m/z: 832.38 Gene names: CDK13

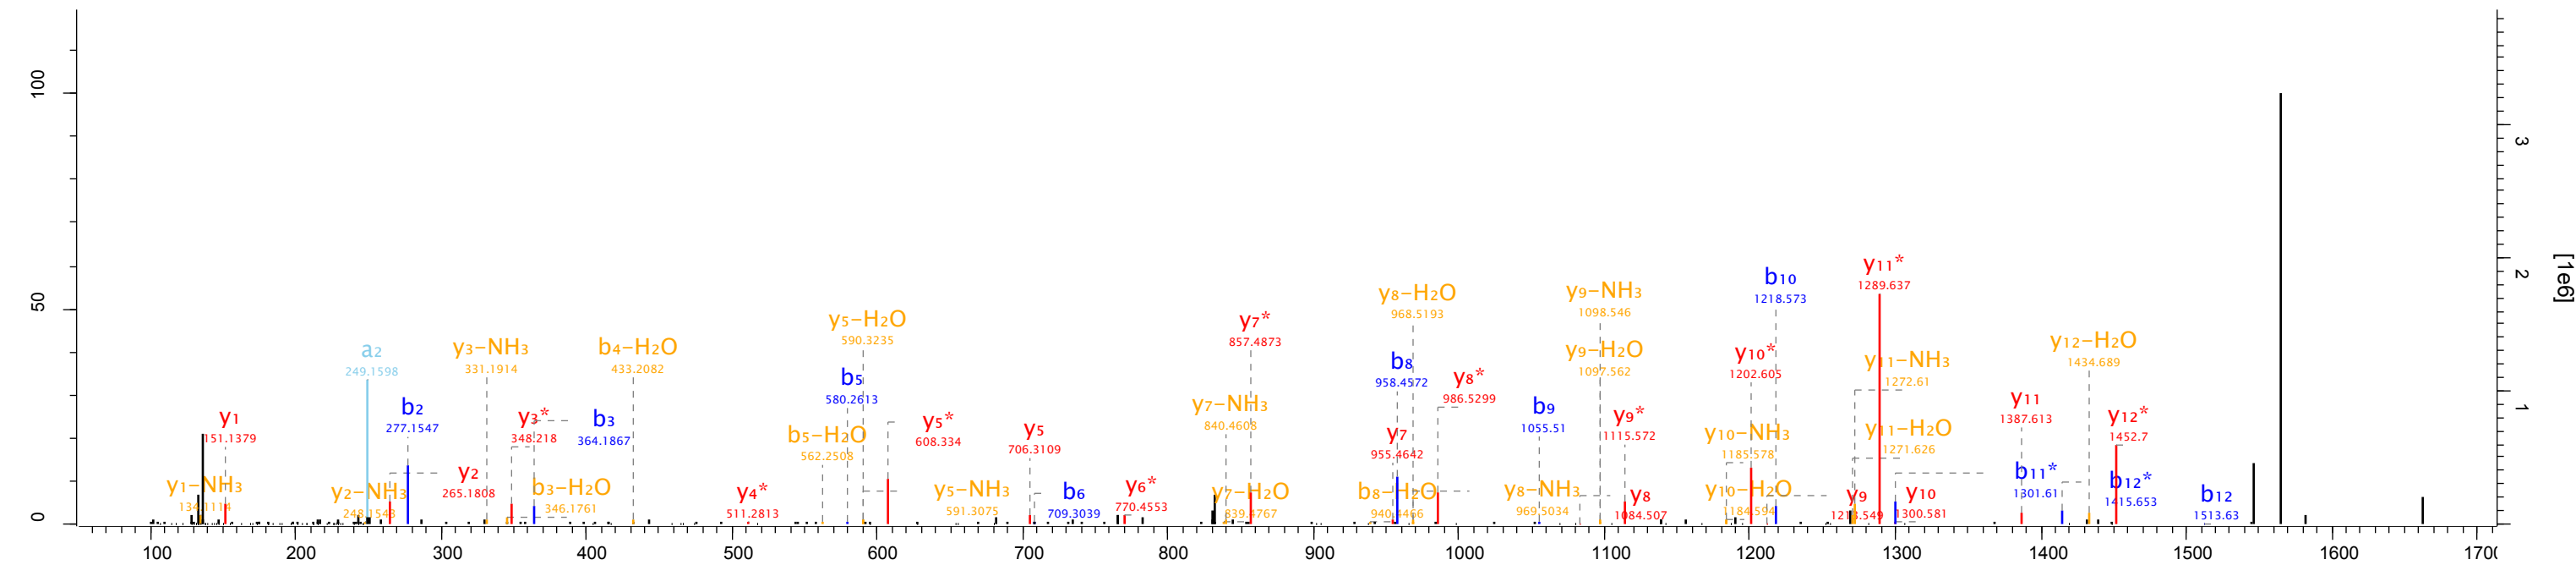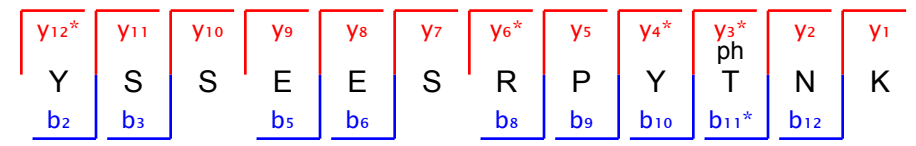

Raw file: 20150814\_A375SR\_Phospho\_BR2\_04  
 Scan: 6411 Method: FTMS; HCD Score: 84.31 m/z: 488.73 Gene names: FOXK1

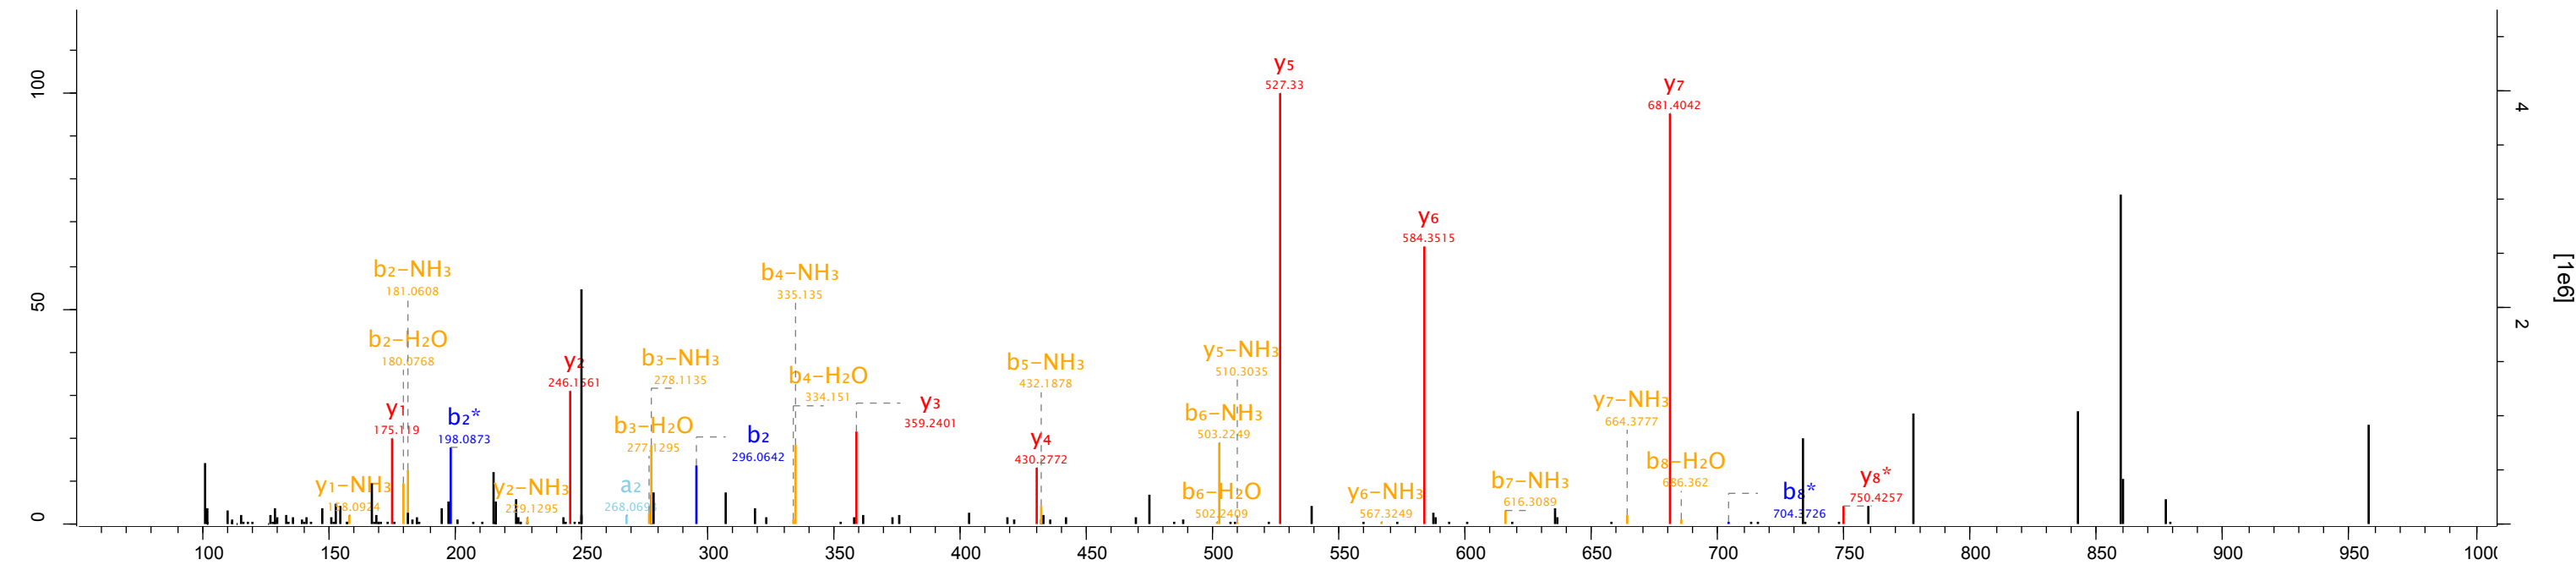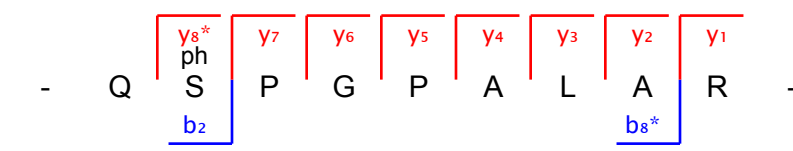

Raw file: 20150814\_A375SR\_Phospho\_BR2\_04  
 Scan: 6631 Method: FTMS; HCD Score: 61.5 m/z: 492.56 Gene names: CDK13

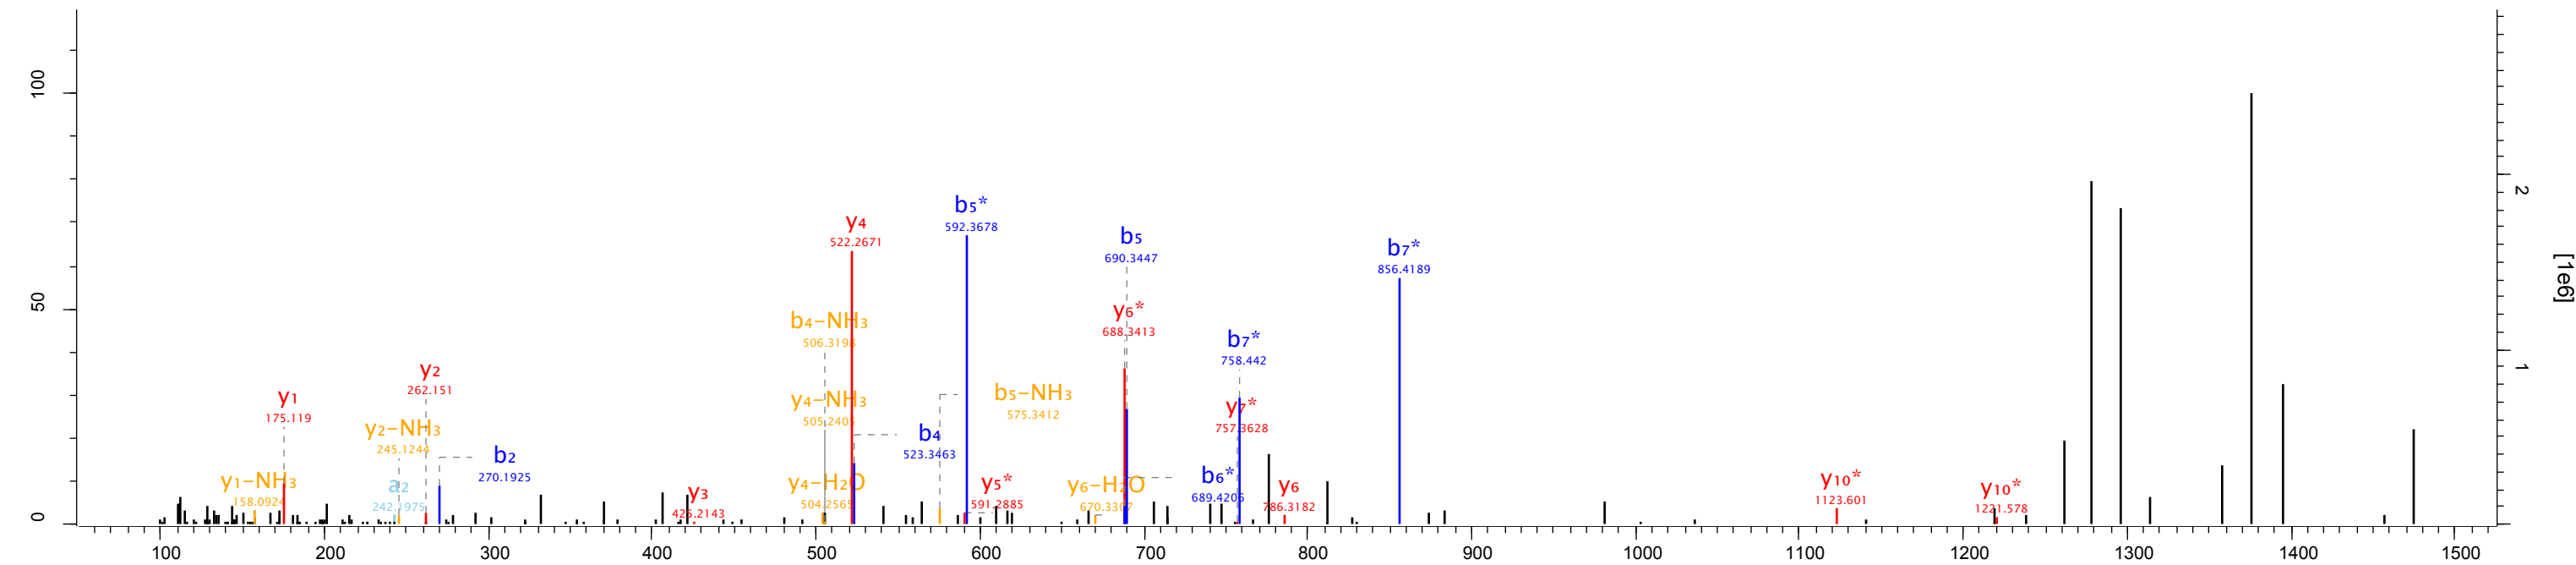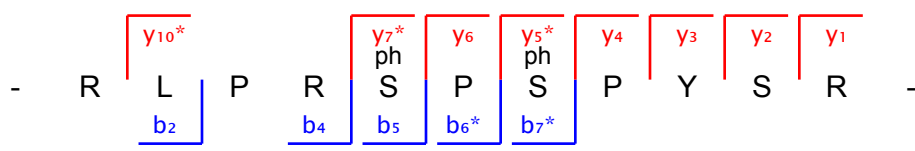

Raw file: 20150814\_A375SR\_Phospho\_BR2\_04  
 Scan: 6751 Method: FTMS; HCD Score: 79.65 m/z: 659.78 Gene names: TNKS1BP1

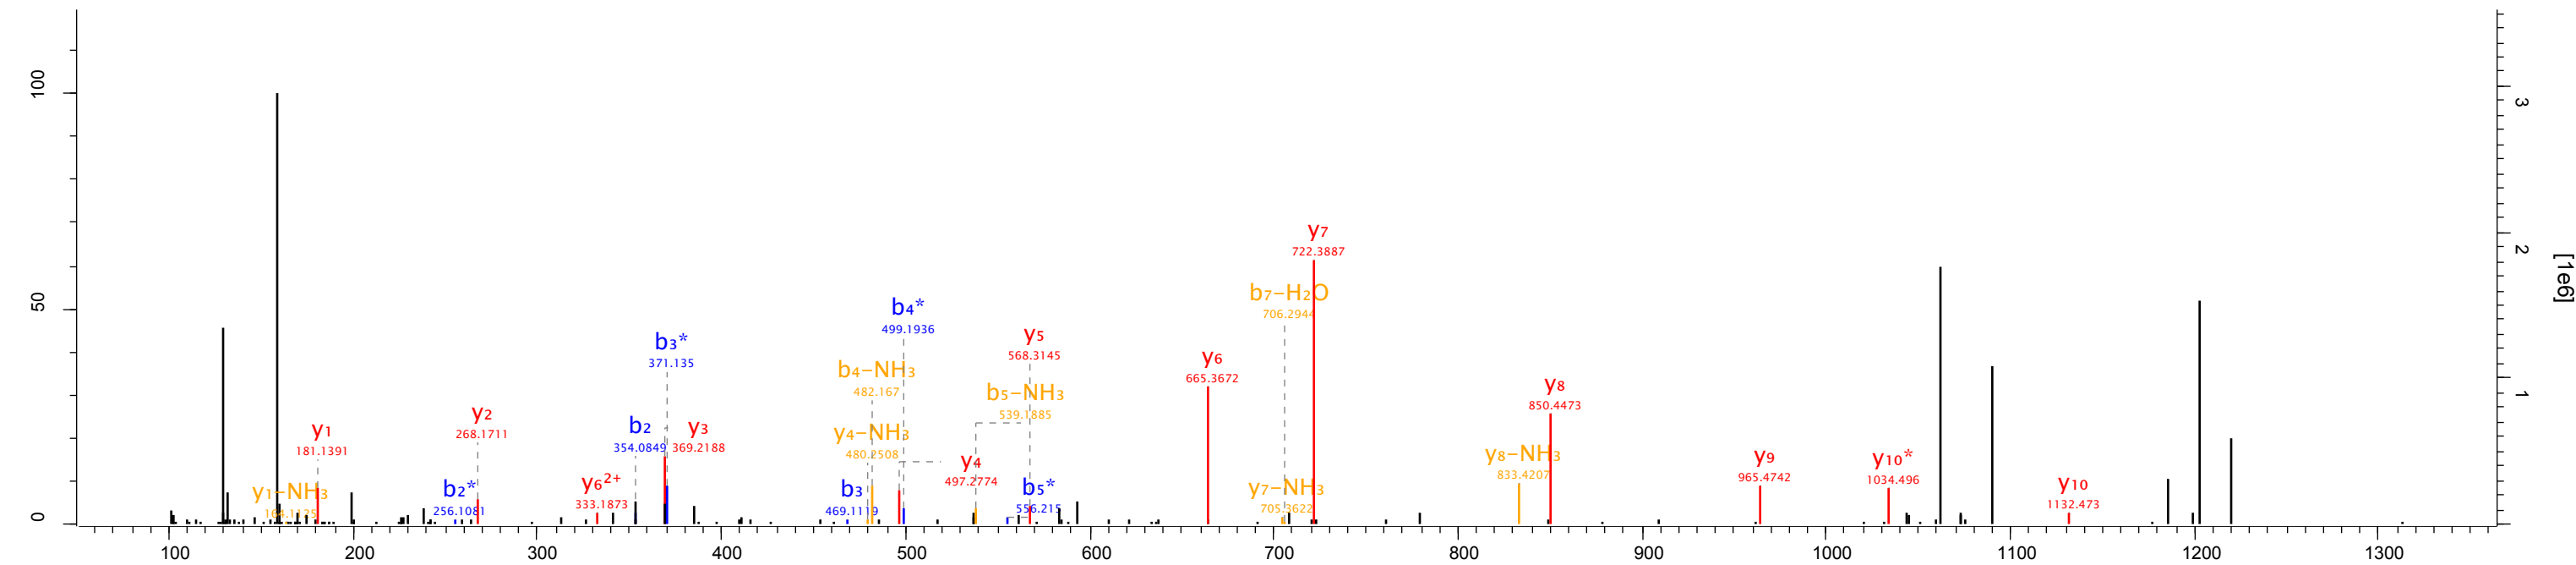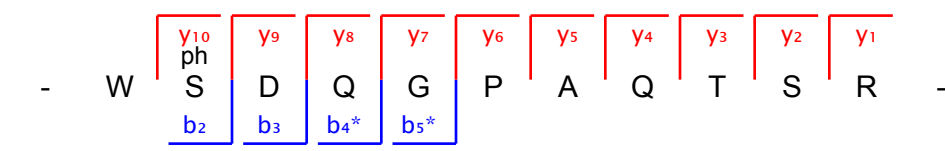

Raw file: 20150814\_A375SR\_Phospho\_BR2\_04  
 Scan: 6781 Method: FTMS; HCD Score: 78.78 m/z: 764.81 Gene names: SNX16

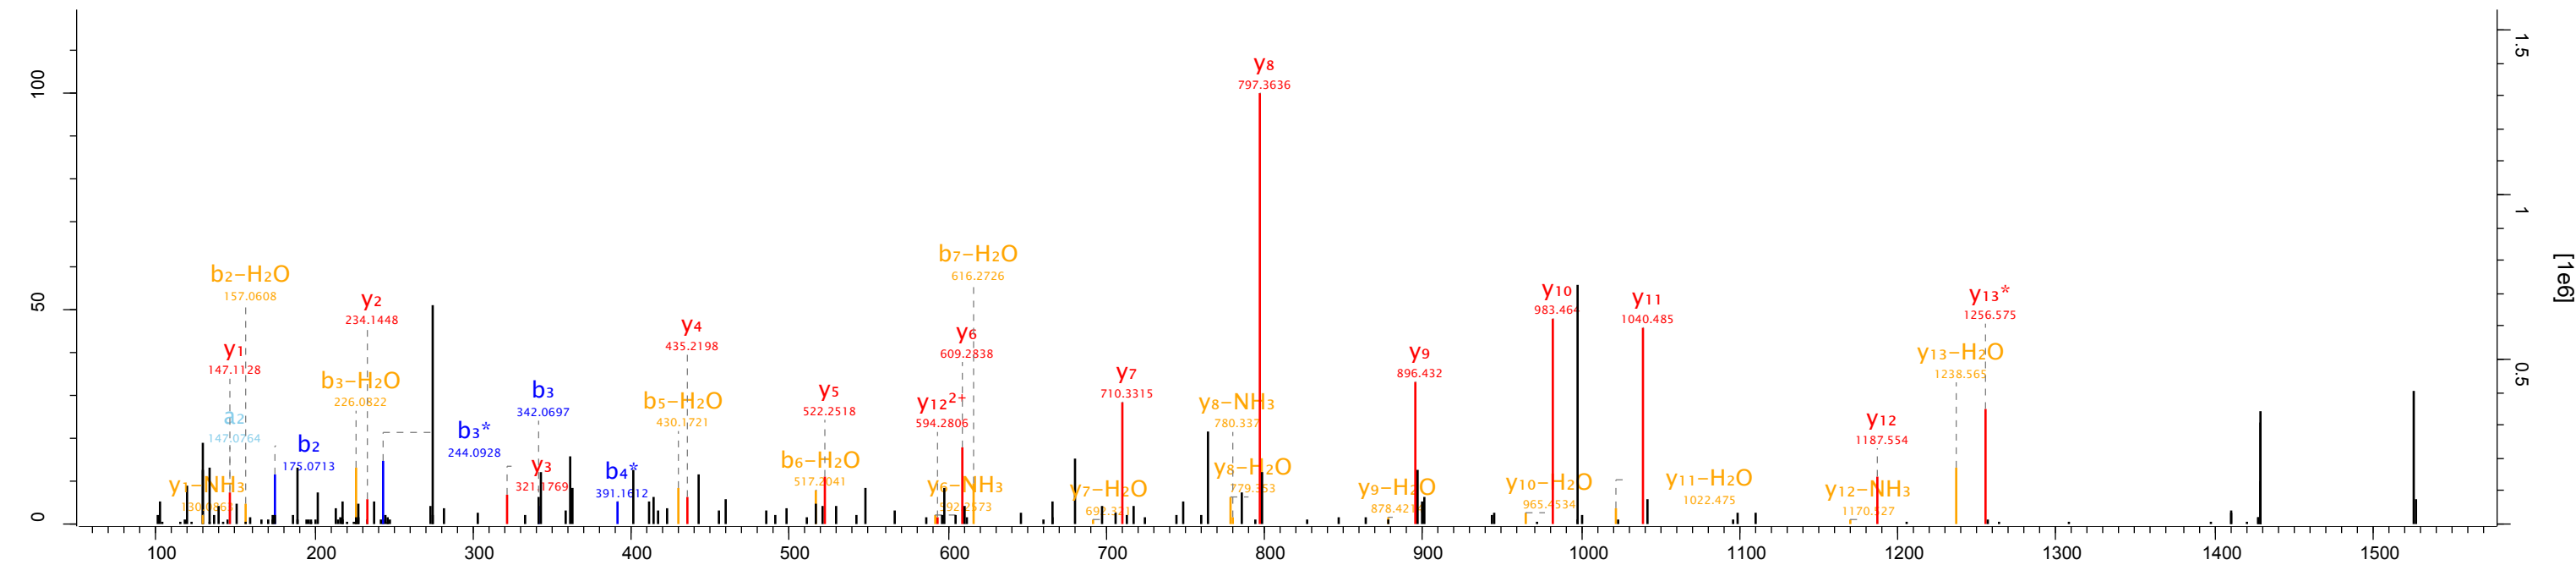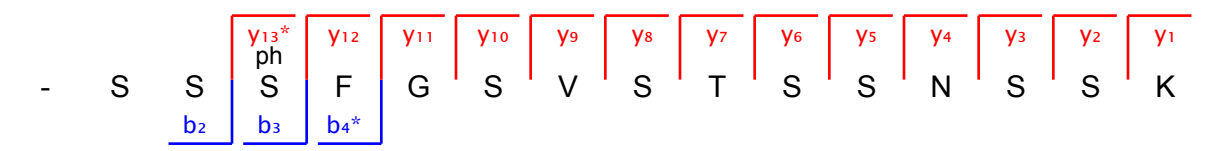

Raw file 20150814\_A375SR\_Phospho\_BR2\_04 Scan 6791 Method FTMS; HCD Score 193.54 m/z 809.39 Gene names SRPK1

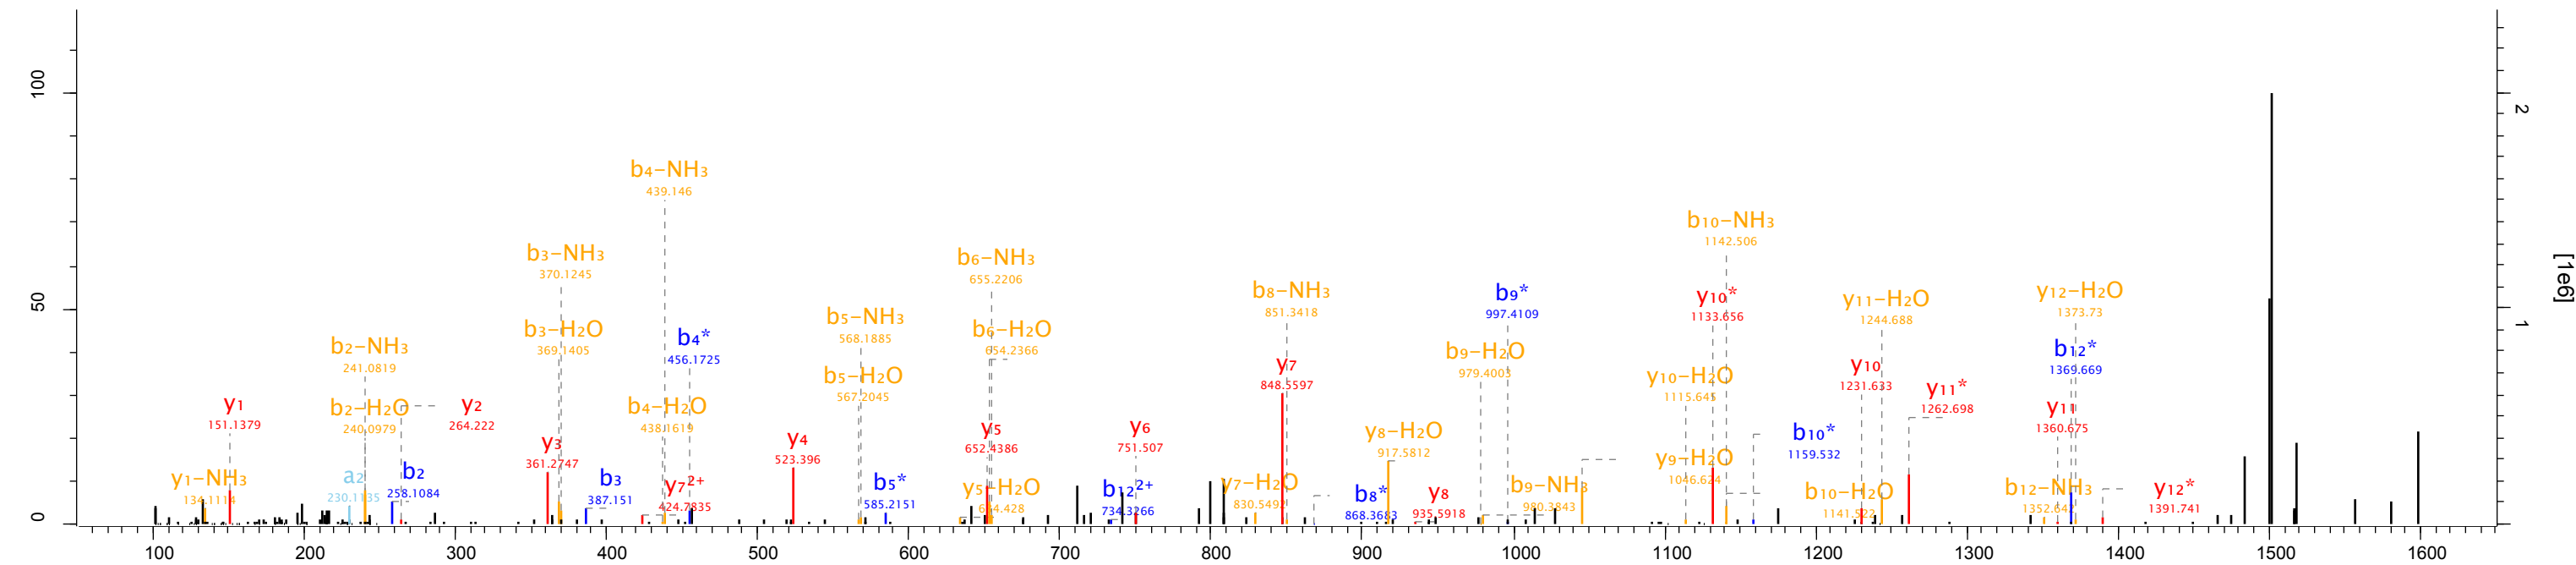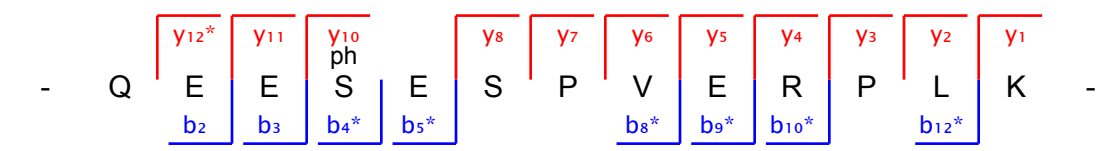



Raw file: 20150814\_A375SR\_Phospho\_BR2\_04  
 Scan: 6821 Method: FTMS; HCD Score: 137.3 m/z: 677.32 Gene names: KIAA1551

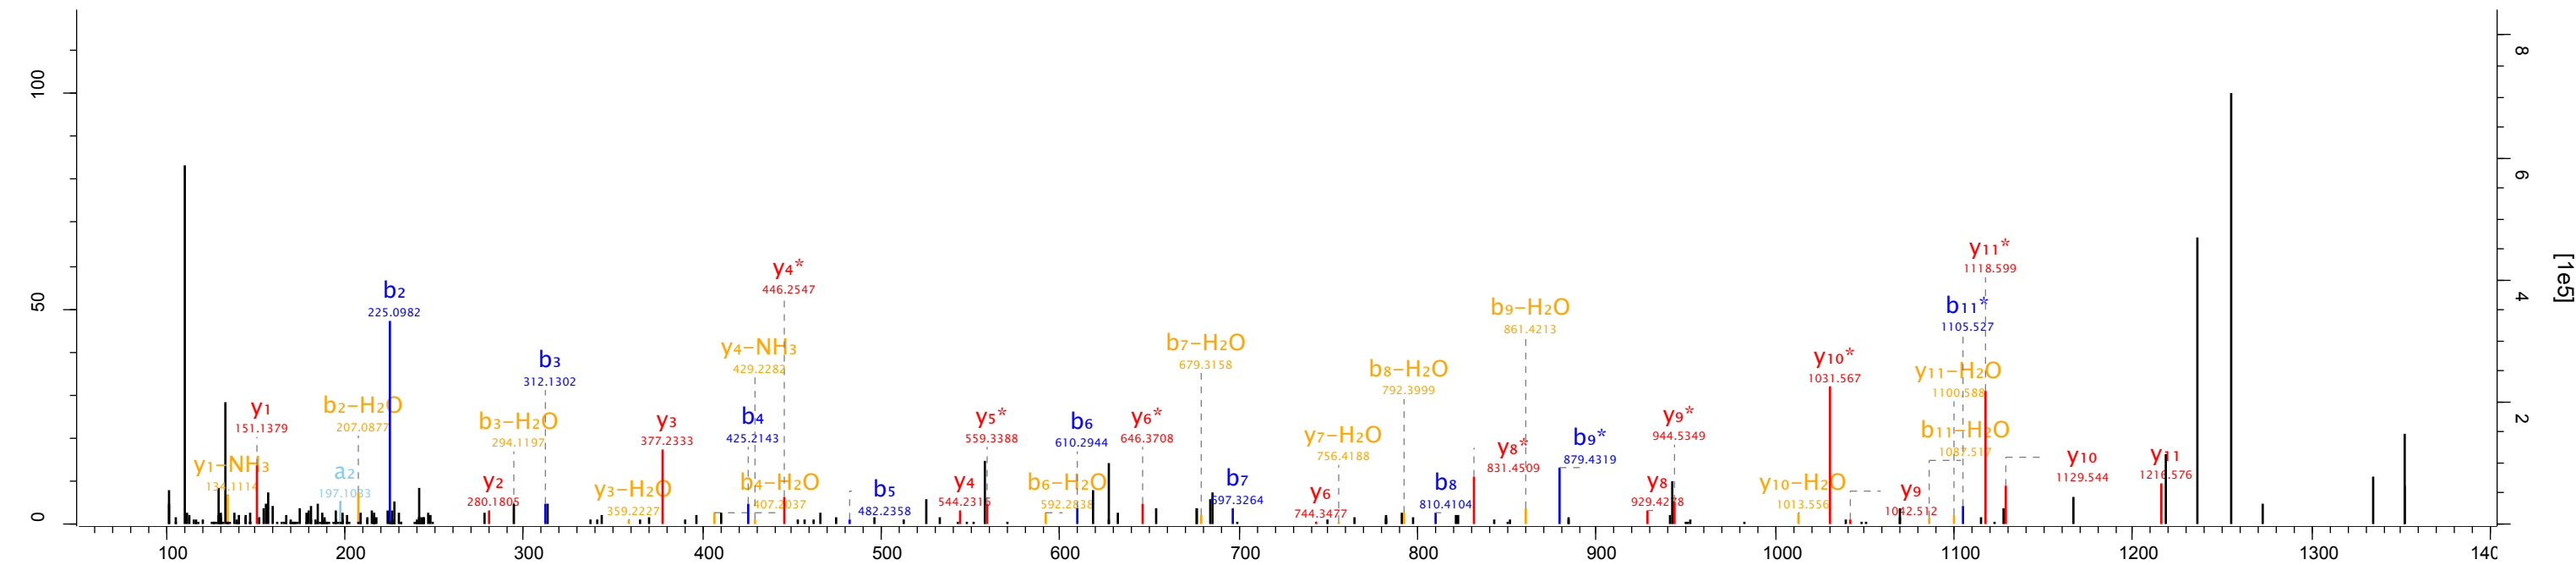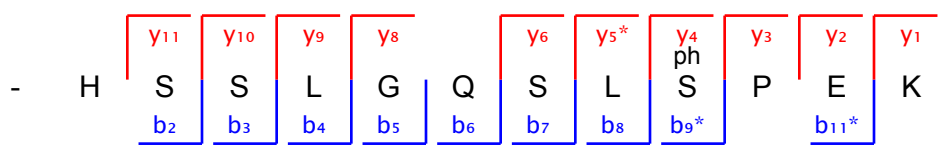

Raw file 20150814\_A375SR\_Phospho\_BR2\_04 Scan 6971 Method FTMS; HCD Score 160.02 m/z 581.27 Gene names CENPC

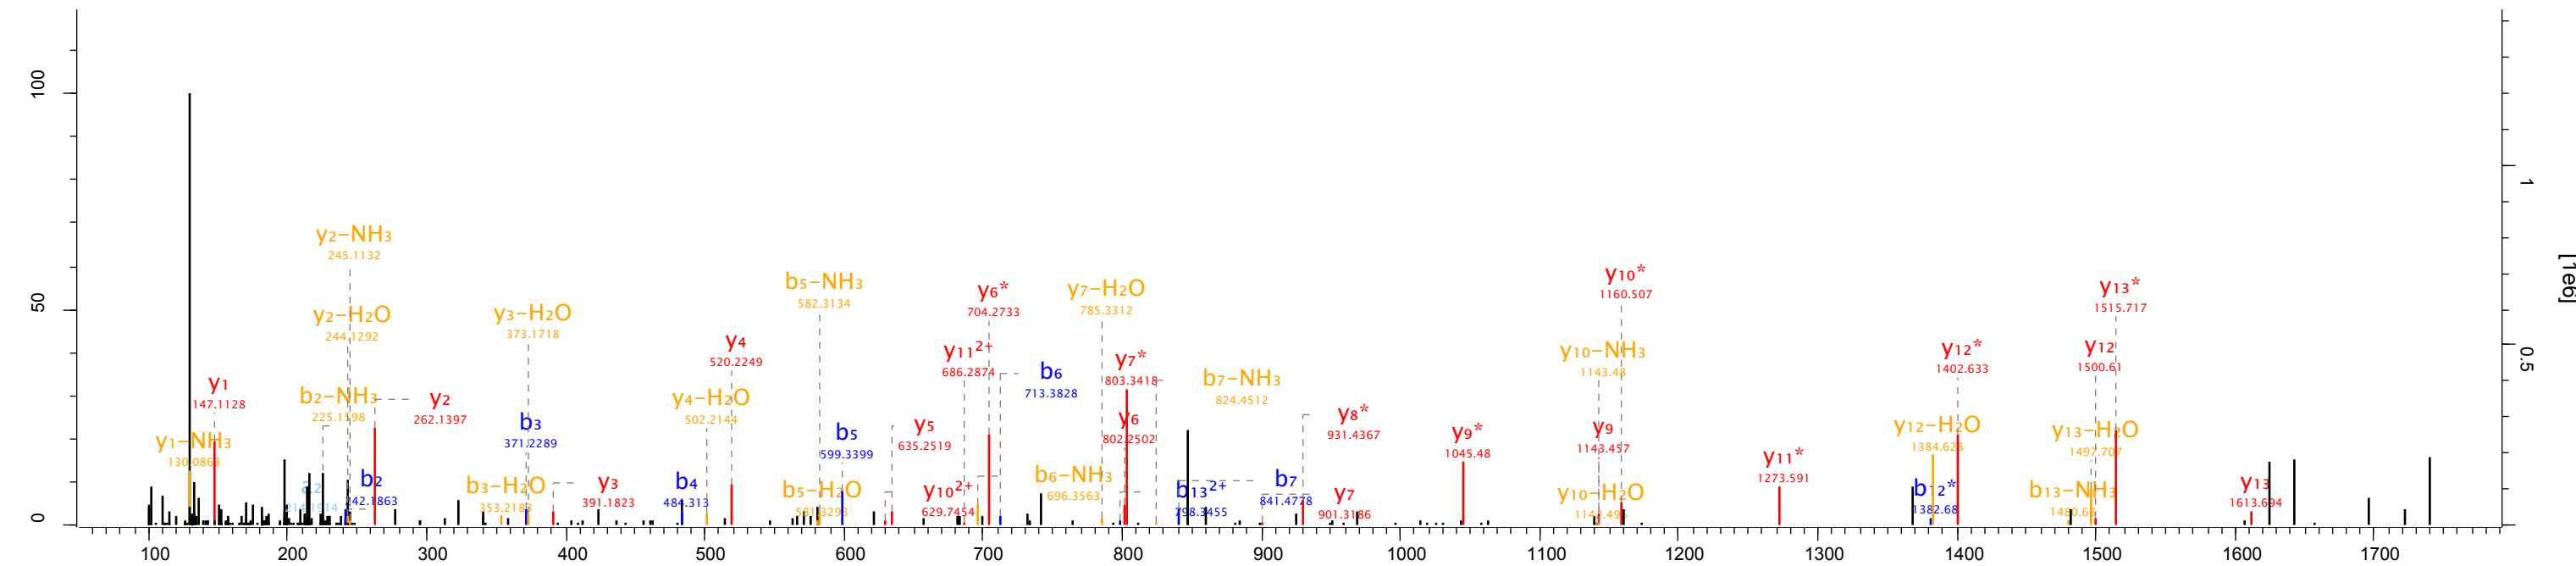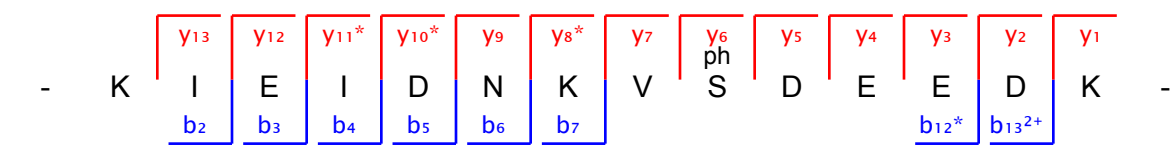

Raw file 20150814\_A375SR\_Phospho\_BR2\_04 Scan 7371 Method FTMS; HCD Score 217.39 m/z 859.87 Gene names ZFR

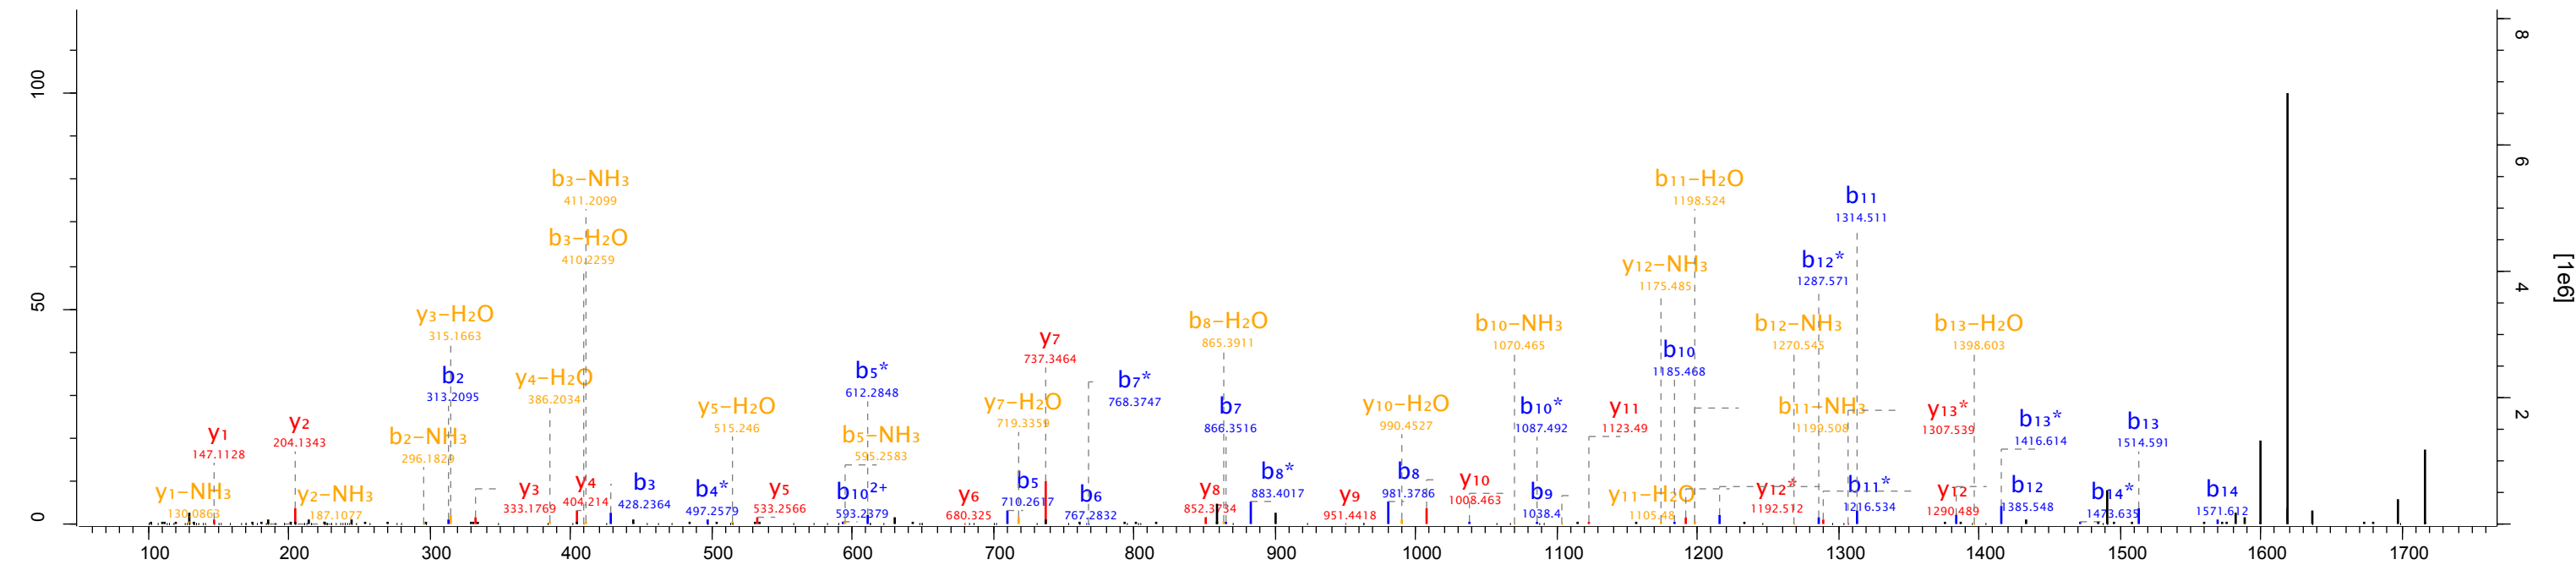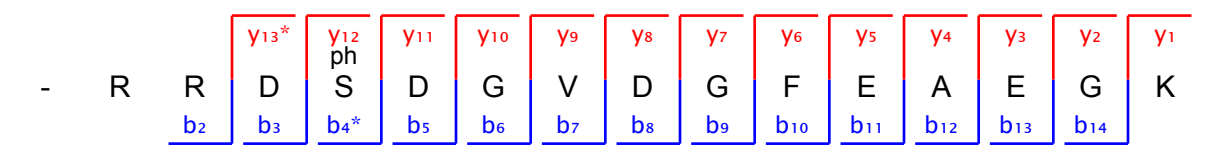

Raw file: 20150814\_A375SR\_Phospho\_BR2\_04  
 Scan: 7391 Method: FTMS; HCD Score: 166.57 m/z: 922.93 Gene names: NSFL1C

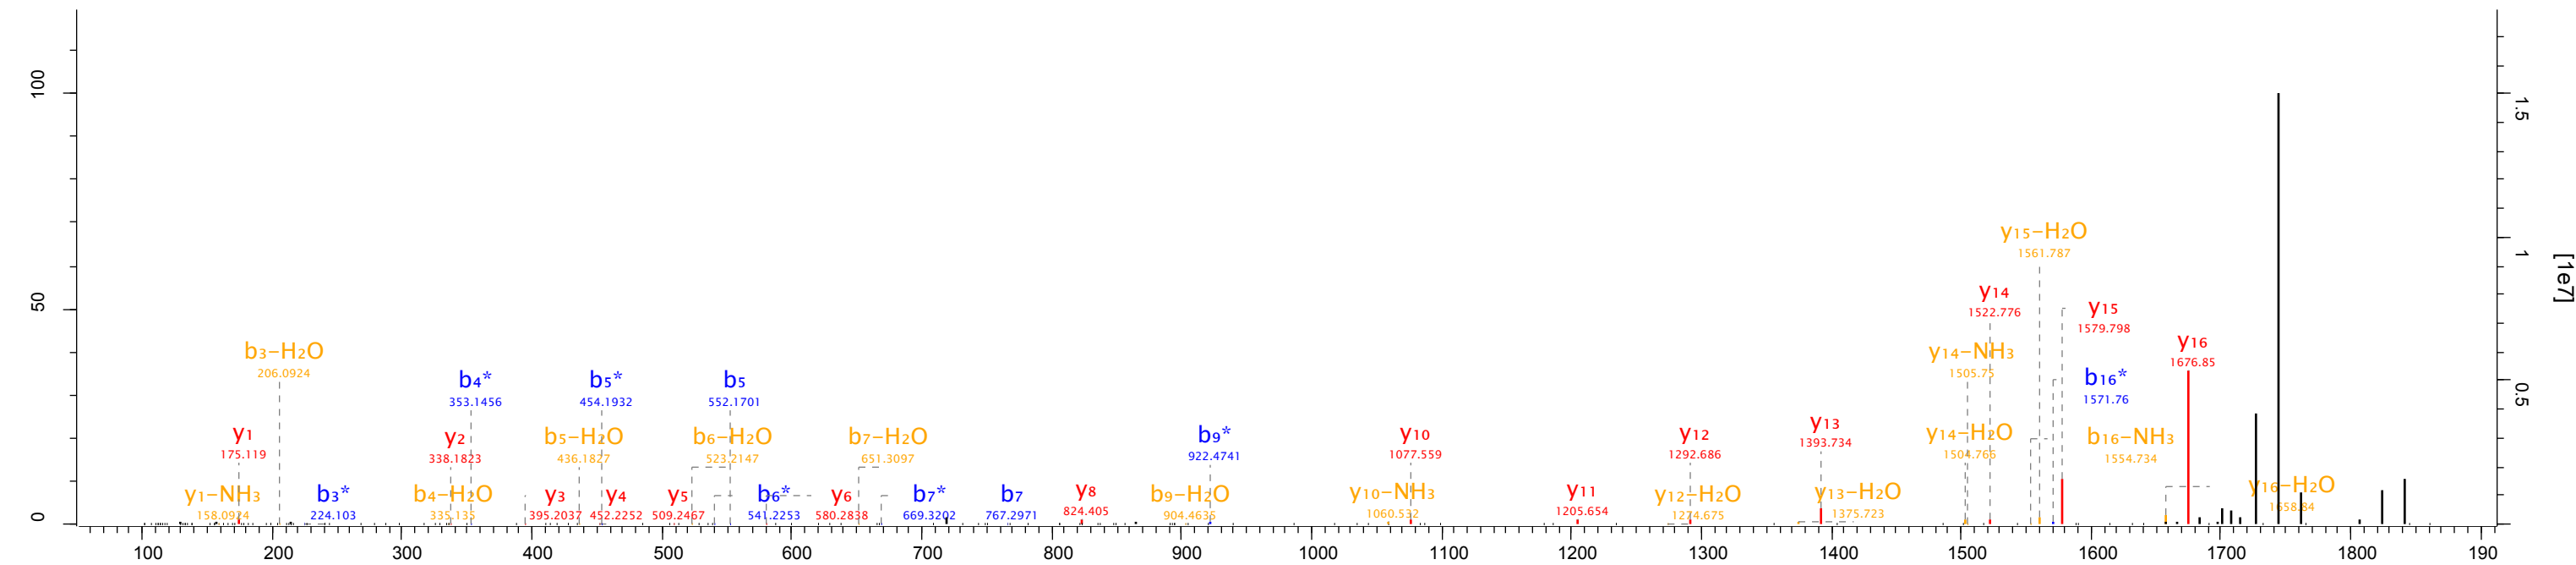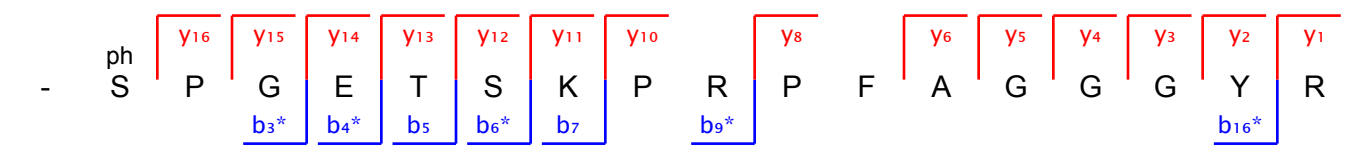

Raw file: 20150814\_A375SR\_Phospho\_BR2\_04  
 Scan: 7571 Method: FTMS; HCD Score: 137.42 m/z: 700.34 Gene names: GPS1

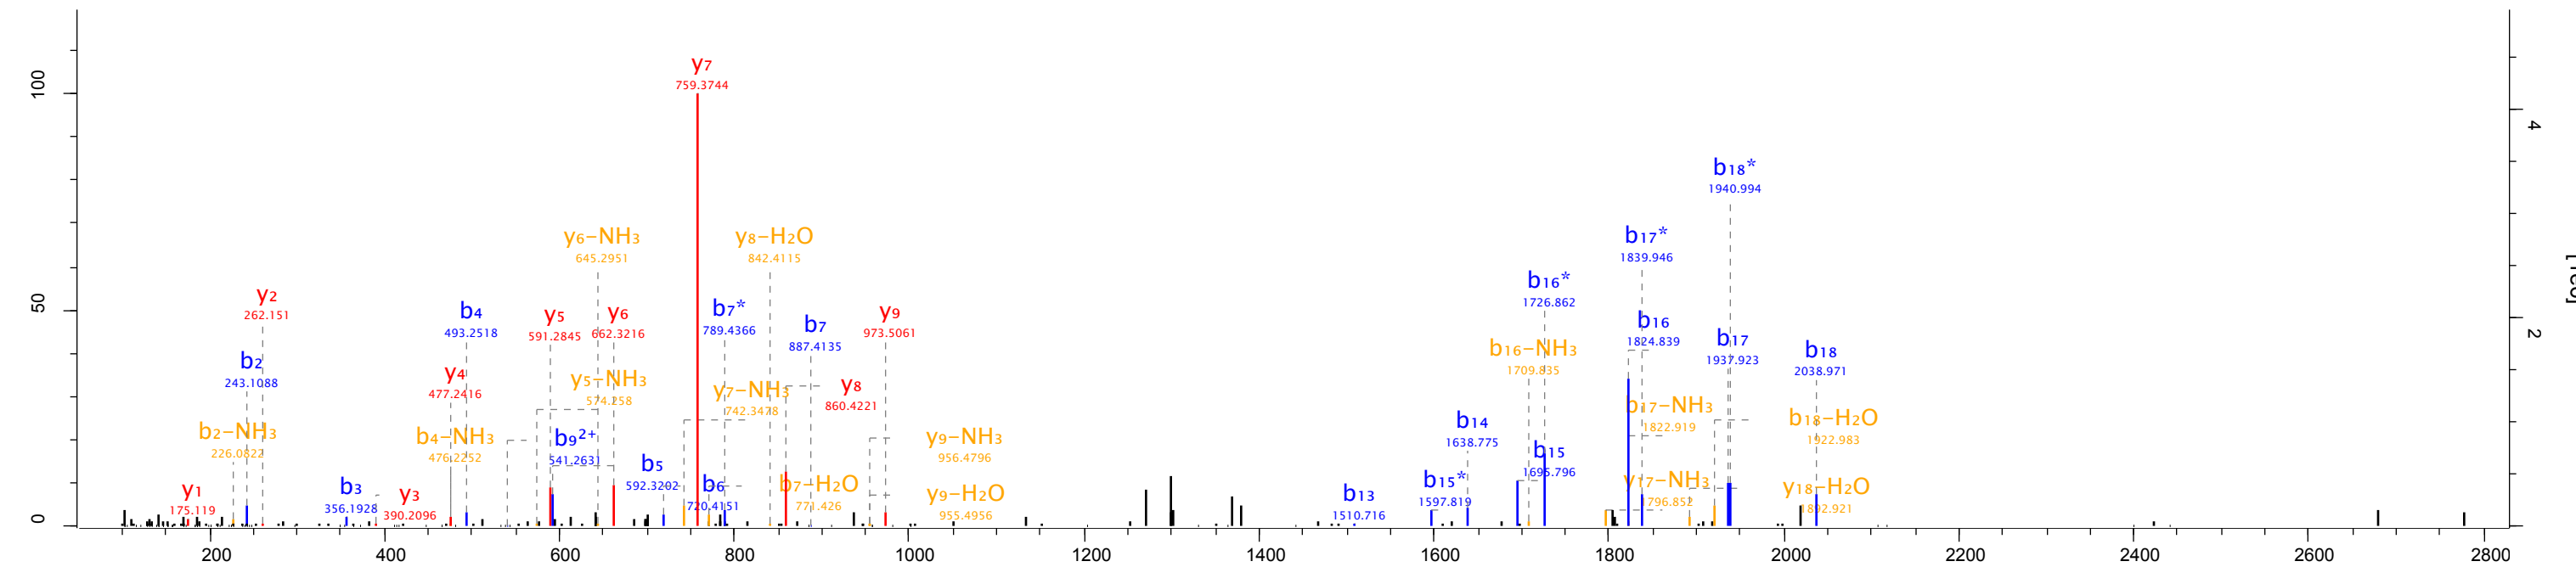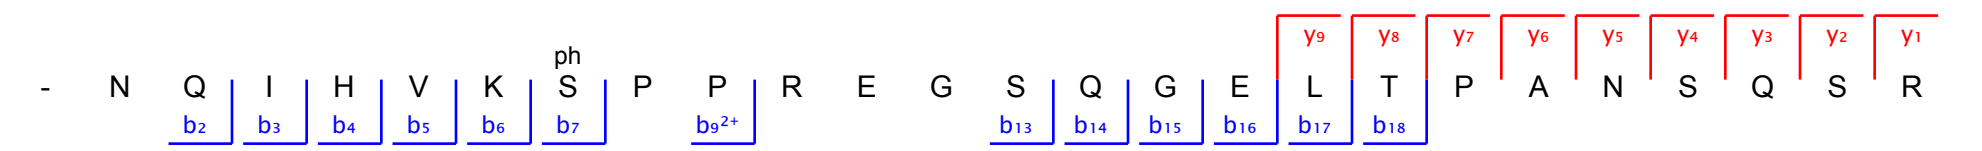

Raw file: 20150814\_A375SR\_Phospho\_BR2\_04  
 Scan: 7791 Method: FTMS; HCD Score: 93.24 m/z: 593.8 Gene names: MARK3

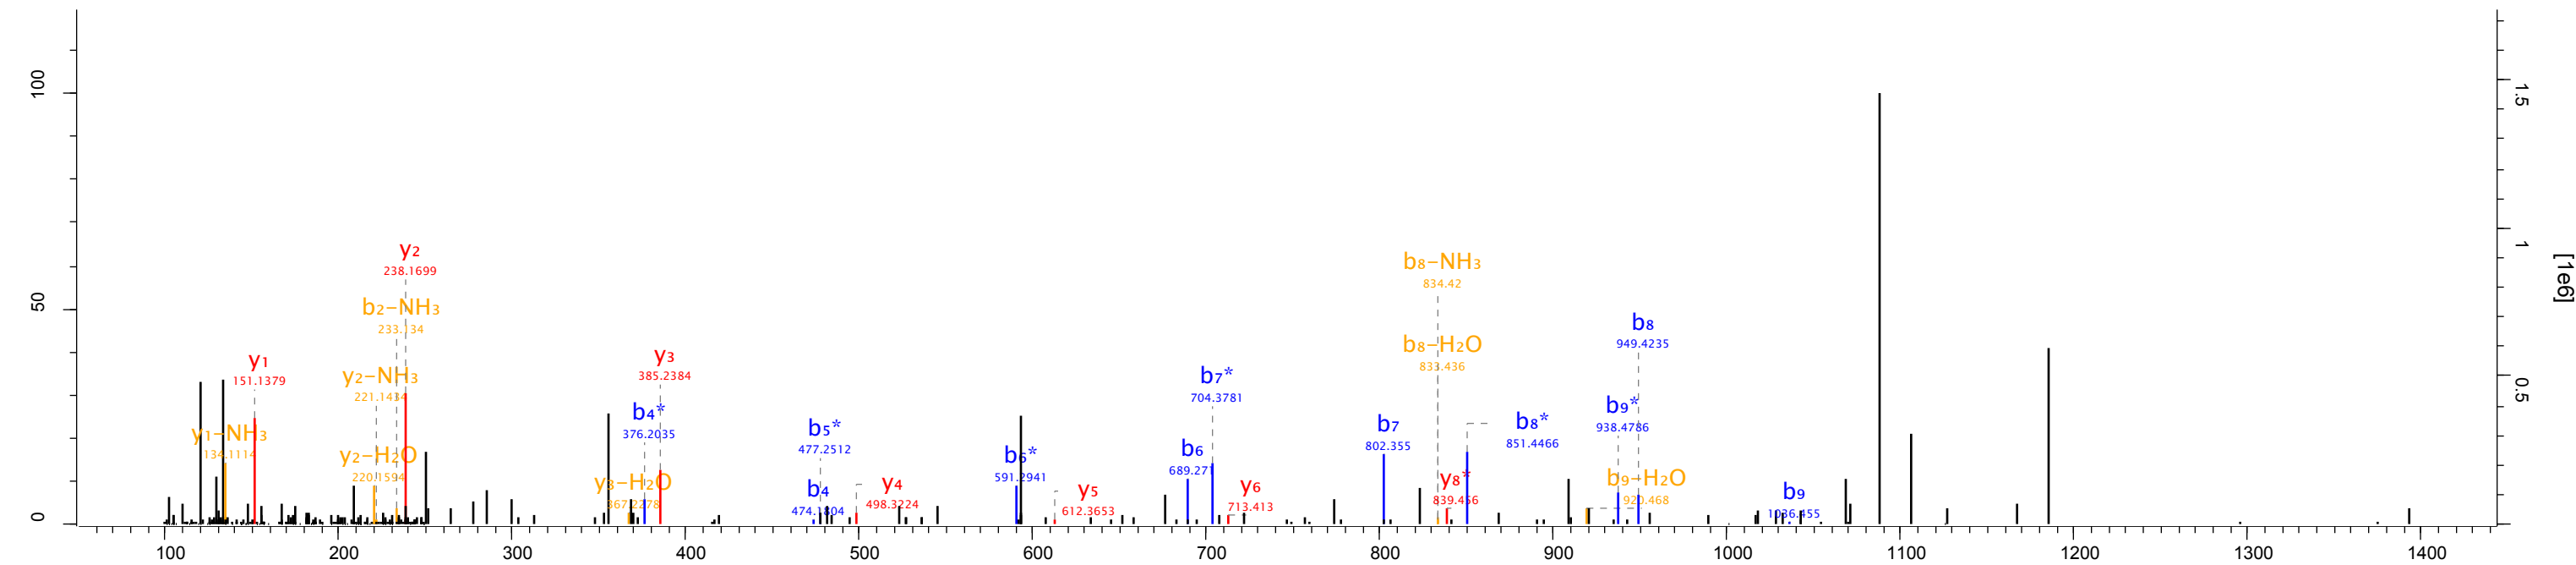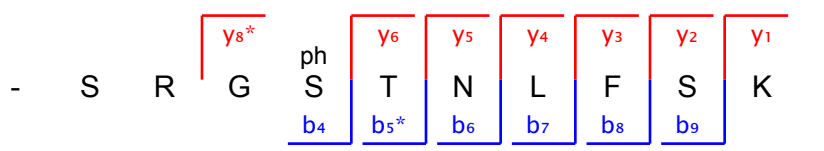

Raw file: 20150814\_A375SR\_Phospho\_BR2\_04  
 Scan: 7851 Method: FTMS; HCD Score: 101.86 m/z: 638.33 Gene names: ARHGAP4

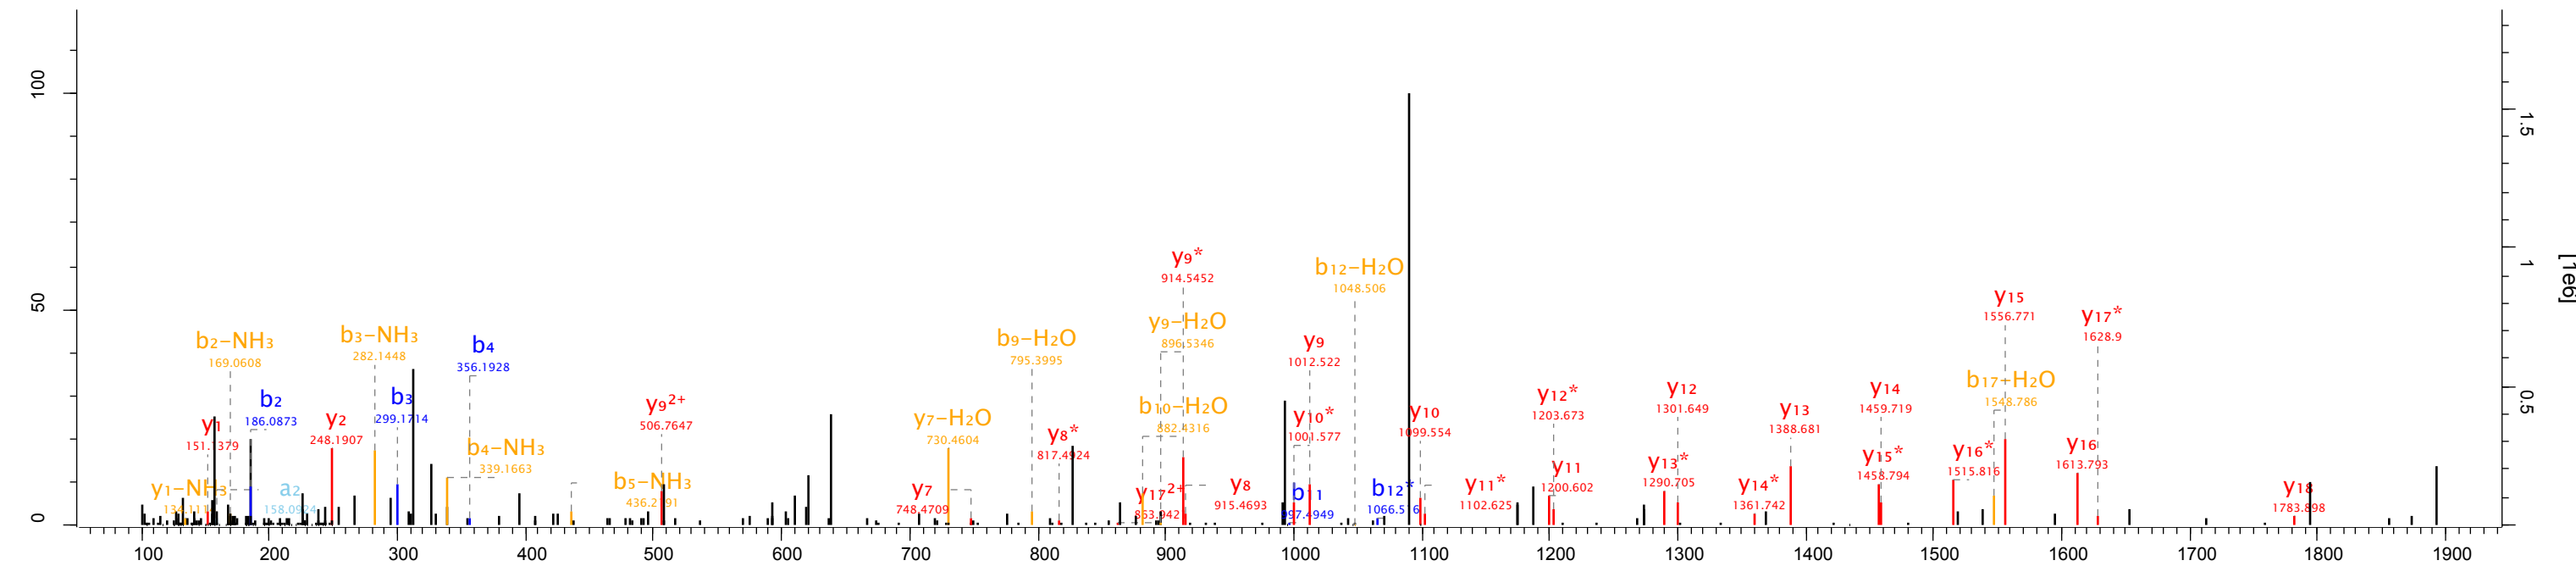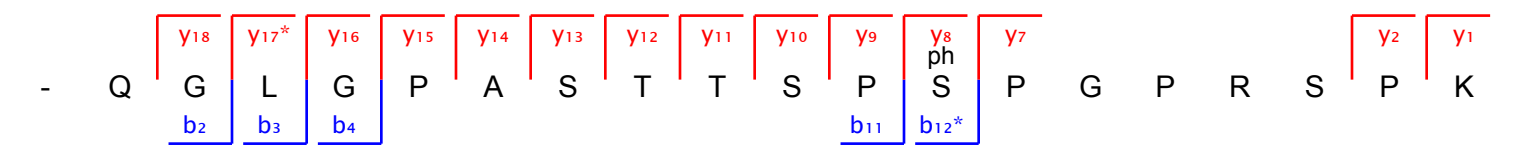

Raw file: 20150814\_A375SR\_Phospho\_BR2\_04  
 Scan: 7971 Method: FTMS; HCD Score: 222.88 m/z: 704.26 Gene names: PRRC2A

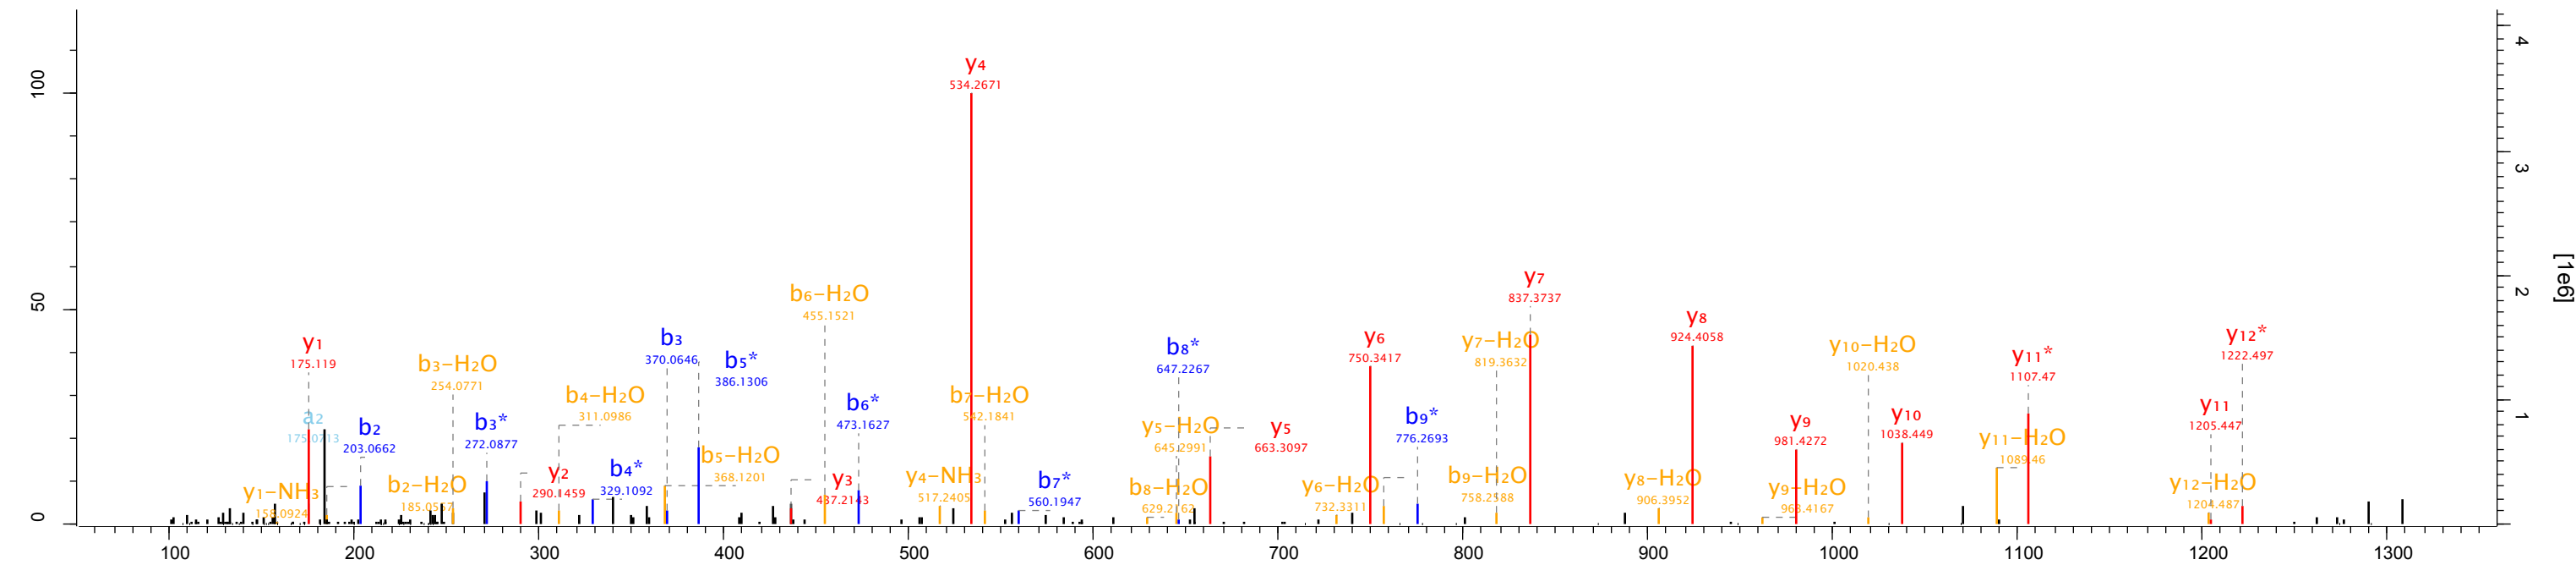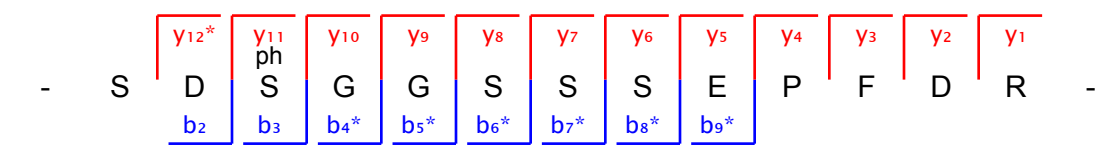



Raw file: 20150814\_A375SR\_Phospho\_BR2\_04  
 Scan: 8411 Method: FTMS; HCD Score: 119.76 m/z: 767.35 Gene names: TMF1

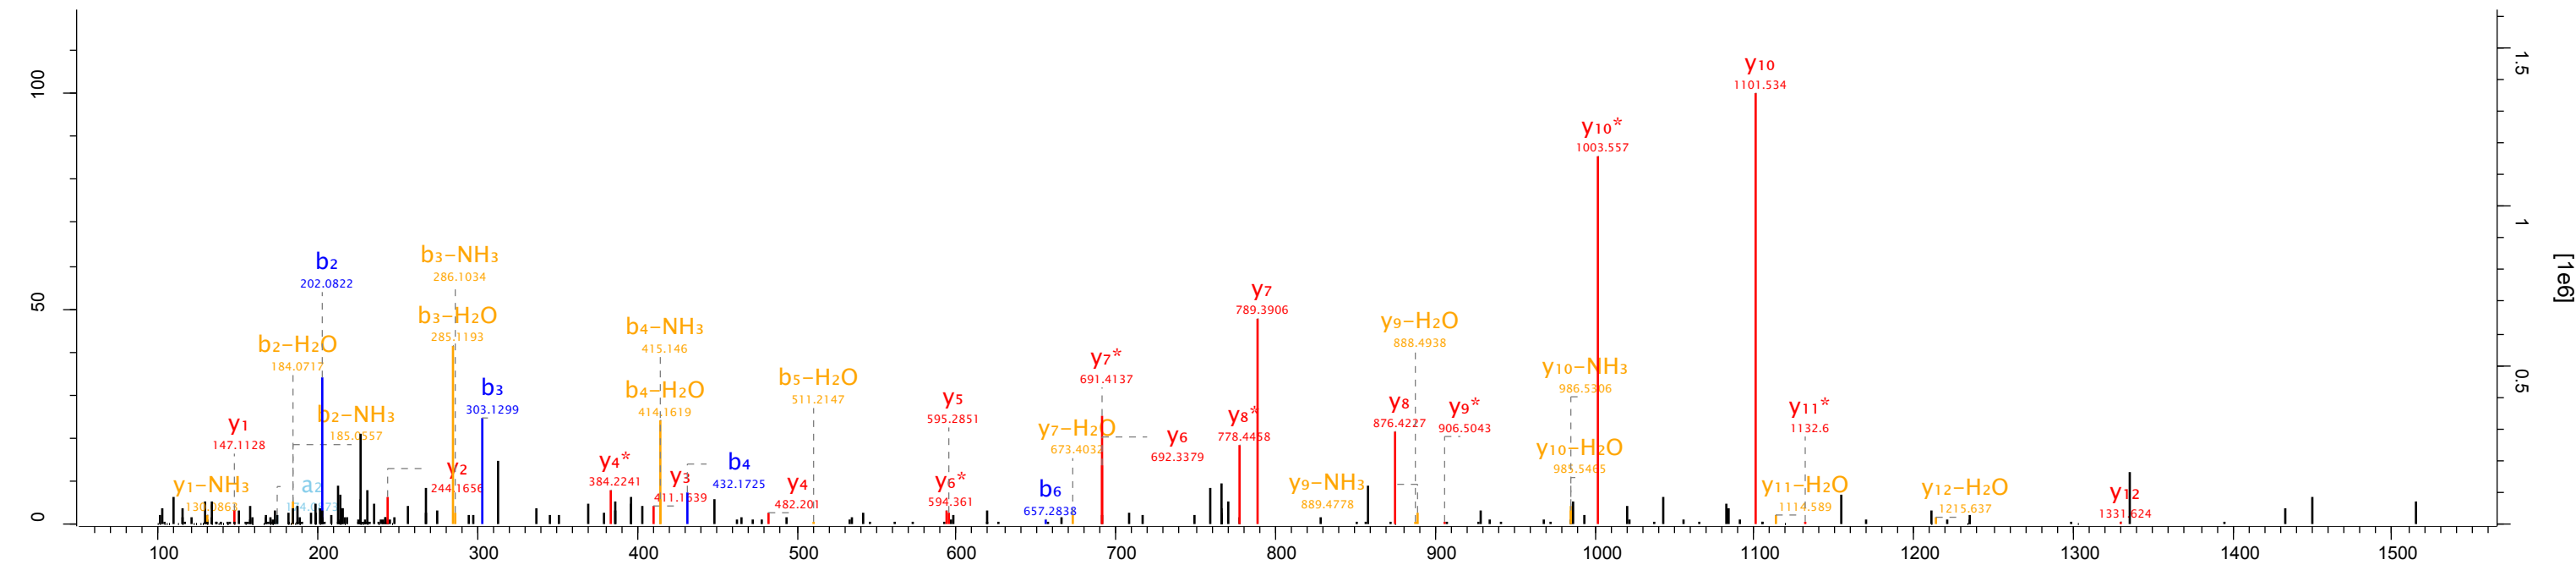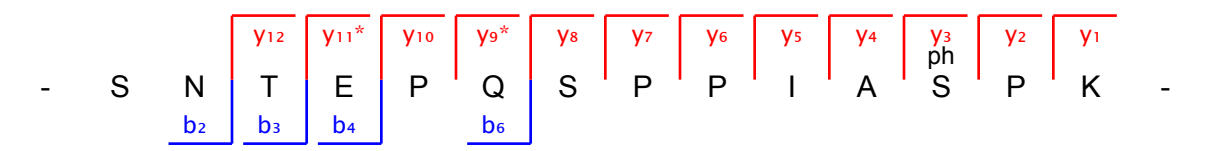

Raw file: 20150814\_A375SR\_Phospho\_BR2\_04  
 Scan: 8701 Method: FTMS; HCD Score: 222.09 m/z: 681.85 Gene names: NCOR2

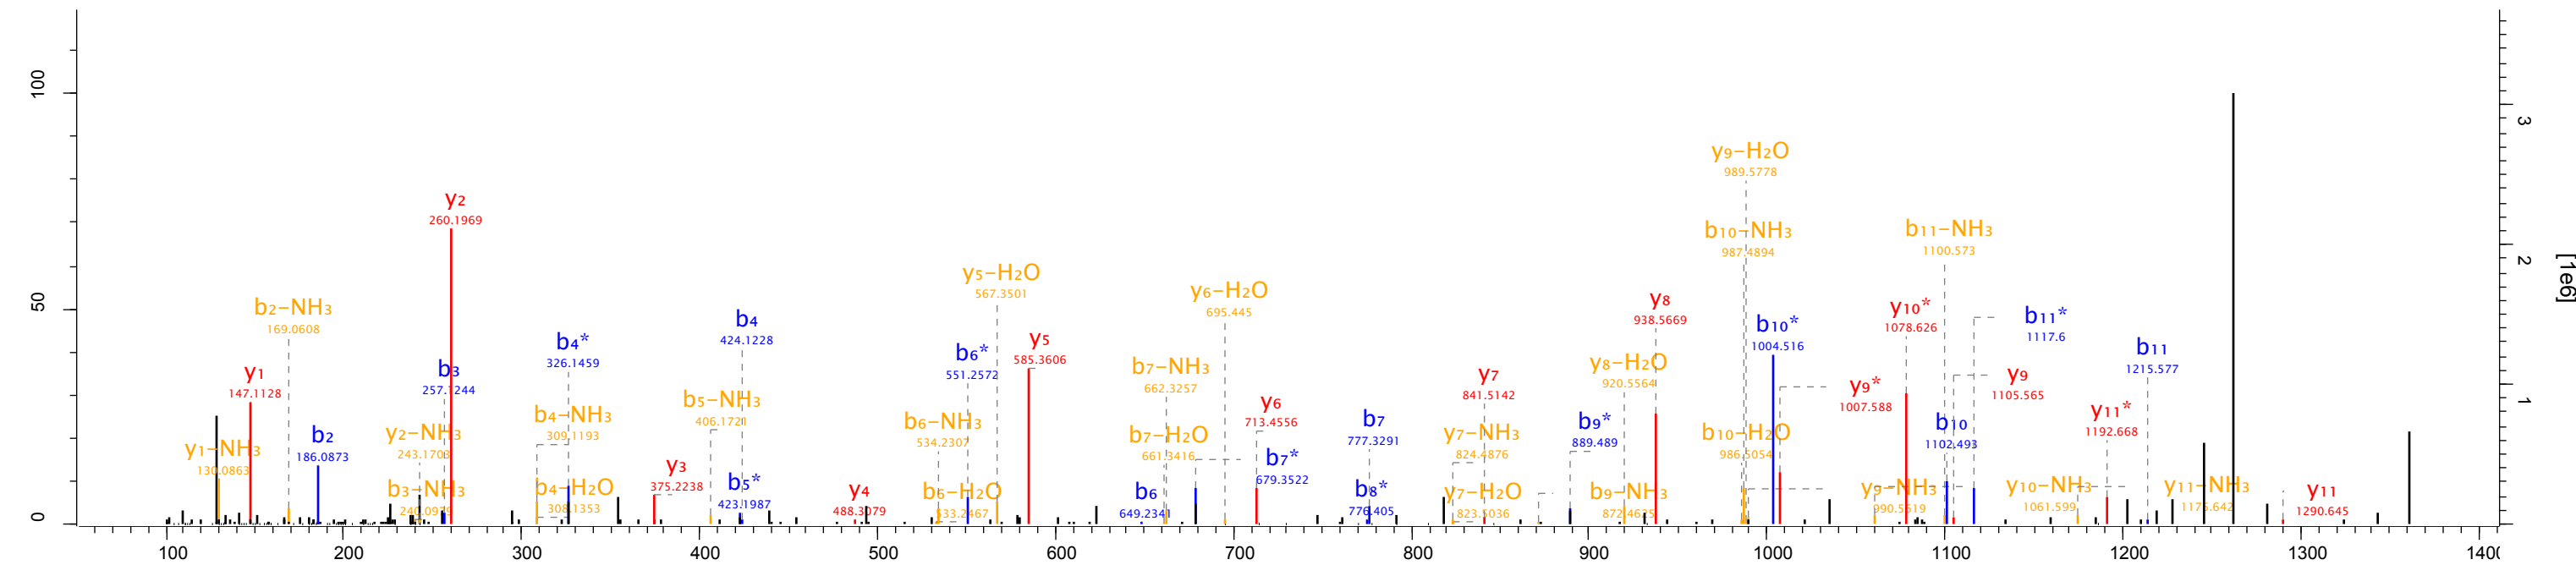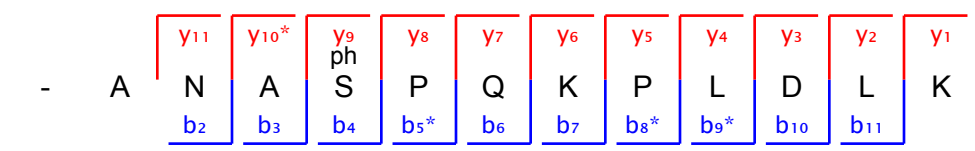

Raw file: 20150814\_A375SR\_Phospho\_BR2\_04  
 Scan: 8931 Method: FTMS; HCD Score: 322.45 m/z: 983.43 Gene names: PDS5B

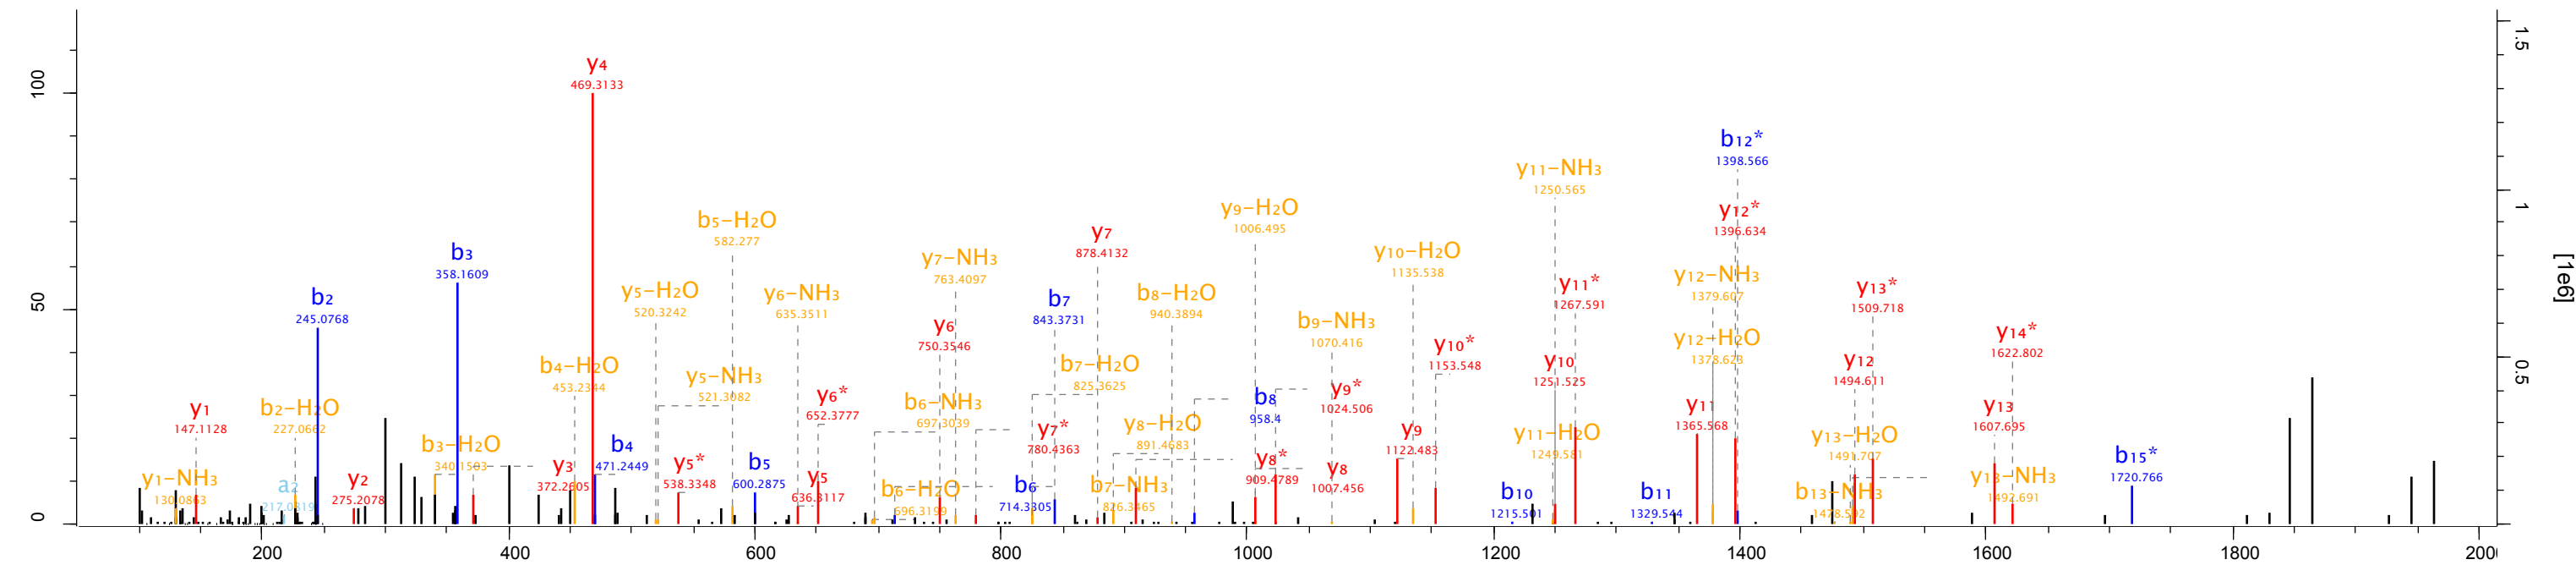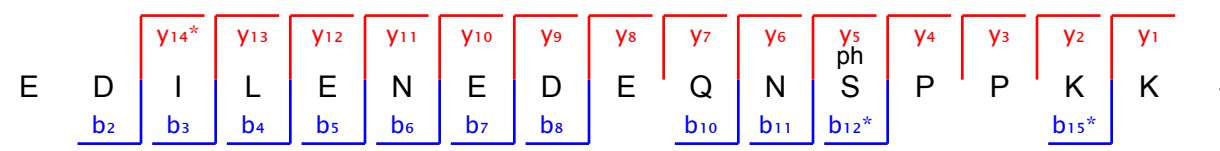

Raw file: 20150814\_A375SR\_Phospho\_BR2\_04  
 Scan: 9171 Method: FTMS; HCD Score: 254.71 m/z: 754.84 Gene names: CANX

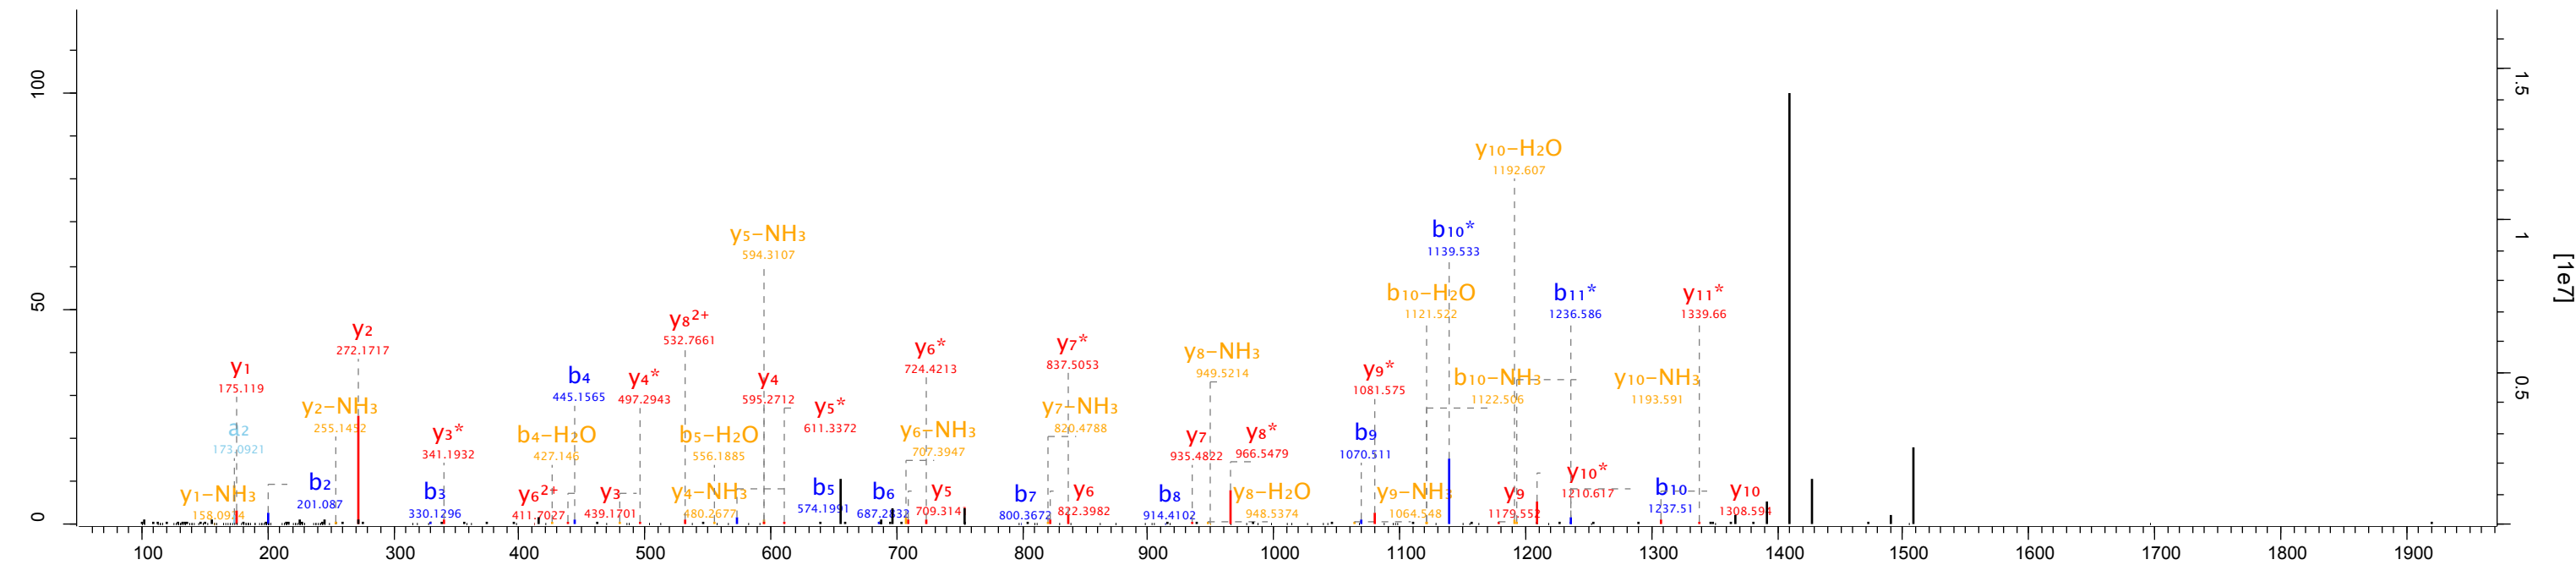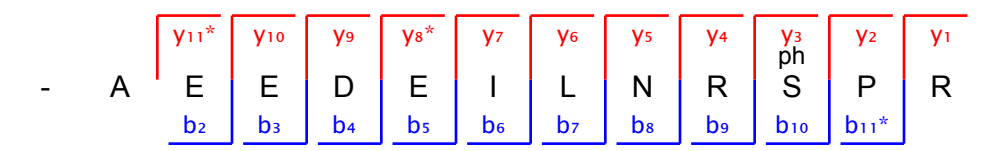

Raw file: 20150814\_A375SR\_Phospho\_BR2\_04  
 Scan: 9571 Method: FTMS; HCD Score: 77.42 m/z: 630.31 Gene names: NCOA7

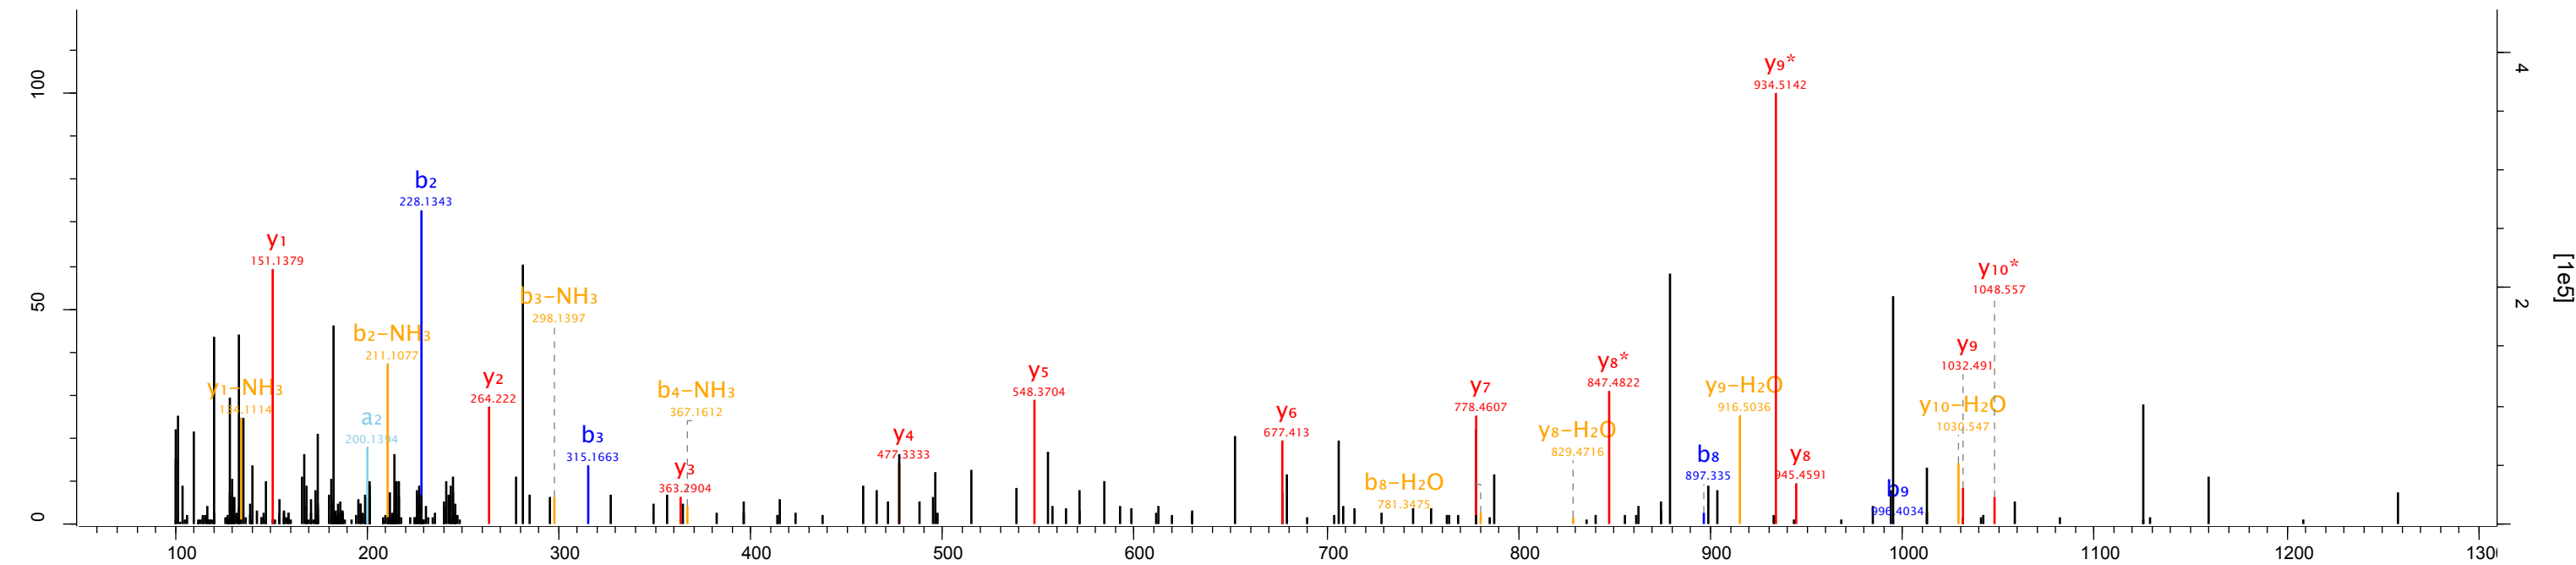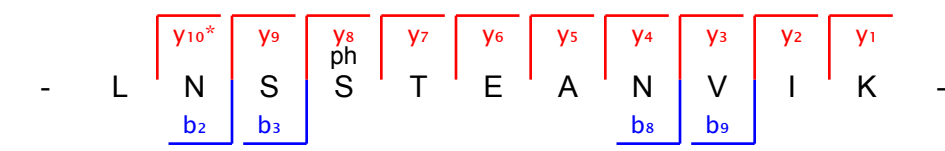

Raw file: 20150814\_A375SR\_Phospho\_BR2\_04  
 Scan: 9701 Method: FTMS; HCD Score: 270.74 m/z: 991.94 Gene names: TCOF1

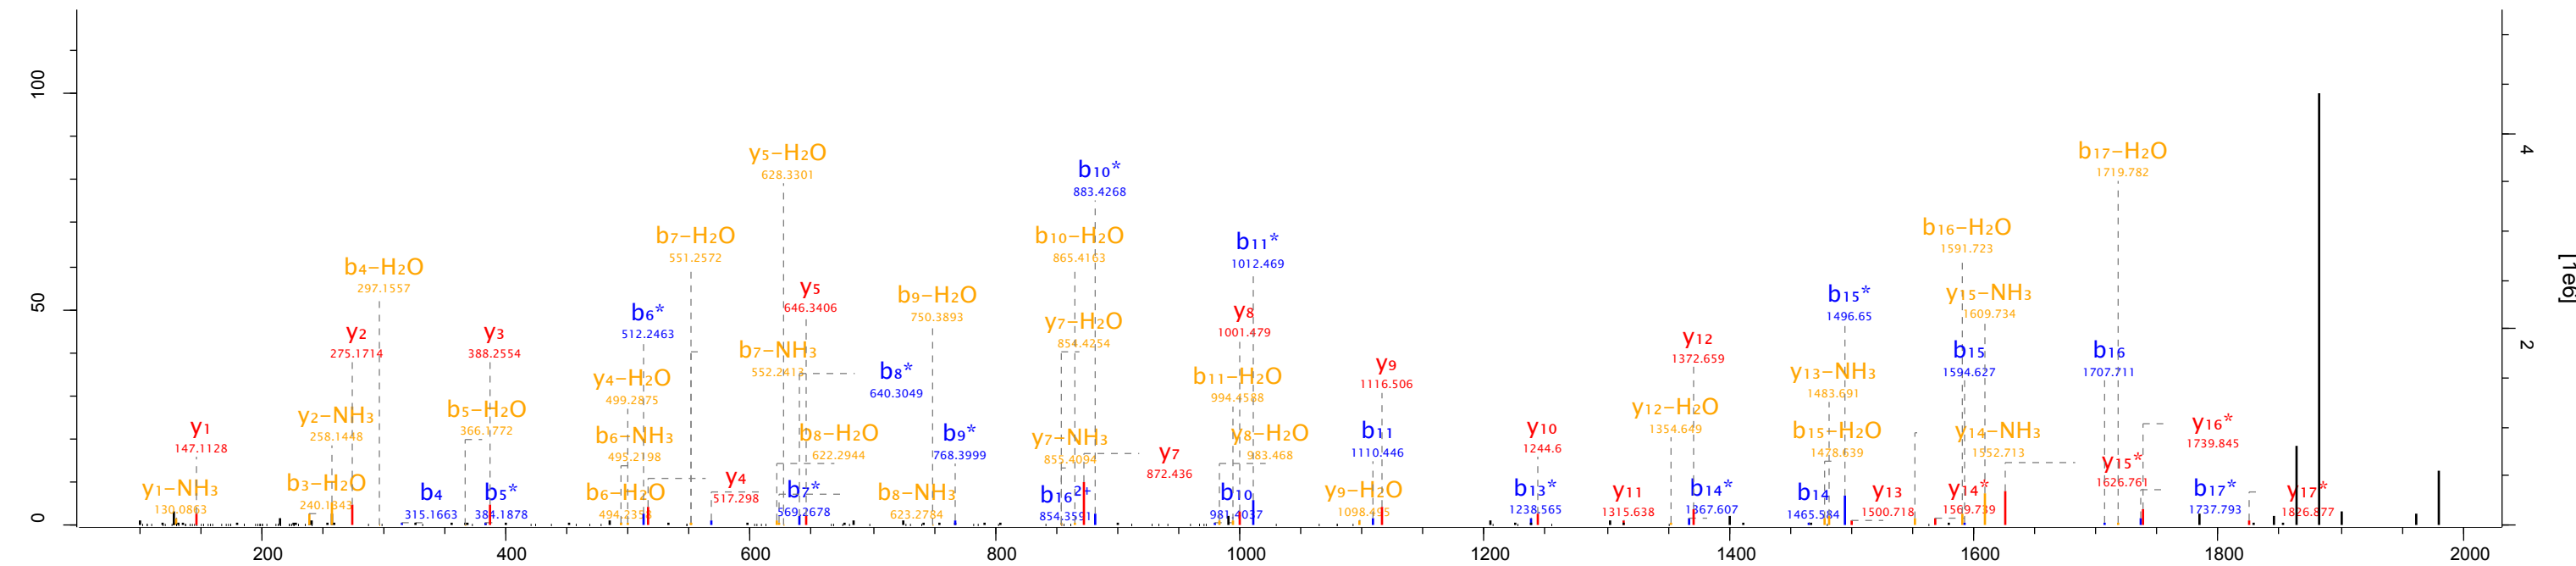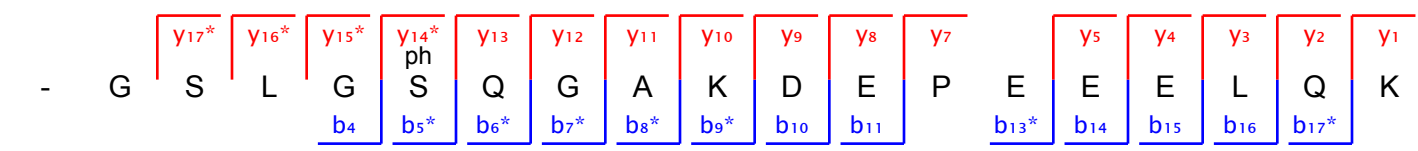

Raw file: 20150814\_A375SR\_Phospho\_BR2\_05  
 Scan: 10161 Method: FTMS; HCD Score: 111.94 m/z: 513.25 Gene names: USP36

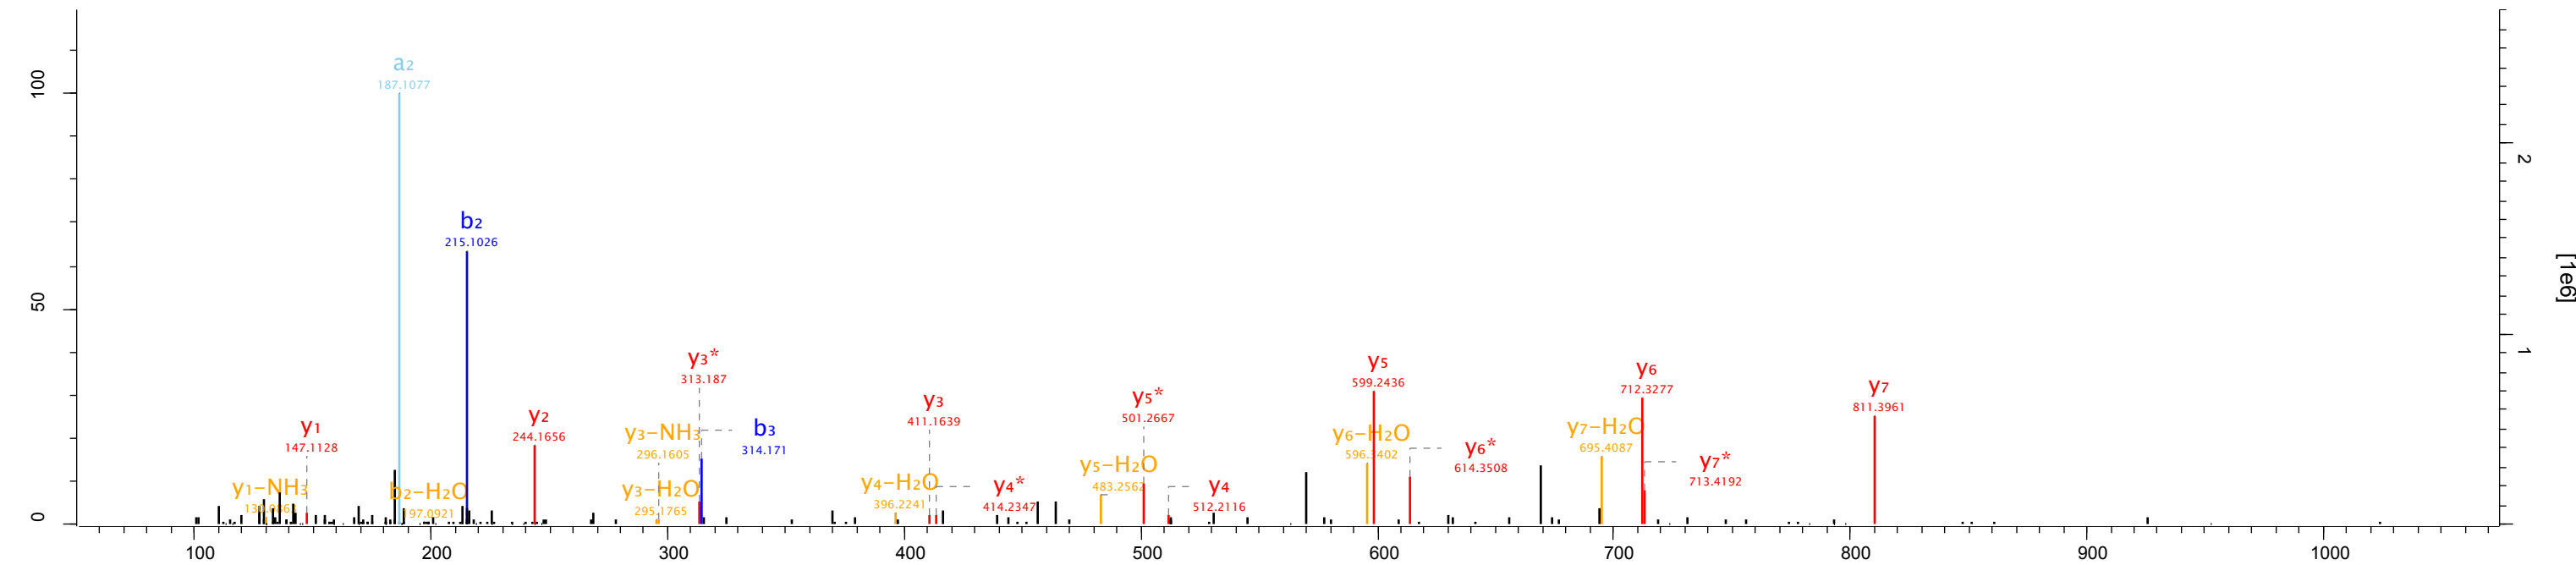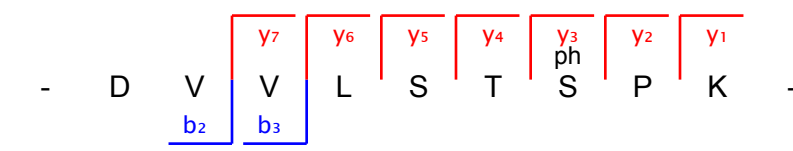

Raw file: 20150814\_A375SR\_Phospho\_BR2\_05  
 Scan: 10851  
 Method: FTMS; HCD  
 Score: 237.71  
 m/z: 1044.46  
 Gene names: MYO18A

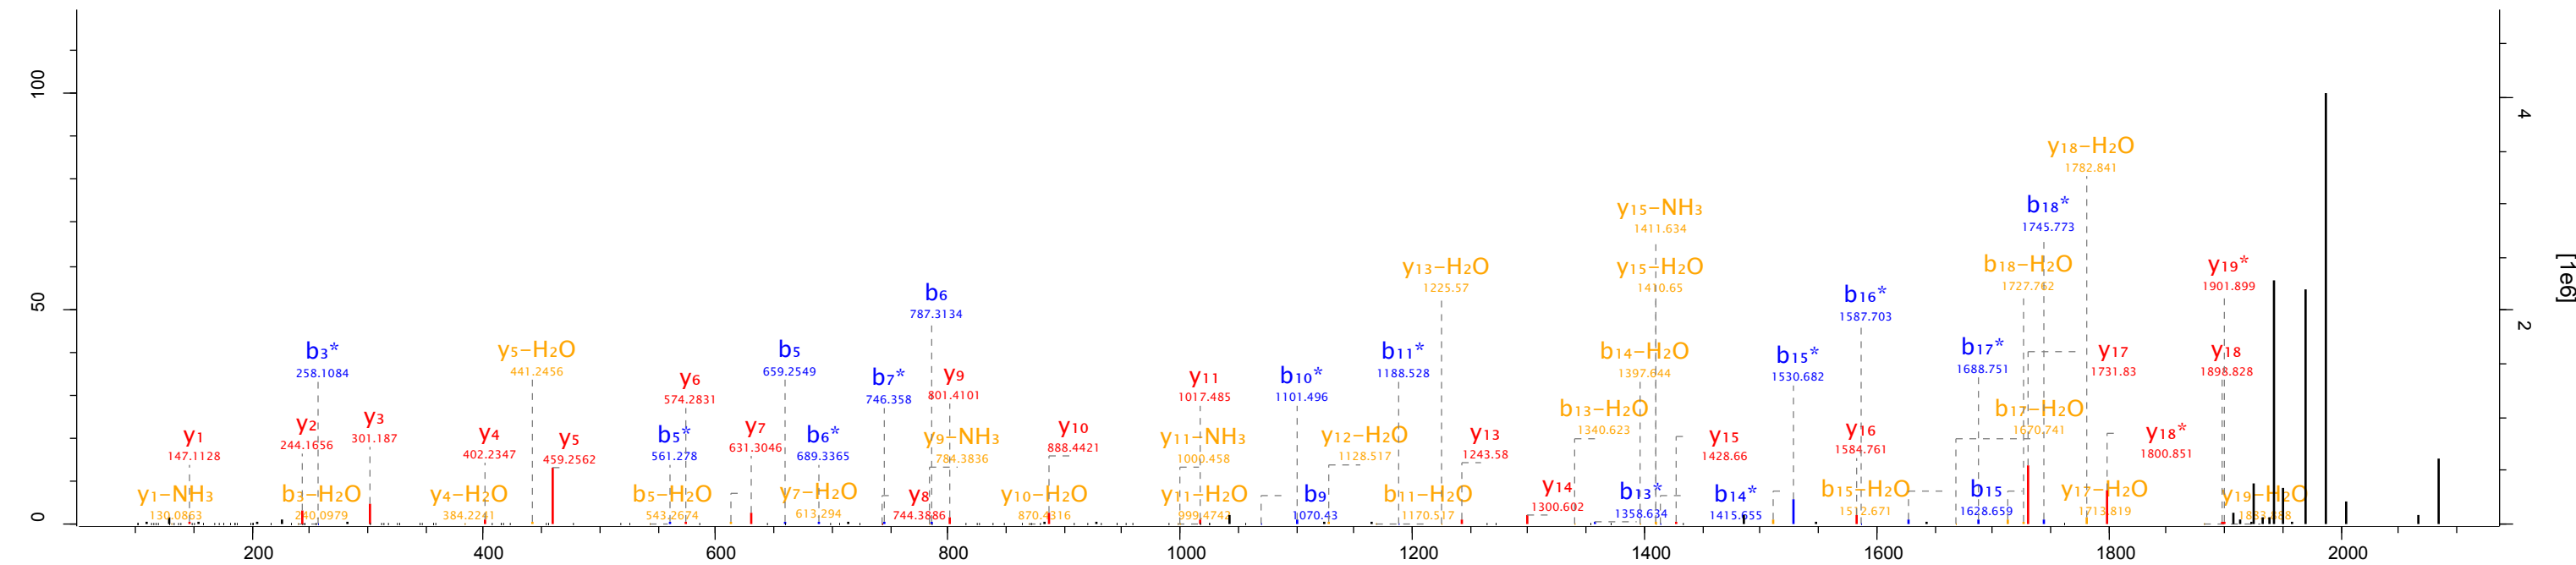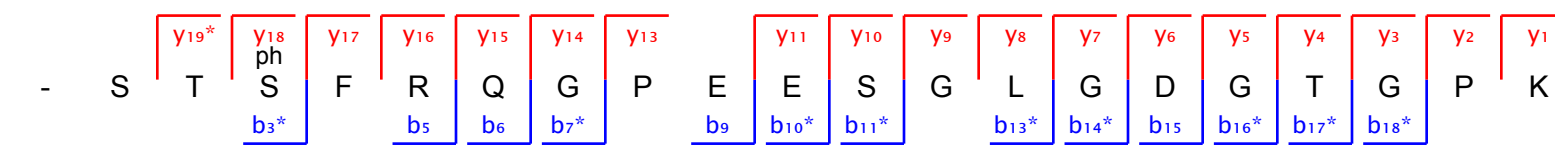



Raw file 20150814\_A375SR\_Phospho\_BR2\_05 Scan 11271 Method FTMS; HCD Score 79.92 m/z 813.32 Gene names ZNF148

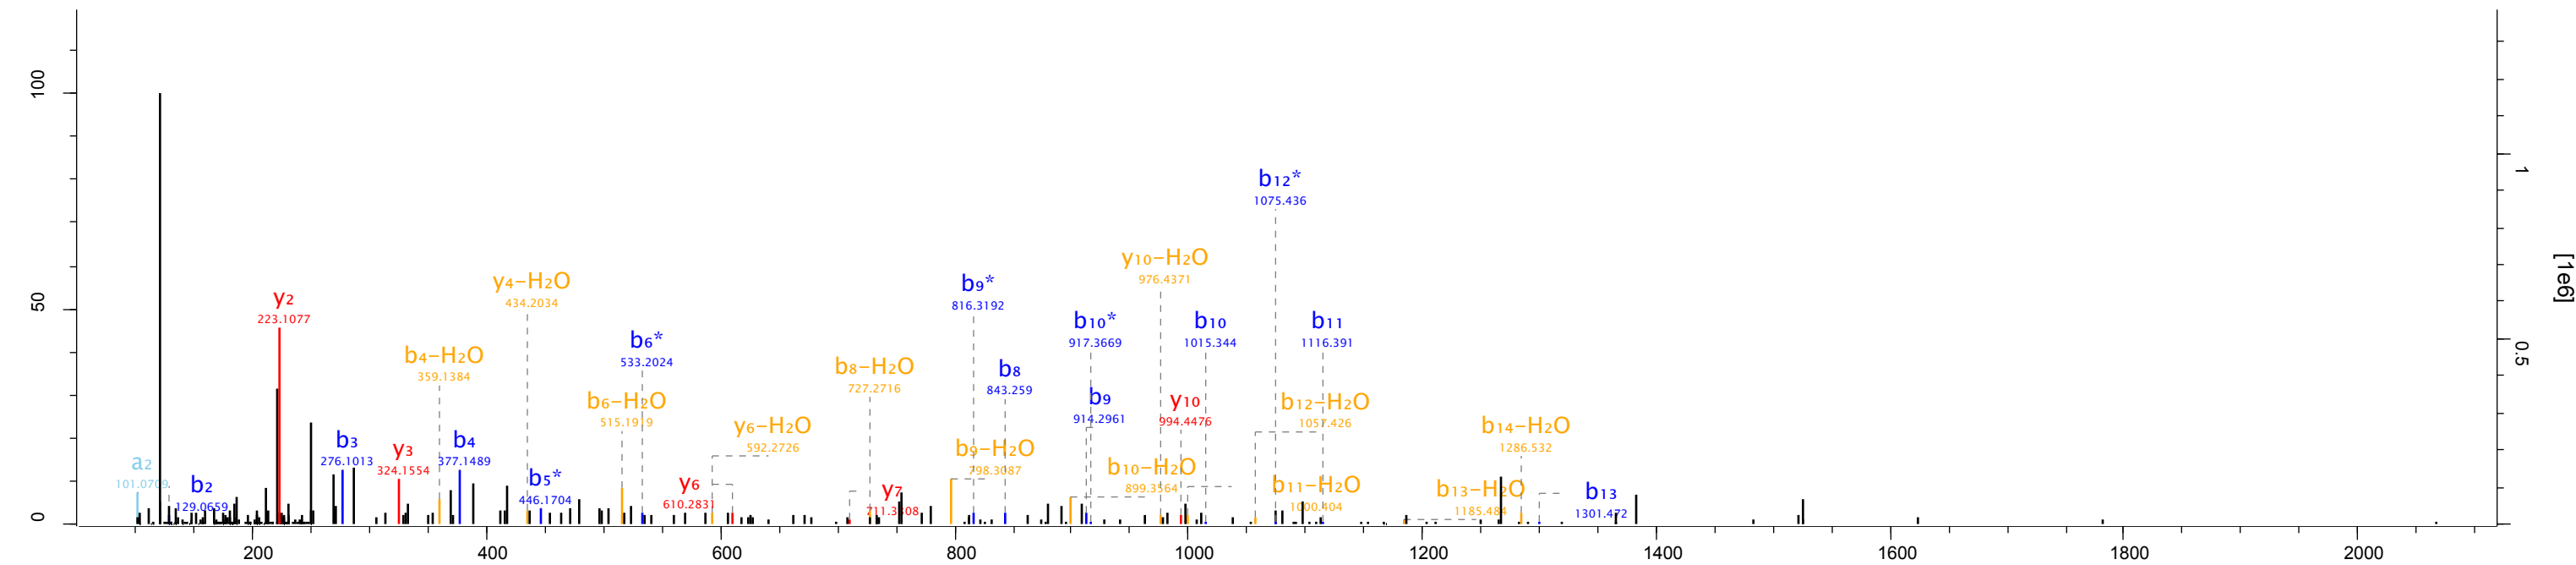

- A G M T S S P D A T T G Q T F G -

ox ph

b<sub>2</sub> b<sub>3</sub> b<sub>4</sub> b<sub>5</sub>\* b<sub>6</sub>\* b<sub>8</sub> b<sub>9</sub> b<sub>10</sub> b<sub>11</sub> b<sub>12</sub>\* b<sub>13</sub> y<sub>2</sub> y<sub>3</sub> y<sub>6</sub> y<sub>7</sub> y<sub>10</sub>

Raw file: 20150814\_A375SR\_Phospho\_BR2\_05  
 Scan: 11671 Method: FTMS; HCD Score: 127.92 m/z: 510.74 Gene names: ARHGAP29

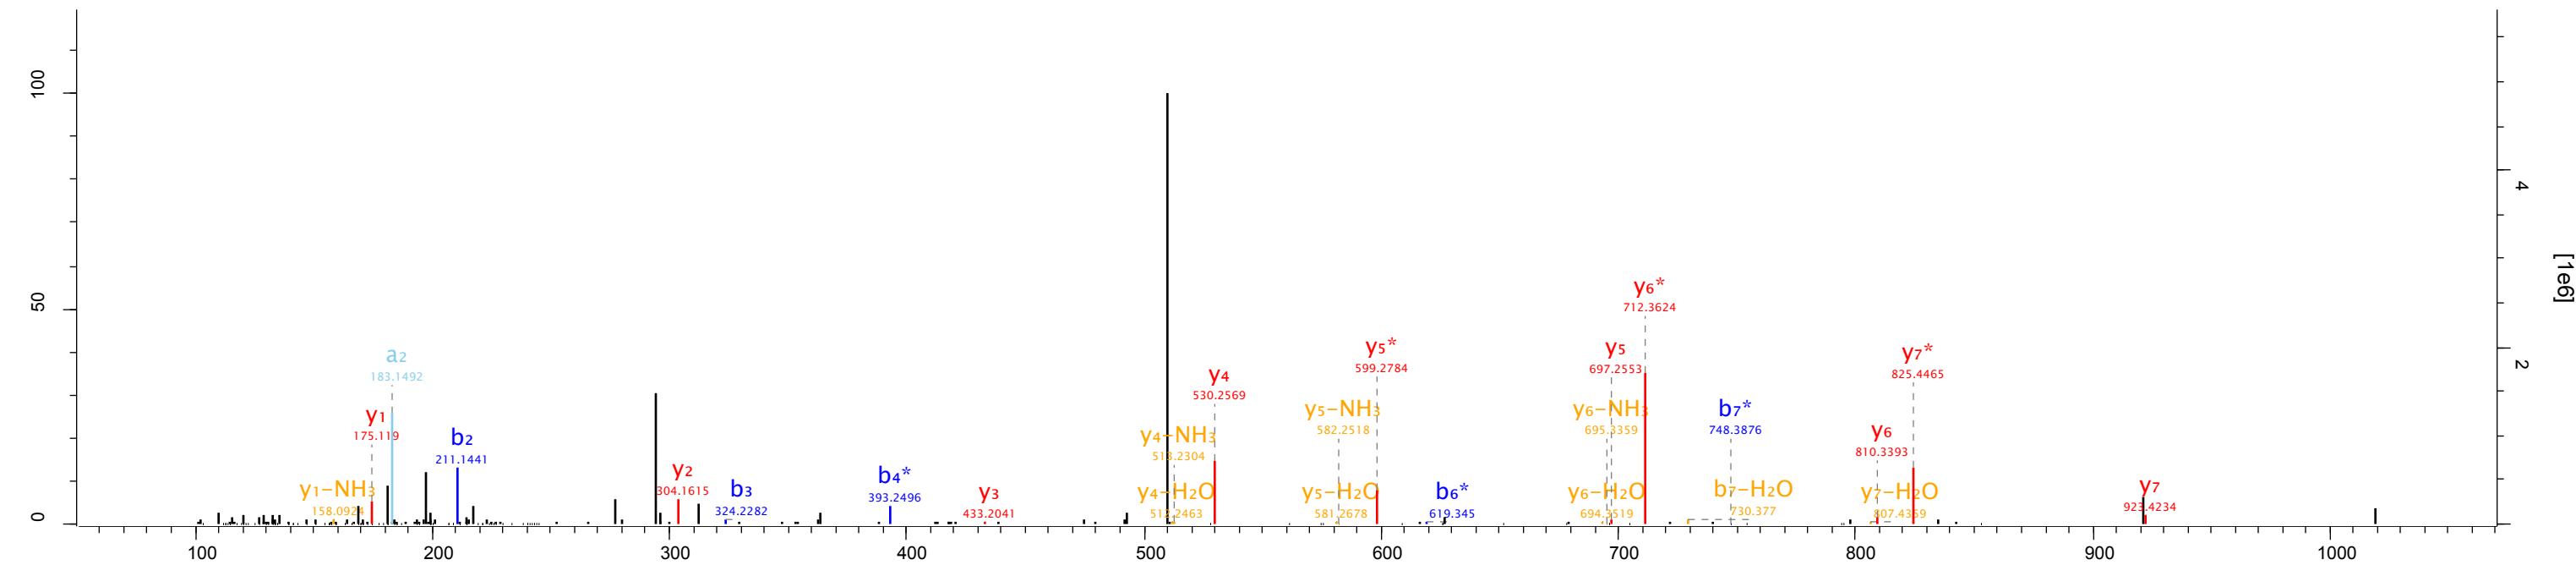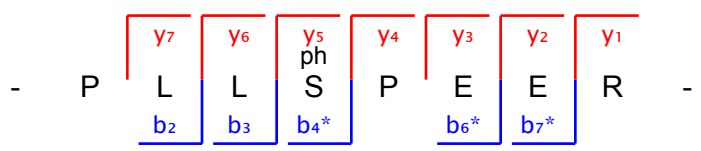

Raw file 20150814\_A375SR\_Phospho\_BR2\_05 Scan 11751 Method FTMS; HCD Score 256.66 m/z 853.41 Gene names ZC3HC1

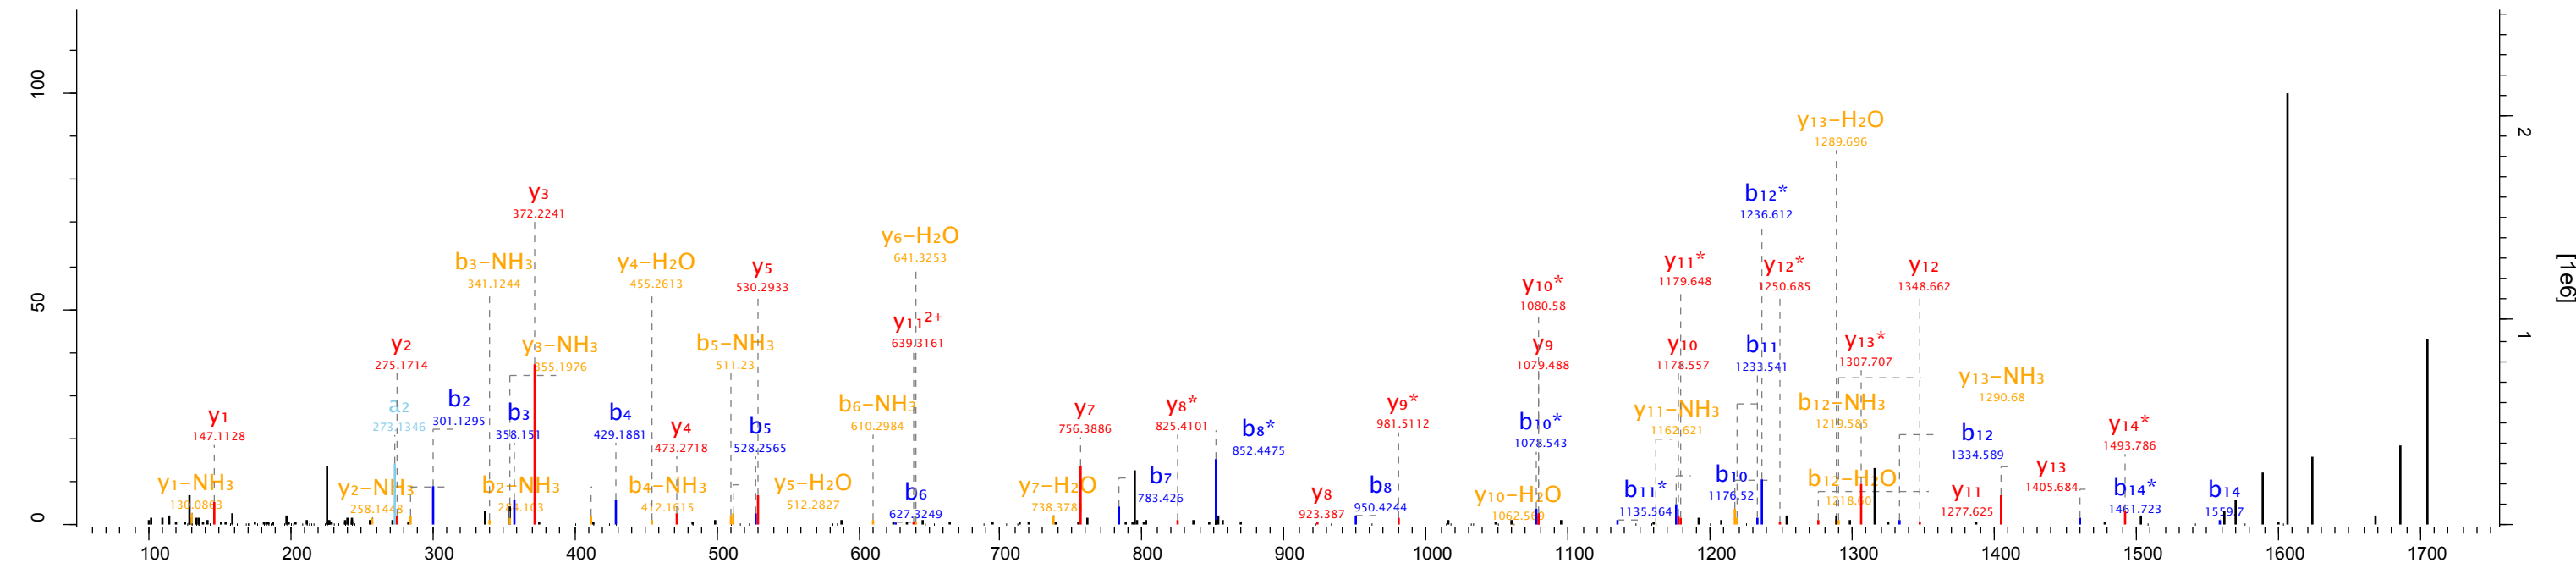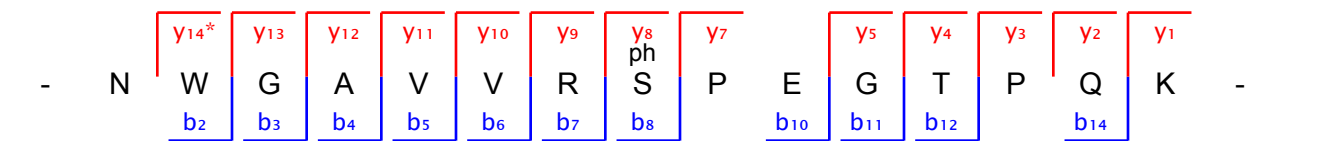

Raw file: 20150814\_A375SR\_Phospho\_BR2\_05  
 Scan: 11831  
 Method: FTMS; HCD  
 Score: 150.85  
 m/z: 861.4  
 Gene names: GLCCI1

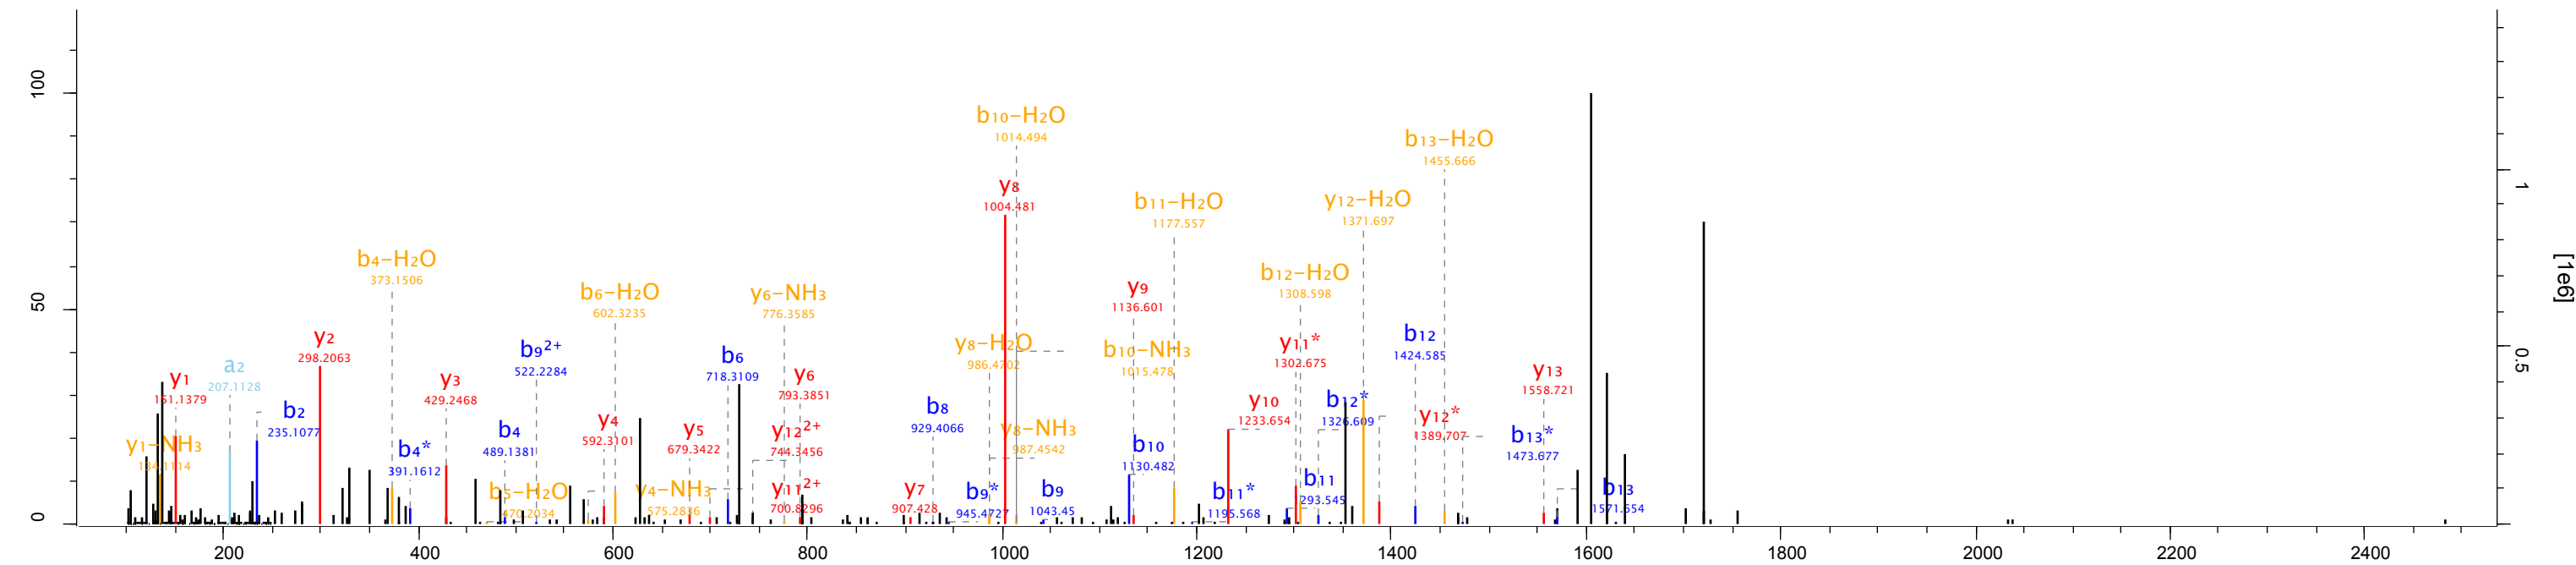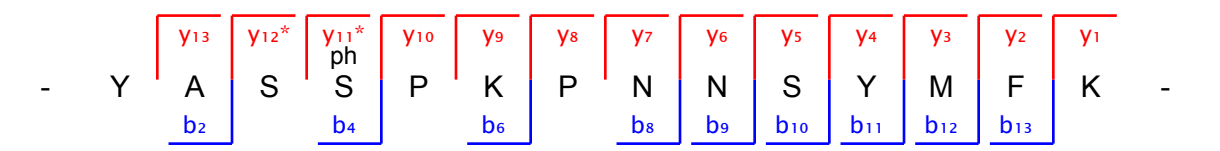

Raw file: 20150814\_A375SR\_Phospho\_BR2\_05  
 Scan: 12071 Method: FTMS; HCD Score: 84.95 m/z: 662.98 Gene names: PRC1

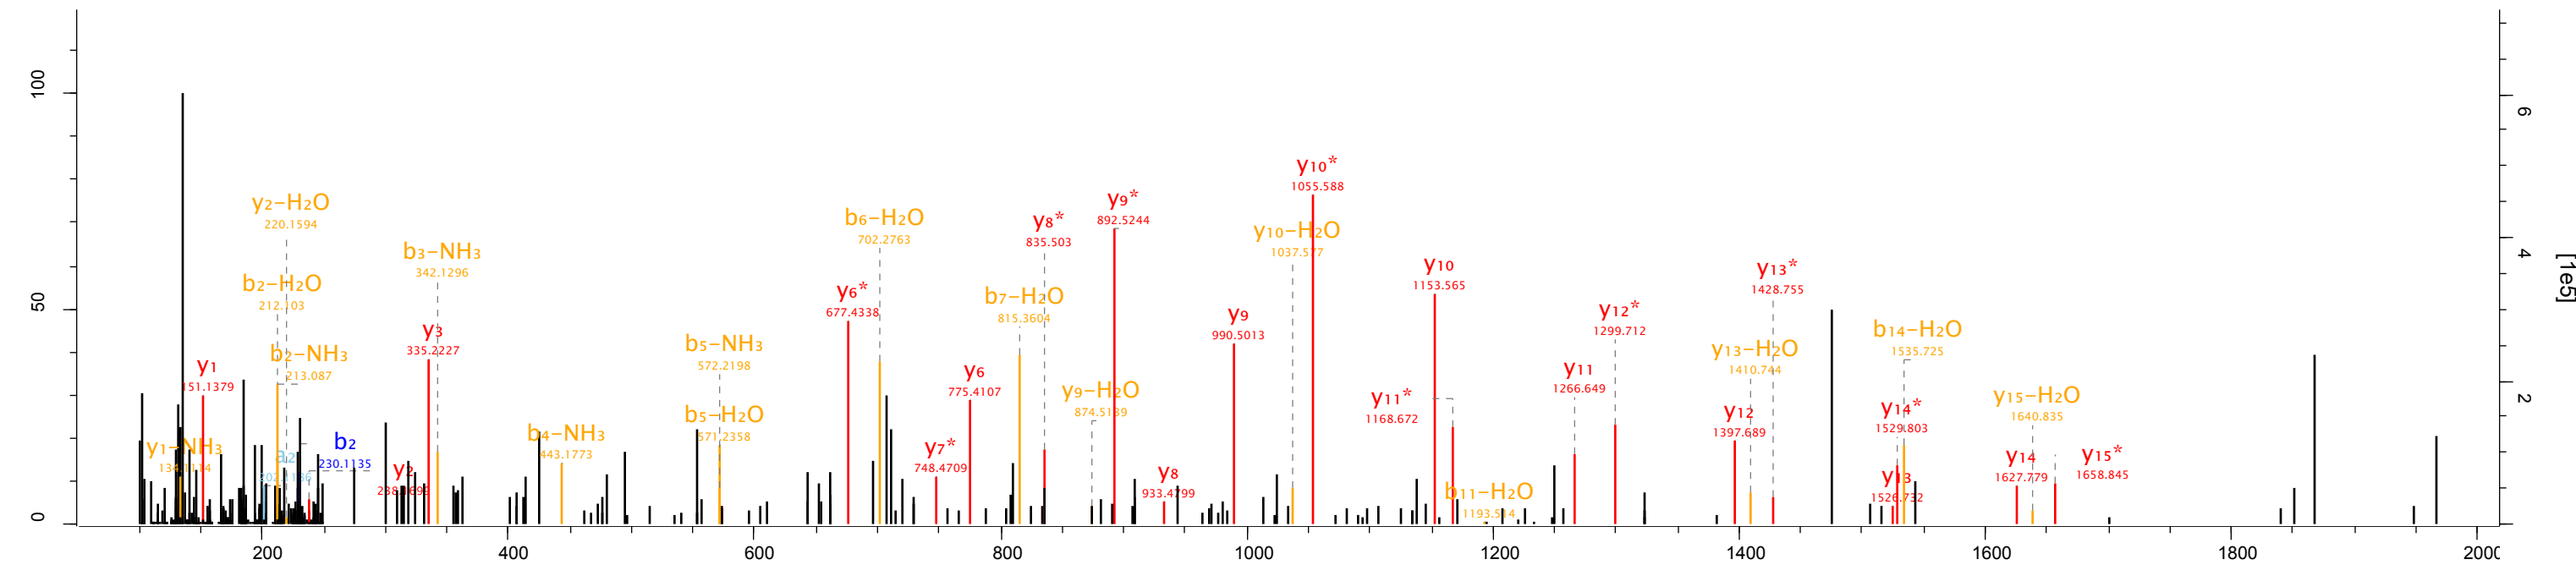

Sequence: - Q T E T E M L Y G S A P R T P S K -

Fragmentation sites are indicated by brackets above the sequence:

- Red brackets above E, T, E, M, L, Y, G, S, A, P, R, T, P, S, K indicate y-ions (y1 to y15\*).
- A blue bracket below T indicates a b2 ion.

Raw file  
 20150814\_A375SR\_Phospho\_BR2\_05  
 Scan 12361 Method FTMS; HCD Score 109.98 m/z 791.05 Gene names ATXN2L

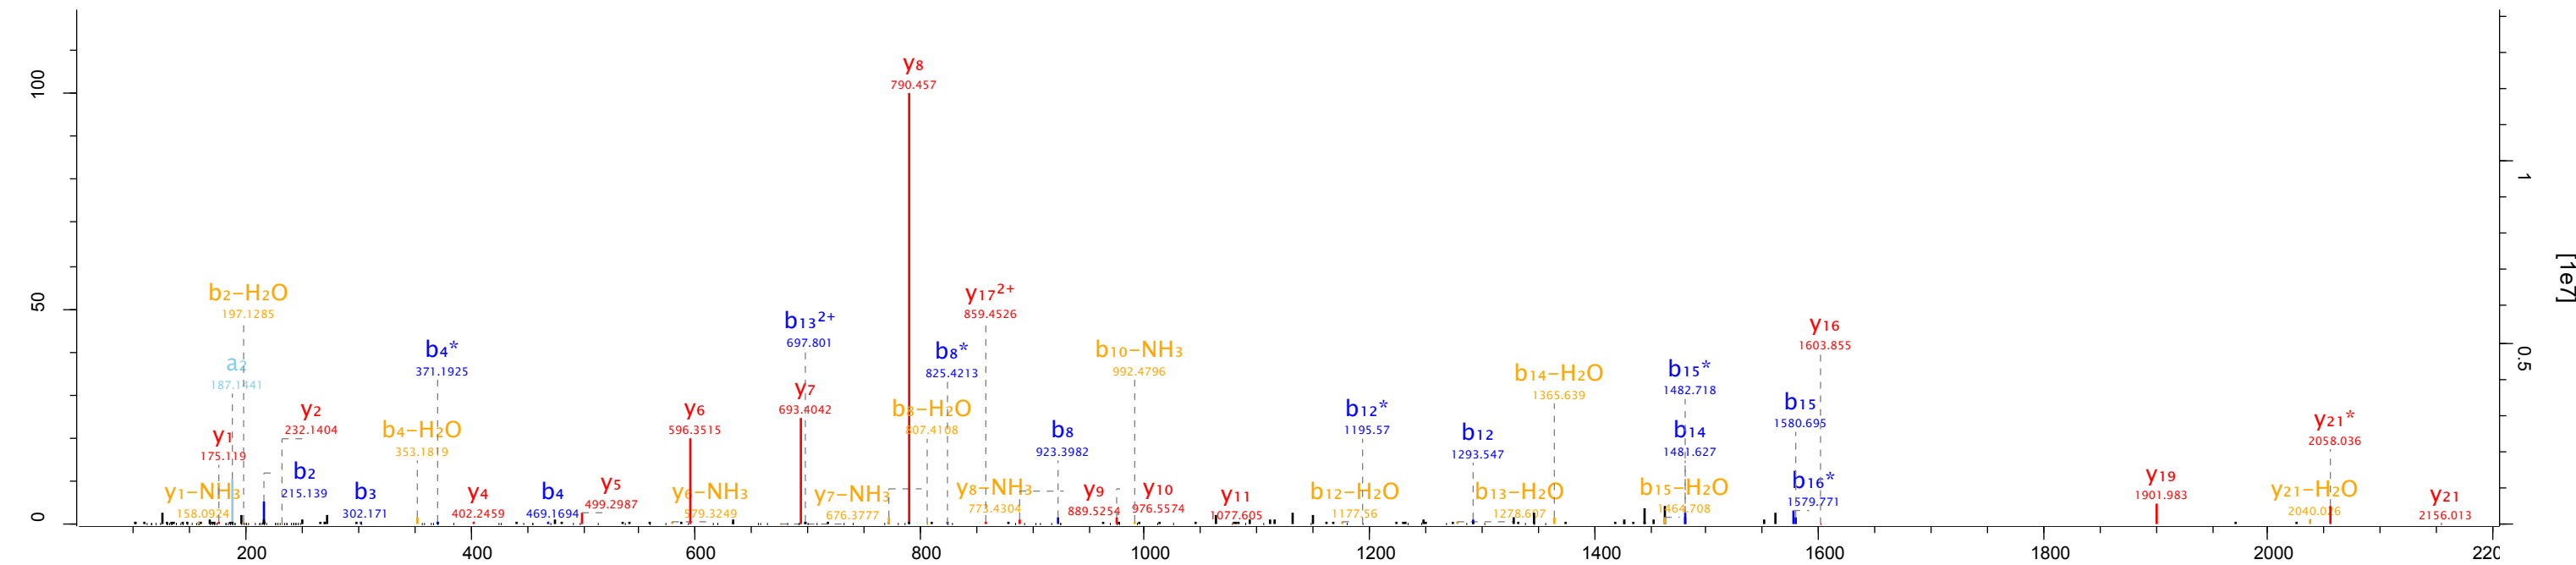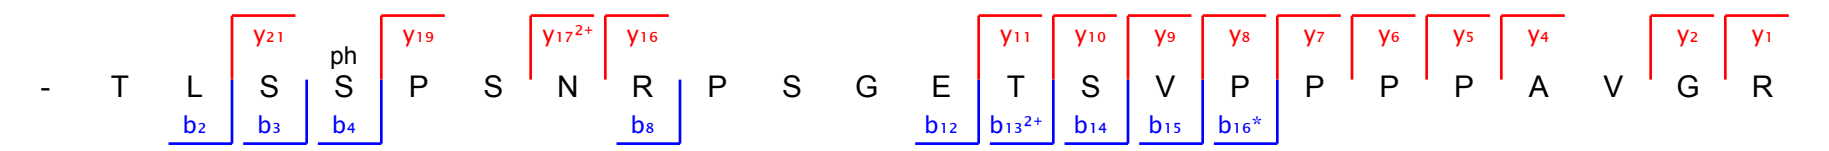

Raw file: 20150814\_A375SR\_Phospho\_BR2\_05  
 Scan: 13231 Method: FTMS; HCD Score: 105.82 m/z: 1037.48 Gene names: NOSIP

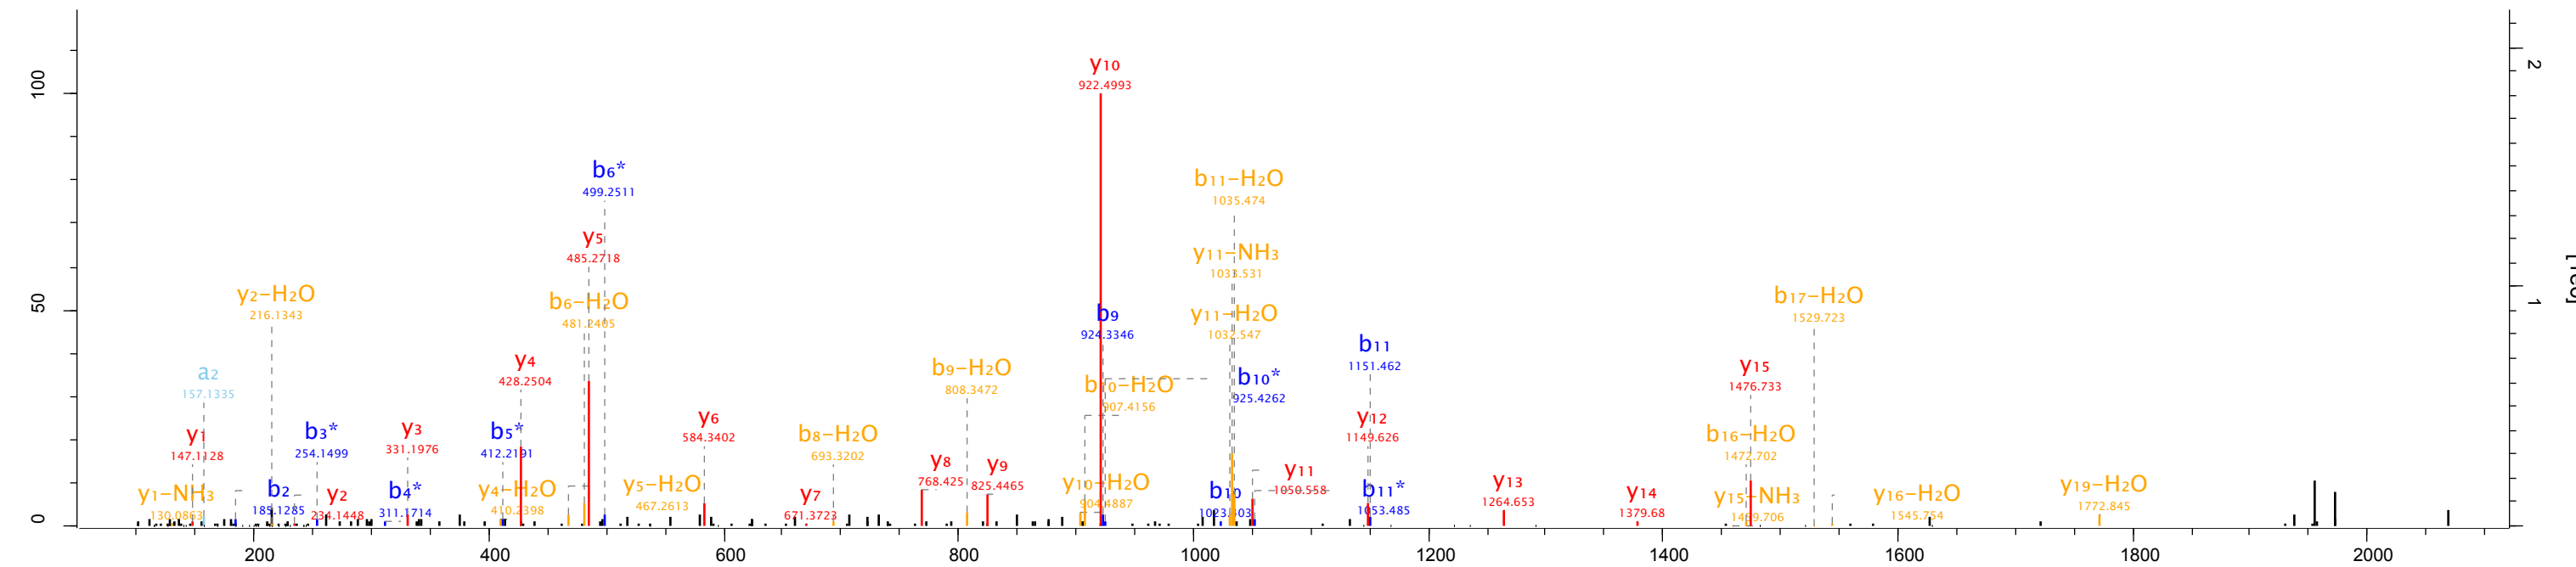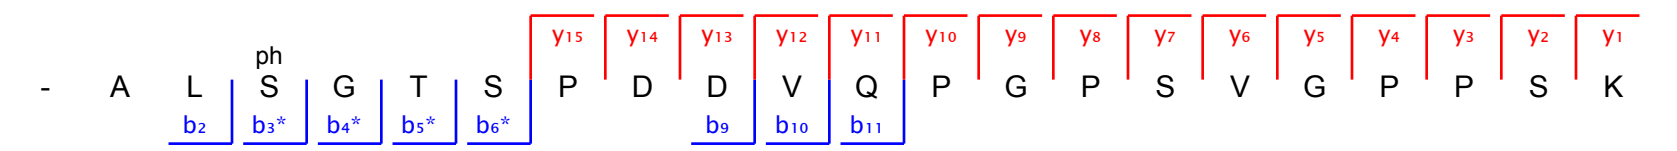

Raw file 20150814\_A375SR\_Phospho\_BR2\_05 Scan 13811 Method FTMS; HCD Score 181.4 m/z 854.86 Gene names GRIPAP1

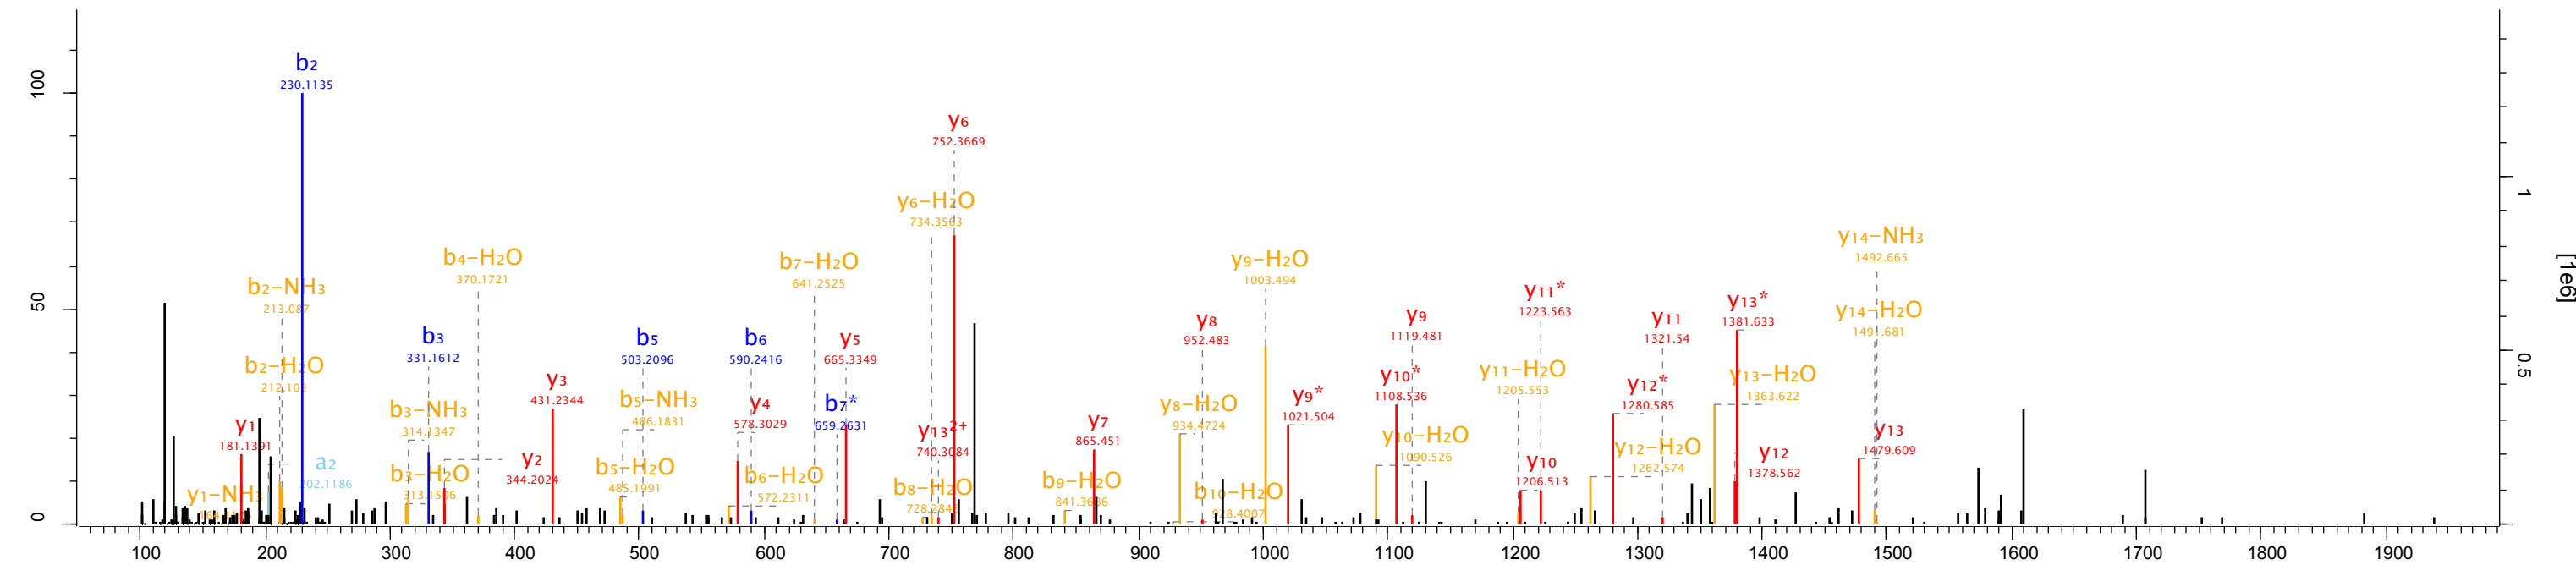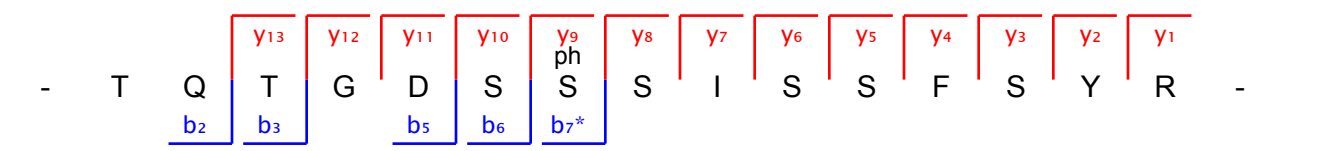



Raw file: 20150814\_A375SR\_Phospho\_BR2\_05  
 Scan: 13951 Method: FTMS; HCD Score: 100.24 m/z: 732.29 Gene names: TAGLN3;TAGLN2

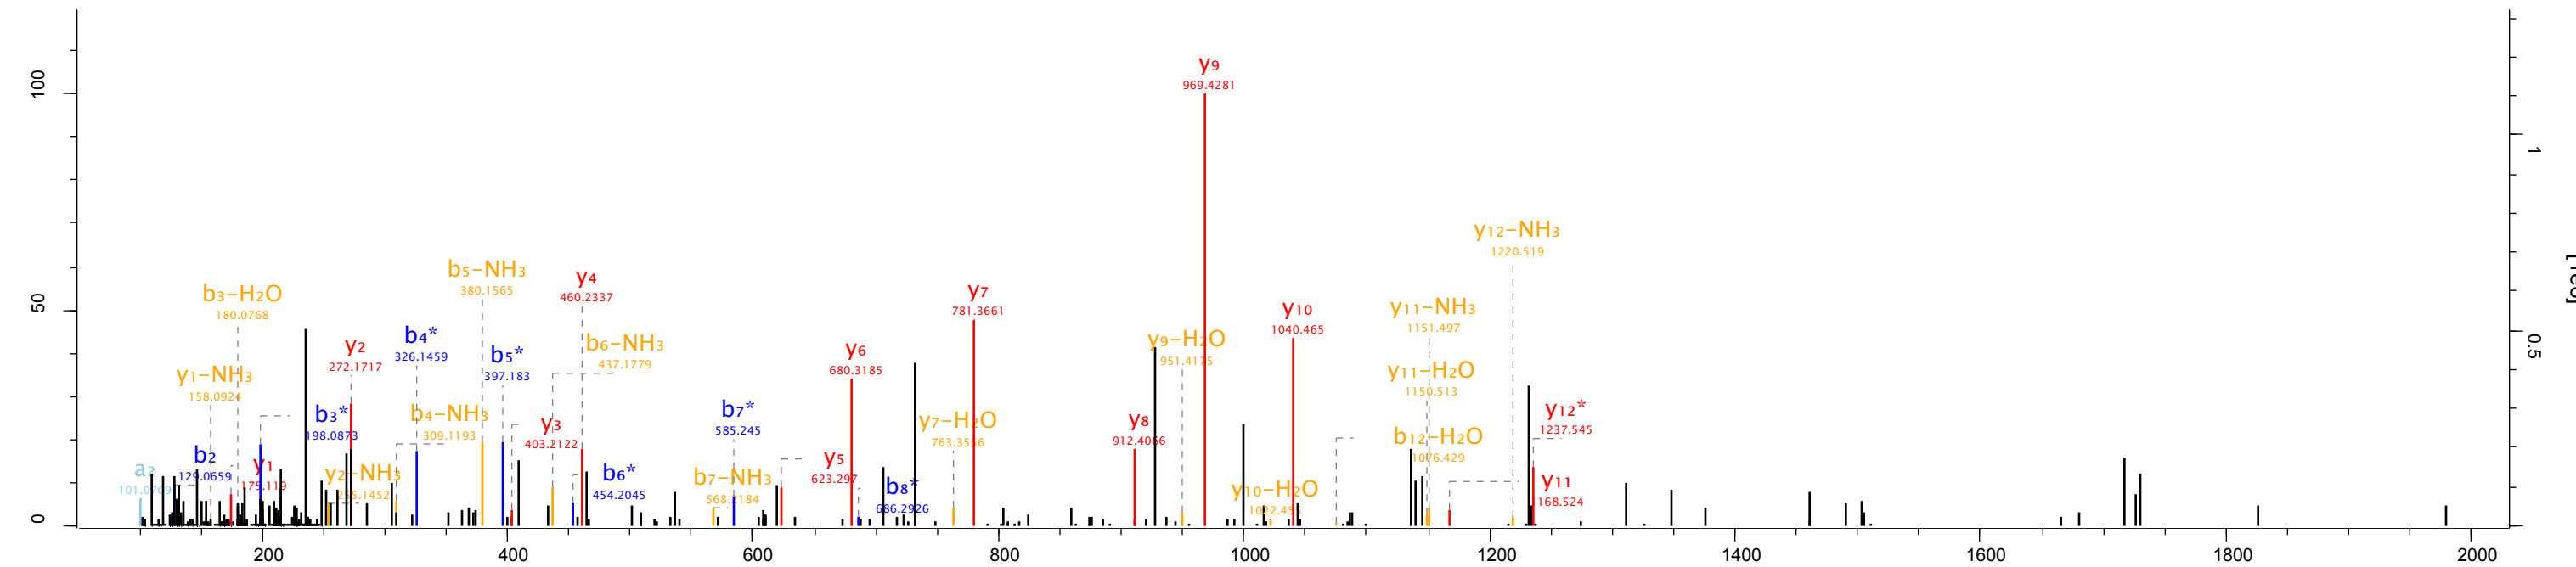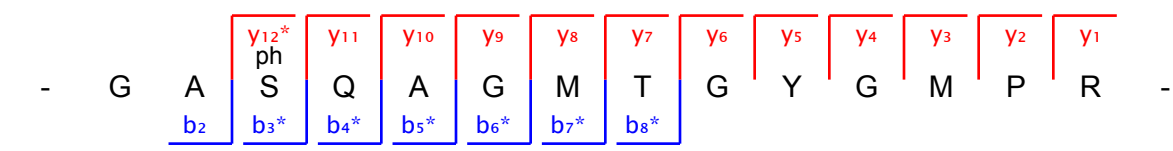

Raw file: 20150814\_A375SR\_Phospho\_BR2\_05  
 Scan: 14081 Method: FTMS; HCD Score: 199.05 m/z: 797.37 Gene names: PGM2

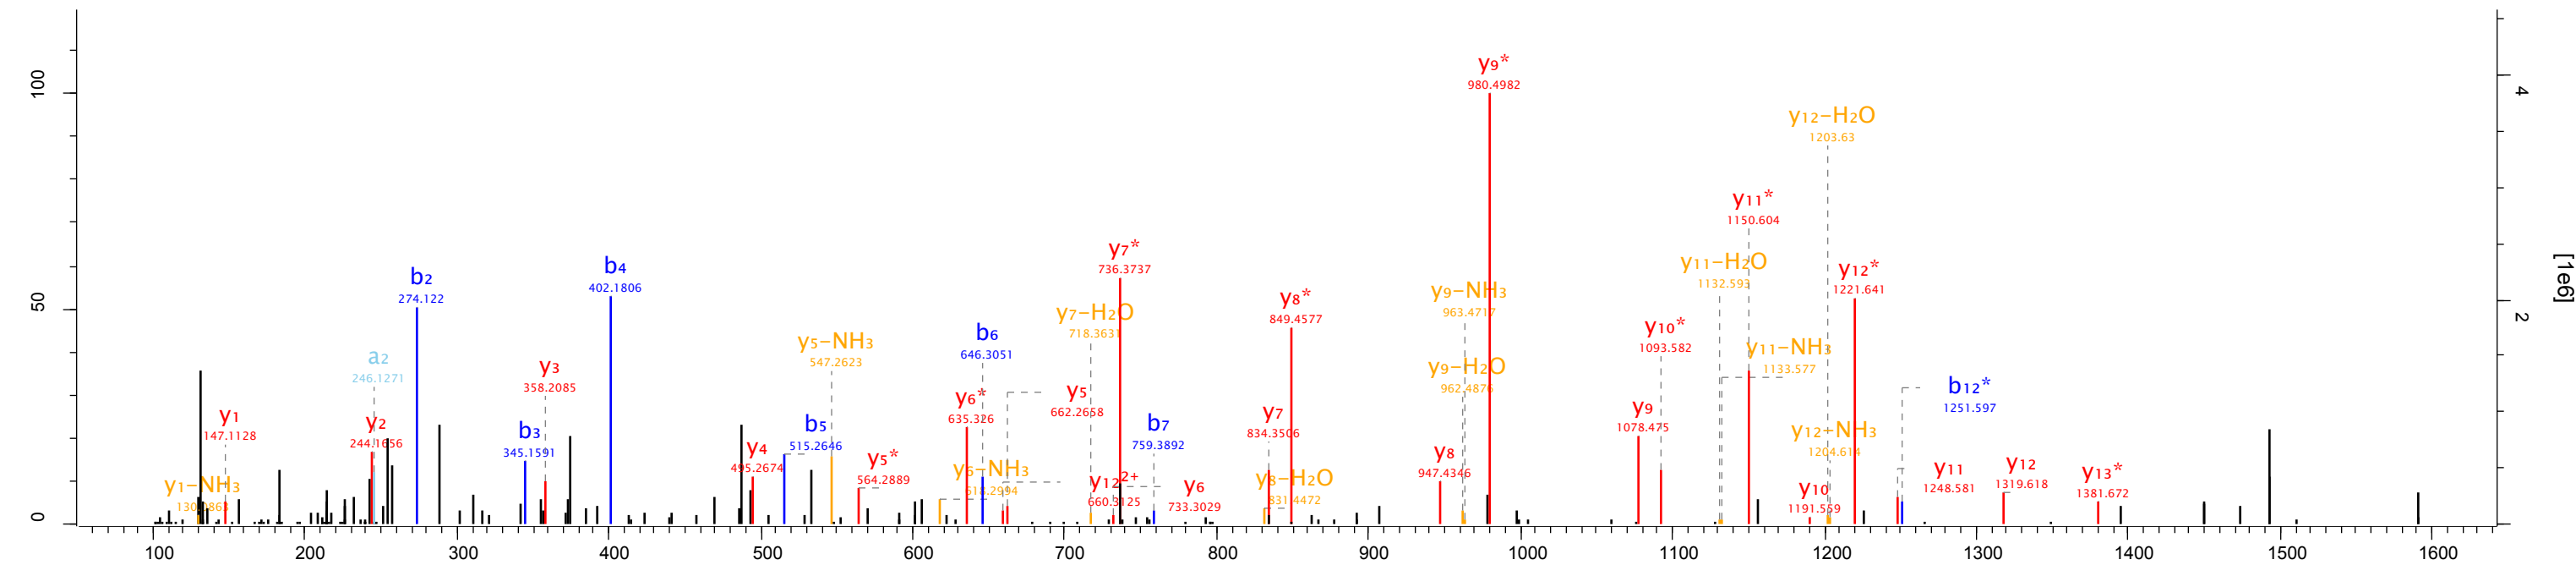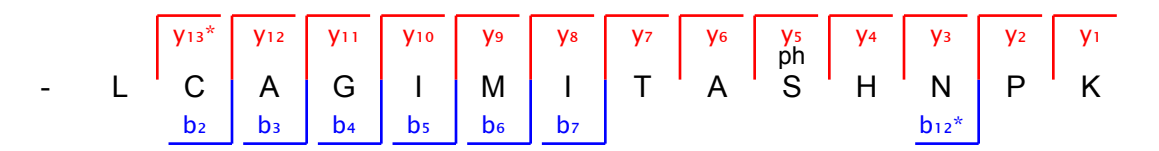

Raw file  
 20150814\_A375SR\_Phospho\_BR2\_05  
 Scan: 14231 Method: FTMS; HCD Score: 75.53 m/z: 806.4 Gene names: RLTPR

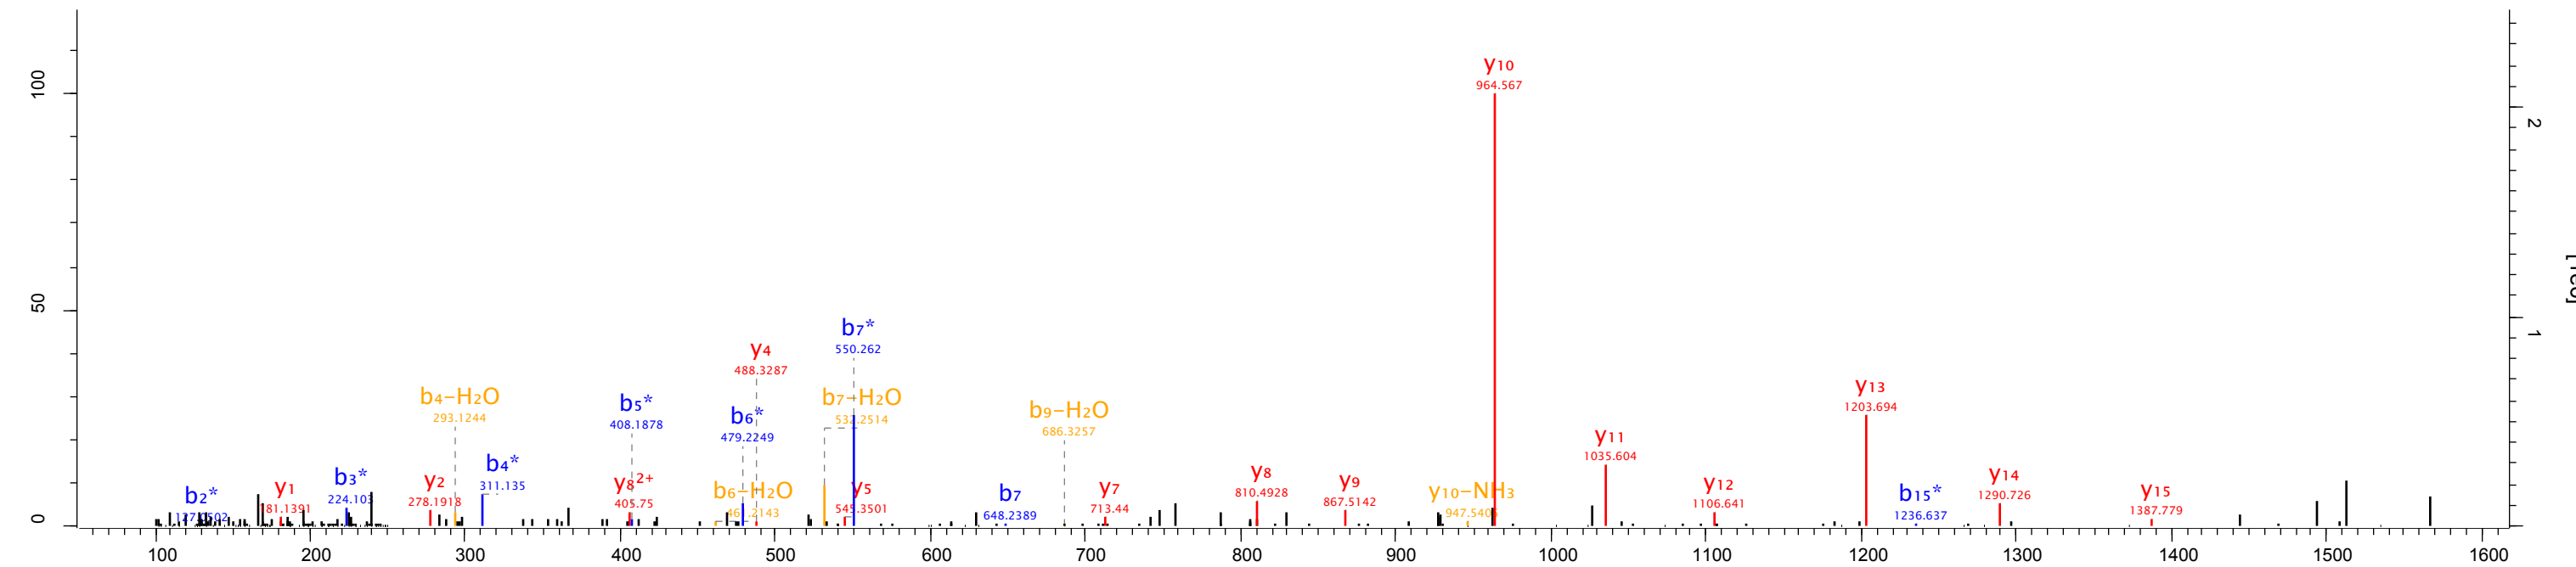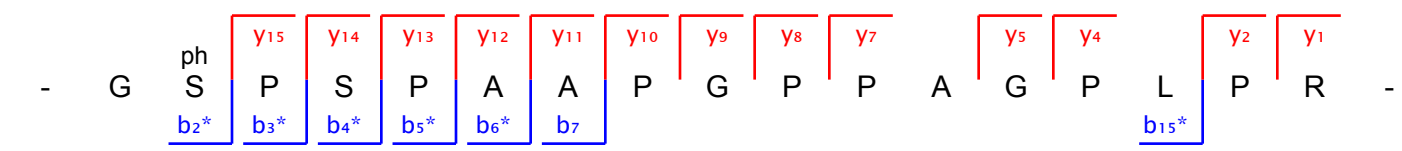

Raw file 20150814\_A375SR\_Phospho\_BR2\_05 Scan 14351 Method FTMS; HCD Score 213.69 m/z 811.36 Gene names RAB34

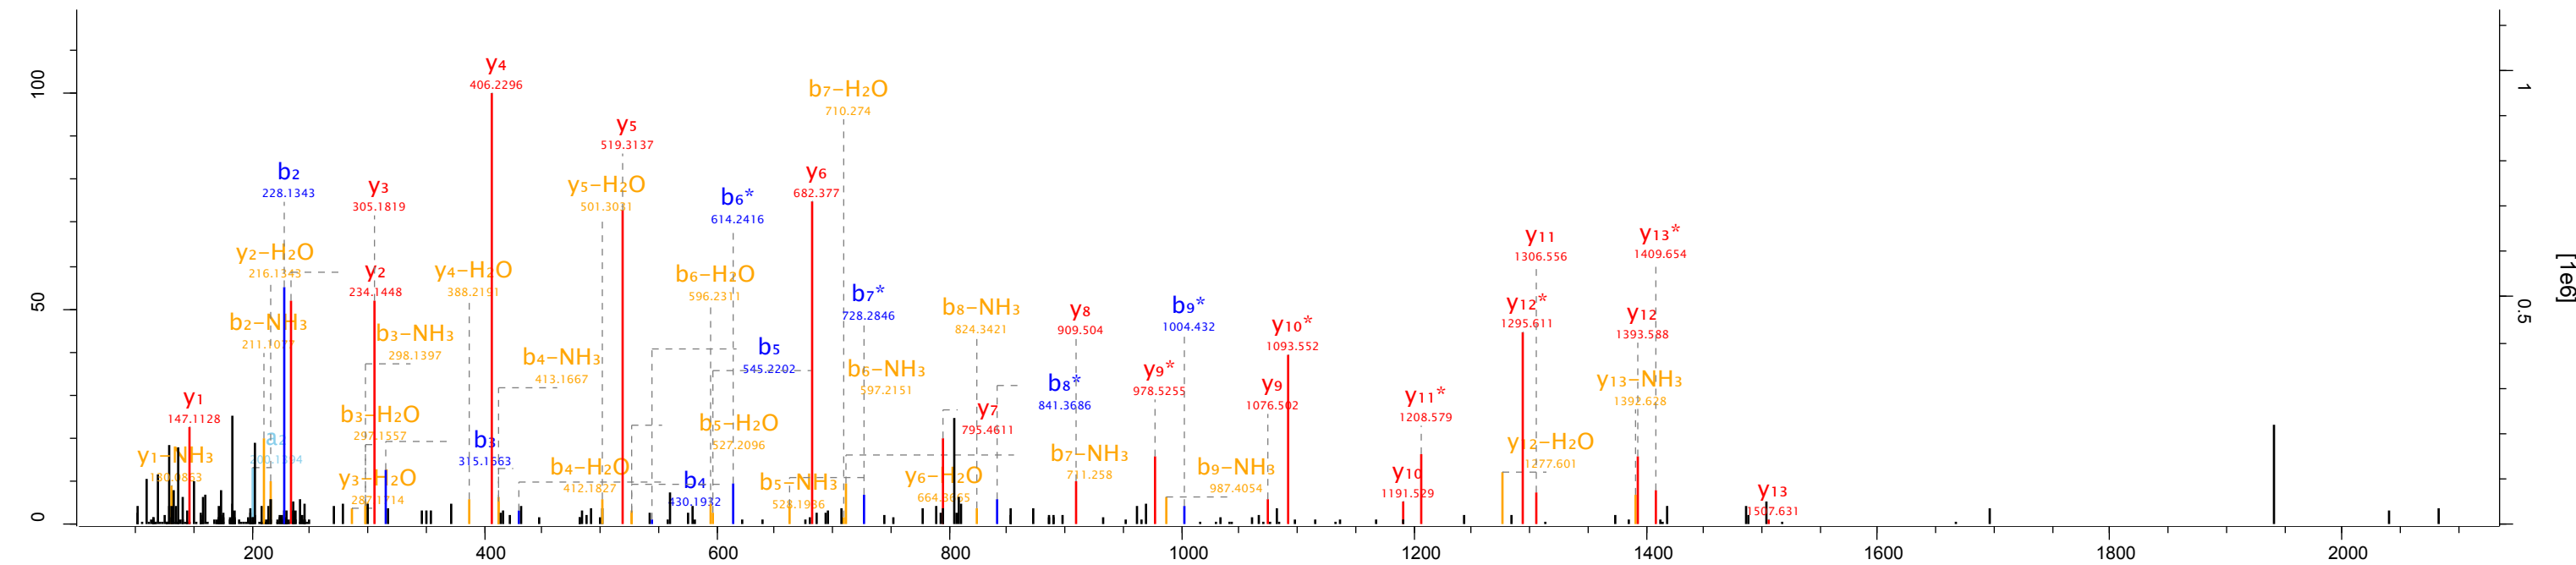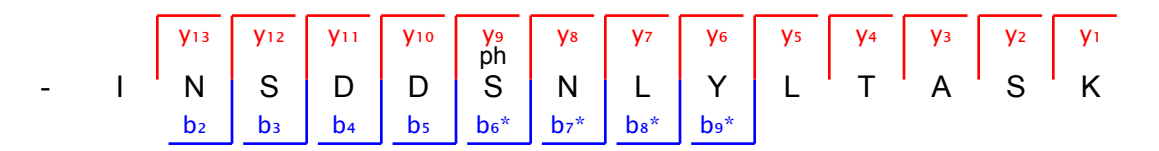

Raw file 20150814\_A375SR\_Phospho\_BR2\_05 Scan 14591 Method FTMS; HCD Score 112.26 m/z 957.46 Gene names MPRIP

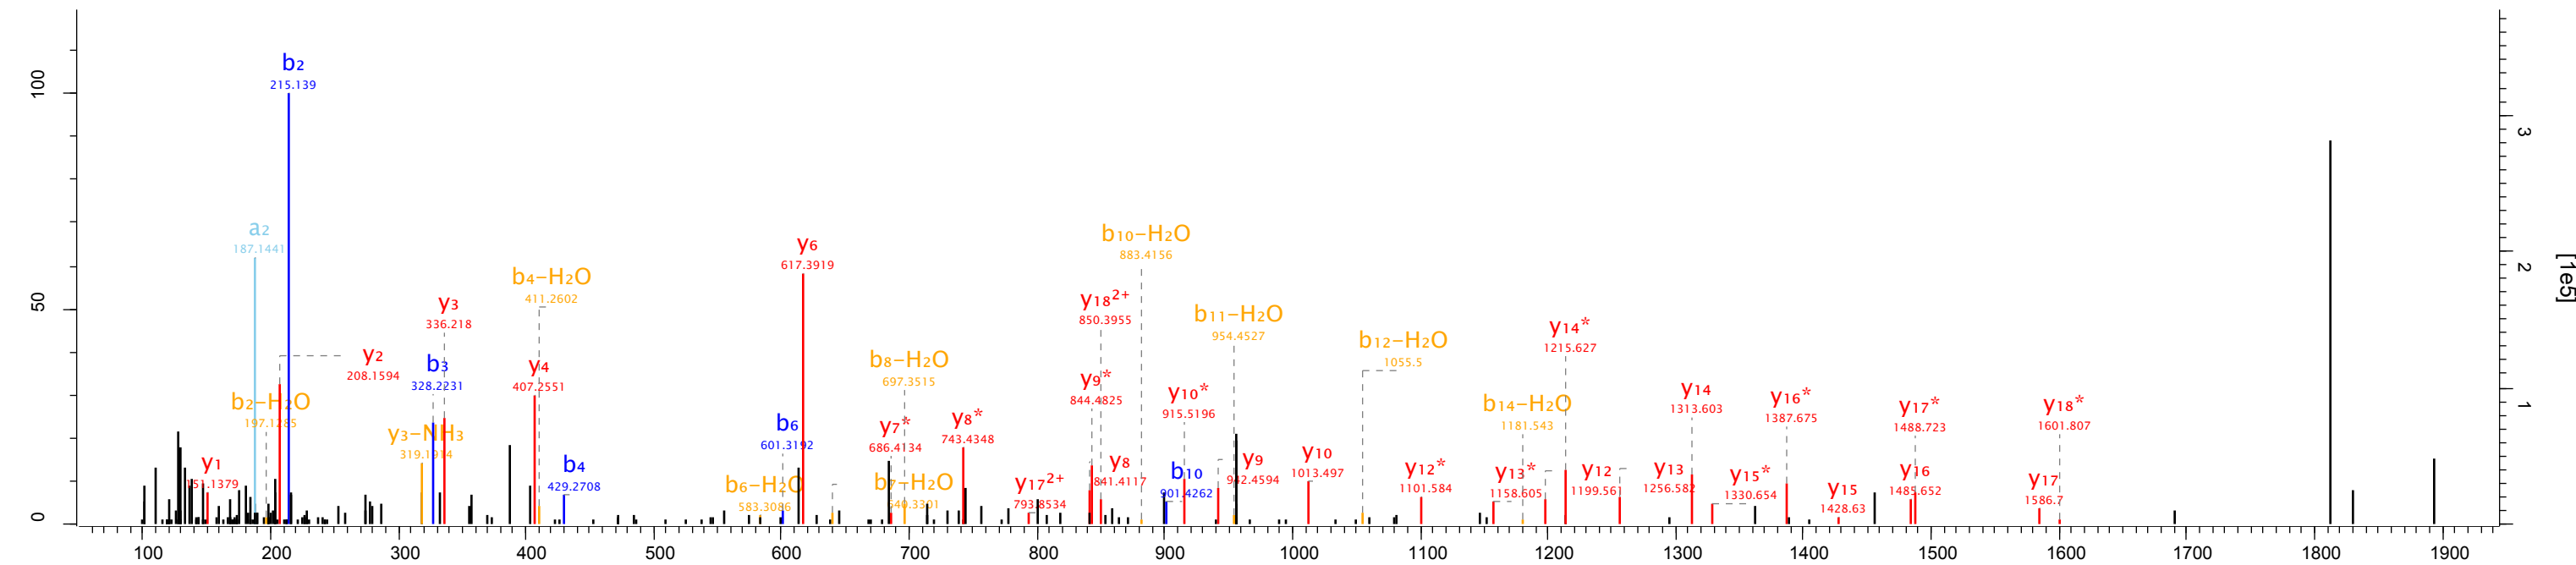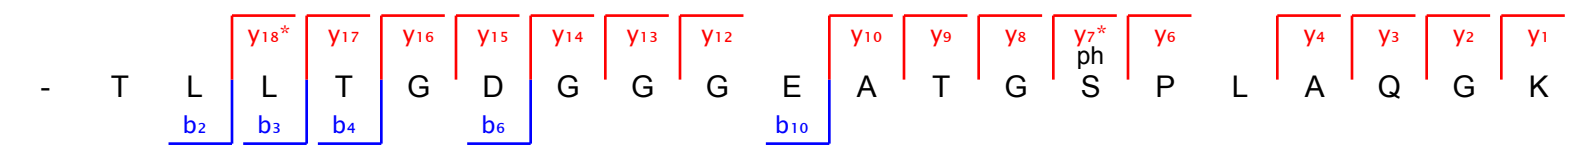

Raw file: 20150814\_A375SR\_Phospho\_BR2\_05  
 Scan: 15281 Method: FTMS; HCD Score: 271.31 m/z: 744.34 Gene names: MAPK1

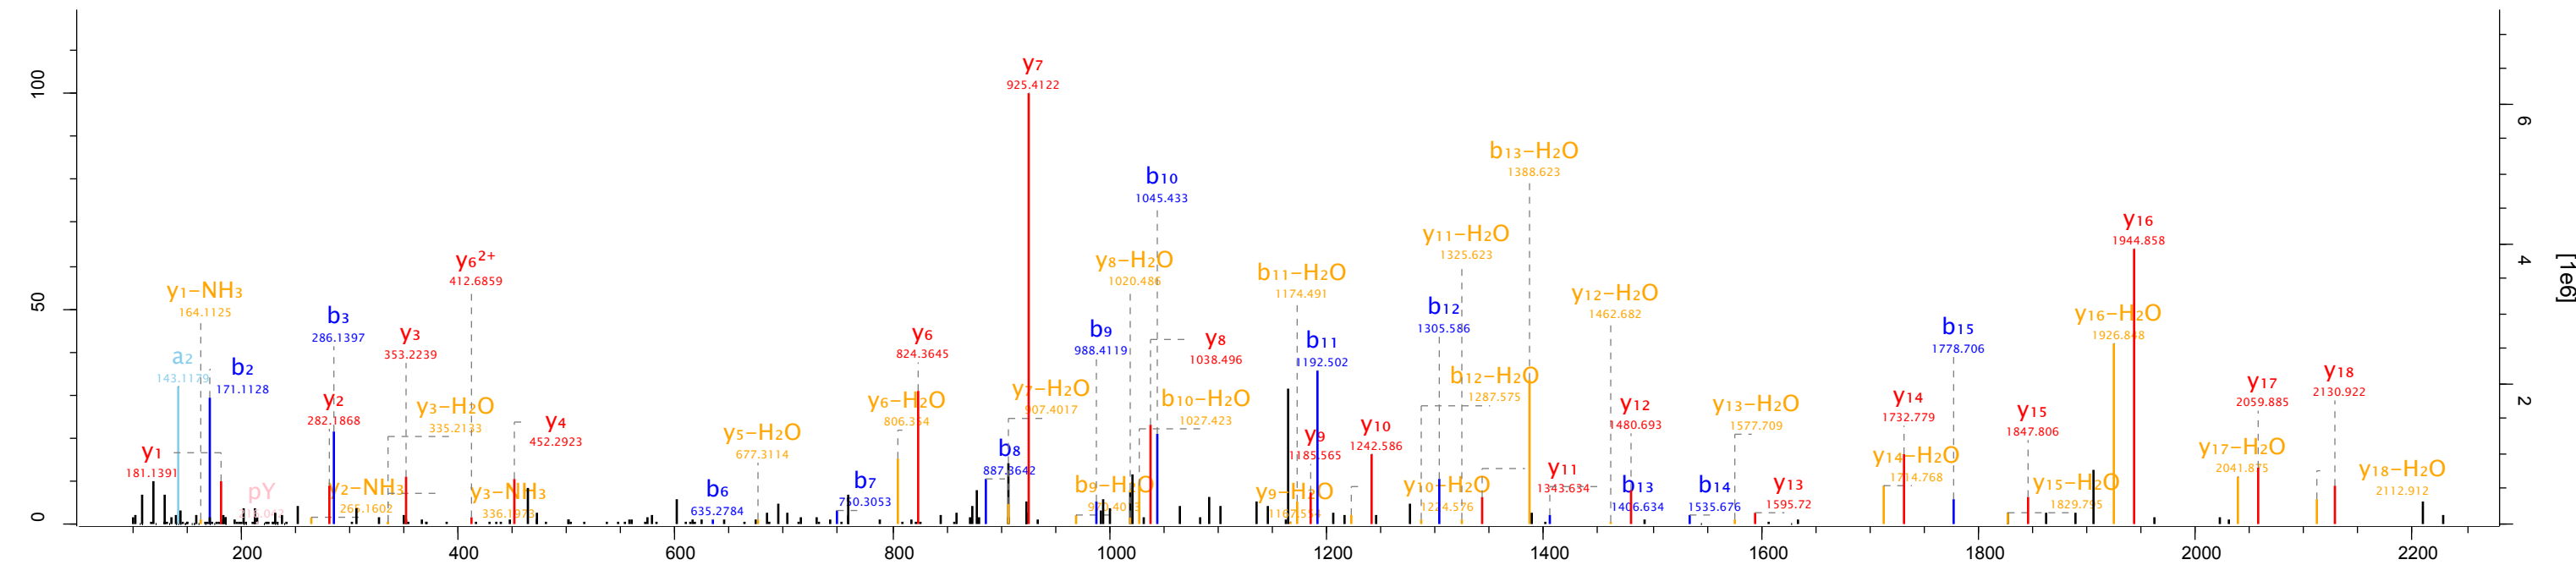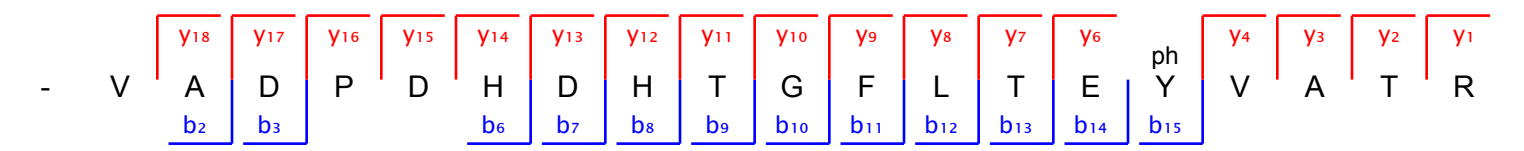

Raw file 20150814\_A375SR\_Phospho\_BR2\_05 Scan 15451 Method FTMS; HCD Score 118.24 m/z 948.45 Gene names SPRY4

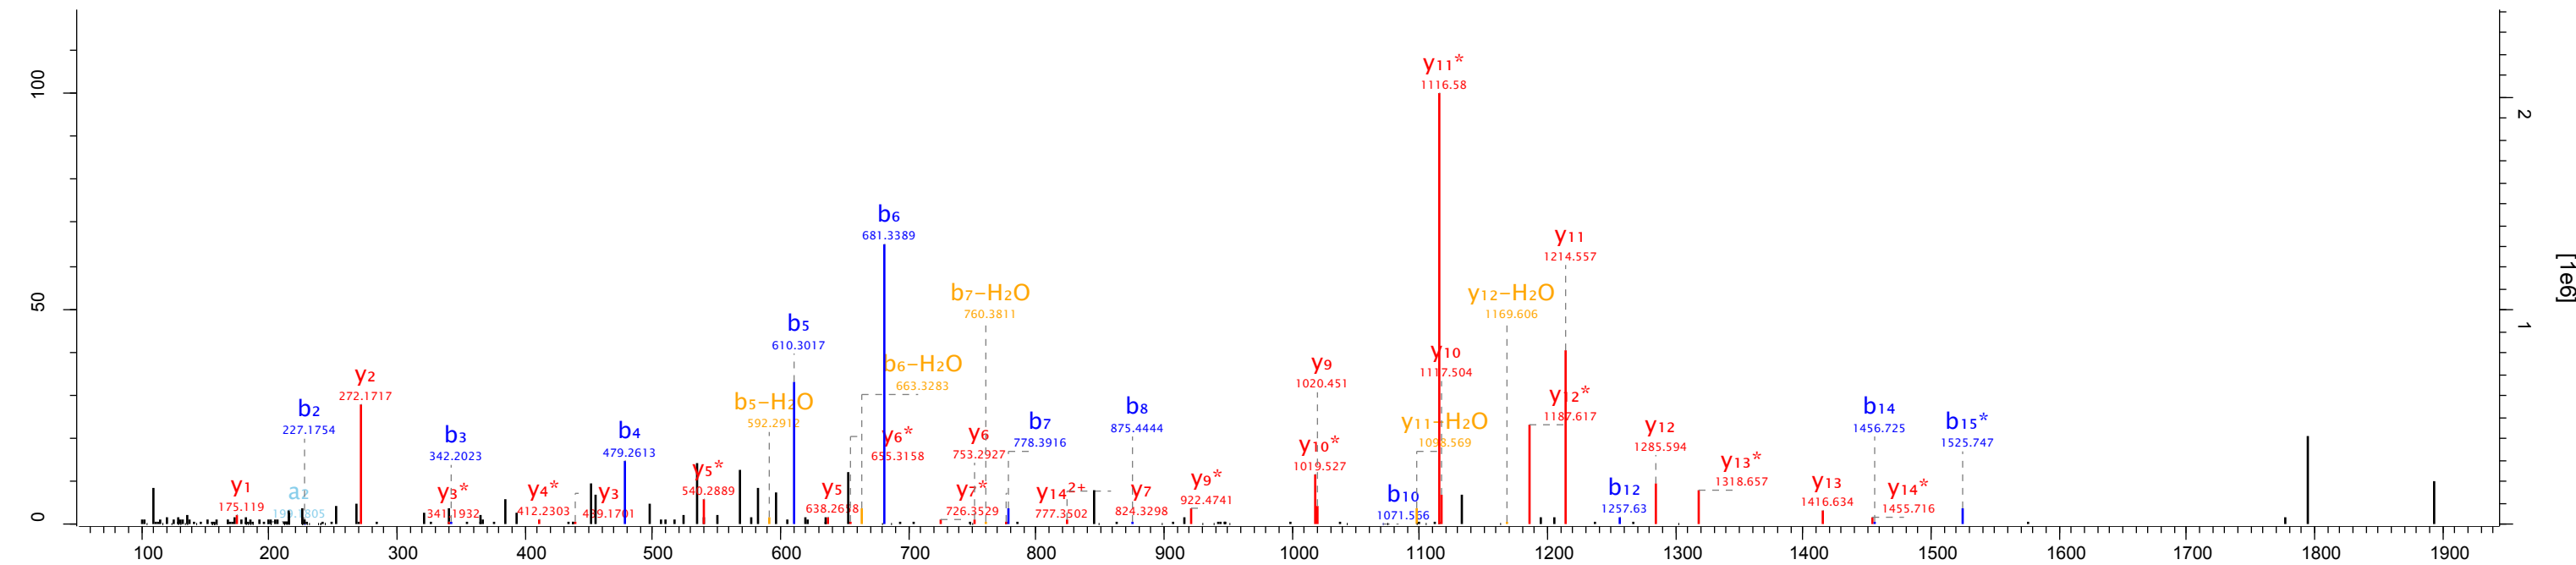

- L L D H M A P P P V A D Q A S P R -

Peptide sequence: L L D H M A P P P V A D Q A S P R

Fragmentation sites (b and y ions) are indicated by brackets below the sequence:

- b<sub>2</sub> (L-L)
- b<sub>3</sub> (L-D)
- b<sub>4</sub> (D-H)
- b<sub>5</sub> (H-M)
- b<sub>6</sub> (M-A)
- b<sub>7</sub> (A-P)
- b<sub>8</sub> (P-P)
- b<sub>10</sub> (V)
- b<sub>12</sub> (D)
- b<sub>14</sub> (A)
- b<sub>15</sub>\*

Corresponding y ions (y<sub>1</sub> to y<sub>14</sub>\*) are also indicated by brackets above the sequence.

Raw file: 20150814\_A375SR\_Phospho\_BR2\_05  
 Scan: 15631 Method: FTMS; HCD Score: 78.67 m/z: 584.97 Gene names: SRCAP

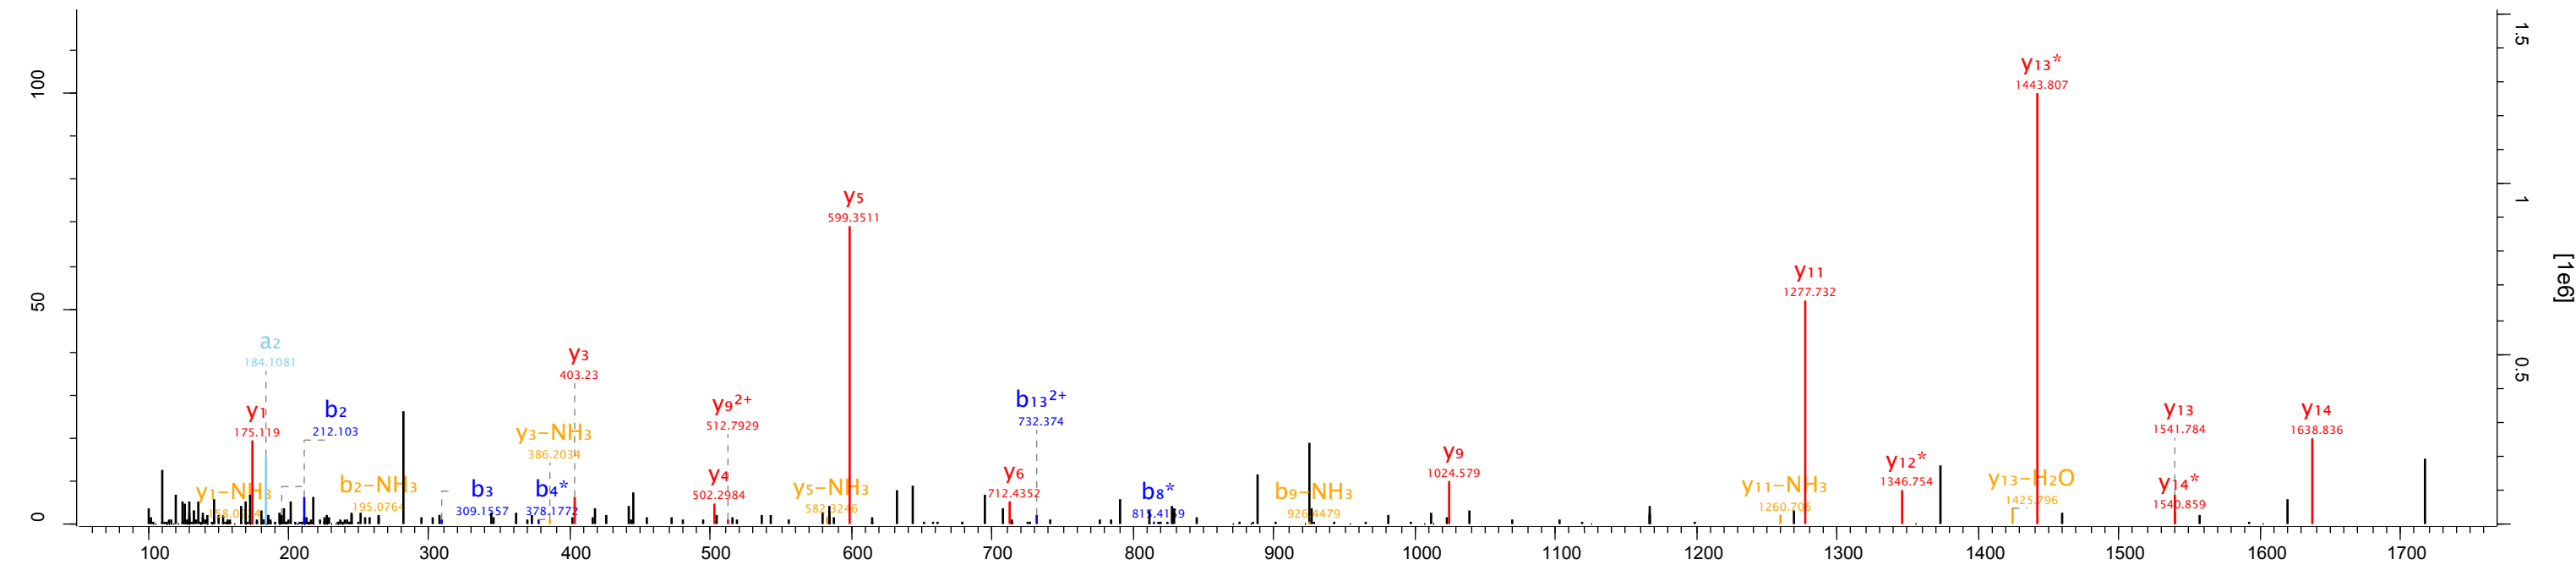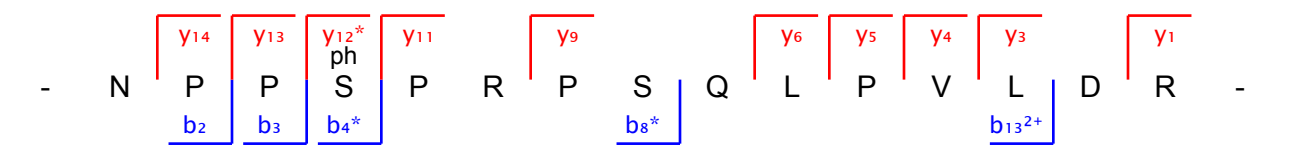



Raw file  
20150814\_A375SR\_Phospho\_BR2\_05

Scan 15791 Method FTMS; HCD Score 157.2 m/z 926.42 Gene names ABLIM1

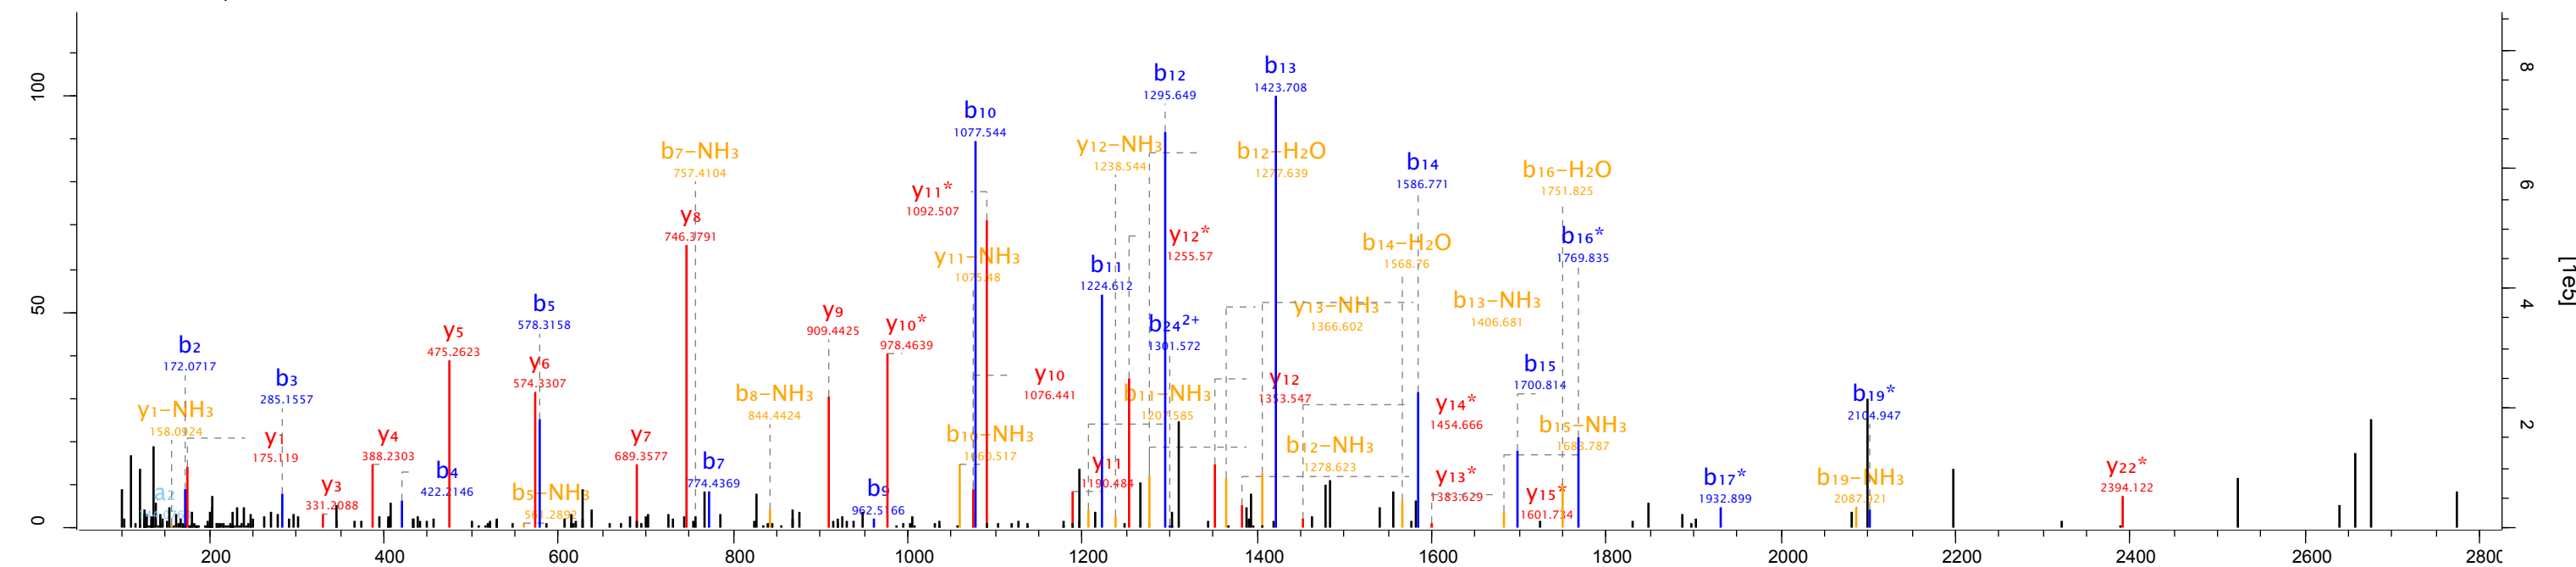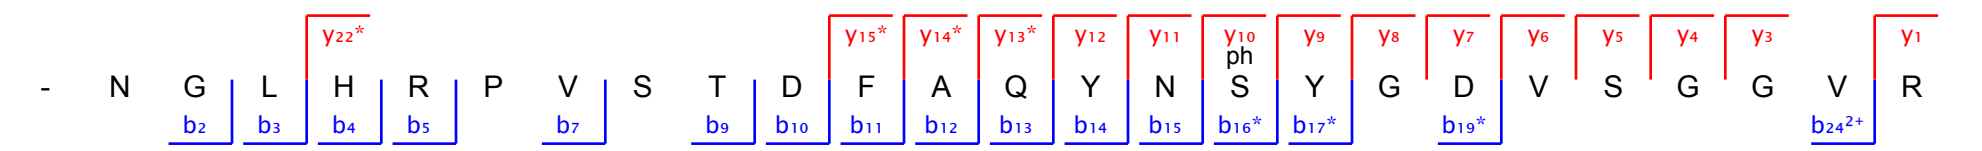

Raw file: 20150814\_A375SR\_Phospho\_BR2\_05  
 Scan: 15871 Method: FTMS; HCD Score: 119.62 m/z: 620.33 Gene names: FAM122A

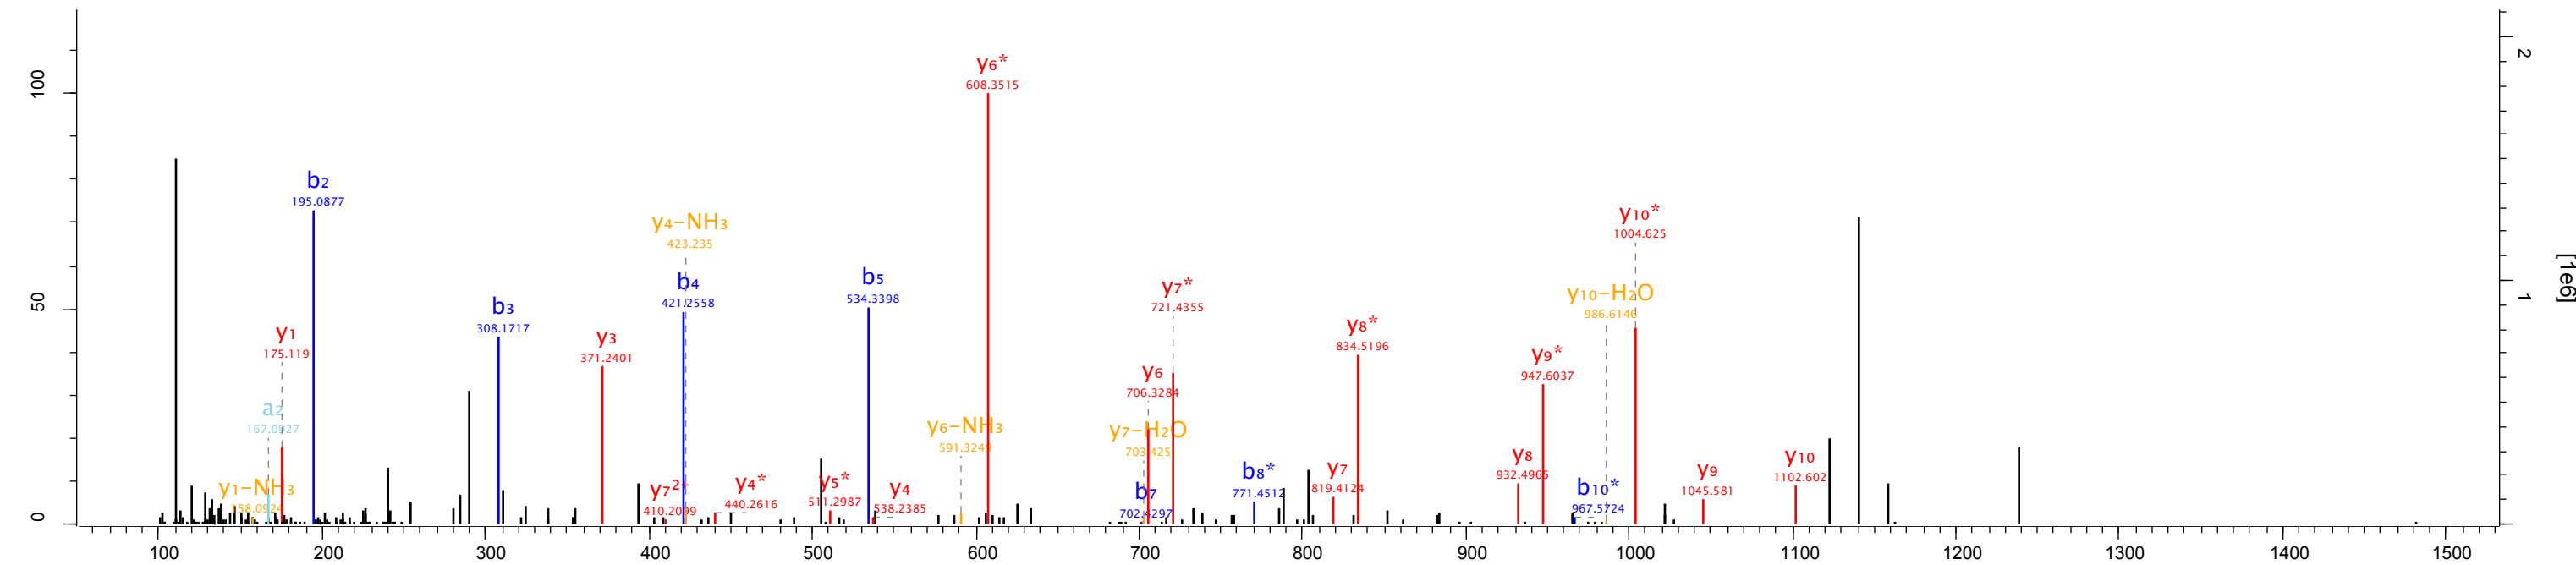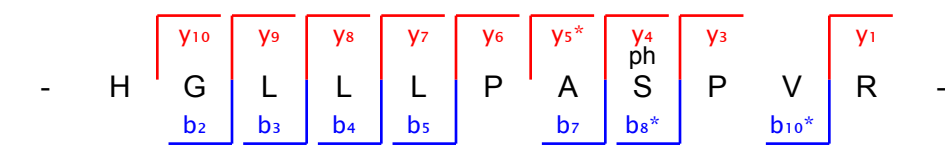

Raw file: 20150814\_A375SR\_Phospho\_BR2\_05  
 Scan: 16451 Method: FTMS; HCD Score: 112.64 m/z: 527.74 Gene names: PLEKHG3

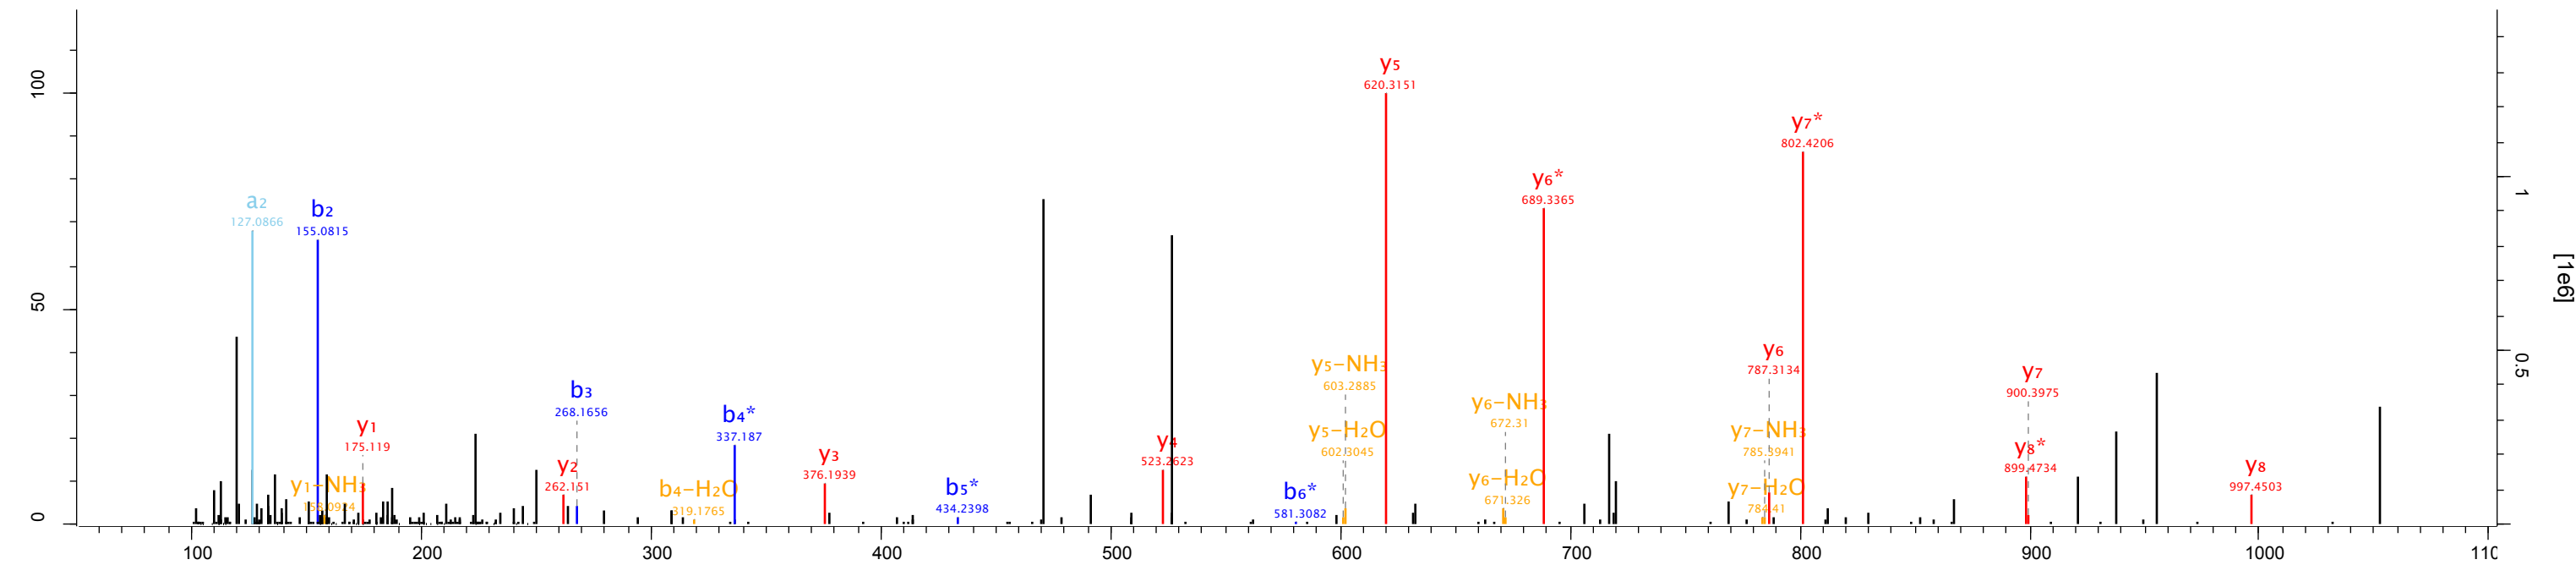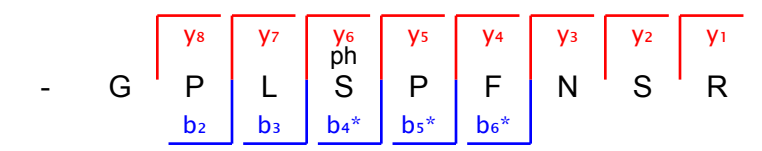

Raw file: 20150814\_A375SR\_Phospho\_BR2\_05  
 Scan: 16511 Method: FTMS; HCD Score: 100.94 m/z: 724.03 Gene names: STX16-NPEPL1;STX16

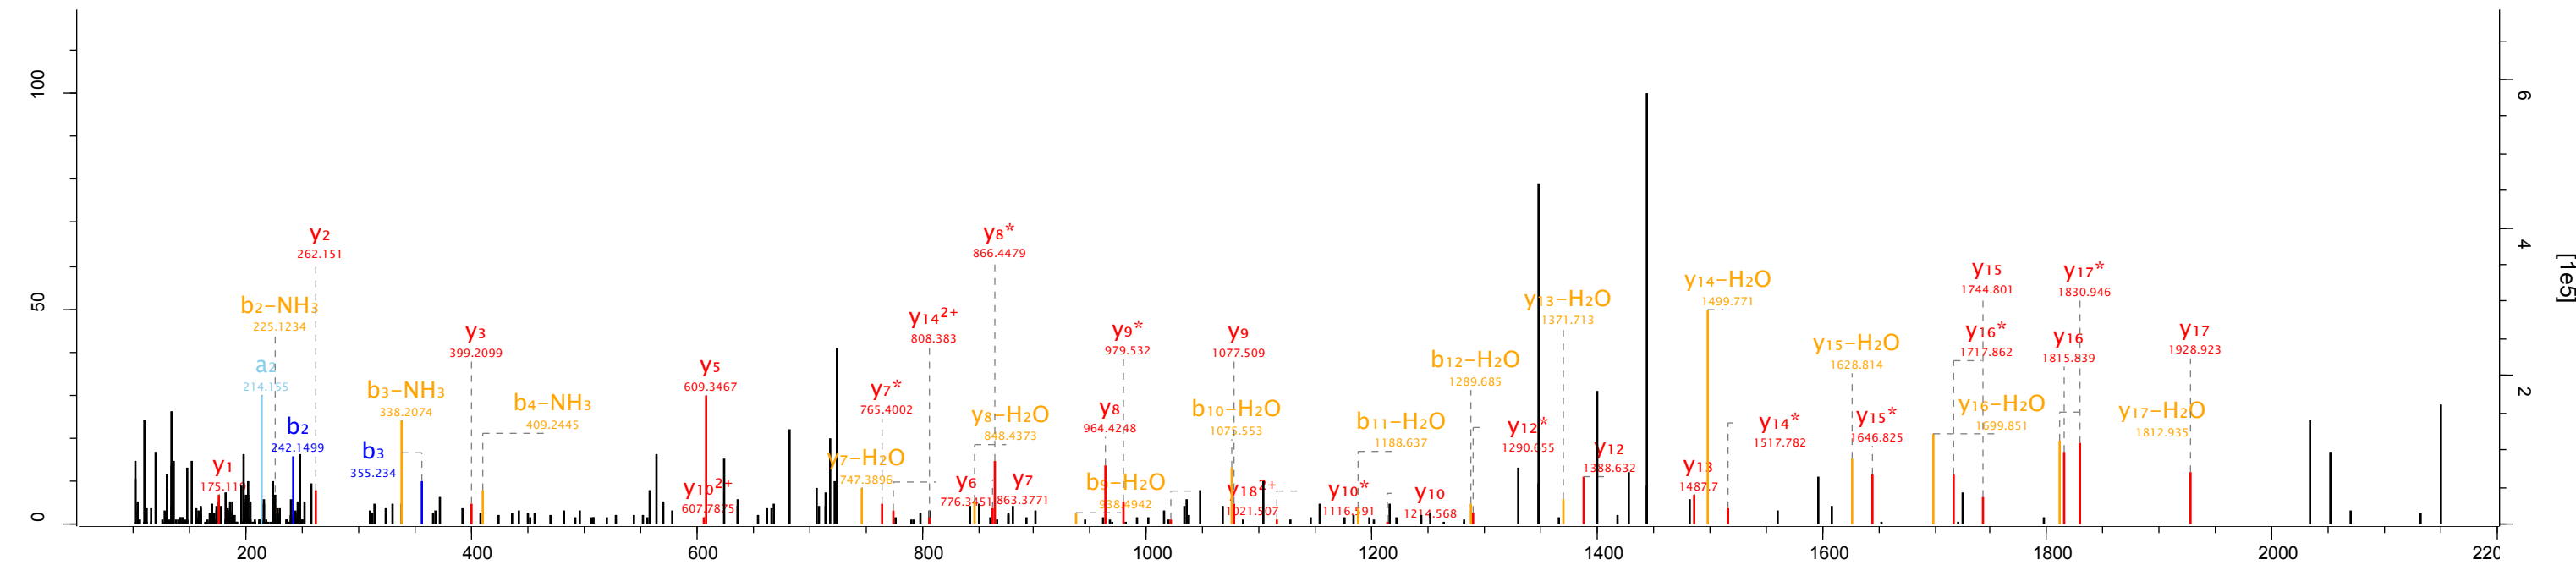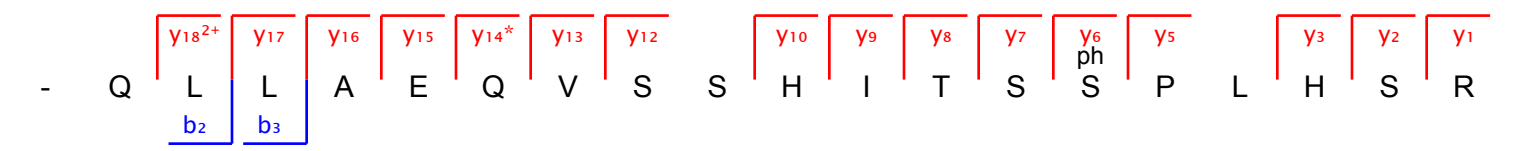

Raw file 20150814\_A375SR\_Phospho\_BR2\_05 Scan 16951 Method FTMS; HCD Score 196.95 m/z 724.32 Gene names KRT80

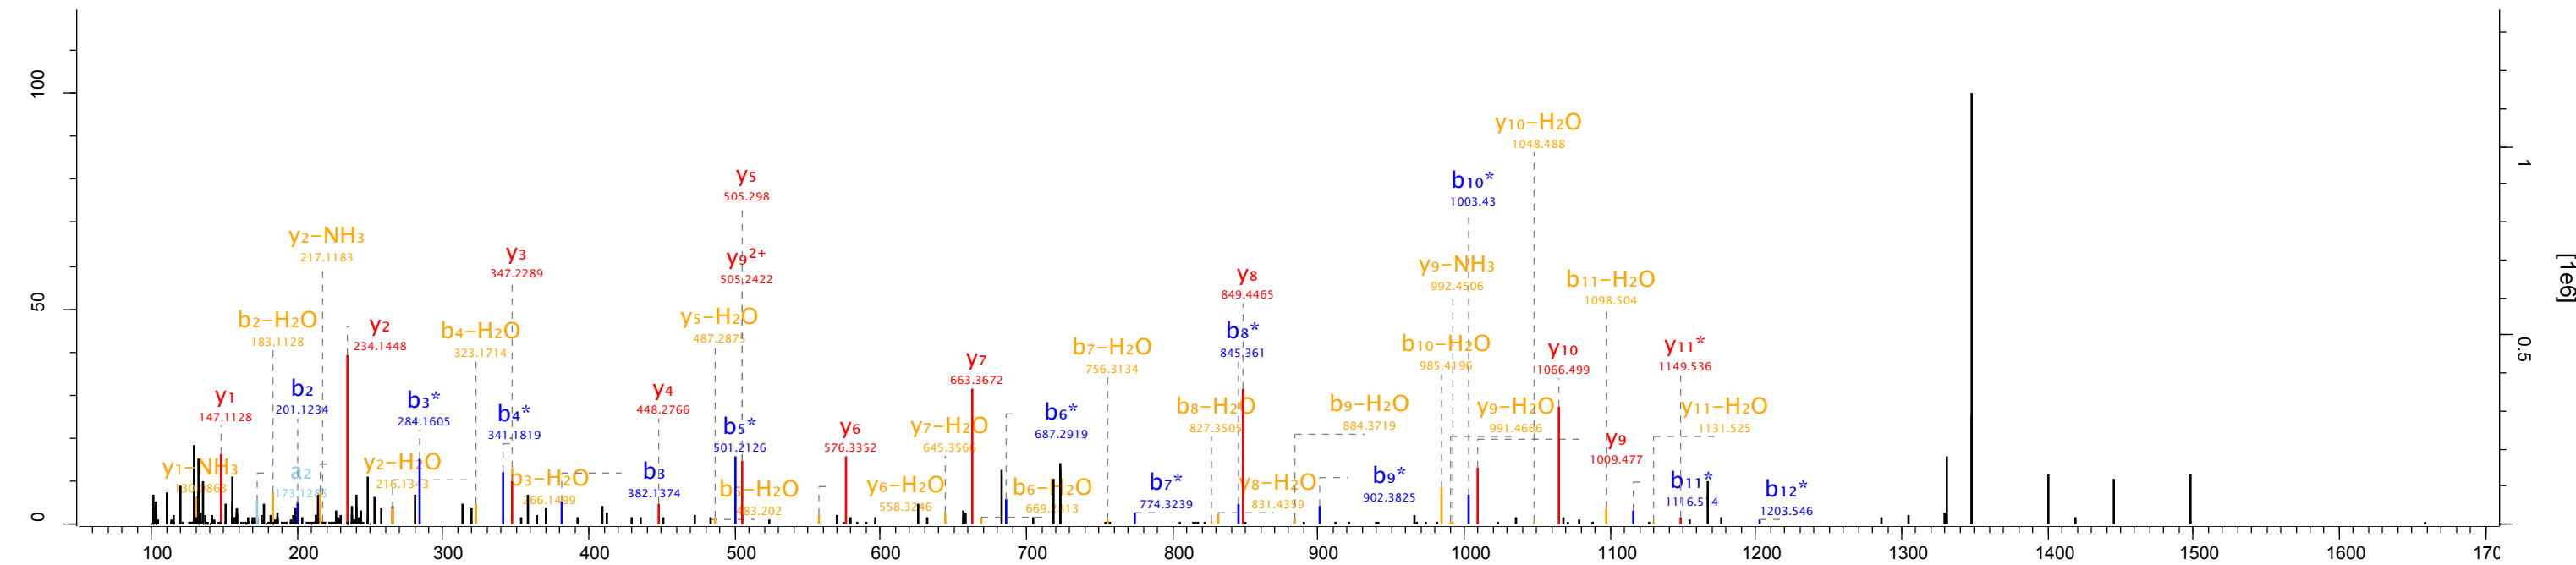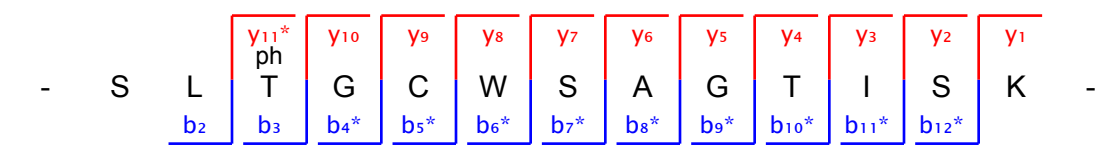

Raw file Scan Method m/z Gene names  
 20150814\_A375SR\_Phospho\_BR2\_05 17161 FTMS; HCD 214.61 810.72 MPRIP

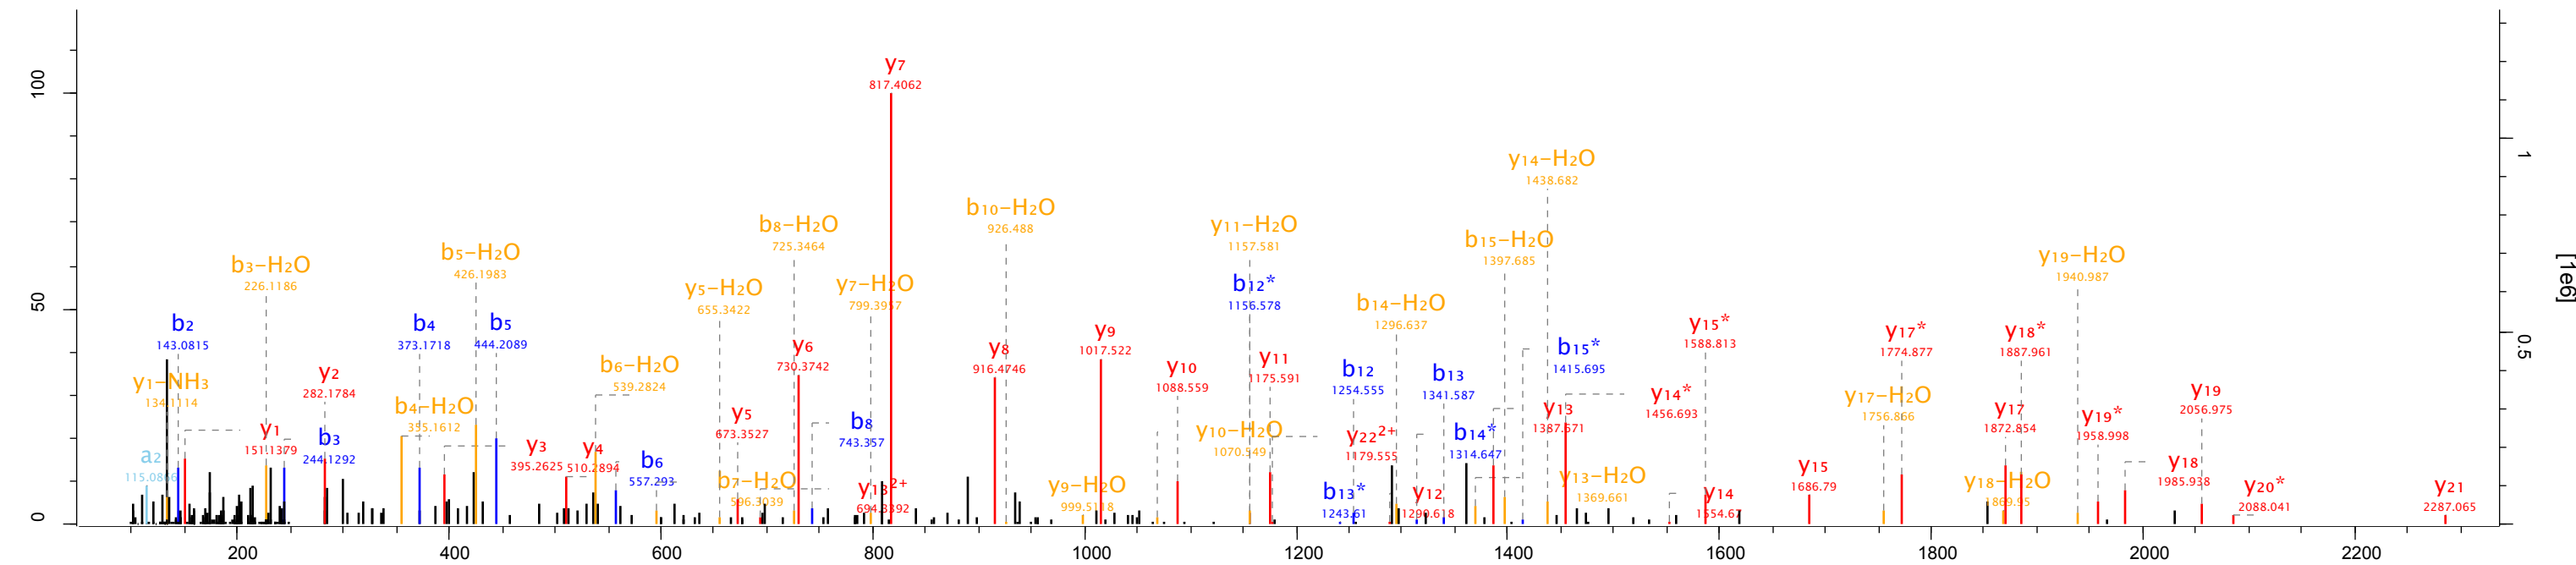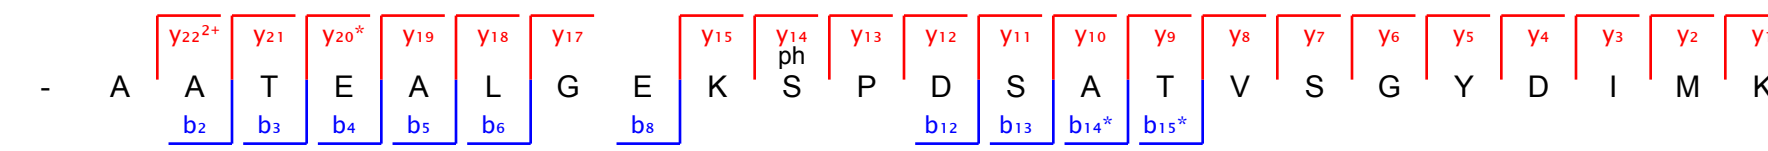

Raw file: 20150814\_A375SR\_Phospho\_BR2\_05  
 Scan: 17331 Method: FTMS; HCD Score: 345.28 m/z: 984.94 Gene names: OSBPL3

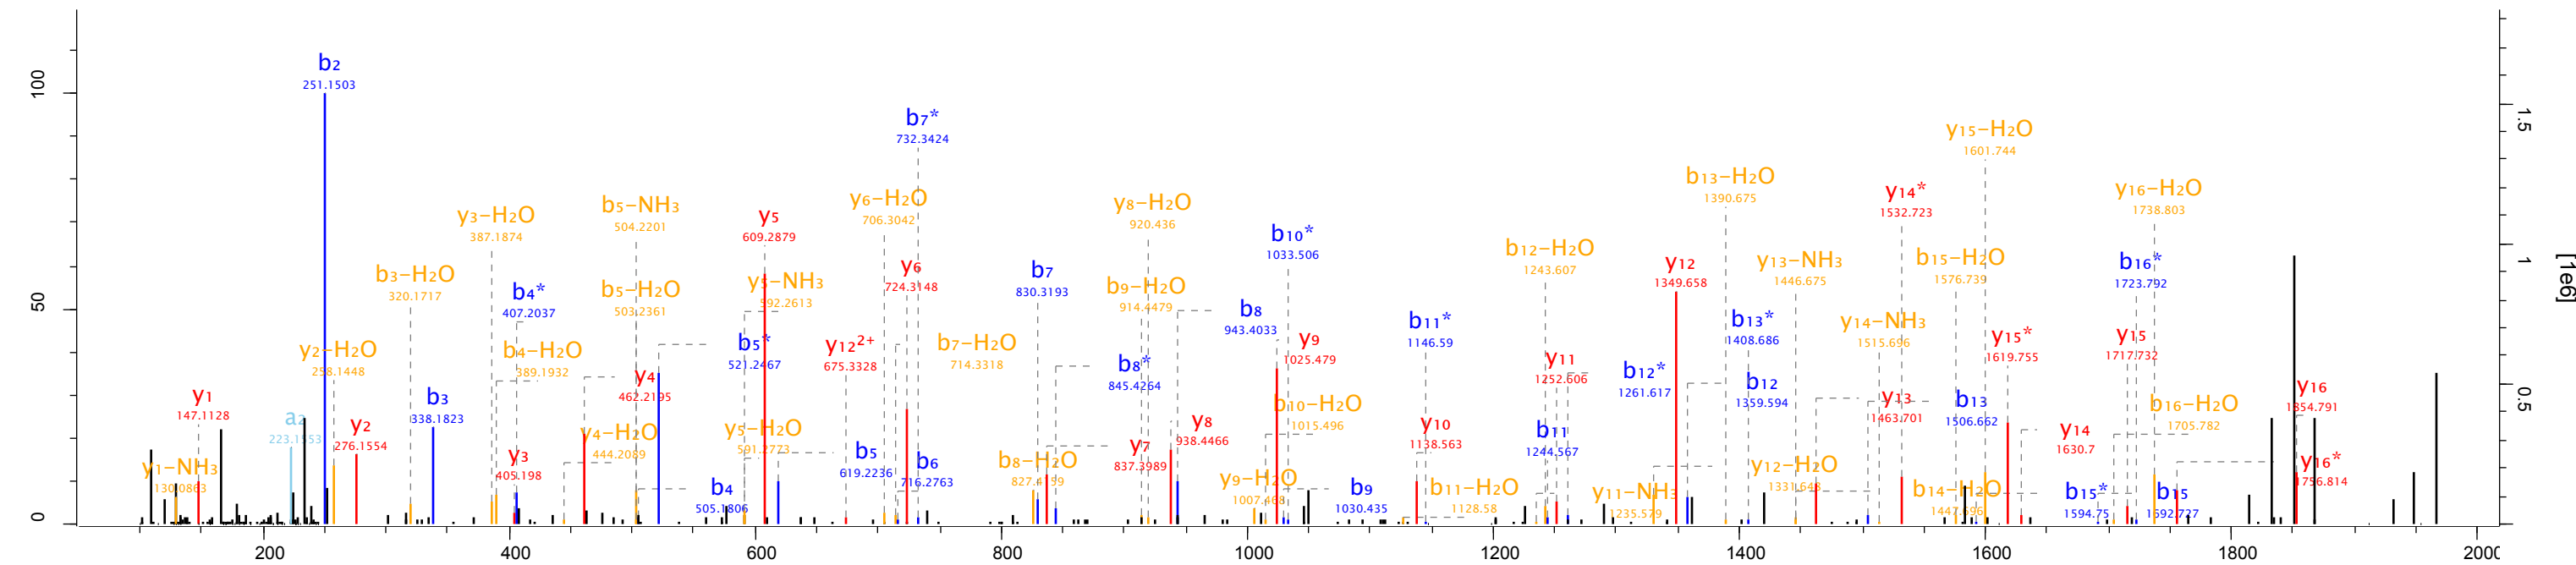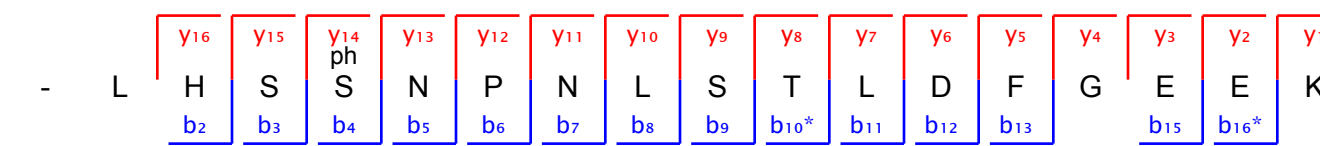

Raw file: 20150814\_A375SR\_Phospho\_BR2\_05  
 Scan: 17371 Method: FTMS; HCD Score: 161.02 m/z: 824.95 Gene names: NRIP1

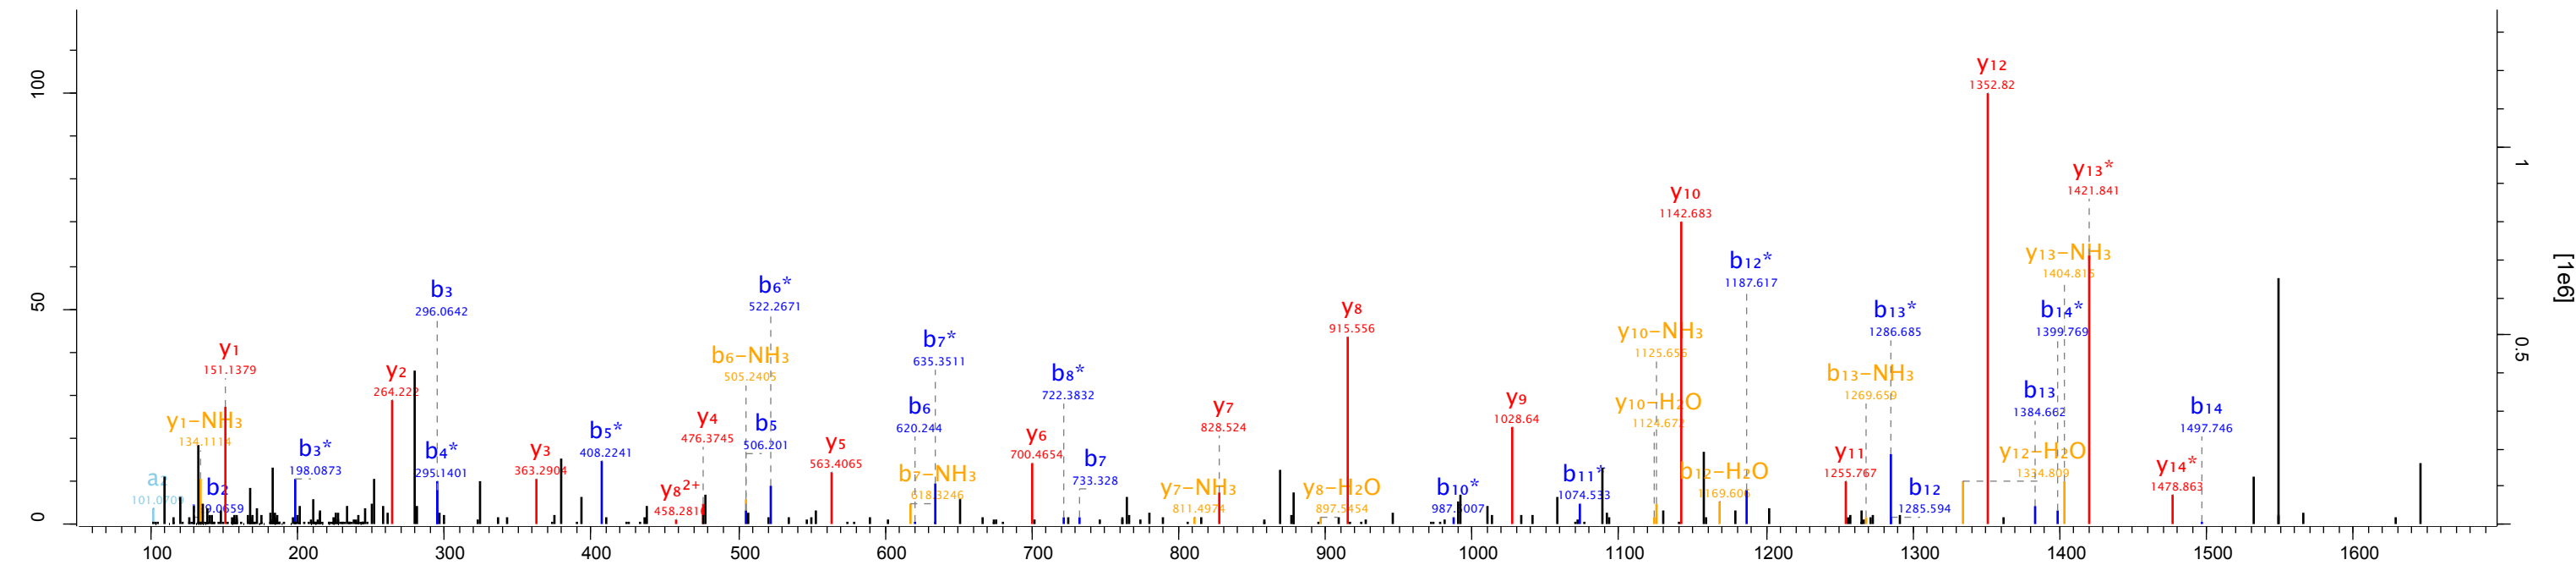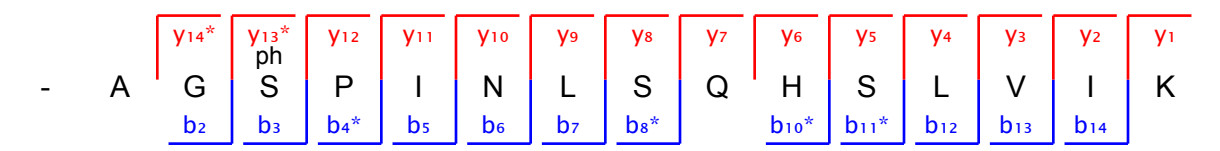



Raw file: 20150814\_A375SR\_Phospho\_BR2\_05  
 Scan: 17571 Method: FTMS; HCD Score: 153.75 m/z: 720.8 Gene names: BAD

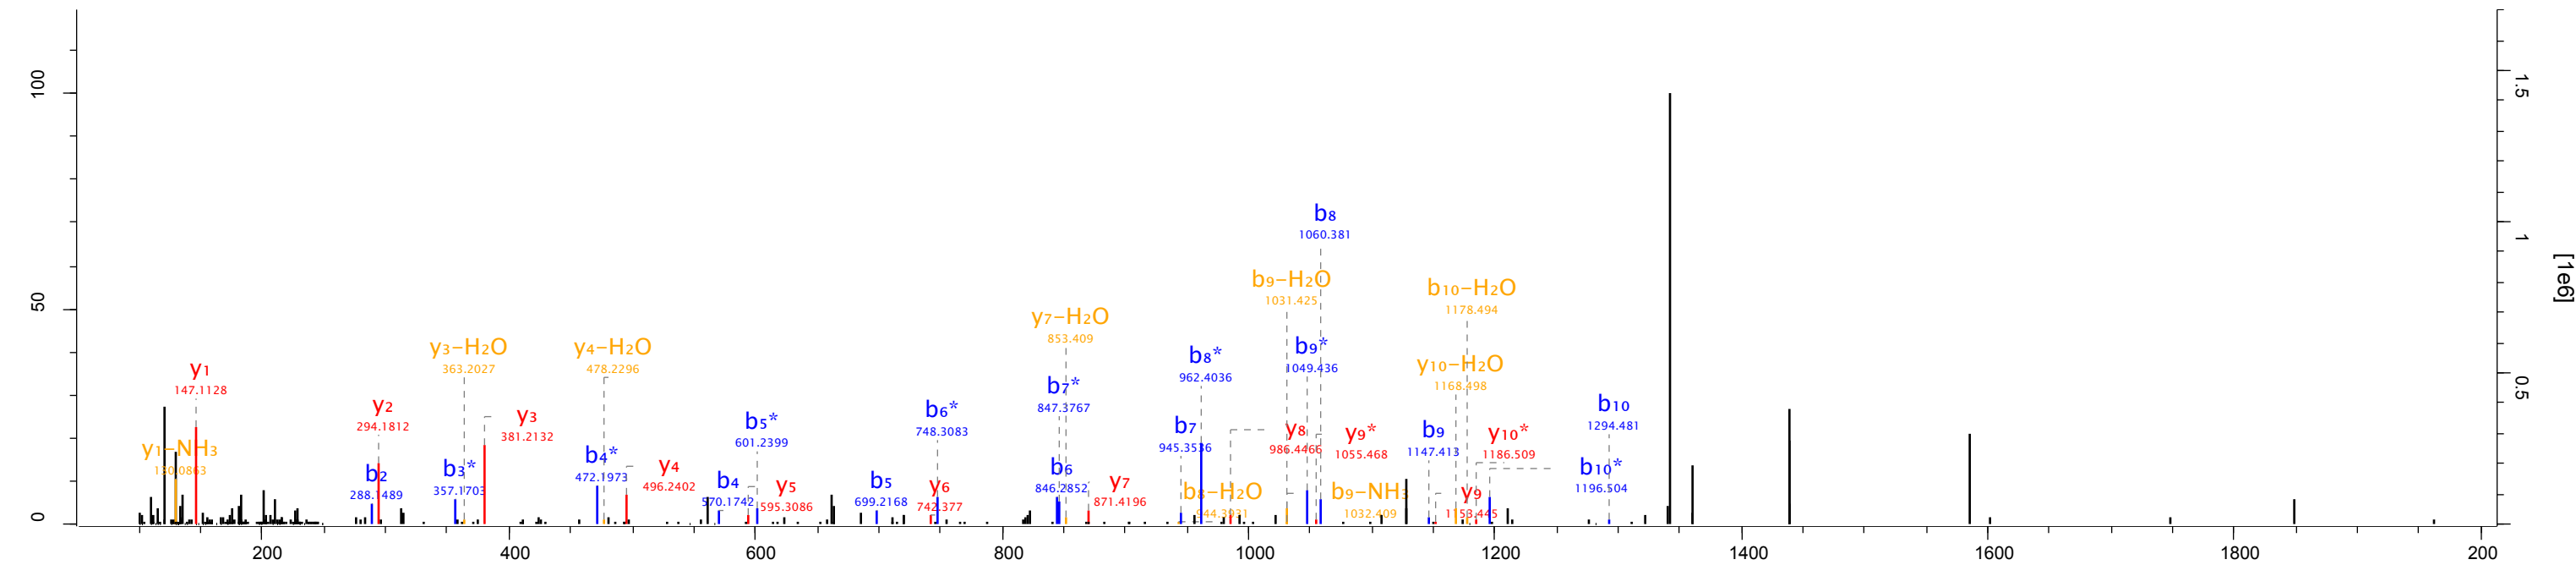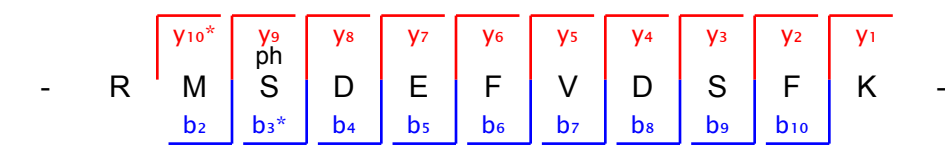

Raw file 20150814\_A375SR\_Phospho\_BR2\_05 Scan 17591 Method FTMS; HCD Score 119.25 m/z 935.96 Gene names ASH1L

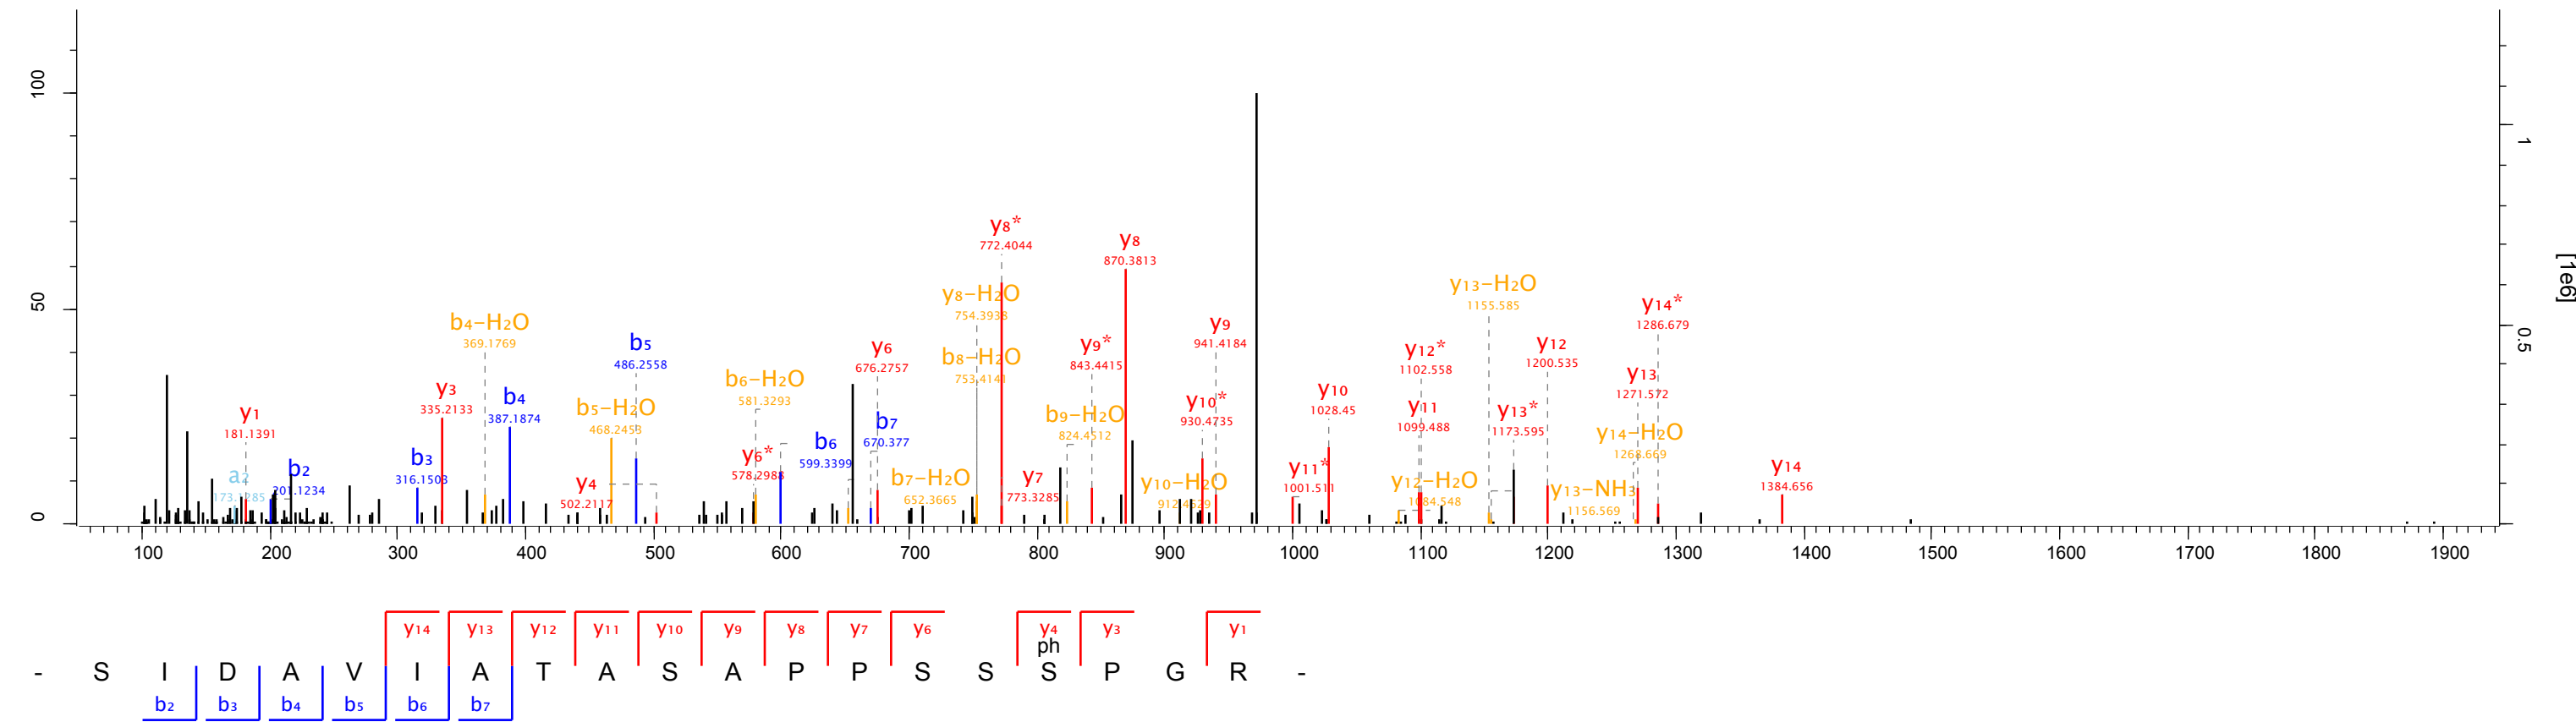

Raw file 20150814\_A375SR\_Phospho\_BR2\_05 Scan 17861 Method FTMS; HCD Score 97.55 m/z 748.39 Gene names GAPDH

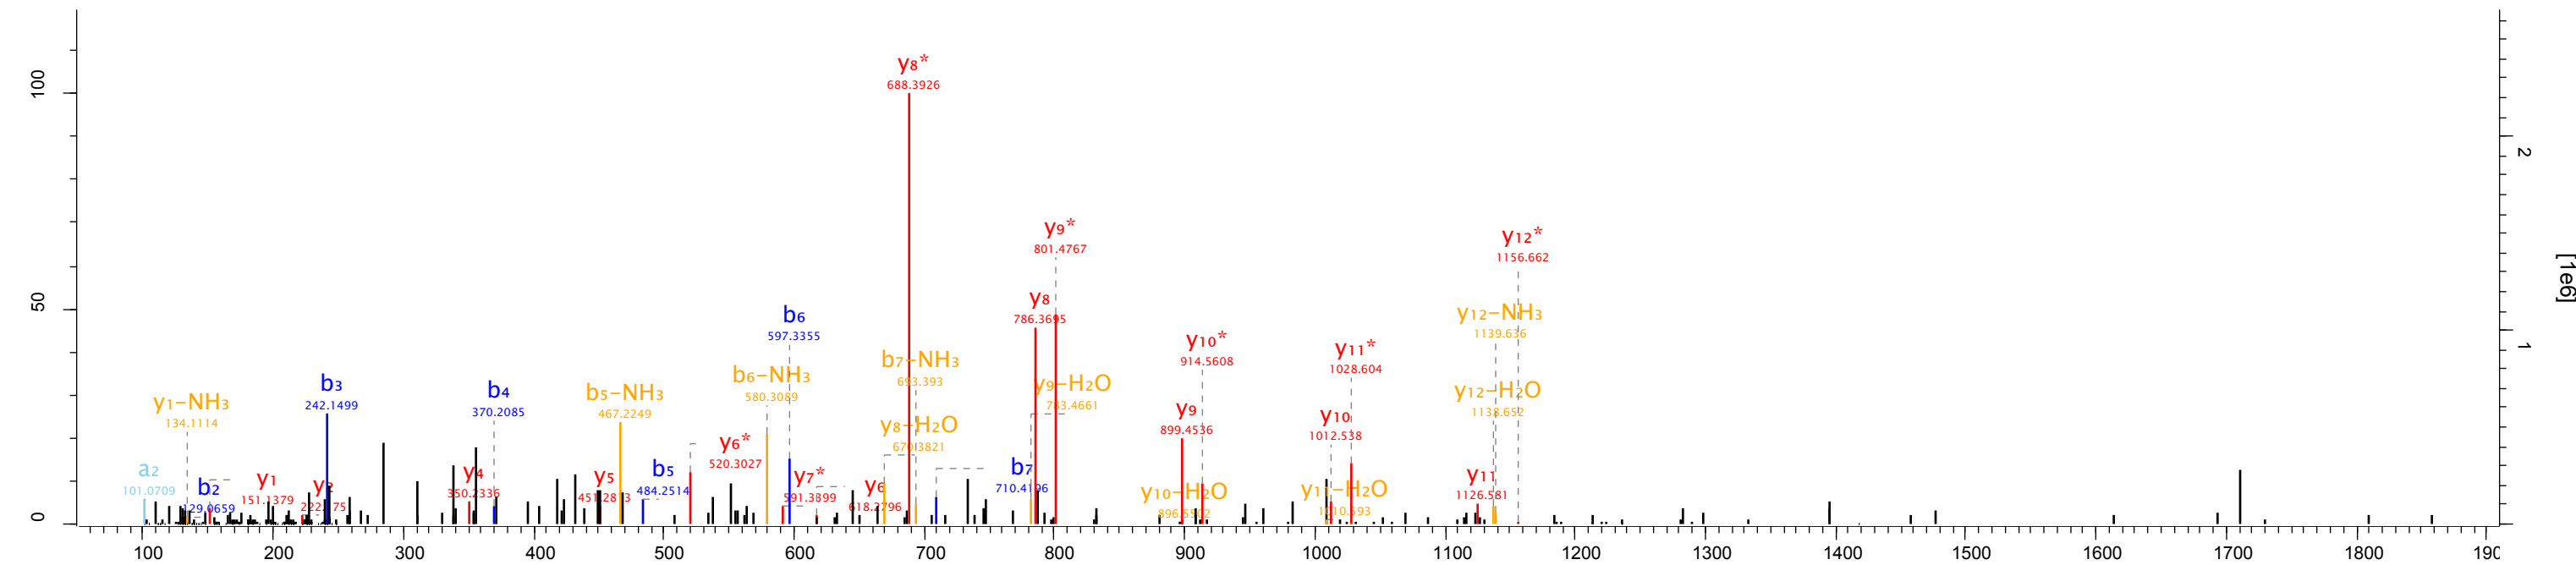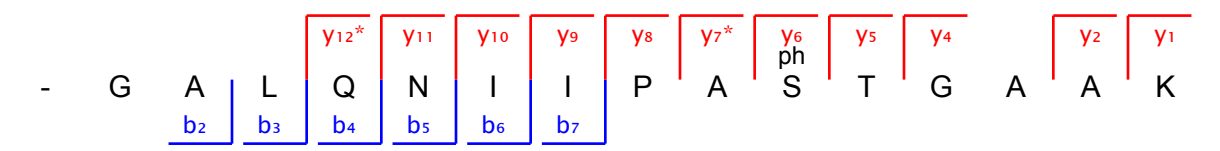

Raw file 20150814\_A375SR\_Phospho\_BR2\_05 Scan 17921 Method FTMS; HCD Score 86.96 m/z 893.41 Gene names AHNAK

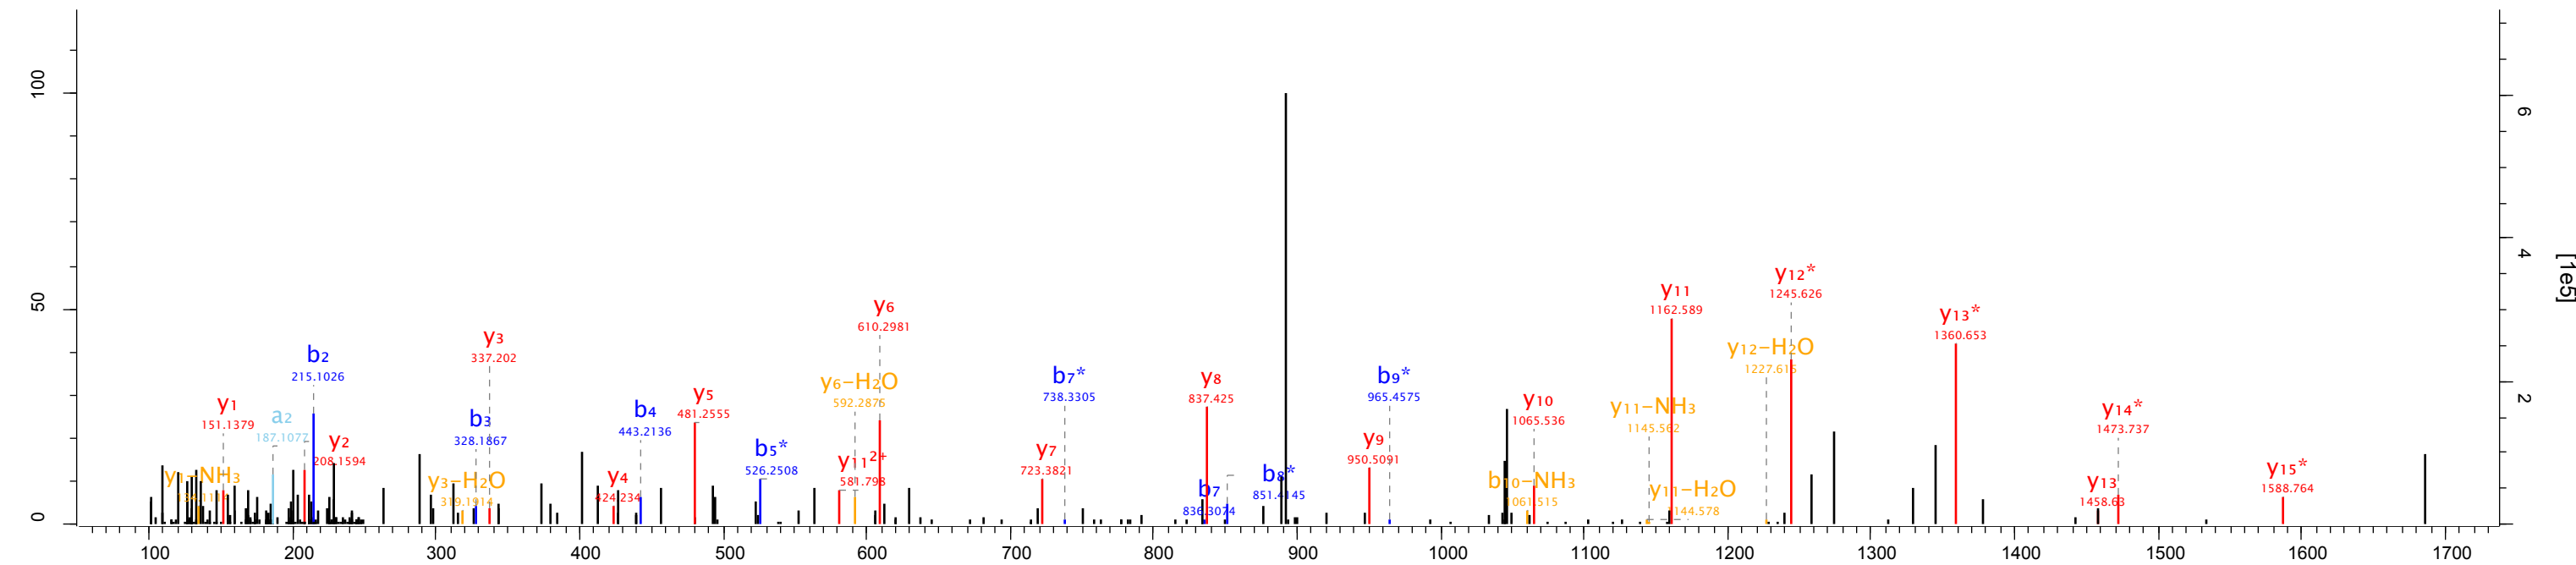

- V D I D I D I N I E G S E G K -

y15\*
y14\*
y13
y12\*  
ph
y11
y10
y9
y8
y7
y6
y5
y4
y3
y2
y1

b2
b3
b4
b5\*
b7
b8\*
b9\*

Raw file  
 20150814\_A375SR\_Phospho\_BR2\_05  
 Scan 18121 Method FTMS; HCD Score 209.42 m/z 767.89 Gene names PAPOLA

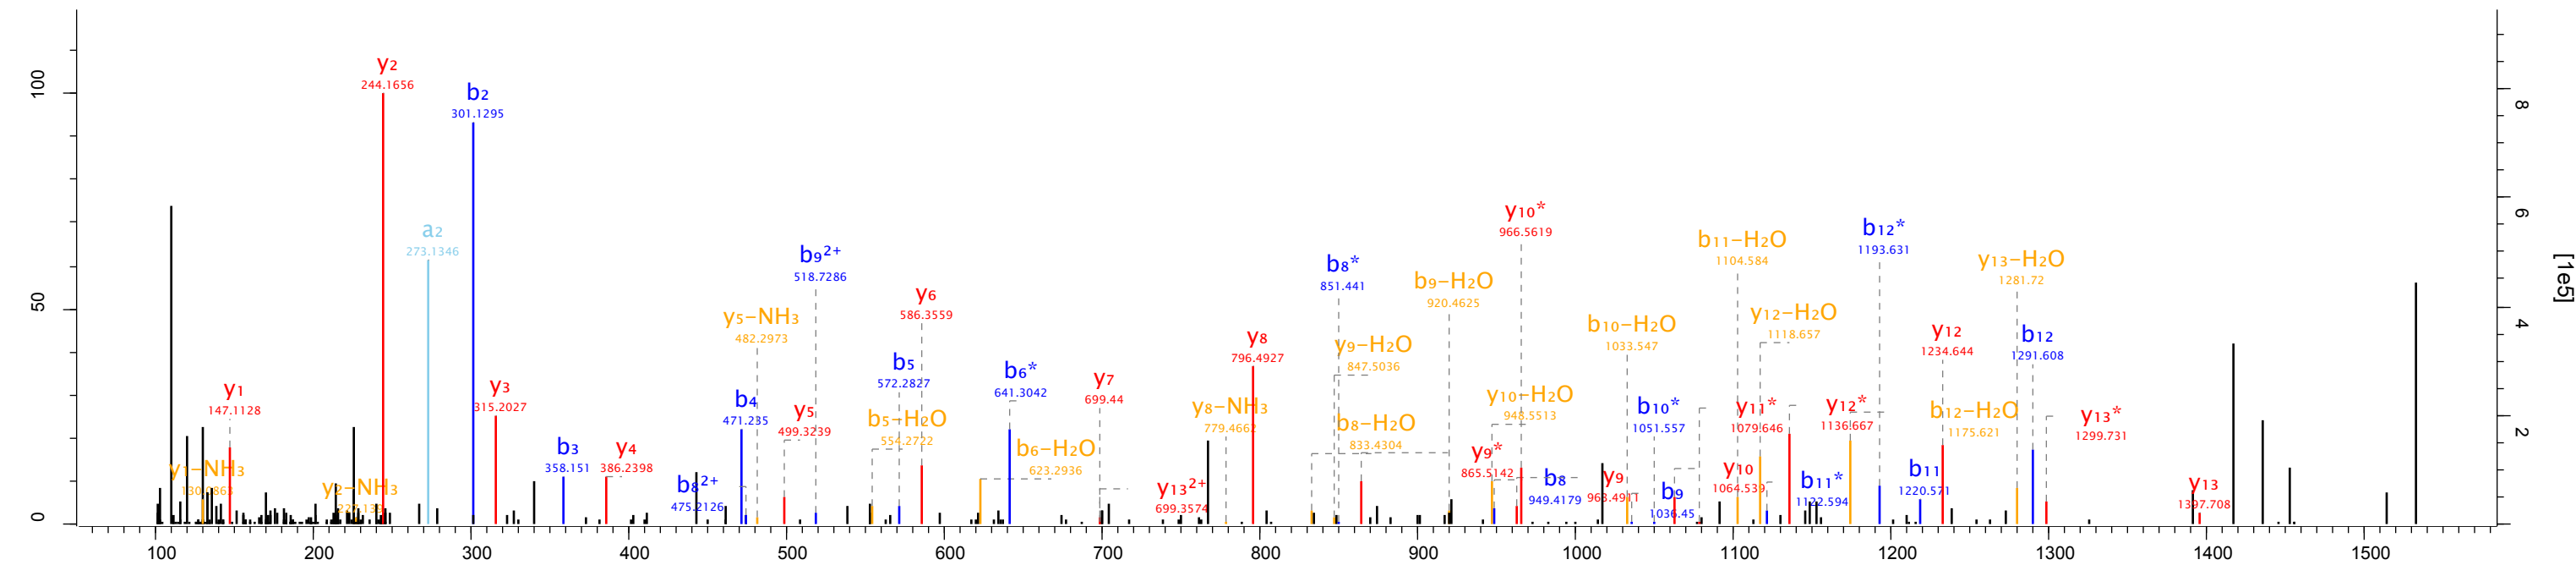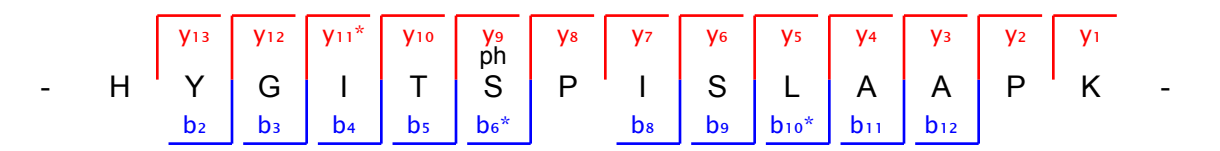

Raw file: 20150814\_A375SR\_Phospho\_BR2\_05  
 Scan: 18131 Method: FTMS; HCD Score: 78.6 m/z: 758.85 Gene names: HELB

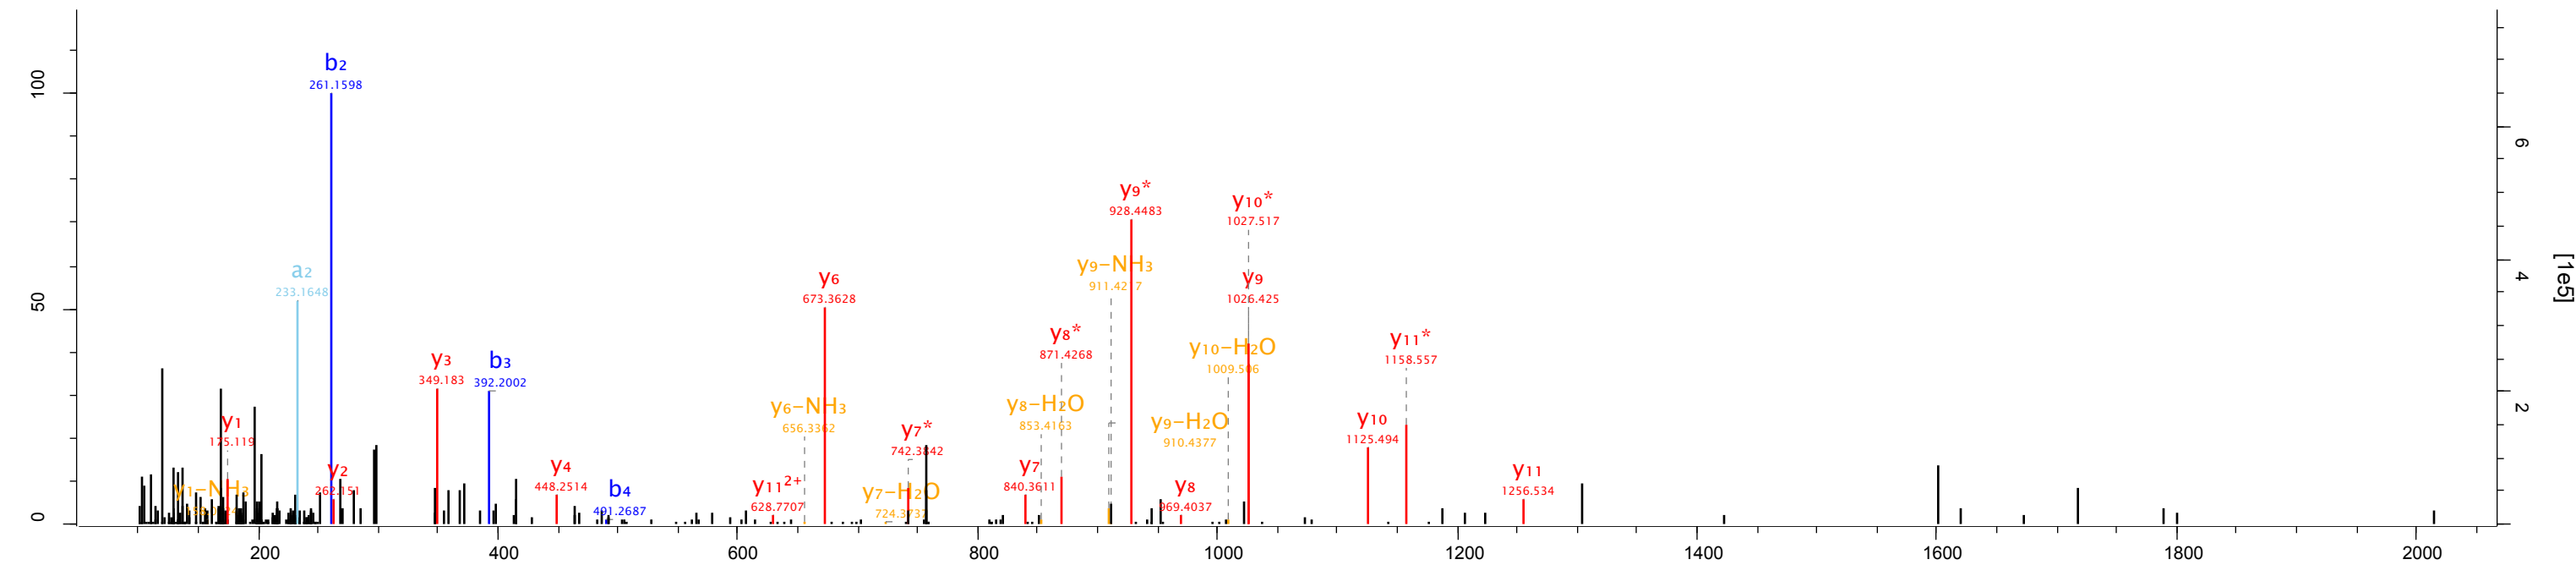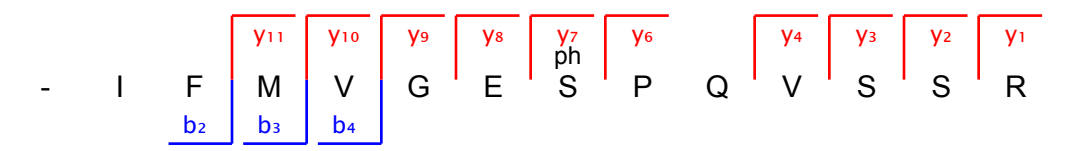

Raw file: 20150814\_A375SR\_Phospho\_BR2\_05  
 Scan: 18211 Method: FTMS; HCD Score: 162.72 m/z: 931.93 Gene names: BUD13

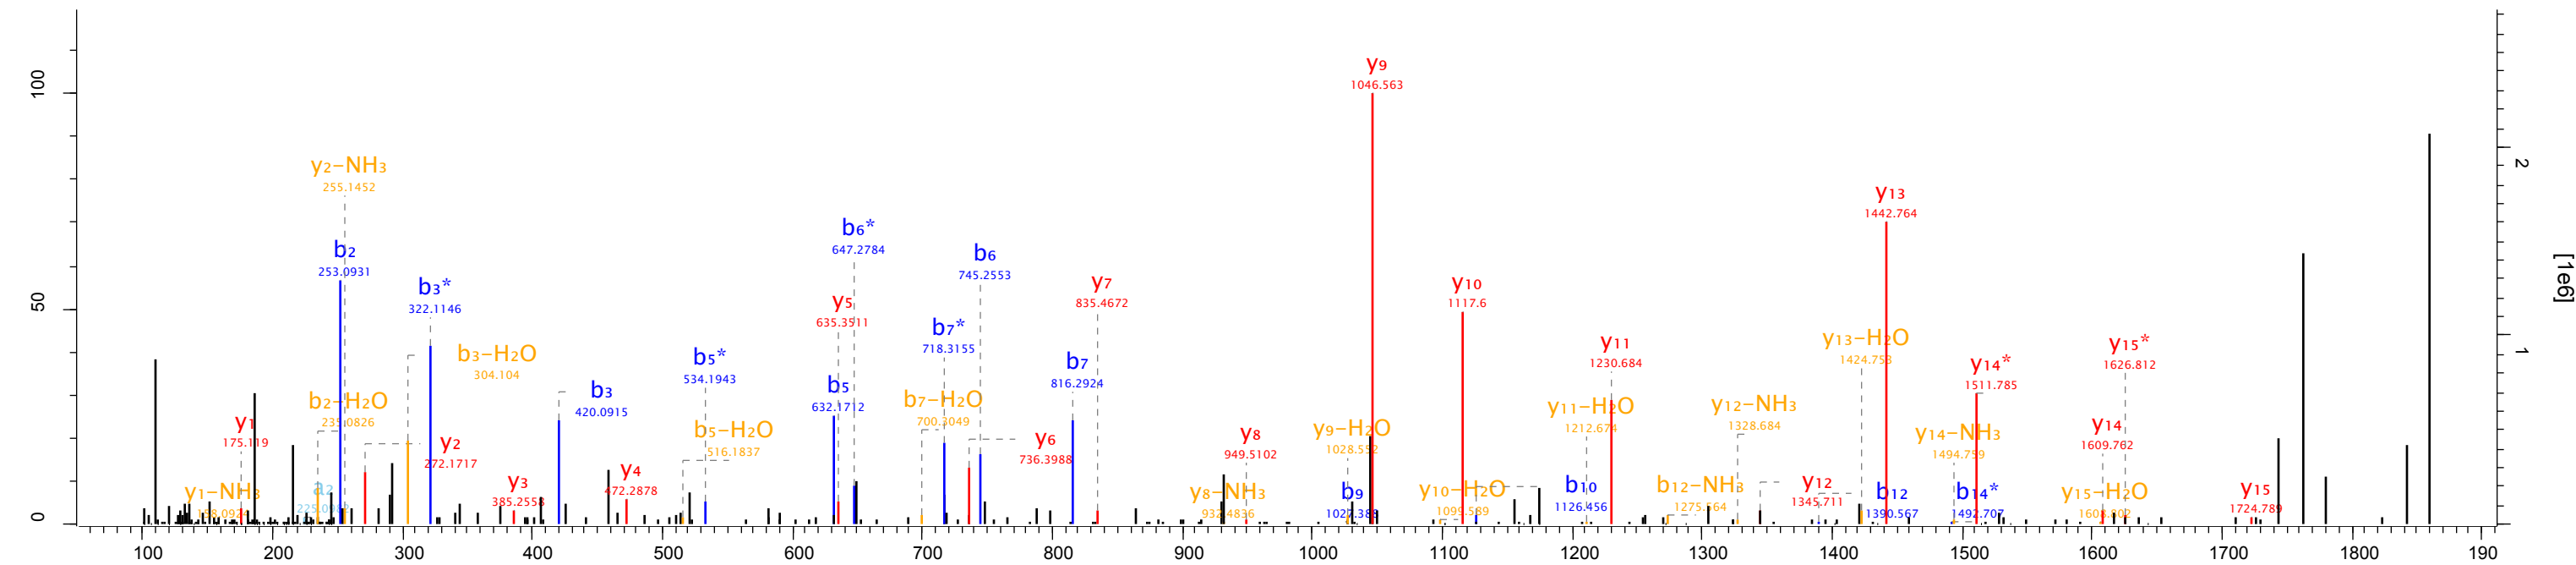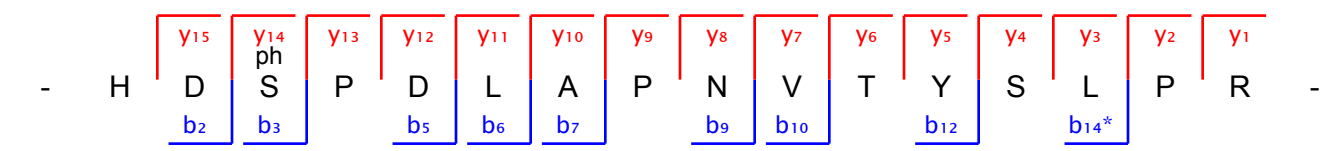

Raw file Scan Method Score m/z Gene names  
 20150814\_A375SR\_Phospho\_BR2\_05 18451 FTMS; HCD 220.74 1035.99 SVIL

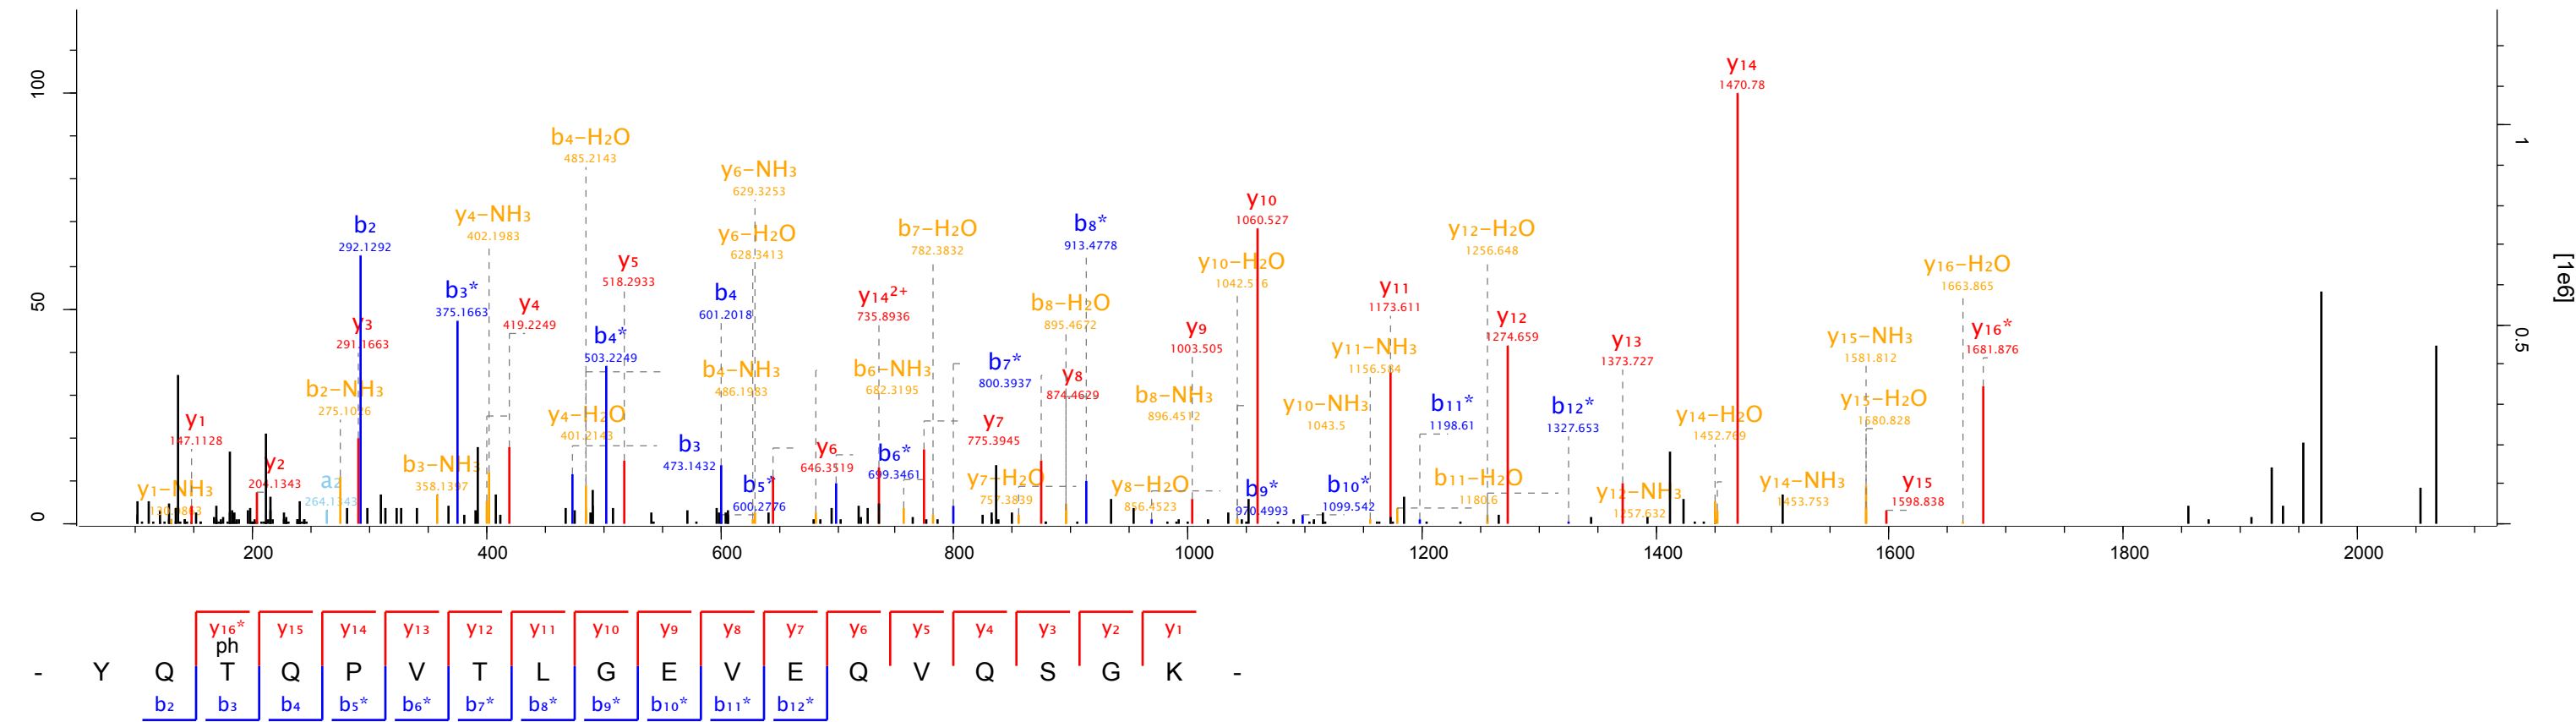



Raw file: 20150814\_A375SR\_Phospho\_BR2\_05  
 Scan: 18481 Method: FTMS; HCD Score: 202.46 m/z: 1137.16 Gene names: ZNF148

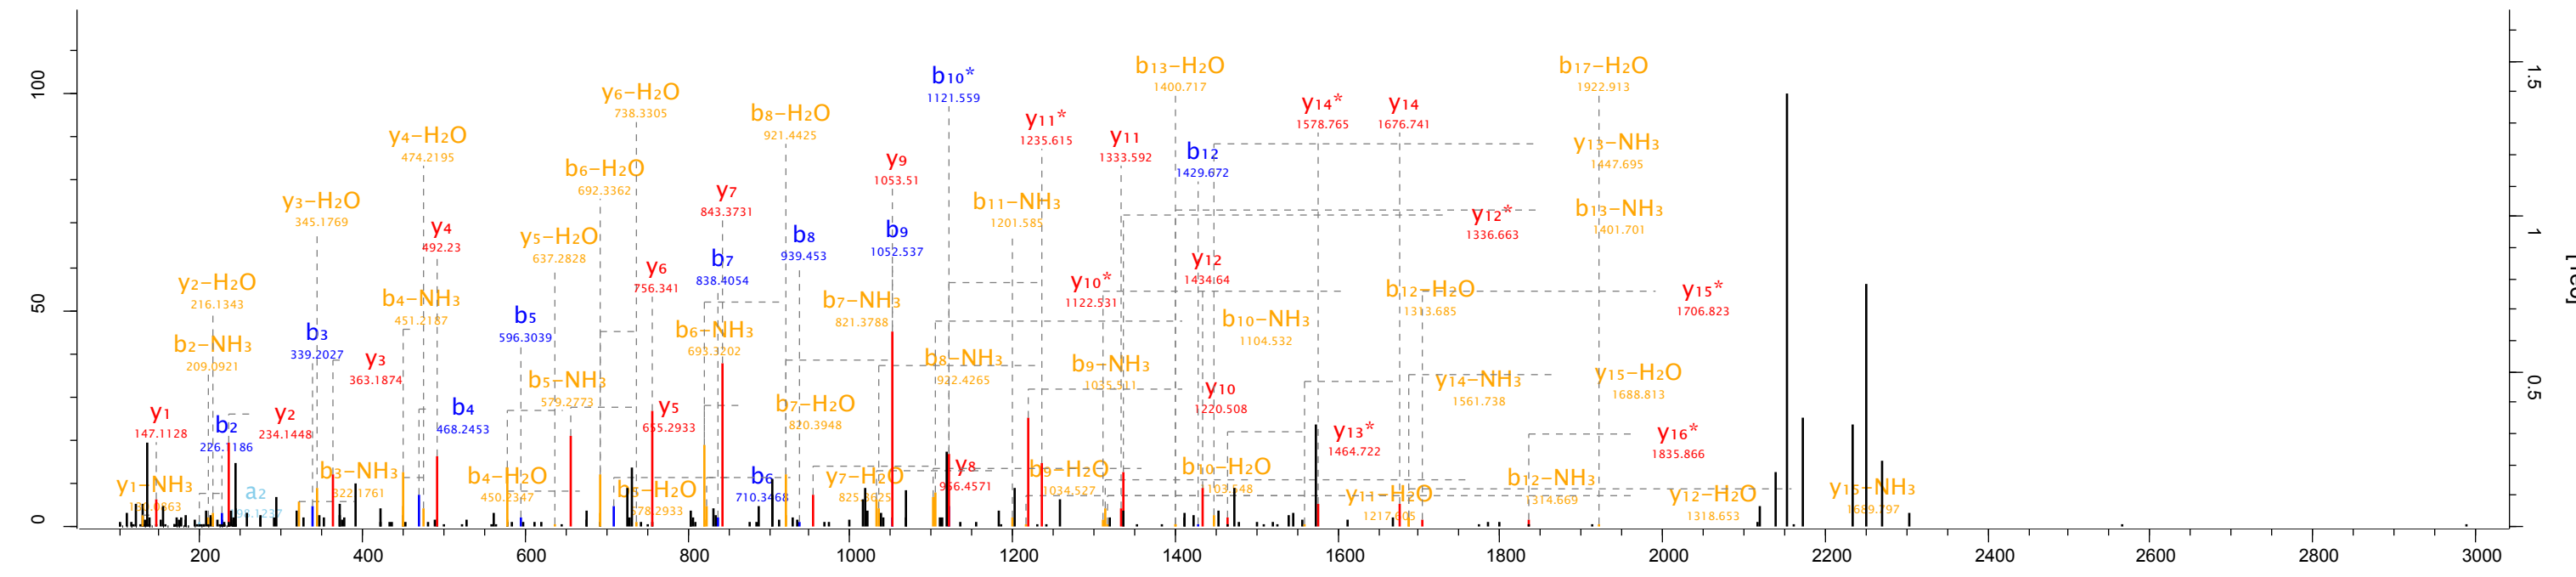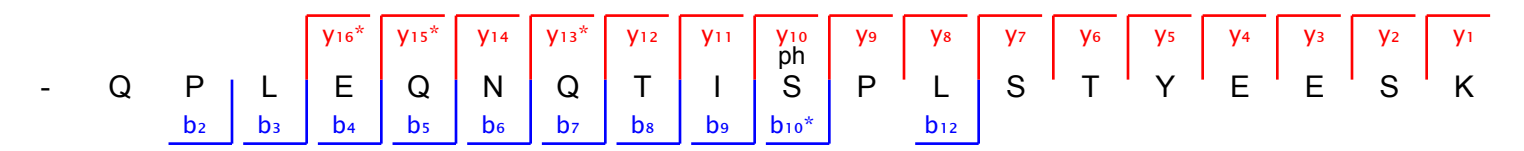

Raw file  
 20150814\_A375SR\_Phospho\_BR2\_05  
 Scan 18931 Method FTMS; HCD Score 267.83 m/z 910.42 Gene names SORBS3

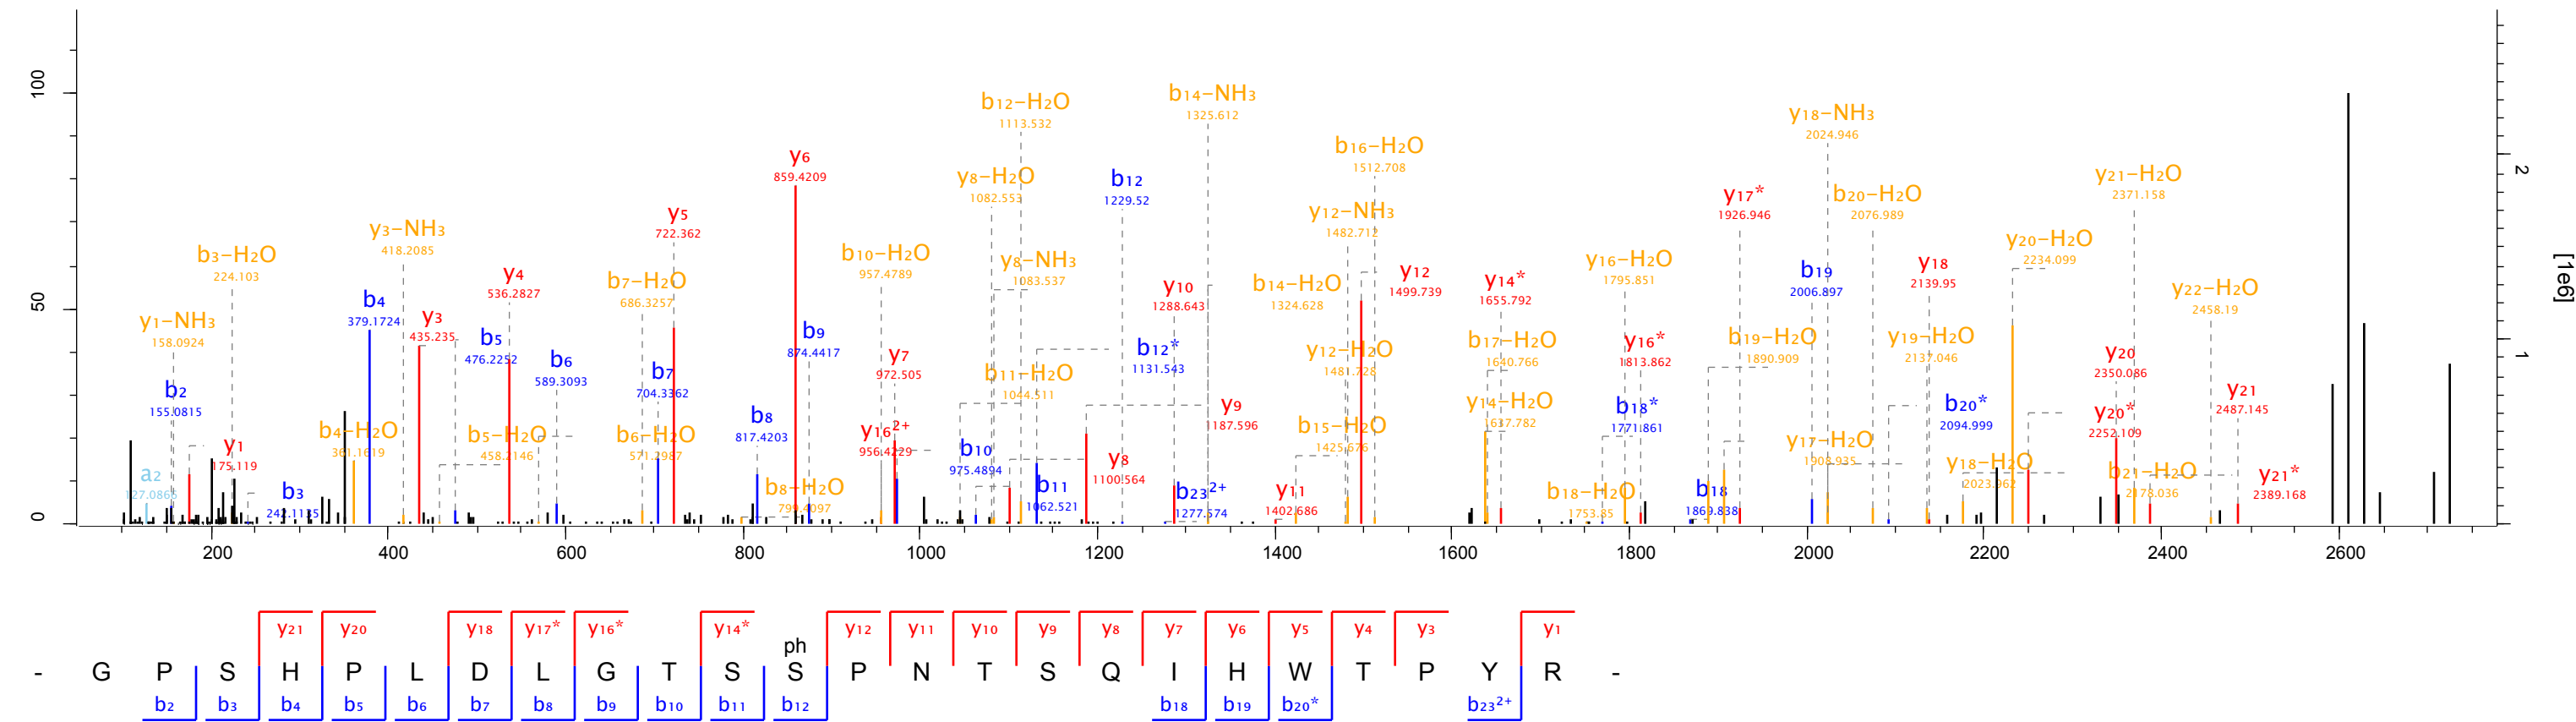

Raw file 20150814\_A375SR\_Phospho\_BR2\_05 Scan 19221 Method FTMS; HCD Score 160.23 m/z 685.31 Gene names RBM17

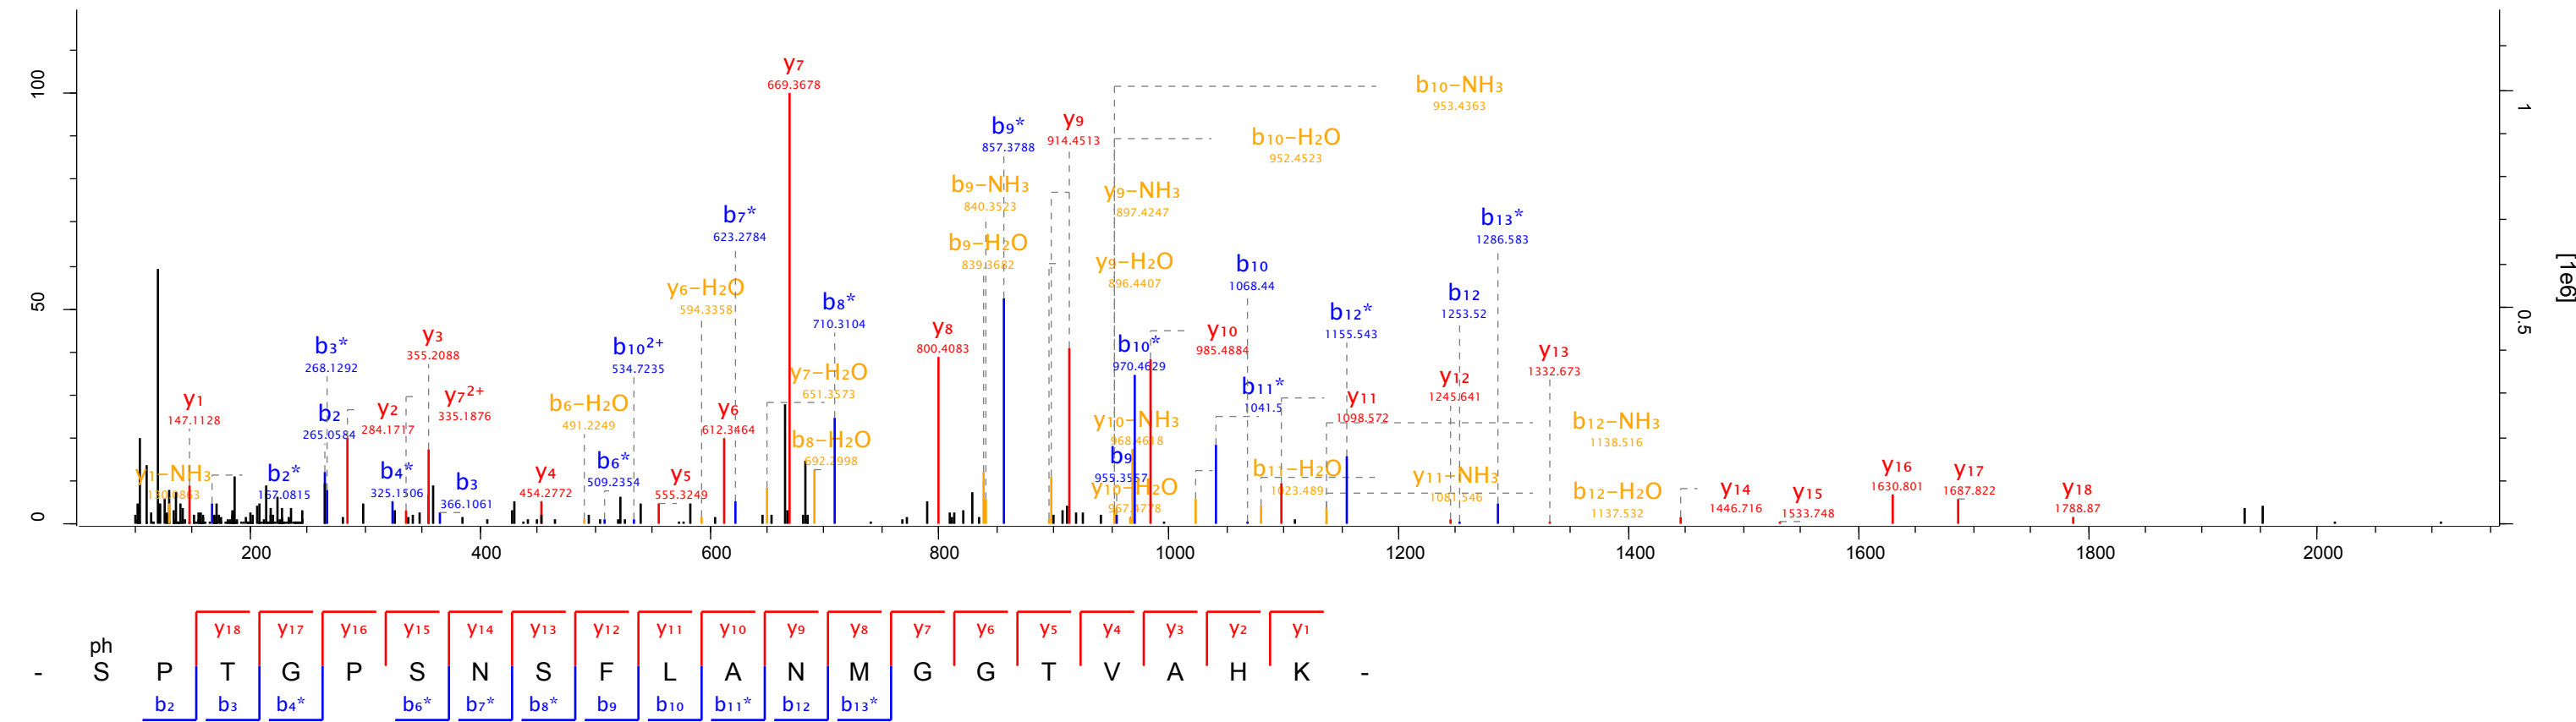

Raw file 20150814\_A375SR\_Phospho\_BR2\_05 Scan 19531 Method FTMS; HCD Score 67.5 m/z 841.37 Gene names ADD2

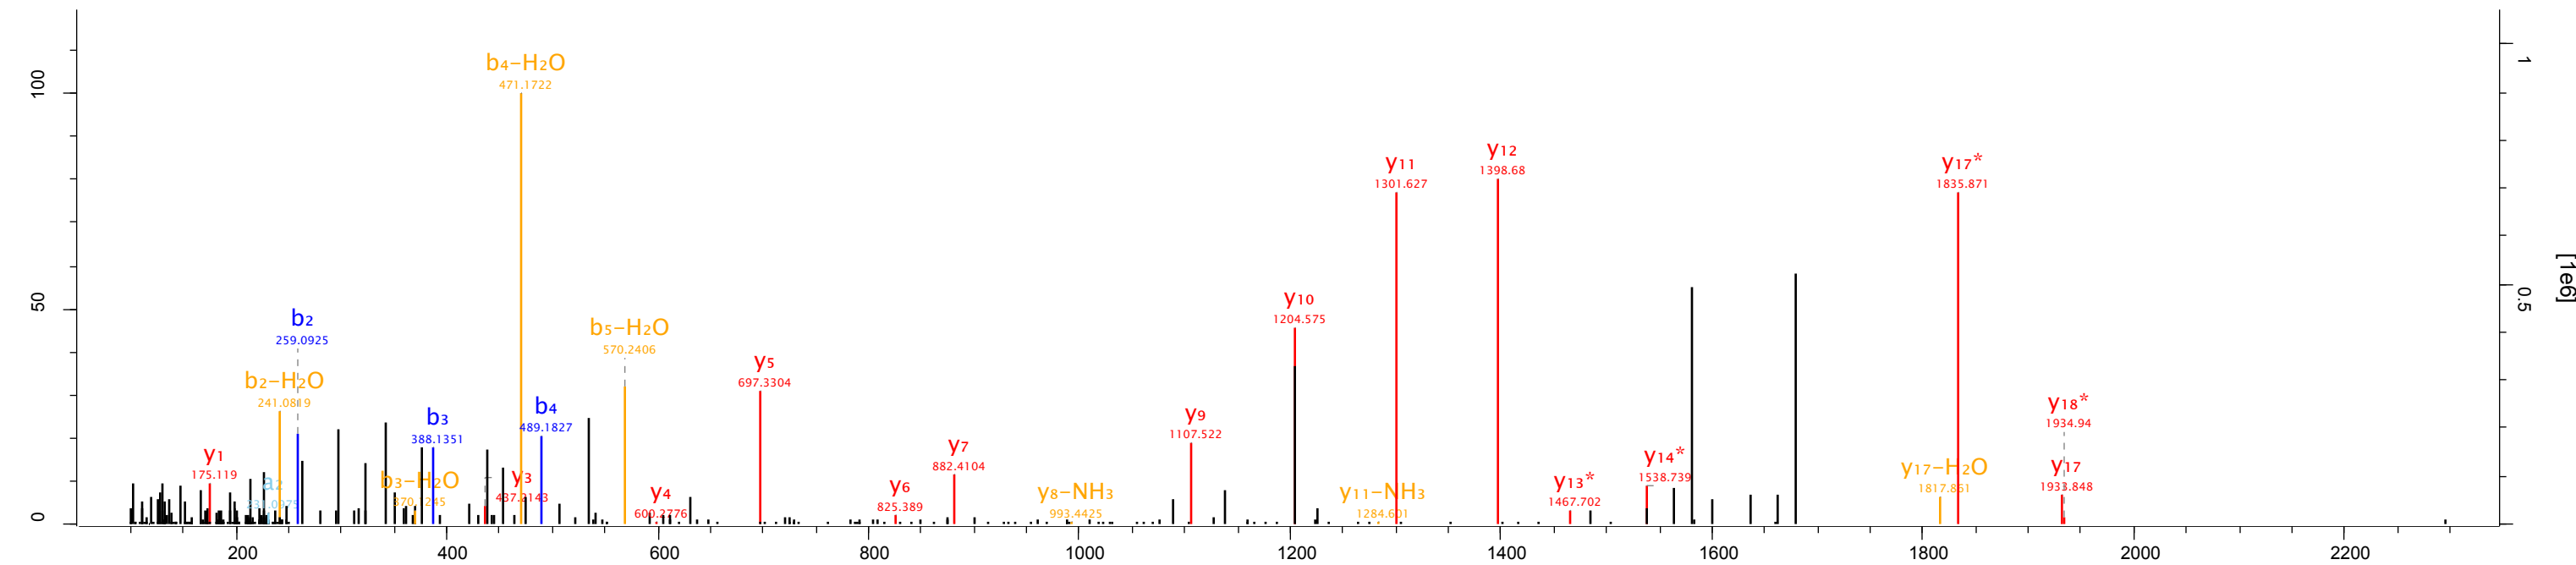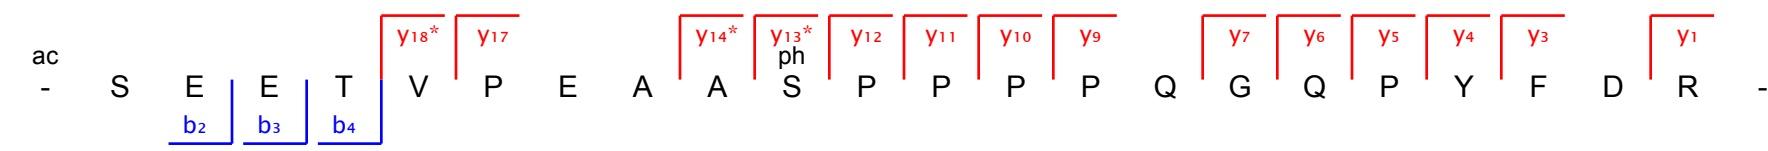

Raw file: 20150814\_A375SR\_Phospho\_BR2\_05  
 Scan: 20211 Method: FTMS; HCD Score: 190.96 m/z: 838.43 Gene names: AKAP13

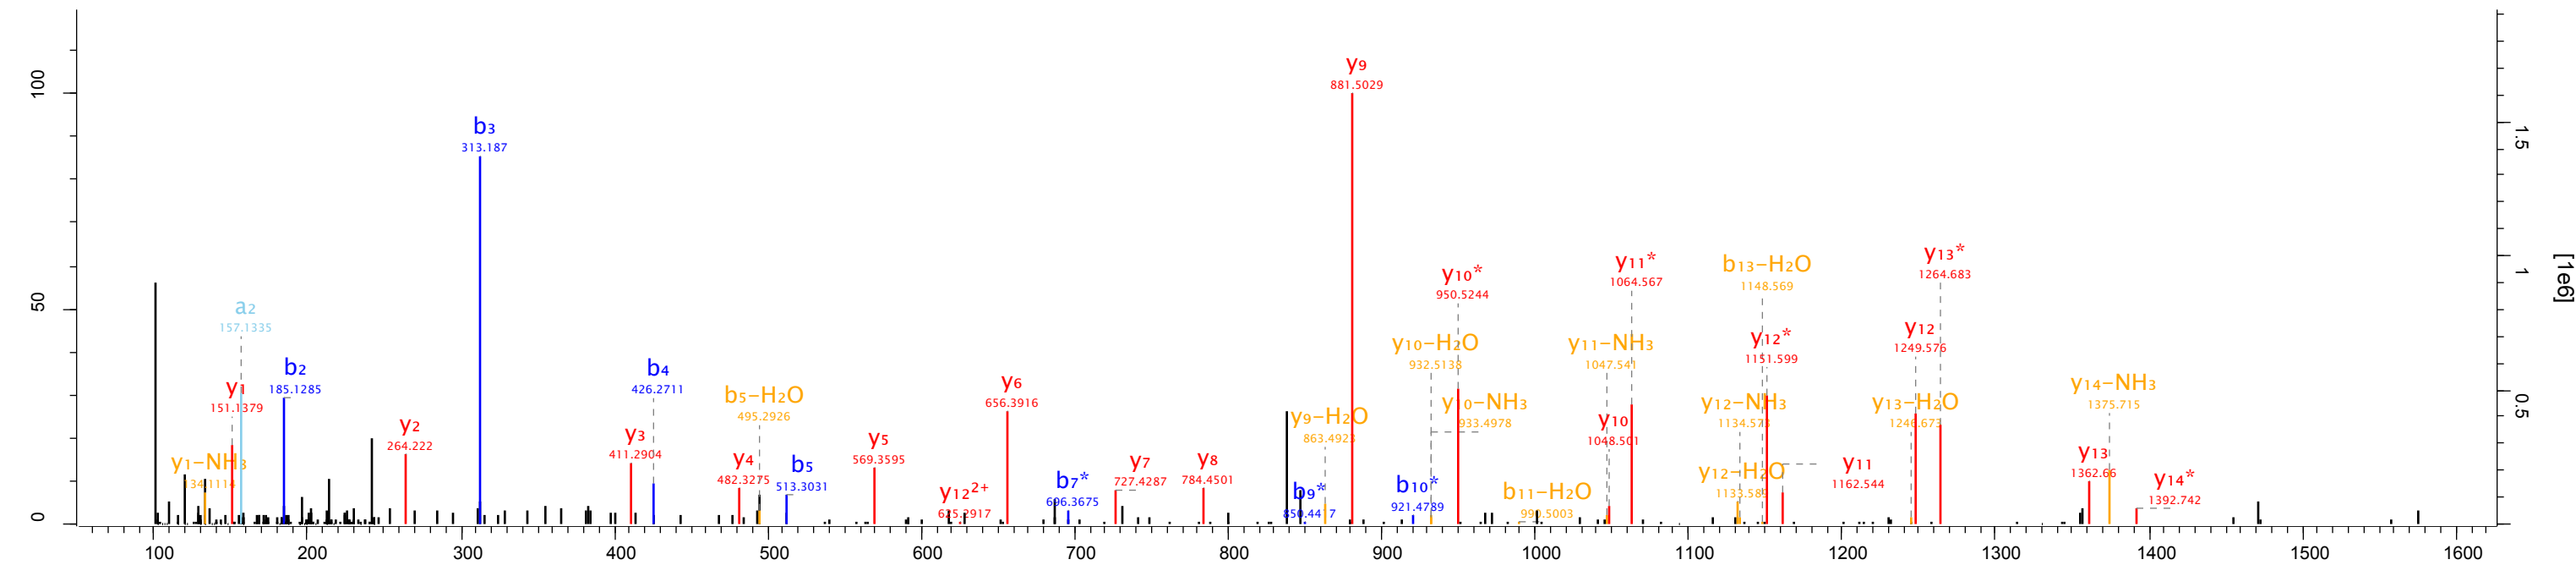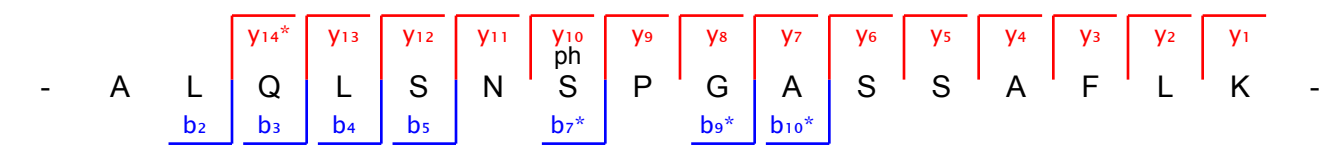

Raw file: 20150814\_A375SR\_Phospho\_BR2\_05  
 Scan: 20291 Method: FTMS; HCD Score: 136.62 m/z: 693.34 Gene names: AKAP9

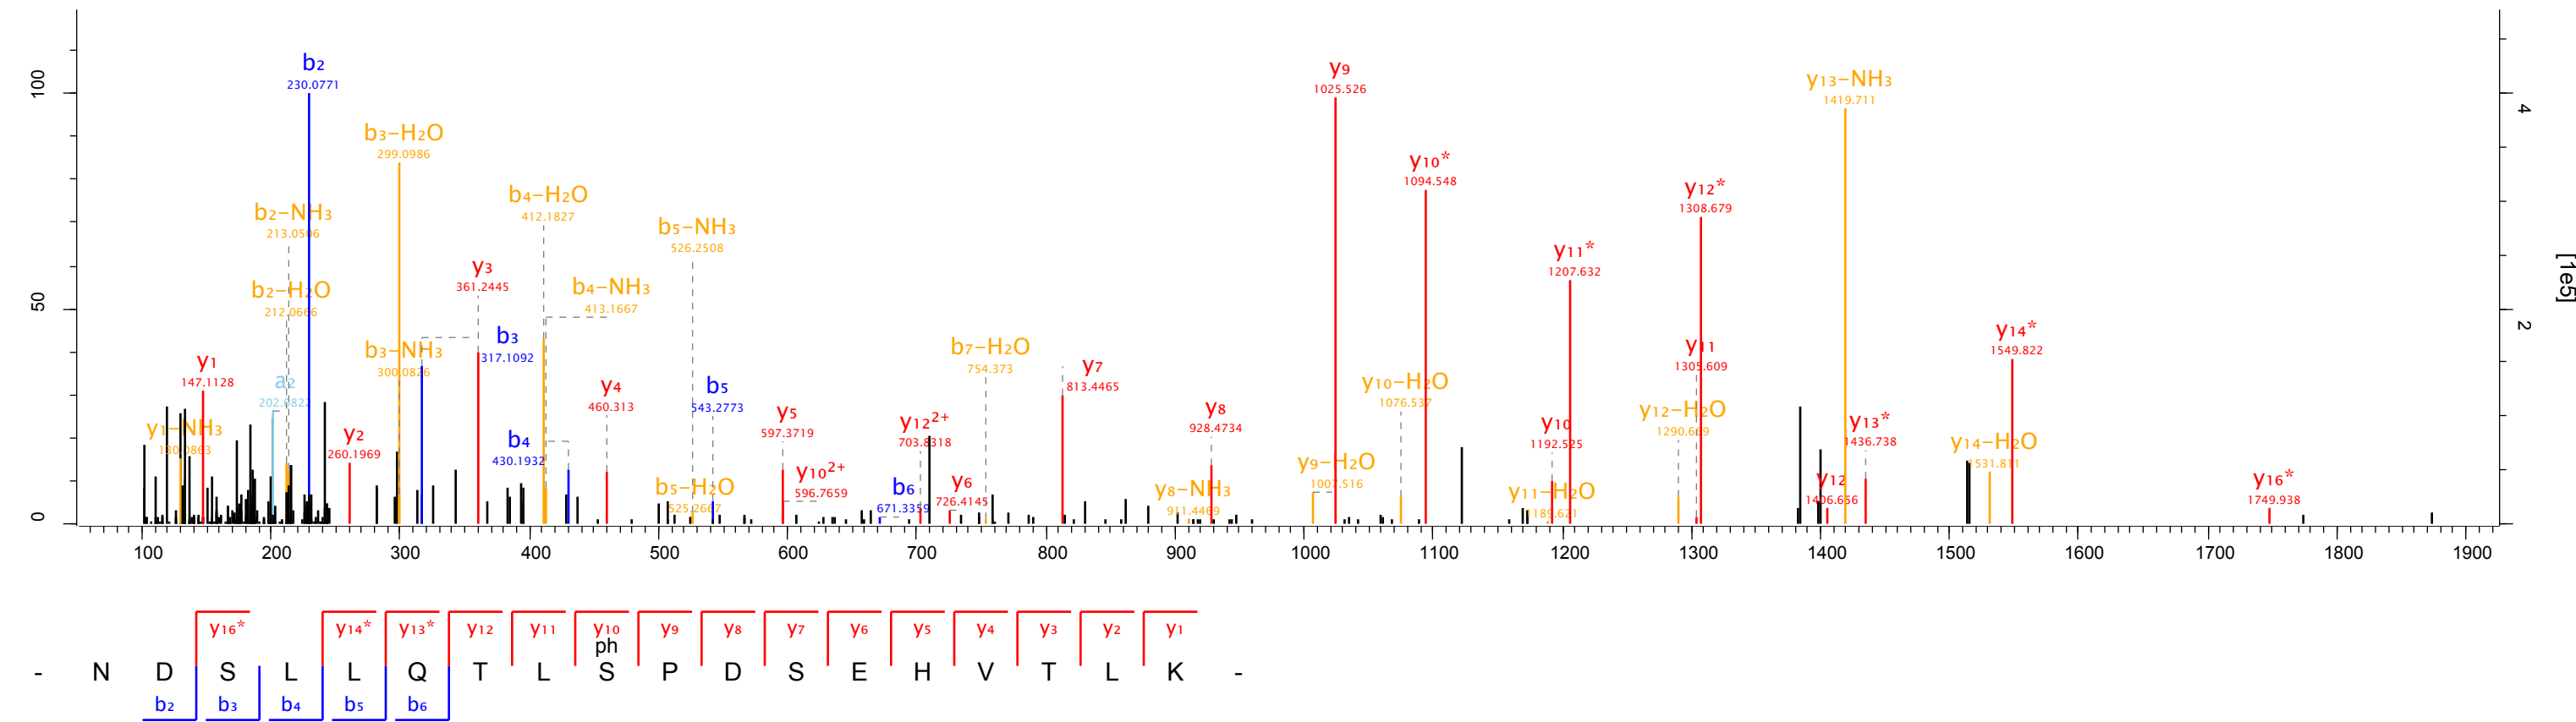

Raw file 20150814\_A375SR\_Phospho\_BR2\_05 Scan 20481 Method FTMS; HCD Score 171.93 m/z 716.81 Gene names RBL2

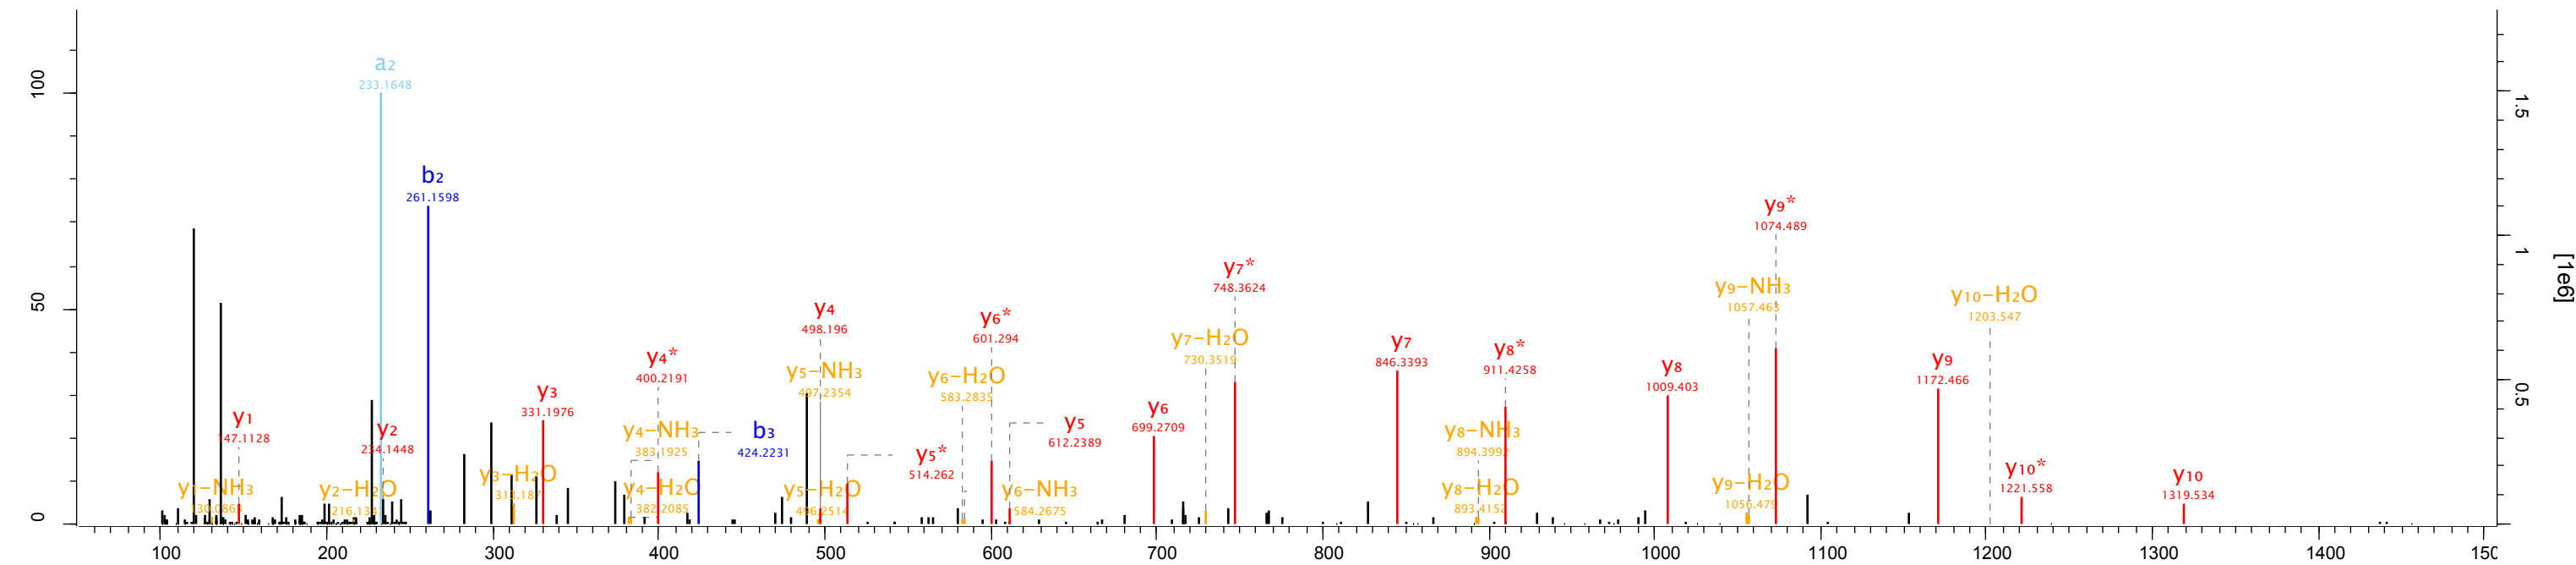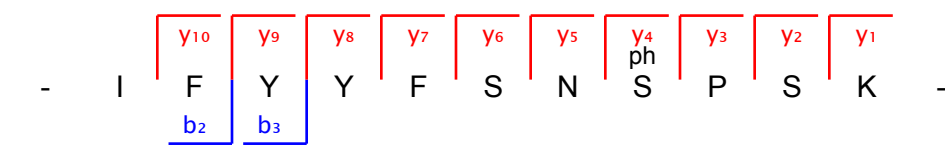

Raw file 20150814\_A375SR\_Phospho\_BR2\_05 Scan 20651 Method FTMS; HCD Score 96.67 m/z 660.28 Gene names HSPA4

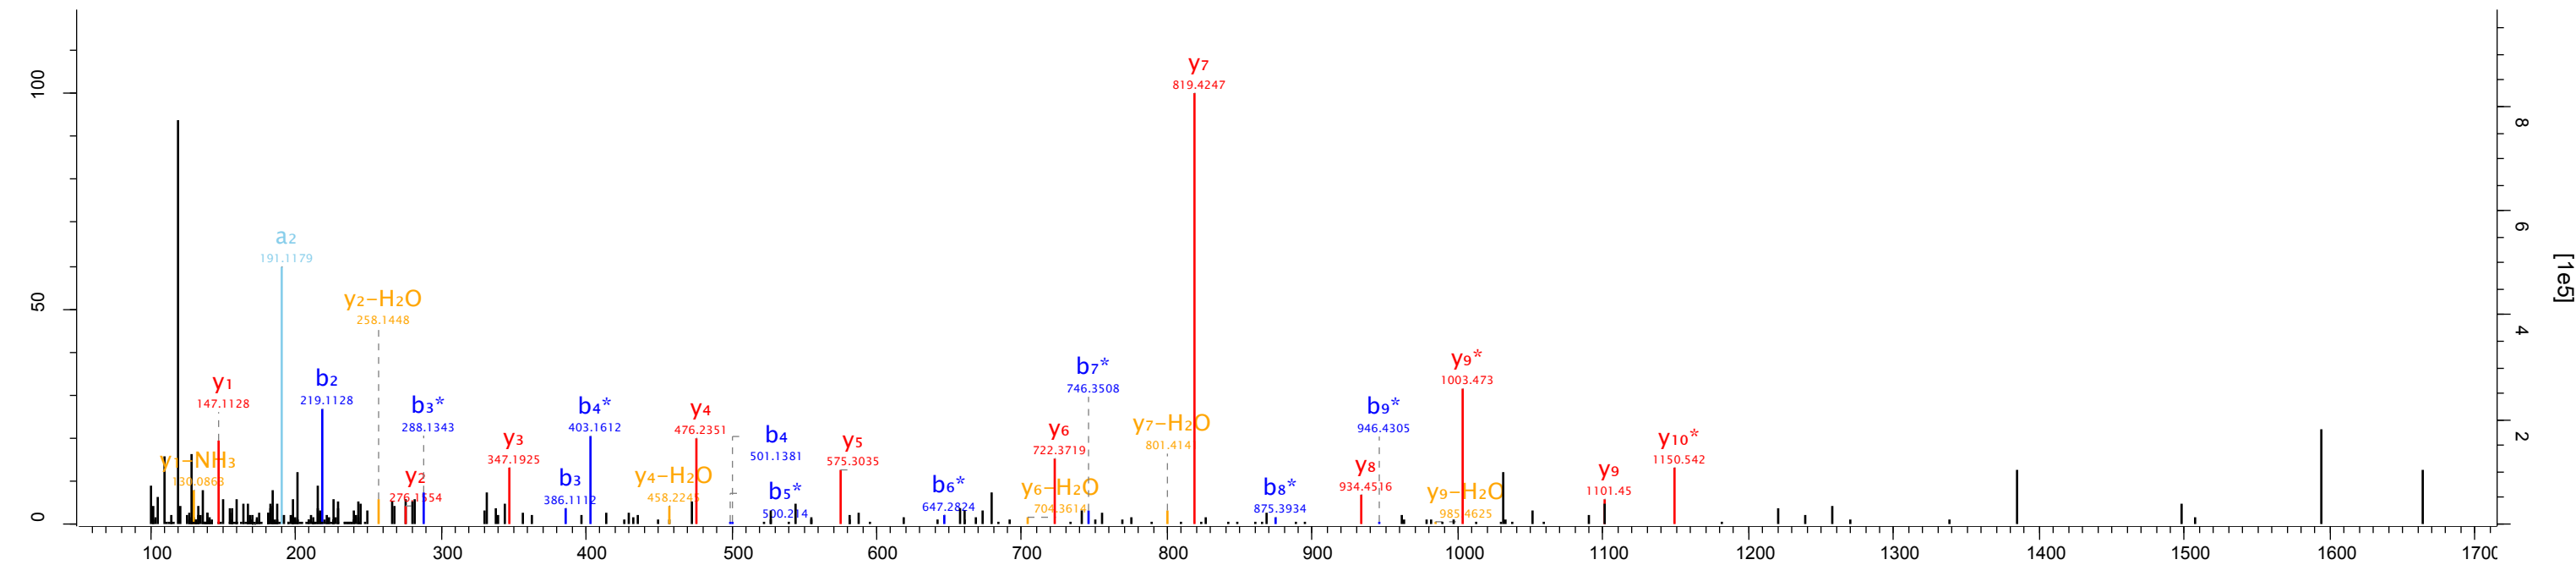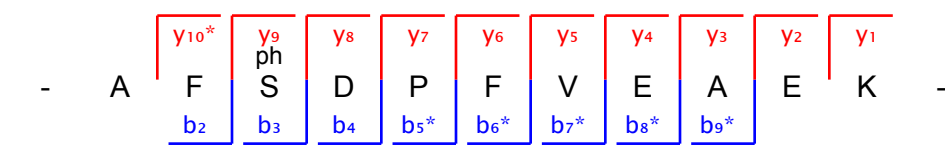



Raw file 20150814\_A375SR\_Phospho\_BR2\_05 Scan 20761 Method FTMS; HCD Score 141.06 m/z 743.38 Gene names ZNF639

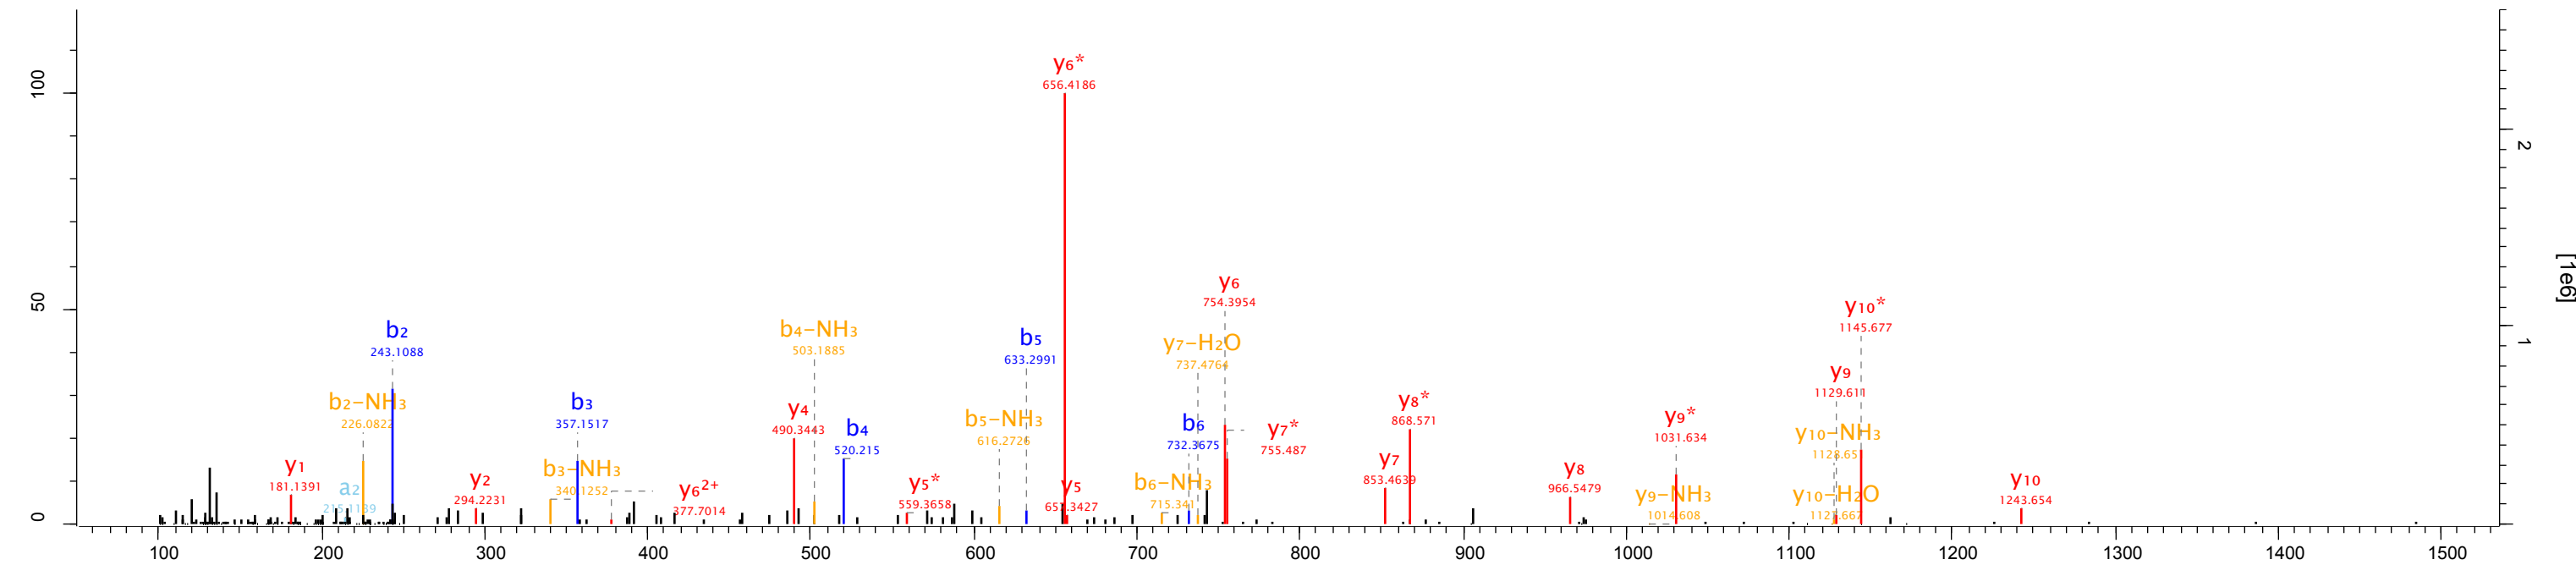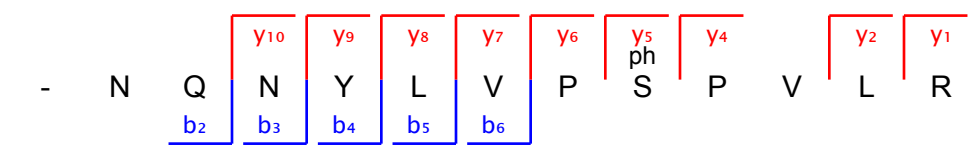

Raw file 20150814\_A375SR\_Phospho\_BR2\_05 Scan 20901 Method FTMS; HCD Score 128.59 m/z 719.34 Gene names SNTB2

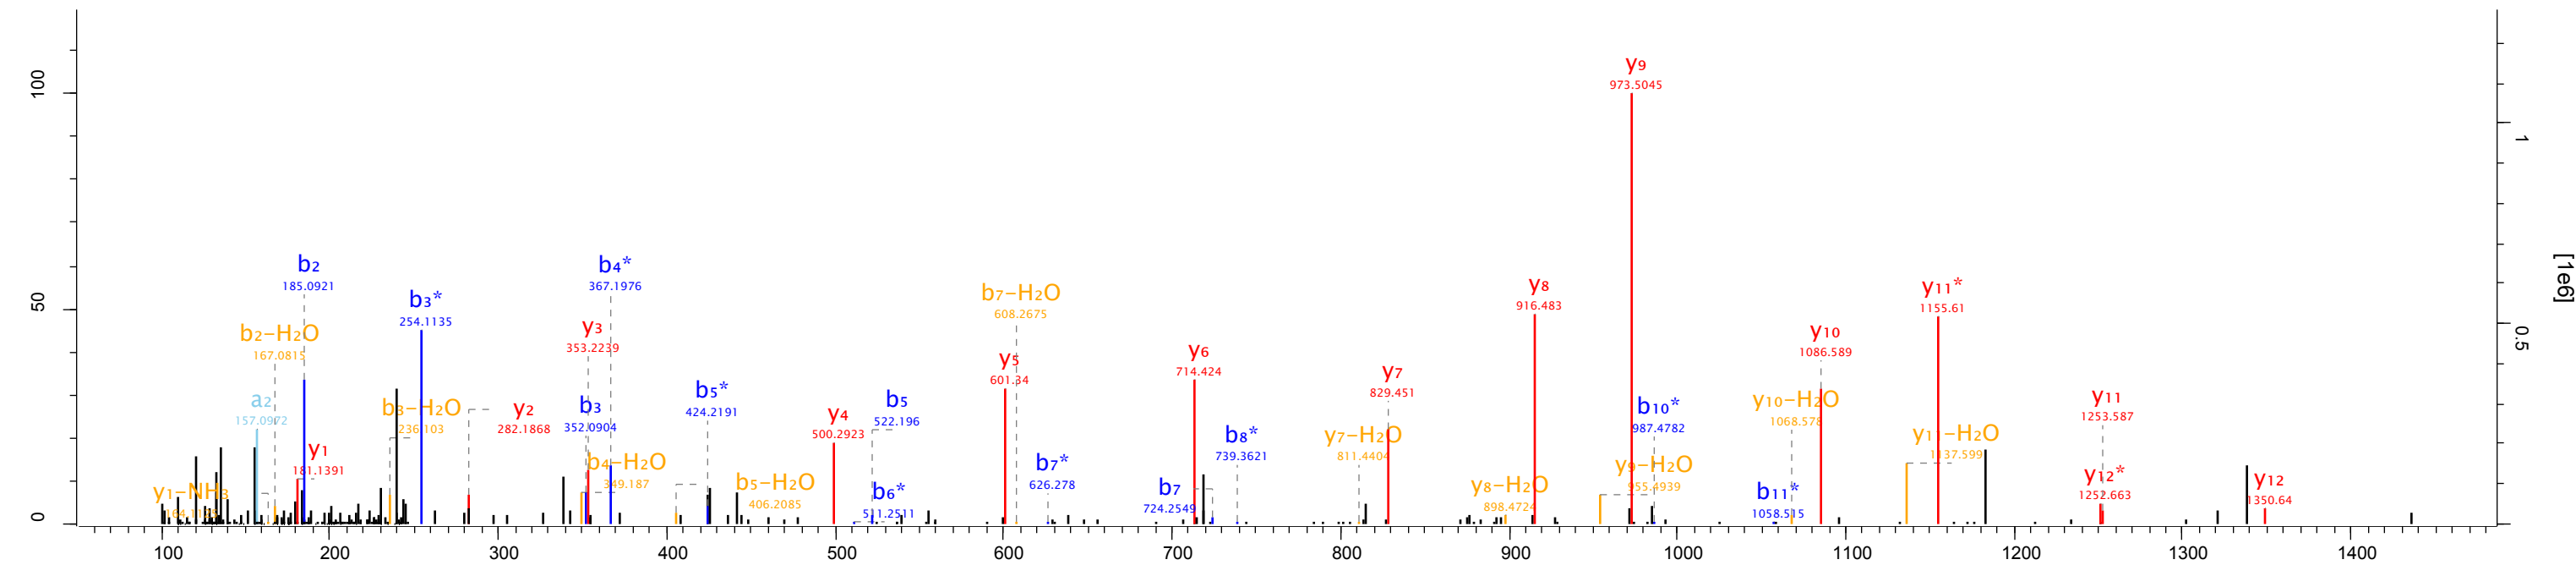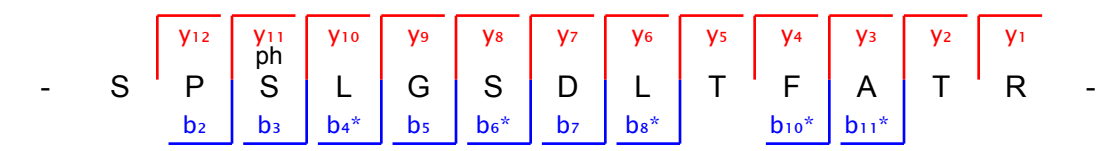

Raw file 20150814\_A375SR\_Phospho\_BR2\_05 Scan 20981 Method FTMS; HCD Score 168.05 m/z 828.39 Gene names SNX29

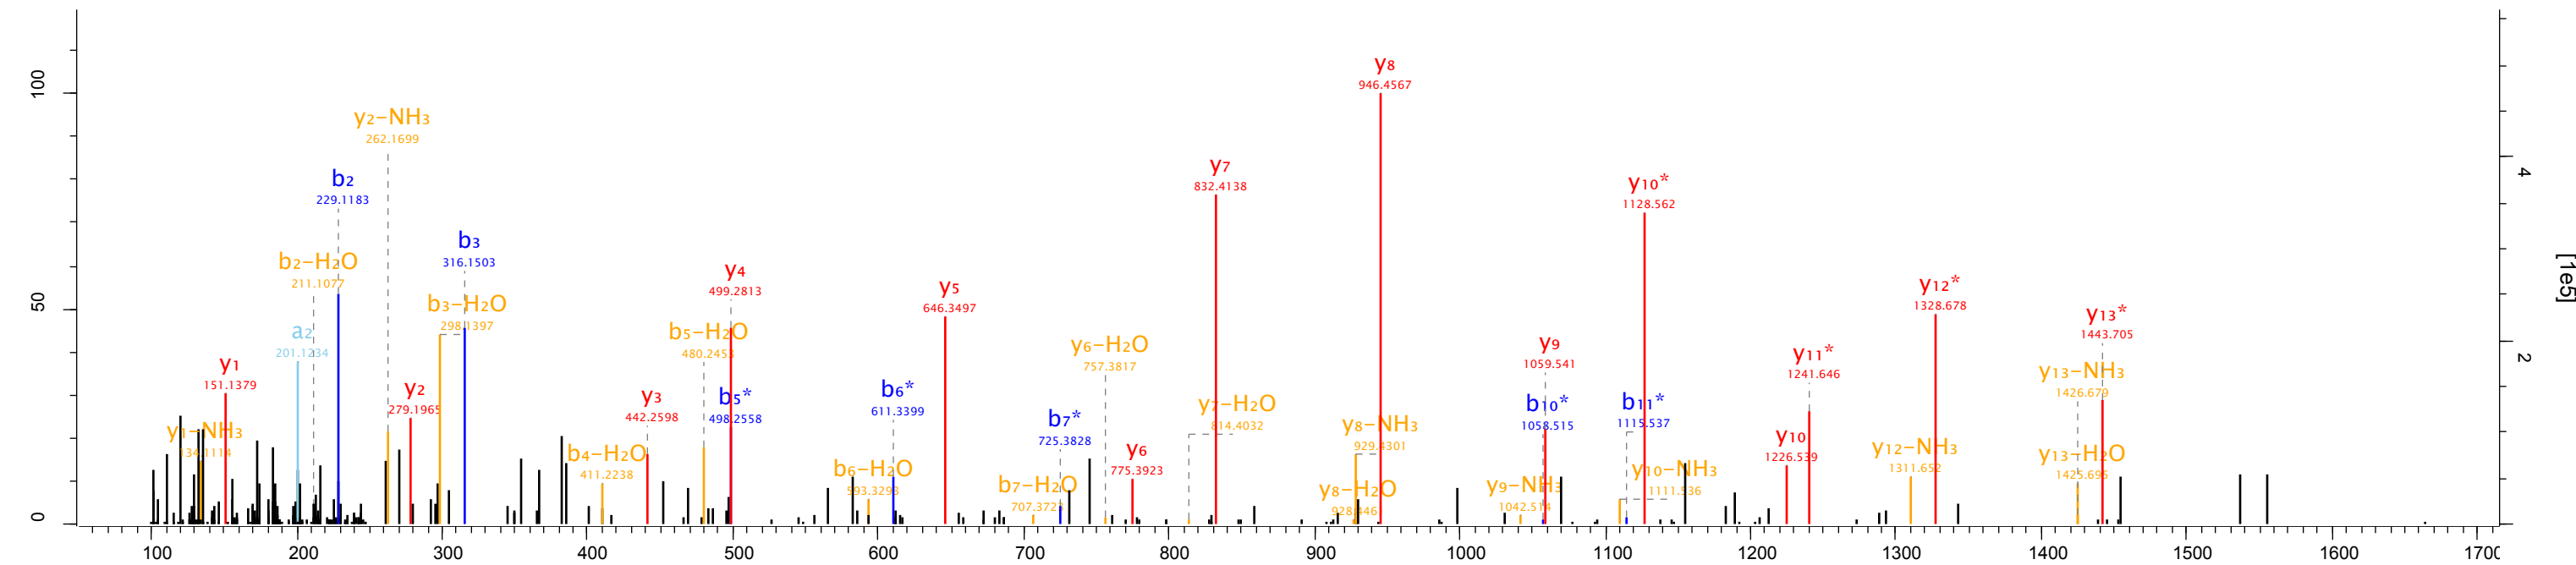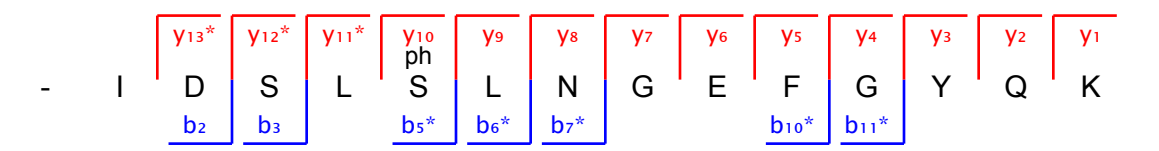

Raw file  
 20150814\_A375SR\_Phospho\_BR2\_05  
 Scan 21181 Method FTMS; HCD Score 137.72 m/z 983.44 Gene names FAM168B

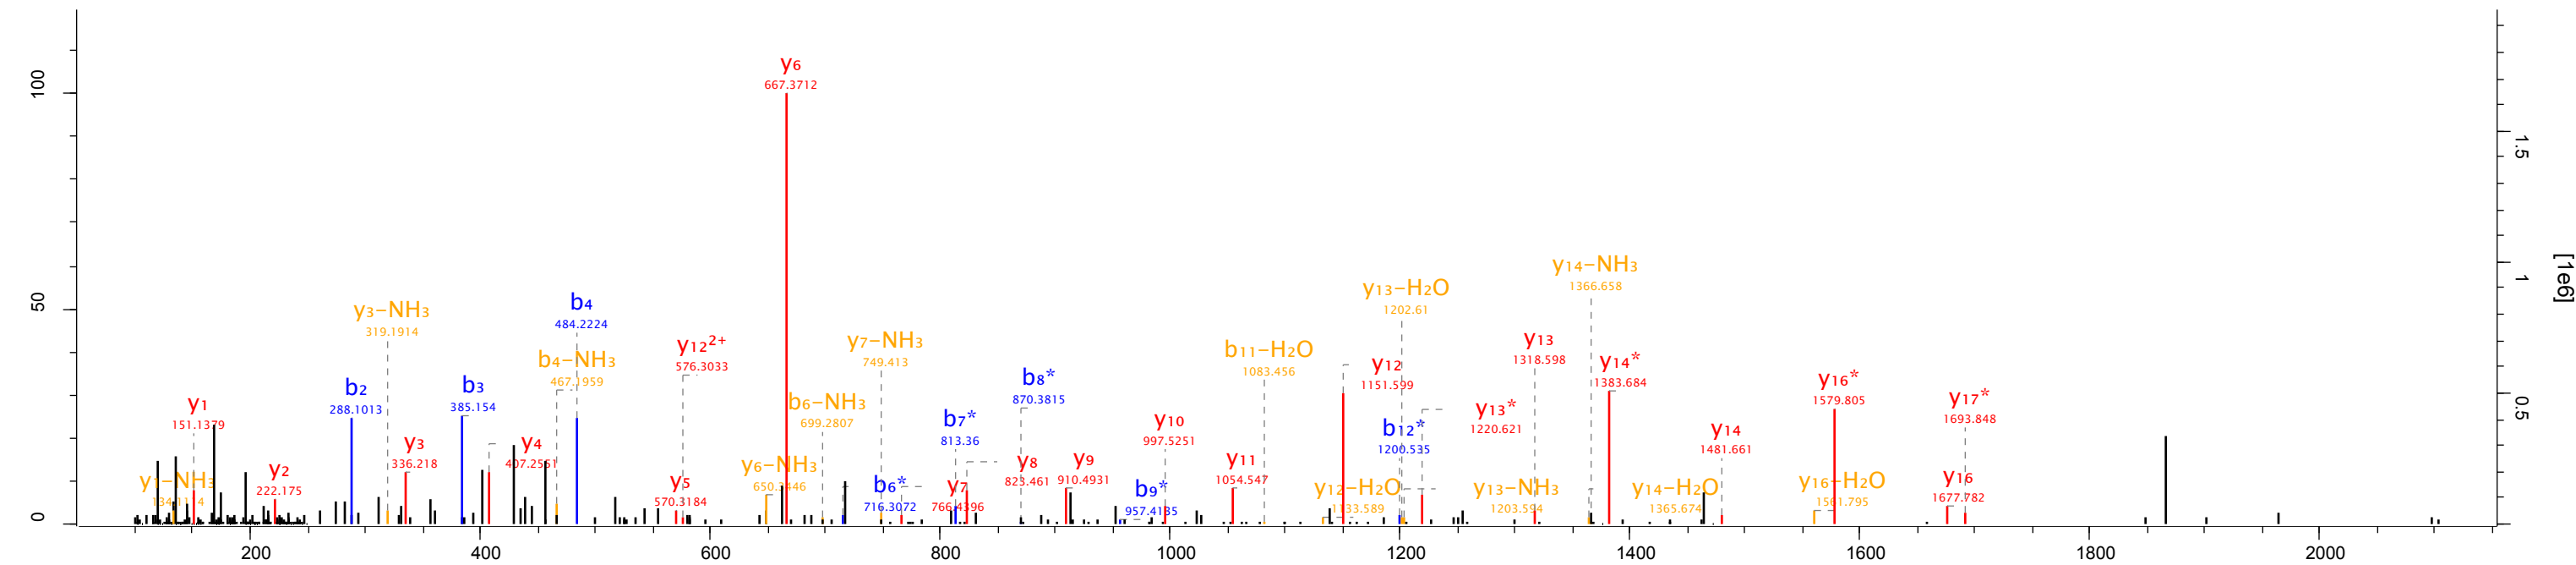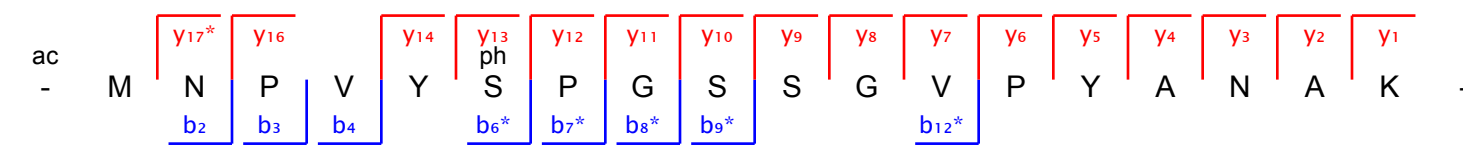

Raw file 20150814\_A375SR\_Phospho\_BR2\_05 Scan 21461 Method FTMS; HCD Score 171.84 m/z 660.64 Gene names WDR47

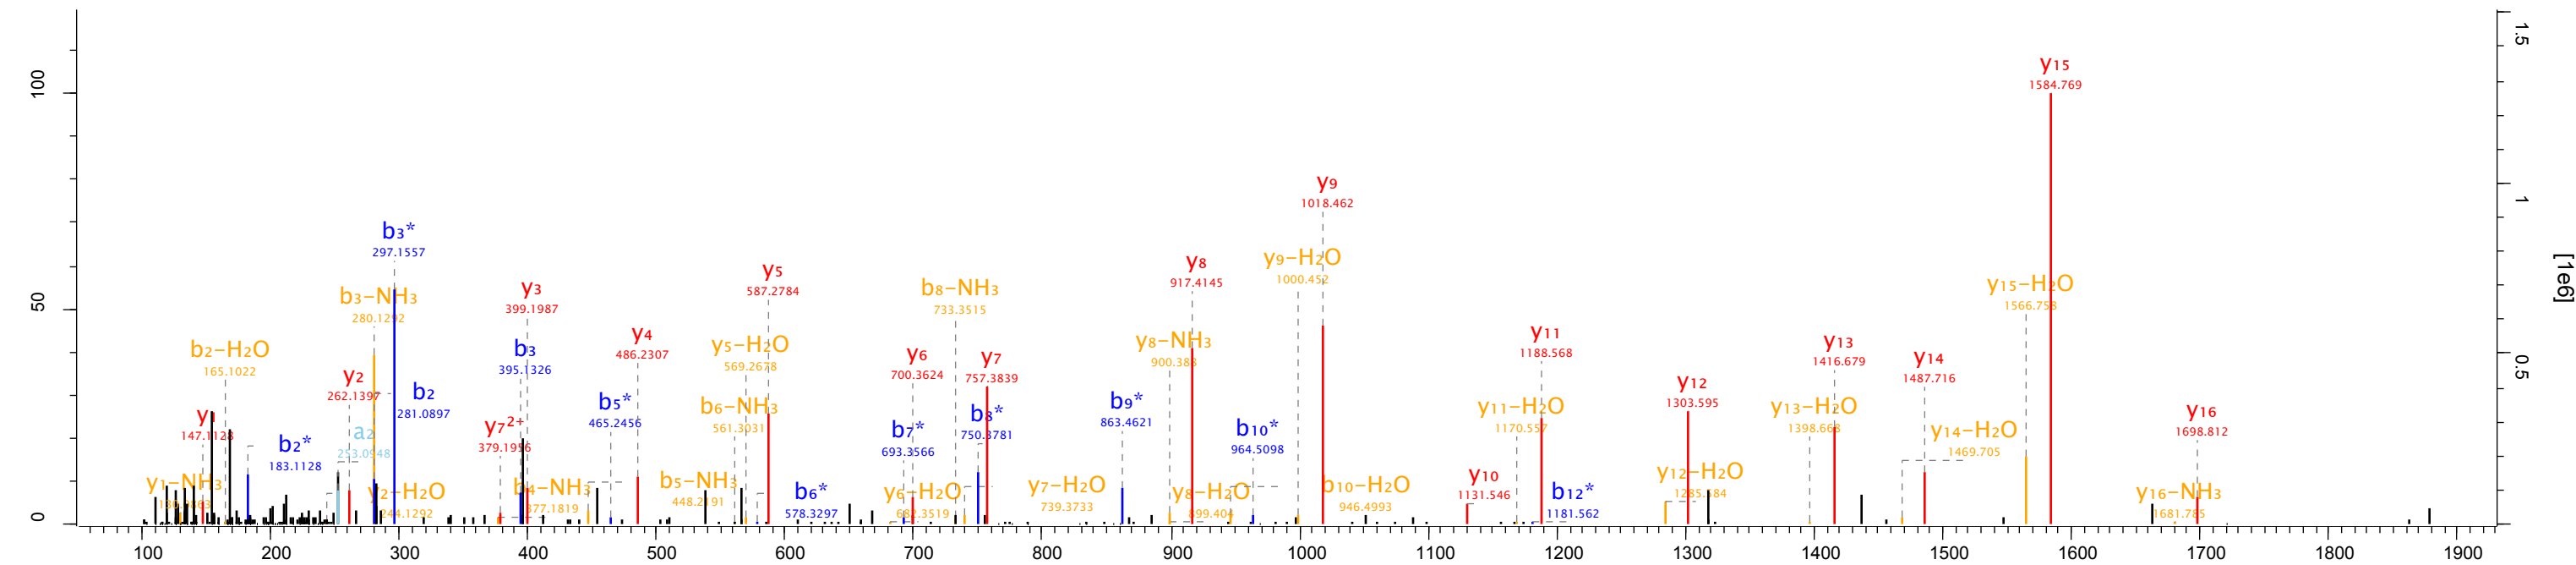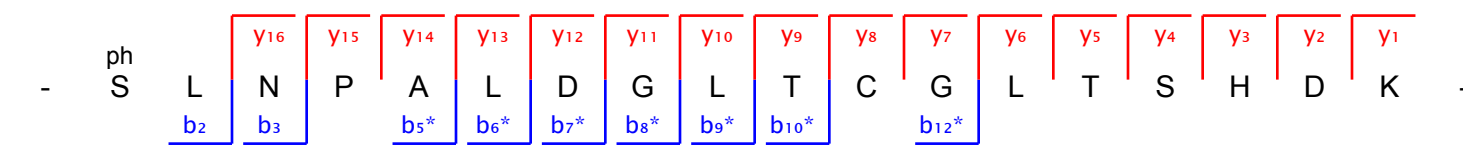

Raw file 20150814\_A375SR\_Phospho\_BR2\_05 Scan 22331 Method FTMS; HCD Score 178.03 m/z 869.44 Gene names AKIRIN2

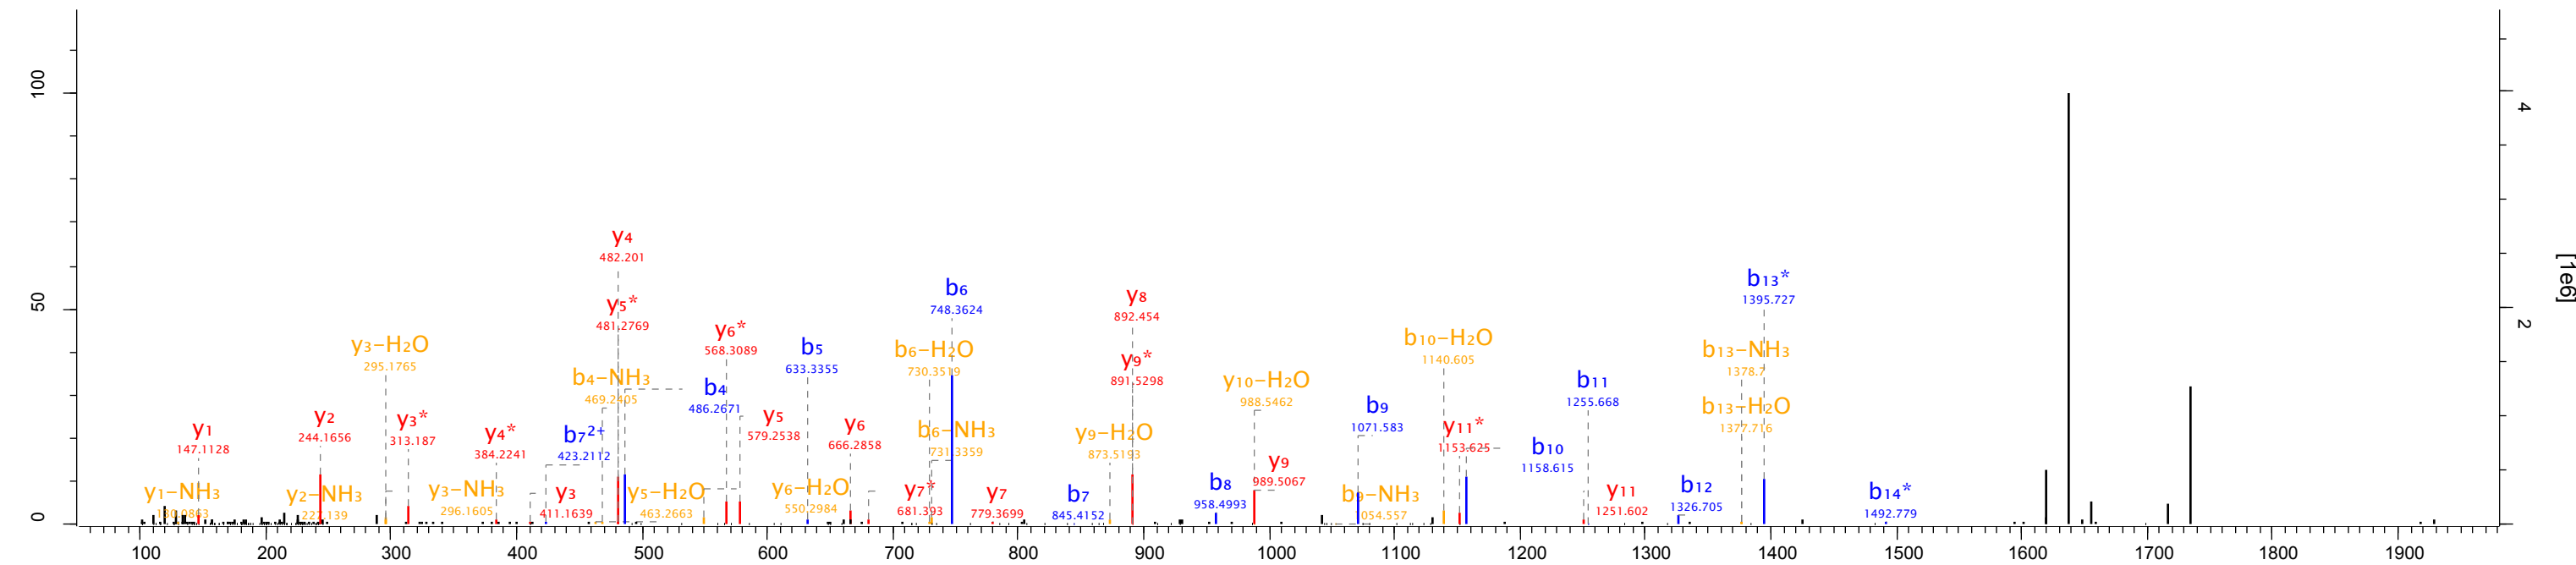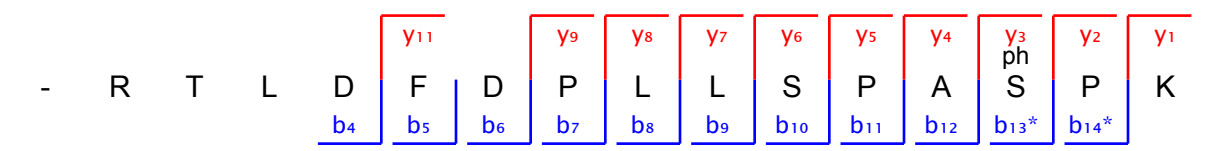

Raw file  
20150814\_A375SR\_Phospho\_BR2\_05

Scan 22441 Method FTMS; HCD Score 112.98 m/z 934.11 Gene names TPRN

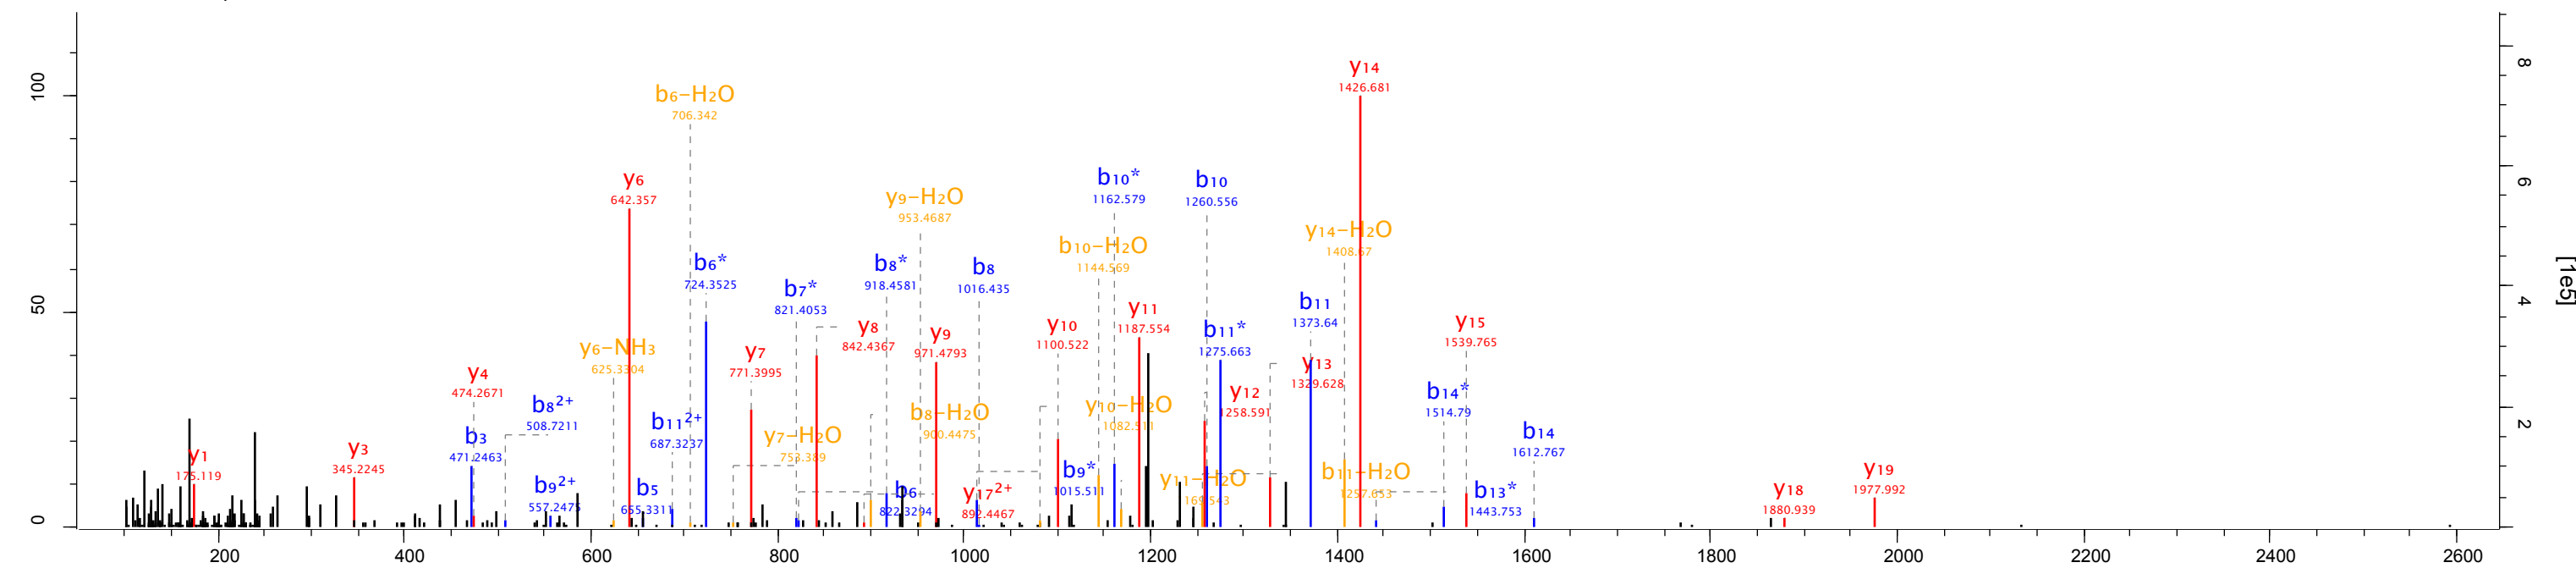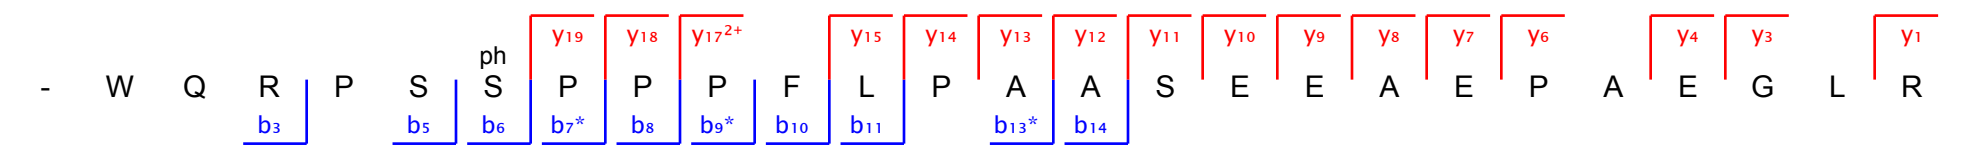

Raw file: 20150814\_A375SR\_Phospho\_BR2\_05  
 Scan: 23531 Method: FTMS; HCD Score: 249.28 m/z: 1268.56 Gene names: ZFX;ZFY

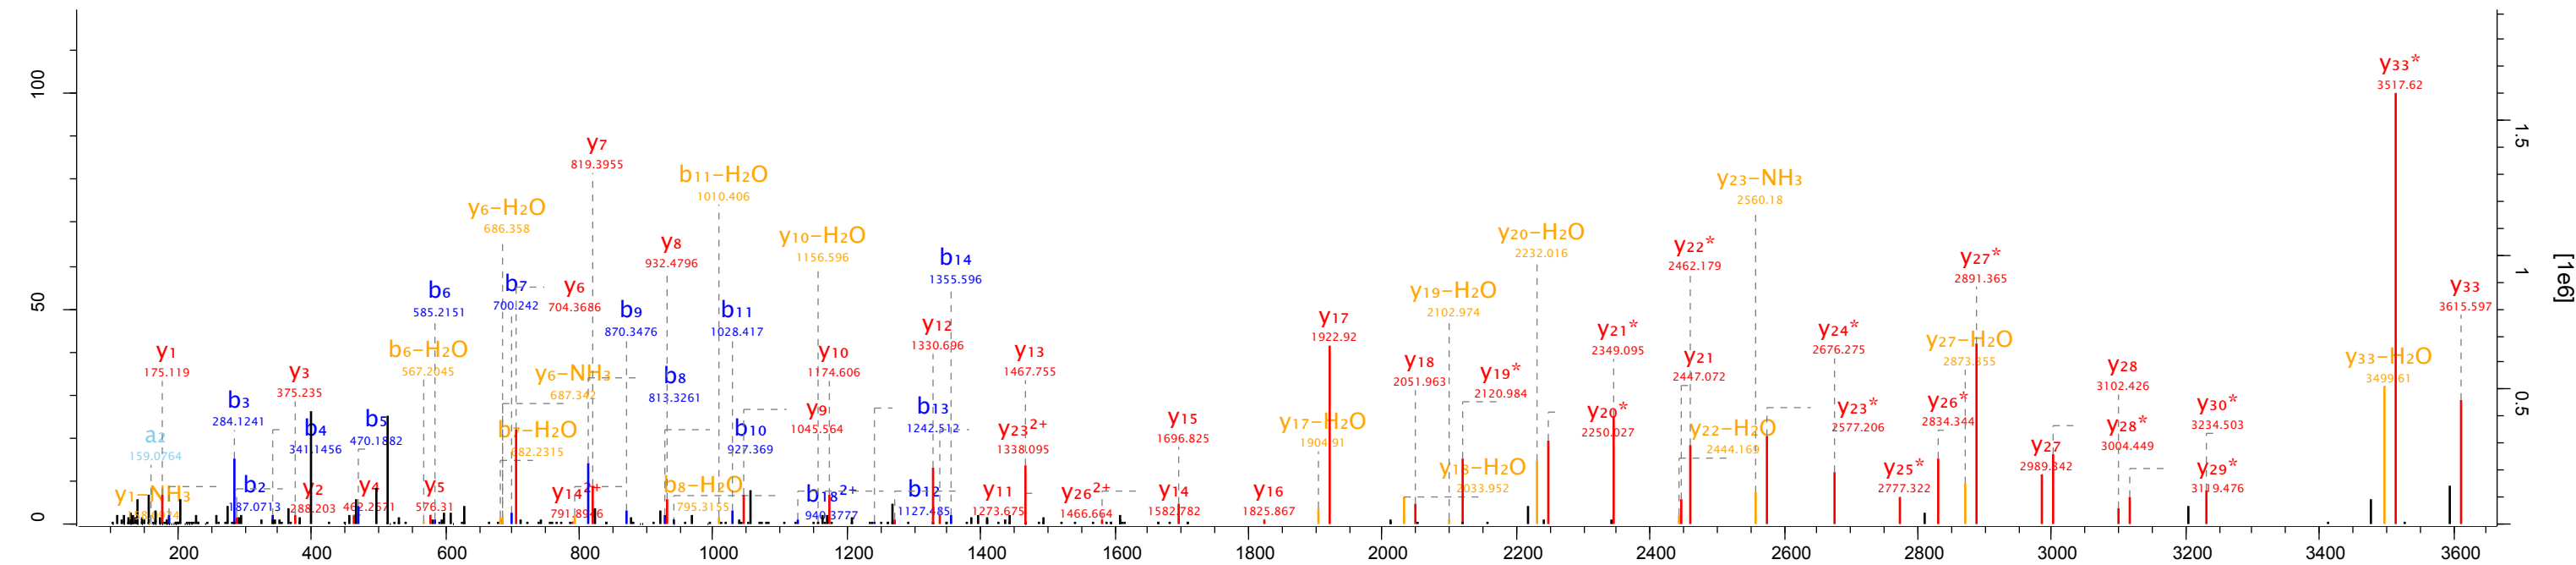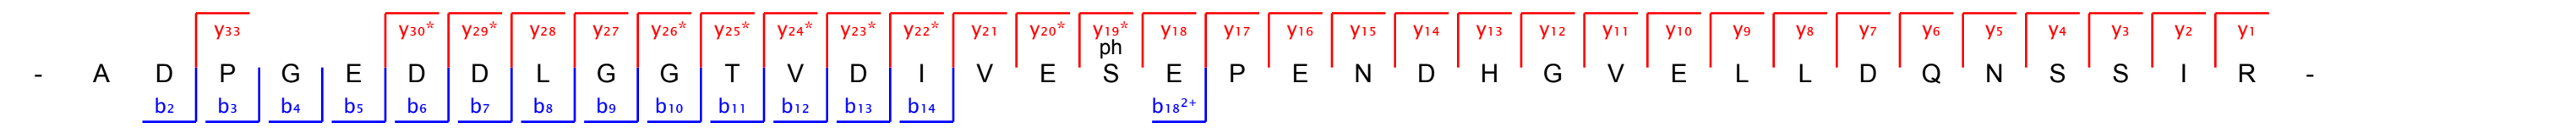



Raw file Scan Method Score m/z Gene names  
 20150814\_A375SR\_Phospho\_BR2\_05 23651 FTMS; HCD 263.15 947.42 RABGEF1

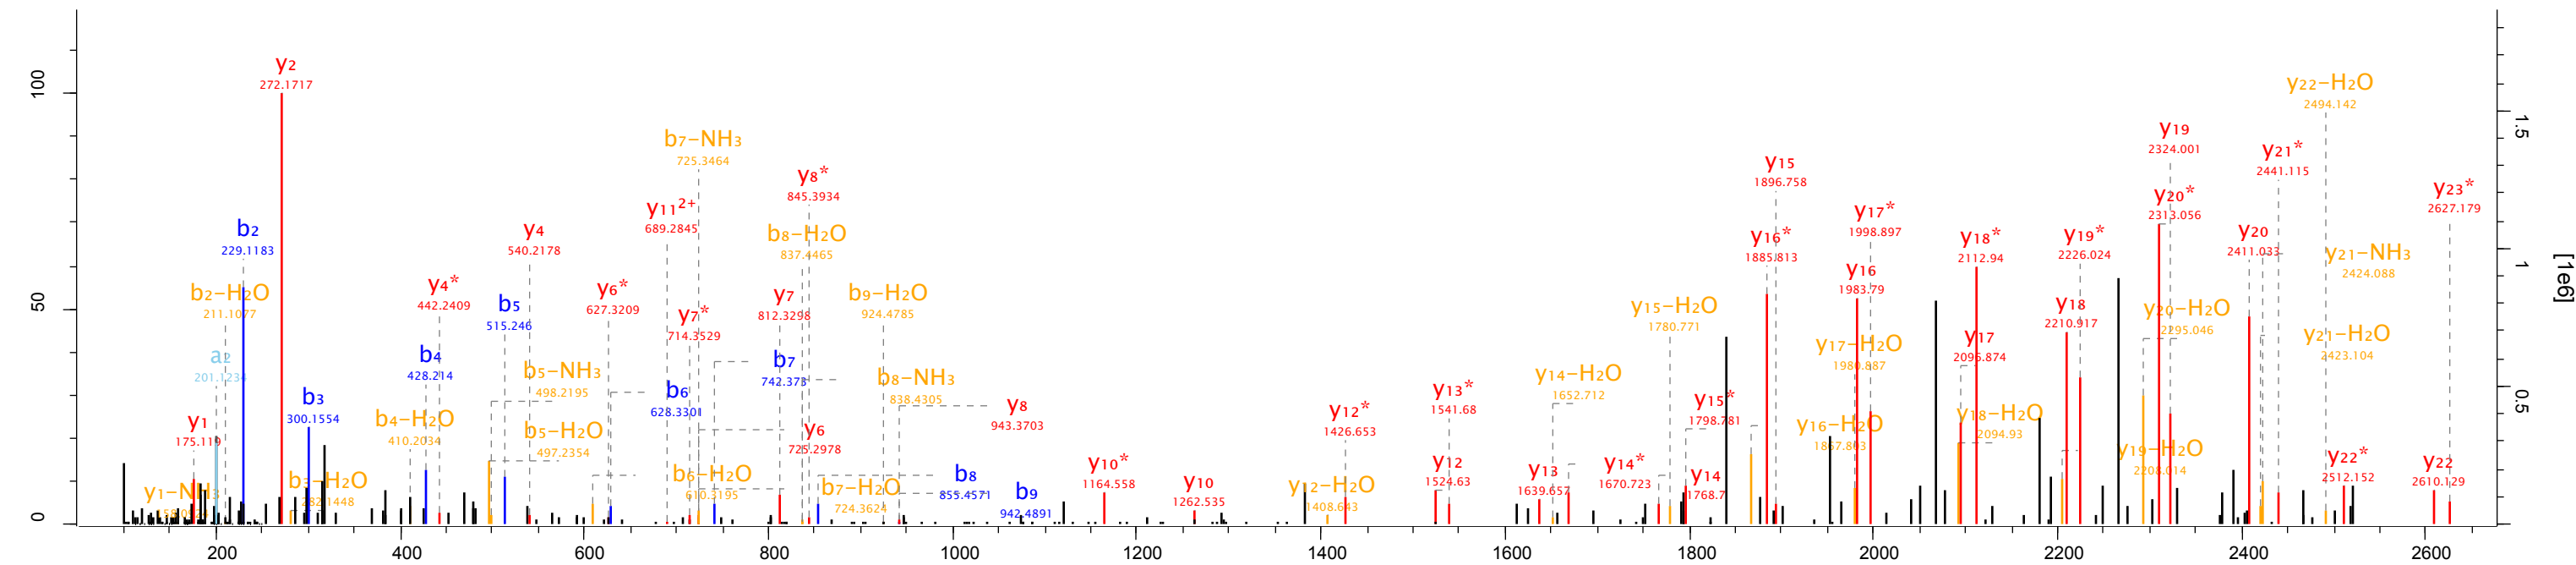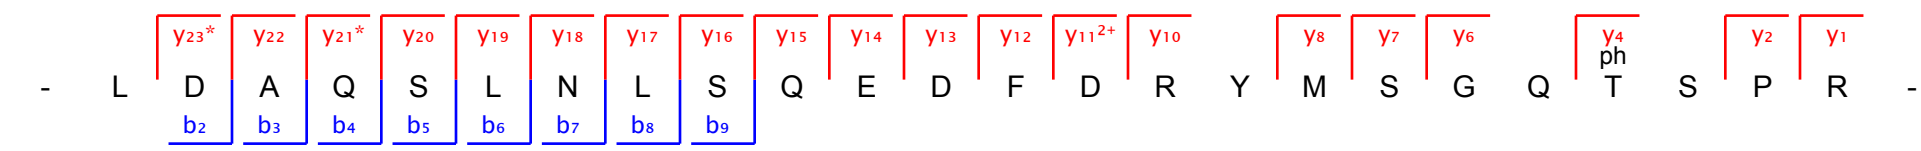

Raw file 20150814\_A375SR\_Phospho\_BR2\_05 Scan 23861 Method FTMS; HCD Score 309.55 m/z 1178.03 Gene names ATP11C

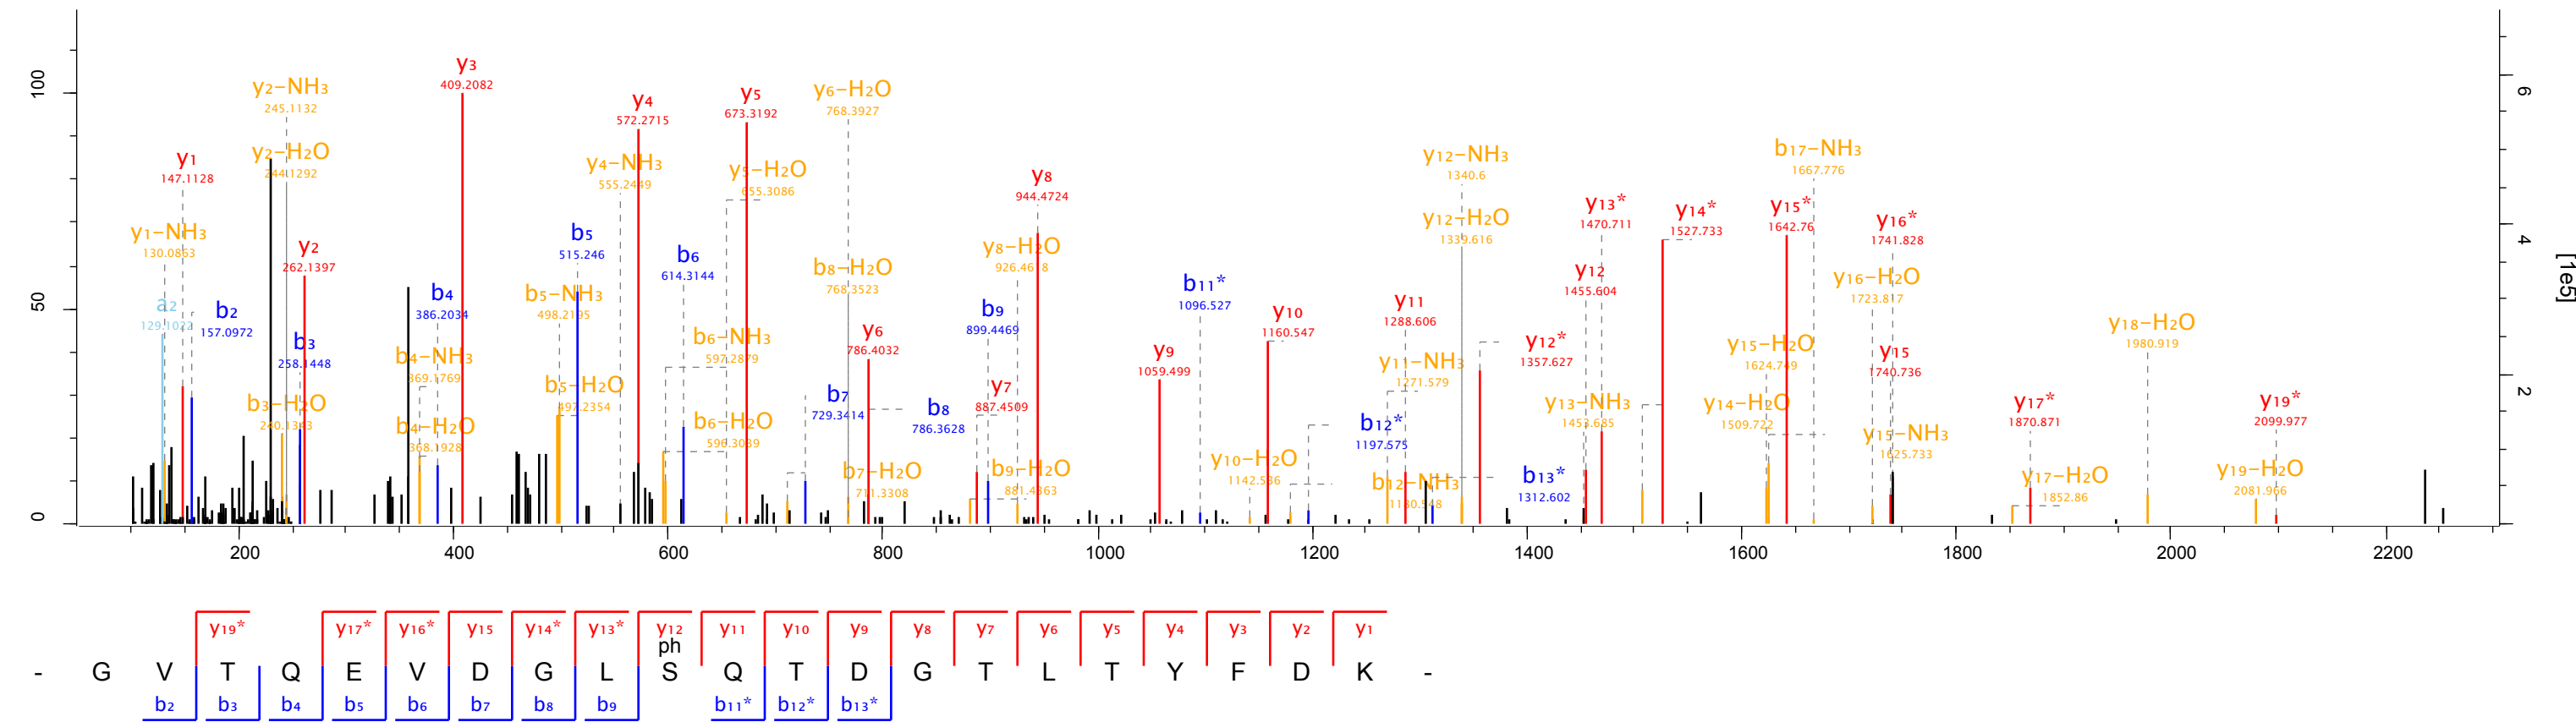

Raw file 20150814\_A375SR\_Phospho\_BR2\_05 Scan 24201 Method FTMS; HCD Score 131.69 m/z 1027.52 Gene names ATXN2L

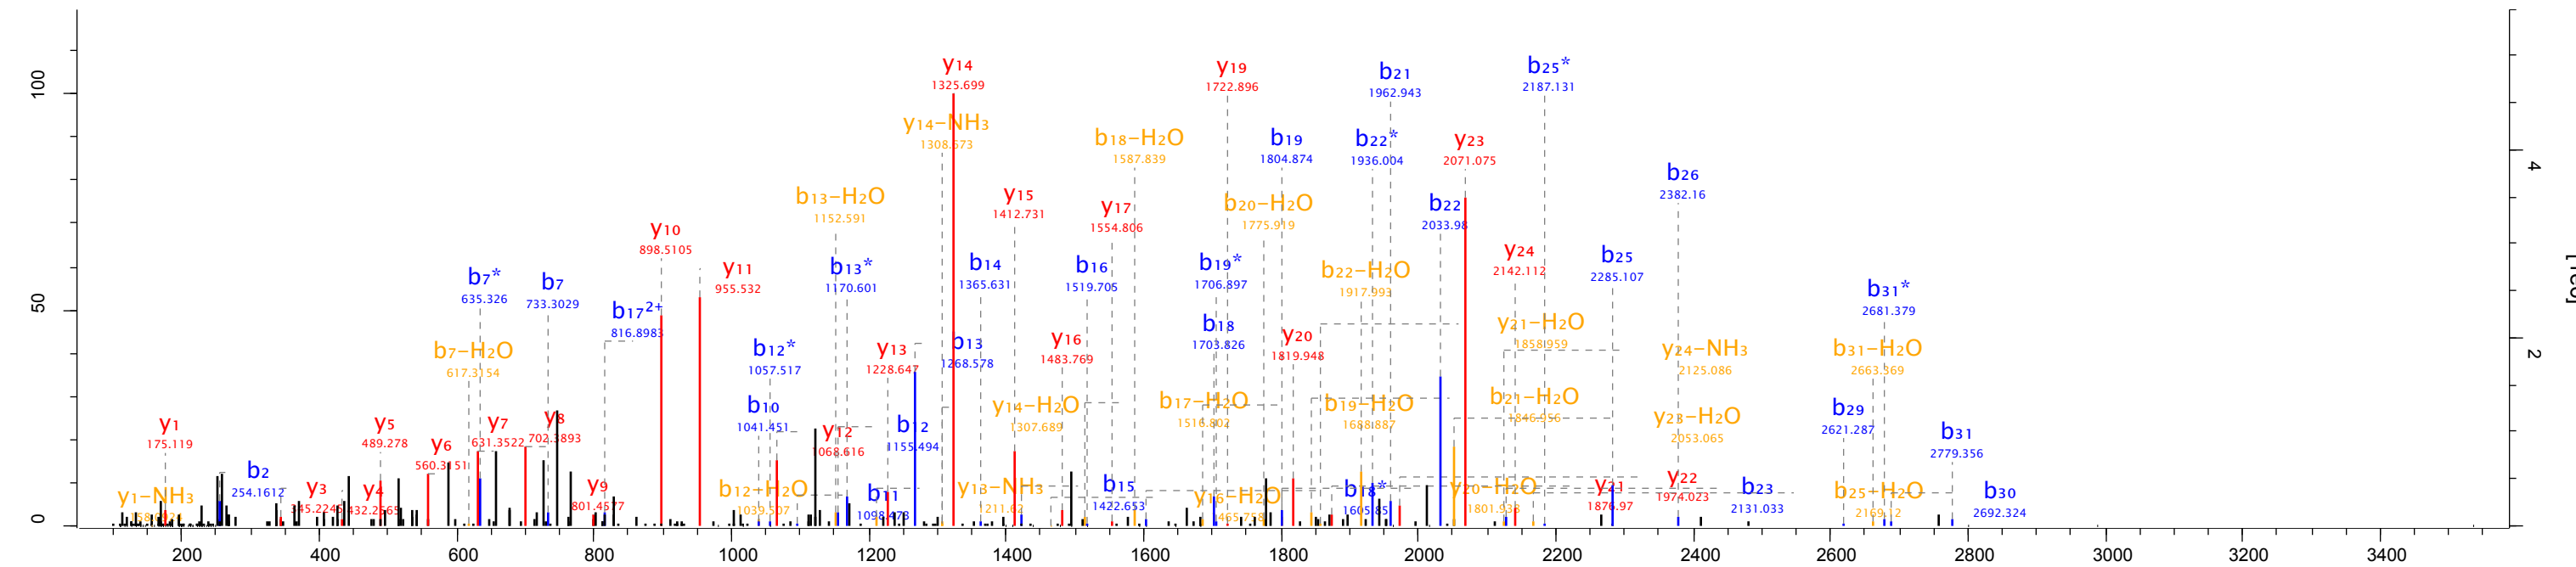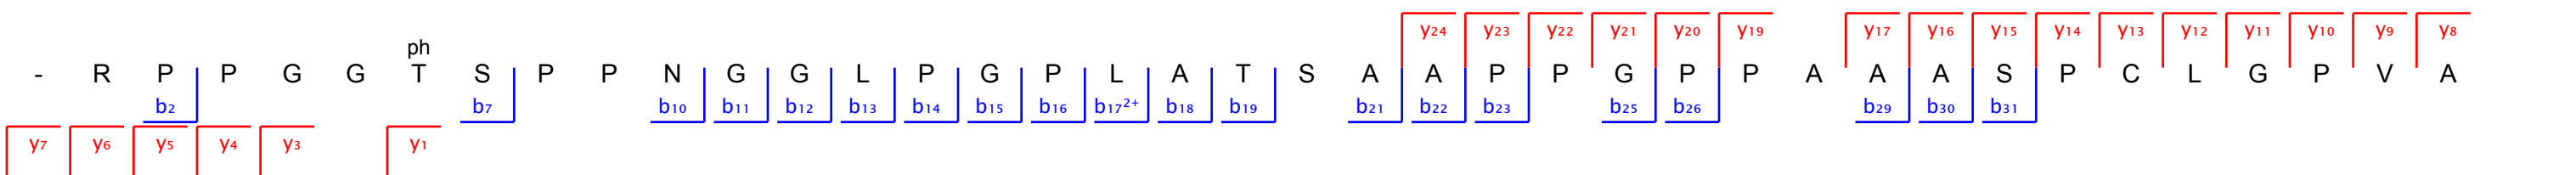

Raw file: 20150814\_A375SR\_Phospho\_BR2\_05  
 Scan: 24421 Method: FTMS; HCD Score: 176.11 m/z: 820.88 Gene names: AHNAK

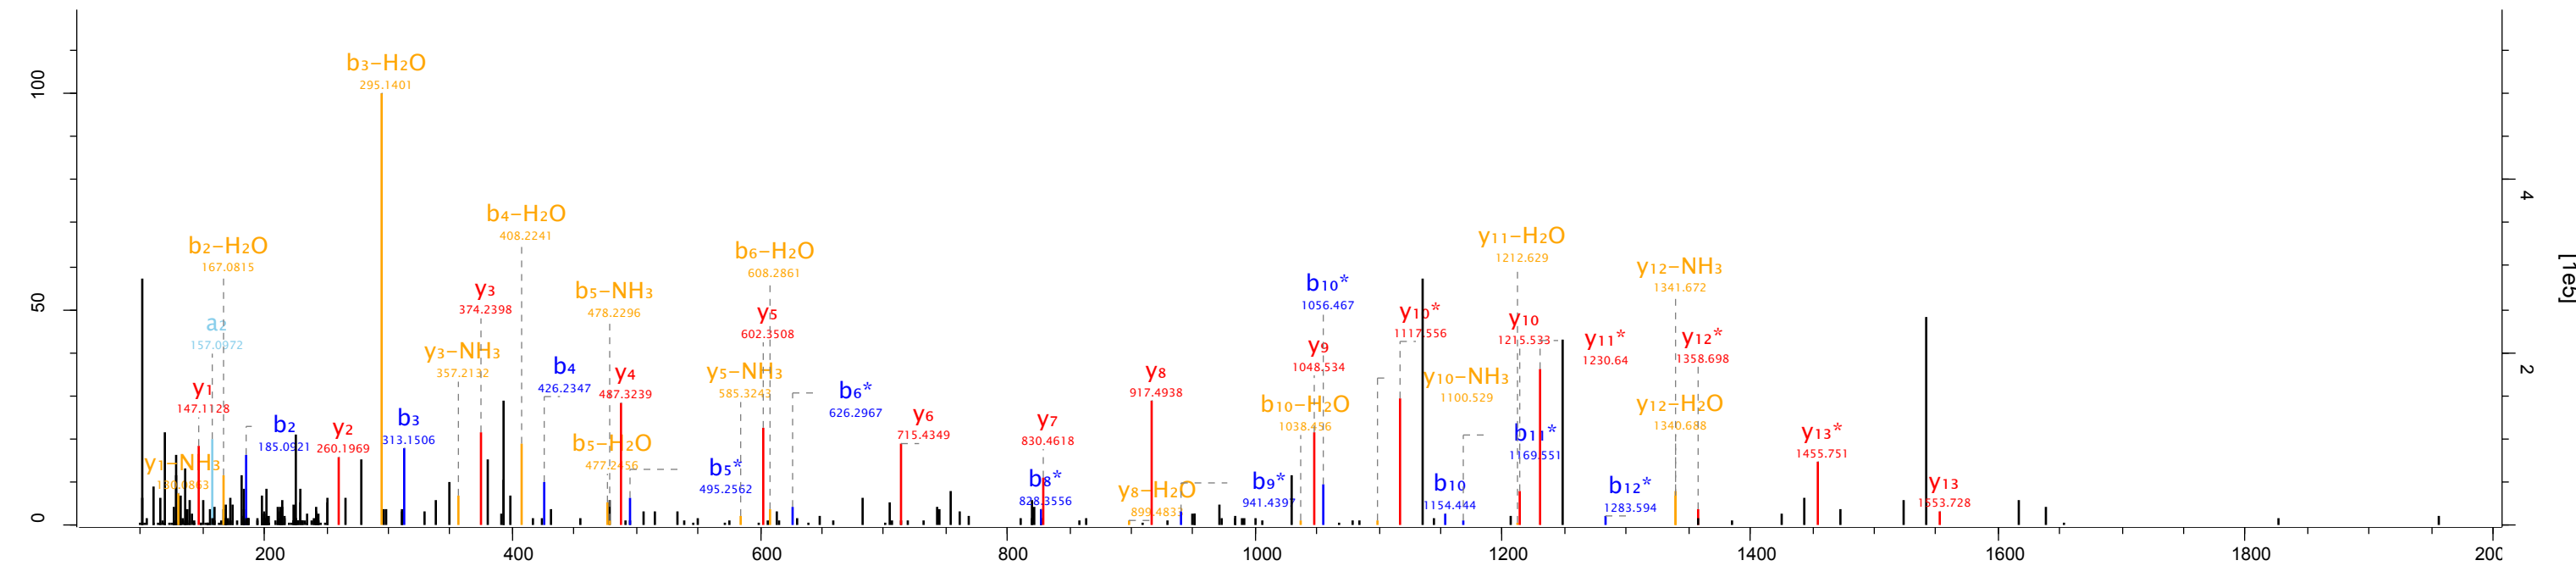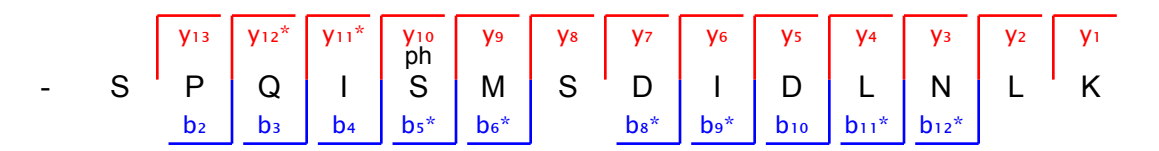

Raw file 20150814\_A375SR\_Phospho\_BR2\_05 Scan 24451 Method FTMS; HCD Score 122.06 m/z 863.77 Gene names MTMR3

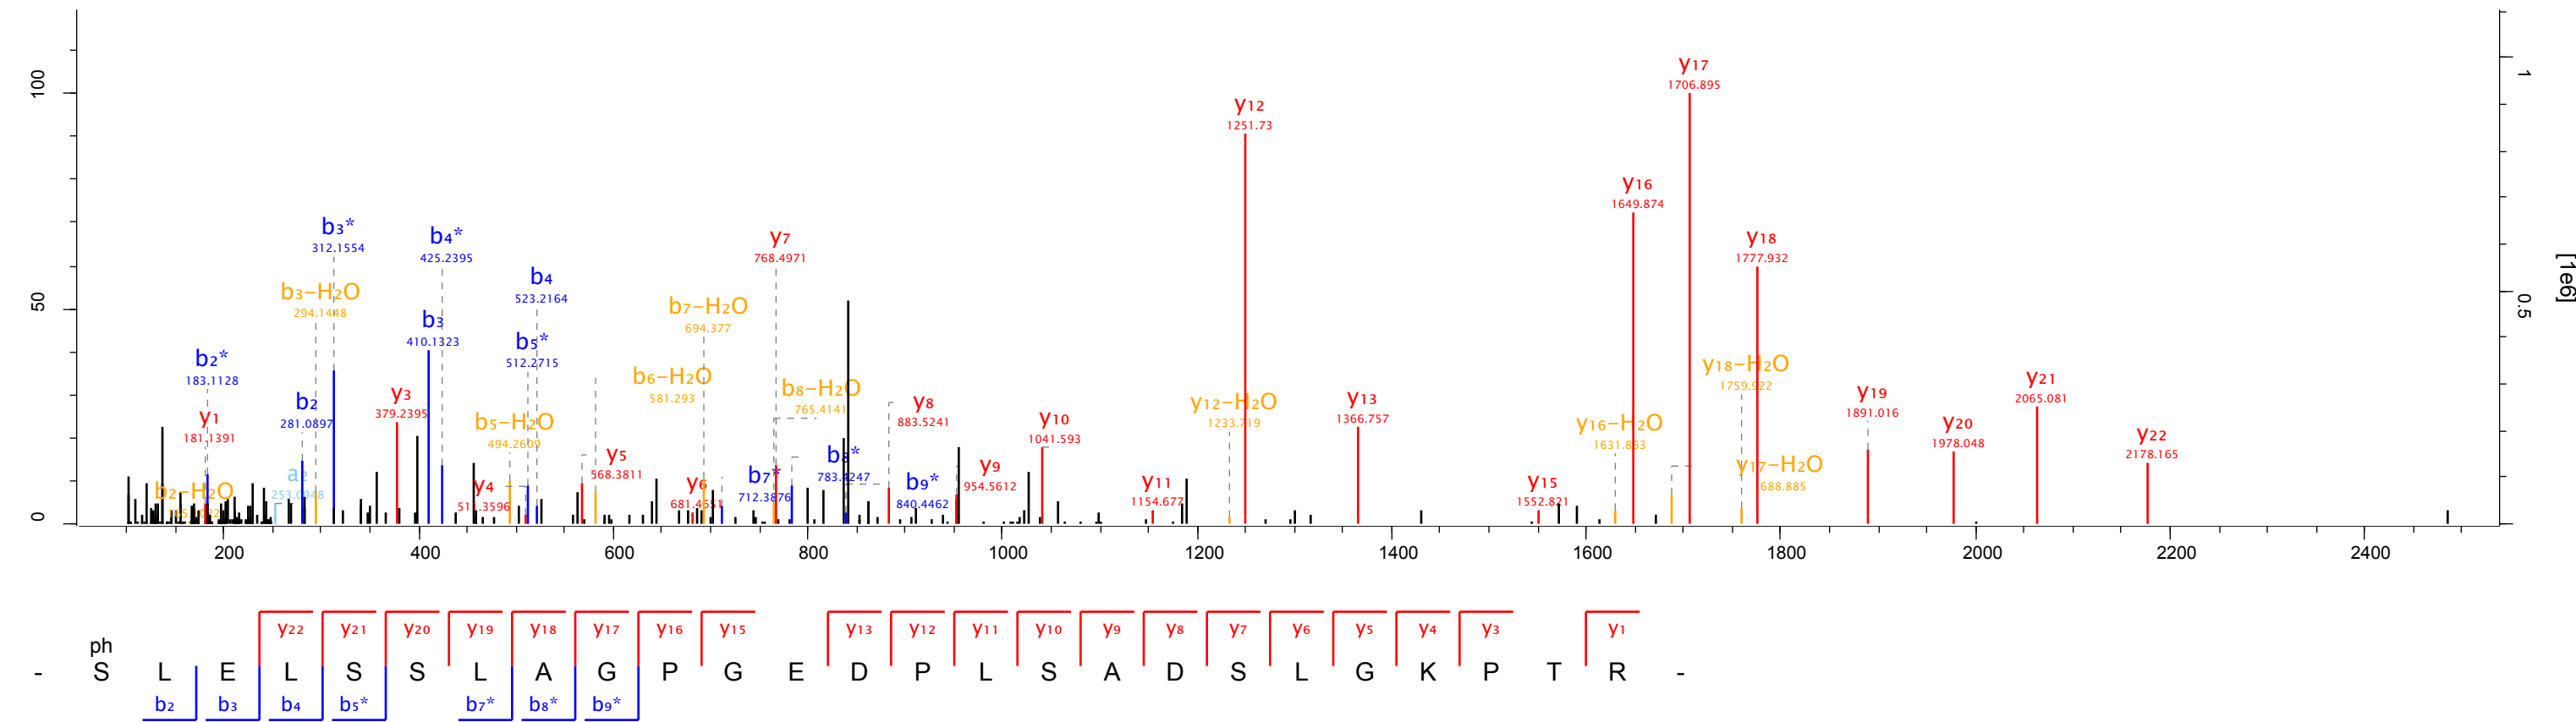

Raw file: 20150814\_A375SR\_Phospho\_BR2\_05  
 Scan: 25011 Method: FTMS; HCD Score: 107.65 m/z: 823.05 Gene names: DNMT1

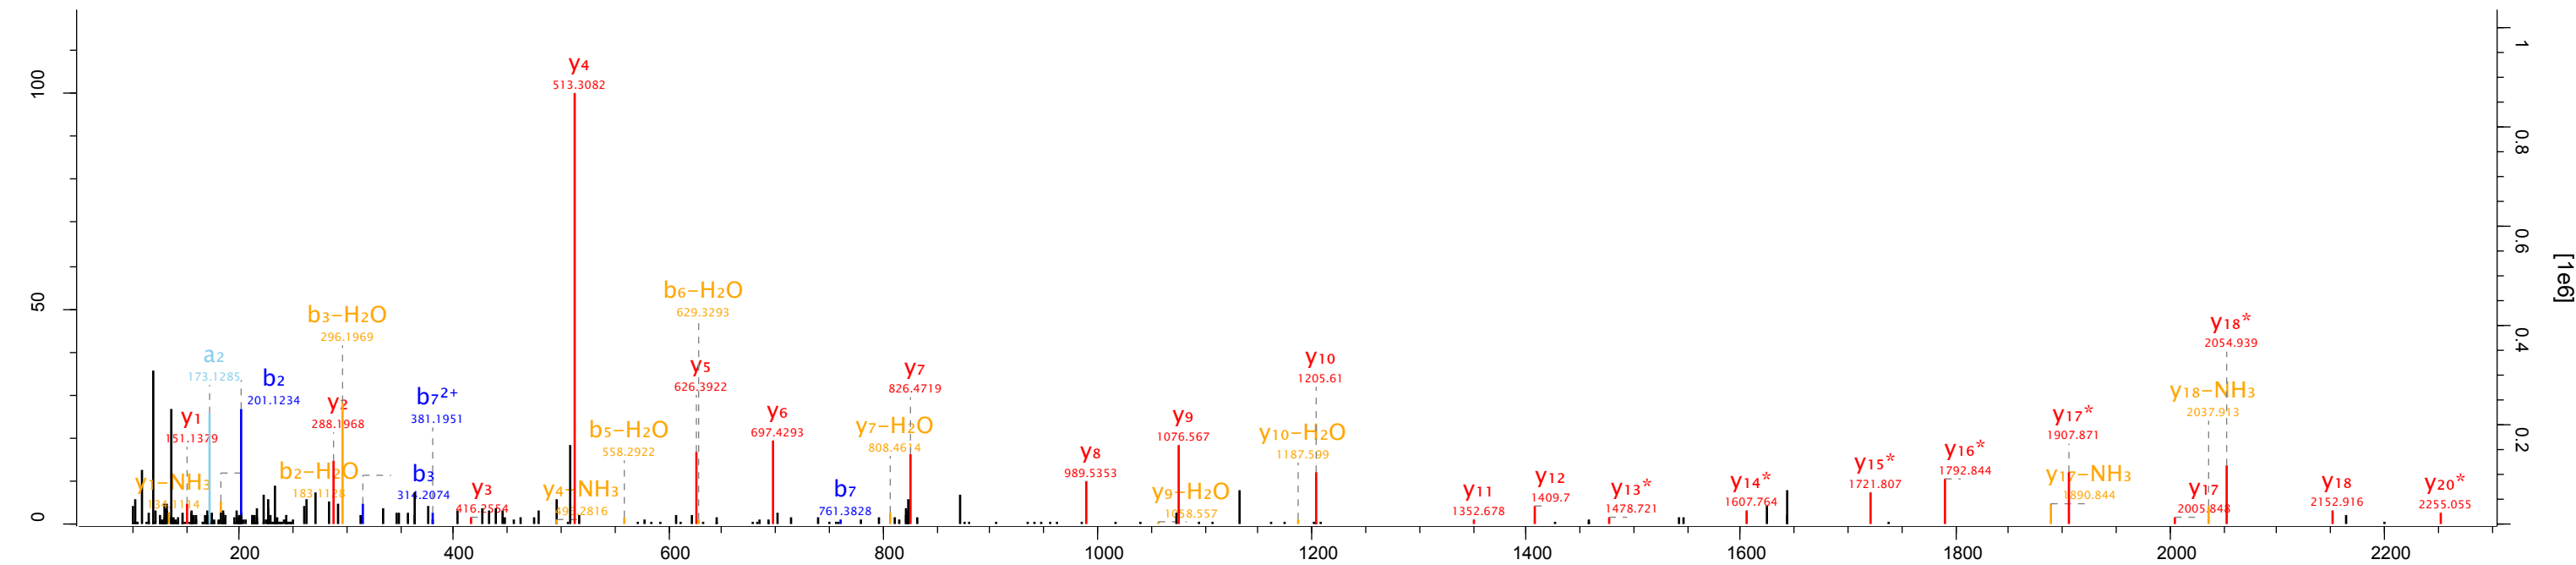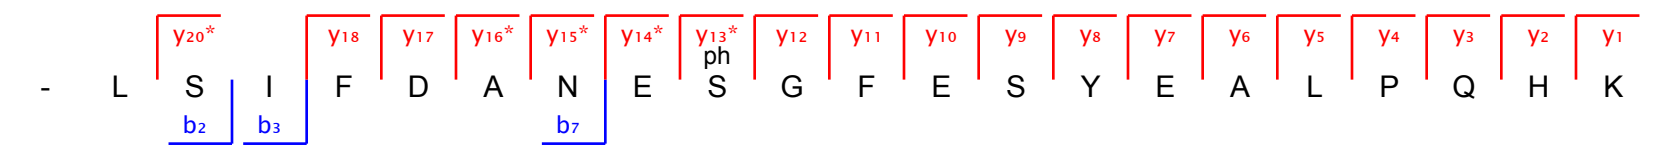

Raw file: 20150814\_A375SR\_Phospho\_BR2\_05  
 Scan: 25271 Method: FTMS; HCD Score: 59.25 m/z: 843.41 Gene names: CD74

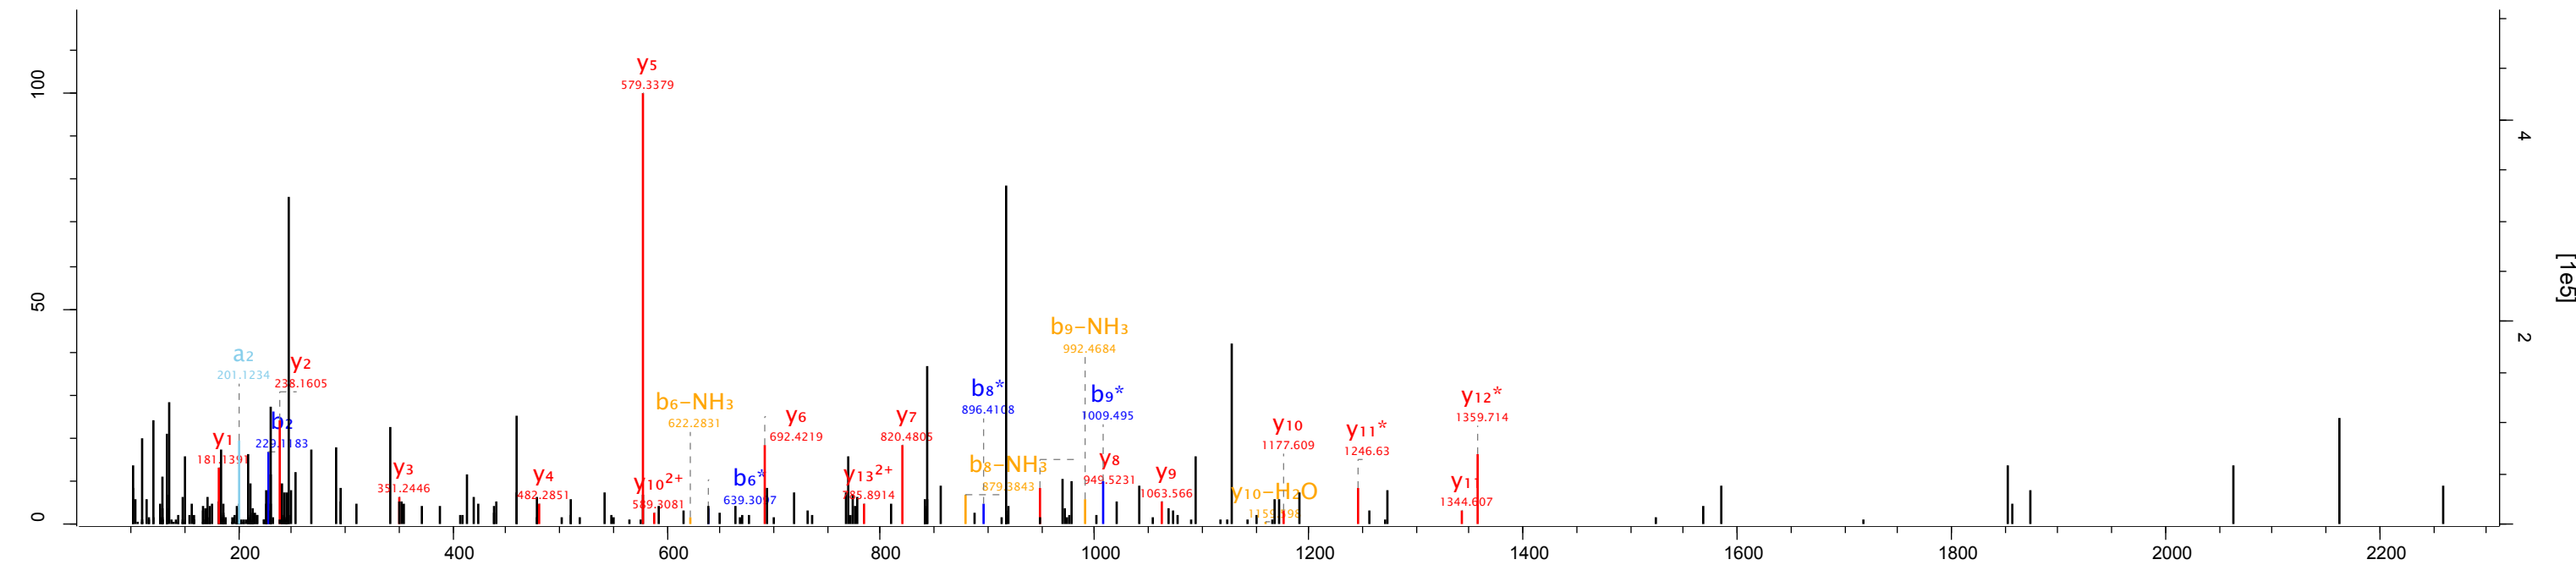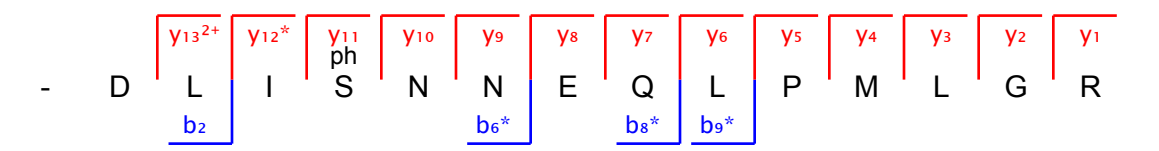

Raw file Scan Method Score m/z Gene names  
 20150814\_A375SR\_Phospho\_BR2\_05 25421 FTMS; HCD 129.35 877.74 RANBP2

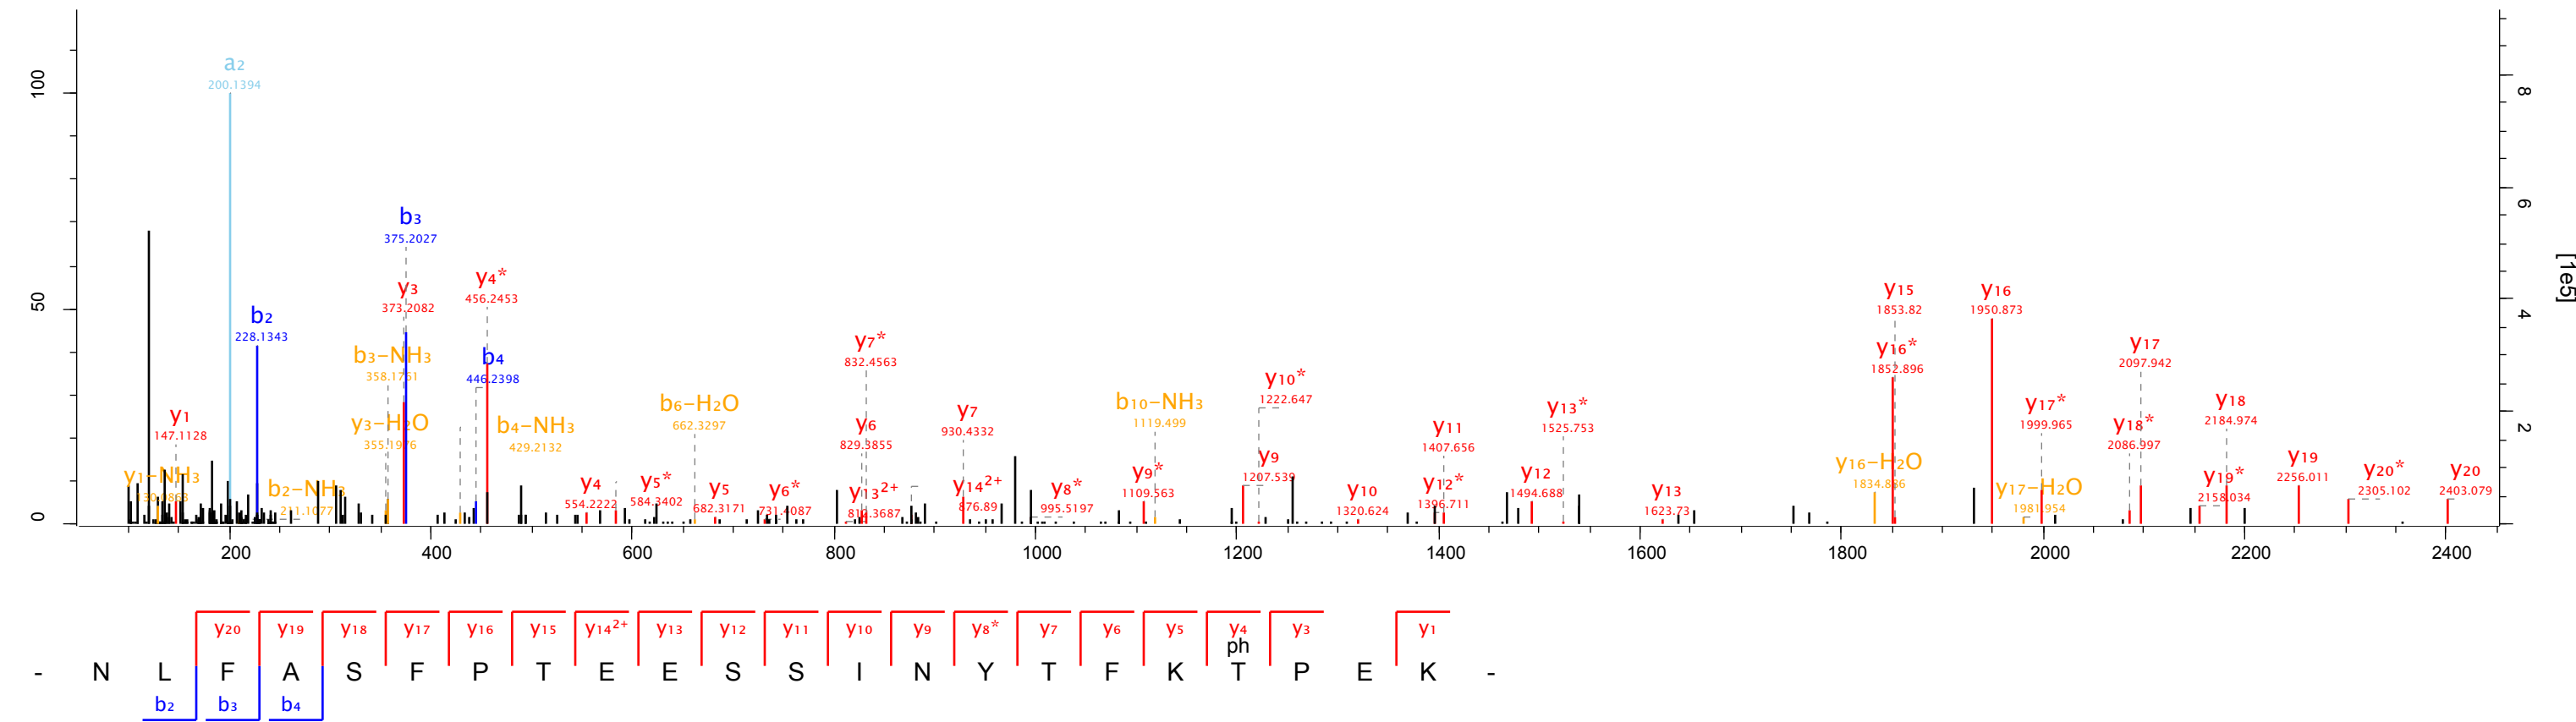



Raw file 20150814\_A375SR\_Phospho\_BR2\_05 Scan 25431 Method FTMS; HCD Score 161.08 m/z 822.9 Gene names AHNAK

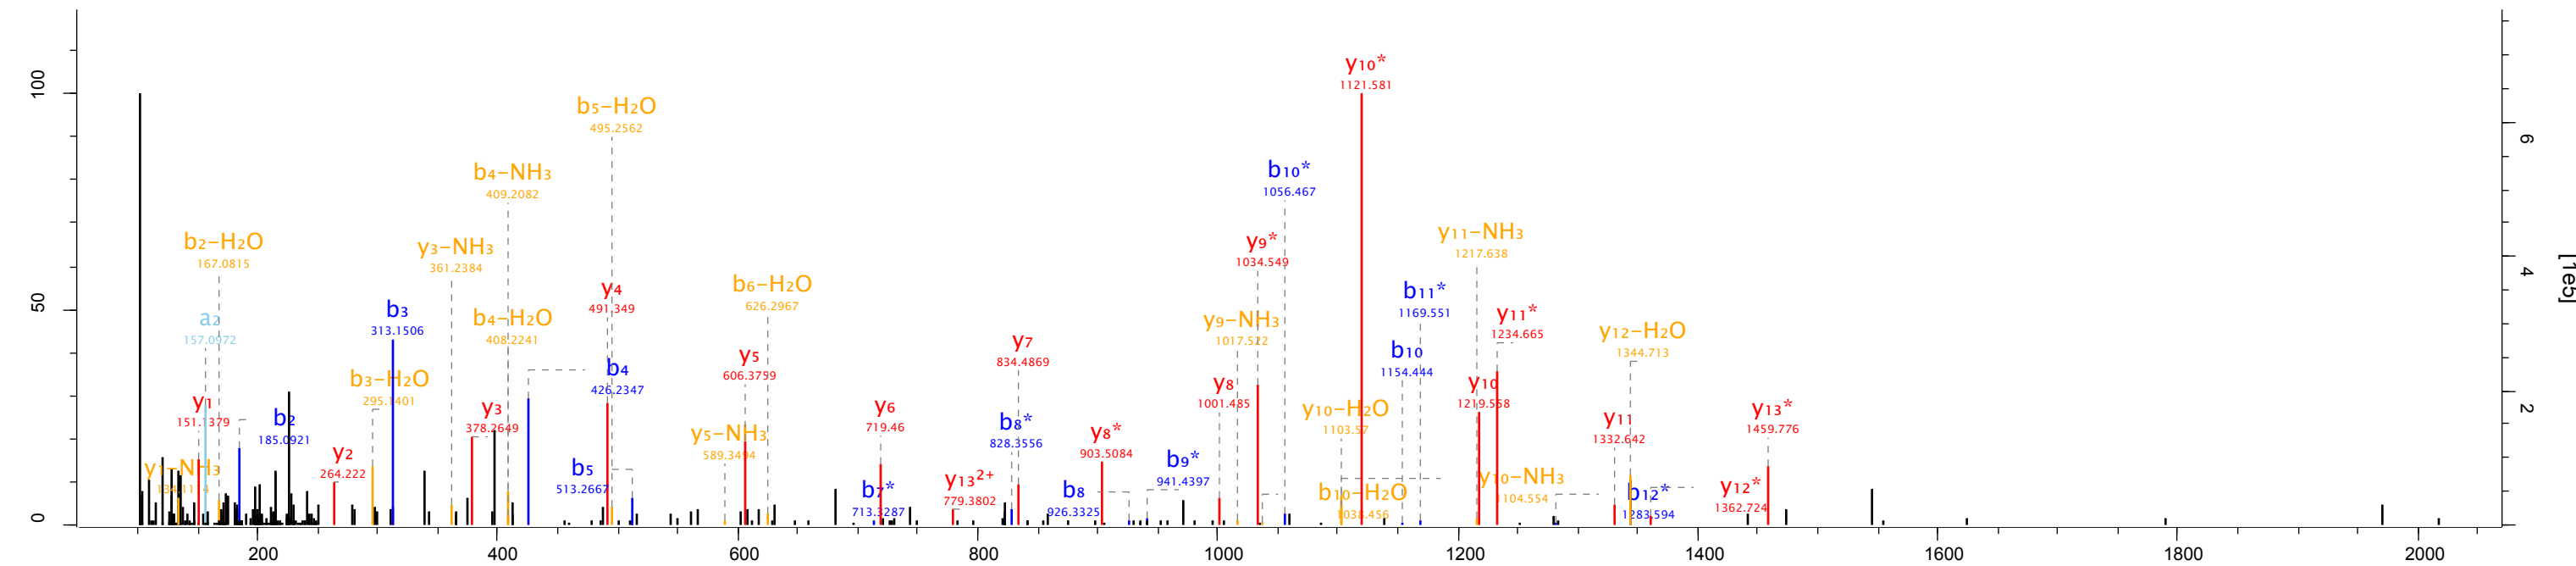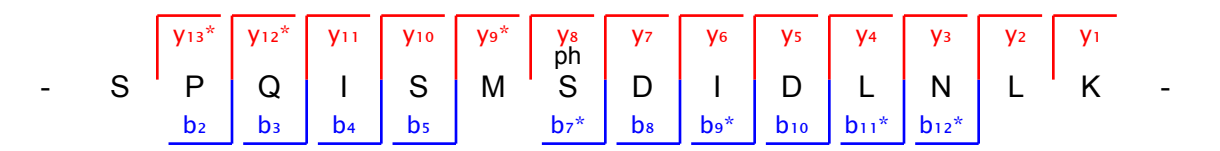

Raw file: 20150814\_A375SR\_Phospho\_BR2\_05  
 Scan: 25561 Method: FTMS; HCD Score: 88.59 m/z: 1109.24 Gene names: ADNP

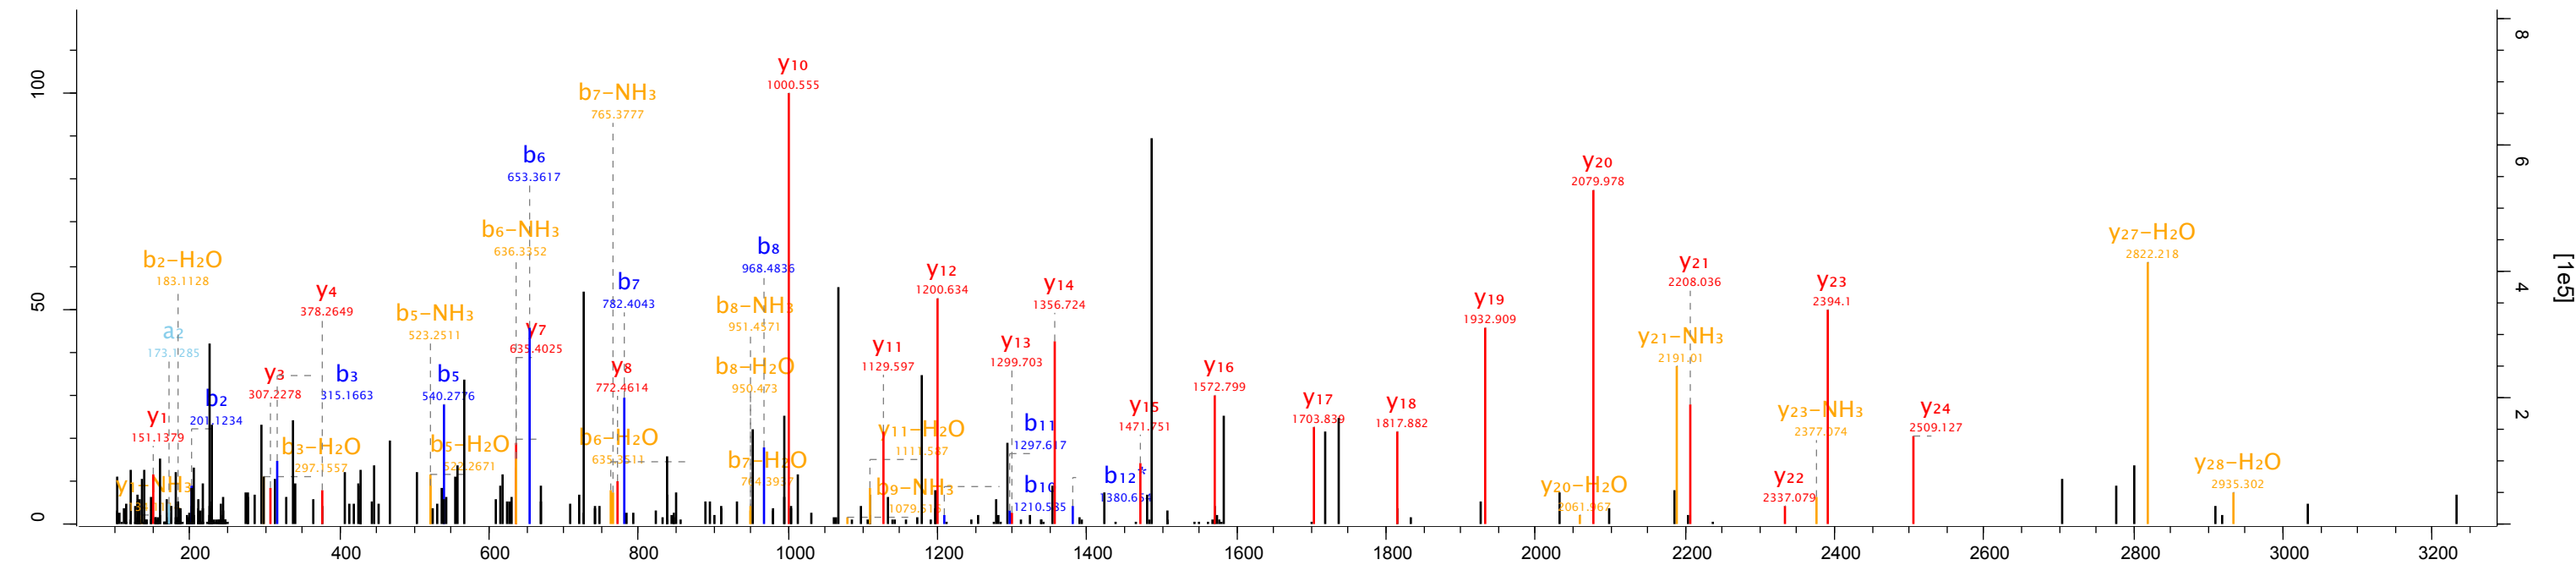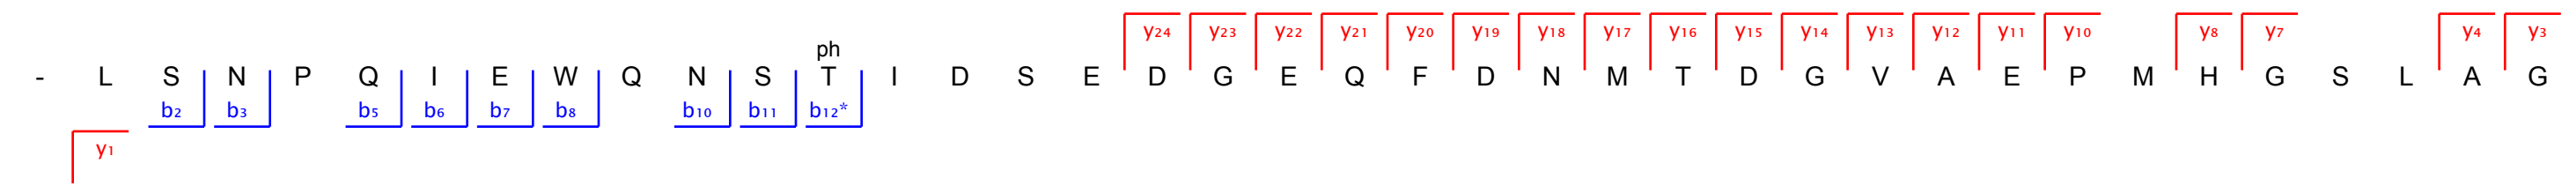

Raw file 20150814\_A375SR\_Phospho\_BR2\_05 Scan 25881 Method FTMS; HCD Score 59.75 m/z 1119.47 Gene names MAF1

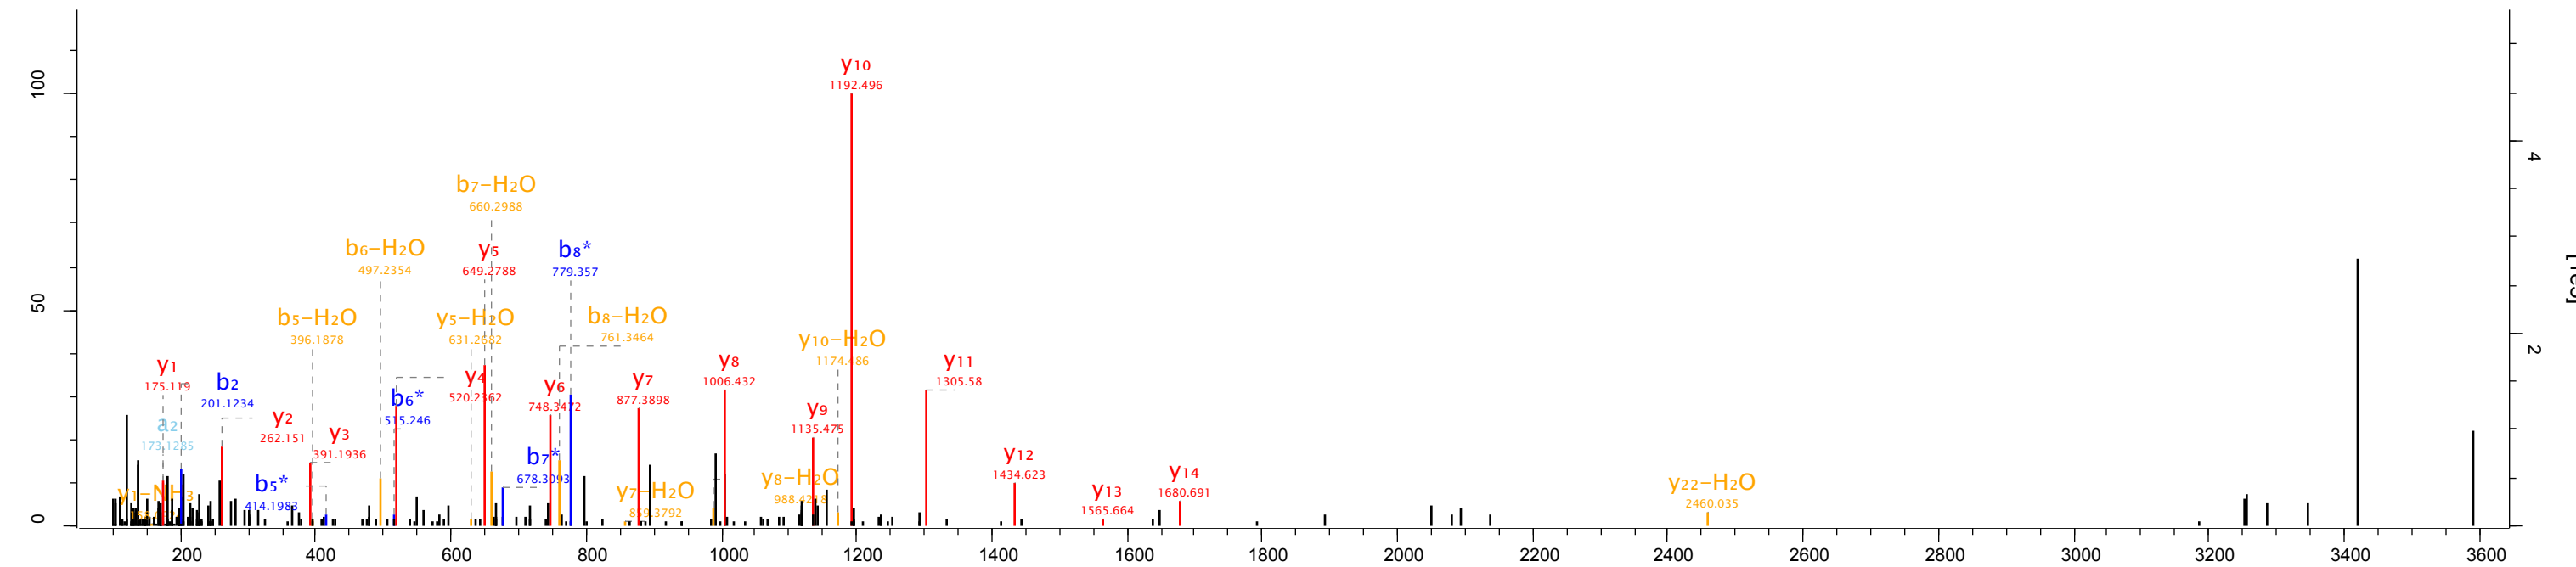

- S I S G S T Y T P S E A G N E L D M E L G E E E V E E E S R -

ph

b<sub>2</sub> b<sub>5</sub>\* b<sub>6</sub>\* b<sub>7</sub>\* b<sub>8</sub>\*

y<sub>14</sub> y<sub>13</sub> y<sub>12</sub> y<sub>11</sub> y<sub>10</sub> y<sub>9</sub> y<sub>8</sub> y<sub>7</sub> y<sub>6</sub> y<sub>5</sub> y<sub>4</sub> y<sub>3</sub> y<sub>2</sub> y<sub>1</sub>

Raw file 20150814\_A375SR\_Phospho\_BR2\_05 Scan 26011 Method FTMS; HCD Score 163.41 m/z 956.91 Gene names RIOK2

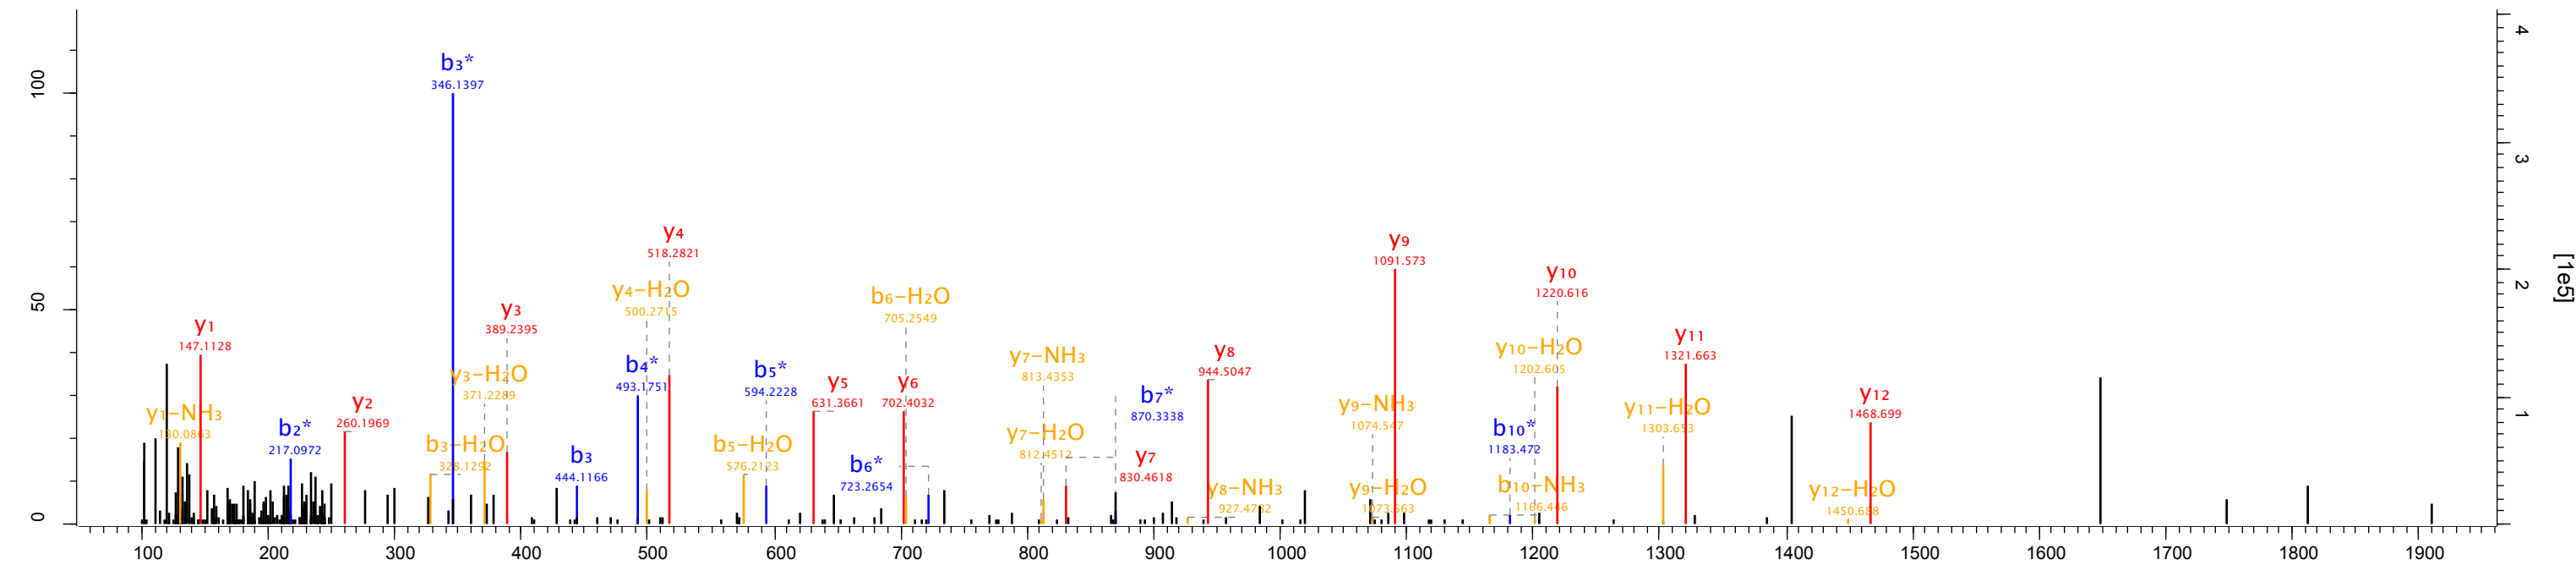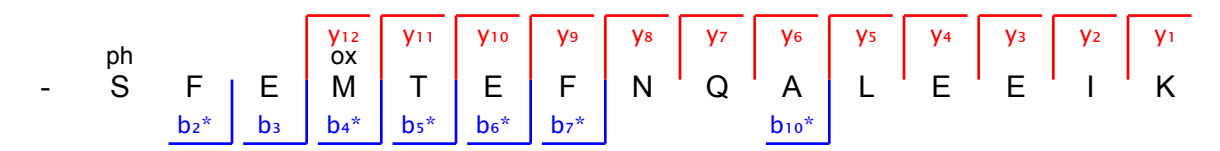

Raw file: 20150814\_A375SR\_Phospho\_BR2\_05  
 Scan: 26311 Method: FTMS; HCD Score: 247.55 m/z: 1009.47 Gene names: TMOD3

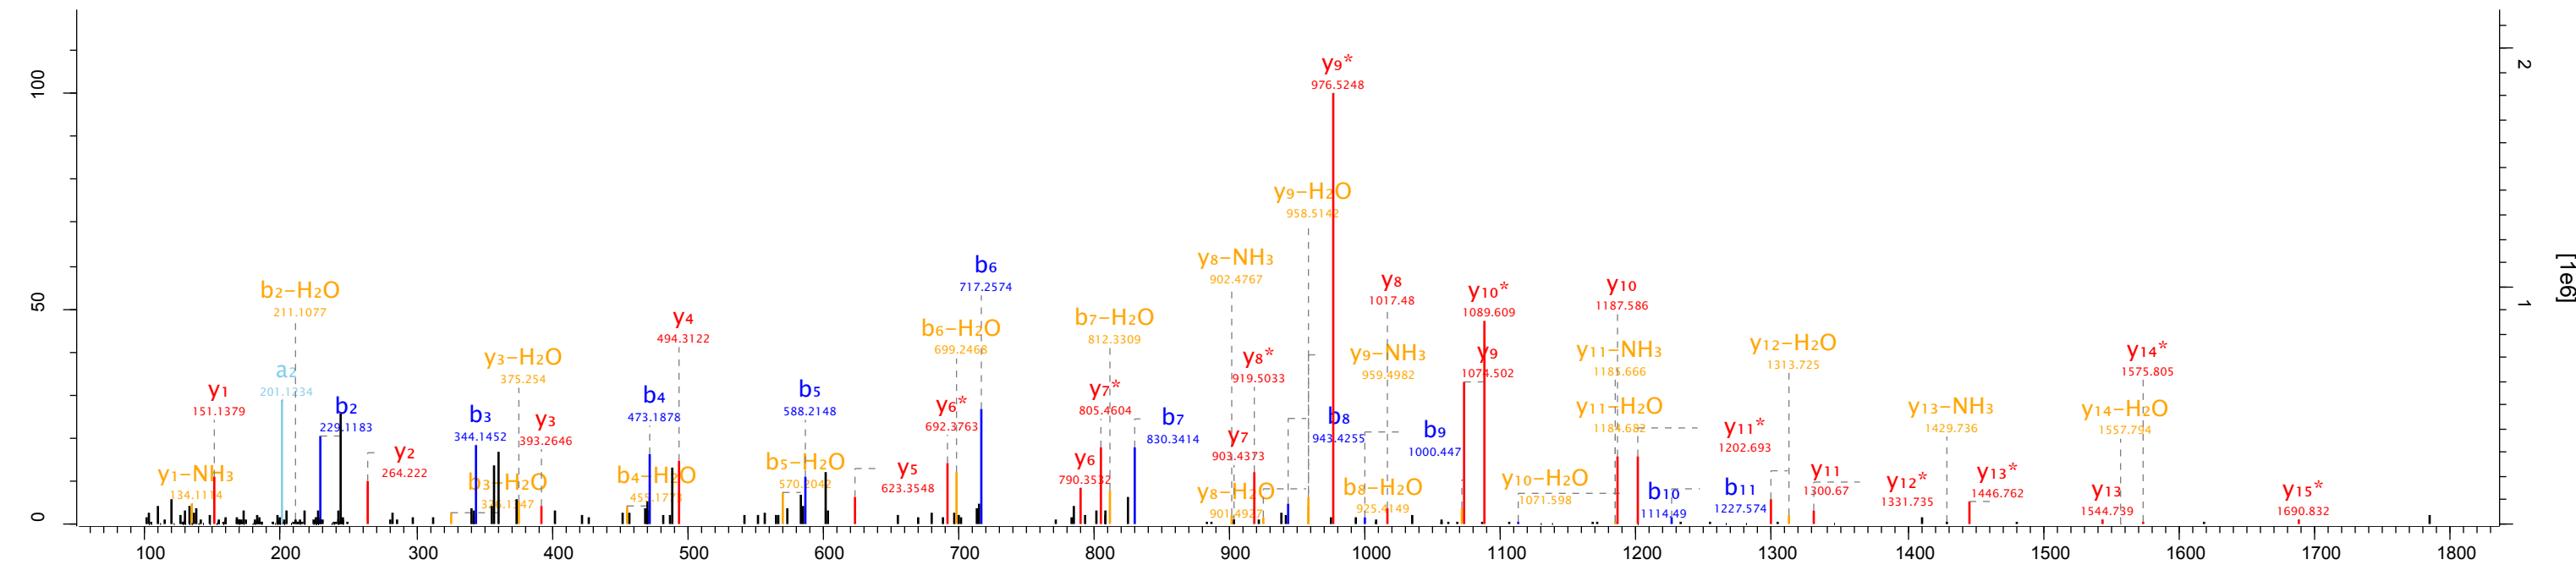

- D L D E D E L L G N L S E T E L K -

b<sub>2</sub>
b<sub>3</sub>
b<sub>4</sub>
b<sub>5</sub>
b<sub>6</sub>
b<sub>7</sub>
b<sub>8</sub>
b<sub>9</sub>
b<sub>10</sub>
b<sub>11</sub>
y<sub>15</sub>\*
y<sub>14</sub>\*
y<sub>13</sub>
y<sub>12</sub>\*
y<sub>11</sub>
y<sub>10</sub>
y<sub>9</sub>
y<sub>8</sub>
y<sub>7</sub>
y<sub>6</sub>
y<sub>5</sub>
y<sub>4</sub>
y<sub>3</sub>
y<sub>2</sub>
y<sub>1</sub>

Raw file  
20150814\_A375SR\_Phospho\_BR2\_05

Scan 26371 Method FTMS; HCD Score 302.11 m/z 1339.09 Gene names MGEA5

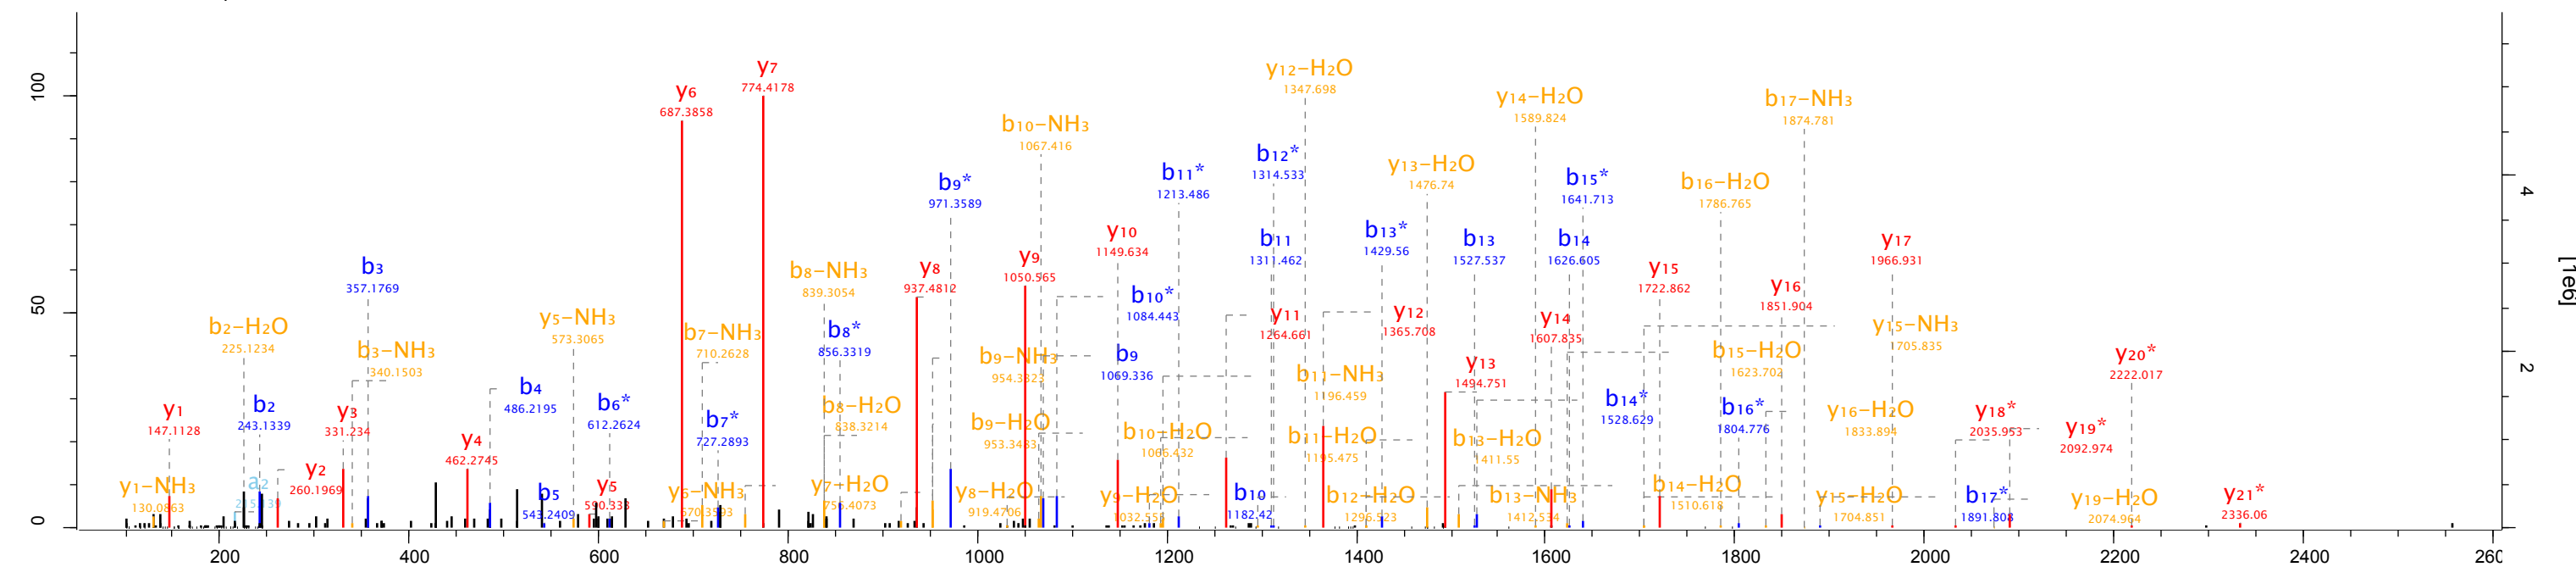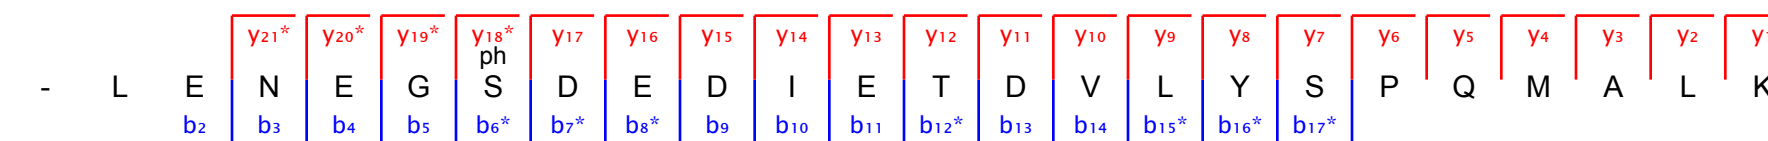

Raw file Scan Method Score m/z Gene names  
 20150814\_A375SR\_Phospho\_BR2\_05 26971 FTMS; HCD 101.34 866.39 GOLGB1

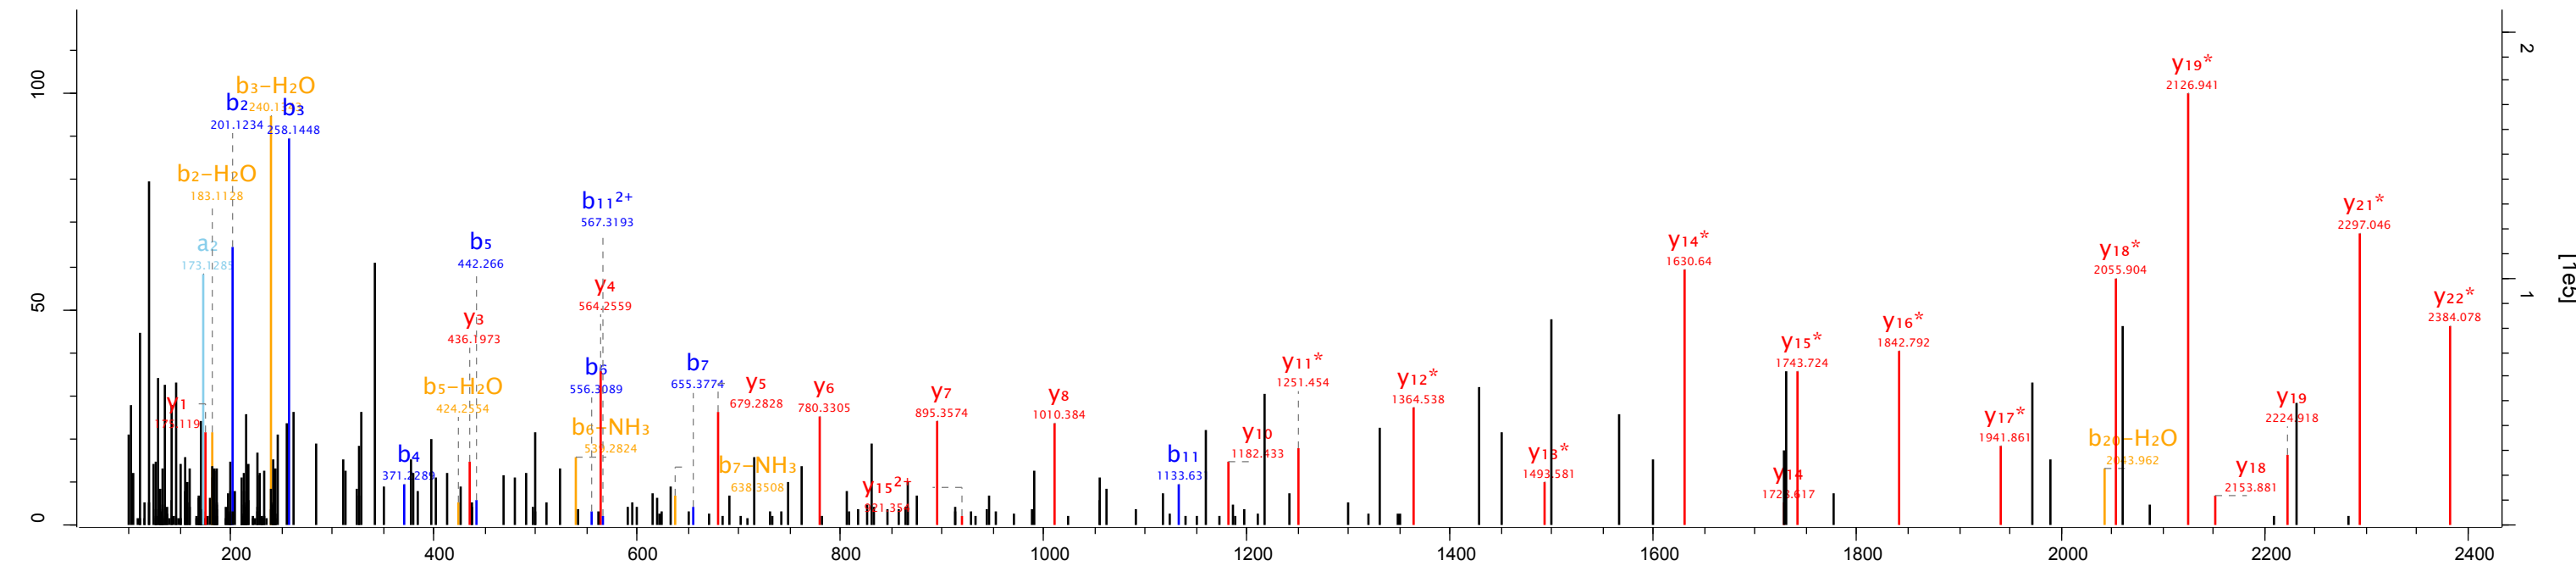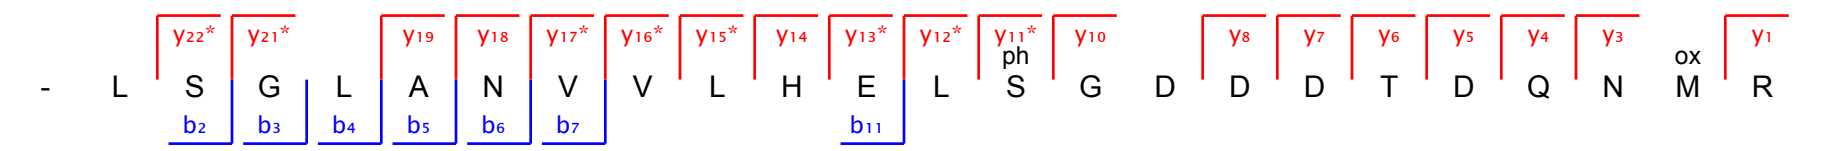

Raw file 20150814\_A375SR\_Phospho\_BR2\_05 Scan 26991 Method FTMS; HCD Score 344.52 m/z 1243.52 Gene names FAM21C

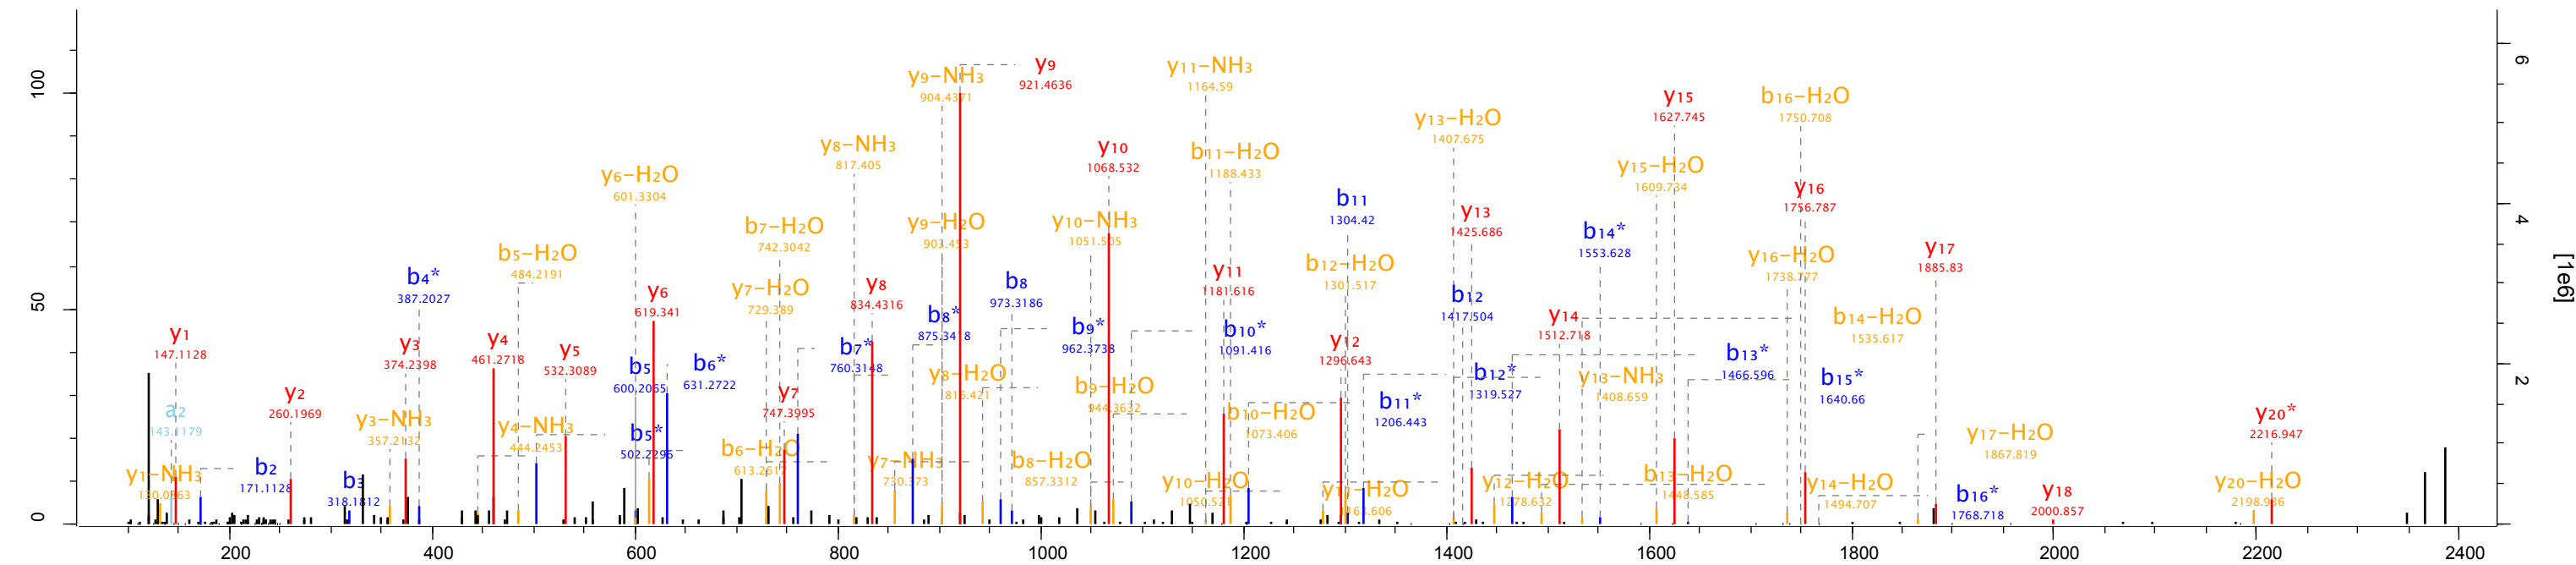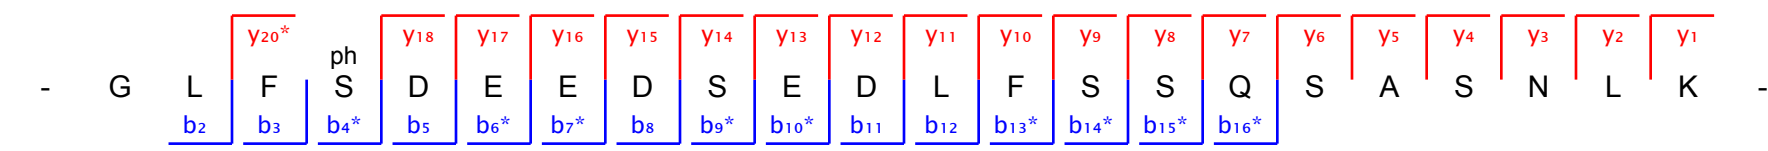



Raw file: 20150814\_A375SR\_Phospho\_BR2\_05  
 Scan: 27031 Method: FTMS; HCD Score: 271.94 m/z: 1138.02 Gene names: ACACA

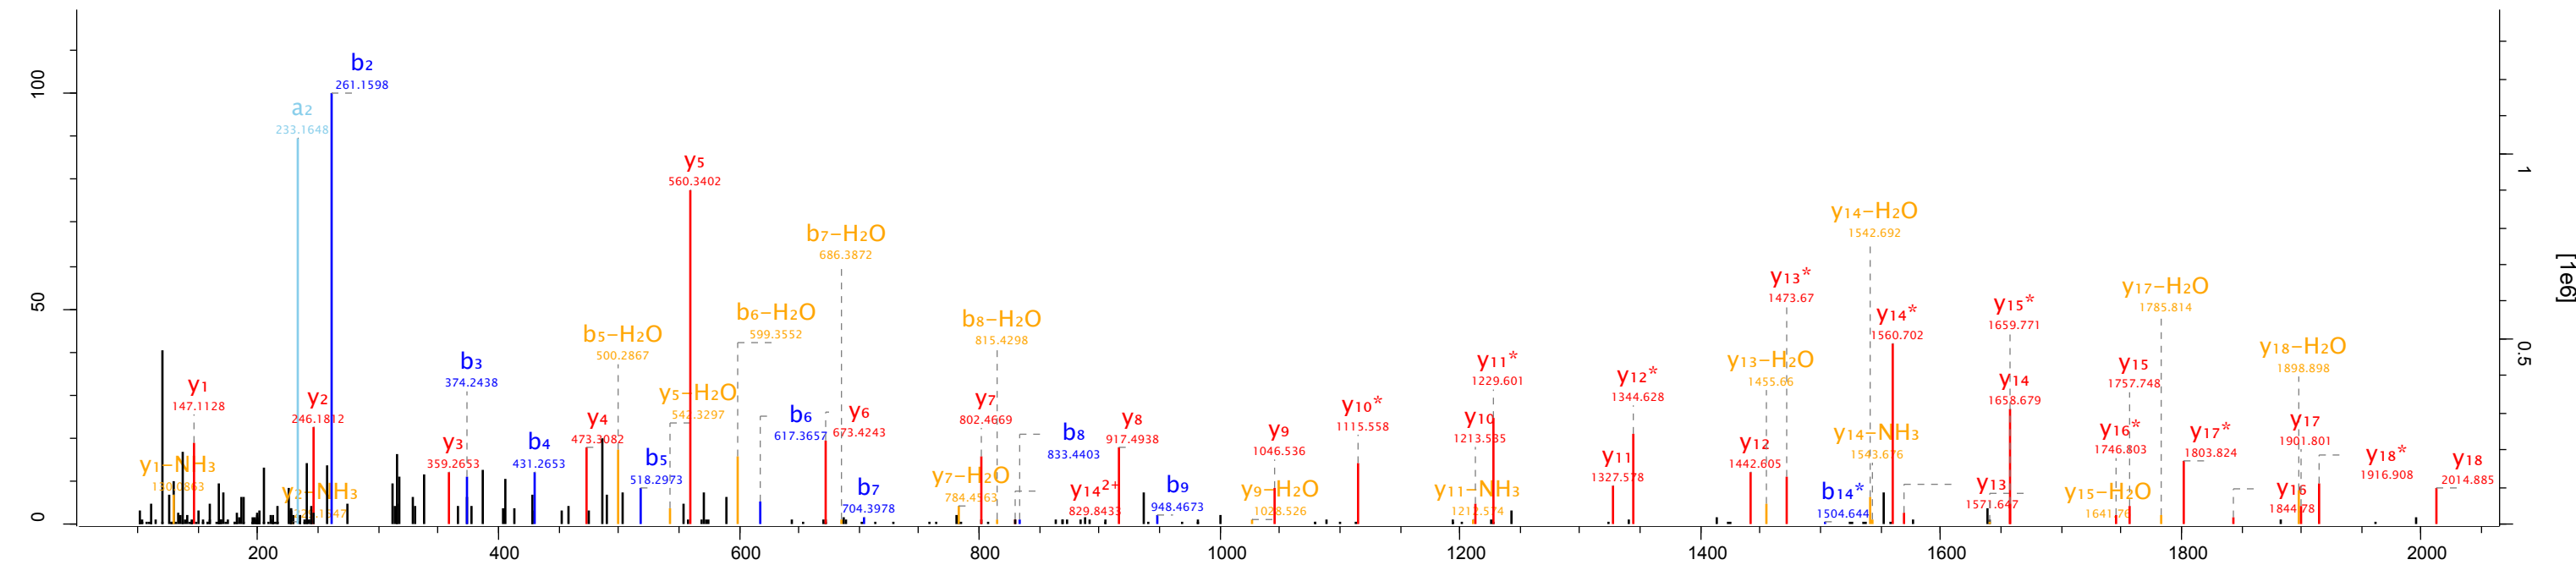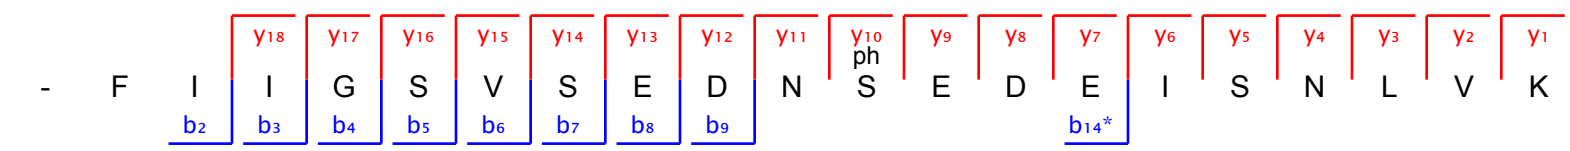

Raw file  
20150814\_A375SR\_Phospho\_BR2\_05

Scan 27091 Method FTMS; HCD Score 192.46 m/z 900.41 Gene names ARHGAP31

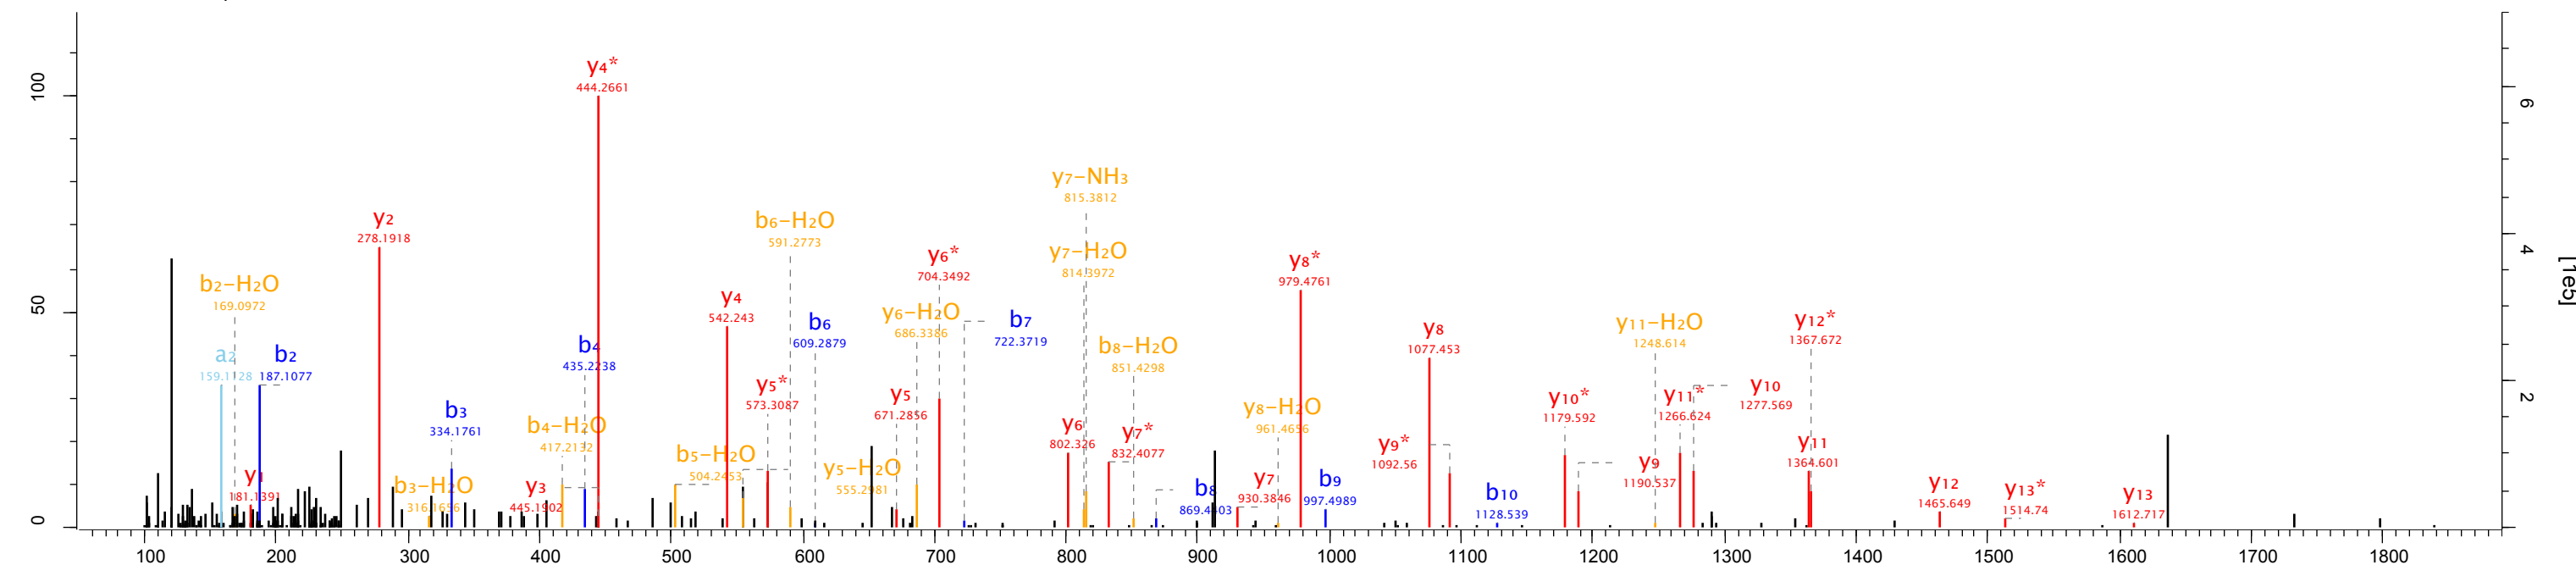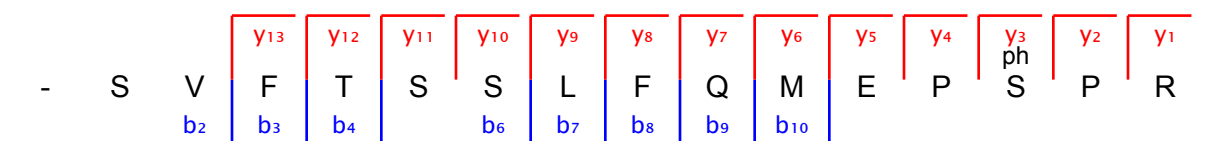

Raw file 20150814\_A375SR\_Phospho\_BR2\_05 Scan 27471 Method FTMS; HCD Score 292.68 m/z 1028.44 Gene names FAM21C;FAM21A

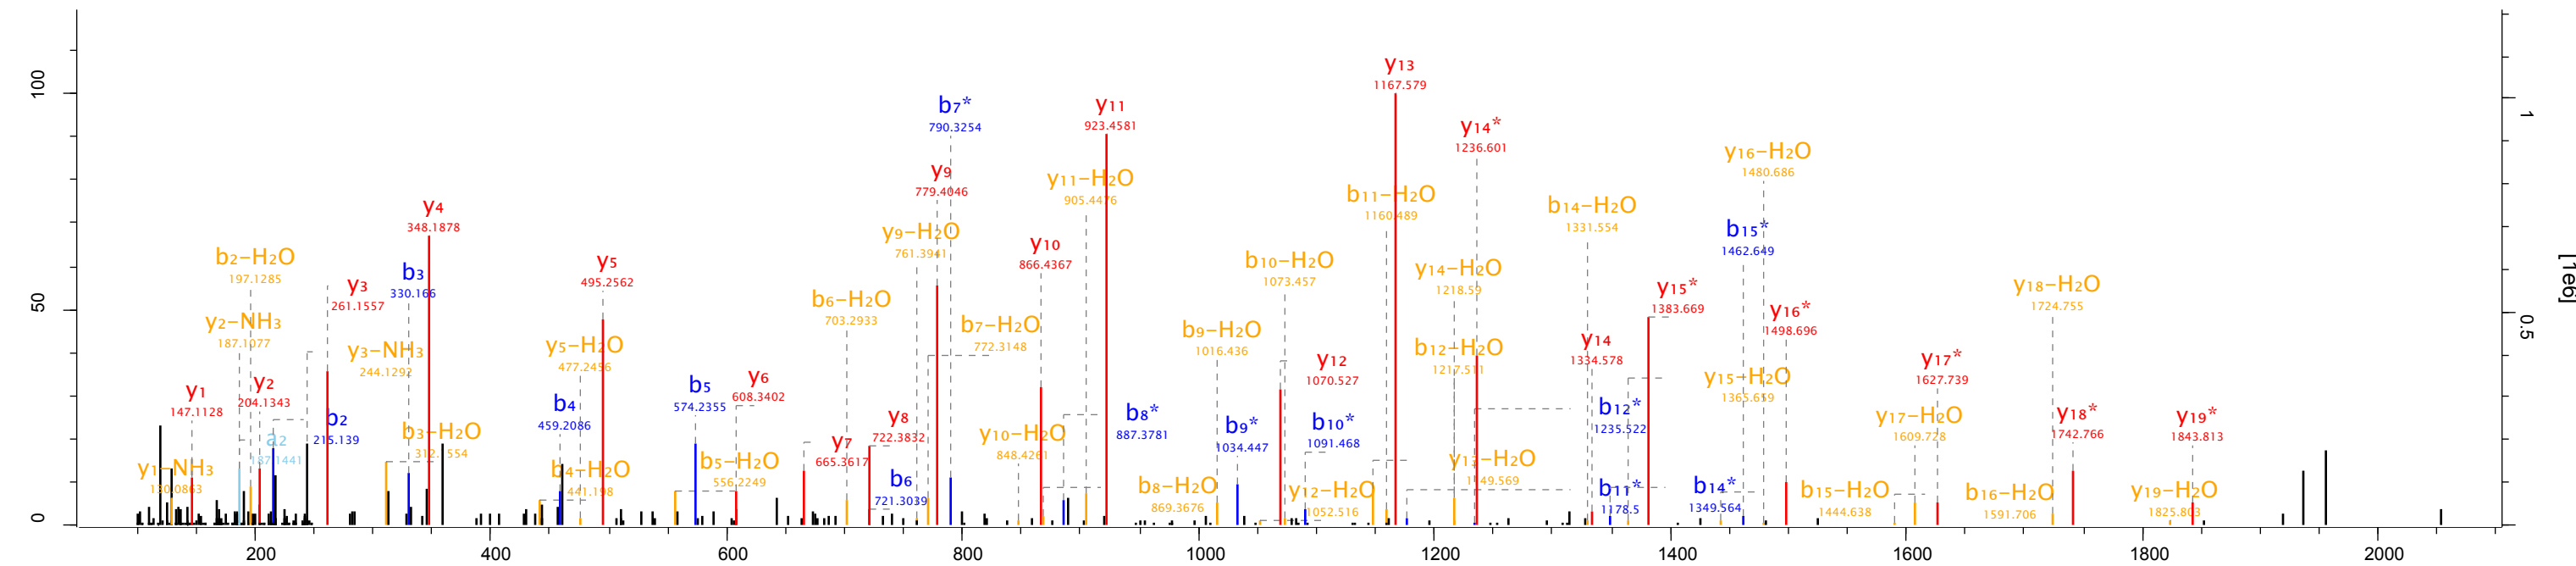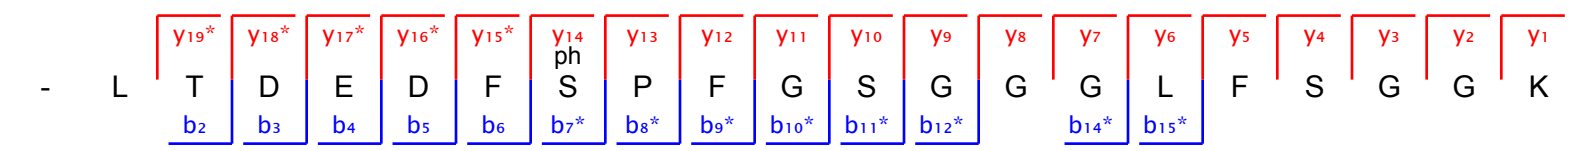

Raw file: 20150814\_A375SR\_Phospho\_BR2\_05  
 Scan: 27791 Method: FTMS; HCD Score: 197.56 m/z: 909.79 Gene names: DKC1

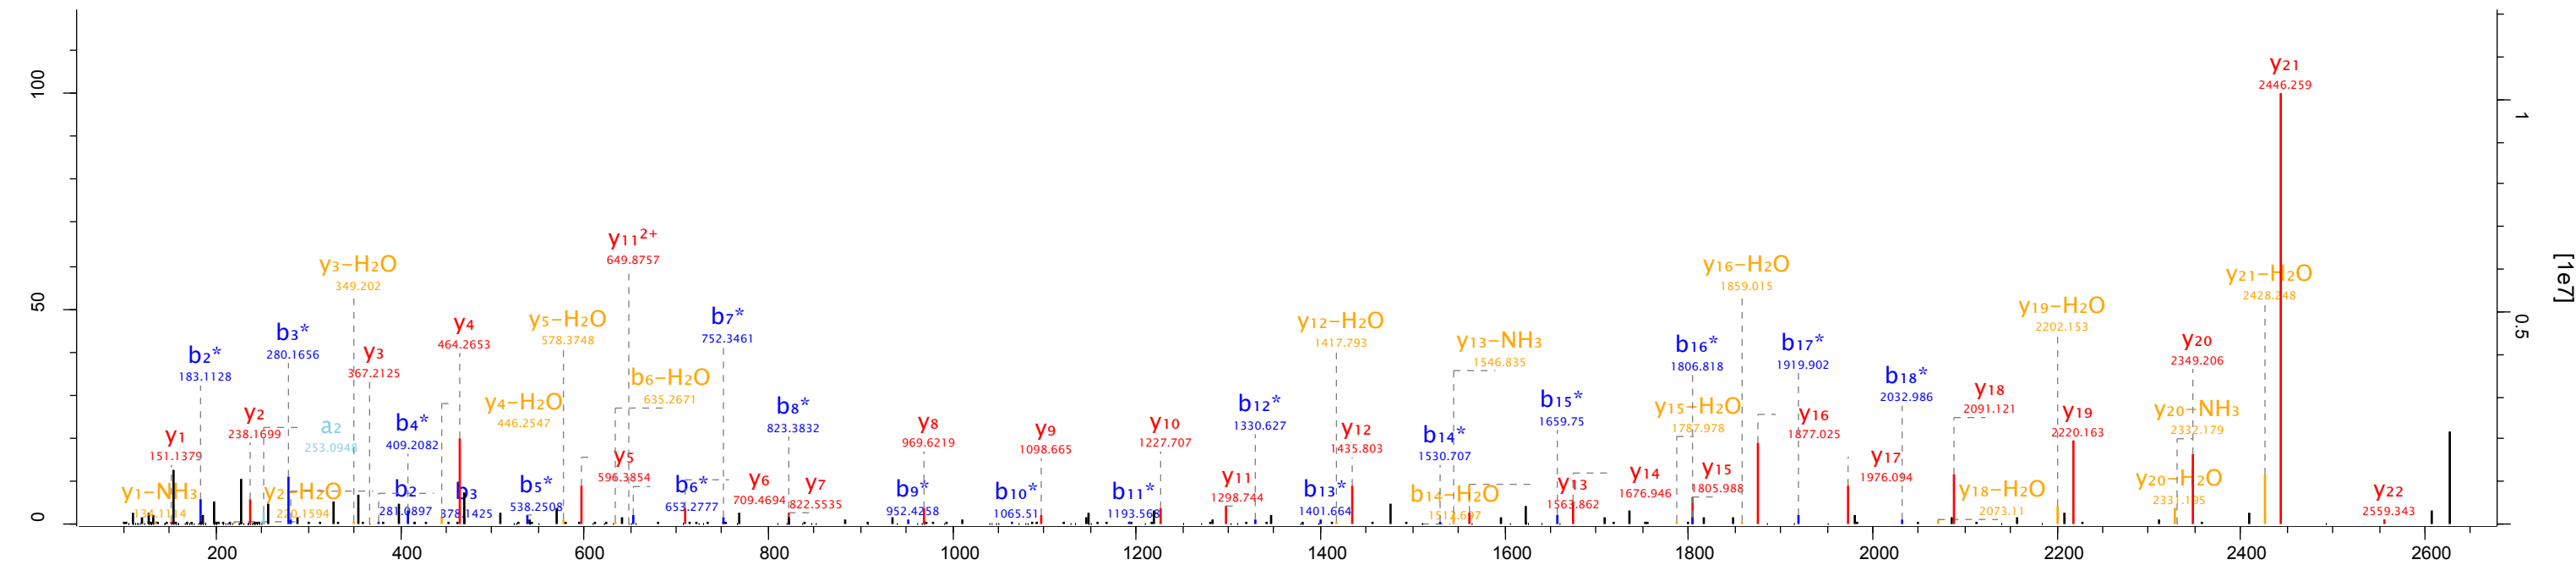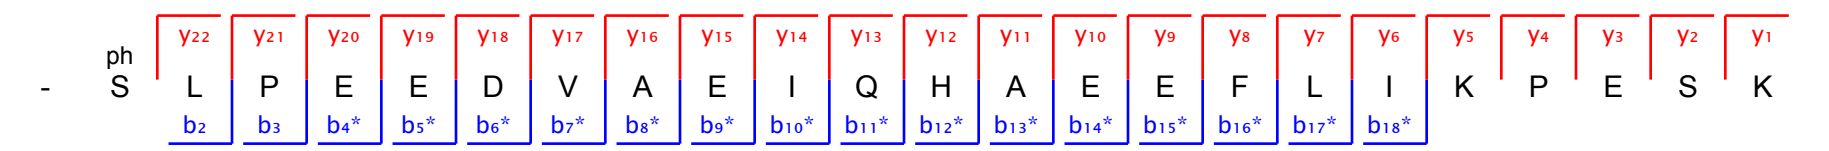

Raw file  
20150814\_A375SR\_Phospho\_BR2\_05

Scan 28421 Method FTMS; HCD Score 158.35 m/z 960.13 Gene names CARD10

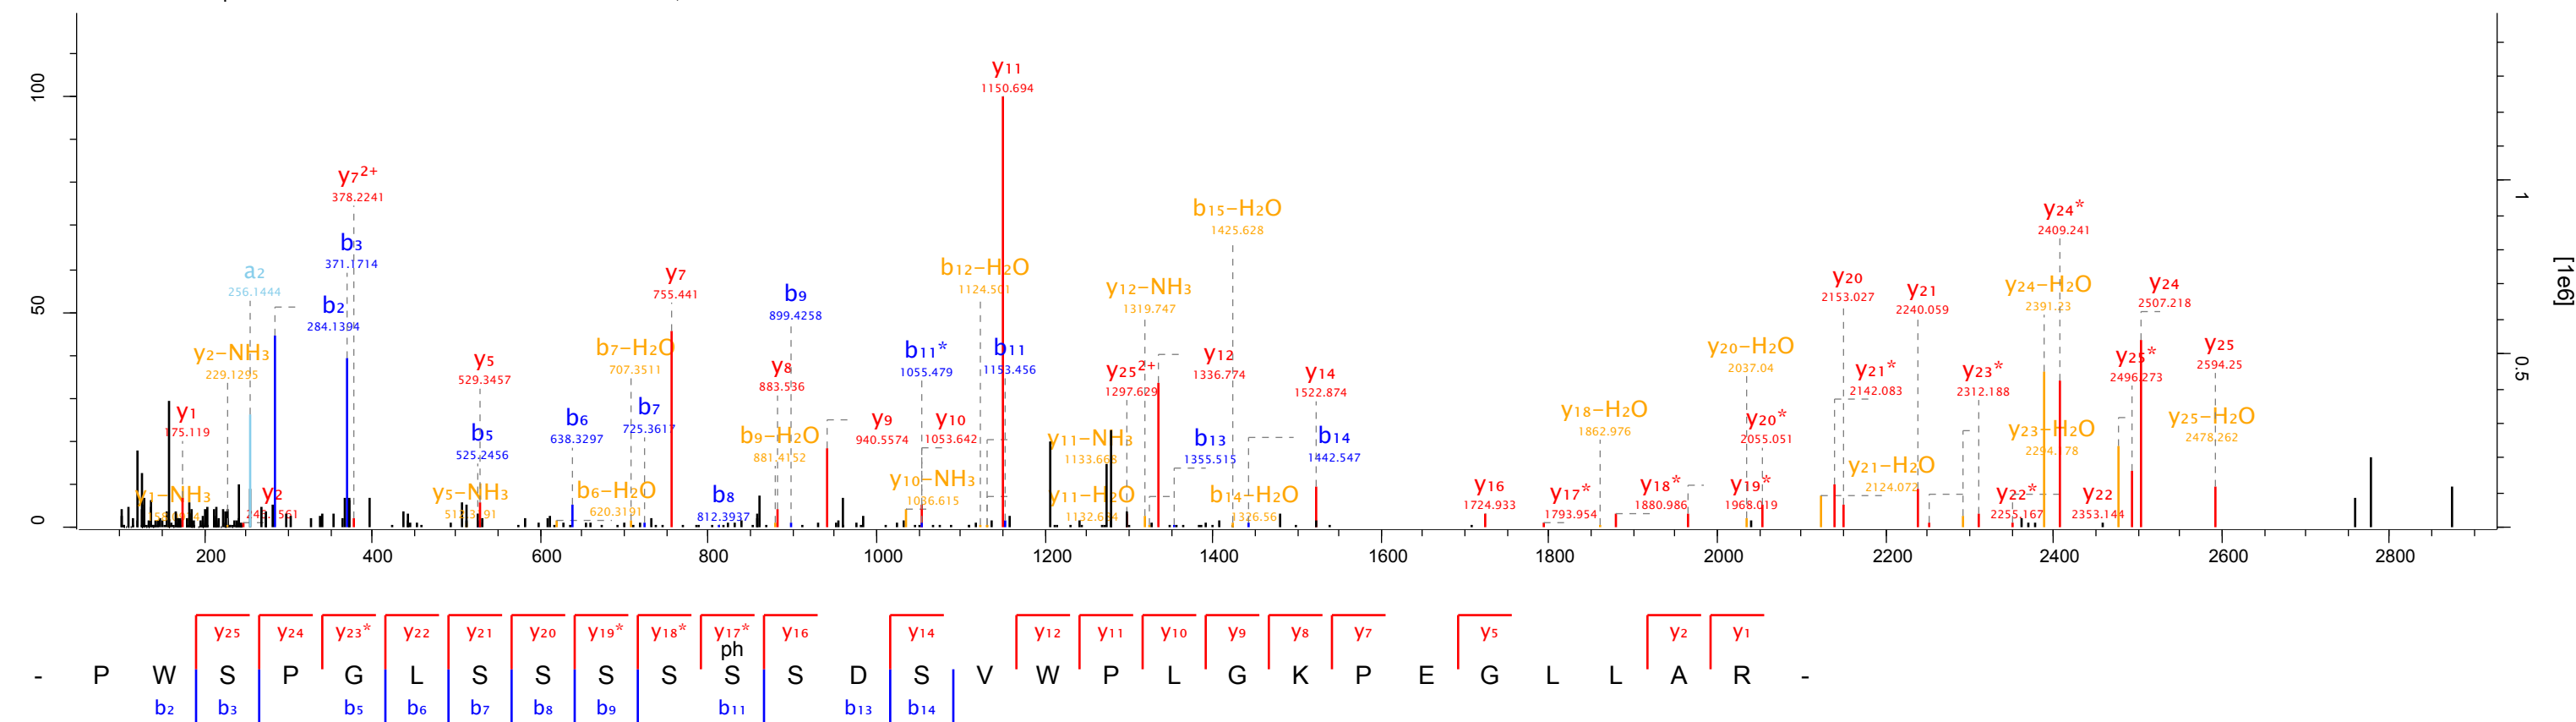

Raw file 20150814\_A375SR\_Phospho\_BR2\_05 Scan 28651 Method FTMS; HCD Score 73.28 m/z 924.5 Gene names GIGYF1

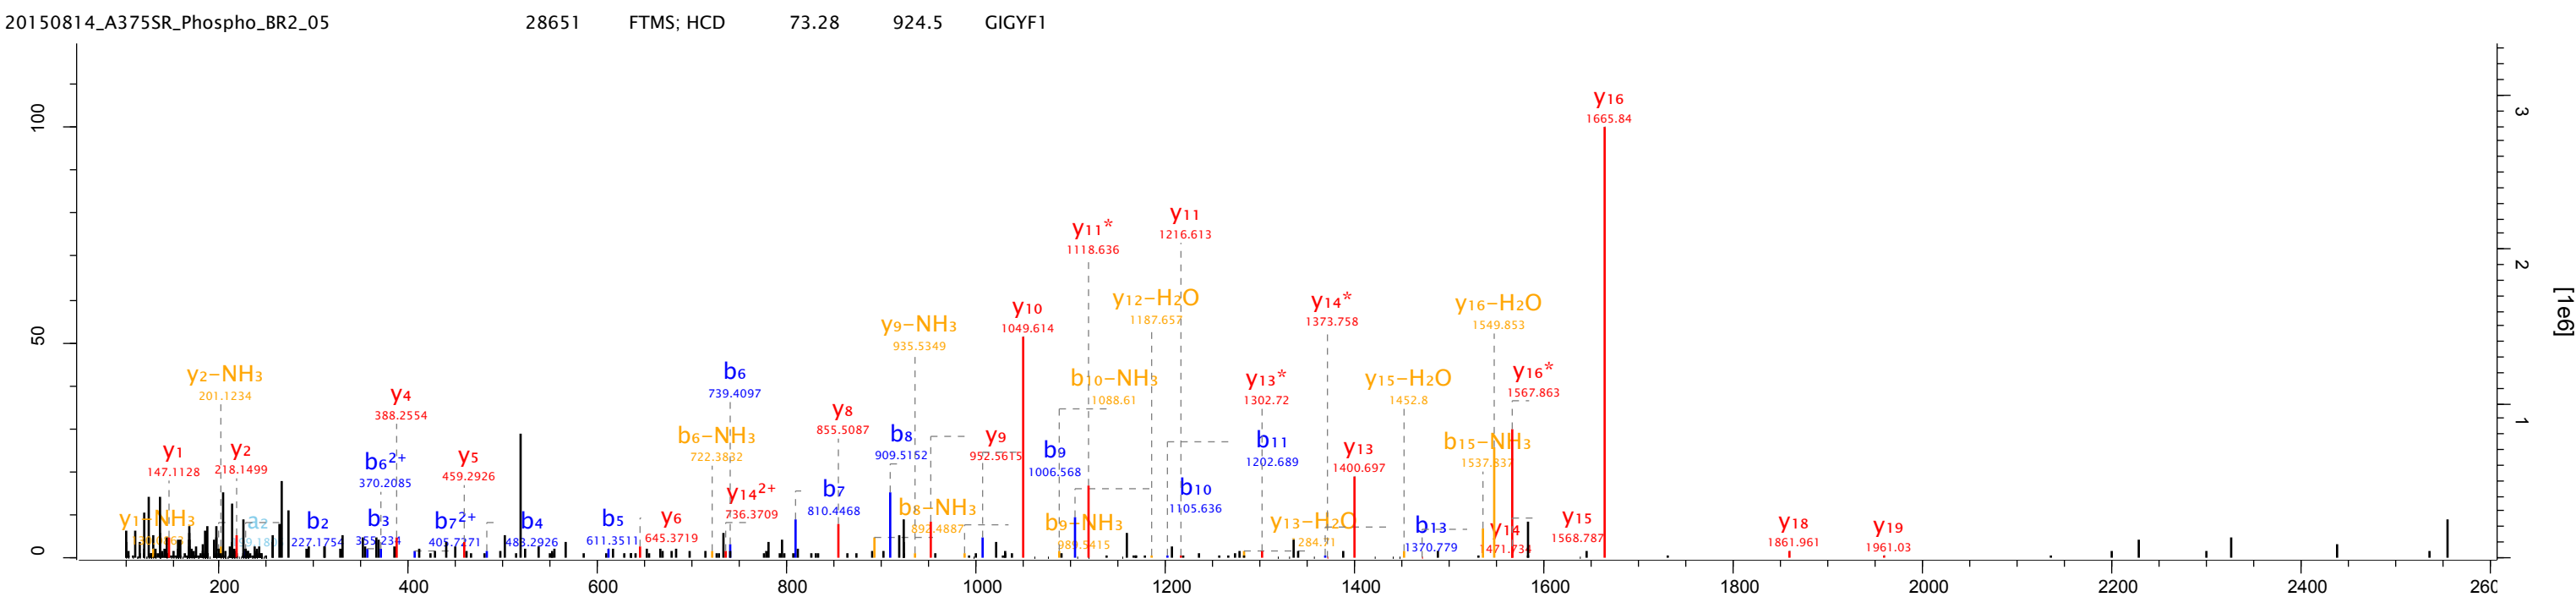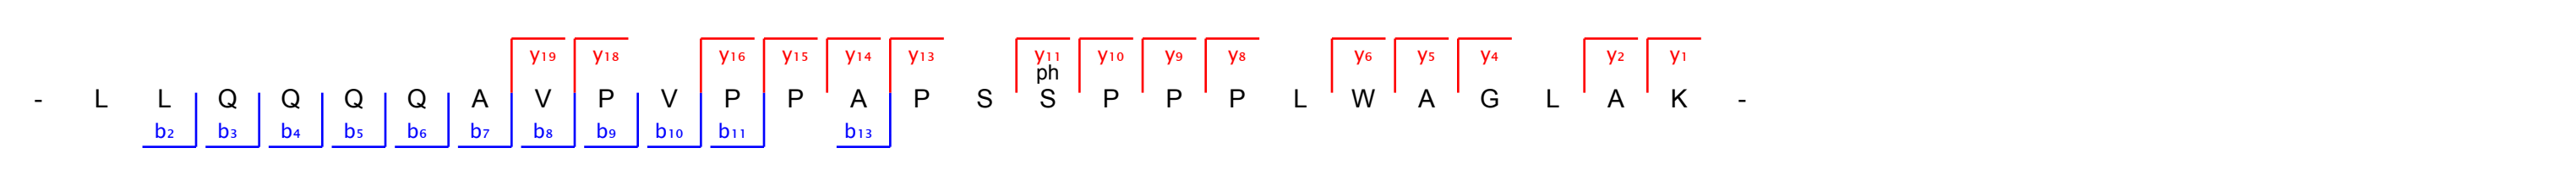

Raw file  
20150814\_A375SR\_Phospho\_BR2\_05

Scan 28741 Method FTMS; HCD Score 220.55 m/z 732.39 Gene names ULK1

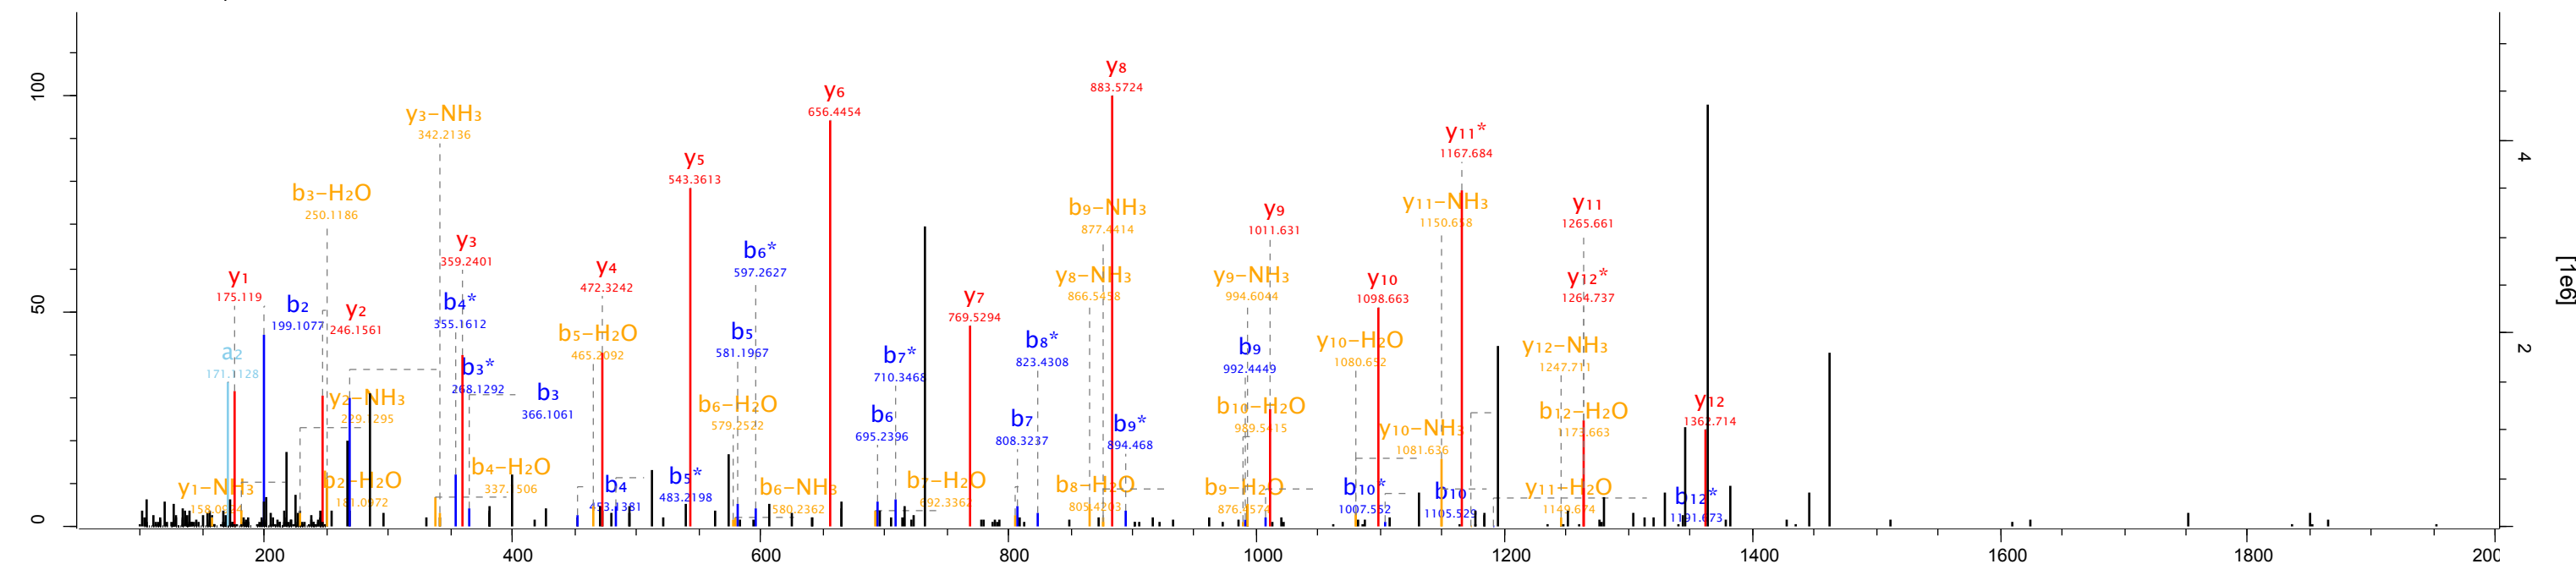

- T P S S Q N L L A L L A R -

y12
y11  
ph
y10
y9
y8
y7
y6
y5
y4
y3
y2
y1

b2
b3
b4
b5
b6
b7
b8\*
b9
b10
b12\*

Raw file: 20150814\_A375SR\_Phospho\_BR2\_05  
 Scan: 3091 Method: FTMS; HCD Score: 65.22 m/z: 440.56 Gene names: HP1BP3

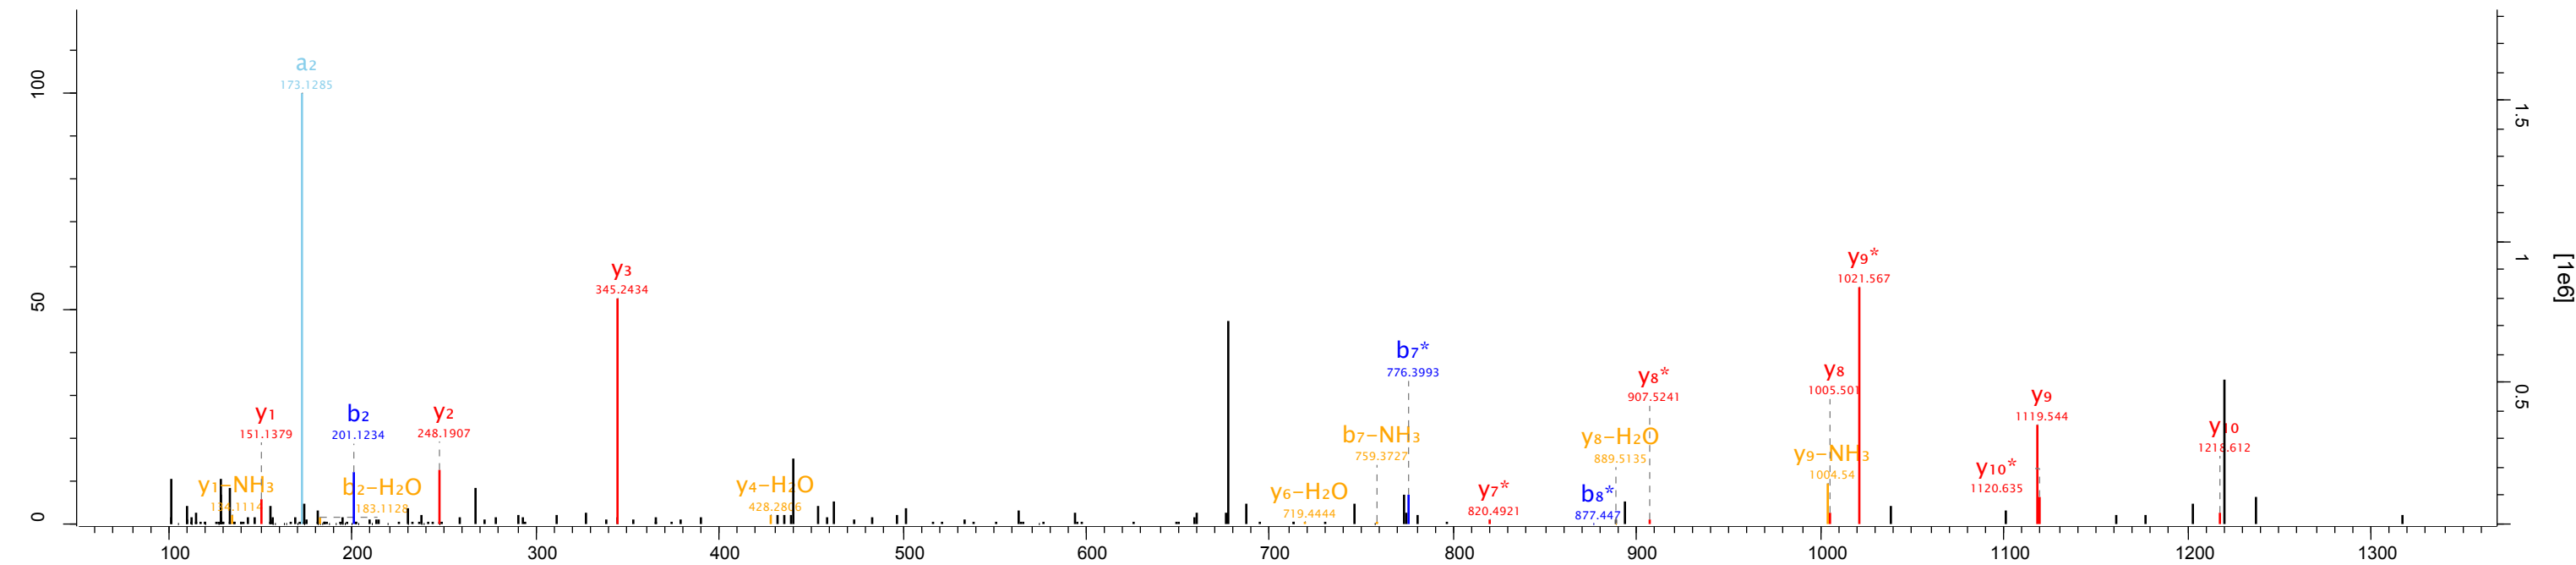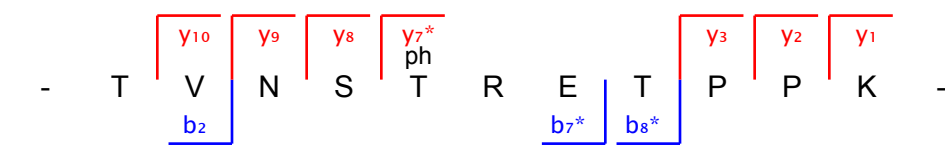



Raw file  
 20150814\_A375SR\_Phospho\_BR2\_05  
 Scan 3131 Method FTMS; HCD Score 200.82 m/z 561.29 Gene names RRP36

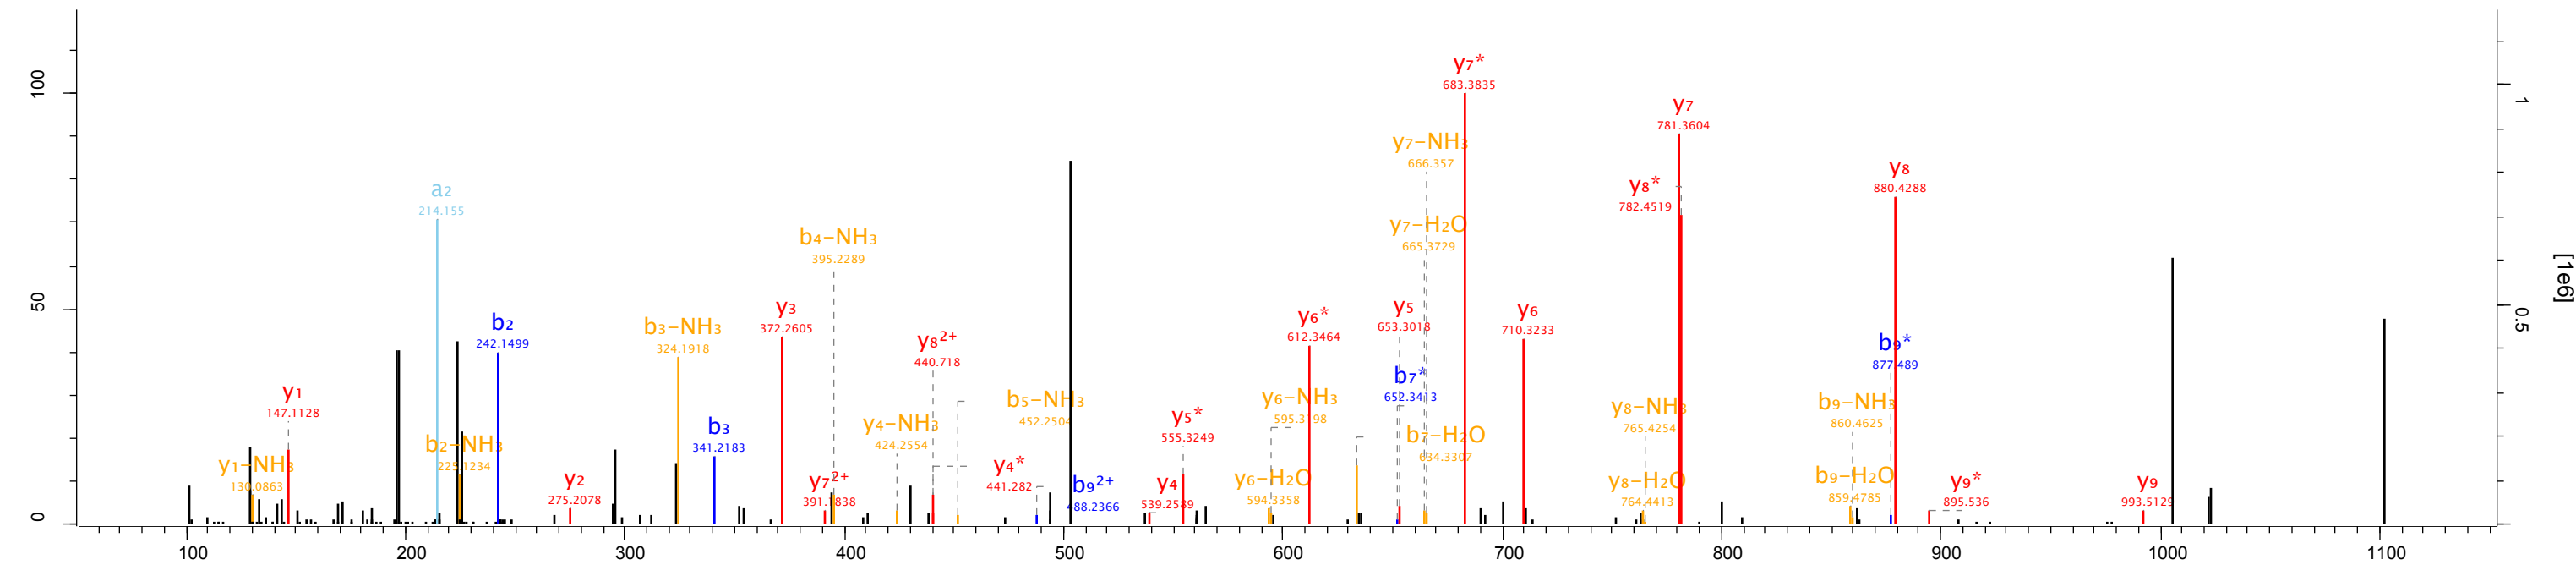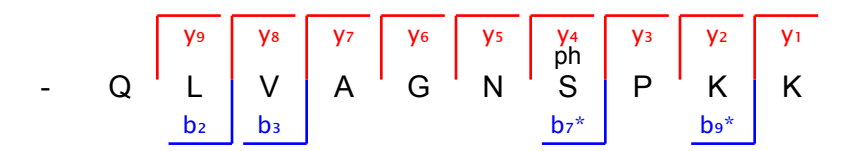

Raw file: 20150814\_A375SR\_Phospho\_BR2\_05  
 Scan: 3811 Method: FTMS; HCD Score: 153.85 m/z: 707.83 Gene names: CCNL1

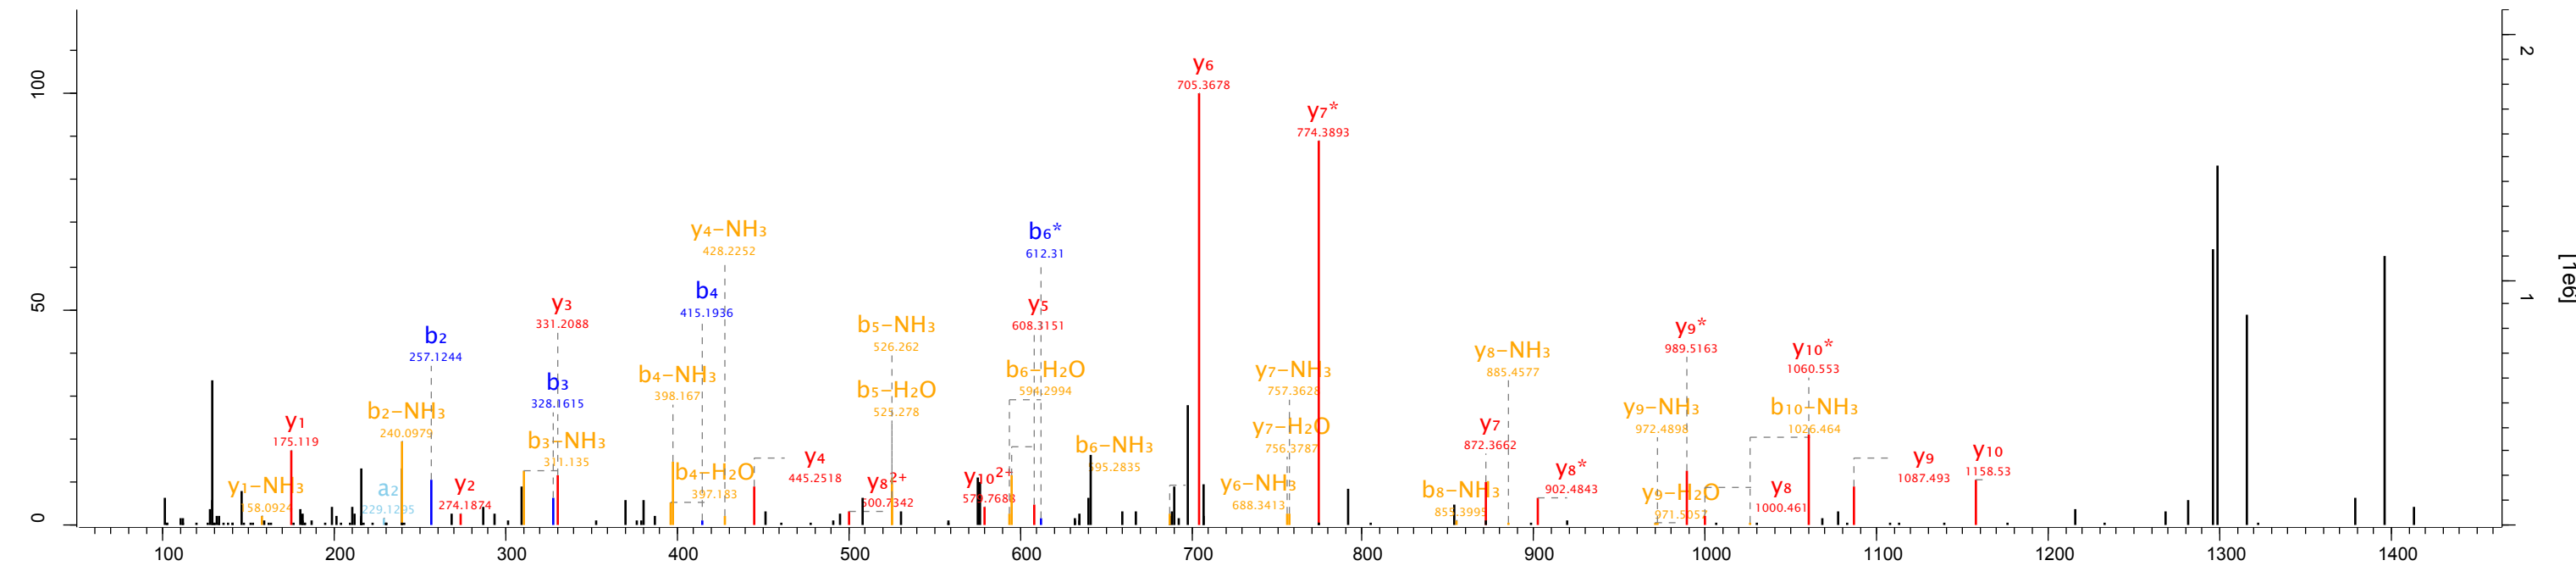

Peptide sequence: - Q Q A S K S P Y N G V R -

Fragmentation sites (b ions): b2 (under Q), b3 (under A), b4 (under S), b6\* (under S)

Fragmentation sites (y ions): y1 (under R), y2 (under V), y3 (under G), y4 (under N), y5 (under Y), y6 (under P), y7-ph (under S), y8 (under K), y9 (under S), y10 (under A)

Raw file: 20150814\_A375SR\_Phospho\_BR2\_05  
 Scan: 4191 Method: FTMS; HCD Score: 112.16 m/z: 804.87 Gene names: RSRC2

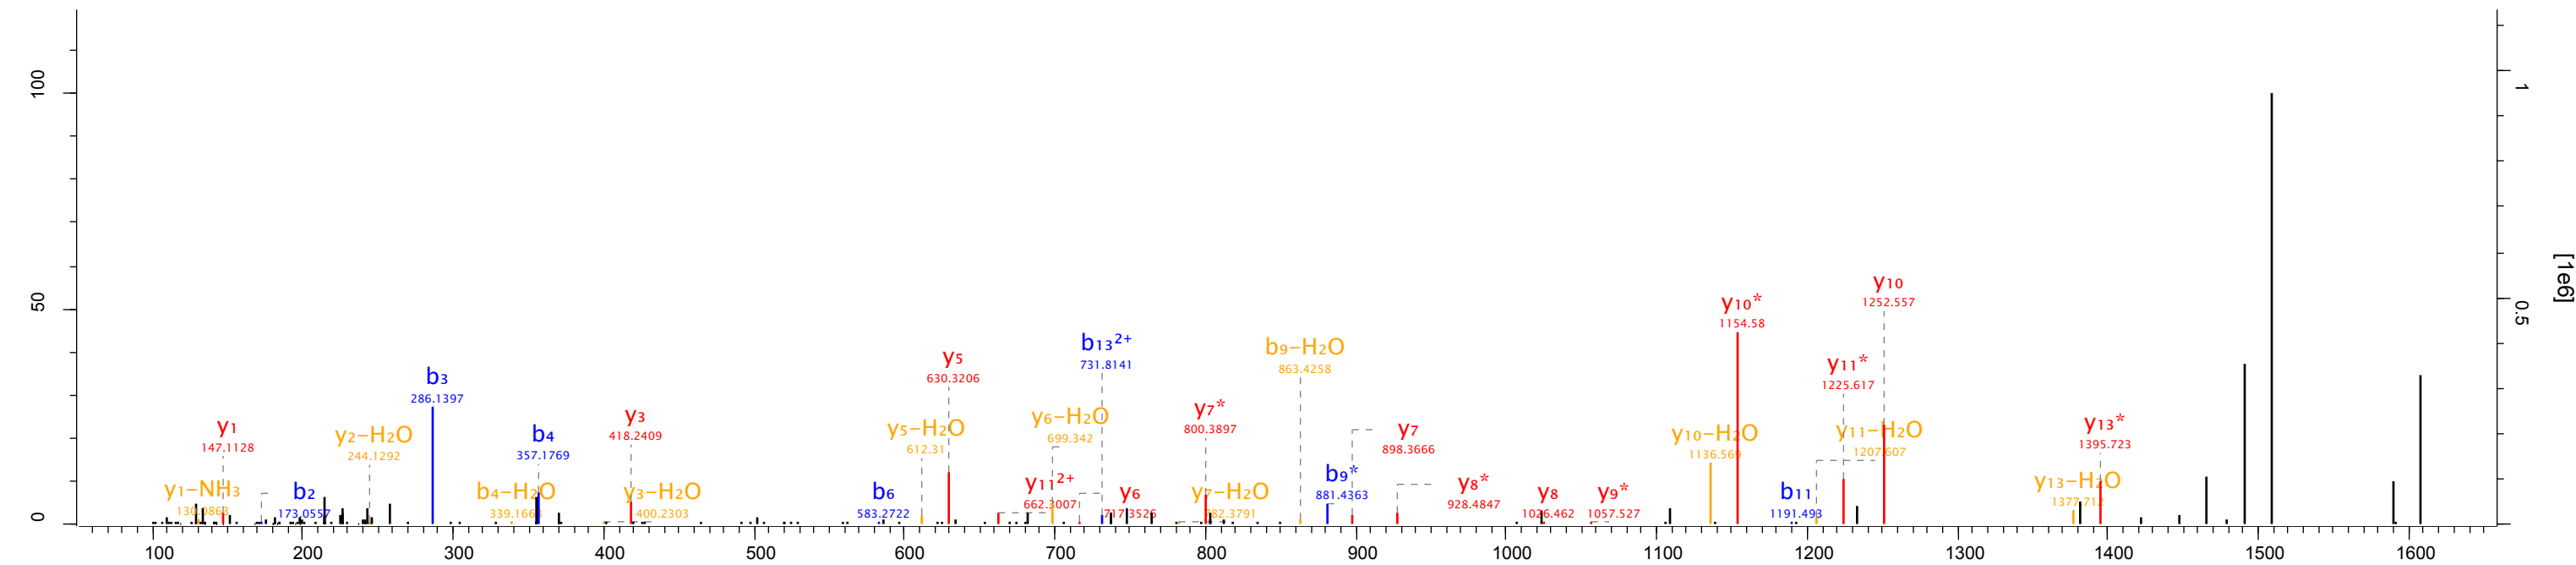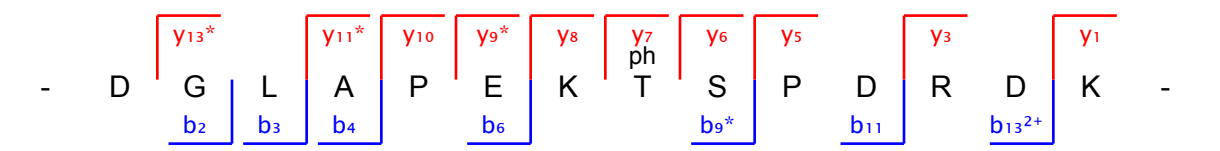

Raw file: 20150814\_A375SR\_Phospho\_BR2\_05  
 Scan: 4491 Method: FTMS; HCD Score: 182.47 m/z: 734.33 Gene names: PLEC

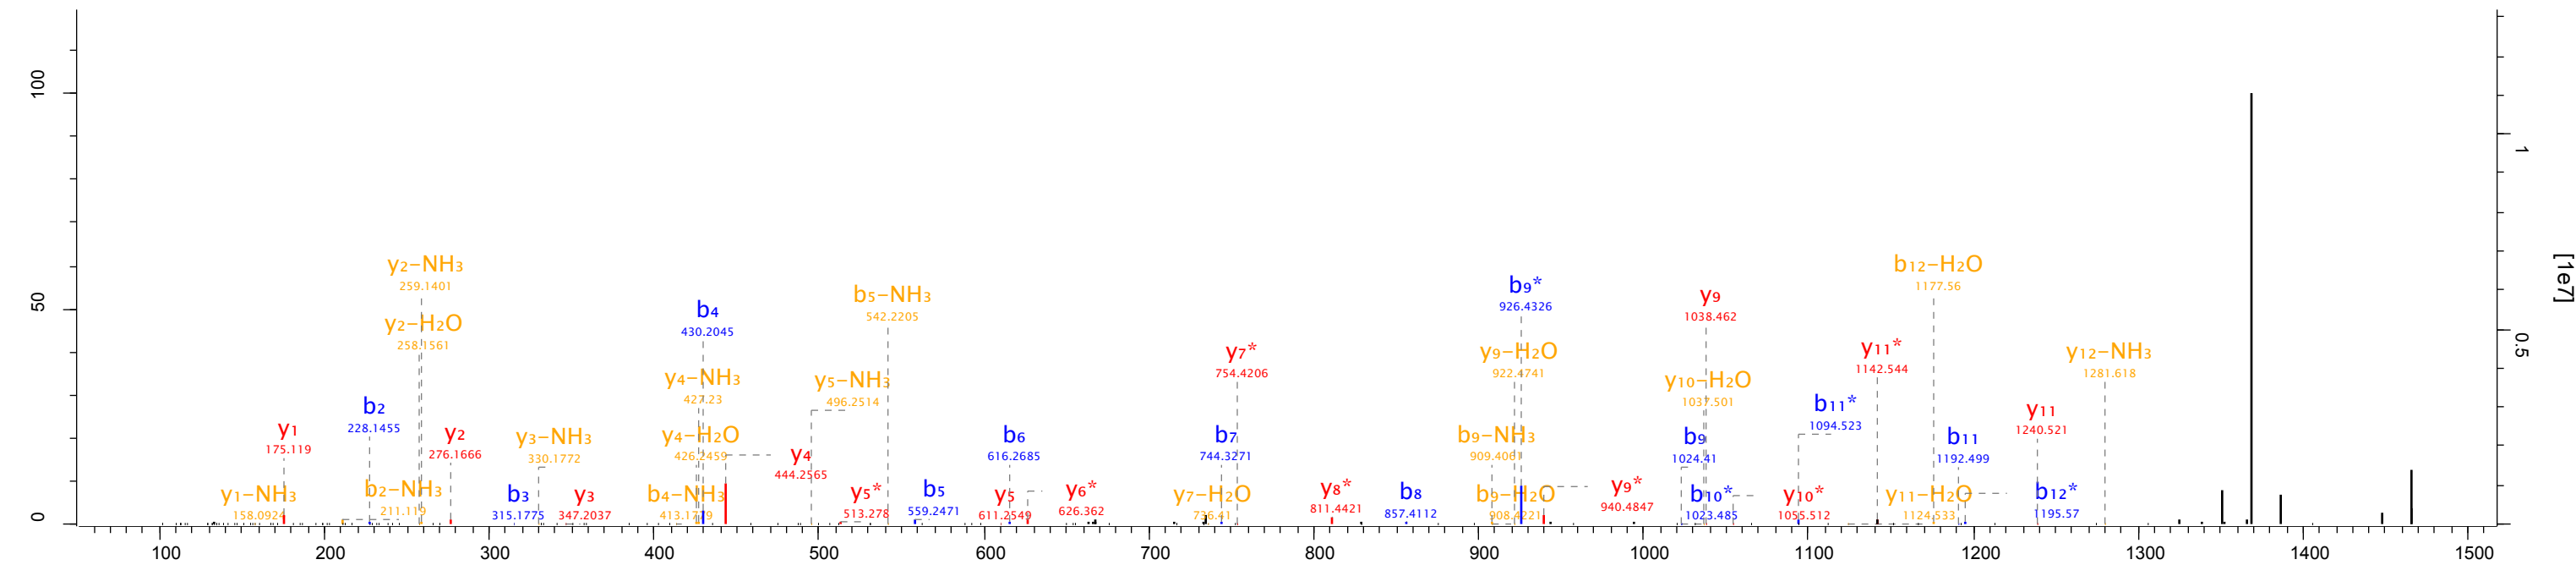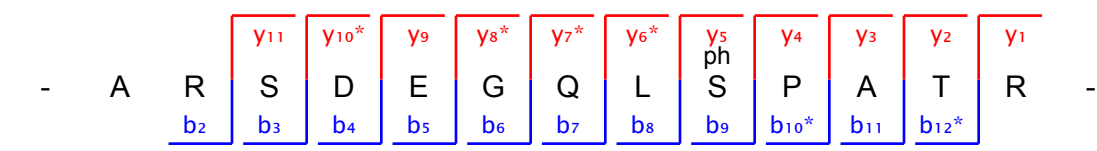

Raw file: 20150814\_A375SR\_Phospho\_BR2\_05  
 Scan: 5311 Method: FTMS; HCD Score: 92.75 m/z: 563.75 Gene names: CDKN1B

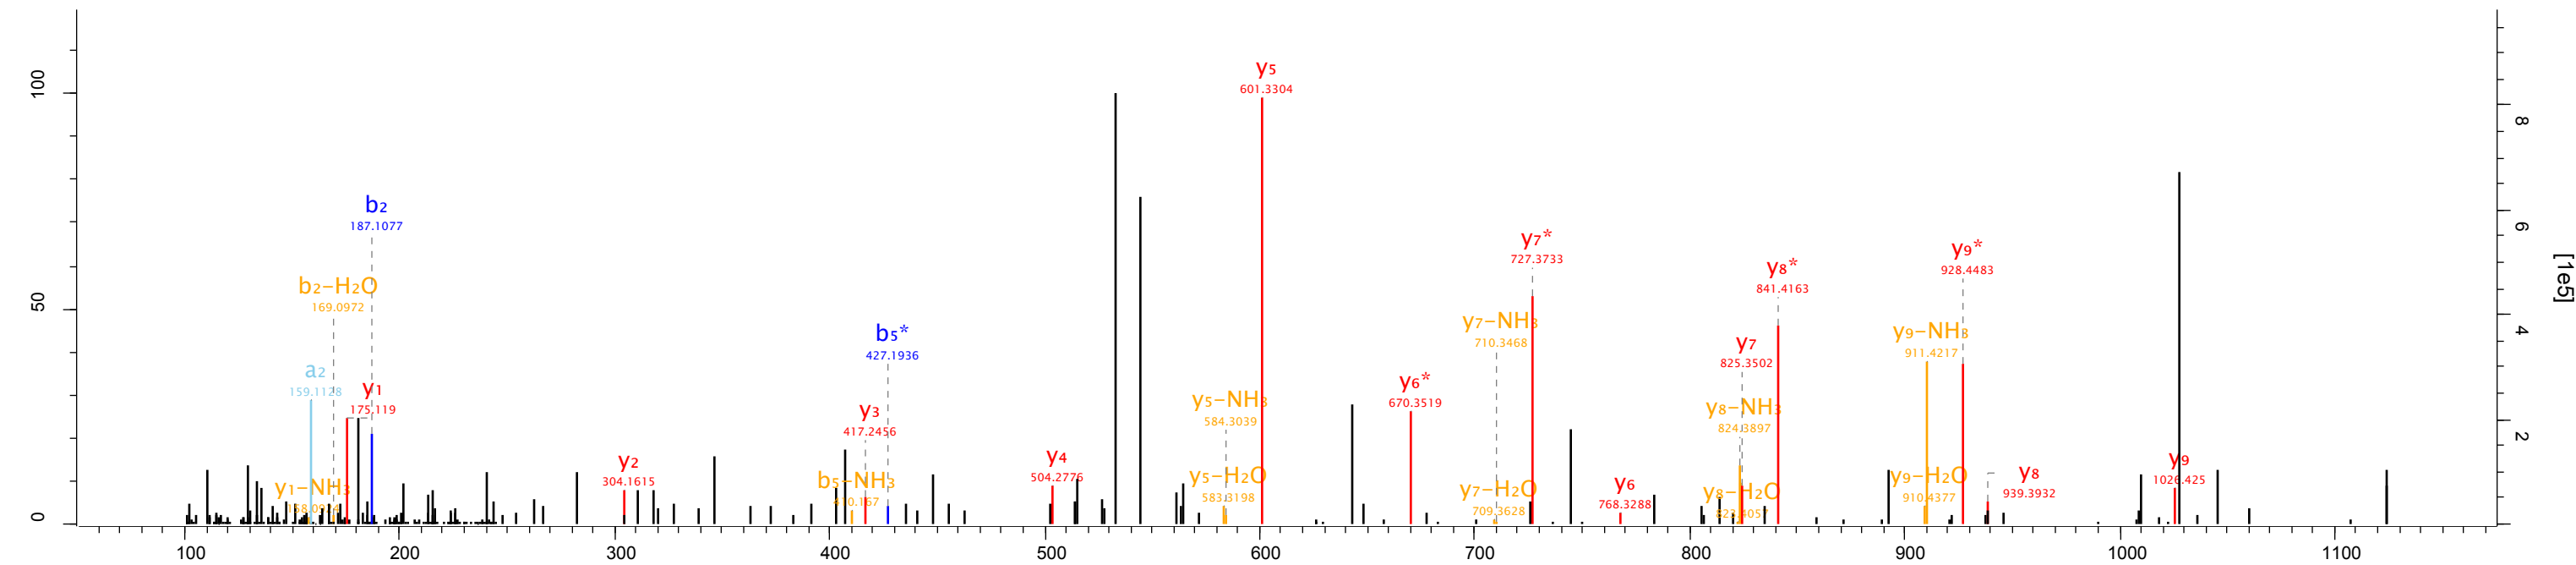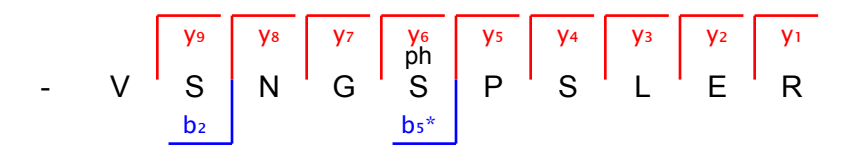

Raw file: 20150814\_A375SR\_Phospho\_BR2\_05  
 Scan: 5391 Method: FTMS; HCD Score: 113.33 m/z: 809.4 Gene names: ZMYND8

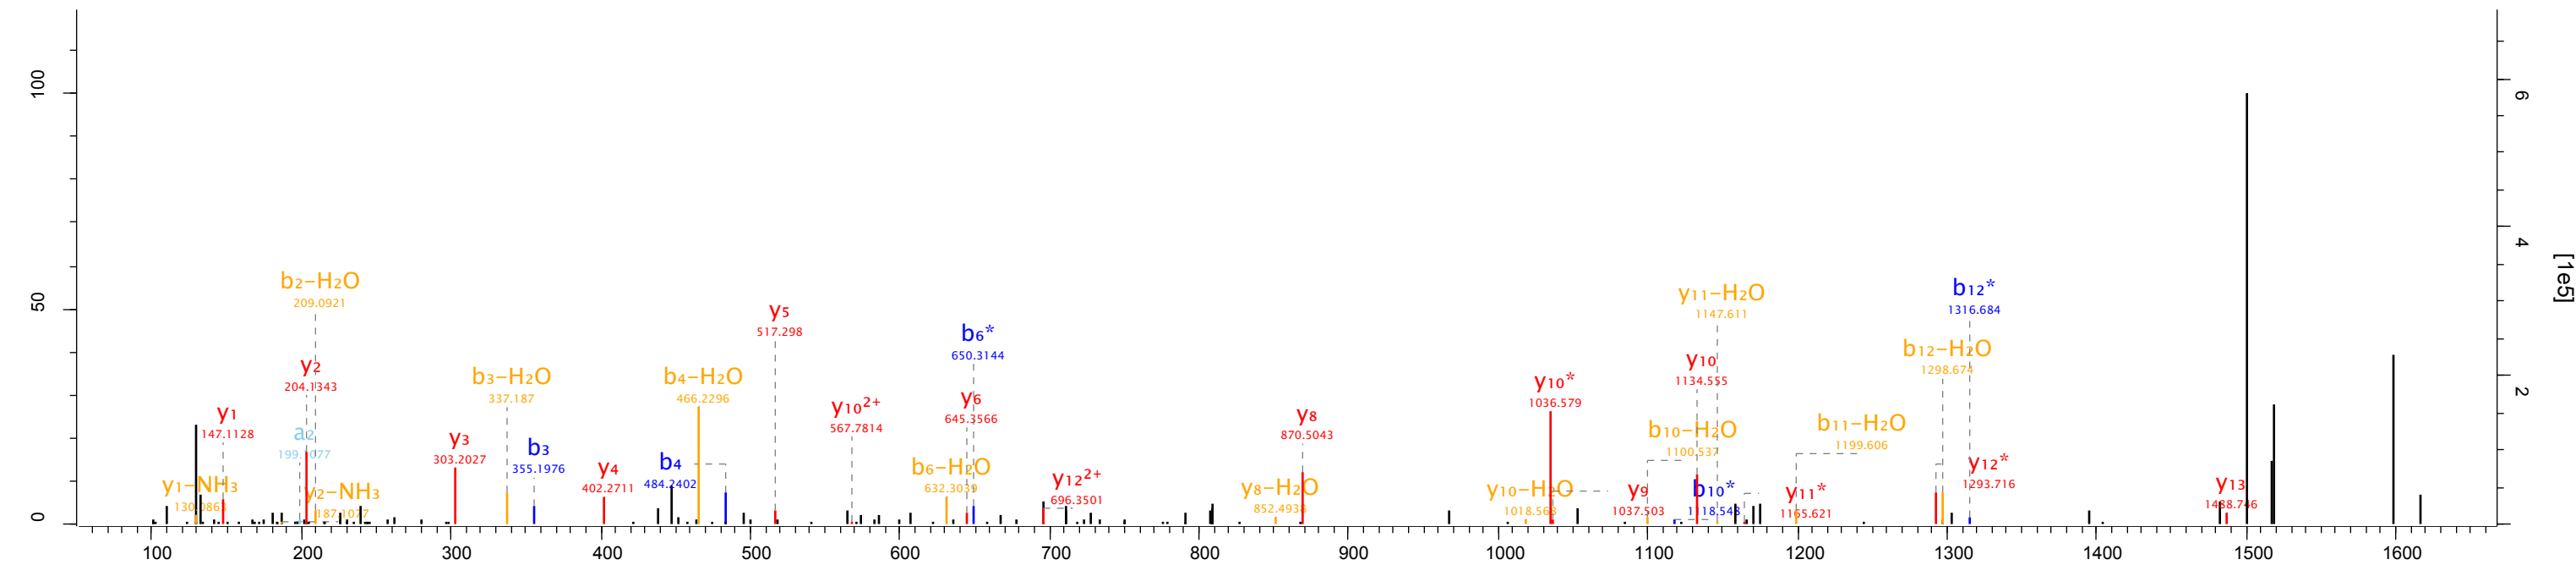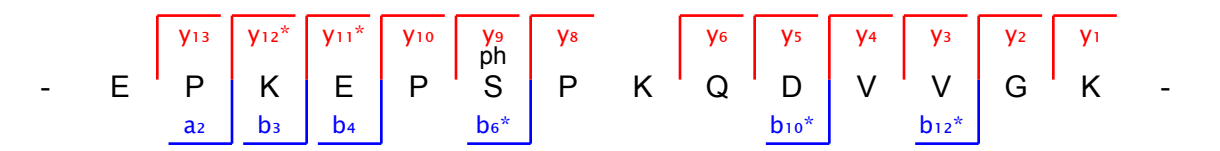

Raw file Scan Method Score m/z Gene names

20150814\_A375SR\_Phospho\_BR2\_05 5911 FTMS; HCD 233.84 698.32 RPRD1B

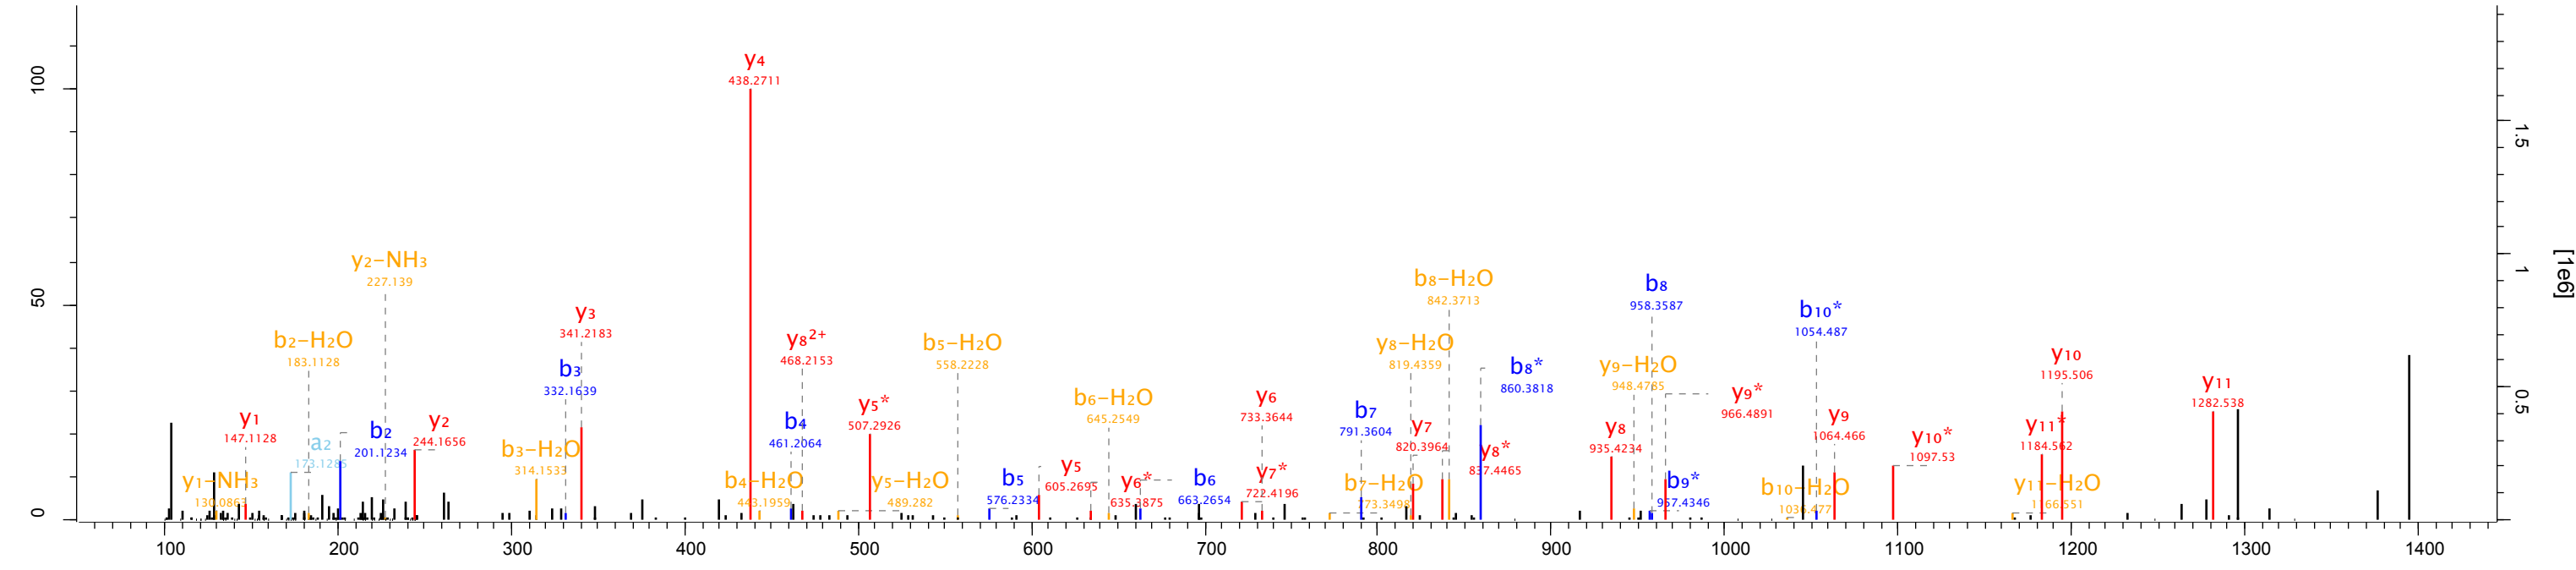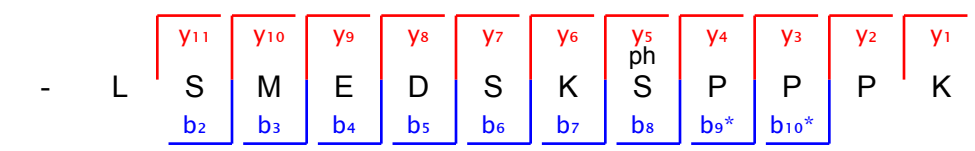

Raw file: 20150814\_A375SR\_Phospho\_BR2\_05  
 Scan: 6531 Method: FTMS; HCD Score: 136.99 m/z: 647.79 Gene names: MYO9B

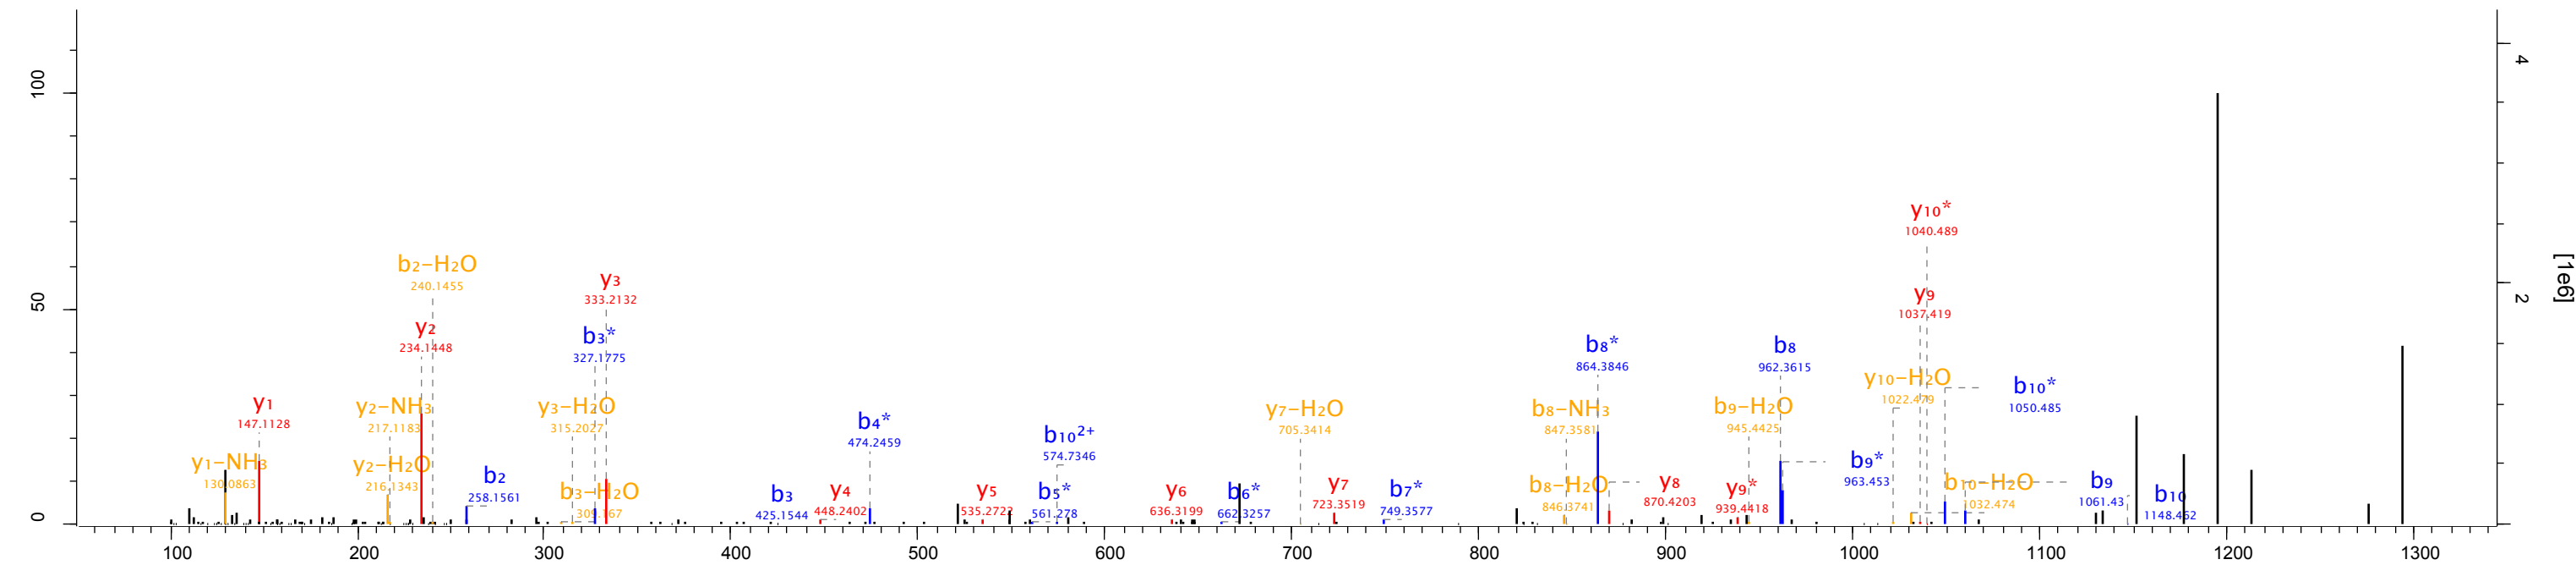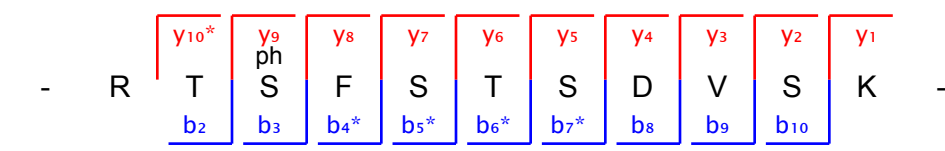



Raw file: 20150814\_A375SR\_Phospho\_BR2\_05  
 Scan: 6841 Method: FTMS; HCD Score: 134.31 m/z: 837.93 Gene names: POU2F1

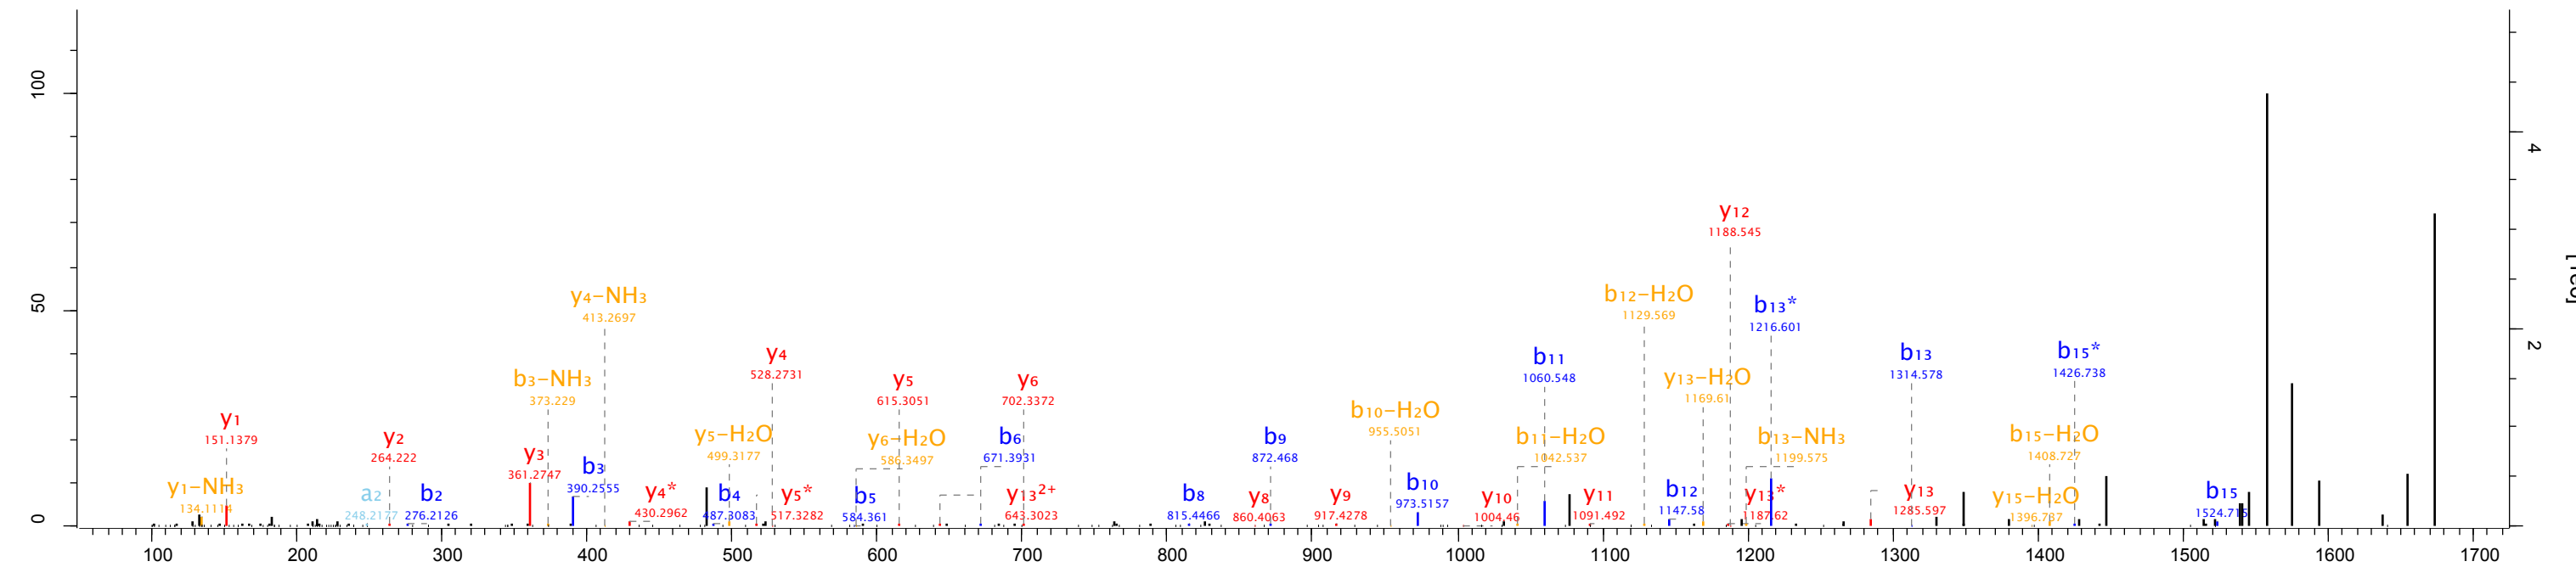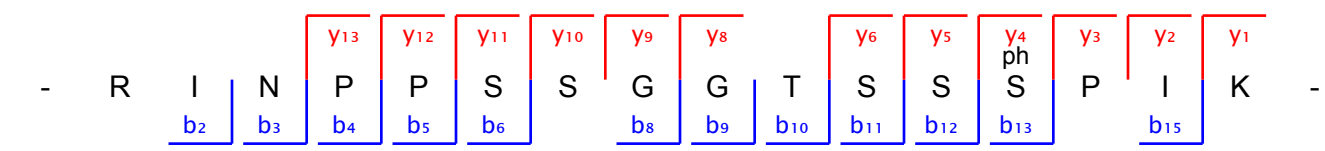

Raw file: 20150814\_A375SR\_Phospho\_BR2\_05  
 Scan: 7081 Method: FTMS; HCD Score: 157.97 m/z: 609.79 Gene names: CHAF1A

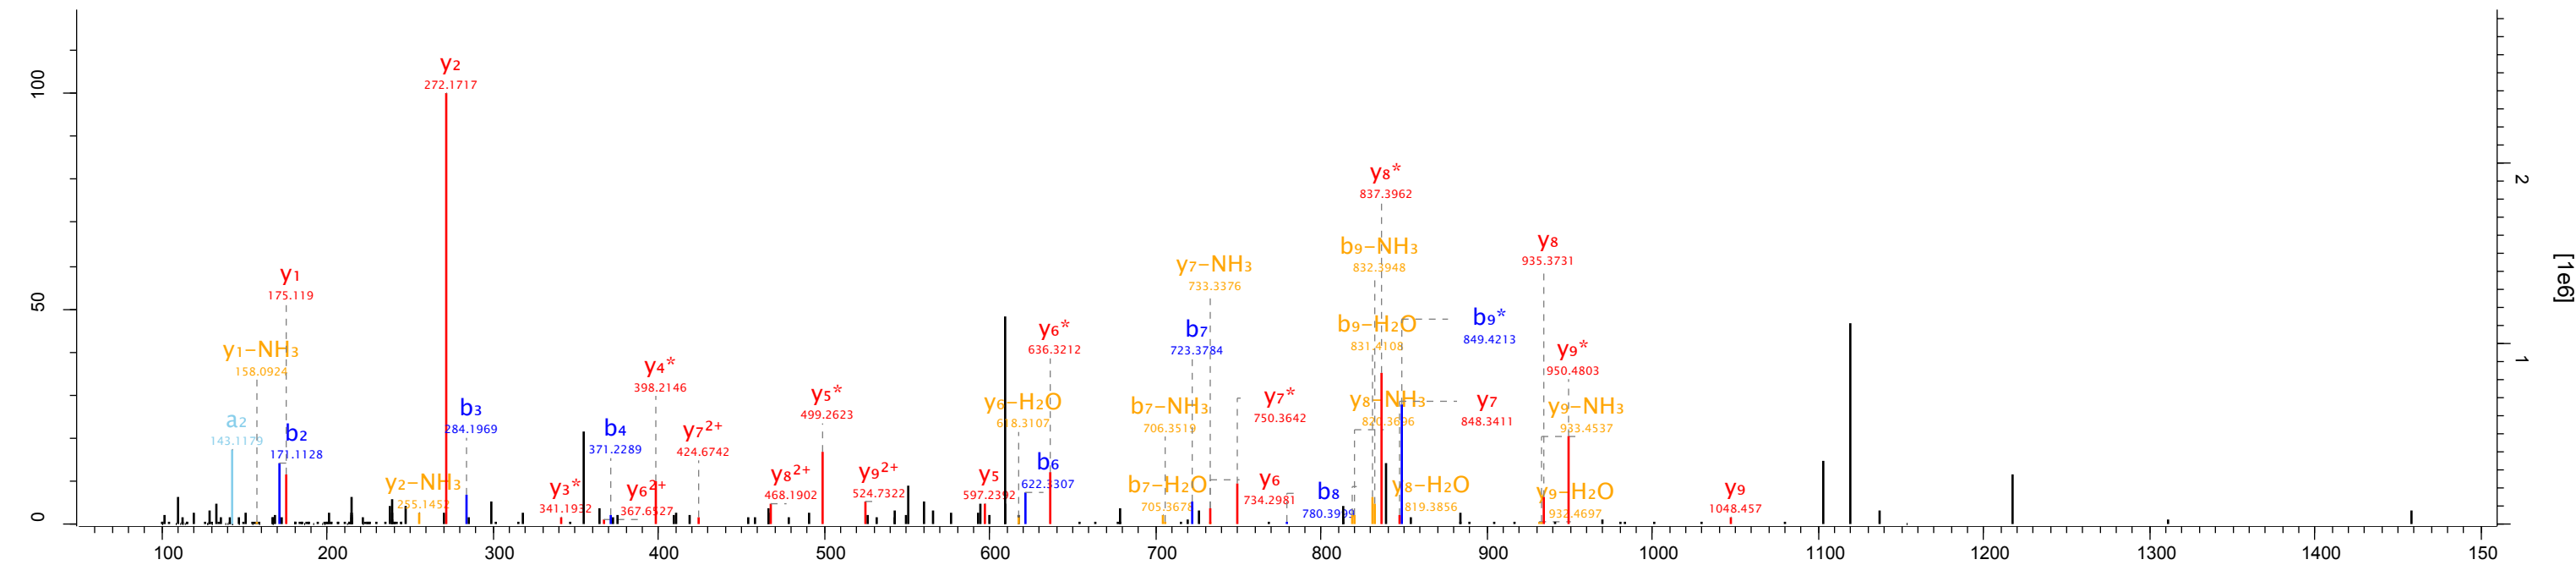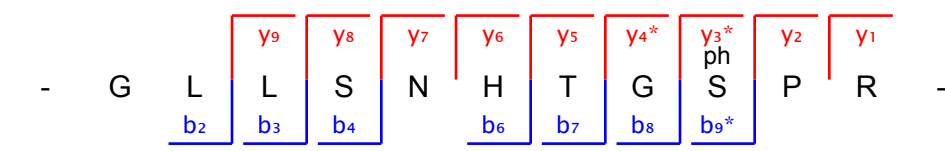

Raw file 20150814\_A375SR\_Phospho\_BR2\_05 Scan 7211 Method FTMS; HCD Score 140.77 m/z 649.8 Gene names PRR12

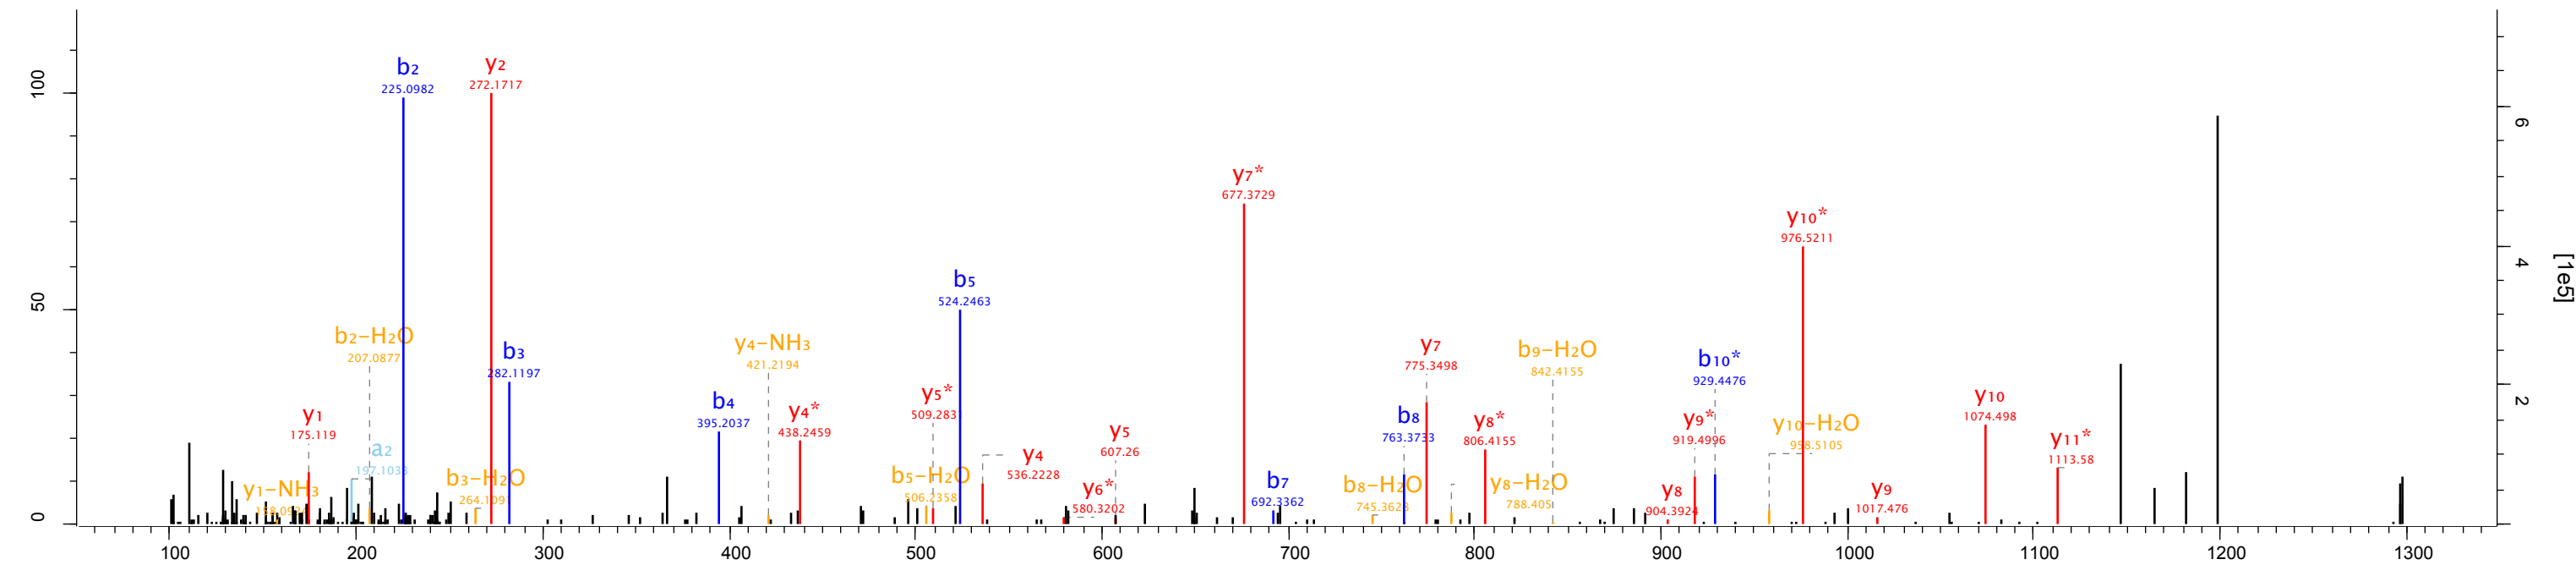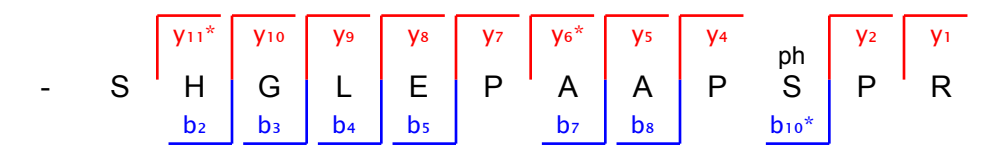

Raw file: 20150814\_A375SR\_Phospho\_BR2\_05  
 Scan: 7561 Method: FTMS; HCD Score: 131.41 m/z: 831.38 Gene names: NDRG1

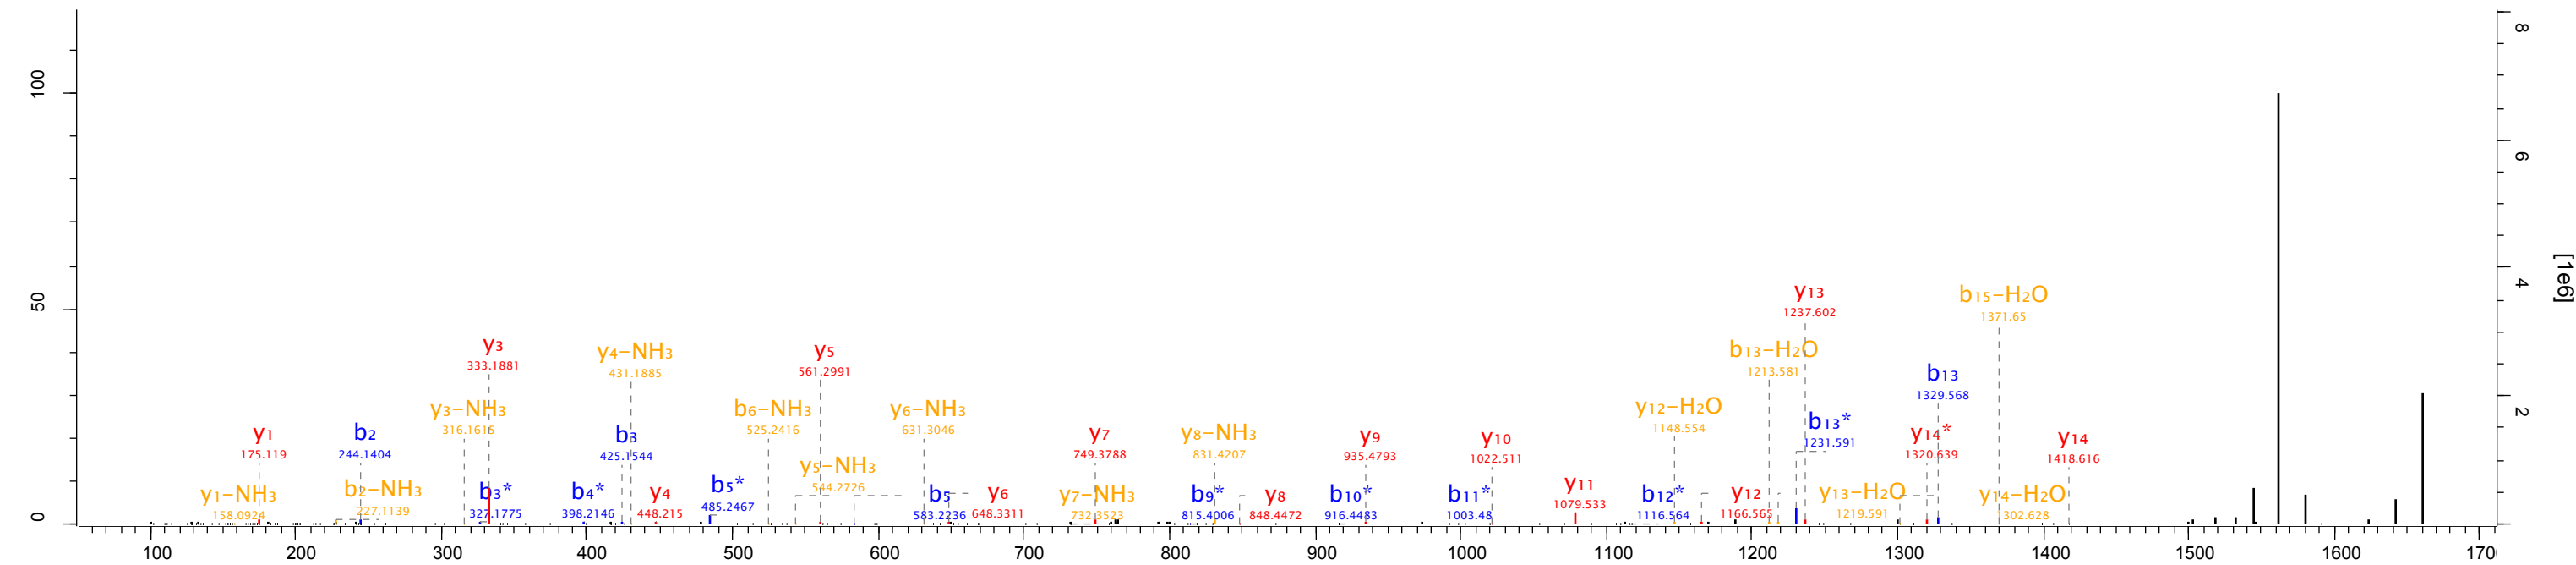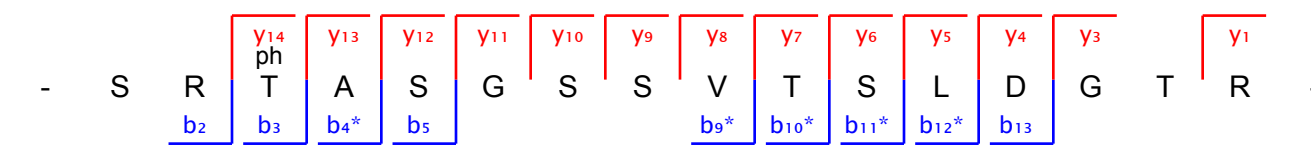

Raw file: 20150814\_A375SR\_Phospho\_BR2\_05  
 Scan: 7731 Method: FTMS; HCD Score: 46.46 m/z: 606.24 Gene names: PSMF1

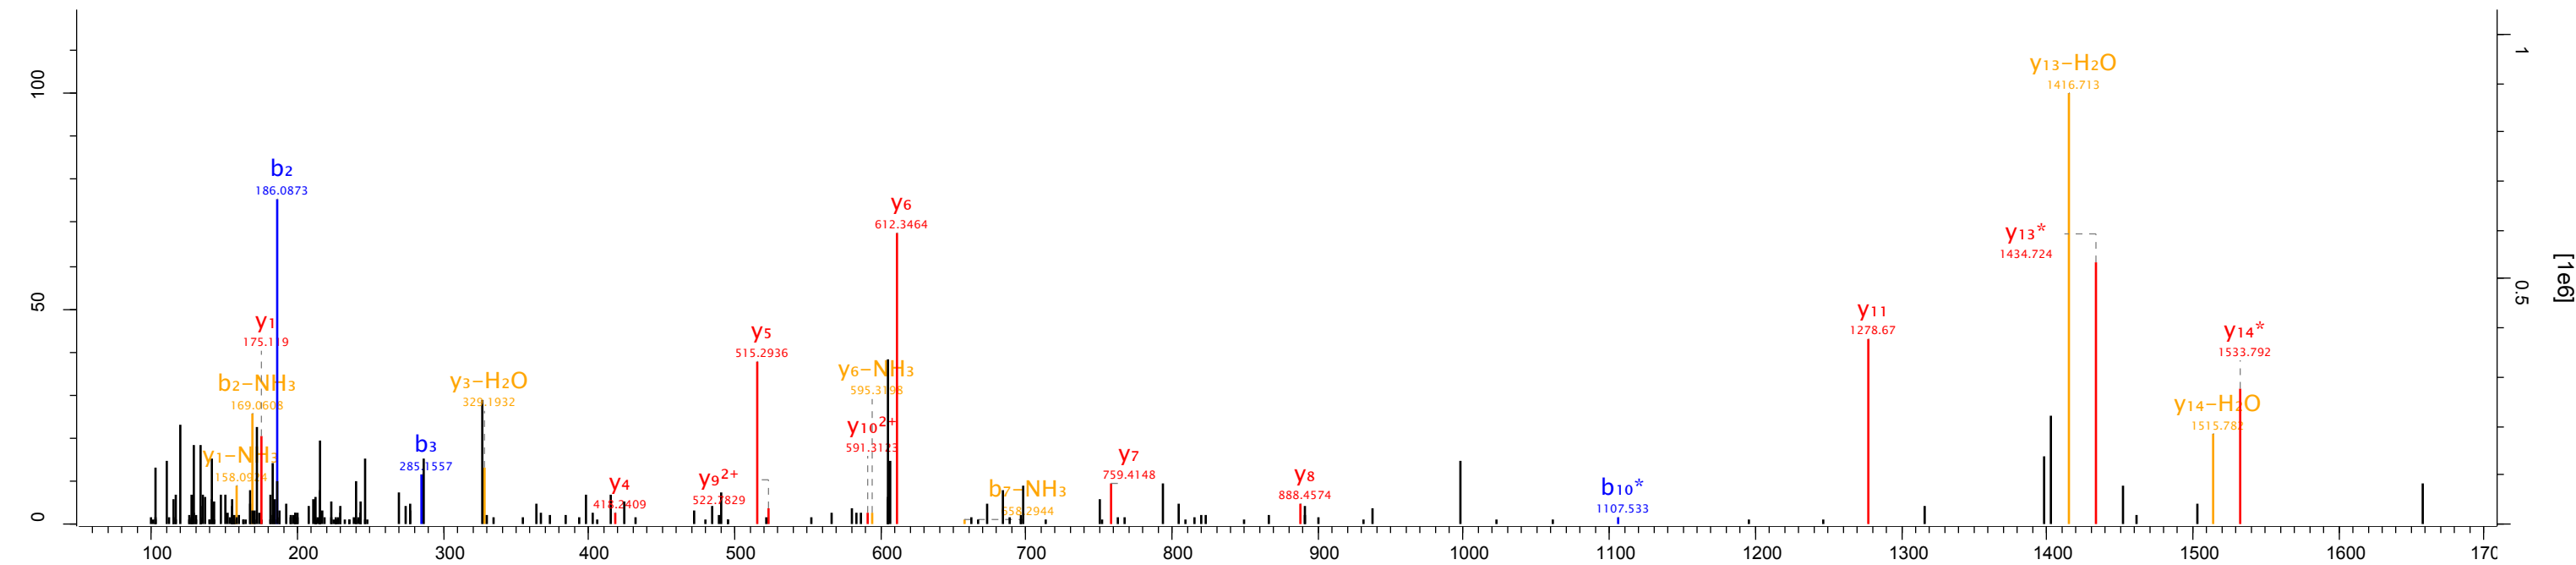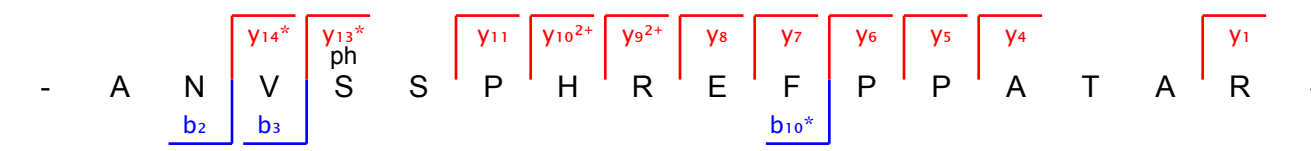

Raw file: 20150814\_A375SR\_Phospho\_BR2\_05  
 Scan: 7931 Method: FTMS; HCD Score: 256.8 m/z: 924.42 Gene names: ARHGEF12

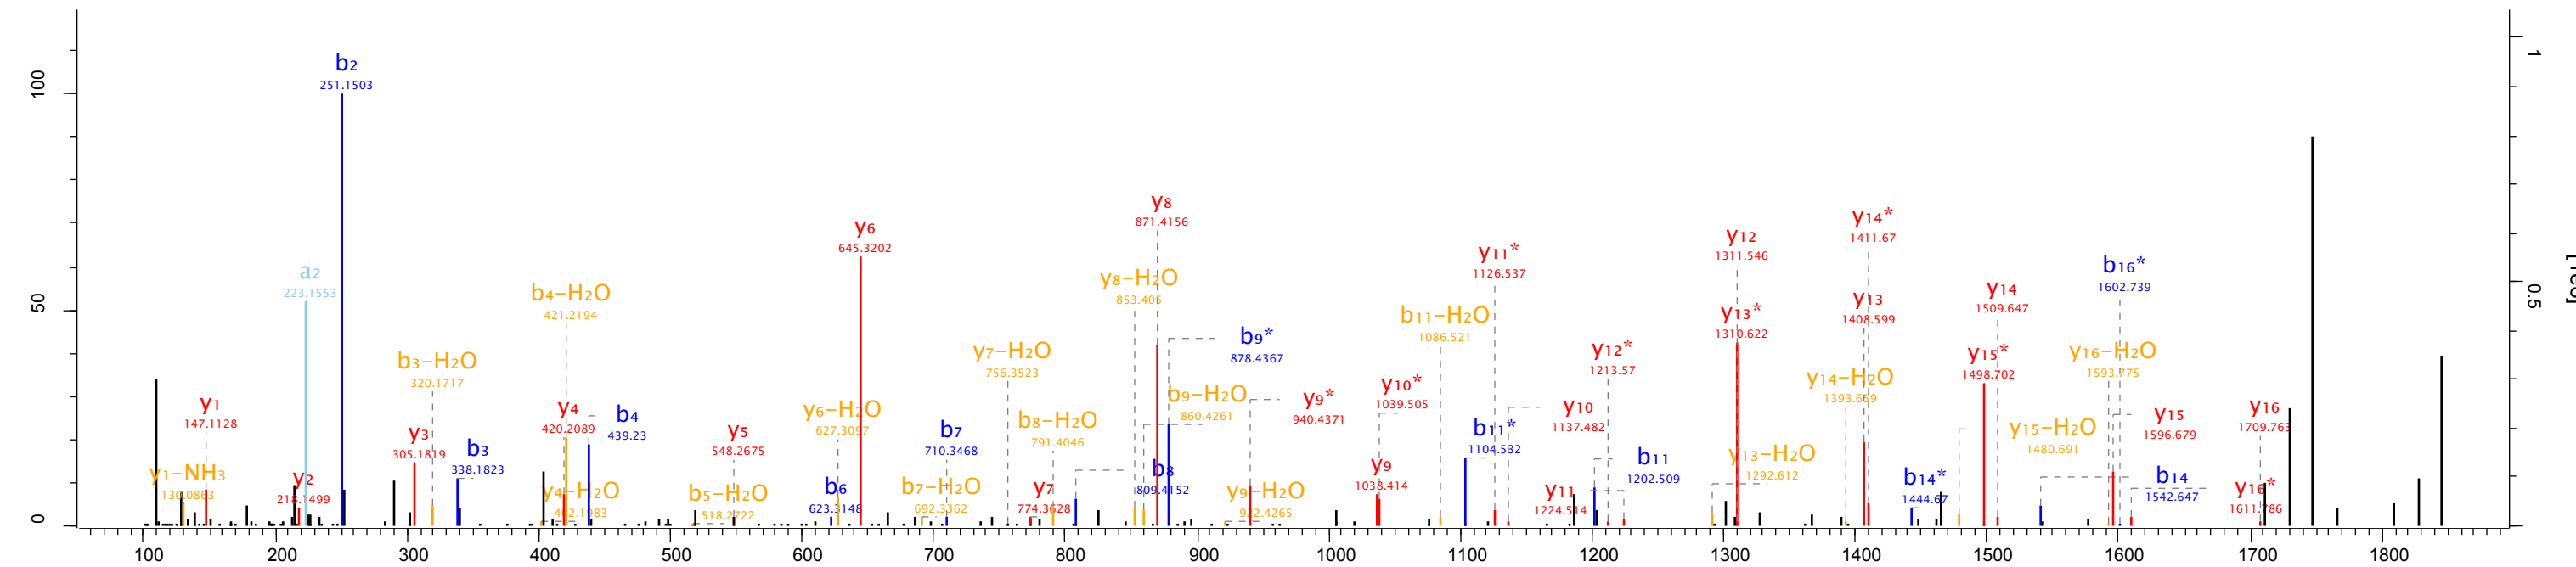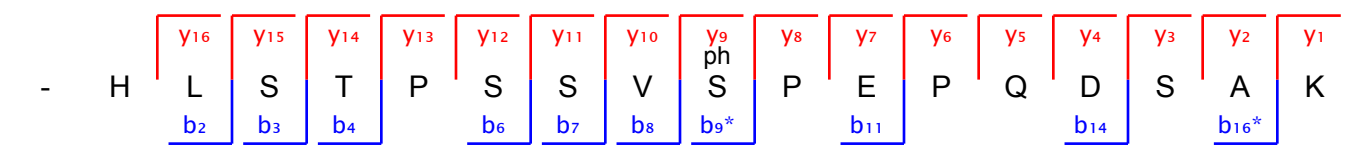

Raw file 20150814\_A375SR\_Phospho\_BR2\_05 Scan 8681 Method FTMS; HCD Score 263.33 m/z 938.39 Gene names BAZ1B

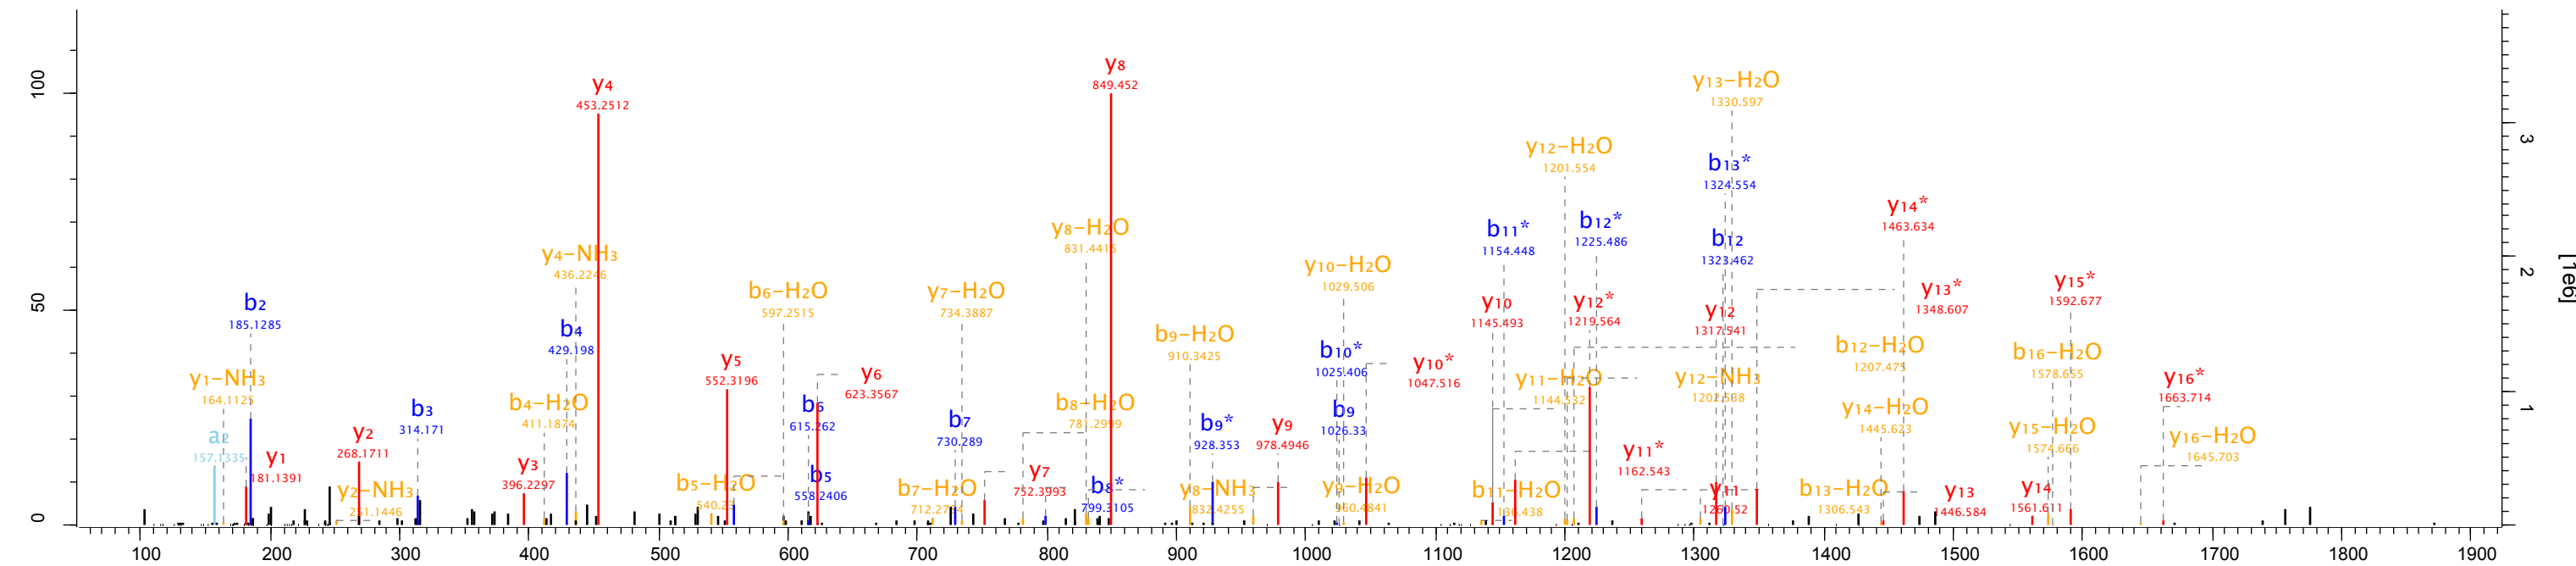

- L A E D E G D S E P E A V G Q S R -

y16\*
y15\*
y14
y13
y12
y11
y10  
ph
y9
y8
y7
y6
y5
y4
y3
y2
y1

b2
b3
b4
b5
b6
b7
b8\*
b9
b10\*
b11\*
b12
b13\*

Raw file: 20150814\_A375SR\_Phospho\_BR2\_05  
 Scan: 8711 Method: FTMS; HCD Score: 168.25 m/z: 730.31 Gene names: STX1A

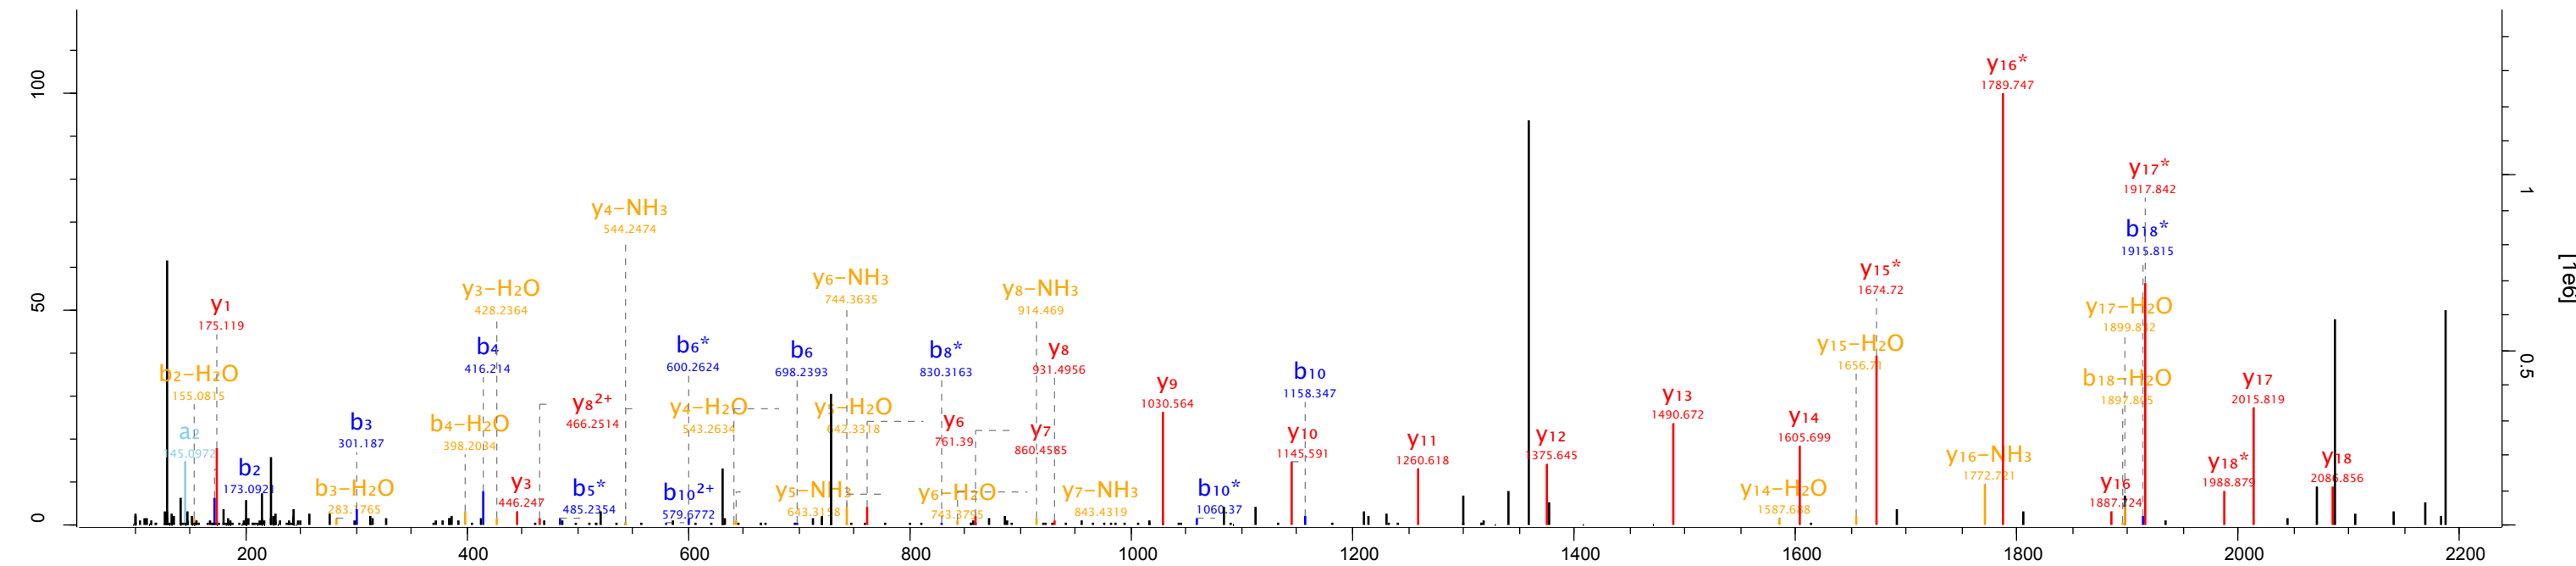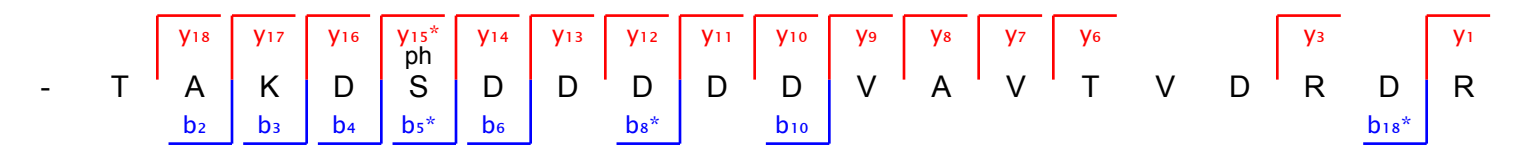



Raw file: 20150814\_A375SR\_Phospho\_BR2\_05  
 Scan: 9071 Method: FTMS; HCD Score: 215.75 m/z: 878.33 Gene names: DTX3L

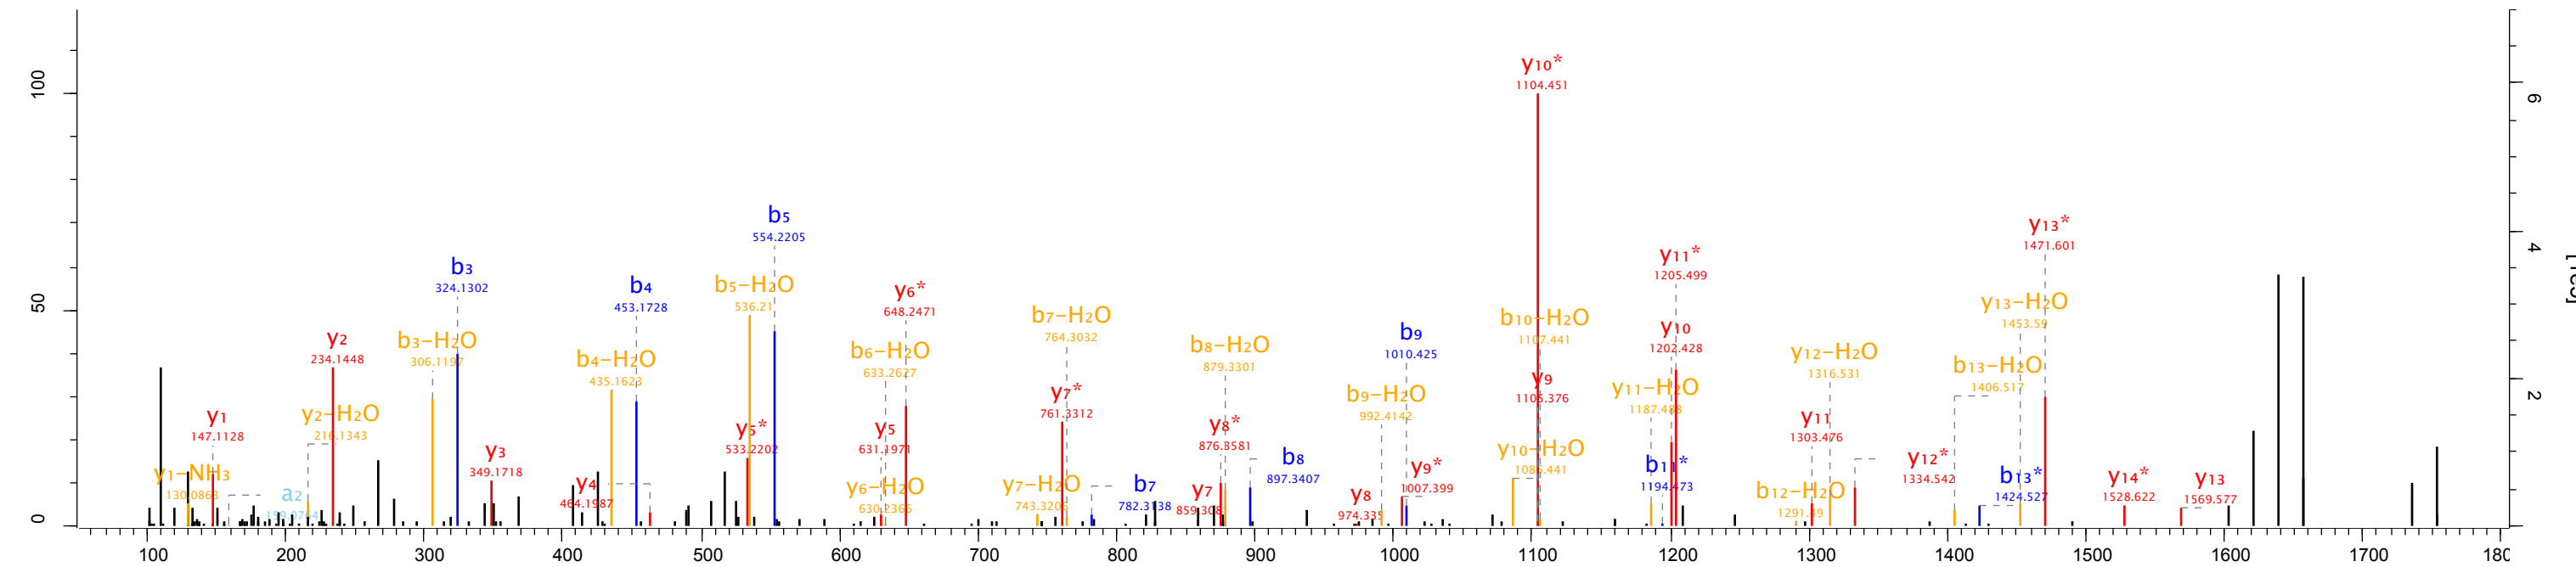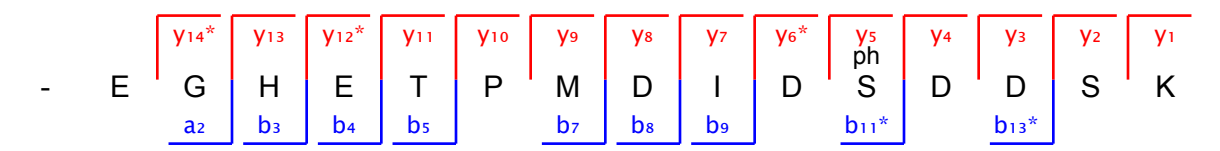

Raw file 20150814\_A375SR\_Phospho\_BR2\_05 Scan 9311 Method FTMS; HCD Score 96.74 m/z 565.32 Gene names DNTTIP2

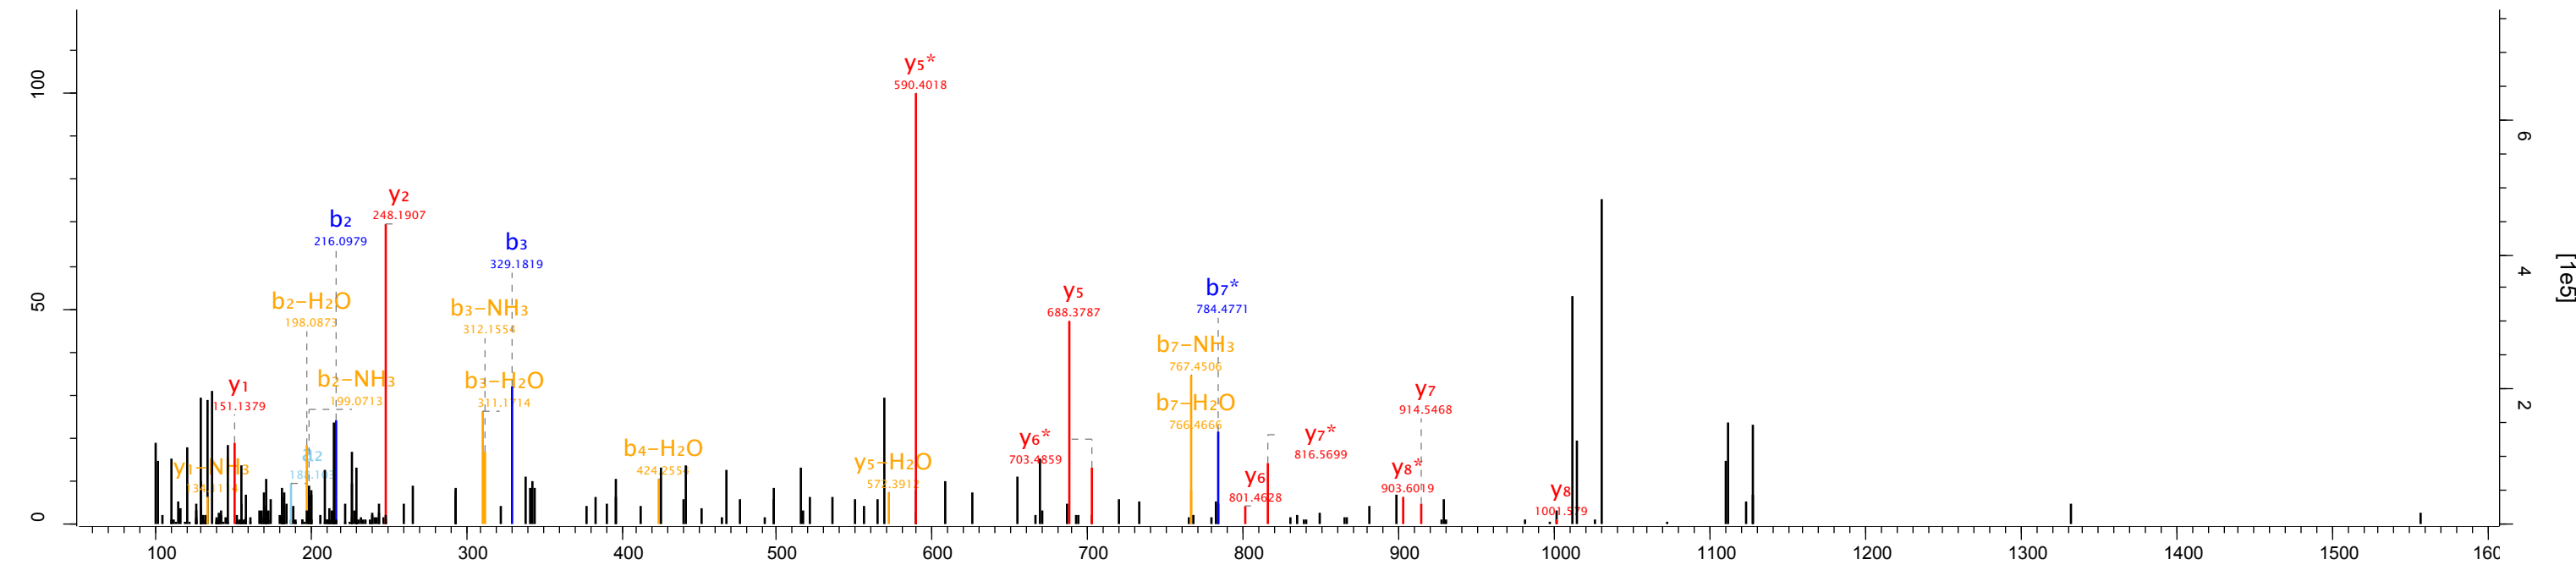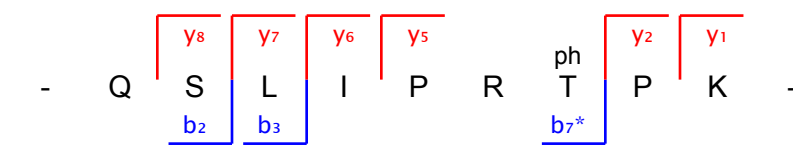

Raw file: 20150814\_A375SR\_Phospho\_BR2\_05  
 Scan: 9441 Method: FTMS; HCD Score: 190.18 m/z: 719.82 Gene names: LMO7

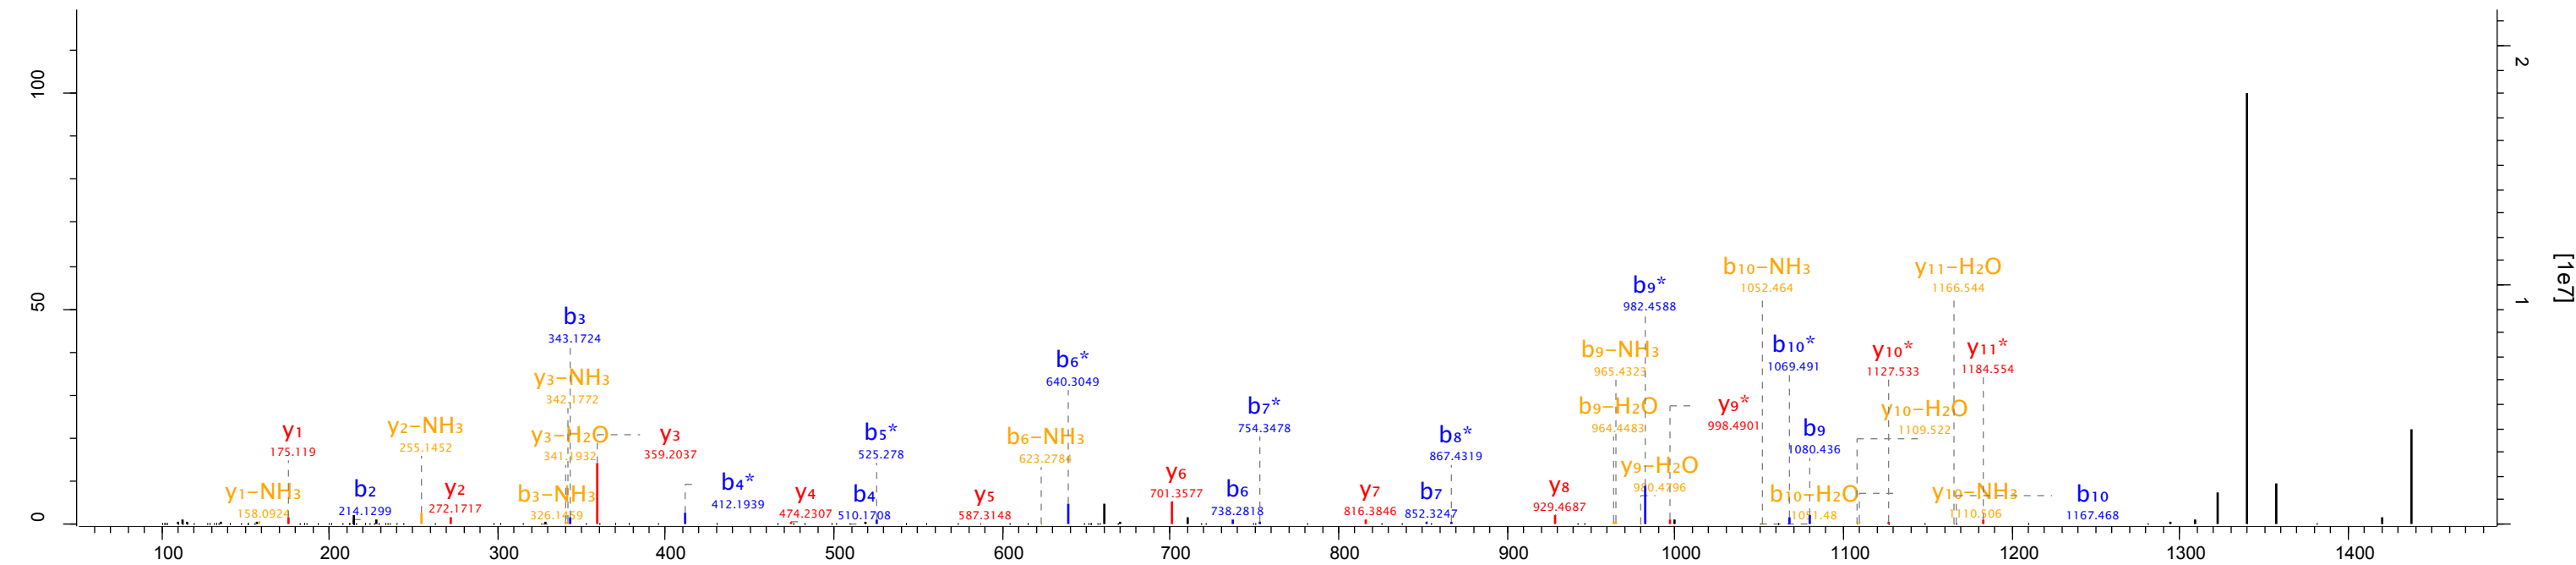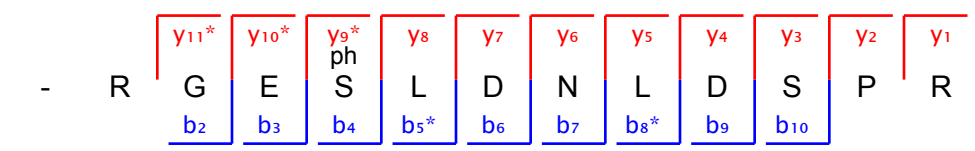

Raw file: 20150814\_A375SR\_Phospho\_BR2\_05  
 Scan: 9681 Method: FTMS; HCD Score: 209.39 m/z: 728.79 Gene names: OSBPL1A

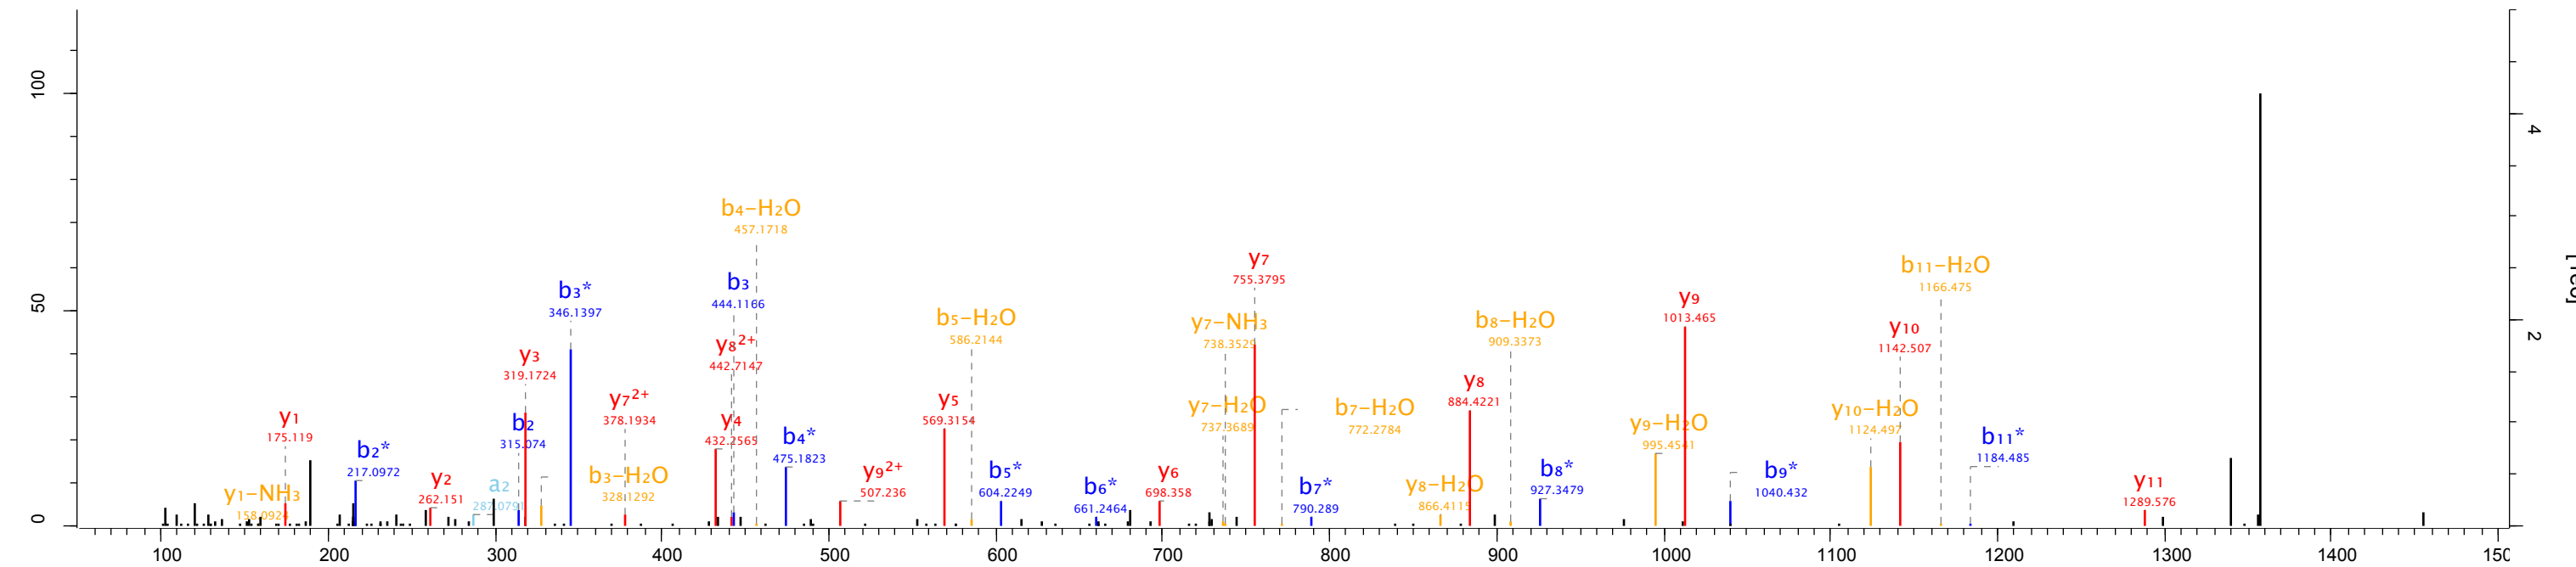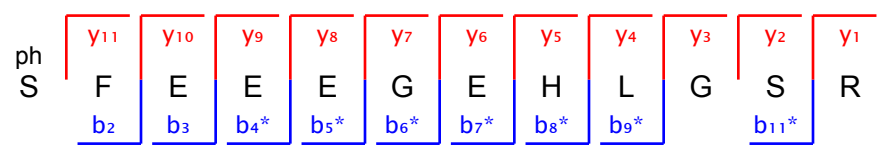

Raw file: 20150814\_A375SR\_Phospho\_BR2\_05  
 Scan: 9751 Method: FTMS; HCD Score: 111.73 m/z: 634.97 Gene names: HSPA4

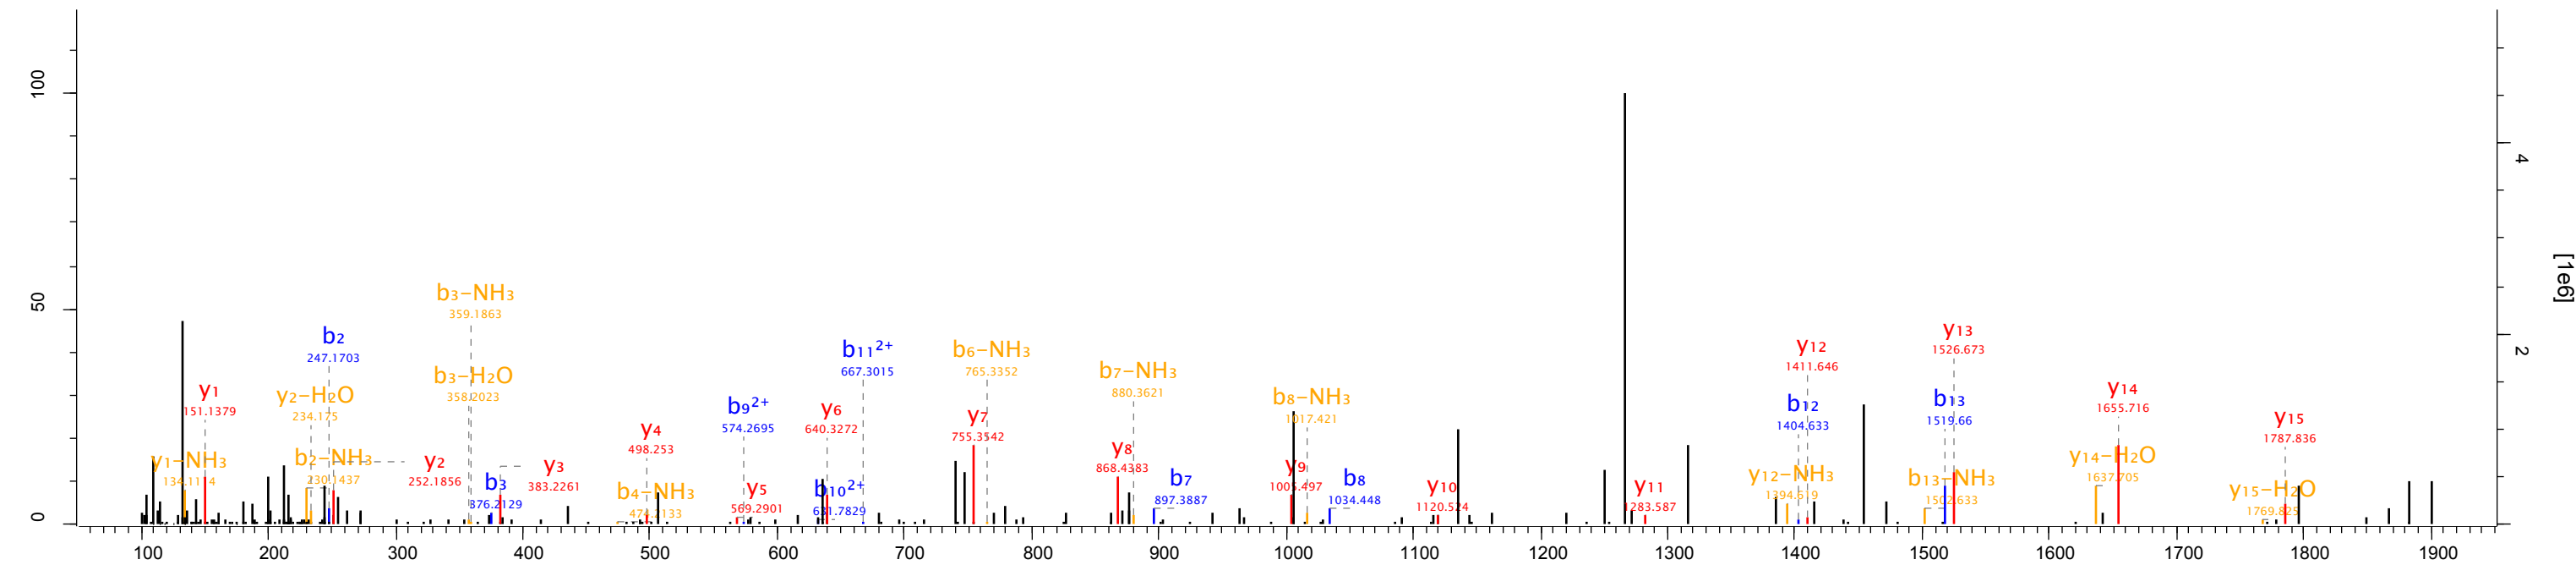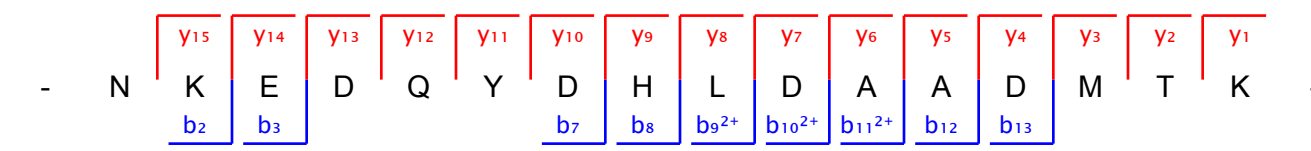

Raw file 20150814\_A375SR\_Phospho\_BR2\_05 Scan 9951 Method FTMS; HCD Score 101.2 m/z 630.27 Gene names PHLDB1

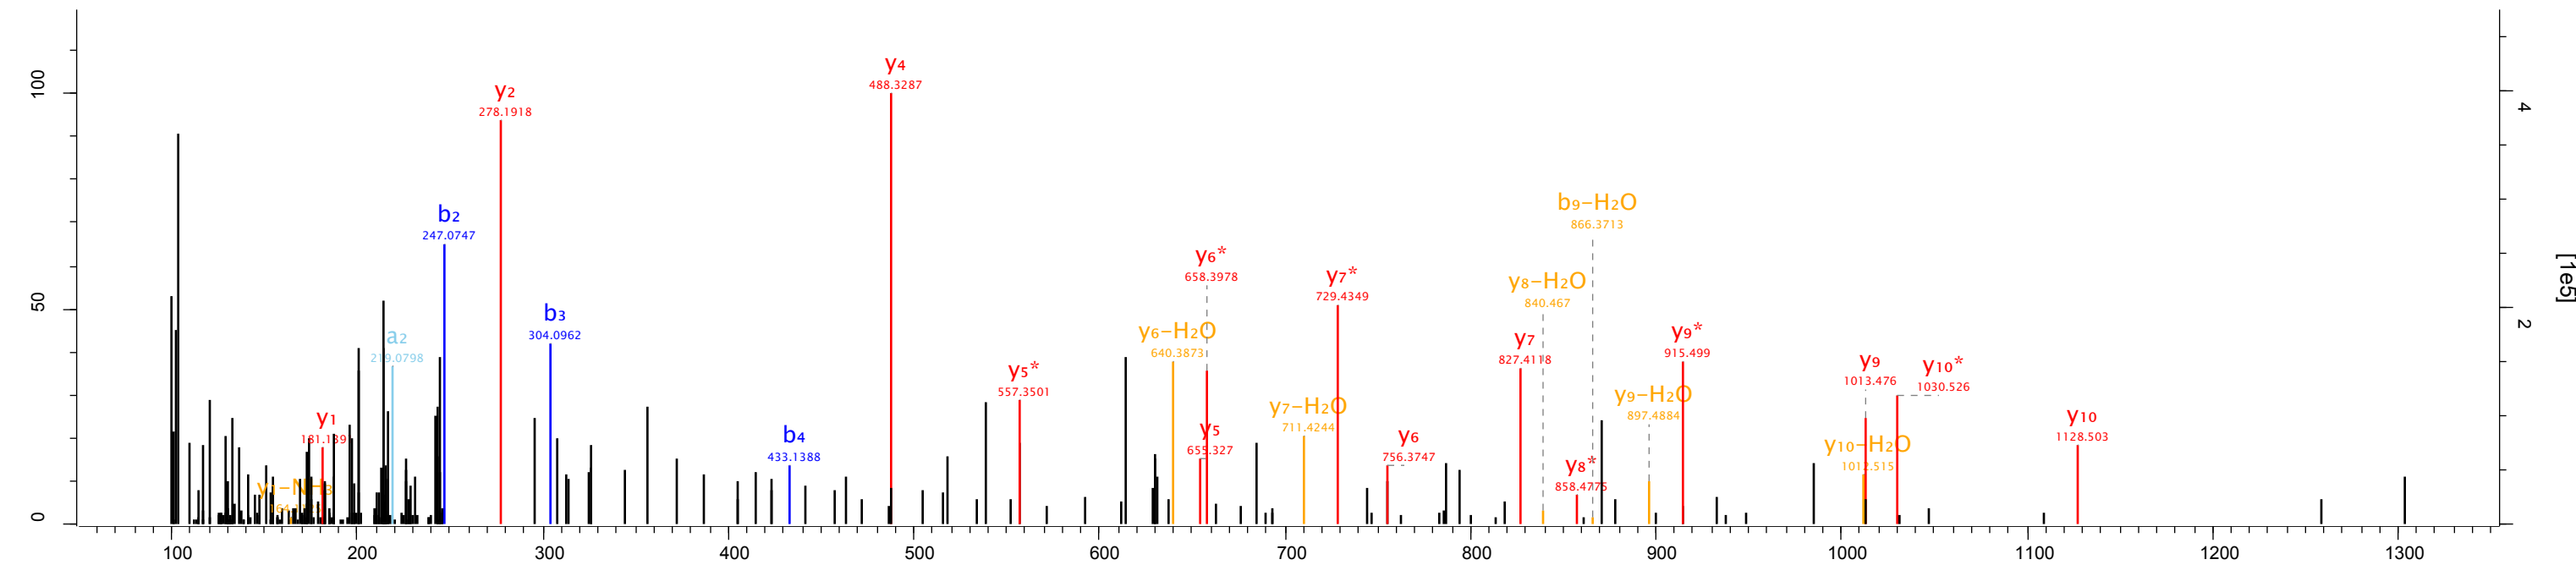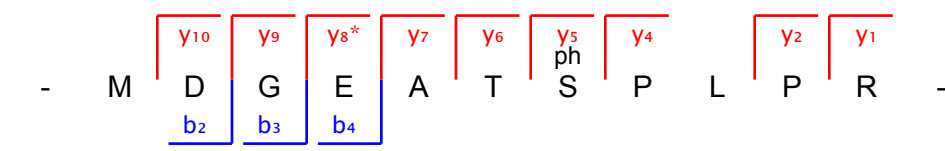

Raw file: 20150814\_A375SR\_Phospho\_BR2\_06  
 Scan: 11851 Method: FTMS; HCD Score: 47.51 m/z: 573.78 Gene names: EIF5B

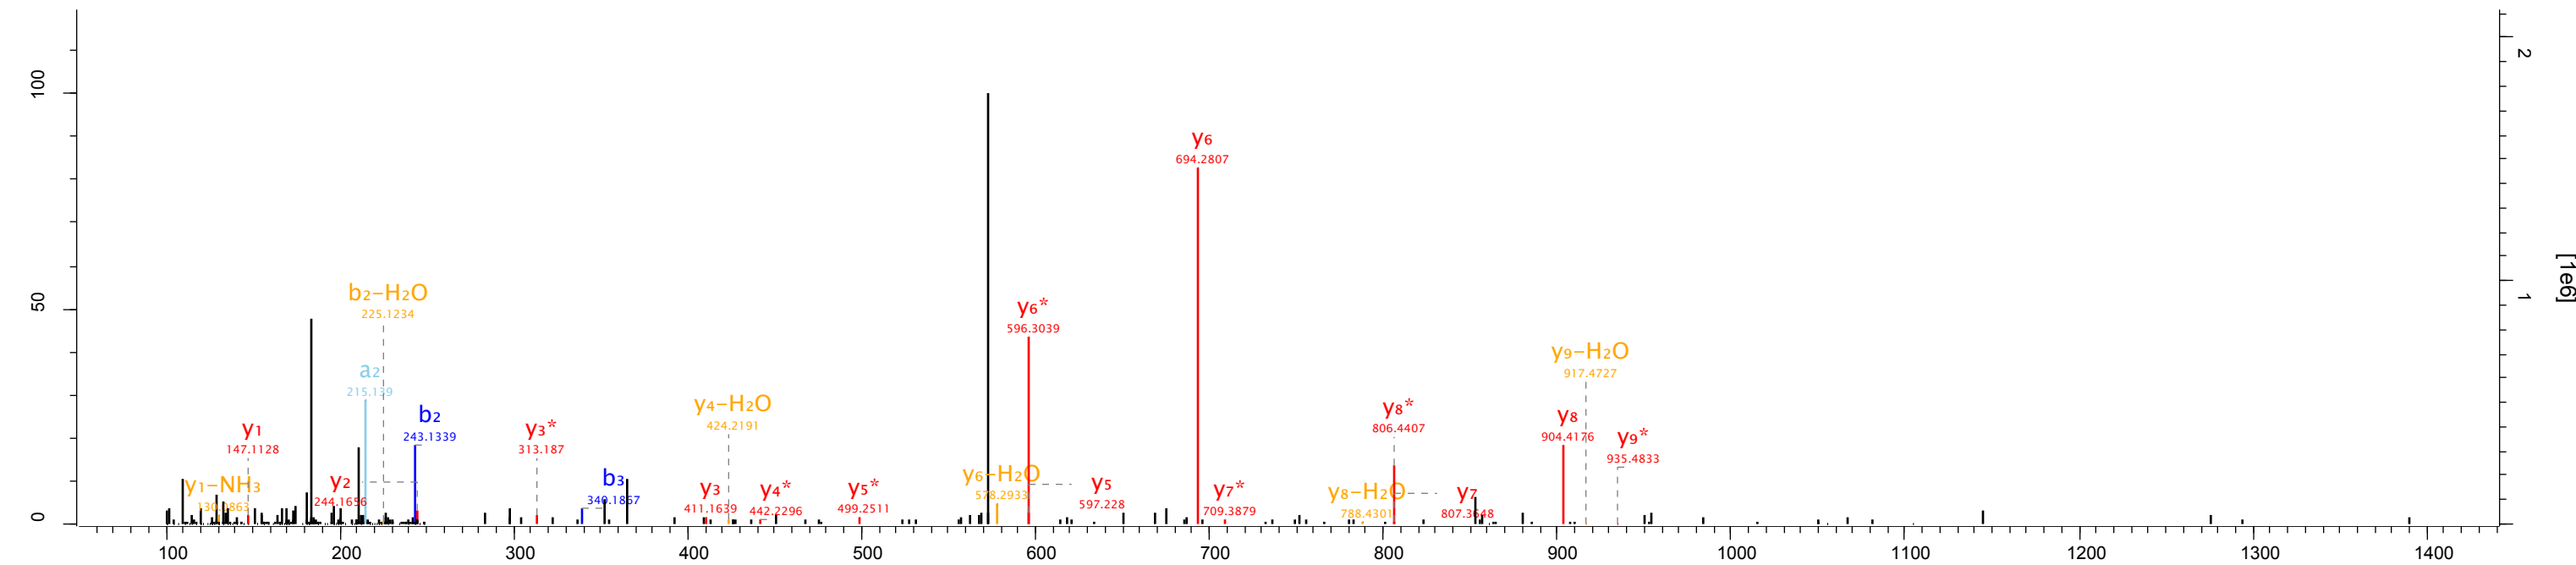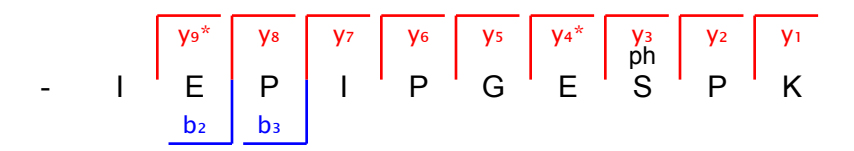

Raw file  
 20150814\_A375SR\_Phospho\_BR2\_06  
 Scan 11961 Method FTMS; HCD Score 63.73 m/z 926.41 Gene names DNPEP

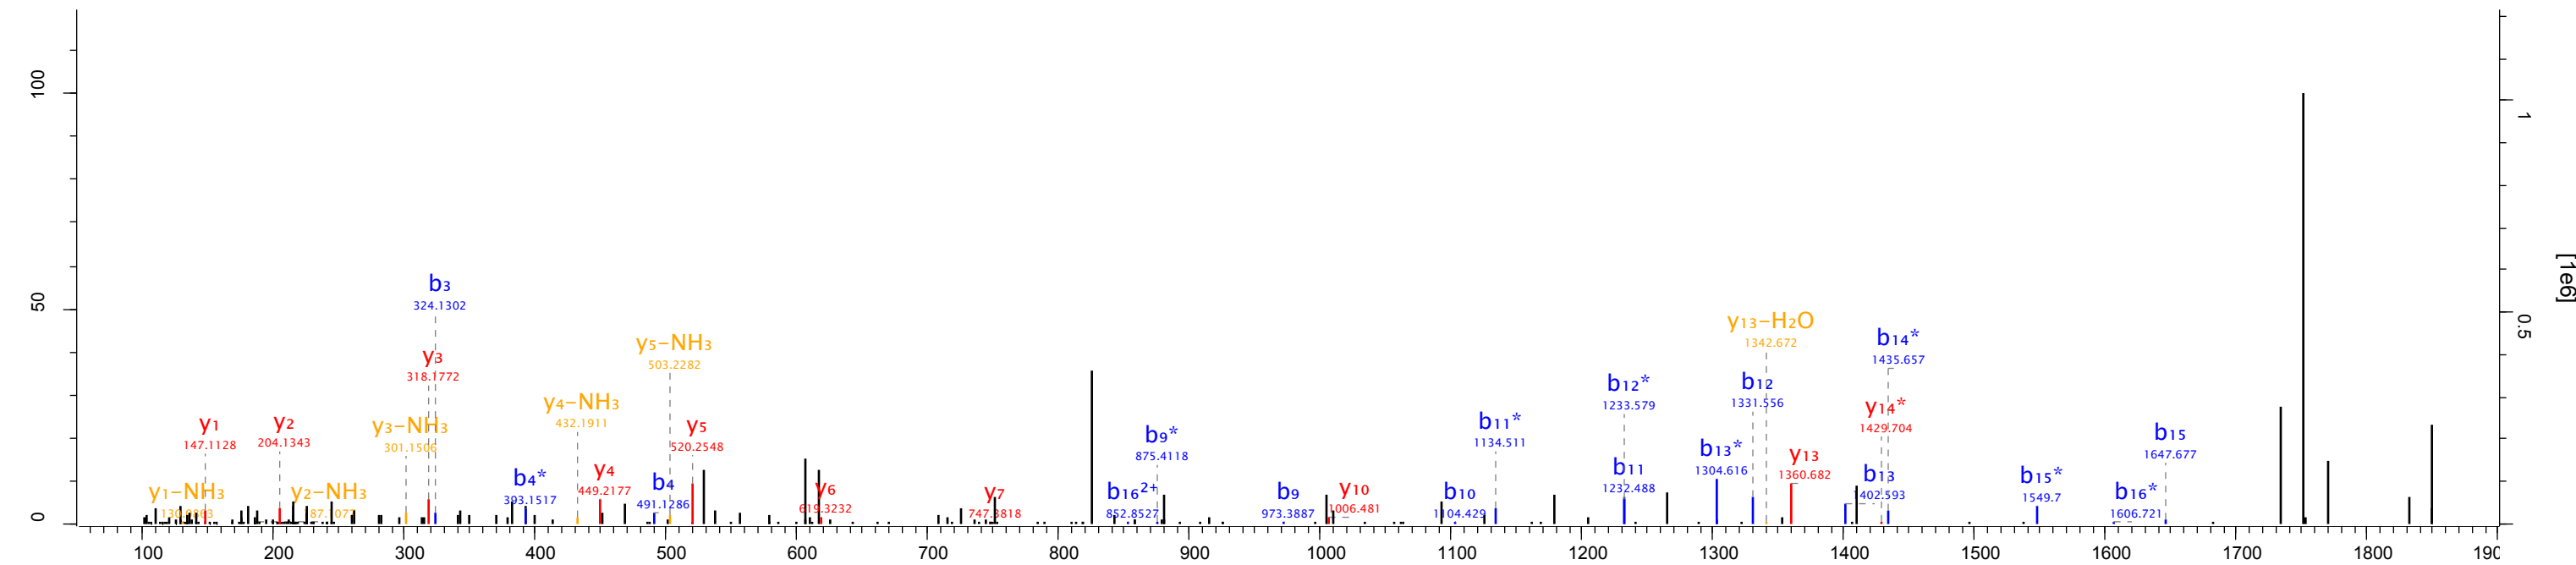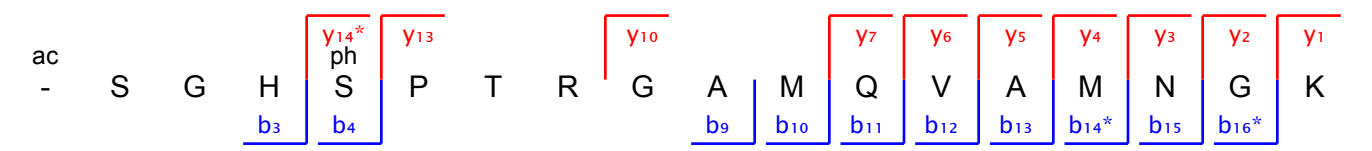



Raw file: 20150814\_A375SR\_Phospho\_BR2\_06  
 Scan: 12061 Method: FTMS; HCD Score: 283.4 m/z: 872.08 Gene names: CCDC86

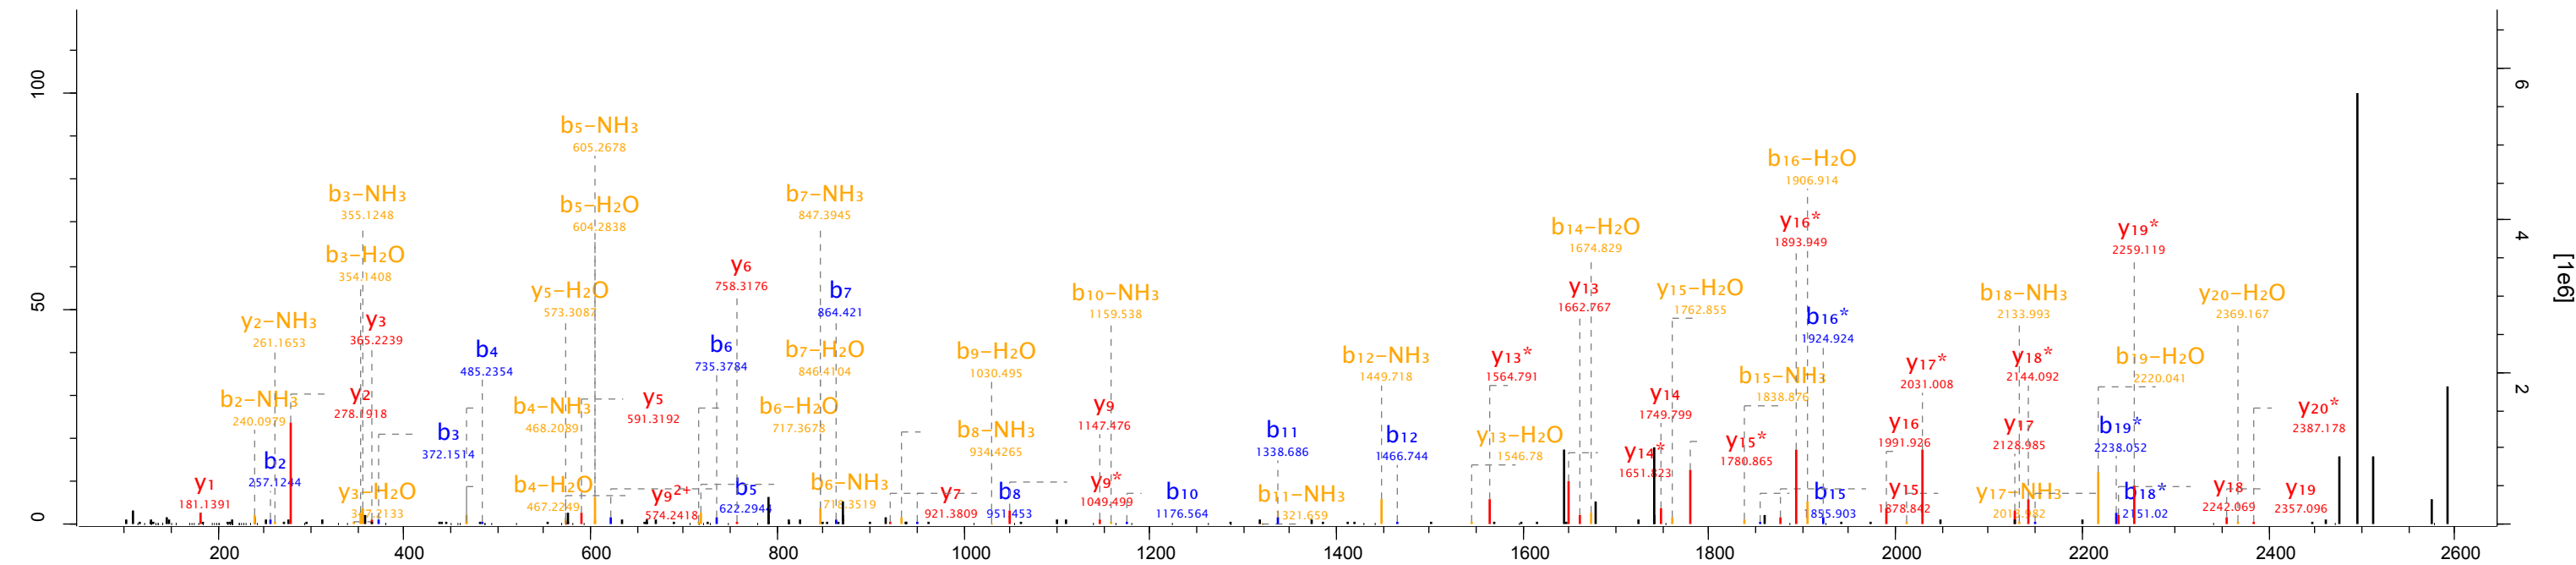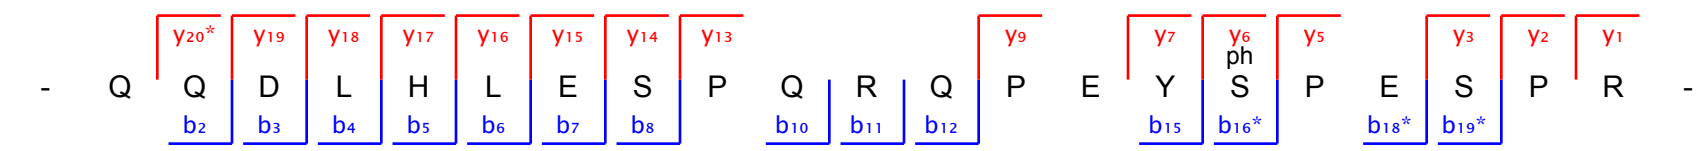

Raw file Scan Method Score m/z Gene names  
 20150814\_A375SR\_Phospho\_BR2\_06 13251 FTMS; HCD 173.85 983.82 SH2B3;BZRAP1

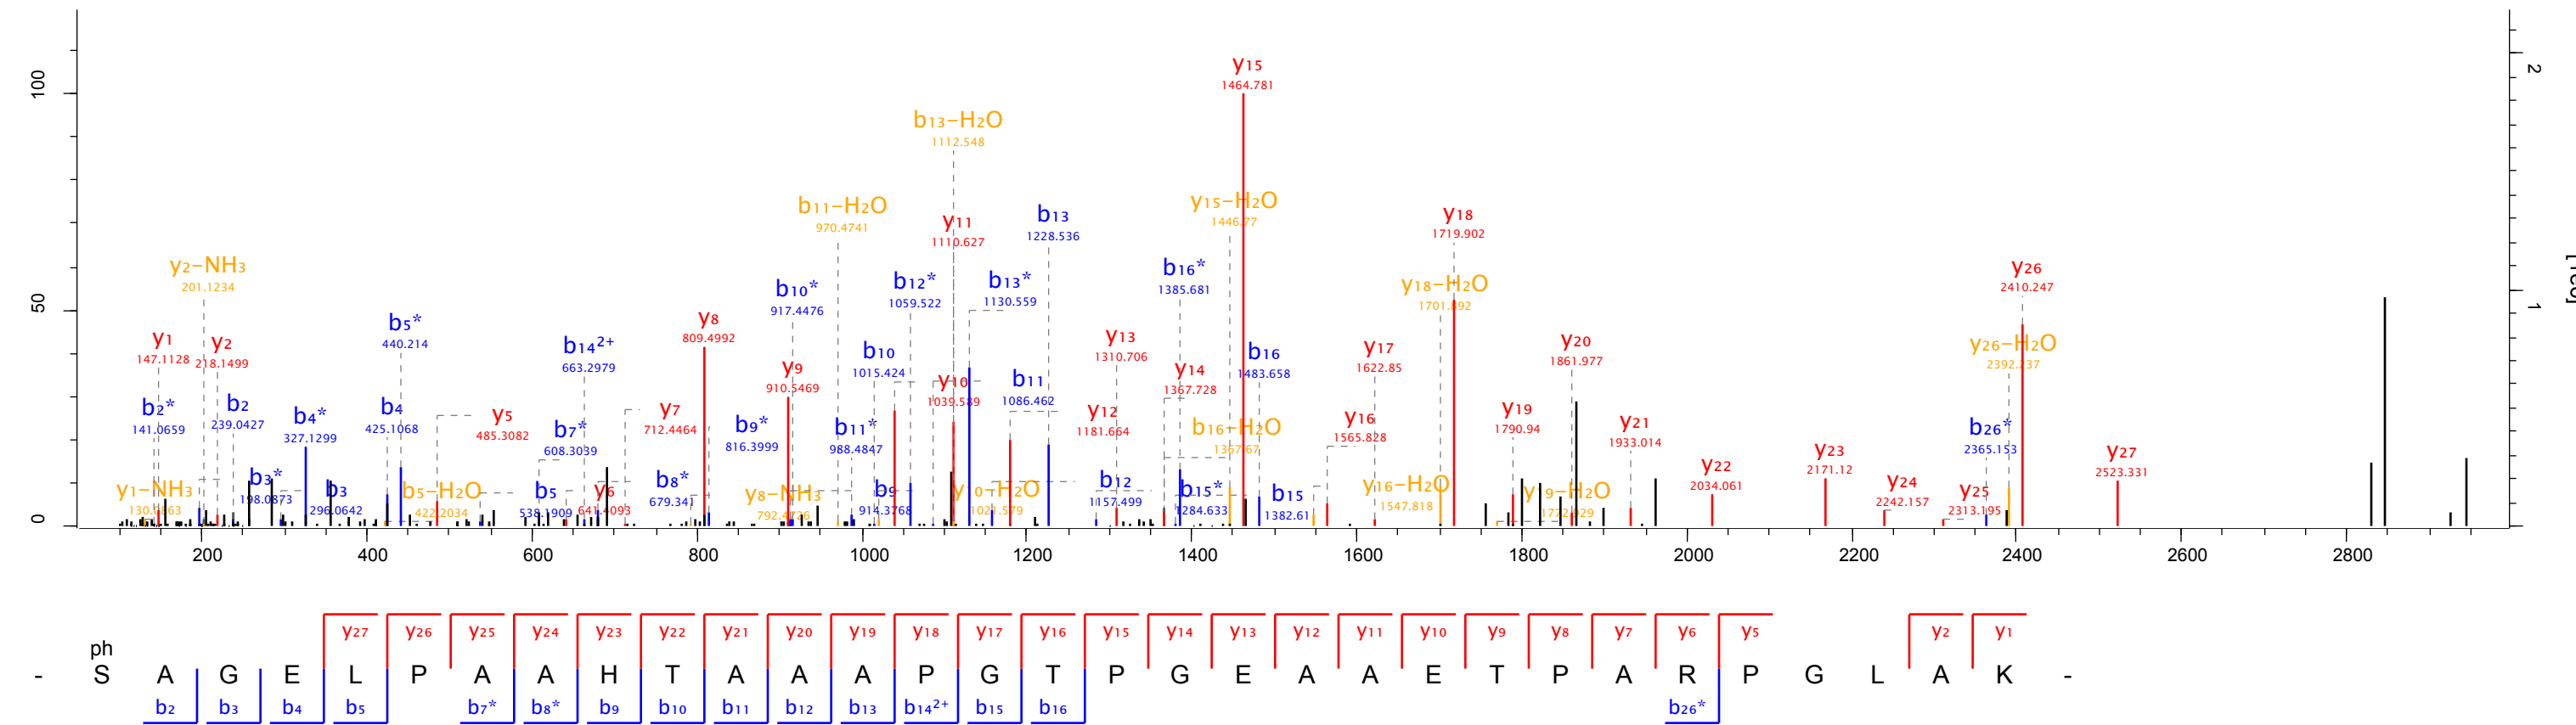

Raw file  
20150814\_A375SR\_Phospho\_BR2\_06

Scan 14001 Method FTMS; HCD Score 187.86 m/z 960.44 Gene names FAM65A

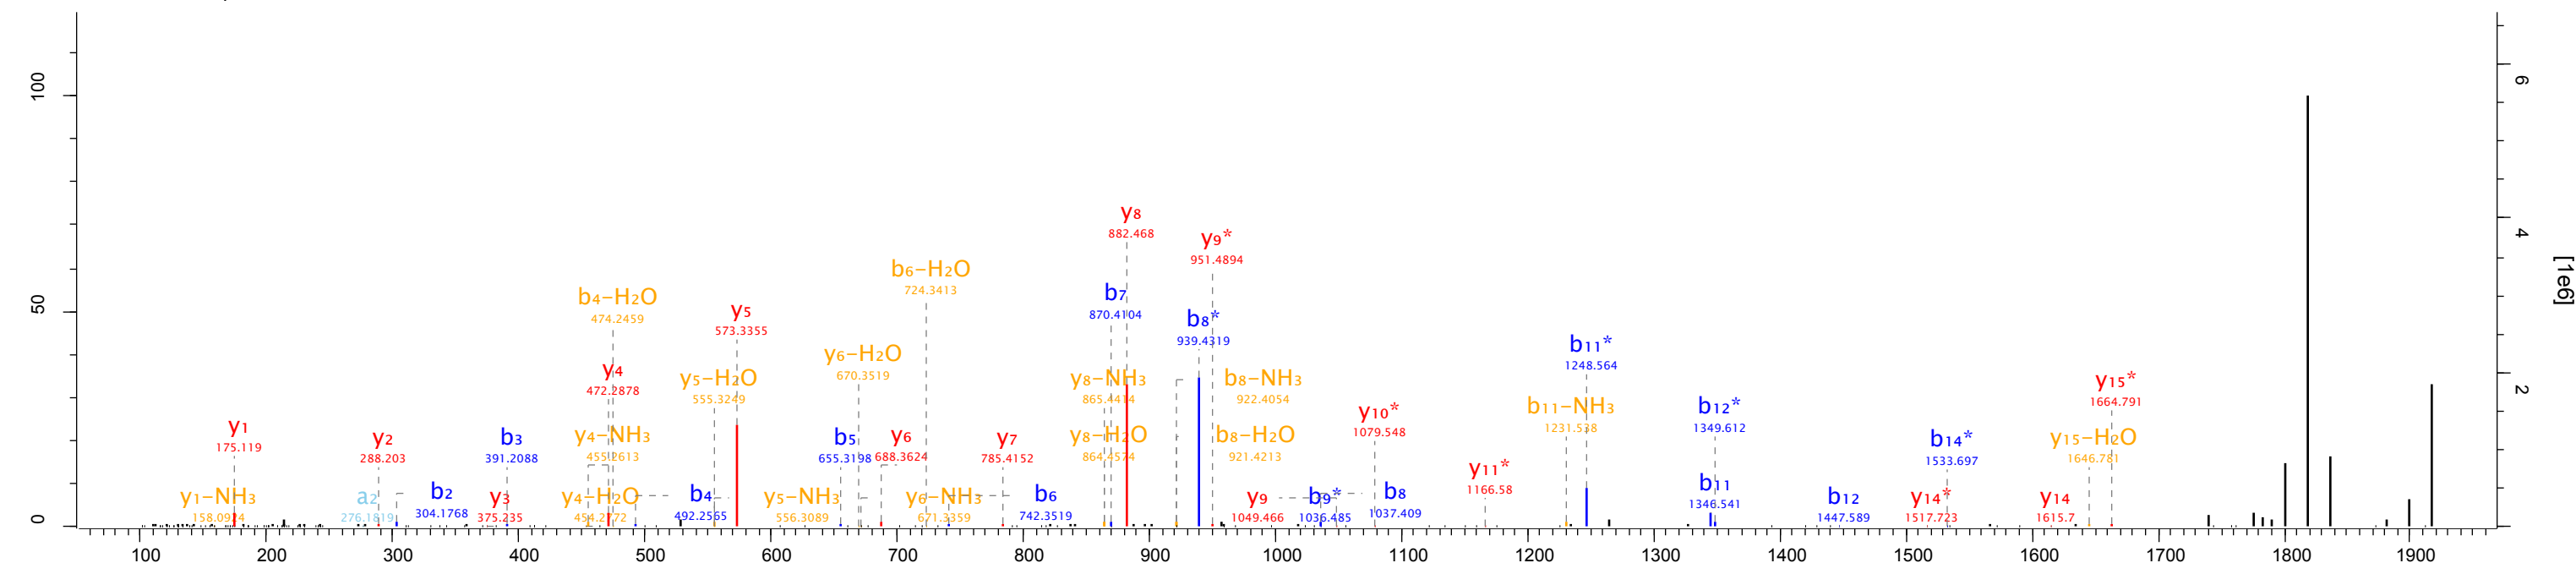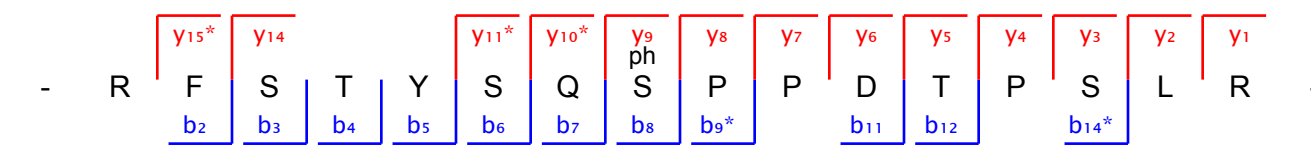

Raw file 20150814\_A375SR\_Phospho\_BR2\_06 Scan 14771 Method FTMS; HCD Score 161.2 m/z 725.4 Gene names TCOF1

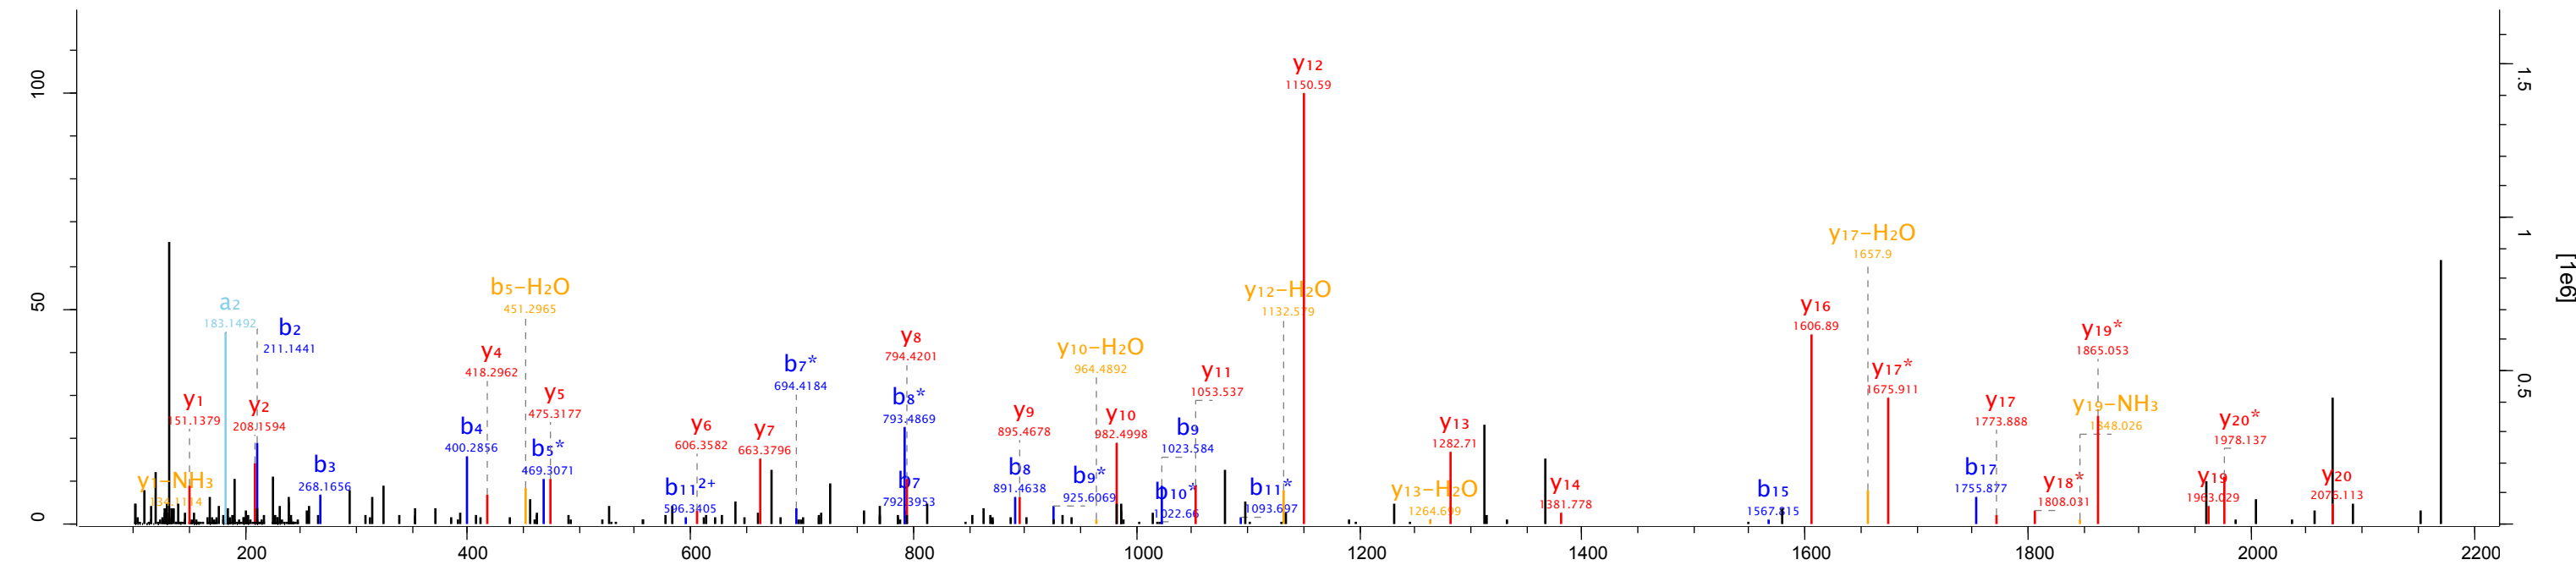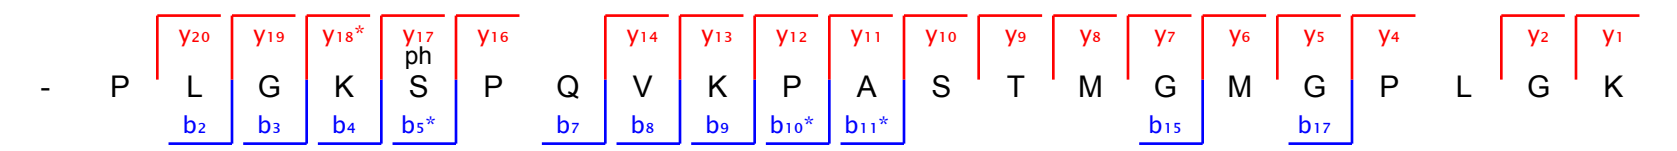



Raw file 20150814\_A375SR\_Phospho\_BR2\_06 Scan 15621 Method FTMS; HCD Score 138.37 m/z 783.37 Gene names MTMR3

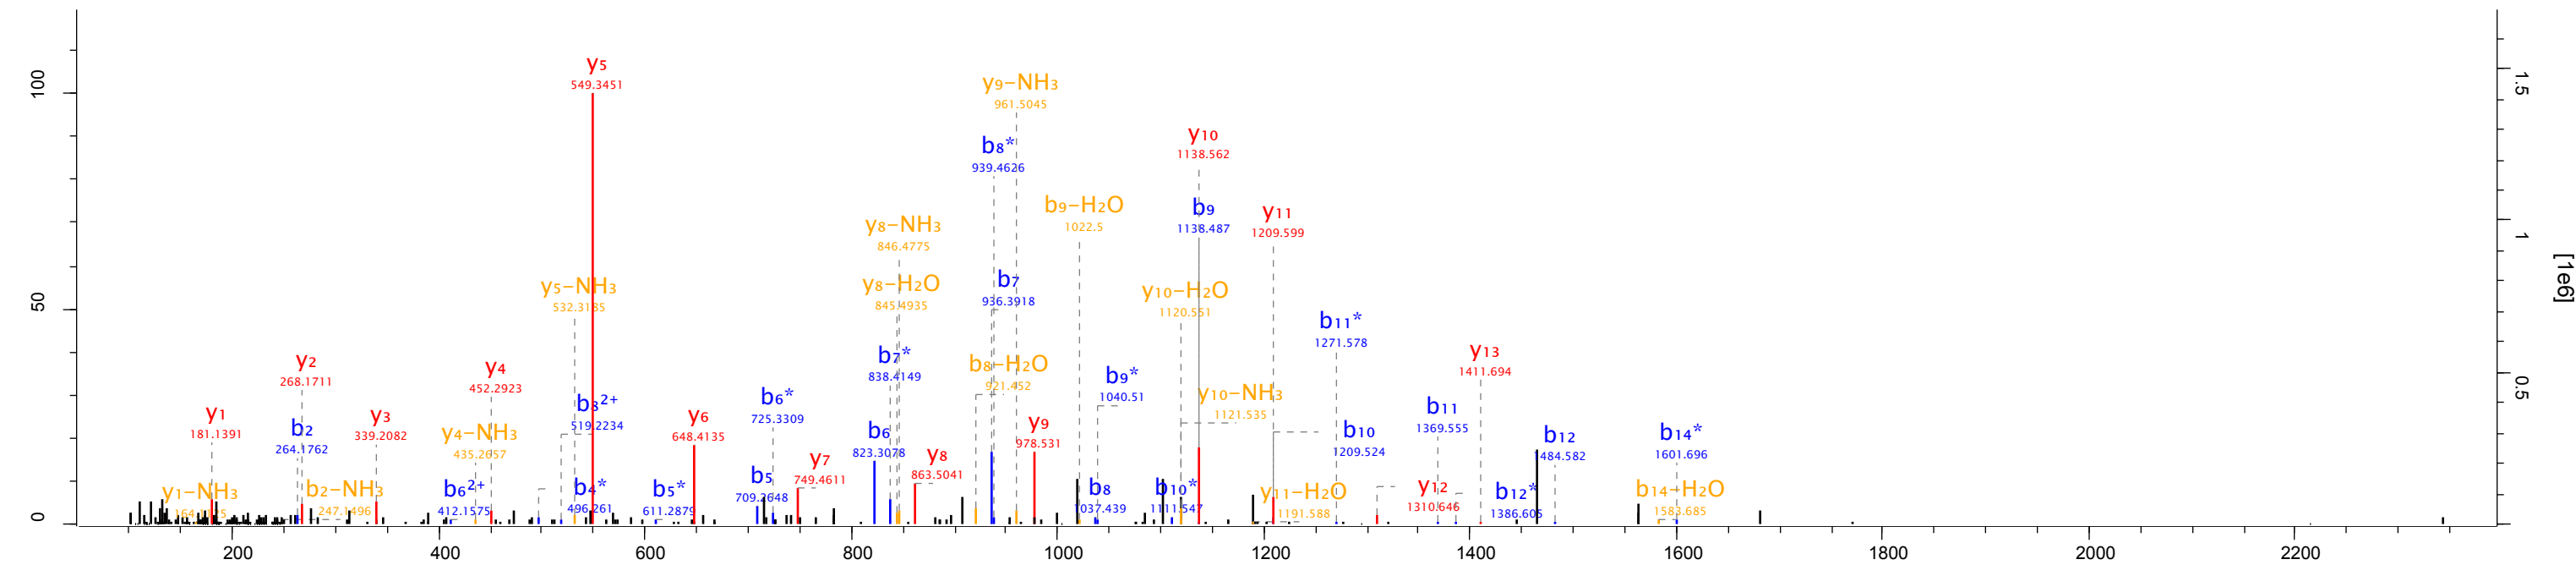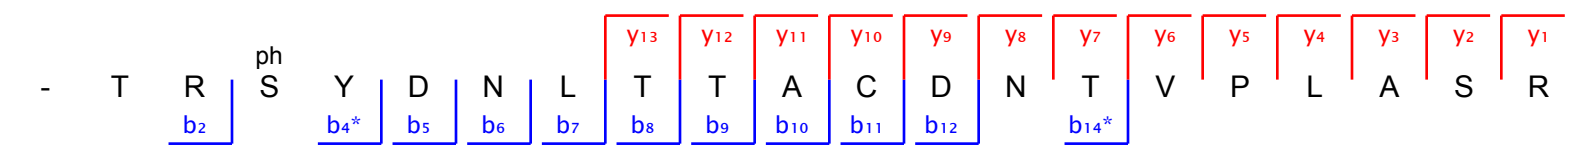

Raw file 20150814\_A375SR\_Phospho\_BR2\_06 Scan 15851 Method FTMS; HCD Score 313.68 m/z 1002.44 Gene names LRRFIP1

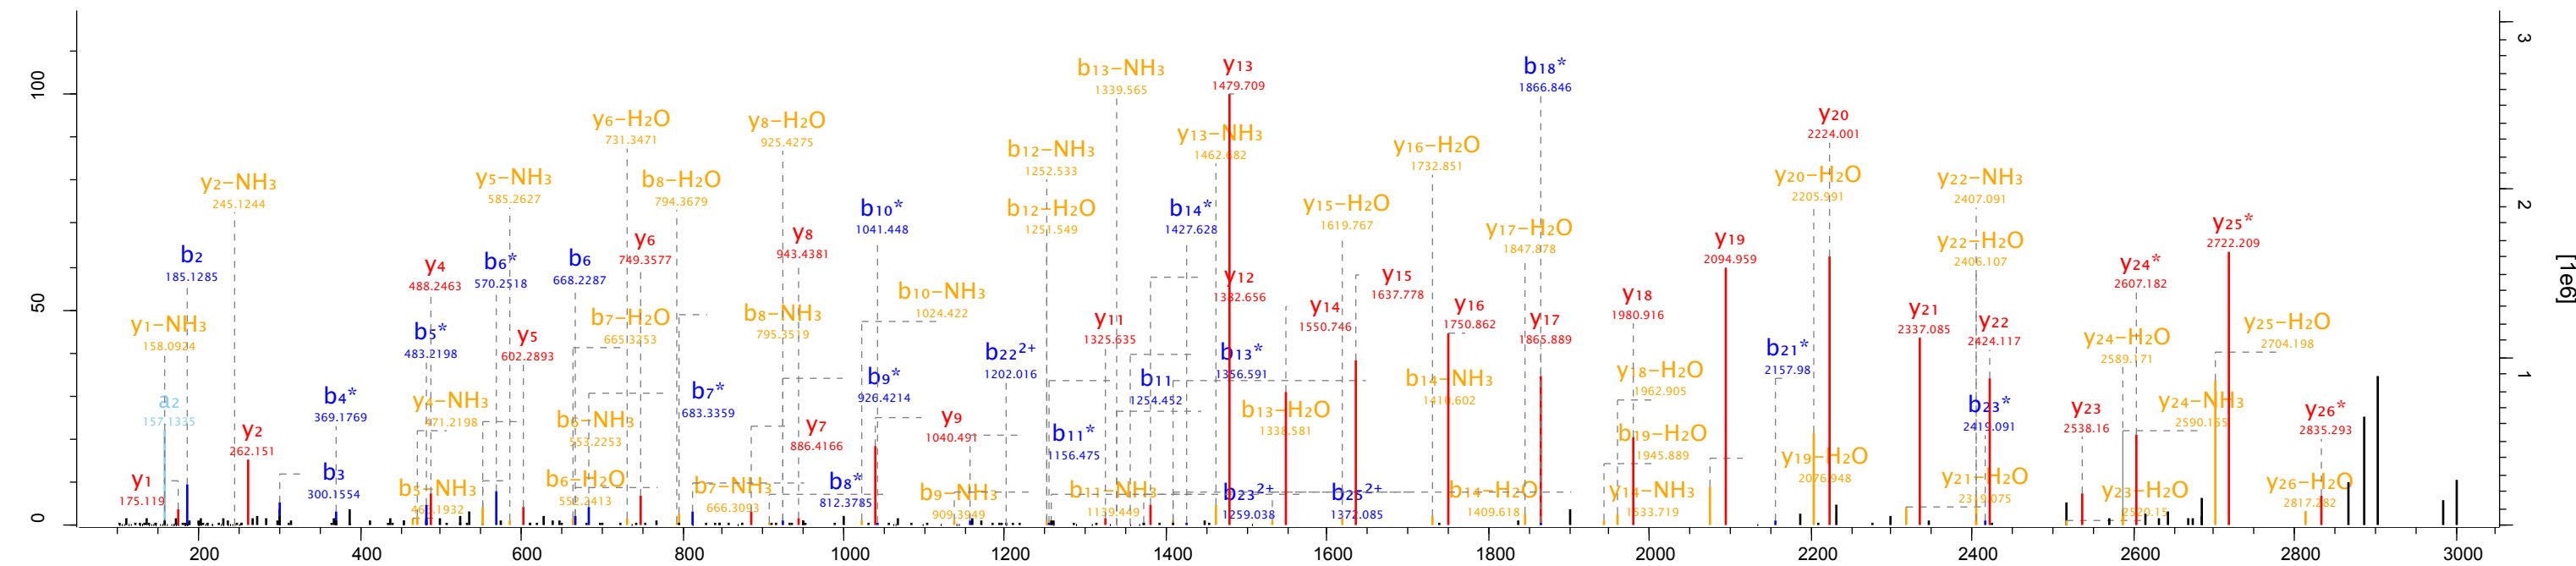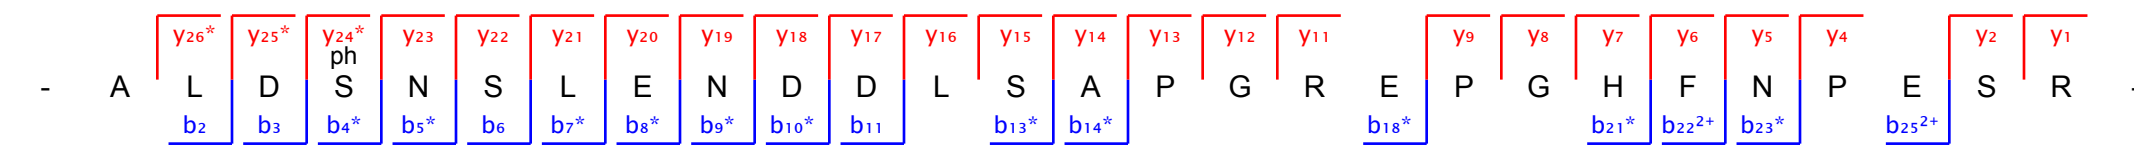

Raw file: 20150814\_A375SR\_Phospho\_BR2\_06  
 Scan: 16101  
 Method: FTMS; HCD  
 Score: 206.45  
 m/z: 792.35  
 Gene names: PHLDB2

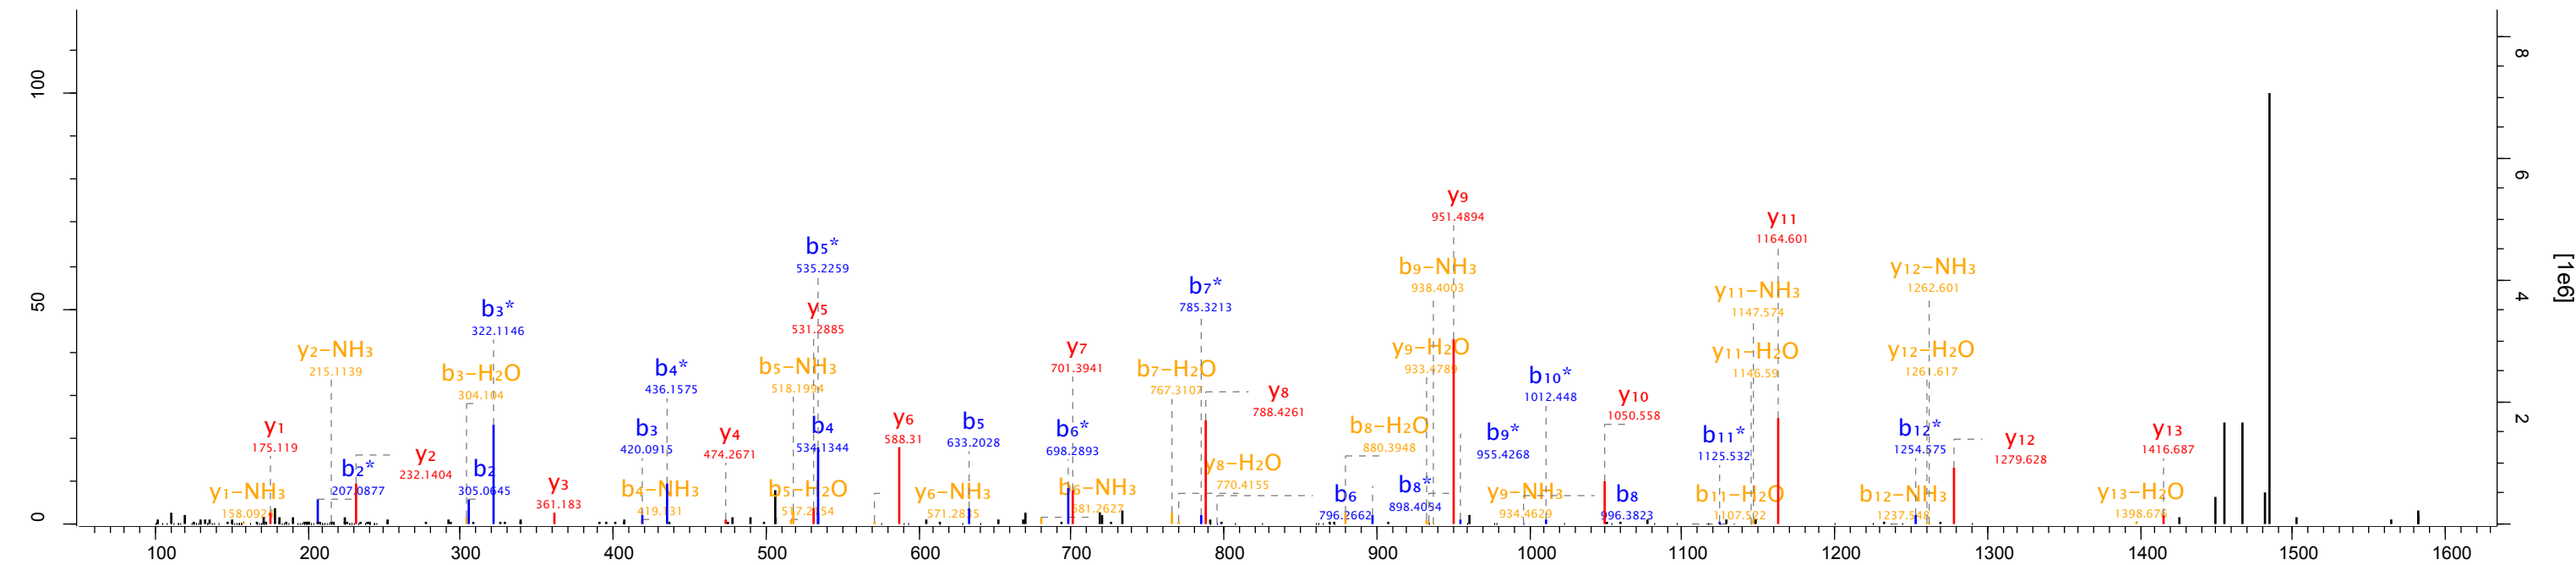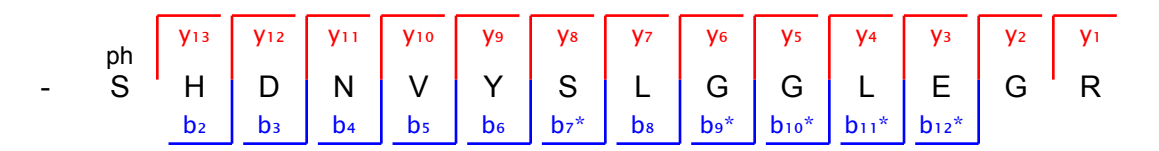



Raw file: 20150814\_A375SR\_Phospho\_BR2\_06  
 Scan: 16181 Method: FTMS; HCD Score: 149.44 m/z: 928.95 Gene names: PTK2

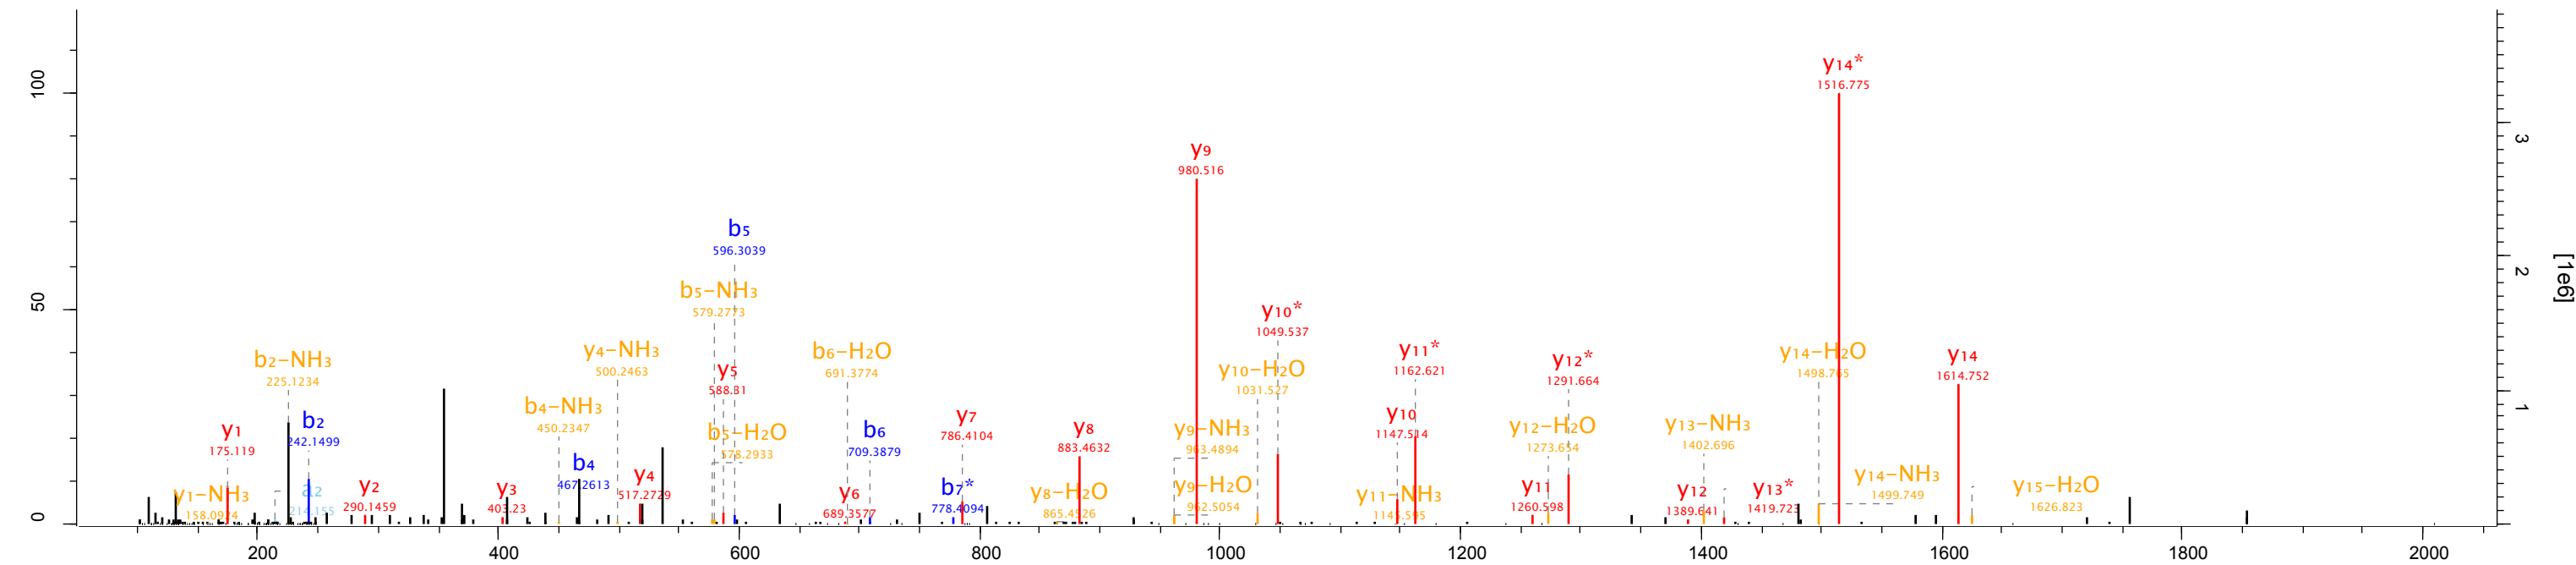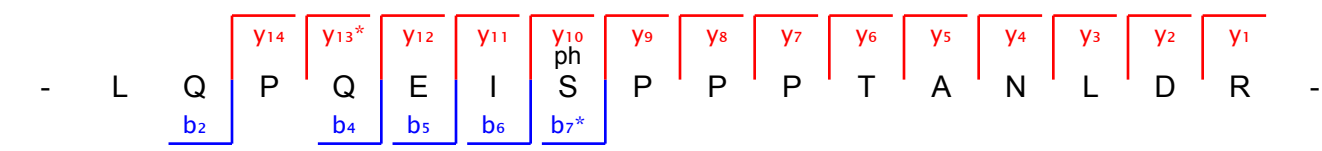

Raw file 20150814\_A375SR\_Phospho\_BR2\_06 Scan 17941 Method FTMS; HCD Score 192.7 m/z 847.88 Gene names LASP1

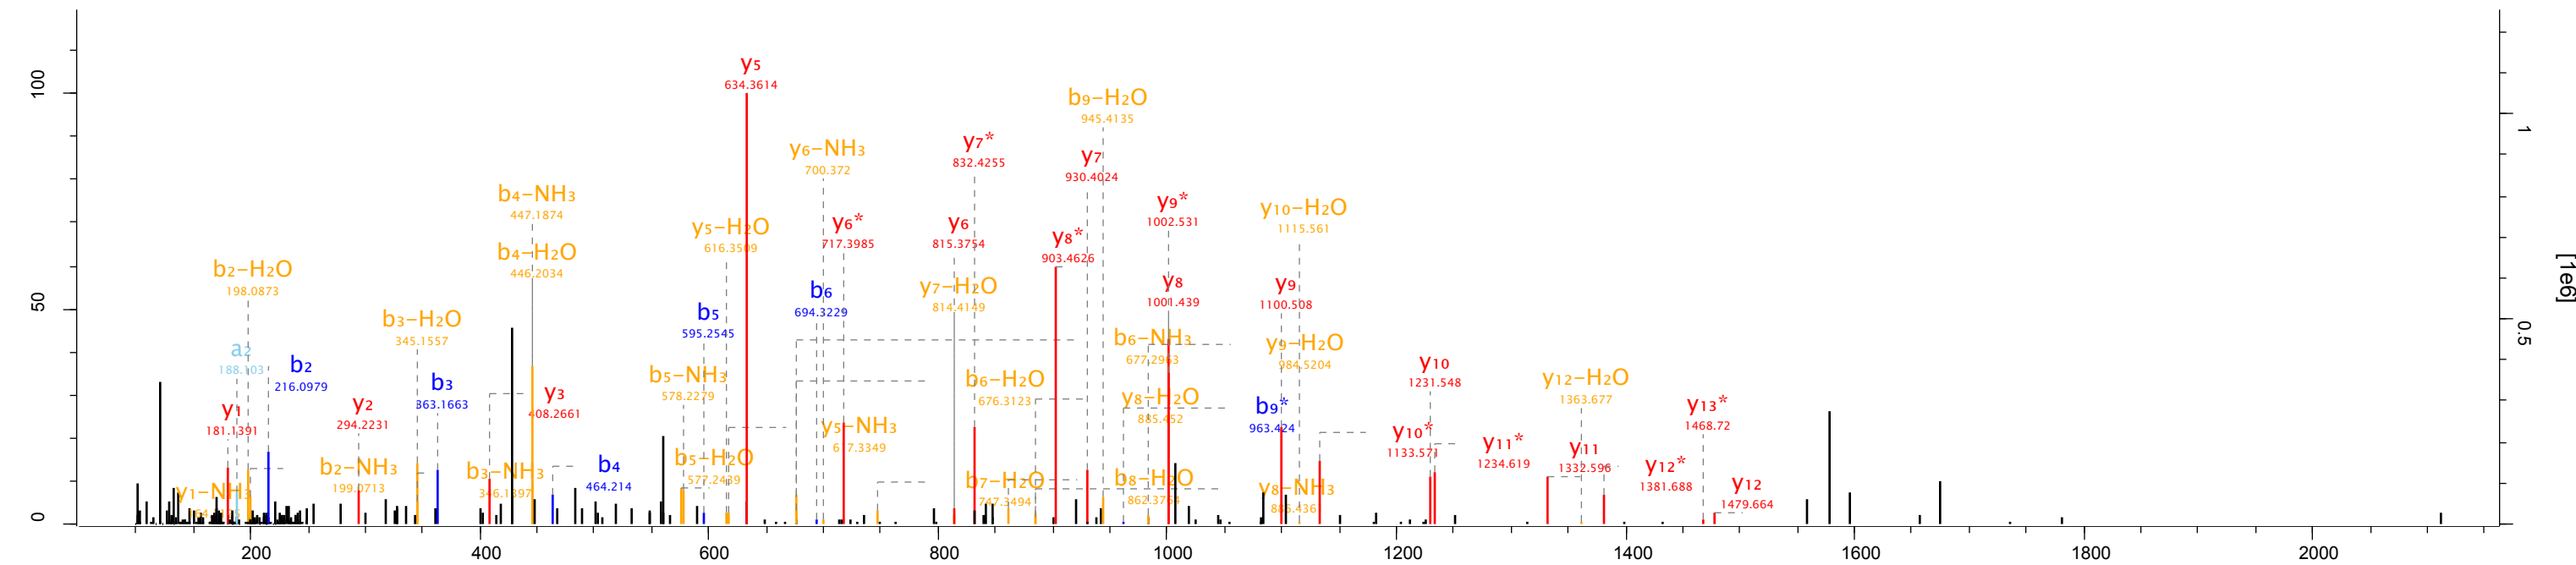

- Q y13\* y12 y11 y10 y9 y8 y7 y6 y5 y3 y2 y1 -

S F T M V A D ph P E N L R -

b2 b3 b4 b5 b6 b9\*

Raw file 20150814\_A375SR\_Phospho\_BR2\_06 Scan 17961 Method FTMS; HCD Score 80.73 m/z 881.86 Gene names IRS2

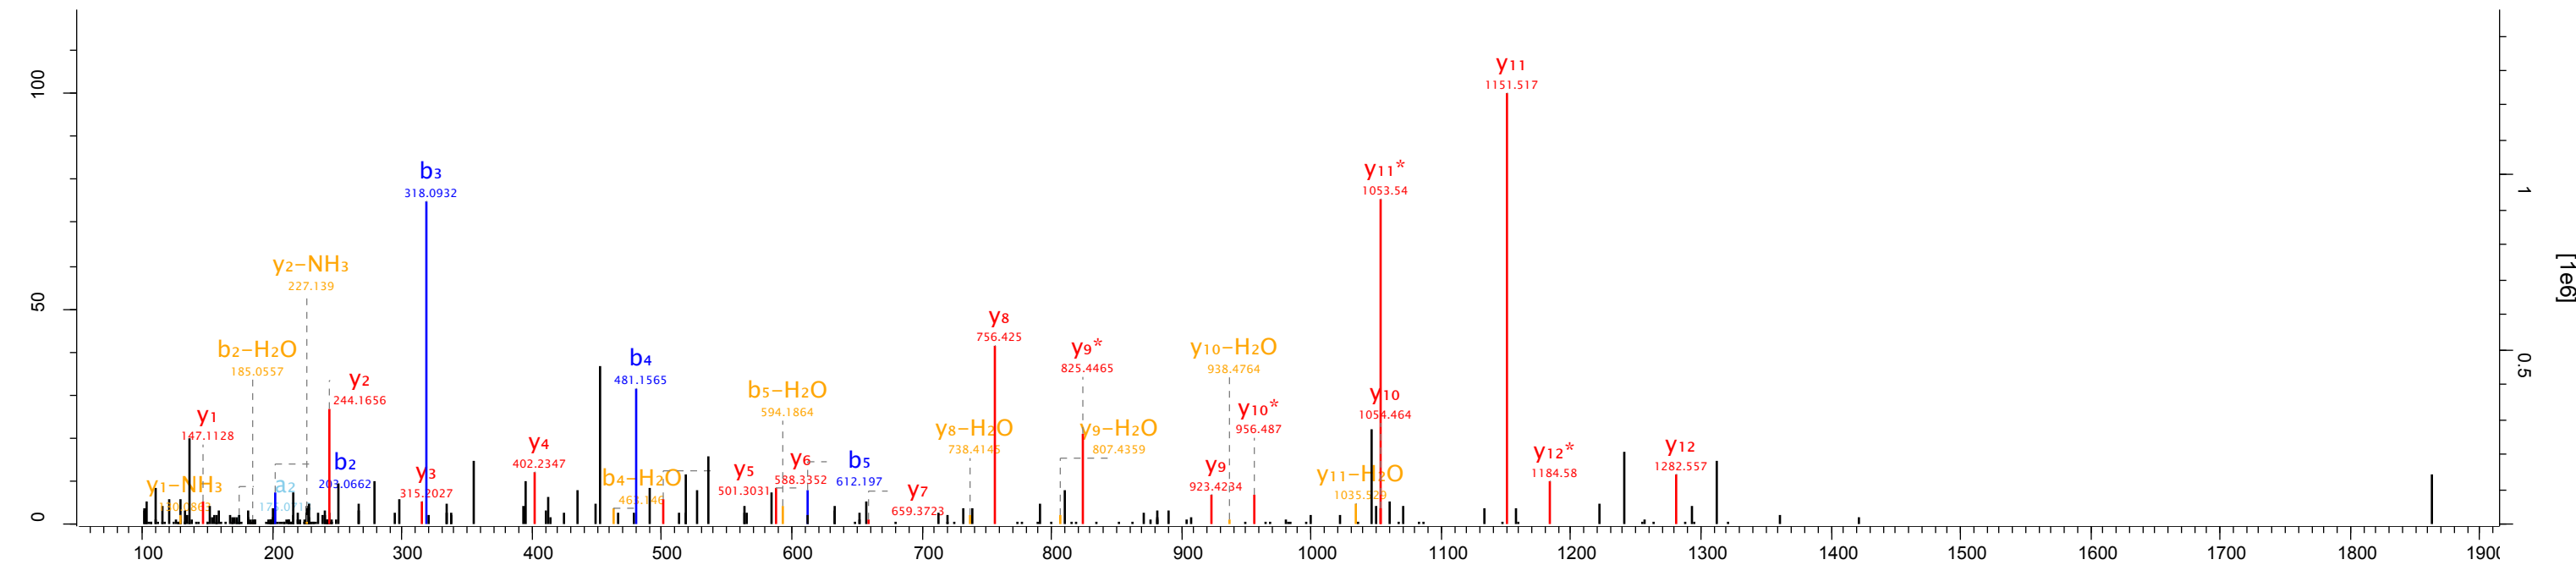

- S D D Y M P M S<sub>ph</sub> P A S V S A P K -

Fragmentation mapping (b and y ions):

- b<sub>2</sub>: S, D
- b<sub>3</sub>: S, D, D
- b<sub>4</sub>: S, D, D, Y
- b<sub>5</sub>: S, D, D, Y, M
- y<sub>1</sub>: K
- y<sub>2</sub>: P
- y<sub>3</sub>: A
- y<sub>4</sub>: S
- y<sub>5</sub>: V
- y<sub>6</sub>: S
- y<sub>7</sub>: A
- y<sub>8</sub>: P
- y<sub>9</sub>: S<sub>ph</sub>
- y<sub>10</sub>: M
- y<sub>11</sub>: P
- y<sub>12</sub>: M

Raw file  
 20150814\_A375SR\_Phospho\_BR2\_06  
 Scan 18621 Method FTMS; HCD Score 187.98 m/z 853.39 Gene names TP53BP1

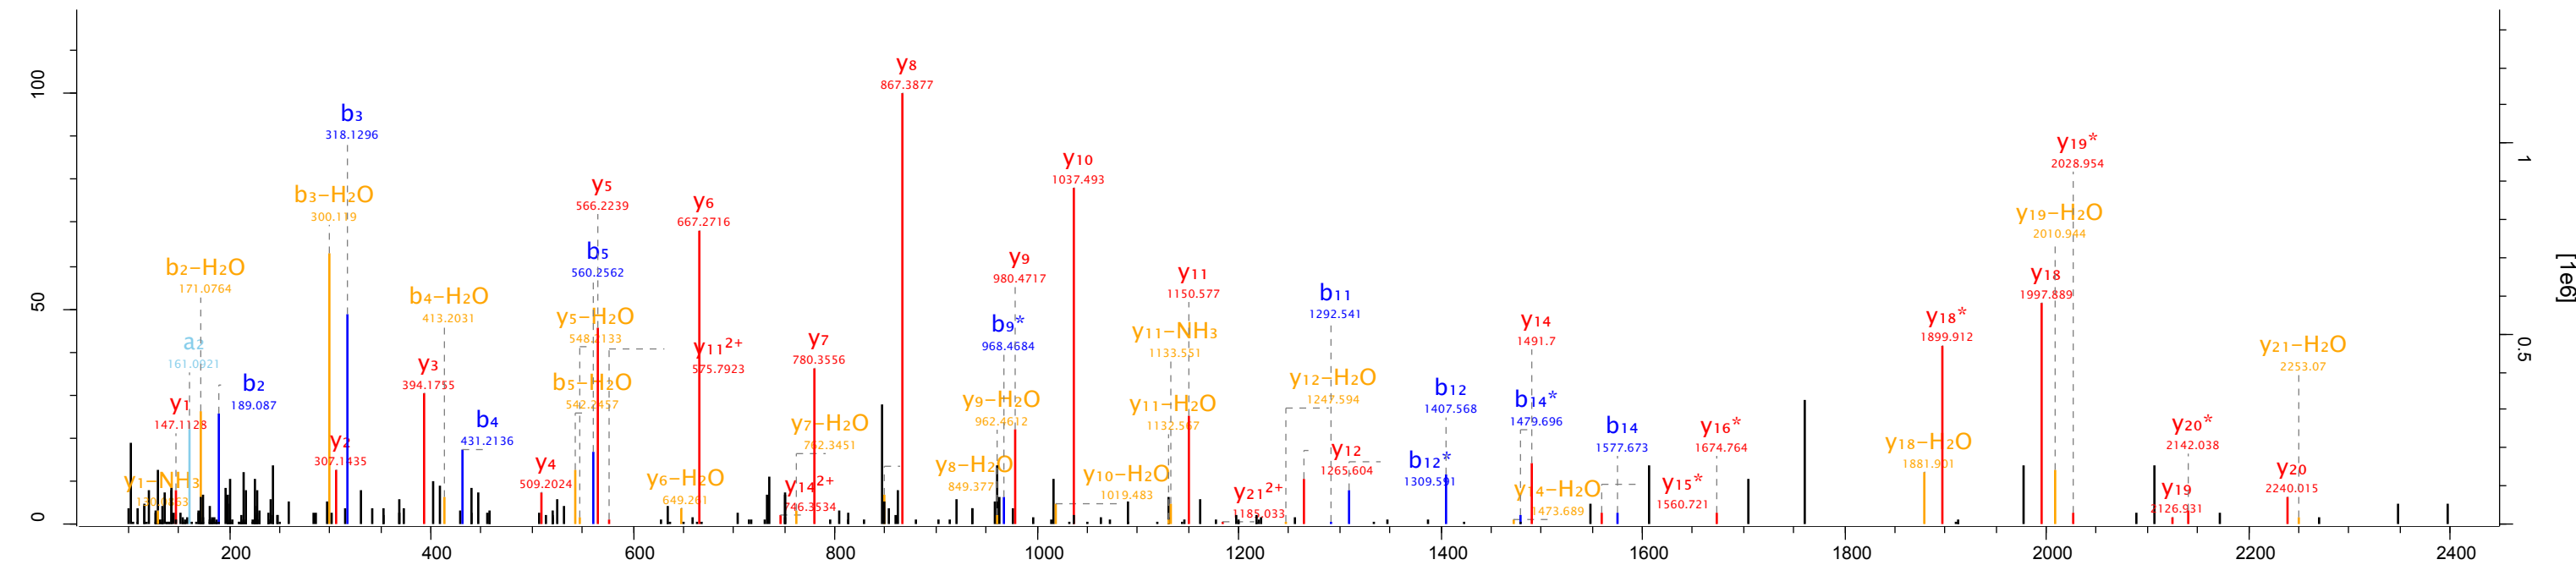

- T S E I E P K N S P E D L G L S L T G D S C K -

b<sub>2</sub>
b<sub>3</sub>
b<sub>4</sub>
b<sub>5</sub>
b<sub>9</sub>\*
b<sub>11</sub>
b<sub>12</sub>
b<sub>14</sub>

y<sub>21</sub><sup>2+</sup>
y<sub>20</sub>
y<sub>19</sub>
y<sub>18</sub>
y<sub>16</sub>\*
y<sub>15</sub>\*
y<sub>14</sub>
y<sub>12</sub>
y<sub>11</sub>
y<sub>10</sub>
y<sub>9</sub>
y<sub>8</sub>
y<sub>7</sub>
y<sub>6</sub>
y<sub>5</sub>
y<sub>4</sub>
y<sub>3</sub>
y<sub>2</sub>
y<sub>1</sub>

Raw file 20150814\_A375SR\_Phospho\_BR2\_06 Scan 1901 Method FTMS; HCD Score 143.98 m/z 657.29 Gene names ZC3H13

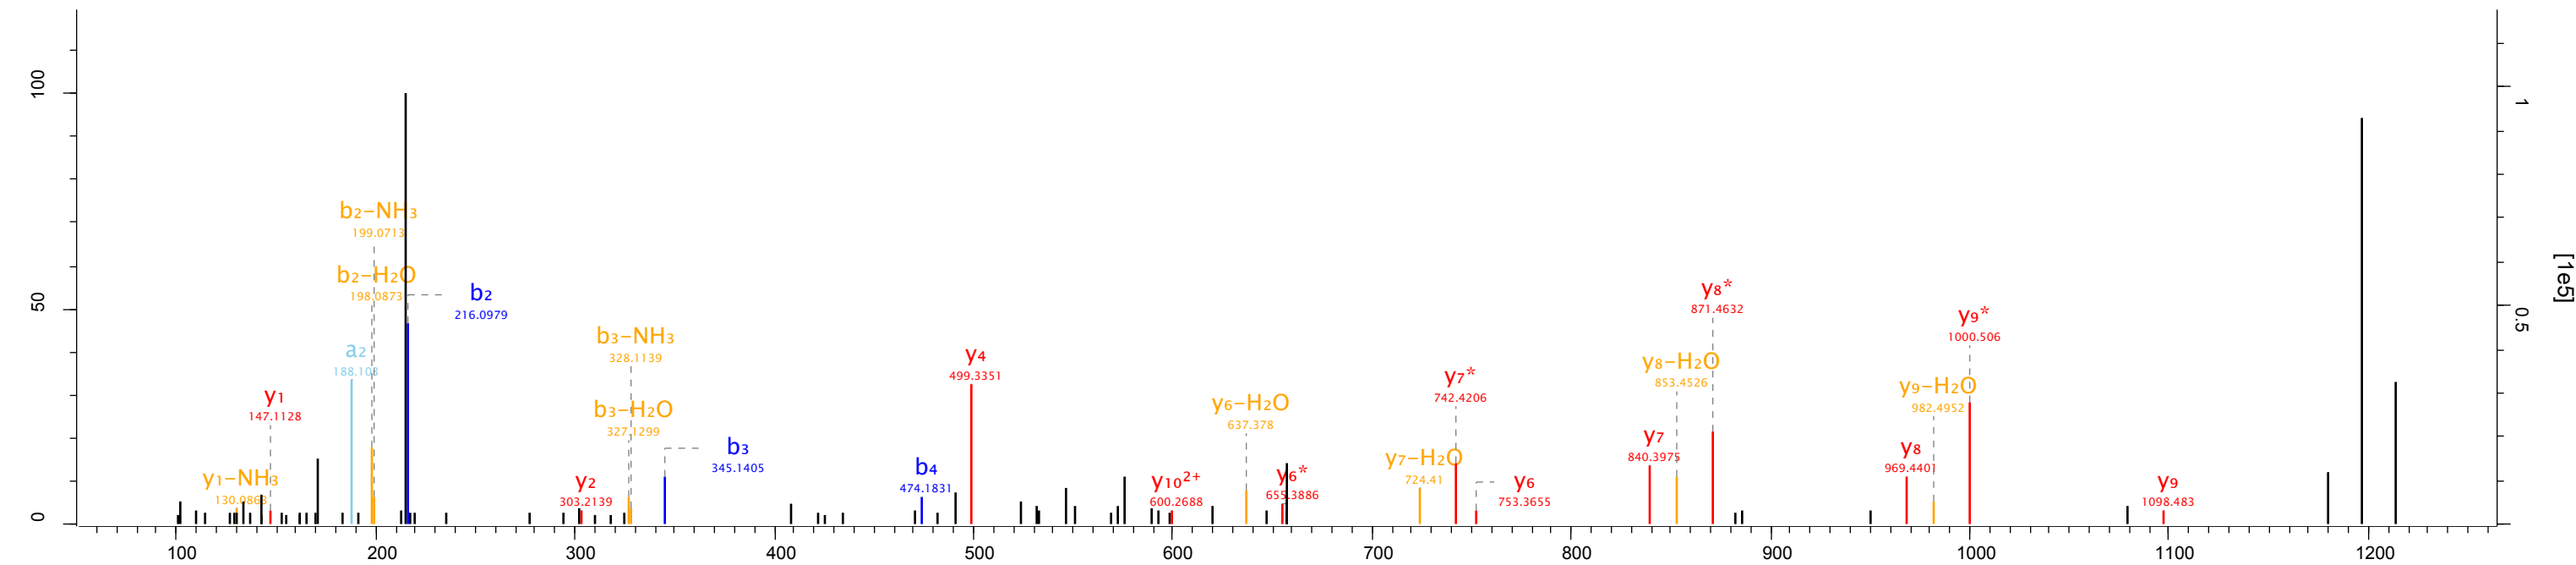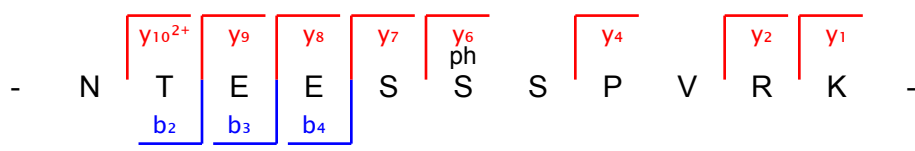

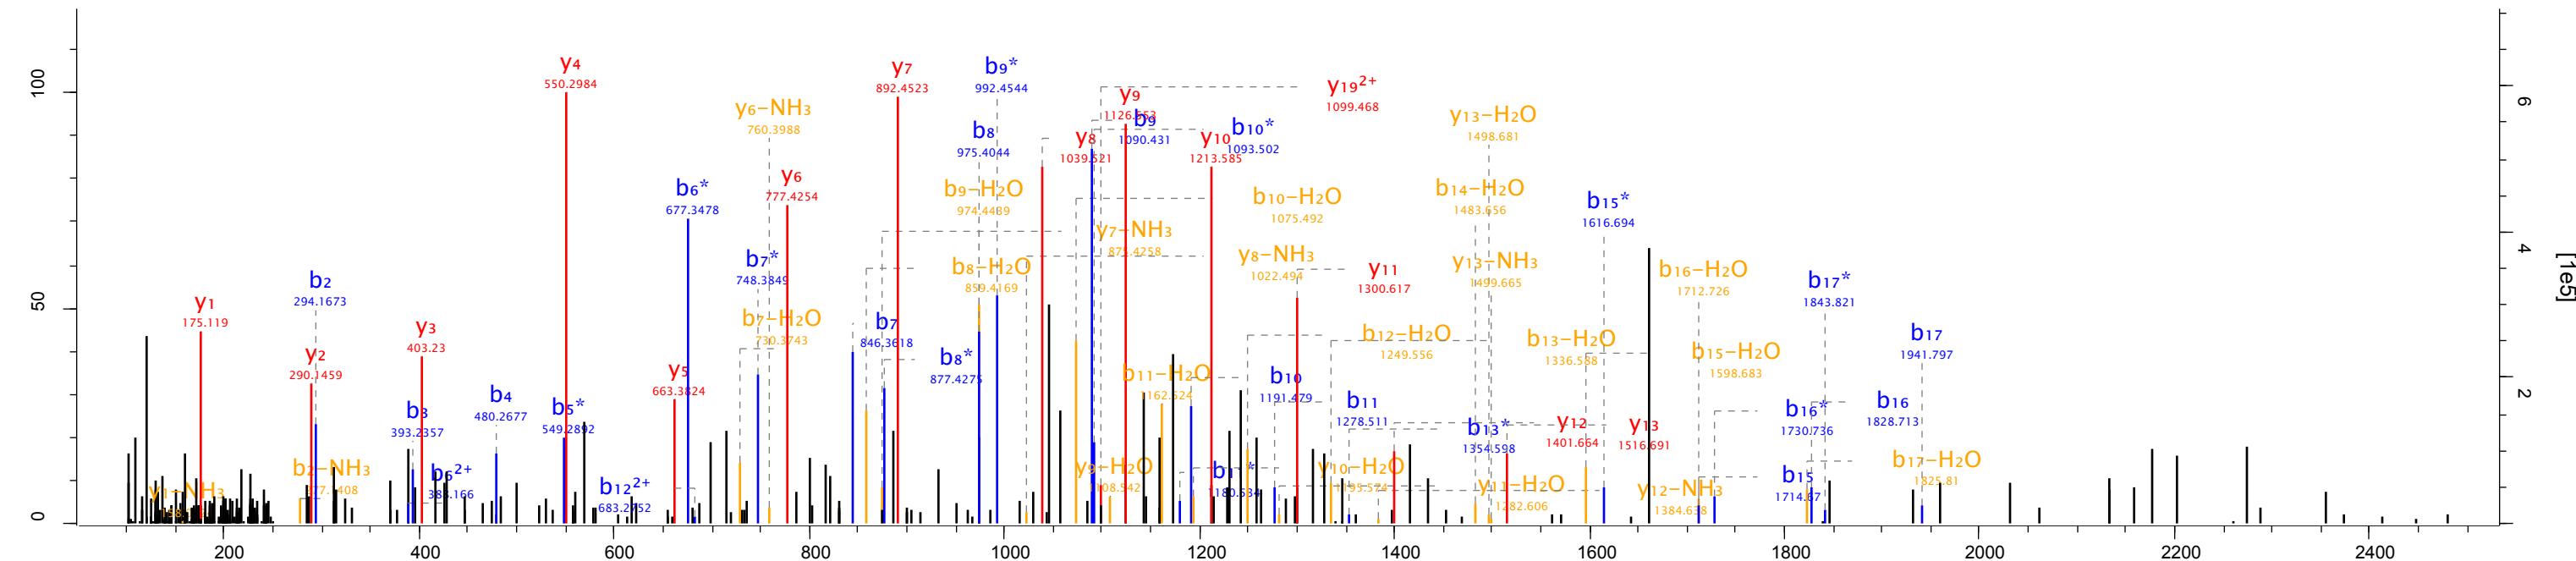

- H R V S S Q A E D T S S S F D N L F I D R -

y<sub>19</sub><sup>2+</sup>
b<sub>2</sub>
b<sub>3</sub>
b<sub>4</sub>
b<sub>5</sub><sup>\*</sup>
b<sub>6</sub><sup>\*</sup>
b<sub>7</sub>
b<sub>8</sub>
y<sub>13</sub>
y<sub>12</sub>
y<sub>11</sub>
y<sub>10</sub>
y<sub>9</sub>
y<sub>8</sub>
y<sub>7</sub>
y<sub>6</sub>
y<sub>5</sub>
y<sub>4</sub>
y<sub>3</sub>
y<sub>2</sub>
y<sub>1</sub>

b<sub>2</sub>-NH<sub>3</sub>
b<sub>6</sub><sup>2+</sup>
b<sub>12</sub><sup>2+</sup>
b<sub>6</sub><sup>\*</sup>
b<sub>7</sub><sup>\*</sup>
b<sub>7</sub>-H<sub>2</sub>O
b<sub>7</sub>
b<sub>8</sub><sup>\*</sup>
b<sub>8</sub>-H<sub>2</sub>O
b<sub>9</sub><sup>\*</sup>
b<sub>9</sub>-H<sub>2</sub>O
b<sub>10</sub><sup>\*</sup>
b<sub>10</sub>
b<sub>11</sub>
b<sub>11</sub>-H<sub>2</sub>O
b<sub>12</sub>-H<sub>2</sub>O
b<sub>13</sub><sup>\*</sup>
b<sub>13</sub>
b<sub>15</sub><sup>\*</sup>
b<sub>15</sub>
b<sub>16</sub><sup>\*</sup>
b<sub>16</sub>
b<sub>17</sub><sup>\*</sup>
b<sub>17</sub>

Raw file Scan Method Score m/z Gene names  
 20150814\_A375SR\_Phospho\_BR2\_06 20851 FTMS; HCD 71.85 685.67 EFR3A

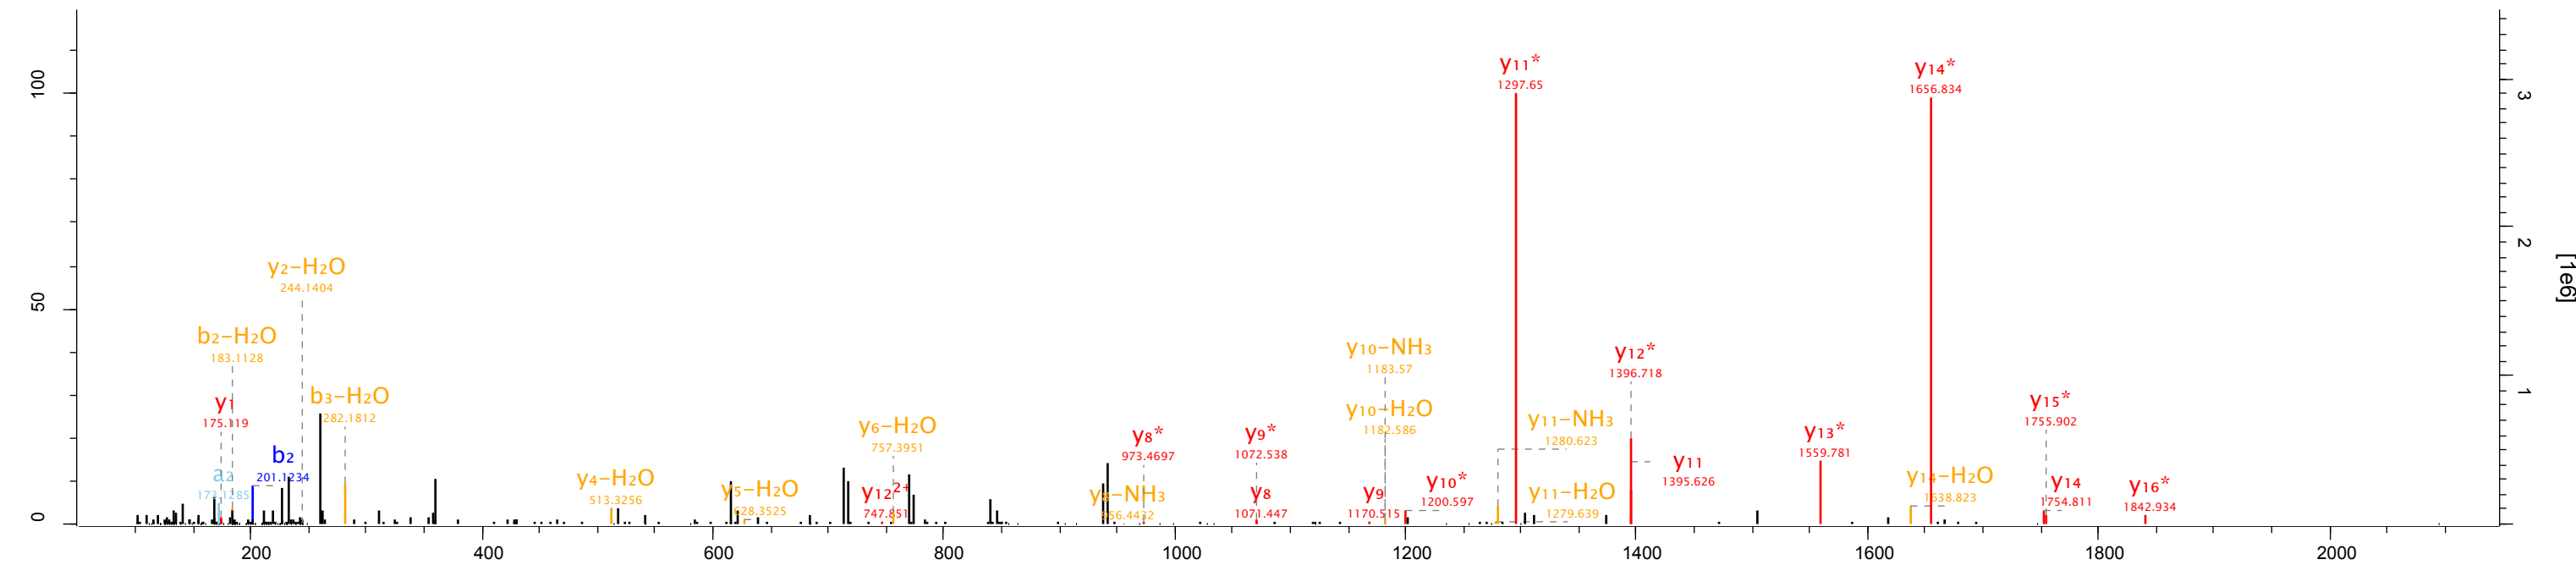

- L S V P Y V P Q V T D E D R L S R -

Fragmentation mapping (b and y ions):

- b2: L-S
- y16\*: S
- y15\*: S-V
- y14: V-P
- y13\*: P-Y
- y12\*: Y-V
- y11: V-P
- y10\*: P-Q
- y9: Q-V
- y8-ph: V-T
- y1: T-R

Raw file: 20150814\_A375SR\_Phospho\_BR2\_06  
 Scan: 21461 Method: FTMS; HCD Score: 202.61 m/z: 1031.44 Gene names: HN1

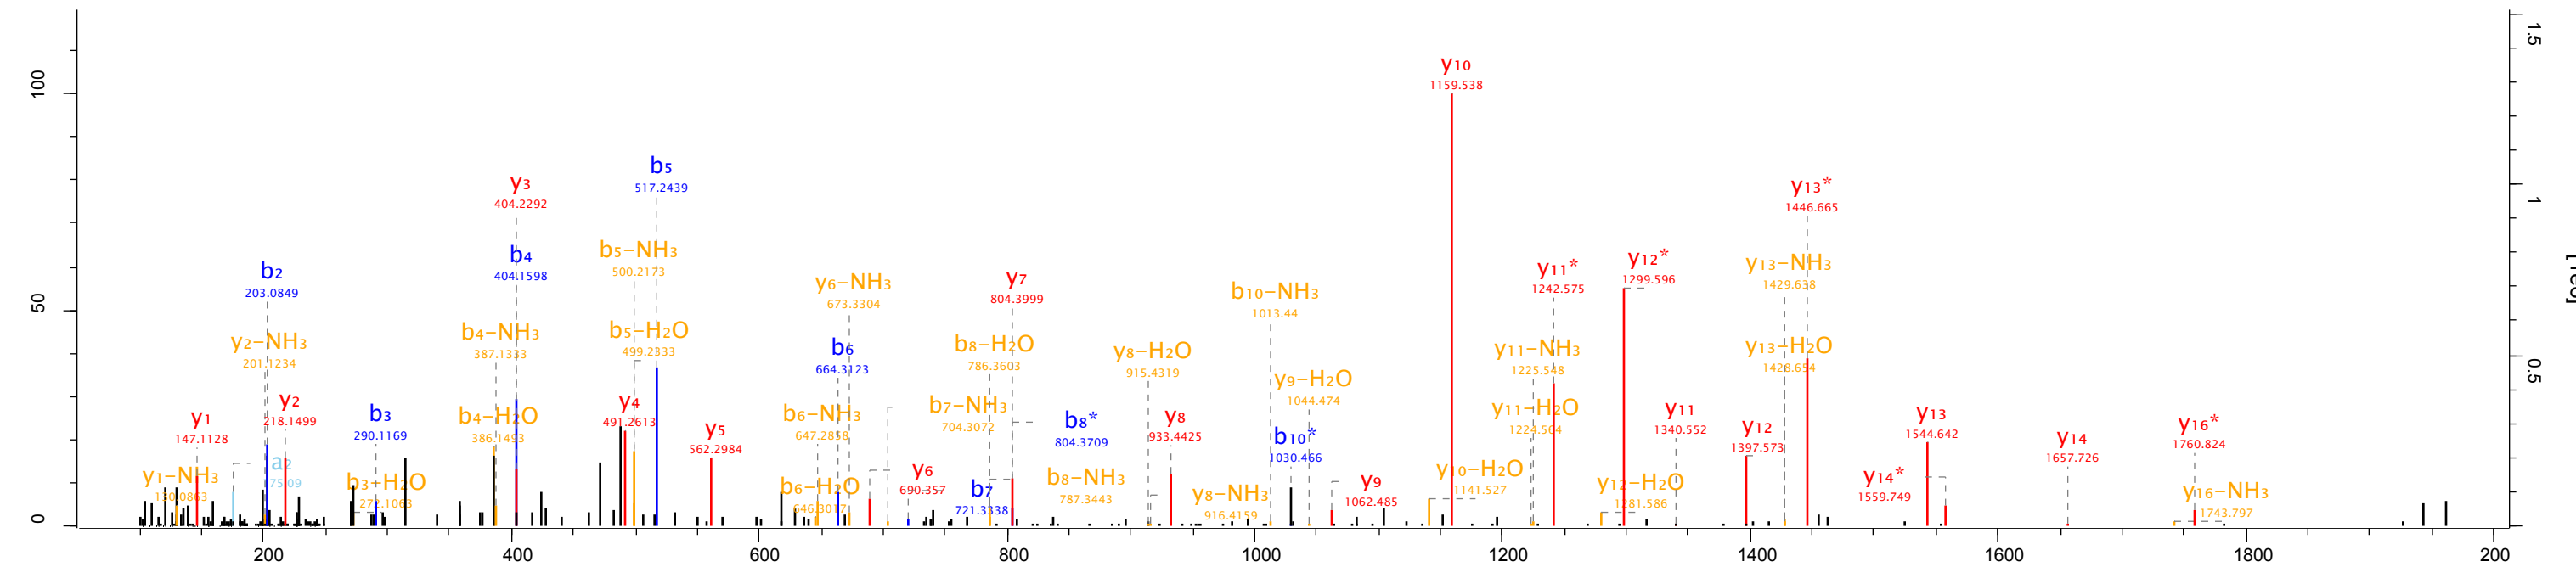

Protein sequence: M A S N I F G T P E E N Q A S W A K -

Fragmentation sites (b ions): b2 (A-S), b3 (S-N), b4 (N-I), b5 (I-F), b6 (F-G), b7 (G-T), b8\* (T-P), b10\* (E-Q)

Fragmentation sites (y ions): y1 (K), y2 (A), y3 (S), y4 (F), y5 (G), y6 (T), y7 (P), y8 (E), y9 (E), y10 (P), y11 (T), y12 (G), y13 (F), y14 (I), y16\* (S)



Raw file Scan Method Score m/z Gene names  
 20150814\_A375SR\_Phospho\_BR2\_06 21571 FTMS; HCD 107.75 737.03 NDRG1

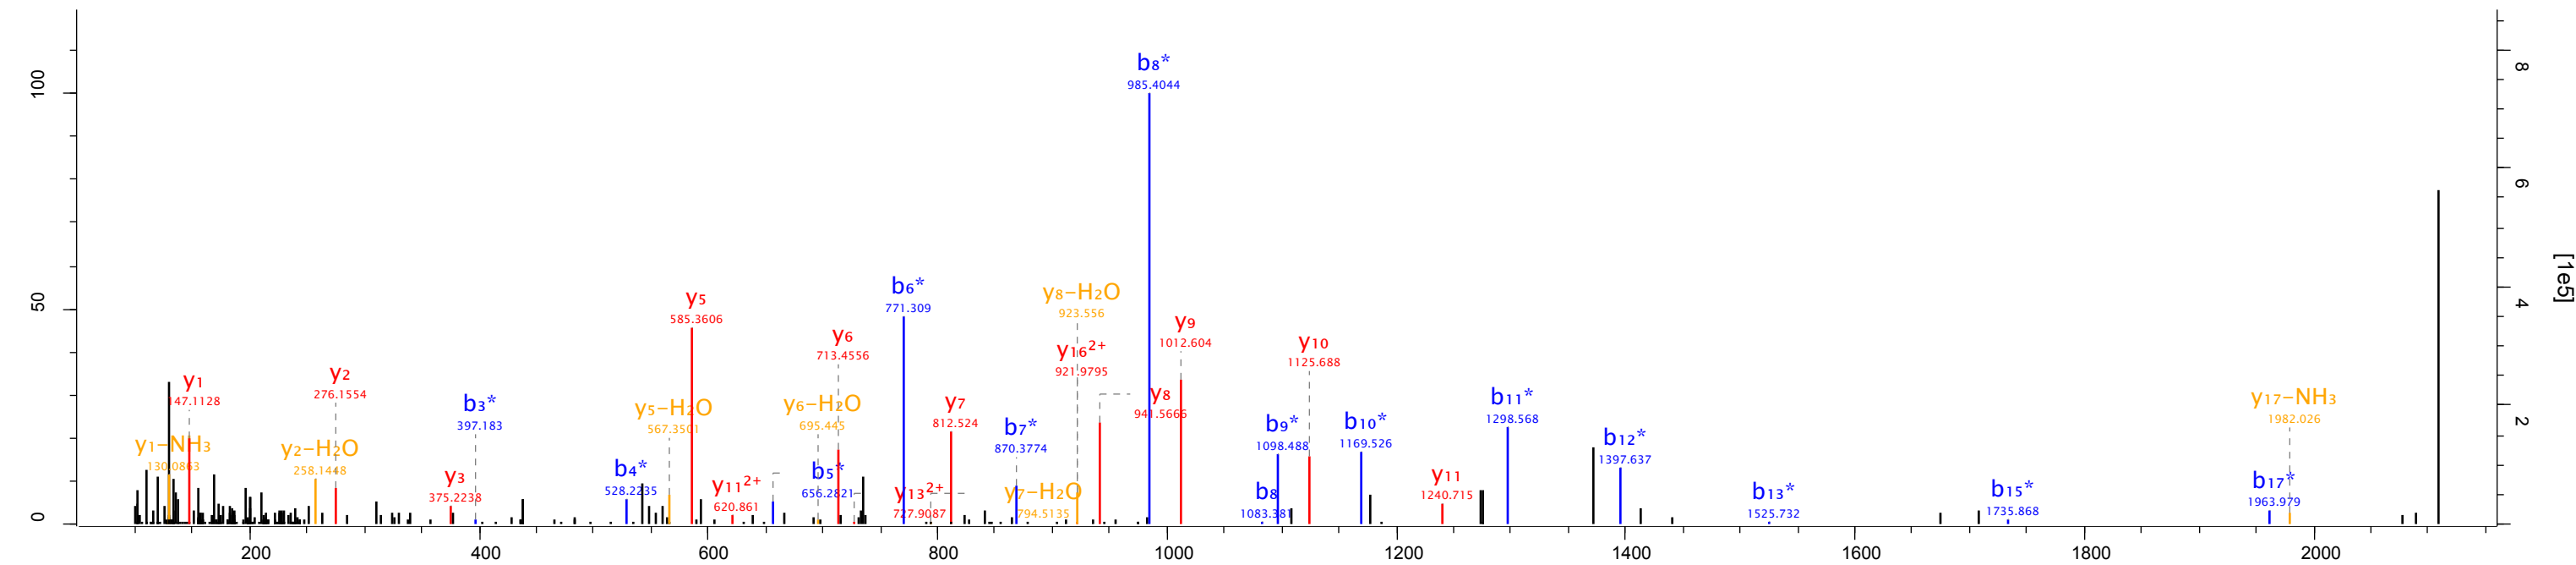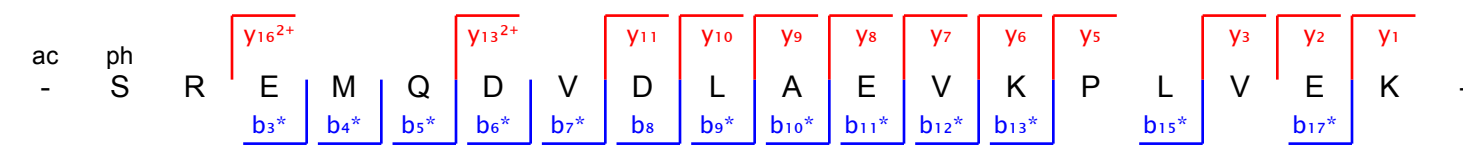

Raw file 20150814\_A375SR\_Phospho\_BR2\_06 Scan 22831 Method FTMS; HCD Score 103.04 m/z 928.76 Gene names ATF7IP

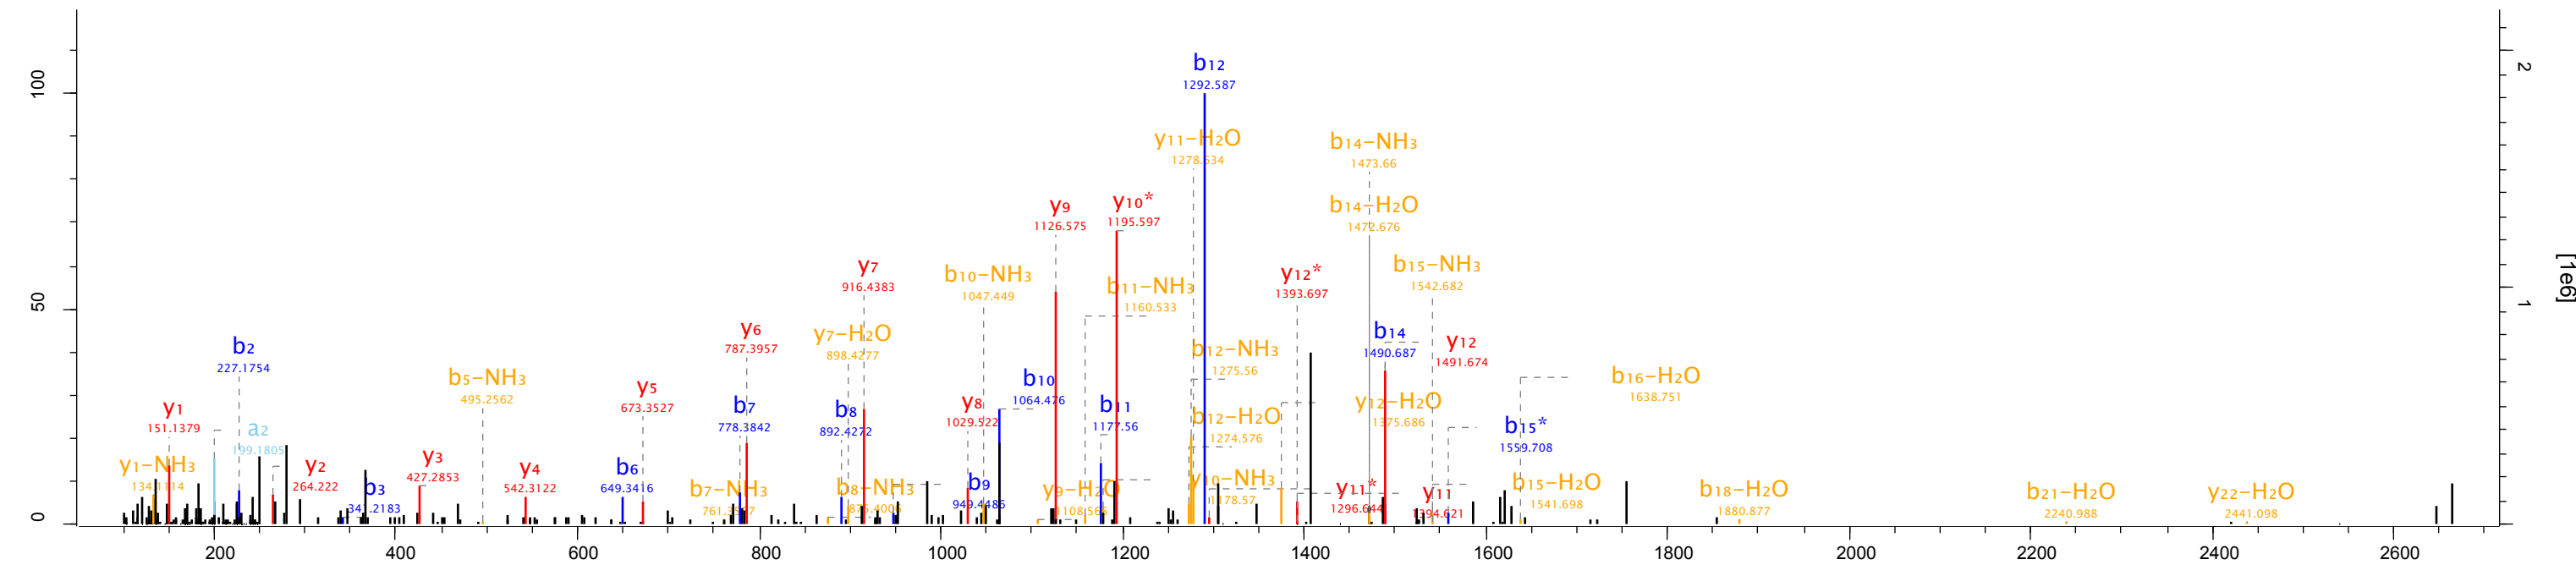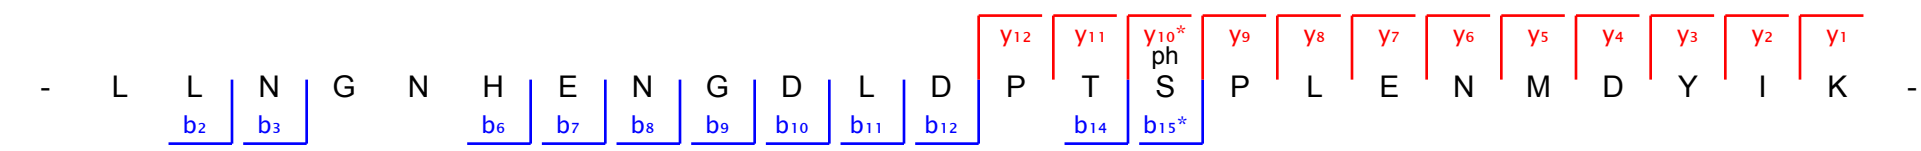

Raw file: 20150814\_A375SR\_Phospho\_BR2\_06  
 Scan: 23151 Method: FTMS; HCD Score: 45.35 m/z: 874.1 Gene names: C18orf8

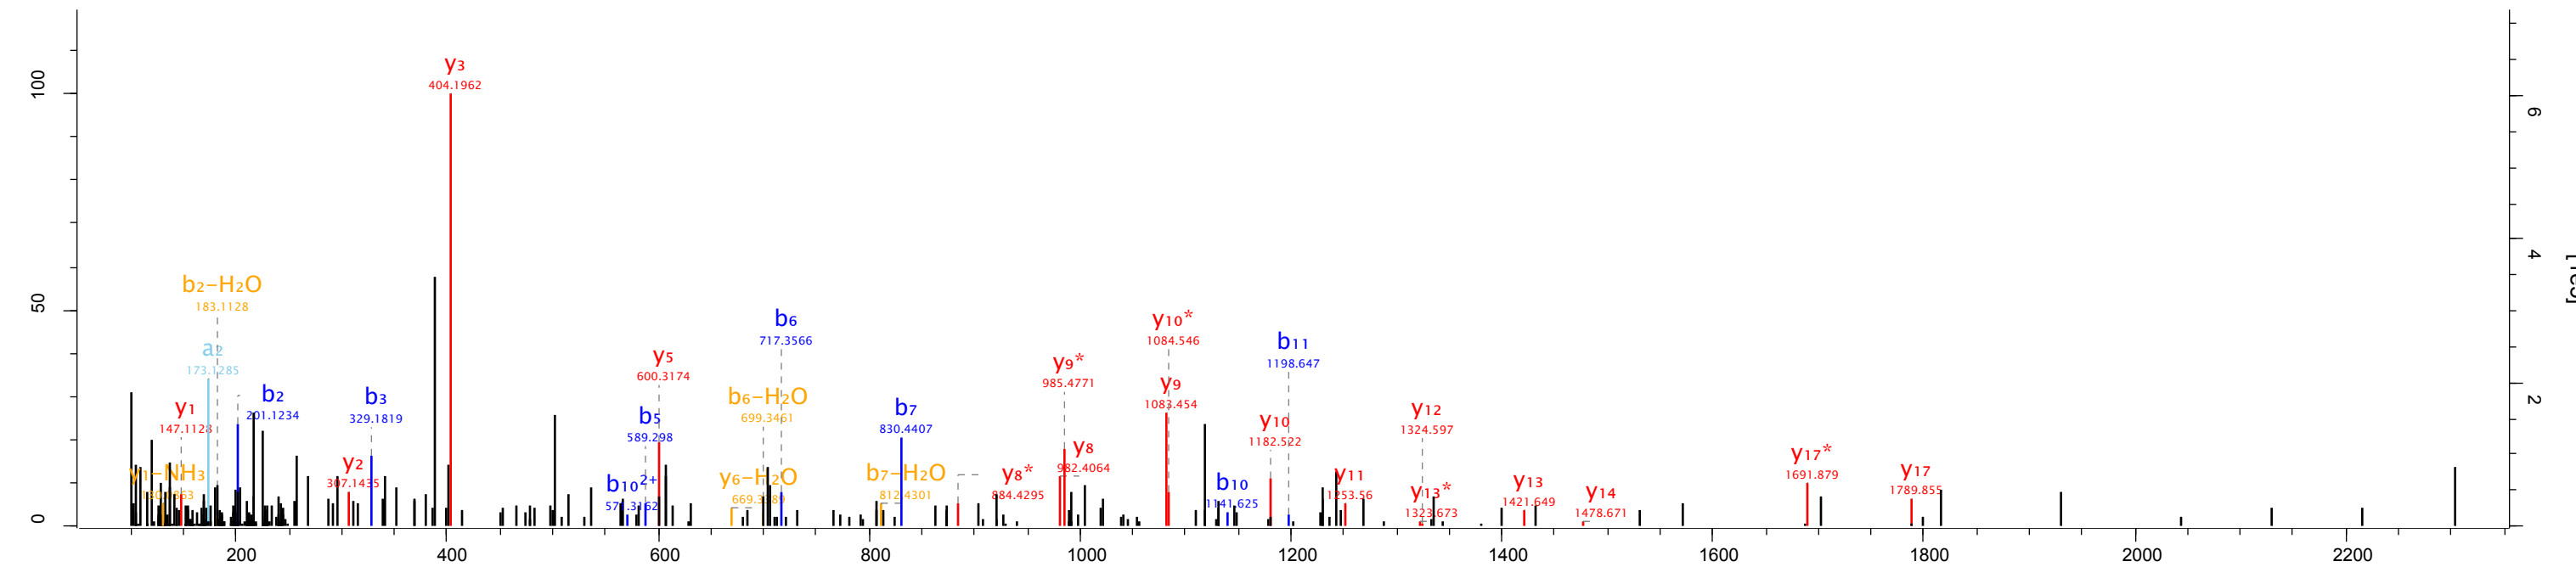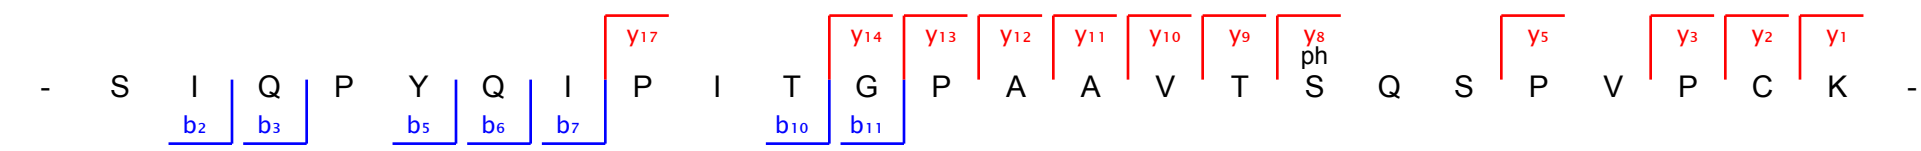

Raw file 20150814\_A375SR\_Phospho\_BR2\_06 Scan 23551 Method FTMS; HCD Score 136.3 m/z 1069.02 Gene names PDLIM2

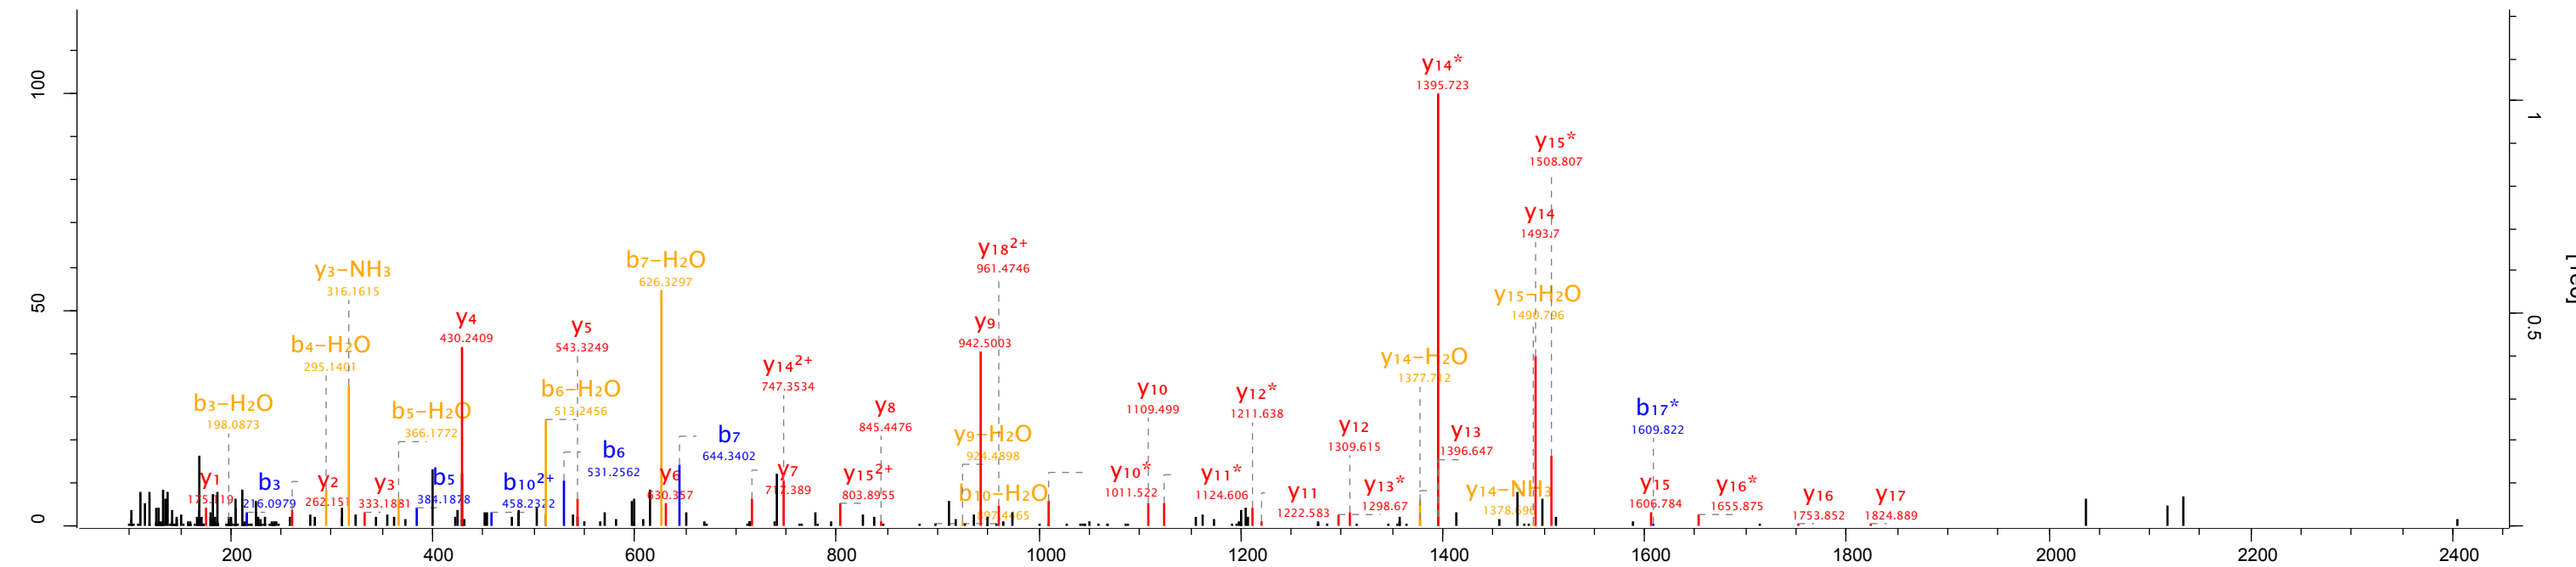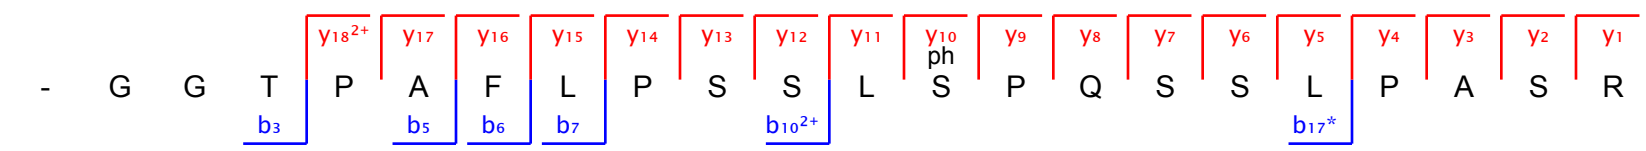

Raw file  
20150814\_A375SR\_Phospho\_BR2\_06

Scan 23591 Method FTMS; HCD Score 196.85 m/z 856.4 Gene names UBE4B

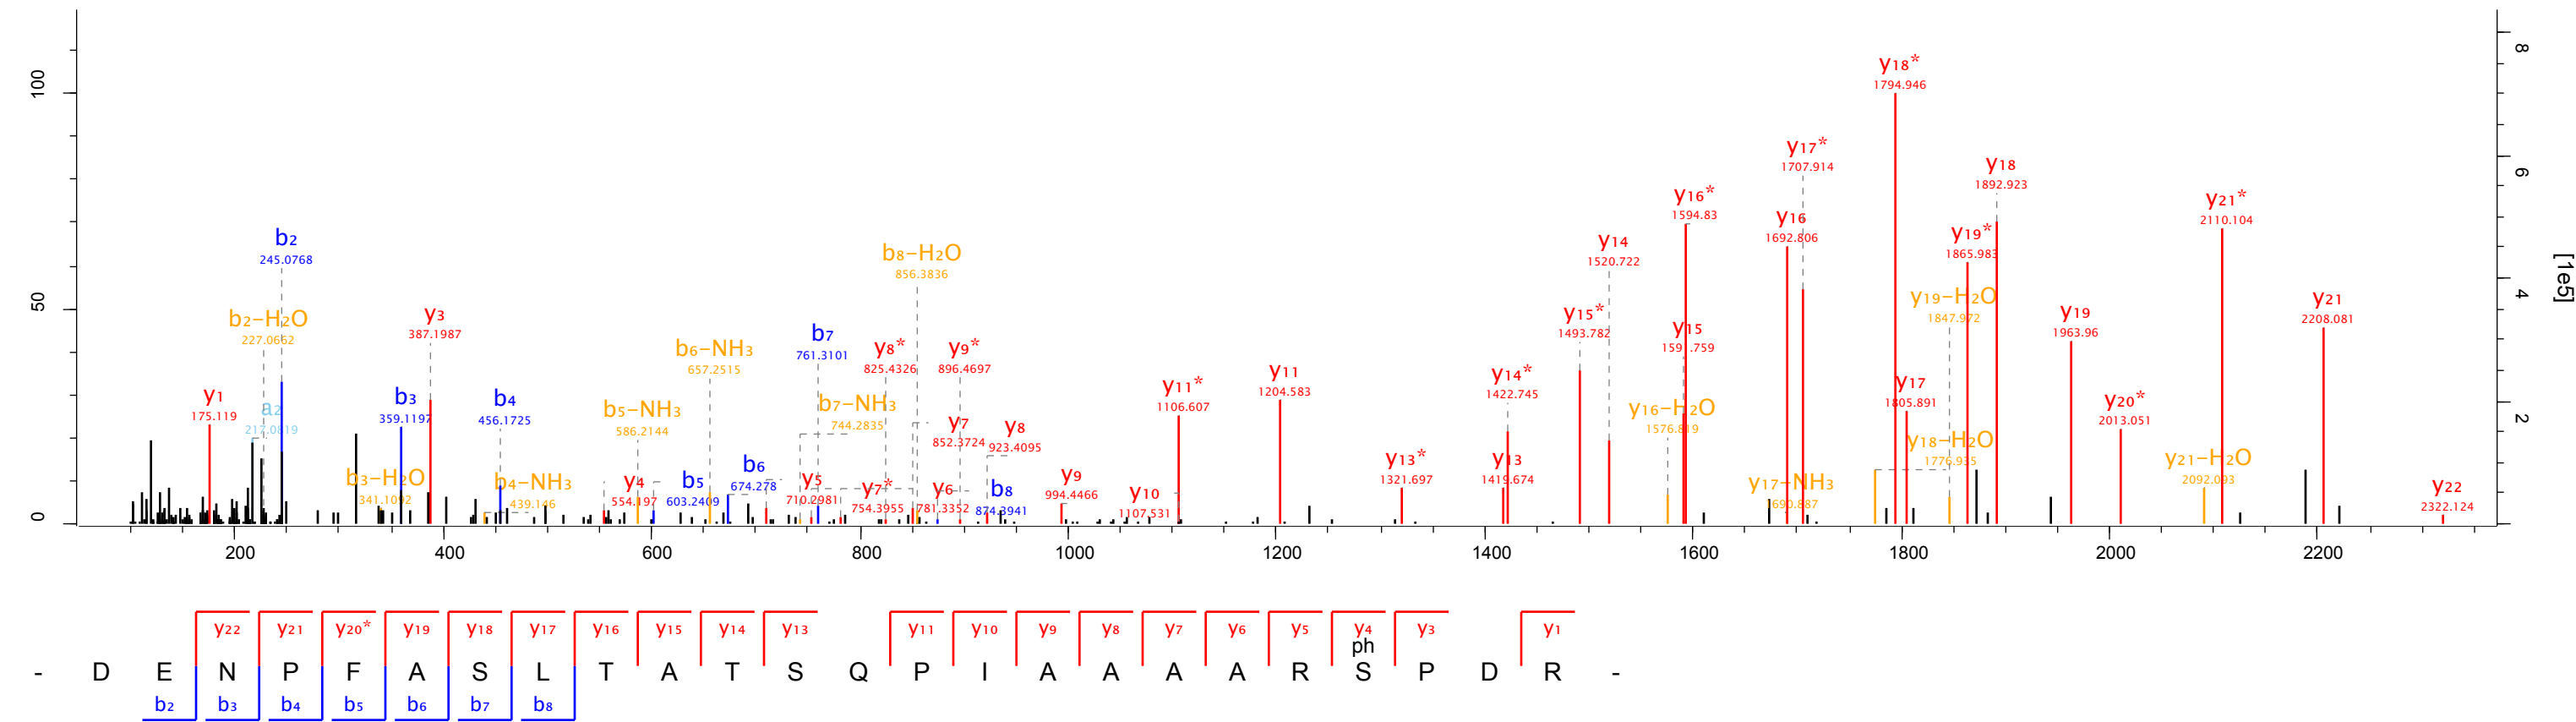

Raw file 20150814\_A375SR\_Phospho\_BR2\_06 Scan 25061 Method FTMS; HCD Score 68.05 m/z 995.83 Gene names EPS15

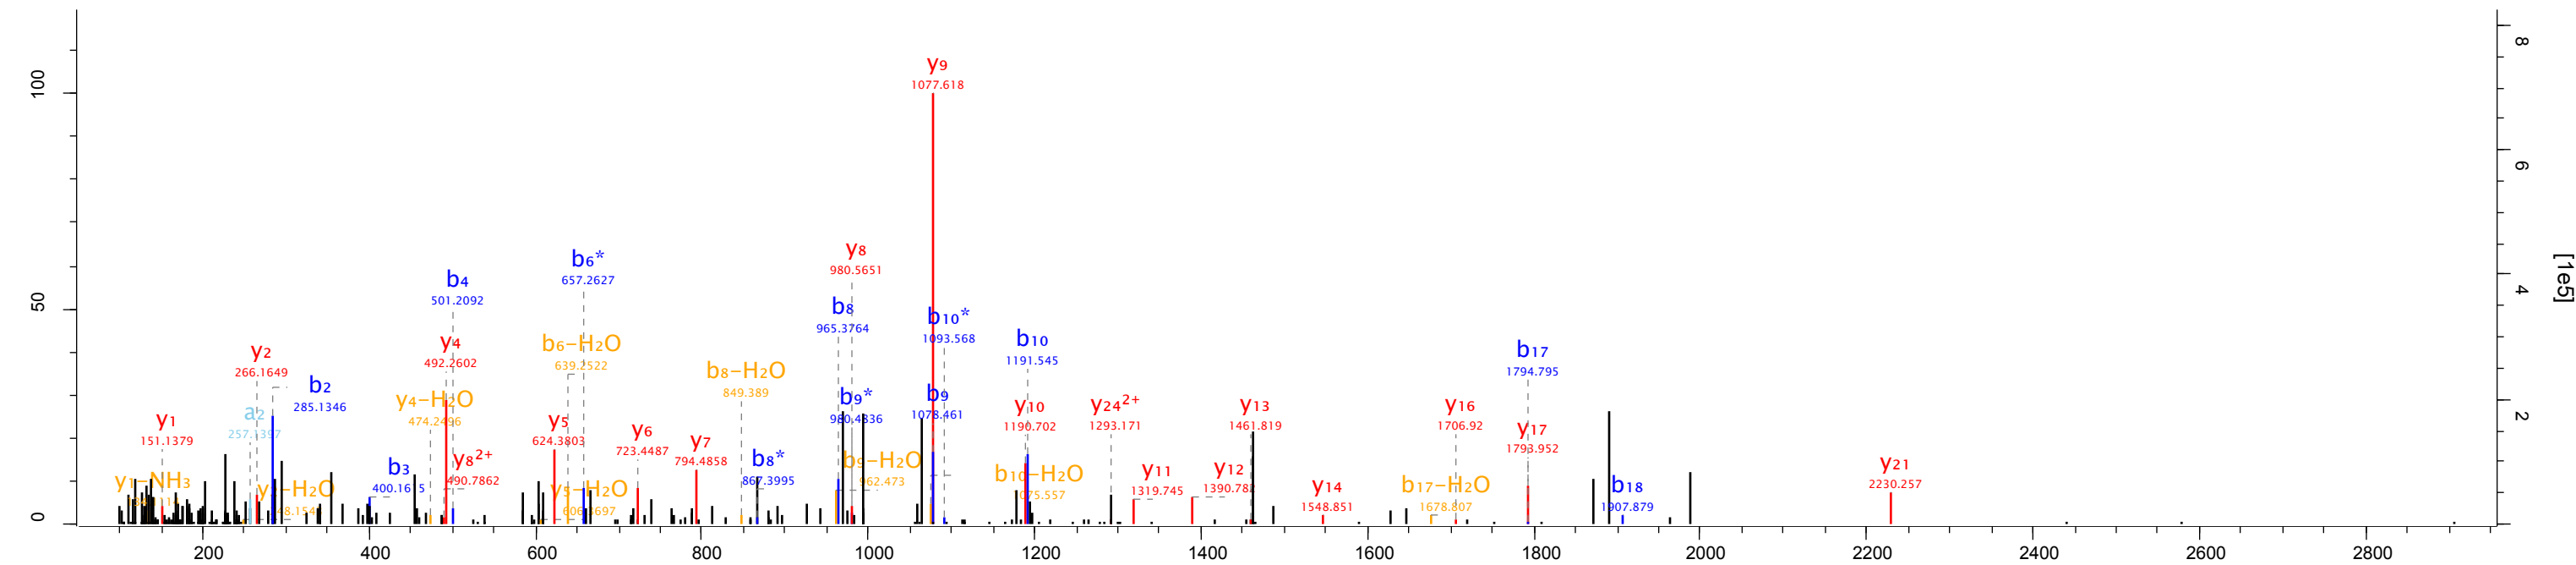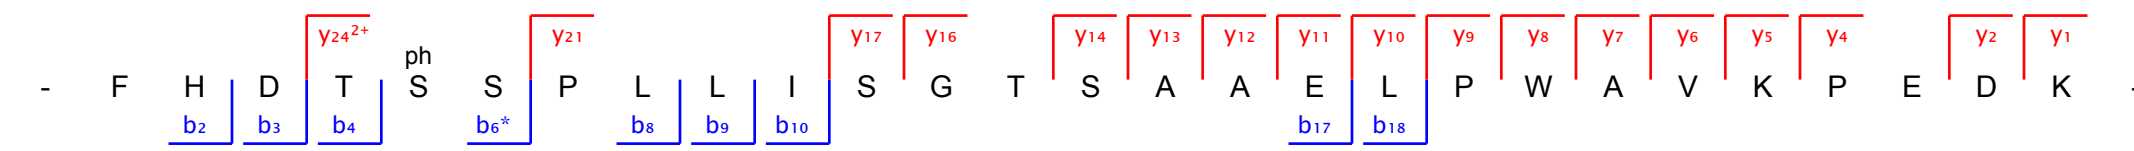

Raw file 20150814\_A375SR\_Phospho\_BR2\_06 Scan 25181 Method FTMS; HCD Score 165.36 m/z 1095.18 Gene names TP53BP1

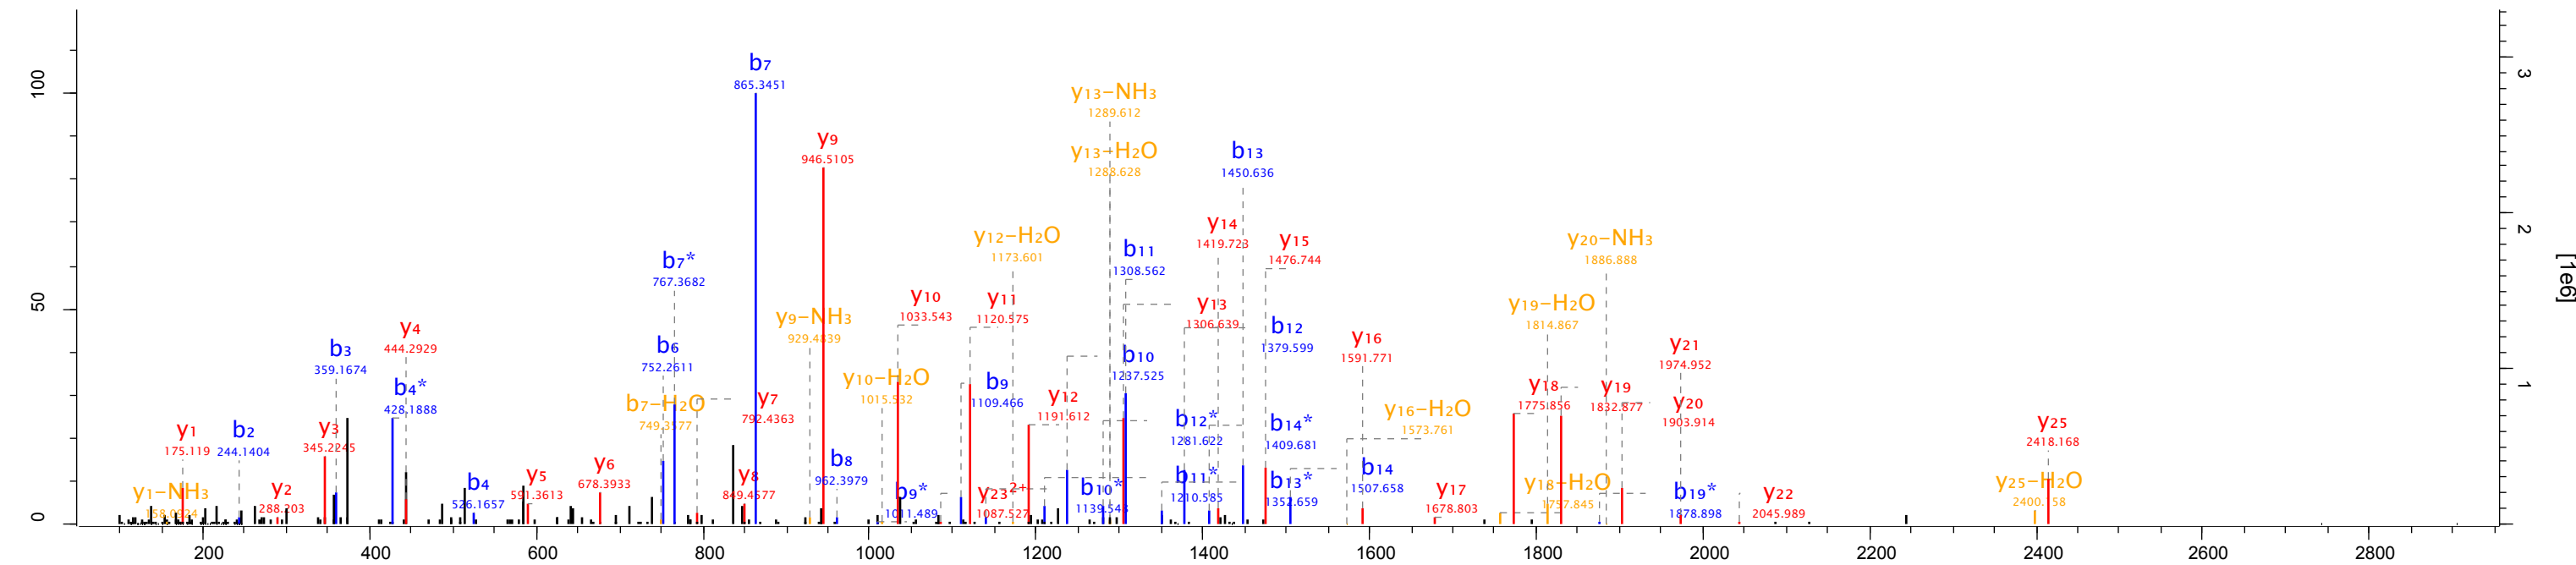

- R S D S P E I P F Q A A A G P S D G L D A S S P G N S F V G L R -

b<sub>2</sub>
b<sub>3</sub>
b<sub>4</sub>
b<sub>6</sub>
b<sub>7</sub>
b<sub>8</sub>
b<sub>9</sub>
b<sub>10</sub>
b<sub>11</sub>
b<sub>12</sub>
b<sub>13</sub>
b<sub>14</sub>
b<sub>19</sub>\*
y<sub>1</sub>
y<sub>2</sub>
y<sub>3</sub>
y<sub>4</sub>
y<sub>5</sub>
y<sub>6</sub>
y<sub>7</sub>
y<sub>8</sub>
y<sub>9</sub>
y<sub>10</sub>
y<sub>11</sub>
y<sub>12</sub>
y<sub>13</sub>
y<sub>14</sub>
y<sub>15</sub>
y<sub>16</sub>
y<sub>17</sub>
y<sub>18</sub>
y<sub>19</sub>
y<sub>20</sub>
y<sub>21</sub>
y<sub>22</sub>
y<sub>23</sub><sup>2+</sup>
y<sub>25</sub>

Raw file: 20150814\_A375SR\_Phospho\_BR2\_06  
 Scan: 25341 Method: FTMS; HCD Score: 179.2 m/z: 834.75 Gene names: ACIN1

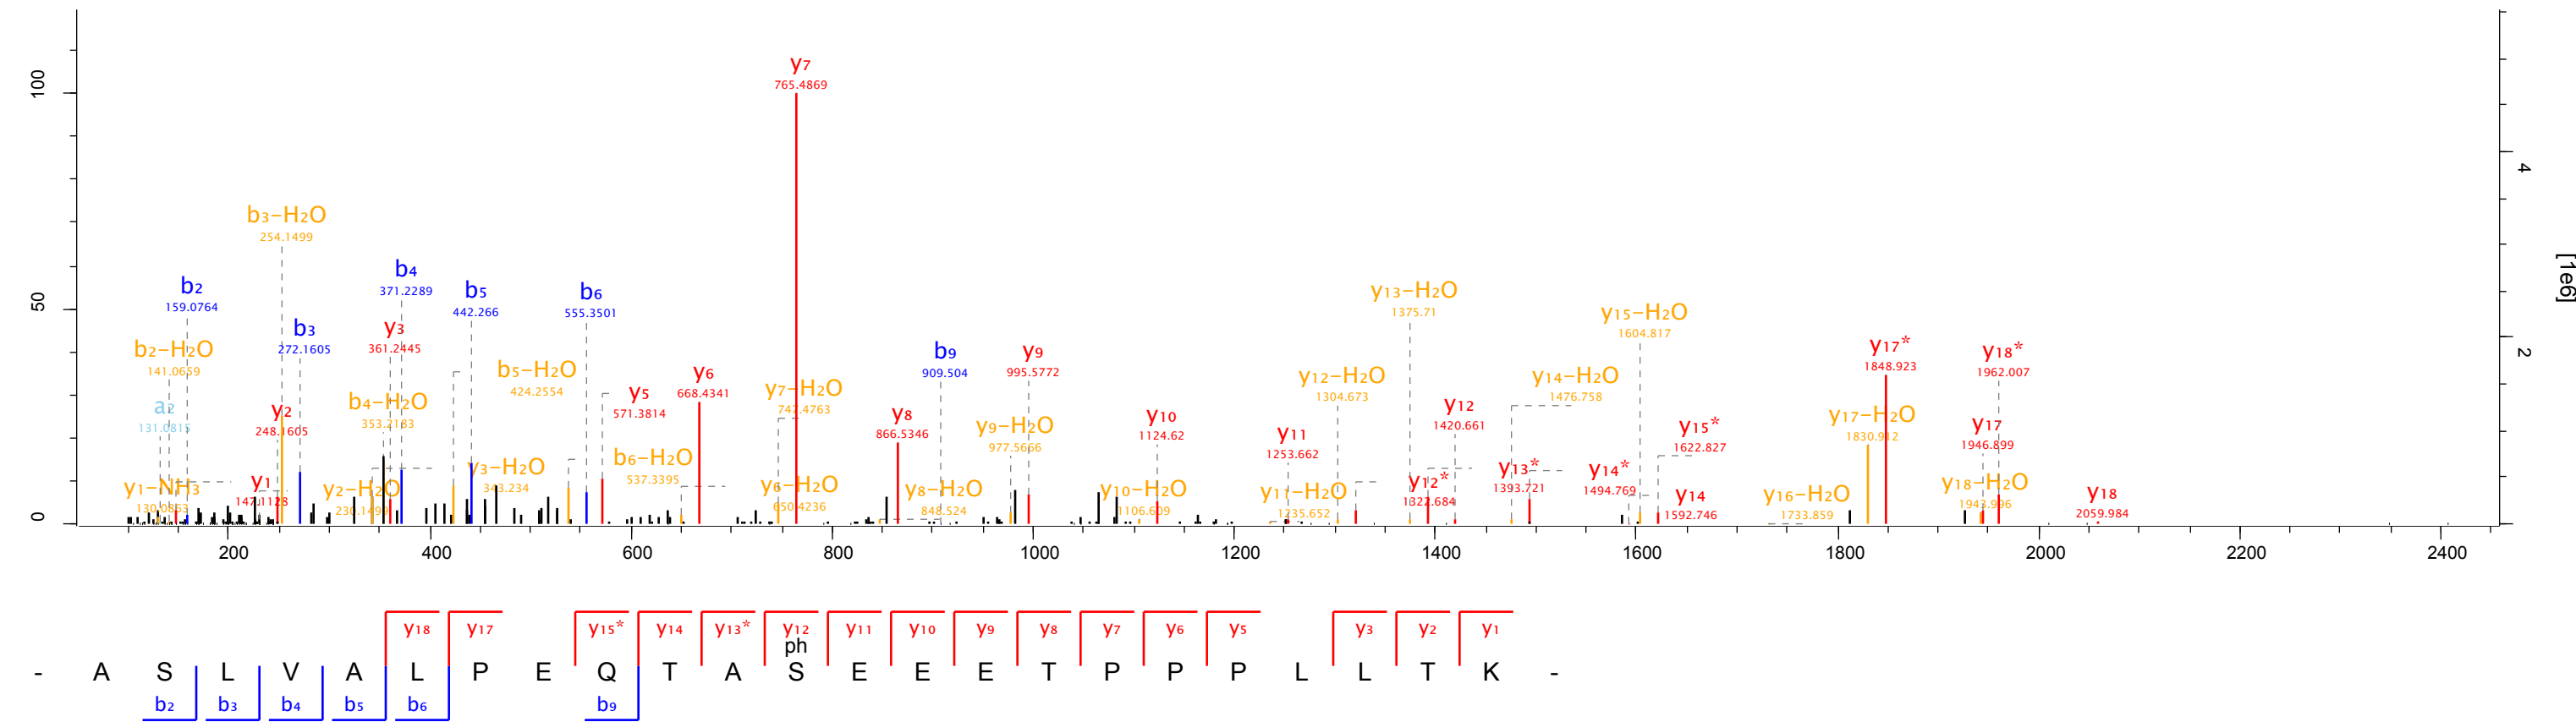



Raw file 20150814\_A375SR\_Phospho\_BR2\_06 Scan 26081 Method FTMS; HCD Score 91.4 m/z 890.09 Gene names ASF1A

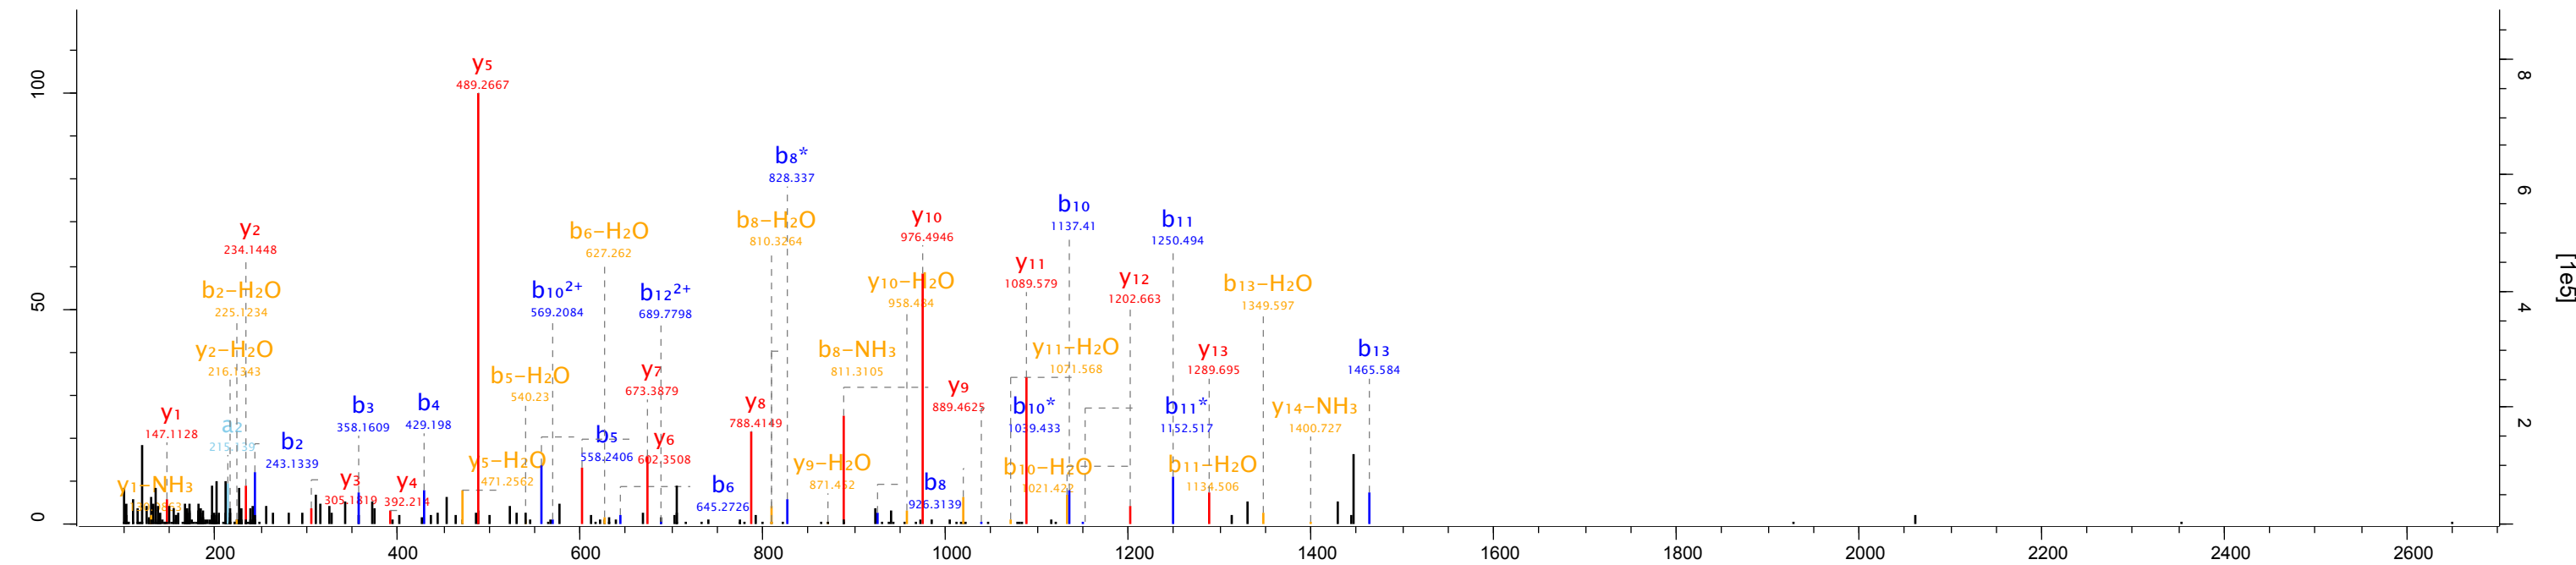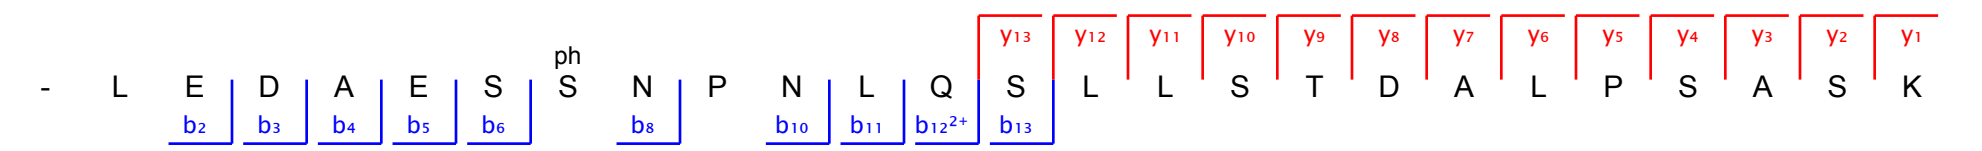

Raw file 20150814\_A375SR\_Phospho\_BR2\_06 Scan 26191 Method FTMS; HCD Score 199.89 m/z 1076.5 Gene names MAP3K3

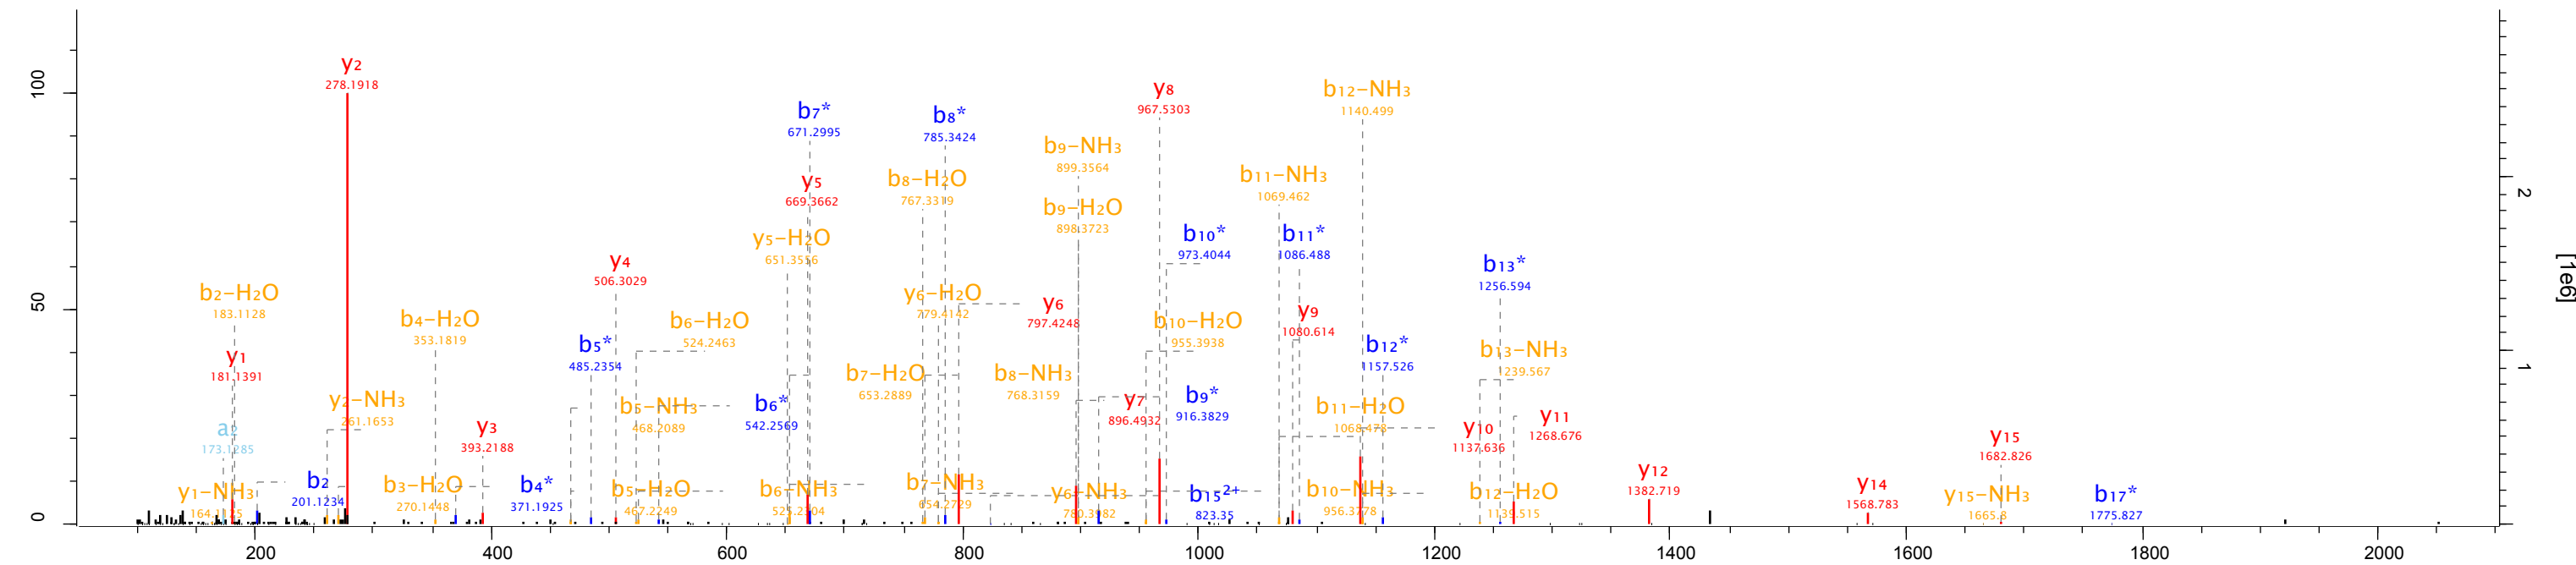

- S L S ph T N G E N M G L A V Q Y L D P R -  
 b<sub>2</sub> b<sub>4</sub>\* b<sub>5</sub>\* b<sub>6</sub>\* b<sub>7</sub>\* b<sub>8</sub>\* b<sub>9</sub>\* b<sub>10</sub>\* b<sub>11</sub>\* b<sub>12</sub>\* b<sub>13</sub>\* b<sub>15</sub><sup>2+</sup> b<sub>17</sub>\*

Raw file: 20150814\_A375SR\_Phospho\_BR2\_06  
 Scan: 26431 Method: FTMS; HCD Score: 187.04 m/z: 846.41 Gene names: TK1

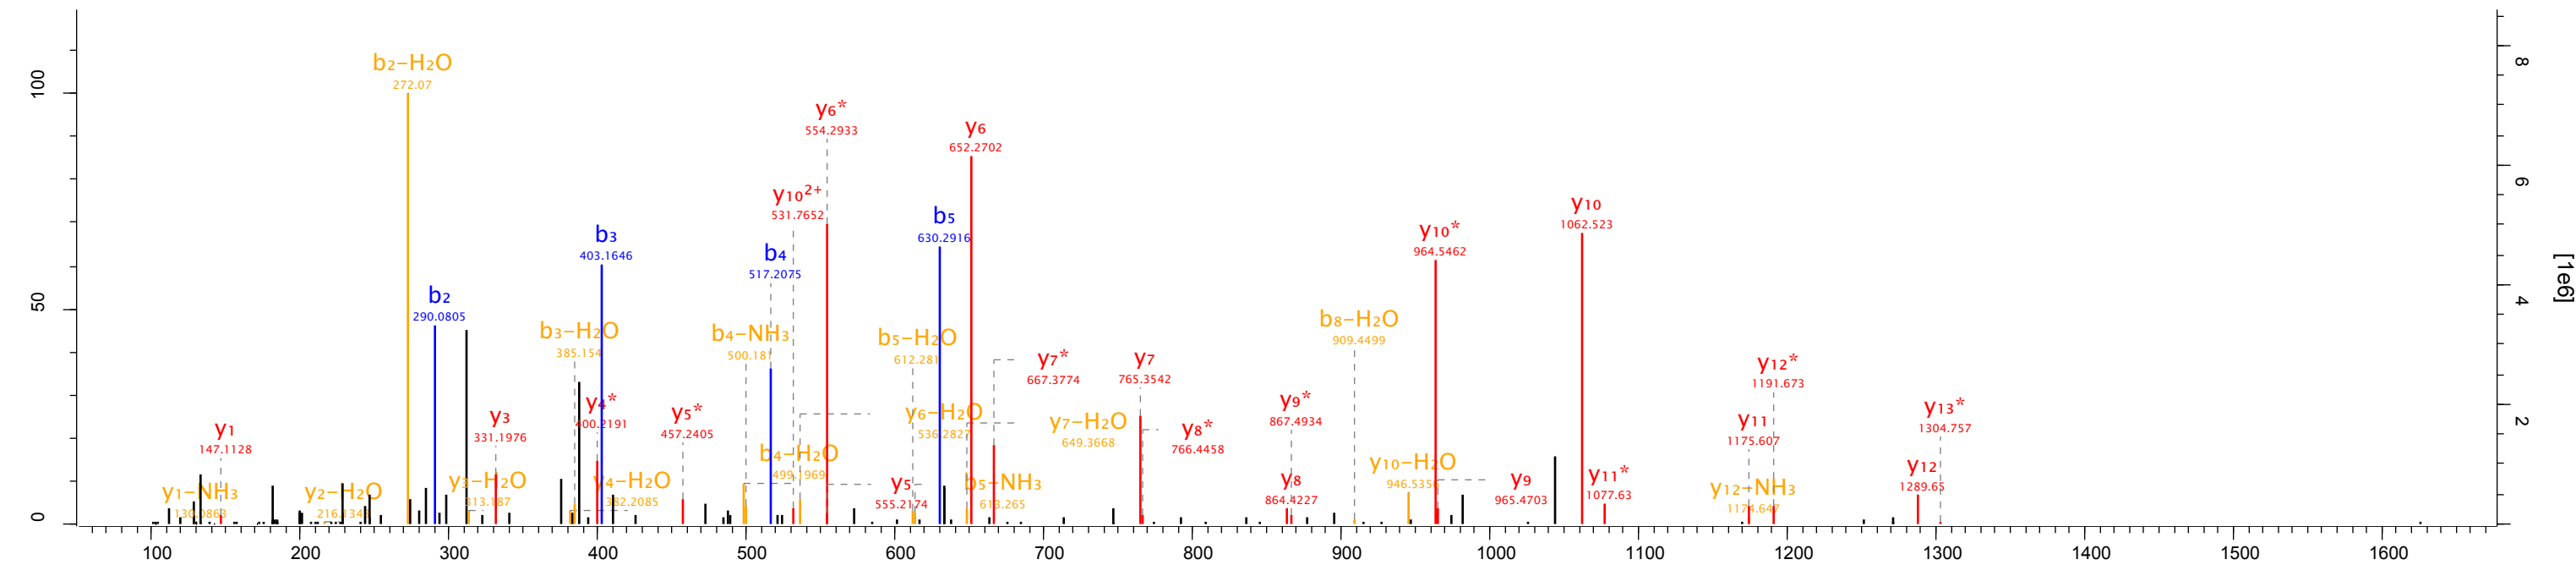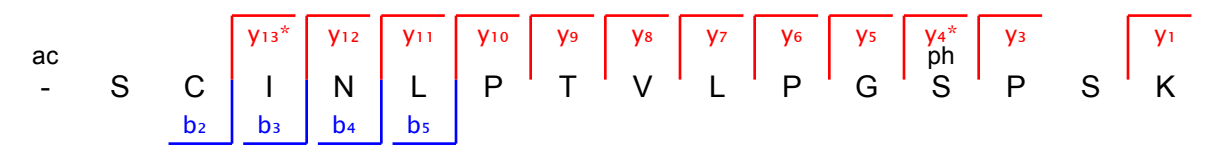

Raw file  
 20150814\_A375SR\_Phospho\_BR2\_06  
 Scan 26581 Method FTMS; HCD Score 74.87 m/z 997.14 Gene names PIK3R2

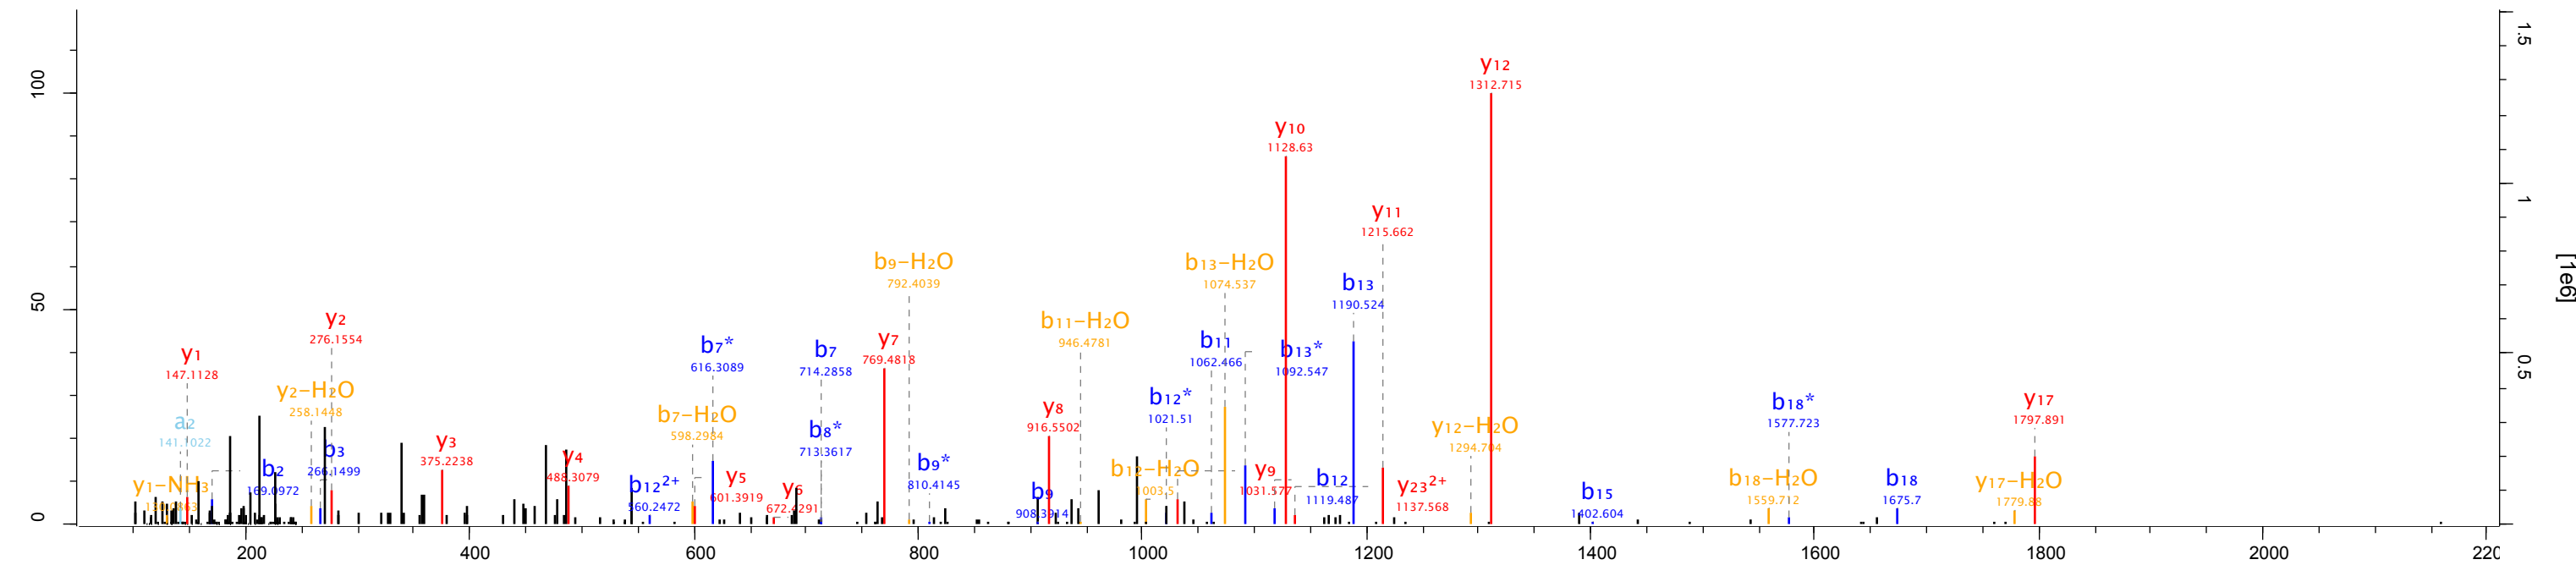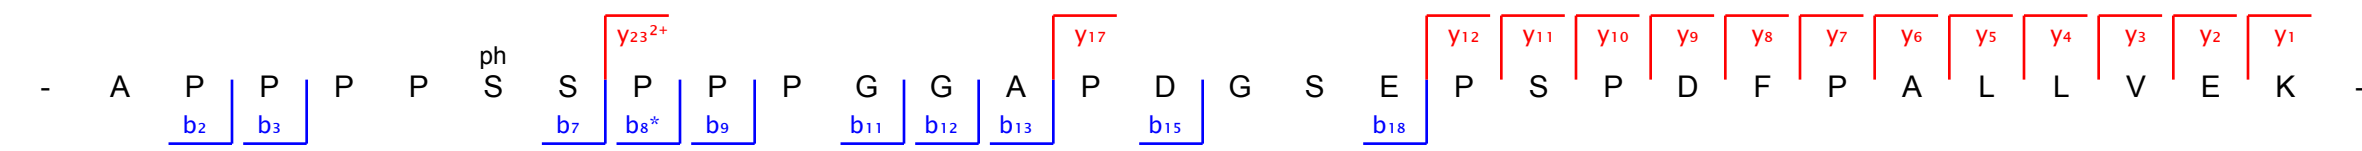

Raw file: 20150814\_A375SR\_Phospho\_BR2\_06  
 Scan: 27101 Method: FTMS; HCD Score: 135.23 m/z: 767.38 Gene names: TNFRSF10A

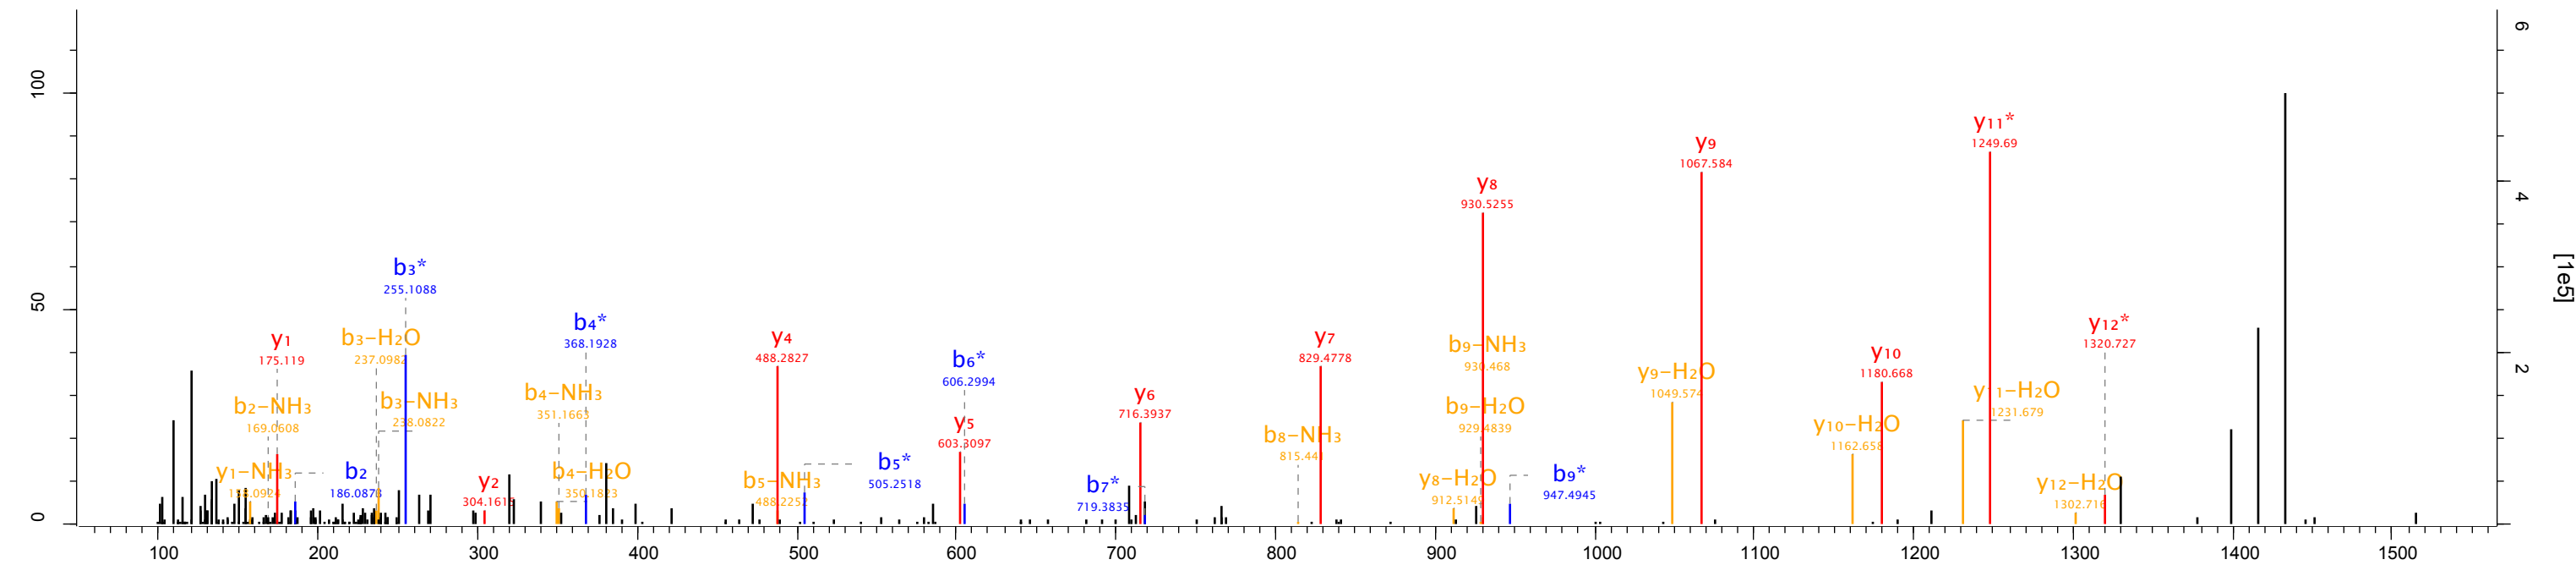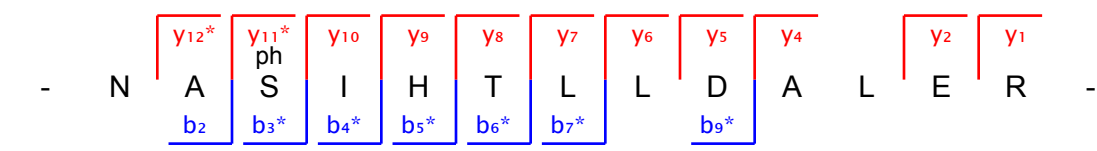

Raw file: 20150814\_A375SR\_Phospho\_BR2\_06  
 Scan: 27621 Method: FTMS; HCD Score: 191.73 m/z: 1056.01 Gene names: ARHGEF2

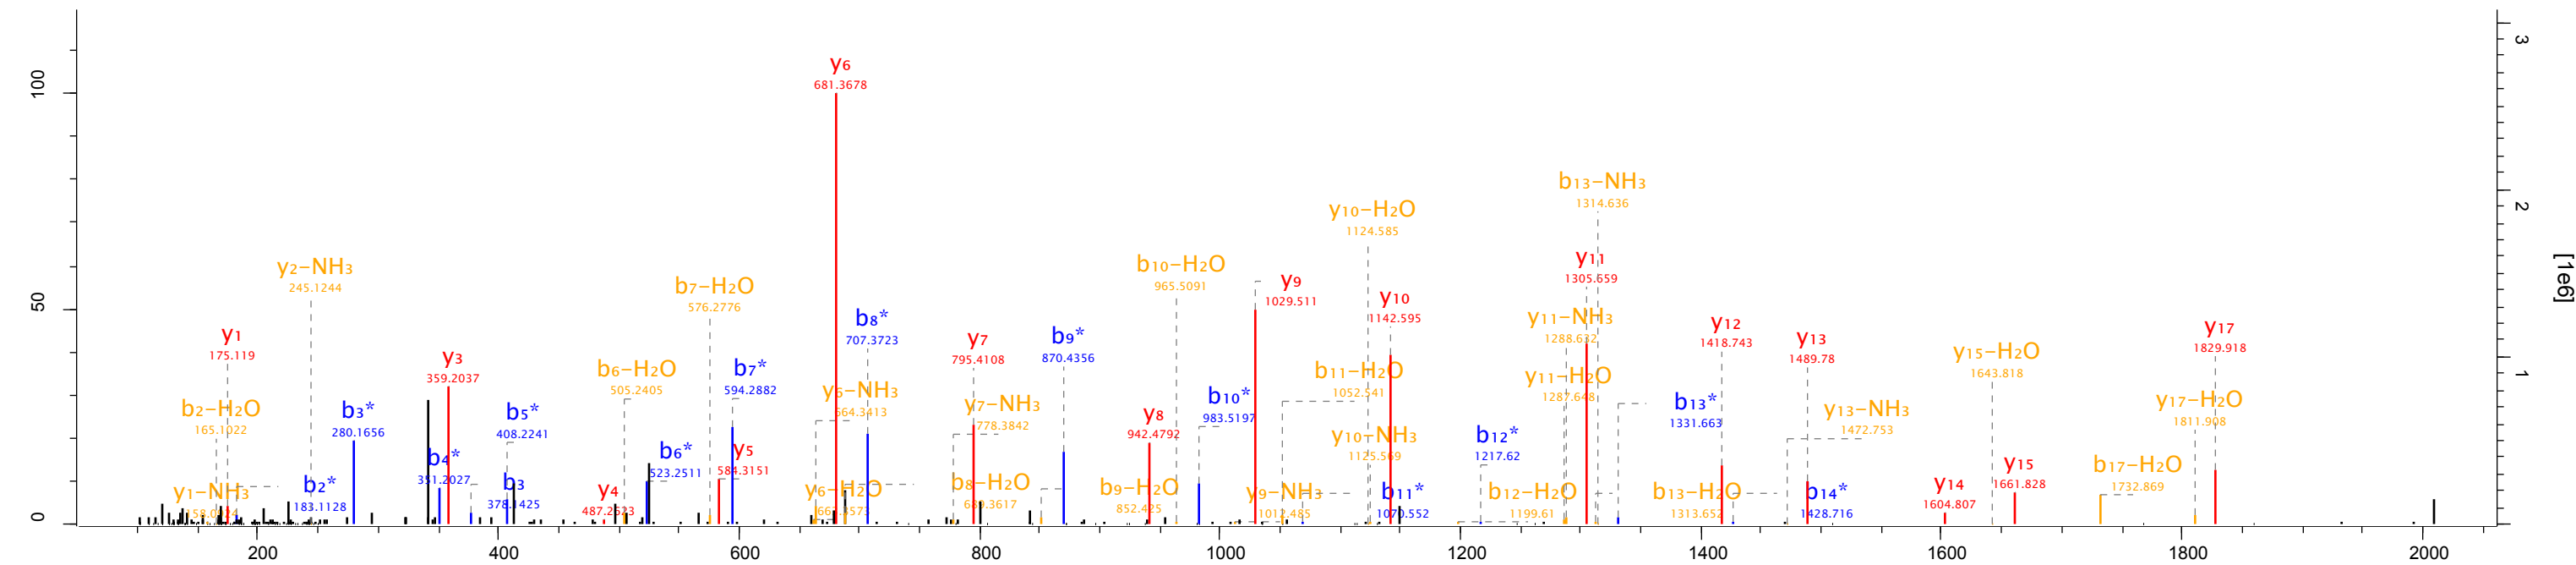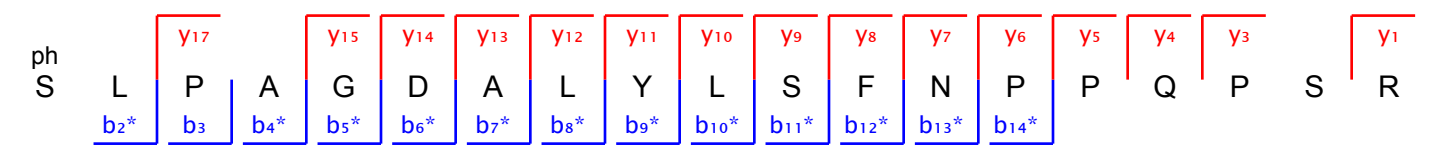

Raw file 20150814\_A375SR\_Phospho\_BR2\_06 Scan 28161 Method FTMS; HCD Score 123.19 m/z 961.95 Gene names MYO5A

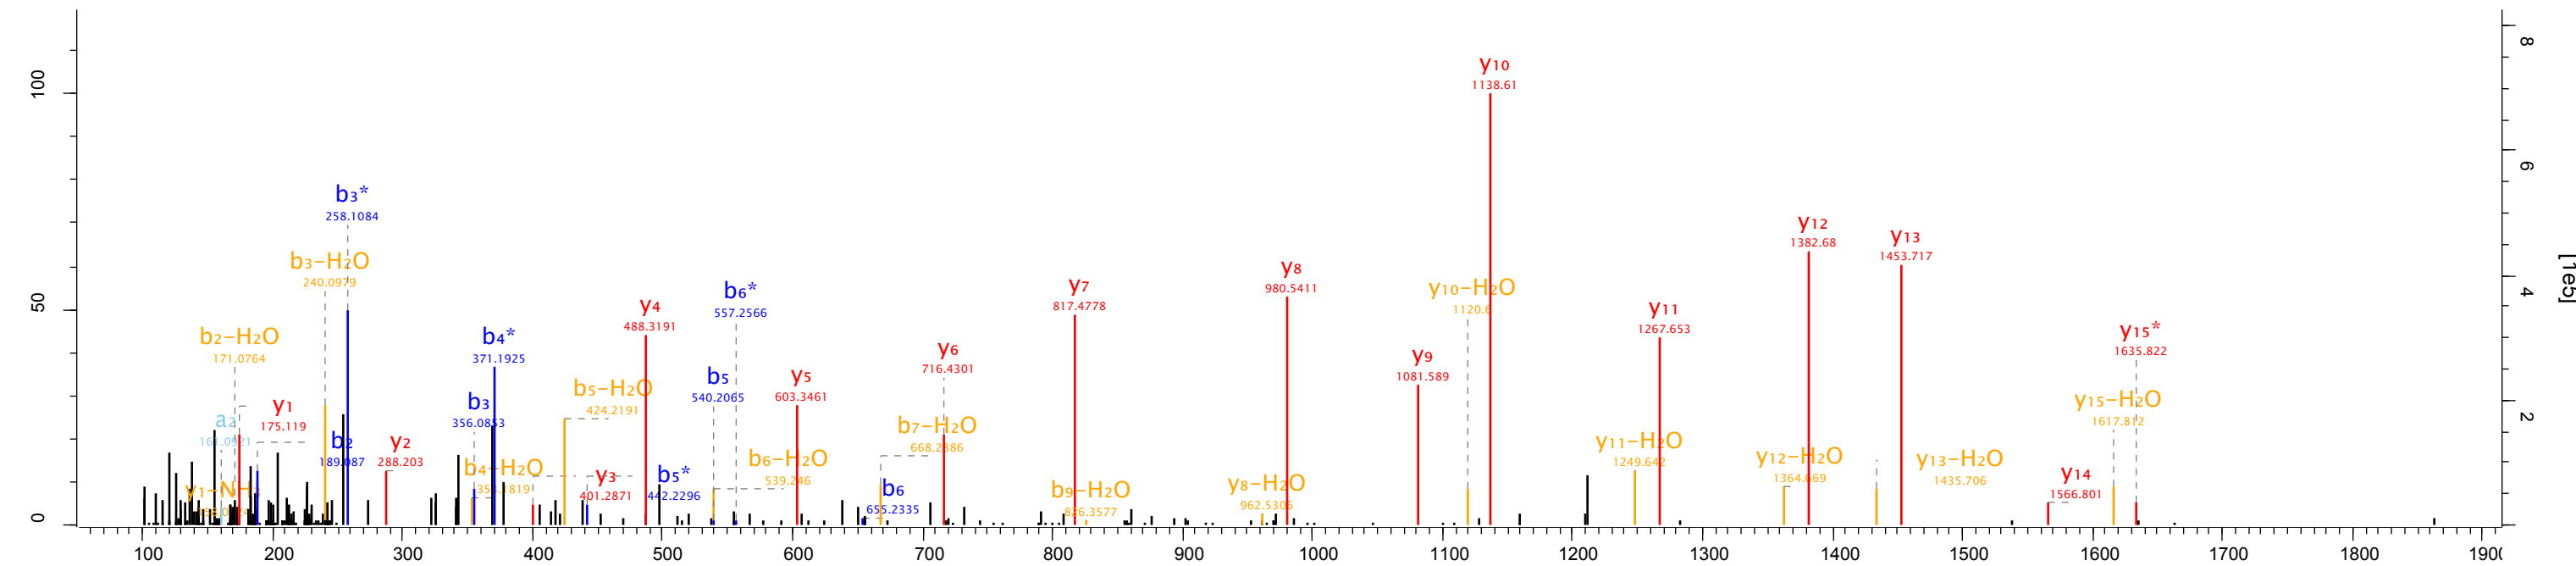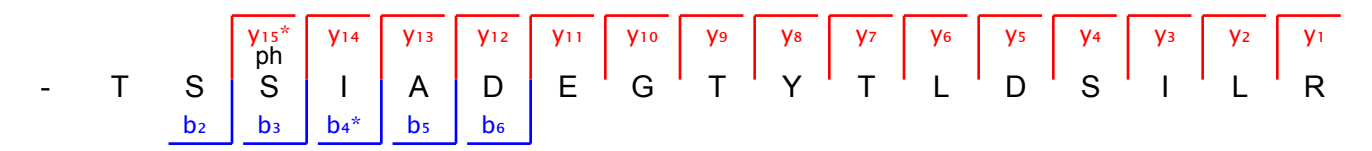

Raw file 20150814\_A375SR\_Phospho\_BR2\_06 Scan 28331 Method FTMS; HCD Score 190.28 m/z 859.11 Gene names PRRC2A

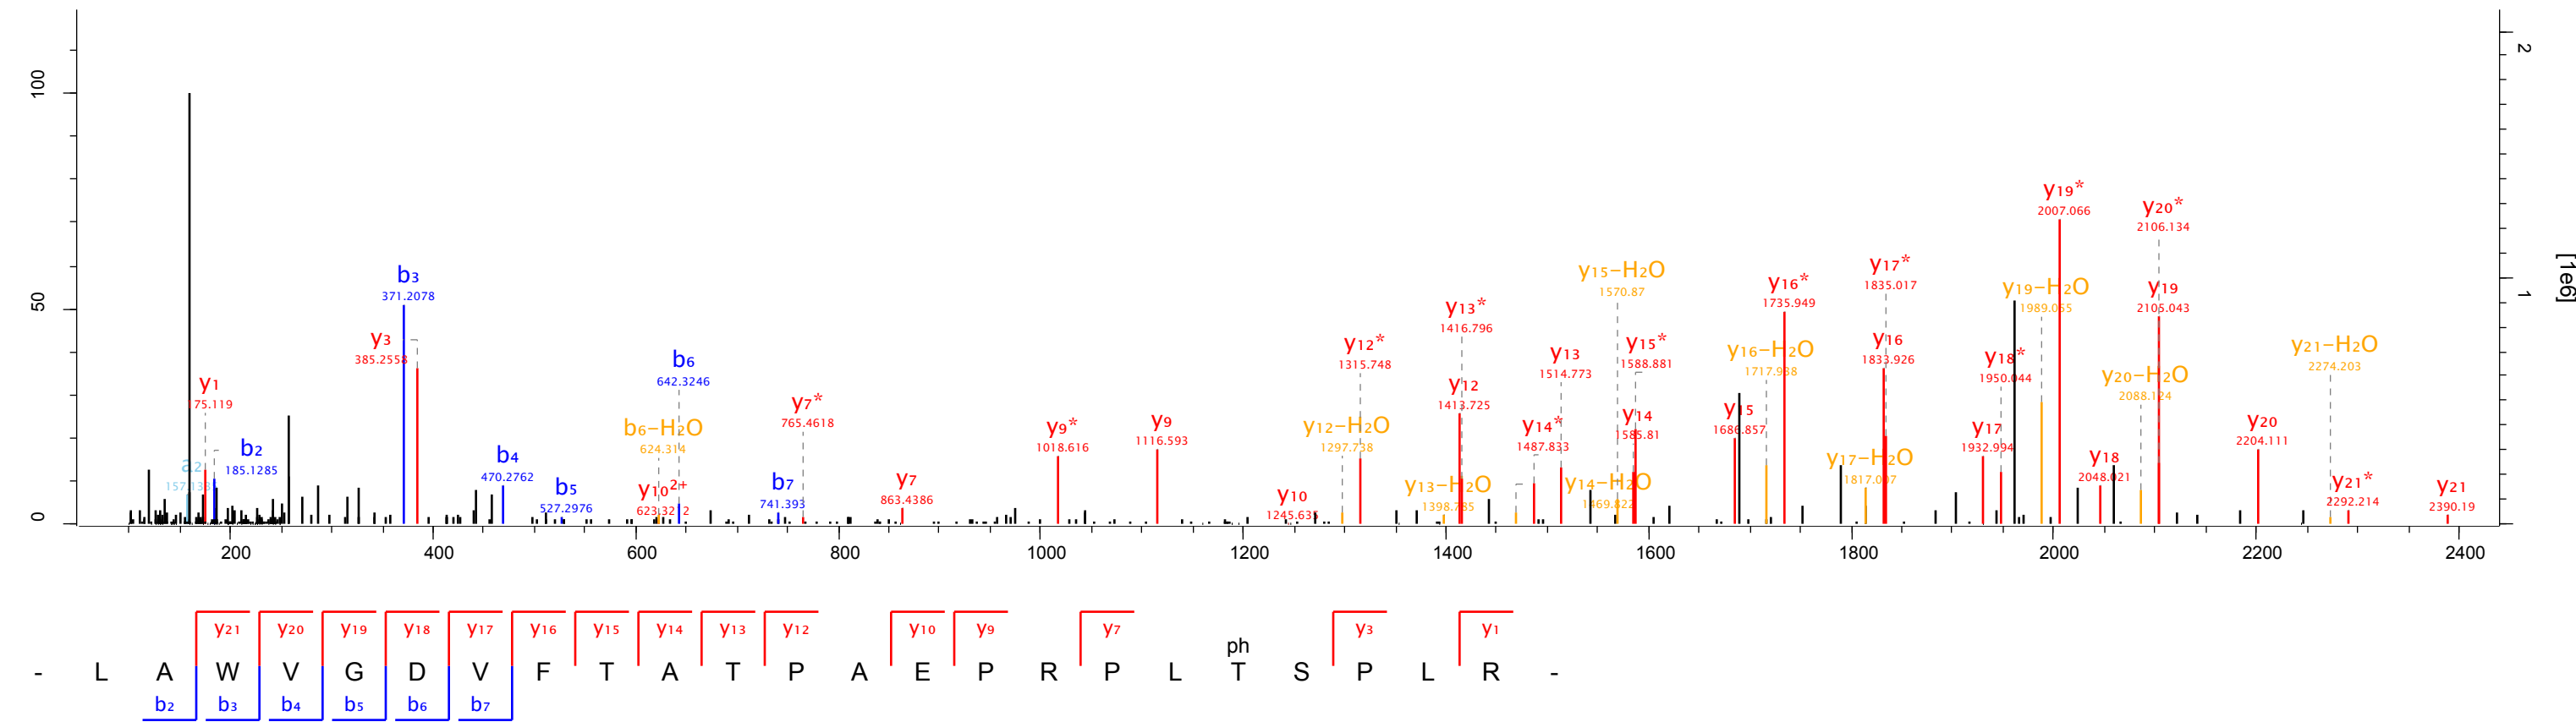



Raw file

20150814\_A375SR\_Phospho\_BR2\_06

| Scan  | Method    | Score  | m/z    | Gene names |
|-------|-----------|--------|--------|------------|
| 28701 | FTMS; HCD | 120.93 | 859.79 | VIM        |

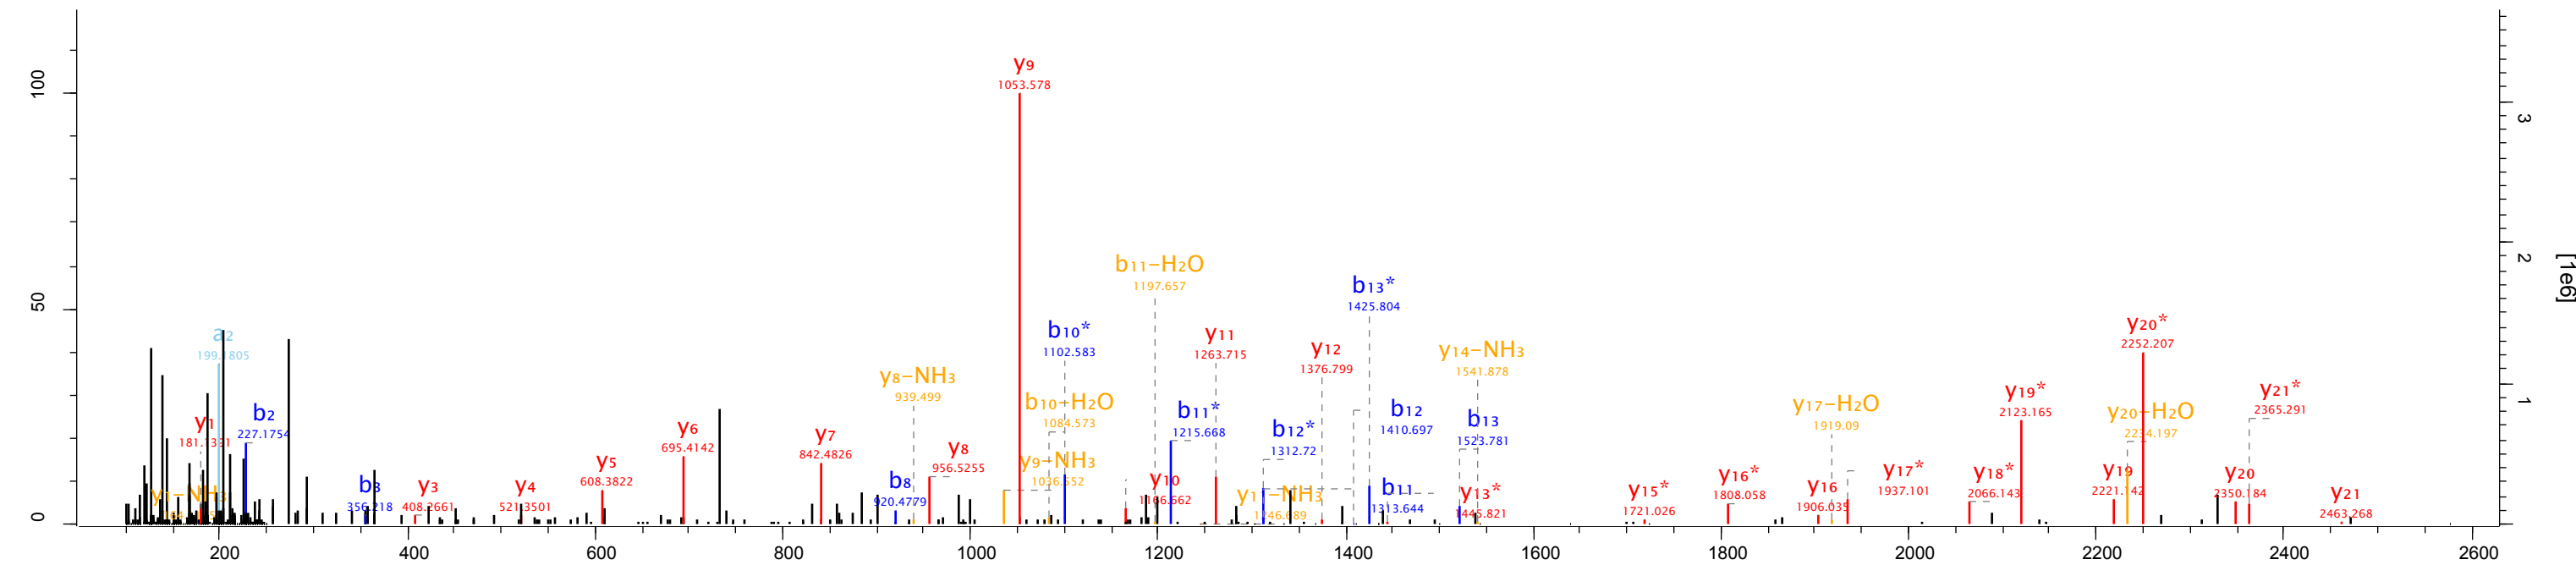

- L L L E G E E S R I S L P L P N F S S L N L R -

y21
y20
y19
y18\*
y17\*
y16
y15\*
y13\*  
ph
y12
y11
y10
y9
y8
y7
y6
y5
y4
y3
y1

b2
b3
b8
b10\*
b11
b12
b13

Raw file: 20150814\_A375SR\_Phospho\_BR2\_06  
 Scan: 4131 Method: FTMS; HCD Score: 55.47 m/z: 540.76 Gene names: ARHGEF6

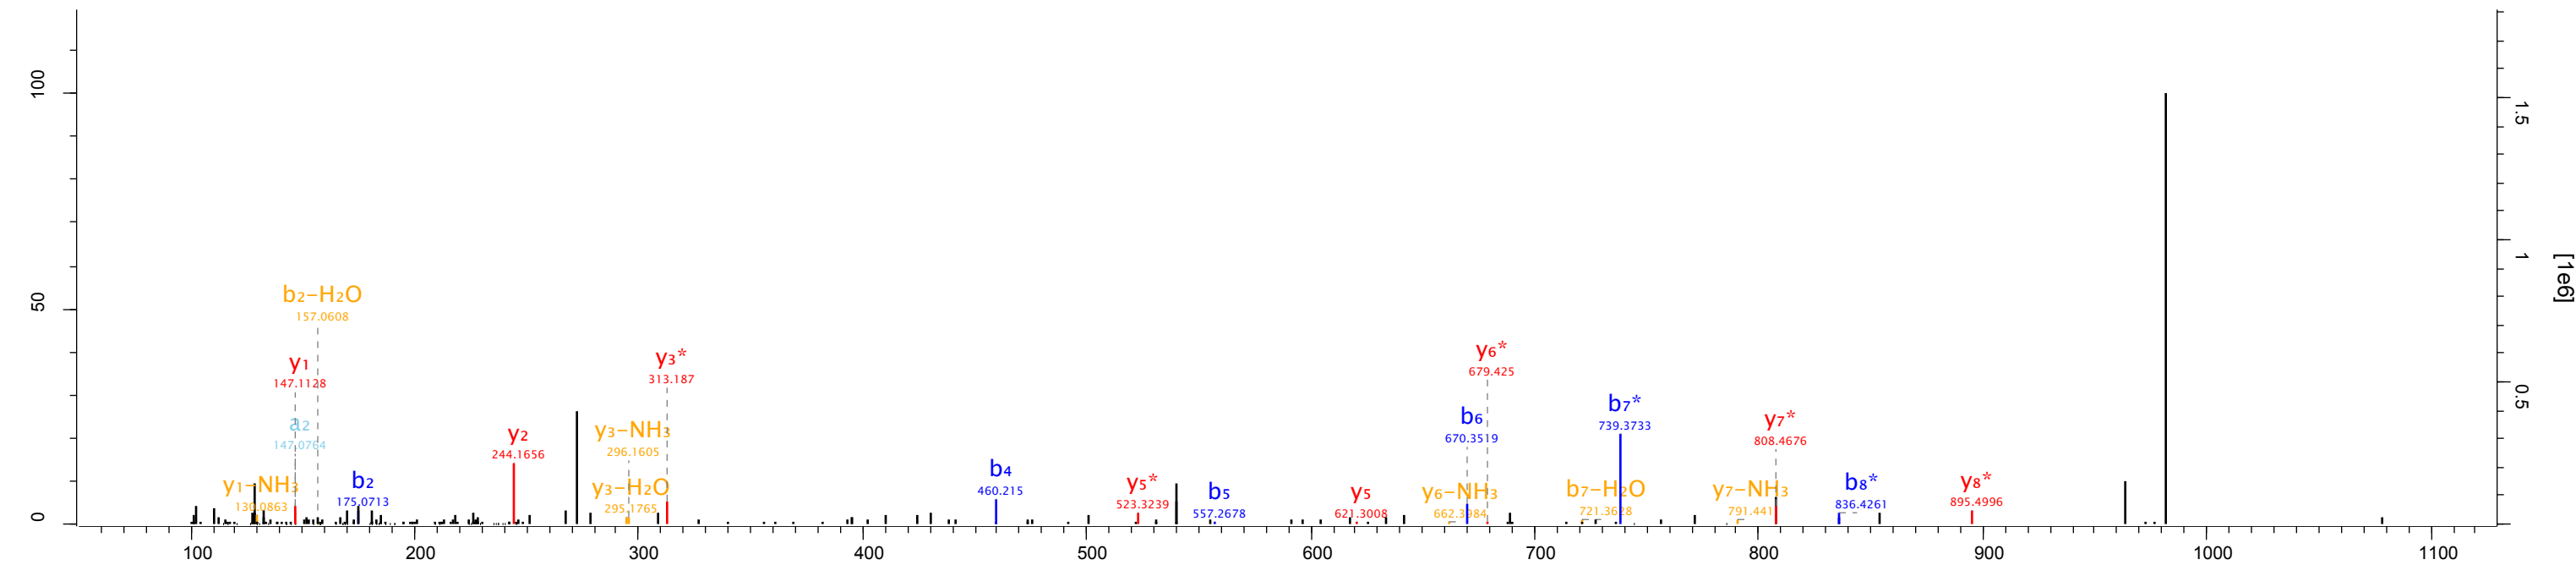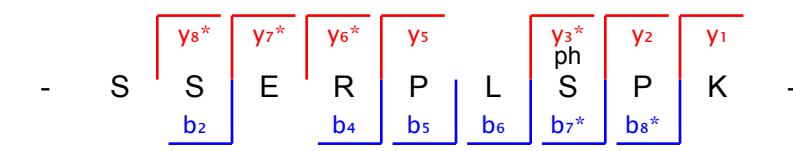

Raw file: 20150814\_A375SR\_Phospho\_BR2\_06  
 Scan: 4411 Method: FTMS; HCD Score: 140.84 m/z: 394.19 Gene names: SRRM1

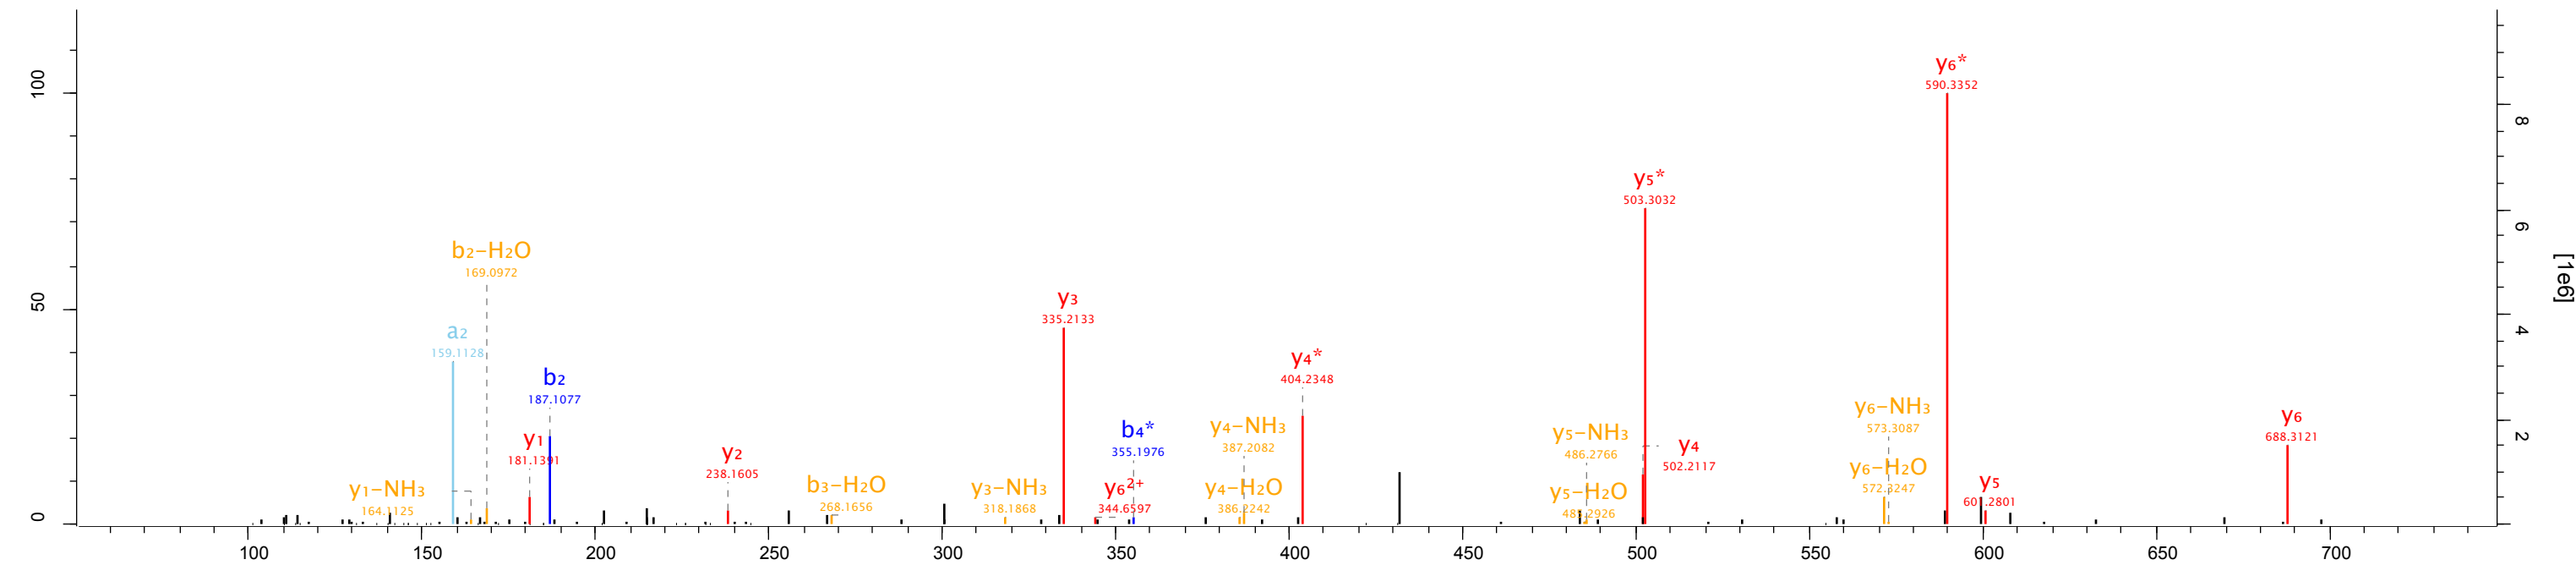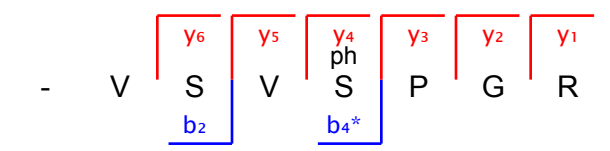

Raw file: 20150814\_A375SR\_Phospho\_BR2\_06  
 Scan: 4891 Method: FTMS; HCD Score: 201.4 m/z: 754.36 Gene names: HNRNPA1

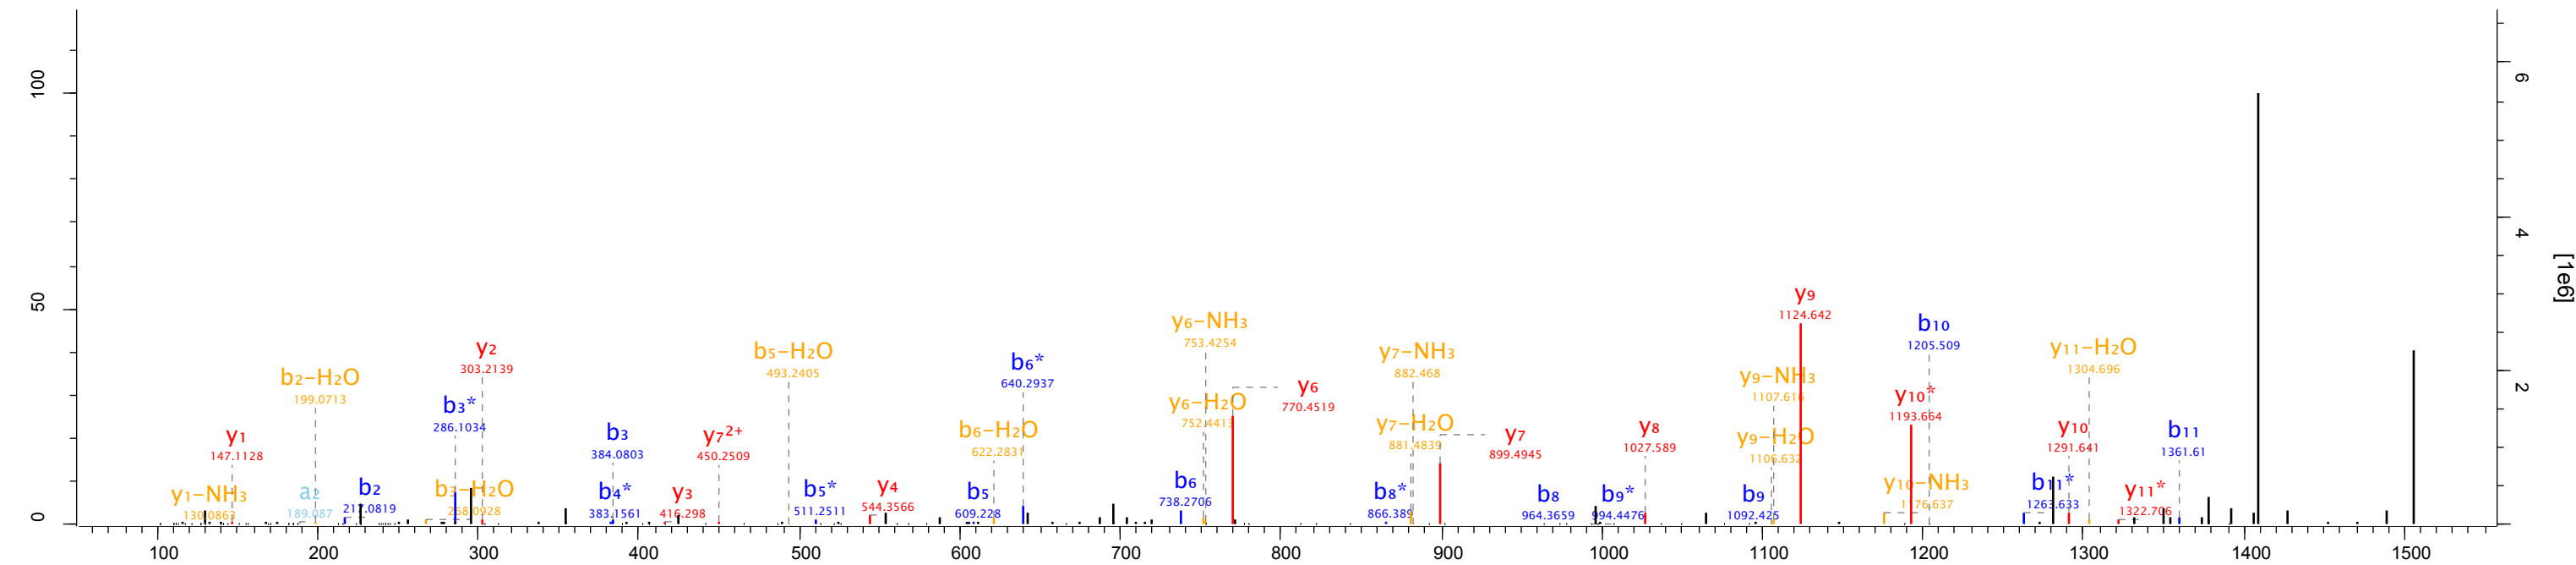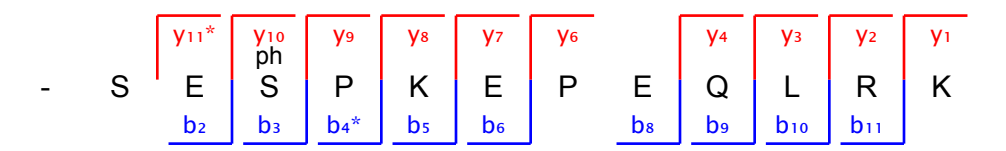

Raw file 20150814\_A375SR\_Phospho\_BR2\_06 Scan 5531 Method FTMS; HCD Score 72.2 m/z 562.26 Gene names RILPL1

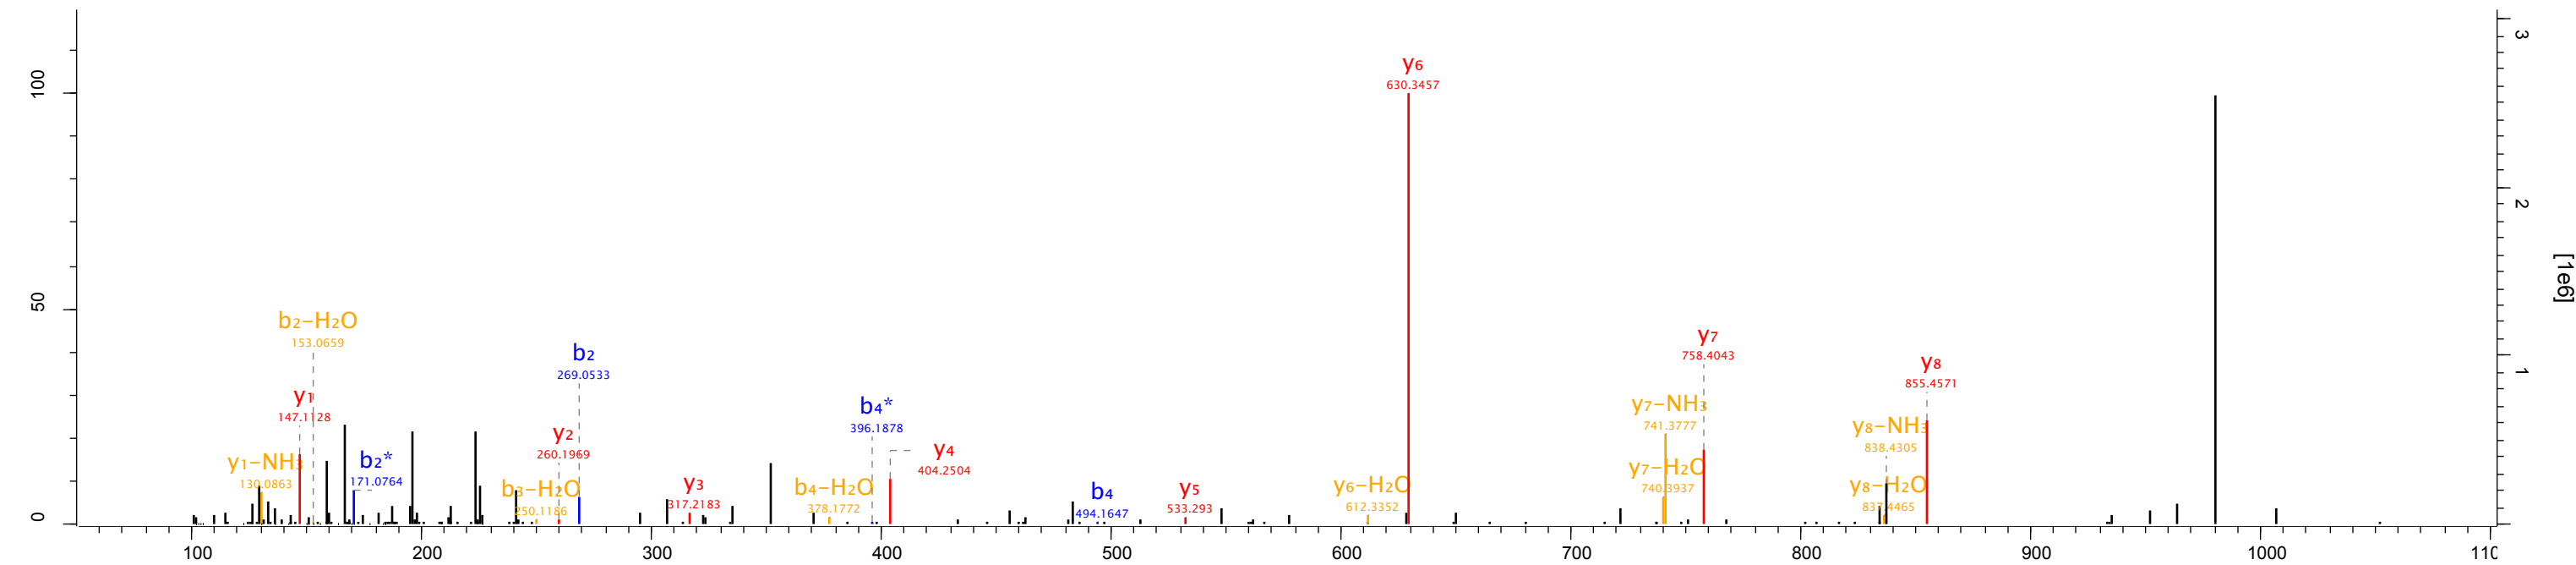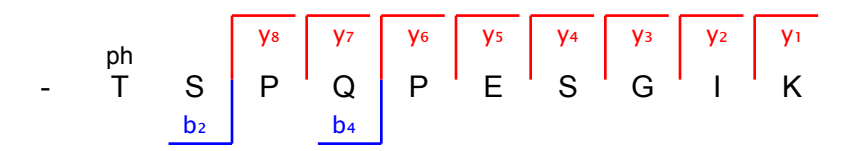

Raw file: 20150814\_A375SR\_Phospho\_BR2\_06  
 Scan: 6561 Method: FTMS; HCD Score: 99.8 m/z: 900.43 Gene names: NUMA1

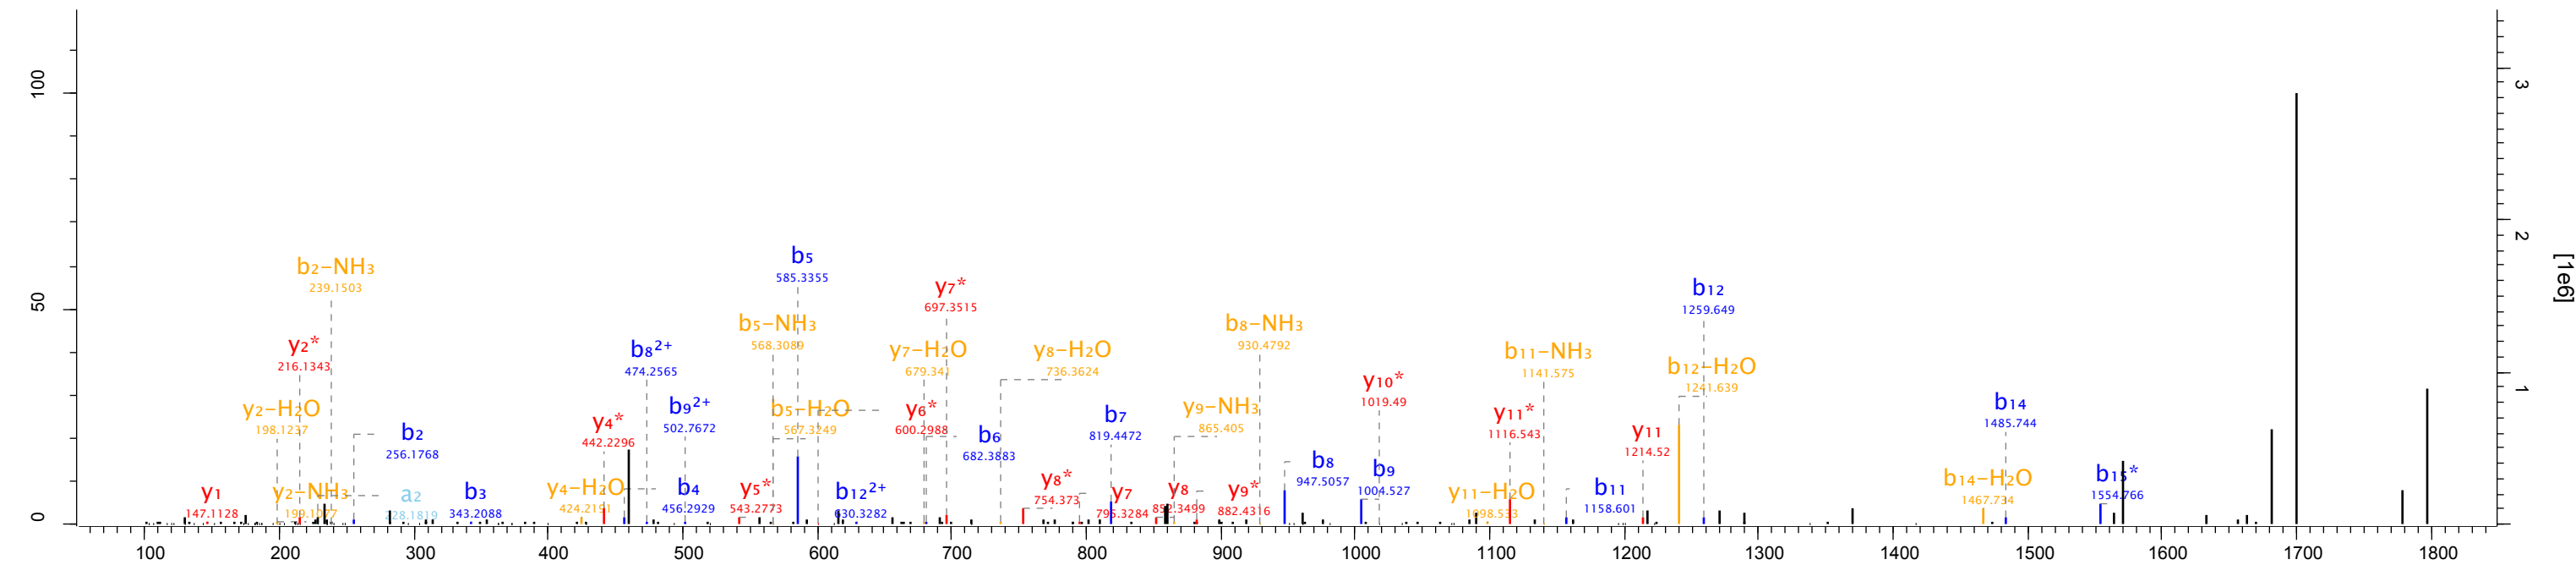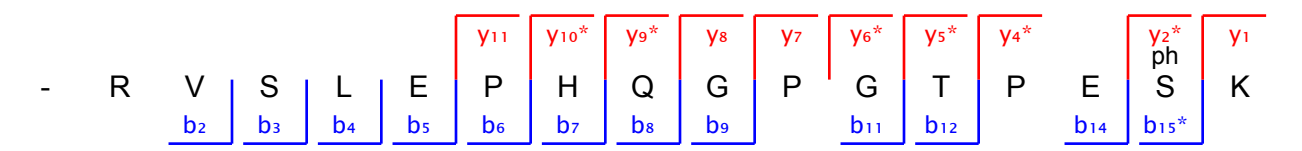

Raw file: 20150814\_A375SR\_Phospho\_BR2\_06  
 Scan: 8611 Method: FTMS; HCD Score: 135.06 m/z: 705.01 Gene names: NEK9

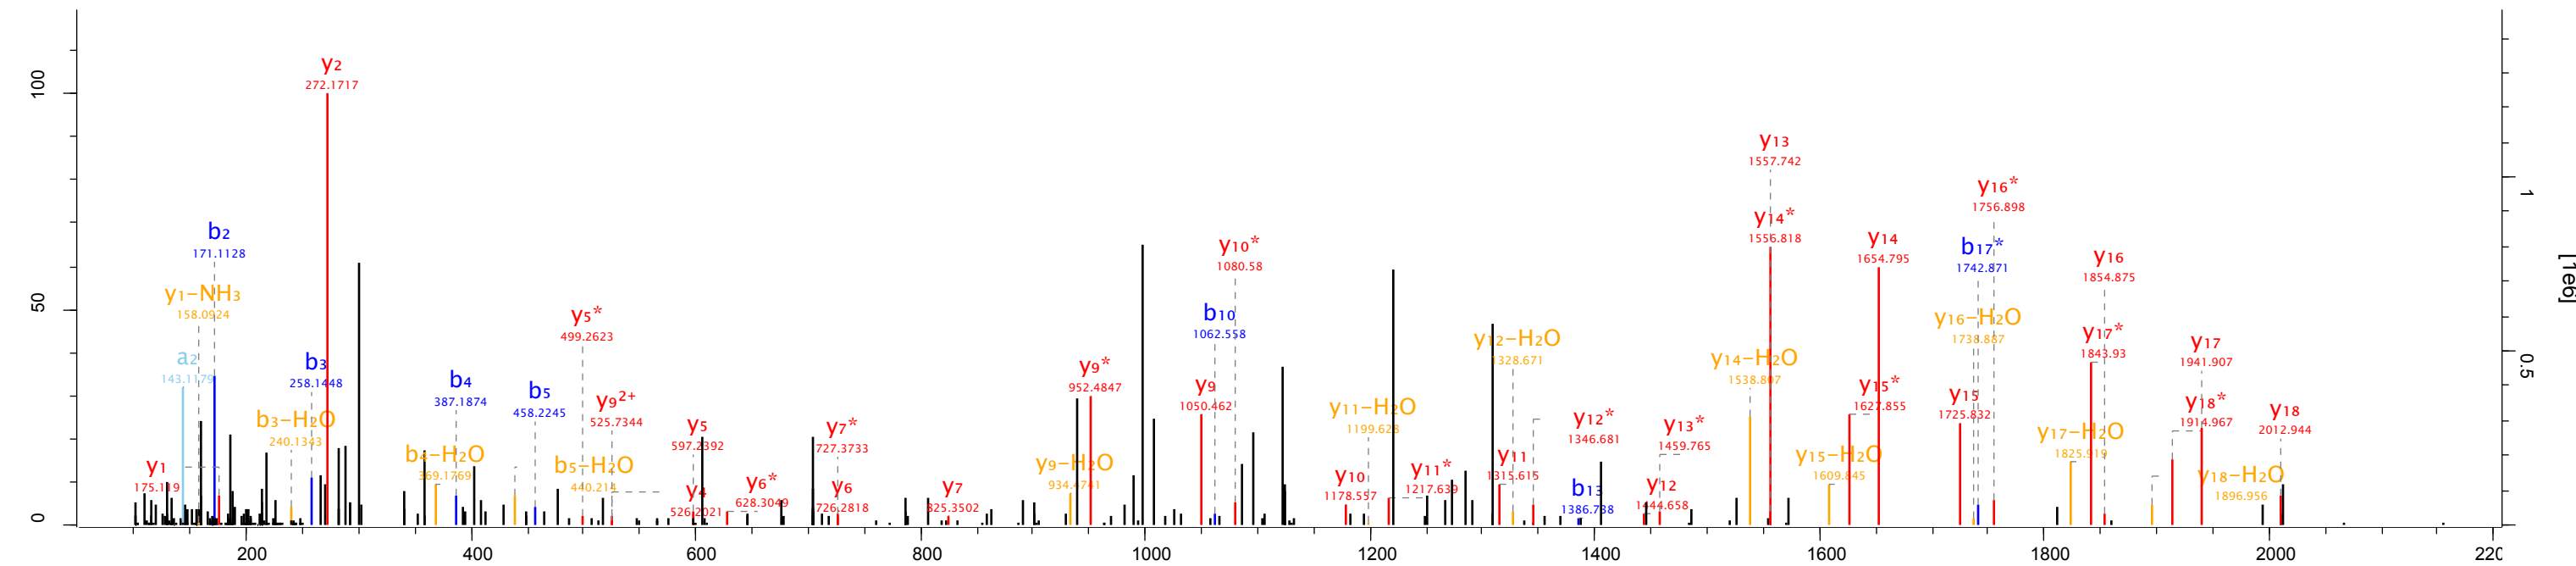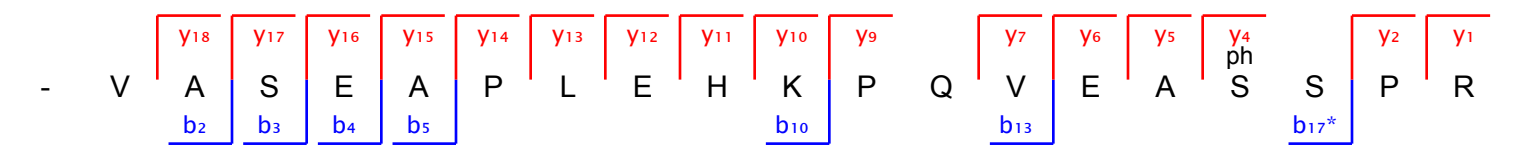

Raw file: 20150814\_A375SR\_Phospho\_BR2\_06  
 Scan: 9451 Method: FTMS; HCD Score: 184.97 m/z: 679.83 Gene names: BAG3

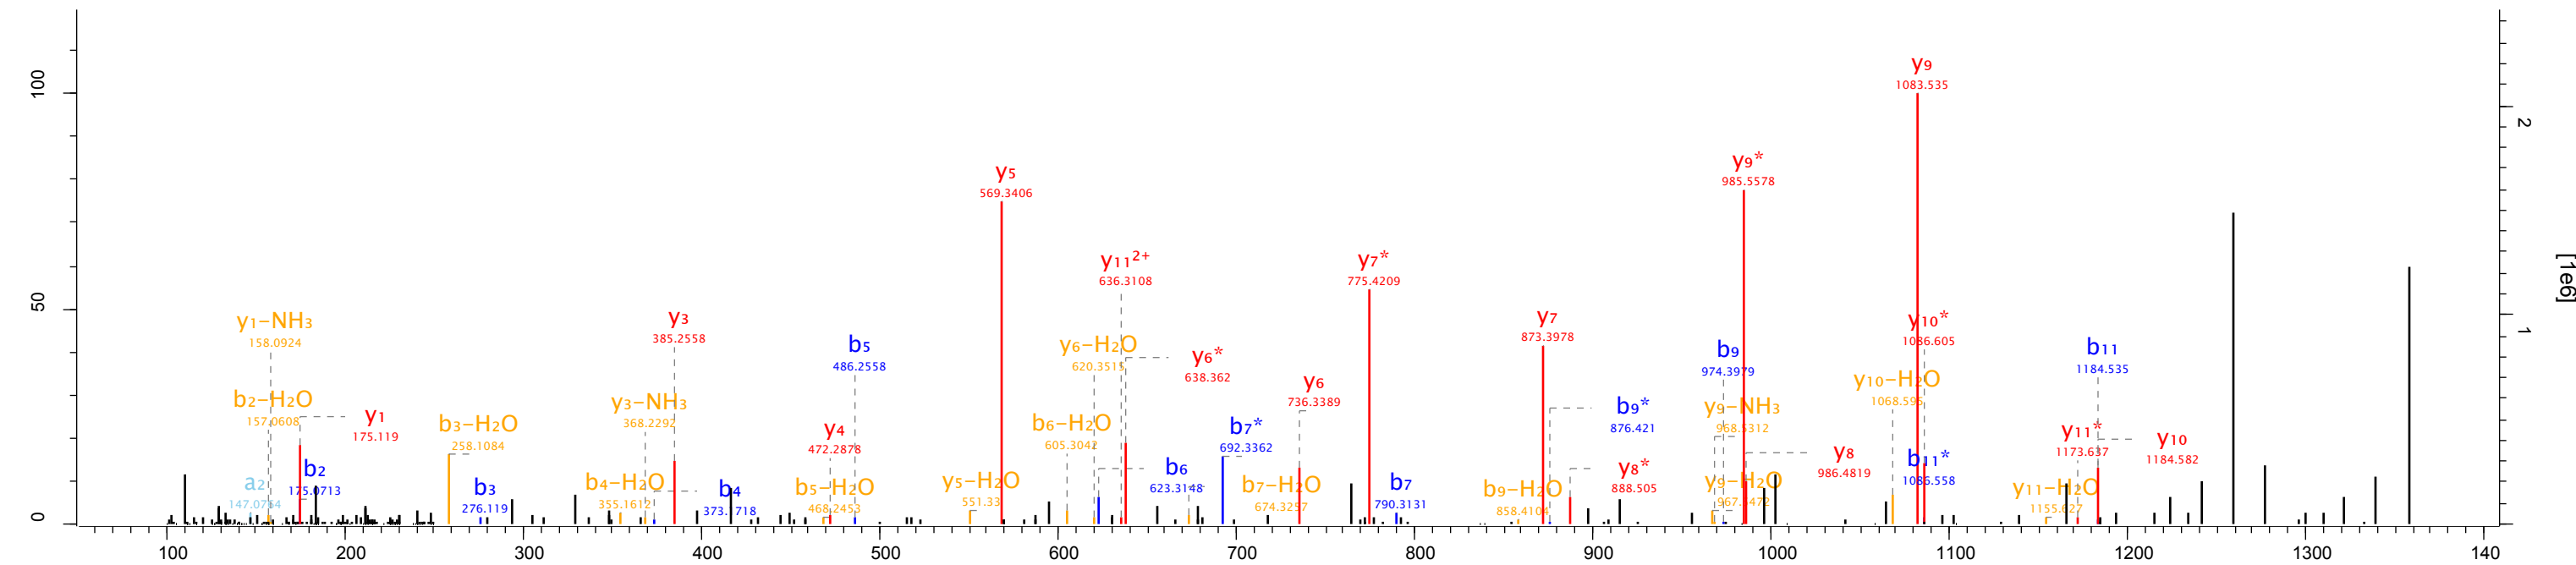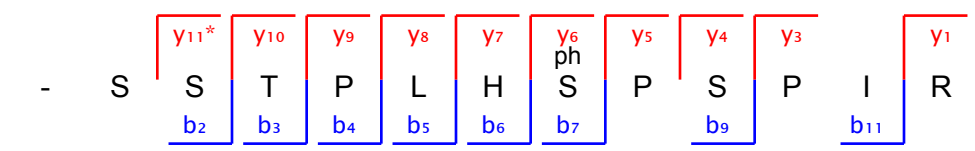



Raw file: 20150814\_A375SR\_Phospho\_BR2\_06  
 Scan: 9571 Method: FTMS; HCD Score: 166.57 m/z: 895.44 Gene names: CTNND1

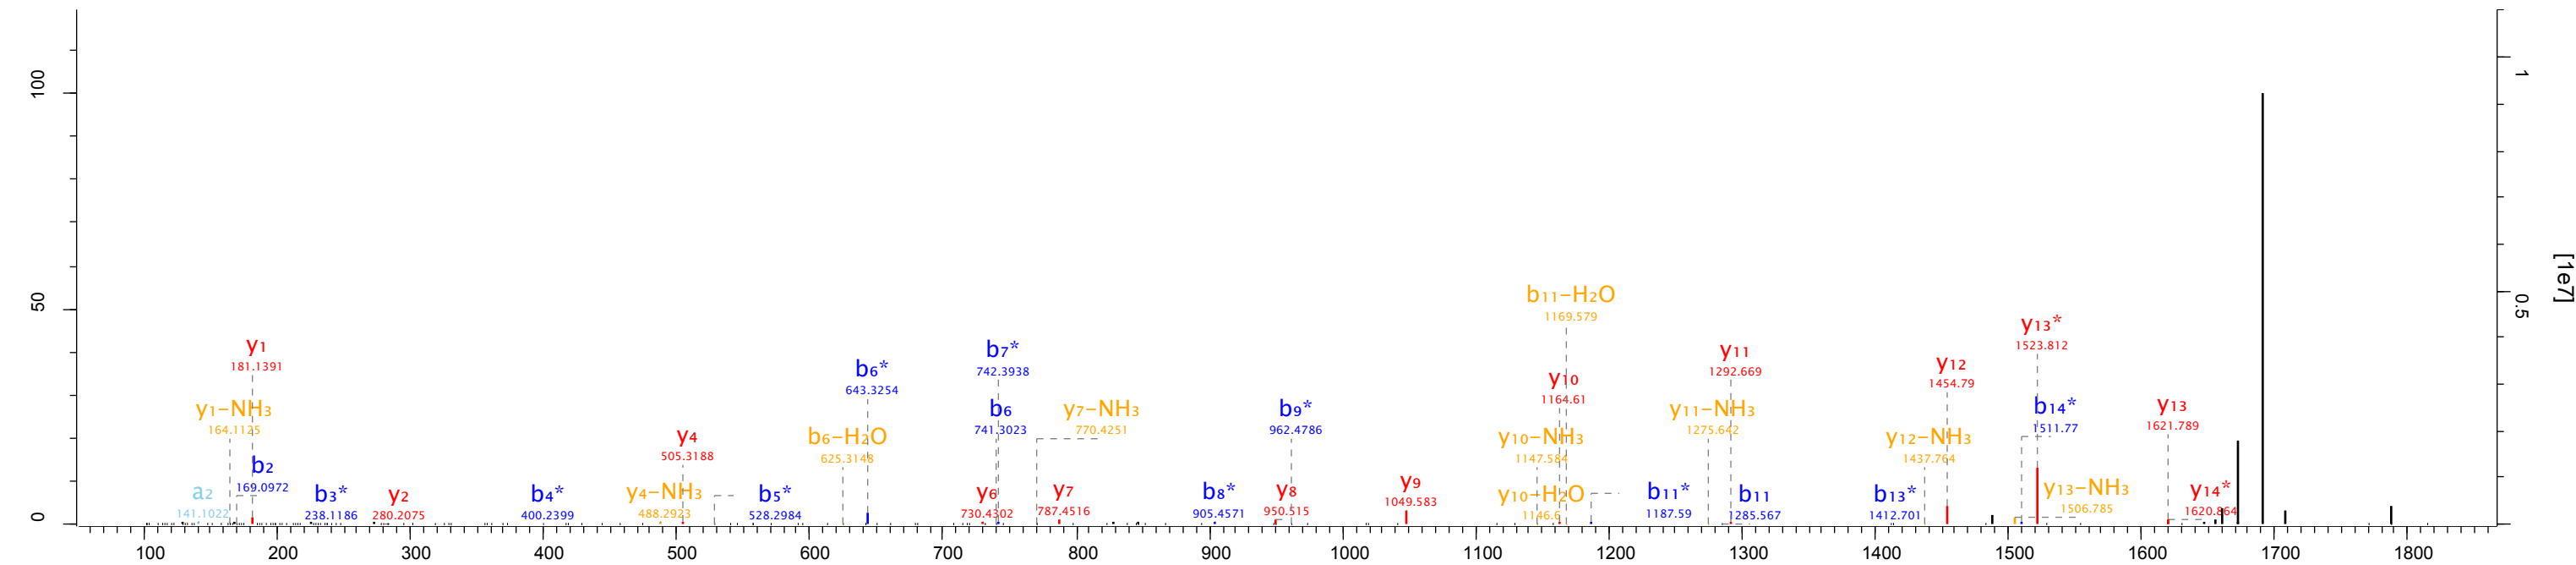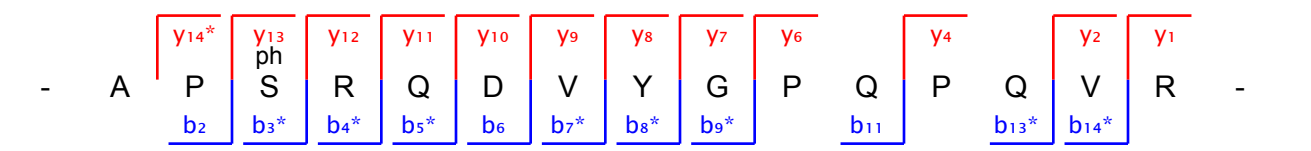

Raw file  
20150814\_A375SR\_Phospho\_BR2\_07

Scan 10221 Method FTMS; HCD Score 40.99 m/z 724.66 Gene names PDXDC1

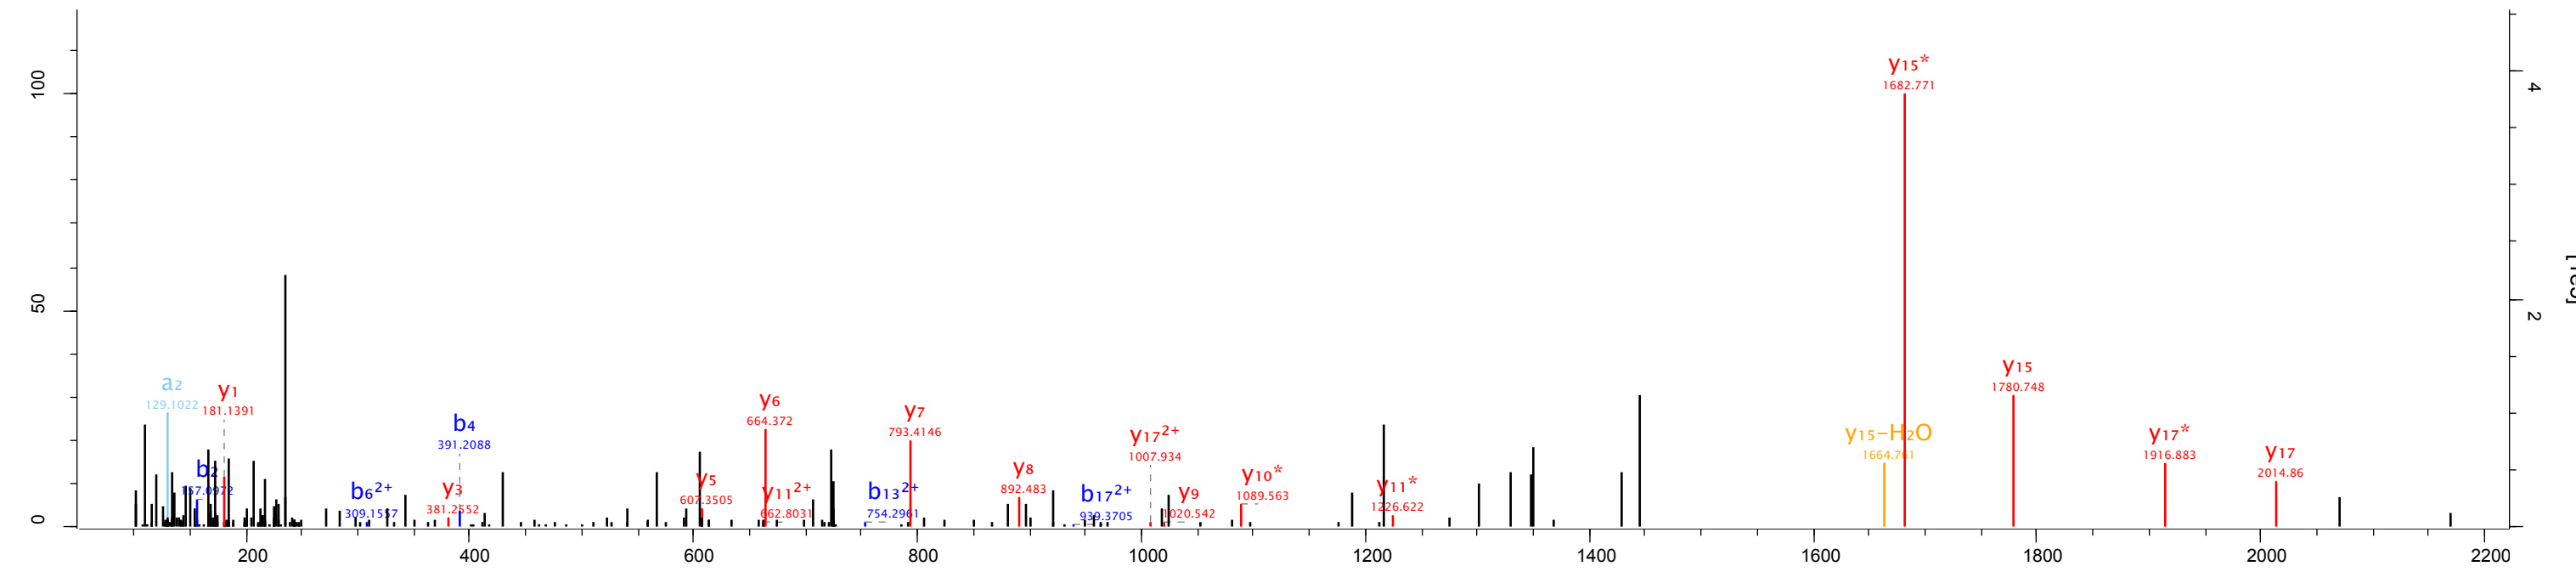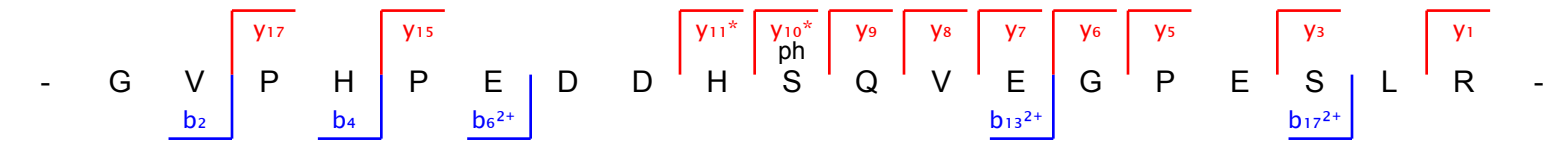

Raw file: 20150814\_A375SR\_Phospho\_BR2\_07  
 Scan: 10311 Method: FTMS; HCD Score: 62.59 m/z: 641.33 Gene names: SNX17

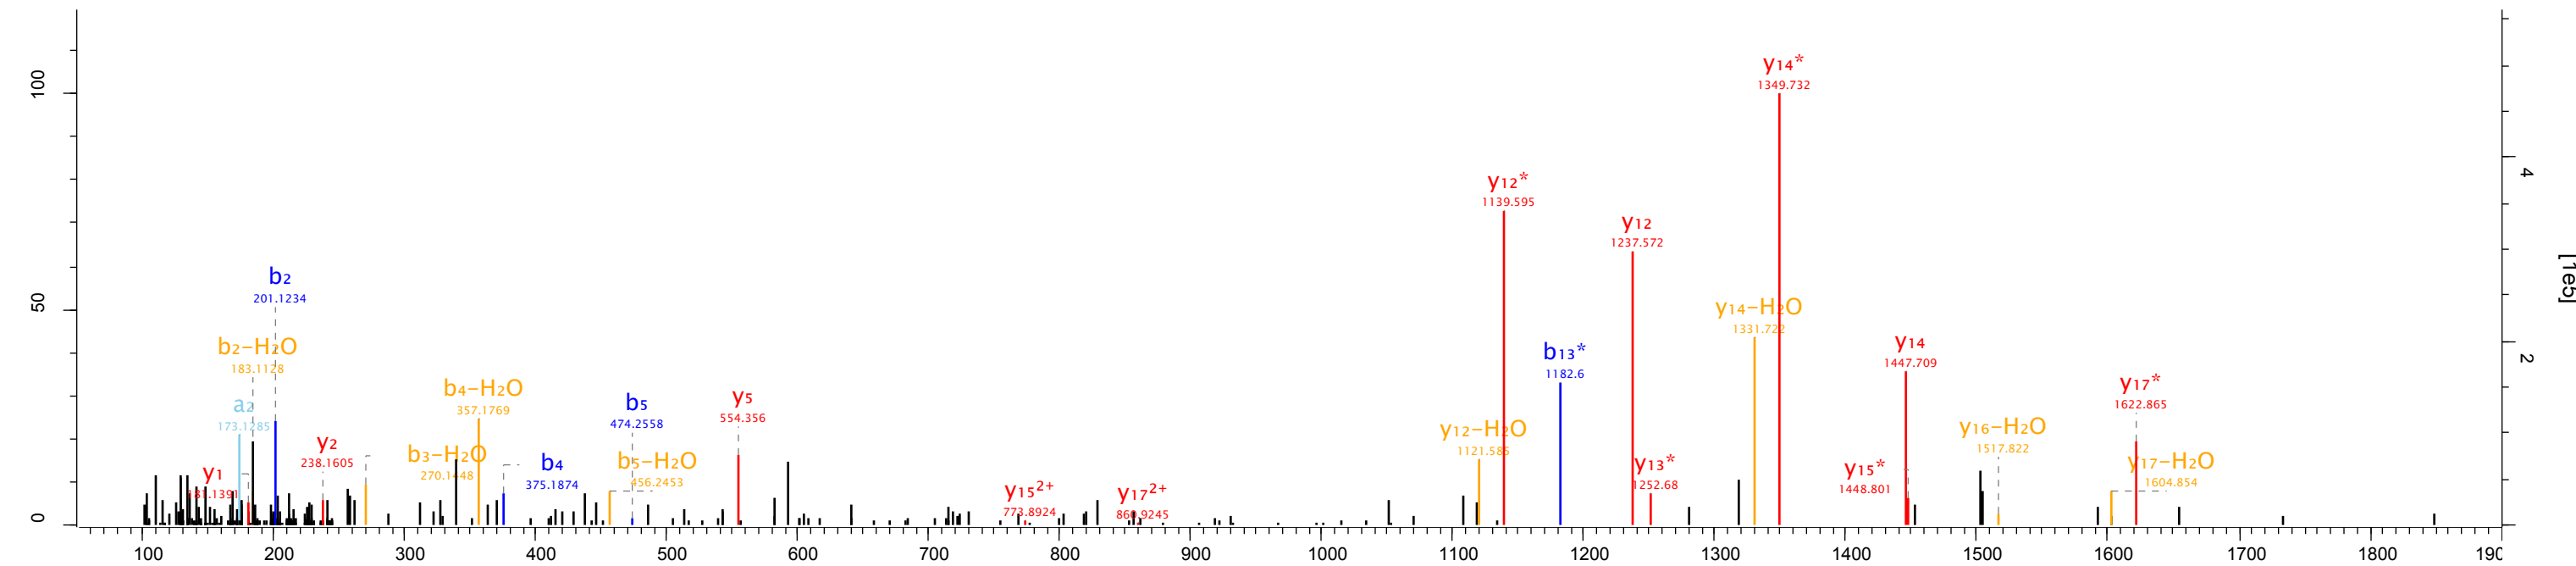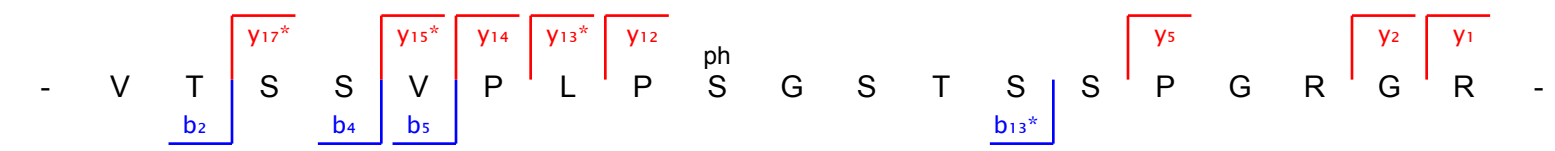

Raw file: 20150814\_A375SR\_Phospho\_BR2\_07  
 Scan: 12771 Method: FTMS; HCD Score: 210.43 m/z: 766.85 Gene names: SGK223

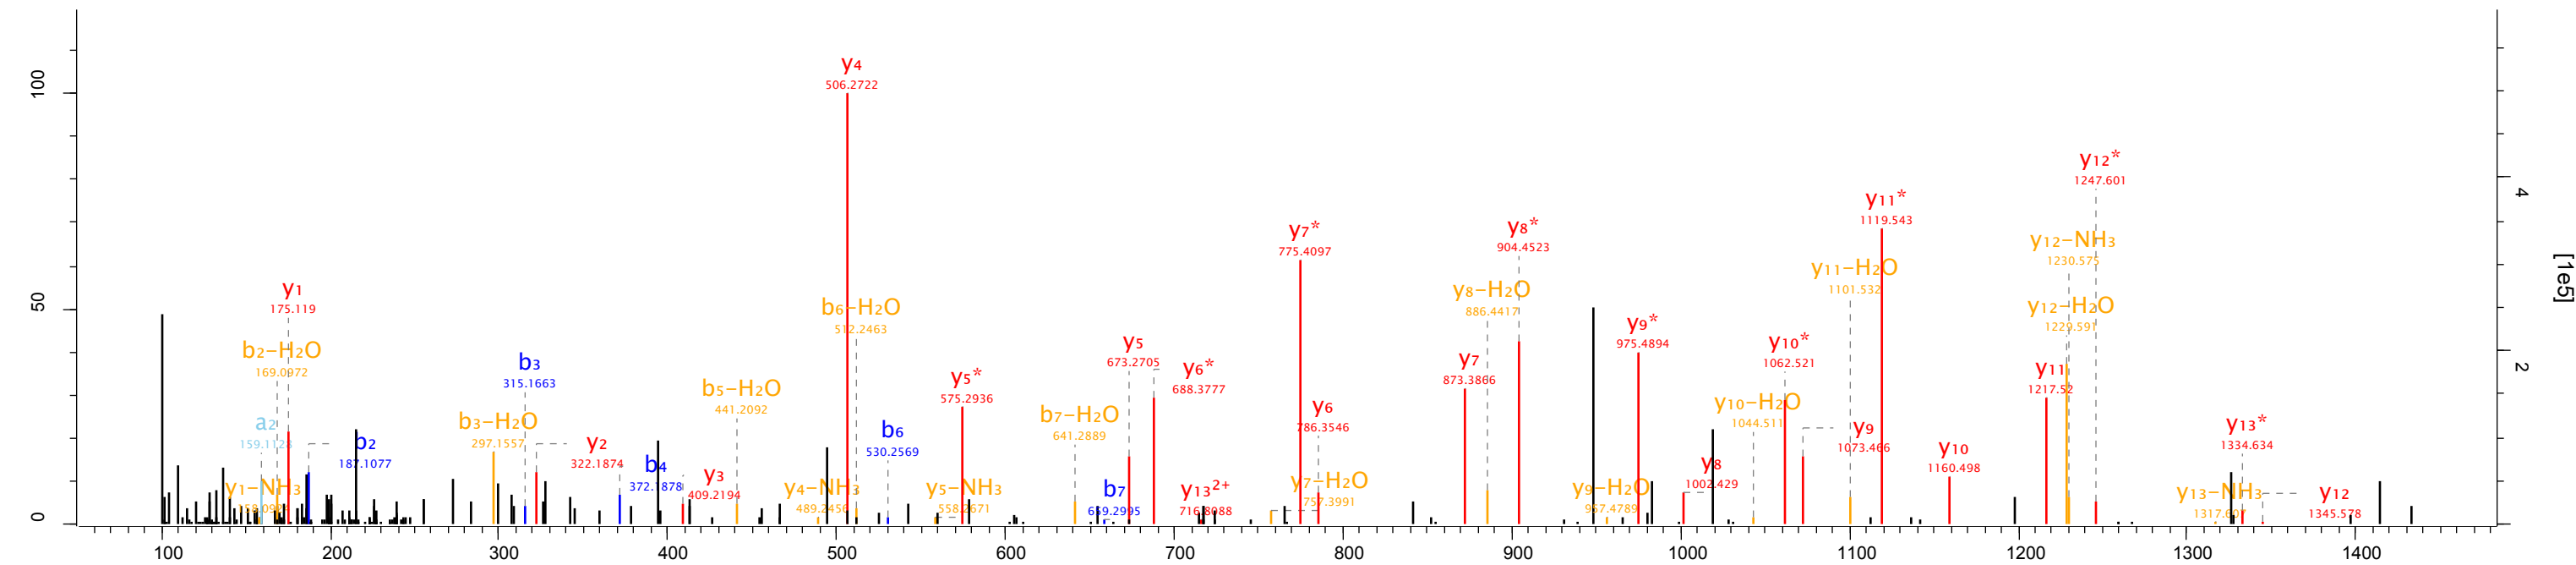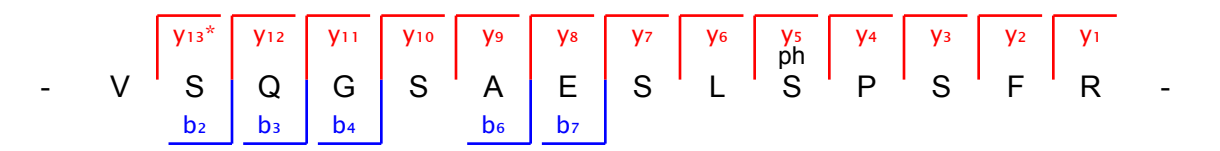

Raw file: 20150814\_A375SR\_Phospho\_BR2\_07  
 Scan: 12911 Method: FTMS; HCD Score: 160.27 m/z: 818.41 Gene names: NUP188

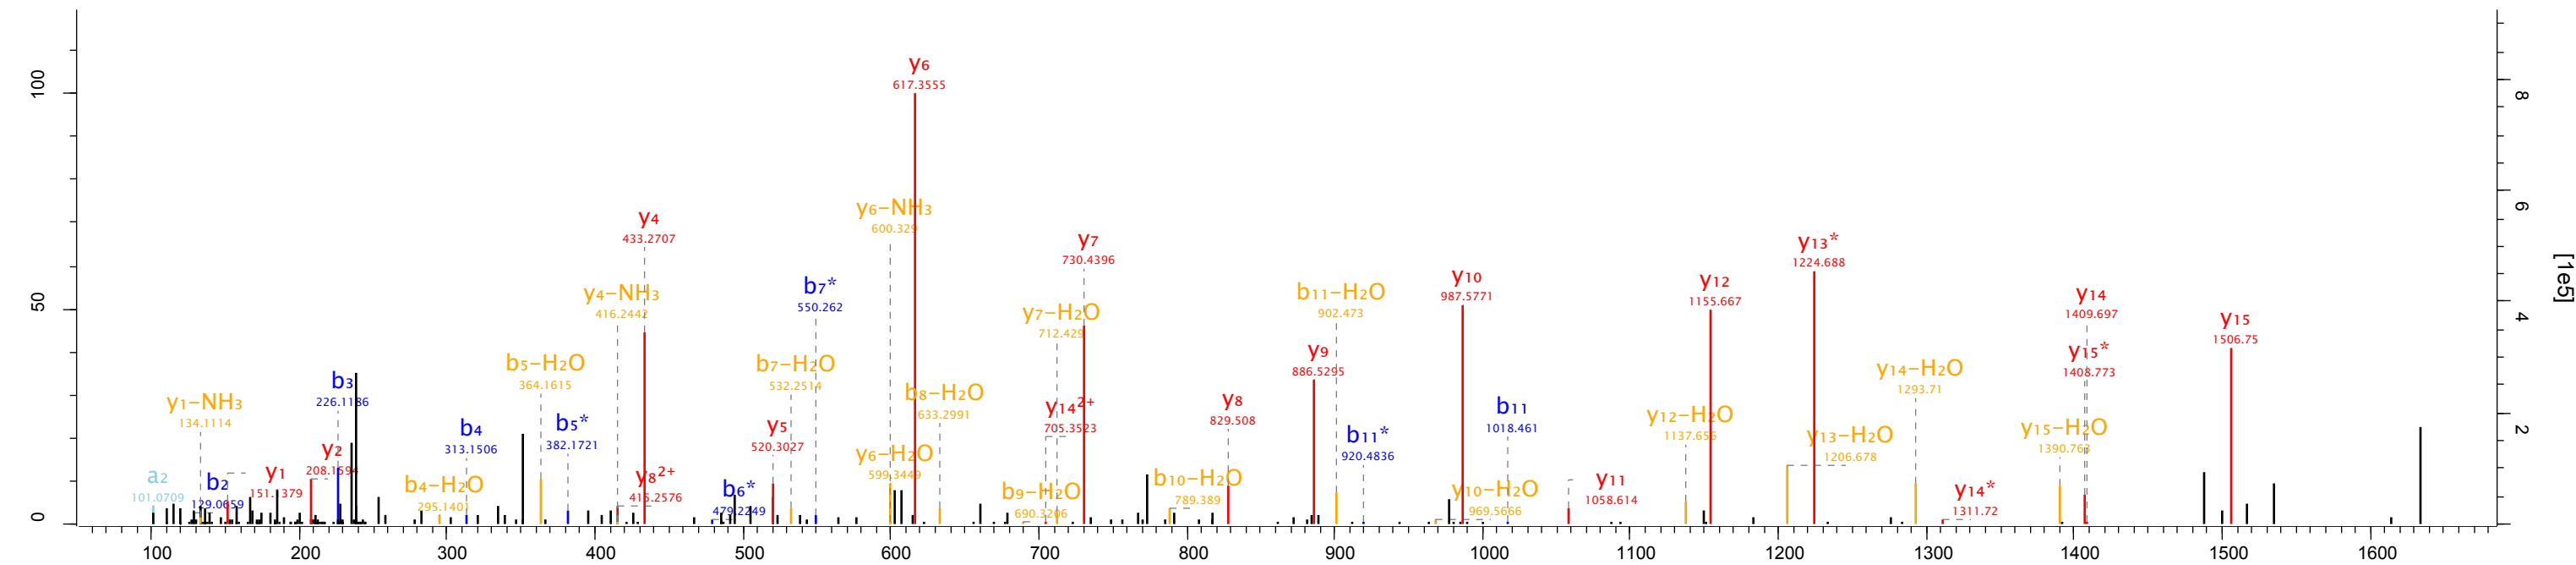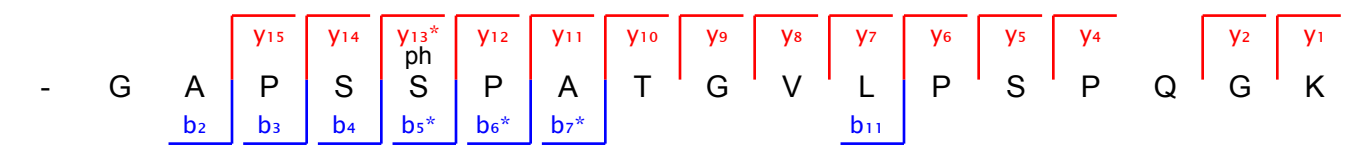

Raw file 20150814\_A375SR\_Phospho\_BR2\_07 Scan 13311 Method FTMS; HCD Score 229.2 m/z 800.71 Gene names LIG1

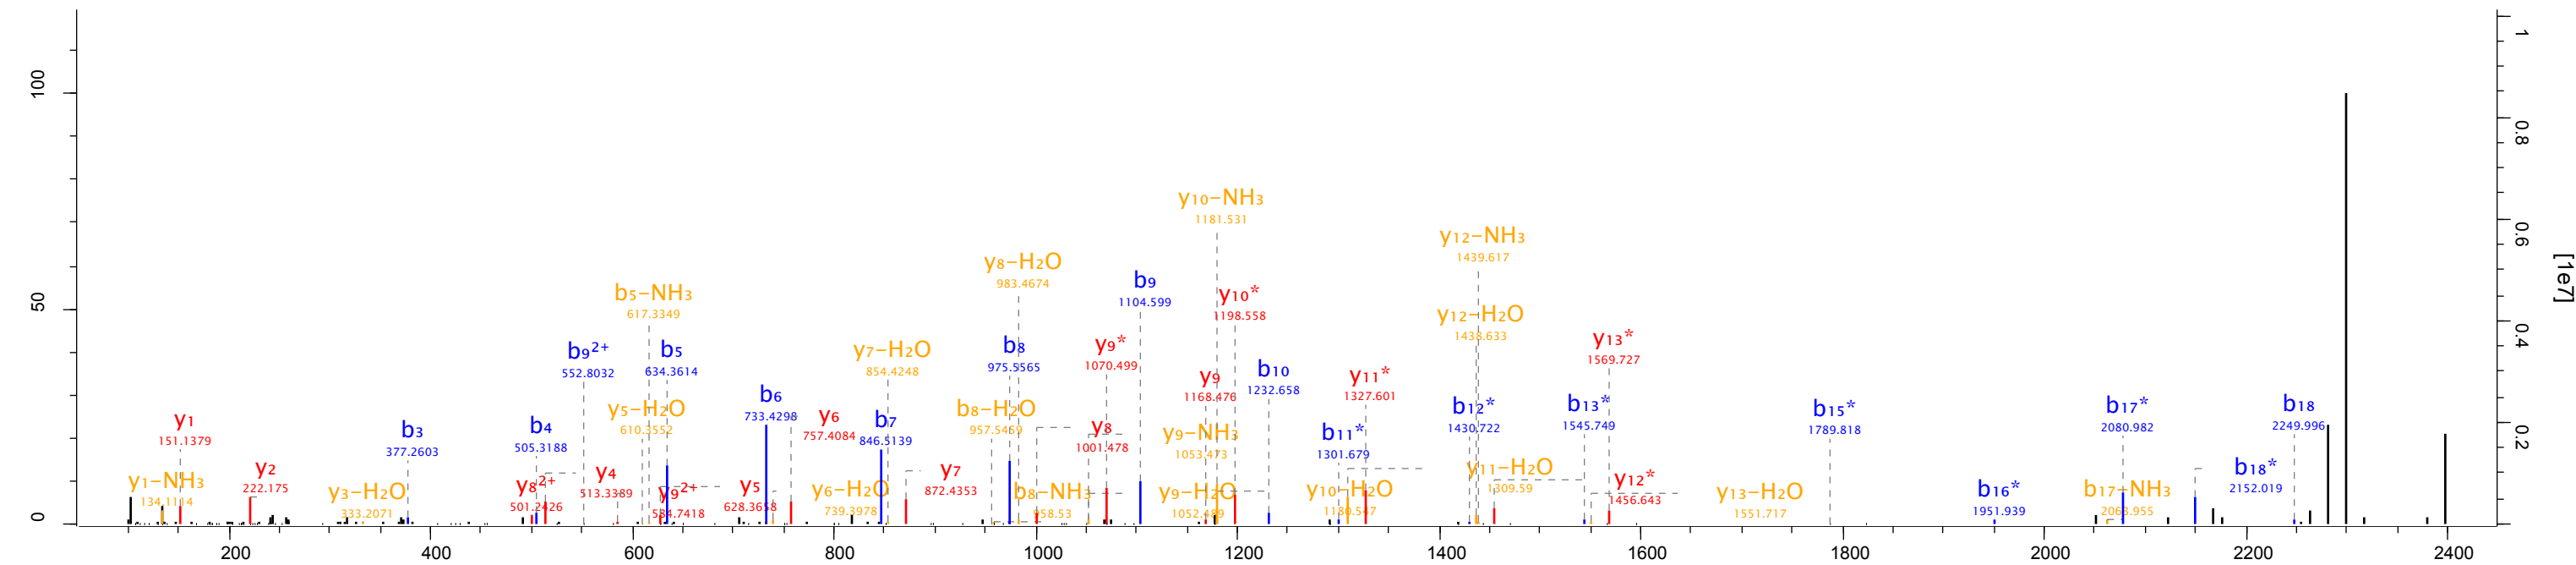

- R T I Q E V L E E Q S E D E D R E A K -

Fragmentation mapping (b and y ions) is shown below the sequence:

- b<sub>3</sub> (I), b<sub>4</sub> (Q), b<sub>5</sub> (E), b<sub>6</sub> (V), b<sub>7</sub> (L), b<sub>8</sub> (E), b<sub>9</sub> (E), b<sub>10</sub> (Q), b<sub>11</sub><sup>\*</sup> (S), b<sub>12</sub><sup>\*</sup> (E), b<sub>13</sub><sup>\*</sup> (D), b<sub>15</sub><sup>\*</sup> (E), b<sub>16</sub><sup>\*</sup> (D), b<sub>17</sub><sup>\*</sup> (R), b<sub>18</sub> (E)
- y<sub>1</sub> (K), y<sub>2</sub> (A), y<sub>4</sub> (R), y<sub>5</sub> (D), y<sub>6</sub> (E), y<sub>7</sub> (D), y<sub>8</sub> (E), y<sub>9</sub><sup>ph</sup> (S), y<sub>10</sub><sup>\*</sup> (Q), y<sub>11</sub><sup>\*</sup> (E), y<sub>12</sub><sup>\*</sup> (E), y<sub>13</sub><sup>\*</sup> (L)

Raw file 20150814\_A375SR\_Phospho\_BR2\_07 Scan 13571 Method FTMS; HCD Score 90.6 m/z 428.21 Gene names AAAS

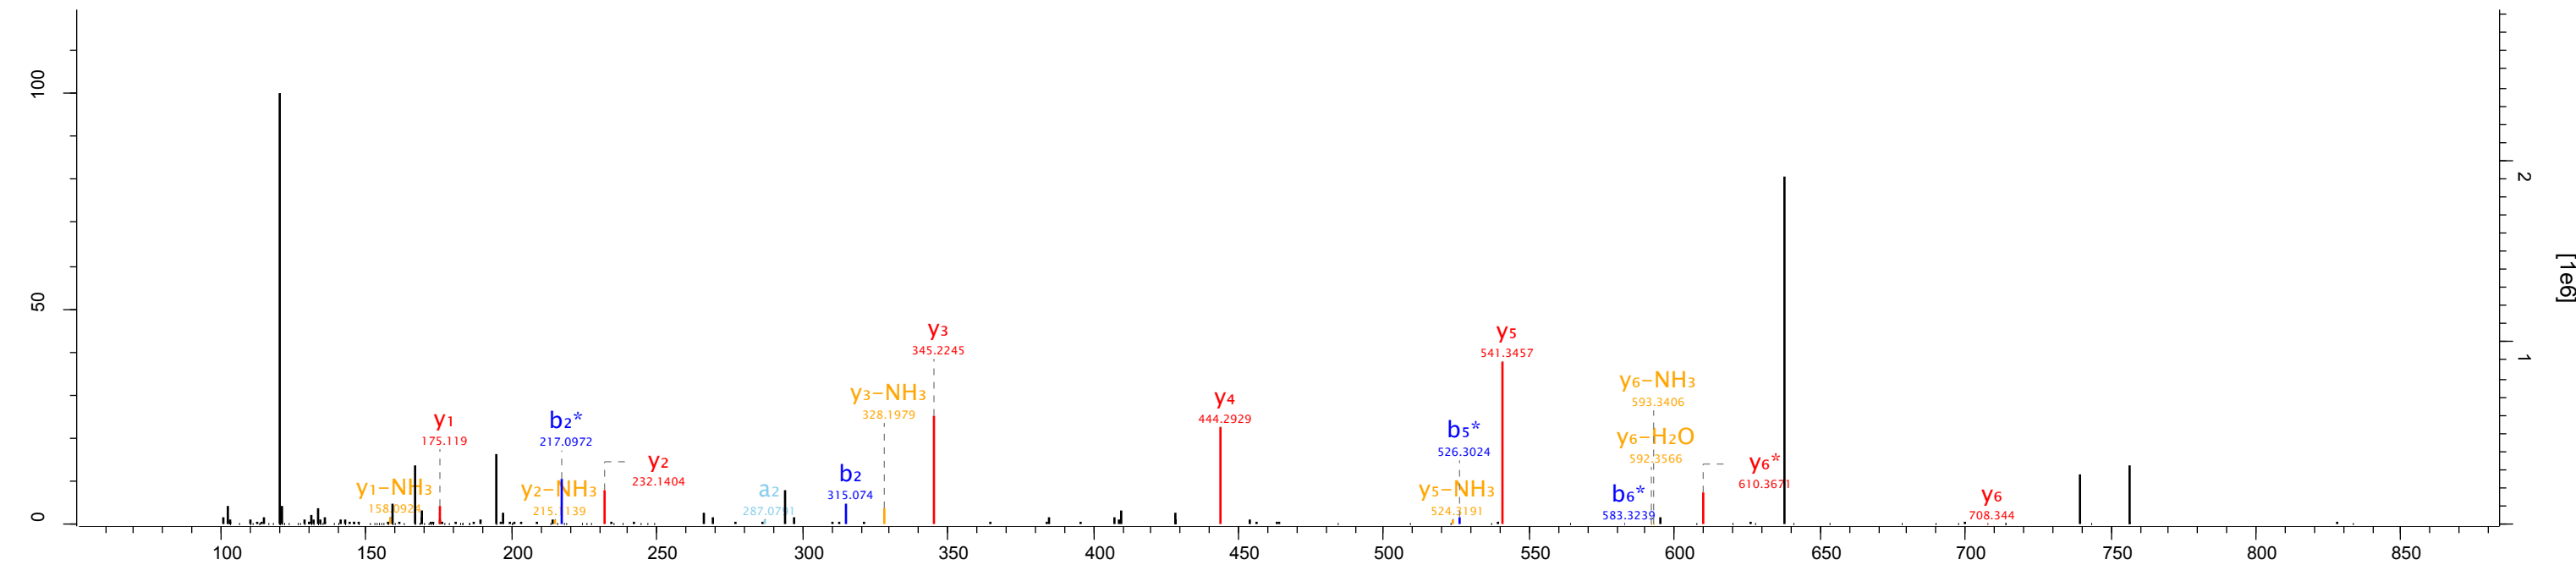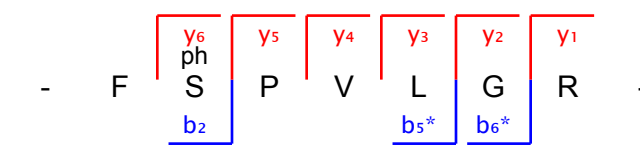

Raw file: 20150814\_A375SR\_Phospho\_BR2\_07  
 Scan: 15331 Method: FTMS; HCD Score: 47.81 m/z: 672.67 Gene names: PAK2

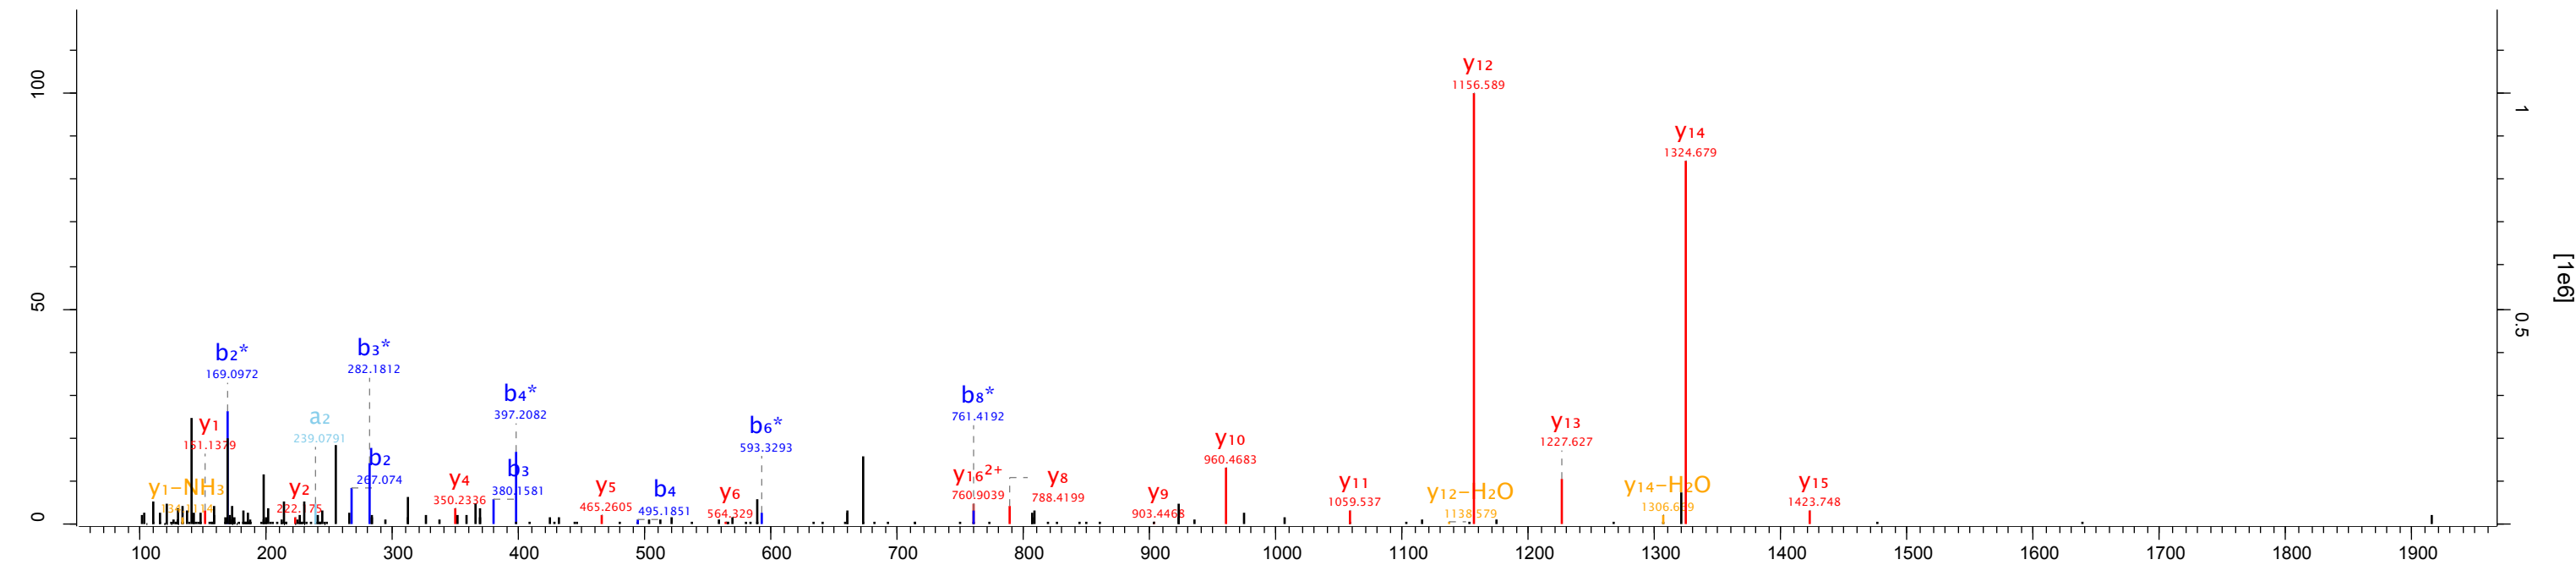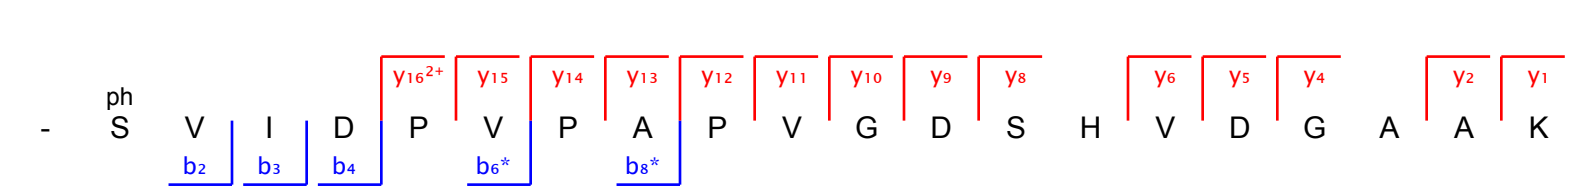



Raw file: 20150814\_A375SR\_Phospho\_BR2\_07  
 Scan: 15431  
 Method: FTMS; HCD  
 Score: 115.93  
 m/z: 1132.84  
 Gene names: PAK2

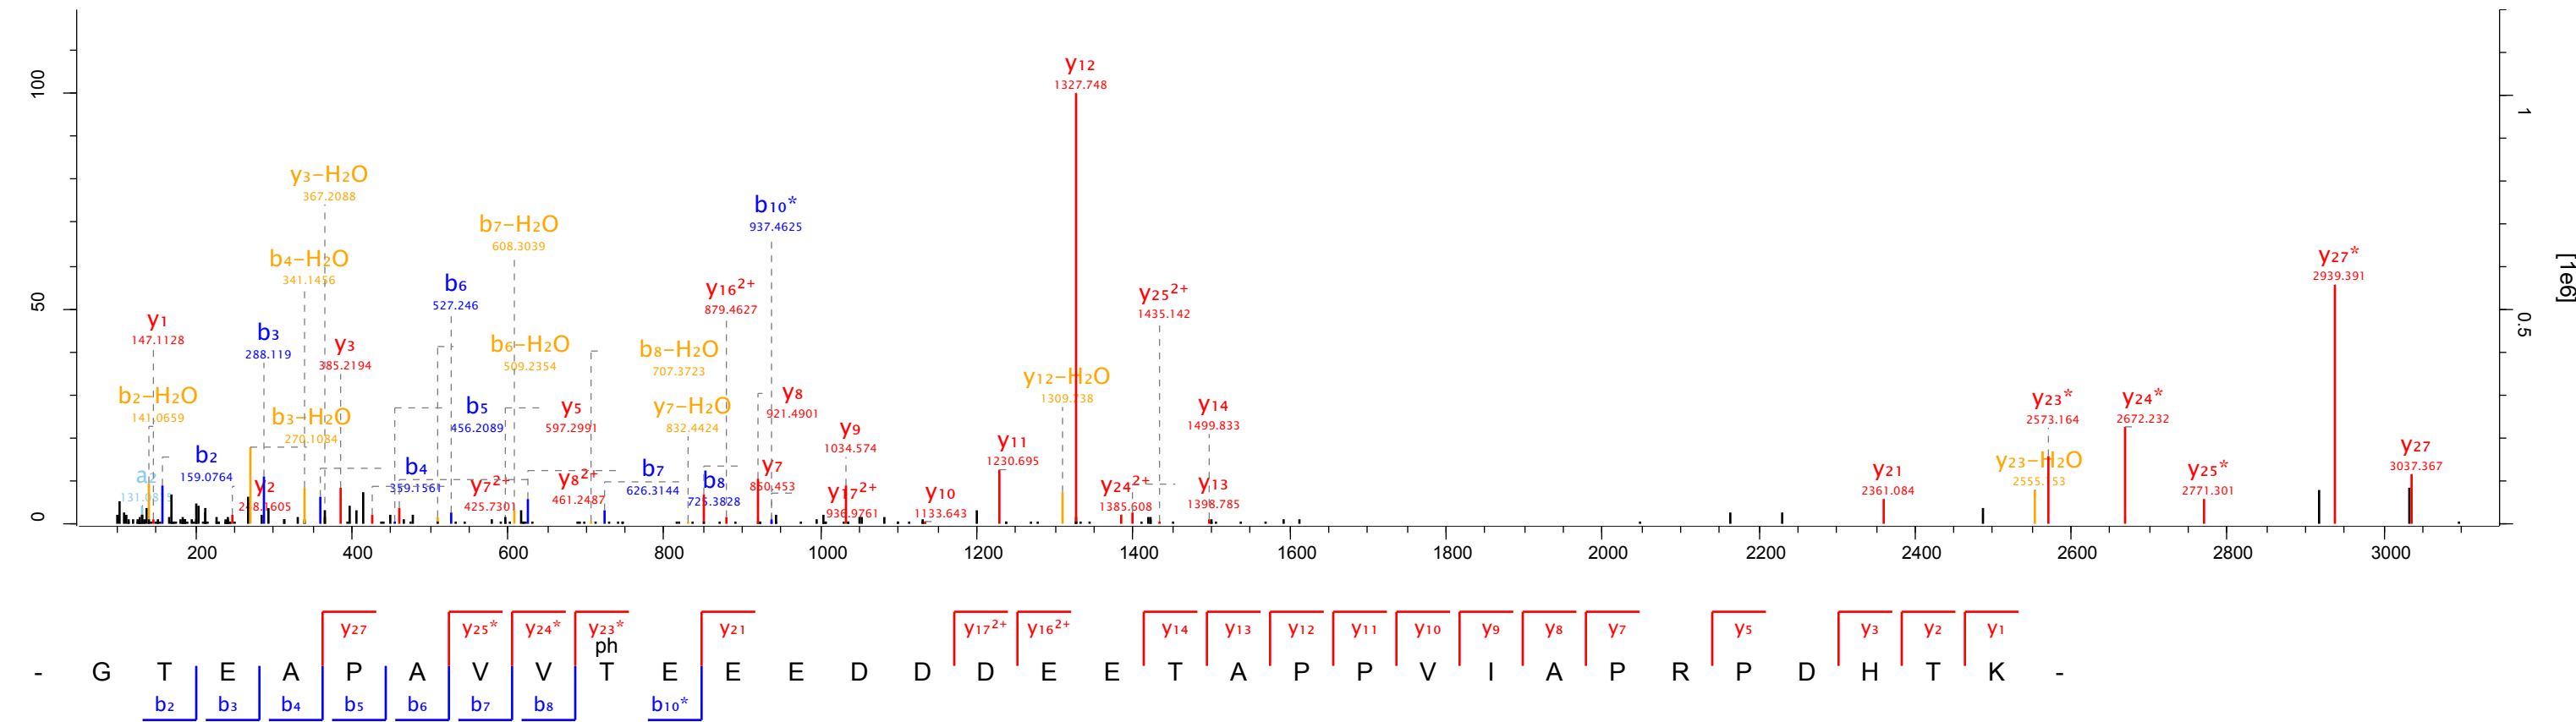

Raw file 20150814\_A375SR\_Phospho\_BR2\_07 Scan 16171 Method FTMS; HCD Score 84.89 m/z 553.28 Gene names LUZP1

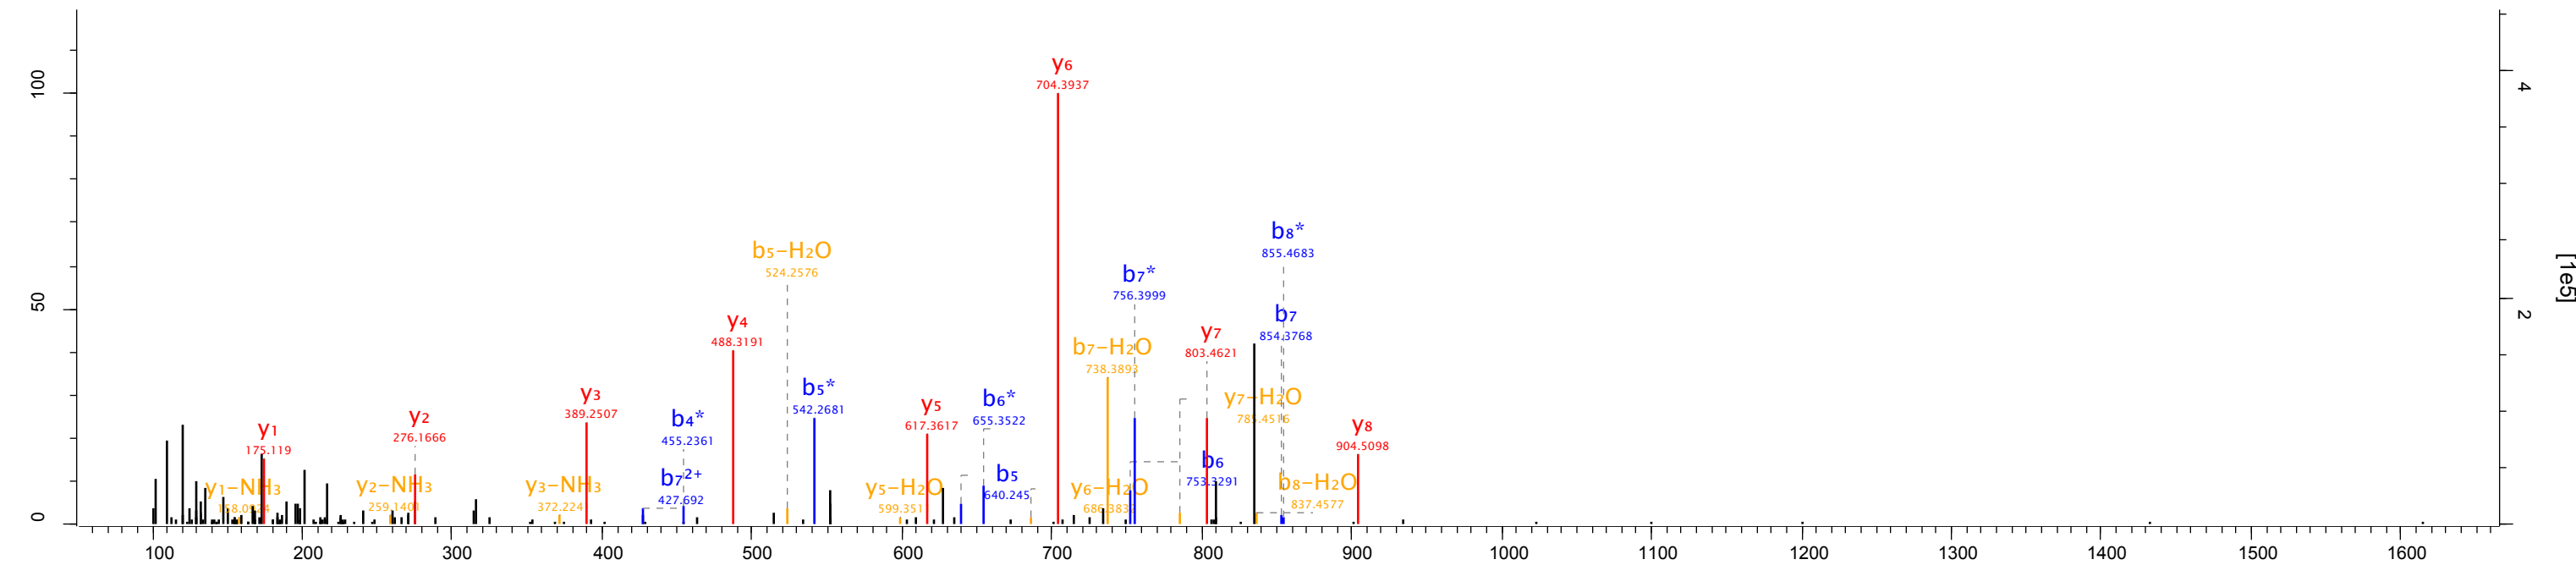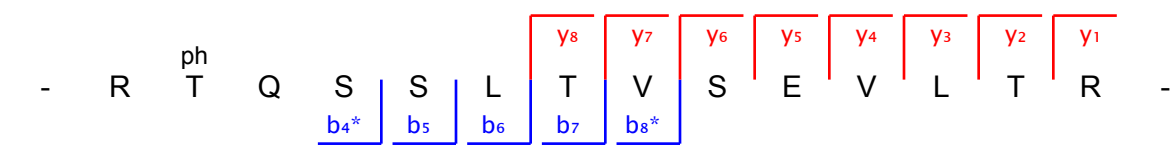

Raw file 20150814\_A375SR\_Phospho\_BR2\_07 Scan 17171 Method FTMS; HCD Score 80.88 m/z 959.23 Gene names EPB41

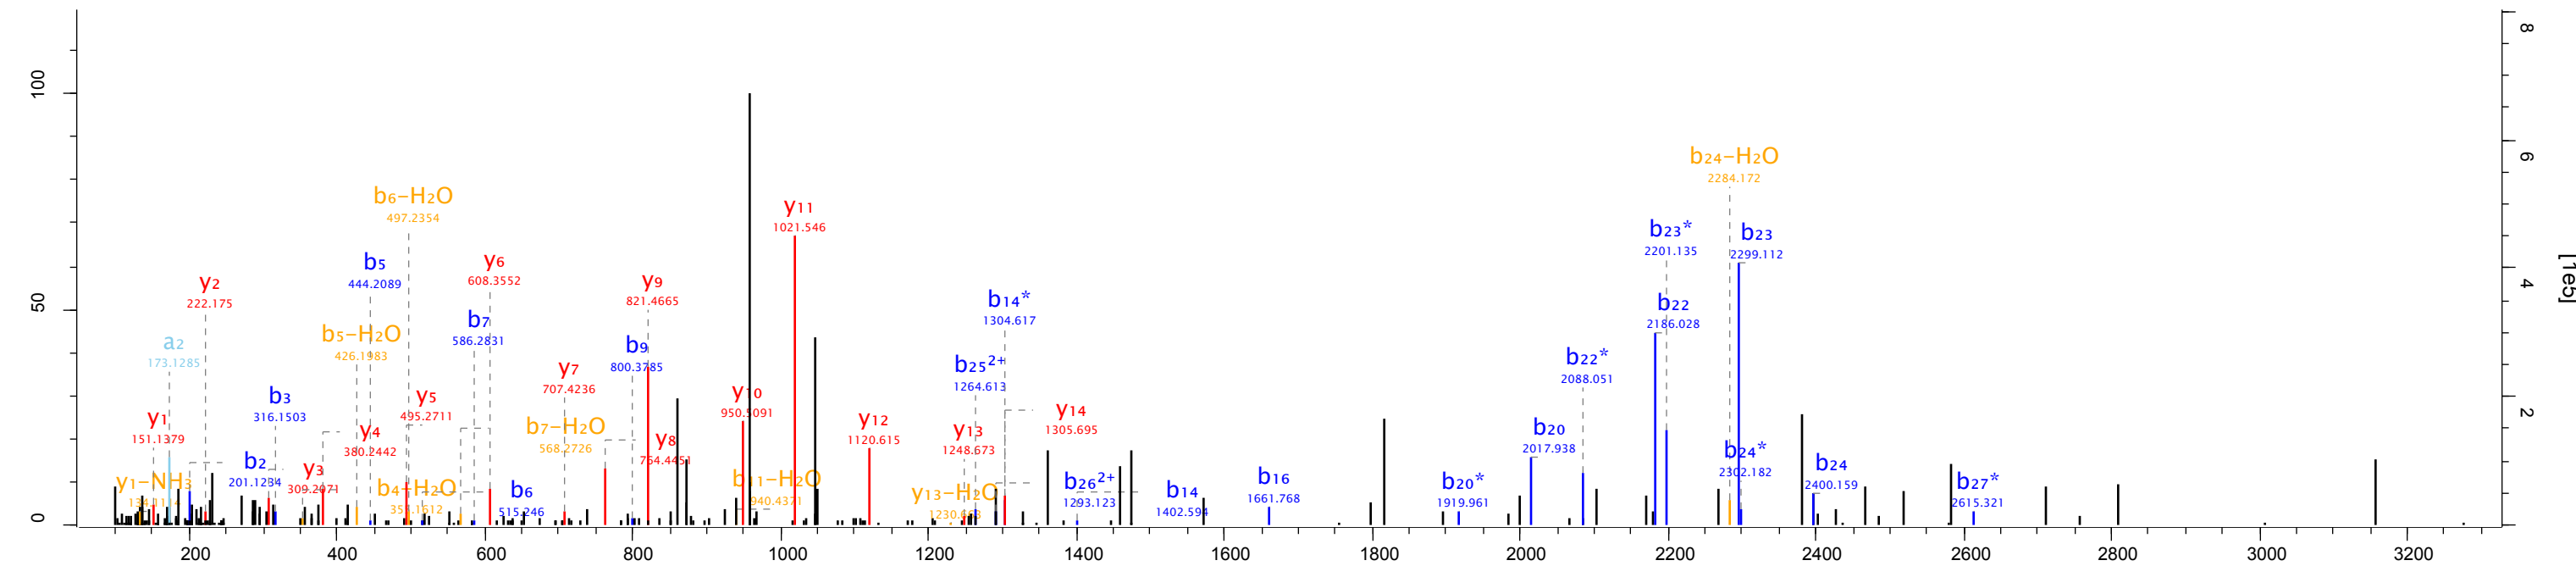

Raw file 20150814\_A375SR\_Phospho\_BR2\_07 Scan 17691 Method FTMS; HCD Score 191.22 m/z 992.44 Gene names MAP1B

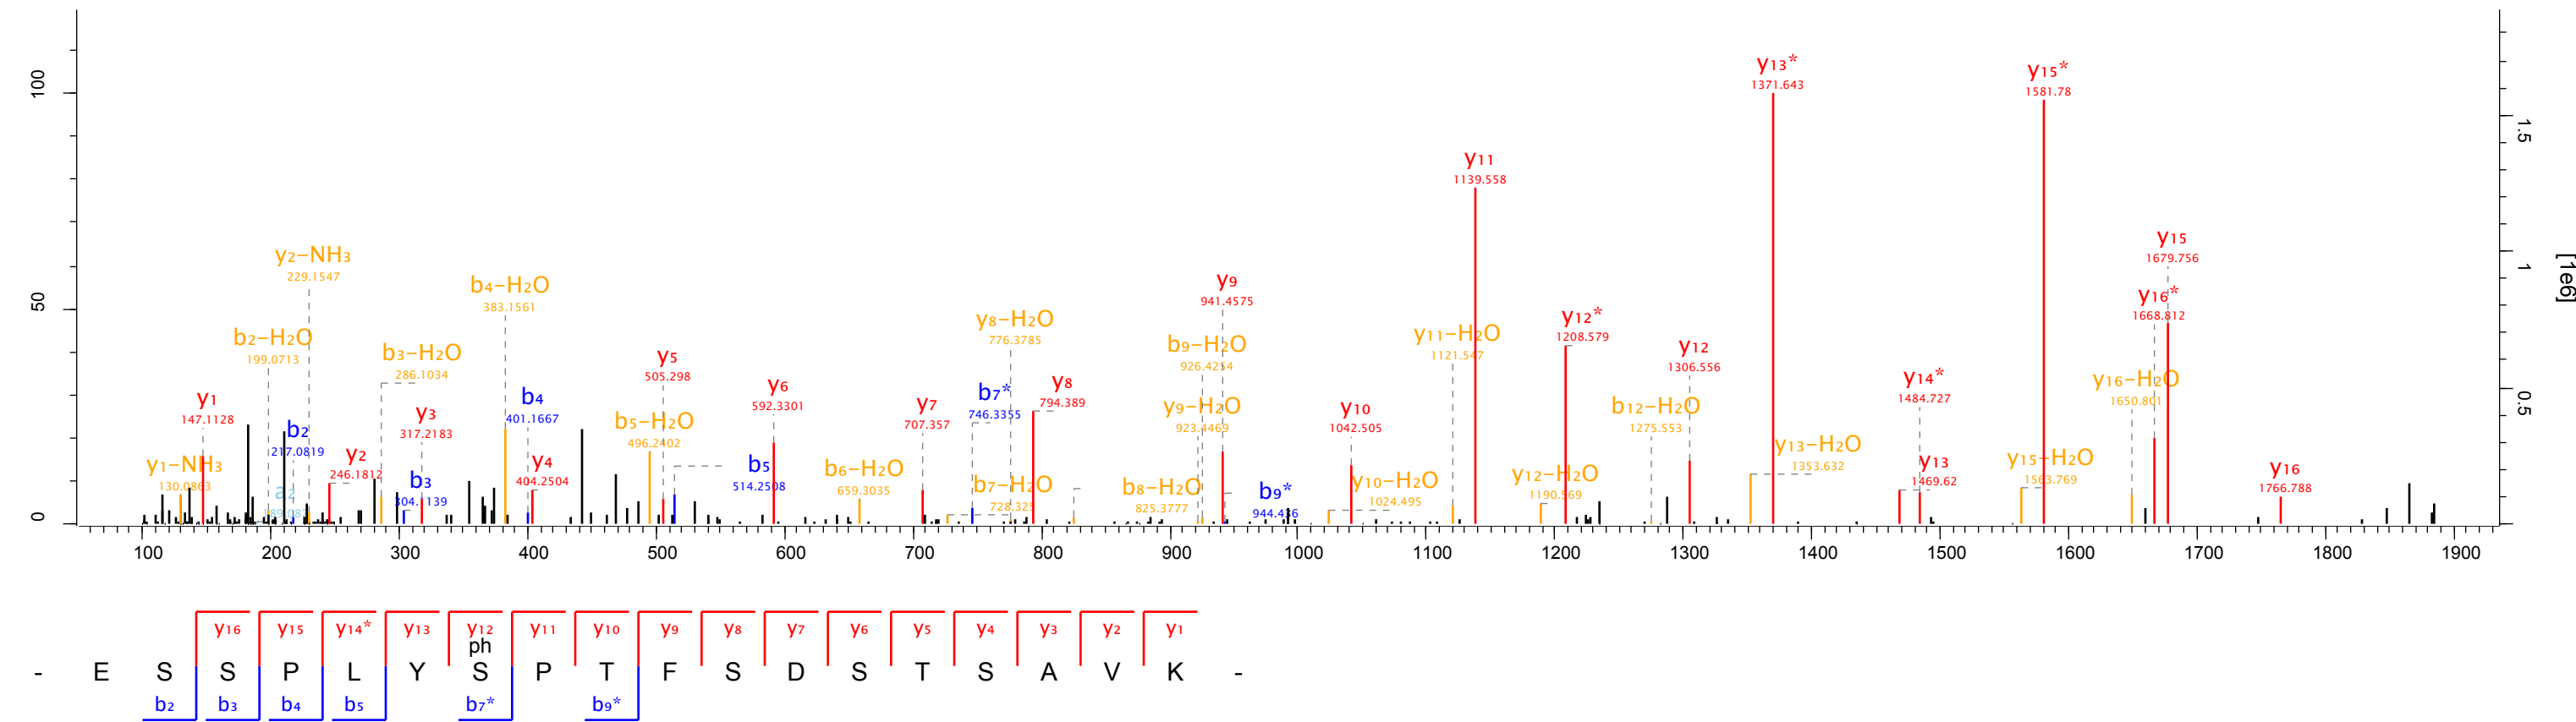

Raw file: 20150814\_A375SR\_Phospho\_BR2\_07  
 Scan: 17791 Method: FTMS; HCD Score: 44.95 m/z: 822.16 Gene names: CNOT2

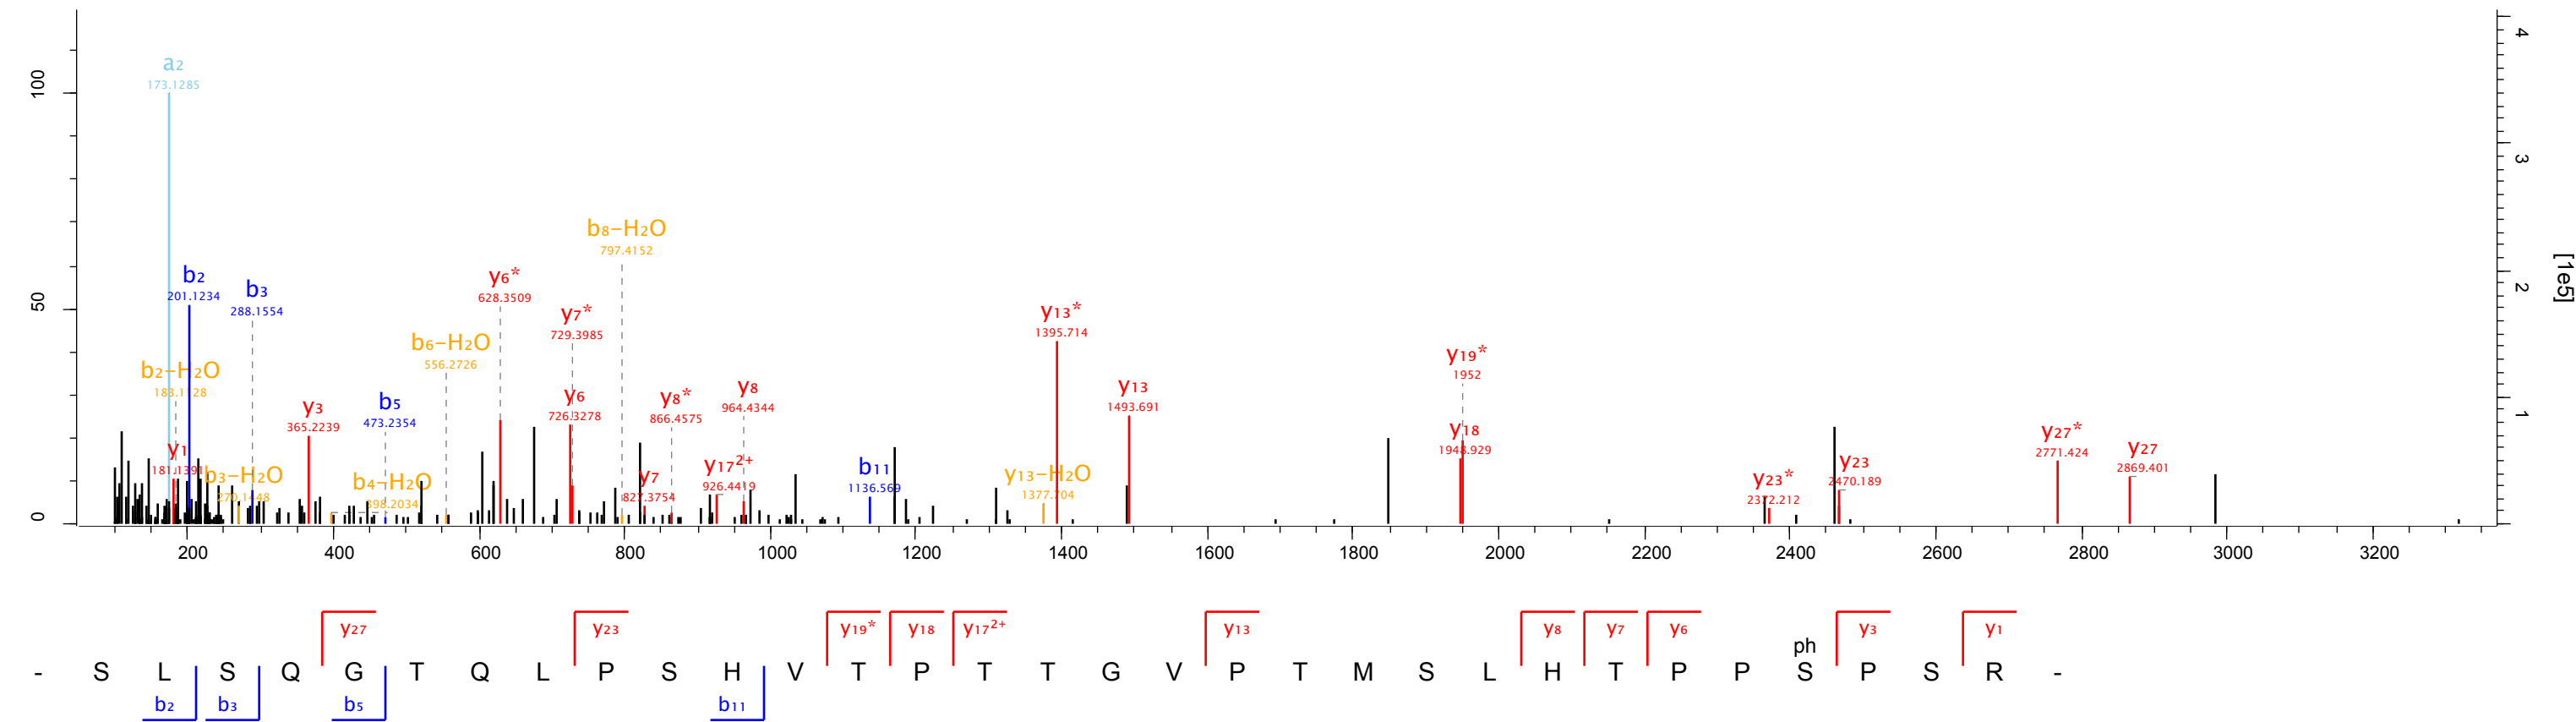

Raw file 20150814\_A375SR\_Phospho\_BR2\_07 Scan 19261 Method FTMS; HCD Score 66.88 m/z 973.16 Gene names ZNF609

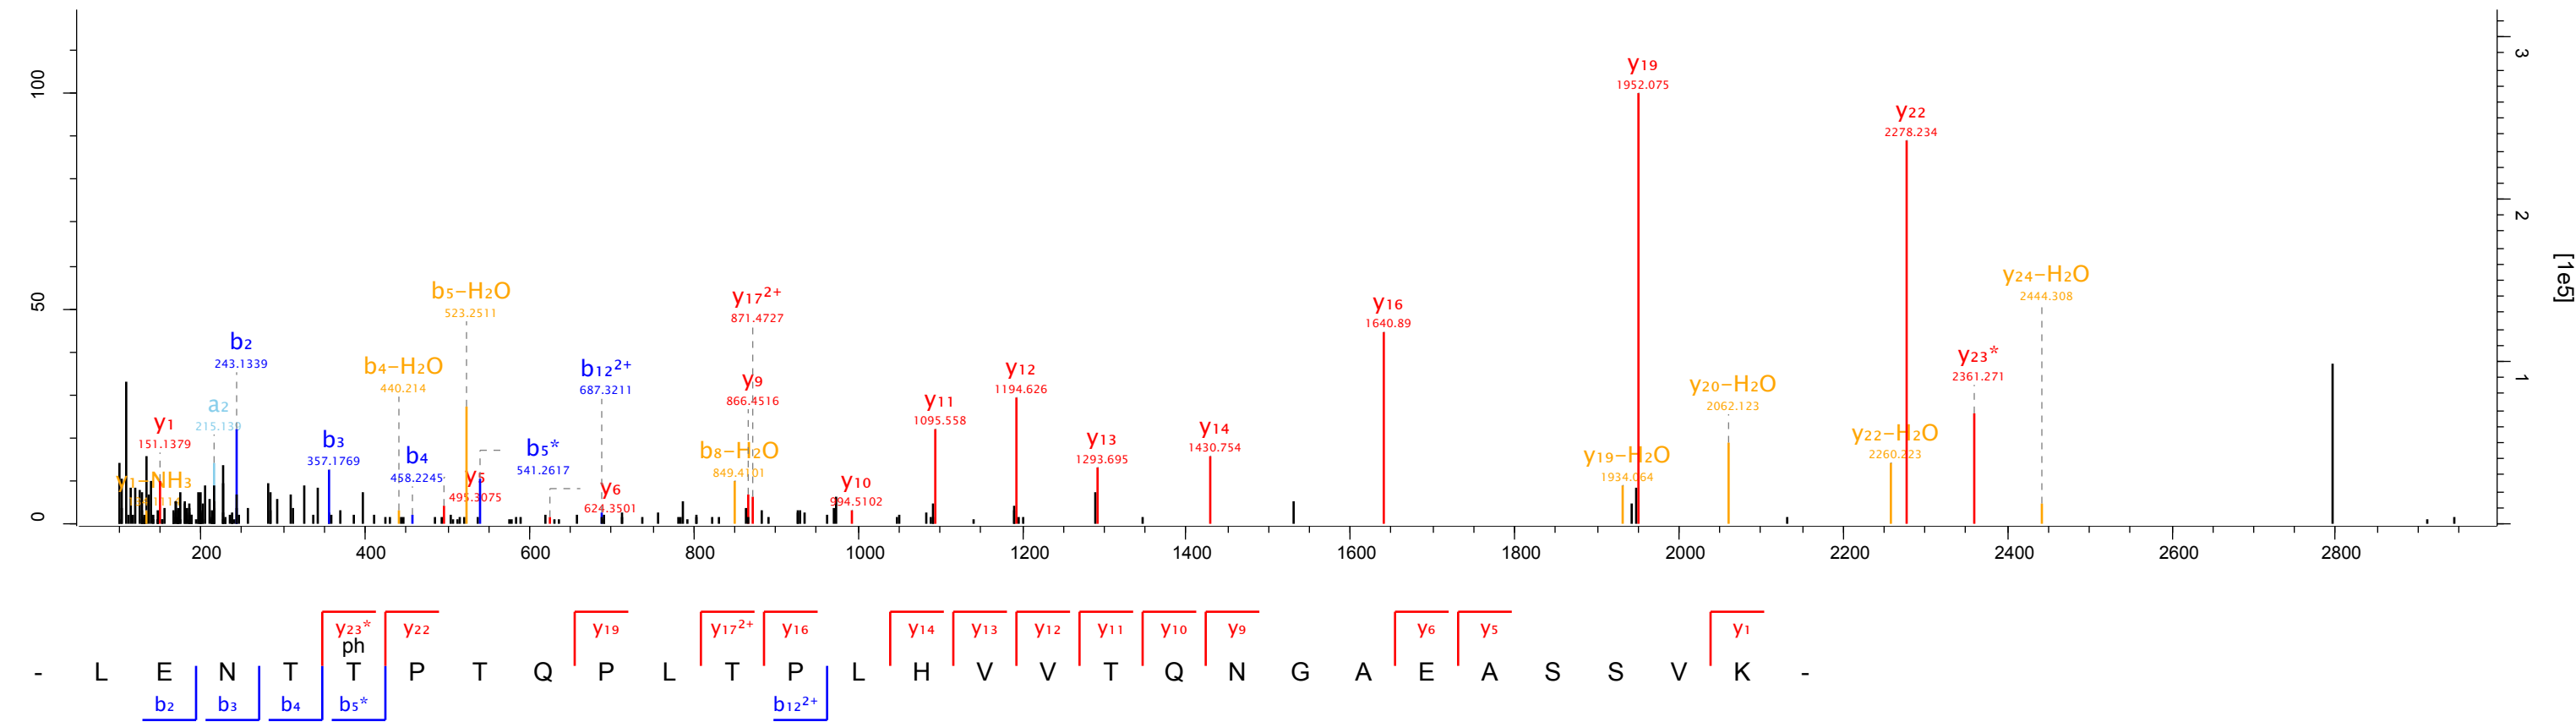

Raw file 20150814\_A375SR\_Phospho\_BR2\_07 Scan 19321 Method FTMS; HCD Score 99.84 m/z 782.39 Gene names BAP18

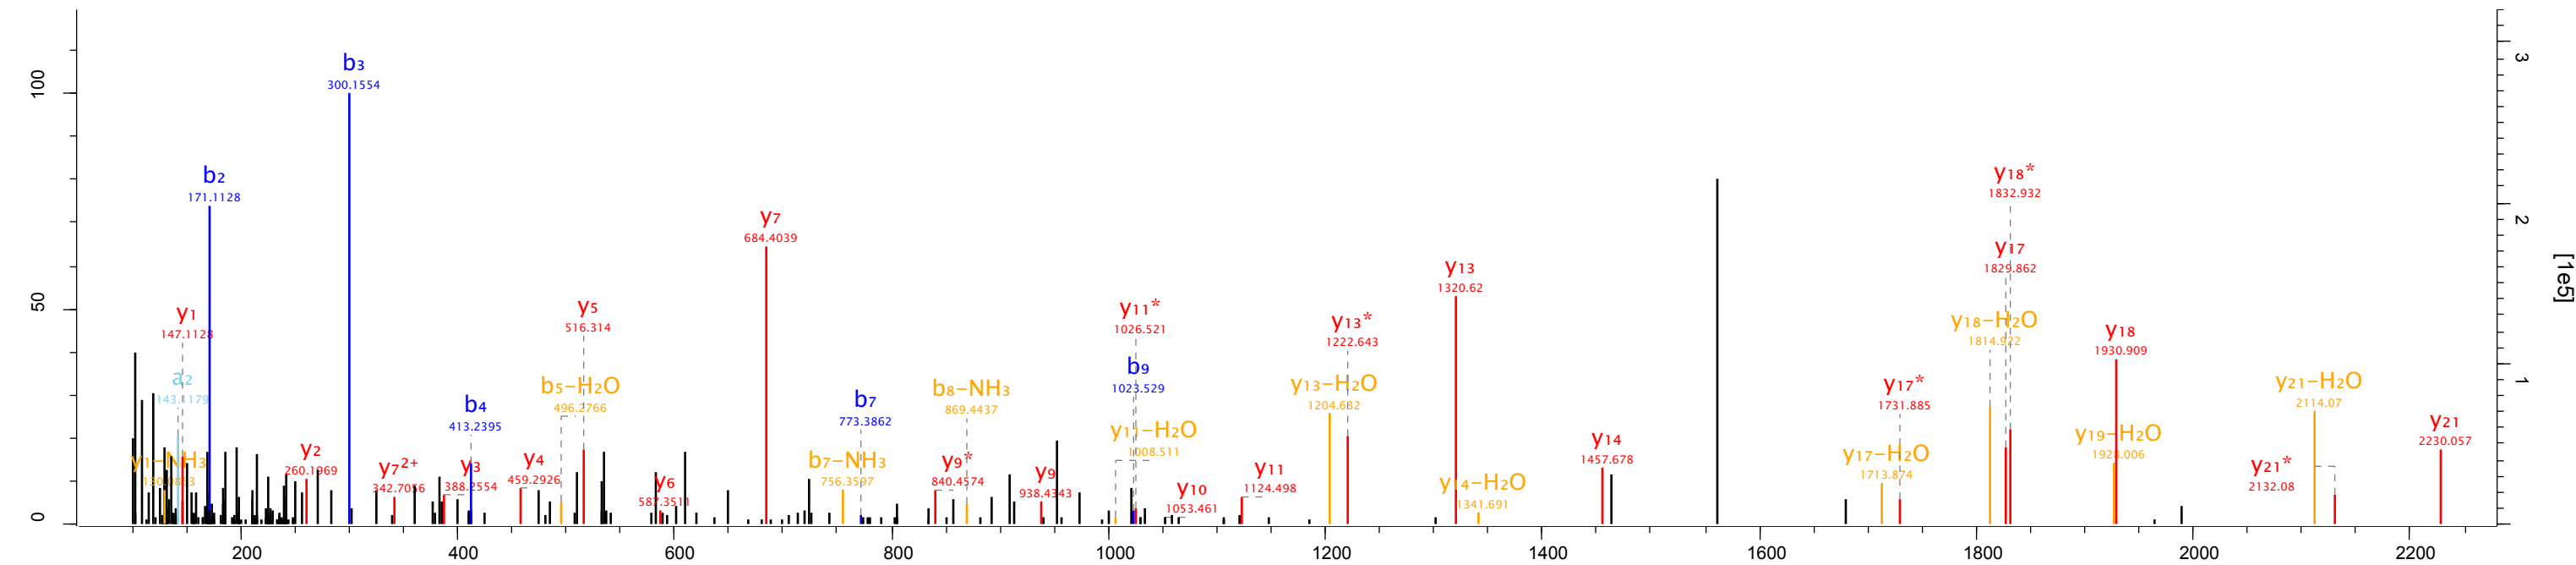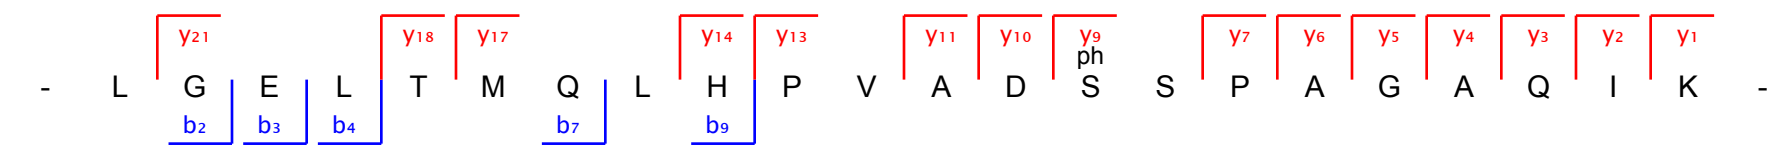

Raw file 20150814\_A375SR\_Phospho\_BR2\_07 Scan 20081 Method FTMS; HCD Score 60.94 m/z 911.41 Gene names ADD1

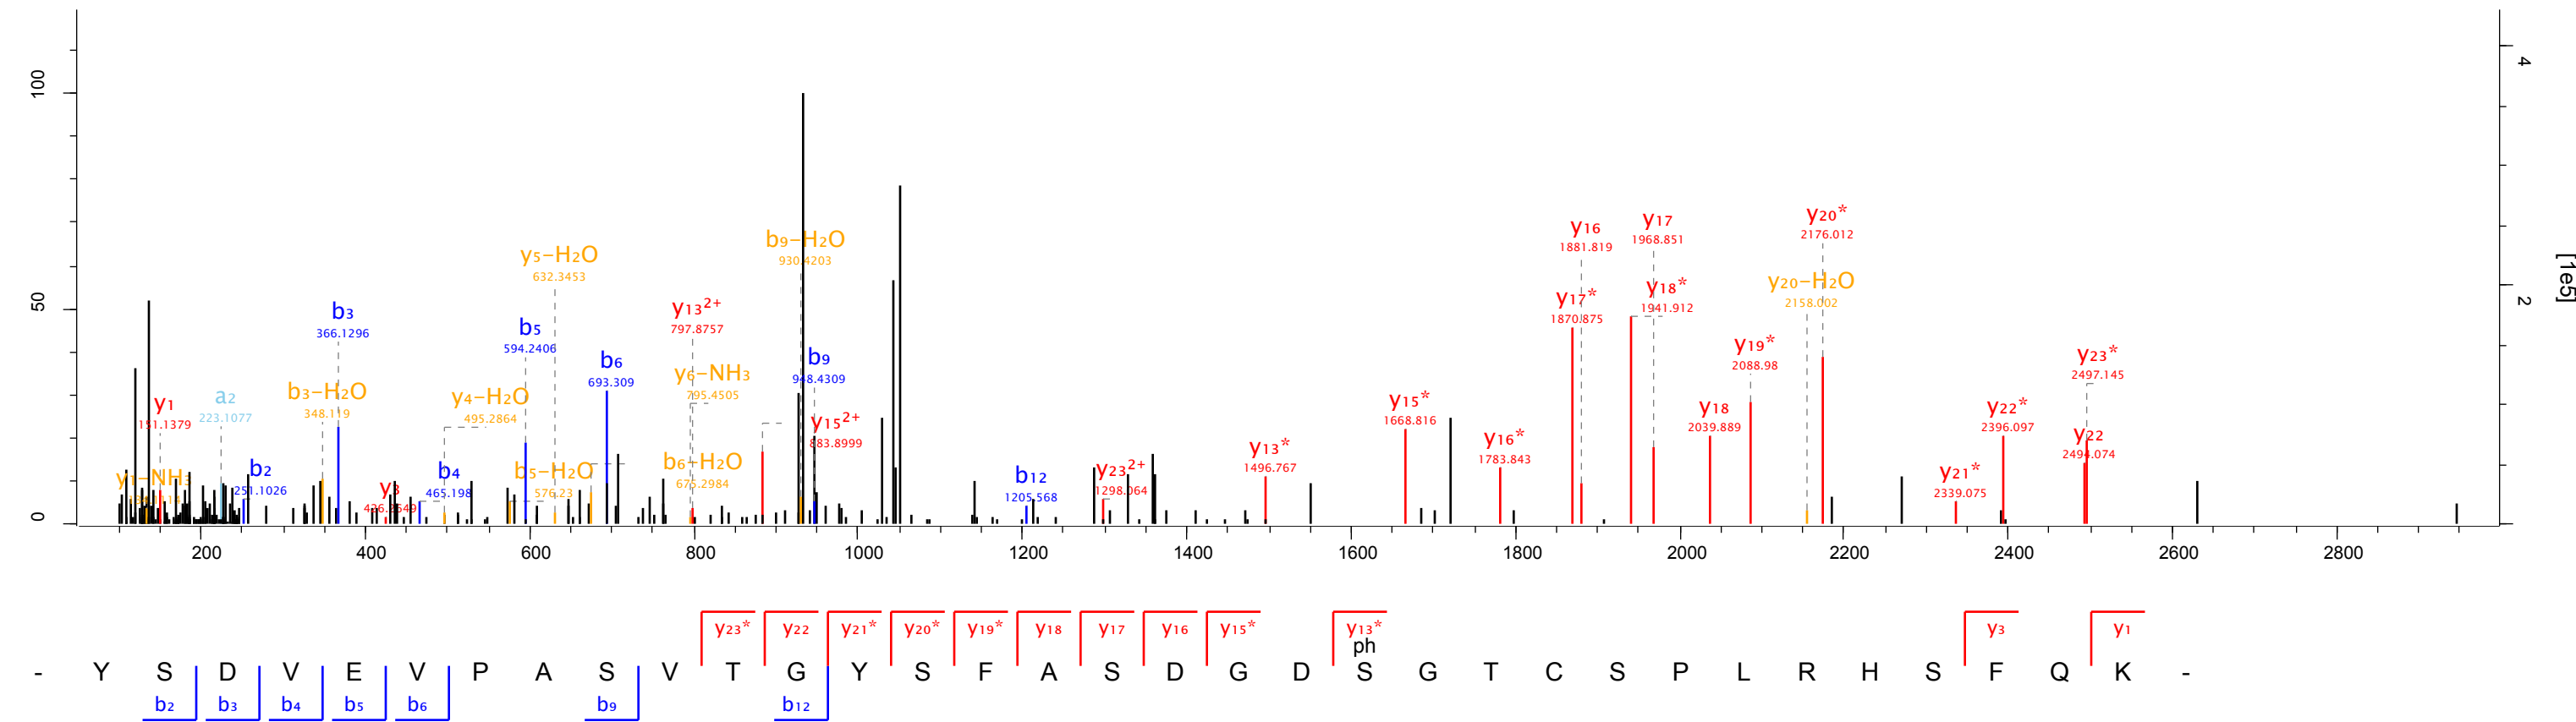



Raw file Scan Method Score m/z Gene names

20150814\_A375SR\_Phospho\_BR2\_07 2091 FTMS; HCD 216.16 849.86 ILF3

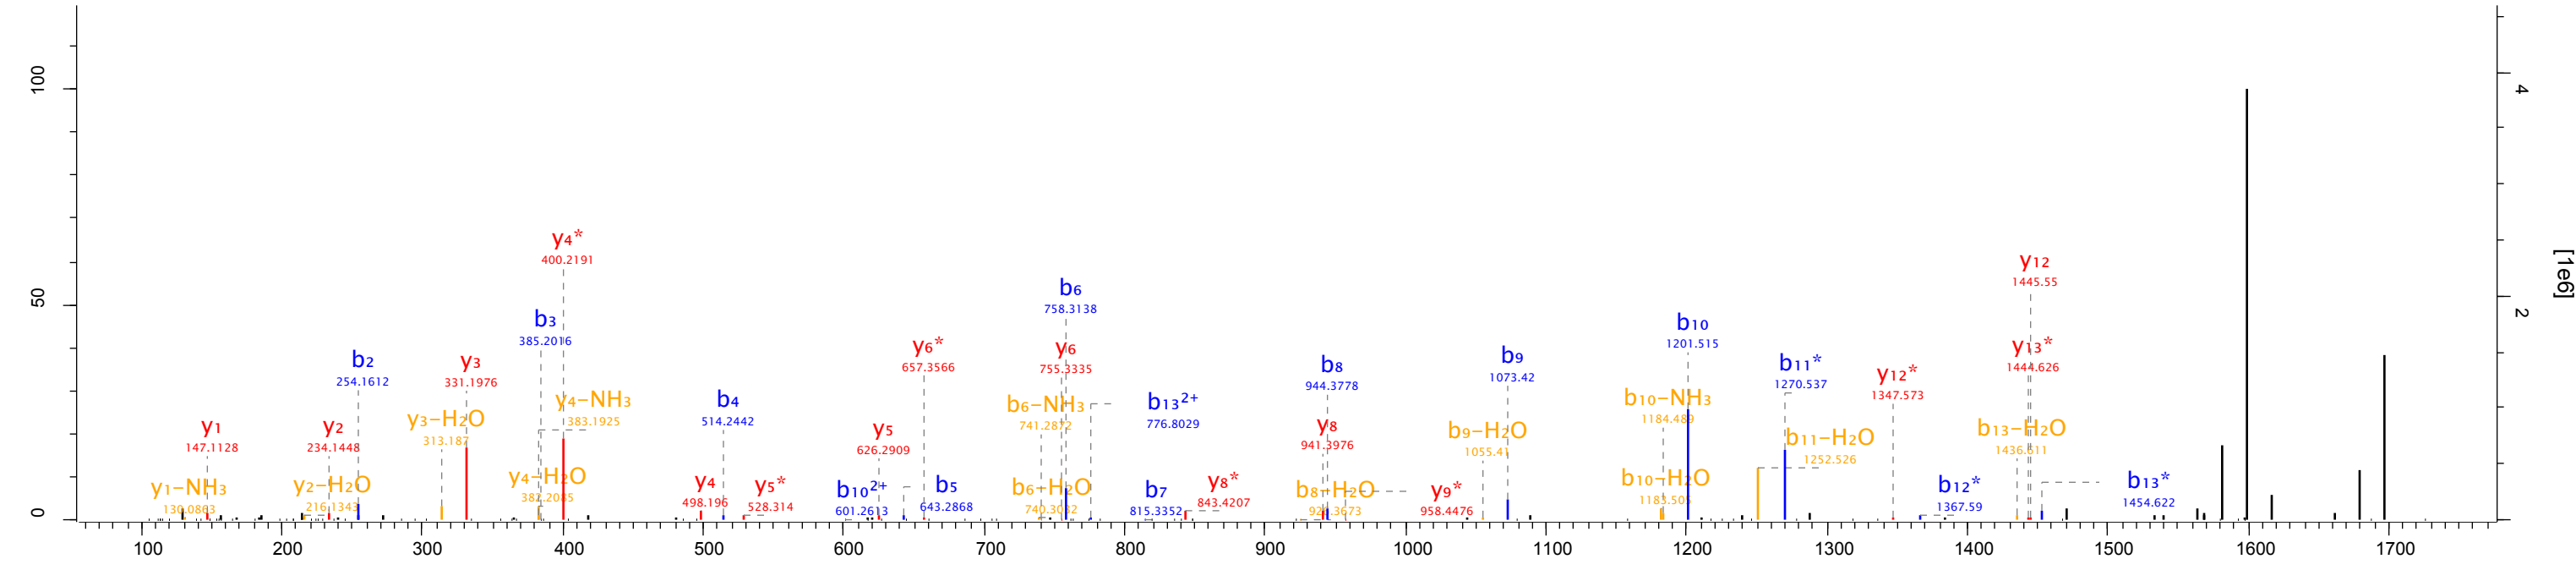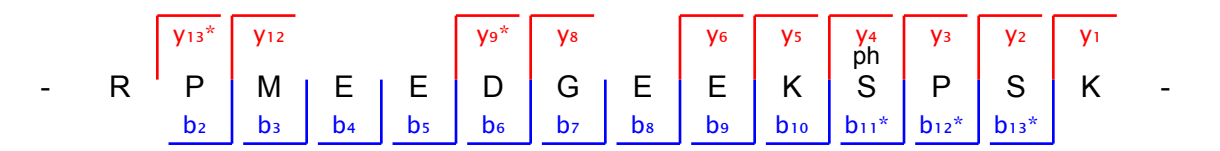

Raw file: 20150814\_A375SR\_Phospho\_BR2\_07  
 Scan: 2111 Method: FTMS; HCD Score: 156.31 m/z: 522.78 Gene names: SRSF11

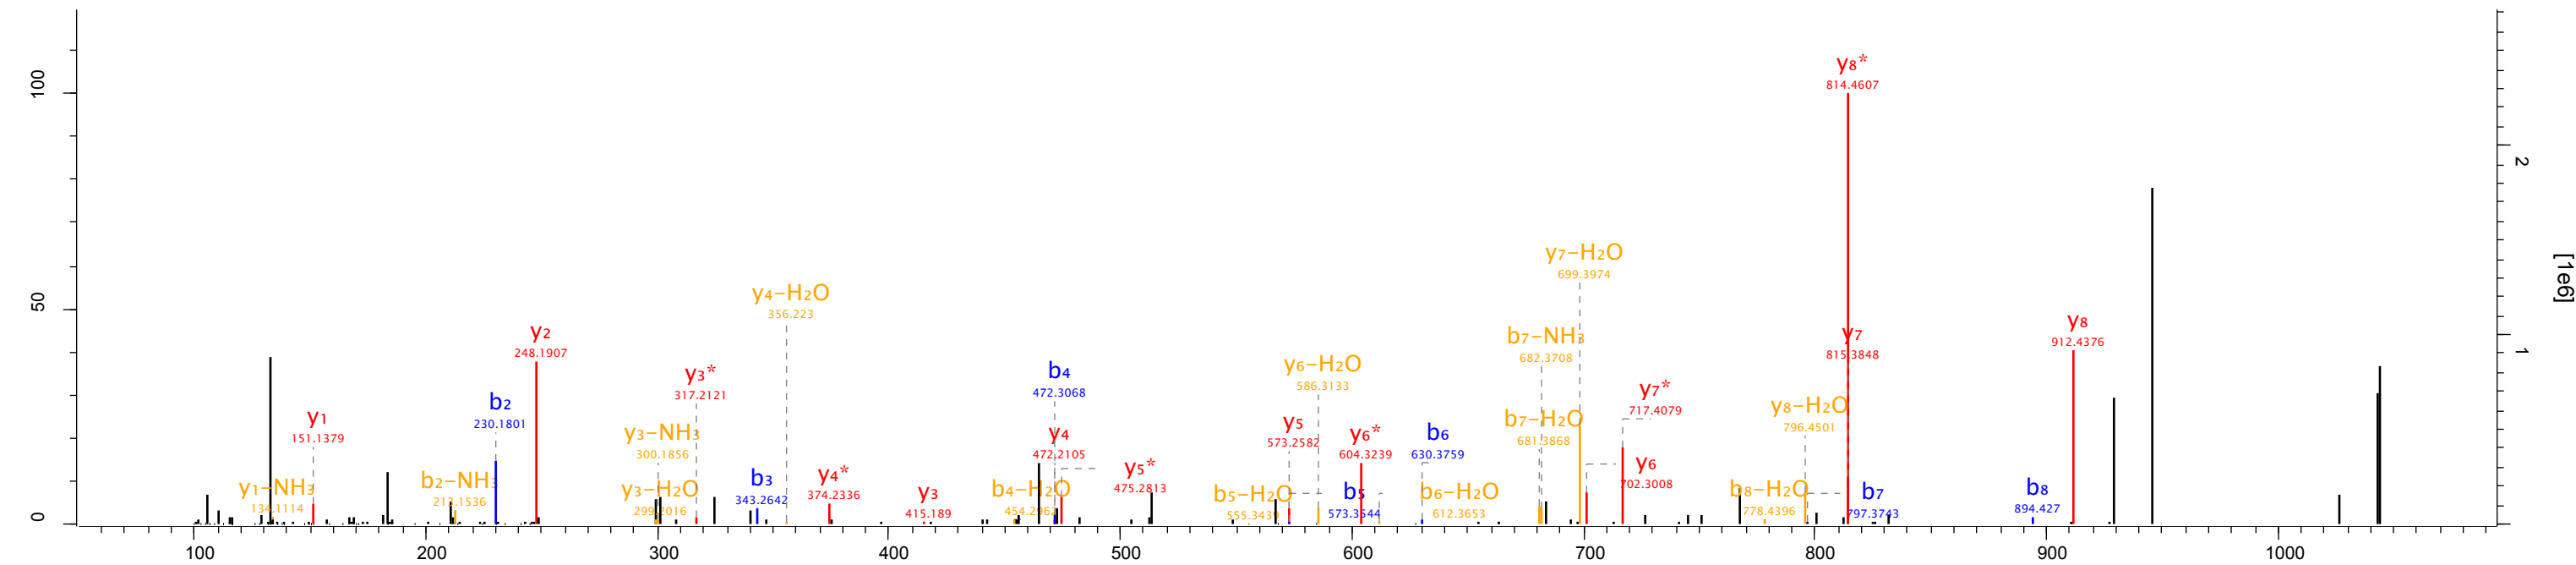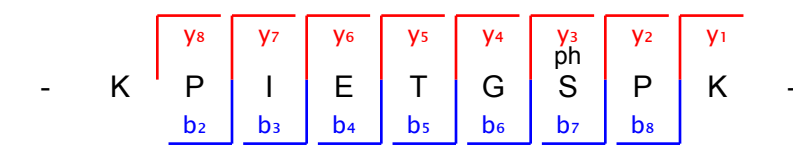

Raw file Scan Method Score m/z Gene names

20150814\_A375SR\_Phospho\_BR2\_07 2691 FTMS; HCD 144.73 723.31 MTRF1

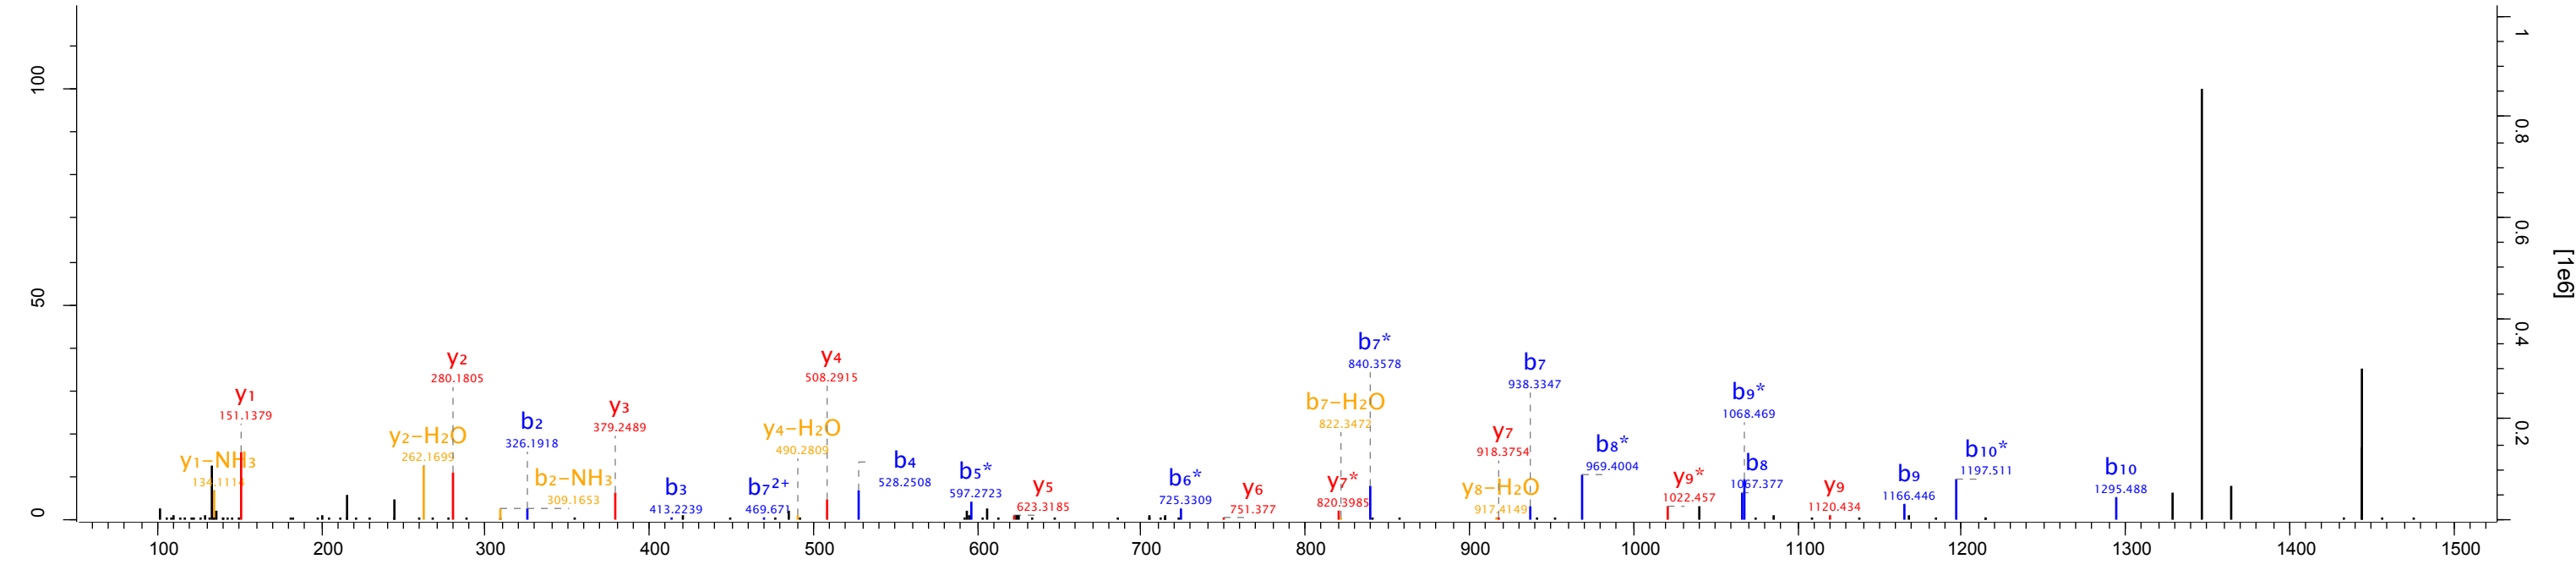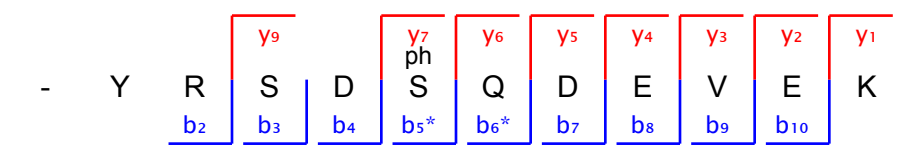

Raw file: 20150814\_A375SR\_Phospho\_BR2\_07  
 Scan: 2931 Method: FTMS; HCD Score: 124.48 m/z: 542.77 Gene names: FSCN1

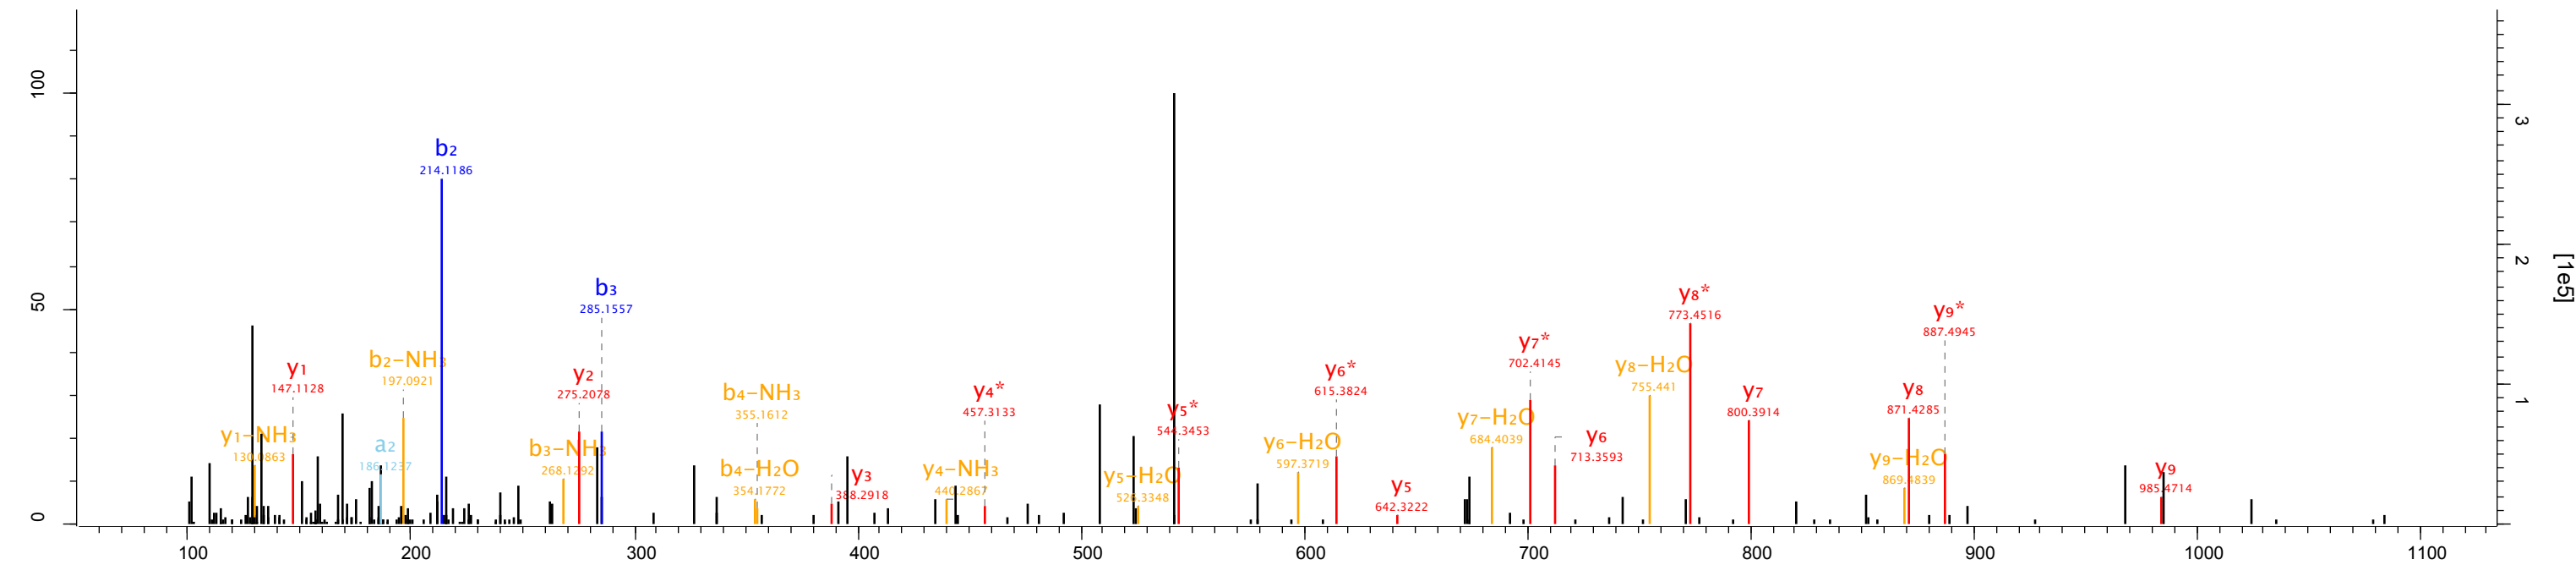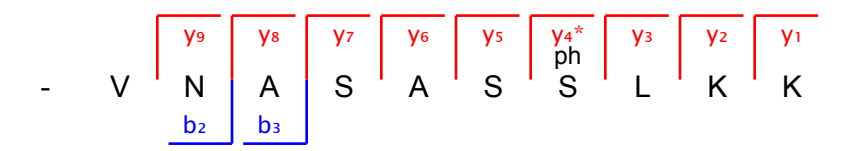

Raw file Scan Method Score m/z Gene names

20150814\_A375SR\_Phospho\_BR2\_07

4071 FTMS; HCD 97.45 659.3 RFX5

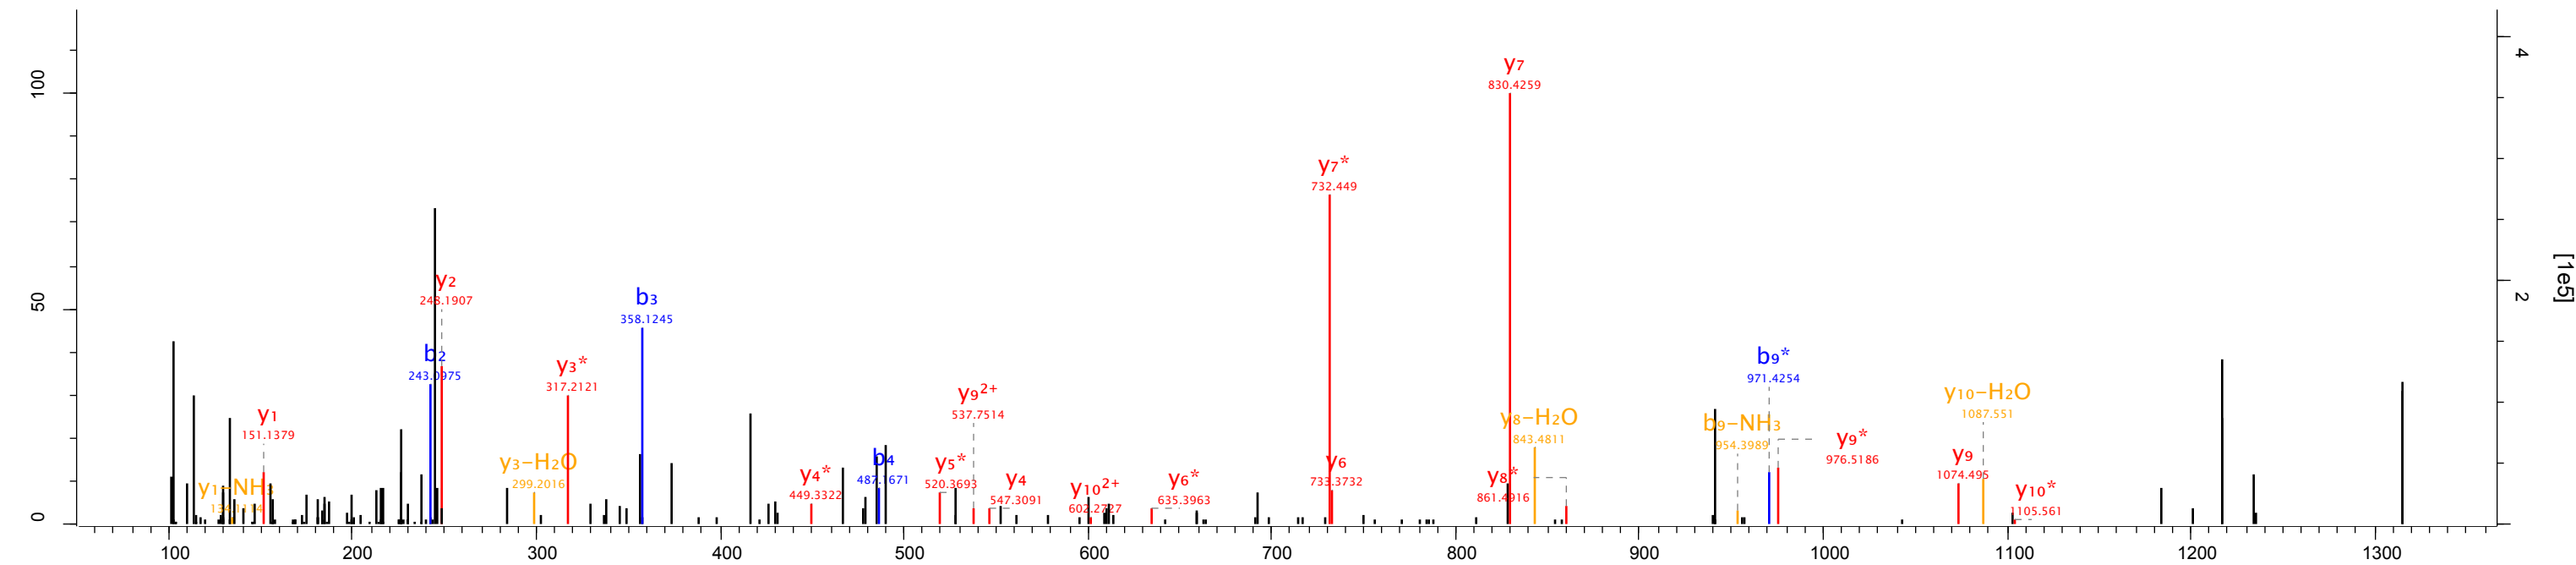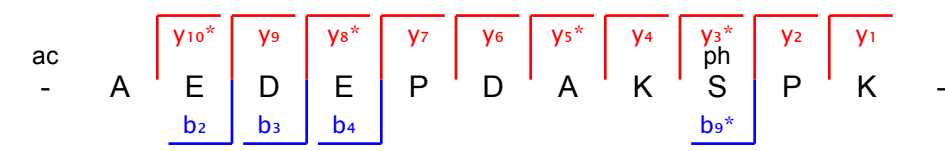

Raw file: 20150814\_A375SR\_Phospho\_BR2\_07  
 Scan: 5041 Method: FTMS; HCD Score: 104.03 m/z: 632.3 Gene names: HMOX1

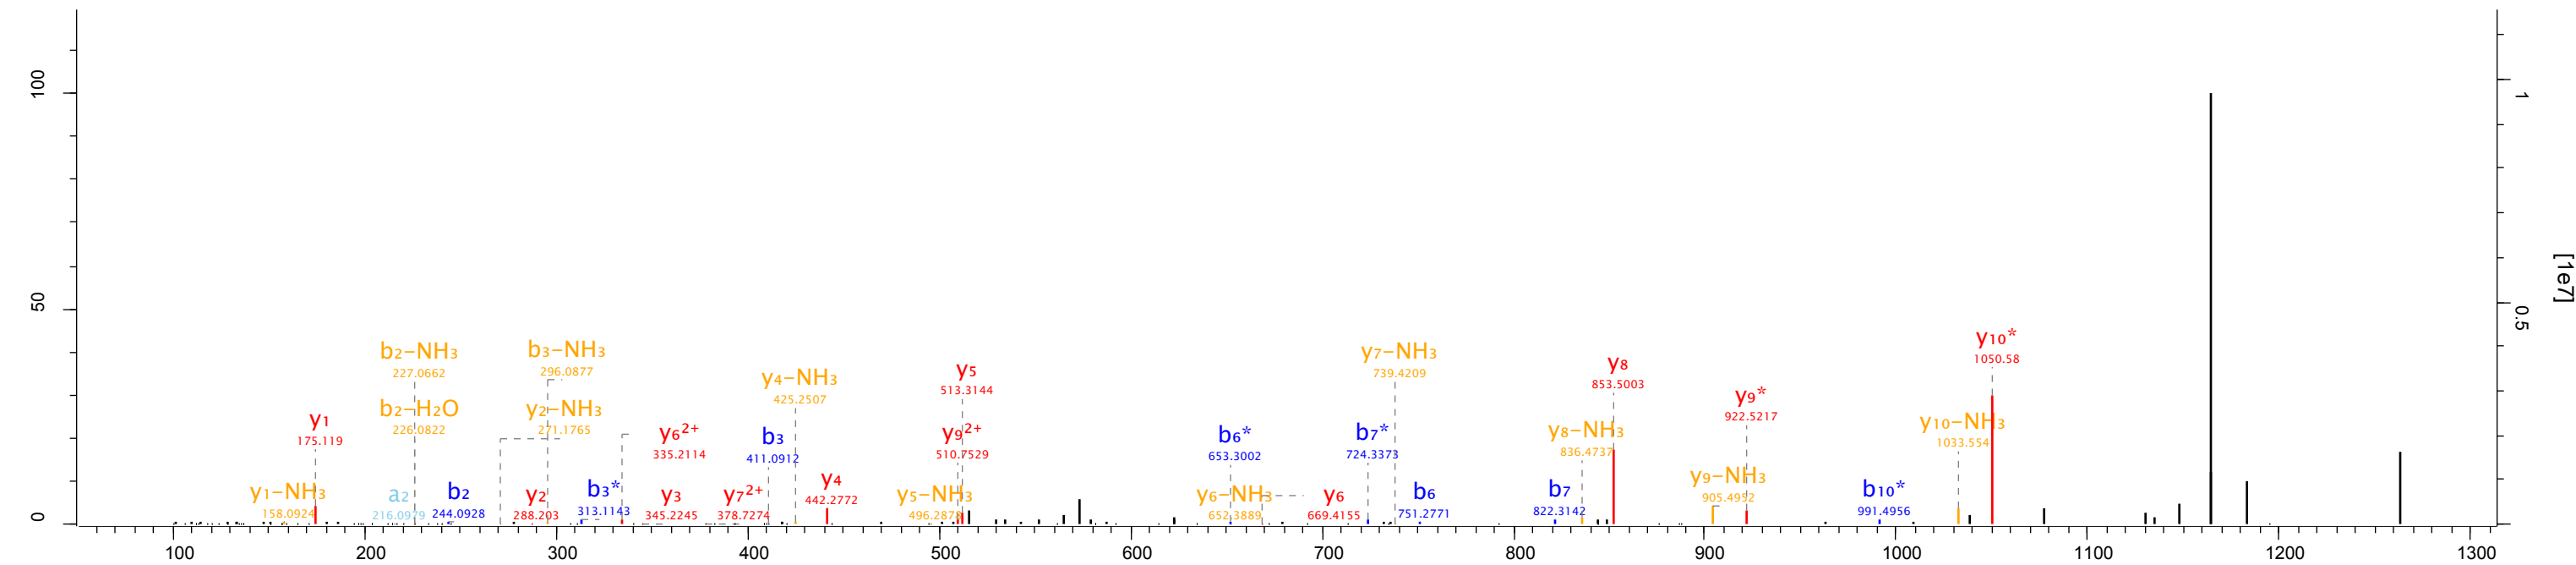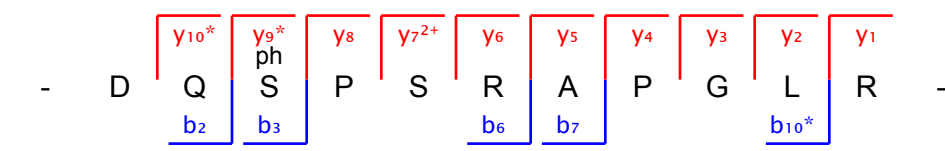

Raw file 20150814\_A375SR\_Phospho\_BR2\_07 Scan 6921 Method FTMS; HCD Score 96.03 m/z 437.19 Gene names CDC2L1;CDK11B;CDK11A

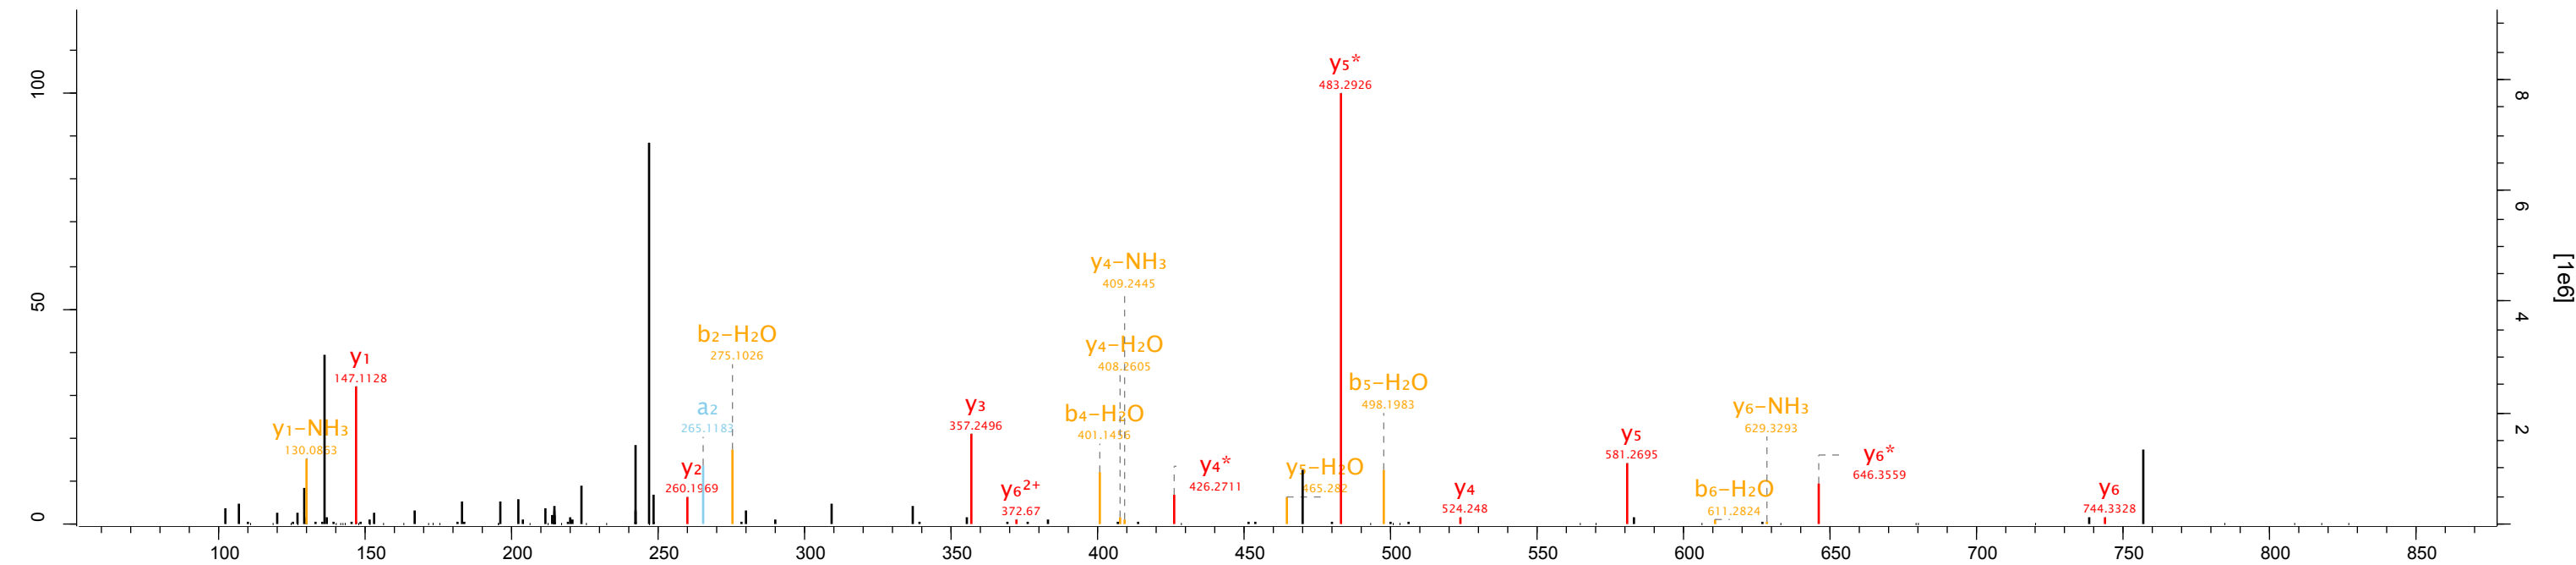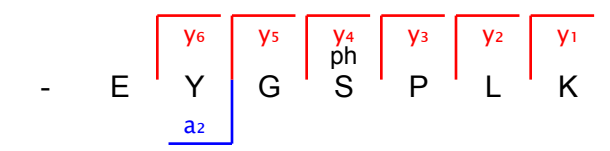

Raw file 20150814\_A375SR\_Phospho\_BR2\_07 Scan 7181 Method FTMS; HCD Score 101.71 m/z 481.58 Gene names SAP130

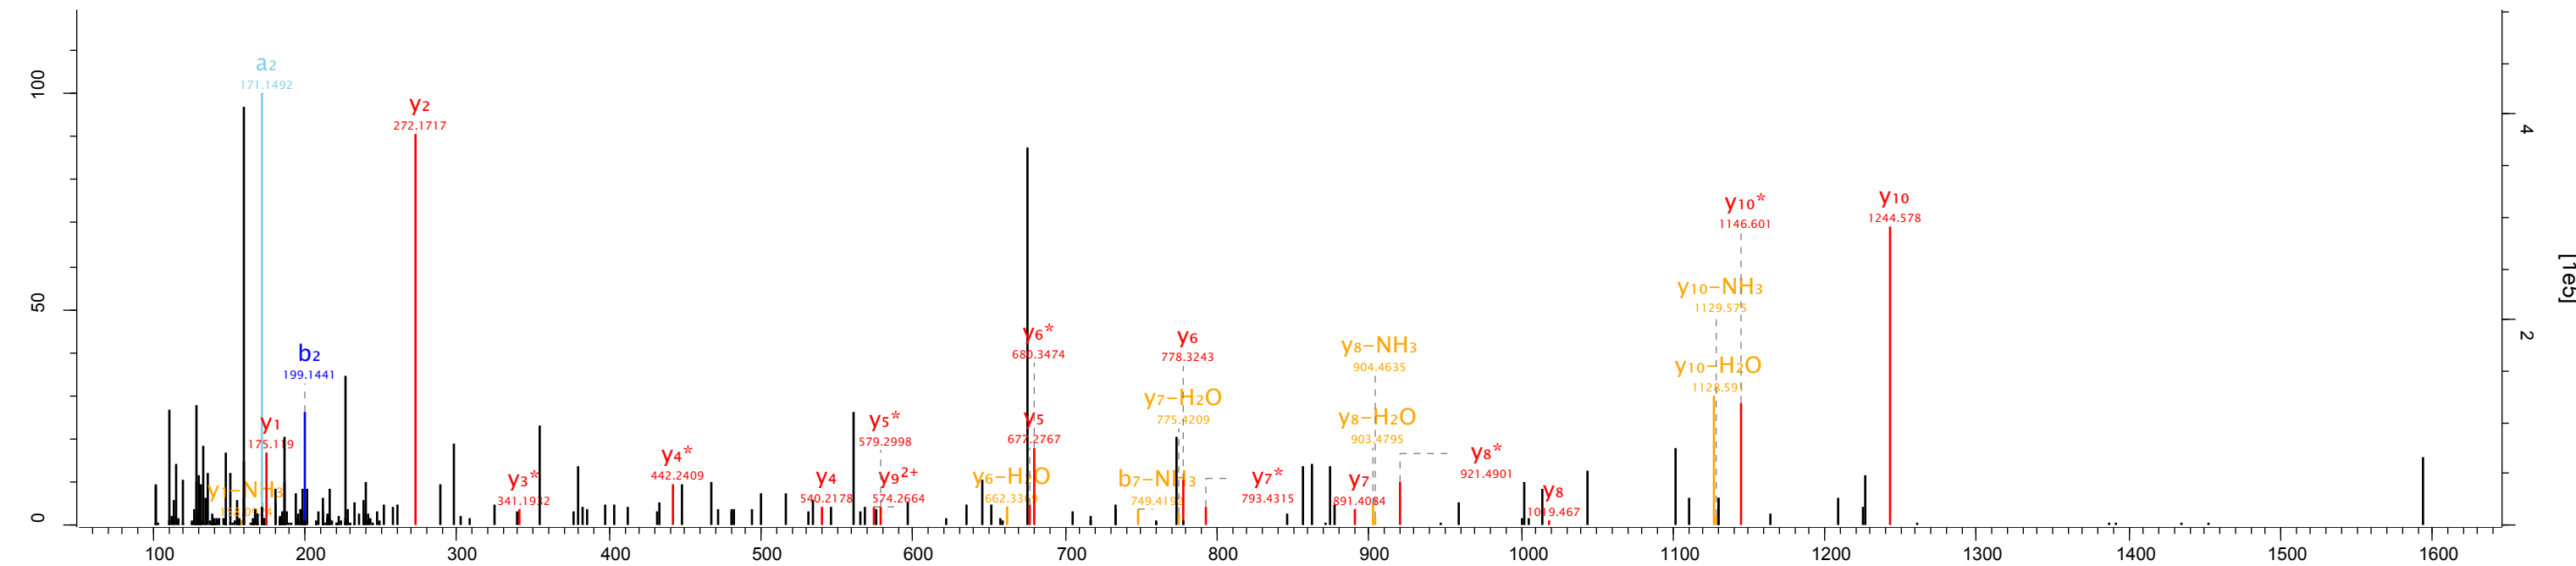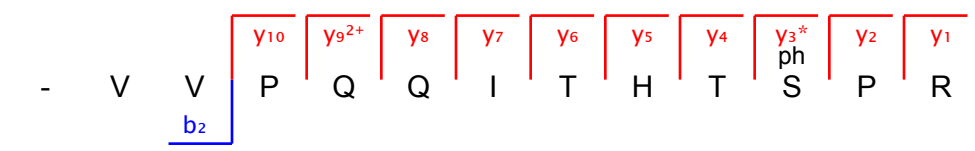



Raw file 20150814\_A375SR\_Phospho\_BR2\_07 Scan 7911 Method FTMS; HCD Score 54.9 m/z 602.31 Gene names KIF21A

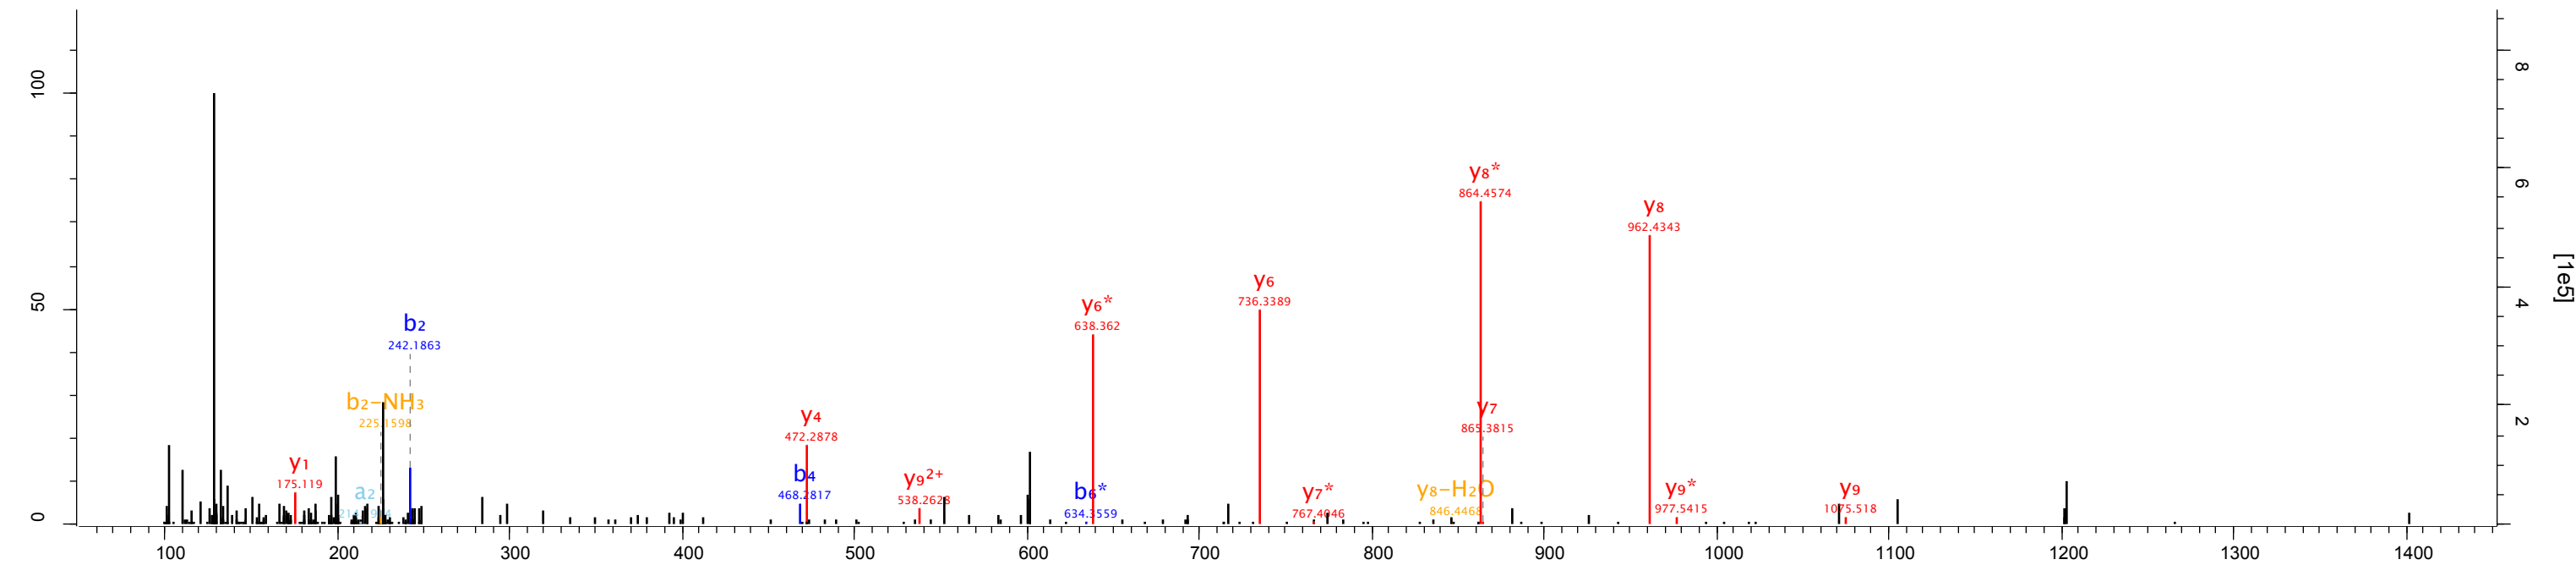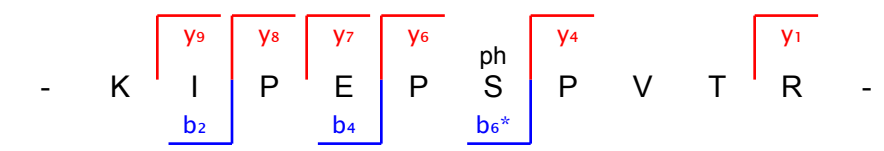

Raw file 20150814\_A375SR\_Phospho\_BR2\_07 Scan 8841 Method FTMS; HCD Score 218.74 m/z 651.3 Gene names SPAG9

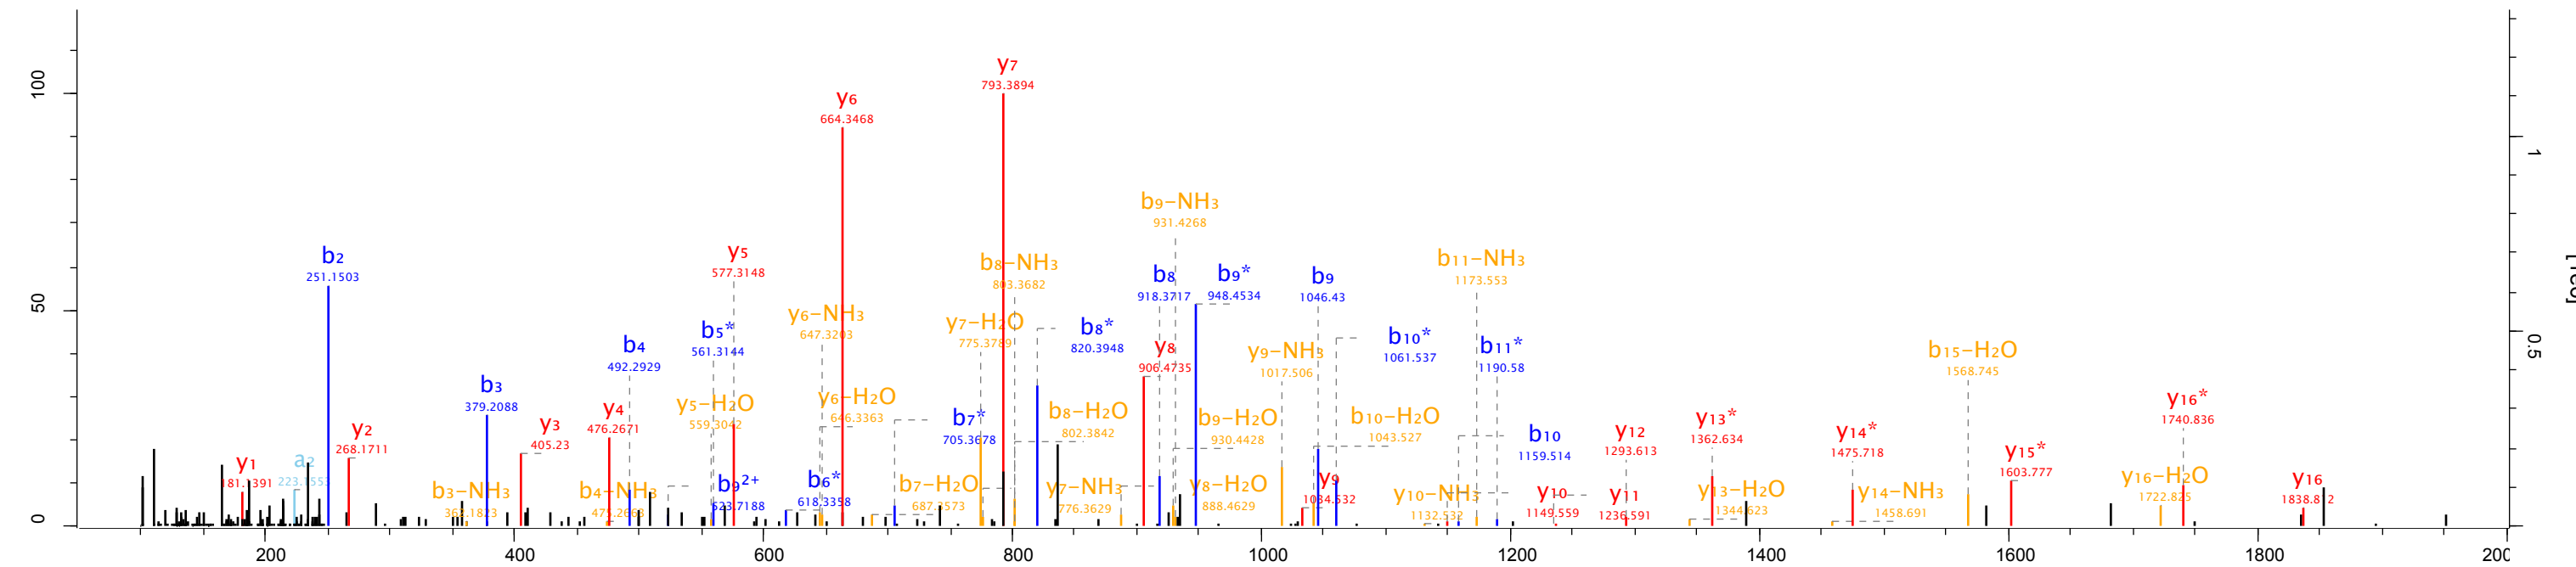

- L H Q L ph S G S D Q L E S T A H S R -

y<sub>16</sub>
y<sub>15</sub>\*
y<sub>14</sub>\*
y<sub>13</sub>\*
y<sub>12</sub>
y<sub>11</sub>
y<sub>10</sub>
y<sub>9</sub>
y<sub>8</sub>
y<sub>7</sub>
y<sub>6</sub>
y<sub>5</sub>
y<sub>4</sub>
y<sub>3</sub>
y<sub>2</sub>
y<sub>1</sub>

b<sub>2</sub>
b<sub>3</sub>
b<sub>4</sub>
b<sub>5</sub>\*
b<sub>6</sub>\*
b<sub>7</sub>\*
b<sub>8</sub>
b<sub>9</sub>
b<sub>10</sub>
b<sub>11</sub>\*

Raw file: 20150814\_A375SR\_Phospho\_BR2\_08  
 Scan: 10071 Method: FTMS; HCD Score: 90.39 m/z: 540.29 Gene names: ROCK2

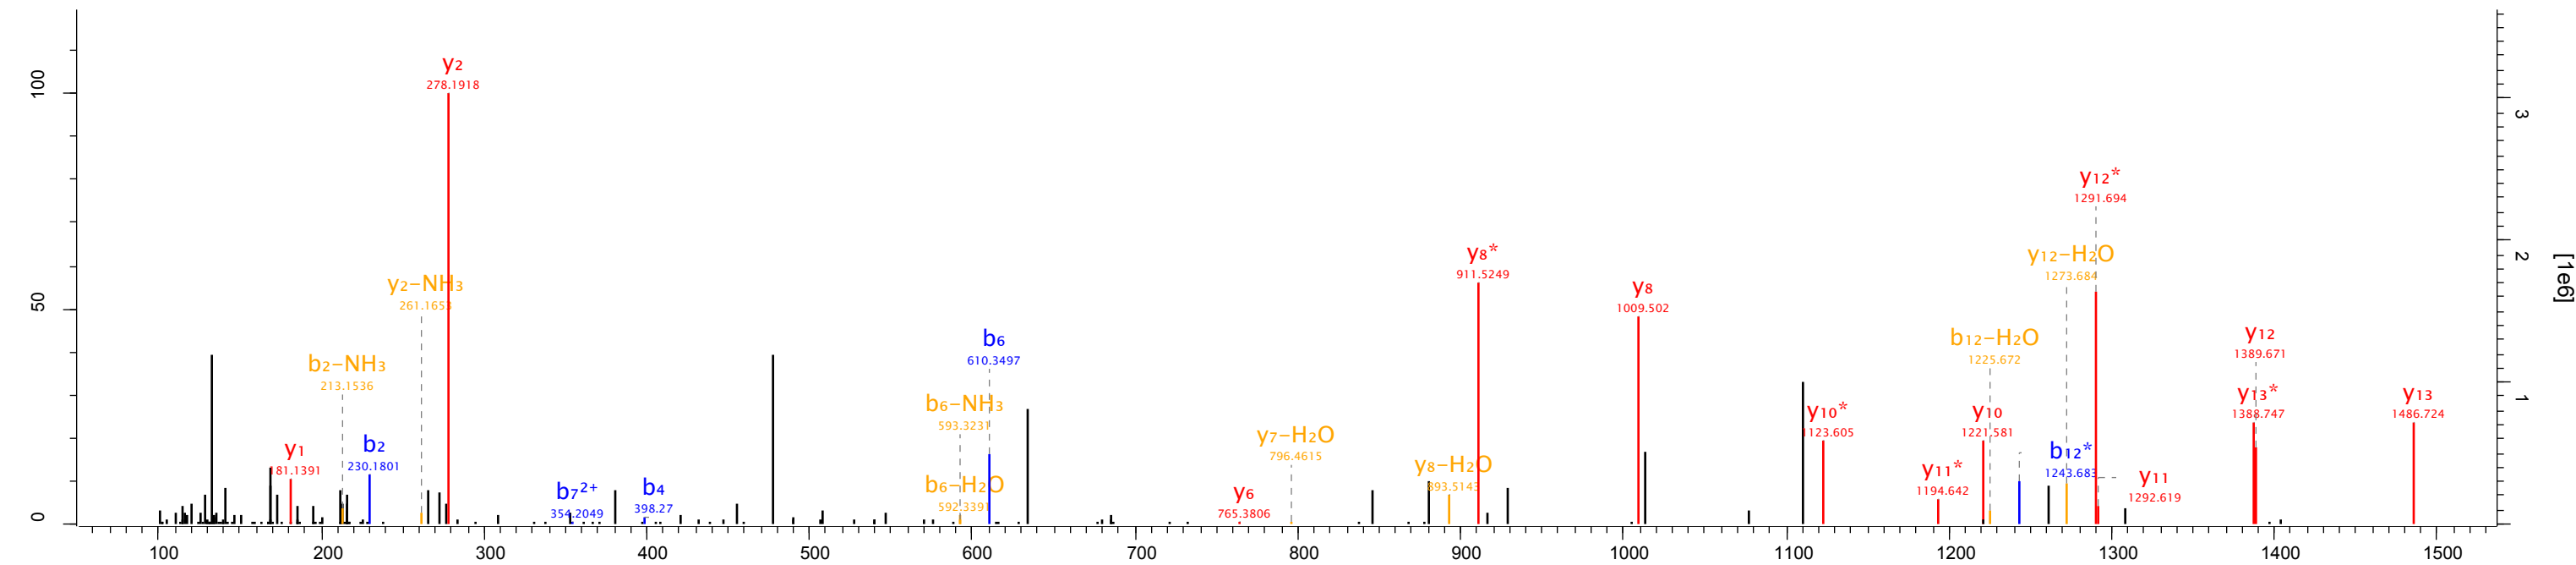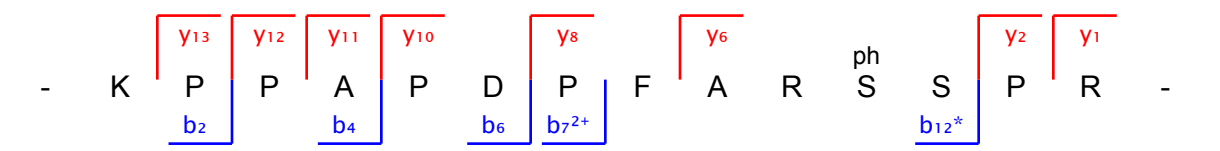

Raw file: 20150814\_A375SR\_Phospho\_BR2\_08  
 Scan: 10361 Method: FTMS; HCD Score: 133.65 m/z: 576.97 Gene names: TSSC4

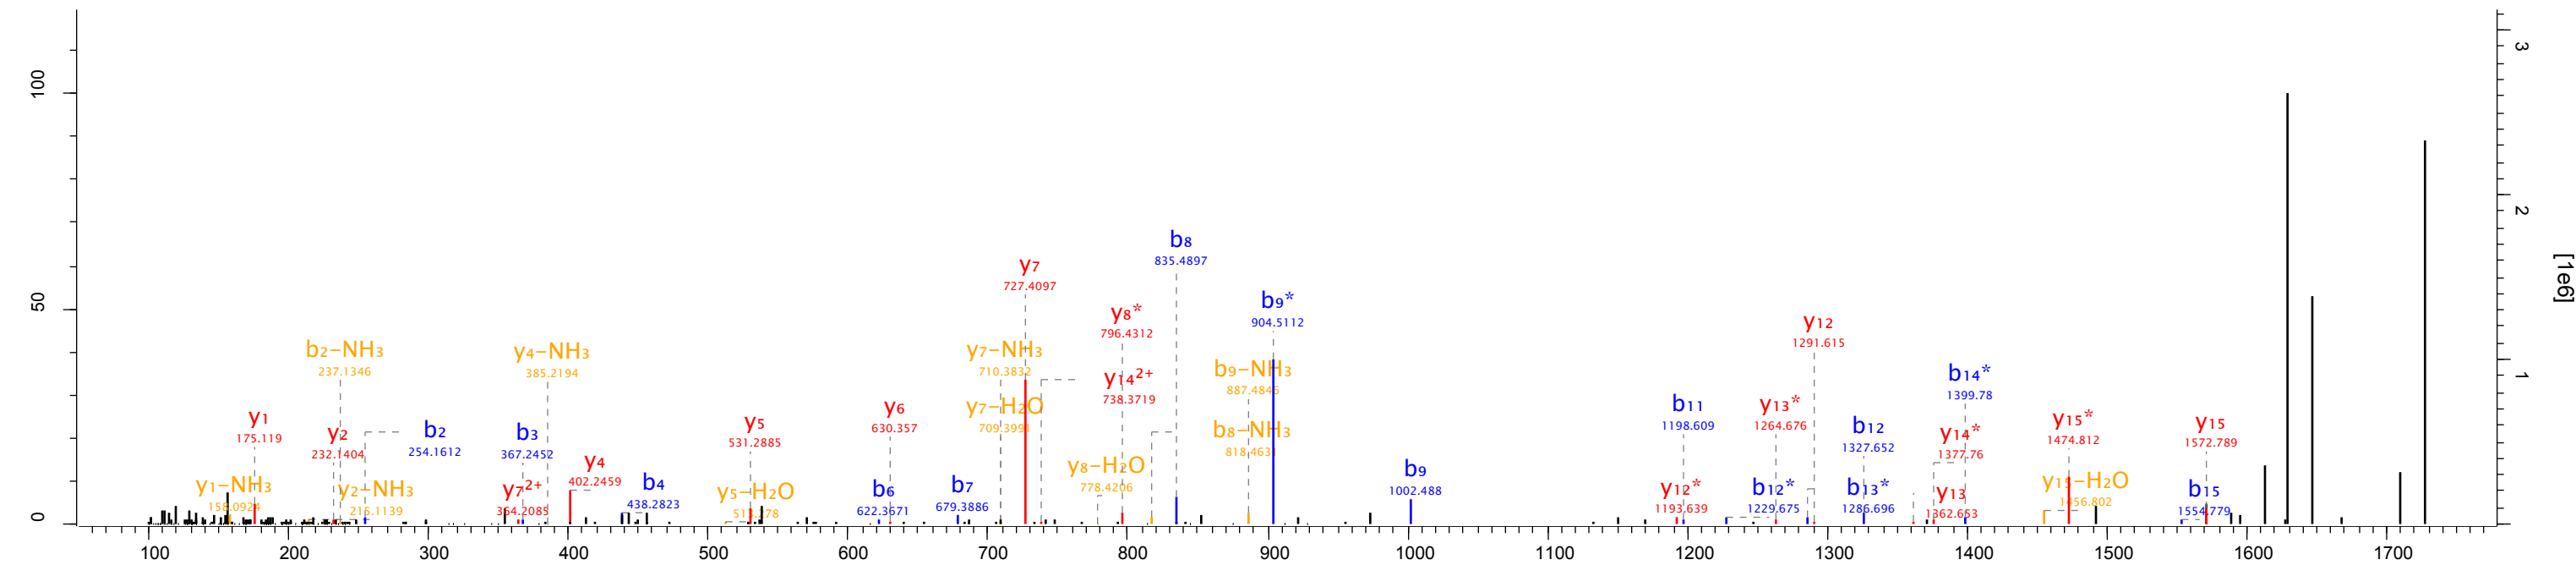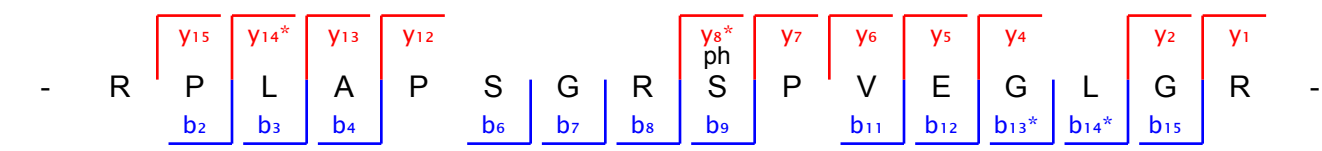

Raw file: 20150814\_A375SR\_Phospho\_BR2\_08  
 Scan: 10421 Method: FTMS; HCD Score: 74.03 m/z: 803.69 Gene names: FAM84B

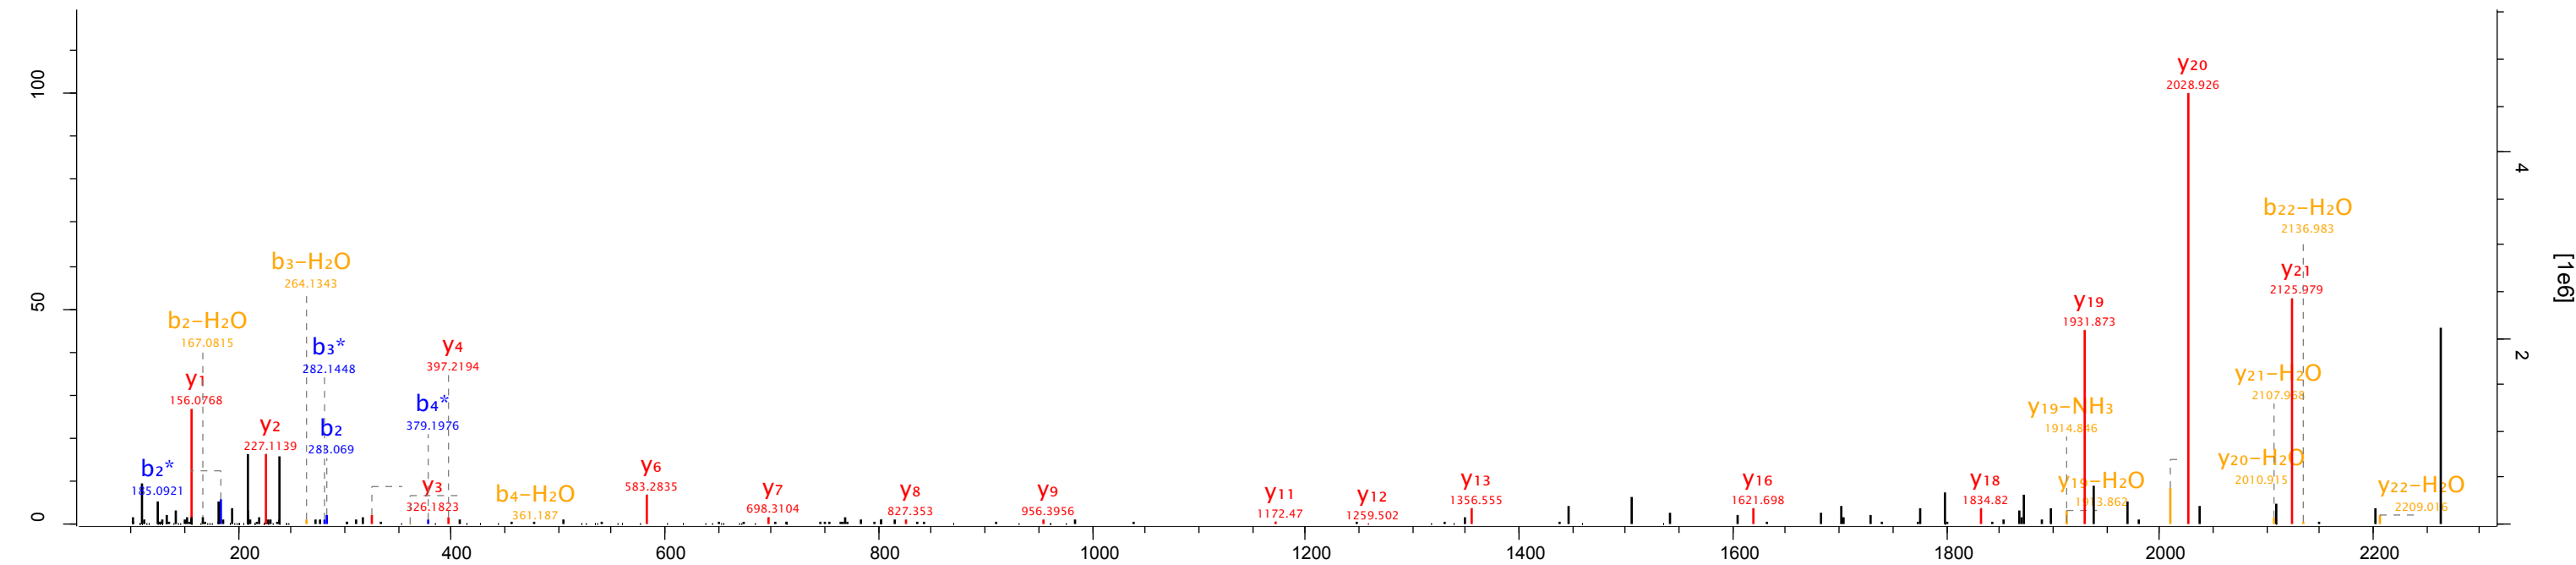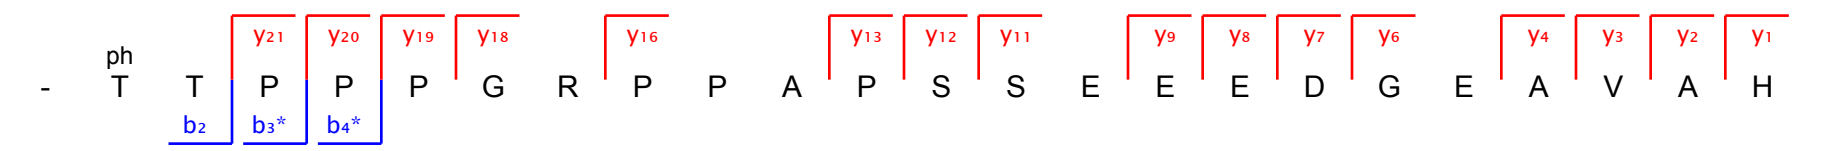

Raw file: 20150814\_A375SR\_Phospho\_BR2\_08  
 Scan: 10531  
 Method: FTMS; HCD  
 Score: 112.68  
 m/z: 1013.83  
 Gene names: TBC1D10B

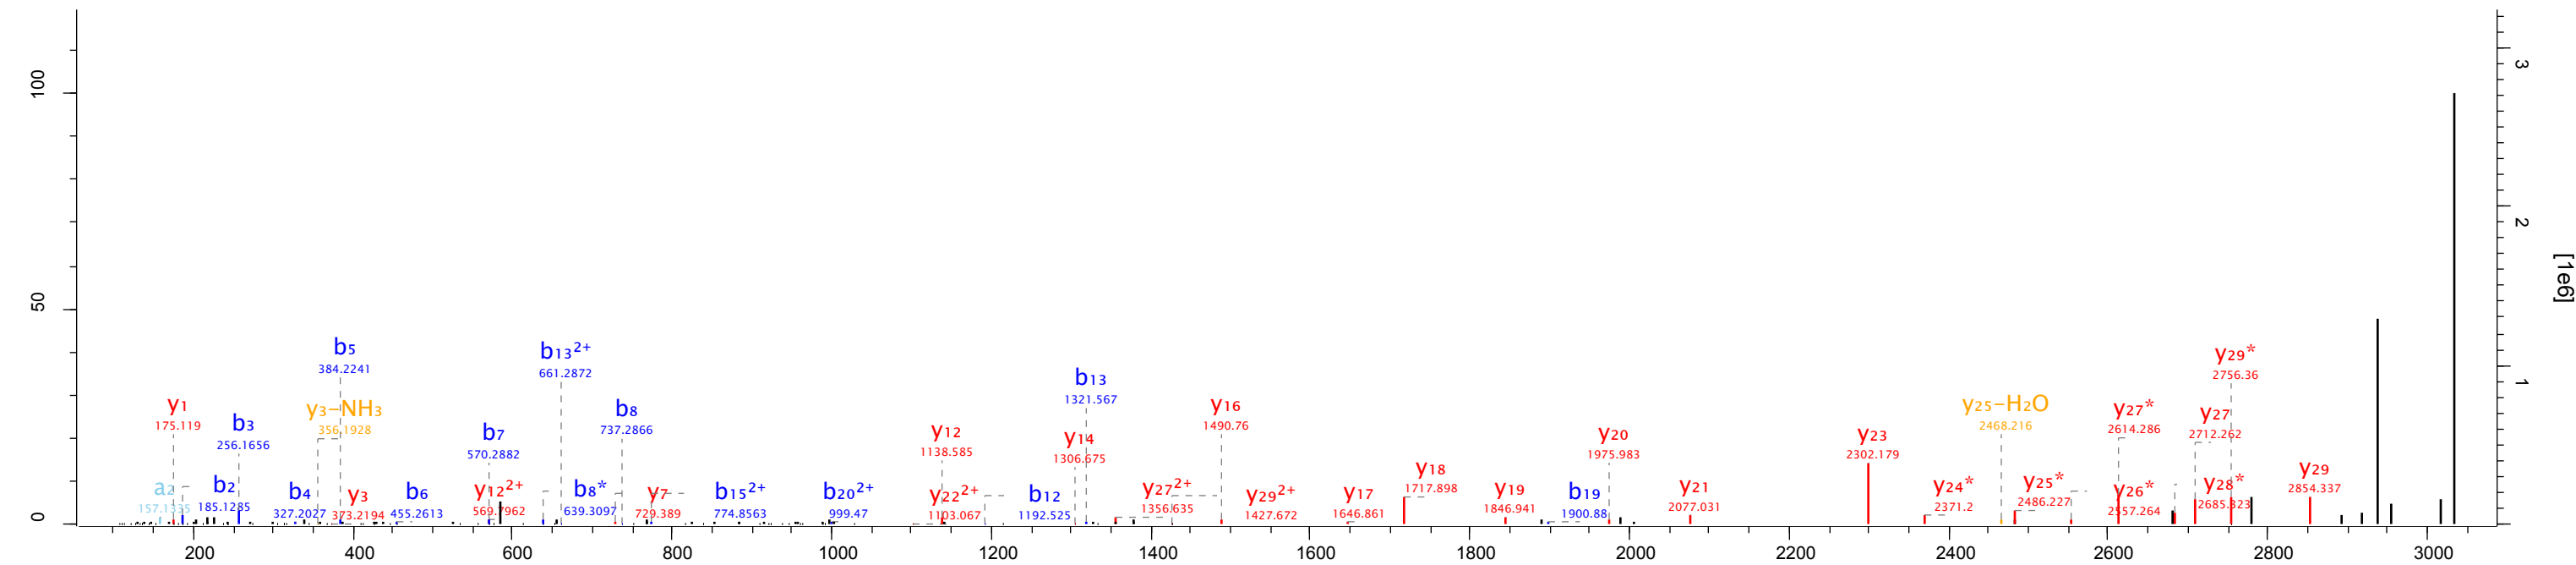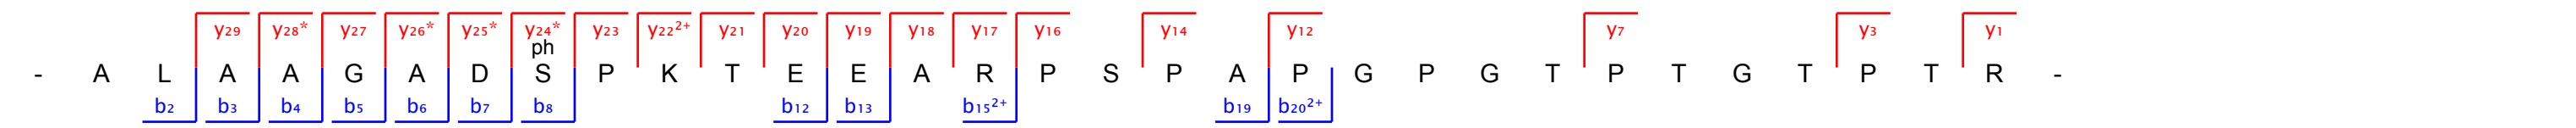

Raw file: 20150814\_A375SR\_Phospho\_BR2\_08  
 Scan: 12481 Method: FTMS; HCD Score: 85.27 m/z: 572.3 Gene names: RALBP1

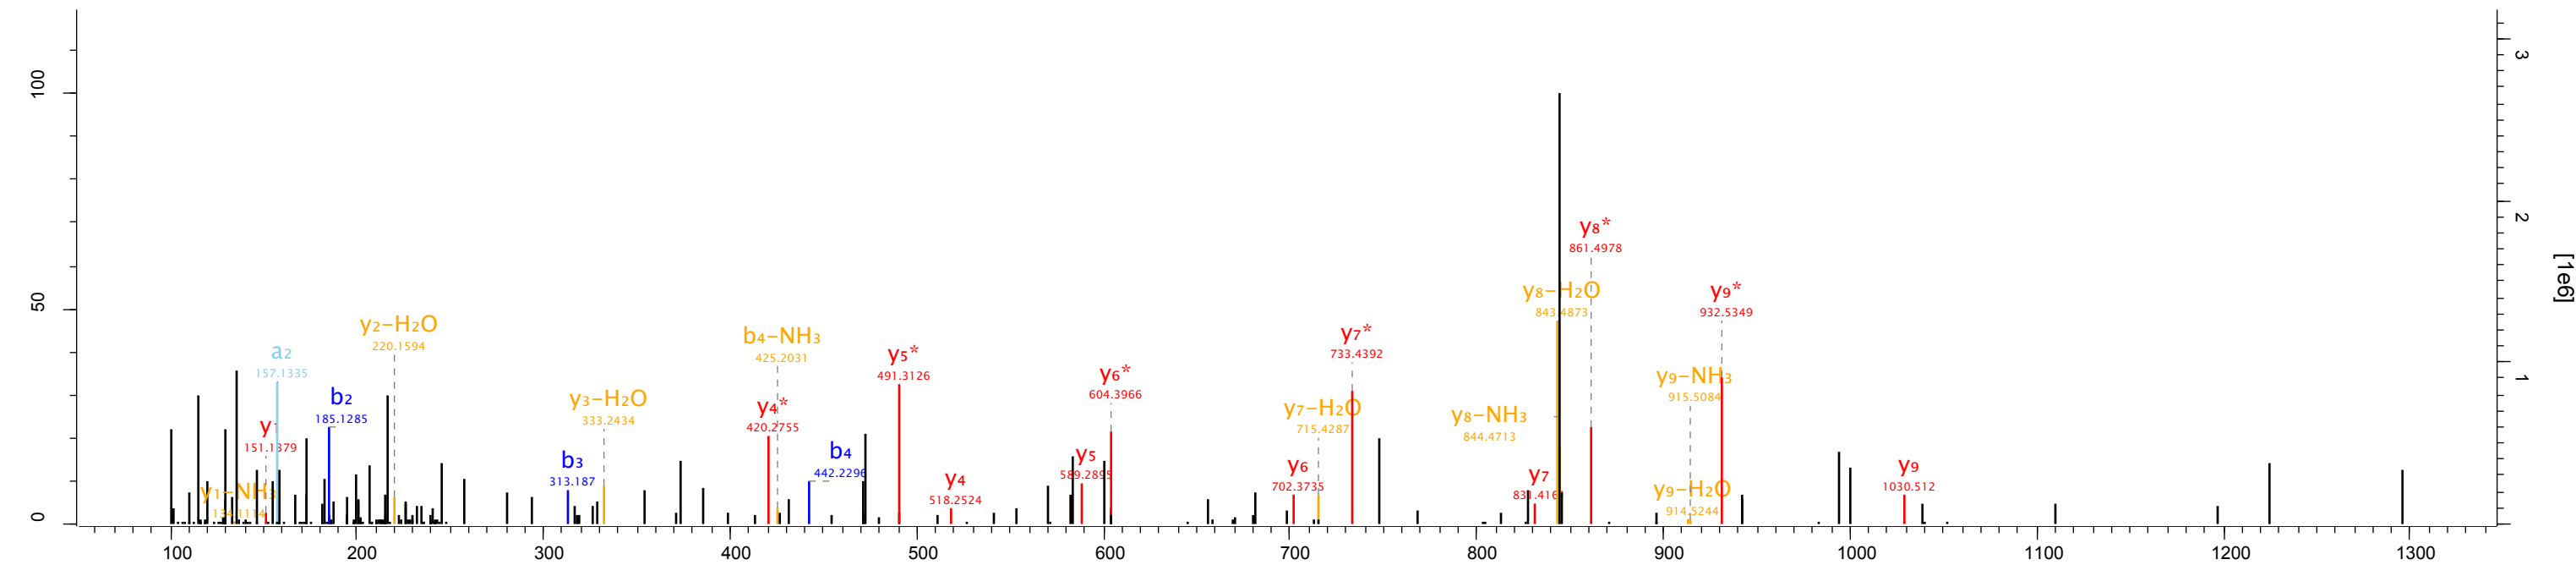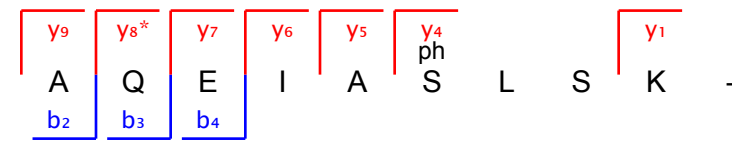

Raw file 20150814\_A375SR\_Phospho\_BR2\_08 Scan 13001 Method FTMS; HCD Score 98.1 m/z 528.25 Gene names WDR33

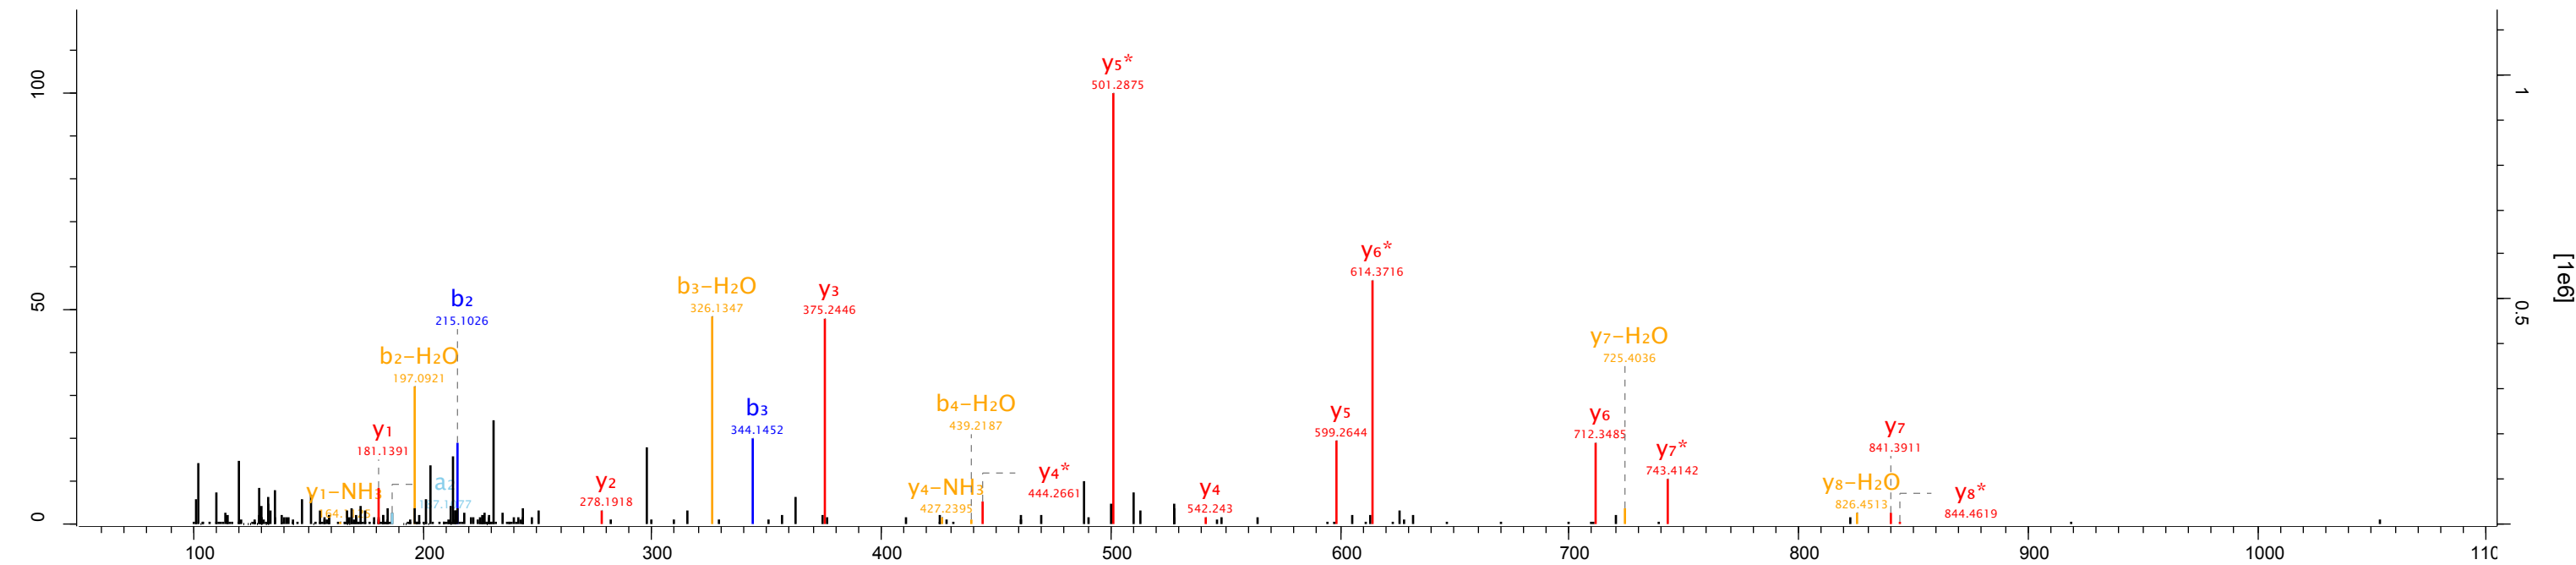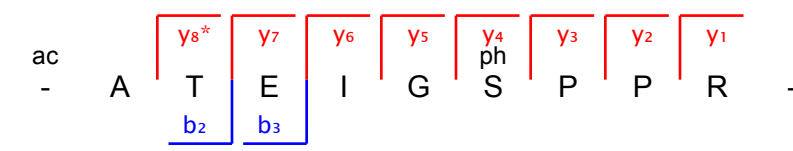



Raw file 20150814\_A375SR\_Phospho\_BR2\_08 Scan 13431 Method FTMS; HCD Score 217.26 m/z 734.05 Gene names KANK2

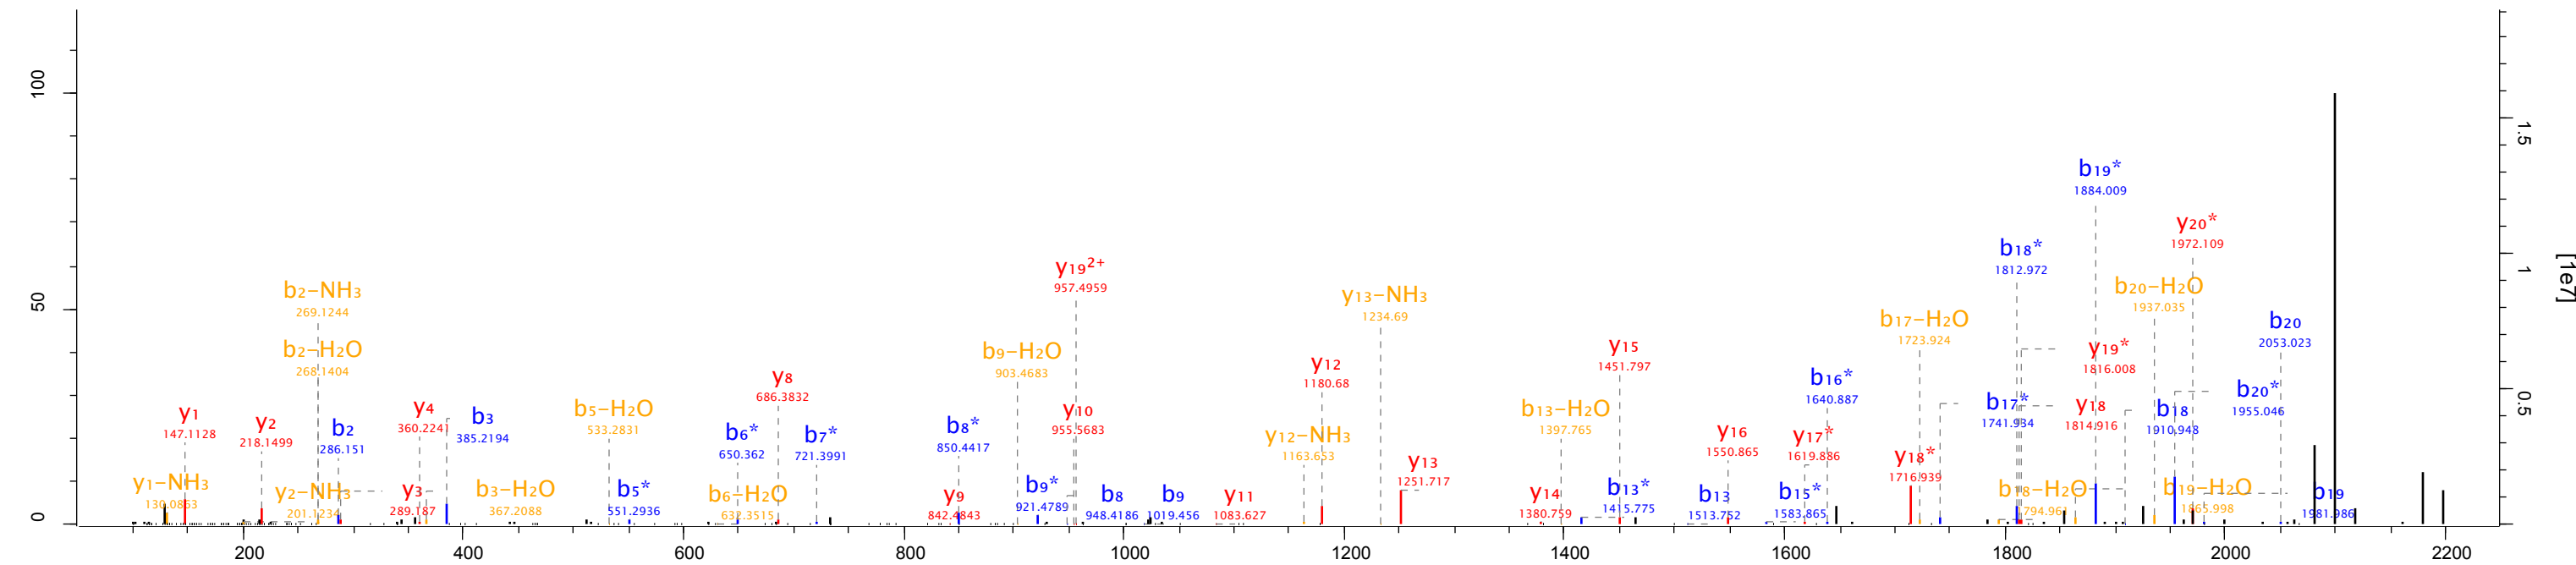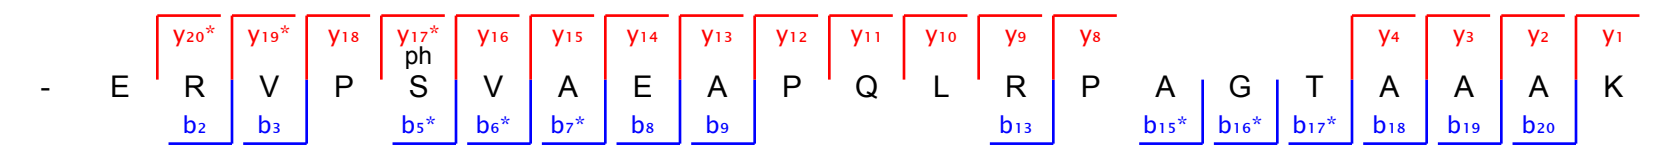

Raw file: 20150814\_A375SR\_Phospho\_BR2\_08  
 Scan: 14231 Method: FTMS; HCD Score: 89.83 m/z: 864.43 Gene names: SH2B3;BZRAP1

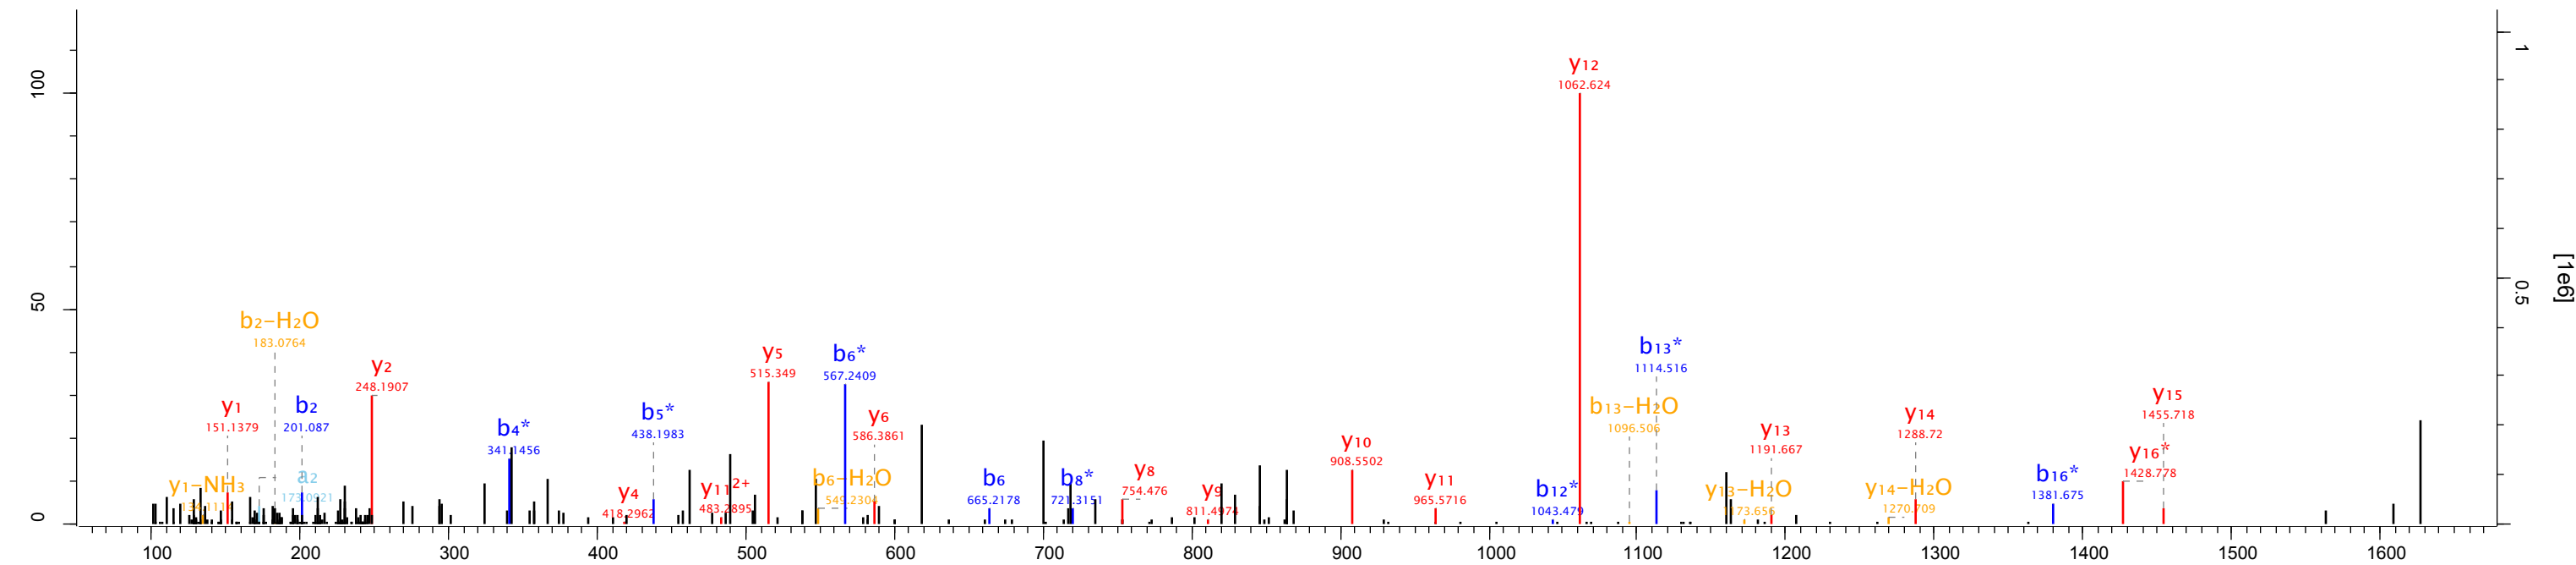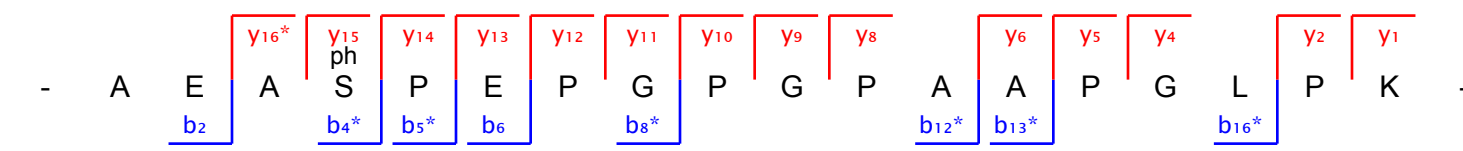

Raw file 20150814\_A375SR\_Phospho\_BR2\_08 Scan 14591 Method FTMS; HCD Score 169.36 m/z 816.08 Gene names TPR

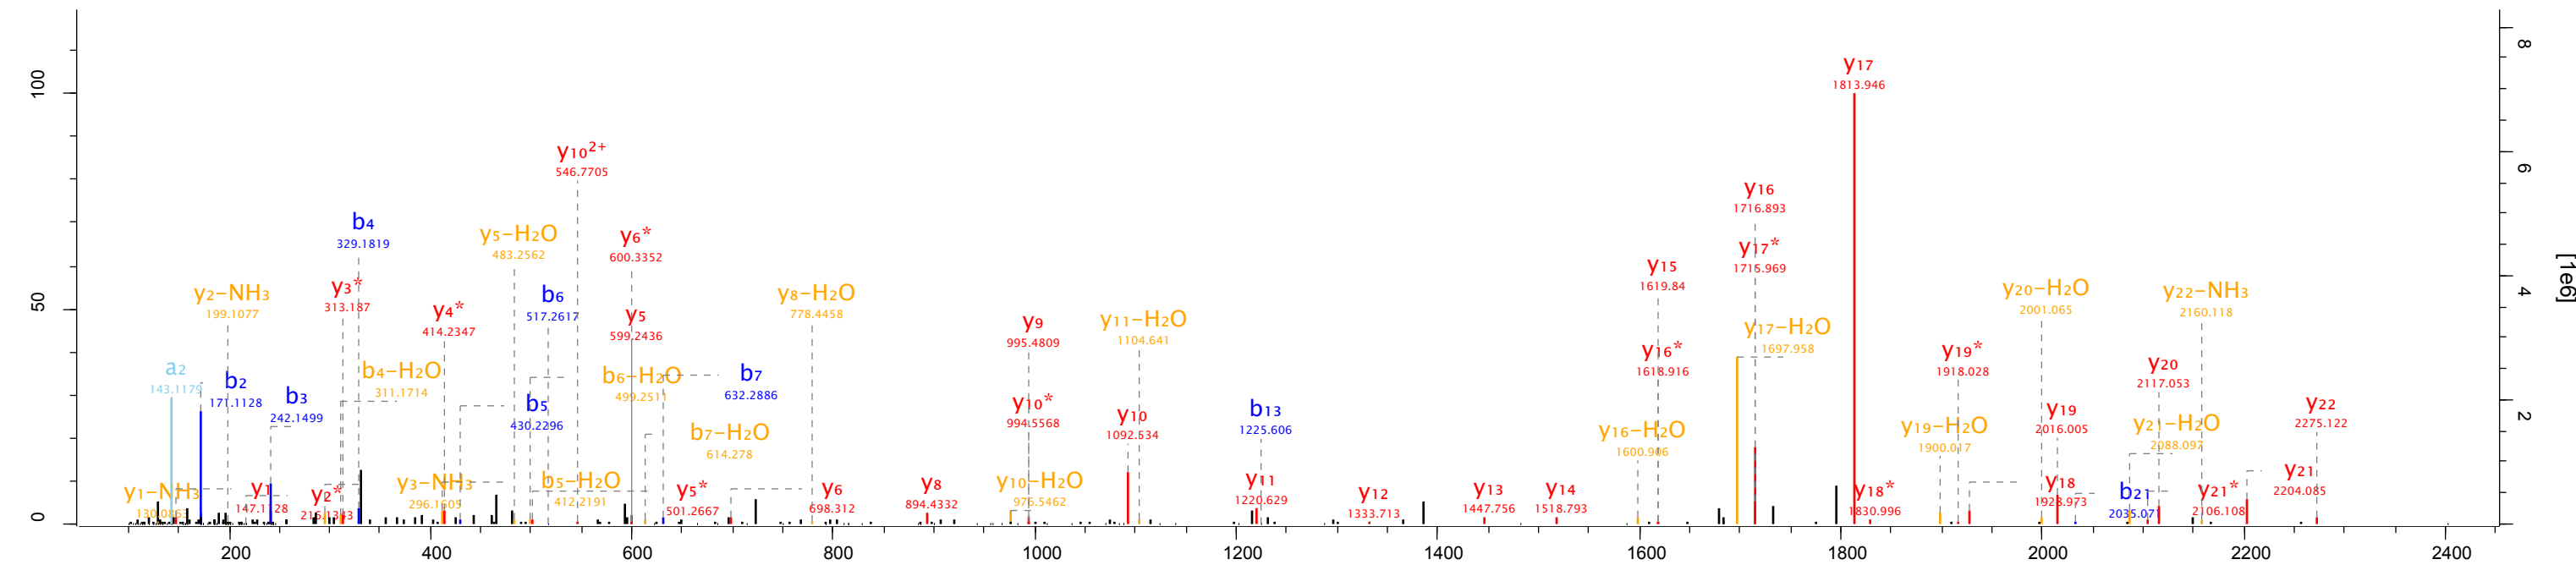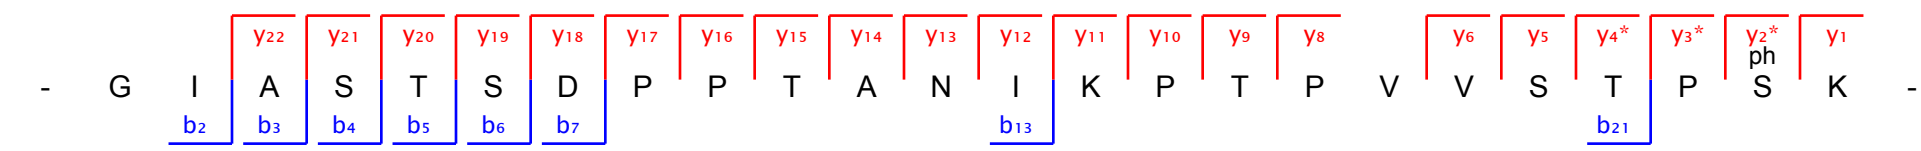

Raw file: 20150814\_A375SR\_Phospho\_BR2\_08  
 Scan: 15631 Method: FTMS; HCD Score: 134.32 m/z: 902.91 Gene names: SLC6A15

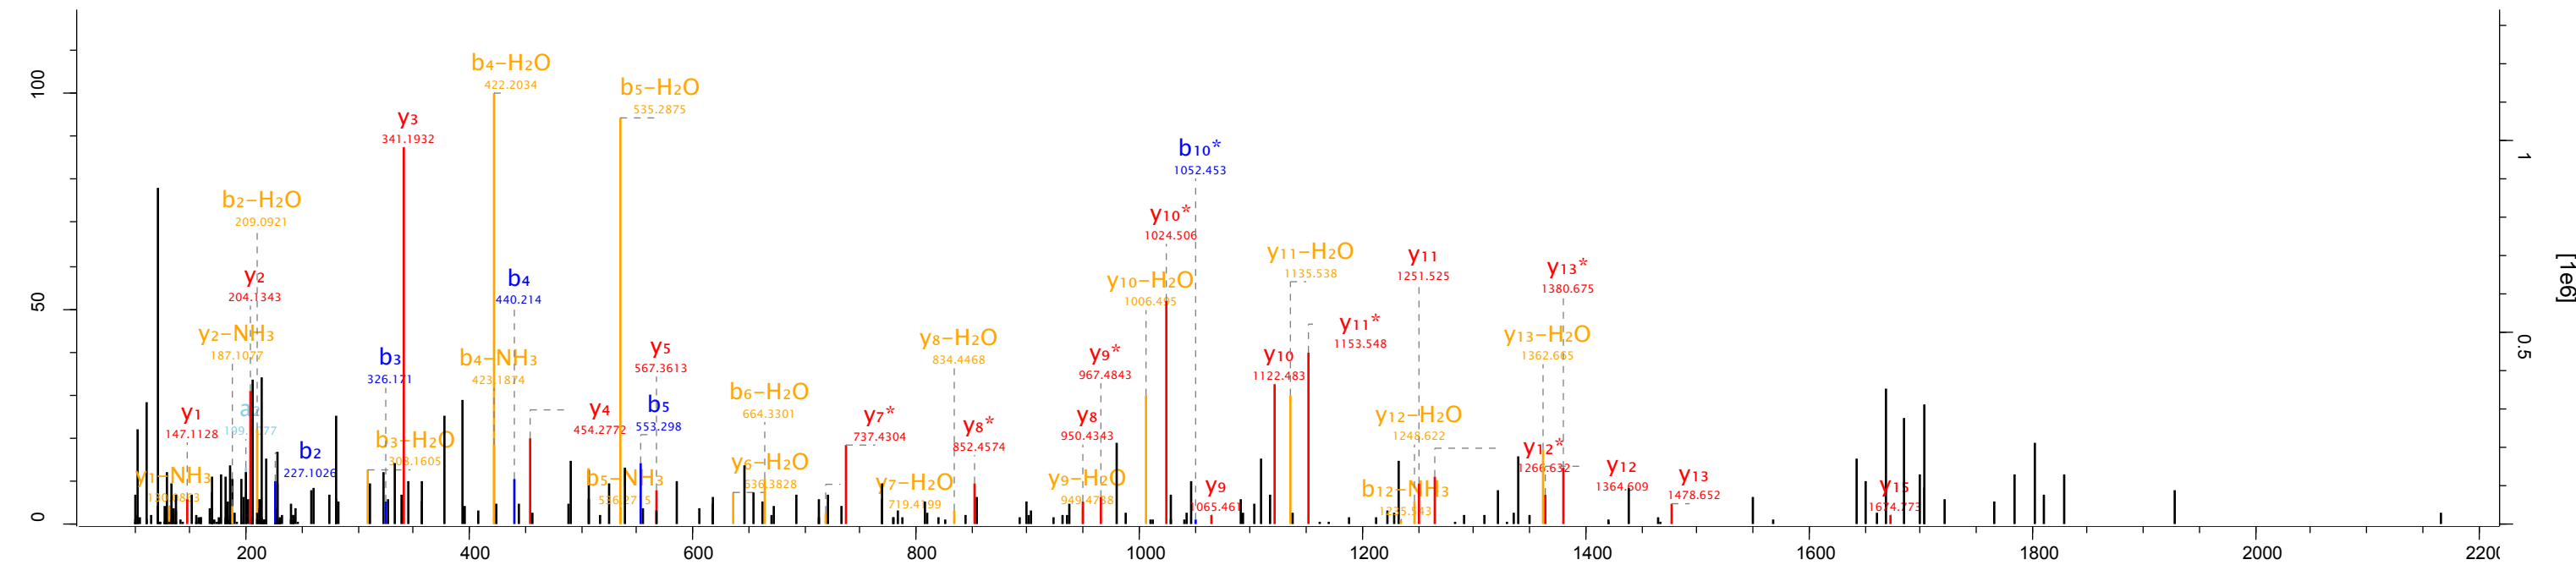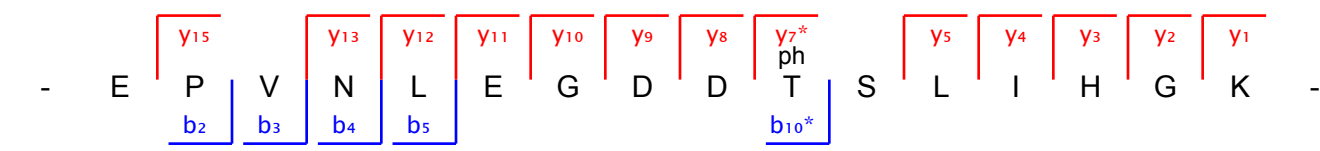

Raw file: 20150814\_A375SR\_Phospho\_BR2\_08  
 Scan: 16601 Method: FTMS; HCD Score: 116.05 m/z: 975.95 Gene names: PUM2

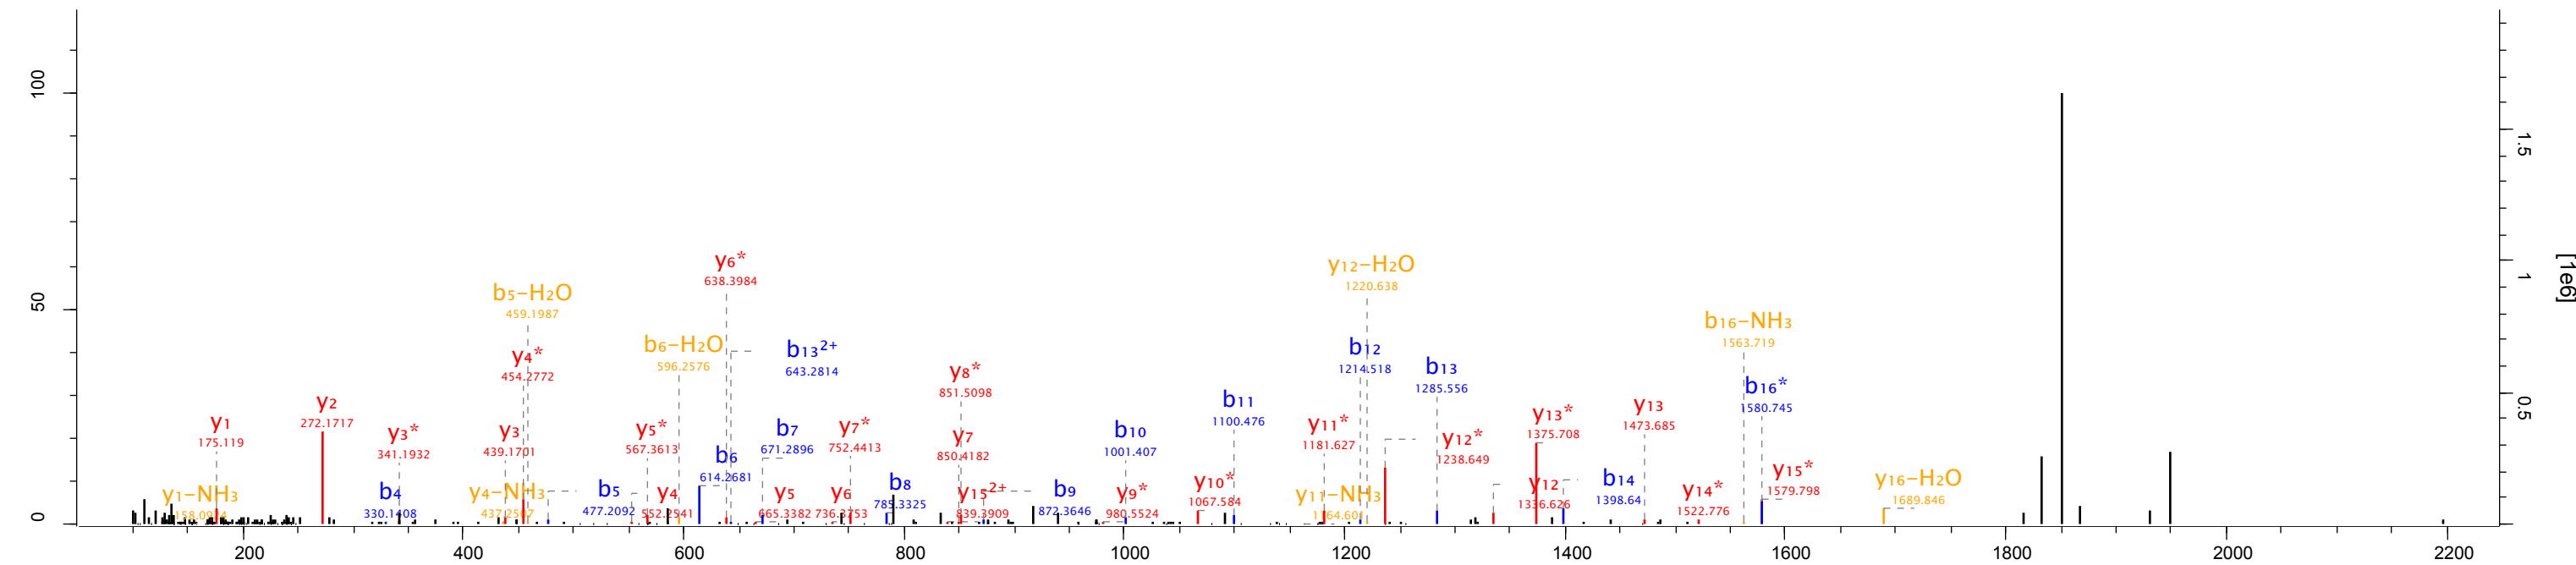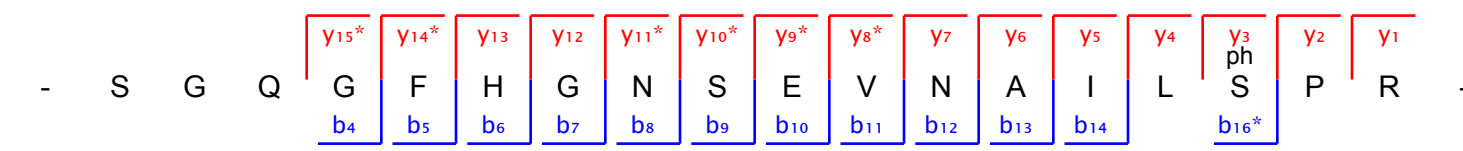

Raw file 20150814\_A375SR\_Phospho\_BR2\_08 Scan 16821 Method FTMS; HCD Score 149.64 m/z 1038 Gene names PRRC2A

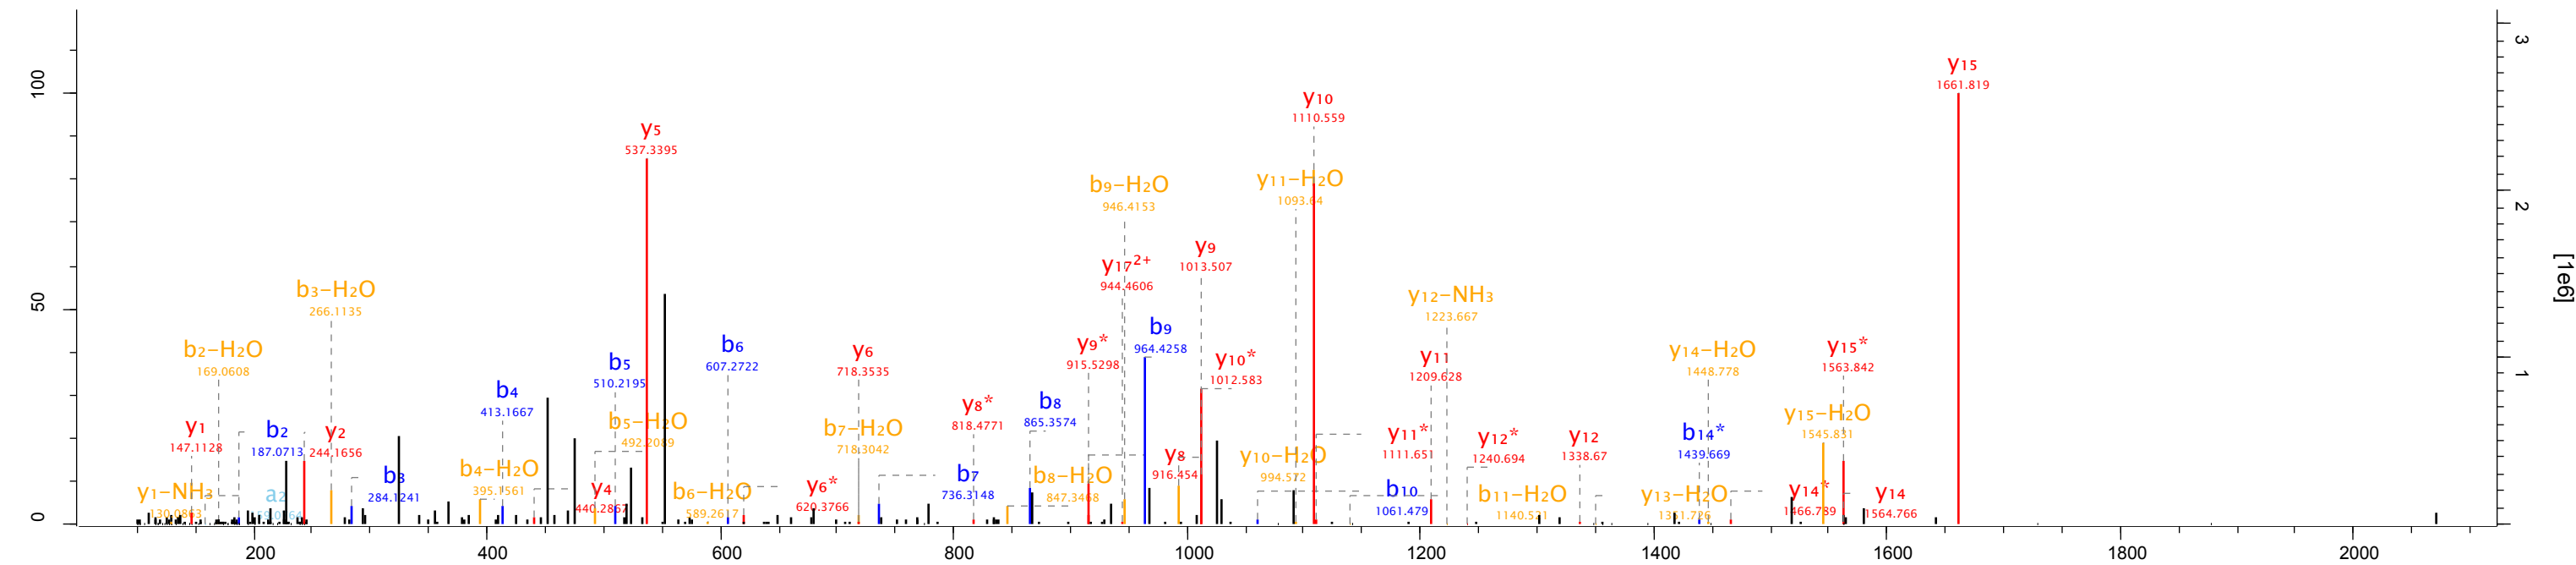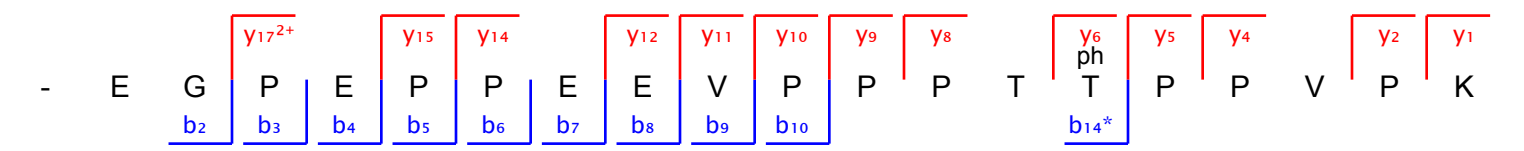

Raw file: 20150814\_A375SR\_Phospho\_BR2\_08  
 Scan: 17061 Method: FTMS; HCD Score: 153.03 m/z: 682.35 Gene names: FOXC2

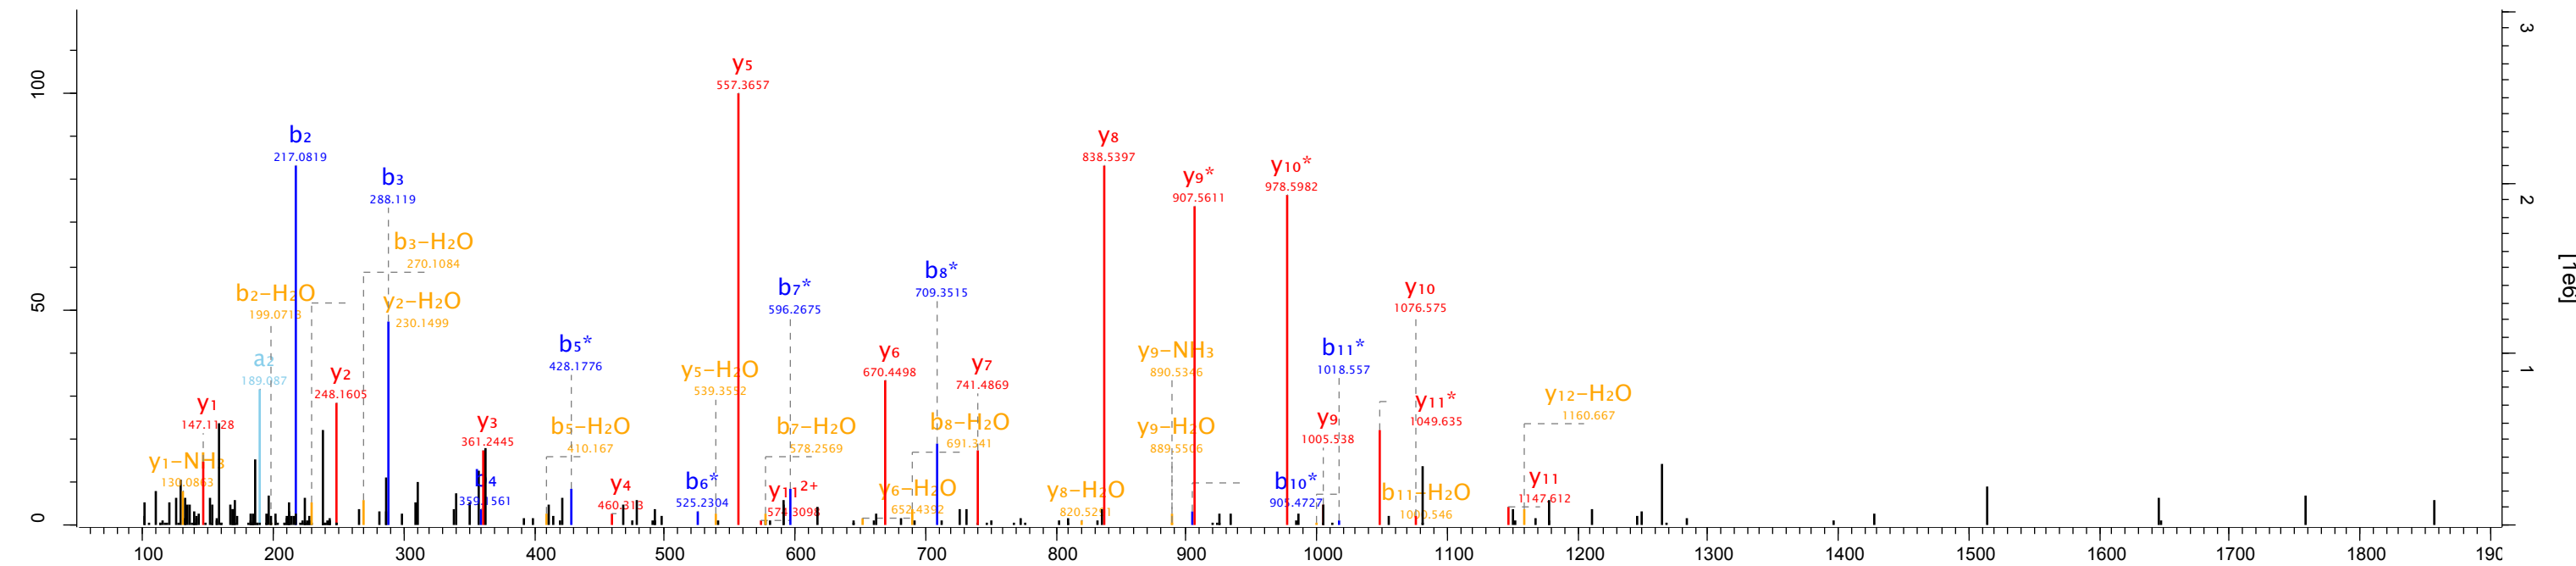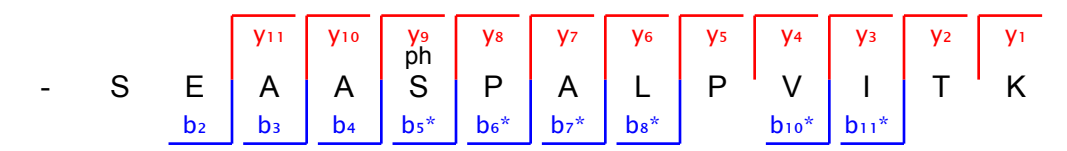

Raw file 20150814\_A375SR\_Phospho\_BR2\_08 Scan 17241 Method FTMS; HCD Score 228.15 m/z 1032.46 Gene names ITGA5

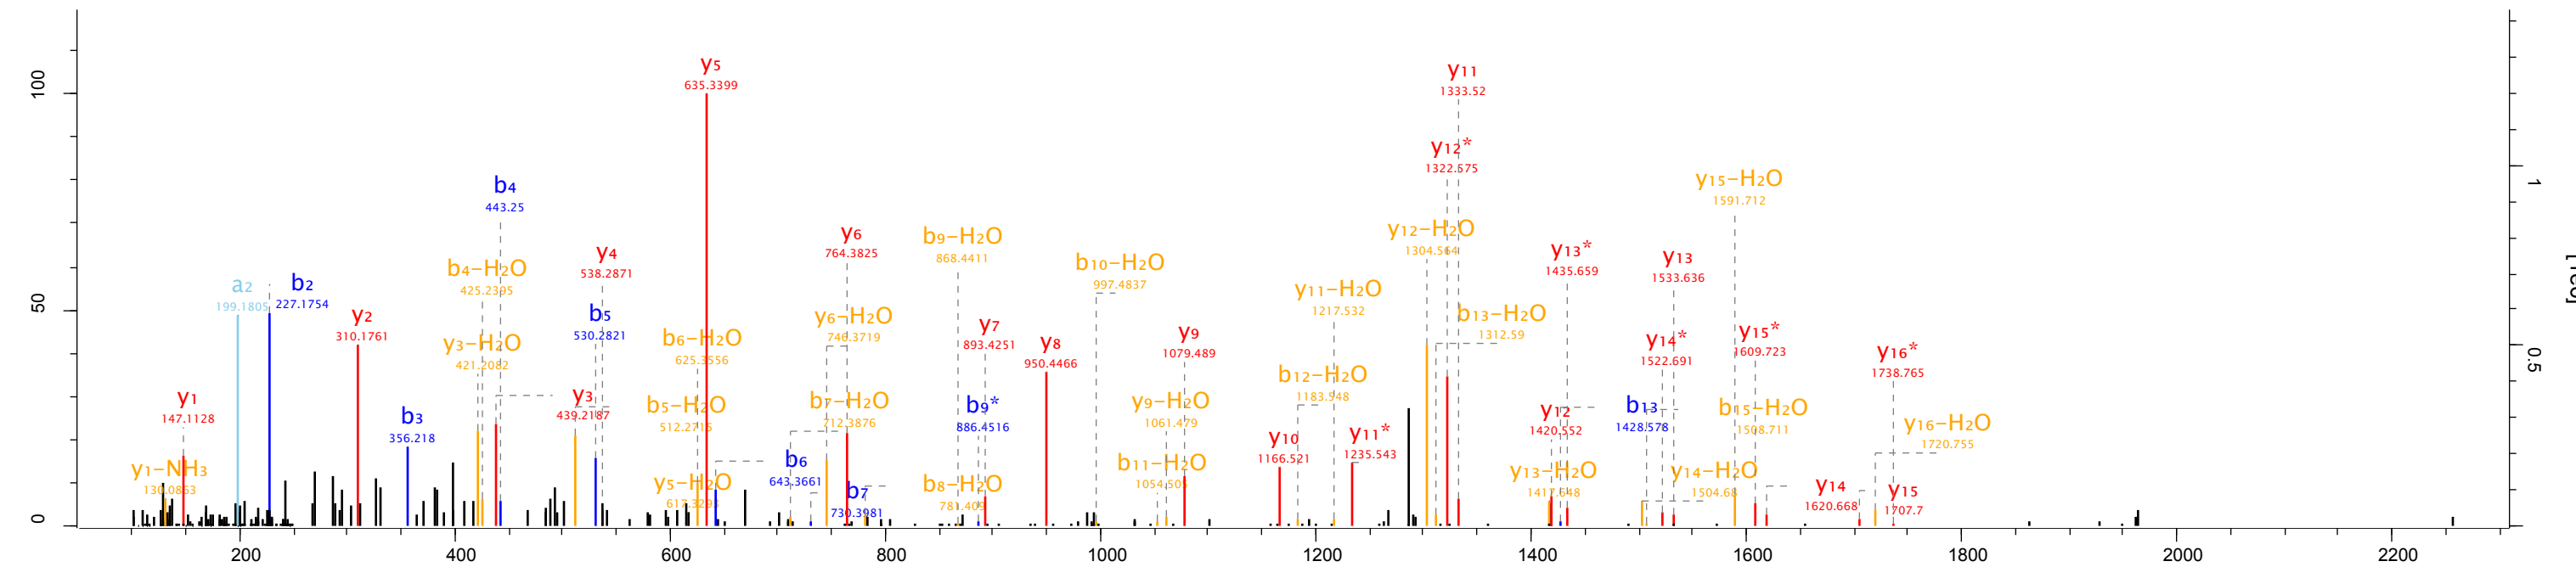

- L L E S S L S S S E G E E P V E Y K -

Fragmentation sites are indicated by boxes below the sequence:

- Red boxes: y16\*, y15, y14, y13, y12, y11 ph, y10, y9, y8, y7, y6, y5, y4, y3, y2, y1
- Blue boxes: b2, b3, b4, b5, b6, b7, b9\*, b13



Raw file 20150814\_A375SR\_Phospho\_BR2\_08 Scan 18061 Method FTMS; HCD Score 189.2 m/z 923.76 Gene names DOCK7

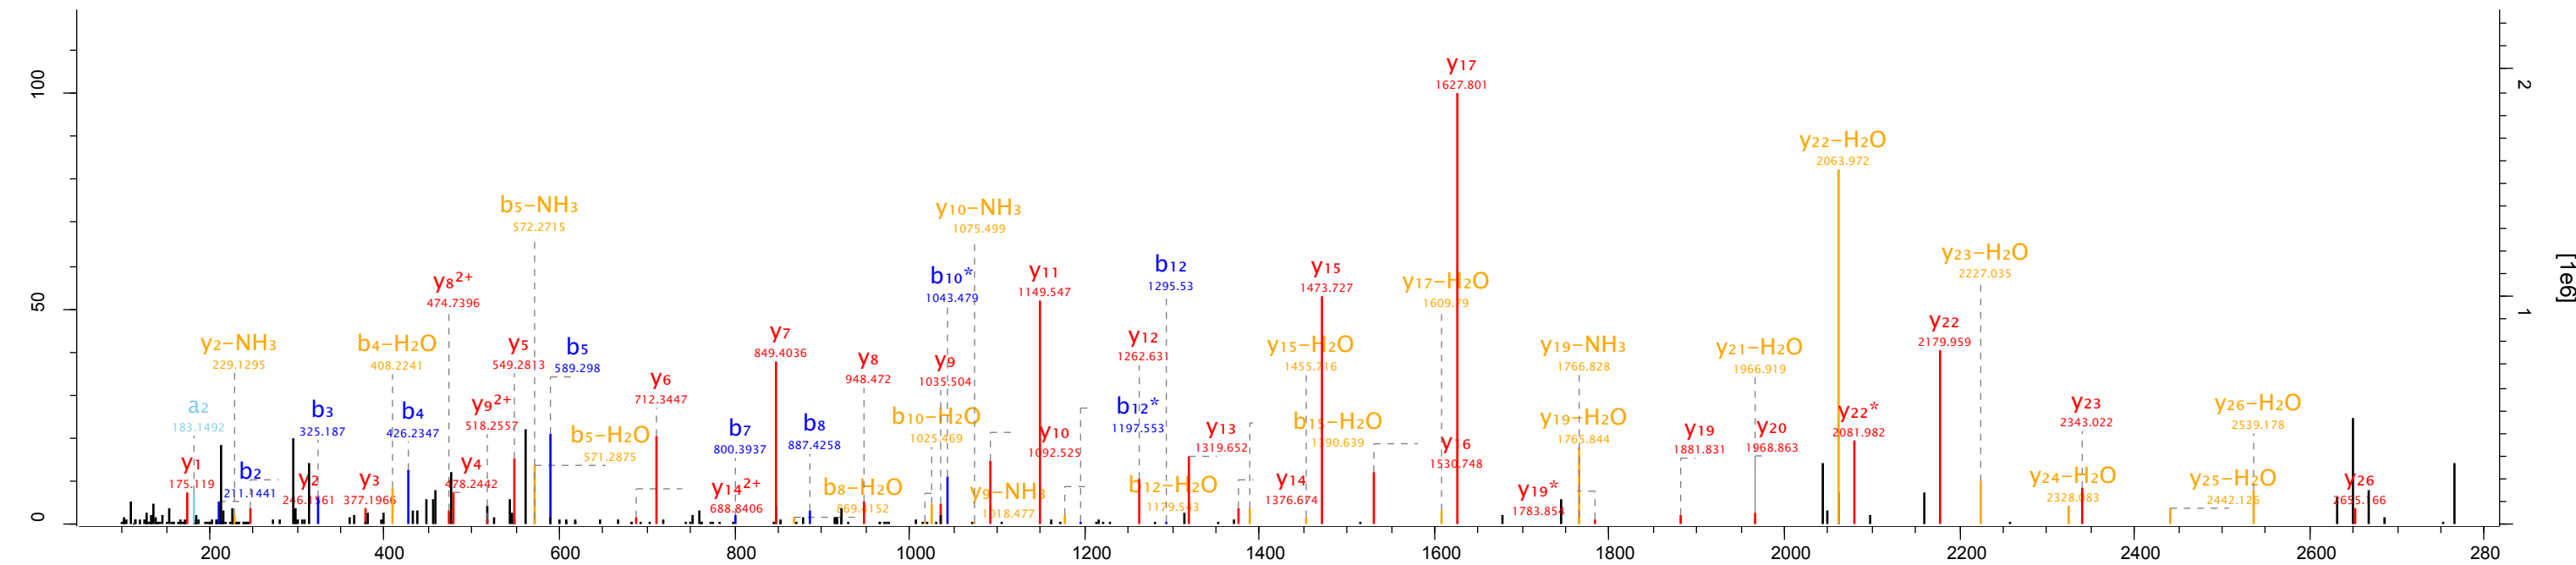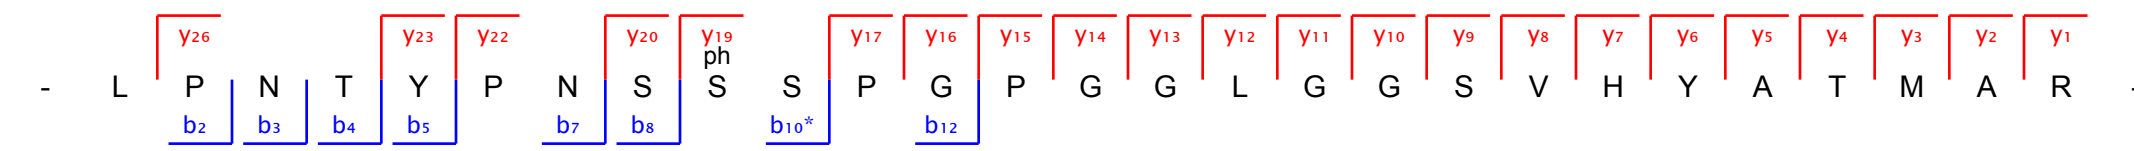

Raw file: 20150814\_A375SR\_Phospho\_BR2\_08  
 Scan: 2121 Method: FTMS; HCD Score: 78.61 m/z: 490.25 Gene names: RBM14;RBM4;RBM4B

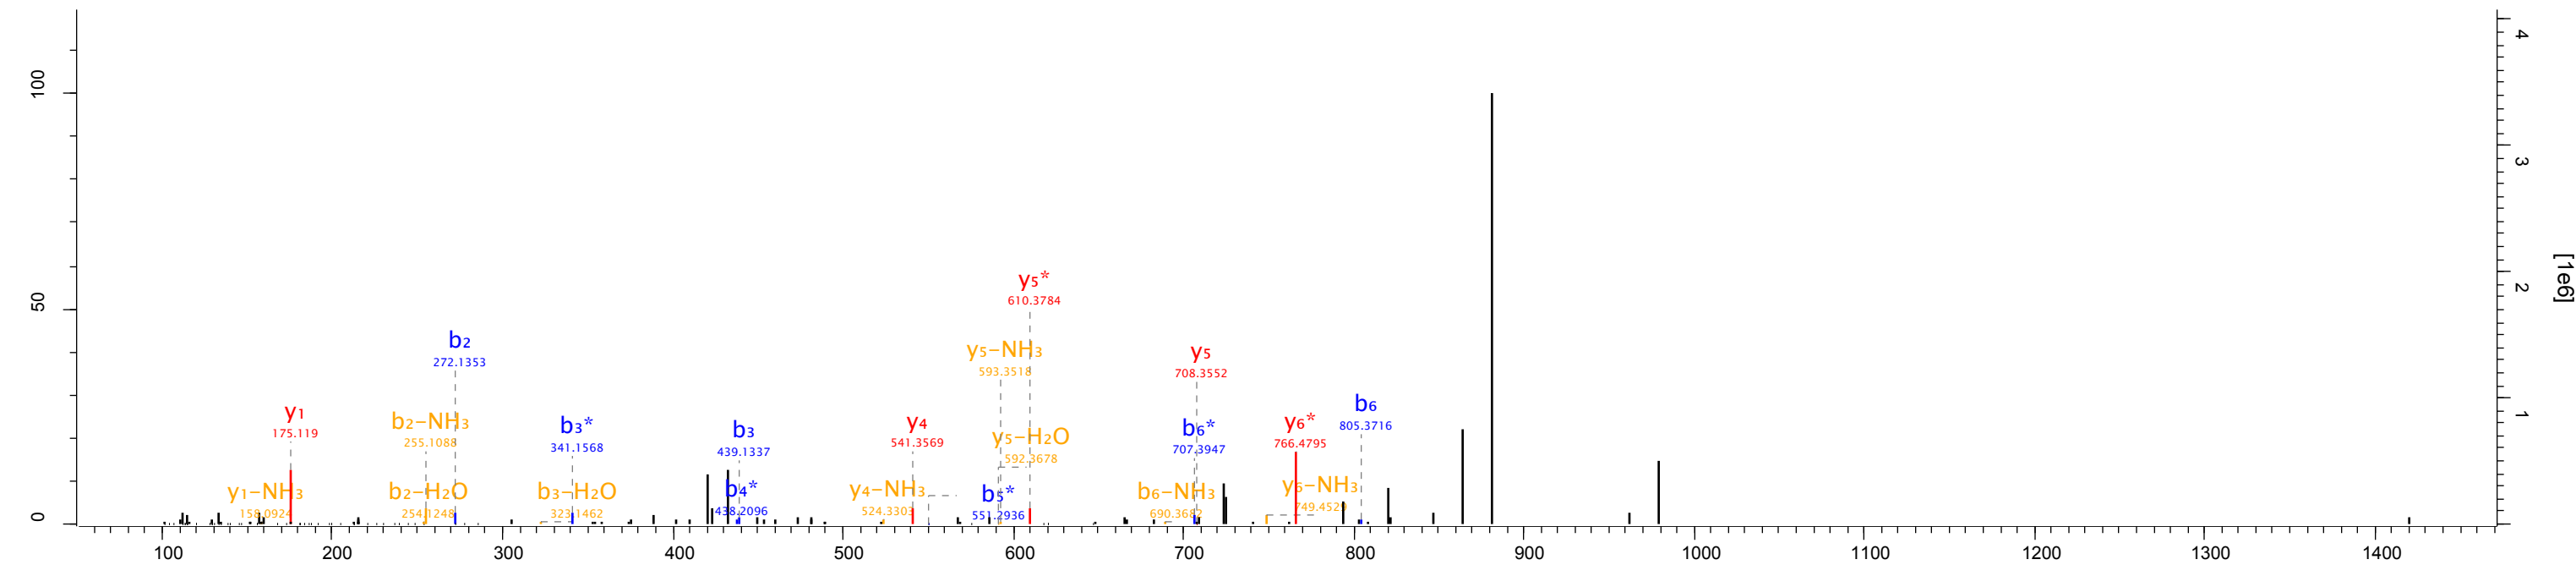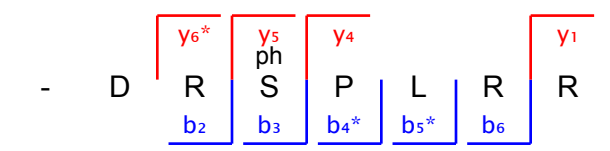

Raw file 20150814\_A375SR\_Phospho\_BR2\_08 Scan 22251 Method FTMS; HCD Score 178.34 m/z 708.83 Gene names NUMA1

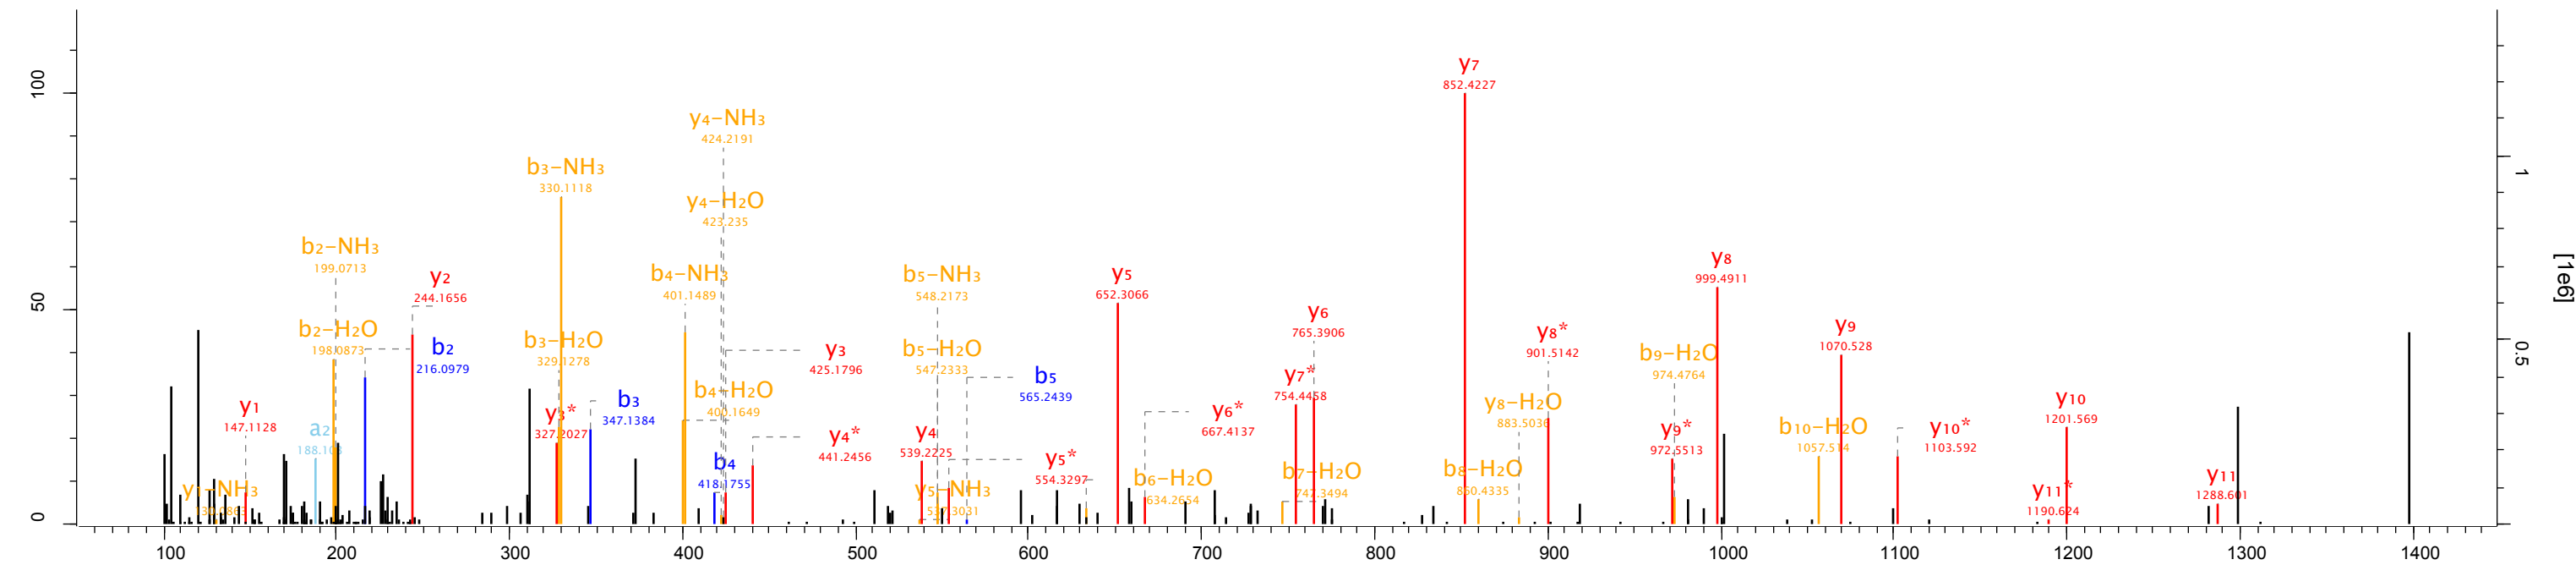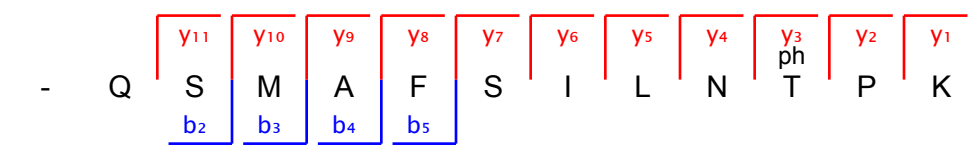

Raw file 20150814\_A375SR\_Phospho\_BR2\_08 Scan 22731 Method FTMS; HCD Score 121.35 m/z 875.97 Gene names ZFH3

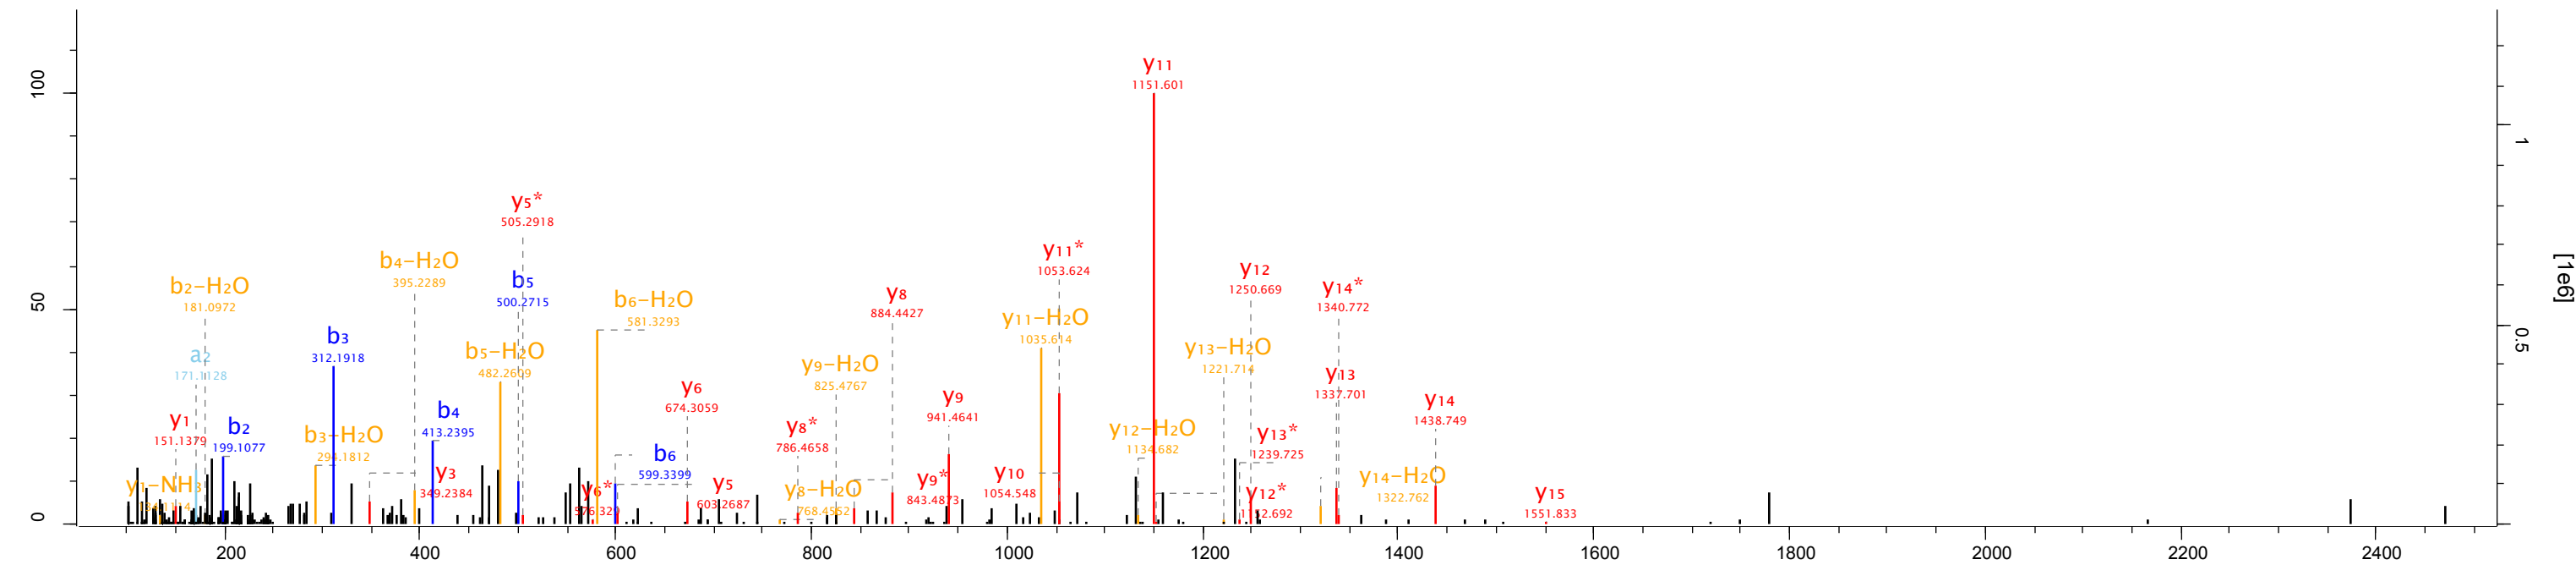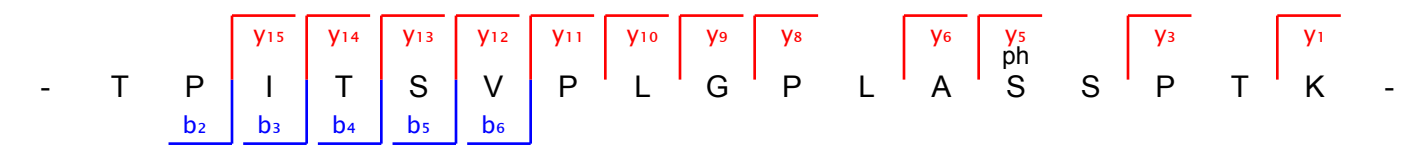

Raw file: 20150814\_A375SR\_Phospho\_BR2\_08  
 Scan: 26171 Method: FTMS; HCD Score: 155.79 m/z: 625.31 Gene names: TMPO

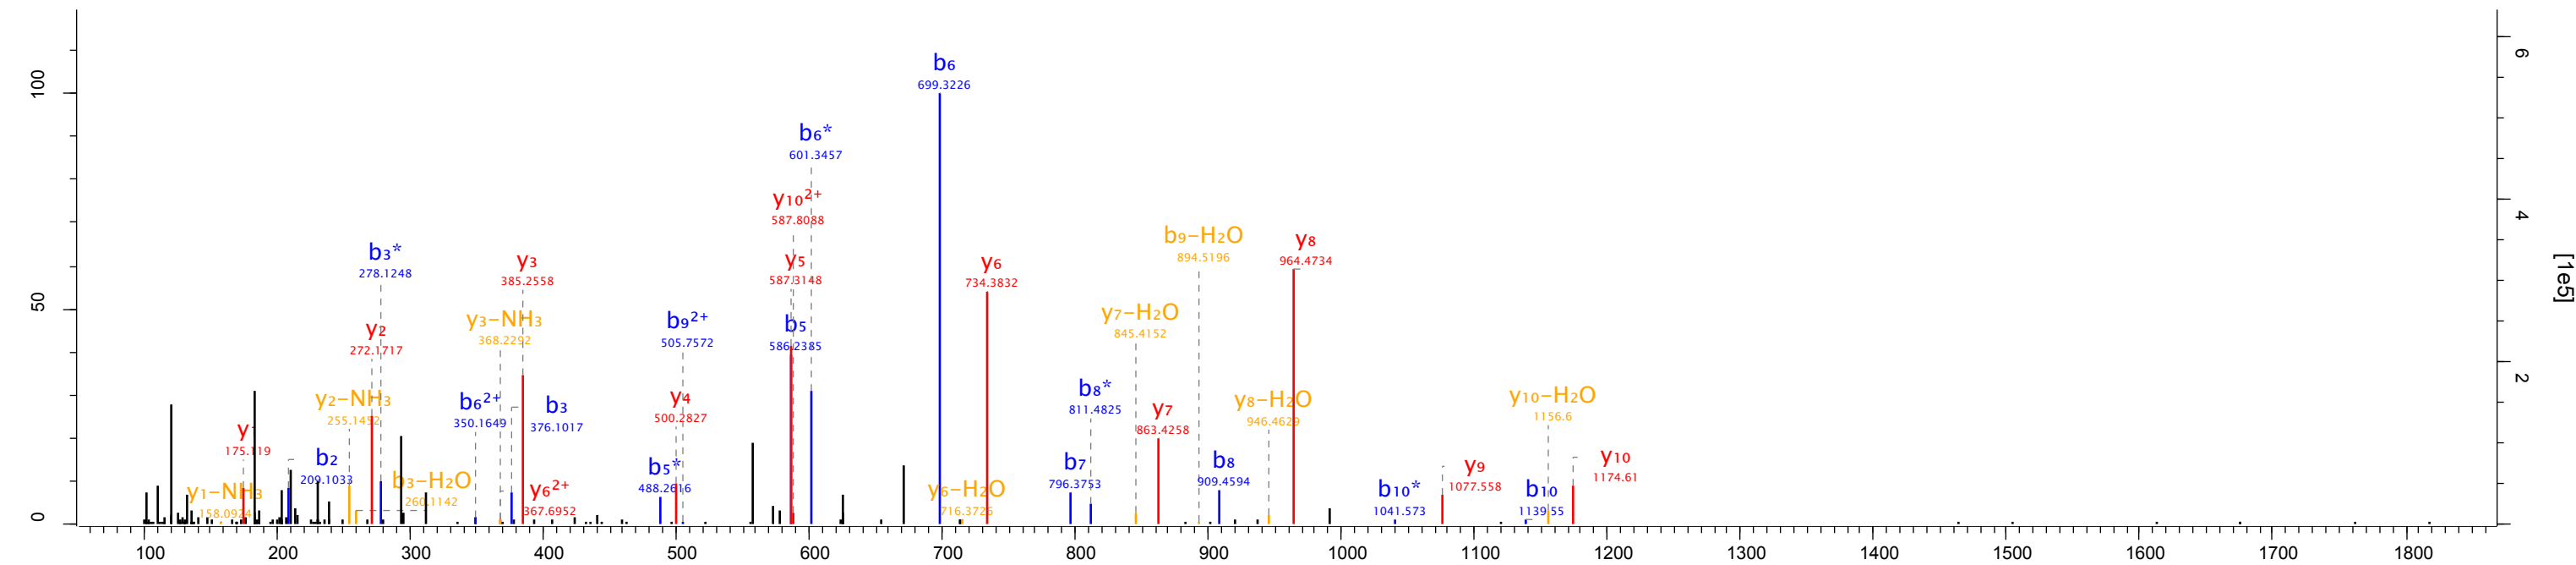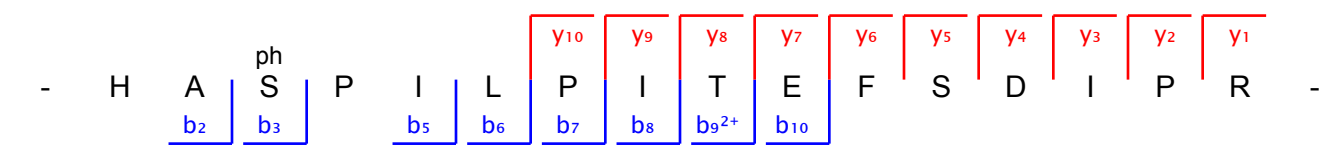

Raw file: 20150814\_A375SR\_Phospho\_BR2\_08  
 Scan: 28031 Method: FTMS; HCD Score: 176.95 m/z: 1138.22 Gene names: EPN1

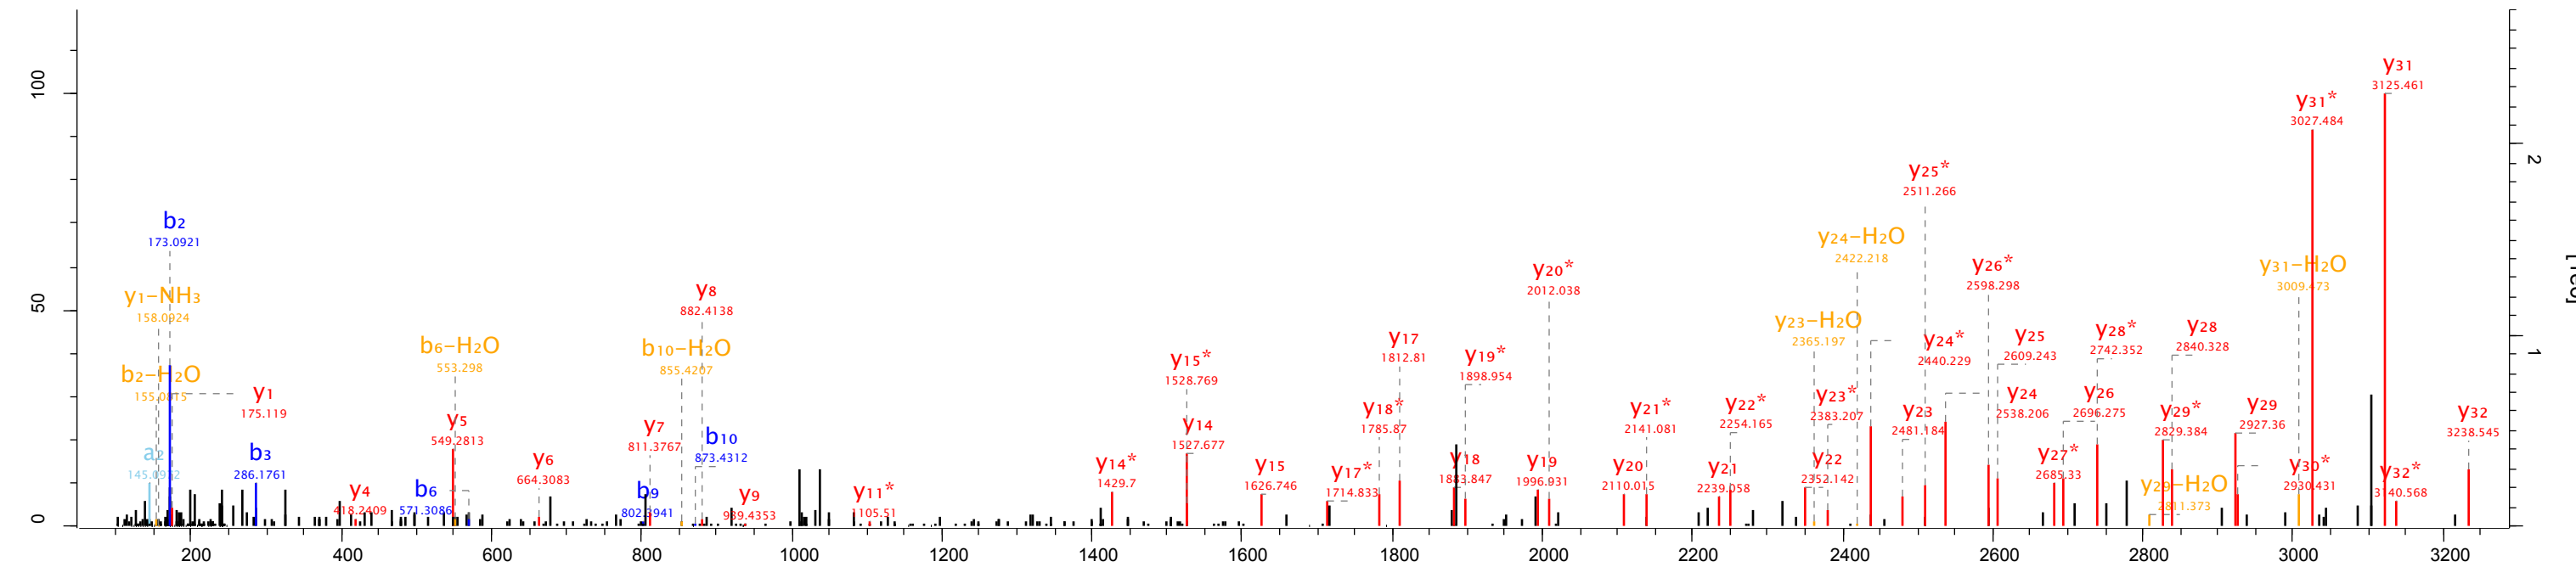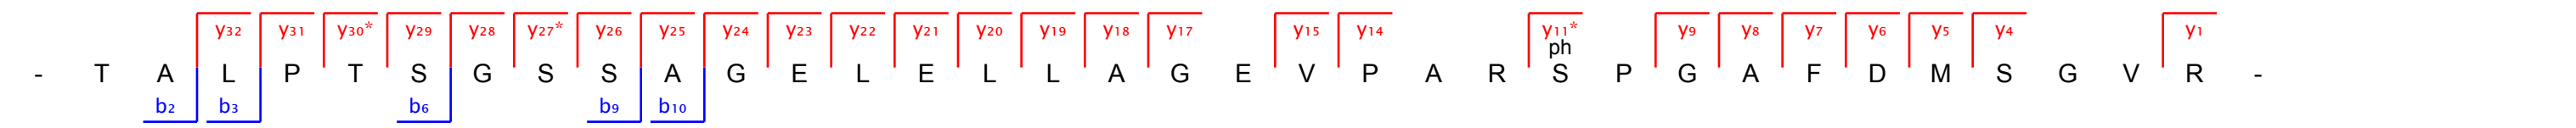

Raw file 20150814\_A375SR\_Phospho\_BR2\_08 Scan 3361 Method FTMS; HCD Score 61.26 m/z 474.88 Gene names USP39

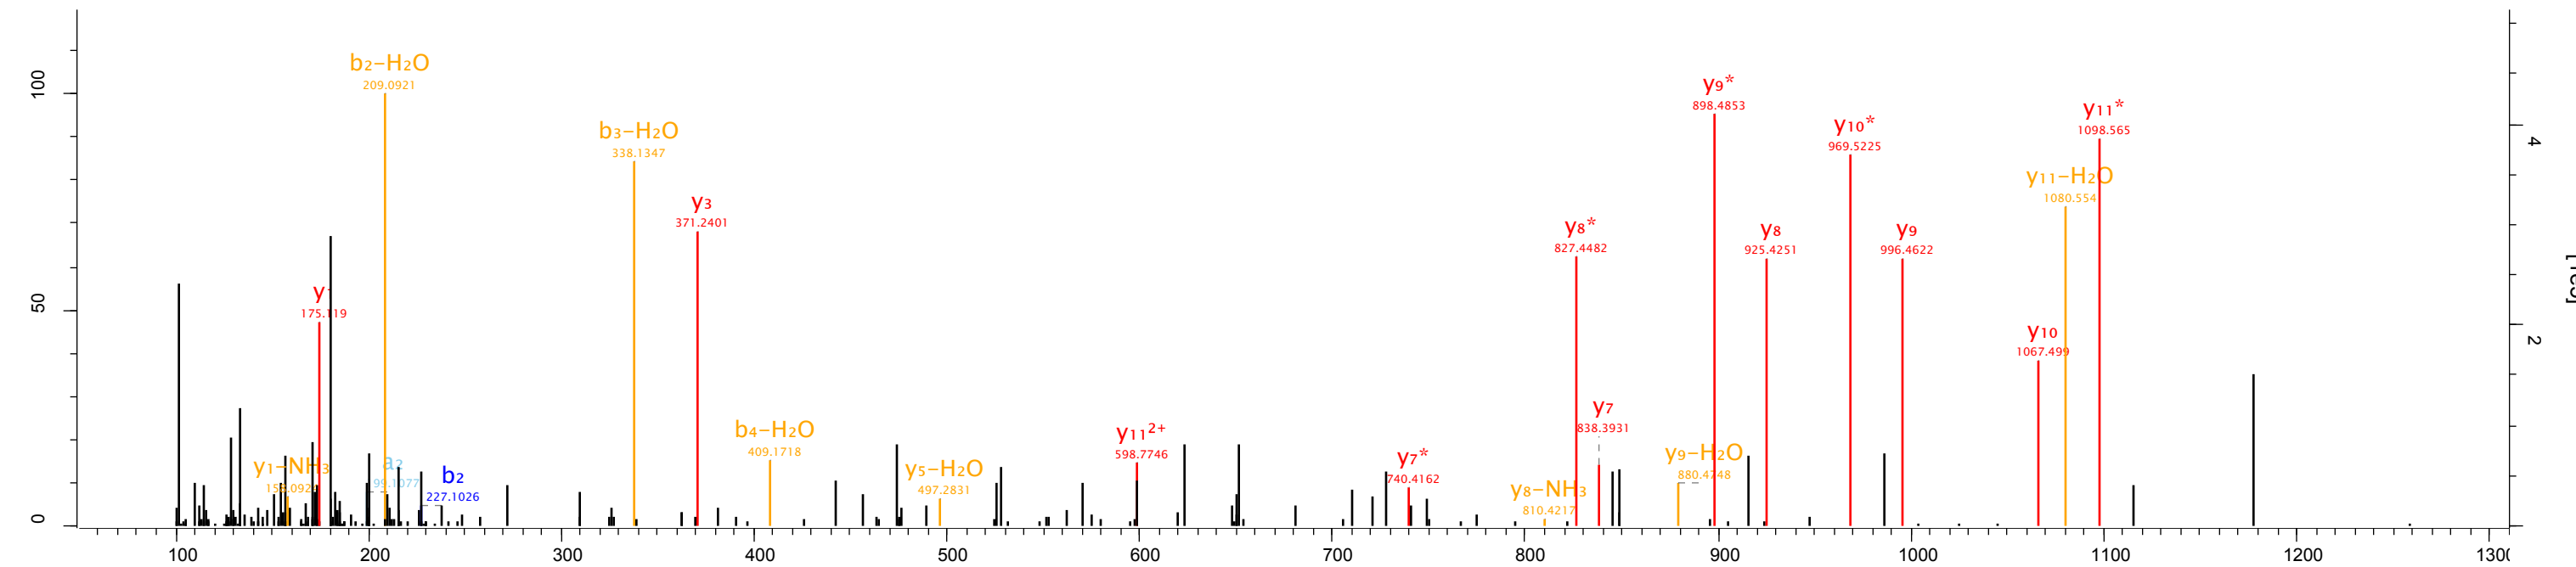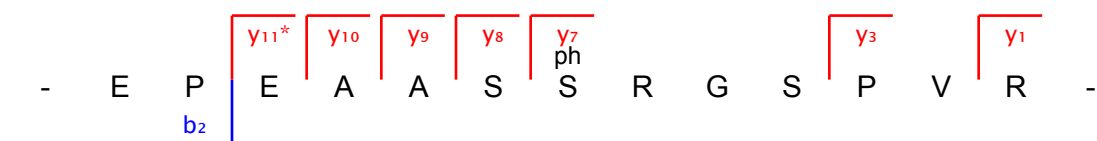

Raw file: 20150814\_A375SR\_Phospho\_BR2\_08  
 Scan: 3421 Method: FTMS; HCD Score: 117.7 m/z: 548.26 Gene names: APIP

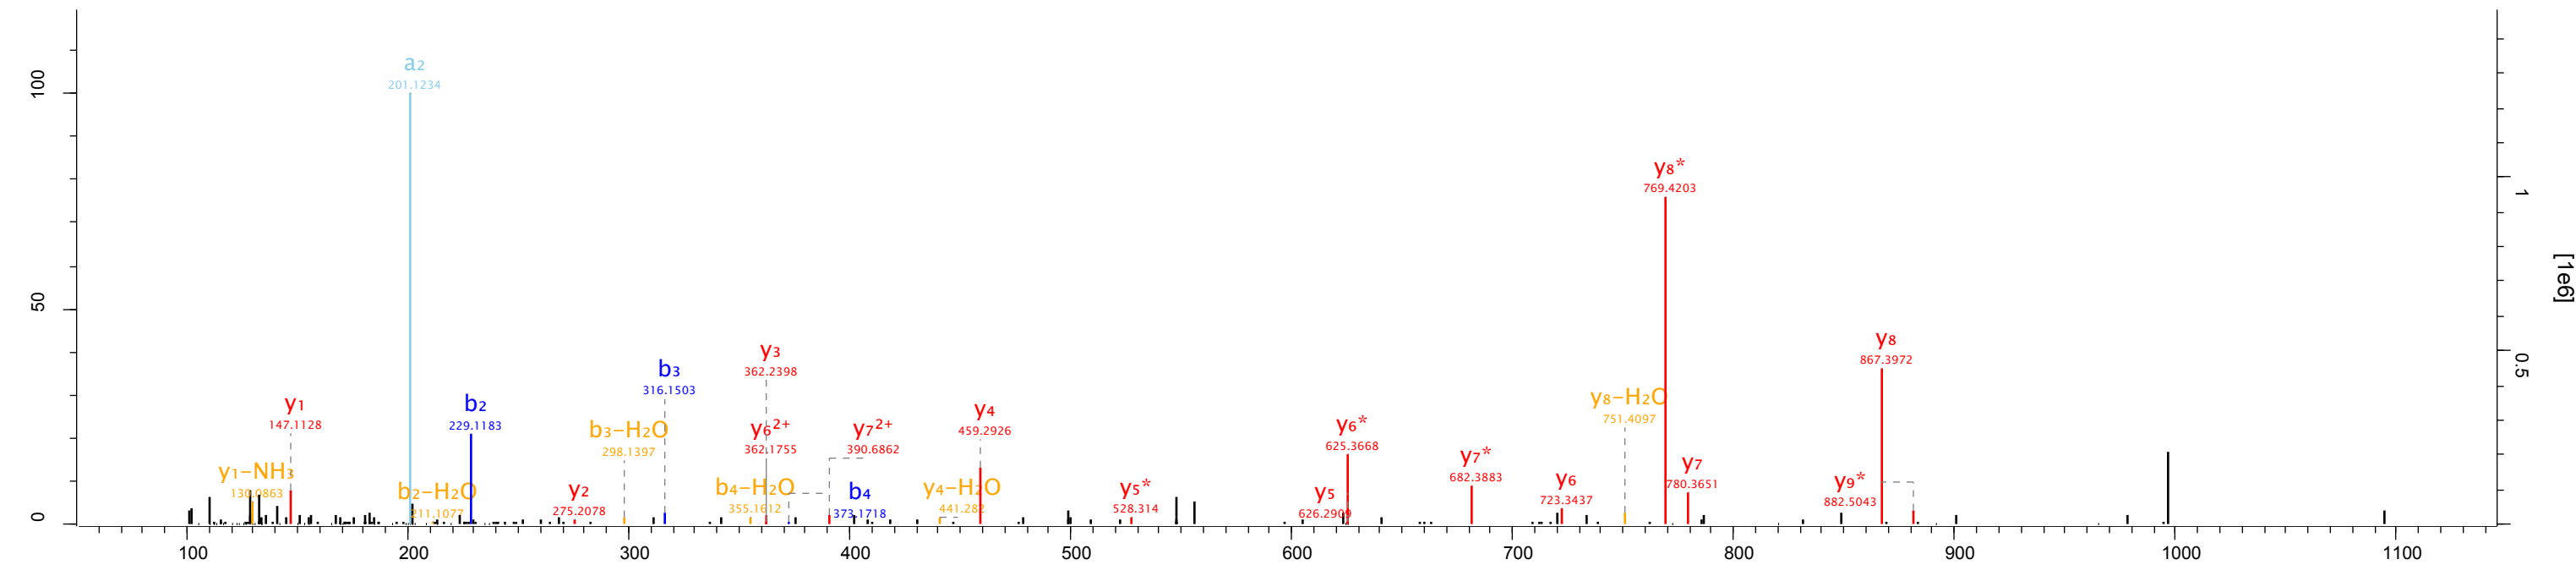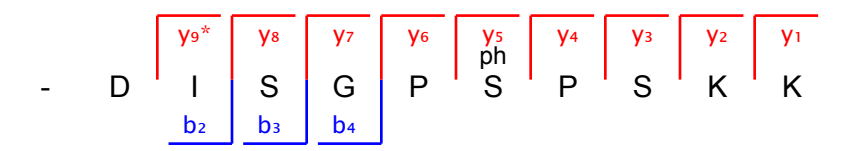



Raw file 20150814\_A375SR\_Phospho\_BR2\_08 Scan 3541 Method FTMS; HCD Score 151.68 m/z 565.79 Gene names SET

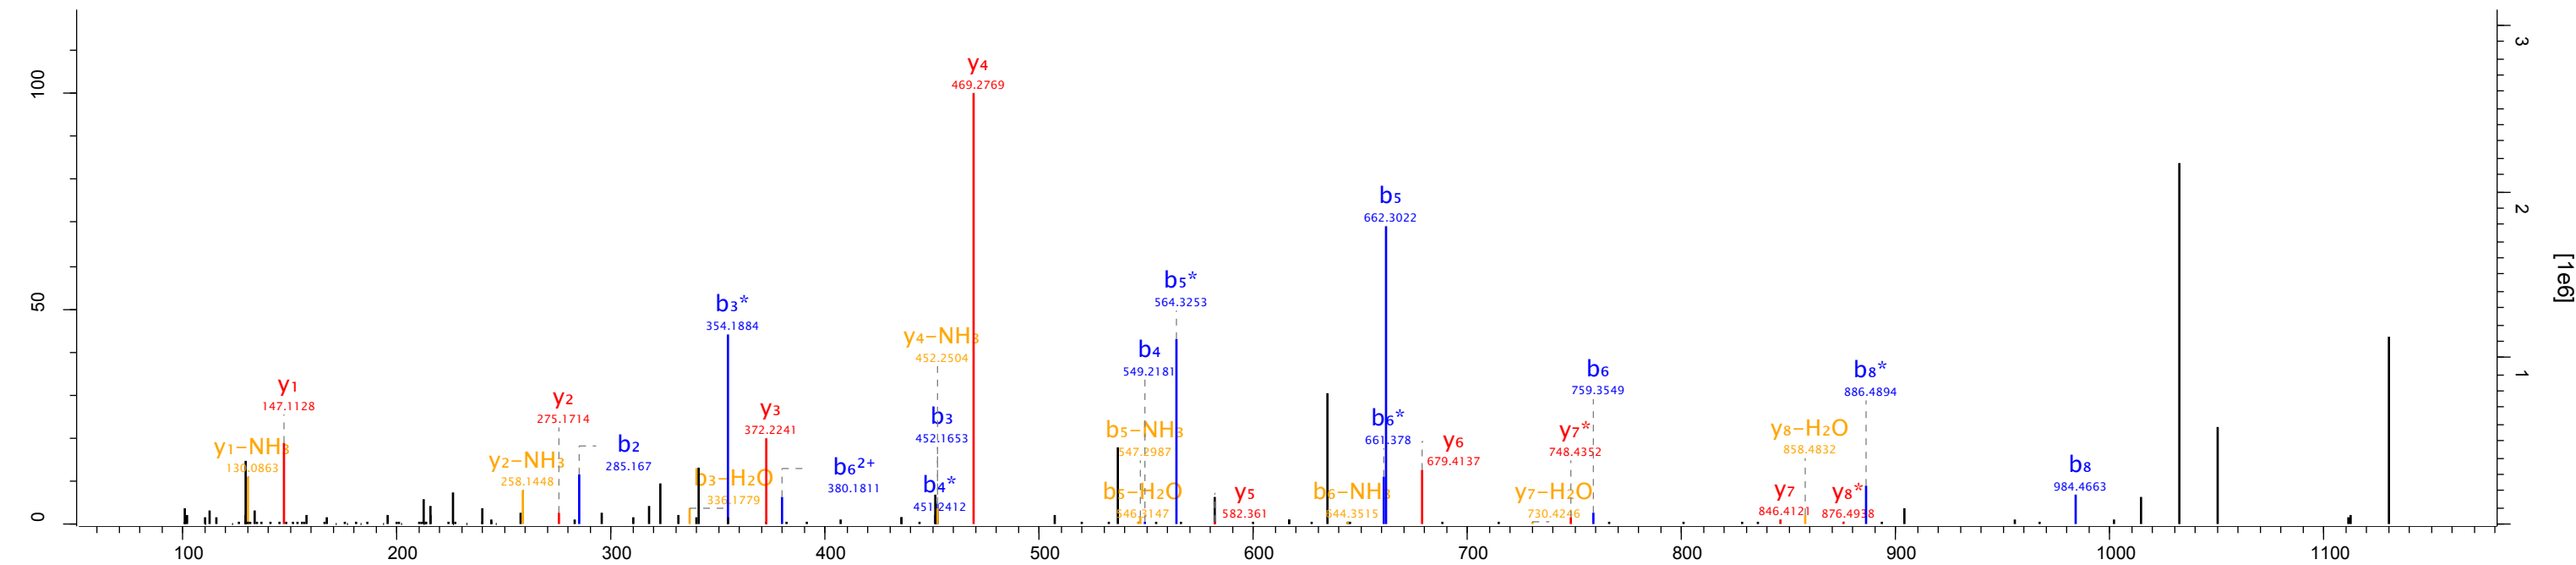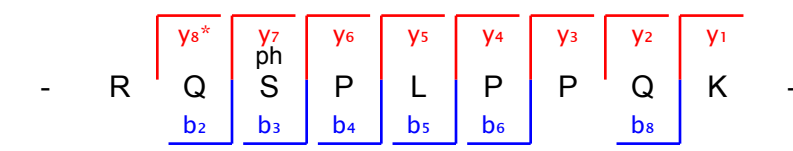

Raw file 20150814\_A375SR\_Phospho\_BR2\_08 Scan 3761 Method FTMS; HCD Score 115.24 m/z 585.31 Gene names MARCKSL1

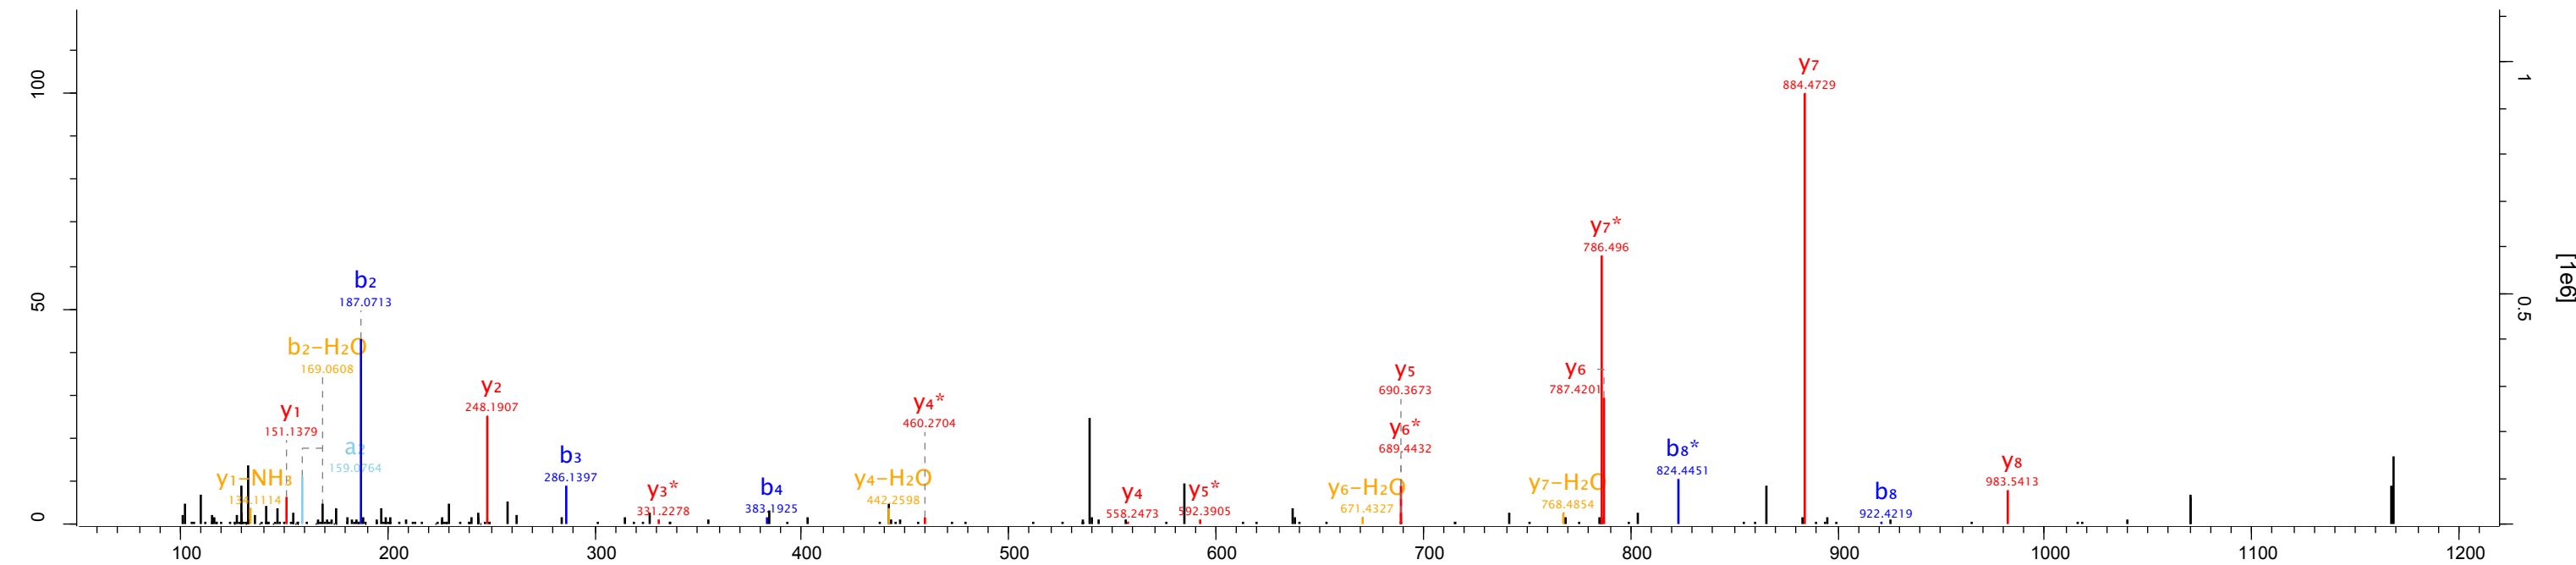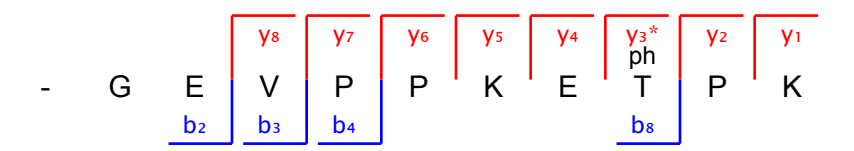

Raw file: 20150814\_A375SR\_Phospho\_BR2\_08  
 Scan: 4181 Method: FTMS; HCD Score: 107.09 m/z: 527.76 Gene names: MYO9B

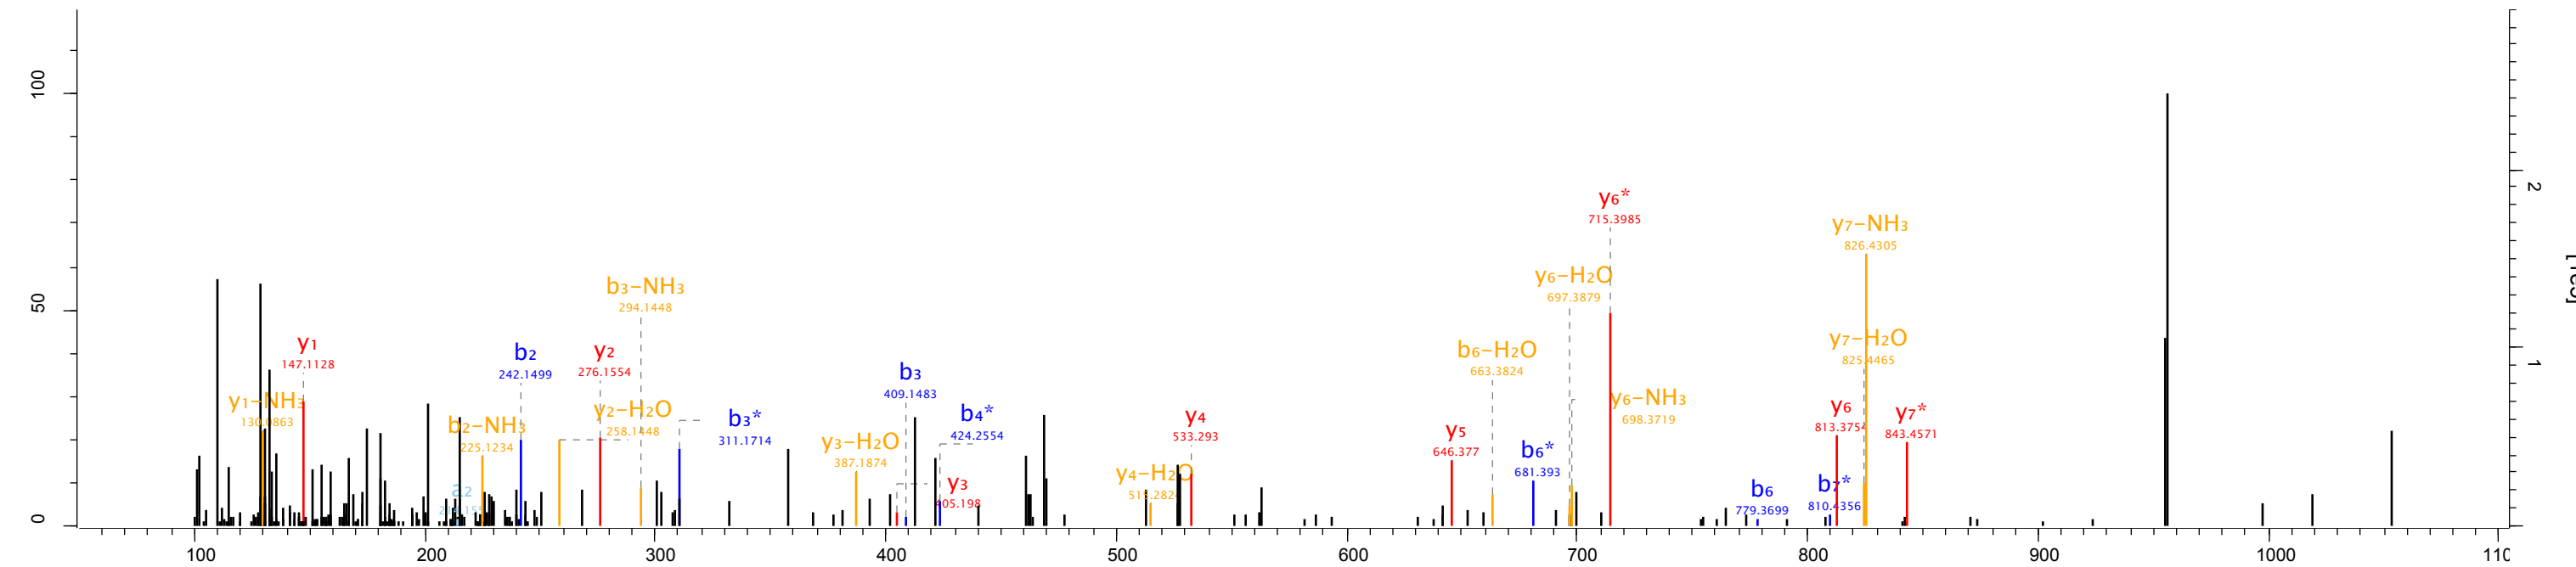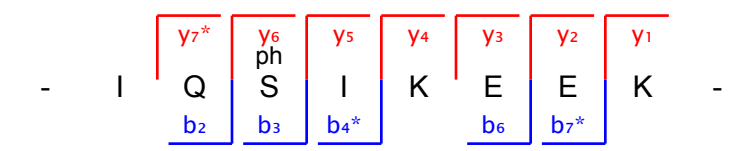

Raw file: 20150814\_A375SR\_Phospho\_BR2\_08  
 Scan: 4451 Method: FTMS; HCD Score: 112.96 m/z: 703.3 Gene names: HMGA2

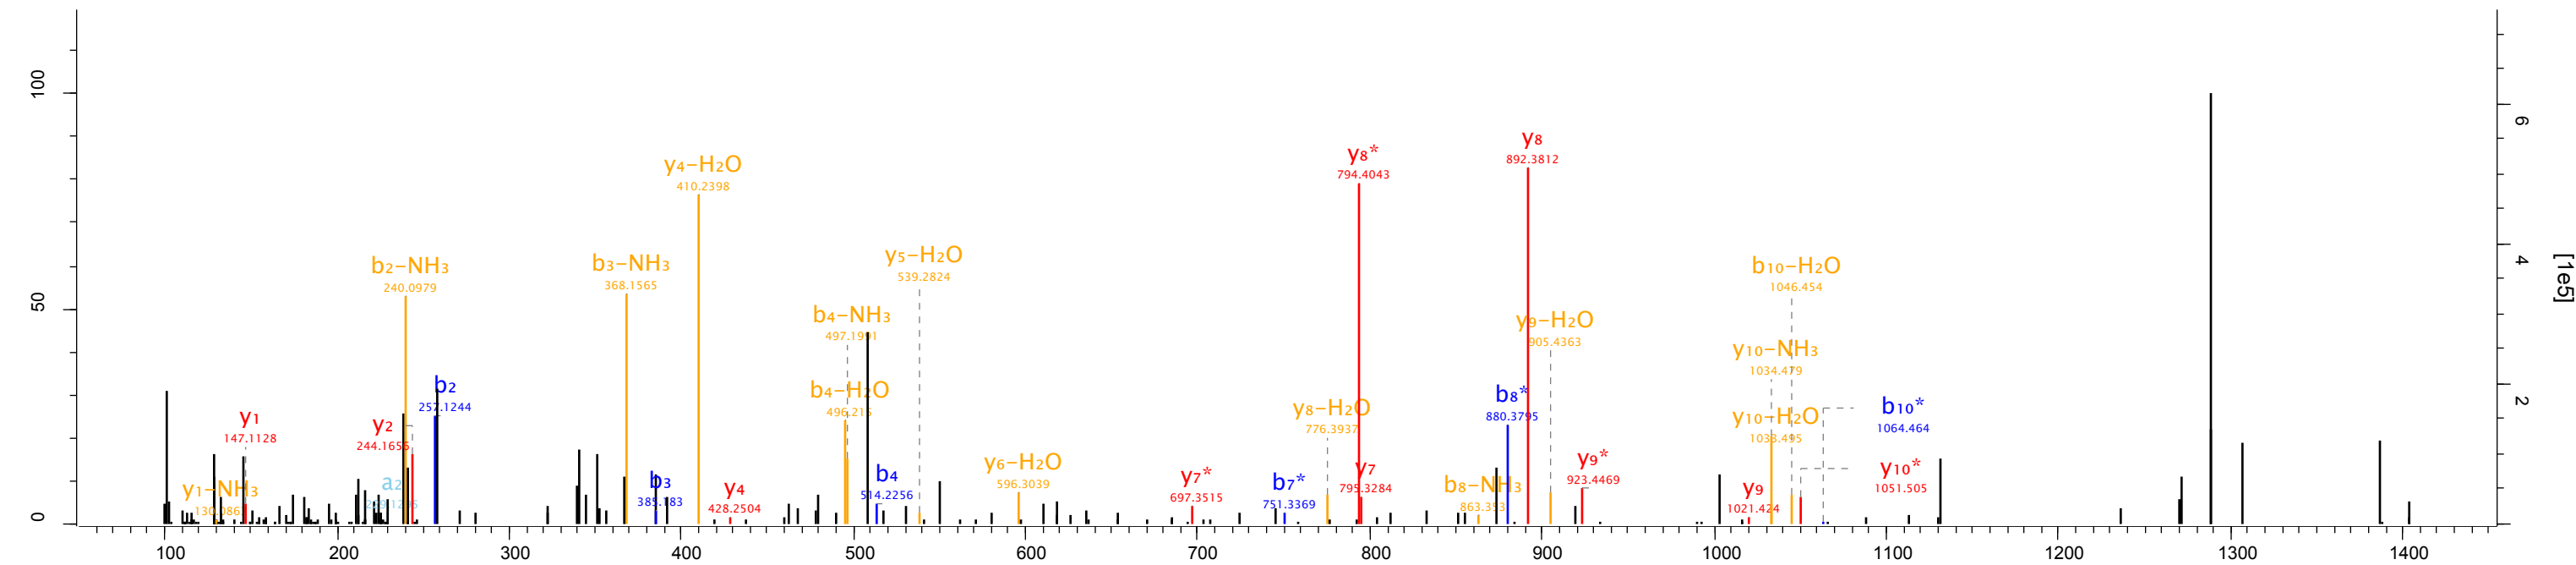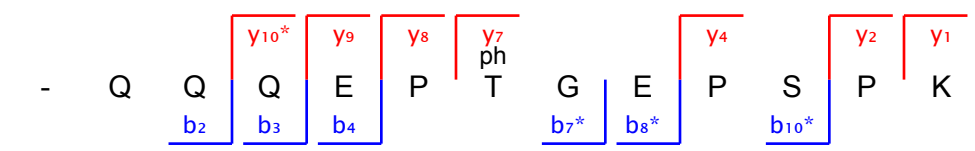

Raw file 20150814\_A375SR\_Phospho\_BR2\_08 Scan 4471 Method FTMS; HCD Score 109.72 m/z 749.86 Gene names TXLNA

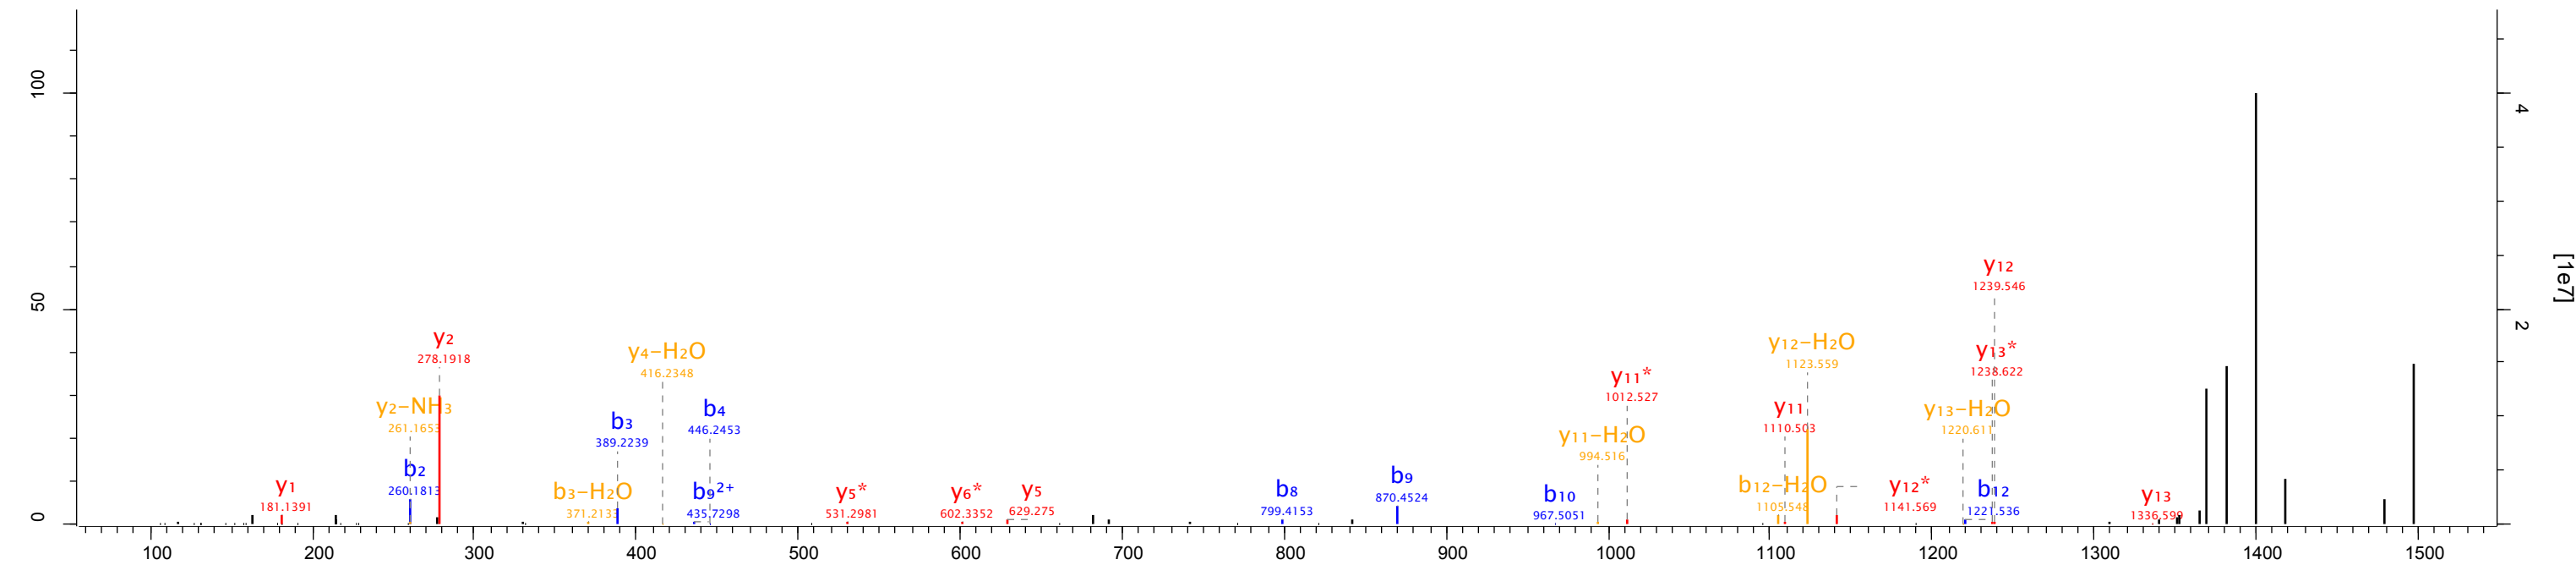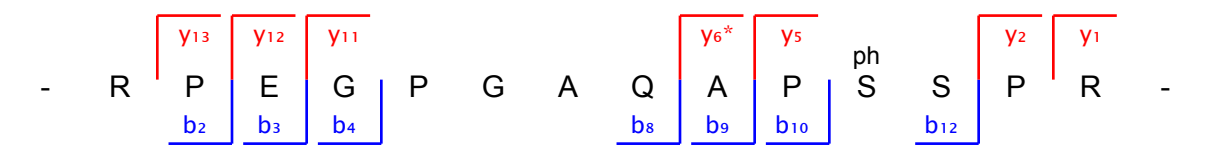

Raw file: 20150814\_A375SR\_Phospho\_BR2\_08  
 Scan: 5211 Method: FTMS; HCD Score: 81.02 m/z: 515.24 Gene names: RAPGEF2

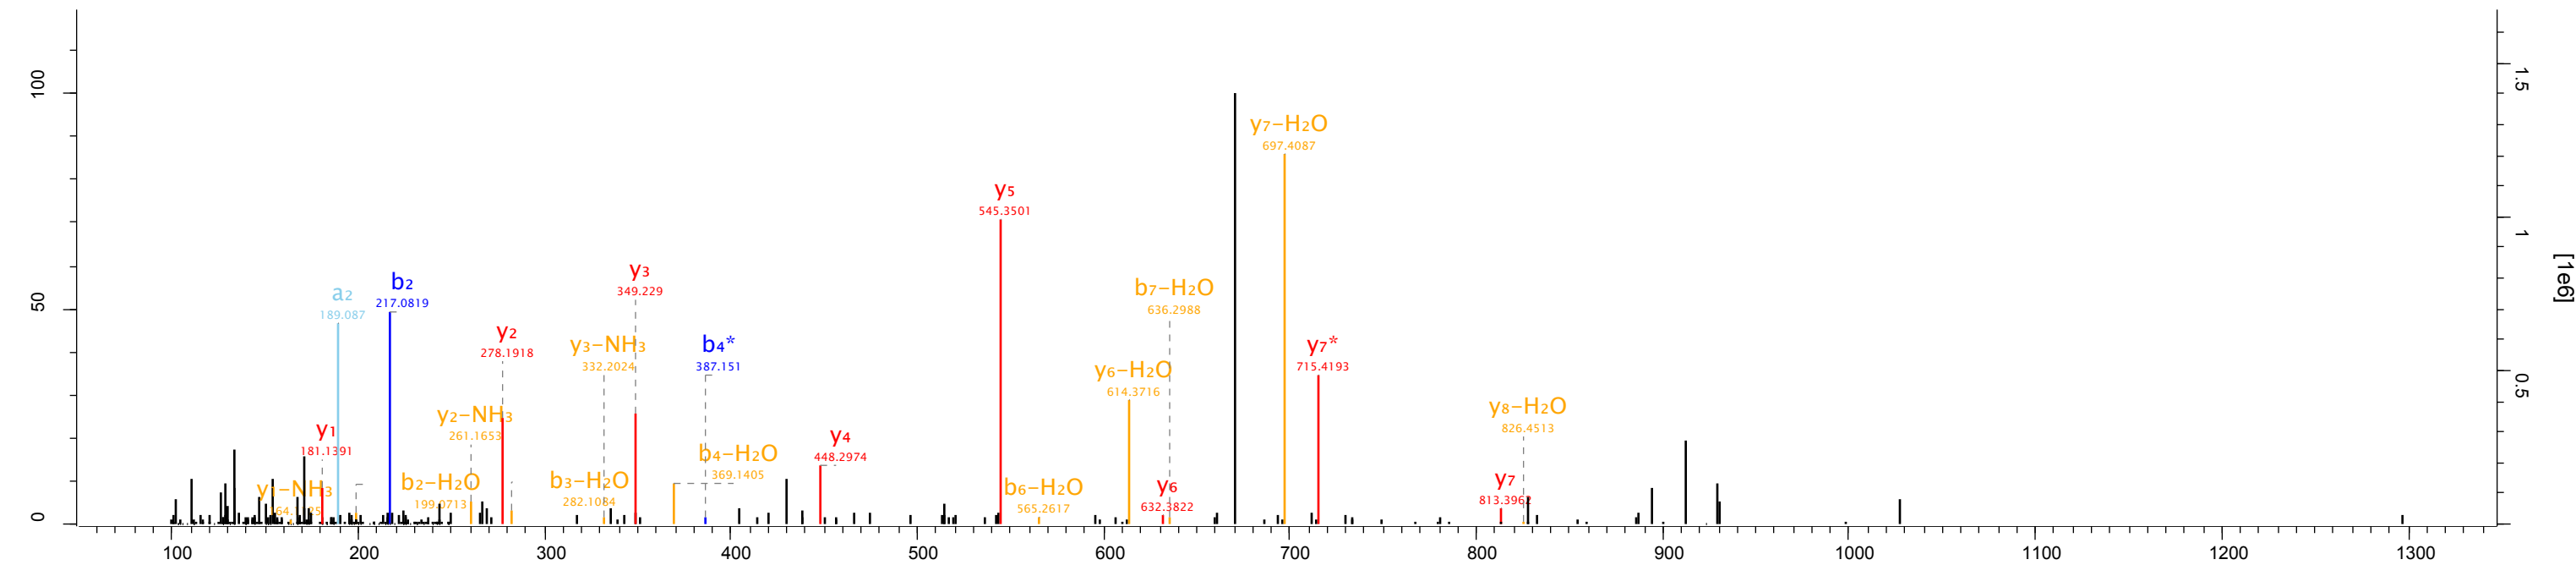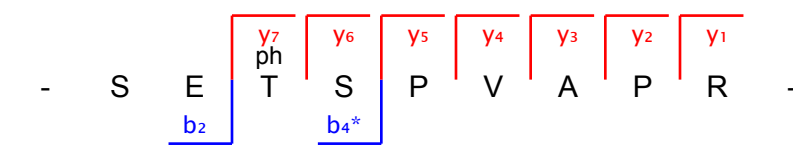

Raw file: 20150814\_A375SR\_Phospho\_BR2\_08  
 Scan: 5951 Method: FTMS; HCD Score: 212.9 m/z: 562.73 Gene names: ARHGEF2

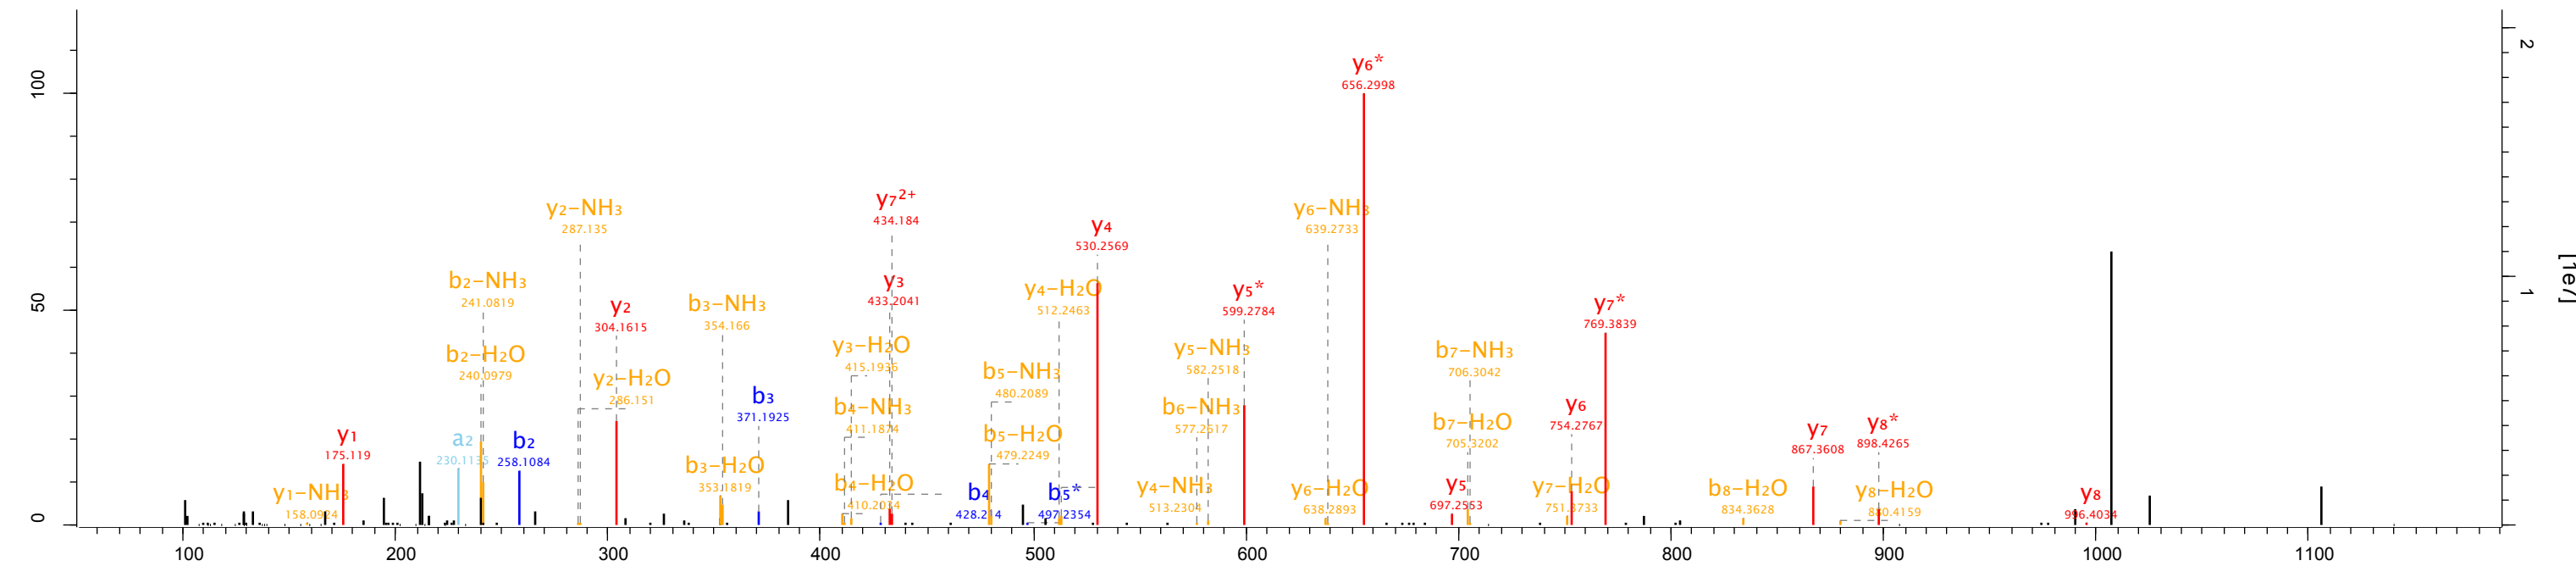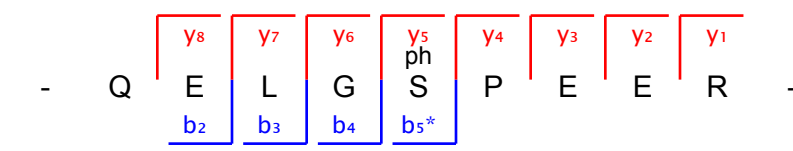

Raw file: 20150814\_A375SR\_Phospho\_BR2\_08  
 Scan: 6711 Method: FTMS; HCD Score: 174.46 m/z: 535.77 Gene names: WRNIP1

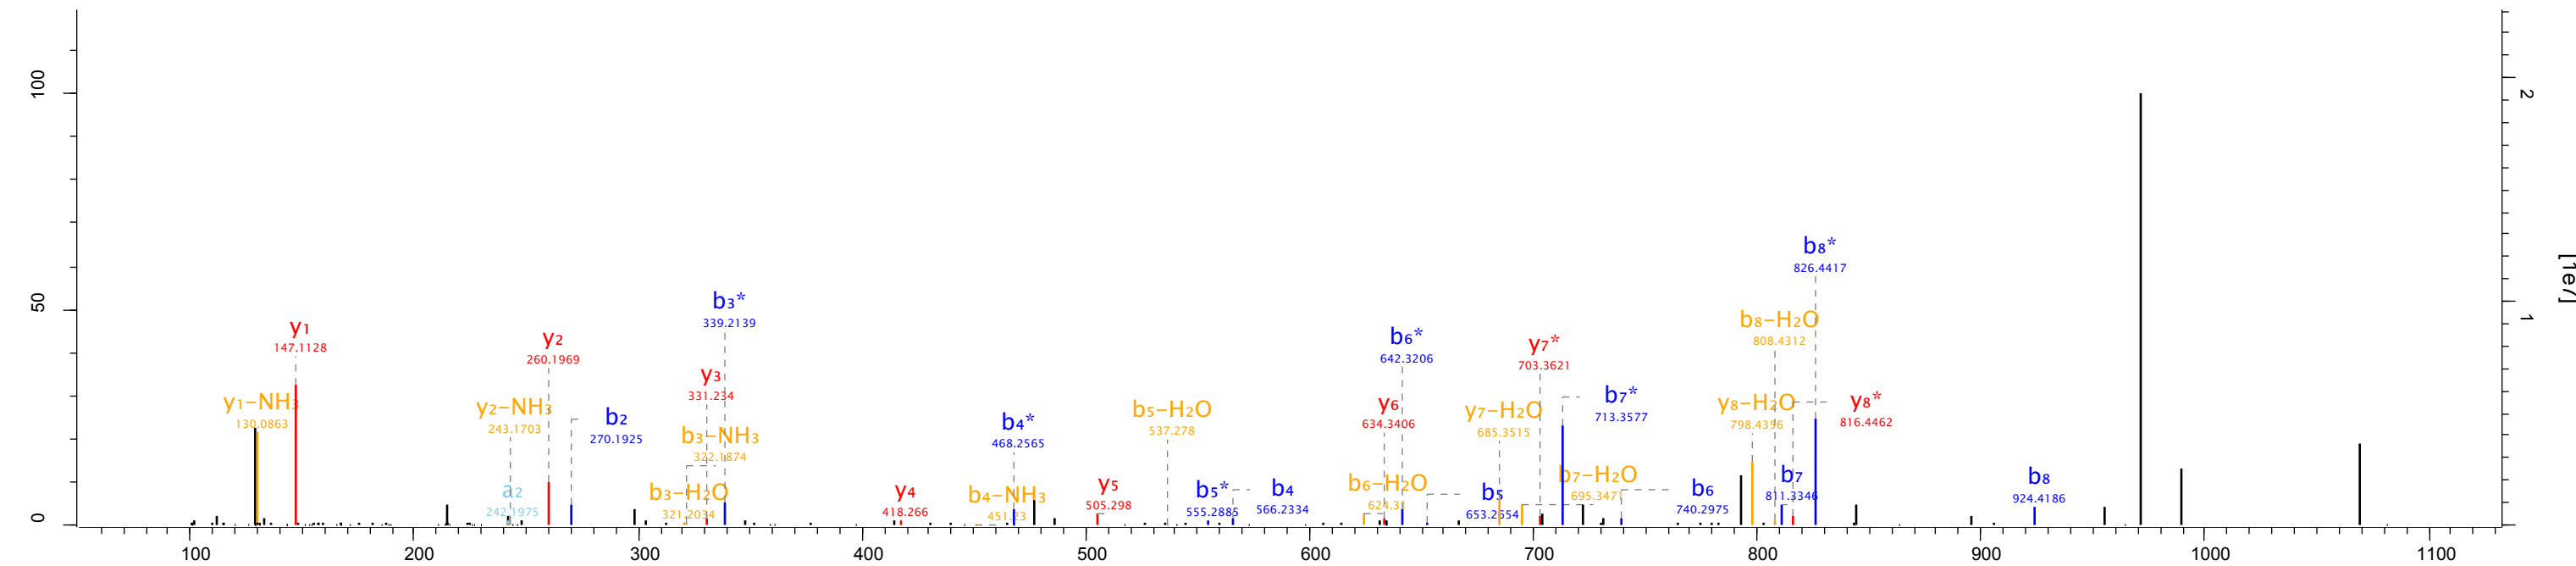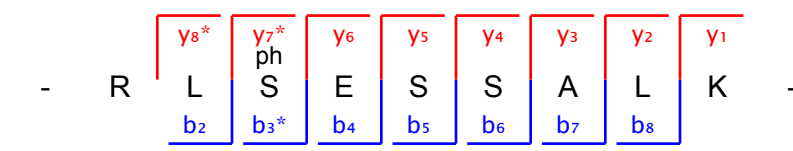



Raw file: 20150814\_A375SR\_Phospho\_BR2\_08  
 Scan: 7341 Method: FTMS; HCD Score: 65.27 m/z: 882.83 Gene names: RBMX;RBMXL1

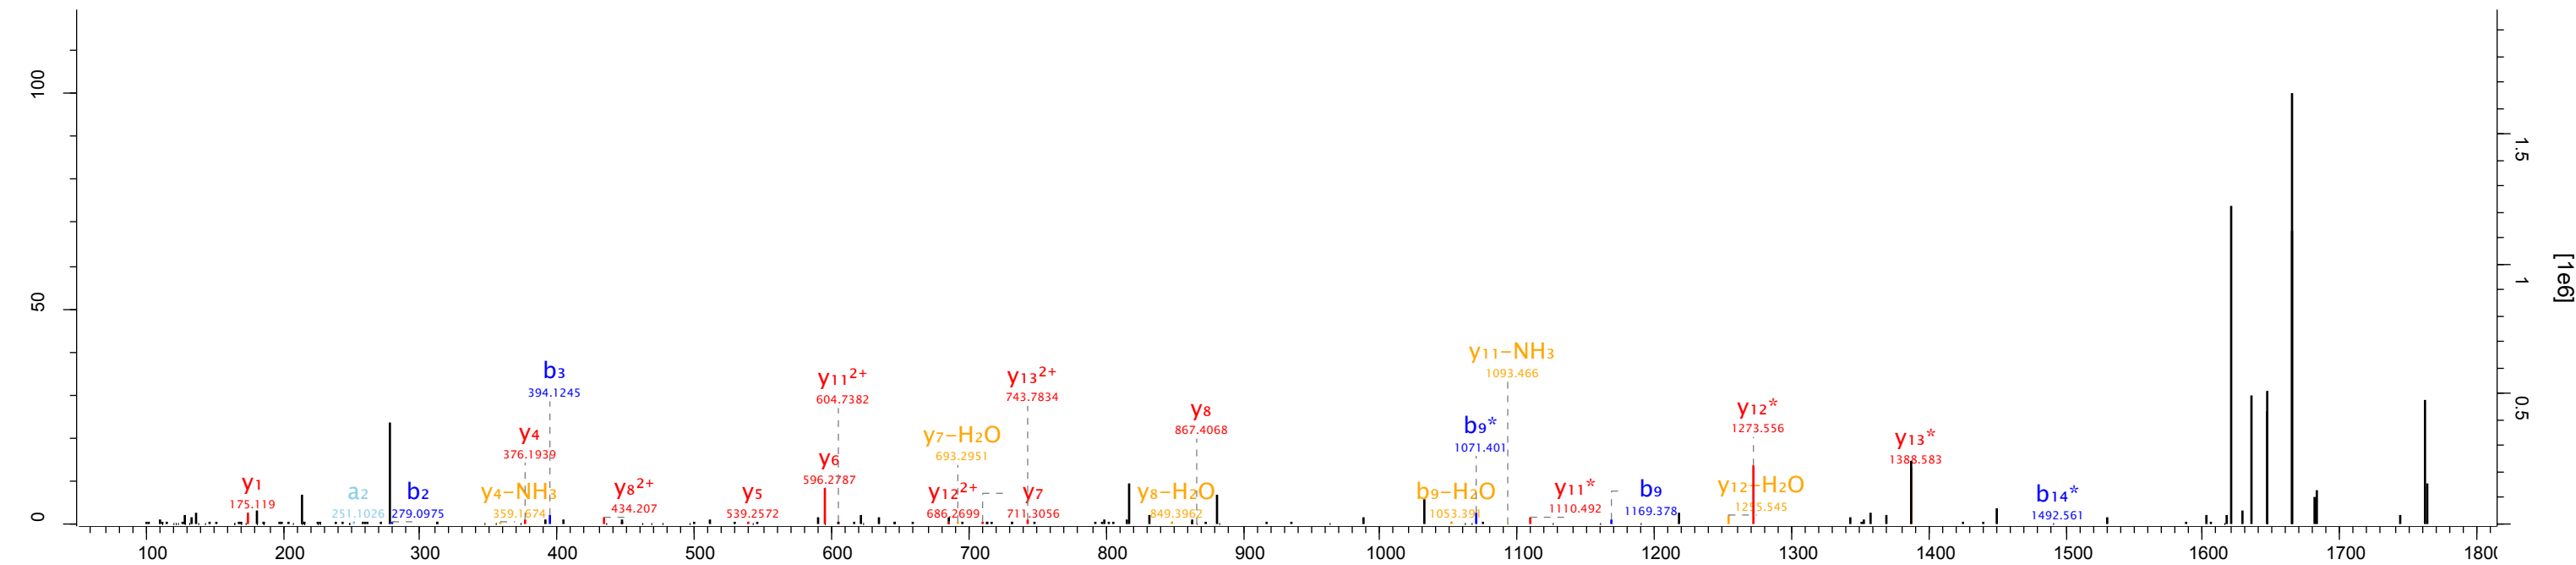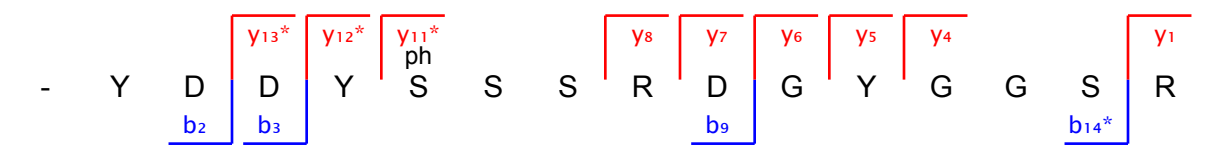

Raw file: 20150814\_A375SR\_Phospho\_BR2\_08  
 Scan: 7741 Method: FTMS; HCD Score: 146.15 m/z: 846.42 Gene names: ASXL2

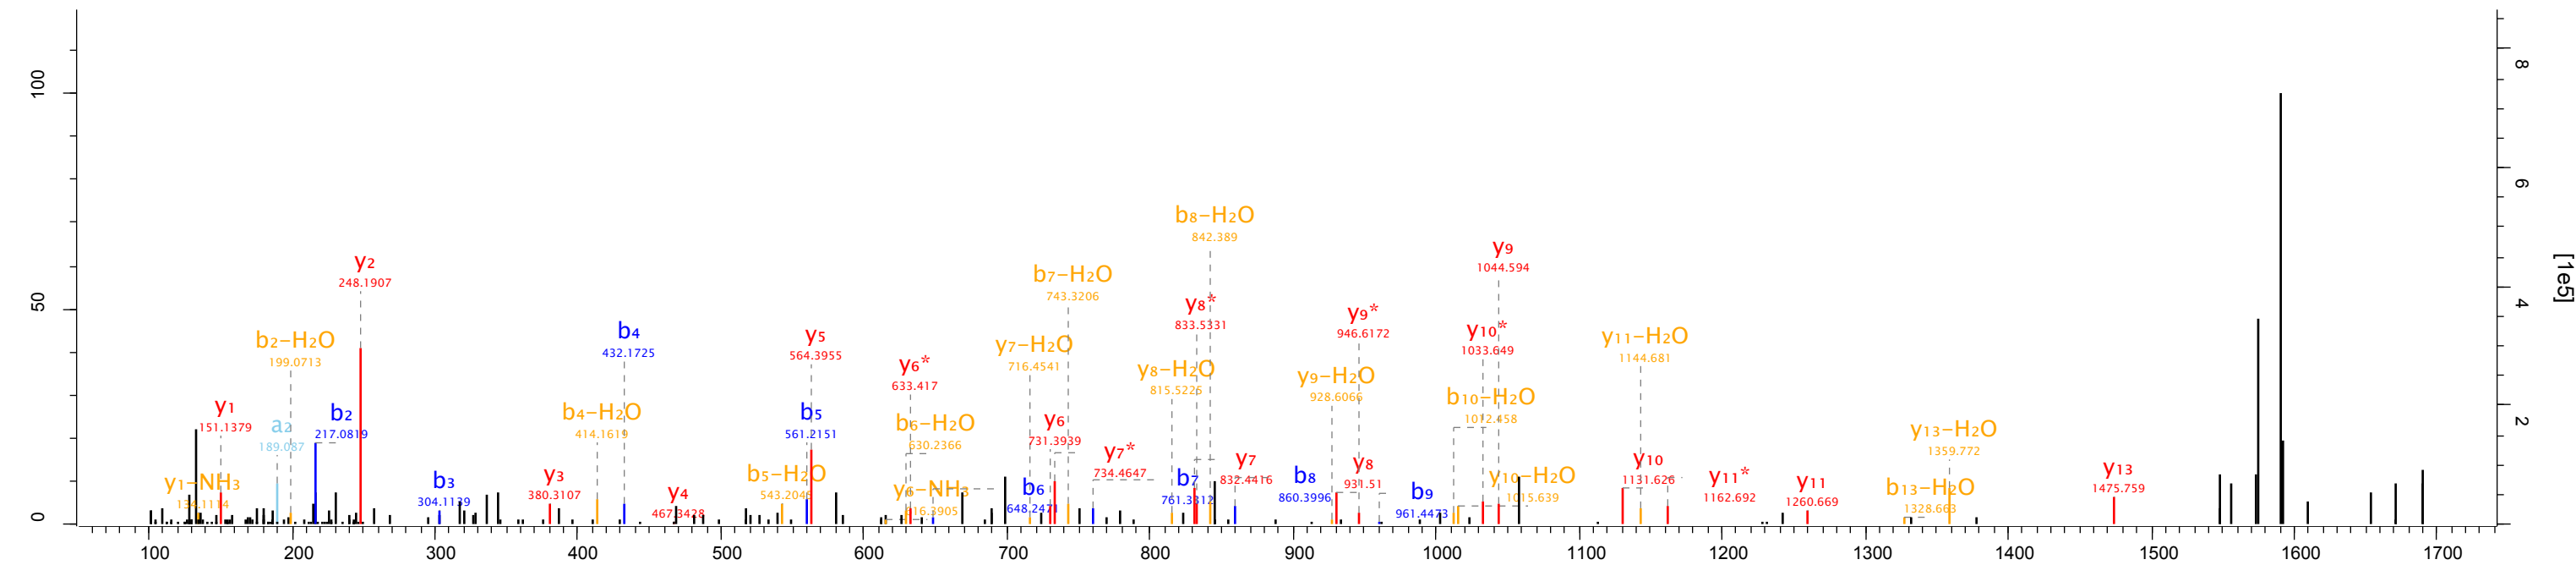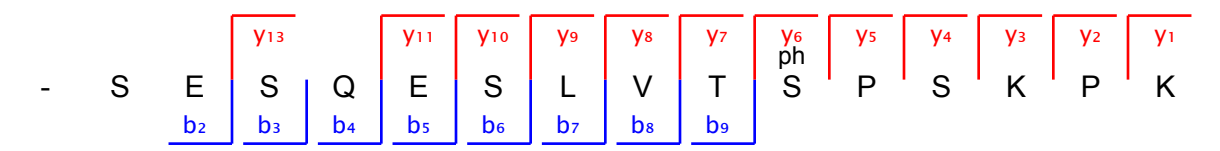

Raw file 20150814\_A375SR\_Phospho\_BR2\_08 Scan 7911 Method FTMS; HCD Score 133.23 m/z 486.2 Gene names TJP2

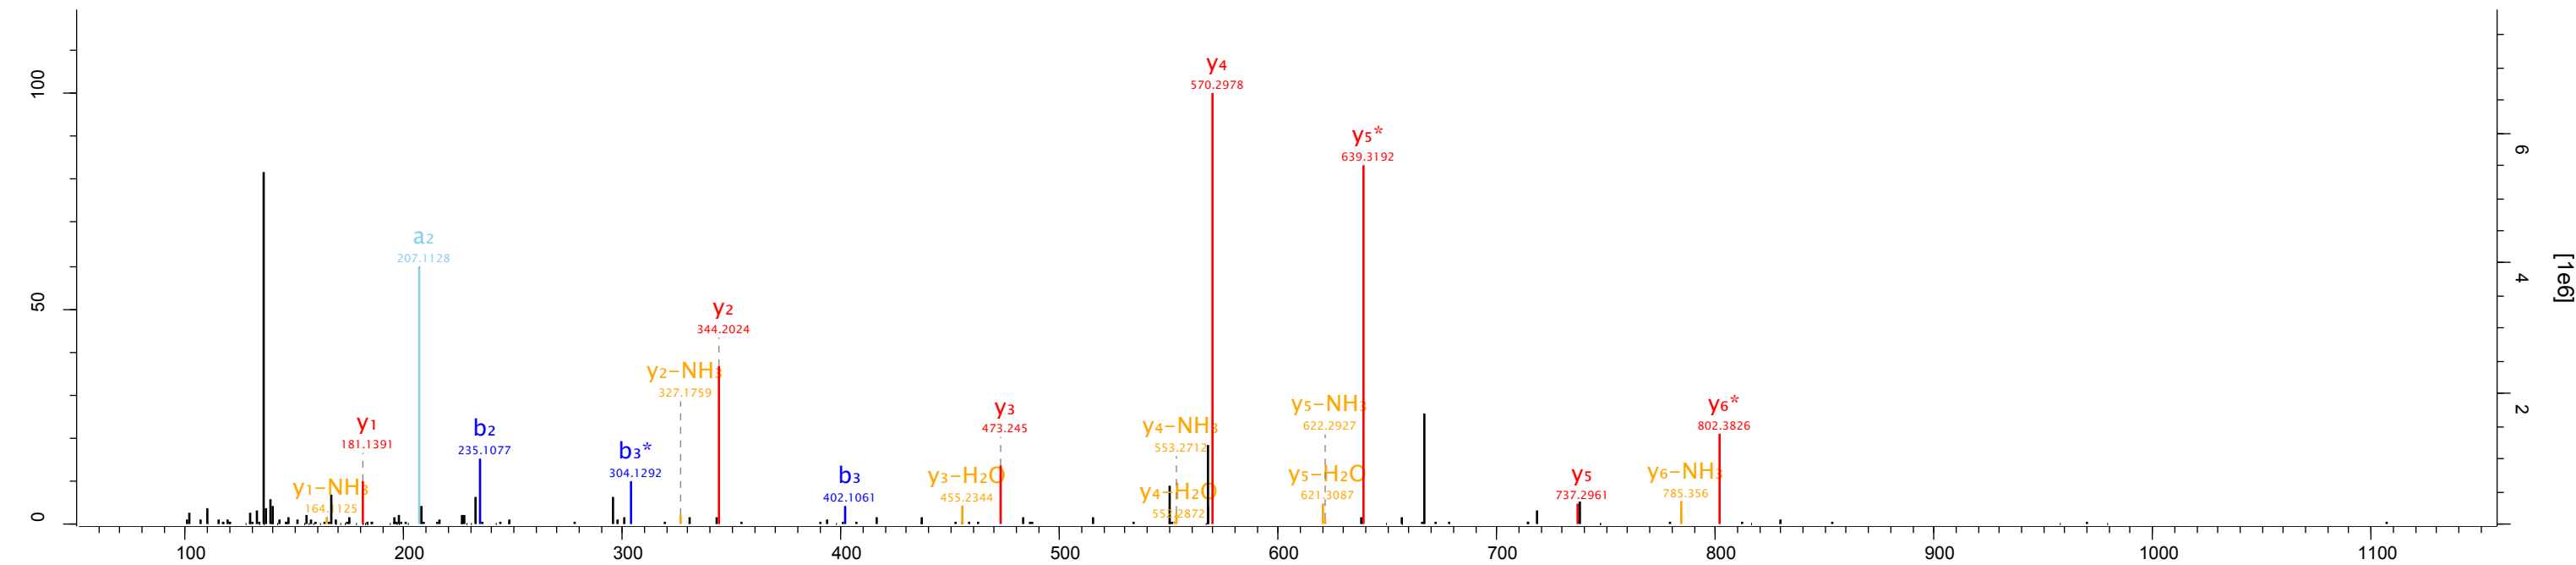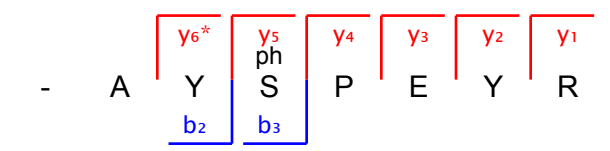

Raw file: 20150814\_A375SR\_Phospho\_BR2\_08  
 Scan: 8191 Method: FTMS; HCD Score: 156.81 m/z: 588.75 Gene names: BAZ2A

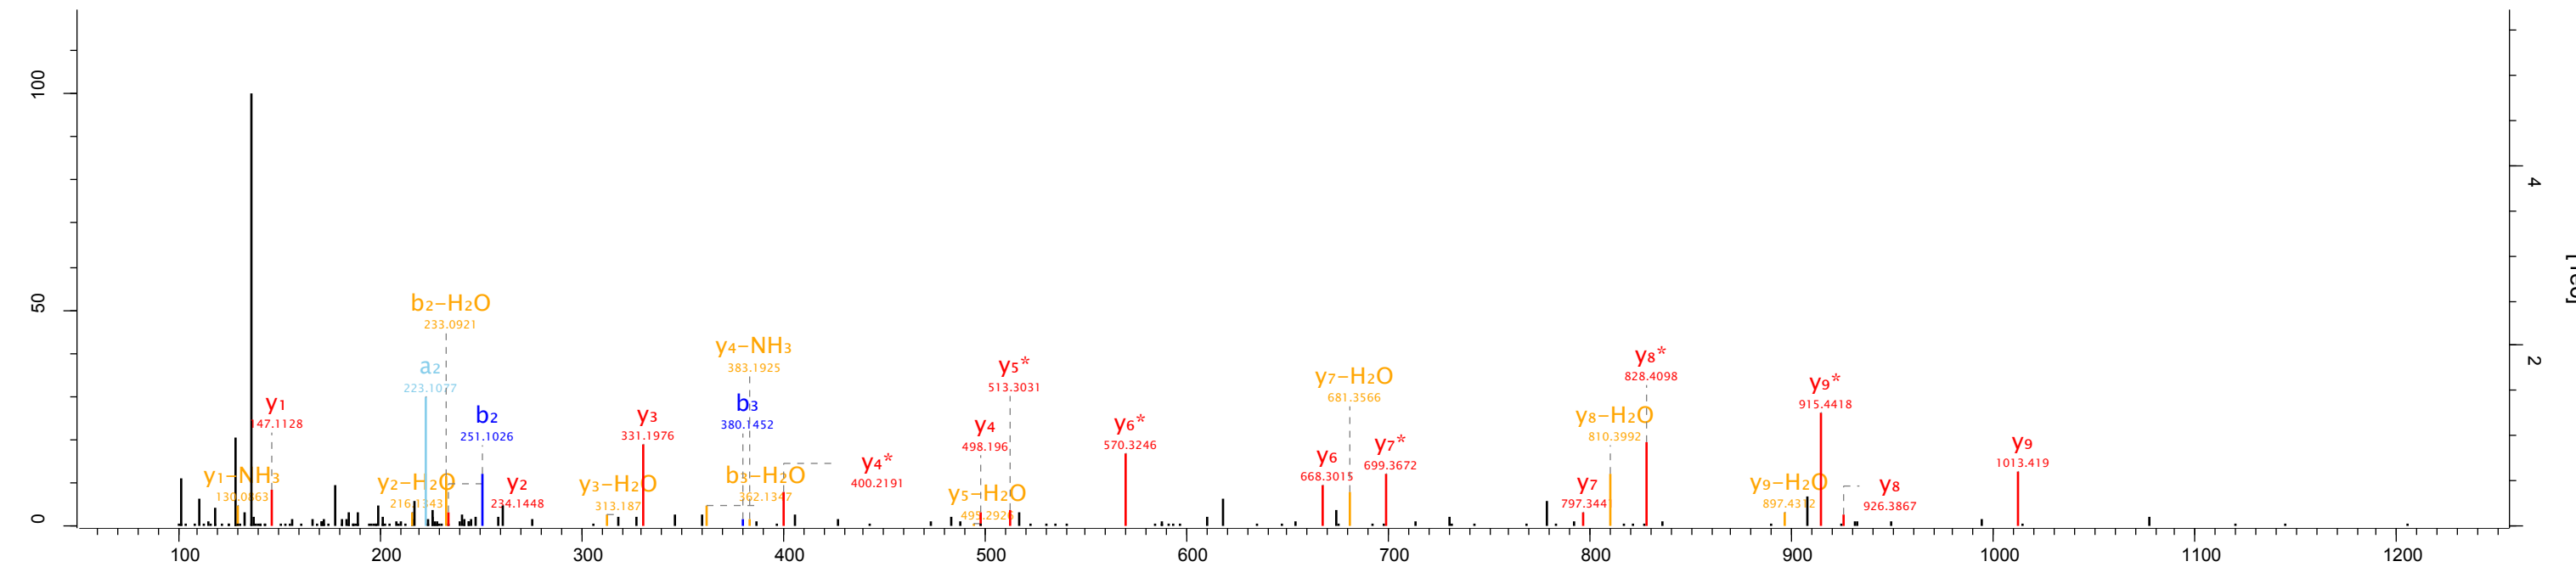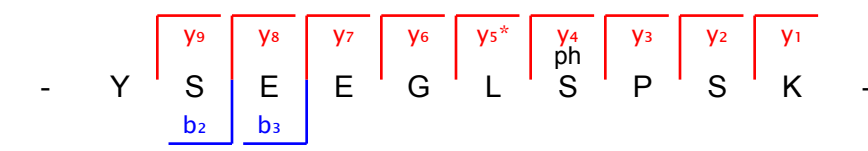

Raw file: 20150814\_A375SR\_Phospho\_BR2\_08  
 Scan: 9001 Method: FTMS; HCD Score: 139.19 m/z: 583.26 Gene names: PPP1R9B

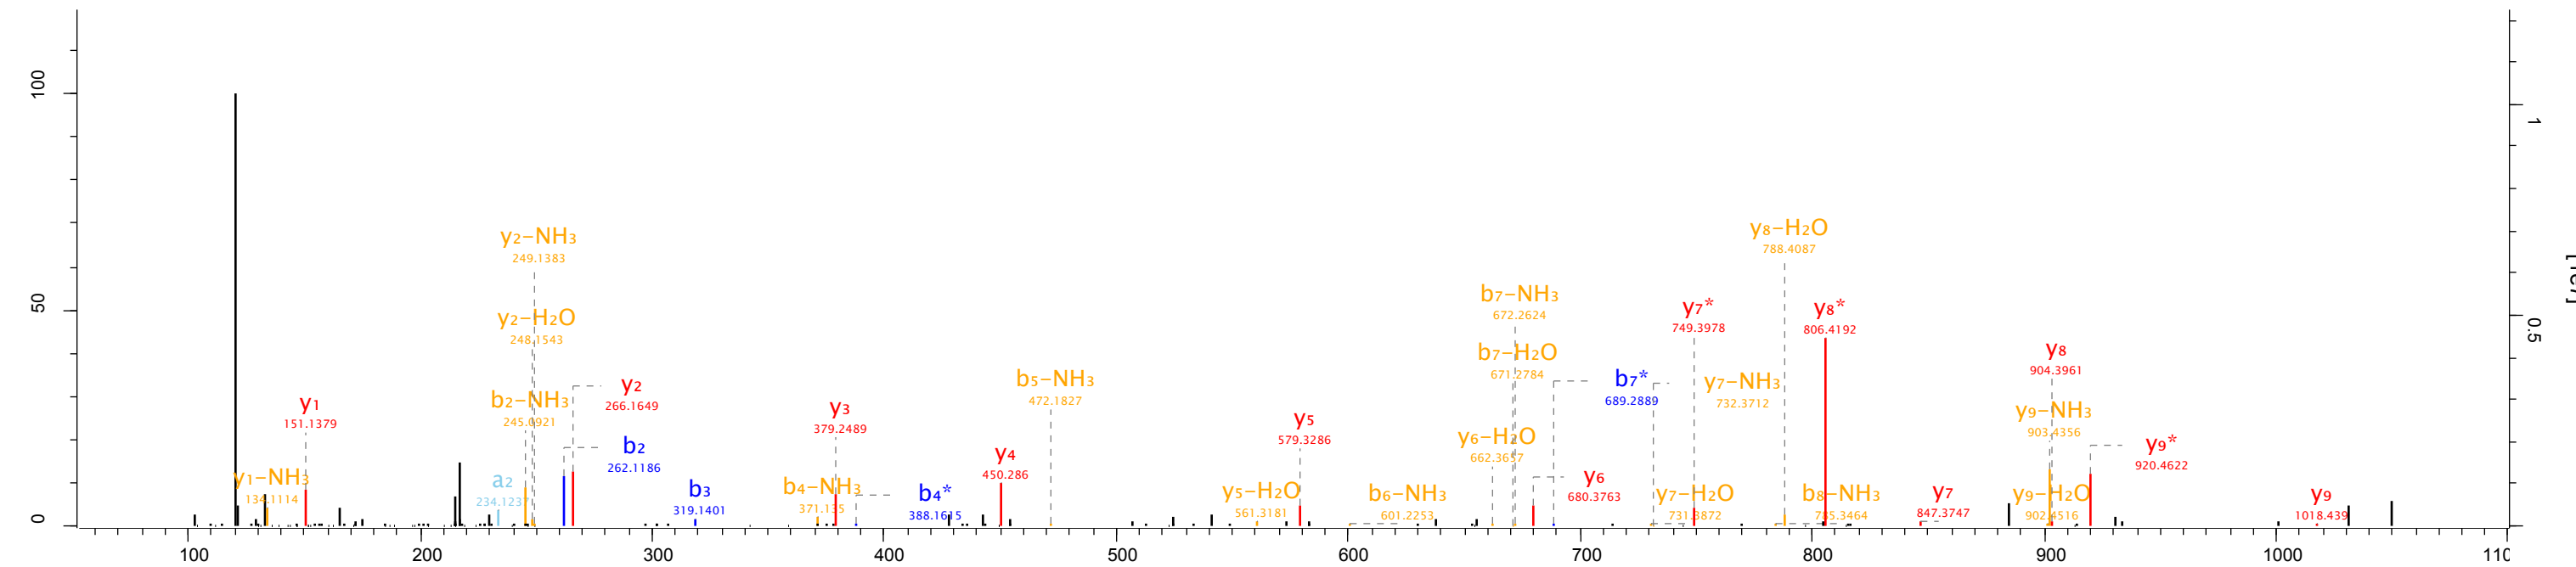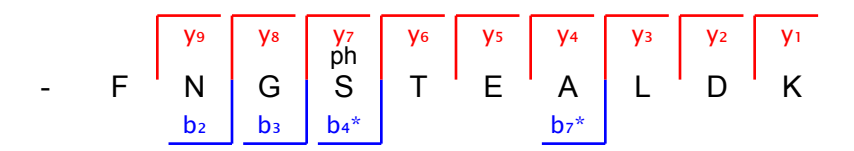

Raw file: 20150814\_A375SR\_Phospho\_BR2\_09  
 Scan: 10011 Method: FTMS; HCD Score: 330 m/z: 899.76 Gene names: SCAF4

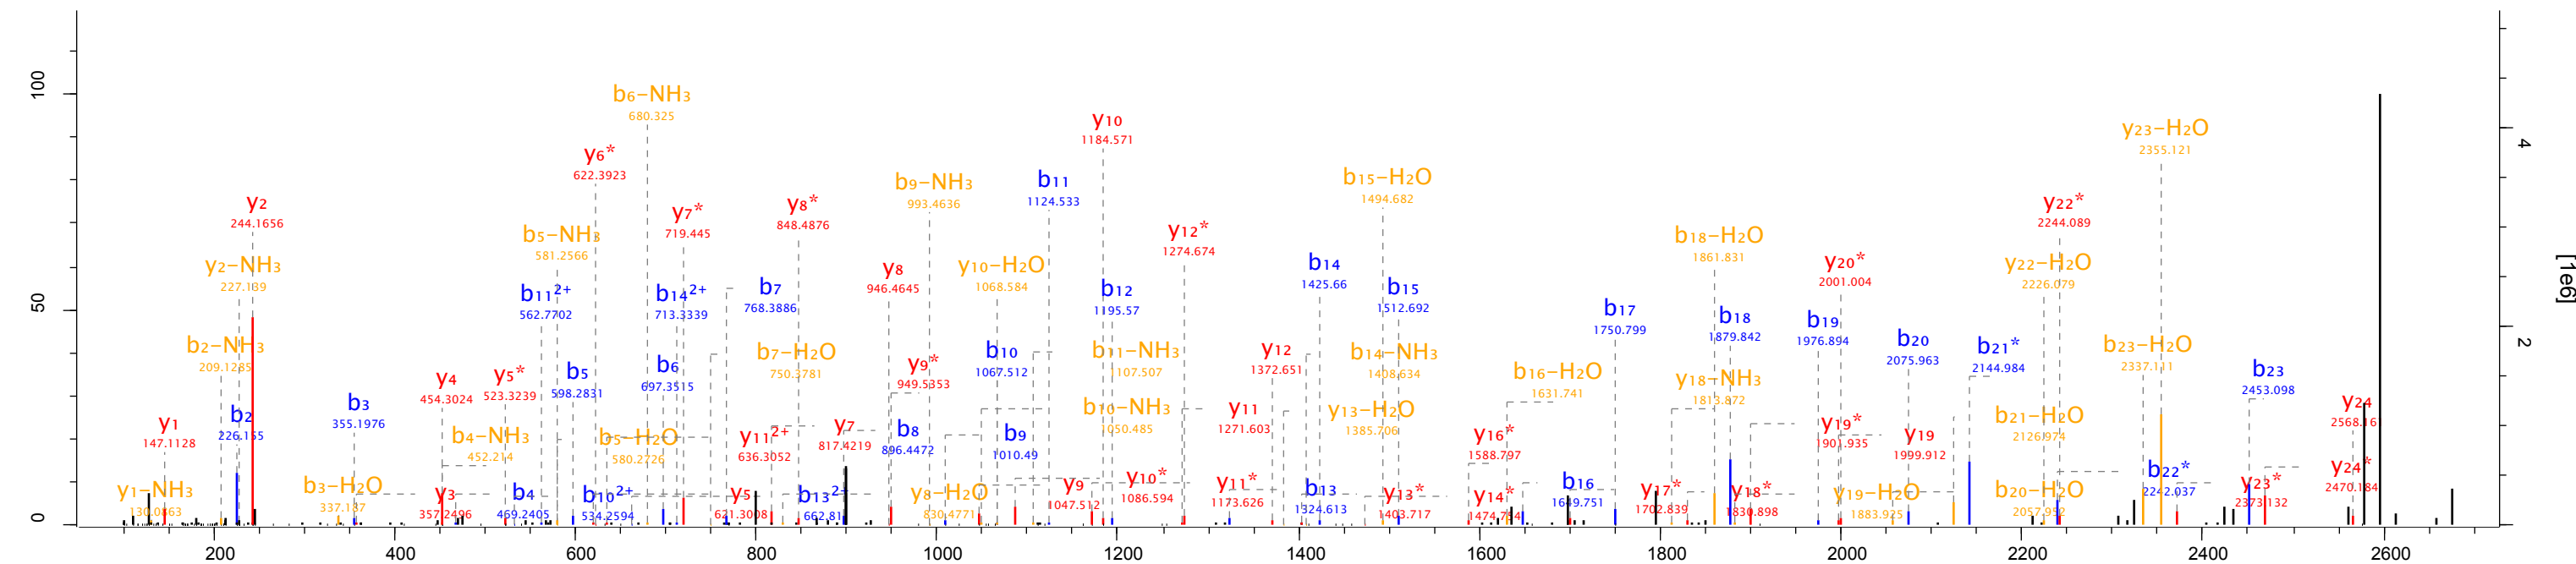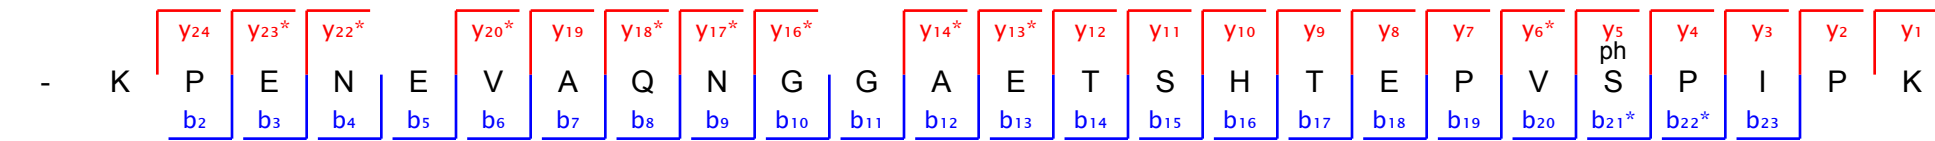

Raw file 20150814\_A375SR\_Phospho\_BR2\_09 Scan 10201 Method FTMS; HCD Score 85.18 m/z 491.56 Gene names SH3RF1

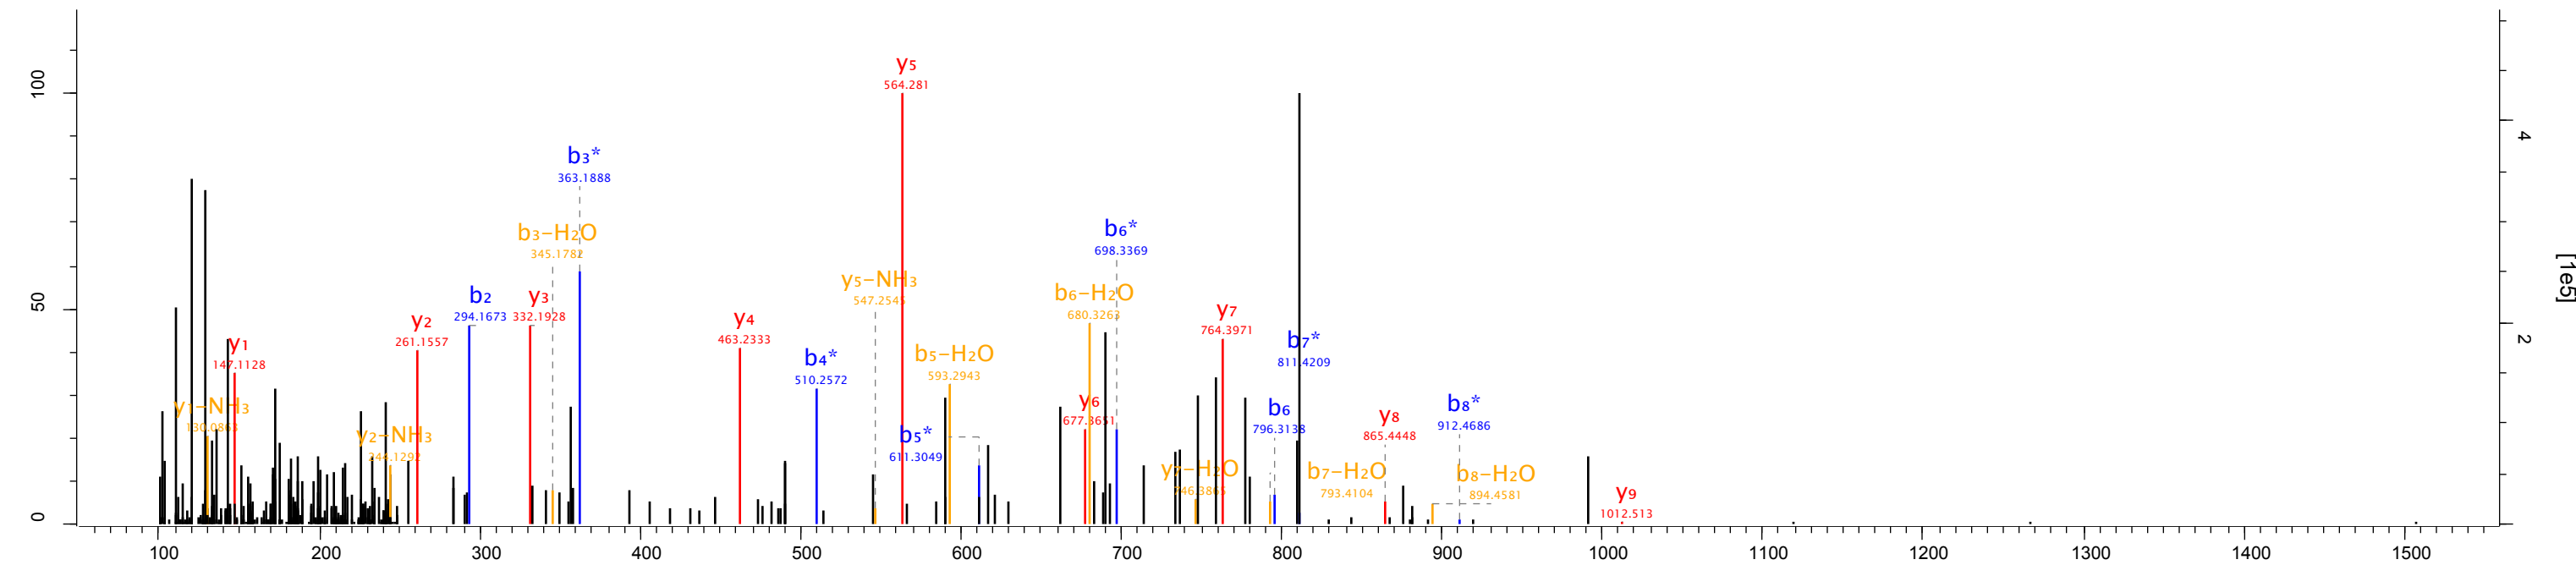

- R H S ph F T S L T M A N K -  
 b2 b3\* b4\* b5\* b6 b7\* b8\*

Raw file: 20150814\_A375SR\_Phospho\_BR2\_09  
 Scan: 10651 Method: FTMS; HCD Score: 135.57 m/z: 695.37 Gene names: SRRM2

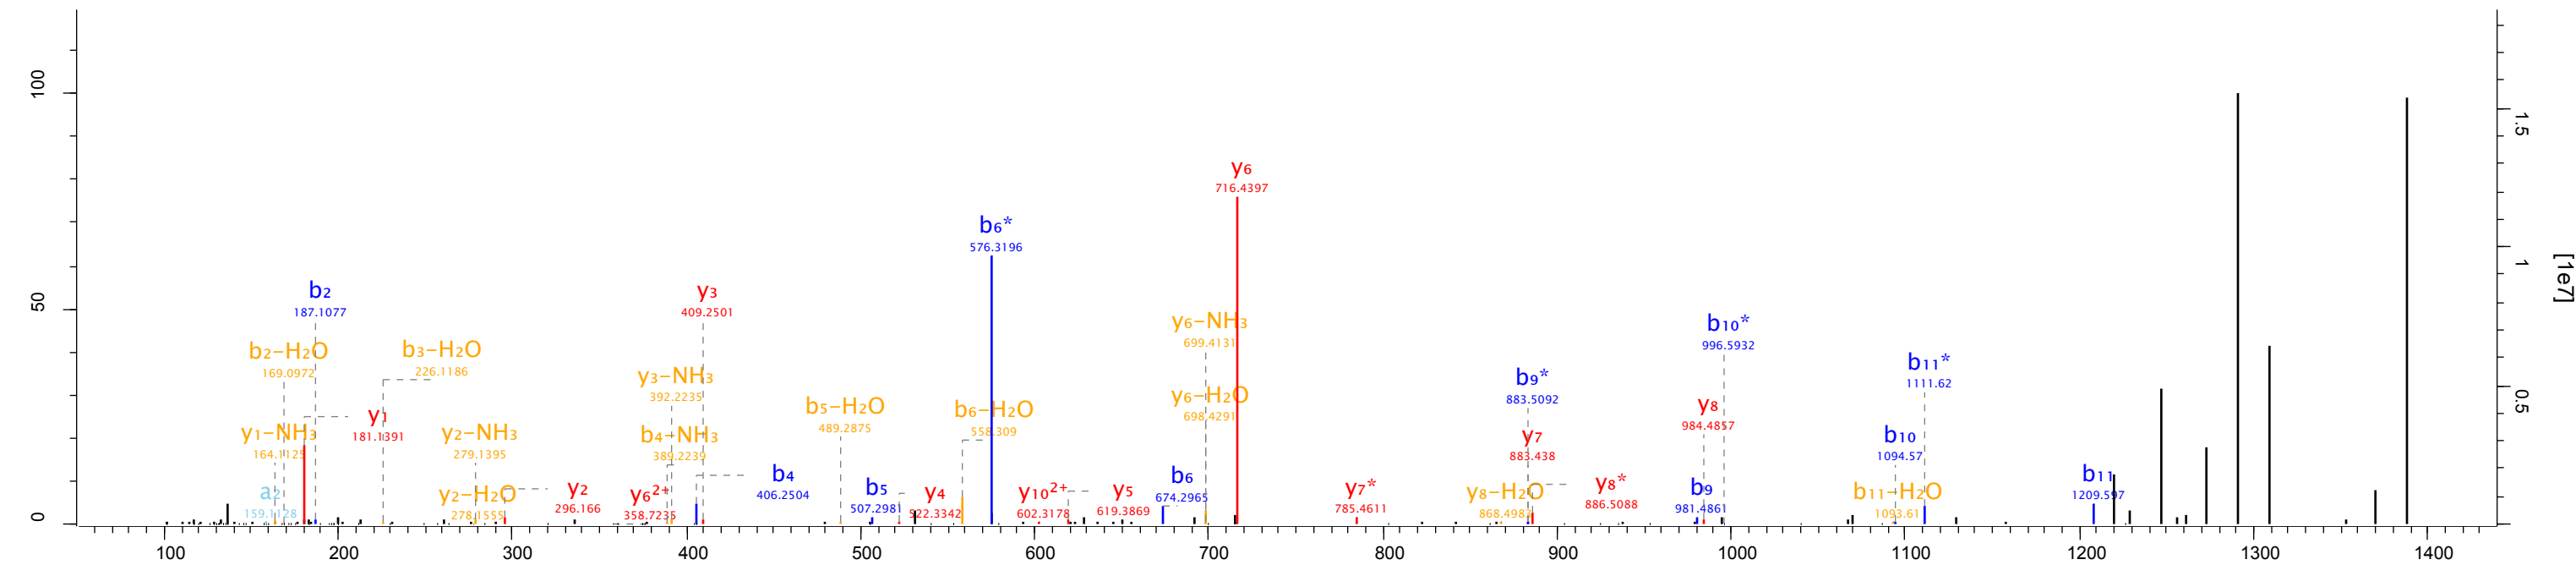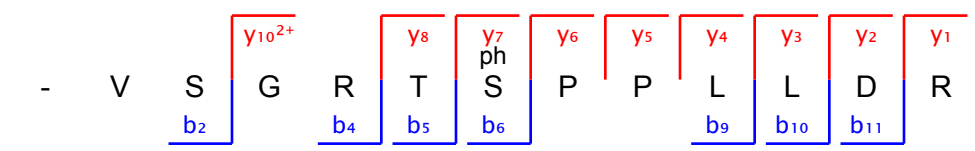



Raw file: 20150814\_A375SR\_Phospho\_BR2\_09  
 Scan: 10671 Method: FTMS; HCD Score: 56.01 m/z: 408.21 Gene names: BCAR1

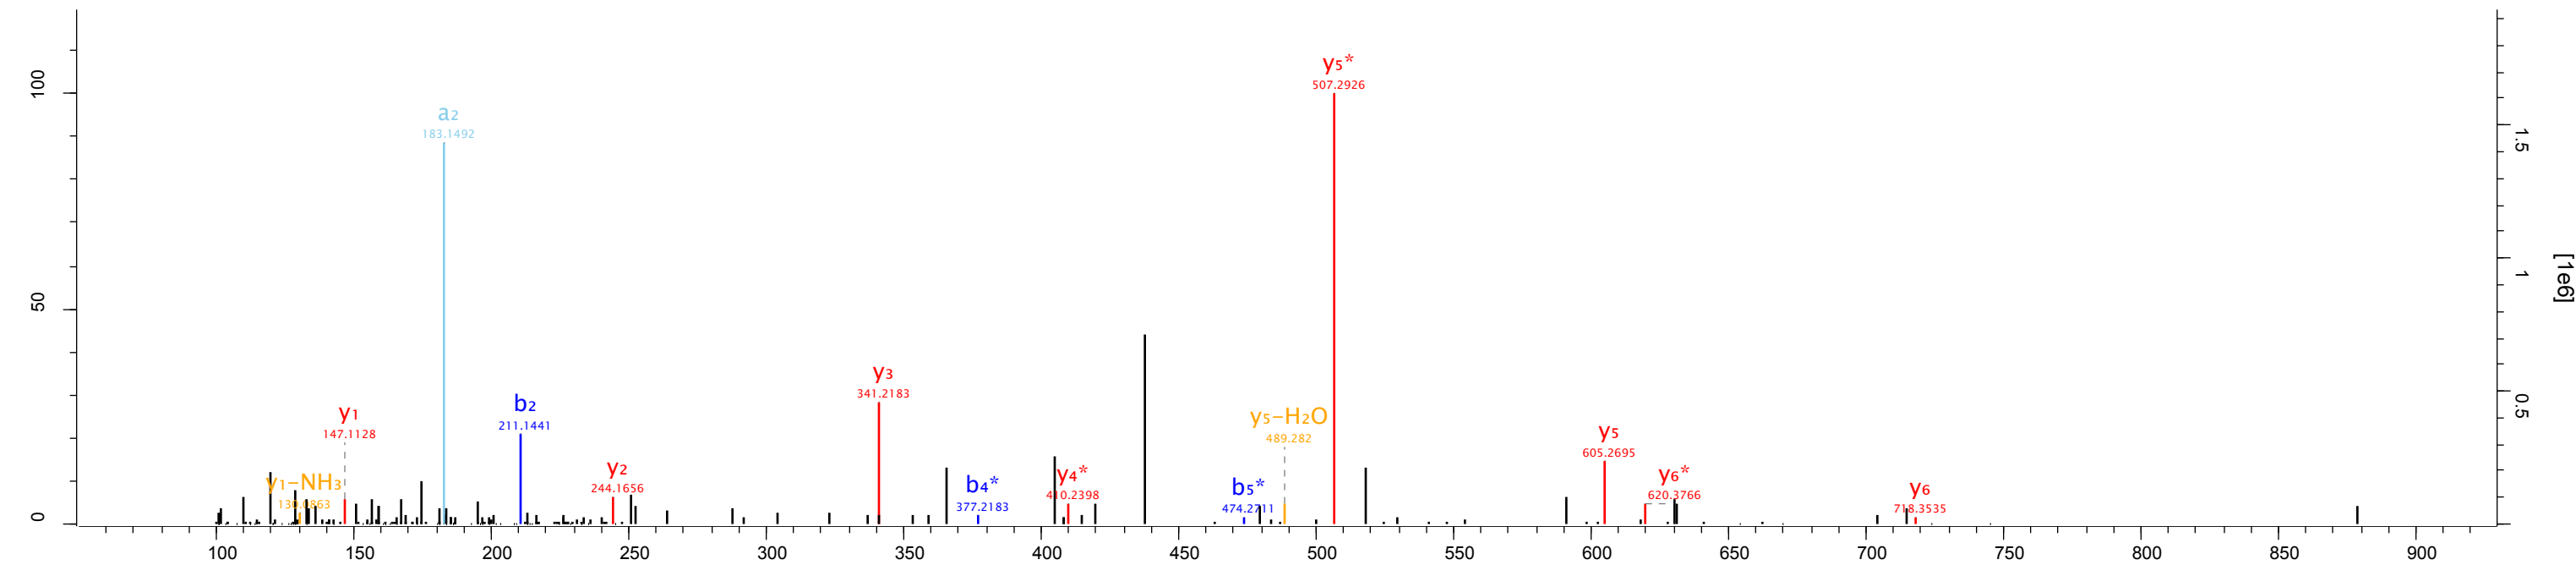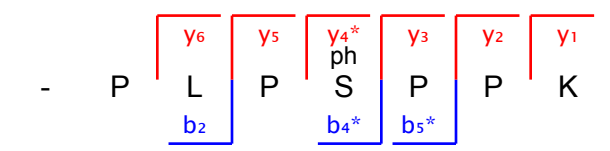

Raw file: 20150814\_A375SR\_Phospho\_BR2\_09  
 Scan: 13561 Method: FTMS; HCD Score: 187.49 m/z: 749.1 Gene names: ZC3H4

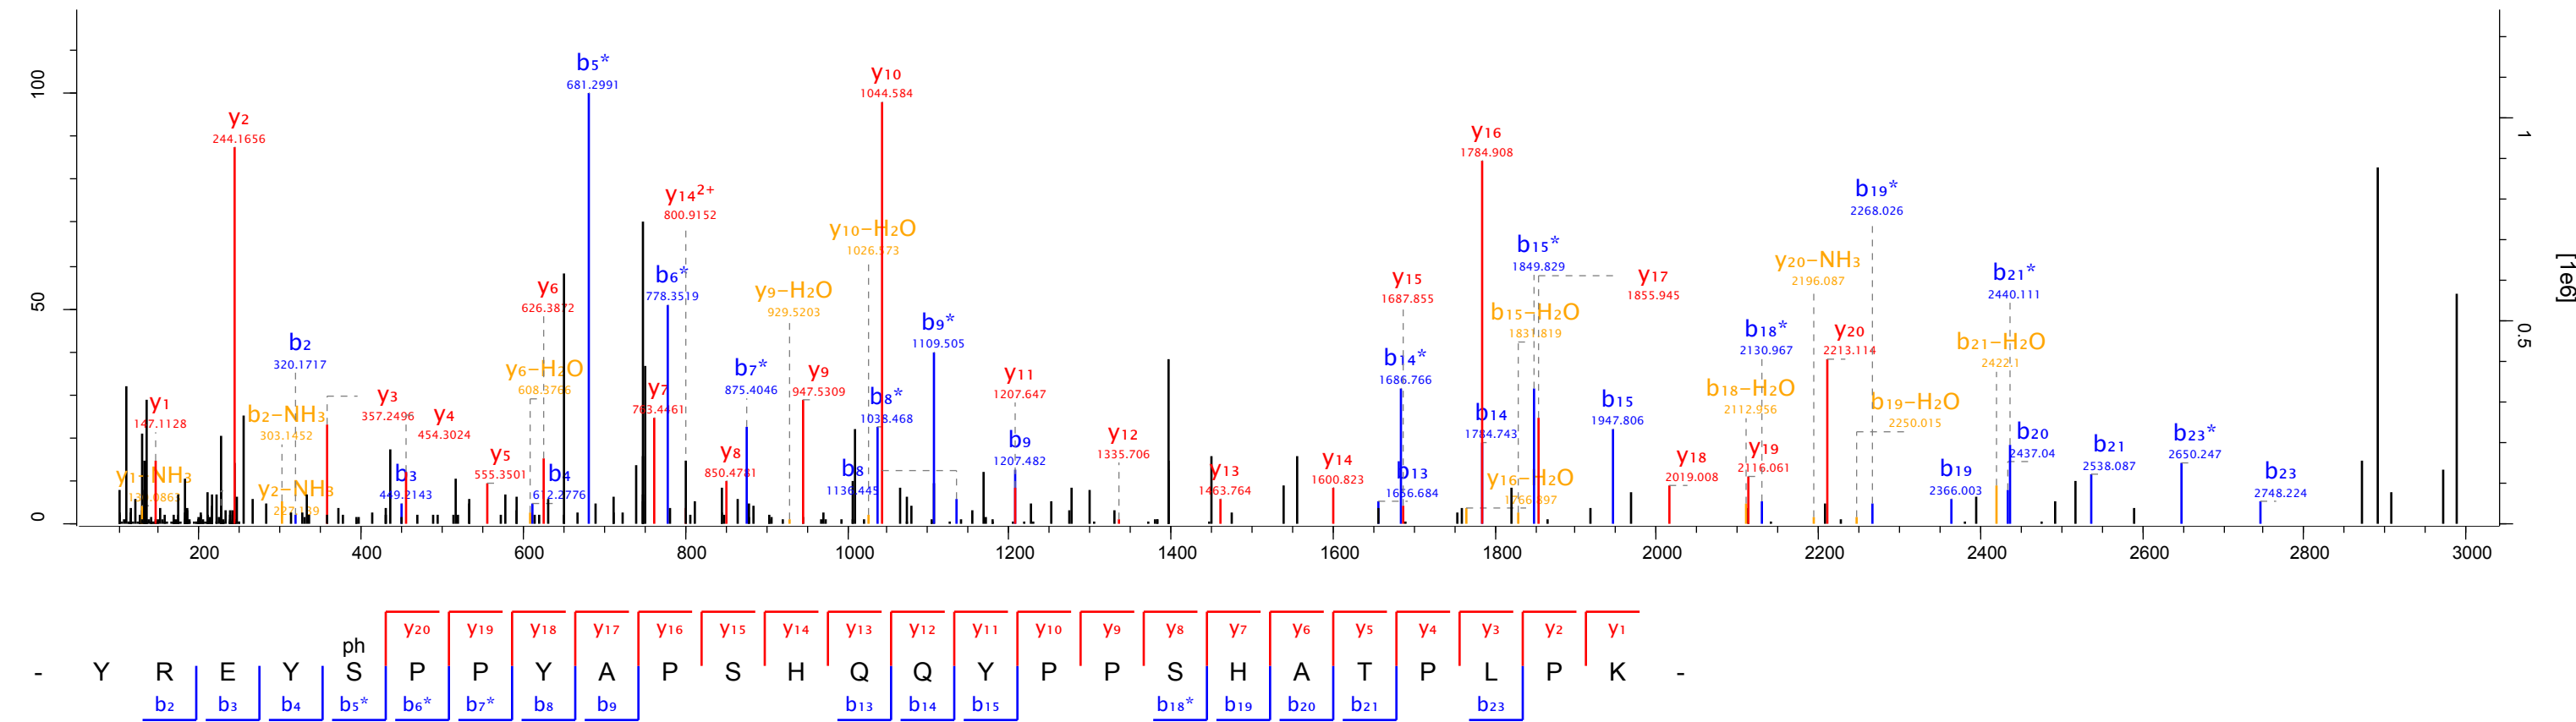

Raw file 20150814\_A375SR\_Phospho\_BR2\_09 Scan 14251 Method FTMS; HCD Score 191.47 m/z 765.37 Gene names FARP1

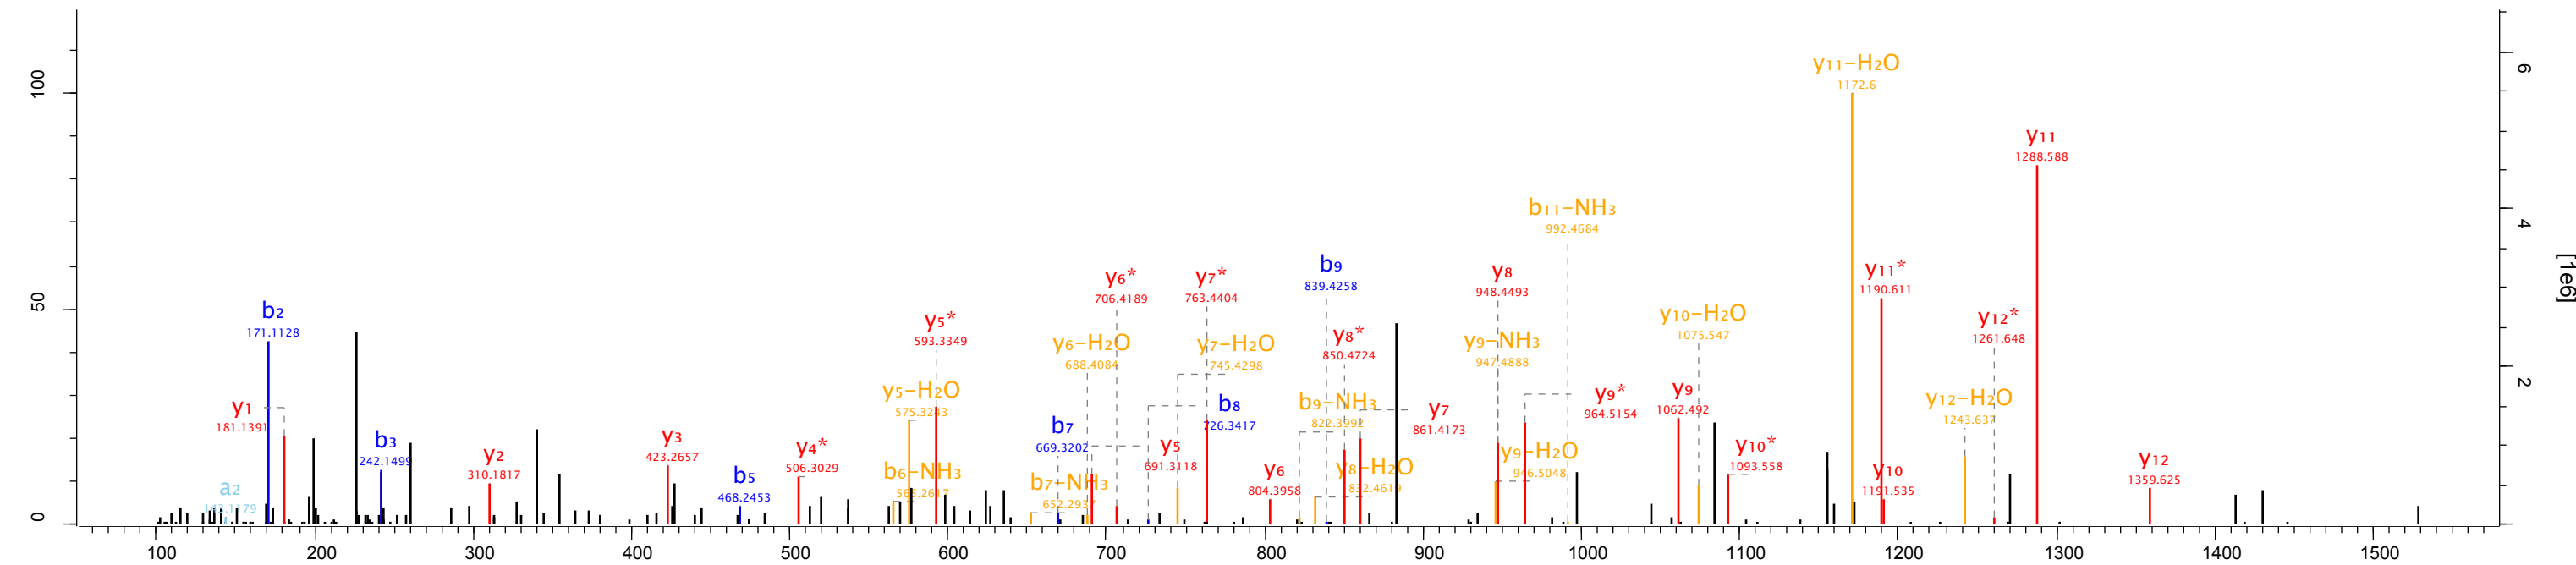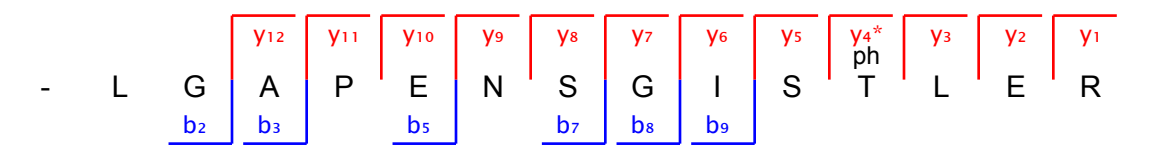

Raw file: 20150814\_A375SR\_Phospho\_BR2\_09  
 Scan: 17181 Method: FTMS; HCD Score: 72.93 m/z: 595.98 Gene names: BCL9

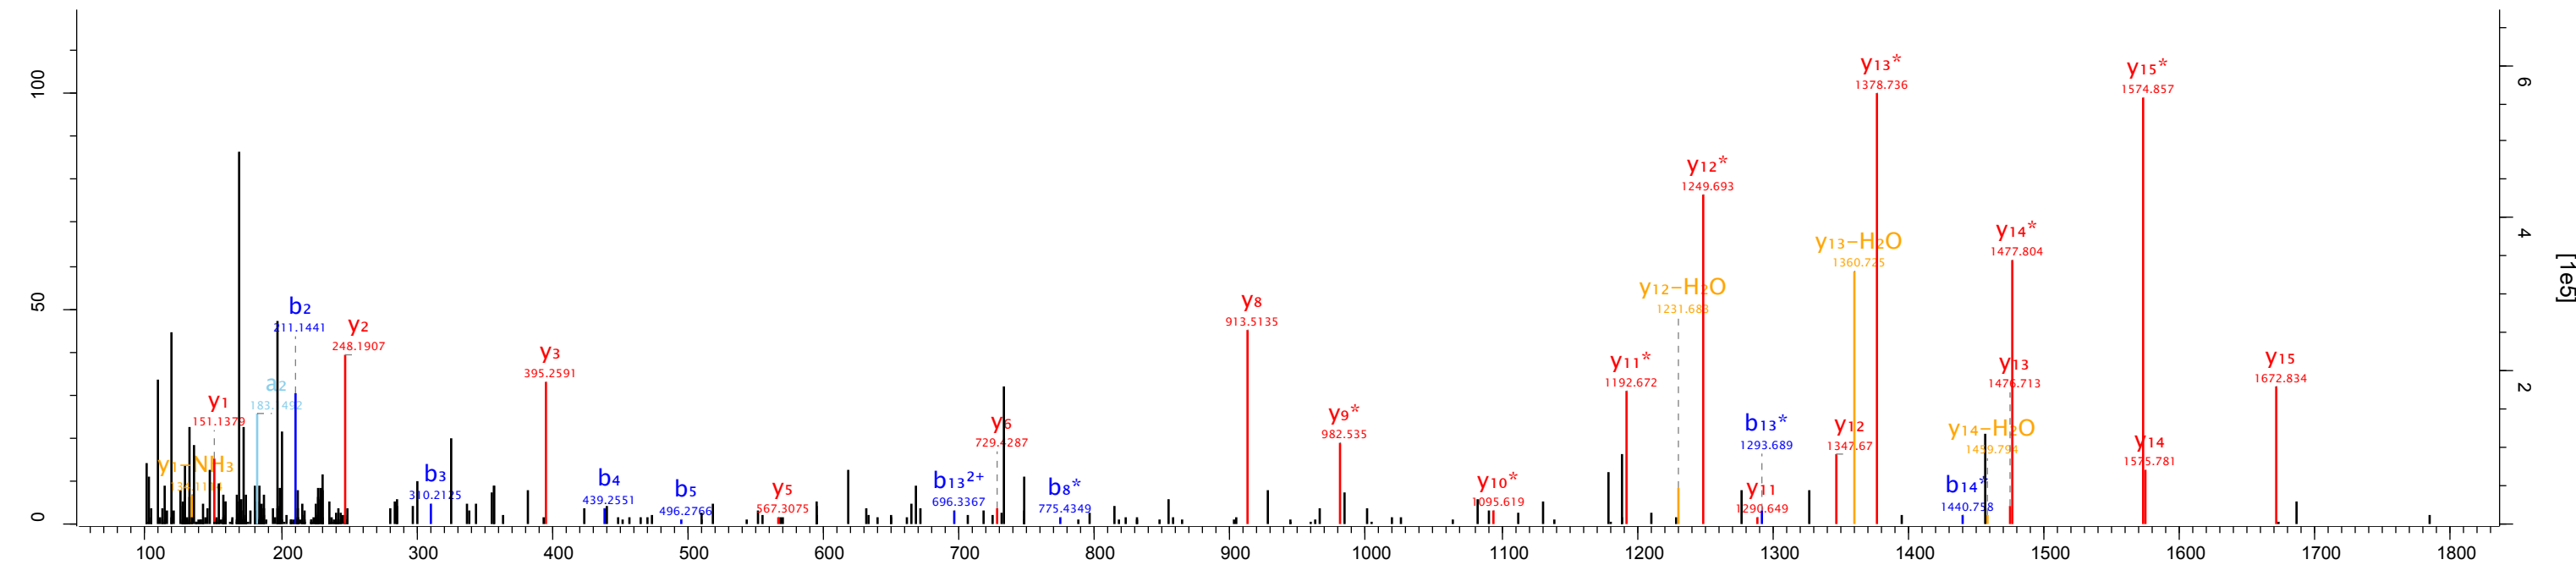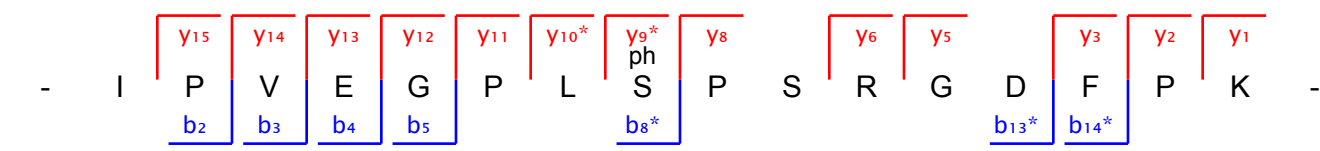

Raw file: 20150814\_A375SR\_Phospho\_BR2\_09  
 Scan: 19441 Method: FTMS; HCD Score: 91.81 m/z: 1051.04 Gene names: POGZ

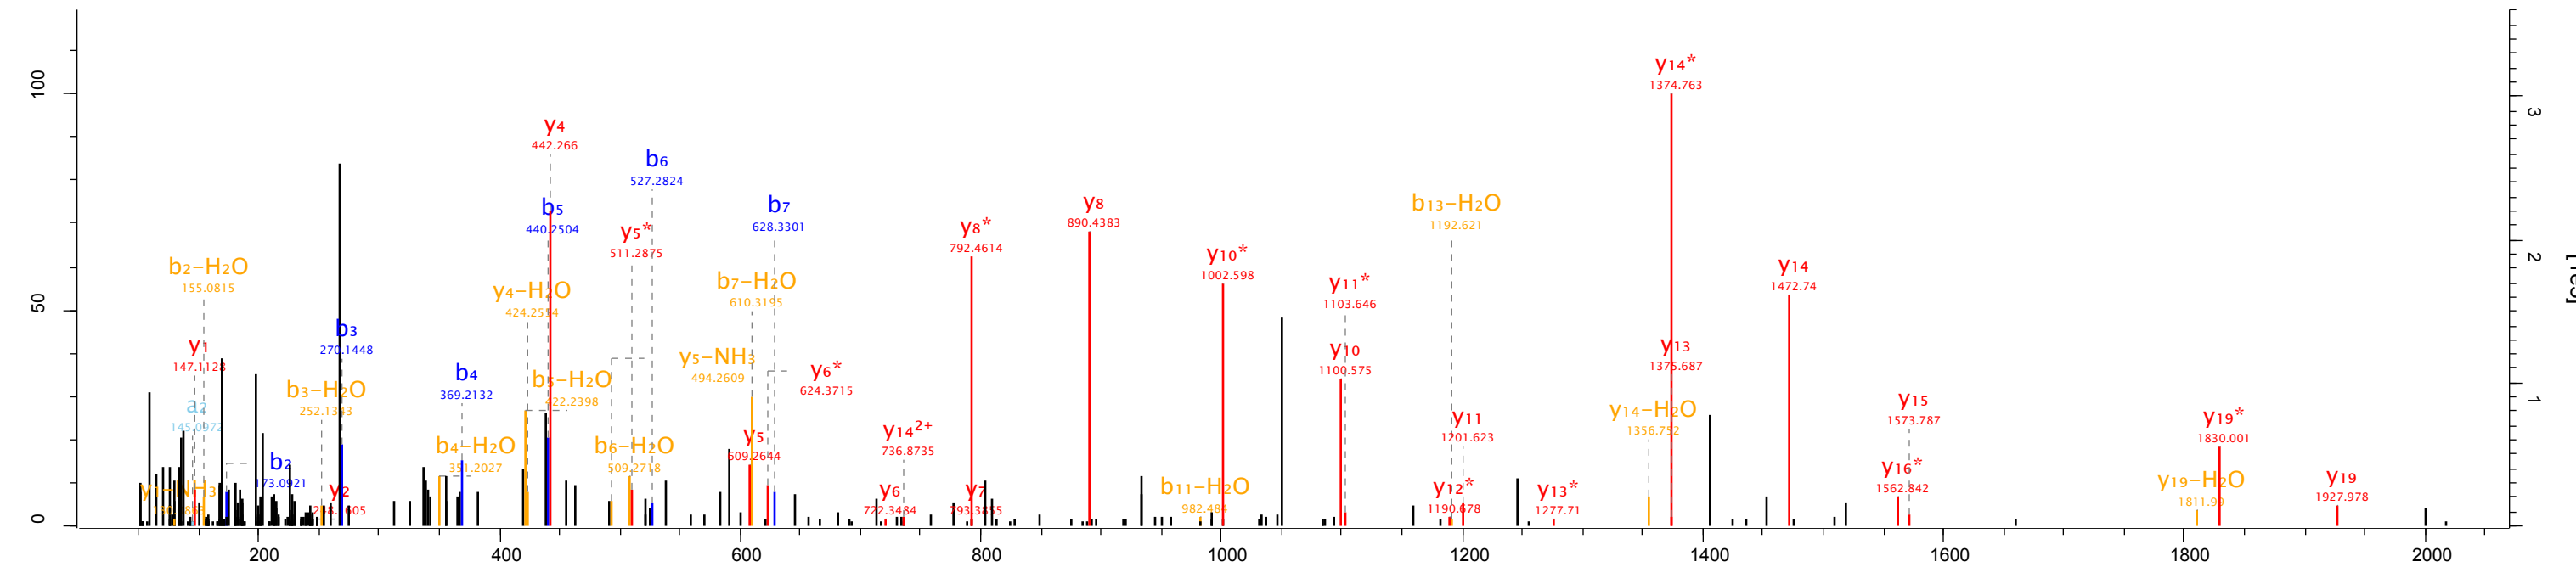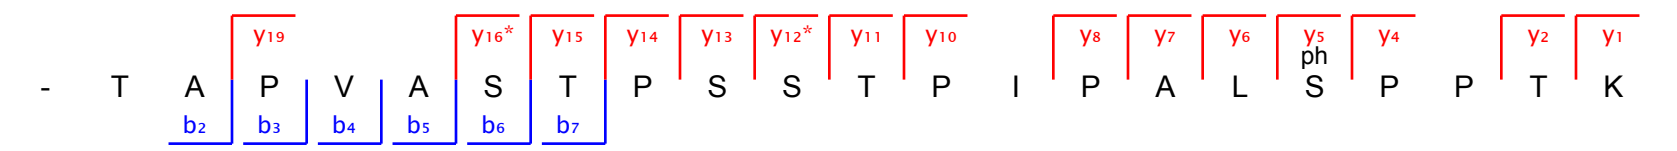

Raw file: 20150814\_A375SR\_Phospho\_BR2\_09  
 Scan: 19541 Method: FTMS; HCD Score: 148.89 m/z: 1058.53 Gene names: SYNC

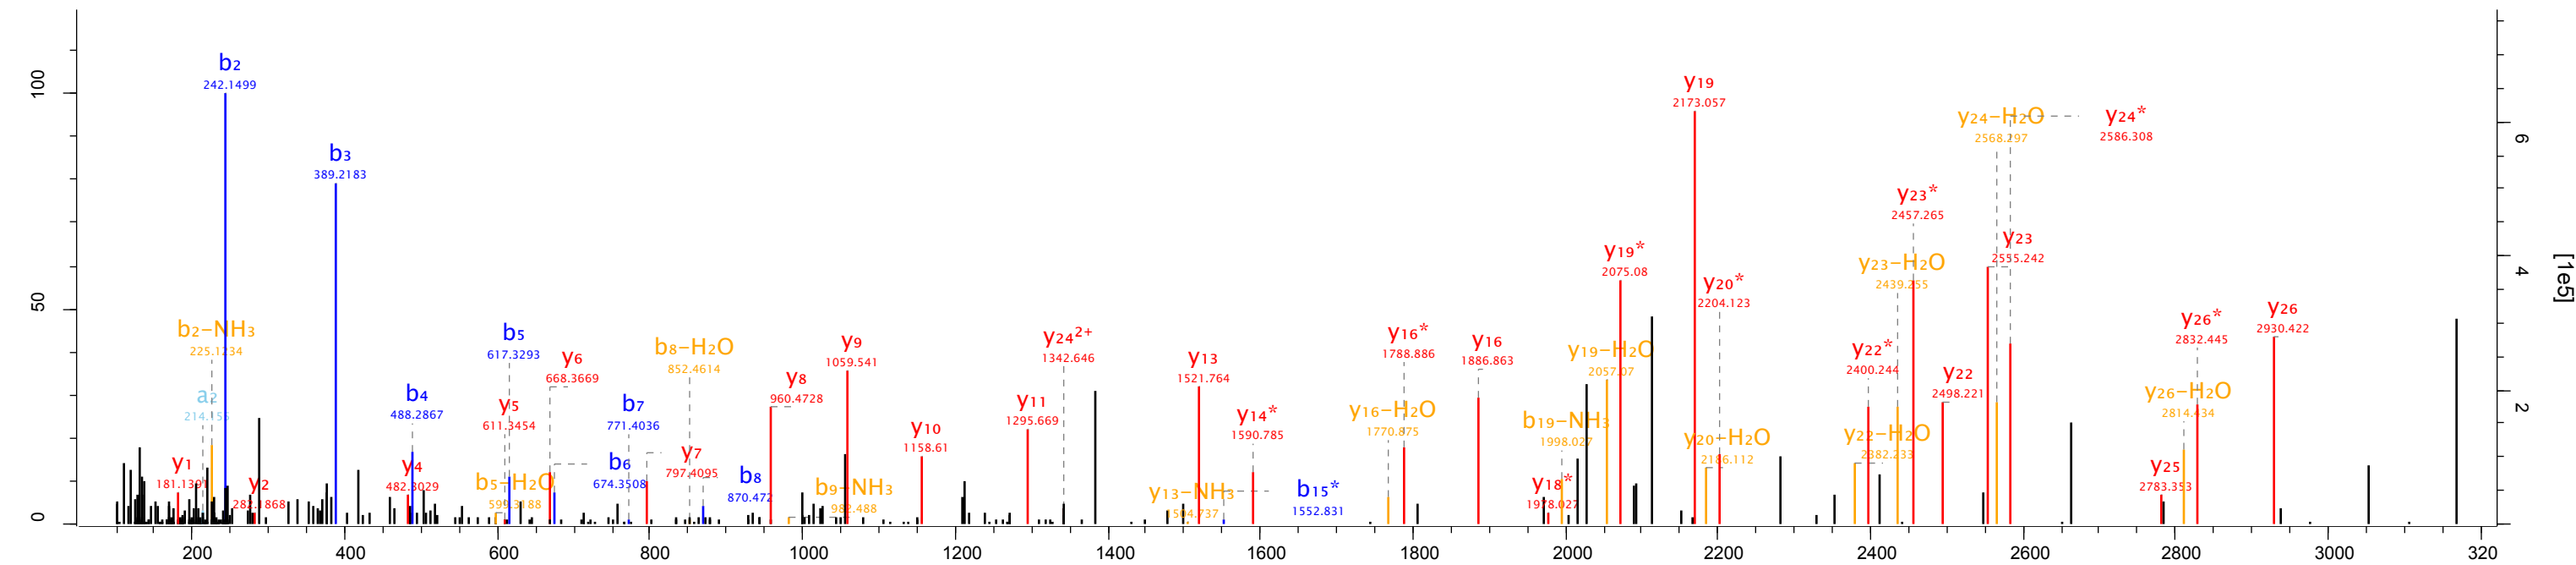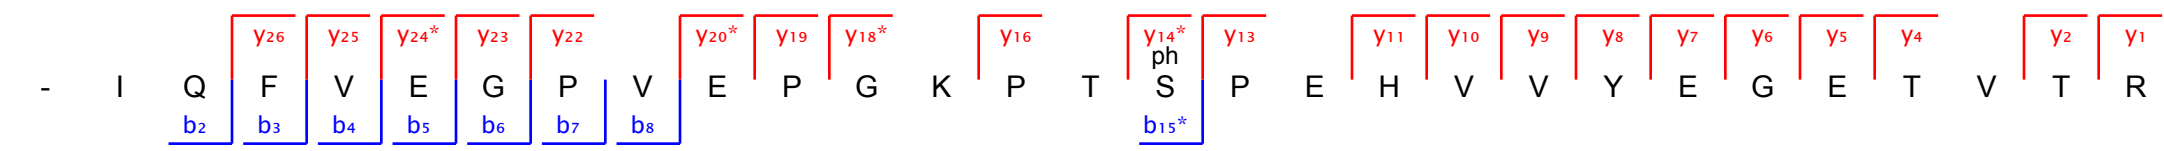

Raw file: 20150814\_A375SR\_Phospho\_BR2\_09  
 Scan: 19591 Method: FTMS; HCD Score: 291.88 m/z: 1226.62 Gene names: CSNK2B

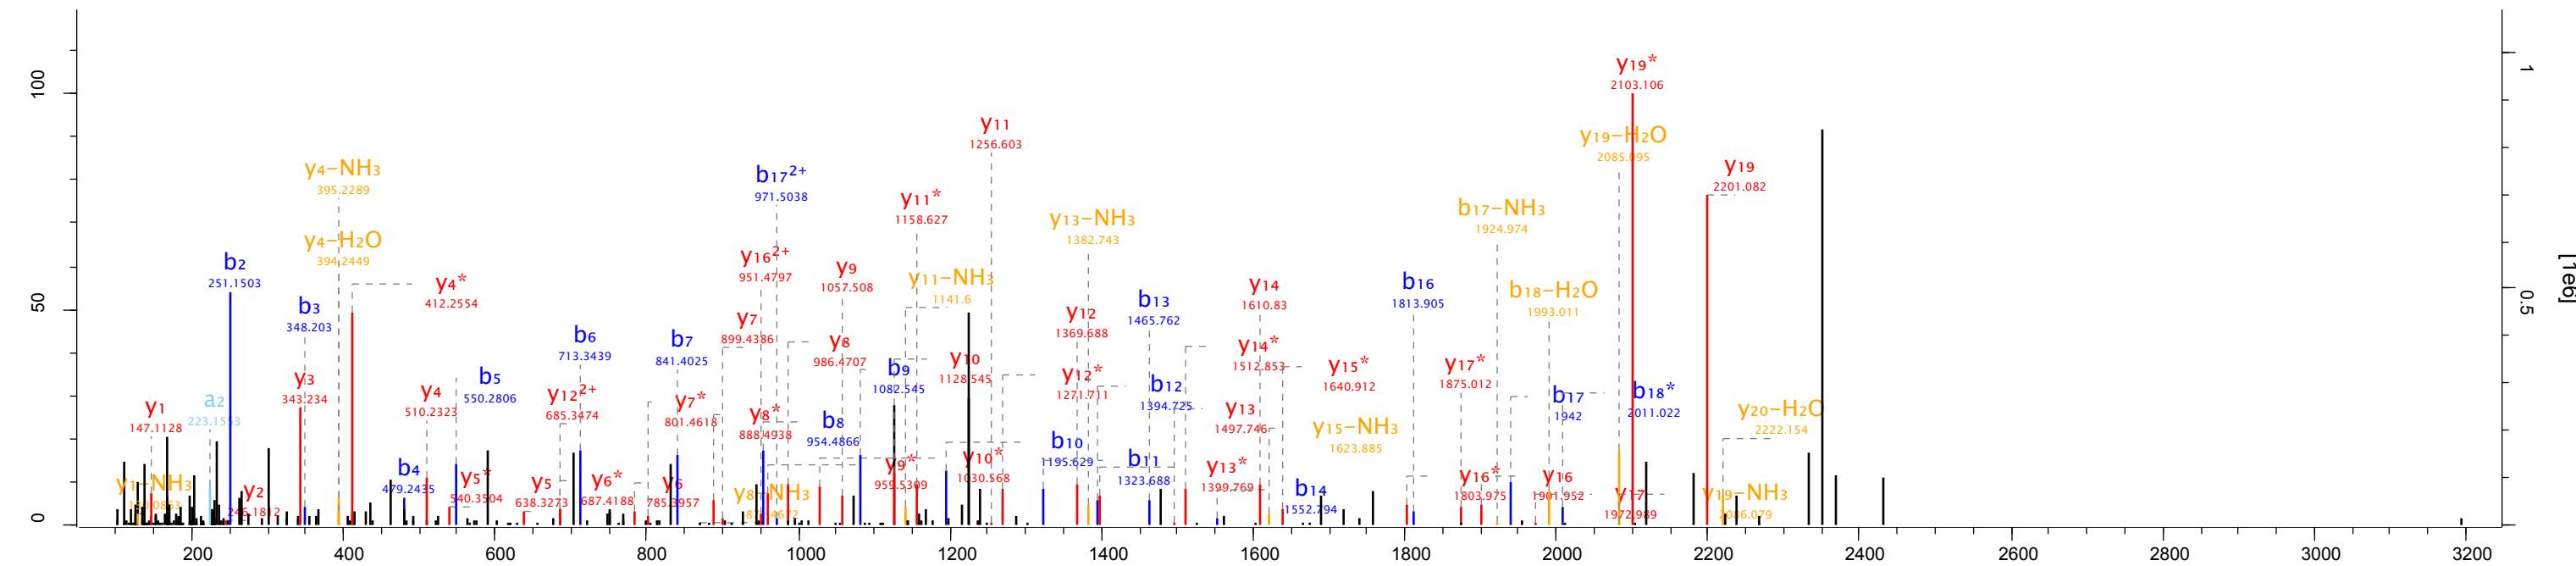

- I H P M A Y Q L Q L Q A A S N F K S P V K -  
 b<sub>2</sub> b<sub>3</sub> b<sub>4</sub> b<sub>5</sub> b<sub>6</sub> b<sub>7</sub> b<sub>8</sub> b<sub>9</sub> b<sub>10</sub> b<sub>11</sub> b<sub>12</sub> b<sub>13</sub> b<sub>14</sub> b<sub>16</sub> b<sub>17</sub> b<sub>18</sub>\*

Raw file 20150814\_A375SR\_Phospho\_BR2\_09 Scan 20501 Method FTMS; HCD Score 122.39 m/z 609.77 Gene names CD2AP

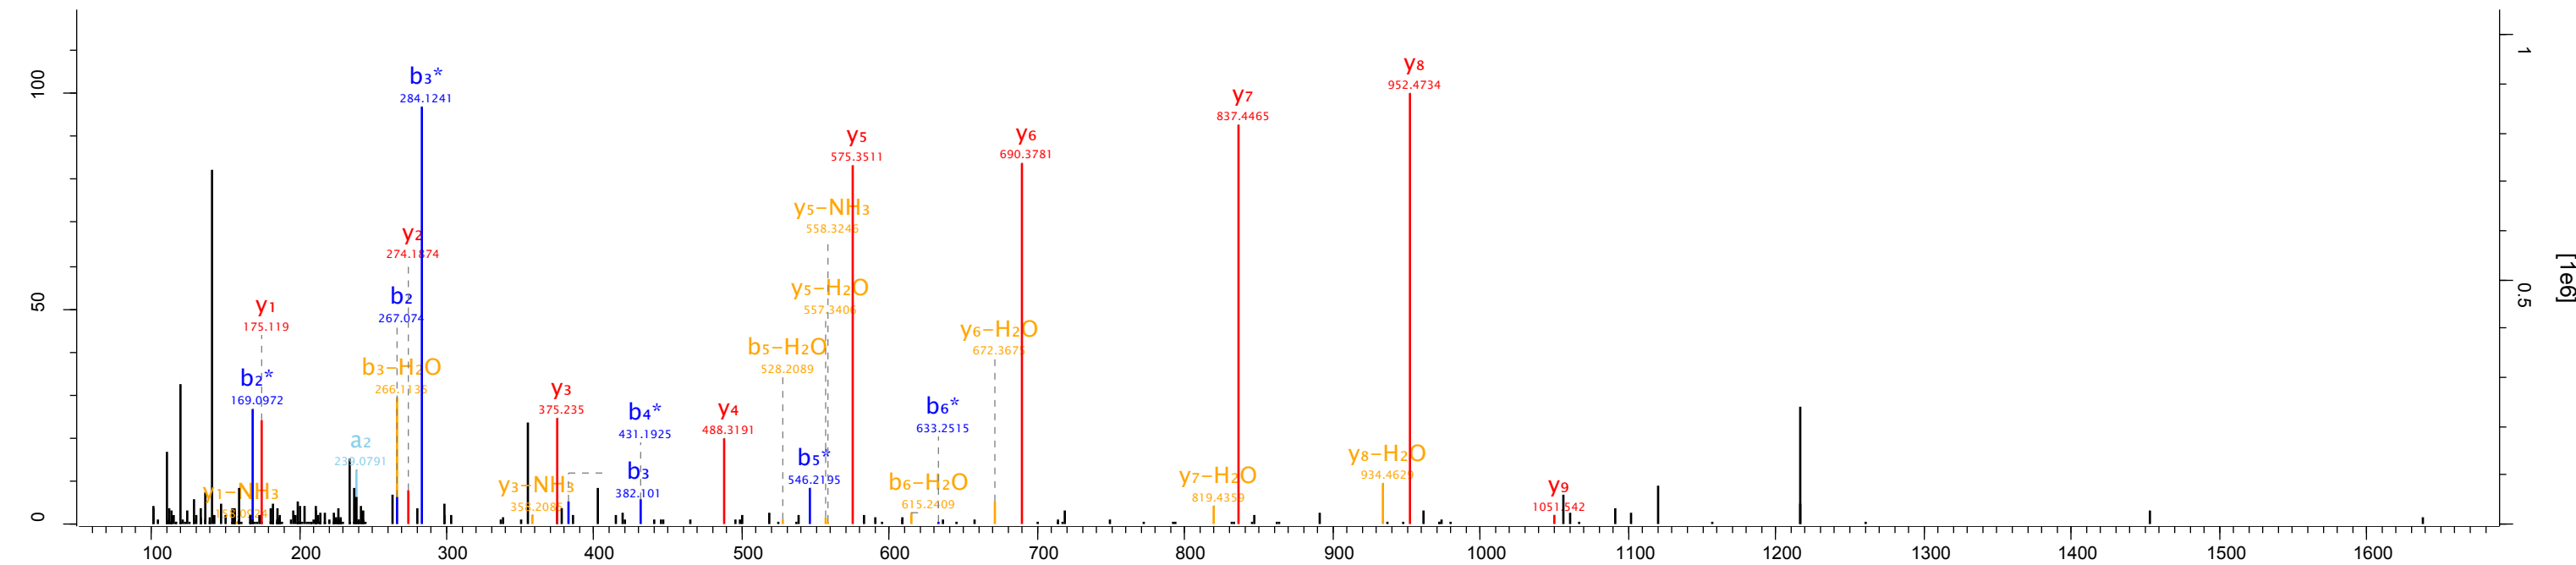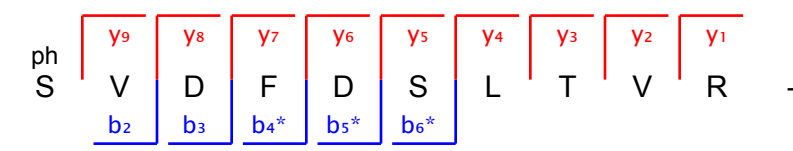



Raw file Scan Method Score m/z Gene names  
 20150814\_A375SR\_Phospho\_BR2\_09 21021 FTMS; HCD 72.11 844.9 PDLIM4

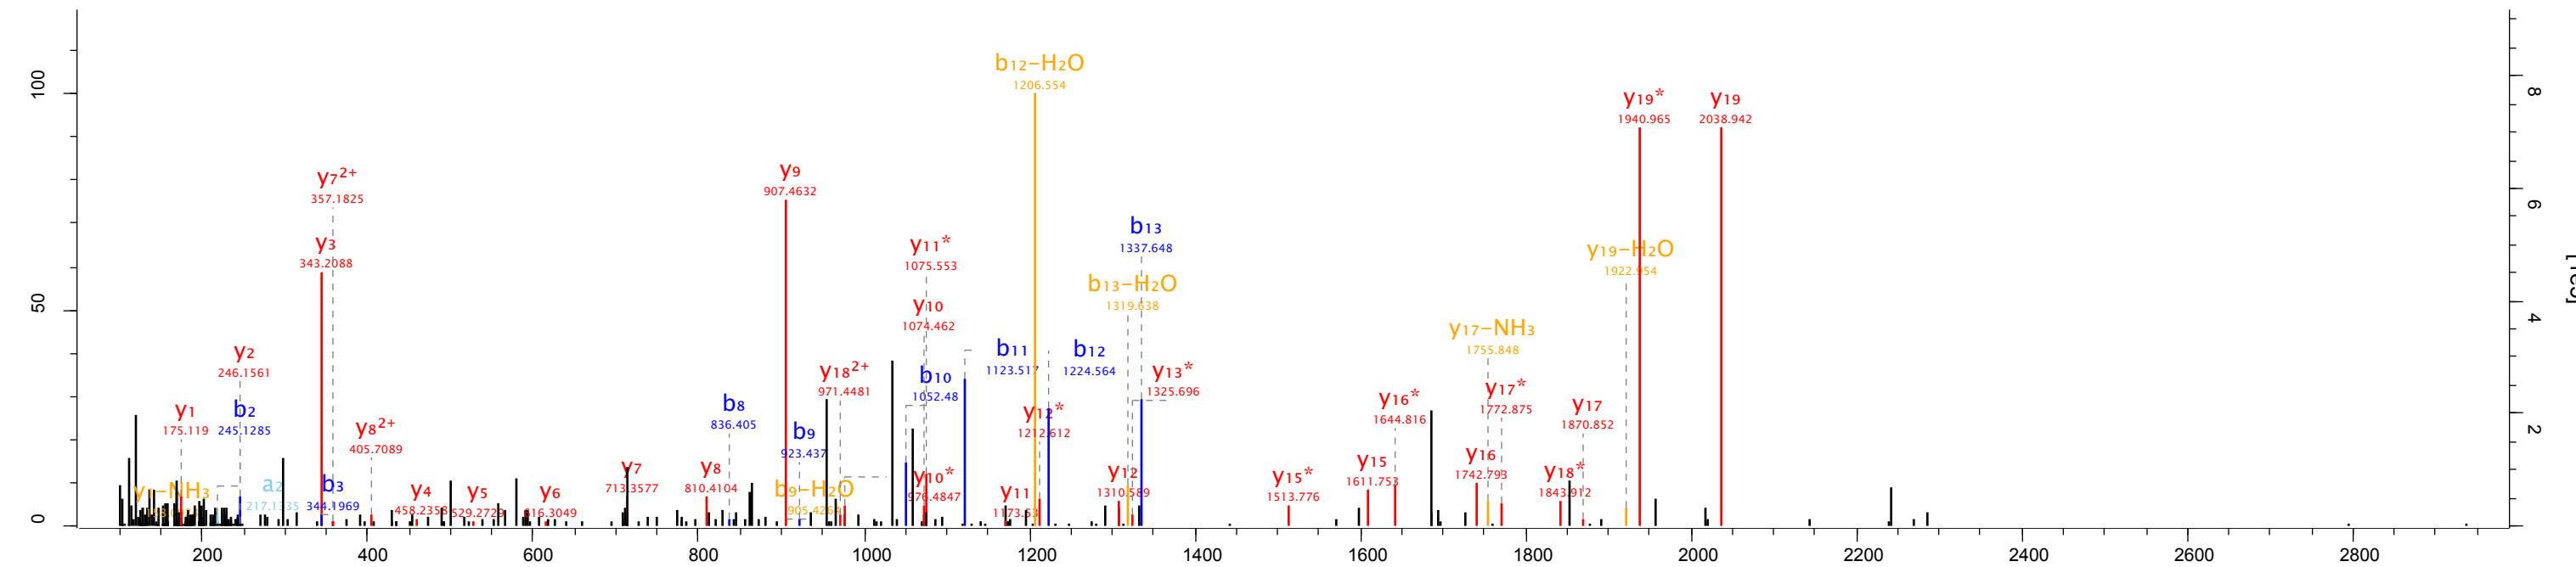

- F P V P H N G S S E A T L P A Q M S T L H V S P P P S A D P A R -

Fragmentation mapping (b and y ions) is shown below the sequence:

- b<sub>2</sub> (P), b<sub>3</sub> (V)
- b<sub>8</sub> (S), b<sub>9</sub> (S), b<sub>10</sub> (E), b<sub>11</sub> (A), b<sub>12</sub> (T), b<sub>13</sub> (L)
- y<sub>1</sub> (P), y<sub>2</sub> (A), y<sub>3</sub> (R), y<sub>4</sub> (D), y<sub>5</sub> (S), y<sub>6</sub> (P), y<sub>7</sub> (P), y<sub>8</sub> (P), y<sub>9</sub> (S), y<sub>10</sub> (ph), y<sub>11</sub> (V), y<sub>12</sub> (H), y<sub>13</sub> (L), y<sub>15</sub> (S), y<sub>16</sub> (M), y<sub>17</sub> (Q), y<sub>18</sub> (A), y<sub>19</sub> (P)

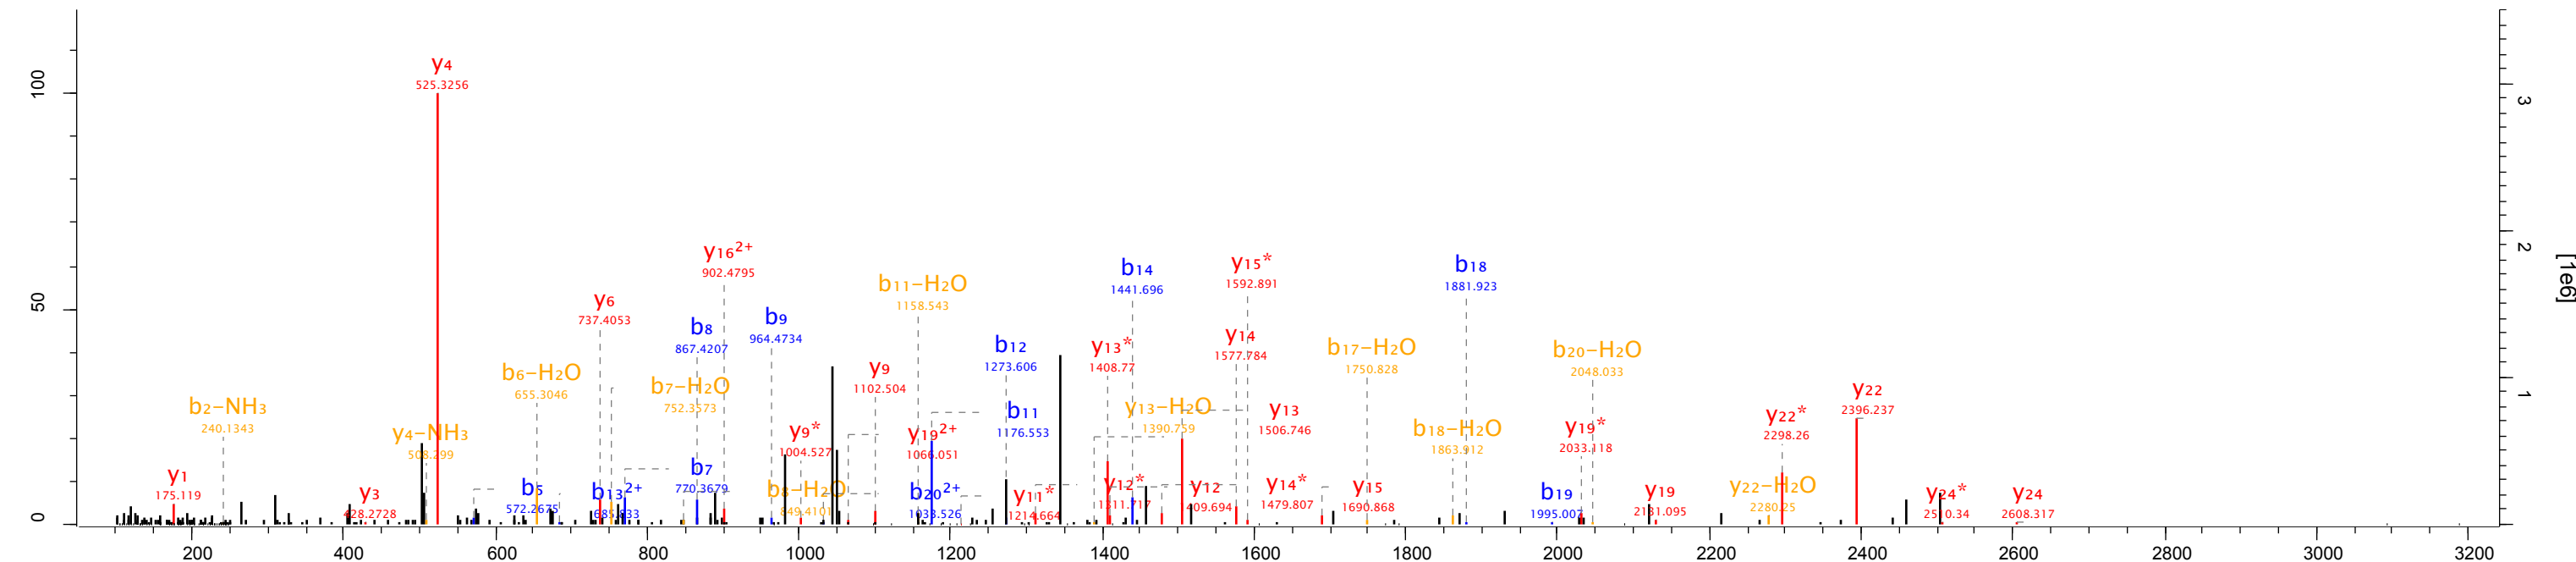

- K Q D A E T P P P P D P P A P E T L L A P P P L P S T P D P P R R -

Fragmentation sites (b and y ions) are indicated by brackets below the amino acid sequence:

- Blue brackets (b ions): b<sub>5</sub> (E), b<sub>7</sub> (P), b<sub>8</sub> (P), b<sub>9</sub> (P), b<sub>11</sub> (D), b<sub>12</sub> (P), b<sub>13<sup>2+</sup></sub> (P), b<sub>14</sub> (A), b<sub>18</sub> (L), b<sub>19</sub> (L), b<sub>20<sup>2+</sup></sub> (A).
- Red brackets (y ions): y<sub>24</sub> (P), y<sub>22</sub> (D), y<sub>19</sub> (P), y<sub>16<sup>2+</sup></sub> (L), y<sub>15</sub> (L), y<sub>14</sub> (A), y<sub>13</sub> (P), y<sub>12</sub> (P), y<sub>11\*</sub> (P), y<sub>9</sub> (L), y<sub>6</sub> (P), y<sub>4</sub> (D), y<sub>3</sub> (P), y<sub>1</sub> (R).

Raw file 20150814\_A375SR\_Phospho\_BR2\_09 Scan 22141 Method FTMS; HCD Score 70.36 m/z 1104.27 Gene names KIAA1467

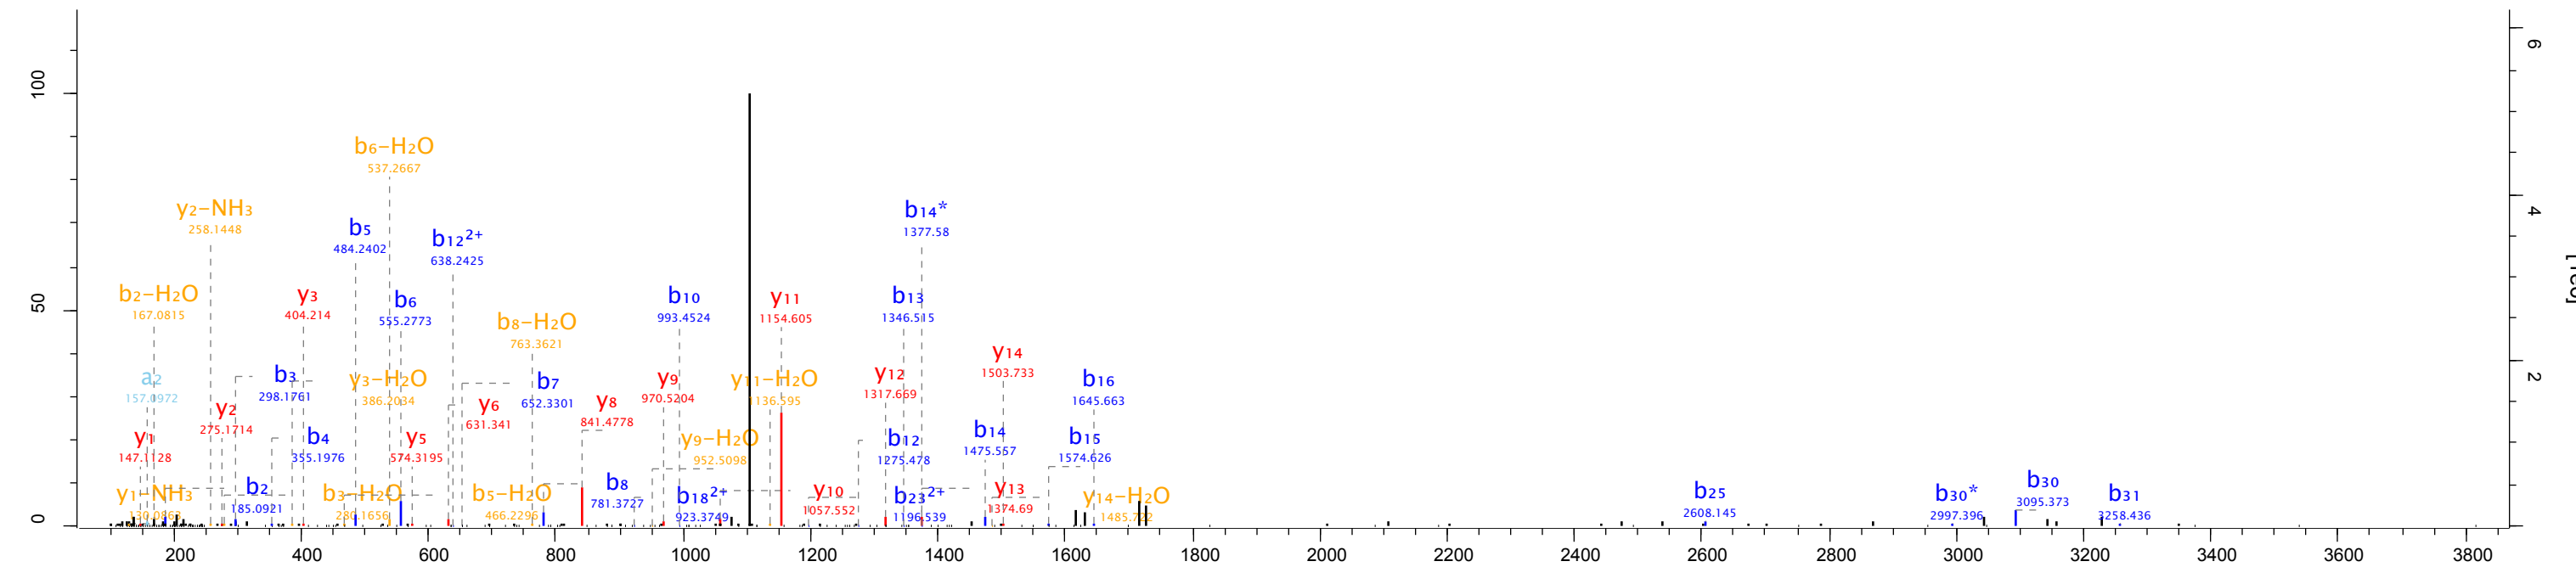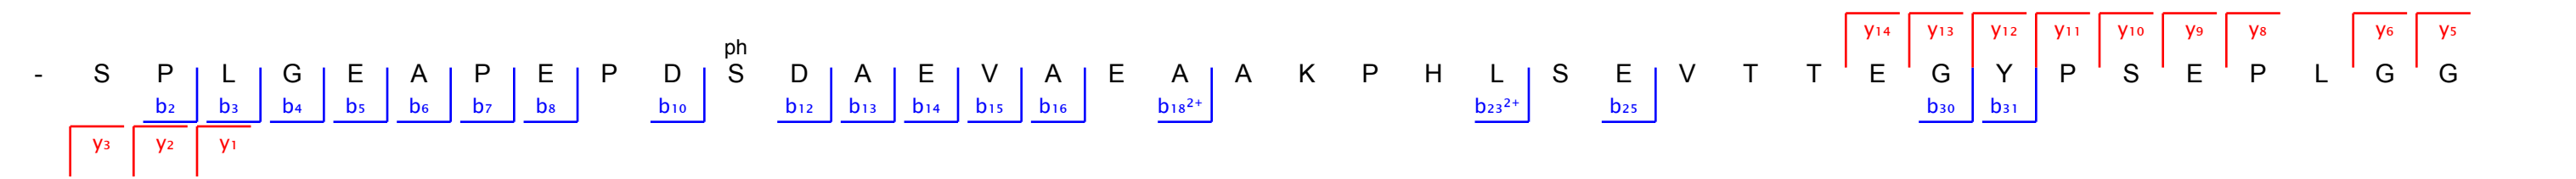

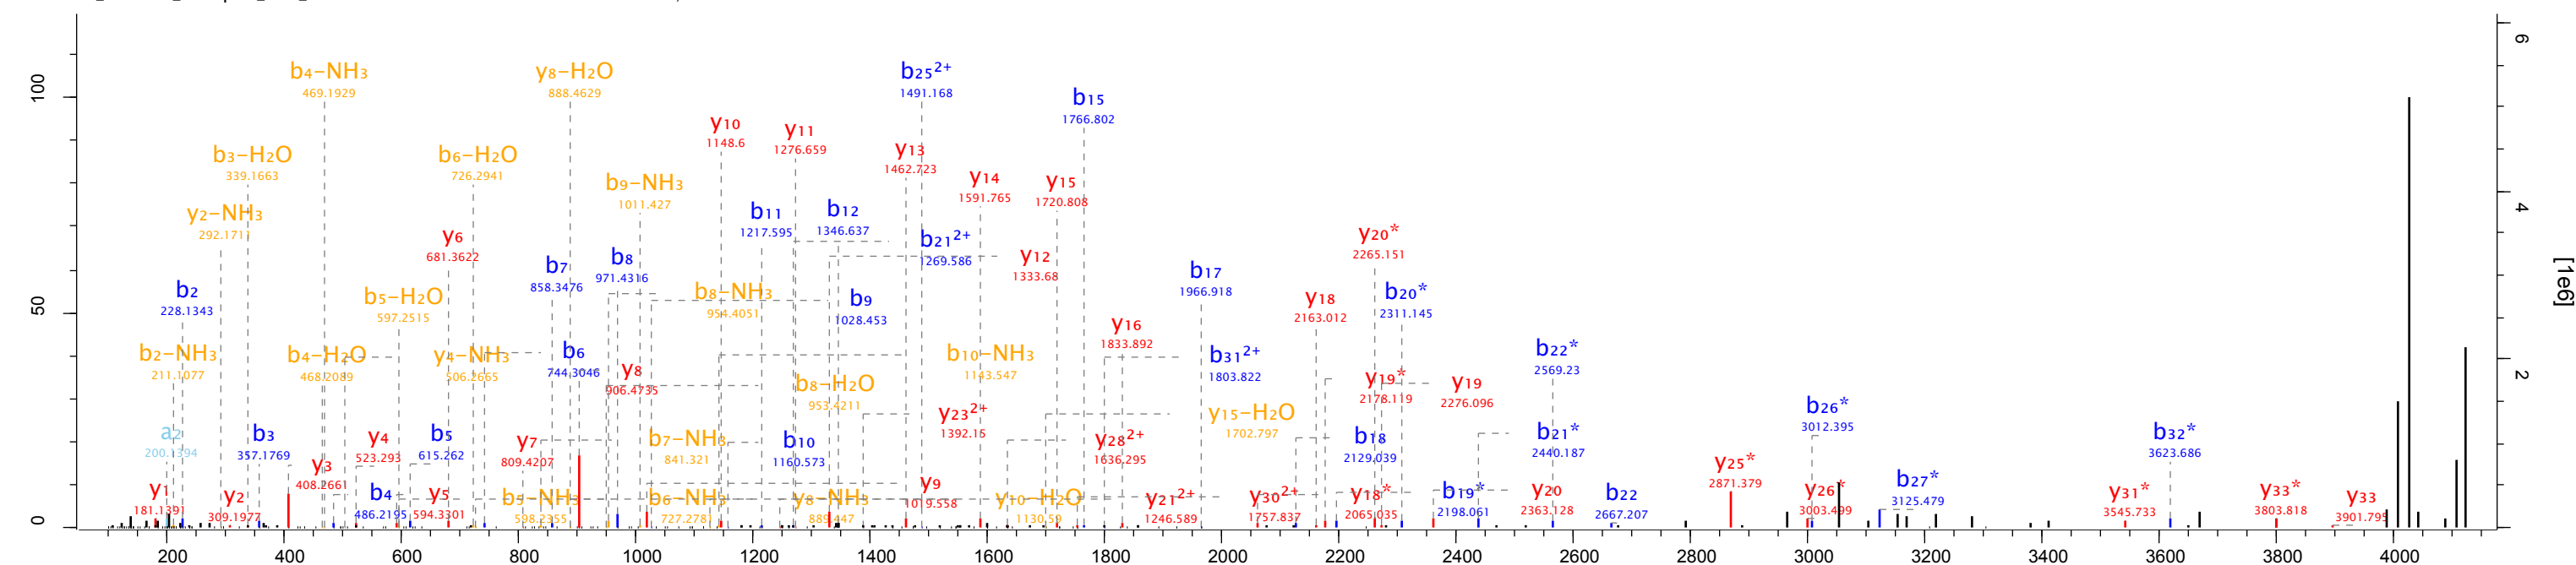

- N L E E E E N L G K G E Y Q E S L R S ph L E E E G Q E L P Q S A D V Q R -

Fragmentation labels (b and y ions) are shown below the corresponding amino acids:

- L: b<sub>2</sub>, b<sub>3</sub>
- E: b<sub>4</sub>, b<sub>5</sub>, b<sub>6</sub>
- N: b<sub>7</sub>
- L: b<sub>8</sub>
- G: b<sub>9</sub>
- K: b<sub>10</sub>
- G: b<sub>11</sub>
- E: b<sub>12</sub>
- Y: y<sub>23</sub>2+
- Q: y<sub>21</sub>2+
- S: y<sub>20</sub>
- L: y<sub>19</sub>, b<sub>17</sub>
- R: y<sub>18</sub>, b<sub>18</sub>
- S: b<sub>19</sub>\*
- L: y<sub>16</sub>, b<sub>20</sub>\*
- E: y<sub>15</sub>, b<sub>21</sub>\*
- E: y<sub>14</sub>, b<sub>22</sub>
- E: y<sub>13</sub>
- G: y<sub>12</sub>
- Q: y<sub>11</sub>, b<sub>25</sub>2+
- E: y<sub>10</sub>, b<sub>26</sub>\*
- L: y<sub>9</sub>, b<sub>27</sub>\*
- P: y<sub>8</sub>, b<sub>31</sub>2+
- Q: y<sub>7</sub>, b<sub>32</sub>\*
- S: y<sub>6</sub>
- A: y<sub>5</sub>
- D: y<sub>4</sub>
- V: y<sub>3</sub>
- Q: y<sub>2</sub>
- R: y<sub>1</sub>

Raw file 20150814\_A375SR\_Phospho\_BR2\_09 Scan 23911 Method FTMS; HCD Score 103.46 m/z 1357.36 Gene names TRIP6

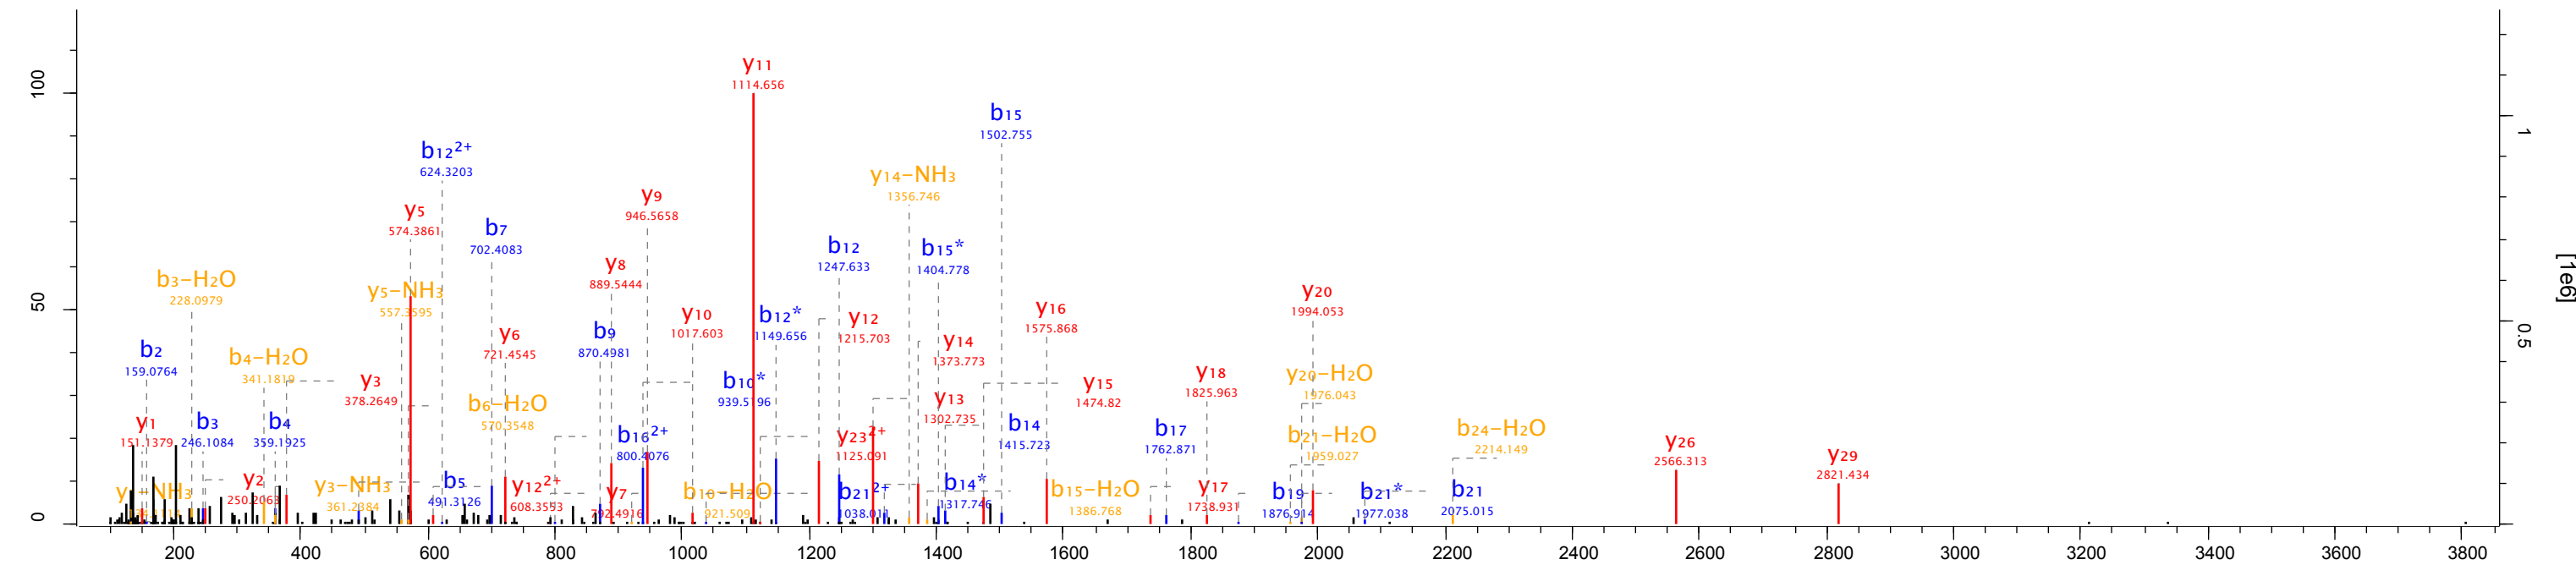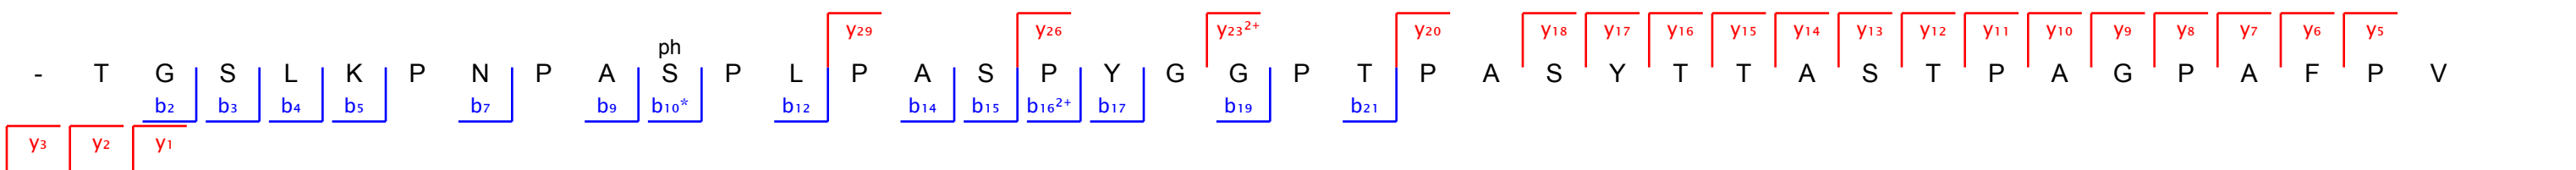

Raw file: 20150814\_A375SR\_Phospho\_BR2\_09  
 Scan: 2471 Method: FTMS; HCD Score: 67.14 m/z: 464.55 Gene names: NFRKB

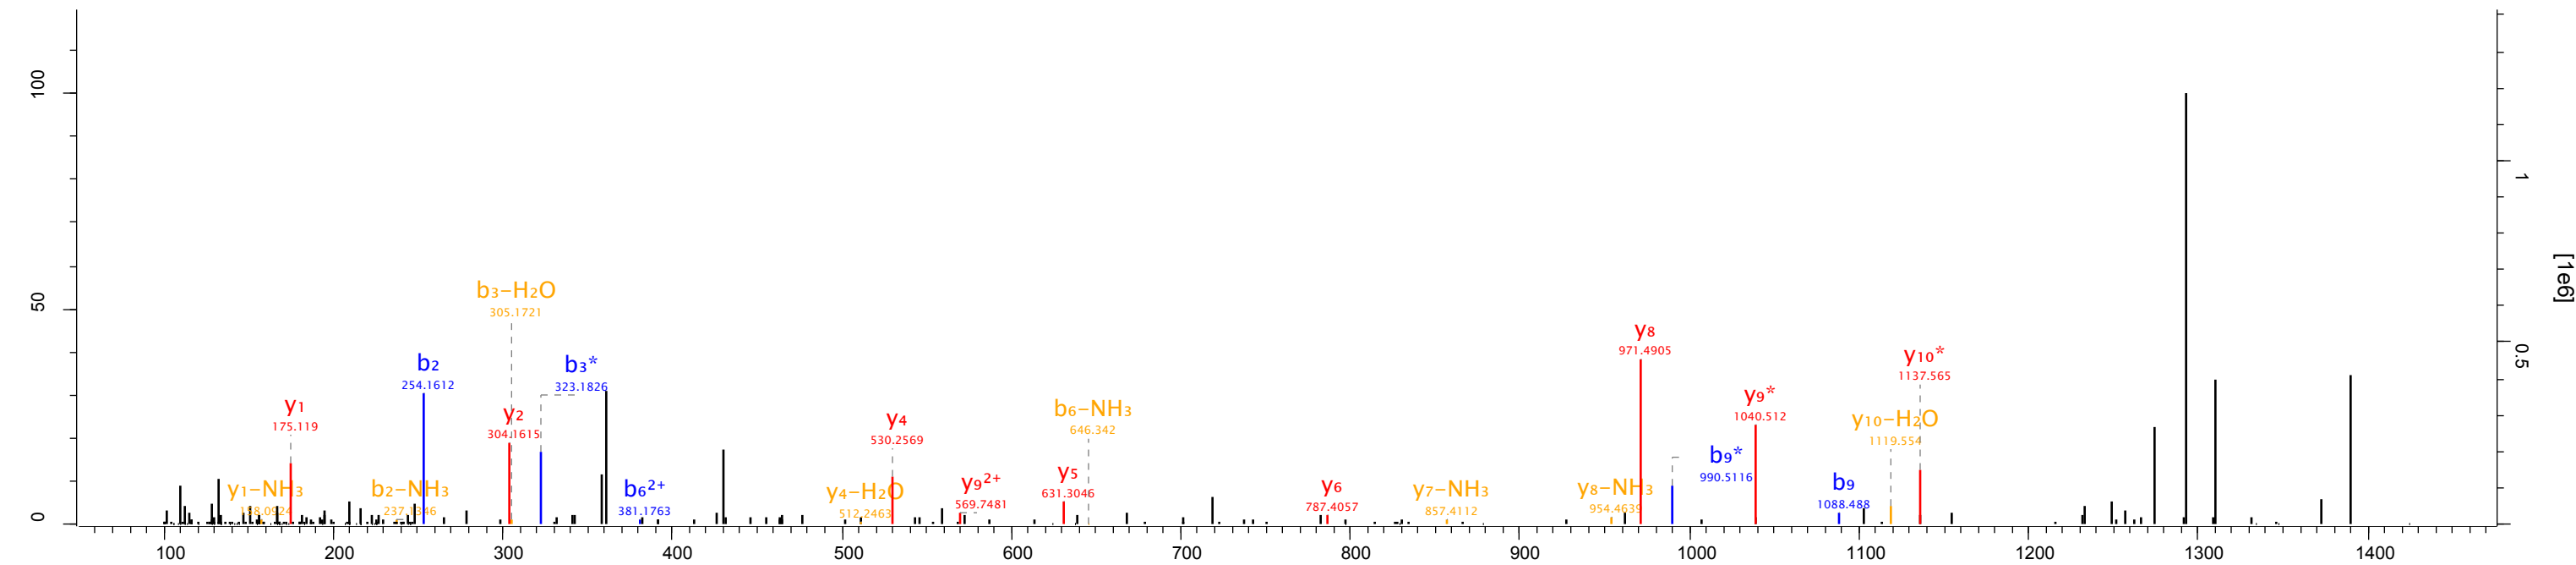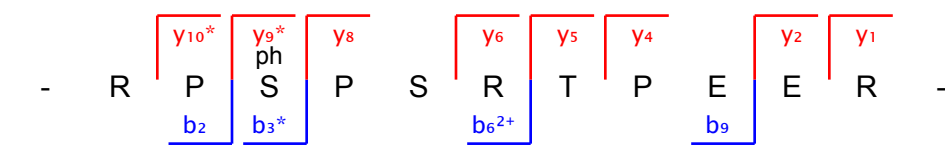

Raw file 20150814\_A375SR\_Phospho\_BR2\_09 Scan 24981 Method FTMS; HCD Score 95.15 m/z 693.33 Gene names MYO5A

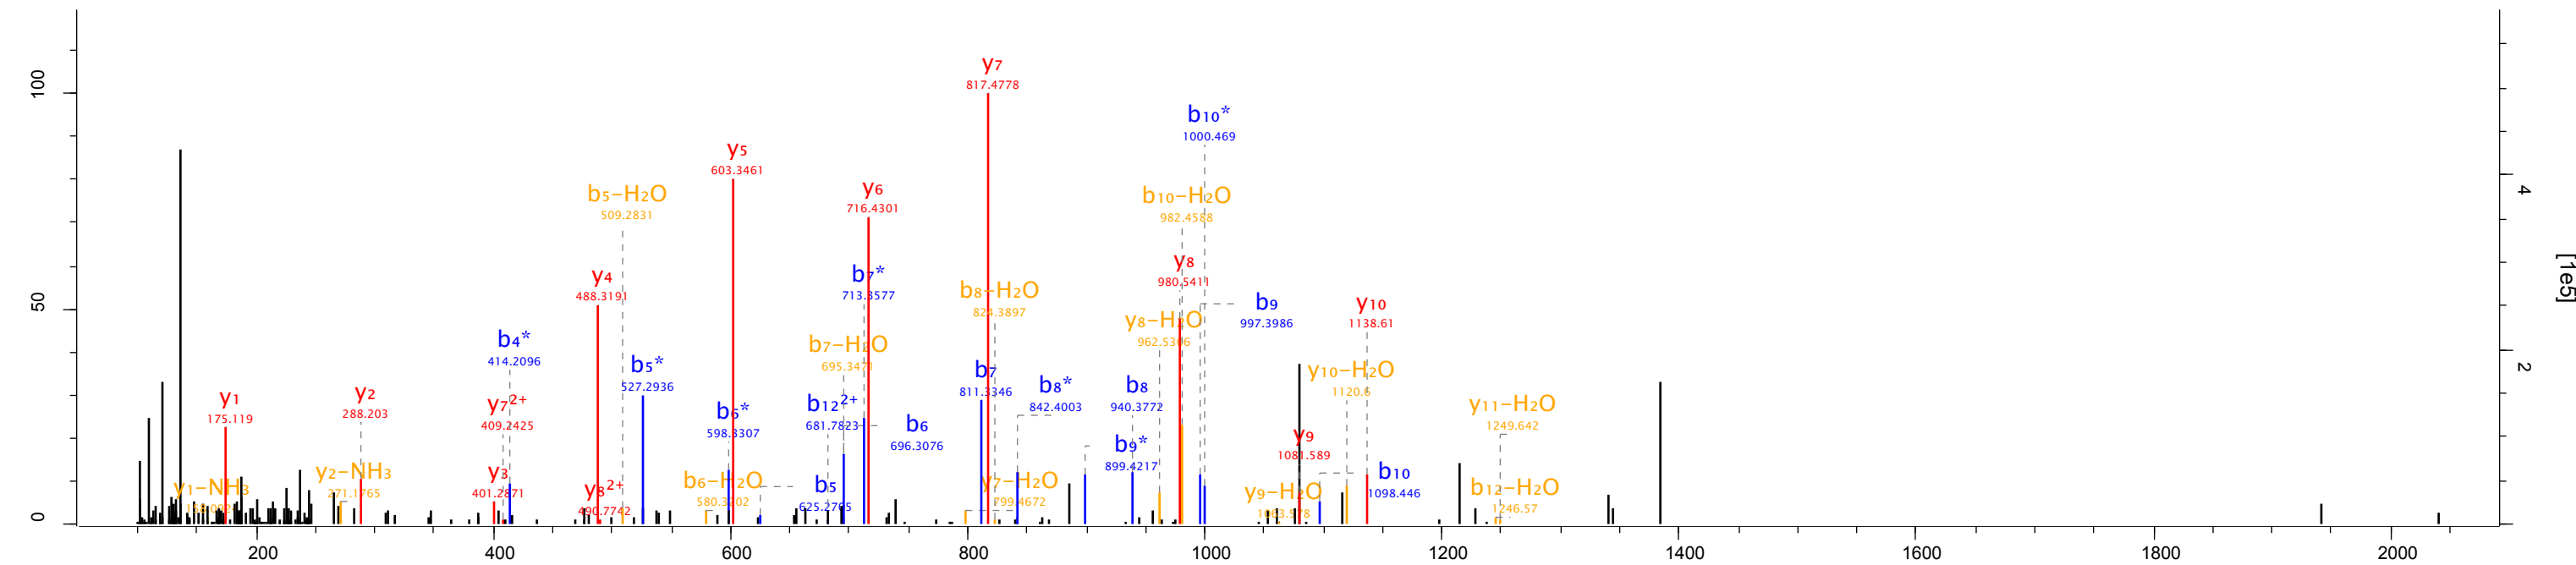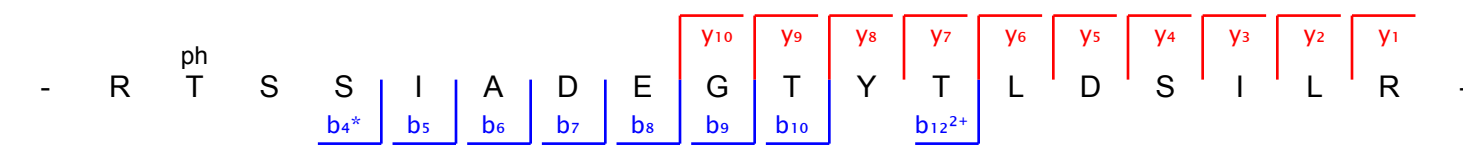

Raw file: 20150814\_A375SR\_Phospho\_BR2\_09  
 Scan: 2661 Method: FTMS; HCD Score: 436.47 m/z: 1031.94 Gene names: HNRNPD

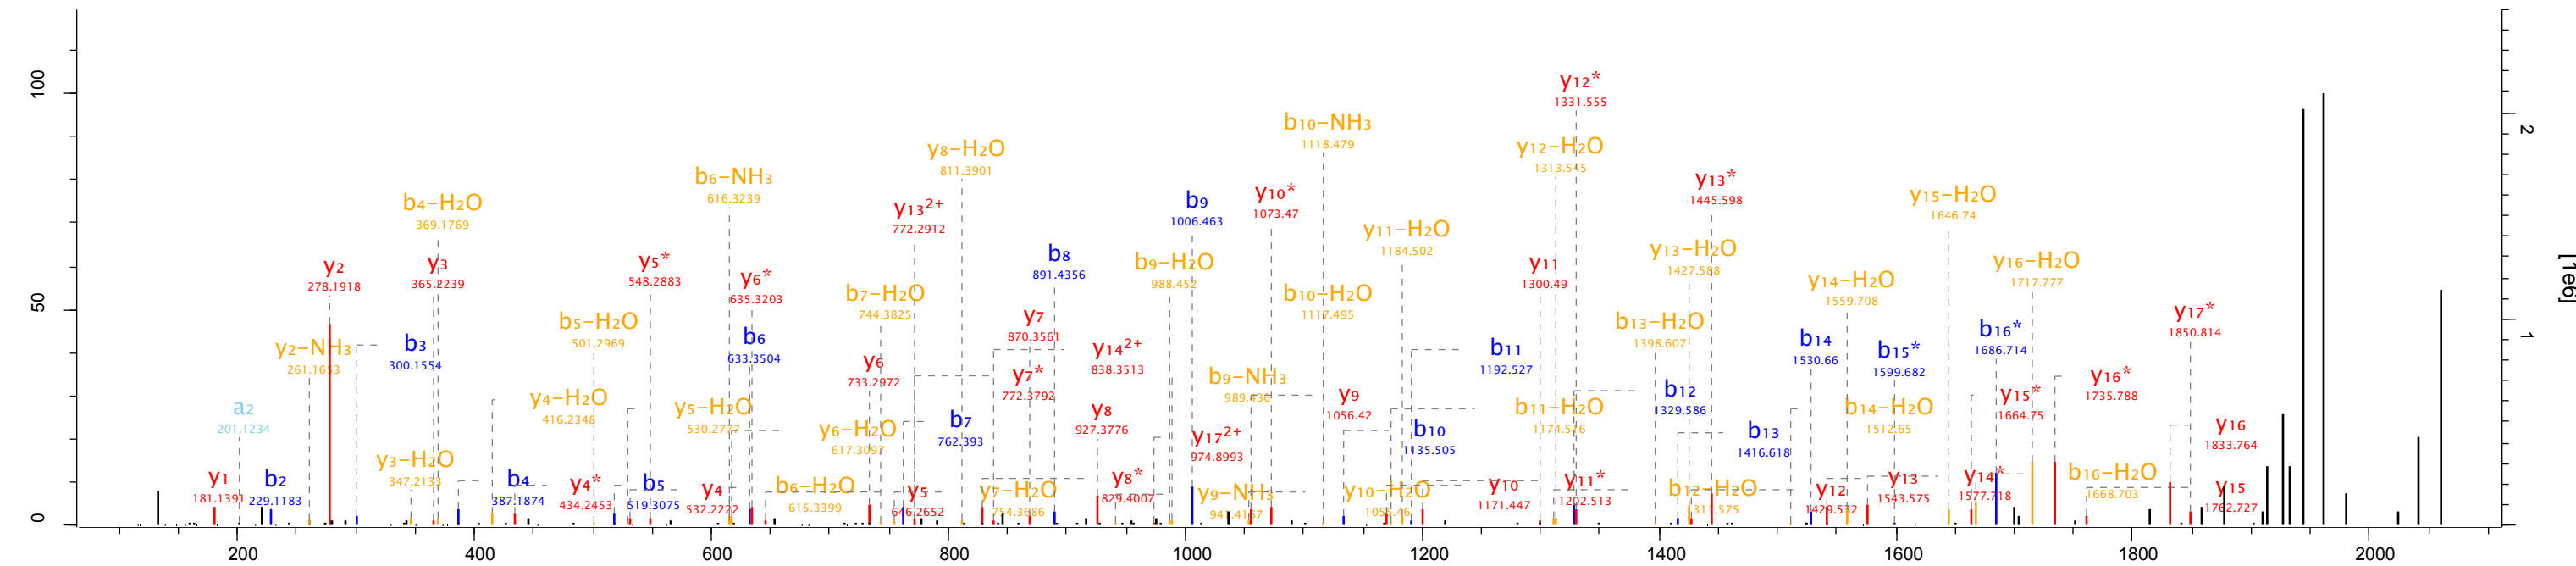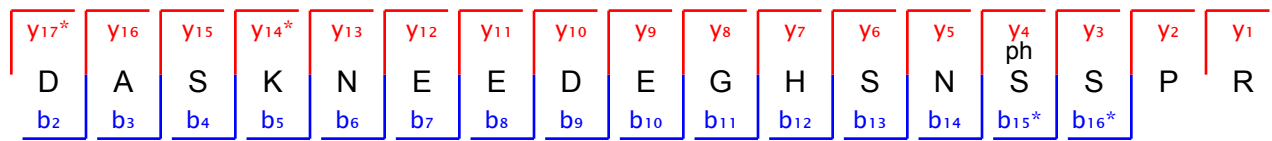



Raw file 20150814\_A375SR\_Phospho\_BR2\_09 Scan 27711 Method FTMS; HCD Score 173.03 m/z 795.17 Gene names PARD3

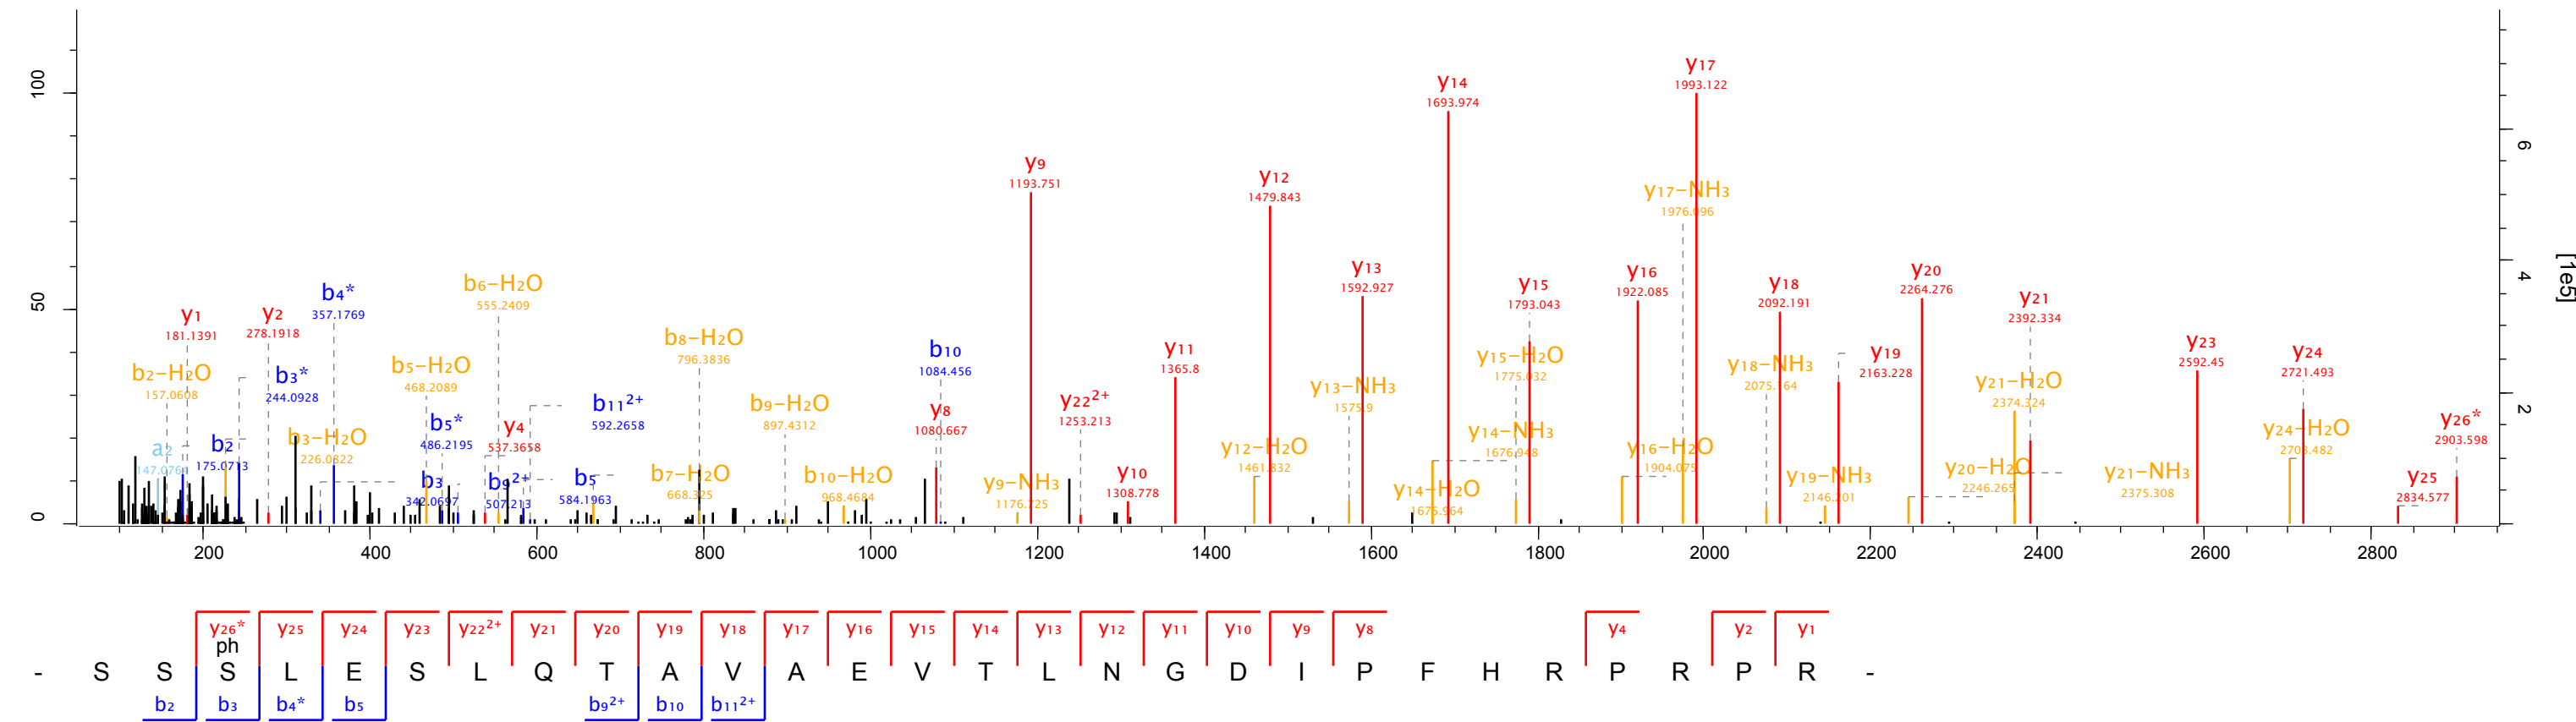

Raw file: 20150814\_A375SR\_Phospho\_BR2\_09 Scan: 27871 Method: FTMS; HCD Score: 55.89 m/z: 1269.99 Gene names: KHDRBS1

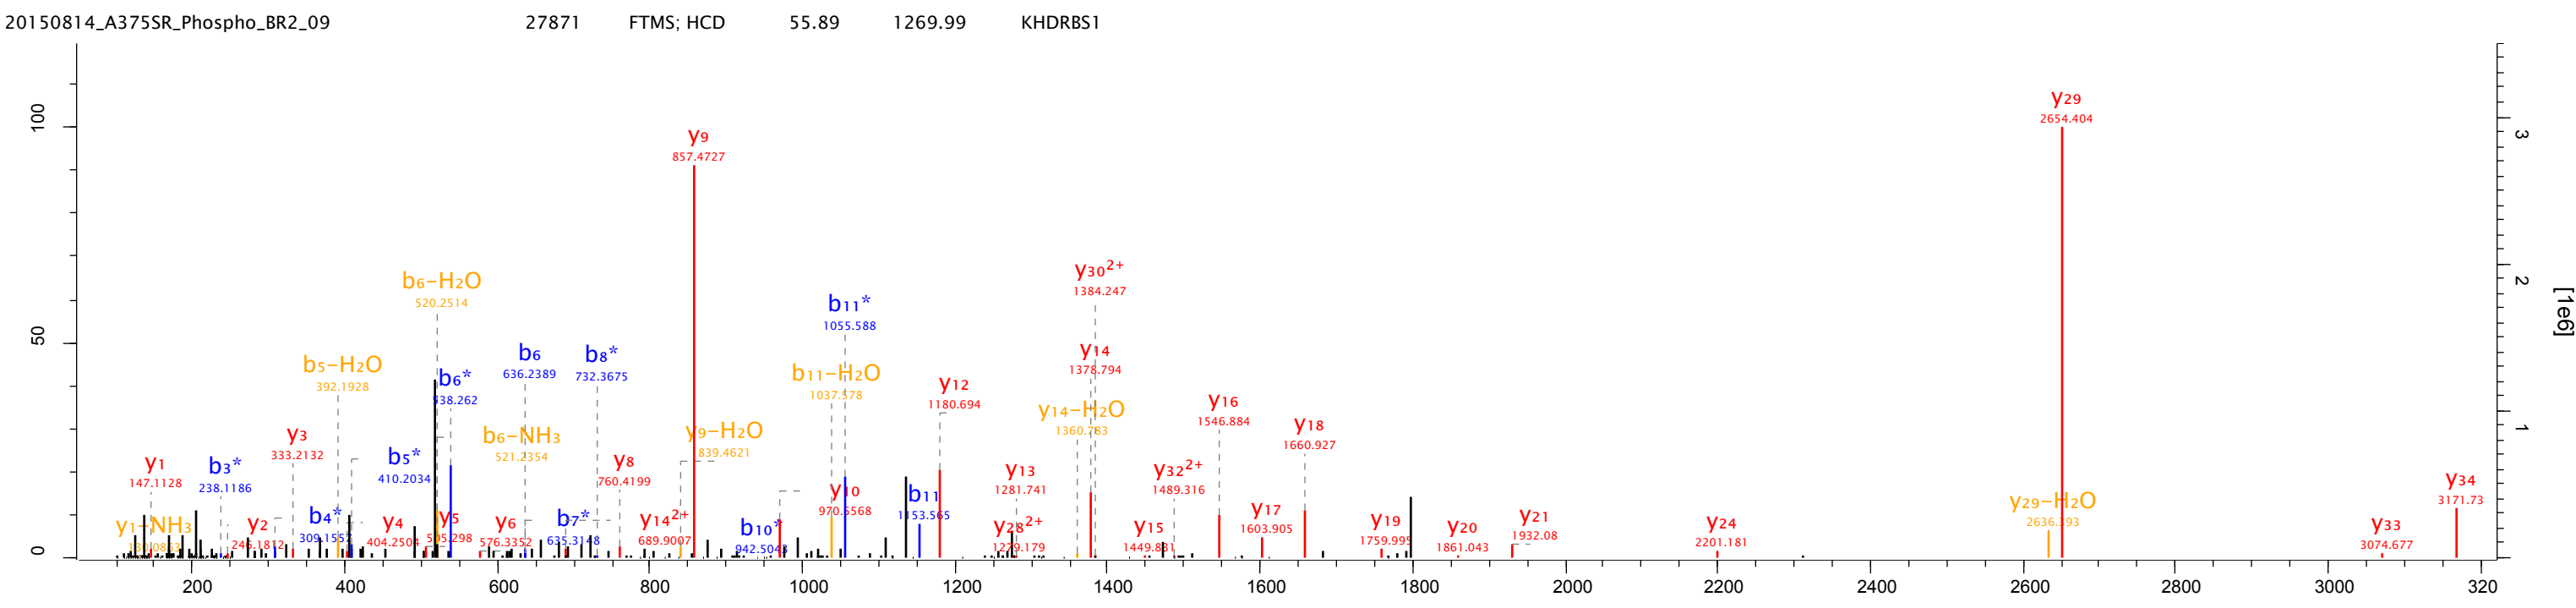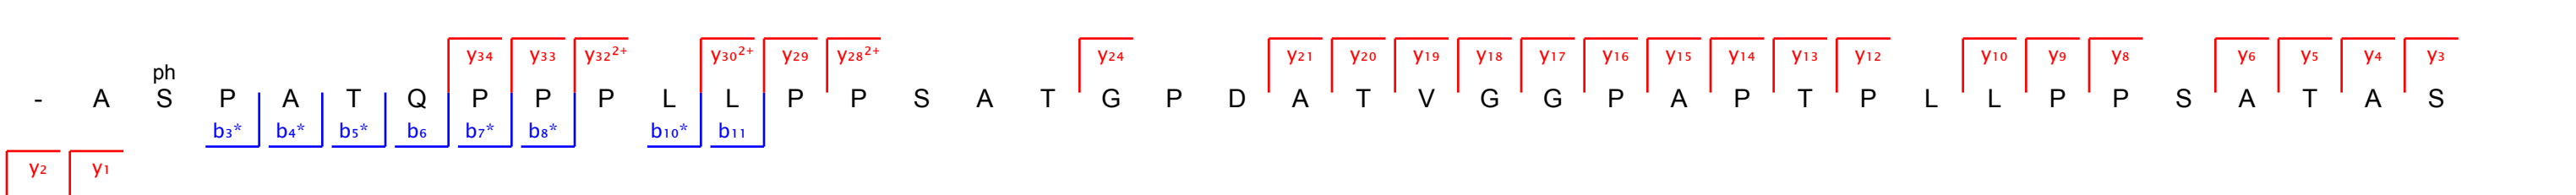

Raw file 20150814\_A375SR\_Phospho\_BR2\_09 Scan 28201 Method FTMS; HCD Score 140.63 m/z 1005.97 Gene names RRN3

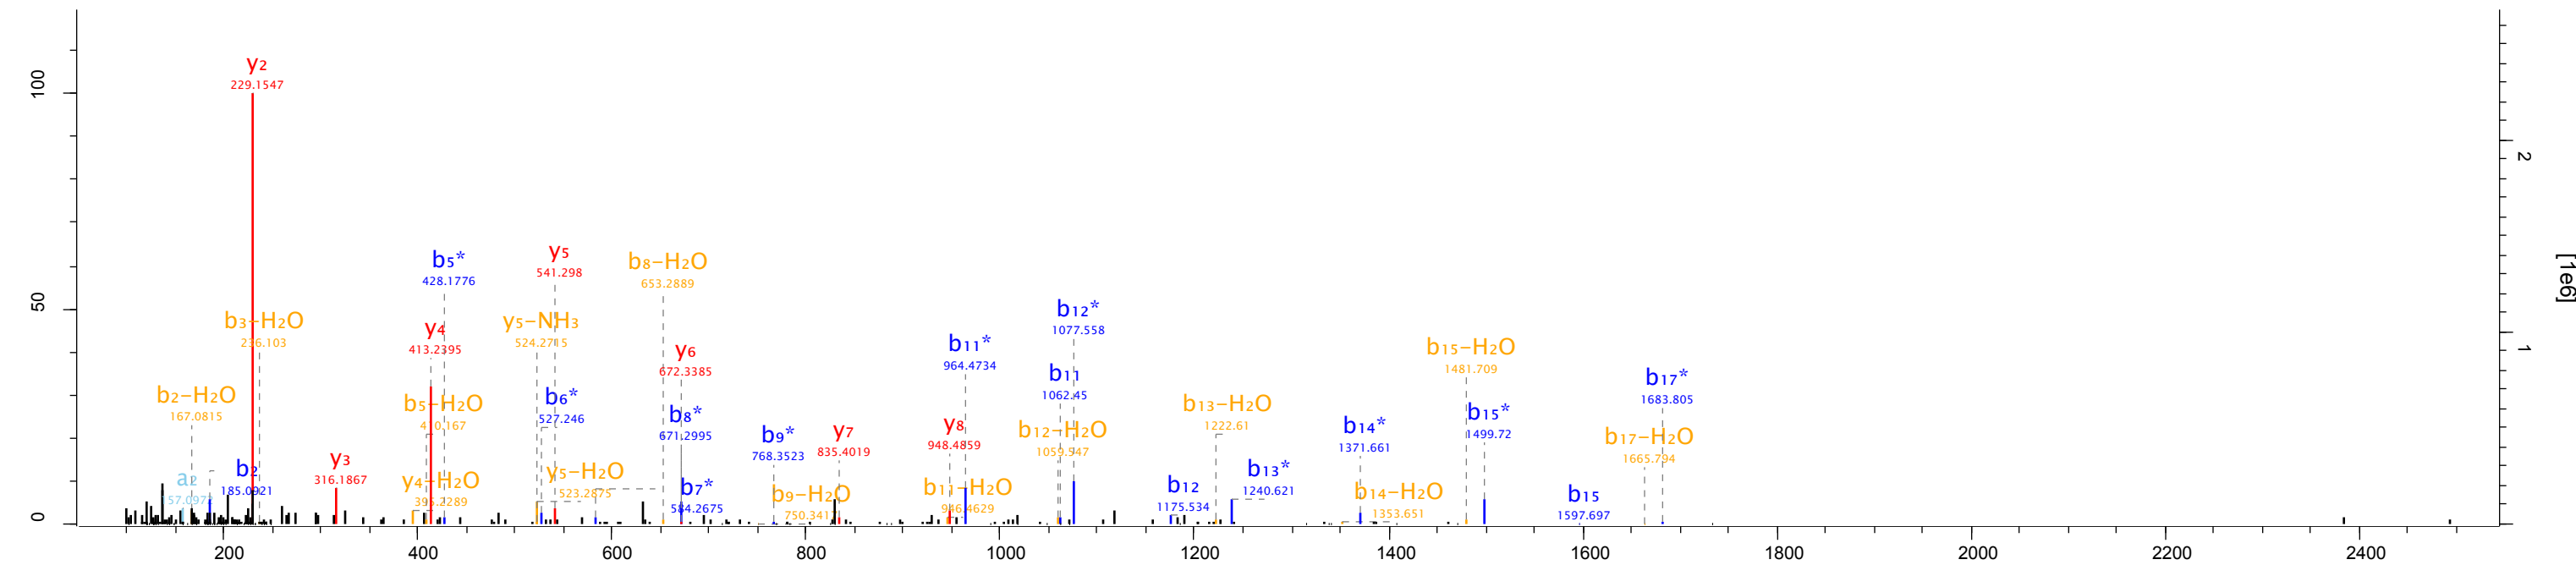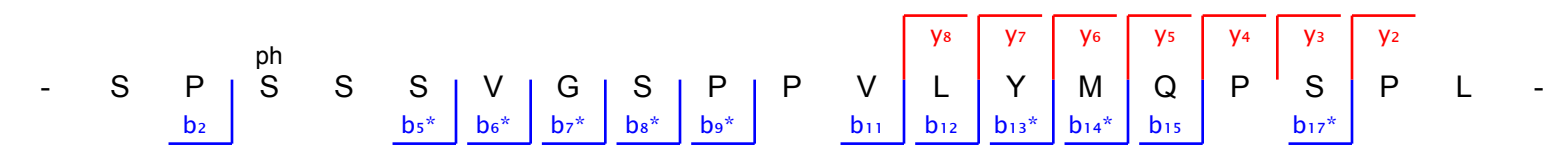

Raw file 20150814\_A375SR\_Phospho\_BR2\_09 Scan 28911 Method FTMS; HCD Score 103.03 m/z 759.97 Gene names ZYX

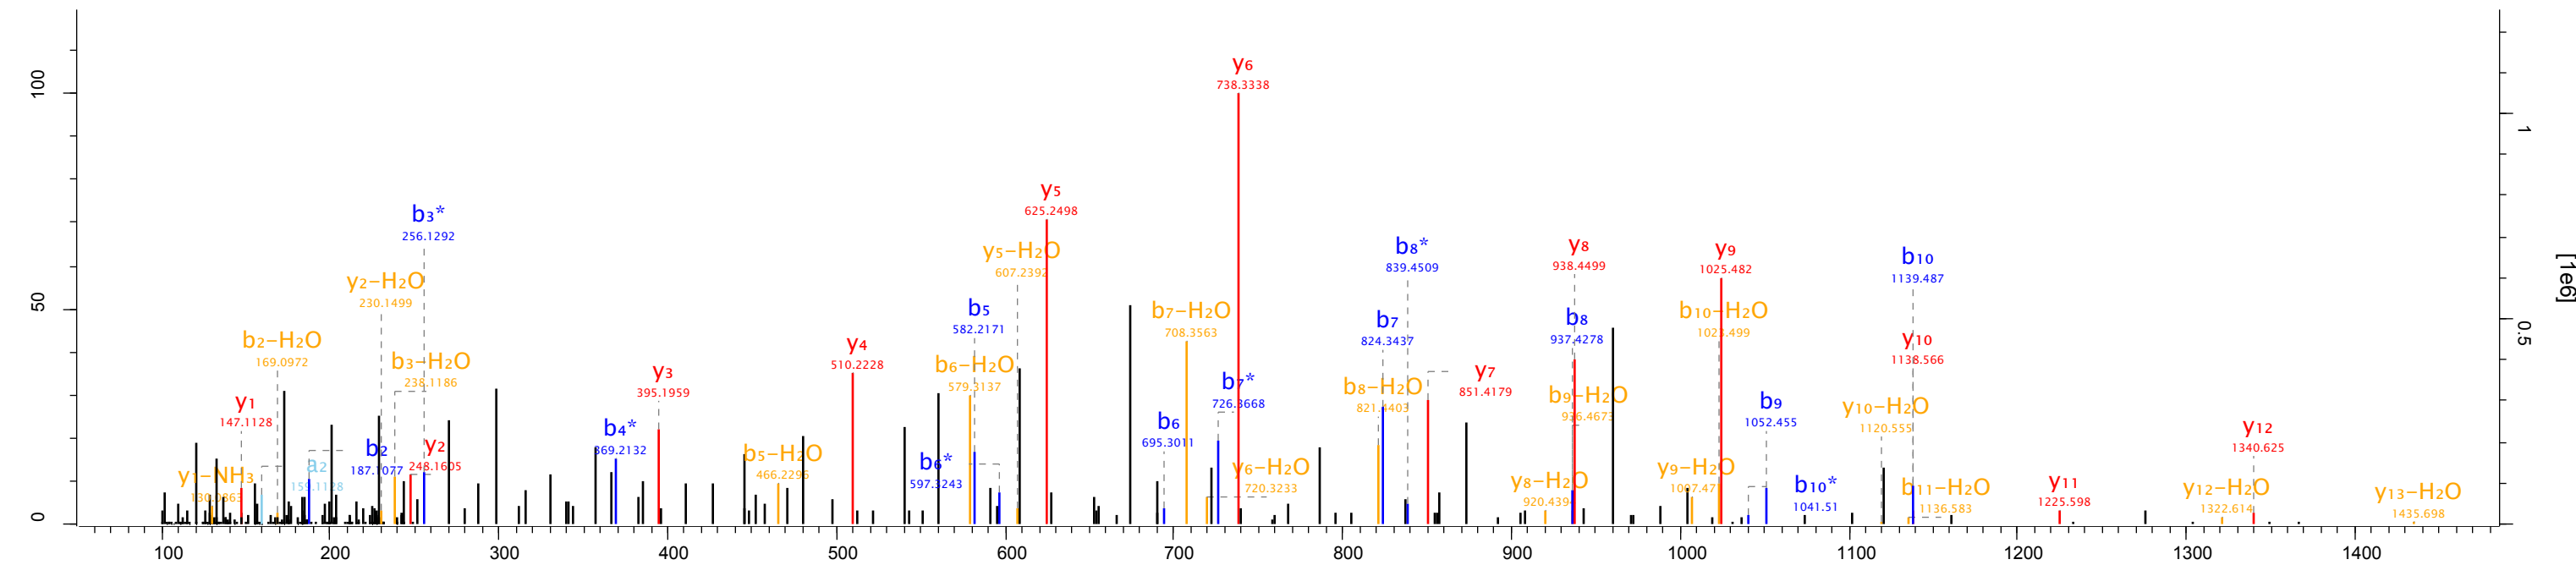

- V S S I D L E I D S L S S L L D D M T K -

ph

b<sub>2</sub> b<sub>3</sub>\* b<sub>4</sub>\* b<sub>5</sub> b<sub>6</sub> b<sub>7</sub> b<sub>8</sub> b<sub>9</sub> b<sub>10</sub> y<sub>12</sub> y<sub>11</sub> y<sub>10</sub> y<sub>9</sub> y<sub>8</sub> y<sub>7</sub> y<sub>6</sub> y<sub>5</sub> y<sub>4</sub> y<sub>3</sub> OX y<sub>2</sub> y<sub>1</sub>

Raw file: 20150814\_A375SR\_Phospho\_BR2\_09  
 Scan: 3121 Method: FTMS; HCD Score: 102.26 m/z: 648.83 Gene names: SLBP

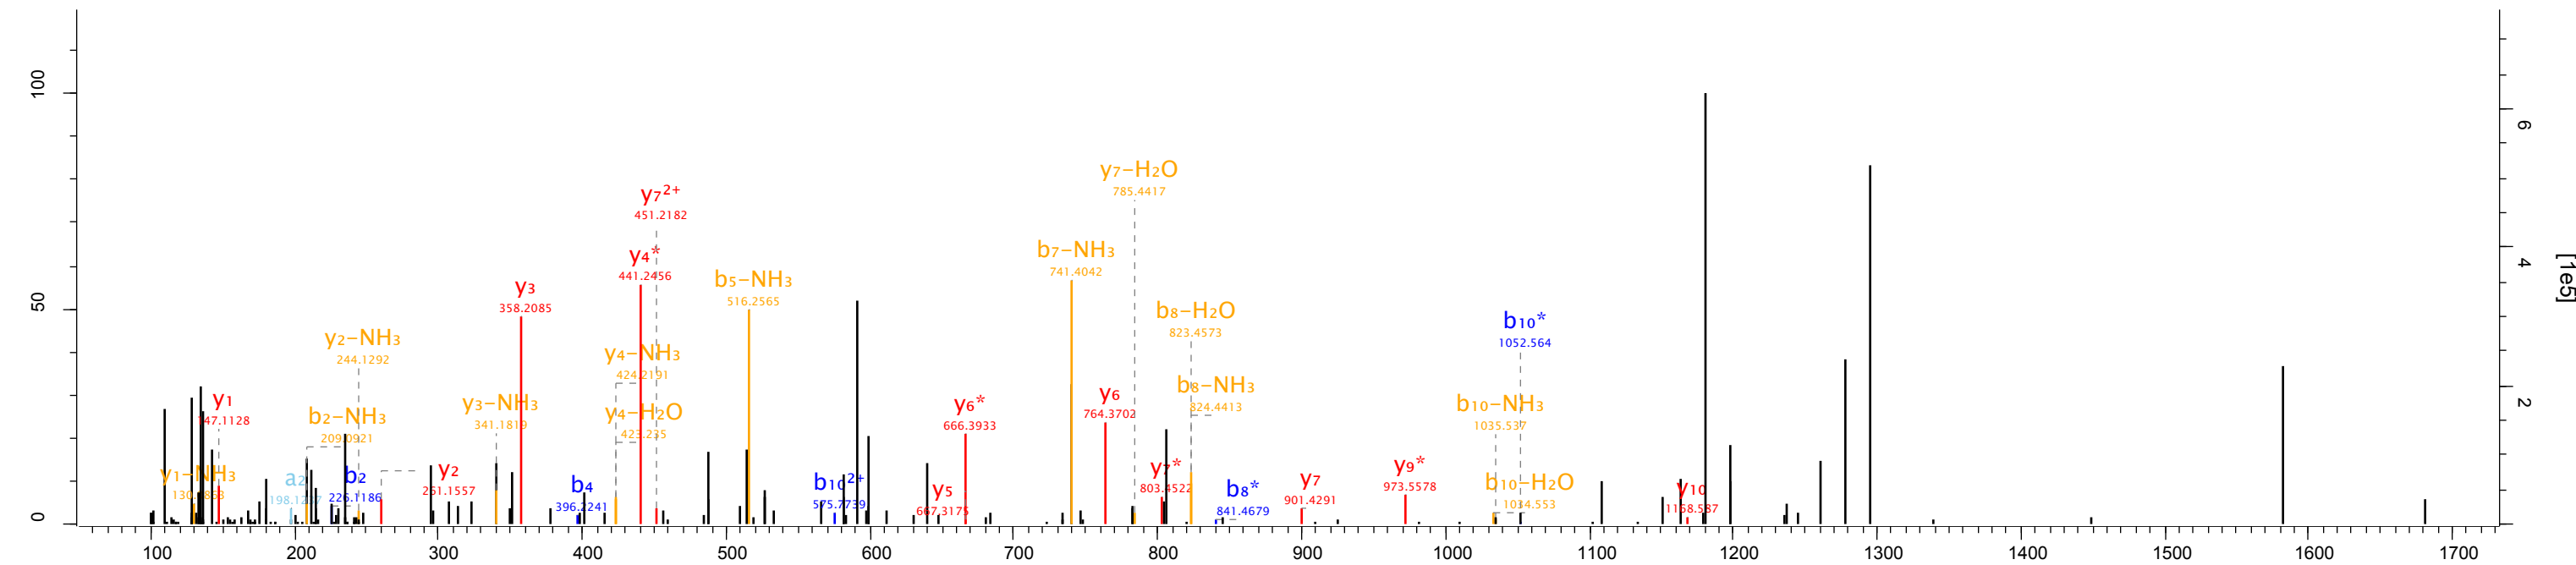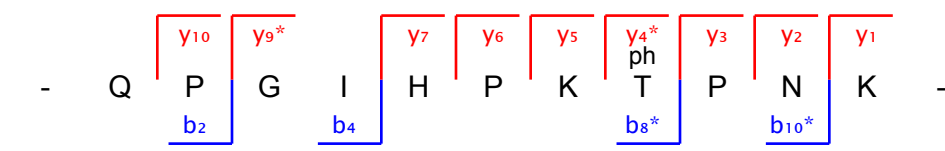

Raw file: 20150814\_A375SR\_Phospho\_BR2\_09  
 Scan: 3211 Method: FTMS; HCD Score: 117.21 m/z: 373.85 Gene names: LRRC47

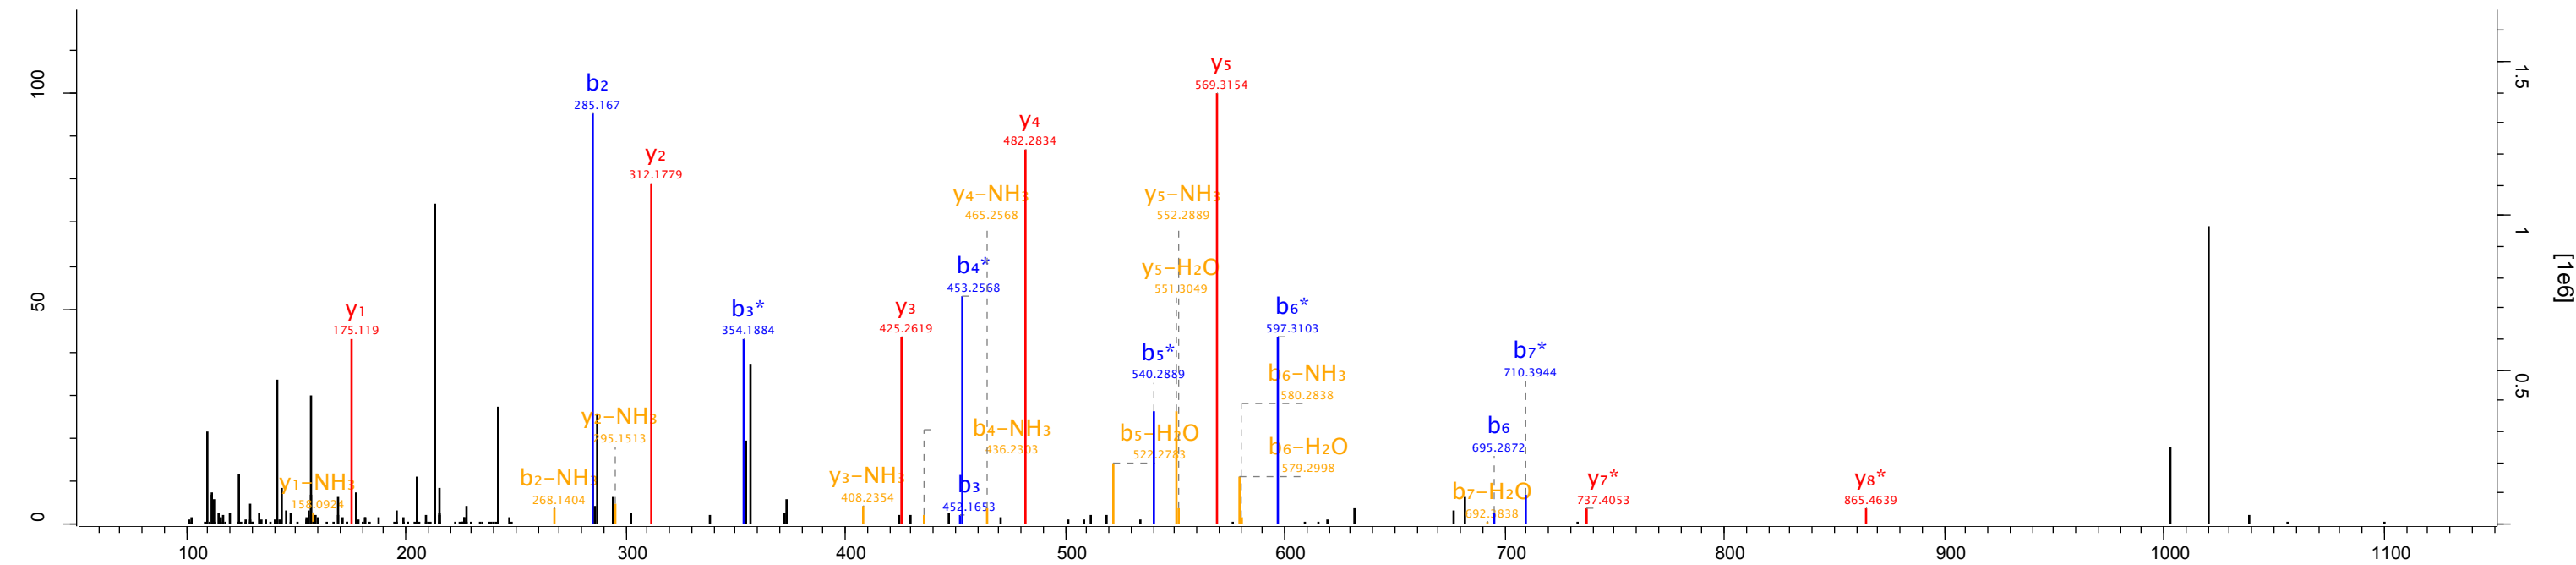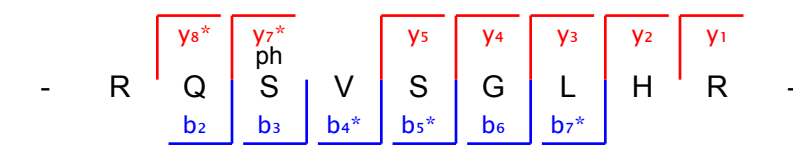

Raw file Scan Method Score m/z Gene names  
 20150814\_A375SR\_Phospho\_BR2\_09 4291 FTMS; HCD 139.9 749.86 TXLNA

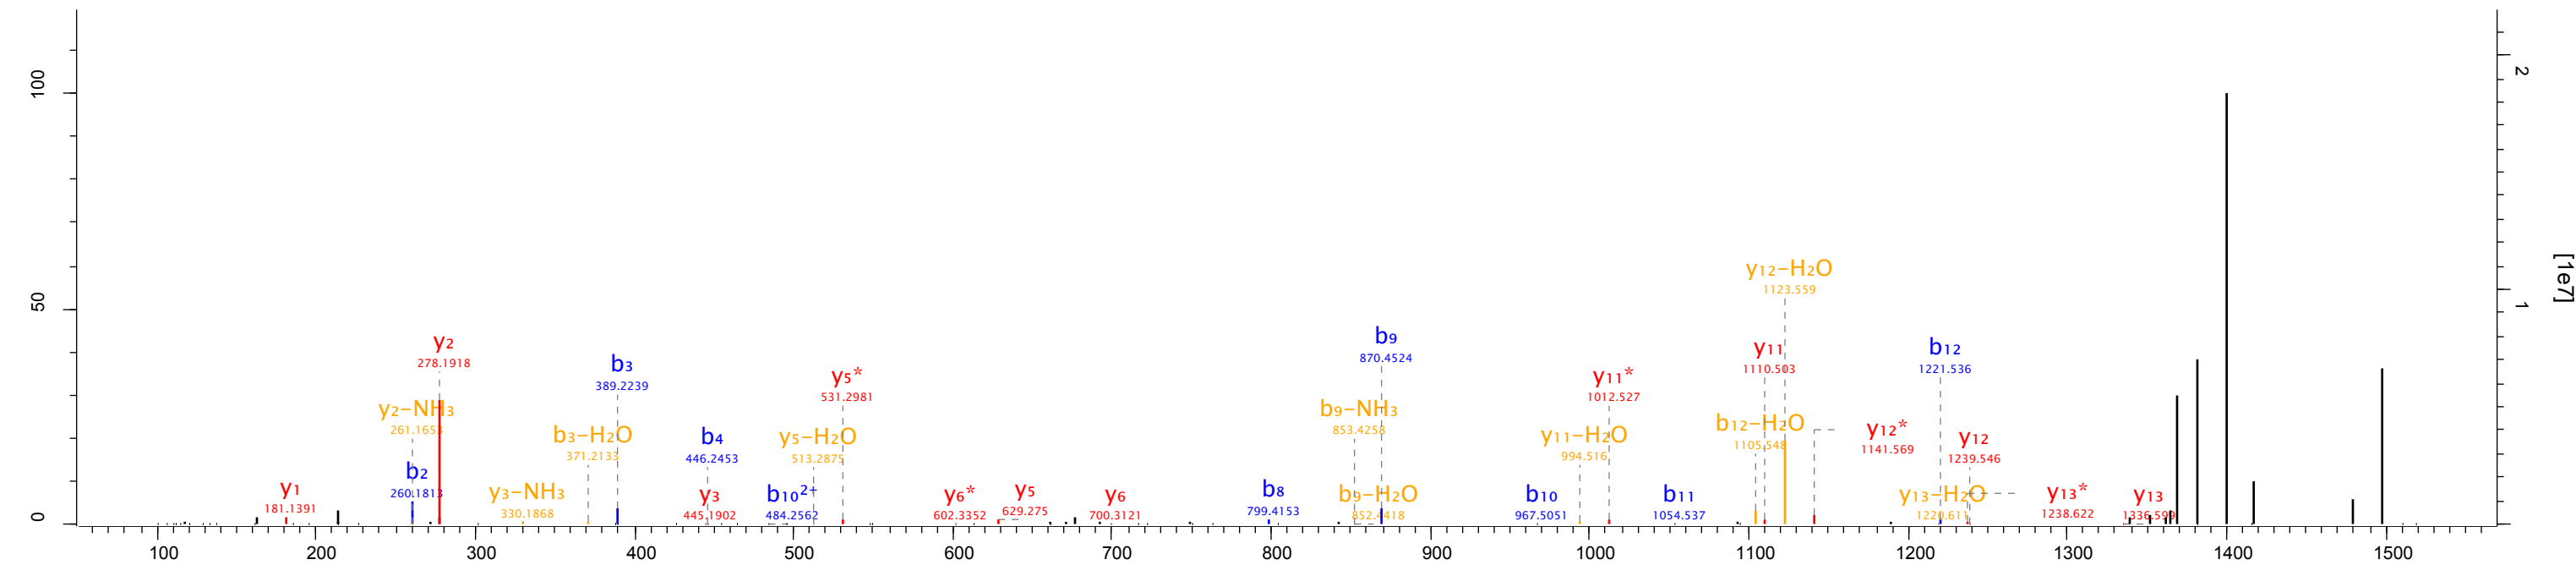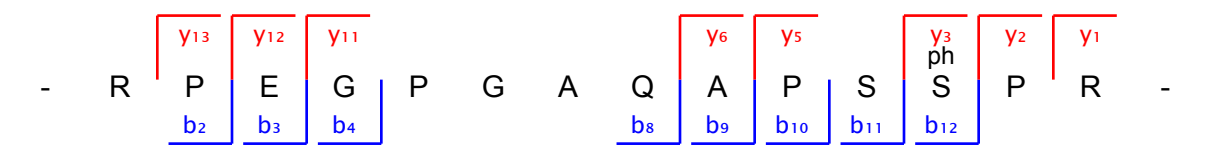

Raw file: 20150814\_A375SR\_Phospho\_BR2\_09  
 Scan: 4391 Method: FTMS; HCD Score: 42.47 m/z: 570.81 Gene names: CSPP1

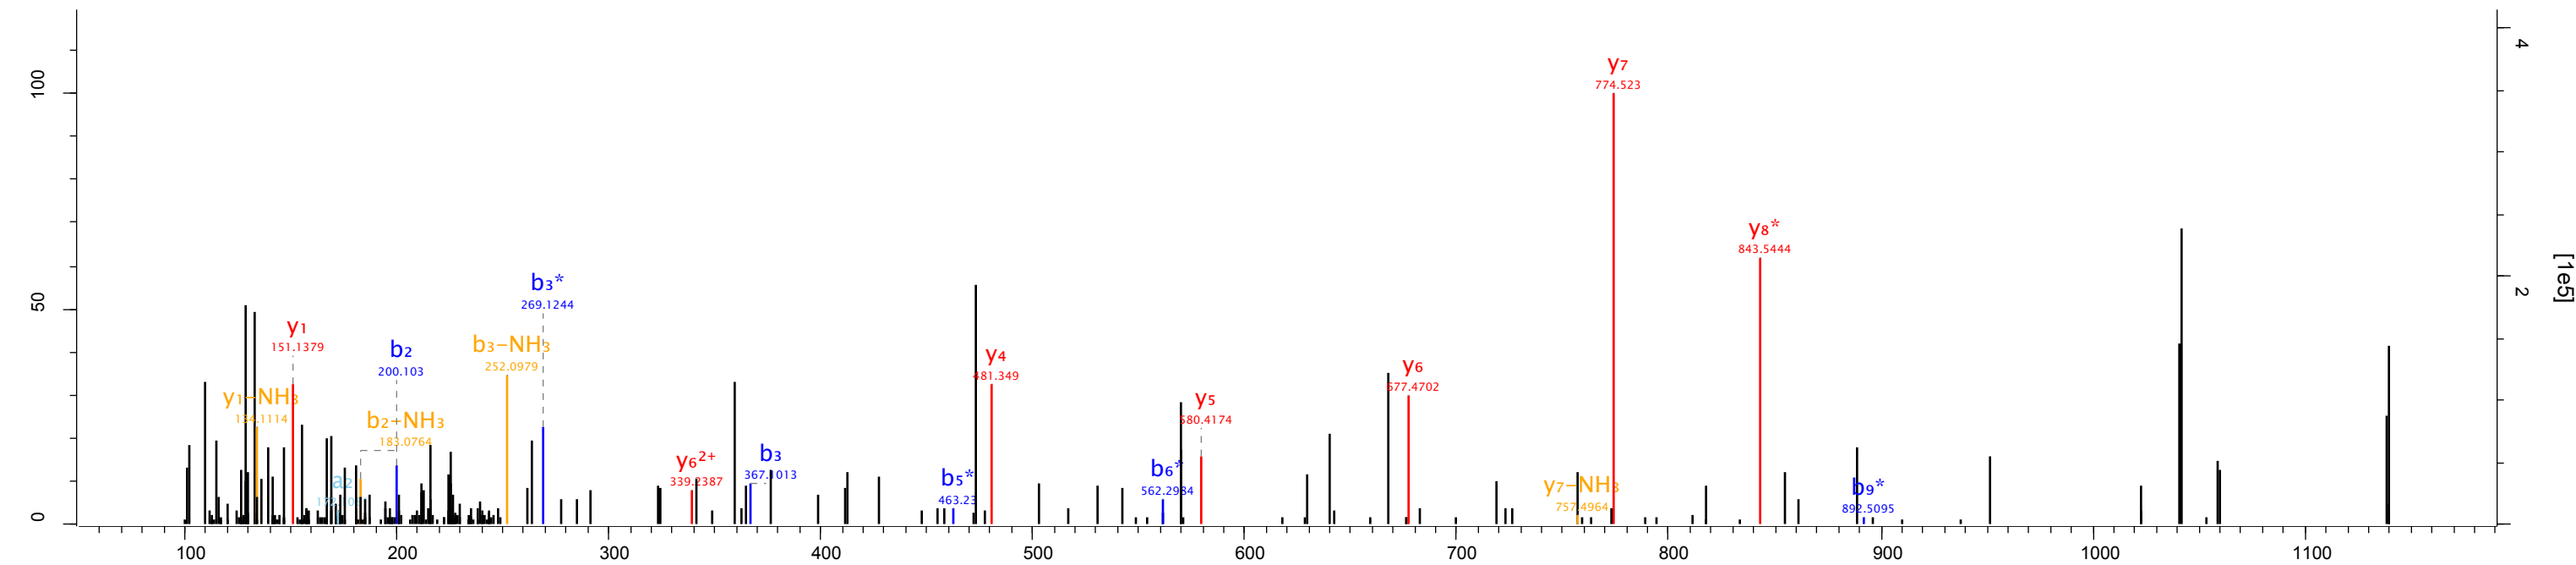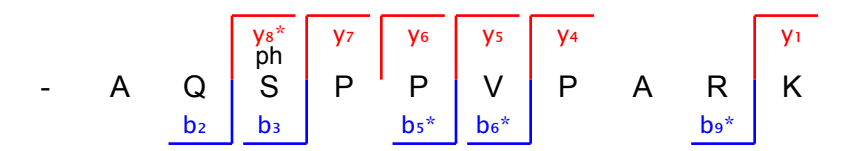



Raw file: 20150814\_A375SR\_Phospho\_BR2\_09  
 Scan: 4871 Method: FTMS; HCD Score: 146.84 m/z: 611.28 Gene names: HEATR5B

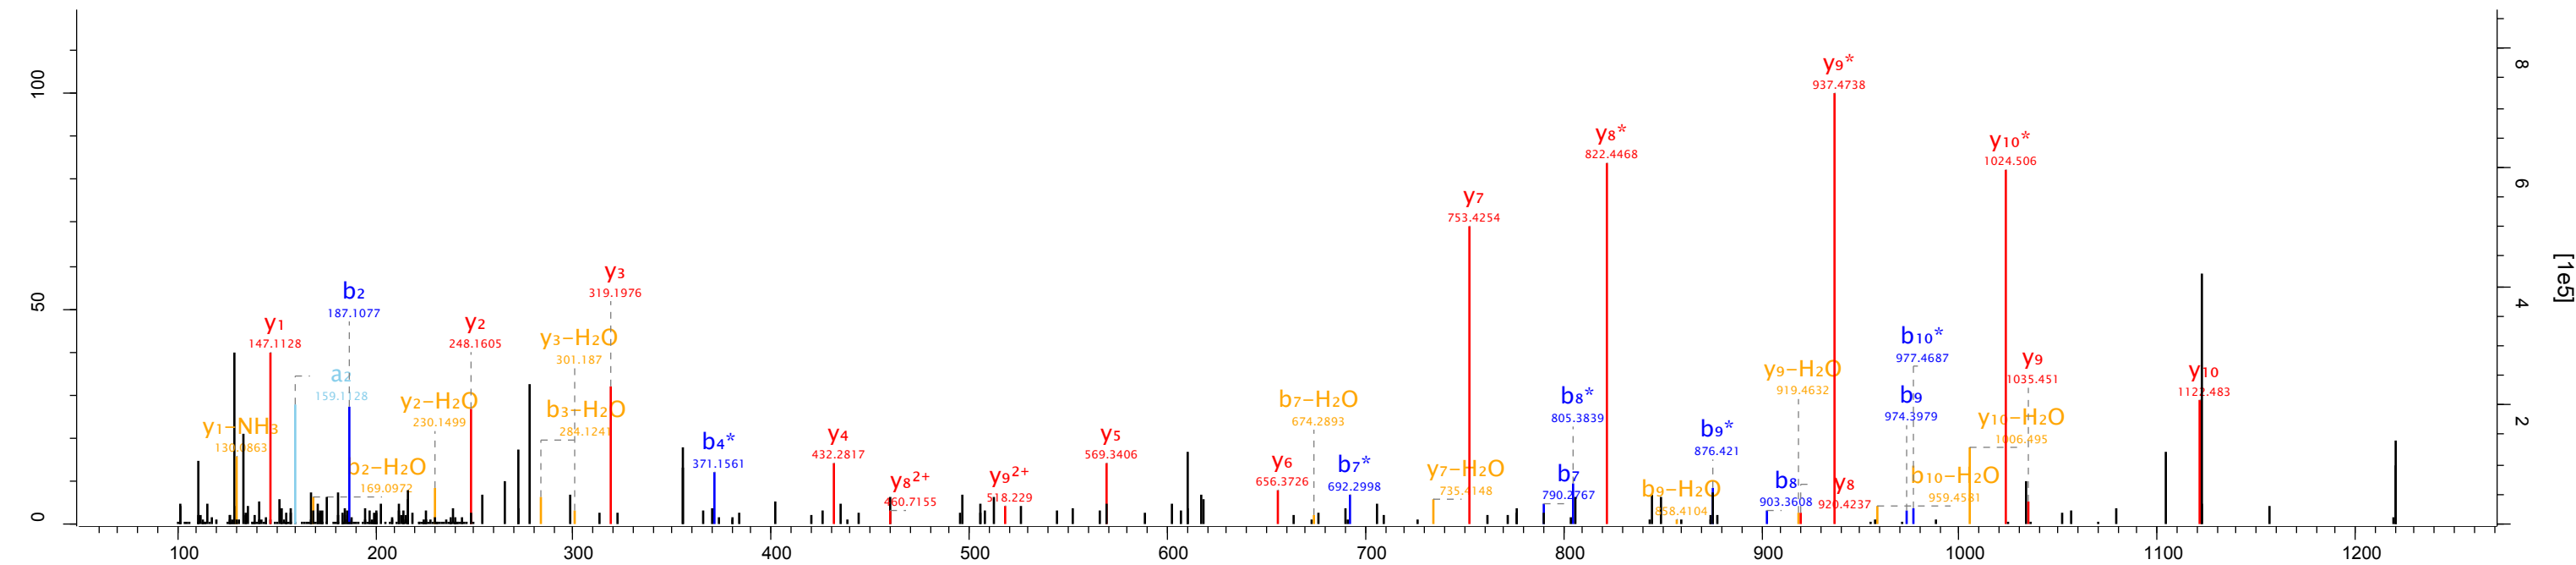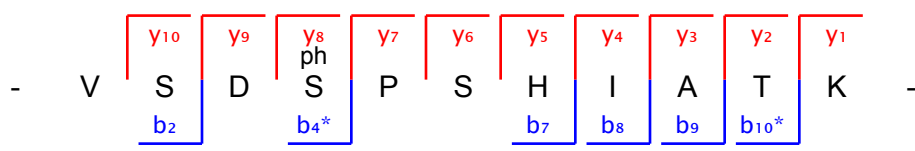

Raw file: 20150814\_A375SR\_Phospho\_BR2\_09  
 Scan: 4911 Method: FTMS; HCD Score: 92.1 m/z: 567.77 Gene names: AKAP10

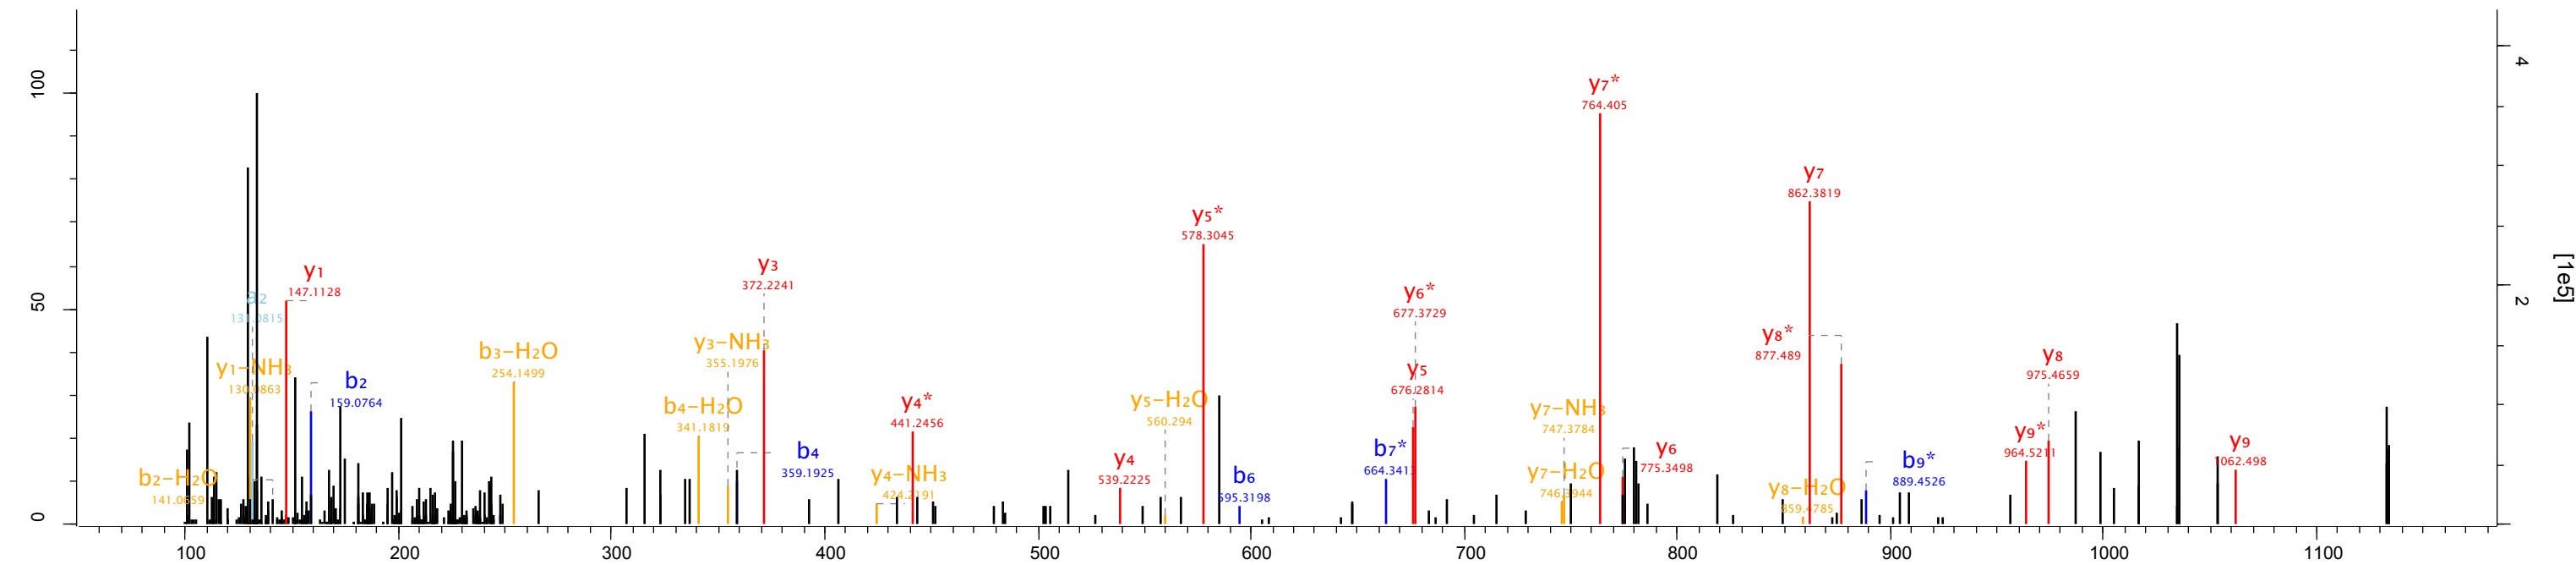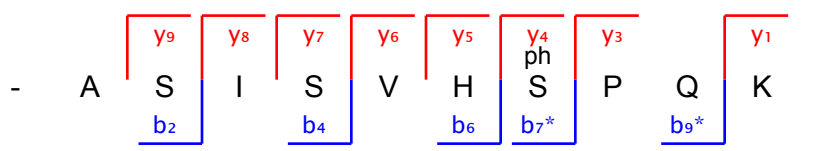

Raw file: 20150814\_A375SR\_Phospho\_BR2\_09  
 Scan: 4981 Method: FTMS; HCD Score: 220.88 m/z: 601.62 Gene names: IRF2BP2

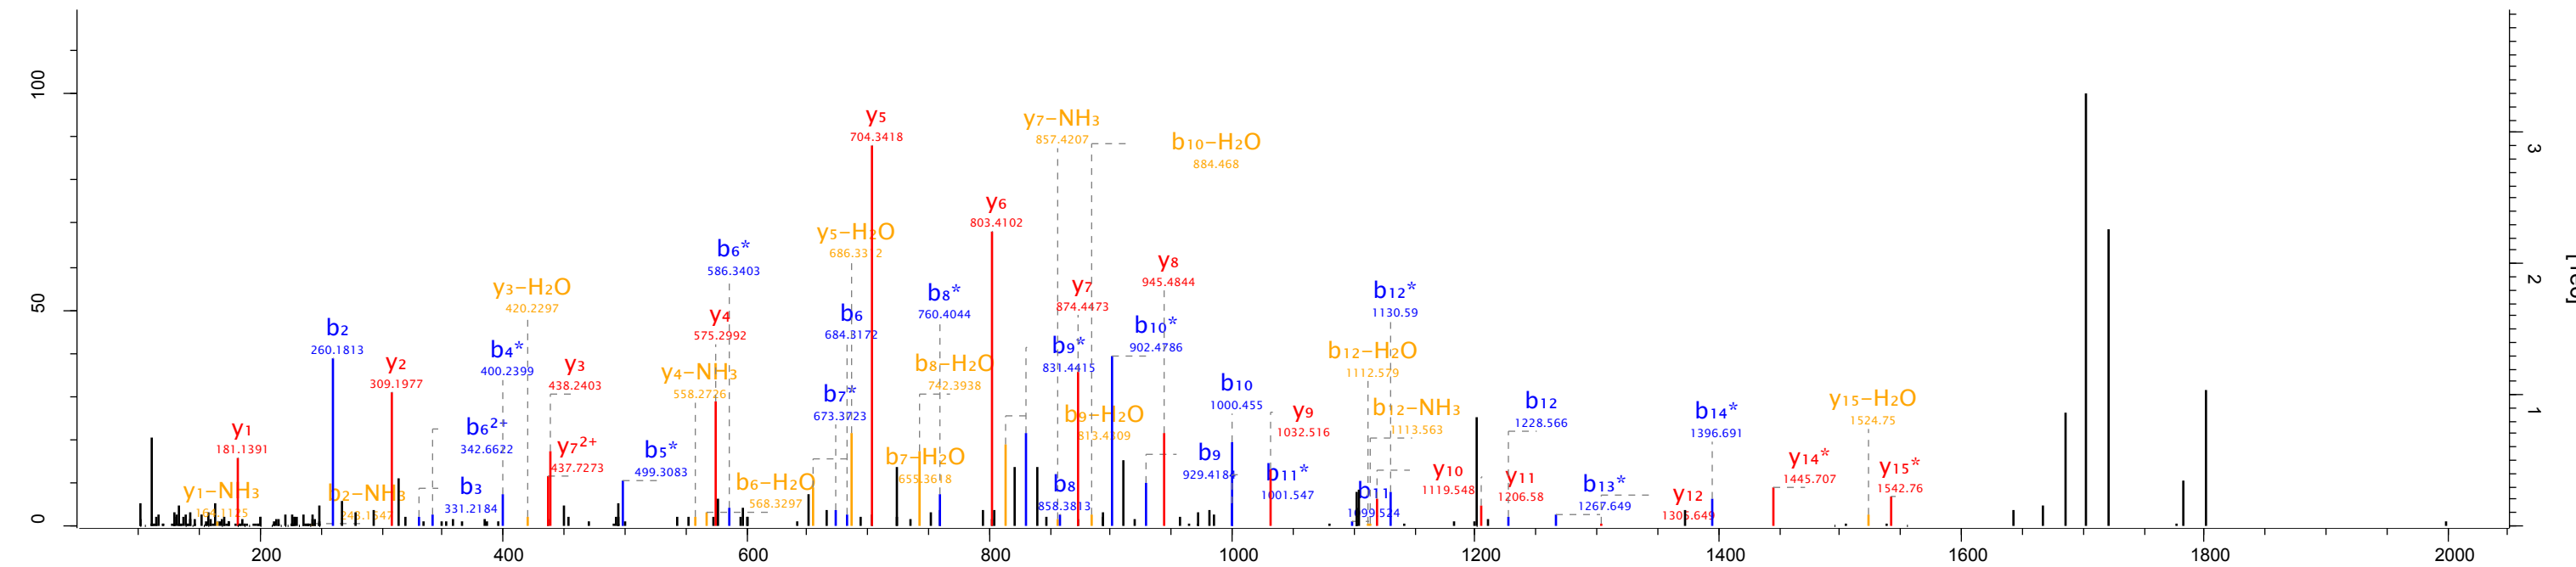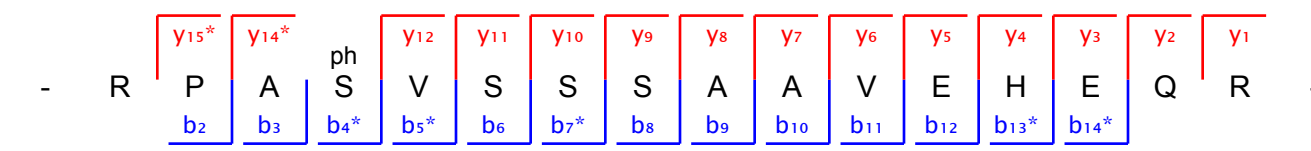

Raw file: 20150814\_A375SR\_Phospho\_BR2\_09  
 Scan: 5011  
 Method: FTMS; HCD  
 Score: 147.74  
 m/z: 470.73  
 Gene names: PHLDB1

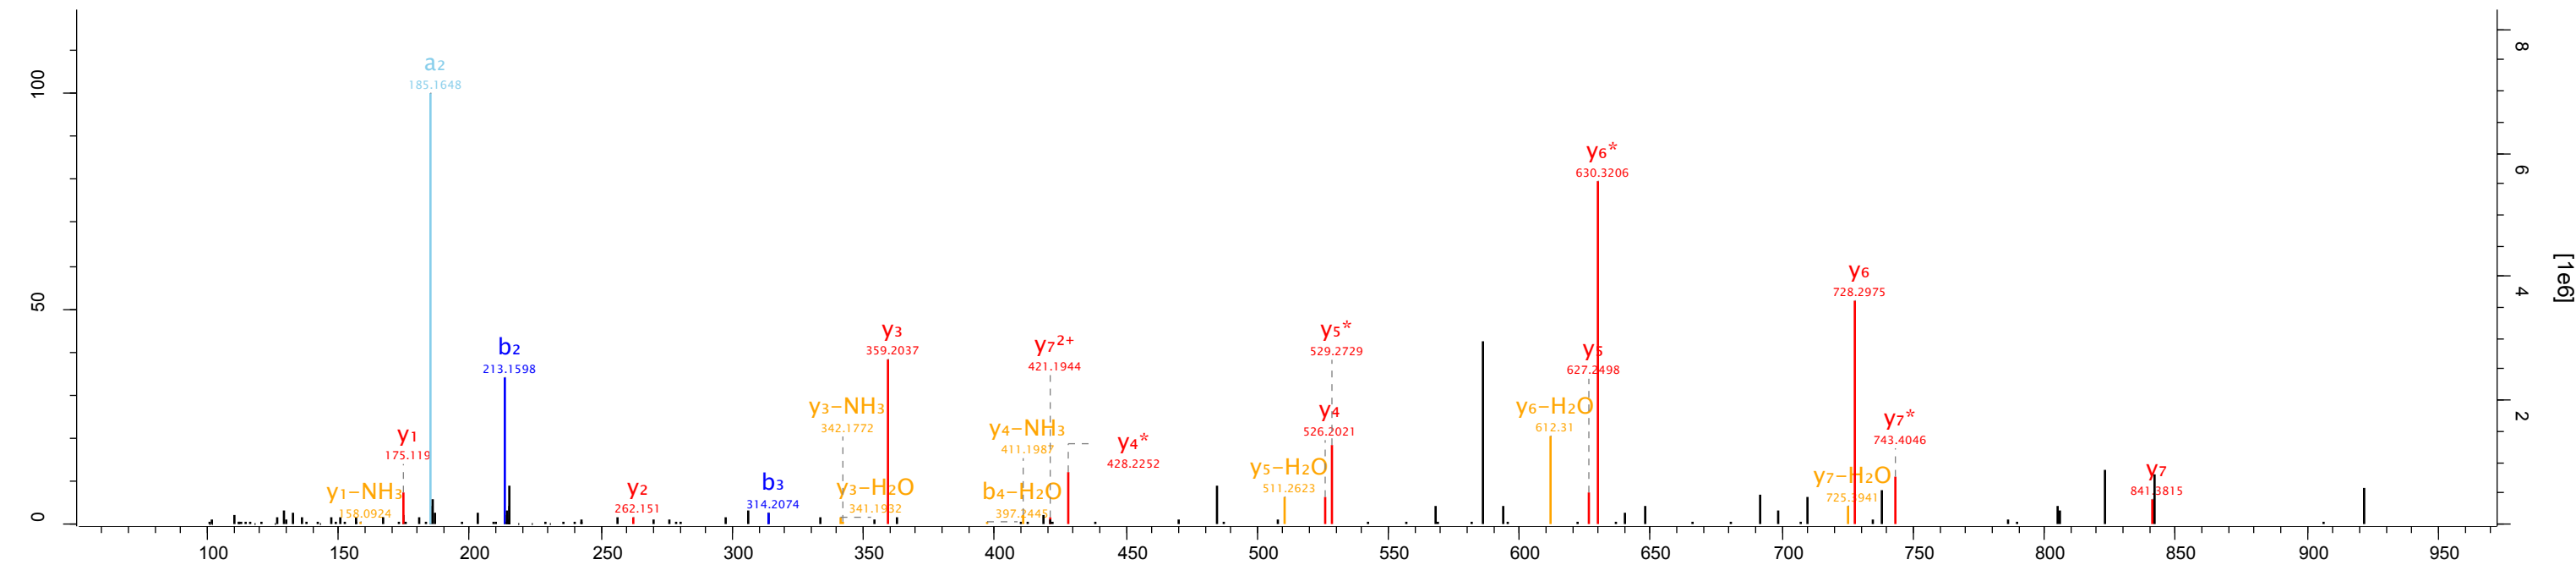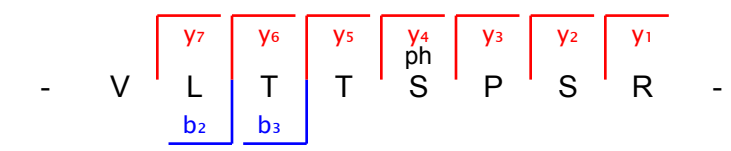

Raw file: 20150814\_A375SR\_Phospho\_BR2\_09  
 Scan: 5231 Method: FTMS; HCD Score: 204.9 m/z: 692.82 Gene names: LRRFIP1

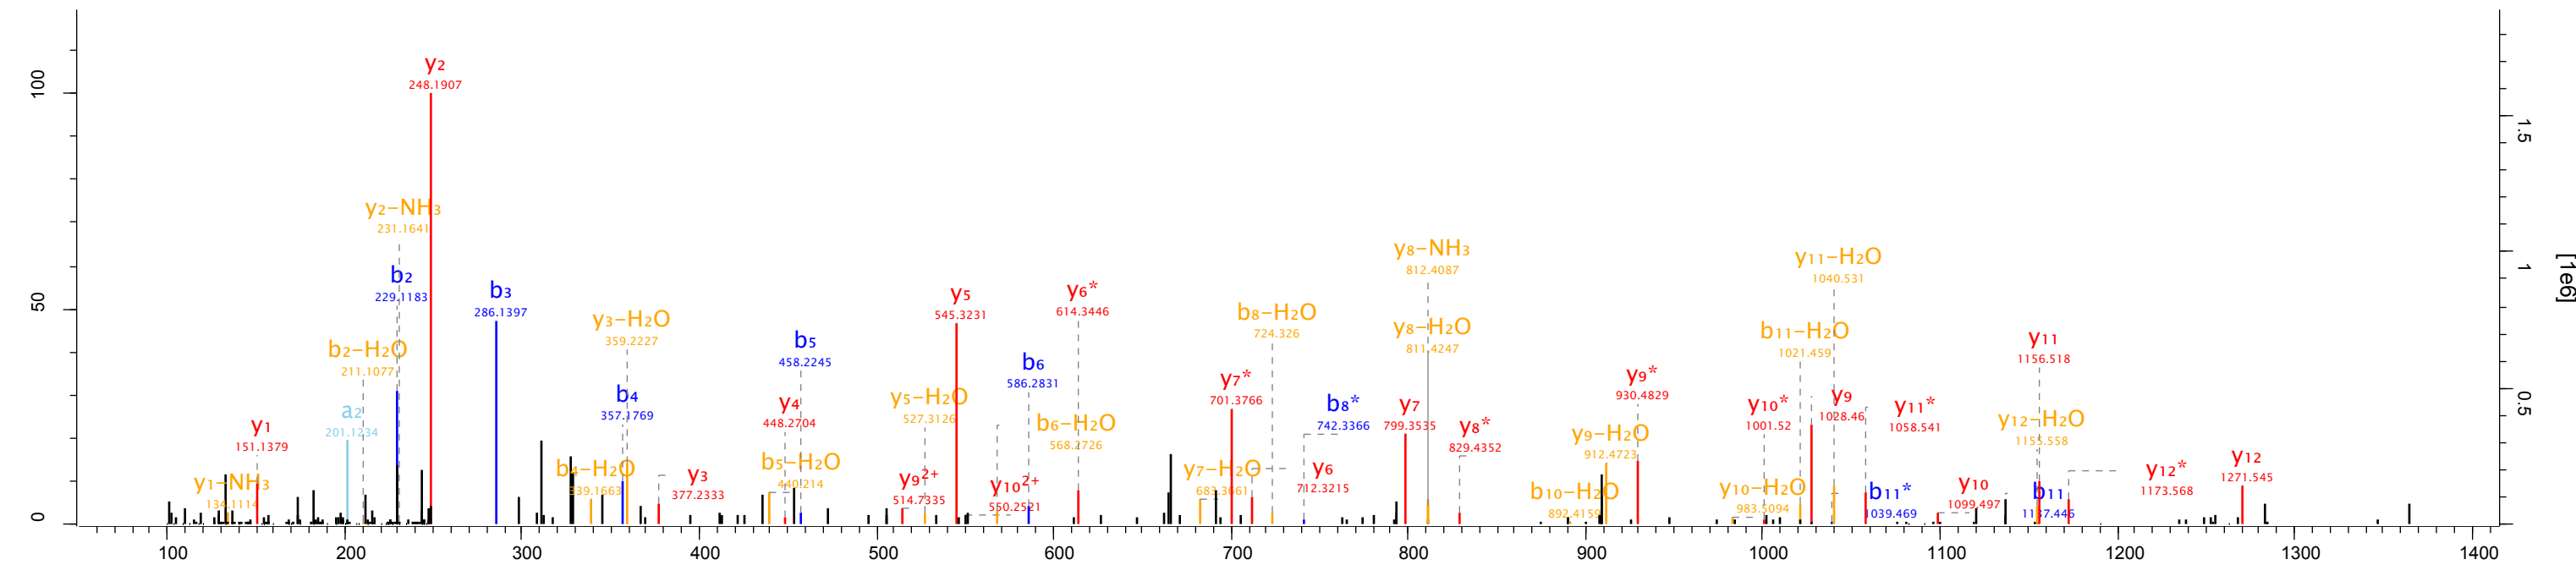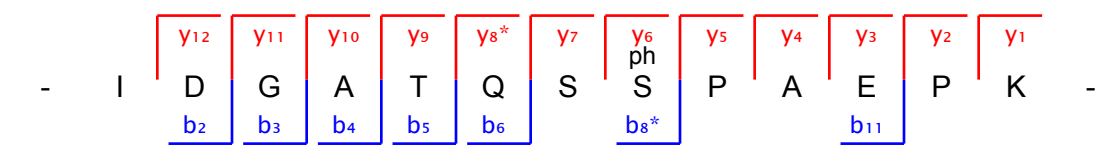

Raw file: 20150814\_A375SR\_Phospho\_BR2\_09  
 Scan: 5871 Method: FTMS; HCD Score: 54.81 m/z: 617.79 Gene names: TBC1D10B

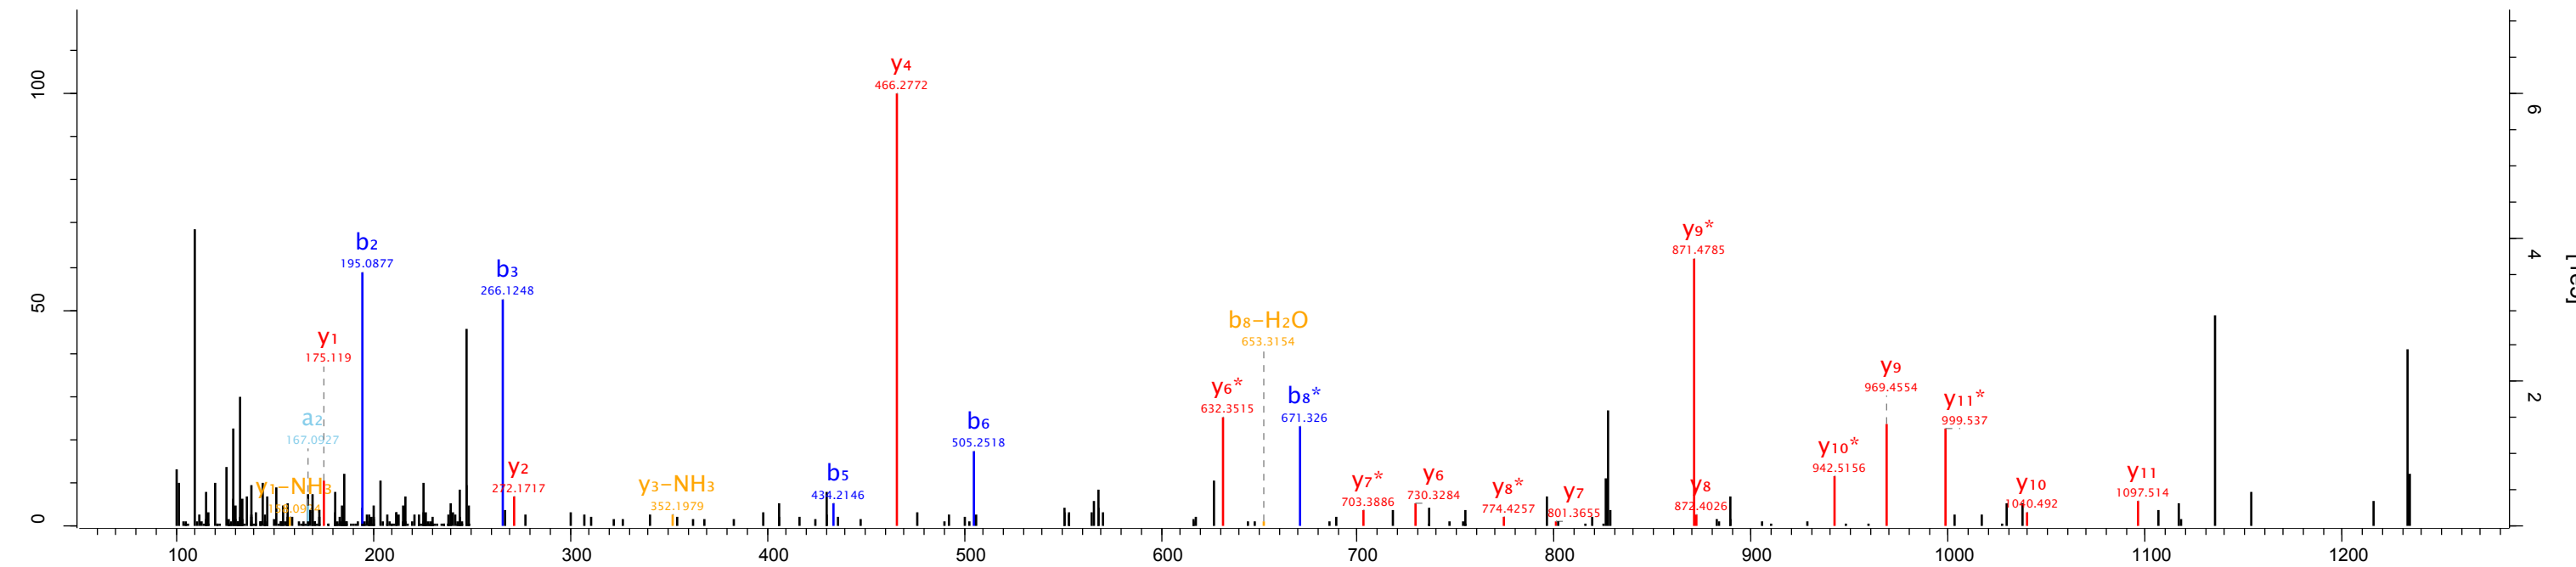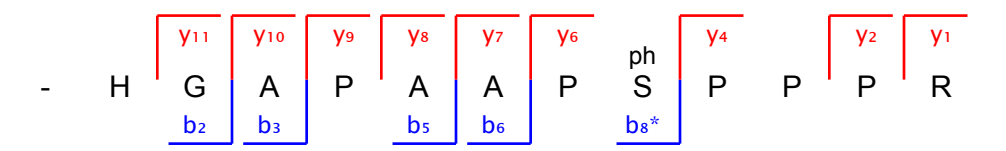

Raw file Scan Method Score m/z Gene names

20150814\_A375SR\_Phospho\_BR2\_09 6251 FTMS; HCD 117.08 651.82 RBM10

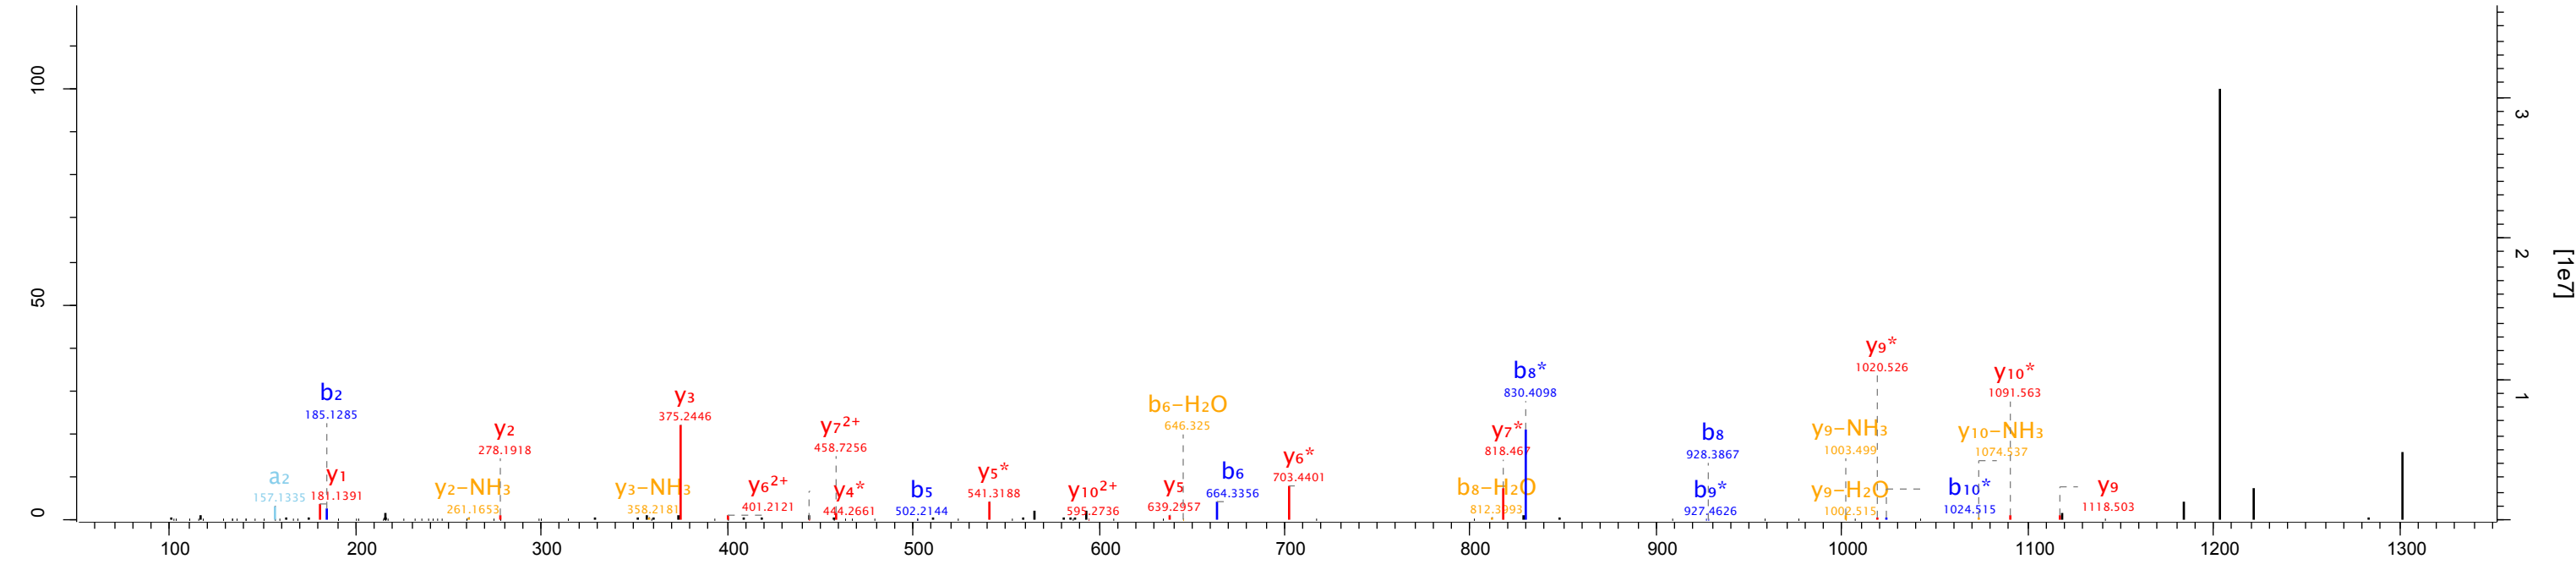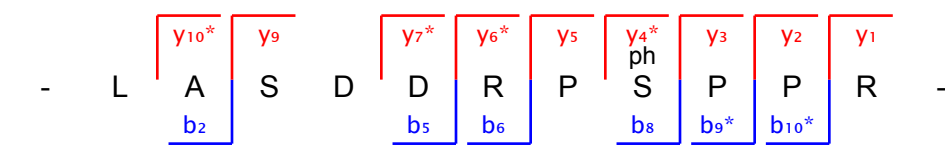

Raw file 20150814\_A375SR\_Phospho\_BR2\_09 Scan 6831 Method FTMS; HCD Score 65.19 m/z 649.31 Gene names RUNX1

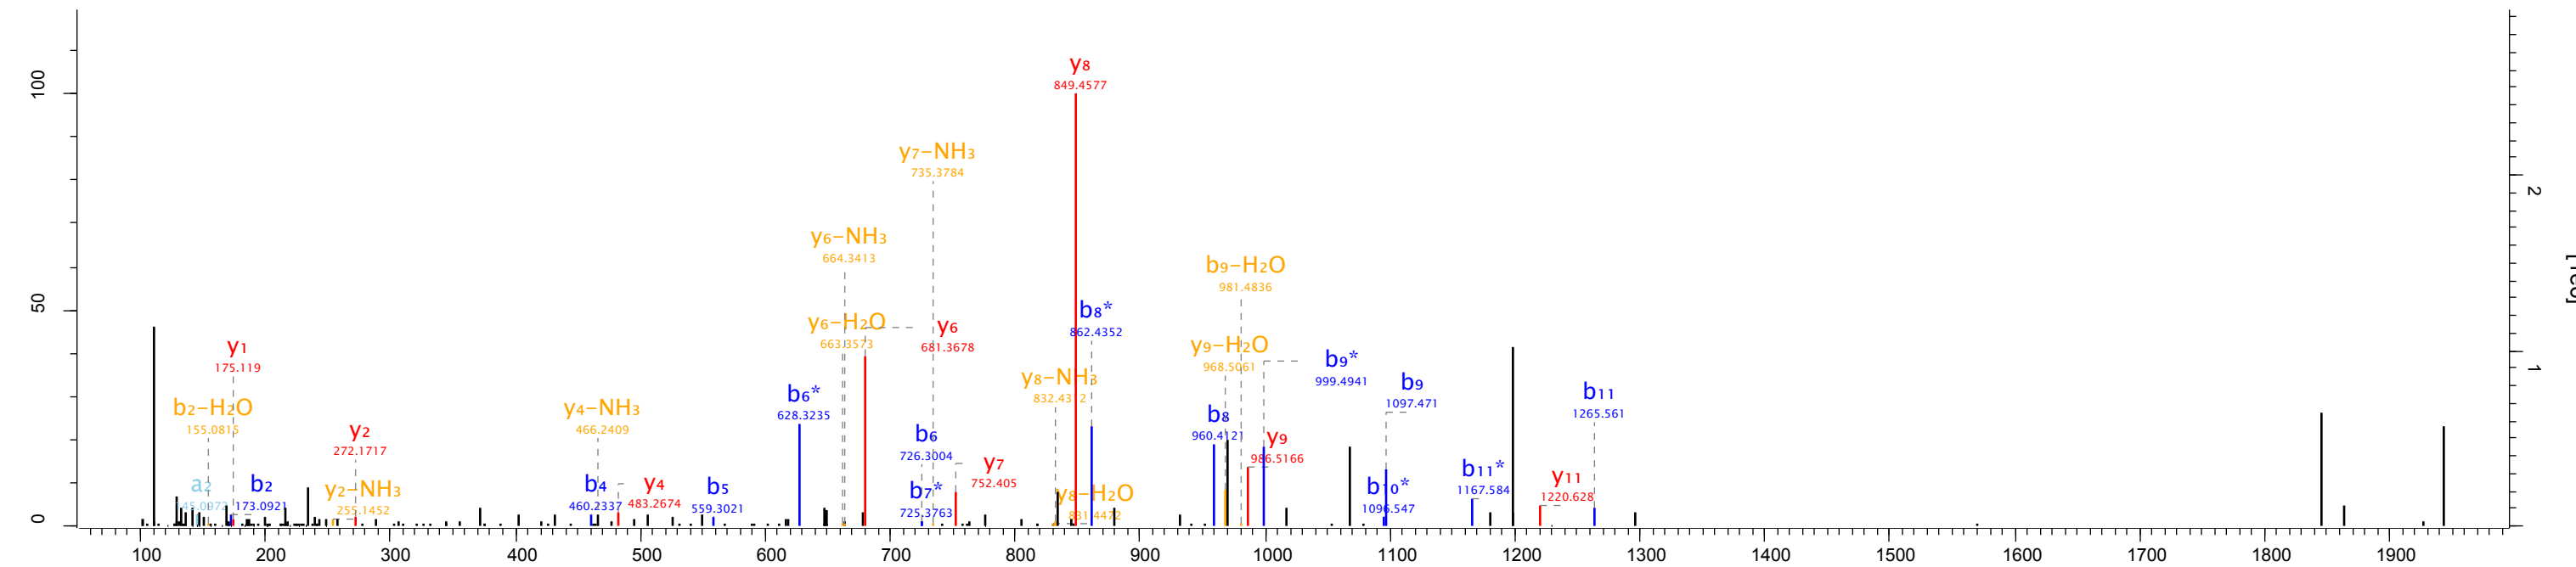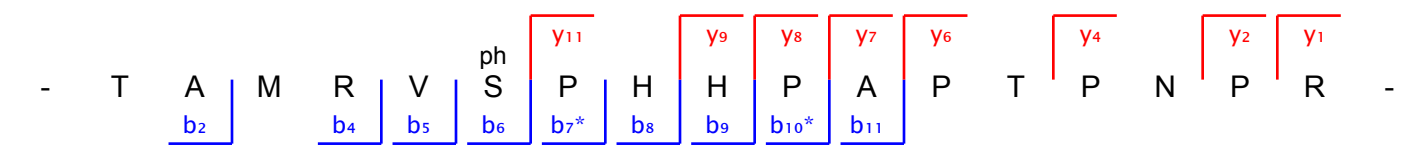



Raw file 20150814\_A375SR\_Phospho\_BR2\_09 Scan 7001 Method FTMS; HCD Score 190.41 m/z 666.8 Gene names PTPN14

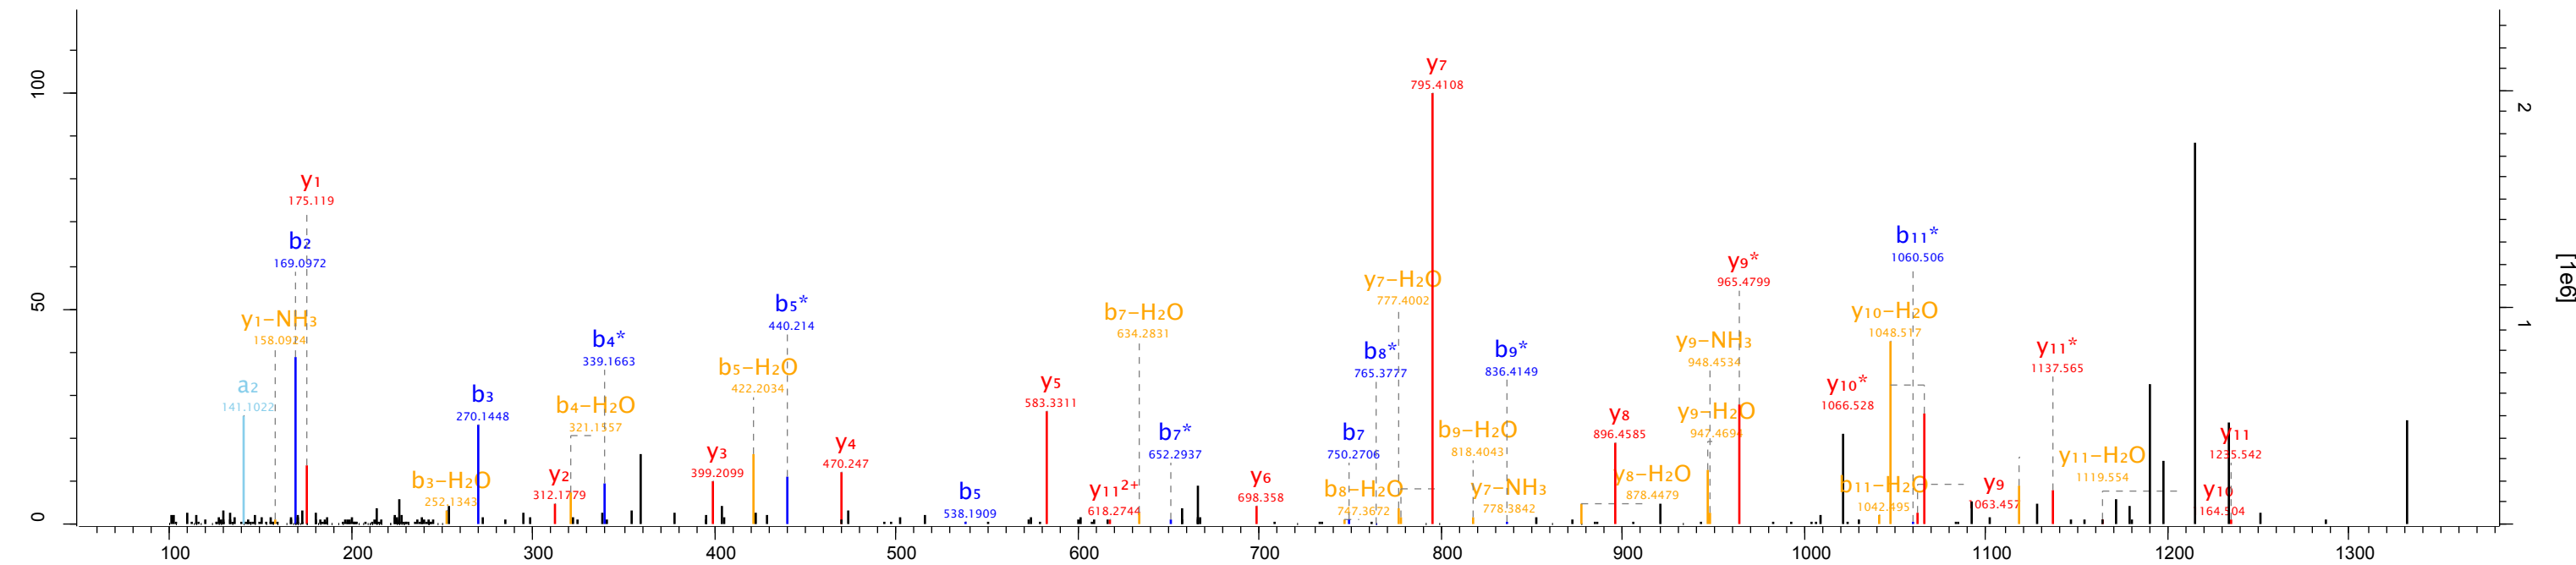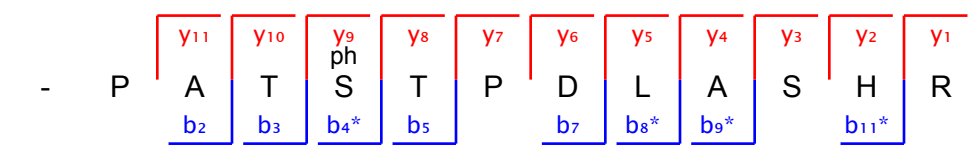

Raw file 20150814\_A375SR\_Phospho\_BR2\_09 Scan 8241 Method FTMS; HCD Score 80.83 m/z 531.23 Gene names CRYBG3

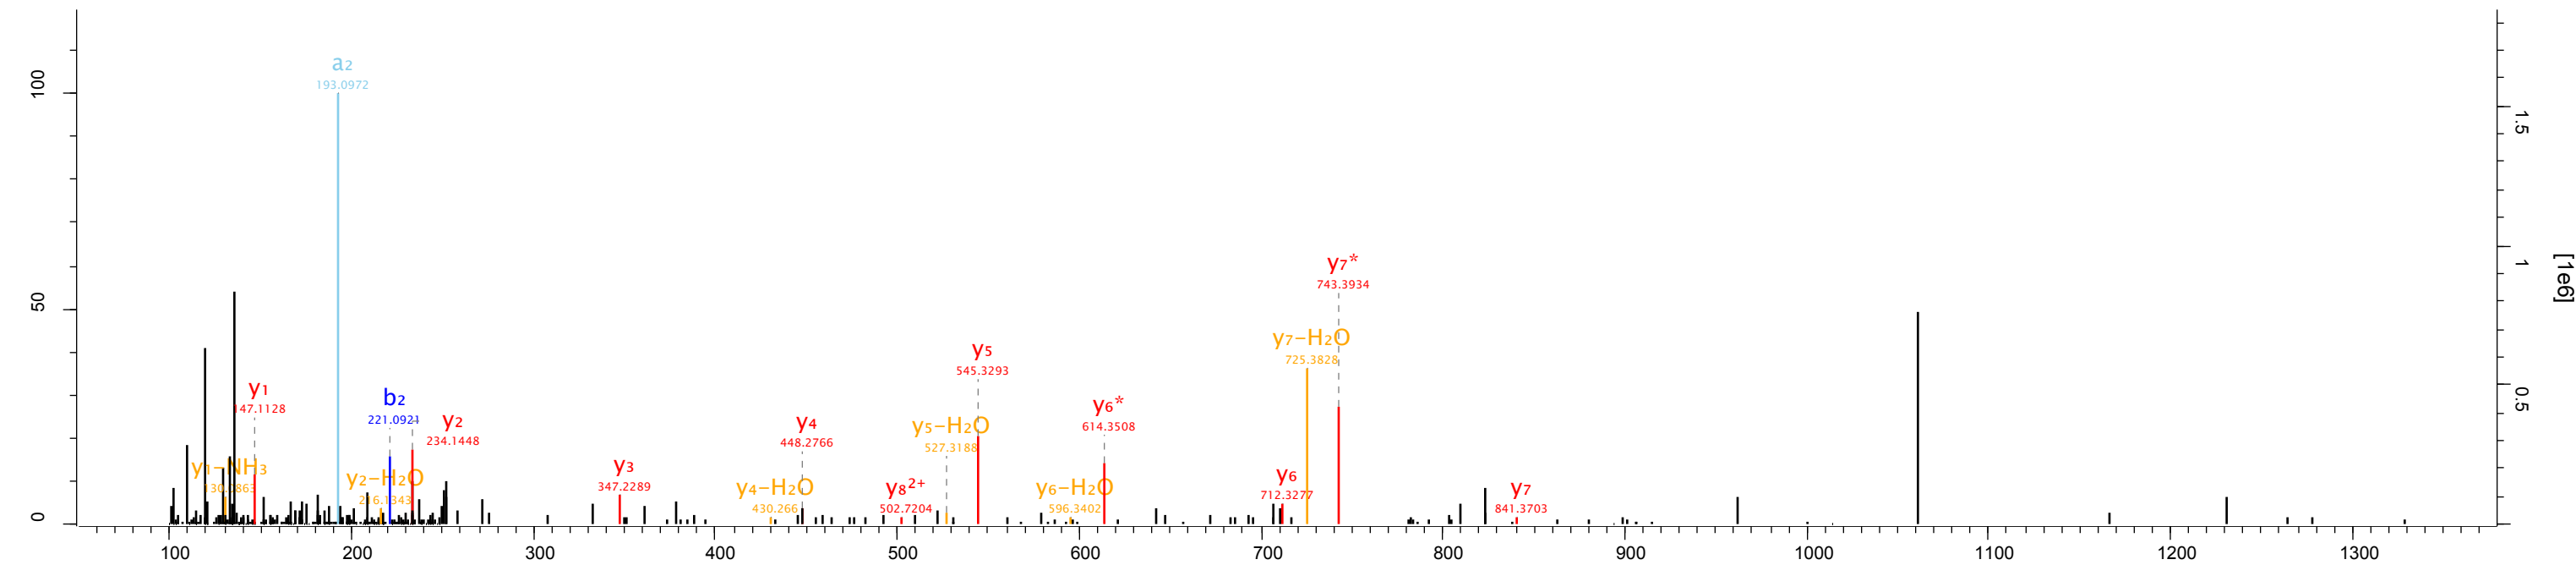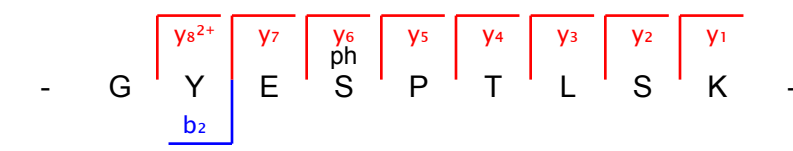

Raw file: 20150814\_A375SR\_Phospho\_BR2\_09  
 Scan: 9631 Method: FTMS; HCD Score: 175.39 m/z: 836.37 Gene names: ERCC5;BIVM-ERCC5

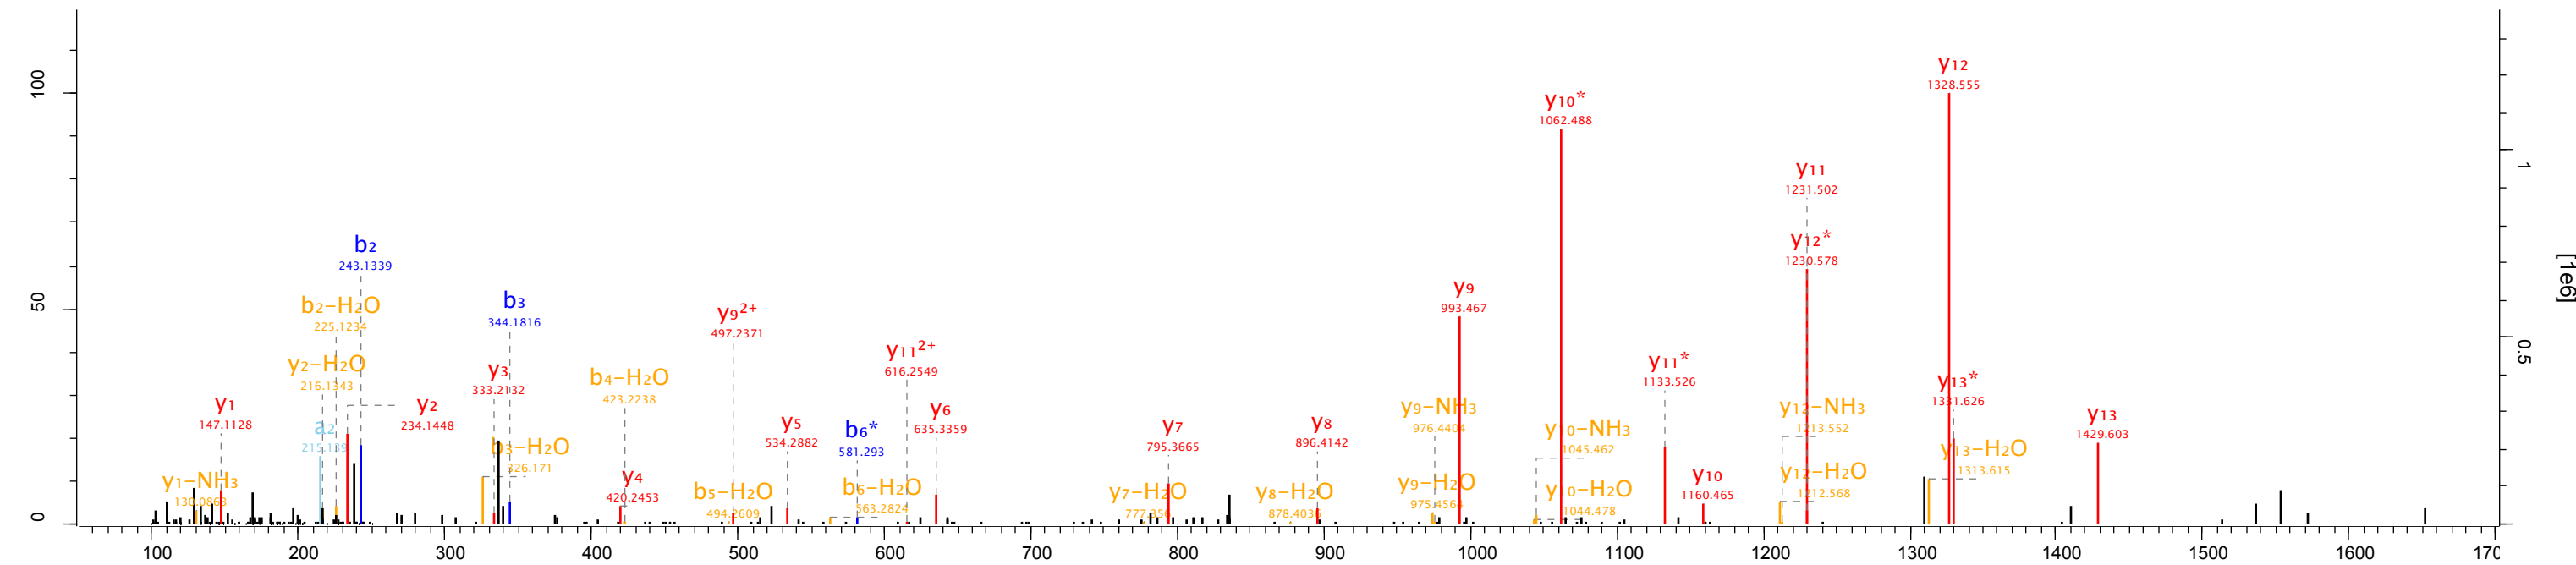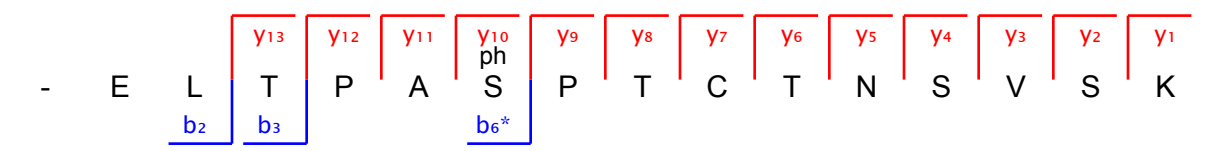



Raw file: 20150814\_A375SR\_Phospho\_BR2\_02  
 Scan: 10542 Method: FTMS; HCD Score: 165.16 m/z: 764.83 Gene names: RANBP2

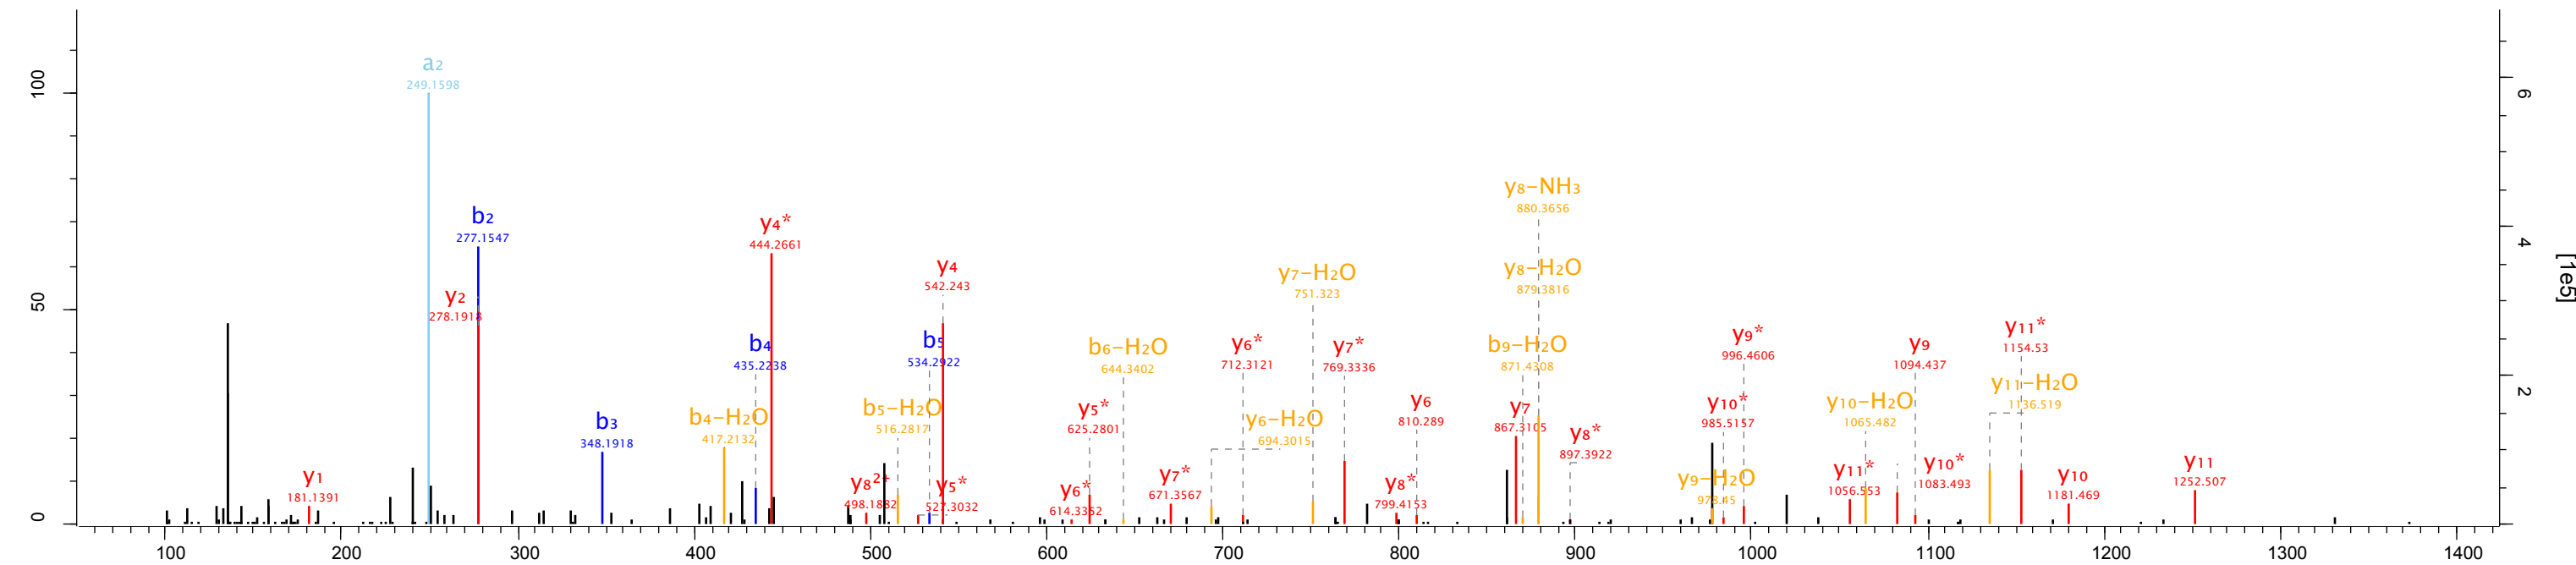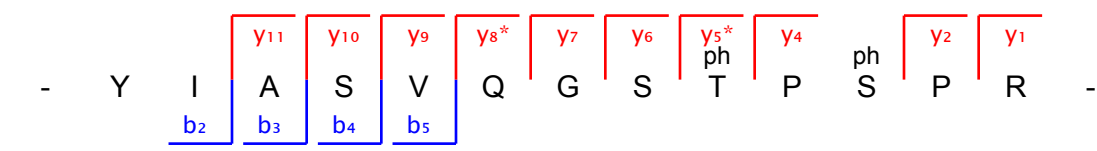

Raw file: 20150814\_A375SR\_Phospho\_BR2\_02  
 Scan: 10782 Method: FTMS; HCD Score: 85.86 m/z: 698.76 Gene names: FAT1

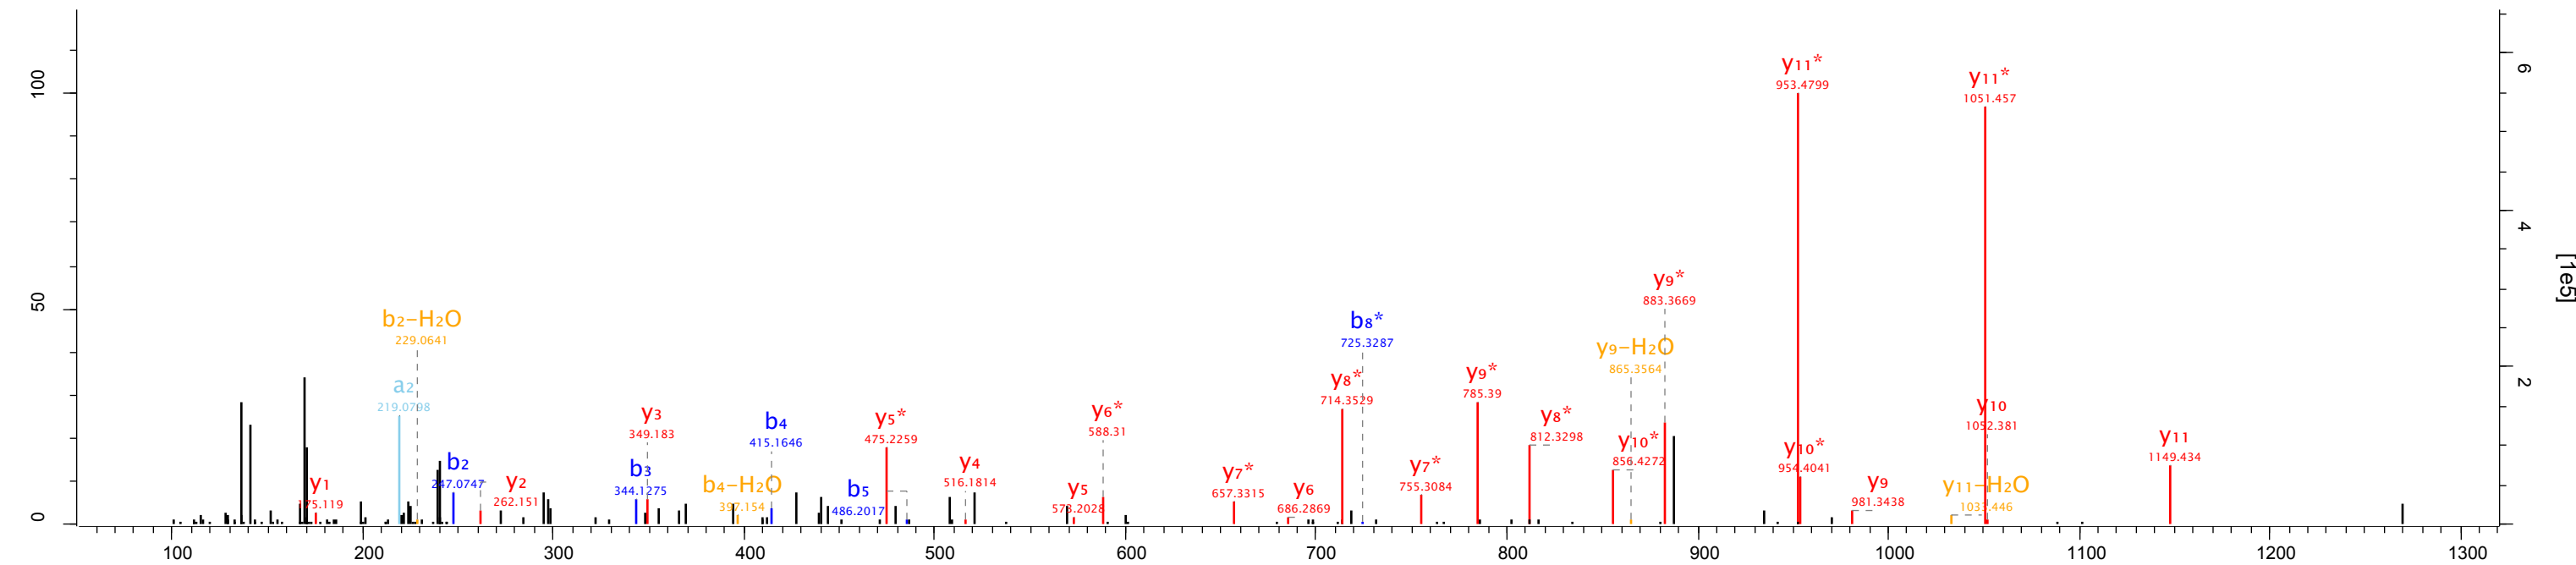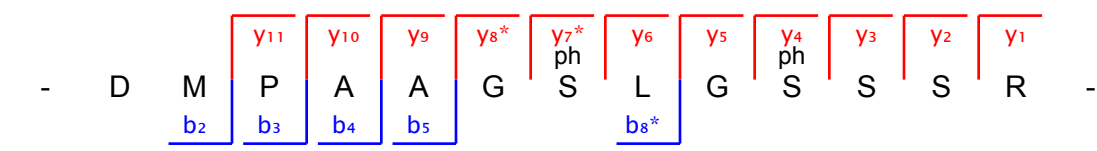

Raw file 20150814\_A375SR\_Phospho\_BR2\_02 Scan 11202 Method FTMS; HCD Score 105.5 m/z 695.77 Gene names PPP1R9A

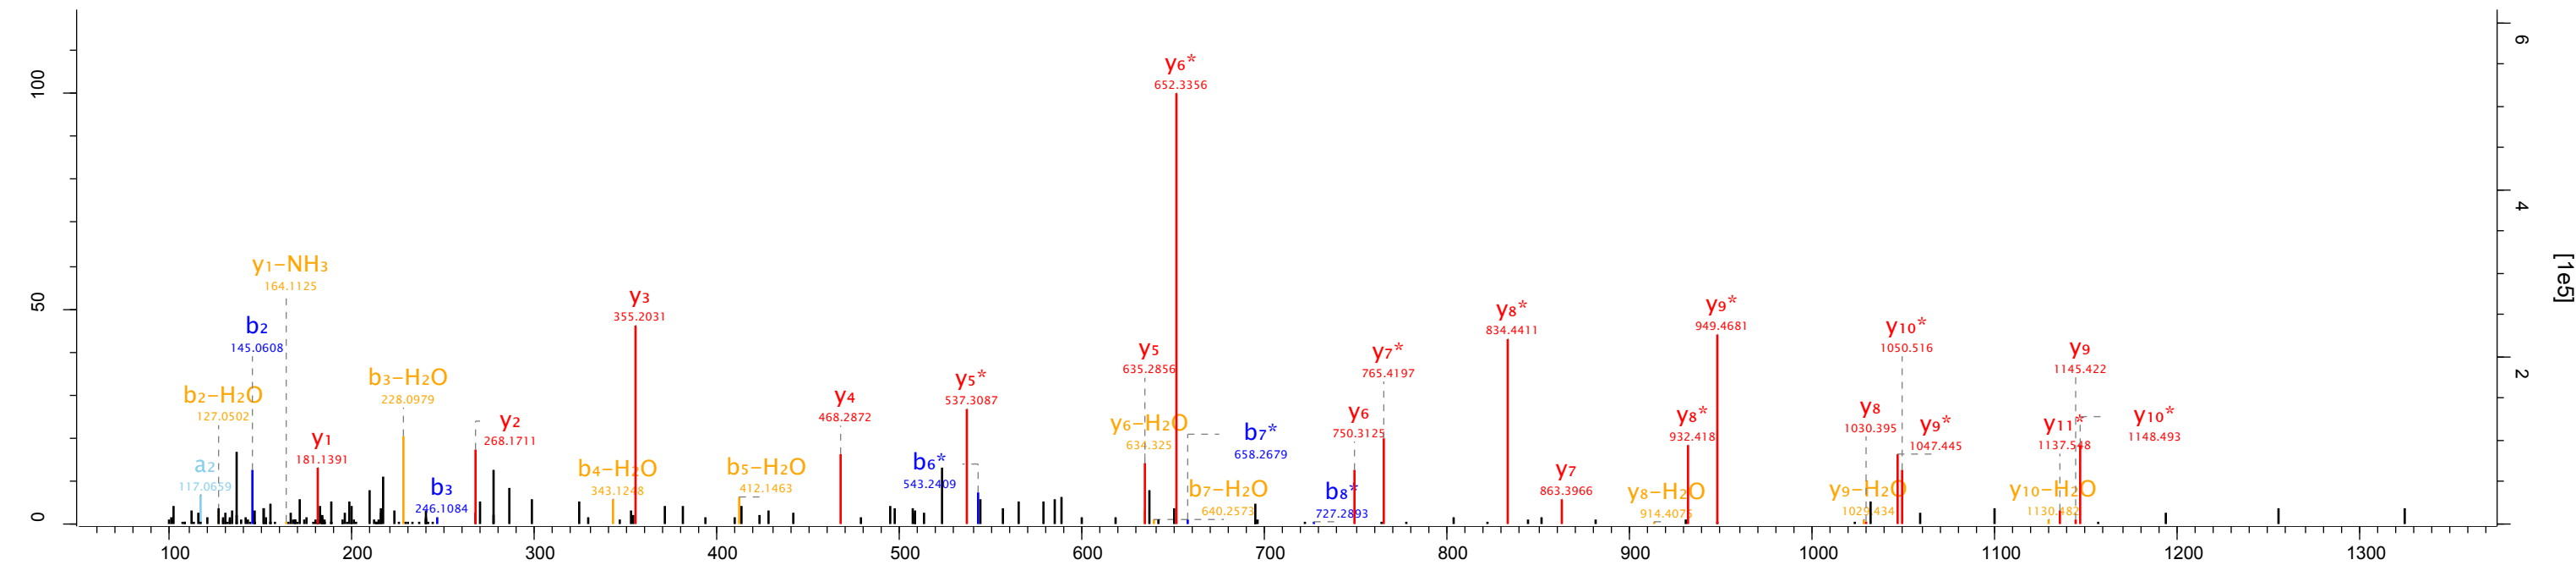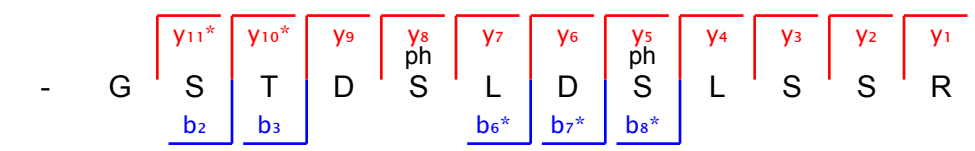

Raw file: 20150814\_A375SR\_Phospho\_BR2\_02  
 Scan: 11652 Method: FTMS; HCD Score: 84.11 m/z: 803.85 Gene names: CENPC

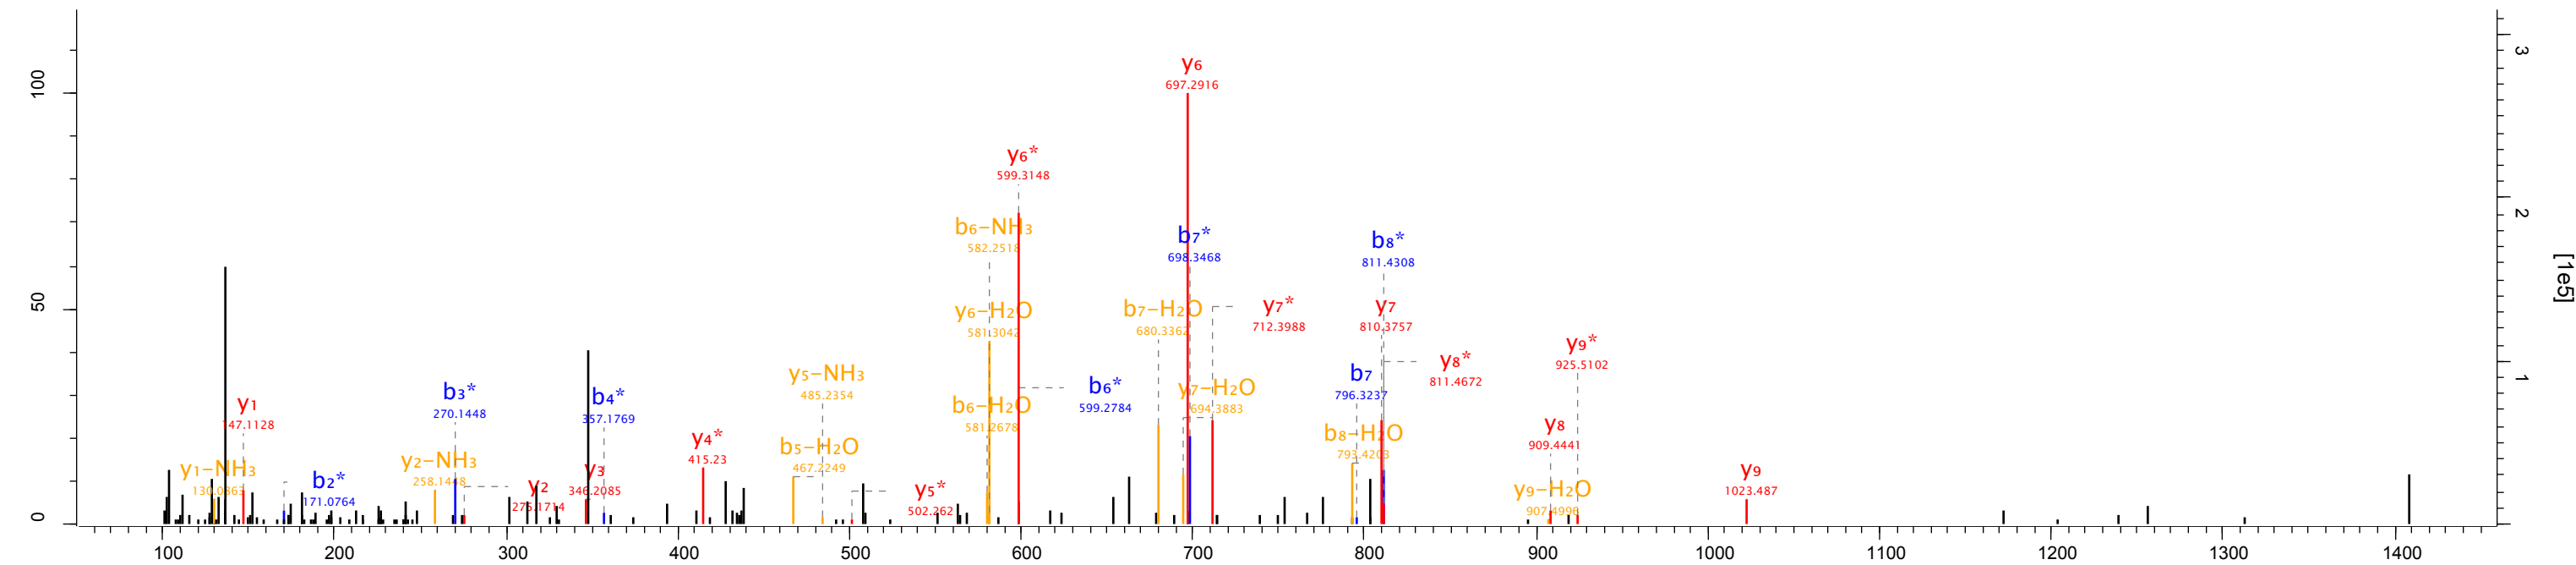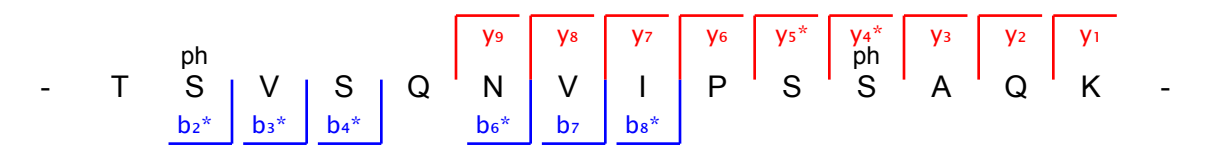



Raw file Scan Method Score m/z Gene names

20150814\_A375SR\_Phospho\_BR2\_02 11752 FTMS; HCD 101.6 1007.44 TRIP10

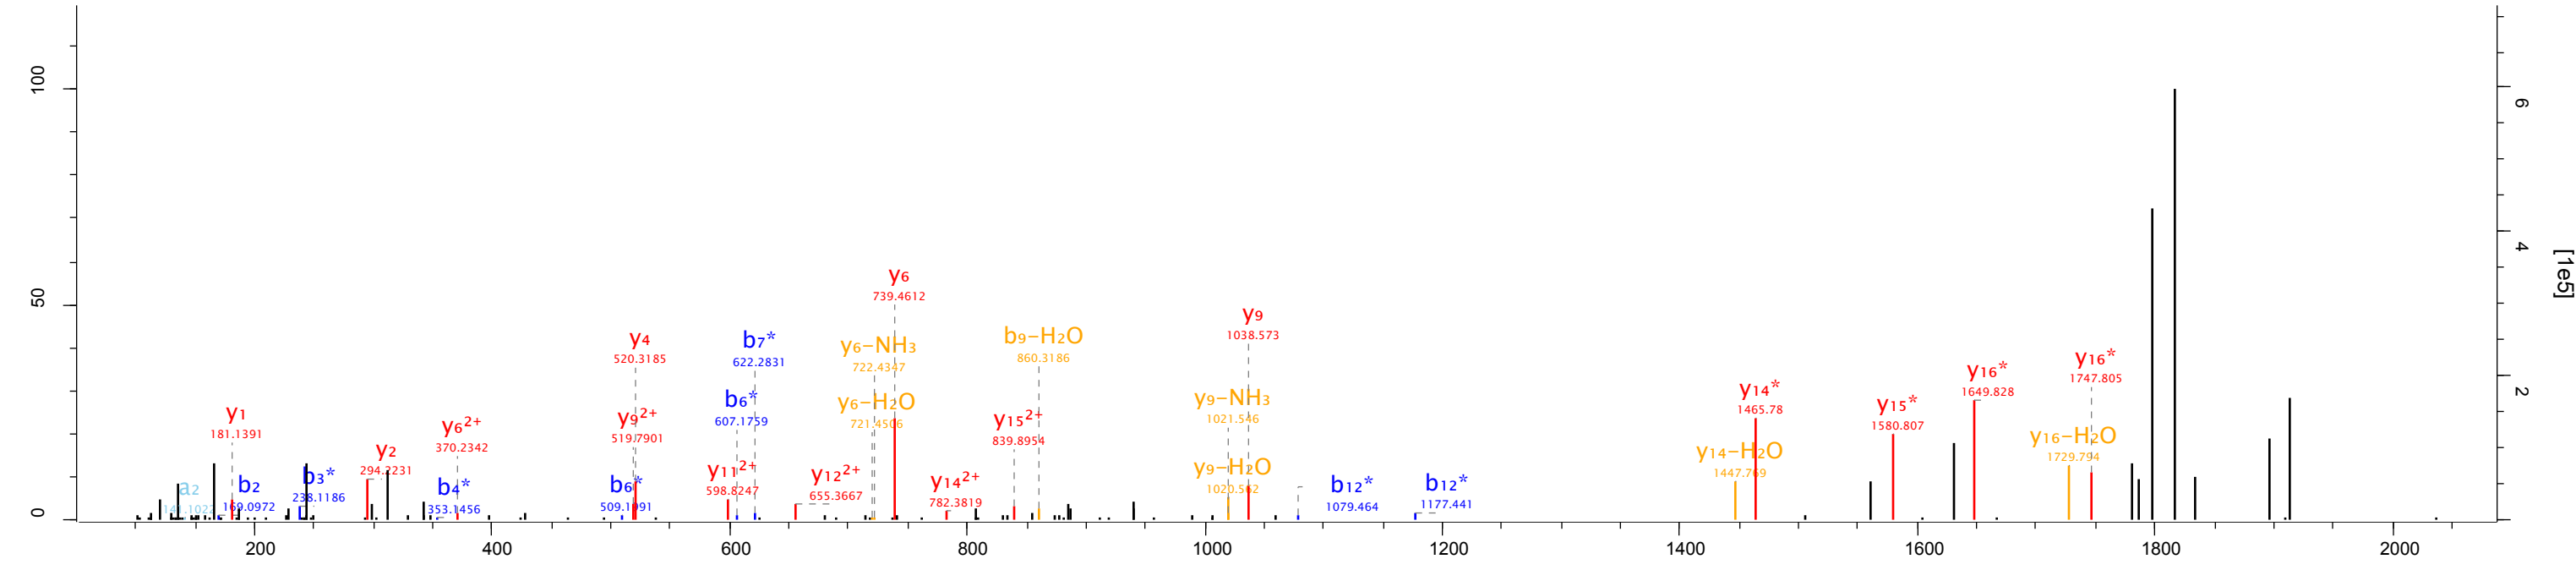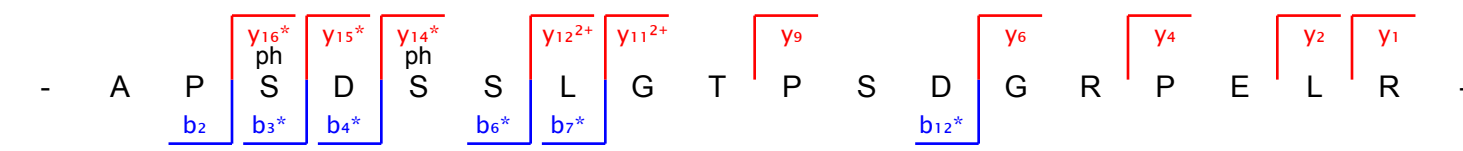

Raw file 20150814\_A375SR\_Phospho\_BR2\_02 Scan 11812 Method FTMS; HCD Score 130.25 m/z 800.96 Gene names ZFAND5

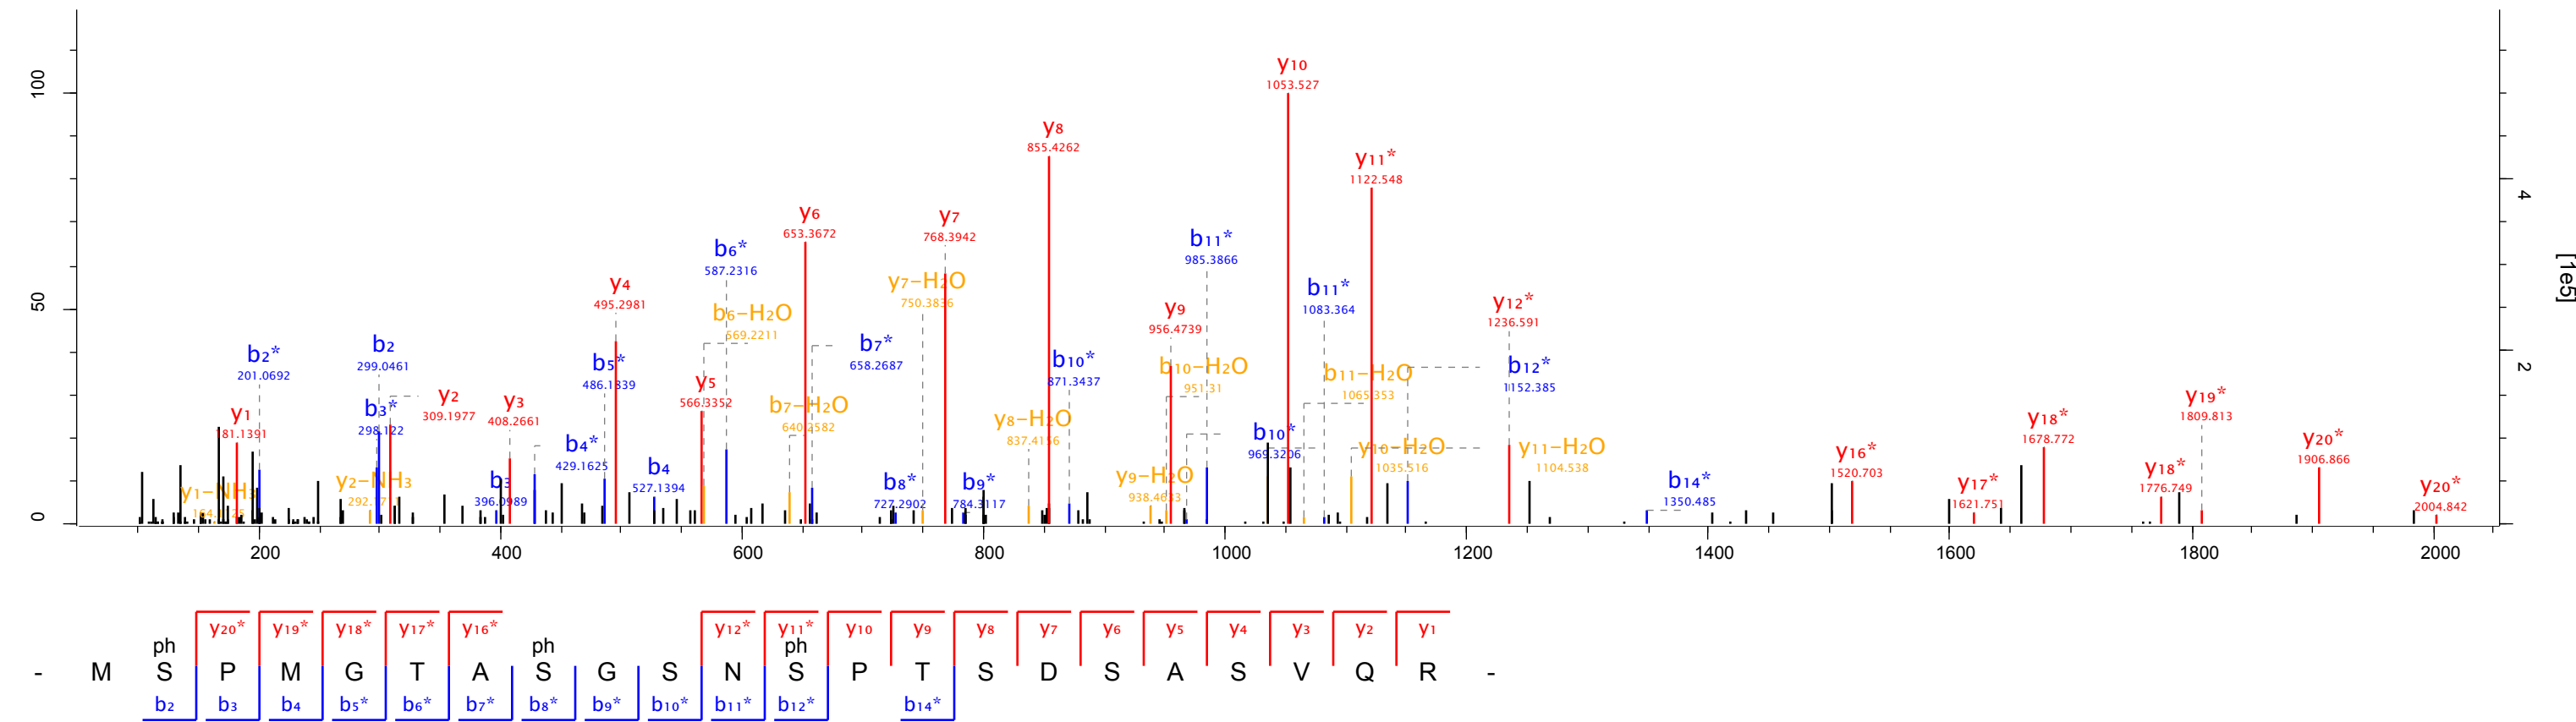

Raw file: 20150814\_A375SR\_Phospho\_BR2\_02  
 Scan: 12242 Method: FTMS; HCD Score: 105.51 m/z: 1032.95 Gene names: PCYT1A

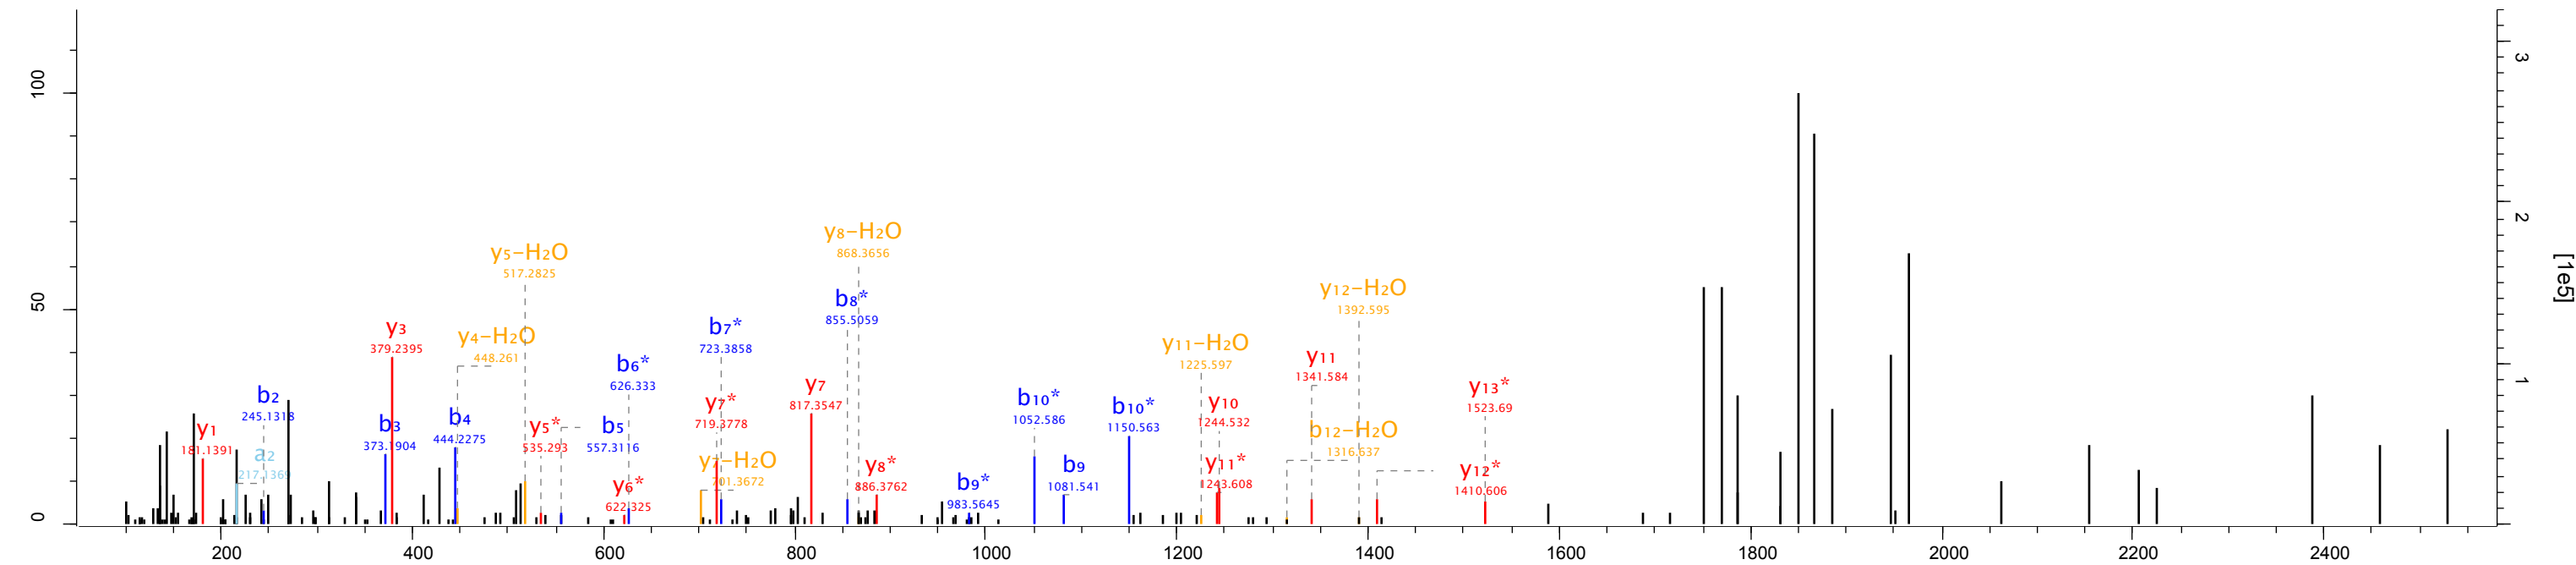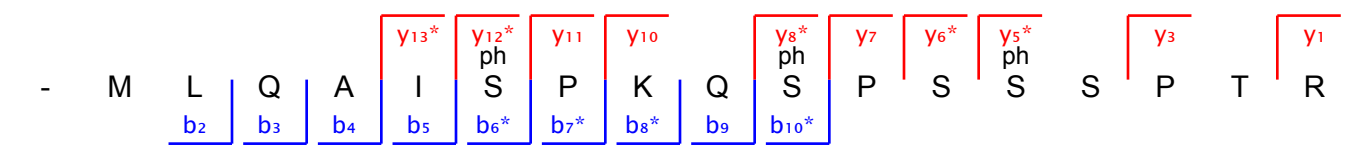

Raw file 20150814\_A375SR\_Phospho\_BR2\_02 Scan 12402 Method FTMS; HCD Score 65.88 m/z 981.41 Gene names RAPGEF2

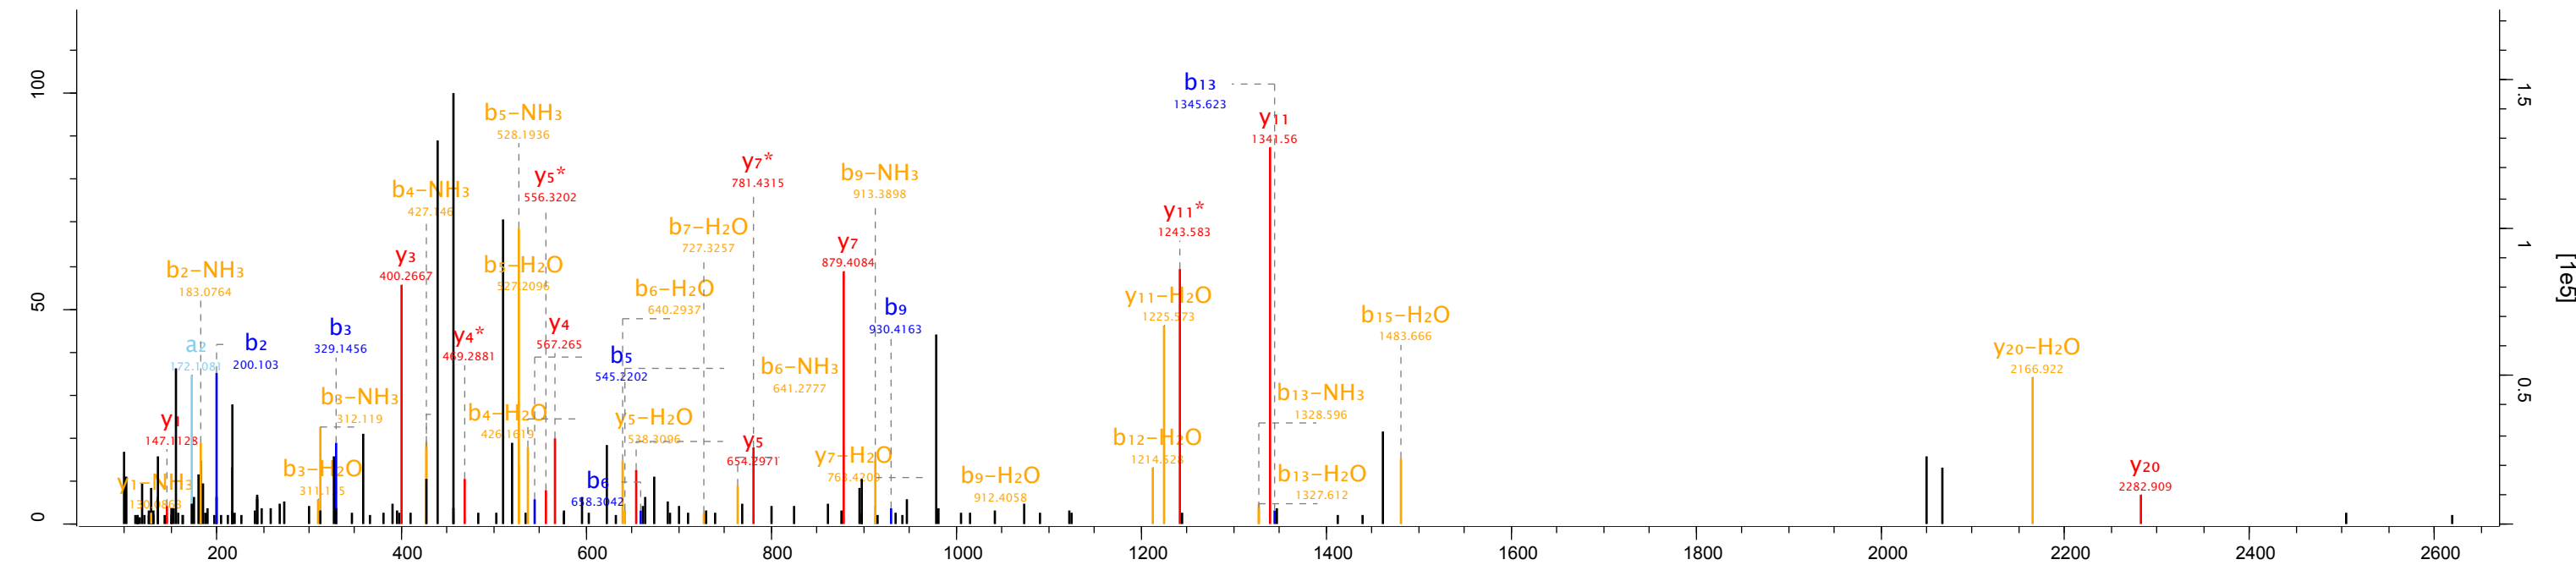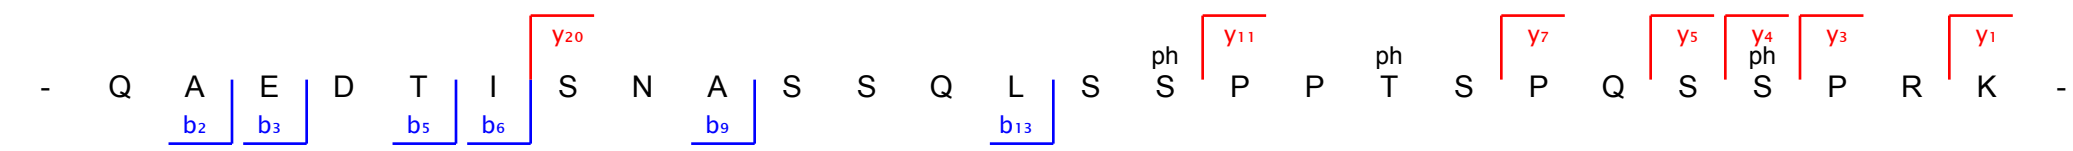

Raw file: 20150814\_A375SR\_Phospho\_BR2\_02  
 Scan: 12562 Method: FTMS; HCD Score: 83.75 m/z: 665.26 Gene names: CCP110

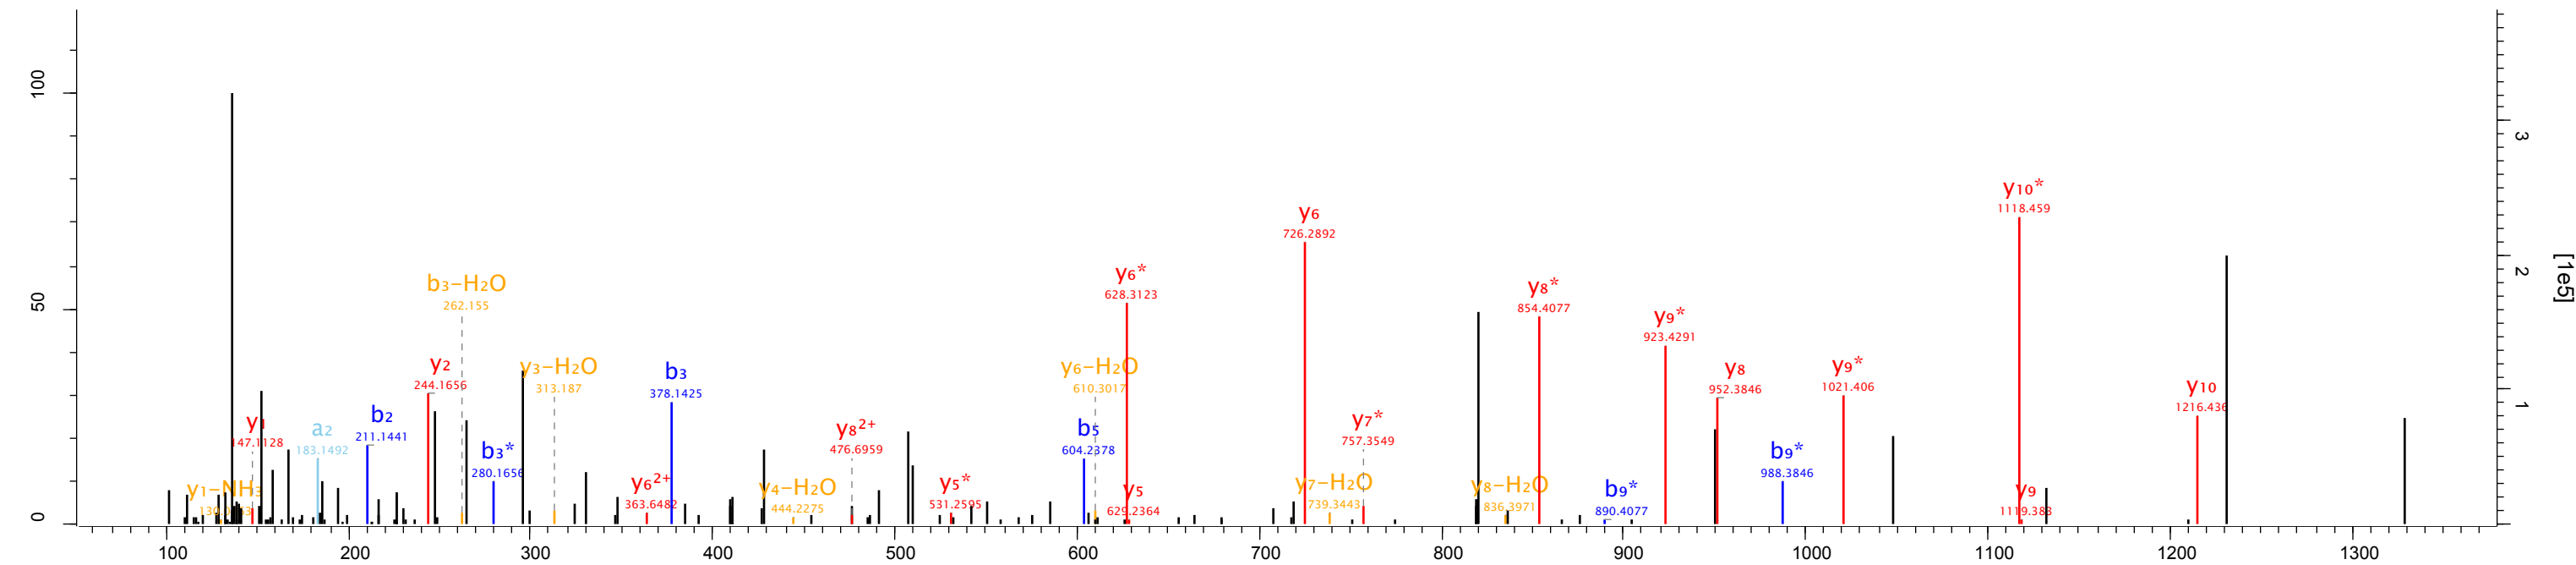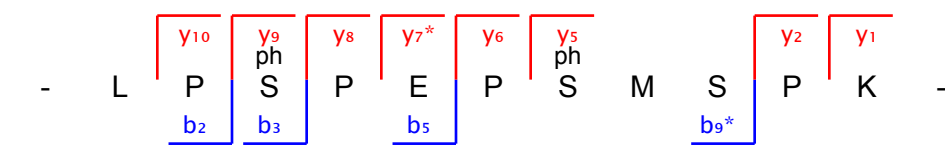

Raw file: 20150814\_A375SR\_Phospho\_BR2\_02  
 Scan: 12612 Method: FTMS; HCD Score: 180.04 m/z: 978.35 Gene names: DHX16

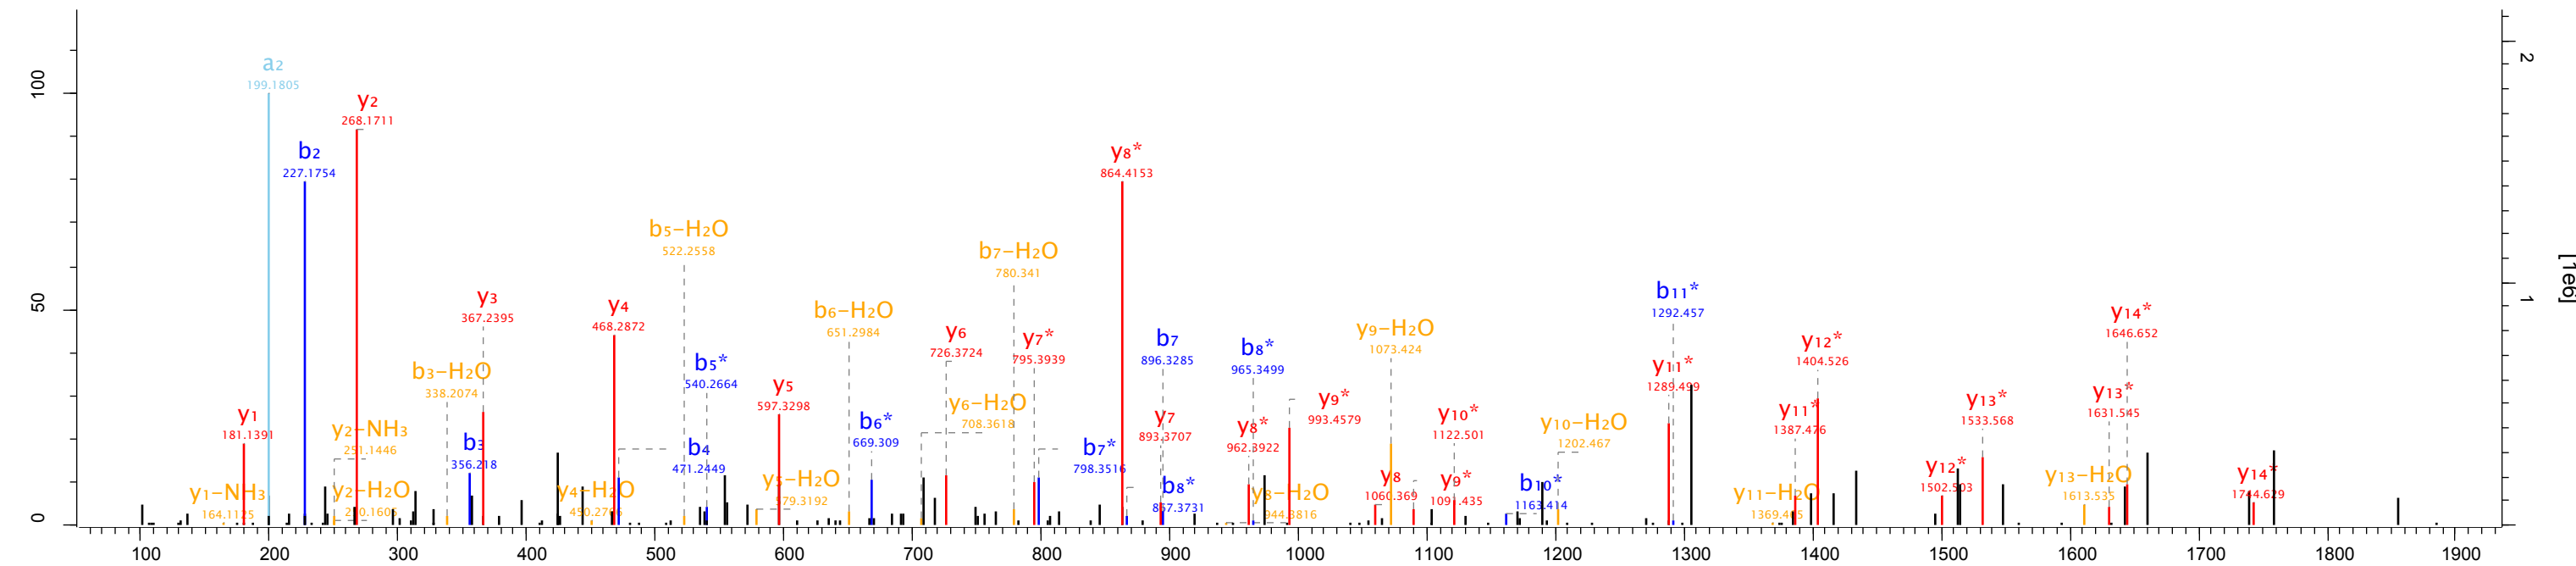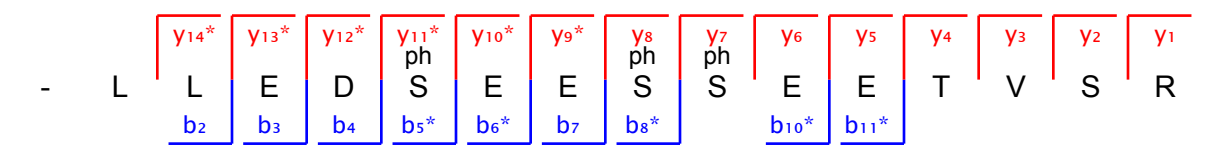

Raw file: 20150814\_A375SR\_Phospho\_BR2\_02  
 Scan: 12682 Method: FTMS; HCD Score: 136.62 m/z: 905.35 Gene names: NRBP1

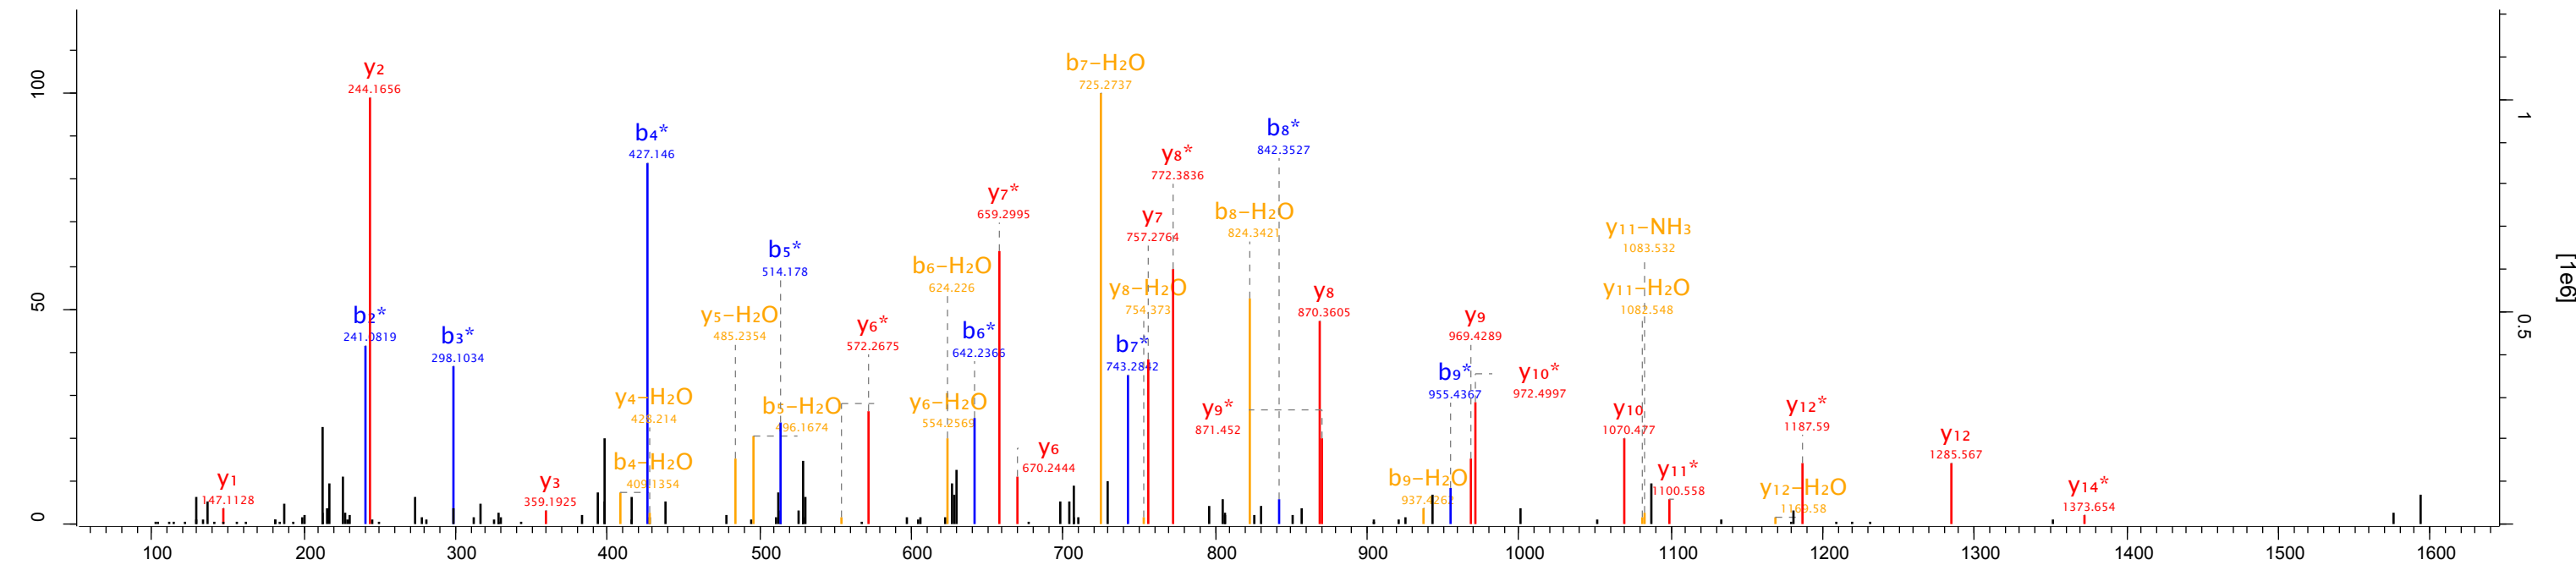

ac - ph S E G E S Q T V L S S G S D P K -

Fragmentation mapping (b and y ions):

- b2\* (E), b3\* (G), b4\* (E), b5\* (S), b6\* (Q), b7\* (T), b8\* (V), b9\* (L)
- y1 (K), y2 (P), y3 (D), y6 (S), y7 (S), y8 (L), y9 (V), y10 (T), y11\* (Q), y12 (S), y14\* (K)

Raw file 20150814\_A375SR\_Phospho\_BR2\_02 Scan 12692 Method FTMS; HCD Score 72.4 m/z 949.9 Gene names PSD3

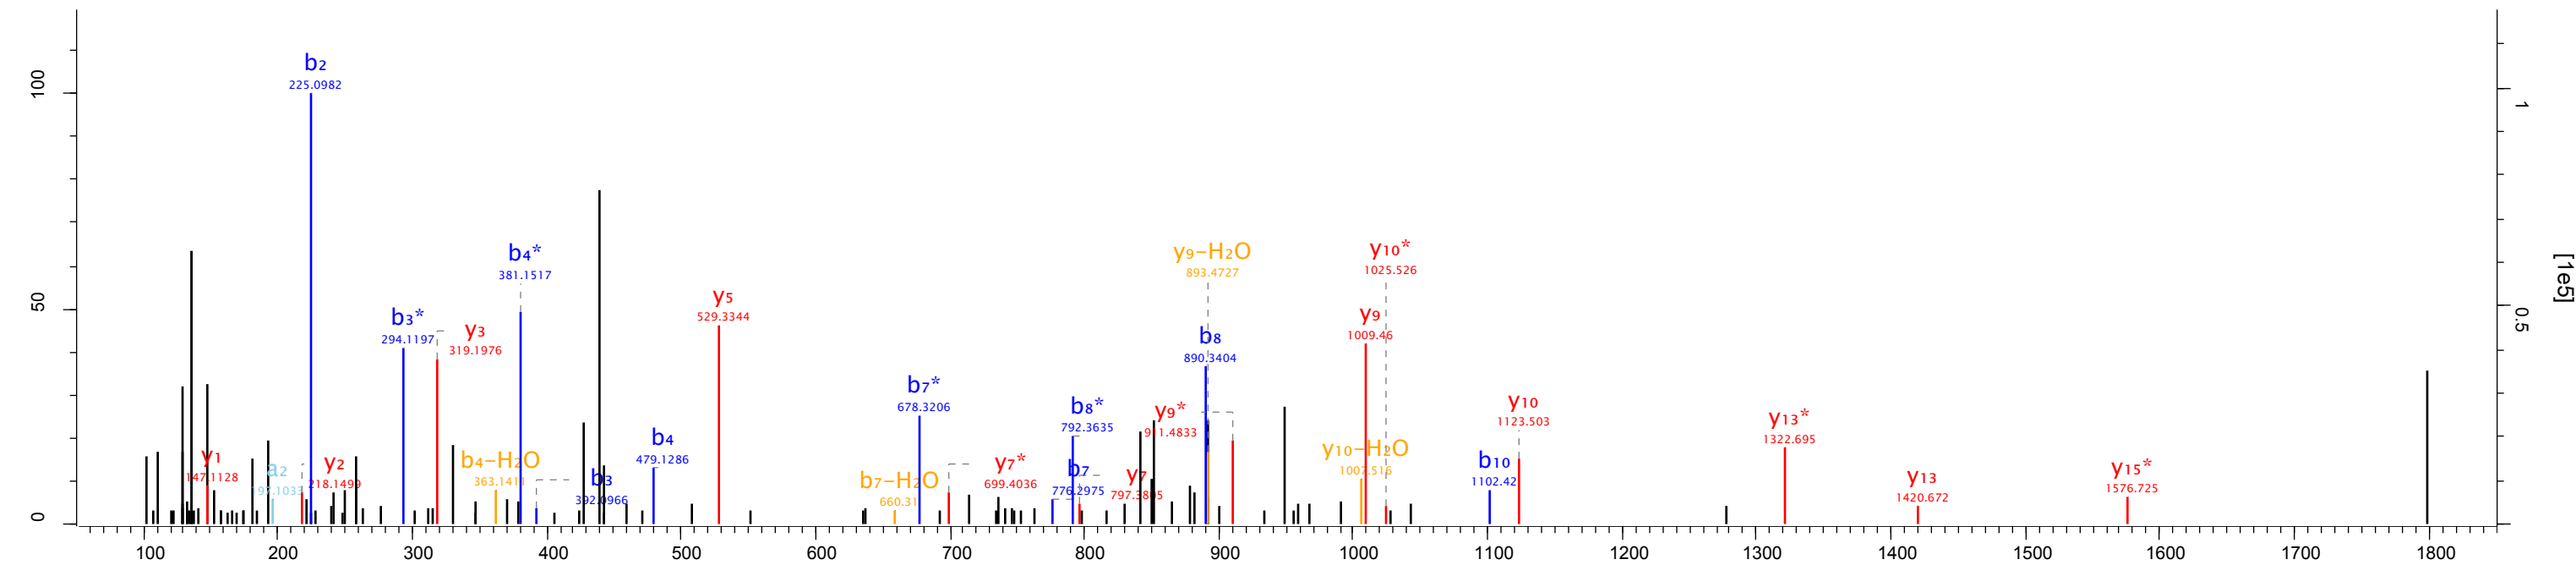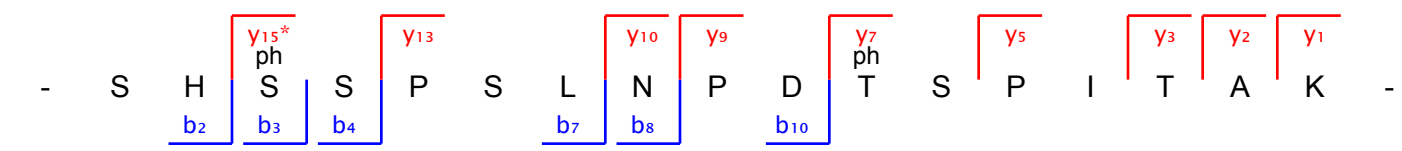



Raw file: 20150814\_A375SR\_Phospho\_BR2\_02  
 Scan: 12702 Method: FTMS; HCD Score: 64.59 m/z: 833.37 Gene names: LIMCH1

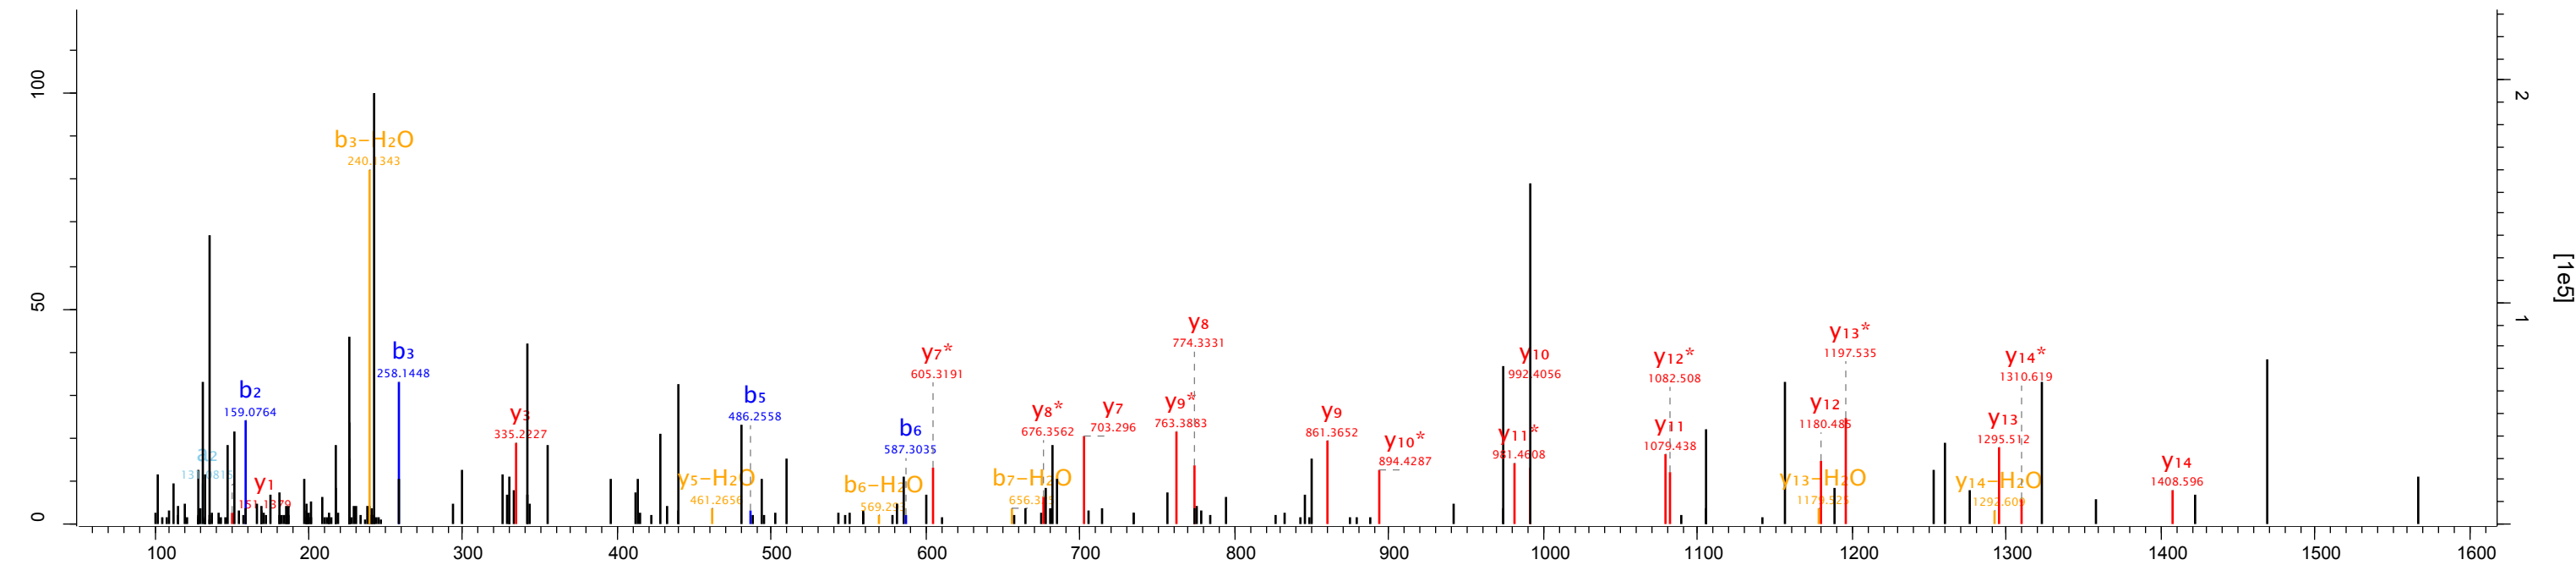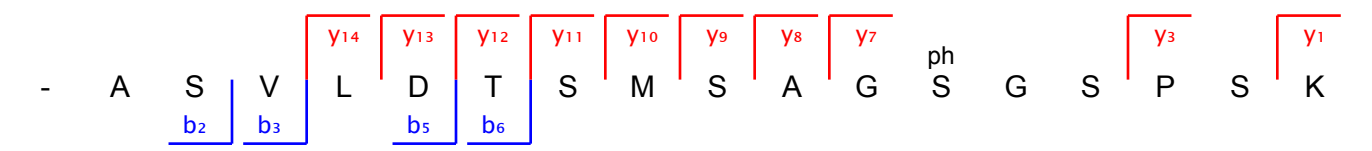

Raw file Scan Method Score m/z Gene names  
 20150814\_A375SR\_Phospho\_BR2\_02 12852 FTMS; HCD 138.49 1021.4 ZNF609

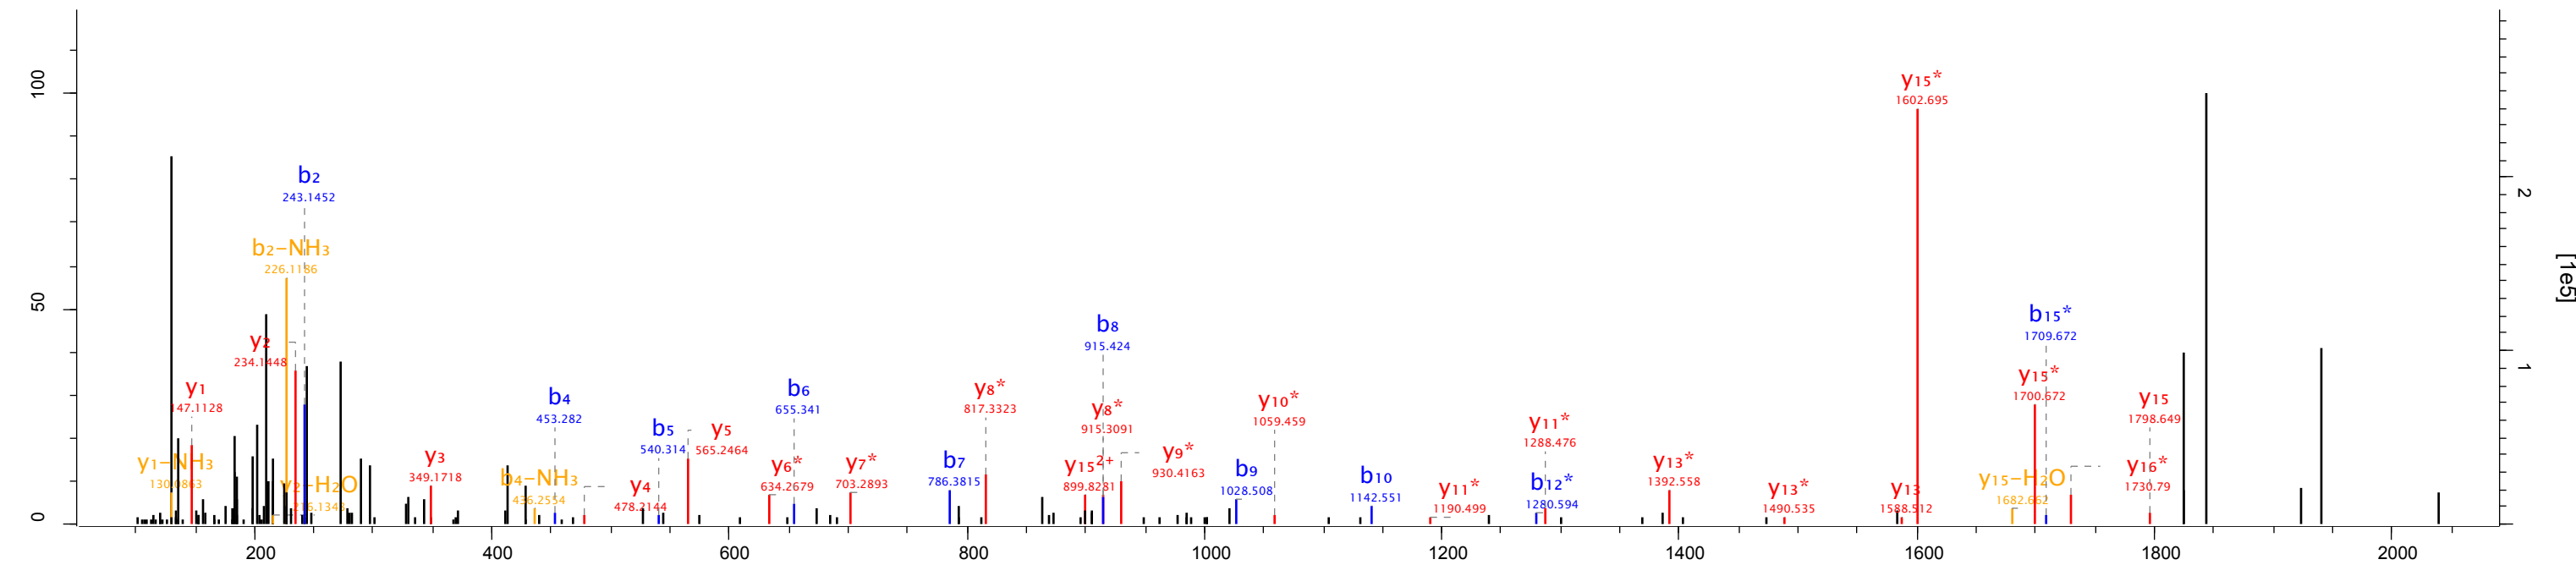

- N K P L S D M E L N S ph S ph S S E D S K -

y16\*
y15
y13
y11\*
y10\*
y9\*
y8\*
y7\*
y6\*
y5
y4
y3
y2
y1

b2
b4
b5
b6
b7
b8
b9
b10
b12\*
b15\*

Raw file Scan Method Score m/z Gene names  
 20150814\_A375SR\_Phospho\_BR2\_02 14372 FTMS; HCD 188.56 864.34 ARFGF2

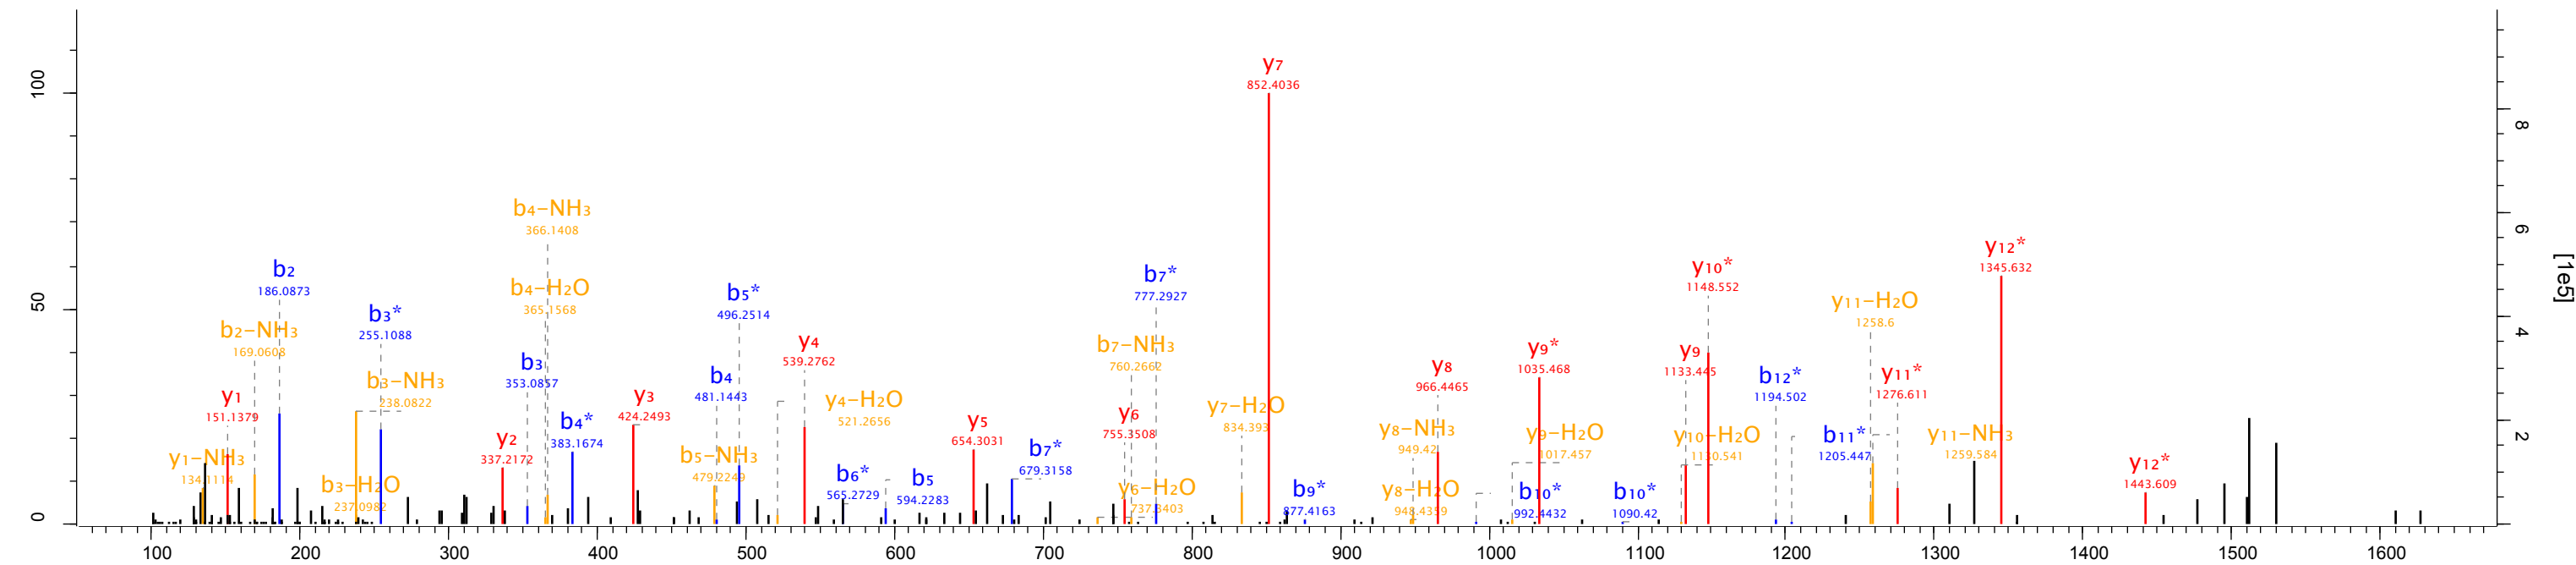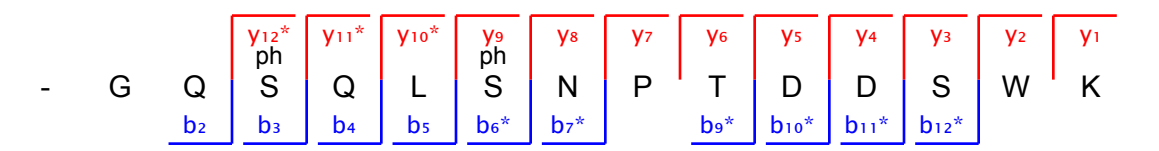

Raw file: 20150814\_A375SR\_Phospho\_BR2\_02  
 Scan: 16362 Method: FTMS; HCD Score: 168.3 m/z: 867.37 Gene names: OSBPL11

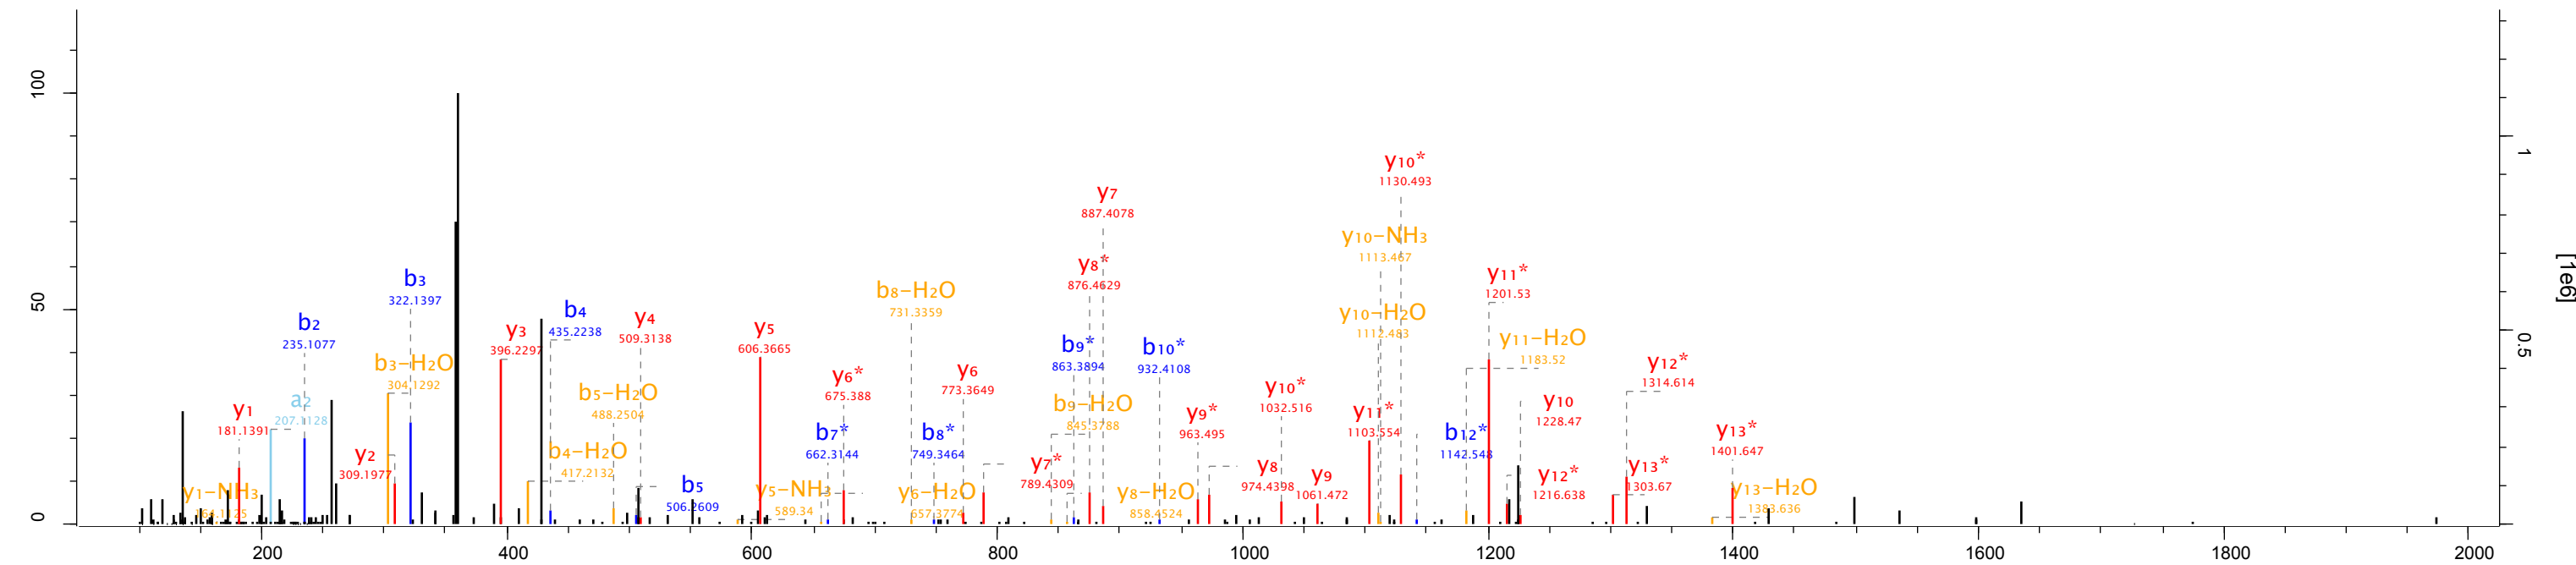

Sequence: - S F S L A S S S N S P I S Q R -

Fragmentation mapping:

- b2: F
- b3: S
- b4: L
- b5: A
- b7\*: S
- b8\*: S
- b9\*: N
- b10\*: S
- b12\*: I

Y-ion fragmentation mapping:

- y1: R
- y2: Q
- y3: S
- y4: I
- y5: P
- y6 ph: S
- y7: N
- y8: S
- y9: S
- y10 ph: S
- y11\*: A
- y12\*: L
- y13\*: S

Raw file 20150814\_A375SR\_Phospho\_BR2\_02 Scan 16612 Method FTMS; HCD Score 198.61 m/z 836.33 Gene names CCDC61

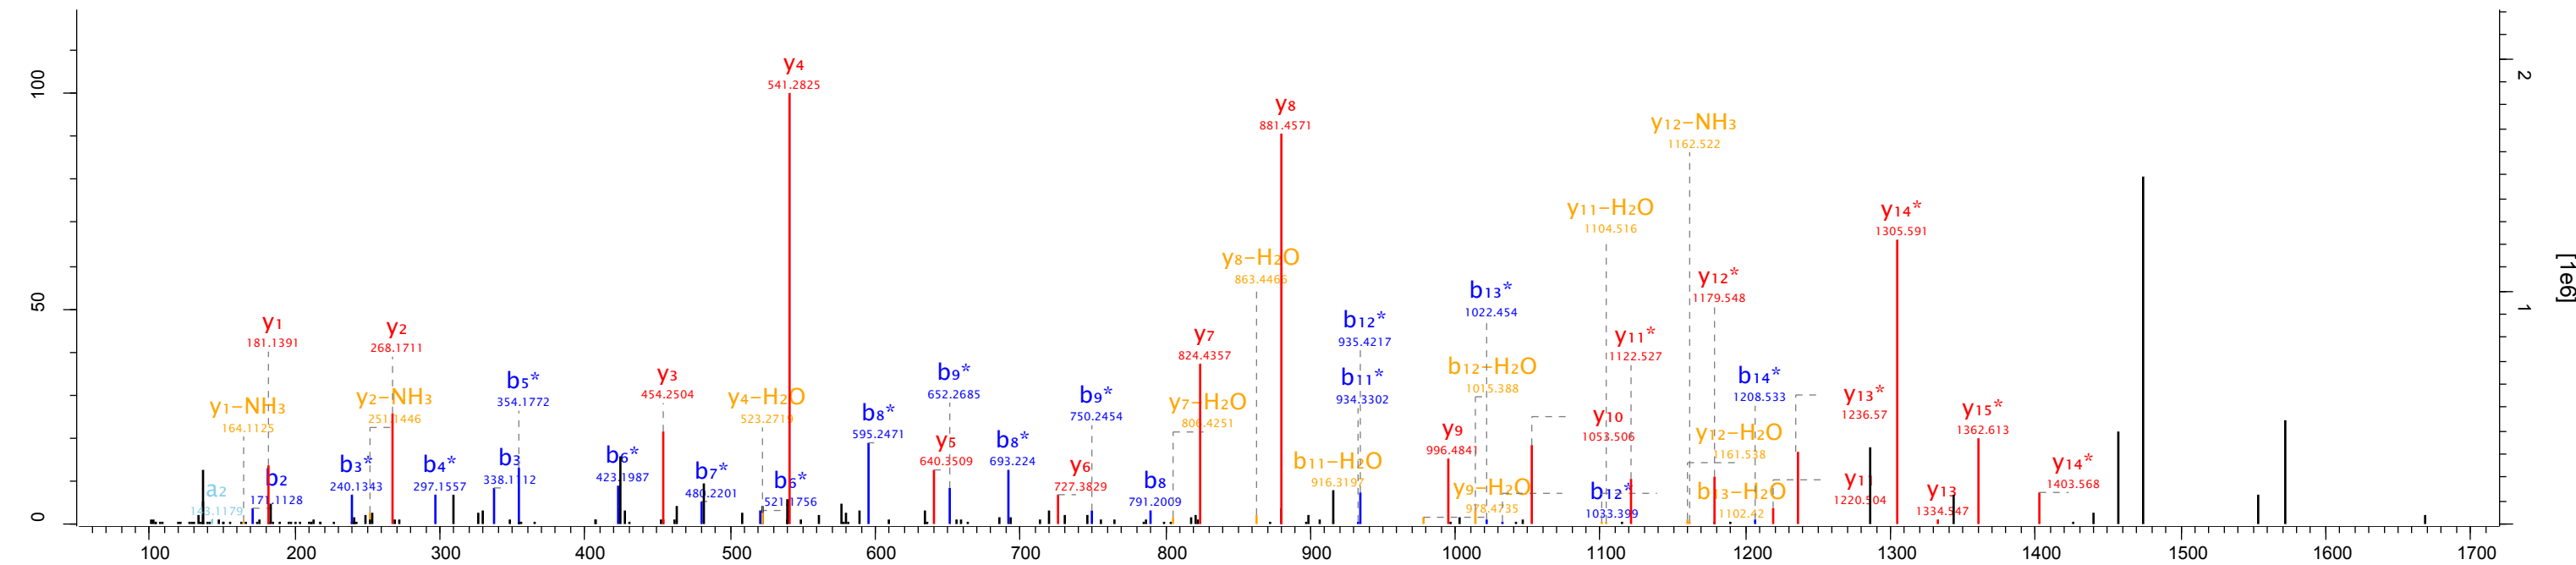

- L y15\* y14\* y13 y12\* y11 y10 y9 y8 y7 y6 y5 y4 y3 y2 y1 -

G S G G S G D G P S V S W S R

b2 b3 b4\* b5\* b6\* b7\* b8 b9\* b11\* b12\* b13\* b14\*

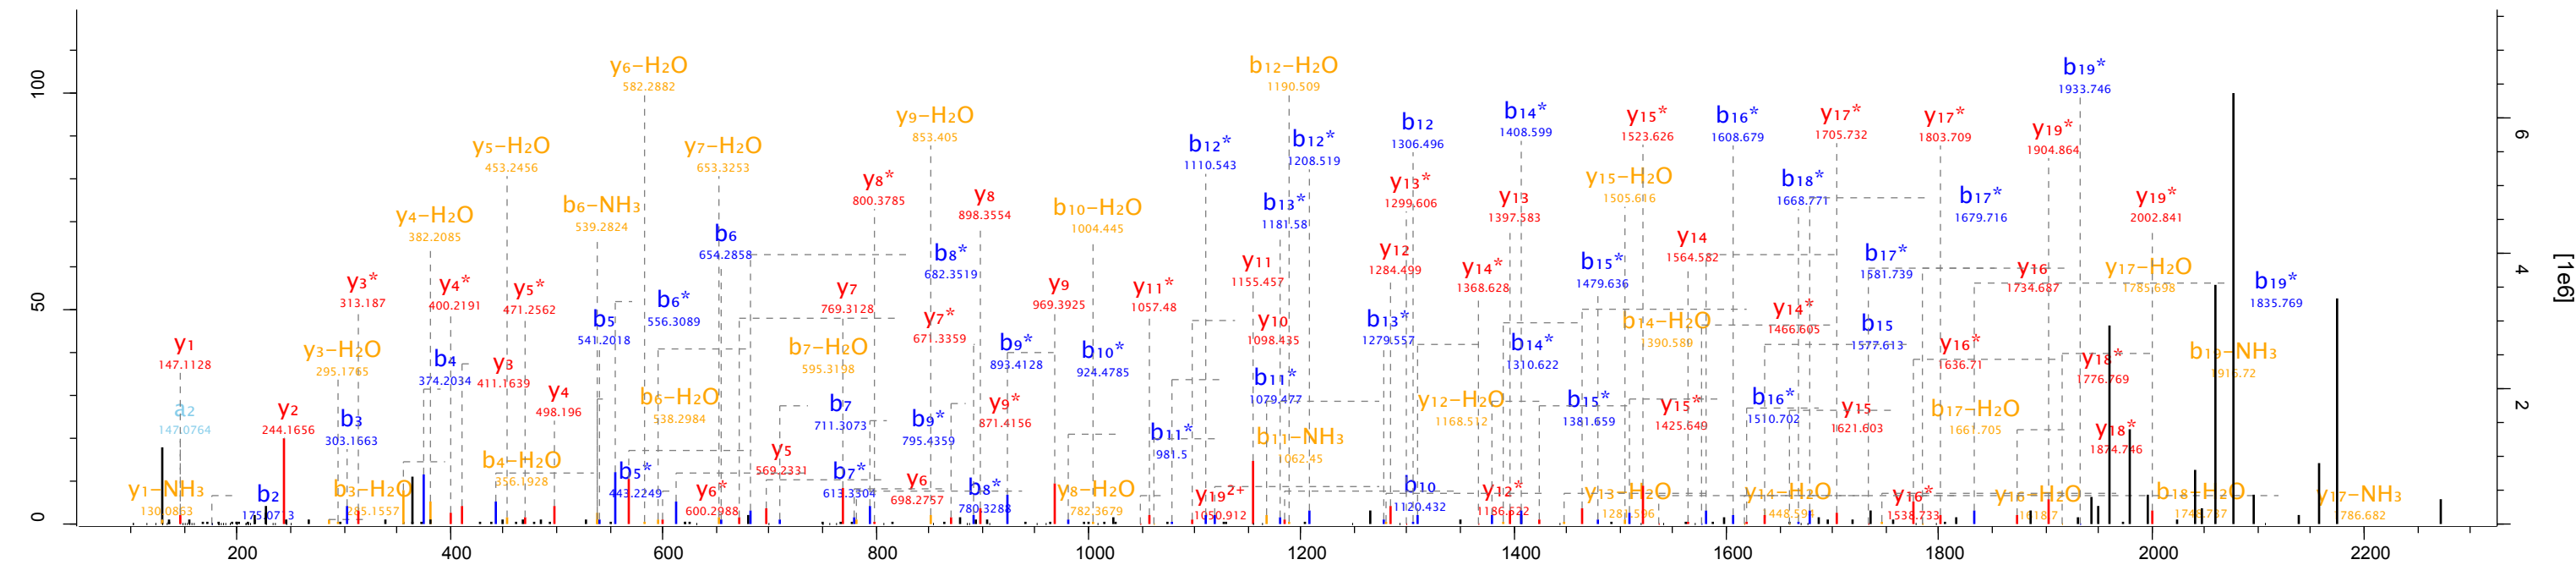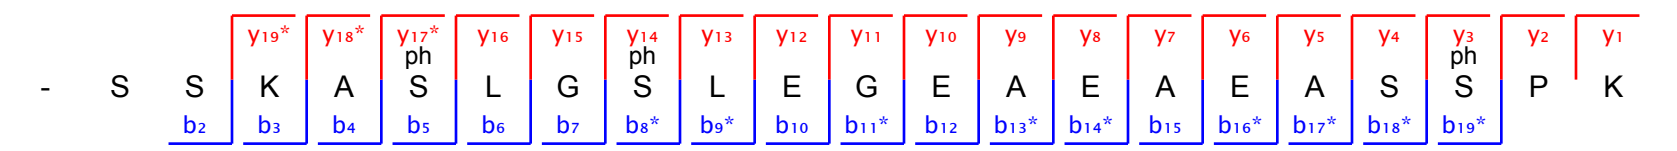

Raw file: 20150814\_A375SR\_Phospho\_BR2\_02  
 Scan: 1902 Method: FTMS; HCD Score: 58.29 m/z: 659.59 Gene names: EIF4B

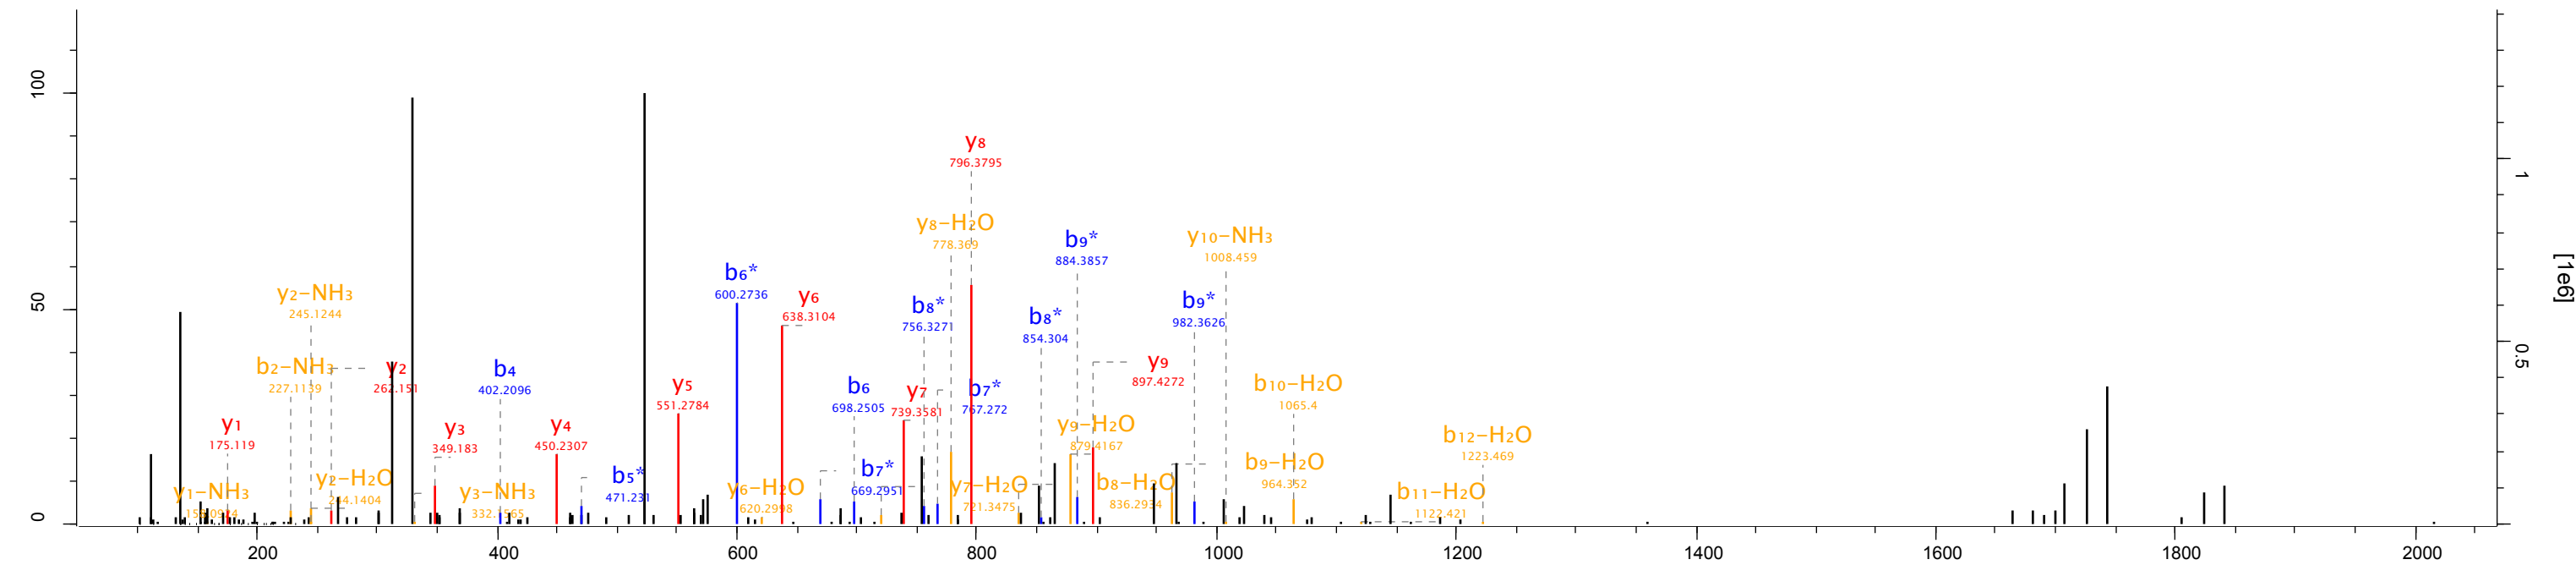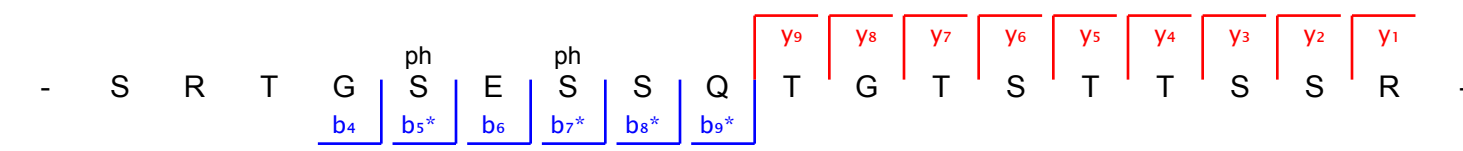

Raw file 20150814\_A375SR\_Phospho\_BR2\_02 Scan 19552 Method FTMS; HCD Score 199.3 m/z 1138.49 Gene names UBXN2B

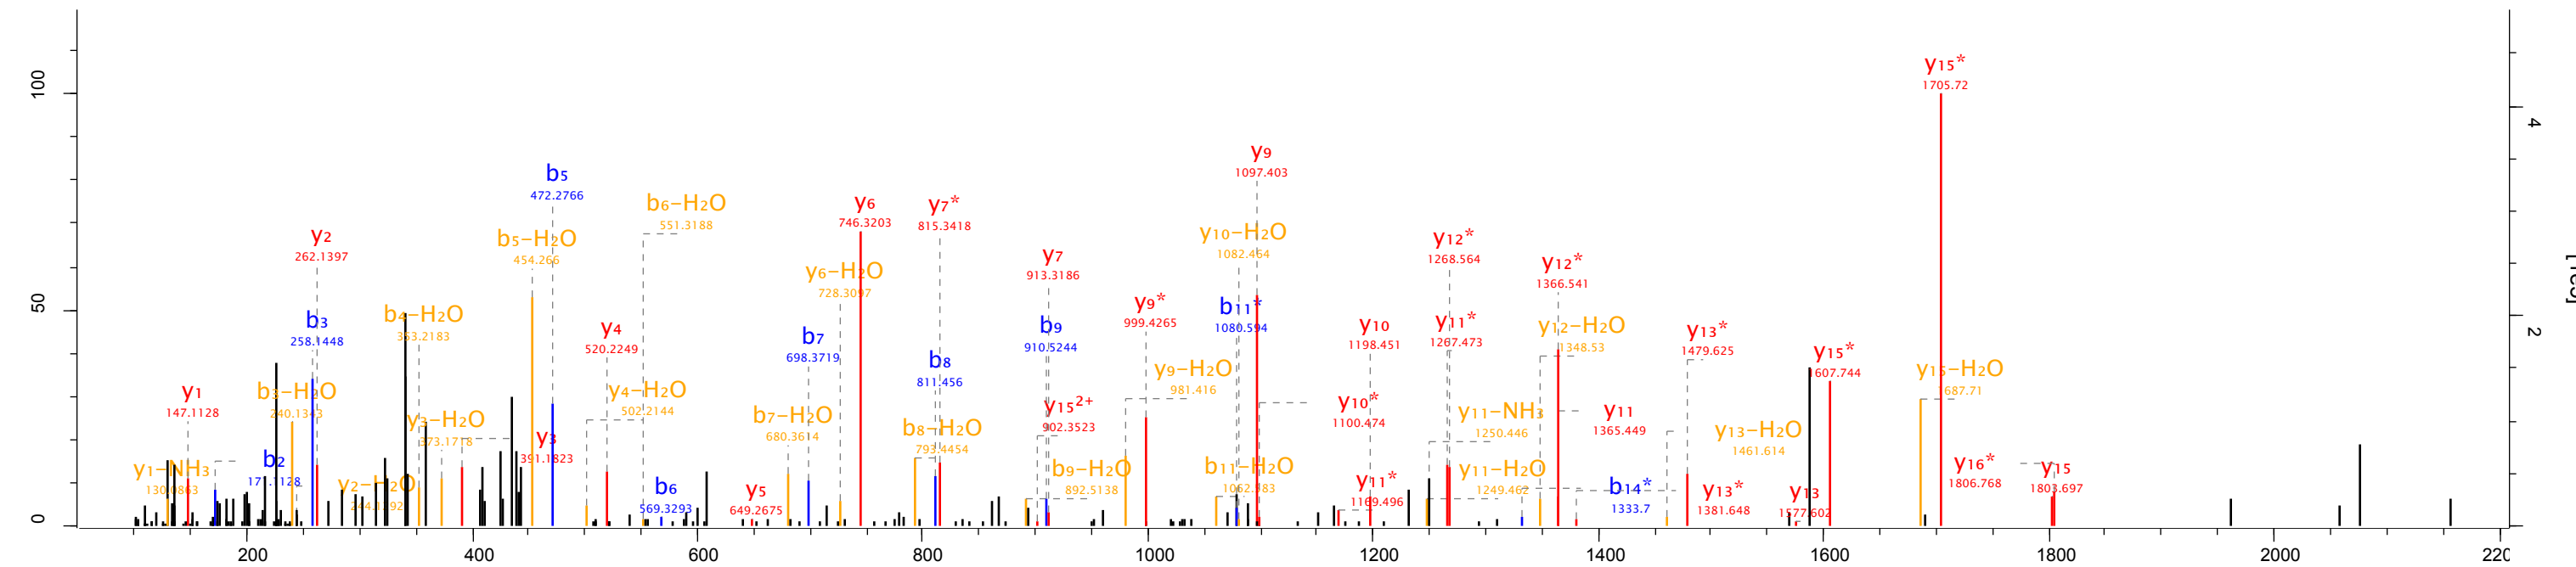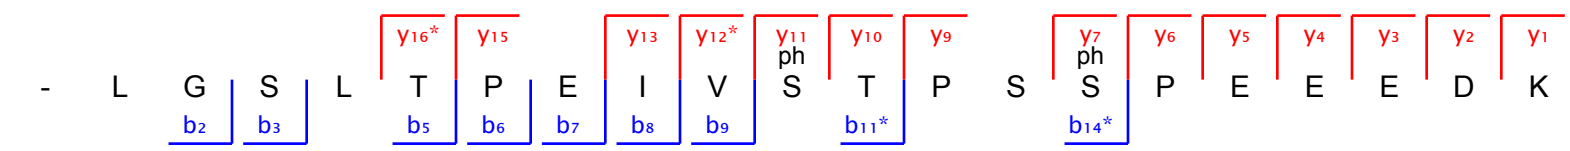



Raw file: 20150814\_A375SR\_Phospho\_BR2\_02  
 Scan: 20132 Method: FTMS; HCD Score: 54.43 m/z: 908.44 Gene names: EIF4G1

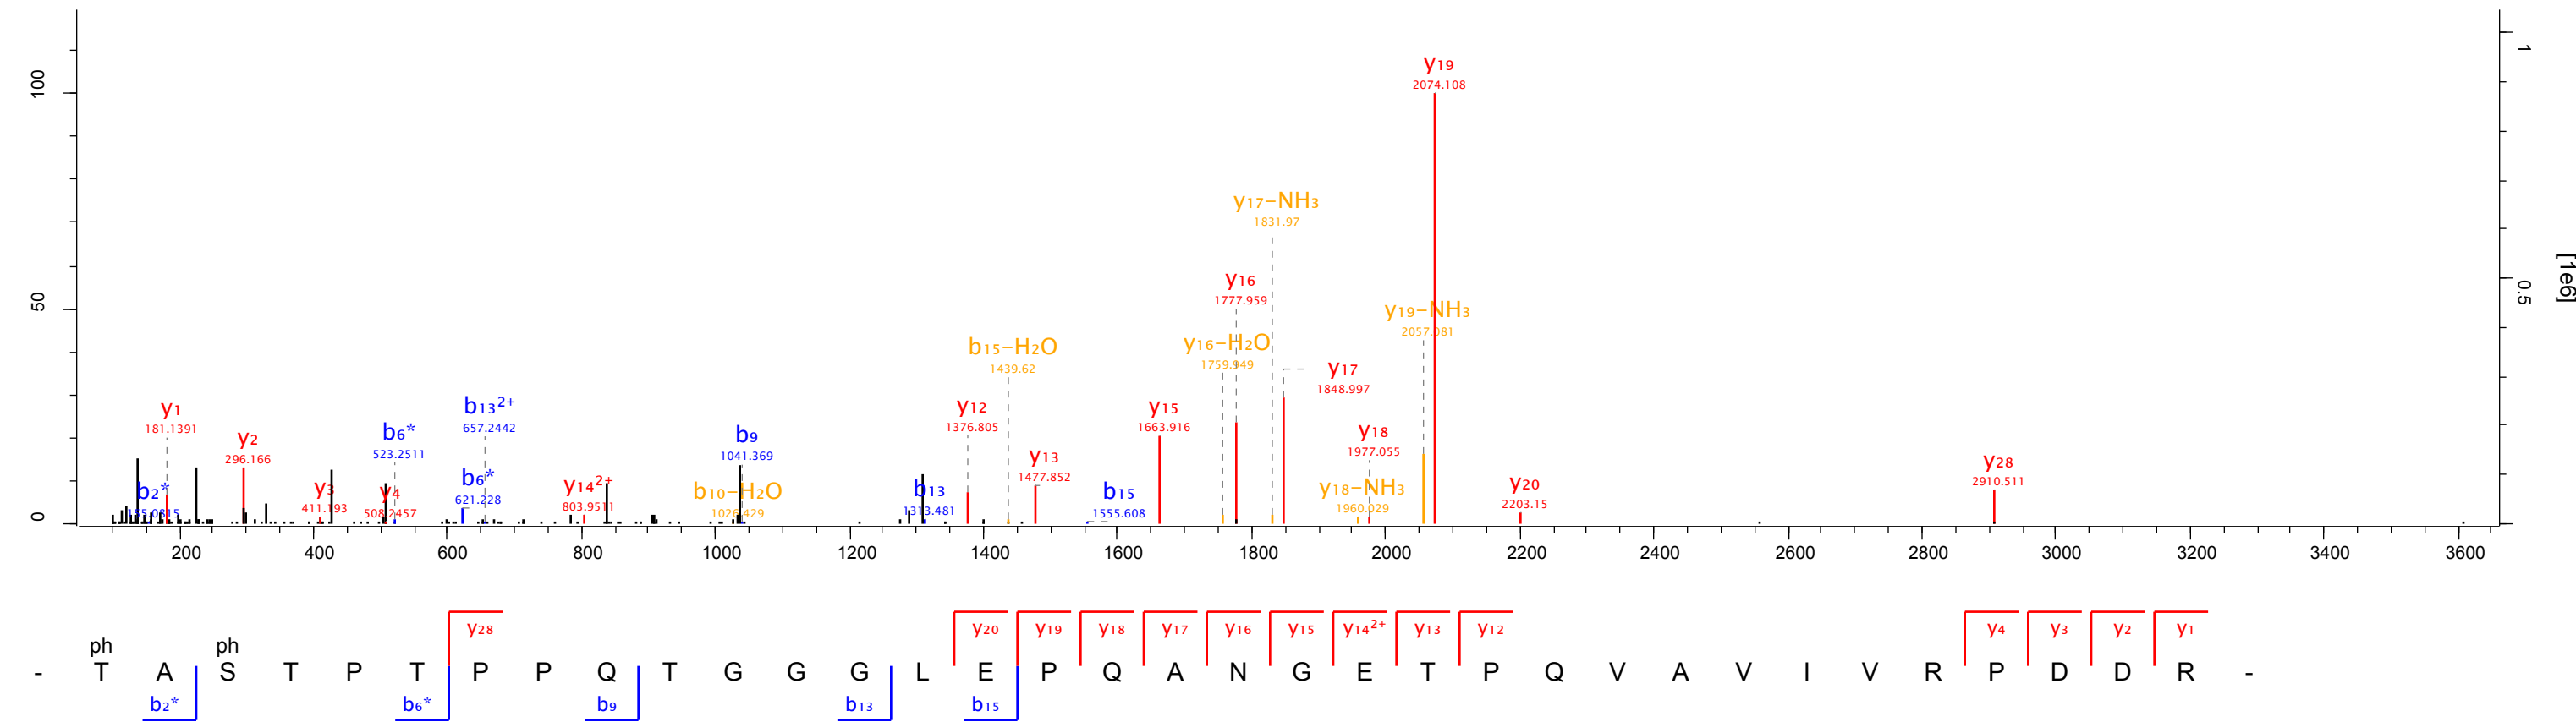

Raw file Scan Method Score m/z Gene names  
 20150814\_A375SR\_Phospho\_BR2\_02 21262 FTMS; HCD 249.65 947.38 AHNAK

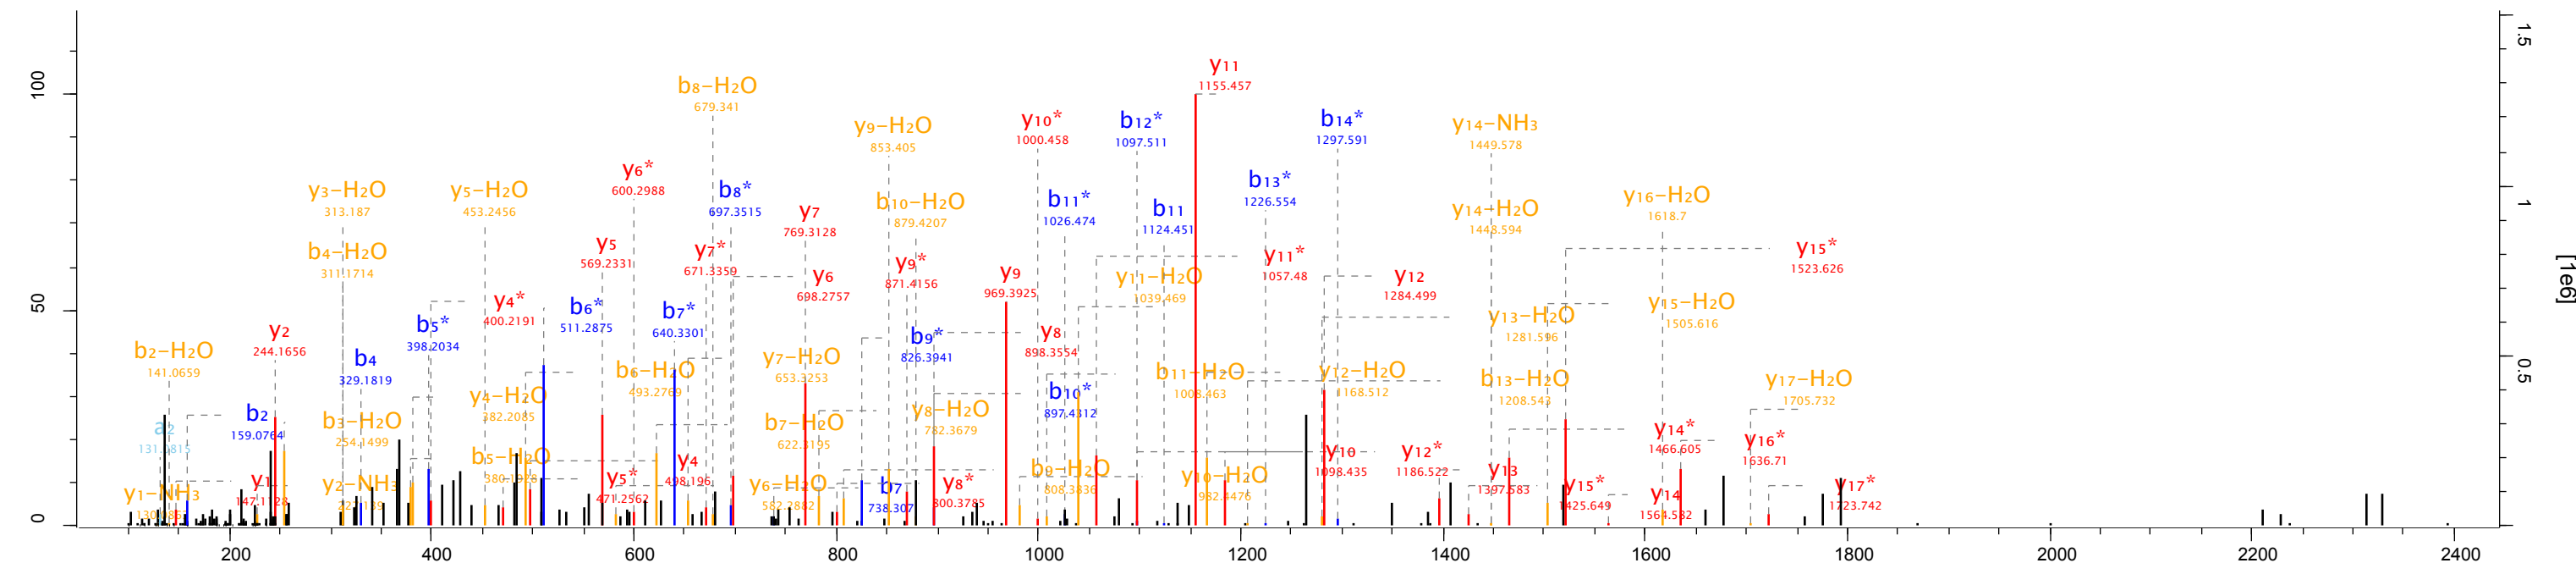

- A S L G S L E G E A E A E A S S P K -

Fragmentation mapping (b and y ions) is shown below the sequence:

- Red boxes above the sequence indicate y-ion fragments: y17\*, y16\*, y15\*, y14<sup>ph</sup>, y13, y12, y11, y10, y9, y8, y7, y6, y5, y4<sup>ph</sup>, y2, y1.
- Blue boxes below the sequence indicate b-ion fragments: b2, b4, b5\*, b6\*, b7, b8\*, b9\*, b10\*, b11, b12\*, b13\*, b14\*.

Raw file: 20150814\_A375SR\_Phospho\_BR2\_02  
 Scan: 23562 Method: FTMS; HCD Score: 58.34 m/z: 790.35 Gene names: EGFR

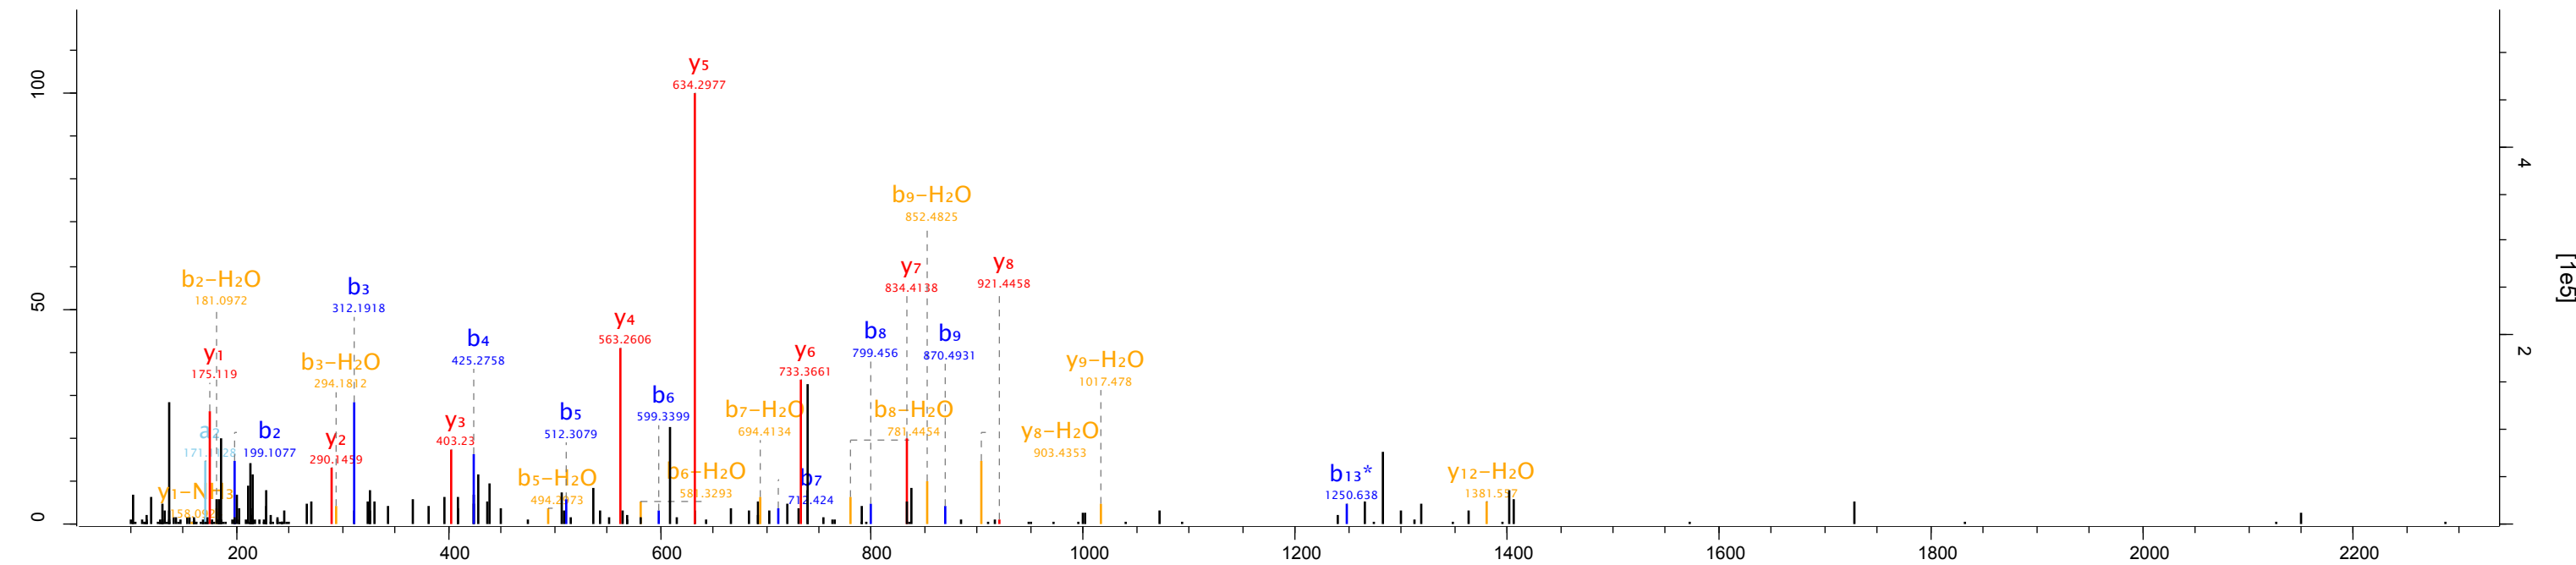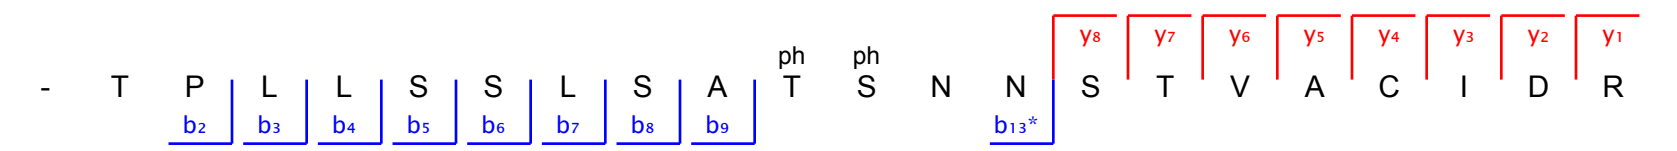

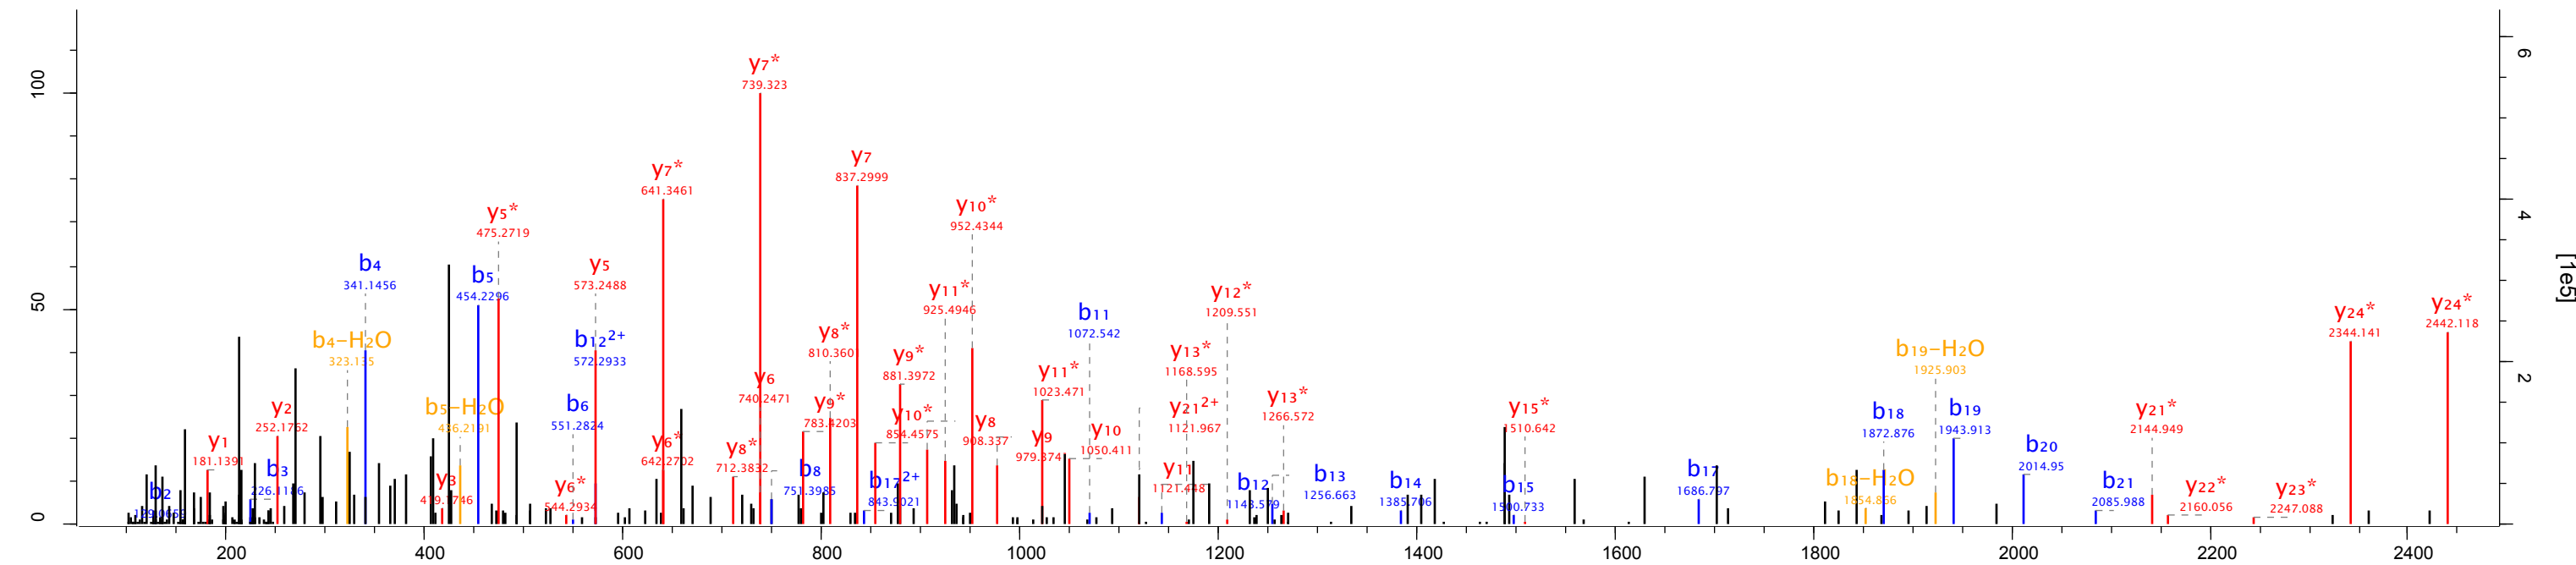

- A G P D L P S L P S H A L E D E G W A A A A P S P G S A R -

b<sub>2</sub>
b<sub>3</sub>
b<sub>4</sub>
b<sub>5</sub>
b<sub>6</sub>
b<sub>8</sub>
b<sub>11</sub>
b<sub>12</sub>
b<sub>13</sub>
b<sub>14</sub>
b<sub>15</sub>
b<sub>17</sub>
b<sub>18</sub>
b<sub>19</sub>
b<sub>20</sub>
b<sub>21</sub>
y<sub>15</sub>\*
y<sub>13</sub>\*
y<sub>12</sub>\*
y<sub>11</sub>
y<sub>10</sub>
y<sub>9</sub>
y<sub>8</sub>
y<sub>7</sub>
y<sub>6</sub>ph
y<sub>5</sub>
y<sub>3</sub>ph
y<sub>2</sub>
y<sub>1</sub>
y<sub>24</sub>\*
y<sub>23</sub>\*
y<sub>22</sub>\*
y<sub>21</sub>\*

Raw file 20150814\_A375SR\_Phospho\_BR2\_02 Scan 4142 Method FTMS; HCD Score 84.16 m/z 929.34 Gene names CLASP2

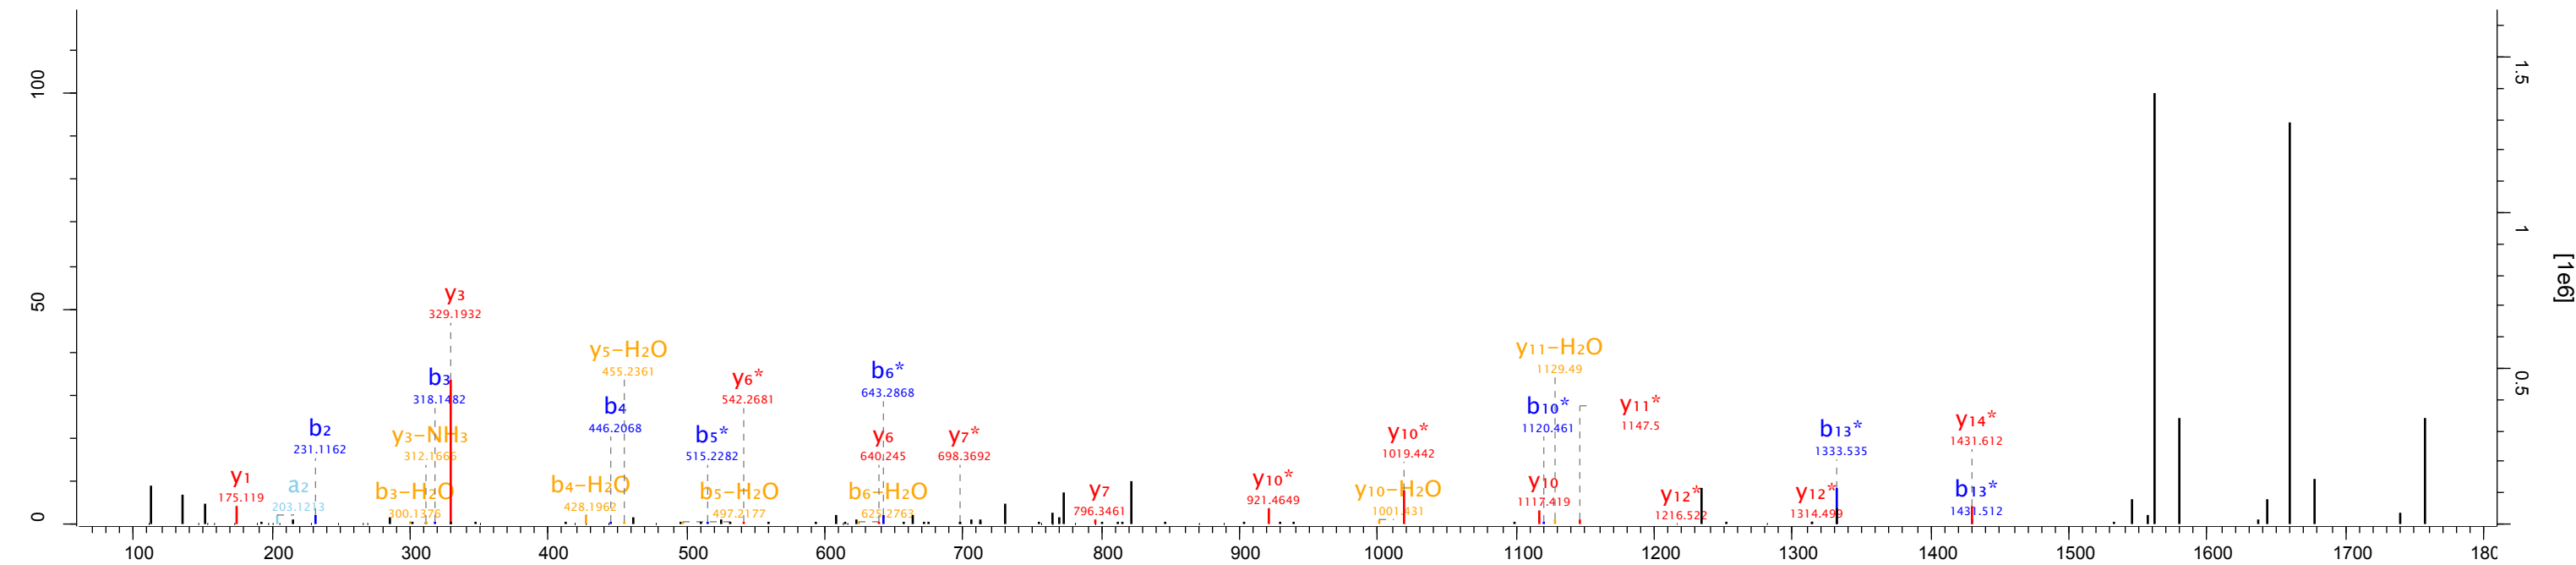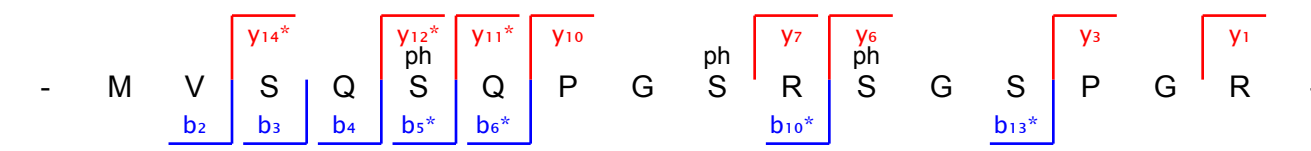

Raw file: 20150814\_A375SR\_Phospho\_BR2\_02  
 Scan: 4212 Method: FTMS; HCD Score: 125.62 m/z: 770.95 Gene names: SRRM2

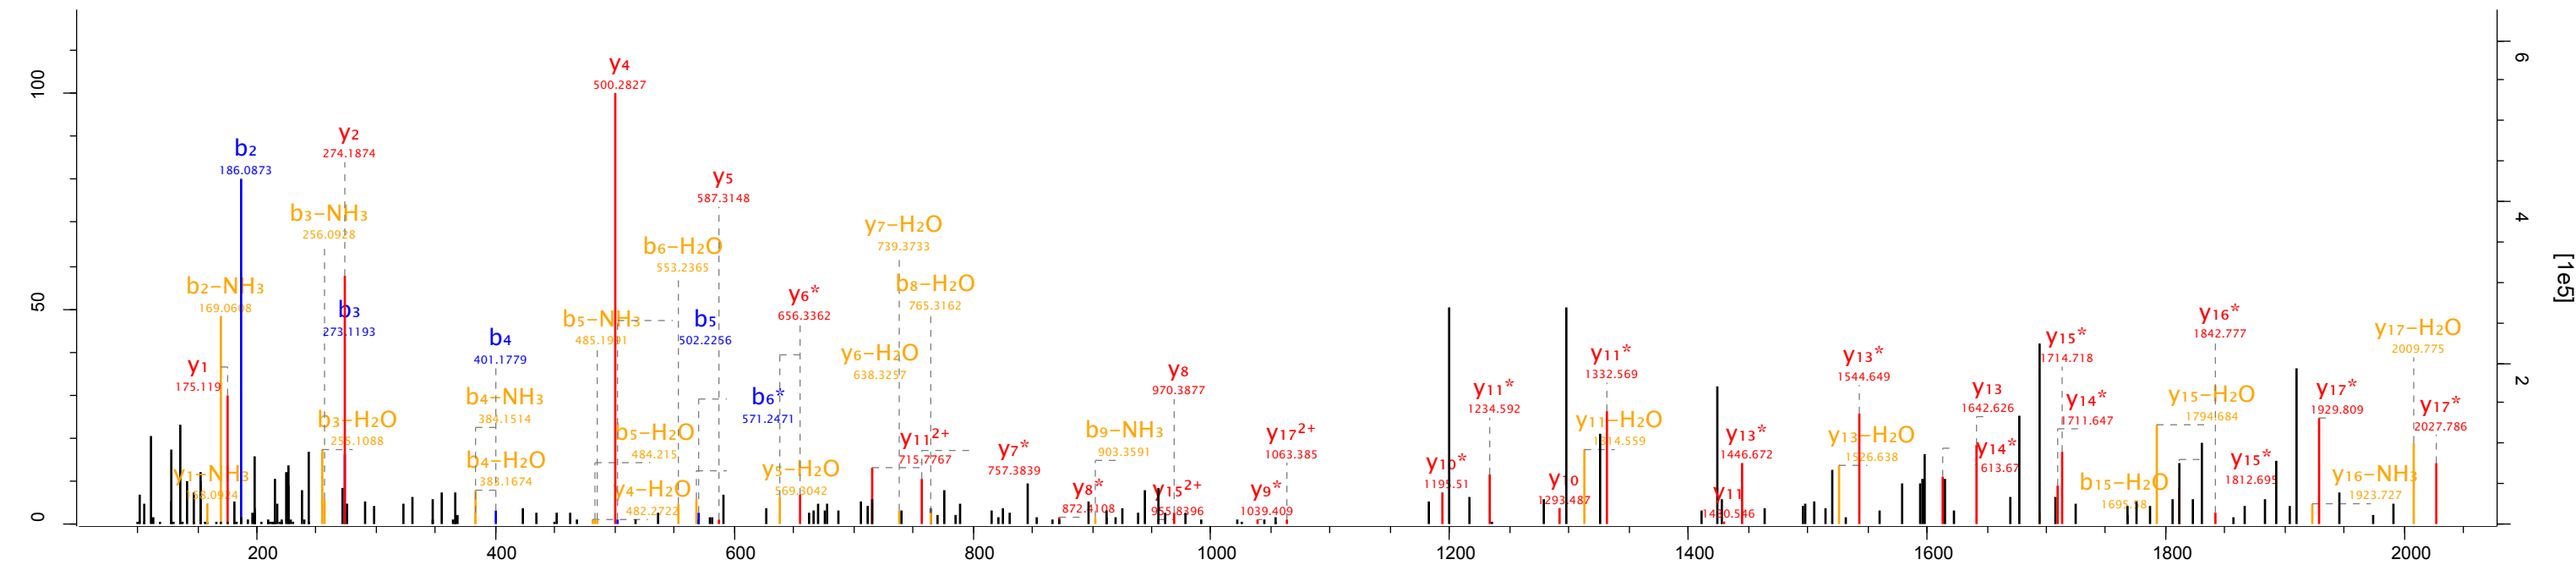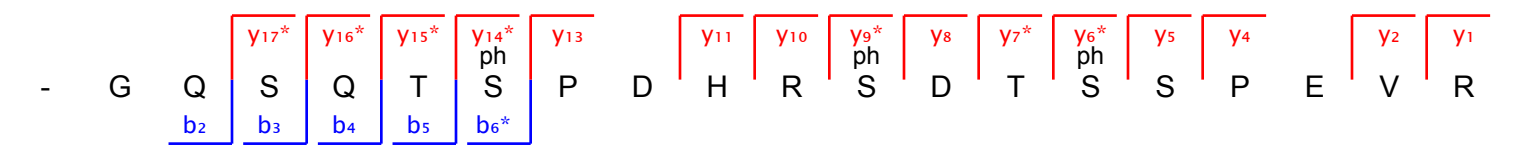

Raw file: 20150814\_A375SR\_Phospho\_BR2\_02  
 Scan: 4832 Method: FTMS; HCD Score: 53.4 m/z: 587.24 Gene names: FSD1

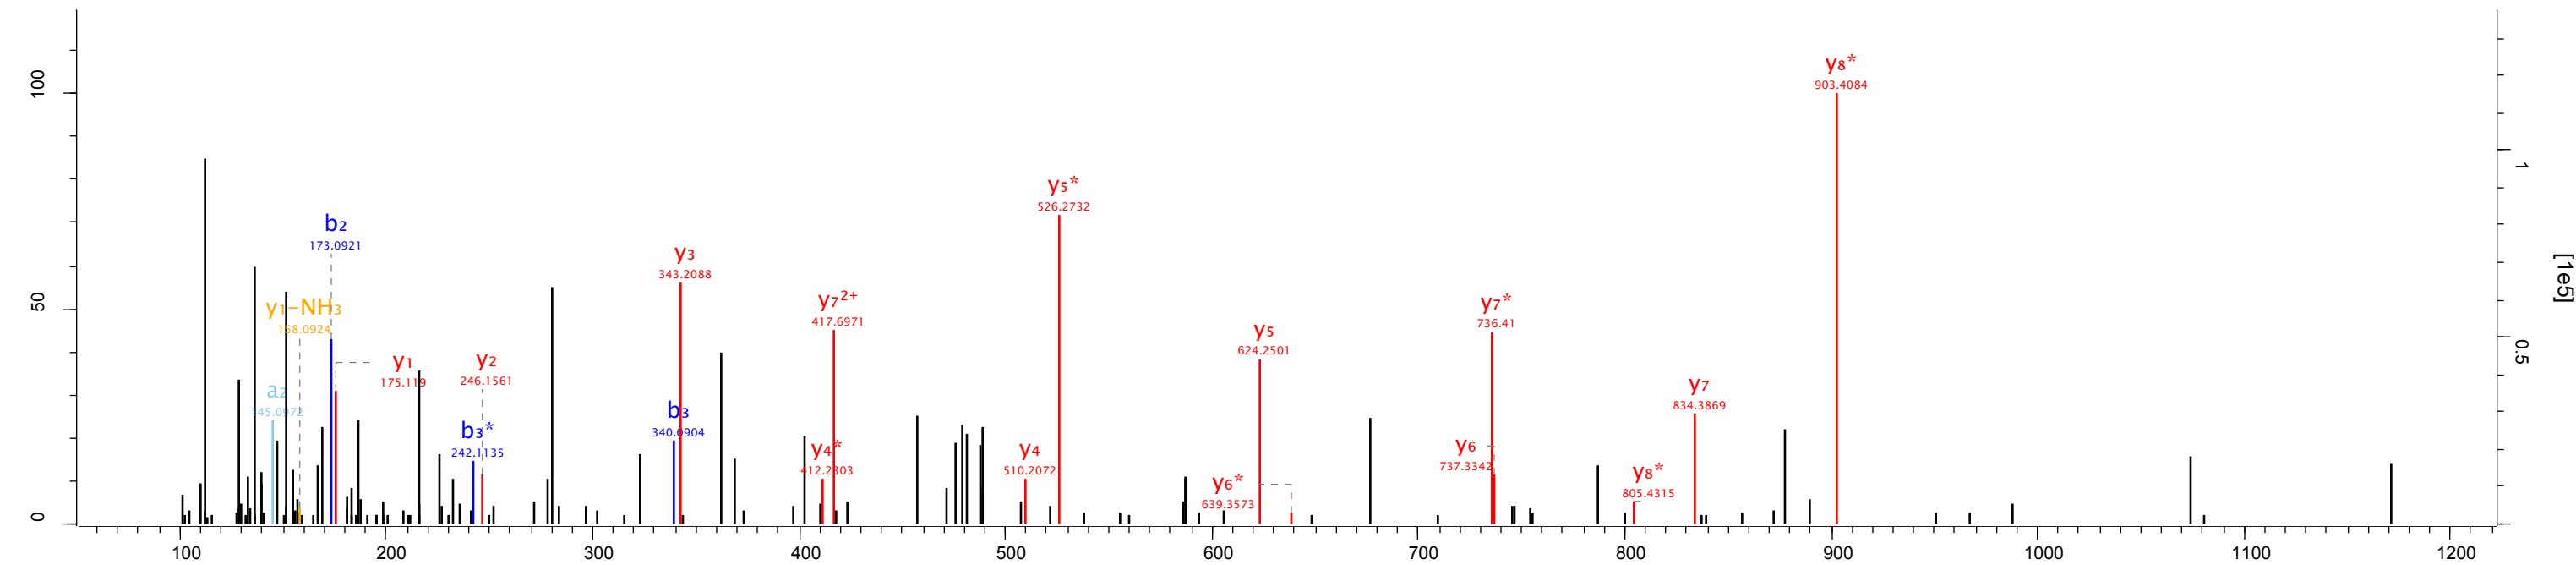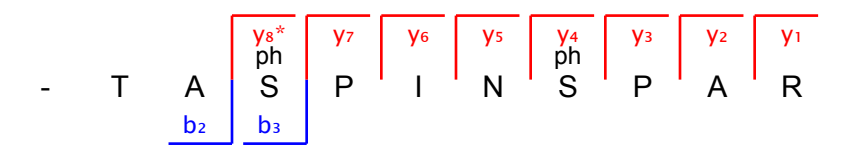

Raw file: 20150814\_A375SR\_Phospho\_BR2\_02  
 Scan: 5762 Method: FTMS; HCD Score: 107.98 m/z: 697.25 Gene names: WNK1

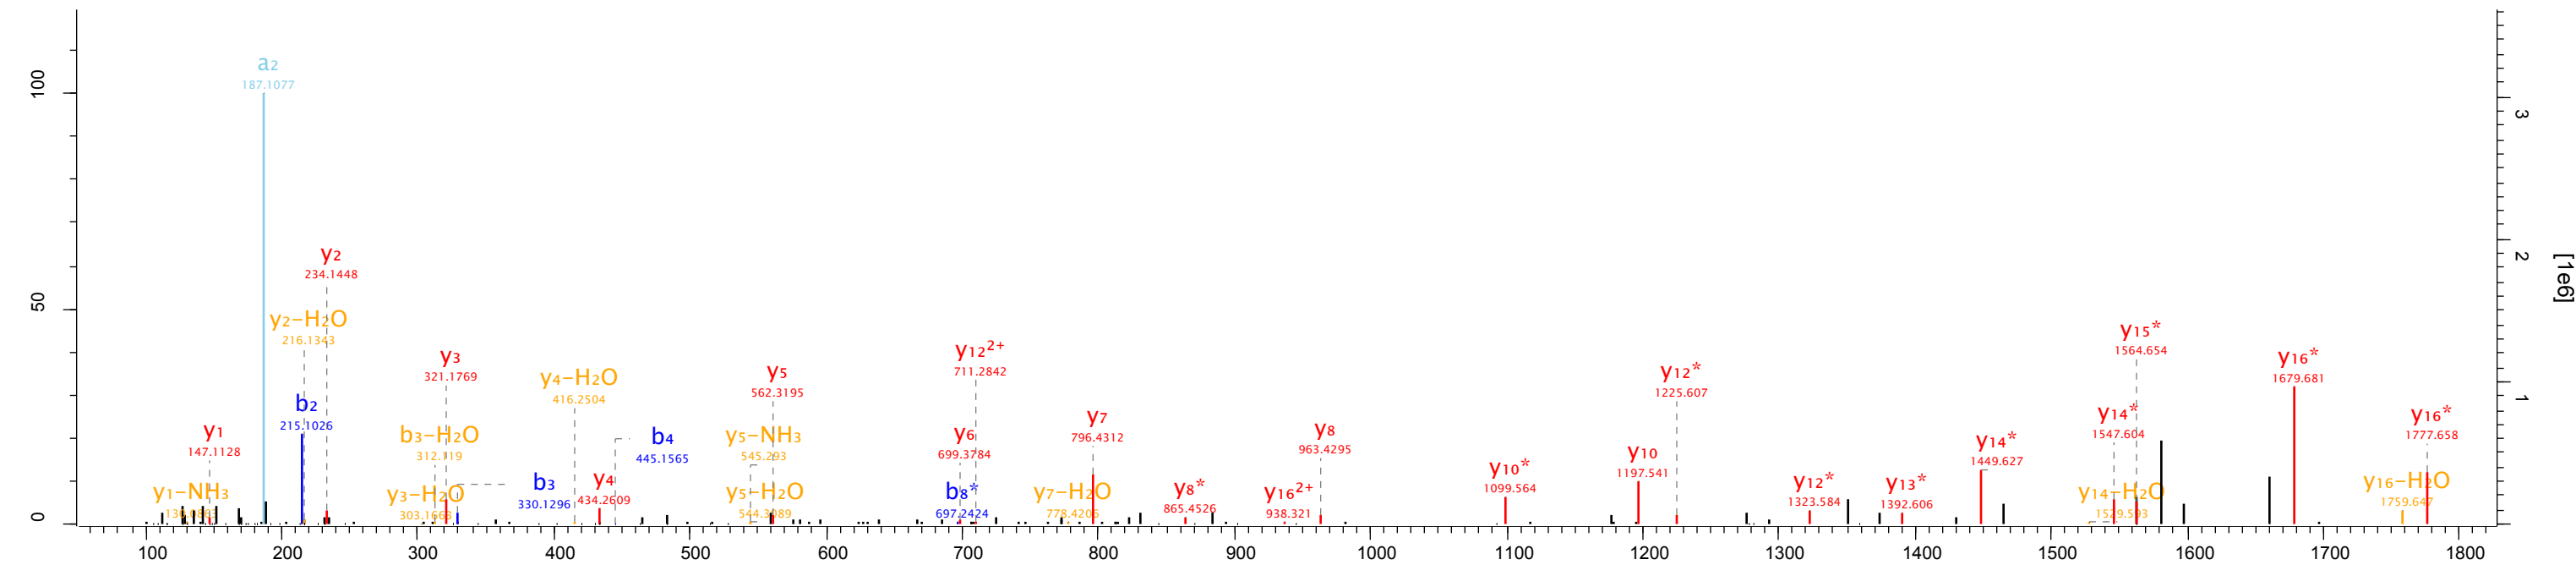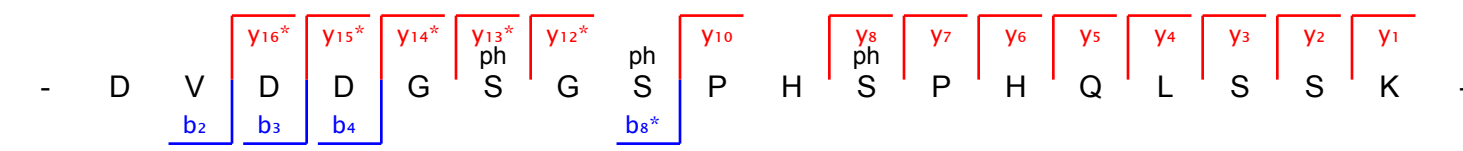



Raw file: 20150814\_A375SR\_Phospho\_BR2\_02  
 Scan: 5842 Method: FTMS; HCD Score: 205.96 m/z: 908.32 Gene names: TRA2B

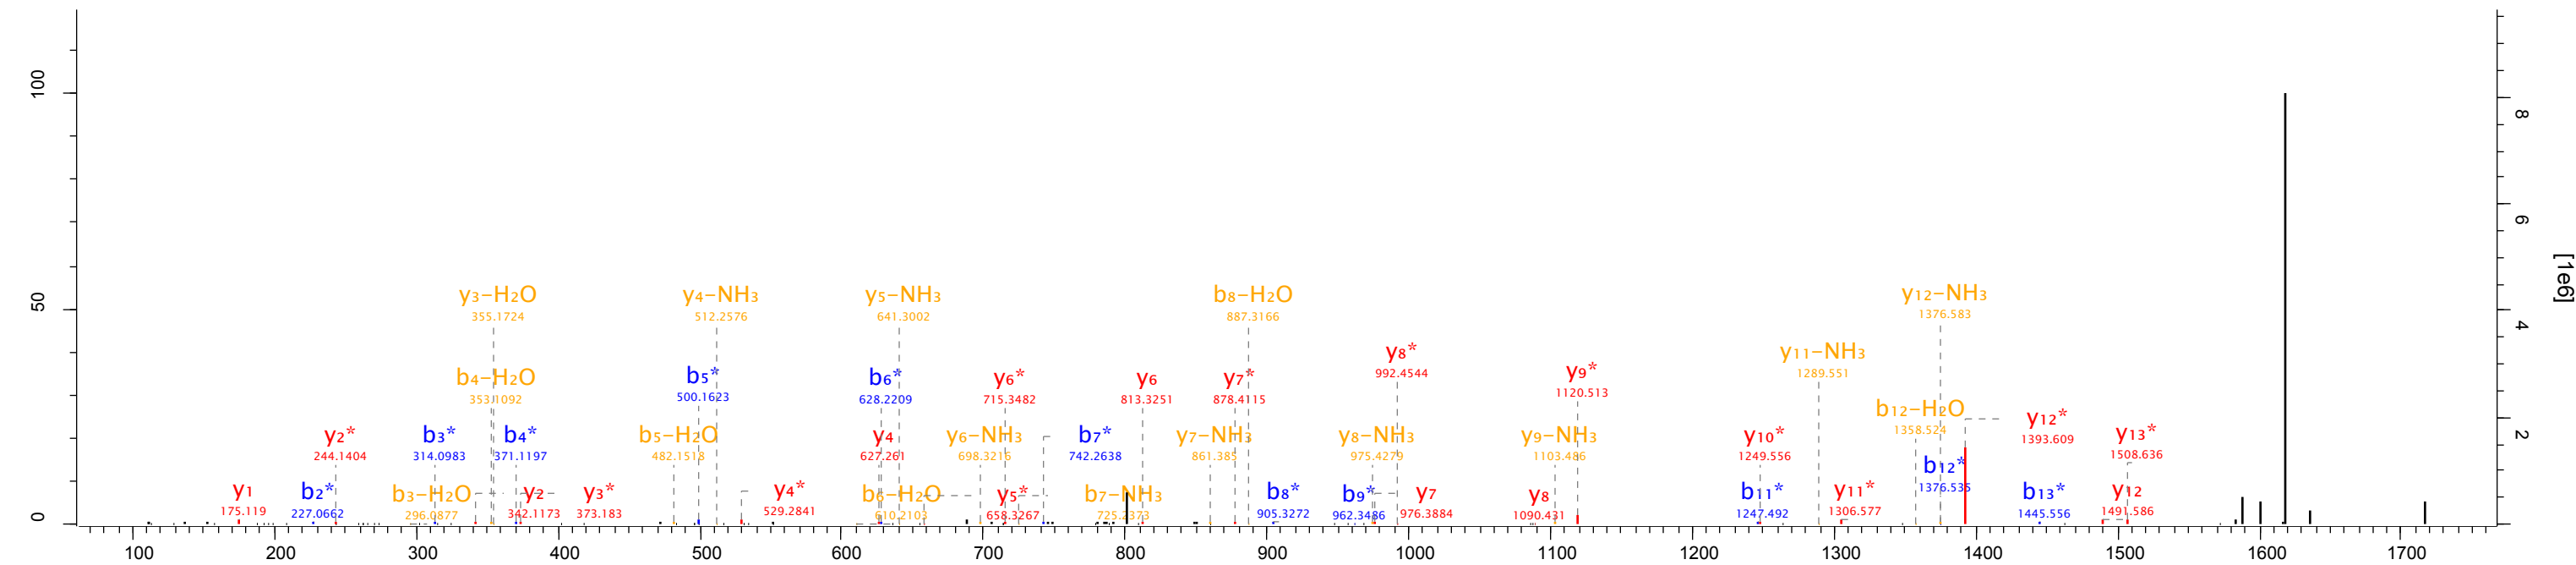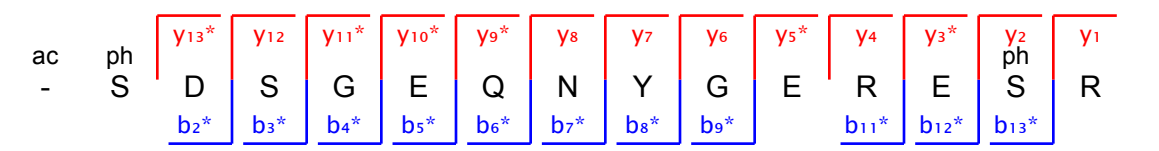

Raw file: 20150814\_A375SR\_Phospho\_BR2\_02  
 Scan: 7852 Method: FTMS; HCD Score: 81.65 m/z: 842.82 Gene names: MKI67

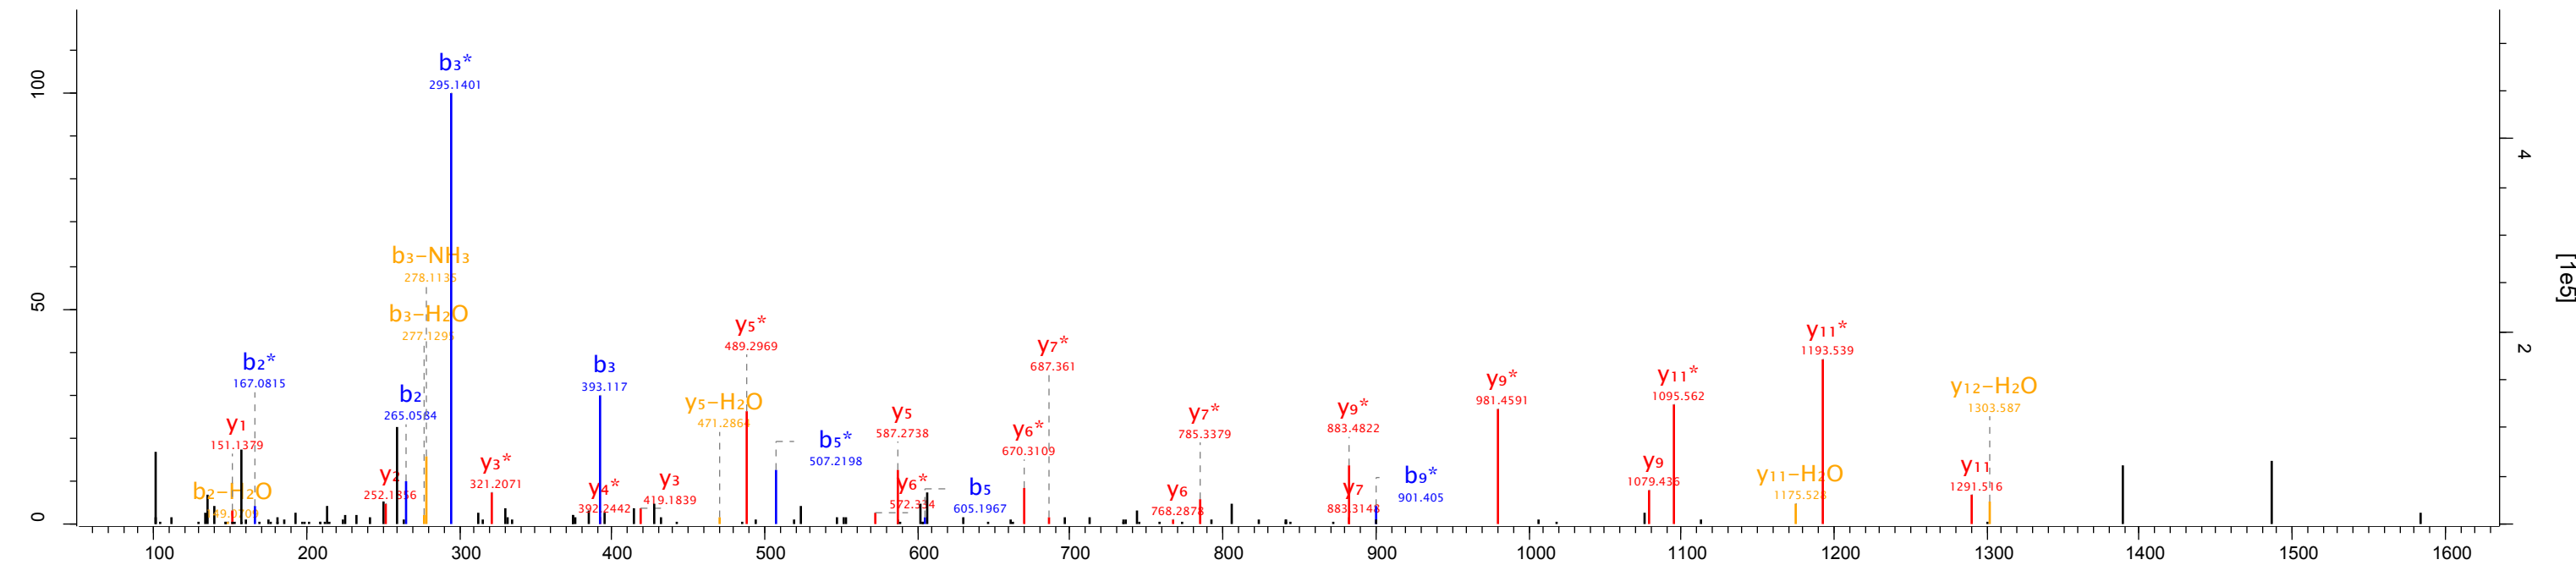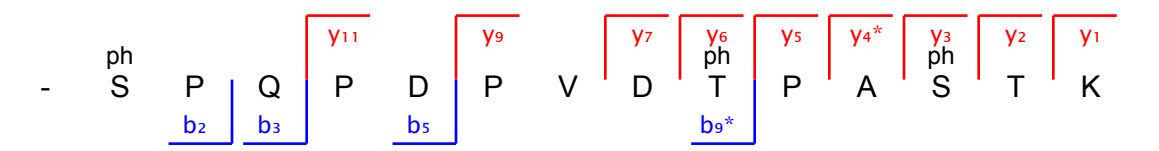

Raw file: 20150814\_A375SR\_Phospho\_BR2\_02  
 Scan: 8252 Method: FTMS; HCD Score: 149.86 m/z: 934.83 Gene names: UBN2

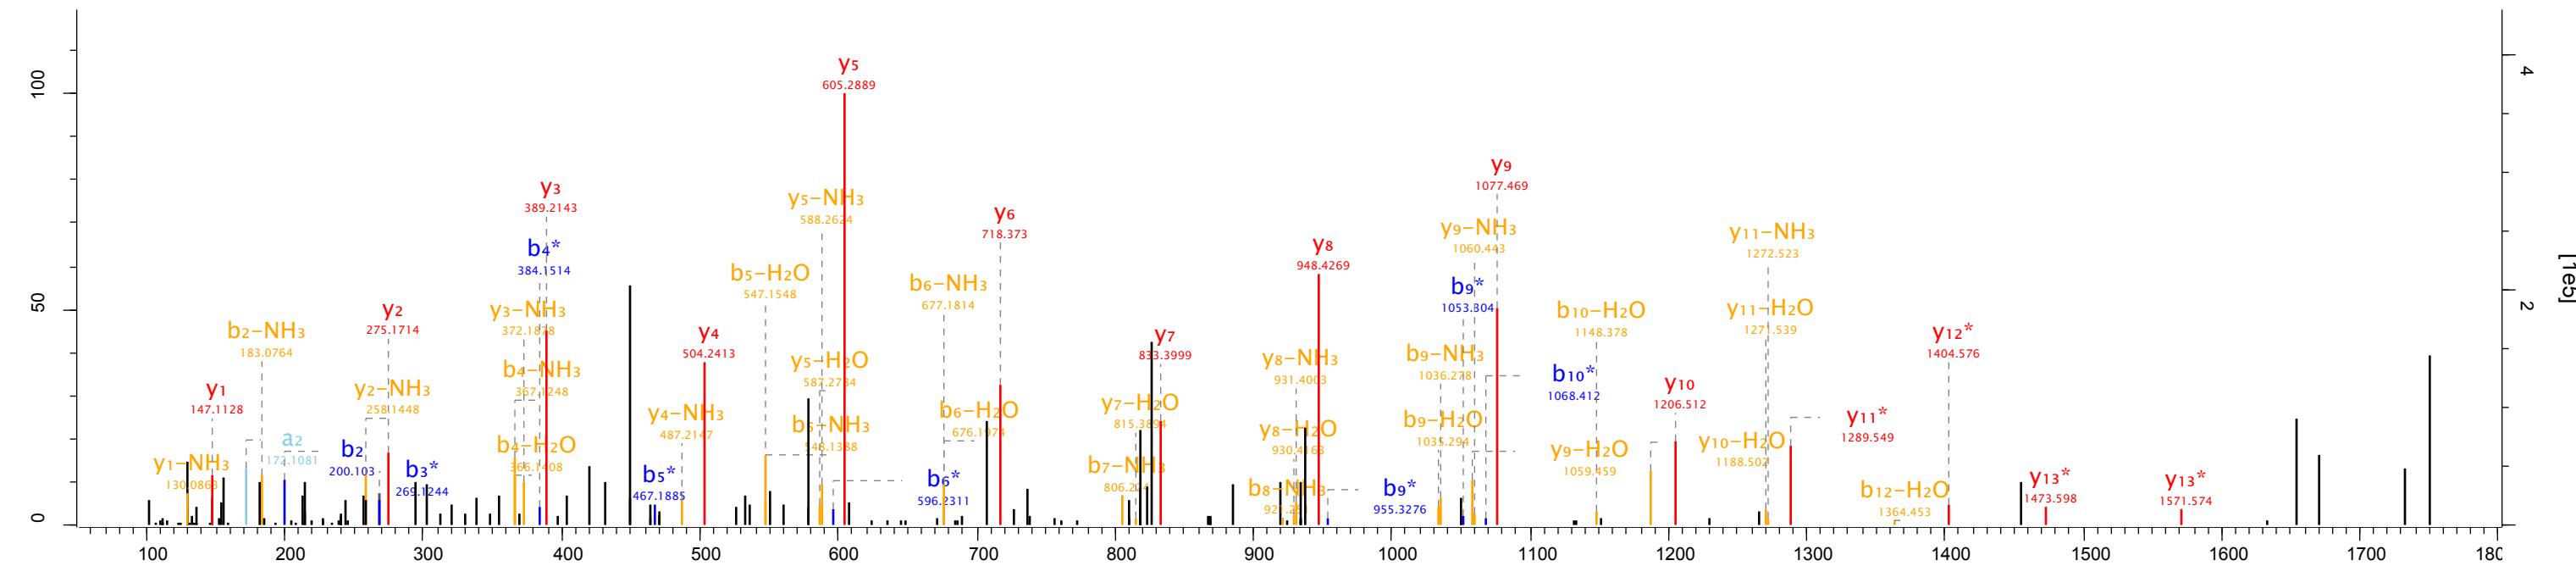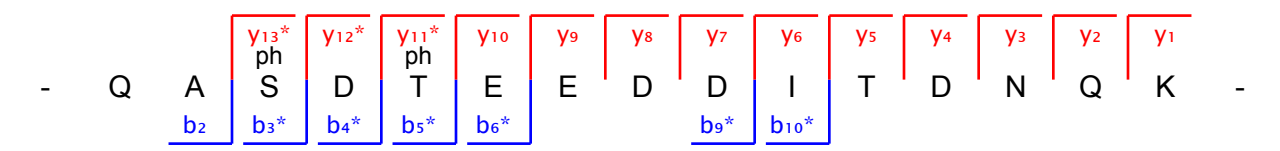

Raw file: 20150814\_A375SR\_Phospho\_BR2\_02  
 Scan: 9112 Method: FTMS; HCD Score: 105.9 m/z: 695.26 Gene names: MAGED2

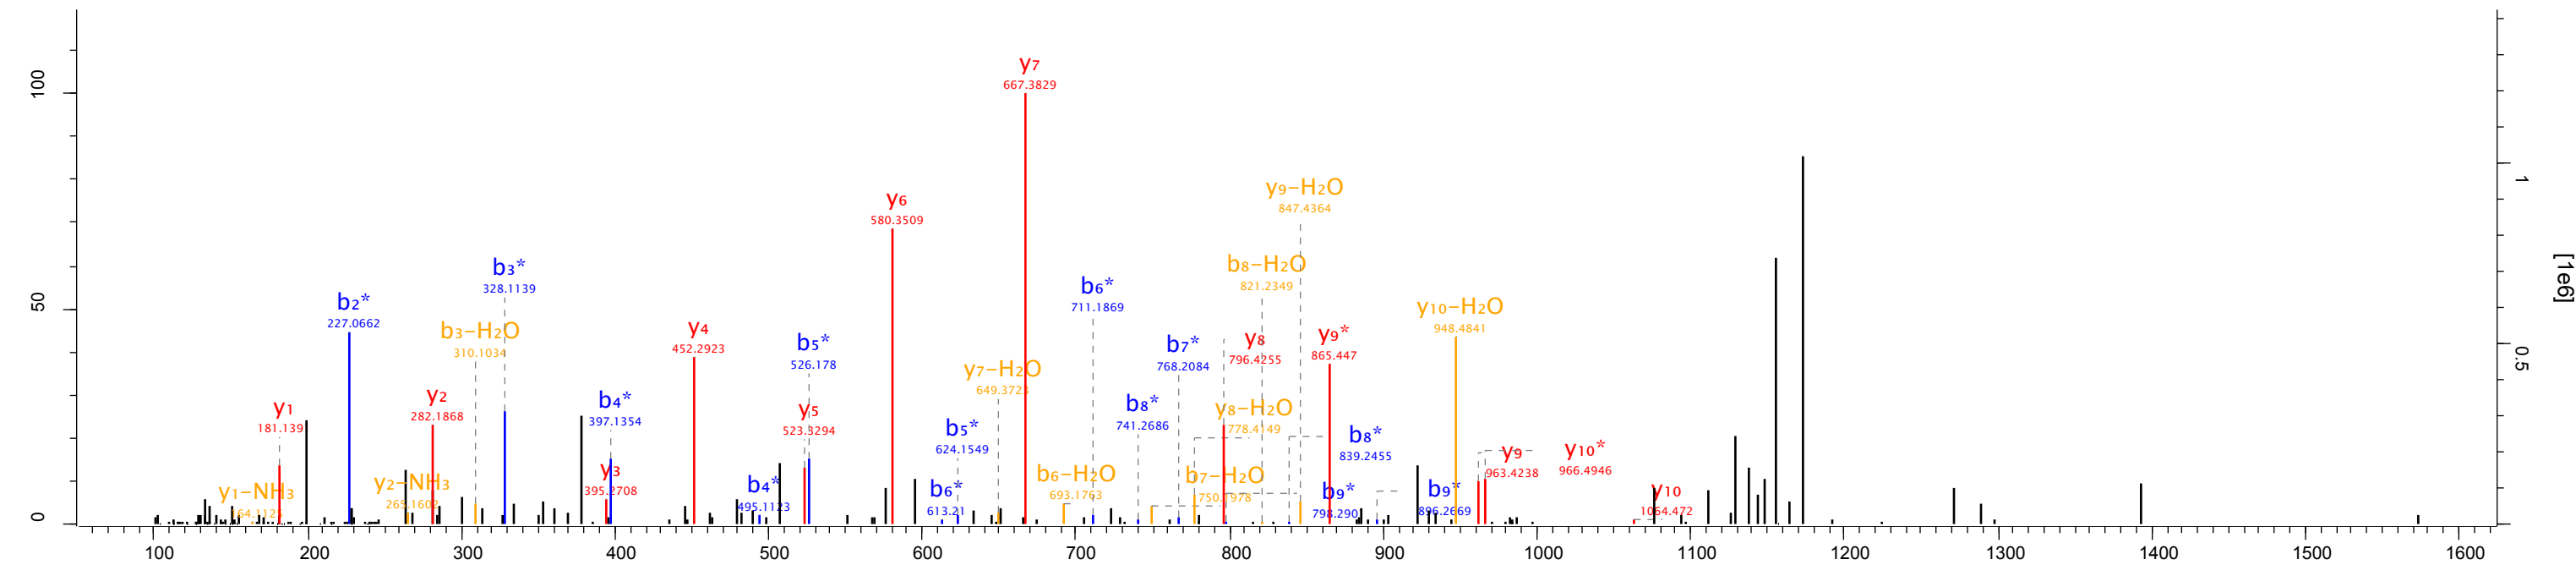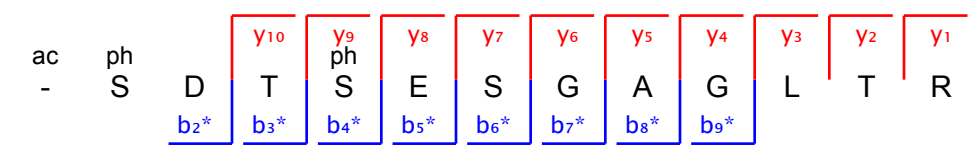

Raw file: 20150814\_A375SR\_Phospho\_BR2\_02  
 Scan: 9392 Method: FTMS; HCD Score: 48.61 m/z: 1001.08 Gene names: SRRM2

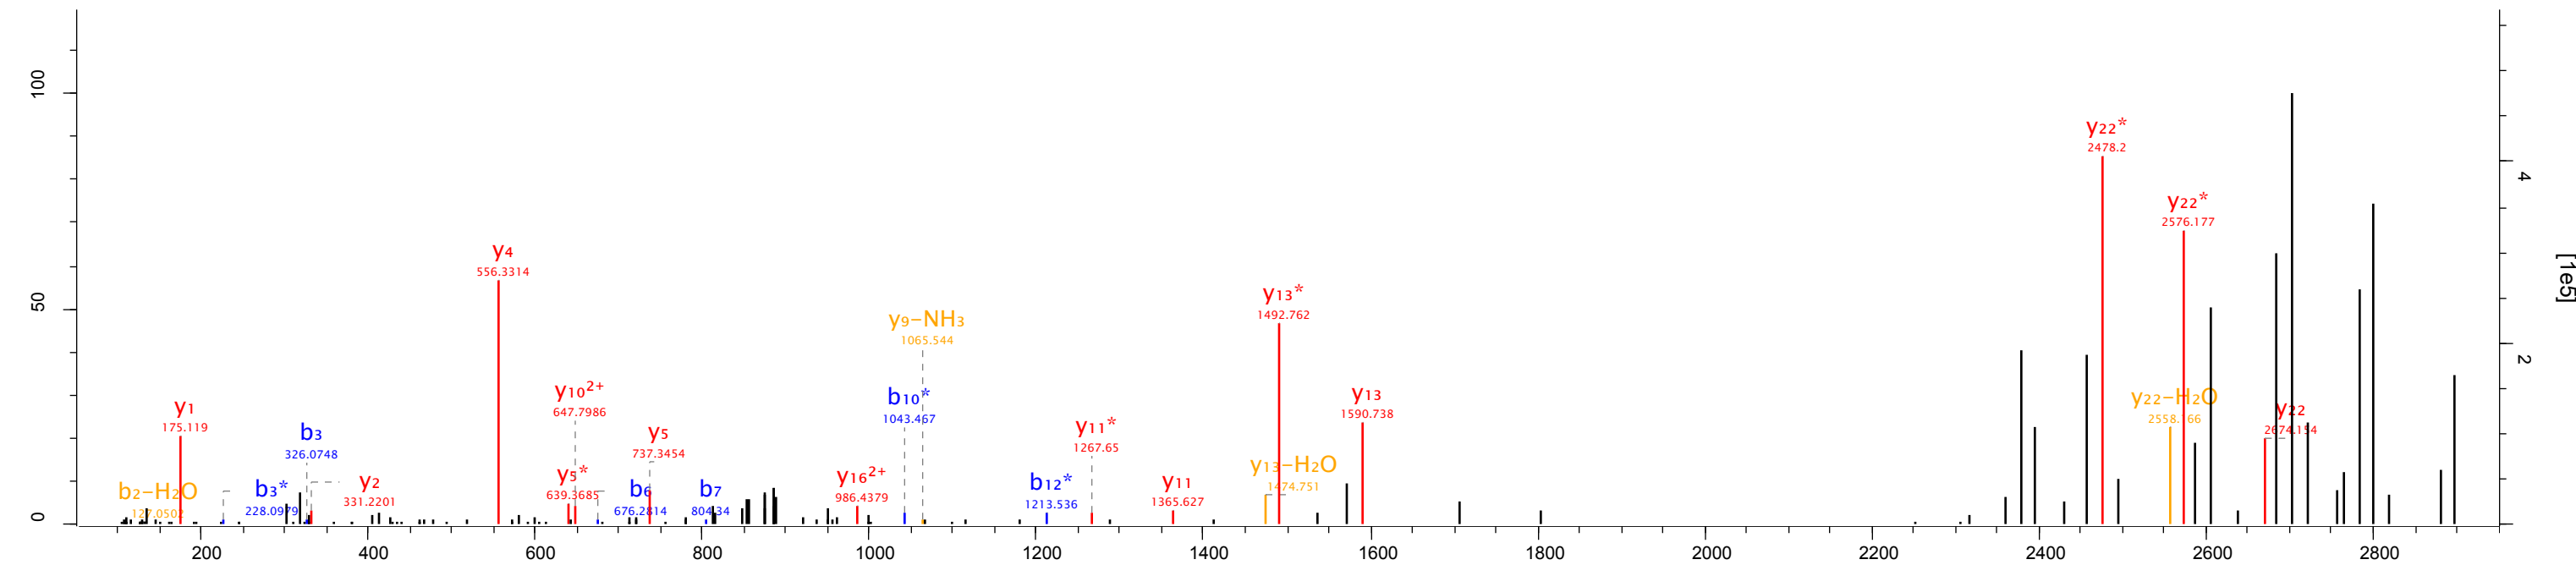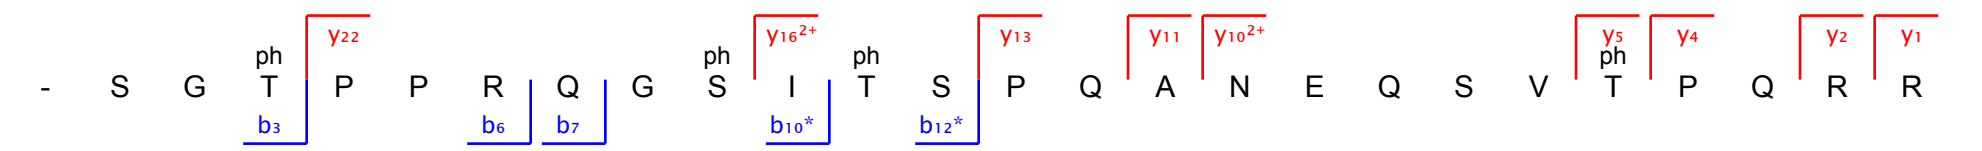

Raw file: 20150814\_A375SR\_Phospho\_BR2\_02  
 Scan: 9772 Method: FTMS; HCD Score: 105.94 m/z: 898.83 Gene names: USP34

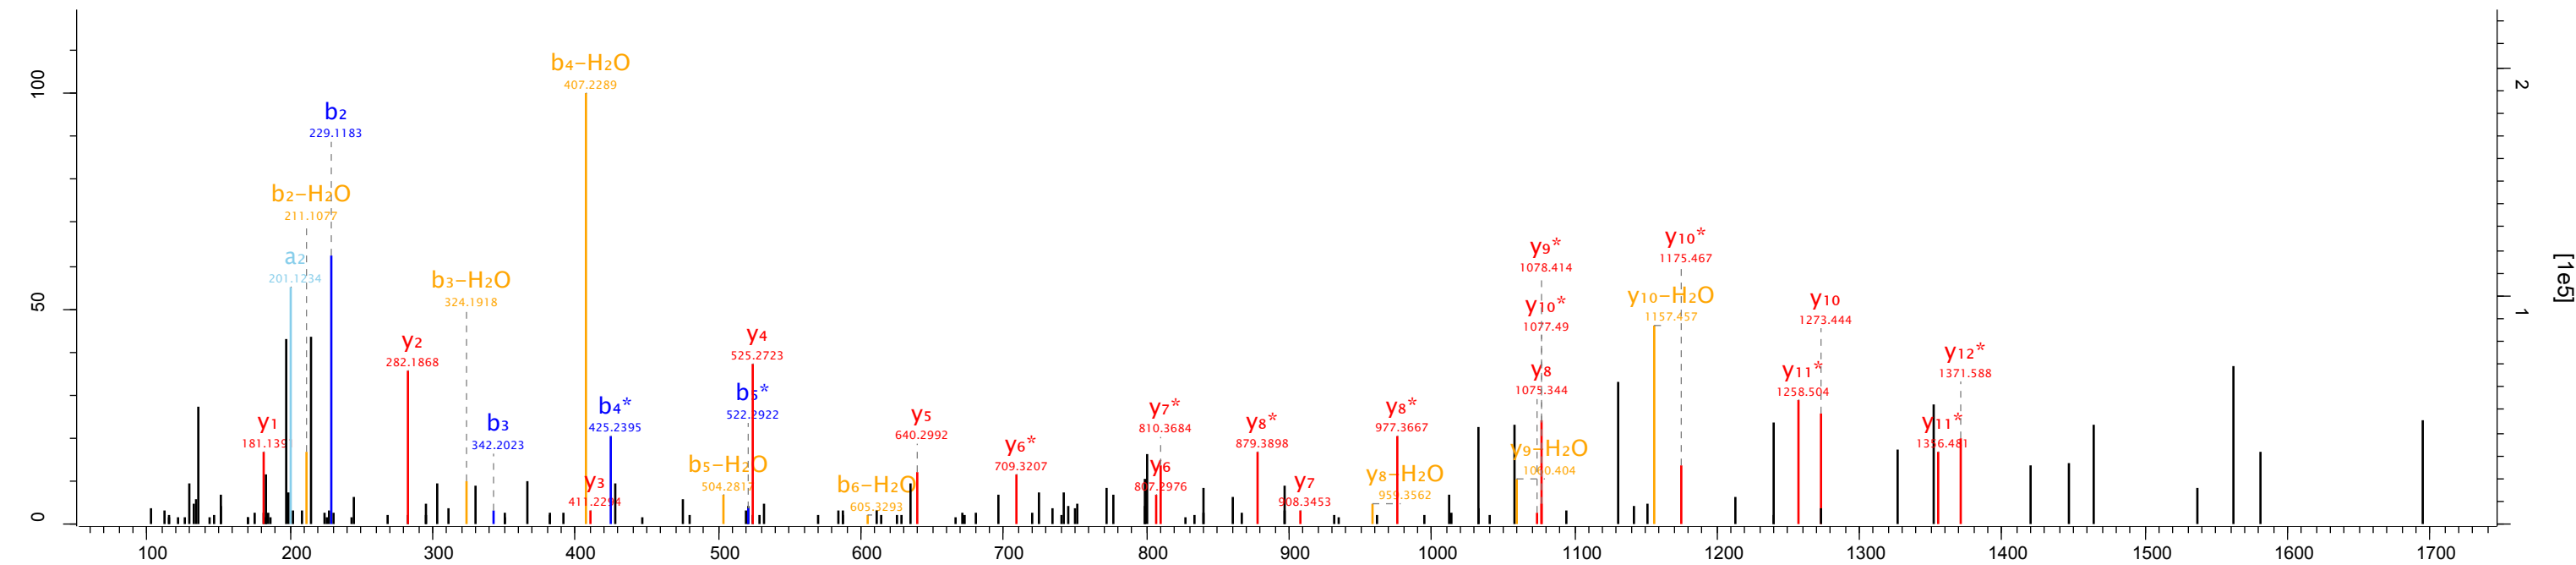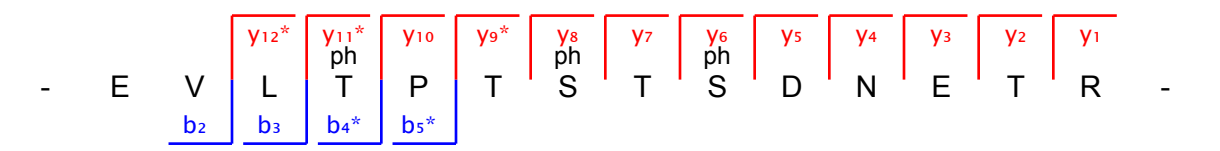

Raw file: 20150814\_A375SR\_Phospho\_BR2\_03  
 Scan: 10402 Method: FTMS; HCD Score: 128.73 m/z: 902.02 Gene names: TMPO

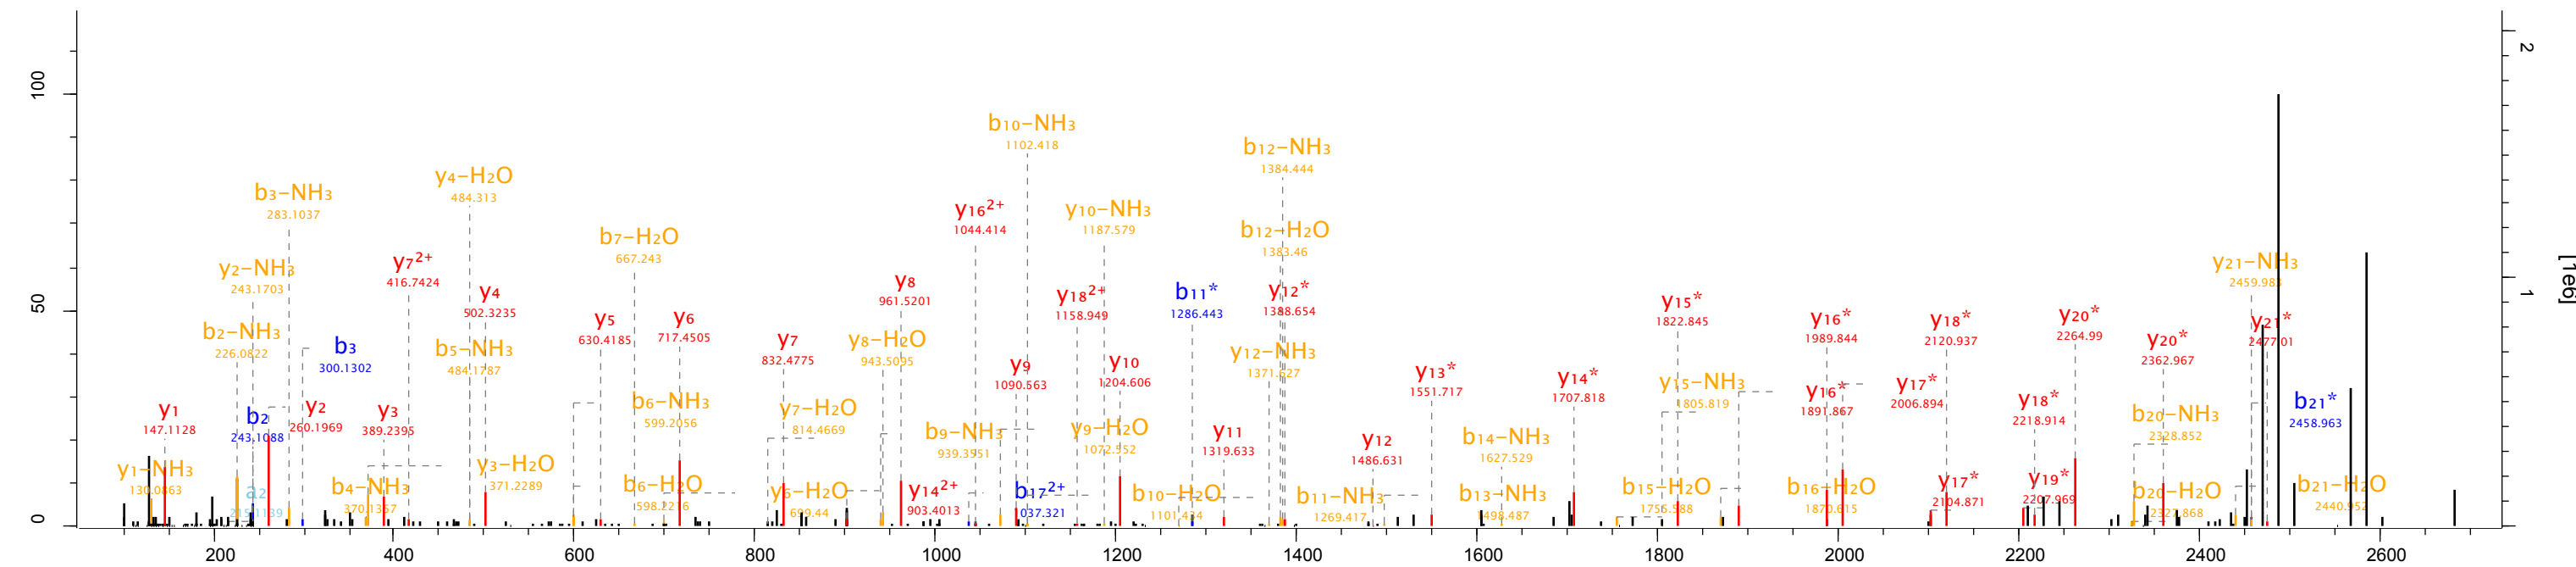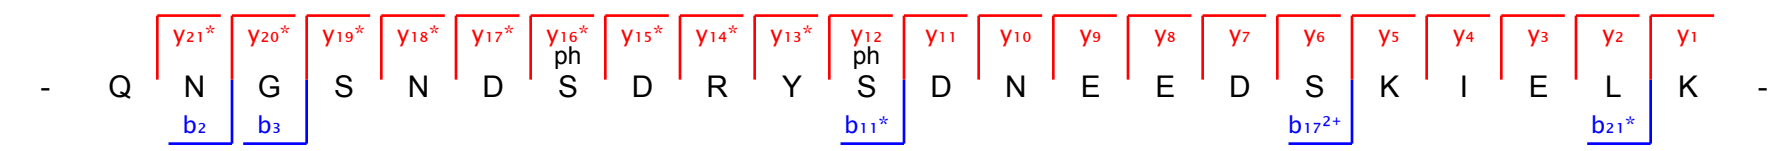

Raw file: 20150814\_A375SR\_Phospho\_BR2\_03  
 Scan: 10502 Method: FTMS; HCD Score: 119.18 m/z: 689.99 Gene names: HSPH1

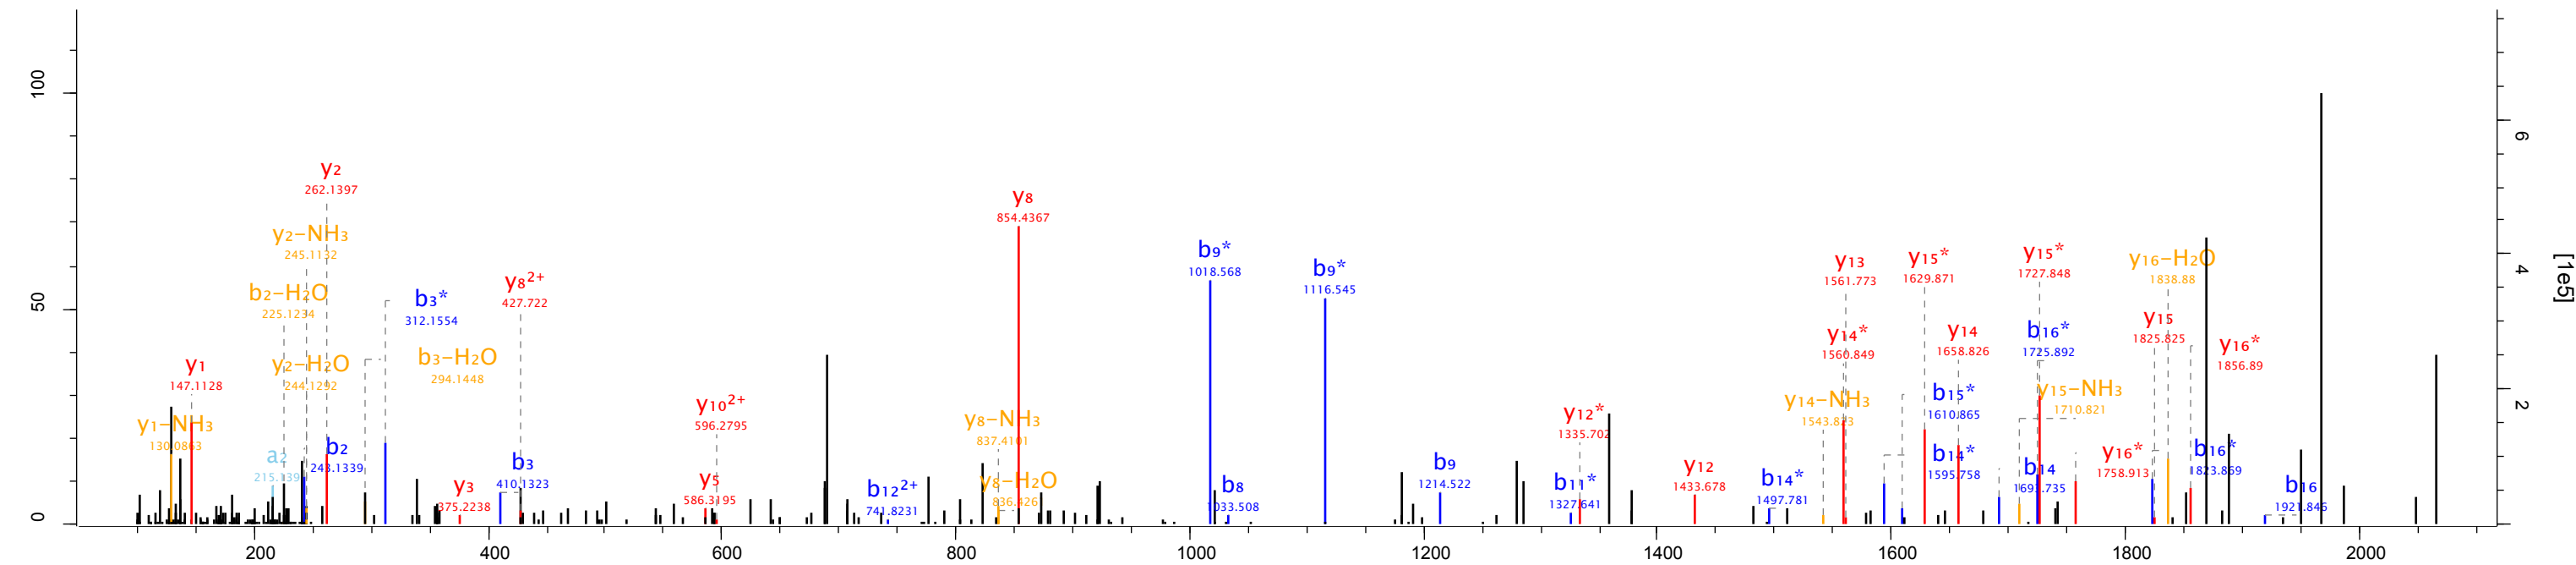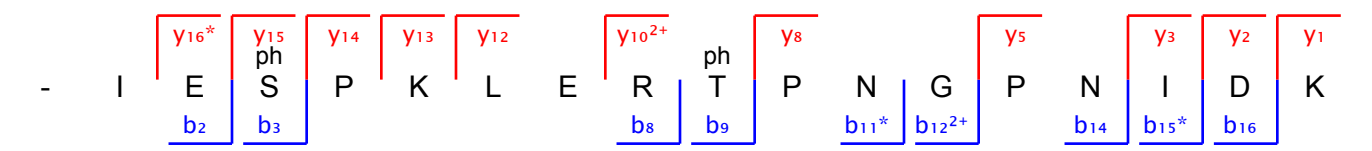



Raw file Scan Method Score m/z Gene names  
 20150814\_A375SR\_Phospho\_BR2\_03 10732 FTMS; HCD 162.61 907.9 DOT1L

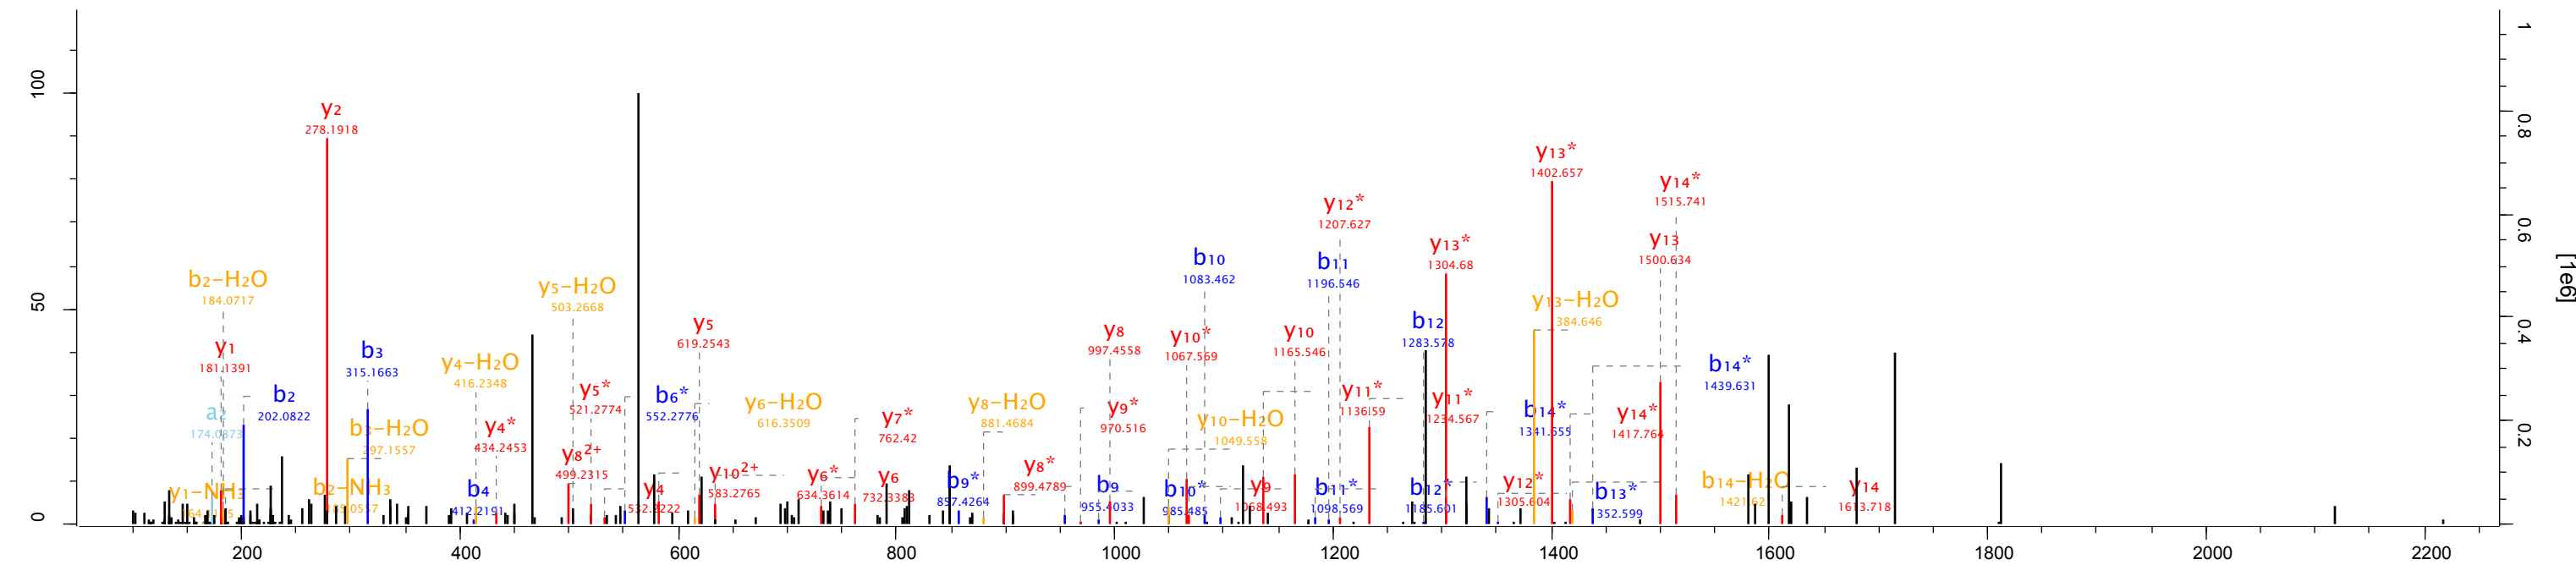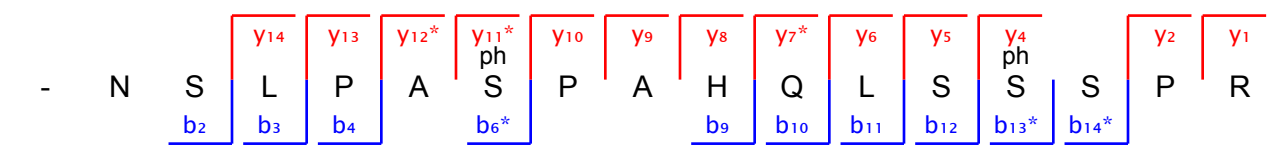

Raw file: 20150814\_A375SR\_Phospho\_BR2\_03  
 Scan: 10782 Method: FTMS; HCD Score: 74.97 m/z: 698.64 Gene names: EPS15L1;SPATA22

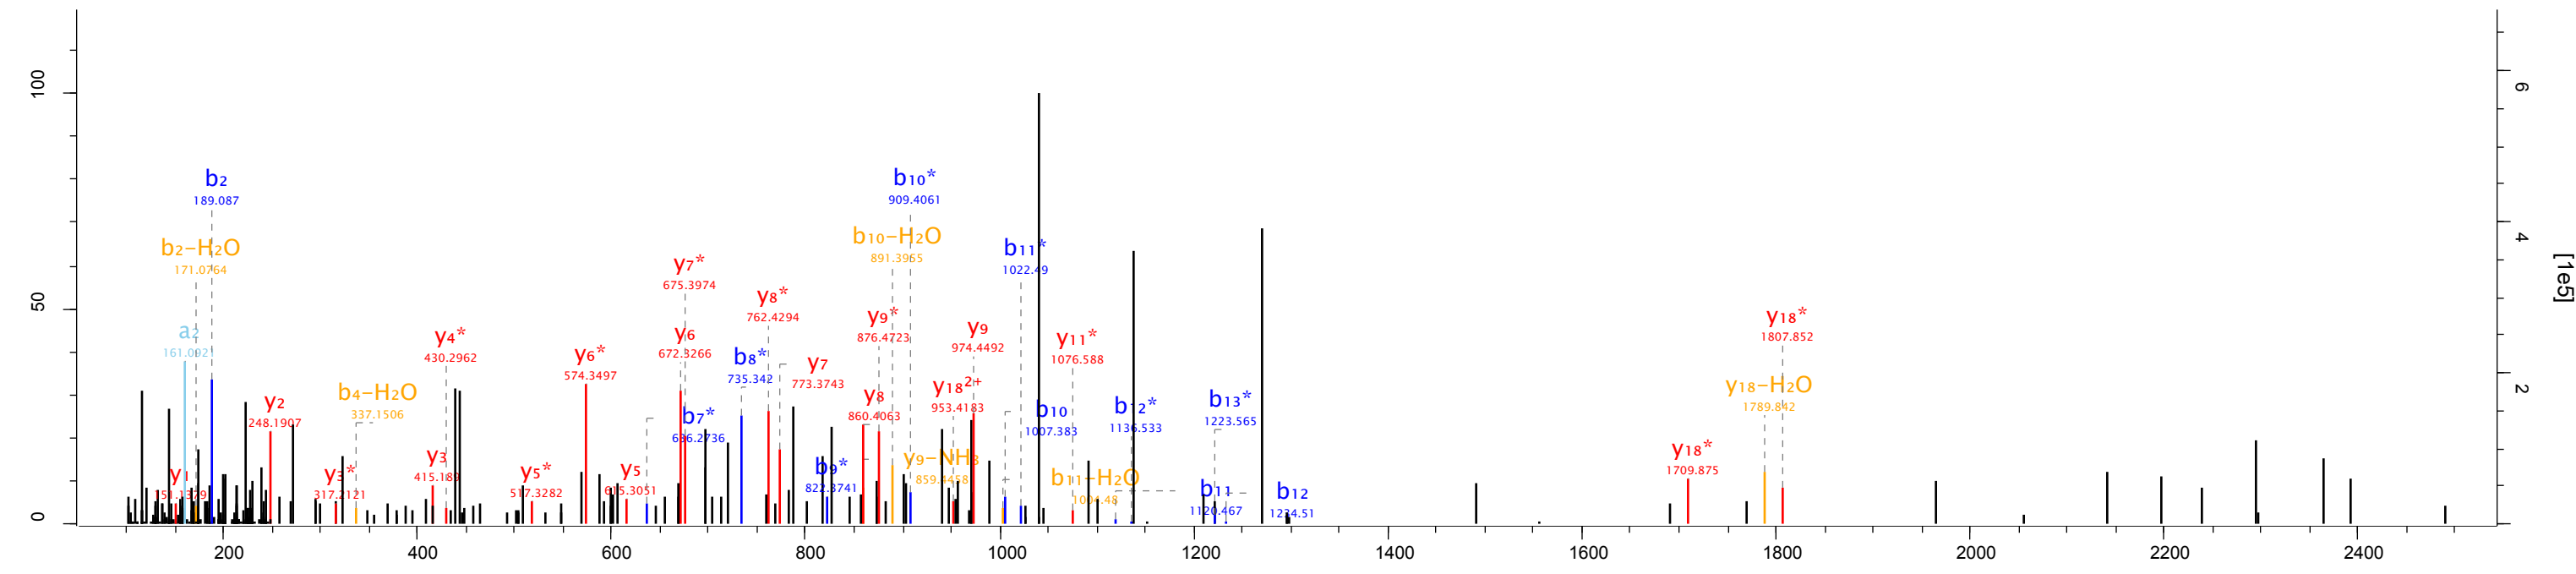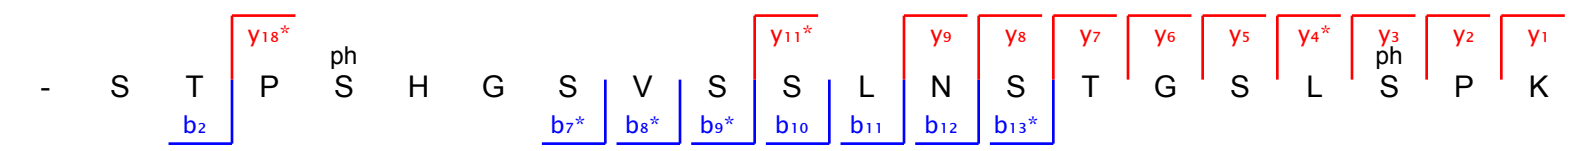

Raw file 20150814\_A375SR\_Phospho\_BR2\_03 Scan 10972 Method FTMS; HCD Score 229.93 m/z 939.88 Gene names TIMELESS

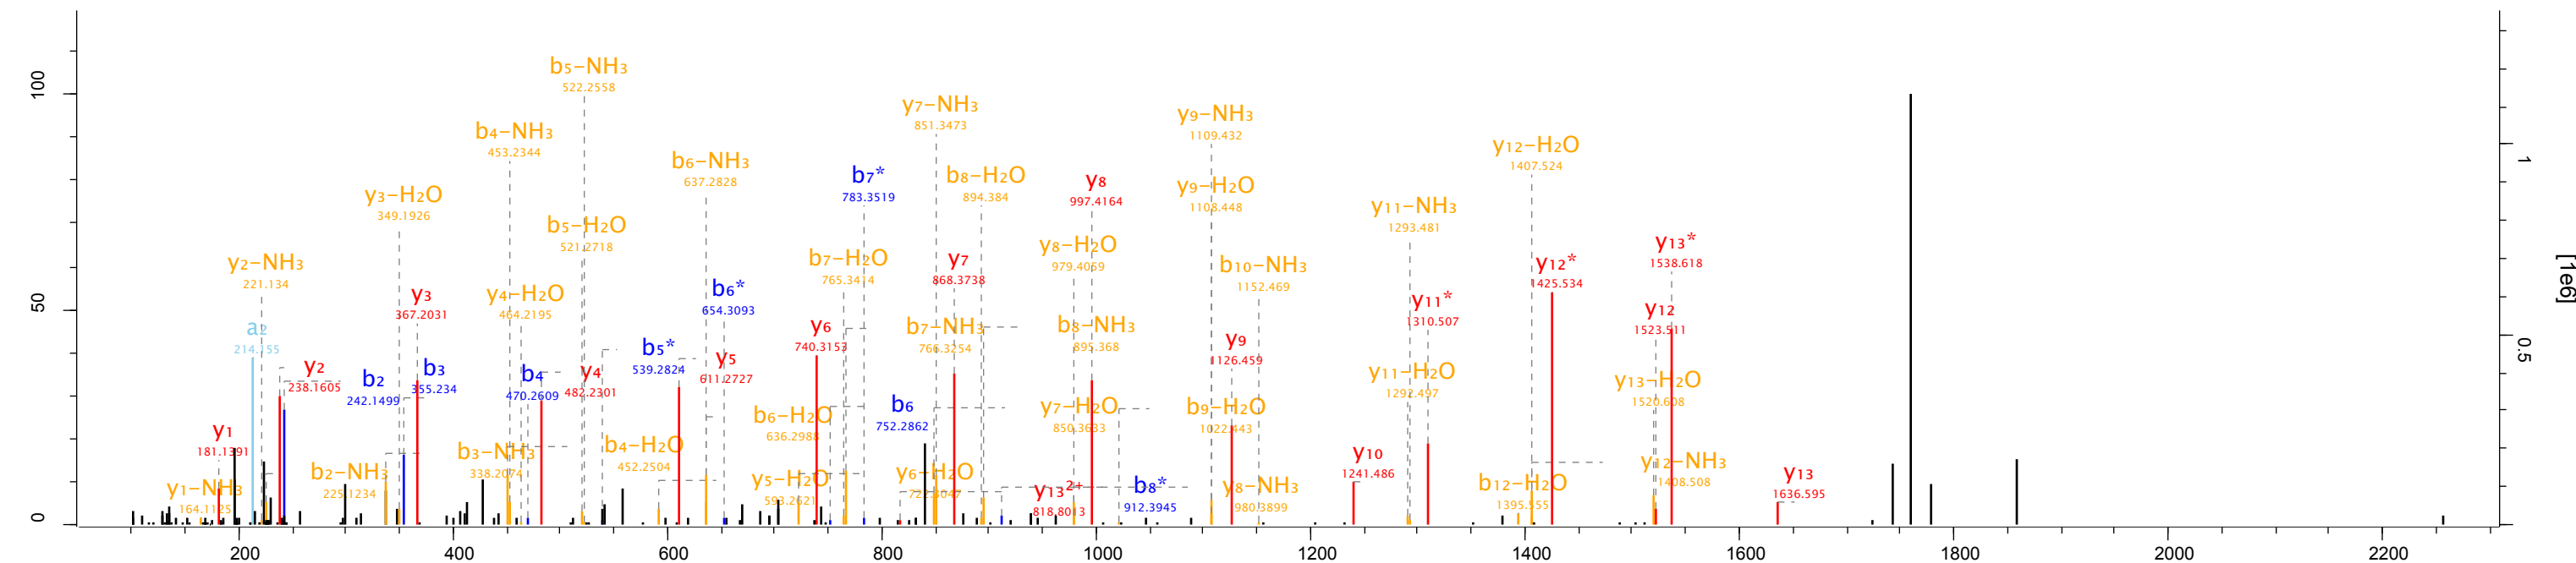

- Q L L D S D E E Q E E D E G R -

b2 b3 b4 b5\* b6 b7\* b8\*

y13 y12 y11\* y10 y9 y8 y7 y6 y5 y4 y3 y2 y1

ph

Raw file 20150814\_A375SR\_Phospho\_BR2\_03 Scan 11202 Method FTMS; HCD Score 132.22 m/z 858.36 Gene names TPR

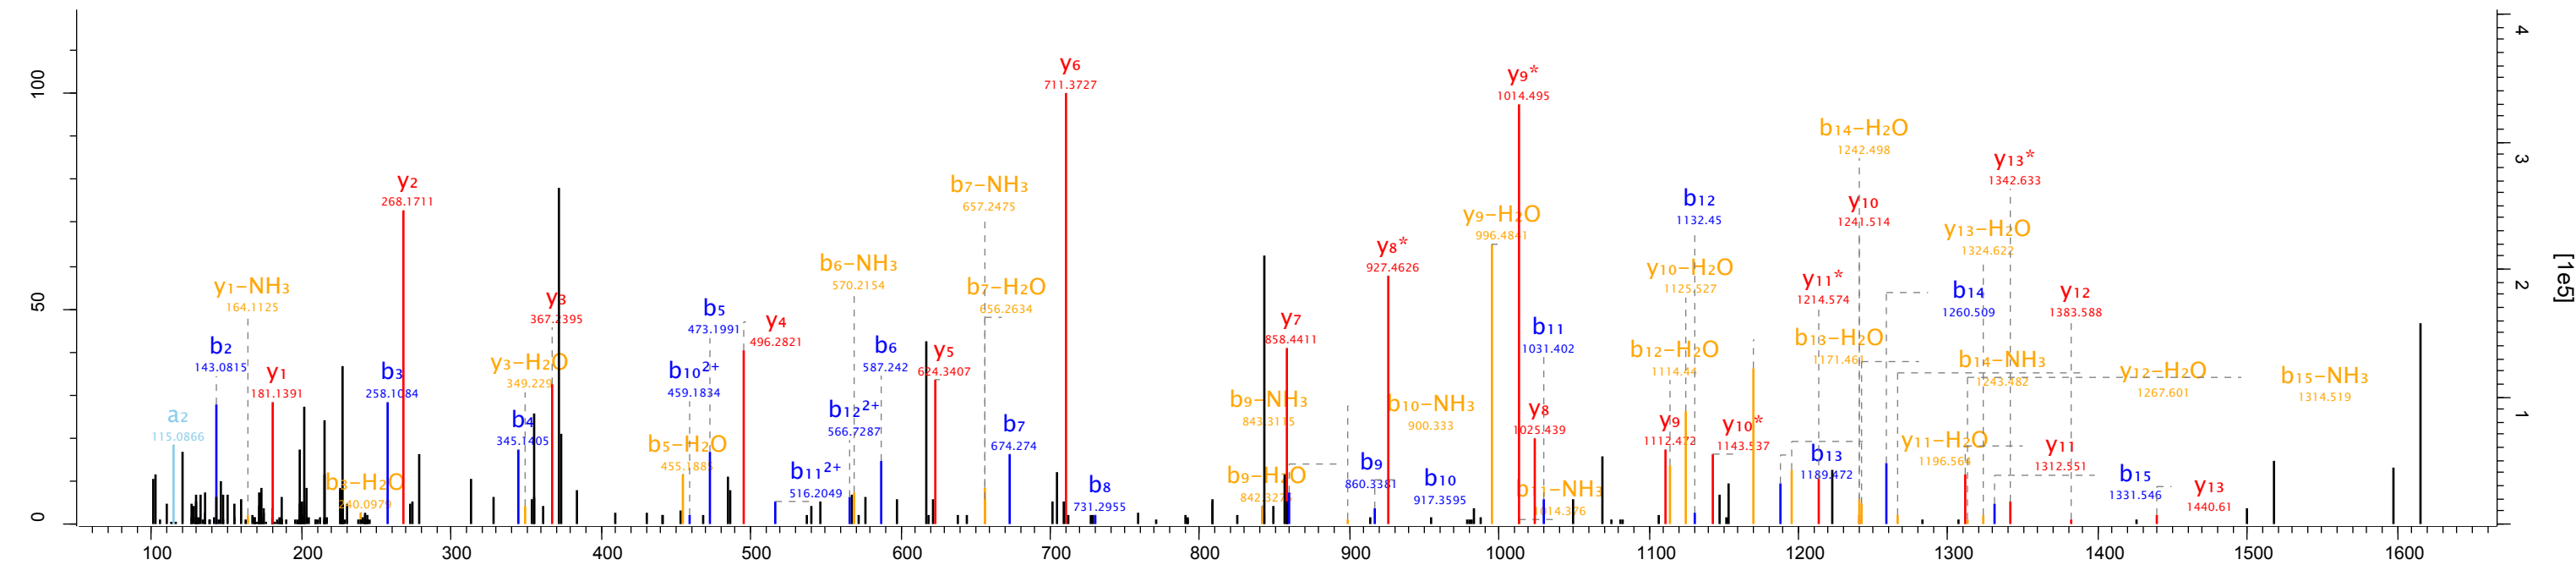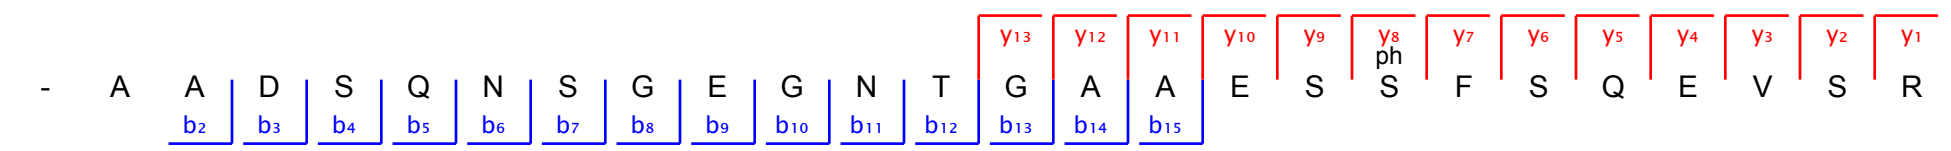

Raw file 20150814\_A375SR\_Phospho\_BR2\_03 Scan 11262 Method FTMS; HCD Score 152.34 m/z 772.38 Gene names NHP2L1

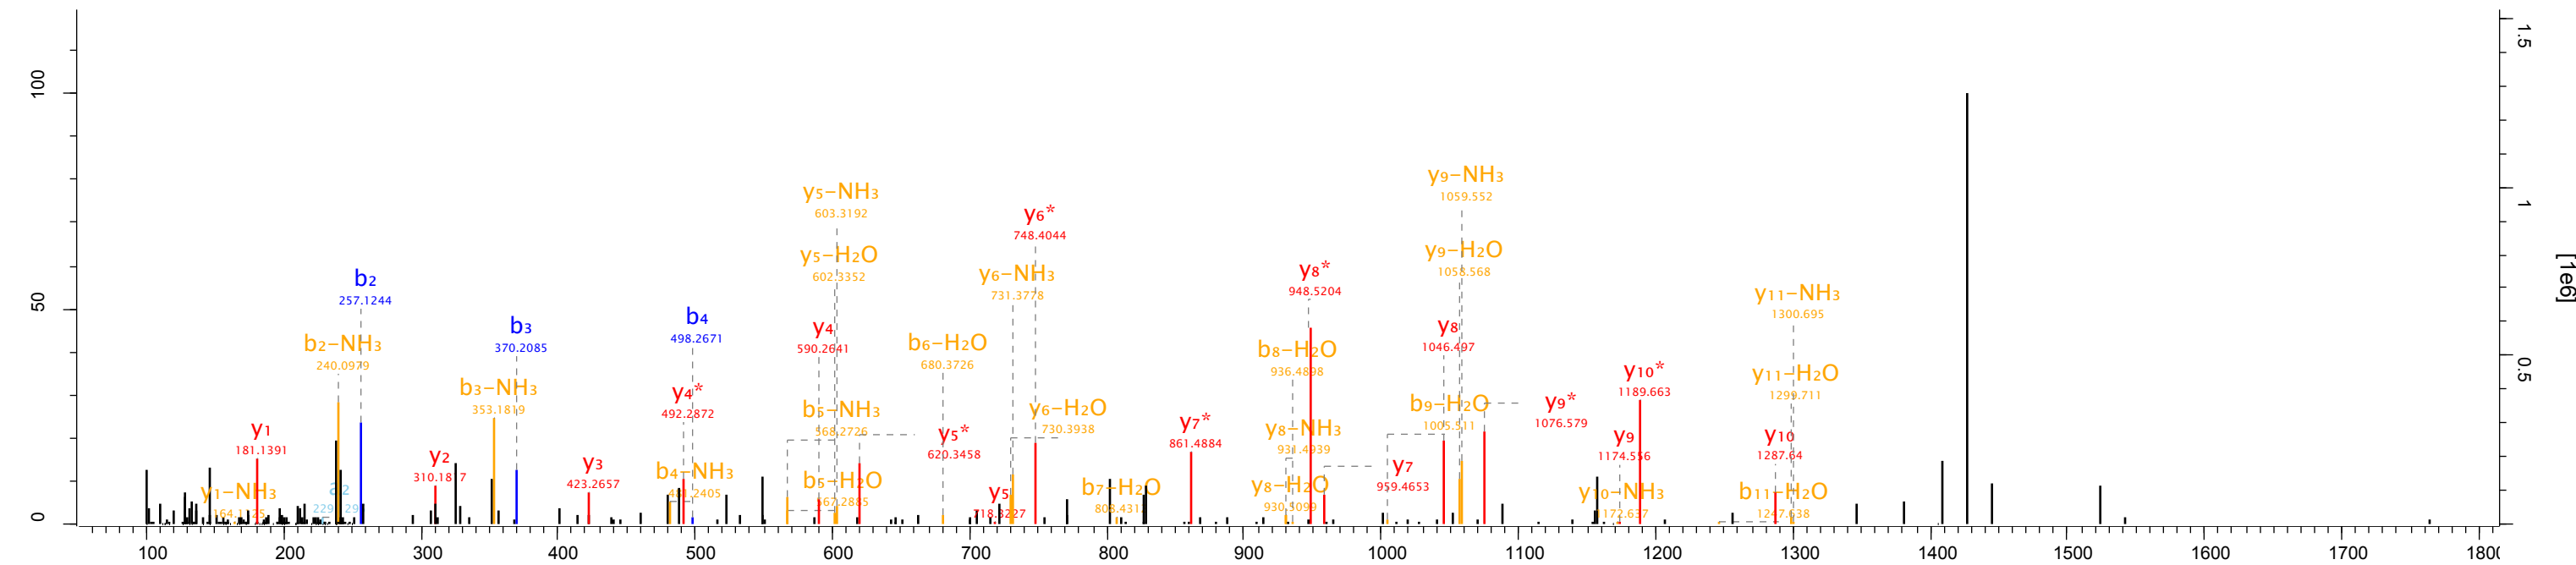

- Q Q Q I Q S I Q Q S I E R -

Fragmentation sites are indicated by boxes below the sequence:

- Red boxes: y<sub>10</sub> (between Q and I), y<sub>9</sub> (between I and Q), y<sub>8</sub> (between Q and S), y<sub>7</sub> (between I and Q), y<sub>6</sub>\*
- Blue boxes: b<sub>2</sub> (between Q and I), b<sub>3</sub> (between I and Q), b<sub>4</sub> (between Q and S)

Raw file: 20150814\_A375SR\_Phospho\_BR2\_03  
 Scan: 11322 Method: FTMS; HCD Score: 140.67 m/z: 1051.44 Gene names: AKAP12

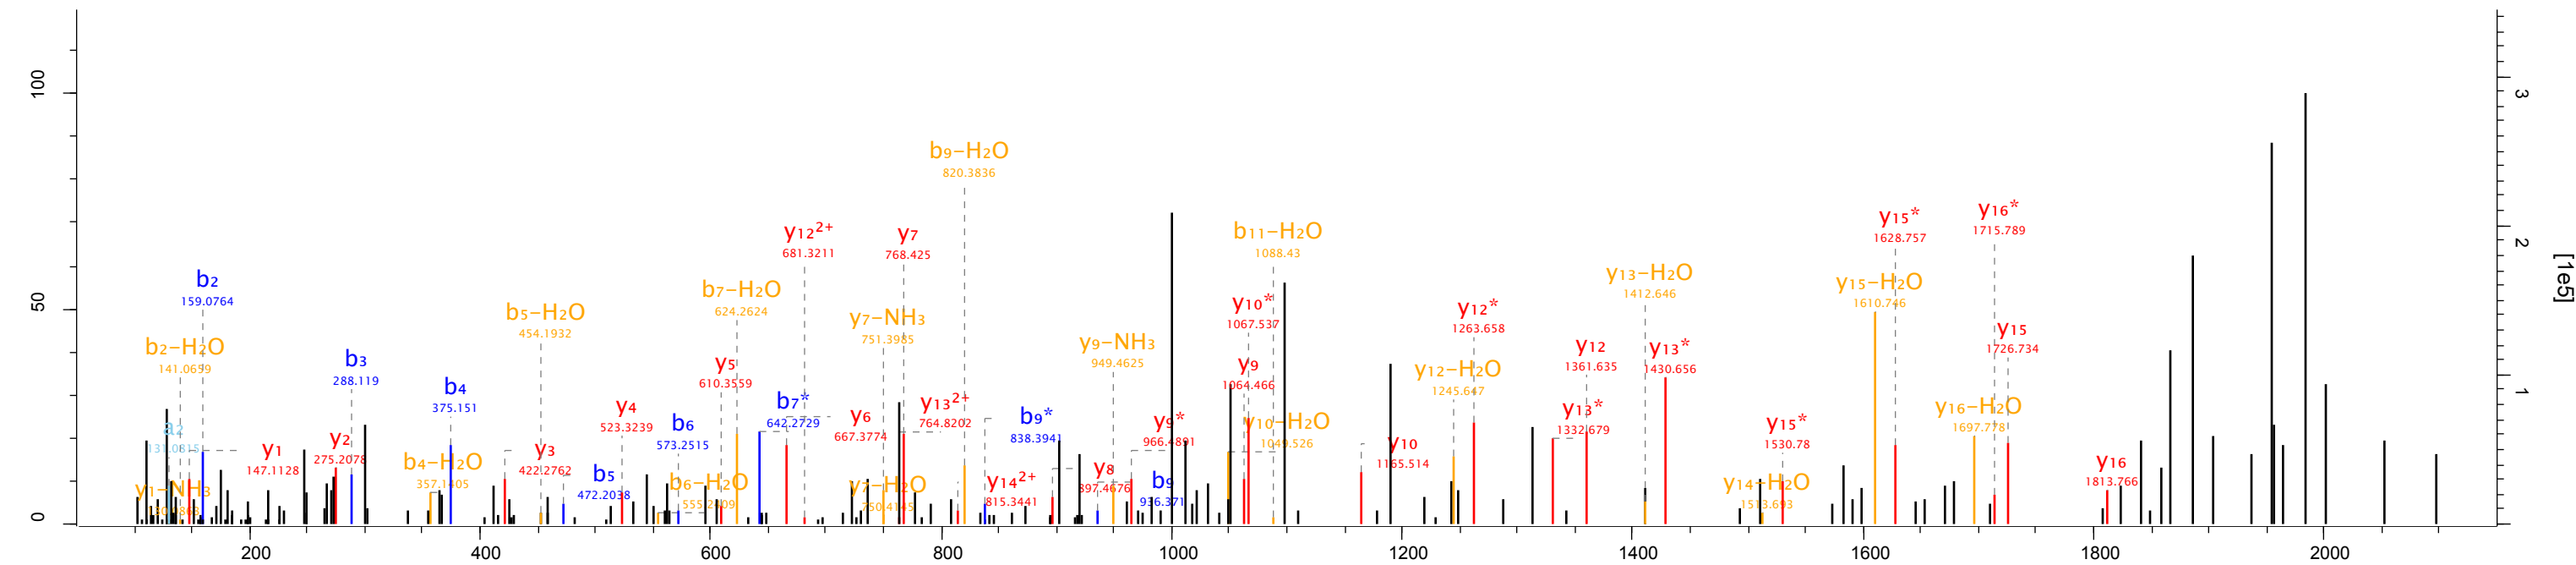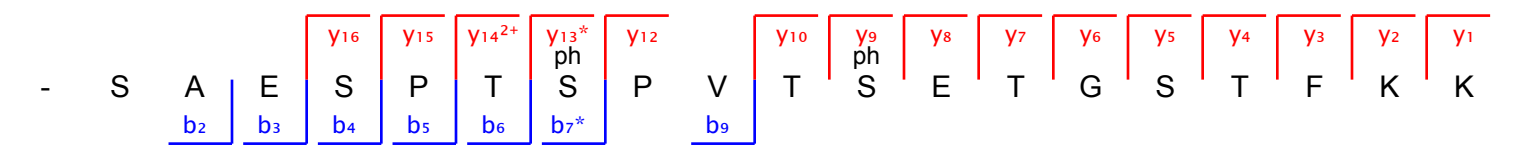

Raw file 20150814\_A375SR\_Phospho\_BR2\_03 Scan 11362 Method FTMS; HCD Score 129.51 m/z 882.38 Gene names EPHA2

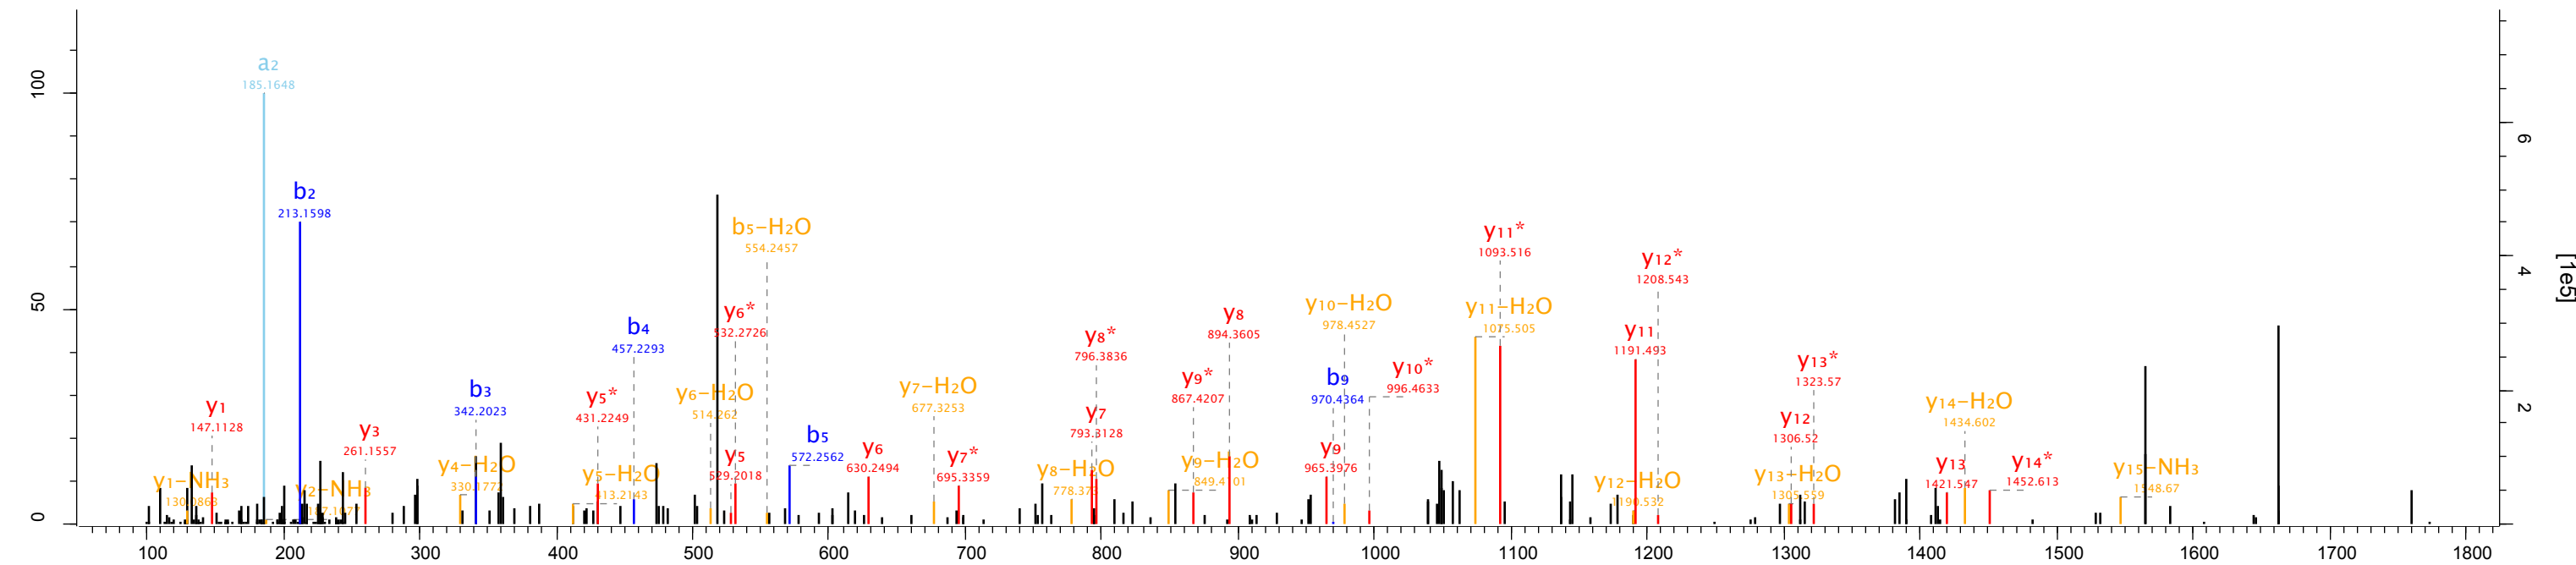

- V L E D D P E A T Y T S G G K -

Fragmentation sites are indicated by brackets below the sequence:

- b2: L
- b3: E
- b4: D
- b5: D
- b9: T
- y1: K
- y3: G
- y5: T
- y6: T
- y7: Y
- y8: T
- y9: A
- y10\*: E
- y11: P
- y12: D
- y13: D
- y14\*: E
- y15: K

Raw file 20150814\_A375SR\_Phospho\_BR2\_03 Scan 11582 Method FTMS; HCD Score 86.04 m/z 717.33 Gene names TMPO

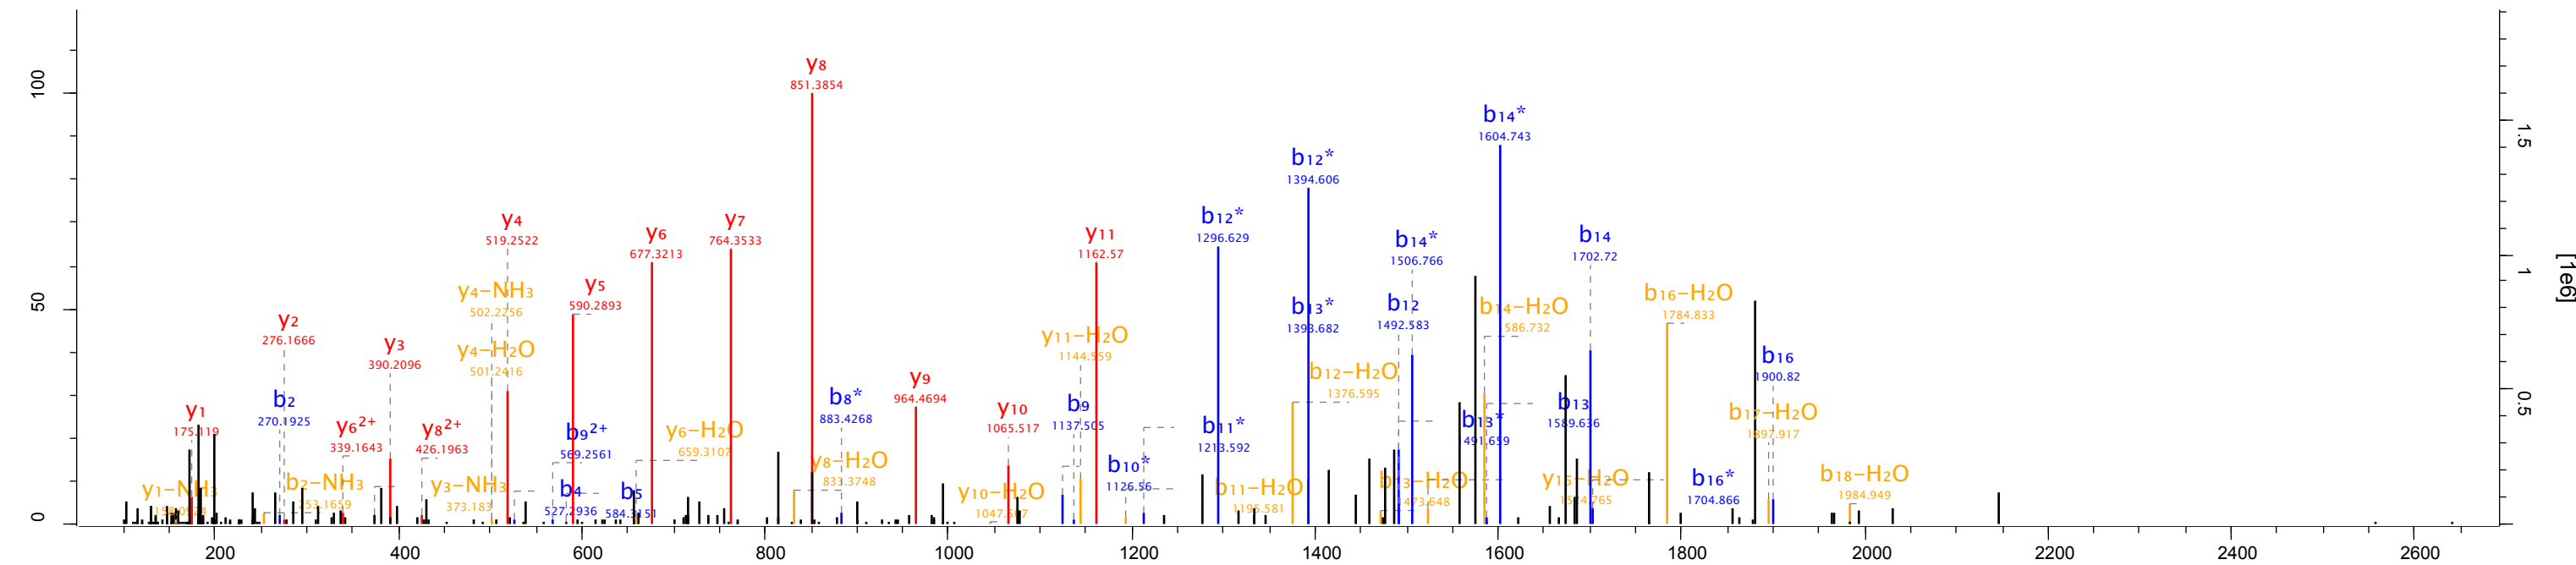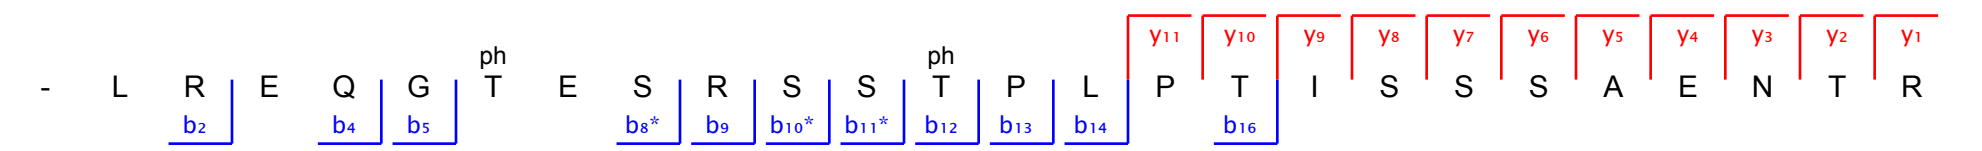



Raw file: 20150814\_A375SR\_Phospho\_BR2\_03  
 Scan: 11862 Method: FTMS; HCD Score: 174.2 m/z: 880.88 Gene names: AIM1

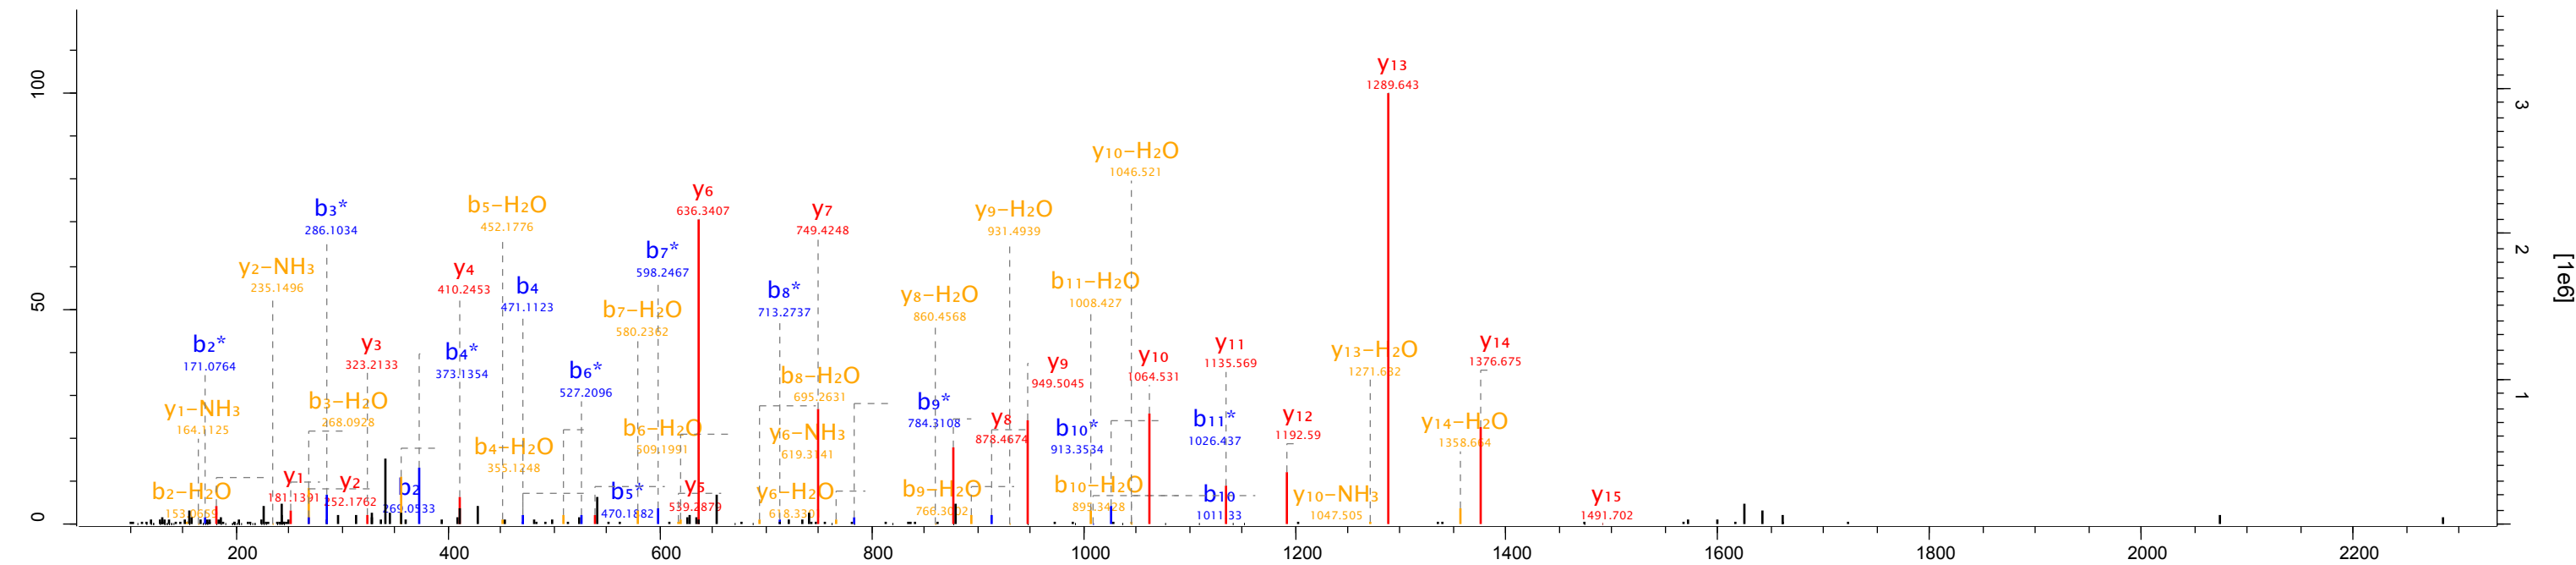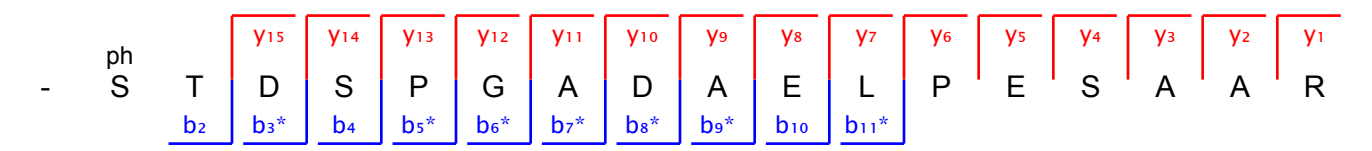

Raw file: 20150814\_A375SR\_Phospho\_BR2\_03  
 Scan: 12102 Method: FTMS; HCD Score: 168.69 m/z: 653.8 Gene names: MLLT4

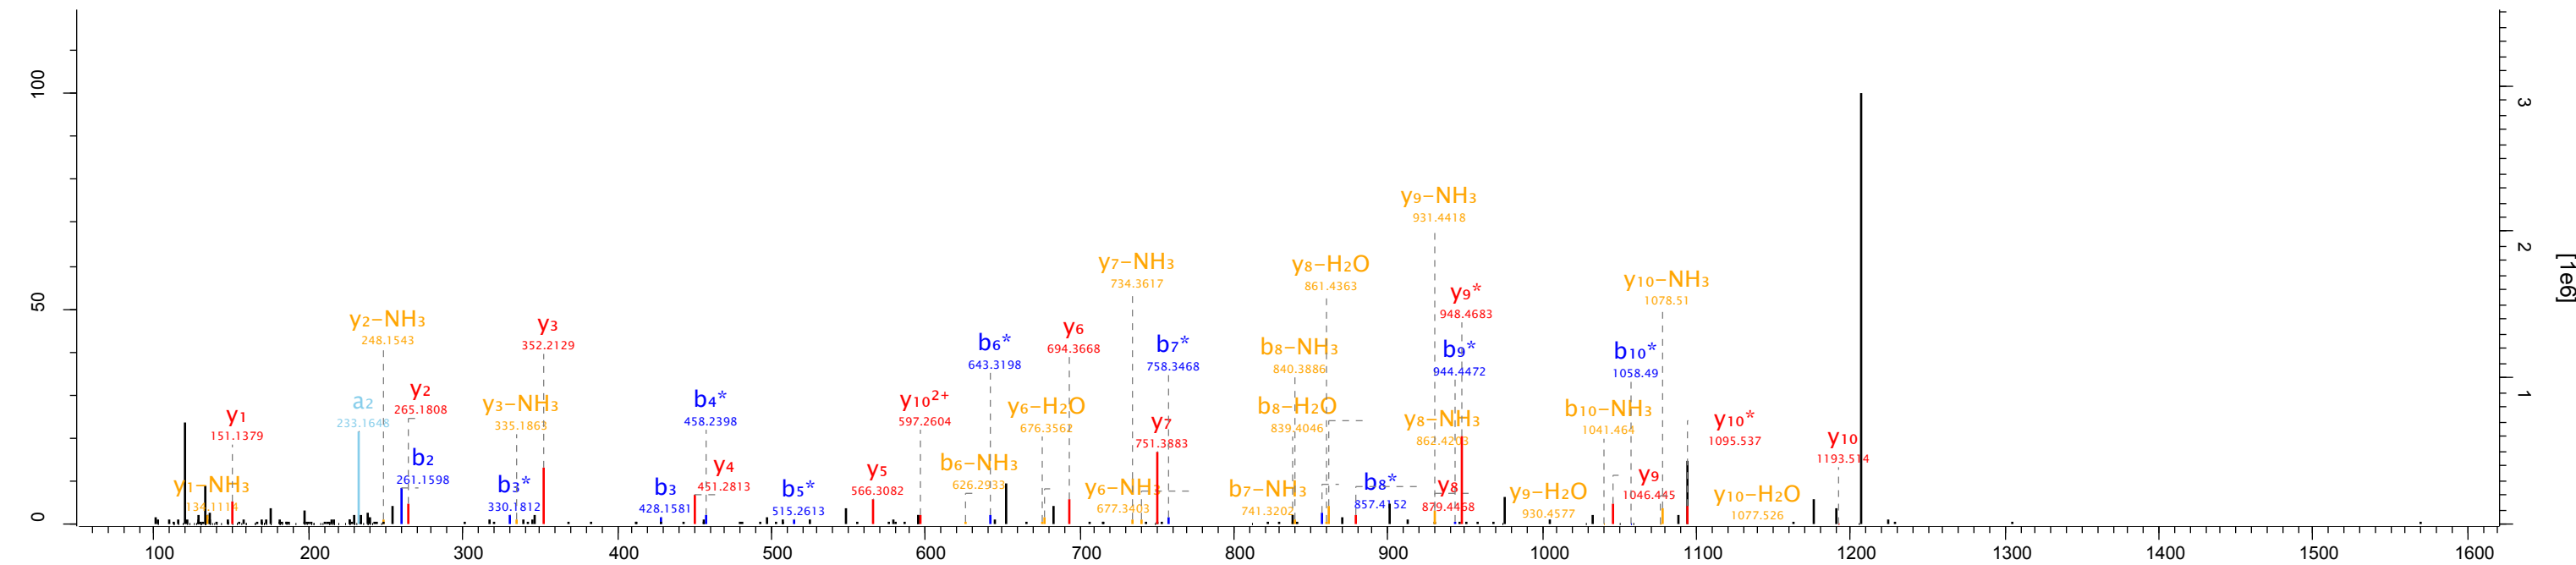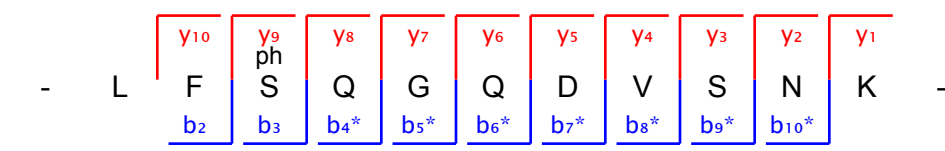

Raw file: 20150814\_A375SR\_Phospho\_BR2\_03  
 Scan: 12442 Method: FTMS; HCD Score: 154.74 m/z: 780.32 Gene names: PRPF4B

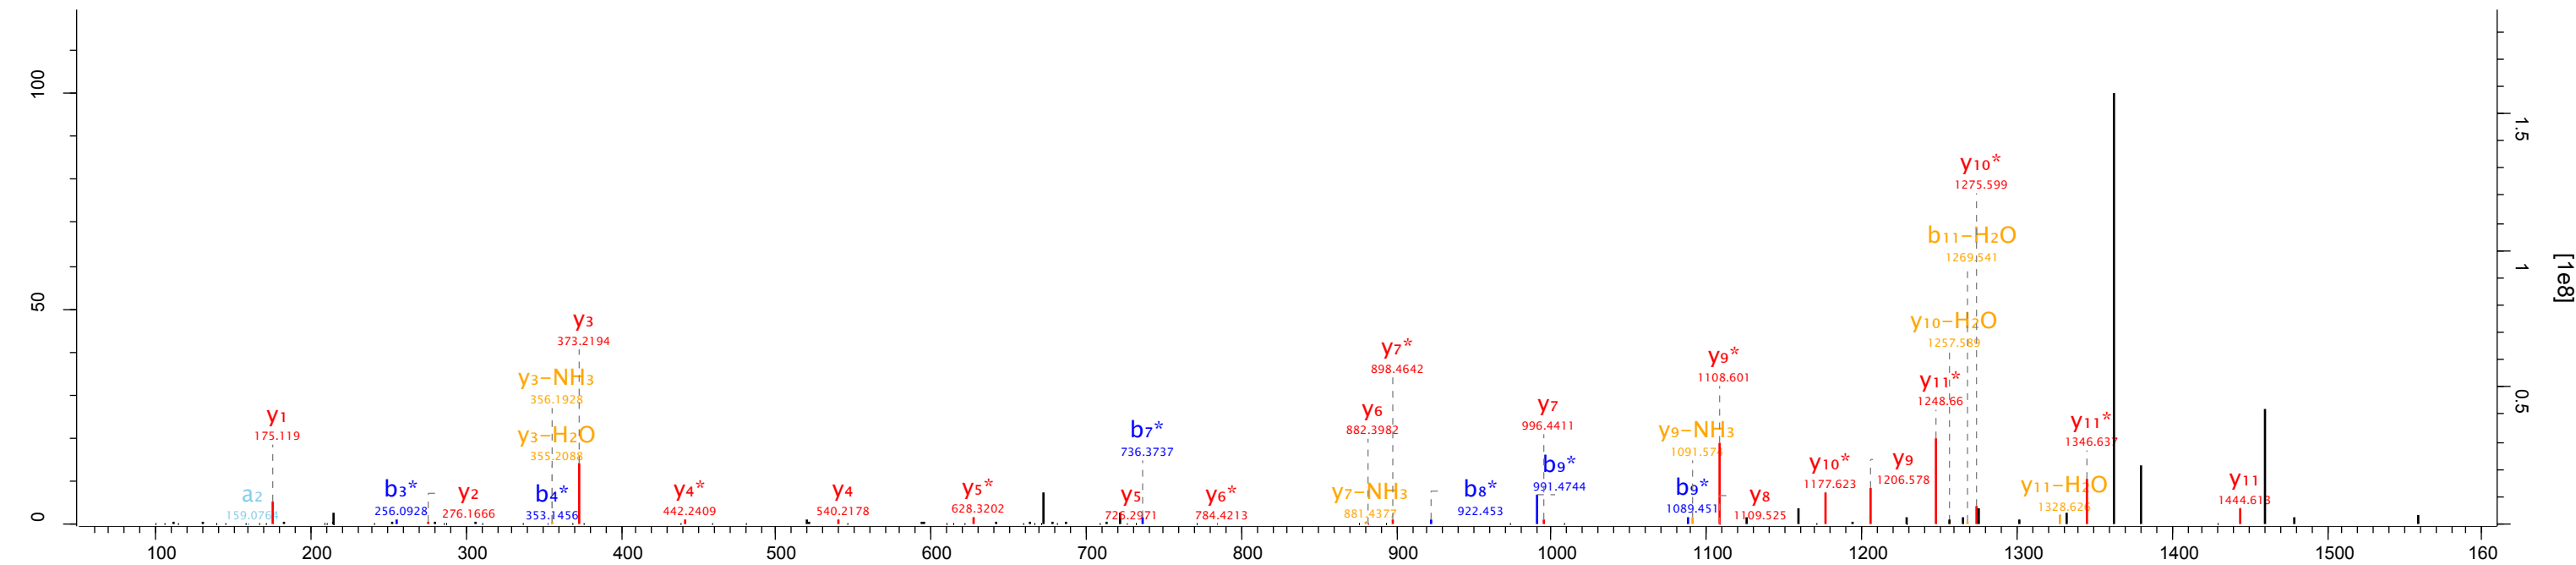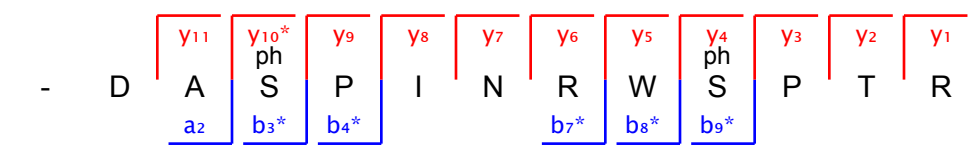

Raw file: 20150814\_A375SR\_Phospho\_BR2\_03  
 Scan: 12452 Method: FTMS; HCD Score: 143.46 m/z: 753.79 Gene names: SLC12A2

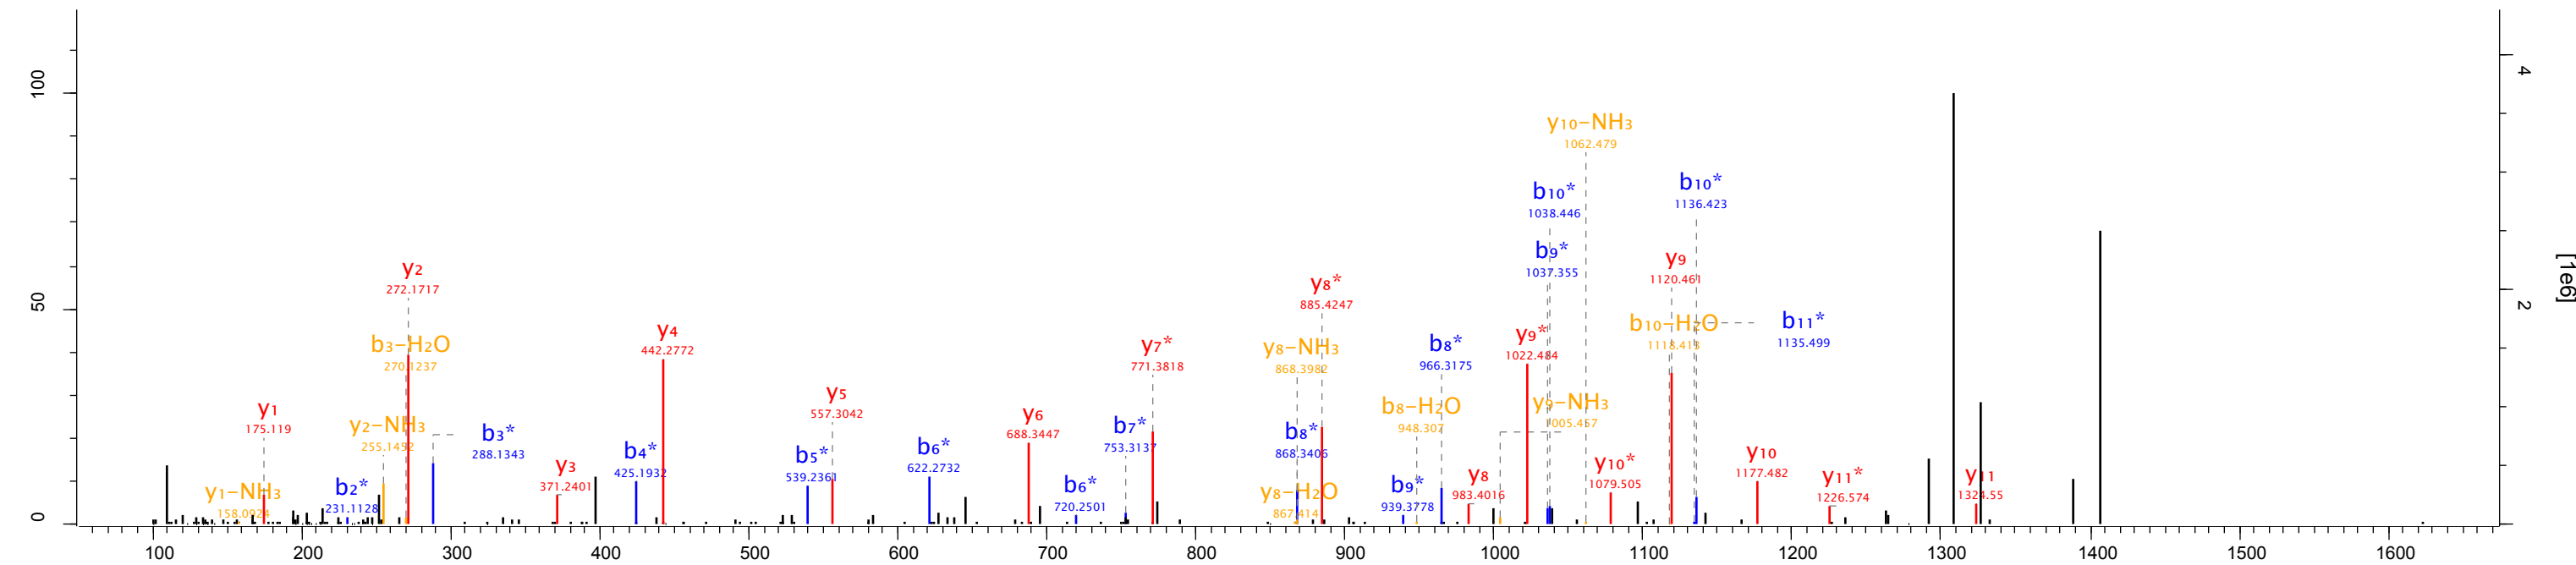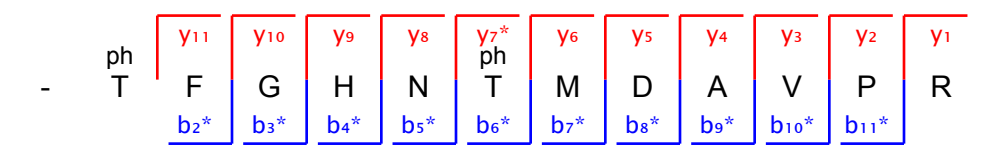

Raw file  
 20150814\_A375SR\_Phospho\_BR2\_03  
 Scan 12702 Method FTMS; HCD Score 190.28 m/z 1406.05 Gene names NASP

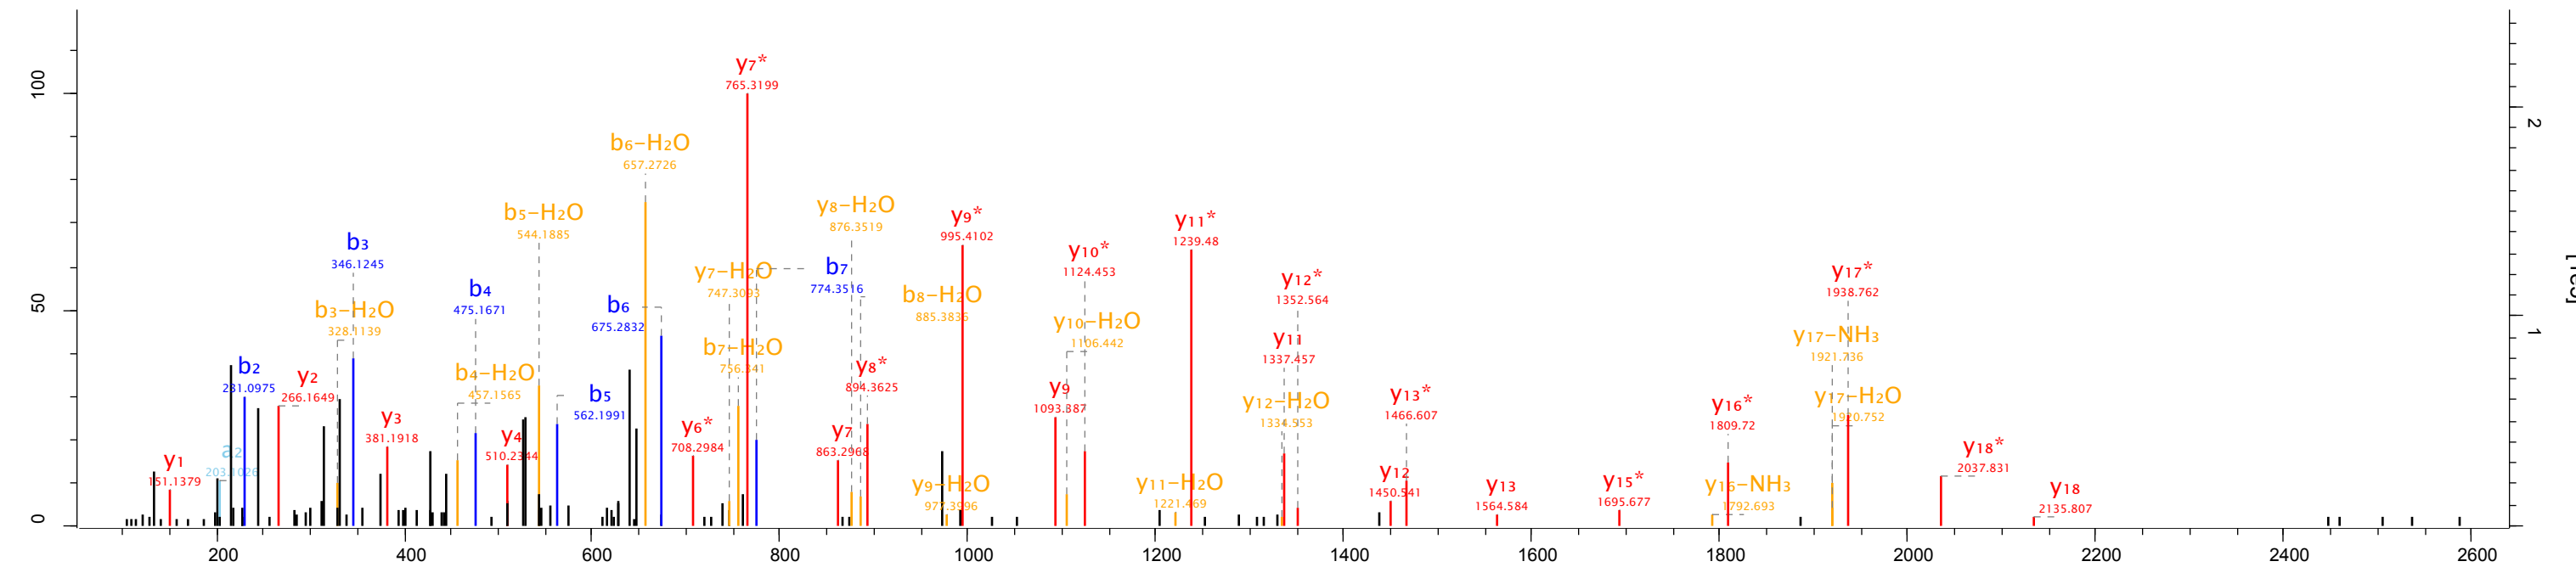

- T E D E S L V E N N D N I D E T E G S E E D D K -

b<sub>2</sub>
b<sub>3</sub>
b<sub>4</sub>
b<sub>5</sub>
b<sub>6</sub>
b<sub>7</sub>
y<sub>18</sub>
y<sub>17</sub>\*
y<sub>16</sub>\*
y<sub>15</sub>\*
y<sub>13</sub>
y<sub>12</sub>
y<sub>11</sub>
y<sub>10</sub>\*
y<sub>9</sub>
y<sub>8</sub>\*
y<sub>7</sub>
y<sub>6</sub>\*
ph

Raw file 20150814\_A375SR\_Phospho\_BR2\_03 Scan 1332 Method FTMS; HCD Score 97.35 m/z 514.24 Gene names API5

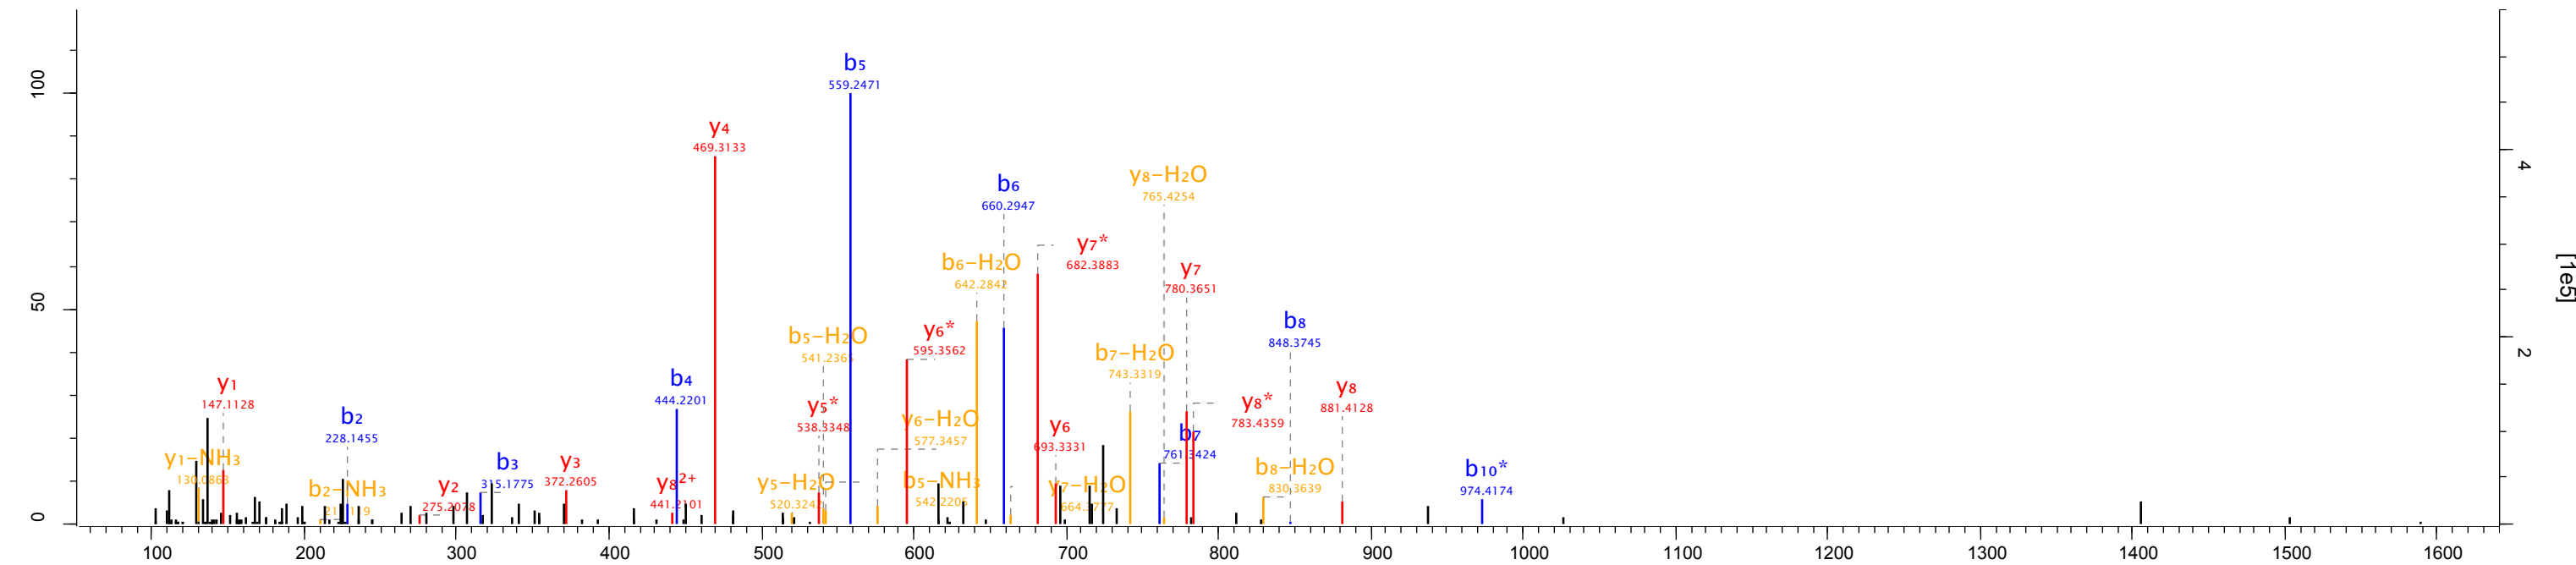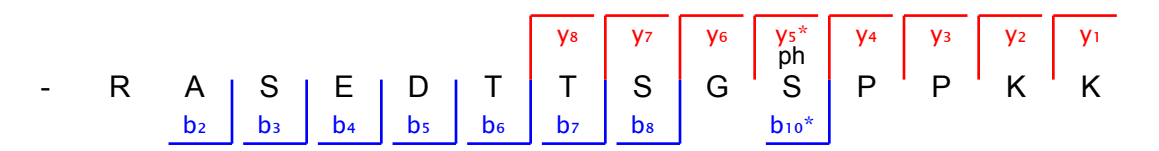

Raw file 20150814\_A375SR\_Phospho\_BR2\_03 Scan 13372 Method FTMS; HCD Score 317.06 m/z 1121.43 Gene names UTP14A

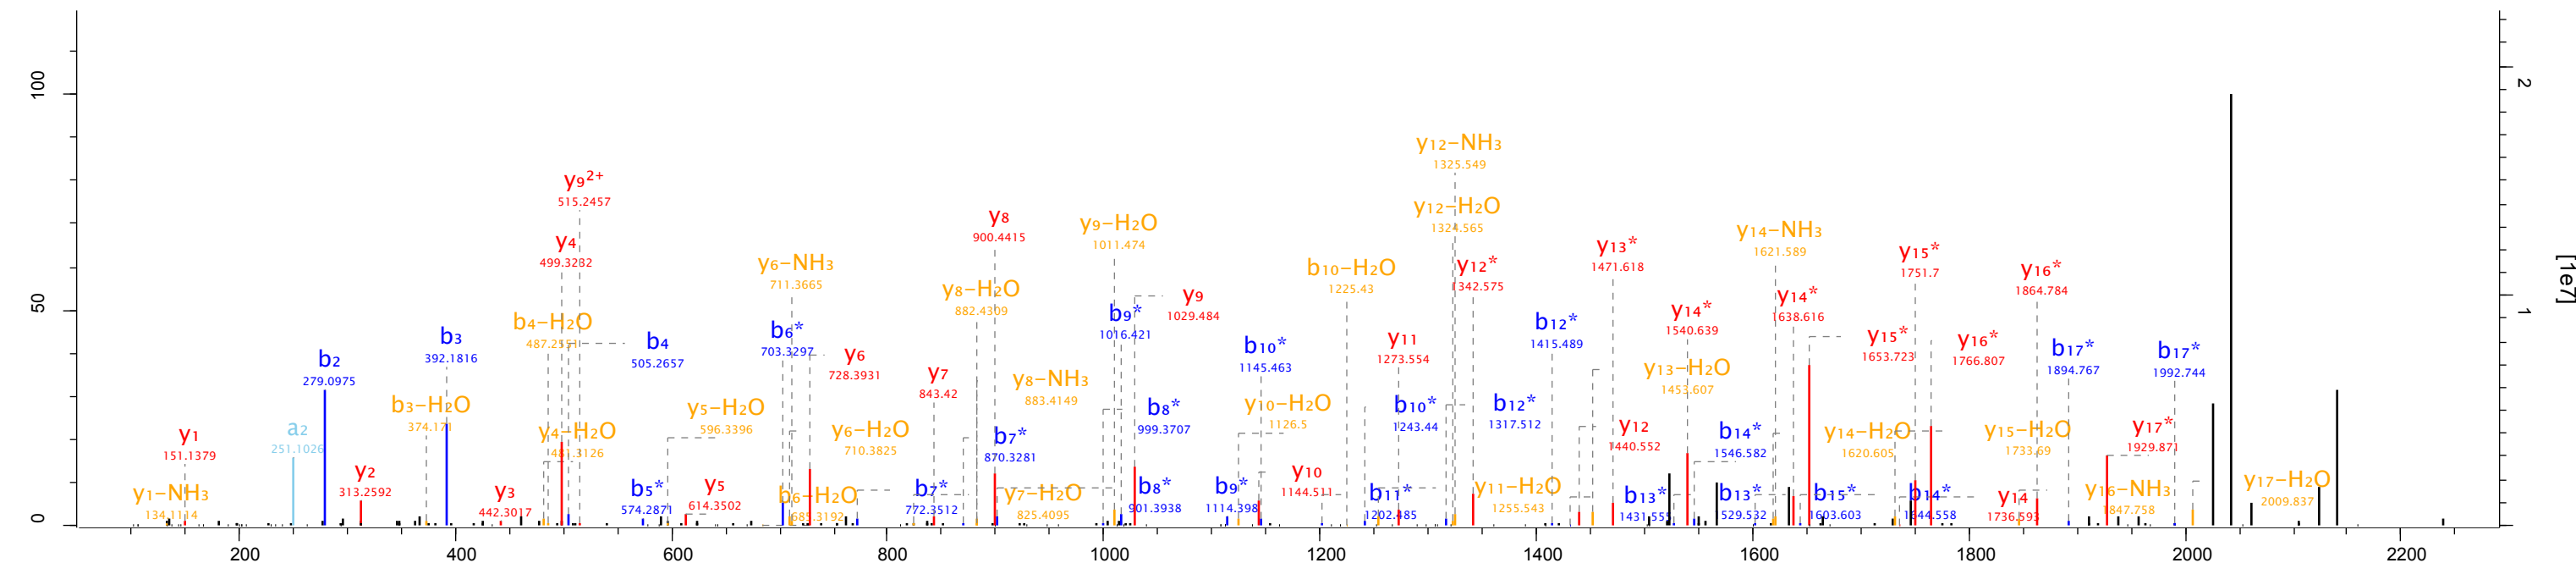

- D Y L L S E S E D E G D N D G E R K -

y17\*
y16\*
y15\*
y14  
ph
y13\*
y12  
ph
y11
y10
y9
y8
y7
y6
y5
y4
y3
y2
y1

b2
b3
b4
b5\*
b6\*
b7\*
b8\*
b9\*
b10\*
b11\*
b12\*
b13\*
b14\*
b15\*
b17\*

Raw file: 20150814\_A375SR\_Phospho\_BR2\_03  
 Scan: 13382 Method: FTMS; HCD Score: 142.39 m/z: 697.8 Gene names: TBC1D4

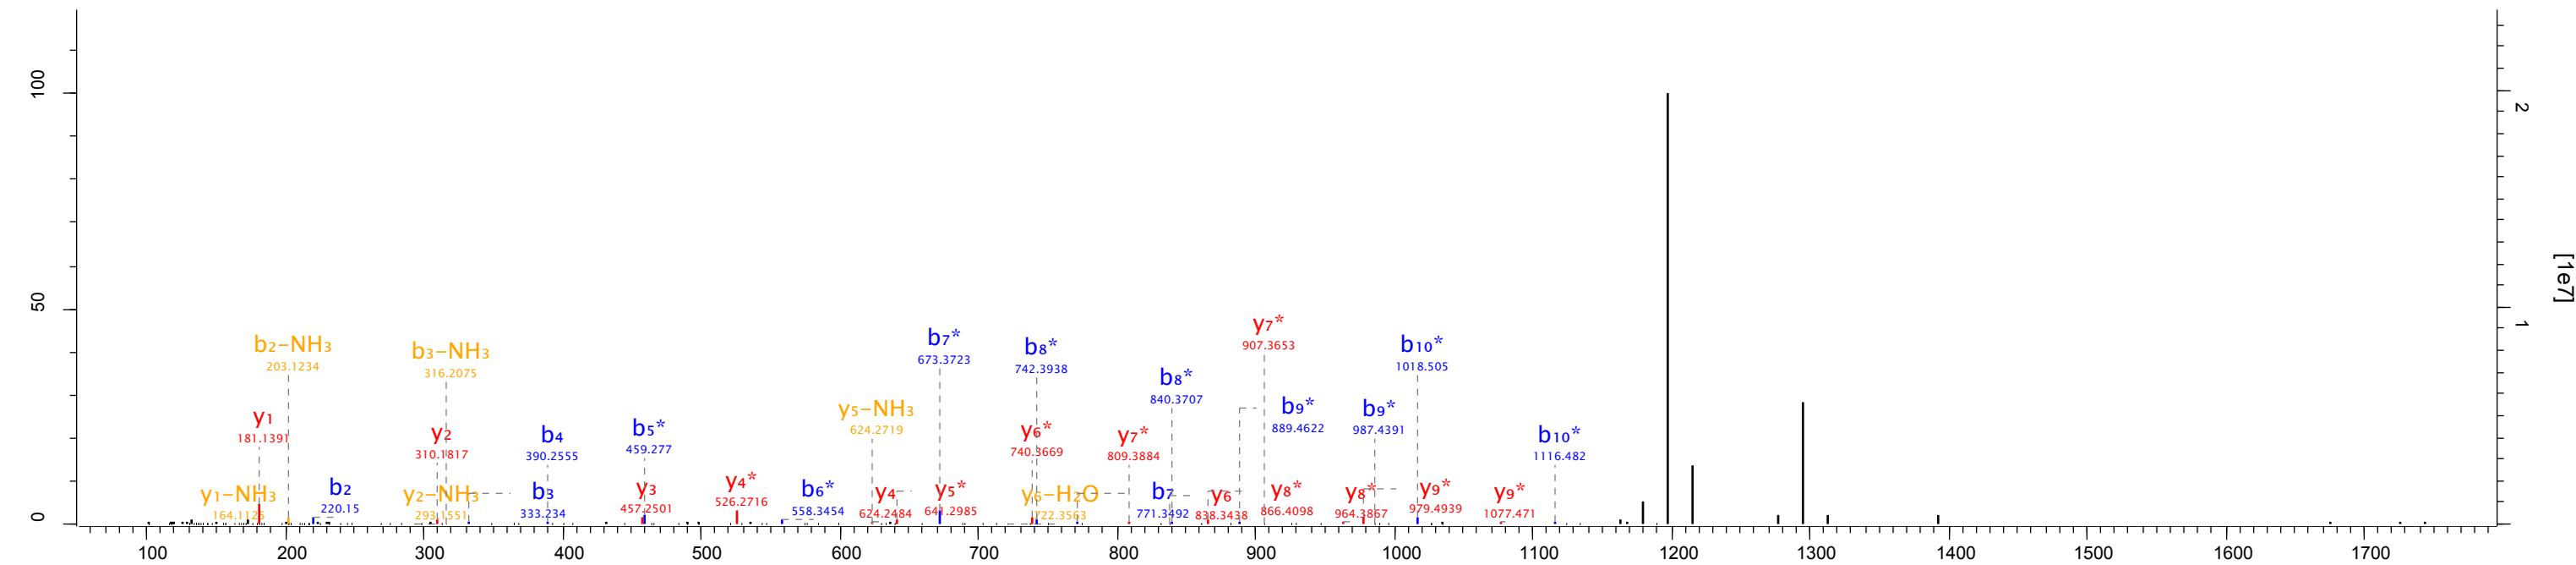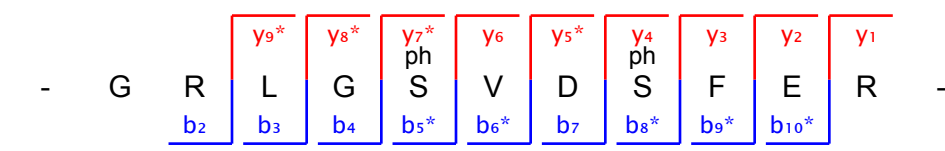





Raw file 20150814\_A375SR\_Phospho\_BR2\_03 Scan 13642 Method FTMS; HCD Score 178.51 m/z 743.32 Gene names CYBRD1

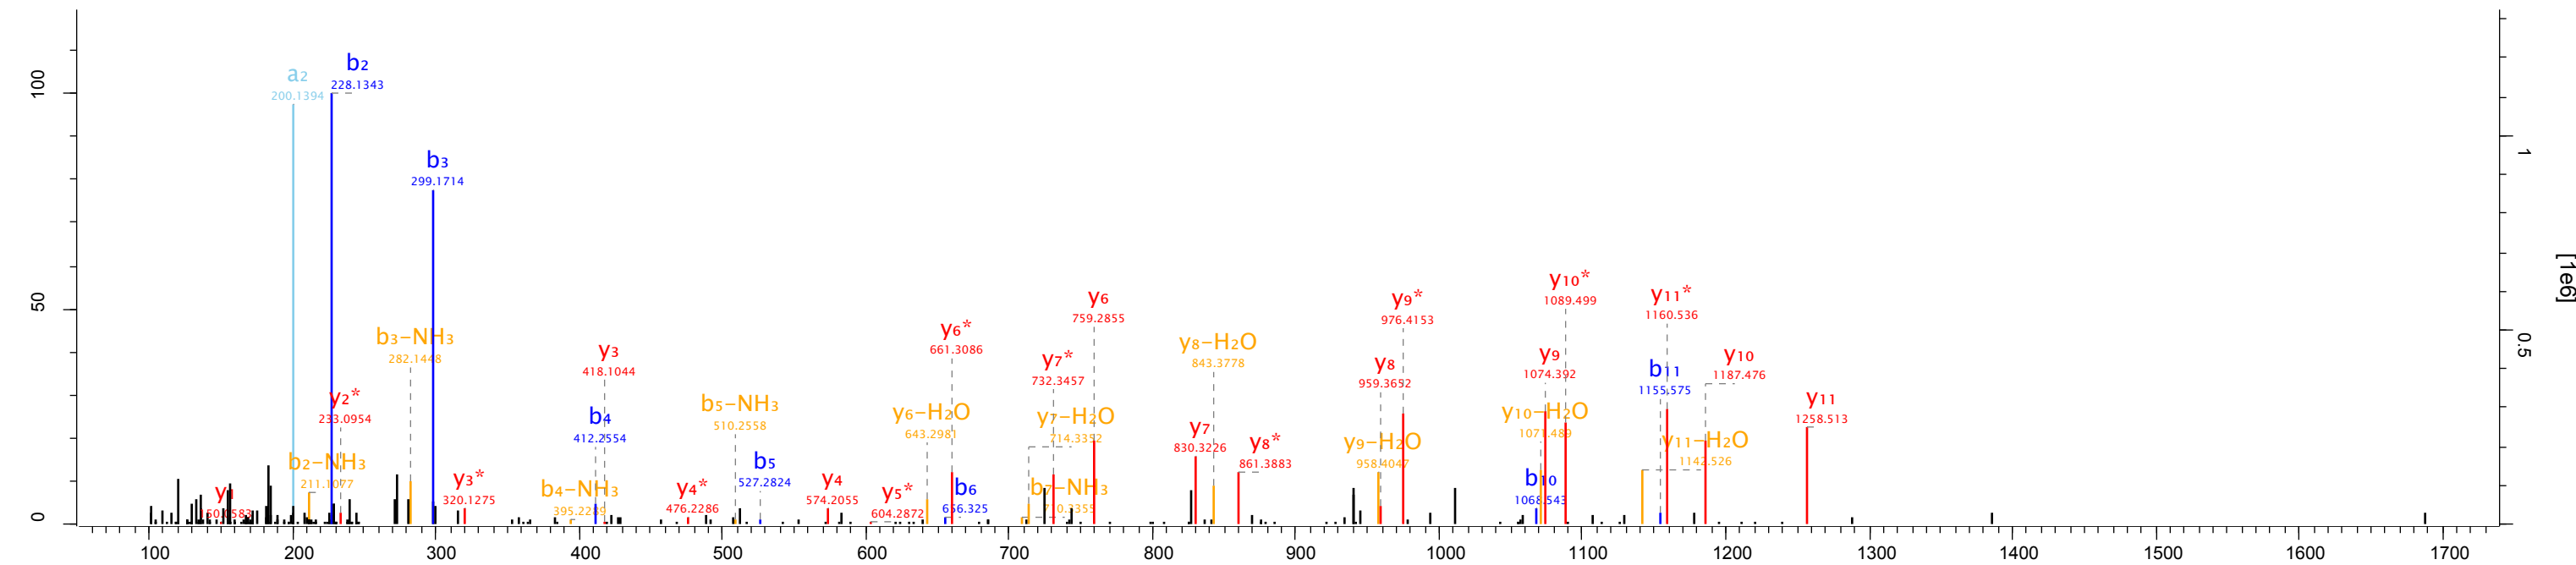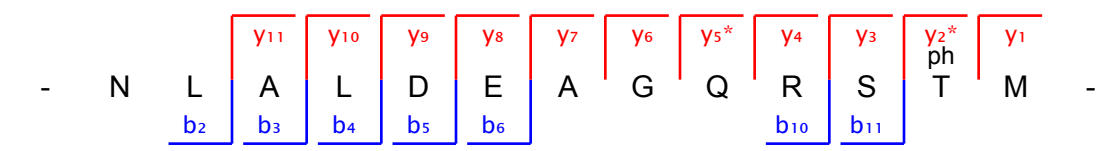

Raw file  
20150814\_A375SR\_Phospho\_BR2\_03

Scan 13842 Method FTMS; HCD Score 361.19 m/z 1400.01 Gene names MFAP1

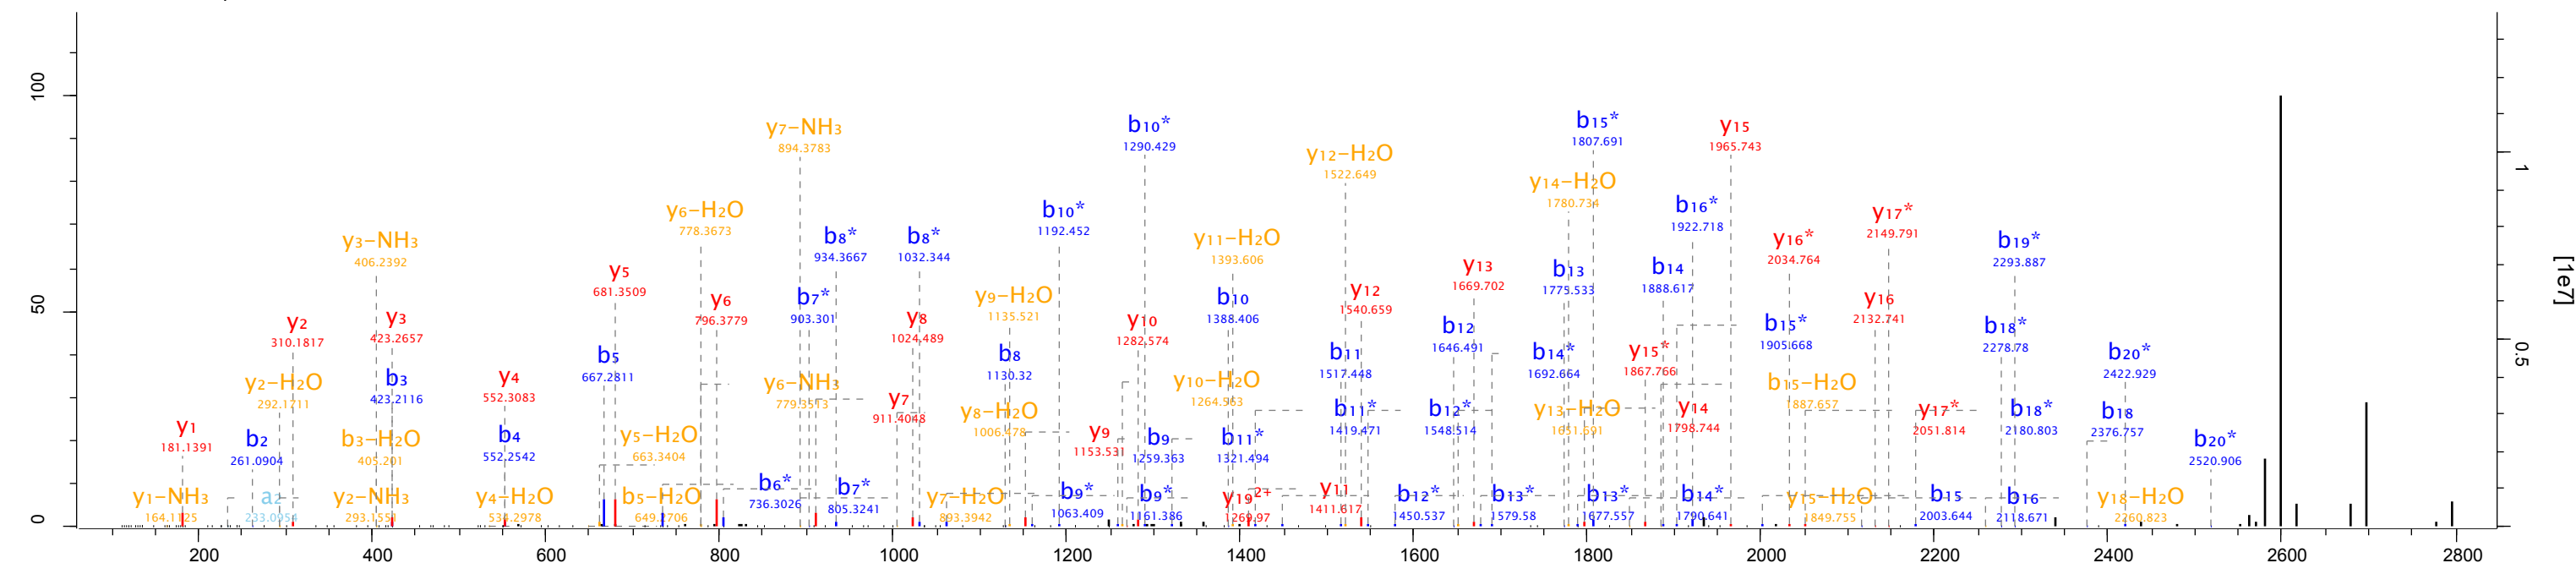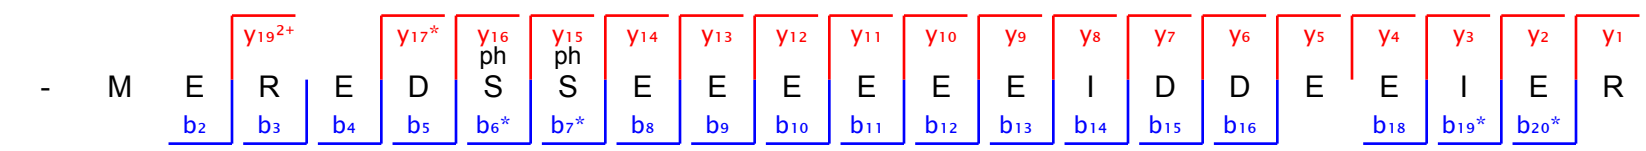

Raw file 20150814\_A375SR\_Phospho\_BR2\_03 Scan 14452 Method FTMS; HCD Score 137.31 m/z 665.31 Gene names ZYX

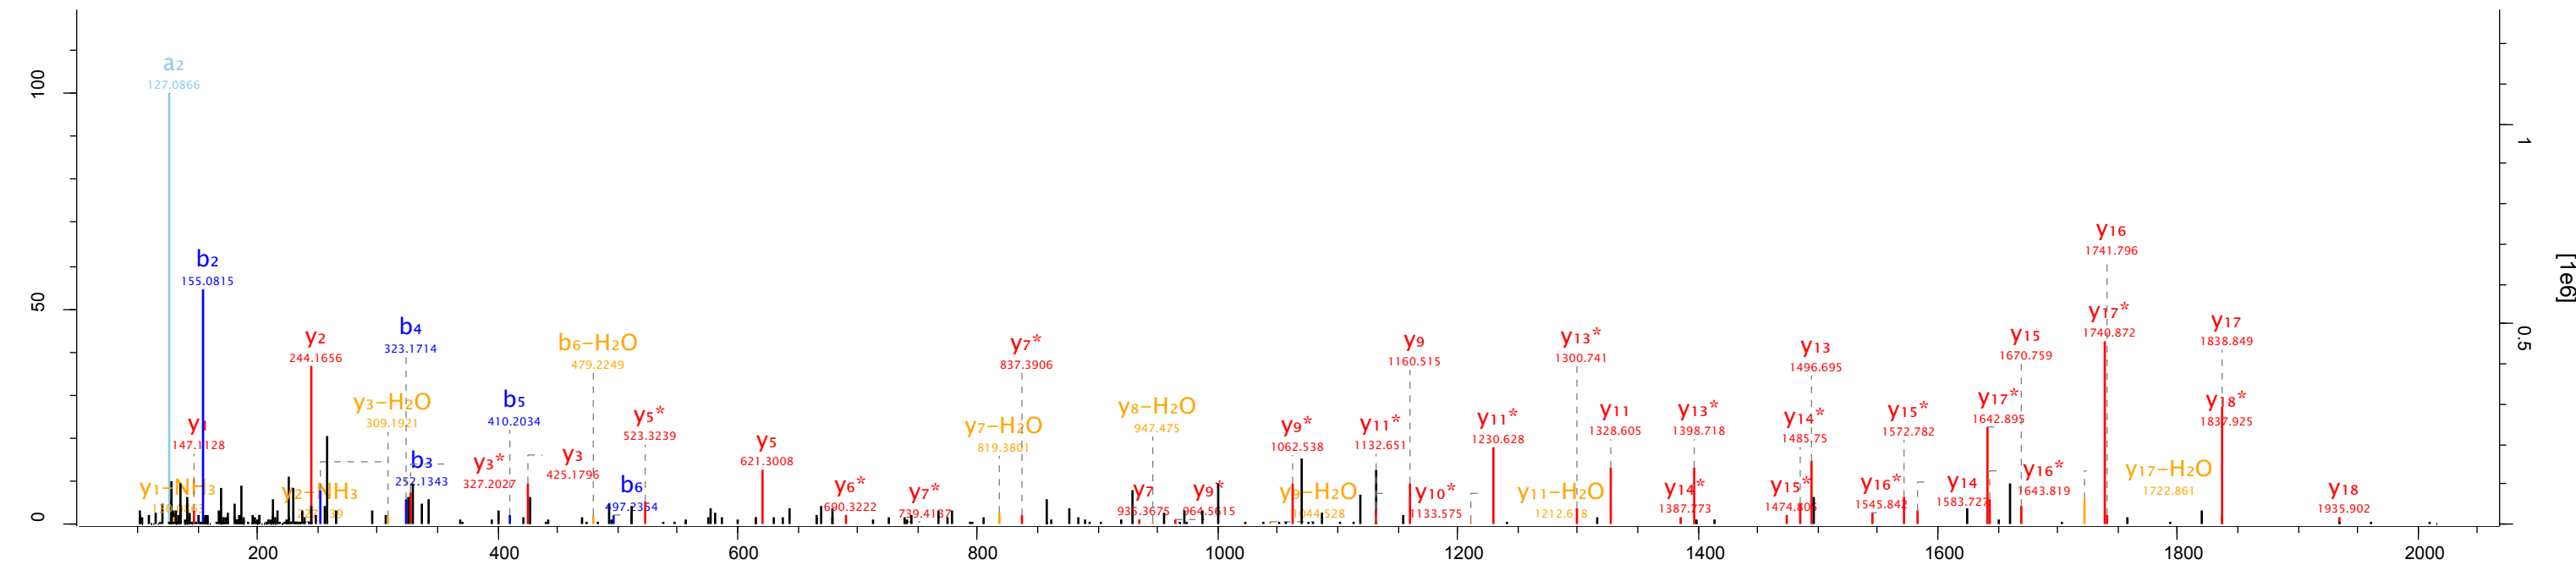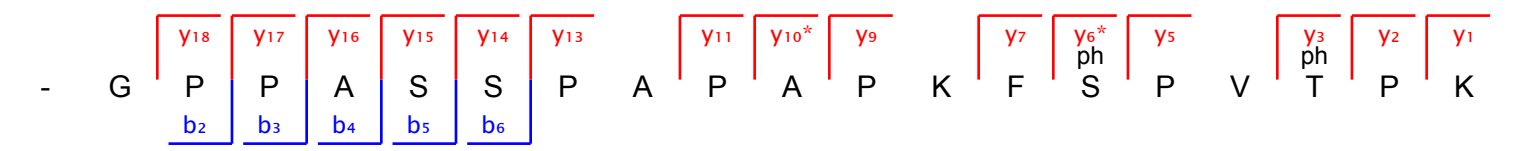

Raw file 20150814\_A375SR\_Phospho\_BR2\_03 Scan 14822 Method FTMS; HCD Score 101.46 m/z 924.04 Gene names ASH2L

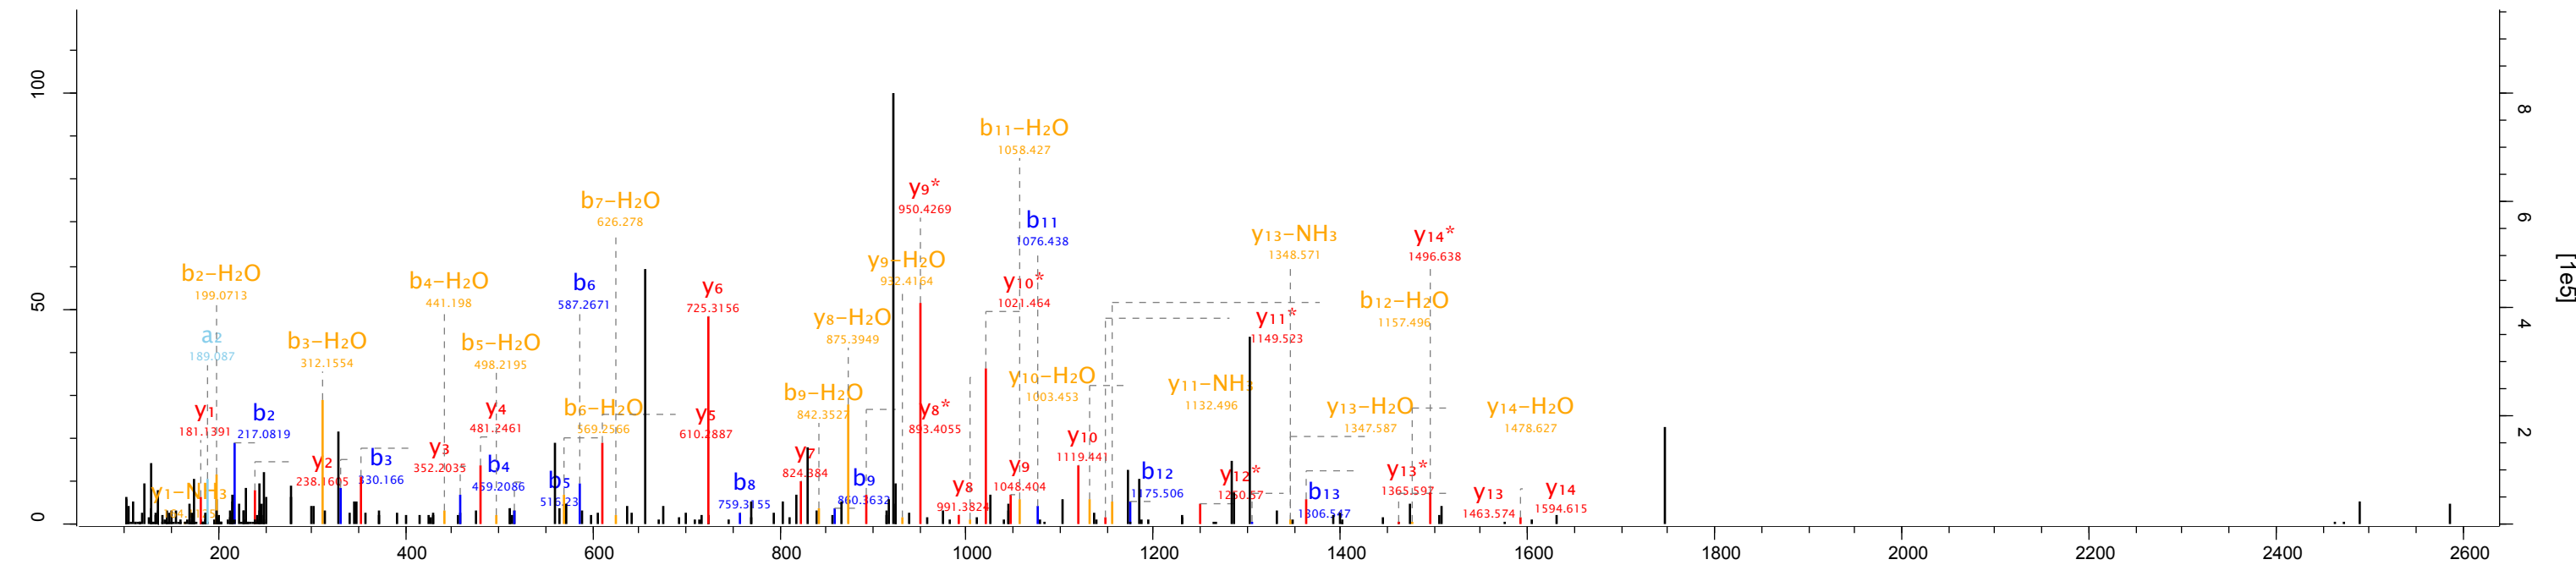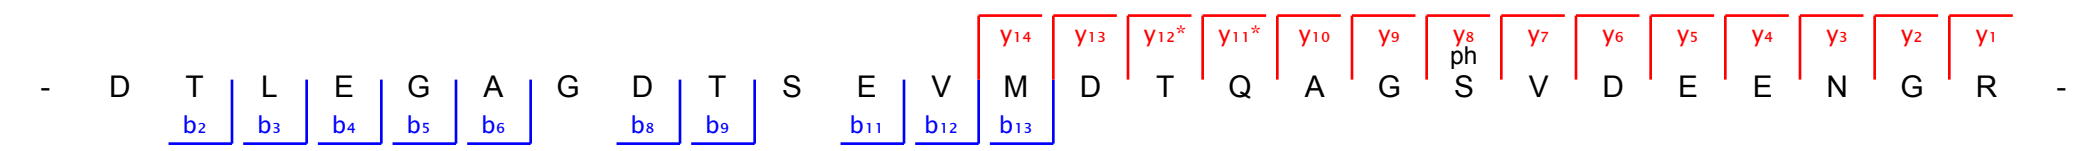

Raw file  
20150814\_A375SR\_Phospho\_BR2\_03

Scan 14982 Method: FTMS; HCD Score 243.31 m/z 1237.04 Gene names AAK1

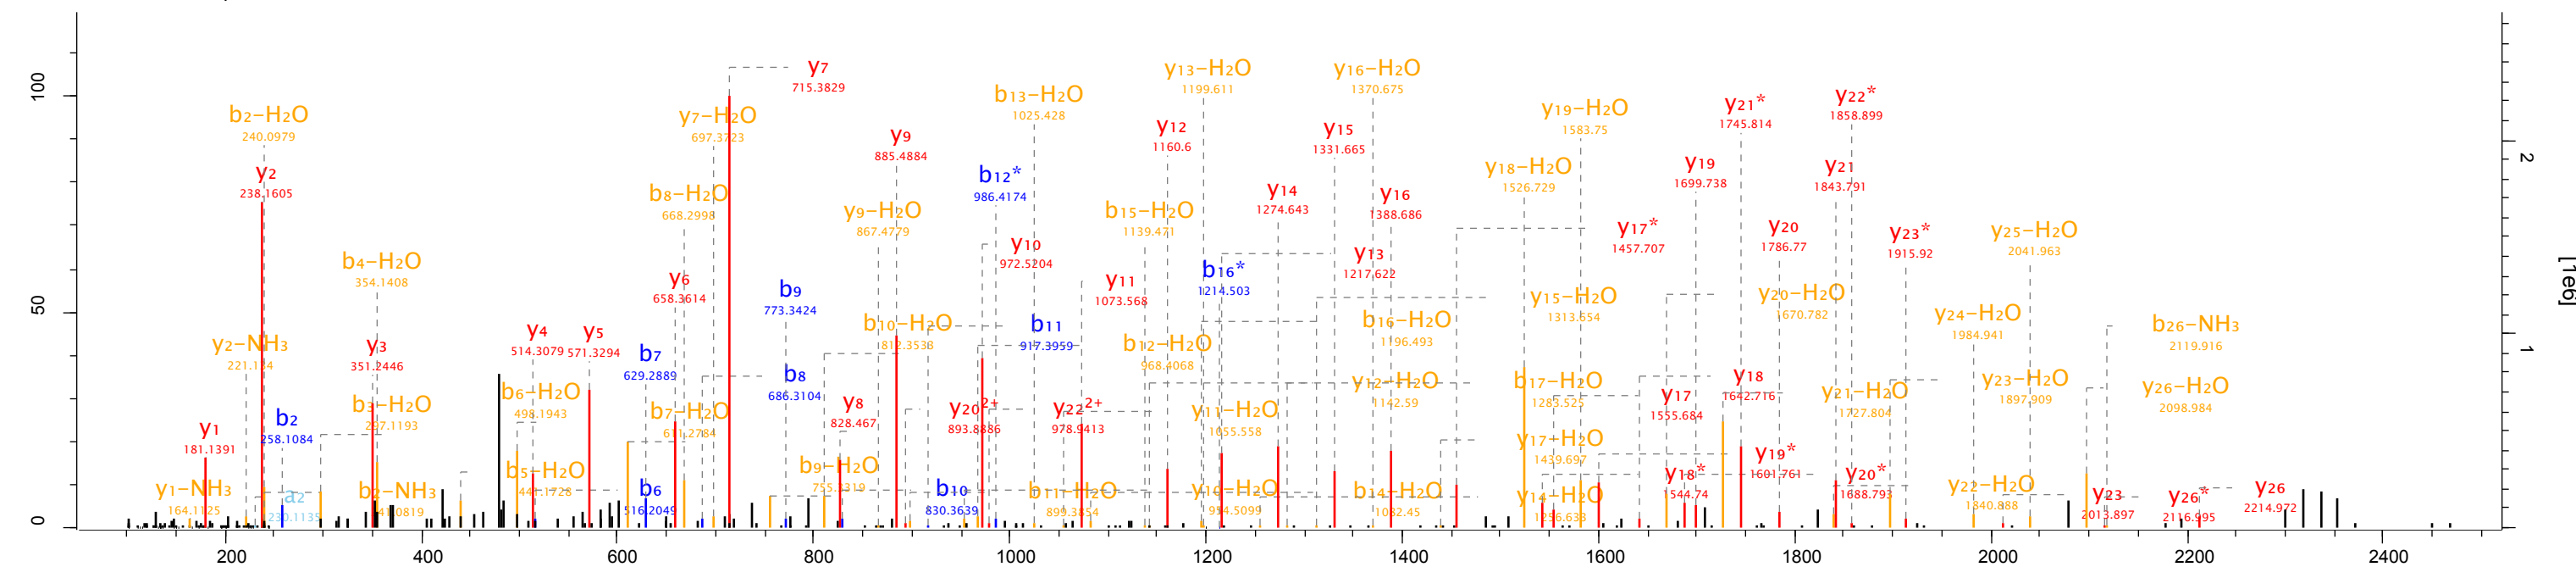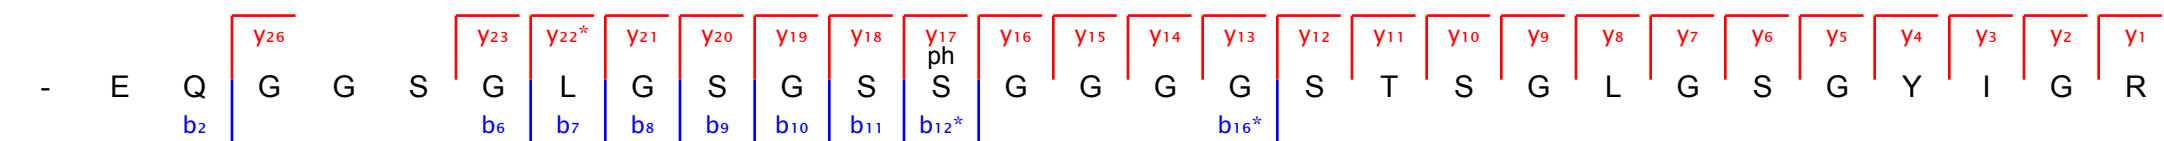

Raw file 20150814\_A375SR\_Phospho\_BR2\_03 Scan 15092 Method FTMS; HCD Score 185.23 m/z 849.35 Gene names LIG1

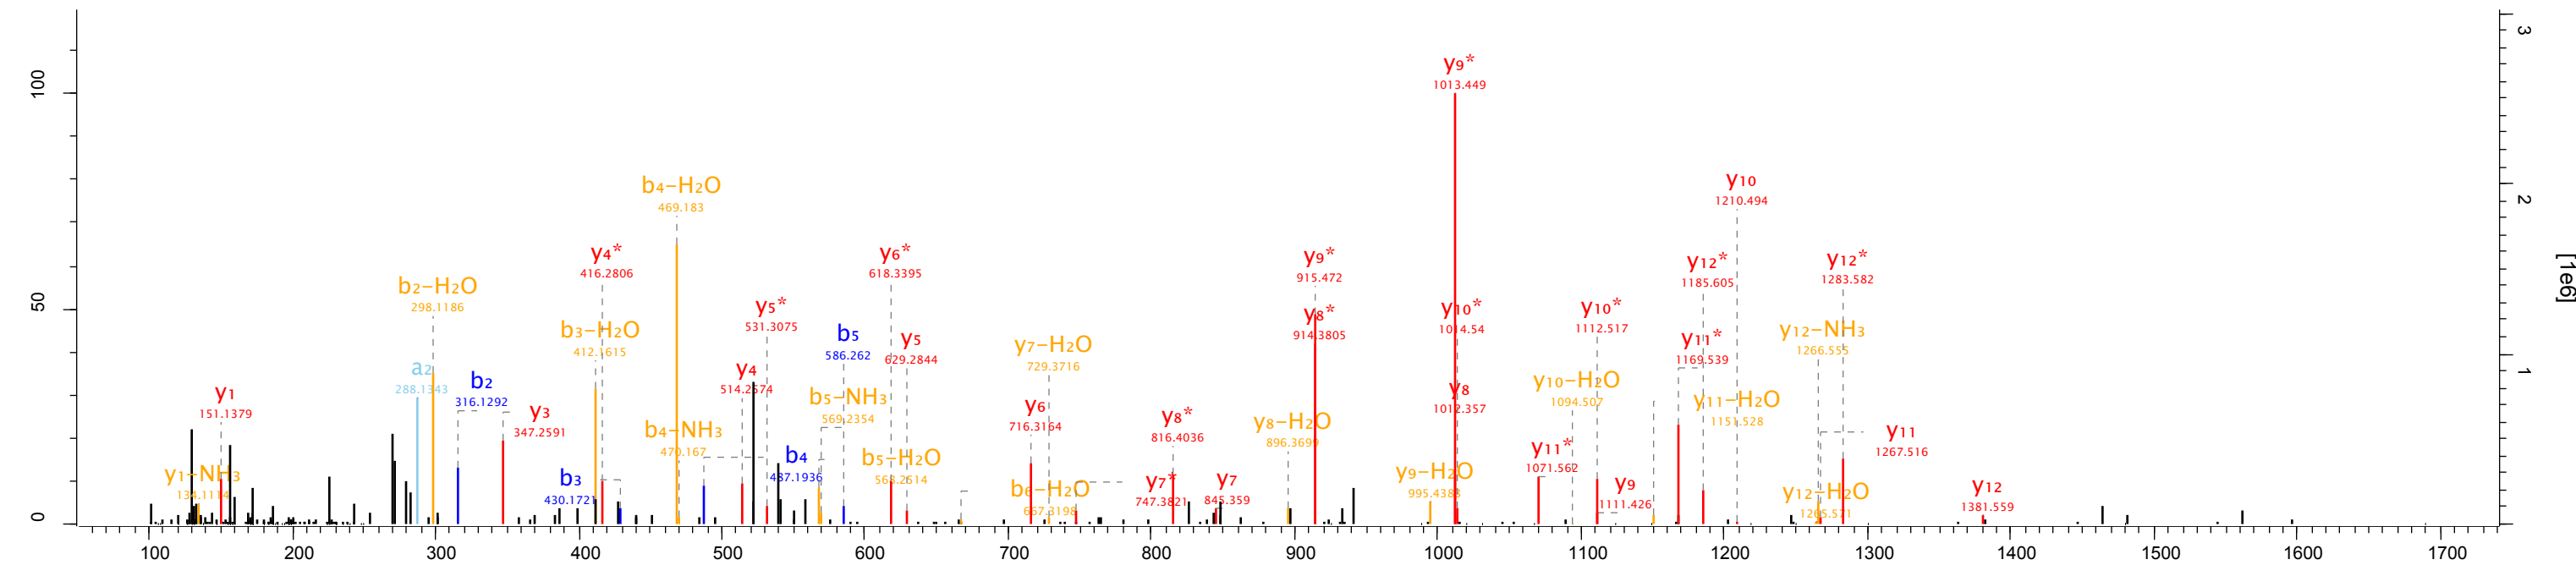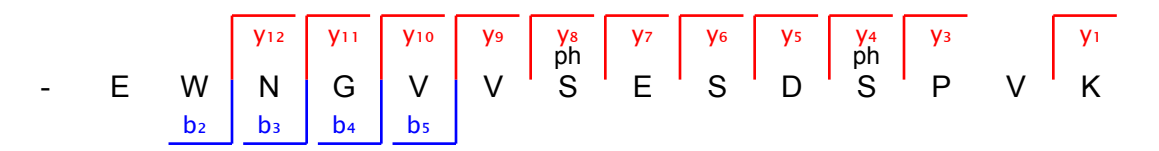

Raw file 20150814\_A375SR\_Phospho\_BR2\_03 Scan 15132 Method FTMS; HCD Score 120.87 m/z 463.21 Gene names CEP170

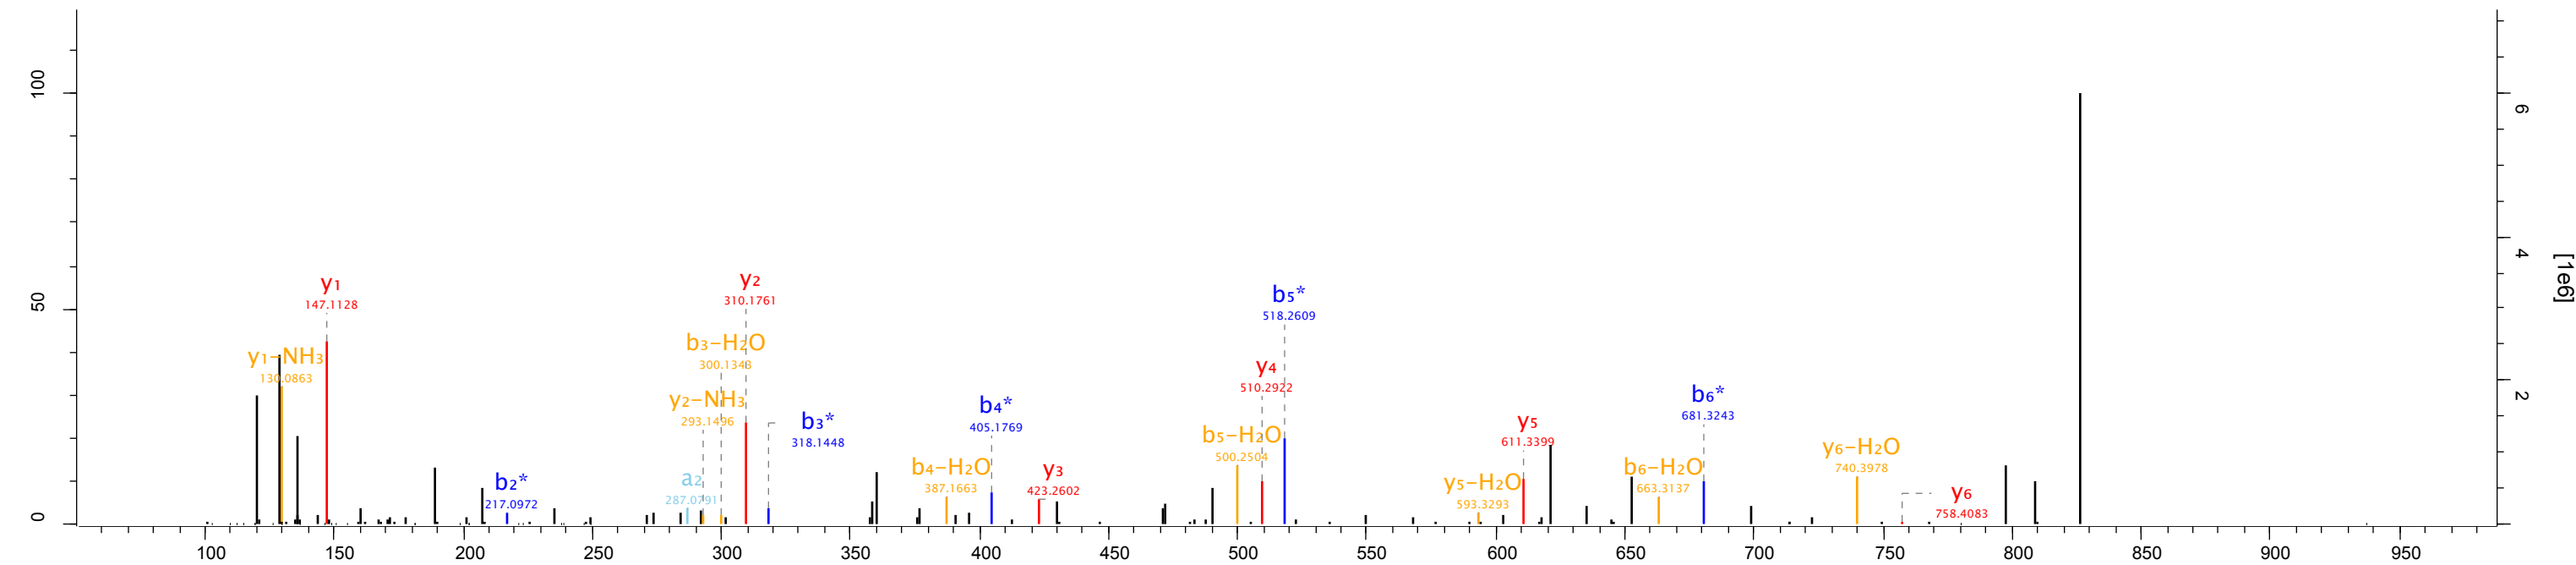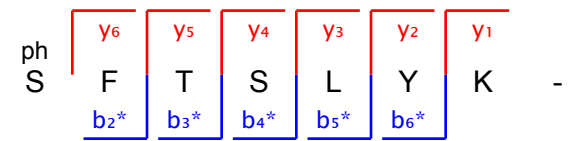



Raw file: 20150814\_A375SR\_Phospho\_BR2\_03  
 Scan: 15612 Method: FTMS; HCD Score: 199.03 m/z: 651.33 Gene names: TFDP1

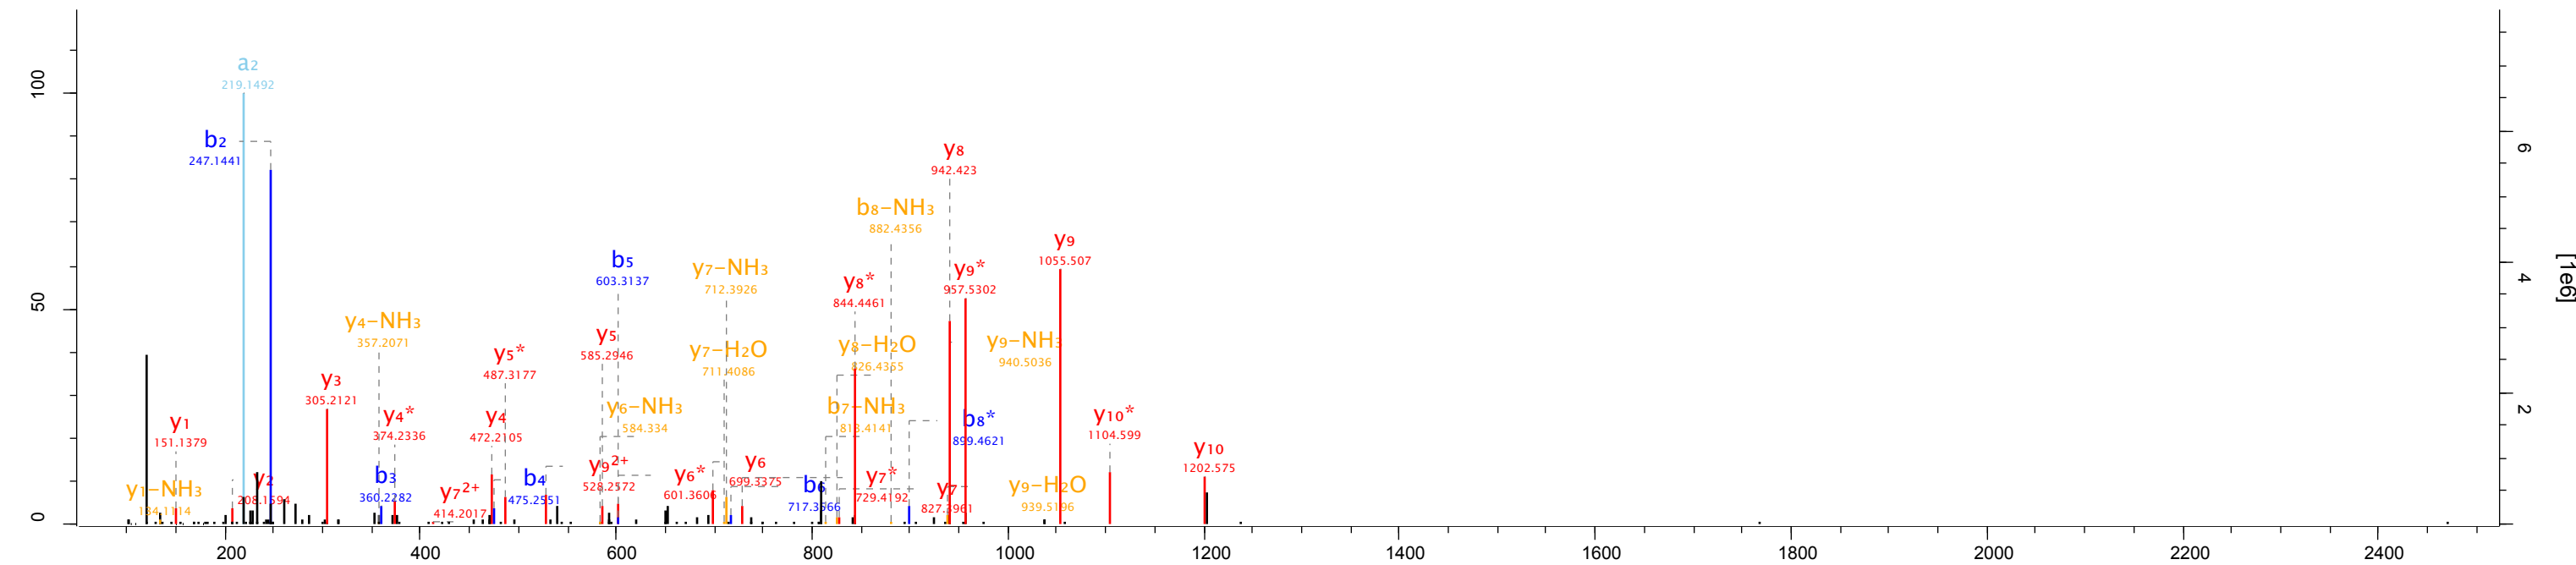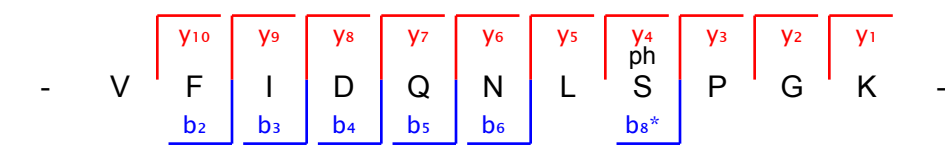

Raw file: 20150814\_A375SR\_Phospho\_BR2\_03  
 Scan: 15922 Method: FTMS; HCD Score: 185.59 m/z: 757.35 Gene names: MYCBP2

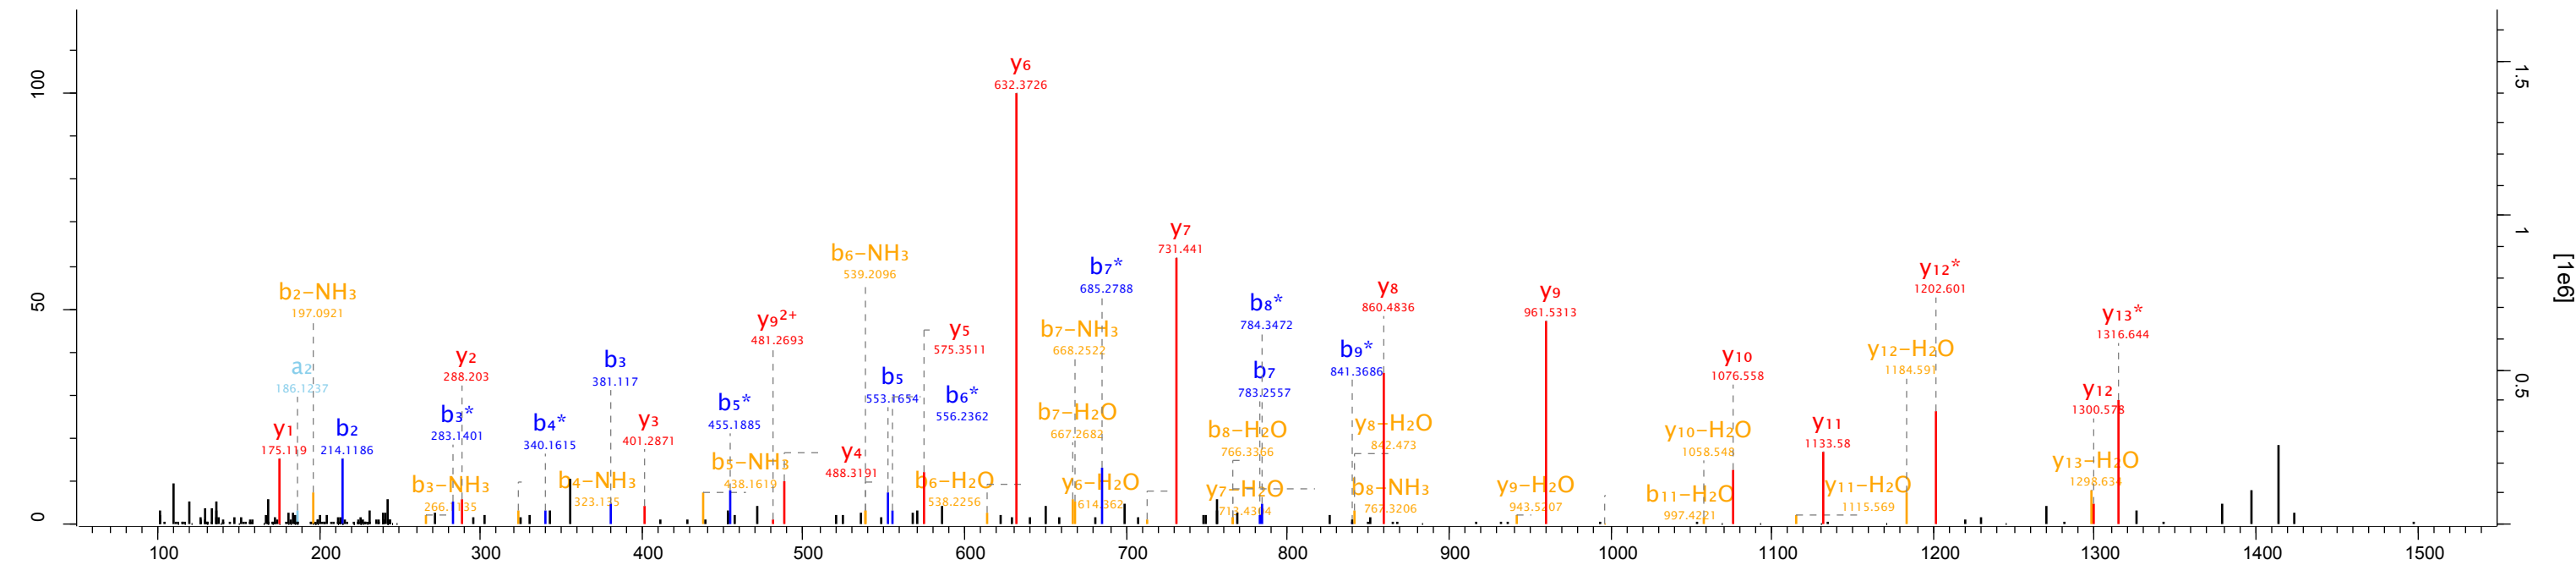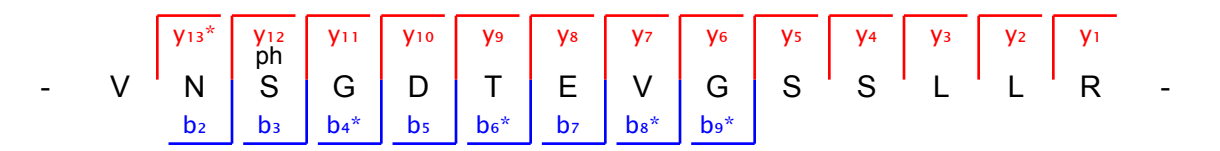

Raw file 20150814\_A375SR\_Phospho\_BR2\_03 Scan 15962 Method FTMS; HCD Score 162.01 m/z 804.69 Gene names ATN1

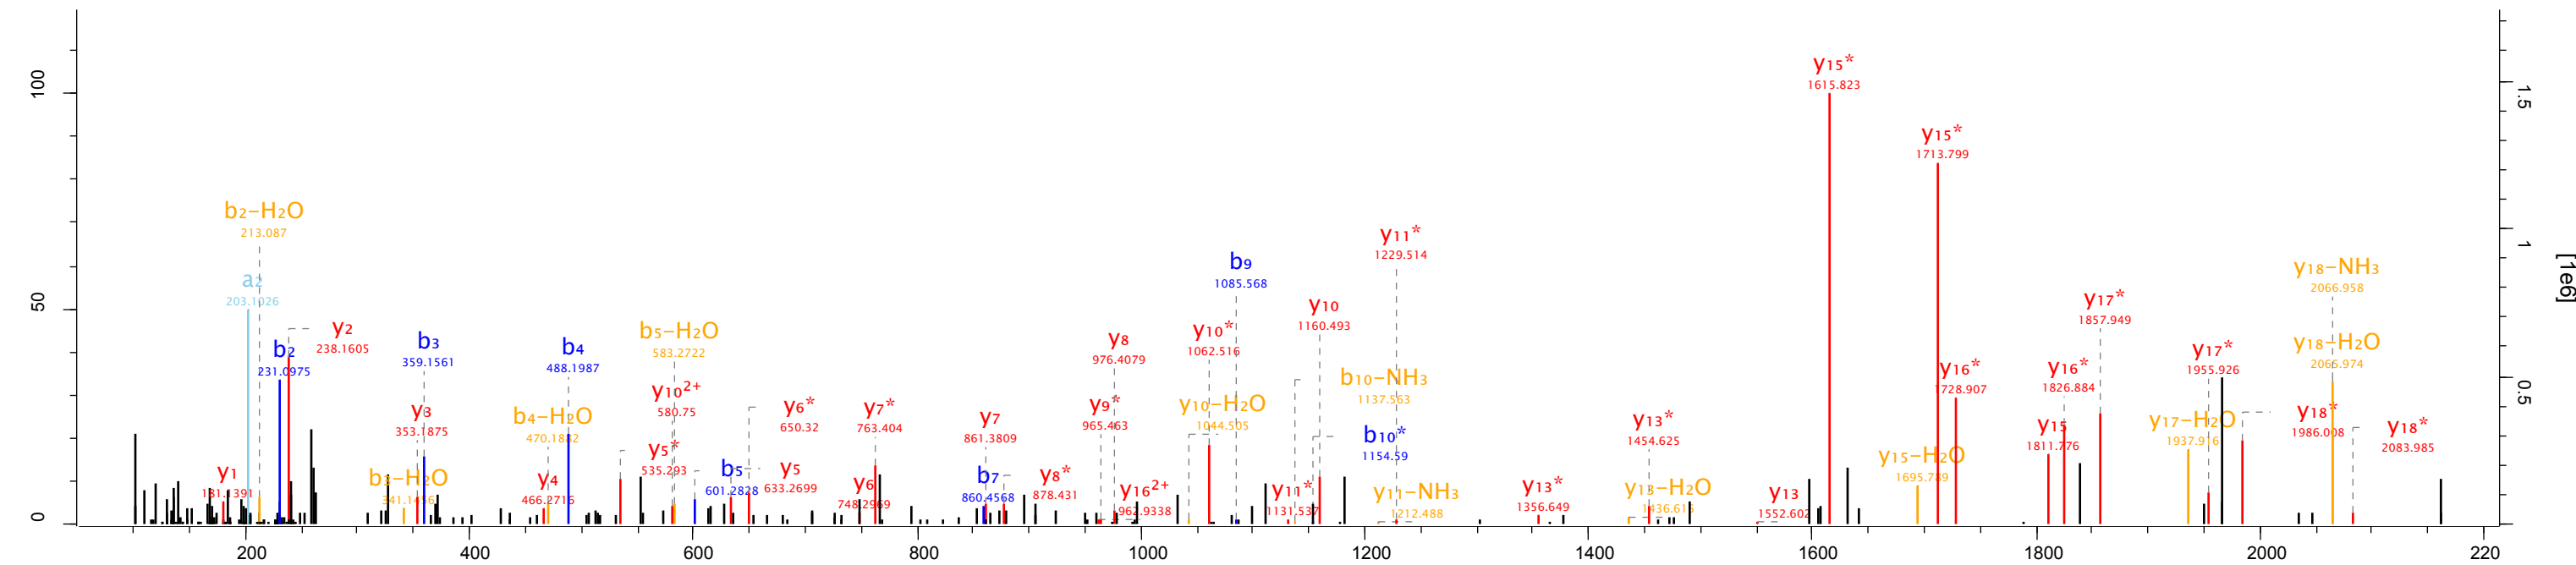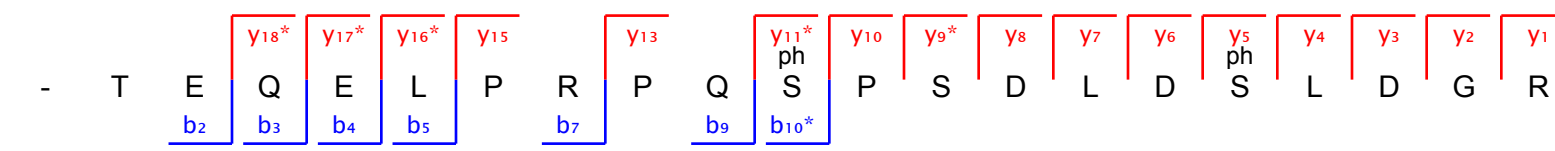

Raw file: 20150814\_A375SR\_Phospho\_BR2\_03  
 Scan: 16142 Method: FTMS; HCD Score: 45.33 m/z: 625.81 Gene names: BRIP1

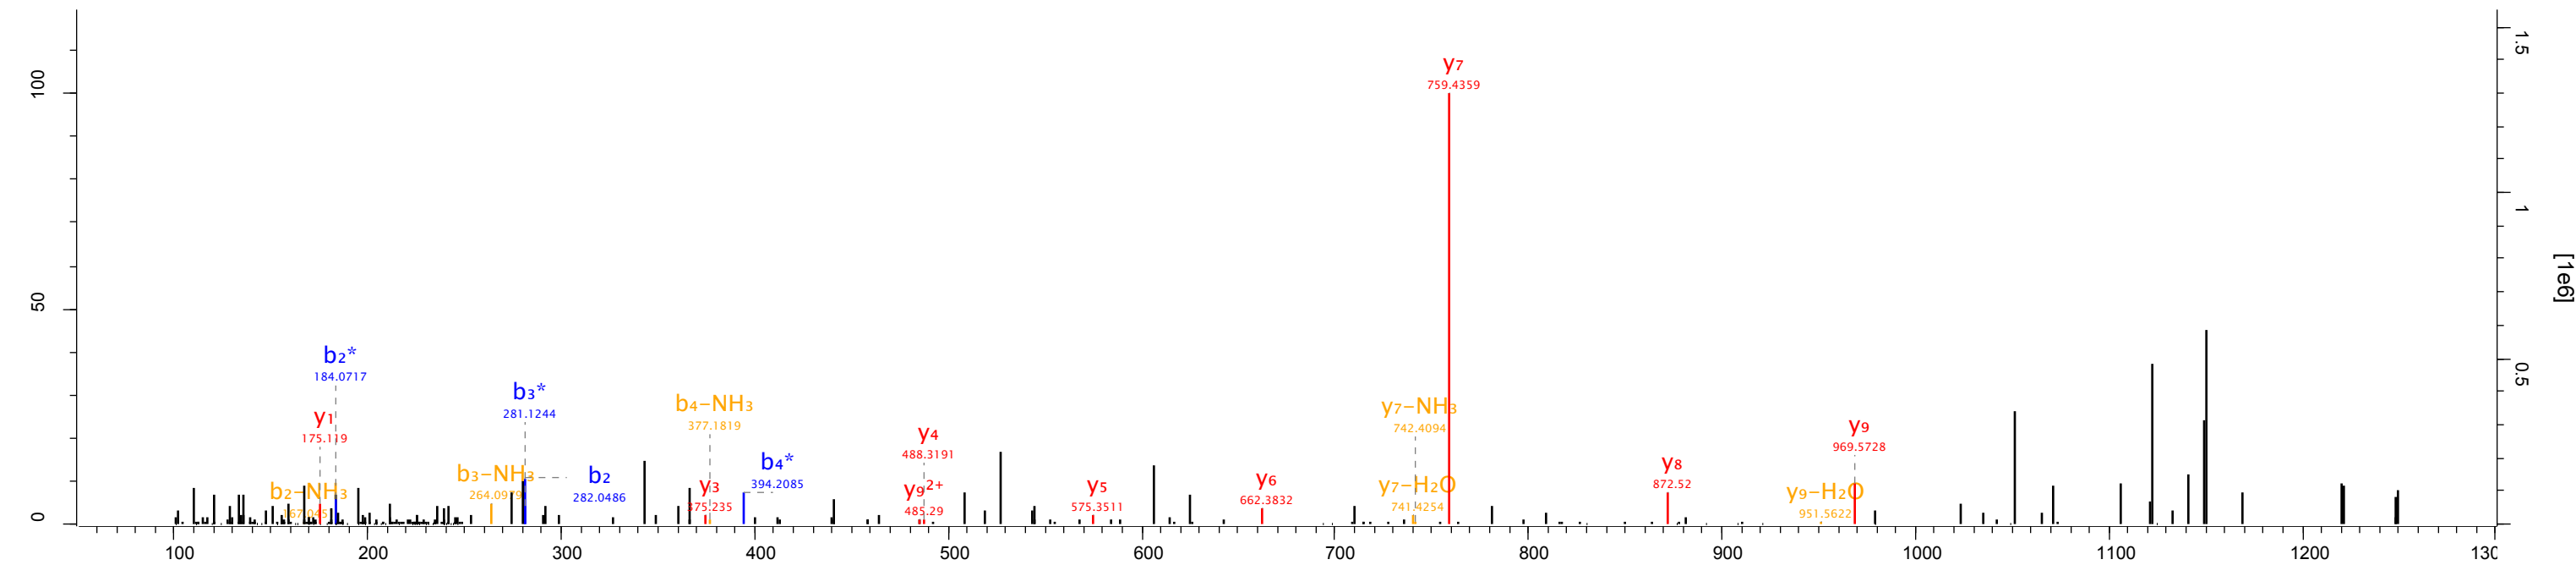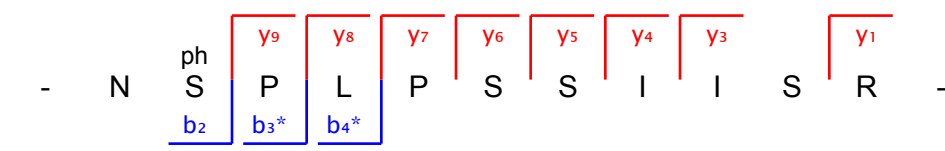

Raw file 20150814\_A375SR\_Phospho\_BR2\_03 Scan 16442 Method FTMS; HCD Score 150.36 m/z 757.65 Gene names FXR1

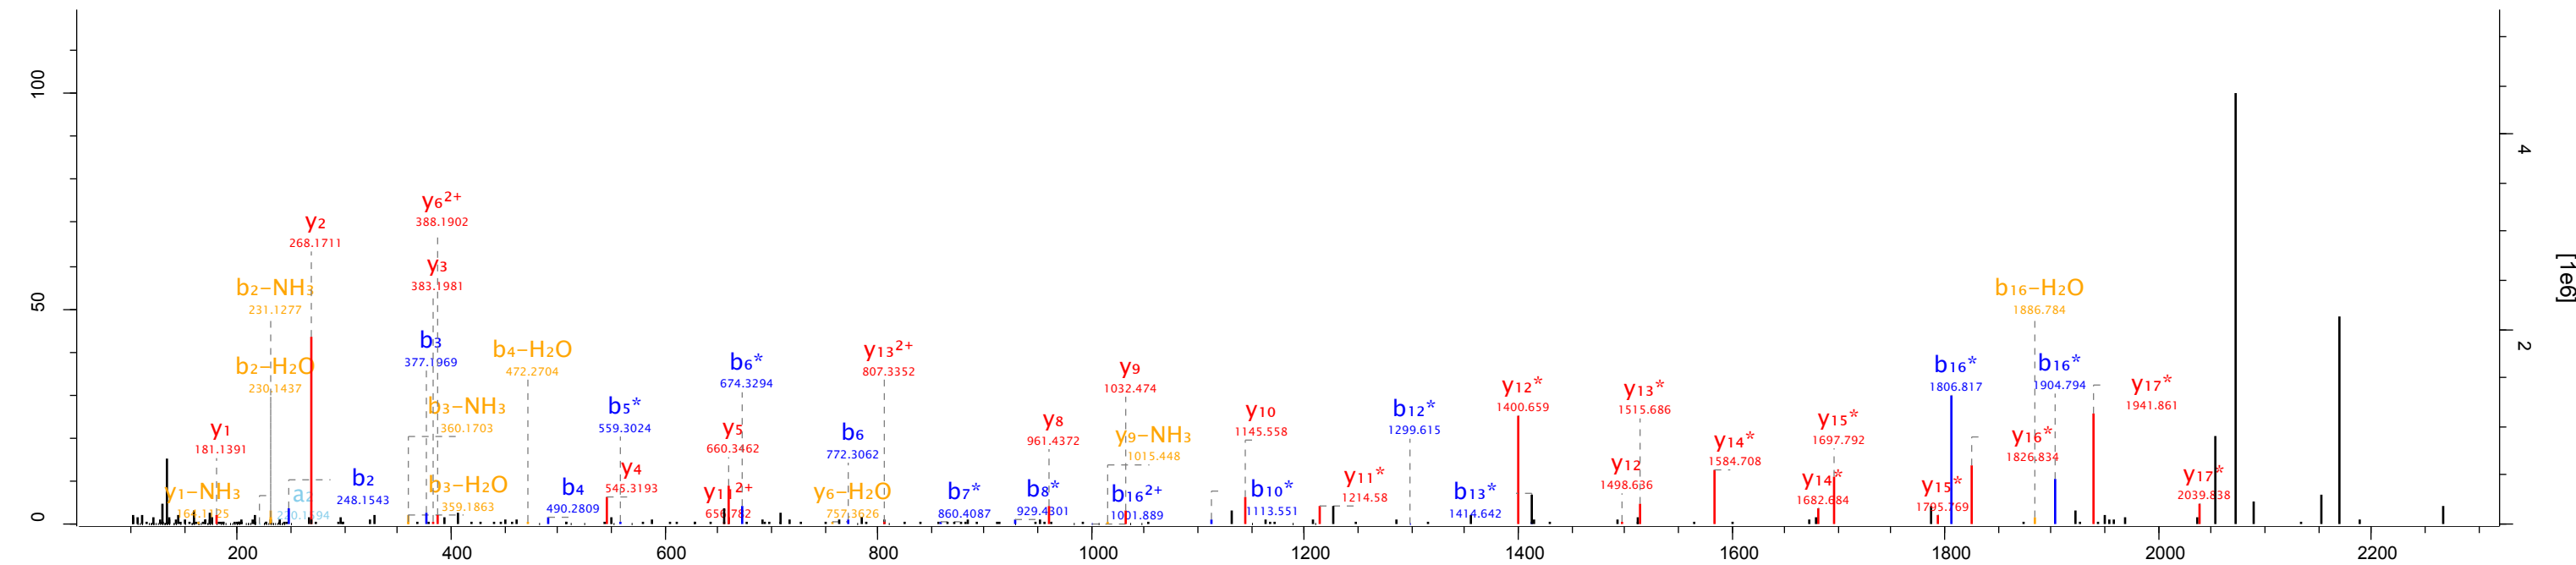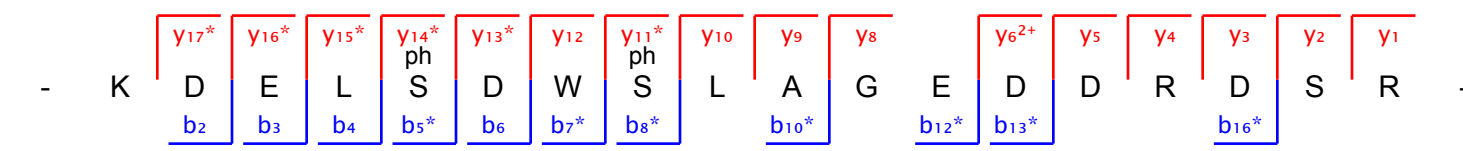

Raw file: 20150814\_A375SR\_Phospho\_BR2\_03  
 Scan: 16612 Method: FTMS; HCD Score: 137.52 m/z: 744.32 Gene names: ARHGEF11

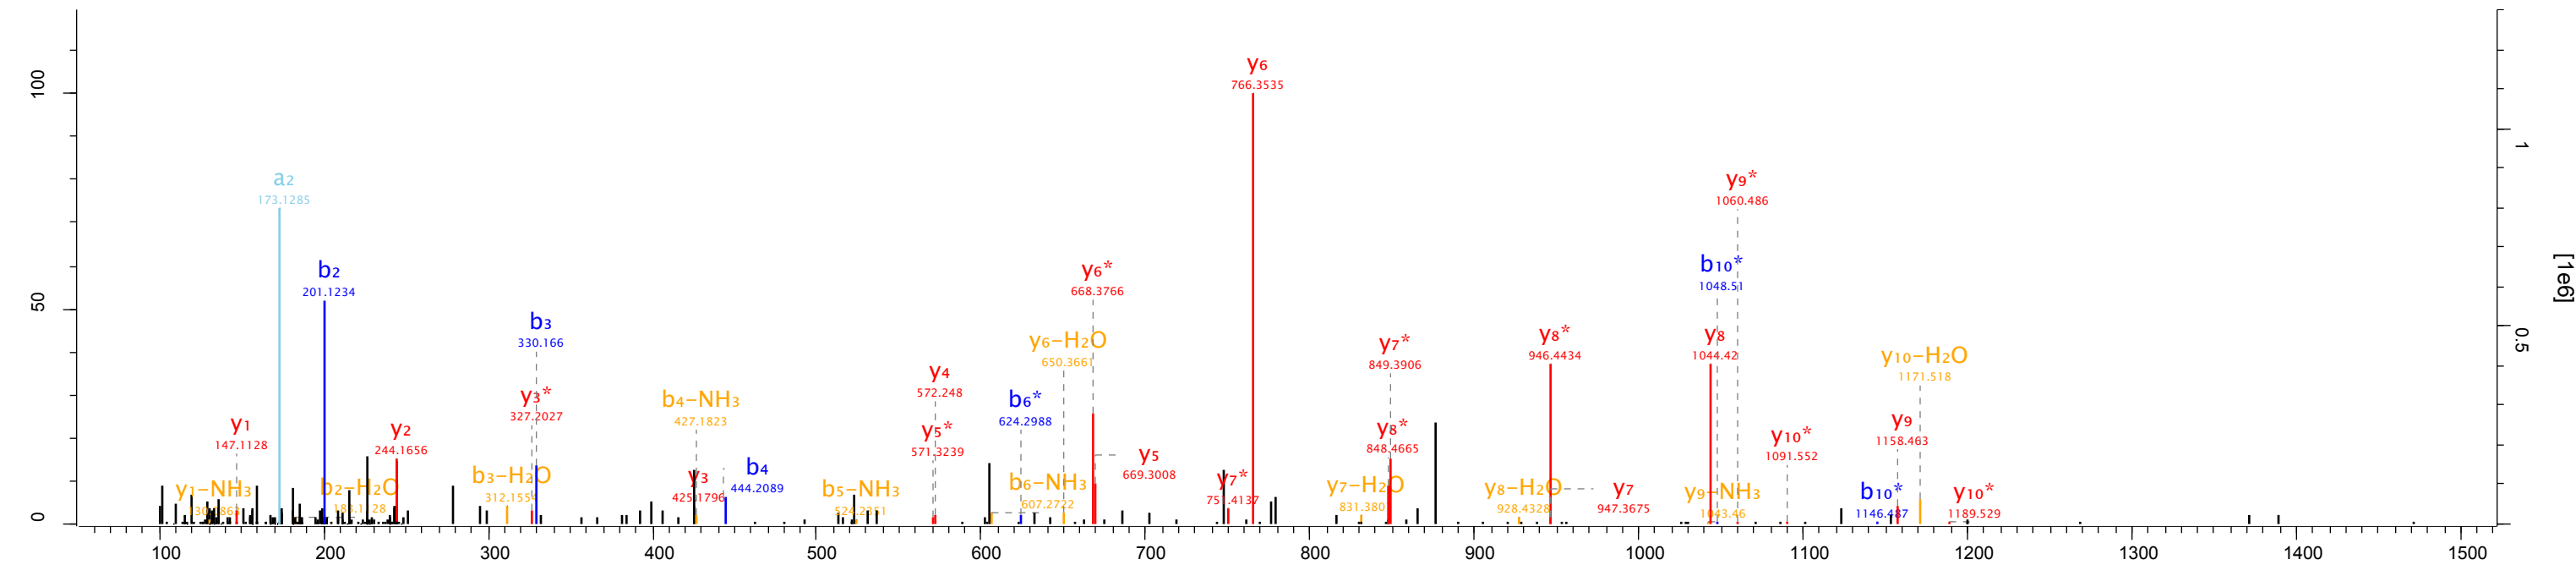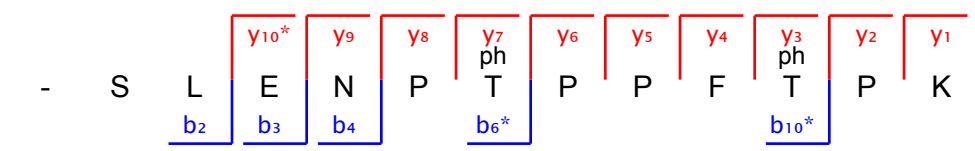

Raw file: 20150814\_A375SR\_Phospho\_BR2\_03  
 Scan: 16982 Method: FTMS; HCD Score: 205.58 m/z: 948.76 Gene names: UBA1

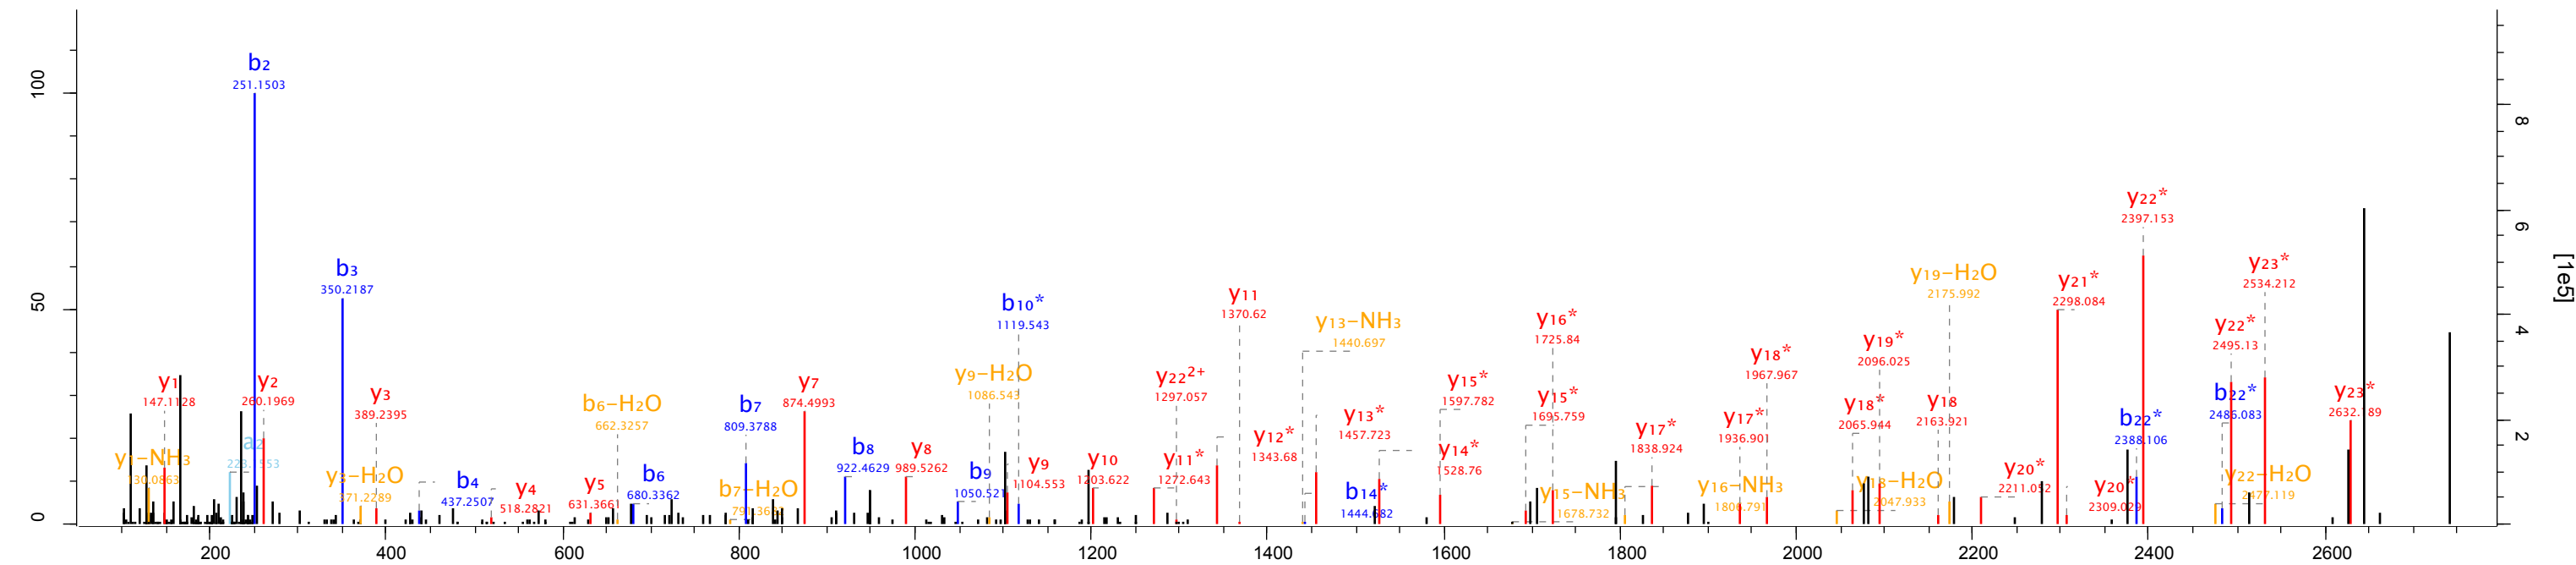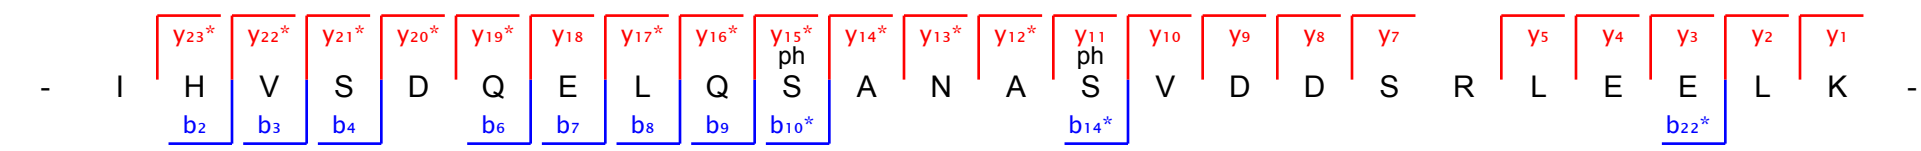

Raw file 20150814\_A375SR\_Phospho\_BR2\_03 Scan 17222 Method FTMS; HCD Score 71.43 m/z 852.86 Gene names RTKN

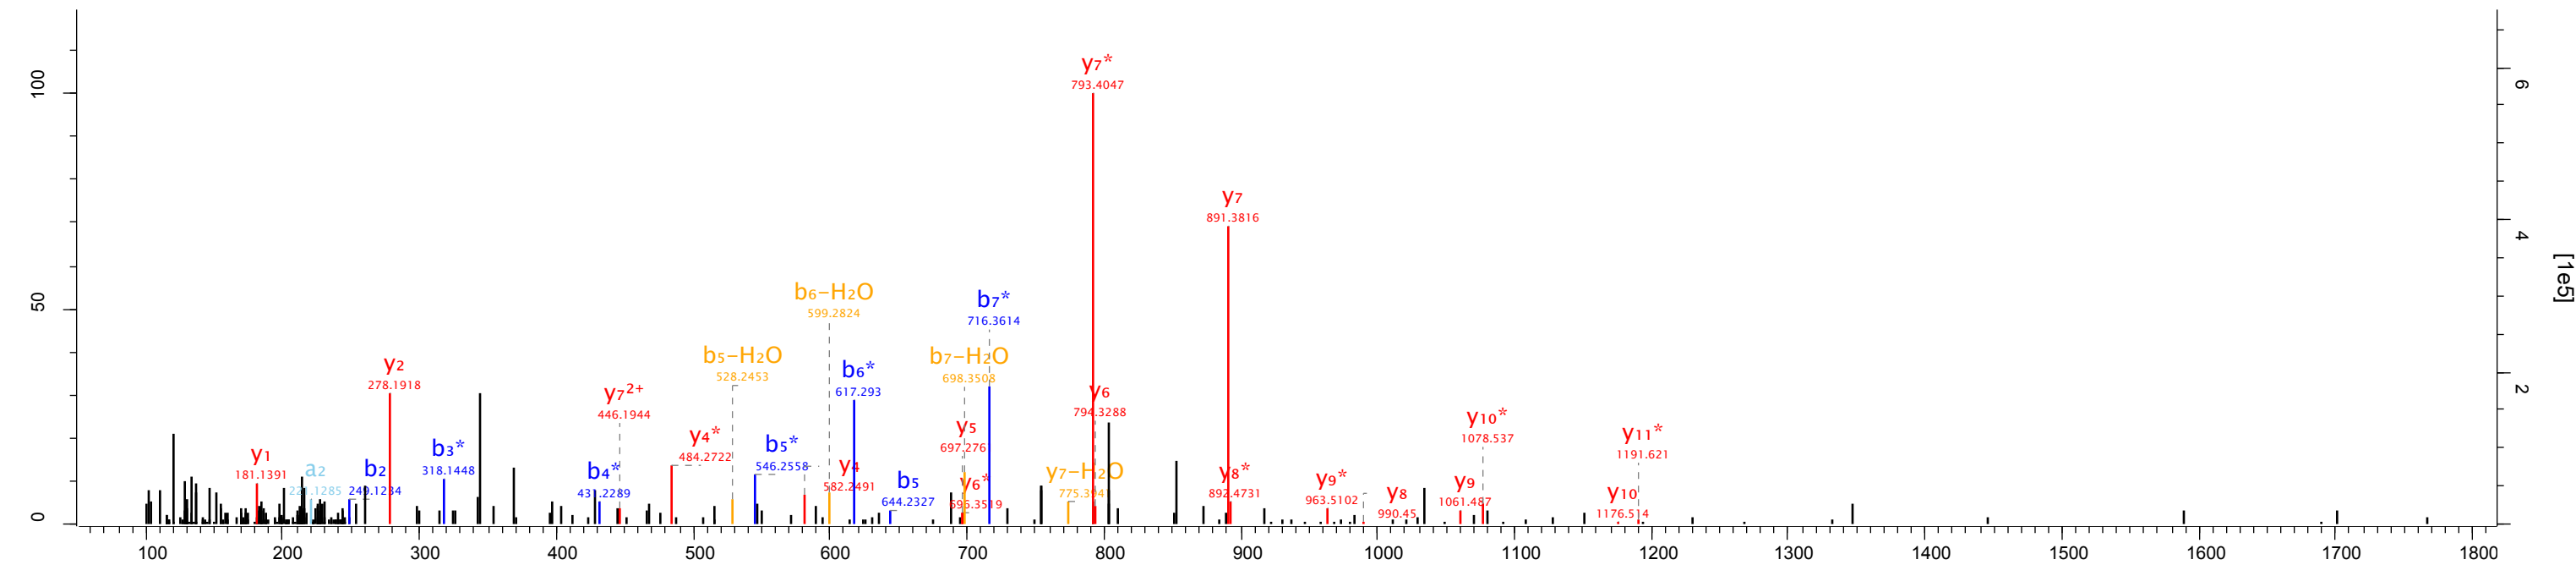

- T F S ph L D A V P P D H S P R -

Fragmentation labels below the sequence:

- b<sub>2</sub> (under F)
- b<sub>3</sub><sup>\*</sup> (under S)
- b<sub>4</sub><sup>\*</sup> (under L)
- b<sub>5</sub> (under D)
- b<sub>6</sub><sup>\*</sup> (under A)
- b<sub>7</sub><sup>\*</sup> (under V)
- y<sub>1</sub> (under R)
- y<sub>2</sub> (under P)
- y<sub>4</sub> (under H)
- y<sub>5</sub> (under D)
- y<sub>6</sub> (under P)
- y<sub>7</sub> (under P)
- y<sub>8</sub> (under V)
- y<sub>9</sub> (under A)
- y<sub>10</sub> (under D)
- y<sub>11</sub><sup>\*</sup> (under L)



Raw file: 20150814\_A375SR\_Phospho\_BR2\_03  
 Scan: 1772 Method: FTMS; HCD Score: 96.09 m/z: 615.28 Gene names: SRRM1

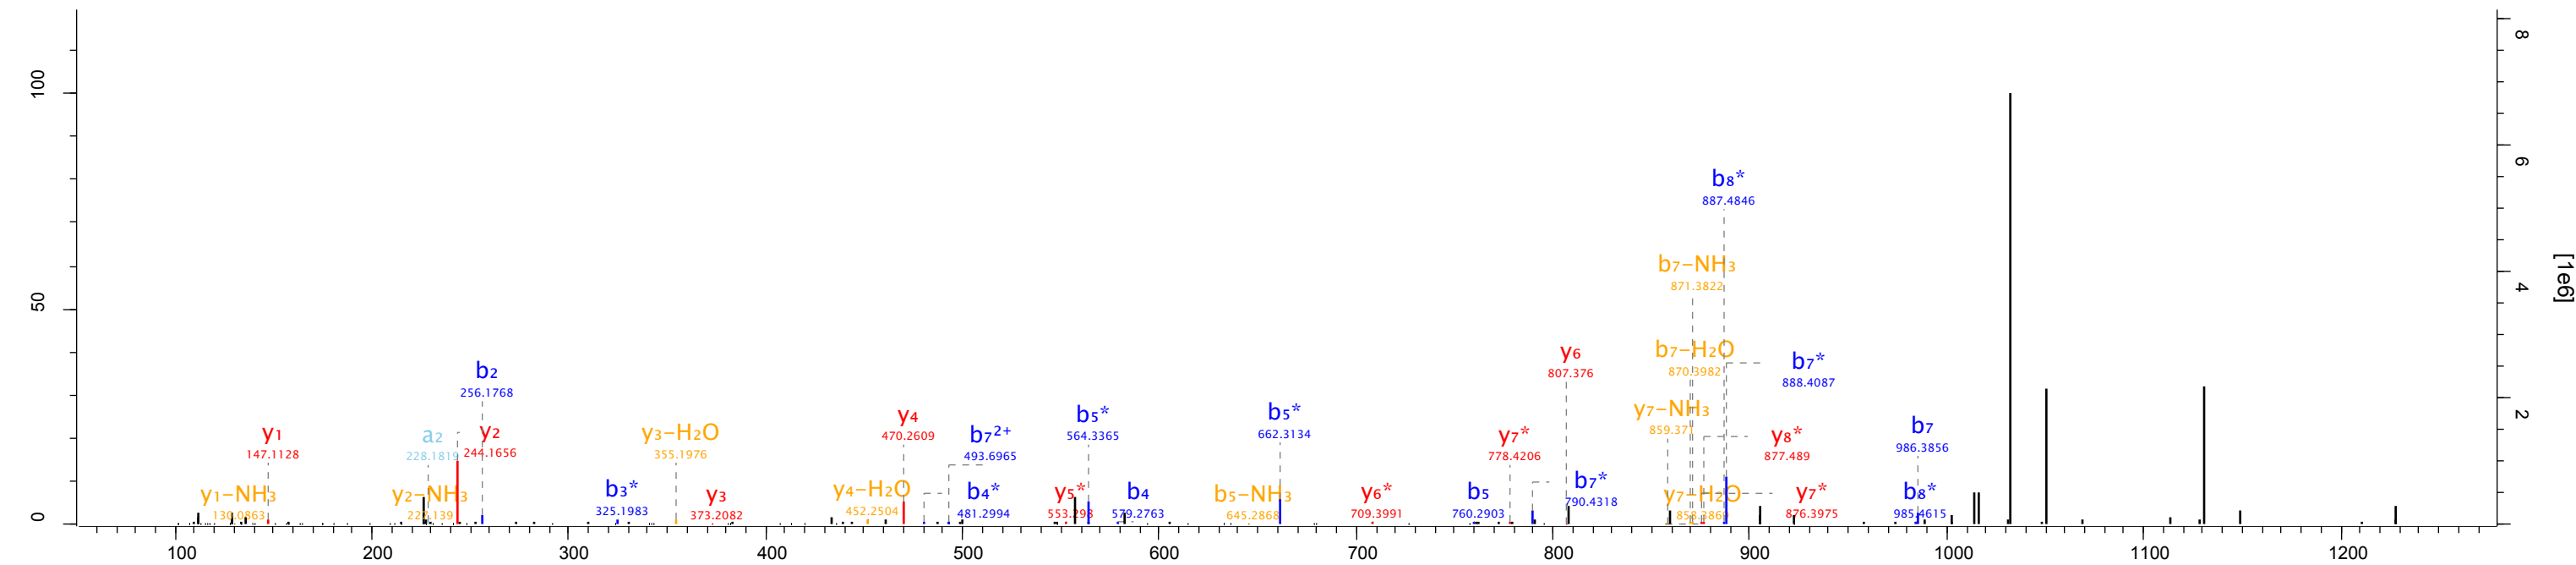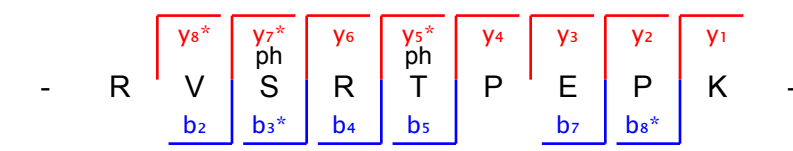

Raw file 20150814\_A375SR\_Phospho\_BR2\_03 Scan 17962 Method FTMS; HCD Score 105.68 m/z 1089.19 Gene names RC3H2

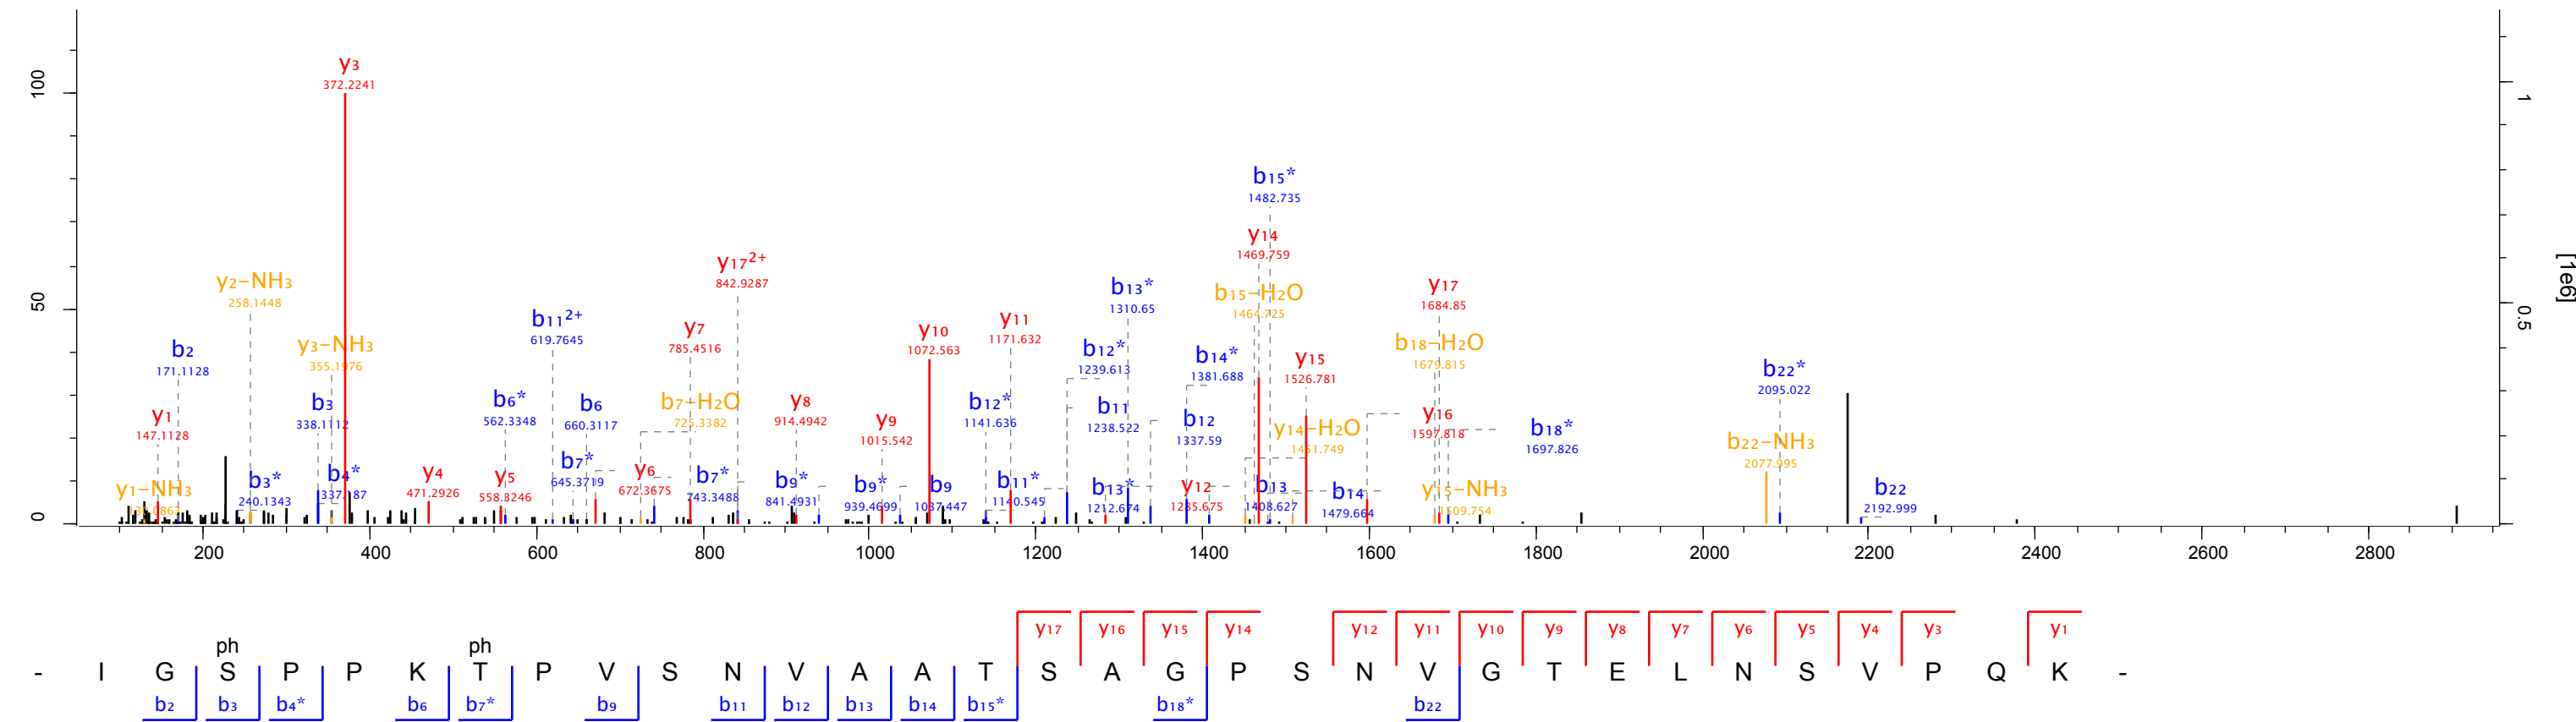

Raw file: 20150814\_A375SR\_Phospho\_BR2\_03  
 Scan: 18152 Method: FTMS; HCD Score: 47.21 m/z: 675.99 Gene names: ZBTB21

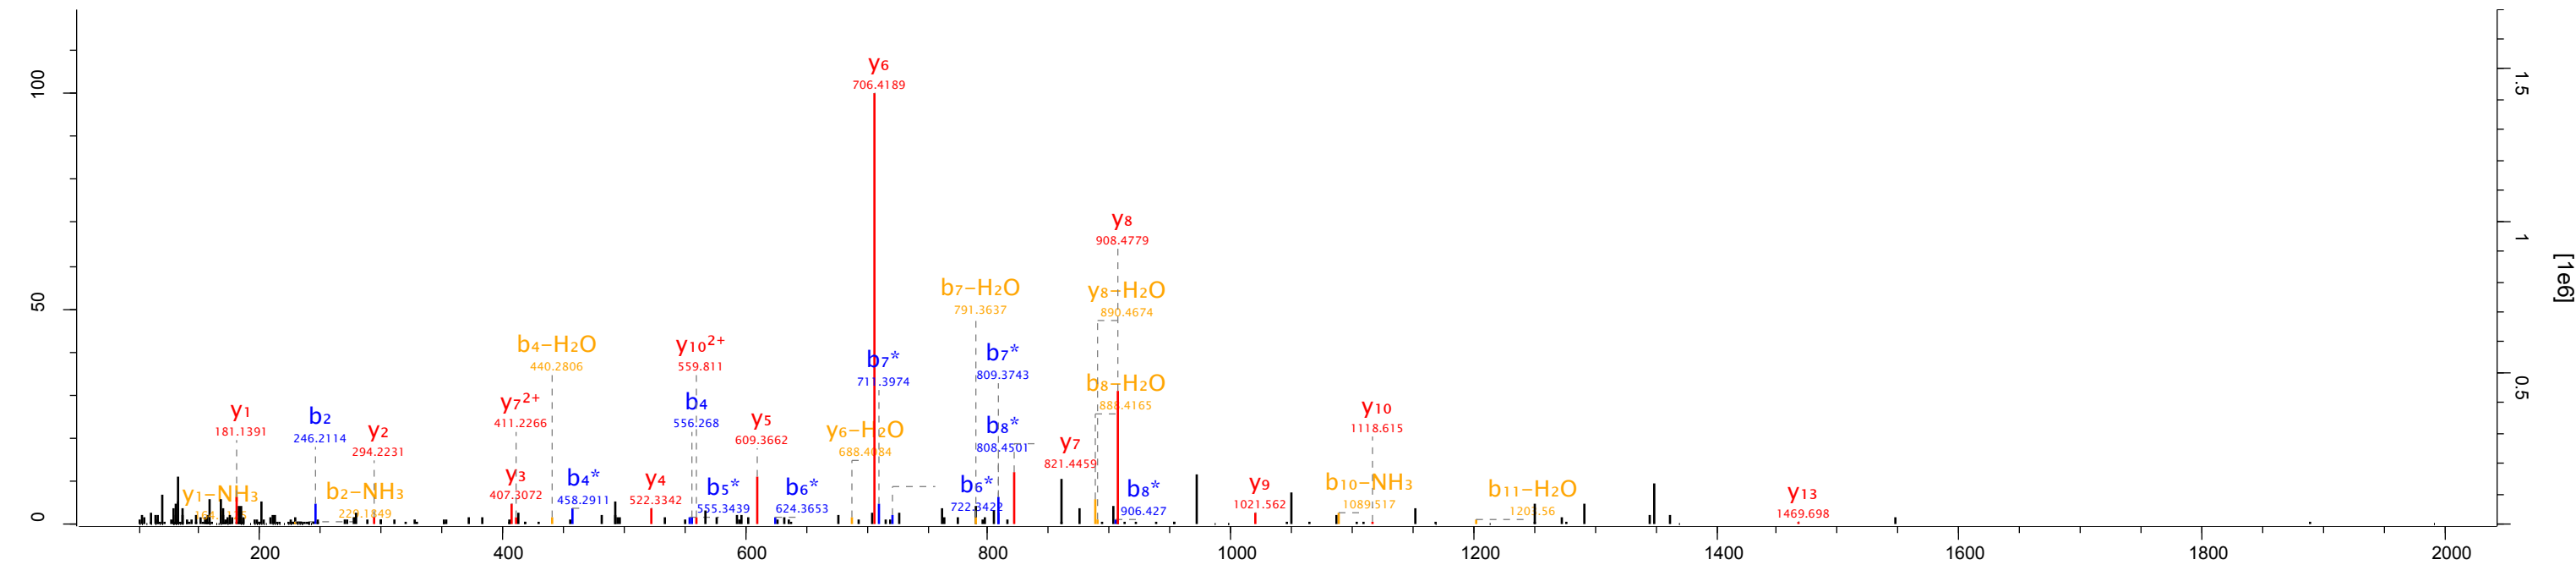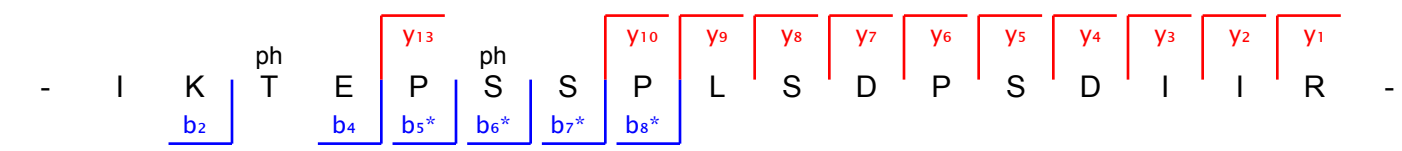

Raw file: 20150814\_A375SR\_Phospho\_BR2\_03  
 Scan: 18192 Method: FTMS; HCD Score: 96.9 m/z: 971.04 Gene names: KDM1A

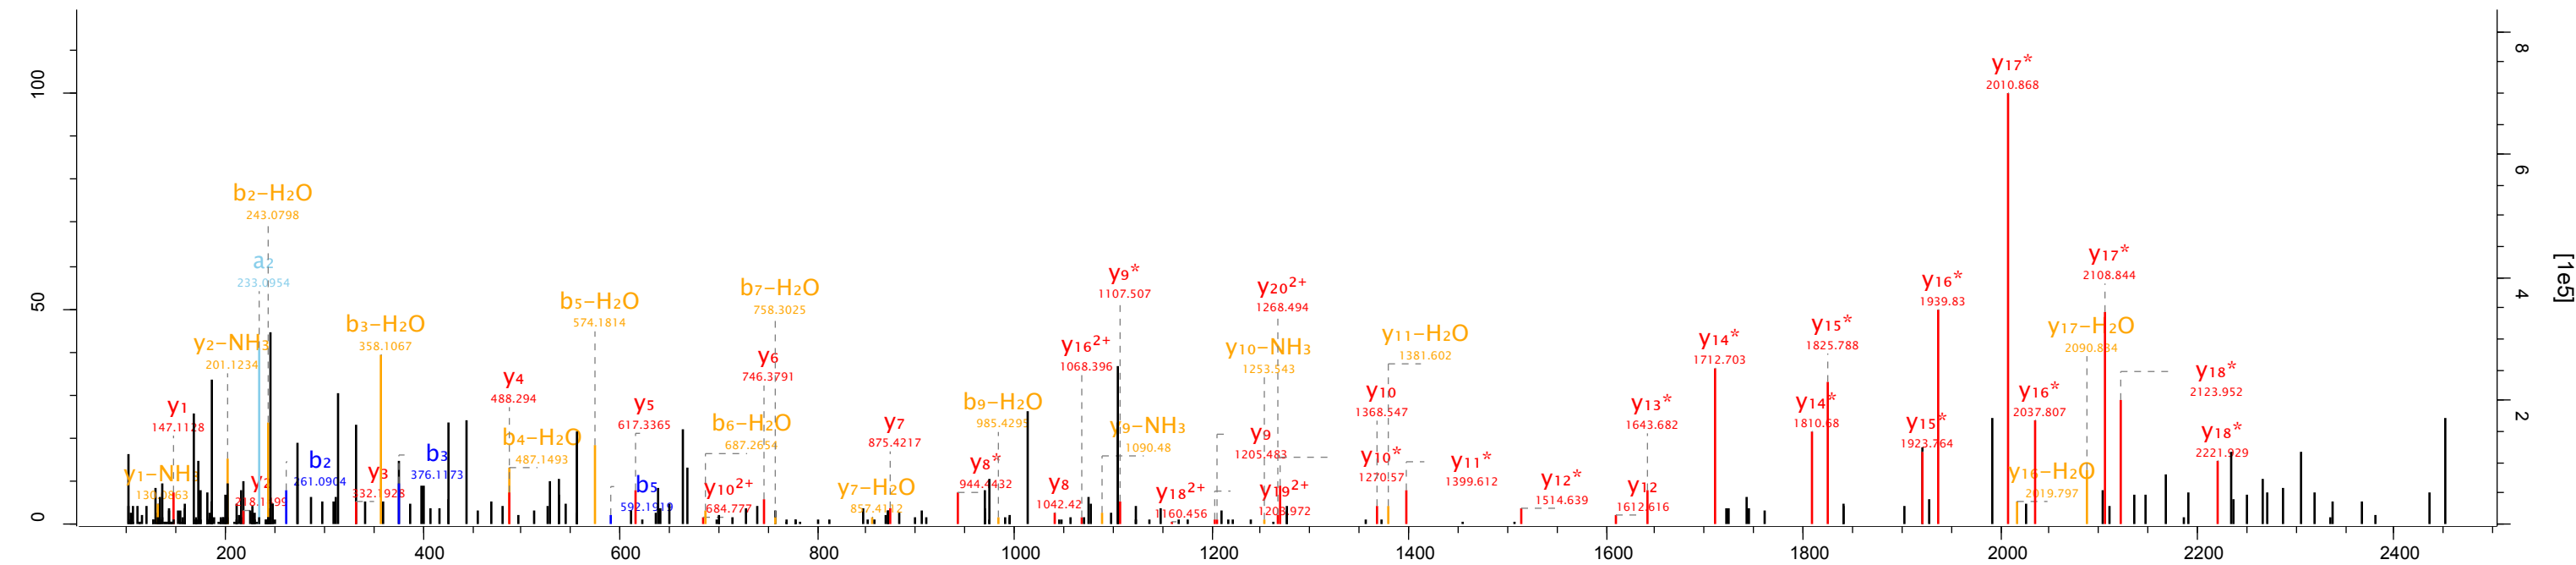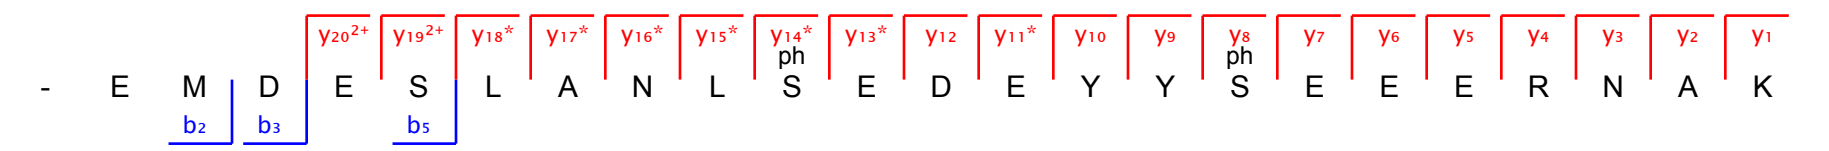

Raw file: 20150814\_A375SR\_Phospho\_BR2\_03  
 Scan: 18282 Method: FTMS; HCD Score: 123.25 m/z: 1007.46 Gene names: SOX10

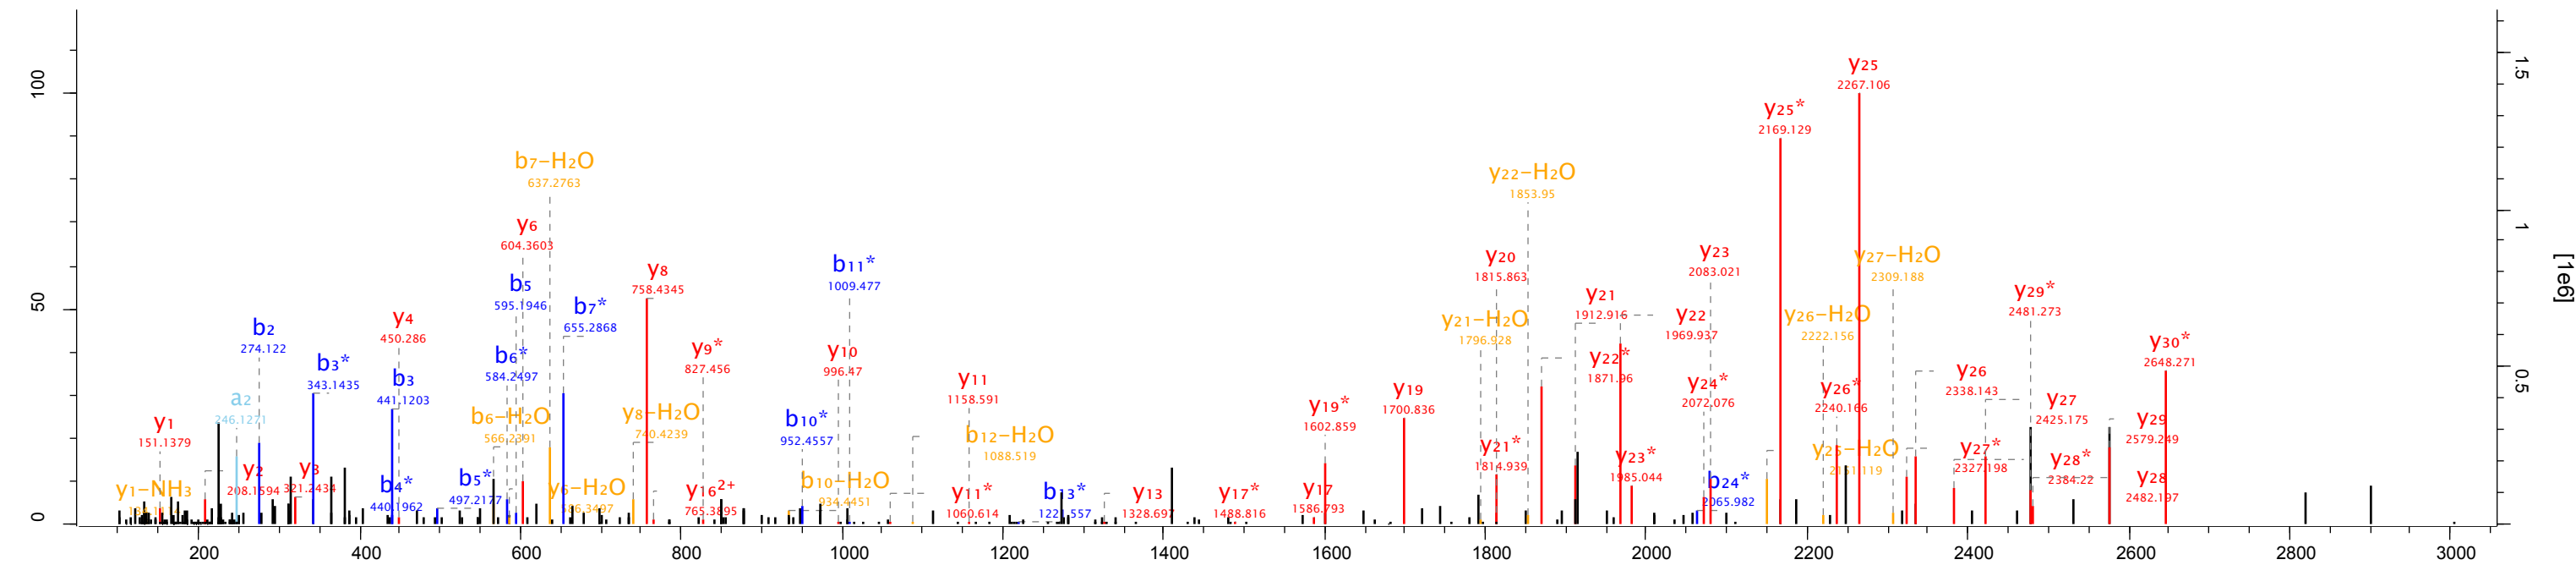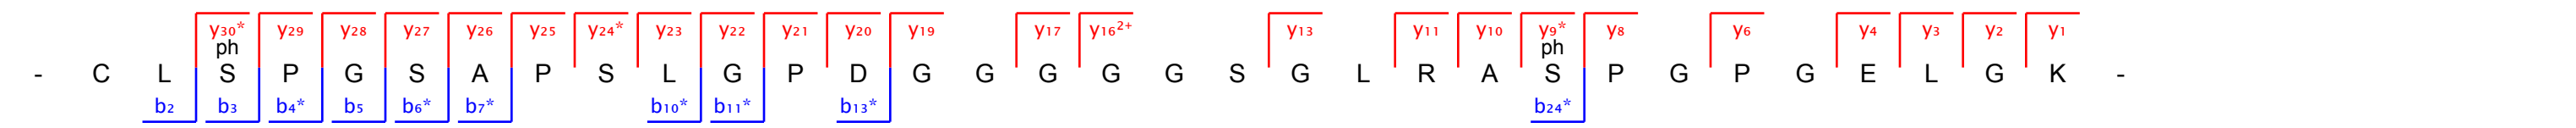

Raw file Scan Method Score m/z Gene names  
 20150814\_A375SR\_Phospho\_BR2\_03 18452 FTMS; HCD 108.23 994.07 FOXN3

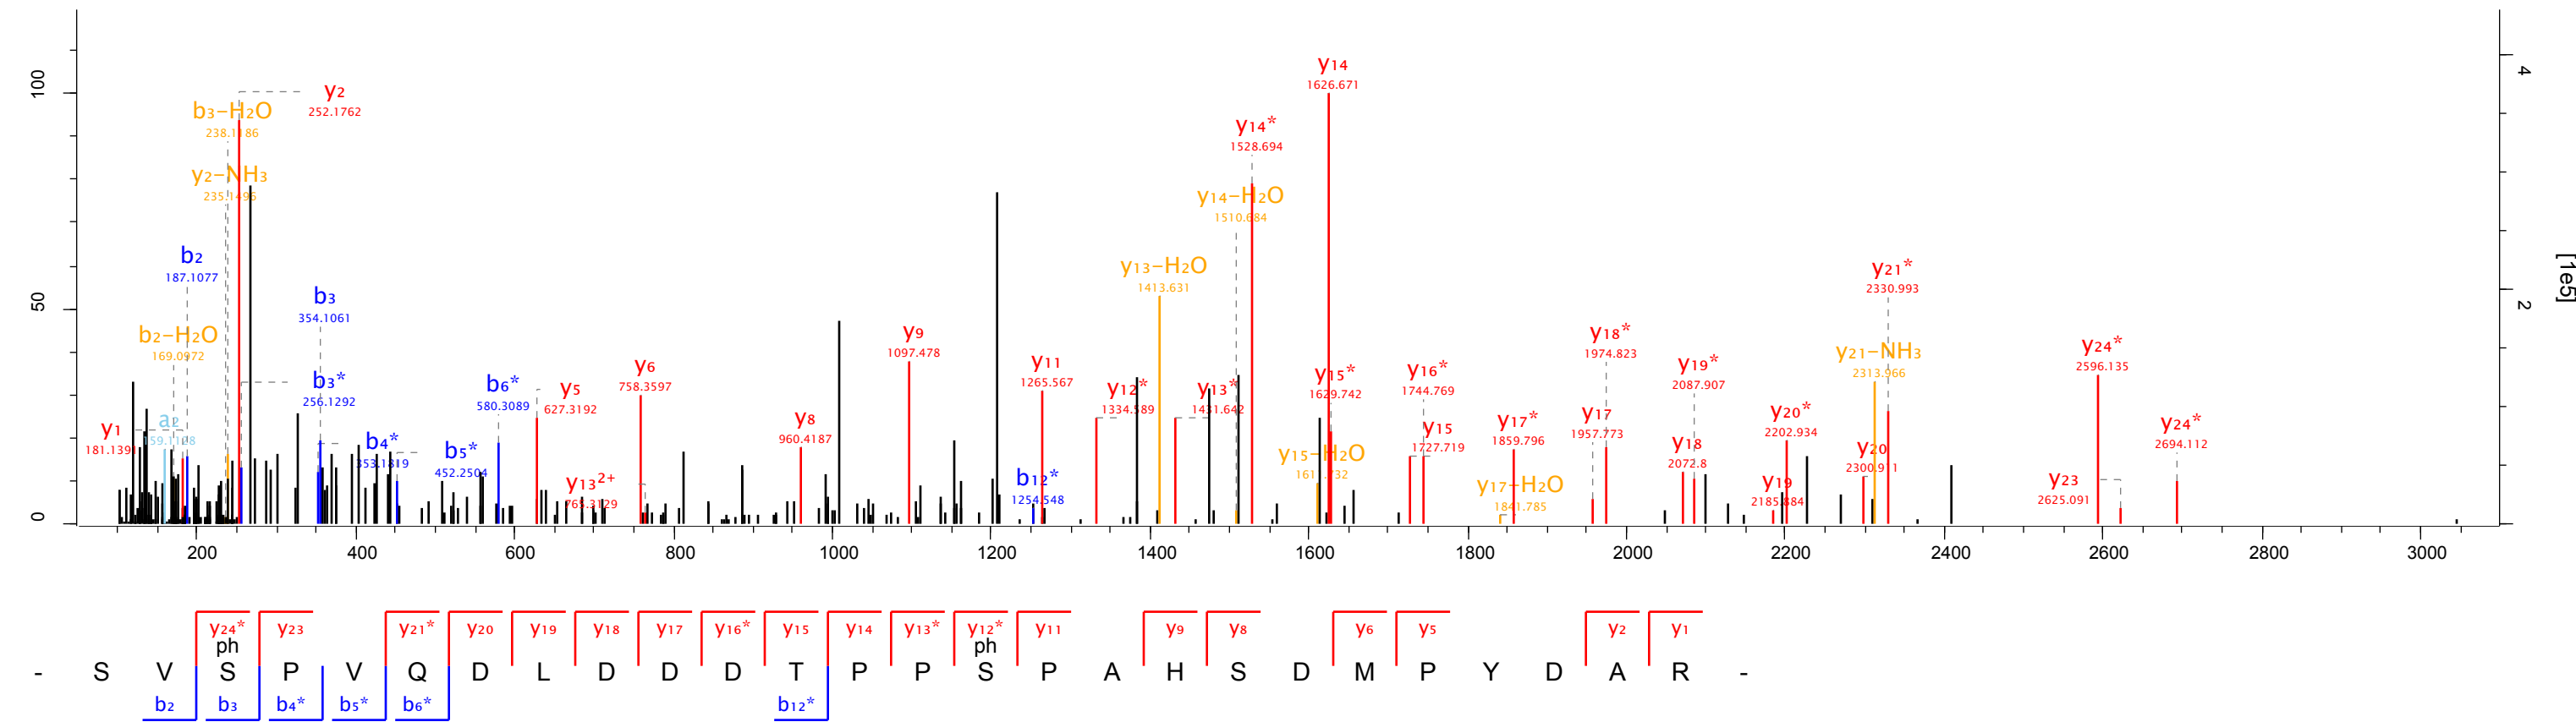

Raw file: 20150814\_A375SR\_Phospho\_BR2\_03  
 Scan: 18572 Method: FTMS; HCD Score: 76.31 m/z: 710.34 Gene names: DVL1P1;DVL1

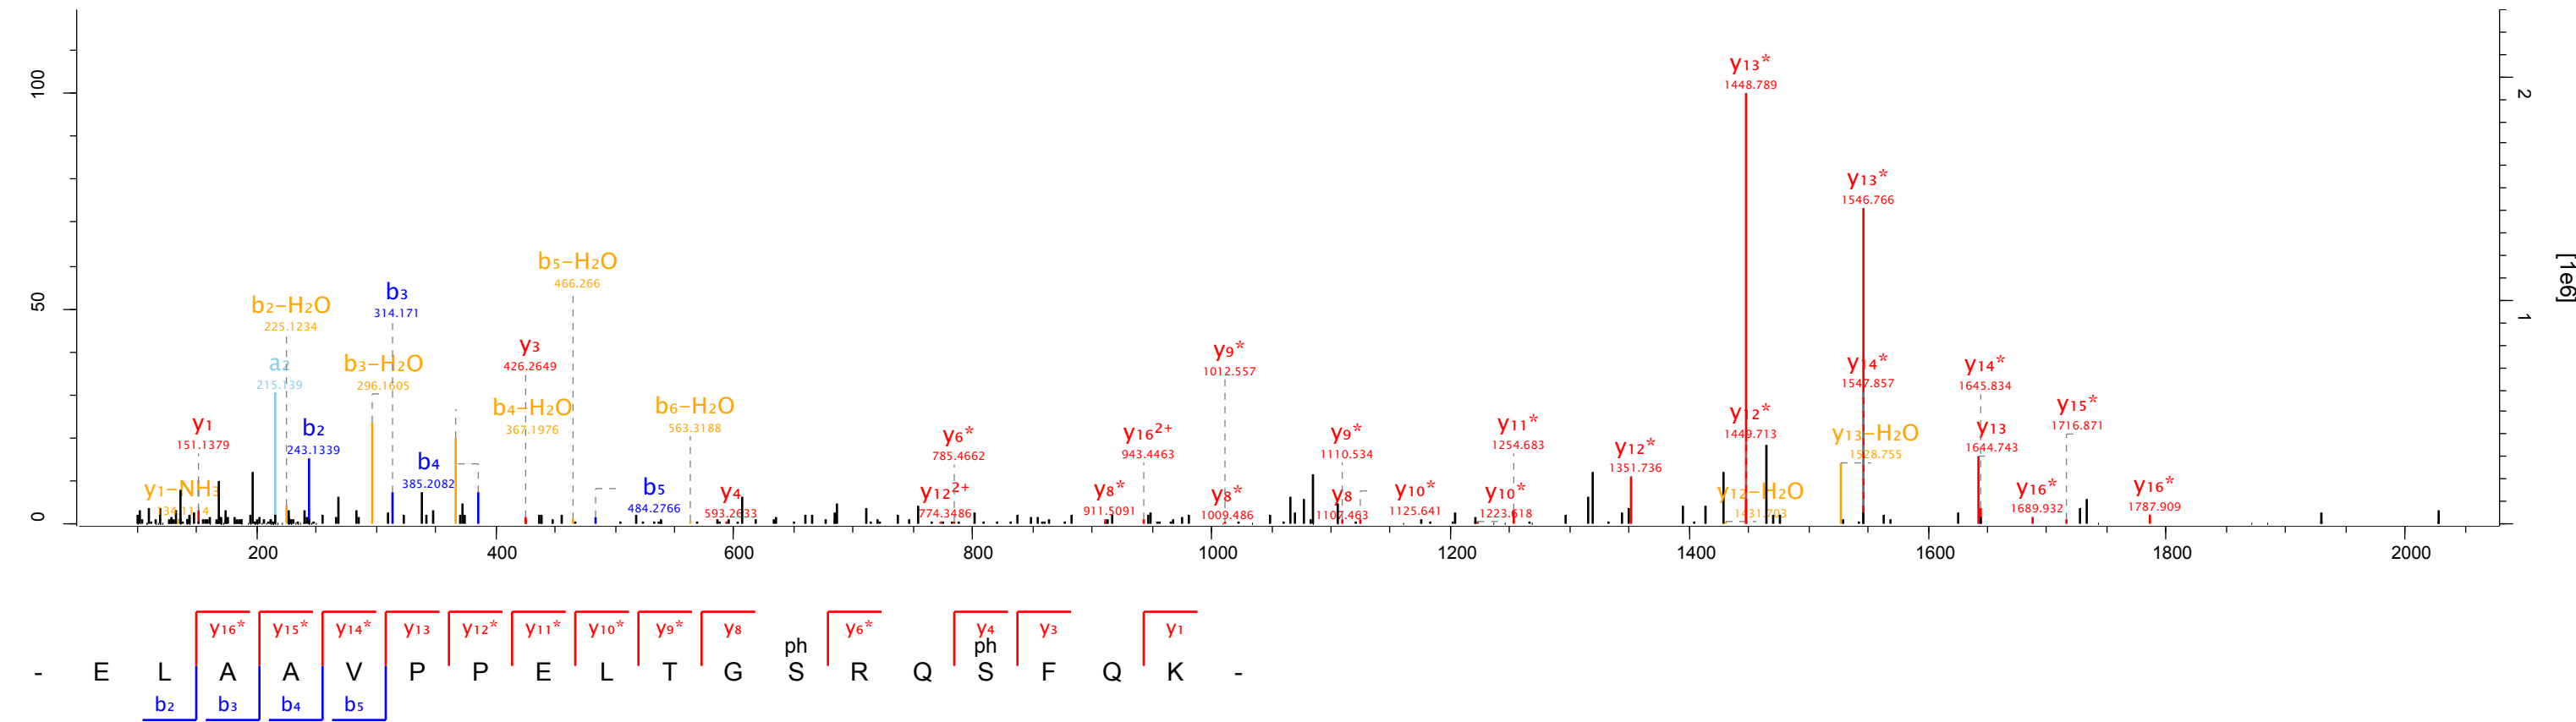

Raw file 20150814\_A375SR\_Phospho\_BR2\_03 Scan 18632 Method FTMS; HCD Score 83.86 m/z 670.32 Gene names NOTCH2

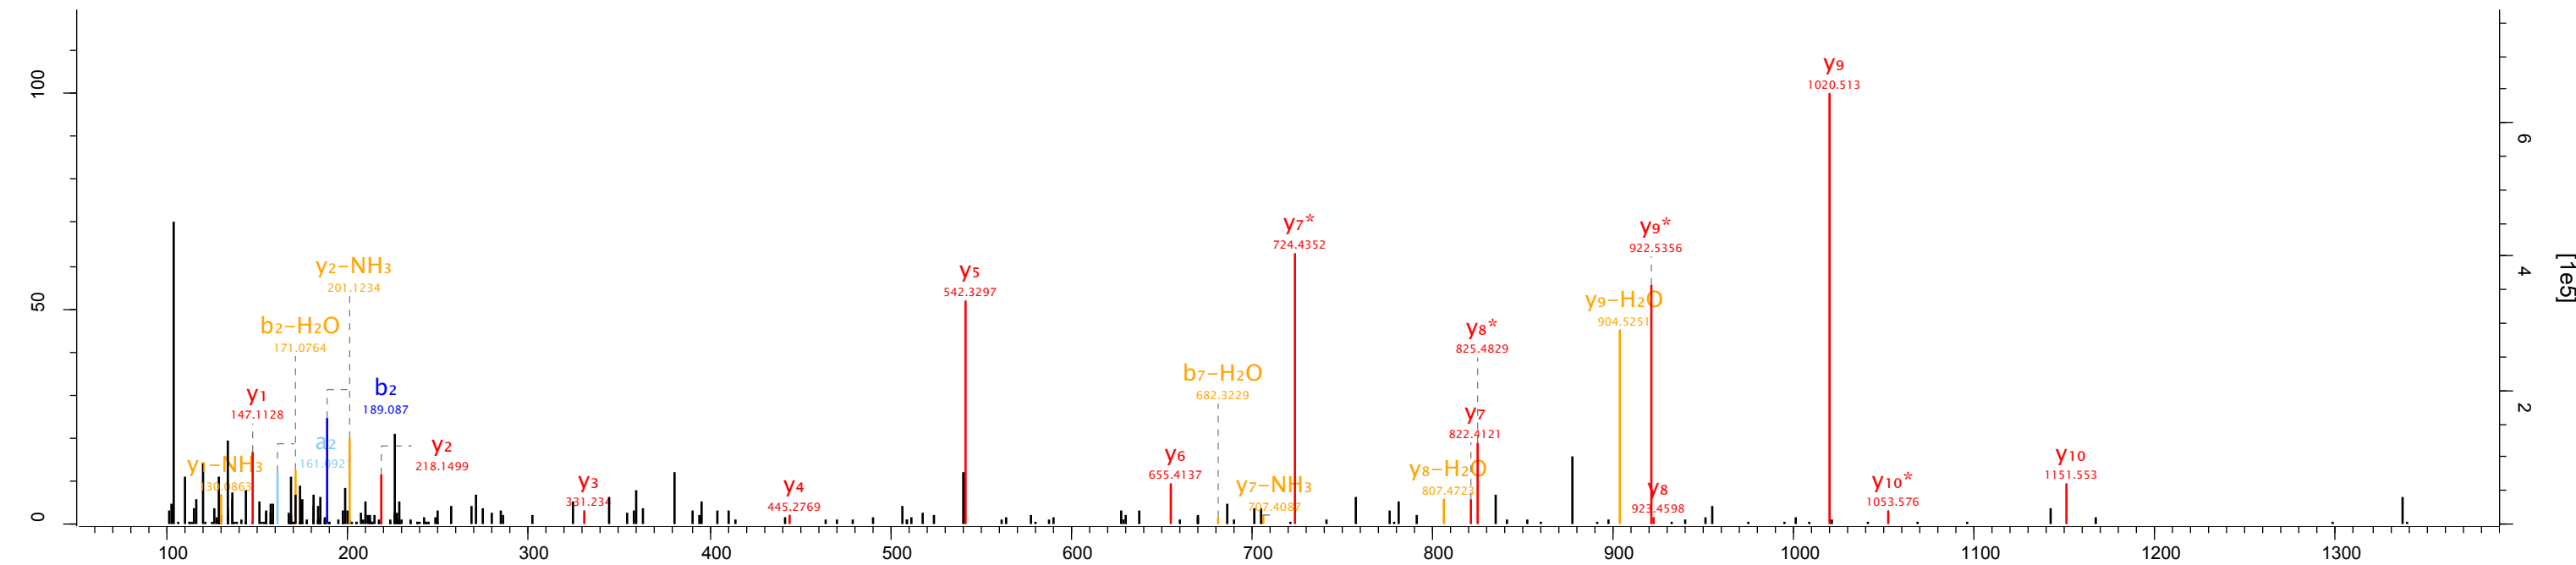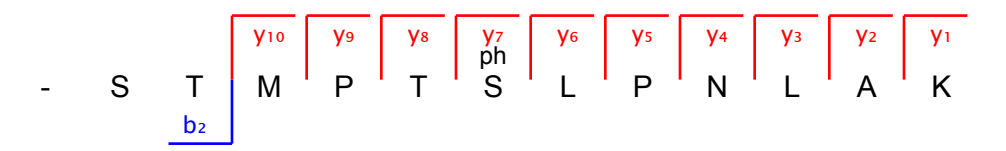



Raw file: 20150814\_A375SR\_Phospho\_BR2\_03  
 Scan: 18702 Method: FTMS; HCD Score: 110.38 m/z: 670.63 Gene names: ZDHHC5

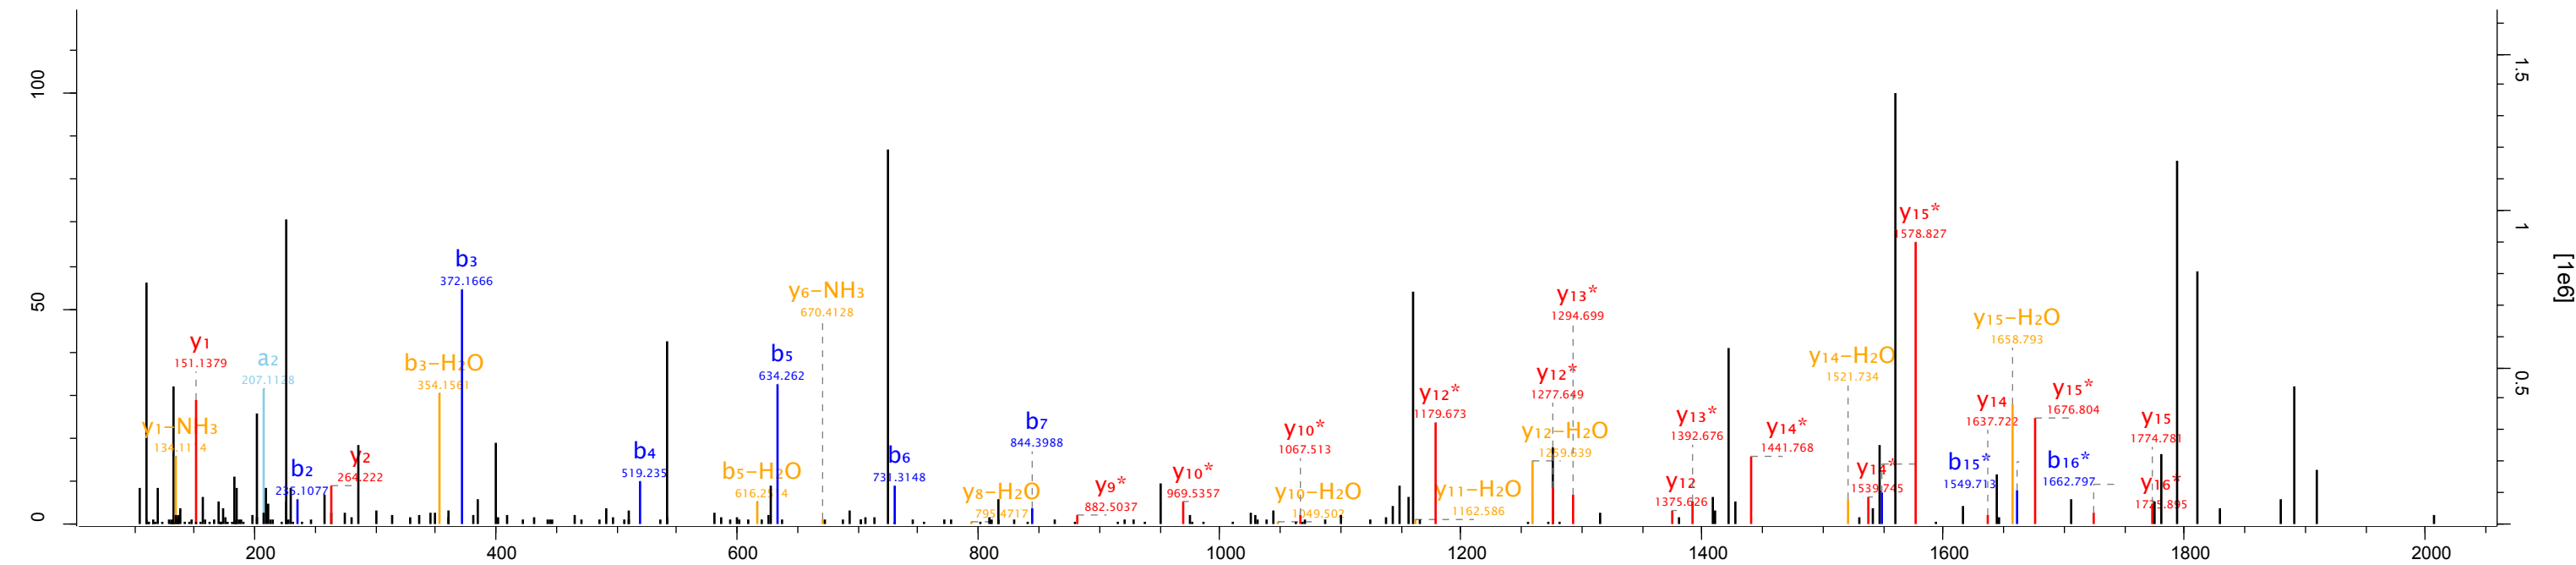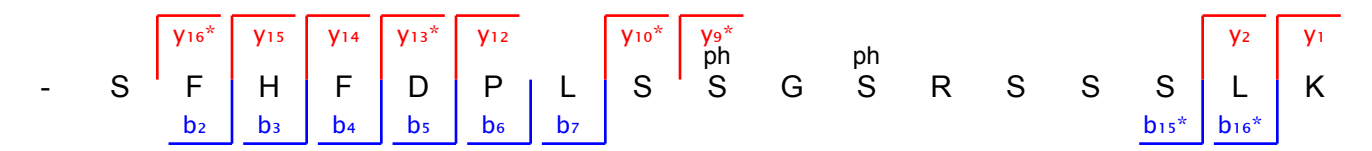

Raw file: 20150814\_A375SR\_Phospho\_BR2\_03  
 Scan: 18762 Method: FTMS; HCD Score: 180.1 m/z: 757.3 Gene names: TMF1

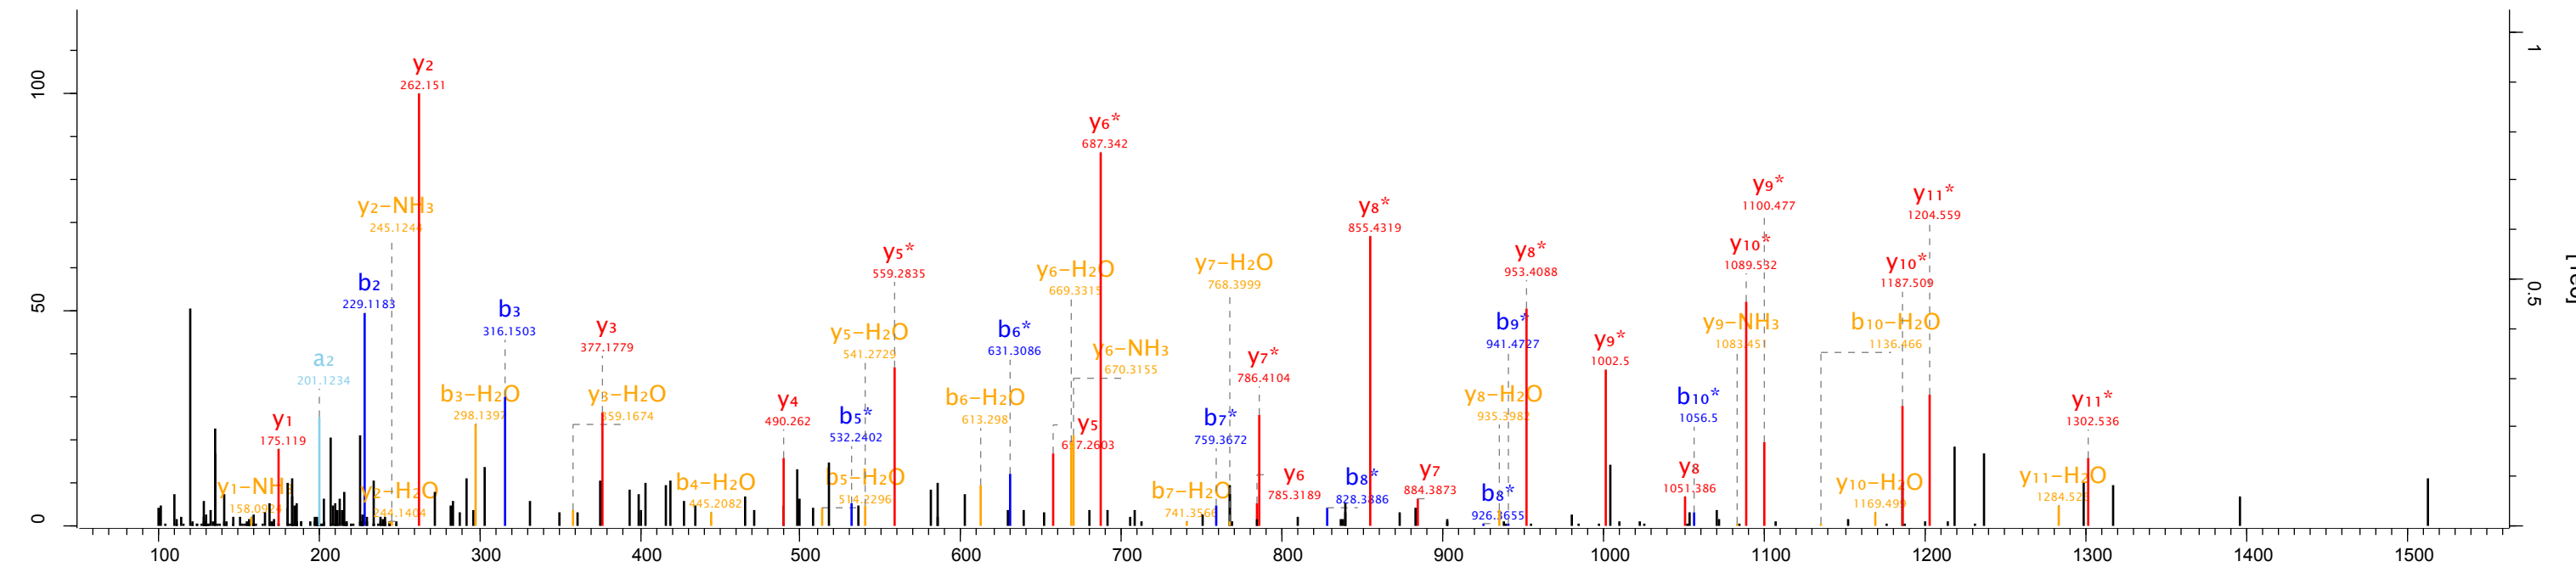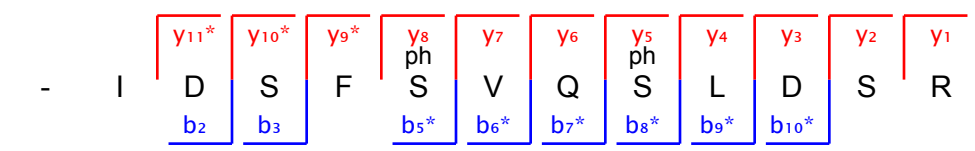

Raw file Scan Method Score m/z Gene names  
 20150814\_A375SR\_Phospho\_BR2\_03 18772 FTMS; HCD 144.31 811.37 ANKRD13D

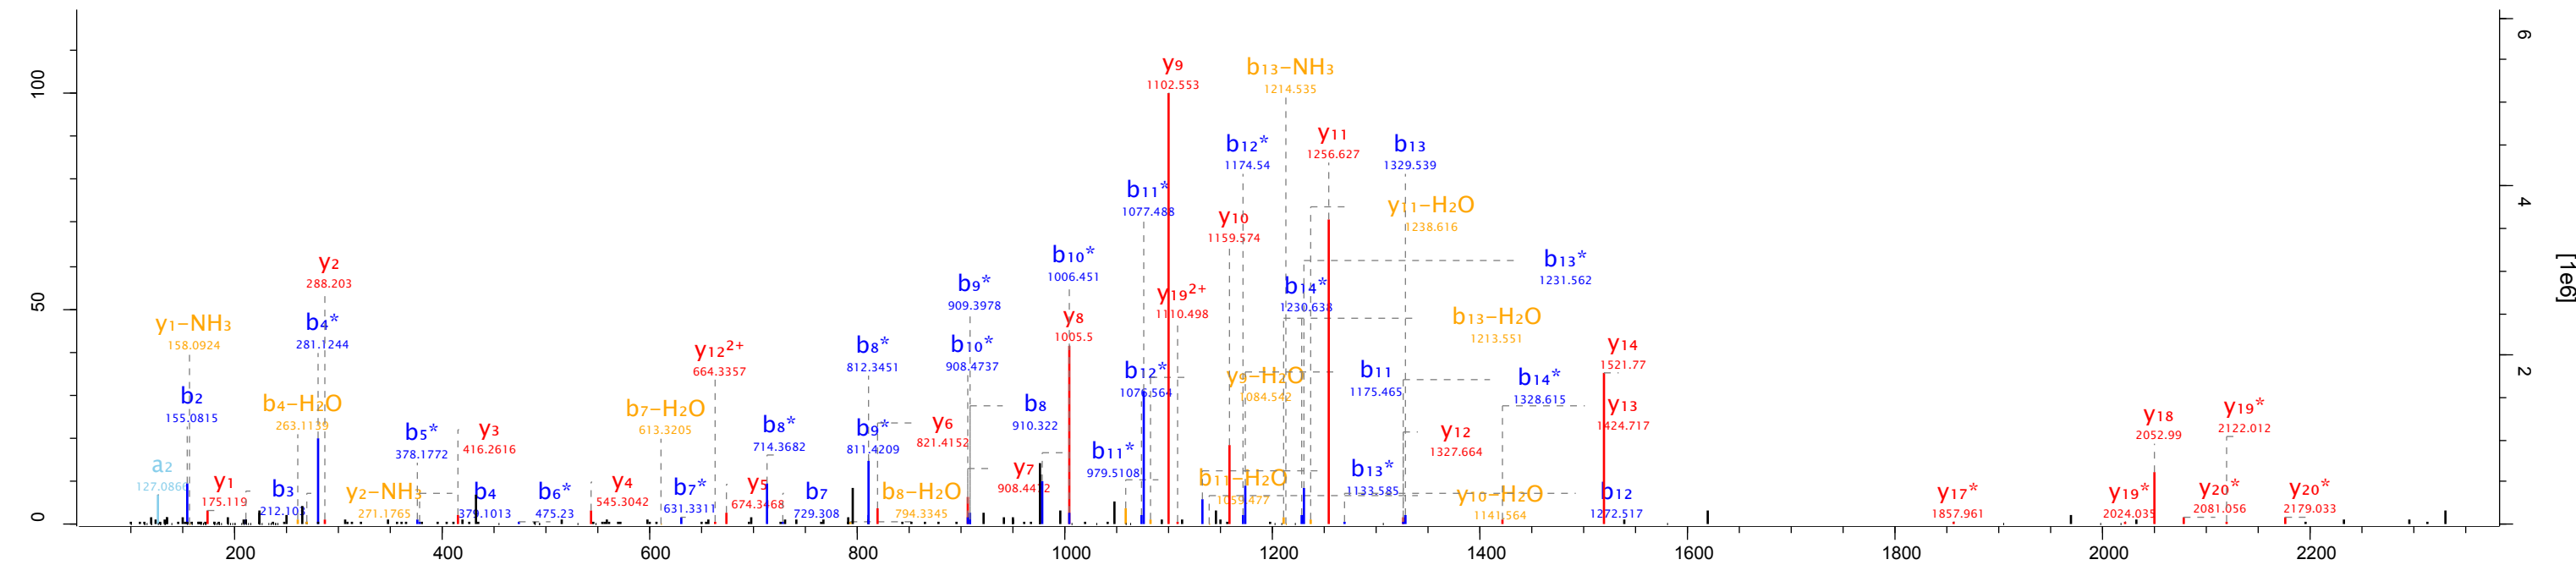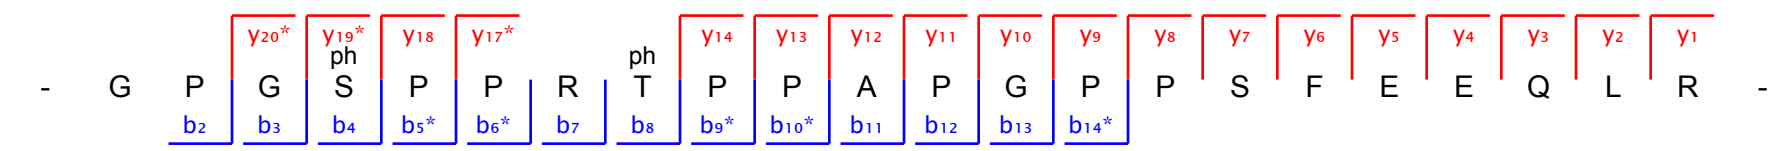

Raw file: 20150814\_A375SR\_Phospho\_BR2\_03  
 Scan: 18952 Method: FTMS; HCD Score: 157.33 m/z: 1187.85 Gene names: RANBP9

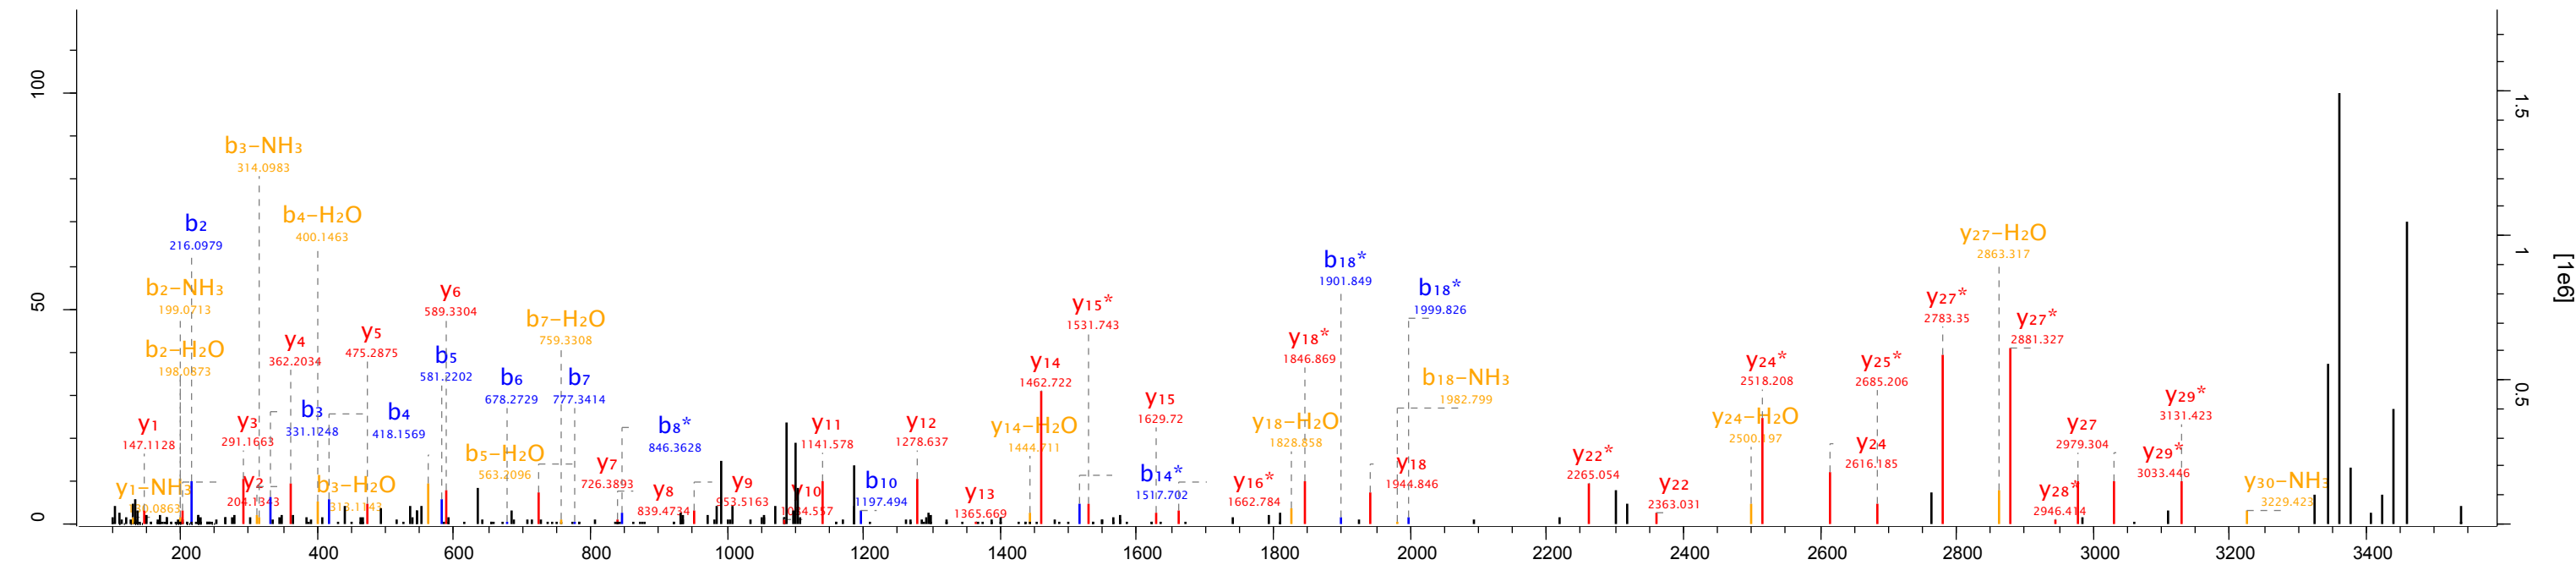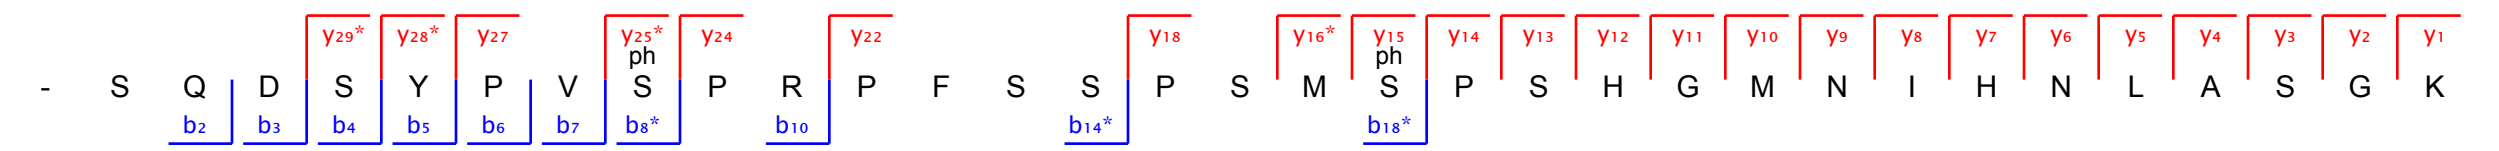

Raw file 20150814\_A375SR\_Phospho\_BR2\_03 Scan 18972 Method FTMS; HCD Score 317.66 m/z 1114 Gene names OSBPL3

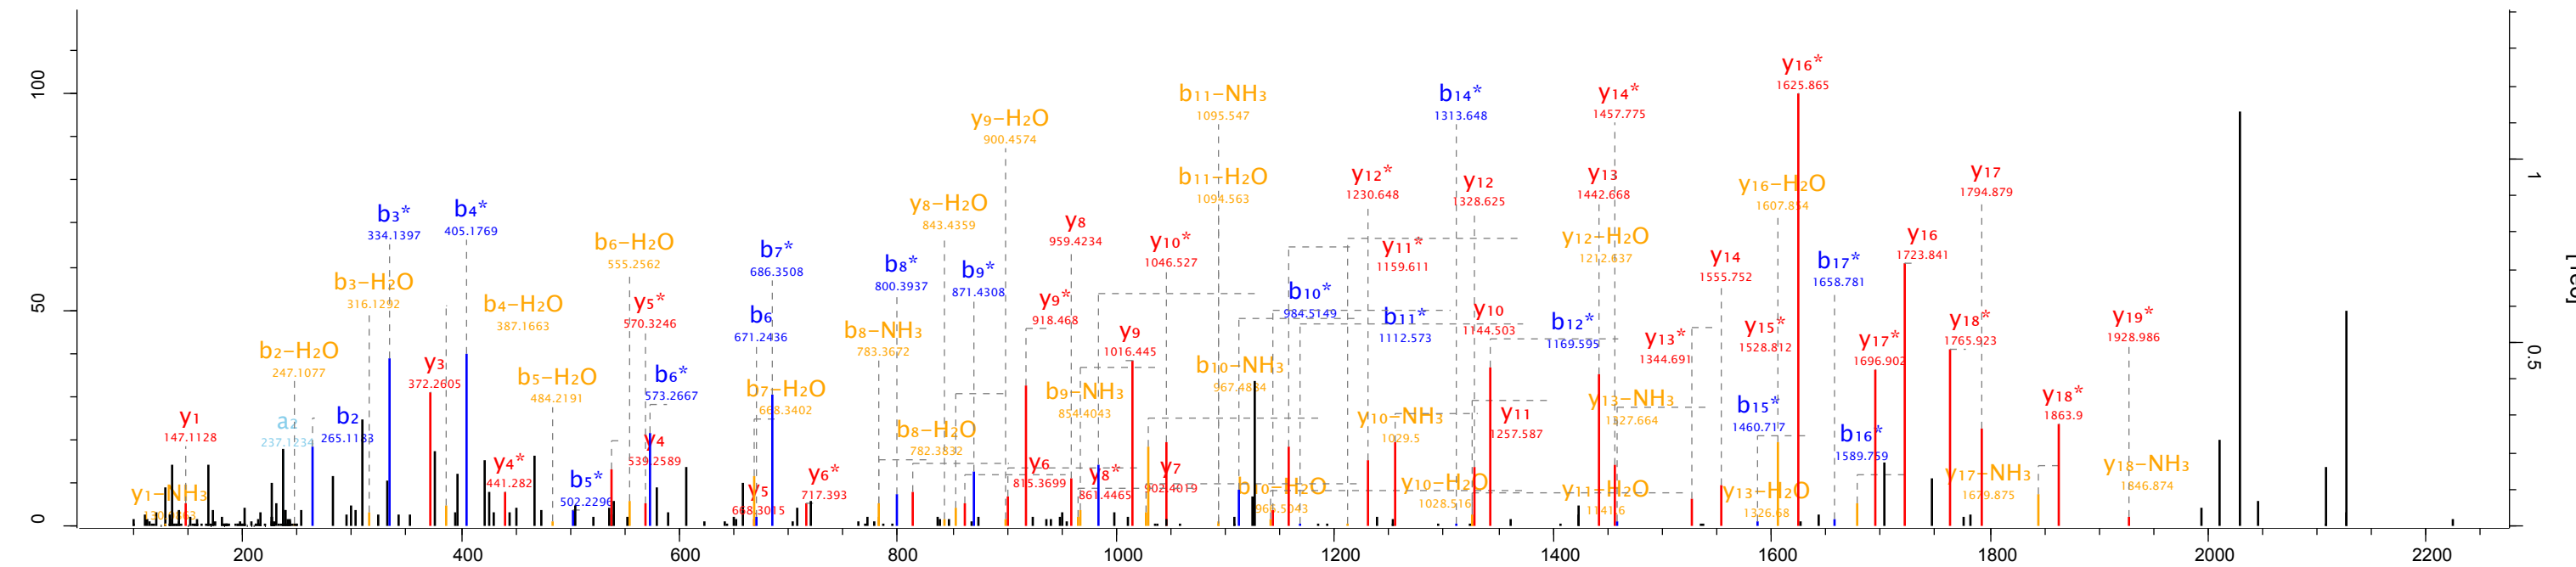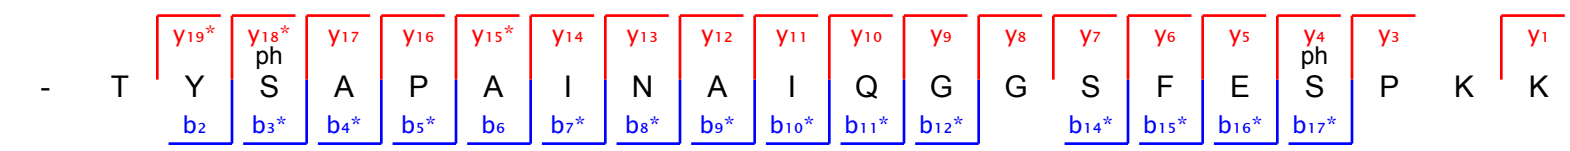

Raw file Scan Method Score m/z Gene names  
 20150814\_A375SR\_Phospho\_BR2\_03 18982 FTMS; HCD 169.06 730.79 CAMSAP2

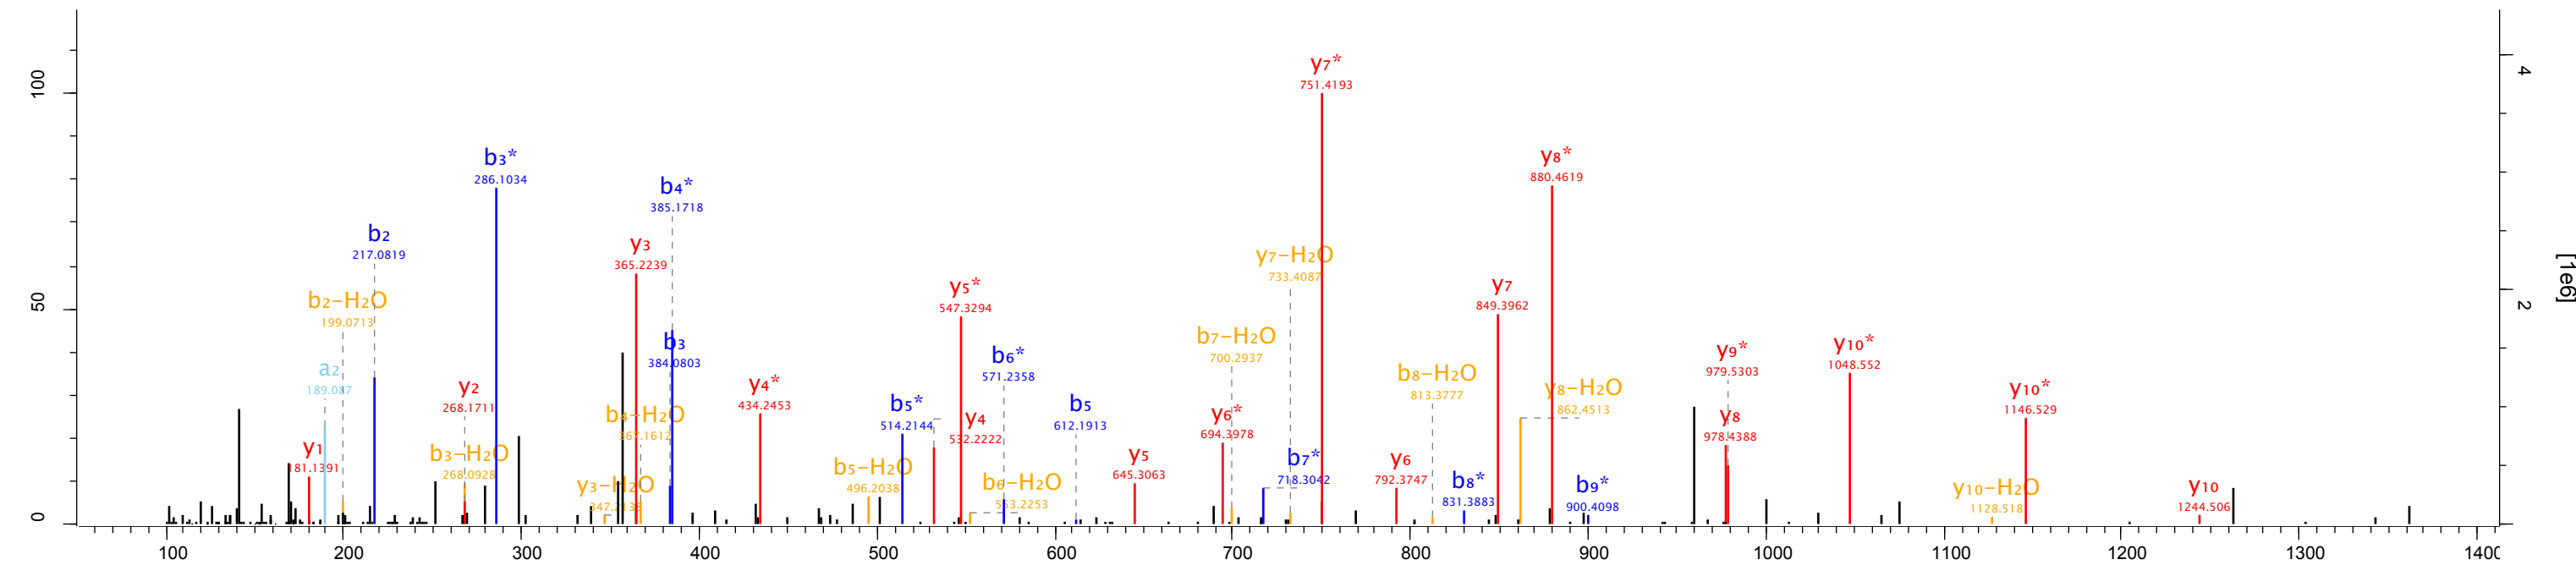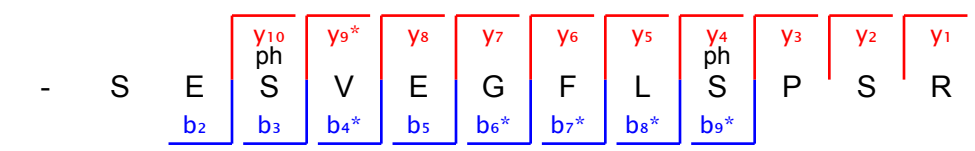

Raw file 20150814\_A375SR\_Phospho\_BR2\_03 Scan 19022 Method FTMS; HCD Score 221.21 m/z 1041.42 Gene names CTNND1

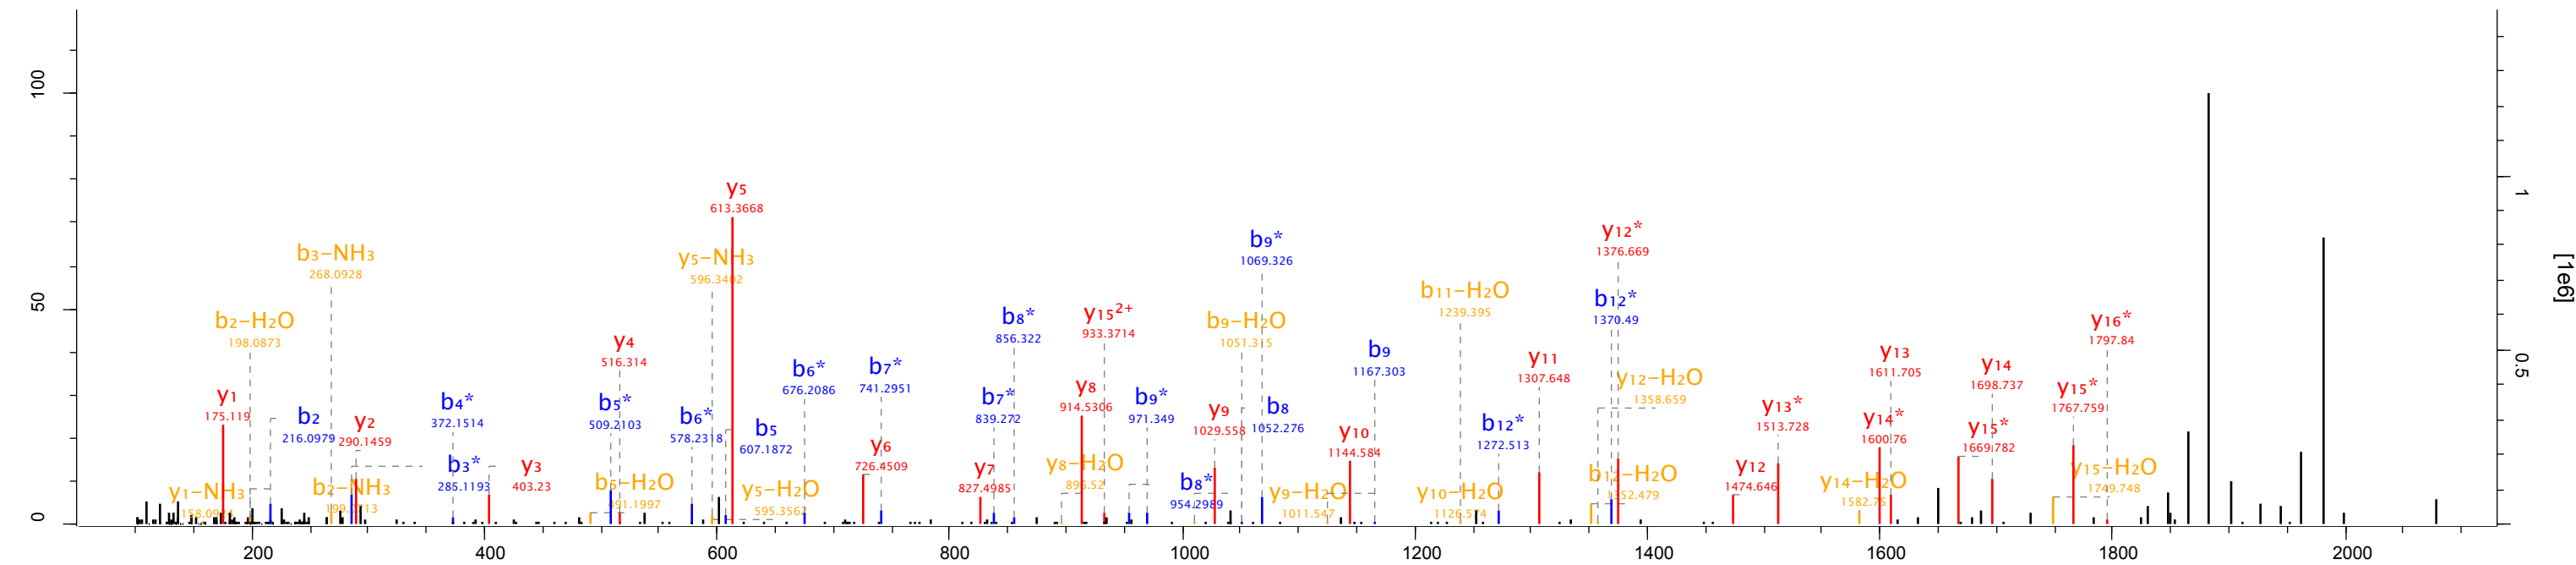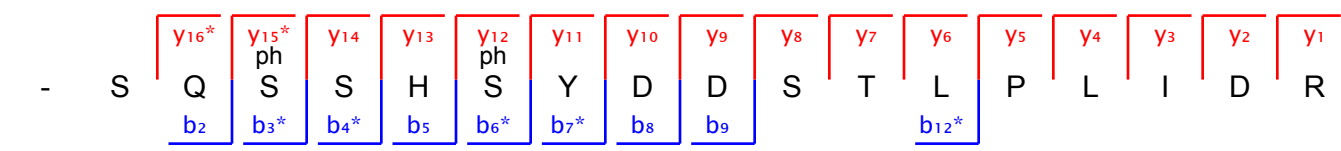

Raw file: 20150814\_A375SR\_Phospho\_BR2\_03  
 Scan: 19592 Method: FTMS; HCD Score: 82.64 m/z: 1061.92 Gene names: POM121C

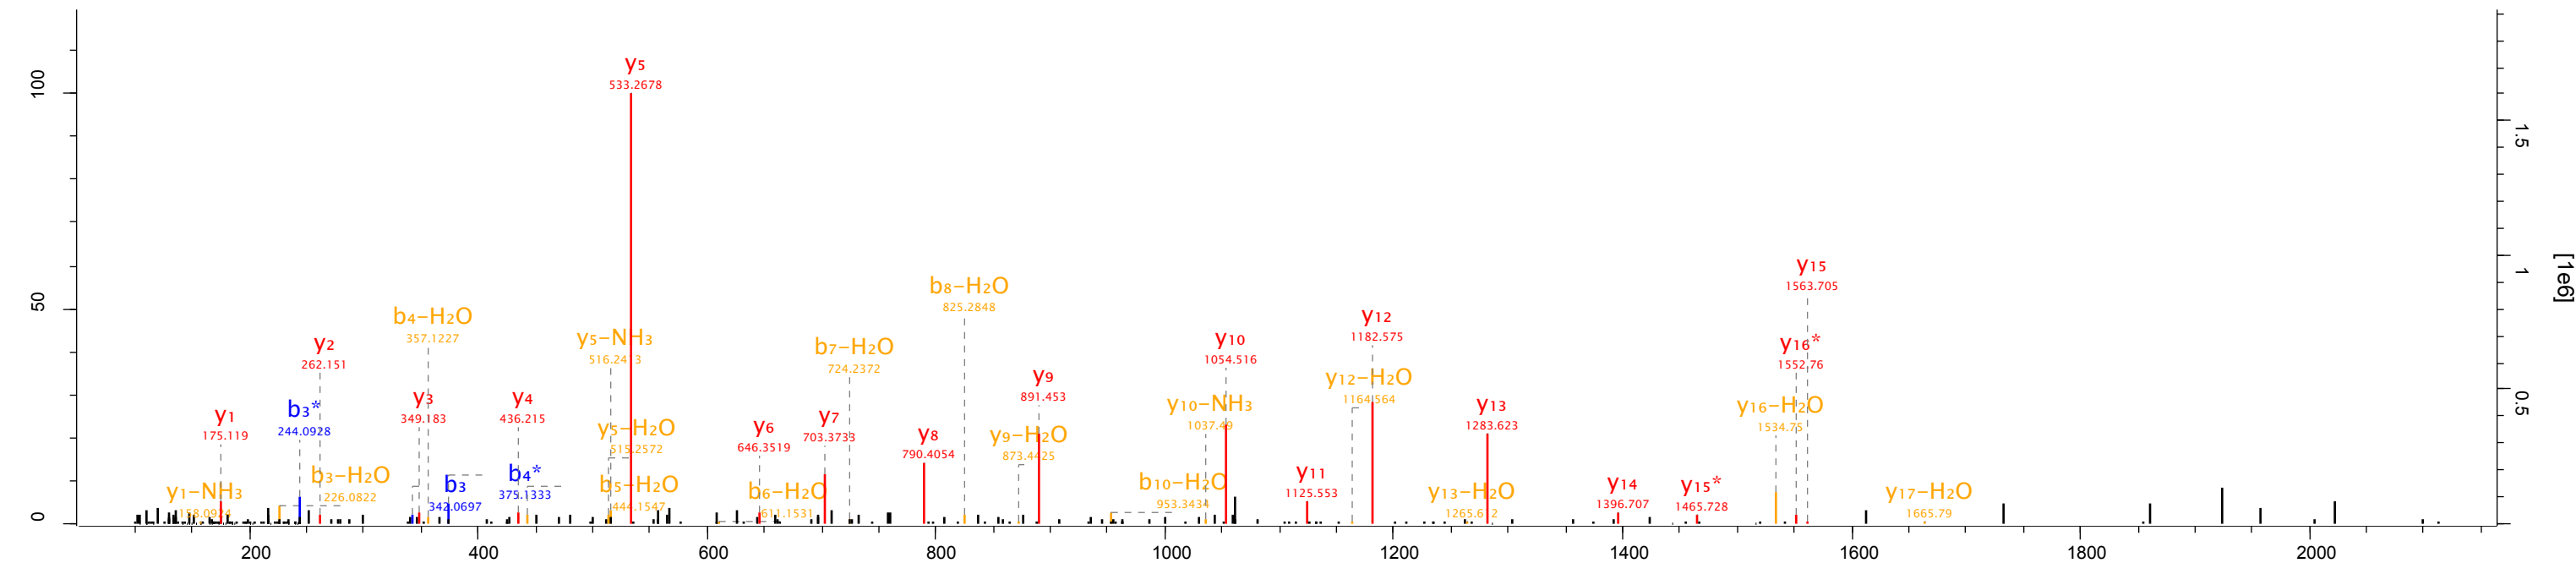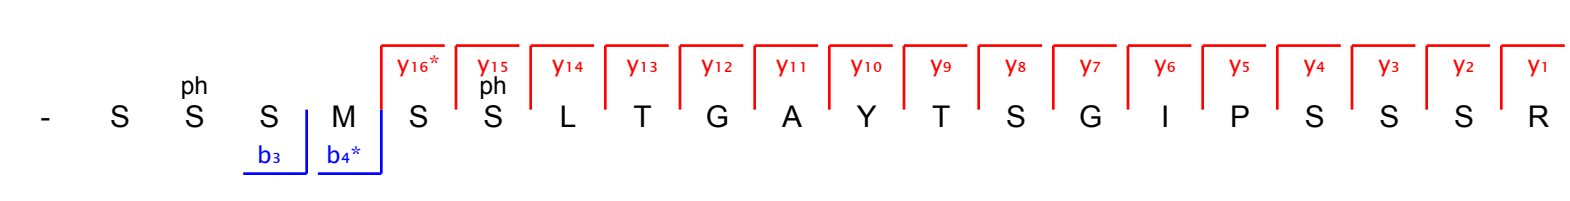



Raw file 20150814\_A375SR\_Phospho\_BR2\_03 Scan 19632 Method FTMS; HCD Score 260.25 m/z 1104.41 Gene names AKAP12

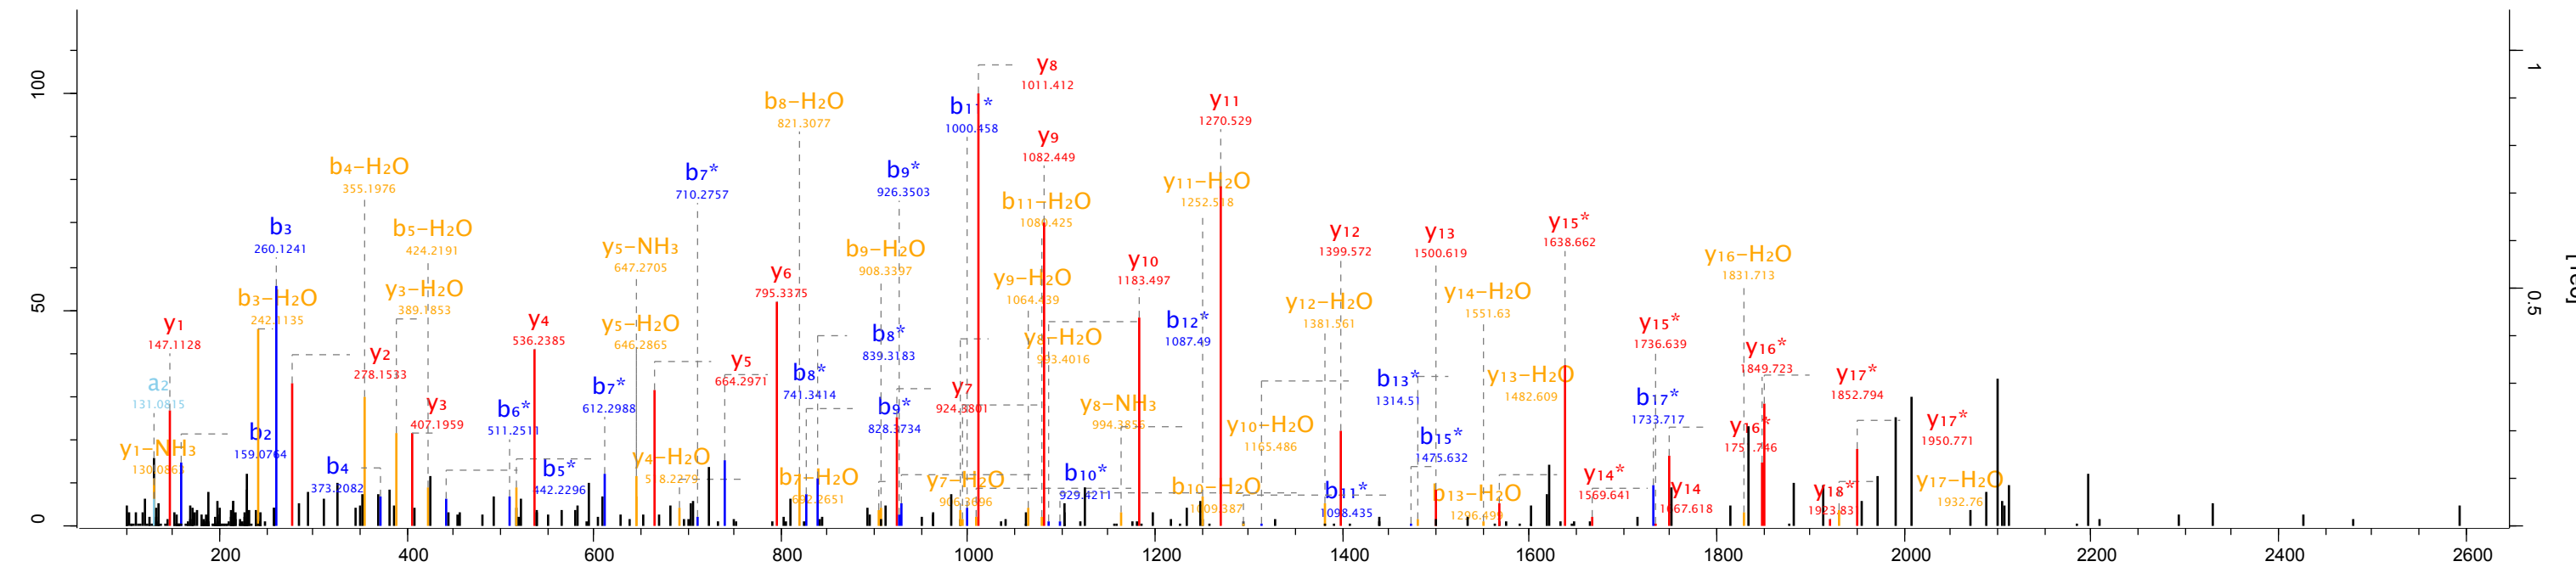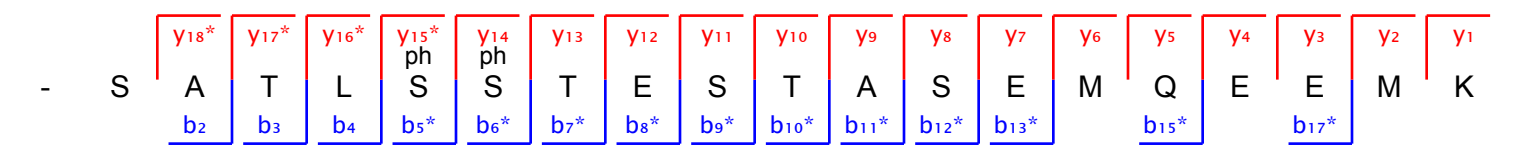

Raw file: 20150814\_A375SR\_Phospho\_BR2\_03  
 Scan: 19712 Method: FTMS; HCD Score: 66.61 m/z: 1038.47 Gene names: FRYL

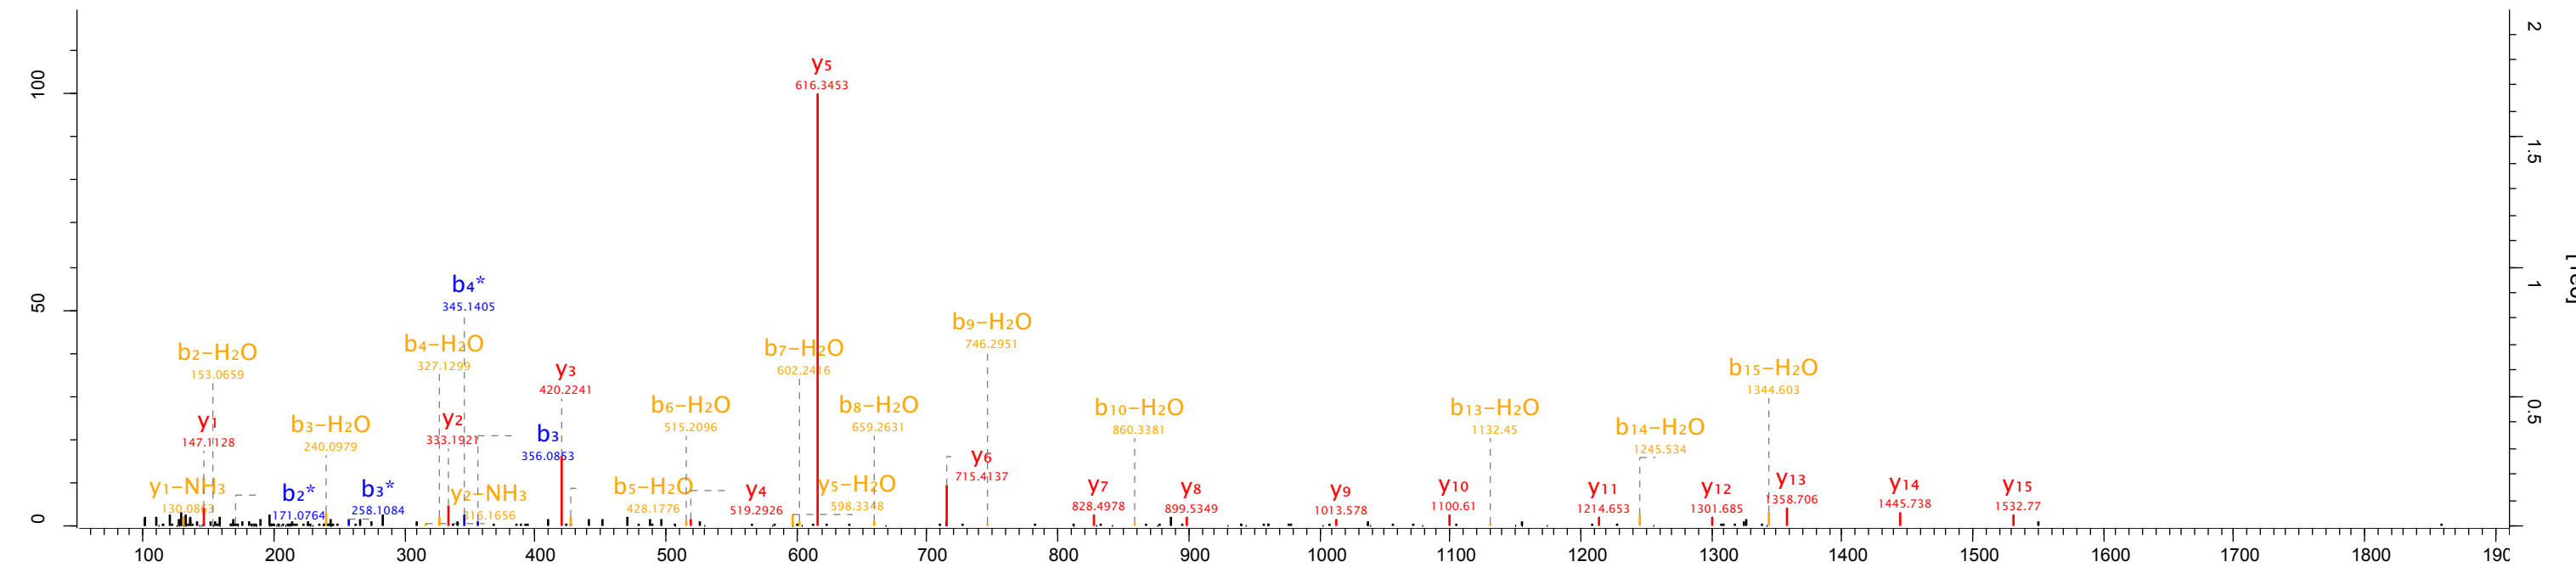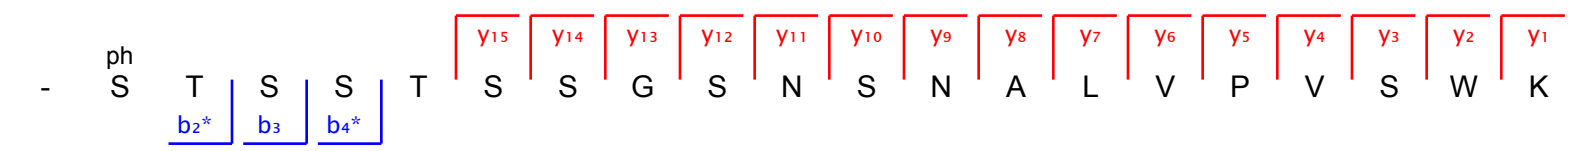

Raw file 20150814\_A375SR\_Phospho\_BR2\_03 Scan 19792 Method FTMS; HCD Score 109.68 m/z 1043.4 Gene names PRPF40B

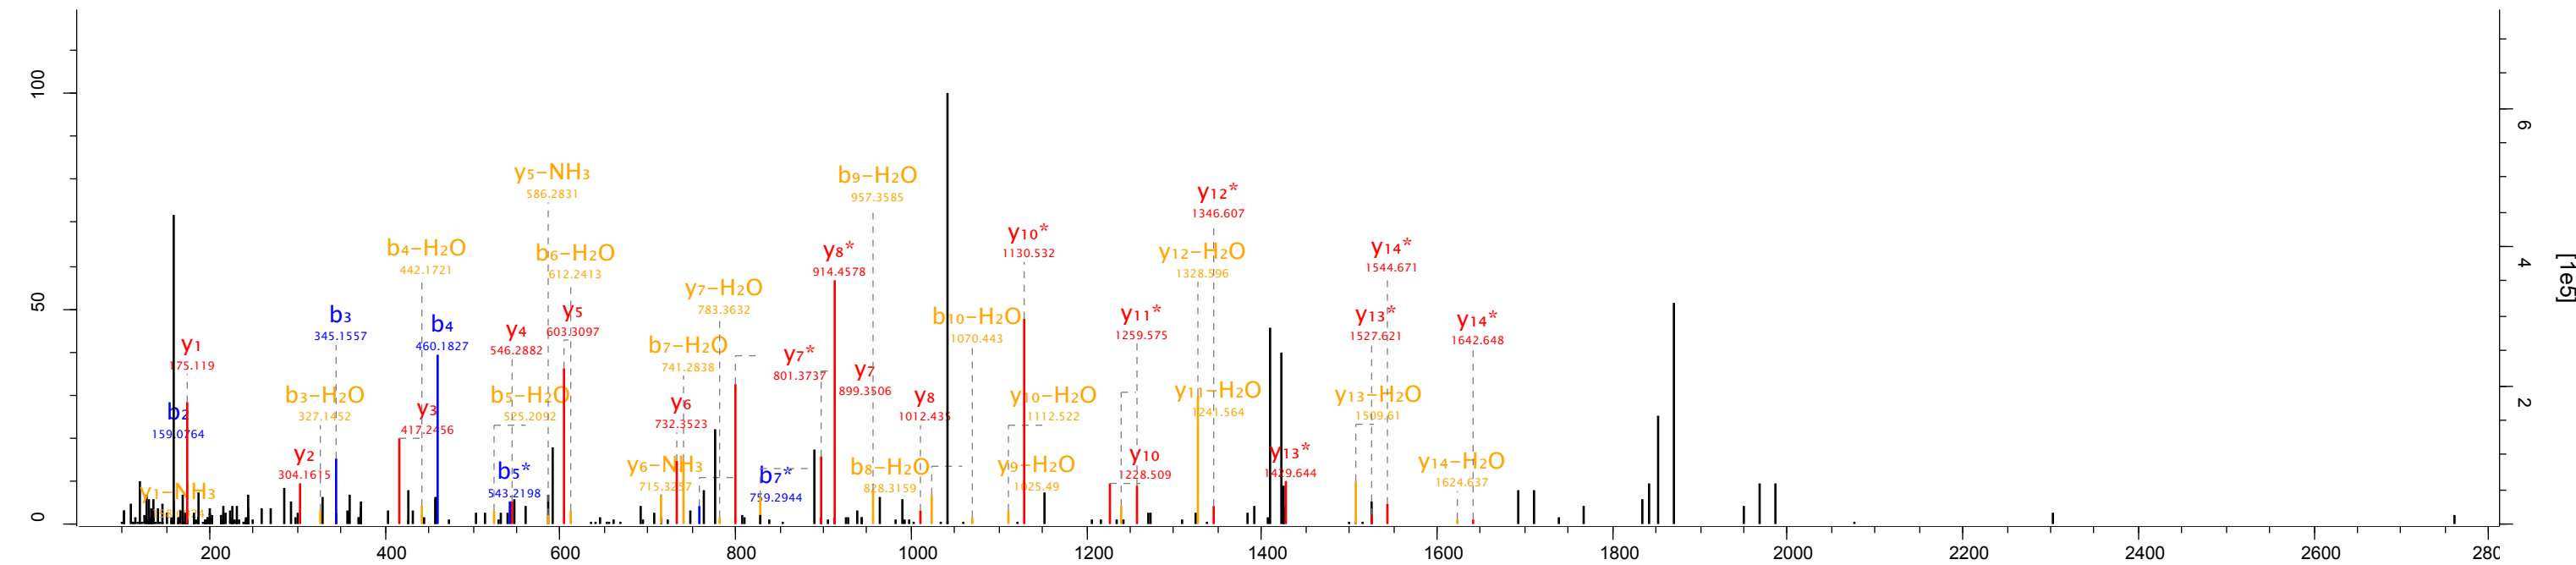

- T G W D ph T S E S E L S E G E L E R -

b<sub>2</sub>
b<sub>3</sub>
b<sub>4</sub>
b<sub>5</sub>\*
b<sub>7</sub>\*
y<sub>14</sub>\*
y<sub>13</sub>\*
y<sub>12</sub>\*
y<sub>11</sub>\*
y<sub>10</sub>
y<sub>8</sub>
y<sub>7</sub>
y<sub>6</sub>
y<sub>5</sub>
y<sub>4</sub>
y<sub>3</sub>
y<sub>2</sub>
y<sub>1</sub>

Raw file: 20150814\_A375SR\_Phospho\_BR2\_03  
 Scan: 19832 Method: FTMS; HCD Score: 124.32 m/z: 1004.49 Gene names: BCL9L

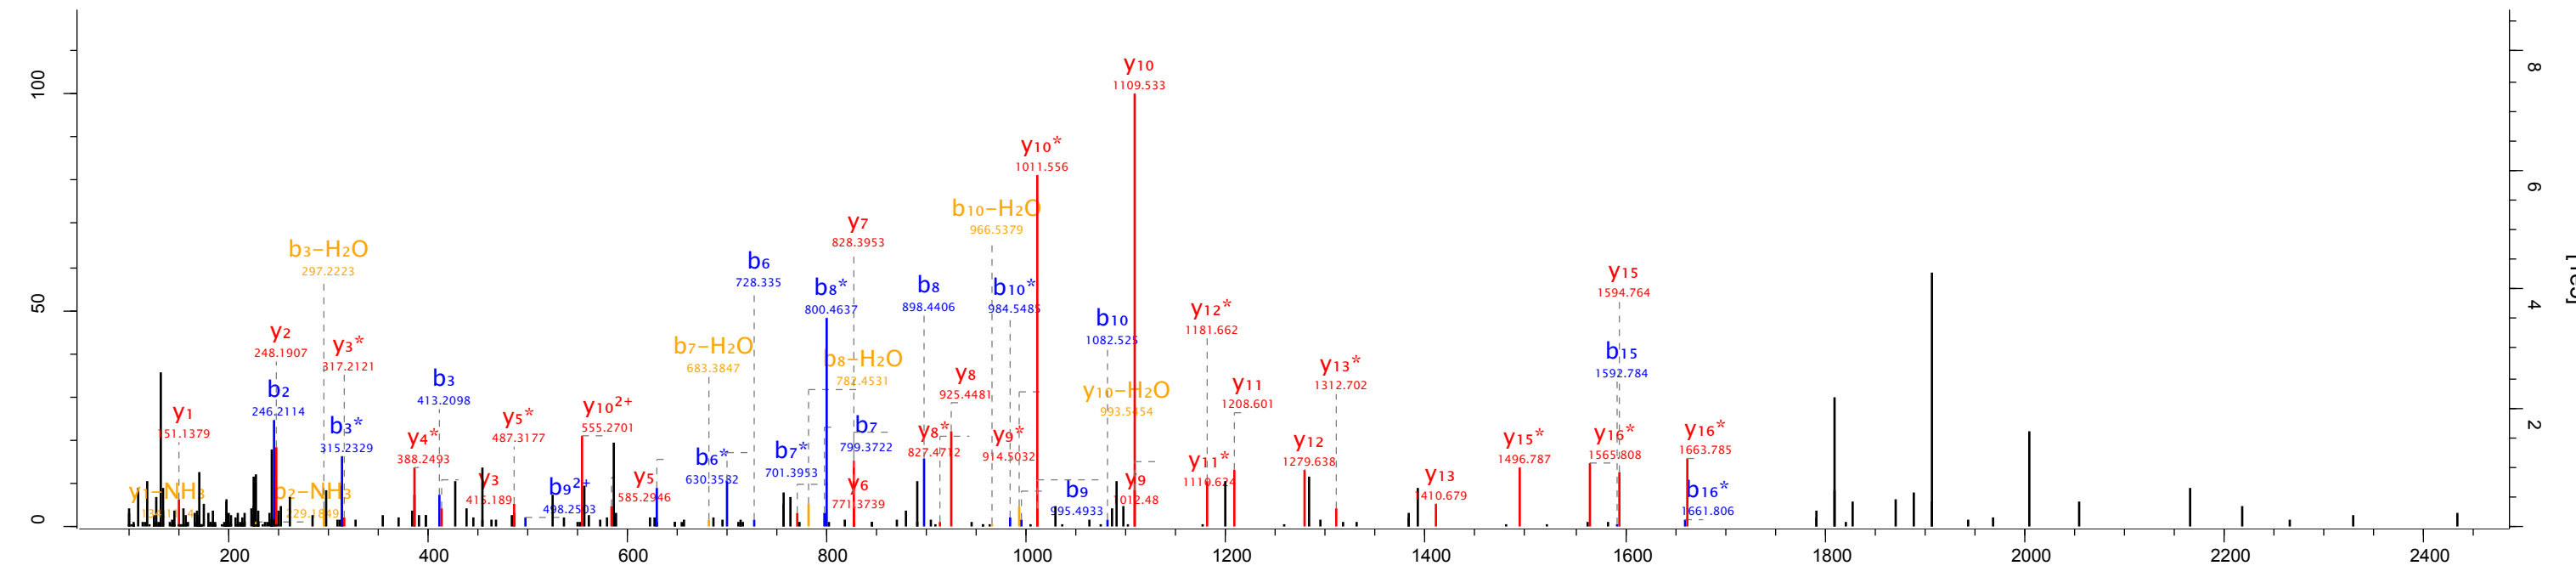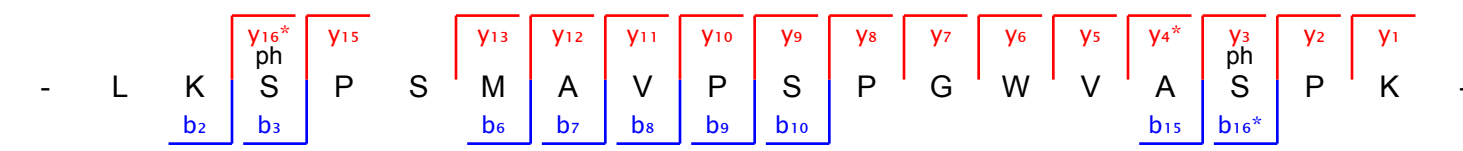

Raw file: 20150814\_A375SR\_Phospho\_BR2\_03  
 Scan: 19992 Method: FTMS; HCD Score: 158.52 m/z: 785.85 Gene names: HMGXB4

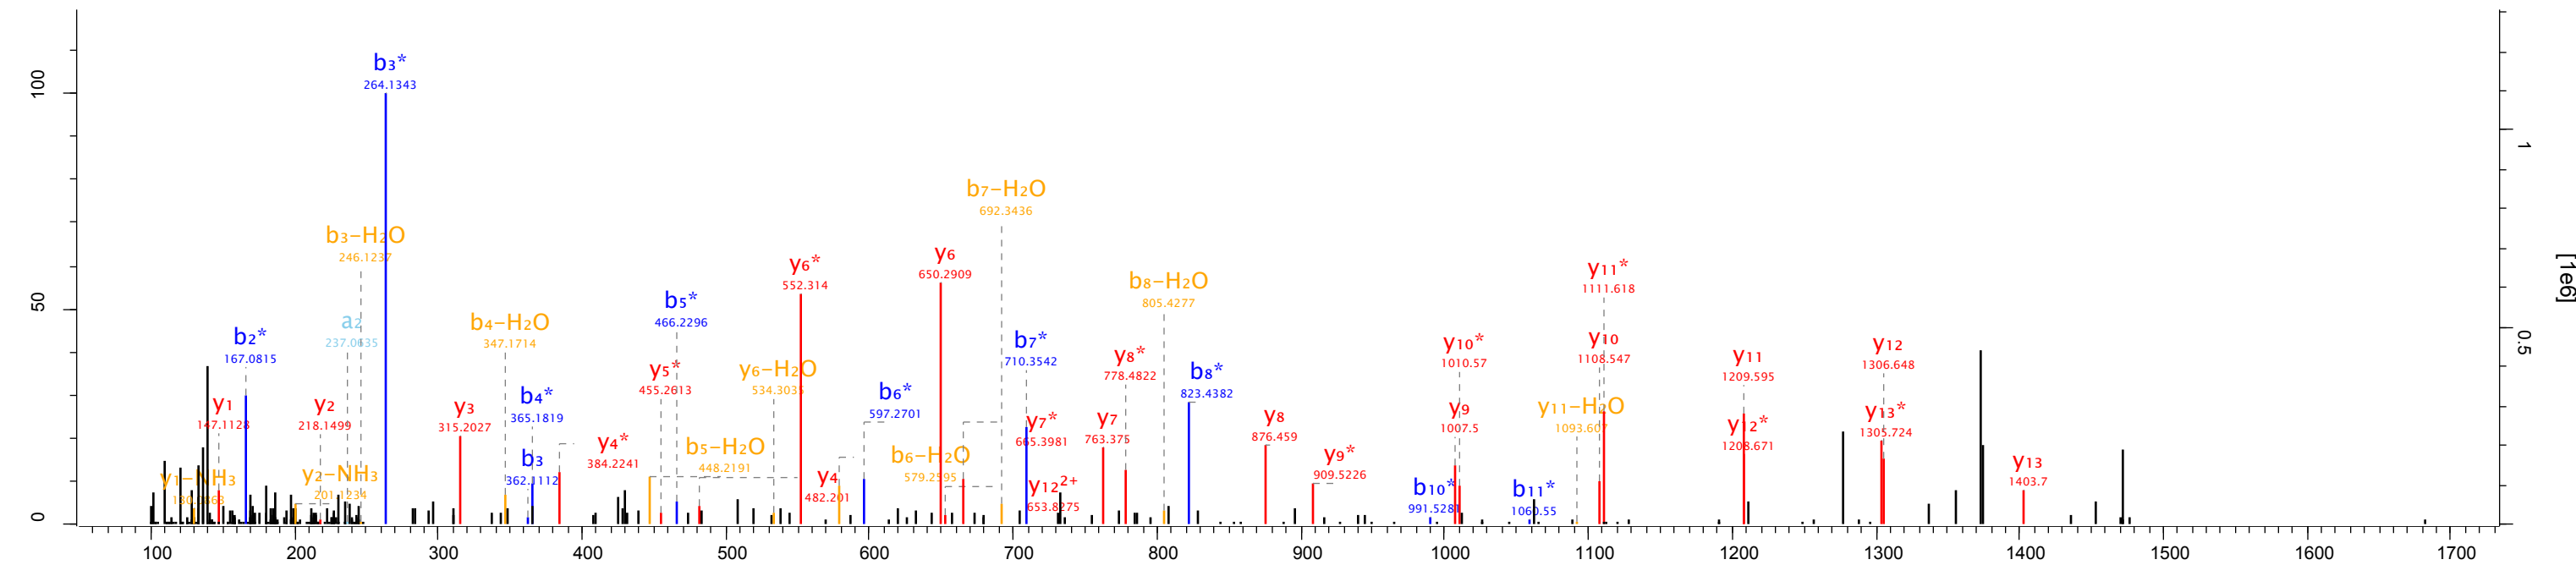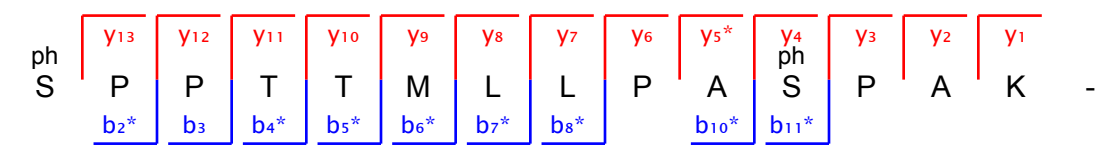

Raw file: 20150814\_A375SR\_Phospho\_BR2\_03  
 Scan: 20172 Method: FTMS; HCD Score: 178.02 m/z: 704.83 Gene names: CEP170

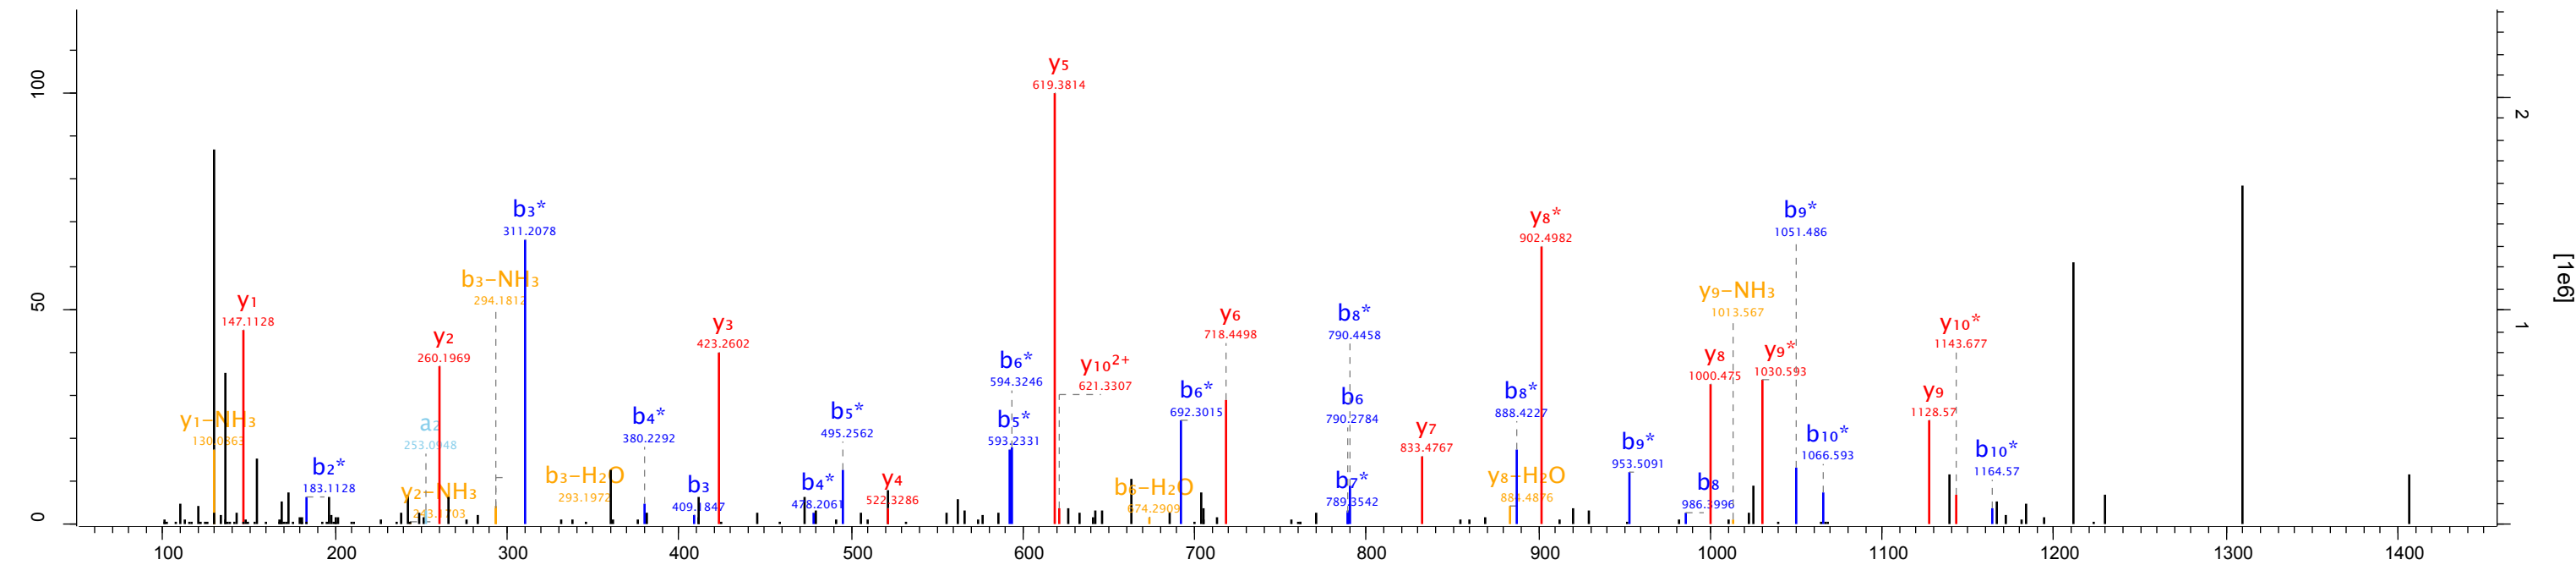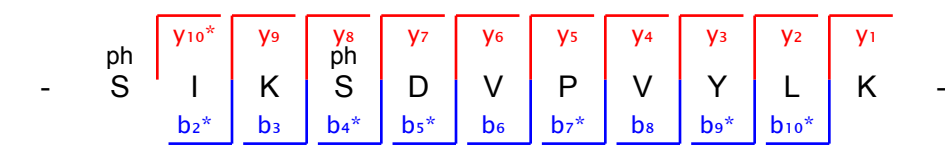

Raw file: 20150814\_A375SR\_Phospho\_BR2\_03  
 Scan: 20542 Method: FTMS; HCD Score: 179.1 m/z: 806.34 Gene names: DLC1

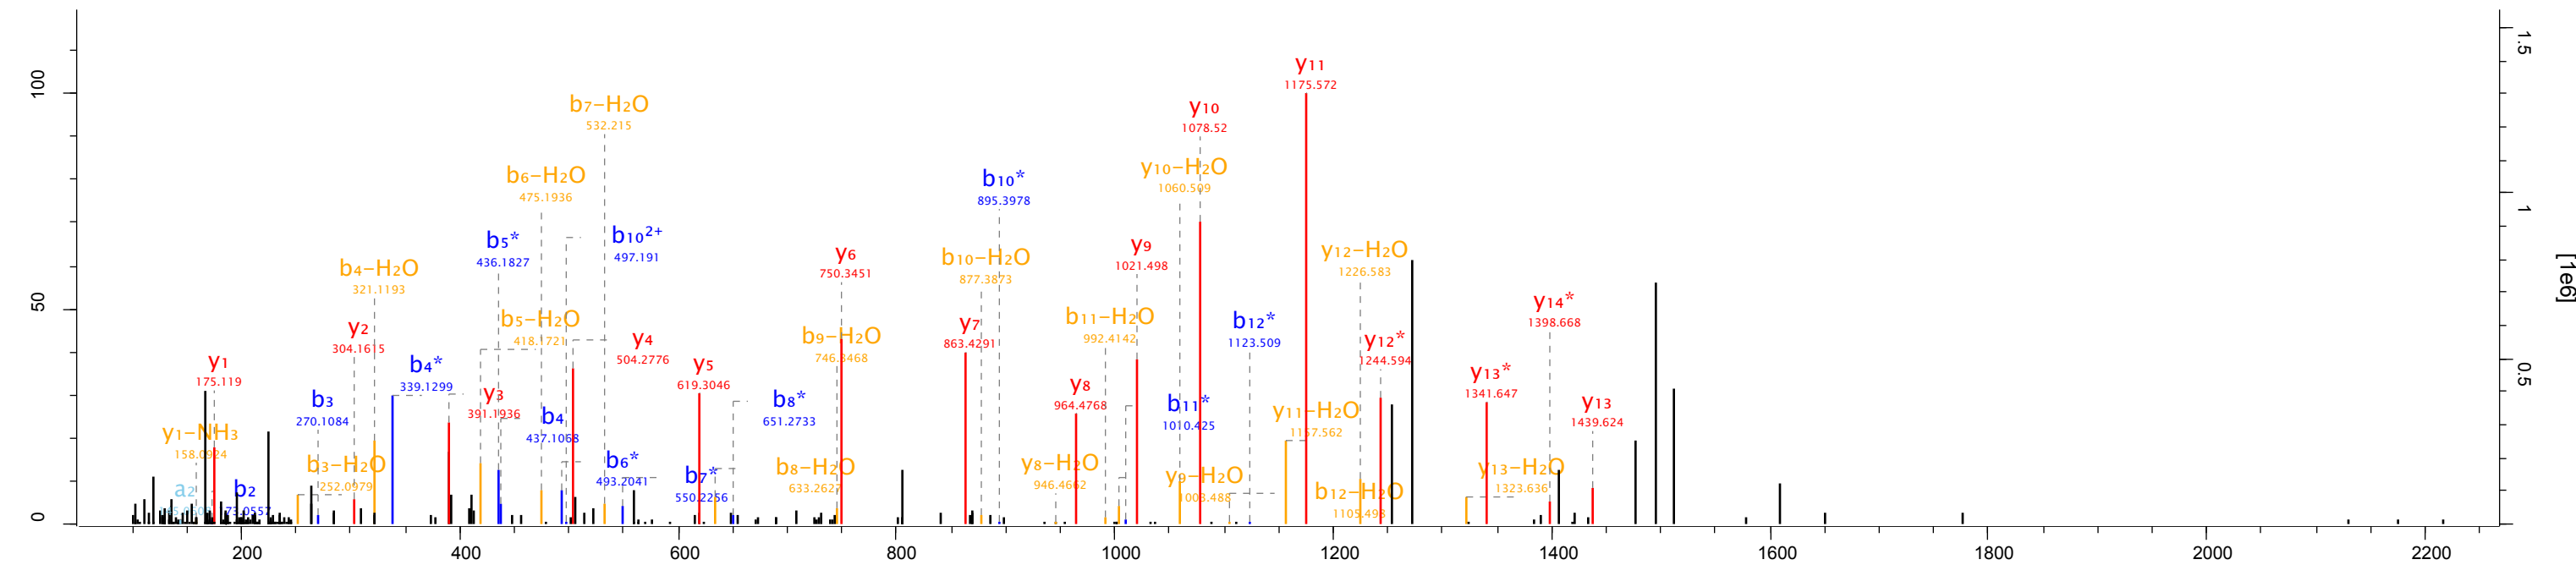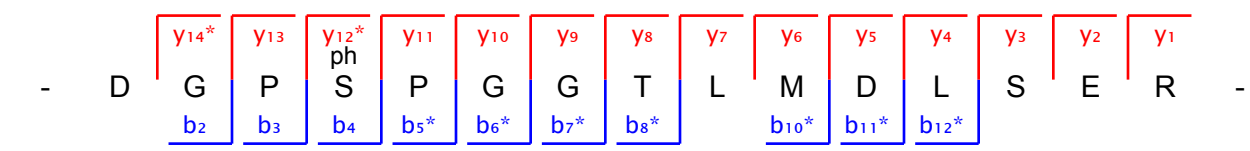

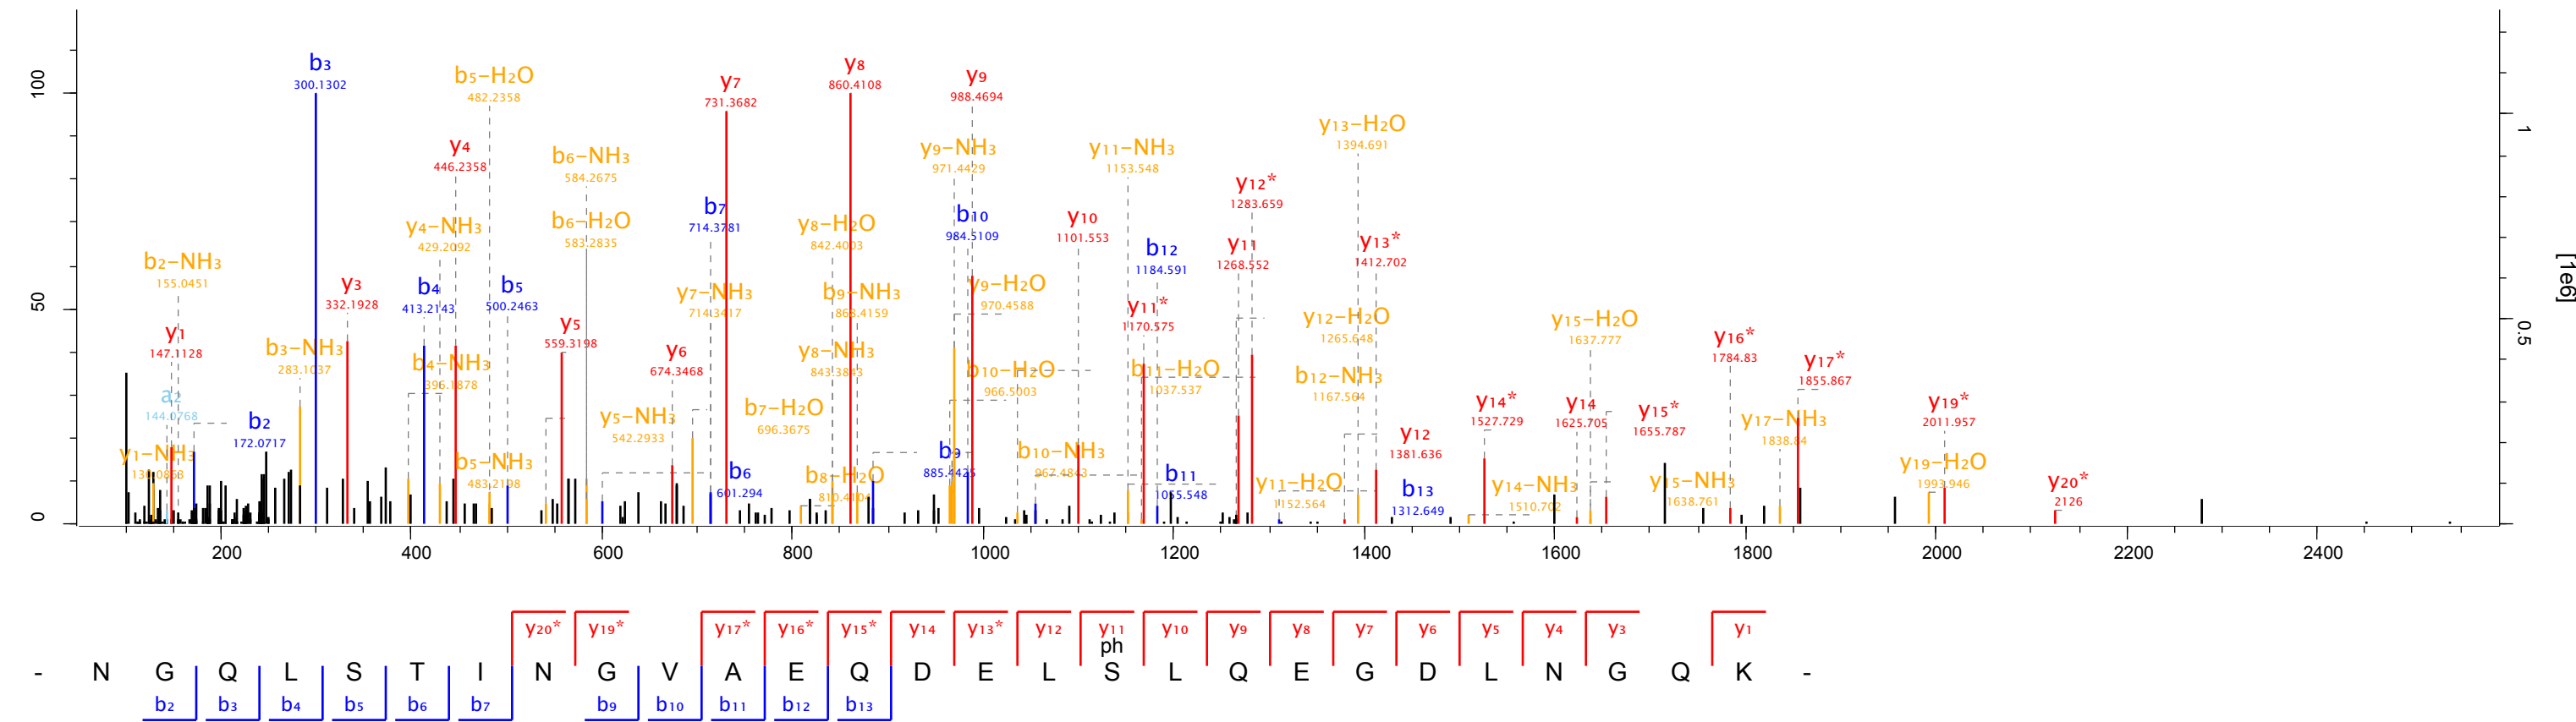



Raw file 20150814\_A375SR\_Phospho\_BR2\_03 Scan 20582 Method FTMS; HCD Score 122.94 m/z 870.34 Gene names ITGB4

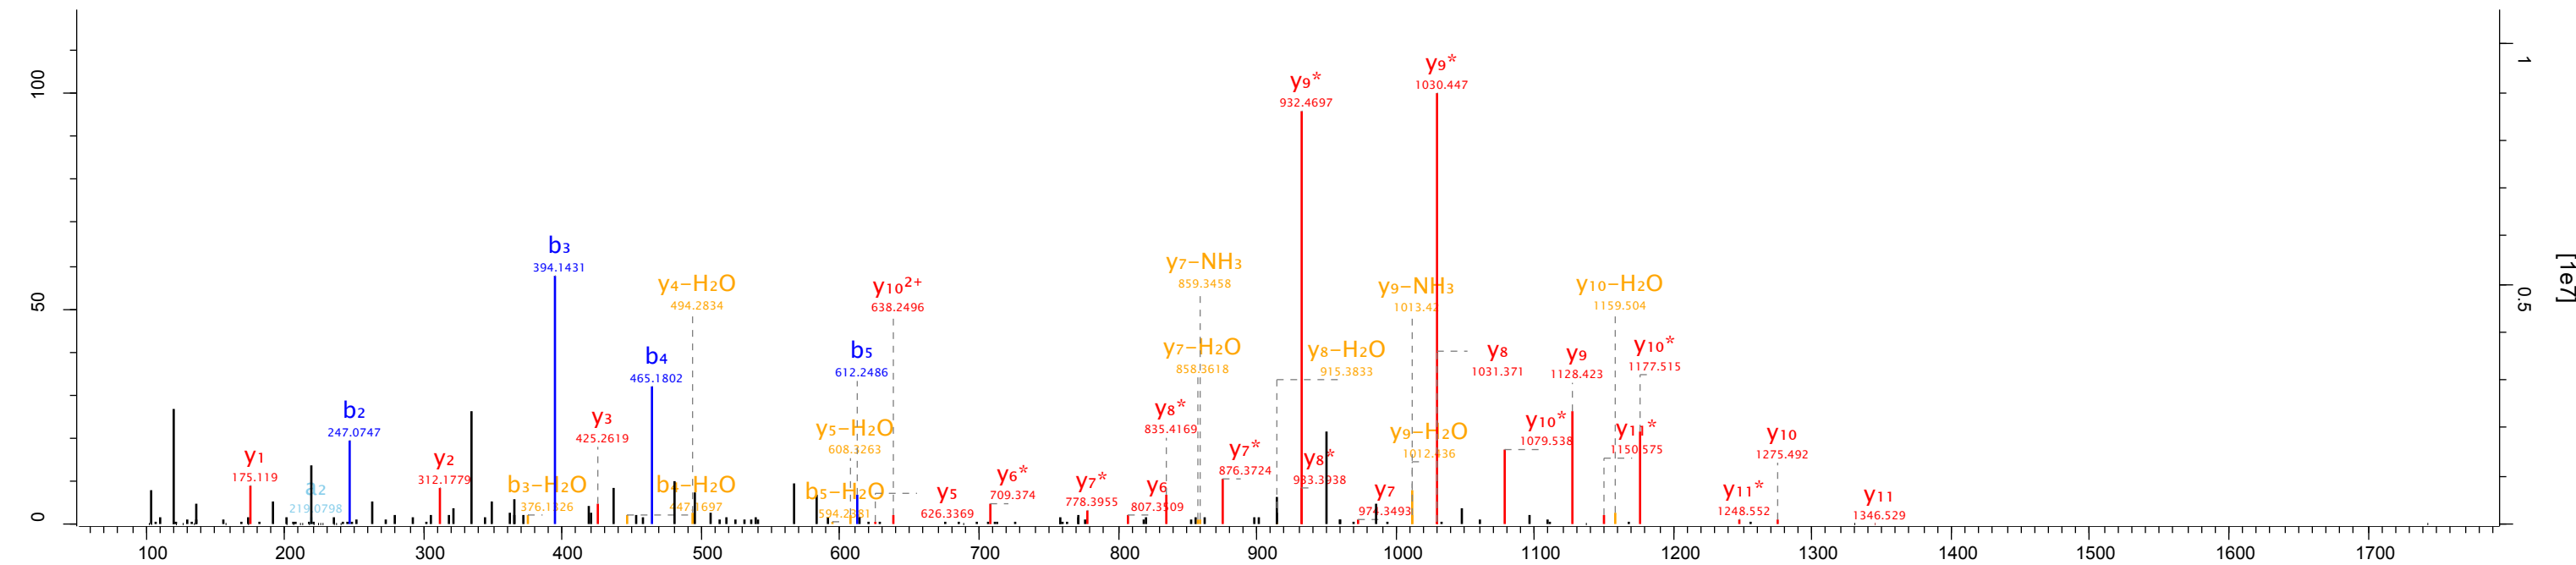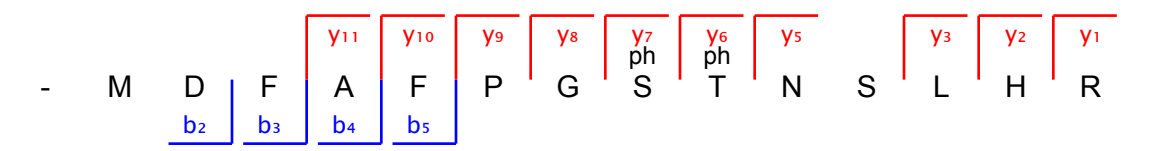

Raw file: 20150814\_A375SR\_Phospho\_BR2\_03  
 Scan: 20782 Method: FTMS; HCD Score: 162.1 m/z: 898.36 Gene names: KMT2B

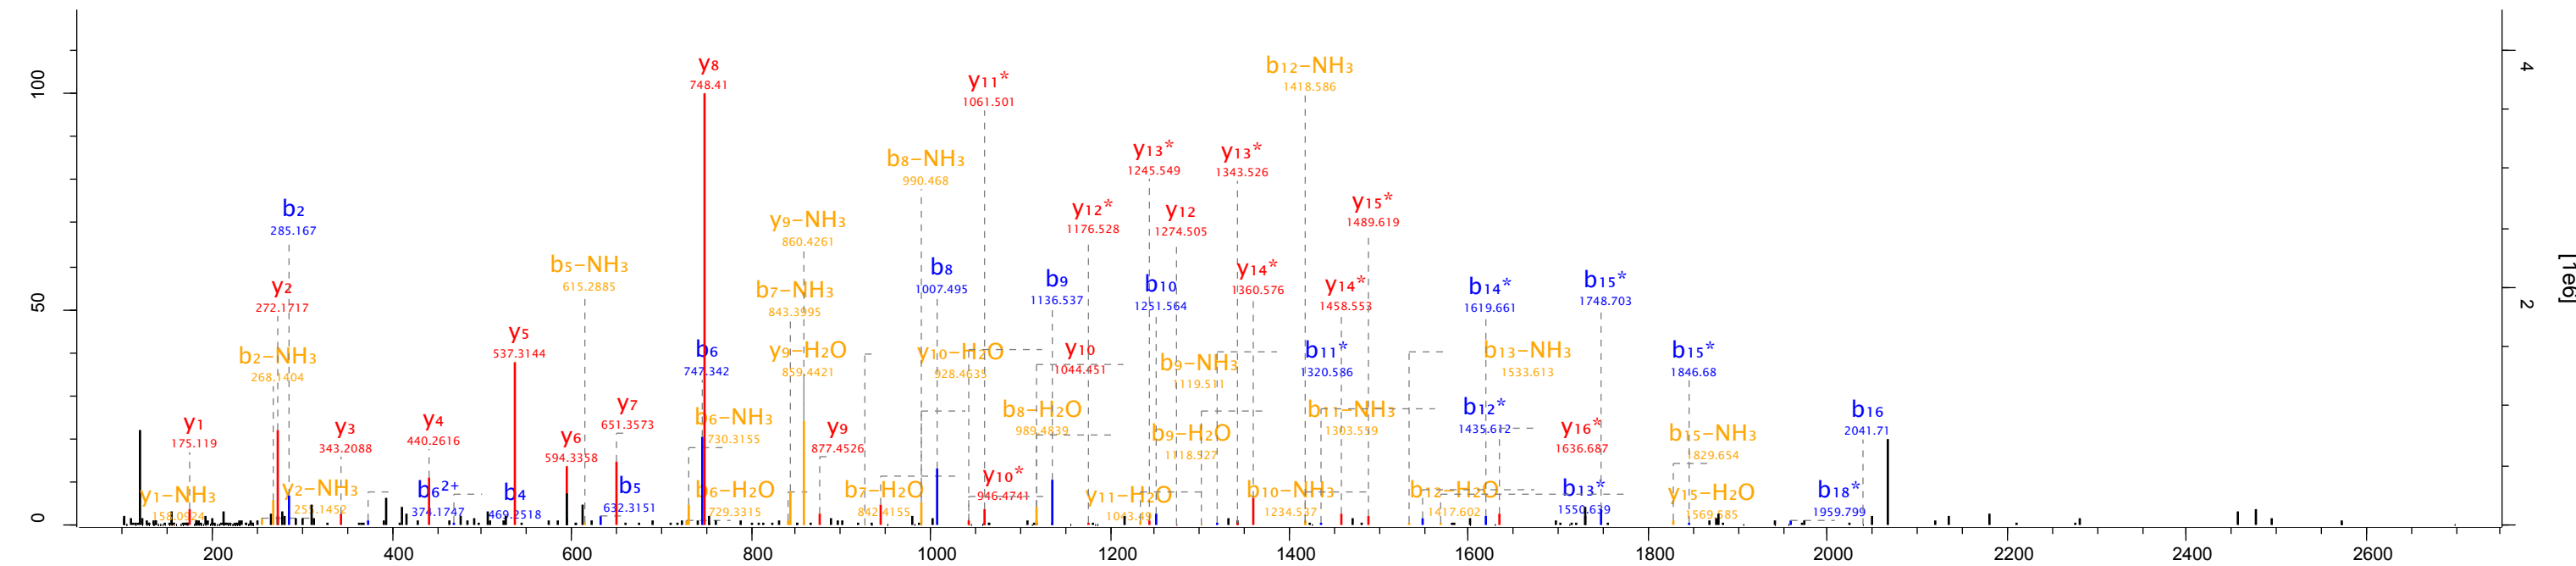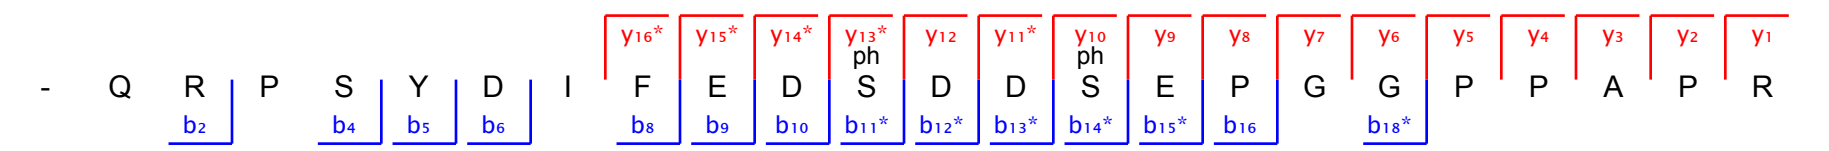

Raw file 20150814\_A375SR\_Phospho\_BR2\_03 Scan 21172 Method FTMS; HCD Score 206.08 m/z 1079.97 Gene names SAMD4B

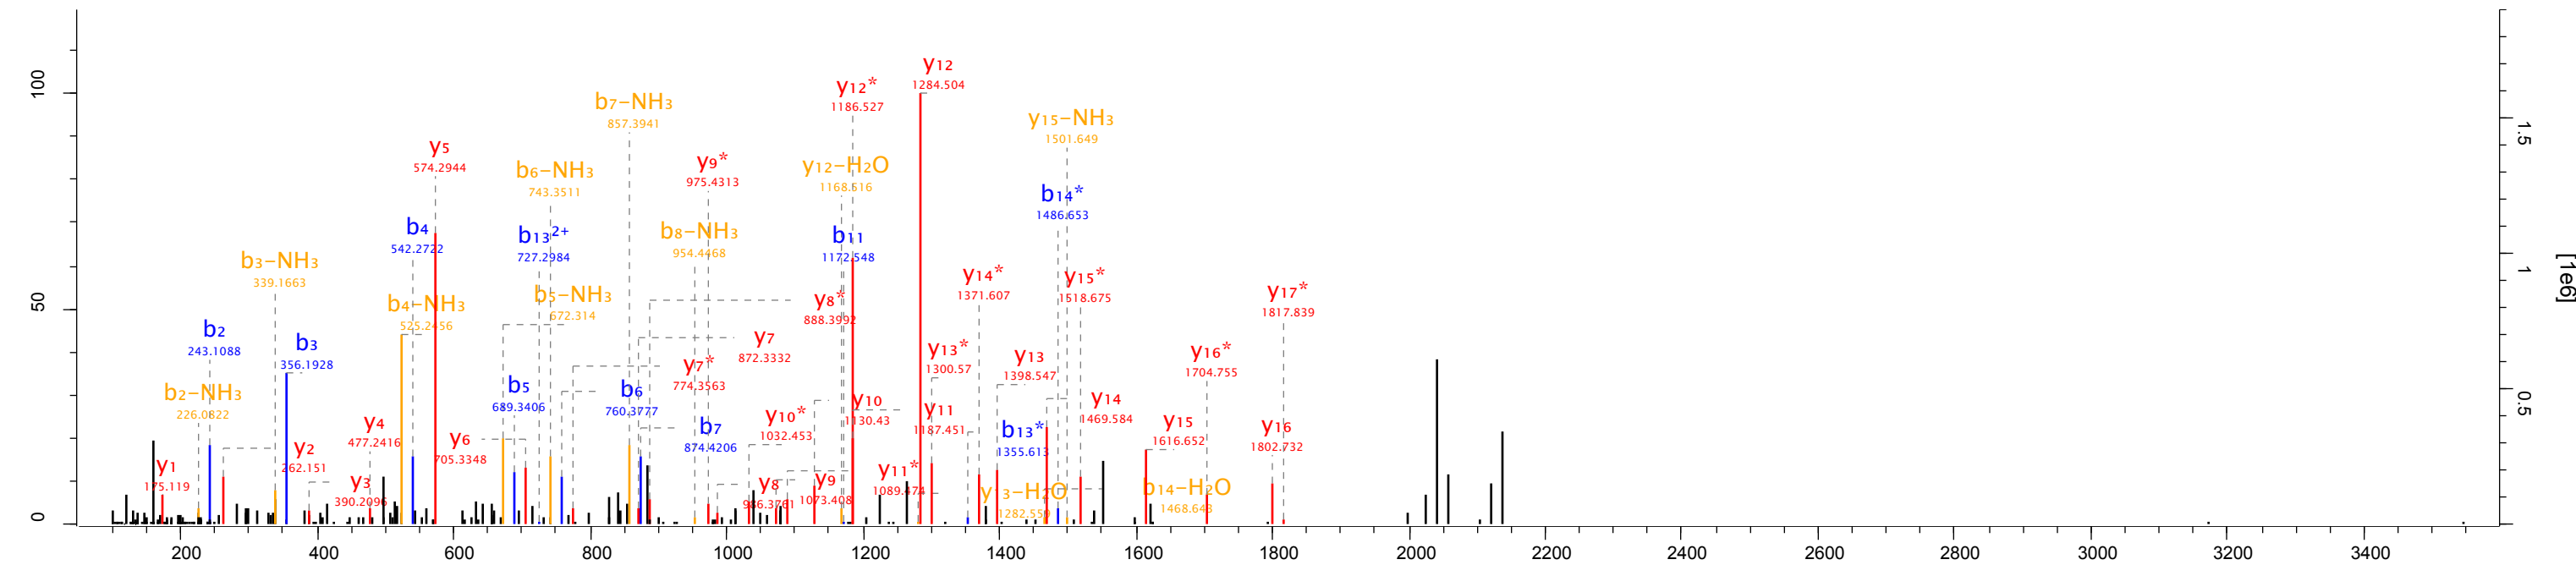

- Q N L W F A N P G G S N S M P S Q S R -

b<sub>2</sub>
b<sub>3</sub>
b<sub>4</sub>
b<sub>5</sub>
b<sub>6</sub>
b<sub>7</sub>
b<sub>11</sub>
b<sub>13</sub>\*
b<sub>14</sub>\*

y<sub>17</sub>\*
y<sub>16</sub>
y<sub>15</sub>
y<sub>14</sub>
y<sub>13</sub>
y<sub>12</sub>
y<sub>11</sub>
y<sub>10</sub>
y<sub>9</sub>
y<sub>8</sub>
y<sub>7</sub><sup>ph</sup>
y<sub>6</sub>
y<sub>5</sub>
y<sub>4</sub>
y<sub>3</sub>
y<sub>2</sub>
y<sub>1</sub>

Raw file Scan Method Score m/z Gene names  
 20150814\_A375SR\_Phospho\_BR2\_03 21222 FTMS; HCD 68.28 844.07 DOCK5

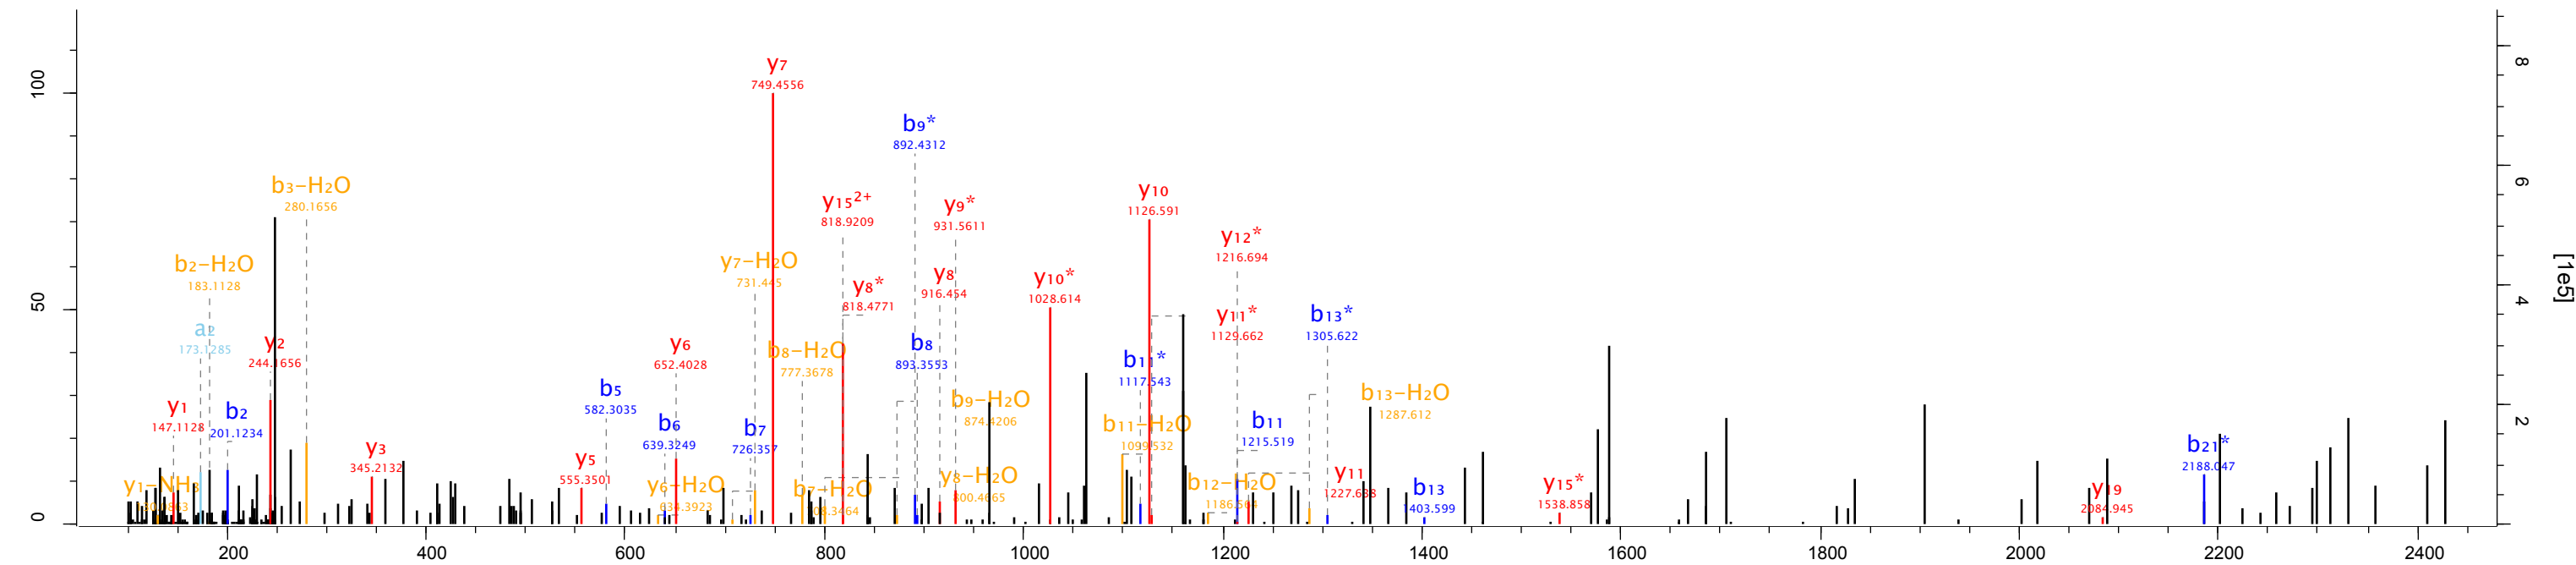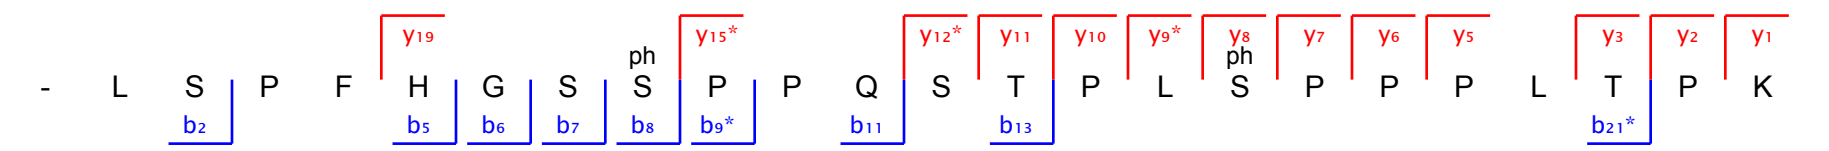

Raw file: 20150814\_A375SR\_Phospho\_BR2\_03  
 Scan: 21382 Method: FTMS; HCD Score: 160.2 m/z: 678.65 Gene names: PLEKHA4

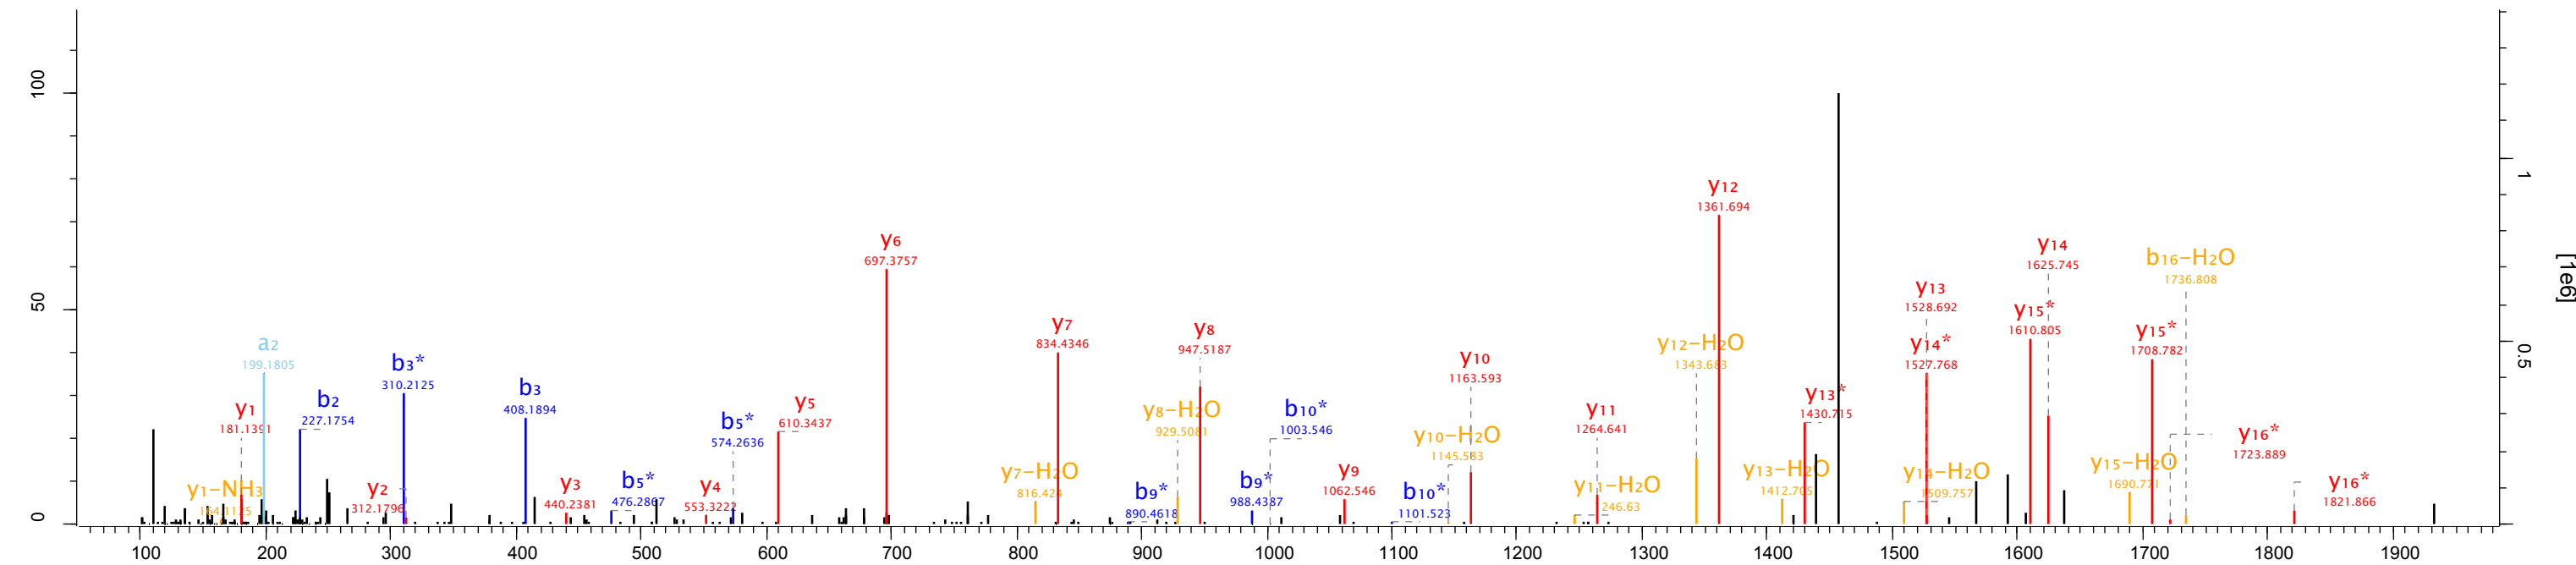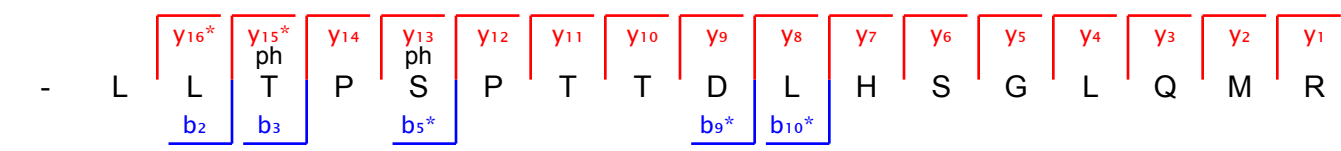

Raw file: 20150814\_A375SR\_Phospho\_BR2\_03  
 Scan: 21592 Method: FTMS; HCD Score: 284.06 m/z: 1273.02 Gene names: MAP1B

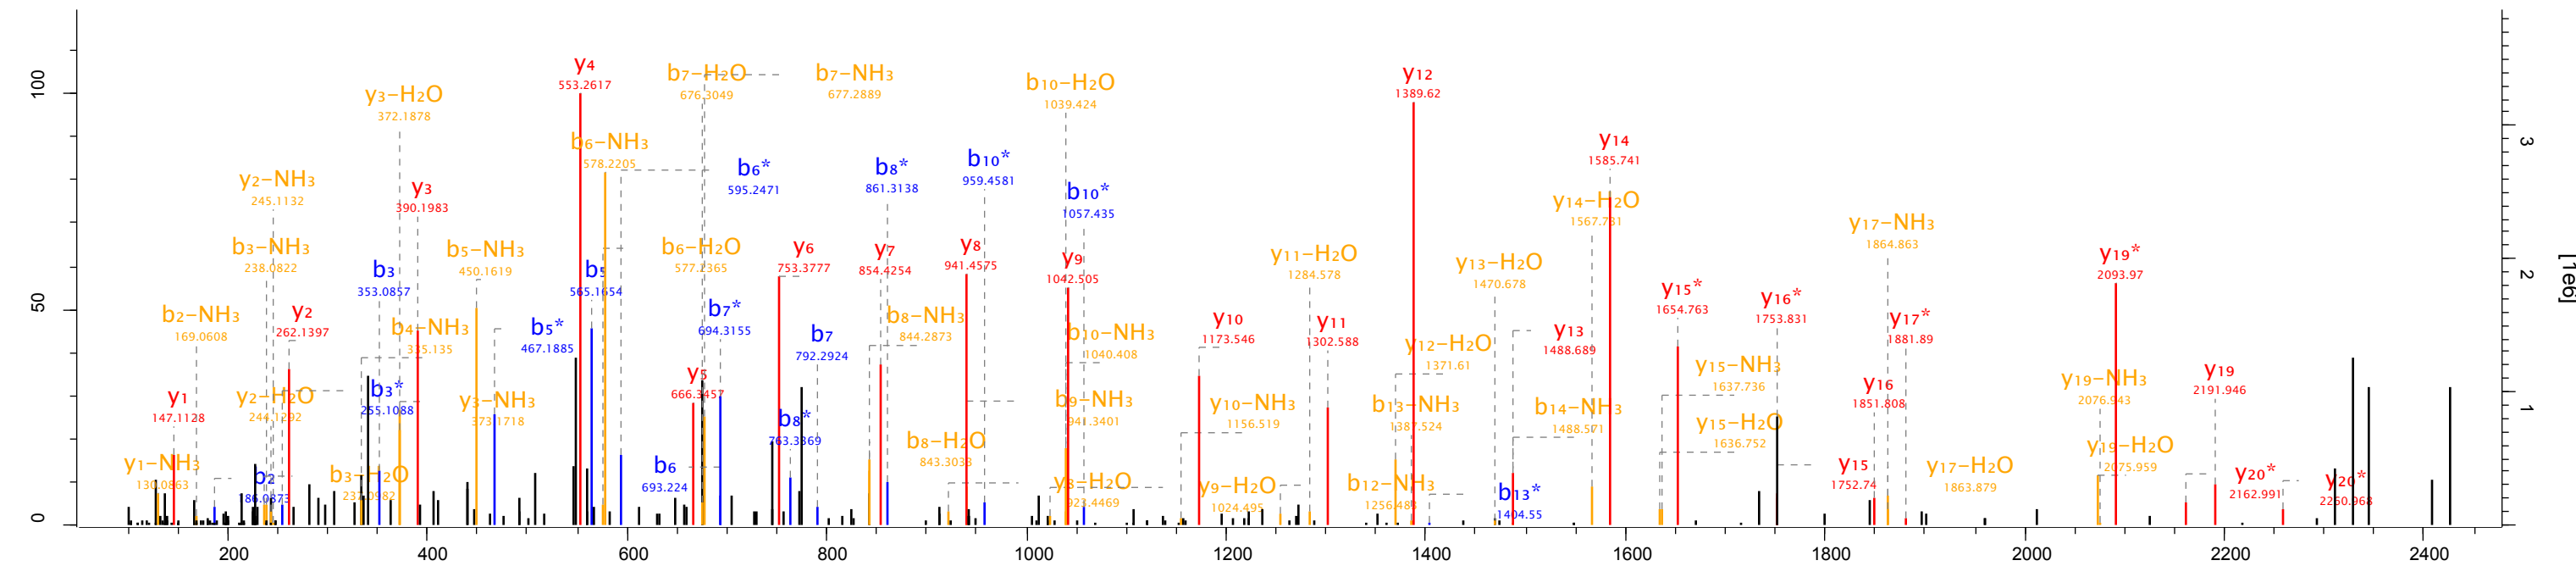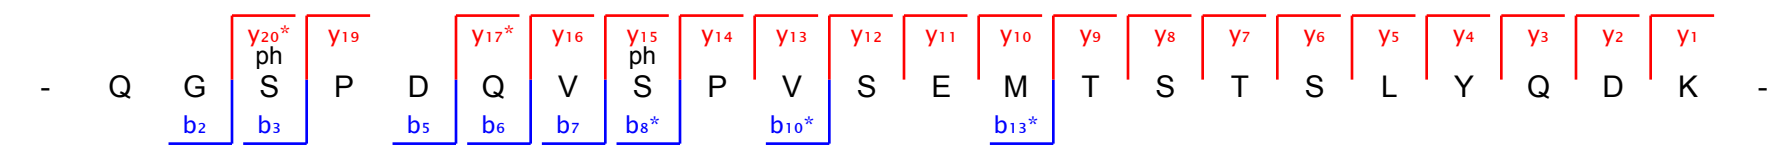

Raw file 20150814\_A375SR\_Phospho\_BR2\_03 Scan 21852 Method FTMS; HCD Score 104.6 m/z 857.02 Gene names MTM1

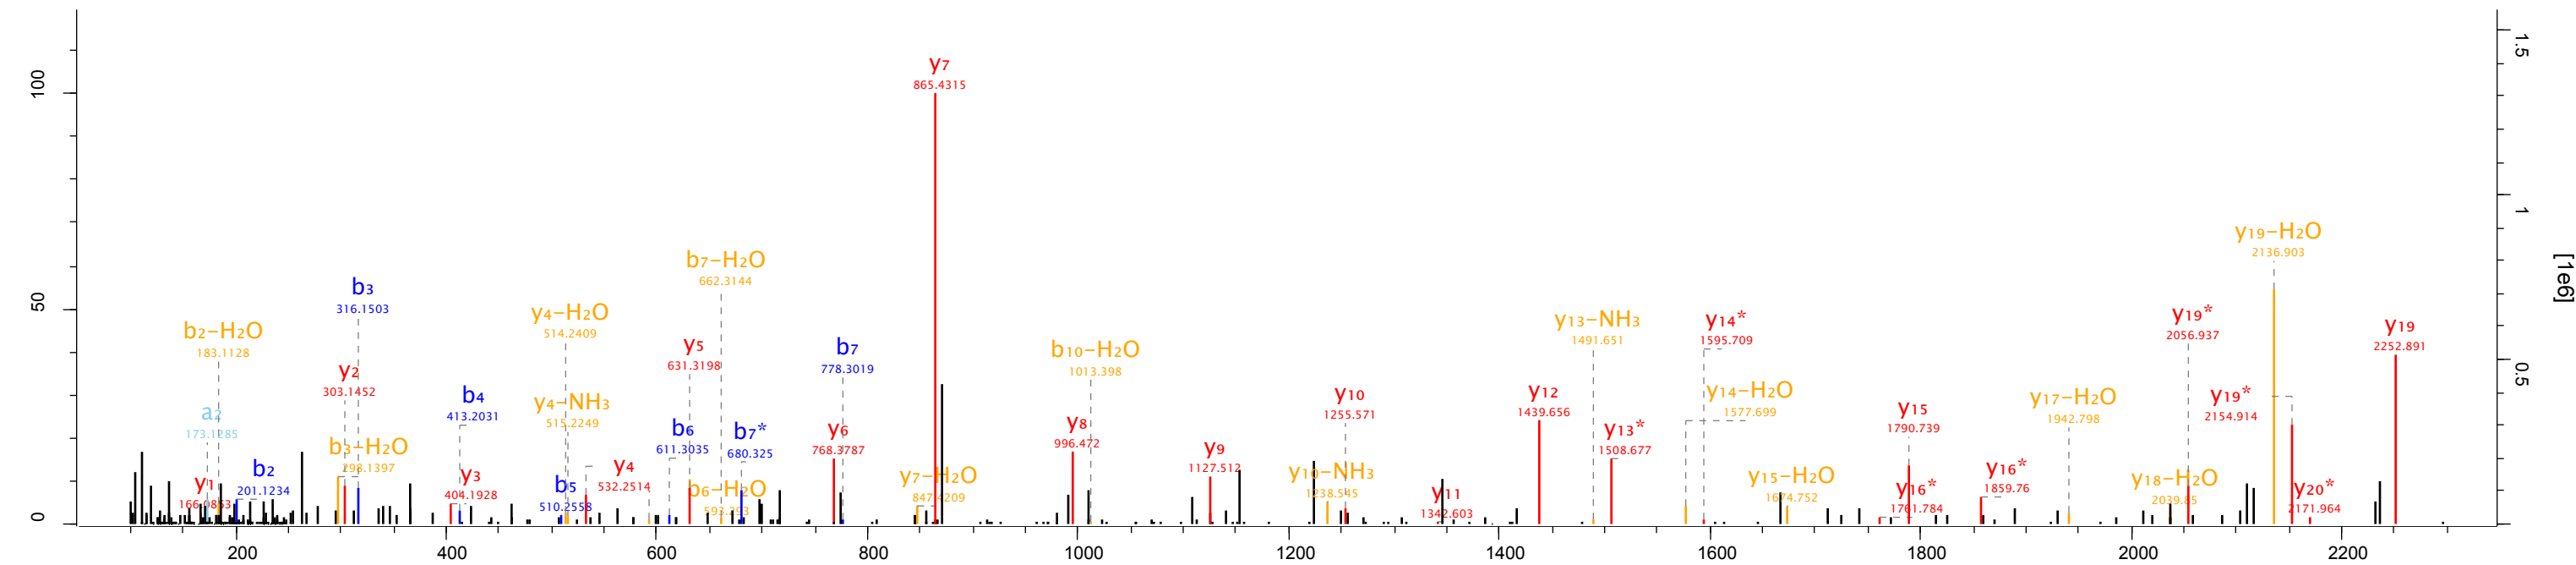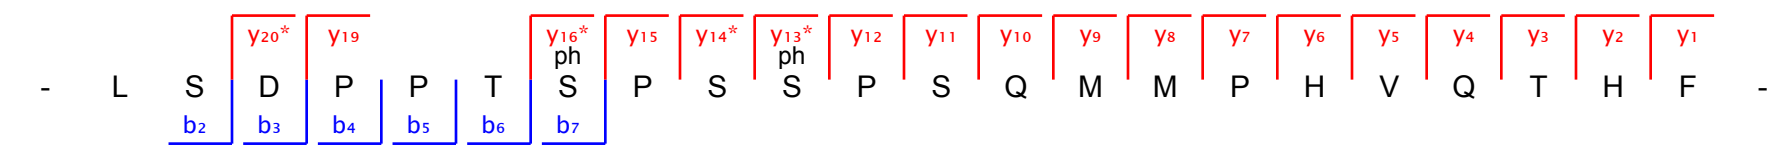

Raw file Scan Method Score m/z Gene names  
 20150814\_A375SR\_Phospho\_BR2\_03 21862 FTMS; HCD 211.7 1409.1 C11orf84

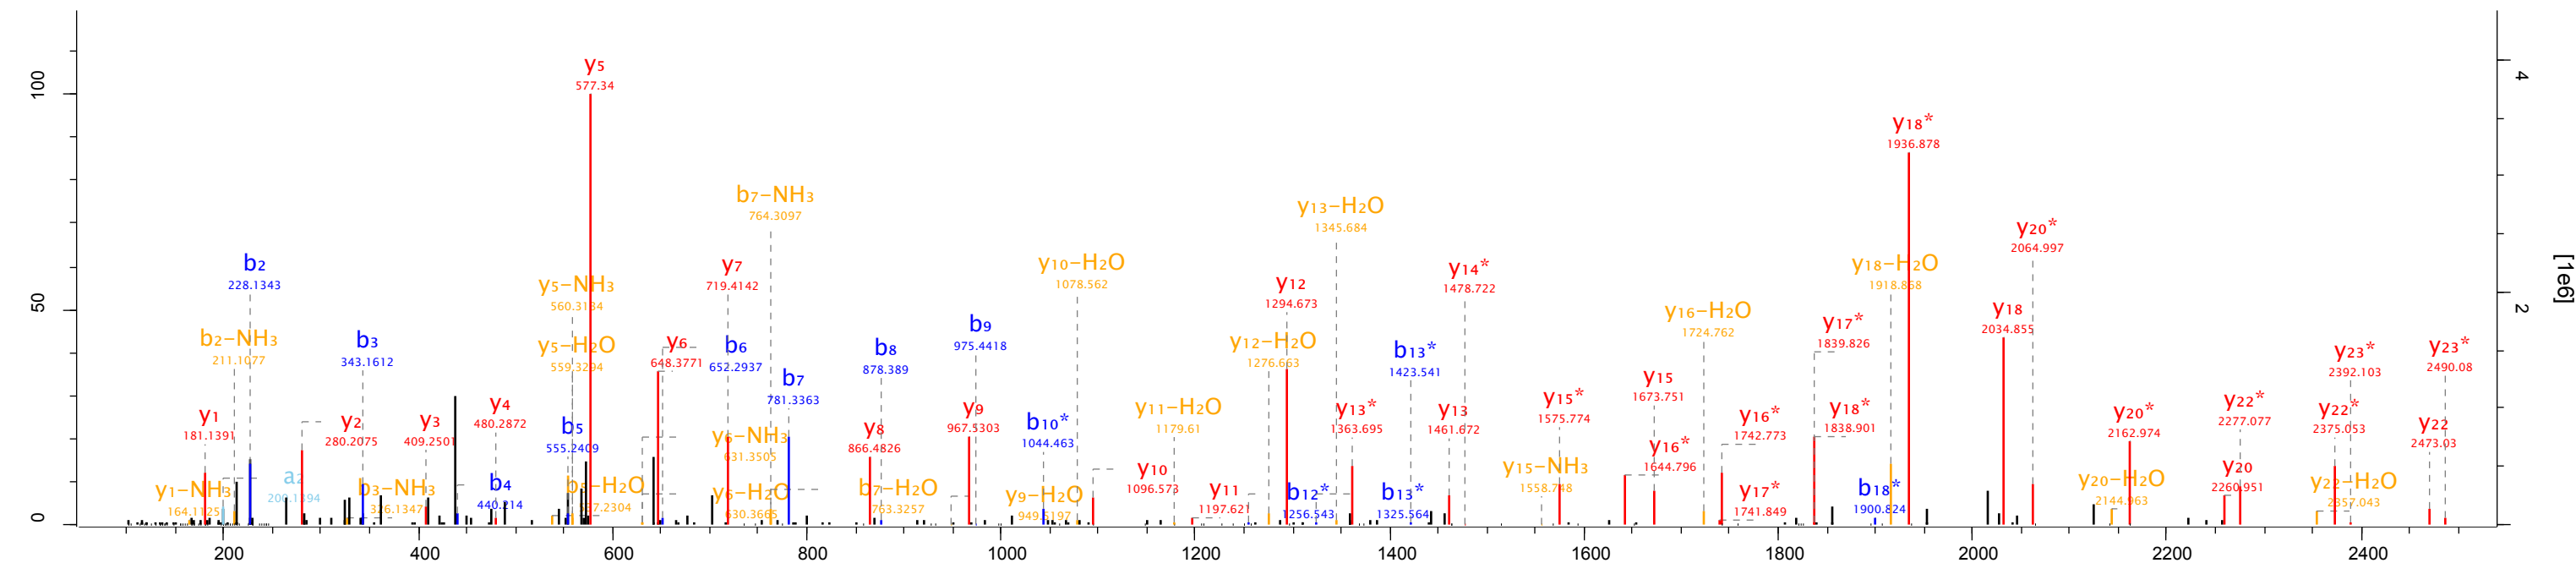

- N L D P D P E P P S P D S P T E T F A A P A E V R -

Fragmentation sites (b and y ions) are indicated by boxes below the sequence:

- Blue boxes: b2, b3, b4, b5, b6, b7, b8, b9, b10\*, b12\*, b13\*, b18\*
- Red boxes: y23\*, y22, y20, y18, y17\*, y16\*ph, y15, y14\*, y13ph, y12, y11, y10, y9, y8, y7, y6, y5, y4, y3, y2, y1



Raw file  
20150814\_A375SR\_Phospho\_BR2\_03

Scan 21982 Method FTMS; HCD Score 297.3 m/z 1336.62 Gene names CCNL1

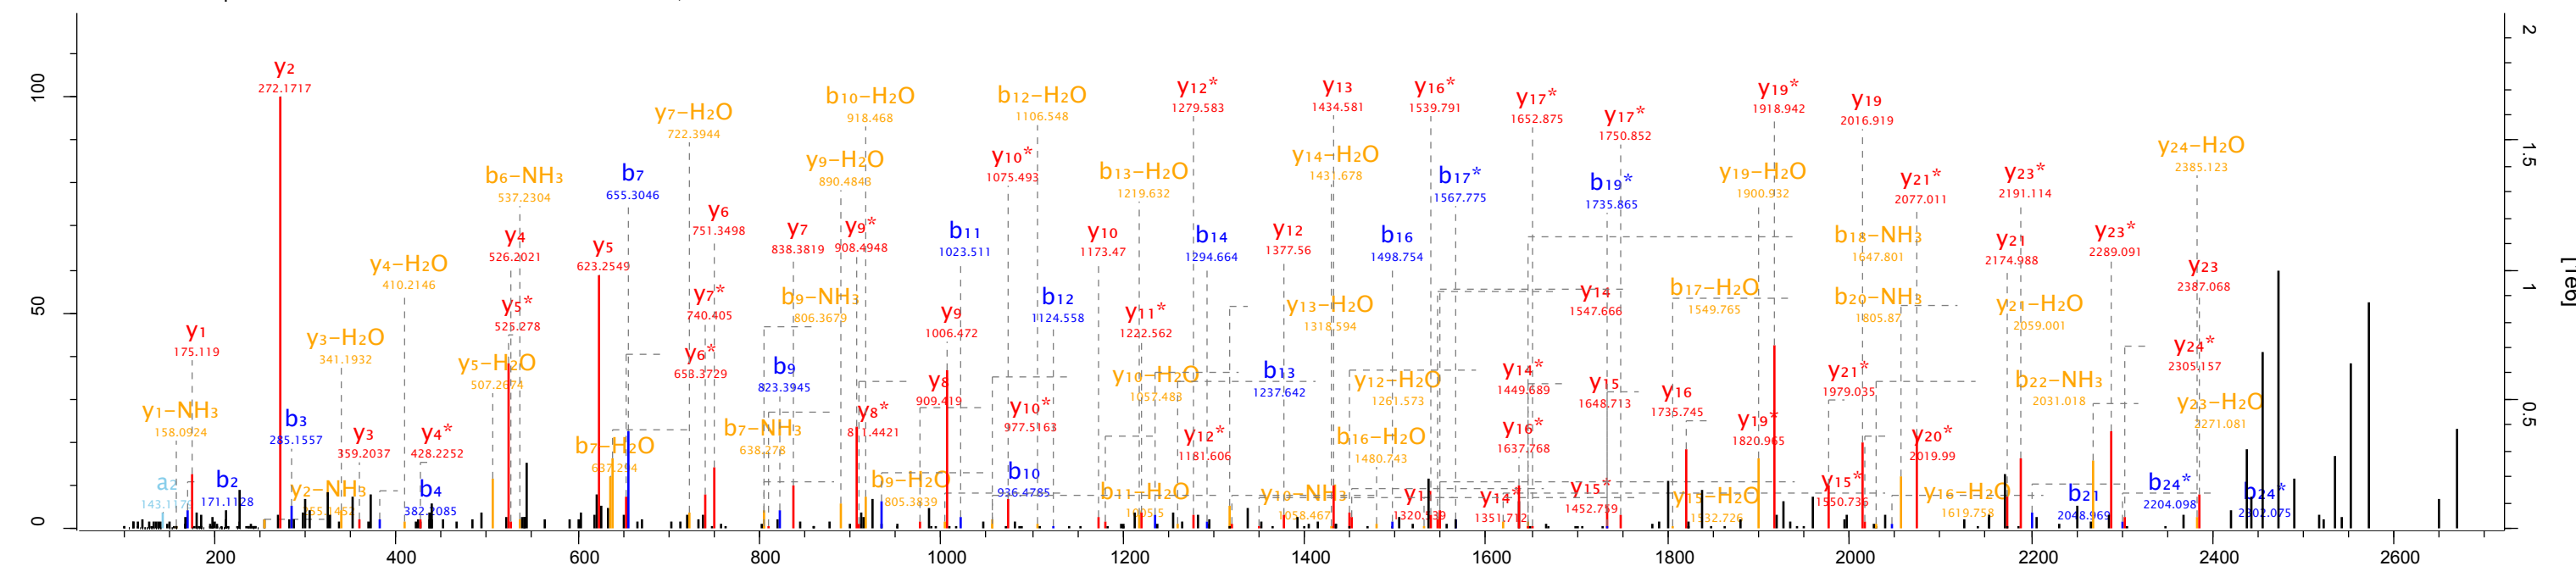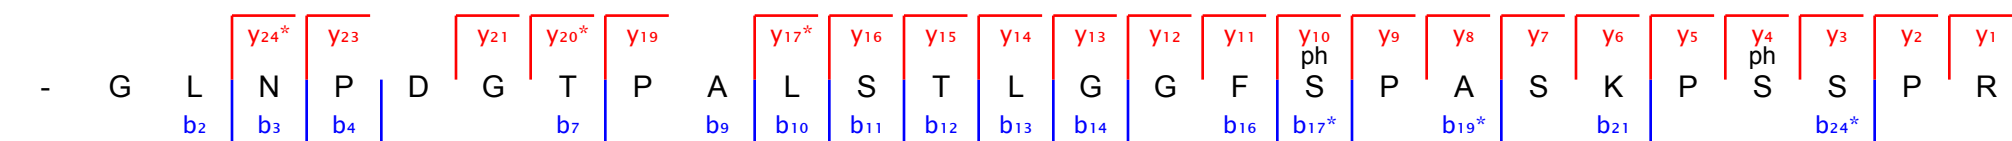

Raw file: 20150814\_A375SR\_Phospho\_BR2\_03  
 Scan: 22012 Method: FTMS; HCD Score: 218.84 m/z: 1065 Gene names: FAM129B

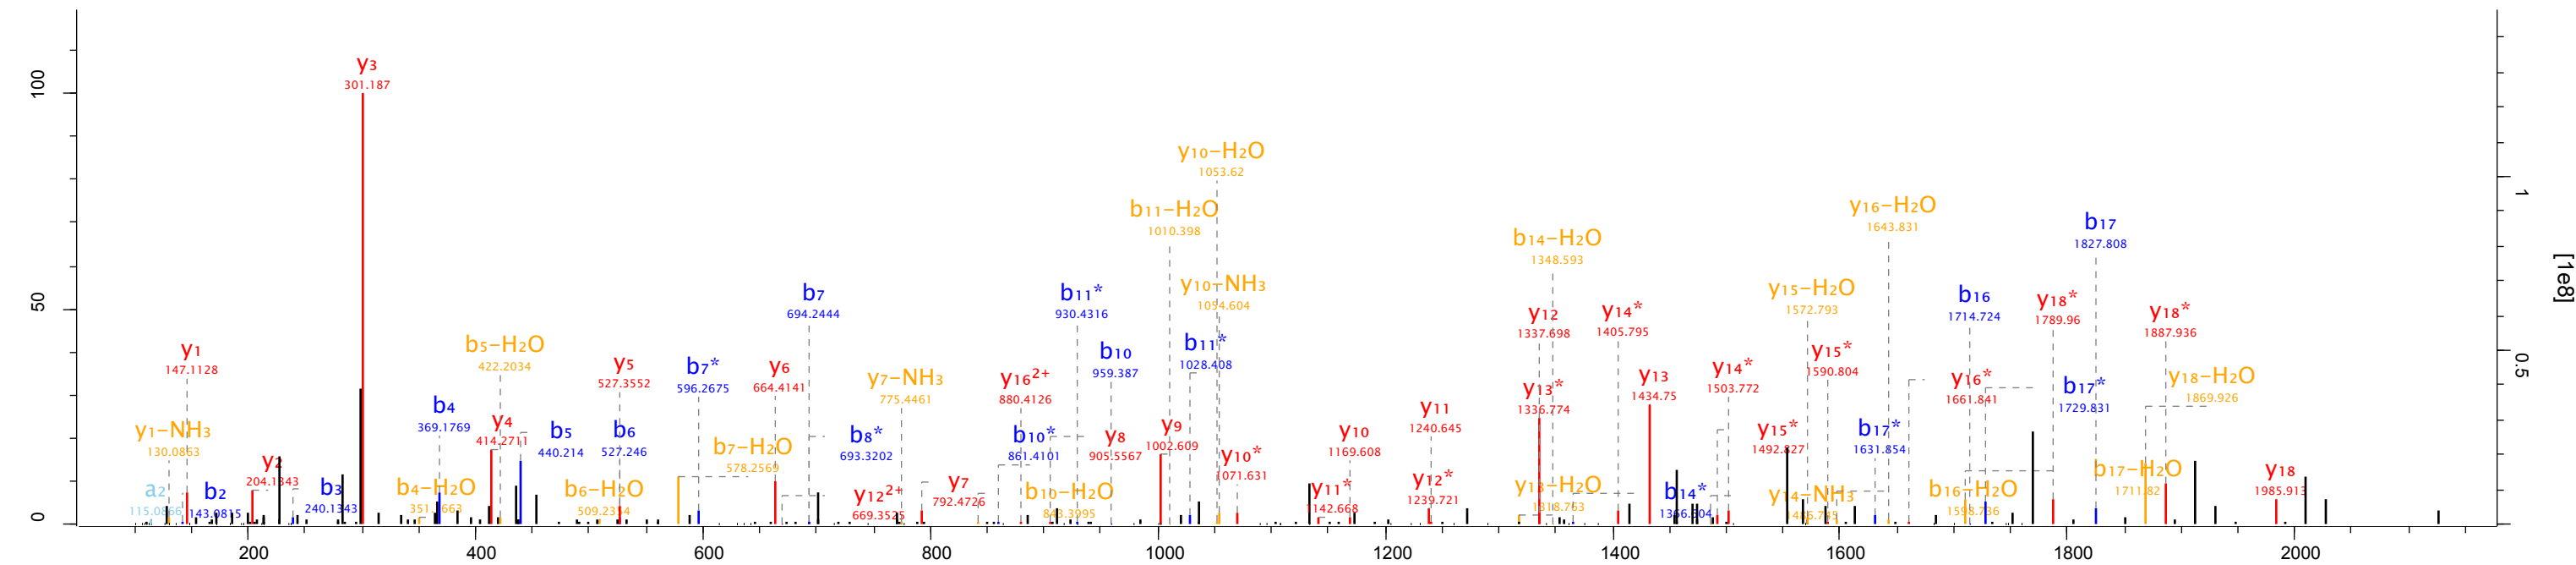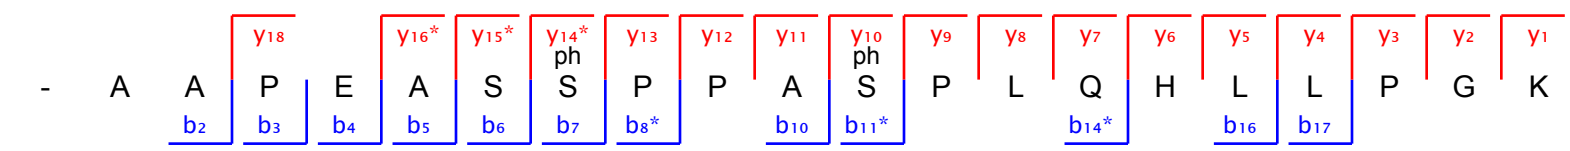

Raw file: 20150814\_A375SR\_Phospho\_BR2\_03  
 Scan: 22412  
 Method: FTMS; HCD  
 Score: 175.52  
 m/z: 870.35  
 Gene names: ARHGAP35

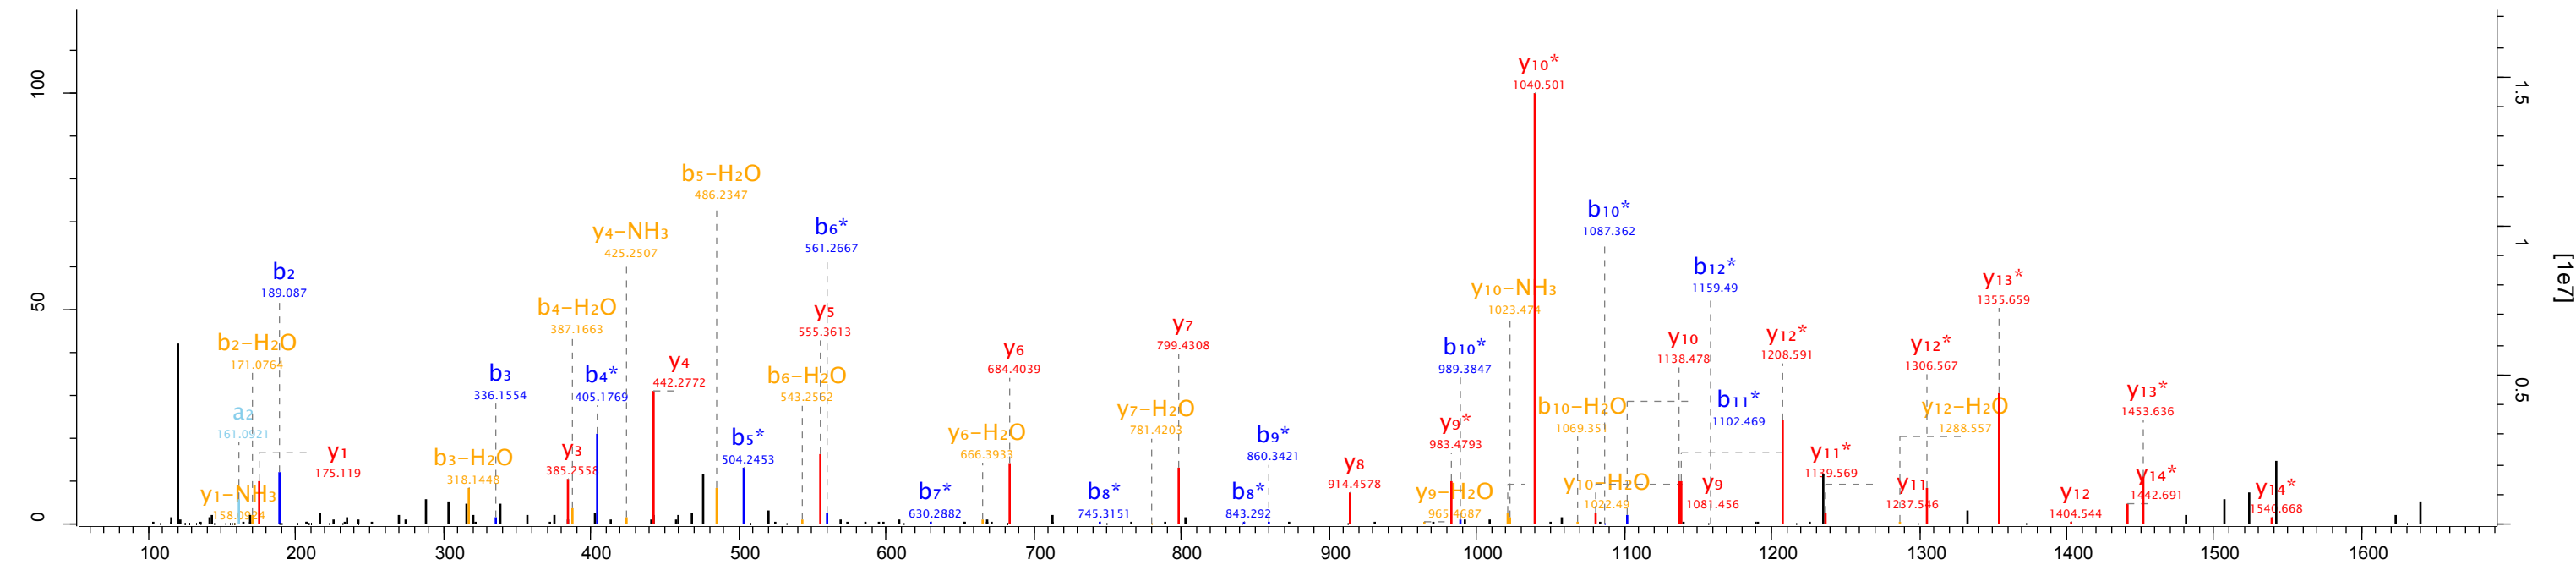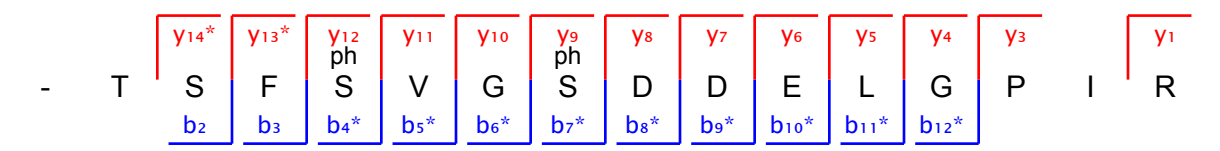

Raw file 20150814\_A375SR\_Phospho\_BR2\_03 Scan 22542 Method FTMS; HCD Score 125.79 m/z 1054.97 Gene names L1CAM

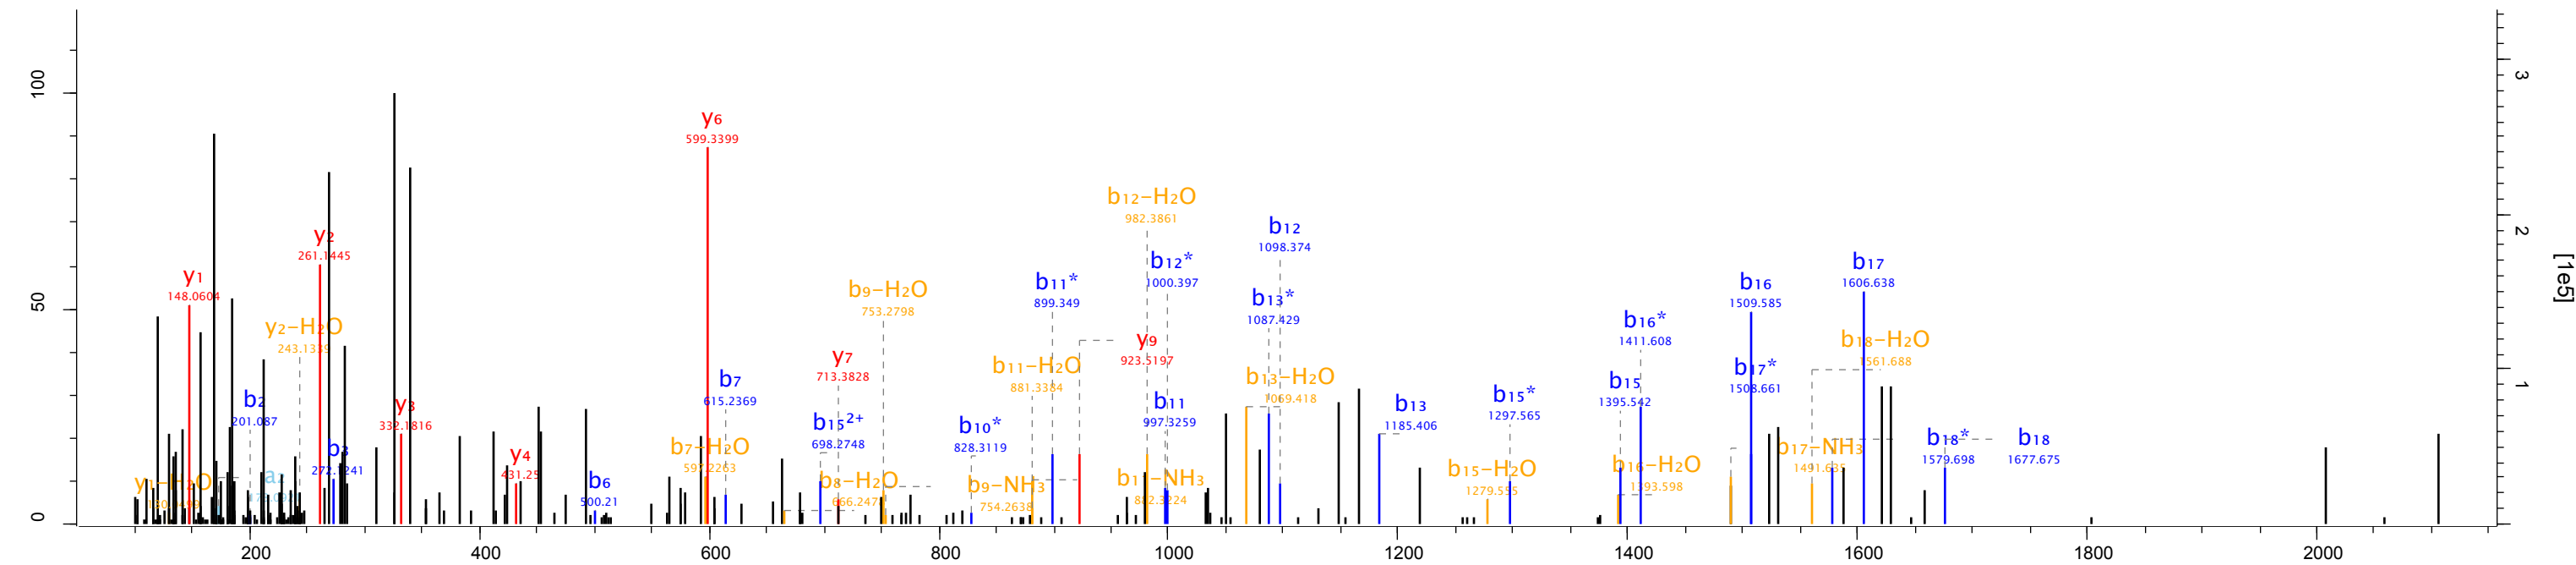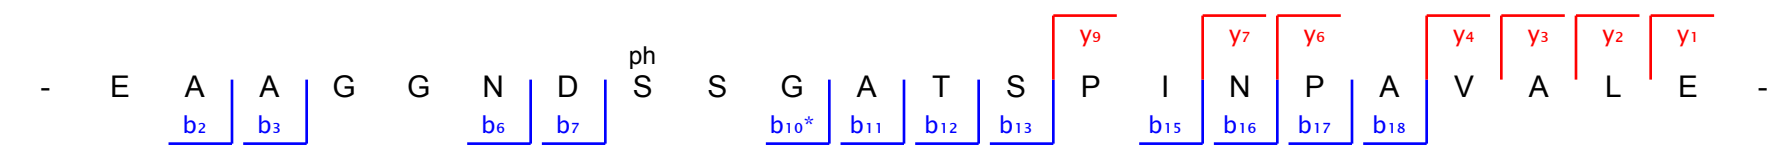

Raw file  
20150814\_A375SR\_Phospho\_BR2\_03

Scan 22592 Method FTMS; HCD Score 161.28 m/z 909.92 Gene names NEDD4L

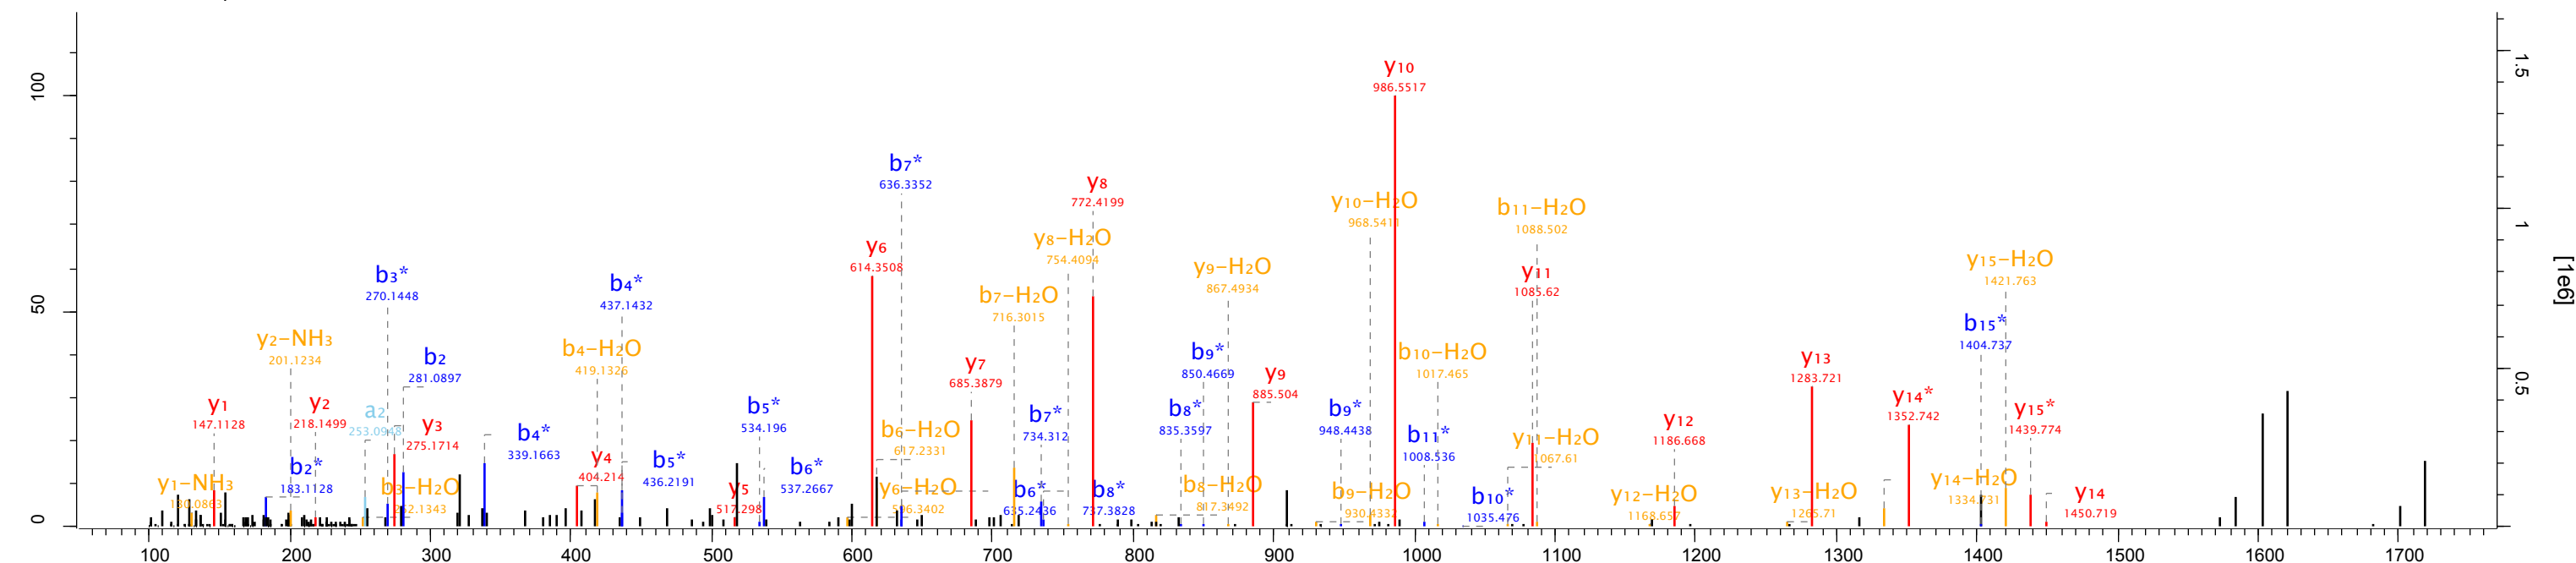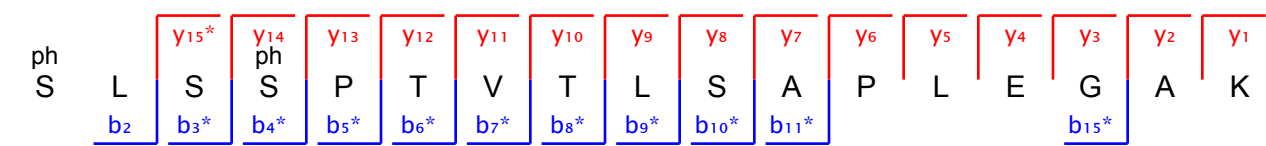

Raw file 20150814\_A375SR\_Phospho\_BR2\_03 Scan 22782 Method FTMS; HCD Score 125.31 m/z 970.96 Gene names GIGYF2

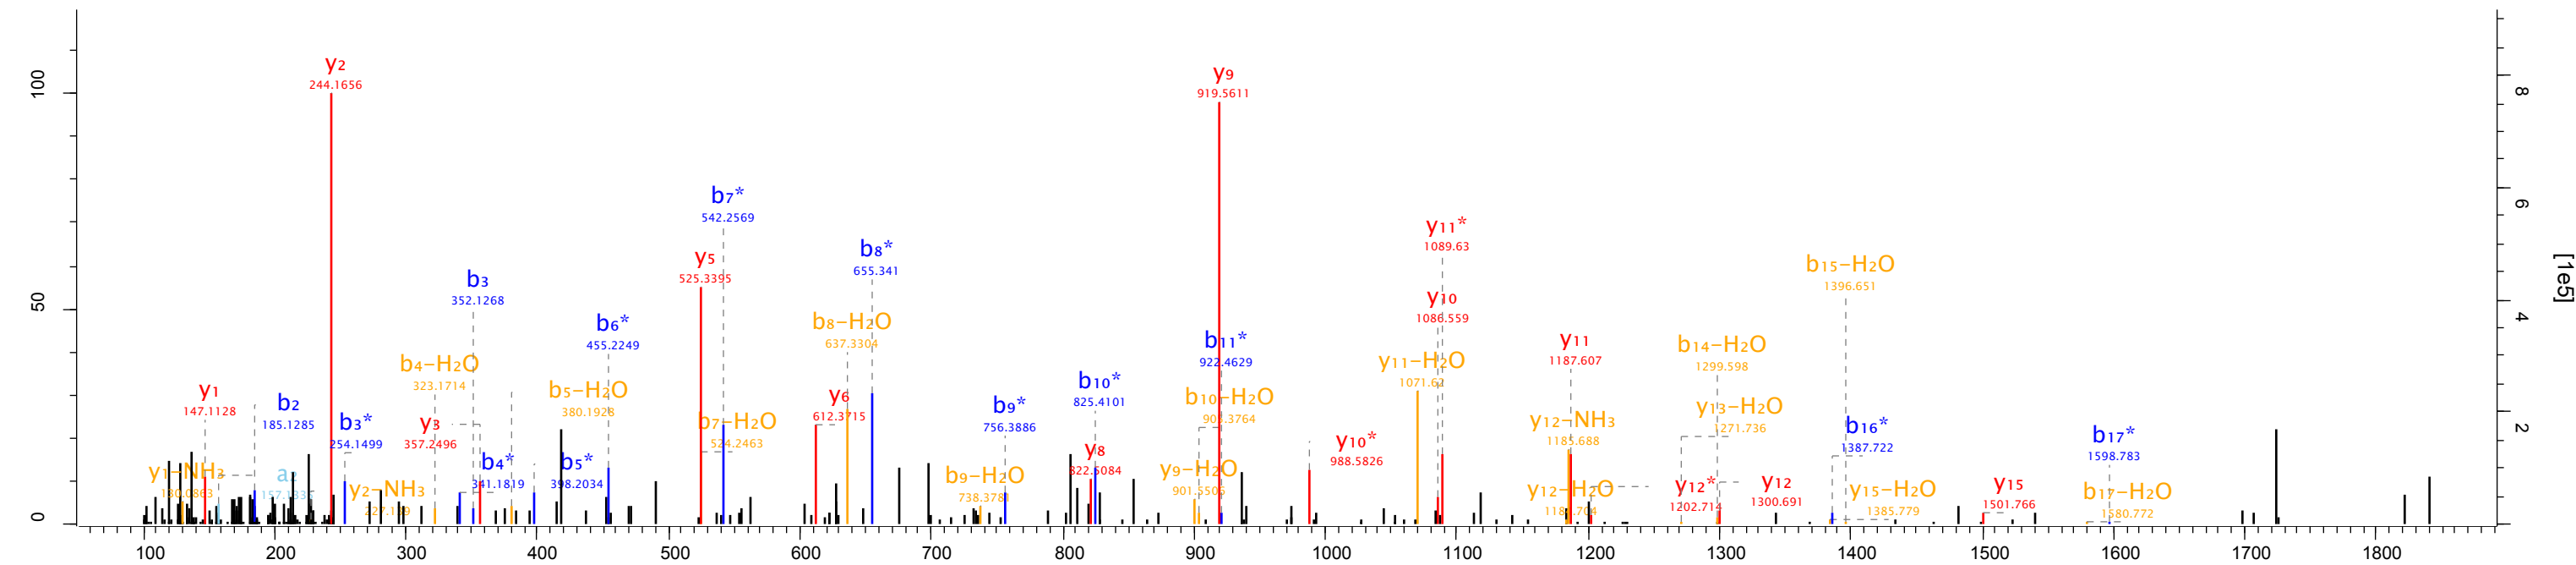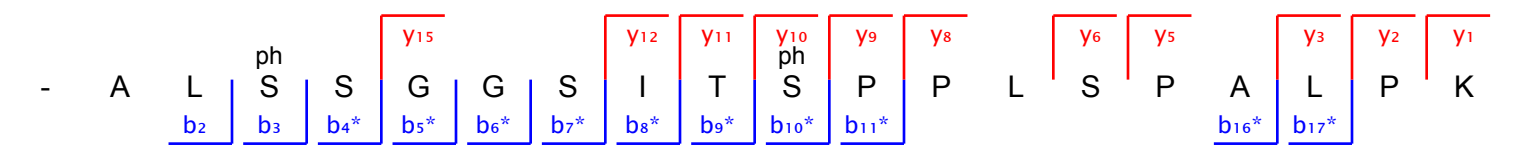

Raw file: 20150814\_A375SR\_Phospho\_BR2\_03  
 Scan: 22942 Method: FTMS; HCD Score: 80.17 m/z: 830.33 Gene names: SOX10

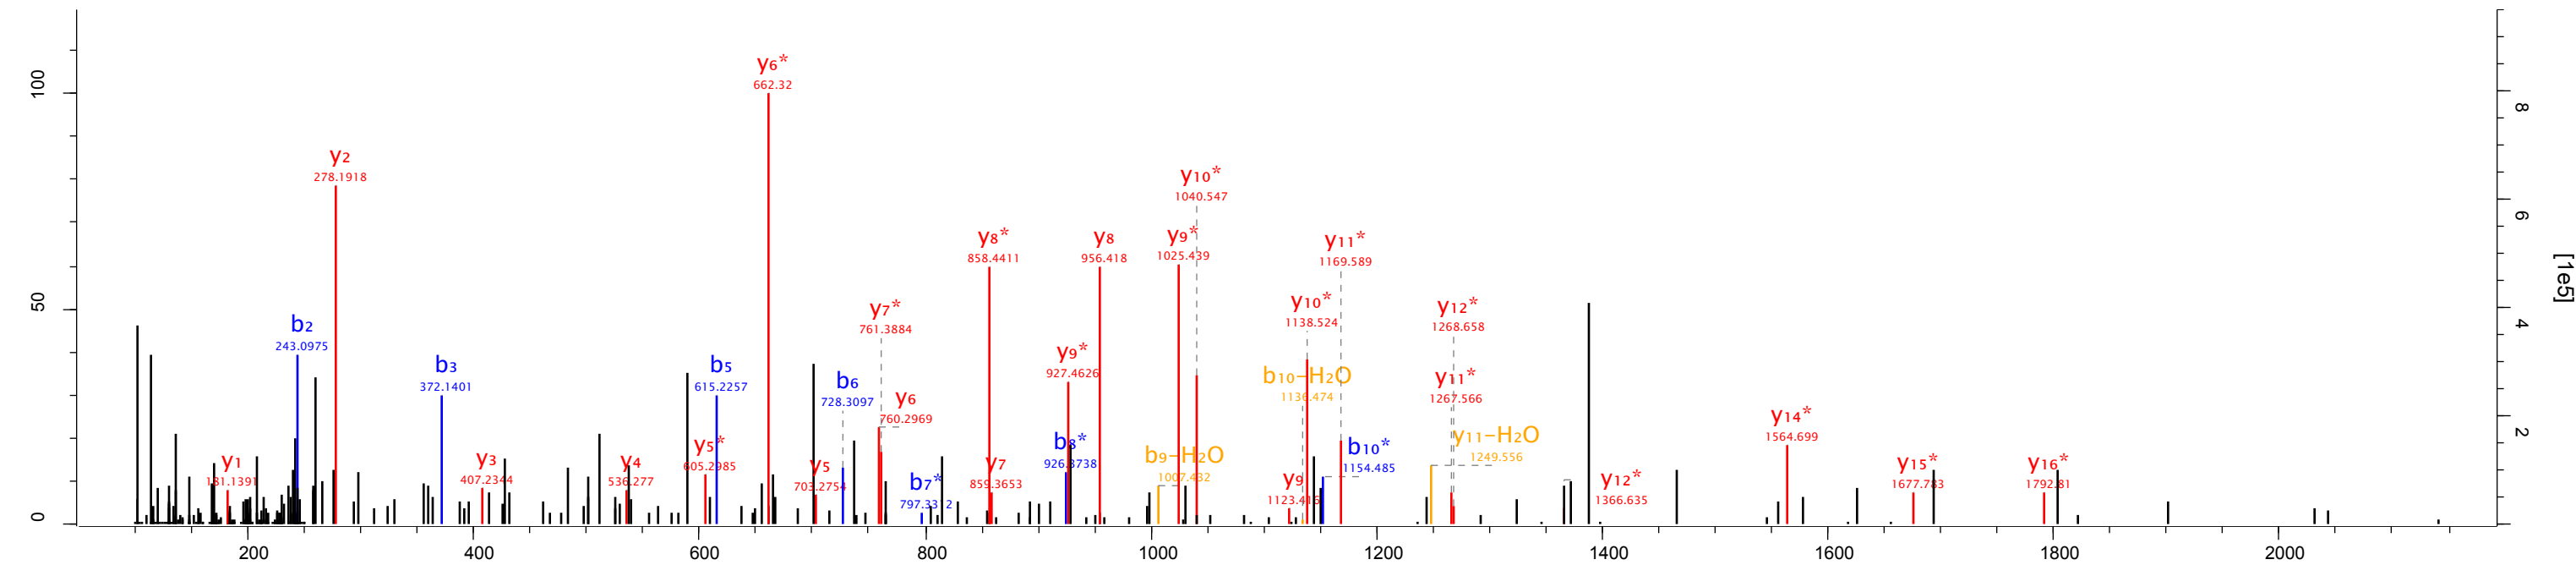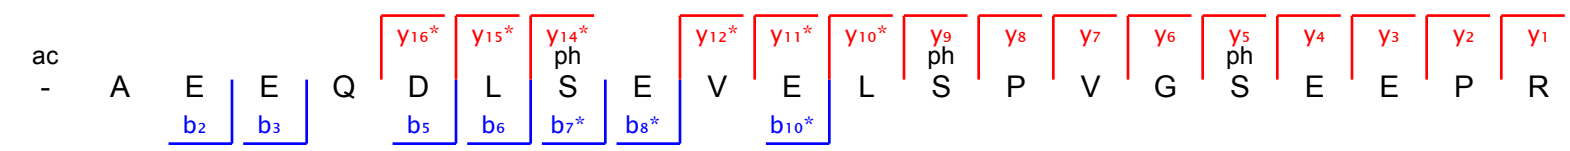

Raw file: 20150814\_A375SR\_Phospho\_BR2\_03  
 Scan: 23102 Method: FTMS; HCD Score: 231.16 m/z: 794.39 Gene names: CDK12

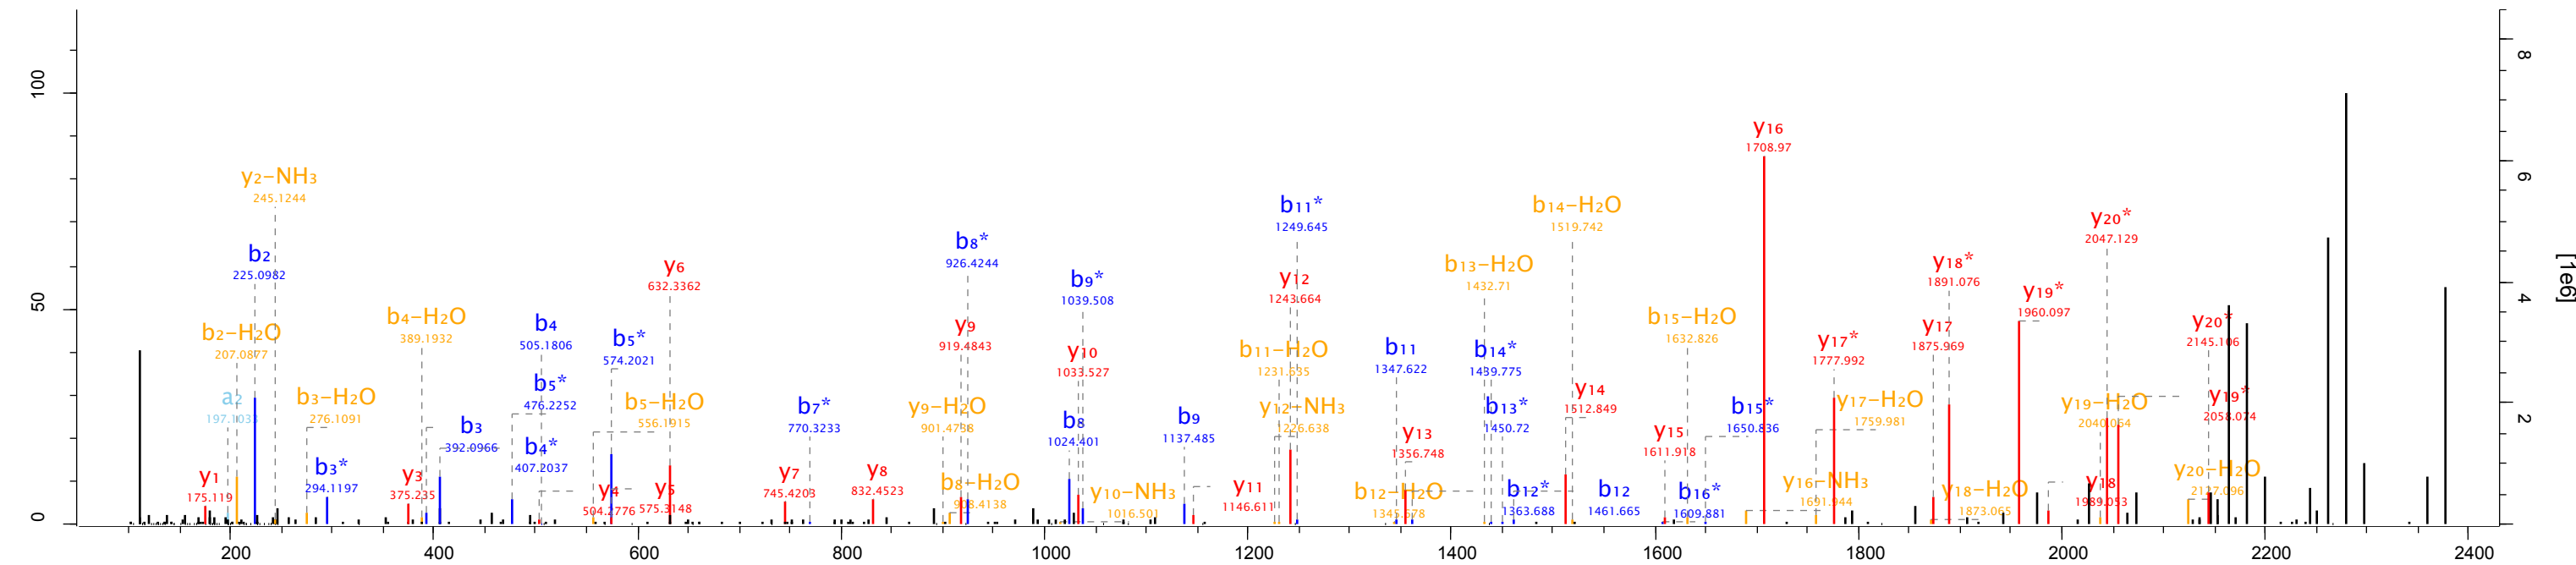

- H S S I P V R L P L N S S L G A E L S R -

y<sub>20</sub>\*
y<sub>19</sub>ph
y<sub>18</sub>
y<sub>17</sub>ph
y<sub>16</sub>
y<sub>15</sub>
y<sub>14</sub>
y<sub>13</sub>
y<sub>12</sub>
y<sub>11</sub>
y<sub>10</sub>
y<sub>9</sub>
y<sub>8</sub>
y<sub>7</sub>
y<sub>6</sub>
y<sub>5</sub>
y<sub>4</sub>
y<sub>3</sub>
y<sub>1</sub>

b<sub>2</sub>
b<sub>3</sub>
b<sub>4</sub>
b<sub>5</sub>\*
b<sub>7</sub>\*
b<sub>8</sub>
b<sub>9</sub>
b<sub>11</sub>
b<sub>12</sub>
b<sub>13</sub>\*
b<sub>14</sub>\*
b<sub>15</sub>\*
b<sub>16</sub>\*



Raw file Scan Method Score m/z Gene names  
 20150814\_A375SR\_Phospho\_BR2\_03 23462 FTMS; HCD 130.16 892.93 GORASP2

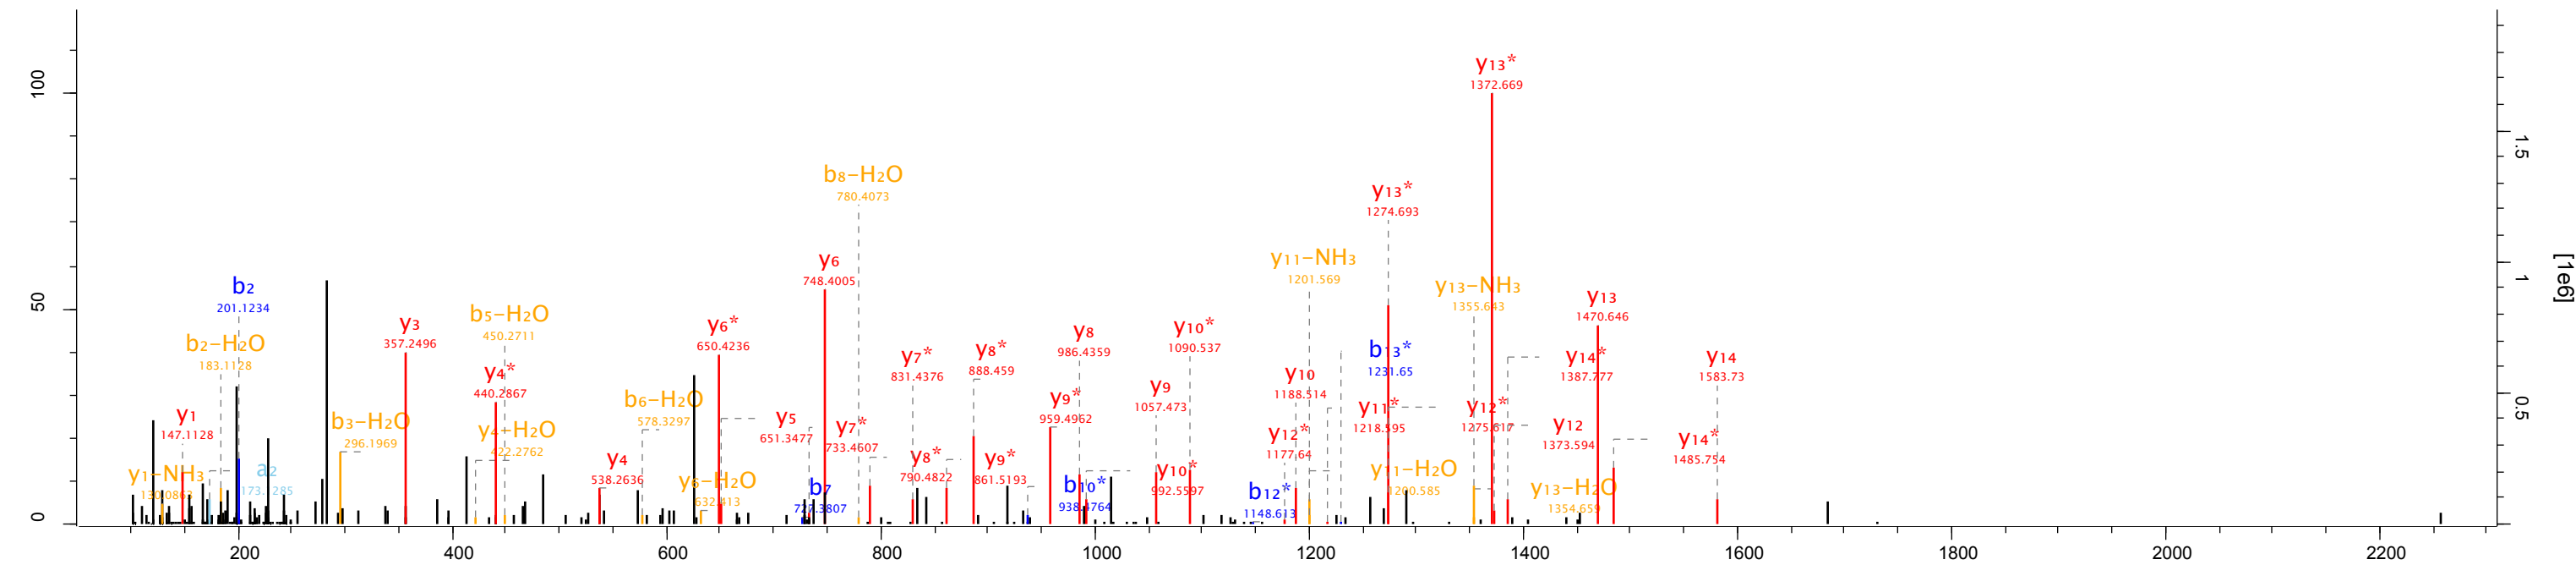

- I S L P G Q M A G T P I T P L K -  
 b2 b7 b10\* b12\* b13\*

Raw file: 20150814\_A375SR\_Phospho\_BR2\_03  
 Scan: 23532 Method: FTMS; HCD Score: 197.48 m/z: 852.9 Gene names: STMN1

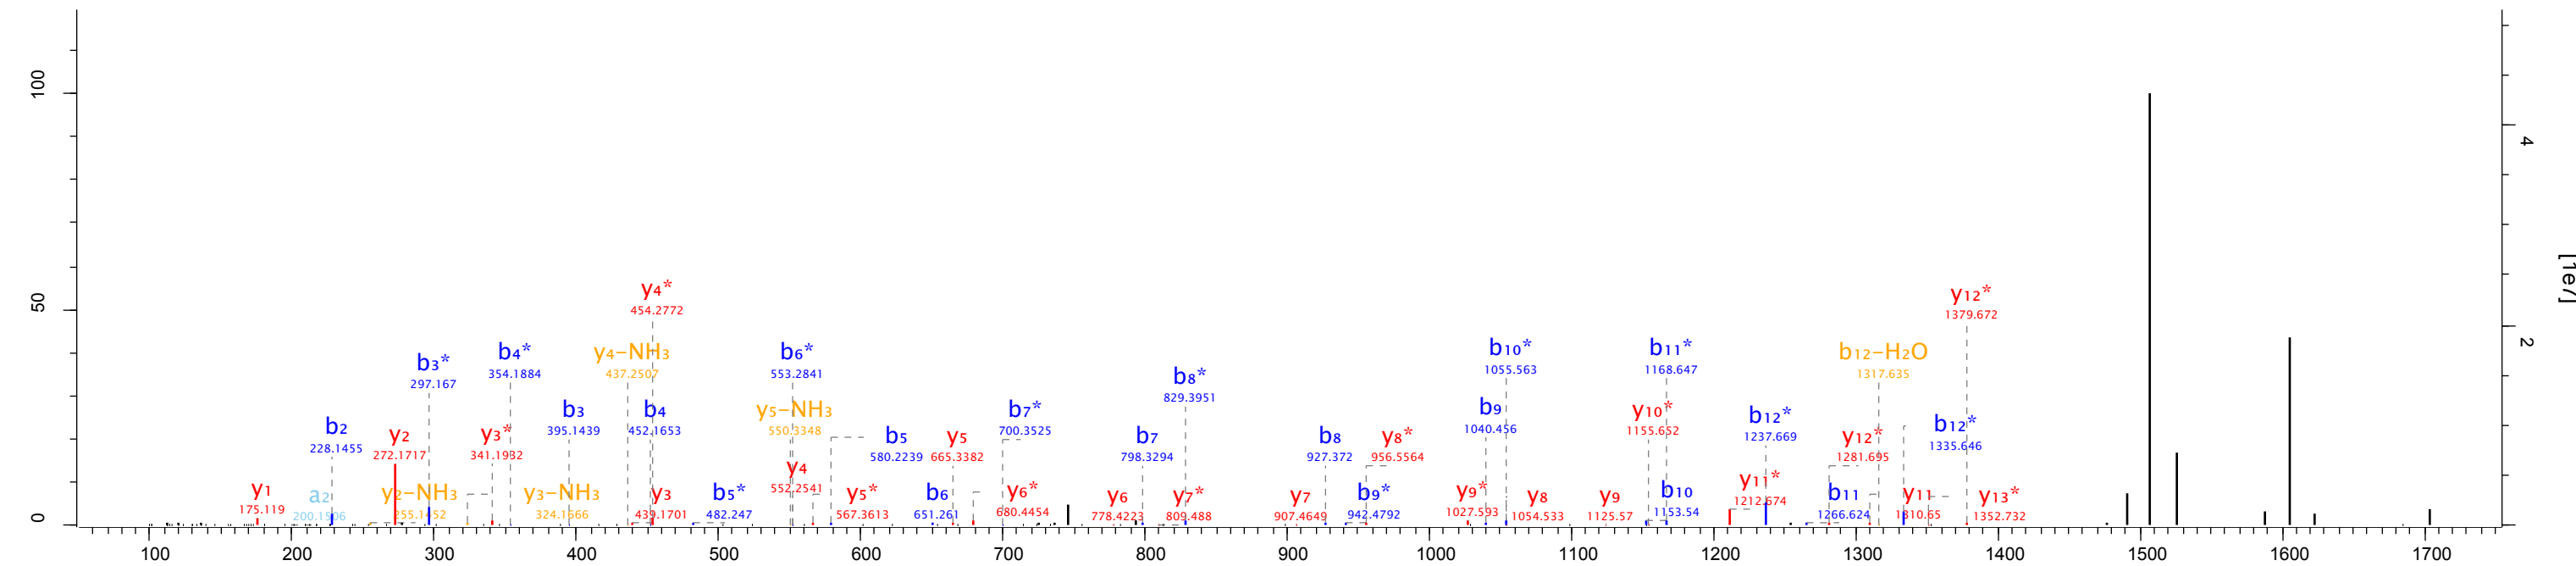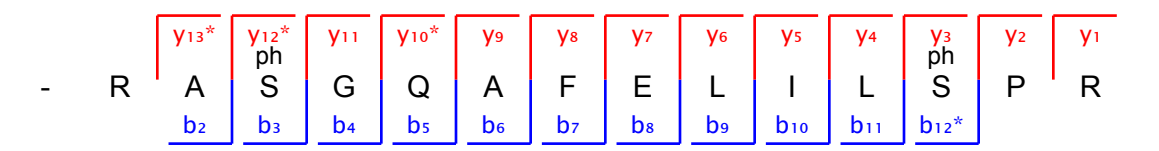

Raw file 20150814\_A375SR\_Phospho\_BR2\_03 Scan 23632 Method FTMS; HCD Score 69.48 m/z 707.99 Gene names PARD3B

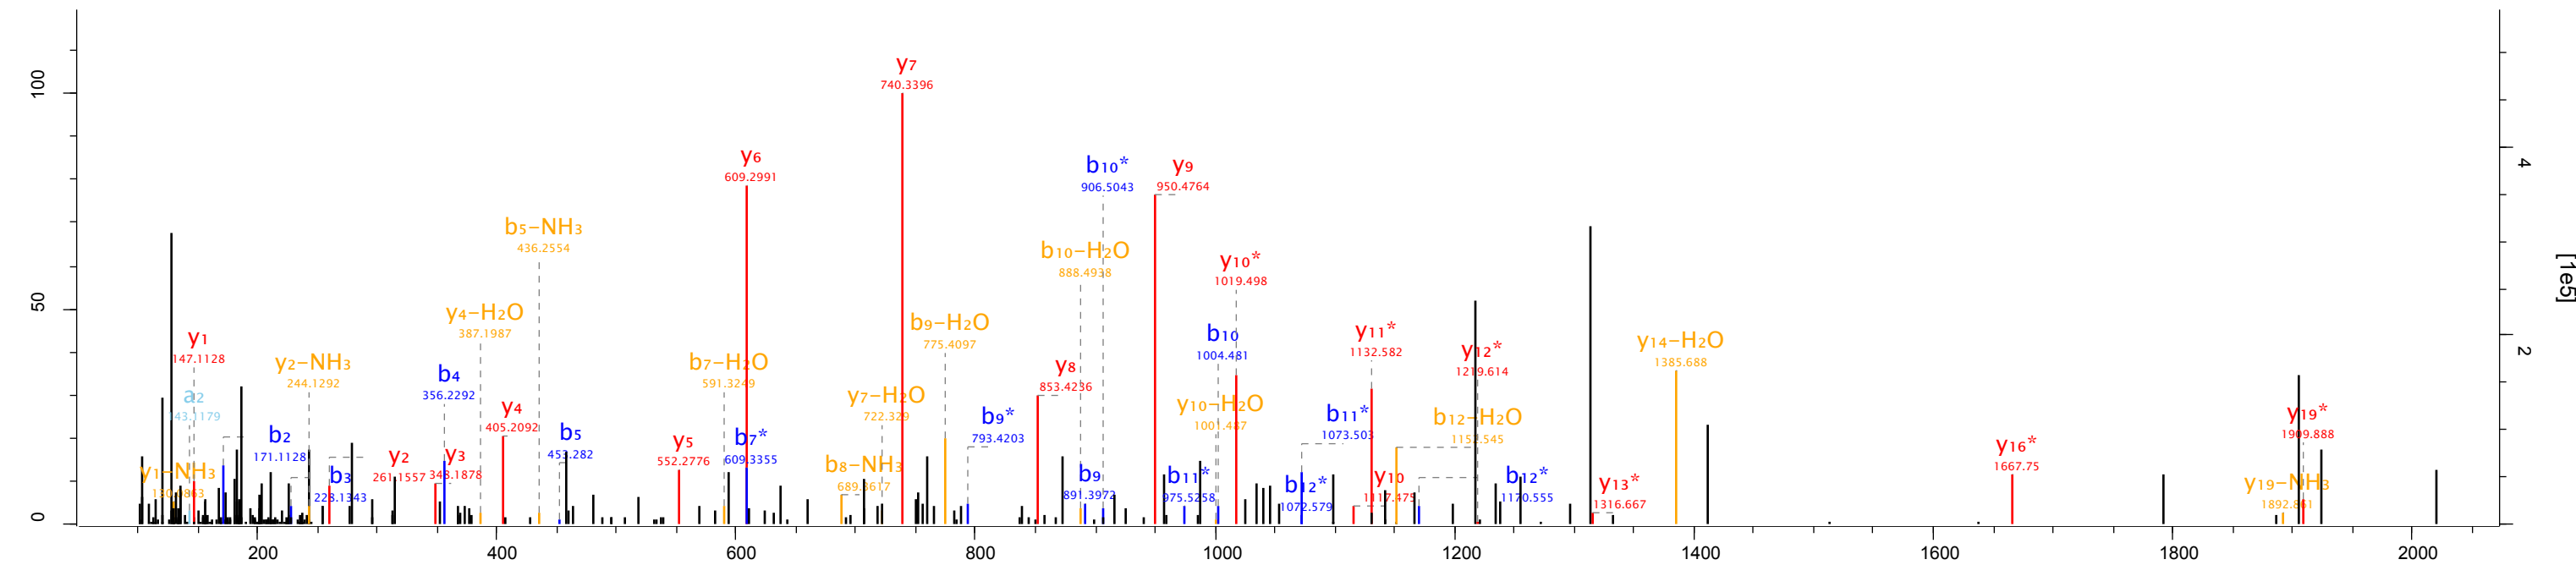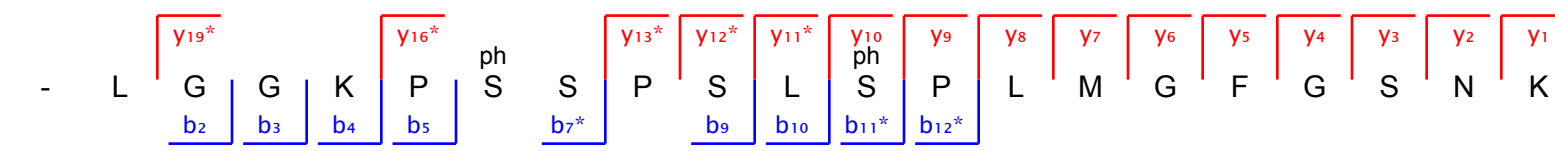

Raw file 20150814\_A375SR\_Phospho\_BR2\_03 Scan 23672 Method FTMS; HCD Score 113.15 m/z 820.1 Gene names SSFA2

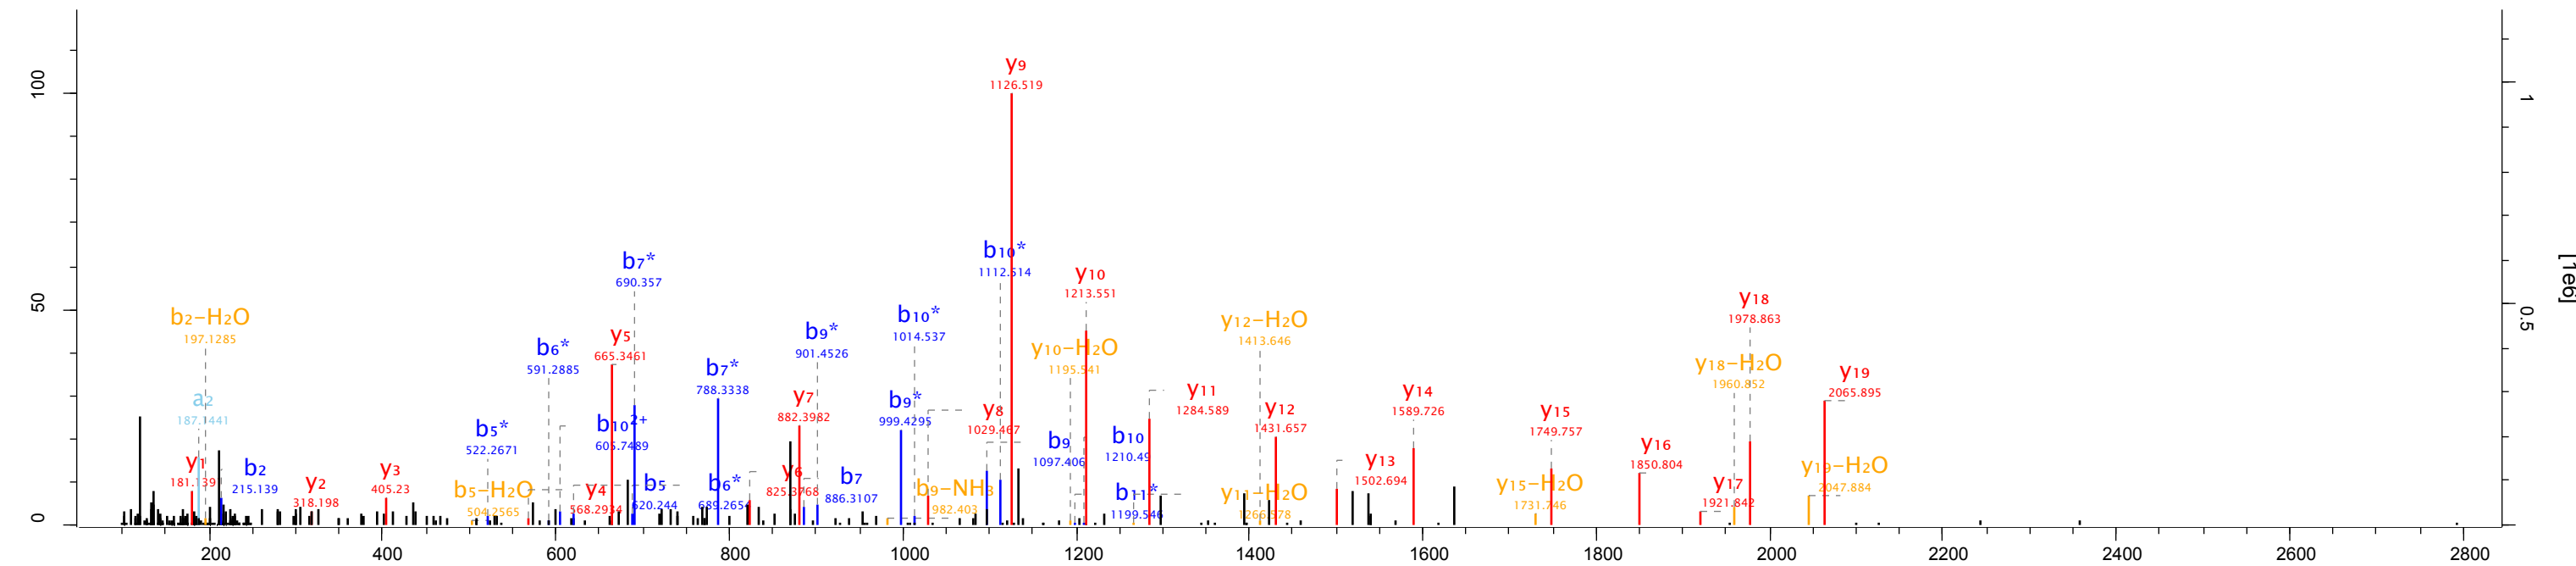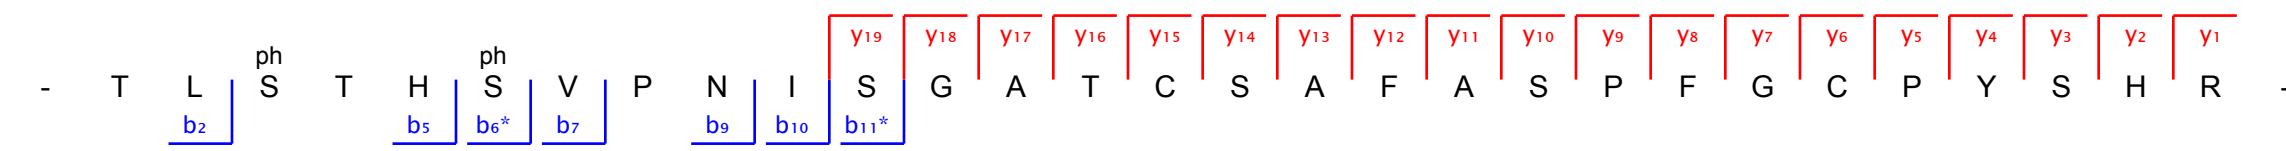

Raw file: 20150814\_A375SR\_Phospho\_BR2\_03  
 Scan: 24092 Method: FTMS; HCD Score: 190.48 m/z: 1416.11 Gene names: RTN4

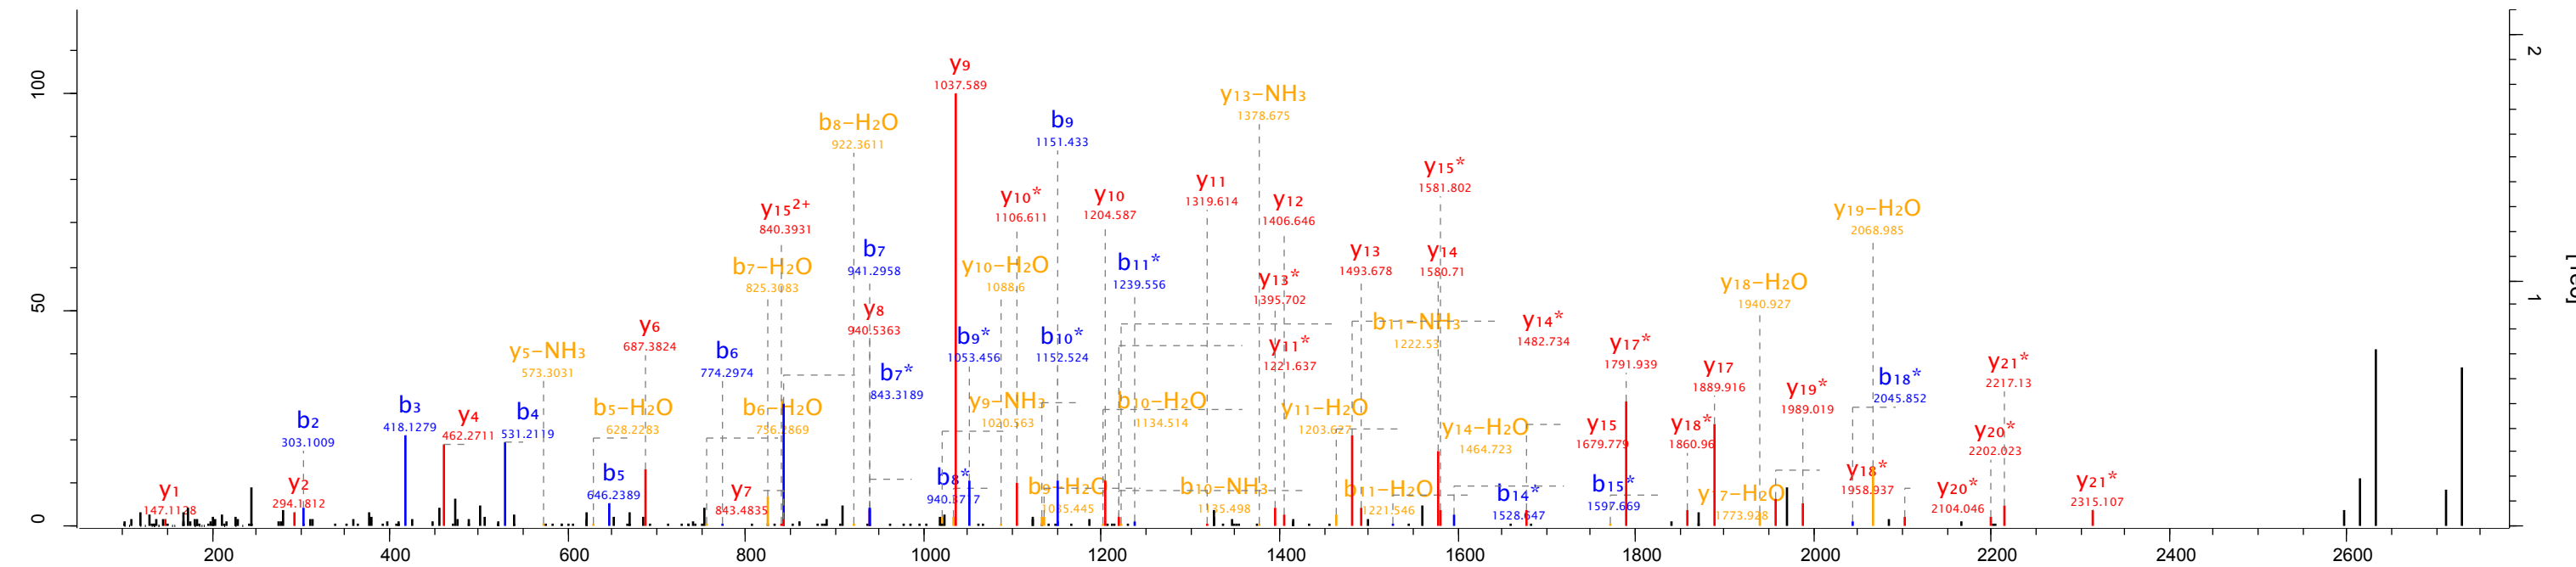

ac - M E D L D Q S P L V S S S D S P P R P Q P A F K -

Peptide sequence with b and y ion fragmentation sites indicated by brackets below the amino acids. b ions are shown in blue brackets, and y ions are shown in red brackets.

Raw file  
20150814\_A375SR\_Phospho\_BR2\_03

Scan 24142 Method FTMS; HCD Score 218.87 m/z 1047.94 Gene names UBXN7

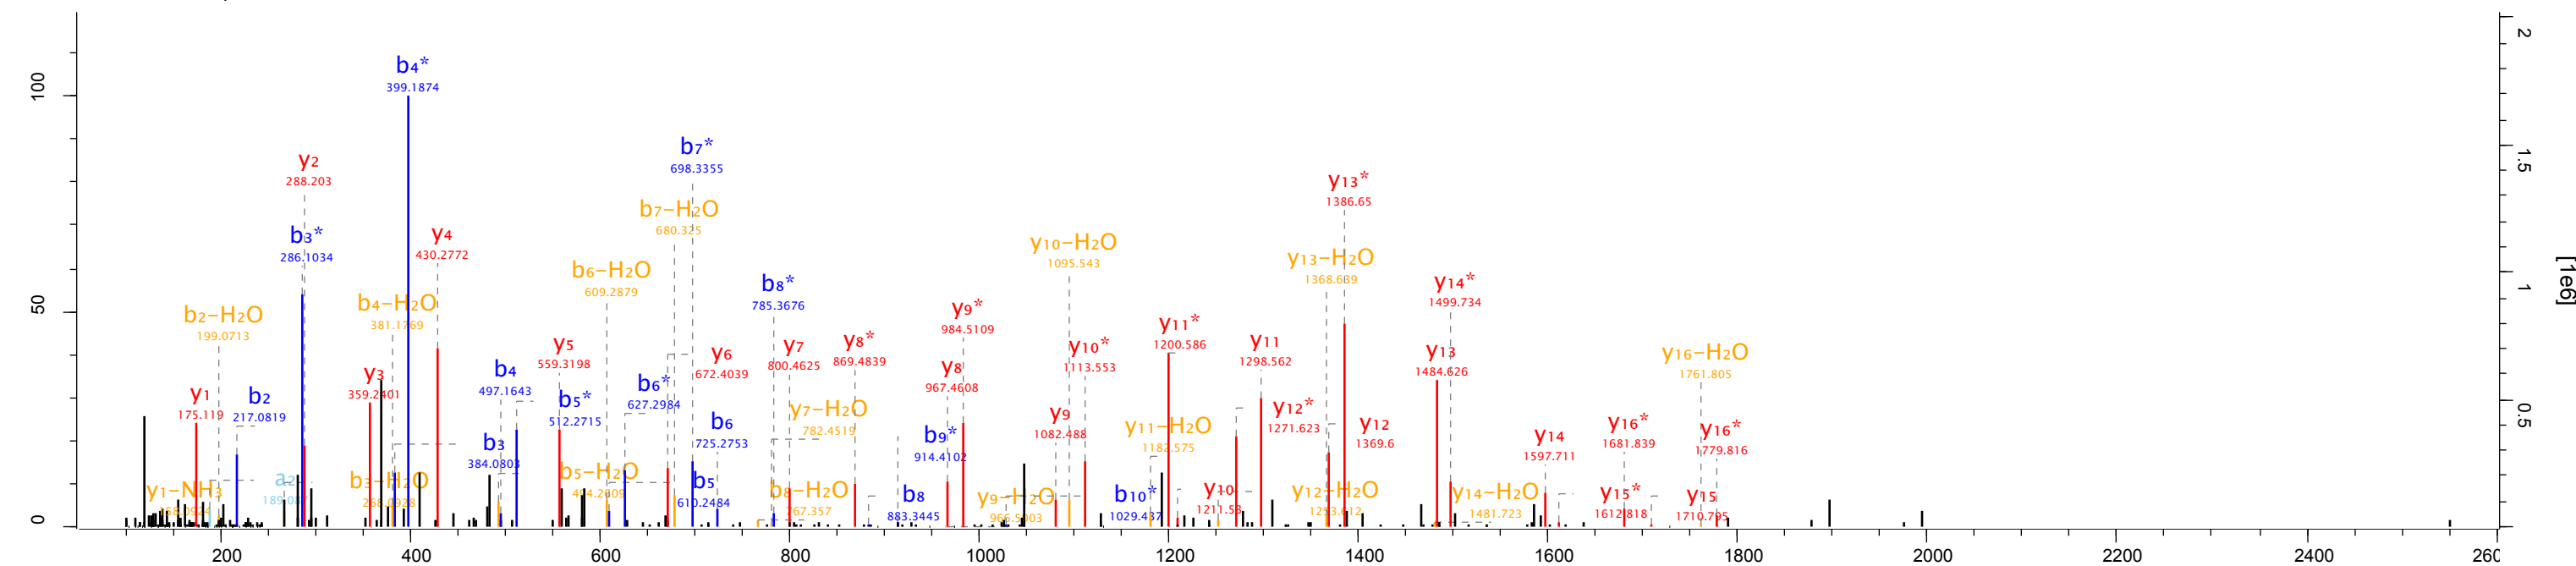

- S E S L I D A S E D S Q L E A A I R -  
b2 b3 b4 b5 b6 b7\* b8 b9\* b10\*

Raw file: 20150814\_A375SR\_Phospho\_BR2\_03  
 Scan: 24372 Method: FTMS; HCD Score: 81.2 m/z: 1058.2 Gene names: PHAX

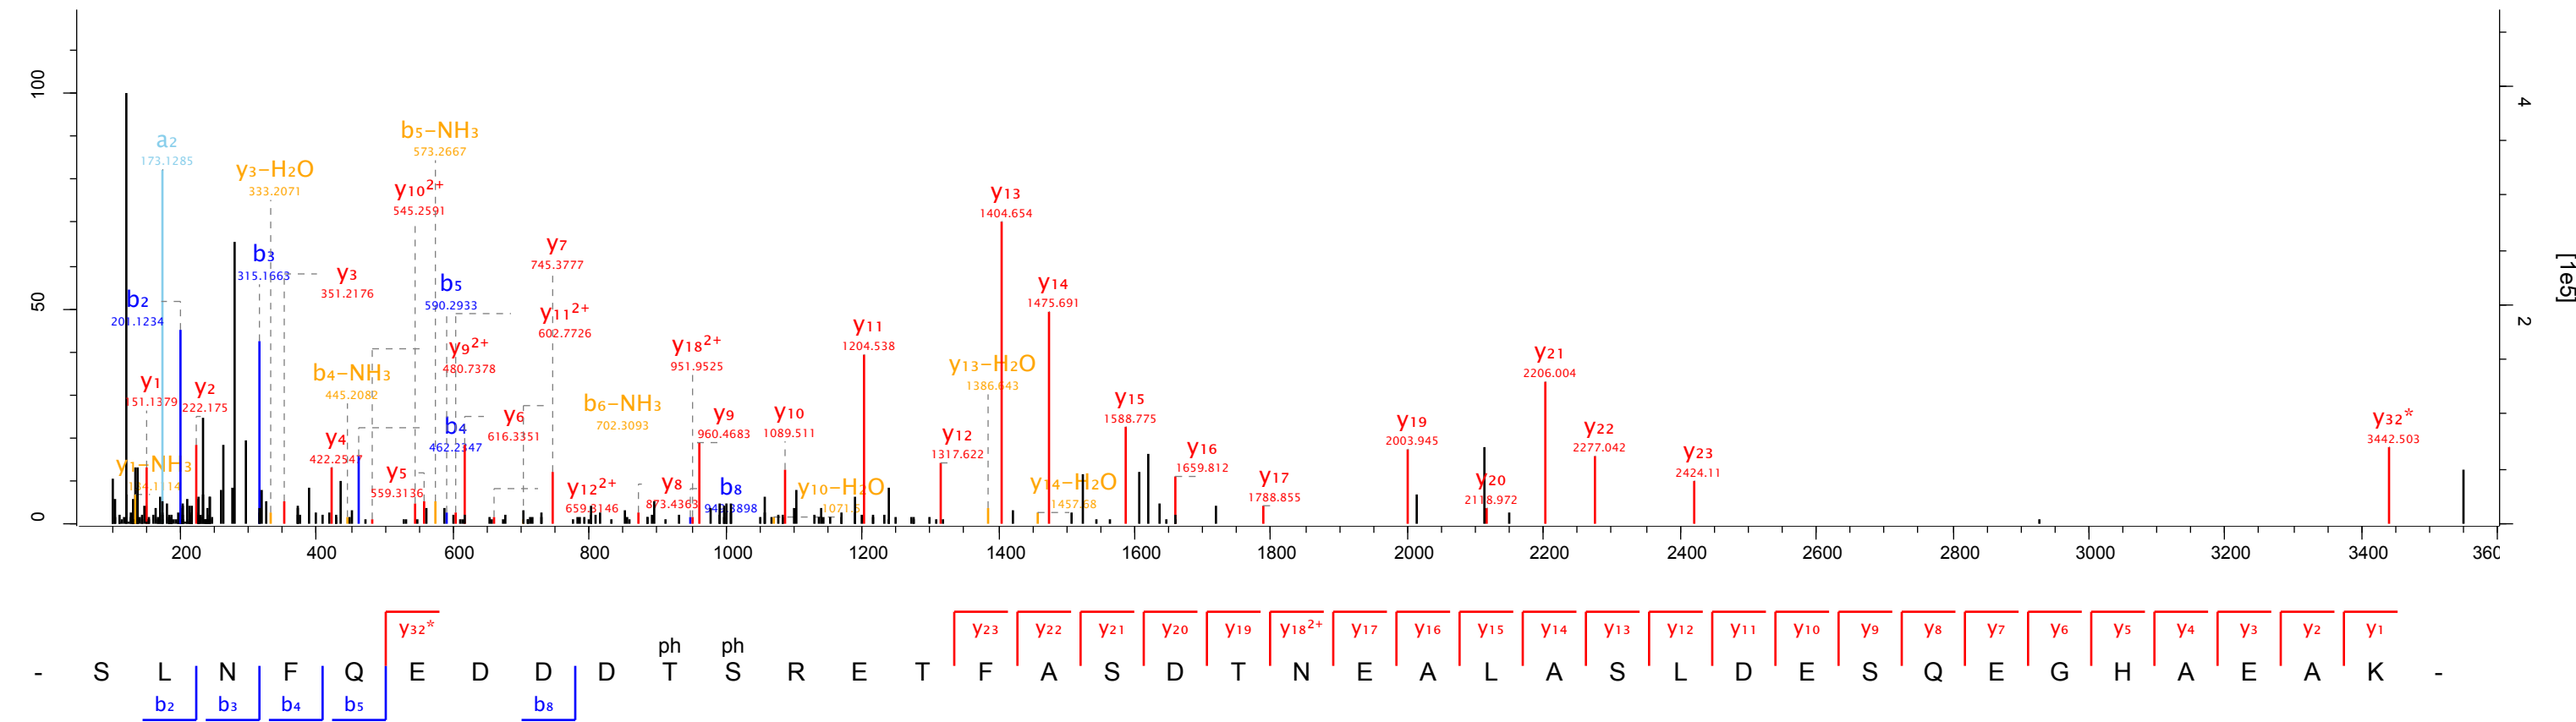

Raw file: 20150814\_A375SR\_Phospho\_BR2\_03  
 Scan: 24742 Method: FTMS; HCD Score: 143.21 m/z: 789.68 Gene names: DENND1B

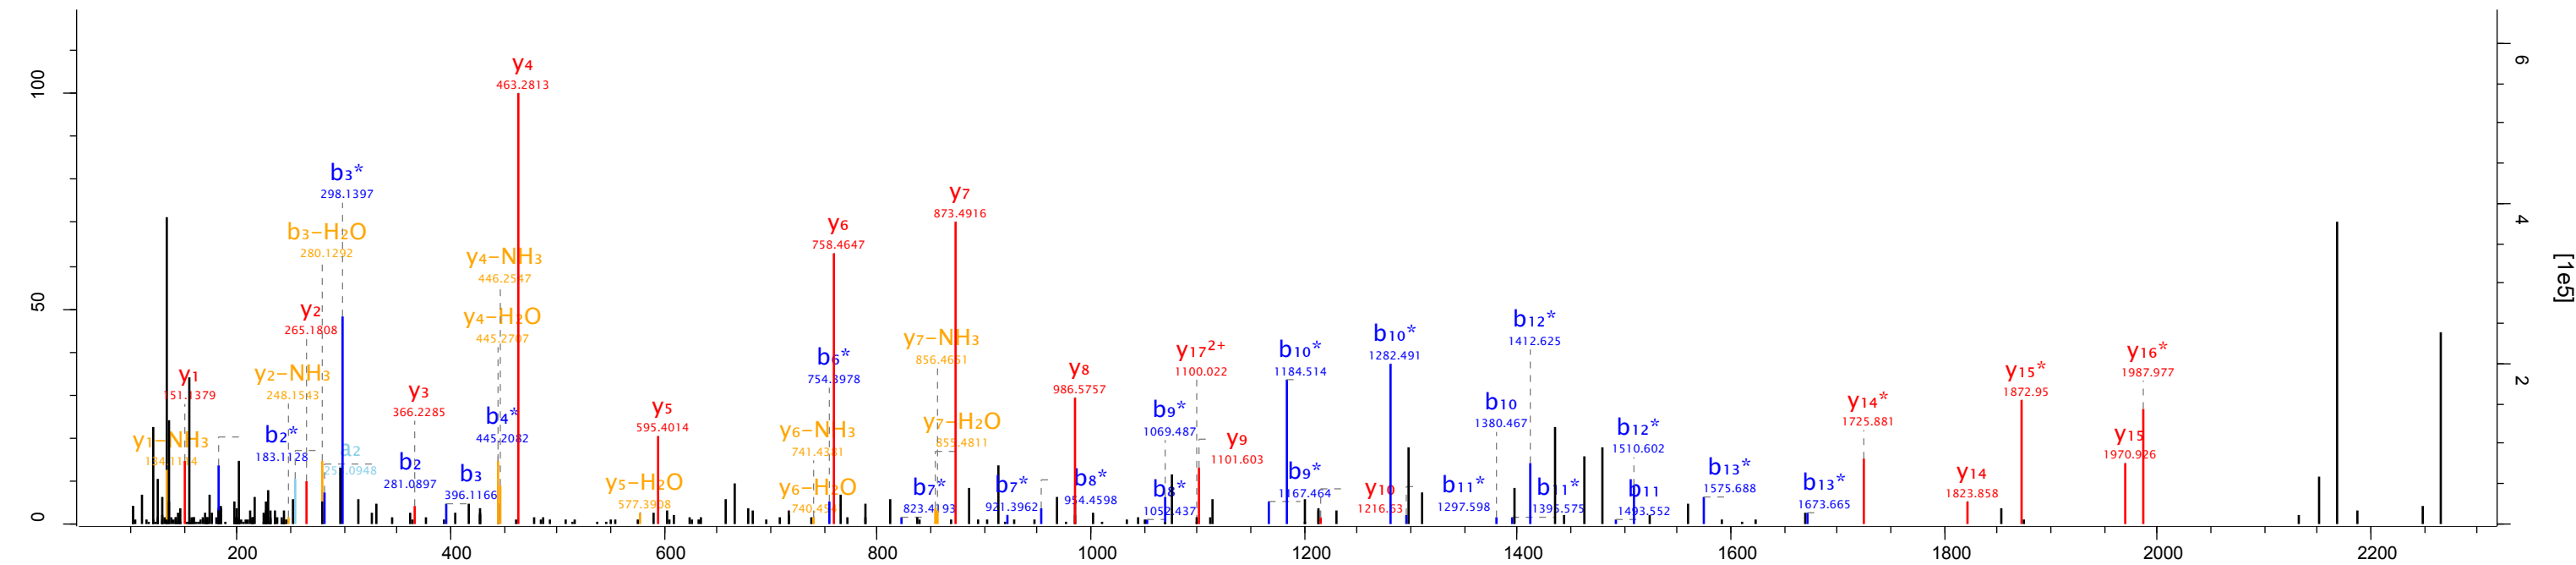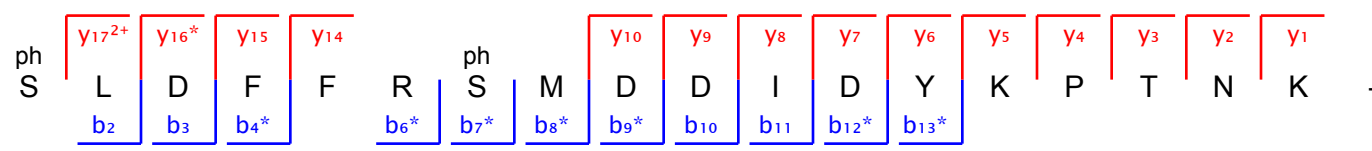



Raw file: 20150814\_A375SR\_Phospho\_BR2\_03  
 Scan: 24752 Method: FTMS; HCD Score: 70.47 m/z: 1025.49 Gene names: CLMP

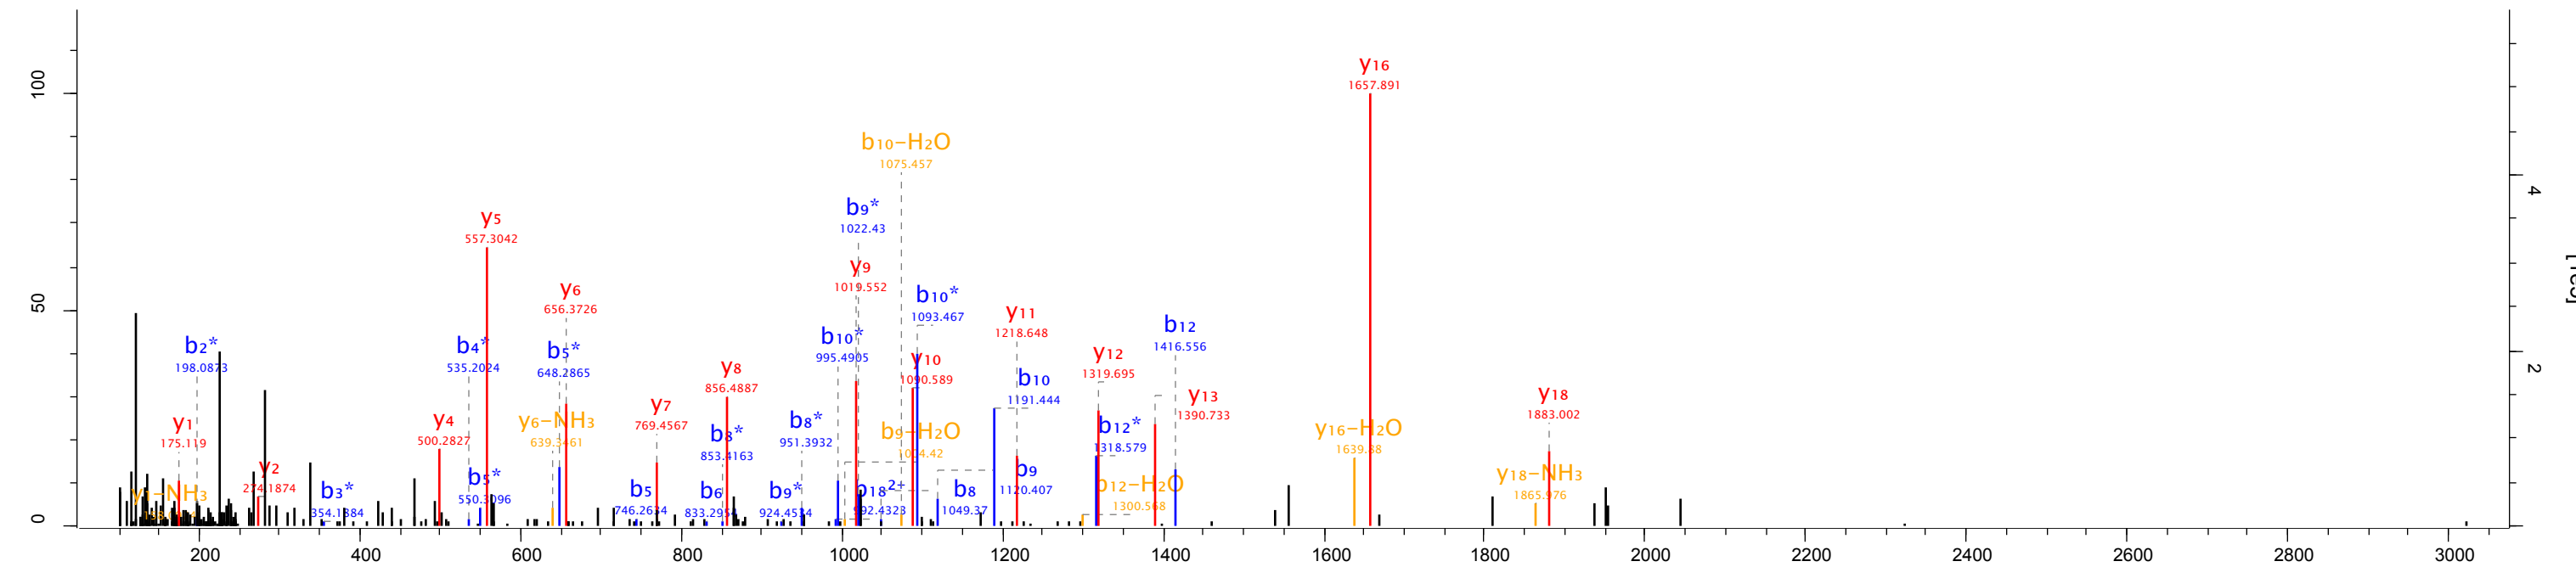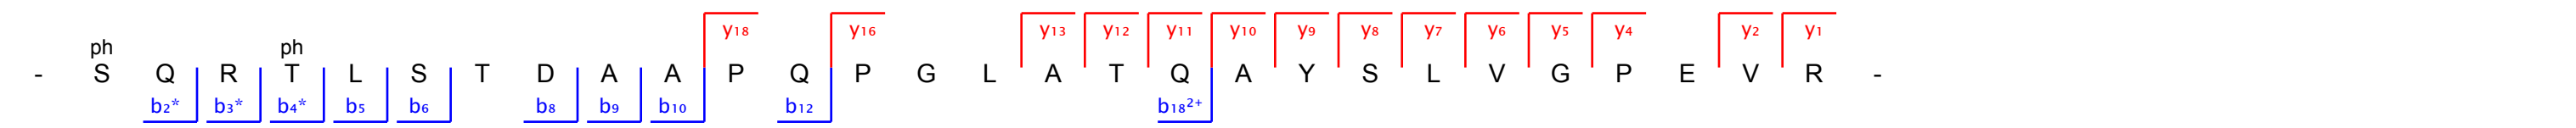

Raw file: 20150814\_A375SR\_Phospho\_BR2\_03  
 Scan: 25022 Method: FTMS; HCD Score: 63.12 m/z: 986.06 Gene names: TOP2B

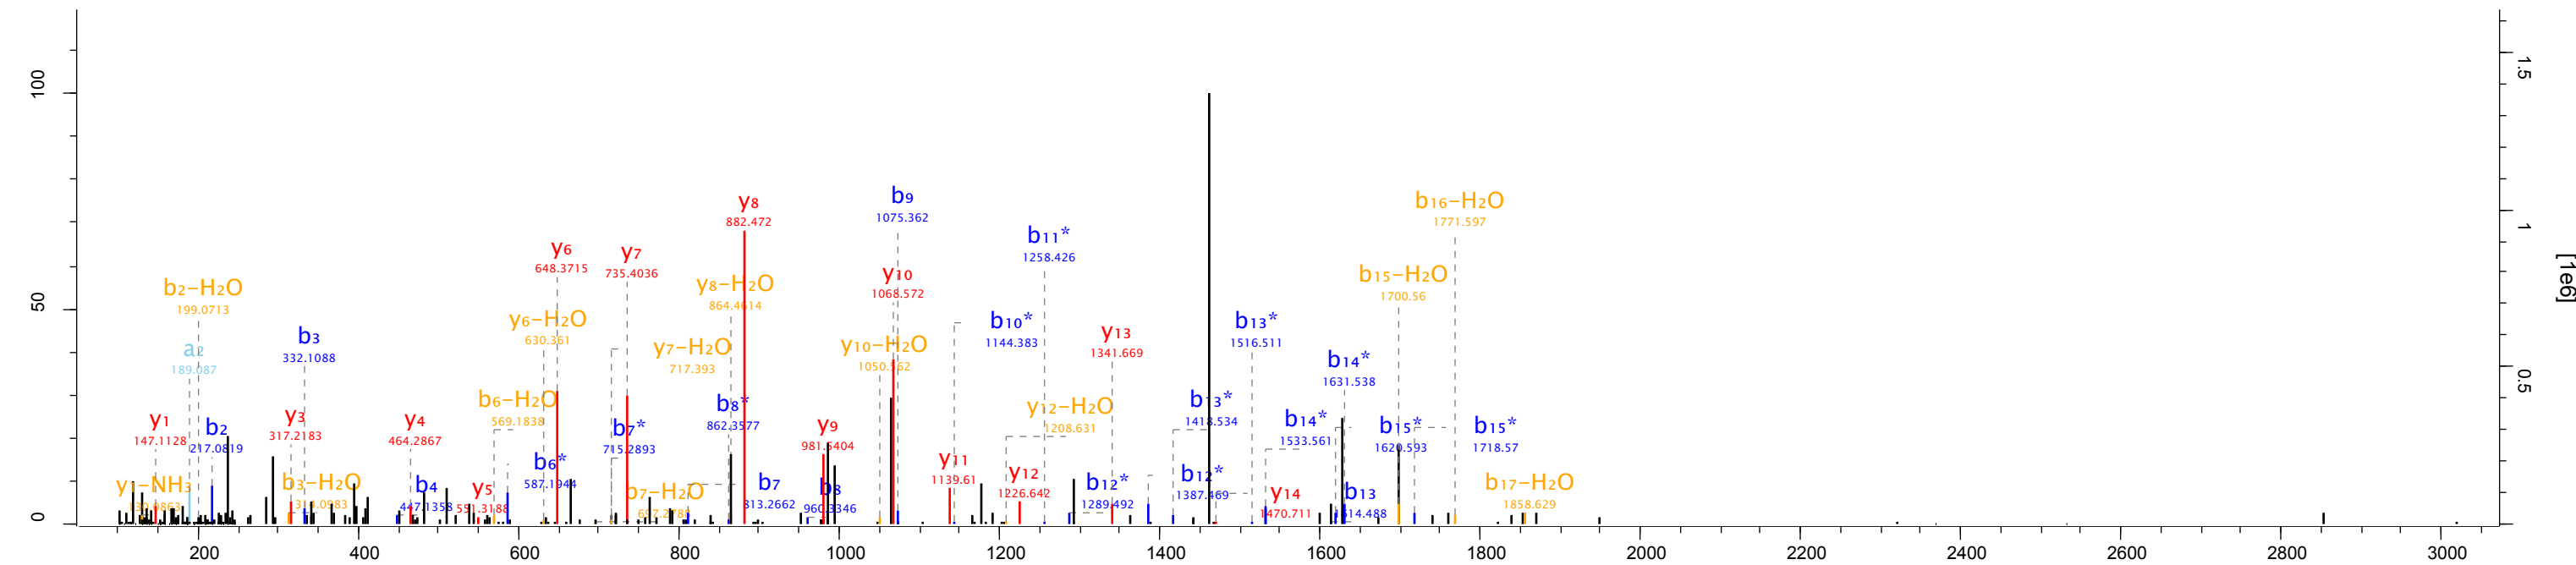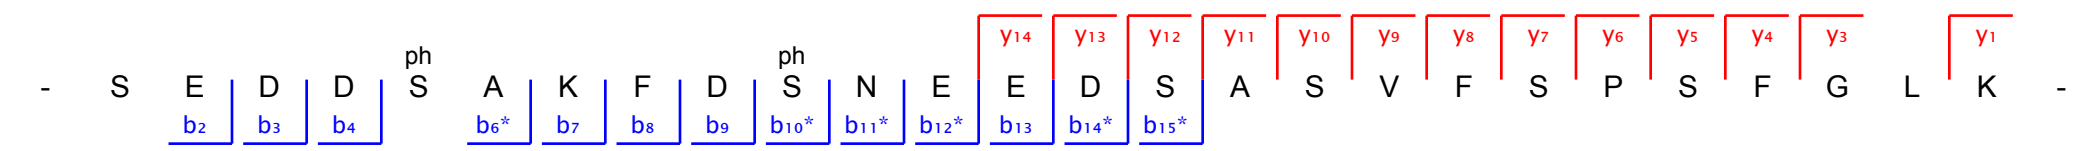

Raw file  
20150814\_A375SR\_Phospho\_BR2\_03

Scan 25052 Method FTMS; HCD Score 72.47 m/z 765.38 Gene names FARP2

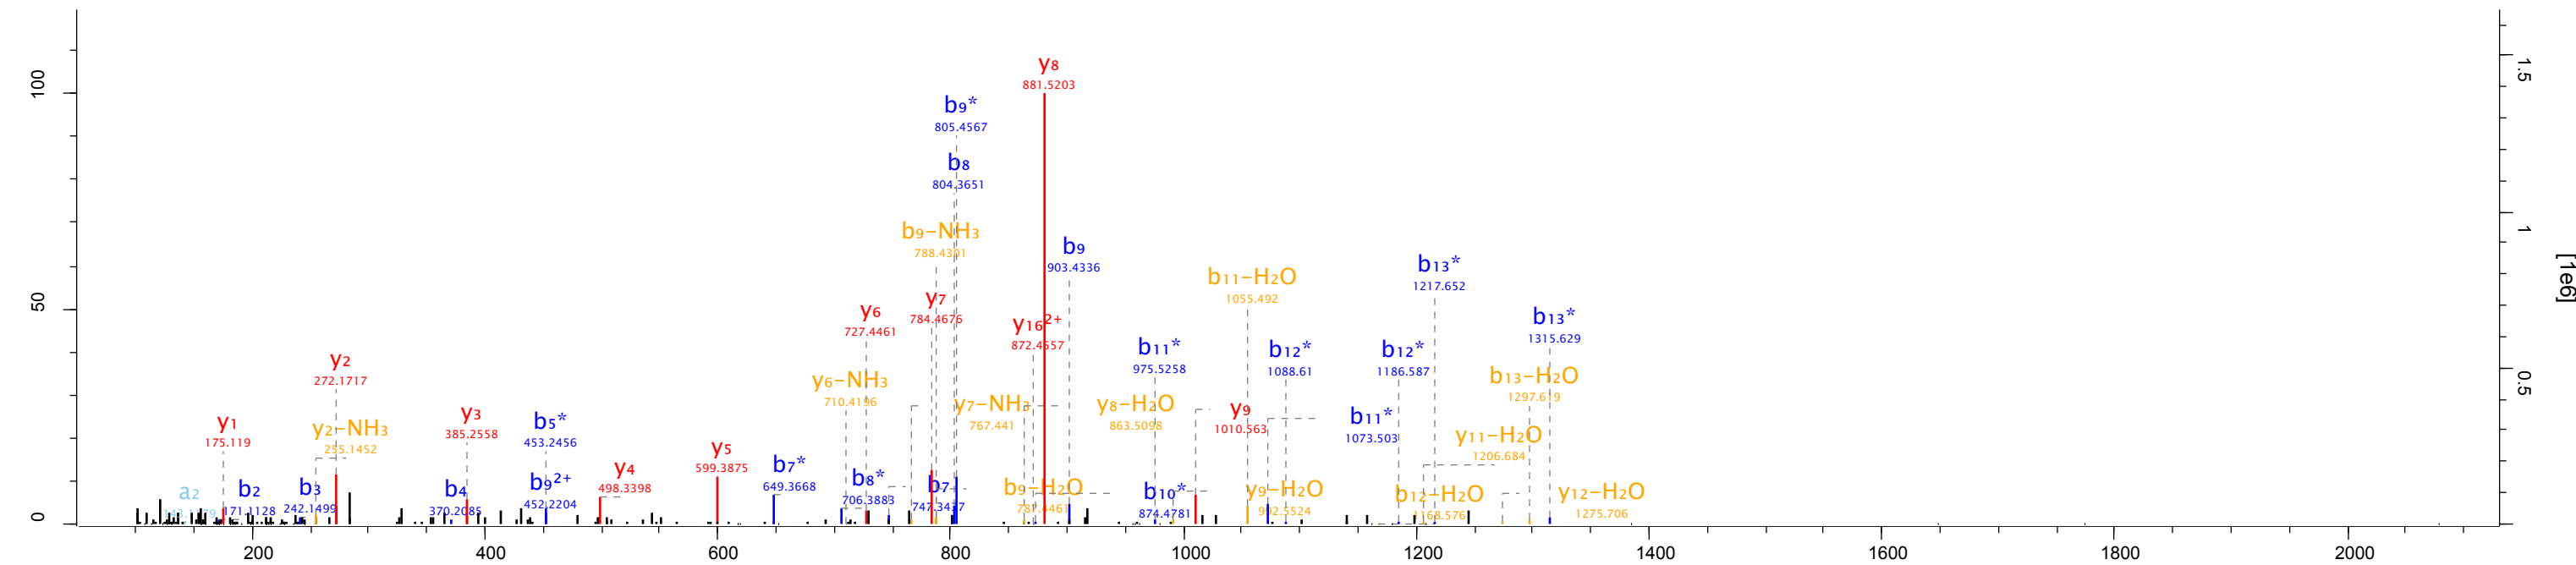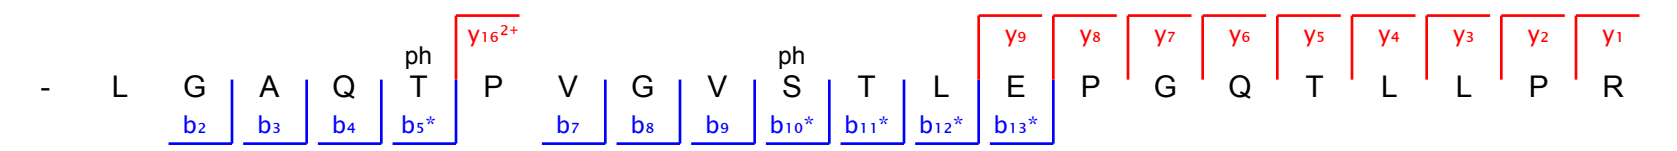

Raw file: 20150814\_A375SR\_Phospho\_BR2\_03  
 Scan: 25112 Method: FTMS; HCD Score: 84.67 m/z: 1104.51 Gene names: FOSL2

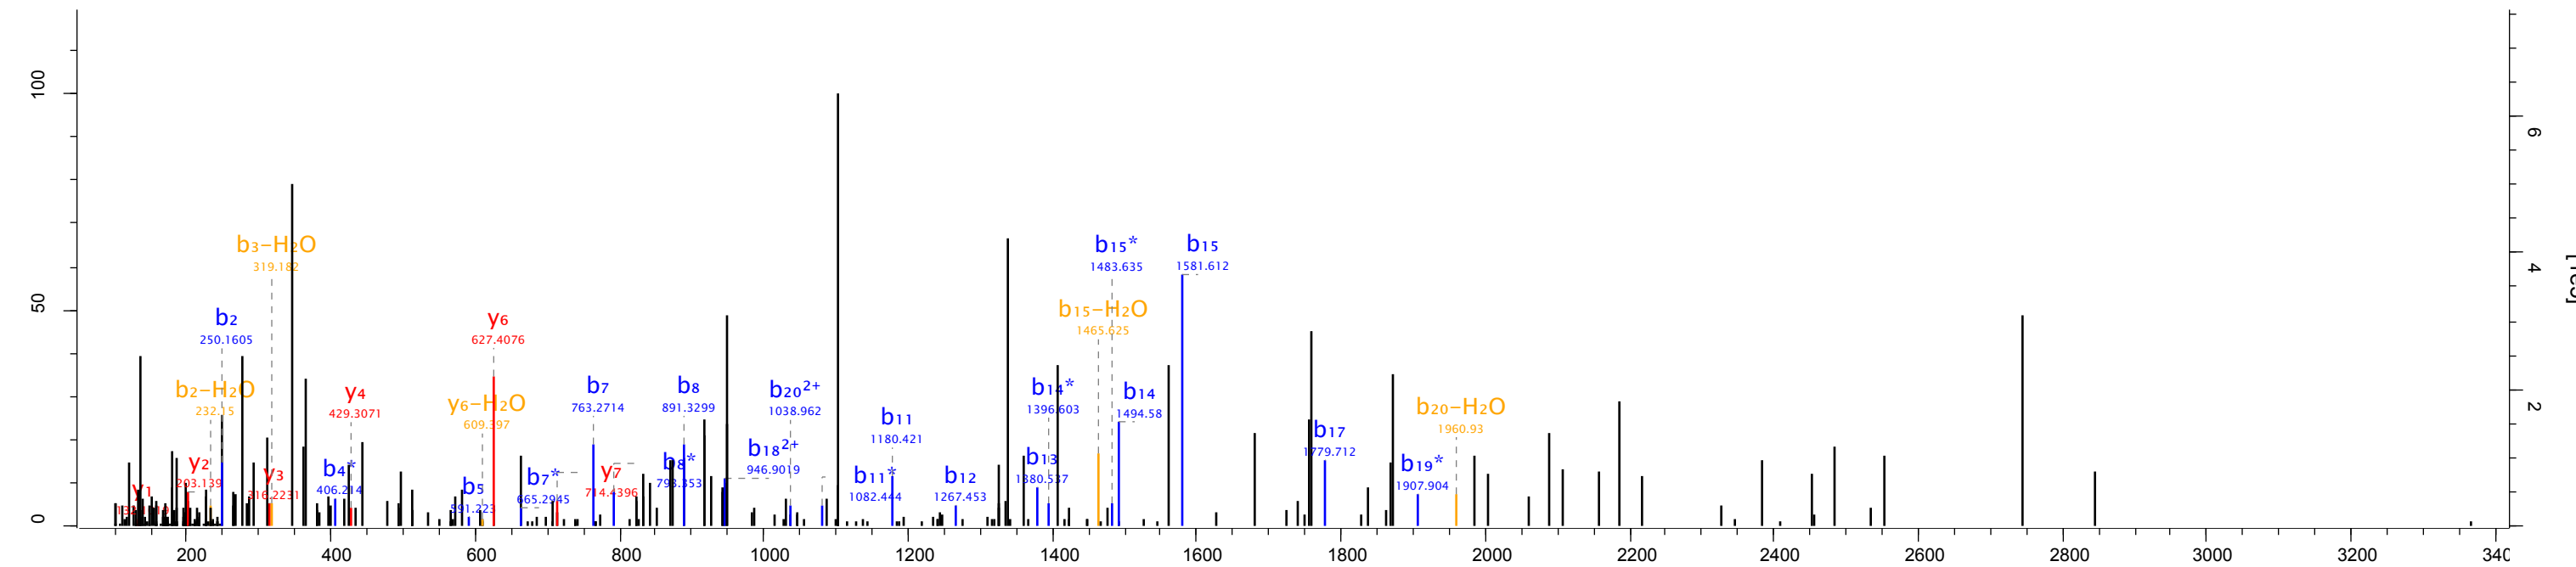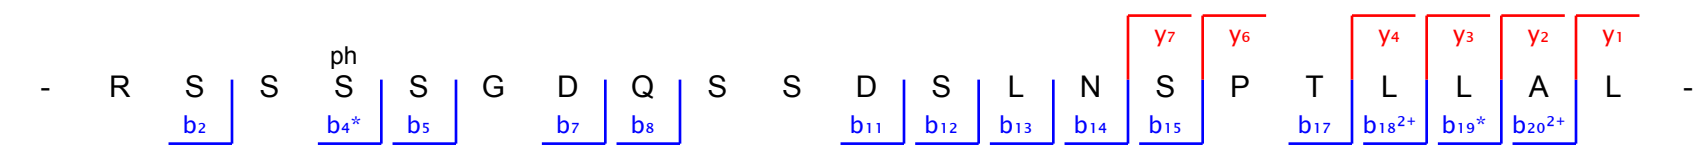

Raw file 20150814\_A375SR\_Phospho\_BR2\_03 Scan 25182 Method FTMS; HCD Score 155.06 m/z 814.84 Gene names TRMT112

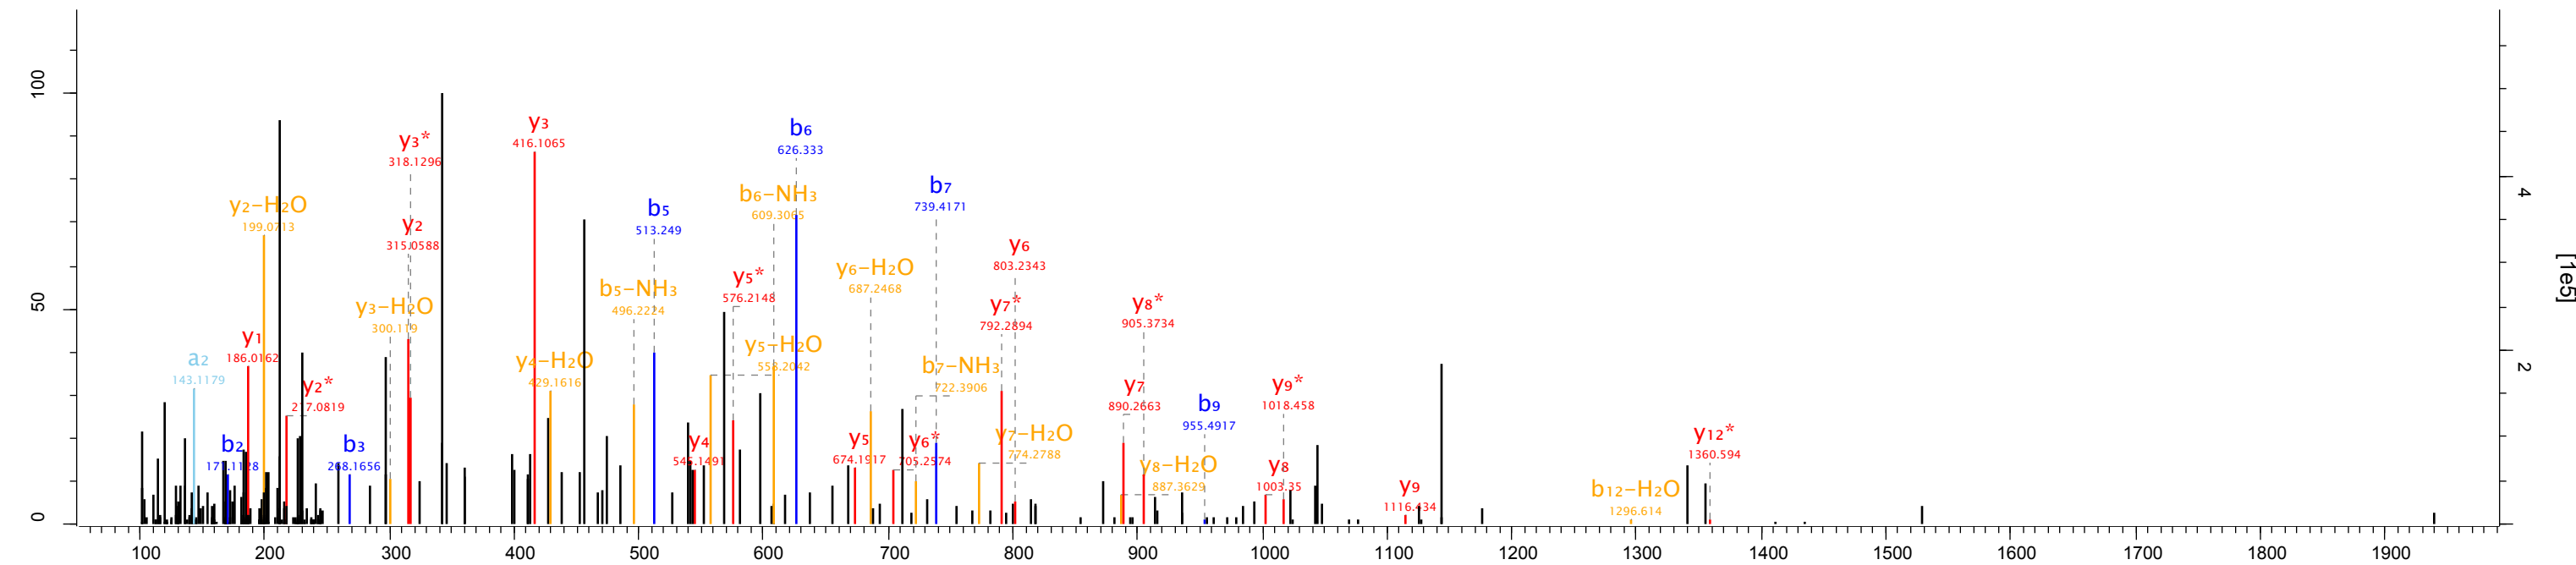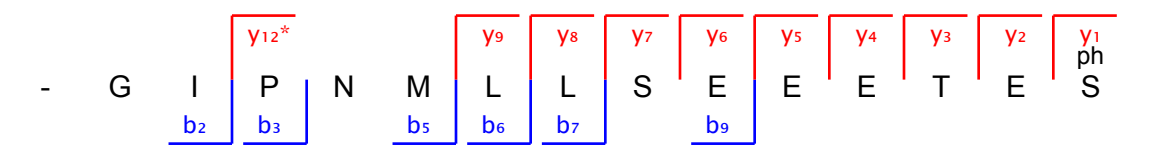

Raw file  
20150814\_A375SR\_Phospho\_BR2\_03

Scan 25352 Method FTMS; HCD Score 70.53 m/z 796.01 Gene names EXOC1

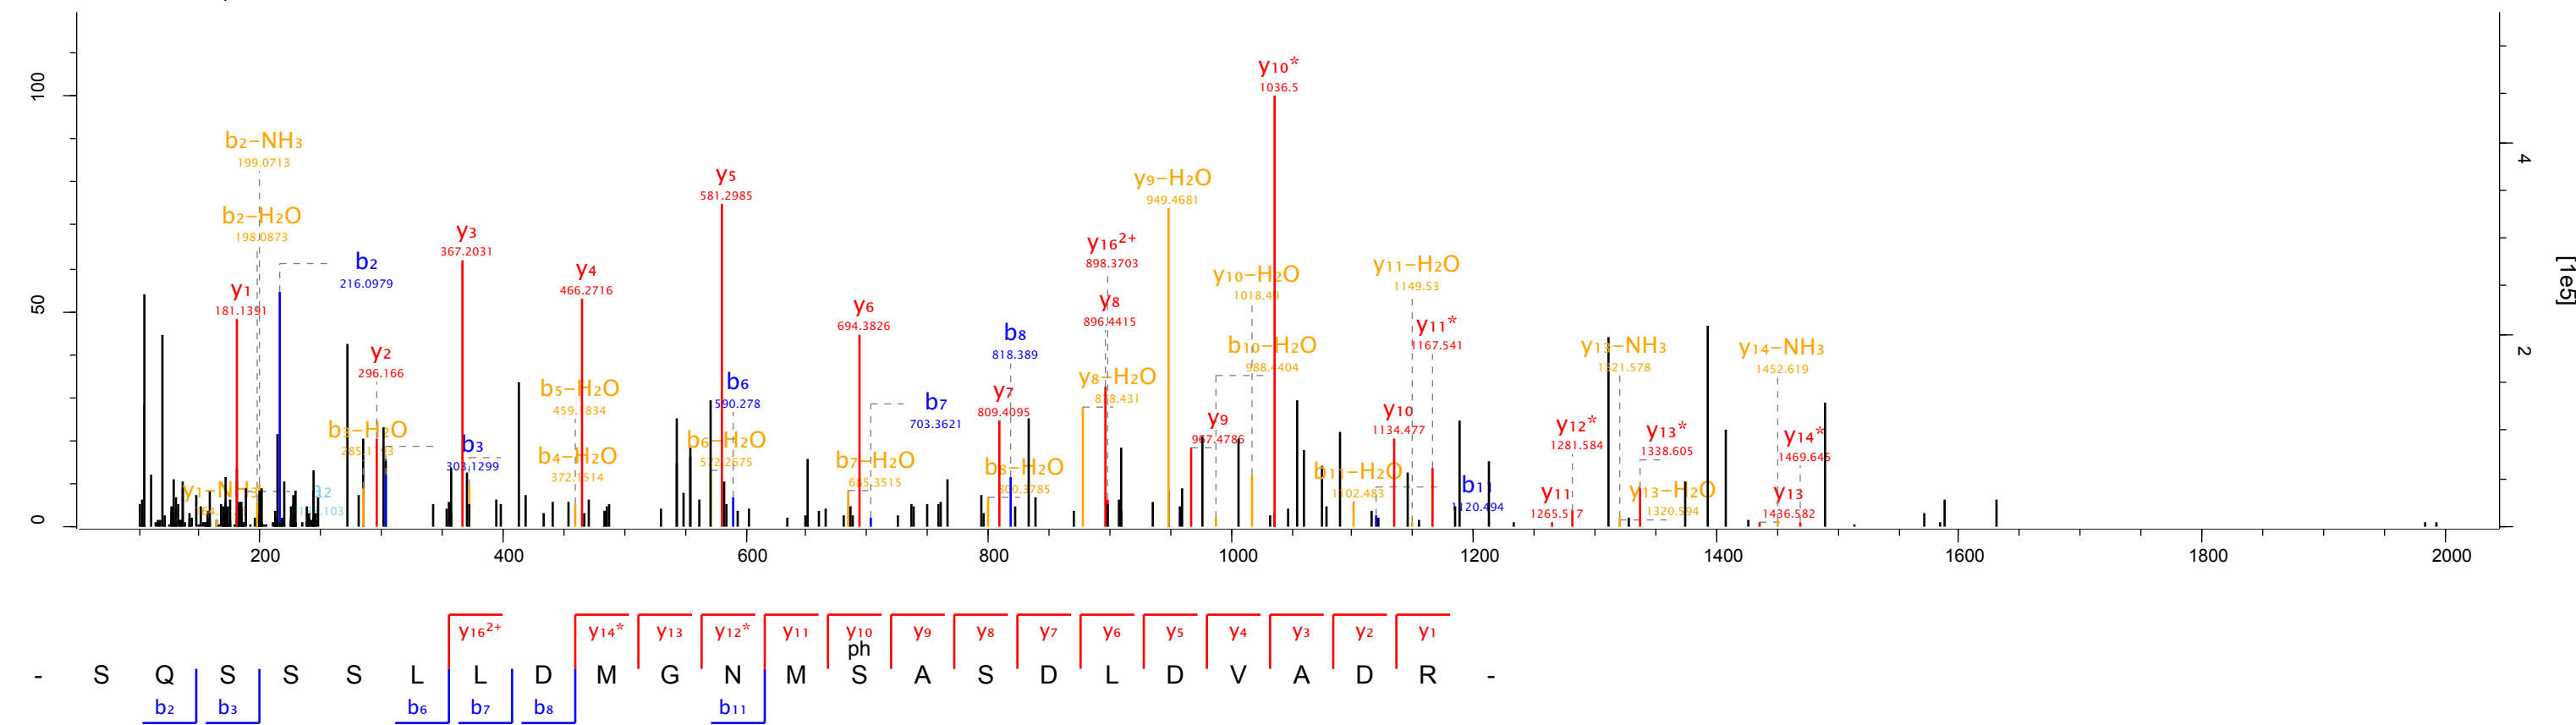

Raw file: 20150814\_A375SR\_Phospho\_BR2\_03  
 Scan: 25582 Method: FTMS; HCD Score: 194.19 m/z: 1214 Gene names: FAM169A

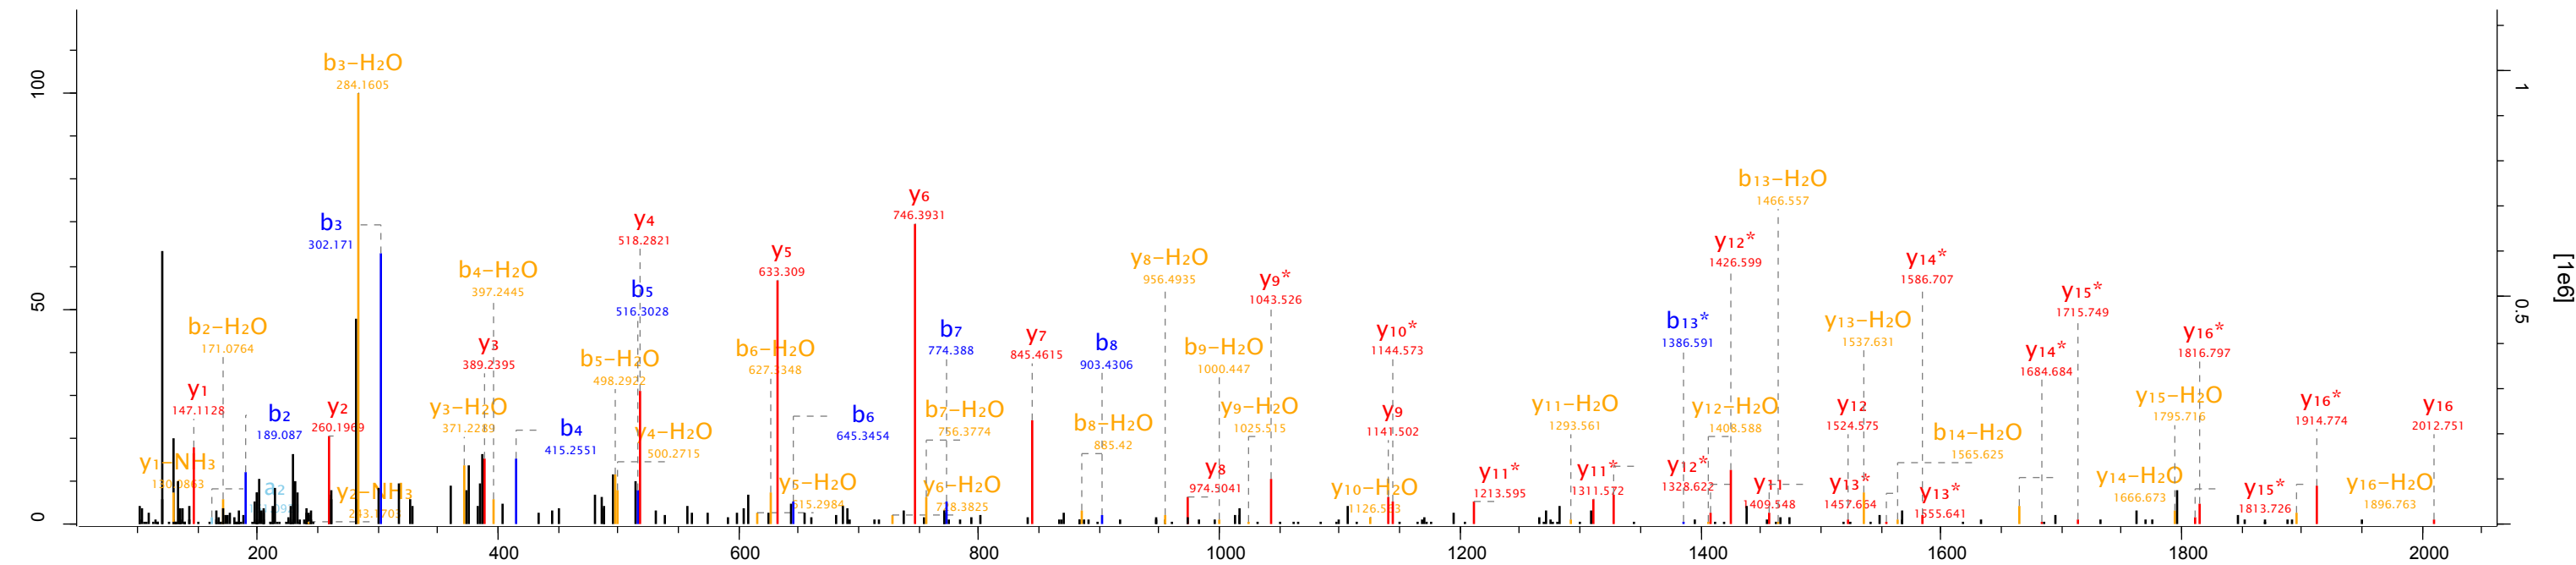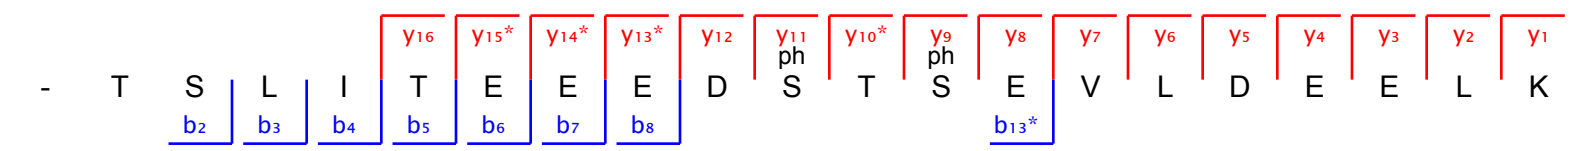

Raw file: 20150814\_A375SR\_Phospho\_BR2\_03  
 Scan: 25862 Method: FTMS; HCD Score: 140.01 m/z: 1045.49 Gene names: SCRIB

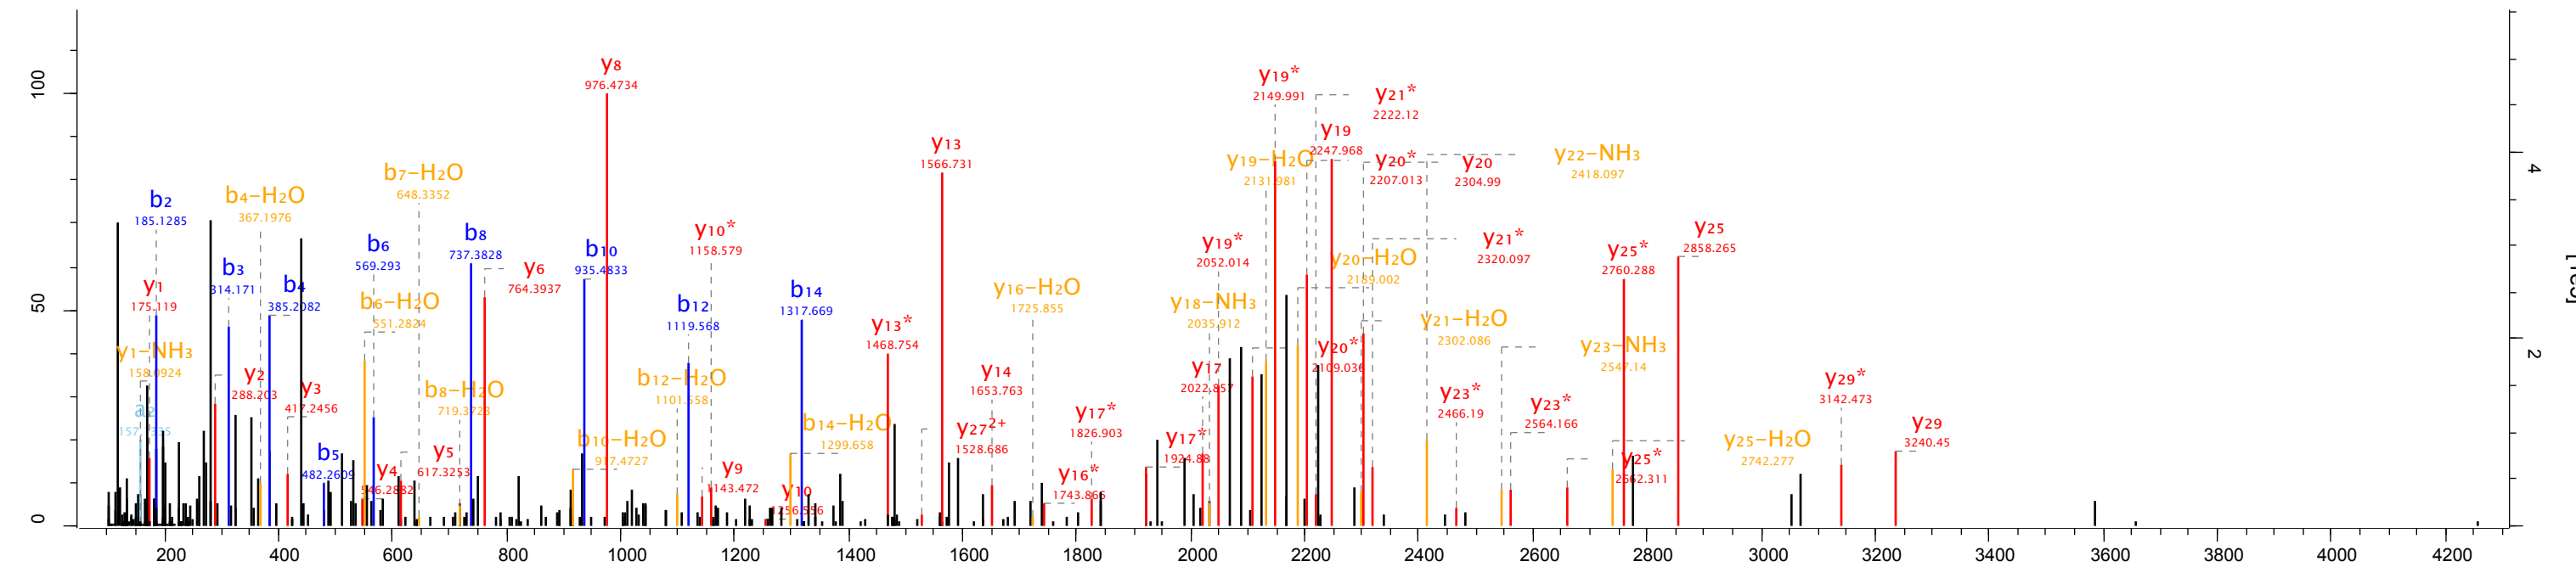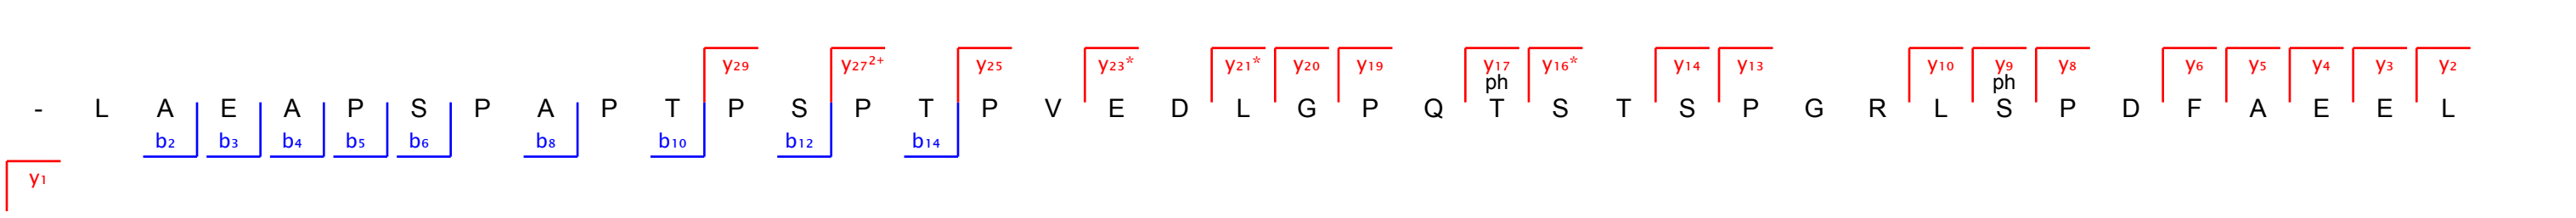



Raw file 20150814\_A375SR\_Phospho\_BR2\_03 Scan 25922 Method FTMS; HCD Score 54.45 m/z 739.36 Gene names CNKSR2

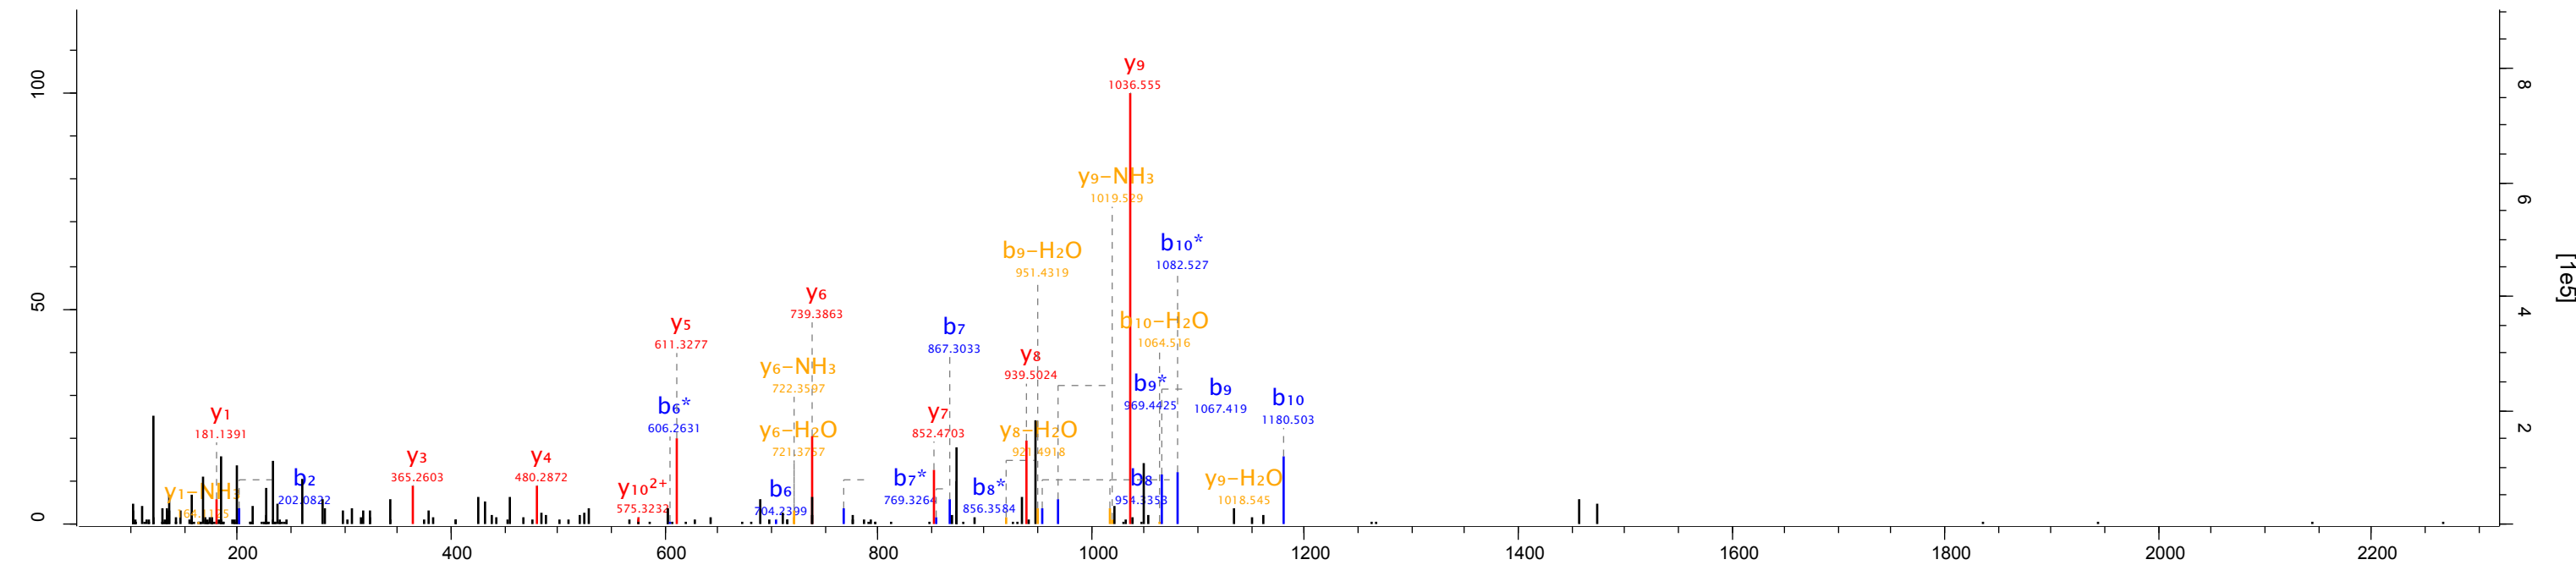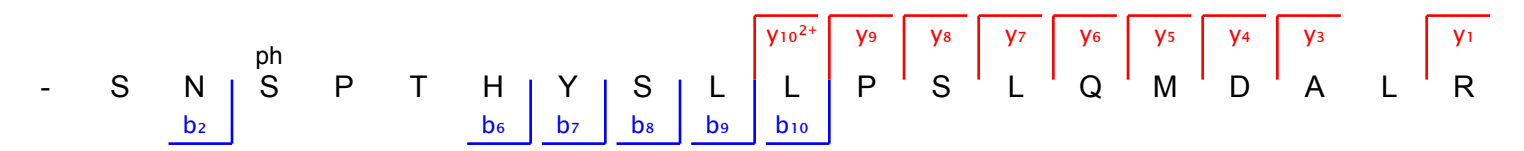

Raw file 20150814\_A375SR\_Phospho\_BR2\_03 Scan 26042 Method FTMS; HCD Score 40.17 m/z 916.74 Gene names ASF1A

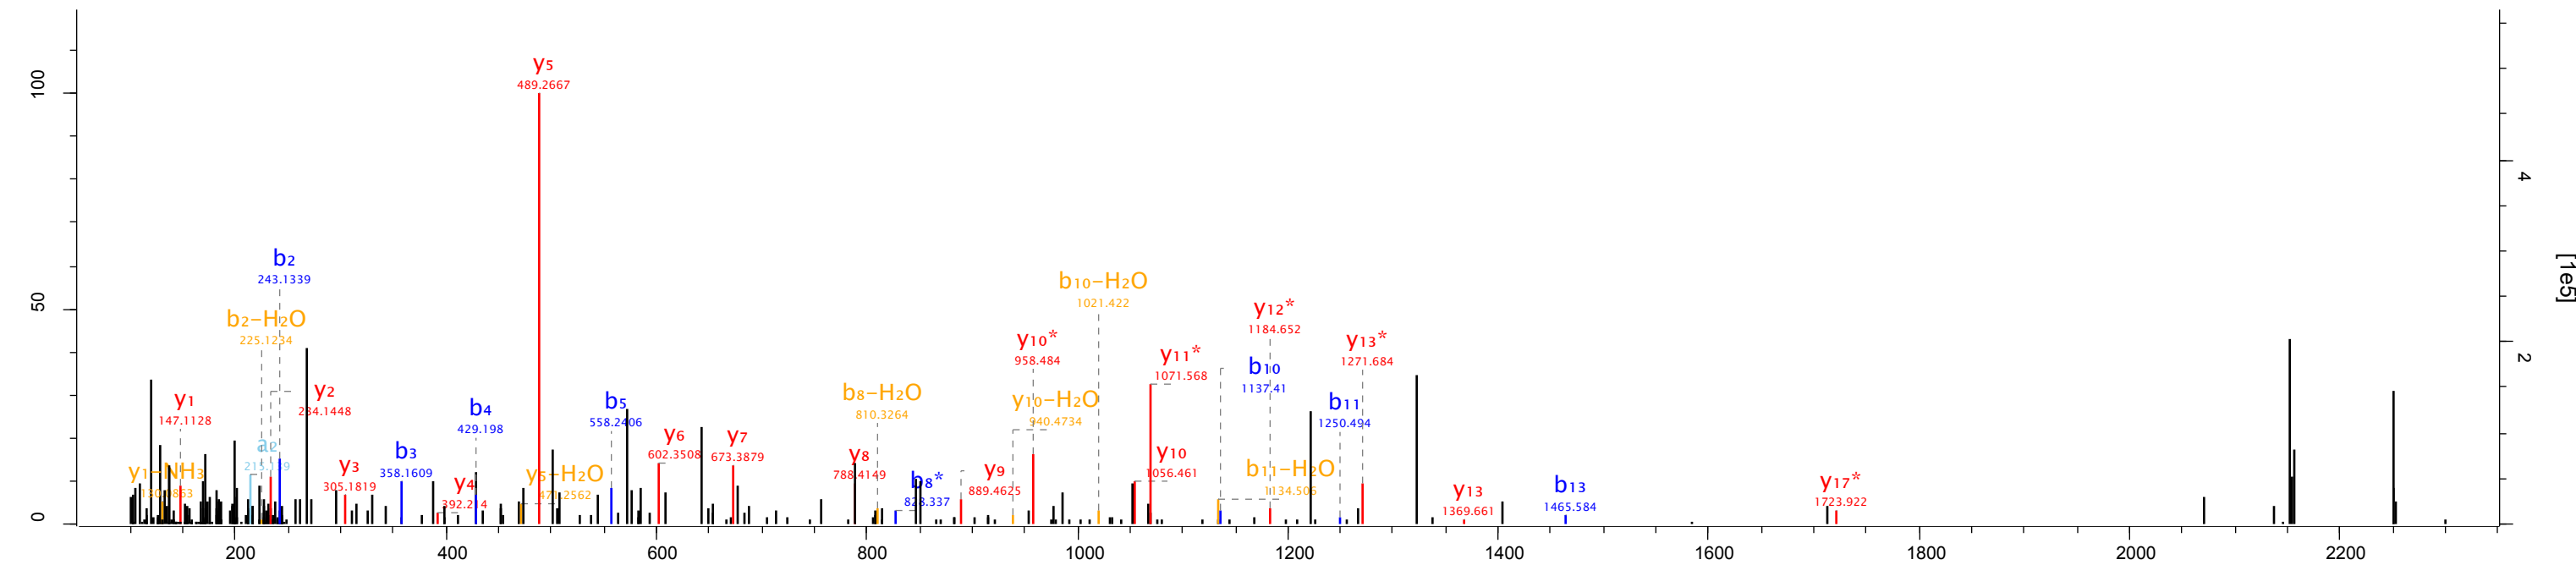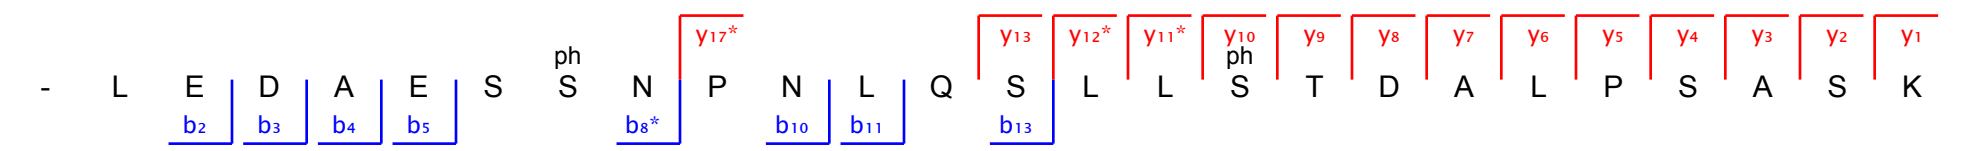



Raw file Scan Method Score m/z Gene names  
 20150814\_A375SR\_Phospho\_BR2\_03 27732 FTMS; HCD 180.14 1005.45 LRRFIP2

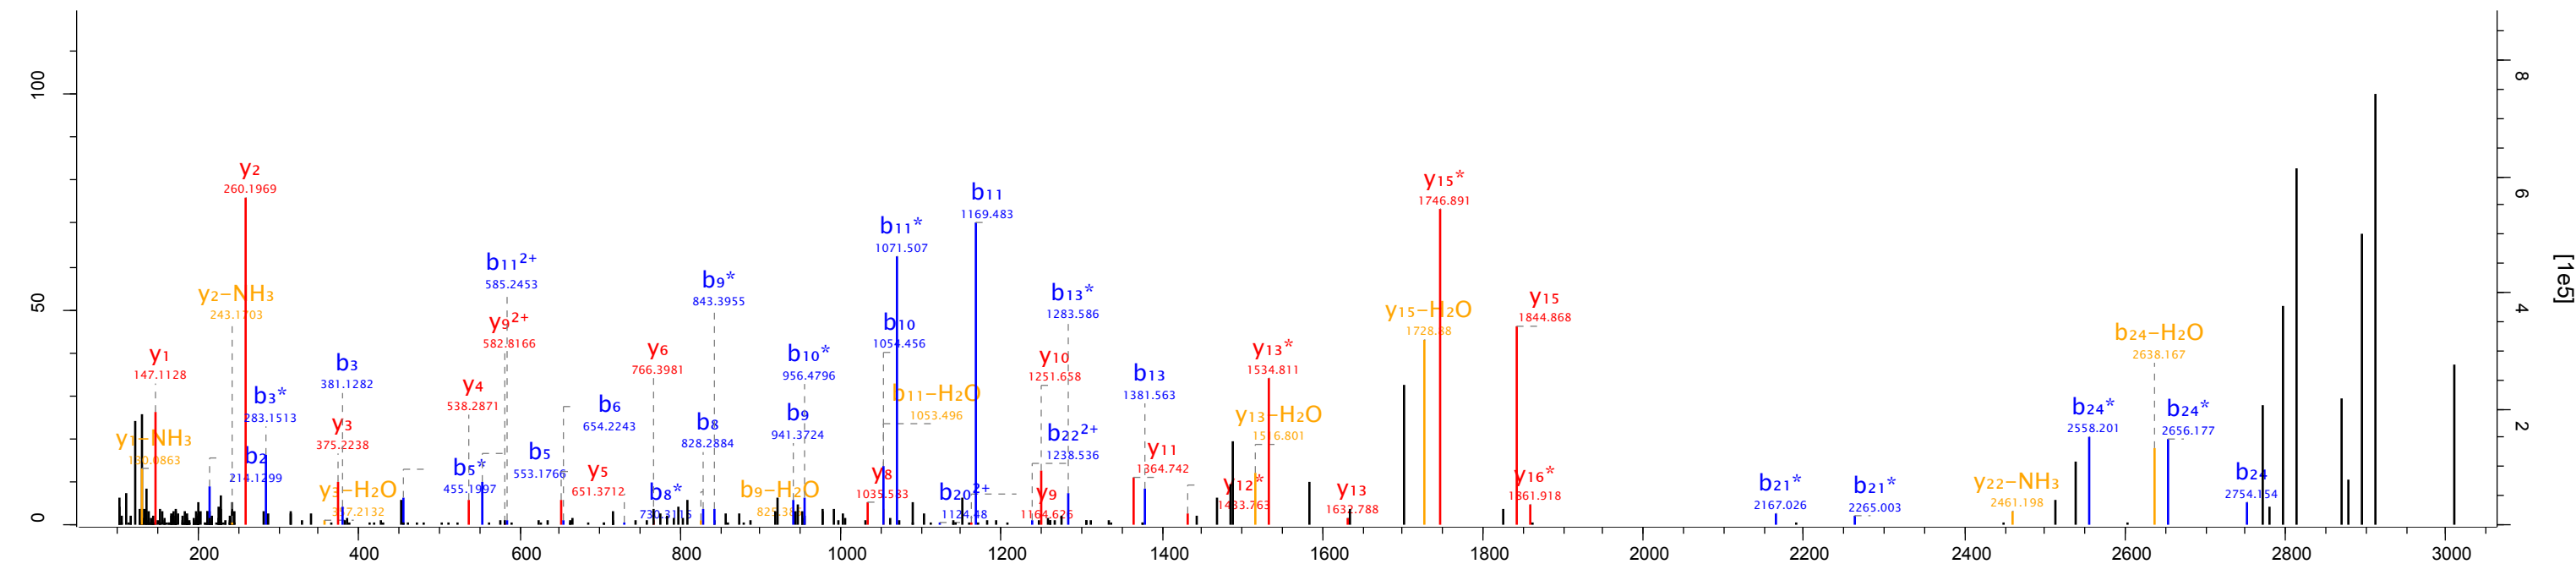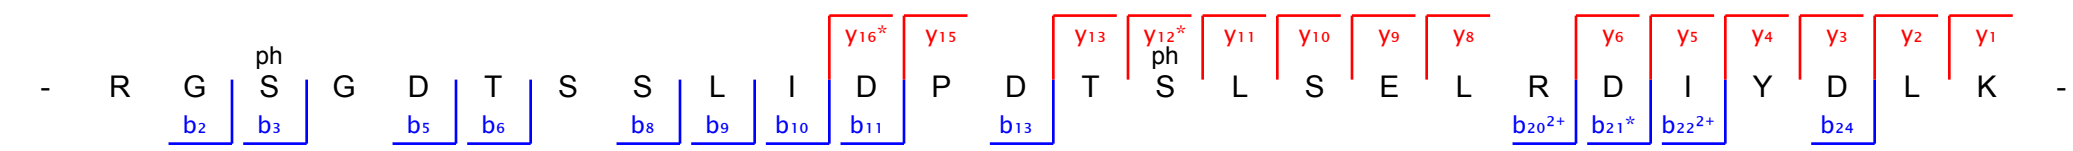



Raw file: 20150814\_A375SR\_Phospho\_BR2\_03  
 Scan: 2802 Method: FTMS; HCD Score: 72.62 m/z: 494.21 Gene names: SNIP1

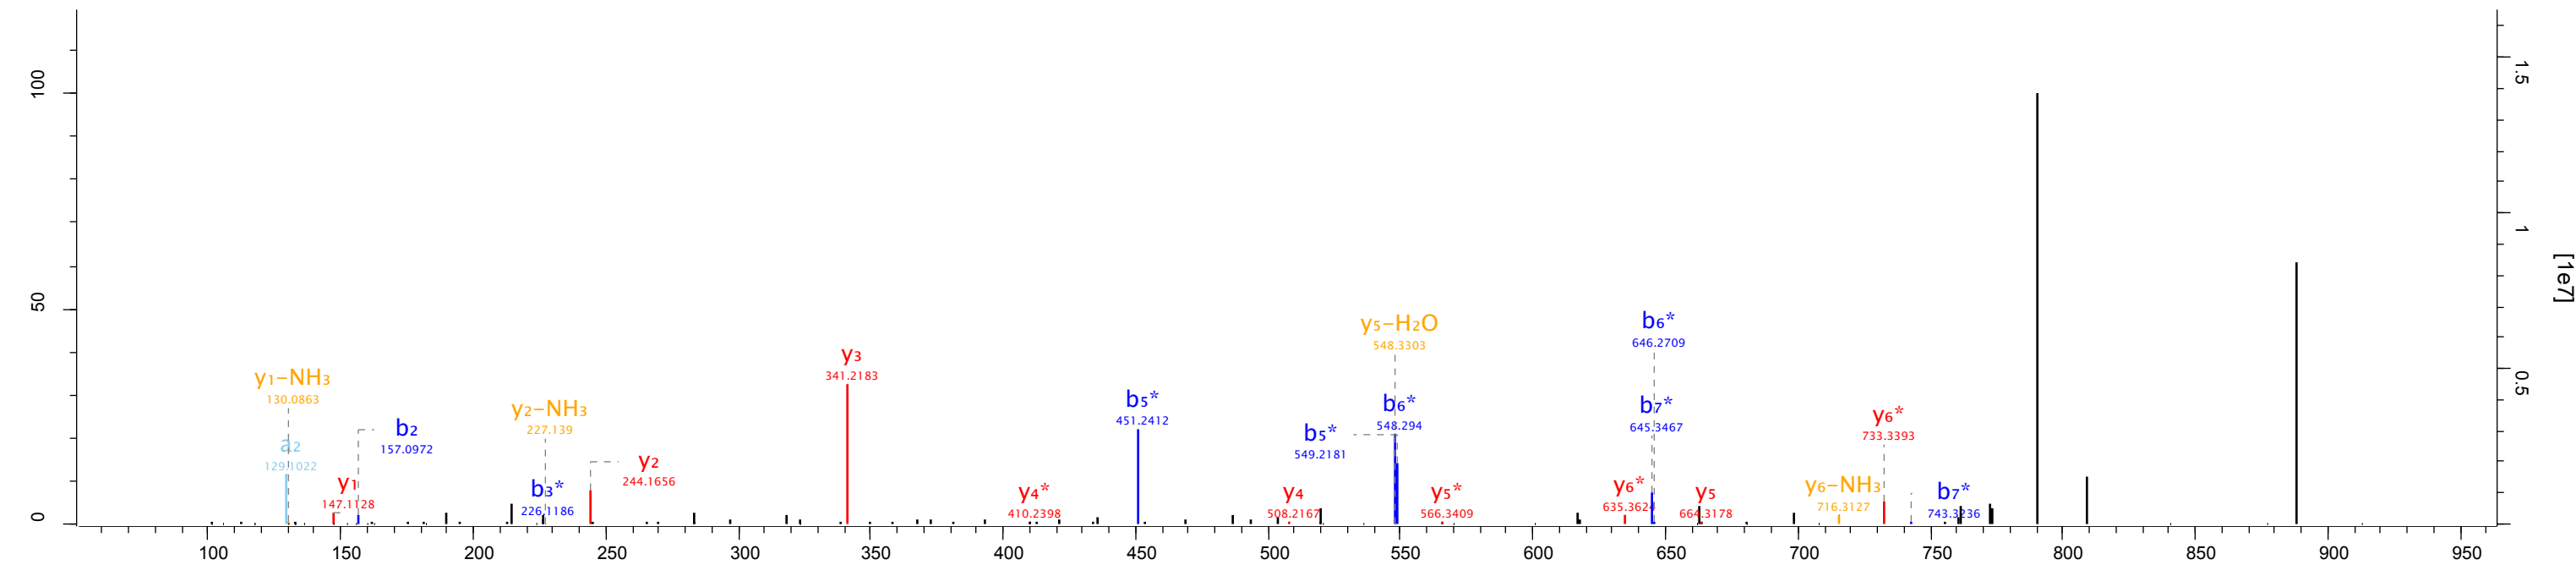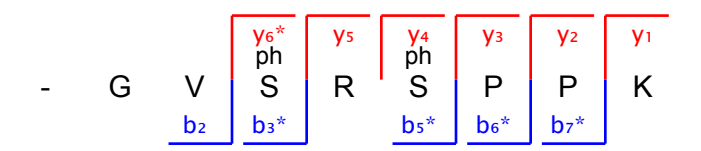

Raw file 20150814\_A375SR\_Phospho\_BR2\_03 Scan 28092 Method FTMS; HCD Score 85.65 m/z 1084.13 Gene names KDM2A

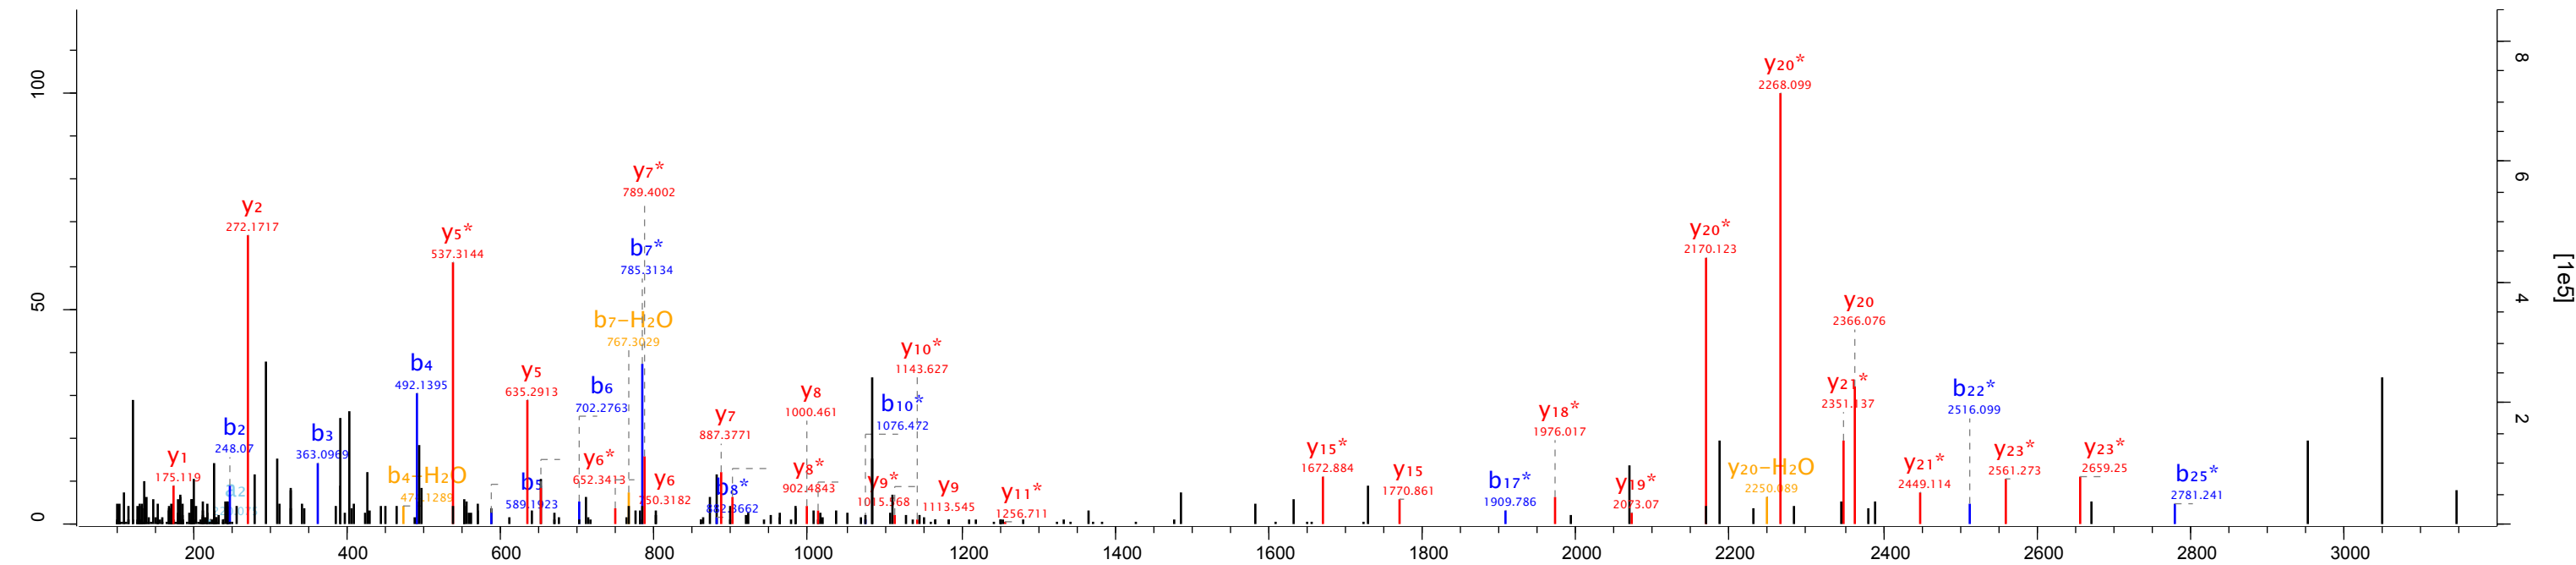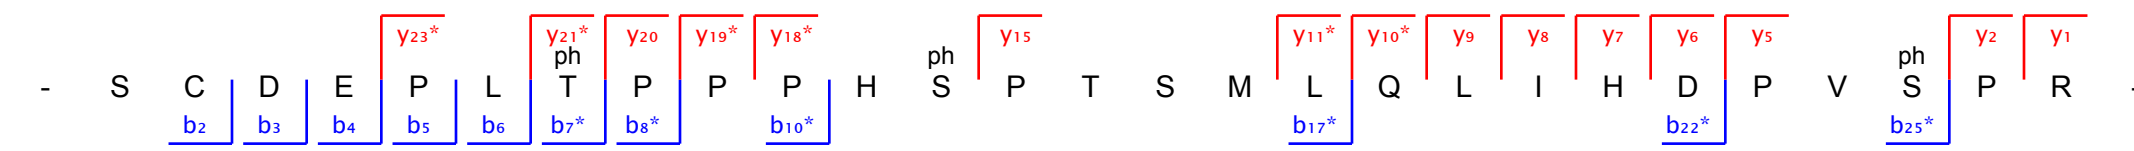

Raw file 20150814\_A375SR\_Phospho\_BR2\_03 Scan 28442 Method FTMS; HCD Score 127.63 m/z 979.76 Gene names TP53BP1

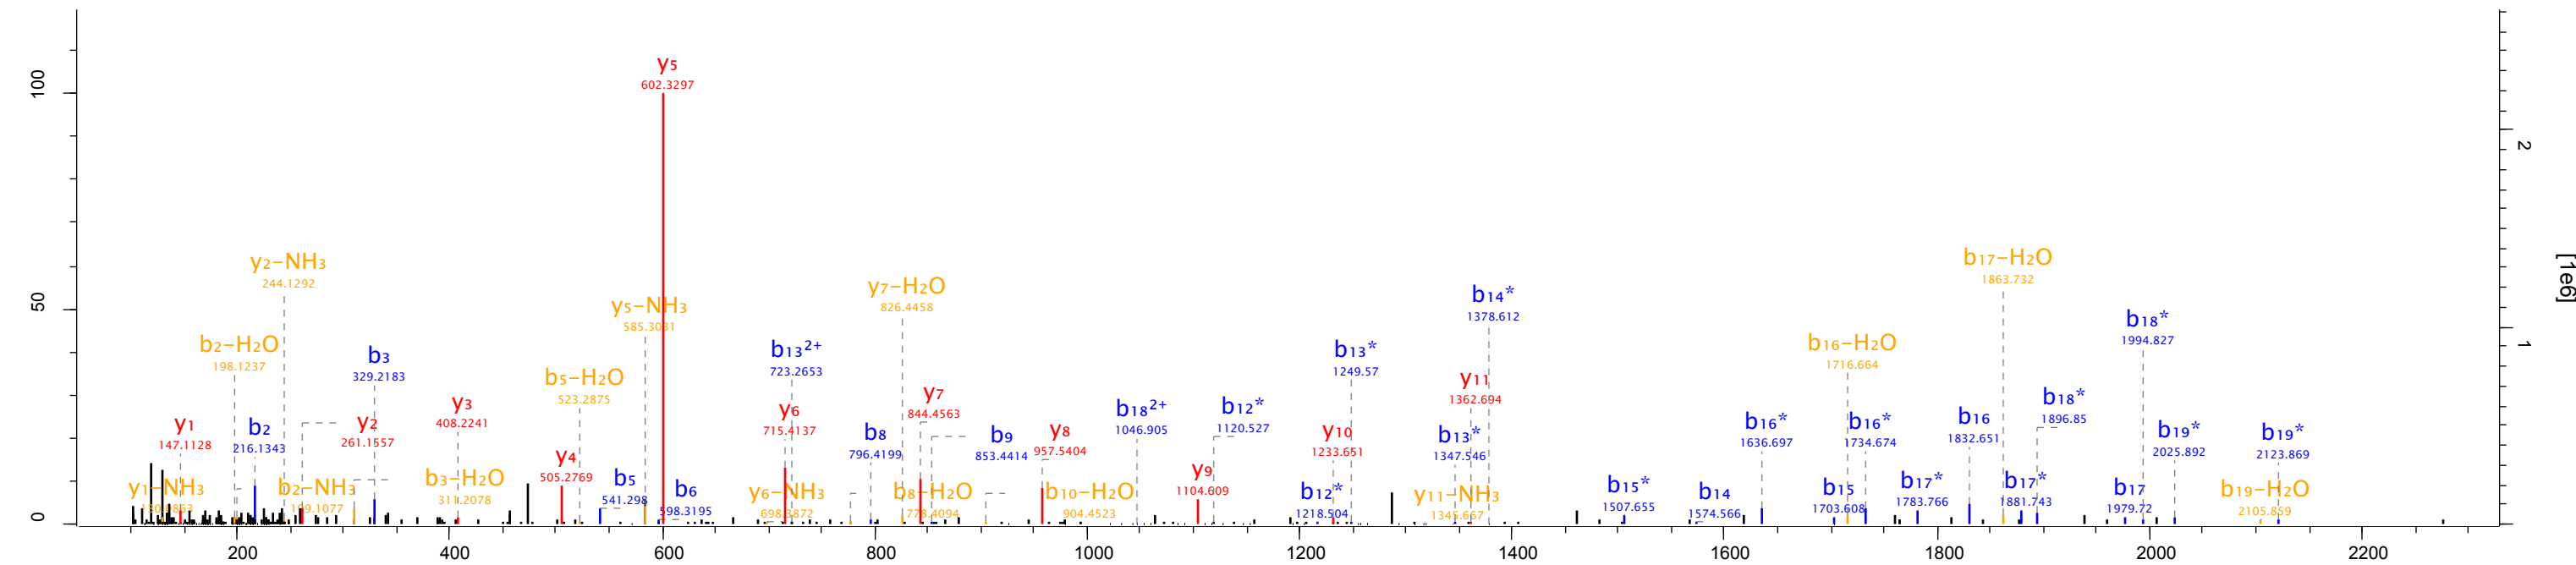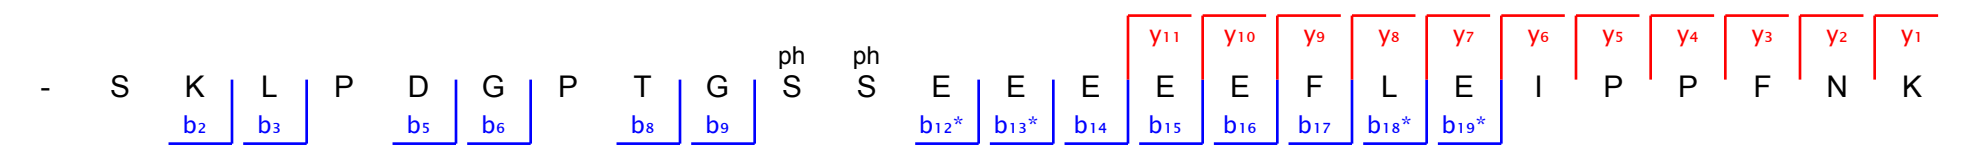



Raw file: 20150814\_A375SR\_Phospho\_BR2\_03  
 Scan: 28662 Method: FTMS; HCD Score: 139.05 m/z: 1151.53 Gene names: YAP1

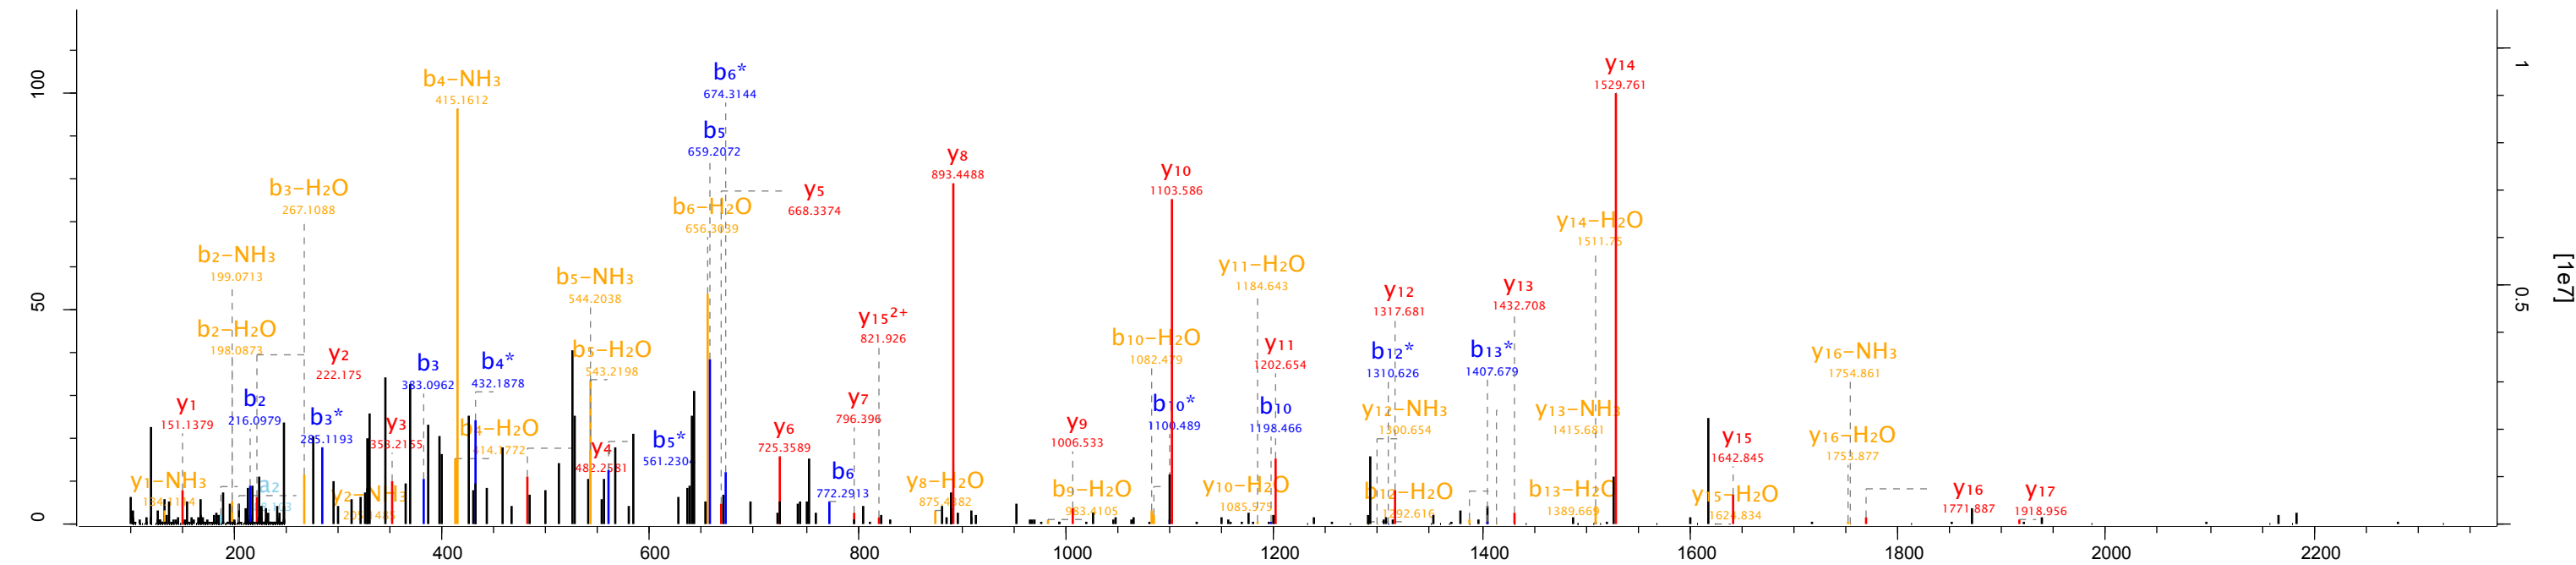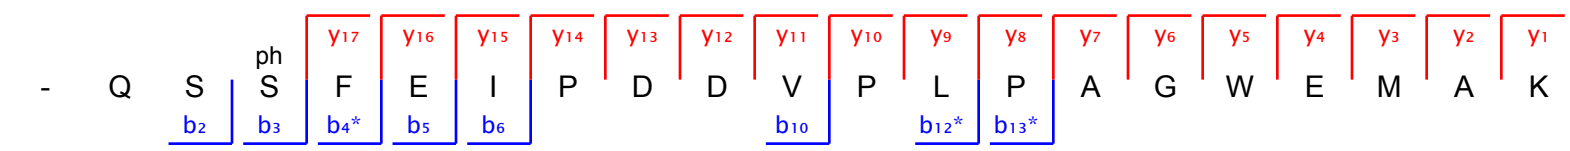

Raw file 20150814\_A375SR\_Phospho\_BR2\_03 Scan 28722 Method FTMS; HCD Score 64.65 m/z 884.67 Gene names RAD54L2

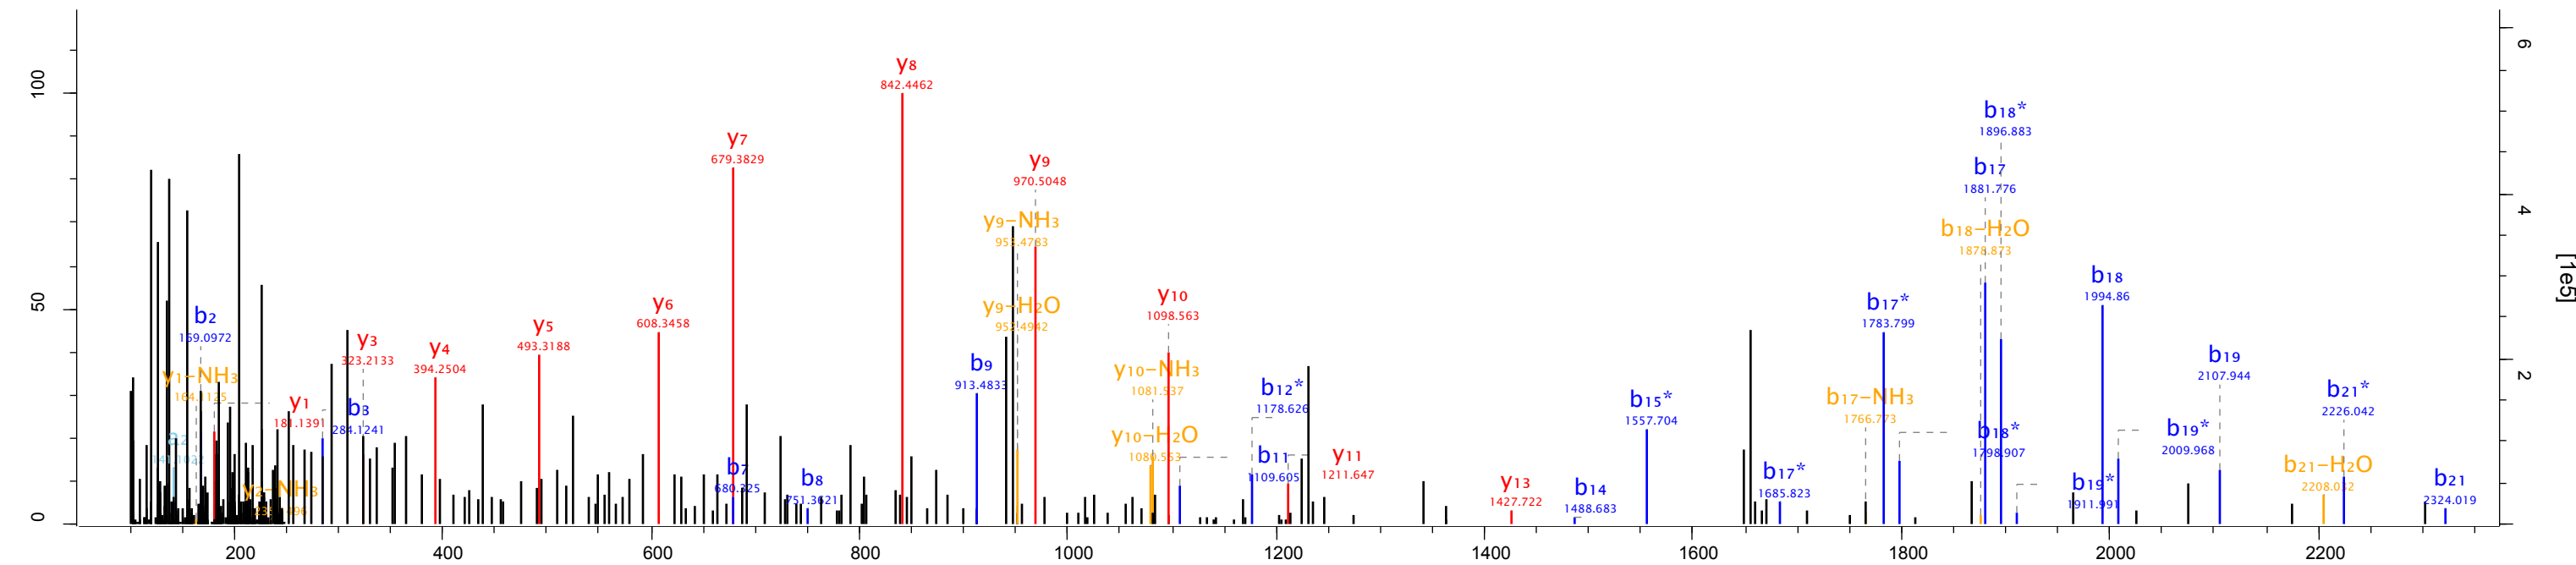

- A P D P E G L A R P V S P D S P E I I S E L Q Q Y A D V A A A R -

Fragmentation sites are indicated by brackets below the sequence:

- b<sub>2</sub> (P), b<sub>3</sub> (D)
- b<sub>7</sub> (L), b<sub>8</sub> (A), b<sub>9</sub> (R)
- b<sub>11</sub> (V), b<sub>12</sub>\* (S)
- b<sub>14</sub> (D), b<sub>15</sub>\* (S)
- b<sub>17</sub> (E), b<sub>18</sub> (I), b<sub>19</sub> (I)
- b<sub>21</sub> (S)

Y-series fragmentation sites are indicated by brackets above the sequence:

- y<sub>13</sub> (S)
- y<sub>11</sub> (L), y<sub>10</sub> (Q), y<sub>9</sub> (Q), y<sub>8</sub> (Y), y<sub>7</sub> (A), y<sub>6</sub> (D), y<sub>5</sub> (V), y<sub>4</sub> (A), y<sub>3</sub> (A), y<sub>1</sub> (A)

Raw file: 20150814\_A375SR\_Phospho\_BR2\_03  
 Scan: 3402 Method: FTMS; HCD Score: 128.01 m/z: 814.34 Gene names: SPEN

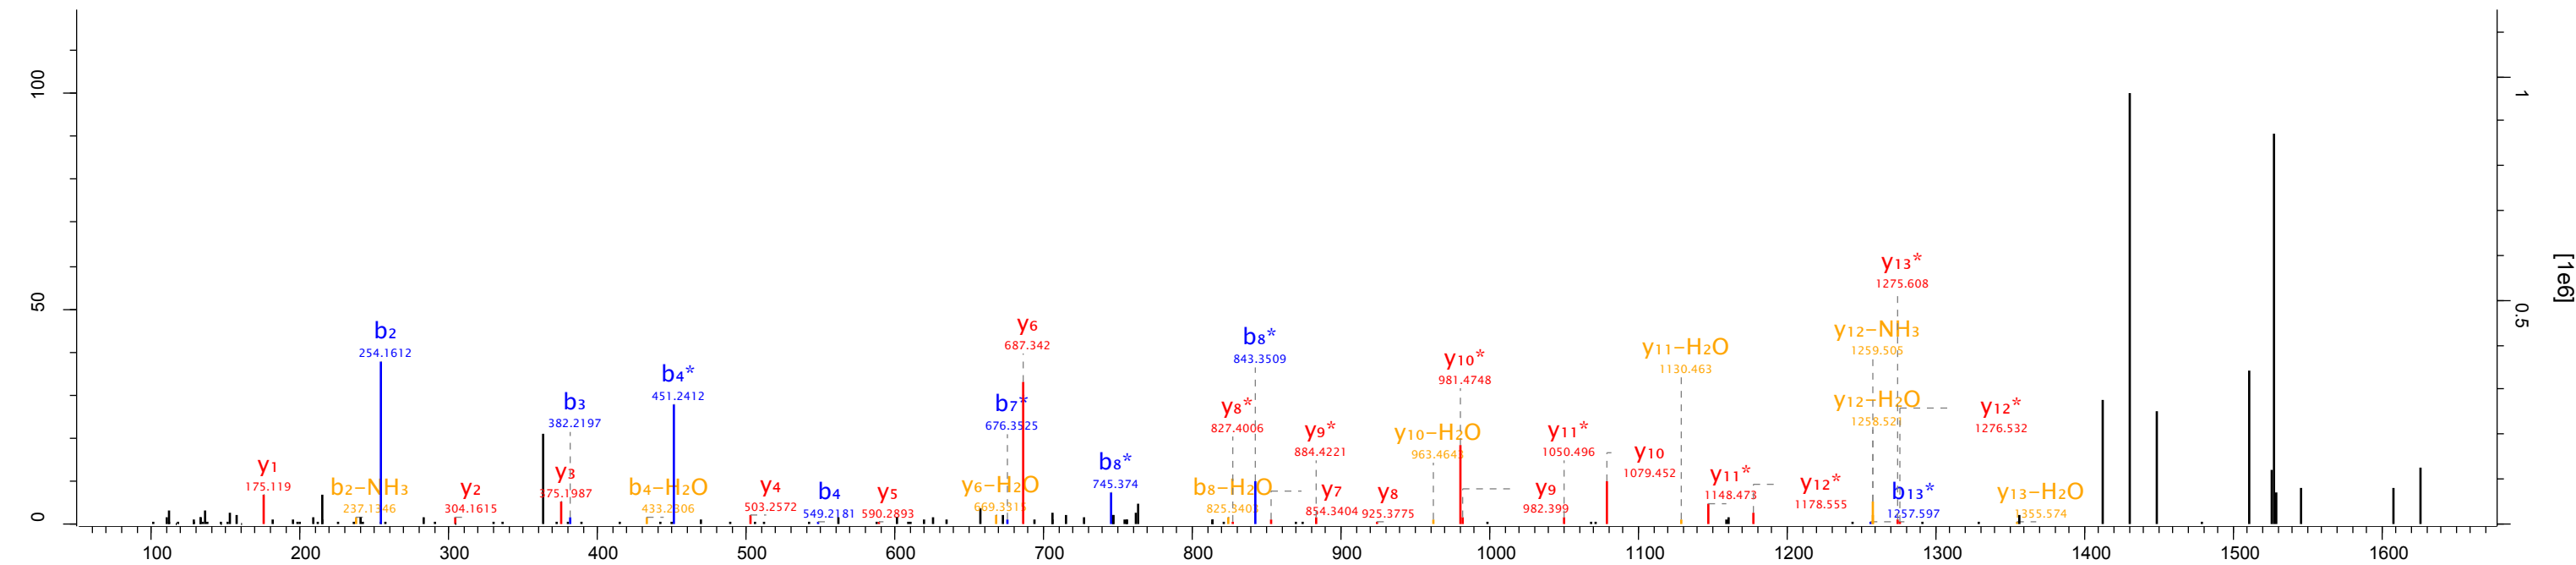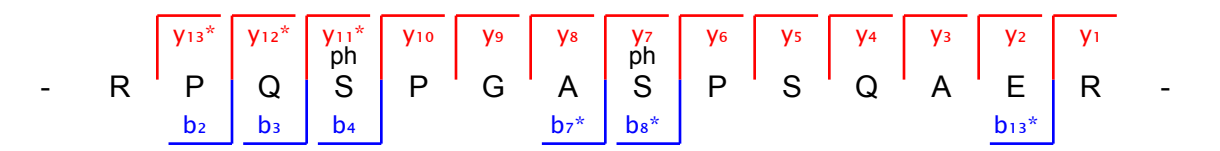

Raw file Scan Method Score m/z Gene names

20150814\_A375SR\_Phospho\_BR2\_03 3682 FTMS; HCD 80.17 560.24 CENPC

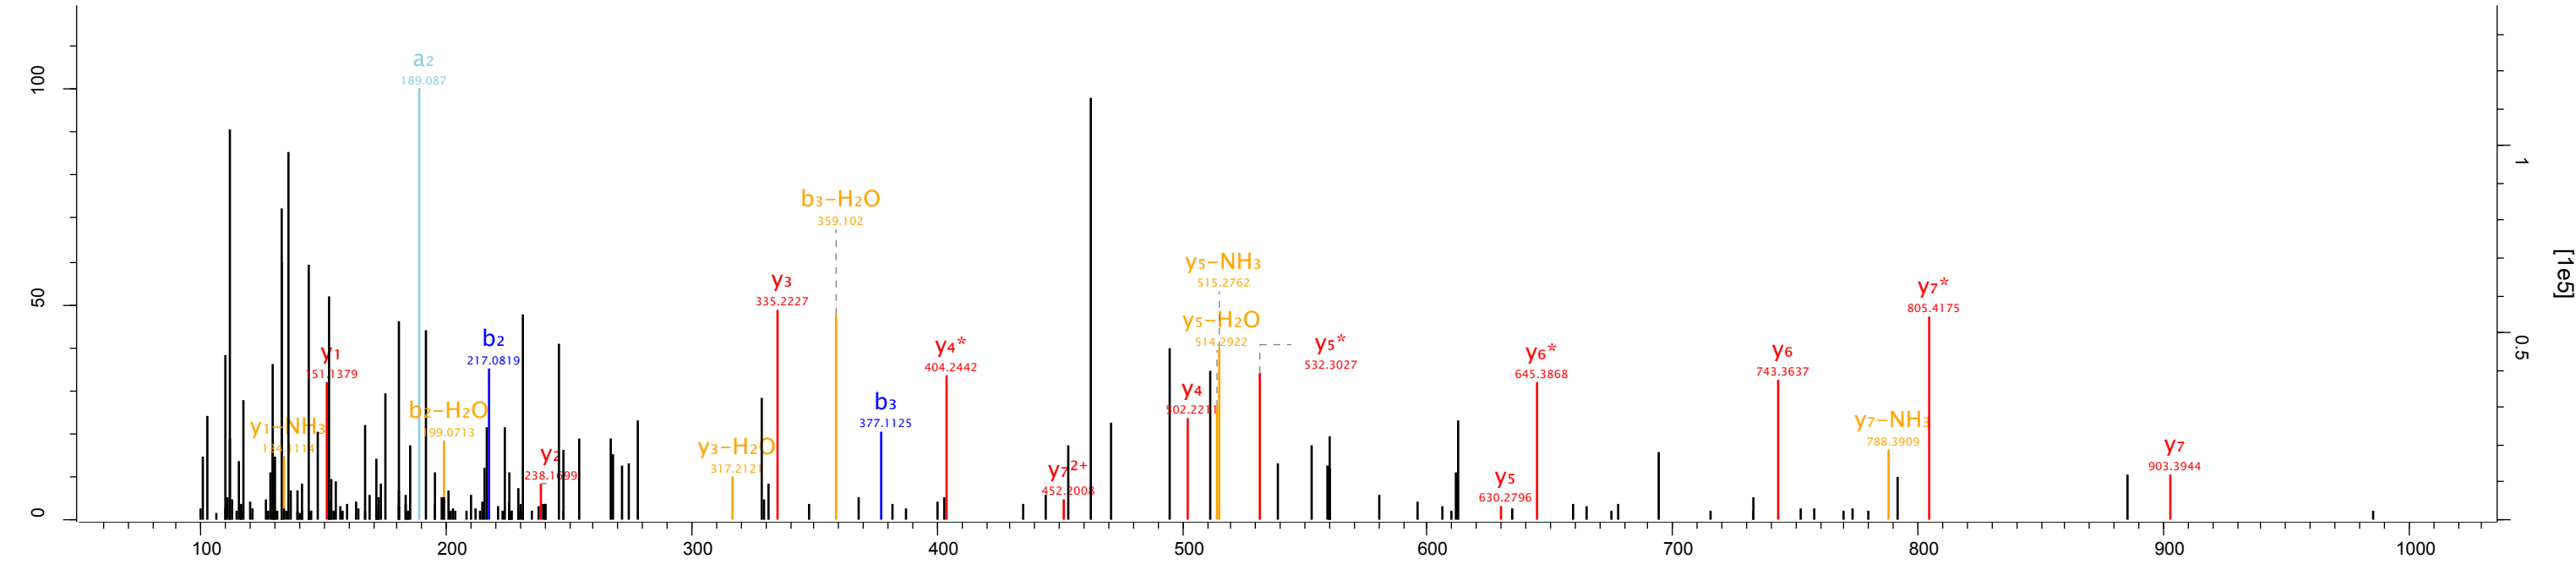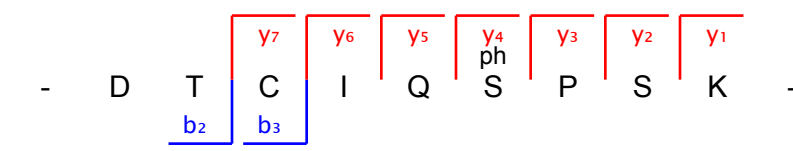

Raw file 20150814\_A375SR\_Phospho\_BR2\_03 Scan 4052 Method FTMS; HCD Score 110.74 m/z 491.73 Gene names ZNF638

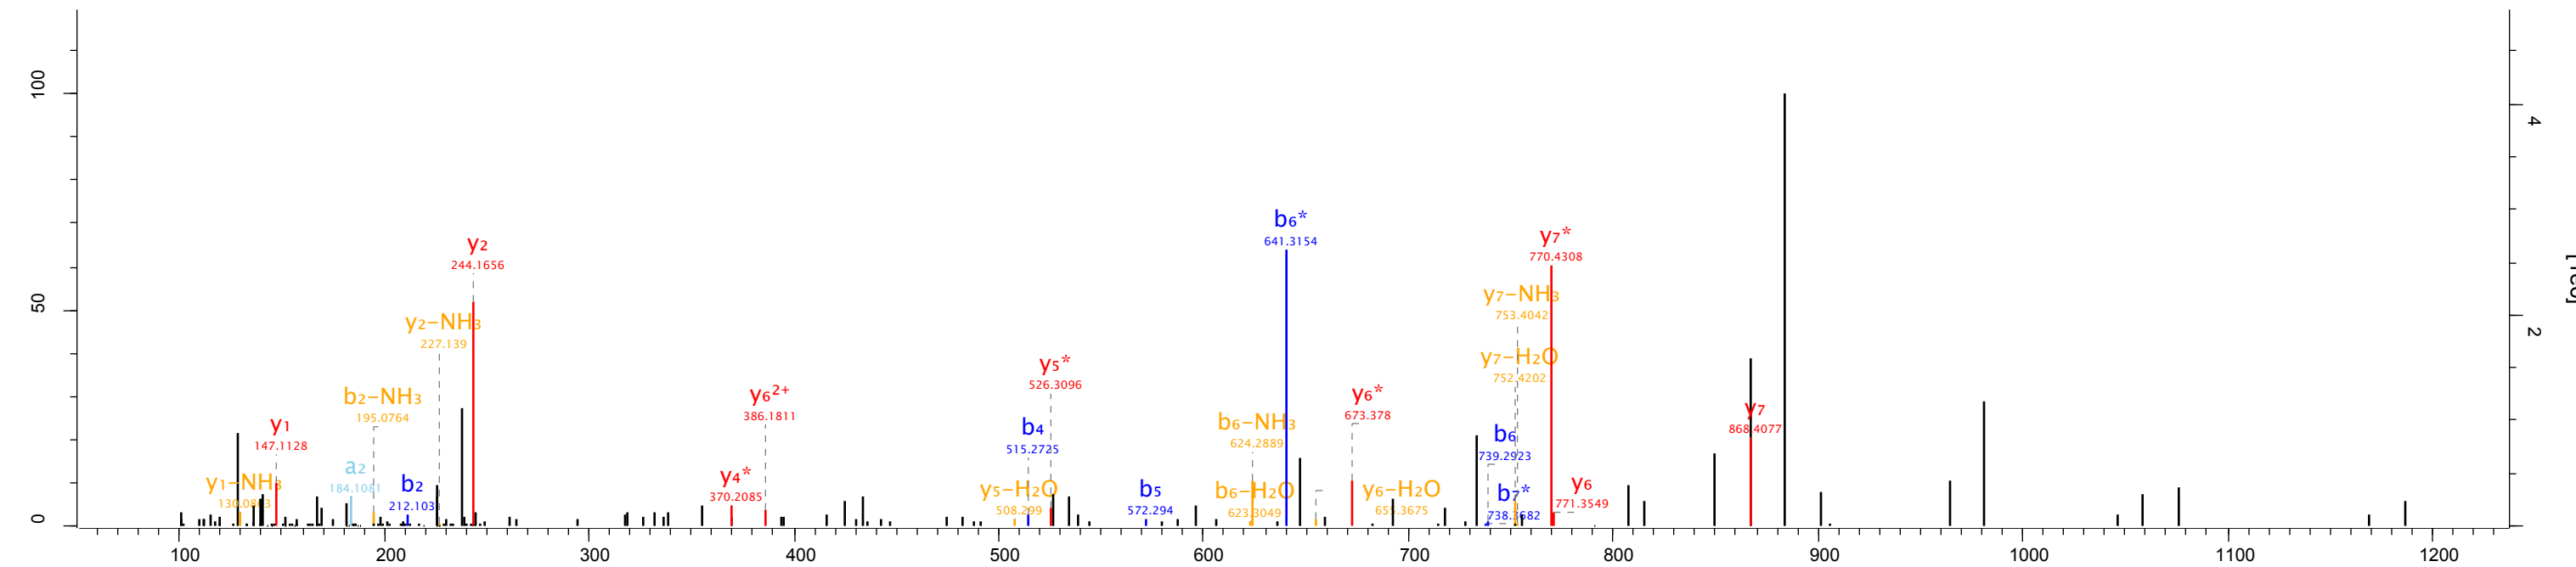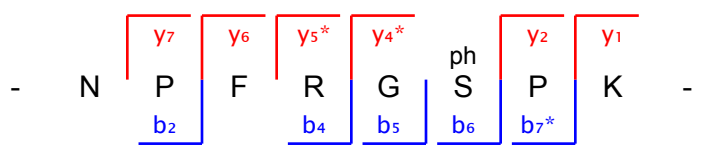

Raw file: 20150814\_A375SR\_Phospho\_BR2\_03  
 Scan: 5322 Method: FTMS; HCD Score: 63.37 m/z: 683.8 Gene names: VPS26B

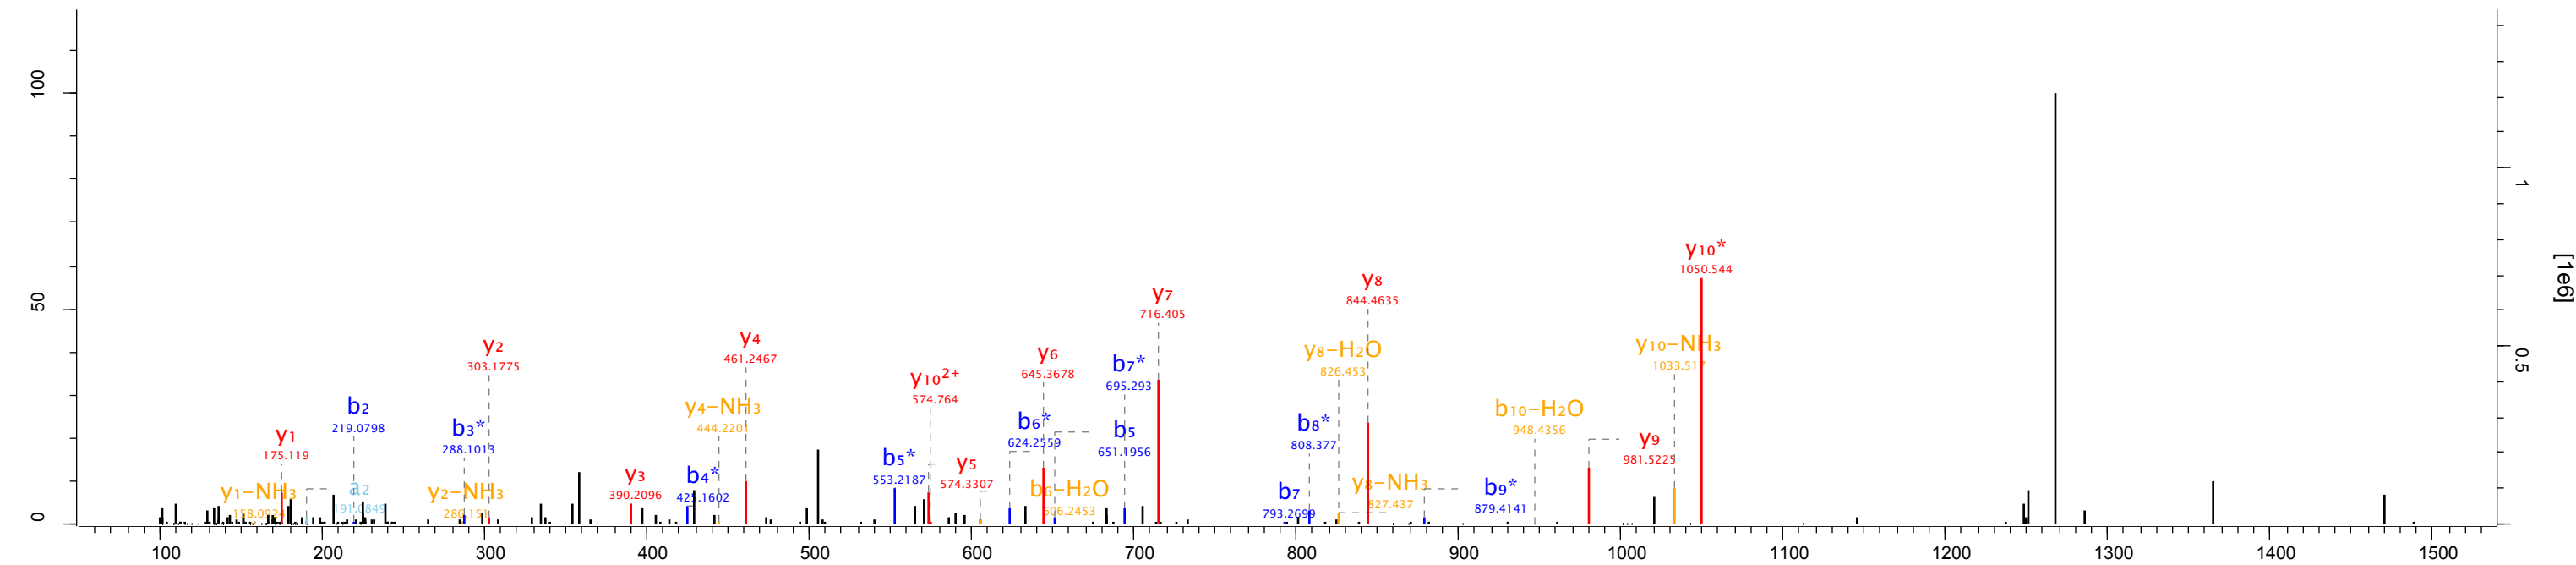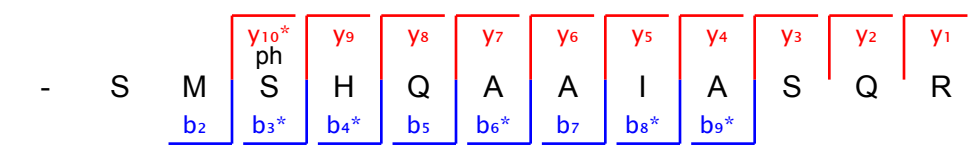

20150814\_A375SR\_Phospho\_BR2\_03 5542 FTMS; HCD 158.52 729.65 APC

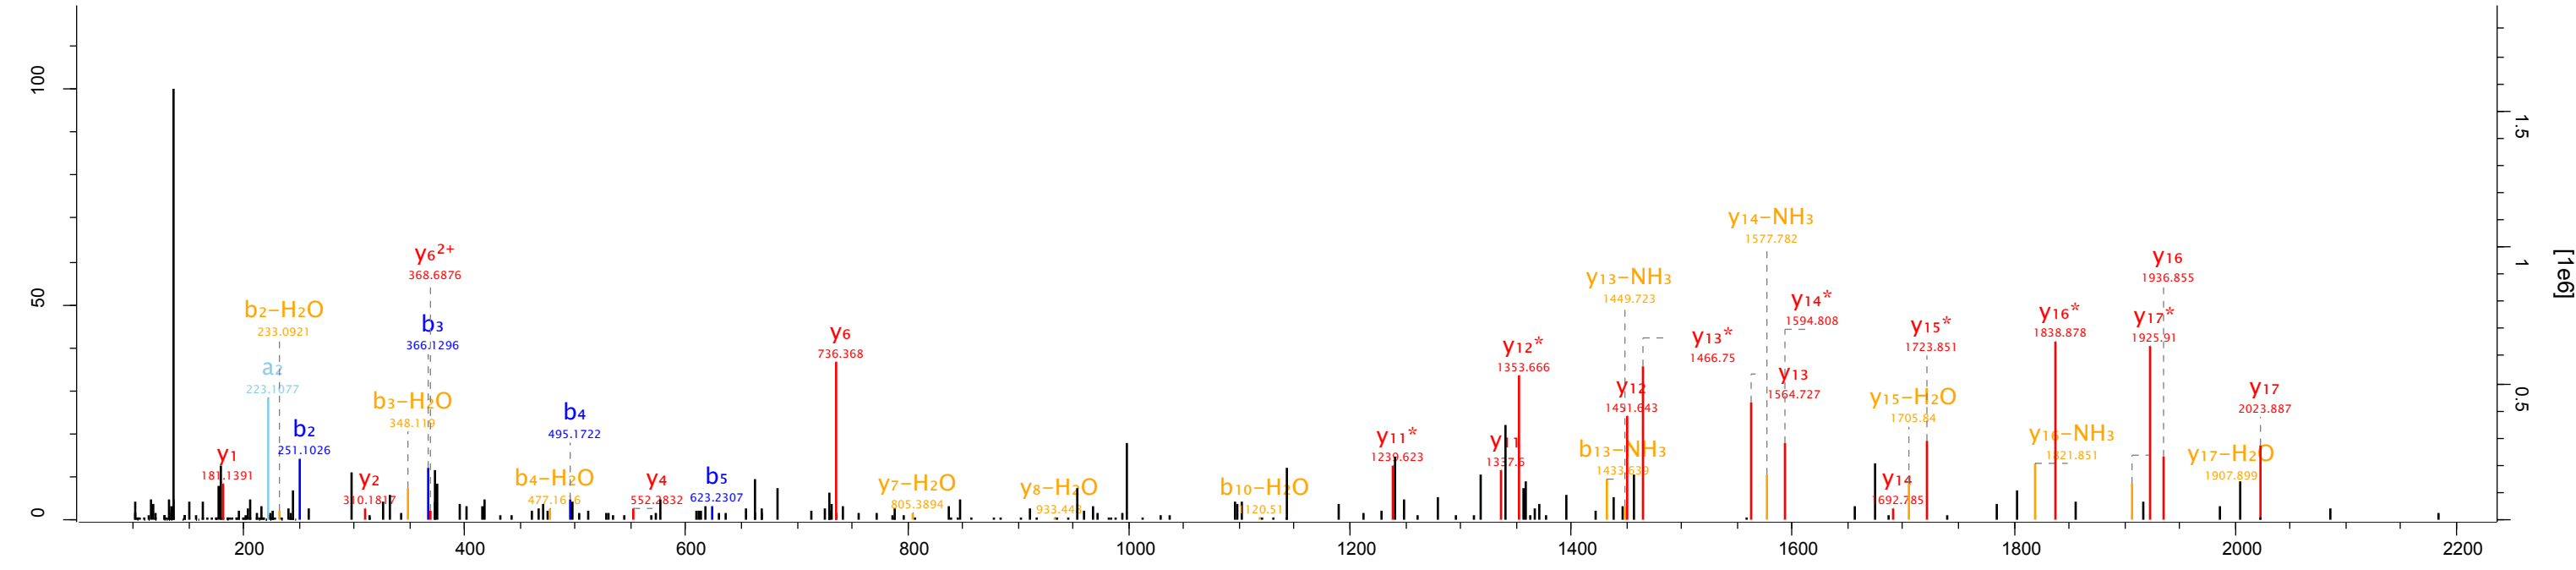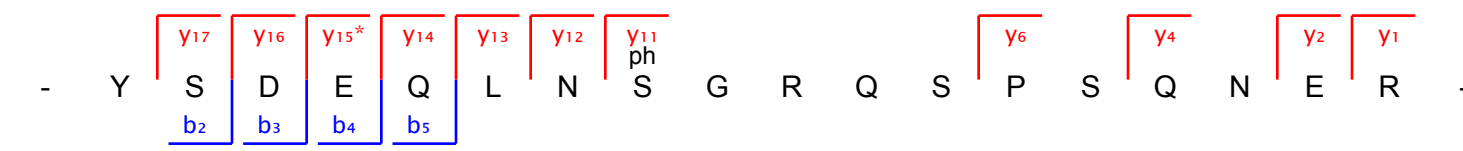

Raw file: 20150814\_A375SR\_Phospho\_BR2\_03  
 Scan: 6062 Method: FTMS; HCD Score: 90.61 m/z: 546.7 Gene names: PCBP2

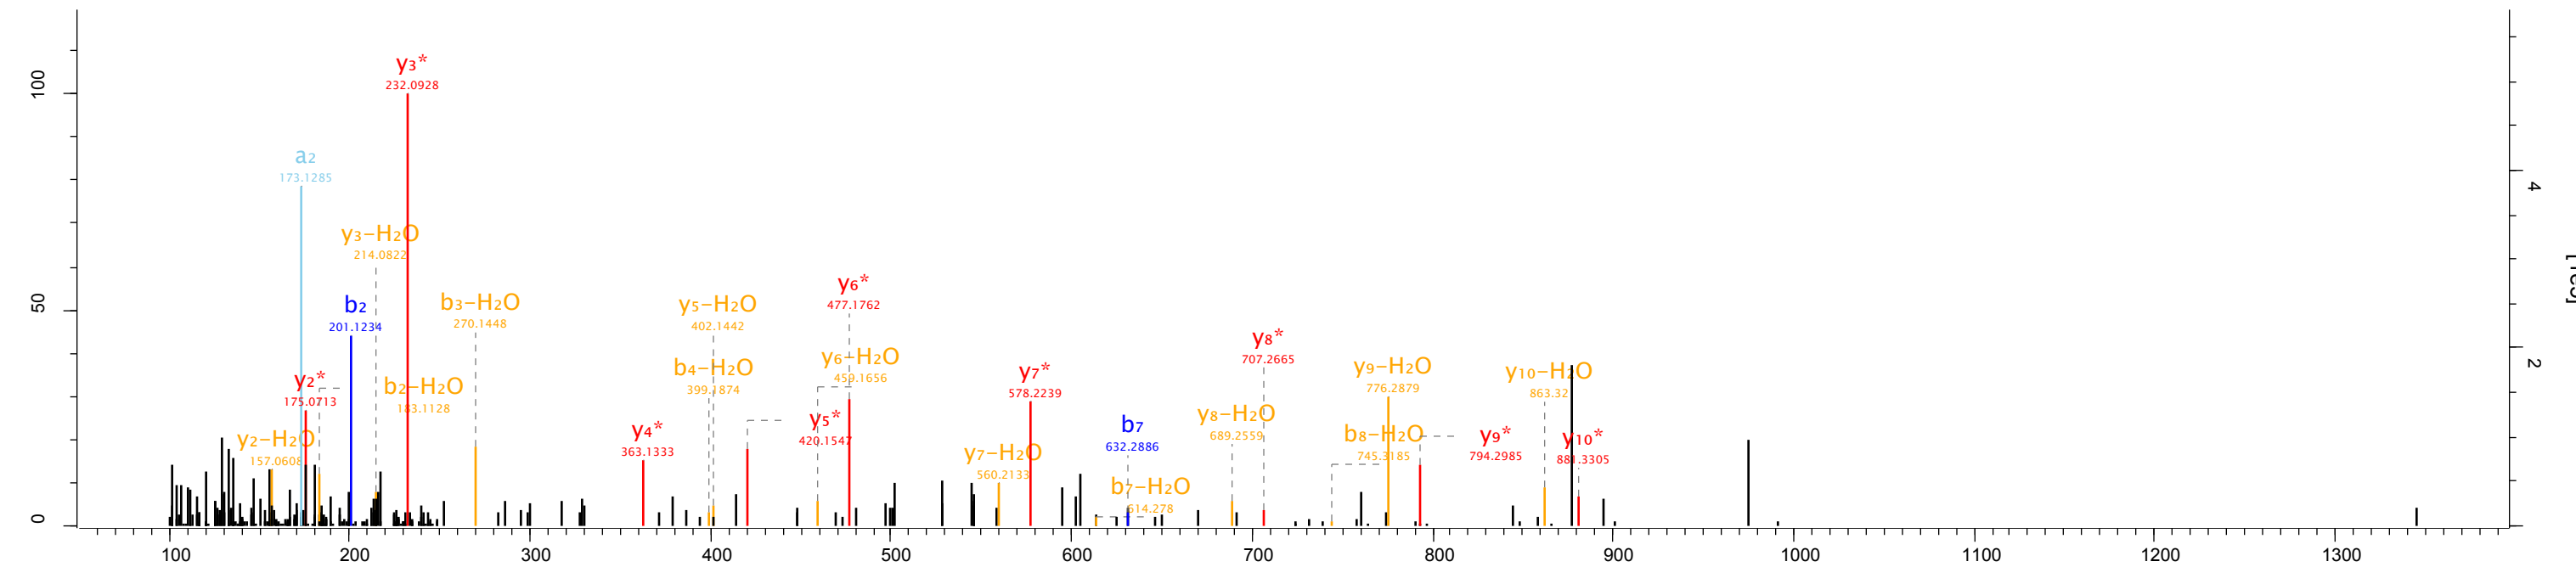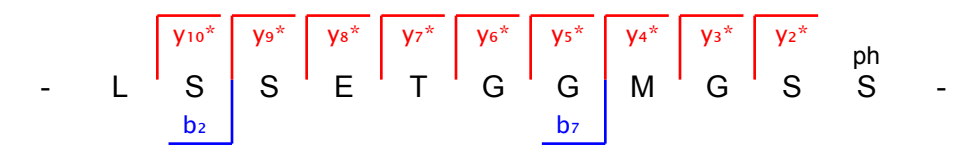



Raw file: 20150814\_A375SR\_Phospho\_BR2\_03  
 Scan: 6162 Method: FTMS; HCD Score: 51.54 m/z: 693.78 Gene names: CNTLN

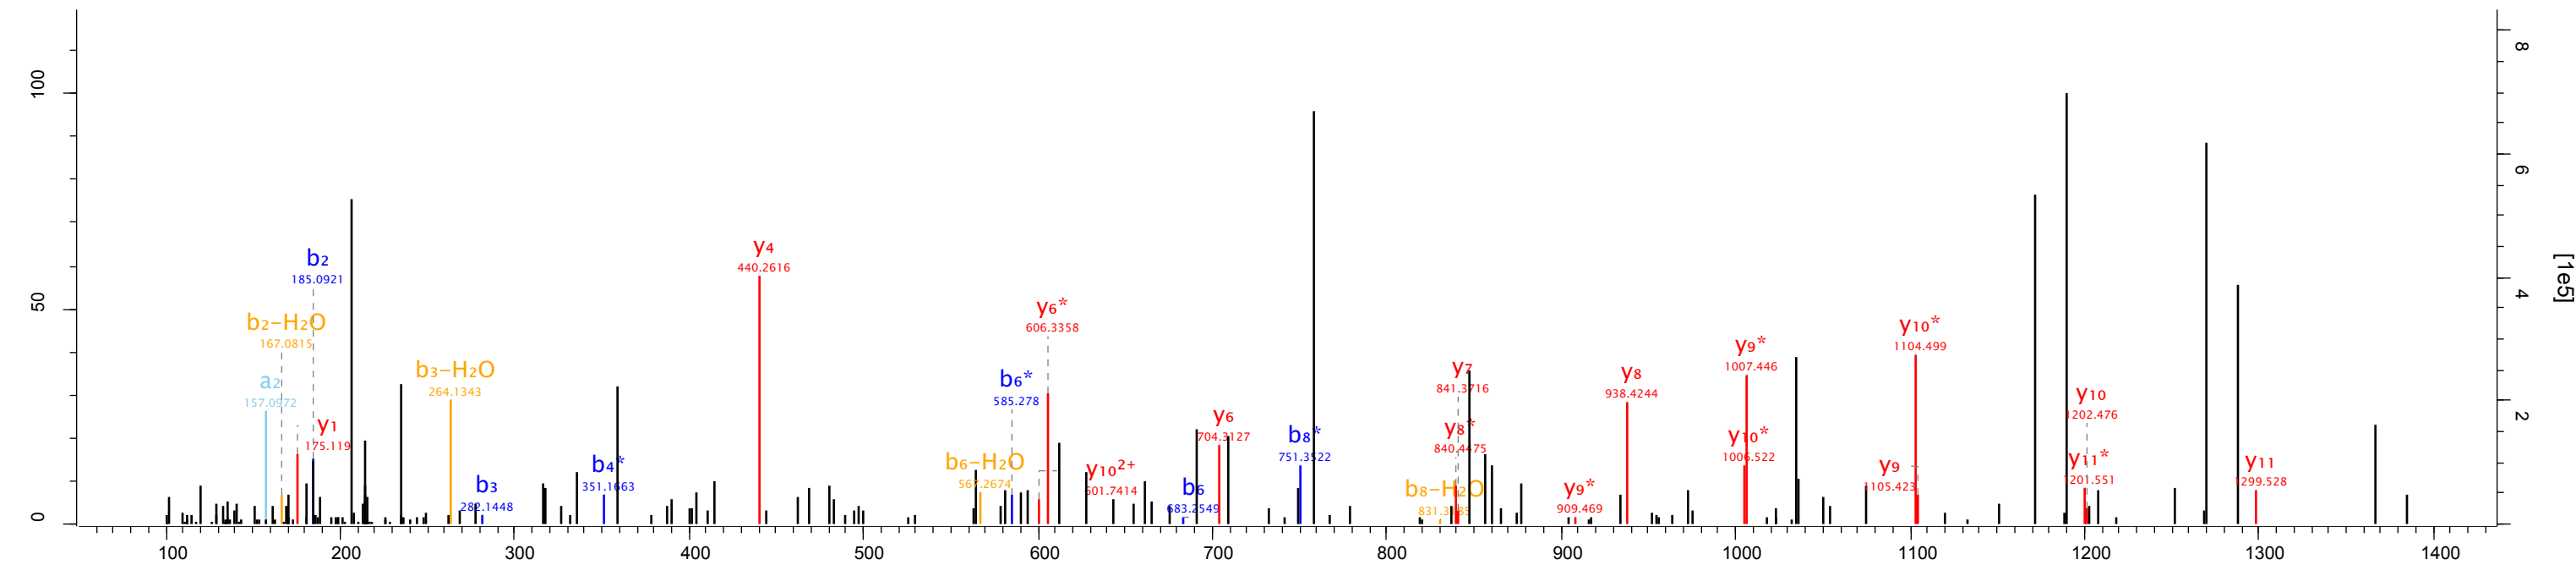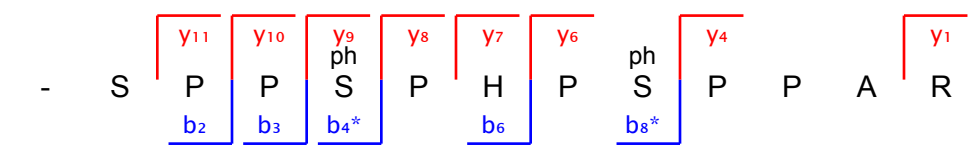

Raw file 20150814\_A375SR\_Phospho\_BR2\_03 Scan 6382 Method FTMS; HCD Score 265.6 m/z 751.86 Gene names ZNF638

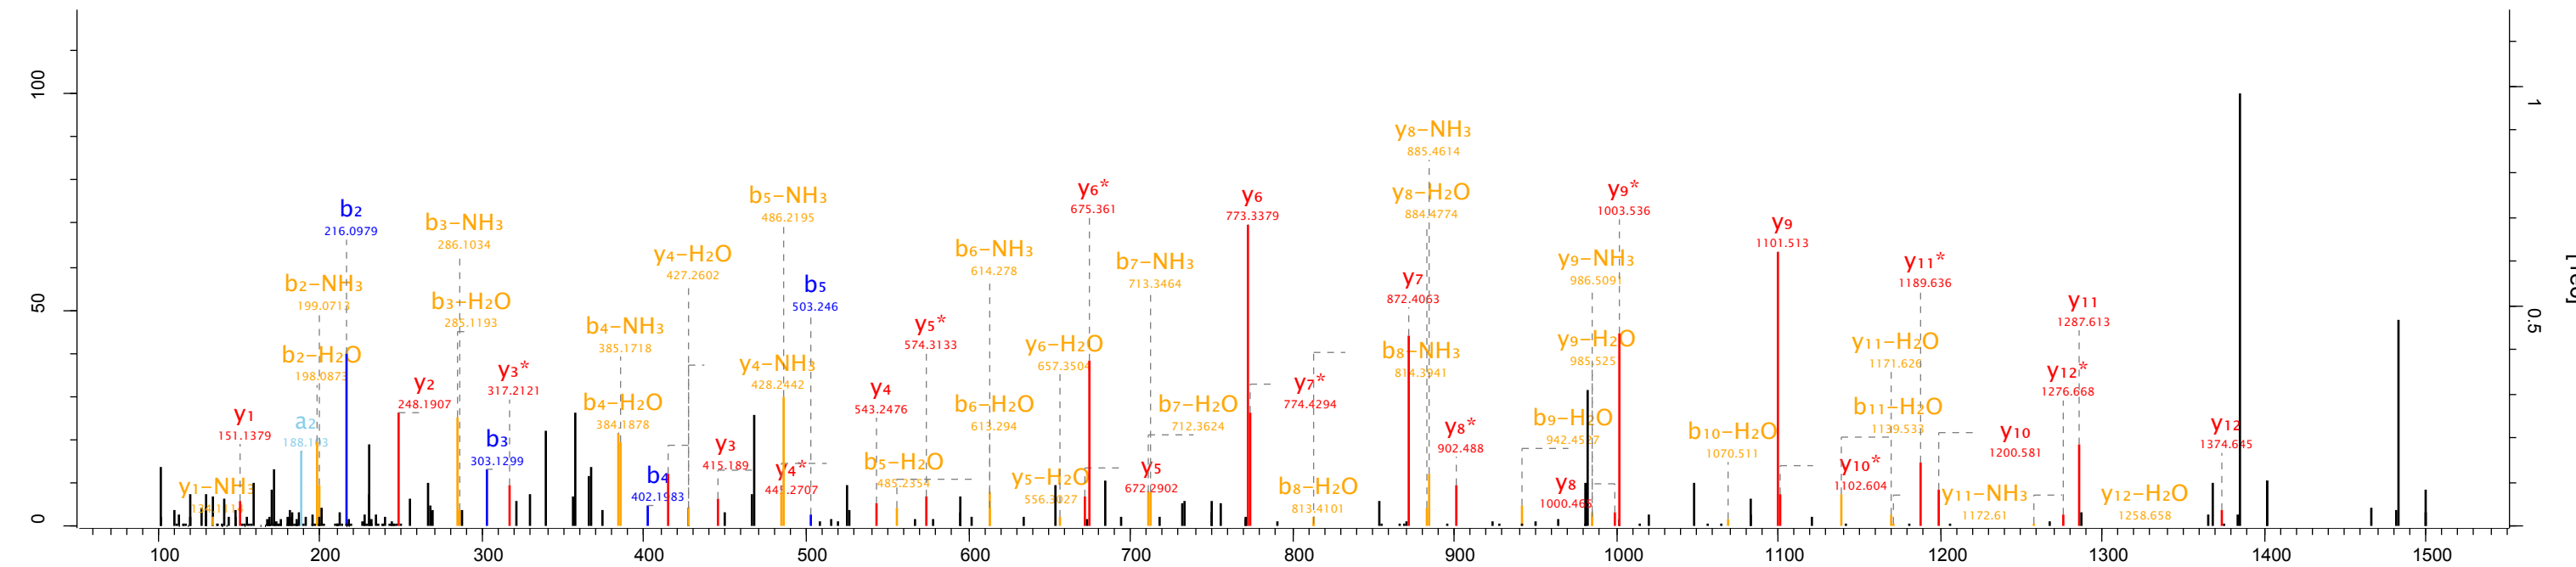

- Q S S V T Q V T E Q S P K -

Fragmentation mapping (b and y ions):

- b<sub>2</sub> (S)
- b<sub>3</sub> (S)
- b<sub>4</sub> (V)
- b<sub>5</sub> (T)
- y<sub>1</sub> (K)
- y<sub>2</sub> (P)
- y<sub>3</sub> (S)
- y<sub>4</sub> (Q)
- y<sub>5</sub> (E)
- y<sub>6</sub> (T)
- y<sub>7</sub> (V)
- y<sub>8</sub> (Q)
- y<sub>9</sub> (T)
- y<sub>10</sub> (V)
- y<sub>11</sub> (S)
- y<sub>12</sub> (K)

Raw file: 20150814\_A375SR\_Phospho\_BR2\_03  
 Scan: 6882 Method: FTMS; HCD Score: 67.08 m/z: 521.76 Gene names: ARID4A

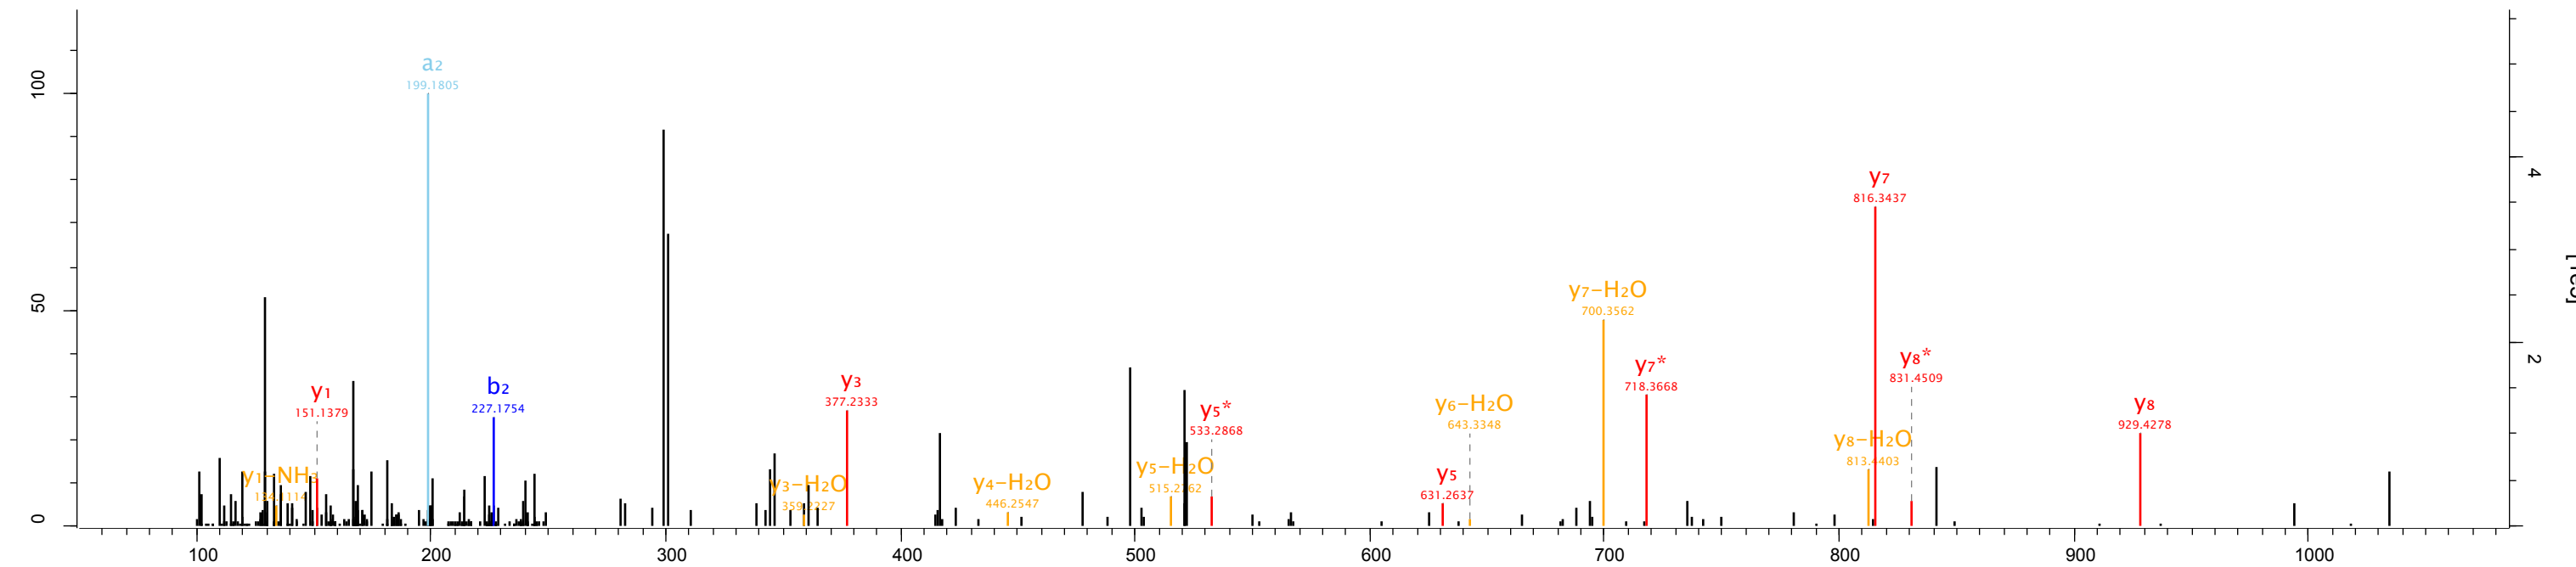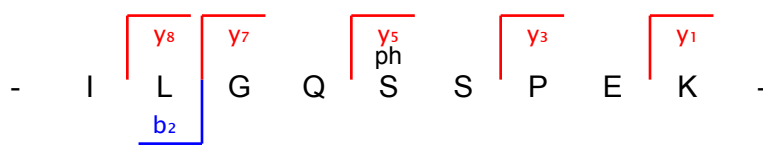

Raw file: 20150814\_A375SR\_Phospho\_BR2\_03  
 Scan: 6942 Method: FTMS; HCD Score: 106.92 m/z: 814.35 Gene names: SMG5

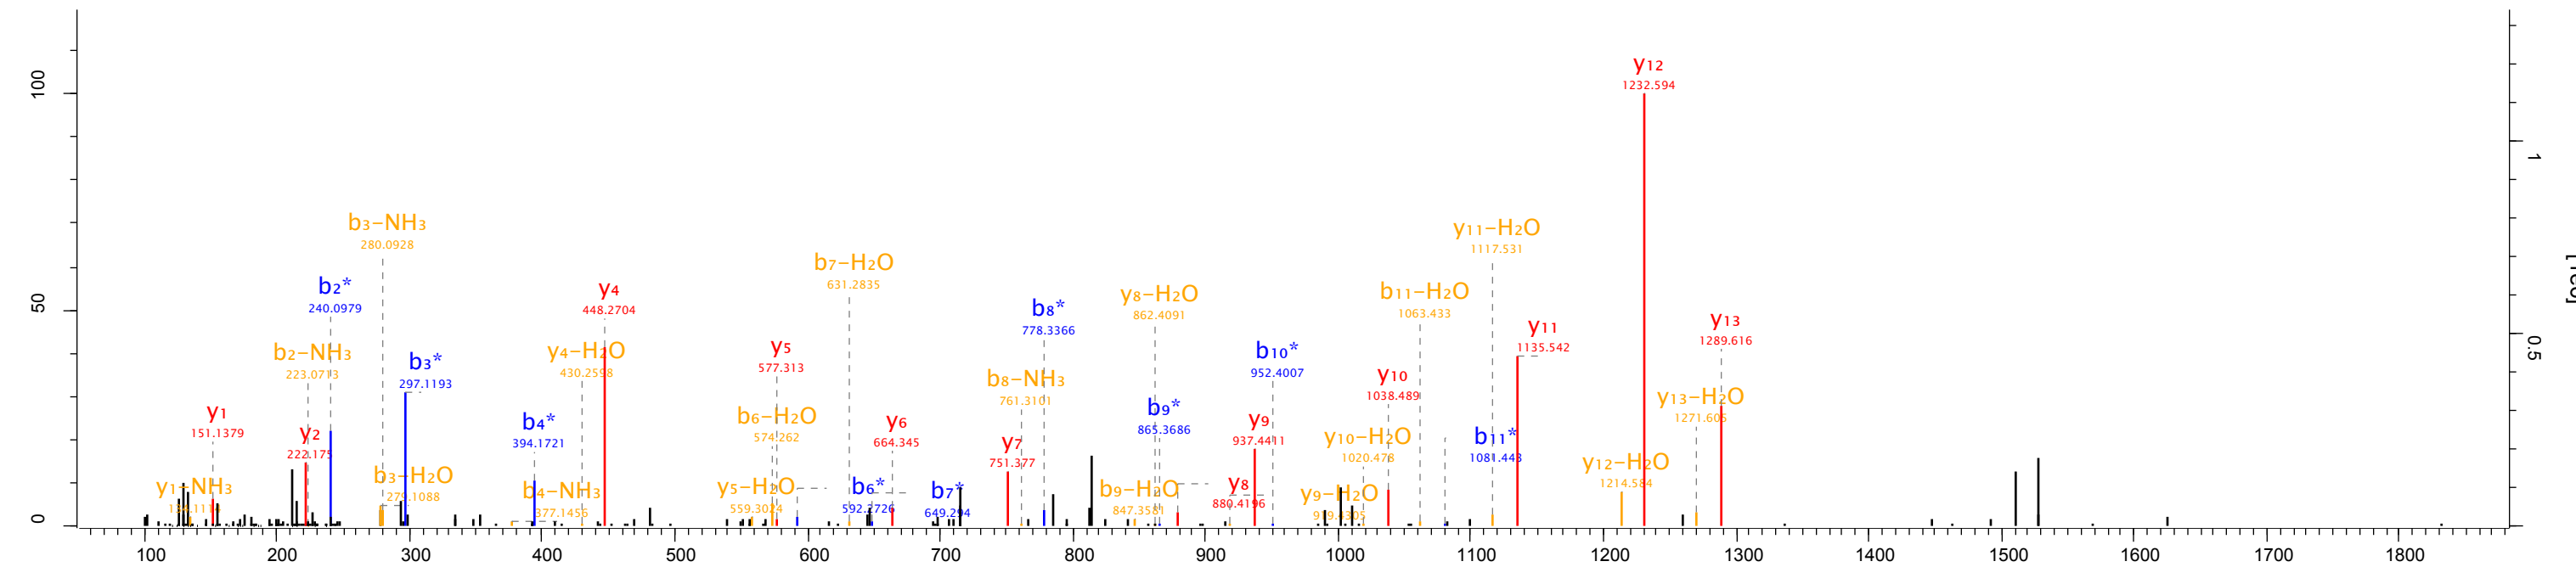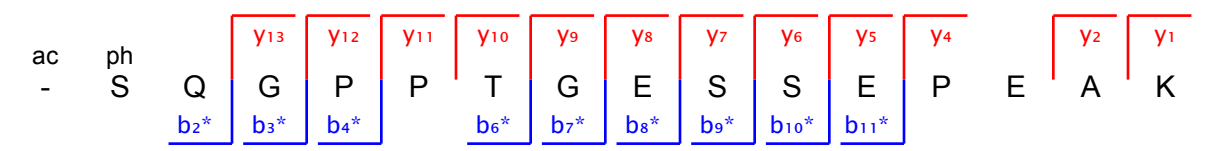

Raw file 20150814\_A375SR\_Phospho\_BR2\_03 Scan 7652 Method FTMS; HCD Score 229.98 m/z 900.88 Gene names PPFIA1

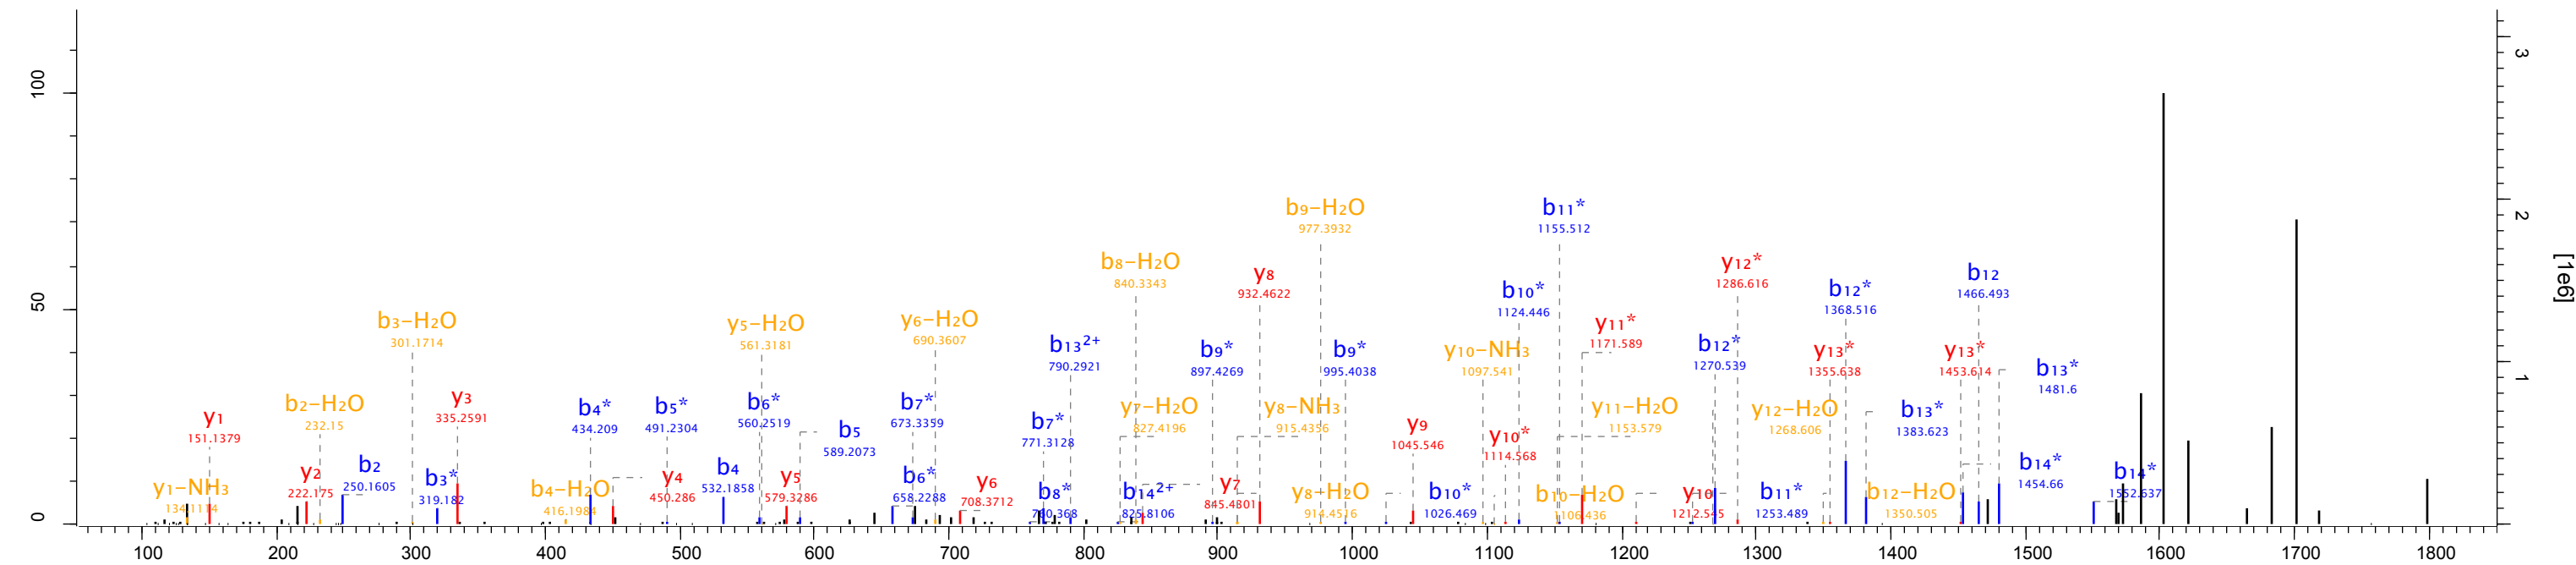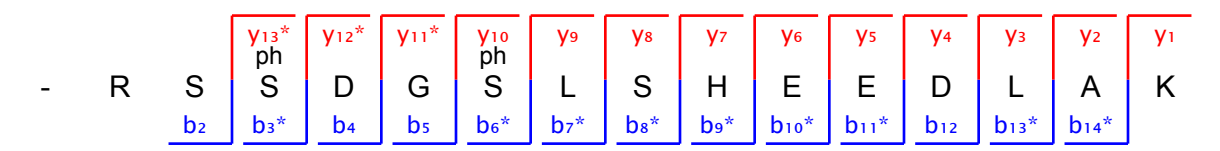

Raw file 20150814\_A375SR\_Phospho\_BR2\_03 Scan 7842 Method FTMS; HCD Score 43.16 m/z 576.27 Gene names CDT1

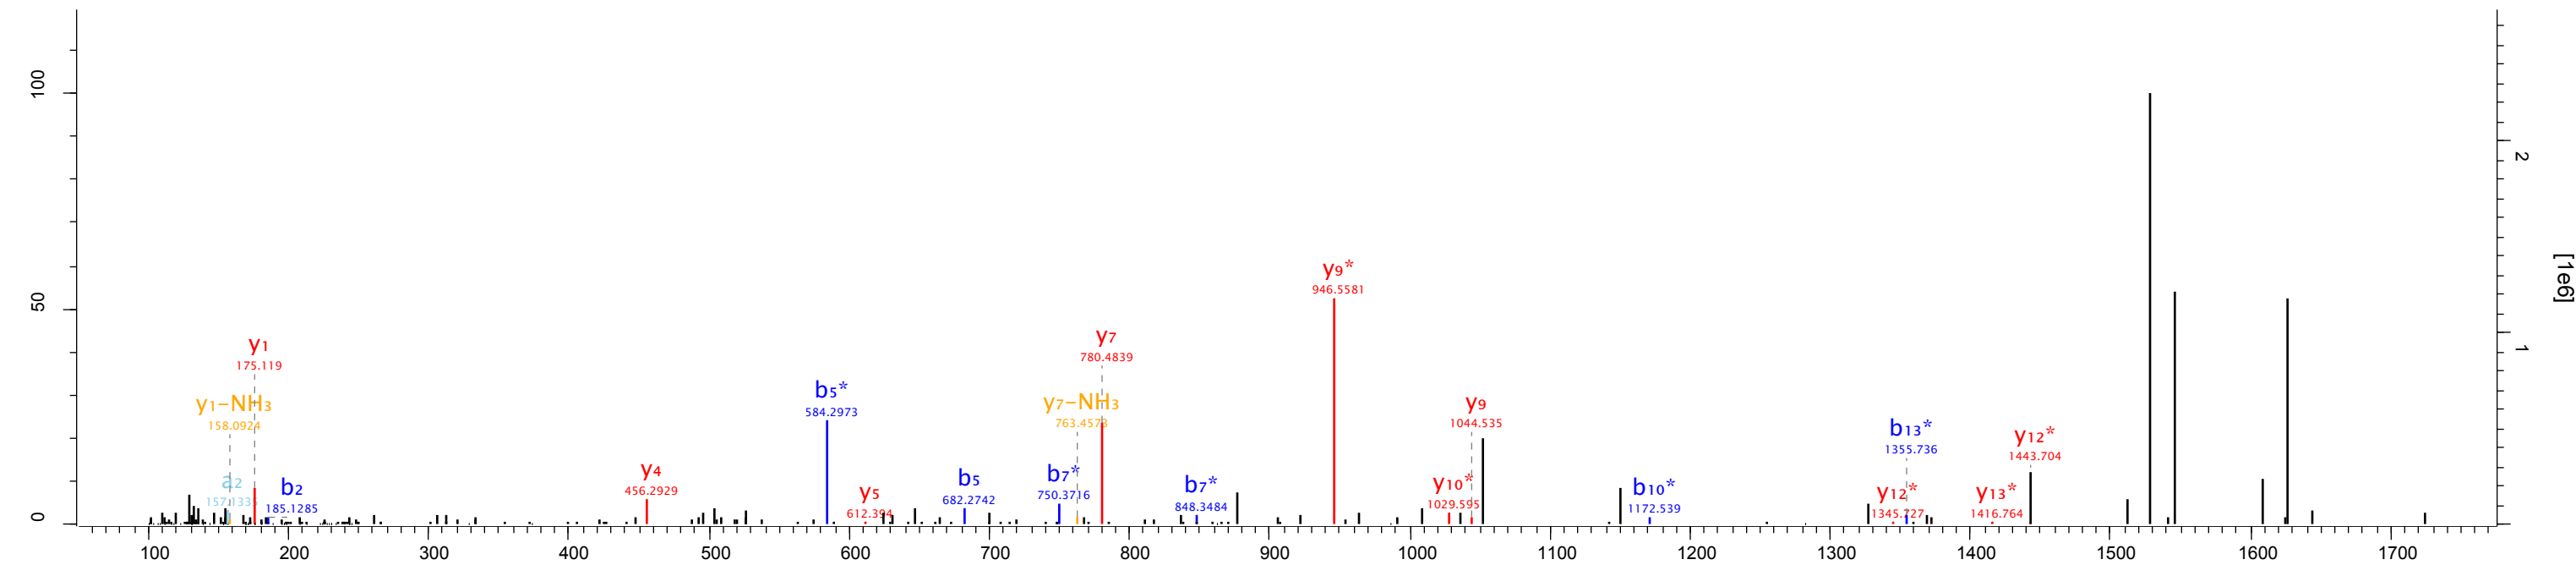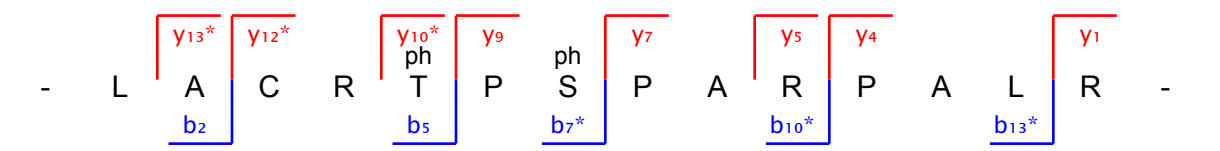

Raw file: 20150814\_A375SR\_Phospho\_BR2\_03  
 Scan: 8052 Method: FTMS; HCD Score: 162 m/z: 631.77 Gene names: WDR43

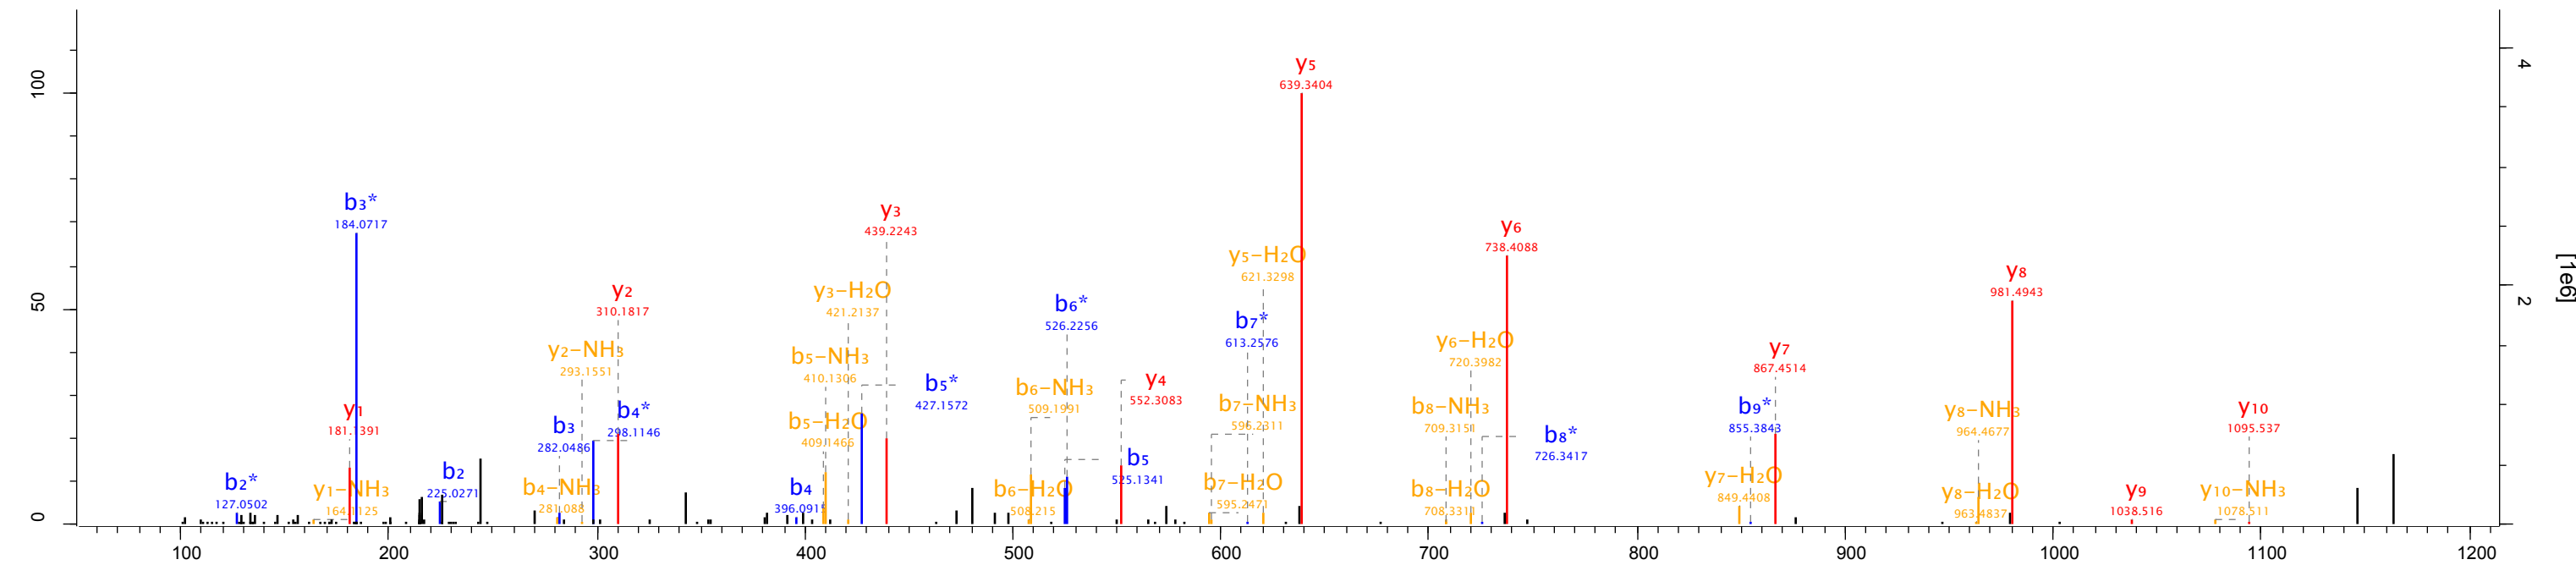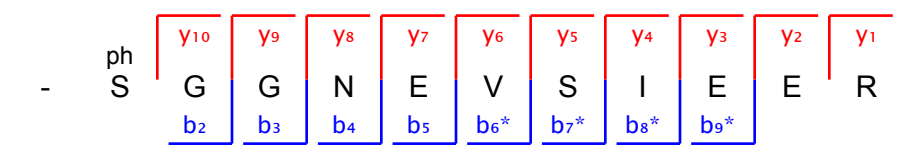

Raw file: 20150814\_A375SR\_Phospho\_BR2\_03  
 Scan: 8132 Method: FTMS; HCD Score: 128.94 m/z: 787.34 Gene names: ZNF148

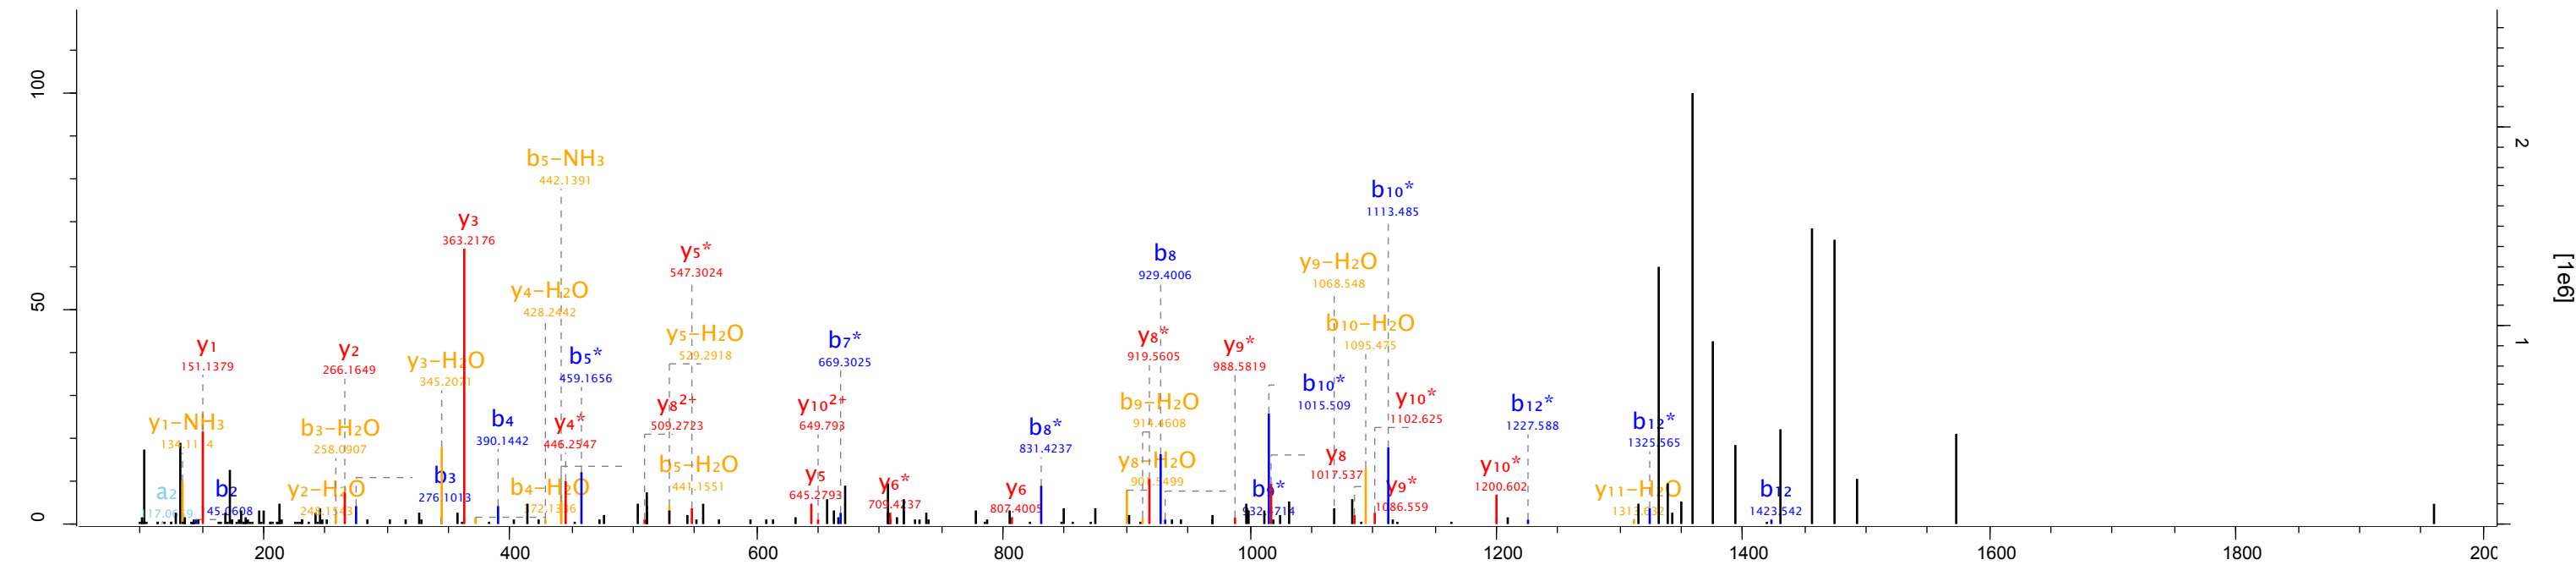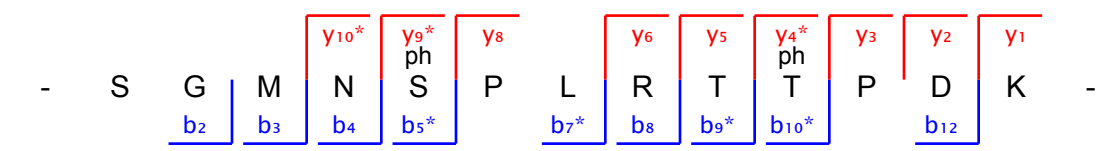



Raw file 20150814\_A375SR\_Phospho\_BR2\_03 Scan 8202 Method FTMS; HCD Score 117.8 m/z 710.83 Gene names SRRM2

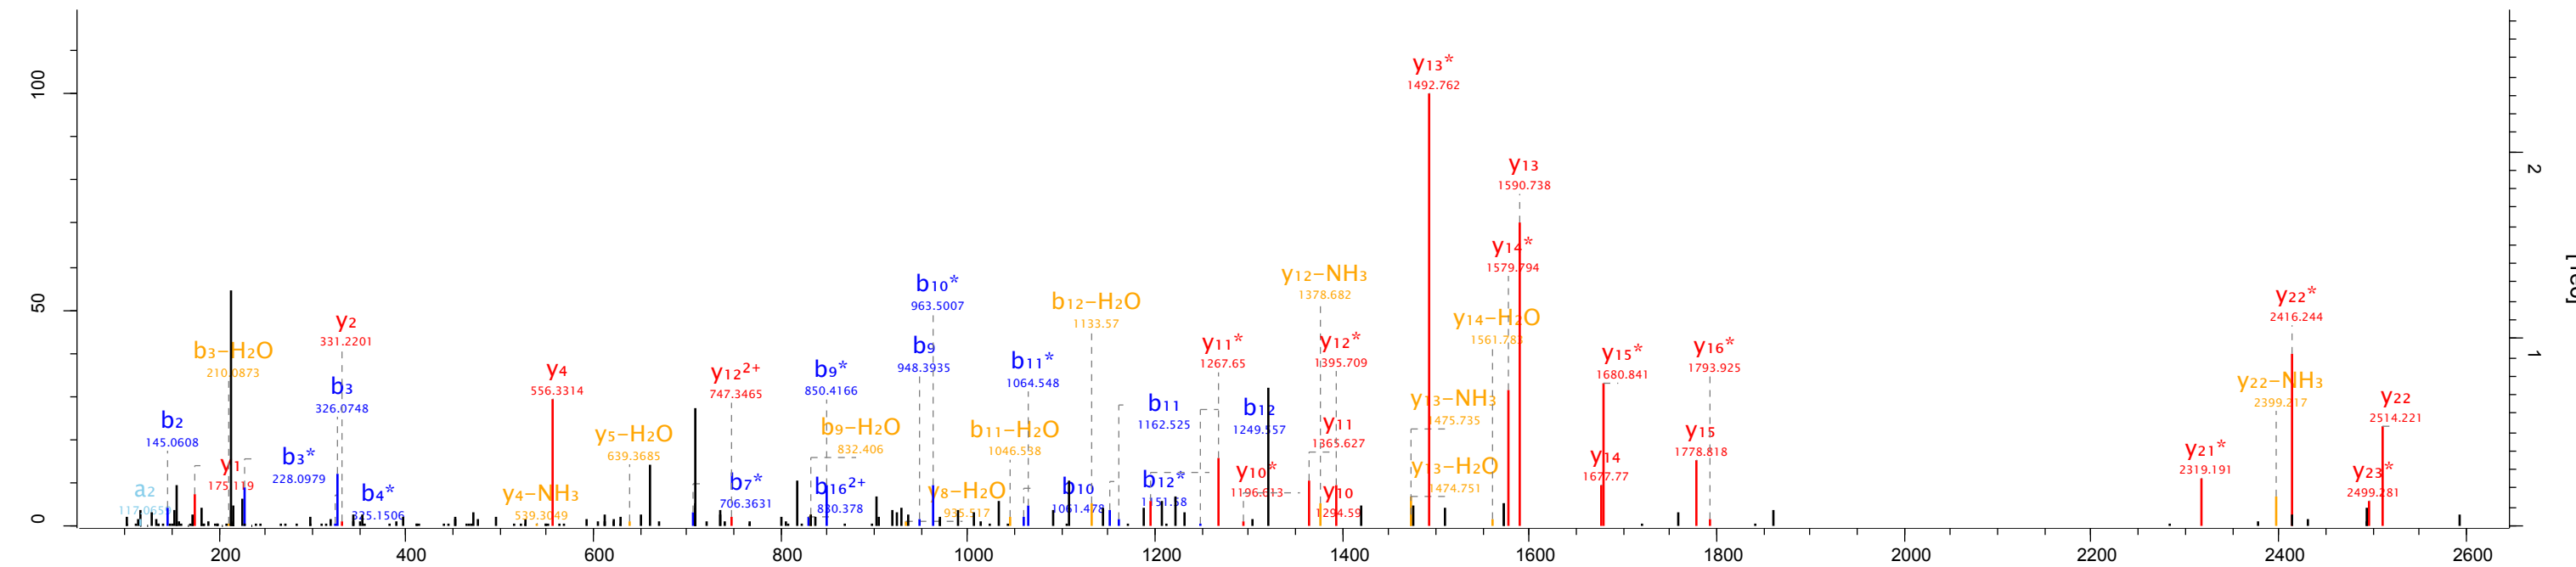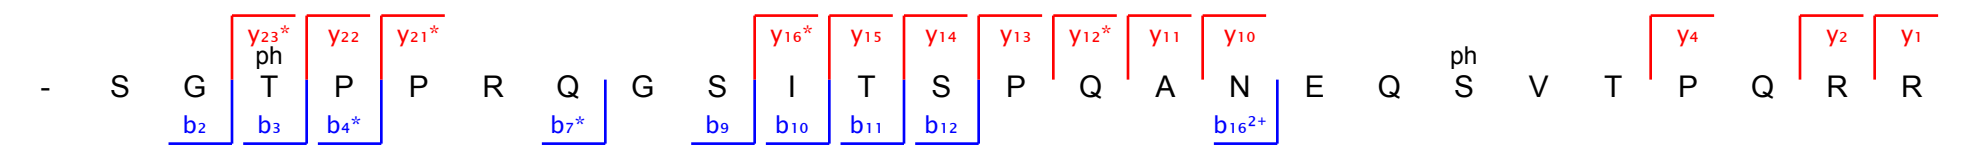

Raw file: 20150814\_A375SR\_Phospho\_BR2\_03  
 Scan: 8422 Method: FTMS; HCD Score: 181.83 m/z: 878.44 Gene names: NPM1

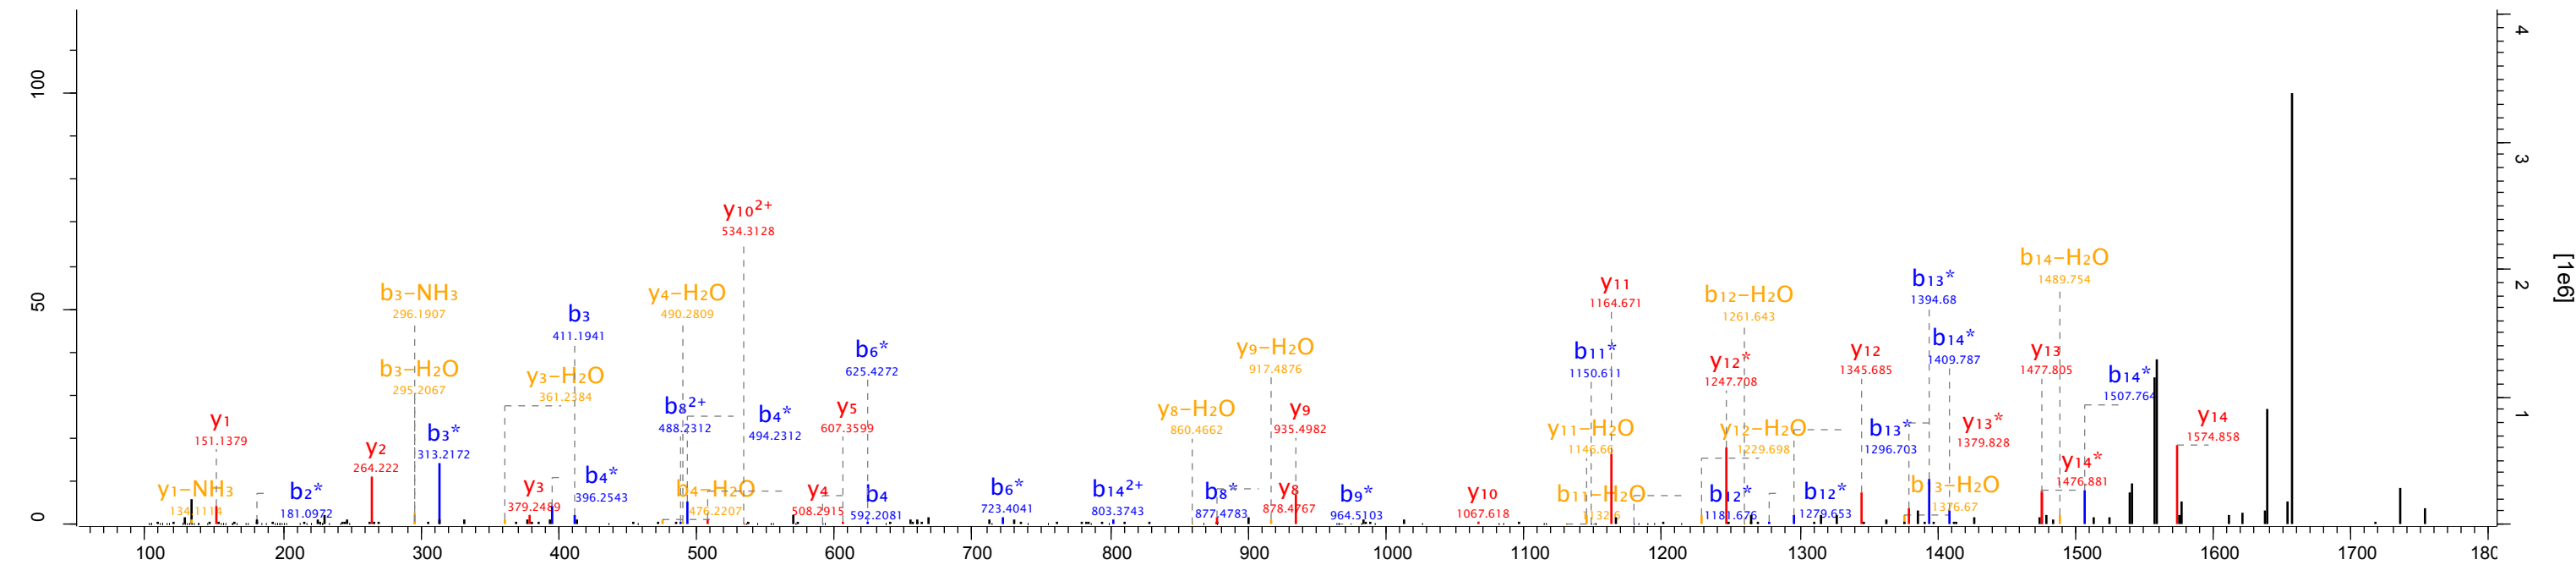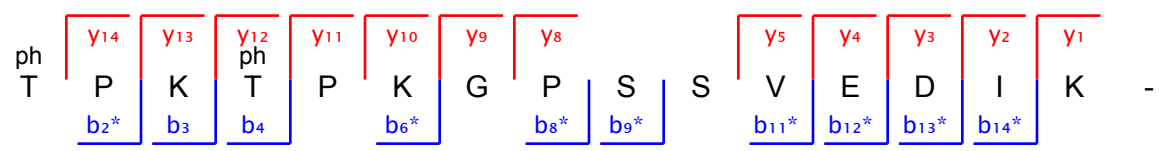

Raw file  
 20150814\_A375SR\_Phospho\_BR2\_03  
 Scan 8892 Method FTMS; HCD Score 280.91 m/z 1048.97 Gene names AKAP2

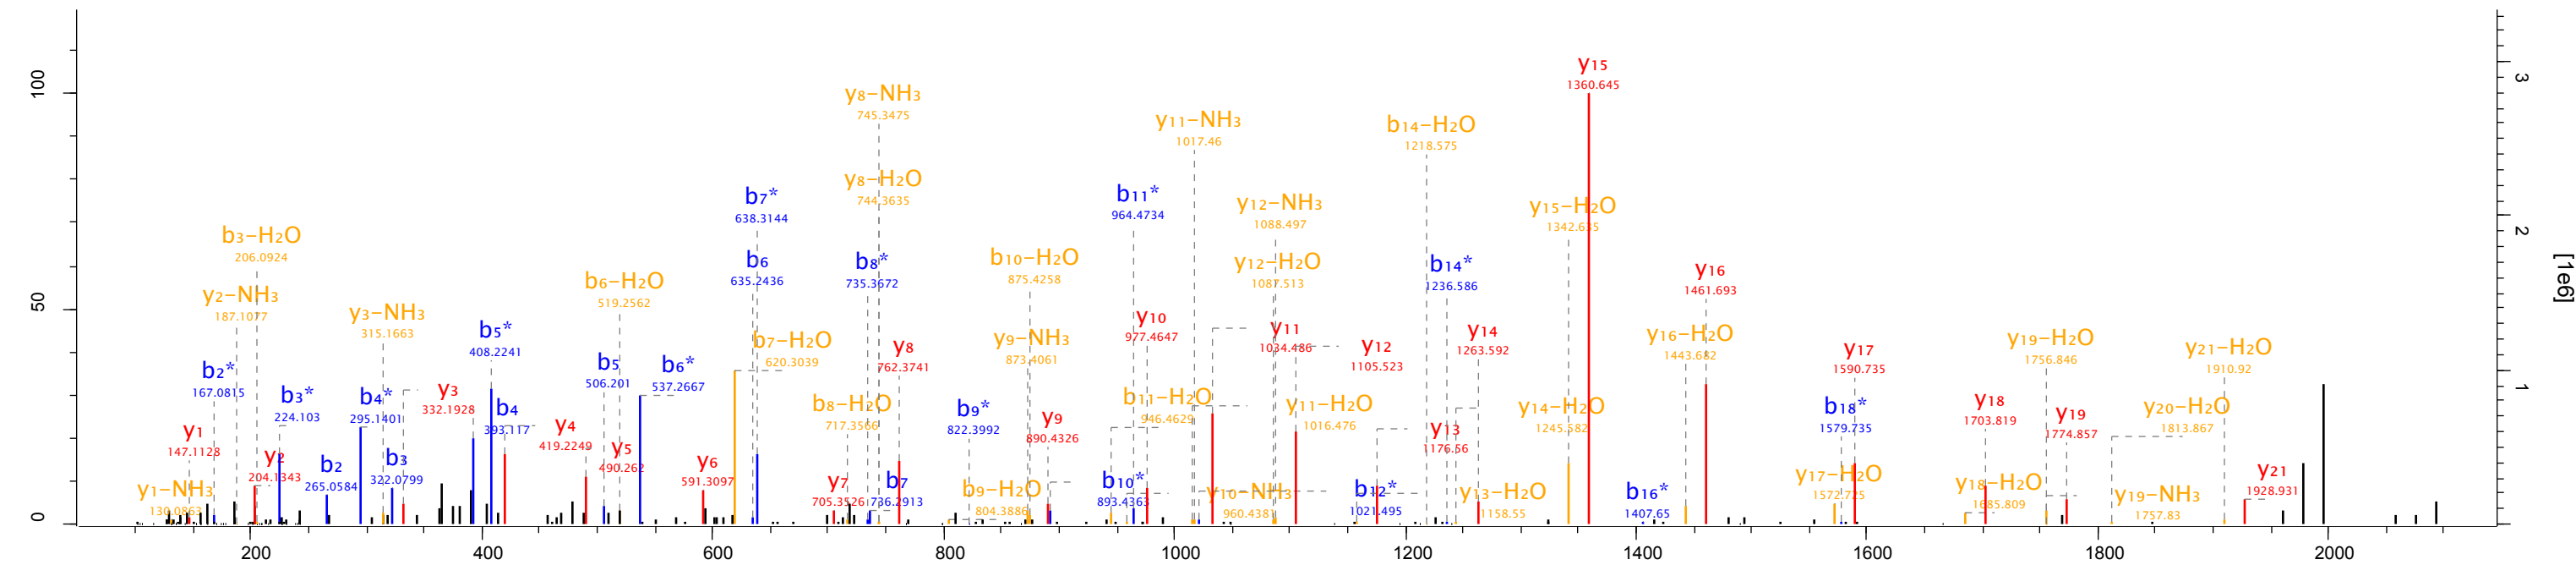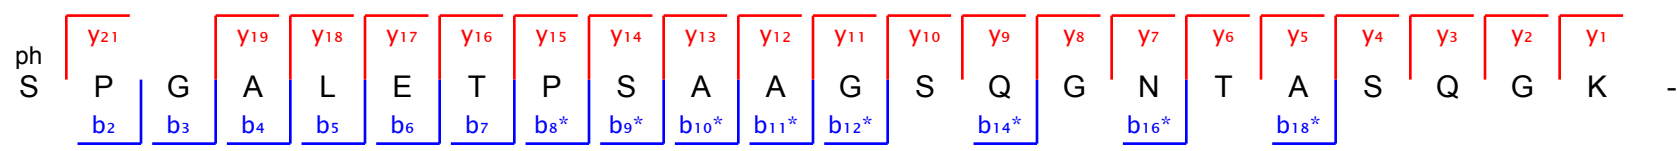

Raw file: 20150814\_A375SR\_Phospho\_BR2\_03  
 Scan: 8982 Method: FTMS; HCD Score: 150.62 m/z: 1107.48 Gene names: SRRM2

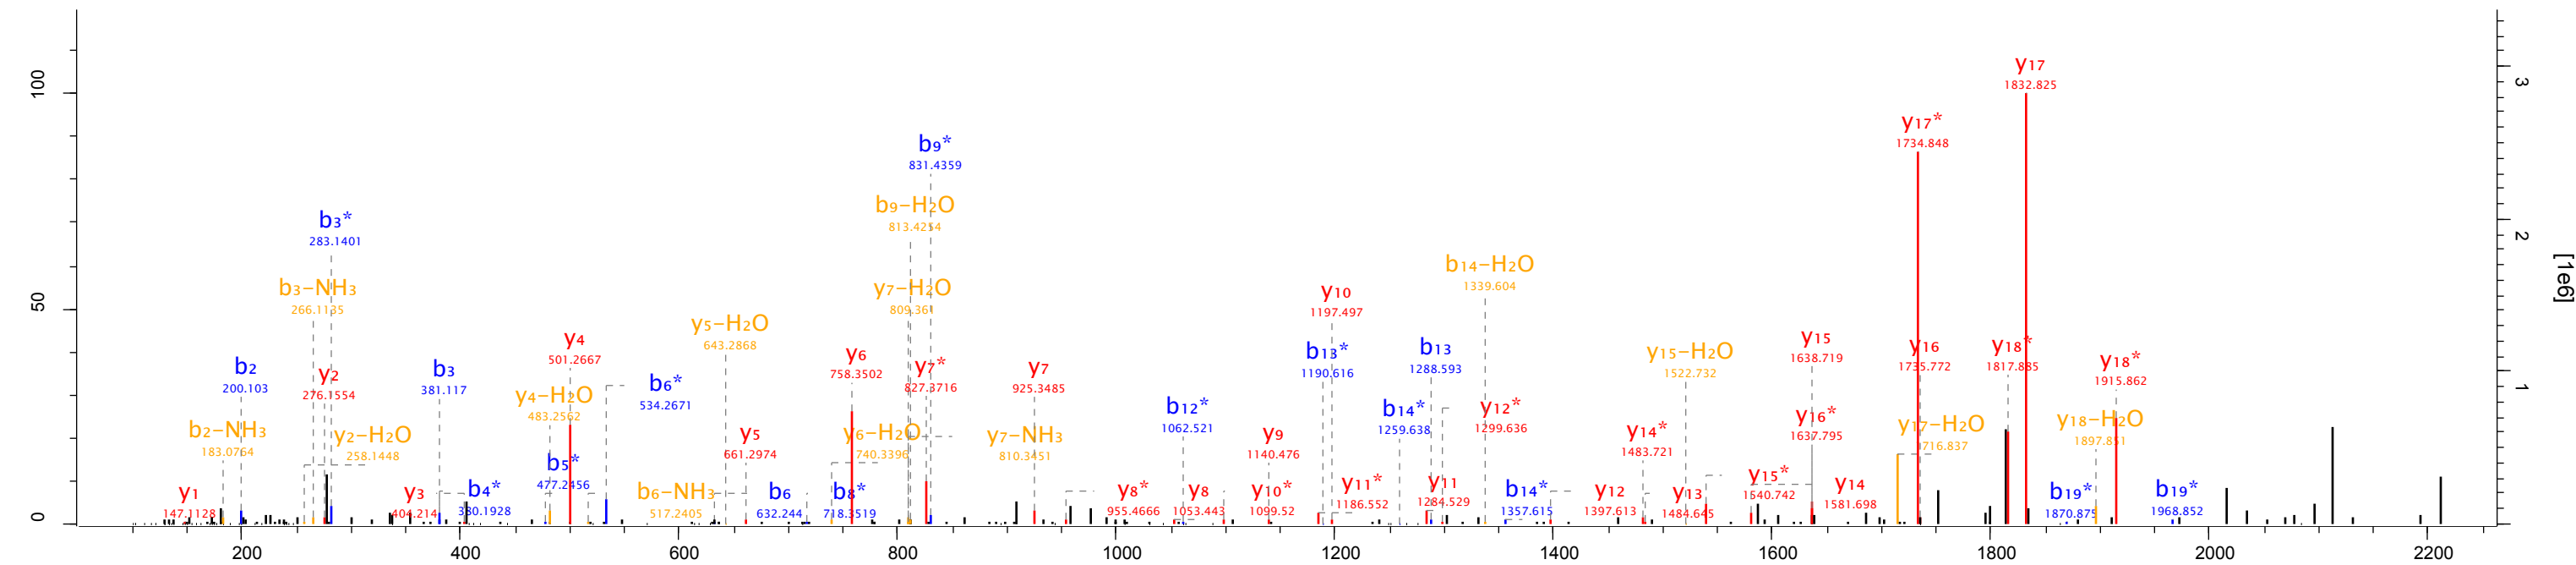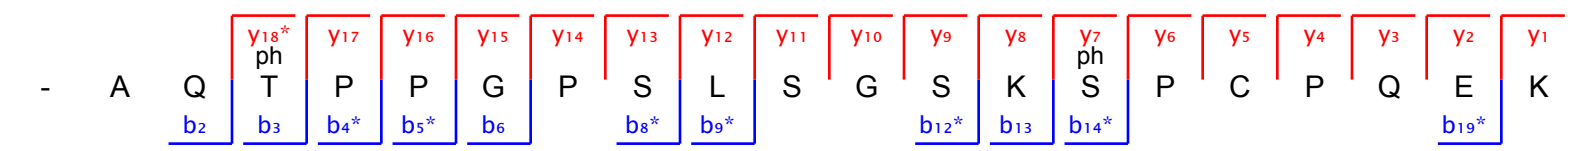

Raw file: 20150814\_A375SR\_Phospho\_BR2\_04  
 Scan: 10222 Method: FTMS; HCD Score: 192.32 m/z: 860.34 Gene names: SRSF10

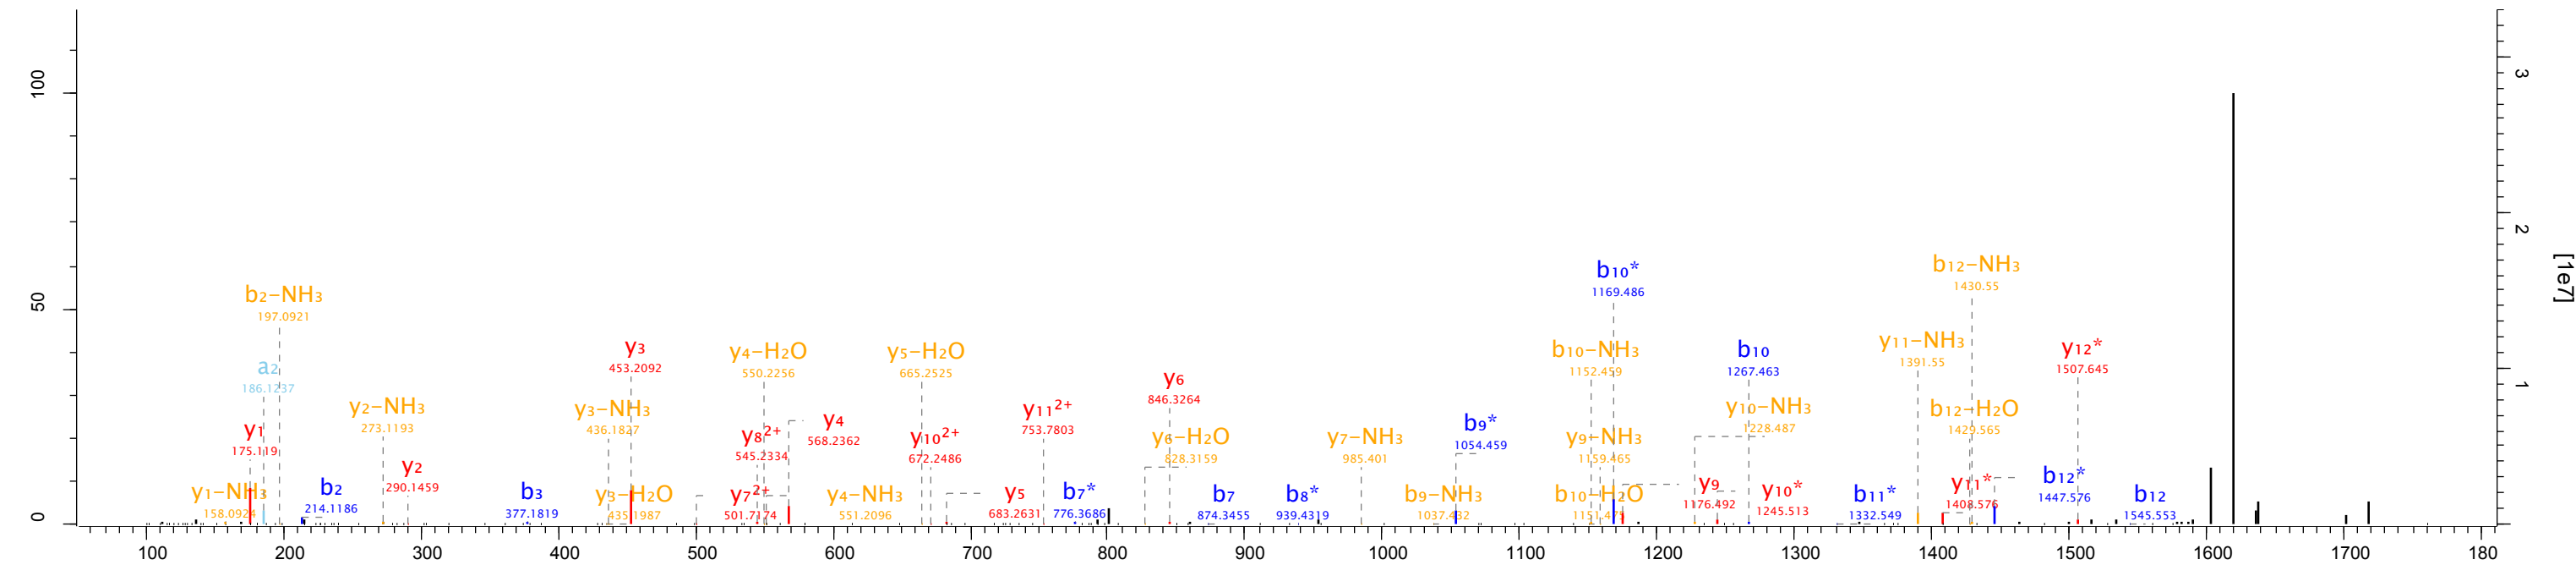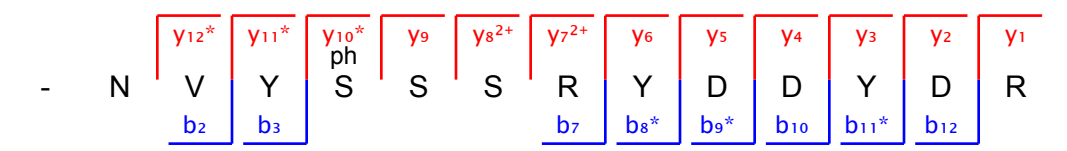

Raw file 20150814\_A375SR\_Phospho\_BR2\_04 Scan 10252 Method FTMS; HCD Score 198.87 m/z 677.32 Gene names LOH12CR1

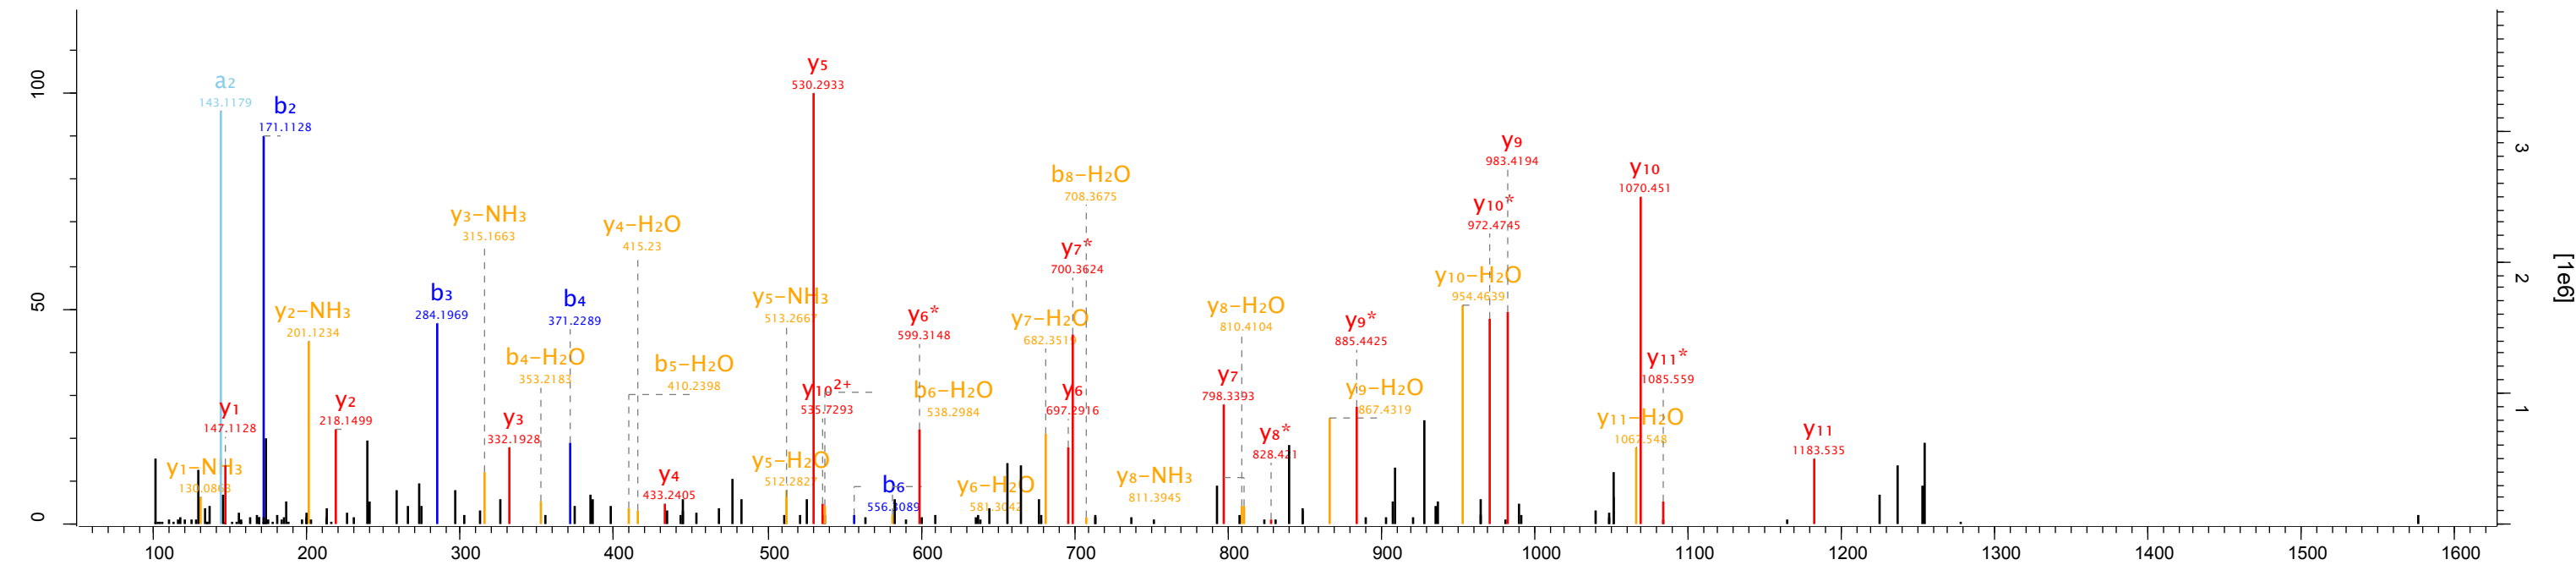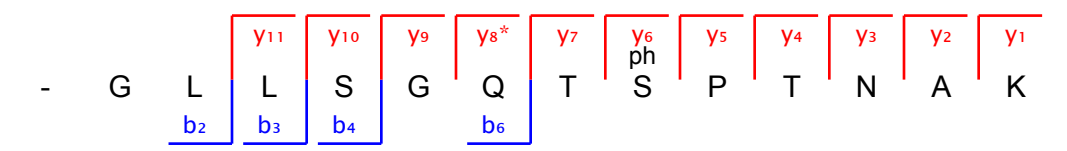

Raw file: 20150814\_A375SR\_Phospho\_BR2\_04  
 Scan: 10662 Method: FTMS; HCD Score: 165.24 m/z: 925.45 Gene names: USP1

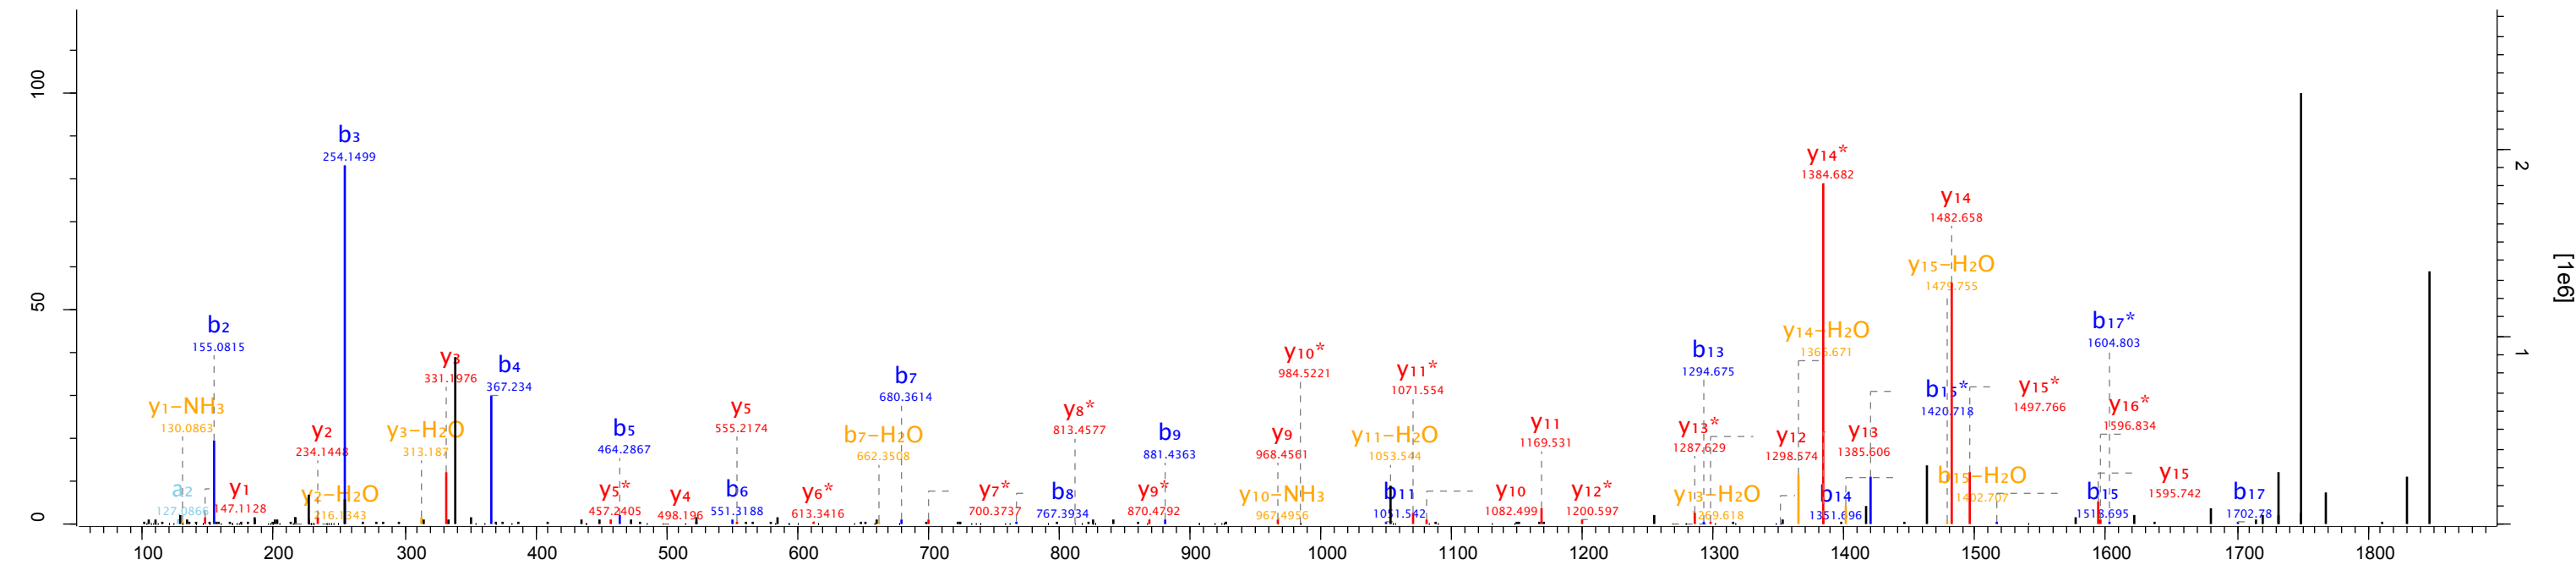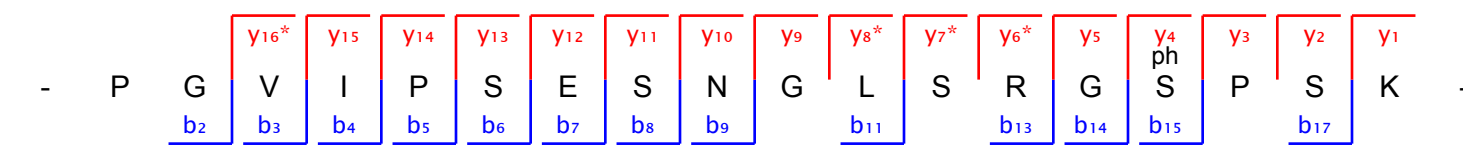

Raw file: 20150814\_A375SR\_Phospho\_BR2\_04  
 Scan: 10692 Method: FTMS; HCD Score: 193.06 m/z: 891.39 Gene names: SLC7A5

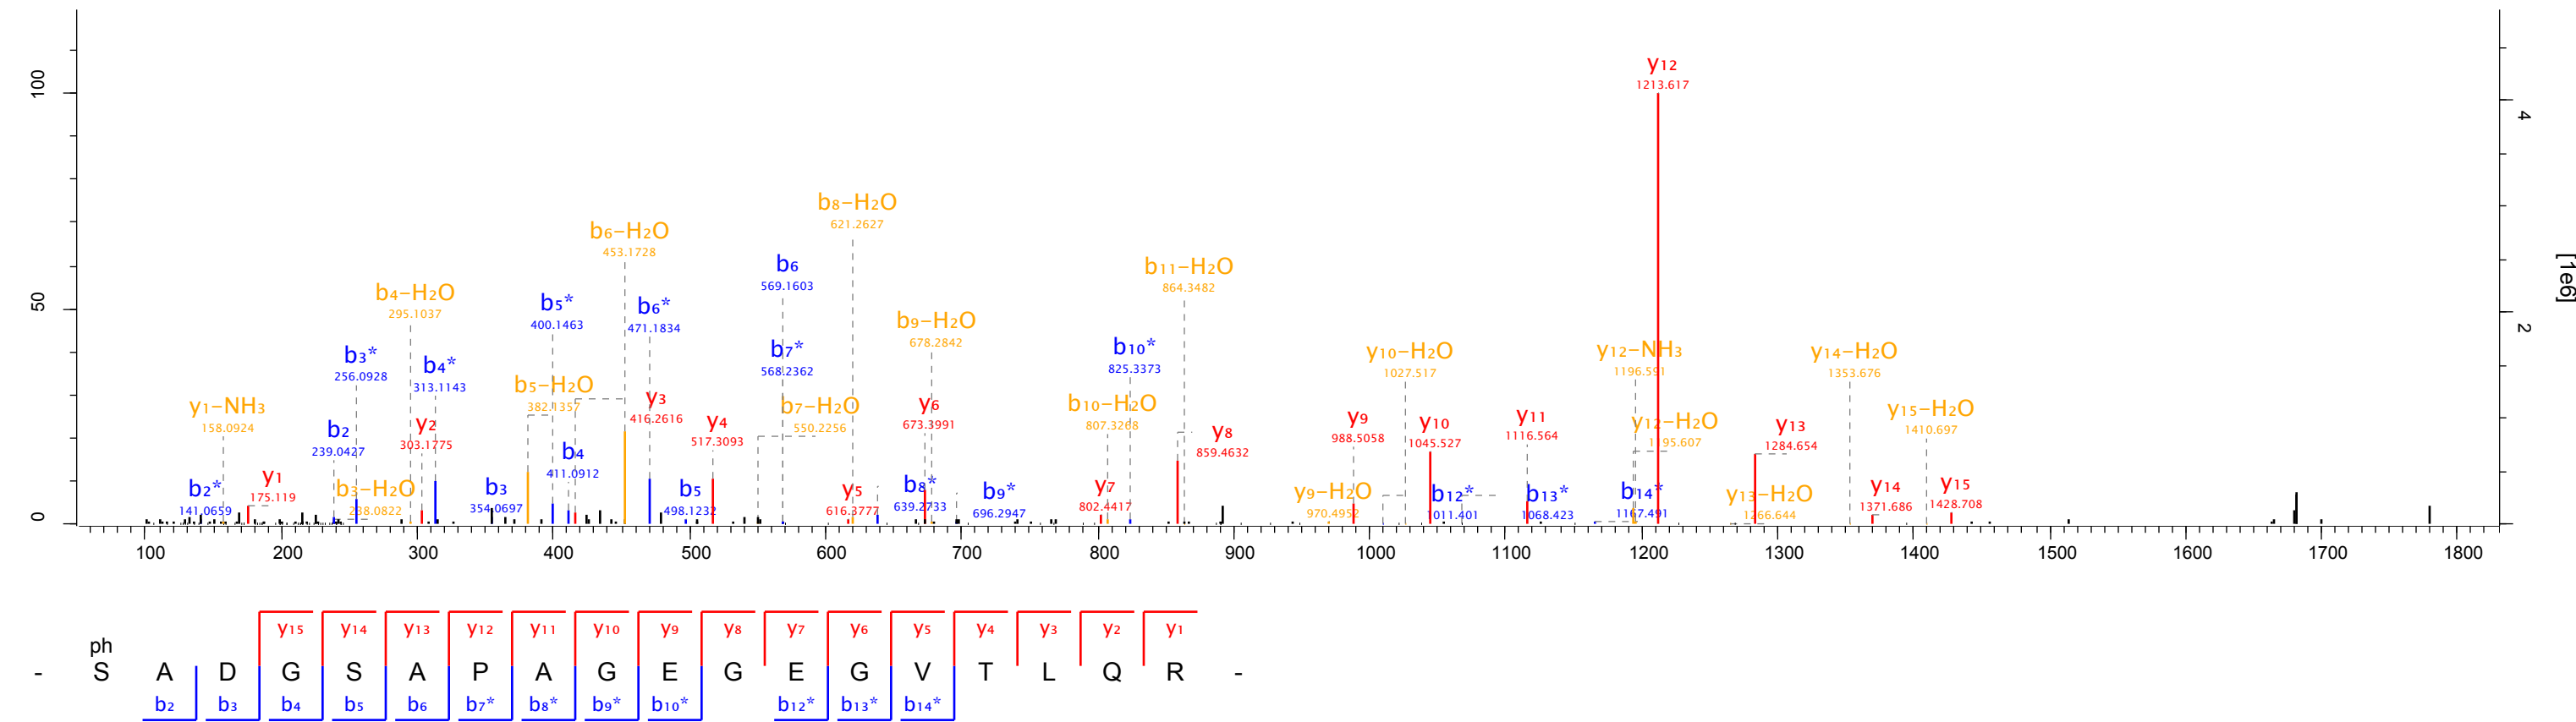



Raw file: 20150814\_A375SR\_Phospho\_BR2\_04  
 Scan: 11012 Method: FTMS; HCD Score: 186.67 m/z: 610.75 Gene names: THRAP3

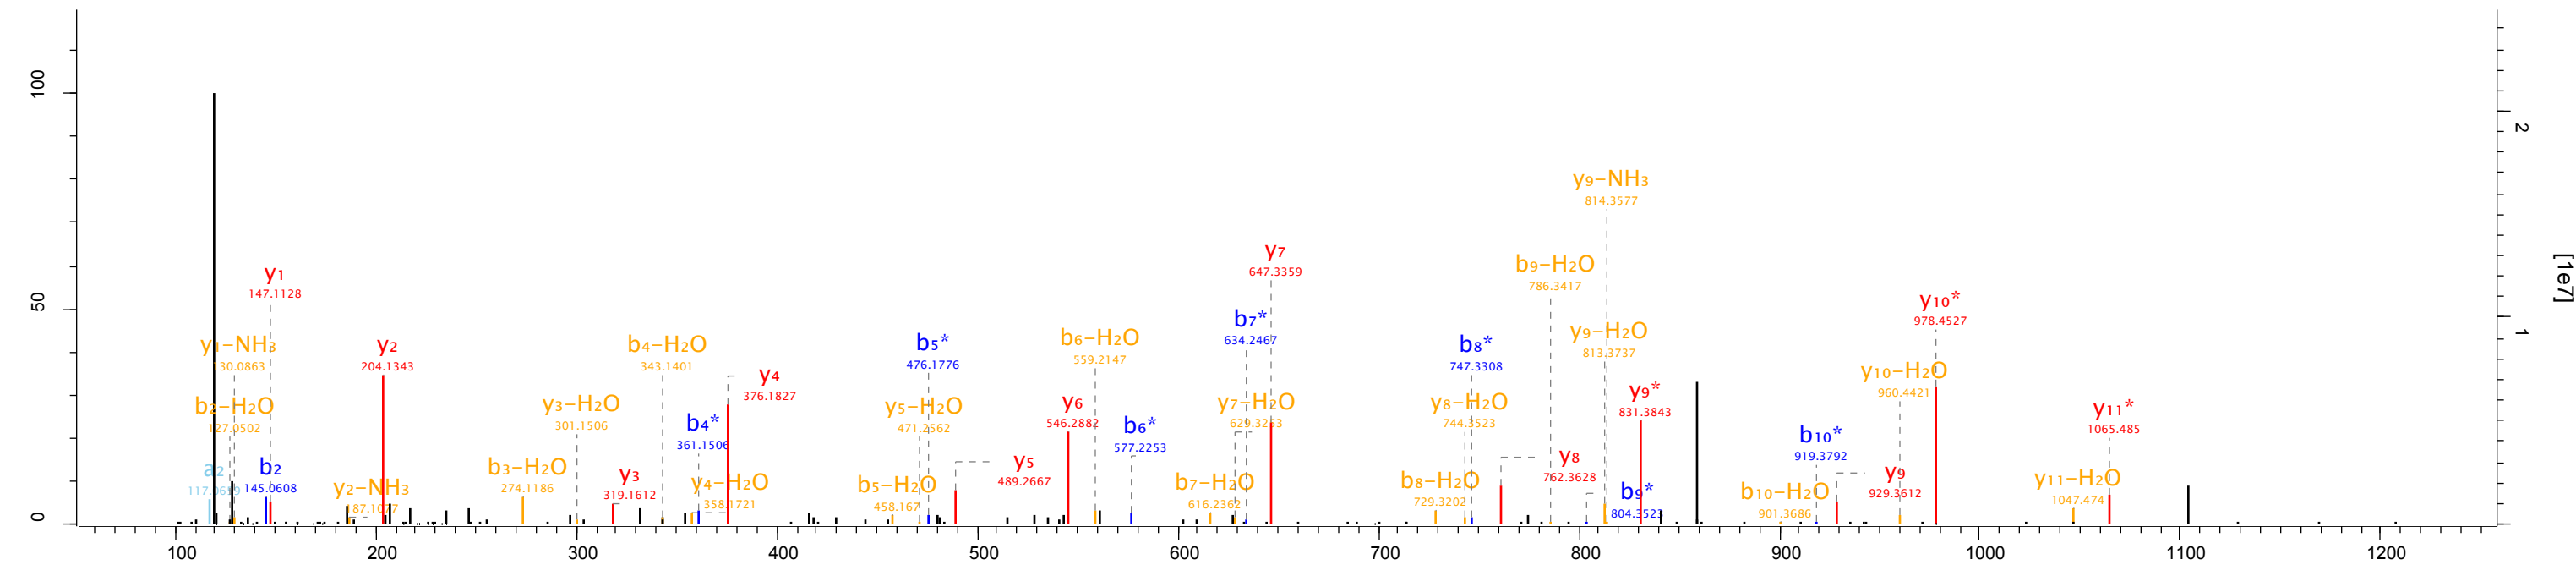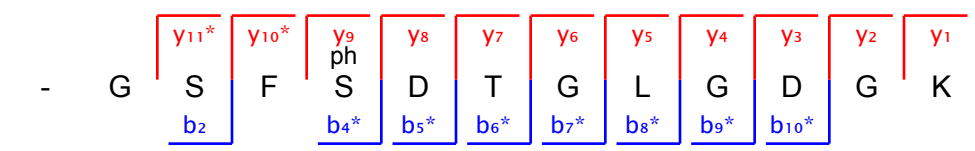

Raw file: 20150814\_A375SR\_Phospho\_BR2\_04  
 Scan: 11042 Method: FTMS; HCD Score: 226 m/z: 719.32 Gene names: NCKAP5L

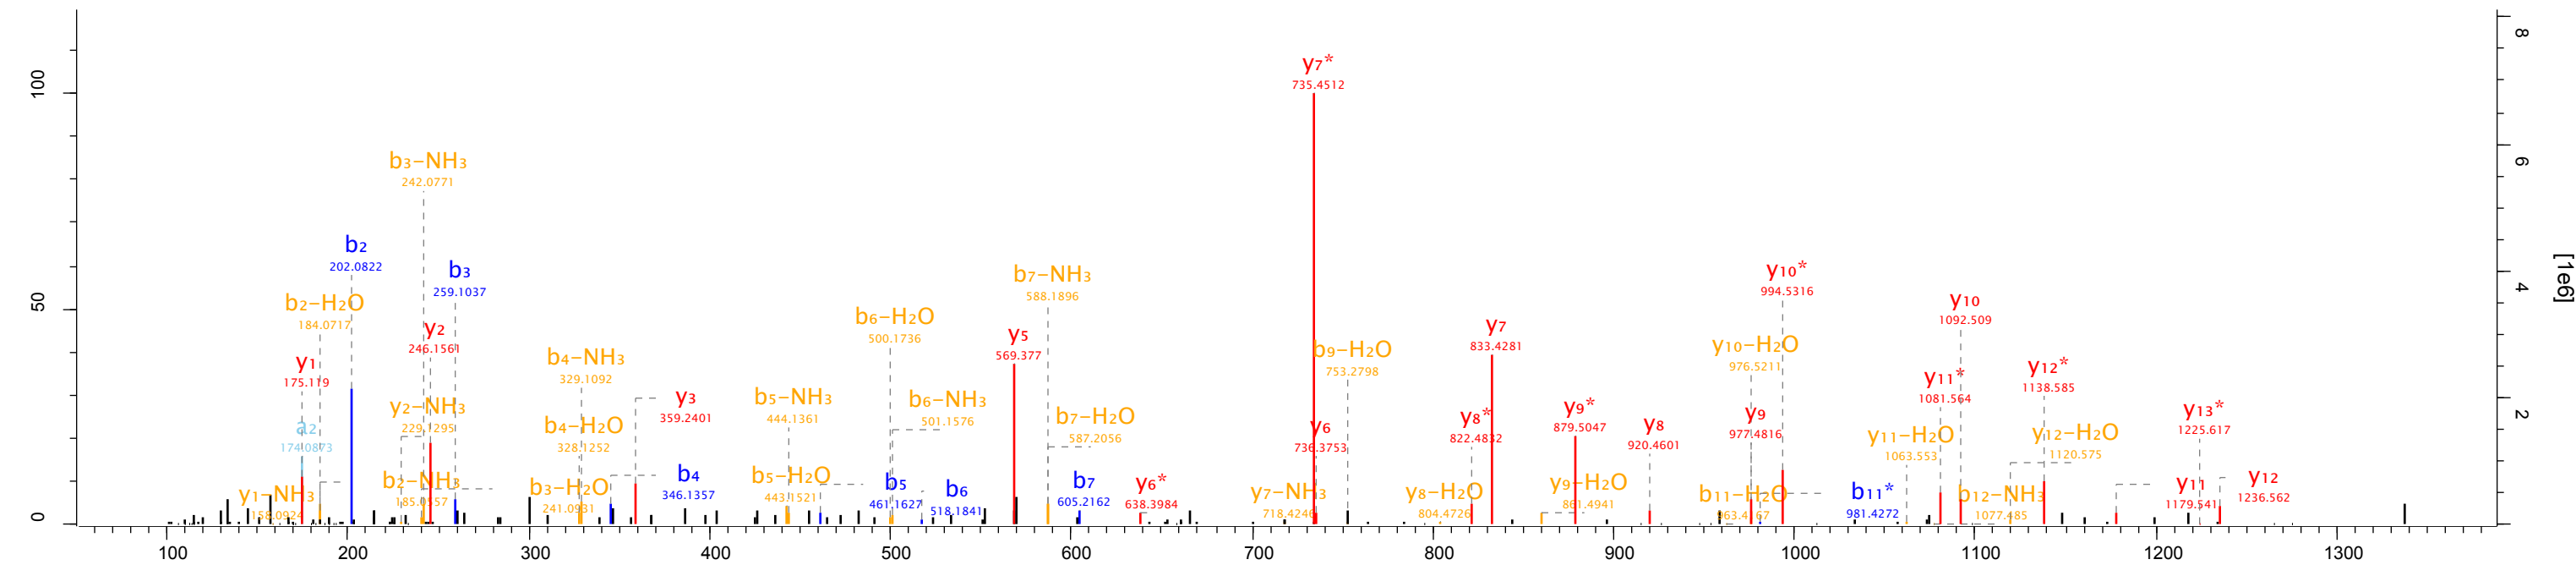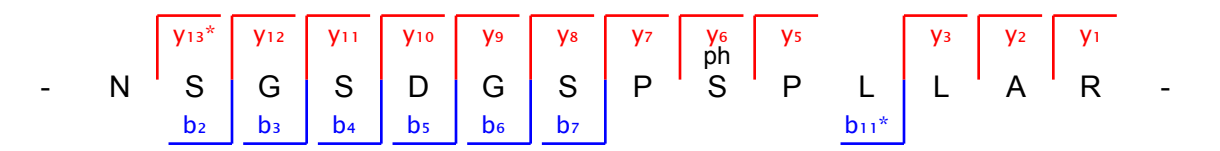

Raw file: 20150814\_A375SR\_Phospho\_BR2\_04  
 Scan: 11932 Method: FTMS; HCD Score: 114.31 m/z: 692.79 Gene names: TMSB4X

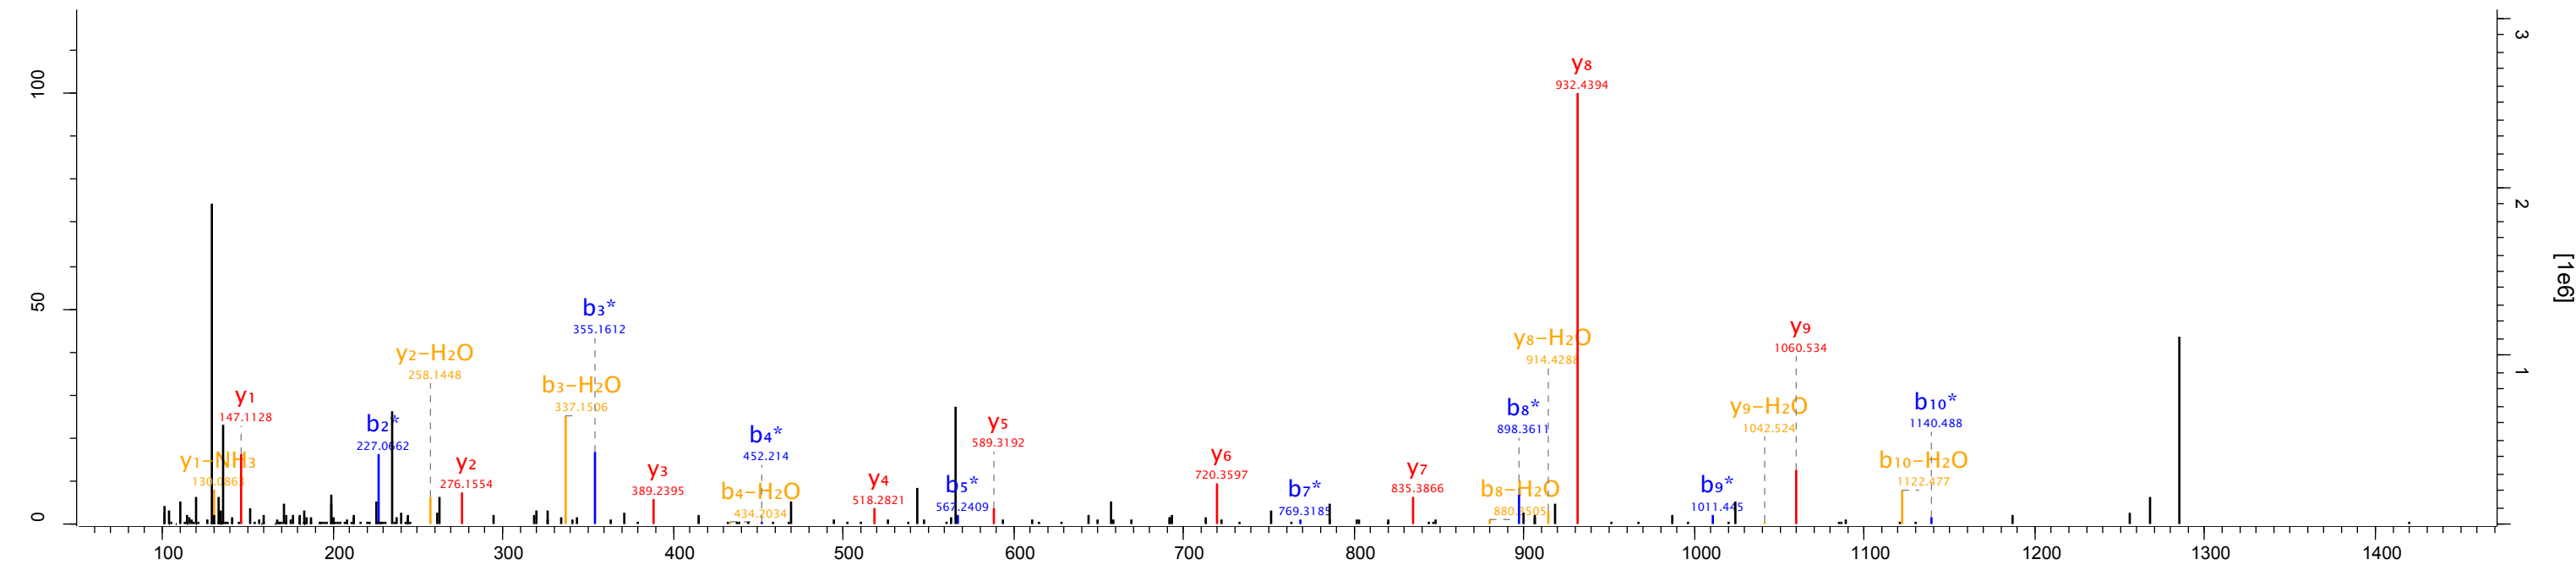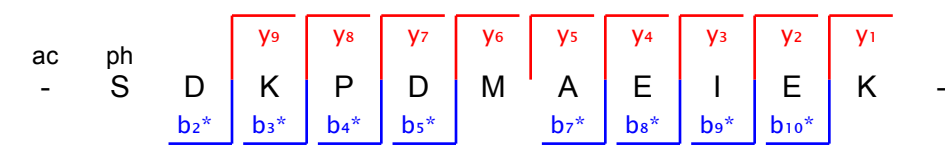

Raw file: 20150814\_A375SR\_Phospho\_BR2\_04  
 Scan: 12062 Method: FTMS; HCD Score: 119.84 m/z: 960.48 Gene names: CIZ1

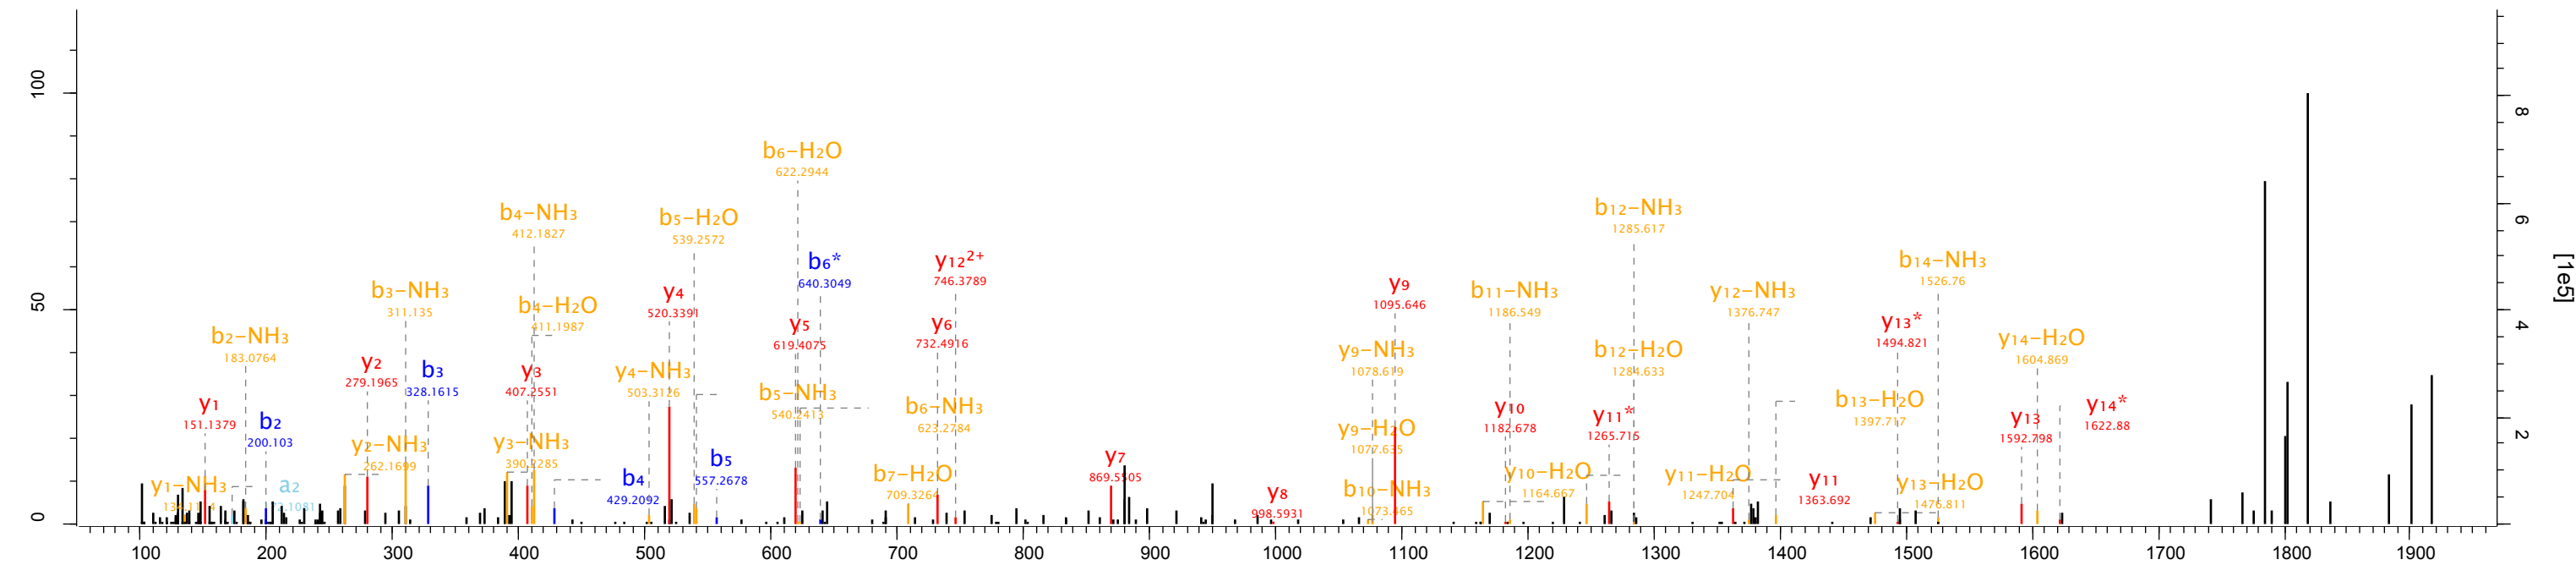

Protein sequence: - Q A Q T Q T S P E H L V L Q Q K -

Fragmentation sites (b-ions in blue, y-ions in red) are indicated by boxes below the sequence:

- Q: b<sub>2</sub>
- A: b<sub>3</sub>
- Q: b<sub>4</sub>
- T: b<sub>5</sub>
- Q: b<sub>6</sub>\*
- T: y<sub>14</sub>\*
- S: y<sub>13</sub>
- P: y<sub>12</sub><sup>2+</sup>
- E: y<sub>11</sub> ph
- H: y<sub>10</sub>
- L: y<sub>9</sub>
- V: y<sub>8</sub>
- L: y<sub>7</sub>
- Q: y<sub>6</sub>
- Q: y<sub>5</sub>
- K: y<sub>4</sub>

Raw file: 20150814\_A375SR\_Phospho\_BR2\_04  
 Scan: 12082 Method: FTMS; HCD Score: 164.93 m/z: 739.8 Gene names: KIAA0930

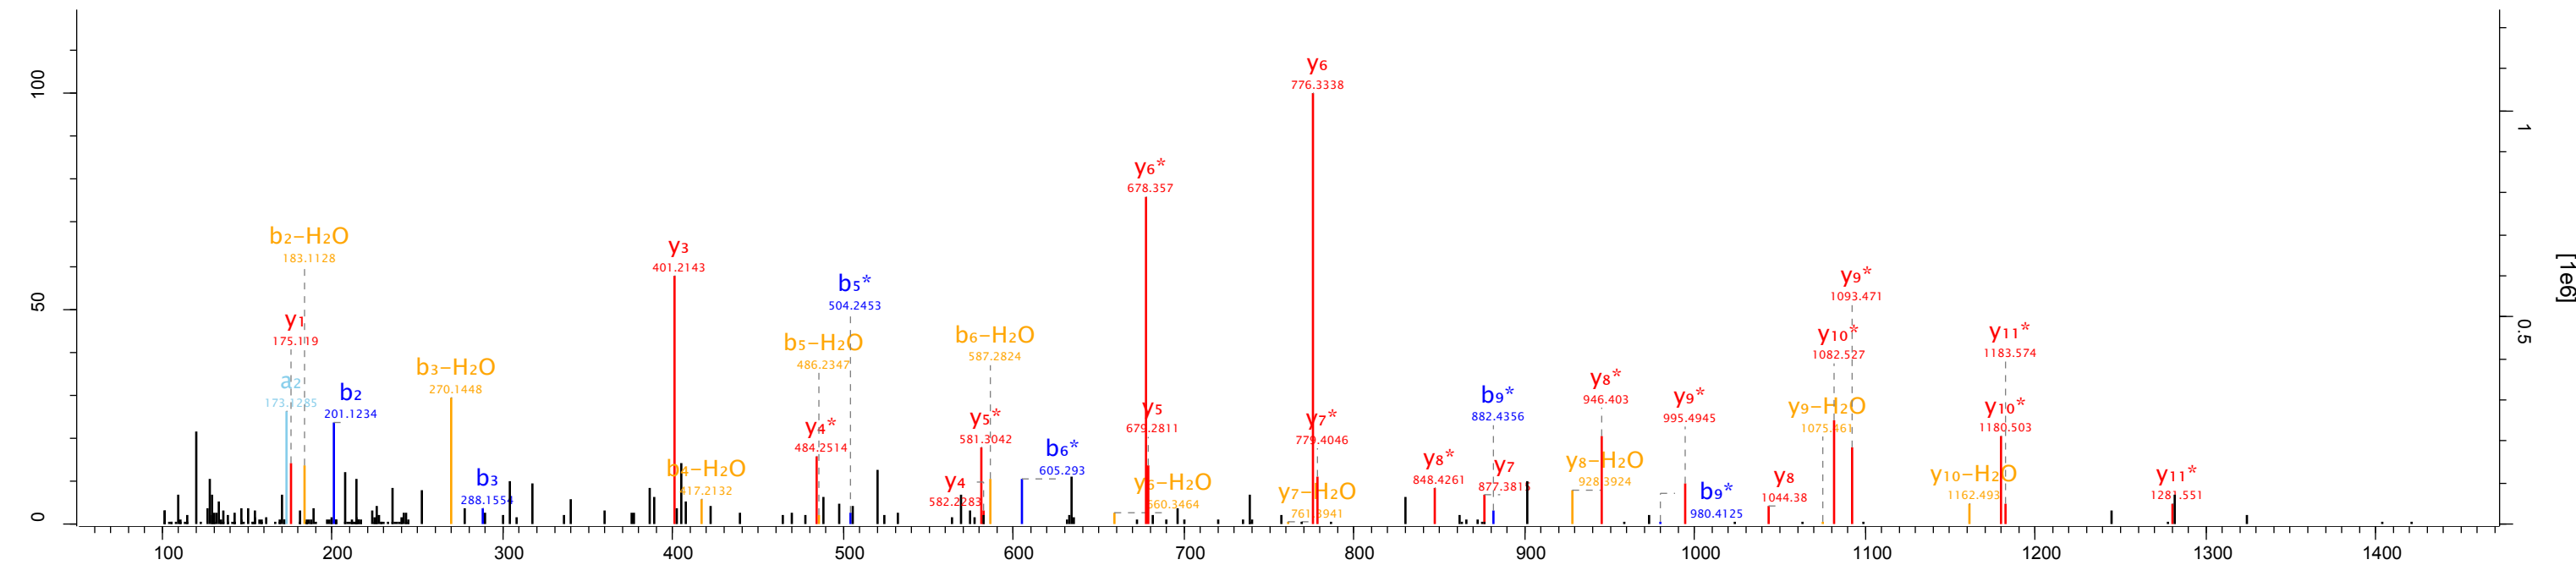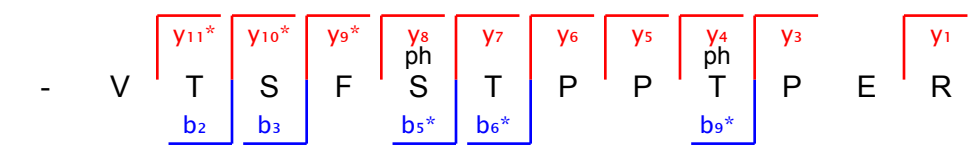

Raw file: 20150814\_A375SR\_Phospho\_BR2\_04  
 Scan: 12992 Method: FTMS; HCD Score: 73.21 m/z: 1037.48 Gene names: NOSIP

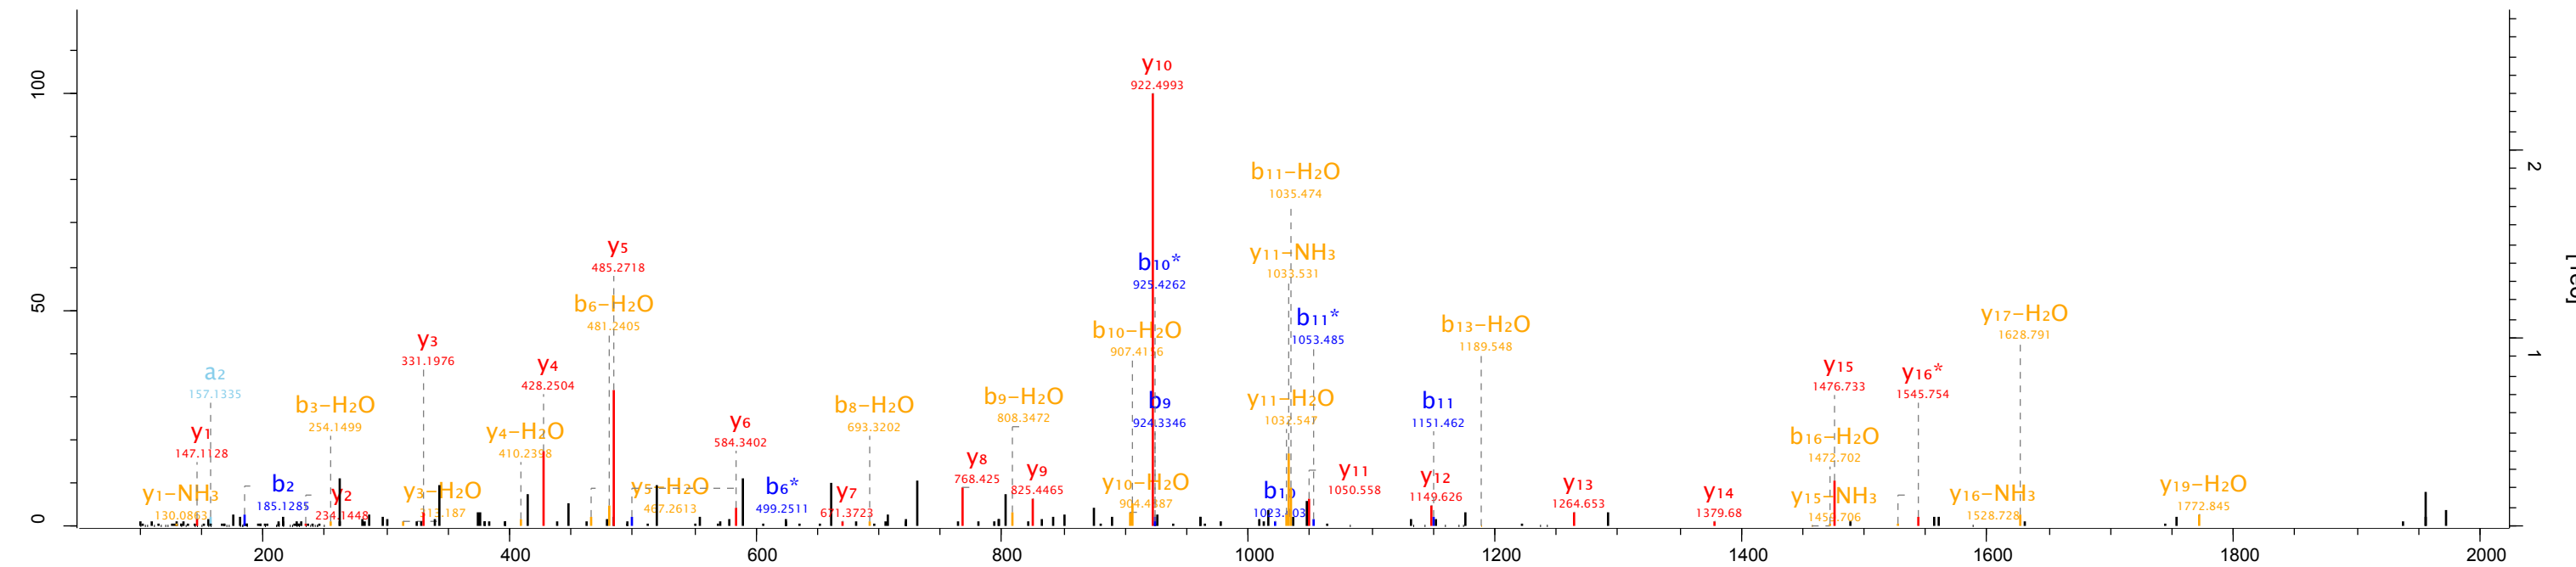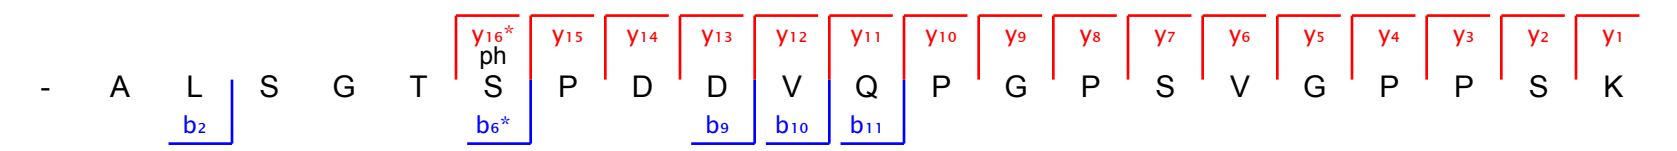

Raw file: 20150814\_A375SR\_Phospho\_BR2\_04  
 Scan: 13002  
 Method: FTMS; HCD  
 Score: 225.69  
 m/z: 1261.52  
 Gene names: POLR3E

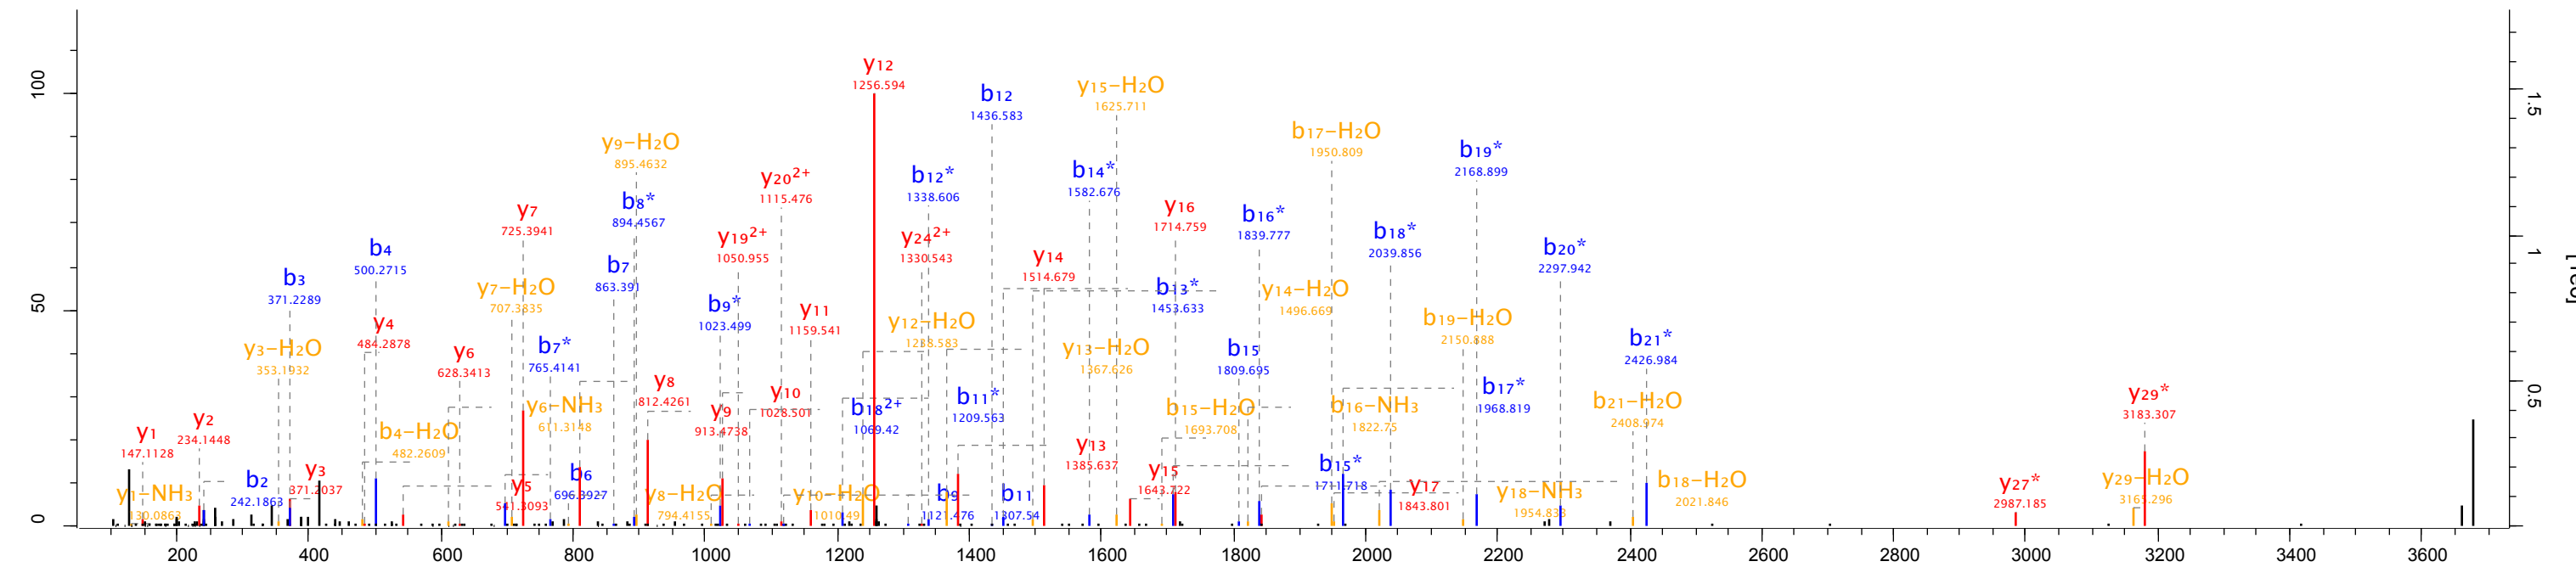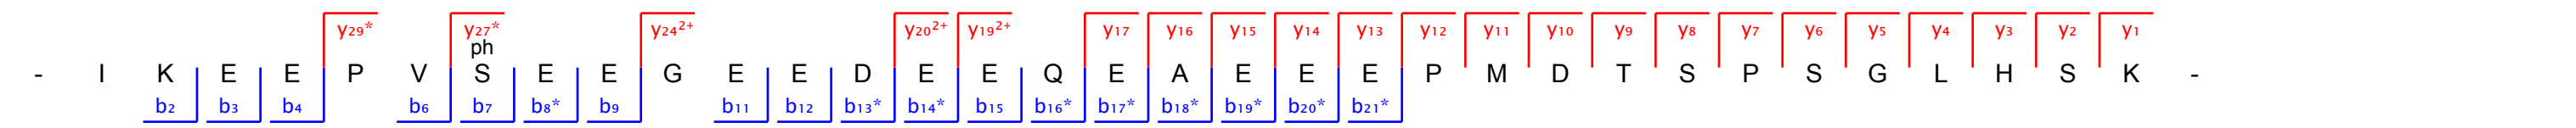

Raw file: 20150814\_A375SR\_Phospho\_BR2\_04  
 Scan: 13092 Method: FTMS; HCD Score: 174.35 m/z: 768.33 Gene names: SORBS3

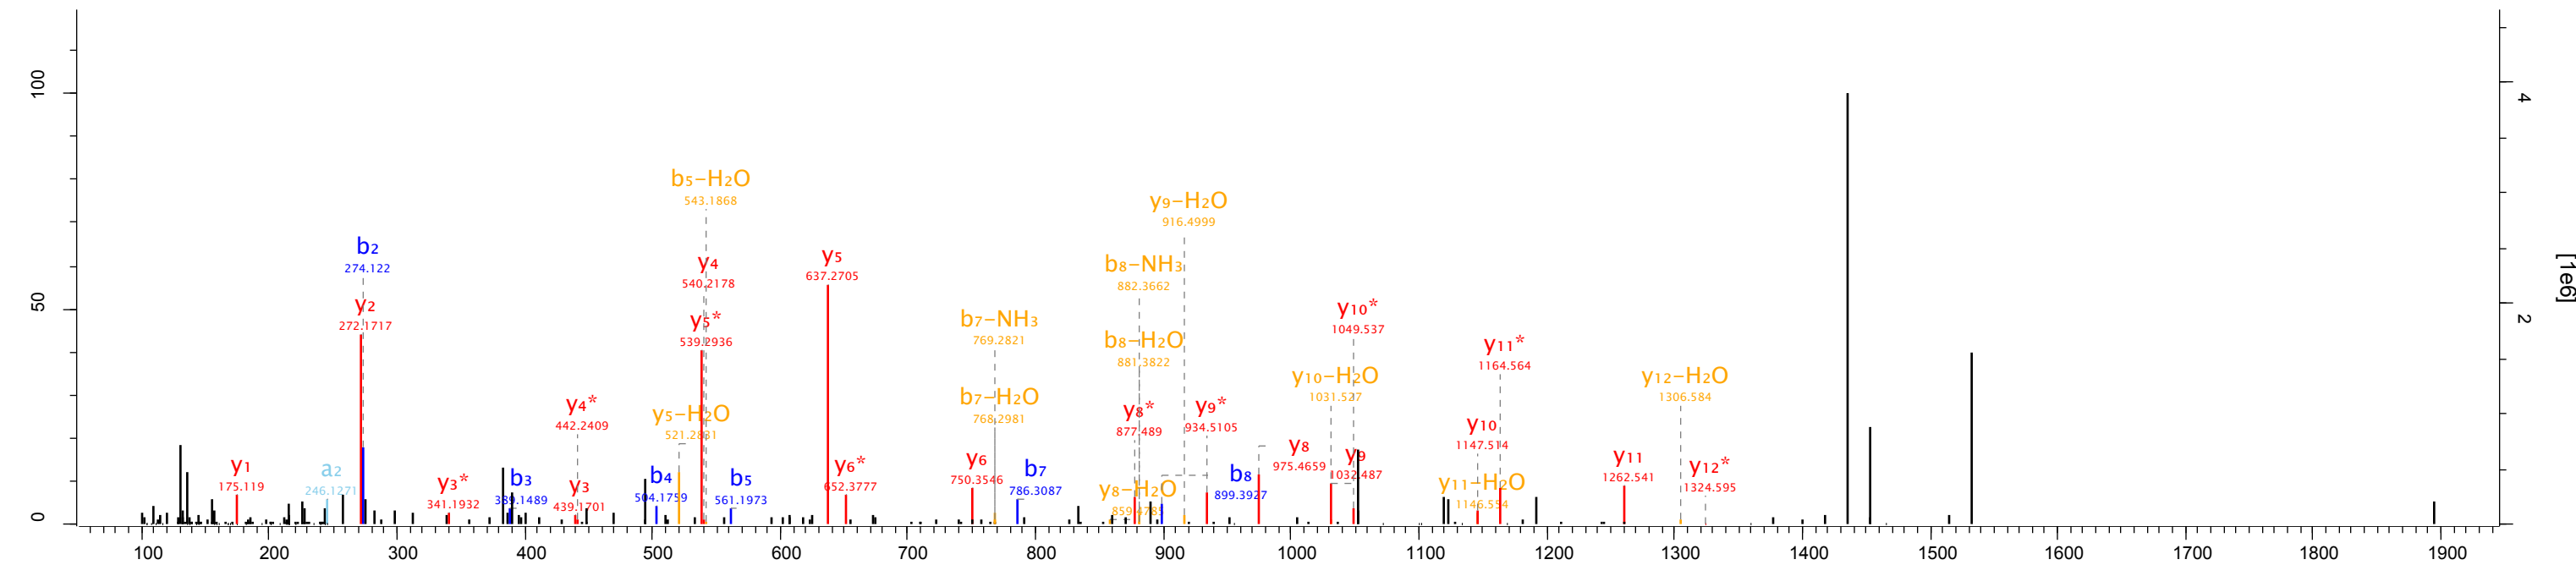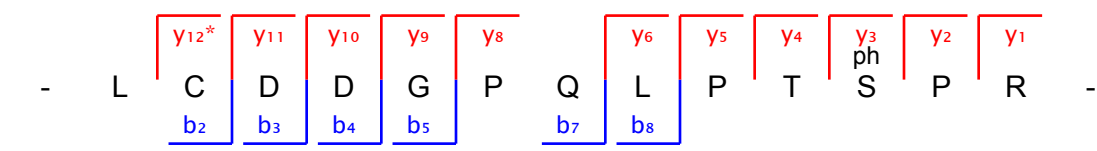



Raw file 20150814\_A375SR\_Phospho\_BR2\_04 Scan 13172 Method FTMS; HCD Score 136.93 m/z 569.77 Gene names ACACA

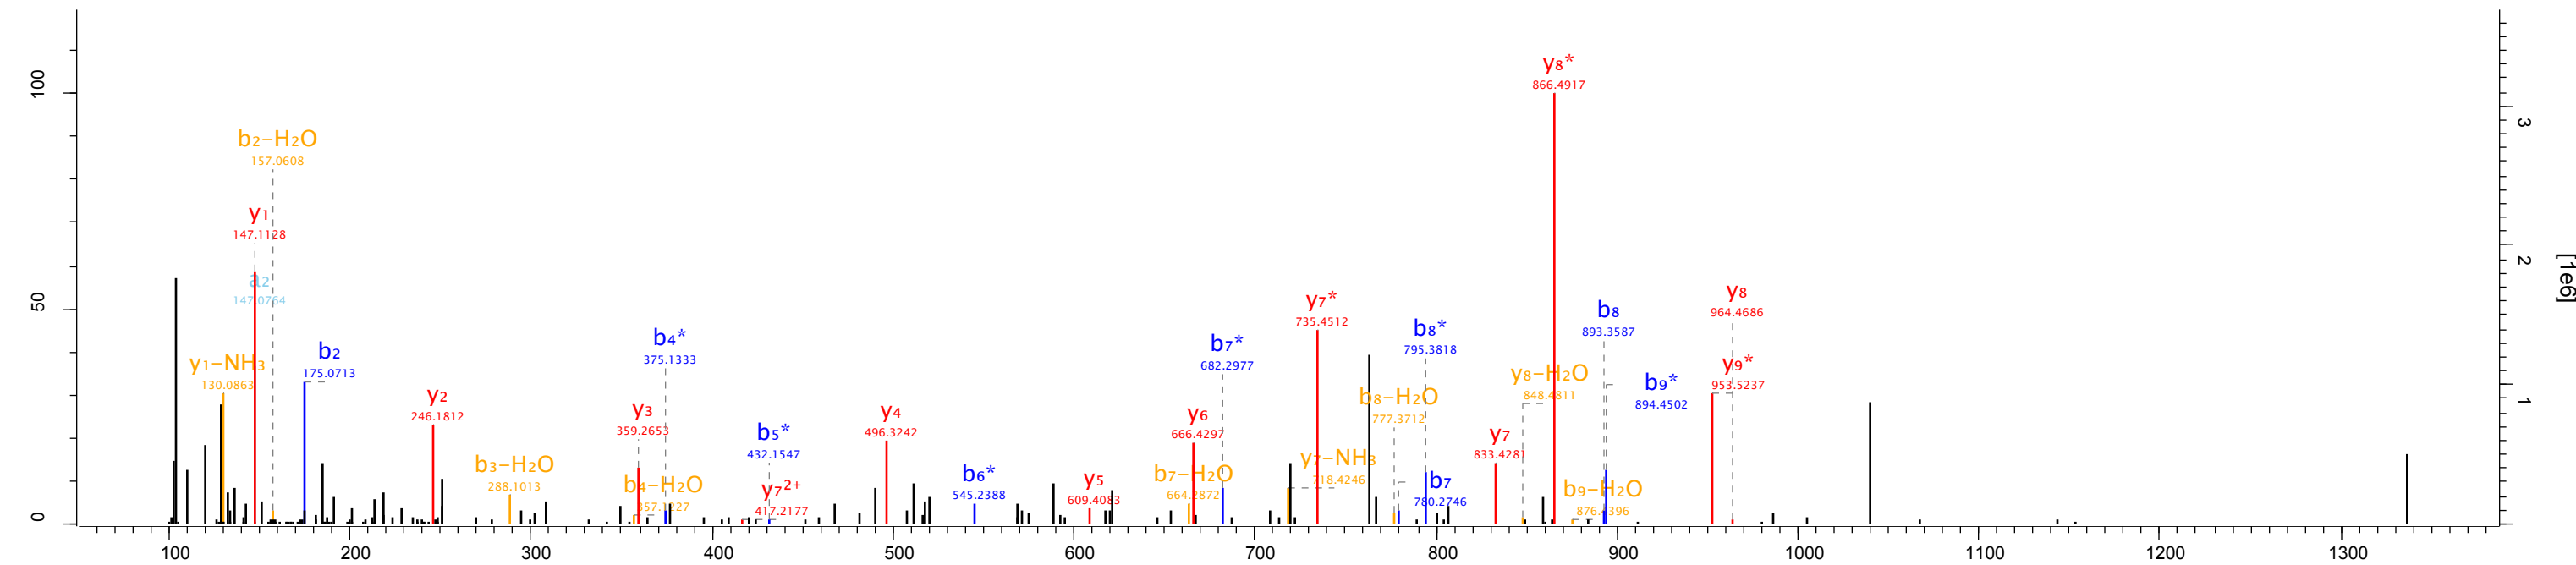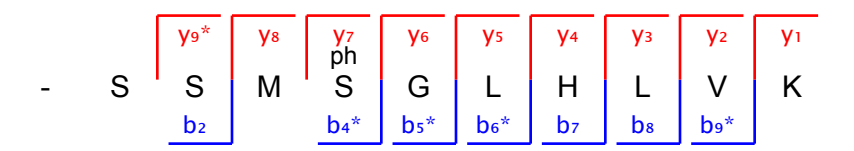

Raw file 20150814\_A375SR\_Phospho\_BR2\_04 Scan 13592 Method FTMS; HCD Score 114.9 m/z 683.34 Gene names PRR14L

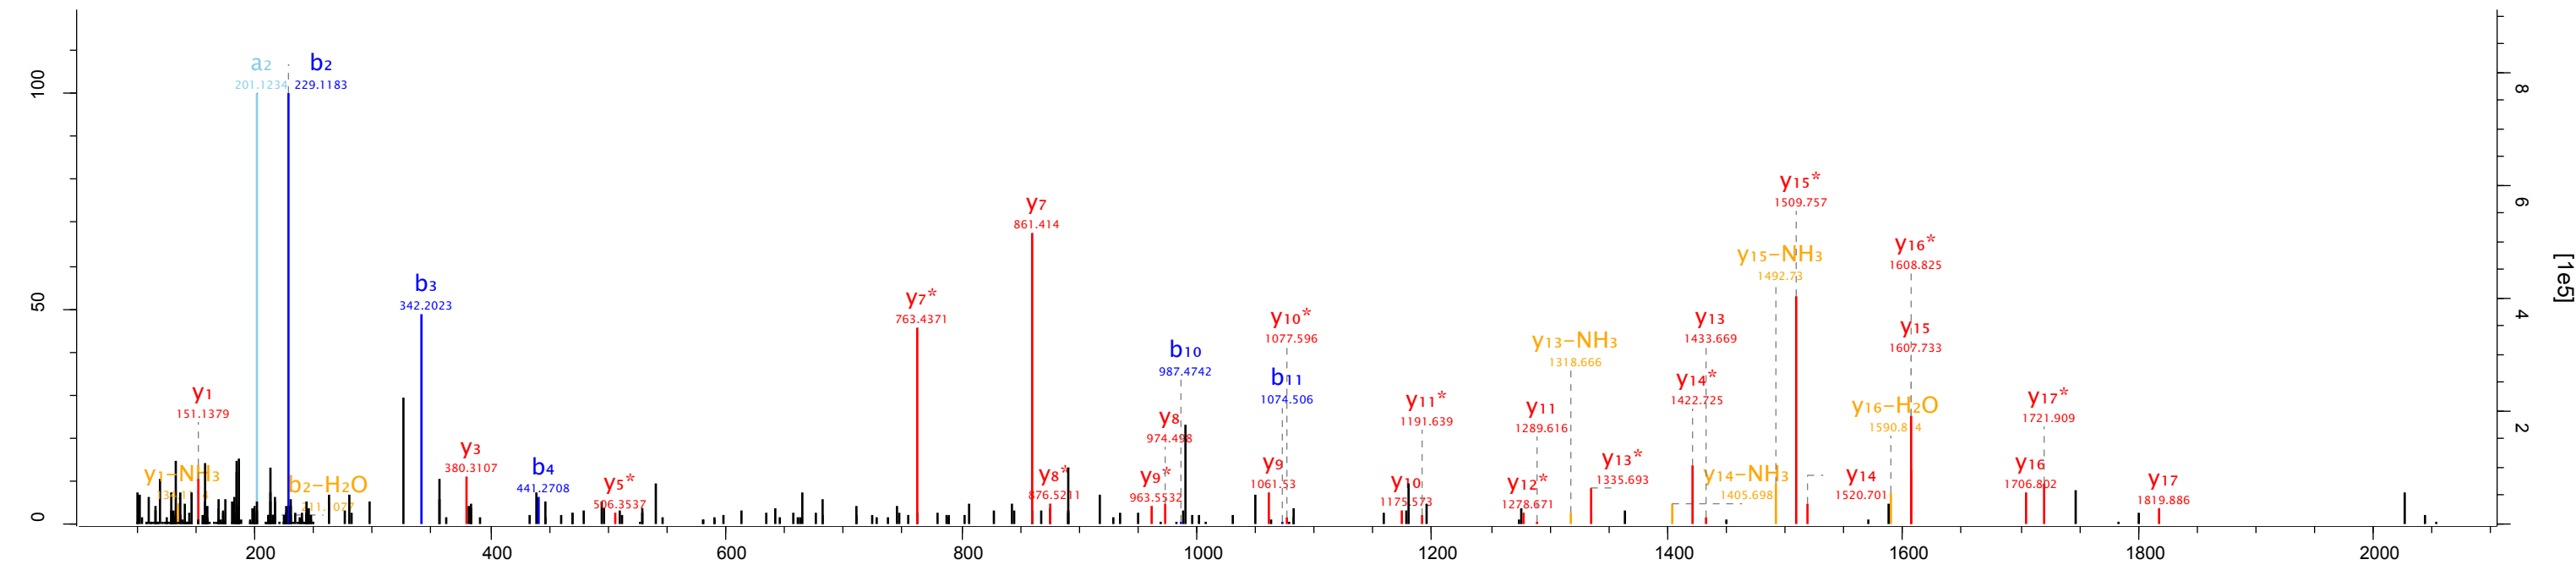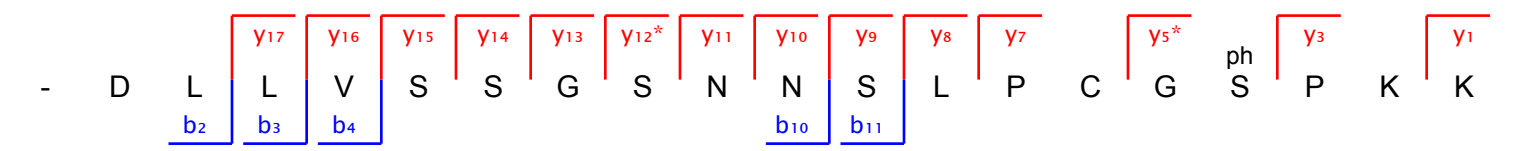

20150814\_A375SR\_Phospho\_BR2\_04 13822 FTMS; HCD 180.05 1023.07 GIT1

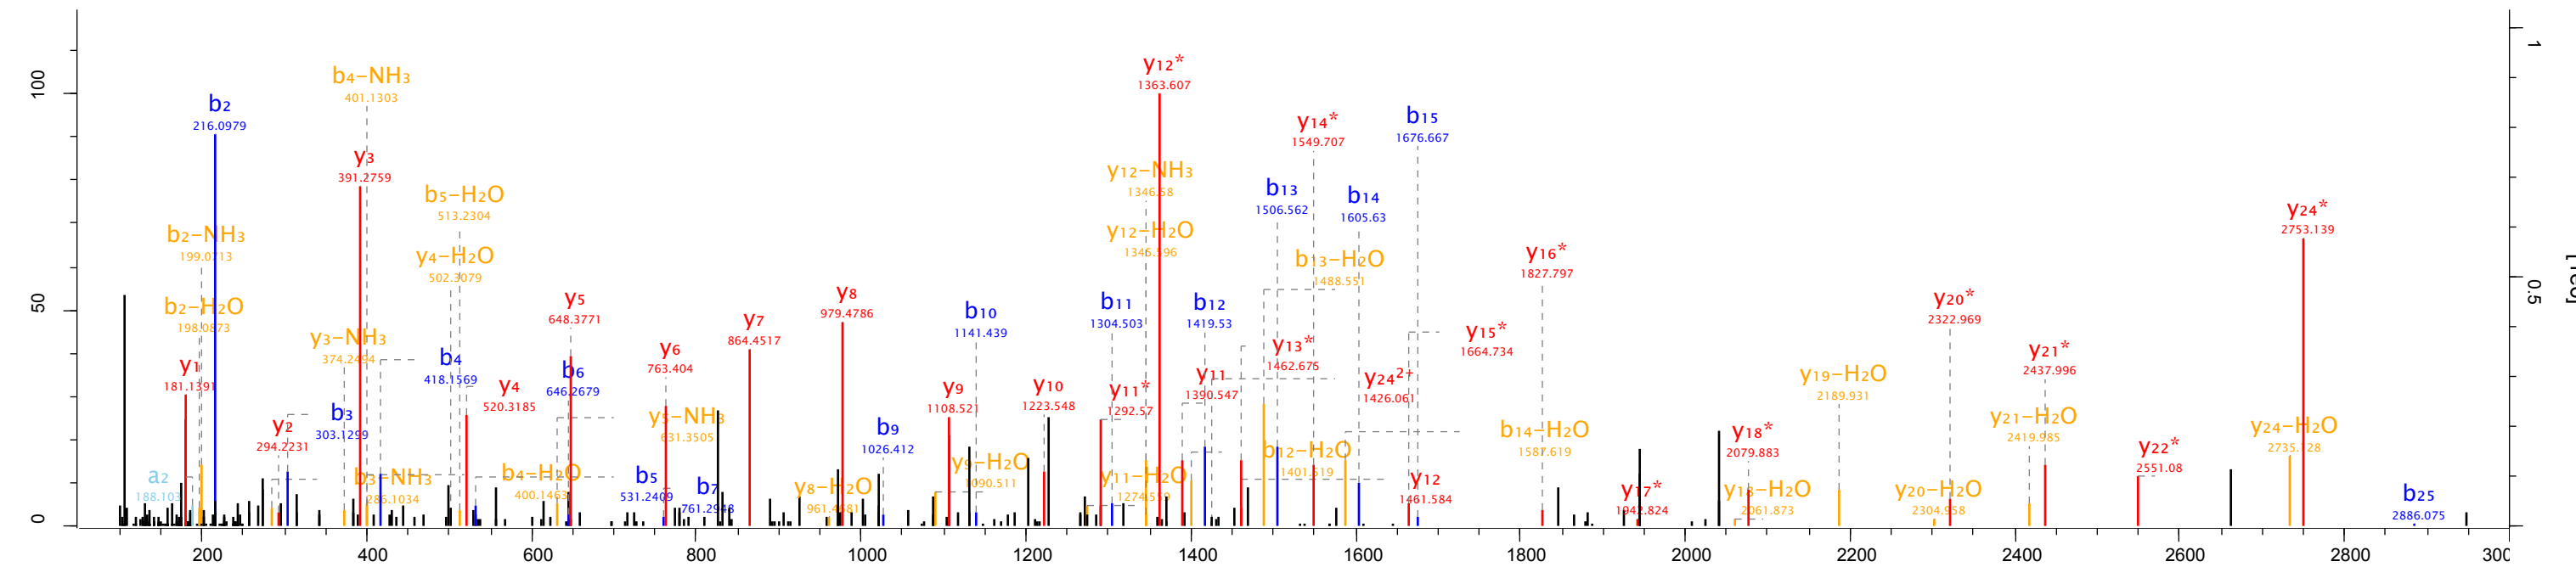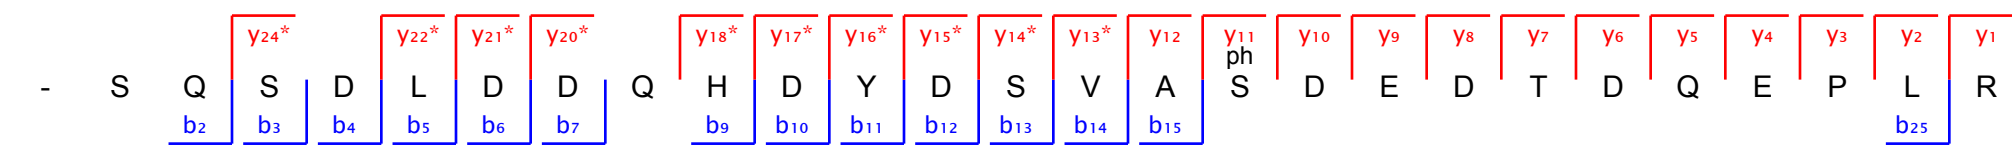

Raw file 20150814\_A375SR\_Phospho\_BR2\_04 Scan 13862 Method FTMS; HCD Score 237.97 m/z 809.36 Gene names LIG1

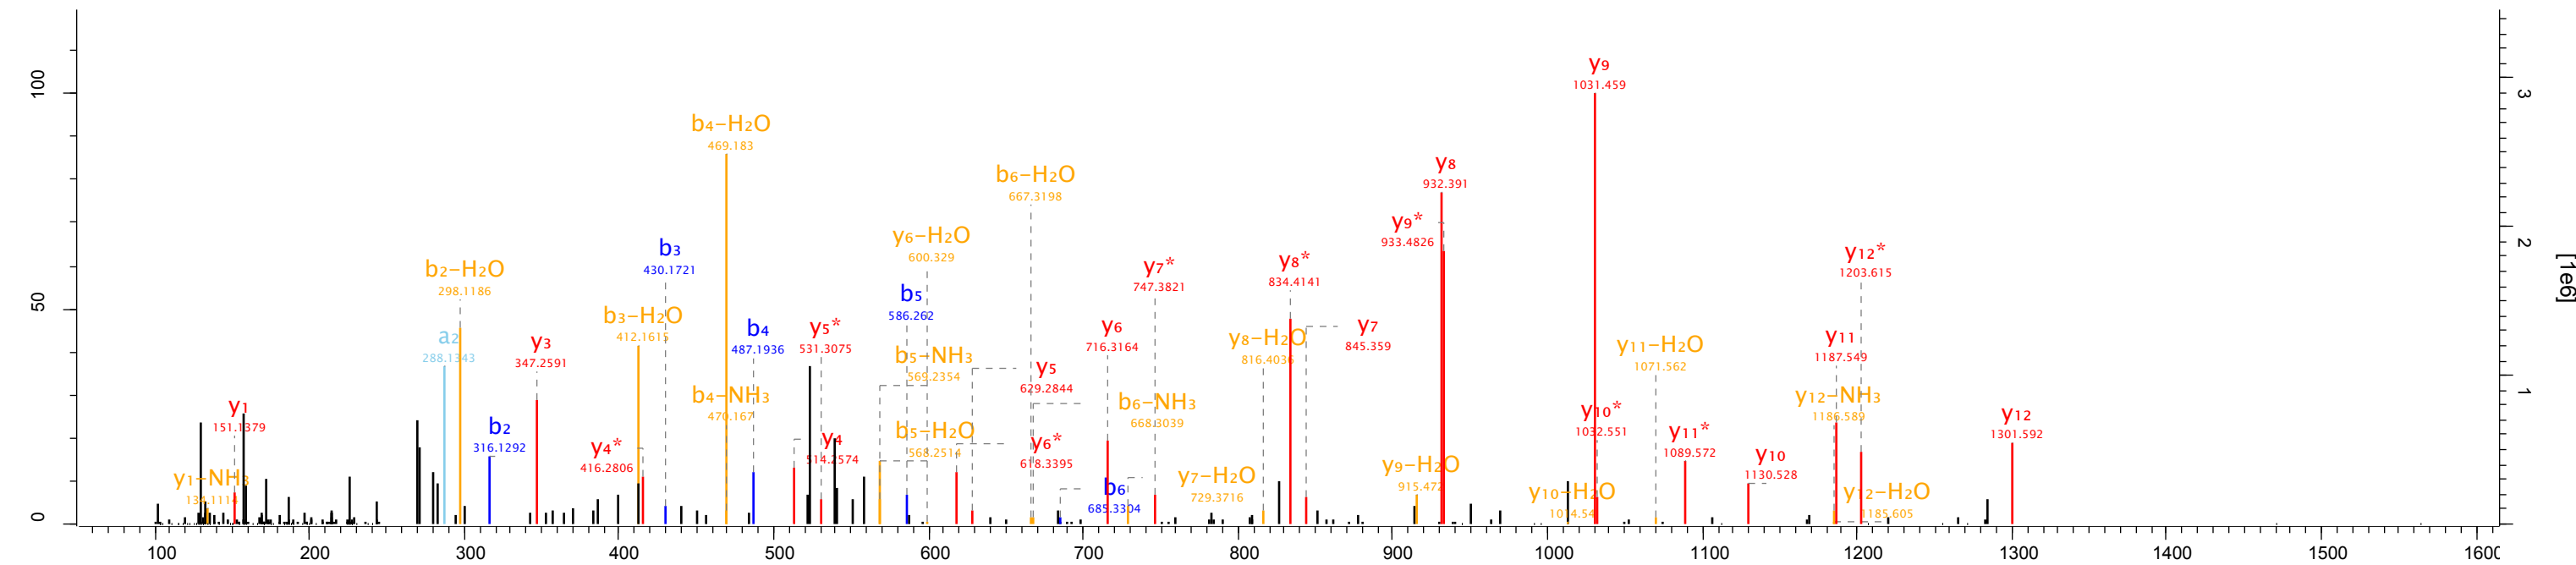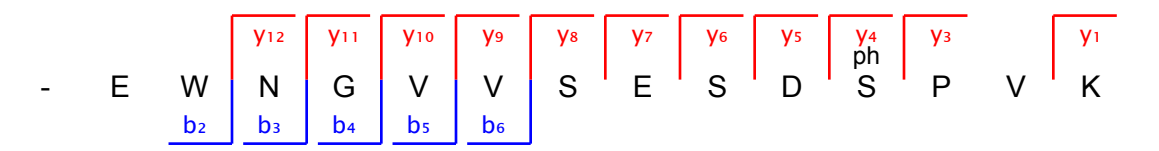

Raw file 20150814\_A375SR\_Phospho\_BR2\_04 Scan 14002 Method FTMS; HCD Score 188.82 m/z 790.32 Gene names RASAL2

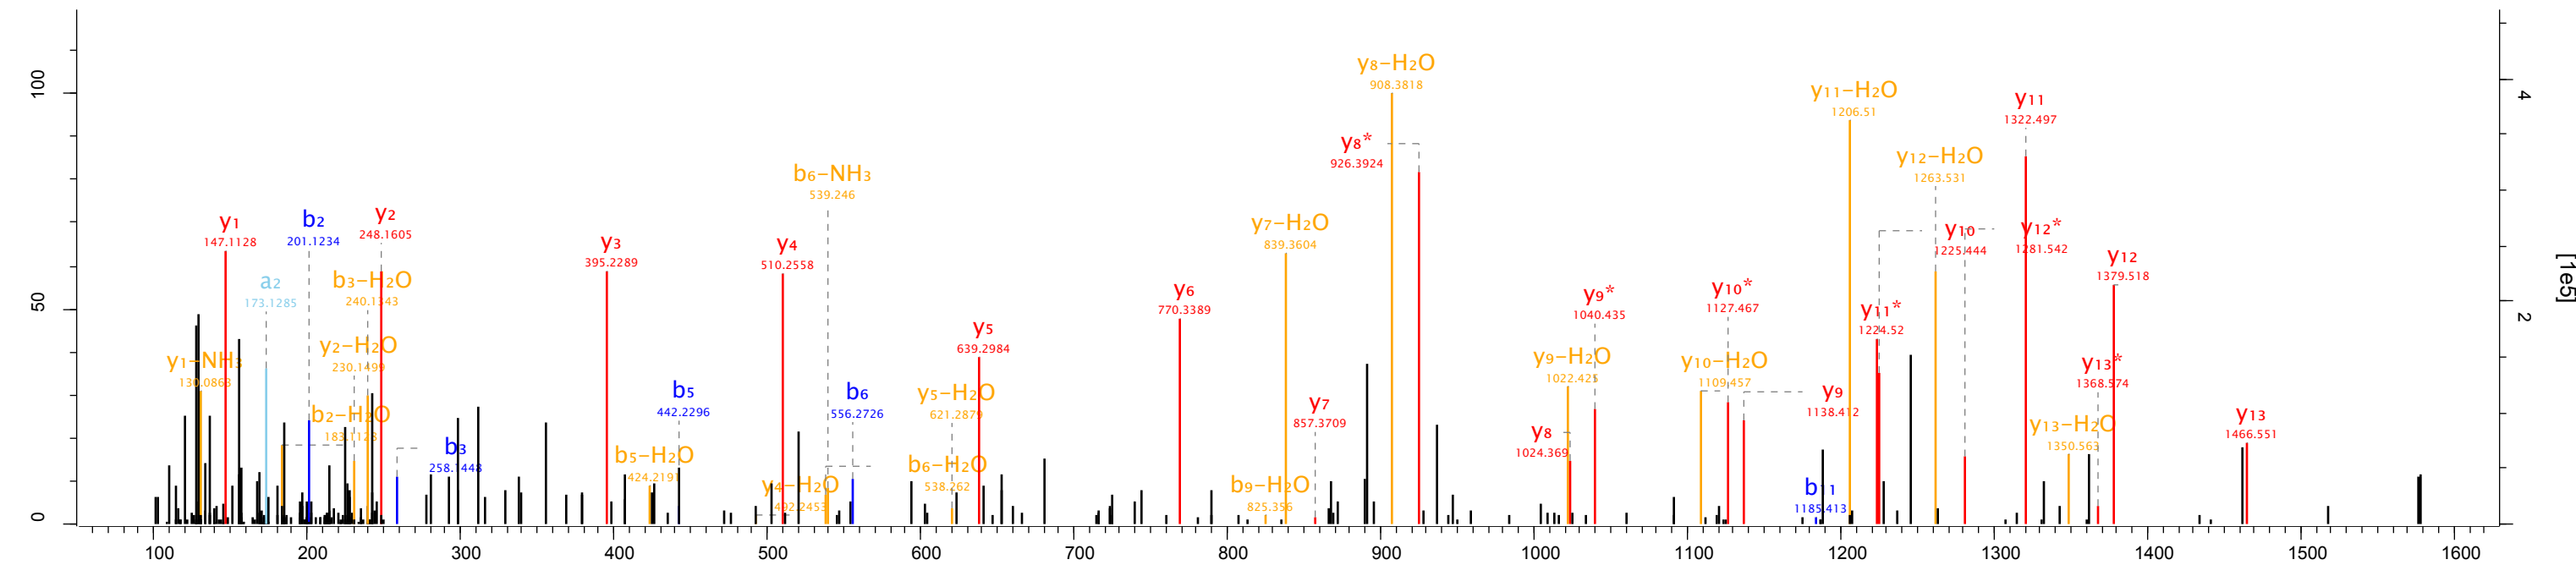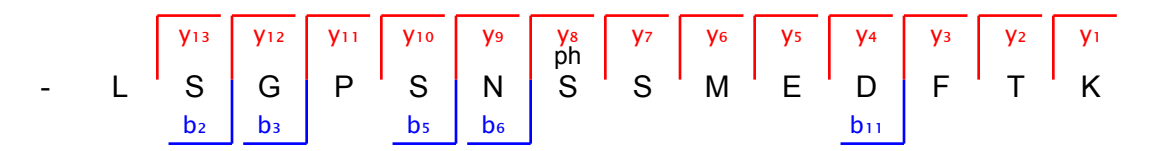

Raw file 20150814\_A375SR\_Phospho\_BR2\_04 Scan 14072 Method FTMS; HCD Score 50.77 m/z 715.28 Gene names SFPQ

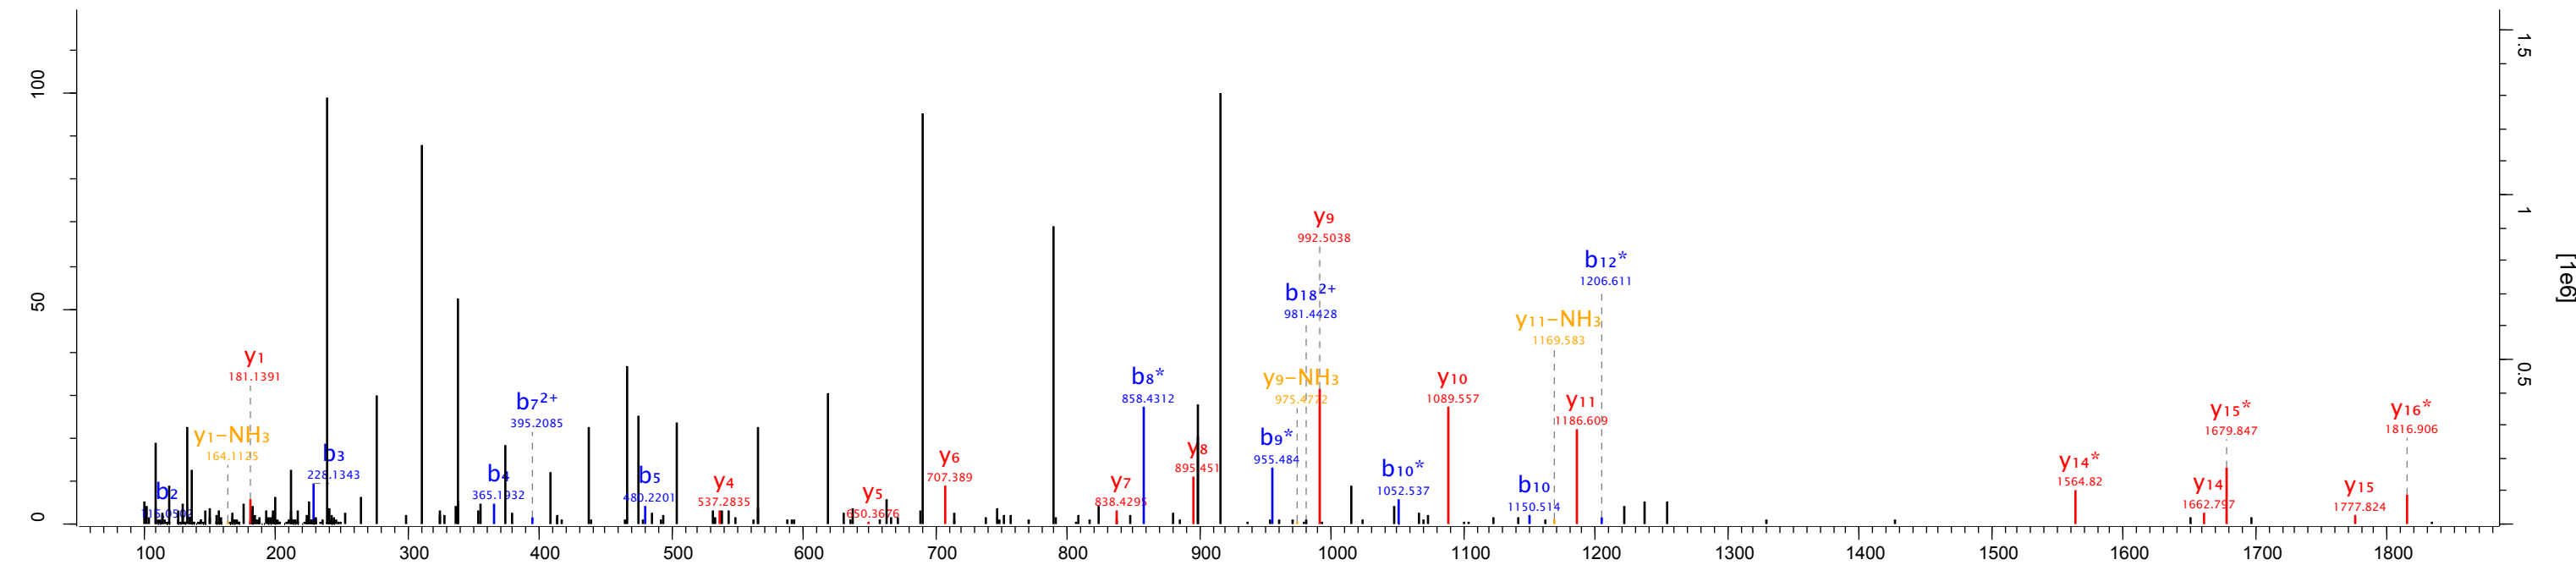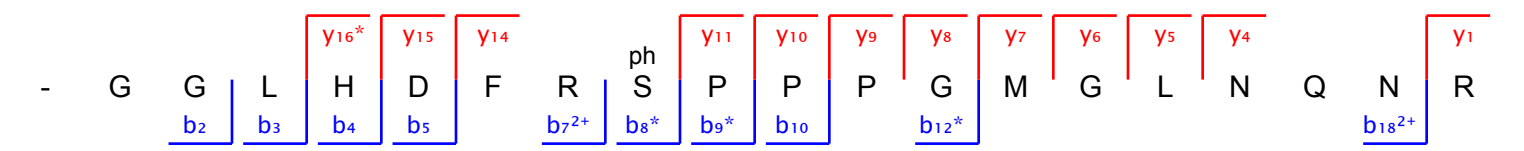

Raw file 20150814\_A375SR\_Phospho\_BR2\_04 Scan 14372 Method FTMS; HCD Score 101.46 m/z 455.74 Gene names LMNA

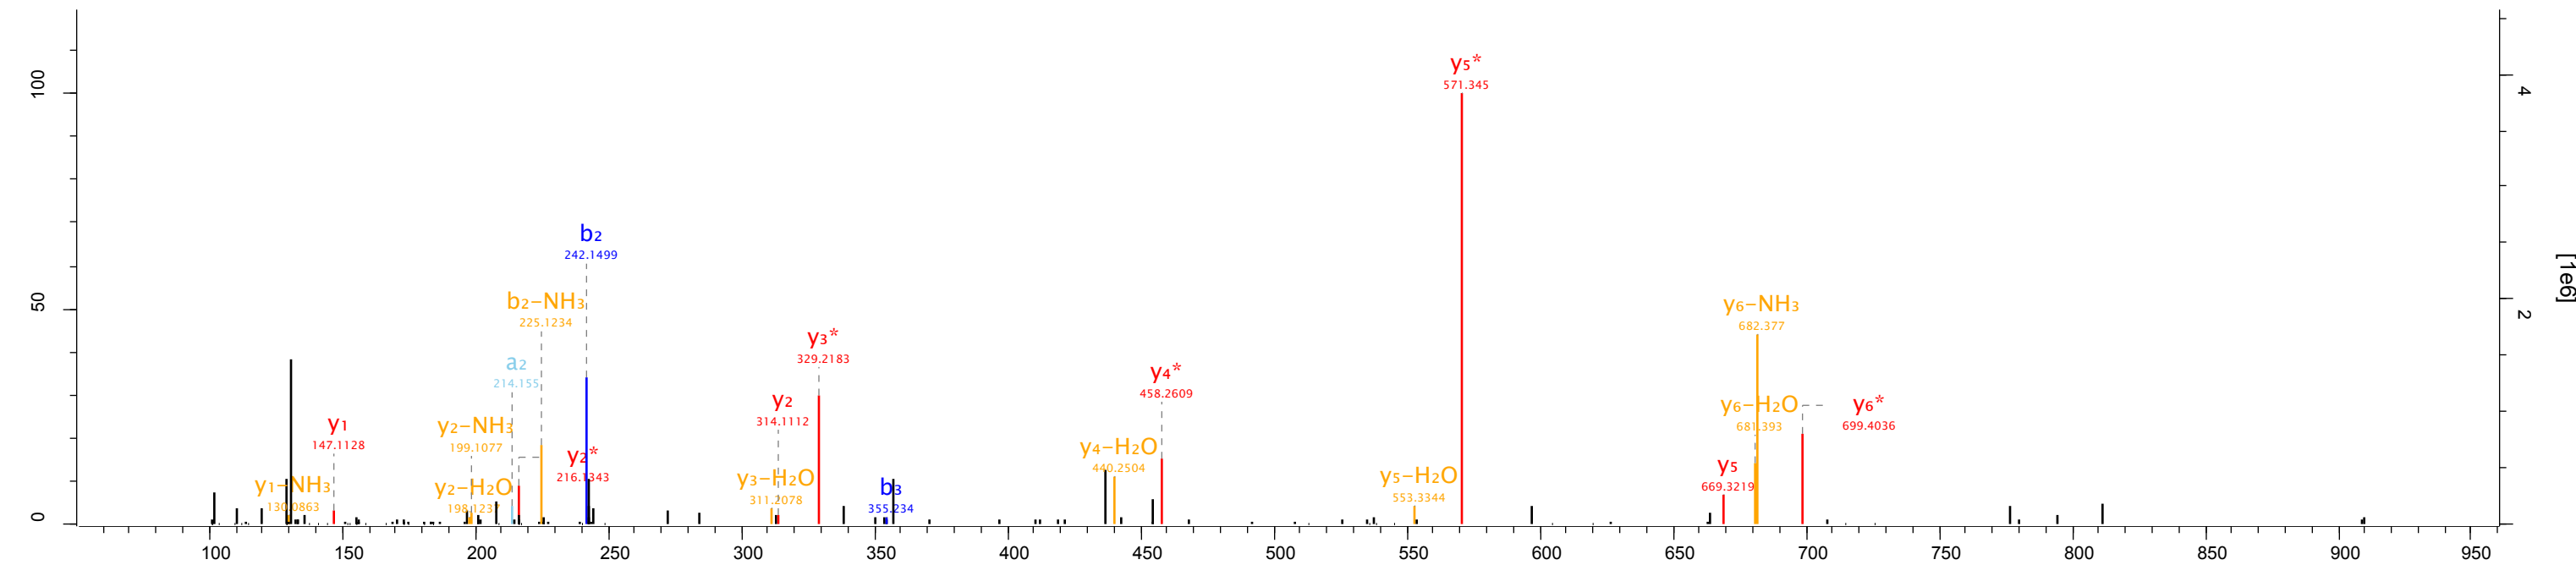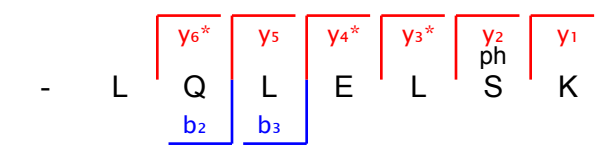

20150814\_A375SR\_Phospho\_BR2\_04 14522 FTMS; HCD 127.4 1001.08 NUCKS1

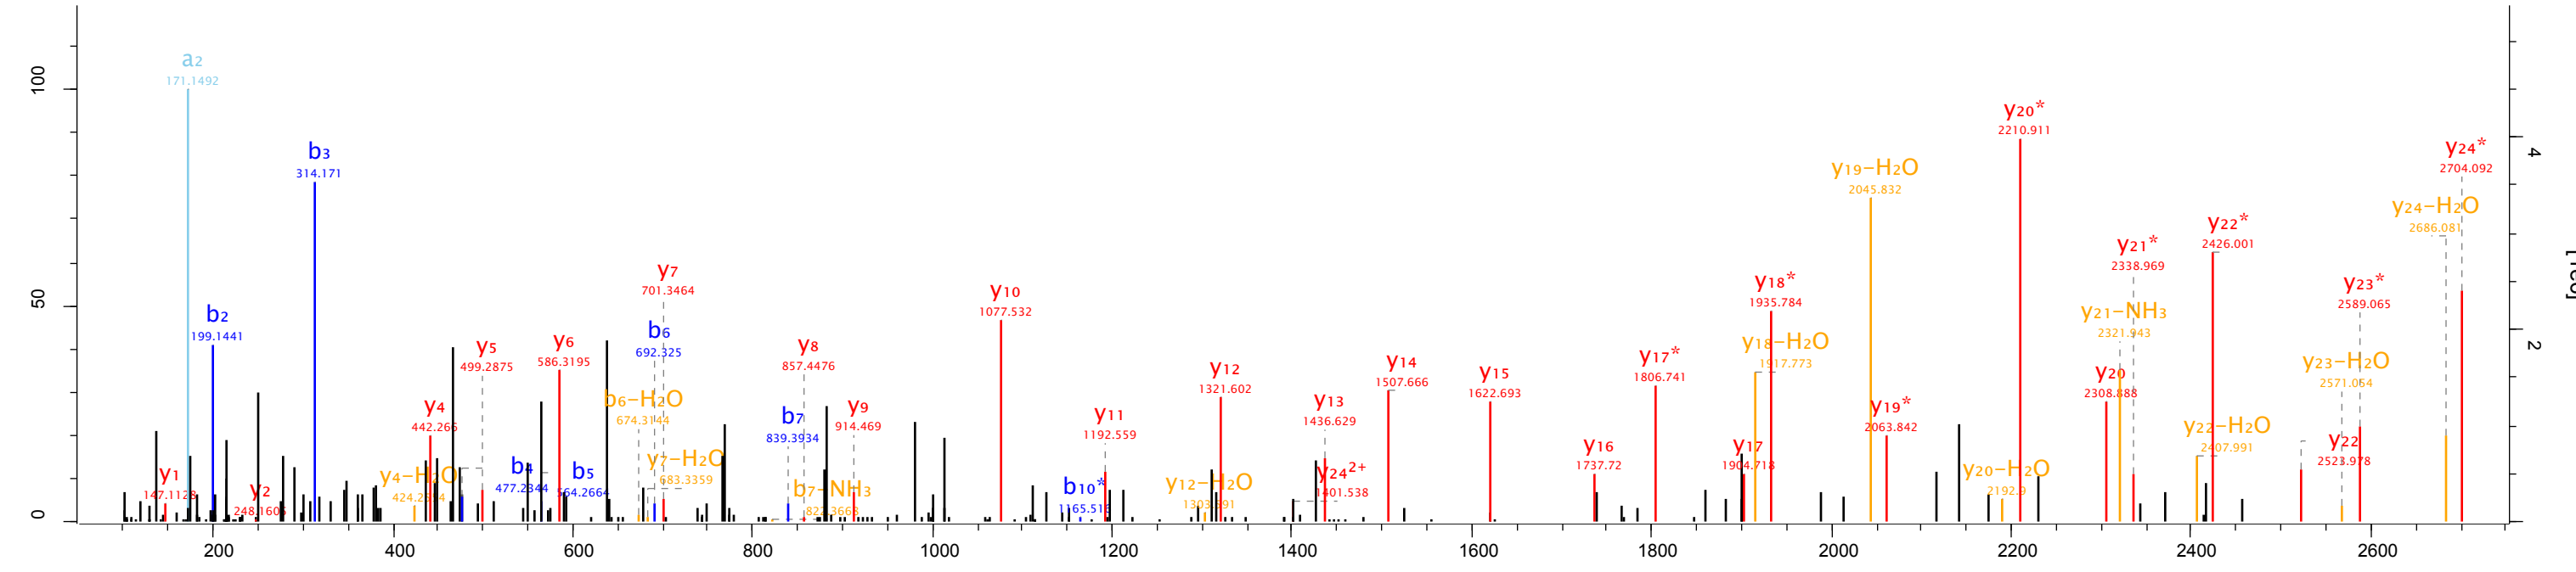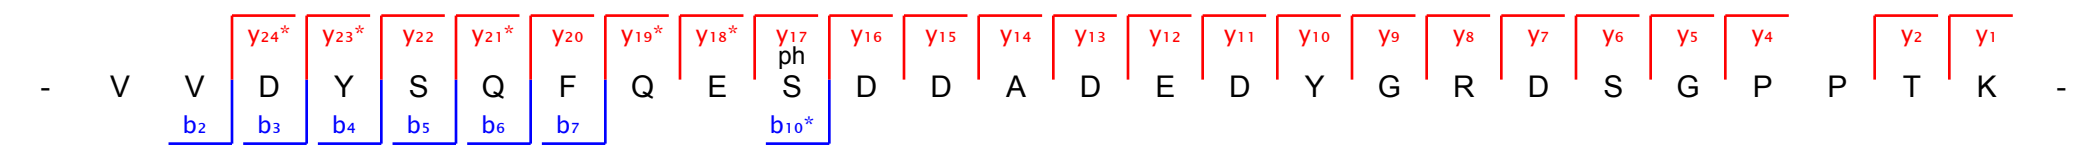



Raw file 20150814\_A375SR\_Phospho\_BR2\_04 Scan 14732 Method FTMS; HCD Score 89.62 m/z 660.83 Gene names MICAL3

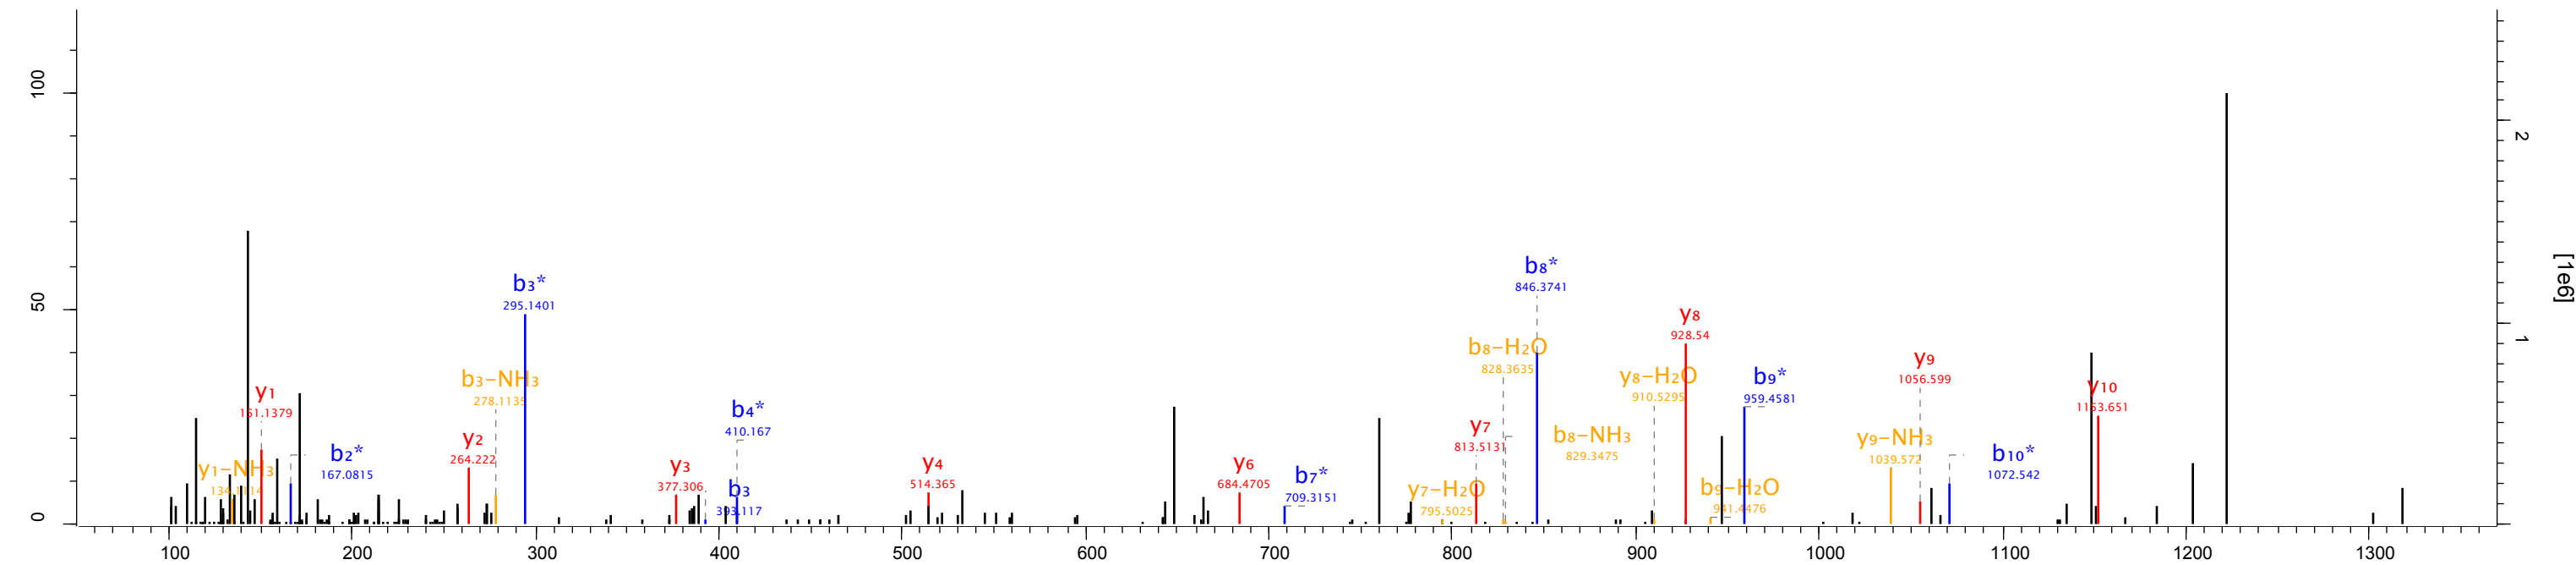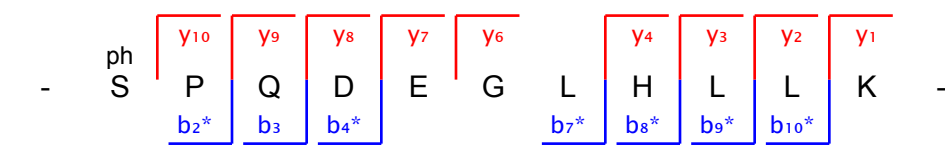

Raw file 20150814\_A375SR\_Phospho\_BR2\_04 Scan 14912 Method FTMS; HCD Score 108.9 m/z 894.76 Gene names TCOF1

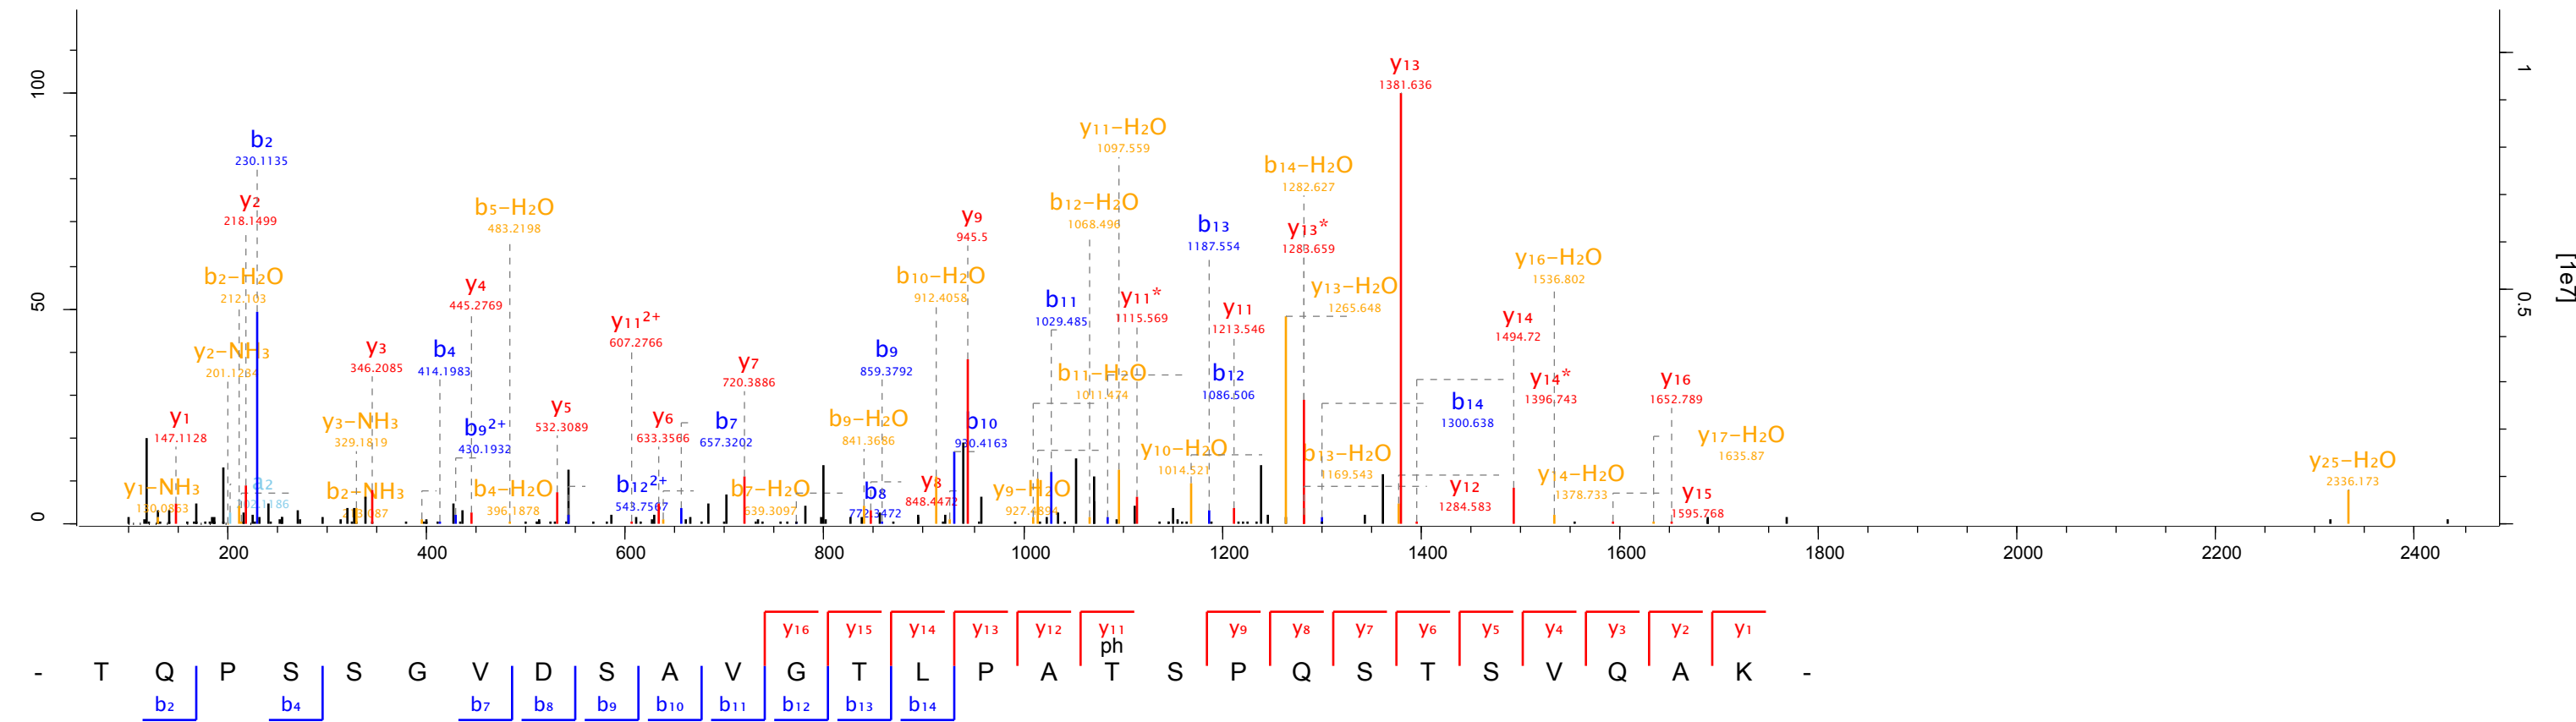

Raw file: 20150814\_A375SR\_Phospho\_BR2\_04  
 Scan: 14962 Method: FTMS; HCD Score: 162.72 m/z: 904.93 Gene names: SLC6A15

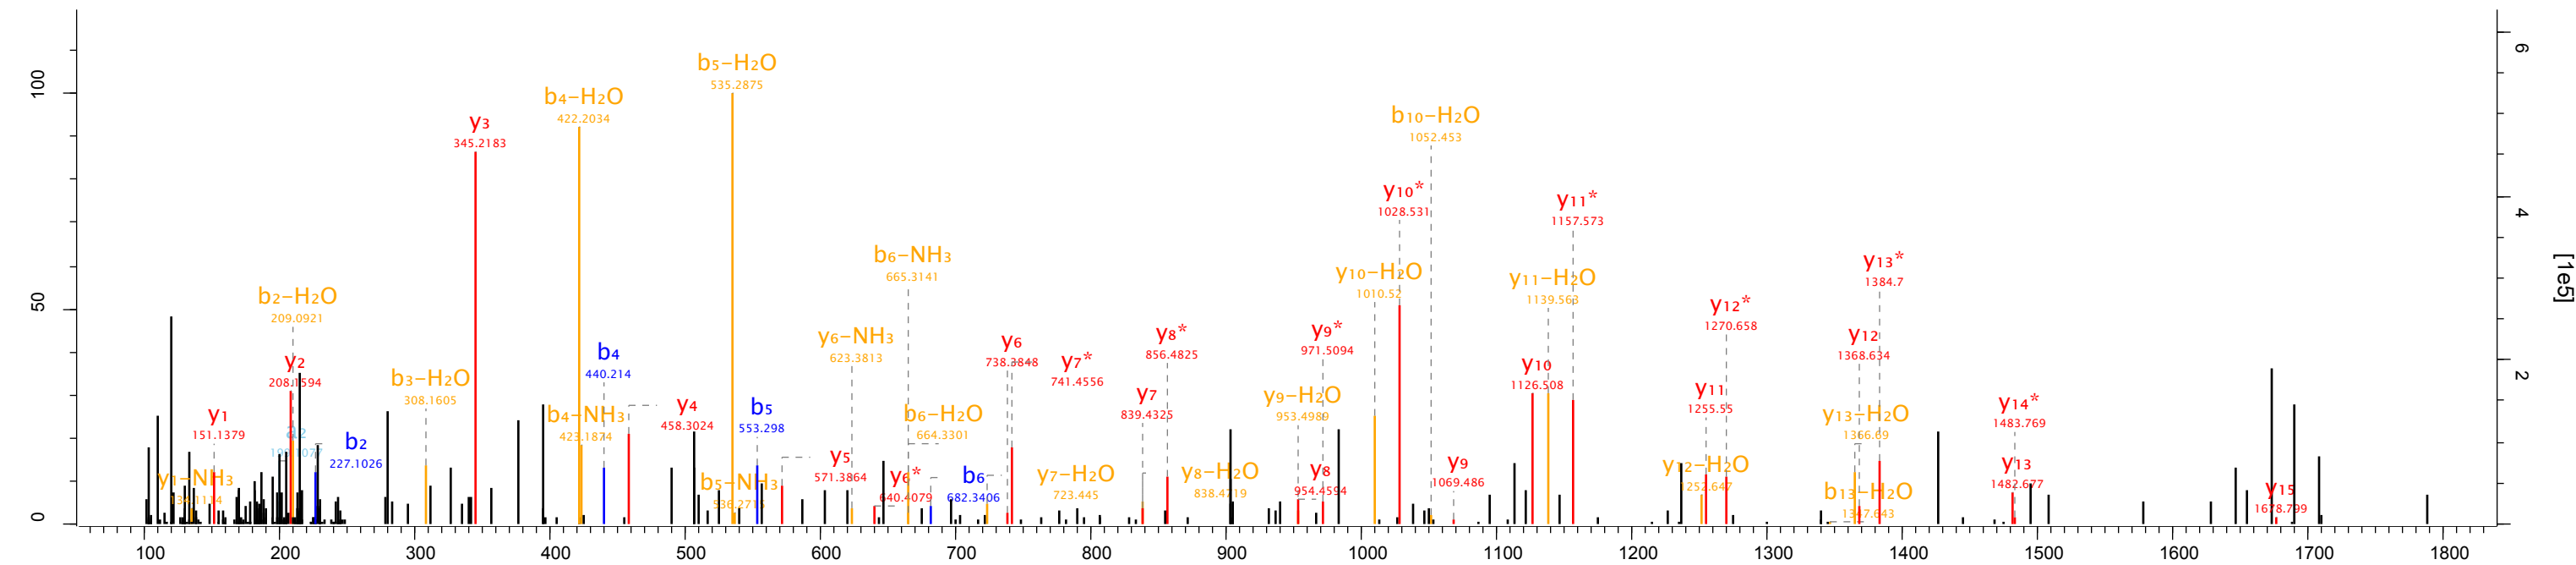

Protein sequence: - E P V N L E G D D T S L I H G K -

Fragmentation sites (b and y ions) are indicated by boxes below the sequence:

- b<sub>2</sub> (under P)
- b<sub>4</sub> (under N)
- b<sub>5</sub> (under L)
- b<sub>6</sub> (under E)

Corresponding y ions are labeled above the sequence:

- y<sub>15</sub> (above P)
- y<sub>14</sub>\* (above V)
- y<sub>13</sub> (above N)
- y<sub>12</sub> (above L)
- y<sub>11</sub> (above E)
- y<sub>10</sub> (above G)
- y<sub>9</sub> (above D)
- y<sub>8</sub> (above D)
- y<sub>7</sub> (above T)
- y<sub>6</sub> (above S)
- y<sub>5</sub> (above L)
- y<sub>4</sub> (above I)
- y<sub>3</sub> (above H)
- y<sub>2</sub> (above G)
- y<sub>1</sub> (above K)

Raw file: 20150814\_A375SR\_Phospho\_BR2\_04  
 Scan: 15142 Method: FTMS; HCD Score: 271.39 m/z: 949.46 Gene names: QSER1

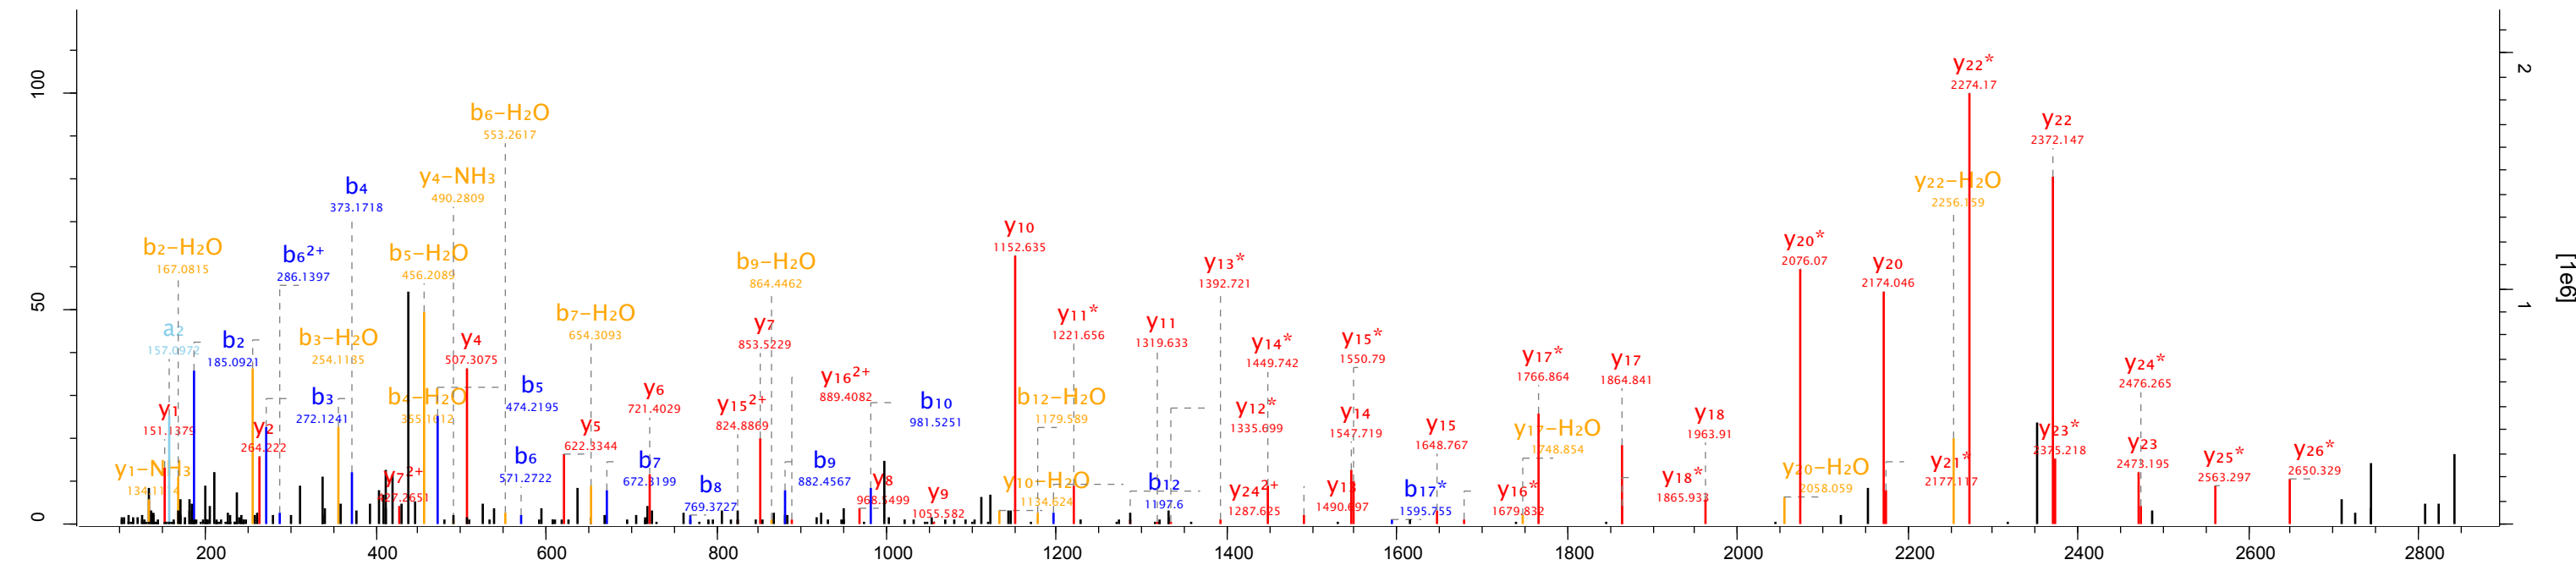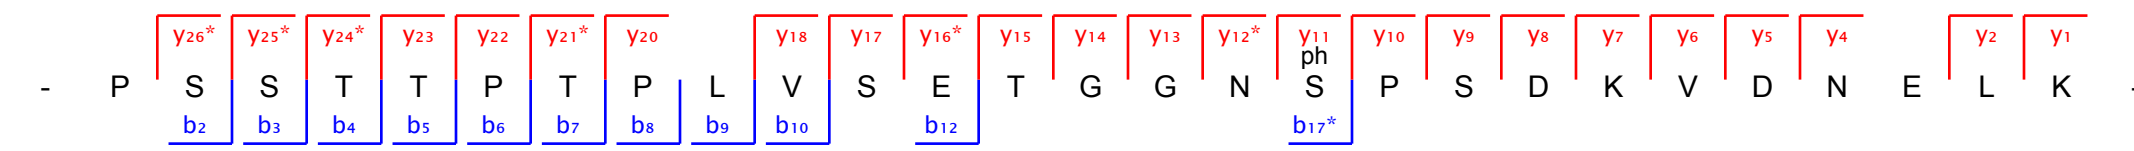

Raw file 20150814\_A375SR\_Phospho\_BR2\_04 Scan 15262 Method FTMS; HCD Score 106.93 m/z 873.83 Gene names VPS26A

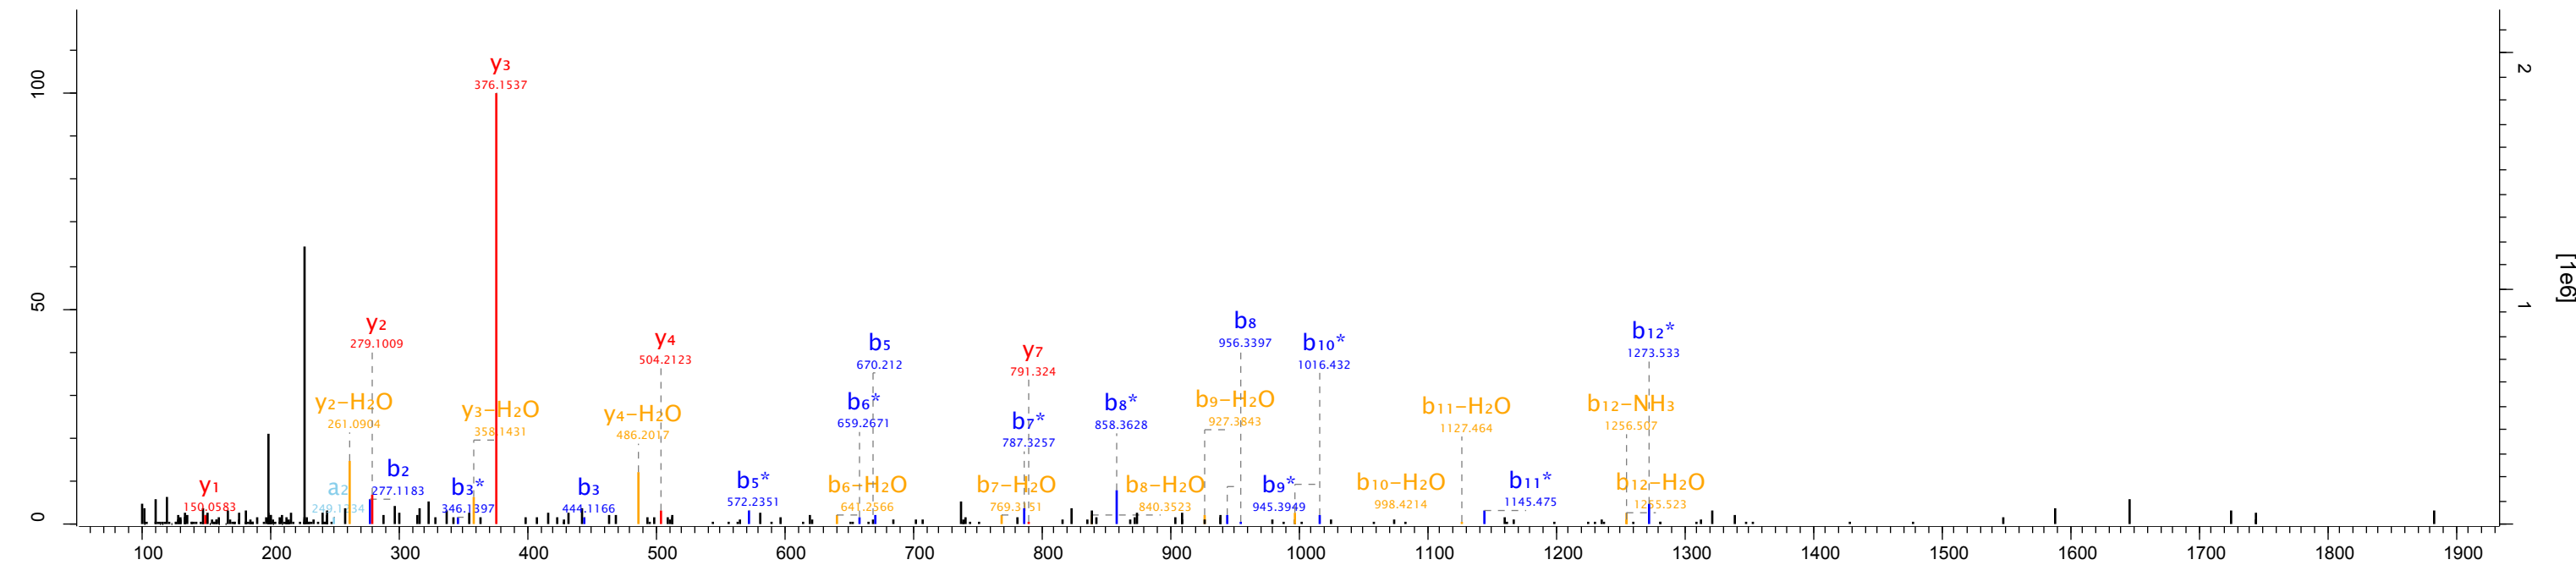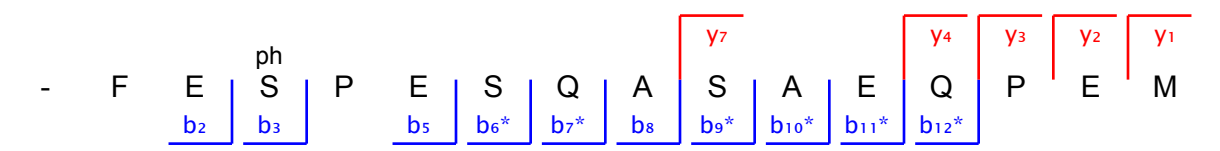

Raw file: 20150814\_A375SR\_Phospho\_BR2\_04  
 Scan: 15272 Method: FTMS; HCD Score: 111.83 m/z: 629.81 Gene names: SOWAHC

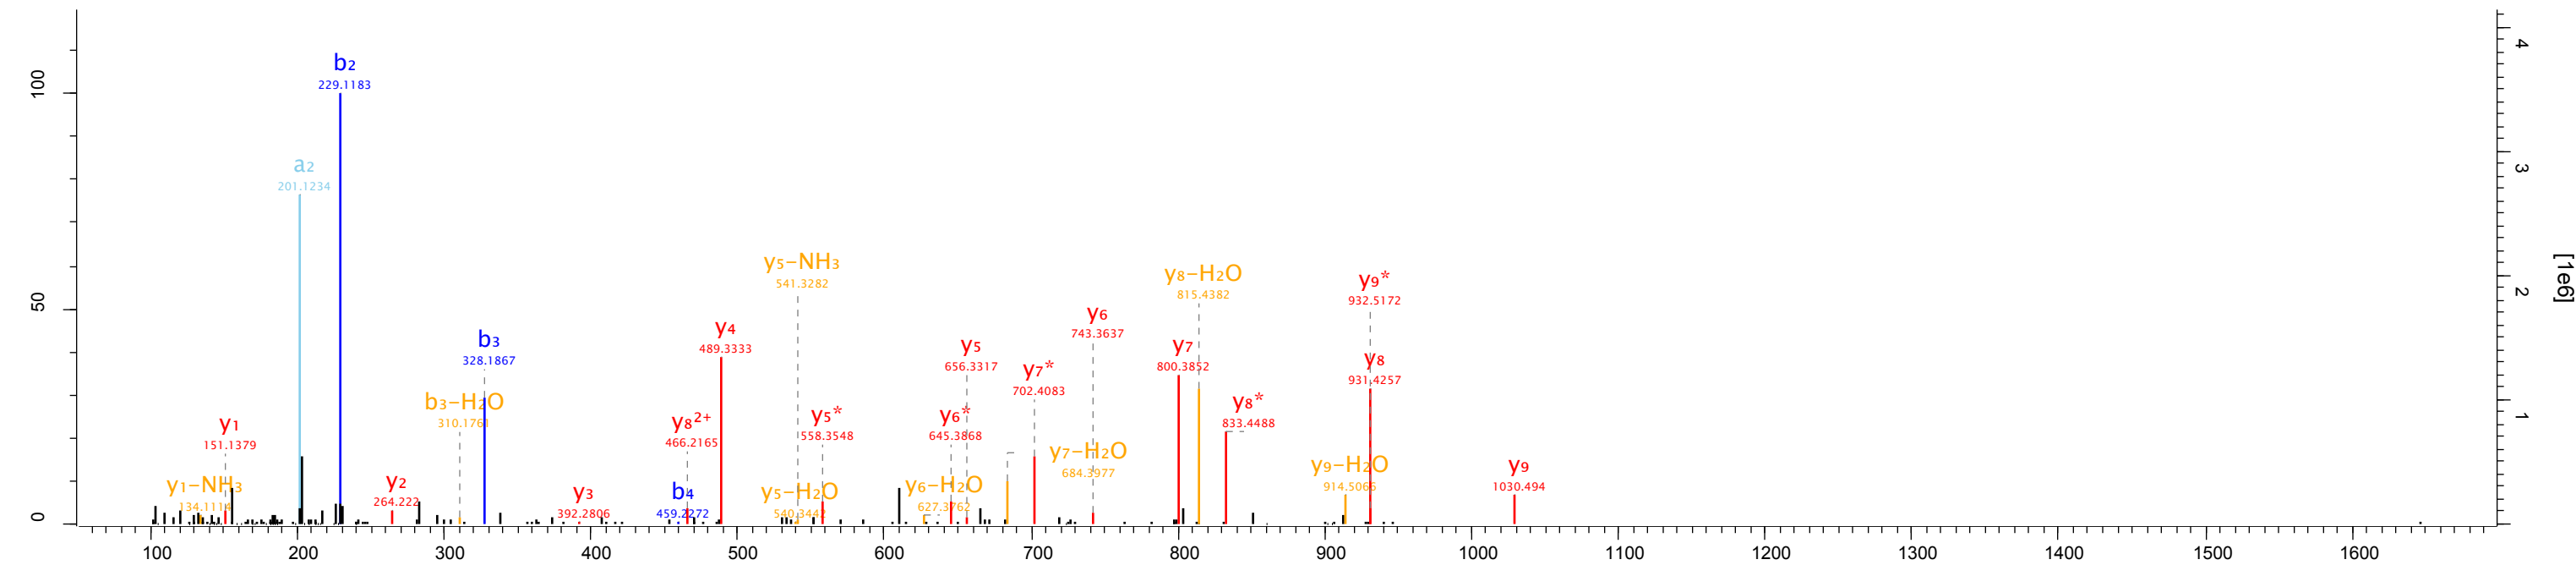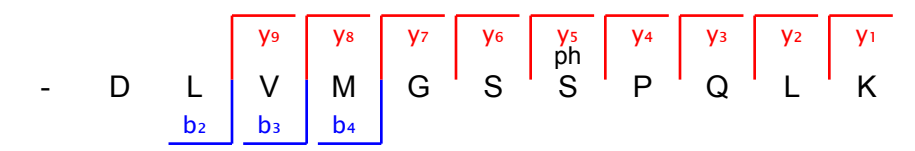

Raw file: 20150814\_A375SR\_Phospho\_BR2\_04  
 Scan: 15292 Method: FTMS; HCD Score: 222.3 m/z: 769.66 Gene names: PARD3

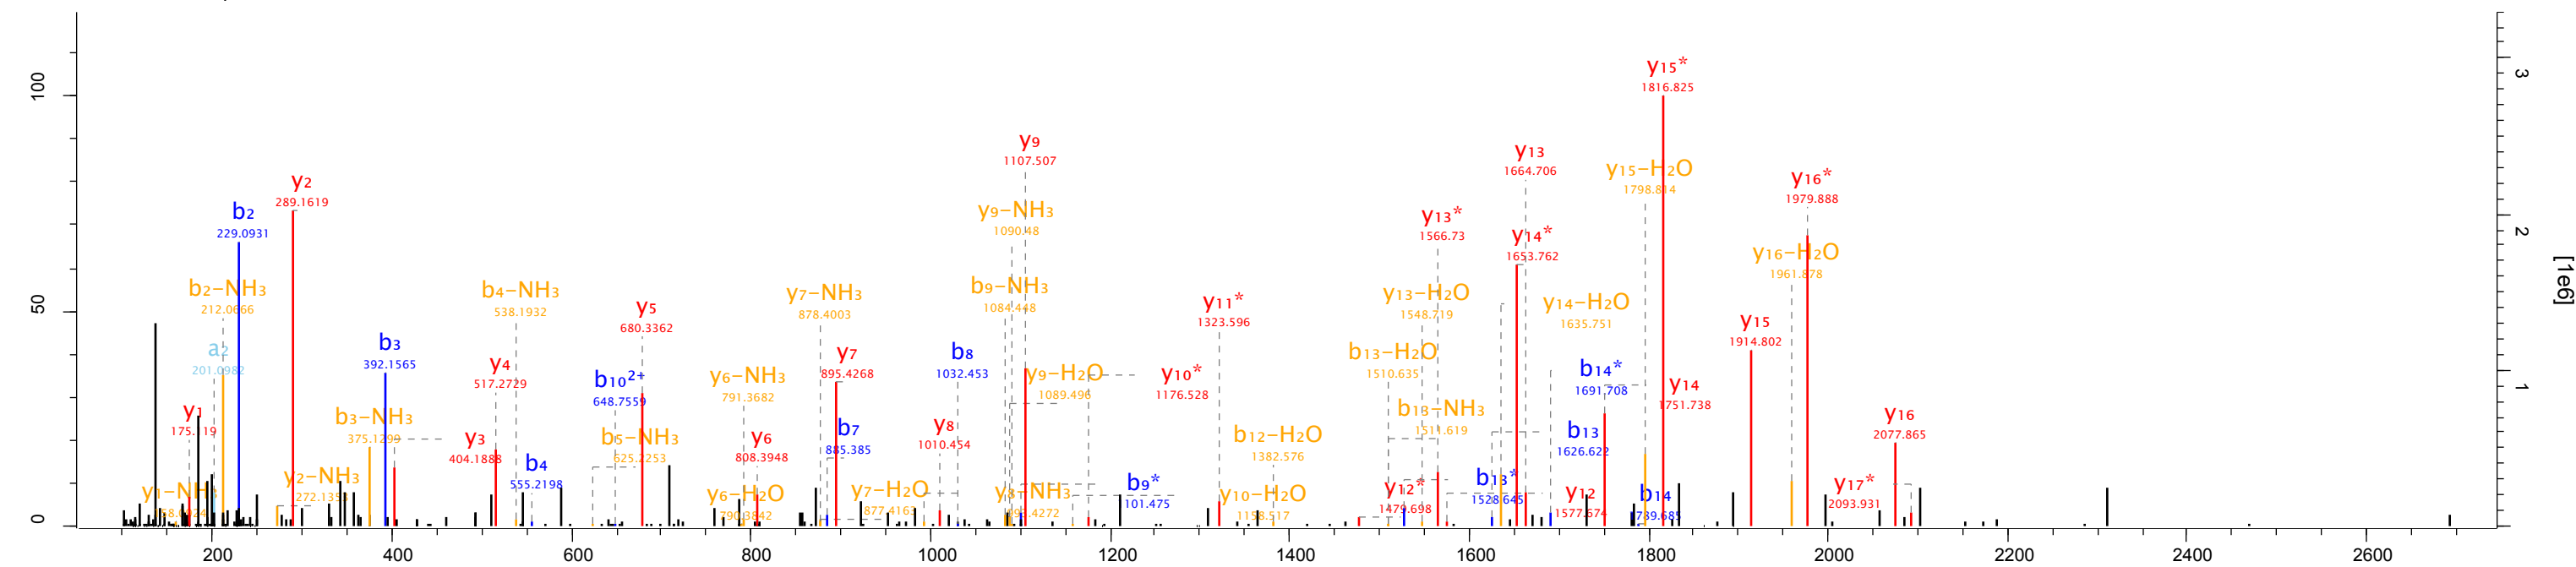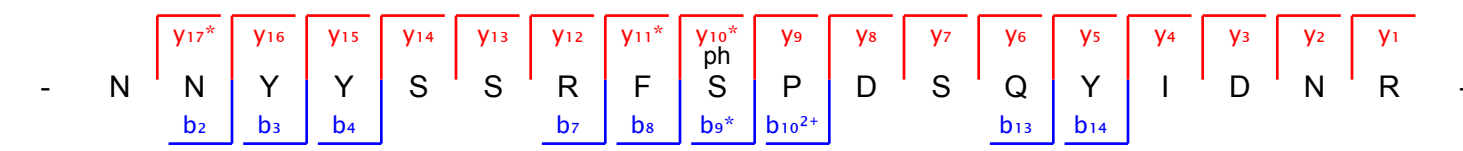

Raw file: 20150814\_A375SR\_Phospho\_BR2\_04  
 Scan: 15382 Method: FTMS; HCD Score: 242.29 m/z: 822.39 Gene names: C6orf106

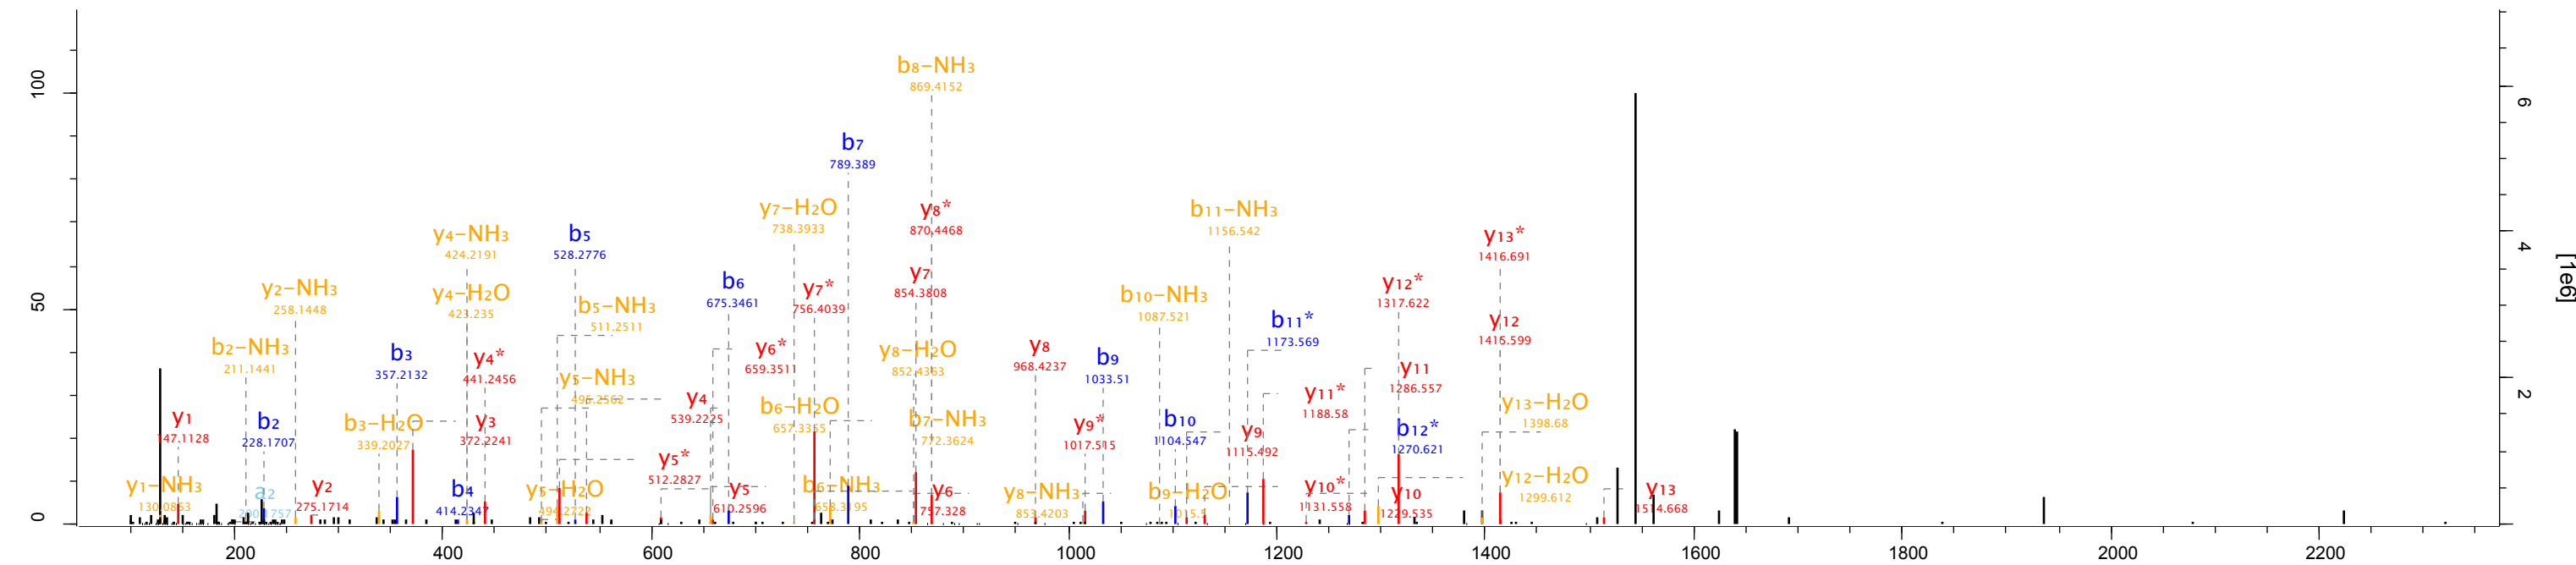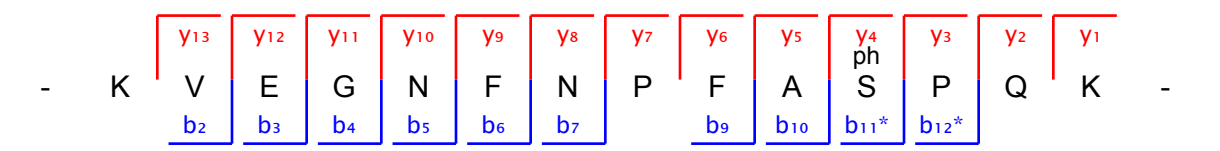



Raw file: 20150814\_A375SR\_Phospho\_BR2\_04  
 Scan: 15672 Method: FTMS; HCD Score: 212.47 m/z: 972.91 Gene names: MAP1A

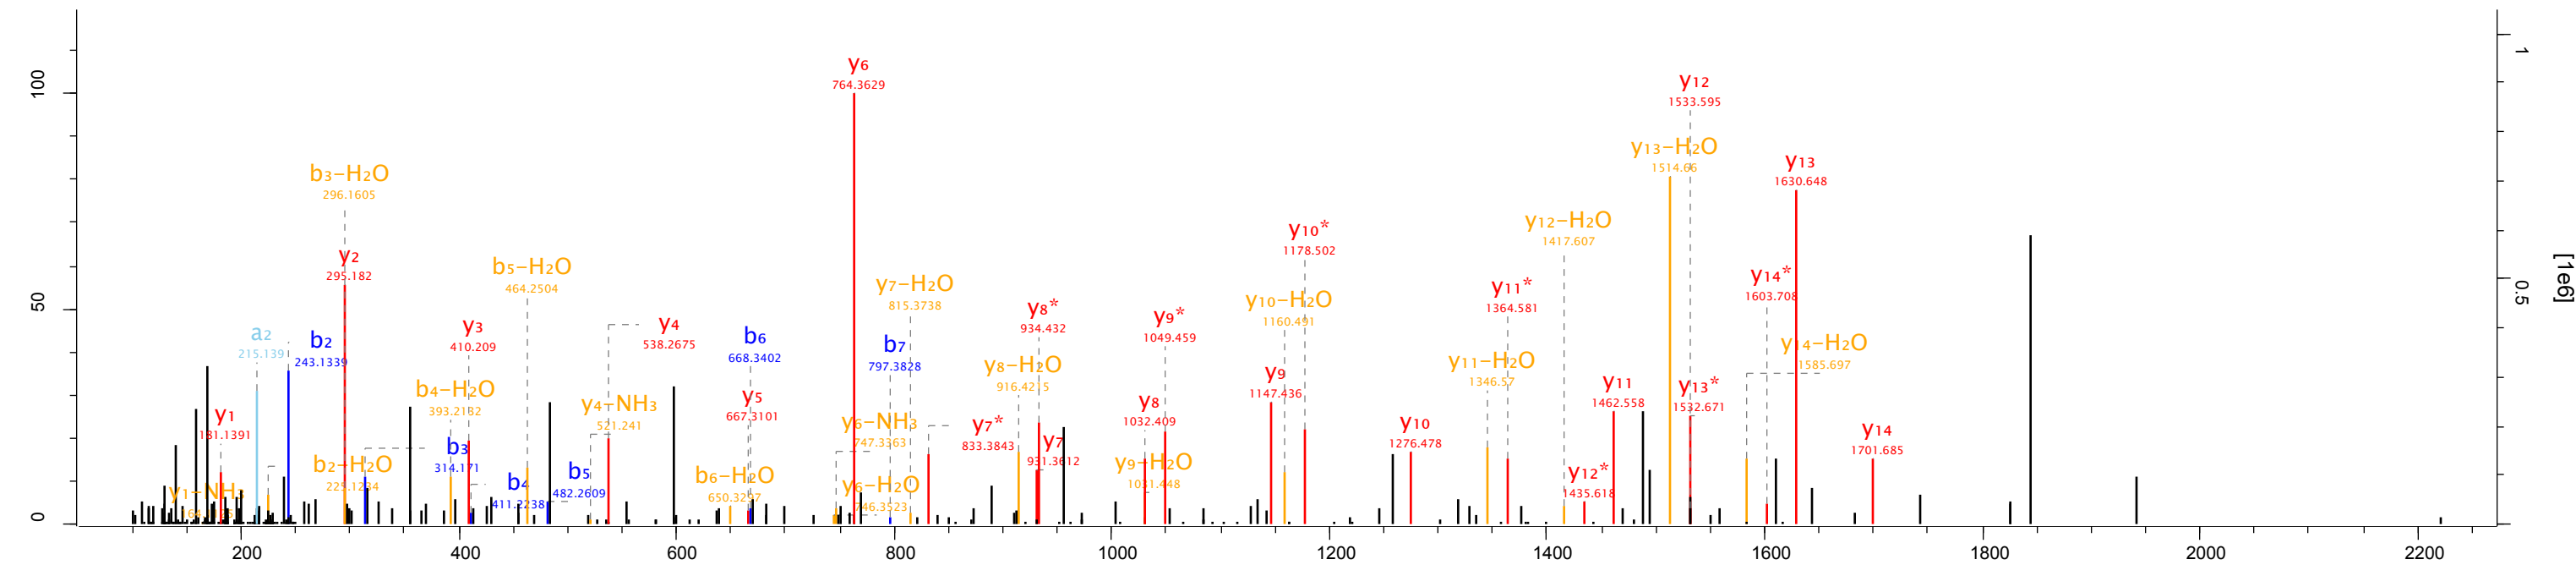

Protein sequence: - E L A P A W E D T S P E Q D N R -

Fragmentation sites (b ions): b<sub>2</sub> (L), b<sub>3</sub> (A), b<sub>4</sub> (P), b<sub>5</sub> (A), b<sub>6</sub> (W), b<sub>7</sub> (E)

Fragmentation sites (y ions): y<sub>1</sub> (R), y<sub>2</sub> (N), y<sub>3</sub> (D), y<sub>4</sub> (Q), y<sub>5</sub> (E), y<sub>6</sub> (P), y<sub>7</sub> (S), y<sub>8</sub> (T), y<sub>9</sub> (D), y<sub>10</sub> (W), y<sub>11</sub> (A), y<sub>12</sub> (A), y<sub>13</sub> (P), y<sub>14</sub> (L)

Raw file: 20150814\_A375SR\_Phospho\_BR2\_04  
 Scan: 15682 Method: FTMS; HCD Score: 236.31 m/z: 798.86 Gene names: EIF3C;EIF3CL

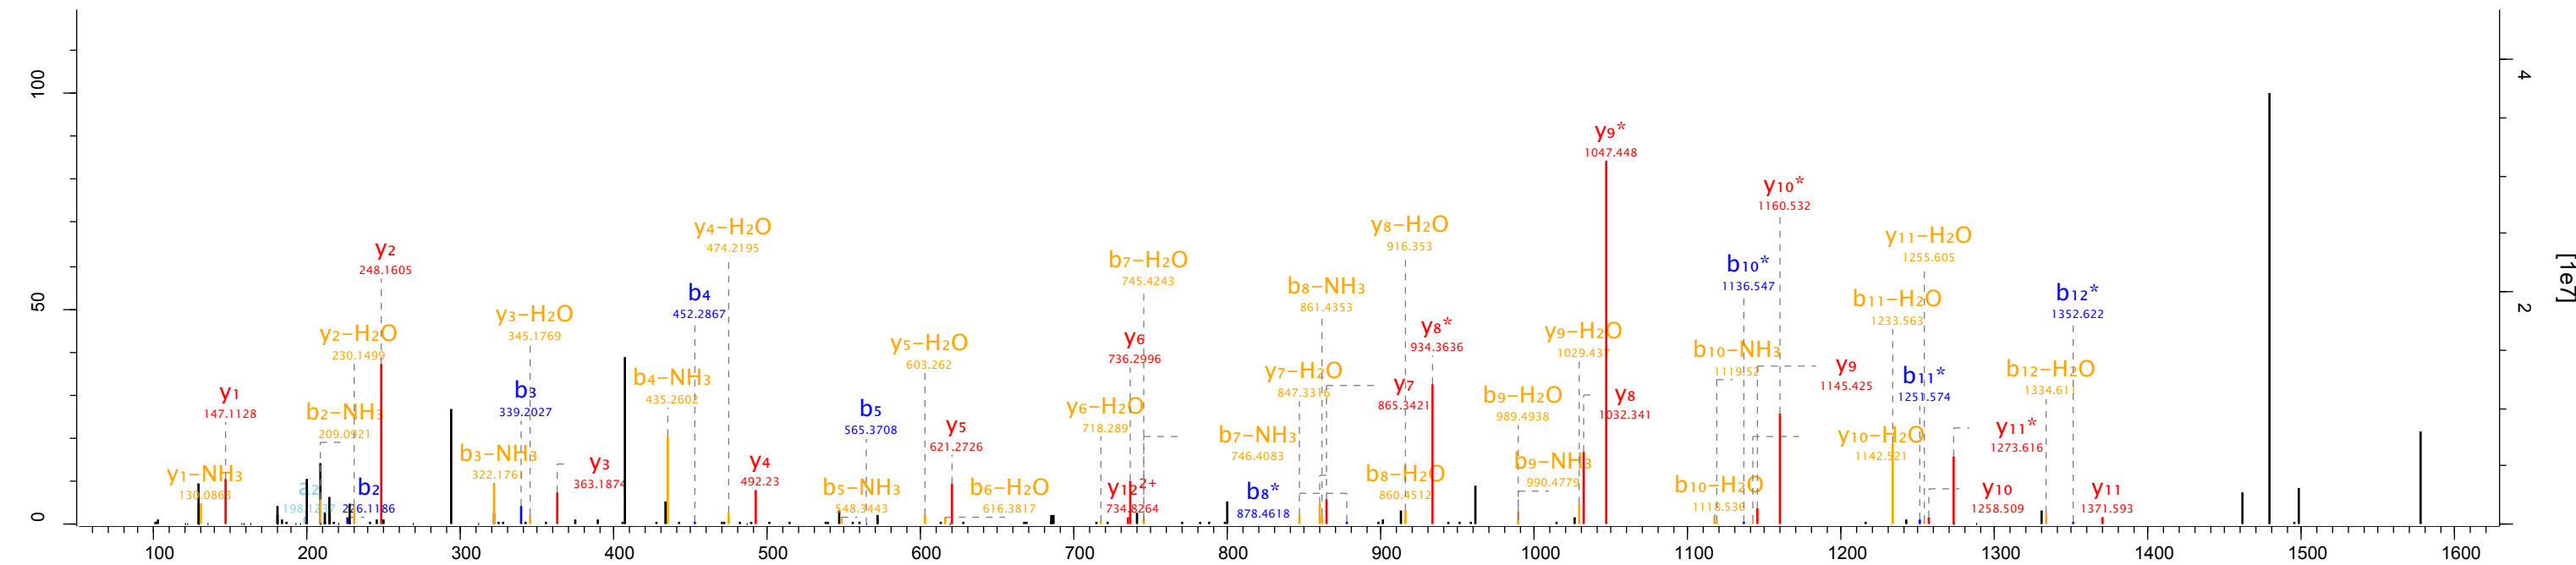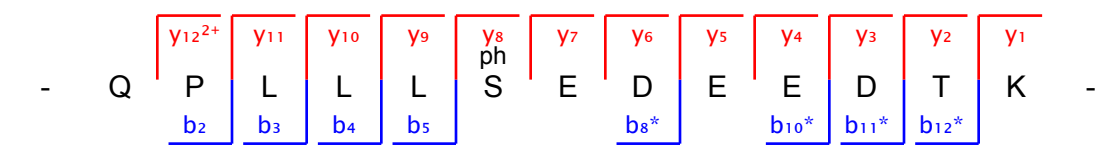

Raw file: 20150814\_A375SR\_Phospho\_BR2\_04  
 Scan: 15832 Method: FTMS; HCD Score: 156.2 m/z: 665.32 Gene names: AKAP12

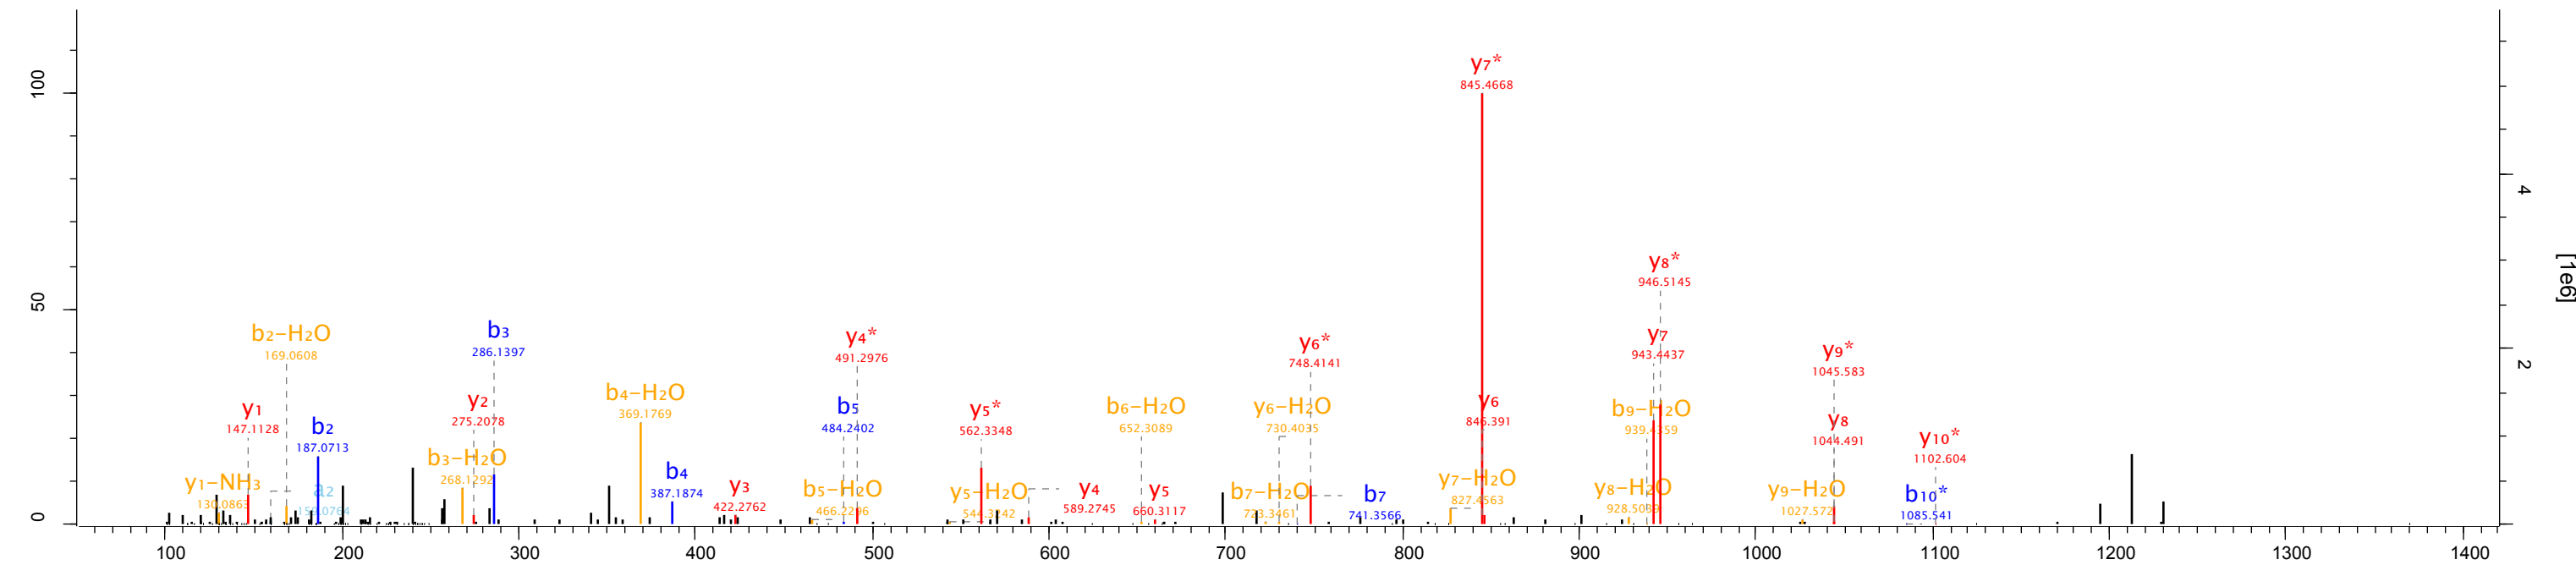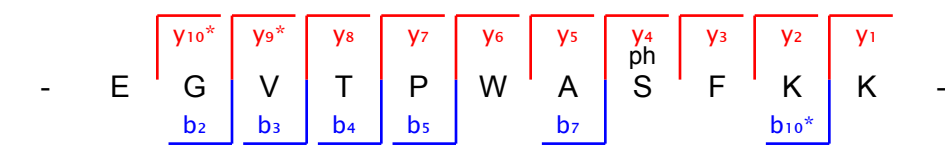

Raw file Scan Method Score m/z Gene names  
 20150814\_A375SR\_Phospho\_BR2\_04 15882 FTMS; HCD 75.11 859.42 TOM1

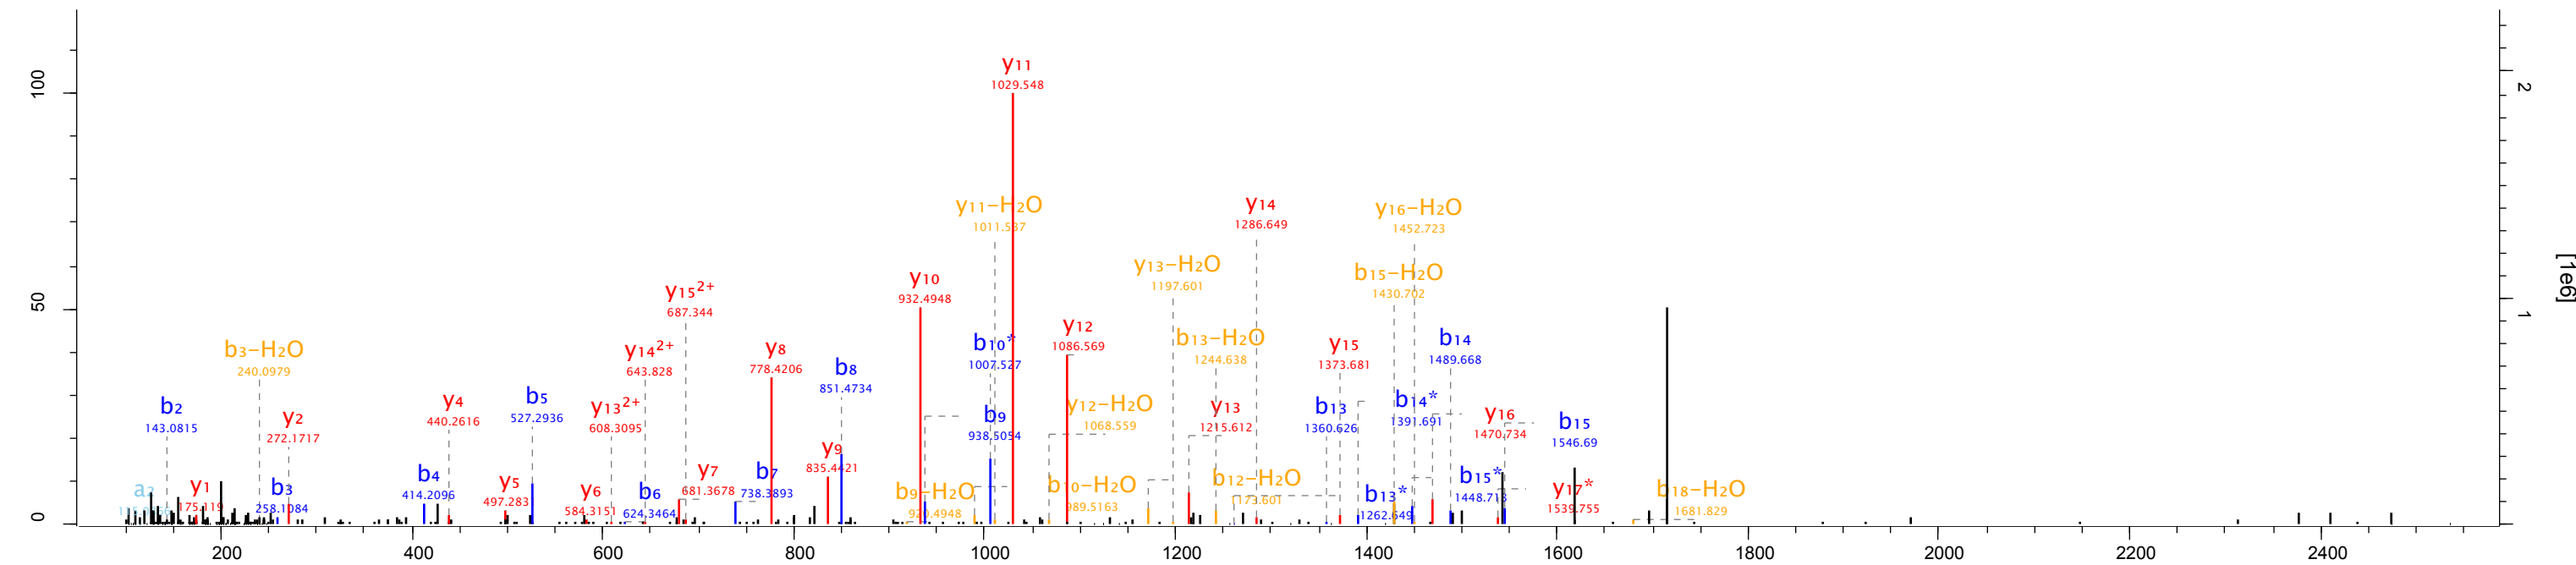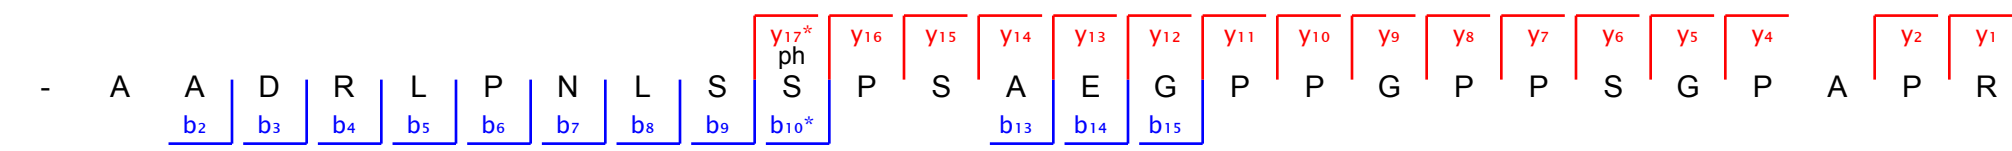

Raw file: 20150814\_A375SR\_Phospho\_BR2\_04  
 Scan: 15932 Method: FTMS; HCD Score: 236.5 m/z: 910.37 Gene names: SP1

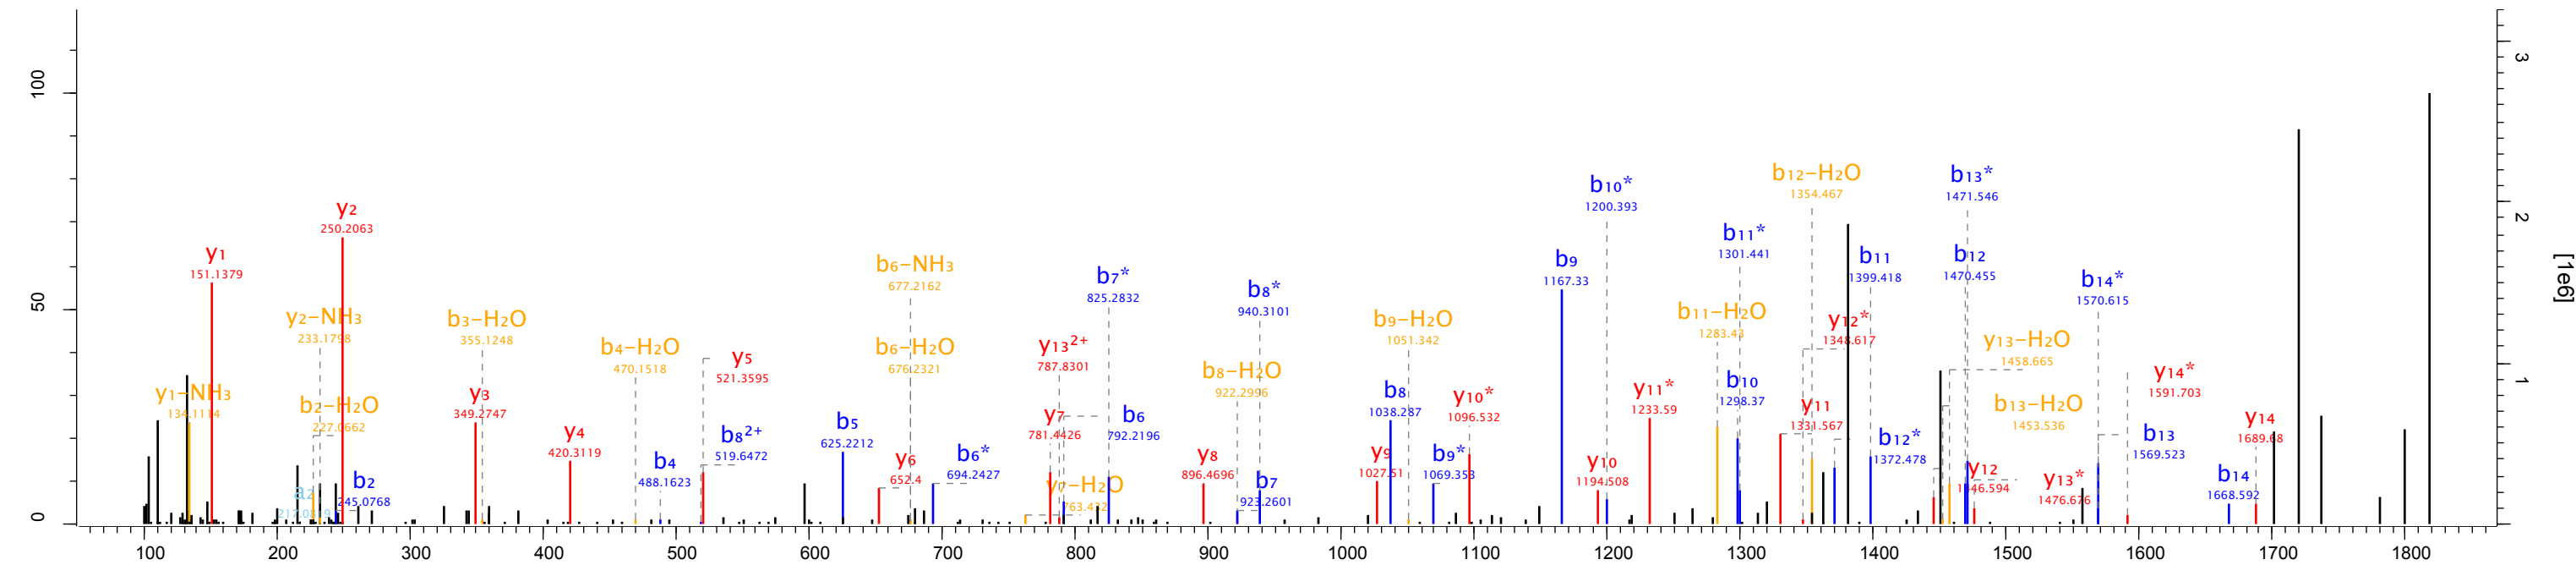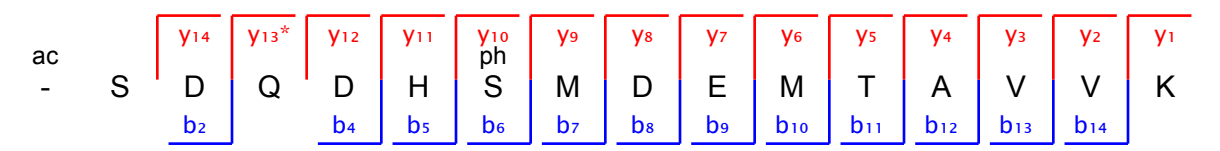

Raw file 20150814\_A375SR\_Phospho\_BR2\_04 Scan 15942 Method FTMS; HCD Score 172.34 m/z 841.09 Gene names TTK

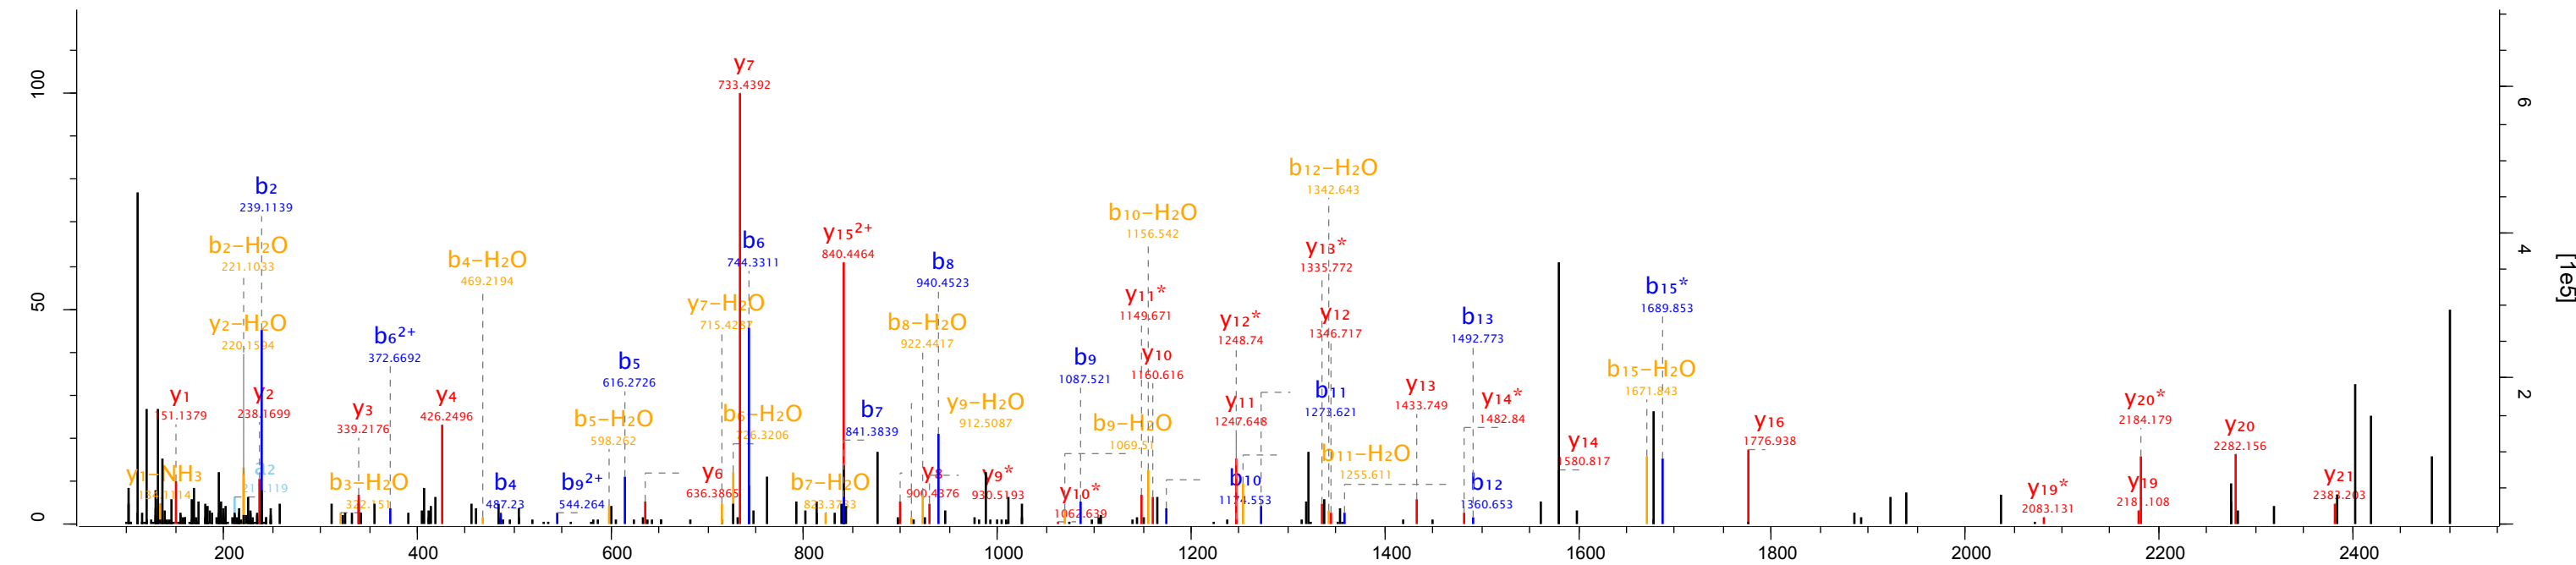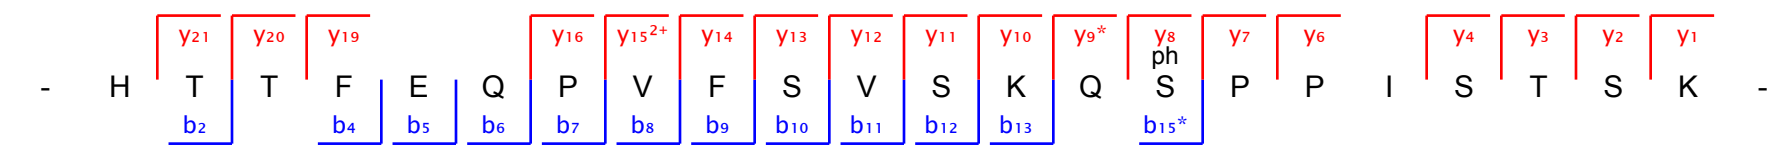

Raw file 20150814\_A375SR\_Phospho\_BR2\_04 Scan 16202 Method FTMS; HCD Score 46.68 m/z 613.26 Gene names TTC7A

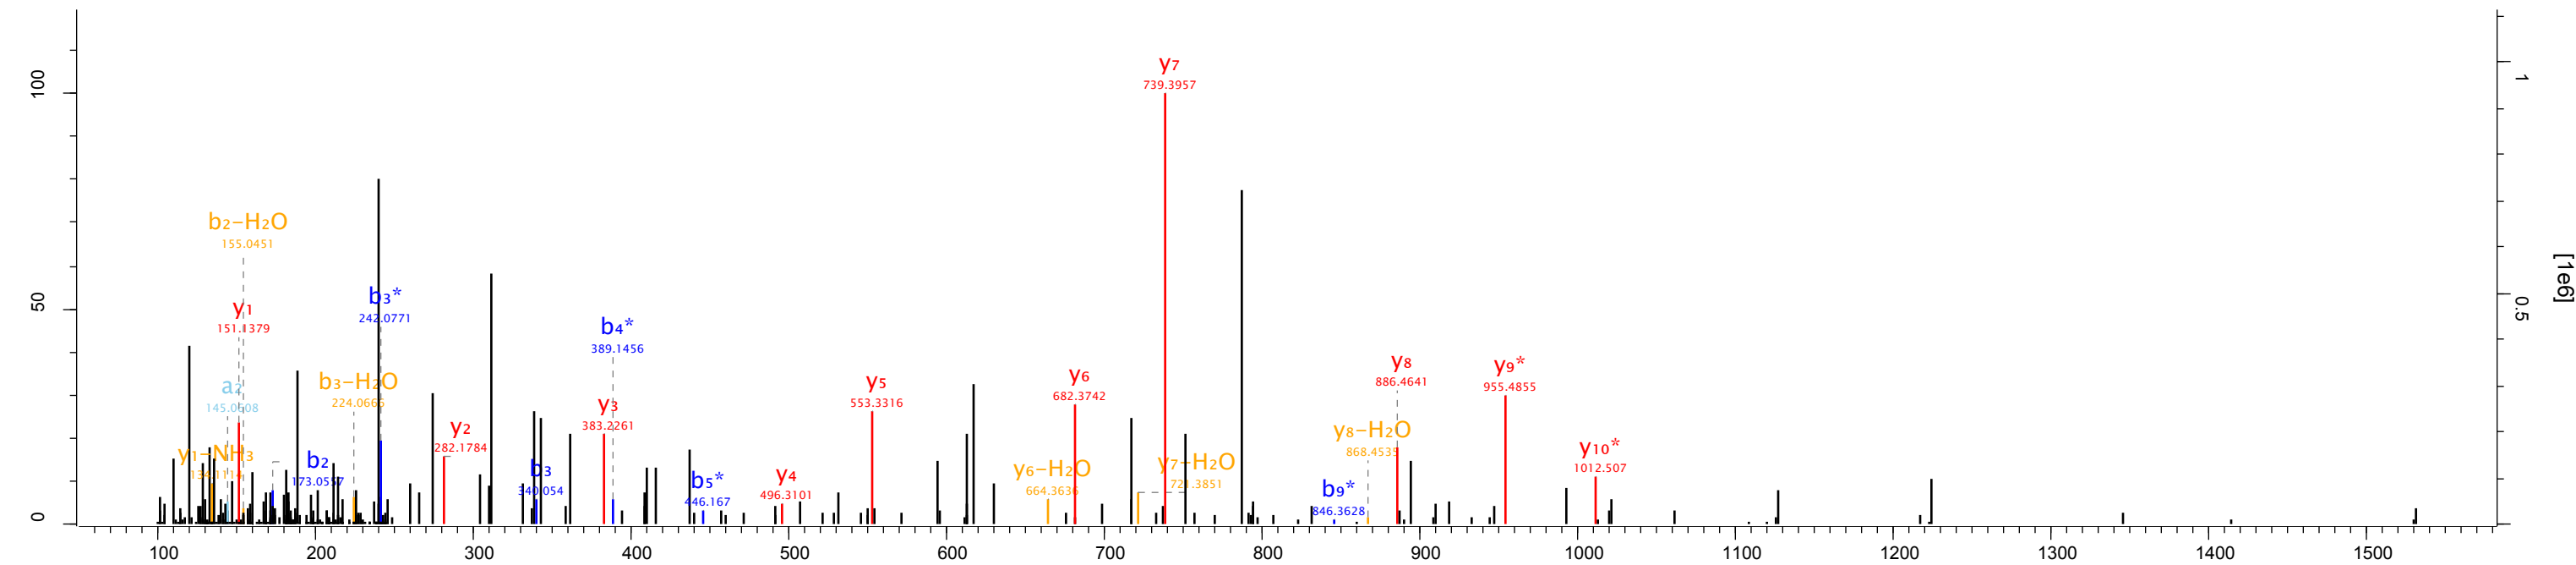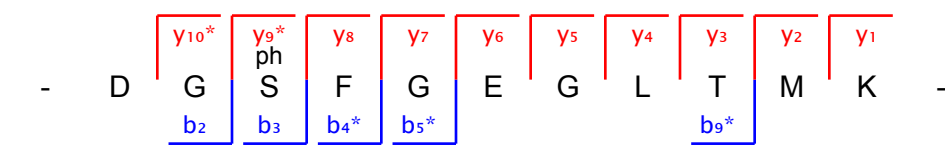





Raw file: 20150814\_A375SR\_Phospho\_BR2\_04  
 Scan: 16512 Method: FTMS; HCD Score: 159.5 m/z: 1135.76 Gene names: EIF3B

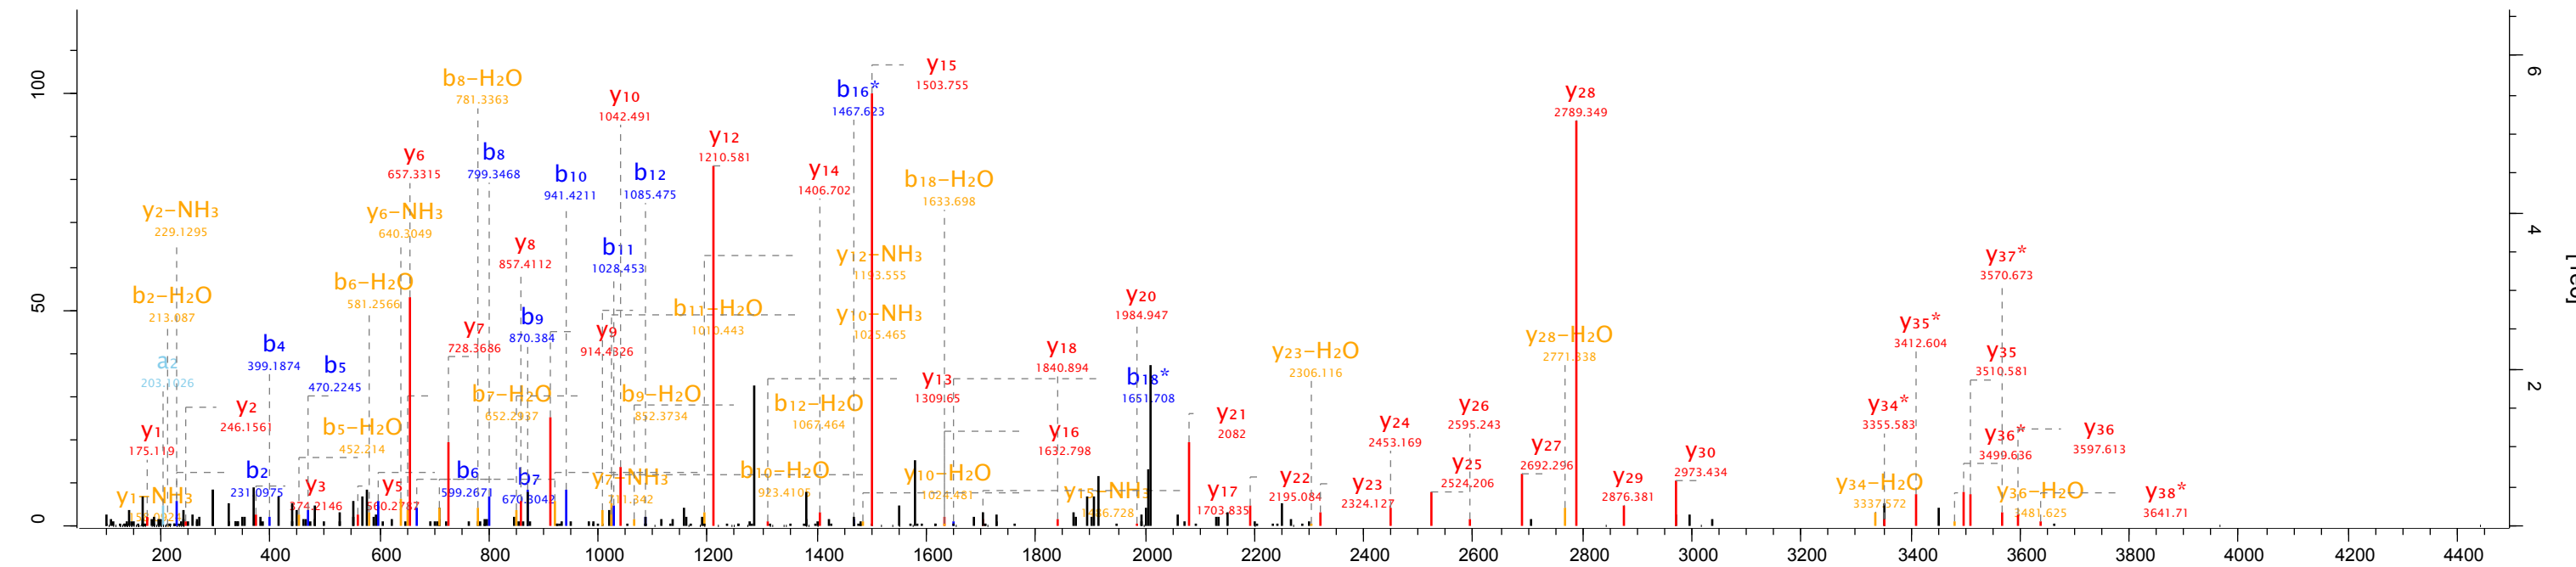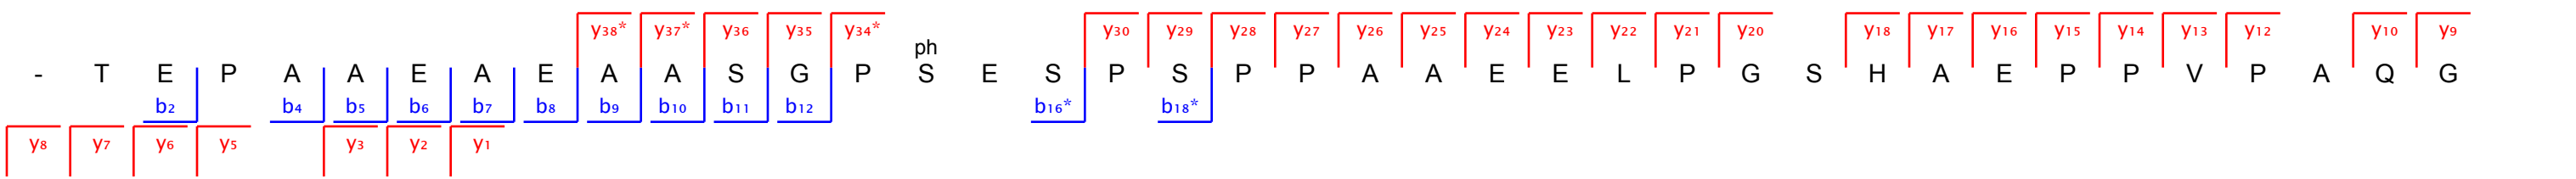

Raw file 20150814\_A375SR\_Phospho\_BR2\_04 Scan 16912 Method FTMS; HCD Score 152.17 m/z 1189.55 Gene names PAK1

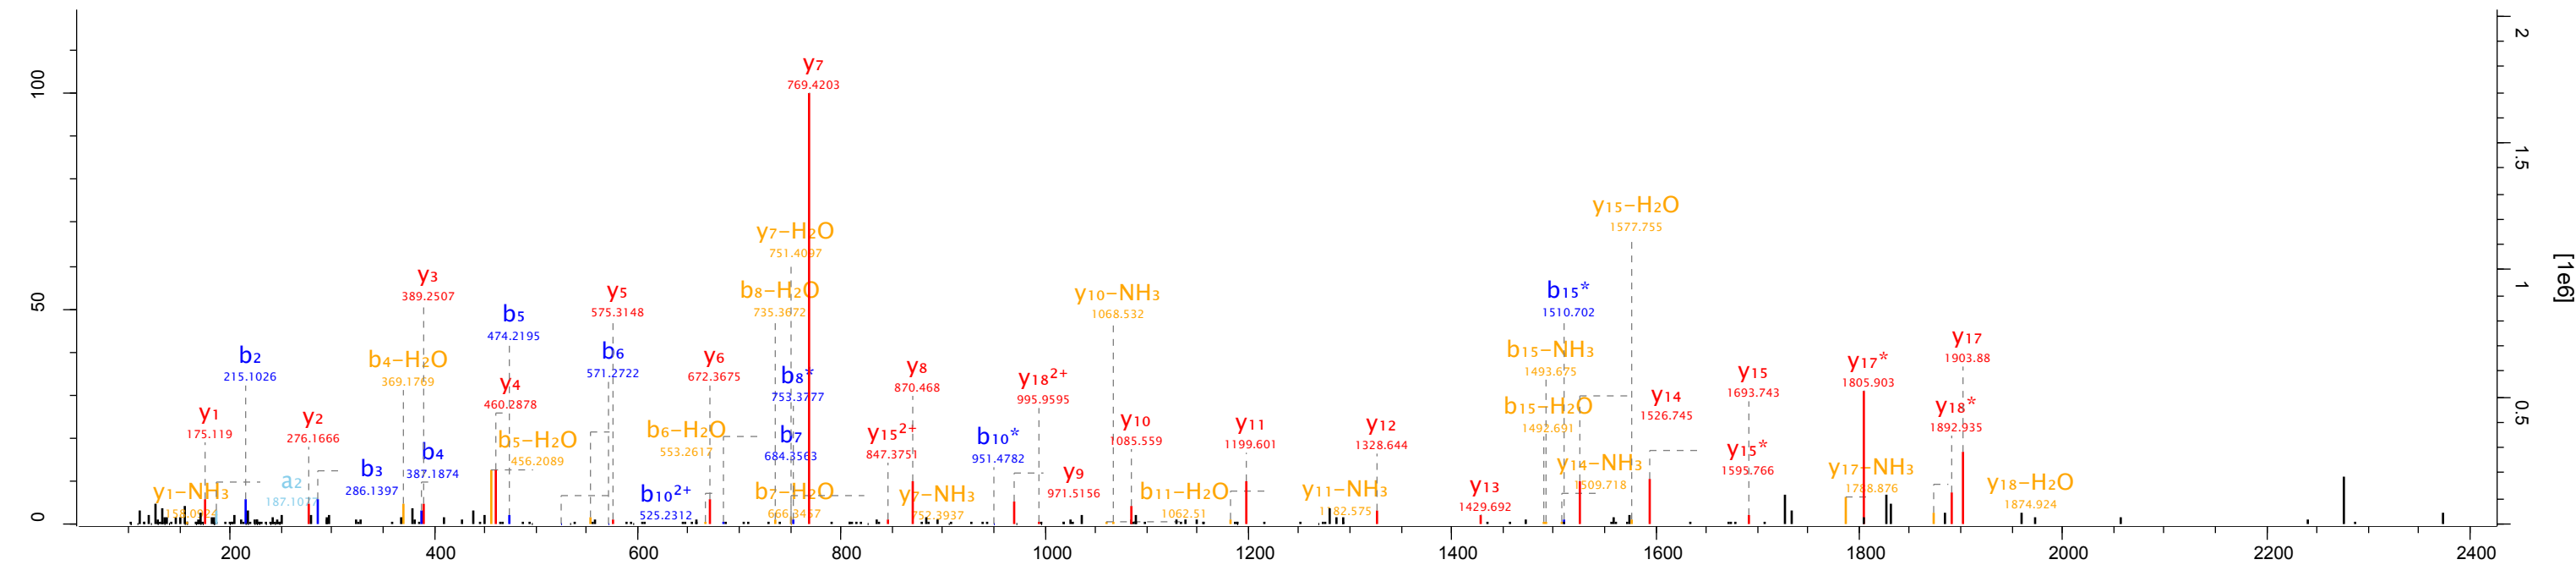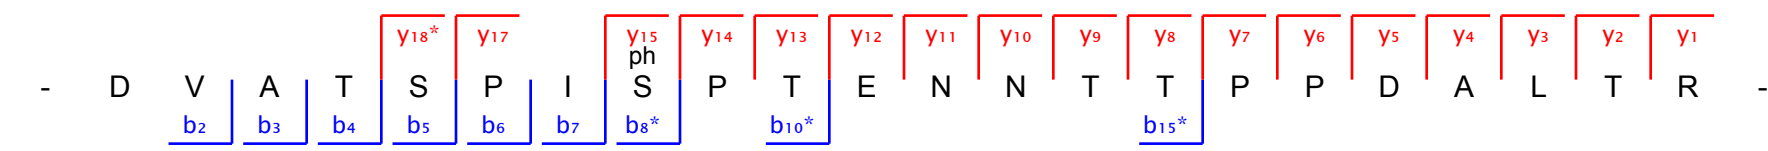

Raw file 20150814\_A375SR\_Phospho\_BR2\_04 Scan 17032 Method FTMS; HCD Score 152.03 m/z 716.35 Gene names OSBPL3

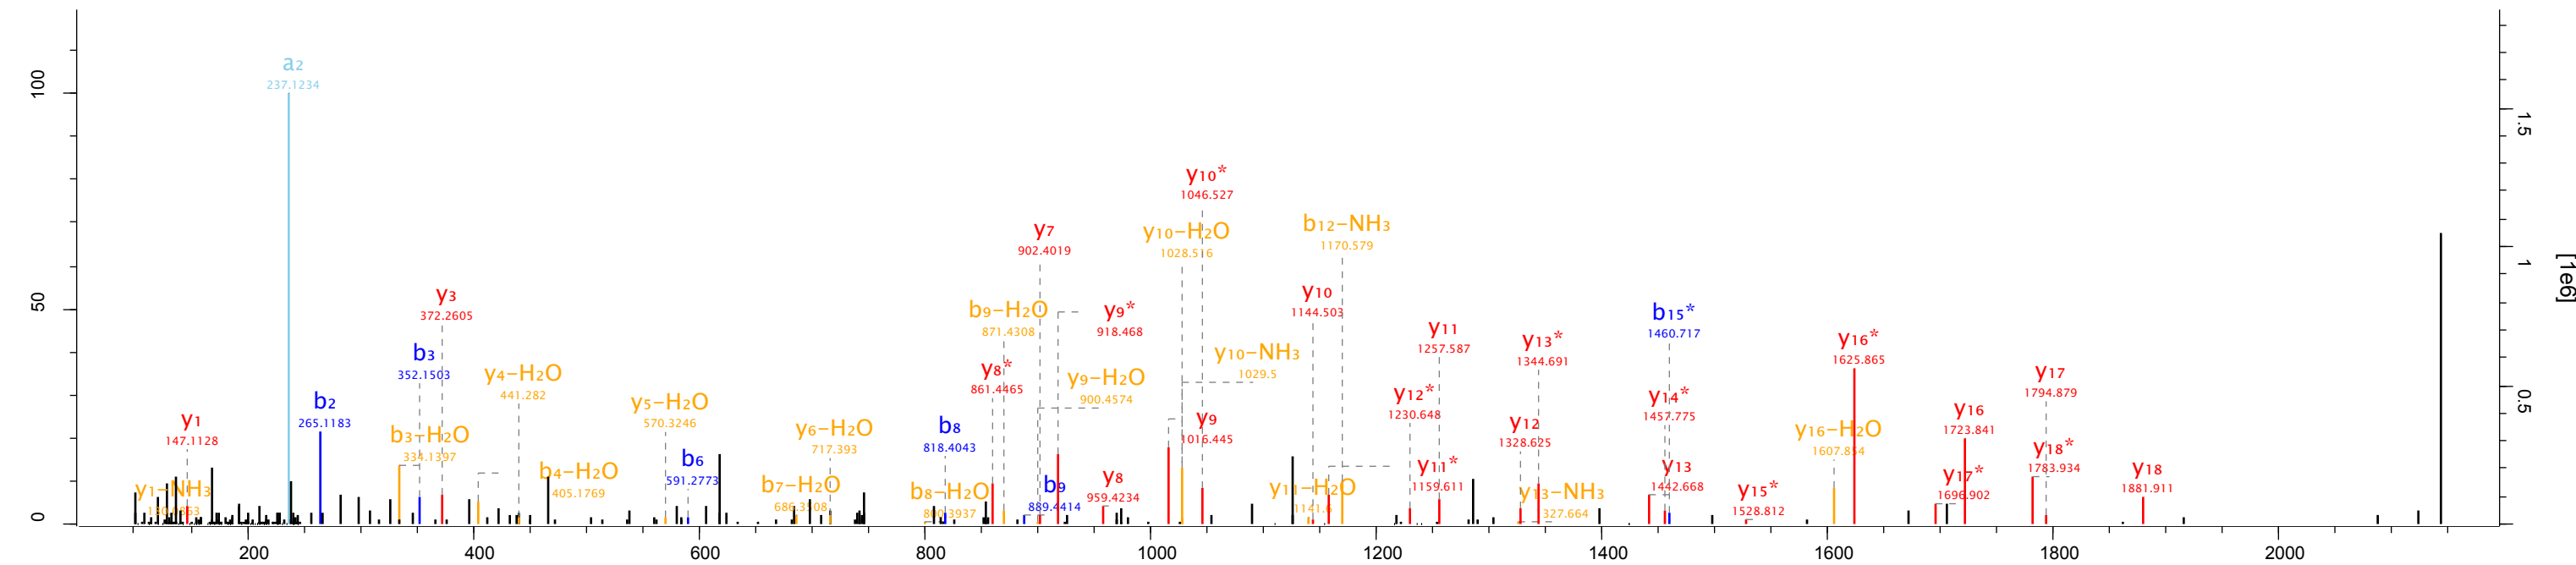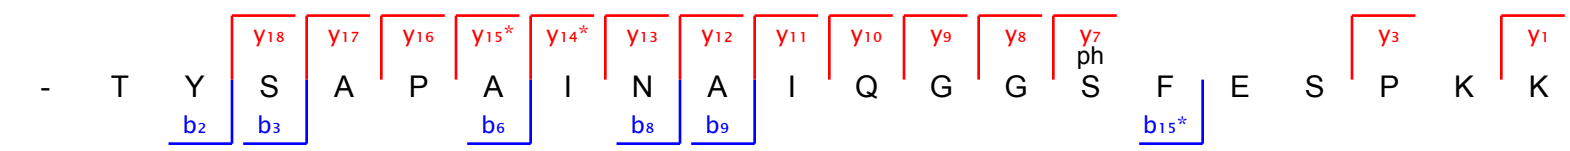

Raw file 20150814\_A375SR\_Phospho\_BR2\_04 Scan 1722 Method FTMS; HCD Score 82.91 m/z 525.26 Gene names PDS5B

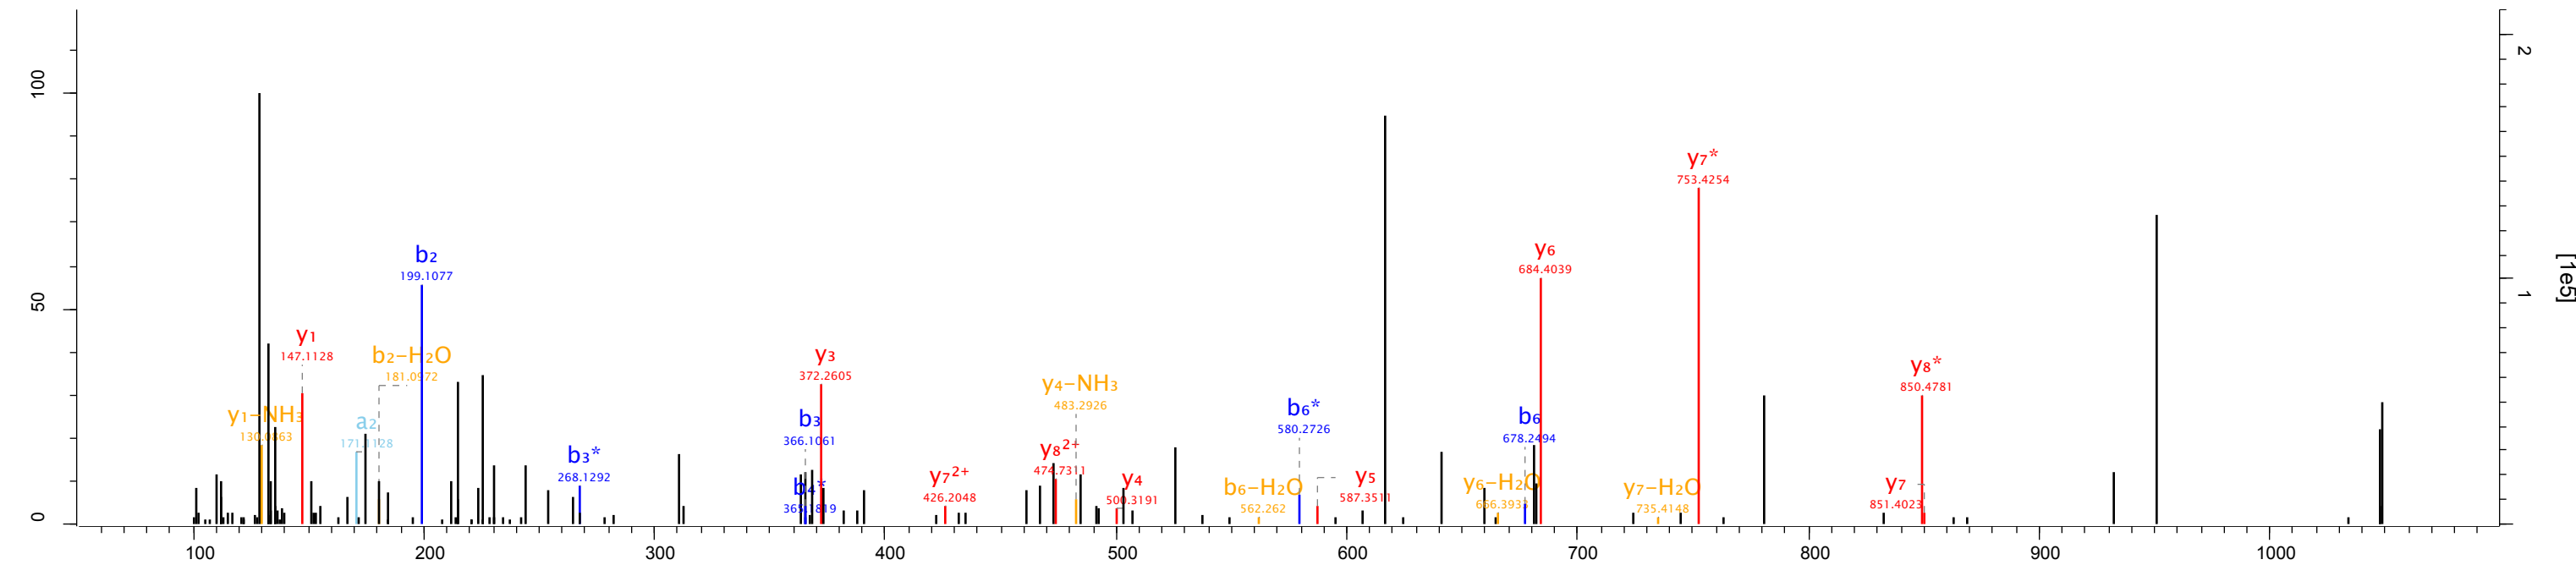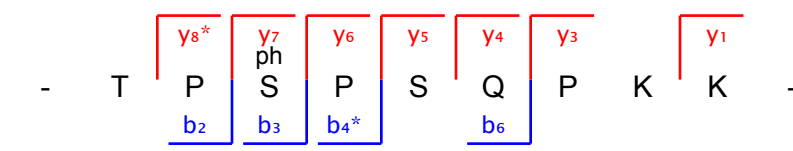

Raw file 20150814\_A375SR\_Phospho\_BR2\_04 Scan 17342 Method FTMS; HCD Score 188.51 m/z 1130.43 Gene names DYNC1LI2

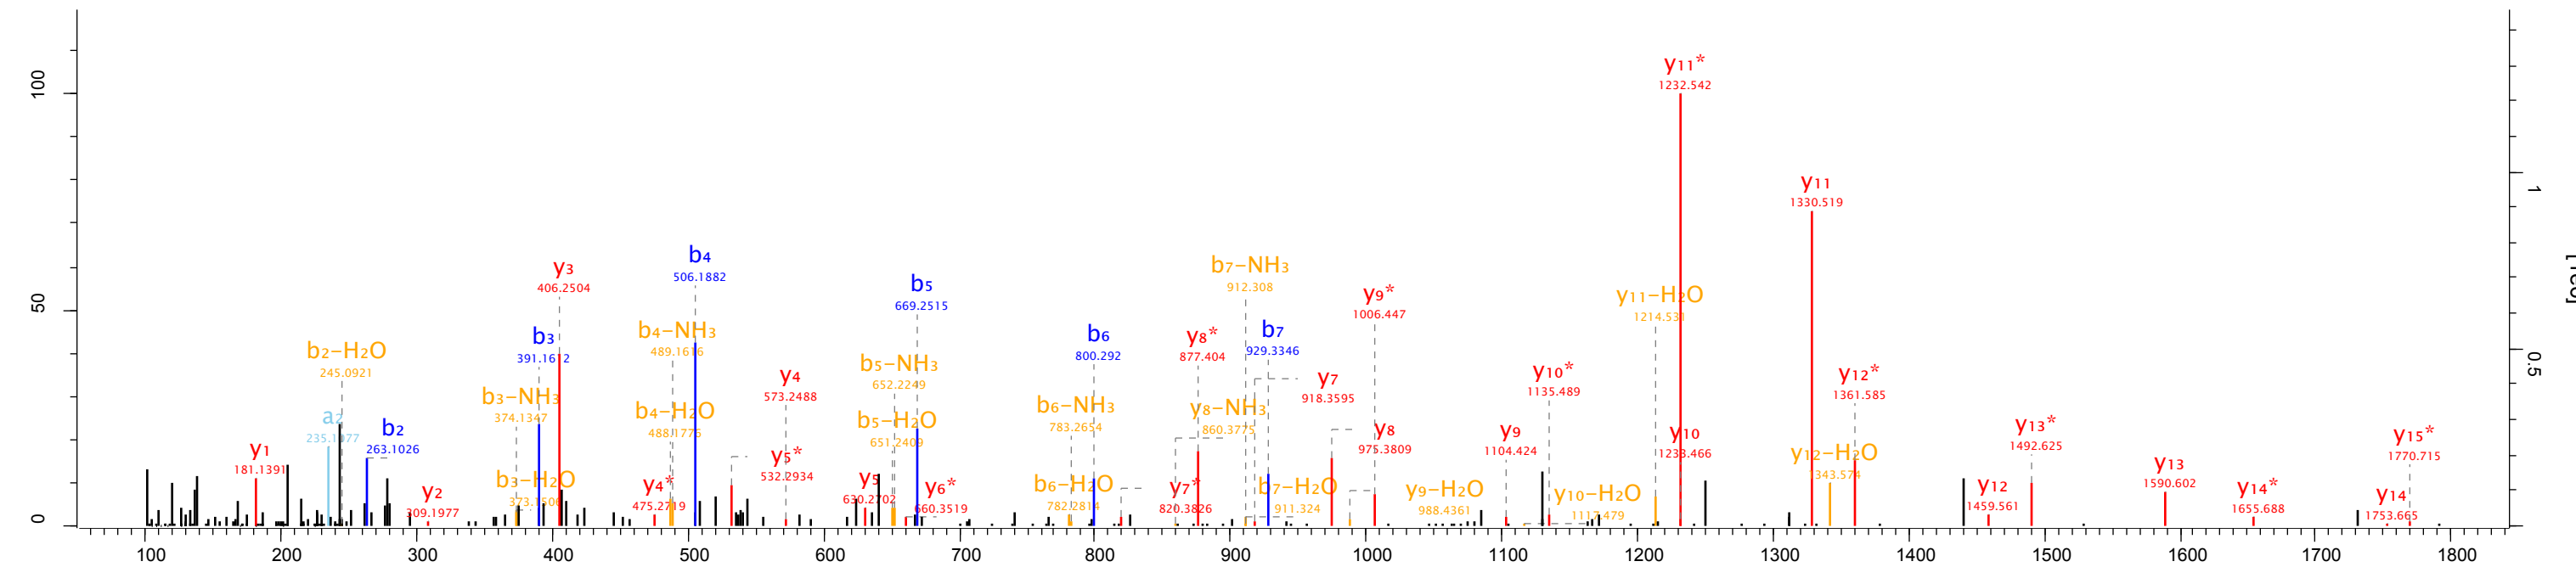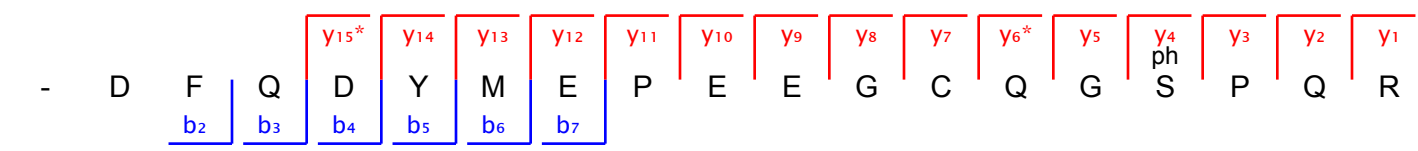

Raw file 20150814\_A375SR\_Phospho\_BR2\_04 Scan 18072 Method FTMS; HCD Score 133.96 m/z 757.82 Gene names OTUD4

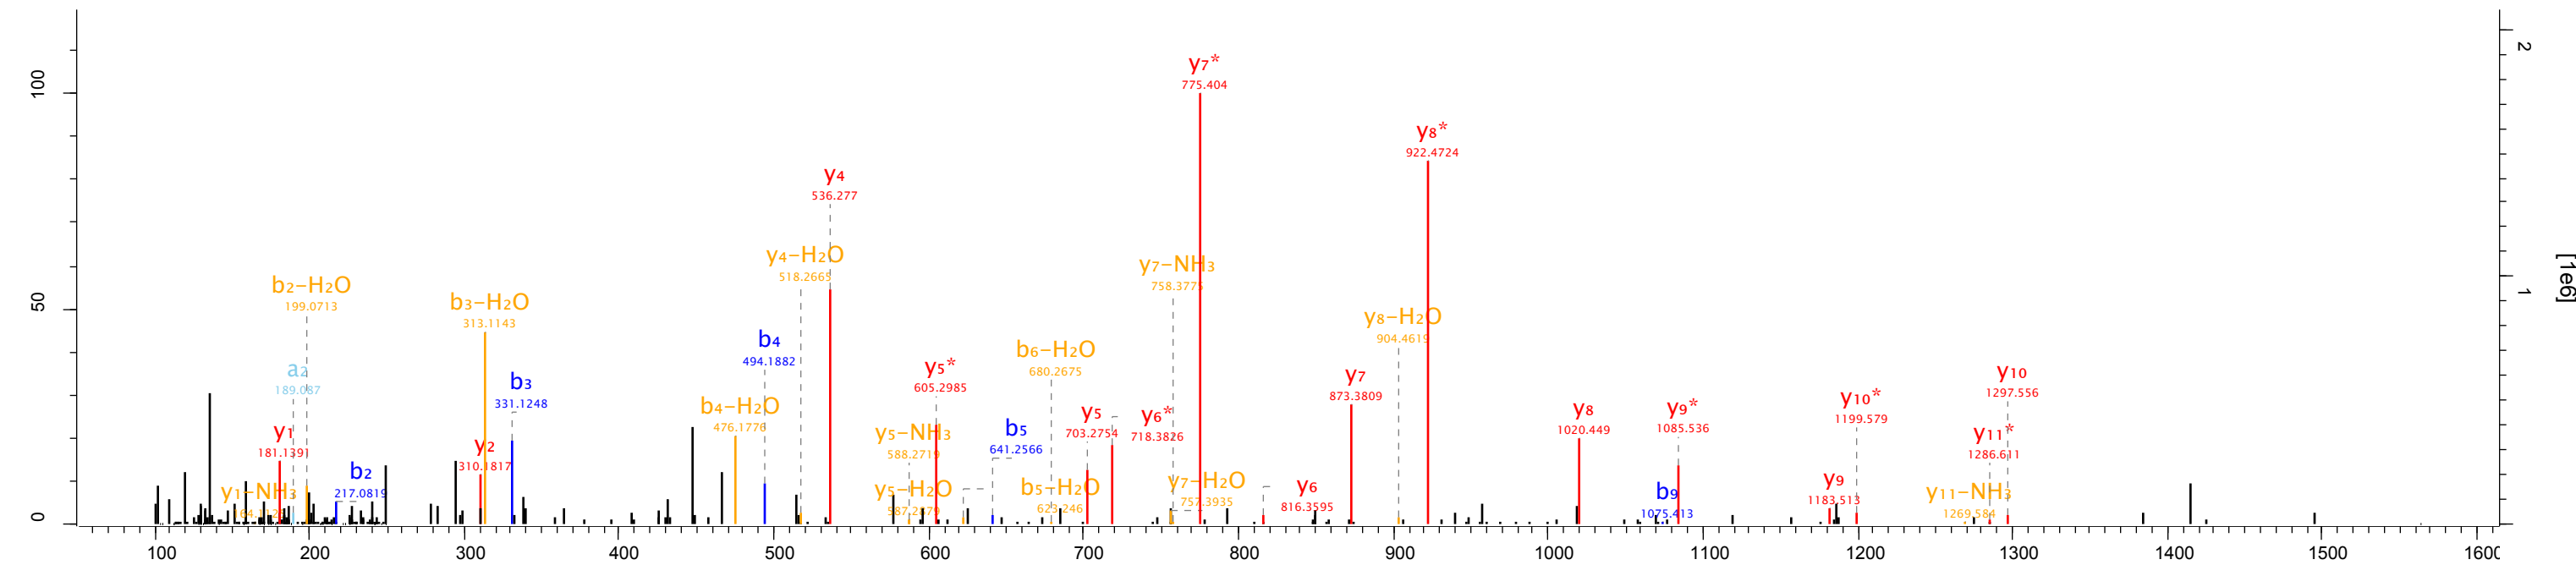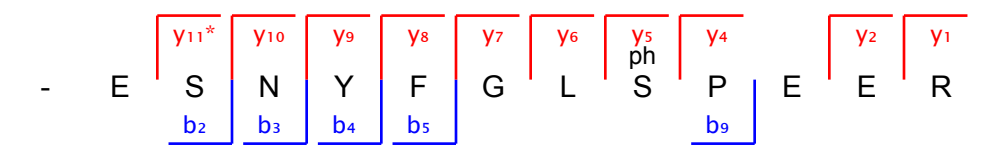

Raw file: 20150814\_A375SR\_Phospho\_BR2\_04  
 Scan: 18202 Method: FTMS; HCD Score: 222.38 m/z: 1069.81 Gene names: HNRNPU

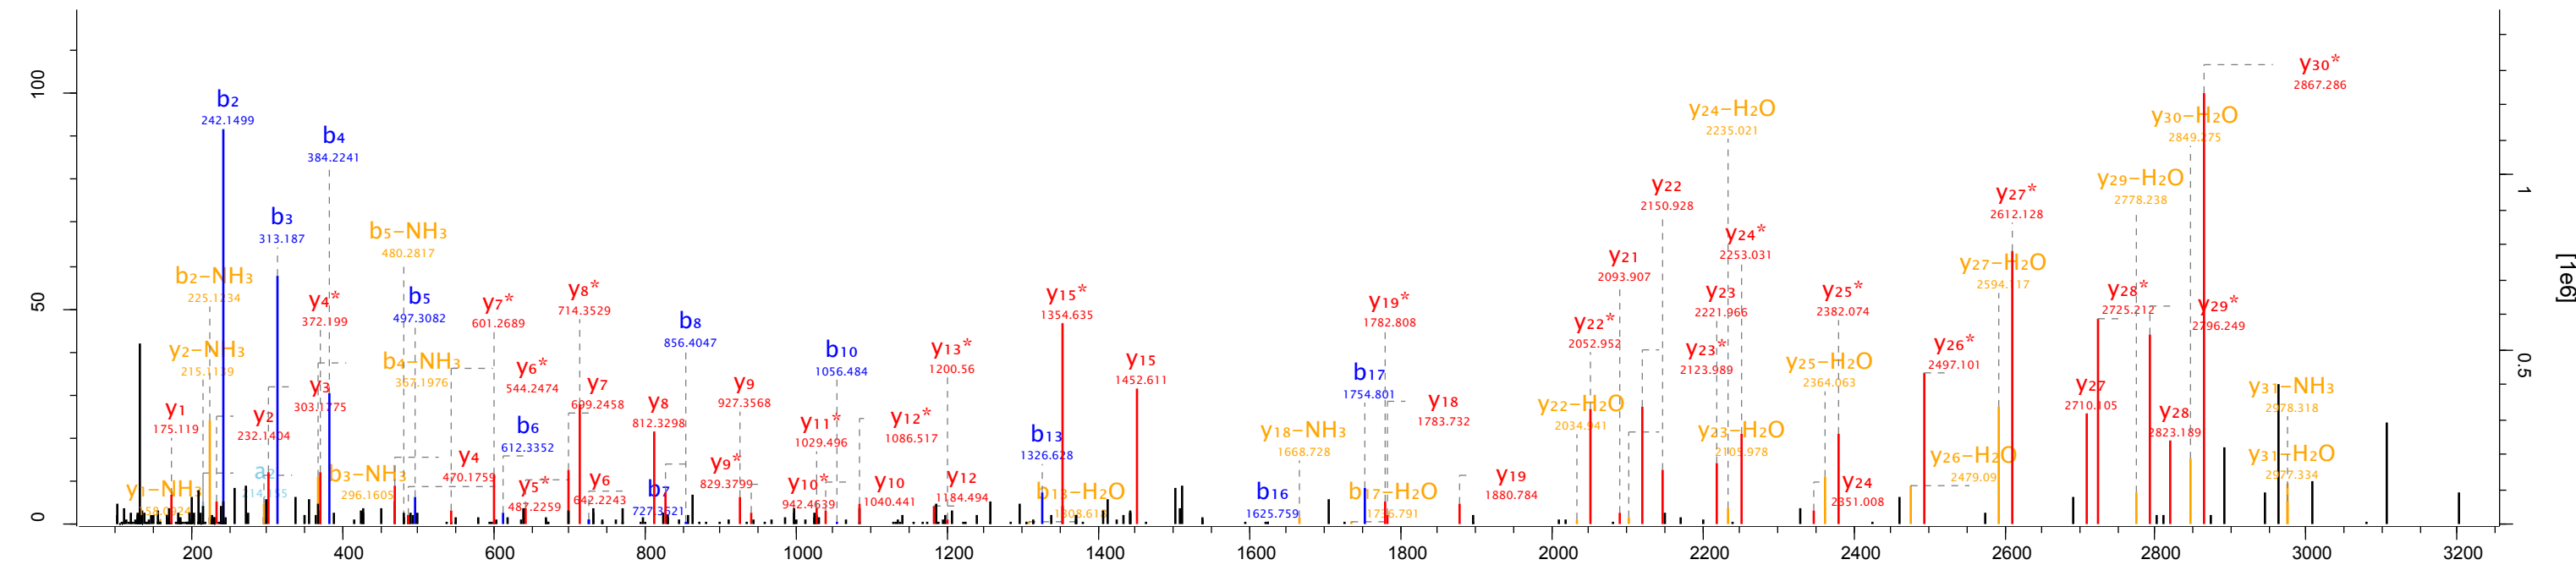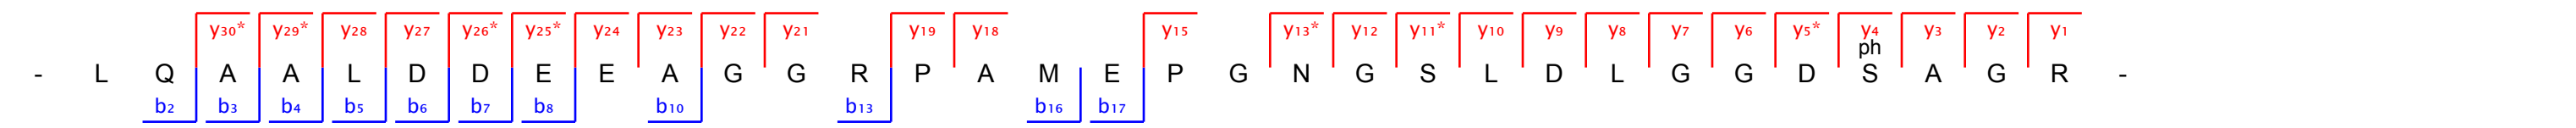

Raw file: 20150814\_A375SR\_Phospho\_BR2\_04  
 Scan: 18392 Method: FTMS; HCD Score: 346.52 m/z: 1258.53 Gene names: PPP6R3

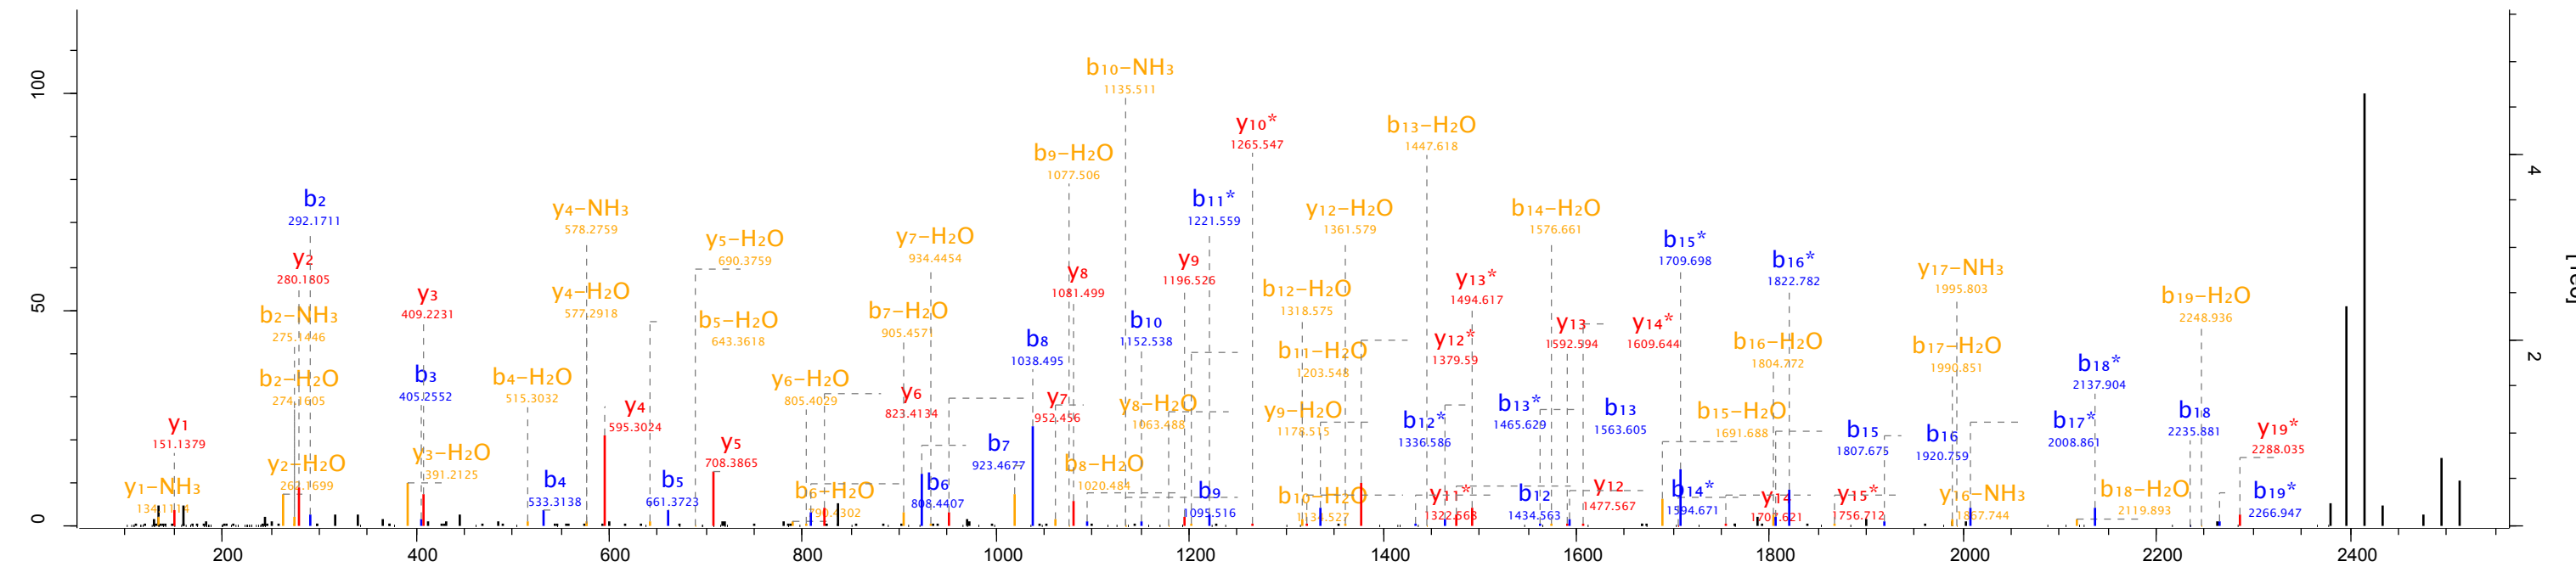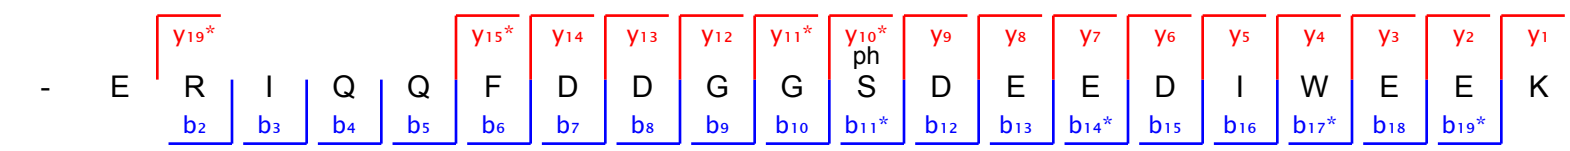



Raw file Scan Method Score m/z Gene names  
 20150814\_A375SR\_Phospho\_BR2\_04 18552 FTMS; HCD 209.31 729.36 NELFE

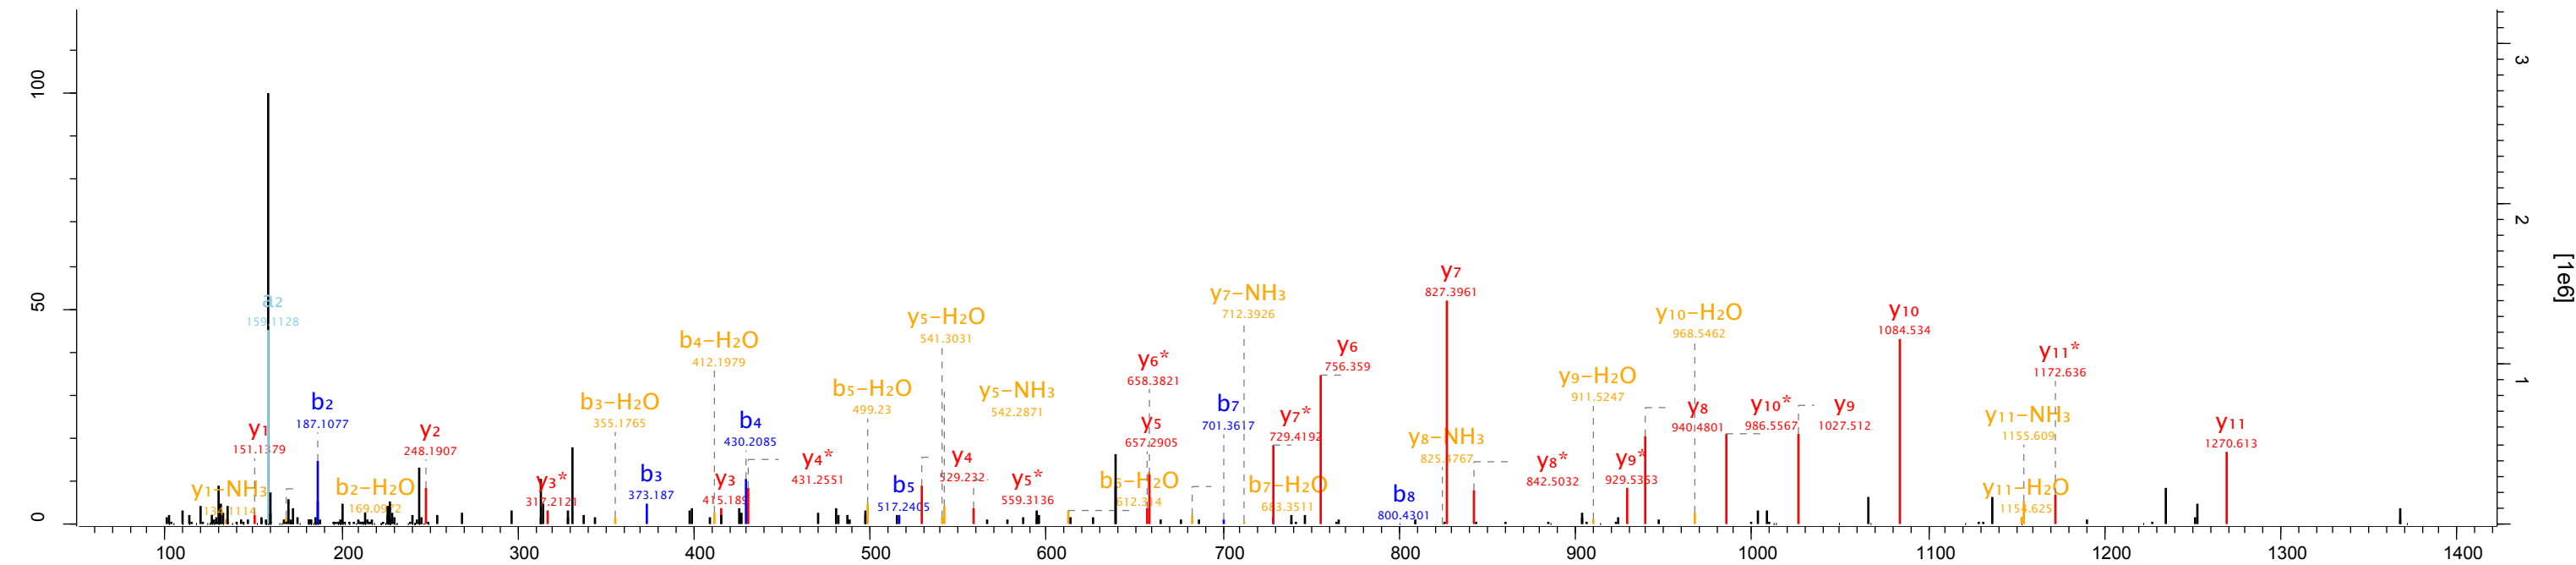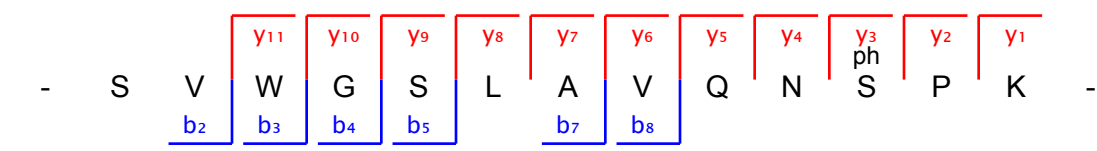

Raw file 20150814\_A375SR\_Phospho\_BR2\_04 Scan 19082 Method FTMS; HCD Score 213.39 m/z 1142.54 Gene names MICALL1

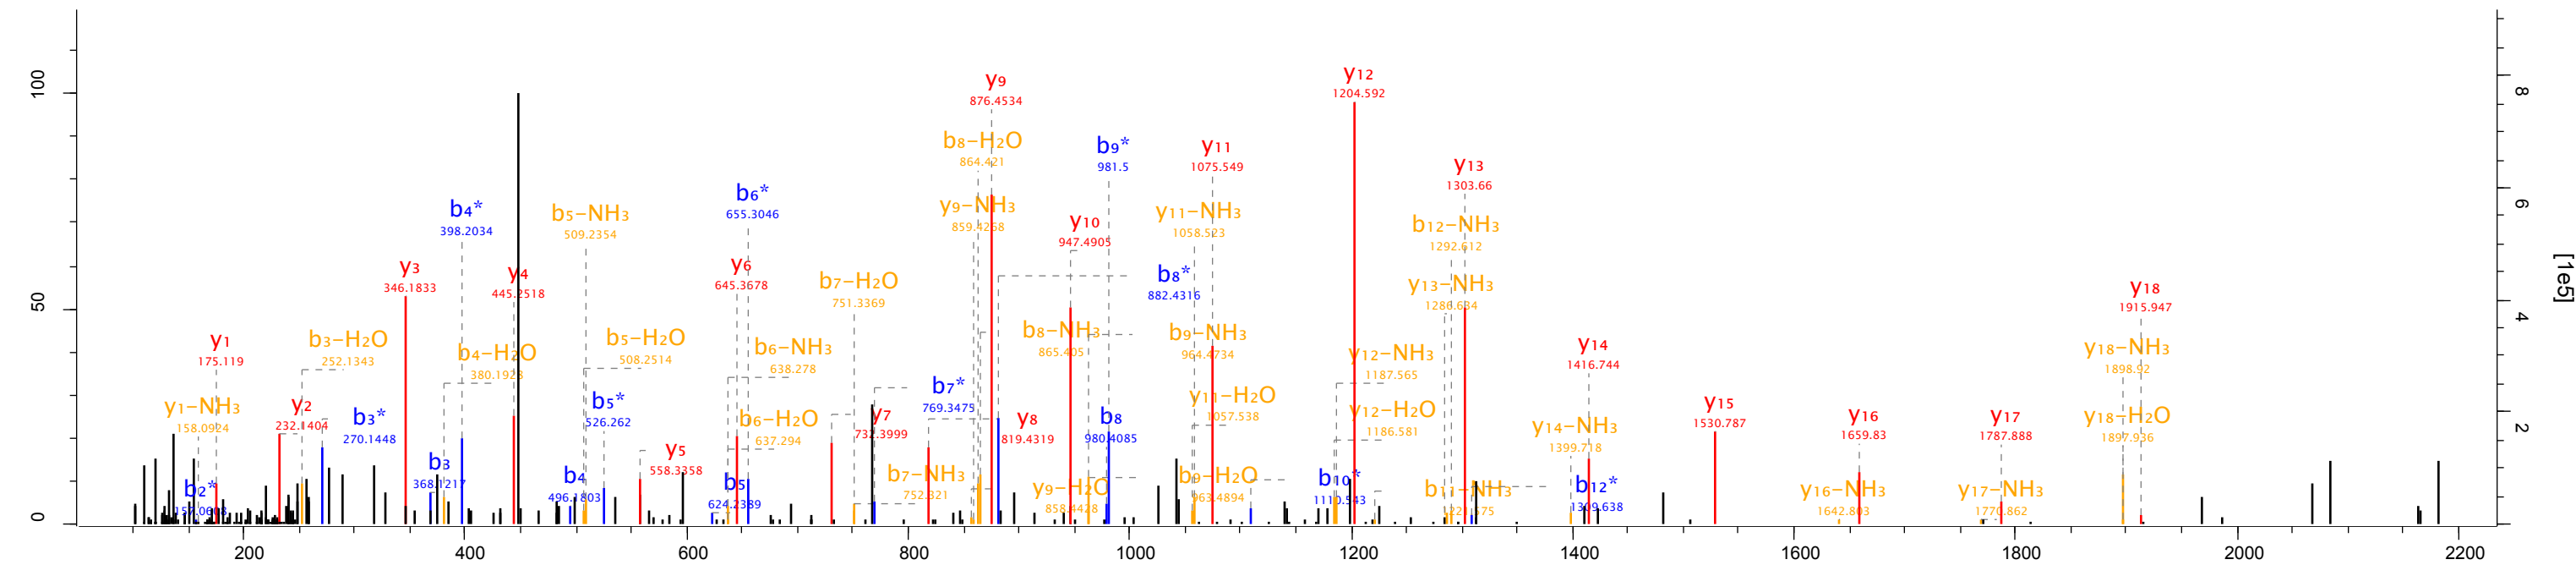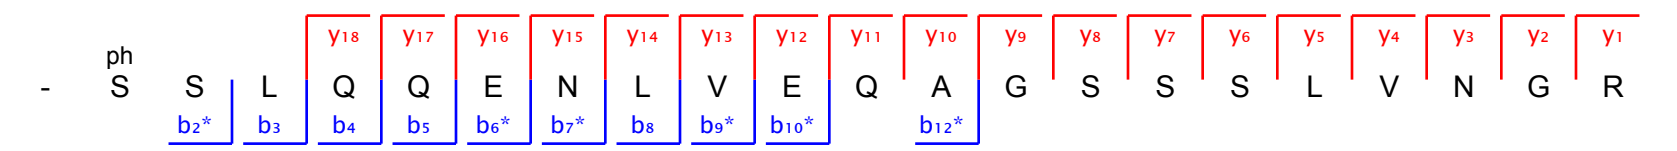

Raw file: 20150814\_A375SR\_Phospho\_BR2\_04  
 Scan: 19262 Method: FTMS; HCD Score: 68.48 m/z: 700.31 Gene names: DENND4A

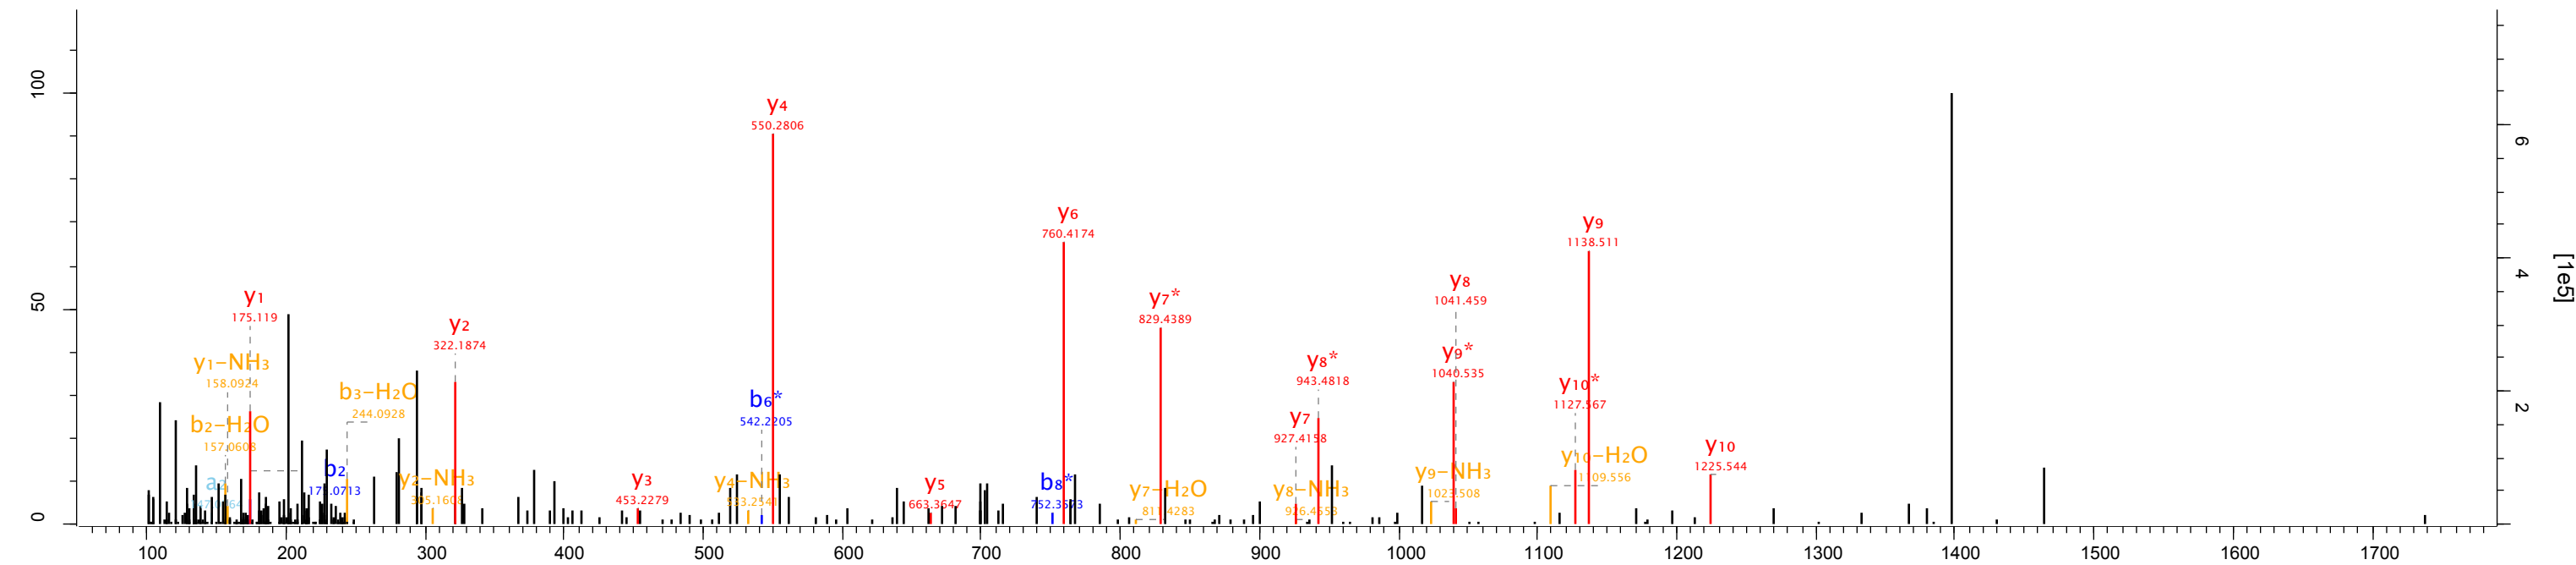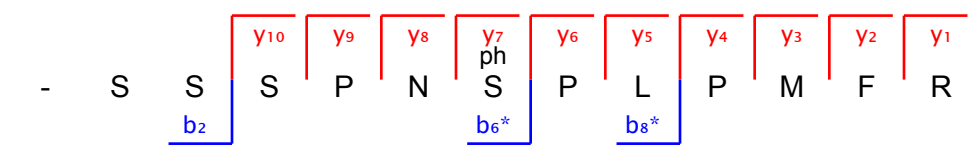

Raw file: 20150814\_A375SR\_Phospho\_BR2\_04  
 Scan: 19592 Method: FTMS; HCD Score: 207.97 m/z: 884.07 Gene names: IQGAP1

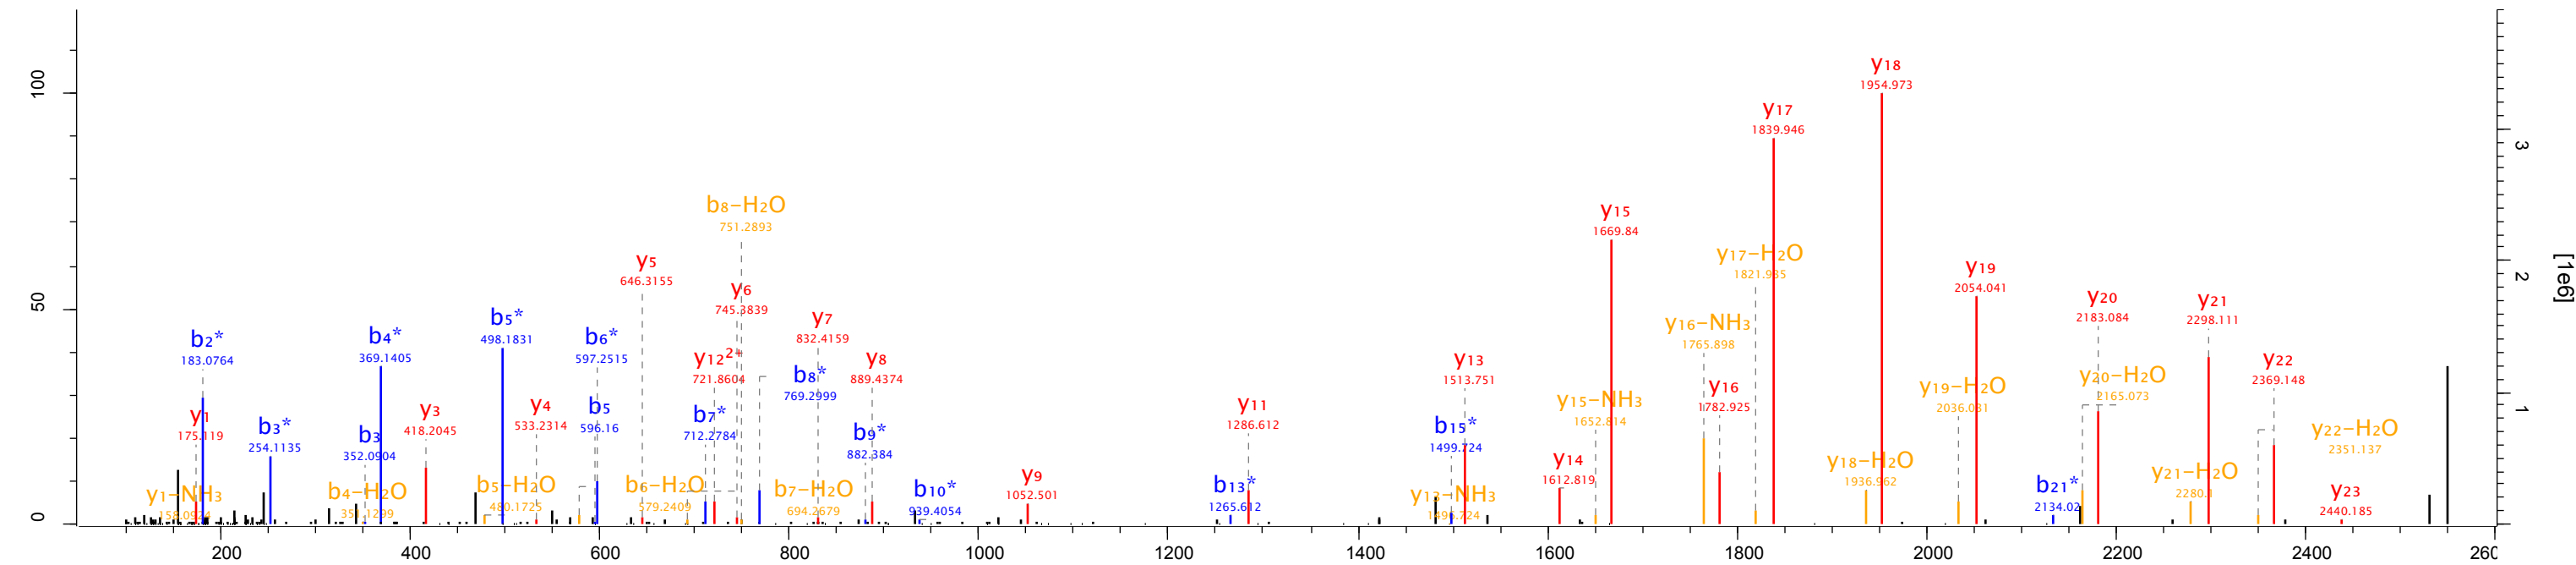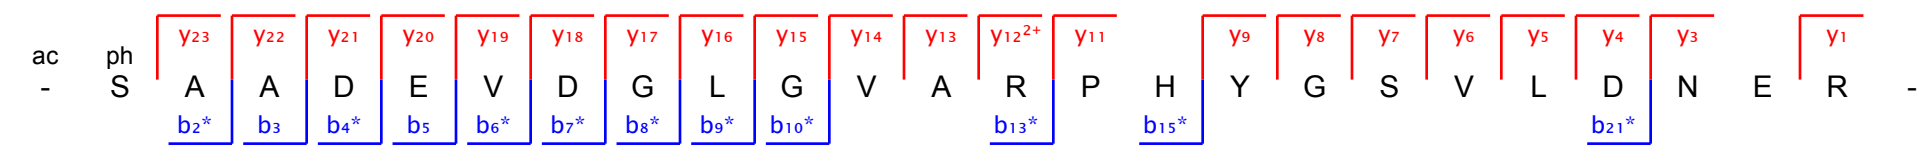

Raw file 20150814\_A375SR\_Phospho\_BR2\_04 Scan 19642 Method FTMS; HCD Score 222.26 m/z 914.05 Gene names SCYL1

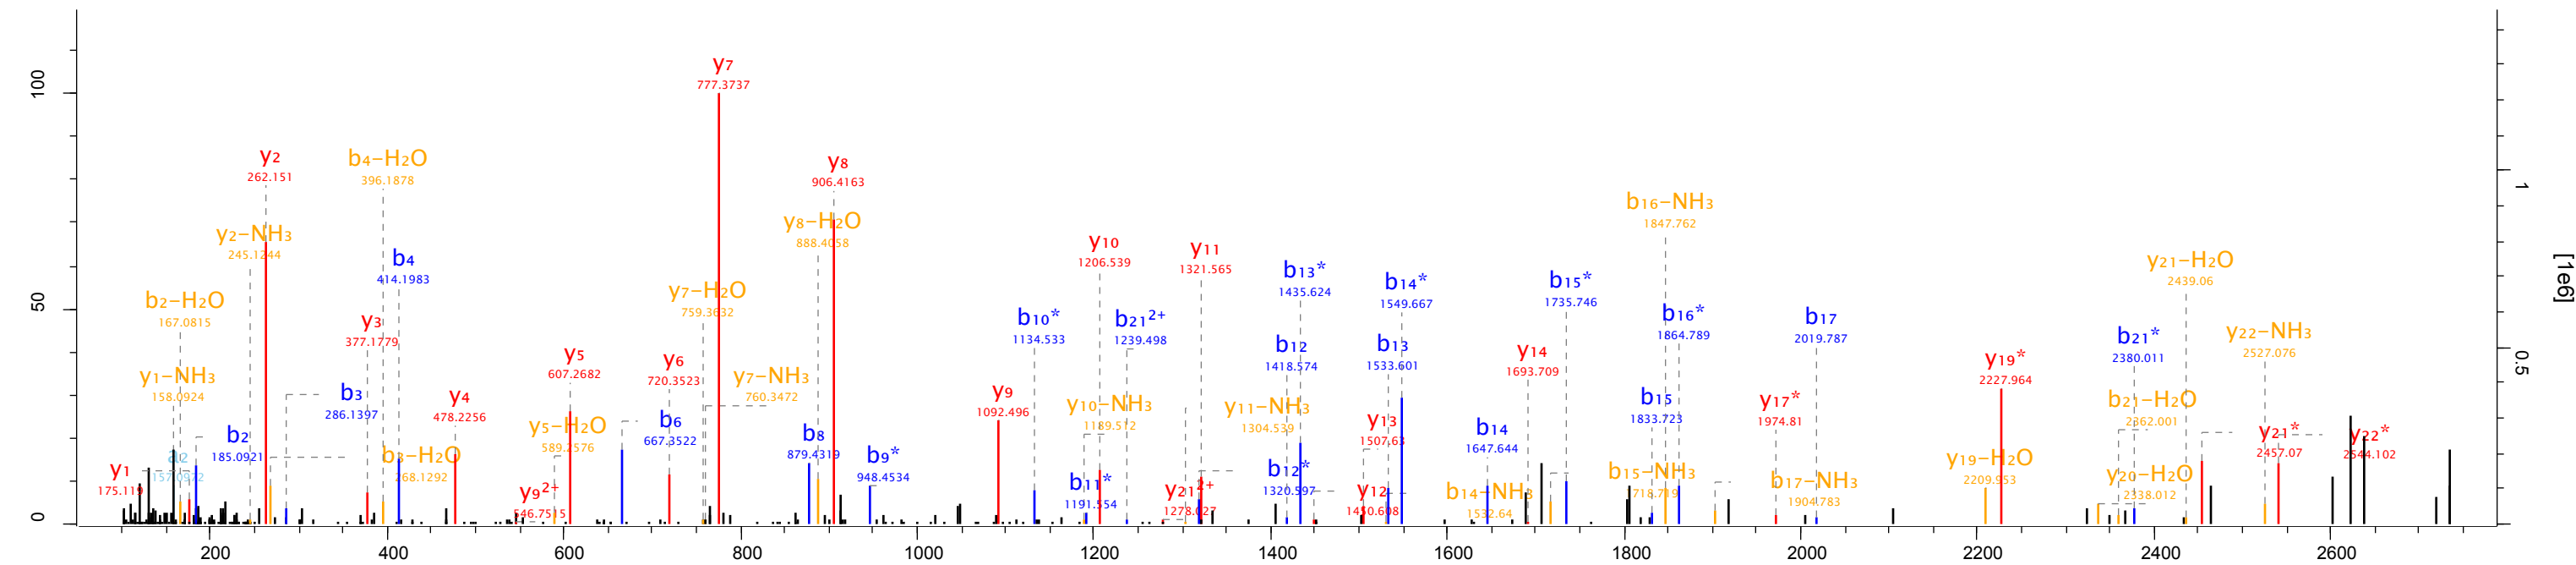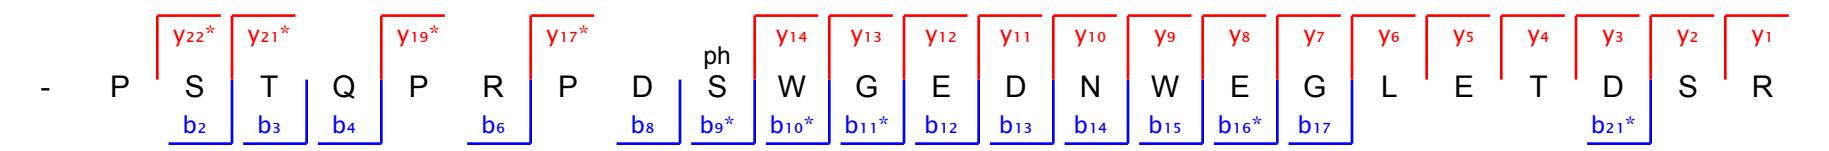

Raw file: 20150814\_A375SR\_Phospho\_BR2\_04  
 Scan: 19682 Method: FTMS; HCD Score: 93.64 m/z: 1044.47 Gene names: ZNF318

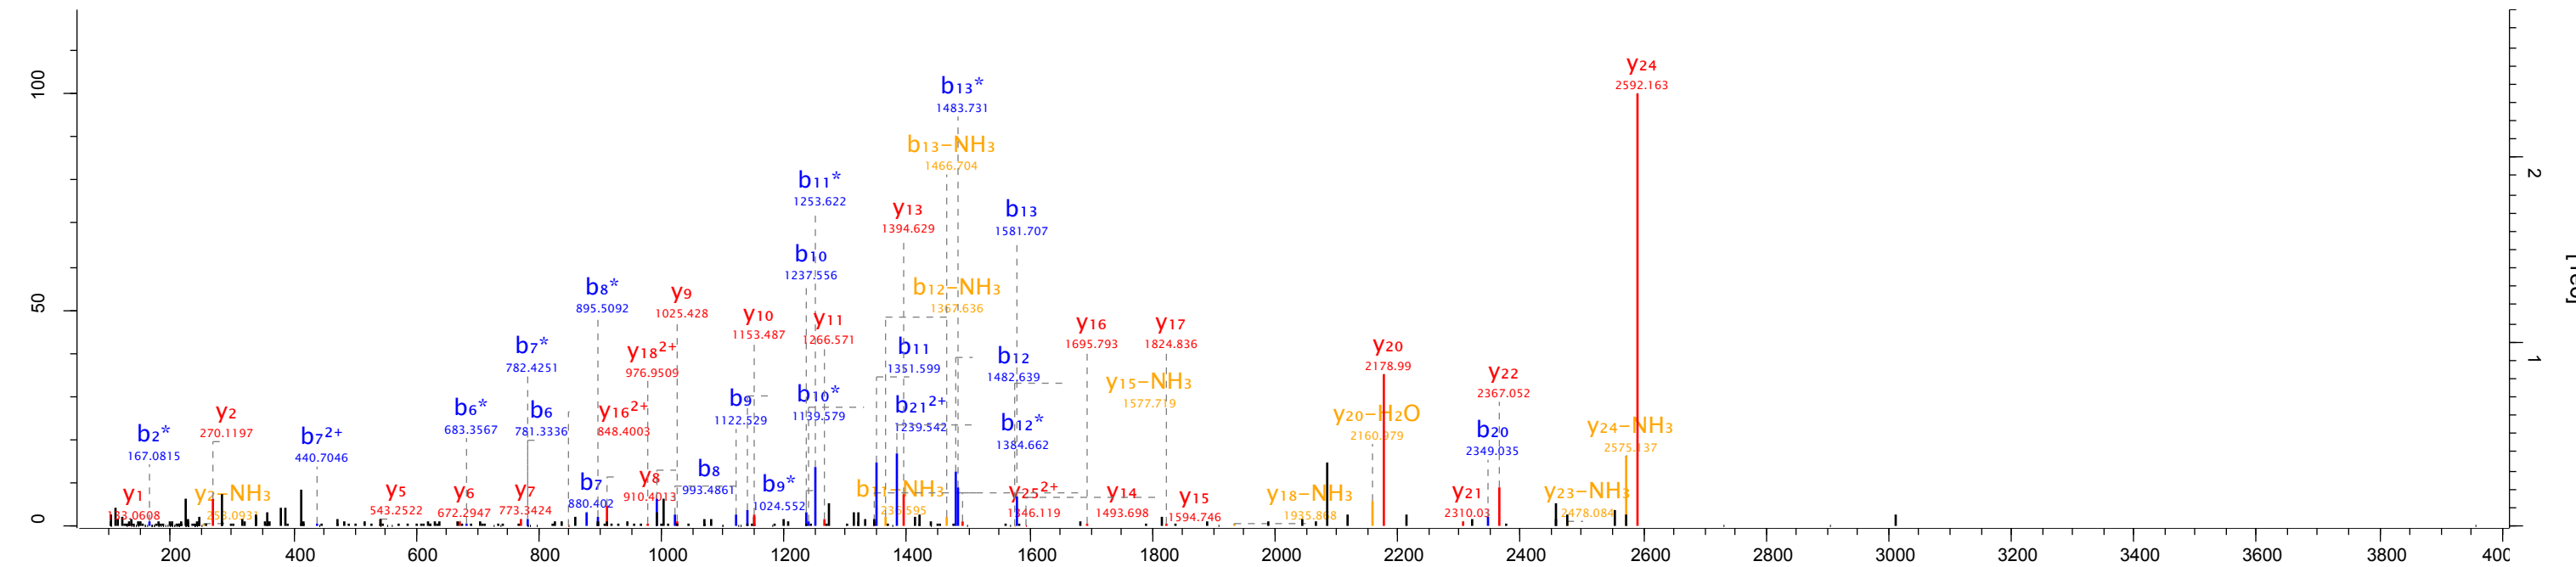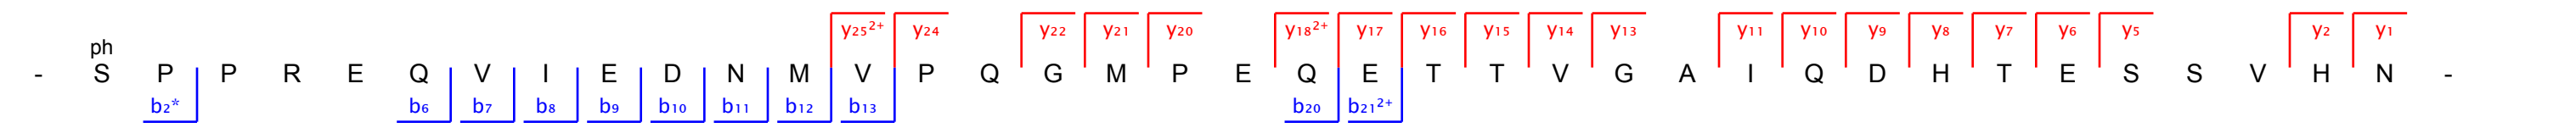

Raw file: 20150814\_A375SR\_Phospho\_BR2\_04  
 Scan: 19752 Method: FTMS; HCD Score: 118.42 m/z: 1048.46 Gene names: DIDO1

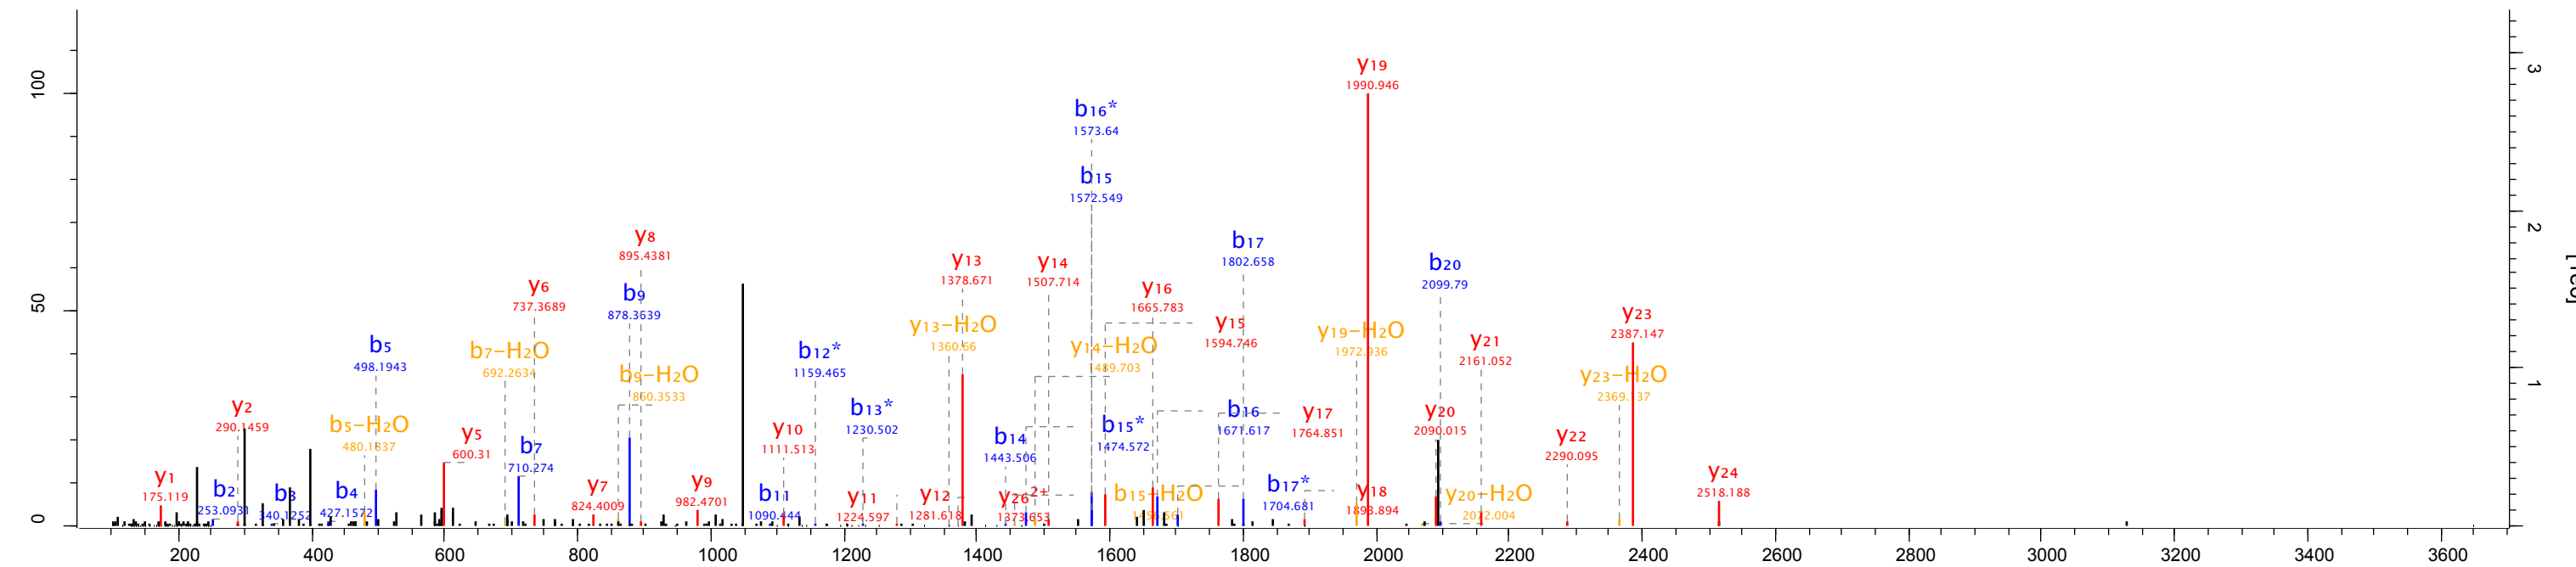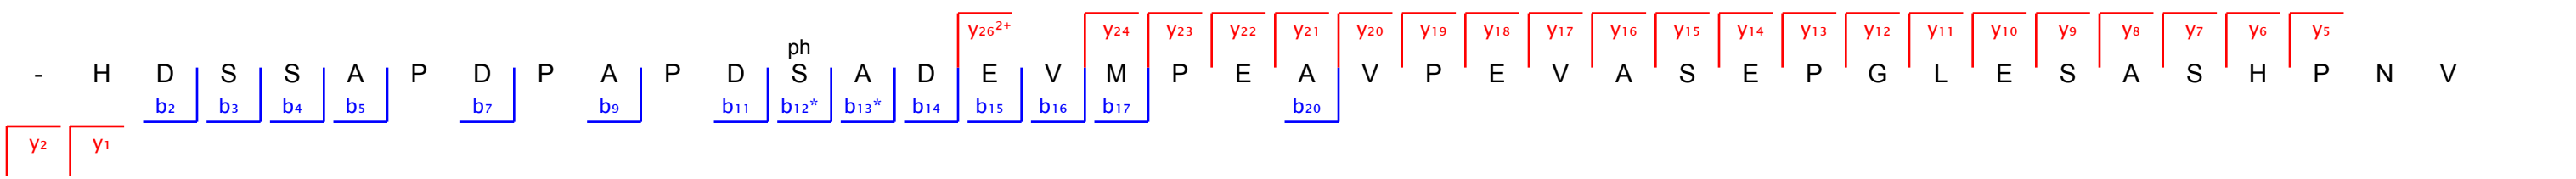

Raw file: 20150814\_A375SR\_Phospho\_BR2\_04  
 Scan: 19922 Method: FTMS; HCD Score: 65.2 m/z: 925.08 Gene names: TOP1

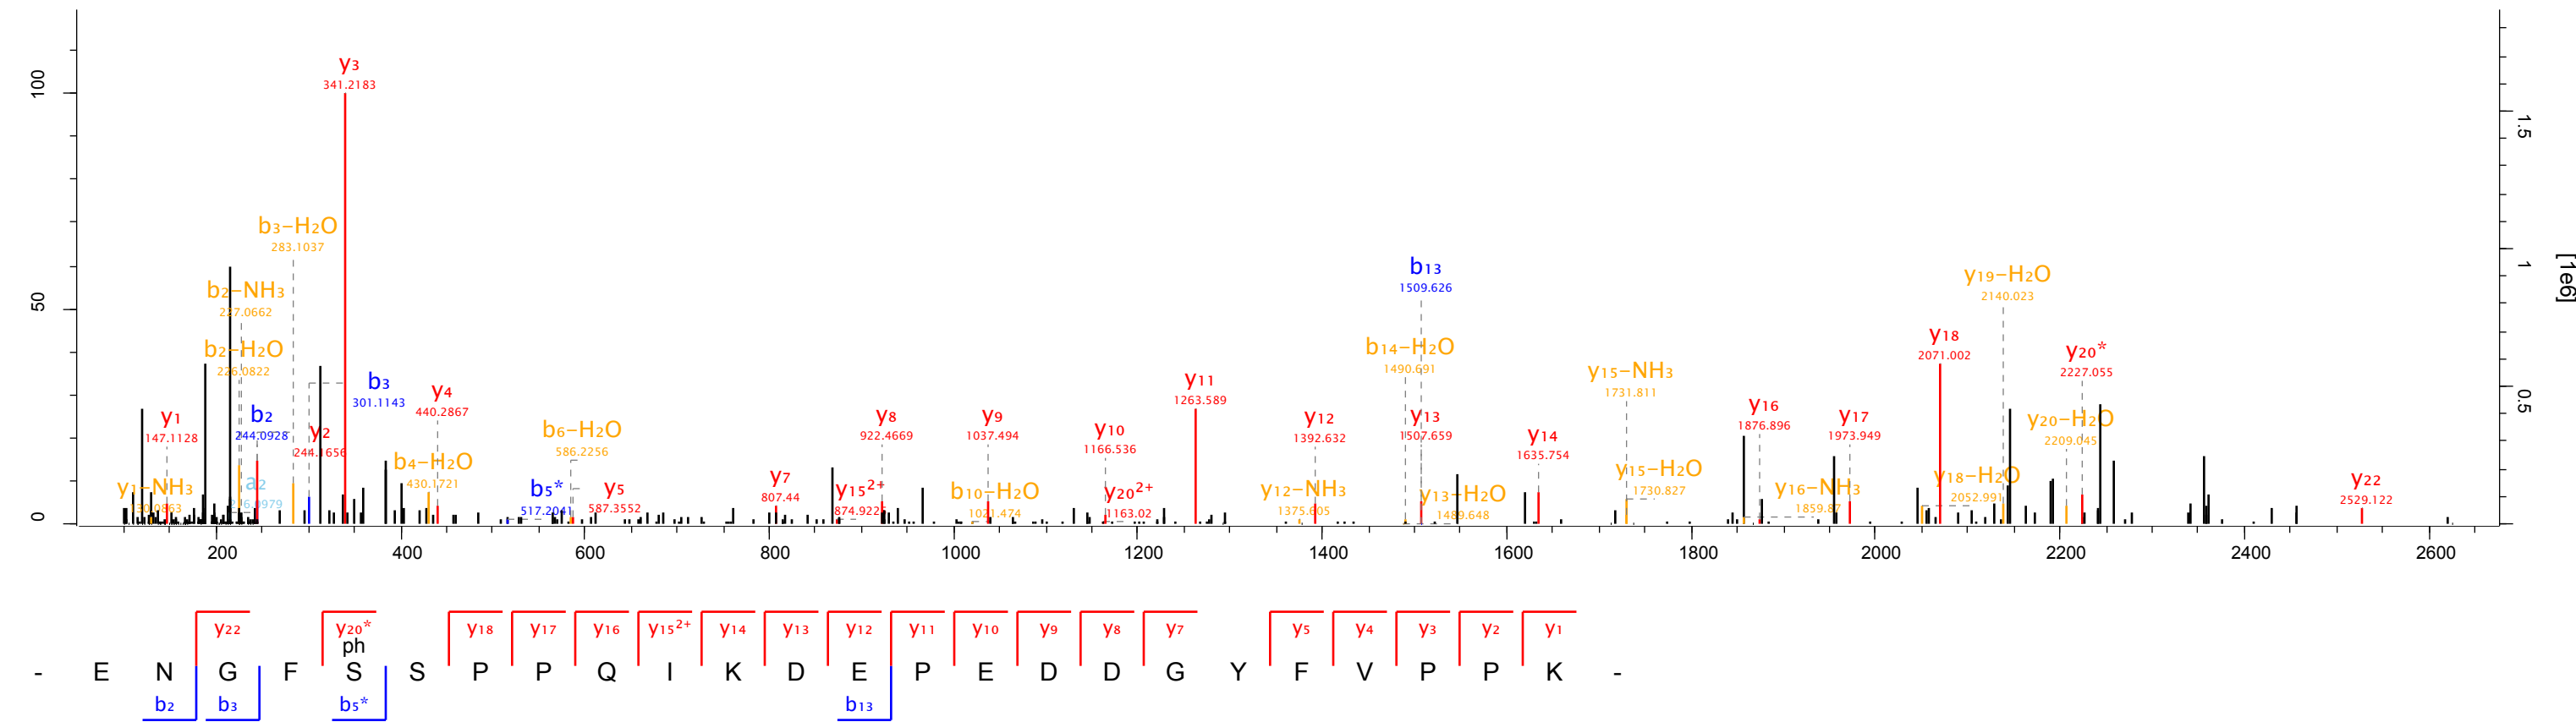



Raw file 20150814\_A375SR\_Phospho\_BR2\_04 Scan 20192 Method FTMS; HCD Score 80.36 m/z 781.34 Gene names SYNPO

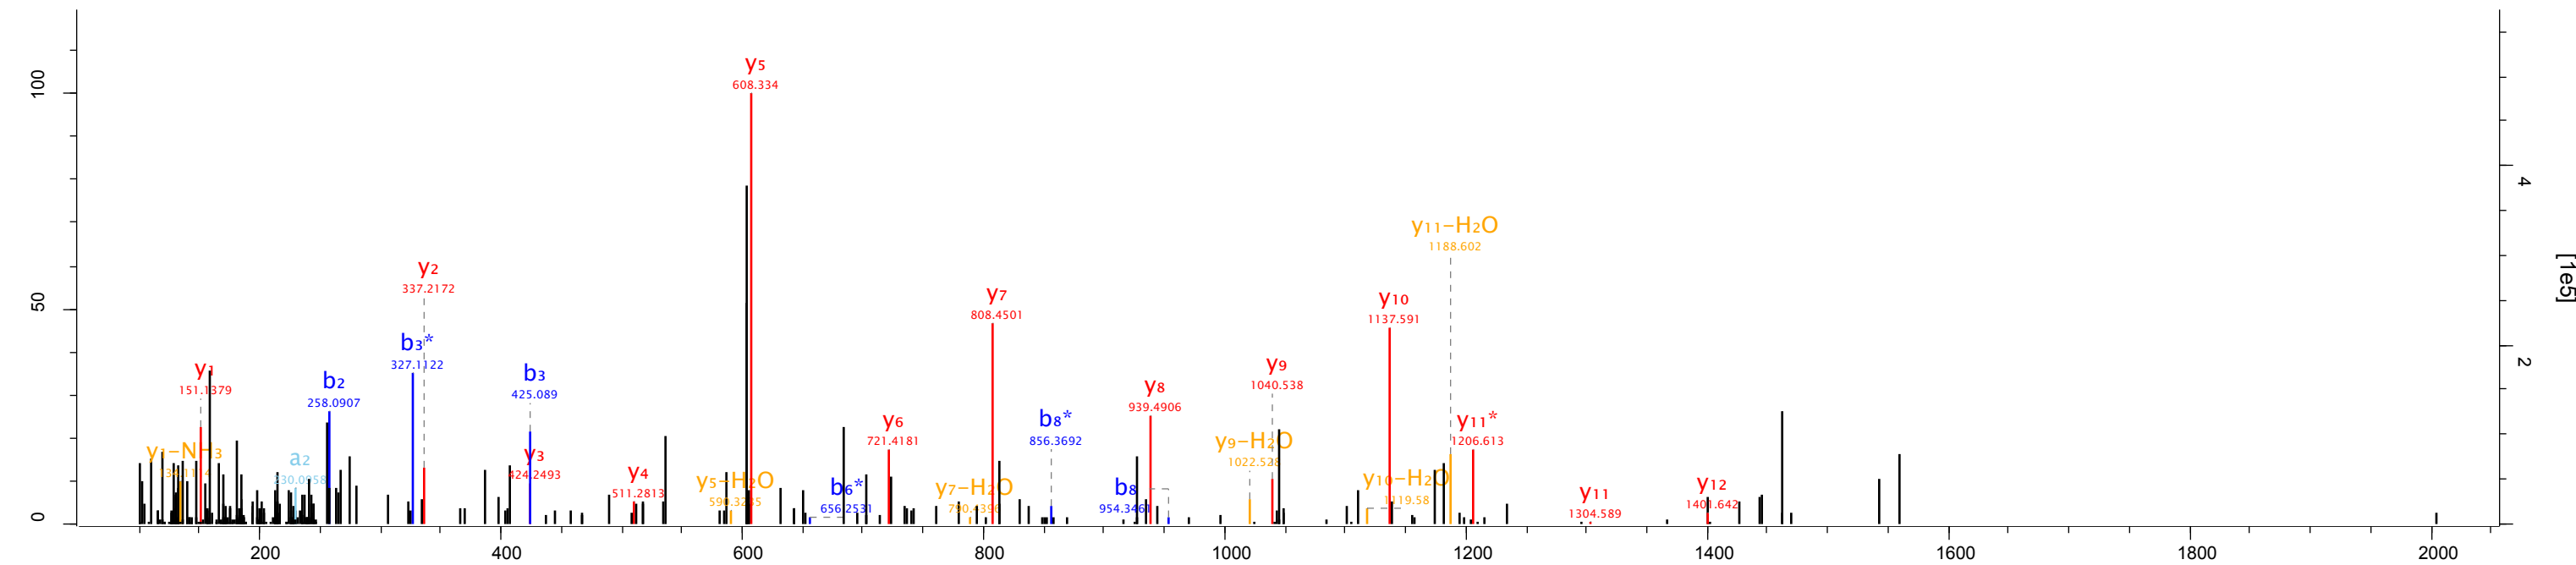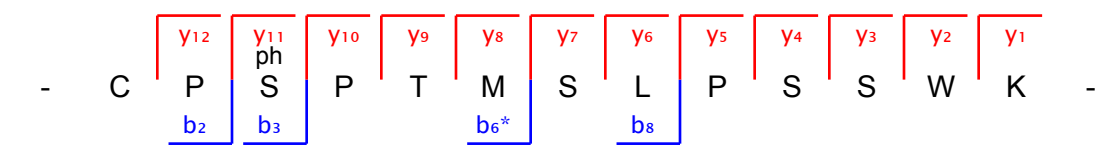

Raw file: 20150814\_A375SR\_Phospho\_BR2\_04  
 Scan: 2052 Method: FTMS; HCD Score: 198.97 m/z: 568.78 Gene names: WDR43

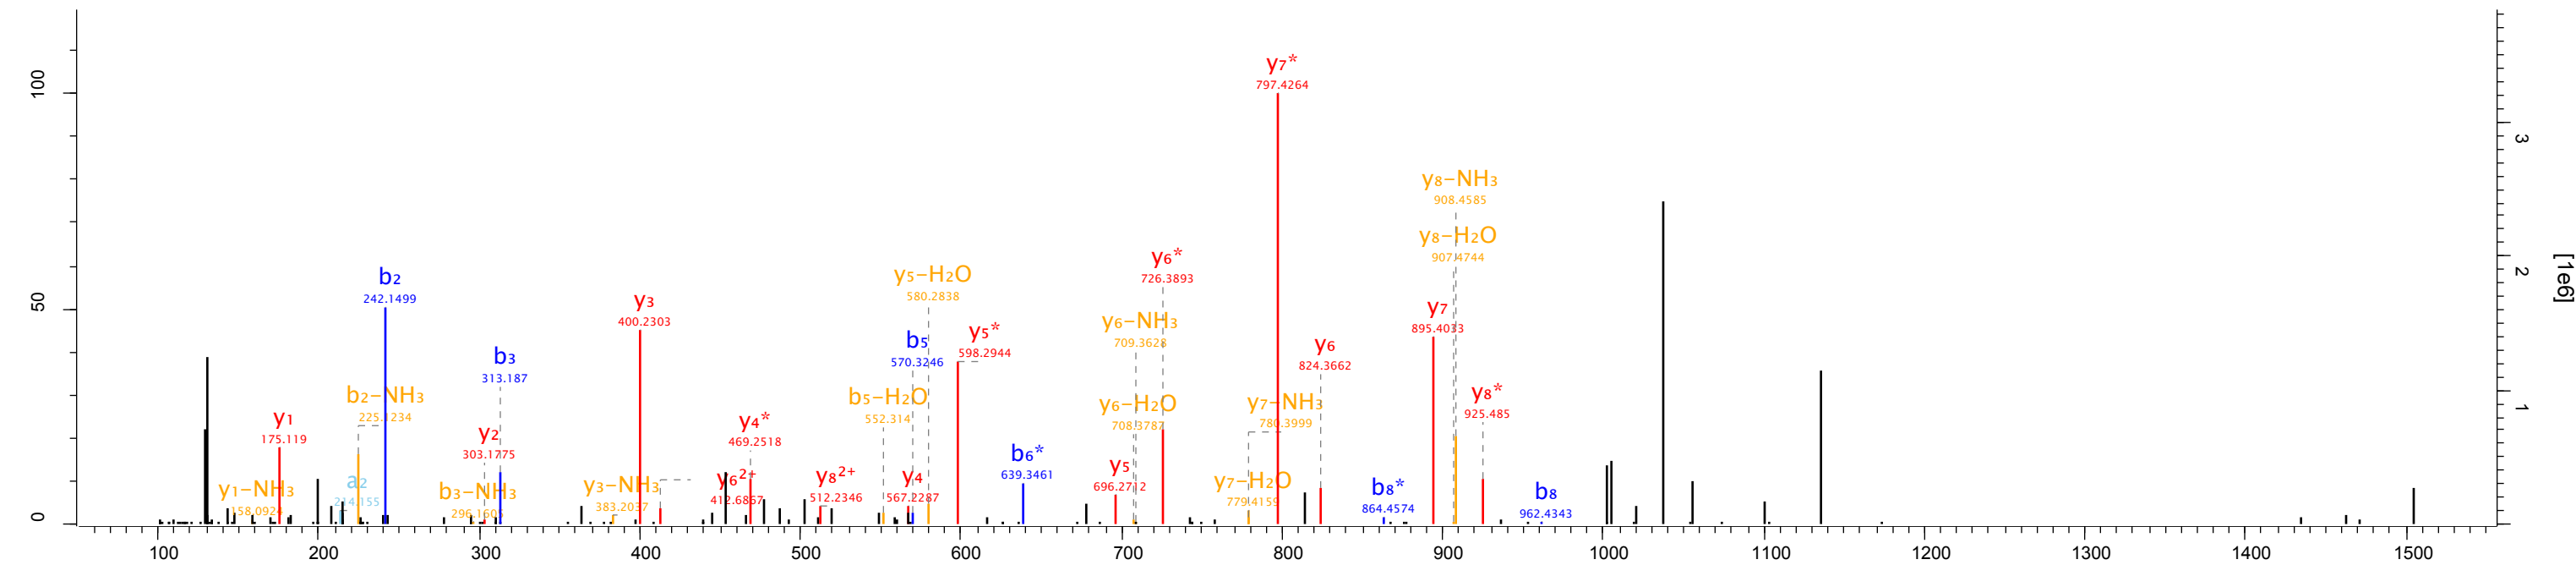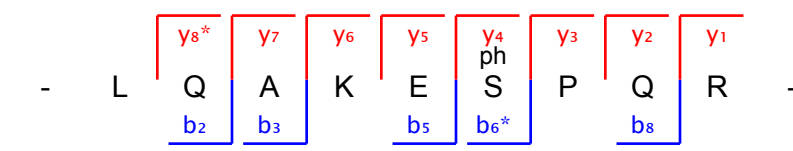

Raw file 20150814\_A375SR\_Phospho\_BR2\_04 Scan 20722 Method FTMS; HCD Score 92.59 m/z 964.77 Gene names XRN2

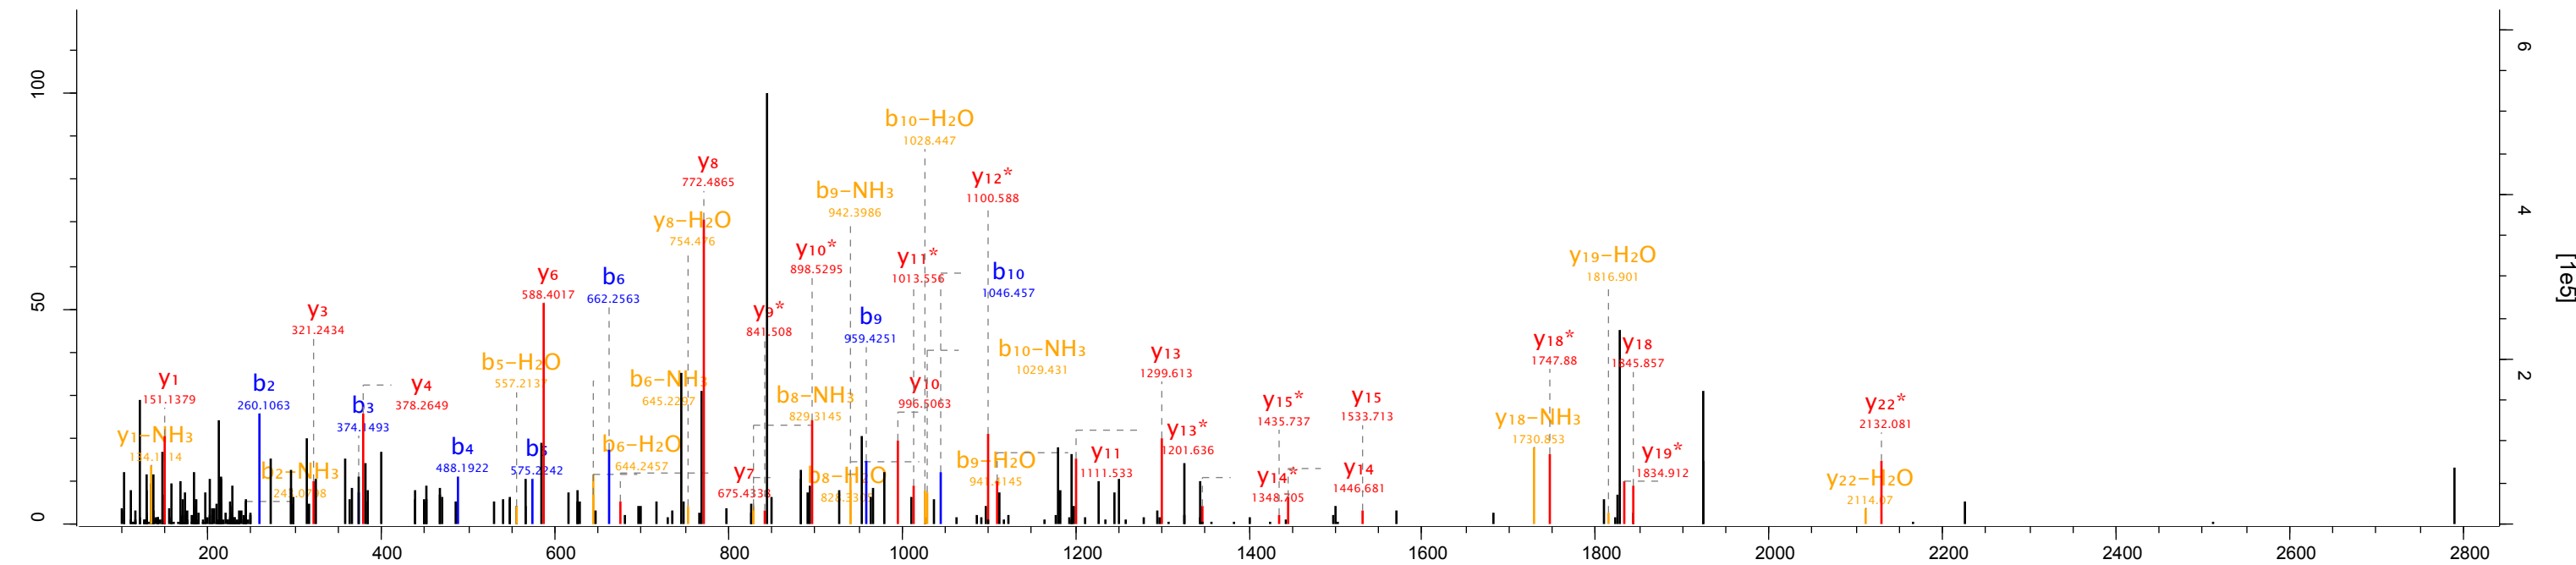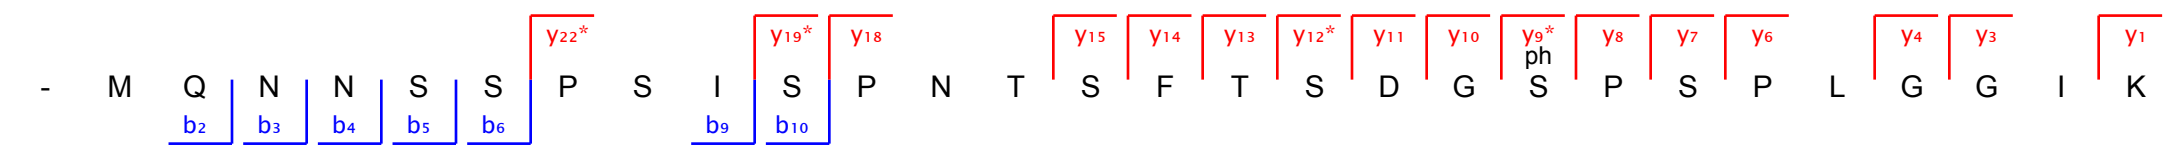

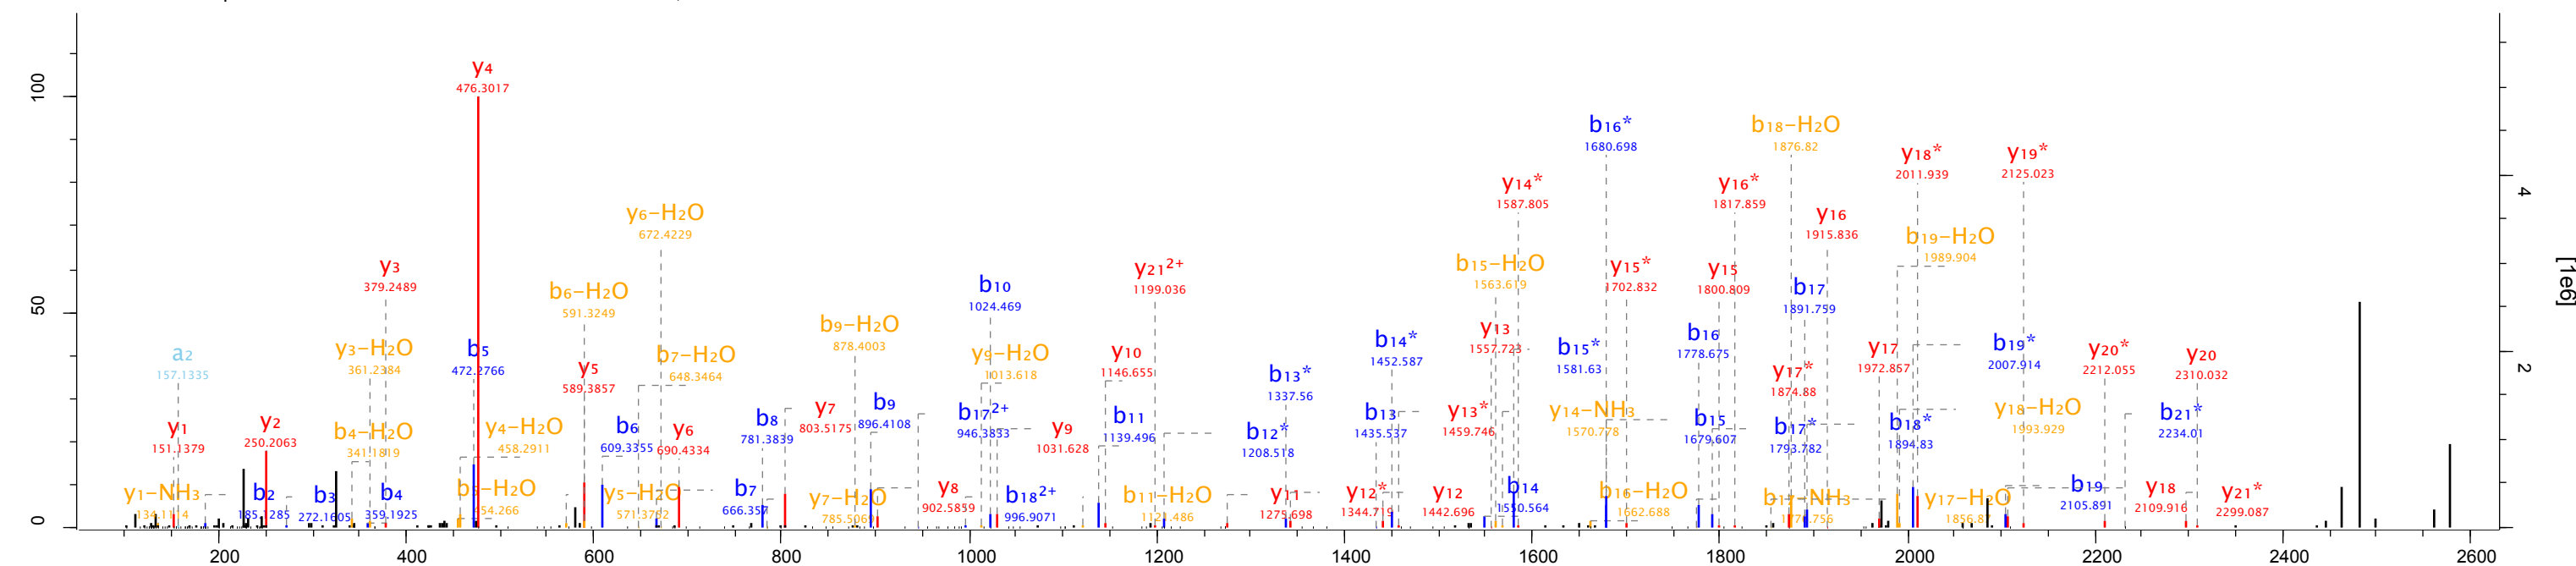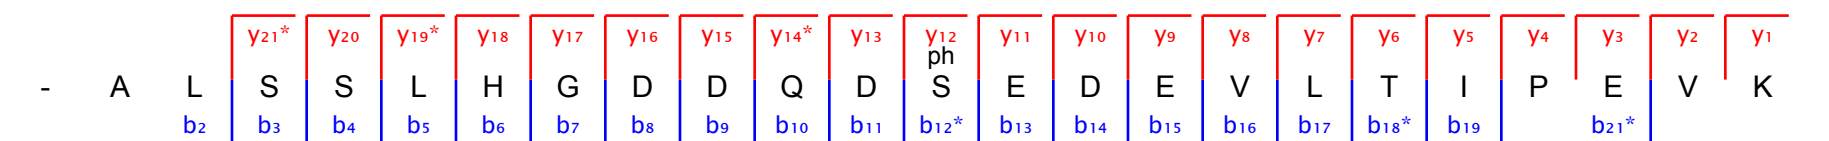

Raw file: 20150814\_A375SR\_Phospho\_BR2\_04  
 Scan: 21022 Method: FTMS; HCD Score: 216.3 m/z: 869.44 Gene names: NEDD4L

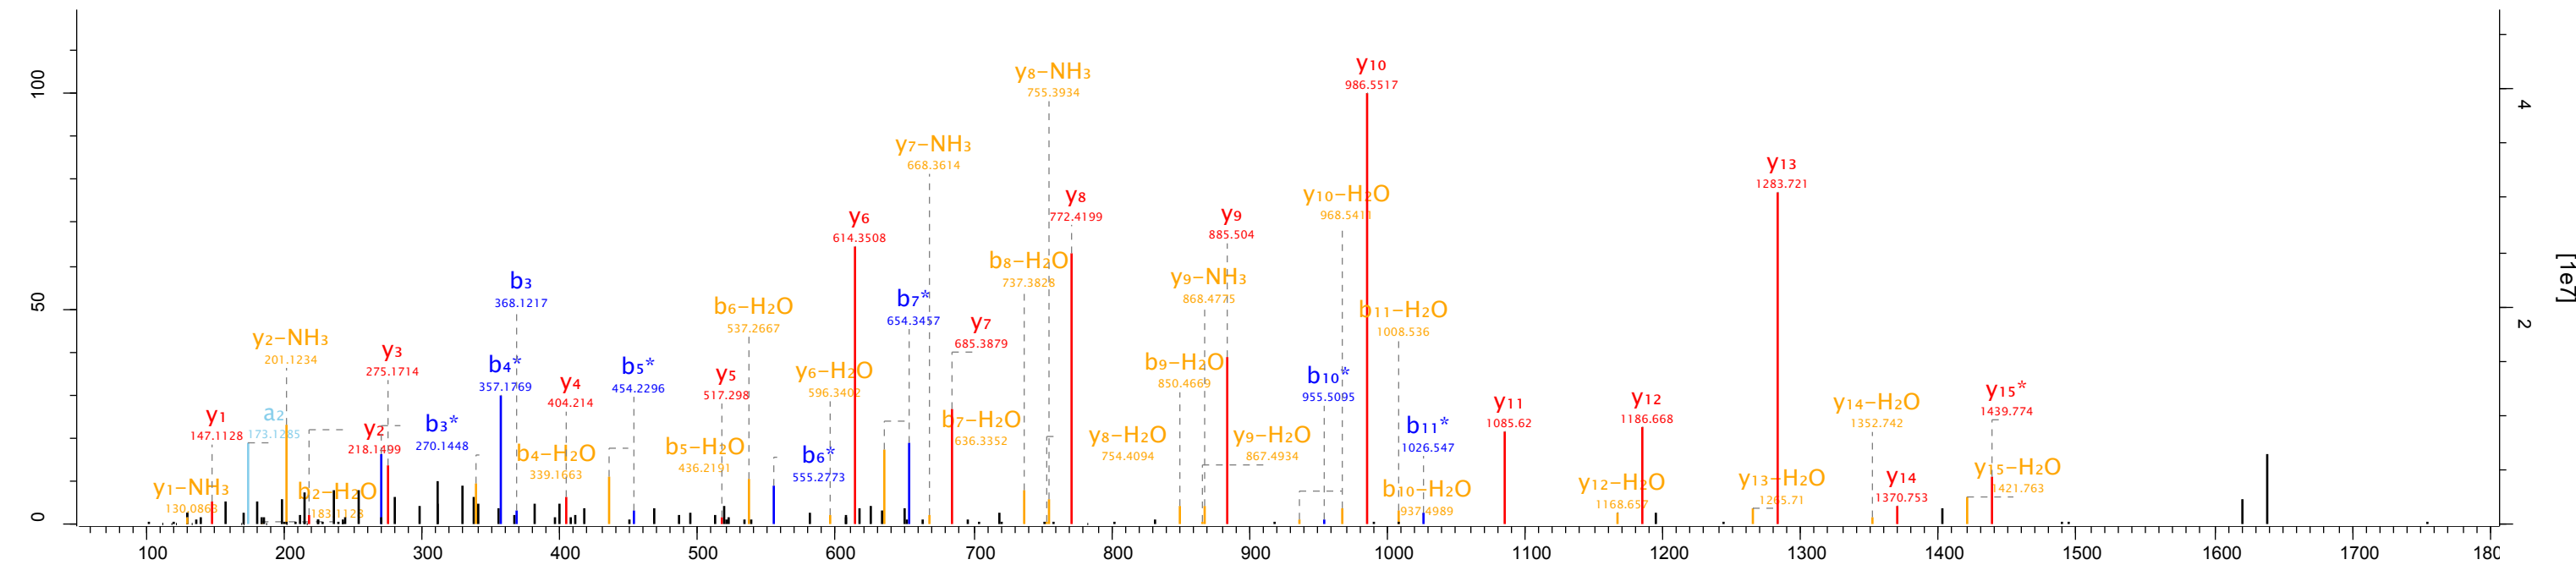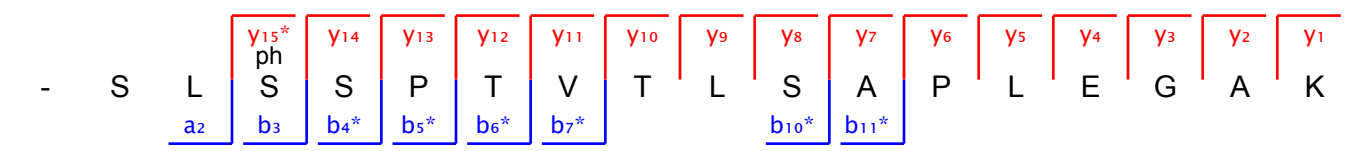

Raw file 20150814\_A375SR\_Phospho\_BR2\_04 Scan 21512 Method FTMS; HCD Score 101.85 m/z 757.37 Gene names UVRAG

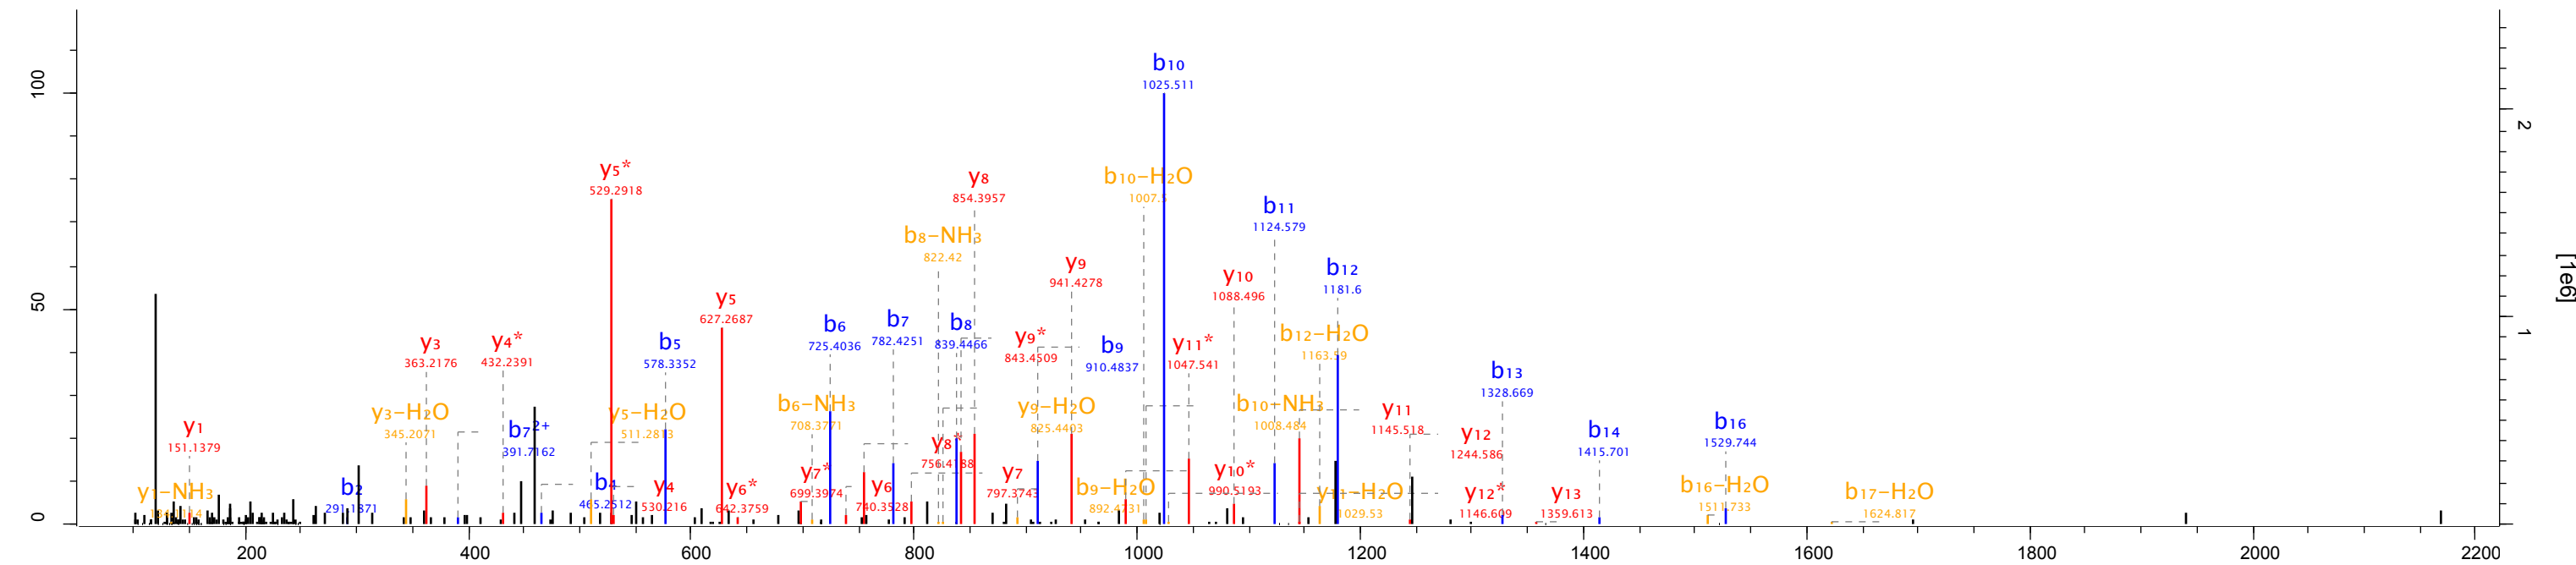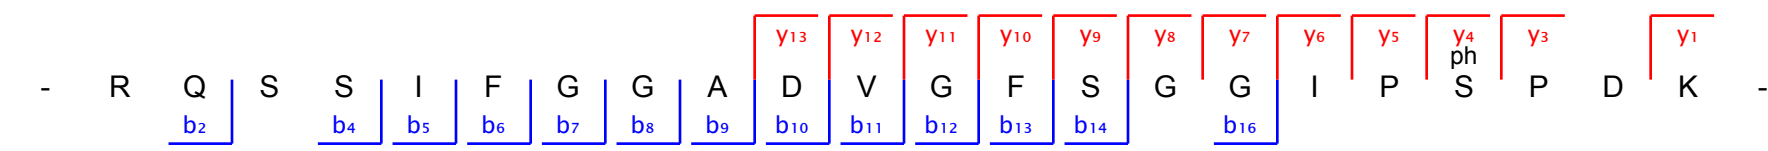

Raw file: 20150814\_A375SR\_Phospho\_BR2\_04  
 Scan: 21912 Method: FTMS; HCD Score: 228.73 m/z: 1132.53 Gene names: AKAP12

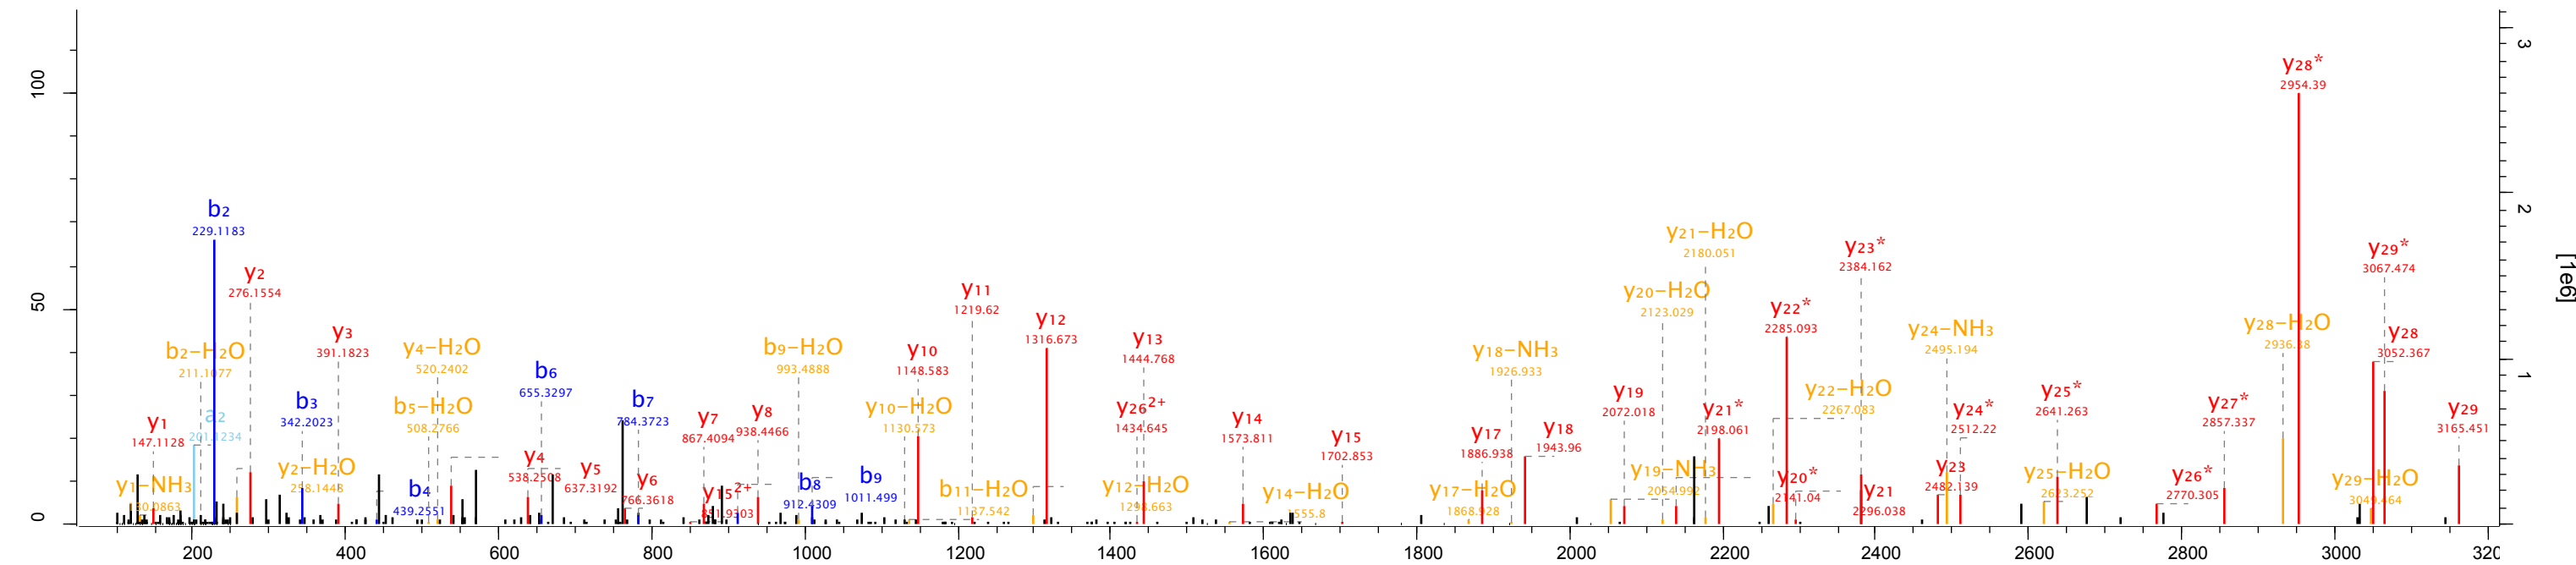

- V E L P S E E Q V S G S Q G P S E E K P A P L A T E V F D E K -

Fragmentation sites (b ions): b2, b3, b4, b6, b7, b8, b9

Fragmentation sites (y ions): y1, y2, y3, y4, y5, y6, y7, y8, y9, y10, y11, y12, y13, y14, y15, y16, y17, y18, y19, y20, y21, y22, y23, y24, y25, y26, y27, y28, y29

Raw file  
20150814\_A375SR\_Phospho\_BR2\_04

Scan 21952 Method FTMS; HCD Score 203.24 m/z 1052.55 Gene names CTTNBP2NL

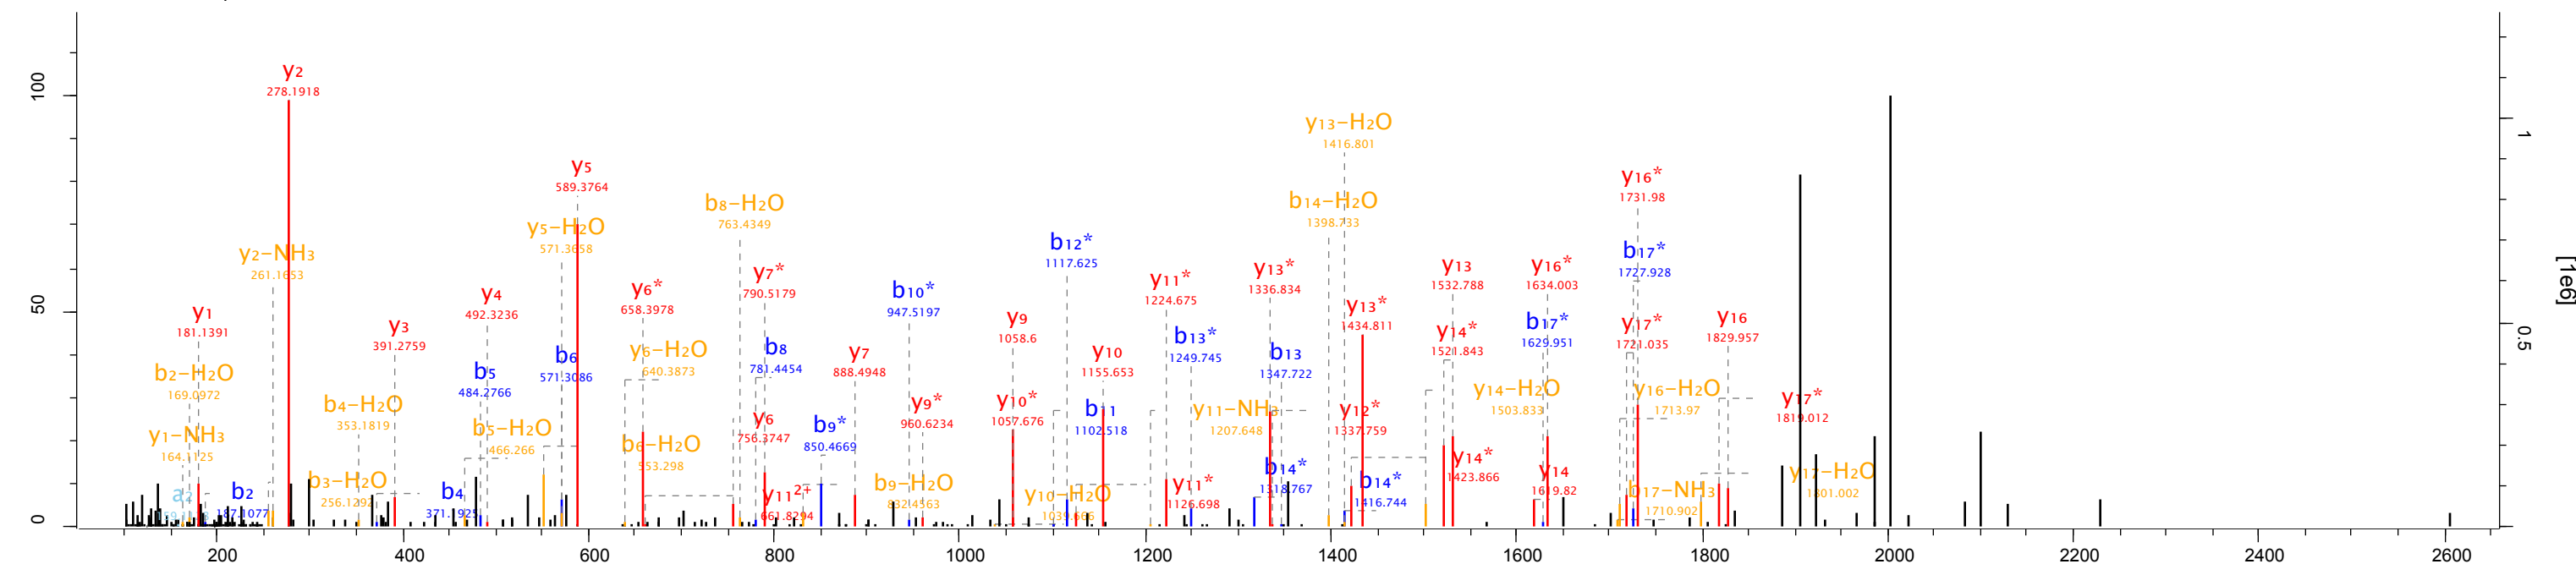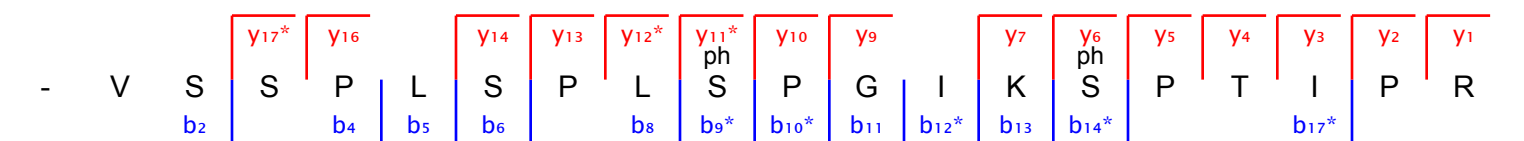



Raw file 20150814\_A375SR\_Phospho\_BR2\_04 Scan 21982 Method FTMS; HCD Score 152.94 m/z 783.85 Gene names UBAP2L

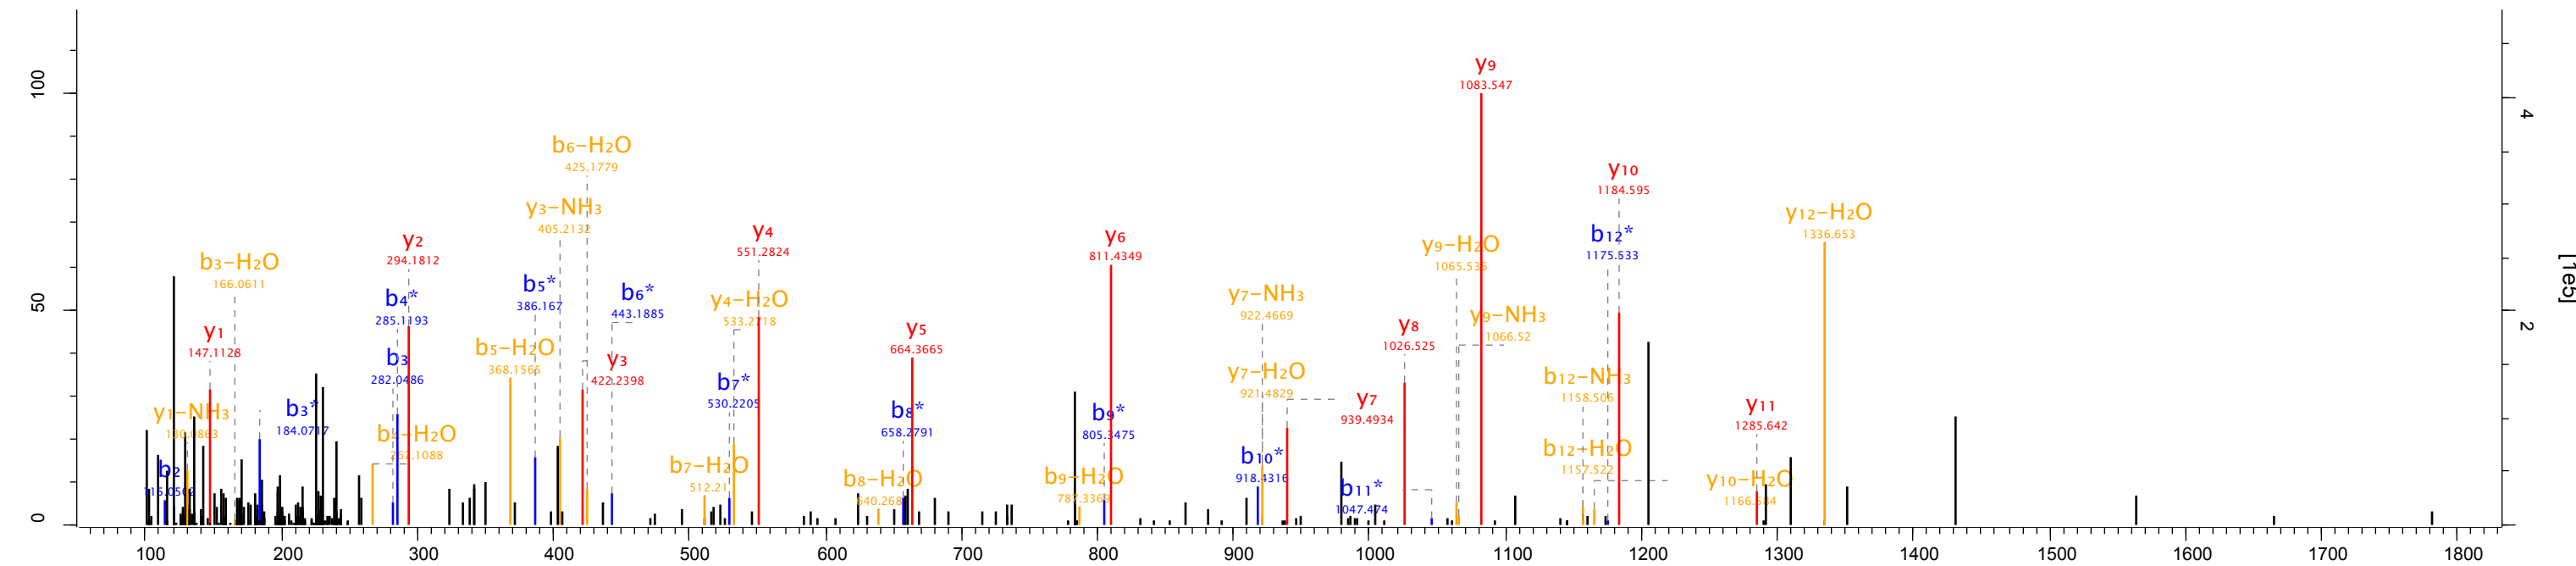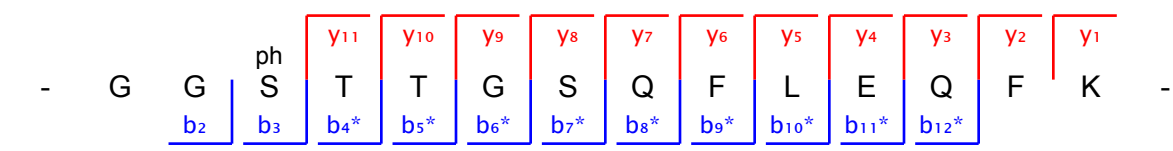

Raw file  
20150814\_A375SR\_Phospho\_BR2\_04

Scan 22192 Method FTMS; HCD Score 186.45 m/z 1148.78 Gene names NES

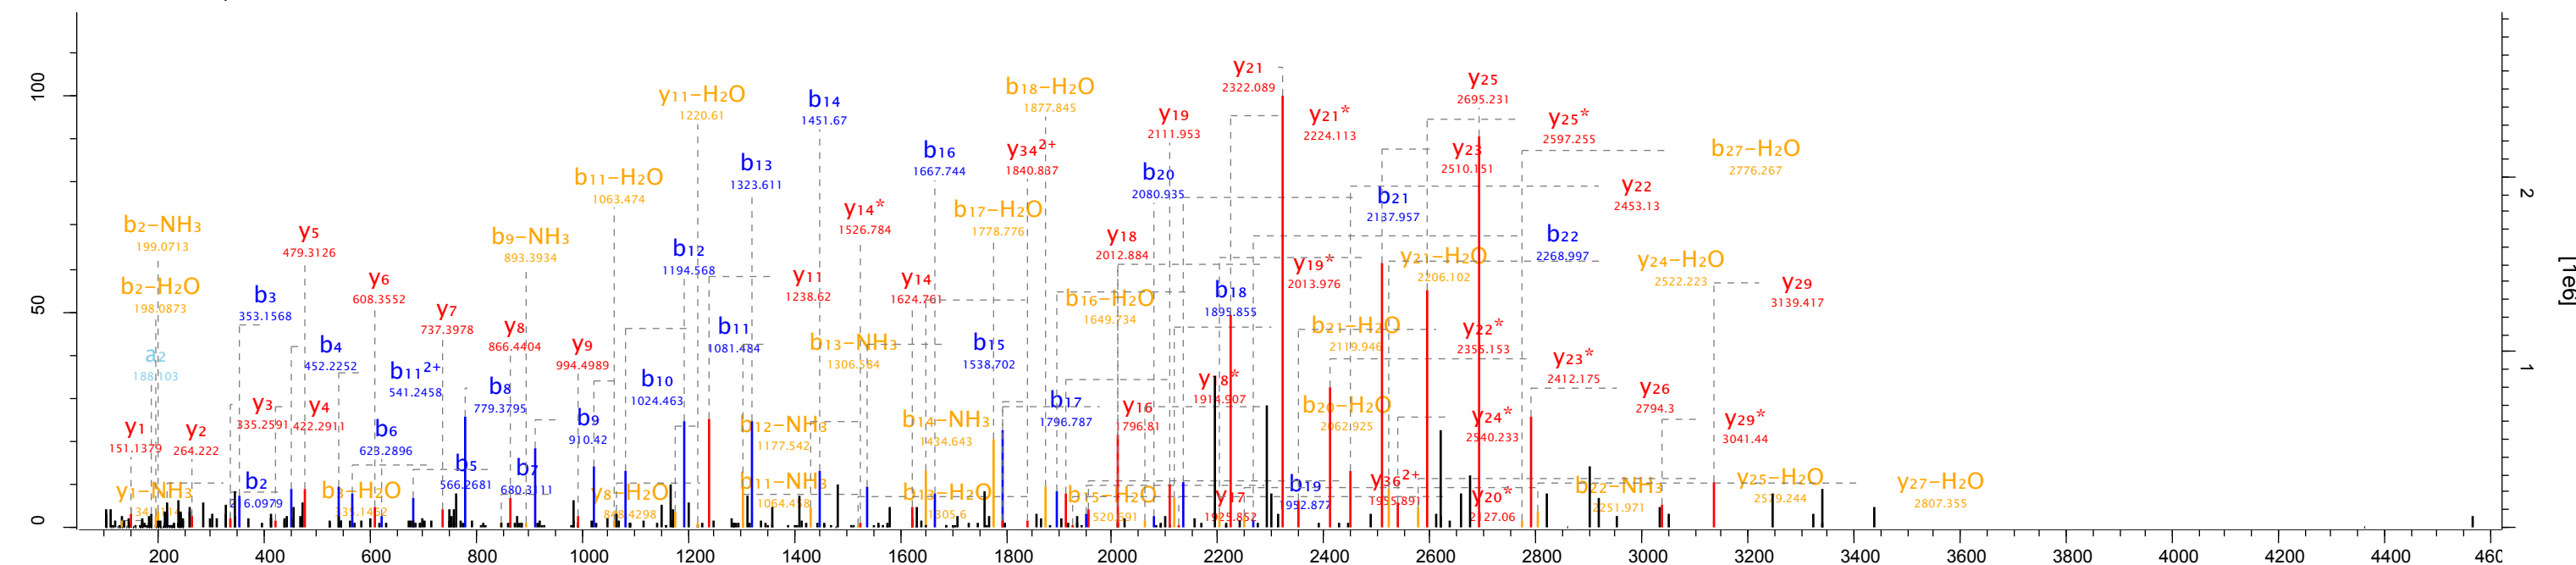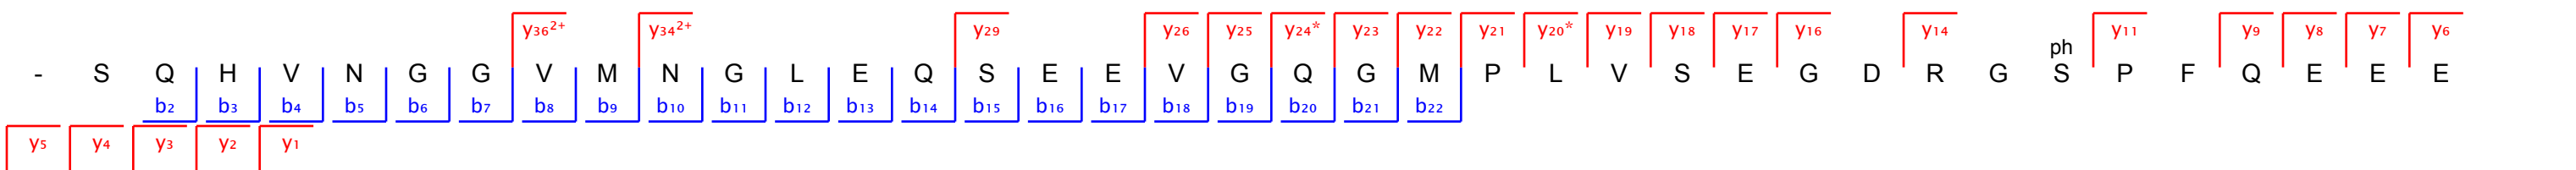

Raw file 20150814\_A375SR\_Phospho\_BR2\_04 Scan 22312 Method FTMS; HCD Score 93.18 m/z 755.83 Gene names ZZEF1

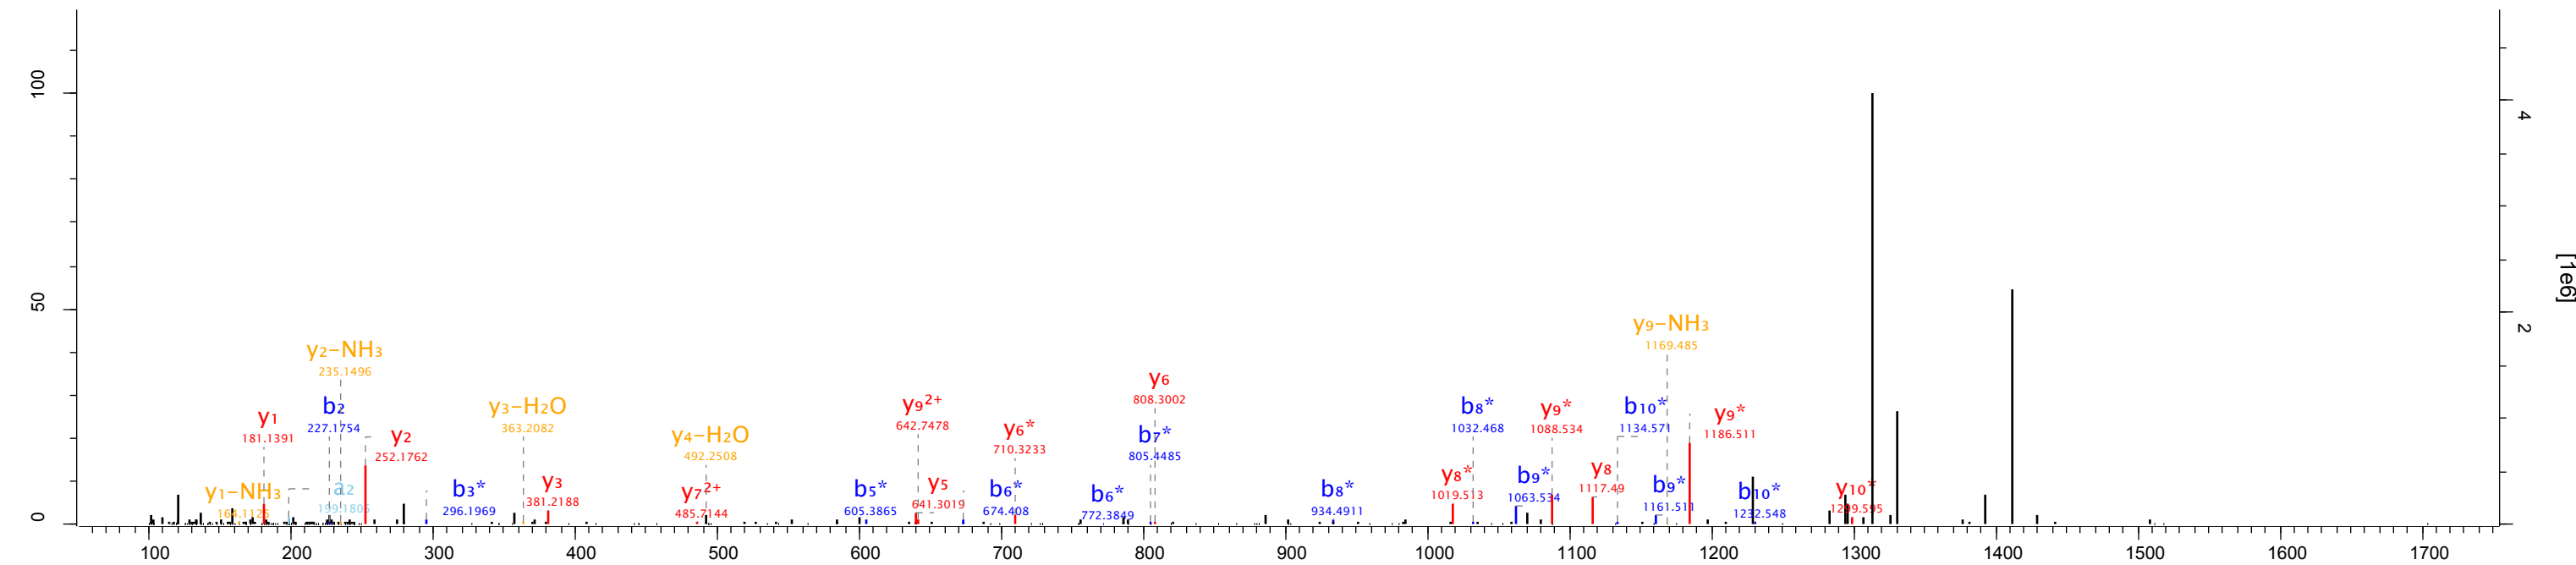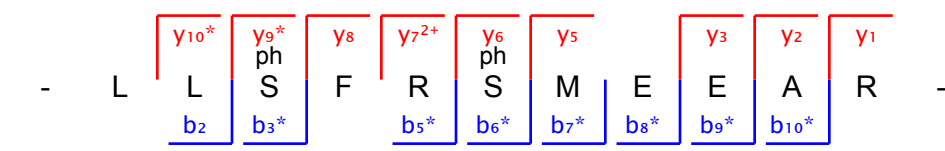

Raw file 20150814\_A375SR\_Phospho\_BR2\_04 Scan 22522 Method FTMS; HCD Score 154.7 m/z 996.14 Gene names ERBB2IP

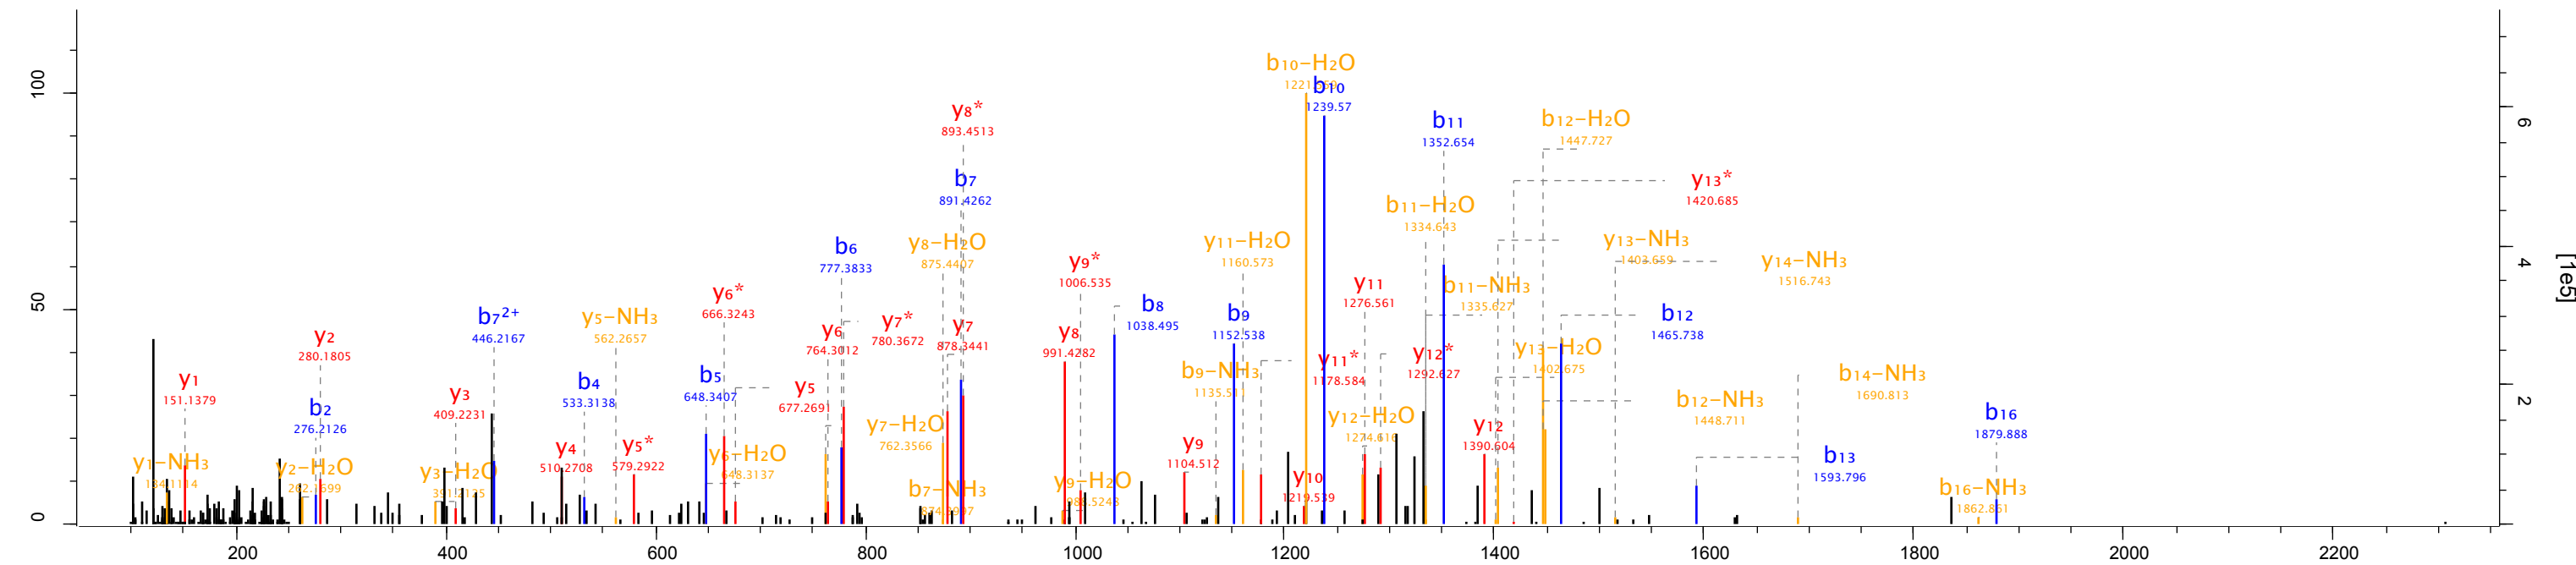

- I R Q E D E N F N S L L Q N G D I L N S <sup>ph</sup>S T E E K -

b<sub>2</sub>
b<sub>4</sub>
b<sub>5</sub>
b<sub>6</sub>
b<sub>7</sub>
b<sub>8</sub>
b<sub>9</sub>
b<sub>10</sub>
b<sub>11</sub>
b<sub>12</sub>
b<sub>13</sub>
b<sub>16</sub>
y<sub>13</sub>\*
y<sub>12</sub>
y<sub>11</sub>
y<sub>10</sub>
y<sub>9</sub>
y<sub>8</sub>
y<sub>7</sub>
y<sub>6</sub>
y<sub>5</sub>
y<sub>4</sub>
y<sub>3</sub>
y<sub>2</sub>
y<sub>1</sub>

Raw file: 20150814\_A375SR\_Phospho\_BR2\_04  
 Scan: 22882 Method: FTMS; HCD Score: 322.56 m/z: 1289.52 Gene names: RNF113A

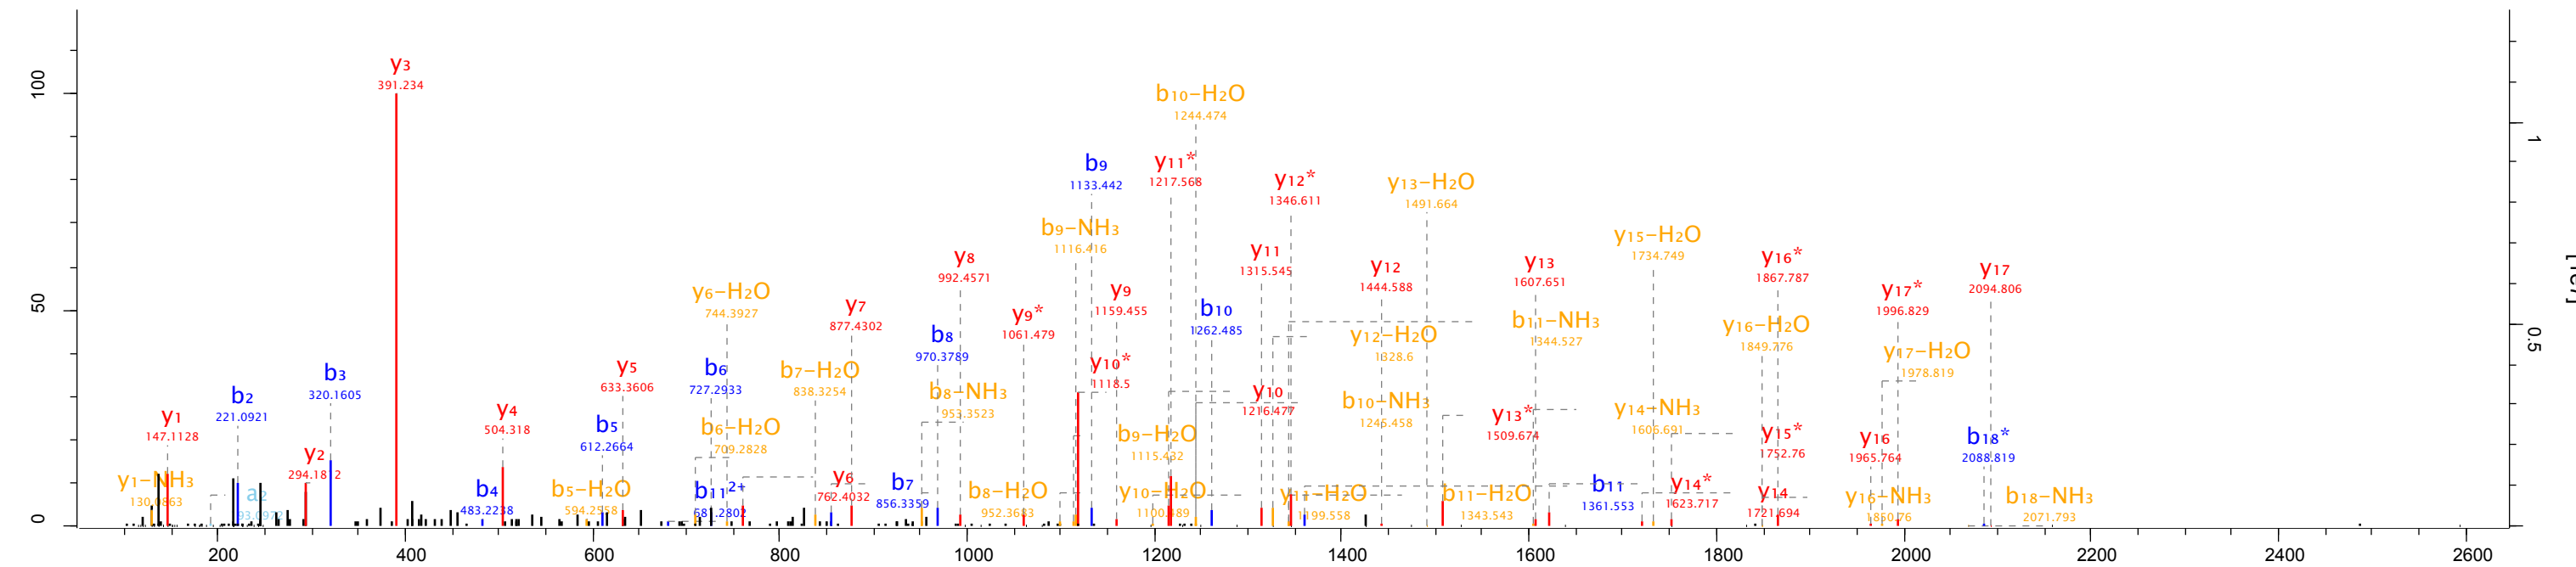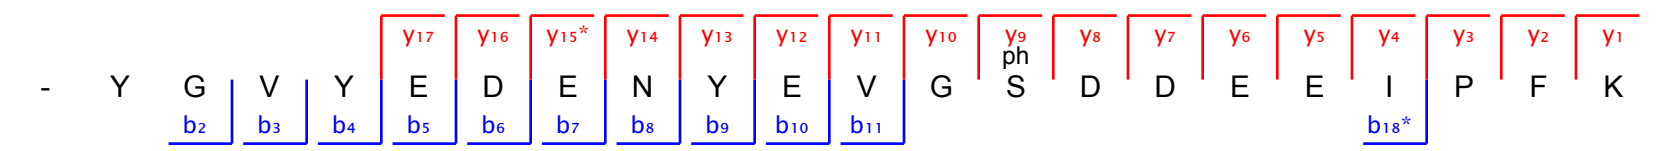

Raw file 20150814\_A375SR\_Phospho\_BR2\_04 Scan 23192 Method FTMS; HCD Score 211.2 m/z 1063.21 Gene names FAM129B

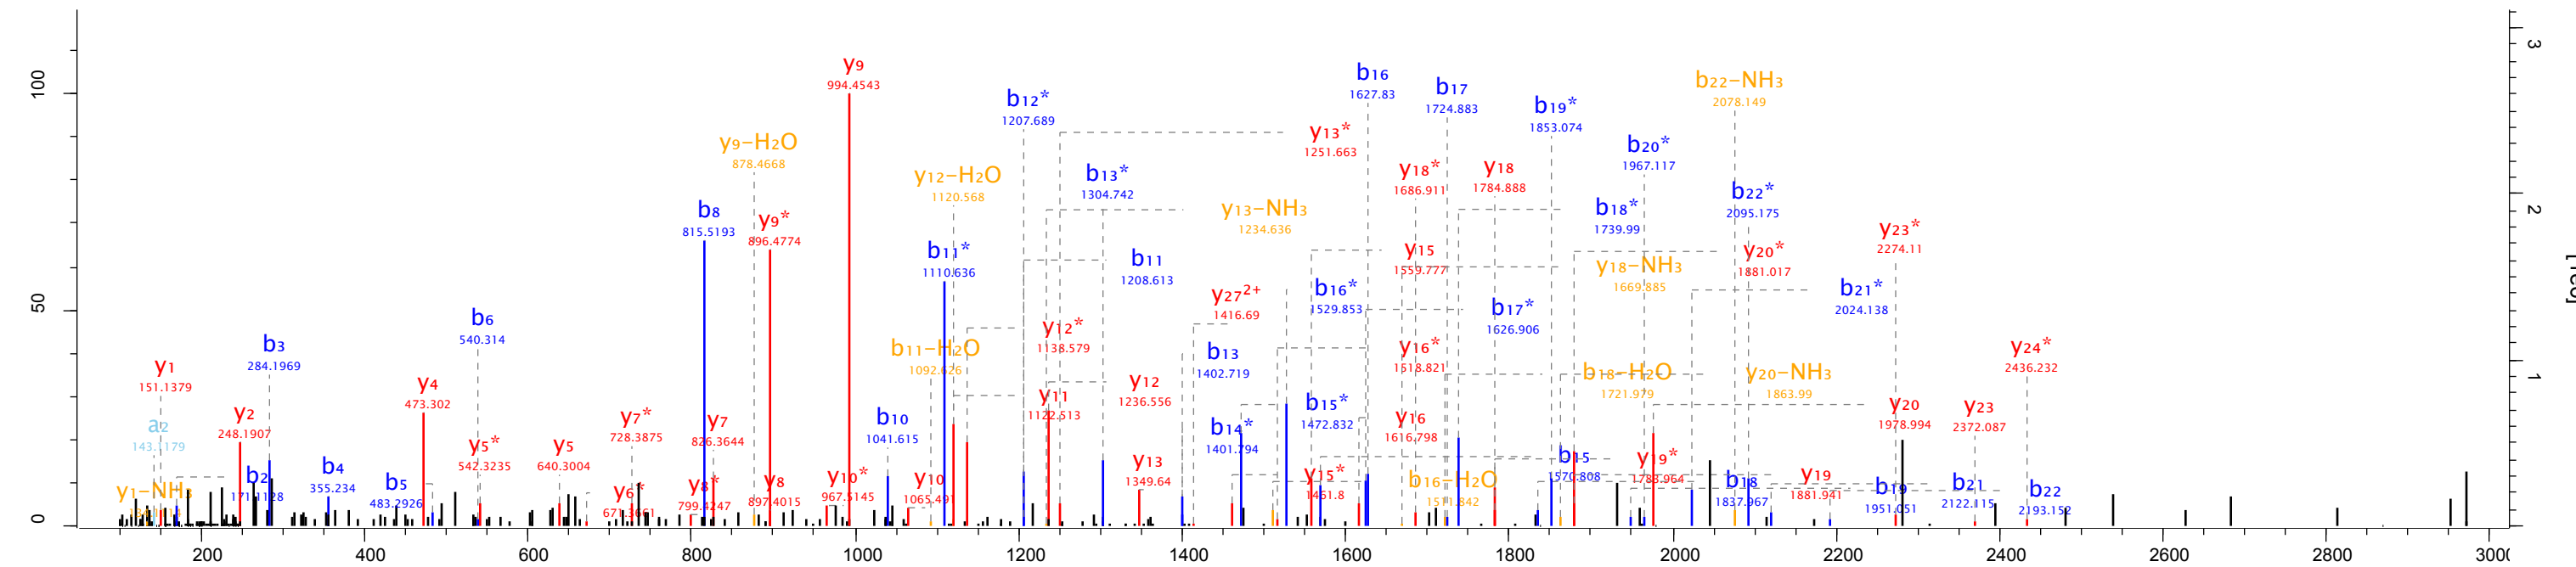

- G L L A Q G L R P E S P P P A G P L L N G A P A G E S P Q P K -

b<sub>2</sub>
b<sub>3</sub>
b<sub>4</sub>
b<sub>5</sub>
b<sub>6</sub>
b<sub>8</sub>
b<sub>10</sub>
b<sub>11</sub>
b<sub>12</sub><sup>\*</sup>
b<sub>13</sub>
b<sub>14</sub><sup>\*</sup>
b<sub>15</sub>
b<sub>16</sub>
b<sub>17</sub>
b<sub>18</sub>
b<sub>19</sub>
b<sub>20</sub><sup>\*</sup>
b<sub>21</sub>
b<sub>22</sub>
y<sub>27</sub><sup>2+</sup>
y<sub>24</sub><sup>\*</sup>
y<sub>23</sub>
y<sub>20</sub>
y<sub>19</sub>
y<sub>18</sub>
y<sub>16</sub>
y<sub>15</sub>
y<sub>13</sub>
y<sub>12</sub>
y<sub>11</sub>
y<sub>10</sub>
y<sub>9</sub>
y<sub>8</sub>
y<sub>7</sub>
y<sub>6</sub><sup>\*</sup>
y<sub>5</sub>
y<sub>4</sub>
y<sub>2</sub>
y<sub>1</sub>

Raw file  
20150814\_A375SR\_Phospho\_BR2\_04

Scan 23302 Method FTMS; HCD Score 205.87 m/z 780.68 Gene names SRRM2

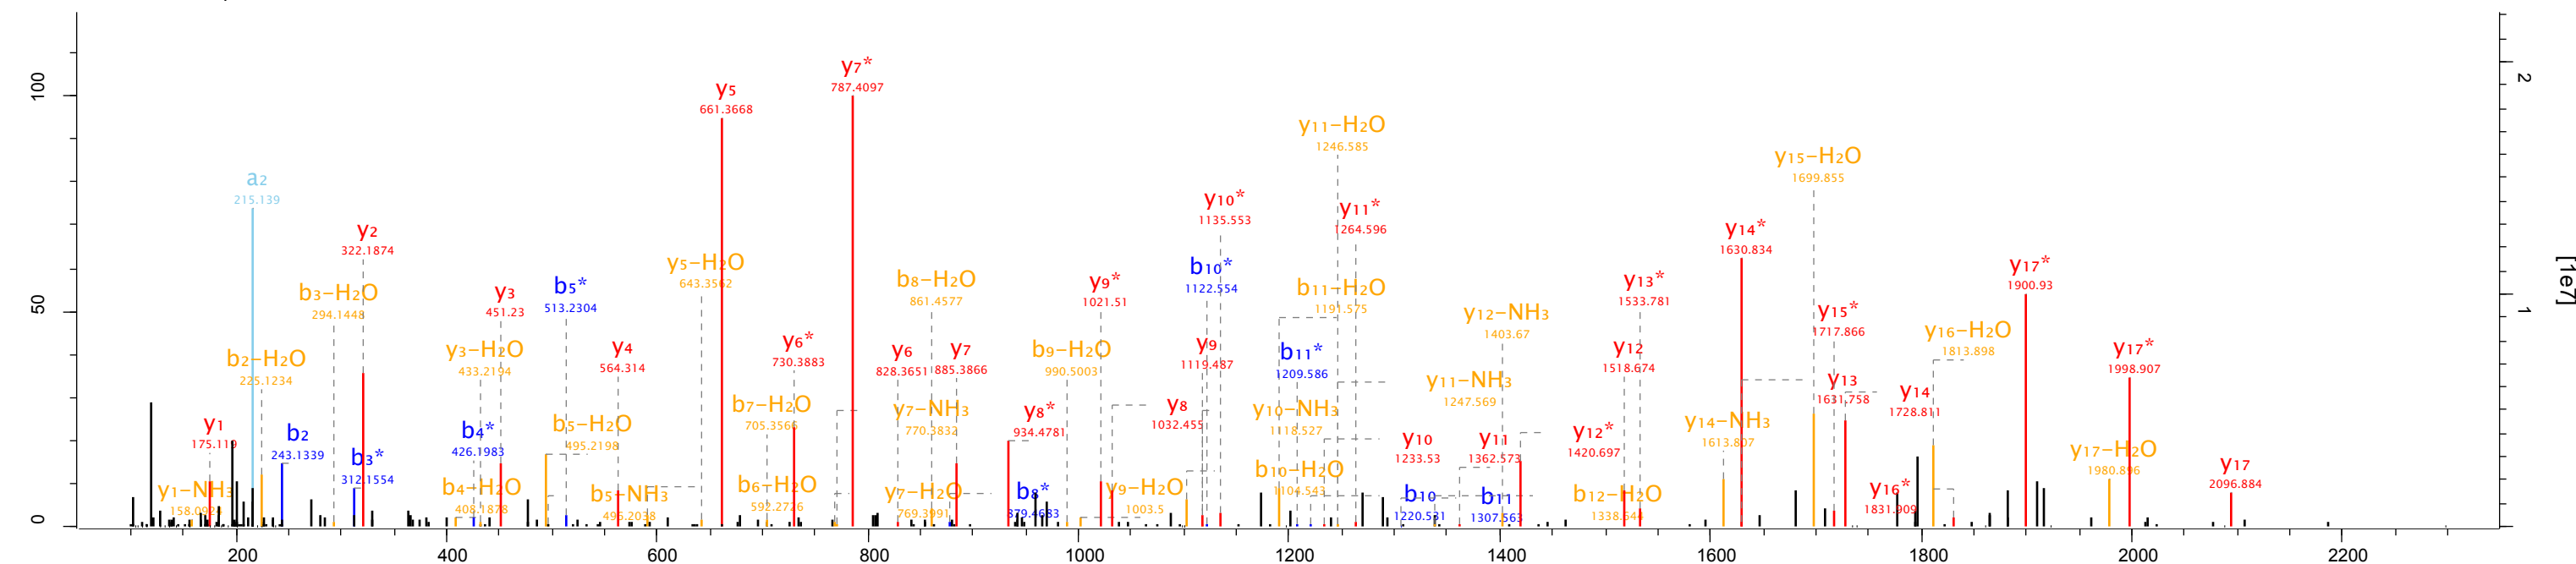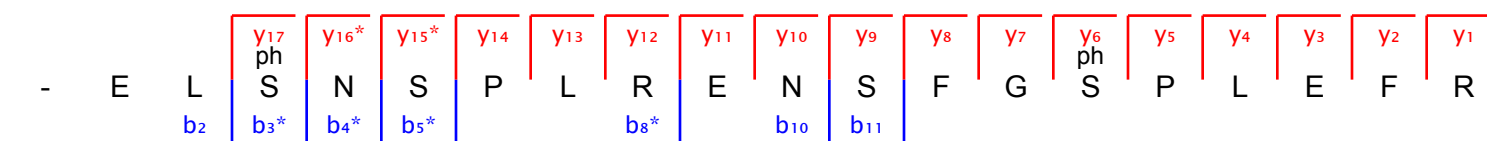

Raw file: 20150814\_A375SR\_Phospho\_BR2\_04  
 Scan: 23382 Method: FTMS; HCD Score: 155.1 m/z: 787.82 Gene names: RAB11FIP1;RAB11FIP2

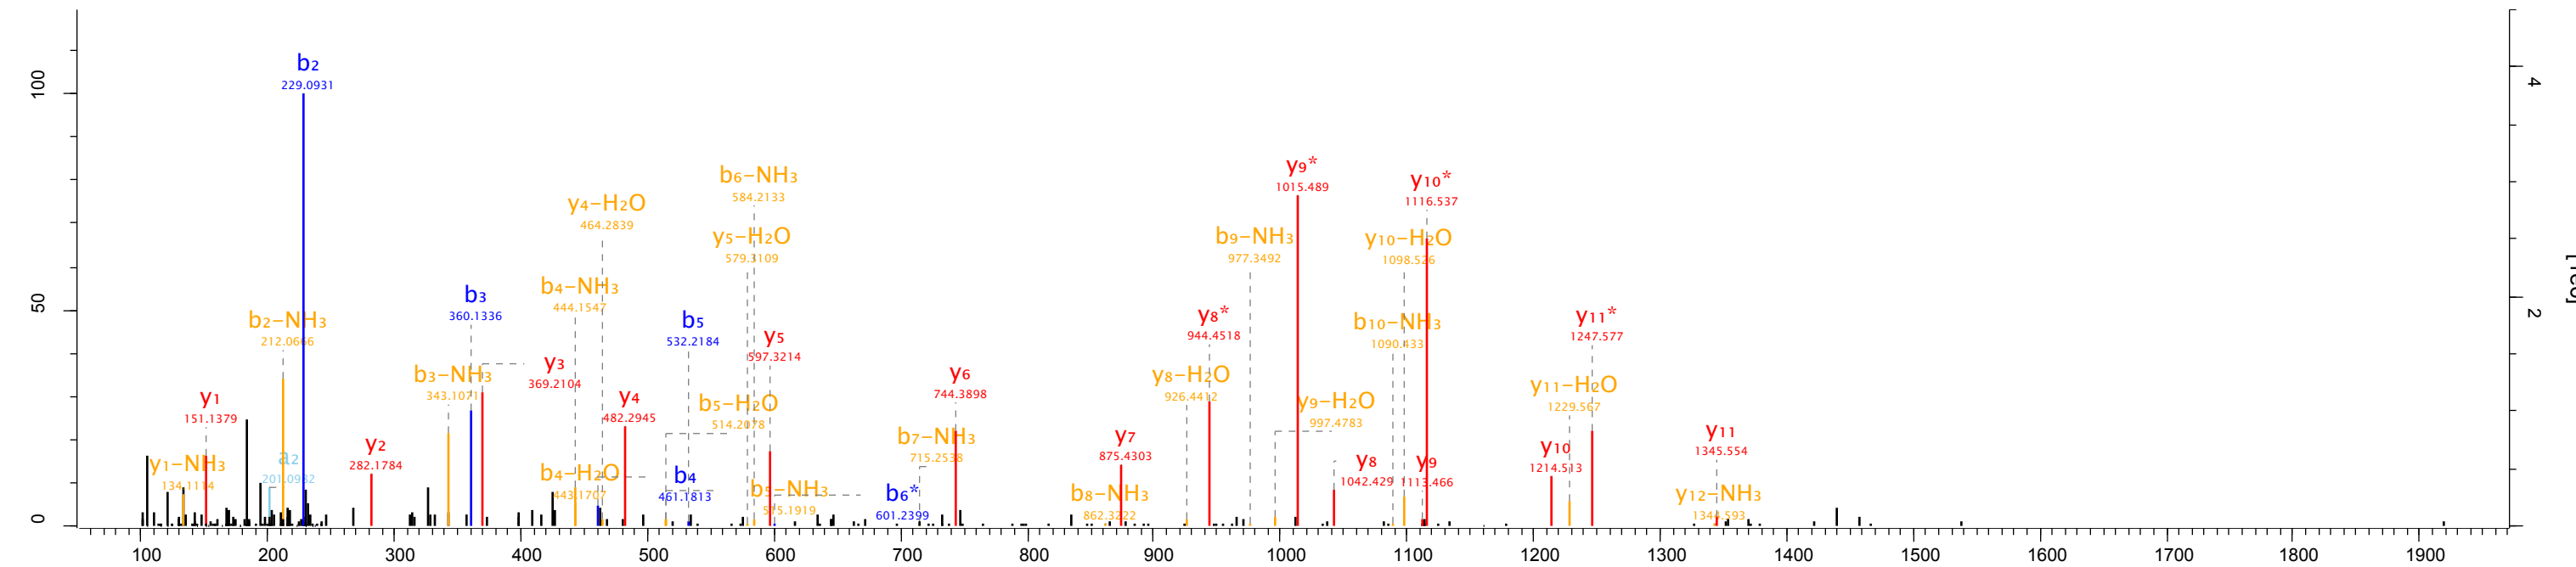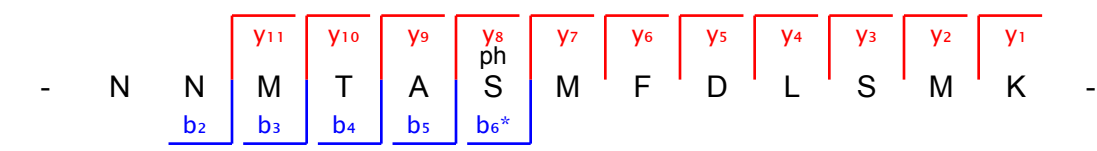



Raw file 20150814\_A375SR\_Phospho\_BR2\_04 Scan 23872 Method FTMS; HCD Score 117.38 m/z 884.09 Gene names SUGP2

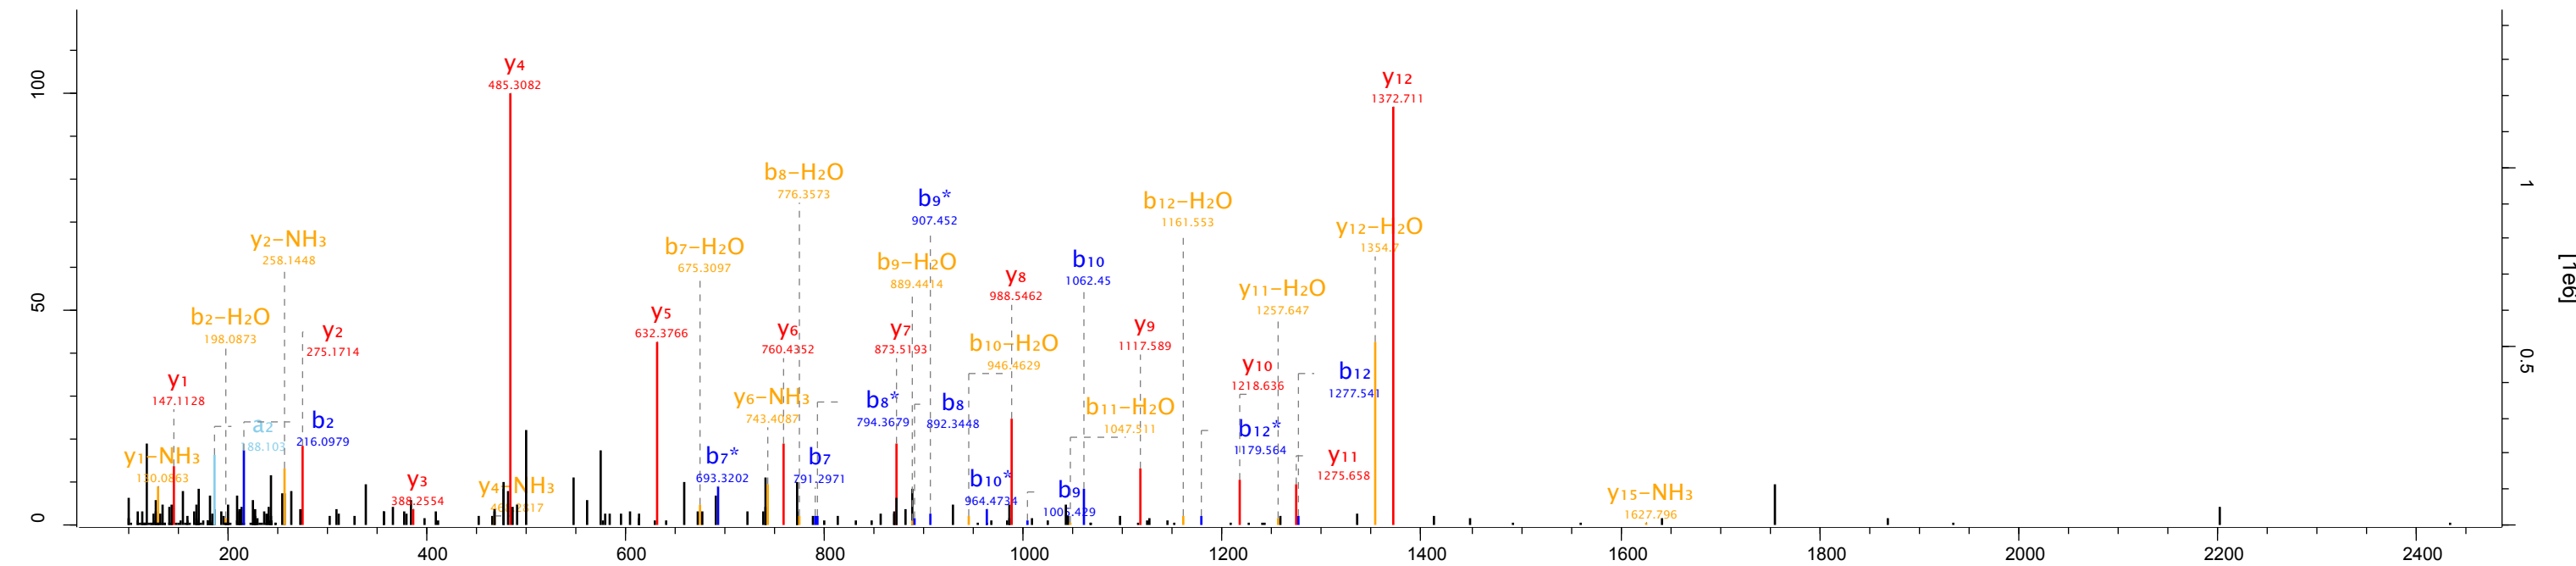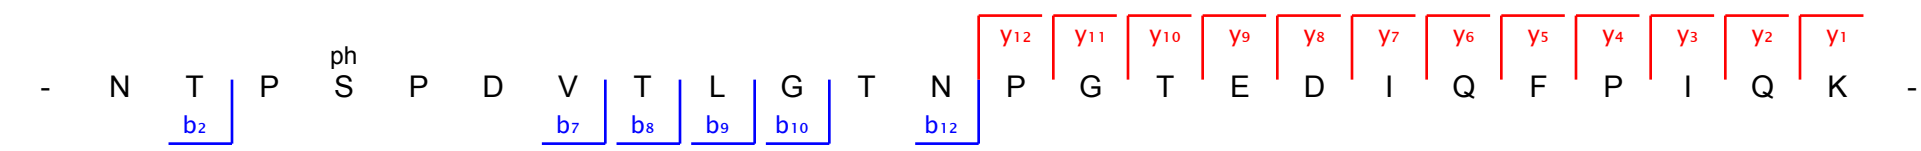

Raw file 20150814\_A375SR\_Phospho\_BR2\_04 Scan 2392 Method FTMS; HCD Score 74.84 m/z 507.24 Gene names PPIG

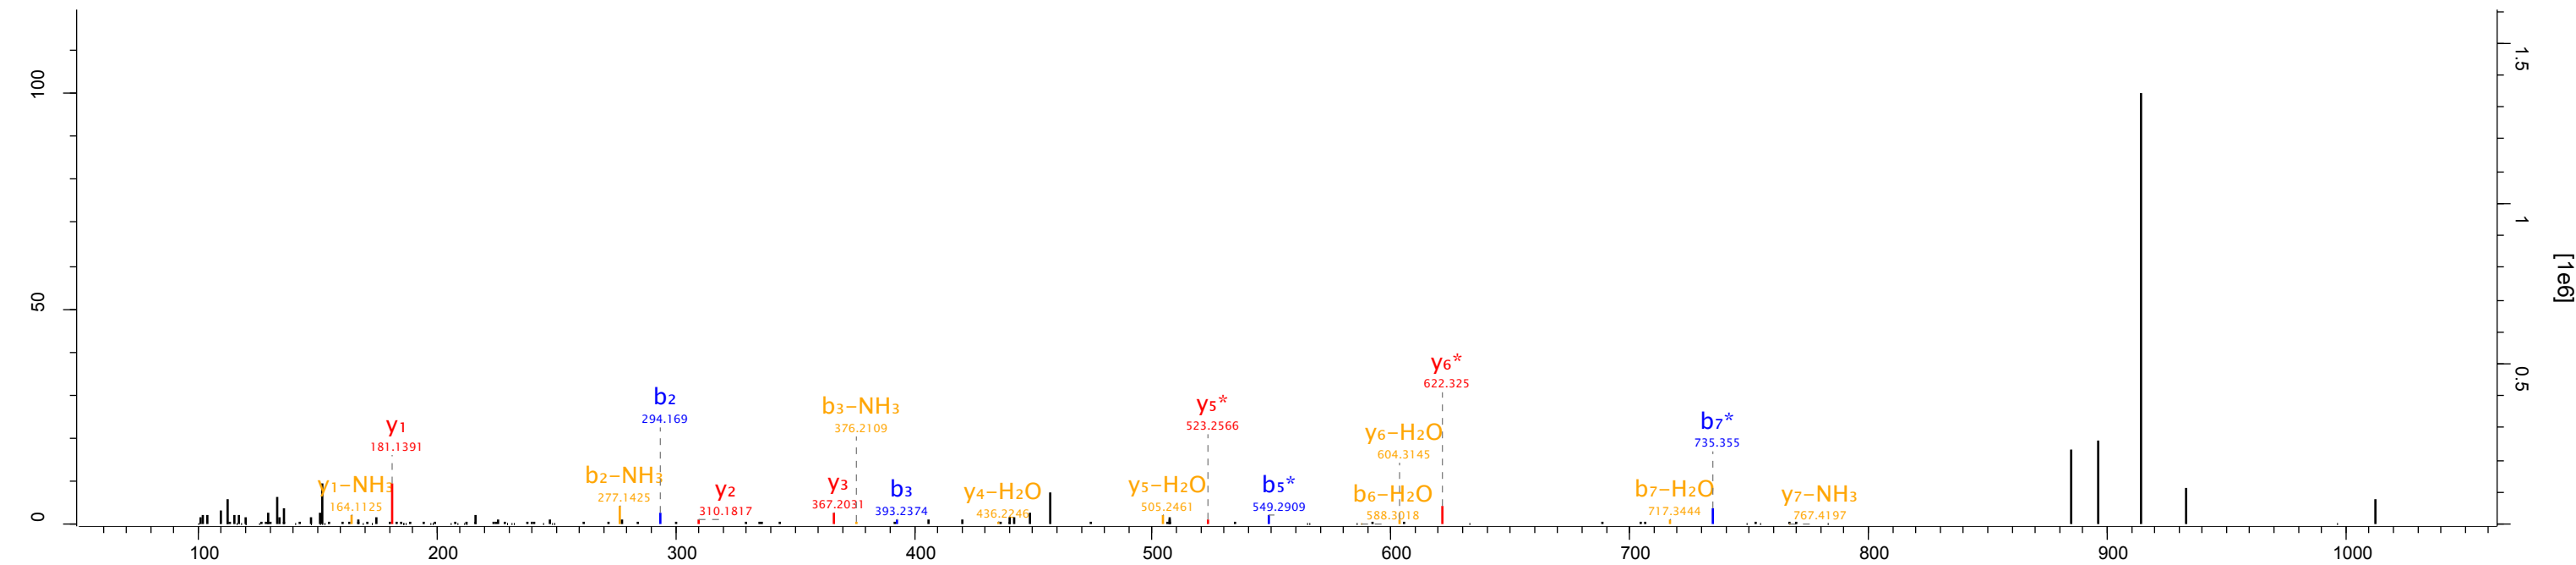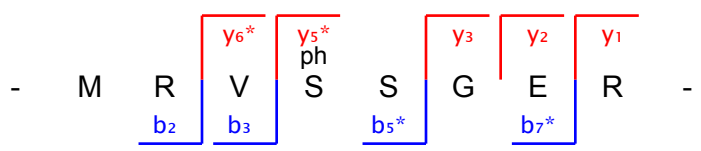

Raw file  
20150814\_A375SR\_Phospho\_BR2\_04

Scan 24012 Method FTMS; HCD Score 138.11 m/z 1045.05 Gene names PPP2R3A

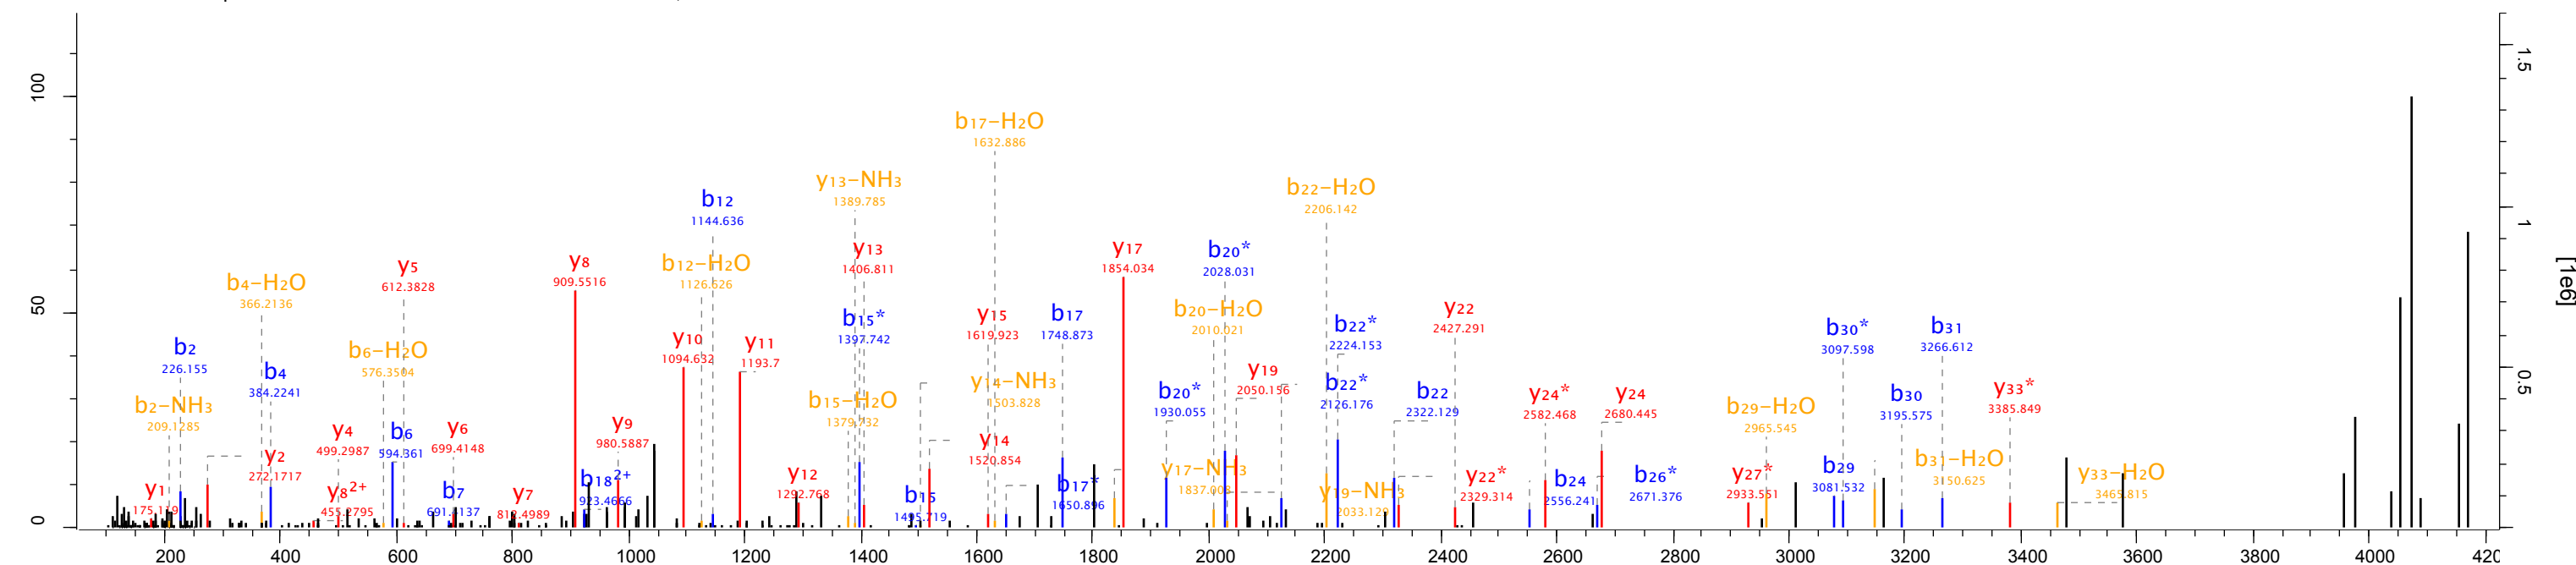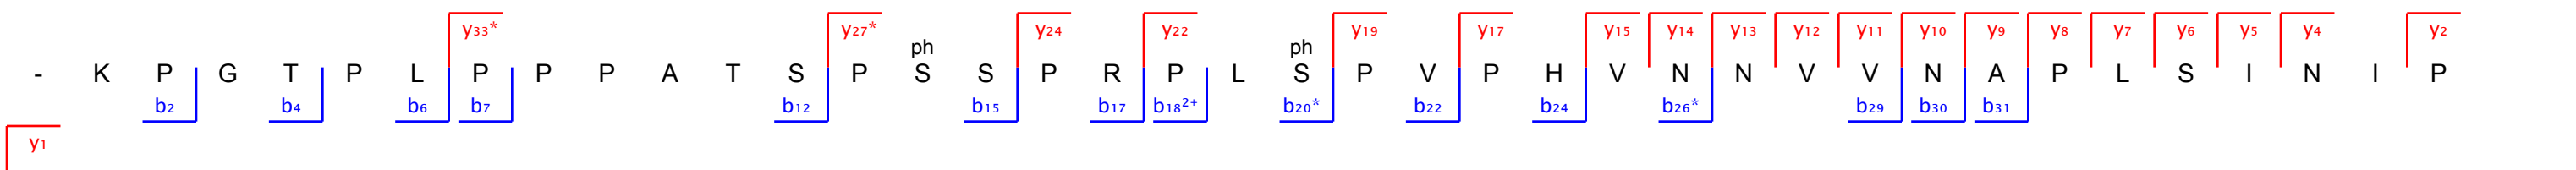

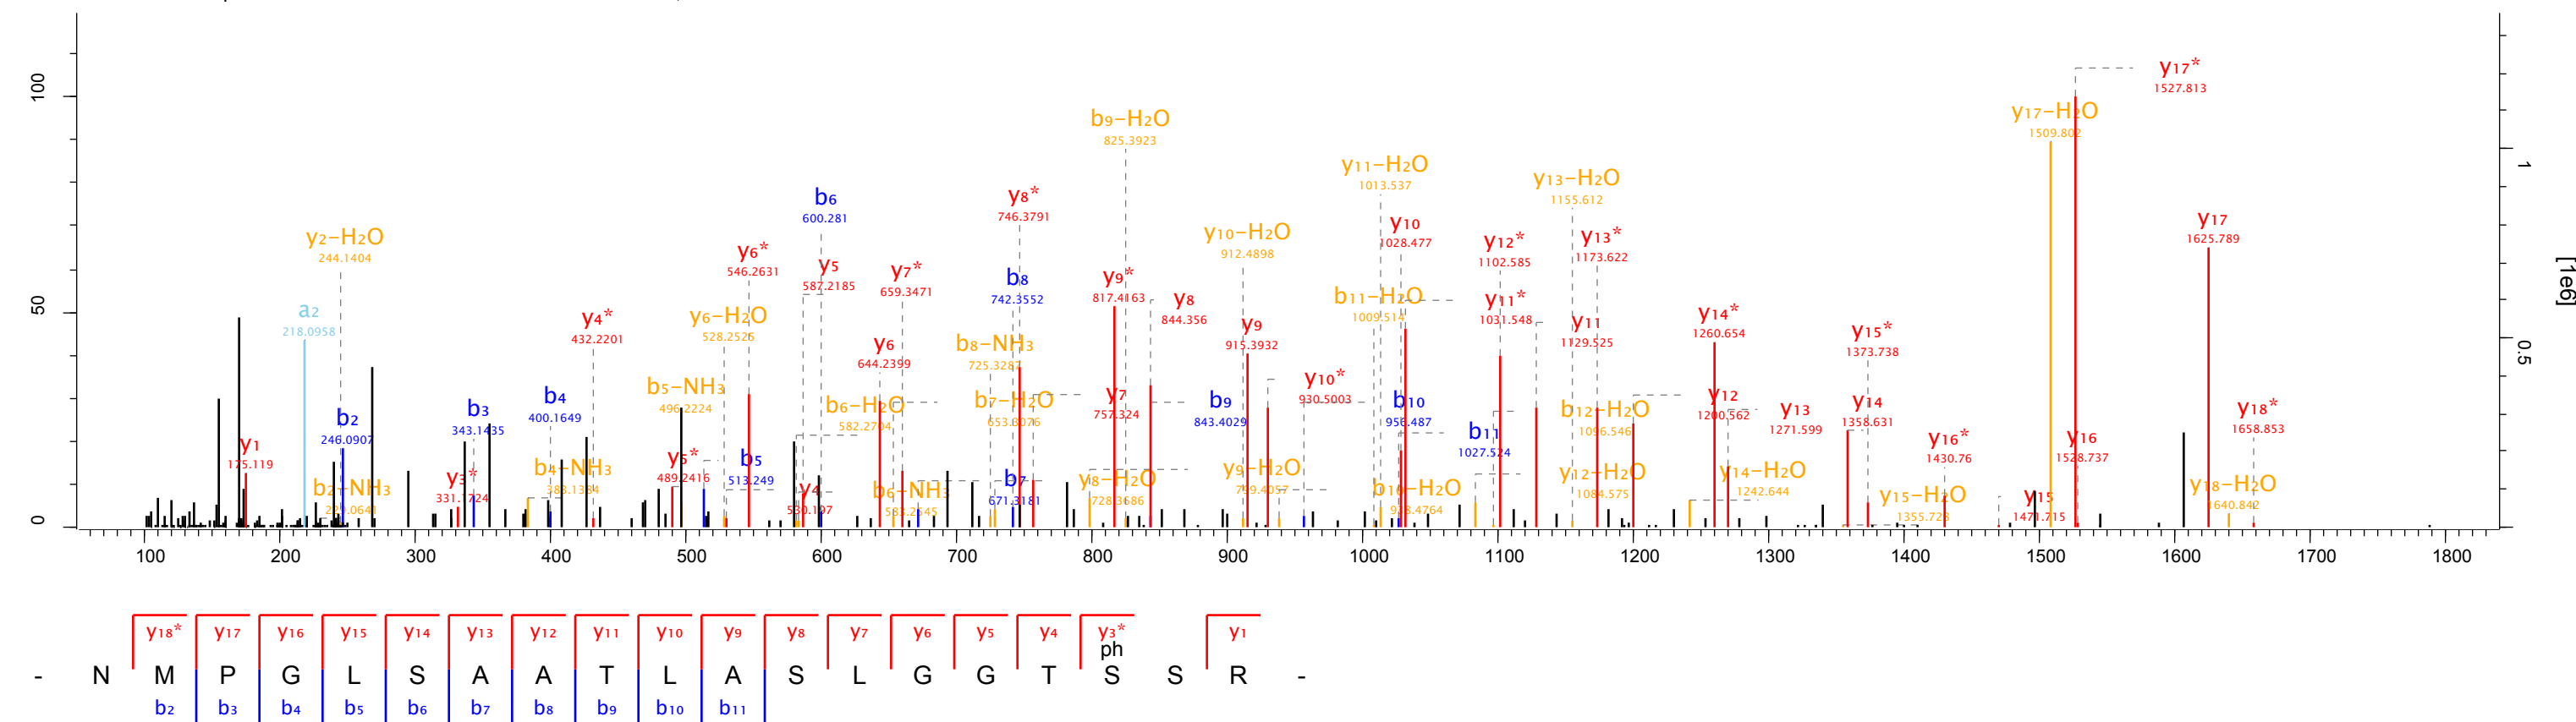

Raw file: 20150814\_A375SR\_Phospho\_BR2\_04  
 Scan: 2482 Method: FTMS; HCD Score: 90.76 m/z: 584.73 Gene names: HDGF

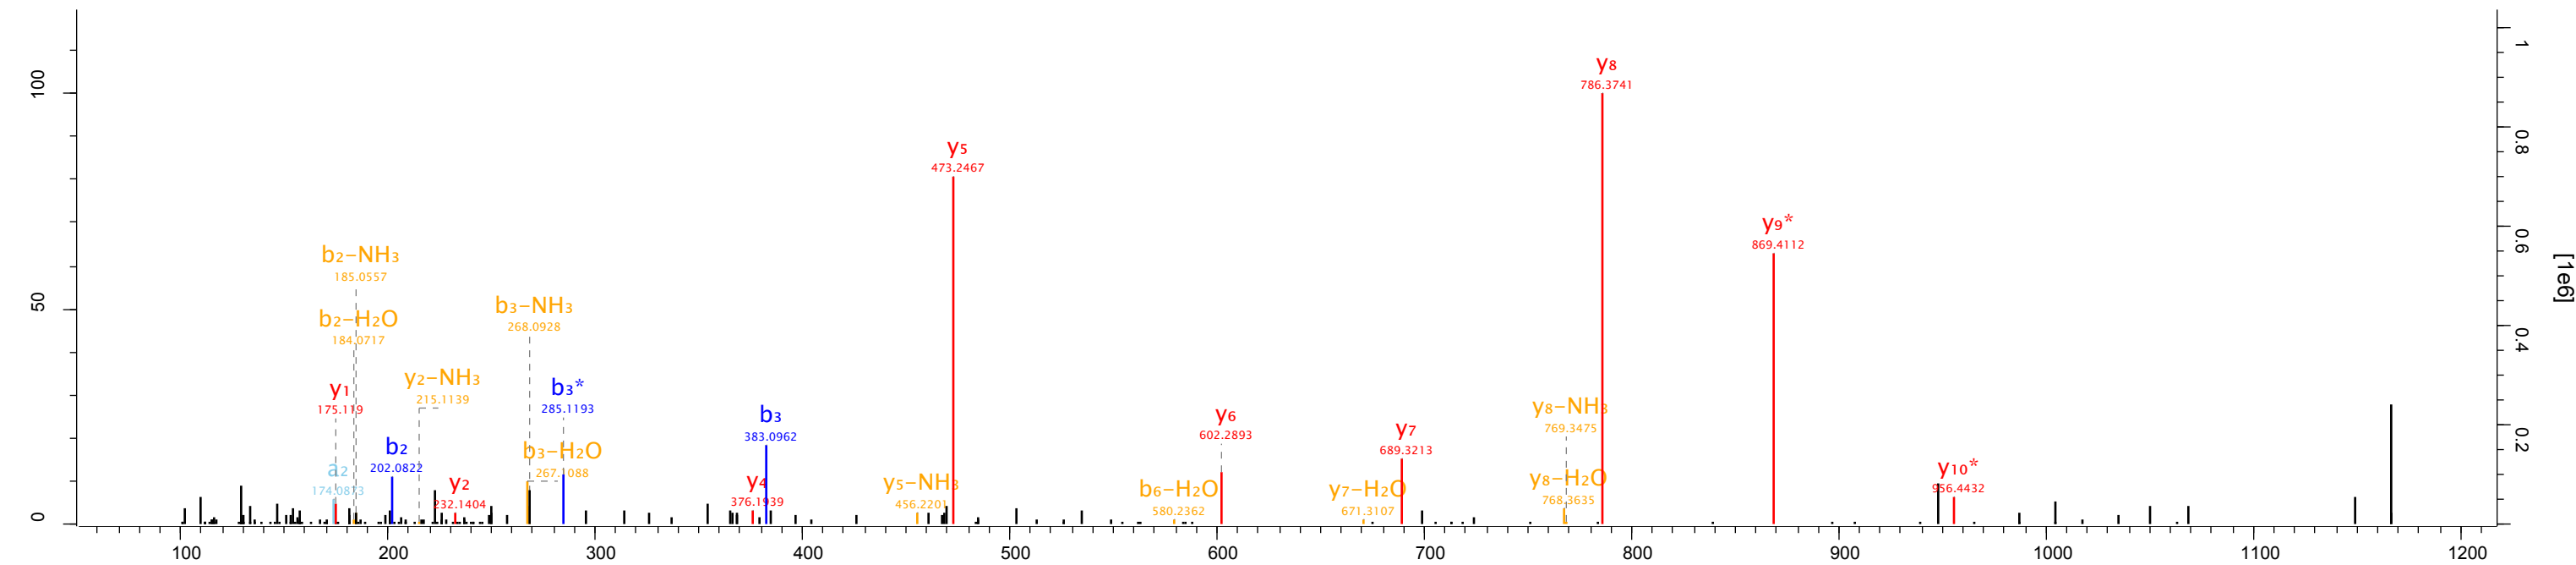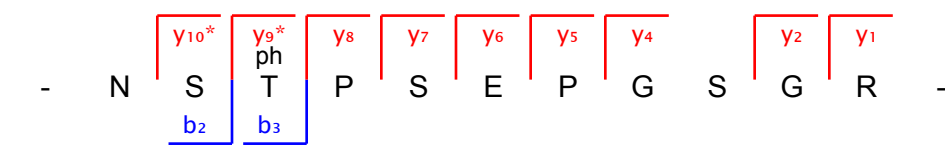

Raw file: 20150814\_A375SR\_Phospho\_BR2\_04  
 Scan: 24962 Method: FTMS; HCD Score: 203.83 m/z: 1093.79 Gene names: TVP23B;TVP23C

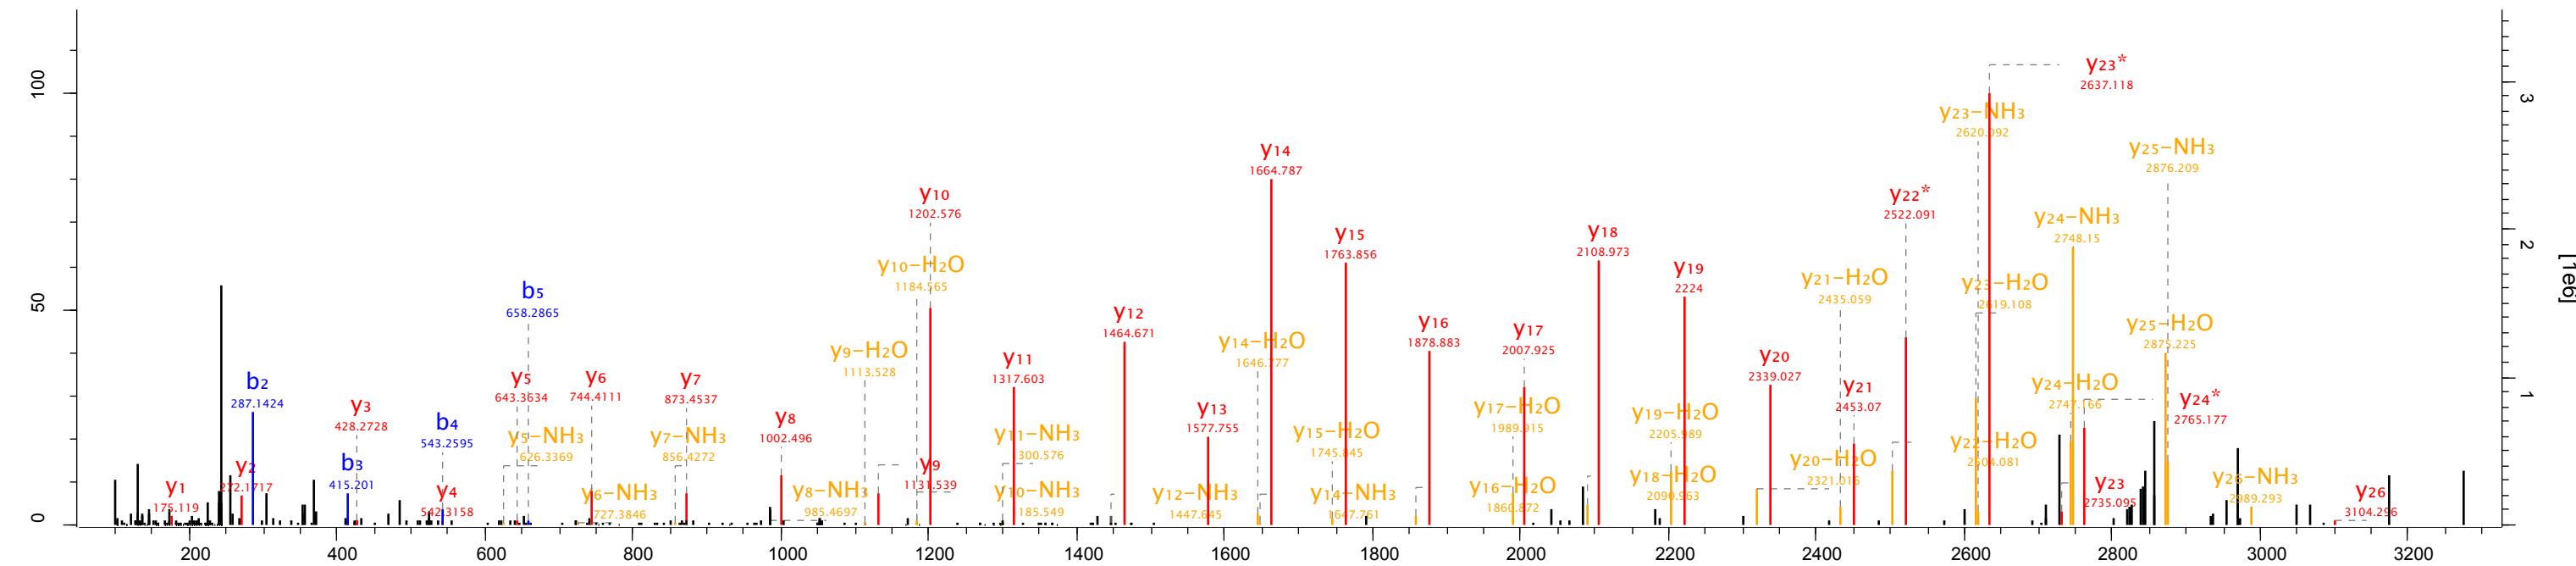

ac - M L Q Q D S N D D T E D V S L F D A E E E T T N R P R -

Fragmentation mapping (b and y ions):

- b<sub>2</sub> (L)
- b<sub>3</sub> (Q)
- b<sub>4</sub> (Q)
- b<sub>5</sub> (D)
- y<sub>1</sub> (R)
- y<sub>2</sub> (P)
- y<sub>3</sub> (N)
- y<sub>4</sub> (T)
- y<sub>5</sub> (T)
- y<sub>6</sub> (E)
- y<sub>7</sub> (E)
- y<sub>8</sub> (E)
- y<sub>9</sub> (A)
- y<sub>10</sub> (D)
- y<sub>11</sub> (F)
- y<sub>12</sub> (L)
- y<sub>13</sub> (S)
- y<sub>14</sub> (V)
- y<sub>15</sub> (D)
- y<sub>16</sub> (E)
- y<sub>17</sub> (D)
- y<sub>18</sub> (D)
- y<sub>19</sub> (D)
- y<sub>20</sub> (D)
- y<sub>21</sub> (N)
- y<sub>22</sub><sup>\*</sup> (S)
- y<sub>23</sub> (D)
- y<sub>24</sub><sup>\*</sup> (Q)
- y<sub>26</sub> (R)

Raw file: 20150814\_A375SR\_Phospho\_BR2\_04  
 Scan: 25002  
 Method: FTMS; HCD  
 Score: 382.55  
 m/z: 1506.22  
 Gene names: NPM1

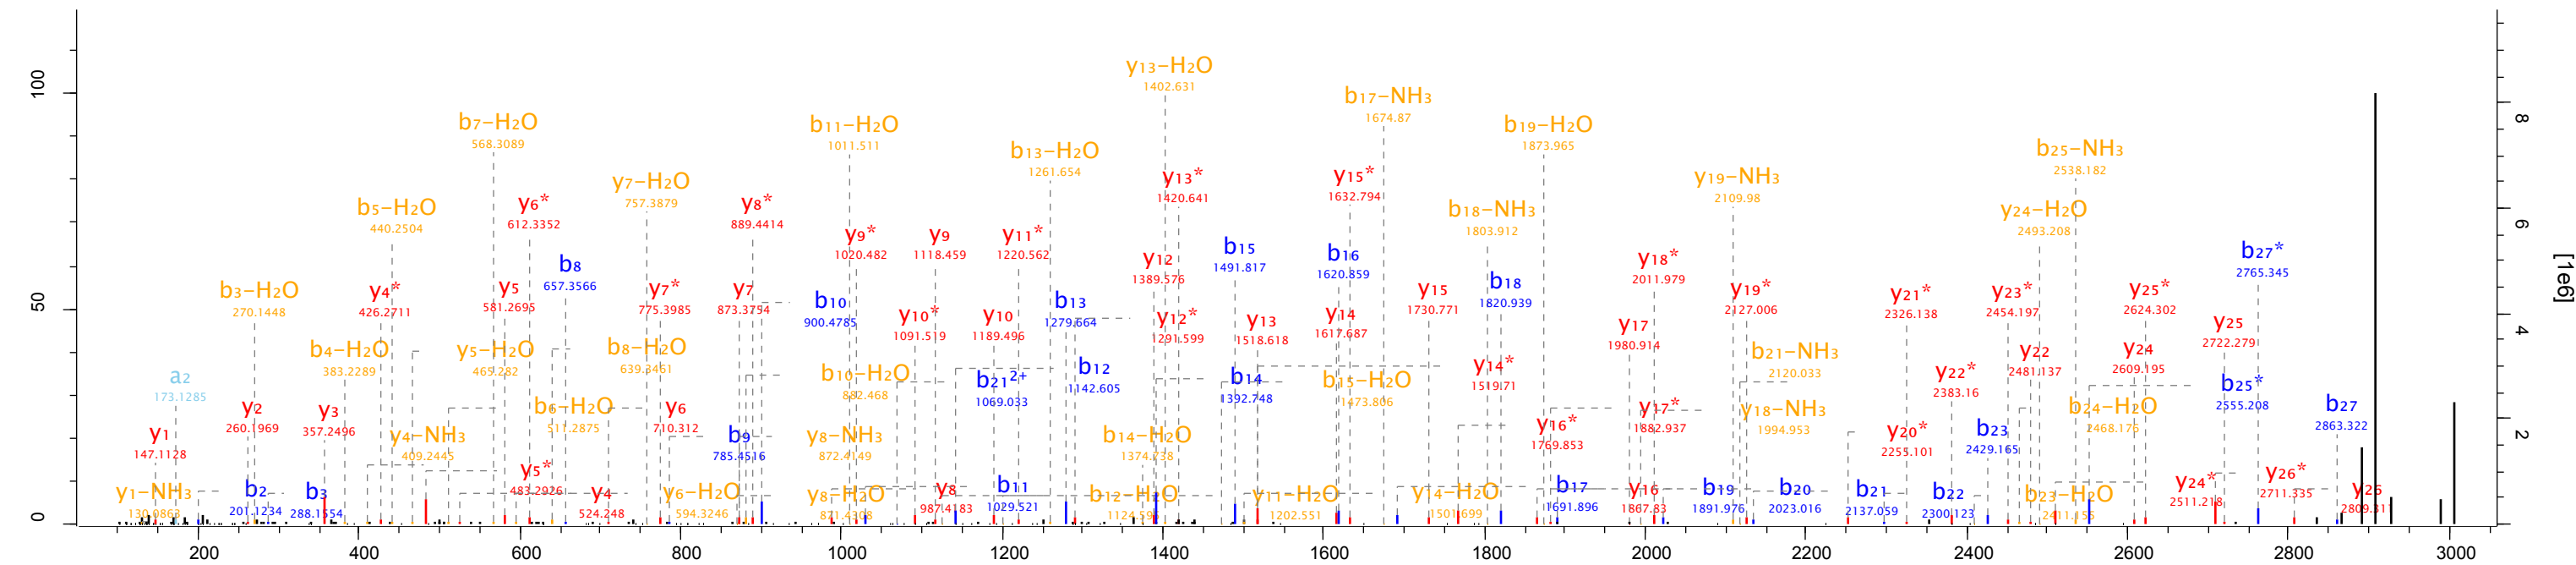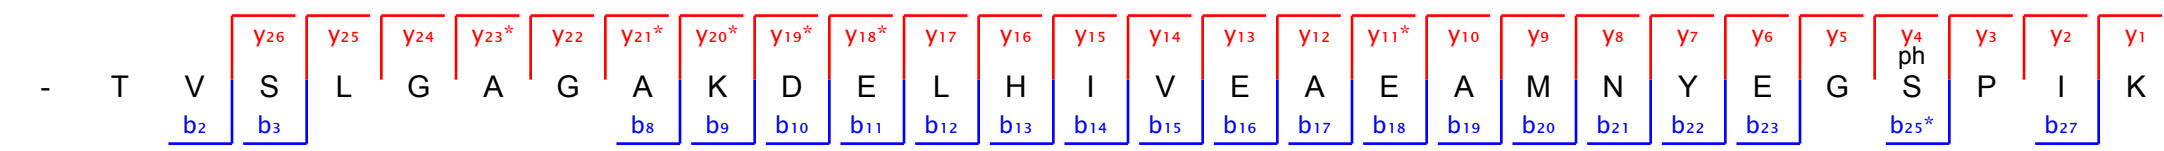

Raw file: 20150814\_A375SR\_Phospho\_BR2\_04  
 Scan: 25082 Method: FTMS; HCD Score: 153.77 m/z: 1105.01 Gene names: FOSL2

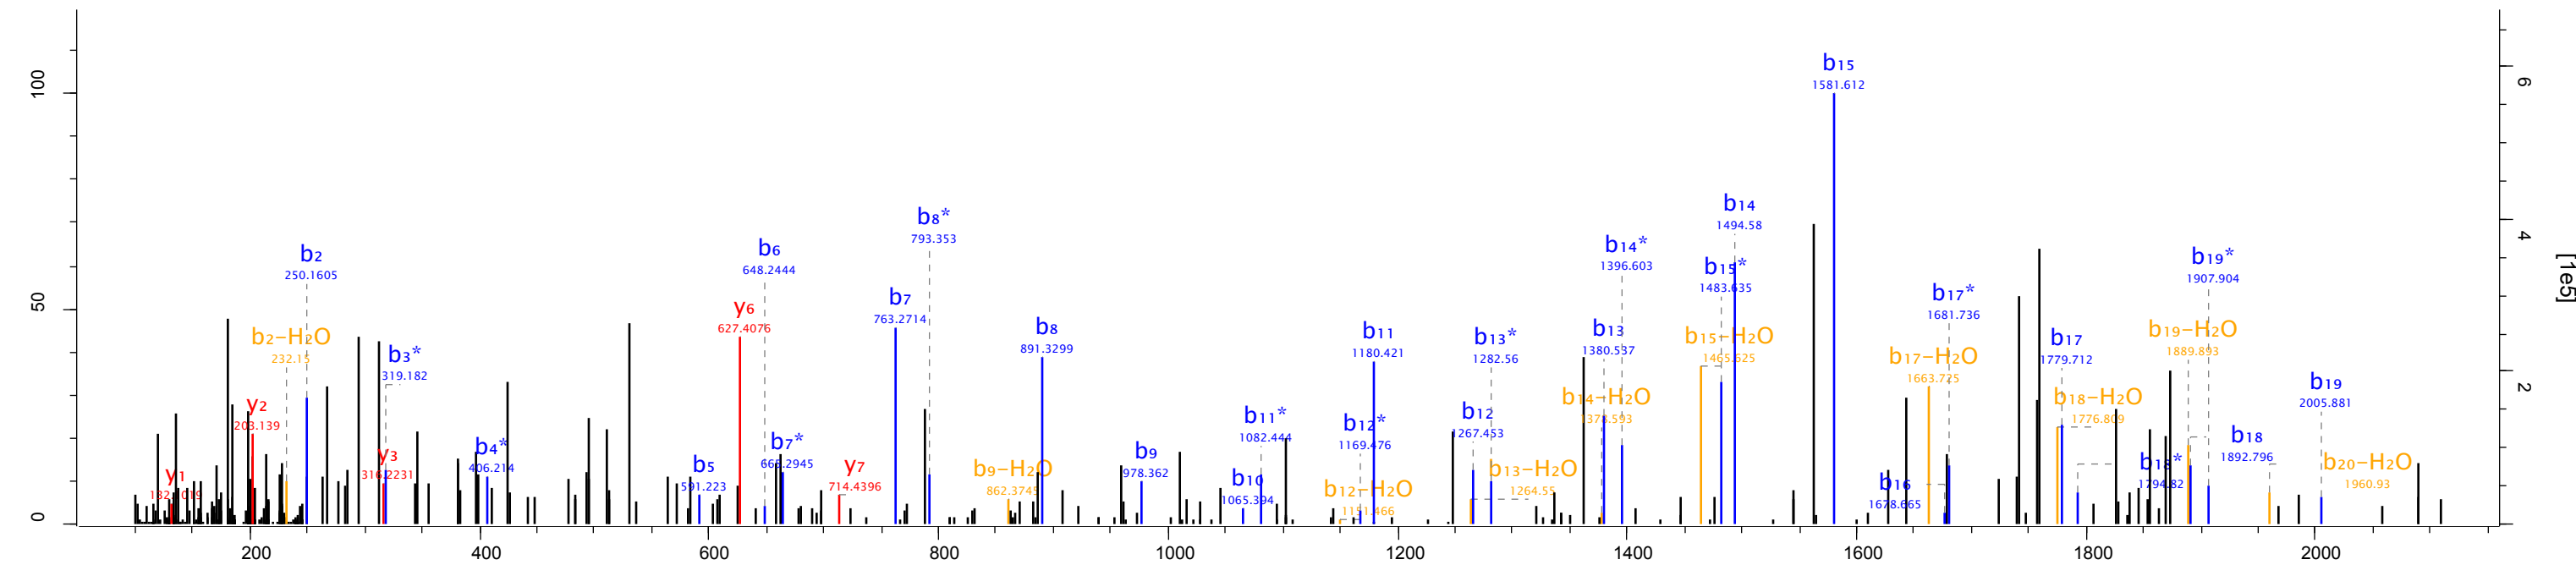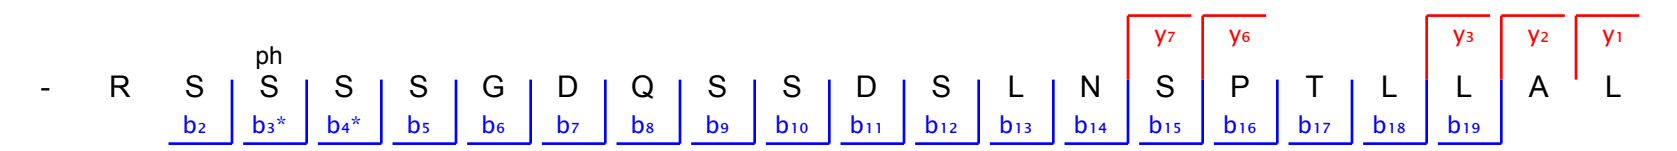



Raw file: 20150814\_A375SR\_Phospho\_BR2\_04  
 Scan: 25262 Method: FTMS; HCD Score: 75.88 m/z: 1034.13 Gene names: MPP6

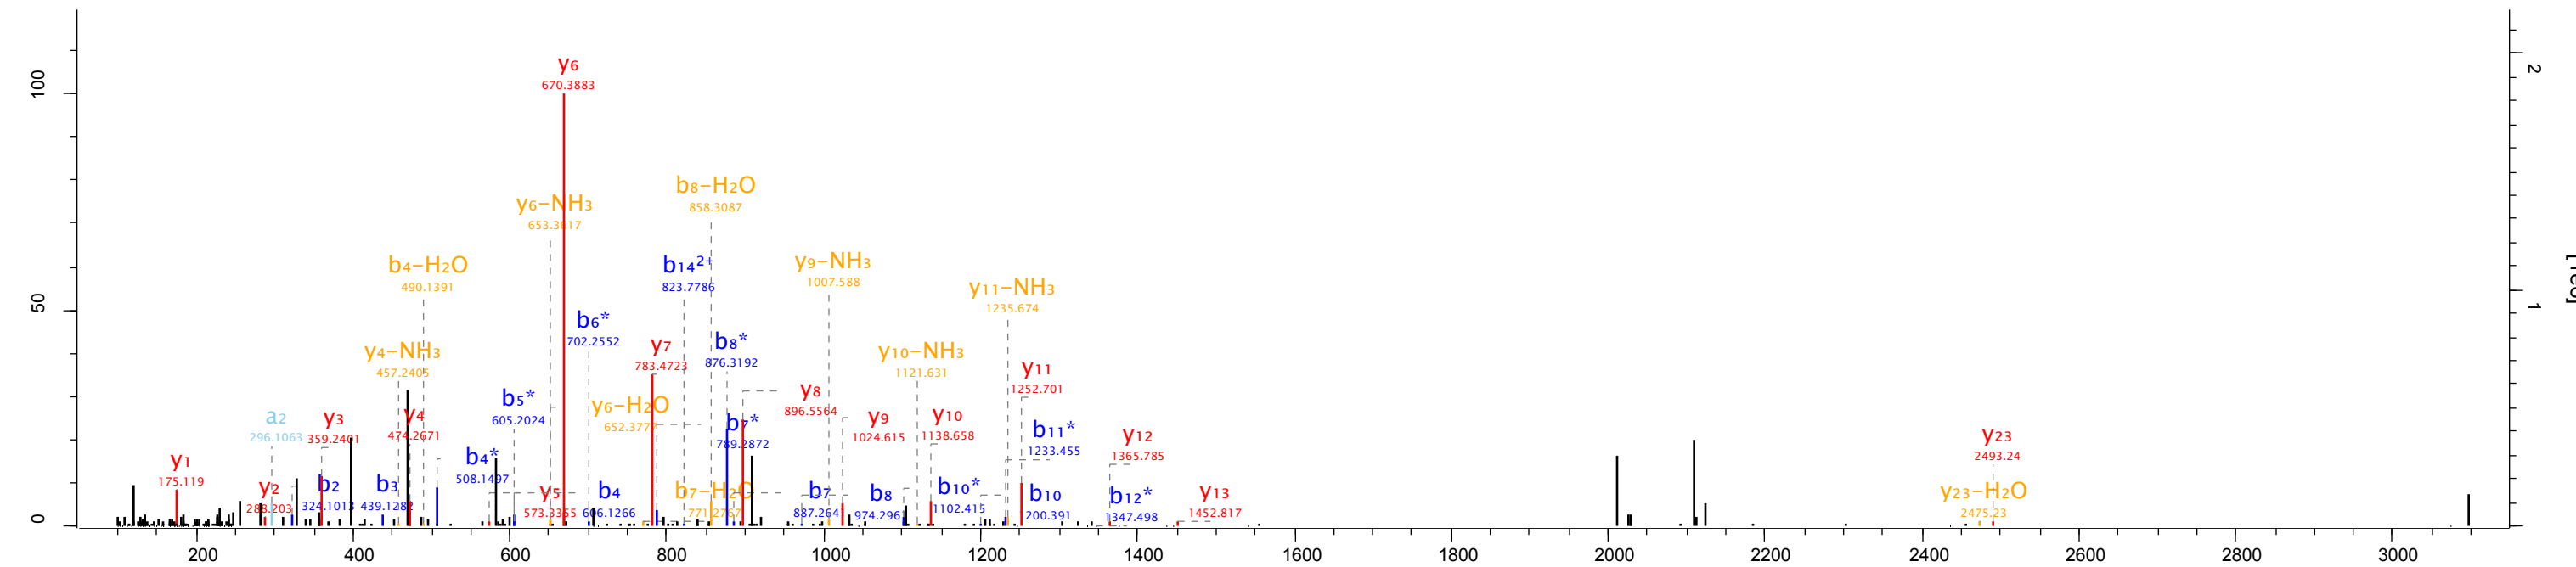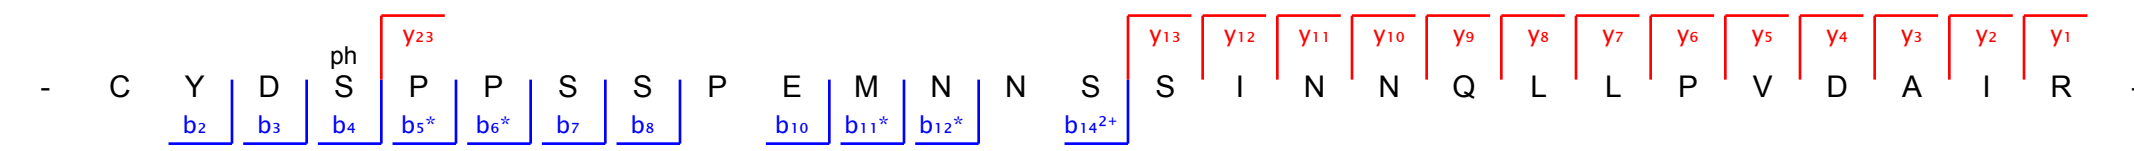

Raw file 20150814\_A375SR\_Phospho\_BR2\_04 Scan 25282 Method FTMS; HCD Score 303.15 m/z 1215.07 Gene names NUFIP2

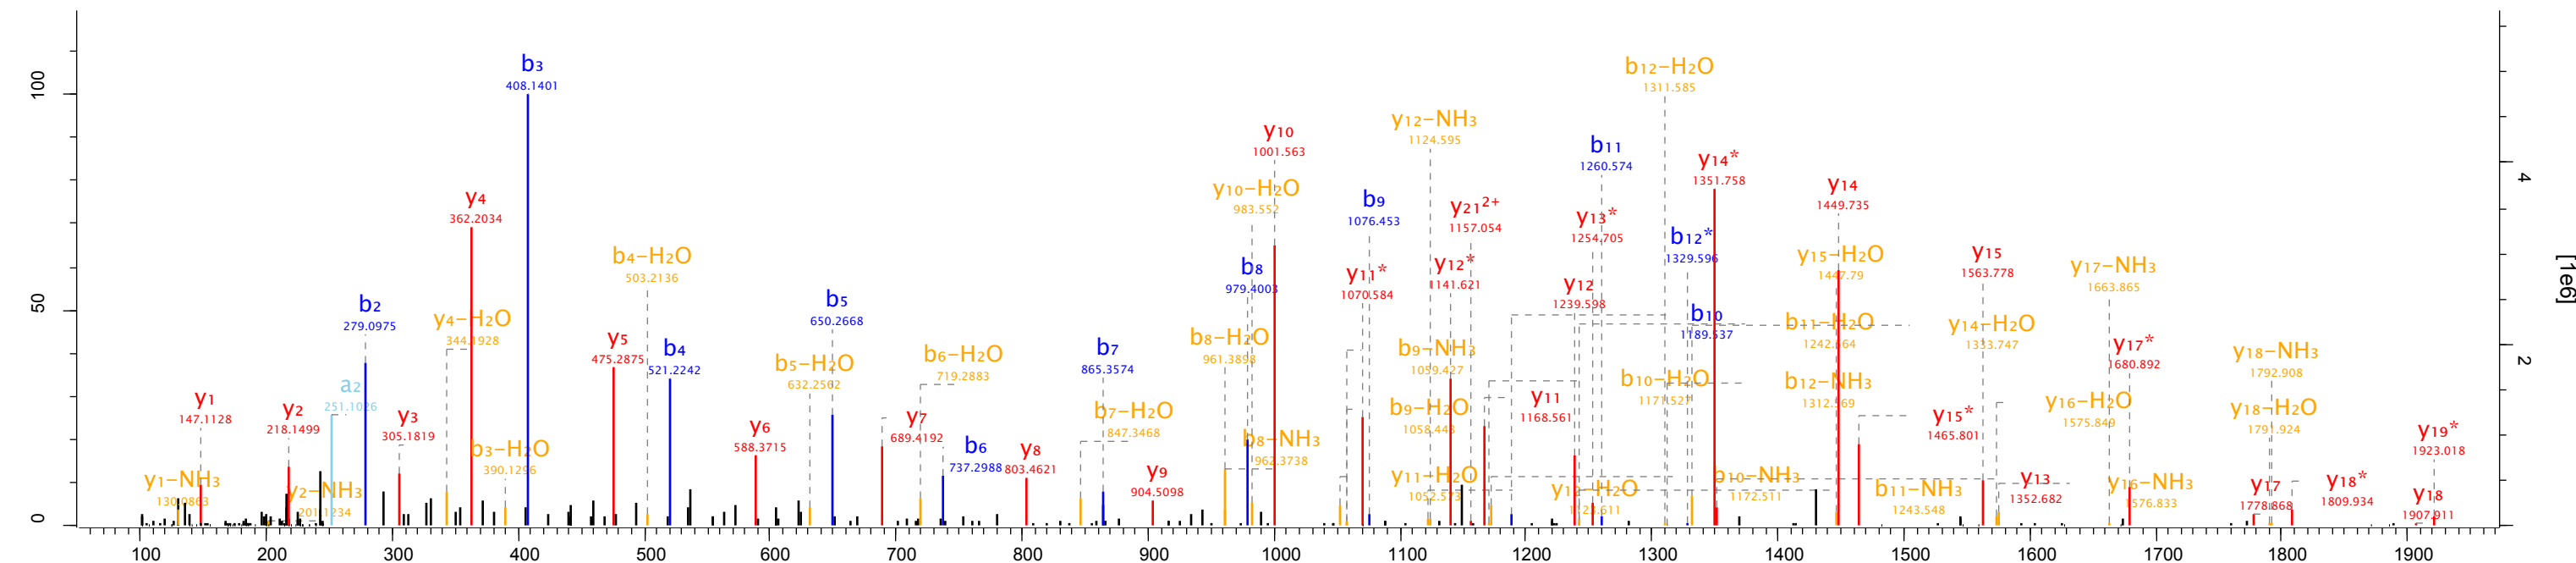

- D Y E I E S Q N P L A S P T N T L L G S A K -

Fragmentation mapping (b and y ions):

- b2: Y
- b3: E
- b4: I
- b5: E
- b6: S
- b7: Q
- b8: N
- b9: P
- b10: L
- b11: A
- b12\*: S

Fragmentation mapping (y ions):

- y1: K
- y2: A
- y3: S
- y4: G
- y5: L
- y6: L
- y7: T
- y8: N
- y9: T
- y10: P
- y11: S
- y12: A
- y13: L
- y14: P
- y15: N
- y16: Q
- y17: S
- y18: E
- y19\*: I
- y21<sup>2+</sup>: Y

Raw file Scan Method Score m/z Gene names

20150814\_A375SR\_Phospho\_BR2\_04 25542 FTMS; HCD 71.73 1117.84 IRS1

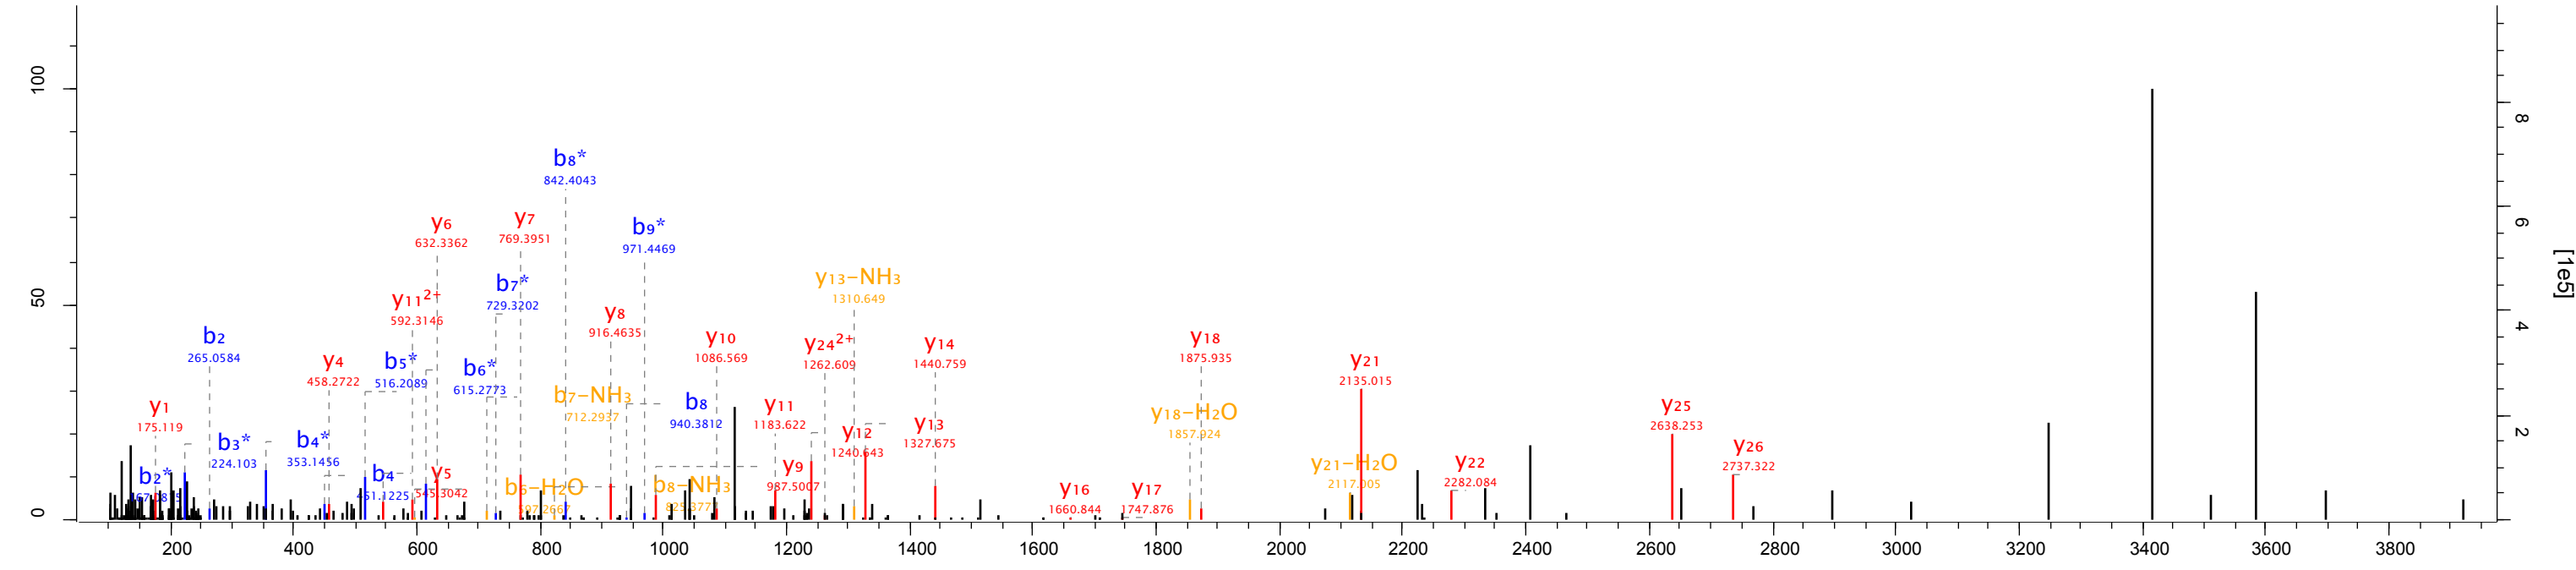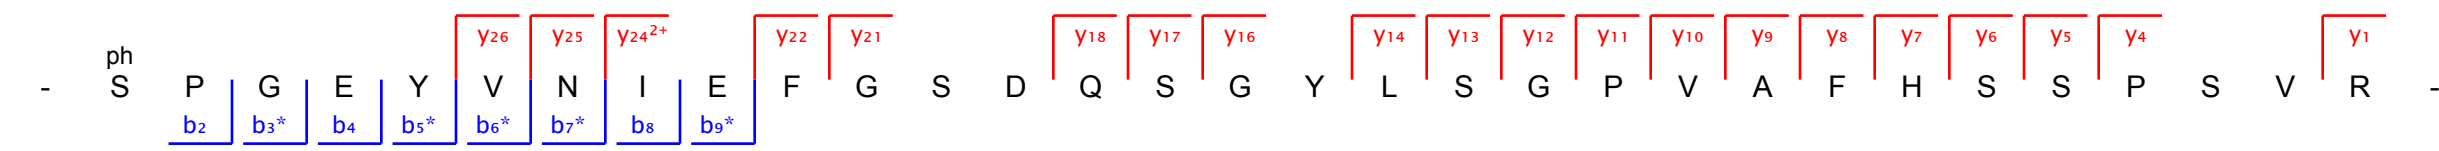

Raw file: 20150814\_A375SR\_Phospho\_BR2\_04  
 Scan: 25682 Method: FTMS; HCD Score: 88.54 m/z: 1179.07 Gene names: WHSC1

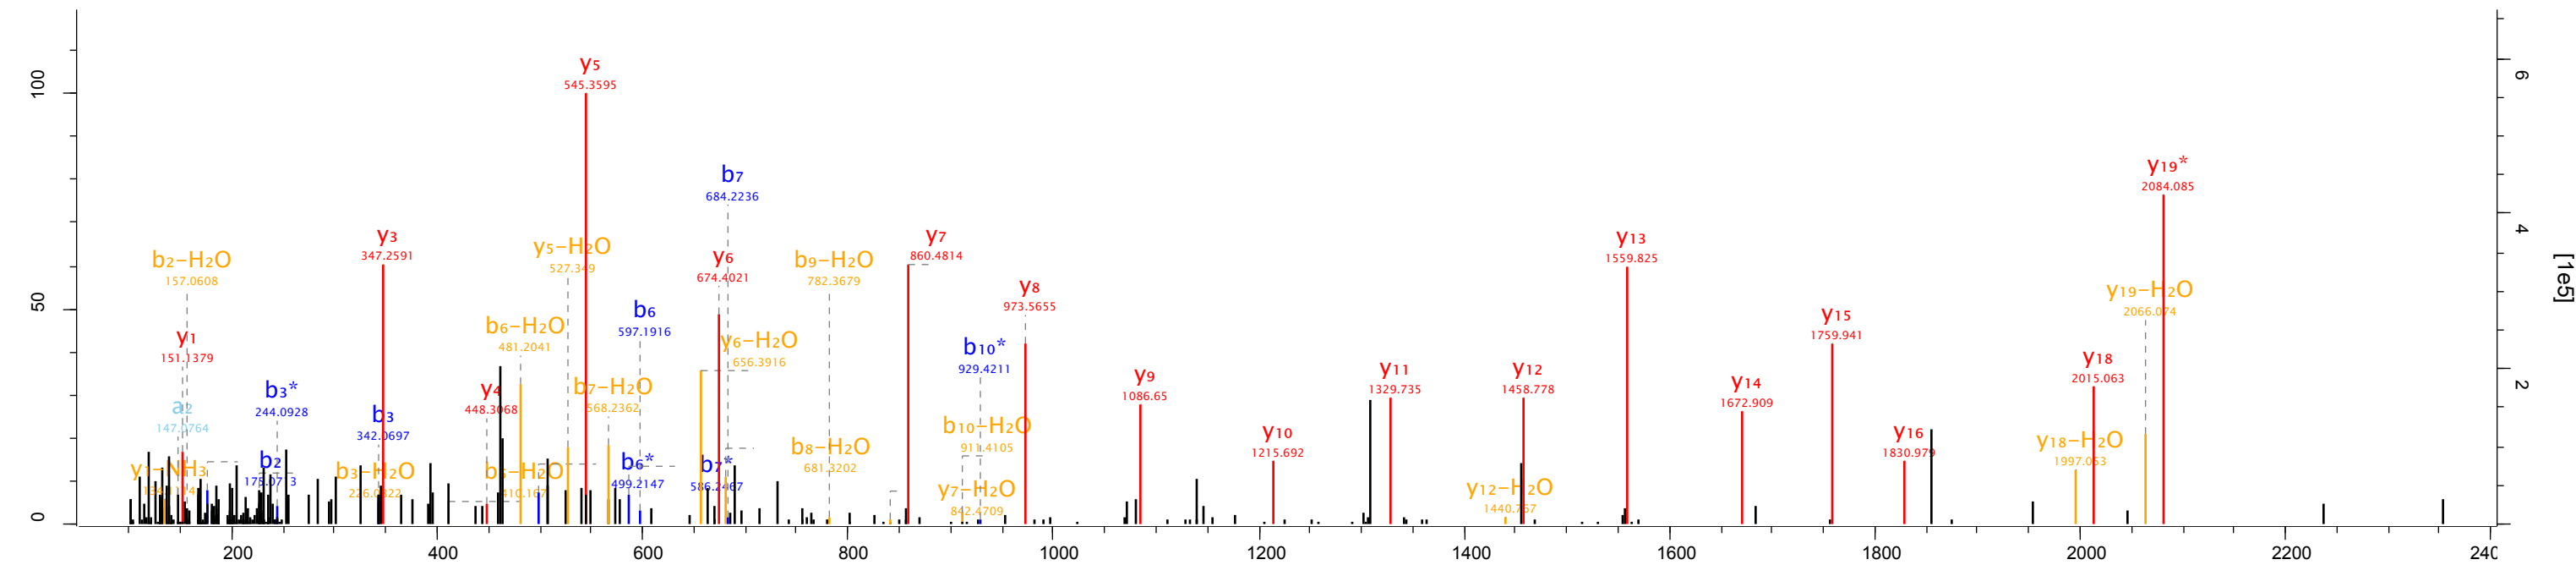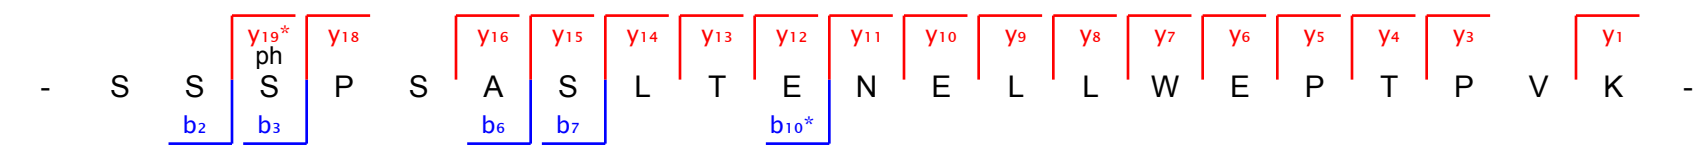

Raw file: 20150814\_A375SR\_Phospho\_BR2\_04  
 Scan: 25722 Method: FTMS; HCD Score: 225.64 m/z: 1221.94 Gene names: CHD8

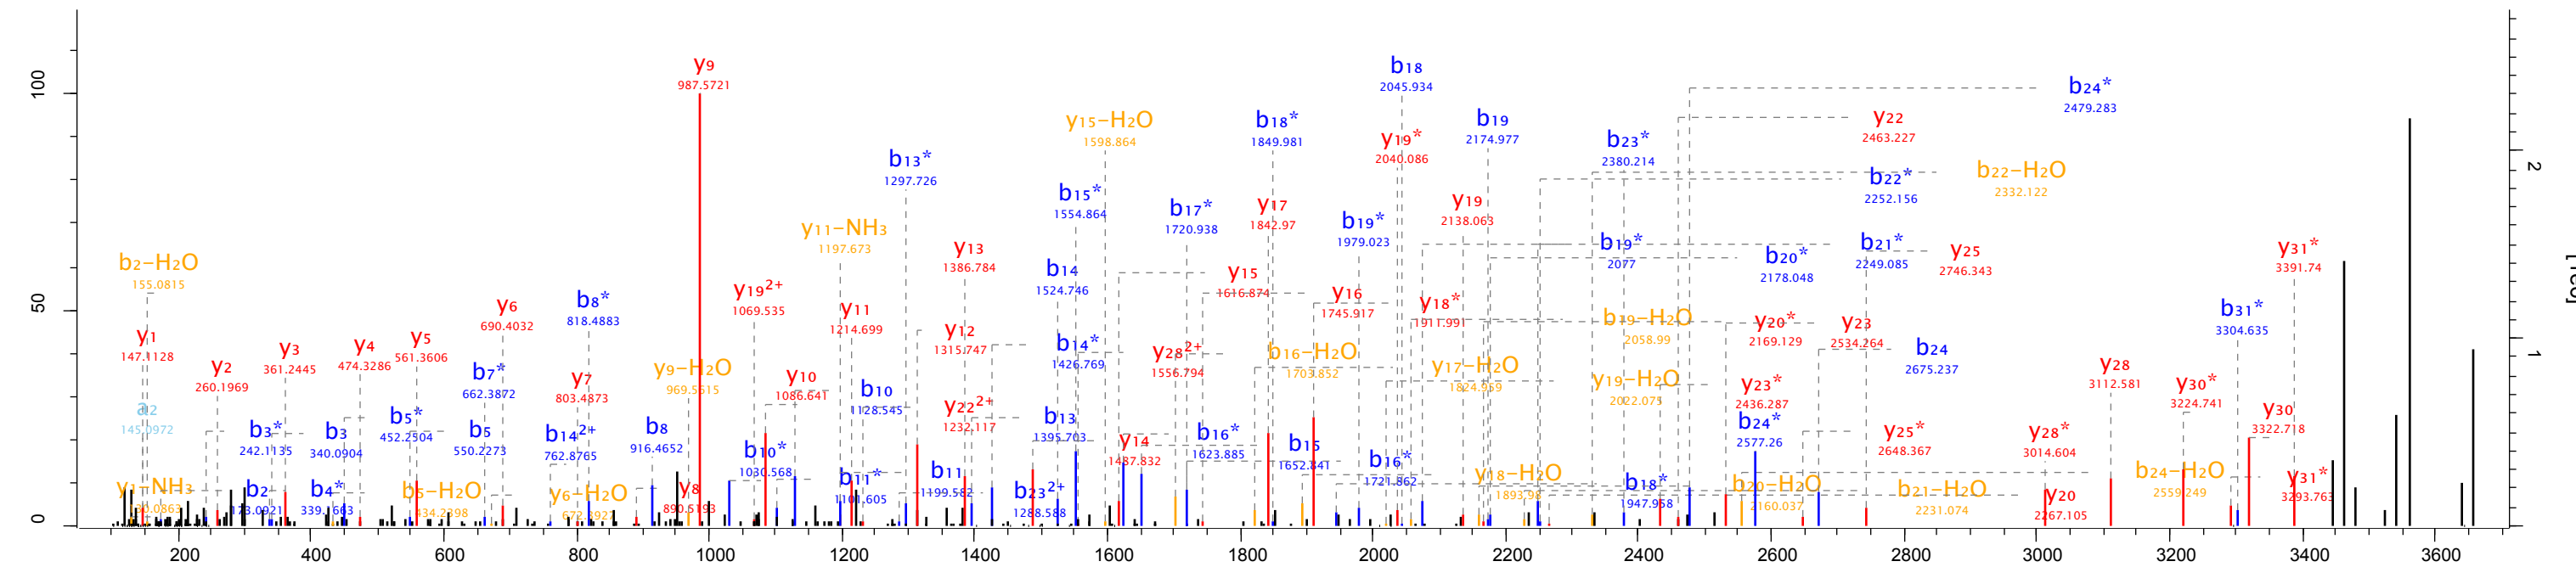

- T A S P L P L R P D A P V E K S P E E T A T Q V P S L E S L T L K -

b<sub>2</sub>
b<sub>3</sub>
b<sub>4</sub><sup>\*</sup>
b<sub>5</sub>
b<sub>7</sub><sup>\*</sup>
b<sub>8</sub>
b<sub>10</sub>
b<sub>11</sub>
b<sub>13</sub>
b<sub>14</sub>
b<sub>15</sub>
b<sub>16</sub><sup>\*</sup>
b<sub>17</sub><sup>\*</sup>
b<sub>18</sub>
b<sub>19</sub>
b<sub>20</sub><sup>\*</sup>
b<sub>21</sub><sup>\*</sup>
b<sub>22</sub><sup>\*</sup>
b<sub>23</sub><sup>\*</sup>
b<sub>24</sub>
b<sub>31</sub><sup>\*</sup>
y<sub>1</sub>
y<sub>2</sub>
y<sub>3</sub>
y<sub>4</sub>
y<sub>5</sub>
y<sub>6</sub>
y<sub>7</sub>
y<sub>8</sub>
y<sub>9</sub>
y<sub>10</sub>
y<sub>11</sub>
y<sub>12</sub>
y<sub>13</sub>
y<sub>14</sub>
y<sub>15</sub>
y<sub>16</sub>
y<sub>17</sub>
y<sub>18</sub><sup>\*</sup>
y<sub>19</sub>
y<sub>20</sub>
y<sub>22</sub>
y<sub>23</sub>
y<sub>25</sub>
y<sub>28</sub>
y<sub>30</sub><sup>\*</sup>
y<sub>31</sub><sup>\*</sup>
y<sub>31</sub><sup>ph</sup>

Raw file: 20150814\_A375SR\_Phospho\_BR2\_04  
 Scan: 25982 Method: FTMS; HCD Score: 110.34 m/z: 1314.62 Gene names: USP36

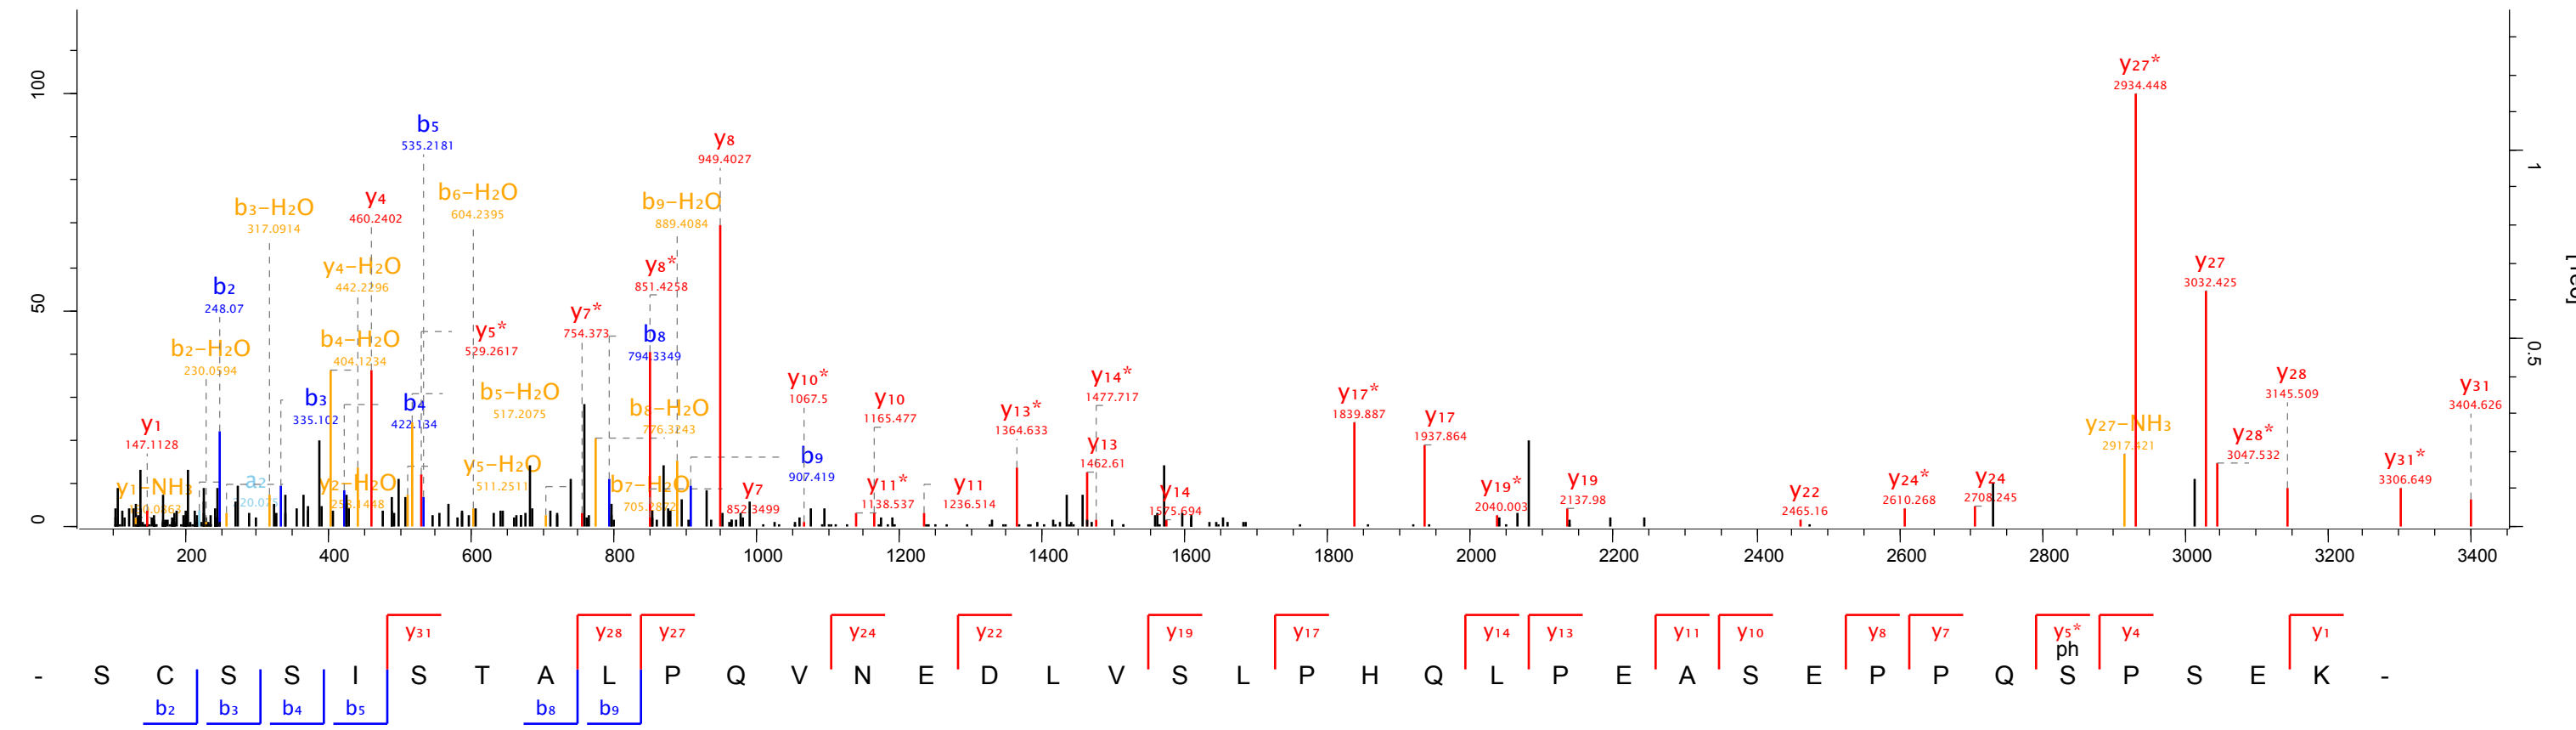

Raw file  
20150814\_A375SR\_Phospho\_BR2\_04

Scan 26182 Method FTMS; HCD Score 90.39 m/z 942.09 Gene names KRT18

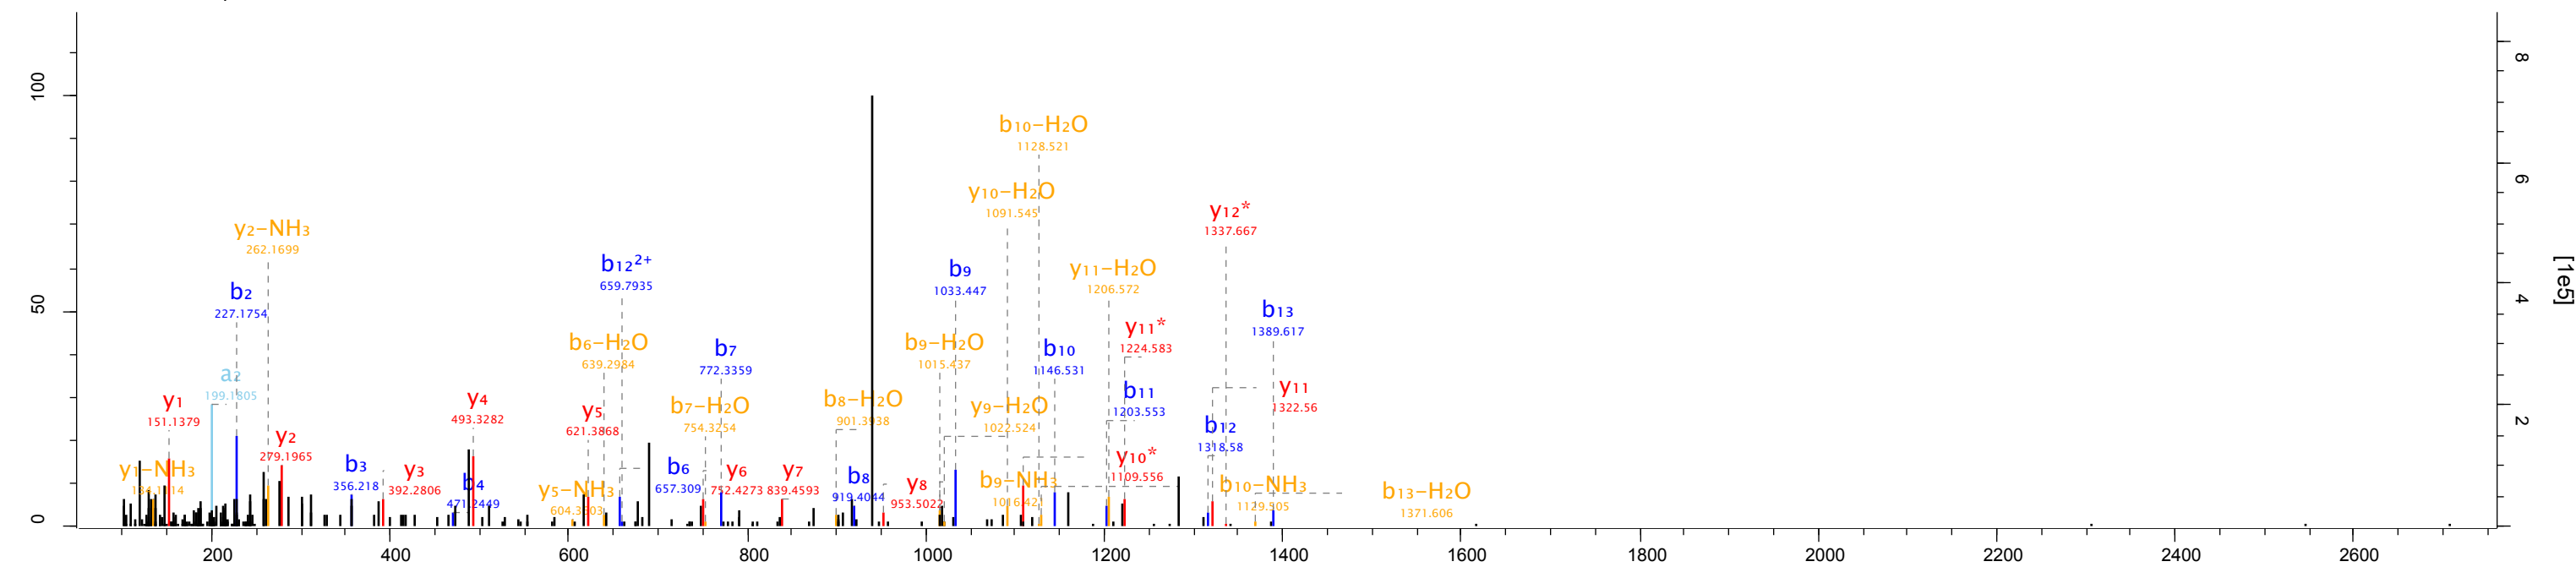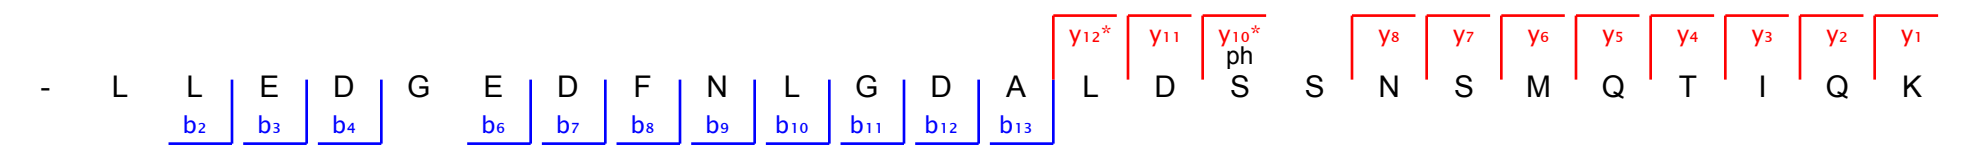

Raw file: 20150814\_A375SR\_Phospho\_BR2\_04  
 Scan: 26552 Method: FTMS; HCD Score: 140.31 m/z: 1061.03 Gene names: POGZ

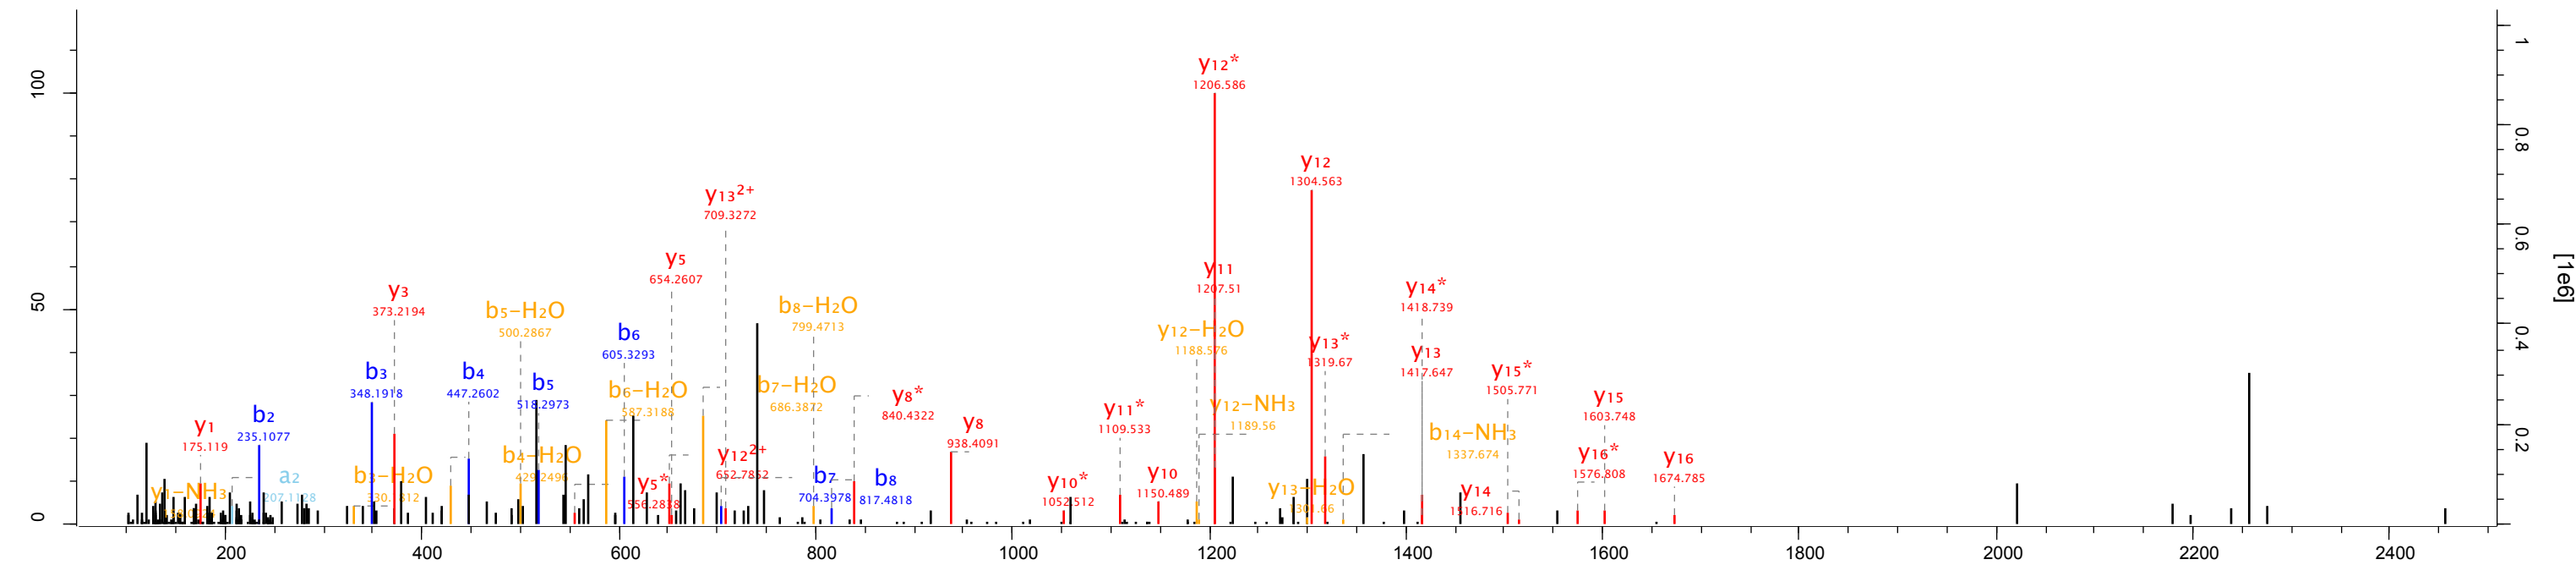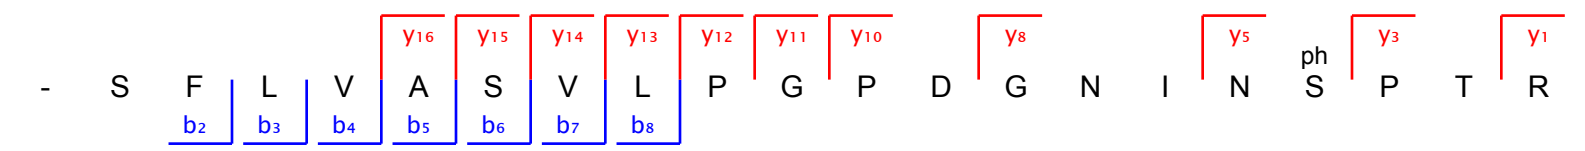



Raw file: 20150814\_A375SR\_Phospho\_BR2\_04  
 Scan: 27002 Method: FTMS; HCD Score: 116.69 m/z: 1234.23 Gene names: MCM2

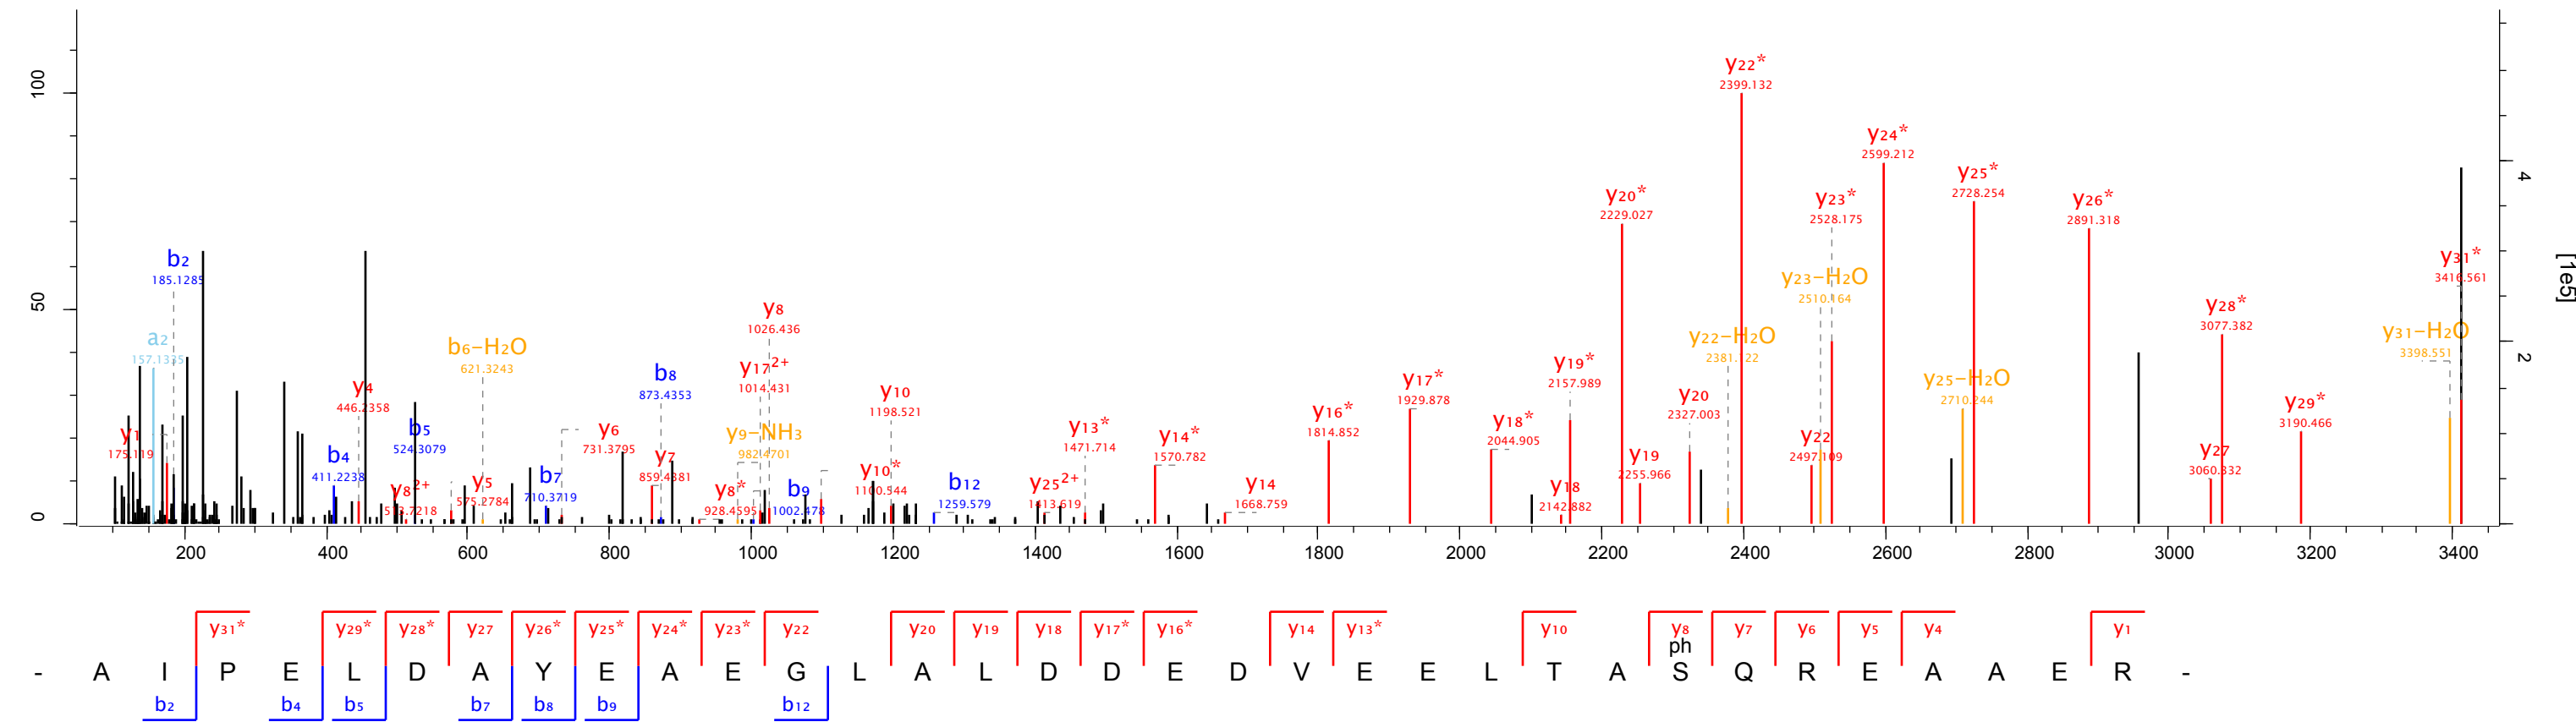

Raw file  
20150814\_A375SR\_Phospho\_BR2\_04

Scan 27112 Method FTMS; HCD Score 97.63 m/z 1185.95 Gene names NRBP1

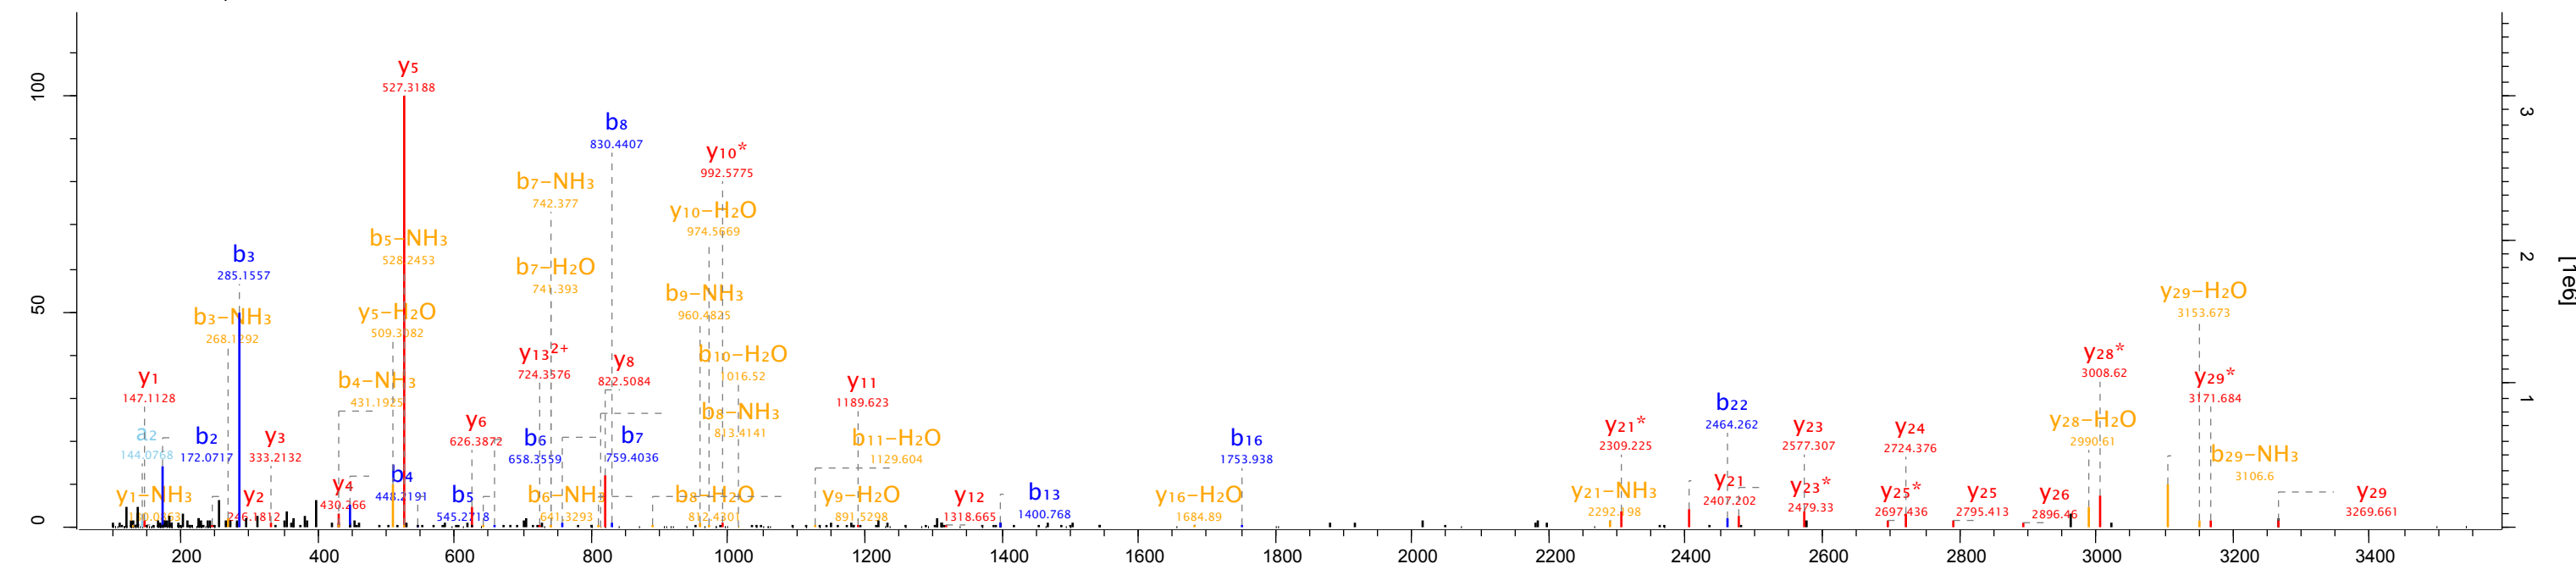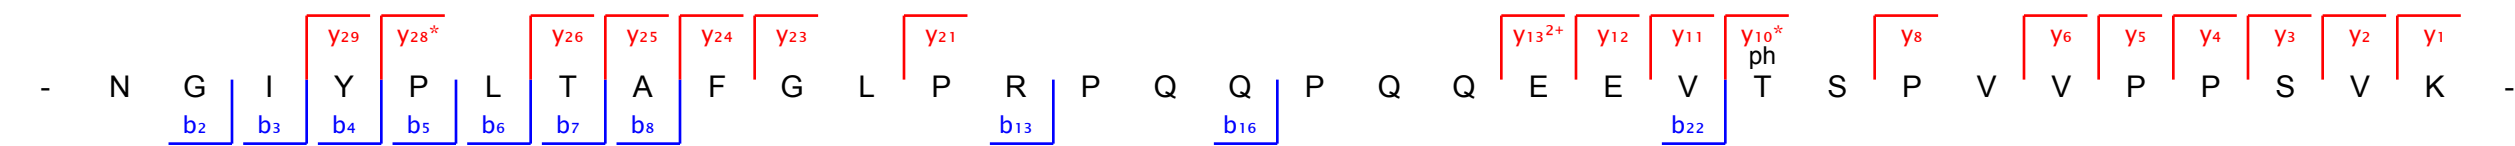

20150814\_A375SR\_Phospho\_BR2\_04 27312 FTMS; HCD 119.3 932.53 CDC42EP2

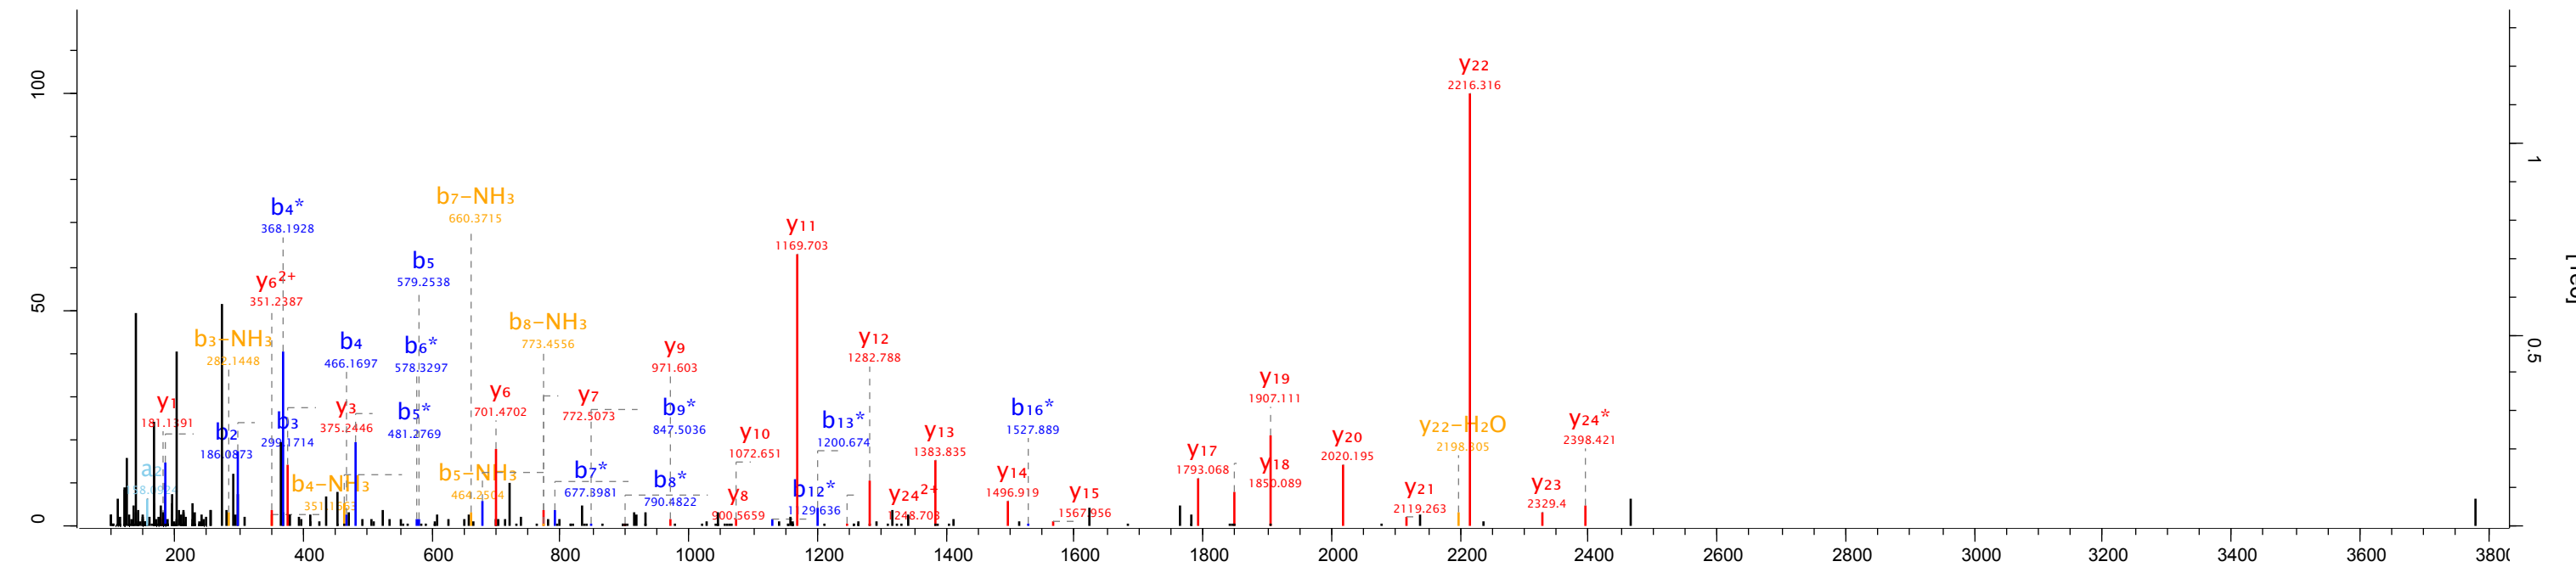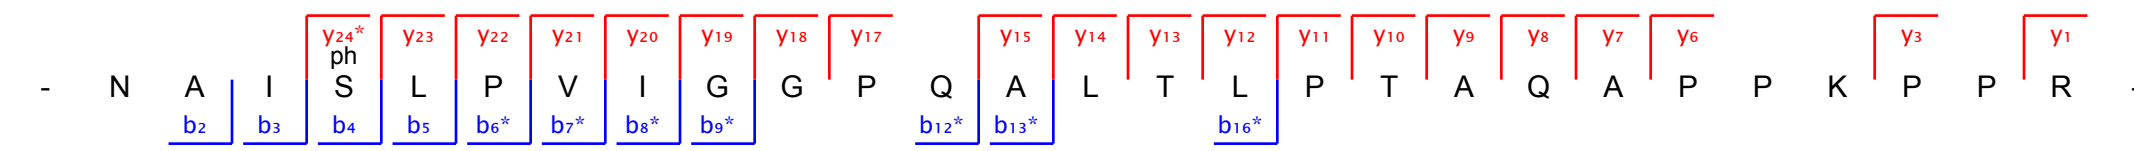

[1e6]

Raw file 20150814\_A375SR\_Phospho\_BR2\_04 Scan 27362 Method FTMS; HCD Score 82.5 m/z 1202.54 Gene names CAMKK2

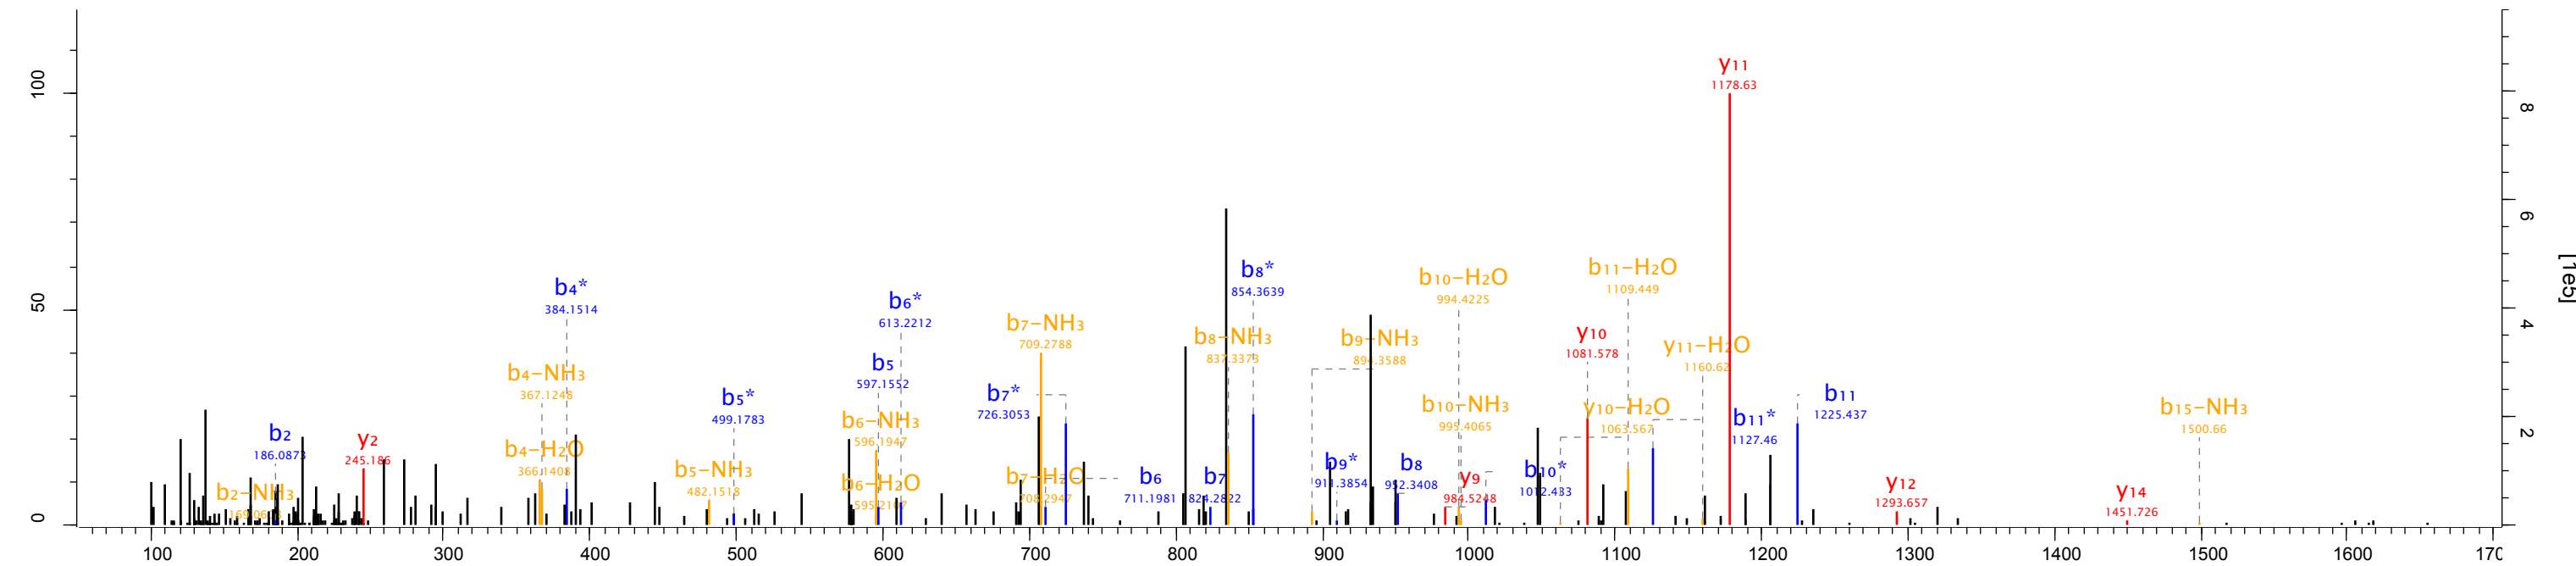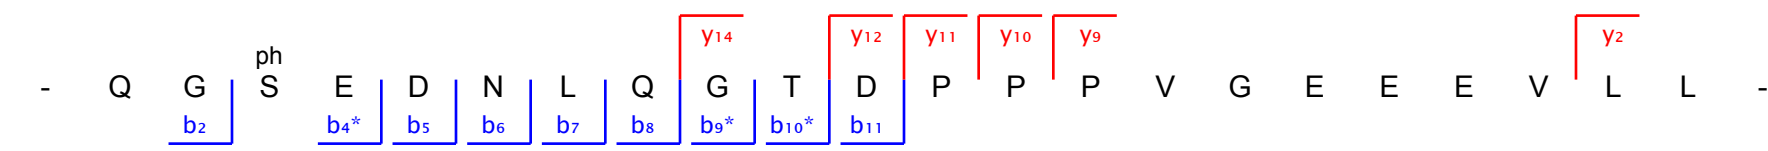

Raw file Scan Method Score m/z Gene names  
 20150814\_A375SR\_Phospho\_BR2\_04 28692 FTMS; HCD 212.26 1160.92 DCP1A

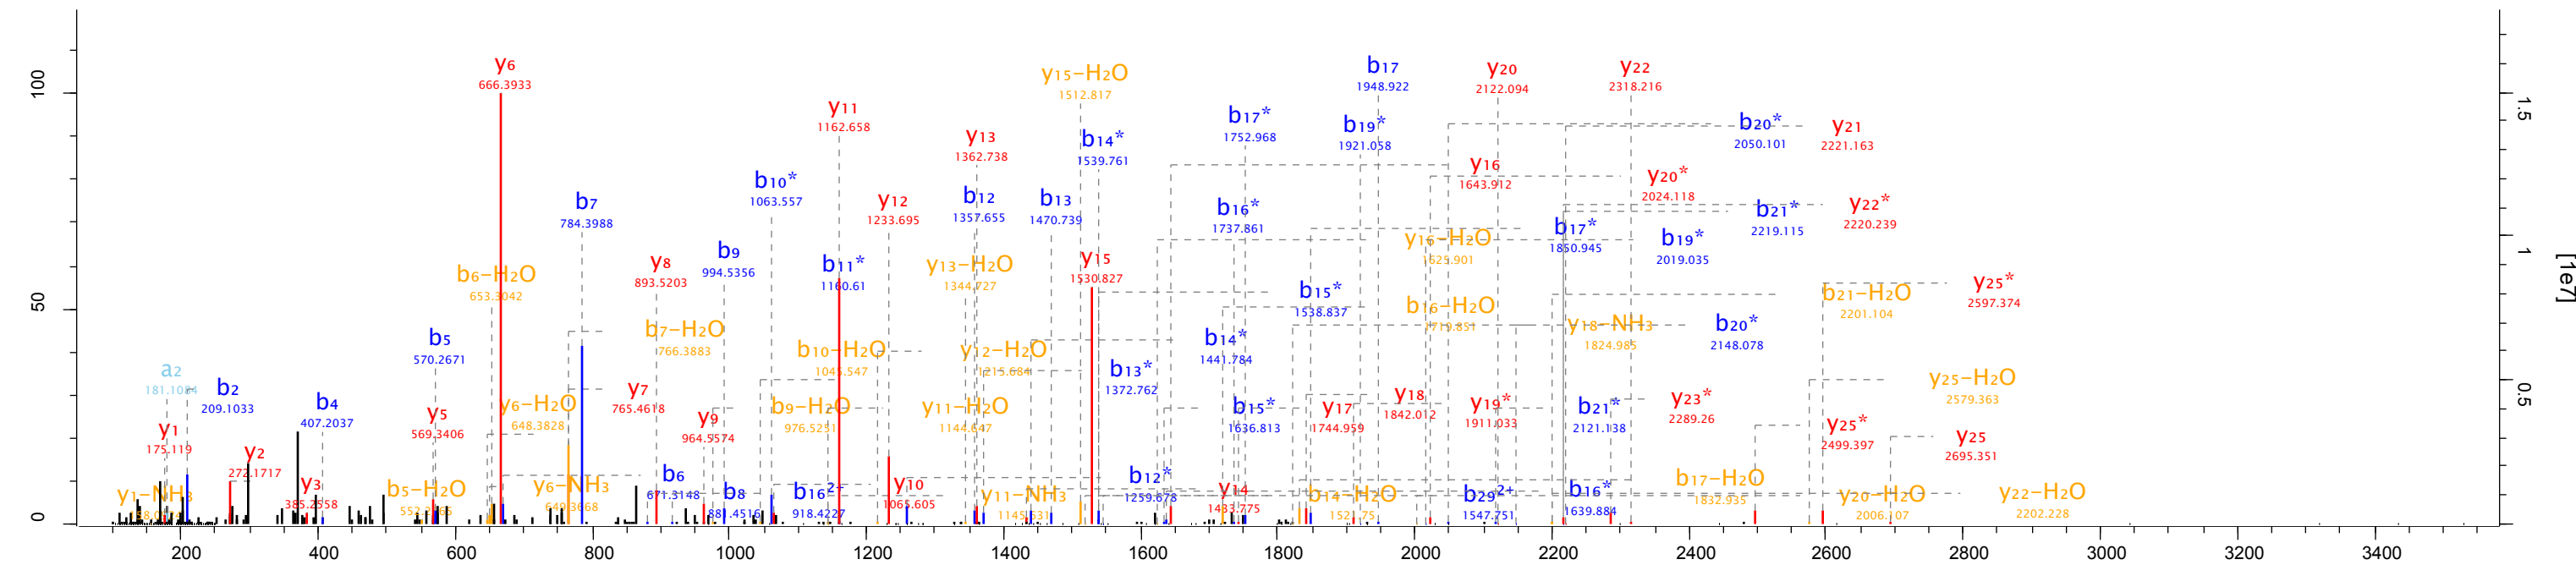

- H A P T Y T I P L S P V L S P T L P A E A P T A Q V P P S L P R -

b<sub>2</sub>
b<sub>4</sub>
b<sub>5</sub>
b<sub>6</sub>
b<sub>7</sub>
b<sub>8</sub>
b<sub>9</sub>
b<sub>10</sub>\*
b<sub>11</sub>\*
b<sub>12</sub>
b<sub>13</sub>
b<sub>14</sub>\*
b<sub>15</sub>\*
b<sub>16</sub>\*
b<sub>17</sub>
b<sub>19</sub>\*
b<sub>20</sub>\*
b<sub>21</sub>\*
b<sub>29</sub><sup>2+</sup>
y<sub>25</sub>
y<sub>23</sub><sup>ph</sup>
y<sub>22</sub>
y<sub>21</sub>
y<sub>20</sub>
y<sub>19</sub><sup>ph</sup>
y<sub>18</sub>
y<sub>17</sub>
y<sub>16</sub>
y<sub>15</sub>
y<sub>14</sub>
y<sub>13</sub>
y<sub>12</sub>
y<sub>11</sub>
y<sub>10</sub>
y<sub>9</sub>
y<sub>8</sub>
y<sub>7</sub>
y<sub>6</sub>
y<sub>5</sub>
y<sub>3</sub>
y<sub>2</sub>
y<sub>1</sub>

Raw file: 20150814\_A375SR\_Phospho\_BR2\_04  
 Scan: 3112 Method: FTMS; HCD Score: 320.43 m/z: 834.84 Gene names: YBX1

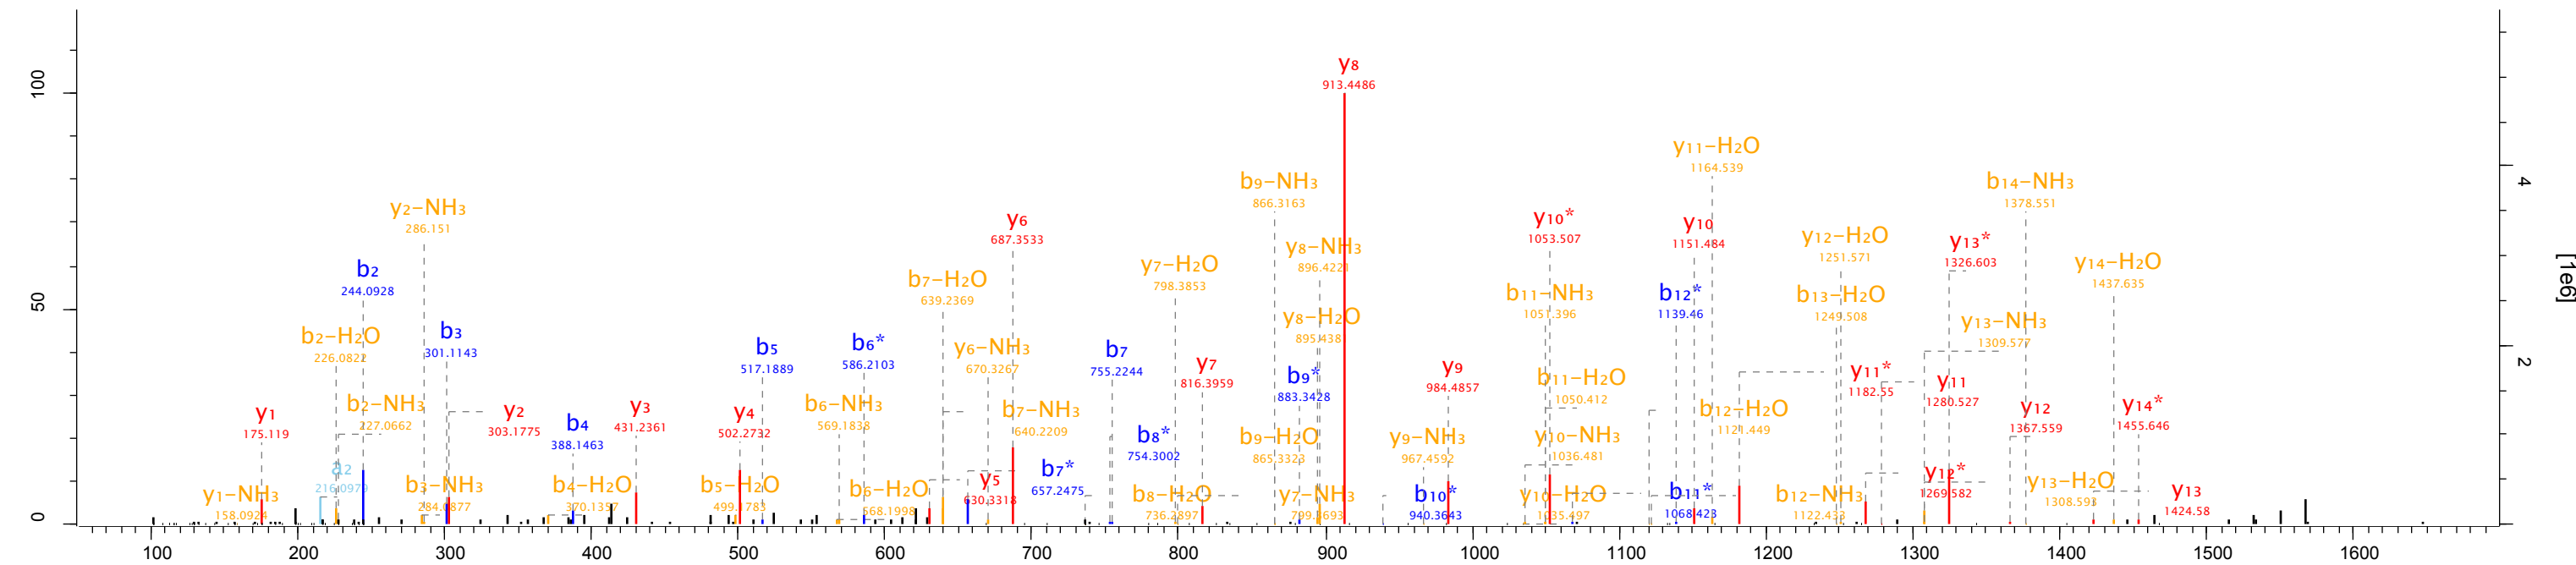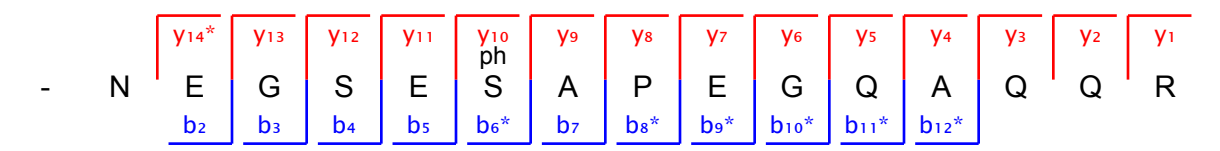

Raw file: 20150814\_A375SR\_Phospho\_BR2\_04  
 Scan: 3352 Method: FTMS; HCD Score: 78.24 m/z: 682.79 Gene names: WAC

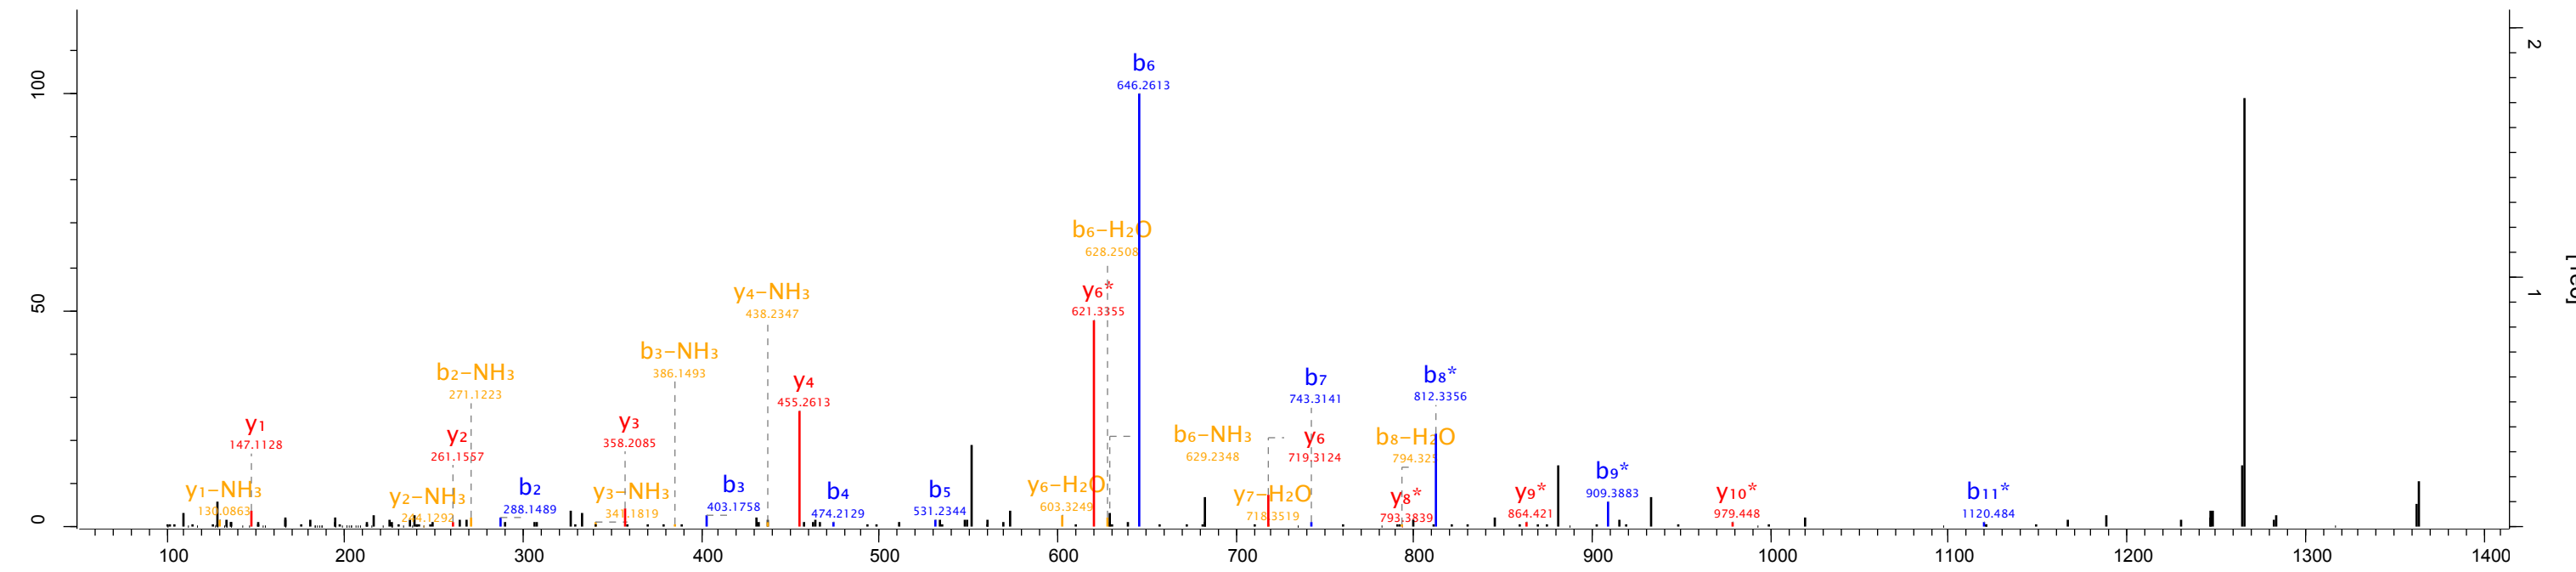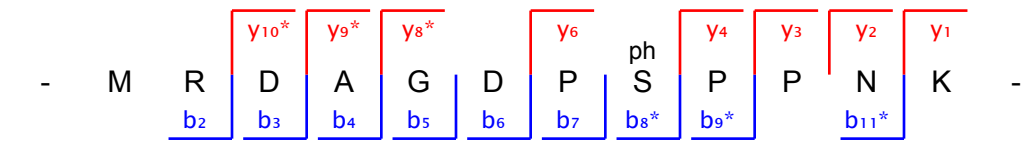

Raw file: 20150814\_A375SR\_Phospho\_BR2\_04  
 Scan: 3412 Method: FTMS; HCD Score: 103.83 m/z: 652.33 Gene names: CIZ1

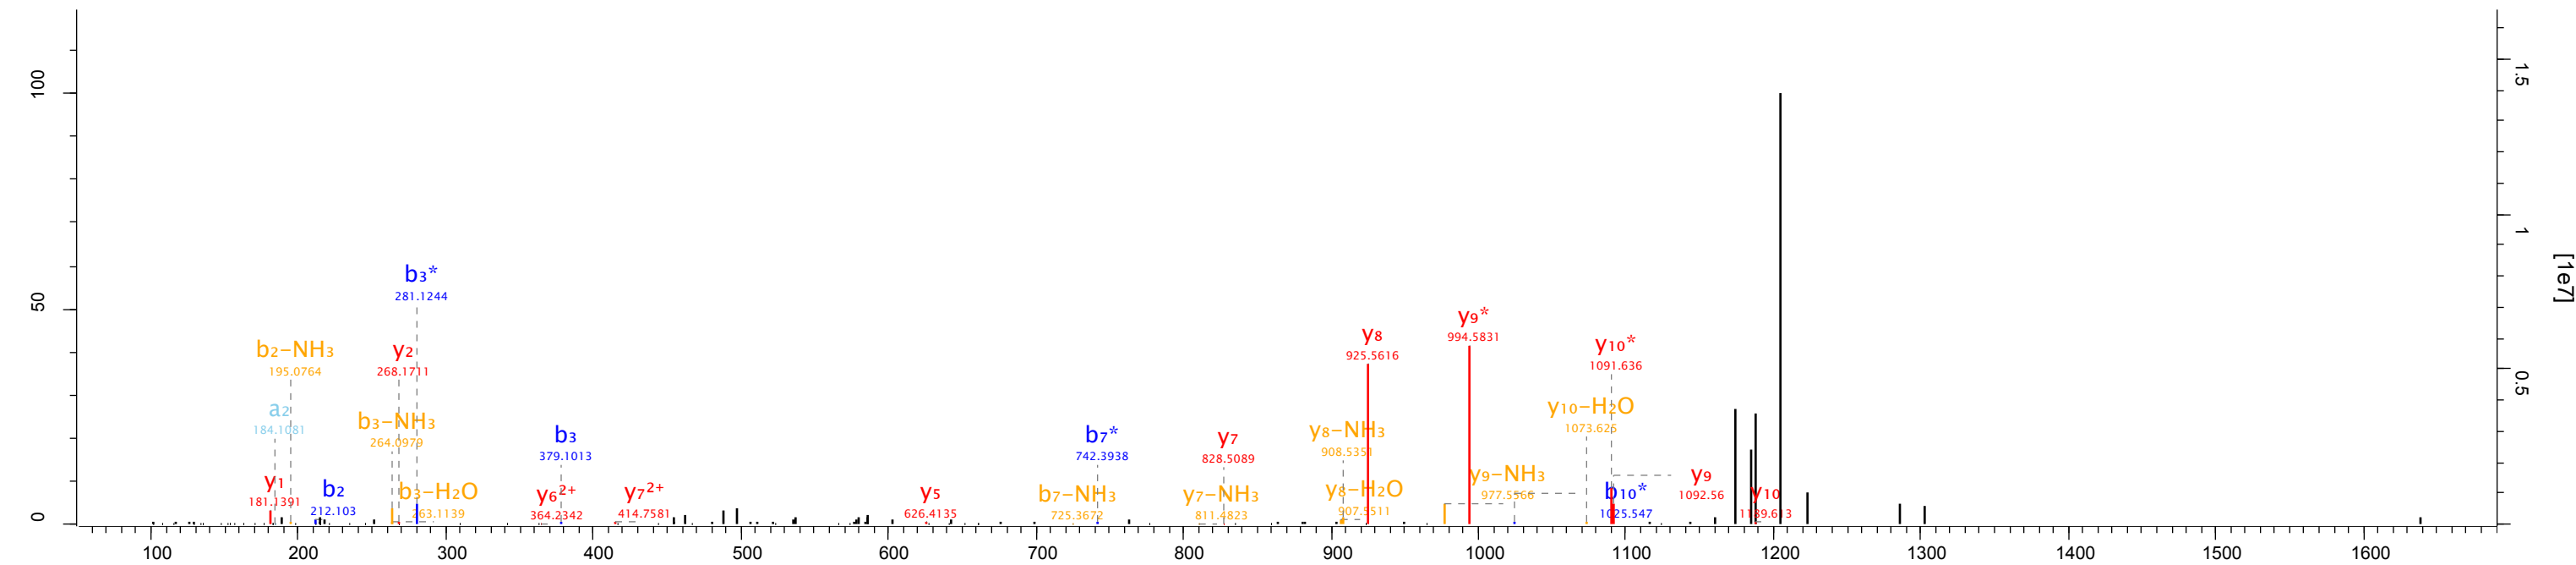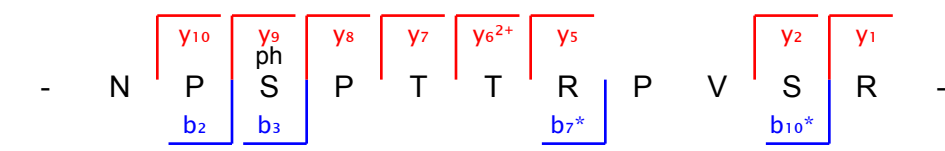



Raw file: 20150814\_A375SR\_Phospho\_BR2\_04  
 Scan: 3972 Method: FTMS; HCD Score: 100.09 m/z: 517.26 Gene names: SRRM2

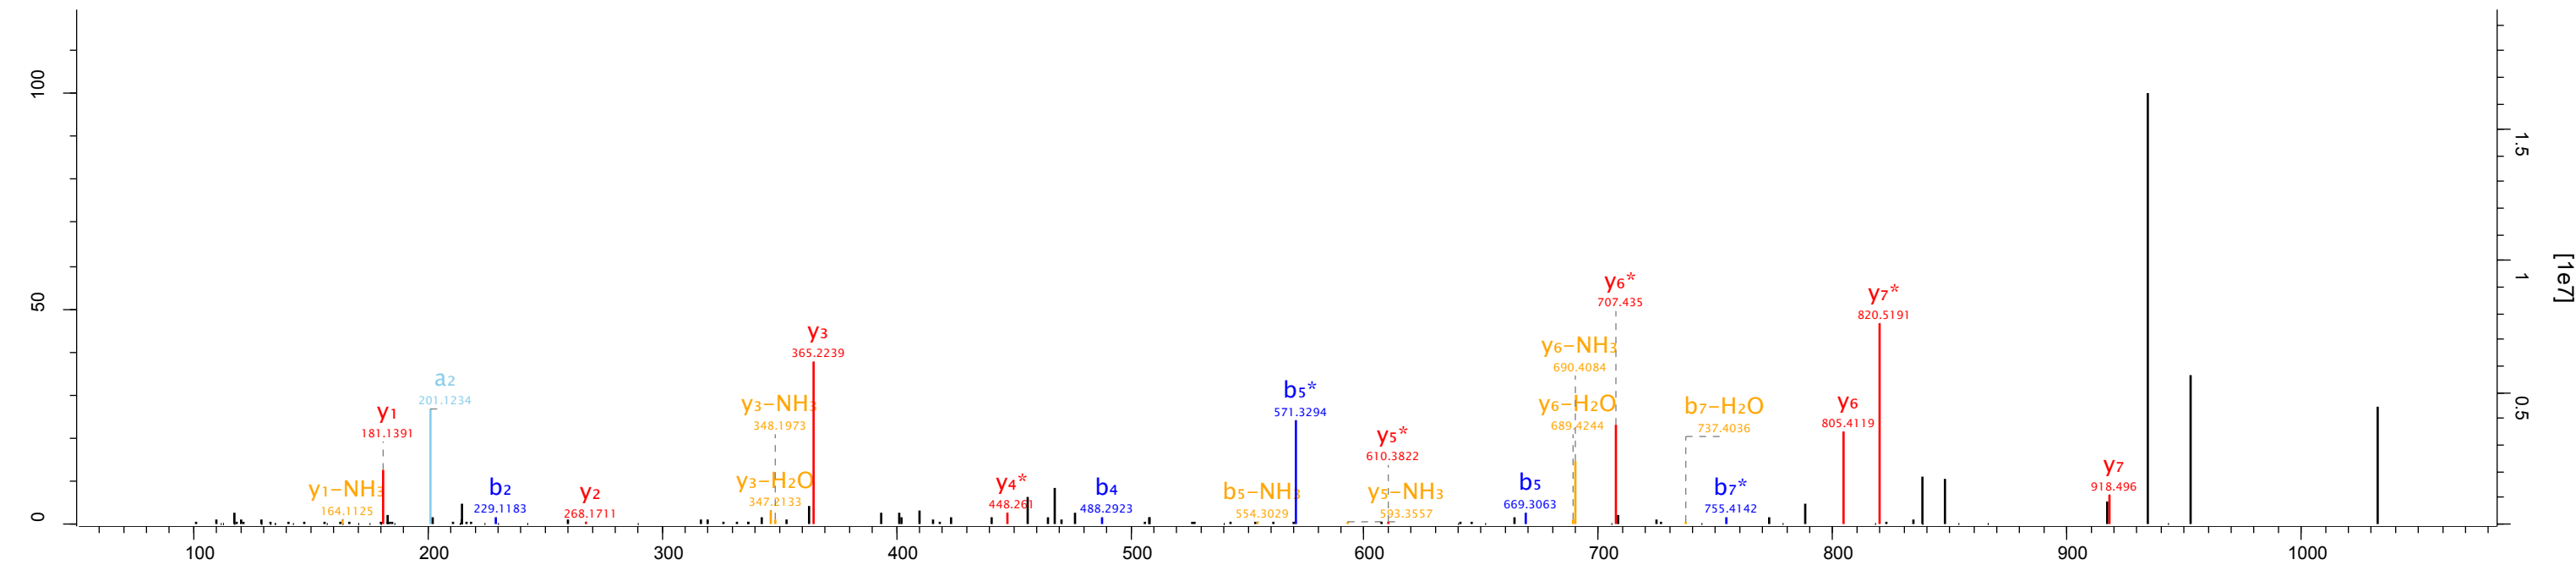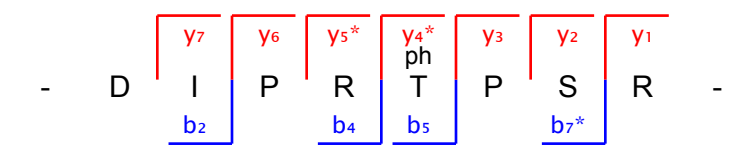

Raw file: 20150814\_A375SR\_Phospho\_BR2\_04  
 Scan: 4552 Method: FTMS; HCD Score: 62.63 m/z: 472.21 Gene names: PPP1R12A

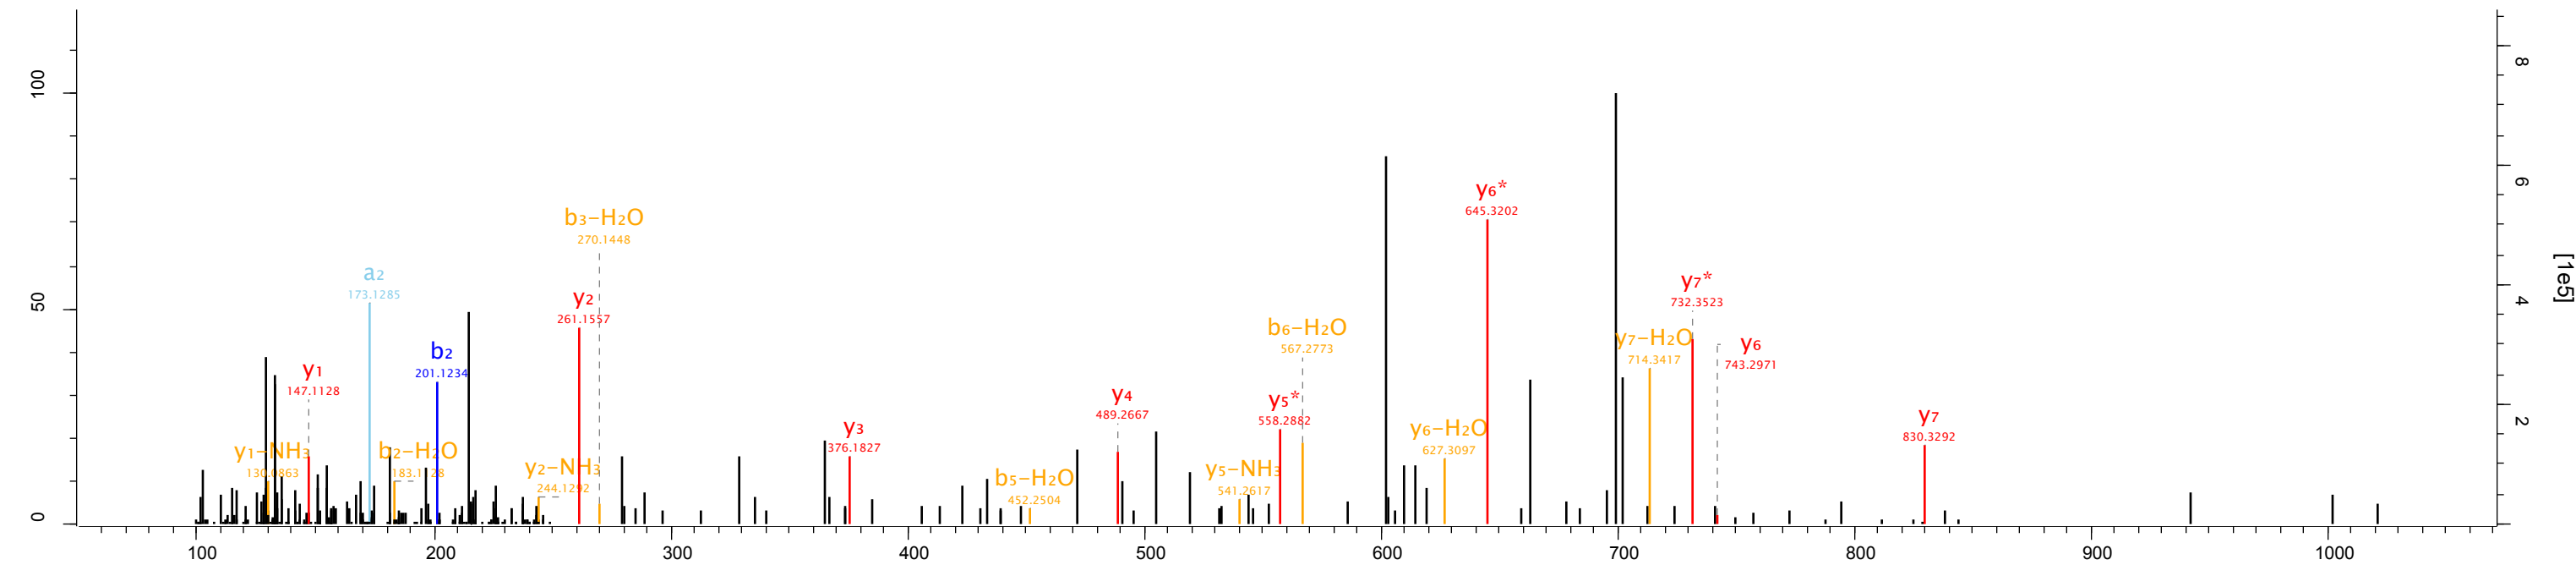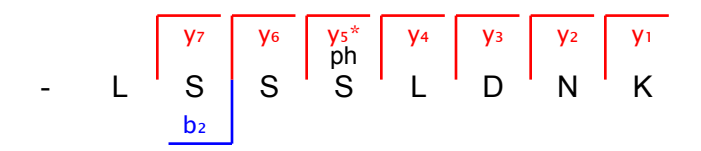

Raw file: 20150814\_A375SR\_Phospho\_BR2\_04  
 Scan: 4622 Method: FTMS; HCD Score: 47.65 m/z: 609.6 Gene names: SRRM2

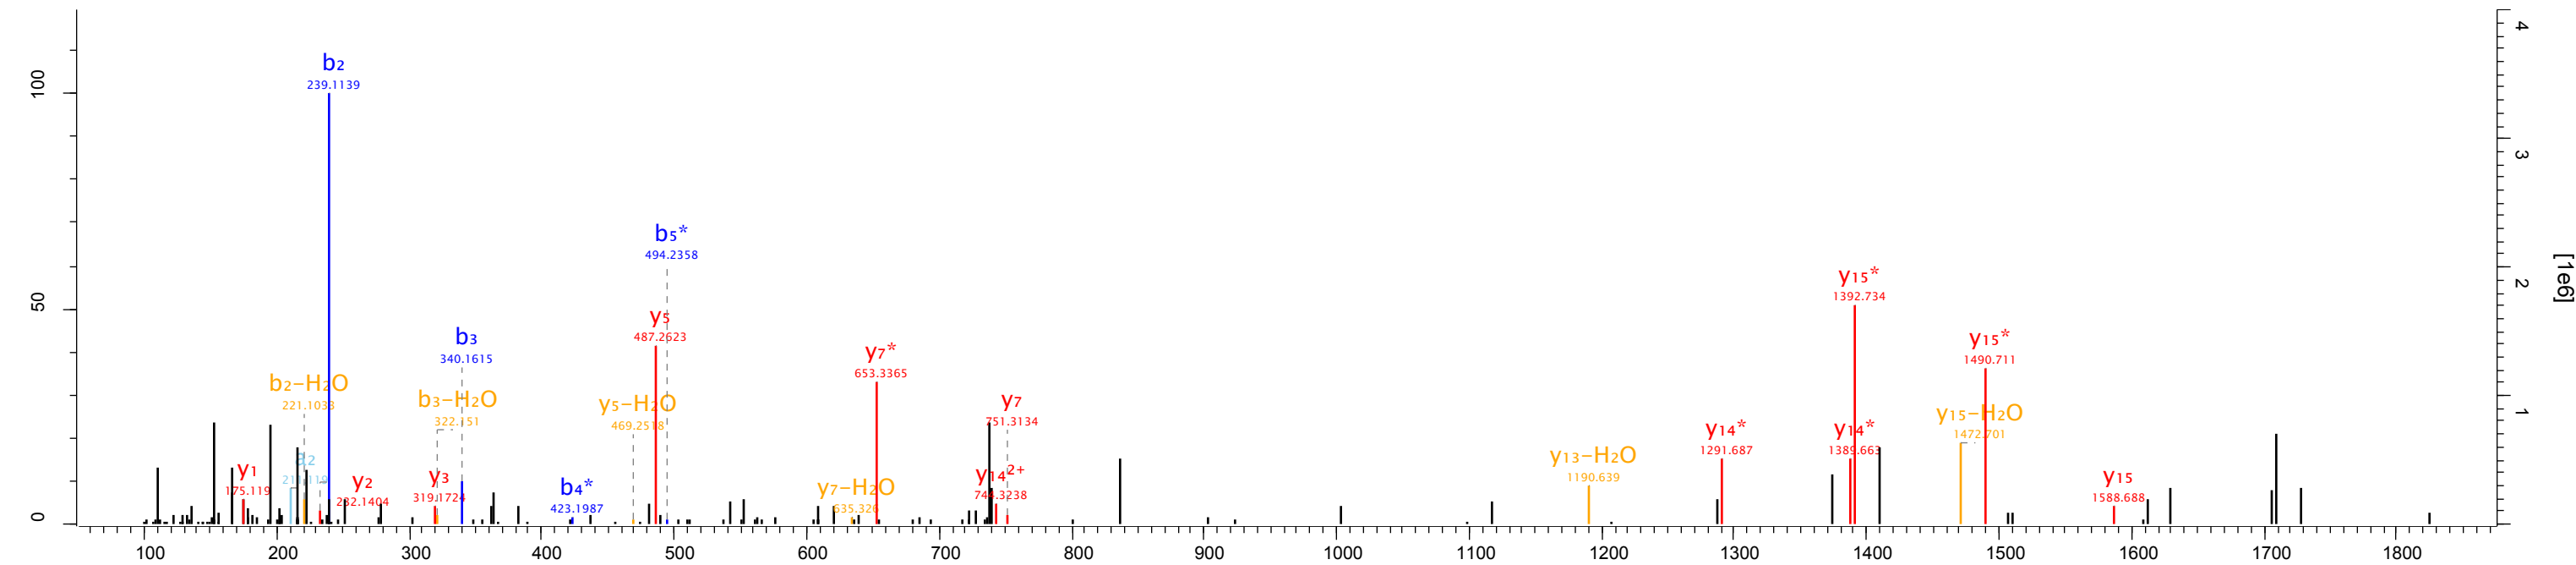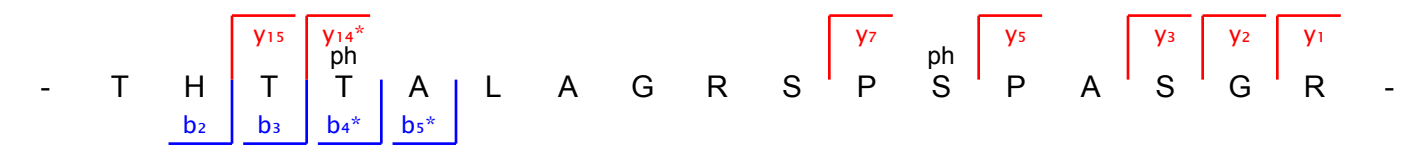

Raw file: 20150814\_A375SR\_Phospho\_BR2\_04  
 Scan: 4942 Method: FTMS; HCD Score: 226.14 m/z: 825.32 Gene names: FANCD2

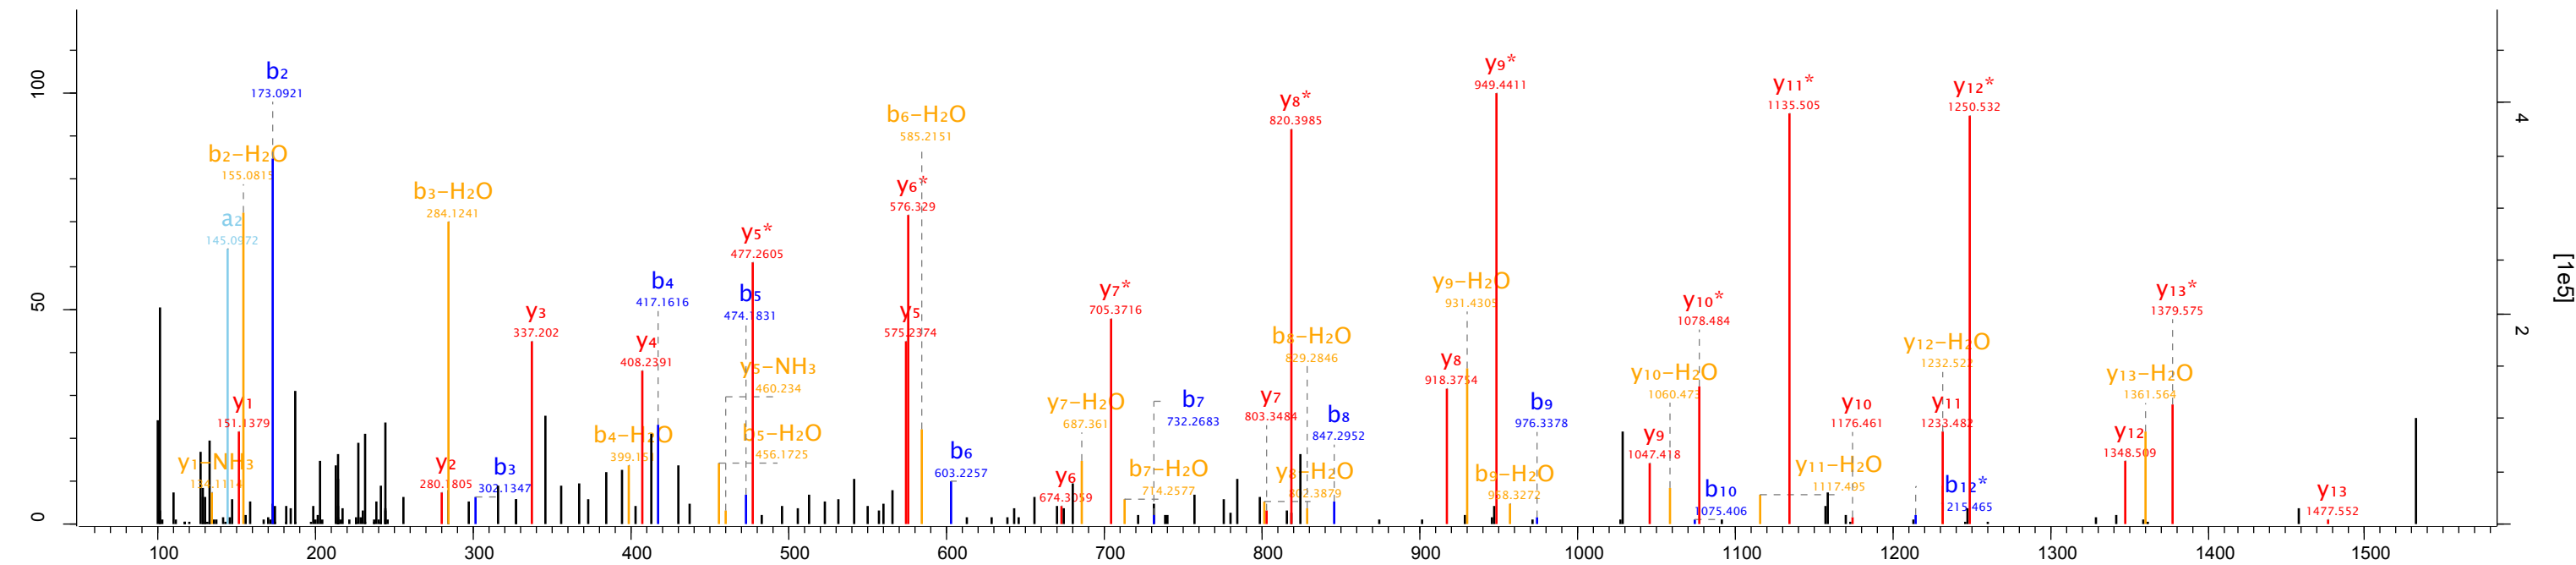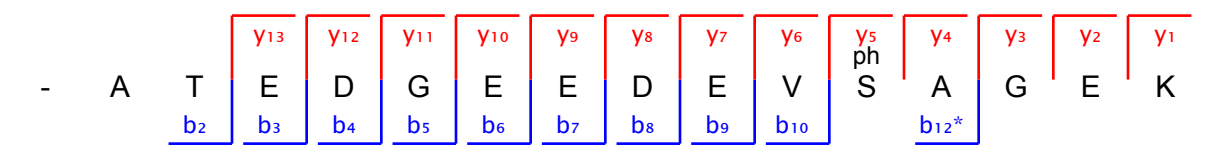

Raw file: 20150814\_A375SR\_Phospho\_BR2\_04  
 Scan: 5332 Method: FTMS; HCD Score: 261.76 m/z: 890.33 Gene names: WDR44

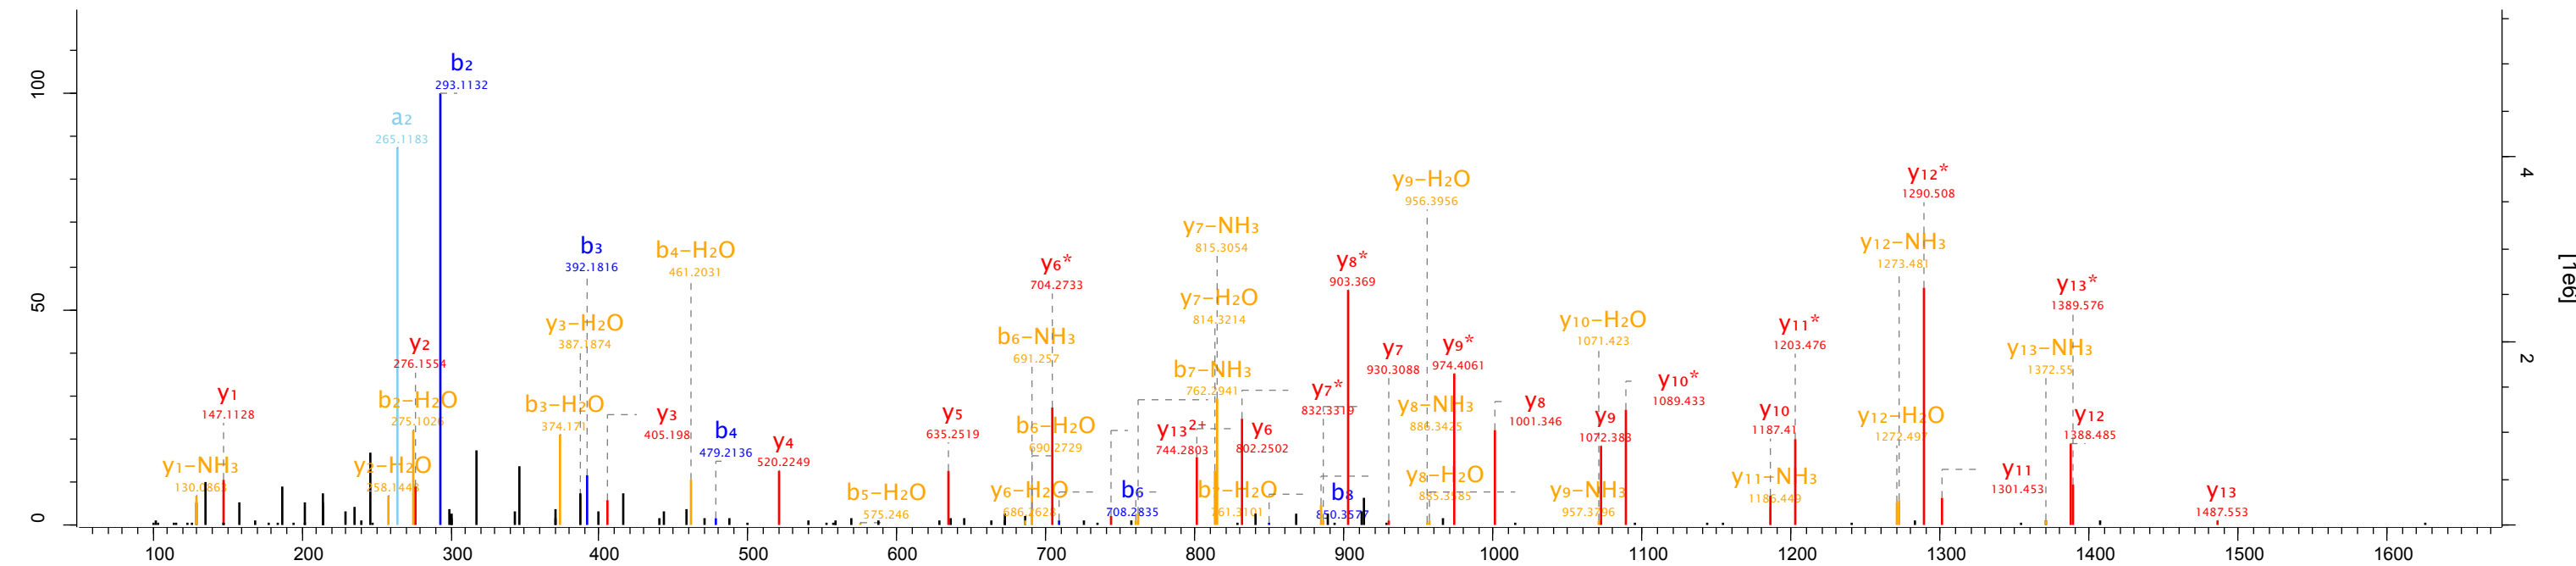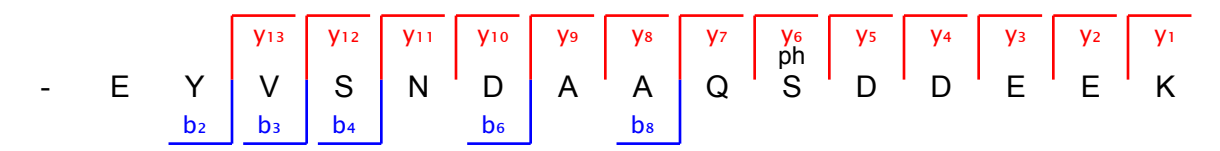

Raw file: 20150814\_A375SR\_Phospho\_BR2\_04  
 Scan: 6612 Method: FTMS; HCD Score: 182.09 m/z: 748.81 Gene names: UBAP2L

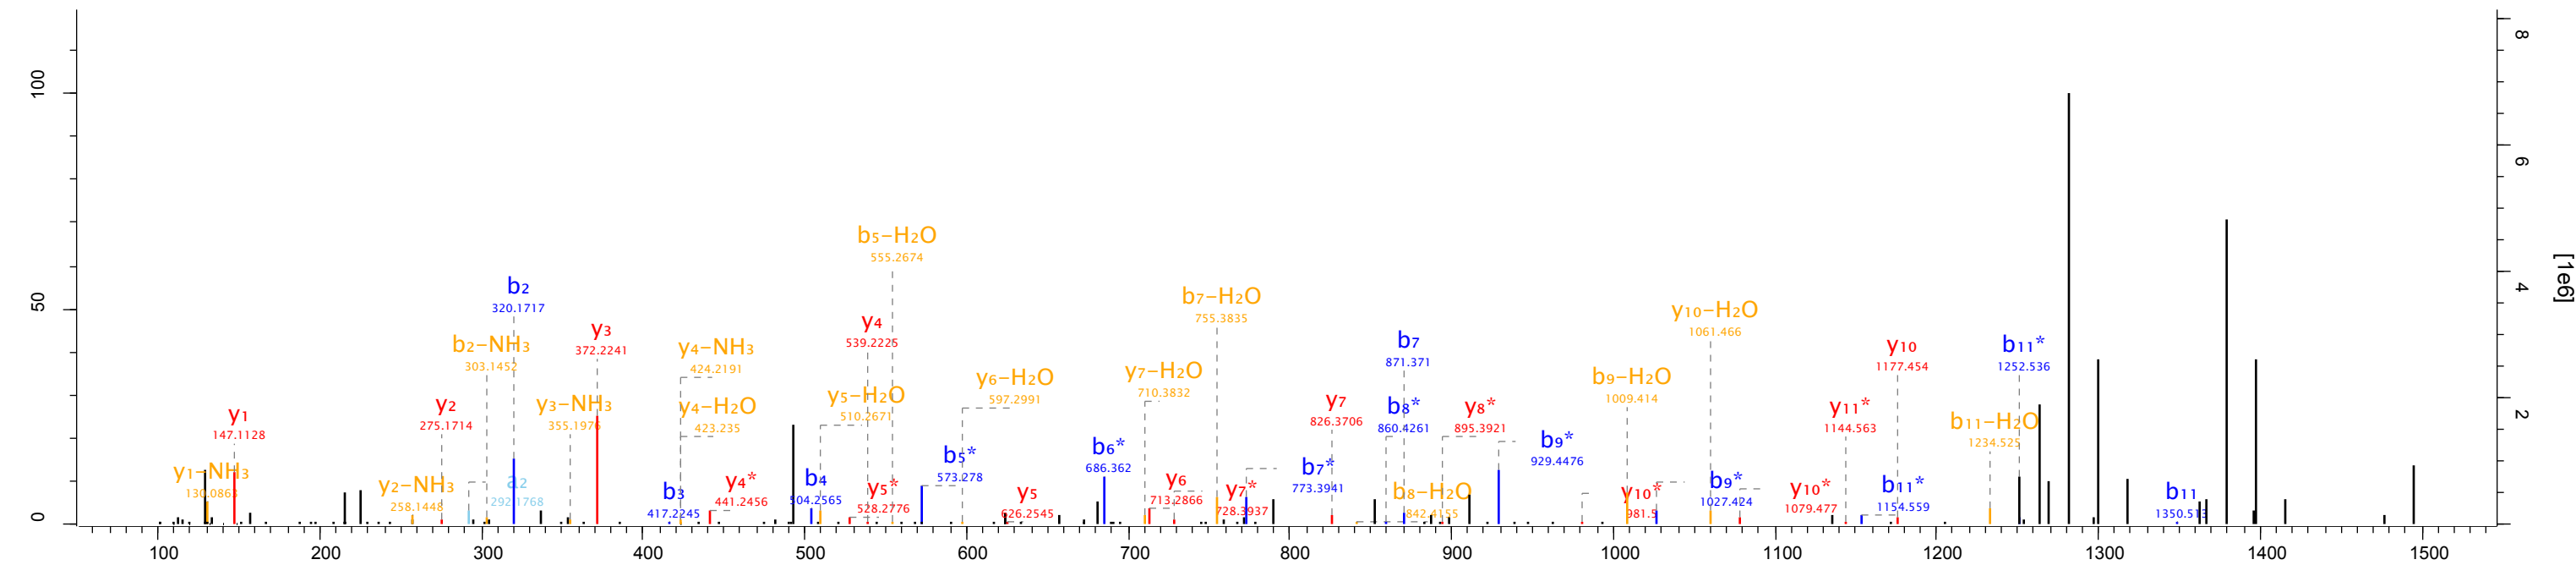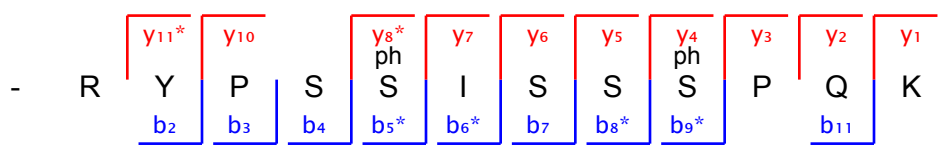

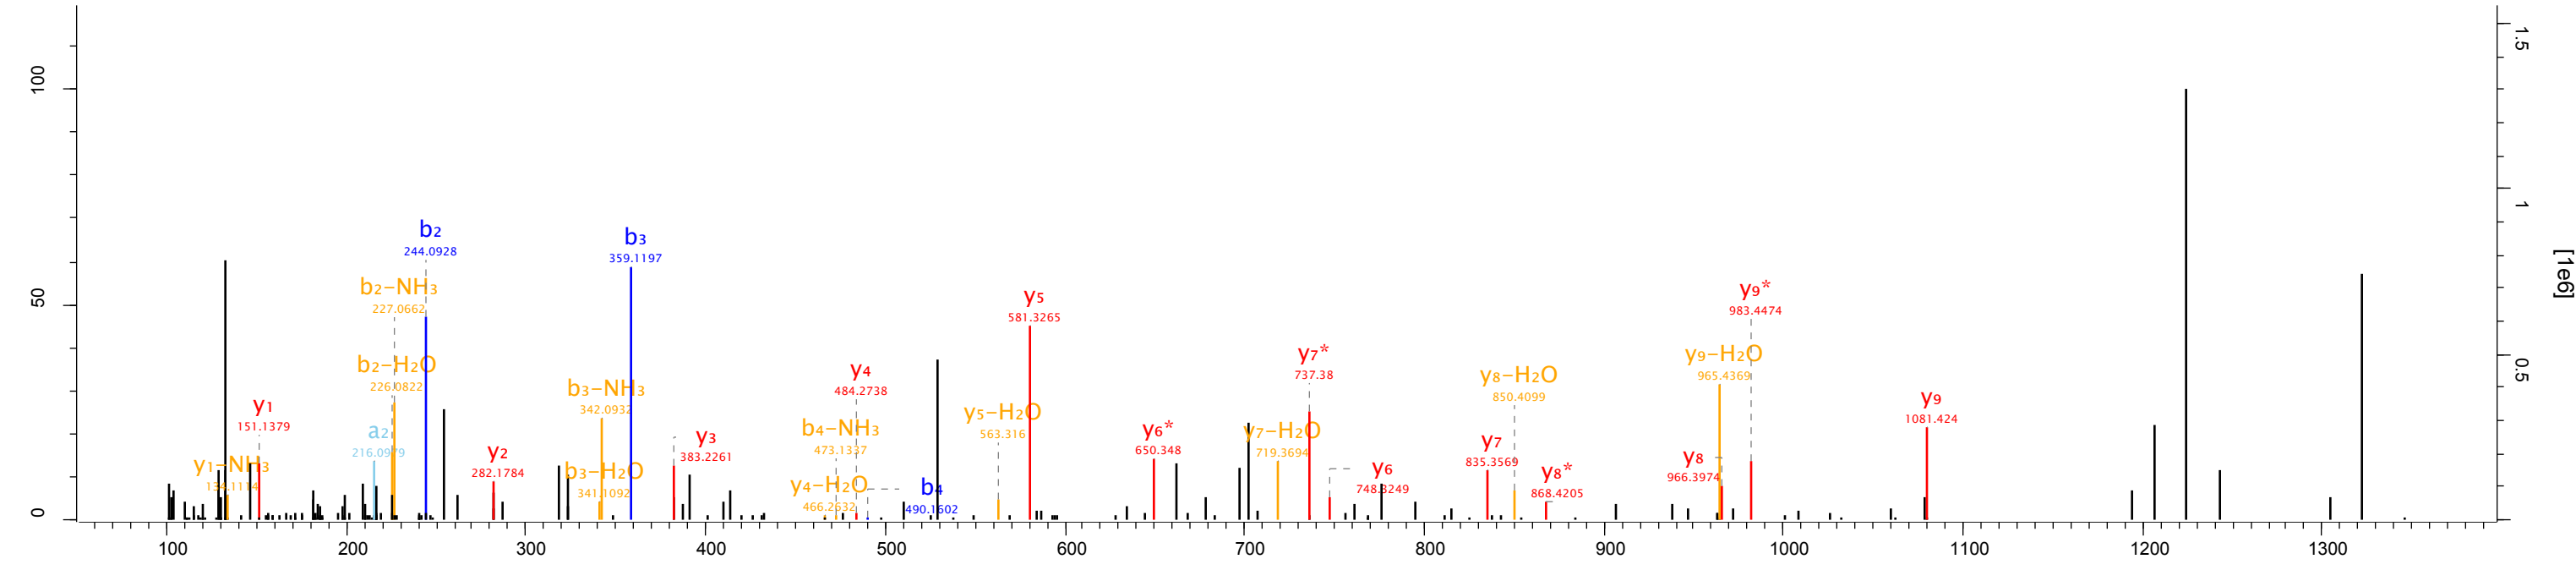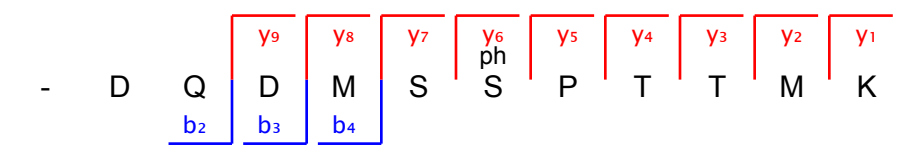

Raw file: 20150814\_A375SR\_Phospho\_BR2\_04  
 Scan: 6902 Method: FTMS; HCD Score: 90.76 m/z: 568.28 Gene names: PTOV1

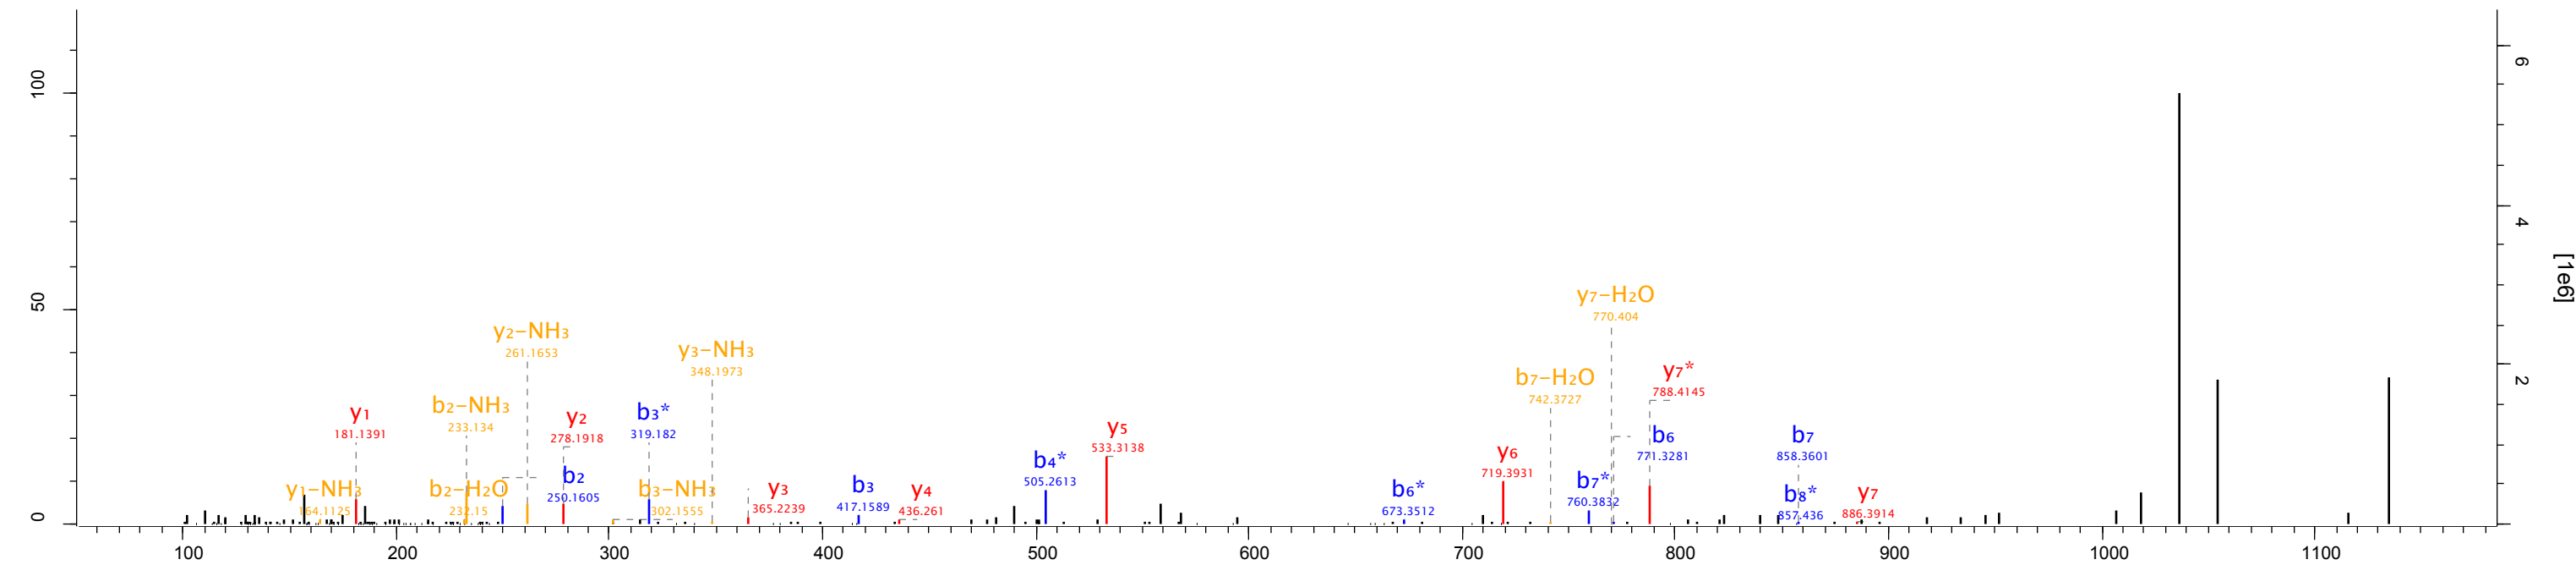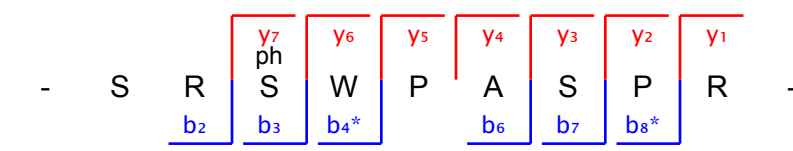



Raw file: 20150814\_A375SR\_Phospho\_BR2\_04  
 Scan: 7732 Method: FTMS; HCD Score: 193.3 m/z: 706.78 Gene names: MAF1

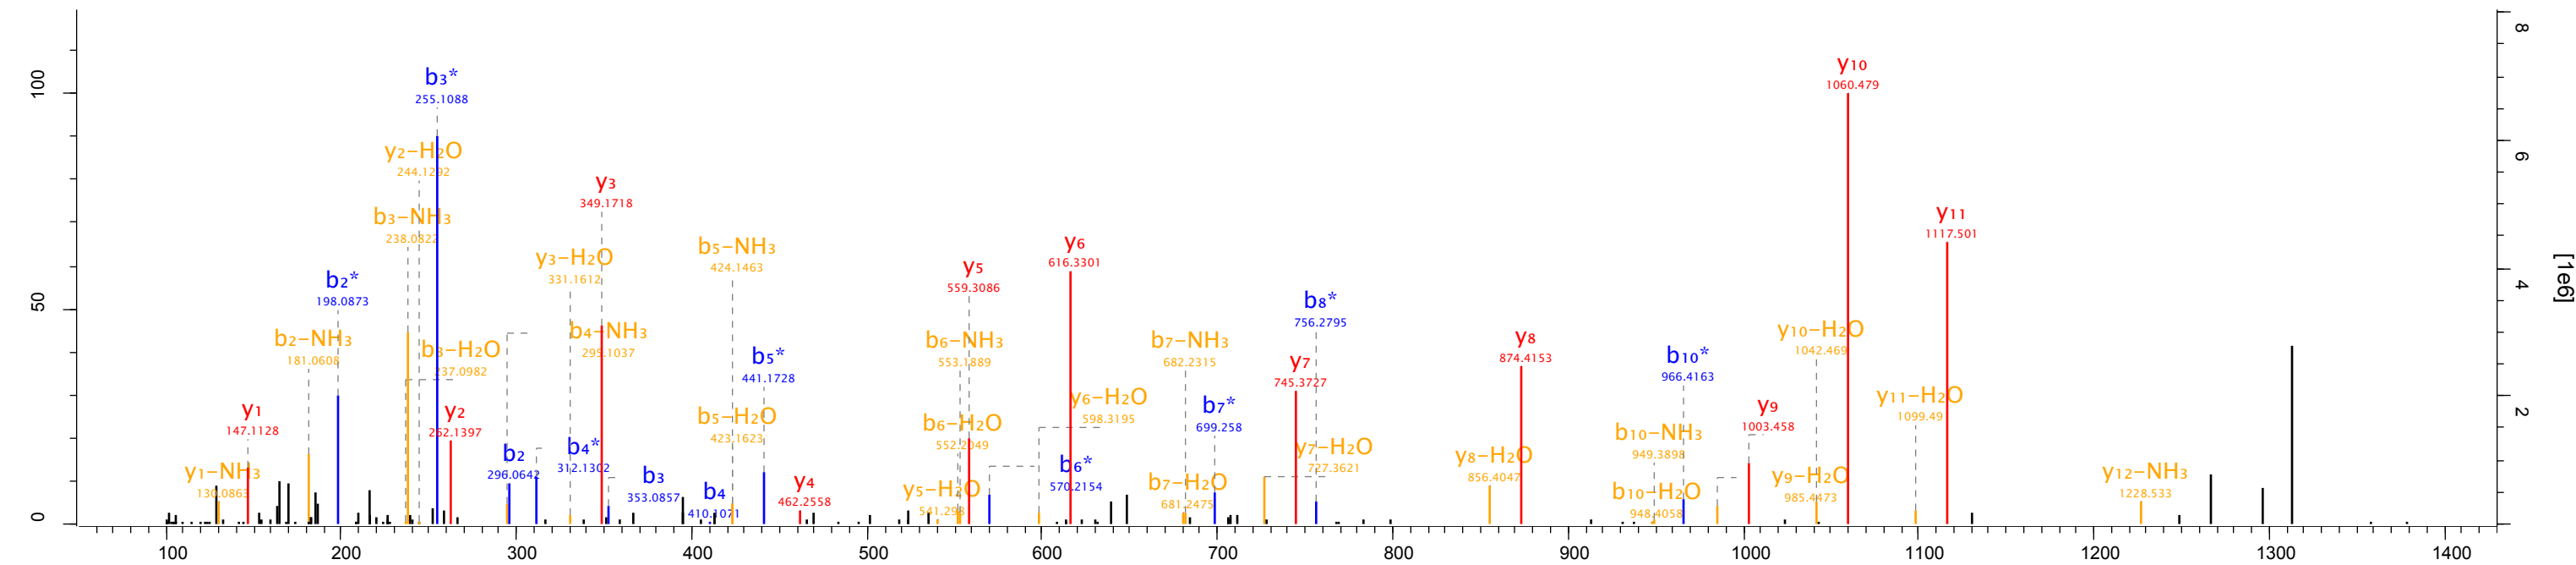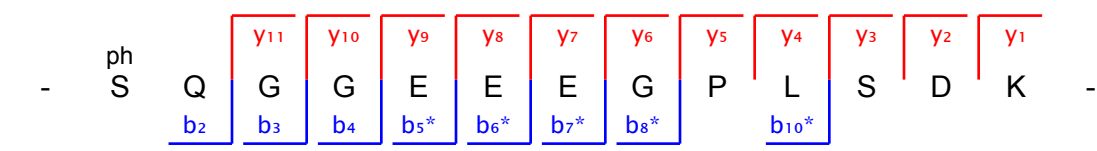

Raw file: 20150814\_A375SR\_Phospho\_BR2\_04  
 Scan: 7972 Method: FTMS; HCD Score: 185.02 m/z: 738.34 Gene names: DBNL

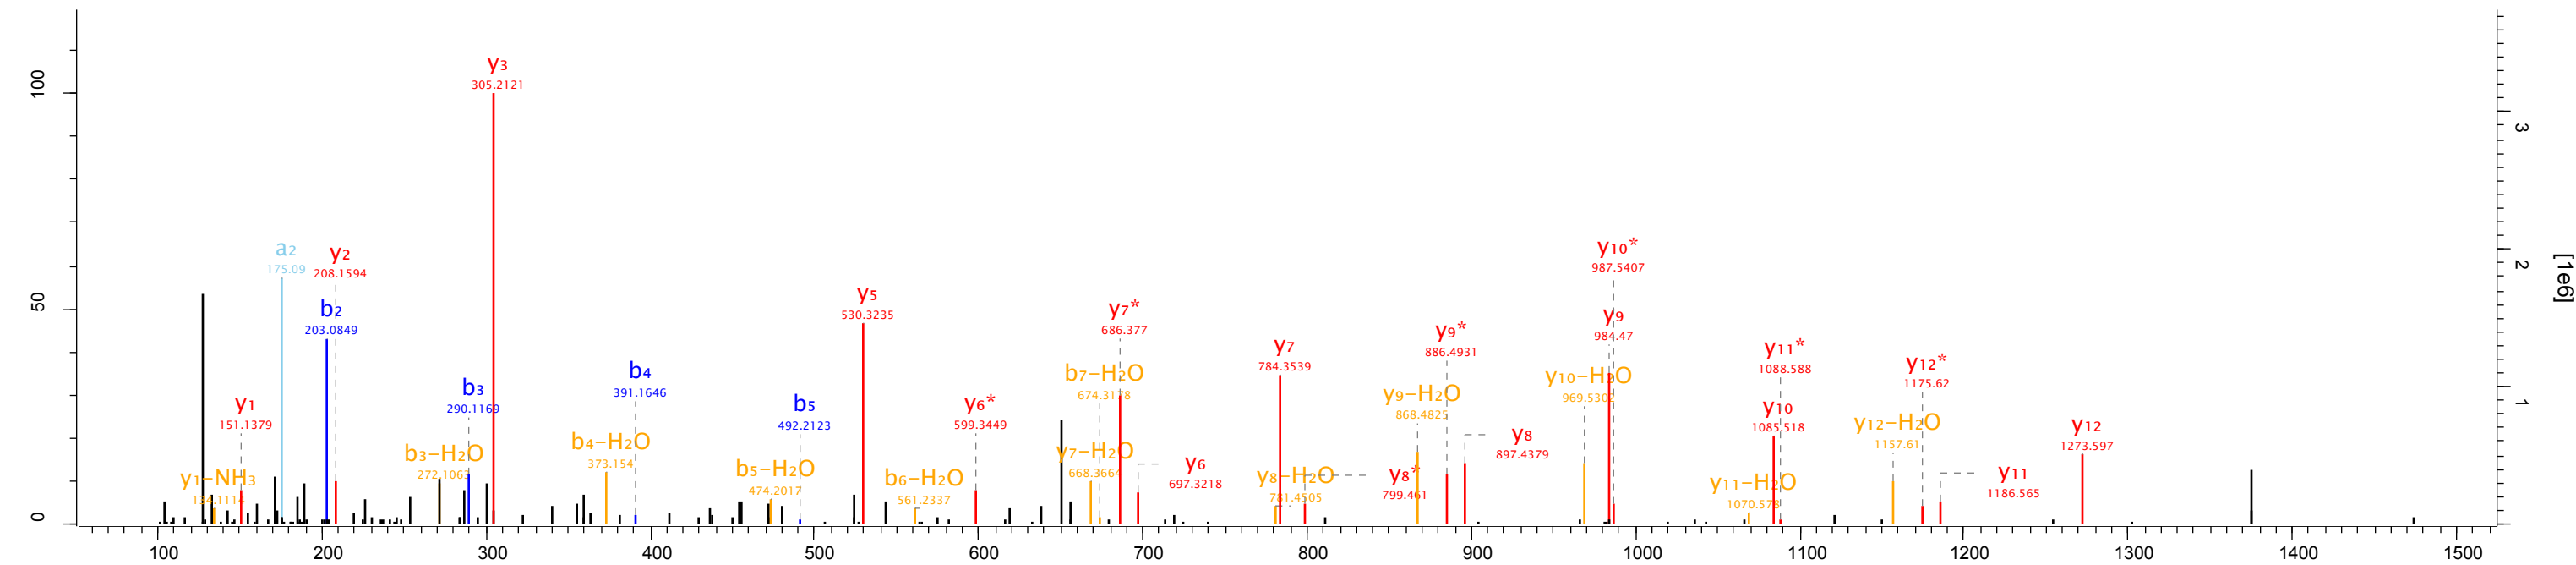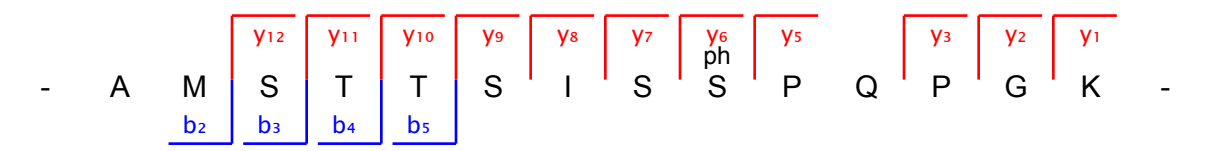

Raw file: 20150814\_A375SR\_Phospho\_BR2\_04  
 Scan: 8162 Method: FTMS; HCD Score: 267.56 m/z: 1016.98 Gene names: PXN

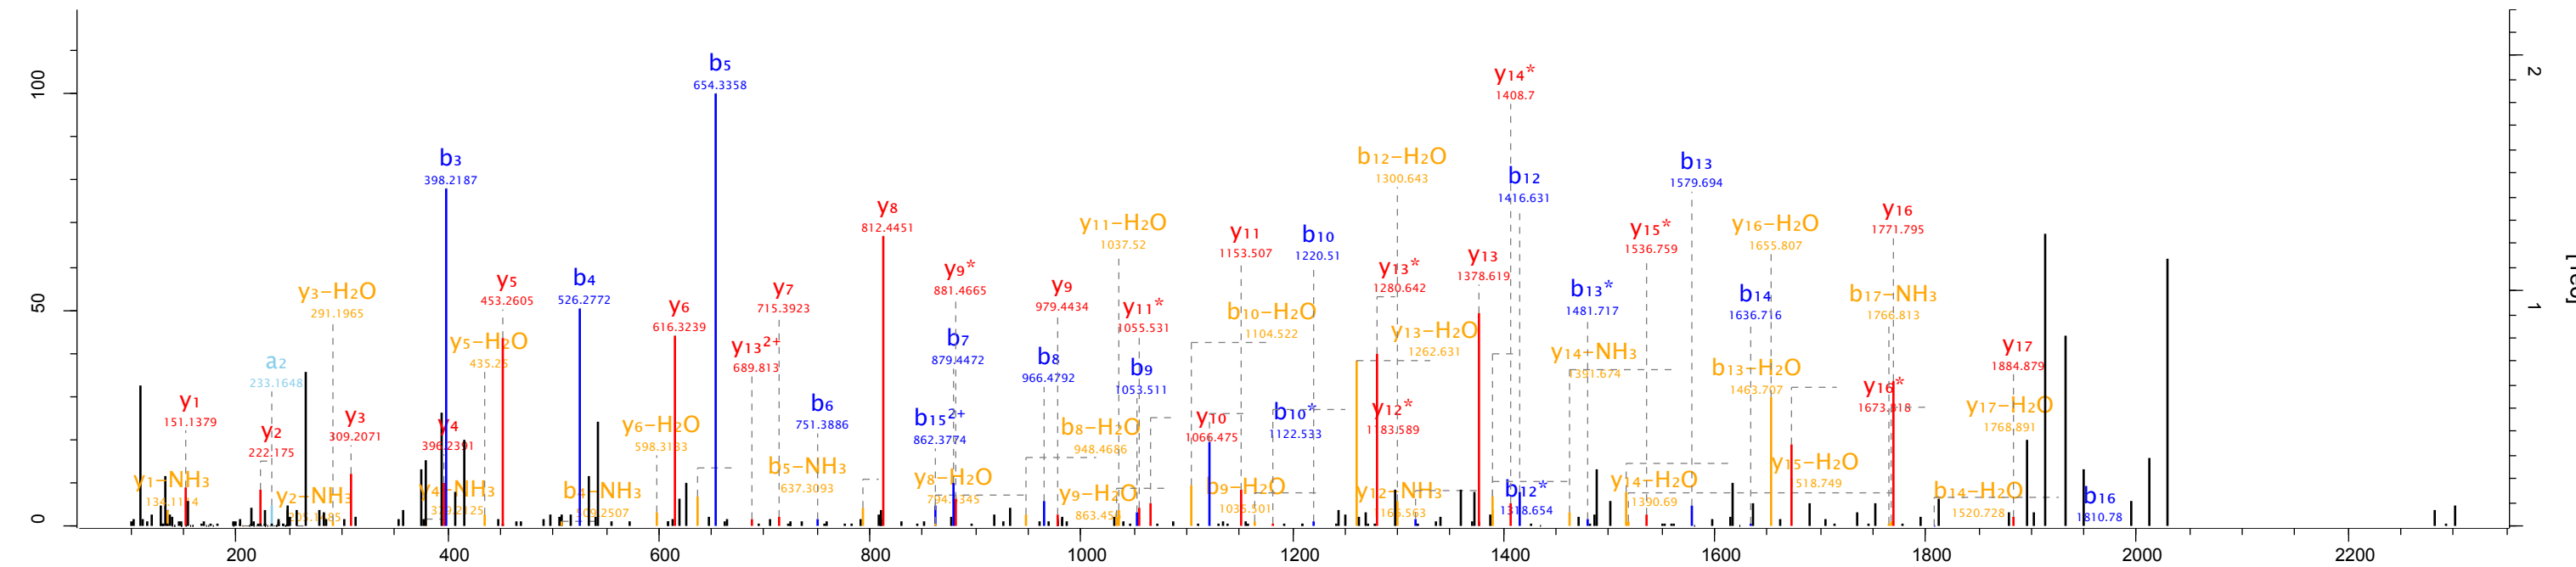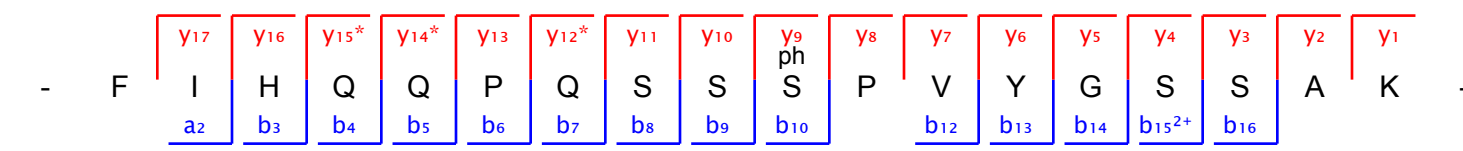

Raw file: 20150814\_A375SR\_Phospho\_BR2\_04  
 Scan: 8182 Method: FTMS; HCD Score: 80.75 m/z: 662.78 Gene names: SLC30A1

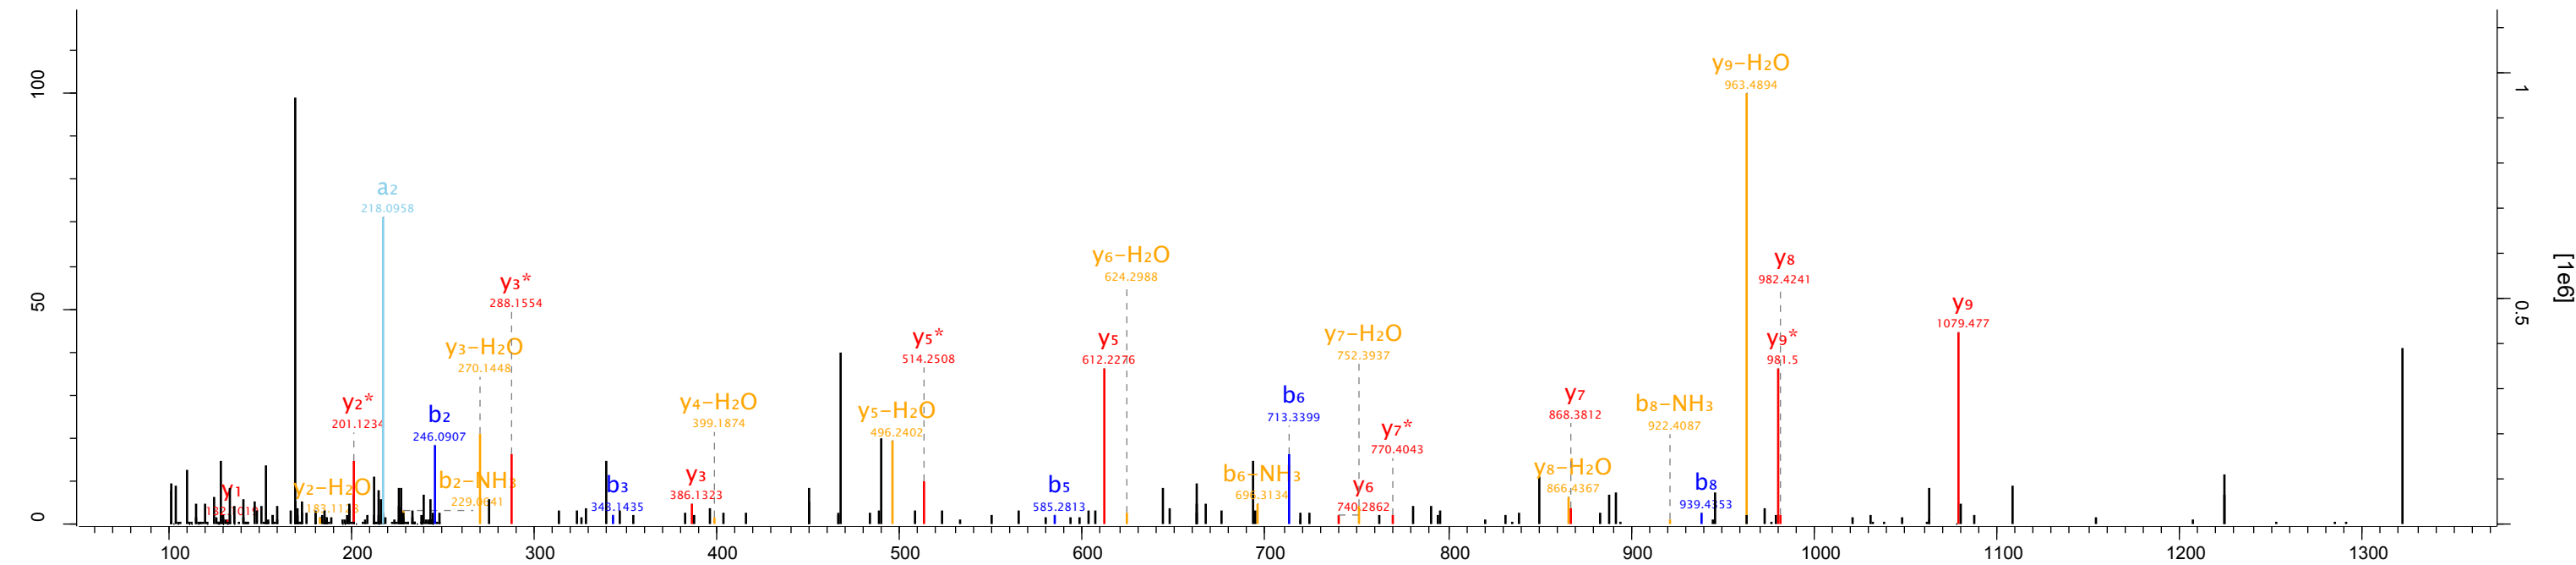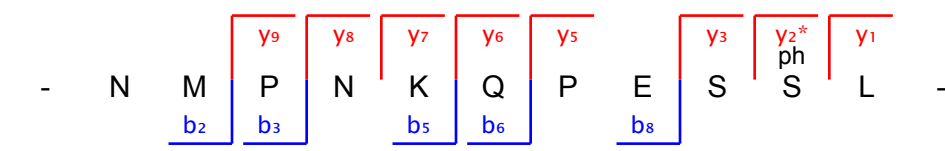

Raw file 20150814\_A375SR\_Phospho\_BR2\_04 Scan 8272 Method FTMS; HCD Score 74.99 m/z 502.9 Gene names BNIP2

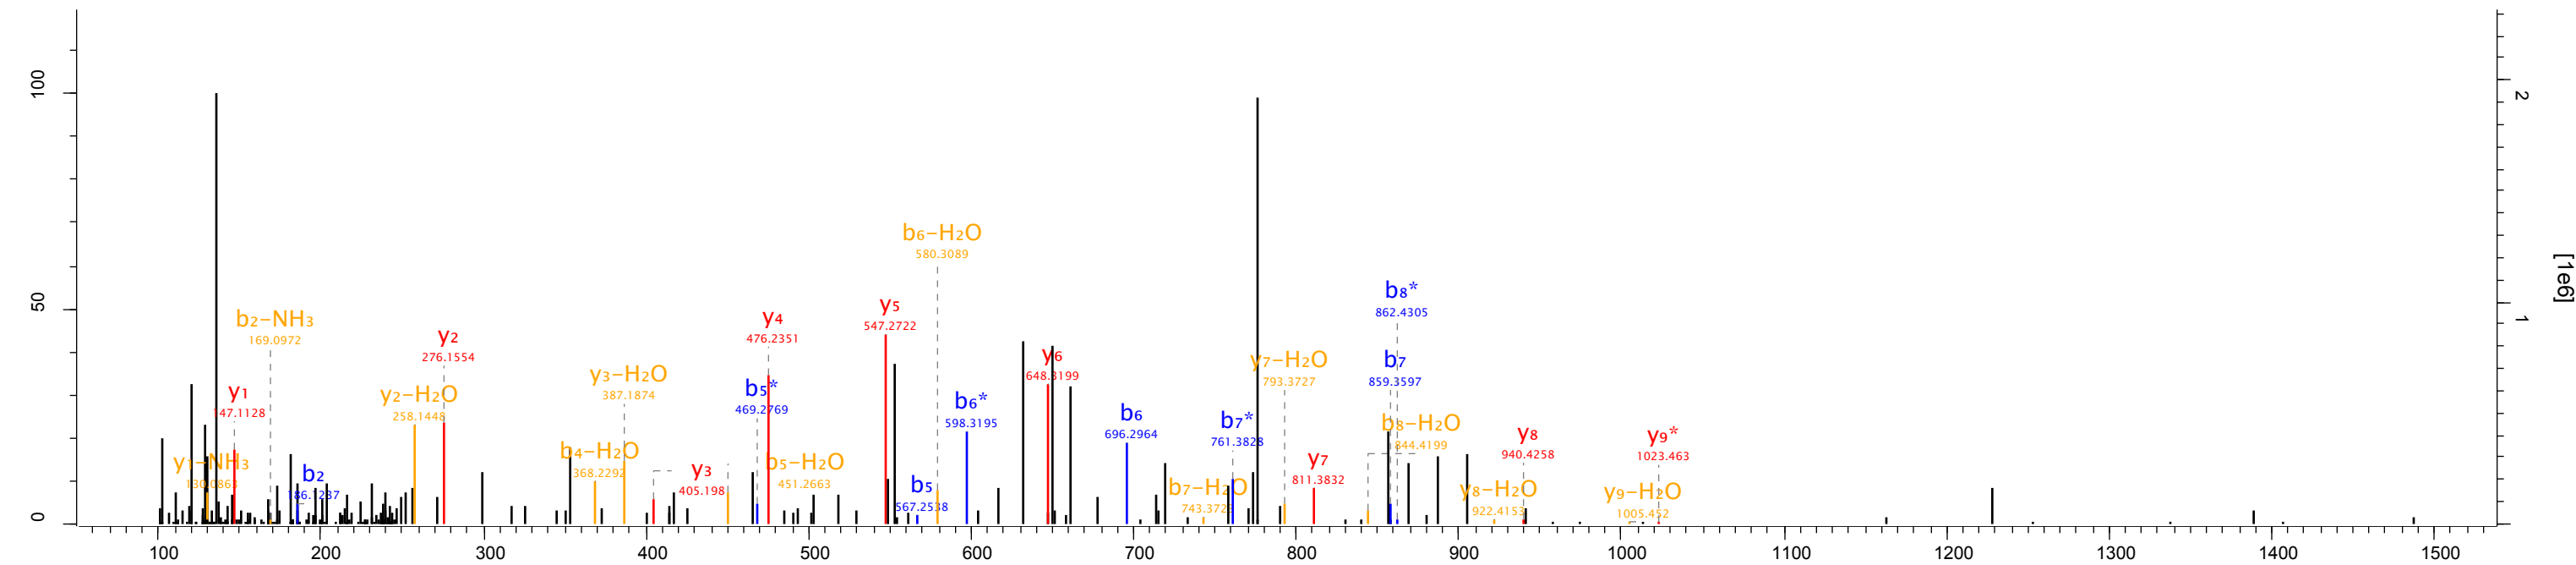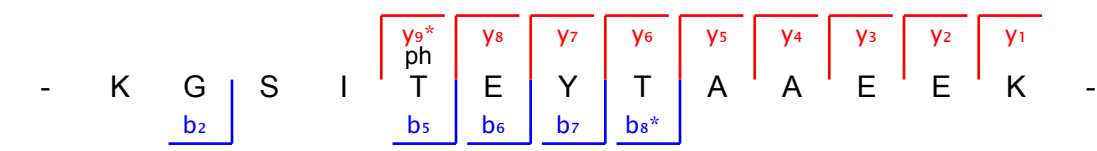

Raw file: 20150814\_A375SR\_Phospho\_BR2\_04  
 Scan: 8432 Method: FTMS; HCD Score: 72.58 m/z: 840.89 Gene names: IL1RAPL2

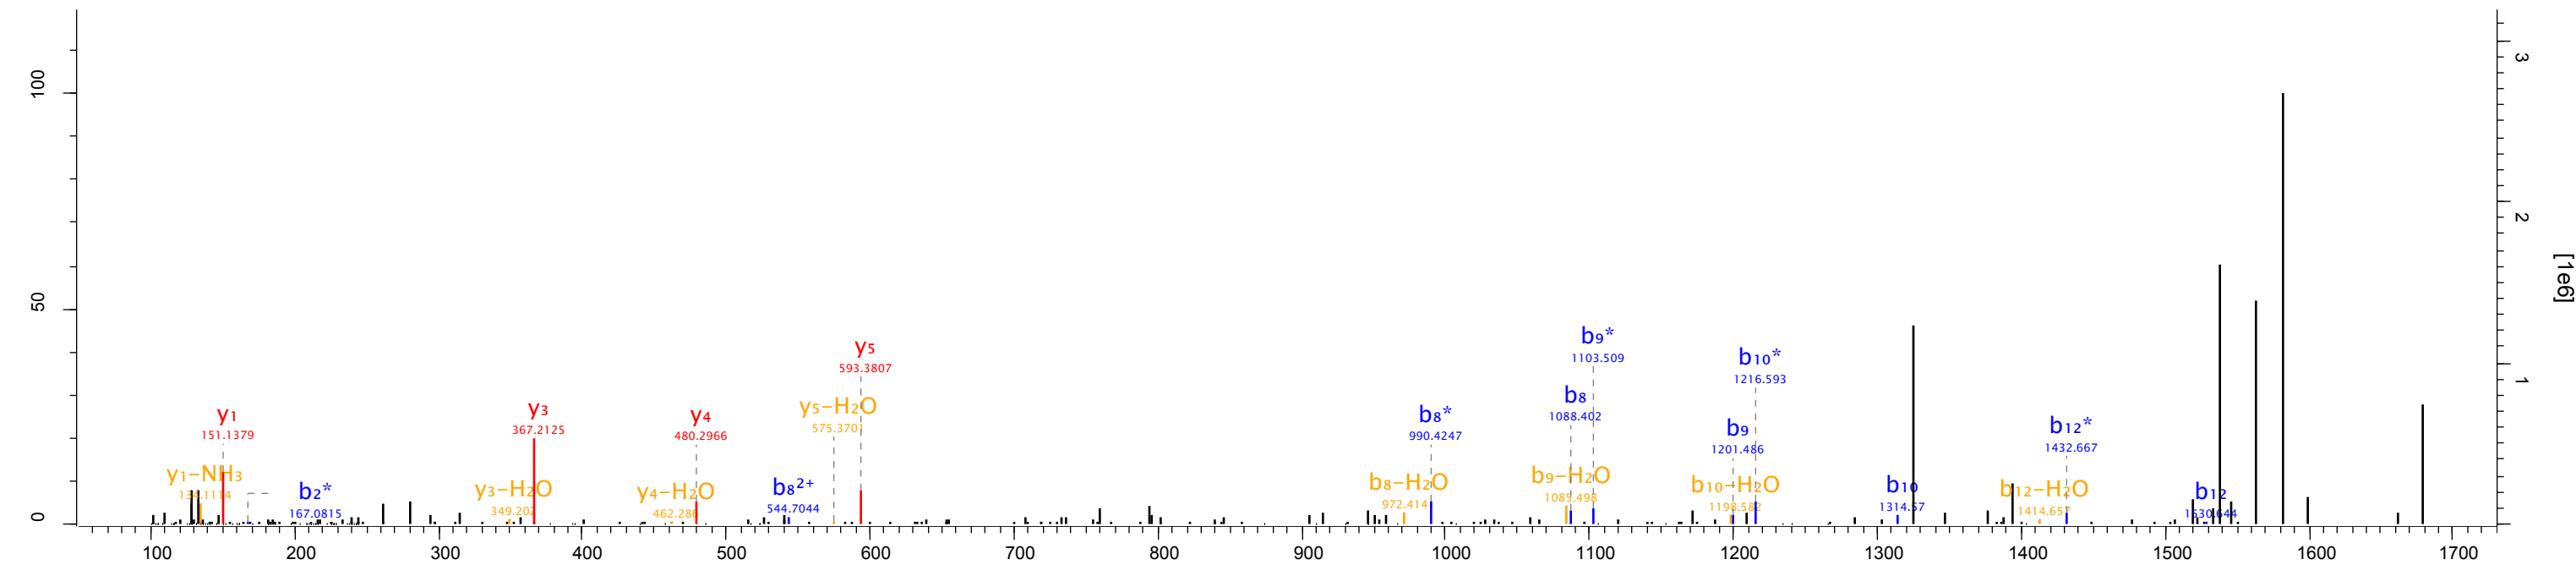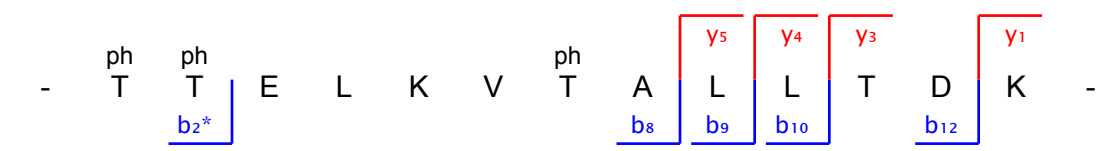

Raw file: 20150814\_A375SR\_Phospho\_BR2\_04  
 Scan: 9132 Method: FTMS; HCD Score: 77.19 m/z: 528.21 Gene names: KRT18

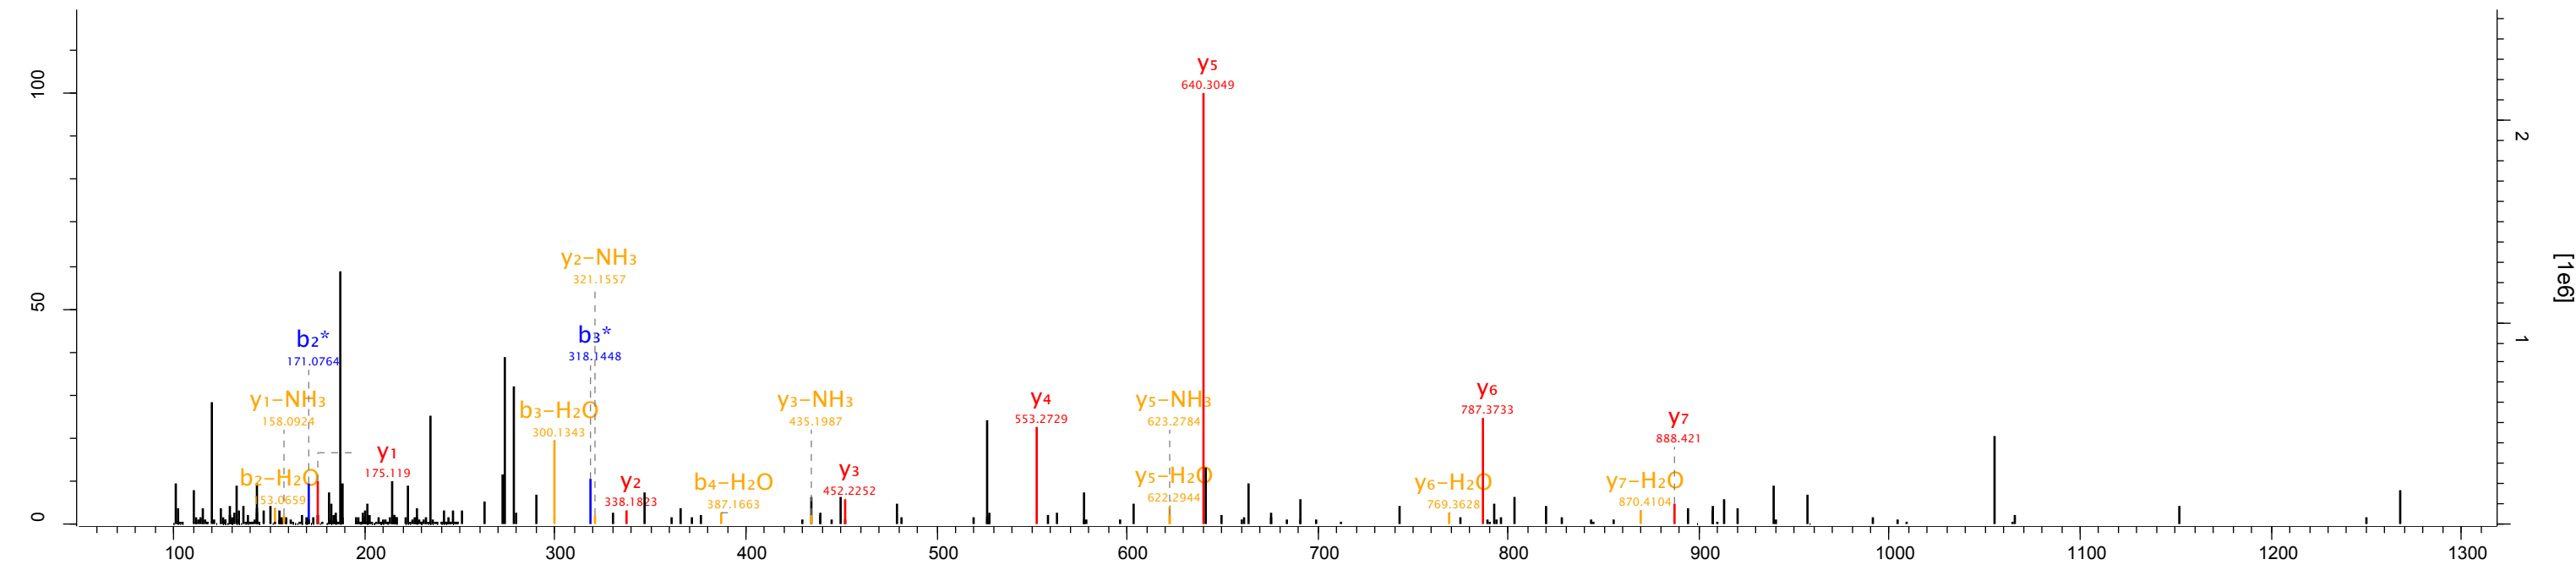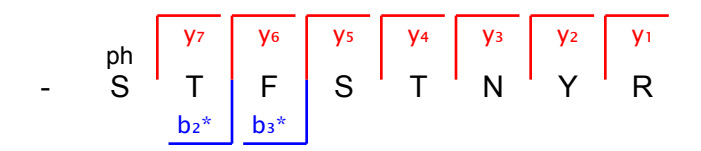

Raw file: 20150814\_A375SR\_Phospho\_BR2\_04  
 Scan: 9282 Method: FTMS; HCD Score: 325.03 m/z: 1146.49 Gene names: ARHGAP12

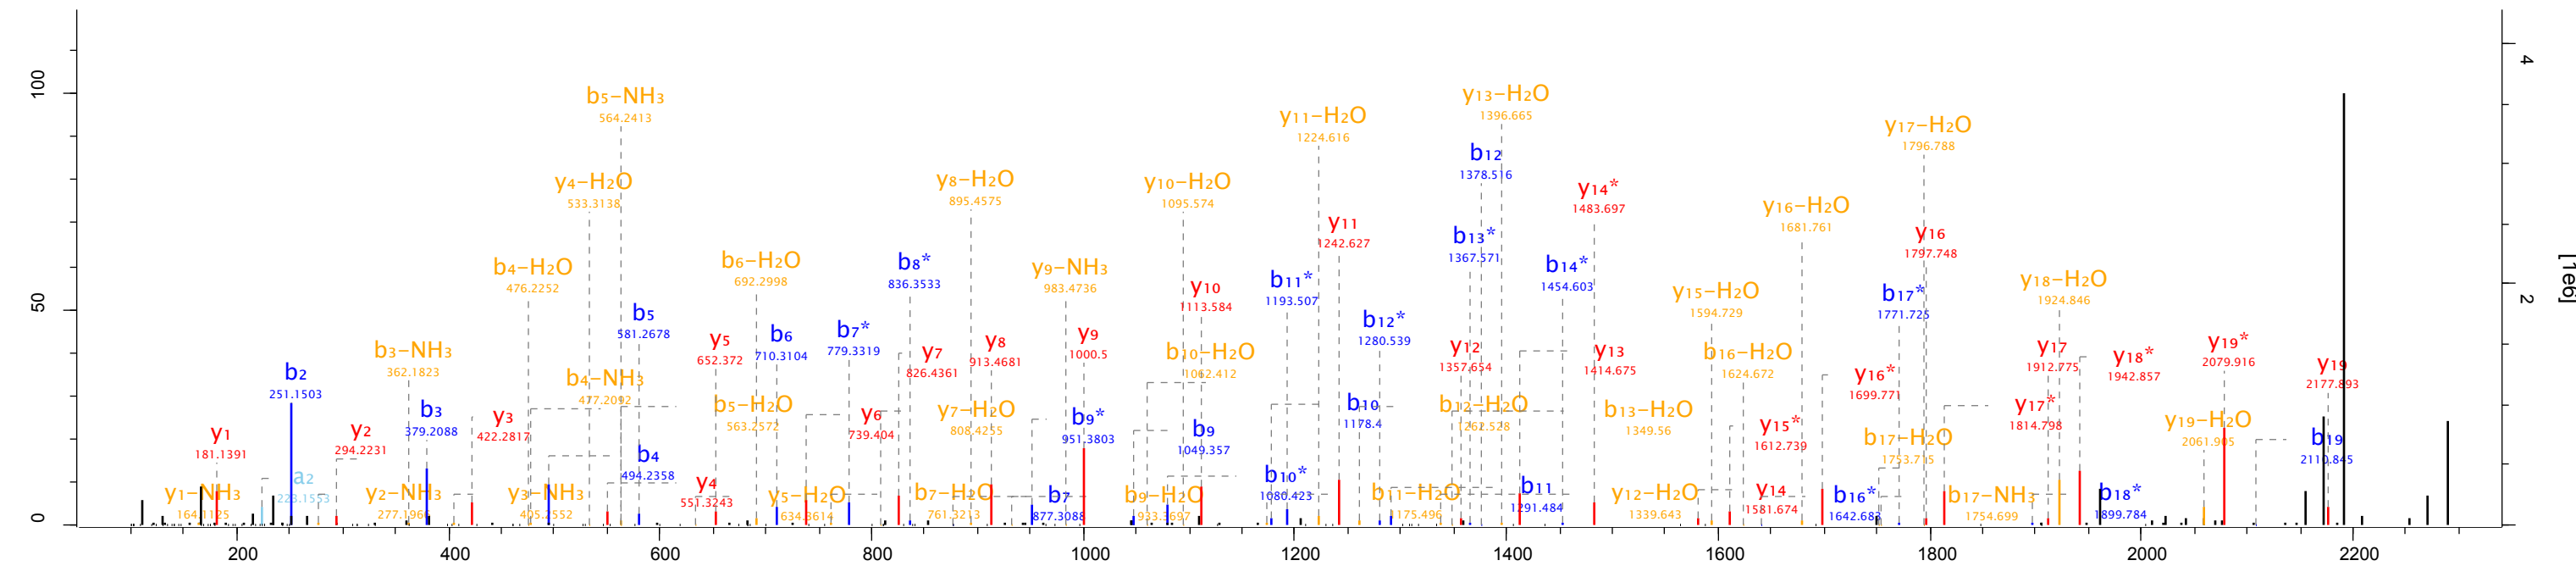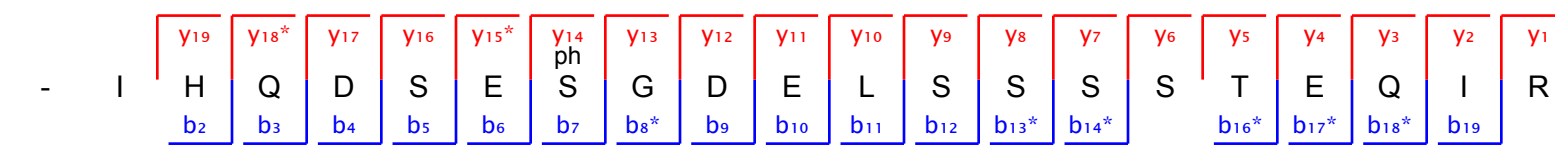



Raw file 20150814\_A375SR\_Phospho\_BR2\_04 Scan 9322 Method FTMS; HCD Score 47.37 m/z 617.97 Gene names C15orf52

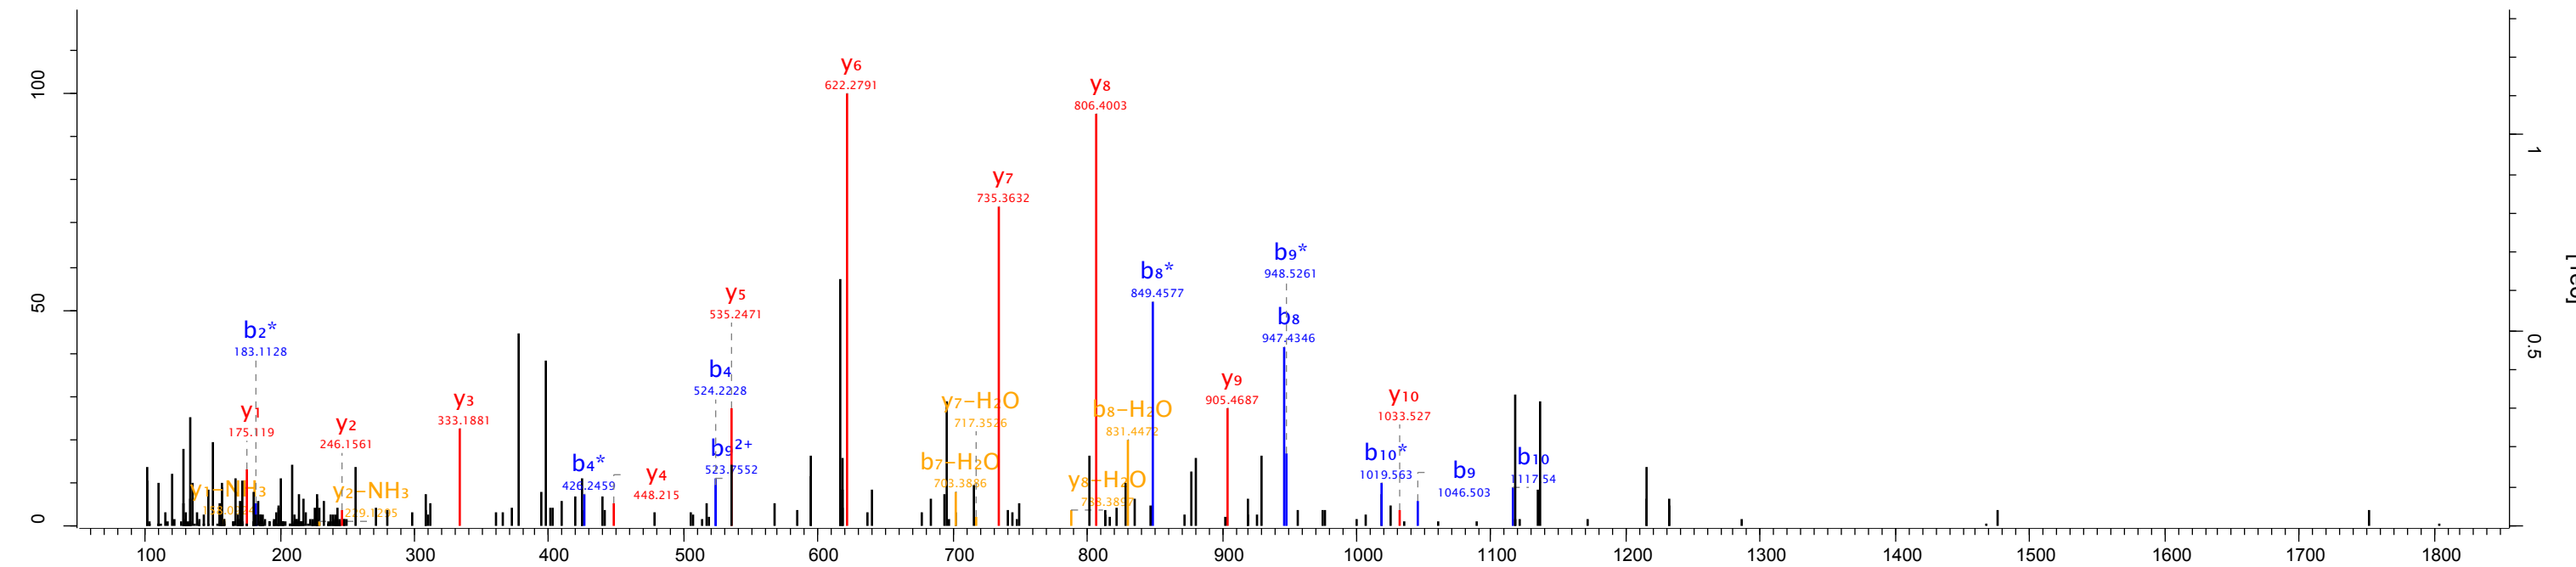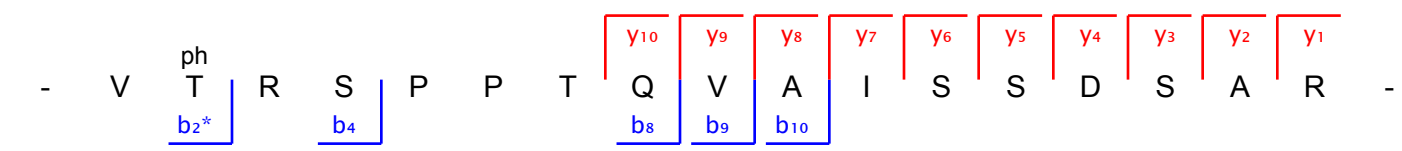

Raw file: 20150814\_A375SR\_Phospho\_BR2\_04  
 Scan: 9372 Method: FTMS; HCD Score: 174.87 m/z: 709.81 Gene names: NDRG1

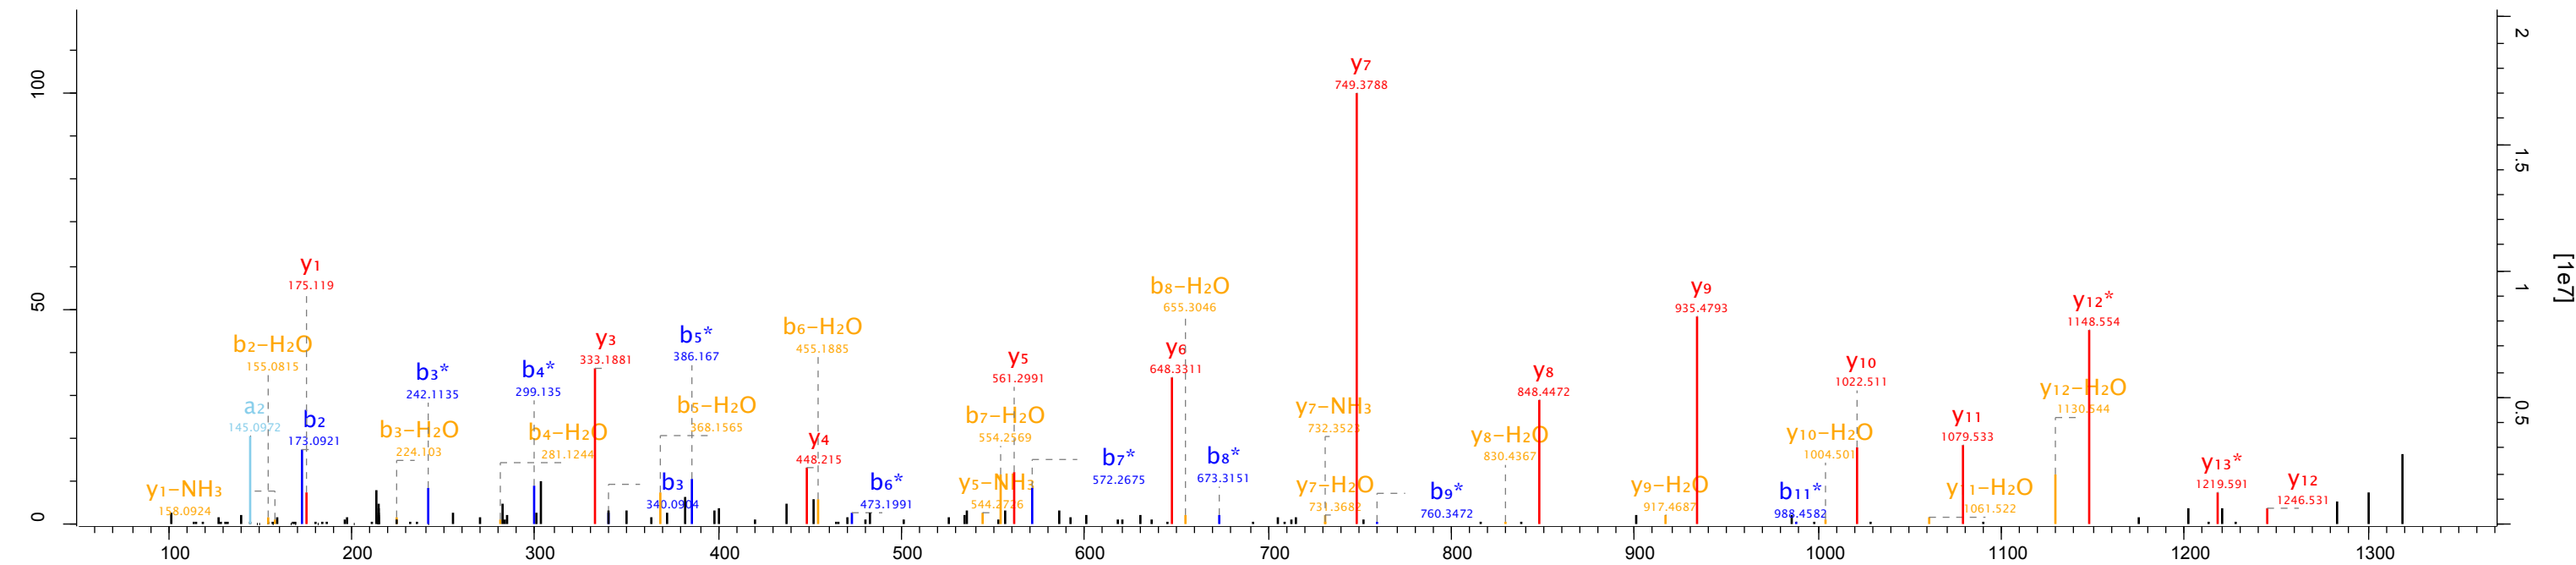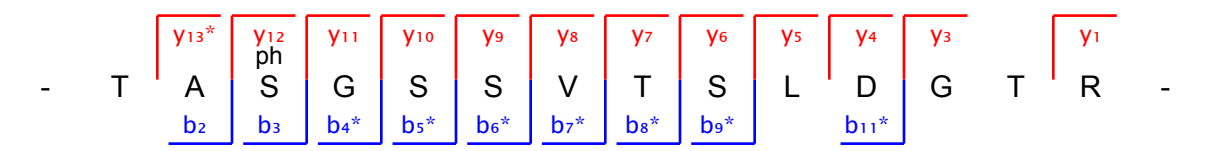

Raw file: 20150814\_A375SR\_Phospho\_BR2\_04  
 Scan: 9542 Method: FTMS; HCD Score: 205.21 m/z: 771.33 Gene names: C9orf40

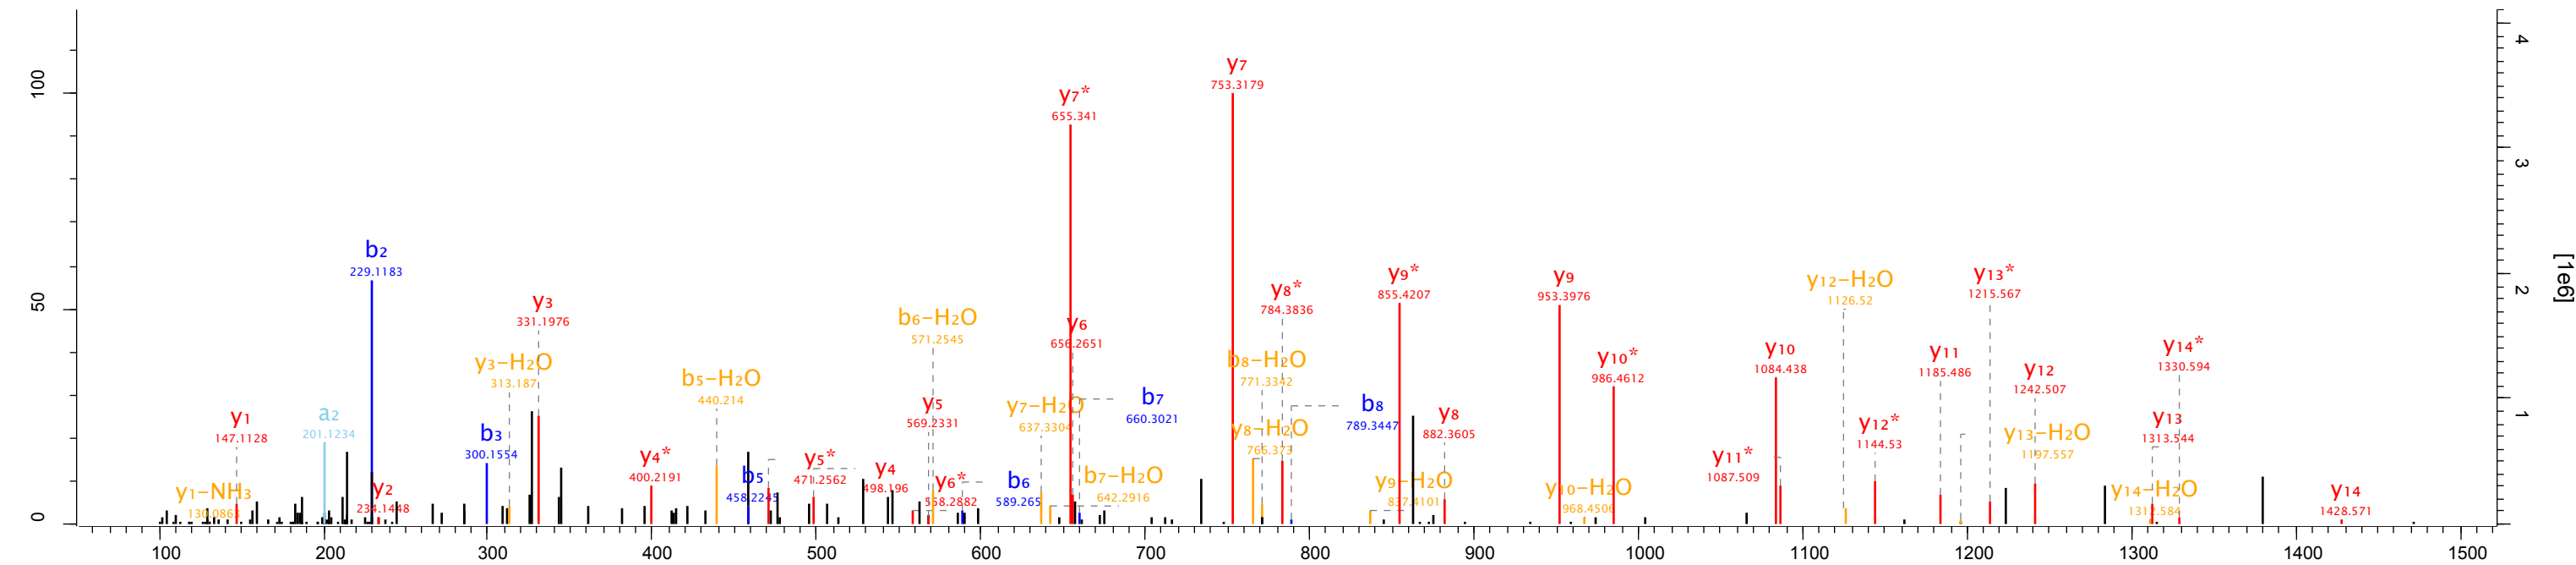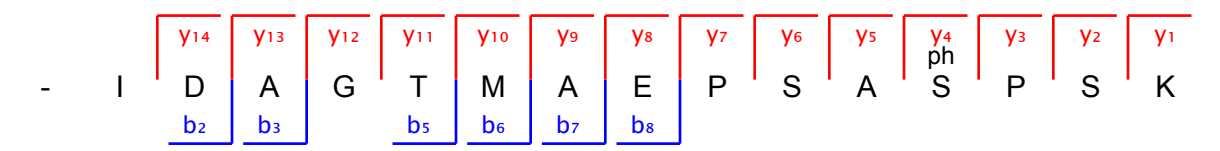

Raw file: 20150814\_A375SR\_Phospho\_BR2\_04  
 Scan: 9832 Method: FTMS; HCD Score: 150.11 m/z: 847.01 Gene names: RECQL5

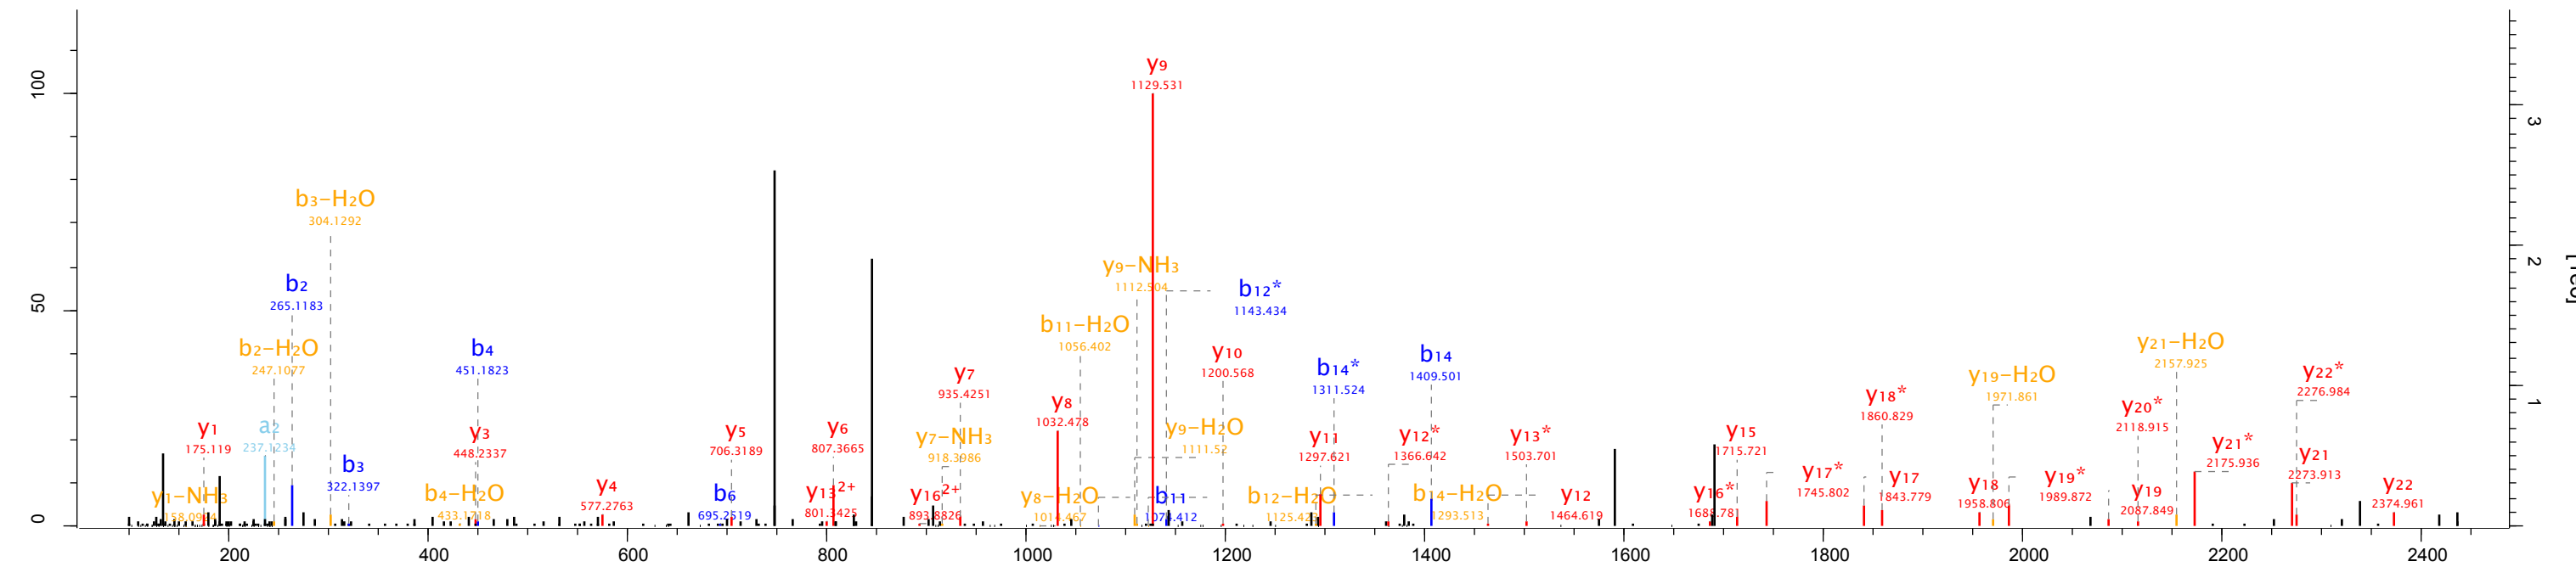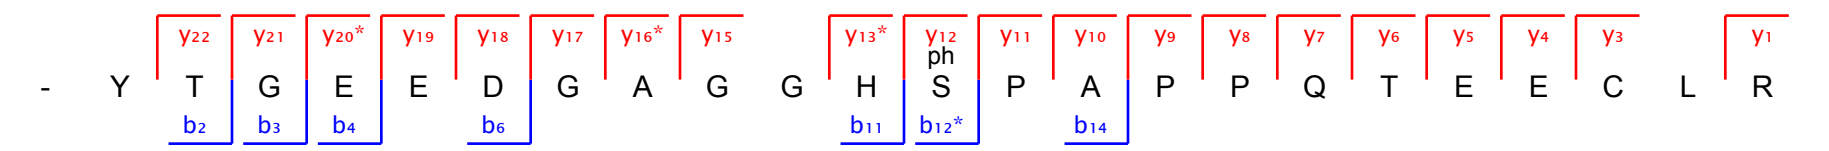

Raw file 20150814\_A375SR\_Phospho\_BR2\_05 Scan 10032 Method FTMS; HCD Score 98.19 m/z 765.72 Gene names RALGPS2

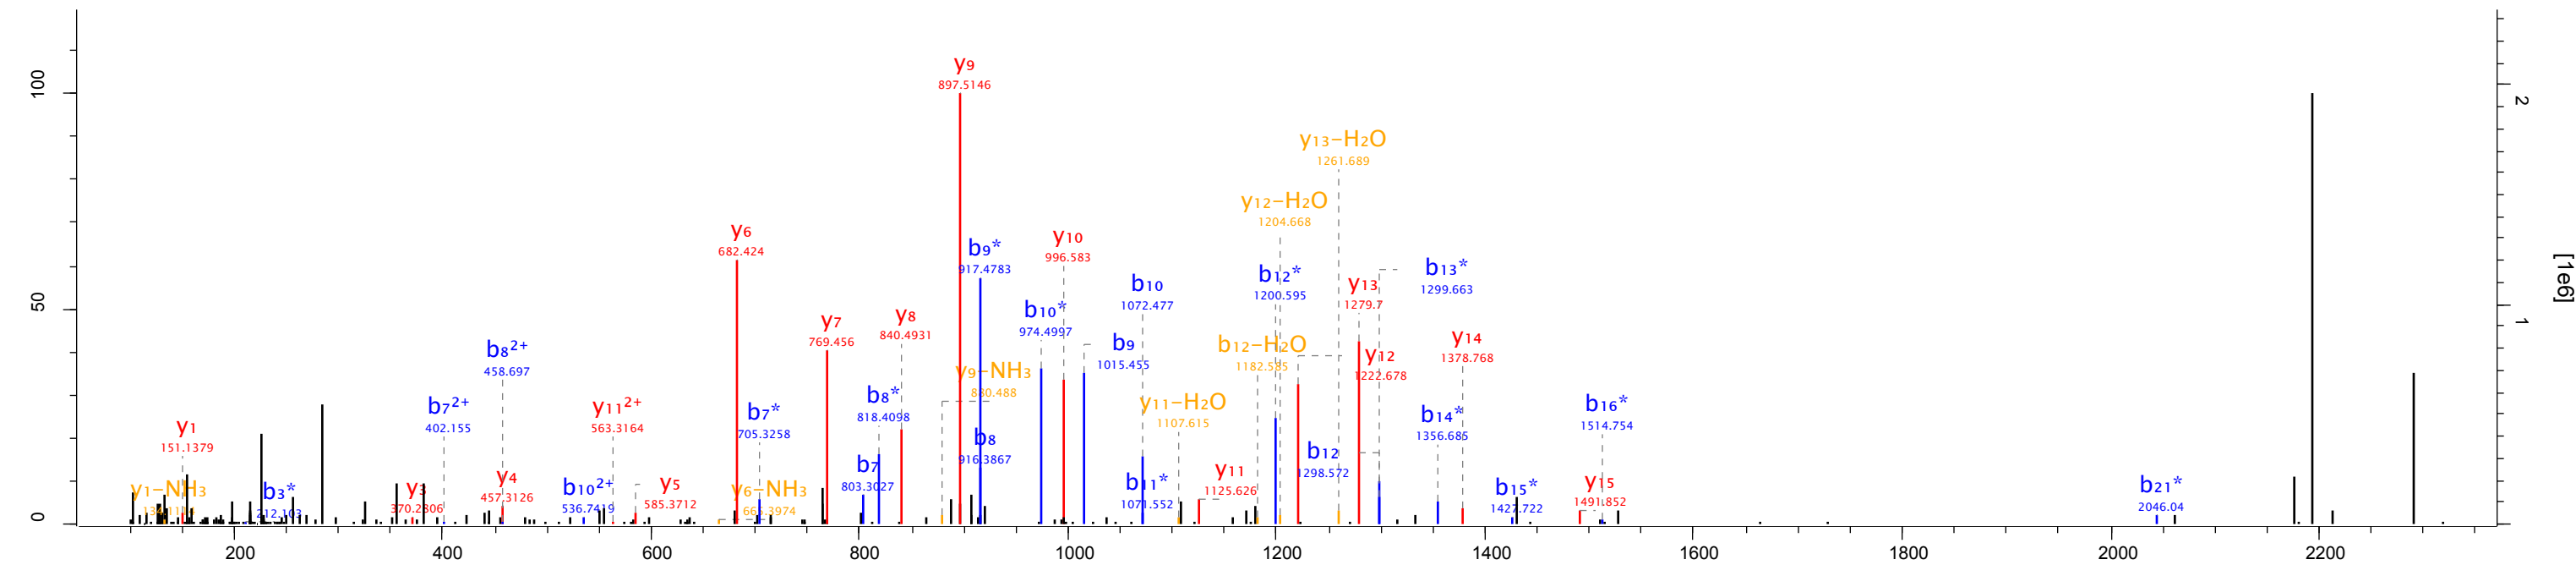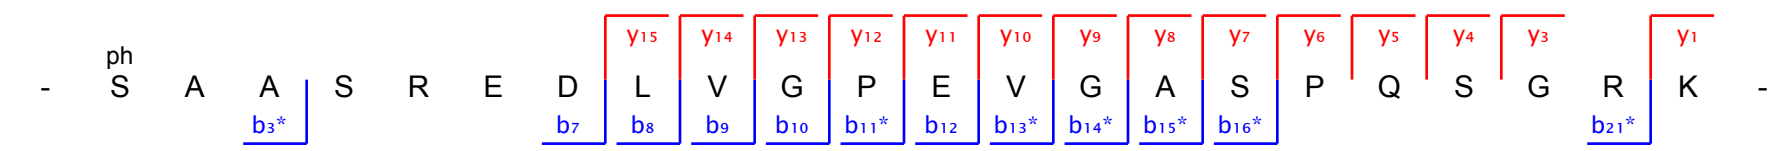

Raw file 20150814\_A375SR\_Phospho\_BR2\_05 Scan 10222 Method FTMS; HCD Score 43.59 m/z 664.79 Gene names CCNB2;CCNB2V

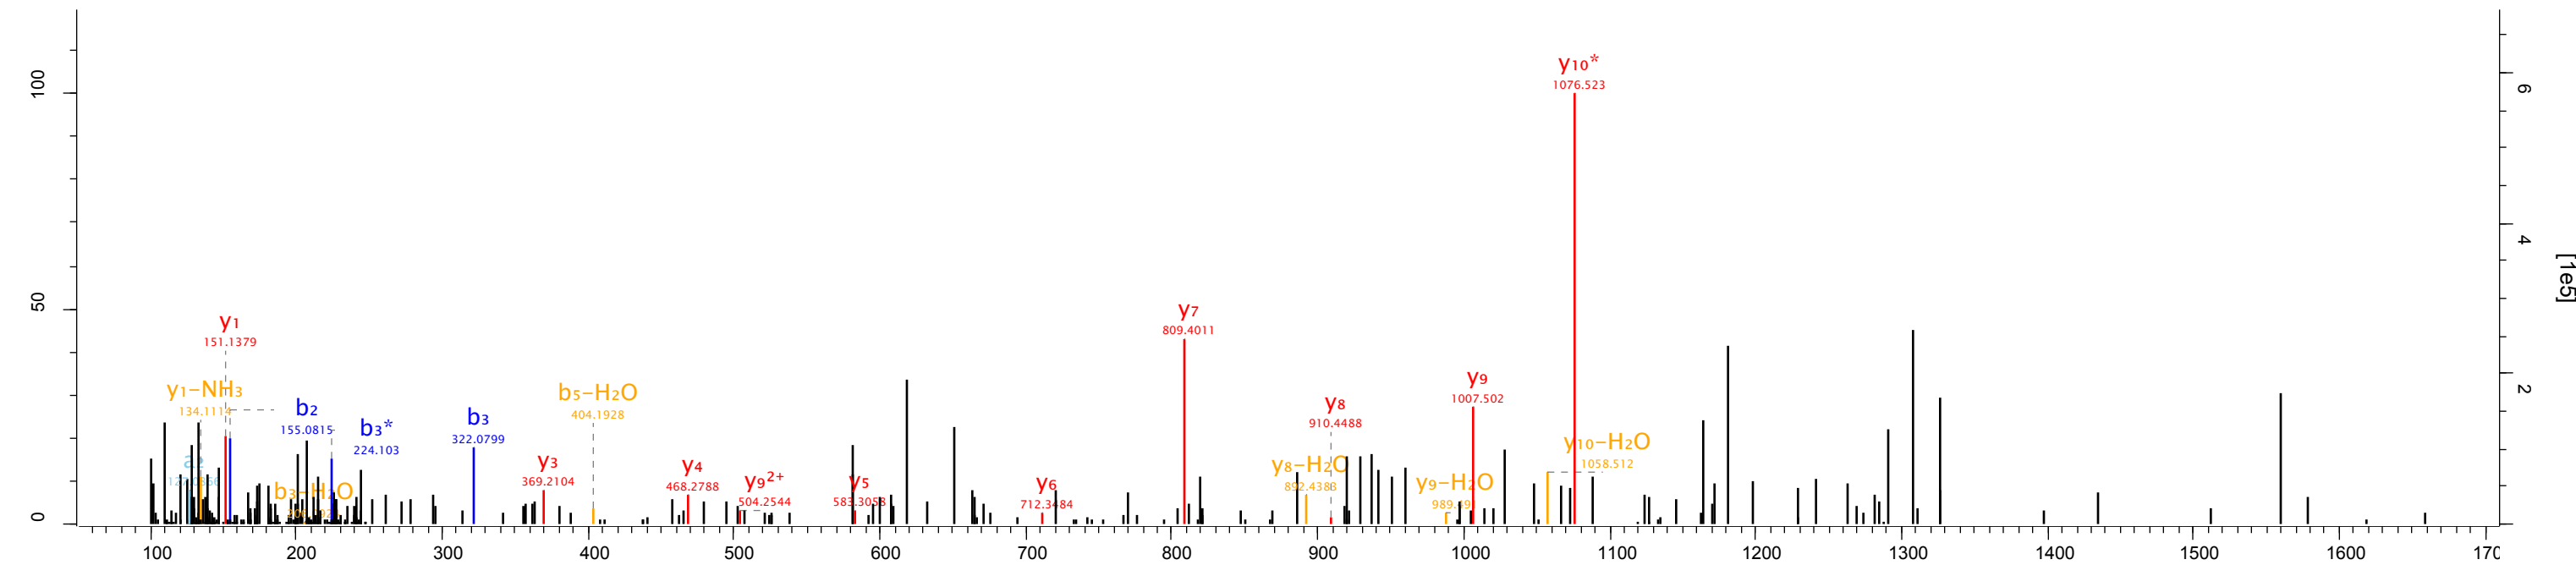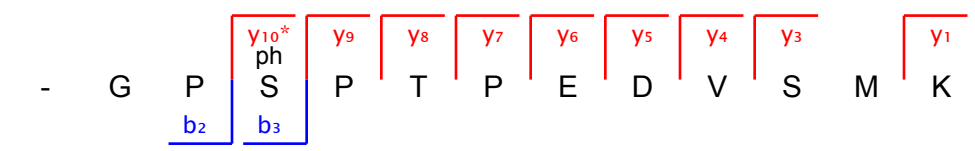

Raw file: 20150814\_A375SR\_Phospho\_BR2\_05  
 Scan: 10362 Method: FTMS; HCD Score: 110.38 m/z: 526.73 Gene names: LZTS1

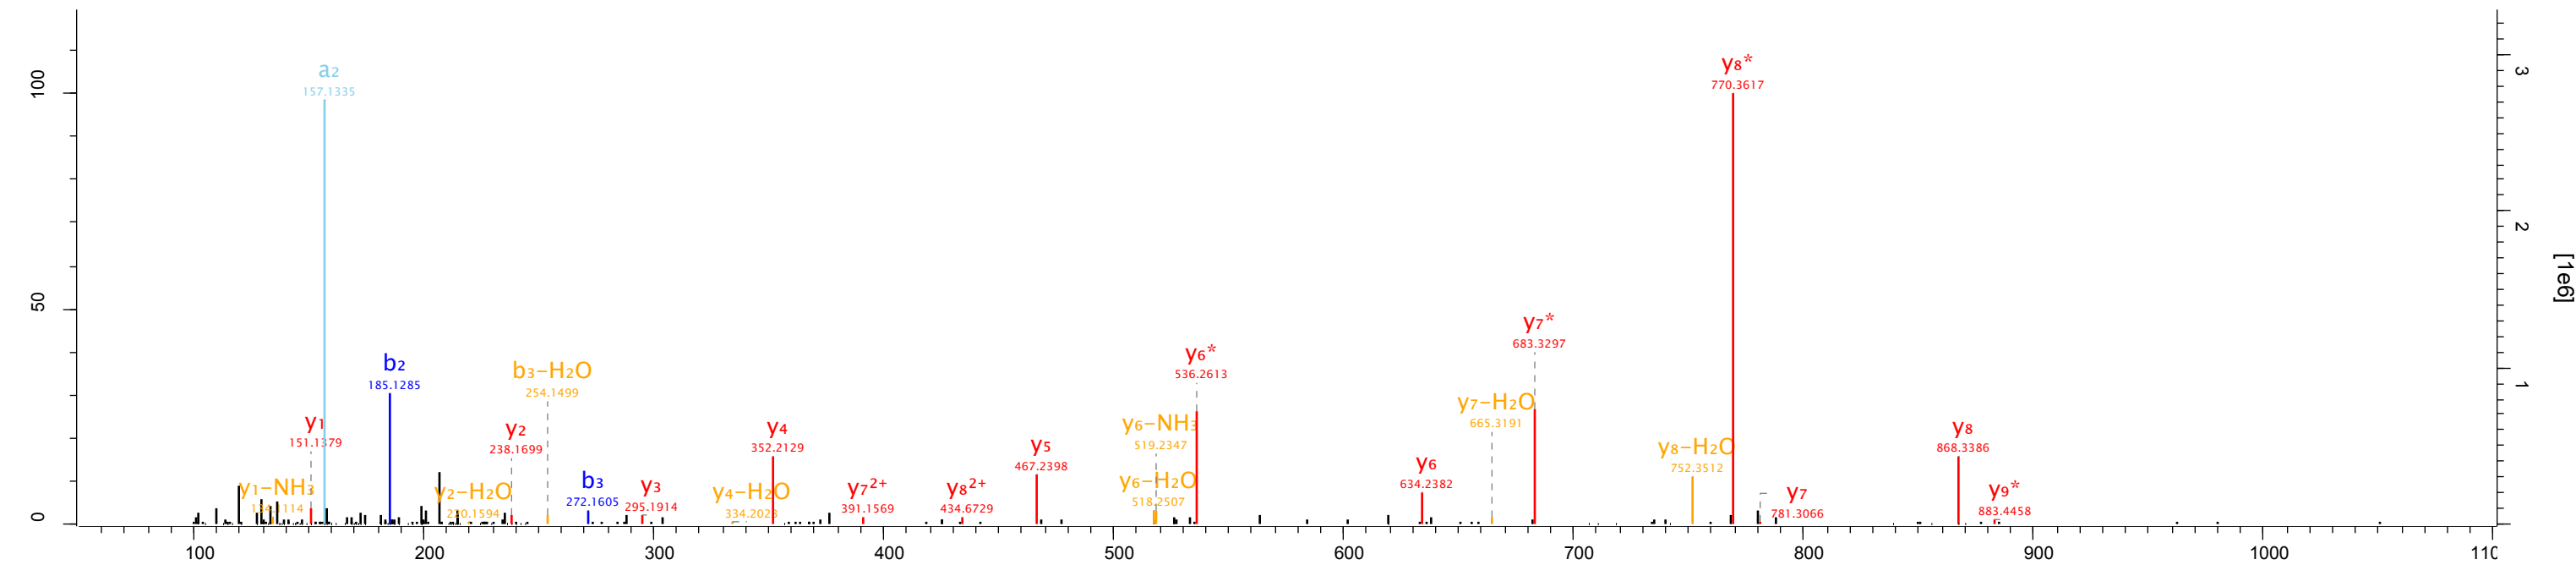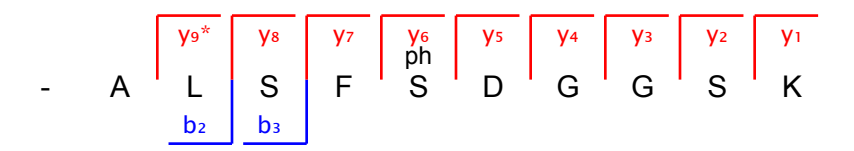

Raw file: 20150814\_A375SR\_Phospho\_BR2\_05  
 Scan: 10512 Method: FTMS; HCD Score: 159.5 m/z: 688.75 Gene names: SRFBP1

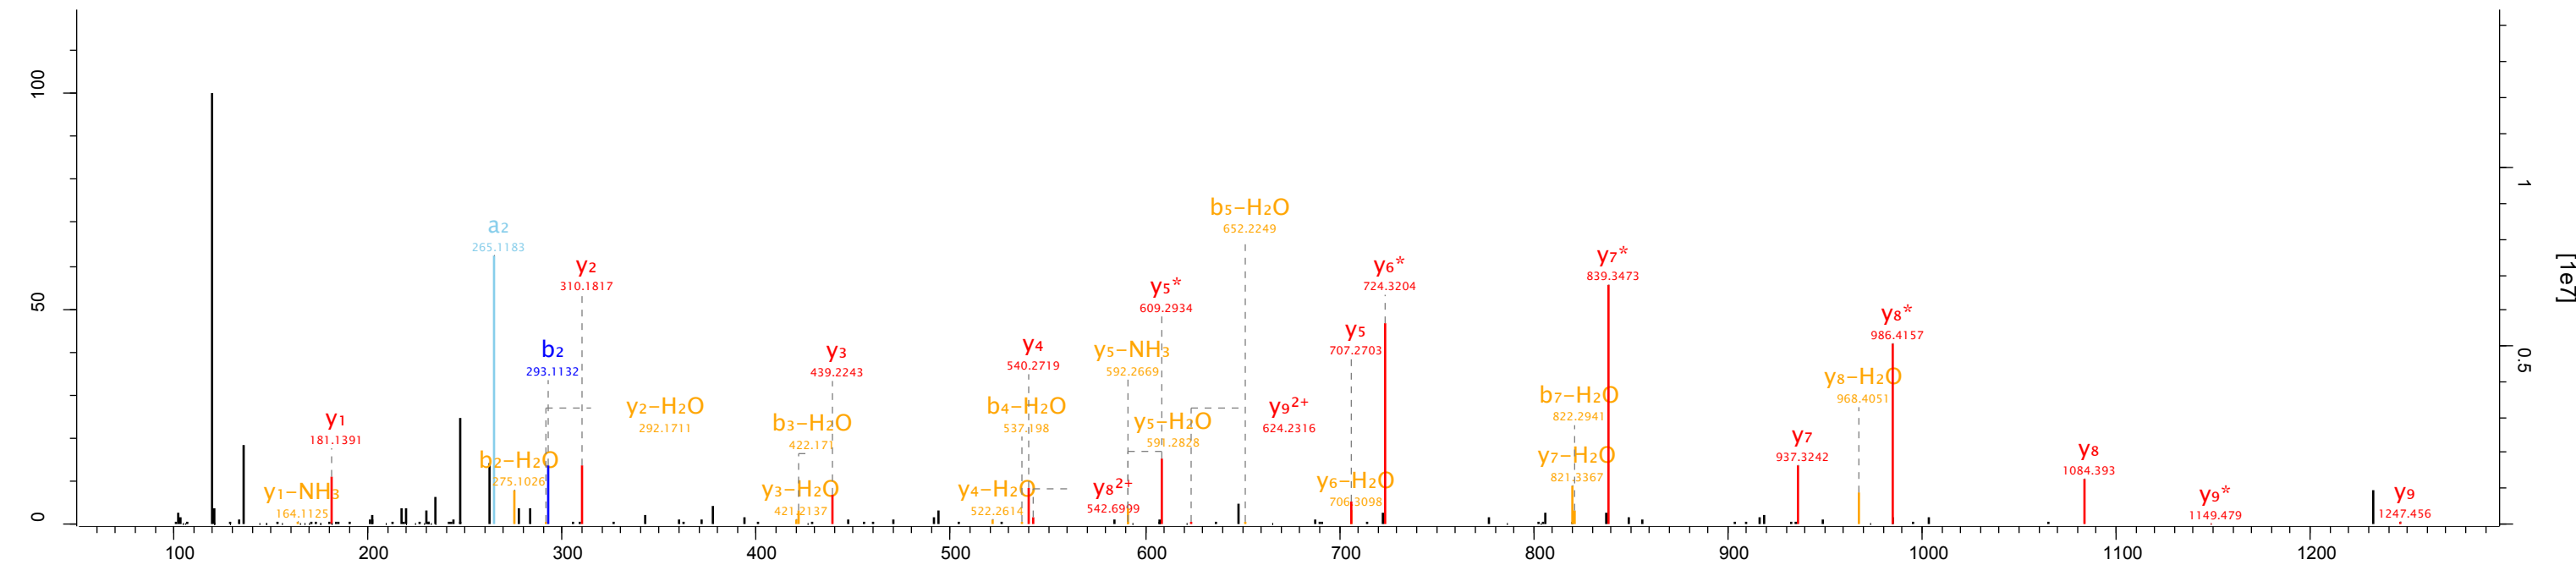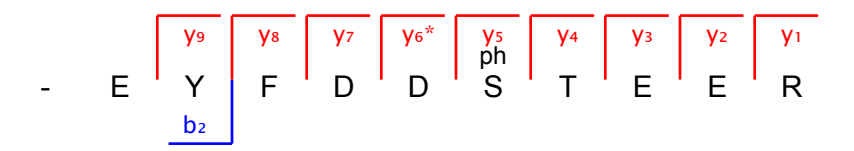



Raw file 20150814\_A375SR\_Phospho\_BR2\_05 Scan 10812 Method FTMS; HCD Score 125.84 m/z 786.35 Gene names MYH9

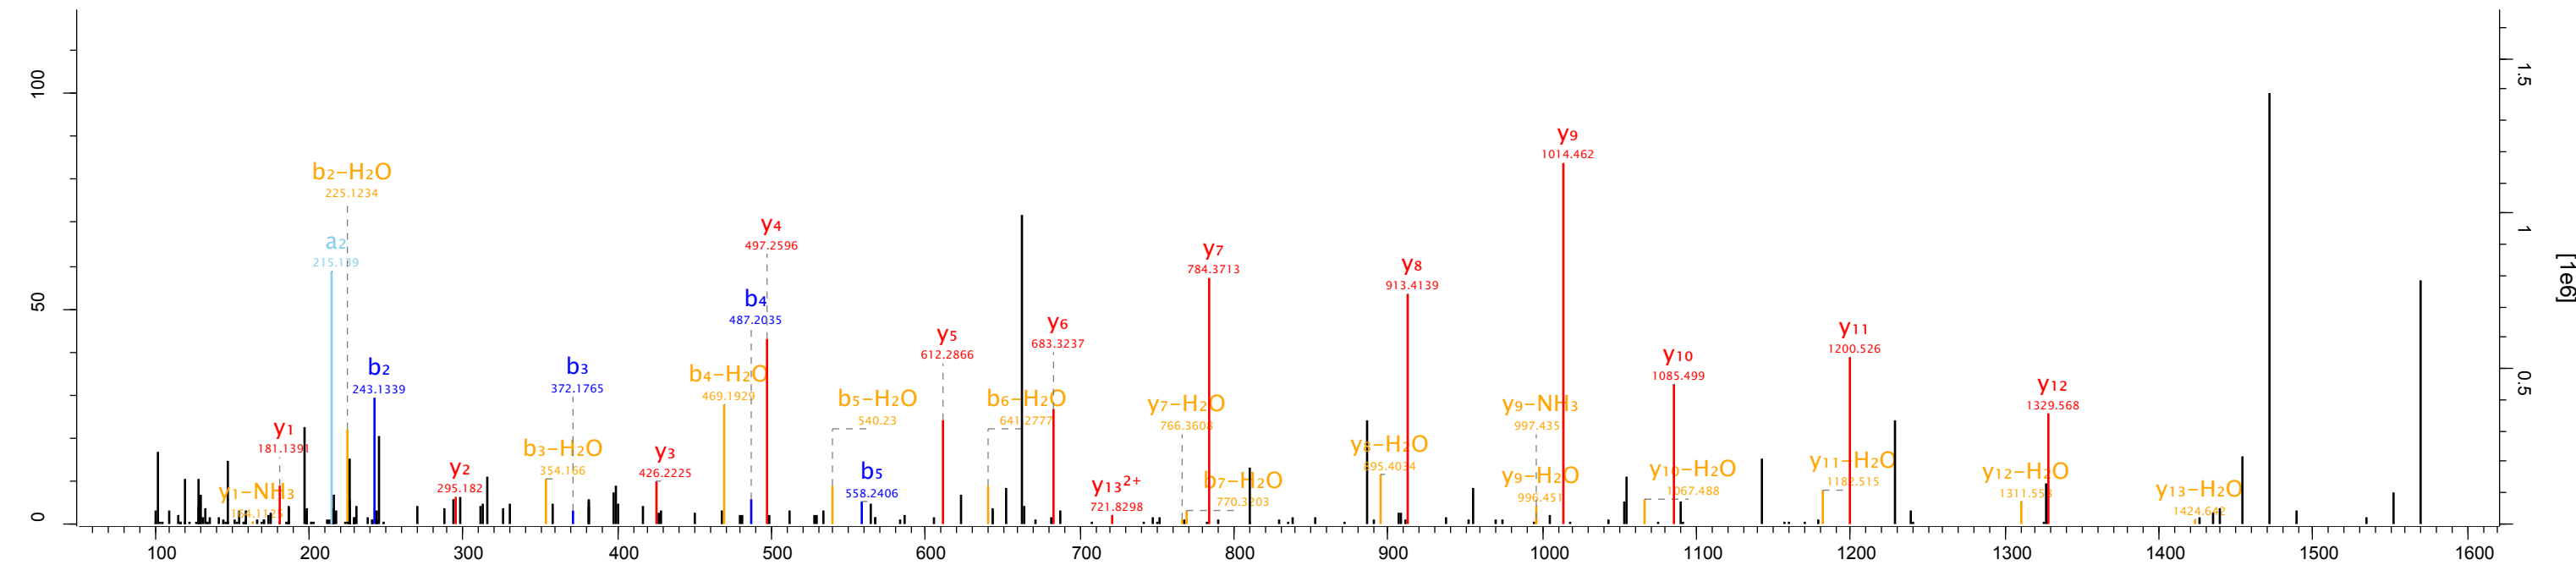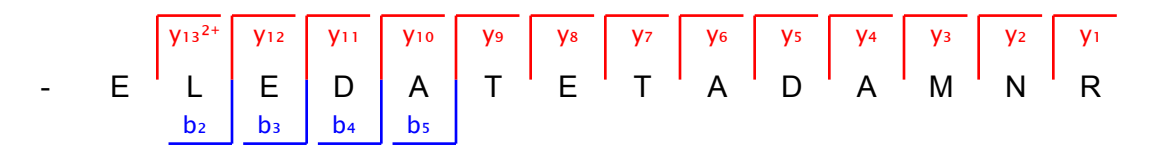

Raw file 20150814\_A375SR\_Phospho\_BR2\_05 Scan 11022 Method FTMS; HCD Score 192.78 m/z 678.32 Gene names MLF2

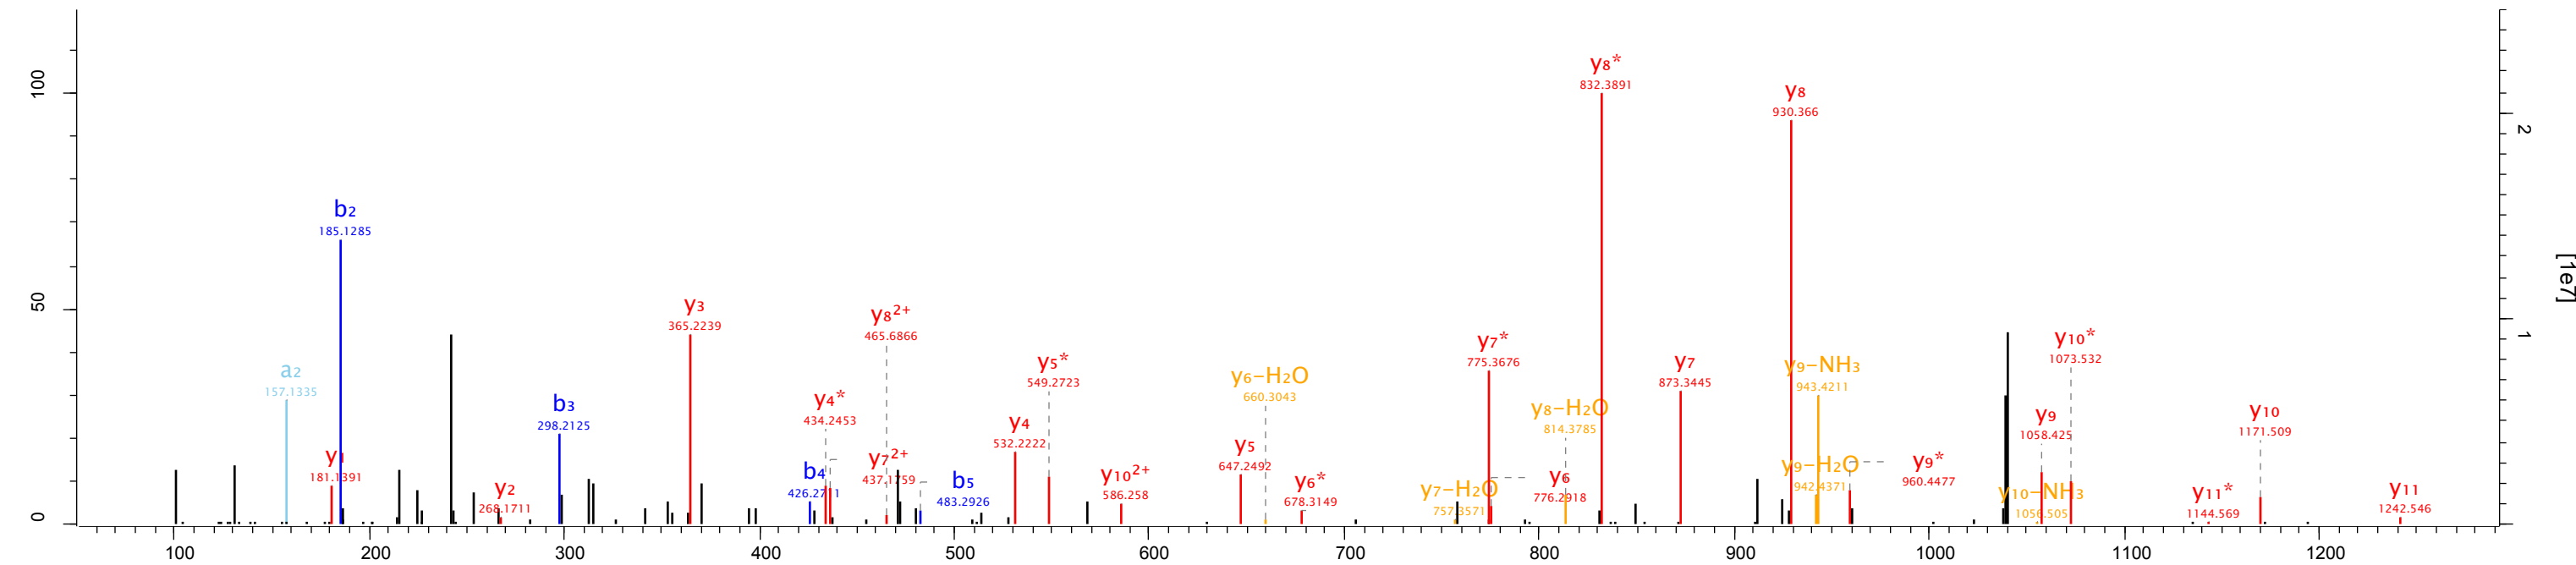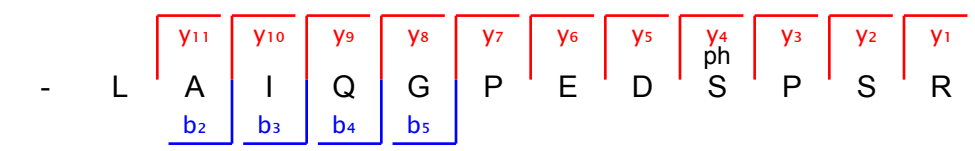

Raw file 20150814\_A375SR\_Phospho\_BR2\_05 Scan 11052 Method FTMS; HCD Score 102.5 m/z 657.31 Gene names SUGP2

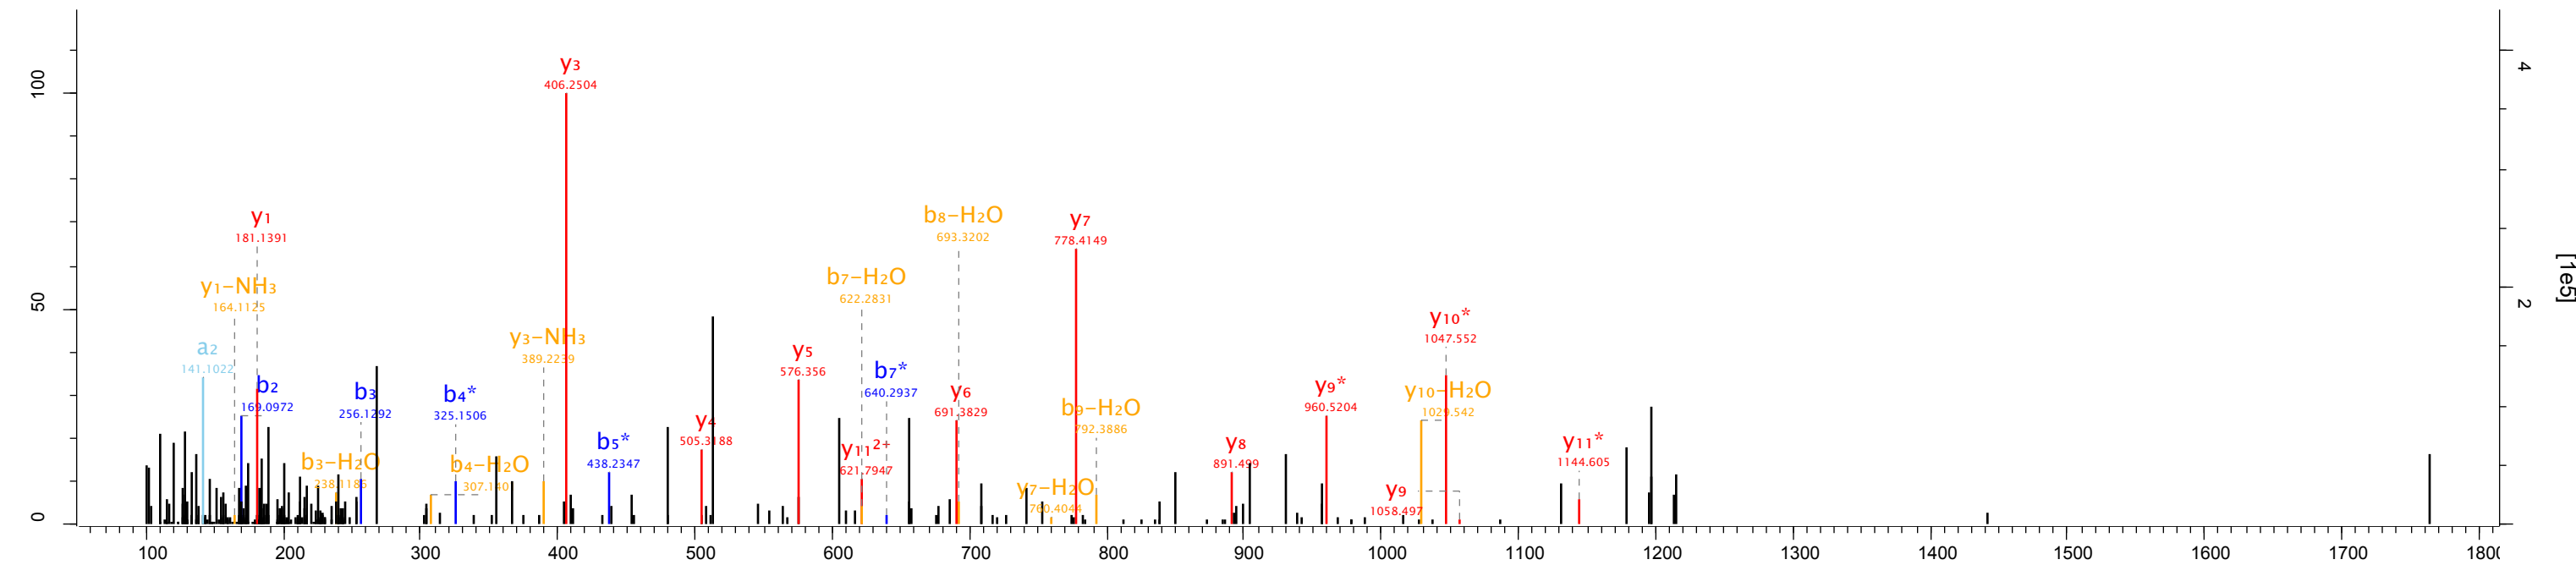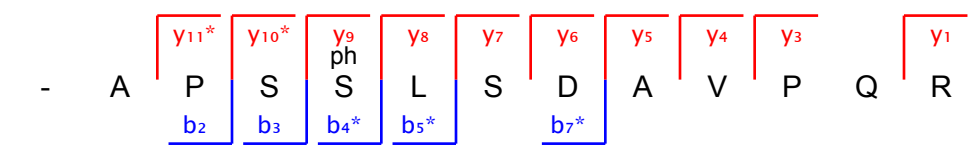

Raw file 20150814\_A375SR\_Phospho\_BR2\_05 Scan 11142 Method FTMS; HCD Score 371.35 m/z 951.07 Gene names HTATSF1

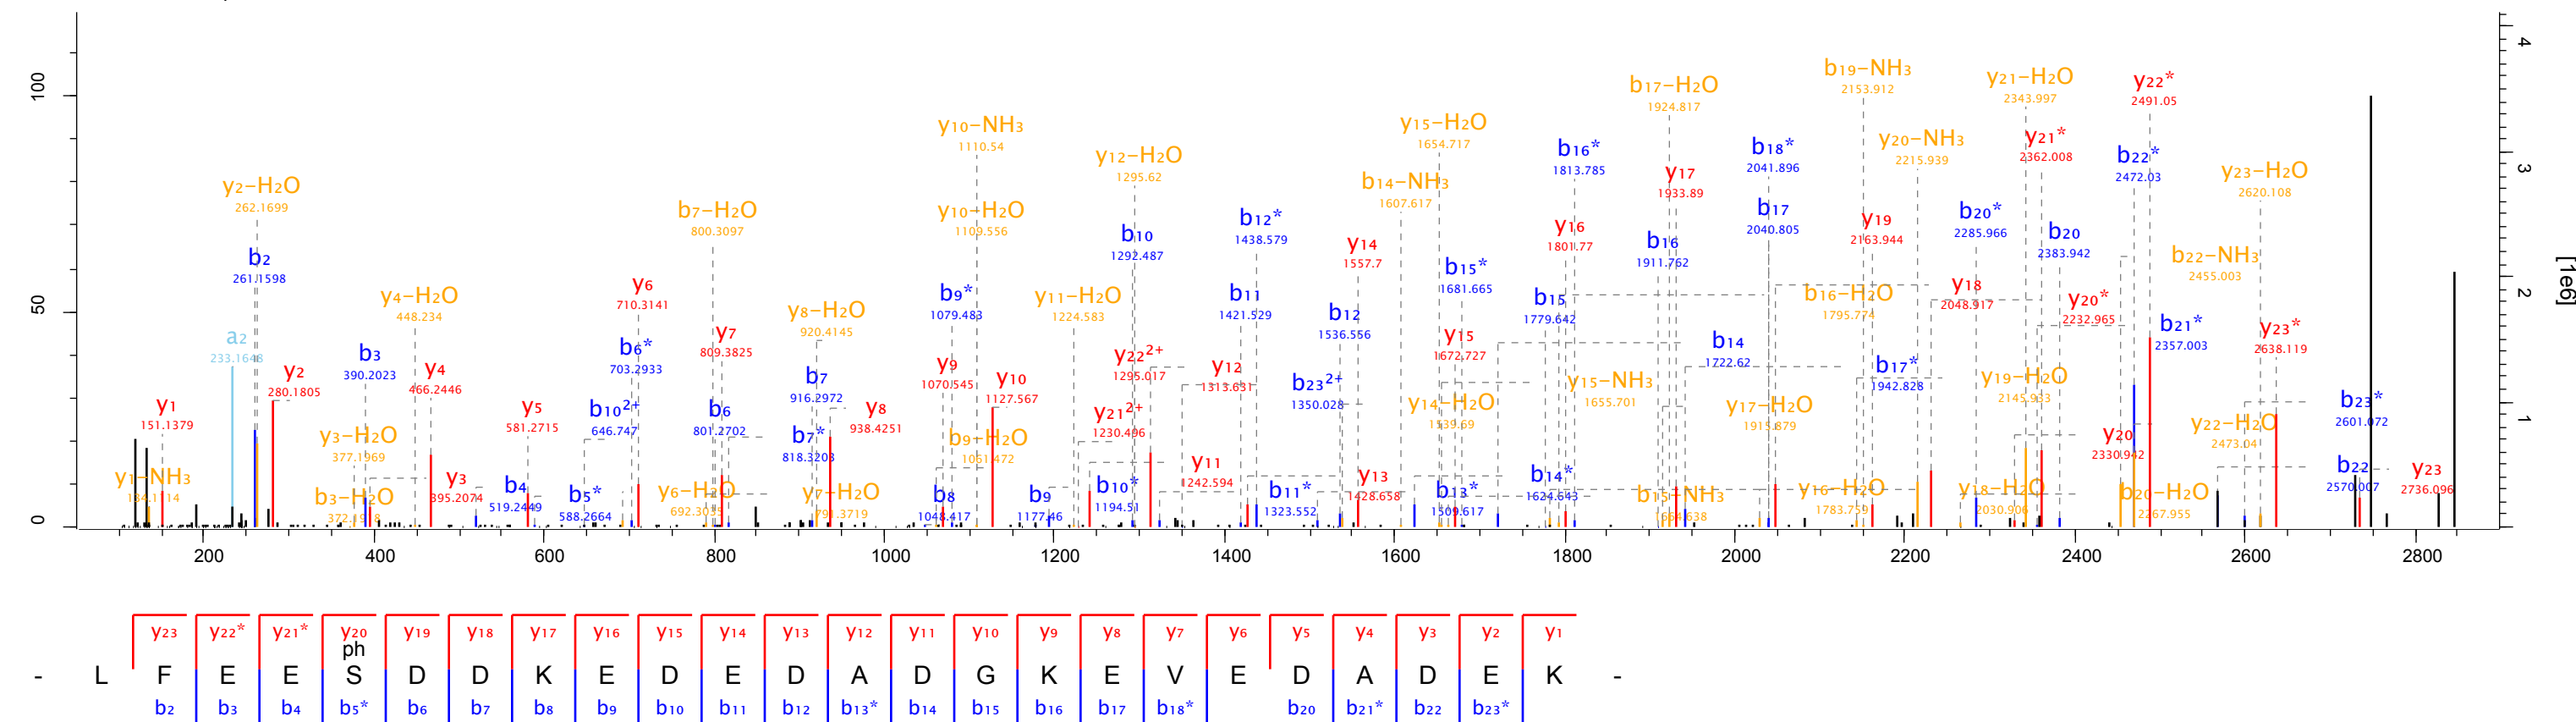

Raw file: 20150814\_A375SR\_Phospho\_BR2\_05  
 Scan: 11342  
 Method: FTMS; HCD  
 Score: 108.43  
 m/z: 494.22  
 Gene names: KNOX1

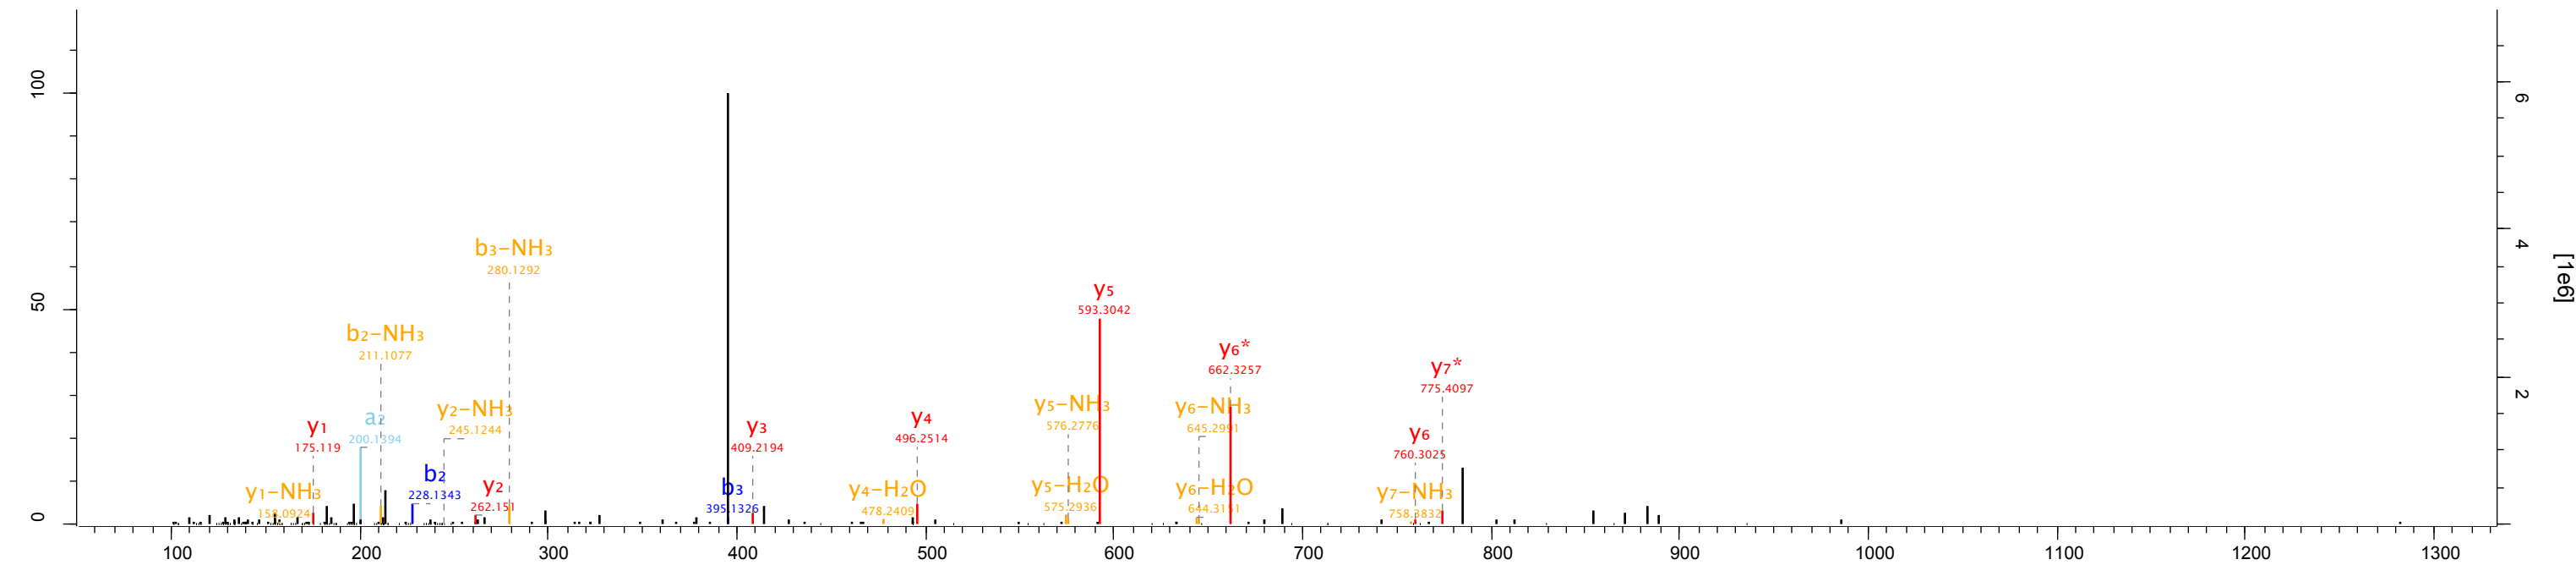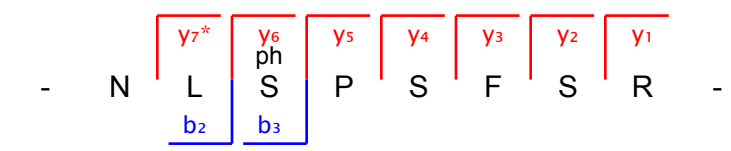

Raw file 20150814\_A375SR\_Phospho\_BR2\_05 Scan 11442 Method FTMS; HCD Score 237.39 m/z 859.87 Gene names SUPT5H

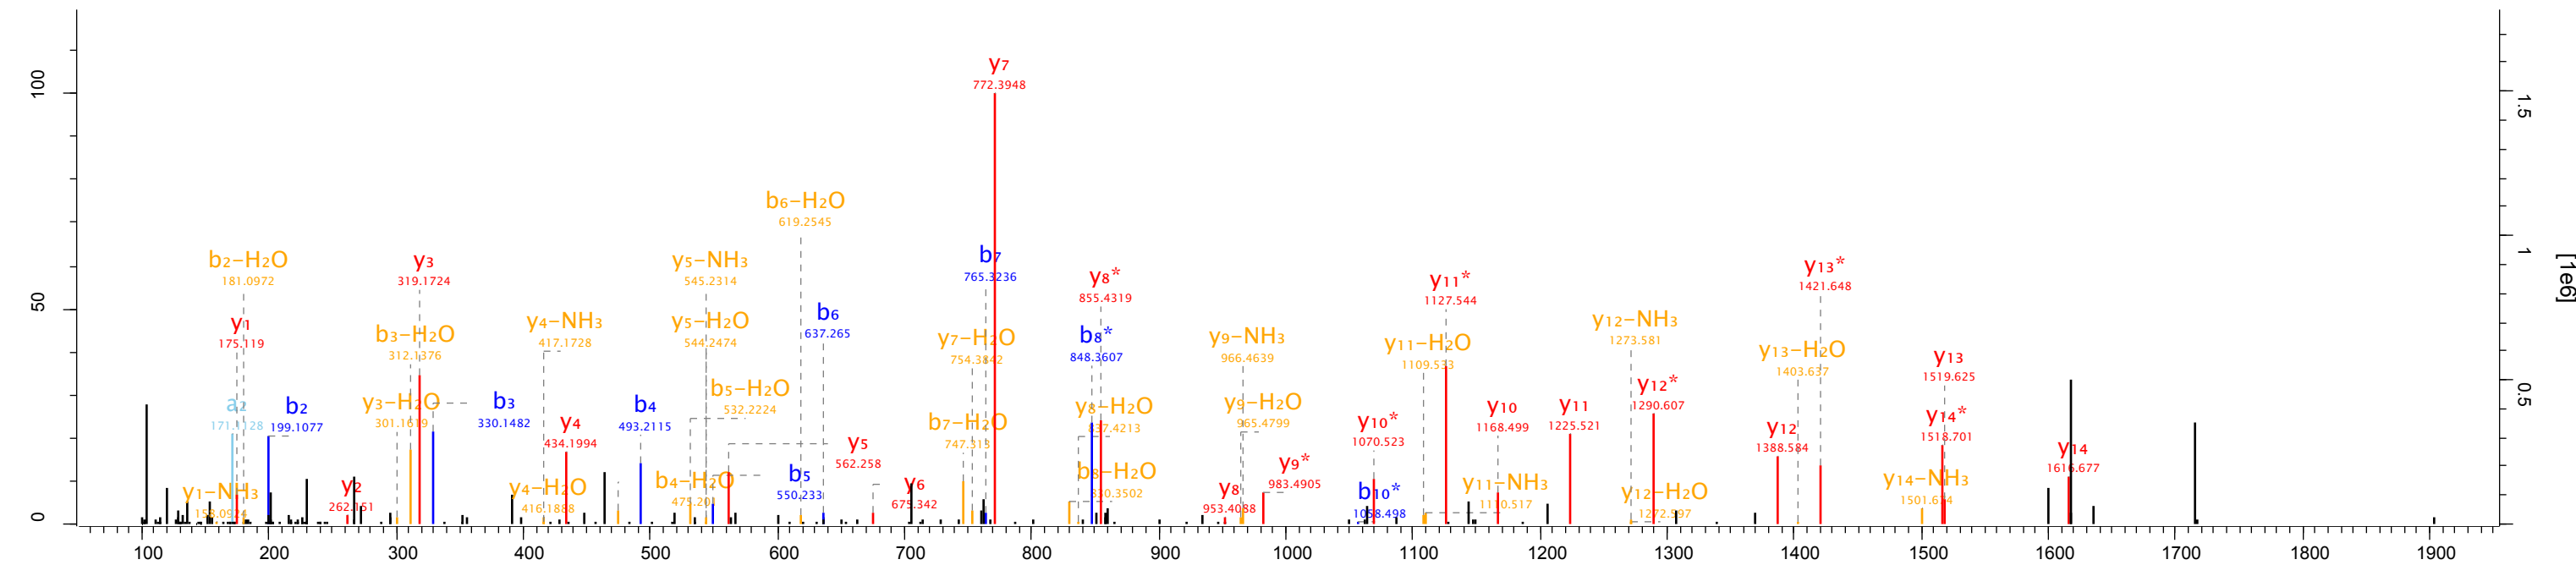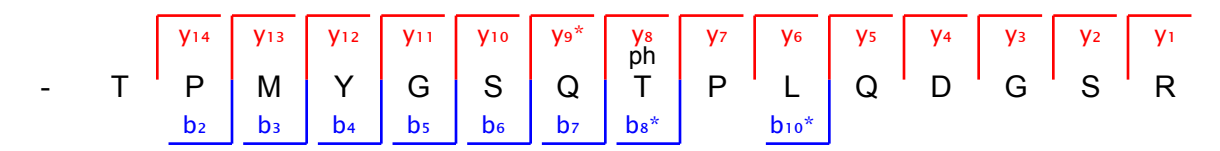

Raw file: 20150814\_A375SR\_Phospho\_BR2\_05  
 Scan: 11862 Method: FTMS; HCD Score: 116.96 m/z: 896.76 Gene names: ARHGAP17

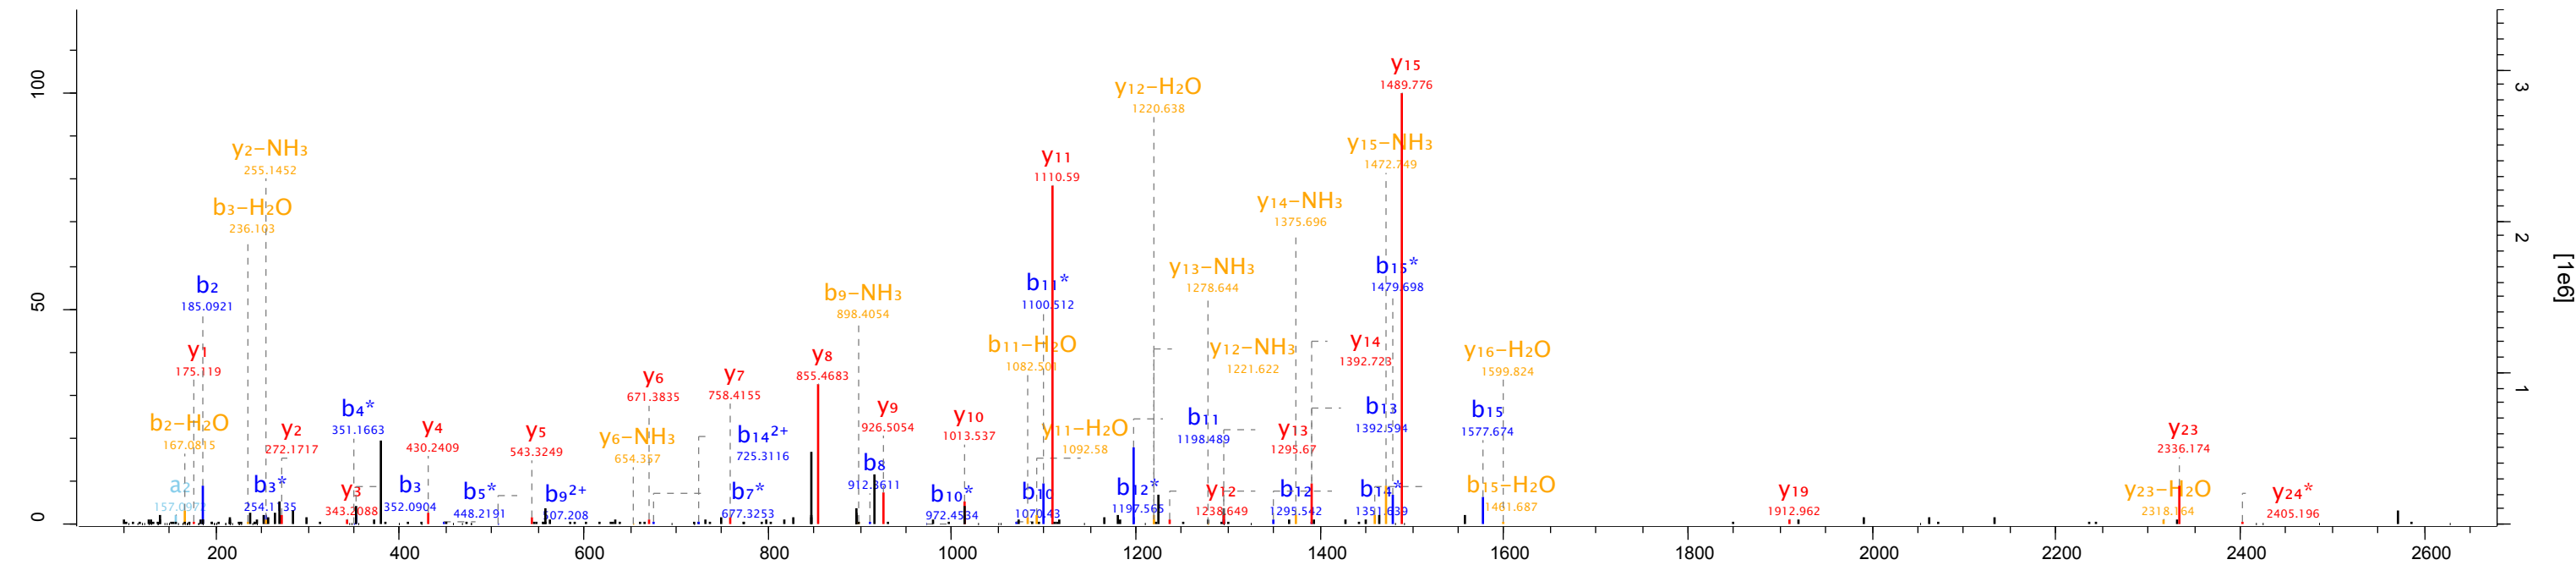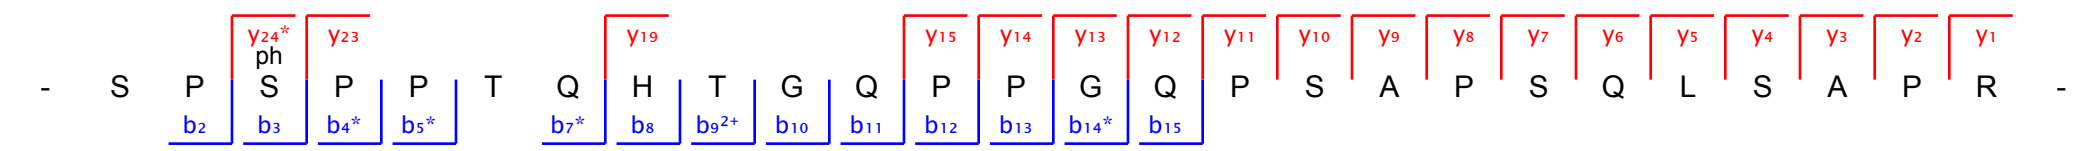

Raw file 20150814\_A375SR\_Phospho\_BR2\_05 Scan 11972 Method FTMS; HCD Score 128.51 m/z 487.25 Gene names LIMCH1

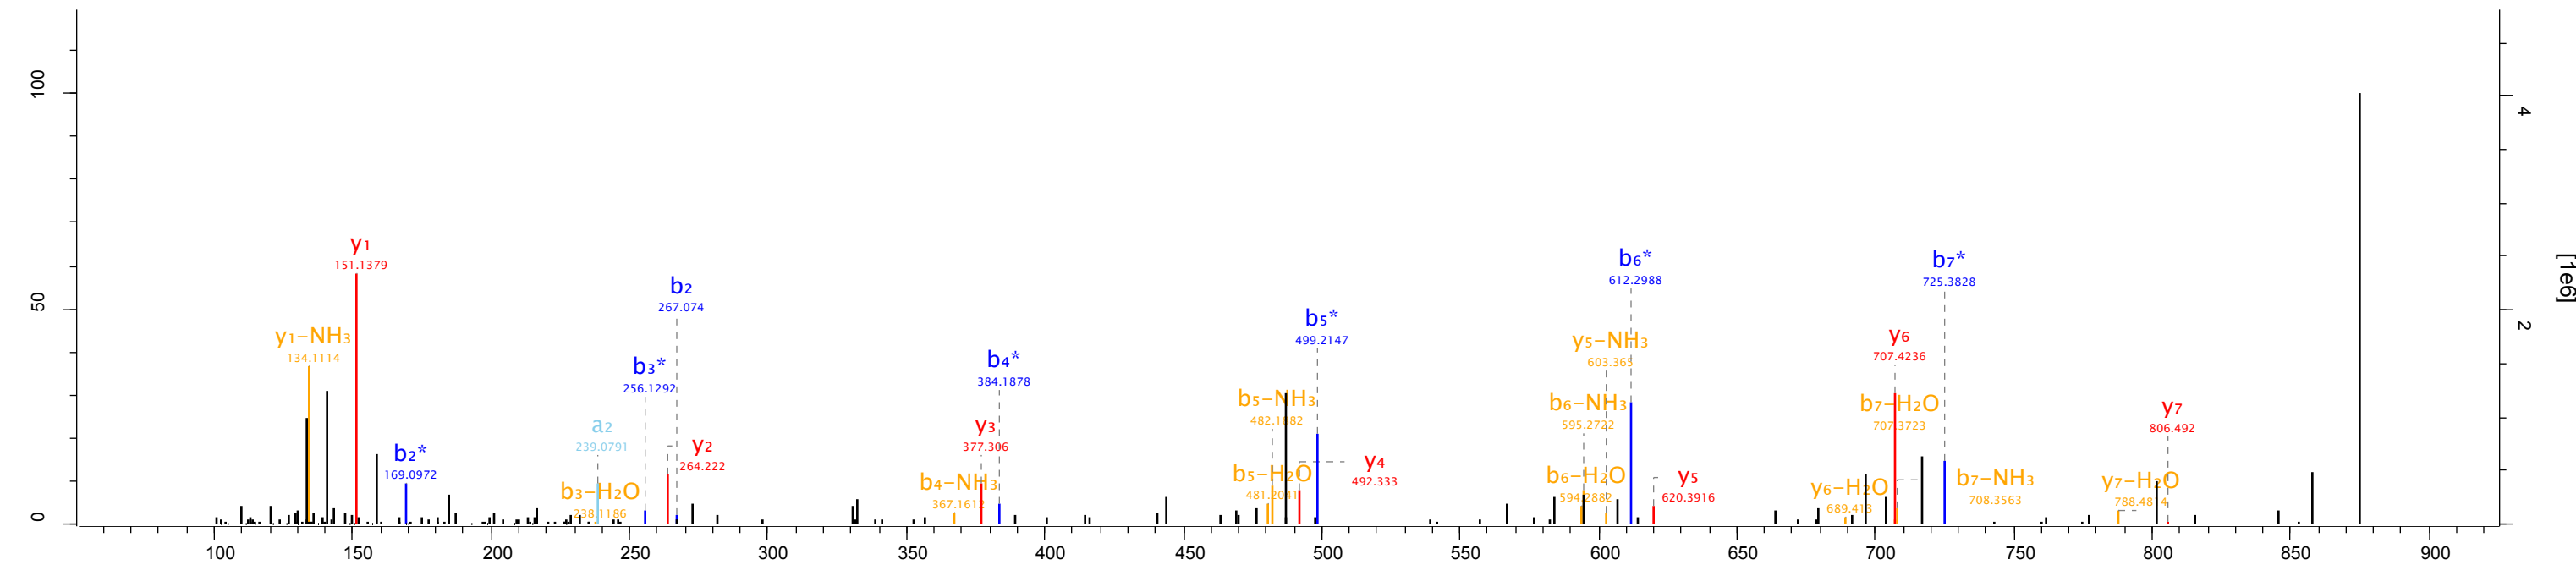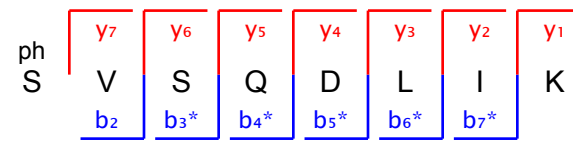



Raw file: 20150814\_A375SR\_Phospho\_BR2\_05  
 Scan: 12462 Method: FTMS; HCD Score: 115.83 m/z: 630.27 Gene names: FAM117B

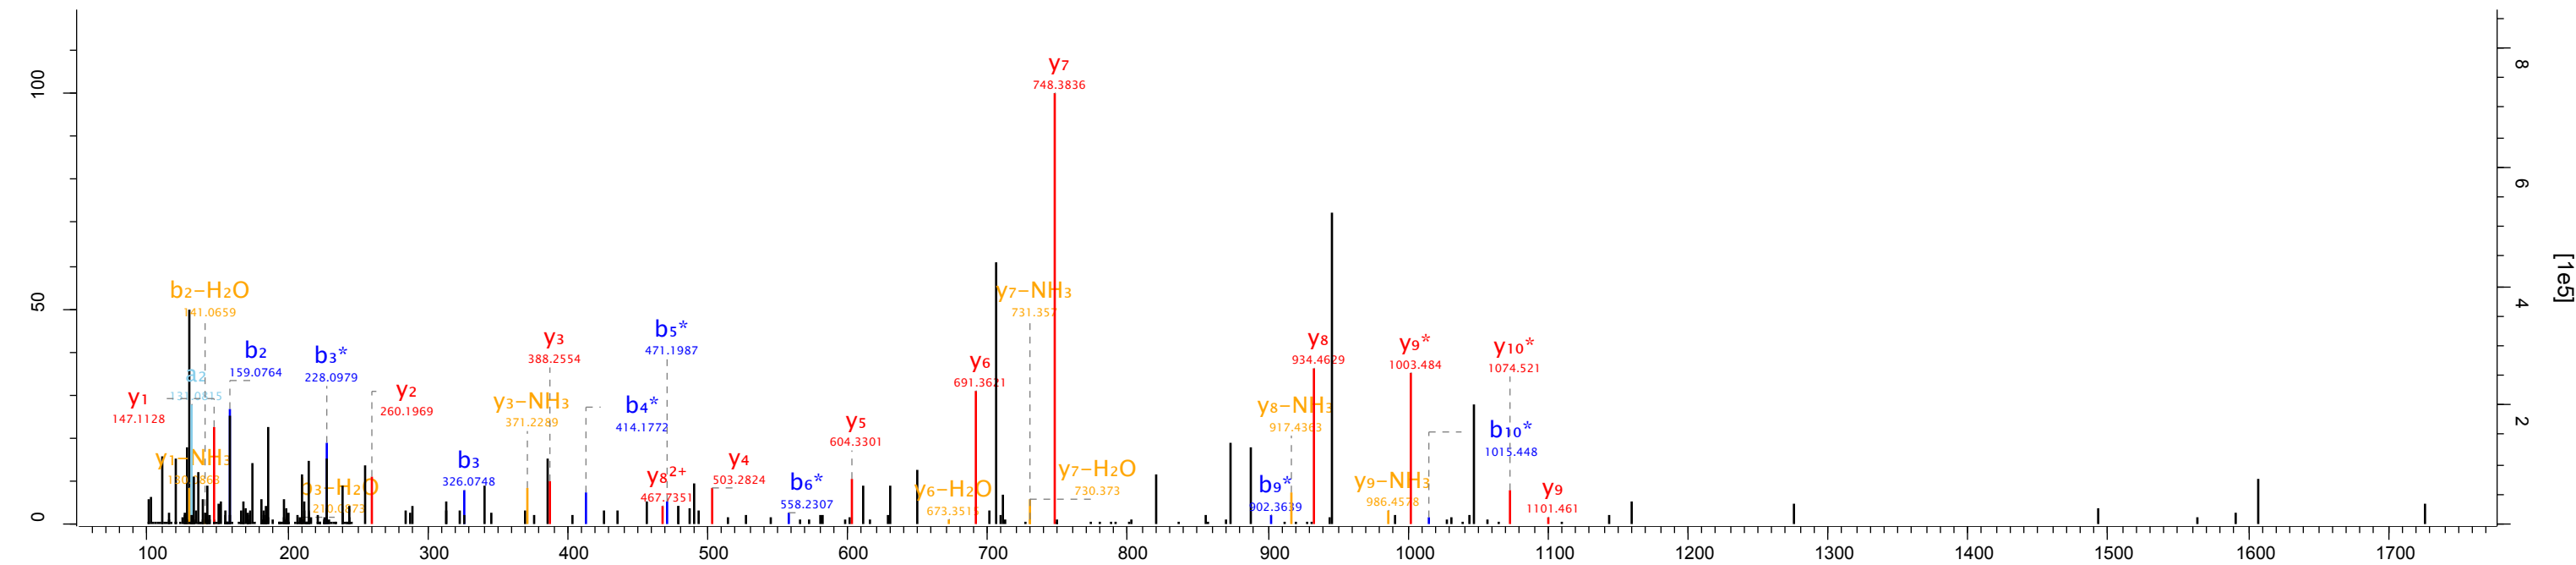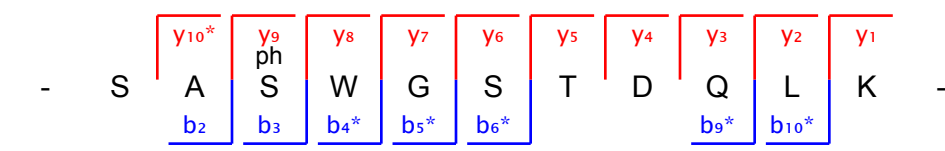

Raw file 20150814\_A375SR\_Phospho\_BR2\_05 Scan 13052 Method FTMS; HCD Score 75.59 m/z 540.74 Gene names MYH10

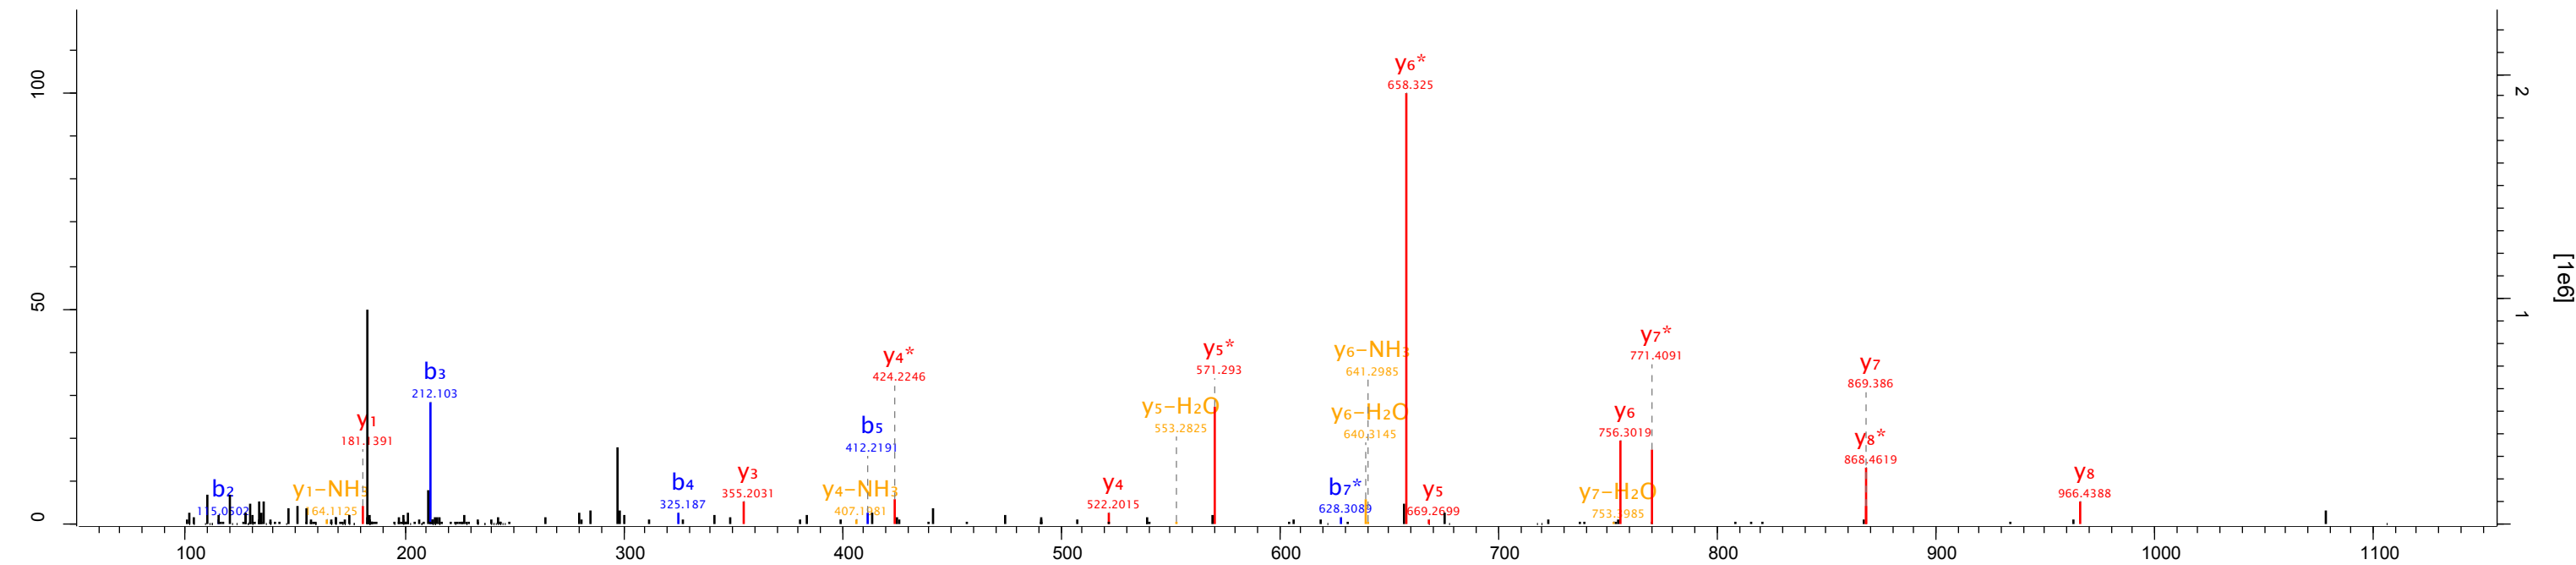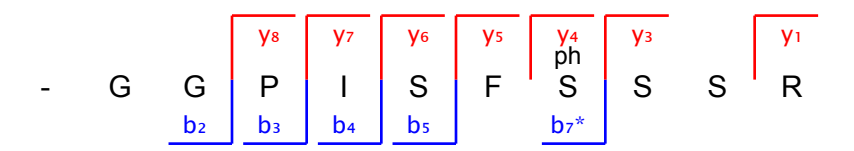

Raw file: 20150814\_A375SR\_Phospho\_BR2\_05  
 Scan: 13282 Method: FTMS; HCD Score: 111.46 m/z: 486.18 Gene names: PAK1

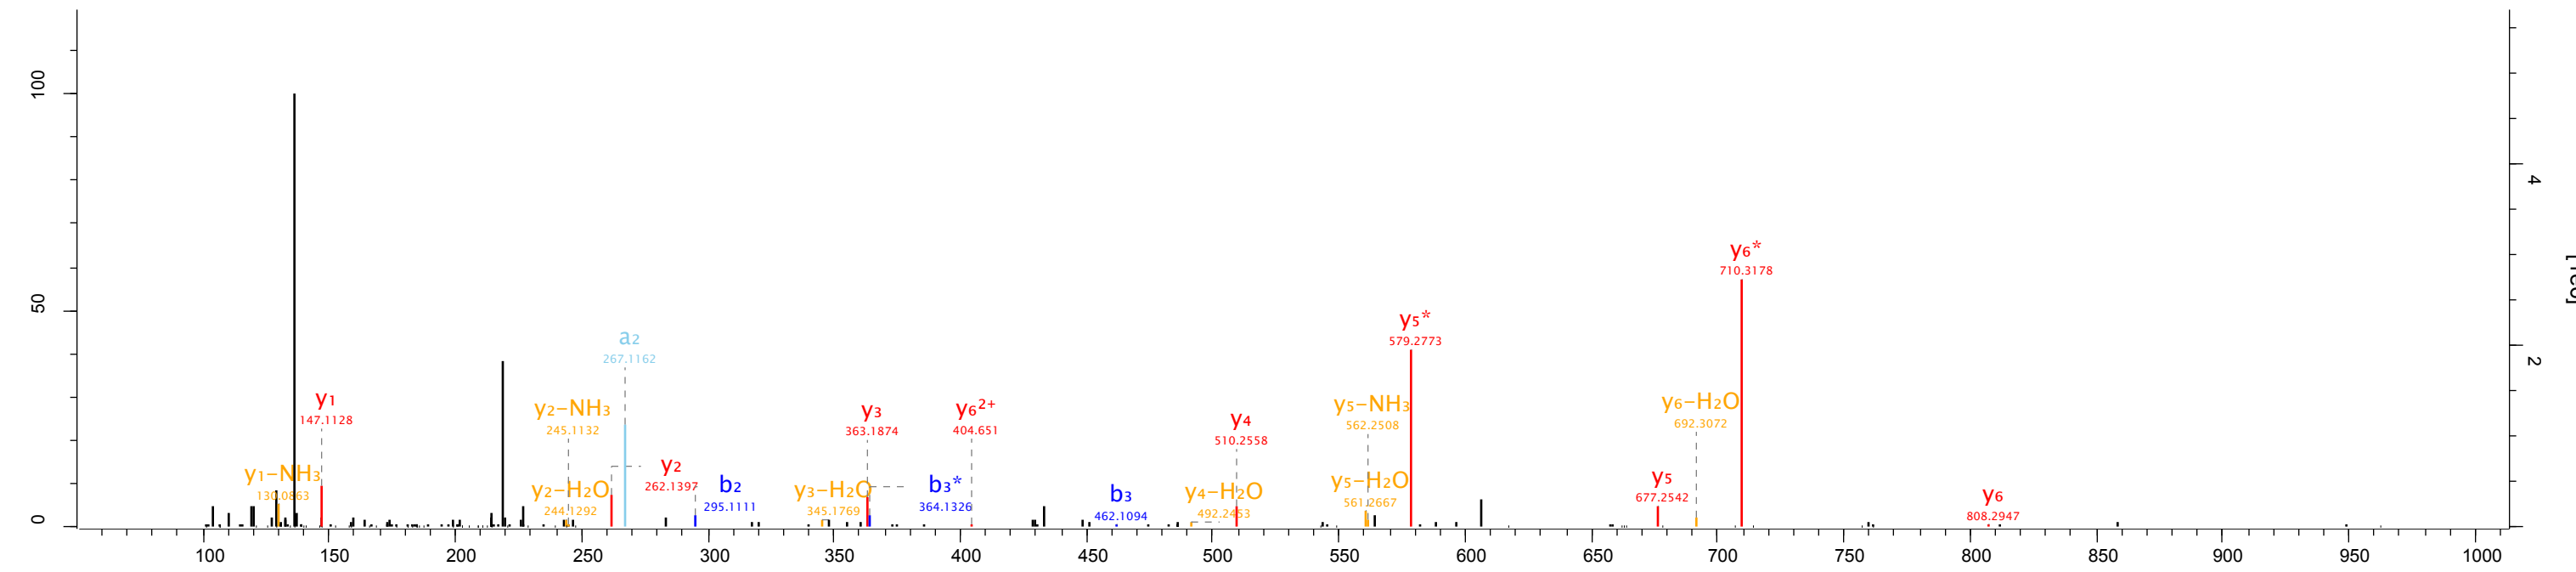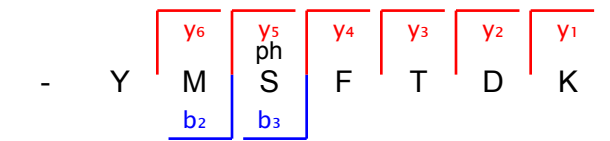

Raw file 20150814\_A375SR\_Phospho\_BR2\_05 Scan 13382 Method FTMS; HCD Score 110.61 m/z 775.88 Gene names DUT

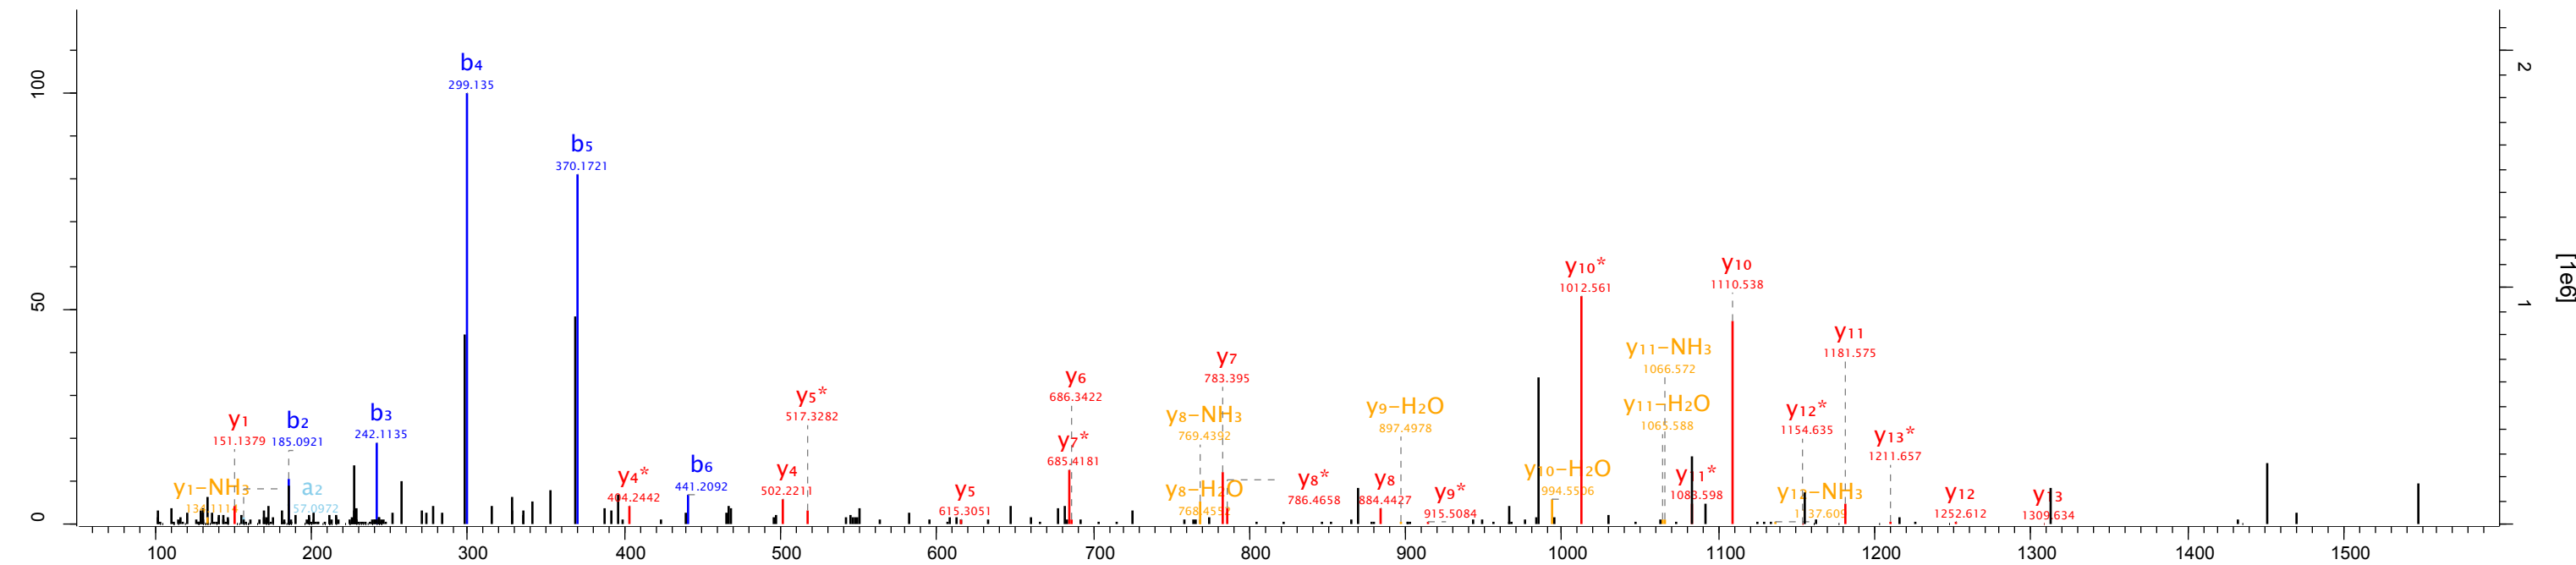

ac - A A G G A A P E T P A I S P S K -

Fragmentation mapping: b2 (A), b3 (G), b4 (G), b5 (A), b6 (A), y13 (A), y12 (A), y11 (A), y10 (P), y9\* (E), y8 (T), y7 (P), y6 (A), y5 (I), y4 (S), y1 (K).

Raw file 20150814\_A375SR\_Phospho\_BR2\_05 Scan 13402 Method FTMS; HCD Score 143.69 m/z 813.86 Gene names SRRM2

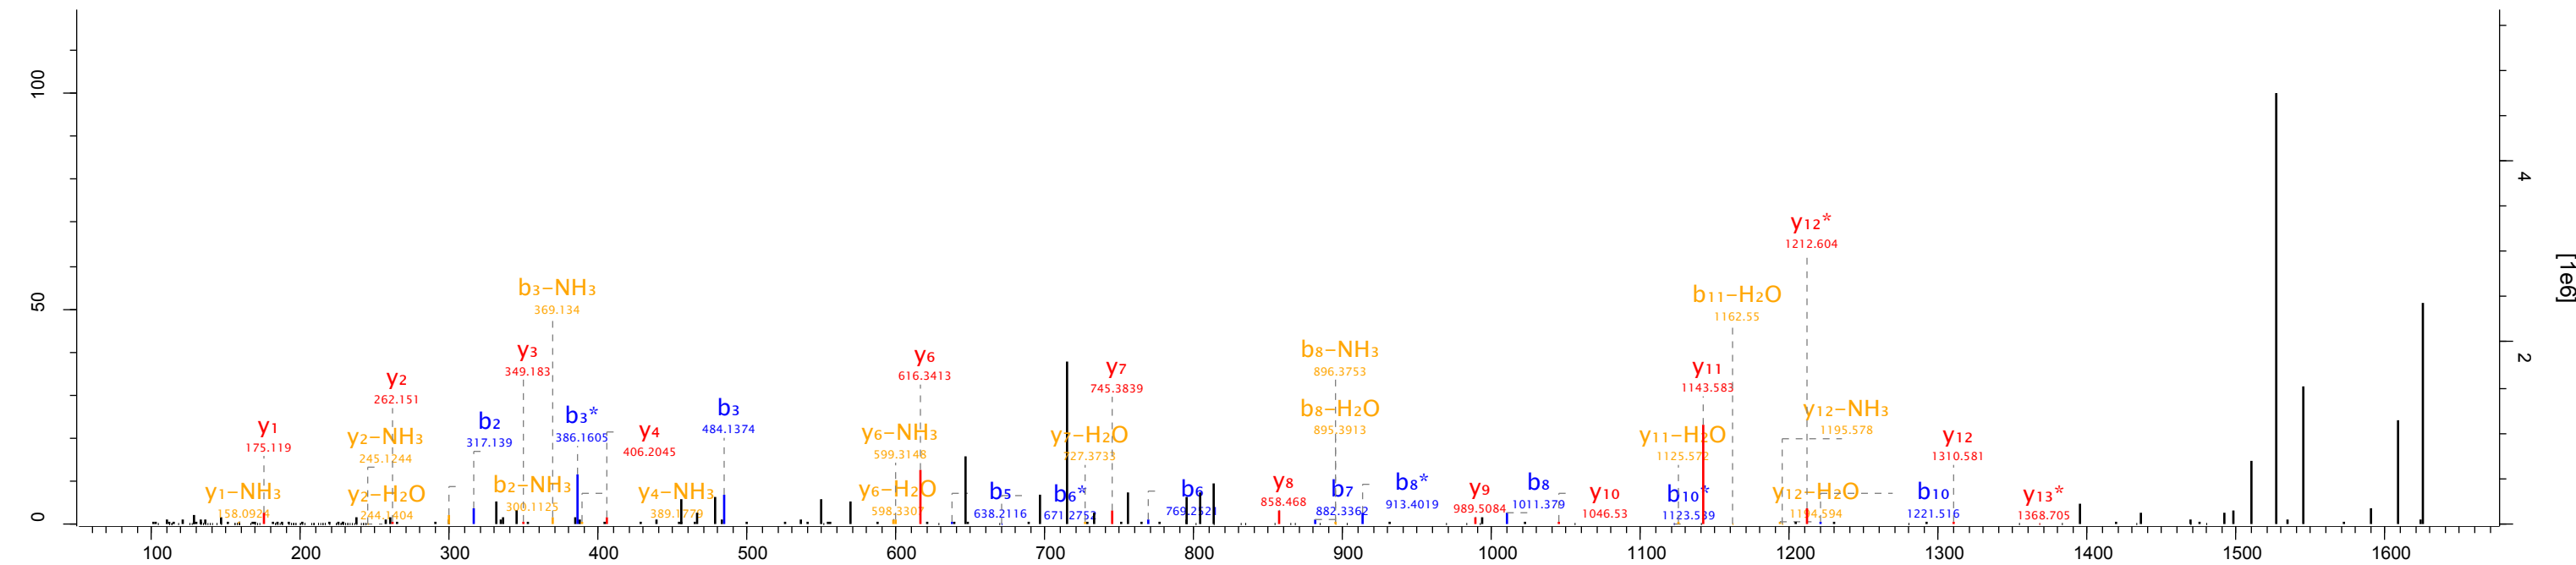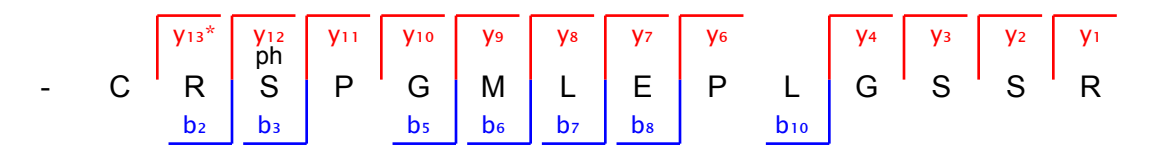

Raw file: 20150814\_A375SR\_Phospho\_BR2\_05  
 Scan: 1342 Method: FTMS; HCD Score: 156.96 m/z: 668.77 Gene names: SRRM2

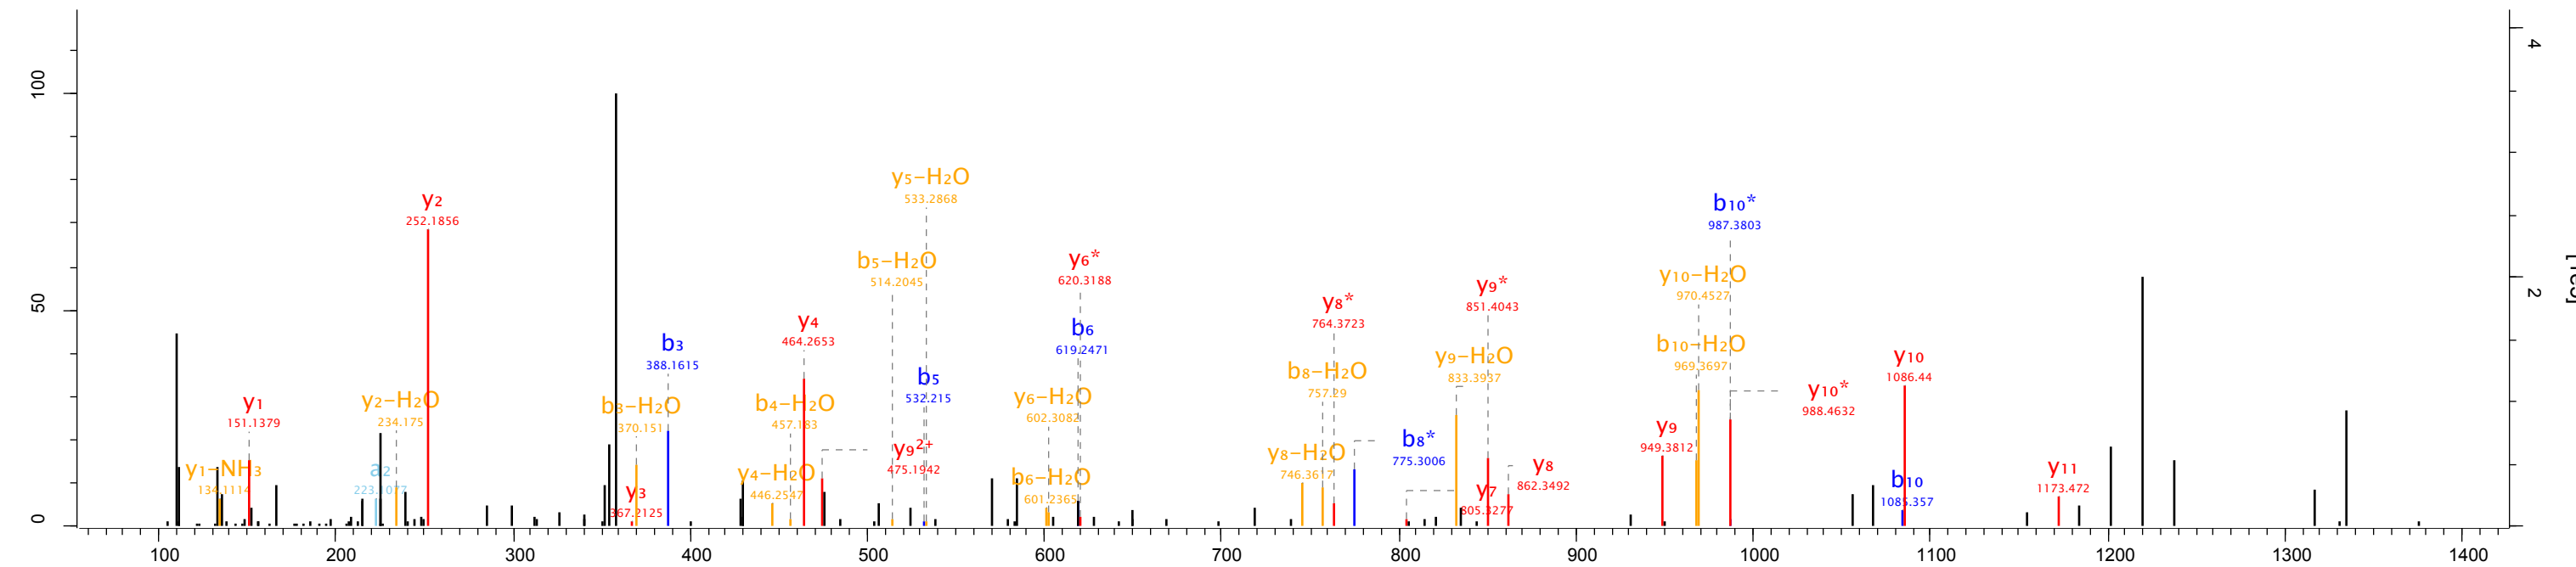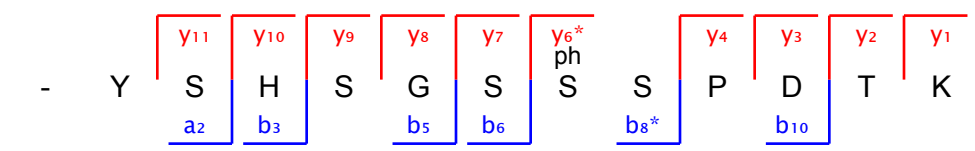

Raw file Scan Method m/z Gene names  
 20150814\_A375SR\_Phospho\_BR2\_05 13422 FTMS; HCD 229.16 919.76 EIF4ENIF1

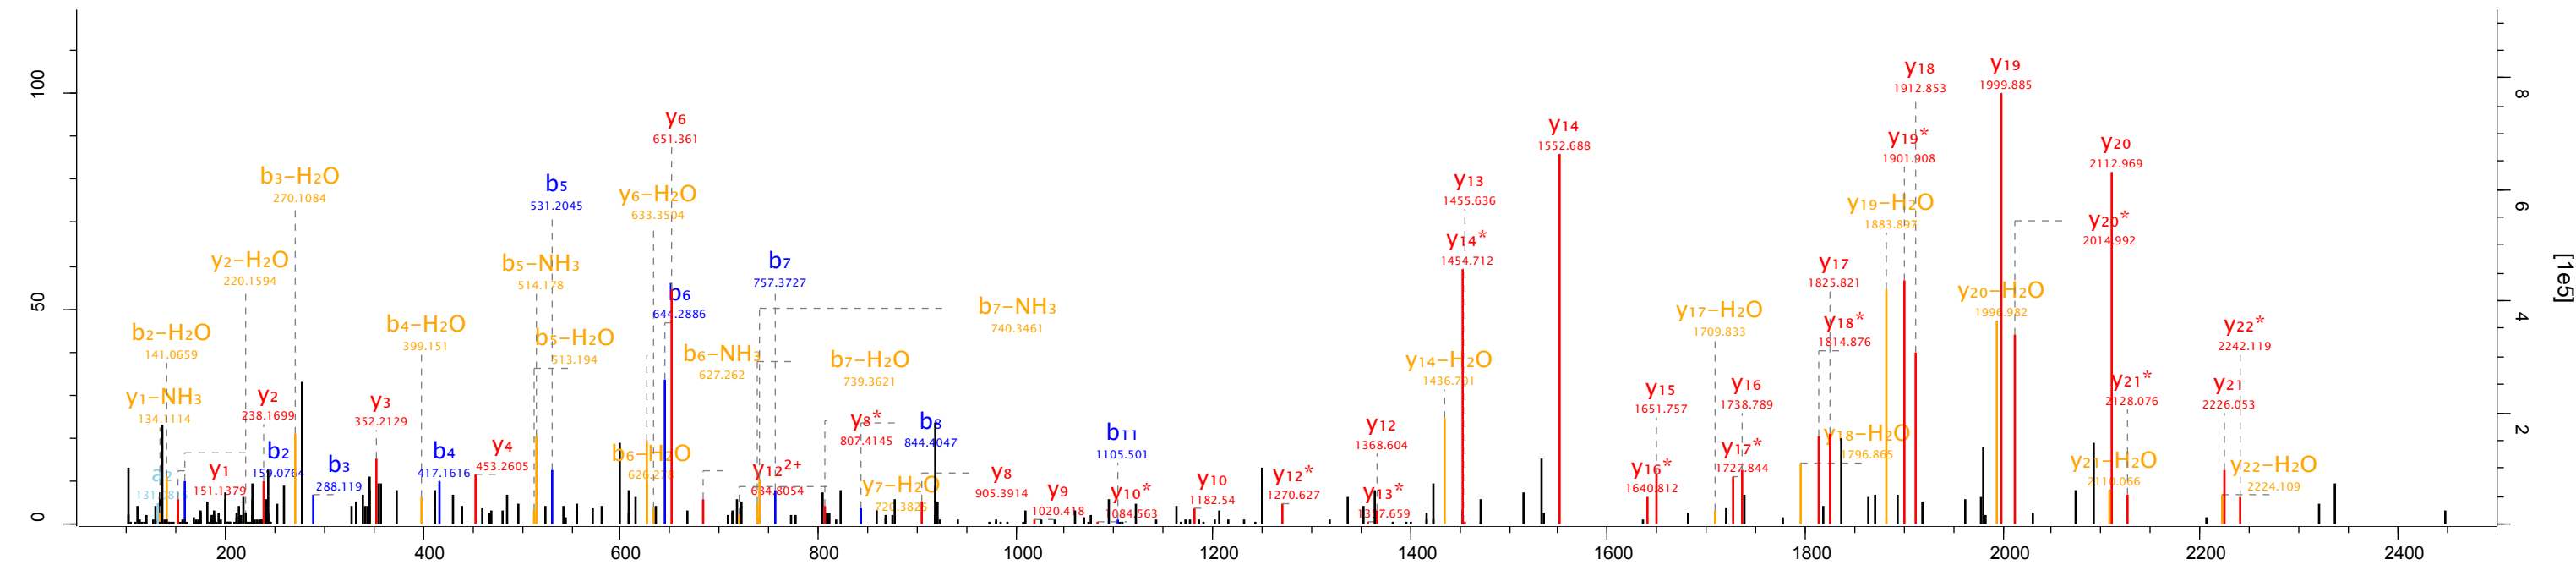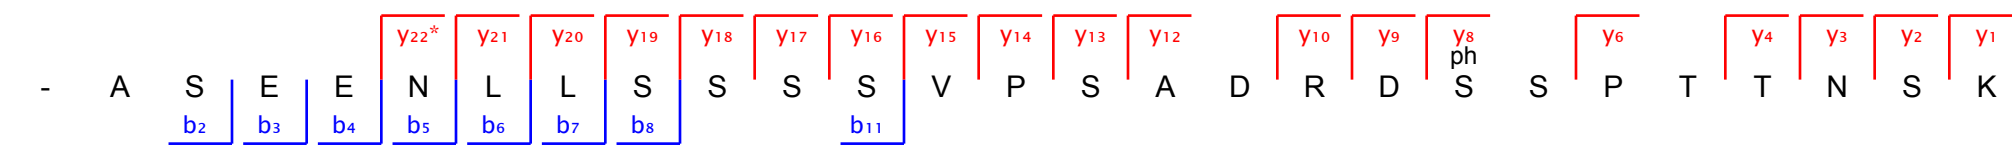

Raw file: 20150814\_A375SR\_Phospho\_BR2\_05  
 Scan: 13492 Method: FTMS; HCD Score: 151.7 m/z: 686.31 Gene names: PTRF

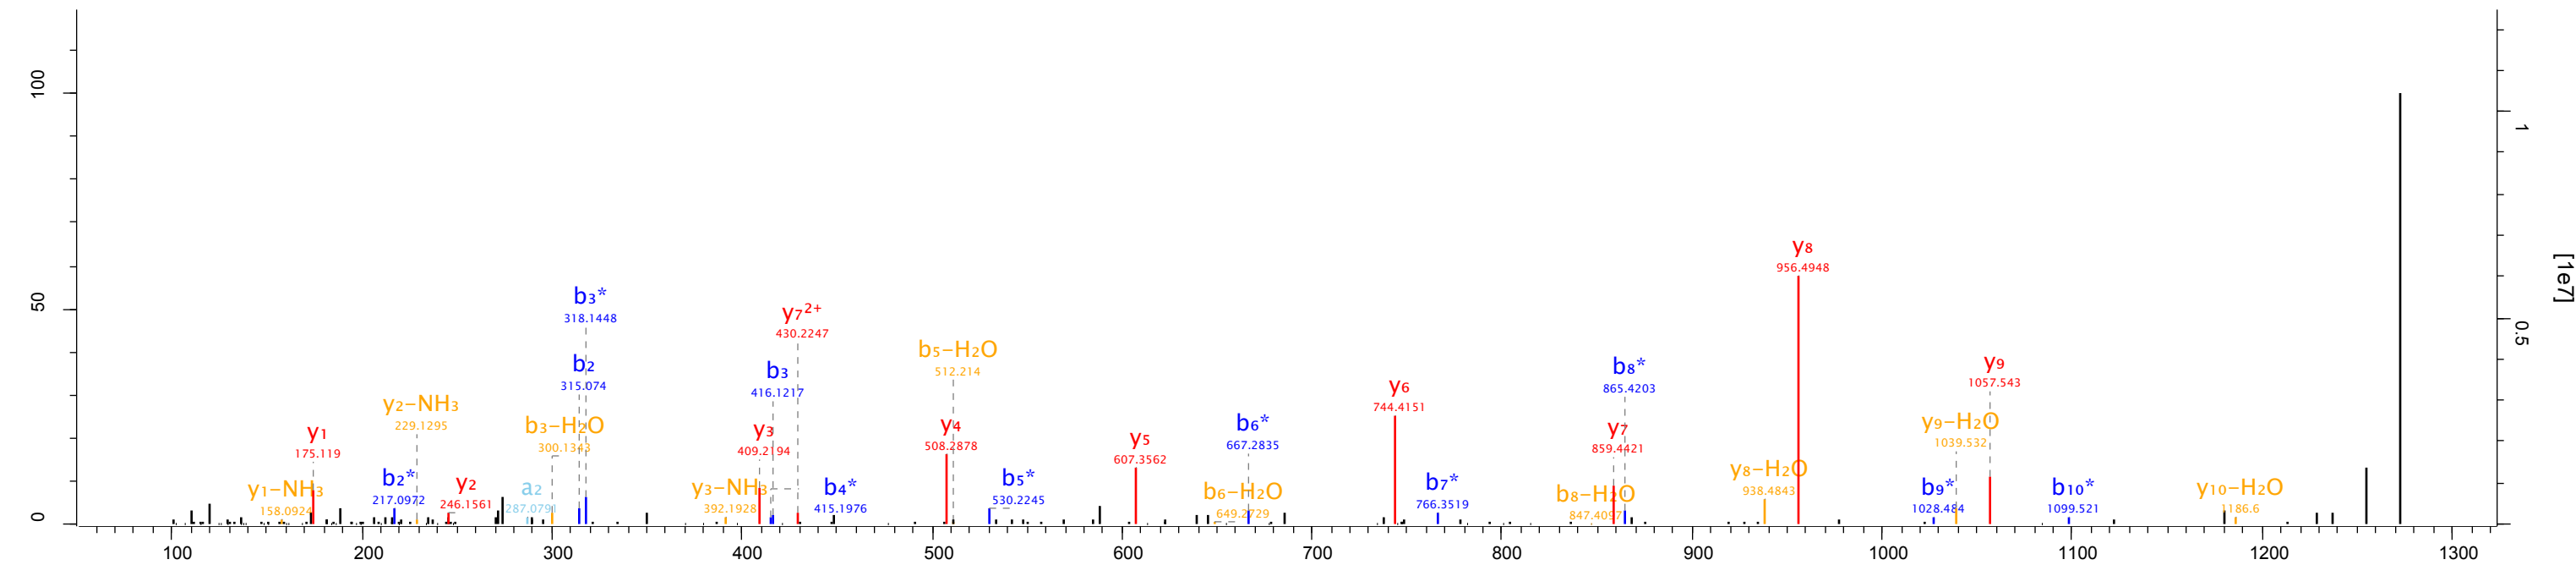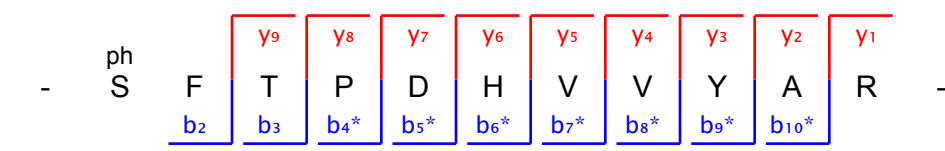



Raw file 20150814\_A375SR\_Phospho\_BR2\_05 Scan 13562 Method FTMS; HCD Score 168.31 m/z 769.26 Gene names LEO1

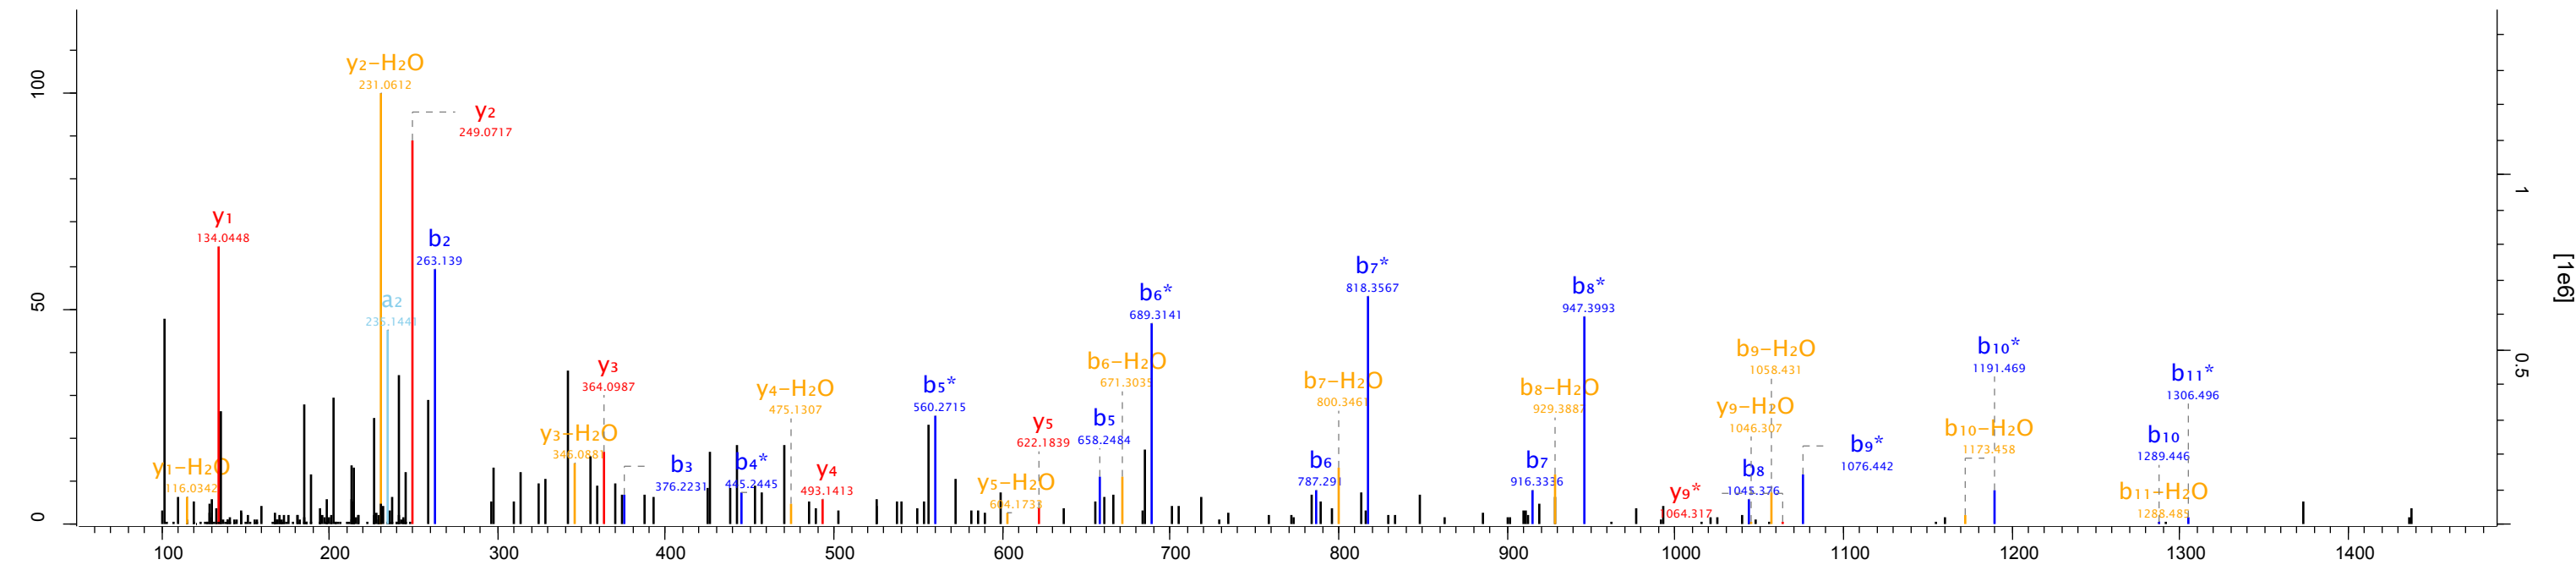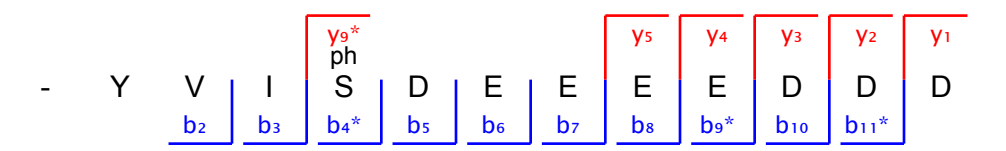

Raw file 20150814\_A375SR\_Phospho\_BR2\_05 Scan 13572 Method FTMS; HCD Score 138.37 m/z 902.94 Gene names ETV3

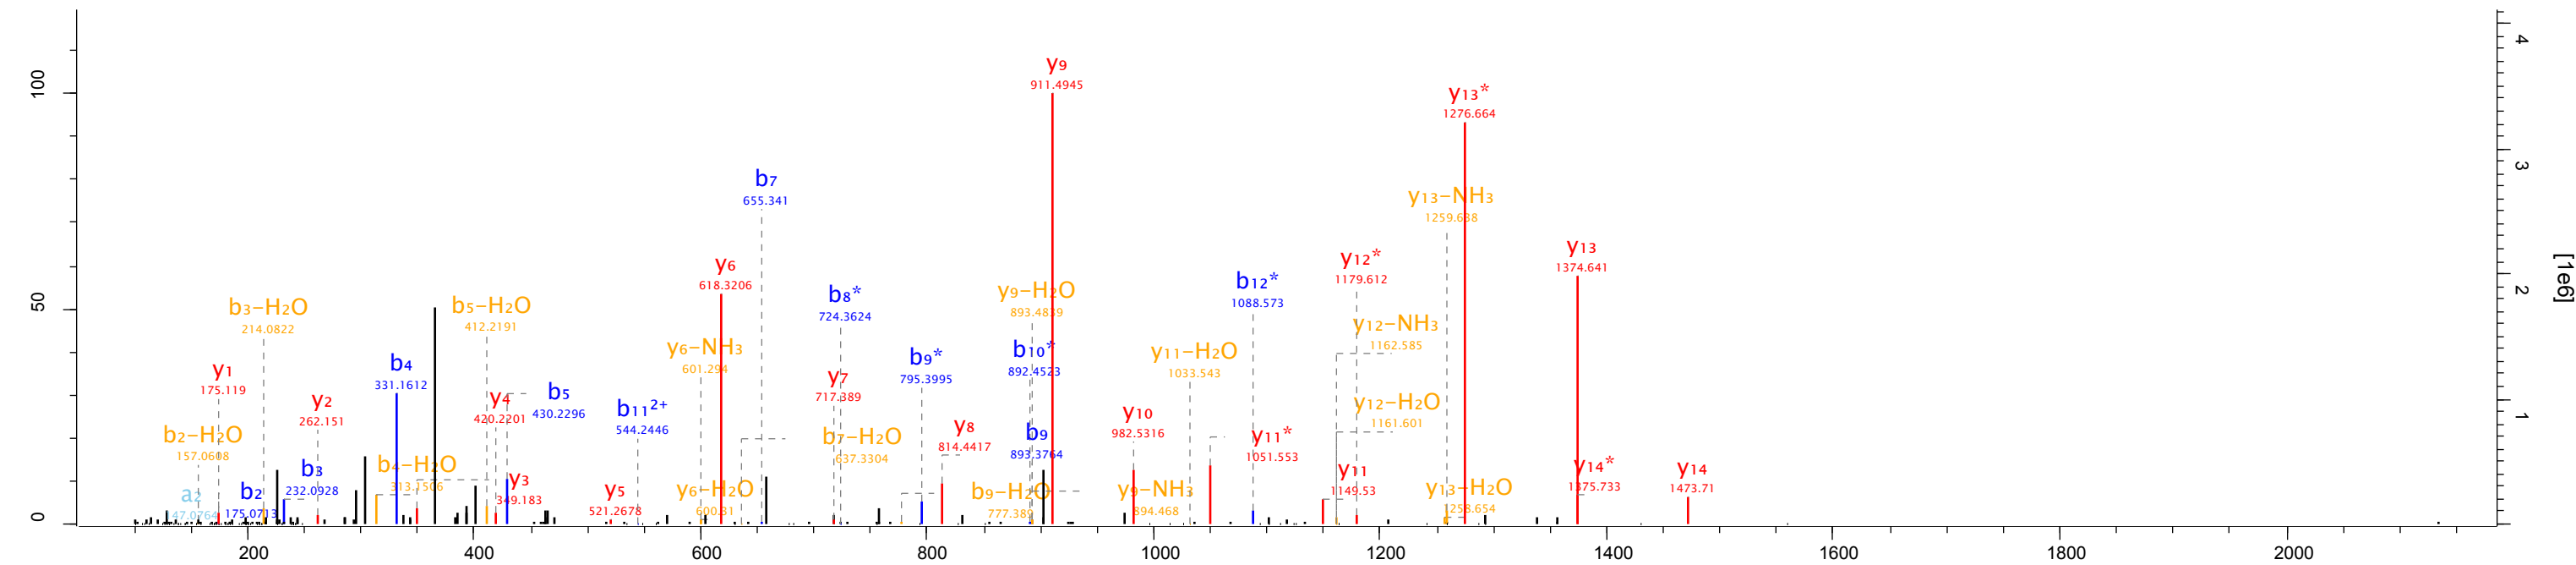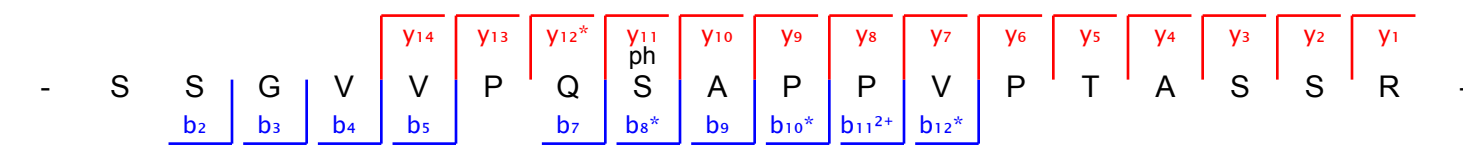

Raw file 20150814\_A375SR\_Phospho\_BR2\_05 Scan 13692 Method FTMS; HCD Score 58.08 m/z 664.28 Gene names MYCBP2

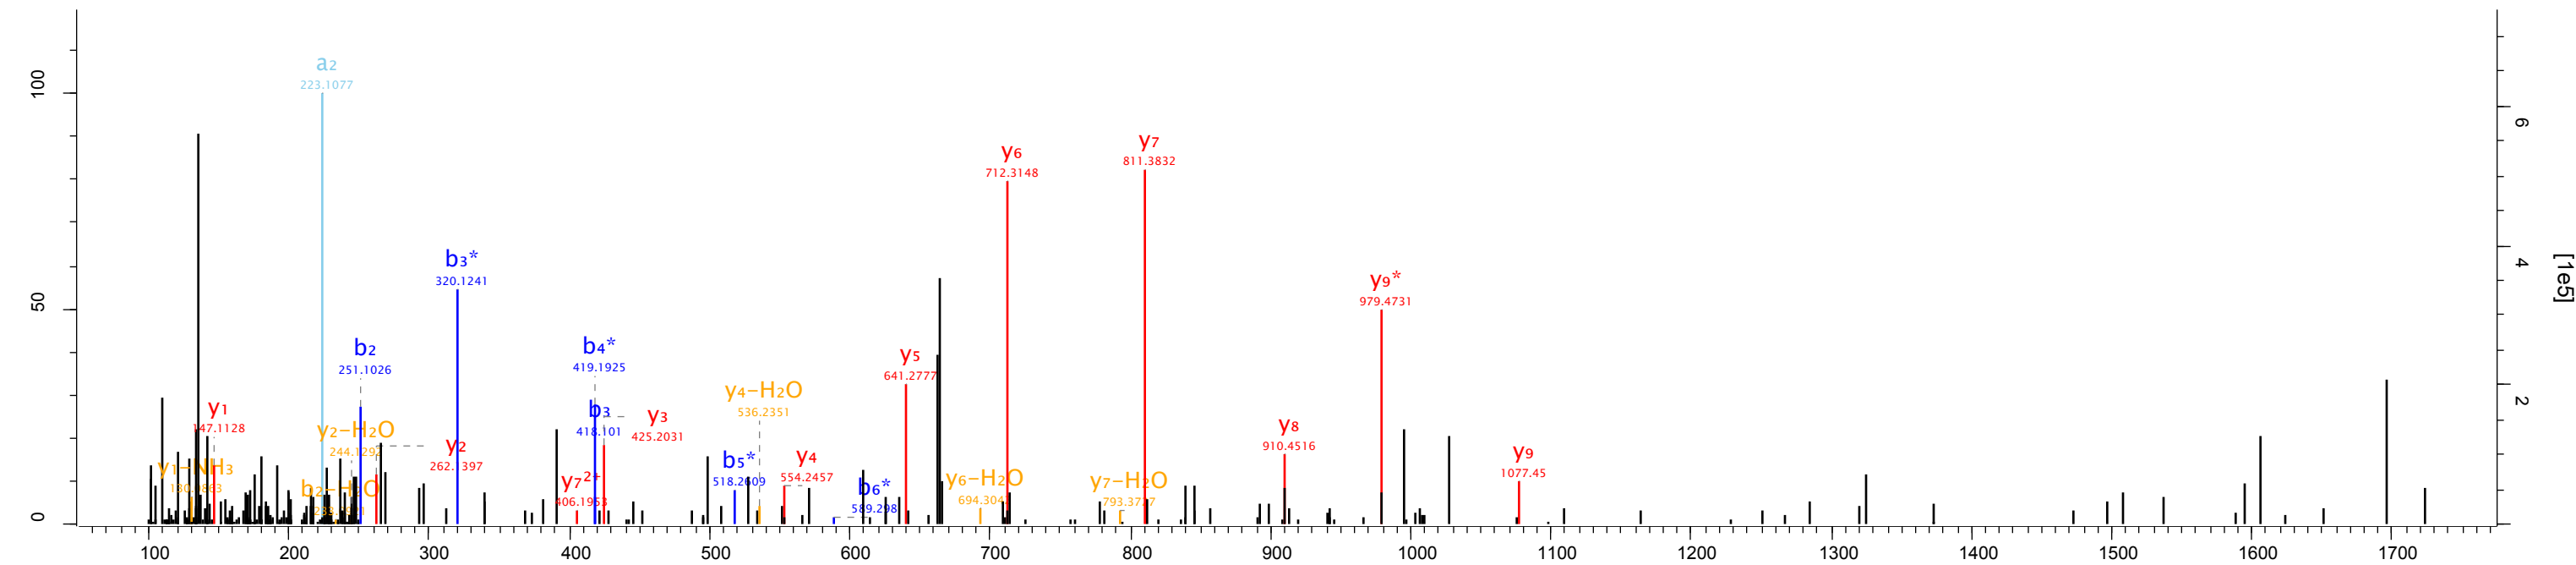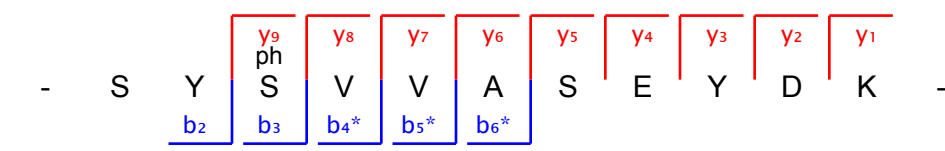

Raw file: 20150814\_A375SR\_Phospho\_BR2\_05  
 Scan: 13832 Method: FTMS; HCD Score: 210.5 m/z: 745.67 Gene names: CCT3

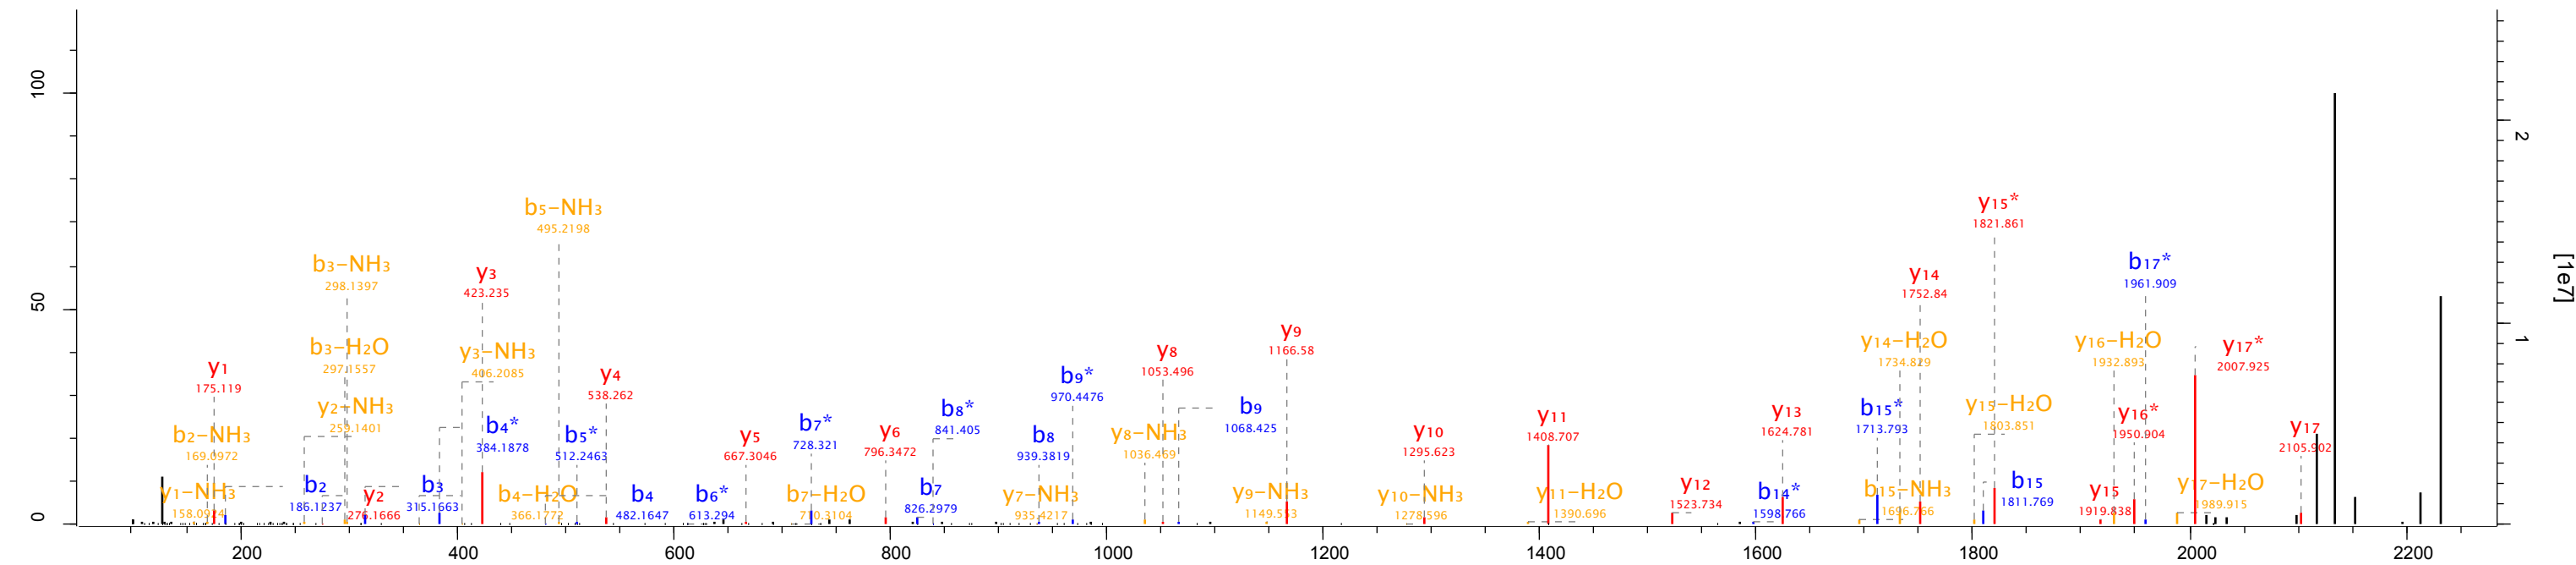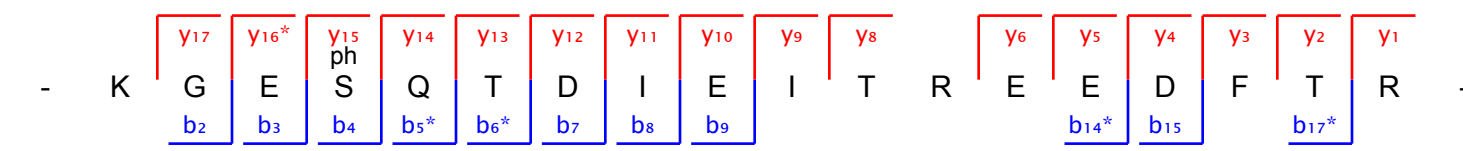

Raw file 20150814\_A375SR\_Phospho\_BR2\_05 Scan 1412 Method FTMS; HCD Score 45.83 m/z 560.77 Gene names PPIG

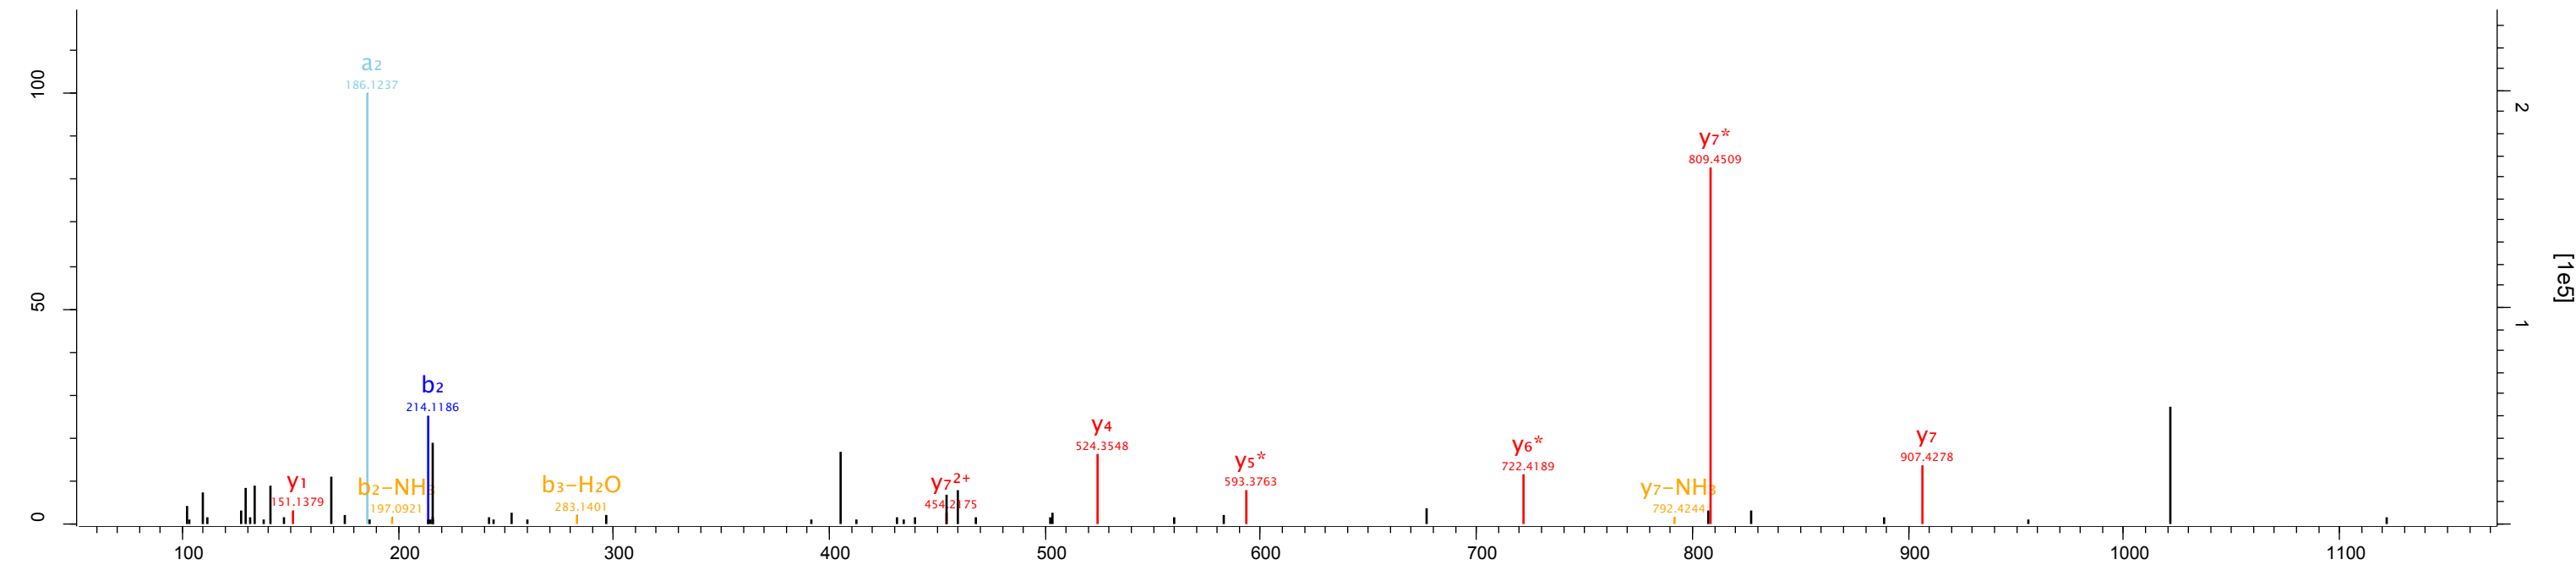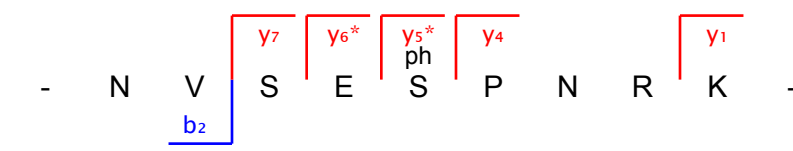

Raw file 20150814\_A375SR\_Phospho\_BR2\_05 Scan 14202 Method FTMS; HCD Score 87.83 m/z 607.28 Gene names PRRC2B

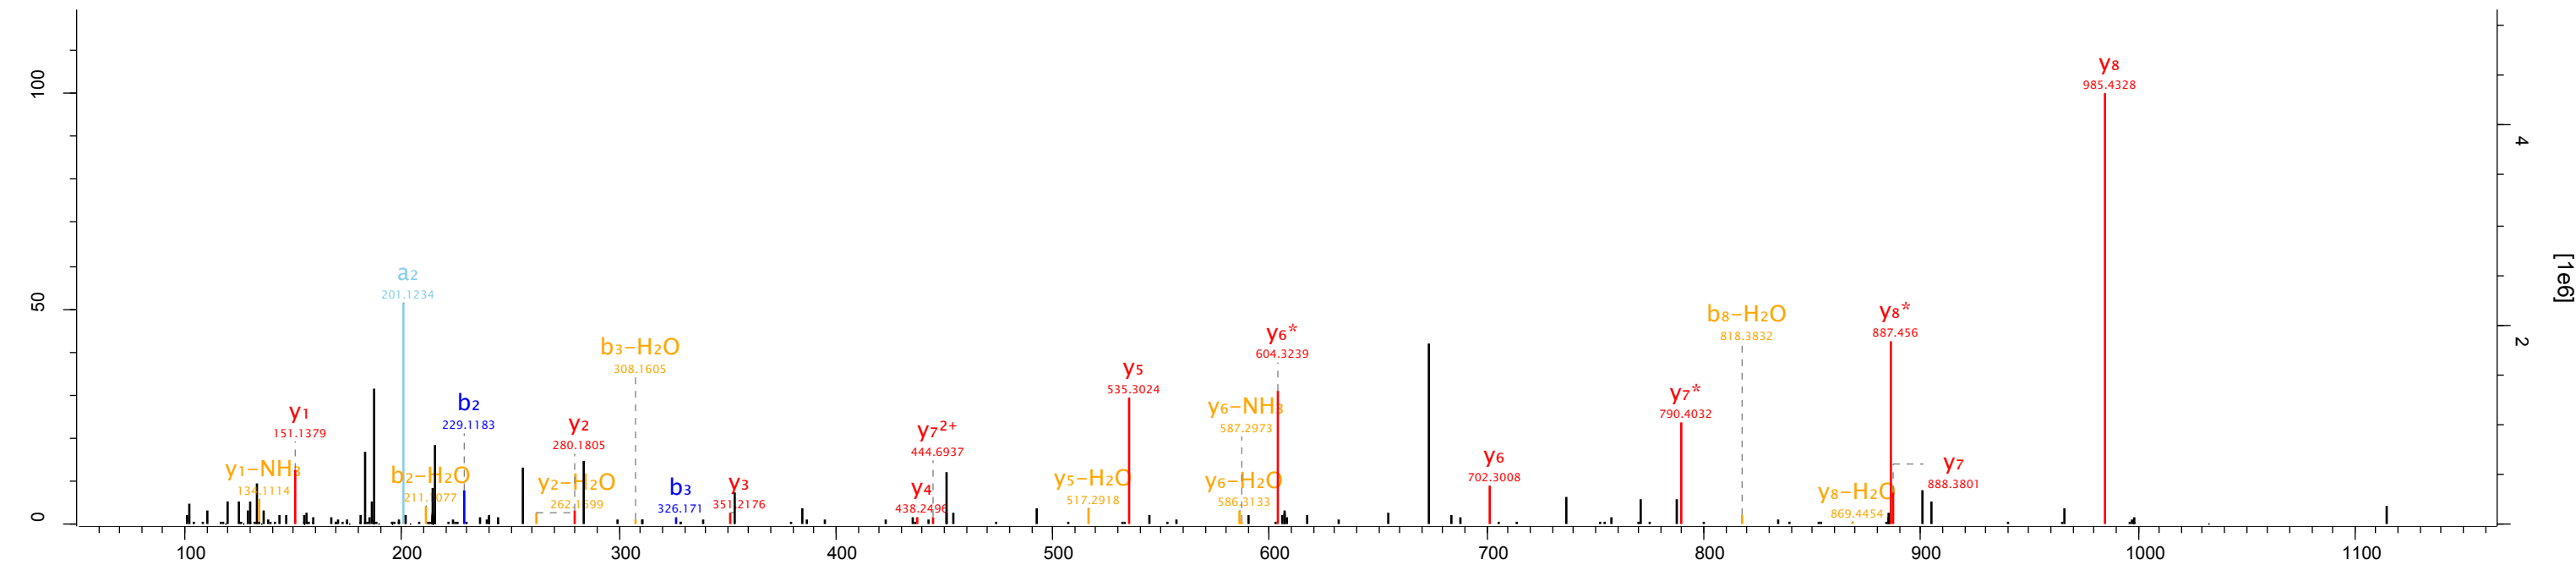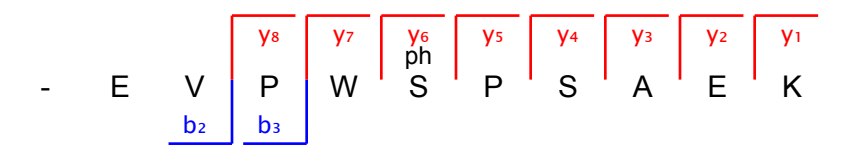

Raw file: 20150814\_A375SR\_Phospho\_BR2\_05  
 Scan: 14532 Method: FTMS; HCD Score: 153.23 m/z: 798.33 Gene names: PIAS2

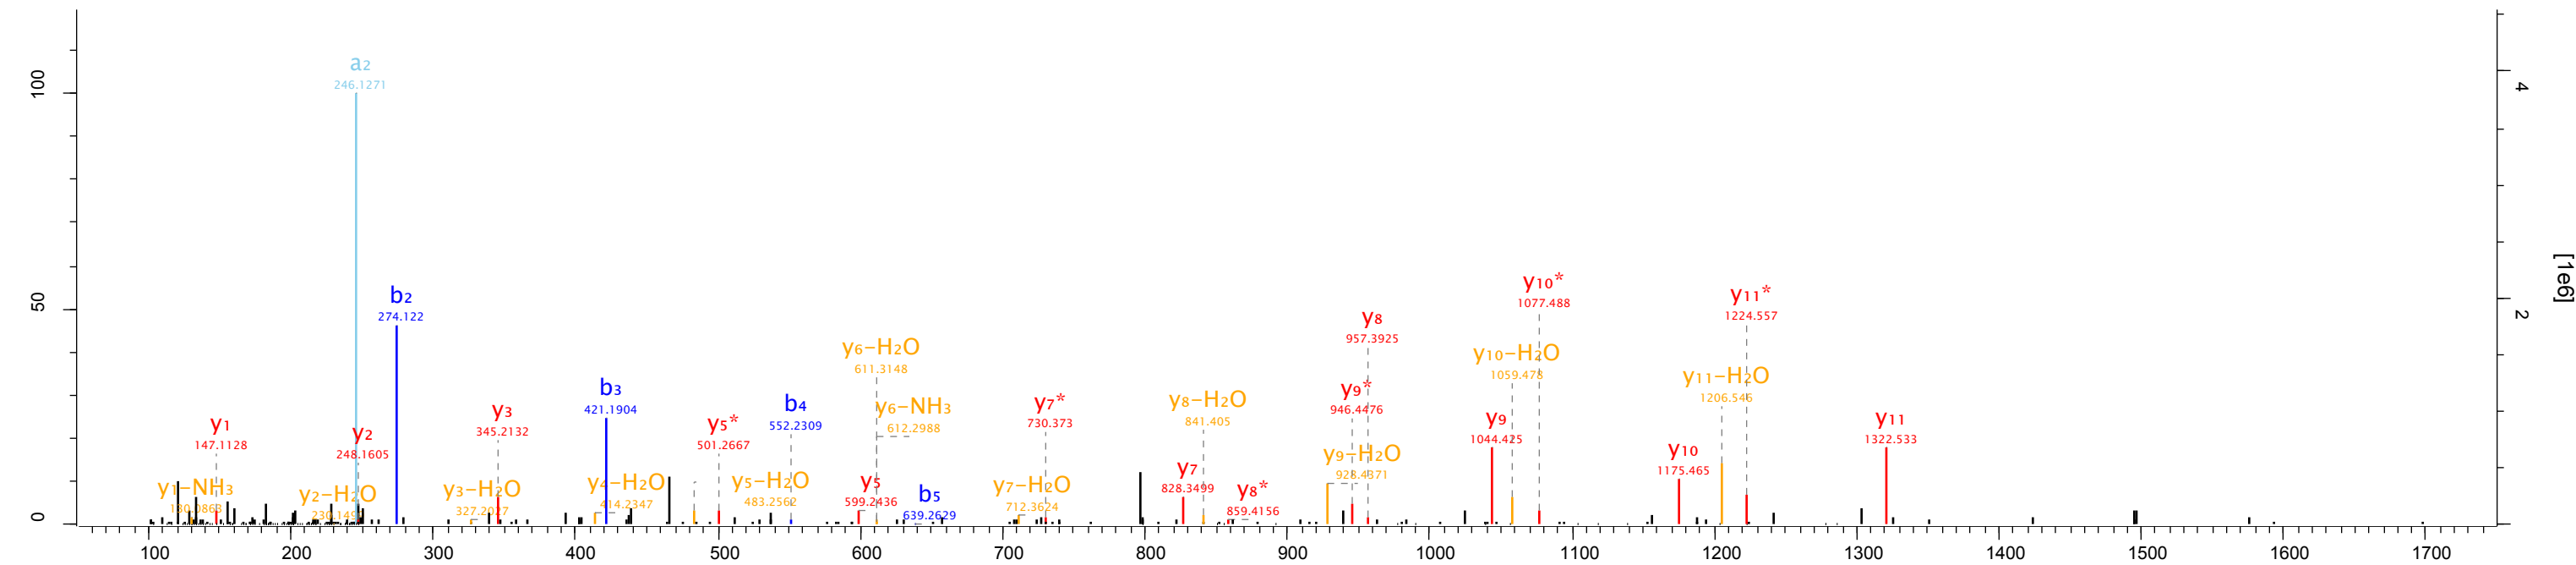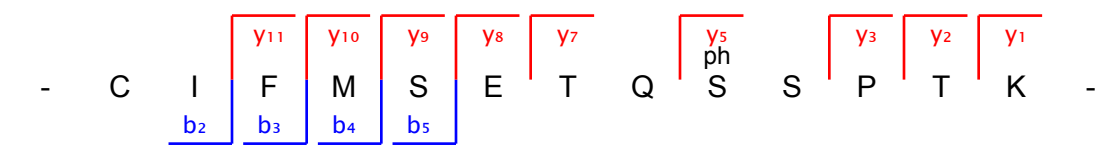

Raw file: 20150814\_A375SR\_Phospho\_BR2\_05  
 Scan: 1462 Method: FTMS; HCD Score: 104.95 m/z: 466.26 Gene names: GTF3C2

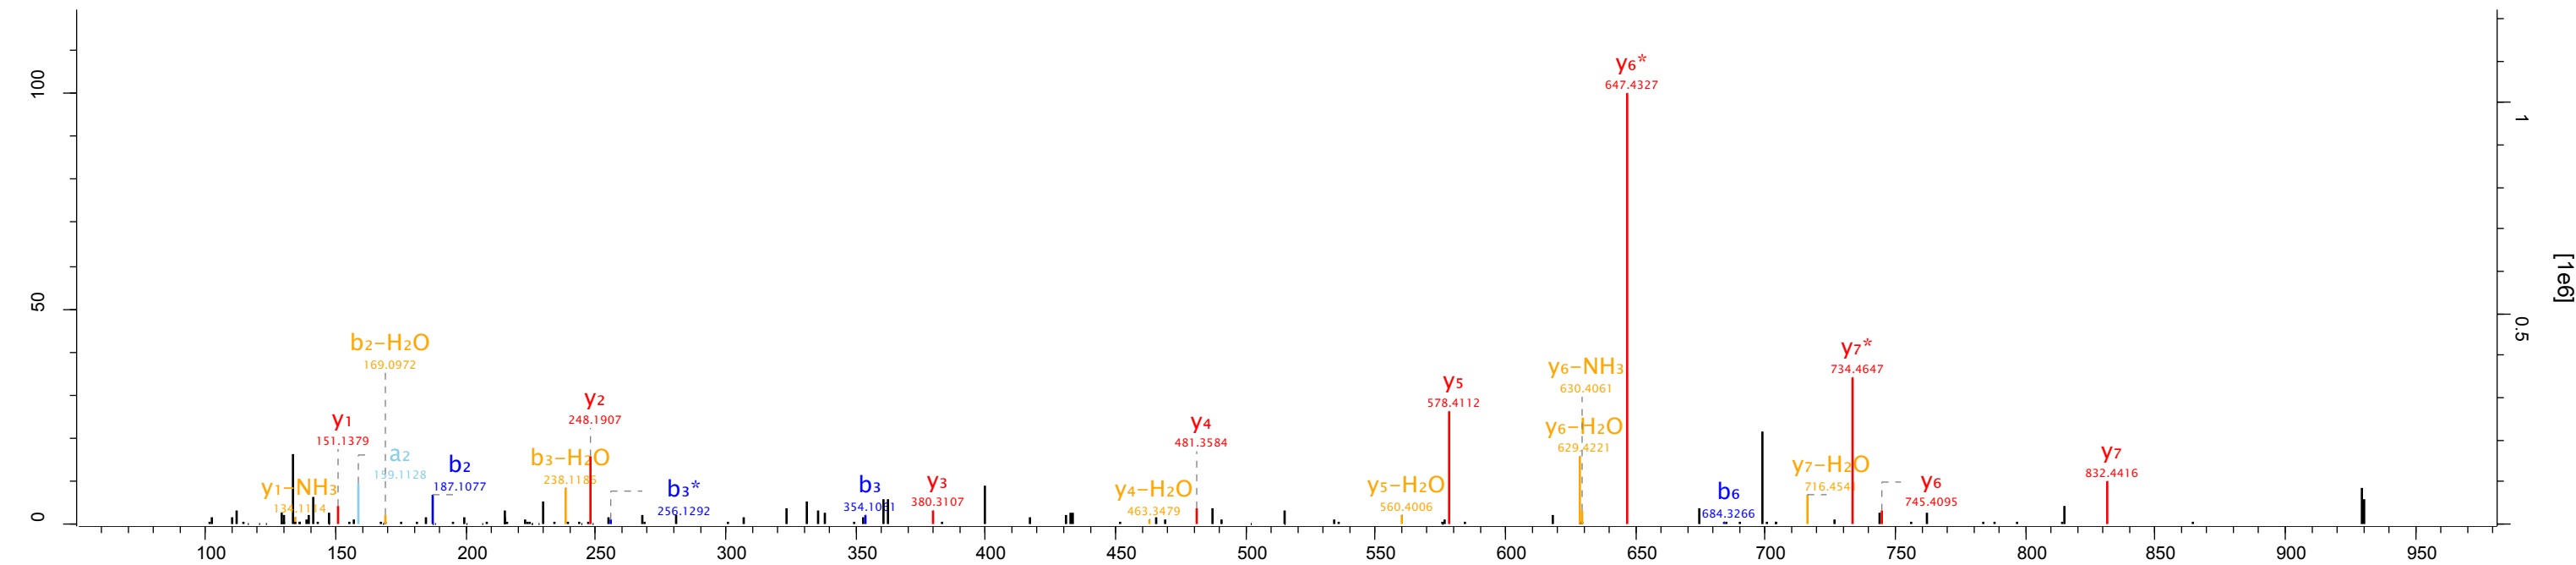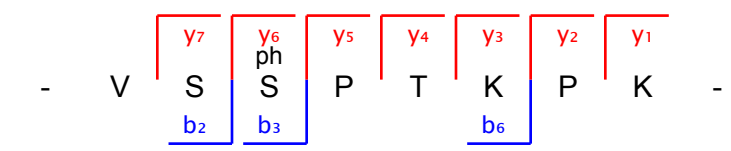



Raw file: 20150814\_A375SR\_Phospho\_BR2\_05  
 Scan: 14682 Method: FTMS; HCD Score: 222.71 m/z: 1020.13 Gene names: SAFB2;SAFB

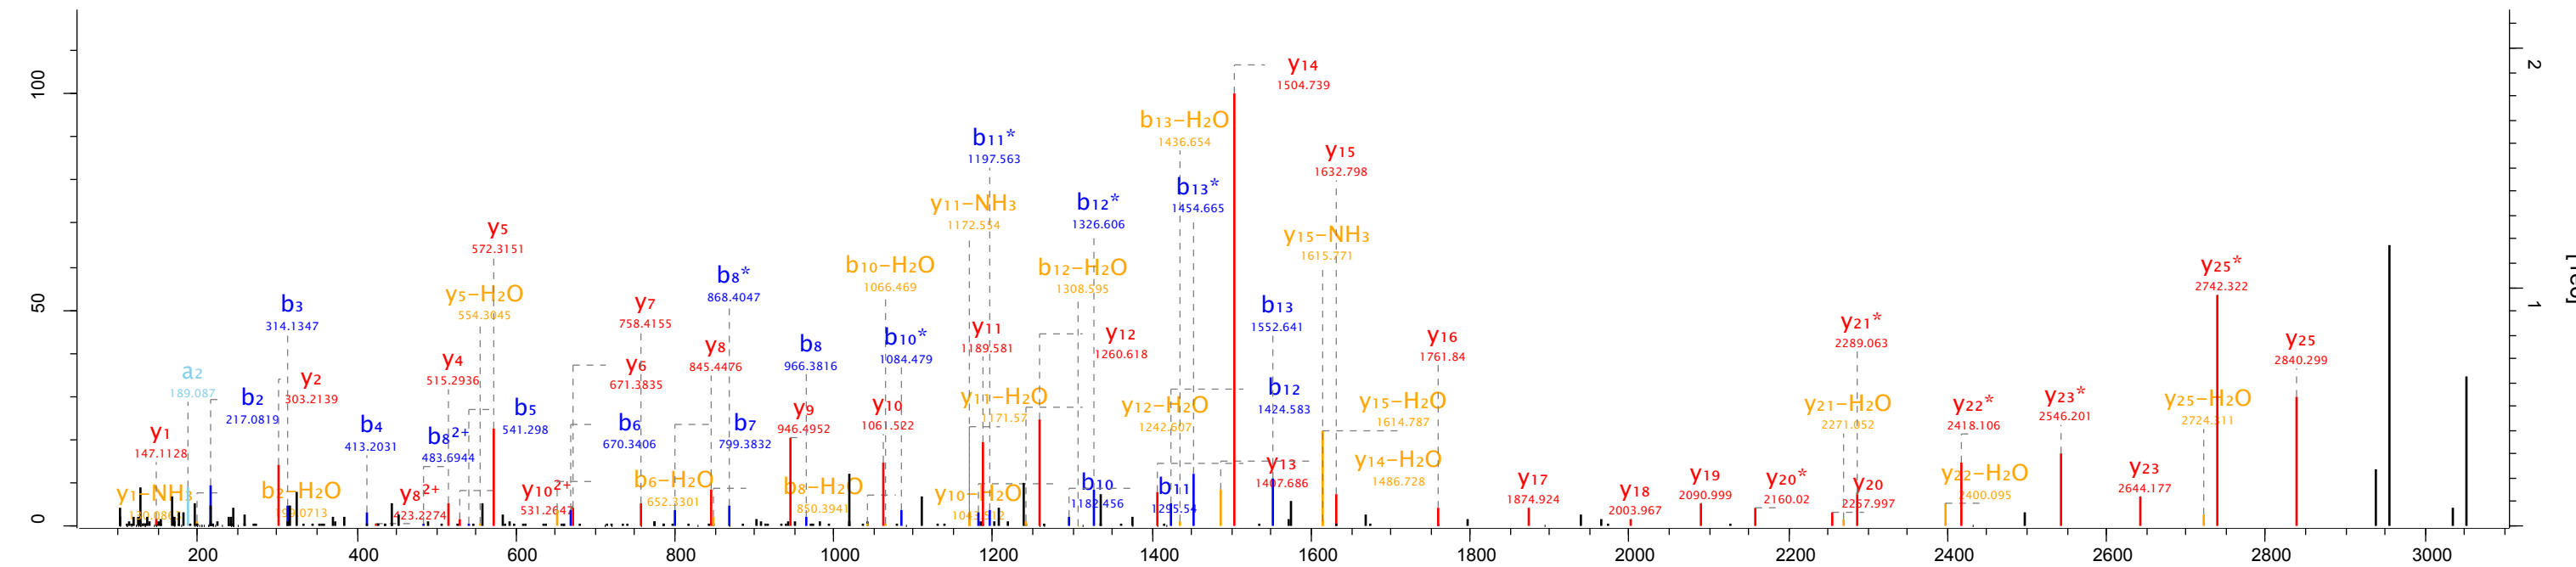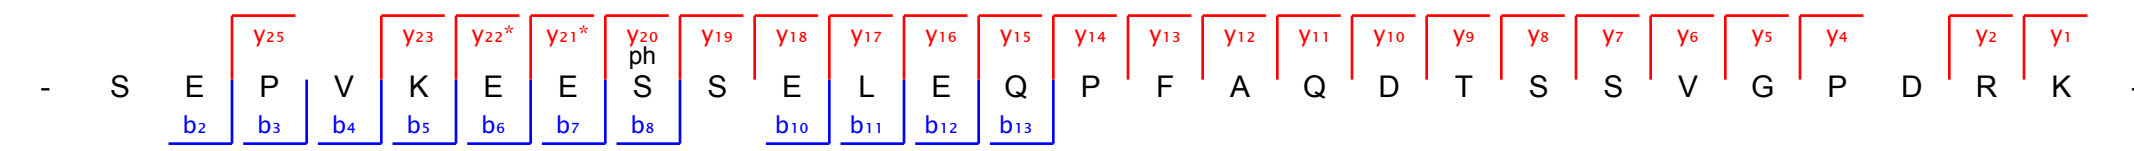

Raw file 20150814\_A375SR\_Phospho\_BR2\_05 Scan 14772 Method FTMS; HCD Score 98.56 m/z 882.71 Gene names DDX47

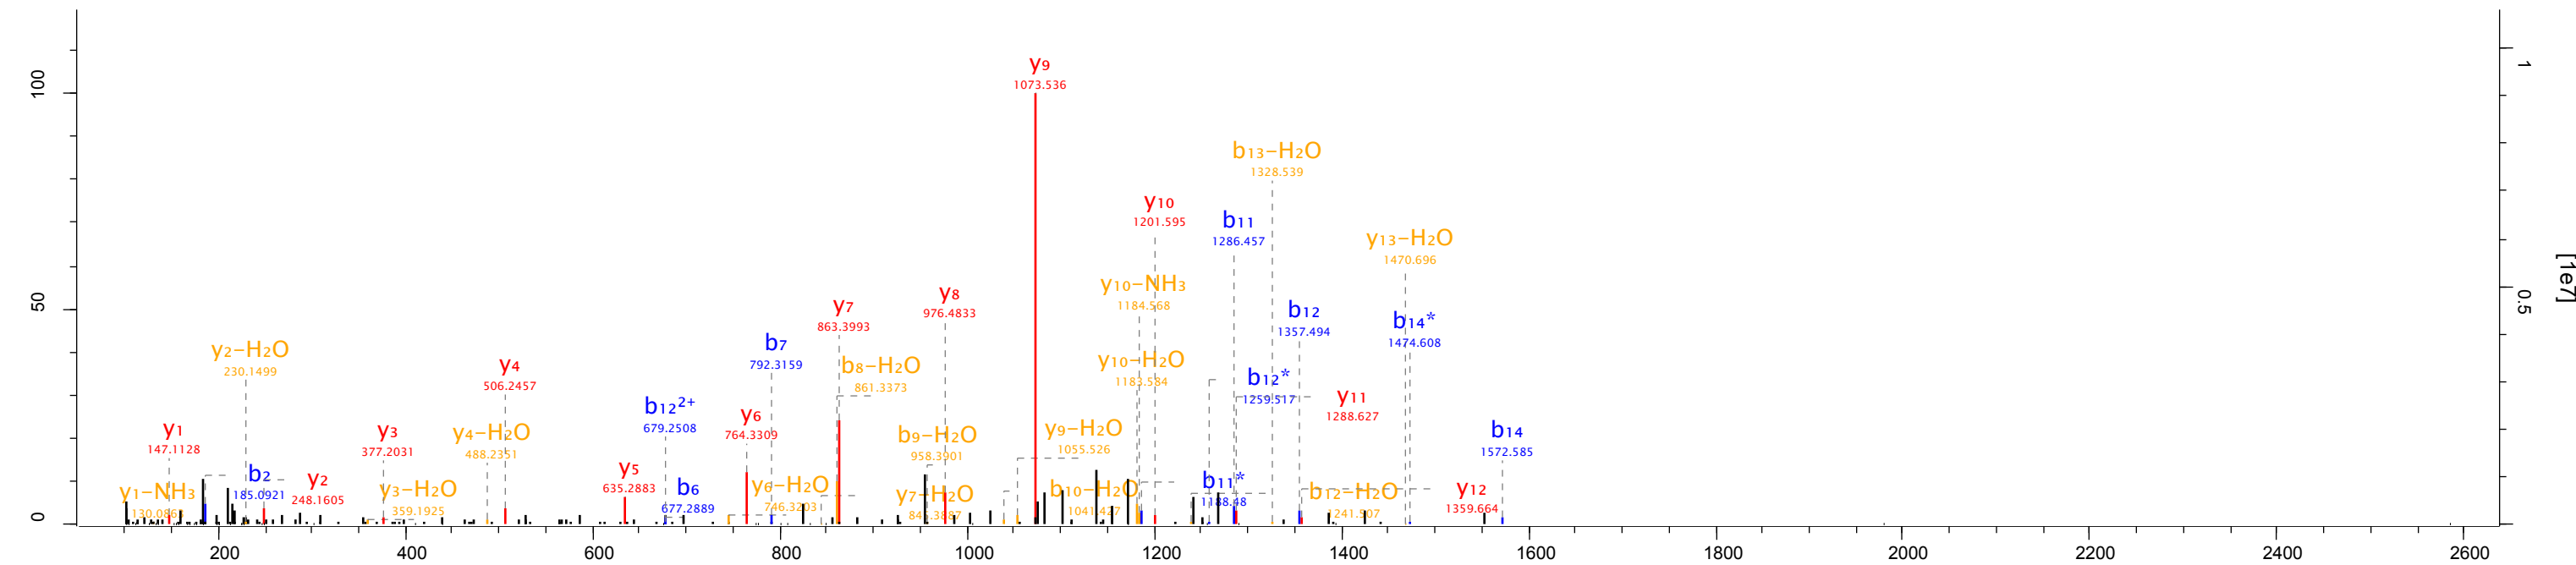

ac - A A P E E H D S P T E A S Q P I V E E E E T K -

b<sub>2</sub>
b<sub>6</sub>
b<sub>7</sub>
b<sub>11</sub>
b<sub>12</sub>
b<sub>14</sub>
y<sub>12</sub>
y<sub>11</sub>
y<sub>10</sub>
y<sub>9</sub>
y<sub>8</sub>
y<sub>7</sub>
y<sub>6</sub>
y<sub>5</sub>
y<sub>4</sub>
y<sub>3</sub>
y<sub>2</sub>
y<sub>1</sub>

Raw file Scan Method Score m/z Gene names  
 20150814\_A375SR\_Phospho\_BR2\_05 14922 FTMS; HCD 257.37 1016.88 AKAP8

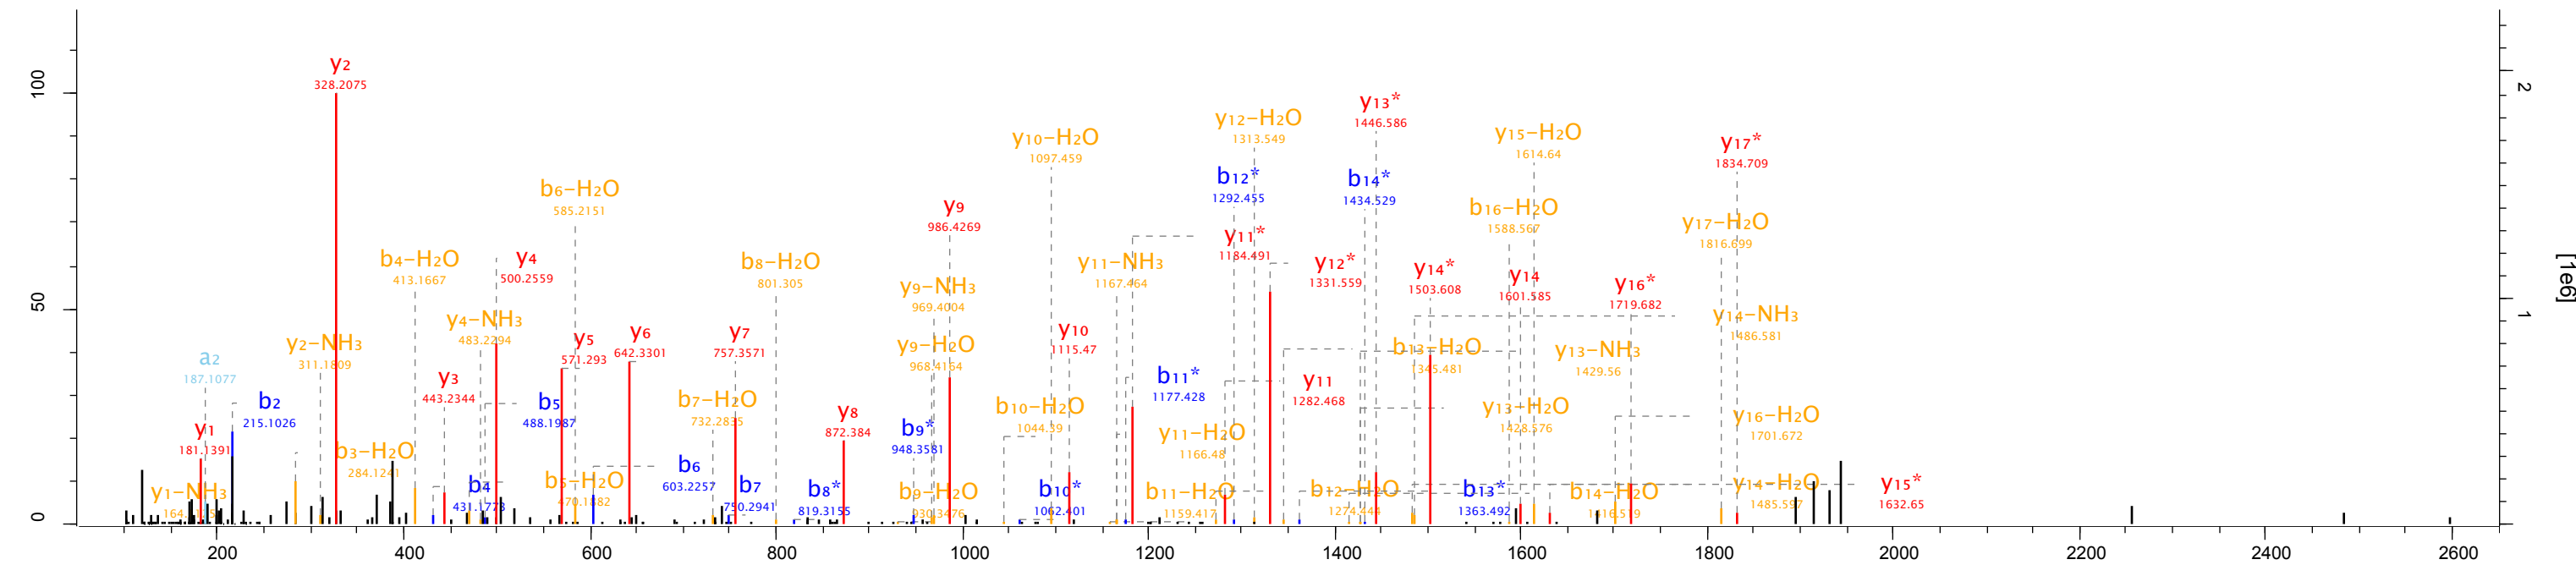

- V D S E G D F S E N D D A A G D F R -

b<sub>2</sub>
b<sub>4</sub>
b<sub>5</sub>
b<sub>6</sub>
b<sub>7</sub>
b<sub>8</sub>\*
b<sub>9</sub>\*
b<sub>10</sub>\*
b<sub>11</sub>\*
b<sub>12</sub>\*
b<sub>13</sub>\*
b<sub>14</sub>\*

y<sub>1</sub>
y<sub>2</sub>
y<sub>3</sub>
y<sub>4</sub>
y<sub>5</sub>
y<sub>6</sub>
y<sub>7</sub>
y<sub>8</sub>
y<sub>9</sub>
y<sub>10</sub>
y<sub>11</sub> ph
y<sub>12</sub>\*
y<sub>13</sub>\*
y<sub>14</sub>
y<sub>15</sub>\*
y<sub>16</sub>\*
y<sub>17</sub>\*

Raw file Scan Method Score m/z Gene names  
 20150814\_A375SR\_Phospho\_BR2\_05 15212 FTMS; HCD 249.32 947.41 POU3F2

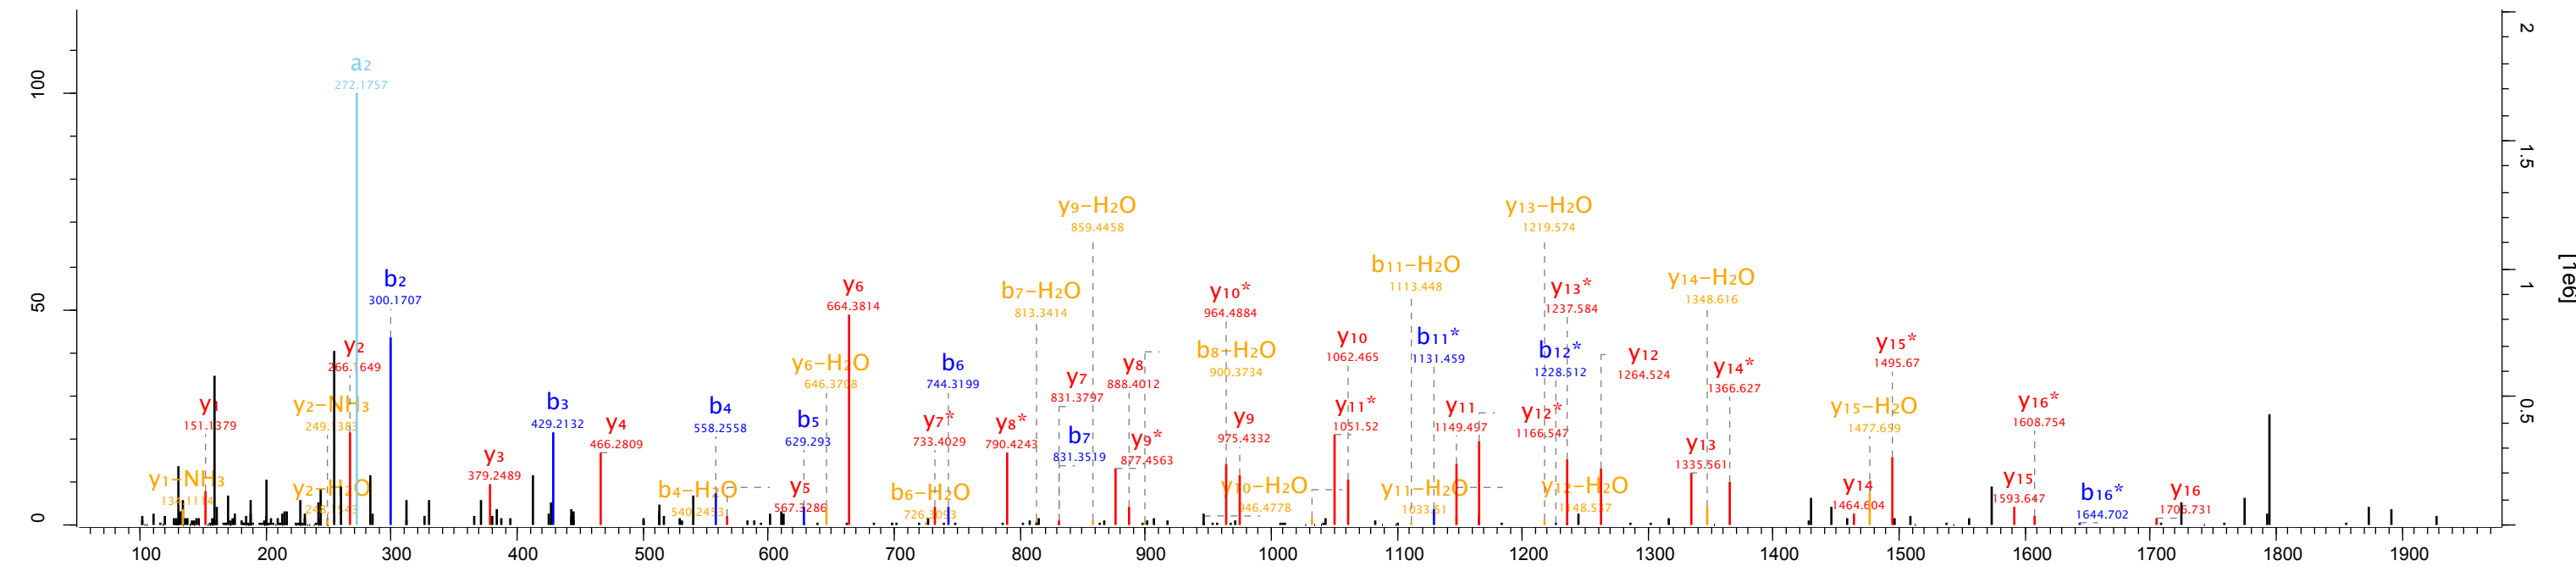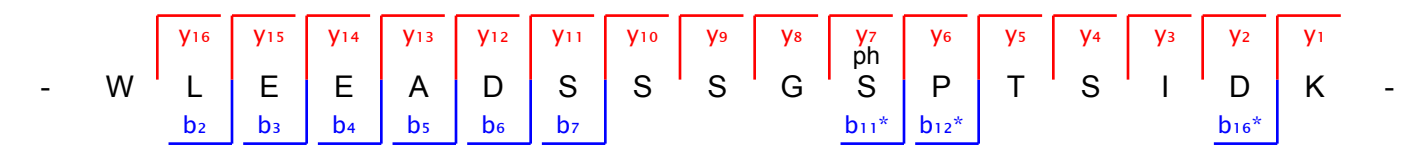

Raw file  
 20150814\_A375SR\_Phospho\_BR2\_05  
 Scan 15412 Method FTMS; HCD Score 157.58 m/z 795.37 Gene names DARS

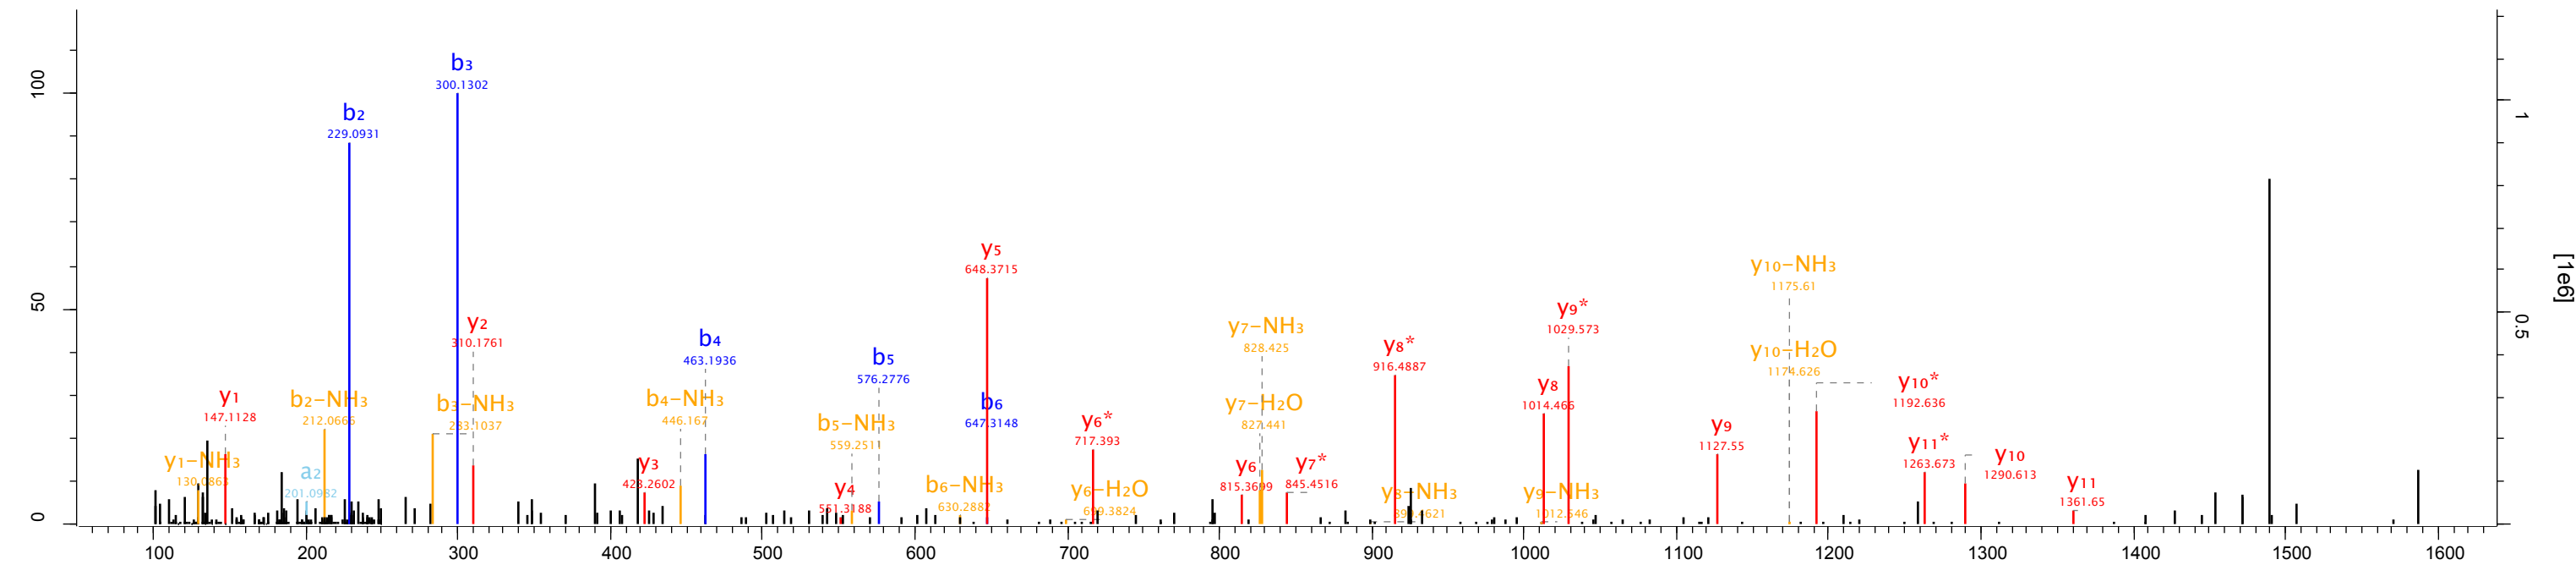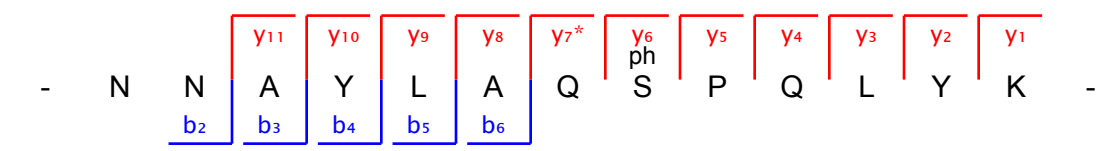

Raw file: 20150814\_A375SR\_Phospho\_BR2\_05  
 Scan: 1542 Method: FTMS; HCD Score: 66.06 m/z: 506.23 Gene names: KNOP1

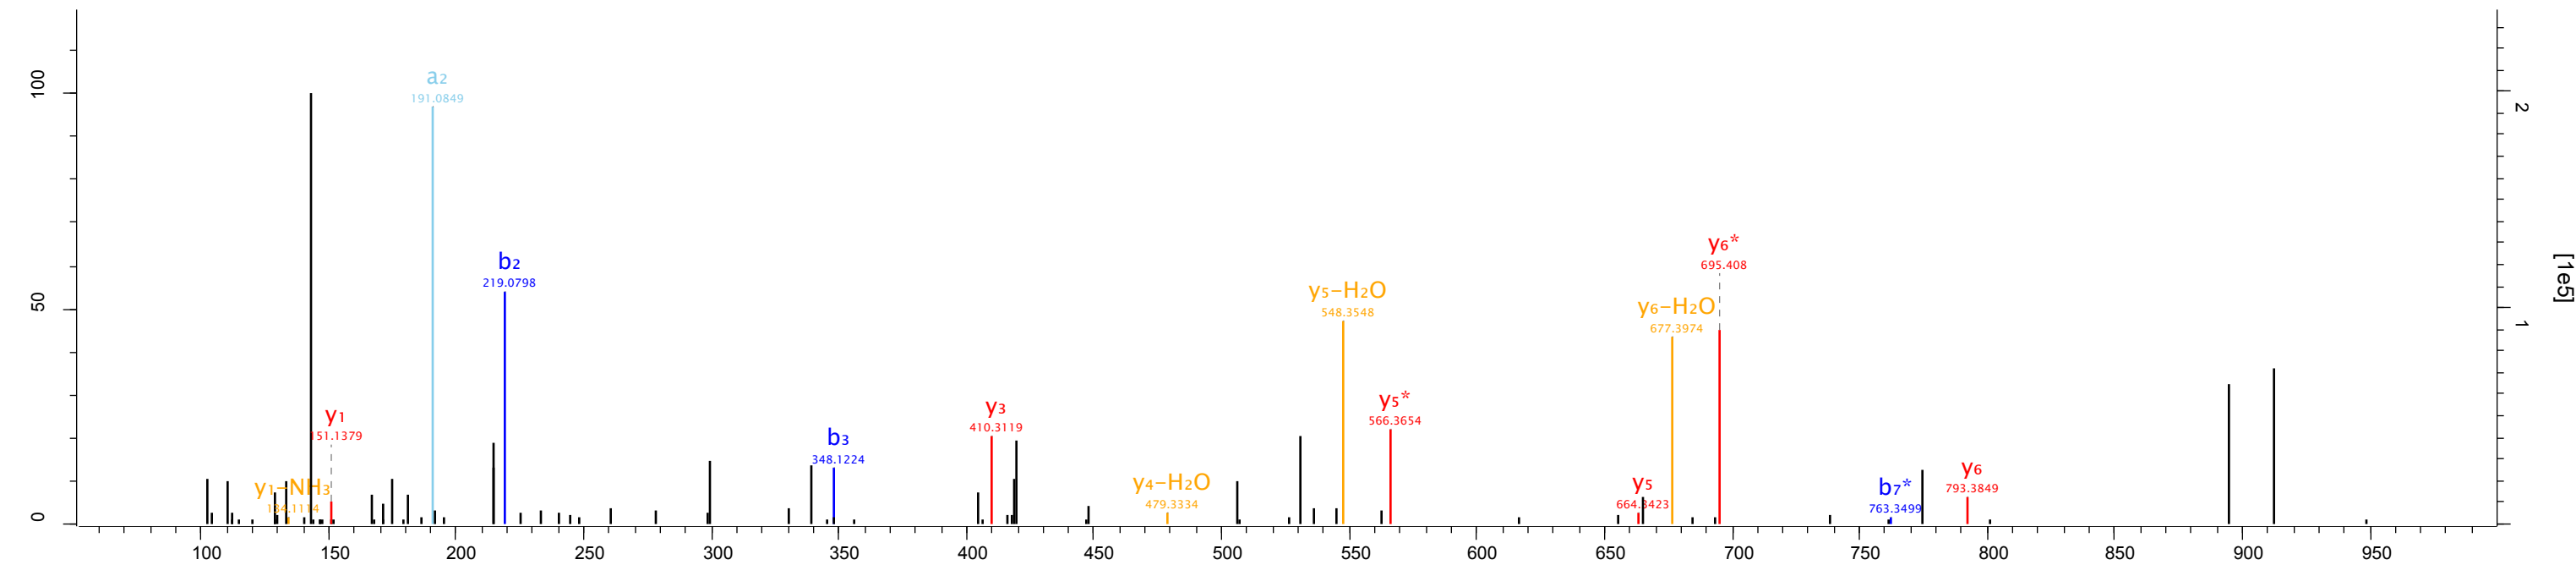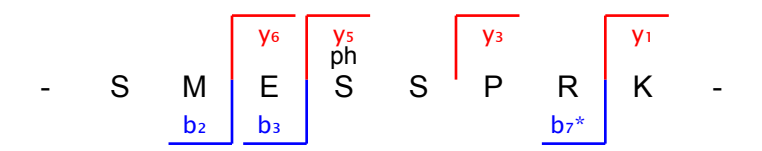

Raw file 20150814\_A375SR\_Phospho\_BR2\_05 Scan 15552 Method FTMS; HCD Score 264.03 m/z 933.43 Gene names NFIC

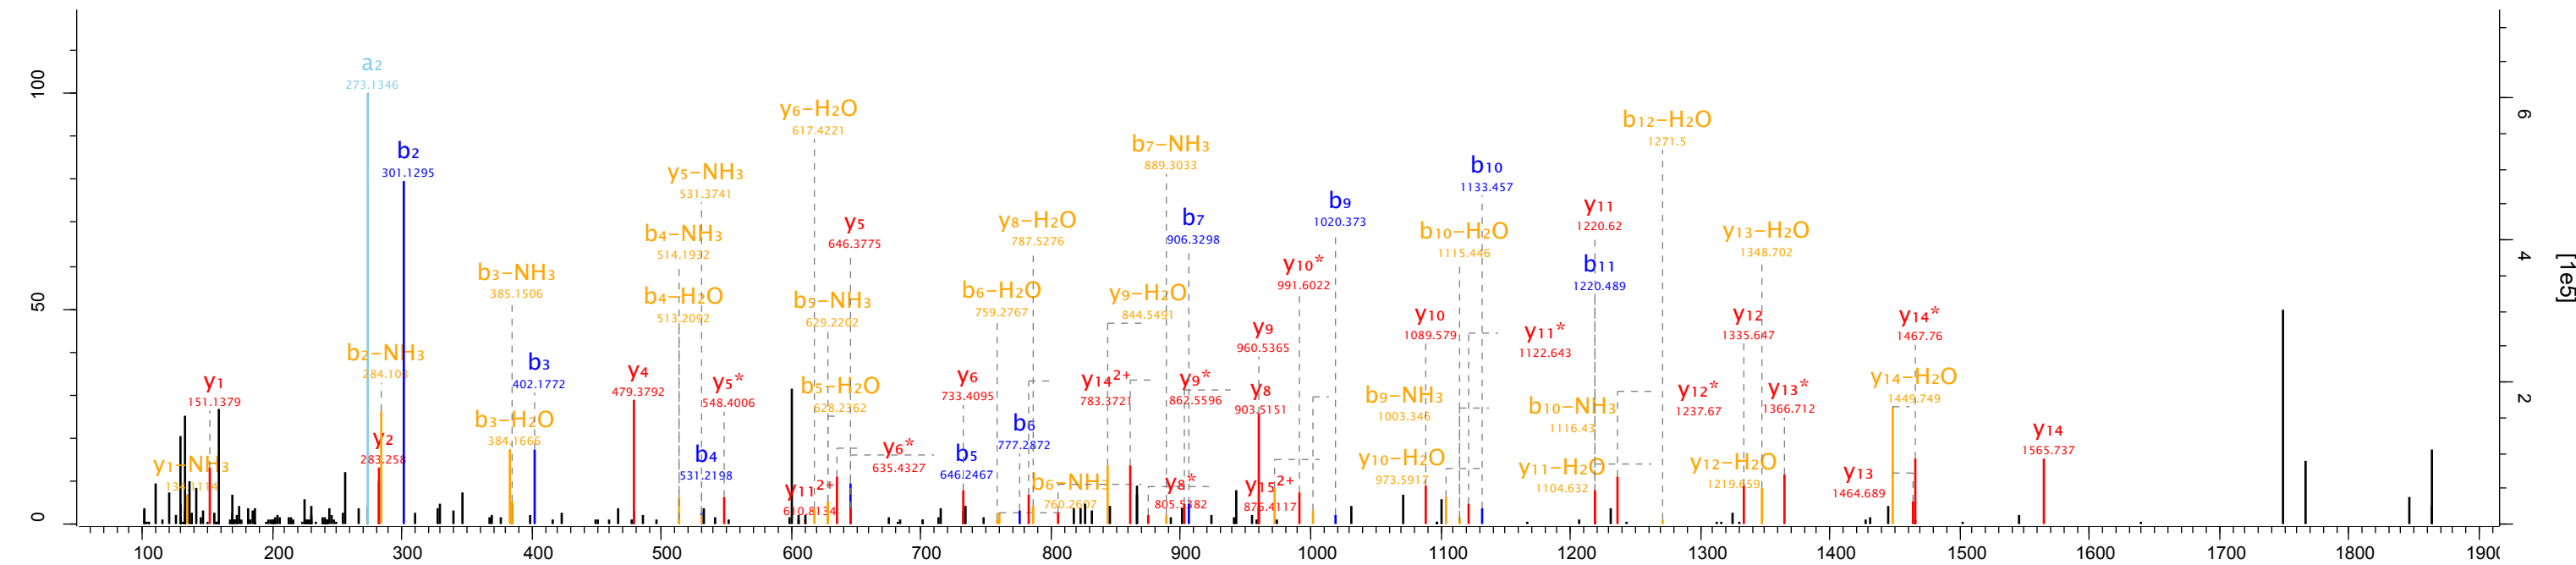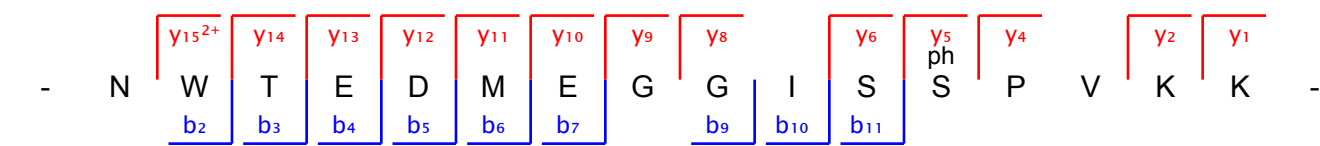

Raw file: 20150814\_A375SR\_Phospho\_BR2\_05  
 Scan: 15992 Method: FTMS; HCD Score: 251.11 m/z: 1019.42 Gene names: SLC12A4

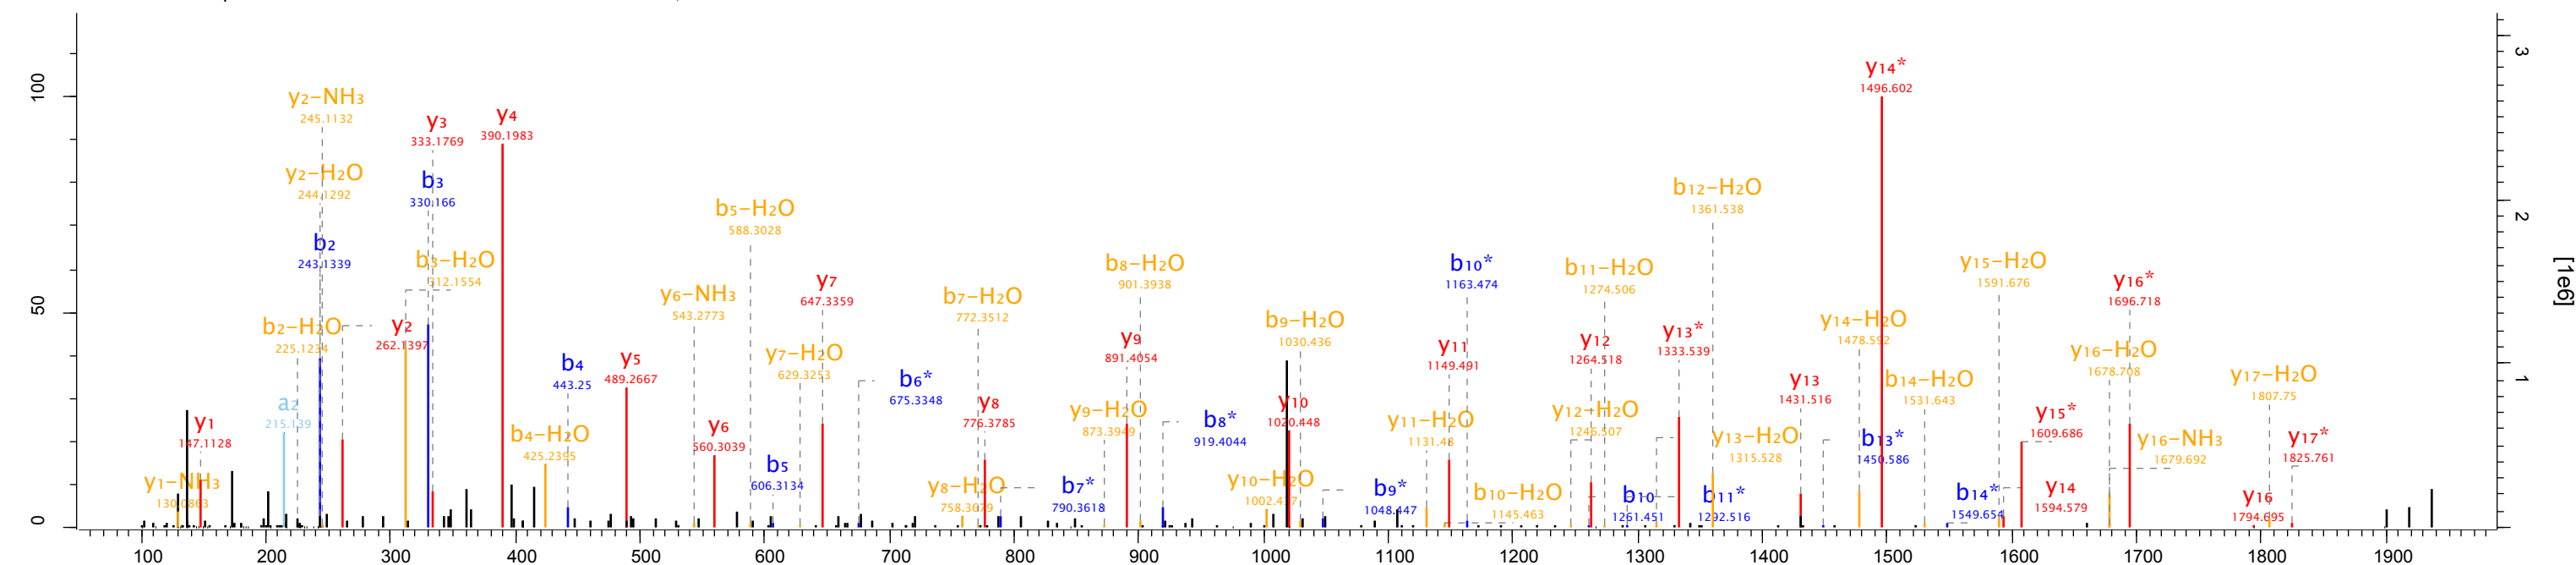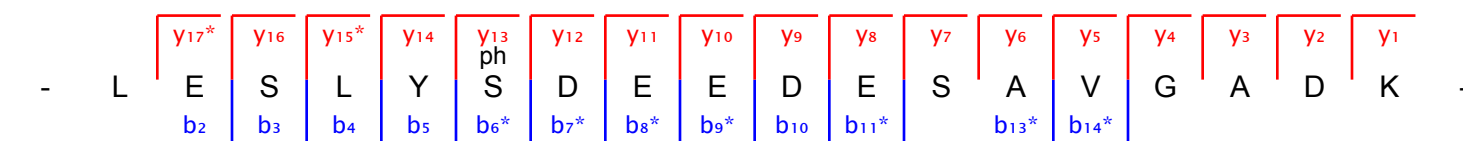



Raw file: 20150814\_A375SR\_Phospho\_BR2\_05  
 Scan: 16372 Method: FTMS; HCD Score: 148.85 m/z: 944.89 Gene names: PPP4R2

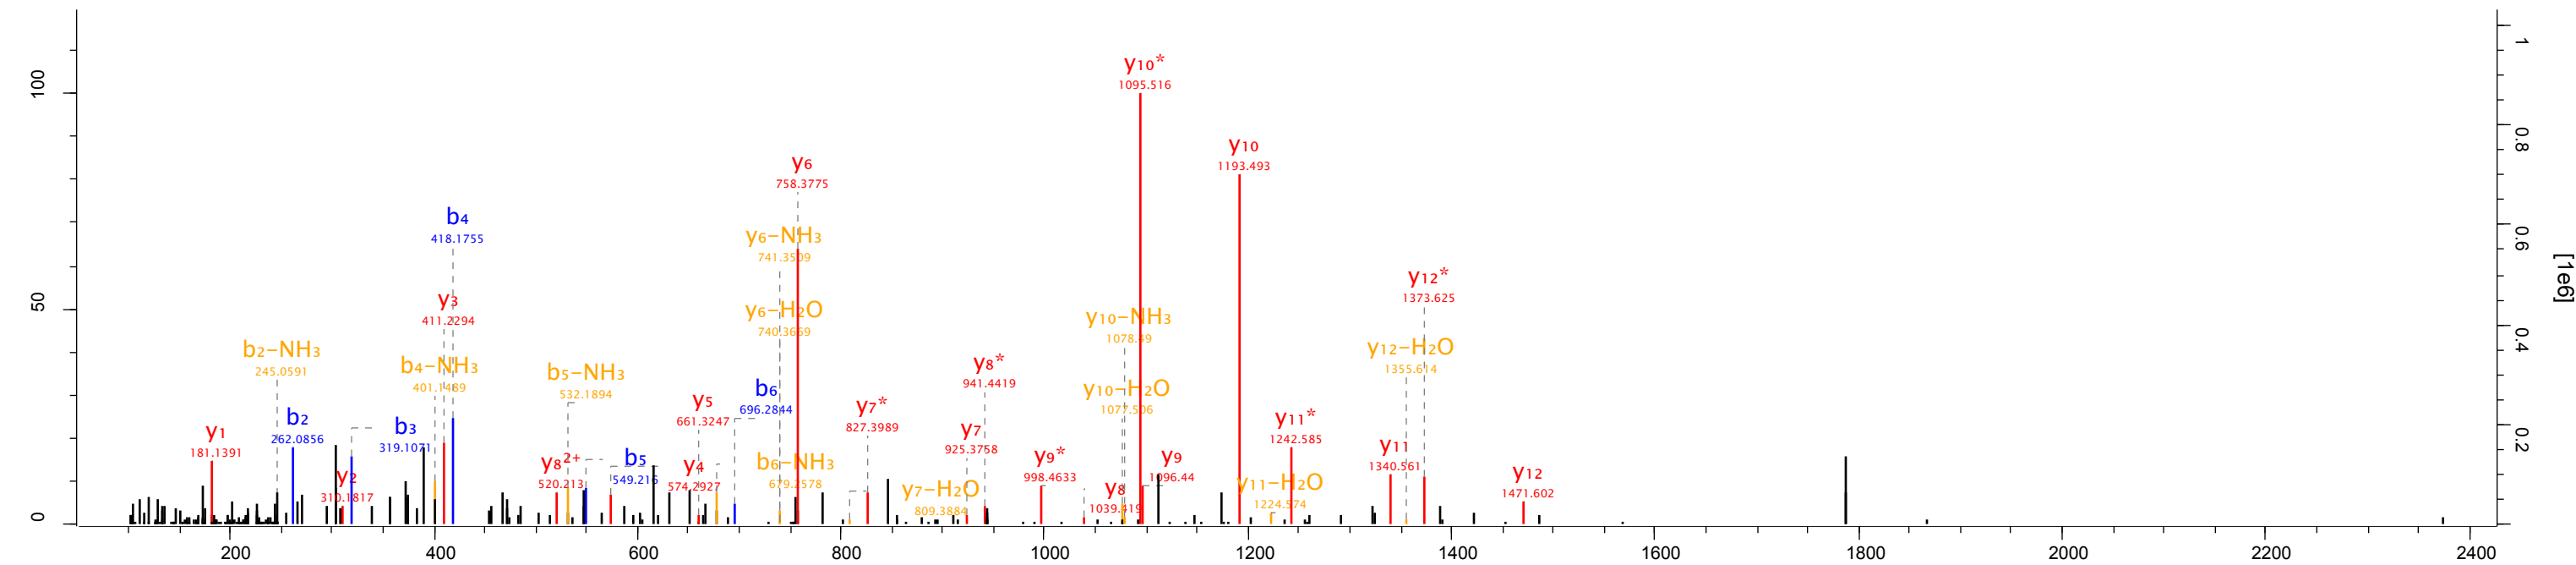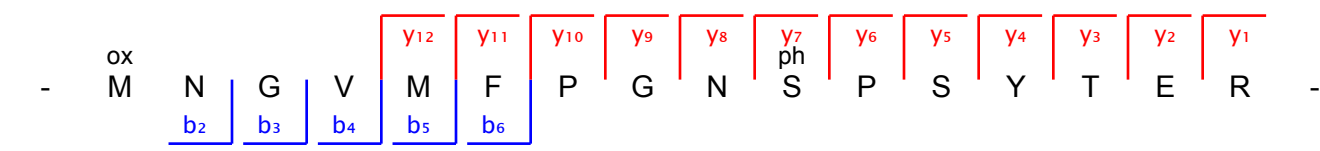

Raw file  
20150814\_A375SR\_Phospho\_BR2\_05

Scan 16482 Method FTMS; HCD Score 128.85 m/z 798.38 Gene names SF3B1

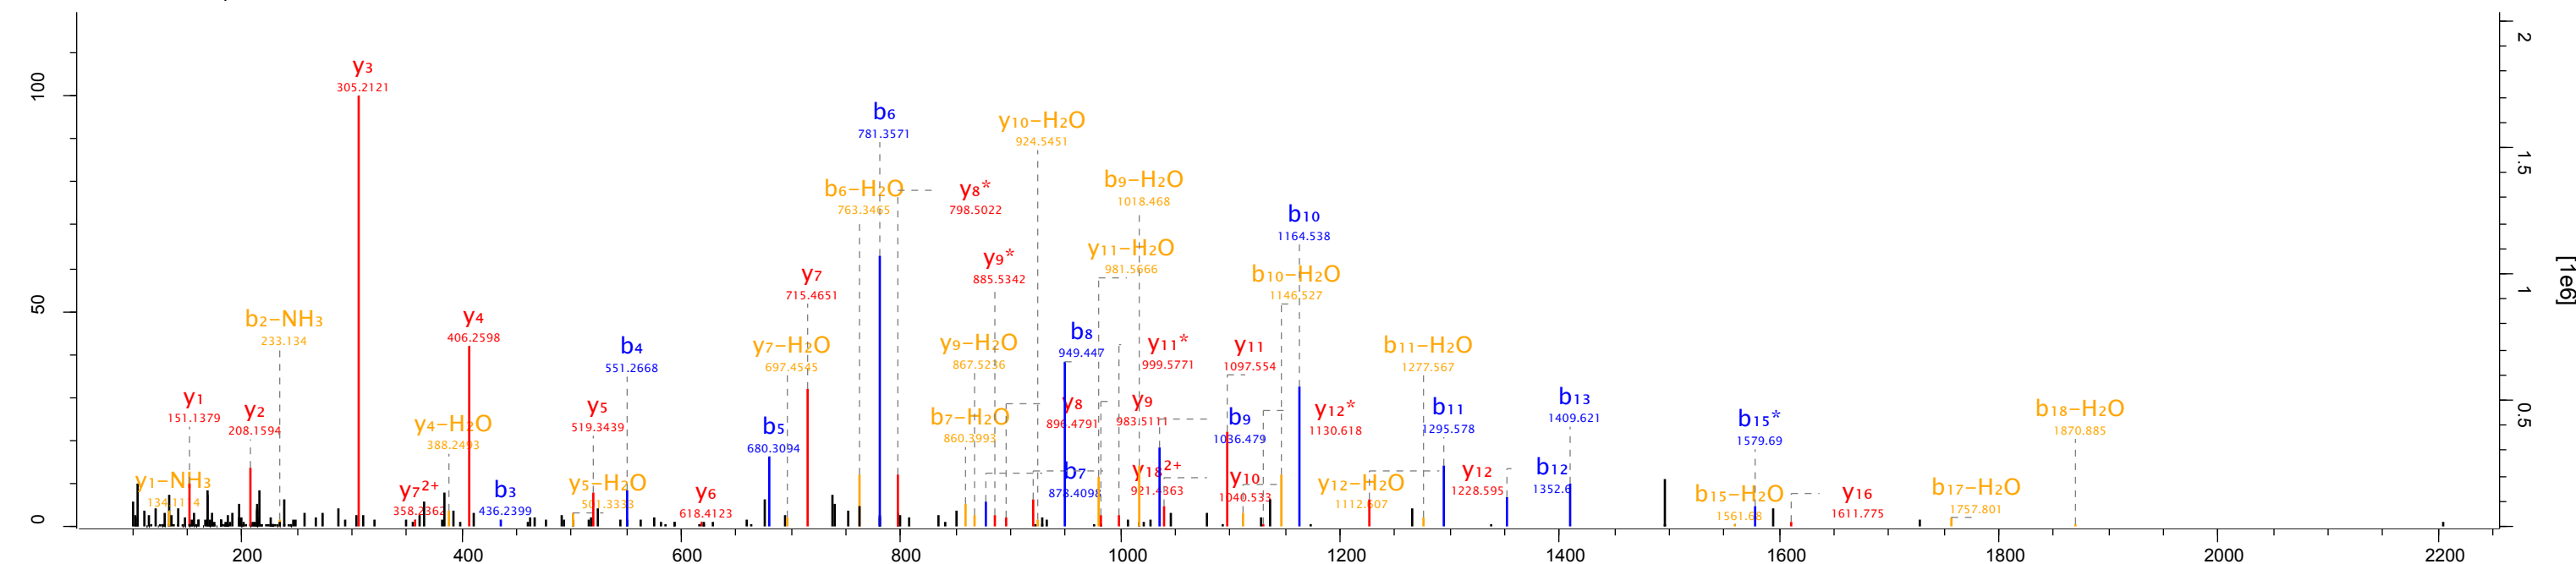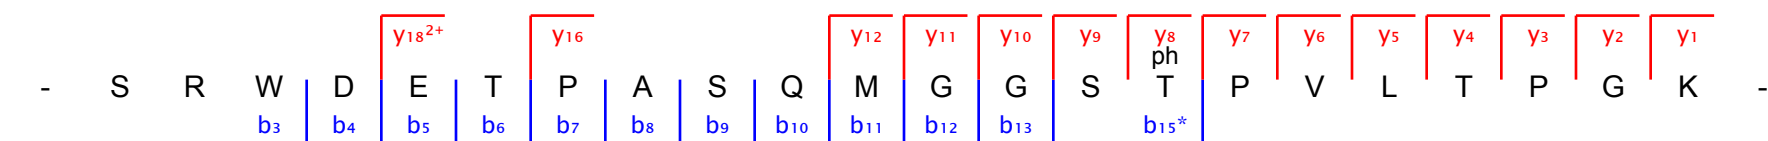

Raw file: 20150814\_A375SR\_Phospho\_BR2\_05  
 Scan: 16772 Method: FTMS; HCD Score: 100.79 m/z: 467.73 Gene names: SPTBN1

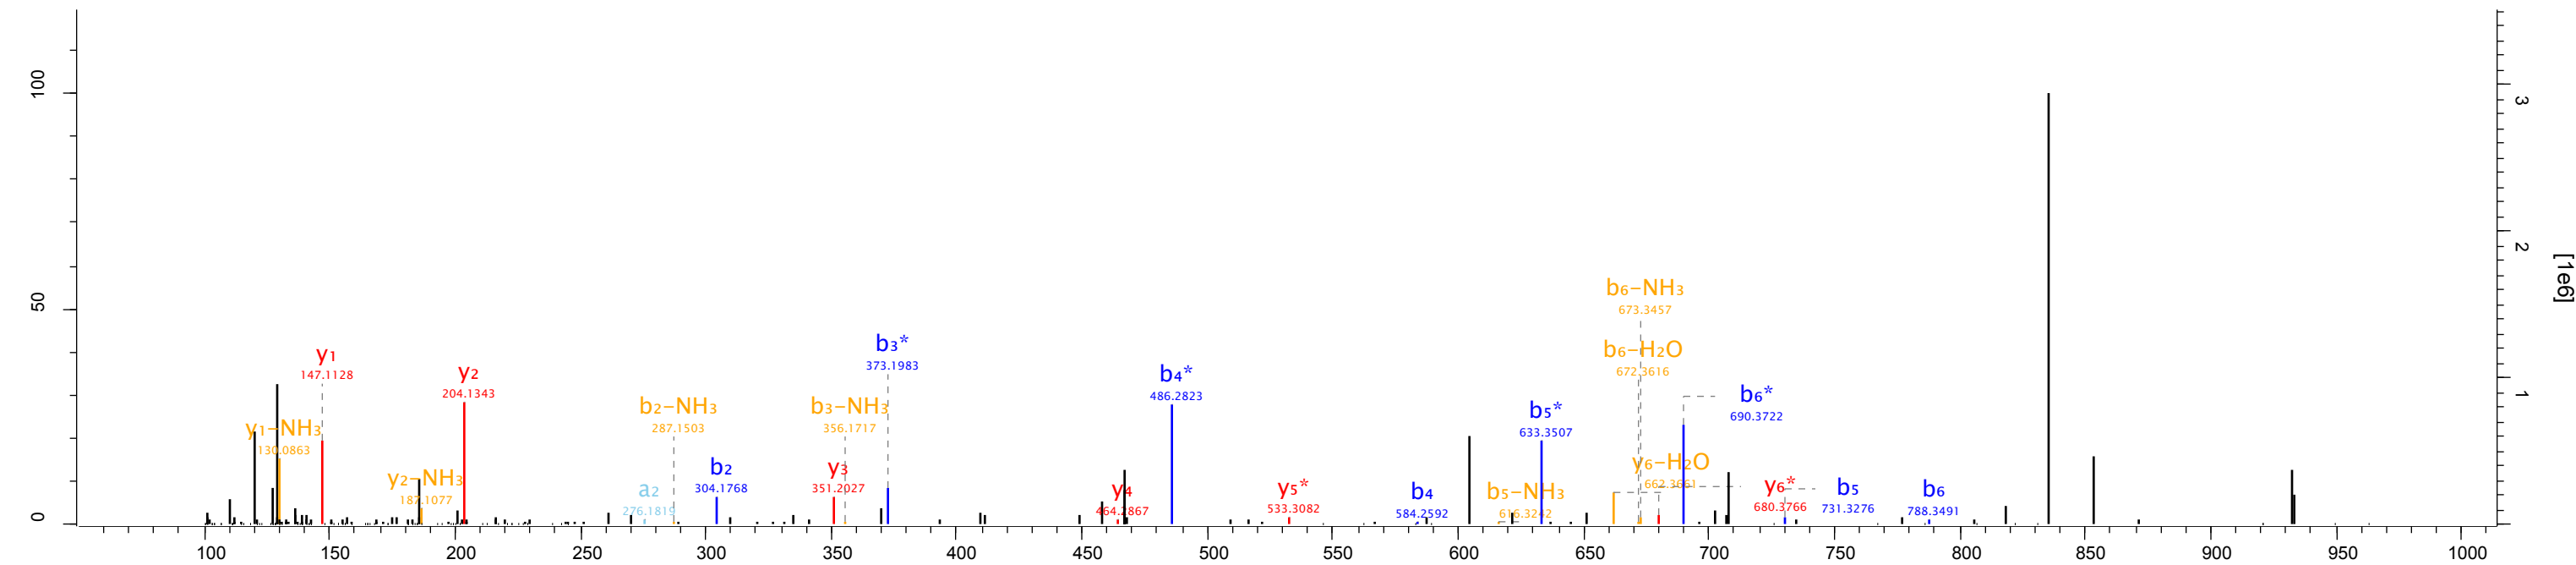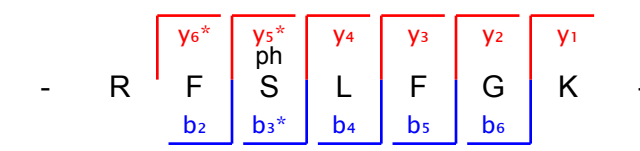

Raw file Scan Method Score m/z Gene names  
 20150814\_A375SR\_Phospho\_BR2\_05 17472 FTMS; HCD 127.67 909.93 TP53BP1

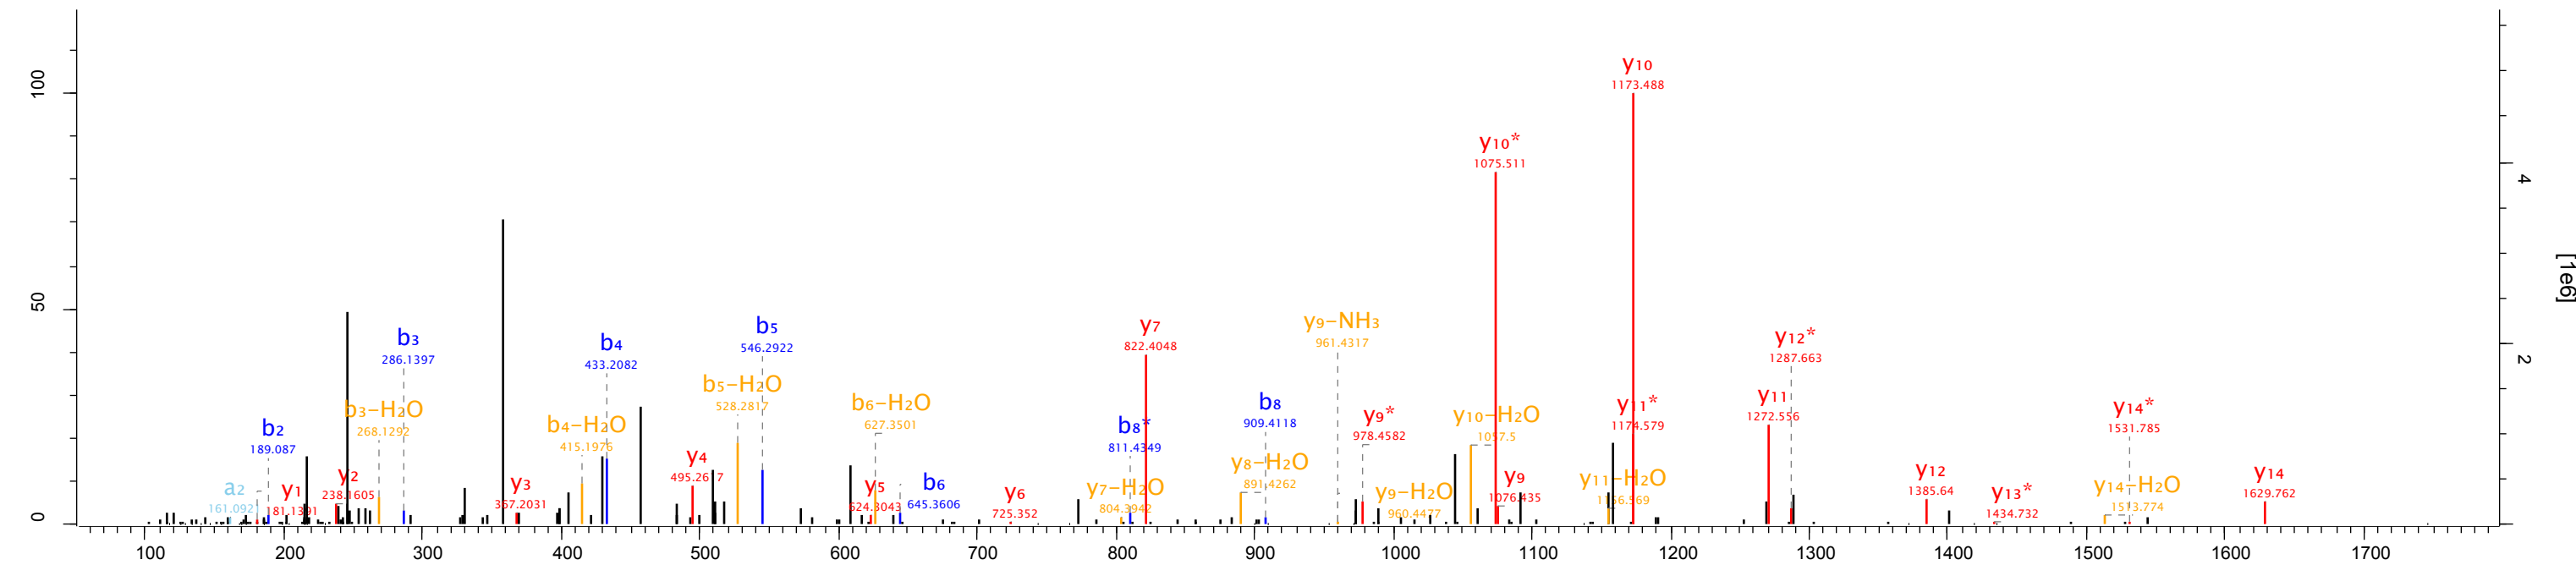

- S T P F I V P S P T E Q E G R -  
 b<sub>2</sub> b<sub>3</sub> b<sub>4</sub> b<sub>5</sub> b<sub>6</sub> b<sub>8</sub> y<sub>14</sub> y<sub>13</sub>\* y<sub>12</sub> y<sub>11</sub> y<sub>10</sub> y<sub>9</sub>ph y<sub>7</sub> y<sub>6</sub> y<sub>5</sub> y<sub>4</sub> y<sub>3</sub> y<sub>2</sub> y<sub>1</sub>

Raw file 20150814\_A375SR\_Phospho\_BR2\_05 Scan 18012 Method FTMS; HCD Score 123.14 m/z 809.32 Gene names TMBIM1

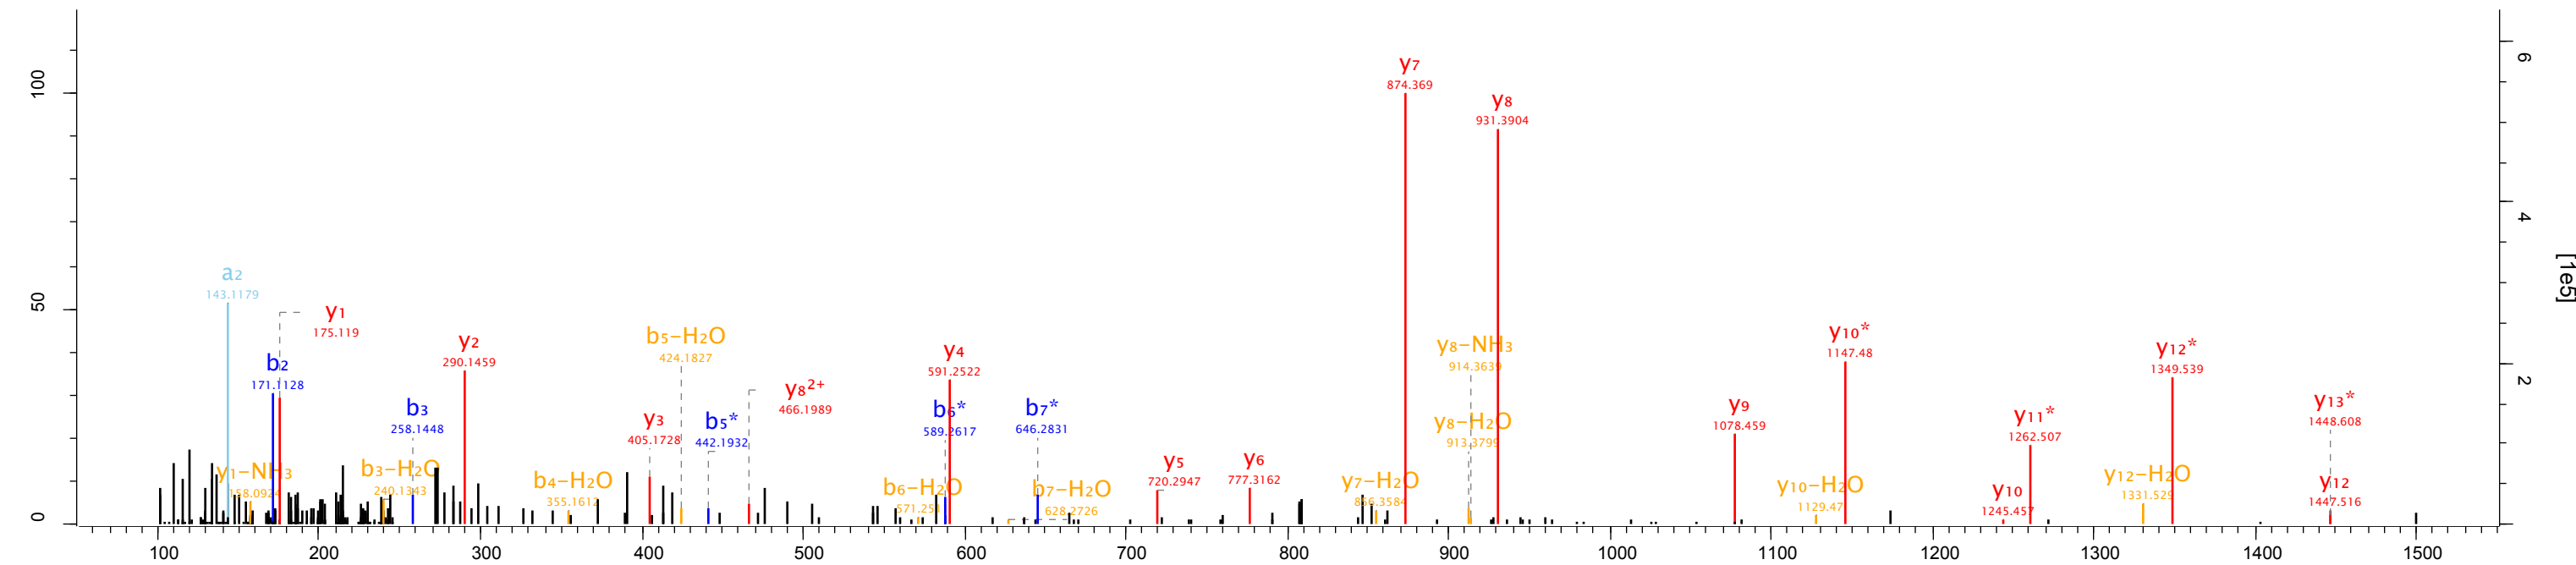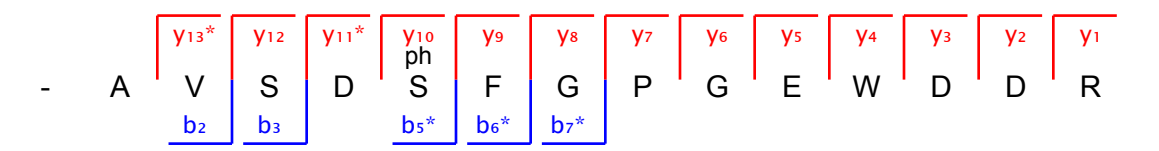

Raw file 20150814\_A375SR\_Phospho\_BR2\_05 Scan 18592 Method FTMS; HCD Score 154.1 m/z 1128.53 Gene names IRS2

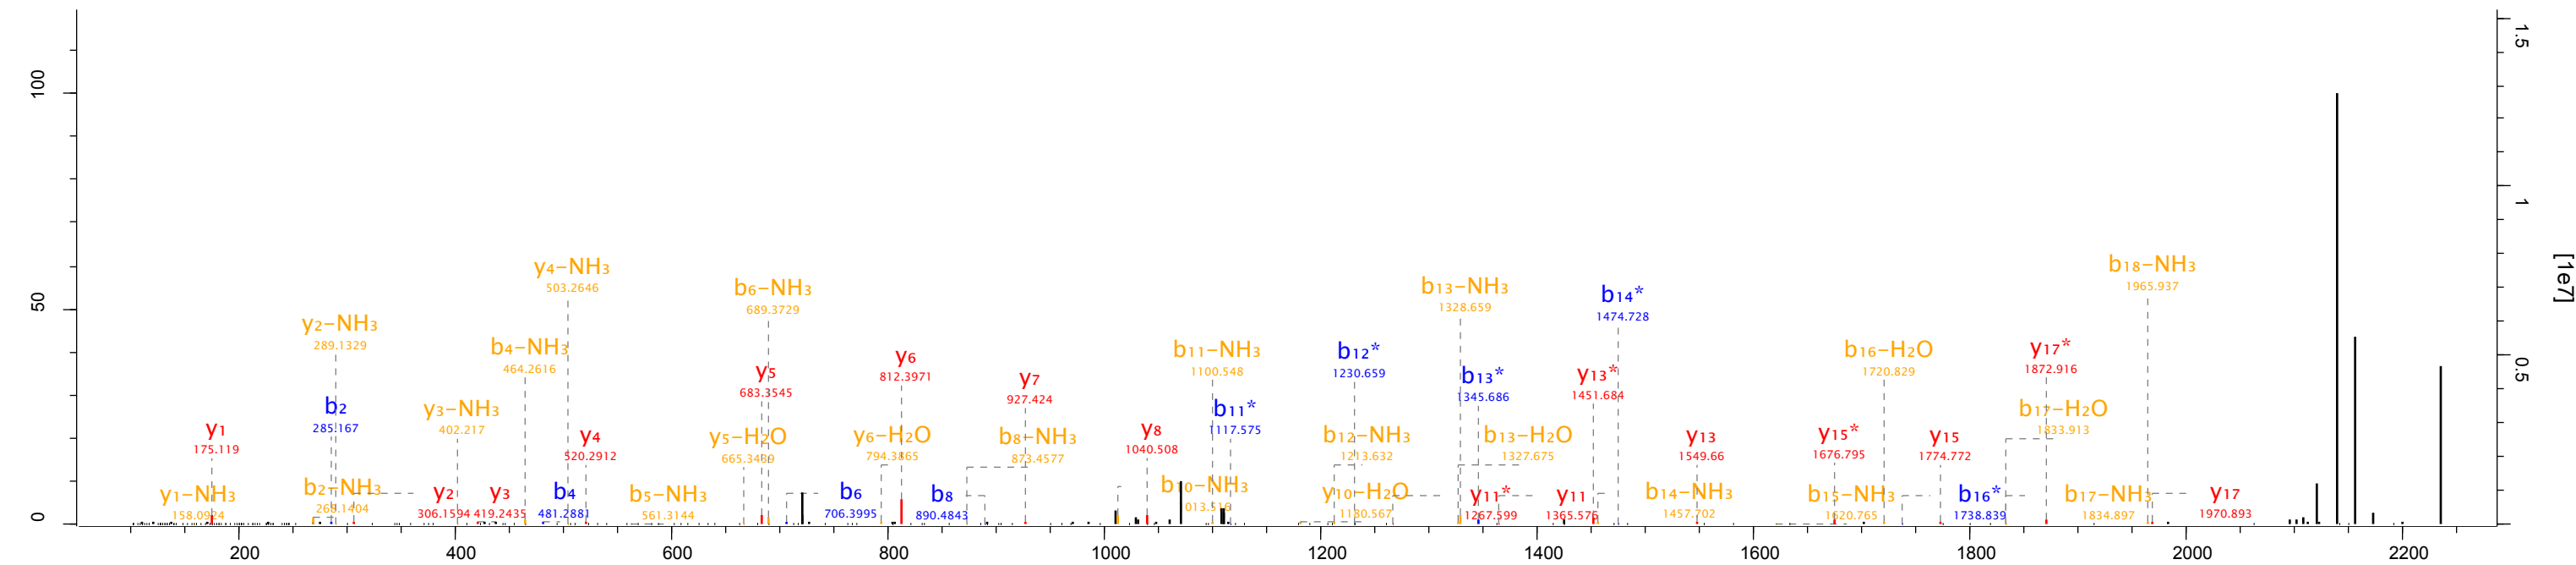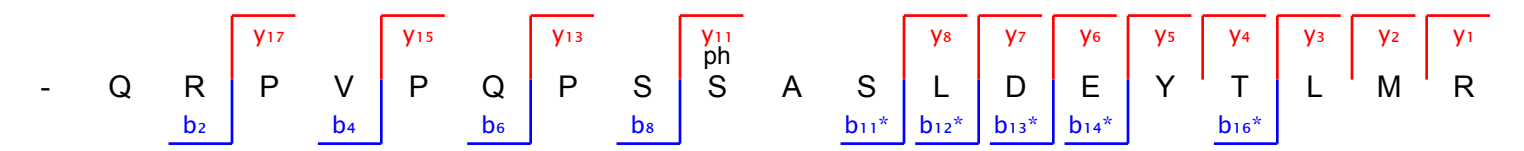

Raw file: 20150814\_A375SR\_Phospho\_BR2\_05  
 Scan: 18692 Method: FTMS; HCD Score: 157.3 m/z: 886.41 Gene names: VCP

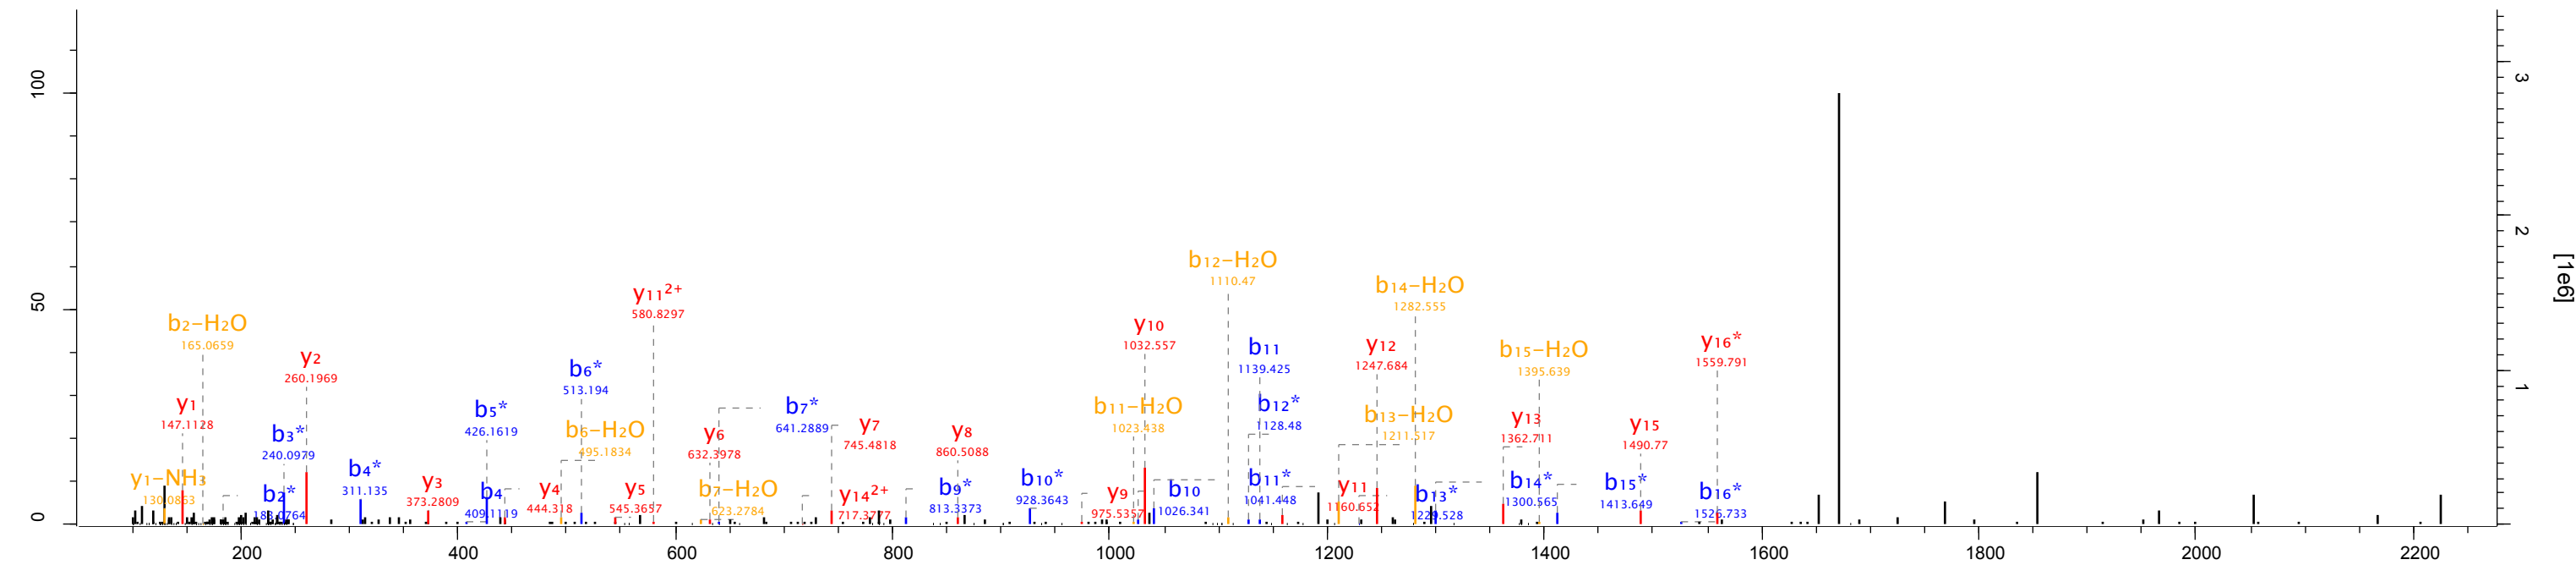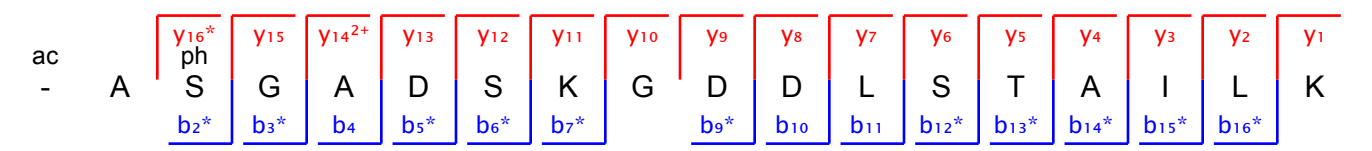

Raw file: 20150814\_A375SR\_Phospho\_BR2\_05  
 Scan: 18762 Method: FTMS; HCD Score: 188.07 m/z: 1098 Gene names: NCAPD2

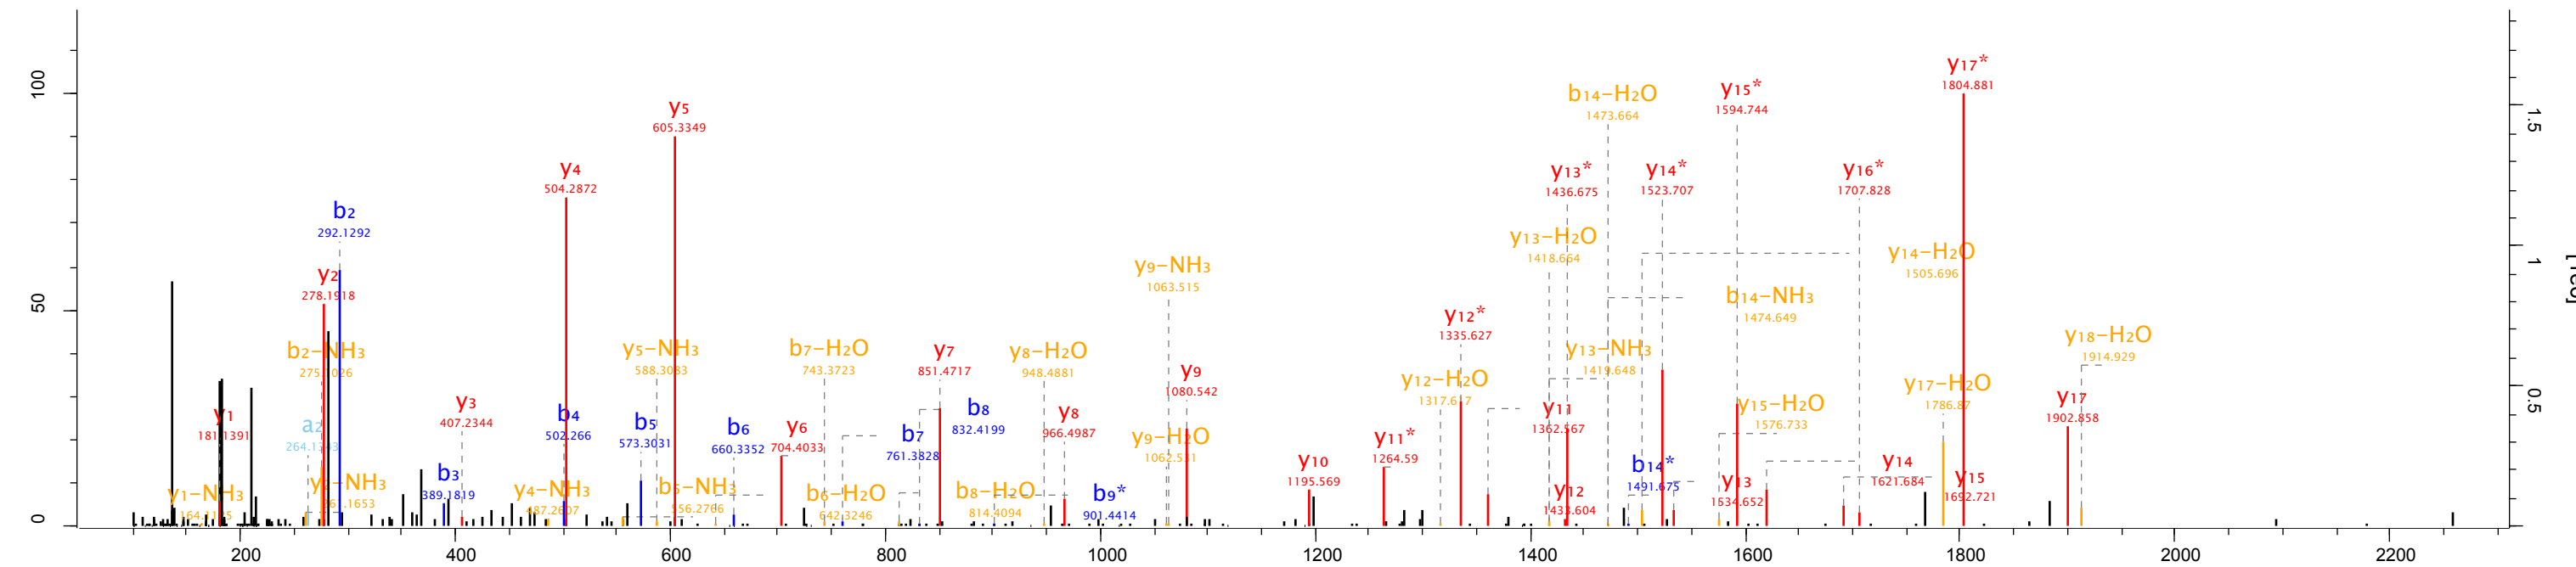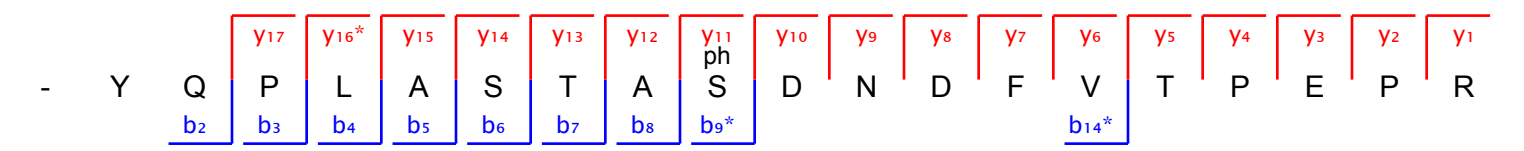



Raw file Scan Method Score m/z Gene names  
 20150814\_A375SR\_Phospho\_BR2\_05 18822 FTMS; HCD 253.17 1044.94 LAS1L

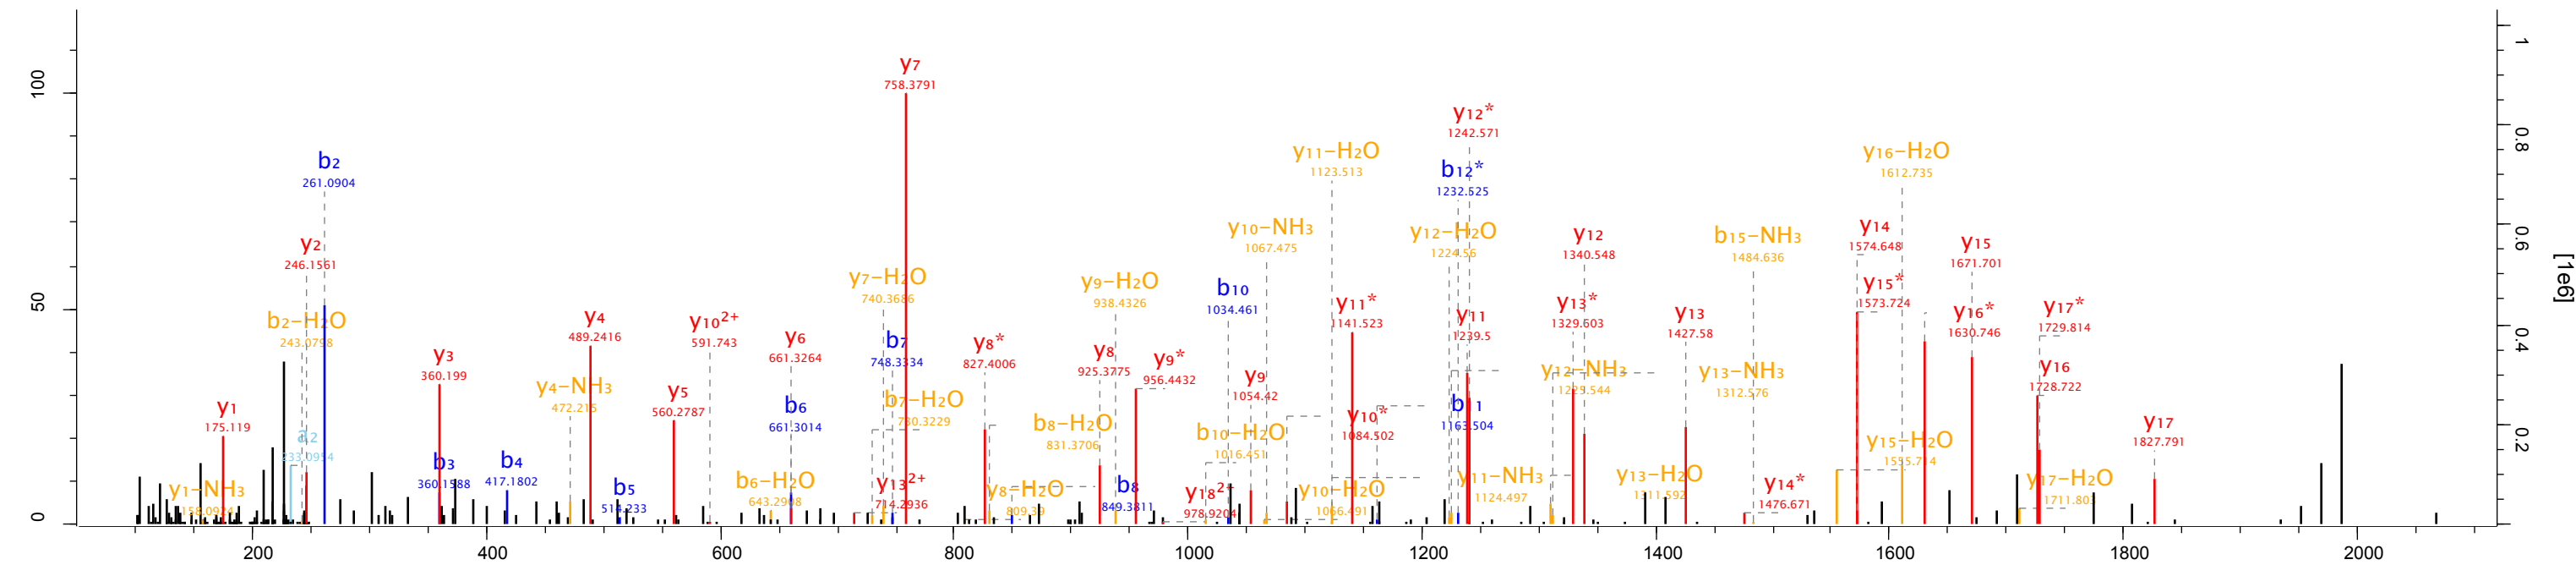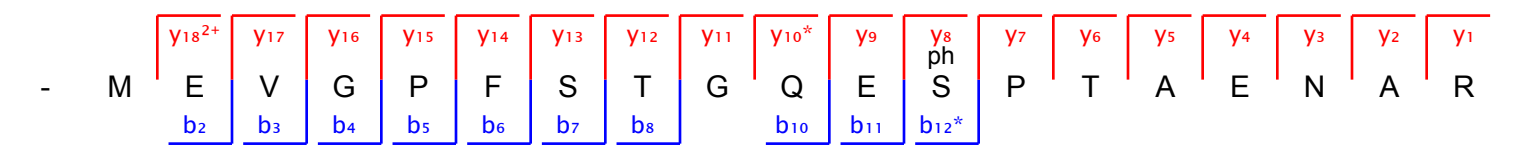

Raw file Scan Method Score m/z Gene names  
 20150814\_A375SR\_Phospho\_BR2\_05 18942 FTMS; HCD 143.48 889.94 VCP

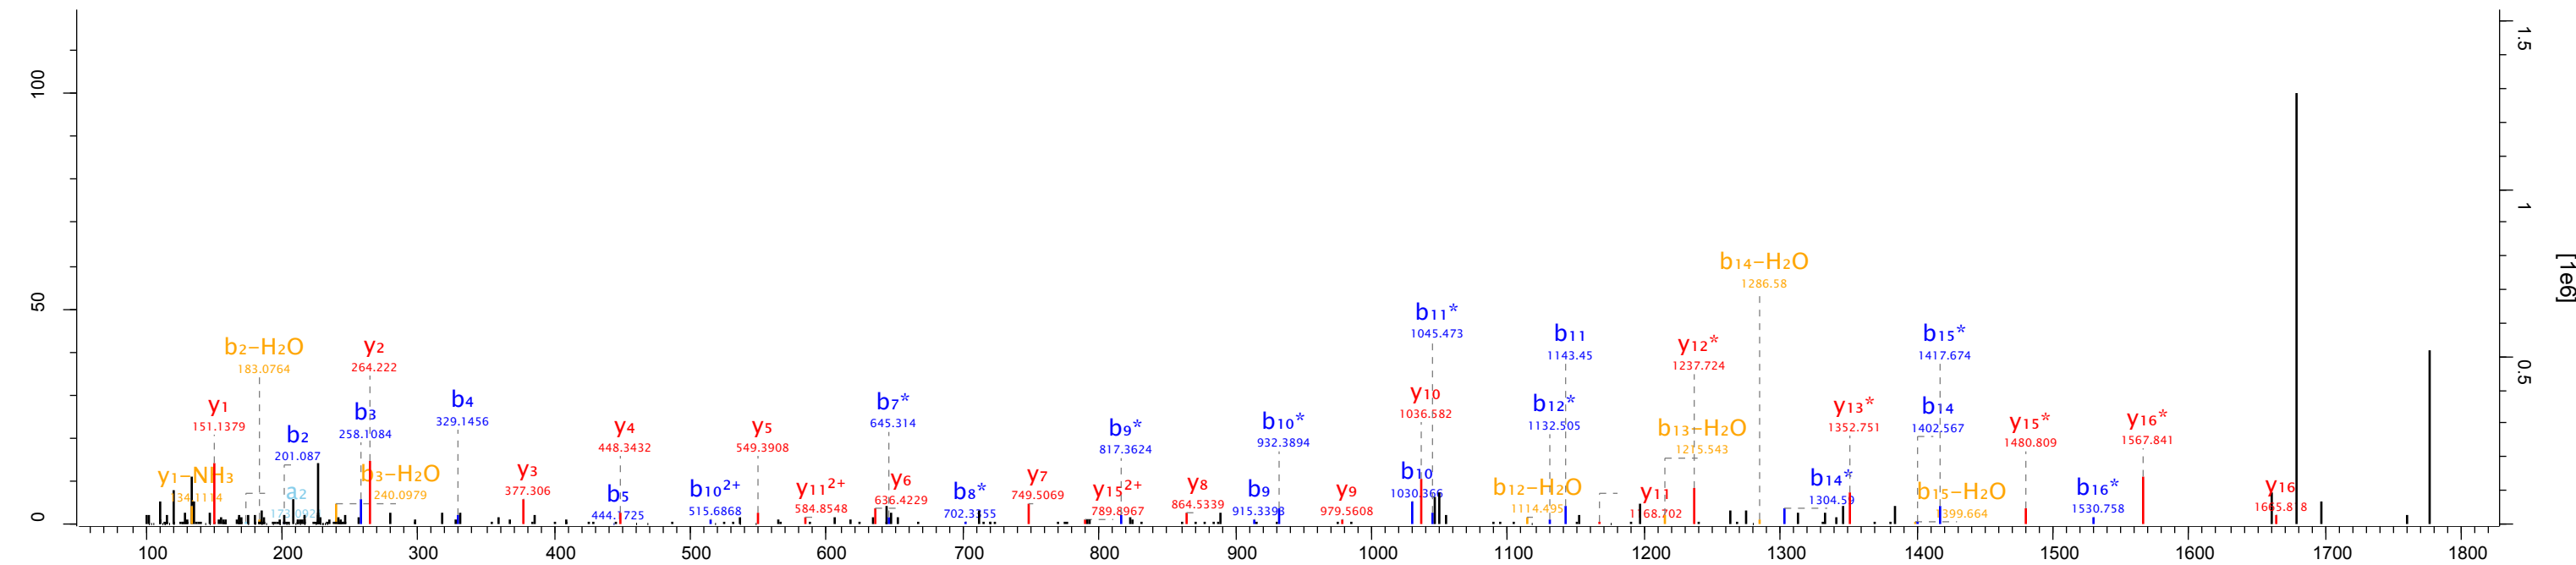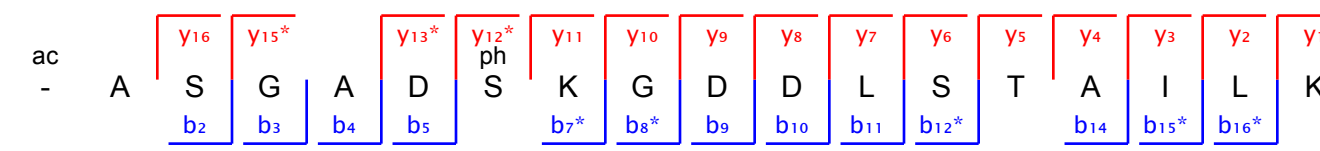

Raw file 20150814\_A375SR\_Phospho\_BR2\_05 Scan 19002 Method FTMS; HCD Score 260.74 m/z 1087.02 Gene names TNKS1BP1

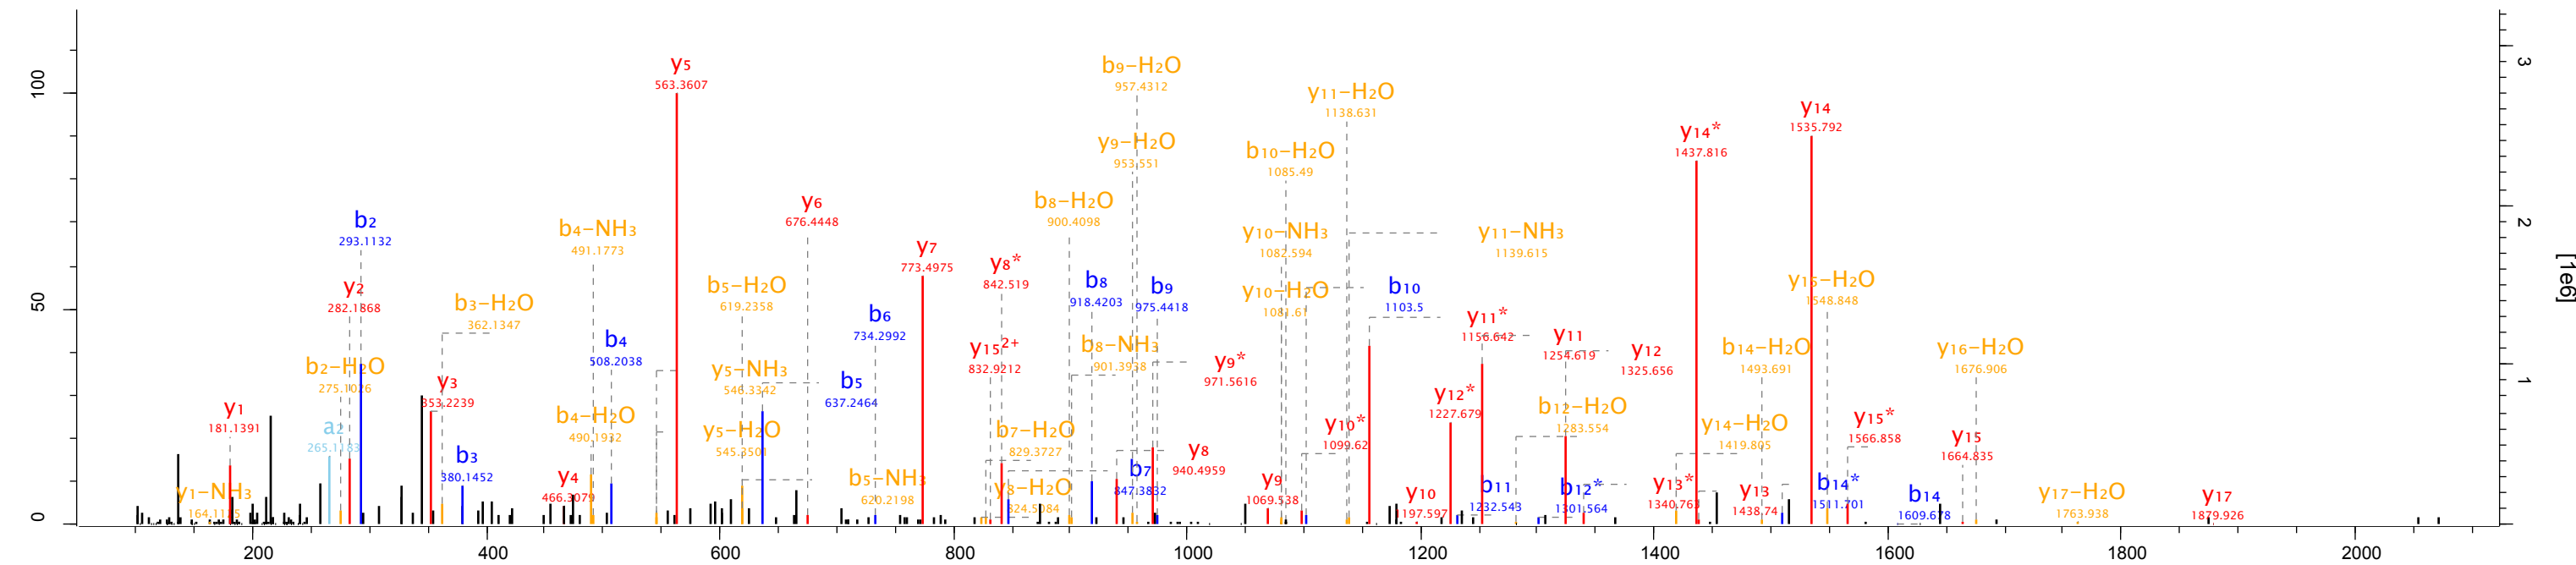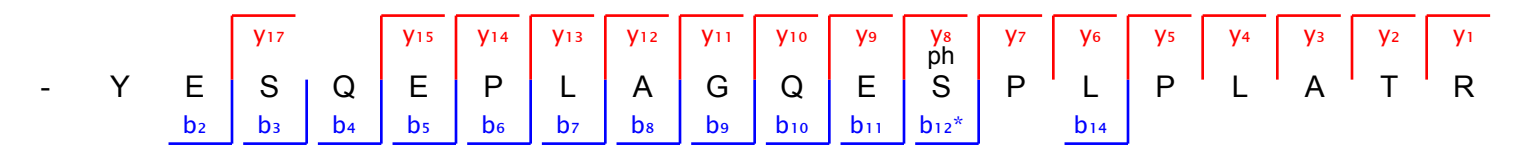

Raw file 20150814\_A375SR\_Phospho\_BR2\_05 Scan 19492 Method FTMS; HCD Score 76.82 m/z 682.28 Gene names PPFIBP1

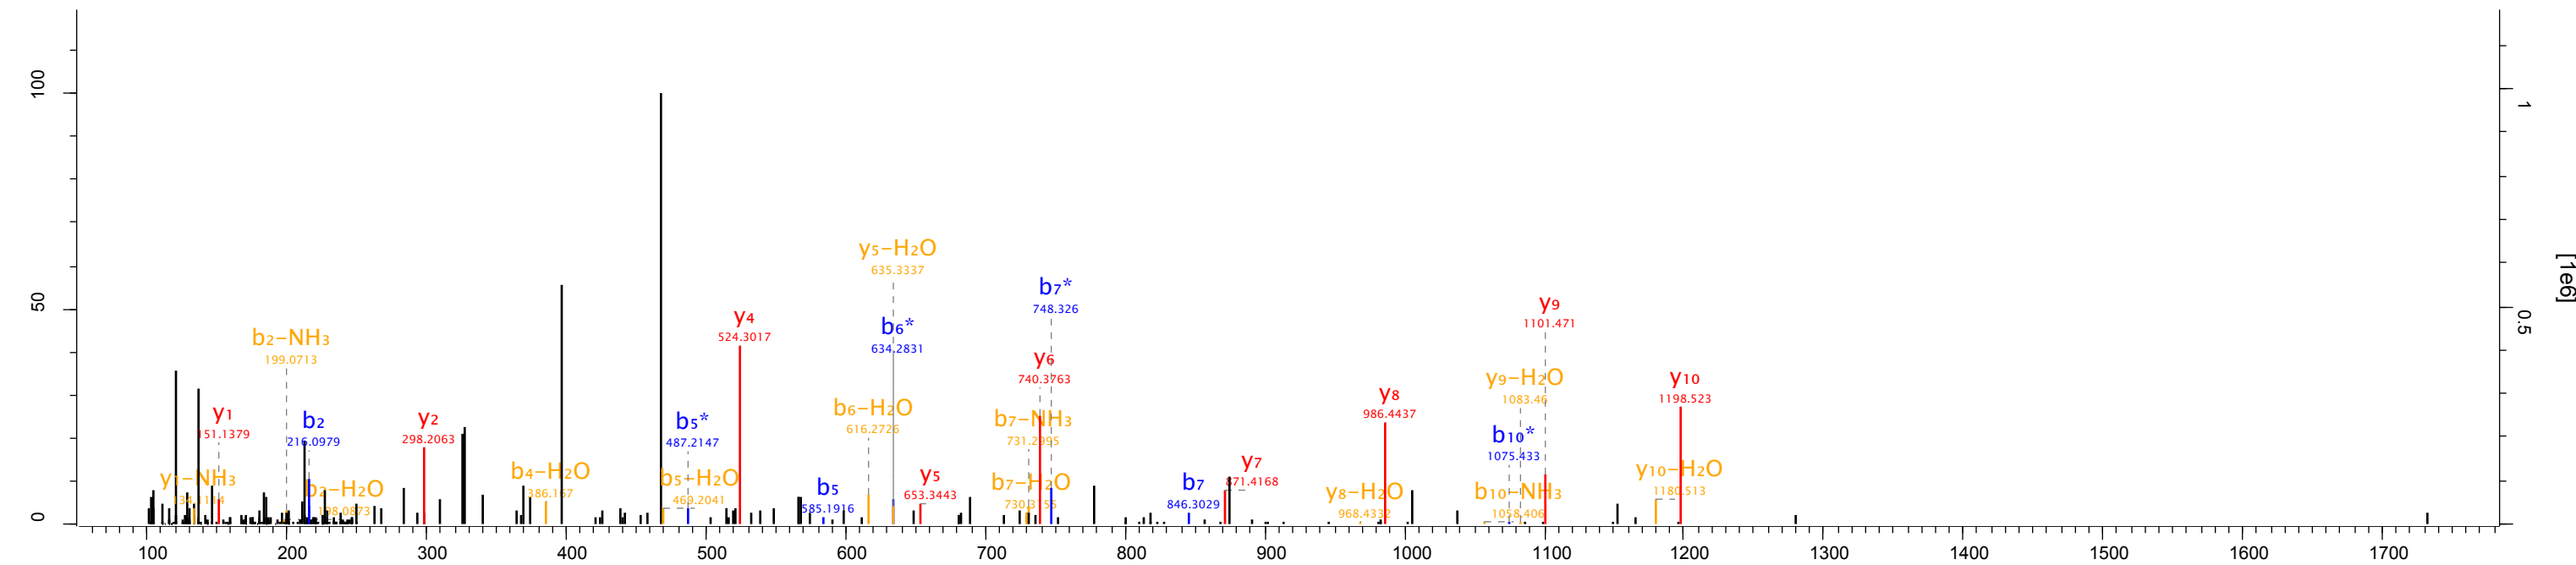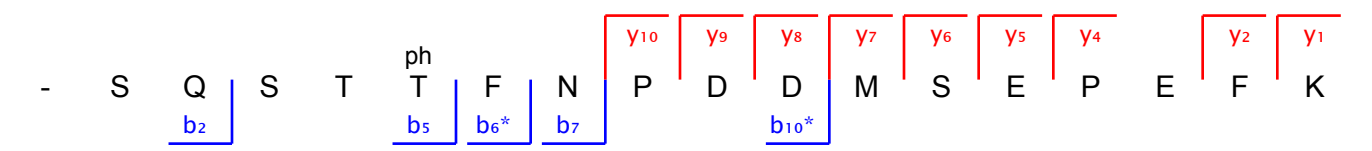

Raw file: 20150814\_A375SR\_Phospho\_BR2\_05  
 Scan: 19732 Method: FTMS; HCD Score: 115.56 m/z: 849.44 Gene names: SPDL1

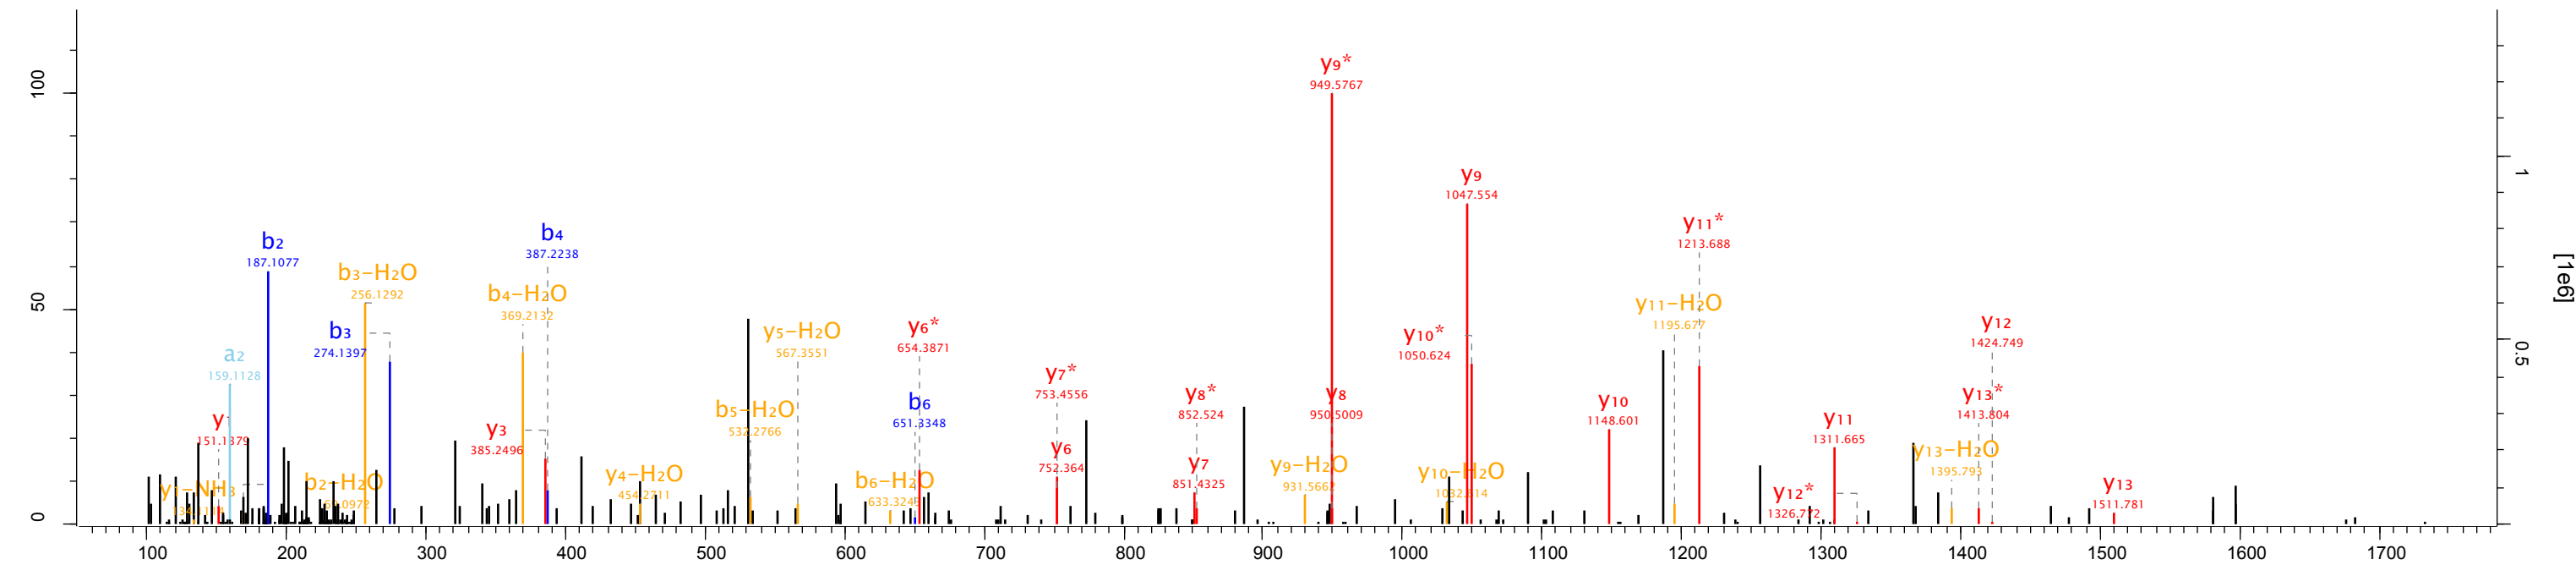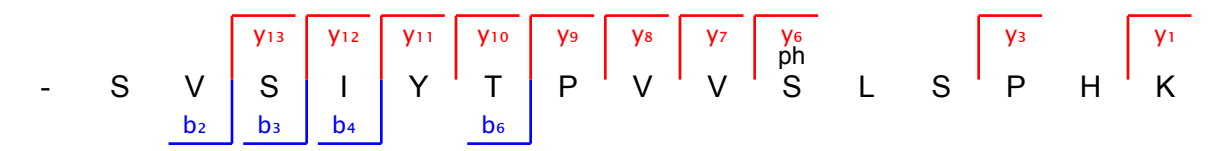

Raw file: 20150814\_A375SR\_Phospho\_BR2\_05  
 Scan: 19812 Method: FTMS; HCD Score: 89.91 m/z: 638.81 Gene names: ARHGEF17

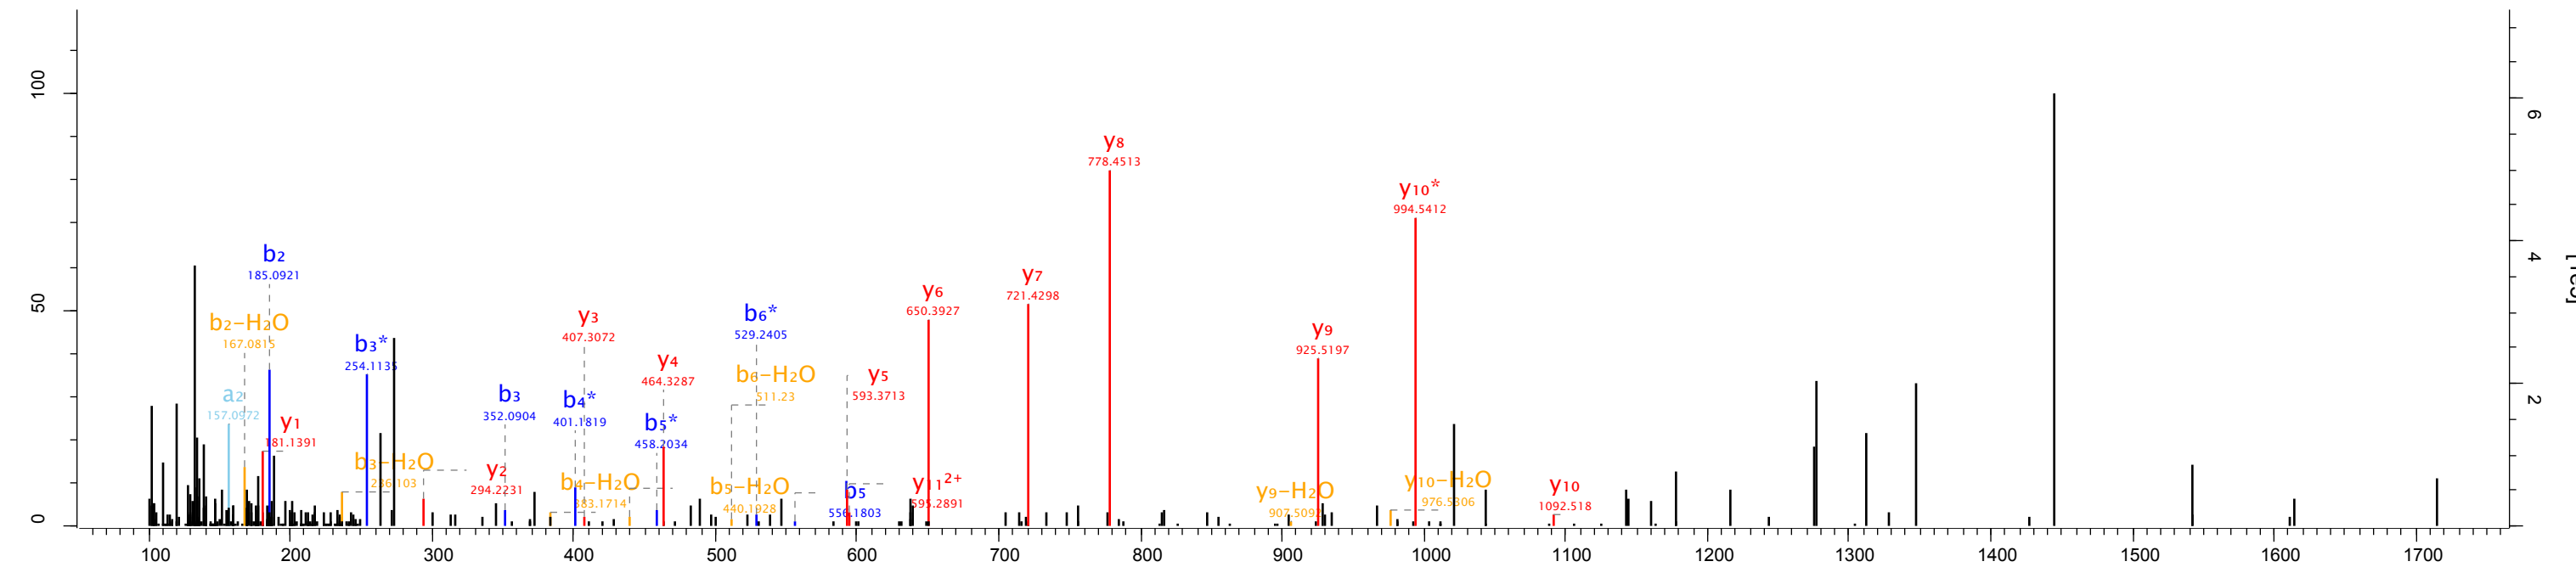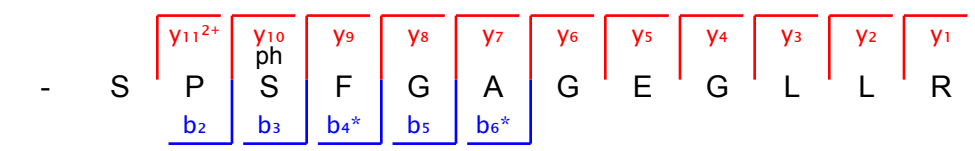

Raw file 20150814\_A375SR\_Phospho\_BR2\_05 Scan 19882 Method FTMS; HCD Score 191.98 m/z 738.3 Gene names LYSMD1

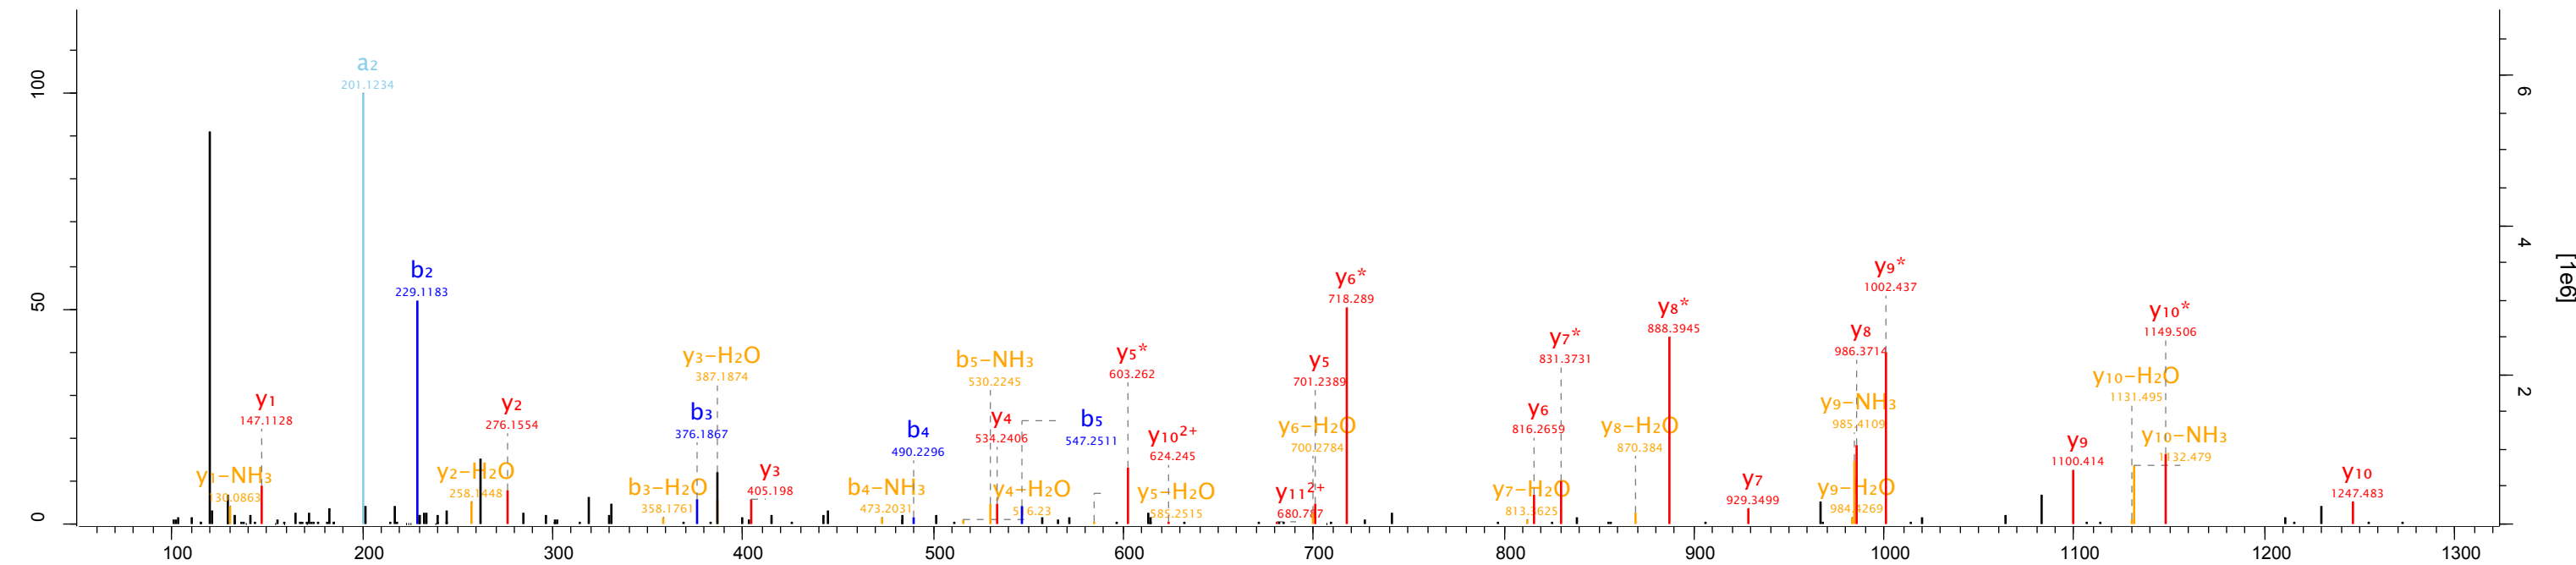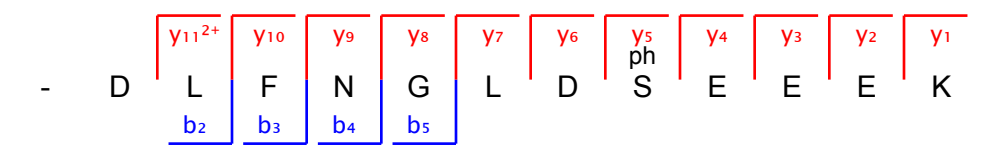

Raw file  
20150814\_A375SR\_Phospho\_BR2\_05

Scan 20002 Method FTMS; HCD Score 211.49 m/z 813.05 Gene names ANXA1

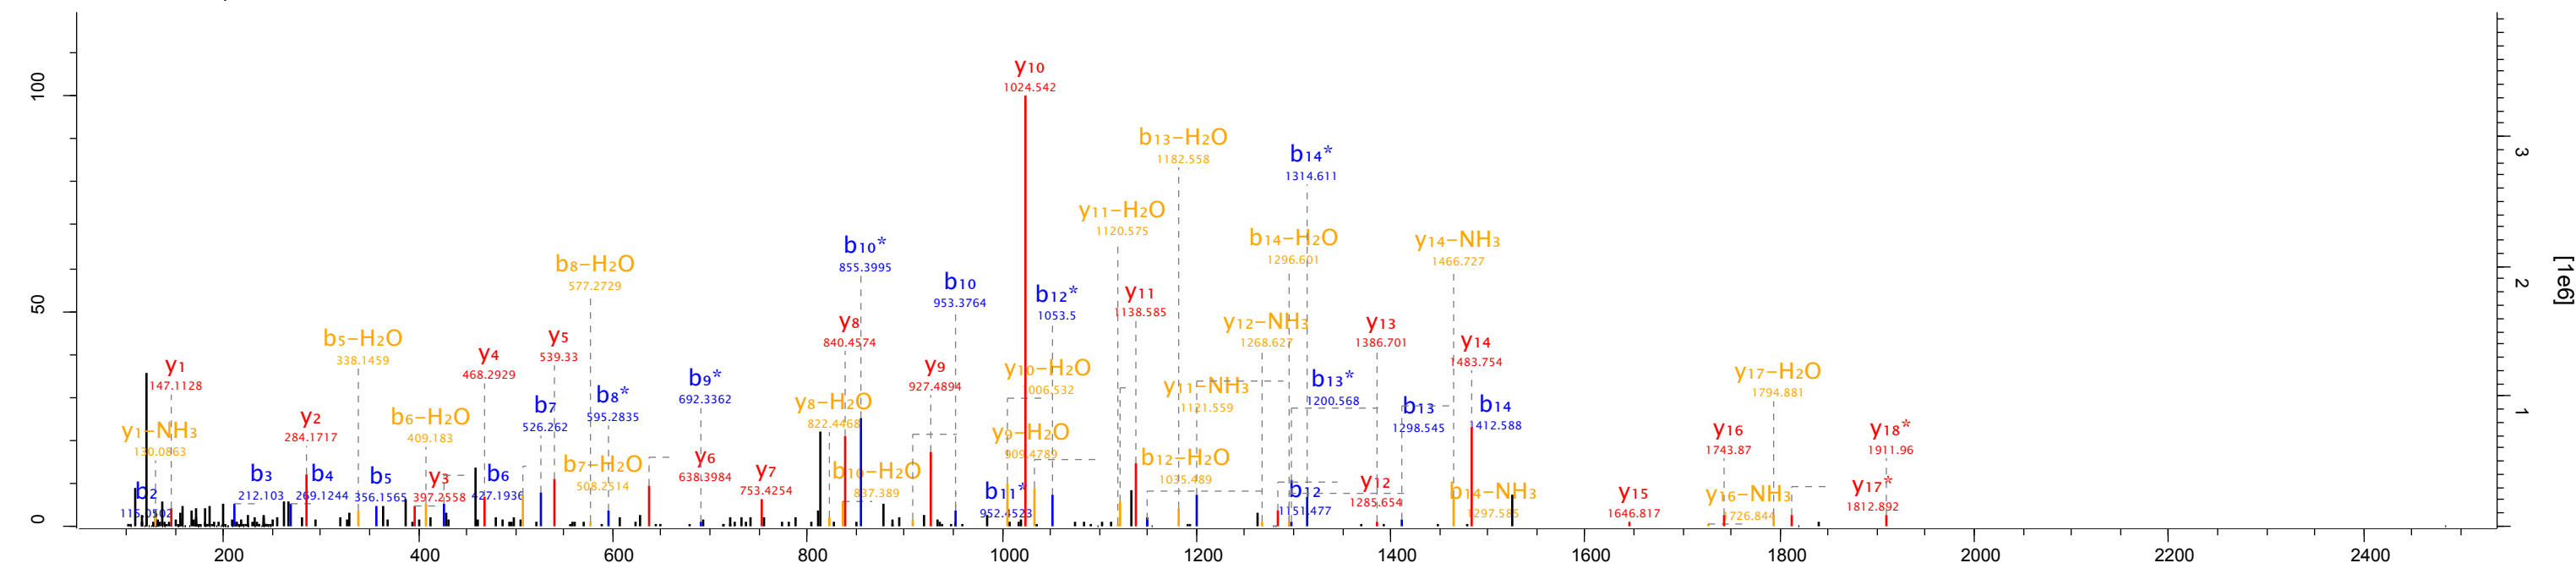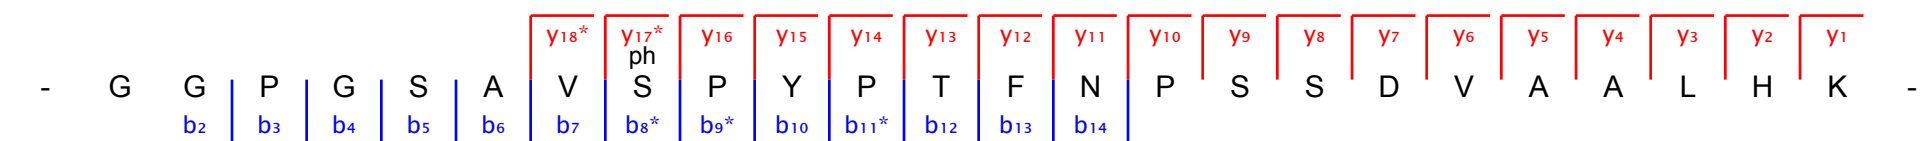



Raw file: 20150814\_A375SR\_Phospho\_BR2\_05  
 Scan: 20172 Method: FTMS; HCD Score: 228.25 m/z: 800.37 Gene names: RPRD2

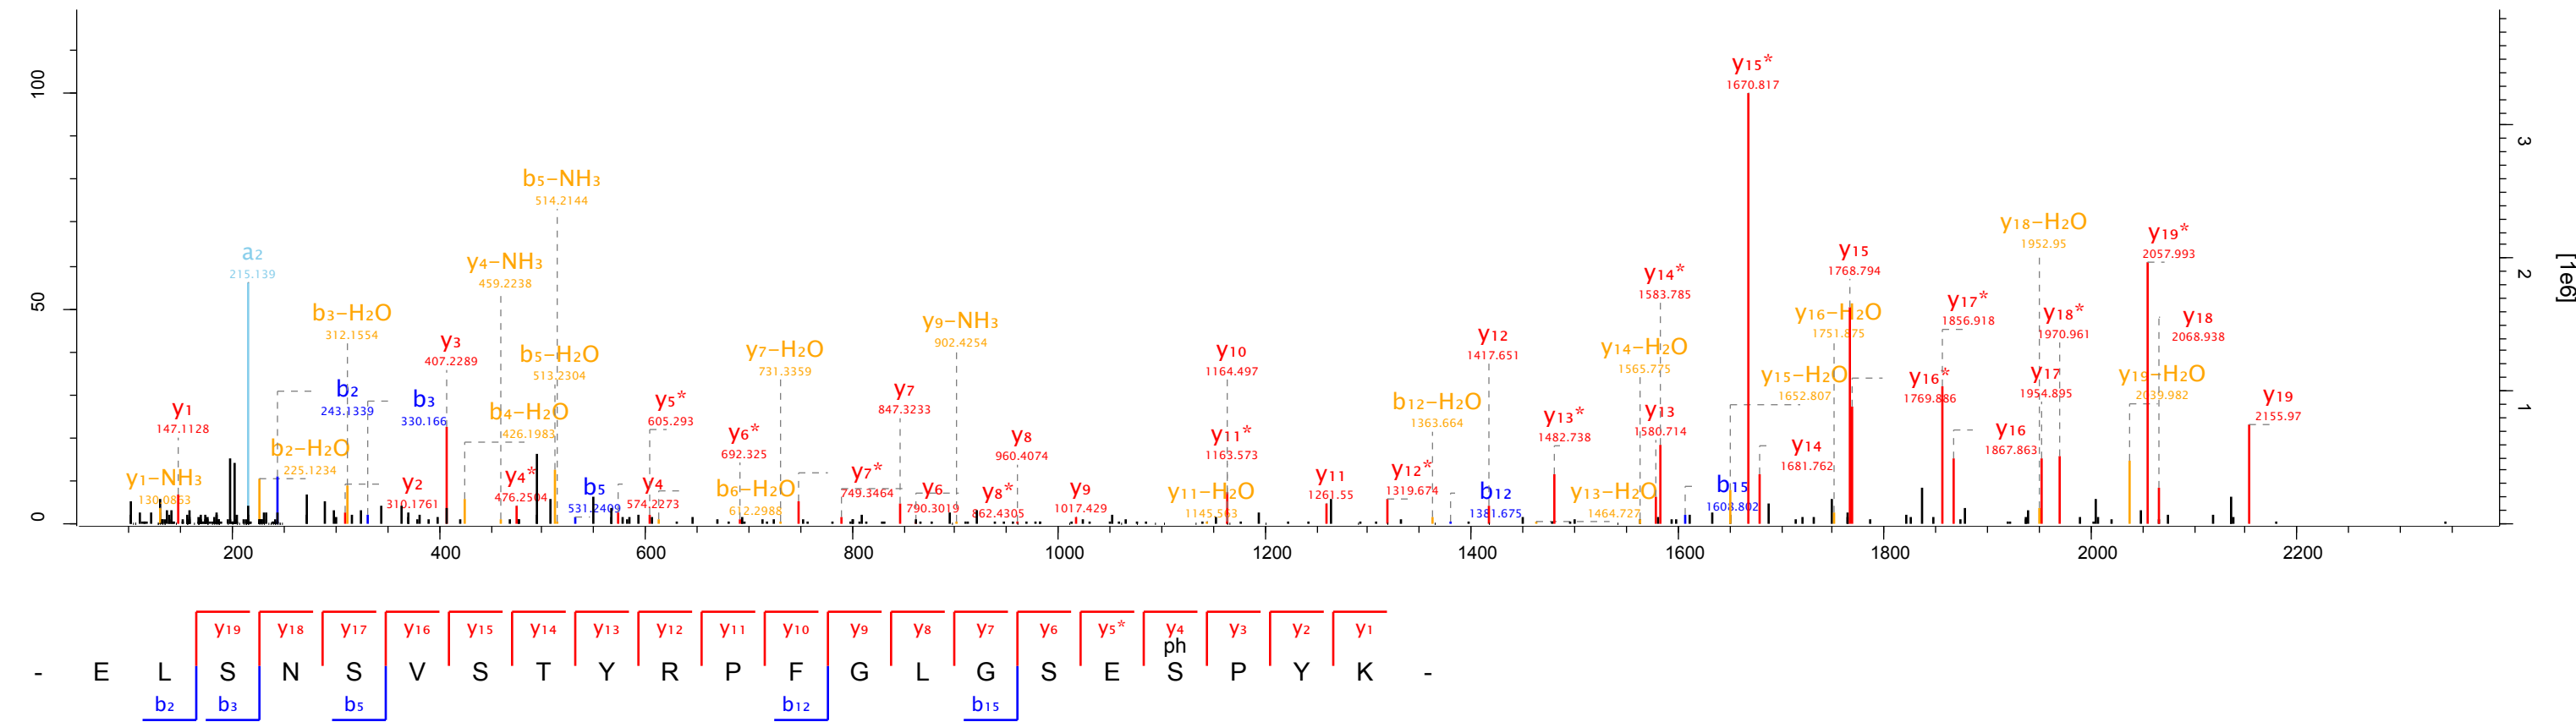

Raw file Scan Method Score m/z Gene names  
 20150814\_A375SR\_Phospho\_BR2\_05 20662 FTMS; HCD 109.5 1100.47 TJP1

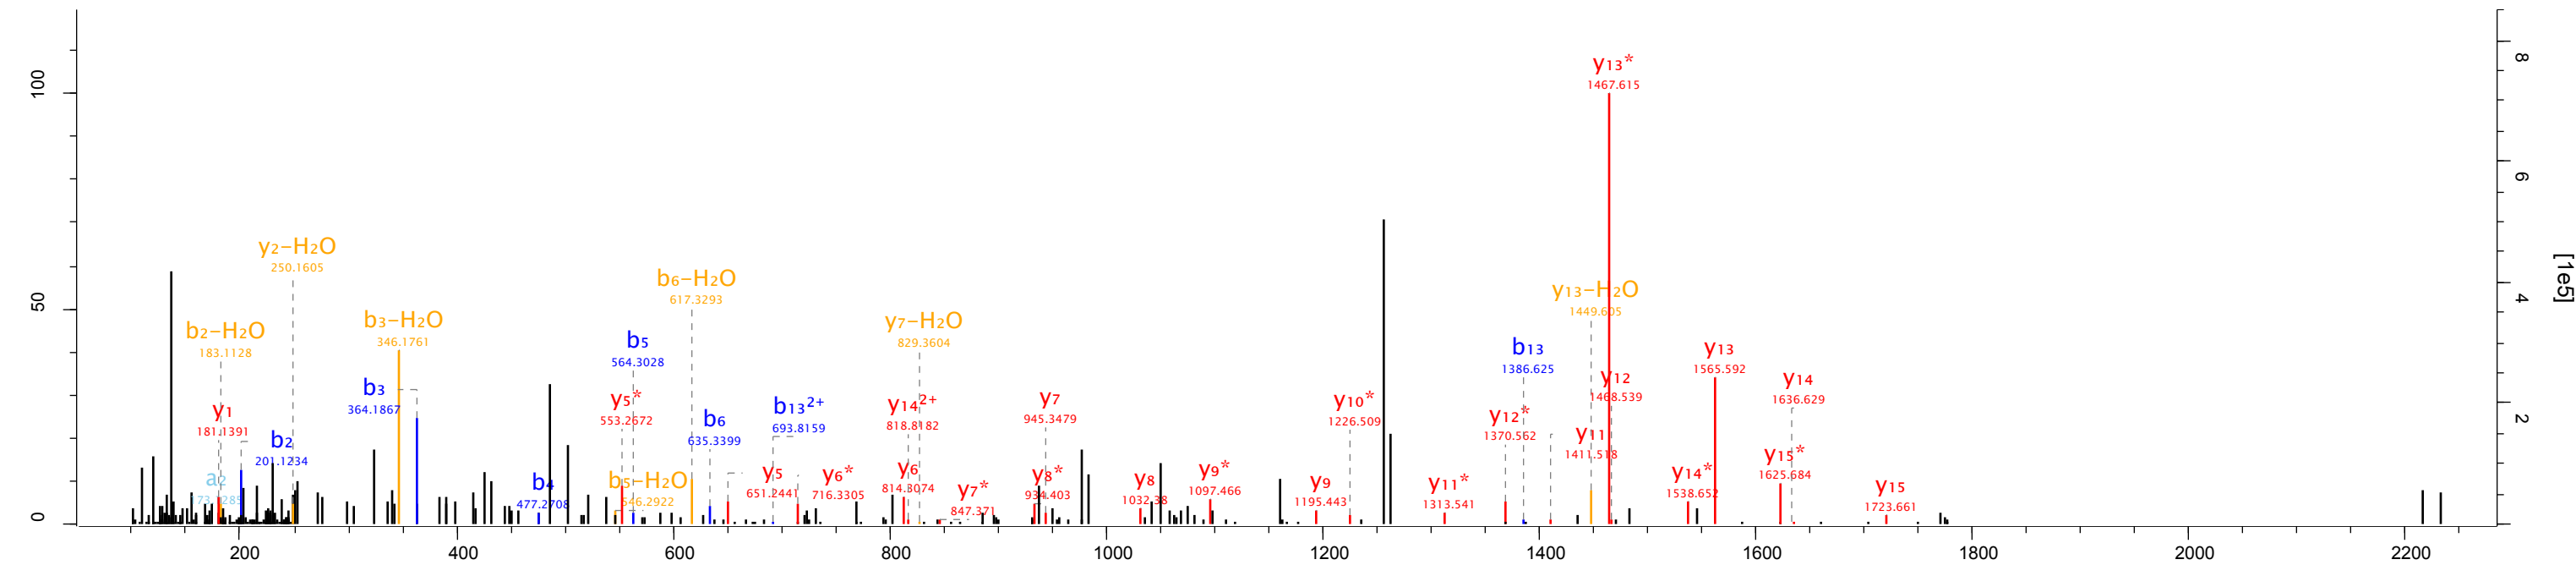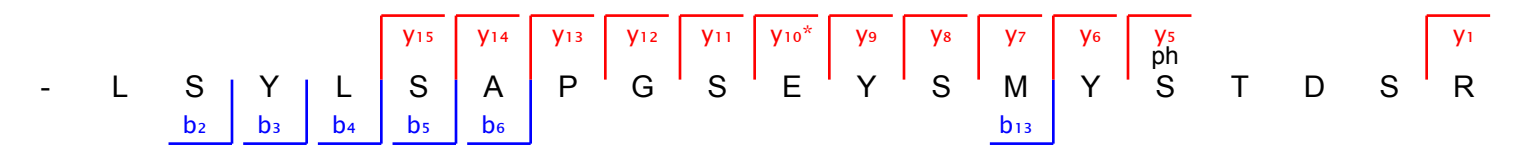

Raw file: 20150814\_A375SR\_Phospho\_BR2\_05  
 Scan: 21132 Method: FTMS; HCD Score: 149.02 m/z: 614.31 Gene names: CDK16

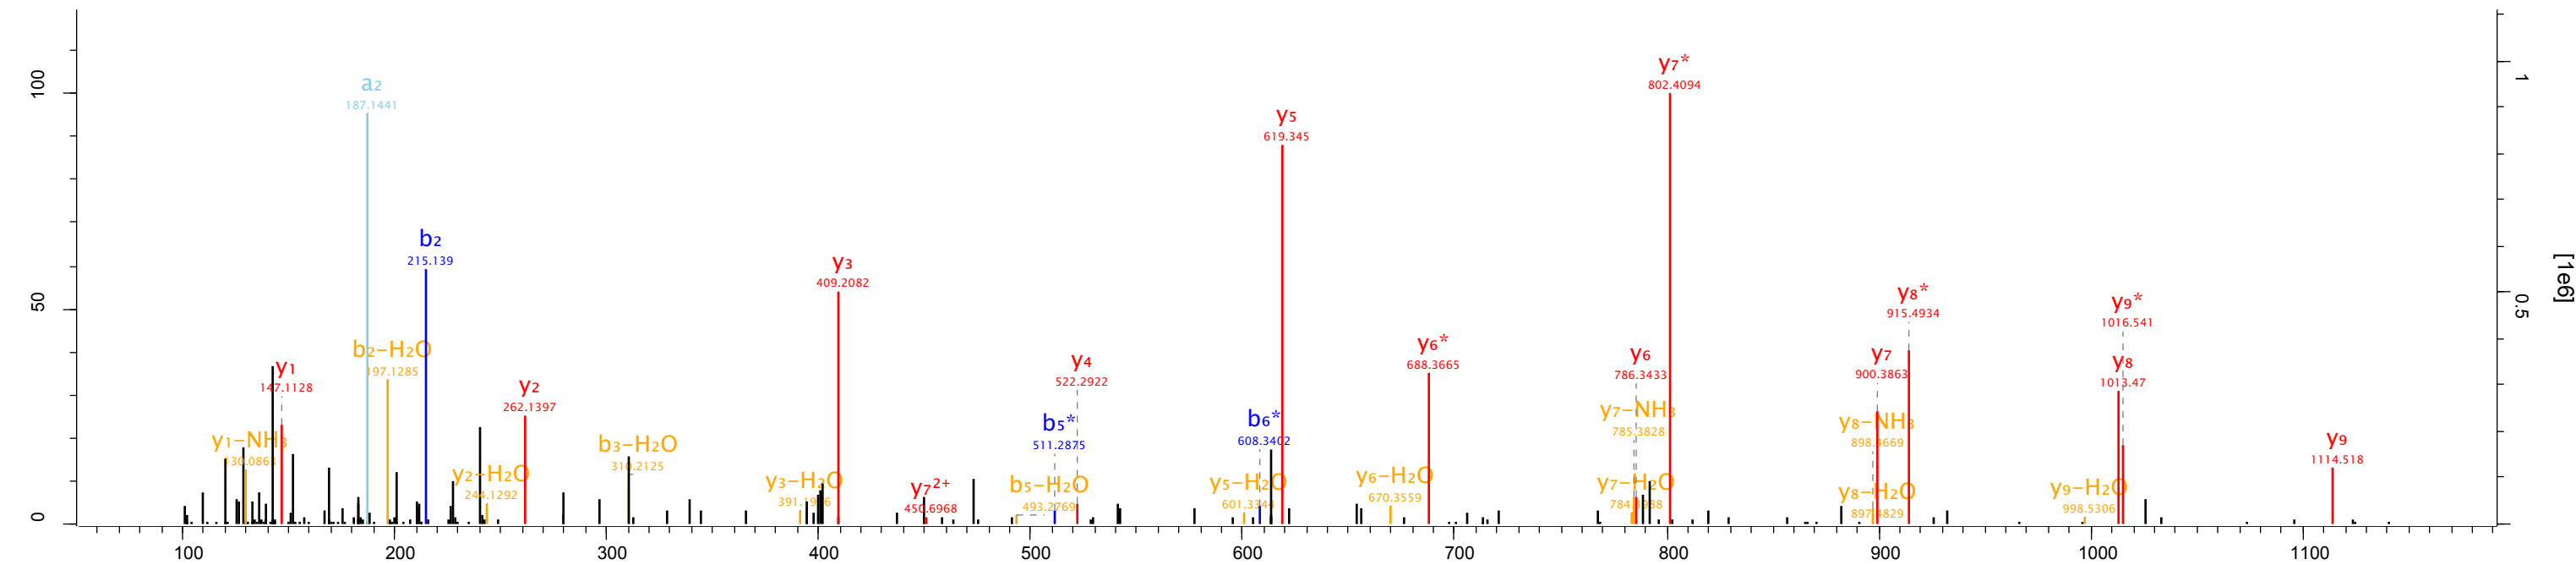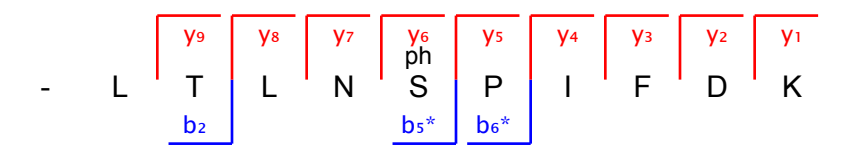

Raw file 20150814\_A375SR\_Phospho\_BR2\_05 Scan 21212 Method FTMS; HCD Score 163.85 m/z 1015.43 Gene names ERCC6L

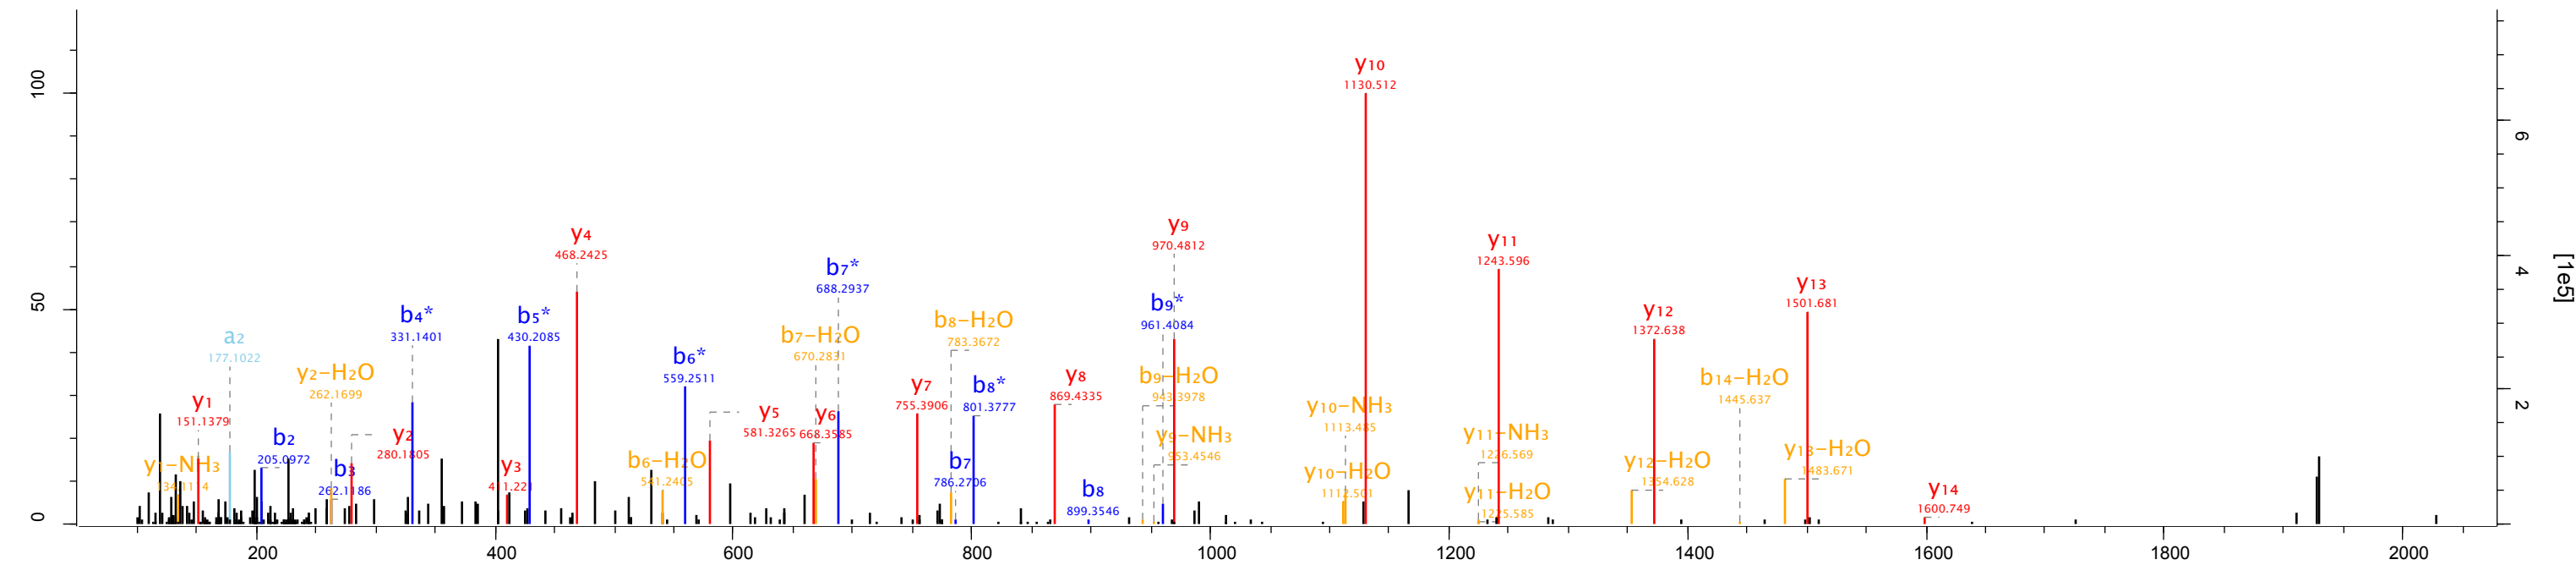

- G F G S V E E L C T N S S L G M E K -

Fragmentation labels below the sequence:

- b2 (under F)
- b3 (under G)
- b4\* (under S)
- b5\* (under V)
- b6\* (under E)
- b7 (under E)
- b8 (under L)
- b9\* (under C)
- y14 (under V)
- y13 (under E)
- y12 (under E)
- y11 (under L)
- y10 (under C)
- y9 (under T)
- y8 (under N)
- y7 (under S)
- y6 (under S)
- y5 (under L)
- y4 (under G)
- y3 (under M)
- y2 (under E)
- y1 (under K)

Raw file: 20150814\_A375SR\_Phospho\_BR2\_05  
 Scan: 21302 Method: FTMS; HCD Score: 40.21 m/z: 700.31 Gene names: DENND4A

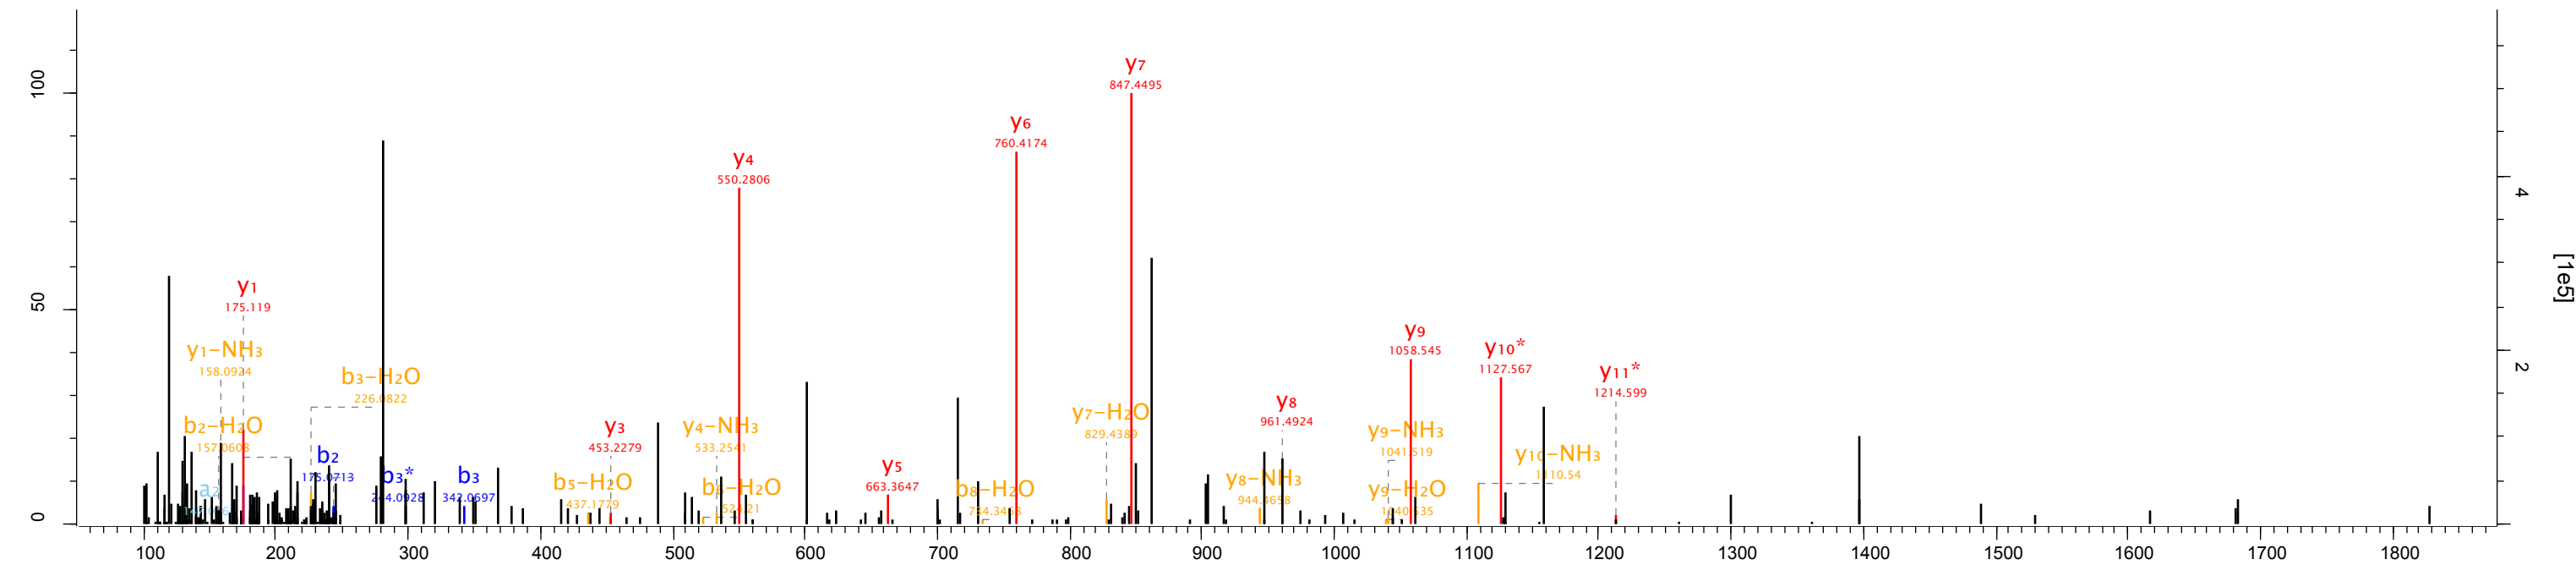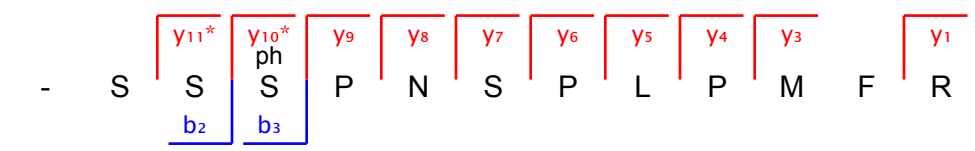

Raw file 20150814\_A375SR\_Phospho\_BR2\_05 Scan 21852 Method FTMS; HCD Score 112.36 m/z 853.05 Gene names TP53BP1

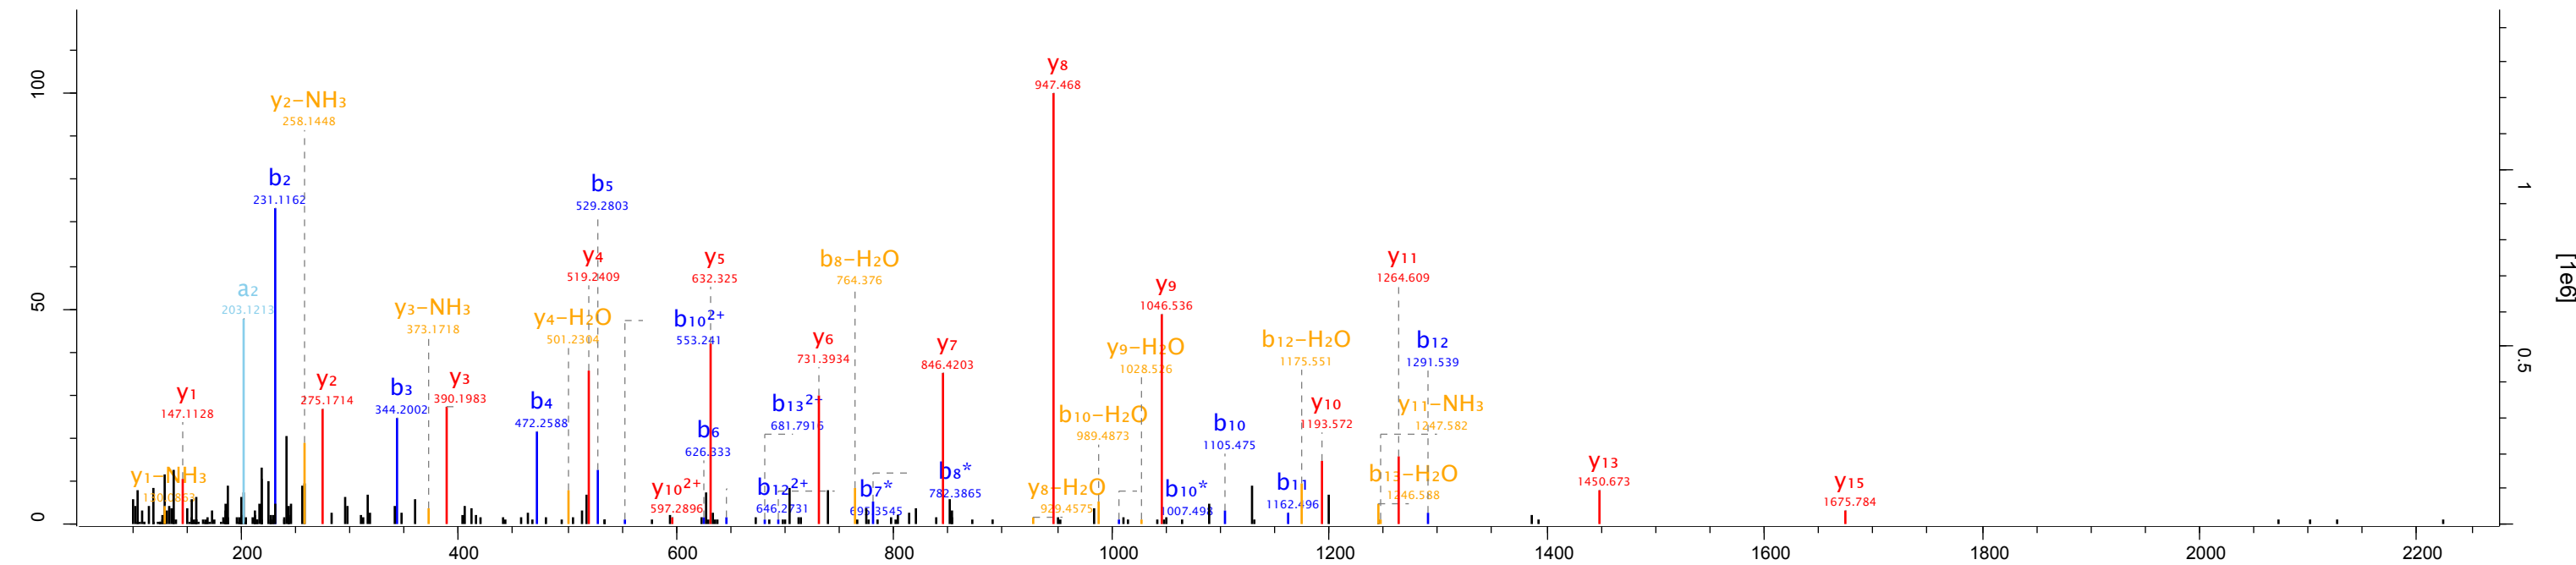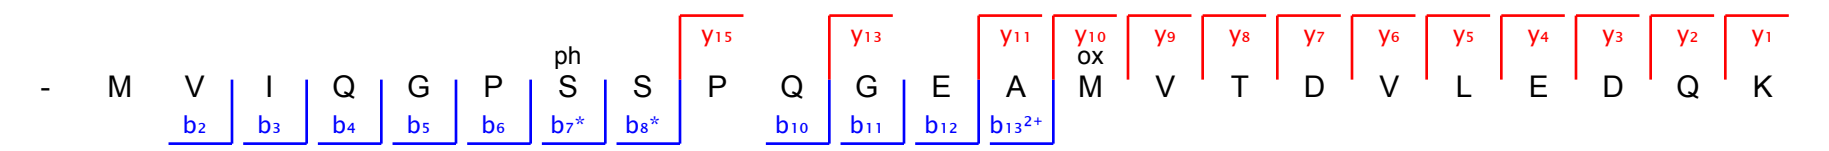

Raw file: 20150814\_A375SR\_Phospho\_BR2\_05  
 Scan: 22082 Method: FTMS; HCD Score: 157.38 m/z: 1140.53 Gene names: CRTC2

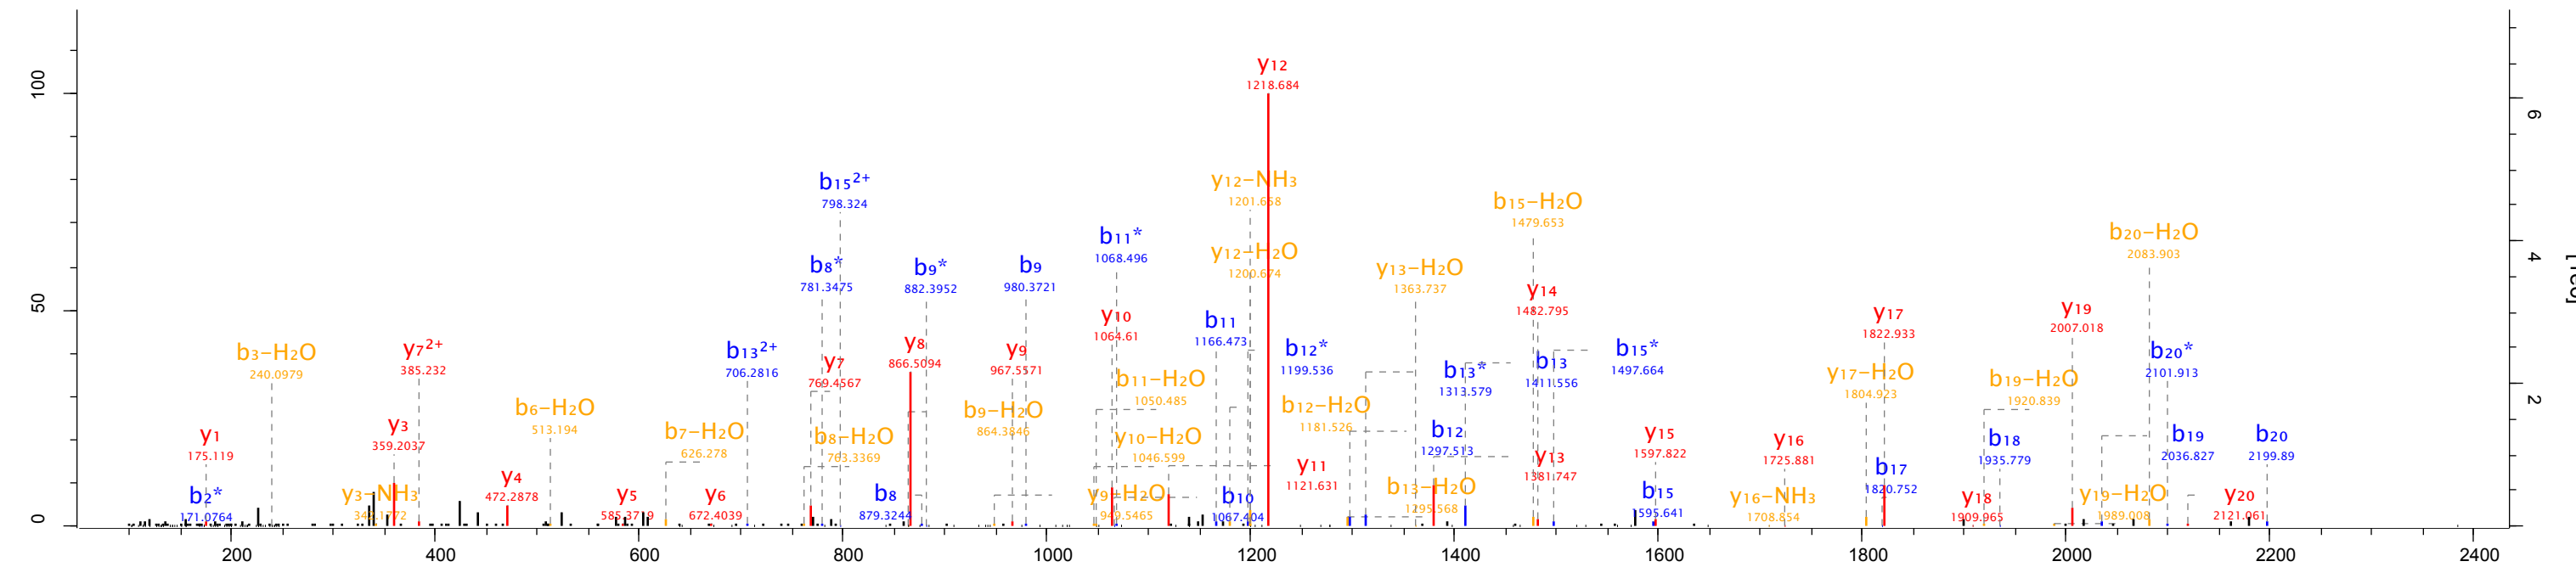

ph  
 - T S S D S A L H T S V M N P S P Q D T Y P G P T P P S I L P S R -  
 b2\* b8 b9 b10 b11 b12 b13 b15 b17 b18 b19 b20 y1 y3 y4 y5 y6 y7 y8 y9 y10 y11 y12 y13 y14 y15 y16 y18 y19 y20

Raw file 20150814\_A375SR\_Phospho\_BR2\_05 Scan 22132 Method FTMS; HCD Score 222.55 m/z 726.34 Gene names MINK1

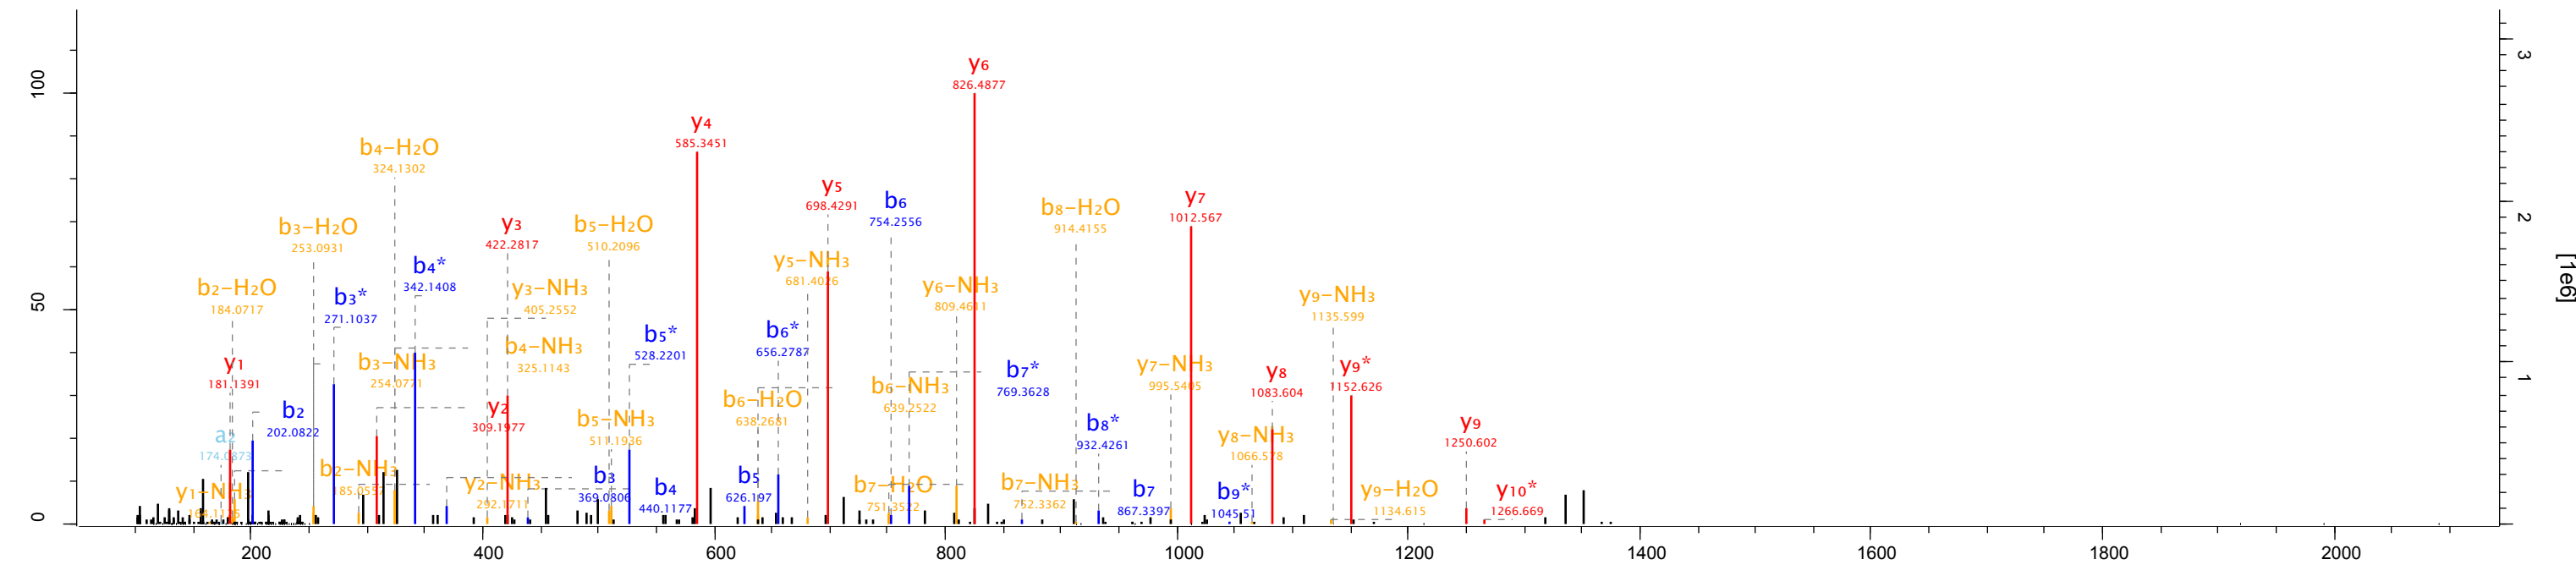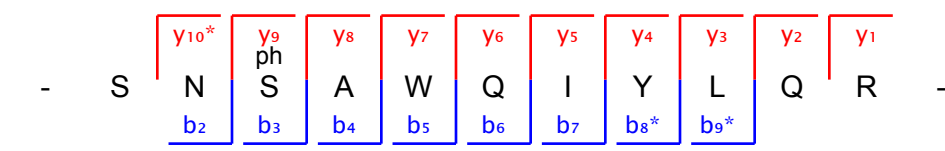



Raw file 20150814\_A375SR\_Phospho\_BR2\_05 Scan 22142 Method FTMS; HCD Score 159.46 m/z 944.9 Gene names AKT1S1

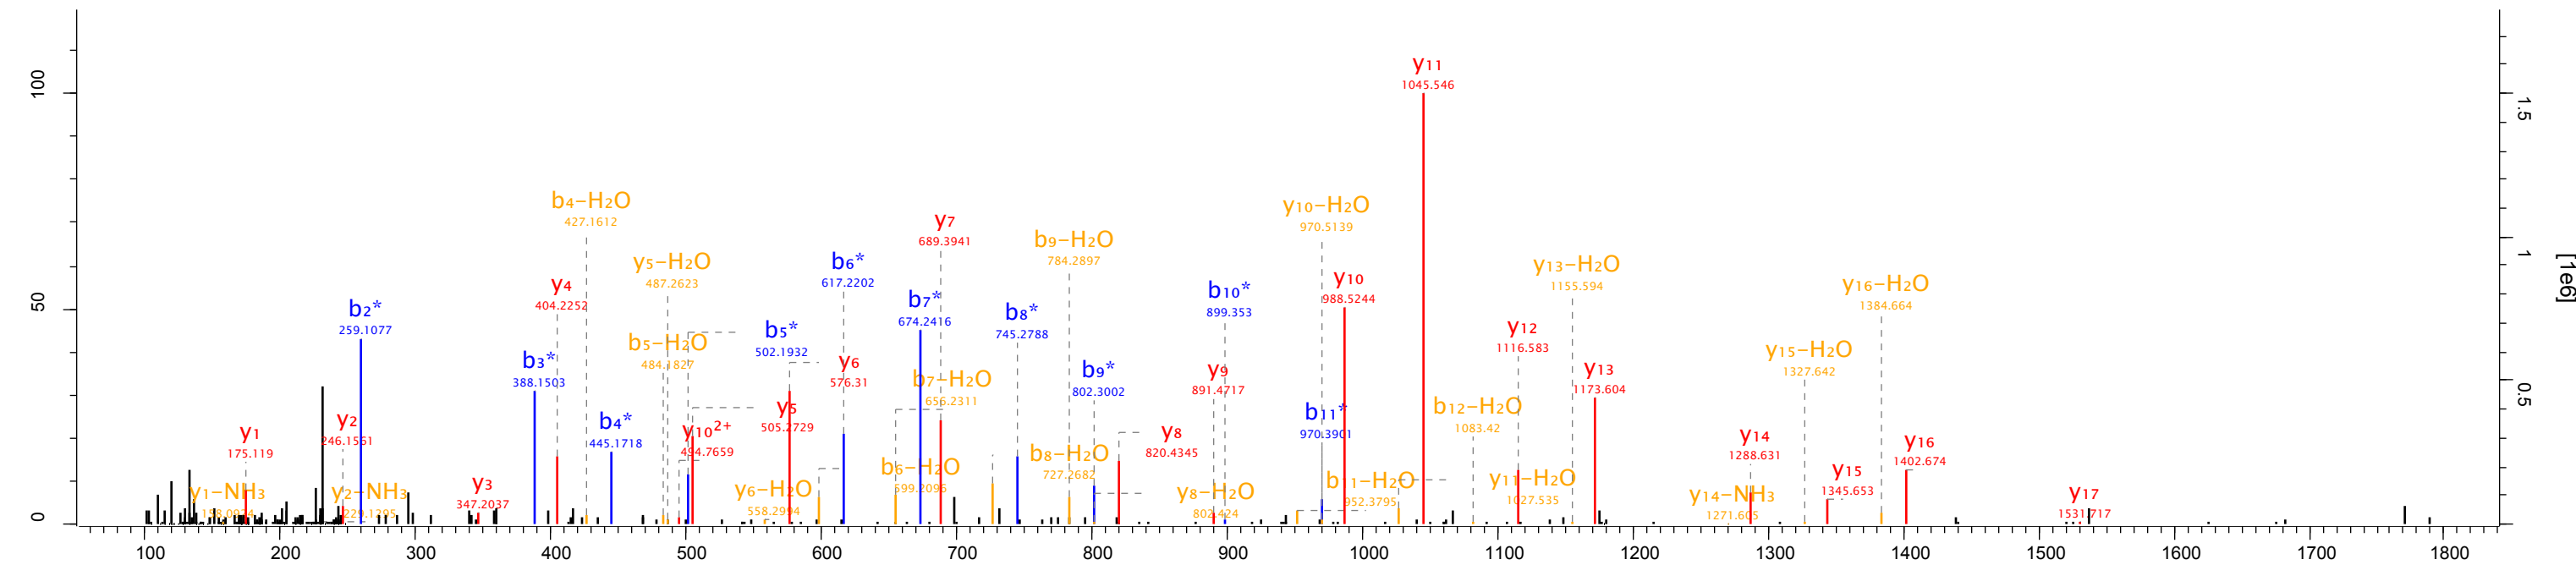

ac - pH S F E G G D G A G P A M L A T G T A R -

b2\* b3\* b4\* b5\* b6\* b7\* b8\* b9\* b10\* b11\*

y17 y16 y15 y14 y13 y12 y11 y10 y9 y8 y7 y6 y5 y4 y3 y2 y1

Raw file 20150814\_A375SR\_Phospho\_BR2\_05 Scan 22182 Method FTMS; HCD Score 93.17 m/z 997.77 Gene names NFIB

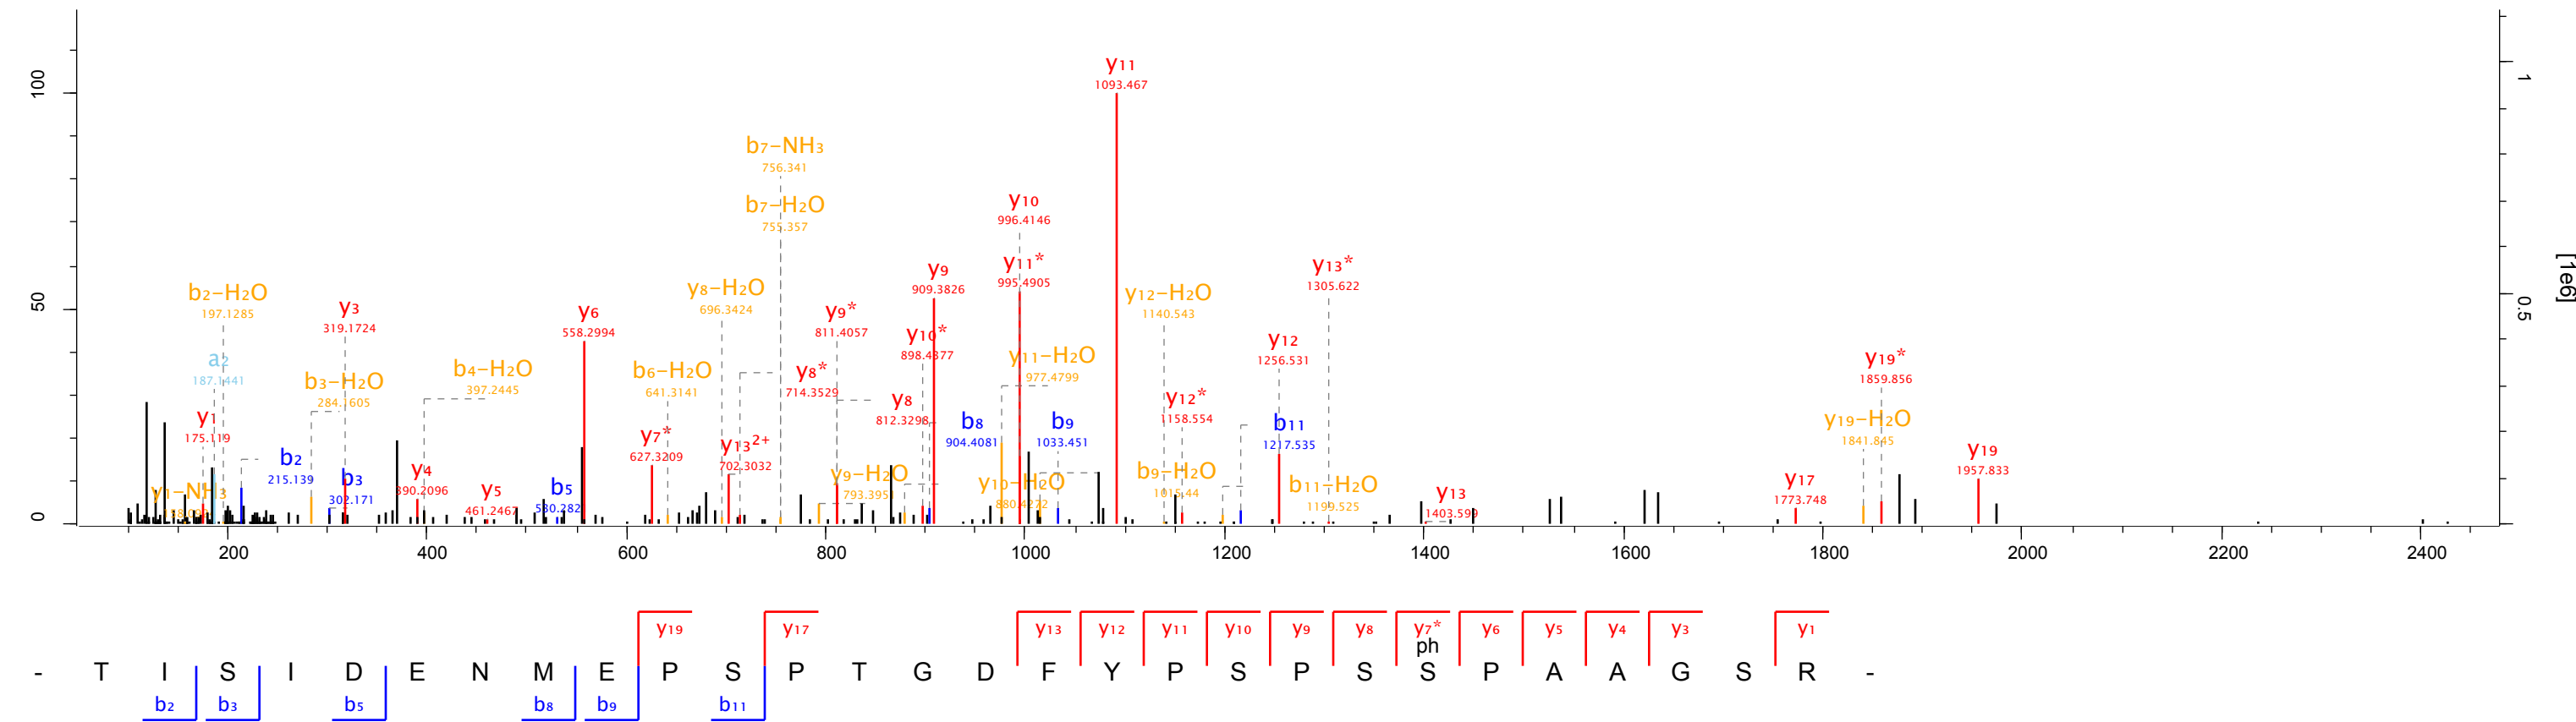

Raw file: 20150814\_A375SR\_Phospho\_BR2\_05  
 Scan: 22452 Method: FTMS; HCD Score: 142 m/z: 524.24 Gene names: PLEC

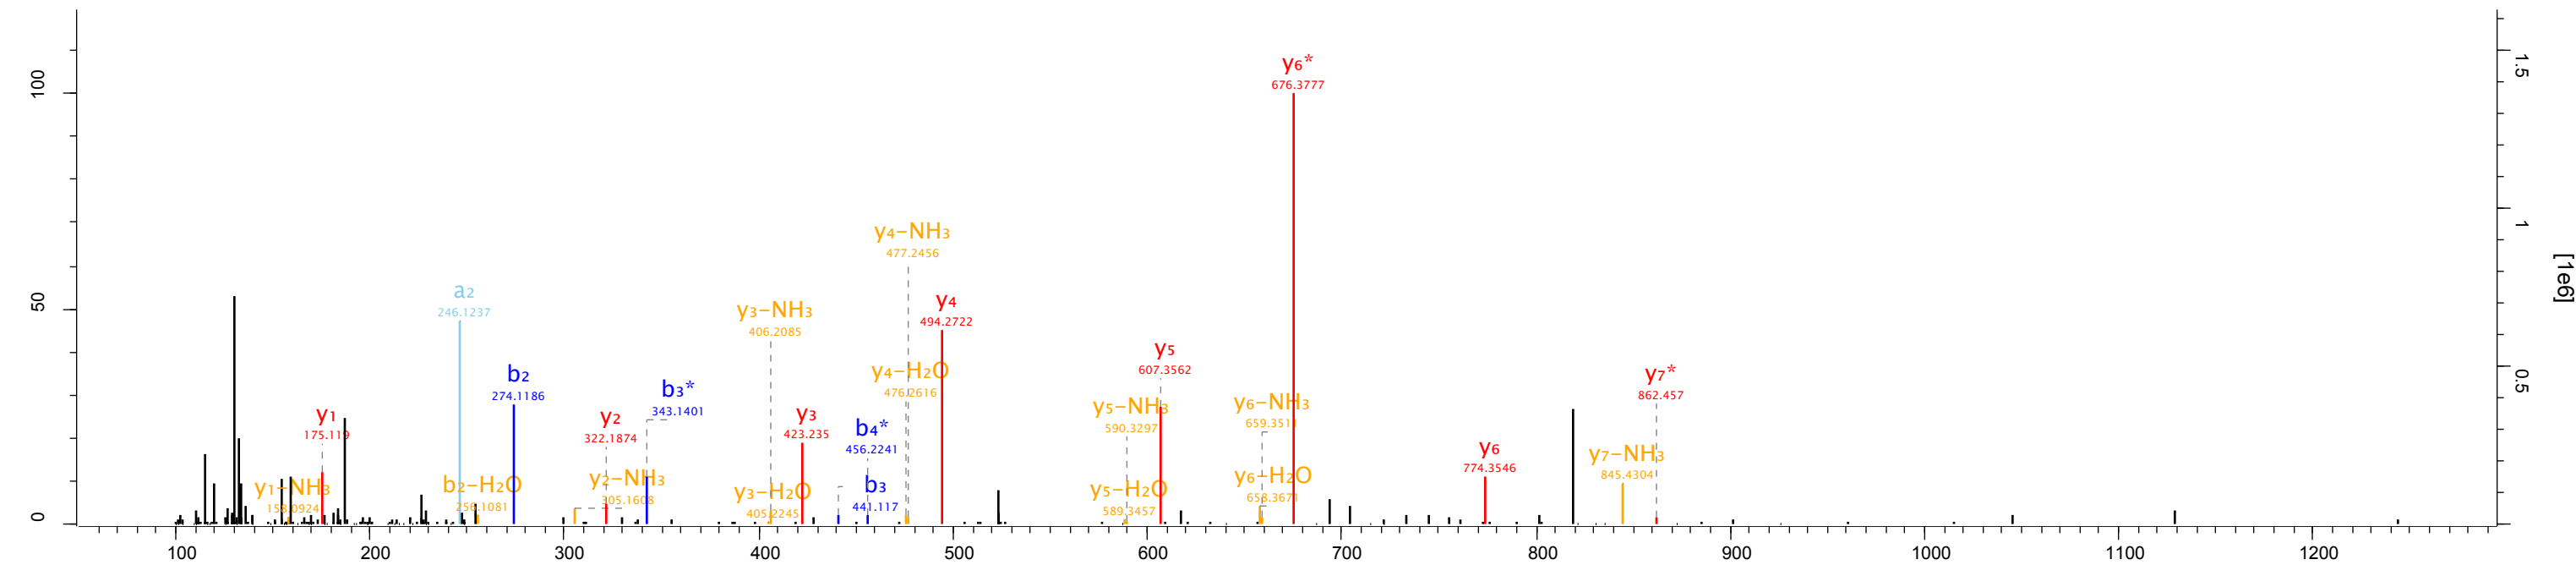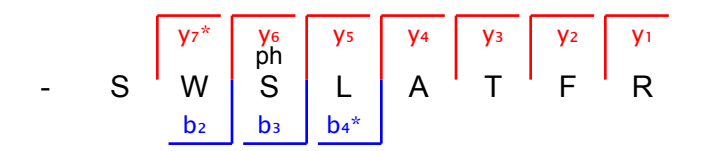

Raw file 20150814\_A375SR\_Phospho\_BR2\_05 Scan 22482 Method FTMS; HCD Score 161.09 m/z 603.81 Gene names MKI67

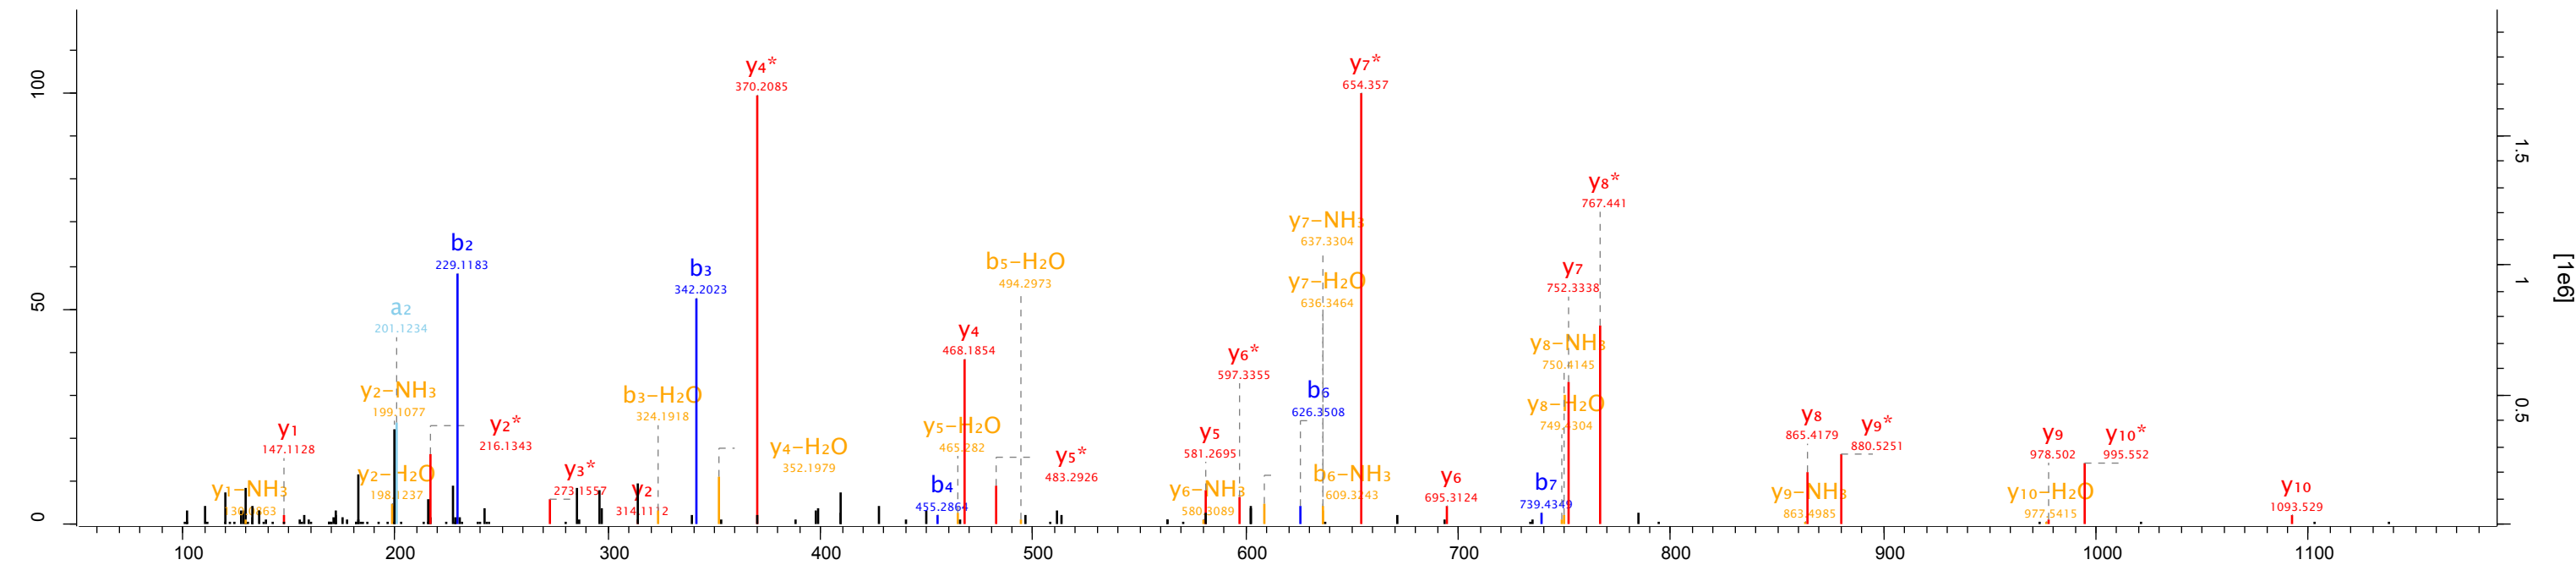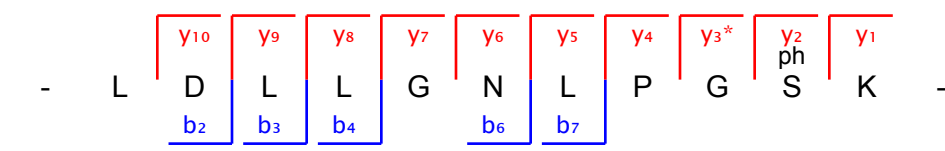

Raw file: 20150814\_A375SR\_Phospho\_BR2\_05  
 Scan: 22632 Method: FTMS; HCD Score: 86.91 m/z: 621.31 Gene names: SYN1

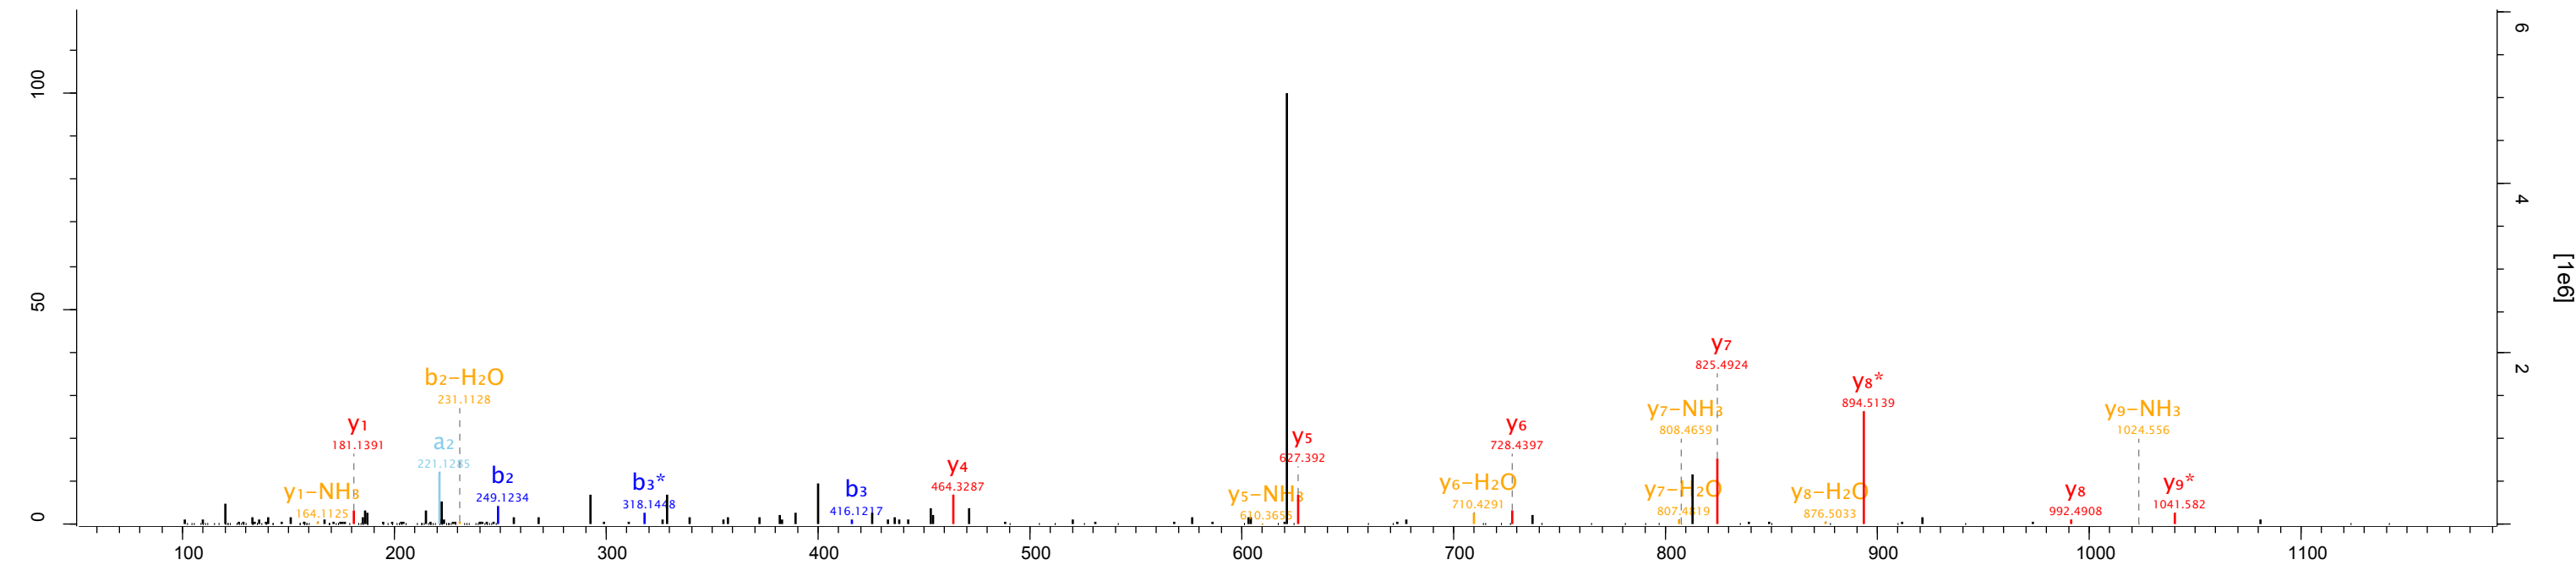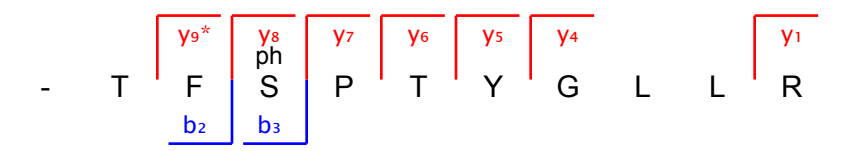

Raw file 20150814\_A375SR\_Phospho\_BR2\_05 Scan 22852 Method FTMS; HCD Score 208.88 m/z 952.98 Gene names TRIO

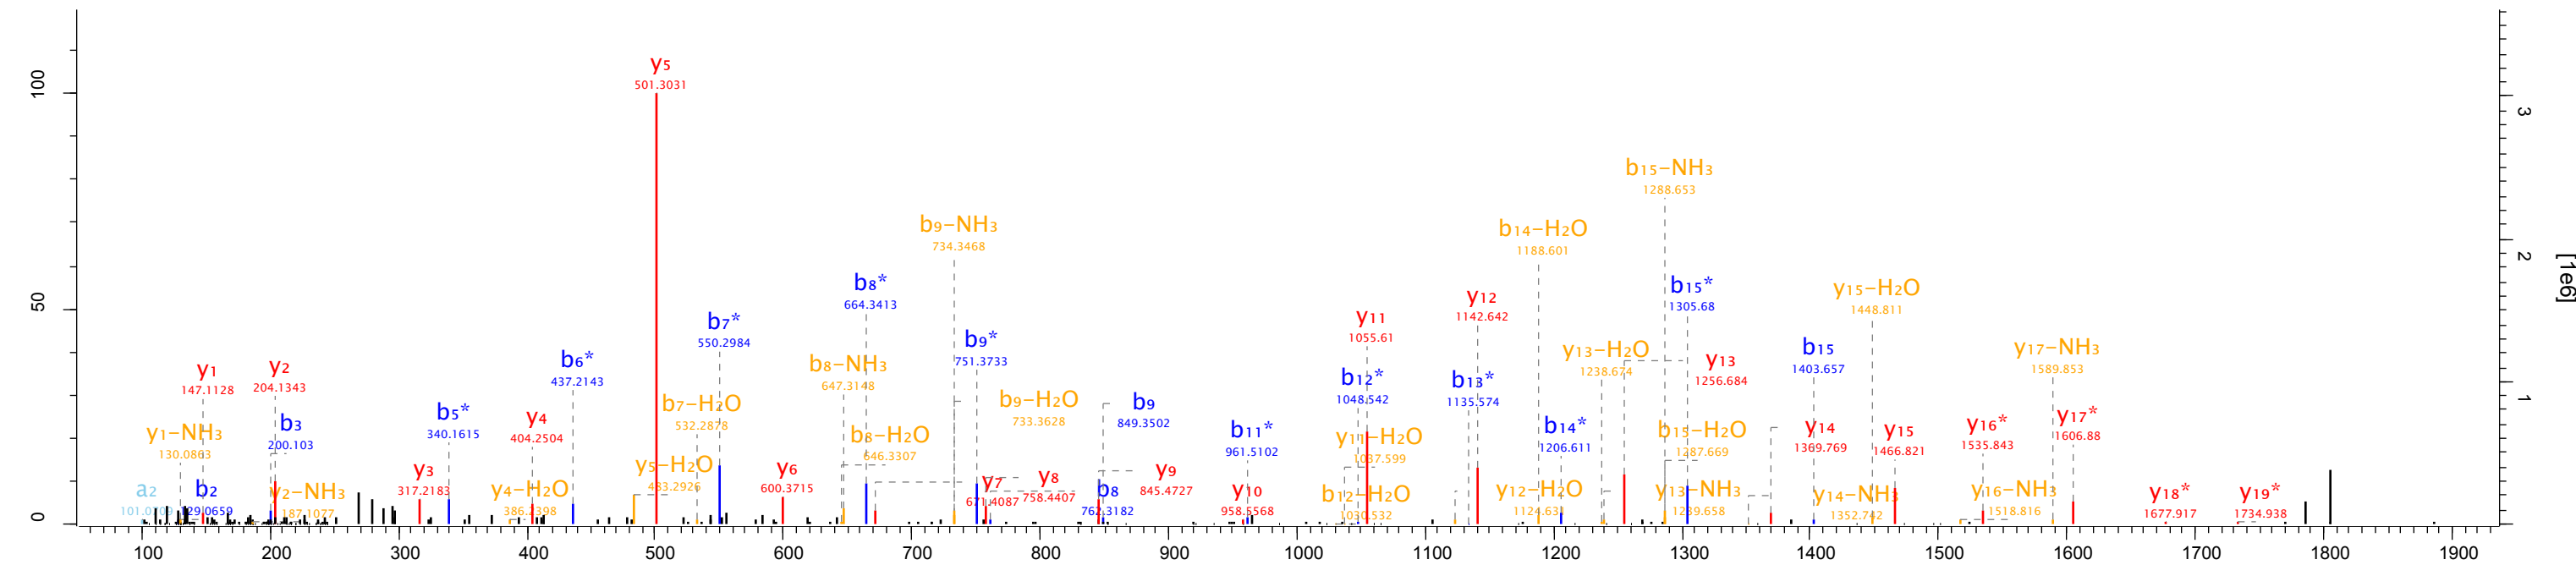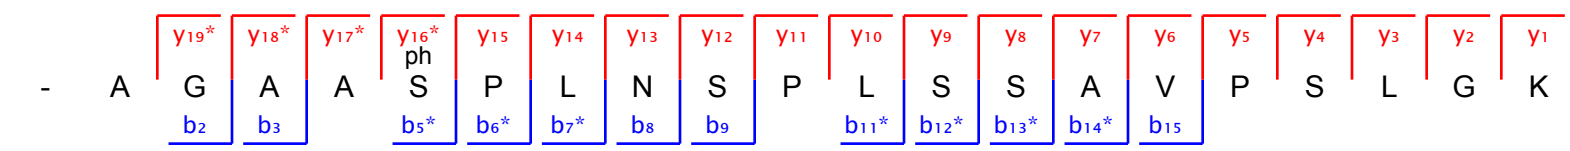

Raw file 20150814\_A375SR\_Phospho\_BR2\_05 Scan 23322 Method FTMS; HCD Score 213.2 m/z 1057.51 Gene names NEDD4L;ZNF227

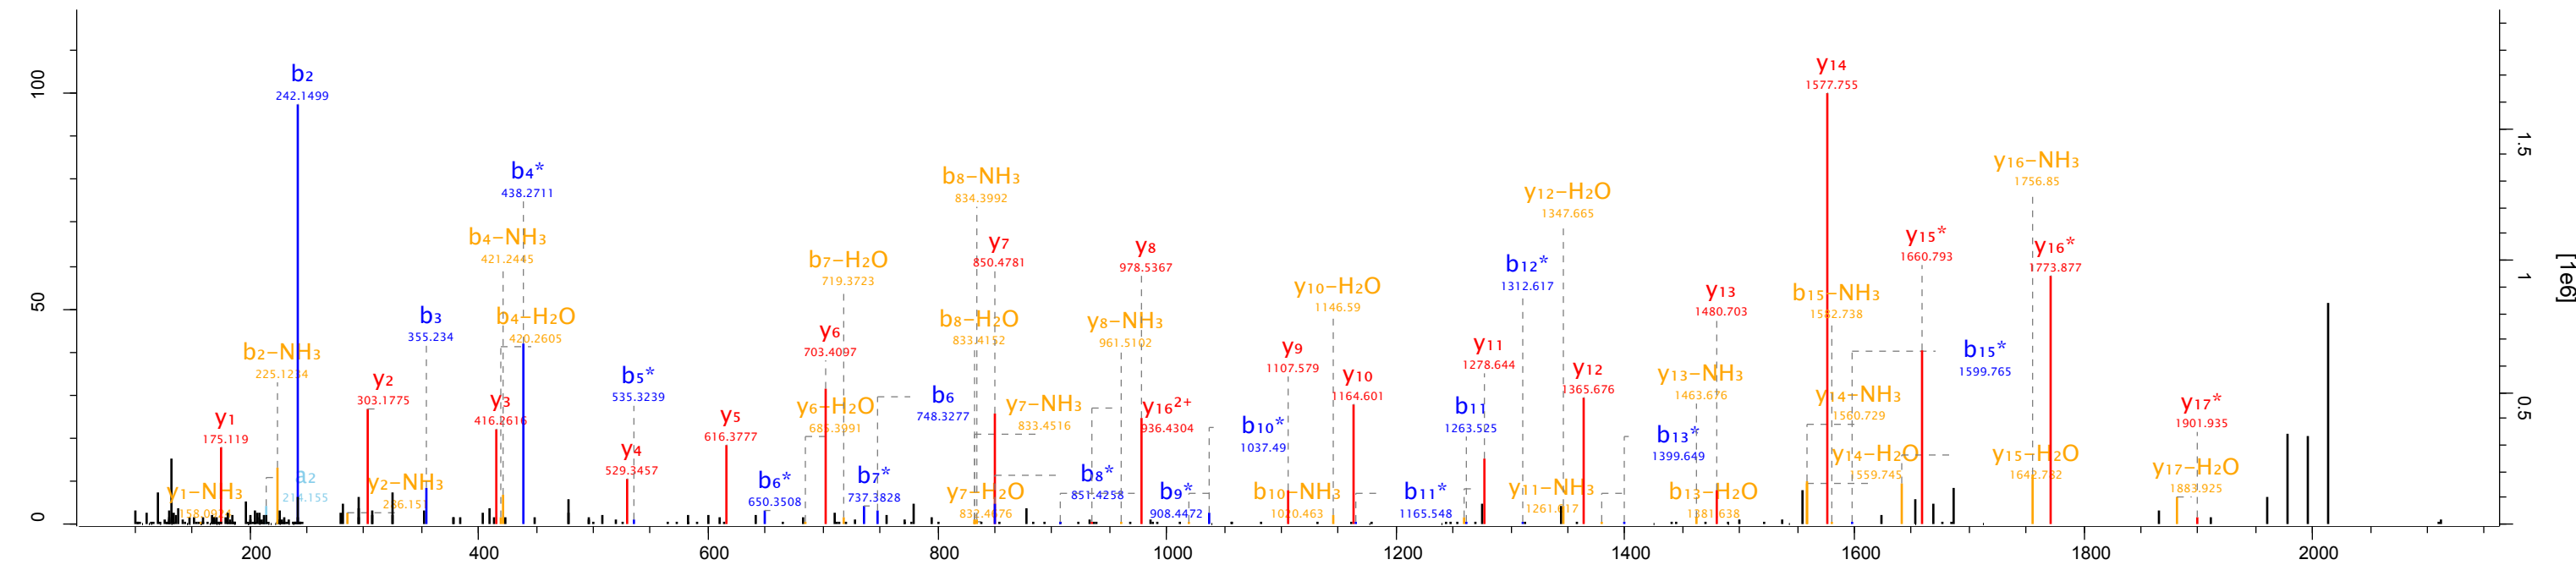

- L Q I T P D S N G E Q F S S L I Q R -

y17\*
y16\*
y15\*
y14
y13
y12
y11
y10
y9
y8
y7
y6
y5
y4
y3
y2
y1

b2
b3
b4\*
b5\*
b6
b7\*
b8\*
b9\*
b10\*
b11
b12\*
b13\*
b15\*

Raw file: 20150814\_A375SR\_Phospho\_BR2\_05  
 Scan: 23692 Method: FTMS; HCD Score: 249.41 m/z: 1180.03 Gene names: PXN

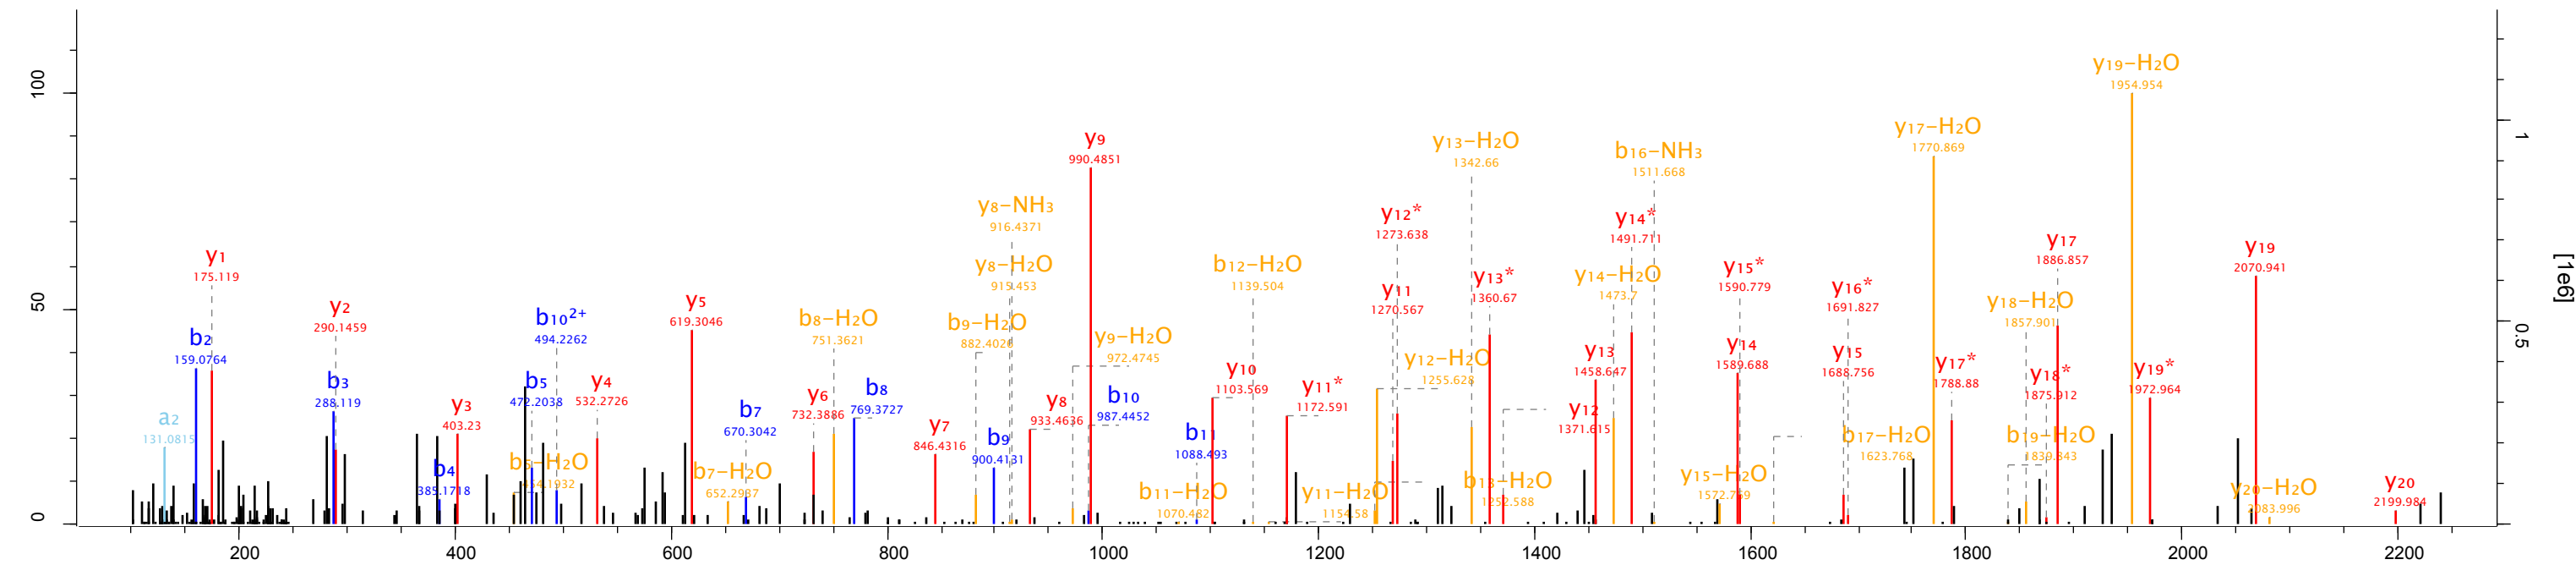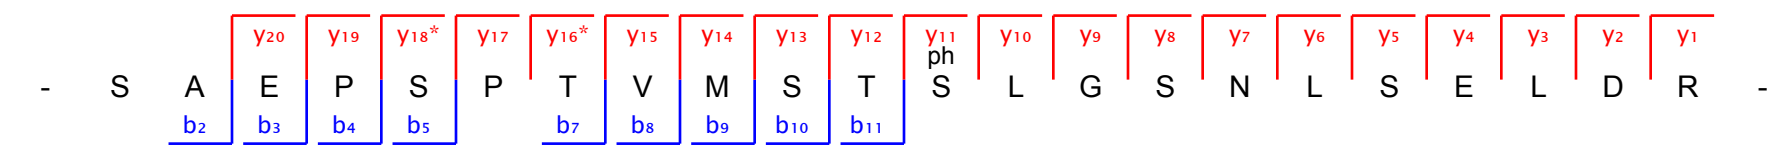



Raw file: 20150814\_A375SR\_Phospho\_BR2\_05  
 Scan: 24012 Method: FTMS; HCD Score: 174.37 m/z: 980.96 Gene names: TFDP2

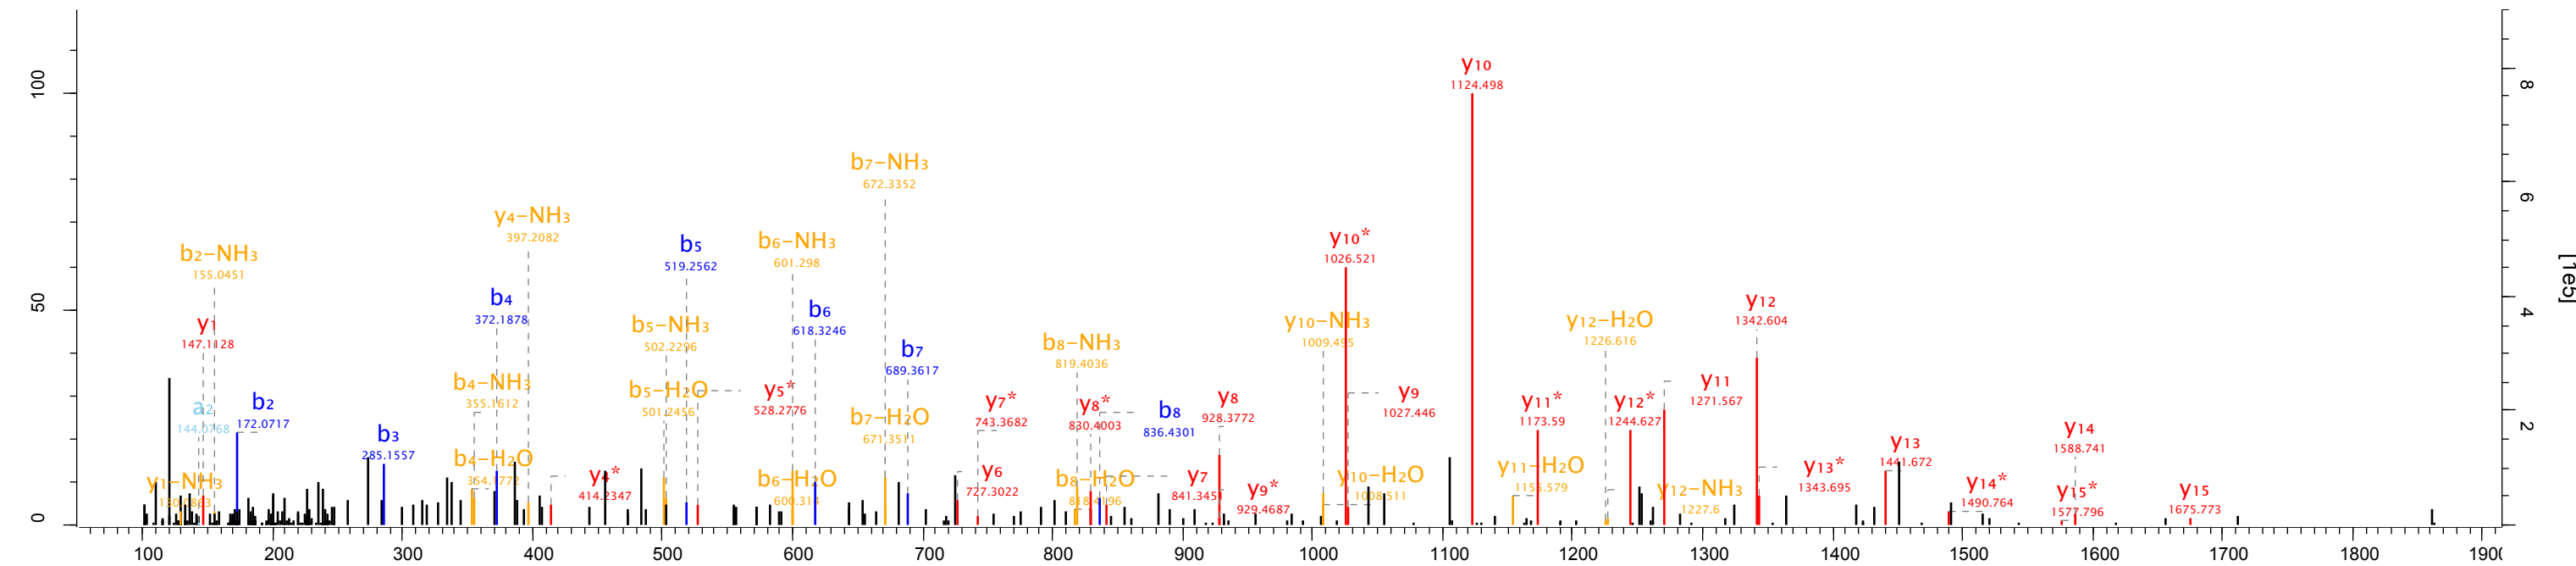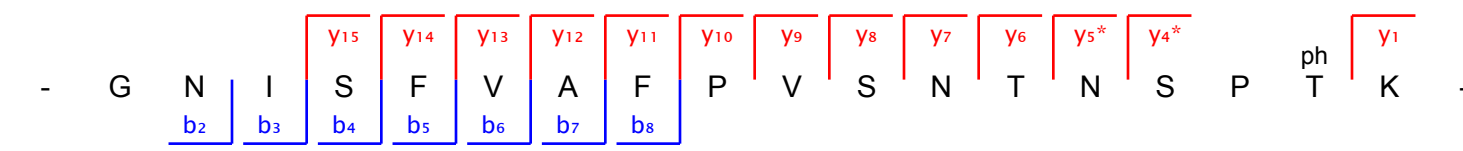

Raw file: 20150814\_A375SR\_Phospho\_BR2\_05  
 Scan: 24162 Method: FTMS; HCD Score: 165.58 m/z: 1023.98 Gene names: ZBTB21

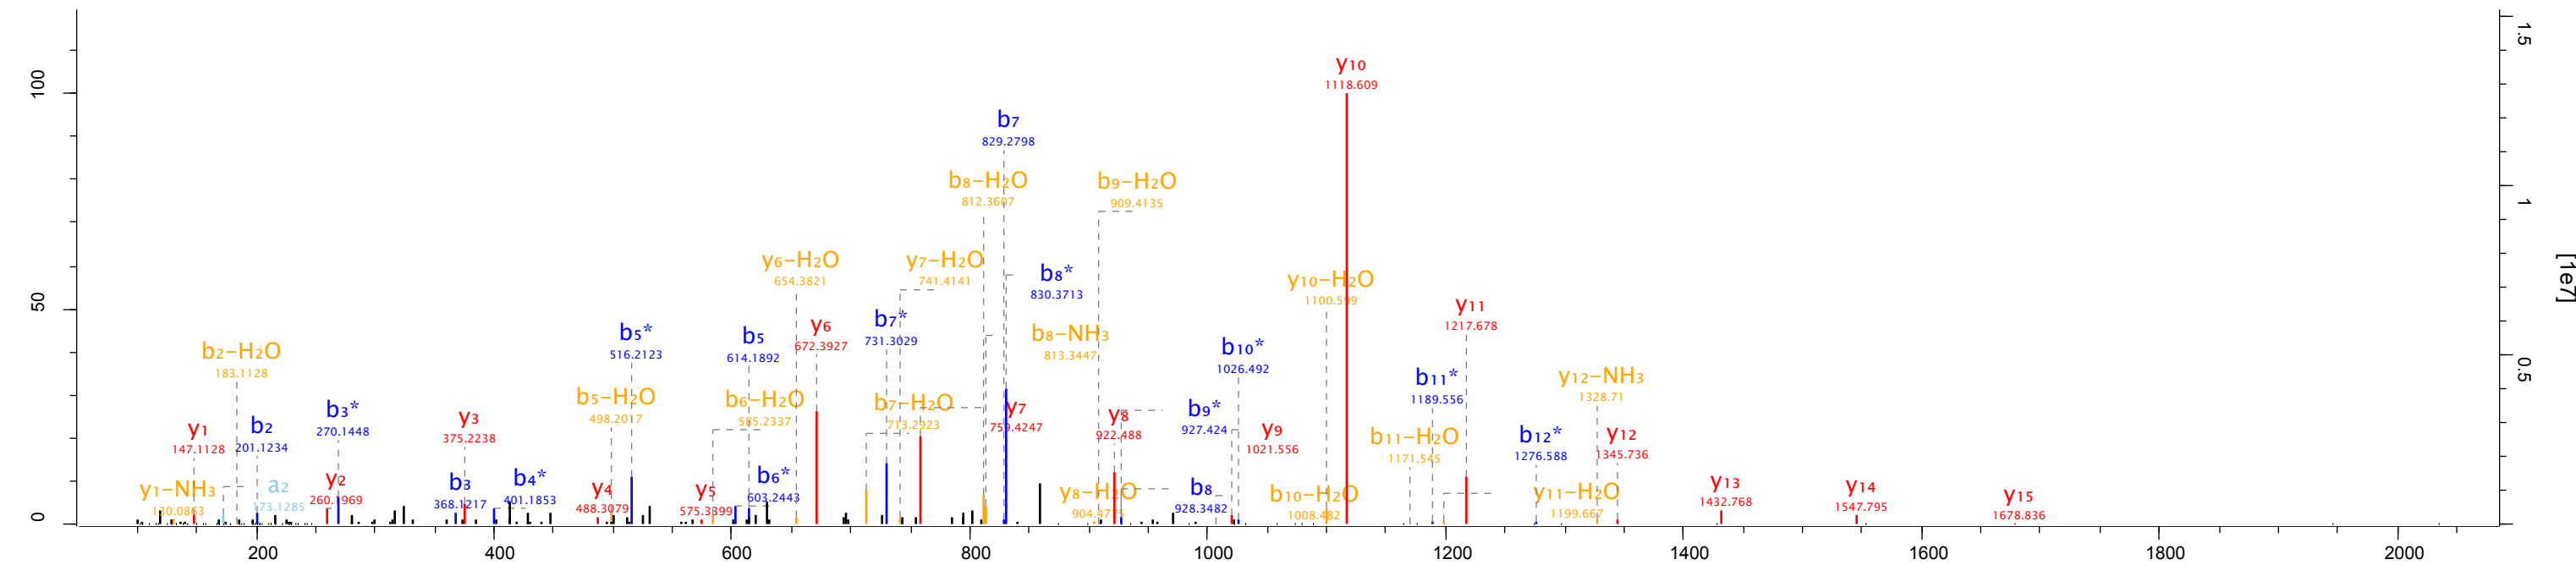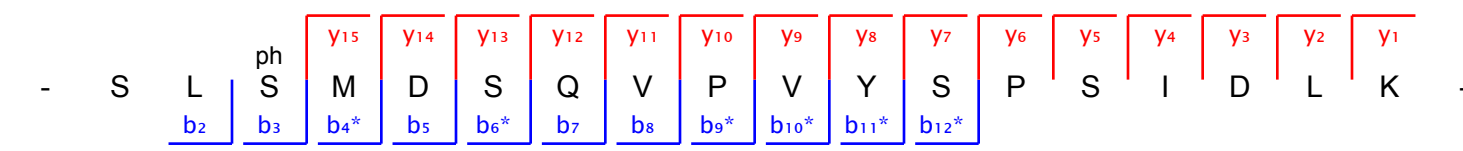

Raw file: 20150814\_A375SR\_Phospho\_BR2\_05  
 Scan: 24322 Method: FTMS; HCD Score: 92.76 m/z: 1009.83 Gene names: FLNA

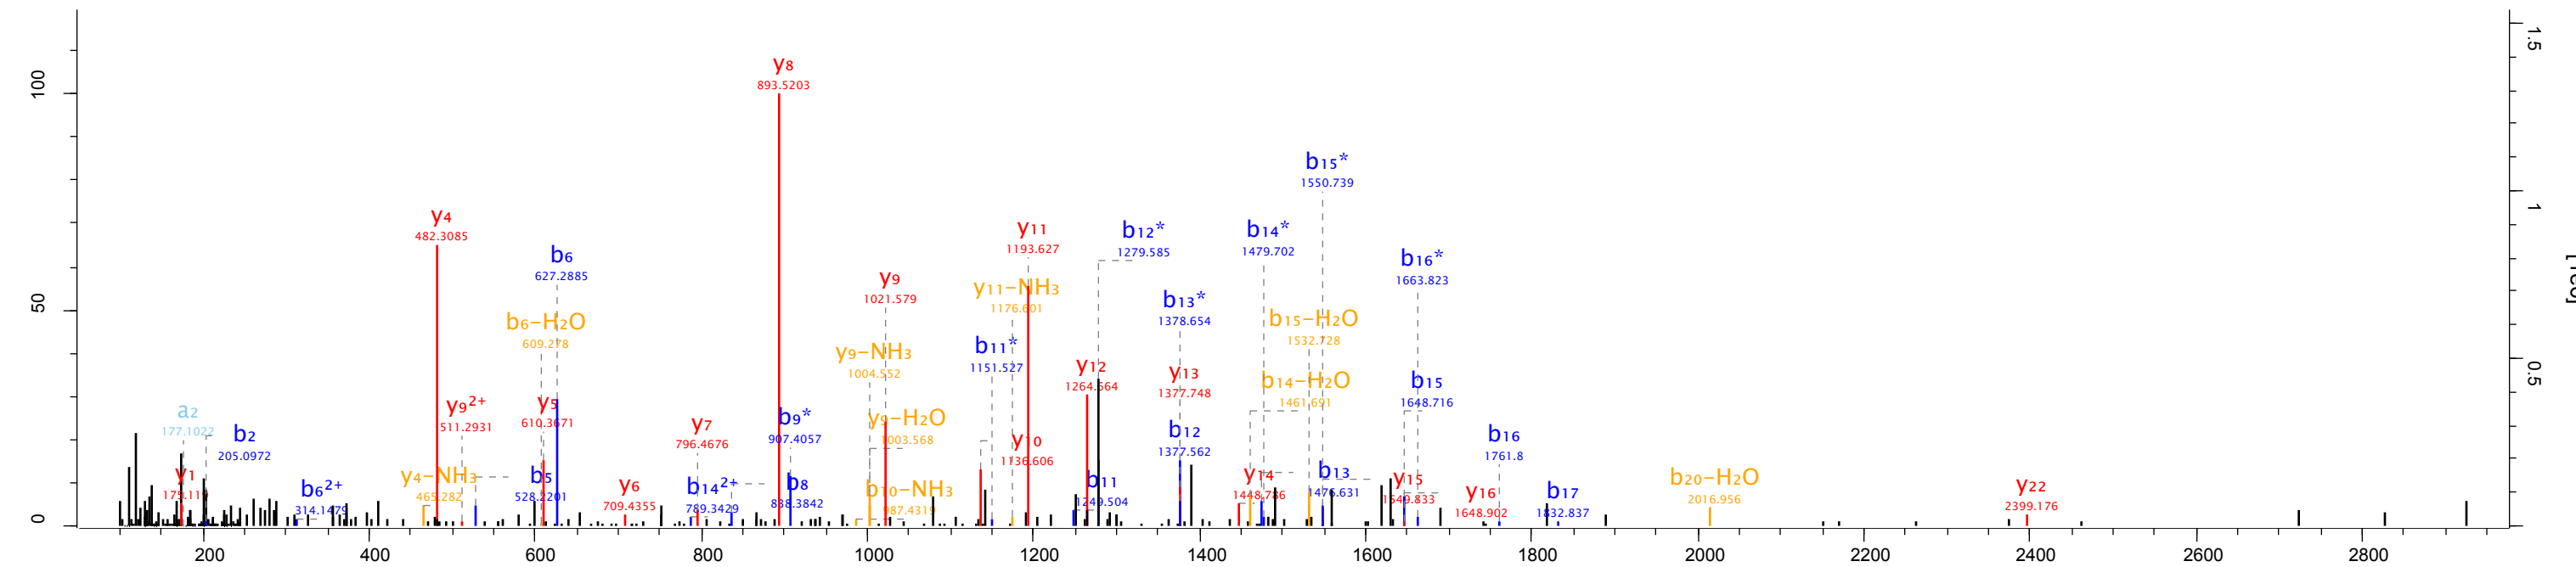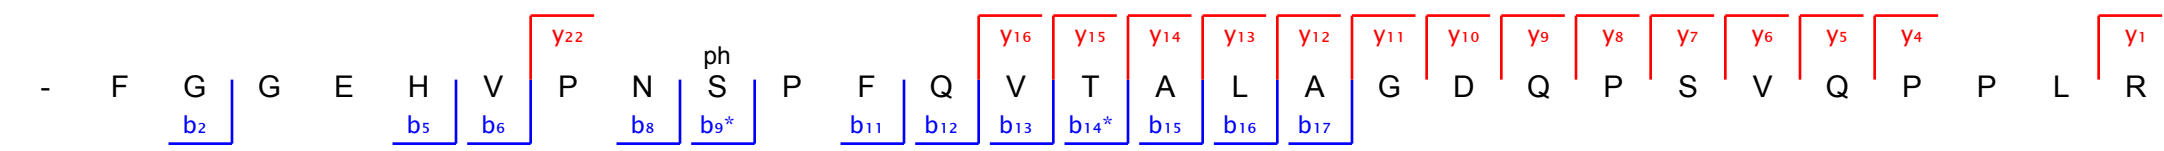

Raw file: 20150814\_A375SR\_Phospho\_BR2\_05  
 Scan: 2452 Method: FTMS; HCD Score: 50.03 m/z: 375.17 Gene names: DYNC1LI1

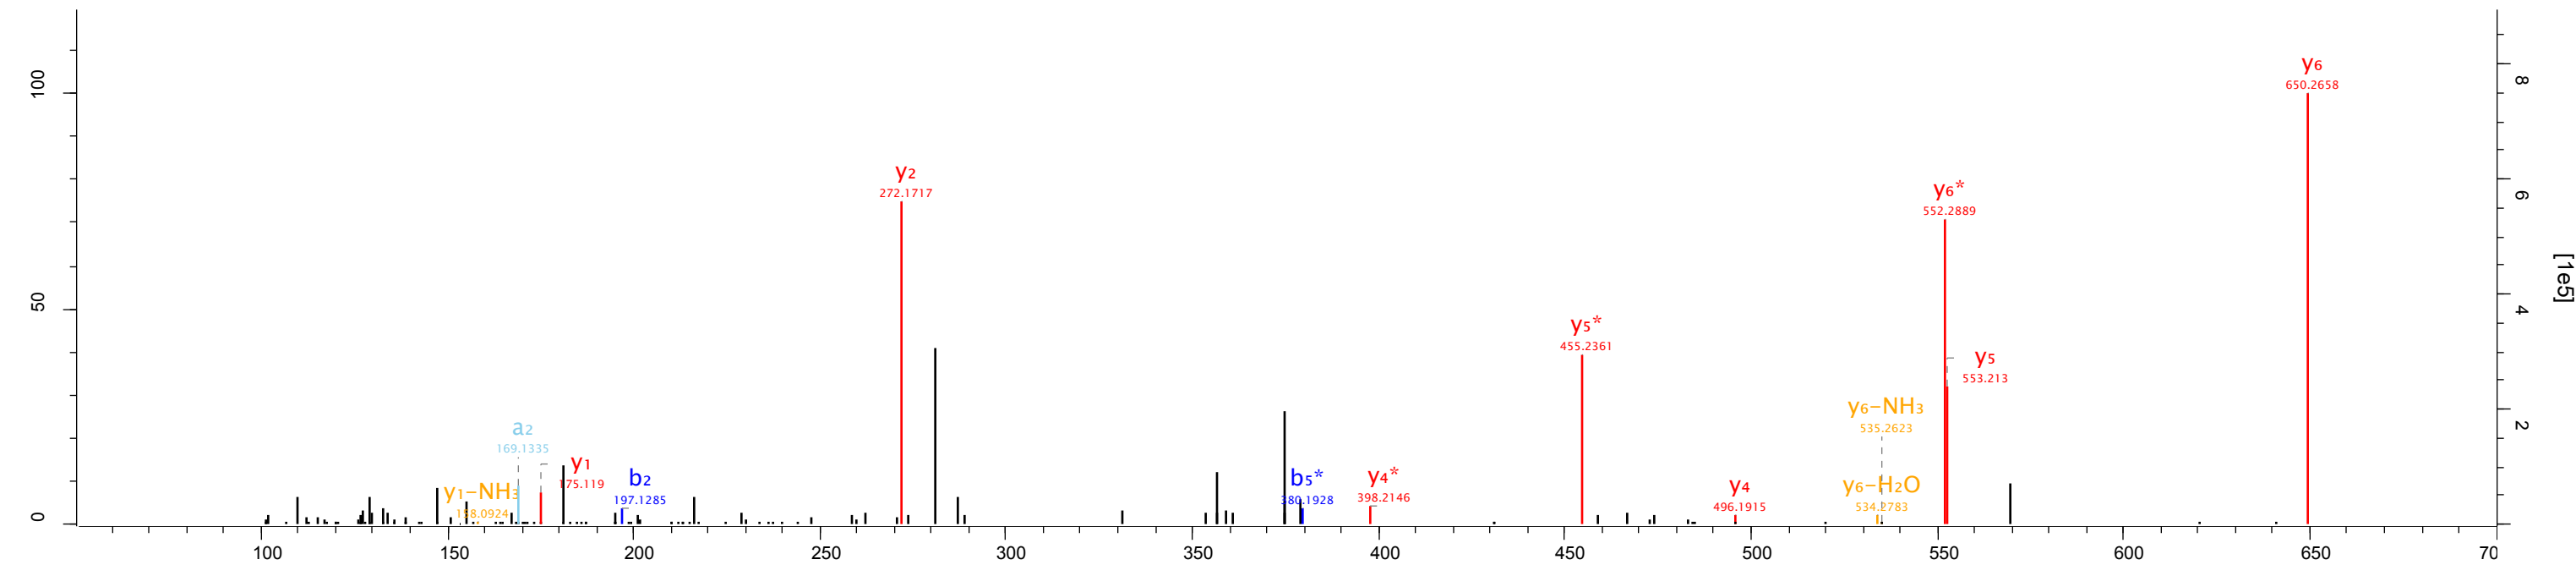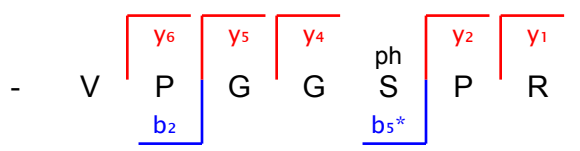

Raw file: 20150814\_A375SR\_Phospho\_BR2\_05  
 Scan: 24532 Method: FTMS; HCD Score: 253.08 m/z: 932.21 Gene names: MOV10

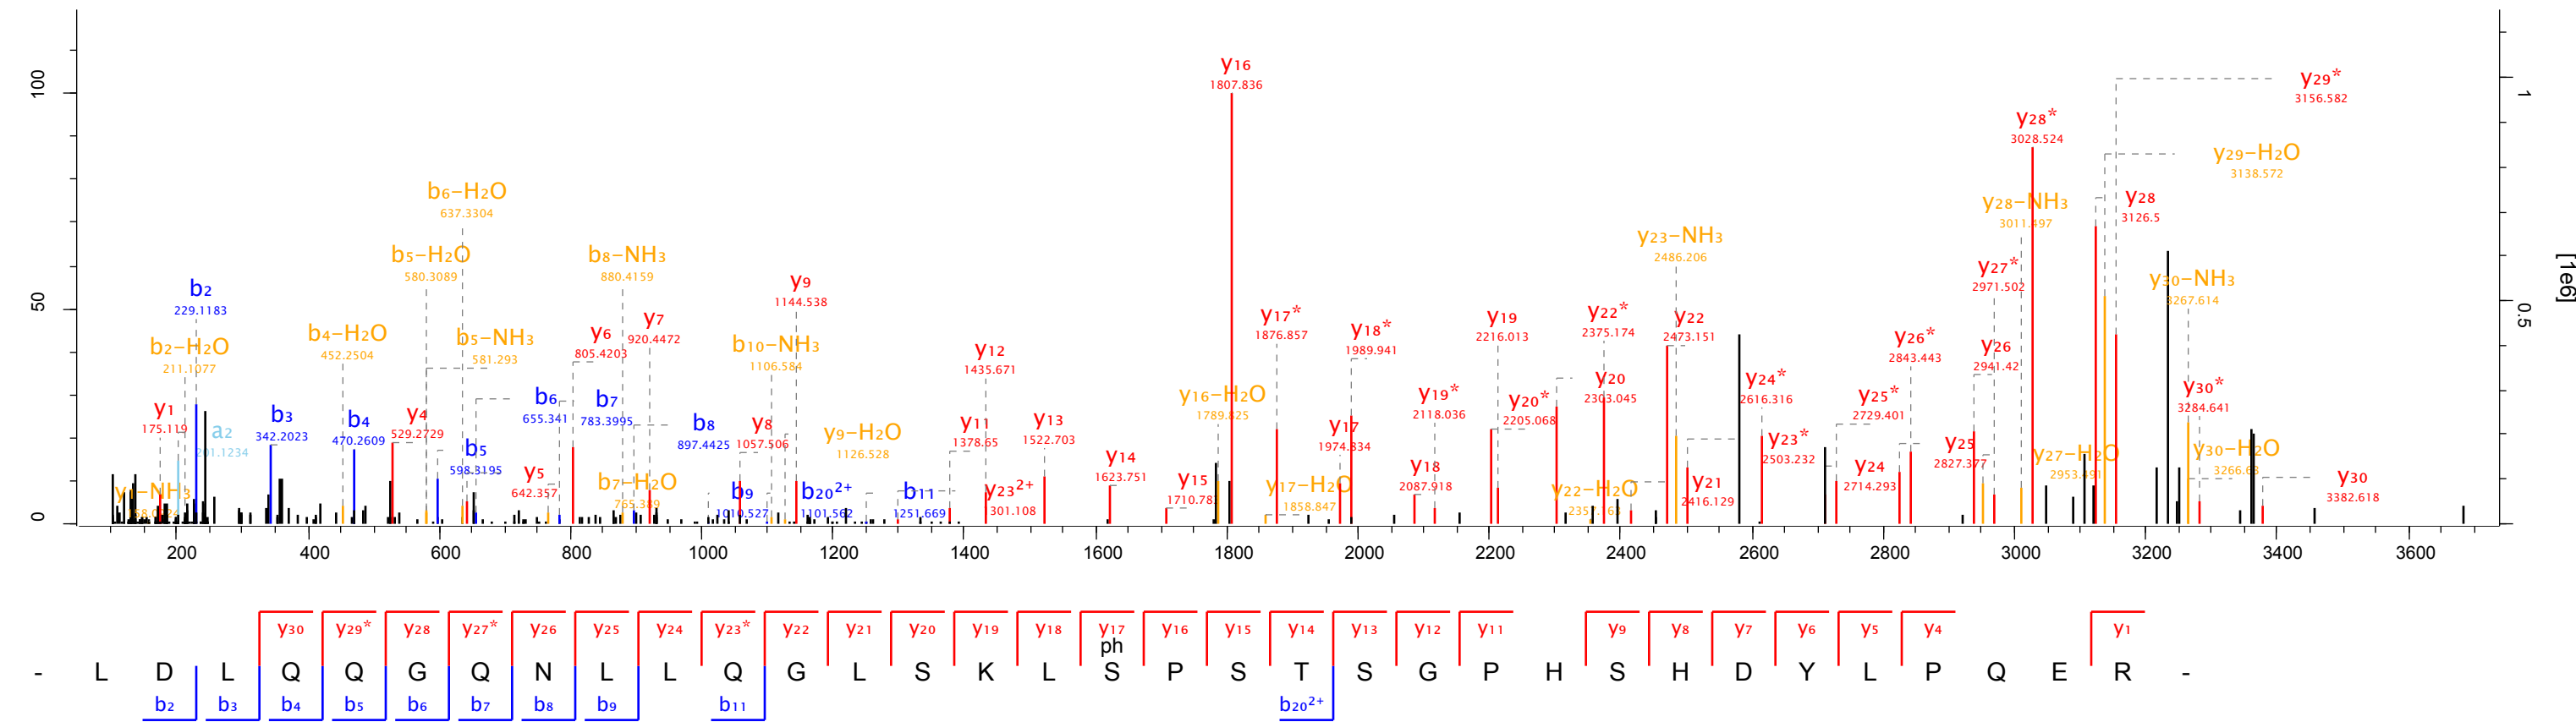

Raw file: 20150814\_A375SR\_Phospho\_BR2\_05  
 Scan: 24702 Method: FTMS; HCD Score: 205.35 m/z: 1158.86 Gene names: SSR1

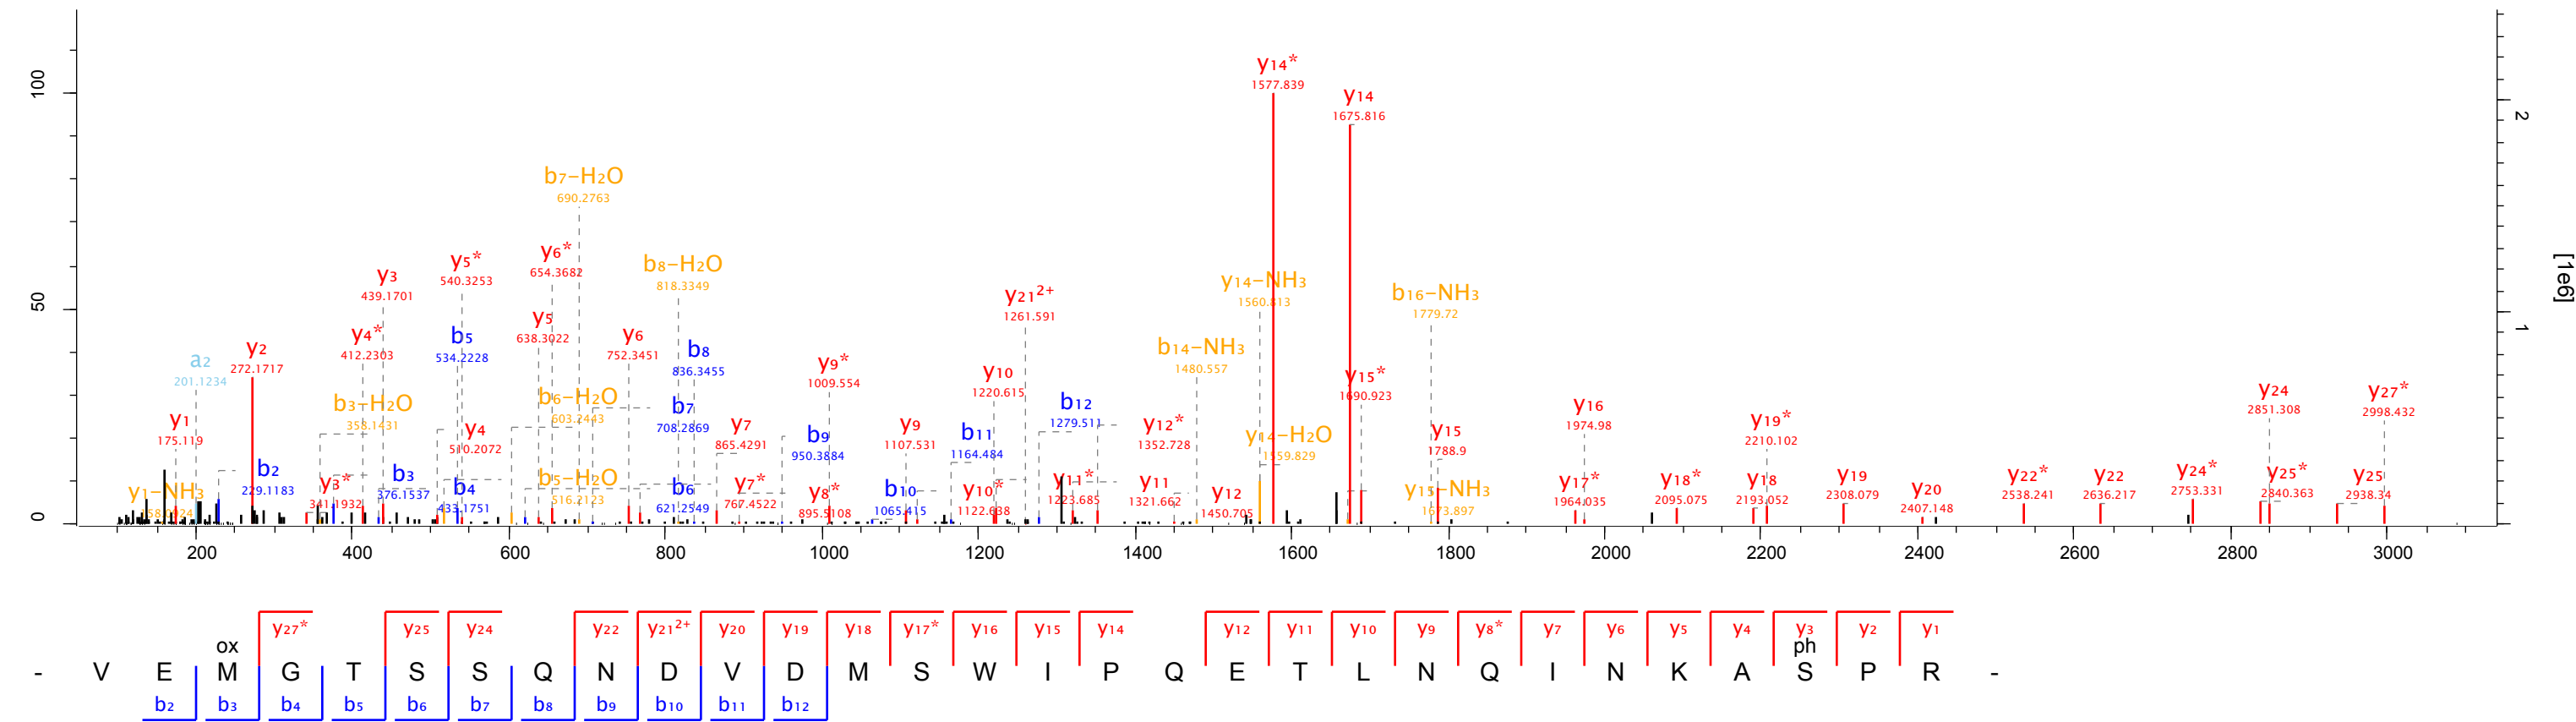

Raw file: 20150814\_A375SR\_Phospho\_BR2\_05  
 Scan: 2472 Method: FTMS; HCD Score: 140.33 m/z: 529.75 Gene names: SMARCC2

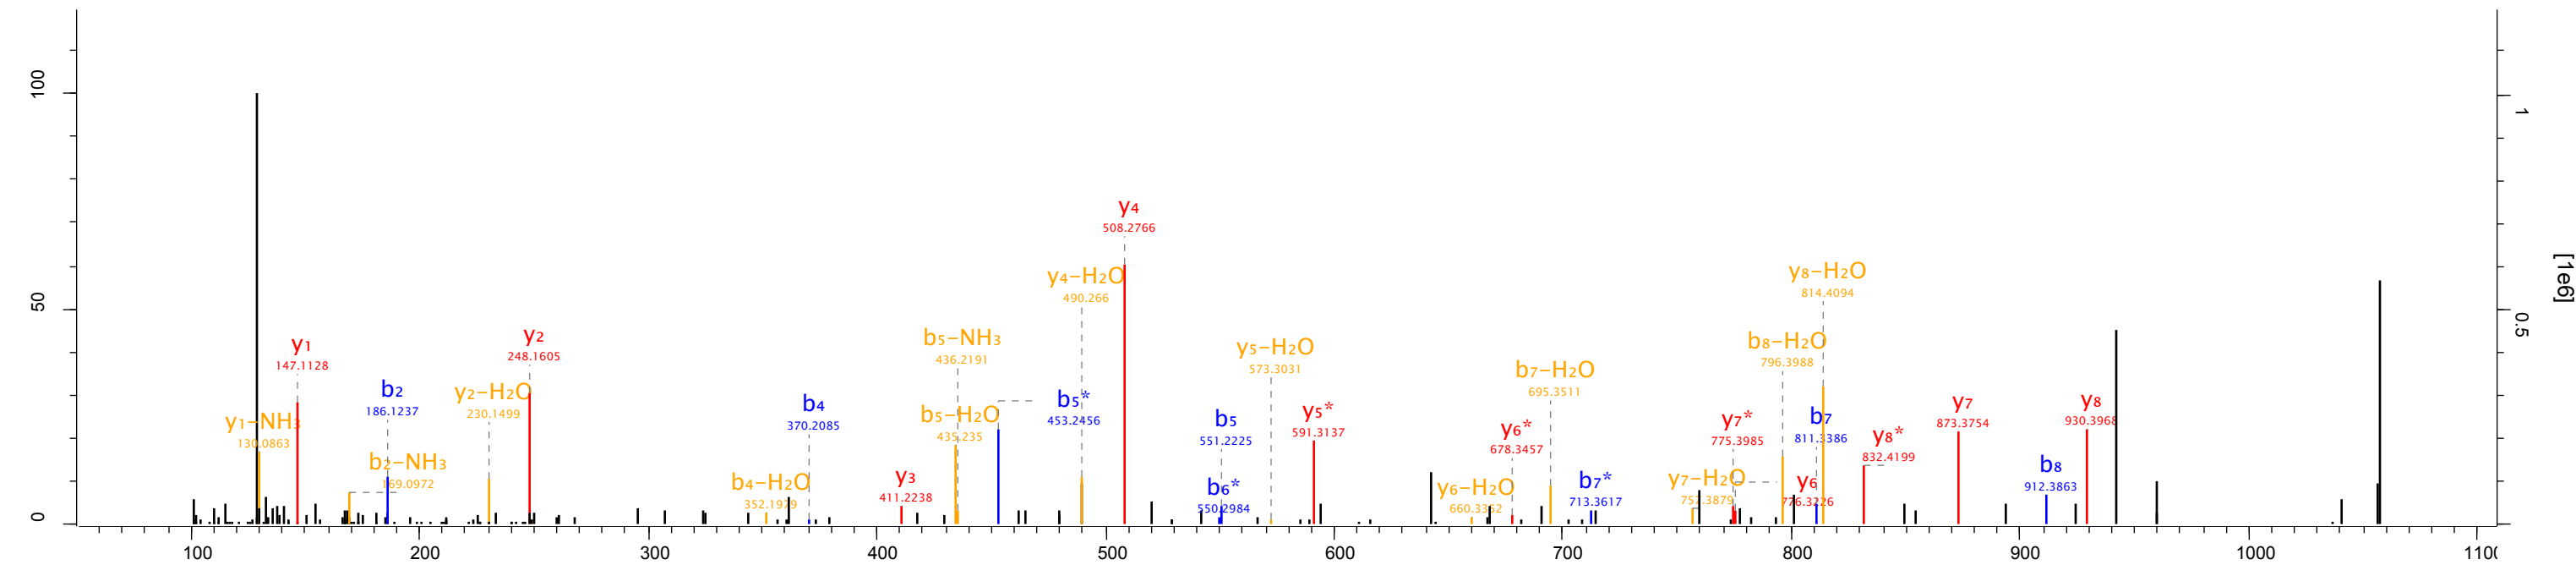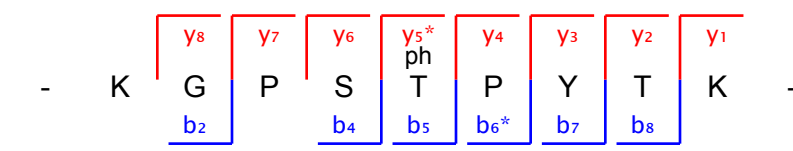

Raw file Scan Method Score m/z Gene names  
 20150814\_A375SR\_Phospho\_BR2\_05 24822 FTMS; HCD 61.17 919.42 ATP2B1

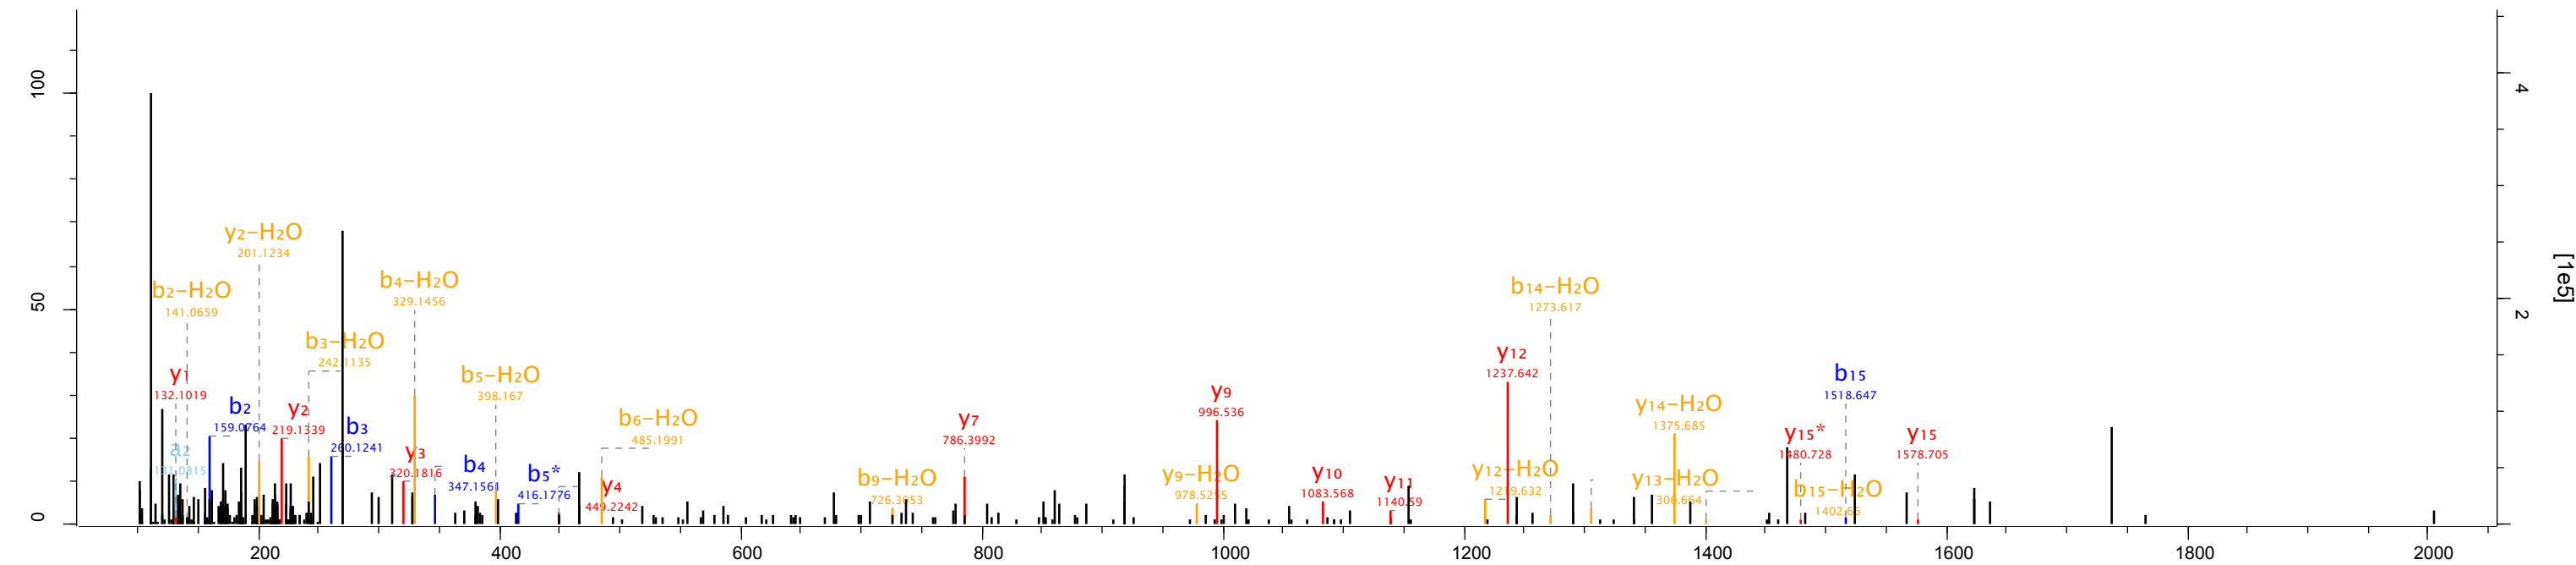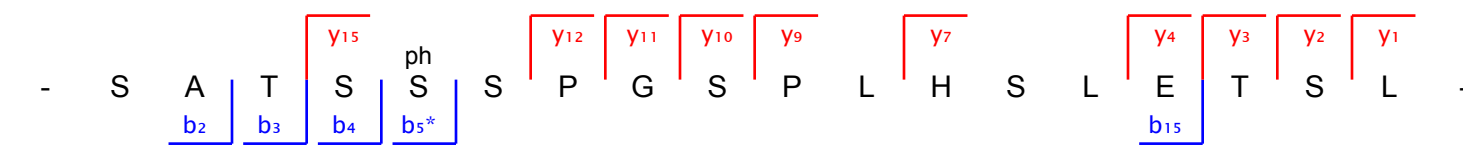



Raw file 20150814\_A375SR\_Phospho\_BR2\_05 Scan 24952 Method FTMS; HCD Score 183.1 m/z 913.1 Gene names GIT1

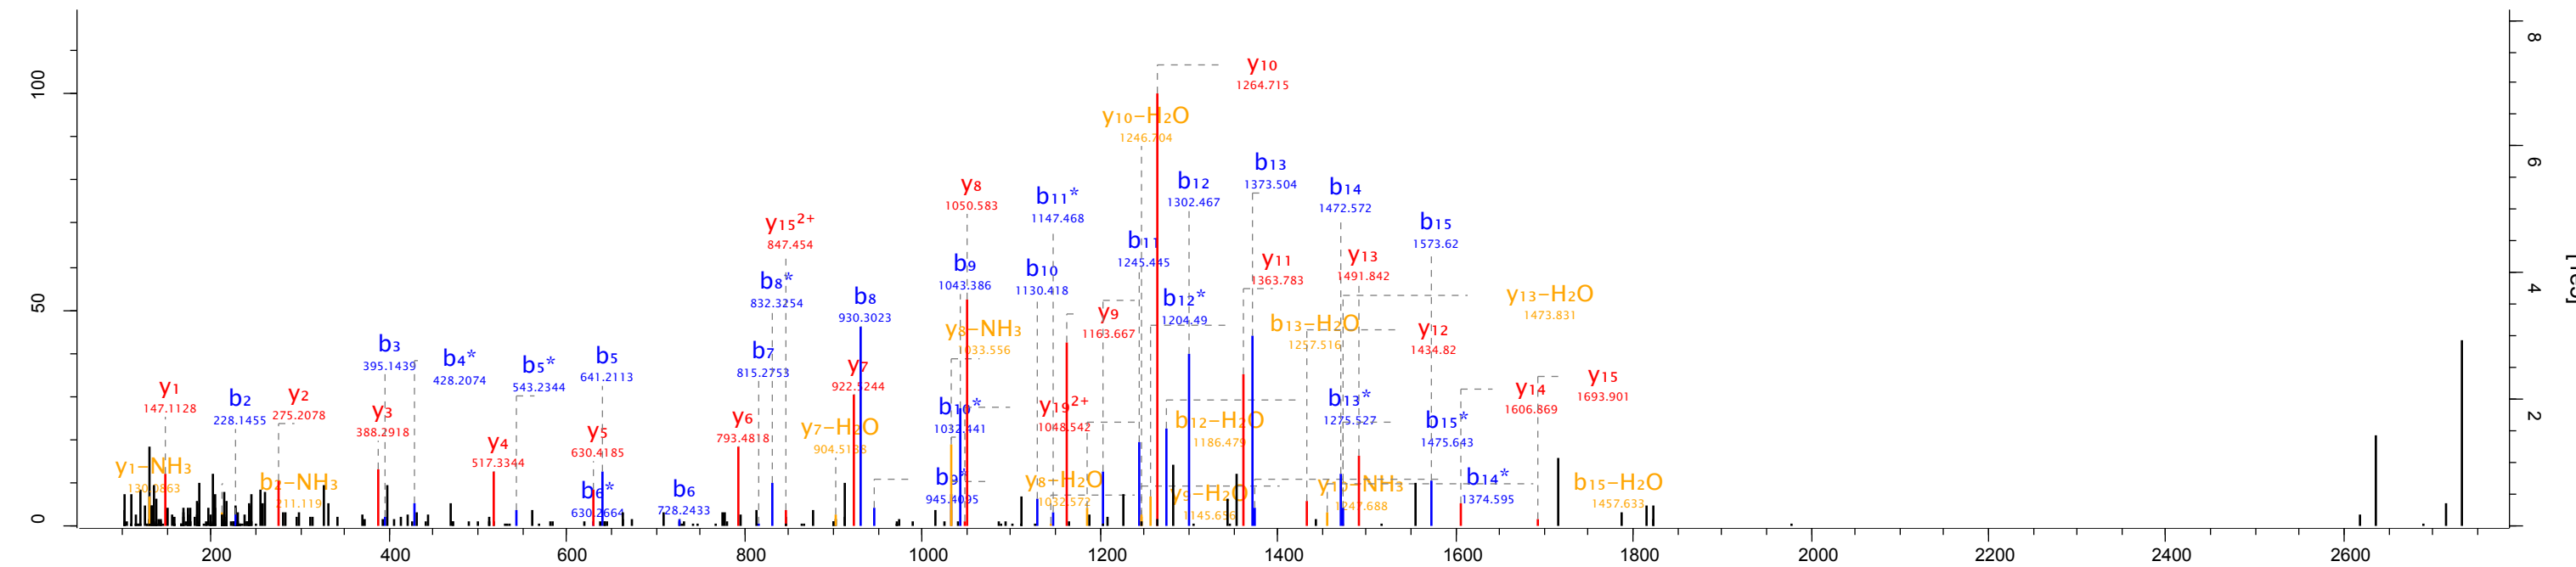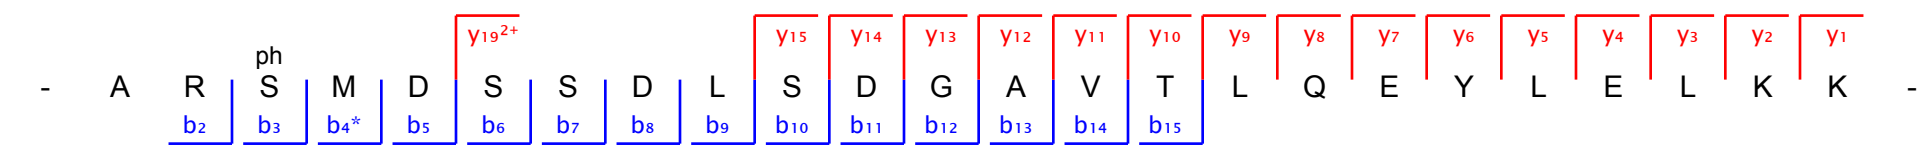

Raw file 20150814\_A375SR\_Phospho\_BR2\_05 Scan 25092 Method FTMS; HCD Score 180.31 m/z 869.92 Gene names TRIM28

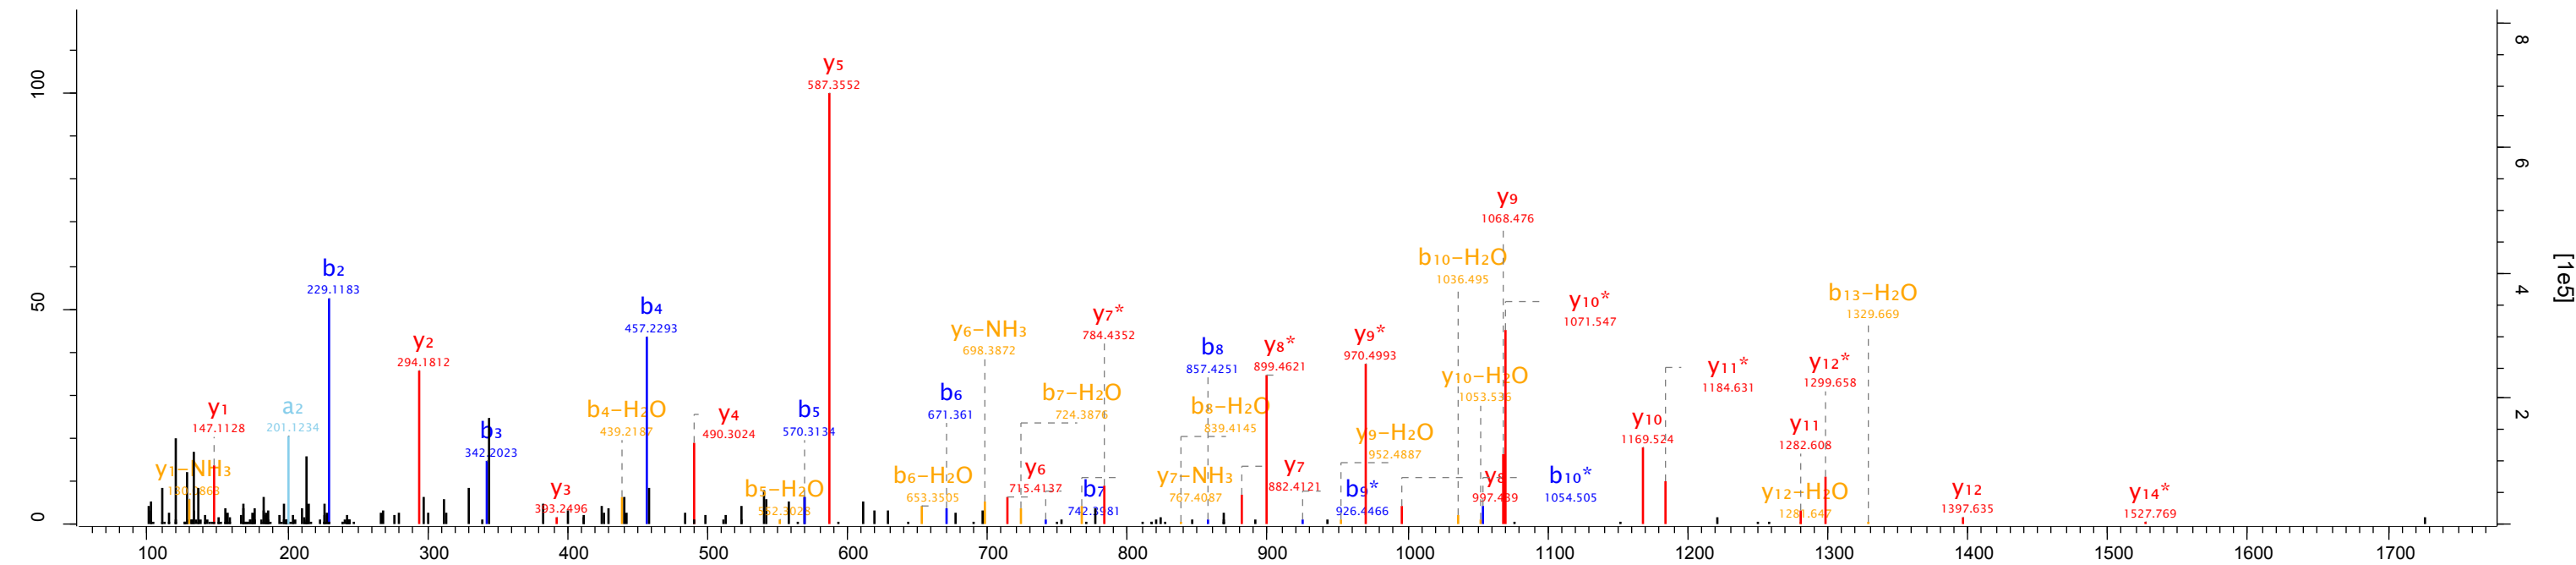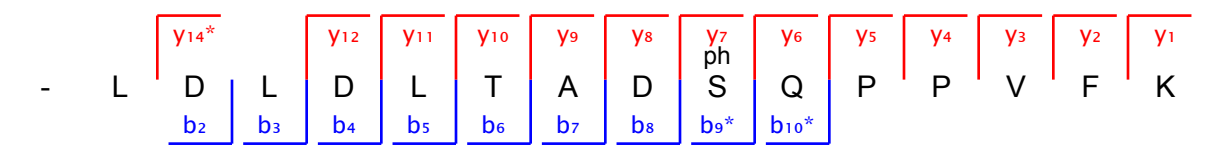

Raw file 20150814\_A375SR\_Phospho\_BR2\_05 Scan 25352 Method FTMS; HCD Score 198.73 m/z 948.47 Gene names SSH3

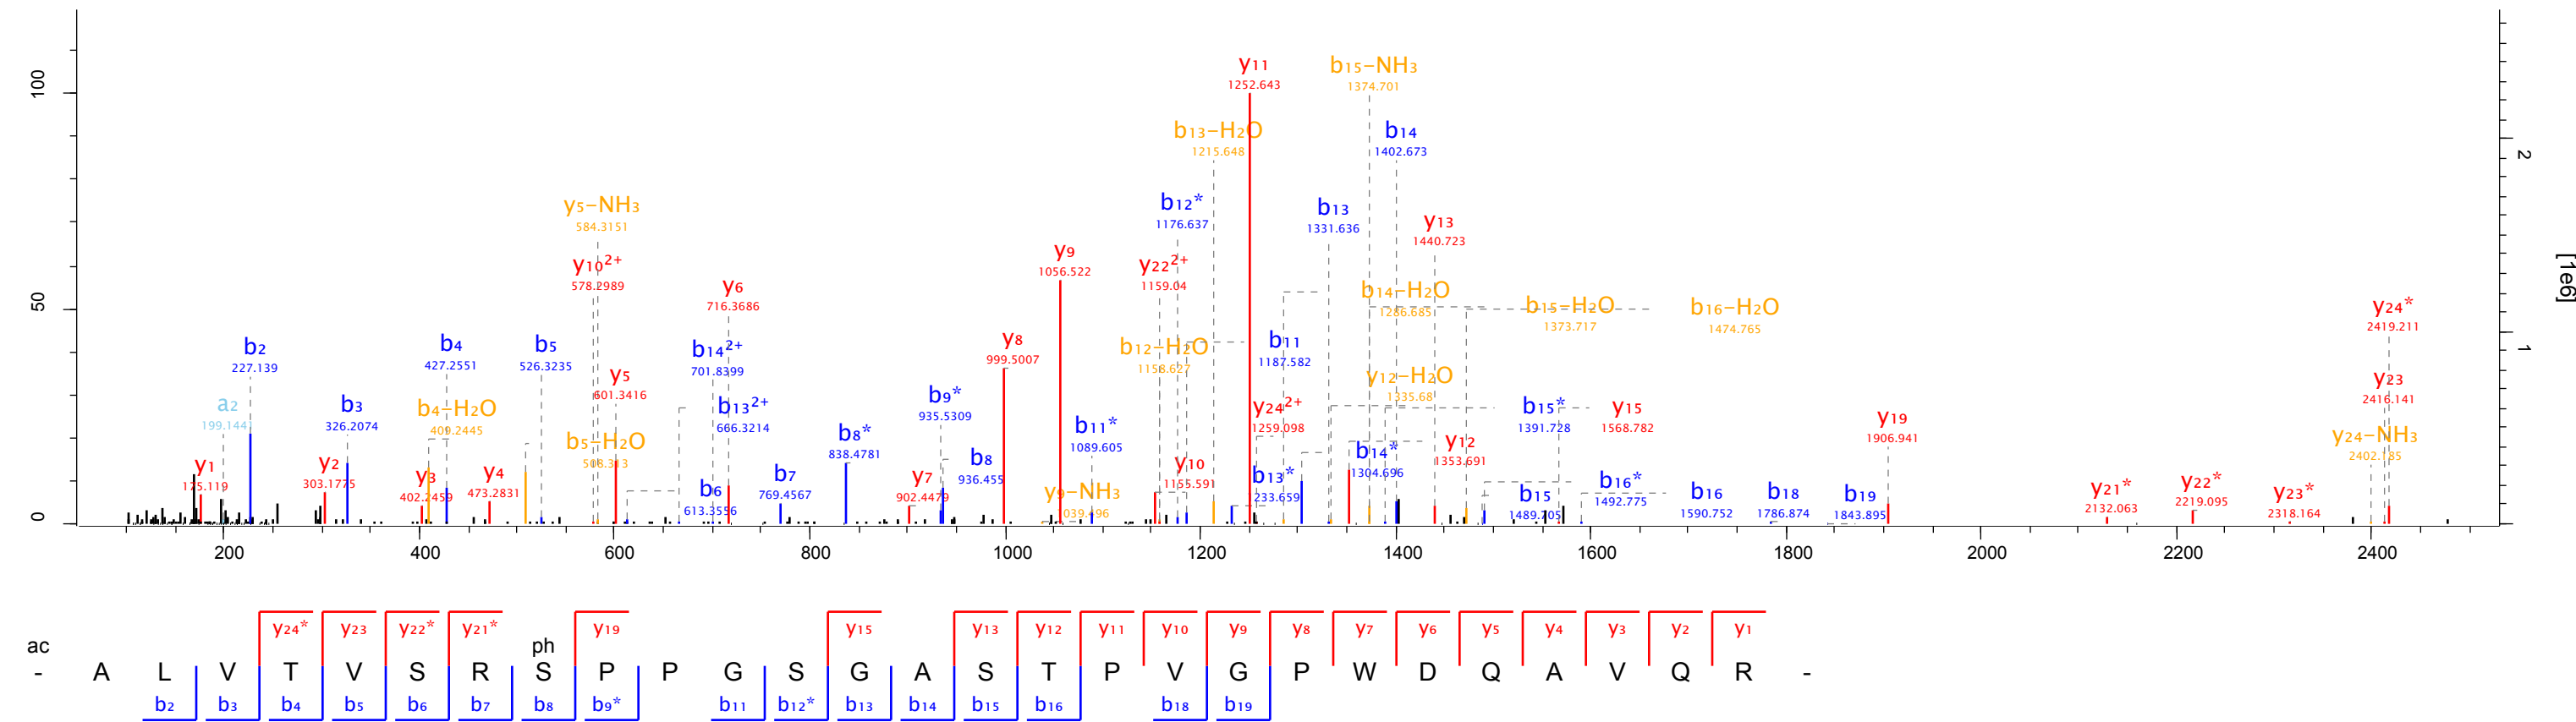

Raw file  
20150814\_A375SR\_Phospho\_BR2\_05

Scan 25422 Method FTMS; HCD Score 129.55 m/z 934.45 Gene names YTHDF3

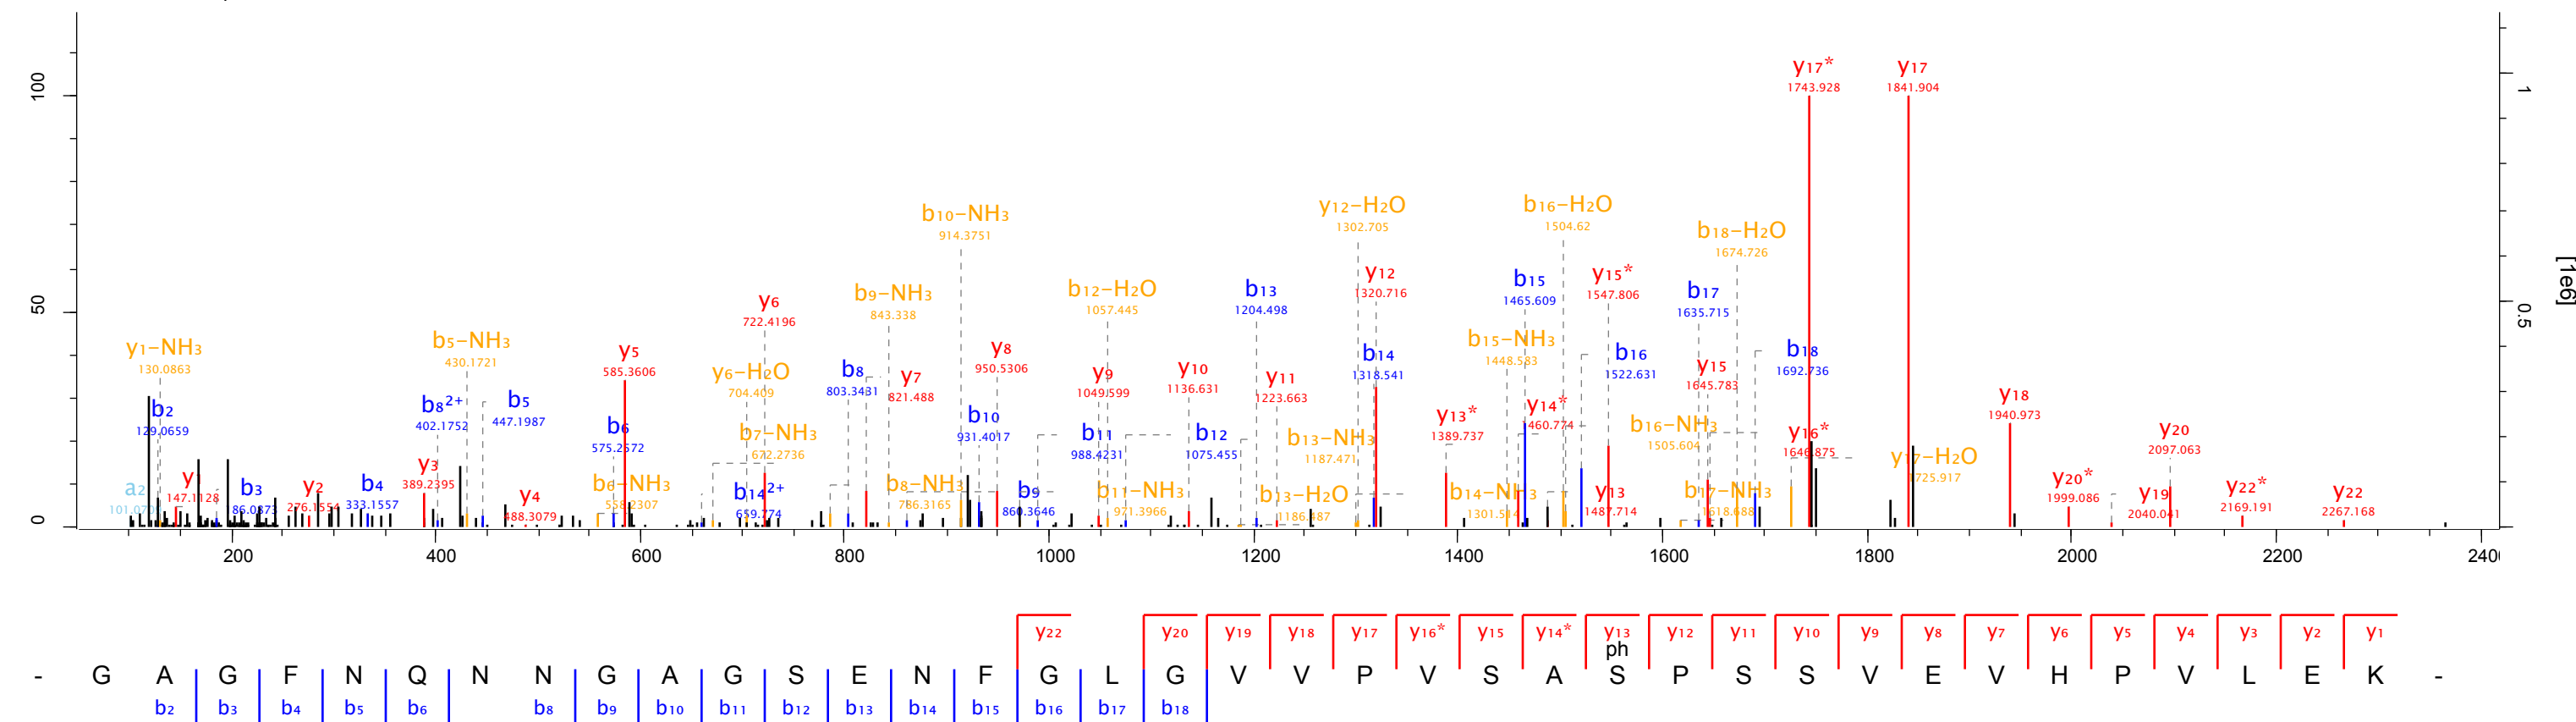

Raw file: 20150814\_A375SR\_Phospho\_BR2\_05  
 Scan: 25462 Method: FTMS; HCD Score: 194.19 m/z: 776.59 Gene names: L1RE1

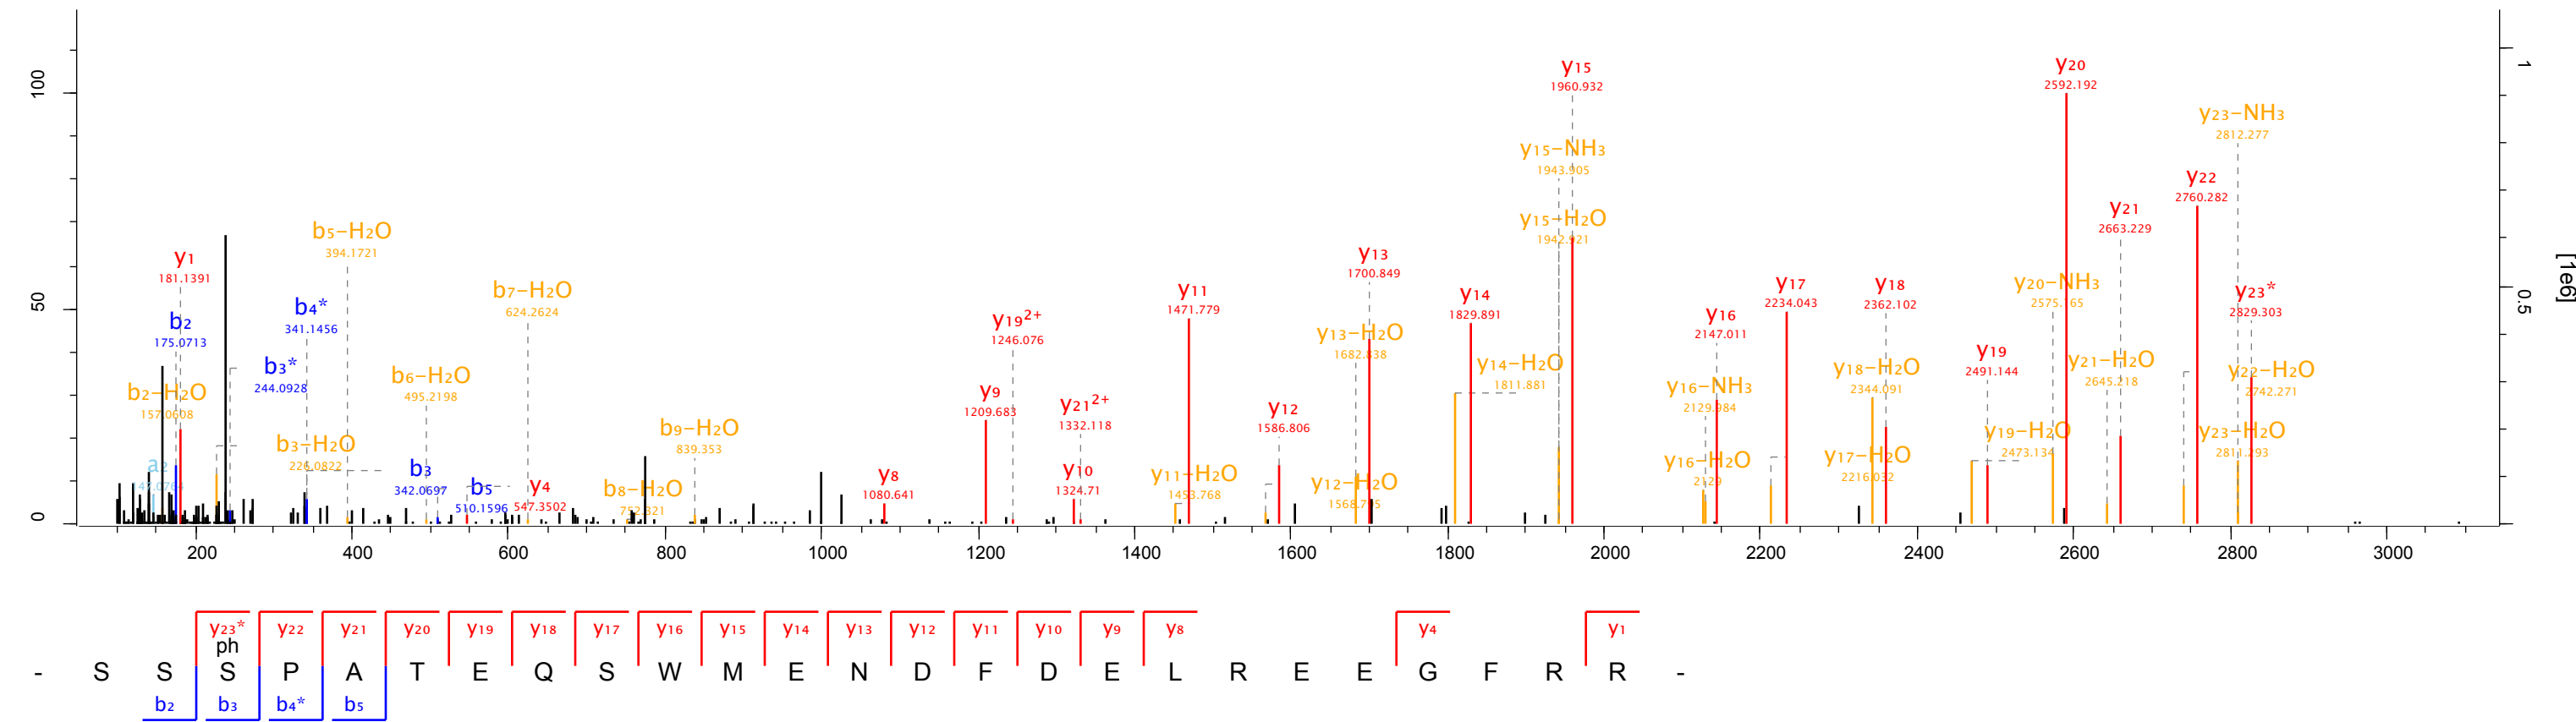

Raw file: 20150814\_A375SR\_Phospho\_BR2\_05  
 Scan: 25672 Method: FTMS; HCD Score: 111.4 m/z: 989.97 Gene names: LIMCH1

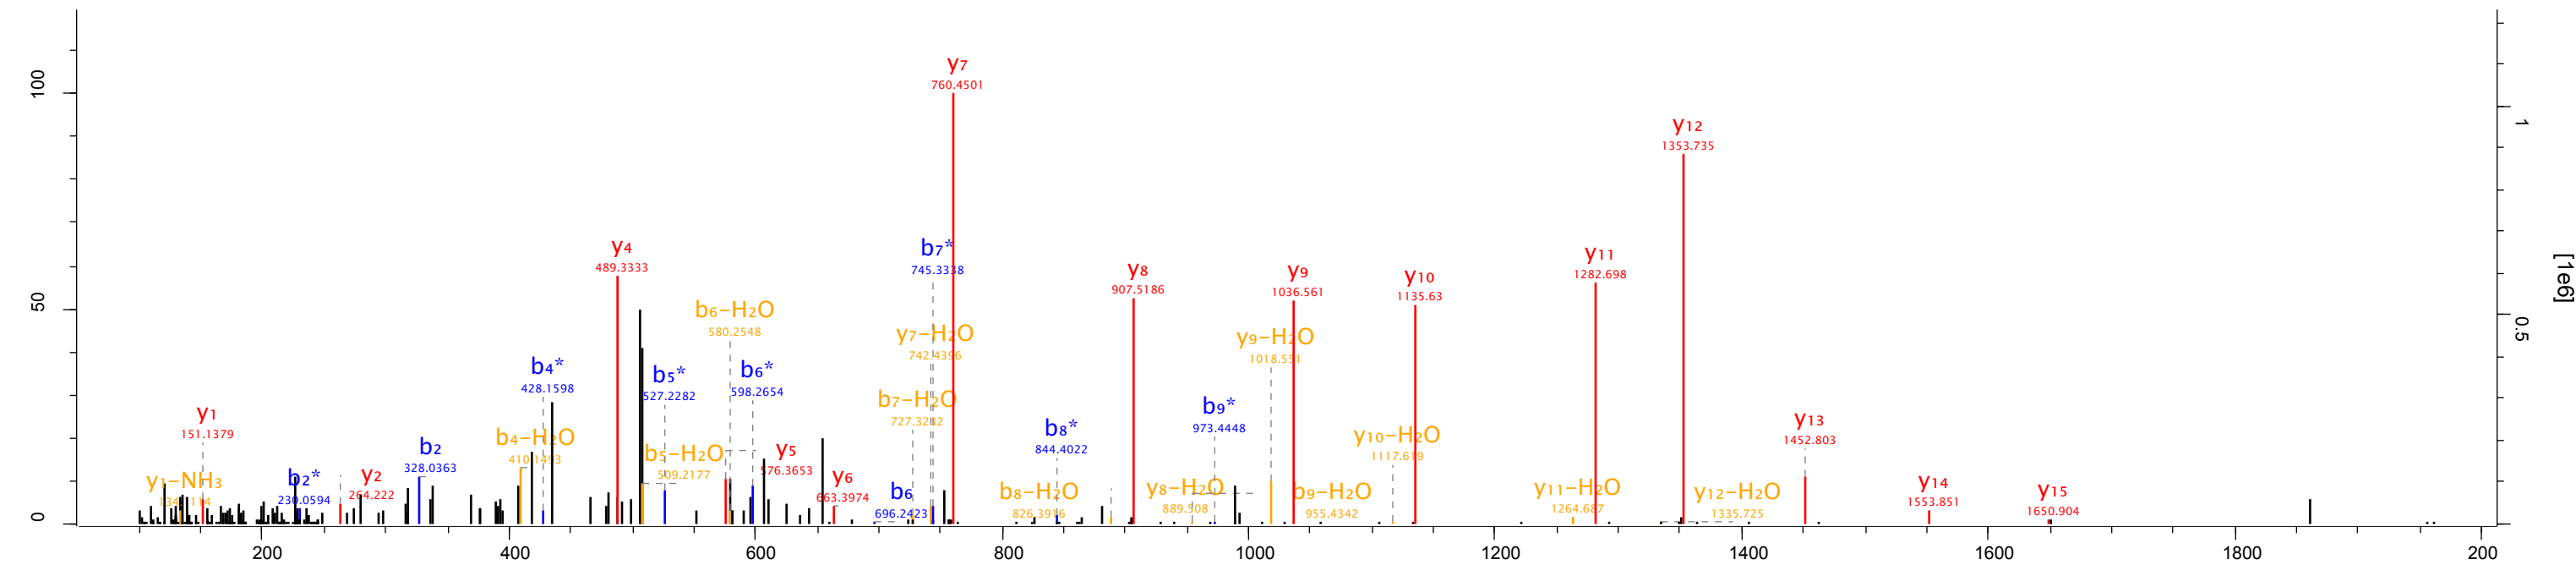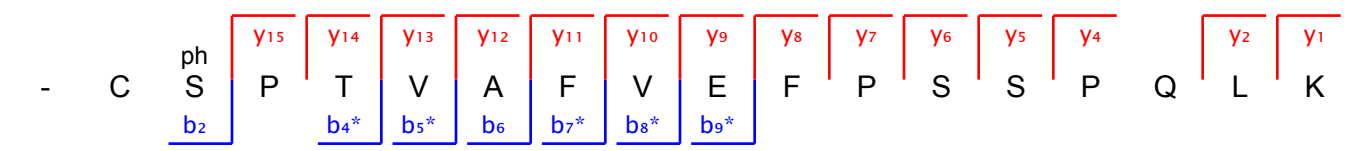



Raw file  
20150814\_A375SR\_Phospho\_BR2\_05

Scan 25952 Method FTMS; HCD Score 185.17 m/z 823.71 Gene names SNX15

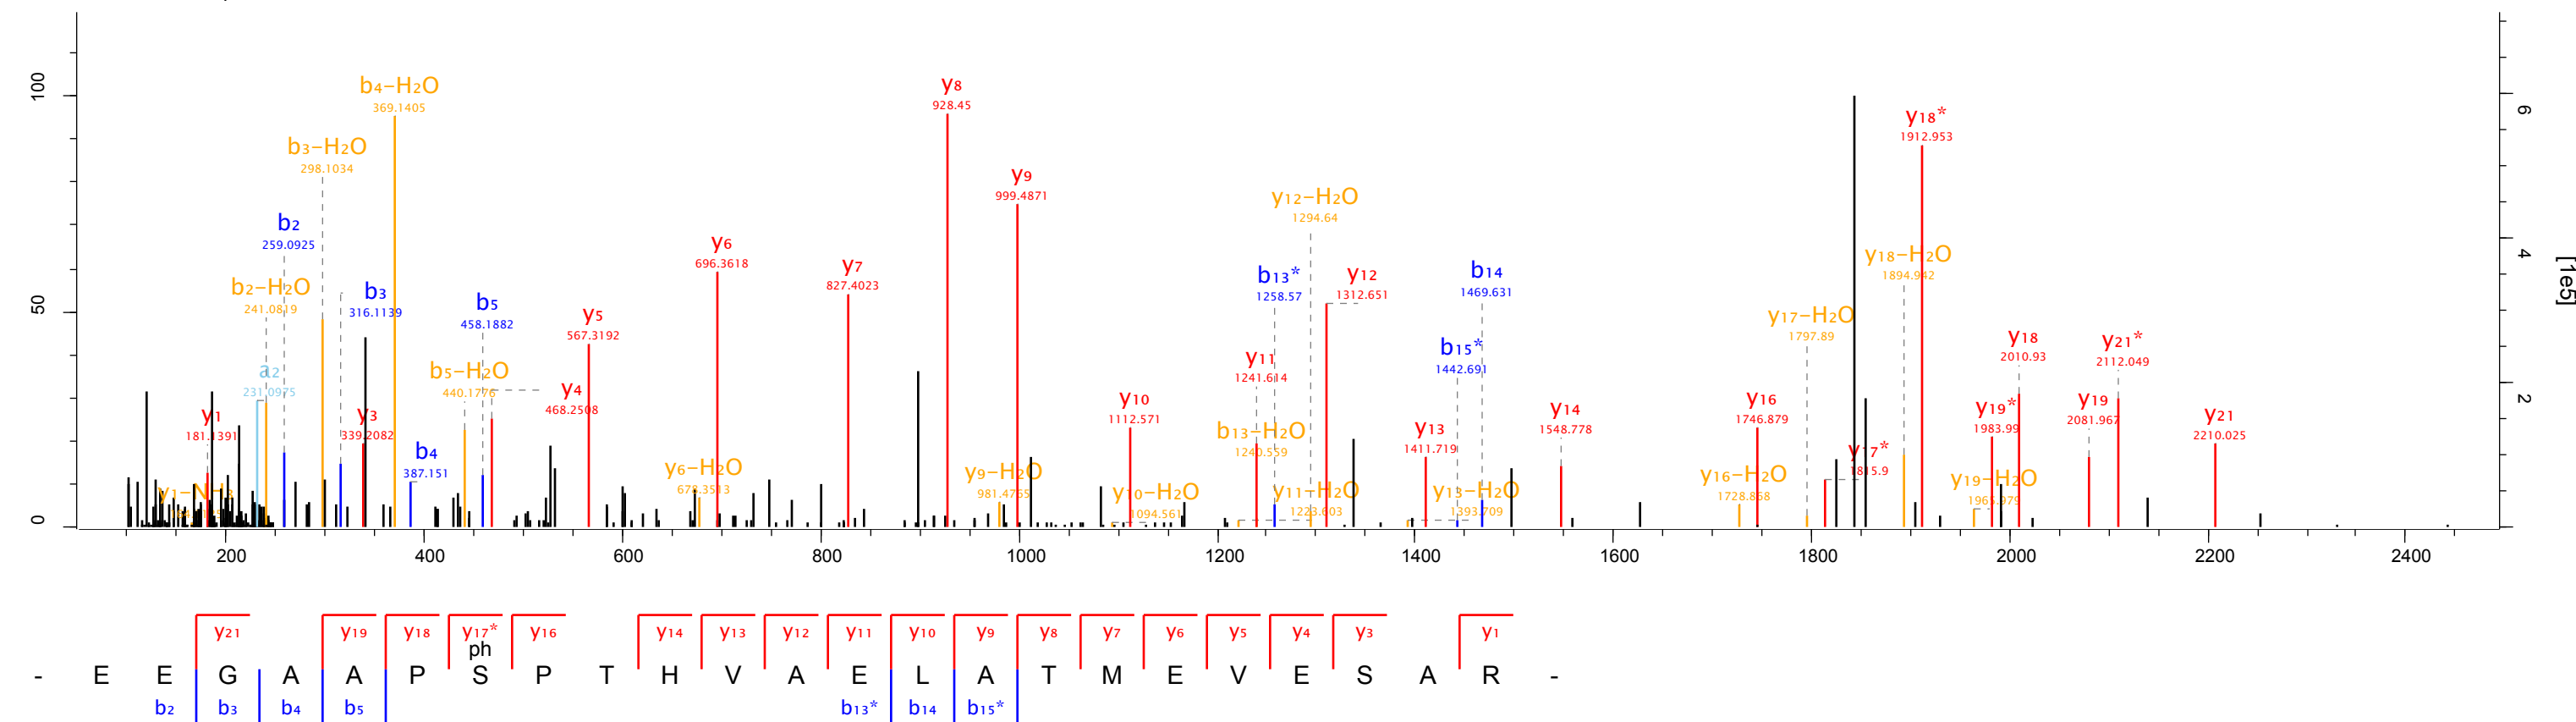



Raw file 20150814\_A375SR\_Phospho\_BR2\_05 Scan 26062 Method FTMS; HCD Score 91.88 m/z 666.03 Gene names NFATC2

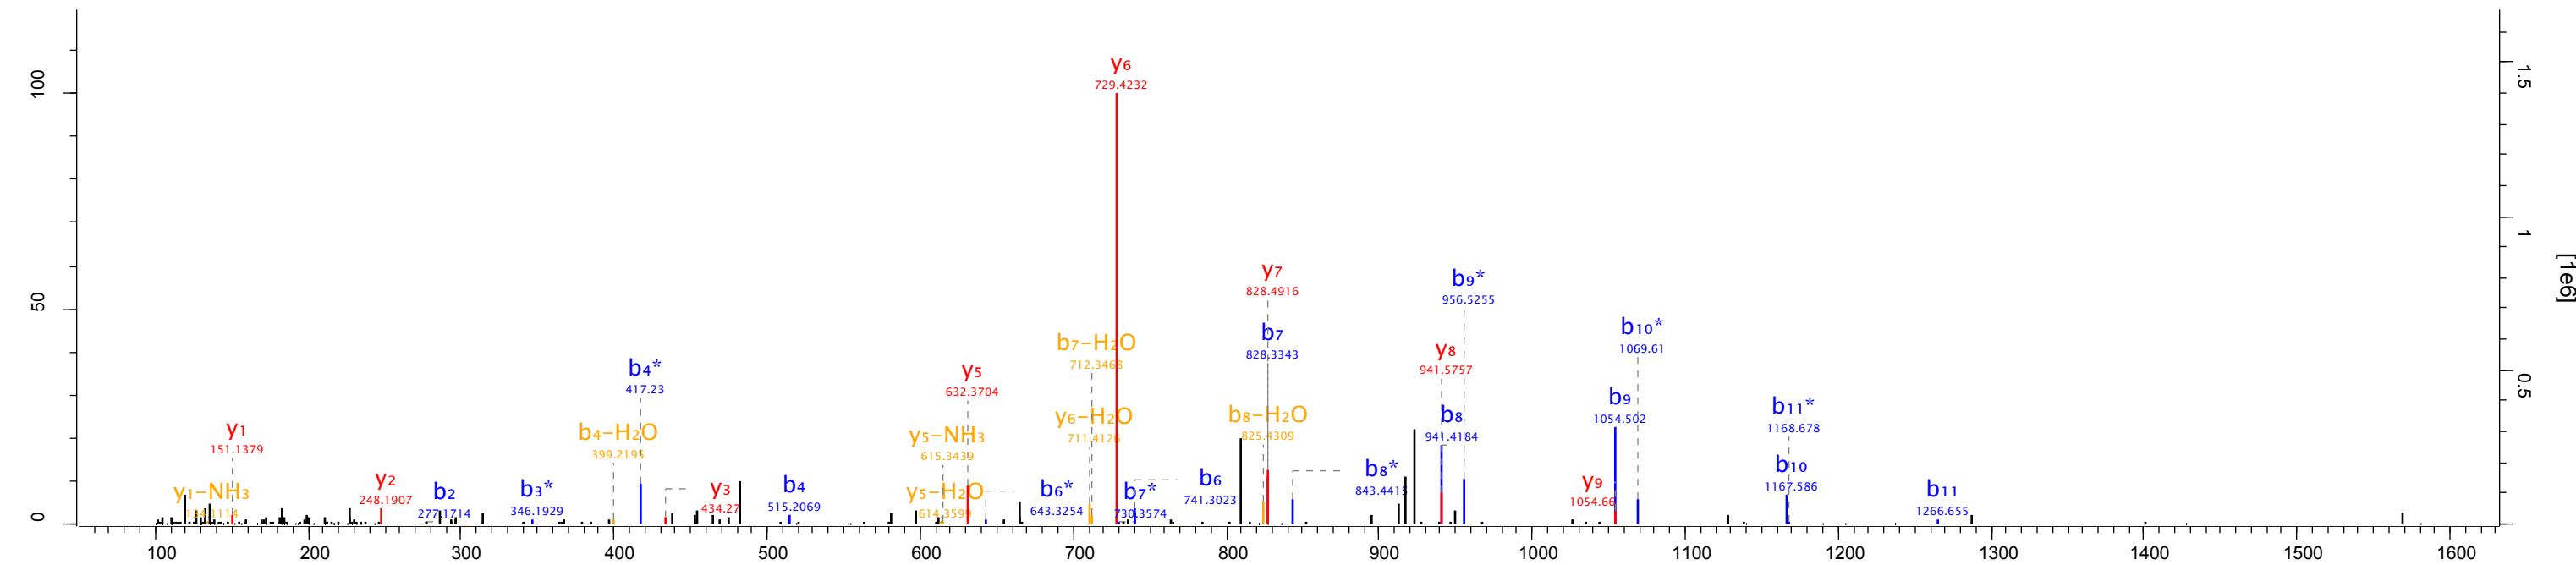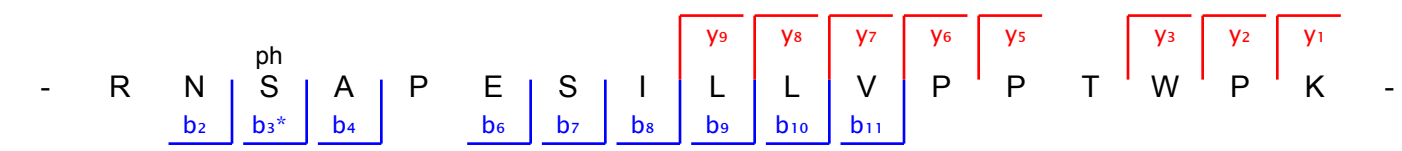

Raw file: 20150814\_A375SR\_Phospho\_BR2\_05  
 Scan: 26152 Method: FTMS; HCD Score: 70.56 m/z: 740.03 Gene names: CNKSR2

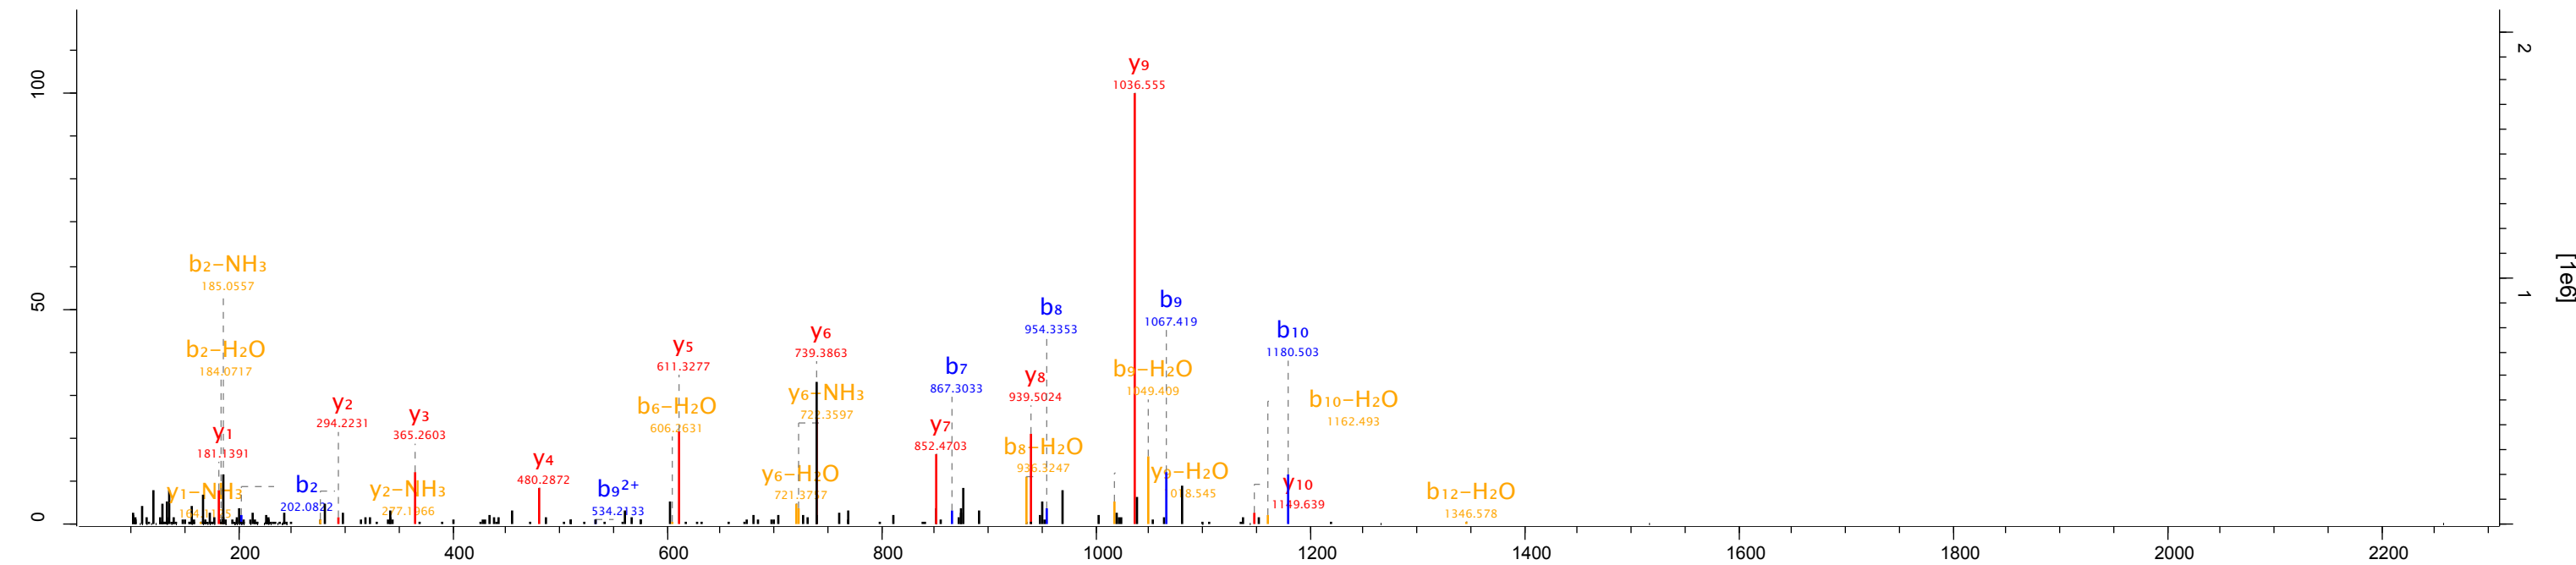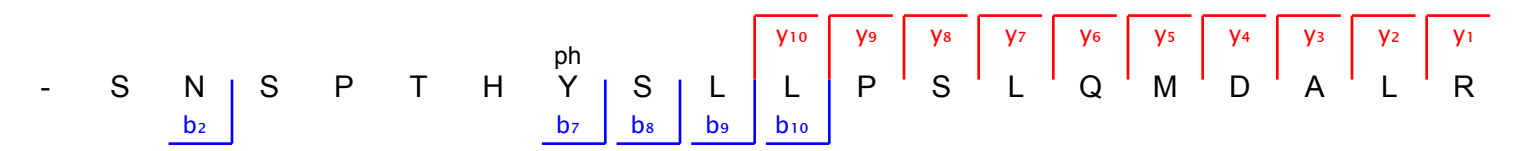

Raw file 20150814\_A375SR\_Phospho\_BR2\_05 Scan 26272 Method FTMS; HCD Score 89.2 m/z 693.34 Gene names RABEP1

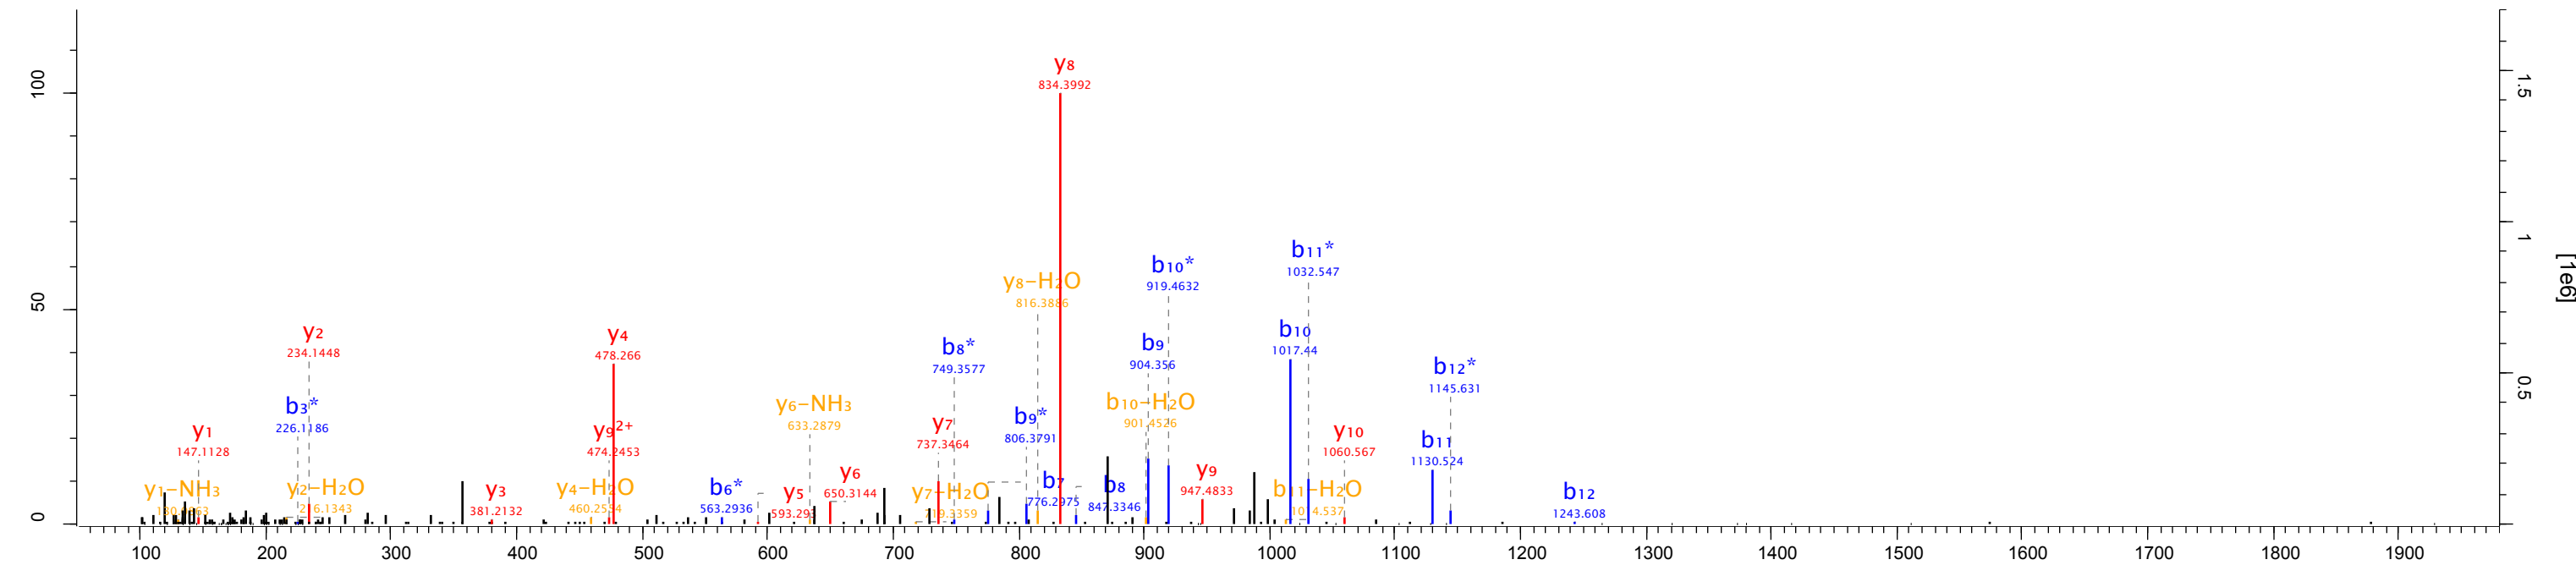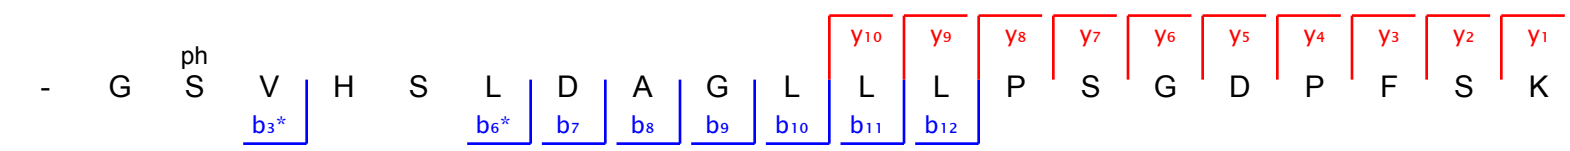

Raw file Scan Method Score m/z Gene names

20150814\_A375SR\_Phospho\_BR2\_05

26312 FTMS; HCD 98.85 1104.29 MAGI1

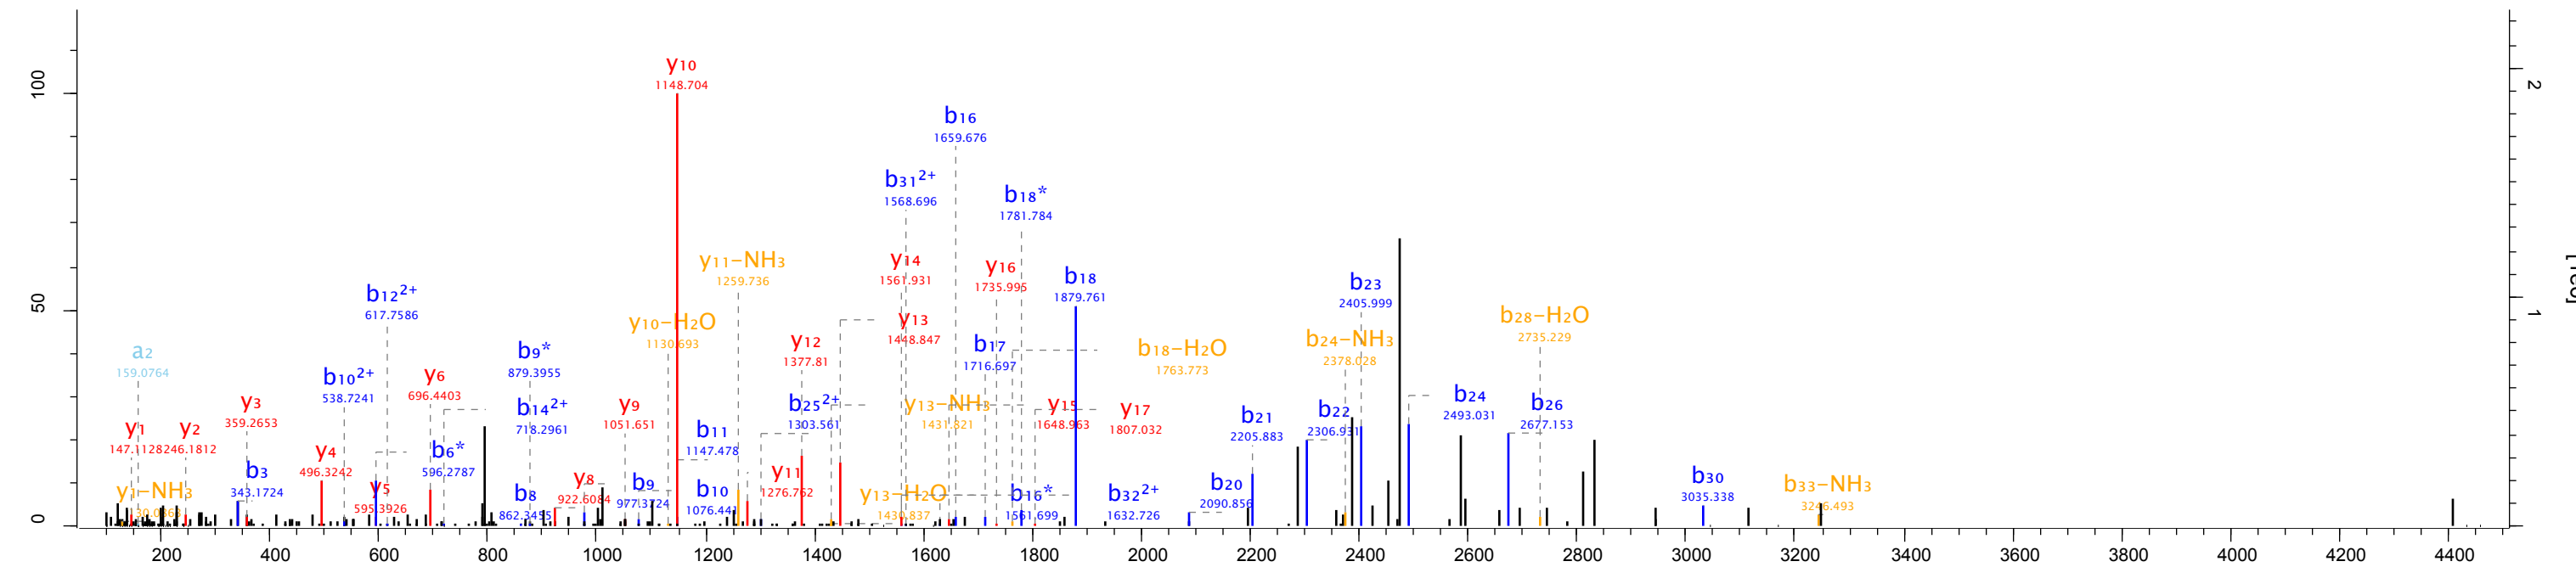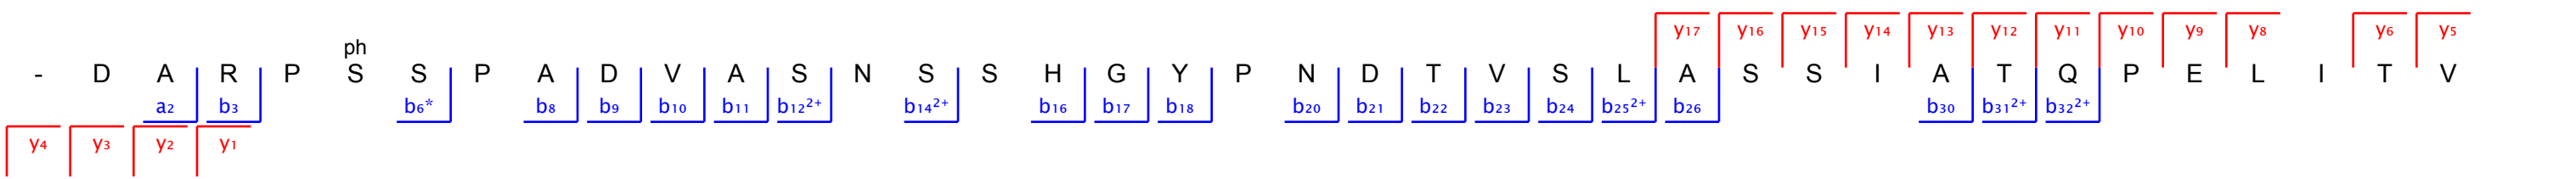

Raw file: 20150814\_A375SR\_Phospho\_BR2\_05  
 Scan: 26482 Method: FTMS; HCD Score: 45.42 m/z: 1290.61 Gene names: EIF4EBP1

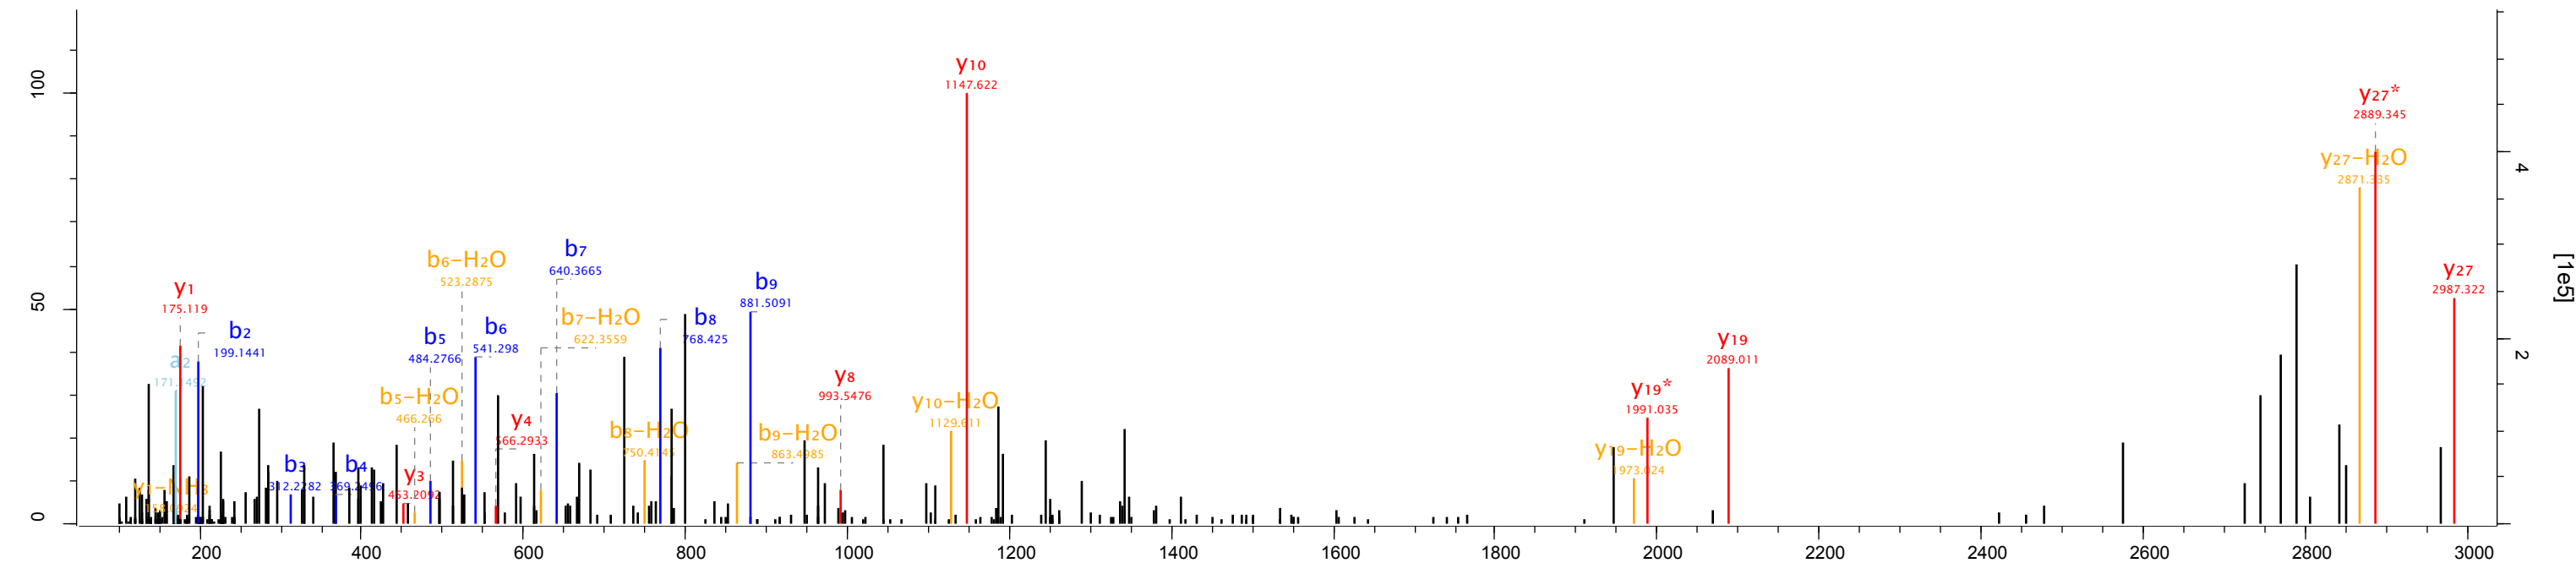

Sequence: - V V L G D G V Q L P P G D Y S T T P G G T L F S T T P G G T R I I Y D R -

Fragmentation sites (b ions): b2 (V-V), b3 (V-L), b4 (L-G), b5 (G-D), b6 (D-G), b7 (G-V), b8 (V-Q), b9 (Q-L)

Fragmentation sites (y ions): y1 (L-R), y3 (G-D), y4 (D-G), y8 (G-V), y10 (V-Q), y19 (T-T), y27 (L-R)

Raw file 20150814\_A375SR\_Phospho\_BR2\_05 Scan 2652 Method FTMS; HCD Score 63.29 m/z 555.25 Gene names SMC5

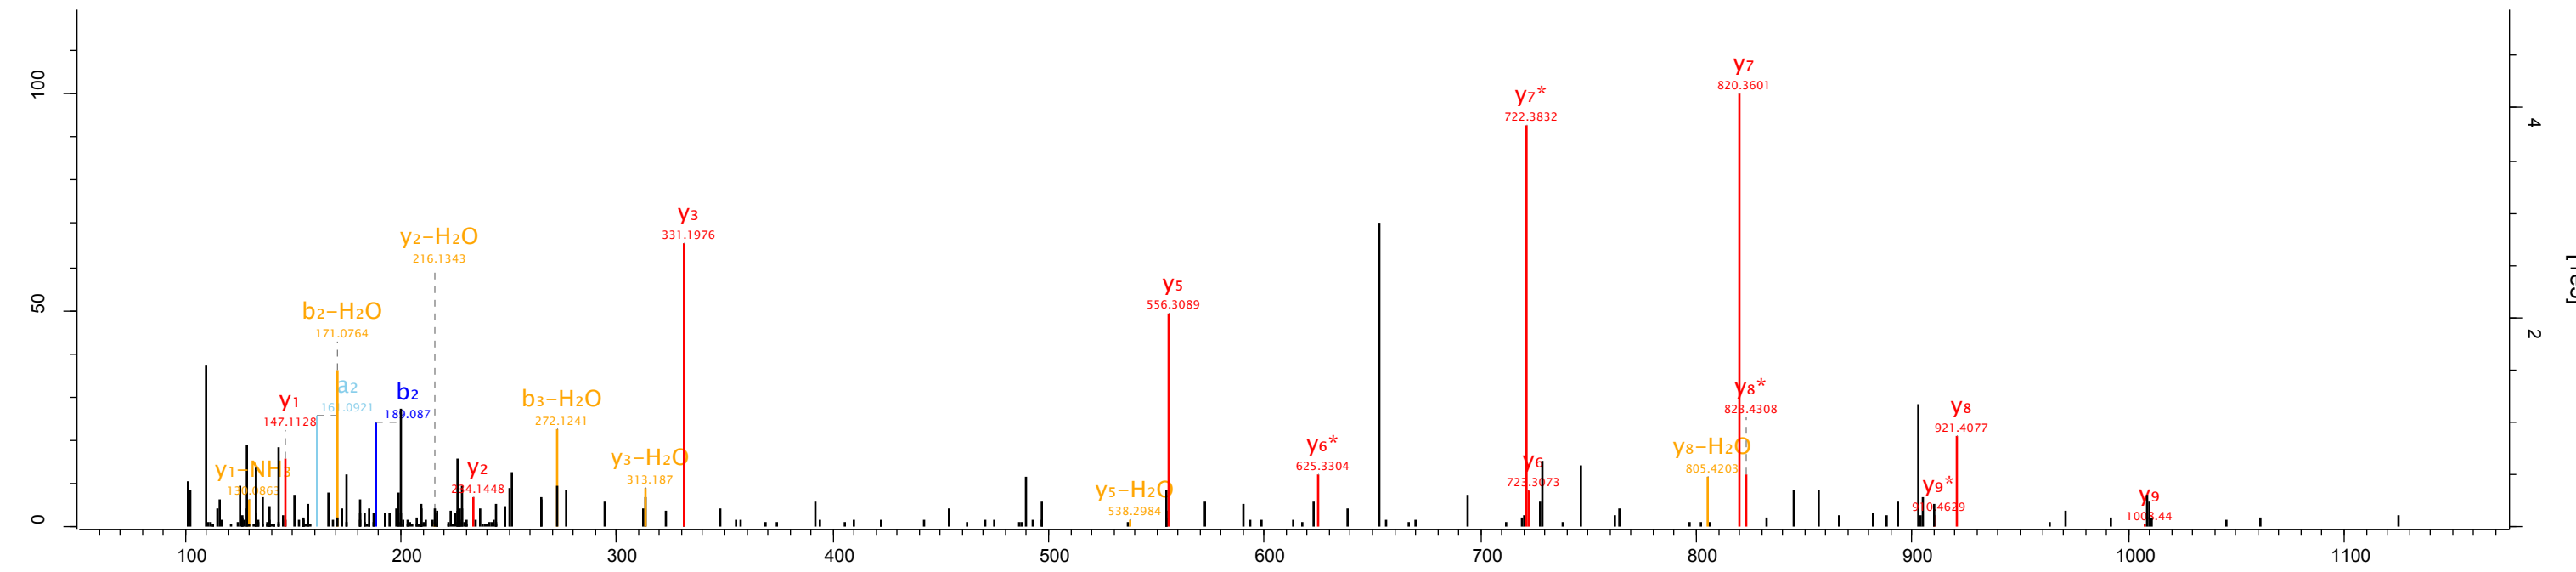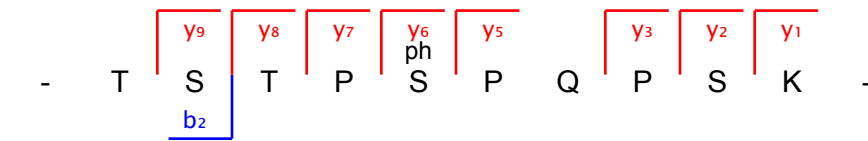

Raw file: 20150814\_A375SR\_Phospho\_BR2\_05  
 Scan: 26942 Method: FTMS; HCD Score: 167.28 m/z: 831.37 Gene names: CELF1

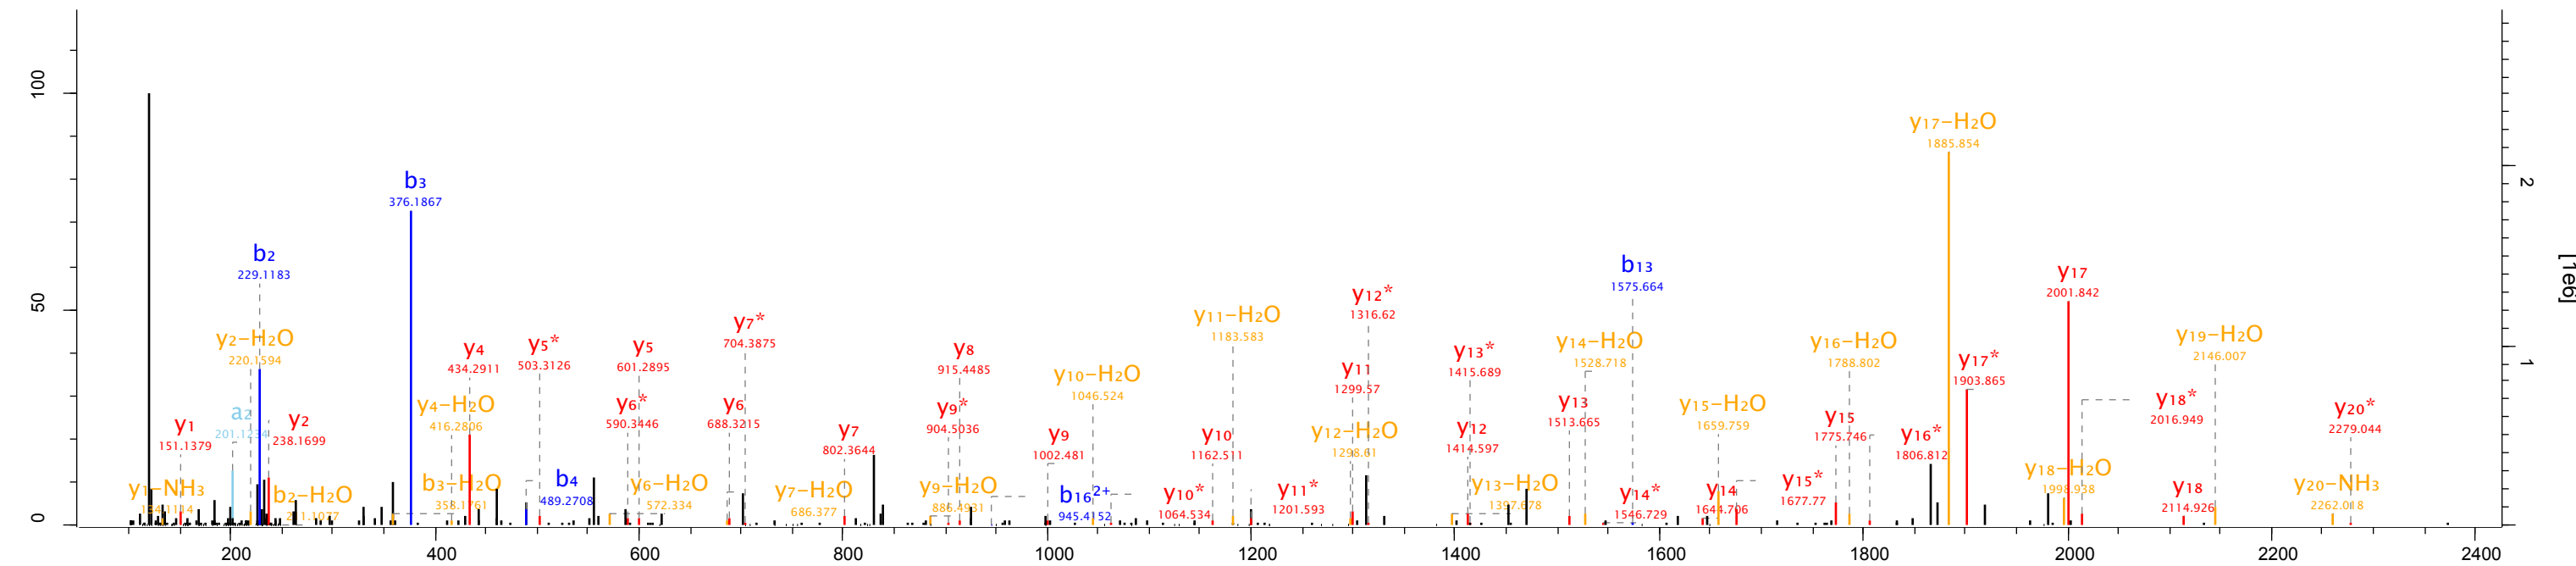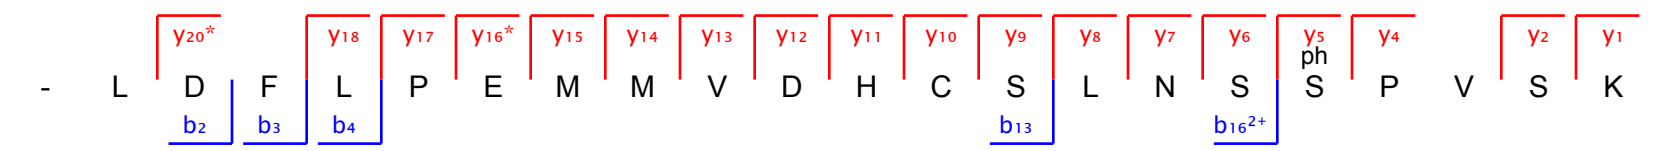

Raw file 20150814\_A375SR\_Phospho\_BR2\_05 Scan 27032 Method FTMS; HCD Score 125.23 m/z 896.47 Gene names USP47

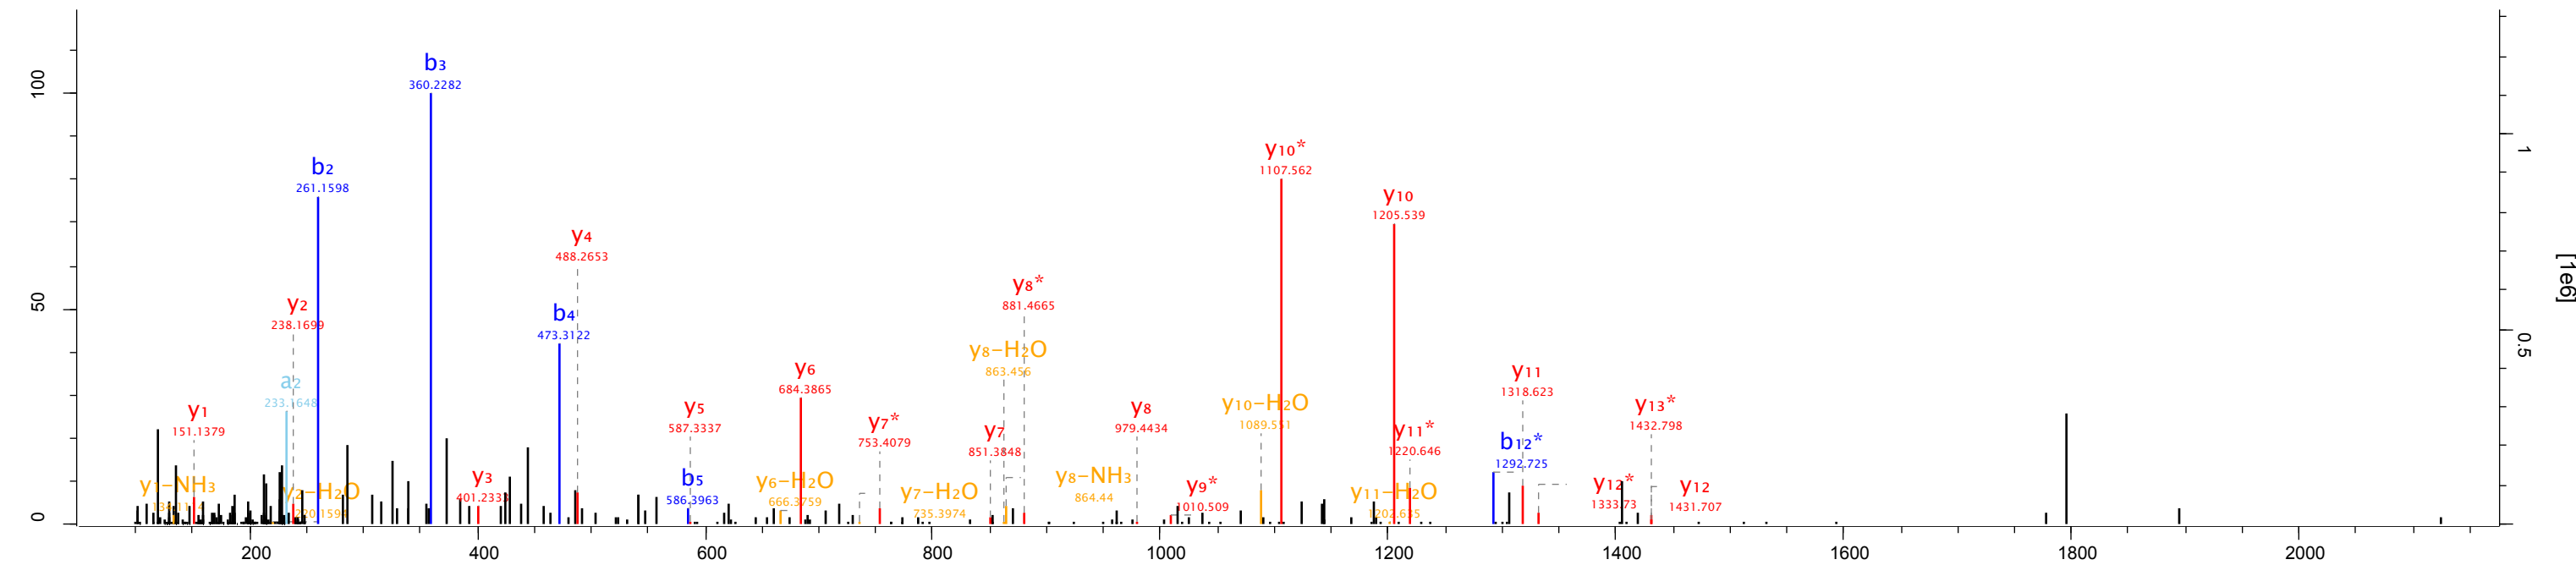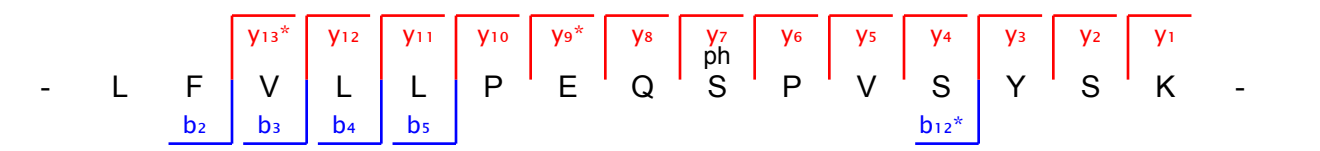



Raw file: 20150814\_A375SR\_Phospho\_BR2\_05  
 Scan: 27152 Method: FTMS; HCD Score: 74.36 m/z: 1040.5 Gene names: GLCCI1

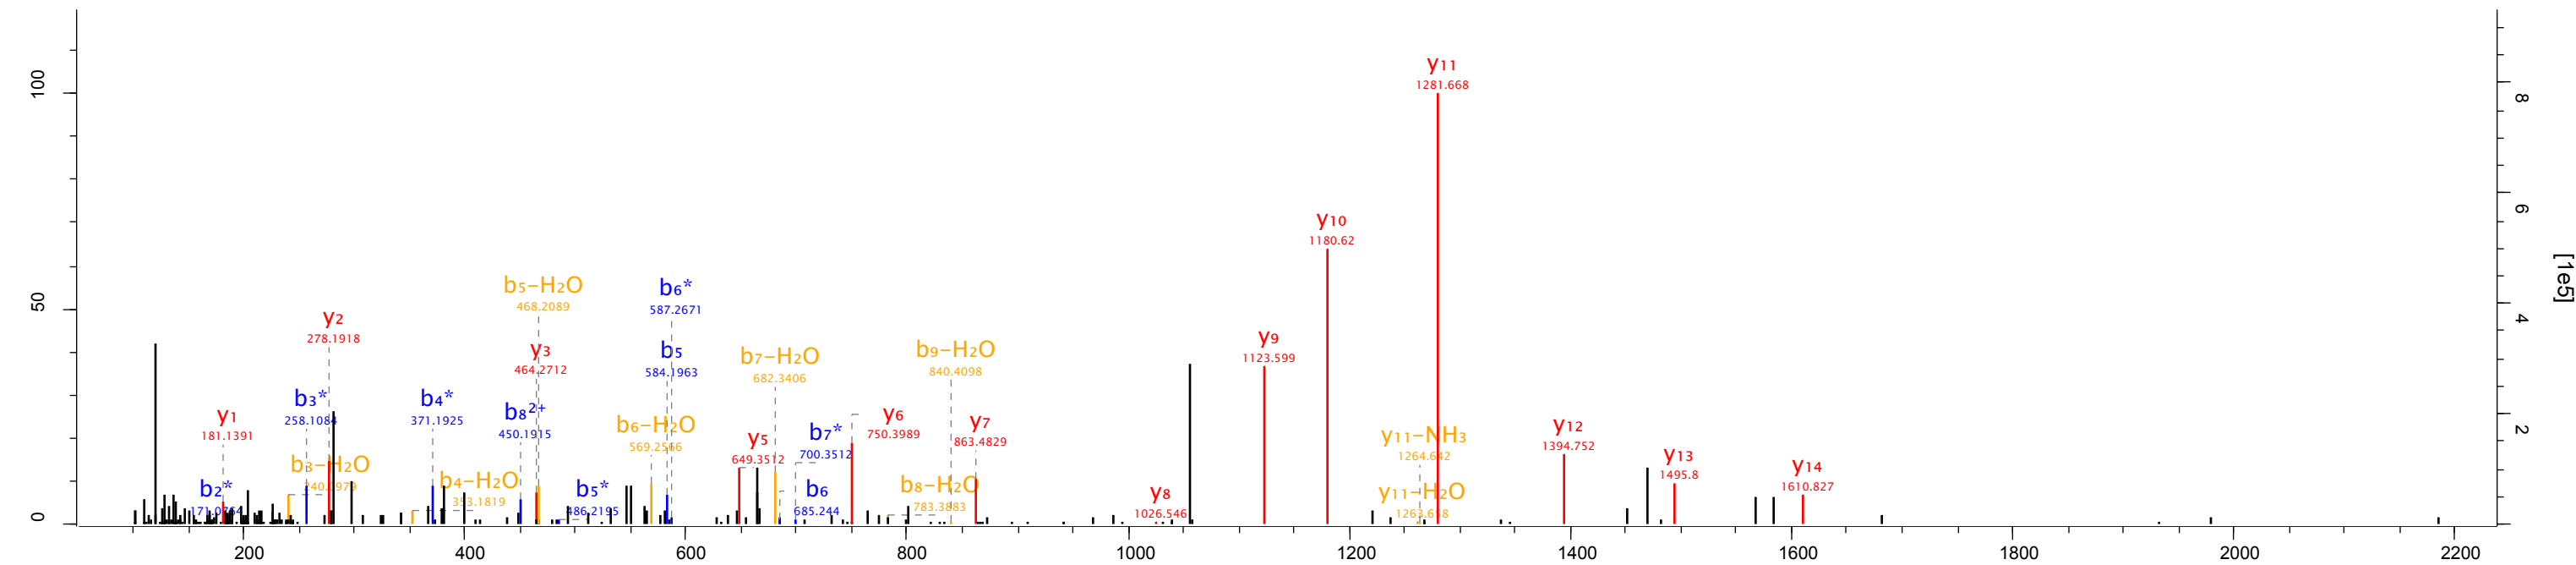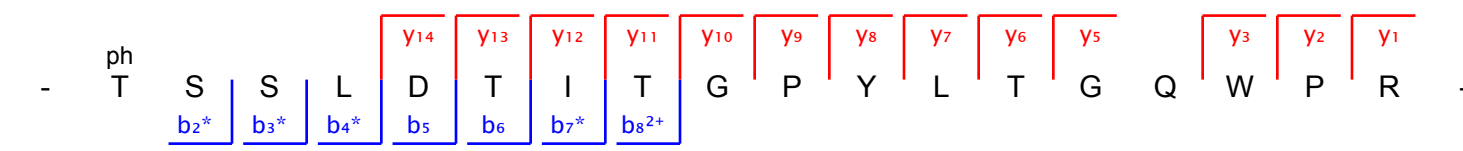

Raw file: 20150814\_A375SR\_Phospho\_BR2\_05  
 Scan: 2742 Method: FTMS; HCD Score: 174.37 m/z: 687.28 Gene names: SRRM2

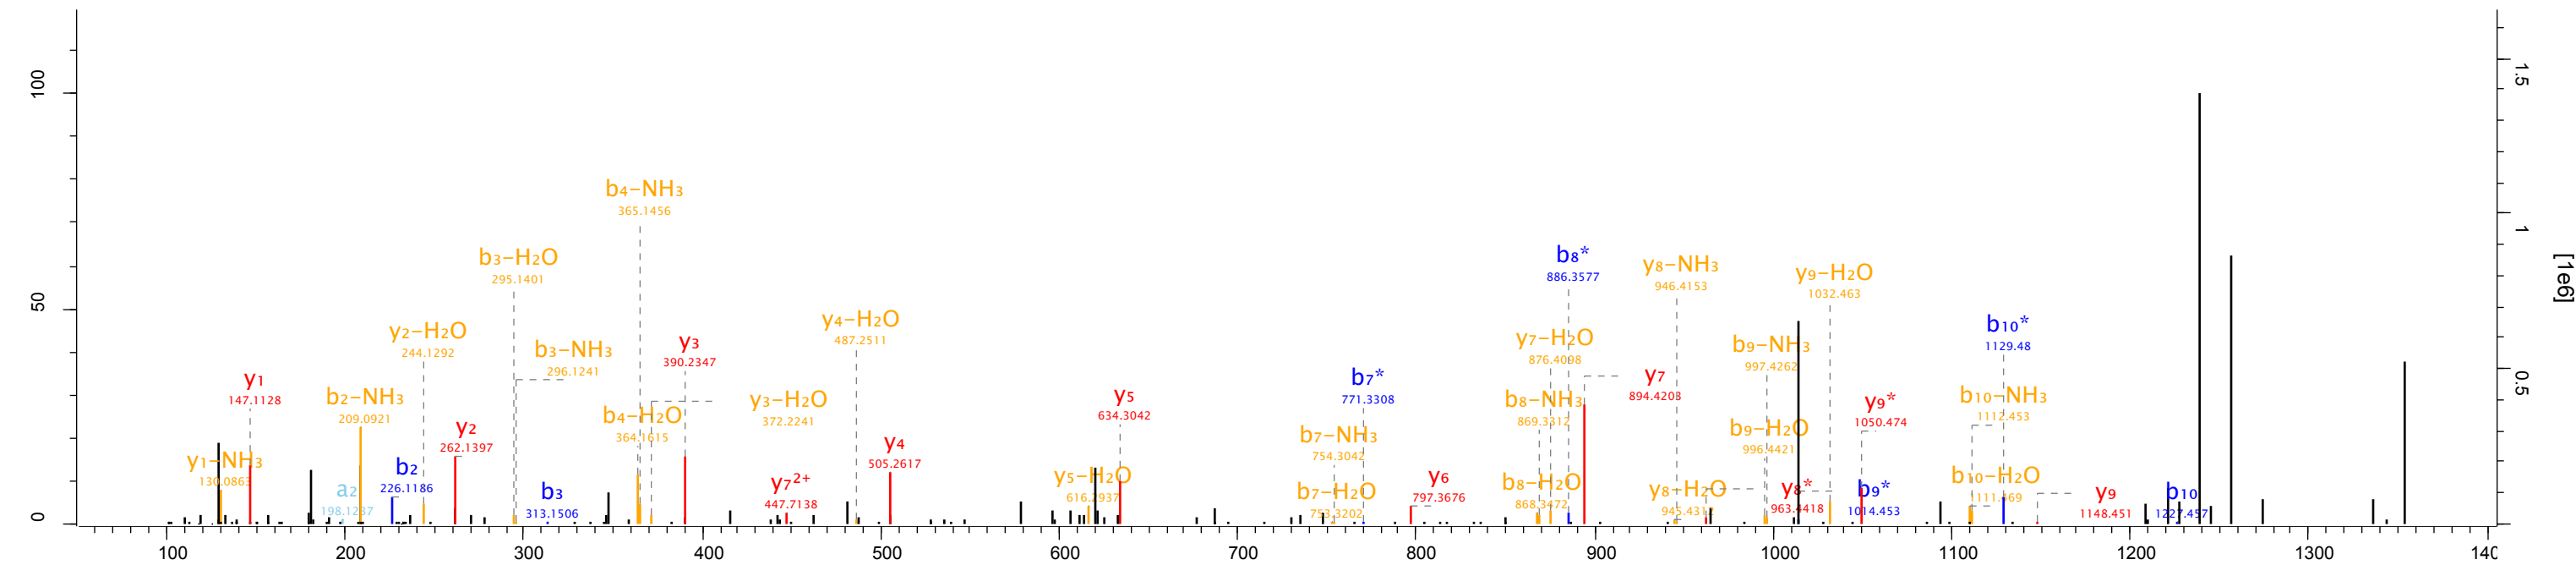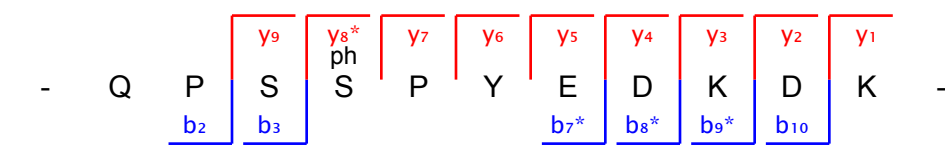

Raw file 20150814\_A375SR\_Phospho\_BR2\_05 Scan 27452 Method FTMS; HCD Score 105.19 m/z 1006.79 Gene names TOP2B

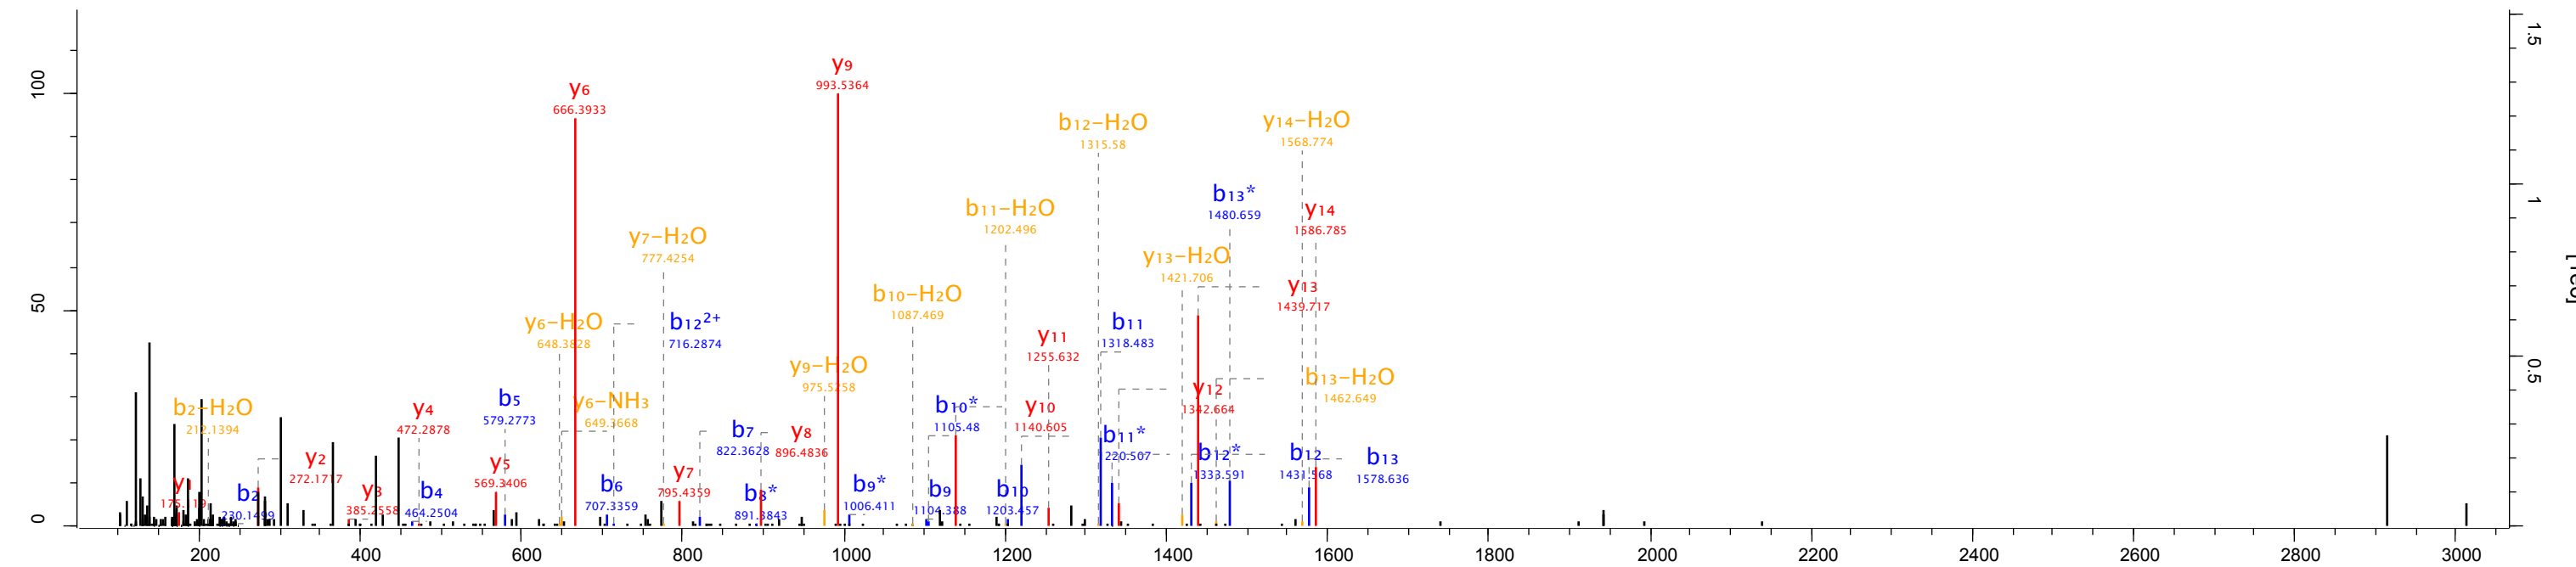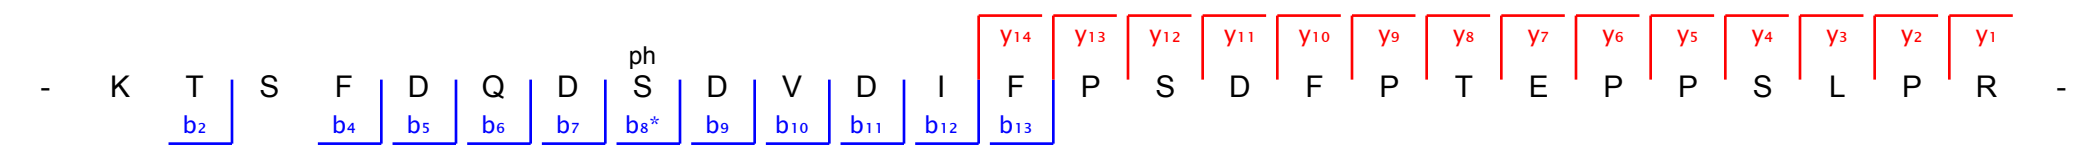

Raw file: 20150814\_A375SR\_Phospho\_BR2\_05  
 Scan: 27462 Method: FTMS; HCD Score: 138.66 m/z: 931.47 Gene names: FLJ33167;PRIMPOL

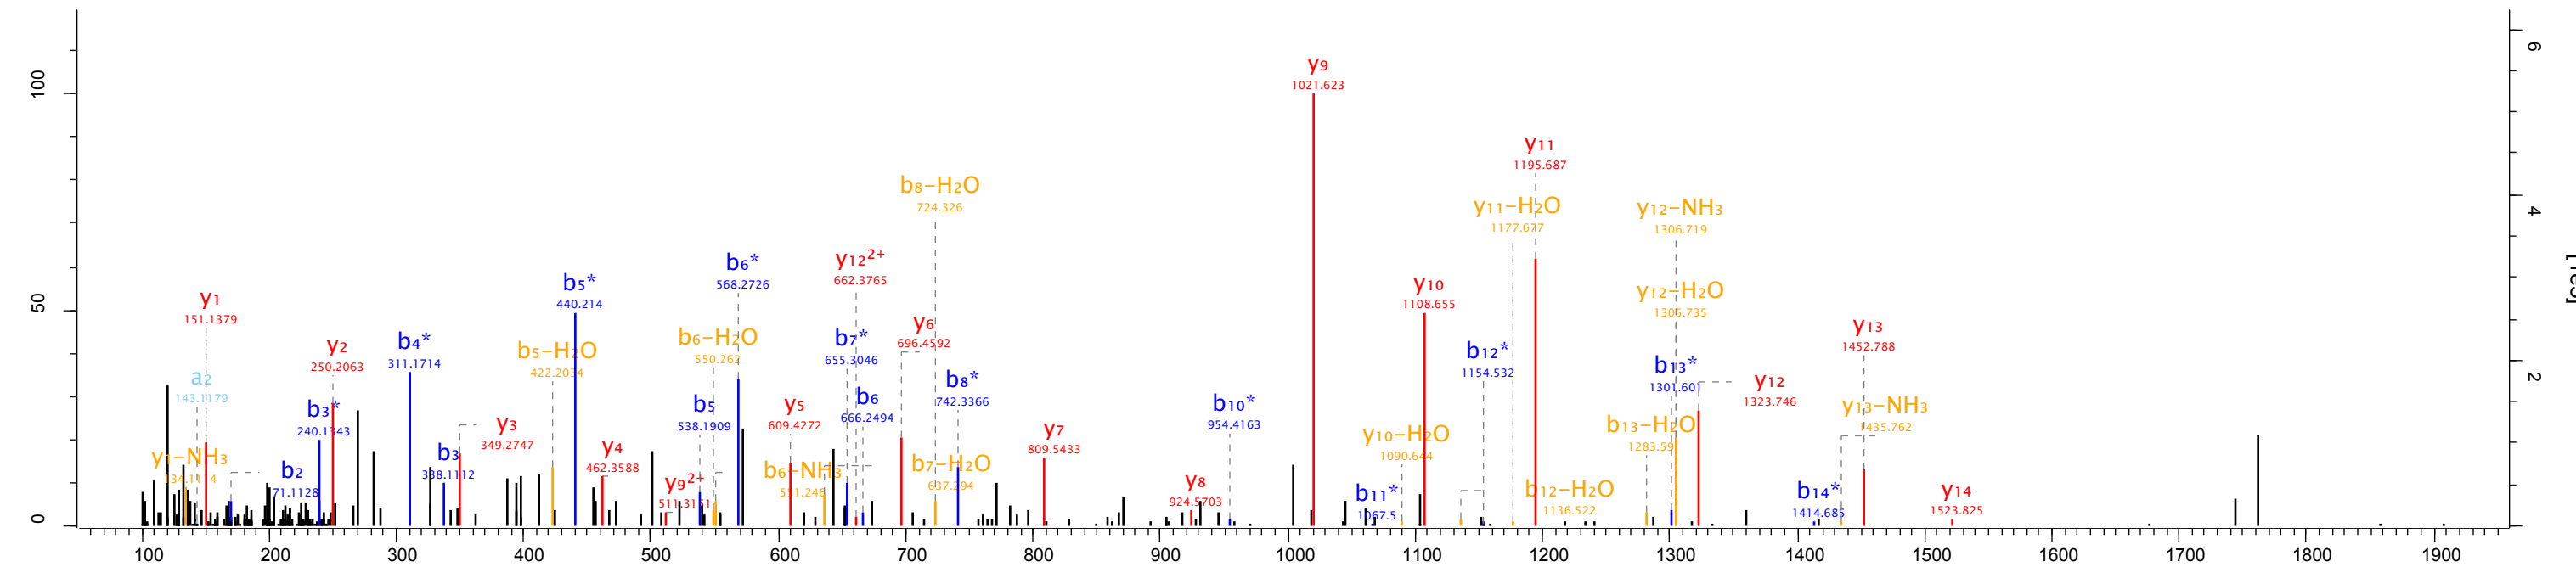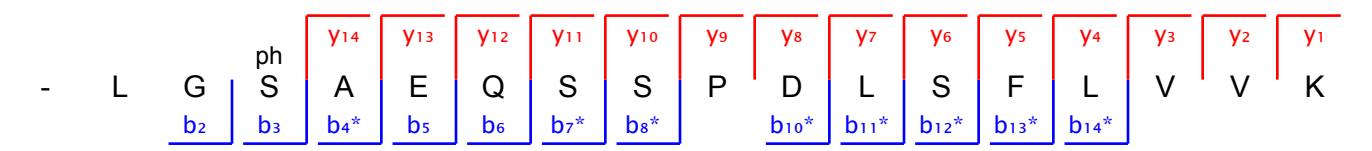

Raw file: 20150814\_A375SR\_Phospho\_BR2\_05  
 Scan: 27822  
 Method: FTMS; HCD  
 Score: 158.1  
 m/z: 1515.24  
 Gene names: PXN

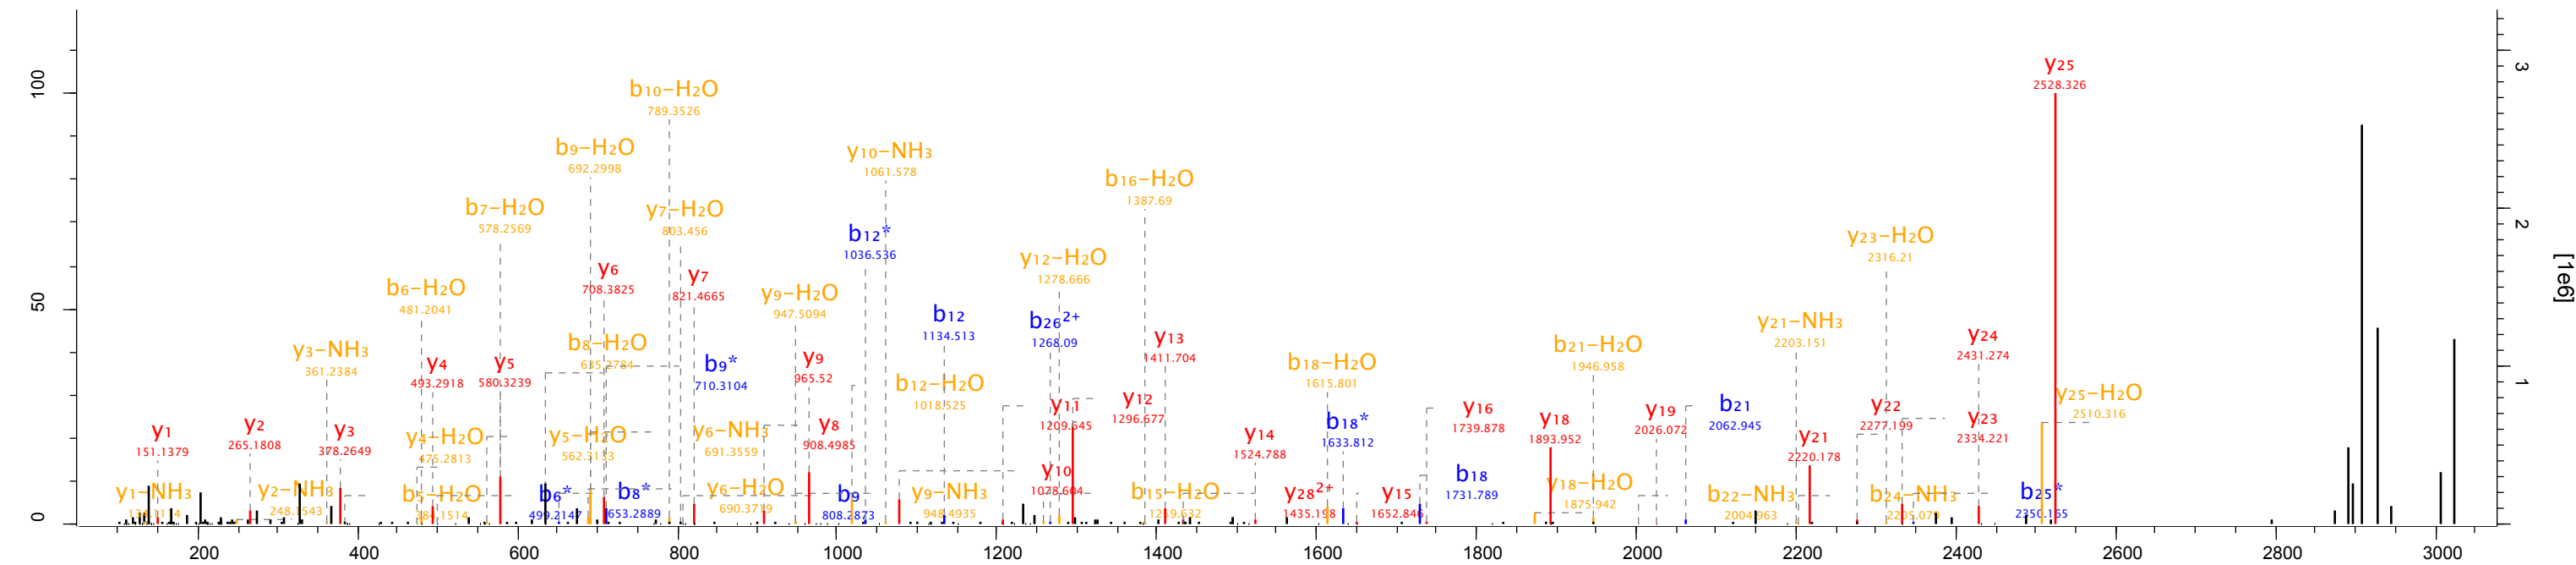

- T G S<sup>y28<sup>2+</sup>ph</sup> S S P<sup>y25</sup> P<sup>y24</sup> G<sup>y23</sup> G<sup>y22</sup> P<sup>y21</sup> P<sup>y19</sup> K<sup>y18</sup> P G S<sup>y16</sup> Q<sup>y15</sup> L<sup>y14</sup> D<sup>y13</sup> S<sup>y12</sup> M<sup>y11</sup> L<sup>y10</sup> G<sup>y9</sup> S<sup>y8</sup> L<sup>y7</sup> Q<sup>y6</sup> S<sup>y5</sup> D<sup>y4</sup> L<sup>y3</sup> N<sup>y2</sup> K<sup>y1</sup> -

b<sub>6</sub><sup>\*</sup> b<sub>8</sub><sup>\*</sup> b<sub>9</sub> b<sub>12</sub> b<sub>18</sub> b<sub>21</sub> b<sub>25</sub><sup>\*</sup> b<sub>26</sub><sup>2+</sup>

Raw file: 20150814\_A375SR\_Phospho\_BR2\_05  
 Scan: 27932 Method: FTMS; HCD Score: 49.09 m/z: 790.4 Gene names: PARD3

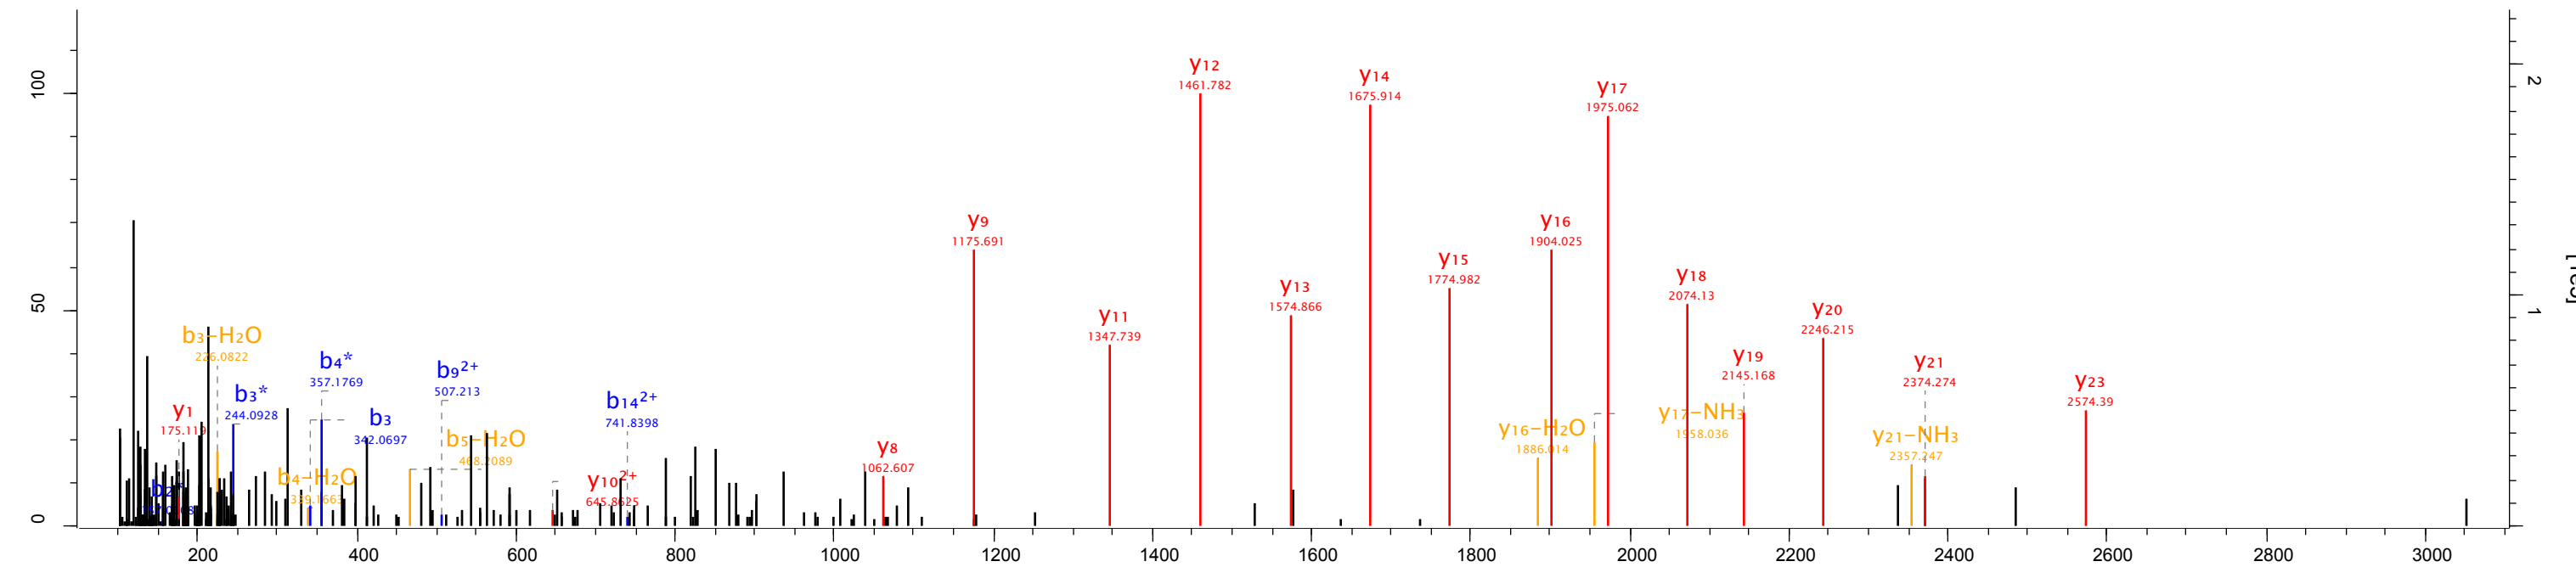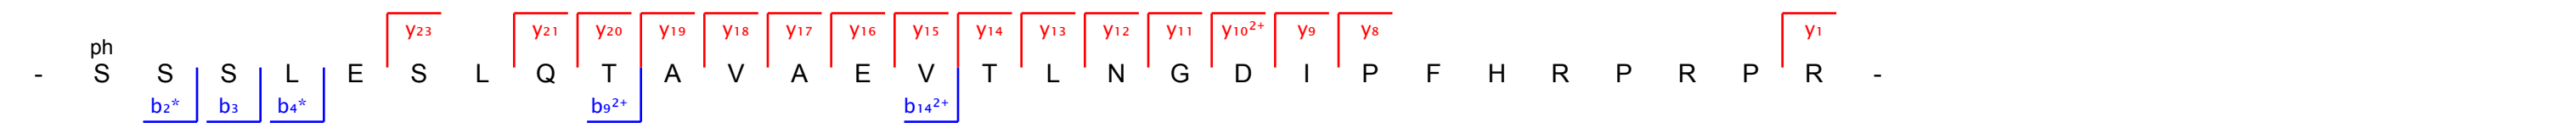

Raw file: 20150814\_A375SR\_Phospho\_BR2\_05  
 Scan: 28172 Method: FTMS; HCD Score: 44.62 m/z: 1262.97 Gene names: NISCH

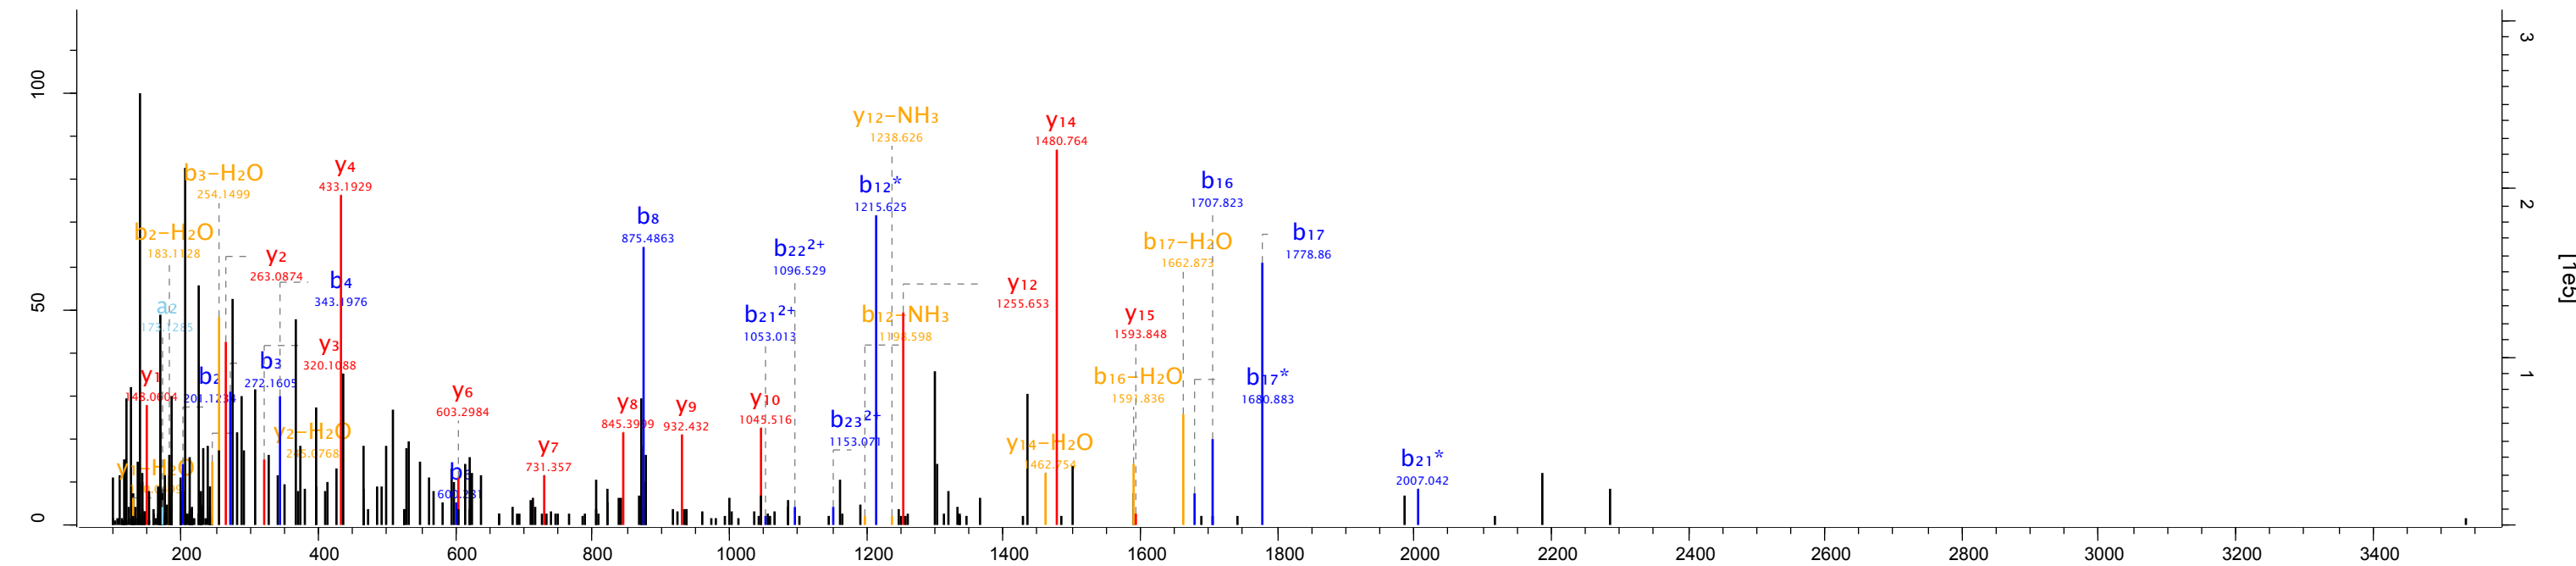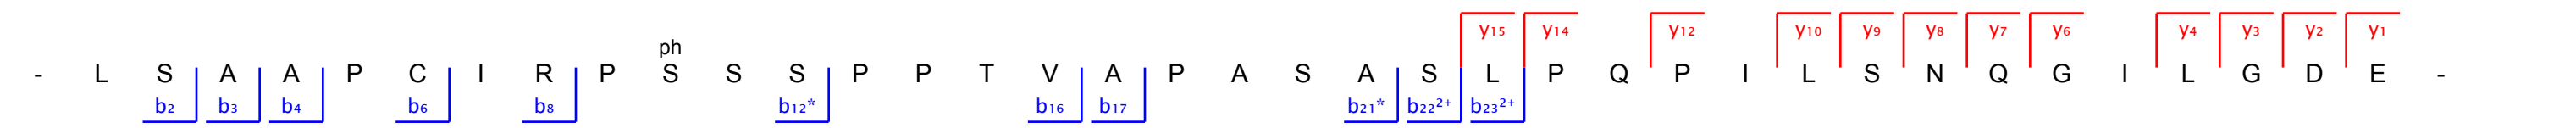

Raw file 20150814\_A375SR\_Phospho\_BR2\_05 Scan 28622 Method FTMS; HCD Score 211.07 m/z 1386.65 Gene names TP53BP1

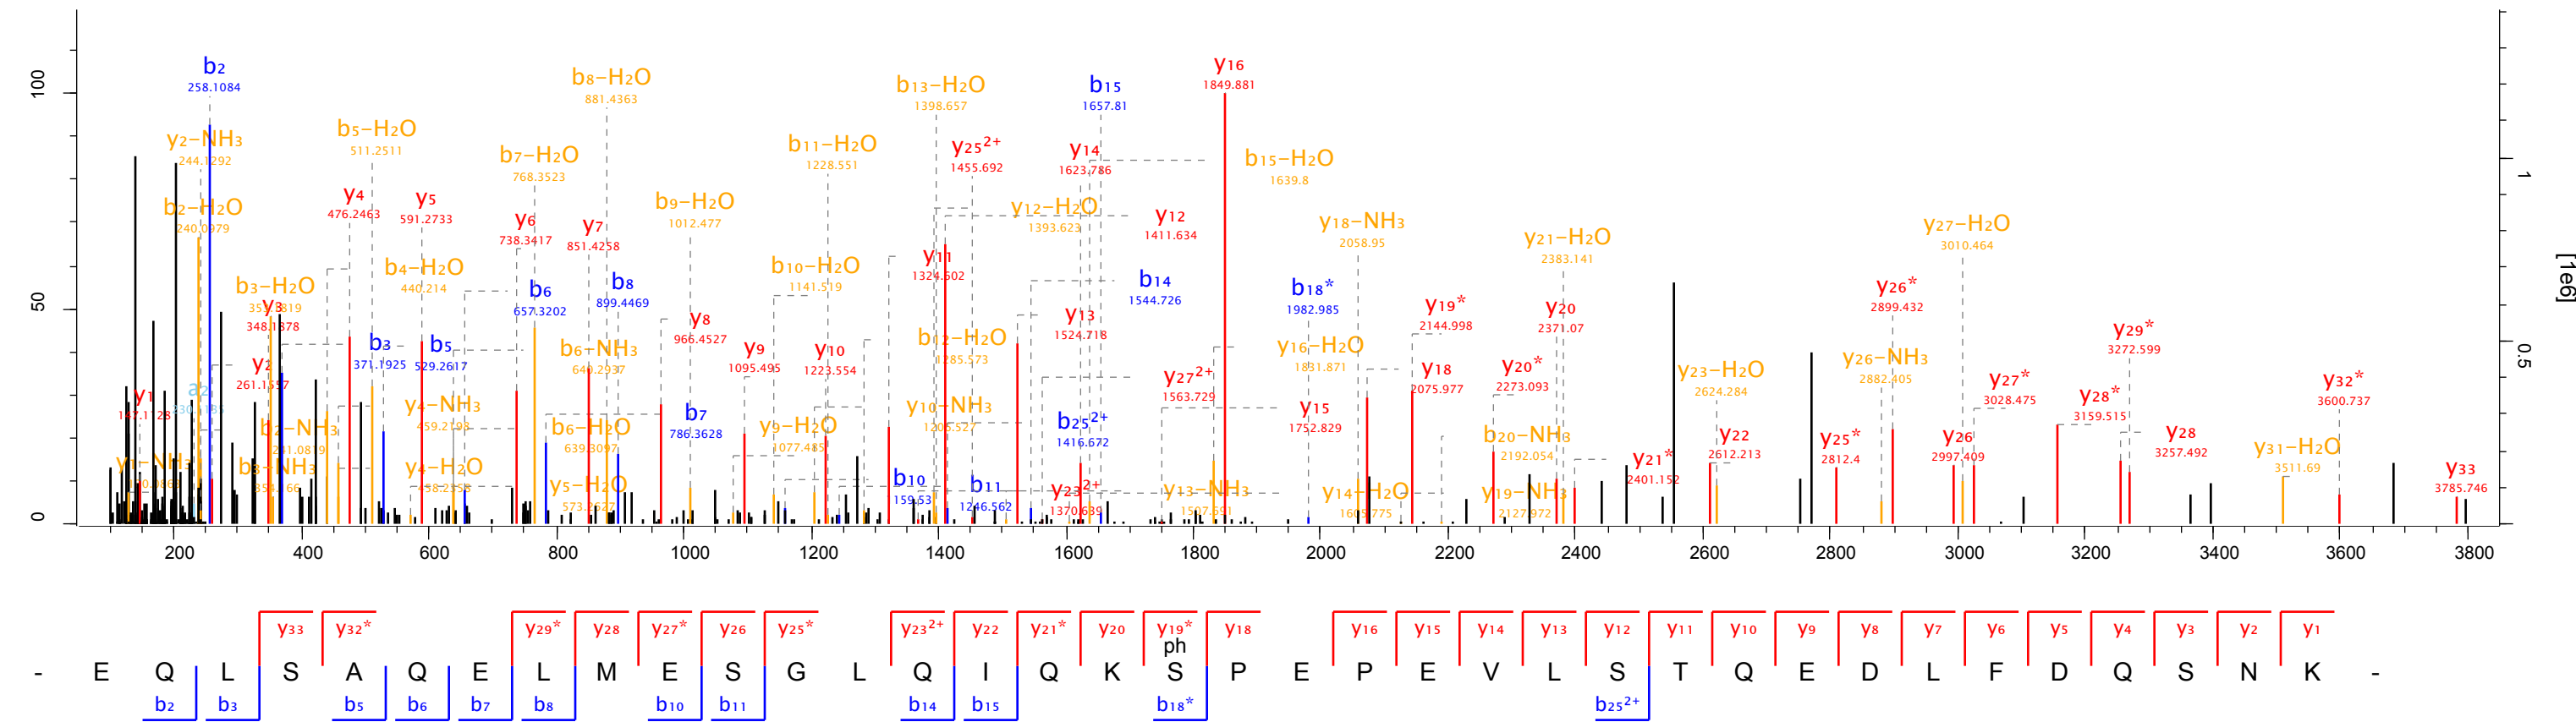



Raw file: 20150814\_A375SR\_Phospho\_BR2\_05  
 Scan: 28812 FTMS; HCD Score: 194.48 m/z: 994.83 Gene names: EDC4

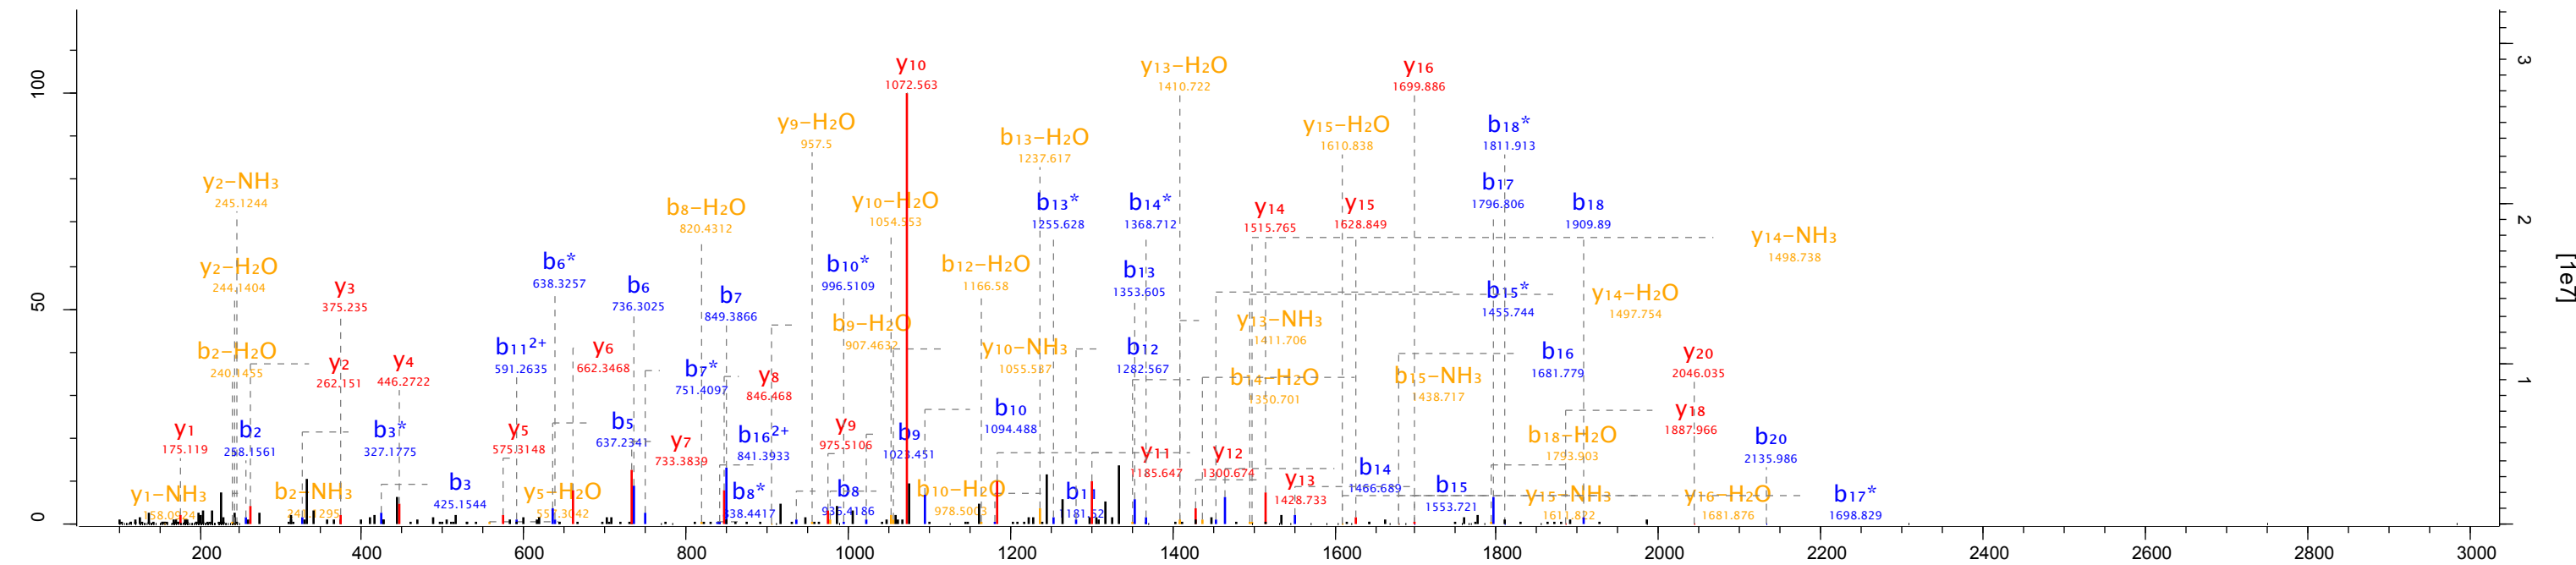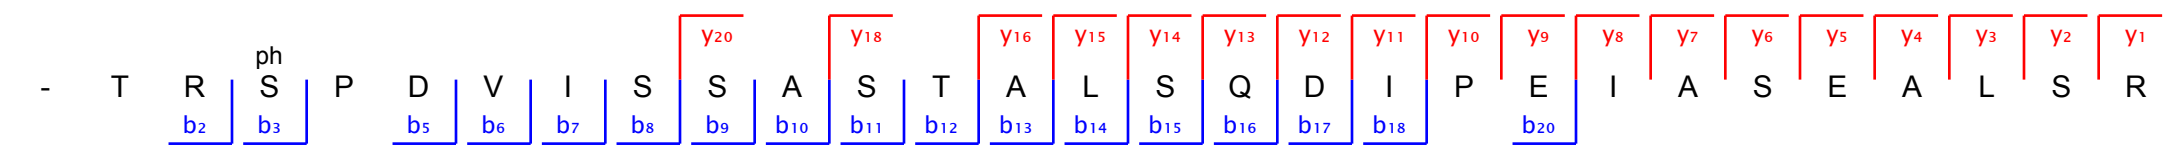

Raw file: 20150814\_A375SR\_Phospho\_BR2\_05  
 Scan: 28822 Method: FTMS; HCD Score: 201.1 m/z: 1016.08 Gene names: NPM1

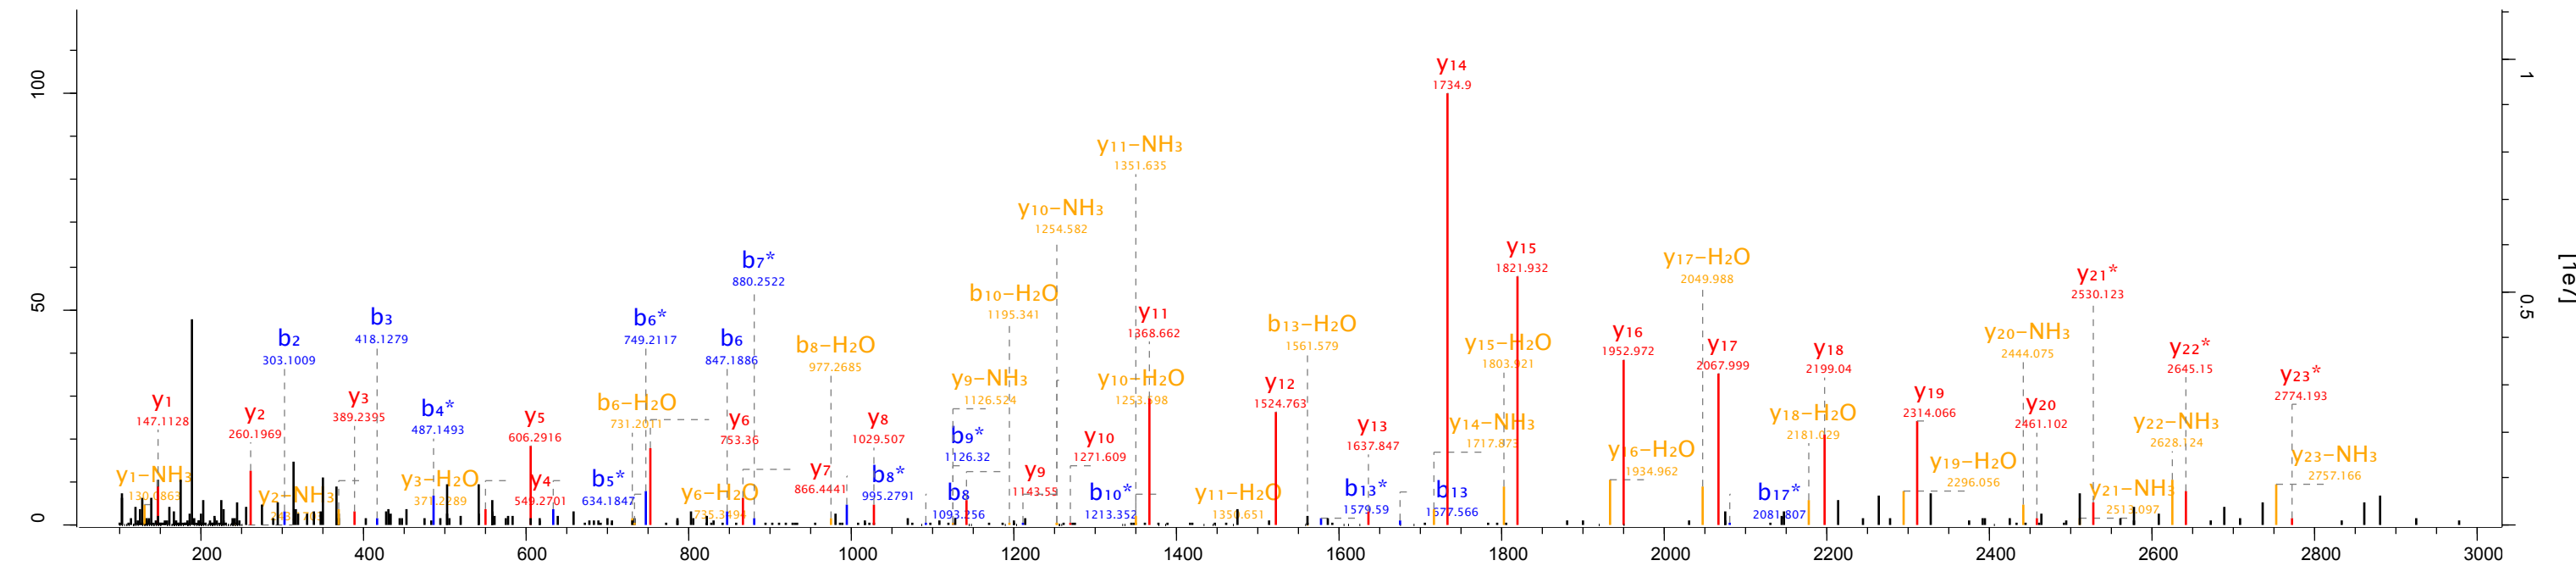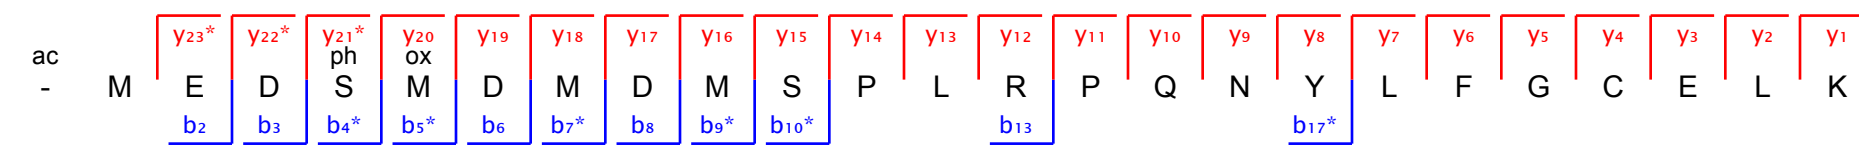

Raw file: 20150814\_A375SR\_Phospho\_BR2\_05  
 Scan: 3462 Method: FTMS; HCD Score: 97.95 m/z: 632.3 Gene names: KIAA1671

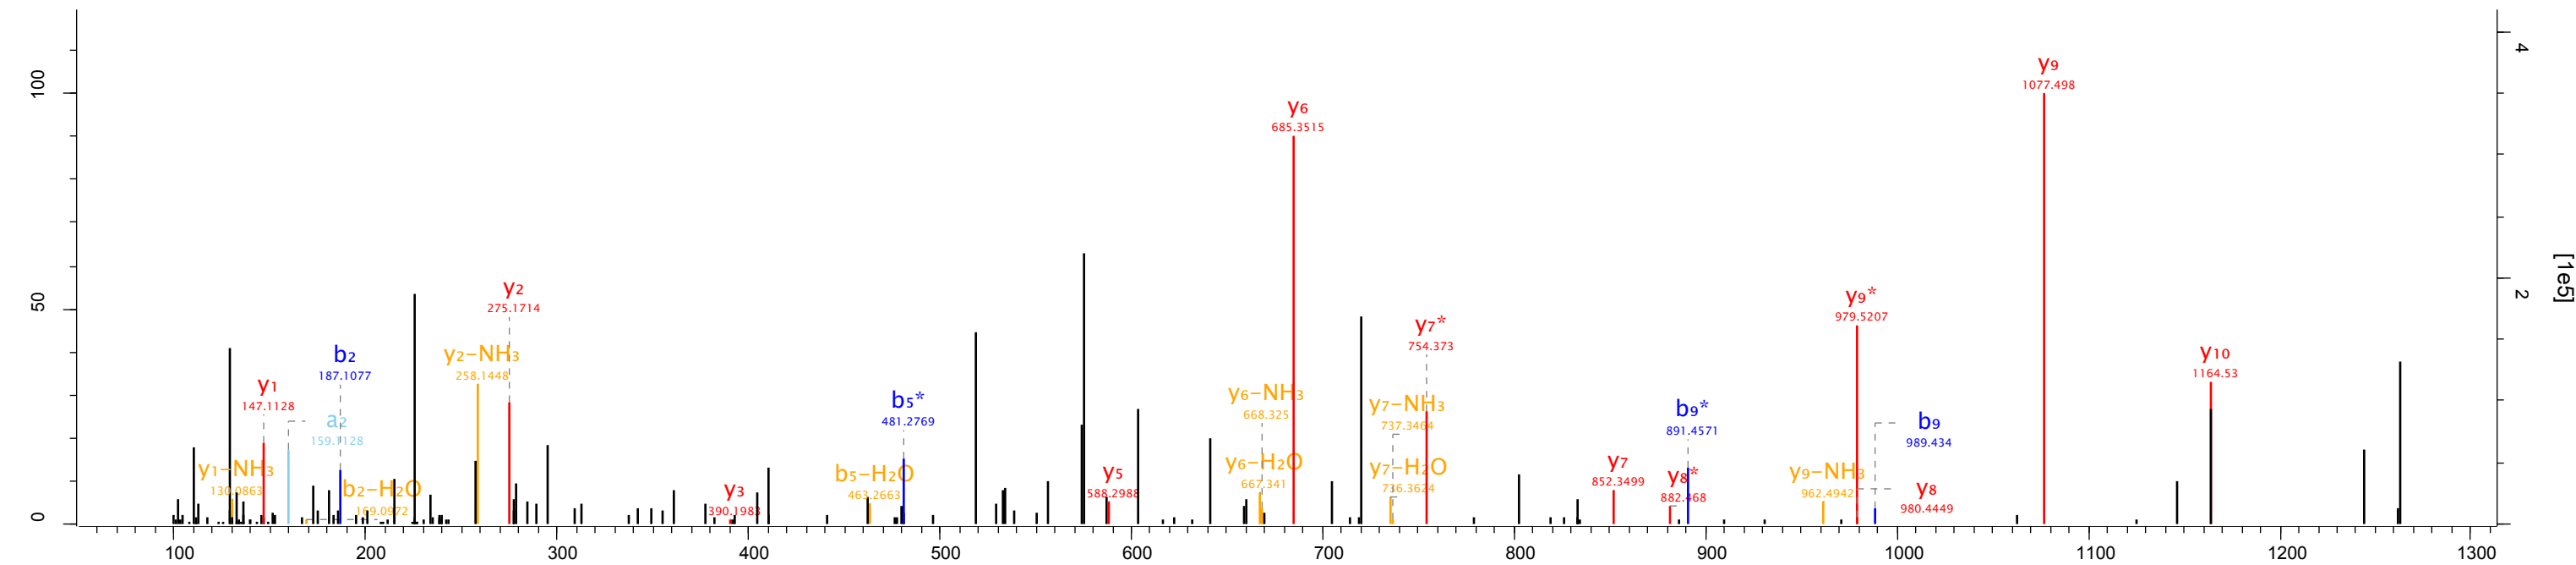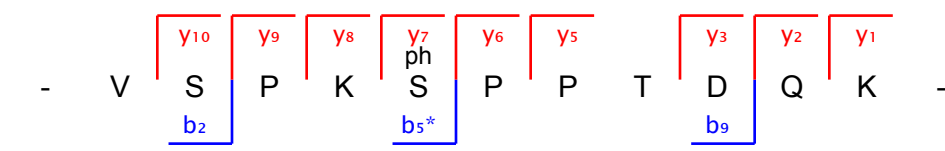

Raw file: 20150814\_A375SR\_Phospho\_BR2\_05  
 Scan: 4572 Method: FTMS; HCD Score: 176.32 m/z: 636.28 Gene names: SRSF1

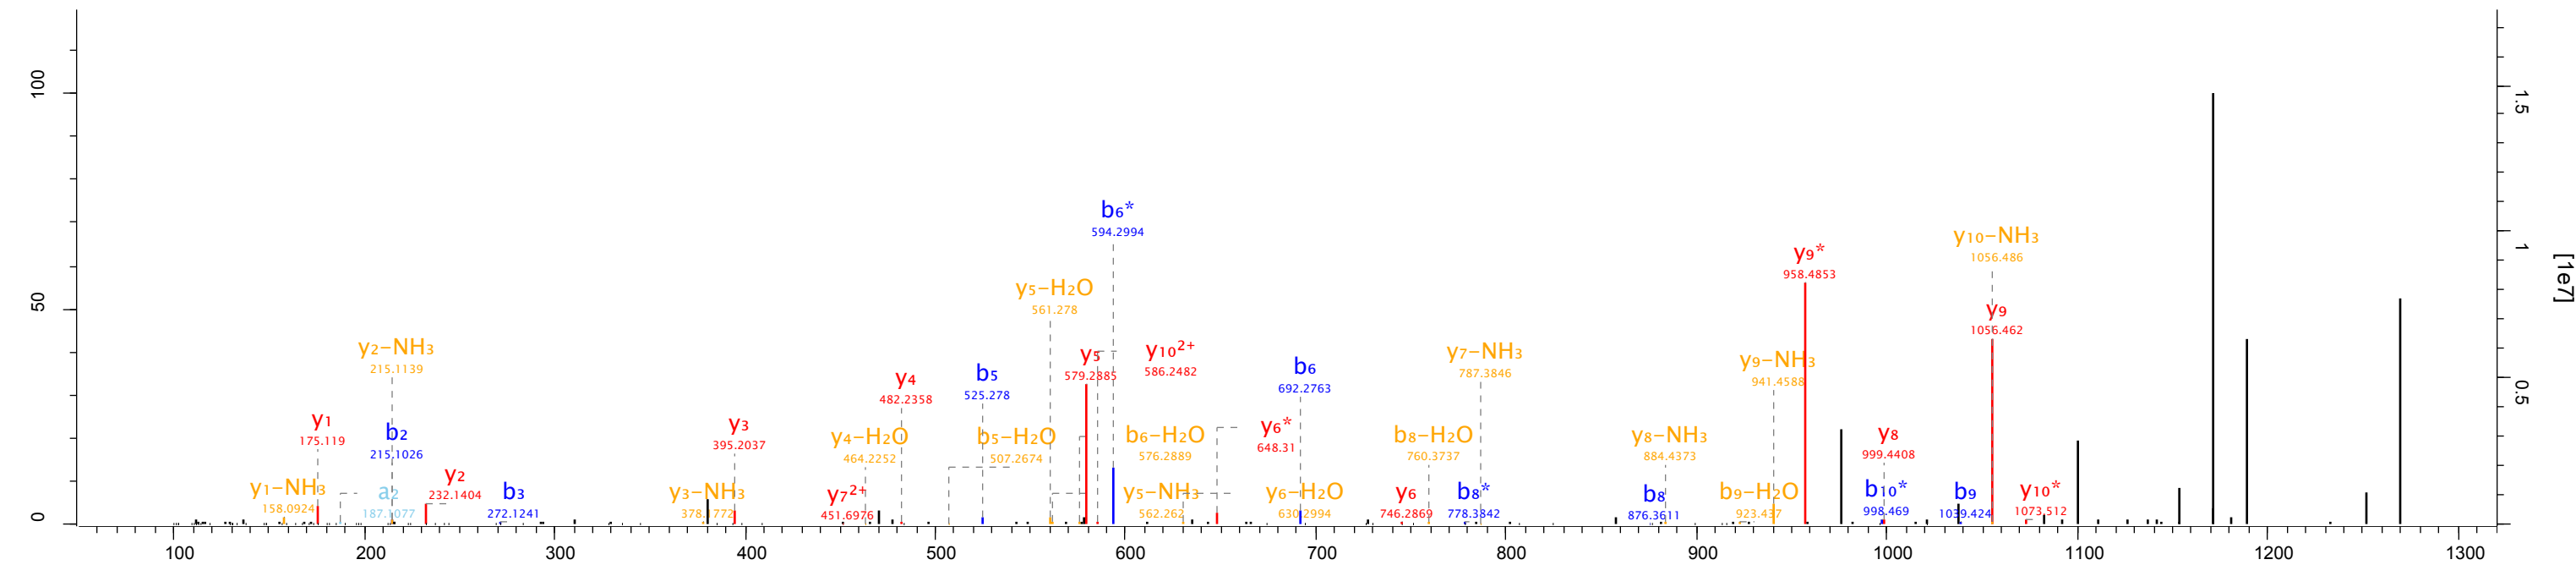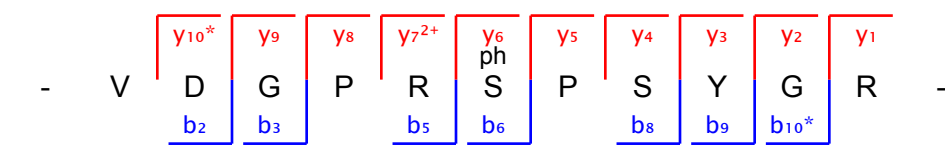

Raw file  
20150814\_A375SR\_Phospho\_BR2\_05  
Scan 4732 Method FTMS; HCD Score 53.76 m/z 630.79

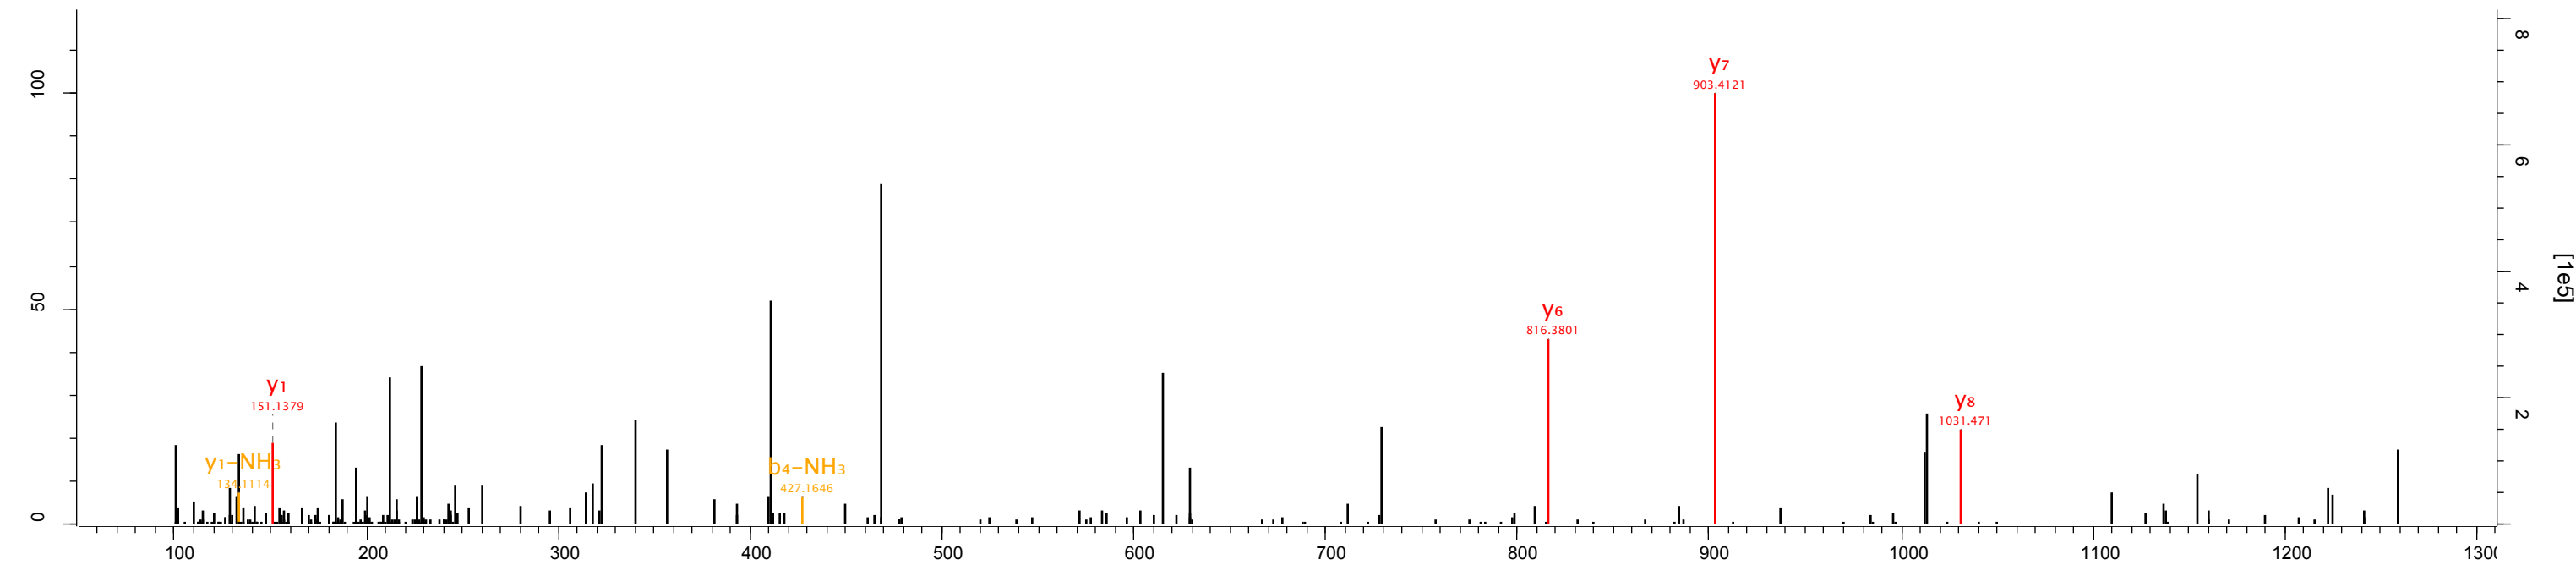

- P M Q S Q L E S Q K -  
          y8 y7 y6          y1

Raw file 20150814\_A375SR\_Phospho\_BR2\_05 Scan 4772 Method FTMS; HCD Score 246.2 m/z 617.29 Gene names SEC61B

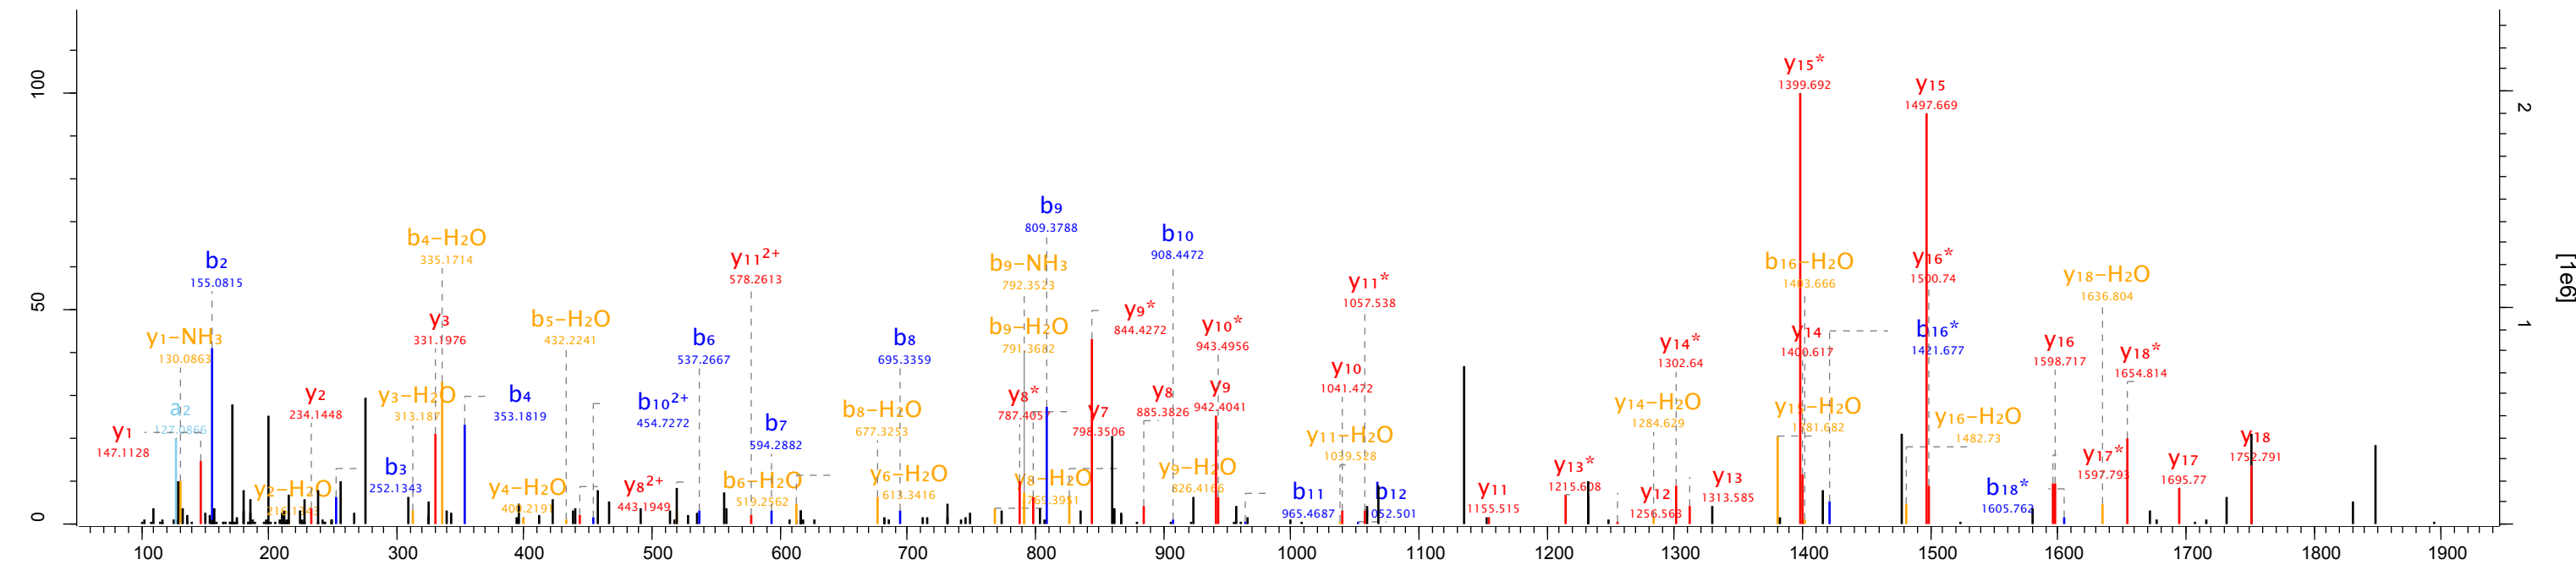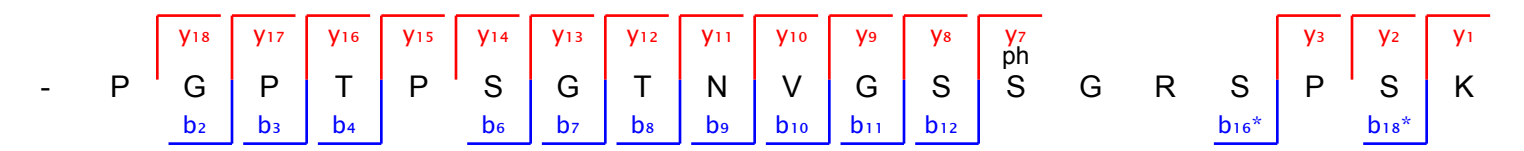

Raw file: 20150814\_A375SR\_Phospho\_BR2\_05  
 Scan: 4812 Method: FTMS; HCD Score: 144.18 m/z: 943.39 Gene names: EIF3B

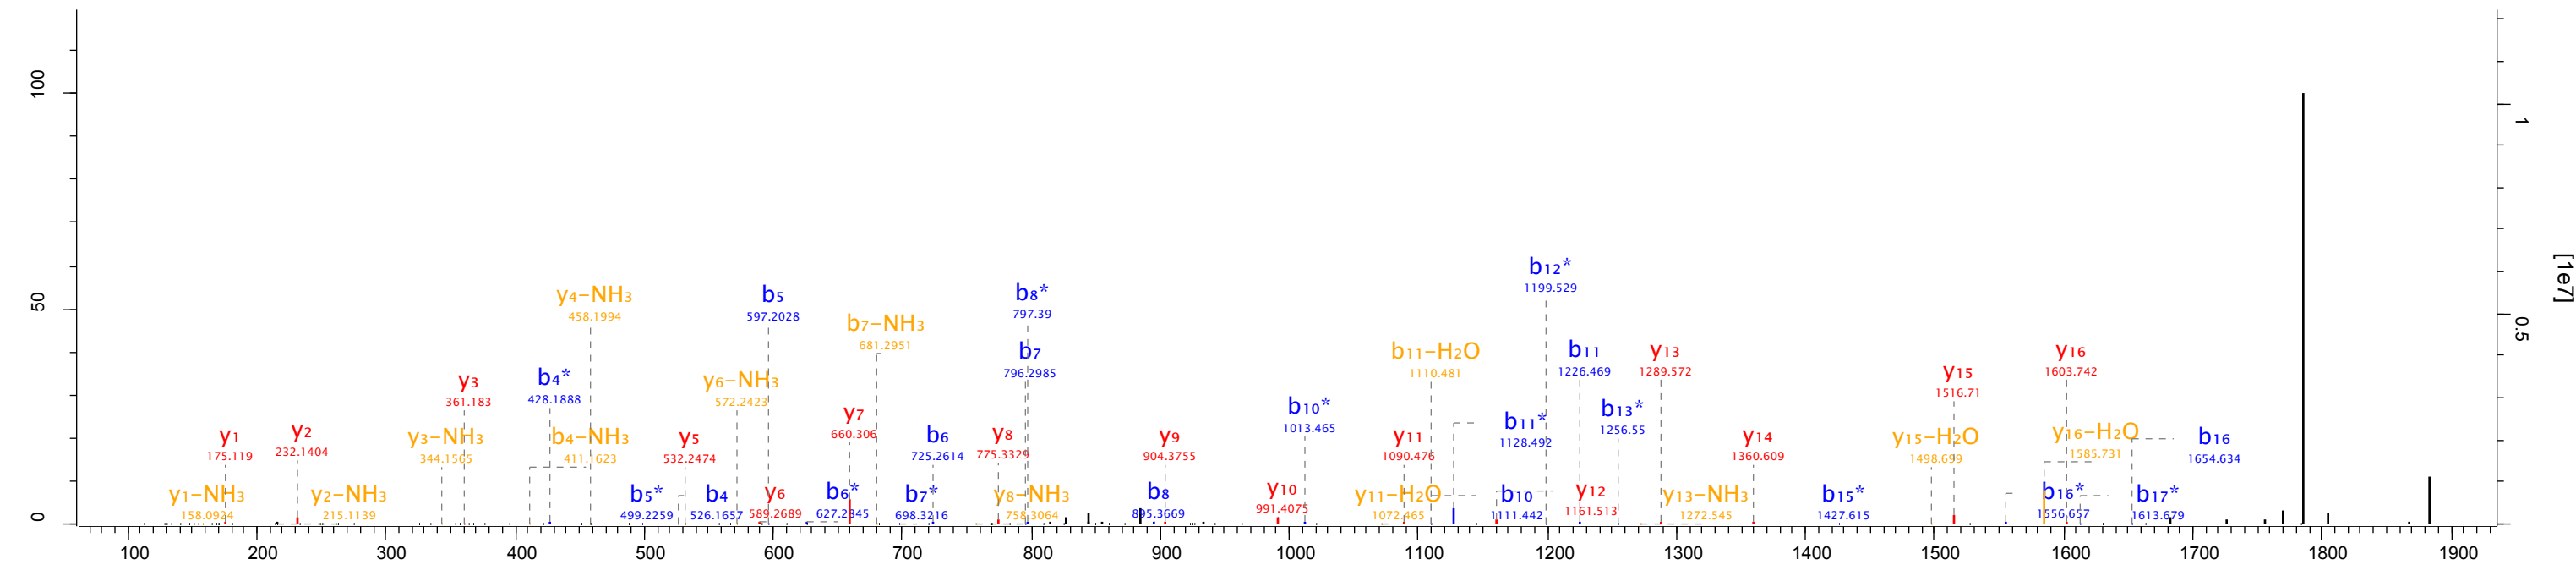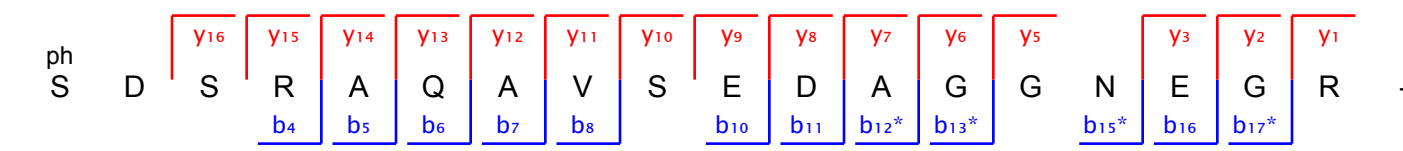

Raw file: 20150814\_A375SR\_Phospho\_BR2\_05  
 Scan: 5042 Method: FTMS; HCD Score: 126.71 m/z: 518.24 Gene names: VCPIP1

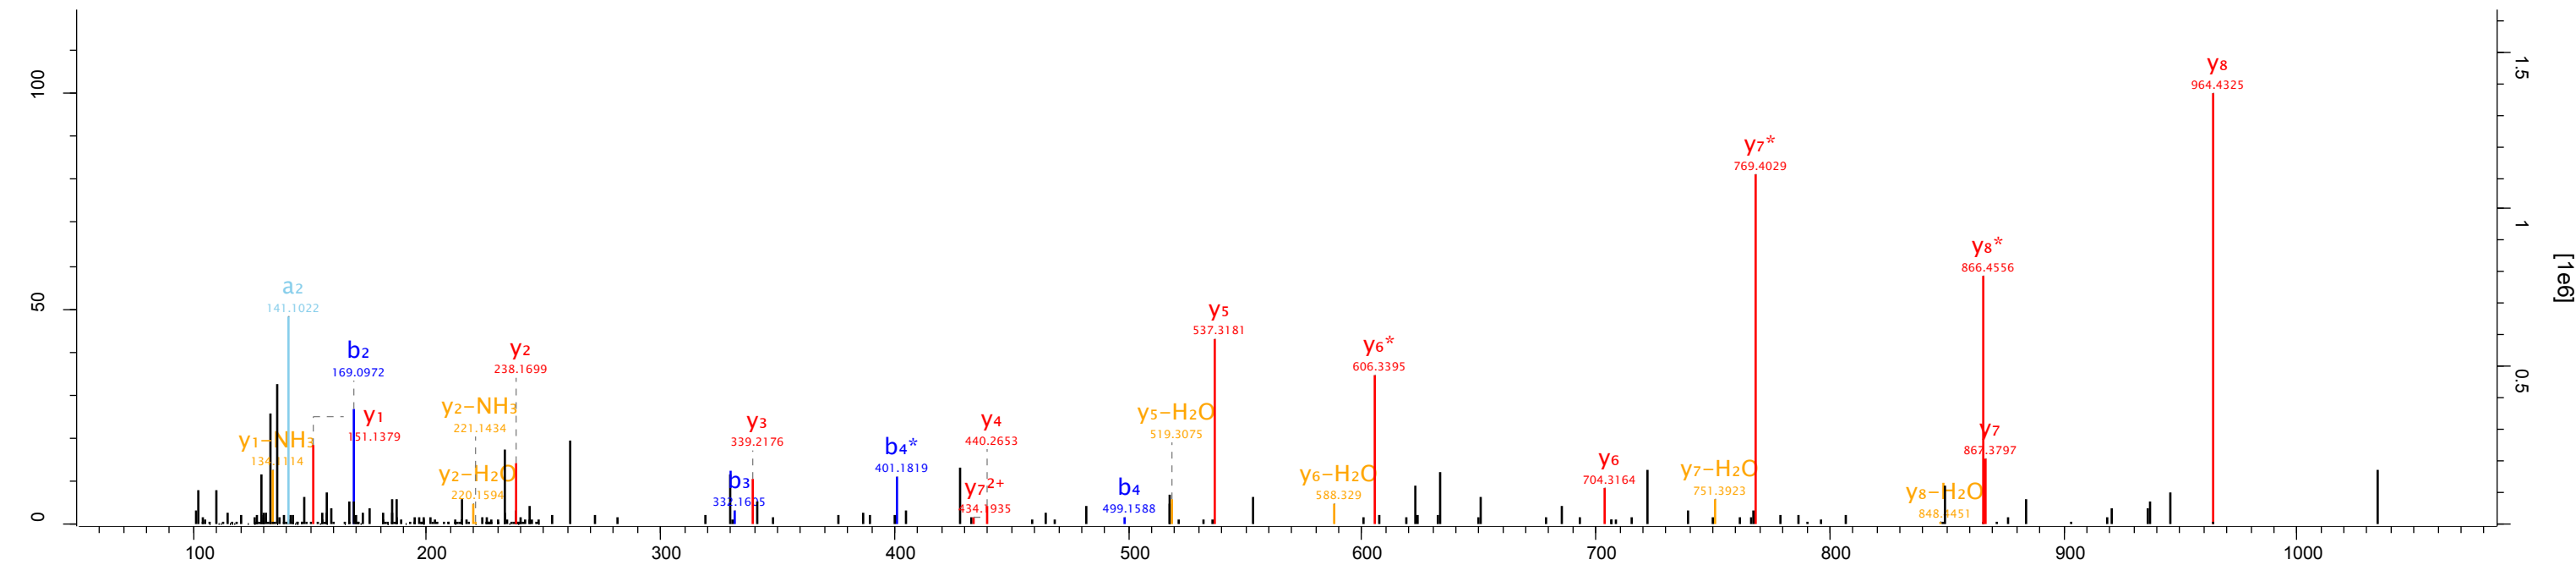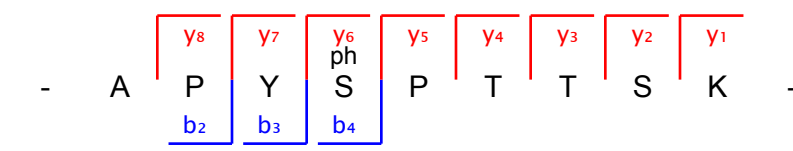



Raw file: 20150814\_A375SR\_Phospho\_BR2\_05  
 Scan: 5362 Method: FTMS; HCD Score: 154.48 m/z: 825.37 Gene names: SYMPK

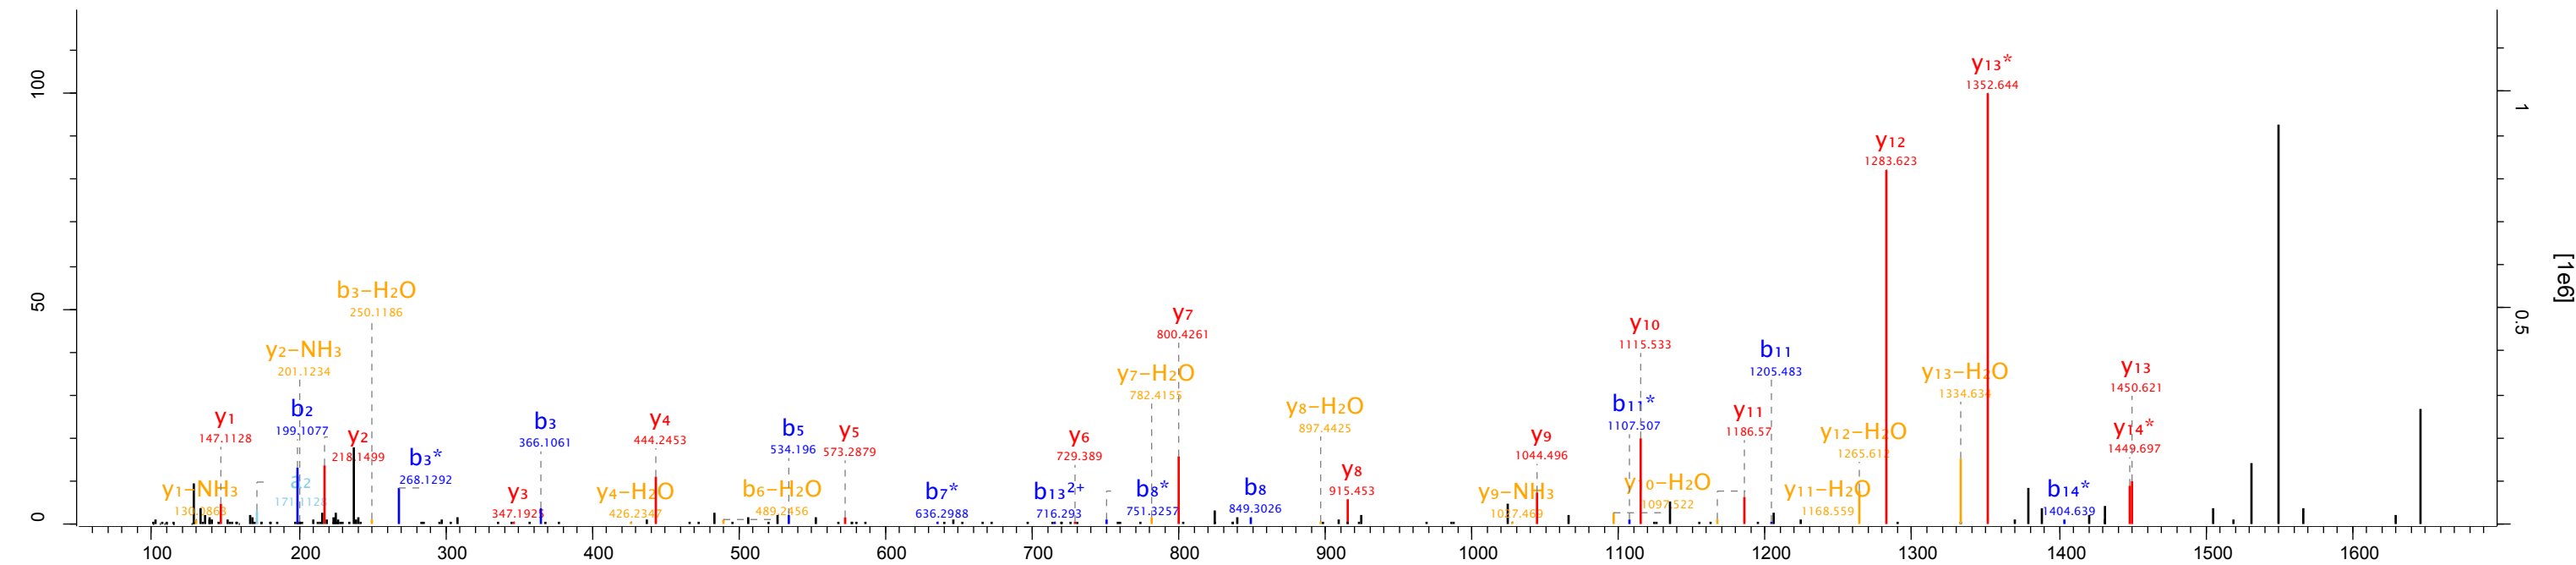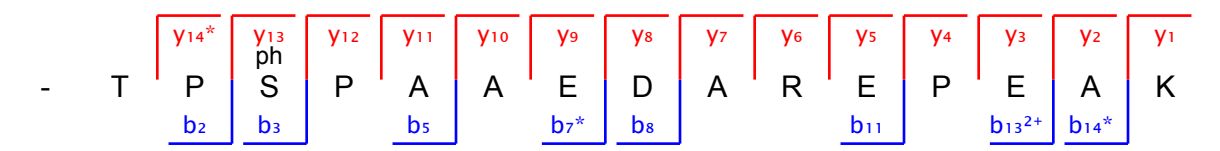

Raw file: 20150814\_A375SR\_Phospho\_BR2\_05  
 Scan: 5612 Method: FTMS; HCD Score: 86.94 m/z: 387.18 Gene names: RIN1

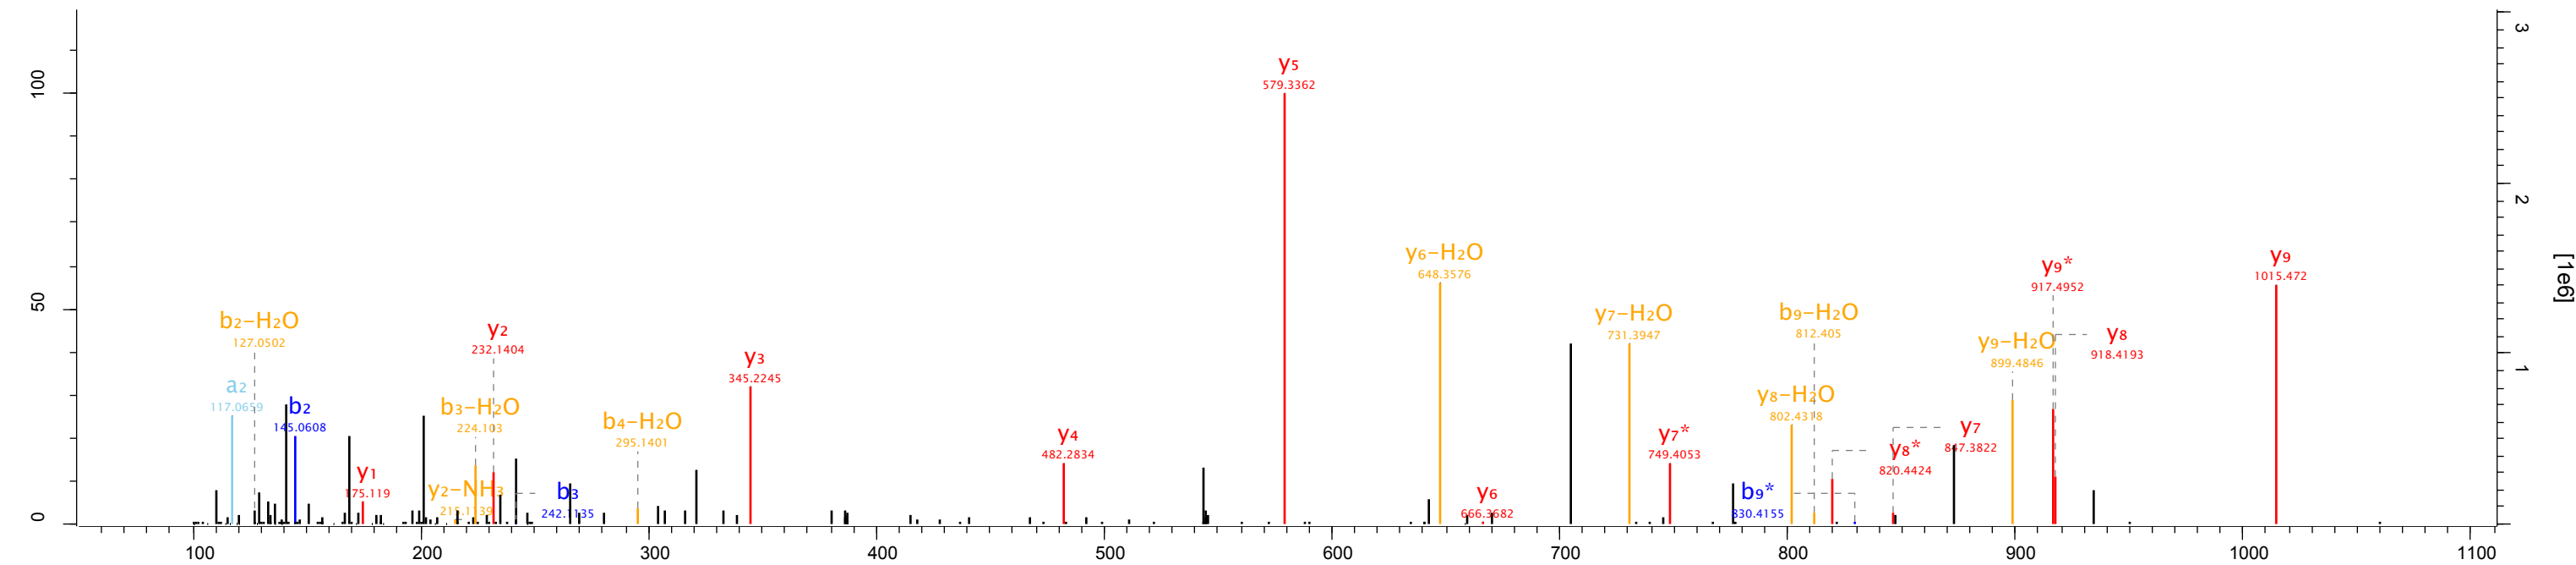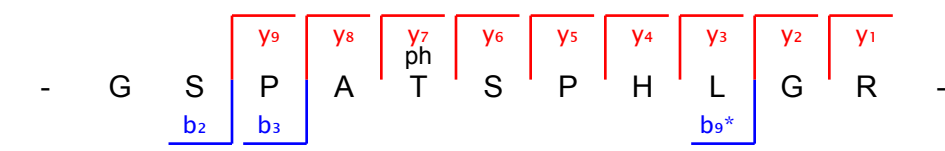

Raw file: 20150814\_A375SR\_Phospho\_BR2\_05  
 Scan: 5892 Method: FTMS; HCD Score: 74.14 m/z: 736.33 Gene names: PHRF1

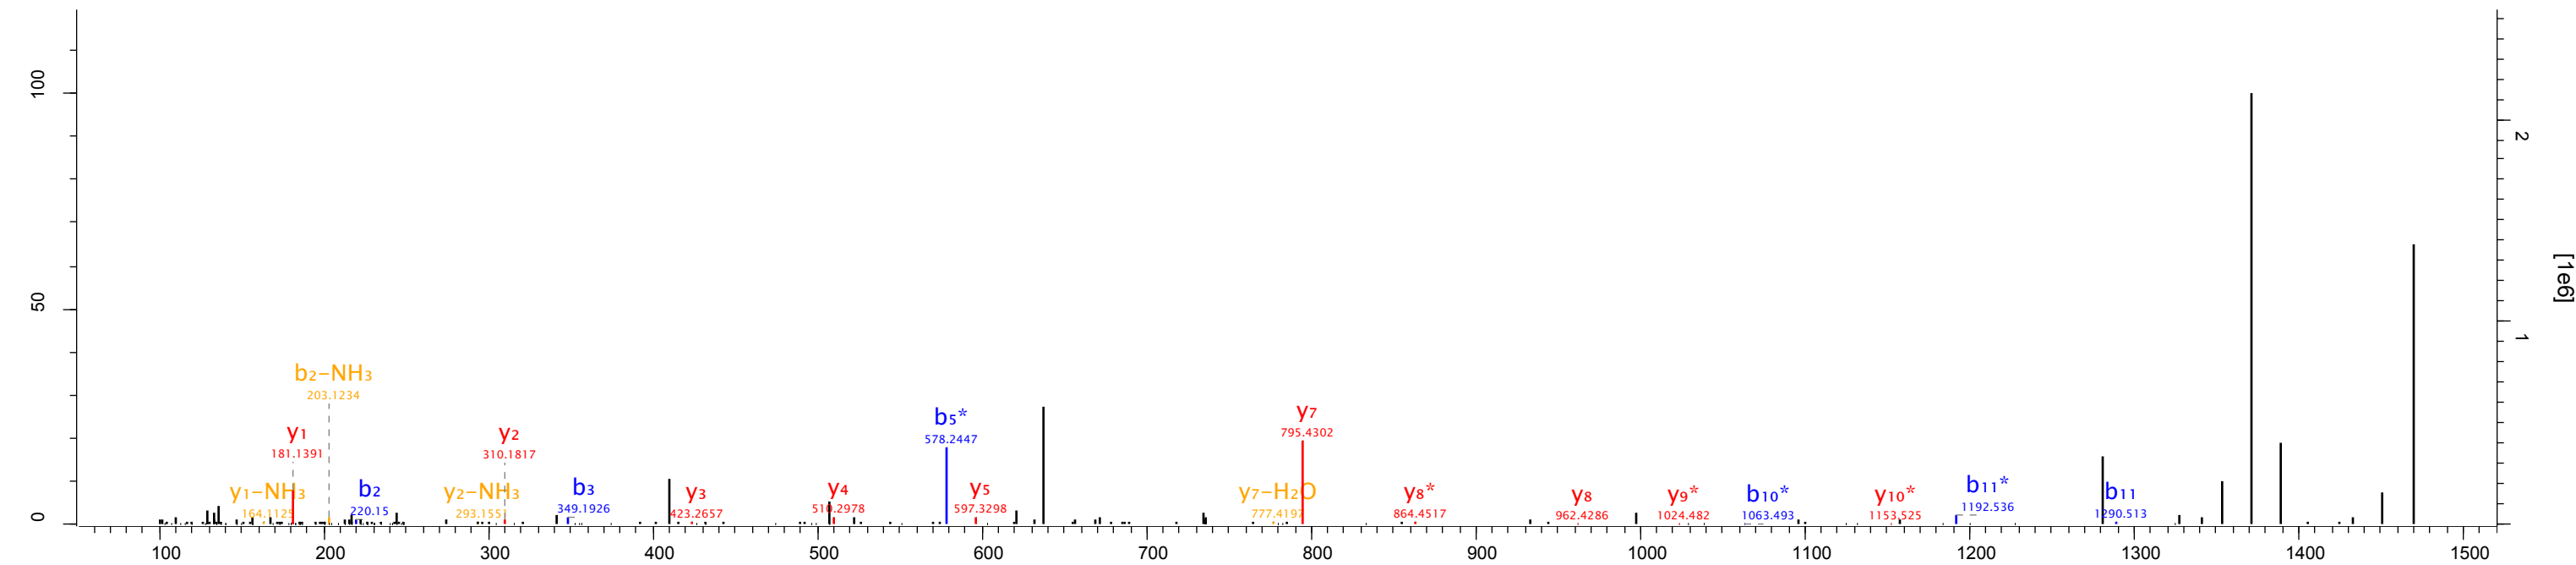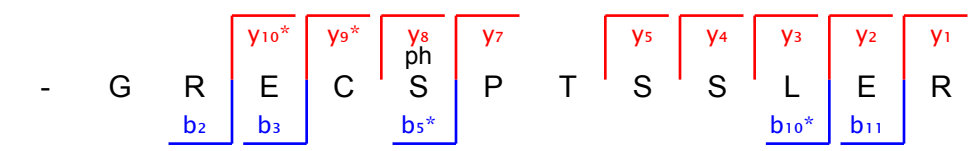

20150814\_A375SR\_Phospho\_BR2\_05 6092 FTMS; HCD 146.67 776.83 LRRFIP2

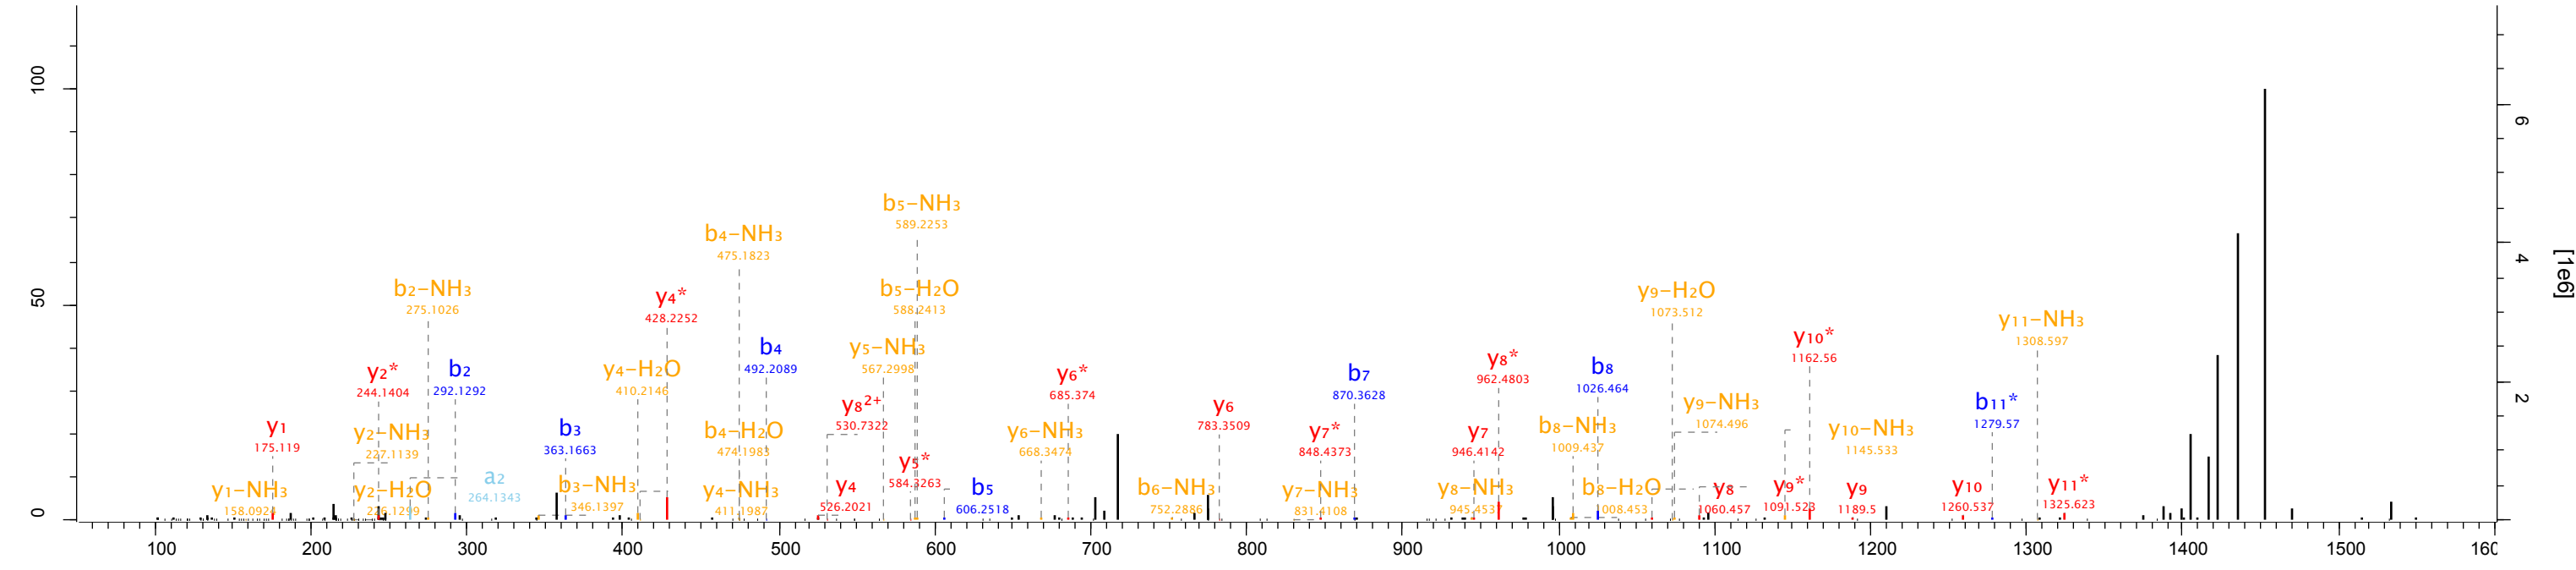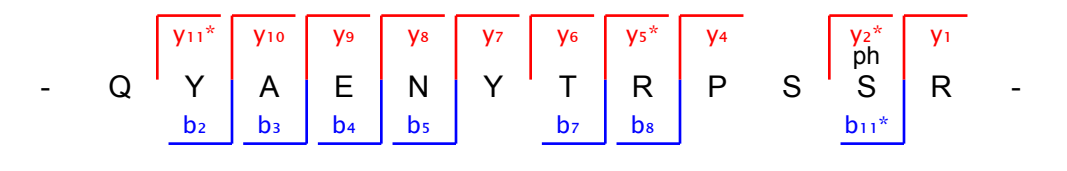

Raw file 20150814\_A375SR\_Phospho\_BR2\_05 Scan 6162 Method FTMS; HCD Score 286.7 m/z 825.83 Gene names DTD1

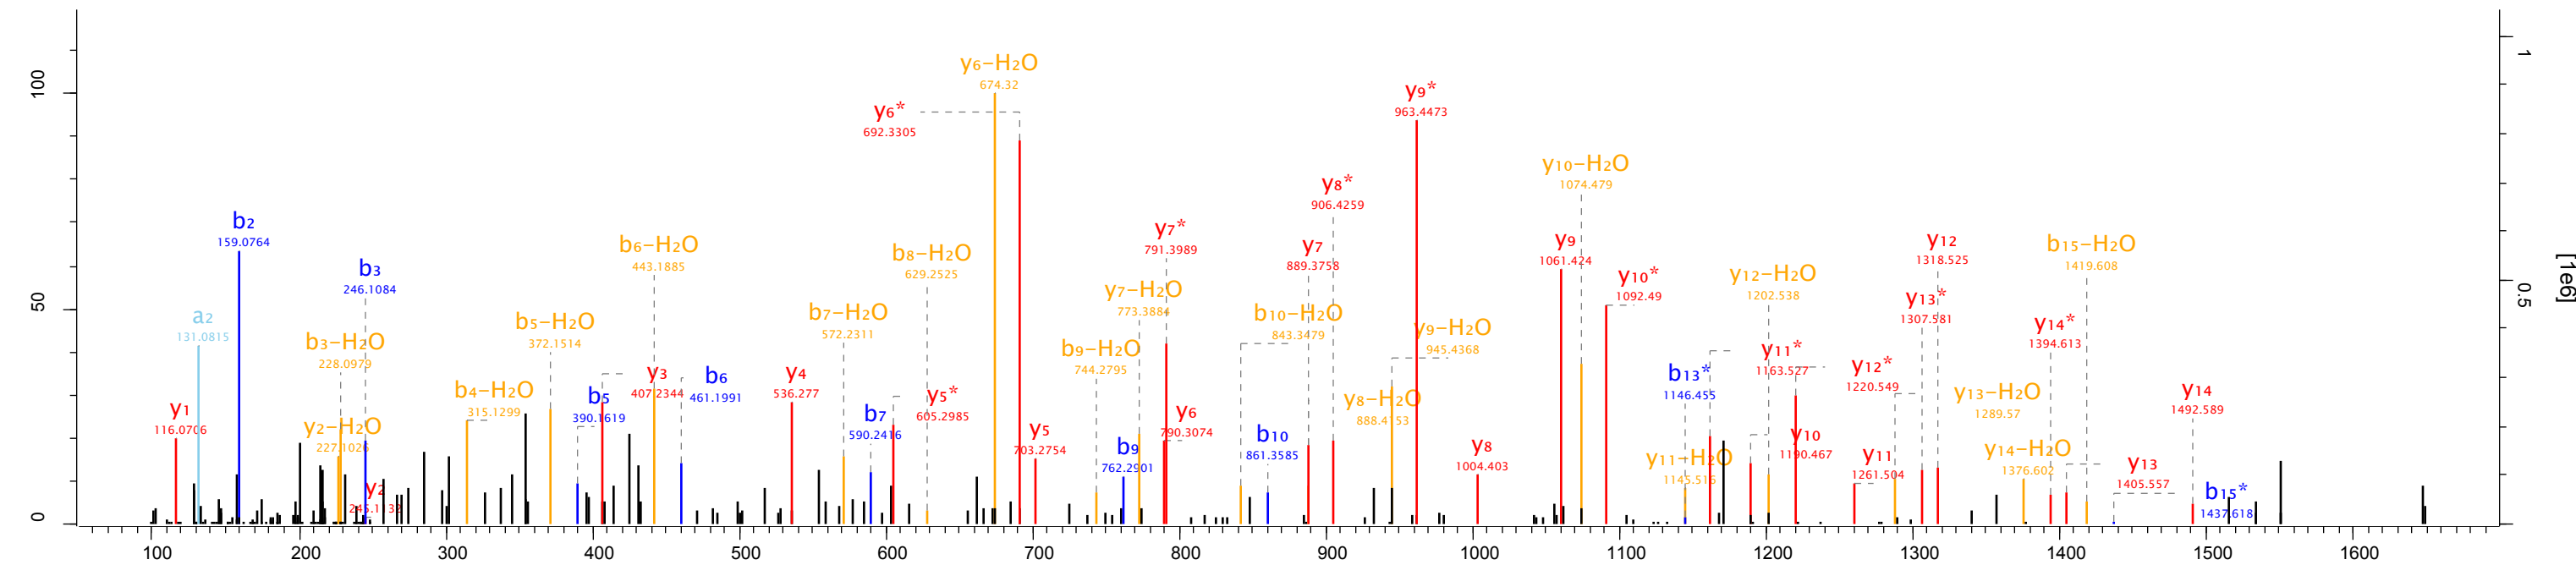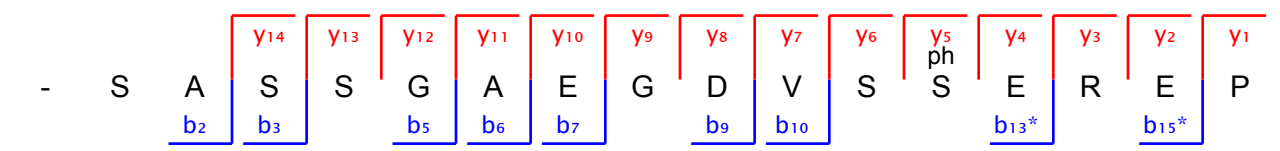

Raw file 20150814\_A375SR\_Phospho\_BR2\_05 Scan 6642 Method FTMS; HCD Score 168.74 m/z 664.84 Gene names ATXN2

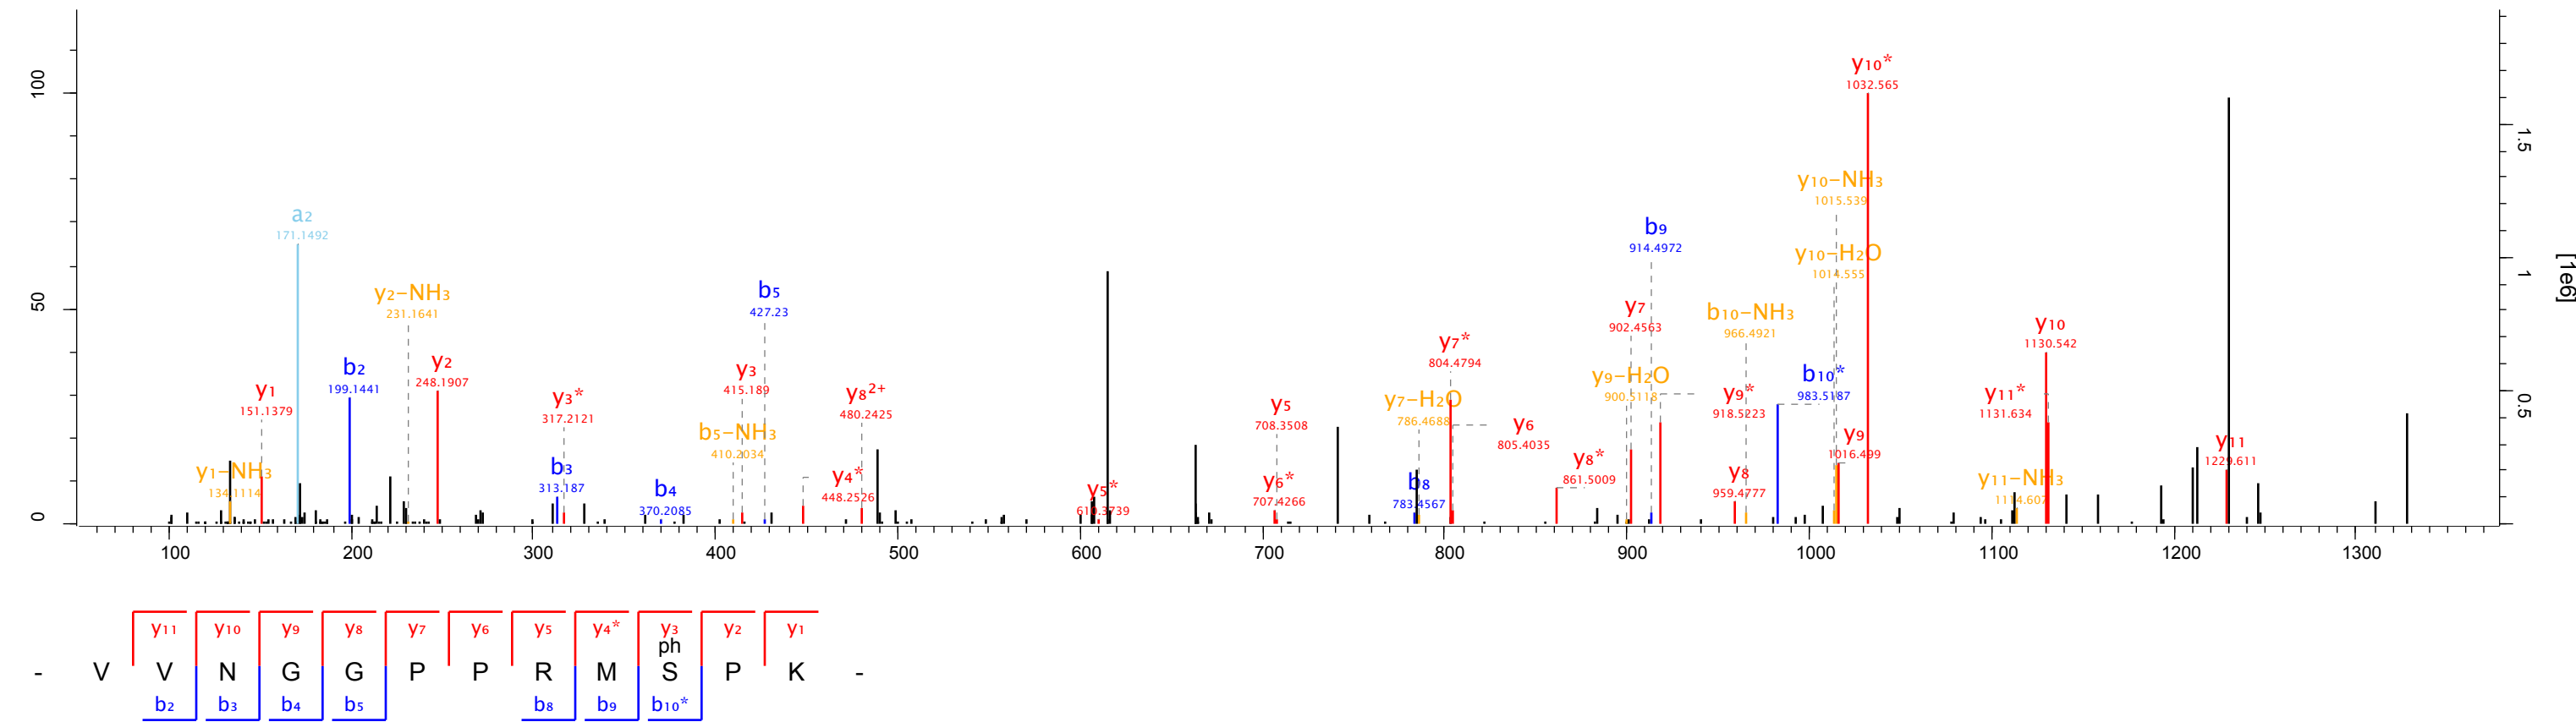

Raw file: 20150814\_A375SR\_Phospho\_BR2\_05  
 Scan: 6792 Method: FTMS; HCD Score: 170.27 m/z: 719.02 Gene names: ZFP91

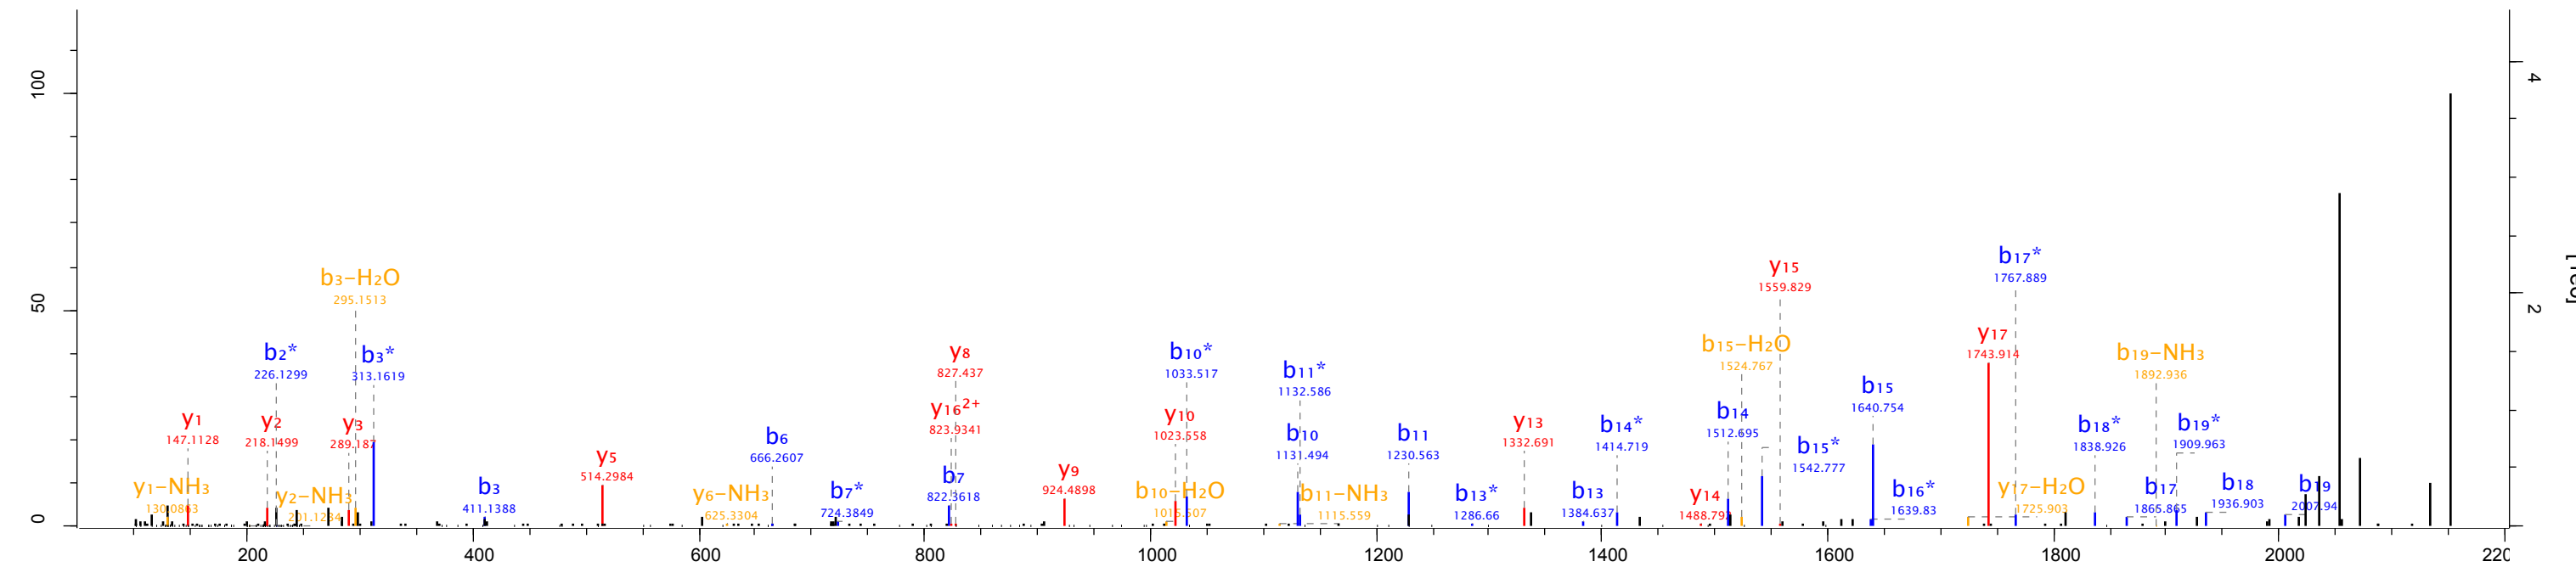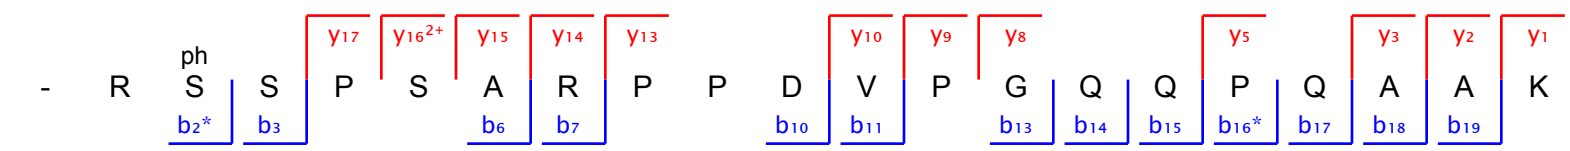

Raw file: 20150814\_A375SR\_Phospho\_BR2\_05  
 Scan: 7052 Method: FTMS; HCD Score: 98.37 m/z: 600.75 Gene names: SIPA1L2

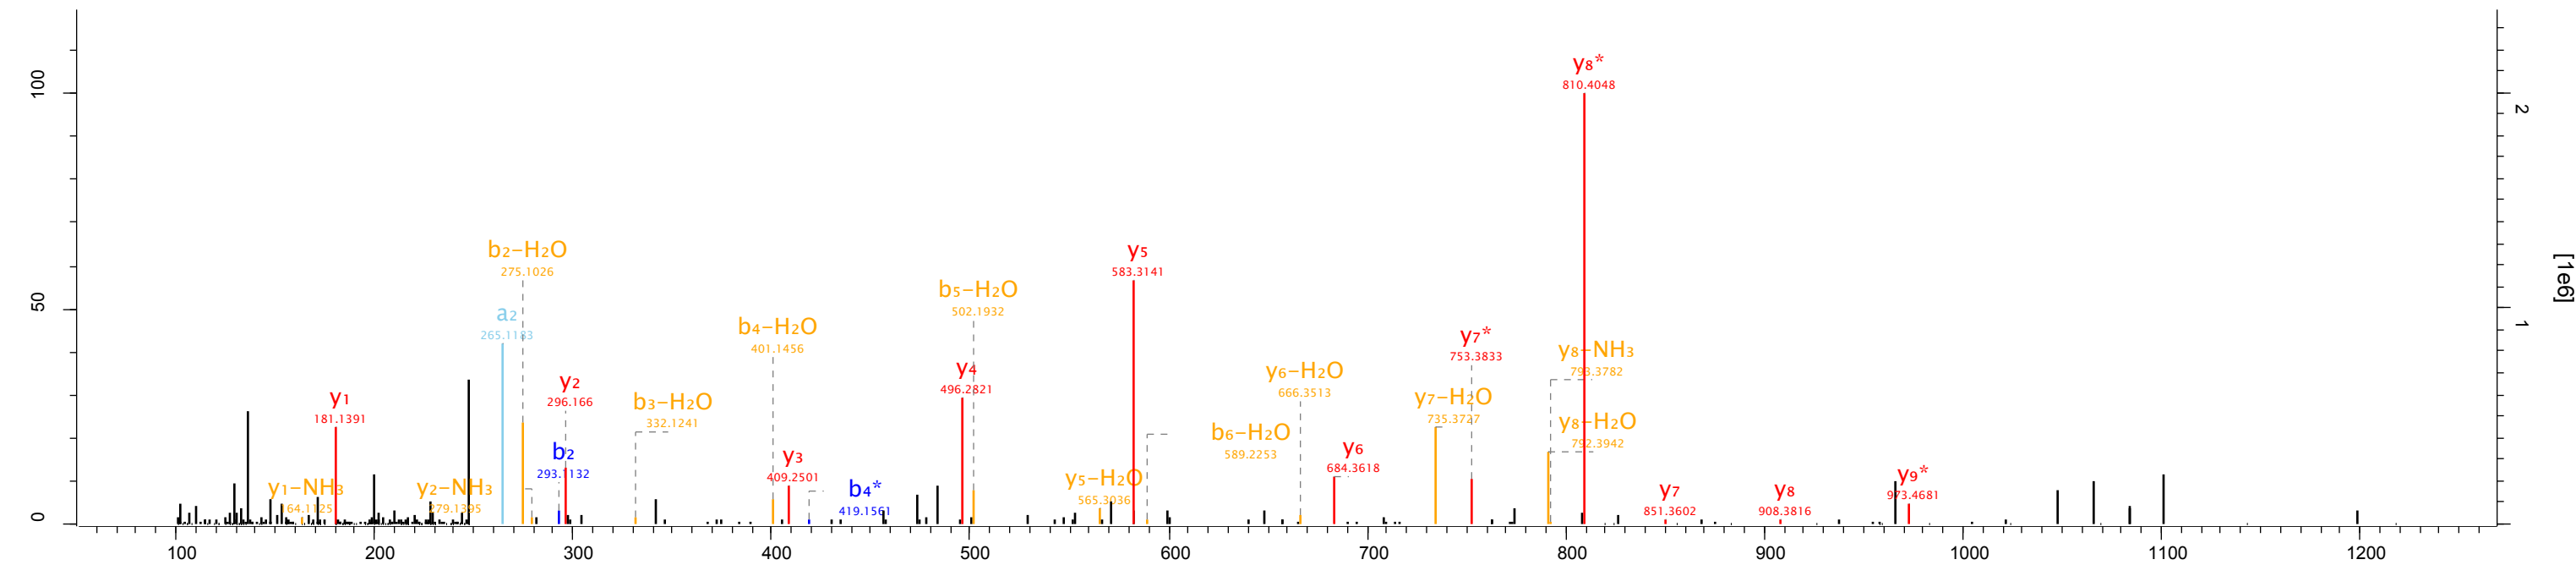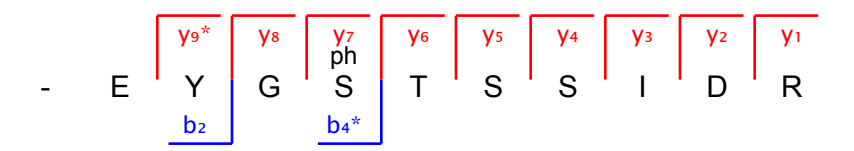





Raw file: 20150814\_A375SR\_Phospho\_BR2\_05  
 Scan: 8552 Method: FTMS; HCD Score: 130.66 m/z: 457.18 Gene names: CAV1

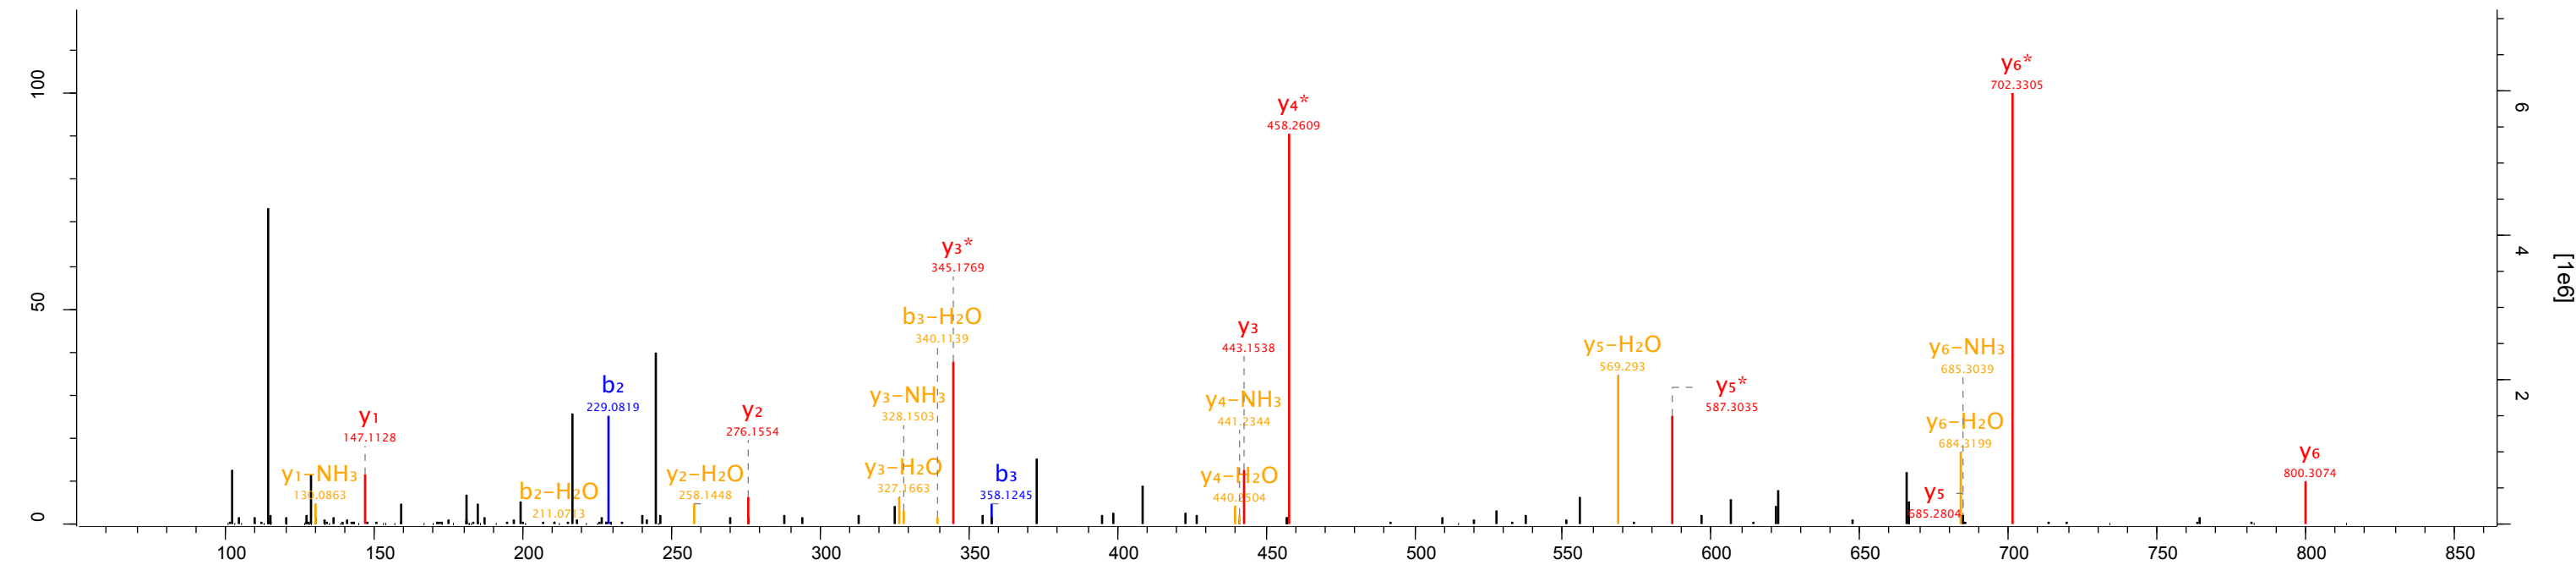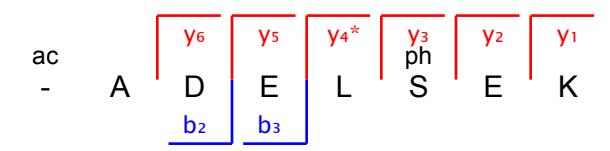

Raw file: 20150814\_A375SR\_Phospho\_BR2\_05  
 Scan: 8932 Method: FTMS; HCD Score: 129.77 m/z: 592.26 Gene names: MTDH

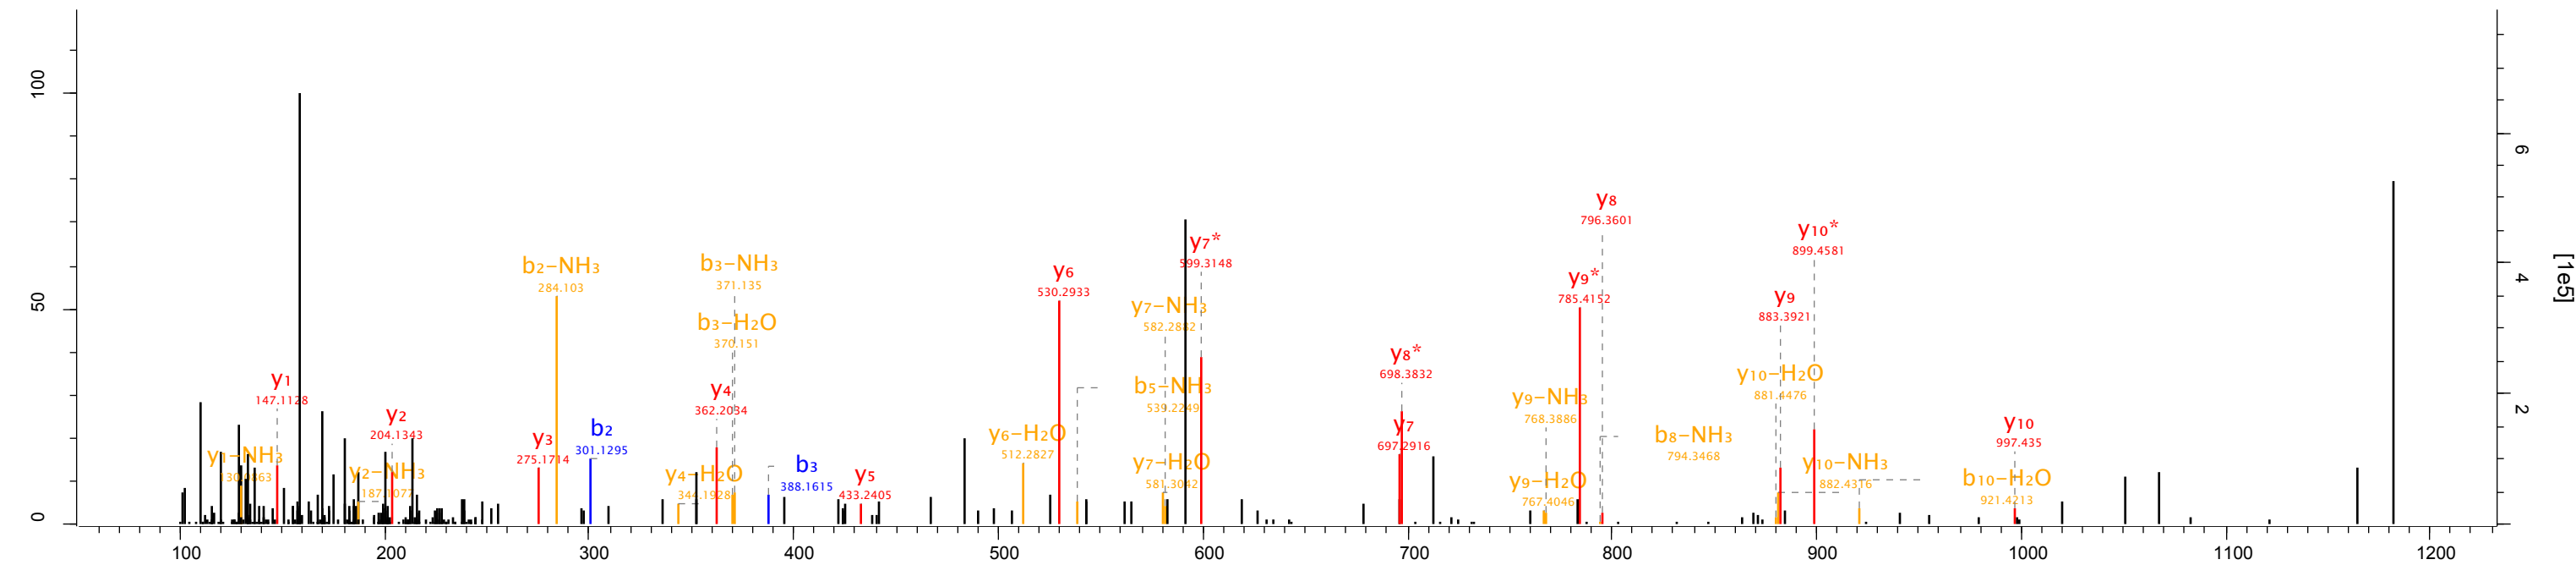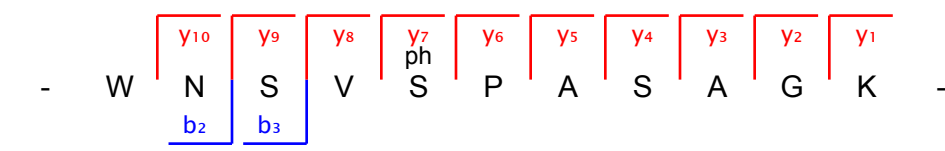

Raw file: 20150814\_A375SR\_Phospho\_BR2\_05  
 Scan: 9182 Method: FTMS; HCD Score: 209.89 m/z: 792.86 Gene names: PTPN14

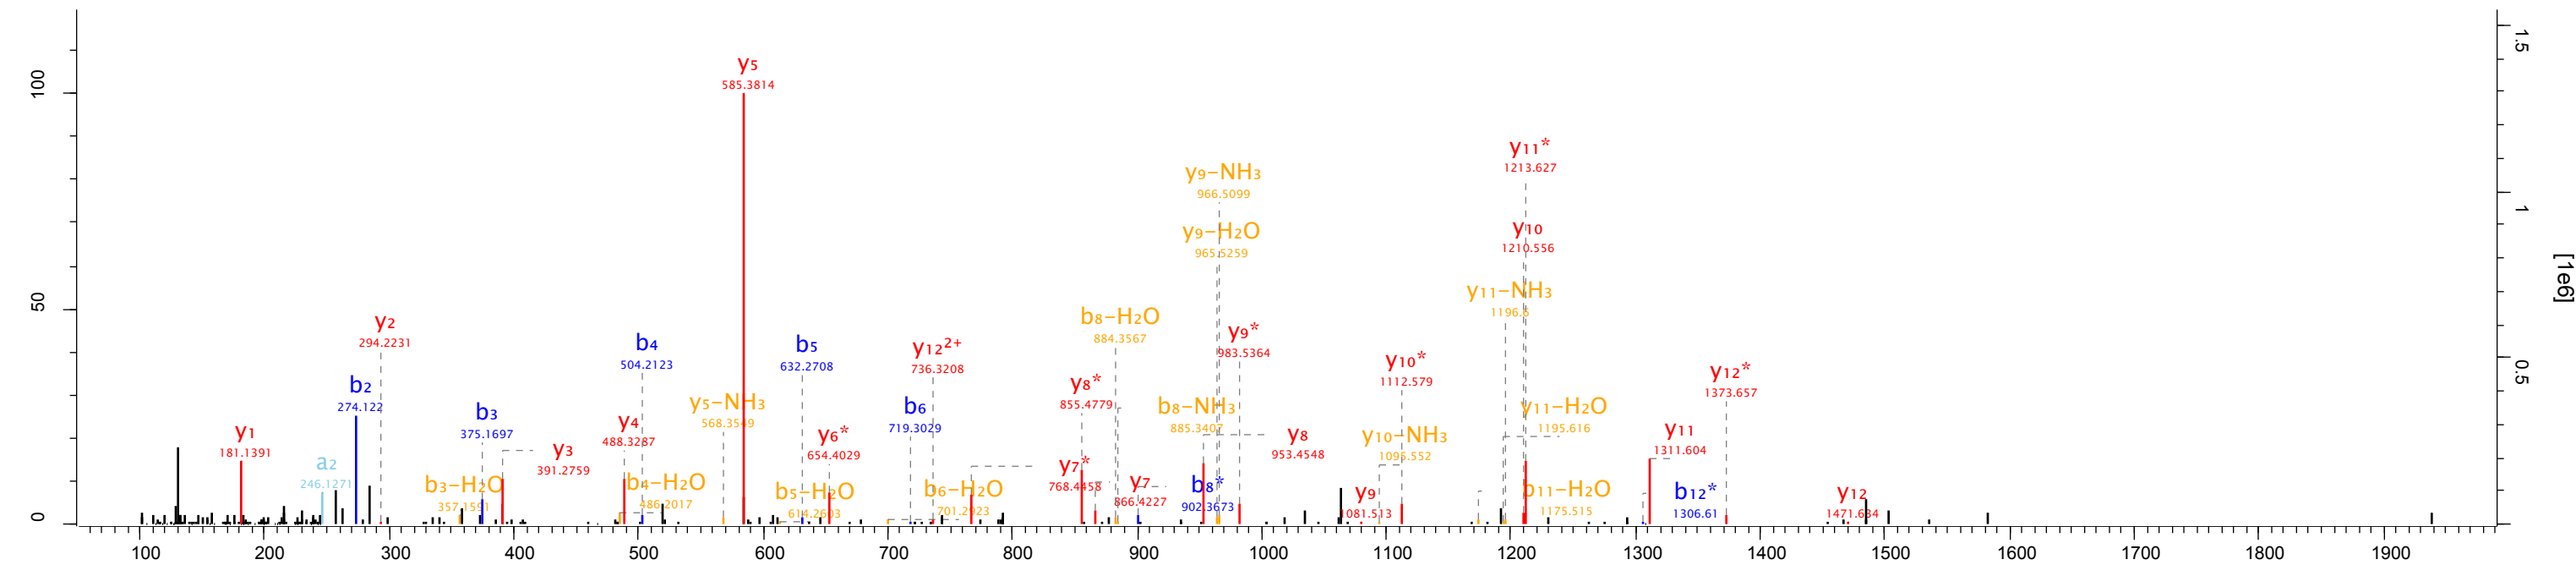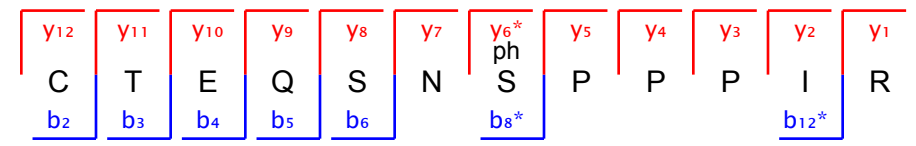

Raw file: 20150814\_A375SR\_Phospho\_BR2\_06  
 Scan: 10502 Method: FTMS; HCD Score: 139.28 m/z: 683.35 Gene names: SYNPO

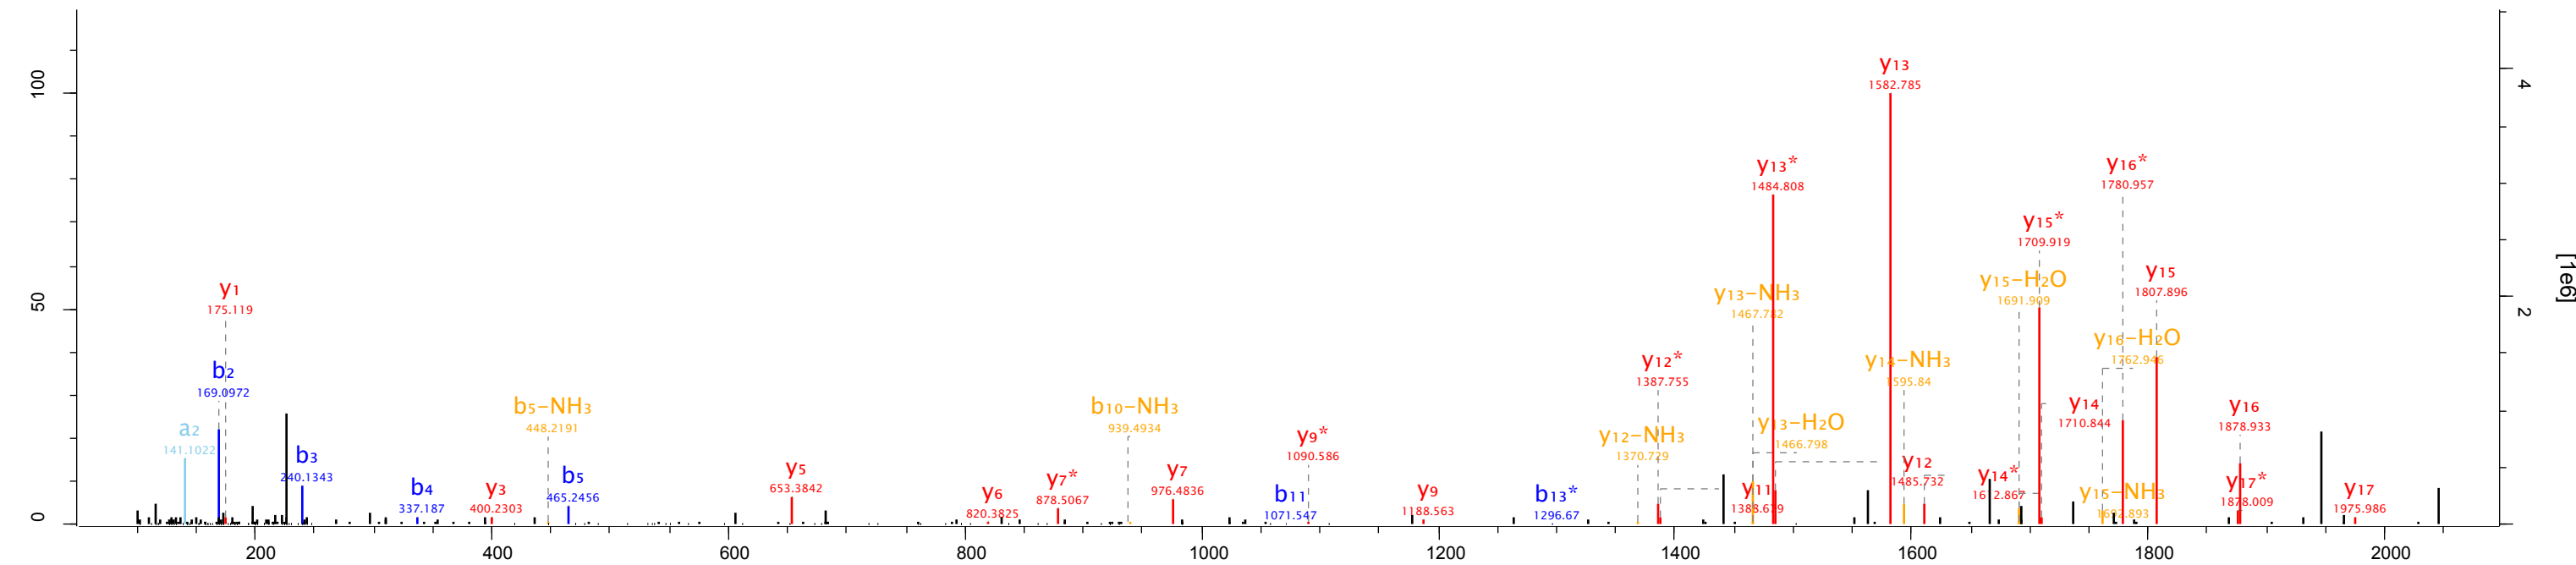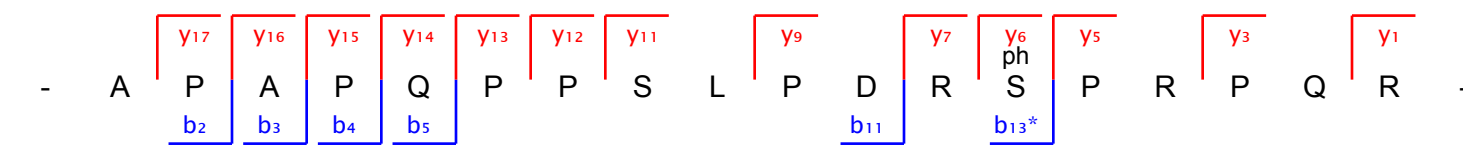

Raw file: 20150814\_A375SR\_Phospho\_BR2\_06  
 Scan: 10792 Method: FTMS; HCD Score: 126.71 m/z: 506.23 Gene names: SCRIB

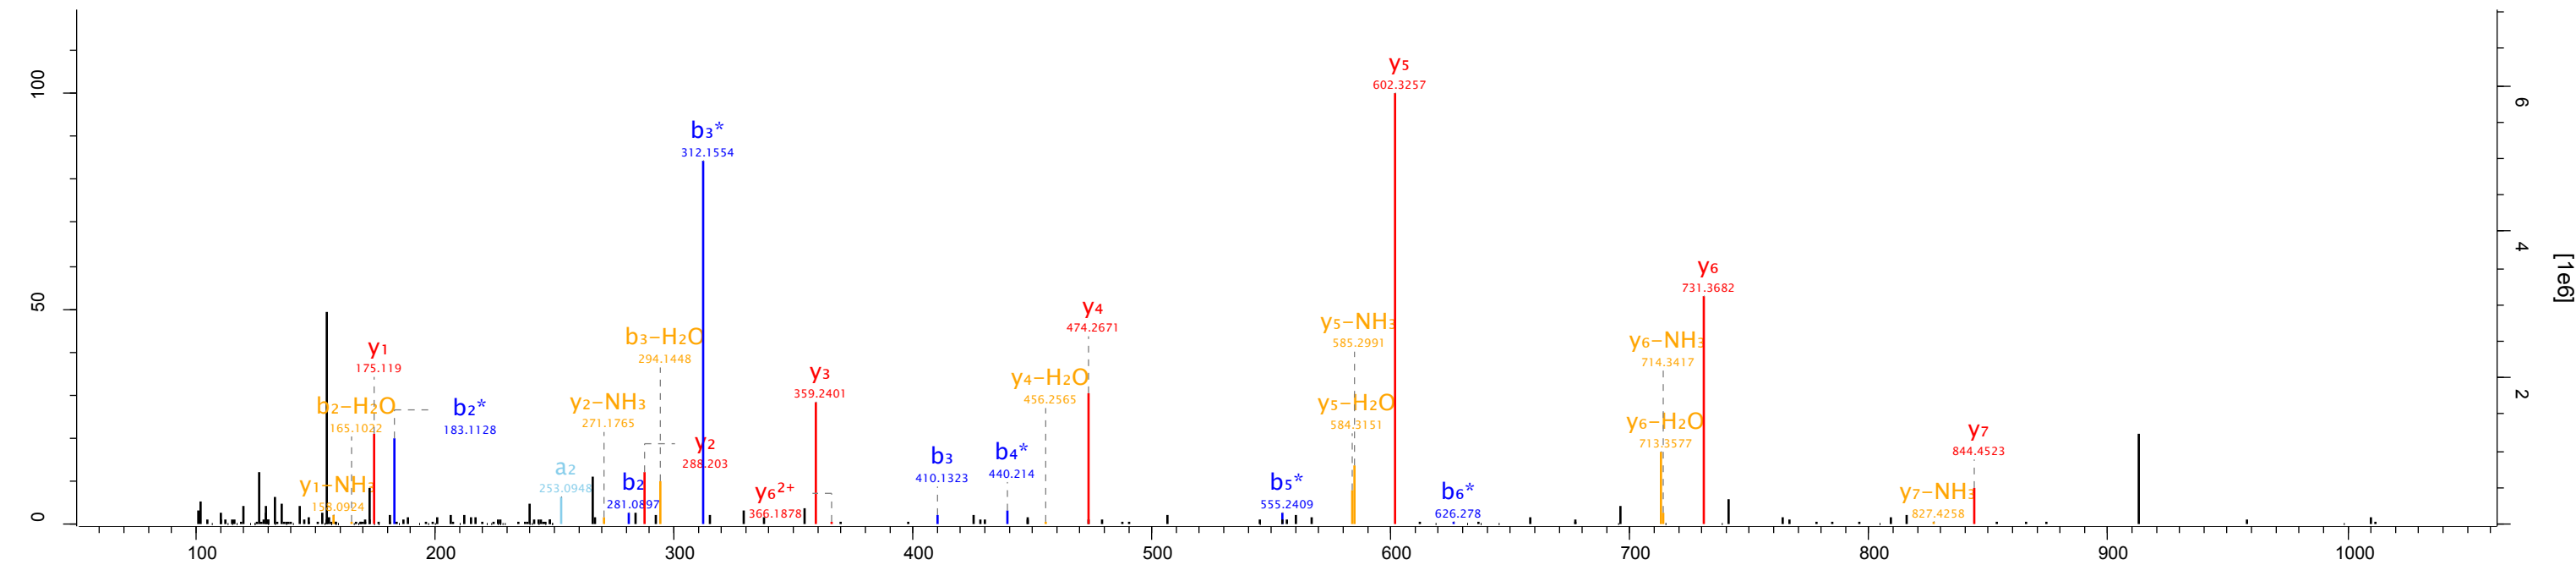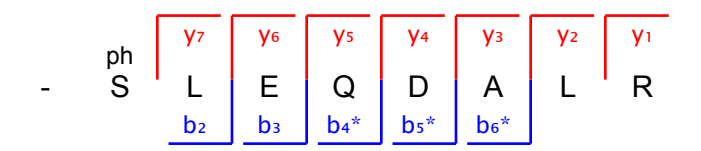

Raw file: 20150814\_A375SR\_Phospho\_BR2\_06  
 Scan: 12132 Method: FTMS; HCD Score: 191.78 m/z: 613.31 Gene names: ATAD2

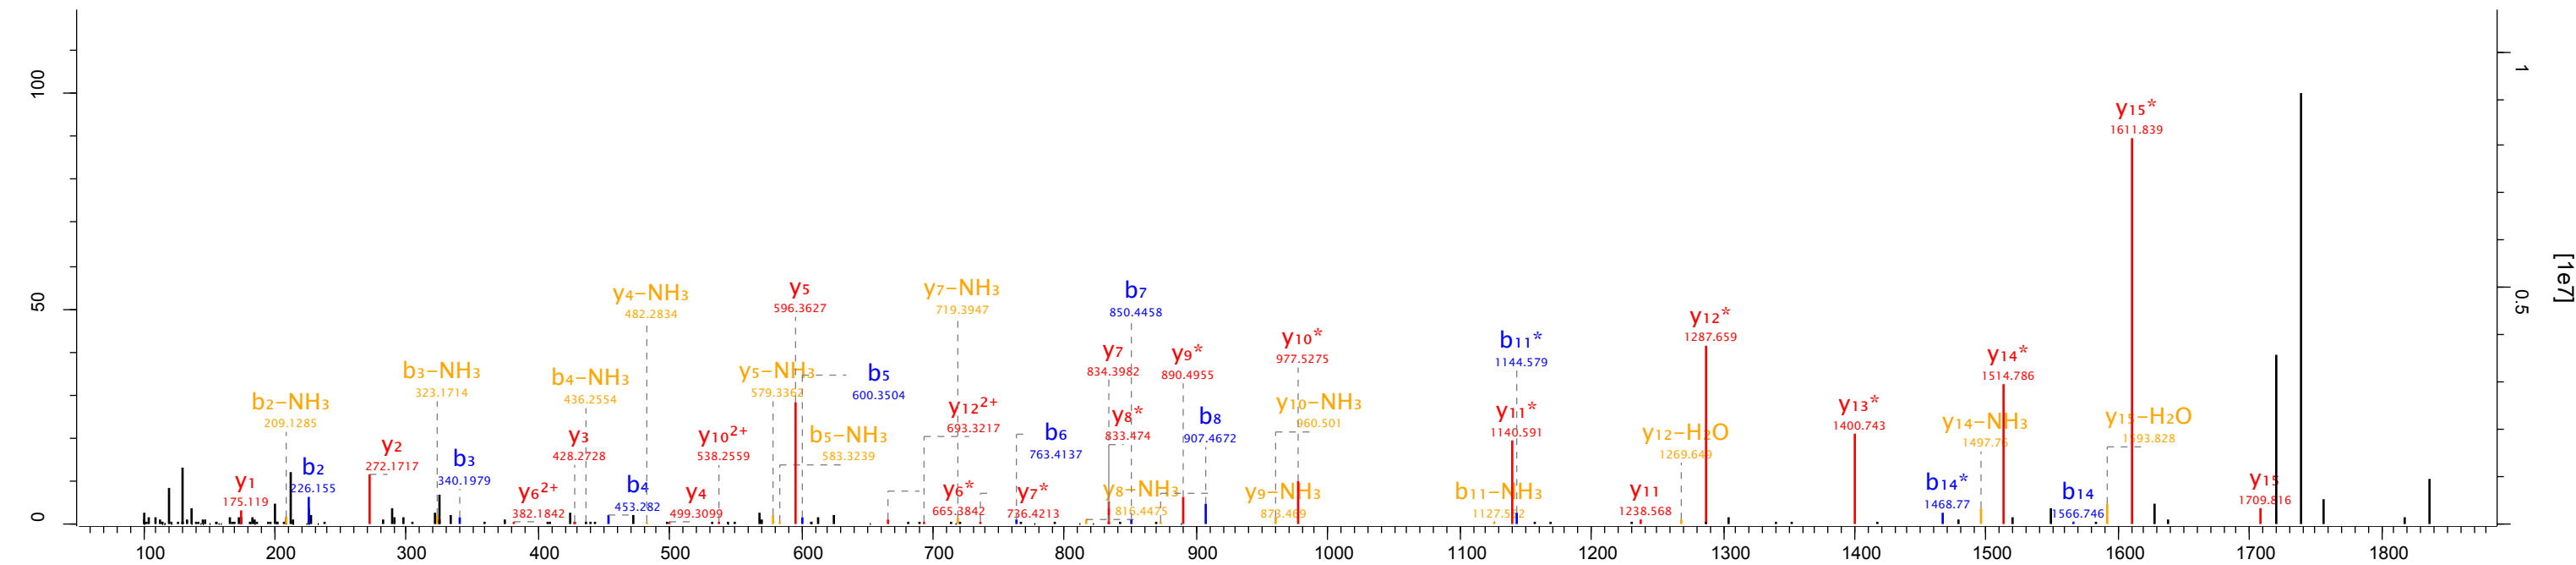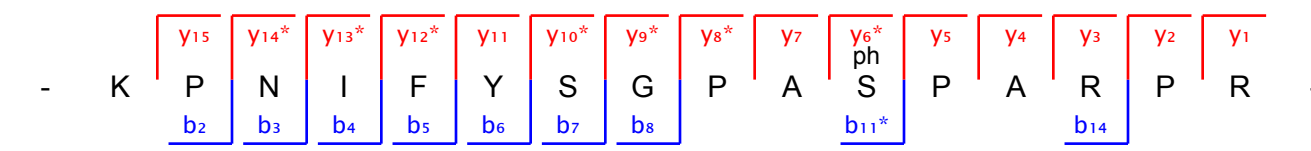

Raw file 20150814\_A375SR\_Phospho\_BR2\_06 Scan 12212 Method FTMS; HCD Score 107.53 m/z 574.27 Gene names RASSF8

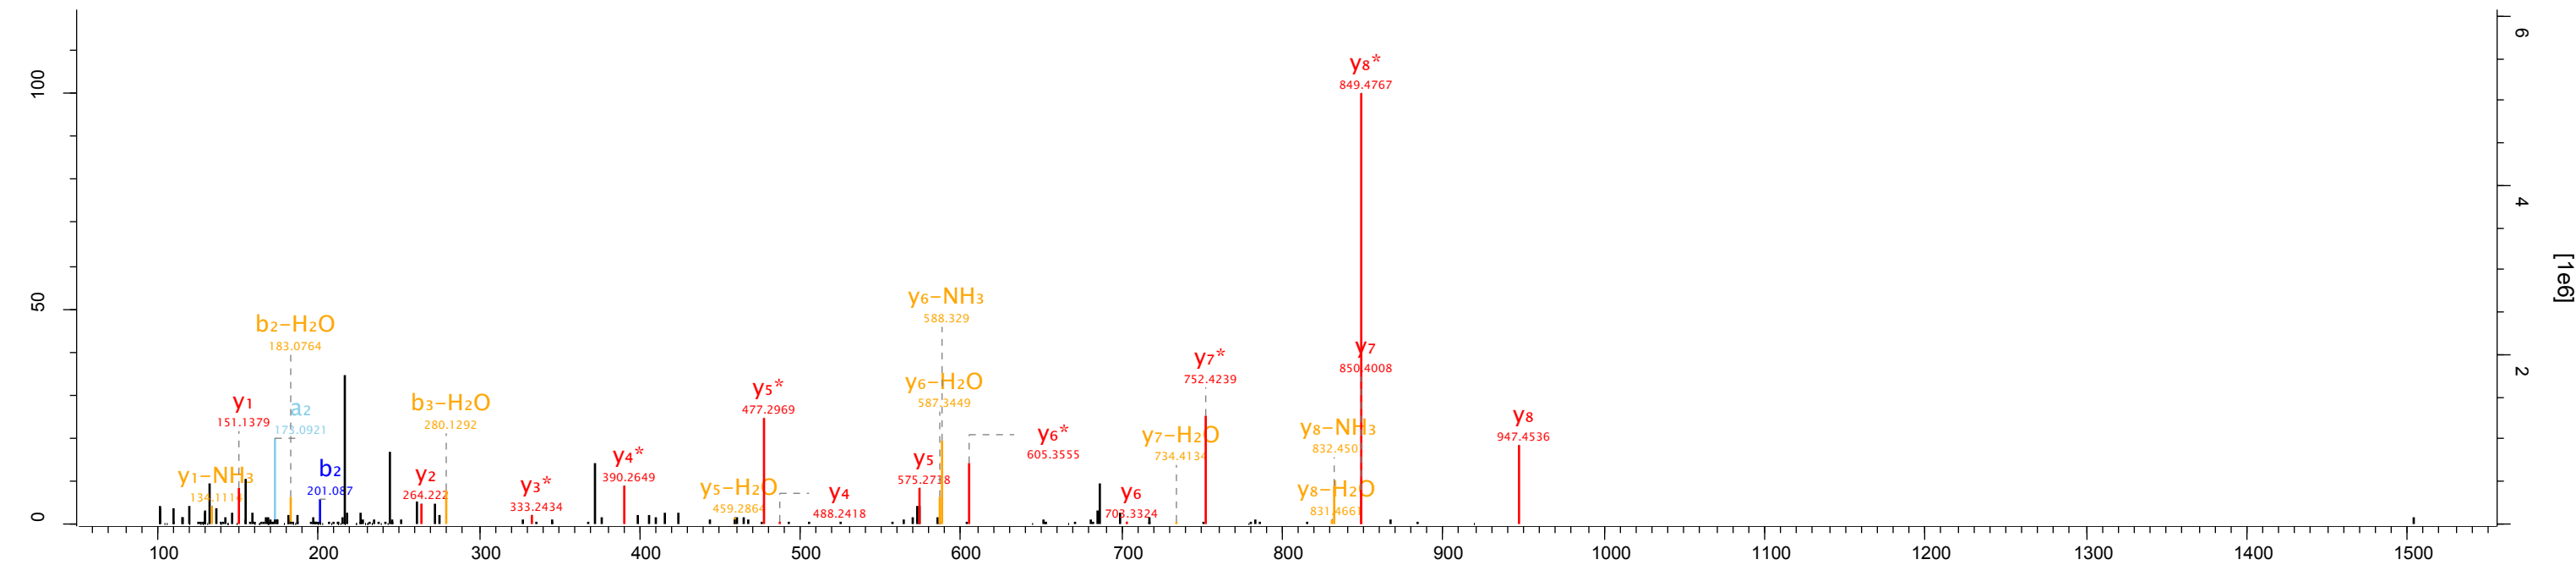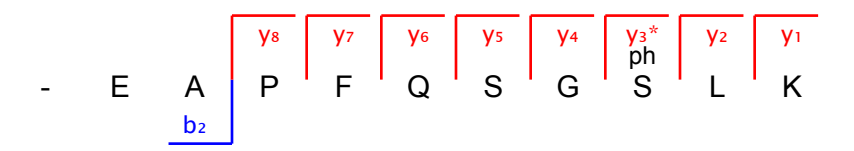



Raw file: 20150814\_A375SR\_Phospho\_BR2\_06  
 Scan: 12752 Method: FTMS; HCD Score: 150.27 m/z: 774.3 Gene names: CAPZA1

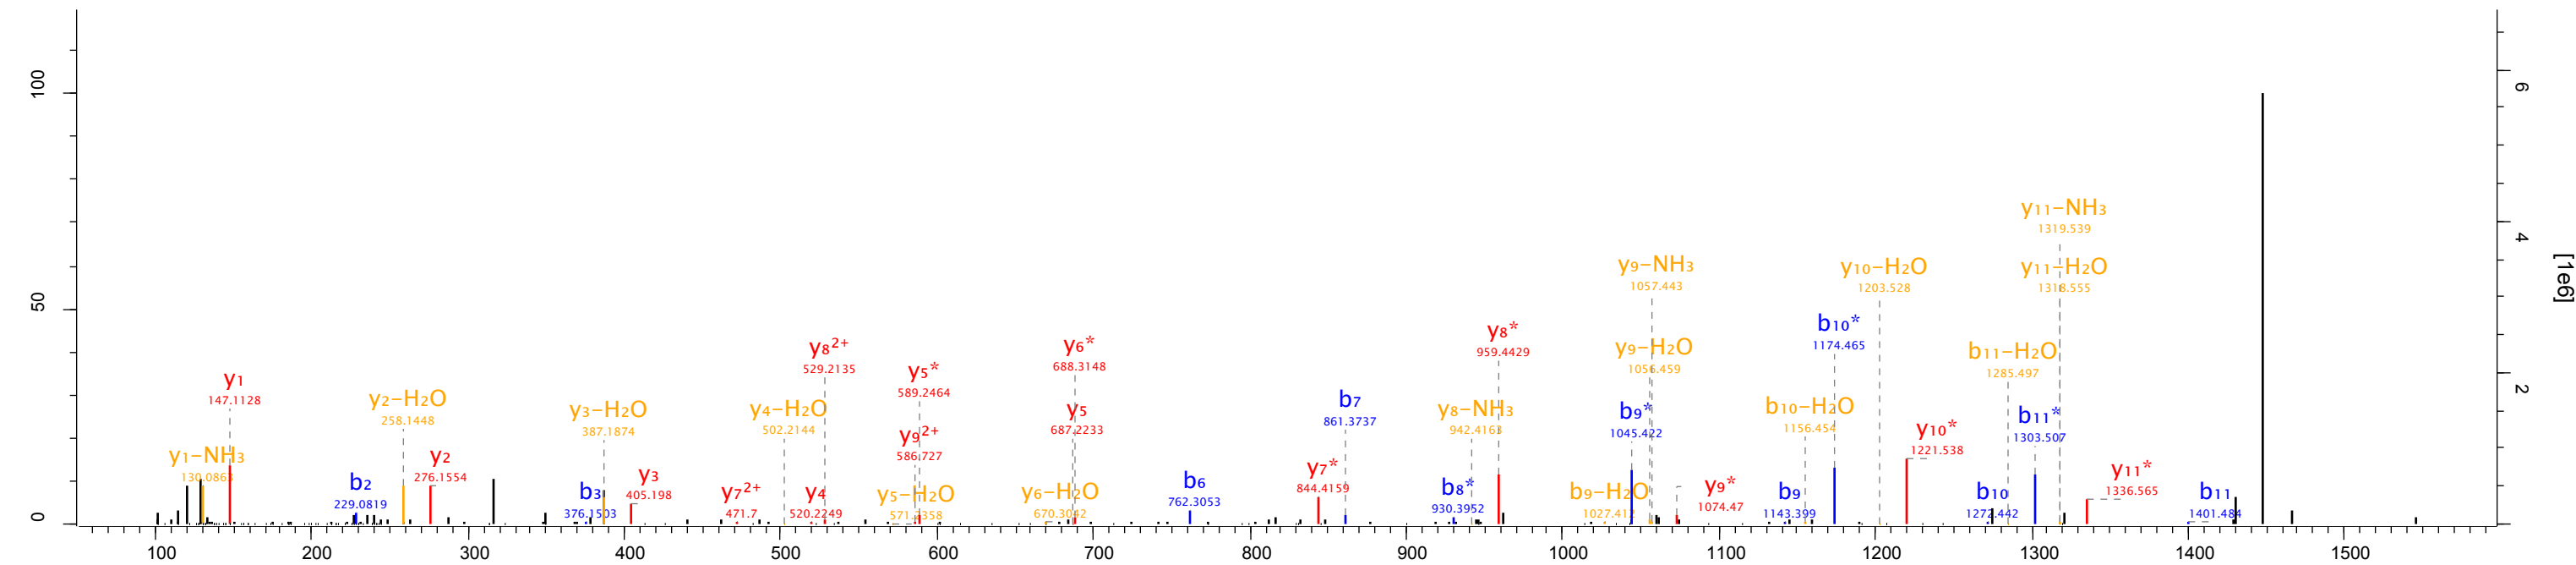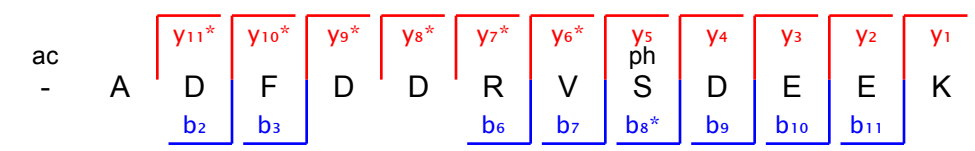

Raw file: 20150814\_A375SR\_Phospho\_BR2\_06  
 Scan: 12792 Method: FTMS; HCD Score: 86.59 m/z: 540.75 Gene names: NCOR1

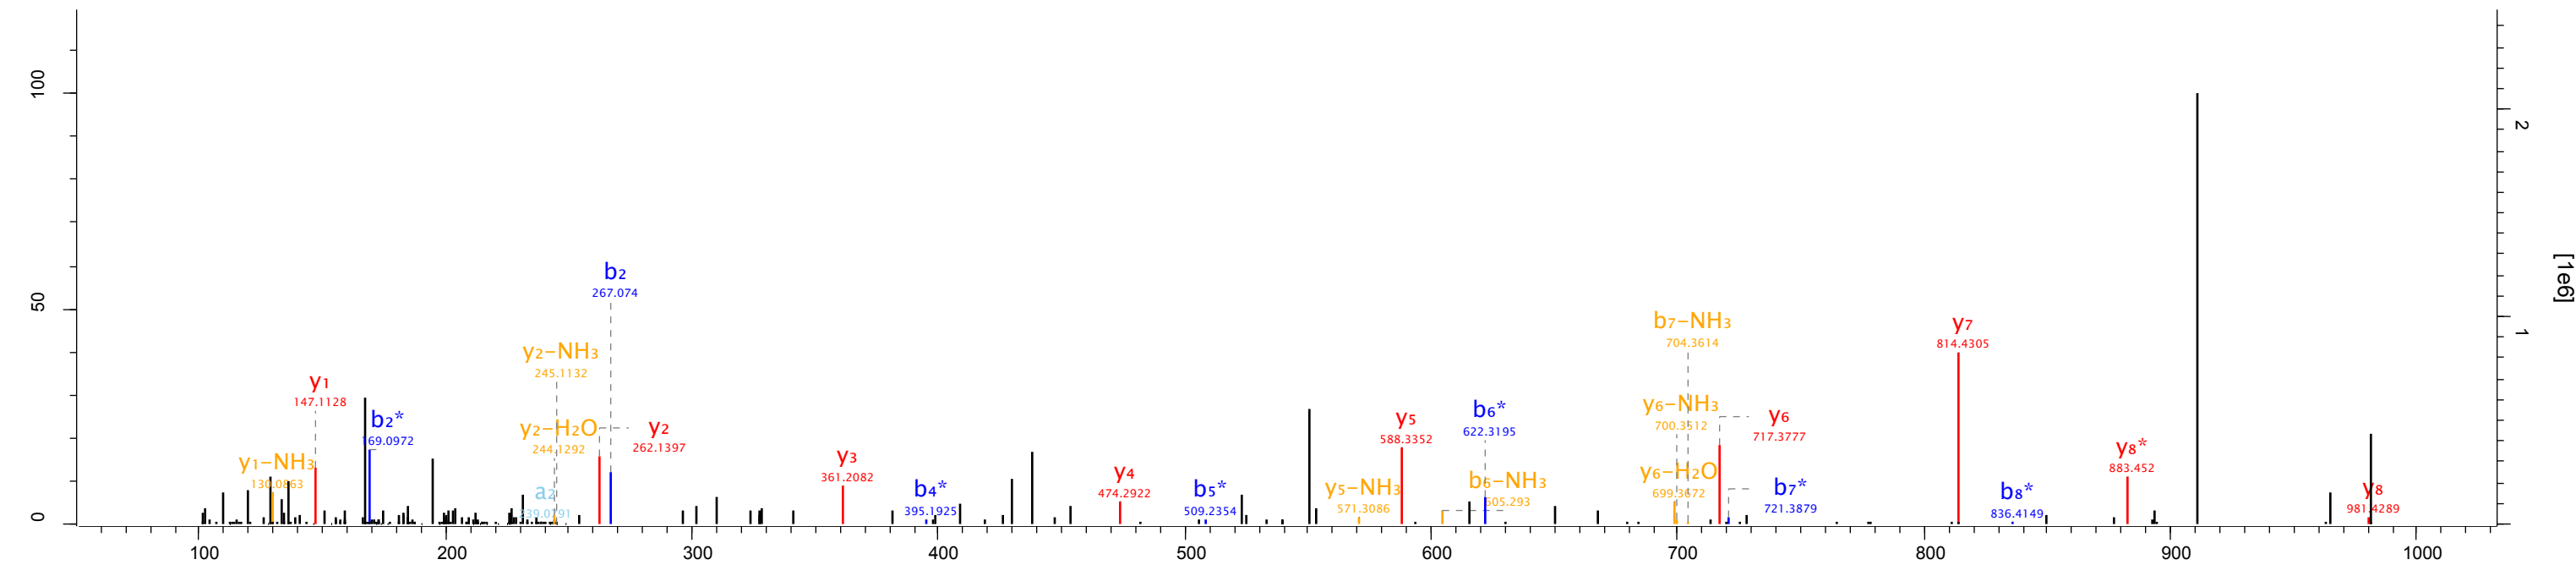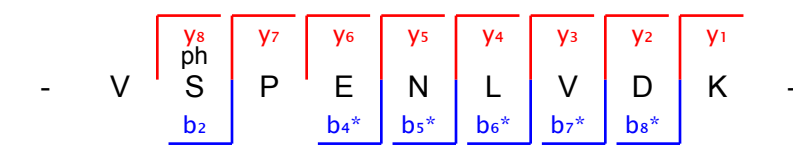

Raw file: 20150814\_A375SR\_Phospho\_BR2\_06  
 Scan: 12852 Method: FTMS; HCD Score: 79.17 m/z: 645.3 Gene names: SRCAP

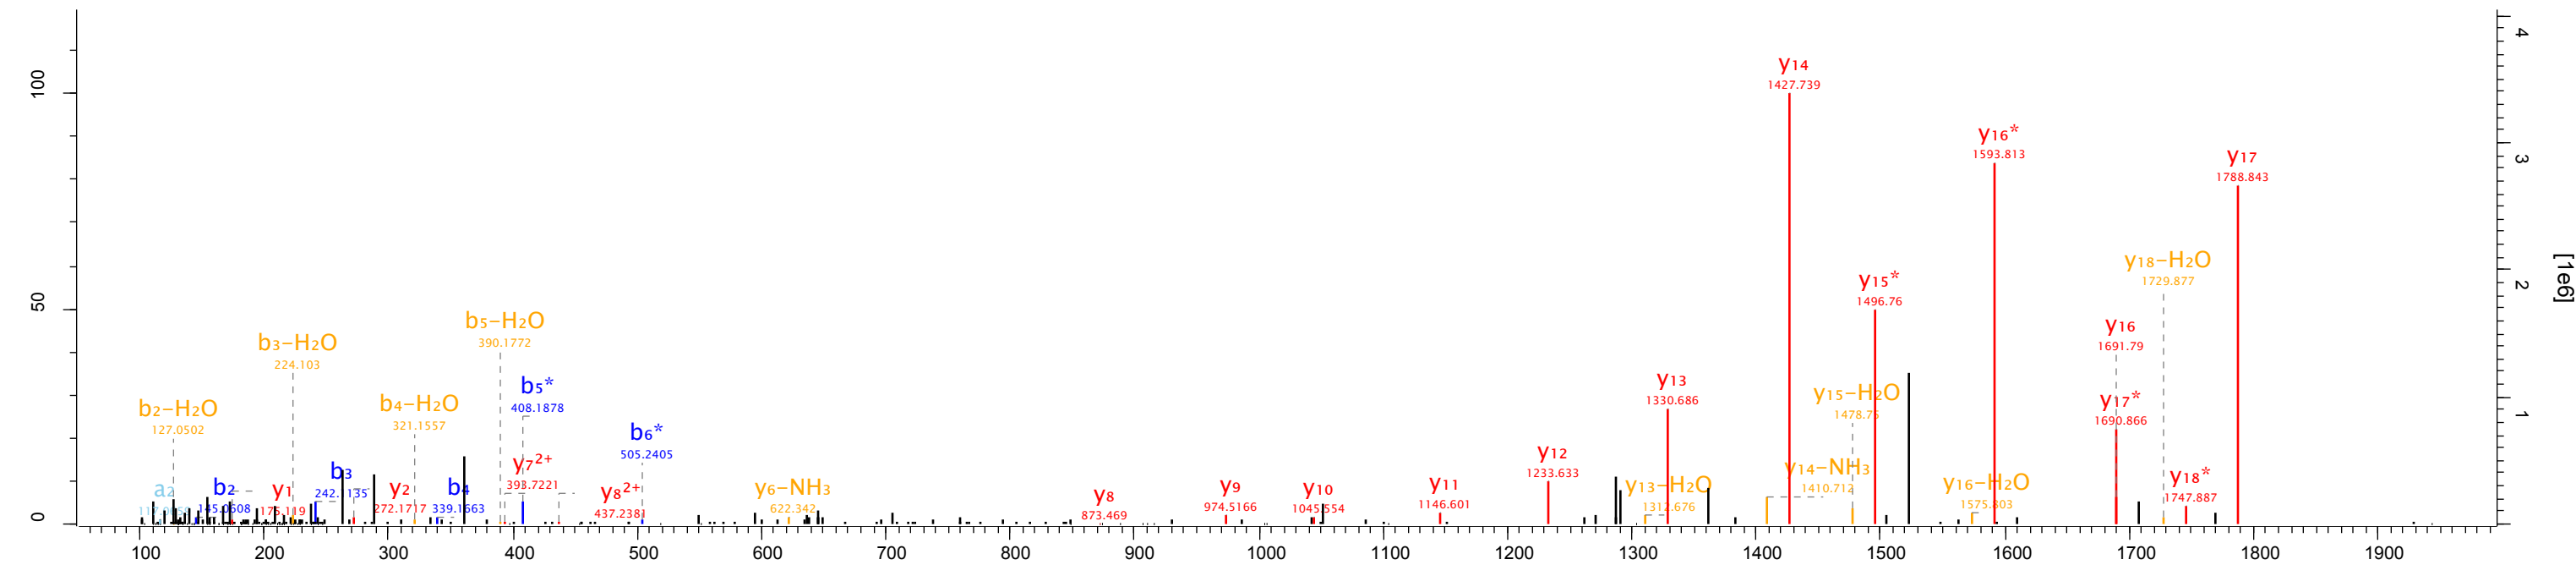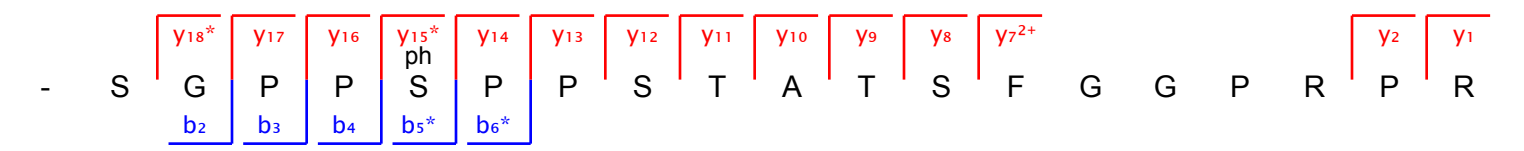

Raw file: 20150814\_A375SR\_Phospho\_BR2\_06  
 Scan: 13022 Method: FTMS; HCD Score: 139.21 m/z: 490.62 Gene names: ARHGAP35

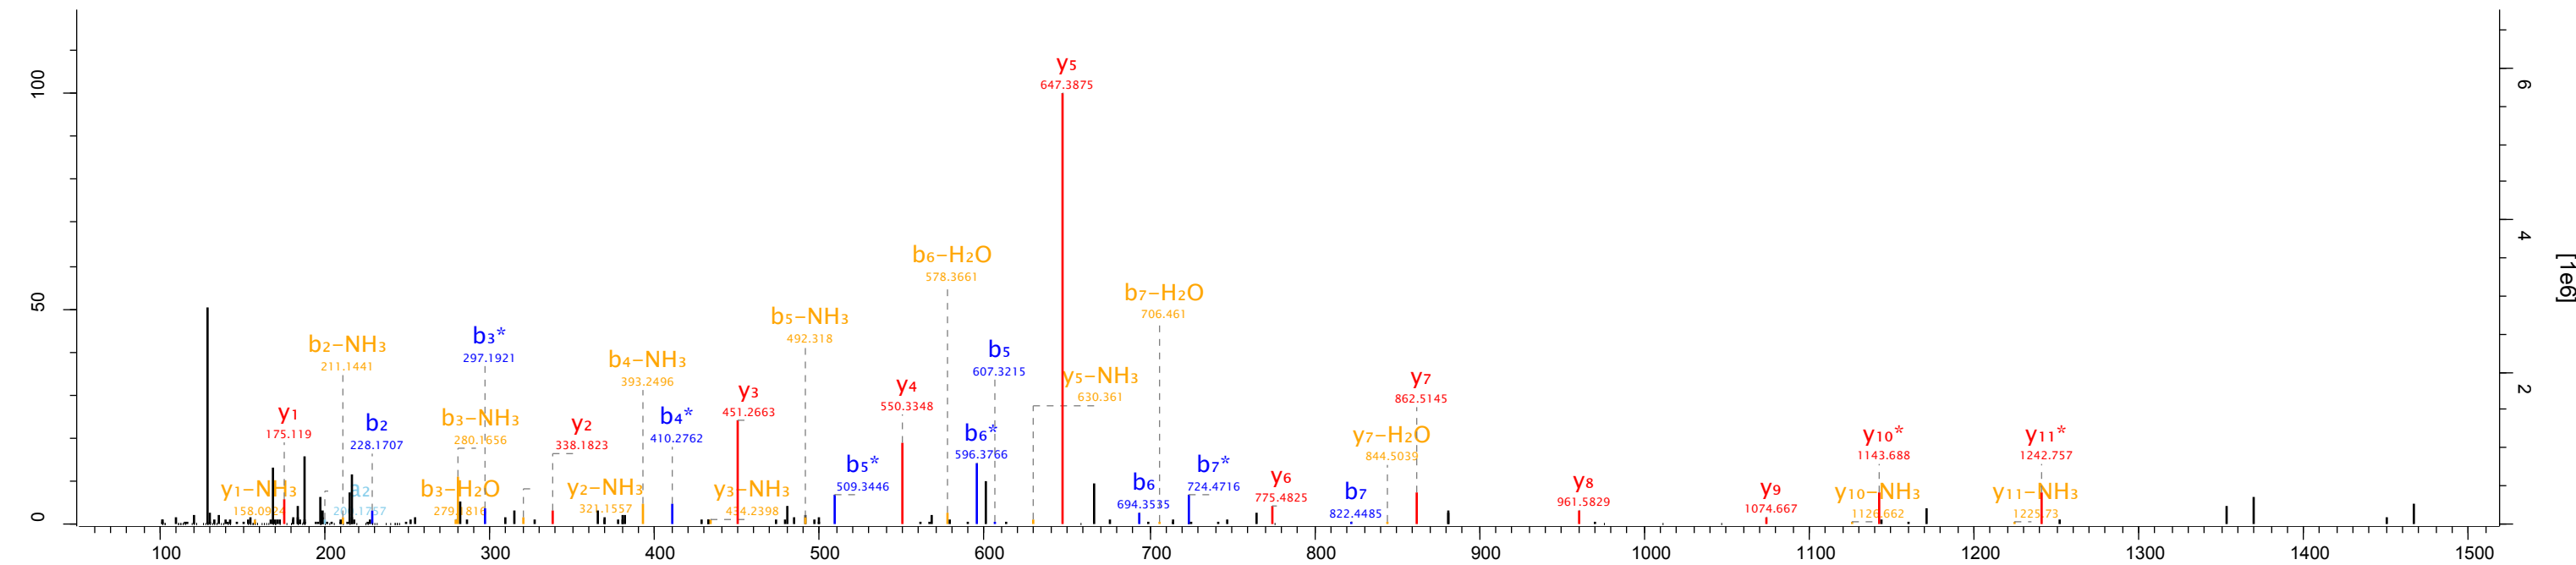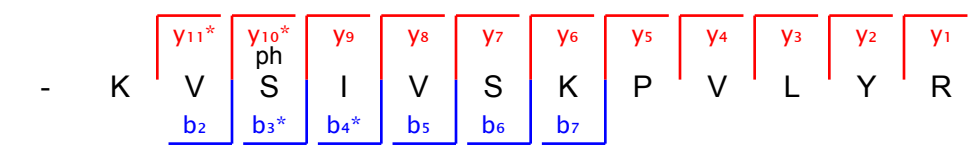

Raw file 20150814\_A375SR\_Phospho\_BR2\_06 Scan 13772 Method FTMS; HCD Score 109.79 m/z 639.83 Gene names TOPBP1

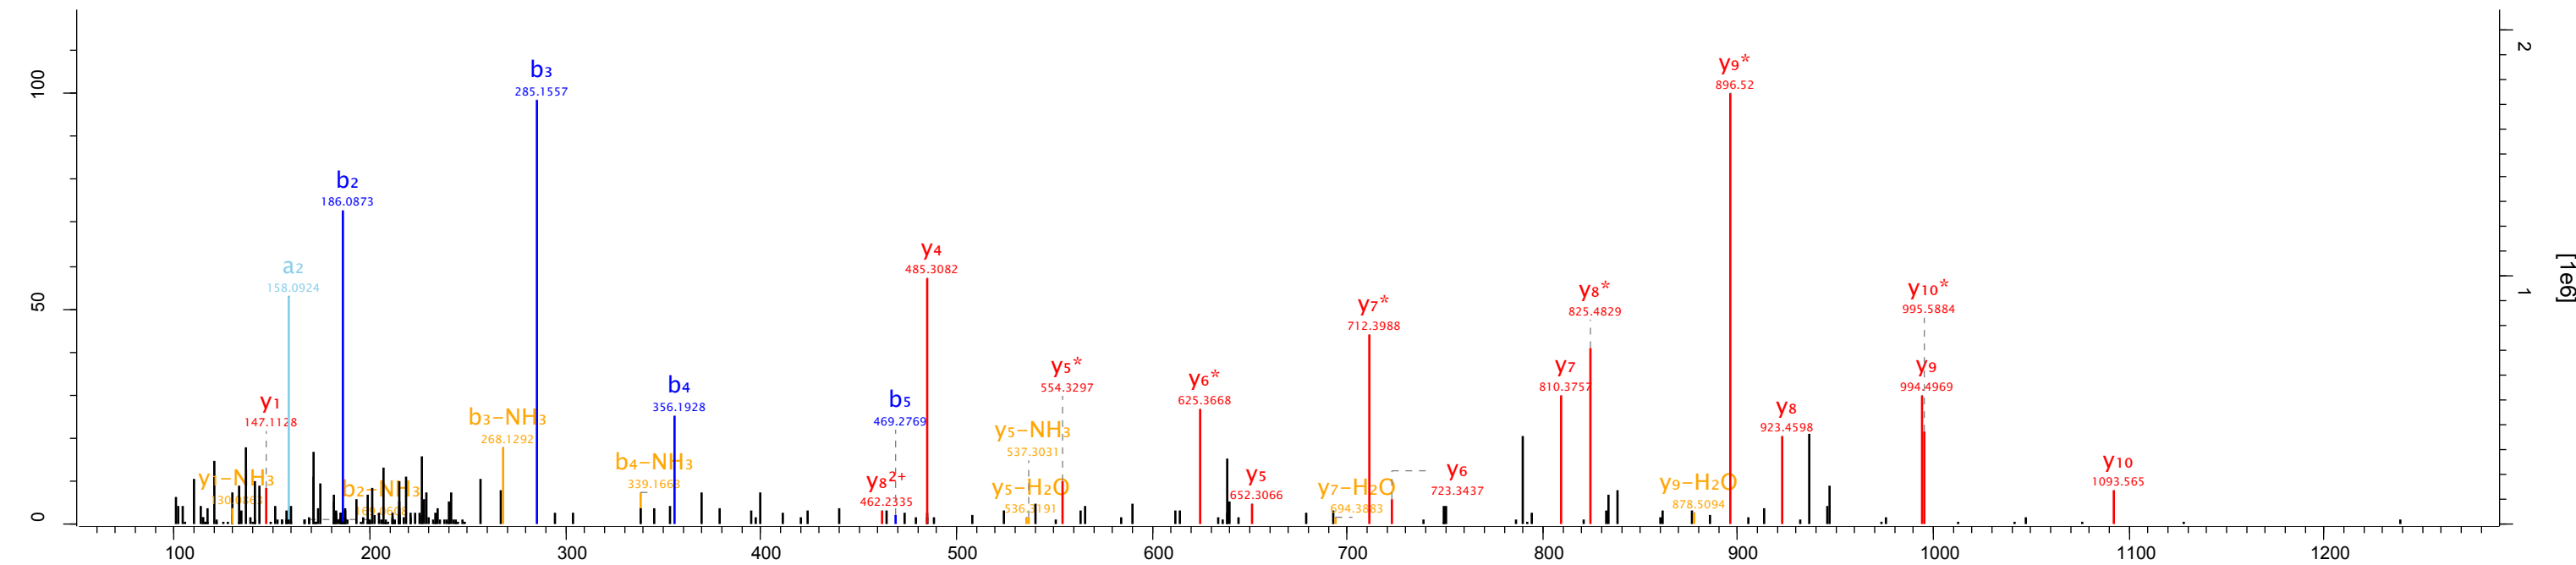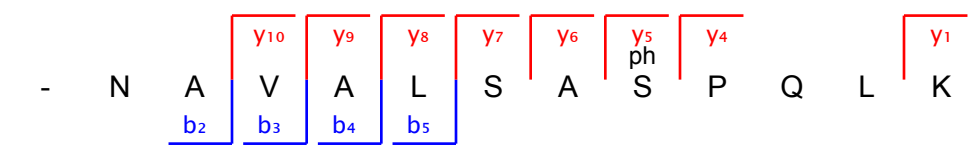

Raw file 20150814\_A375SR\_Phospho\_BR2\_06 Scan 14102 Method FTMS; HCD Score 69.25 m/z 861.91 Gene names SH2B3;BZRAP1

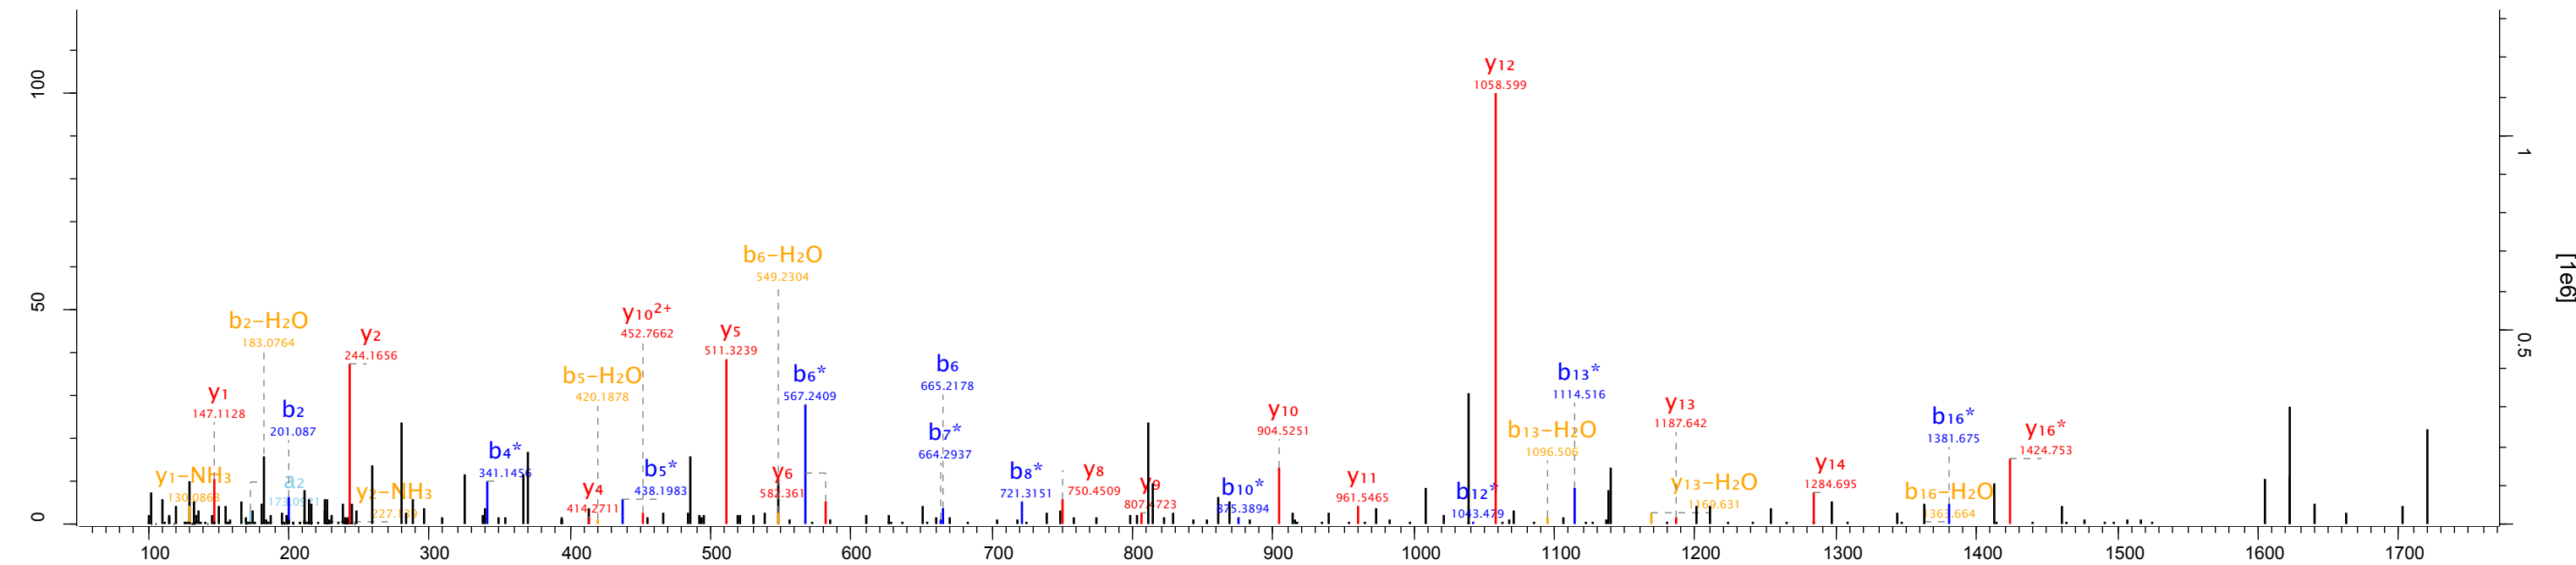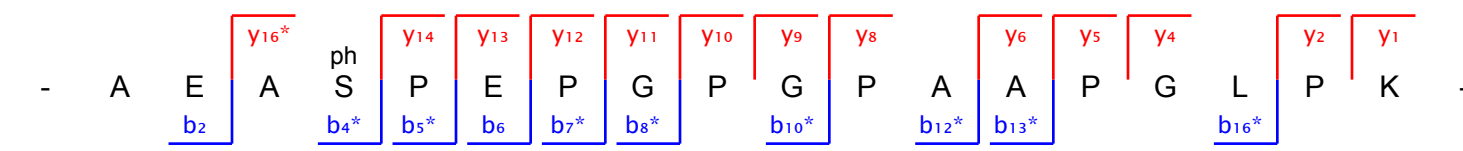

Raw file: 20150814\_A375SR\_Phospho\_BR2\_06  
 Scan: 15112 Method: FTMS; HCD Score: 107.01 m/z: 848.72 Gene names: TXLNG

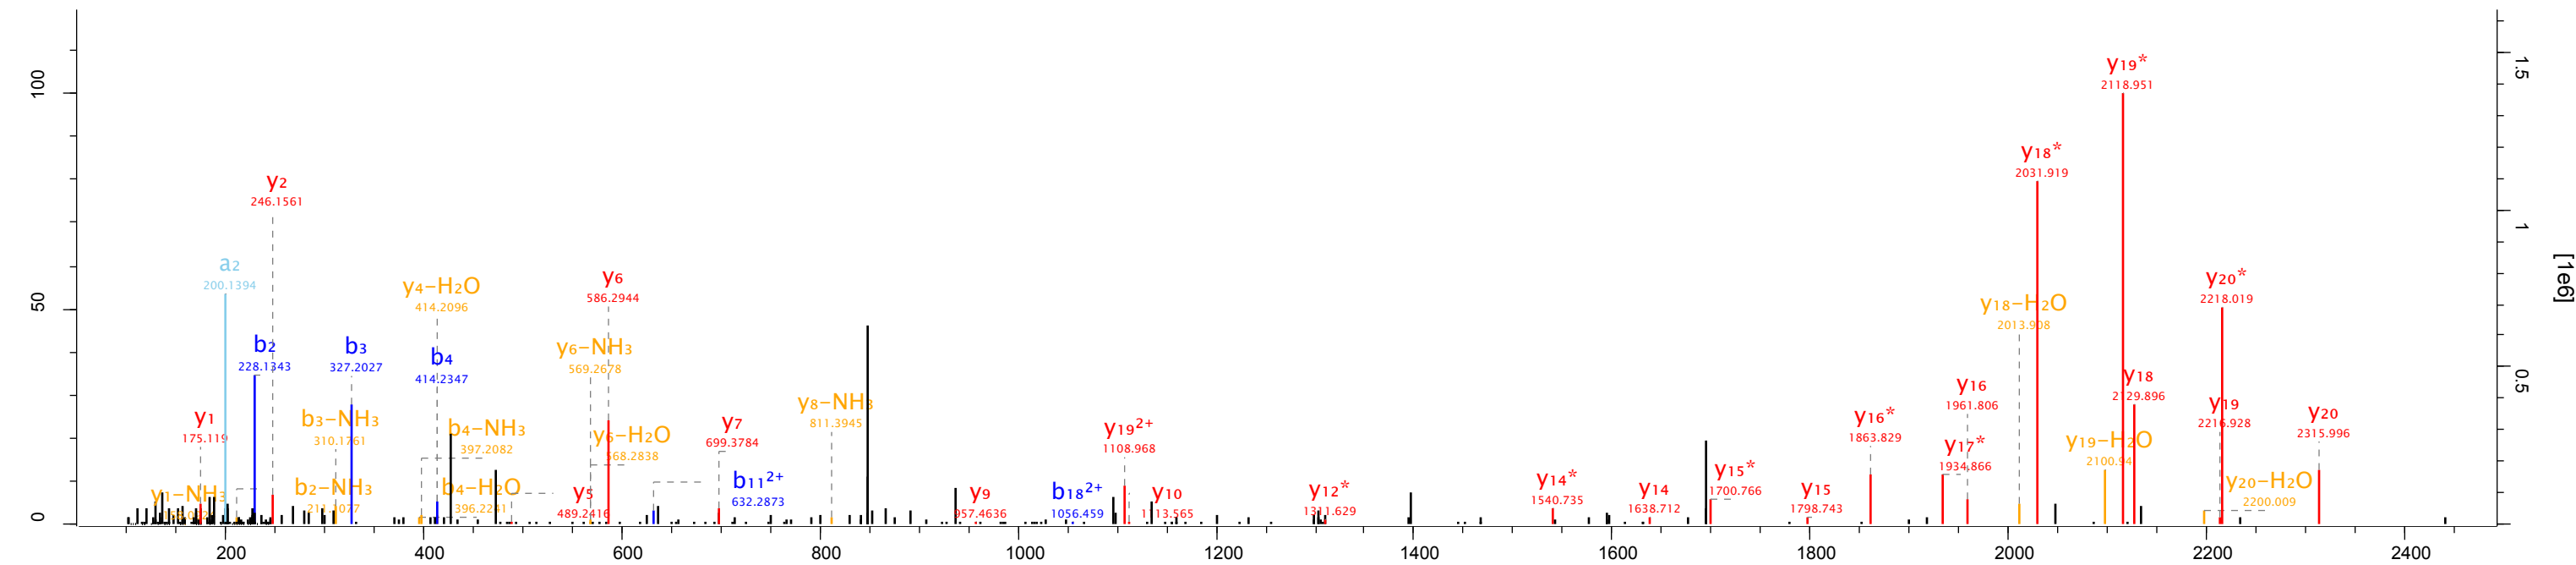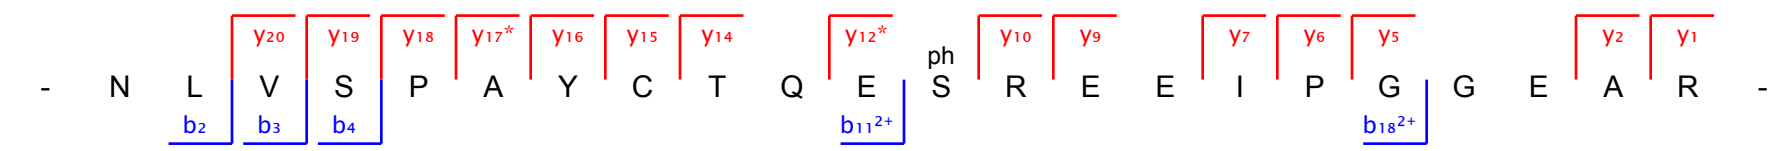

Raw file

Scan Method Score m/z Gene names

20150814\_A375SR\_Phospho\_BR2\_06

15492 FTMS; HCD 97.24 680.33 RBBP8

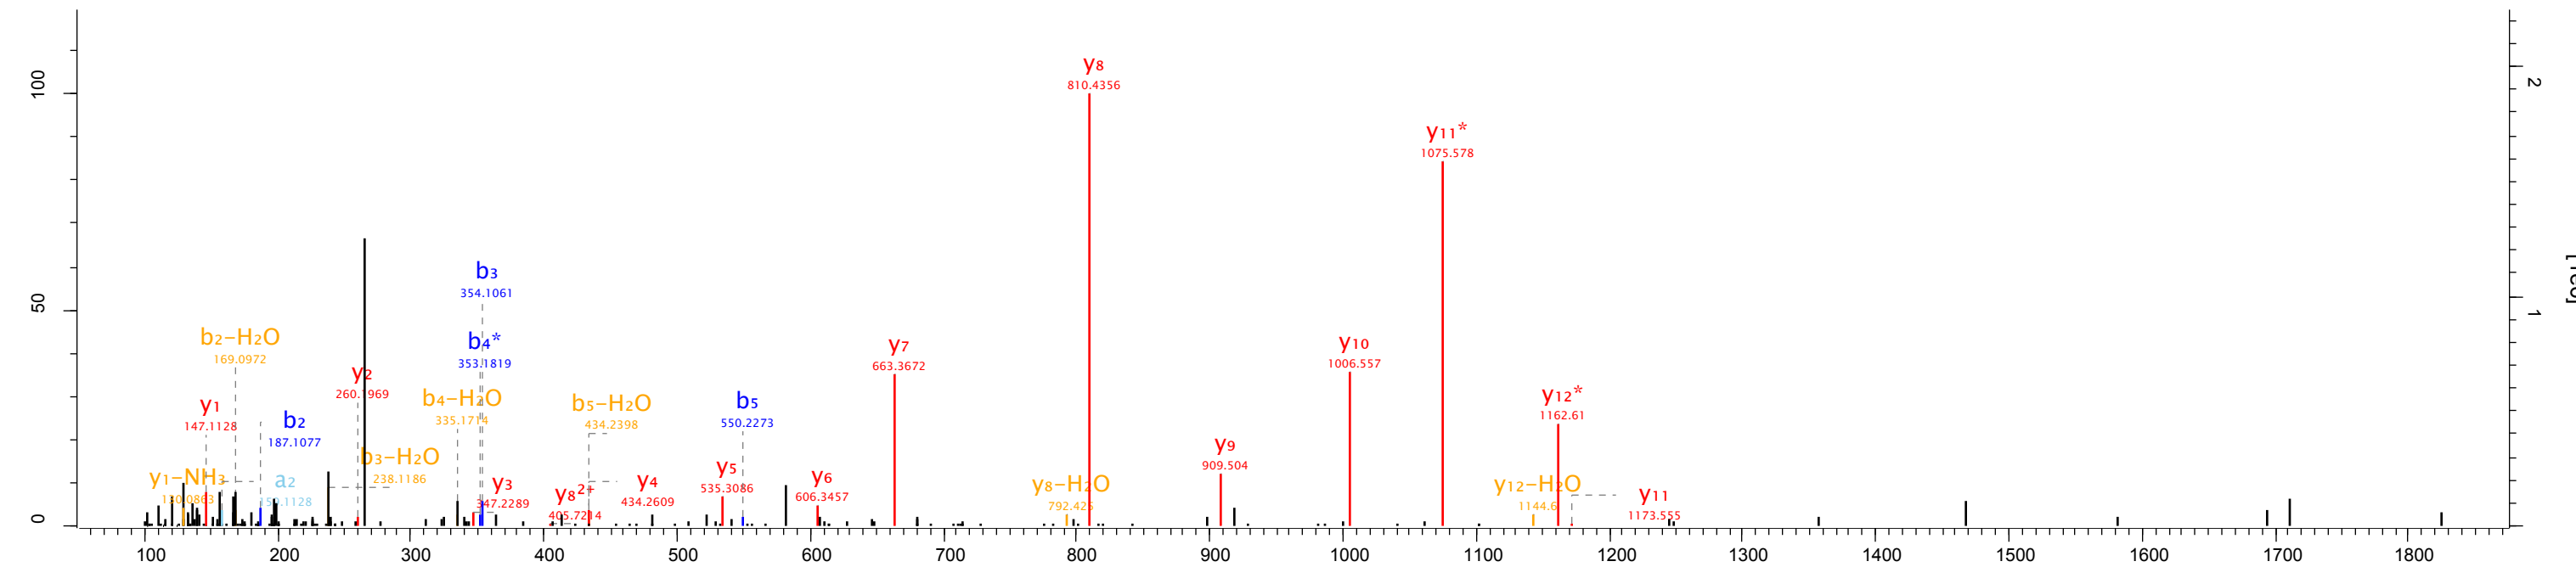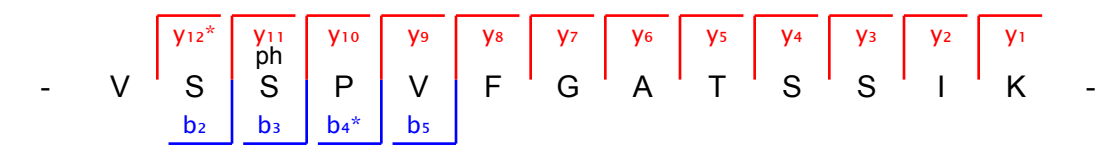



Raw file: 20150814\_A375SR\_Phospho\_BR2\_06  
 Scan: 15832 Method: FTMS; HCD Score: 113.69 m/z: 586.8 Gene names: CDC42EP1

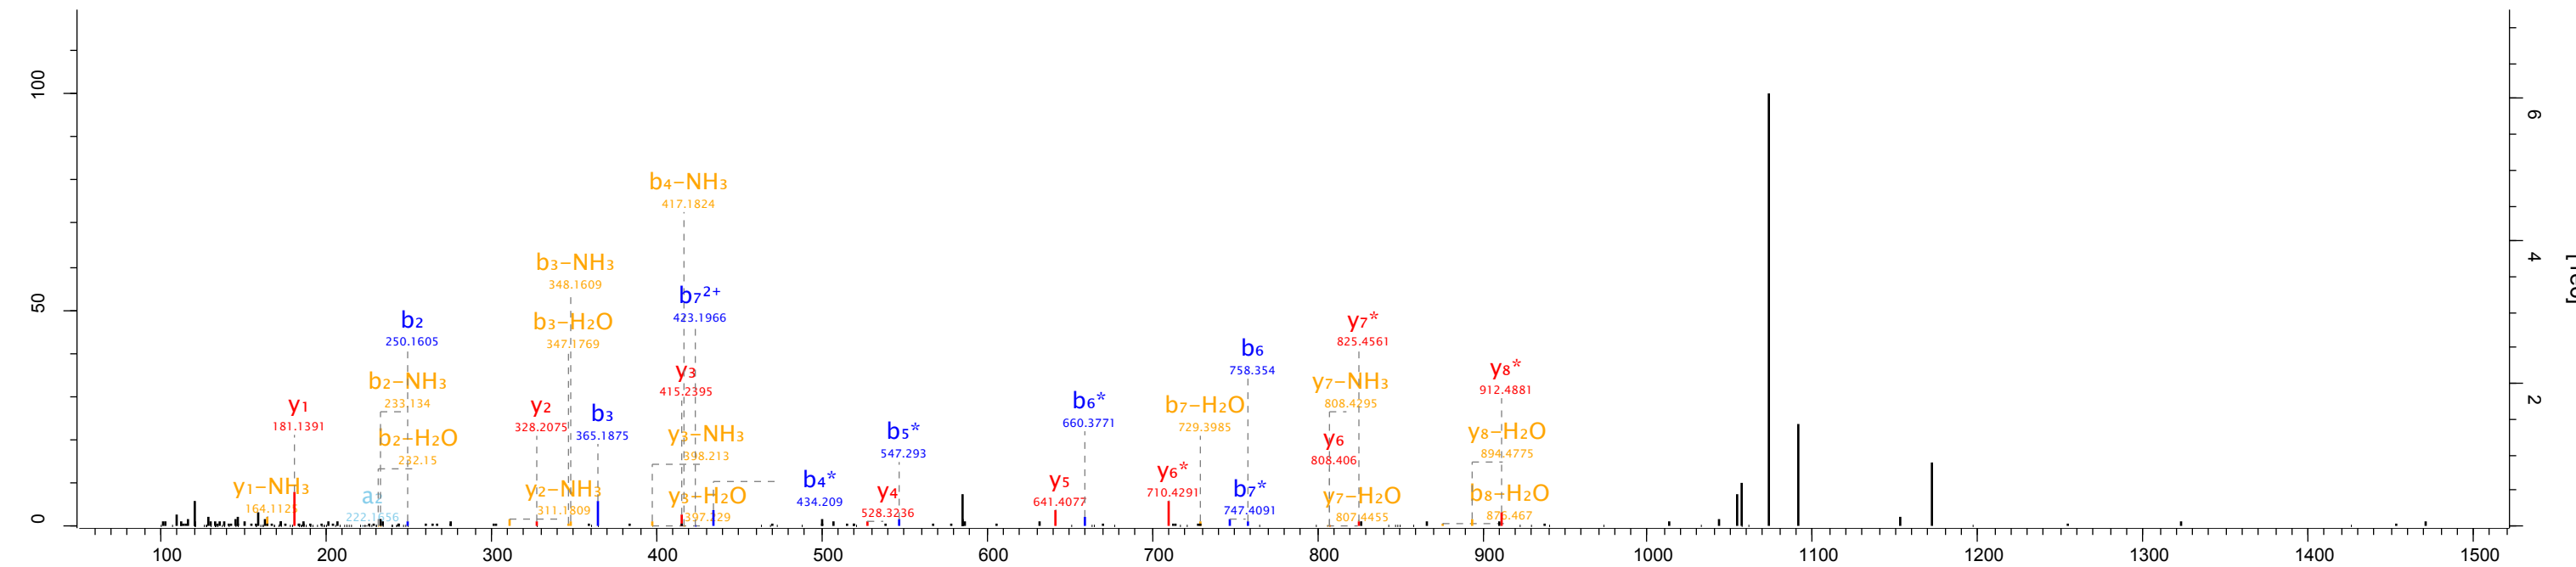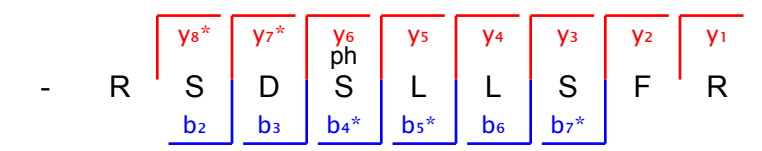

Raw file: 20150814\_A375SR\_Phospho\_BR2\_06  
 Scan: 15982 Method: FTMS; HCD Score: 155.8 m/z: 796.04 Gene names: SNTB2

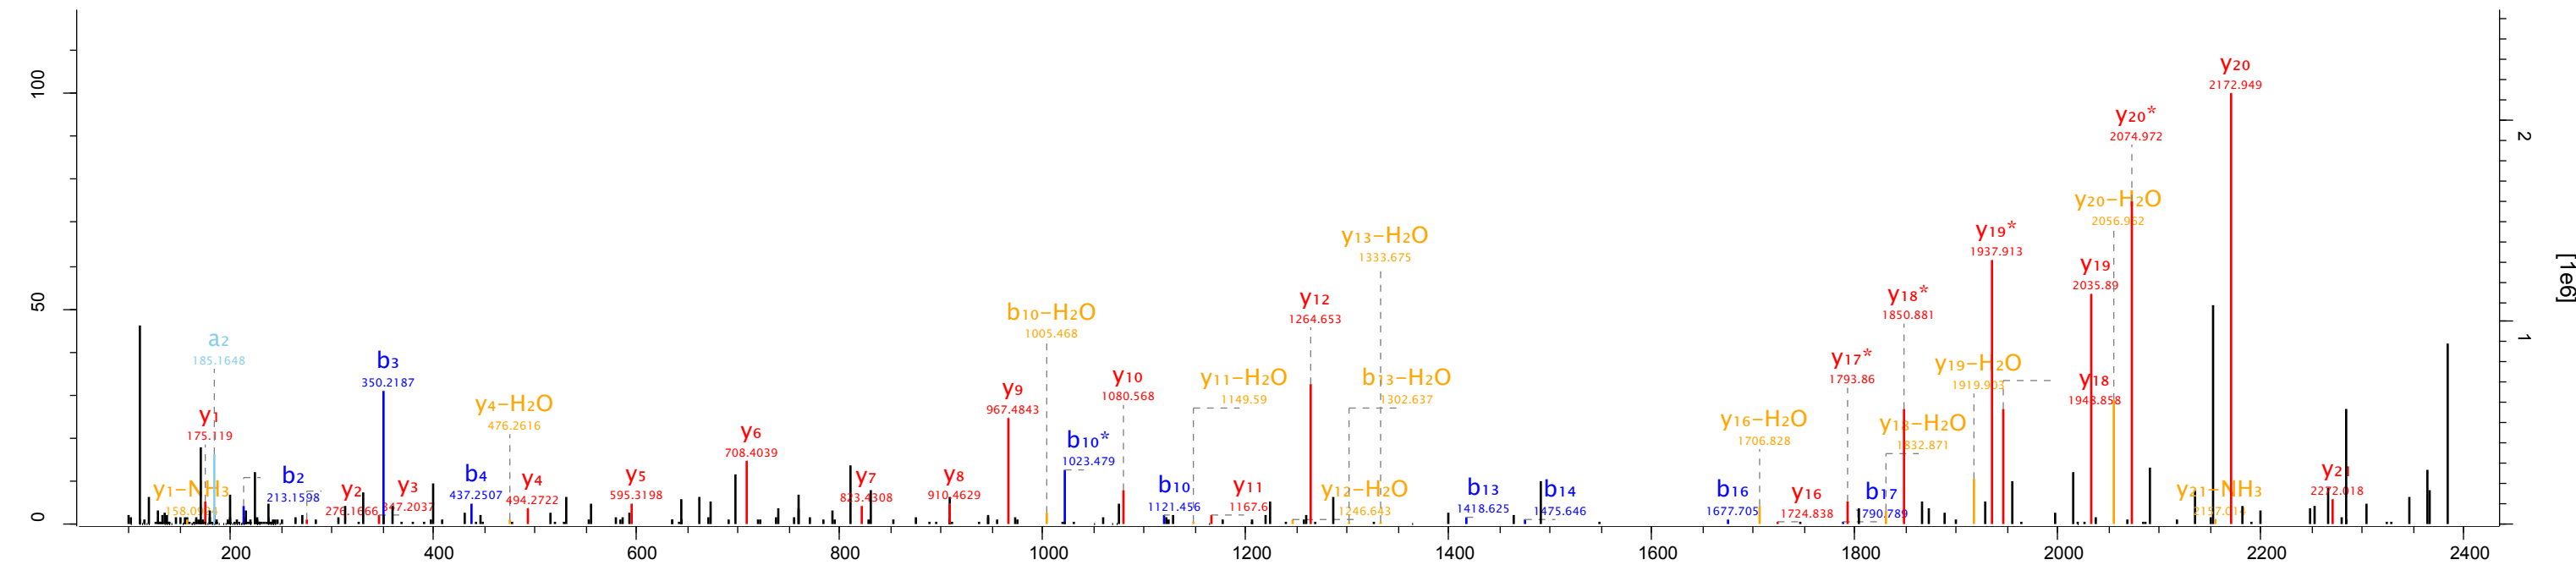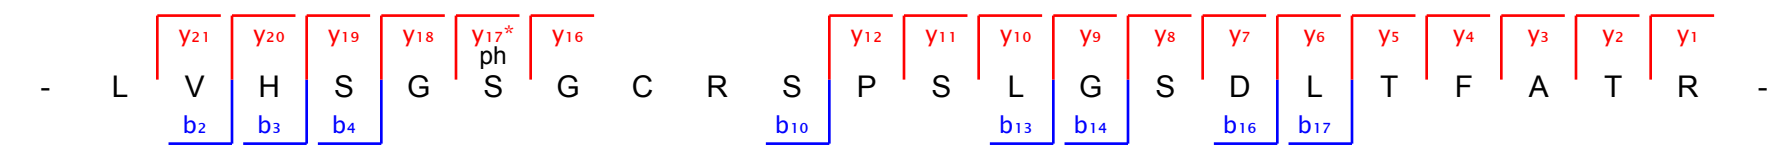

Raw file 20150814\_A375SR\_Phospho\_BR2\_06 Scan 16062 Method FTMS; HCD Score 195.38 m/z 736.36 Gene names ACD

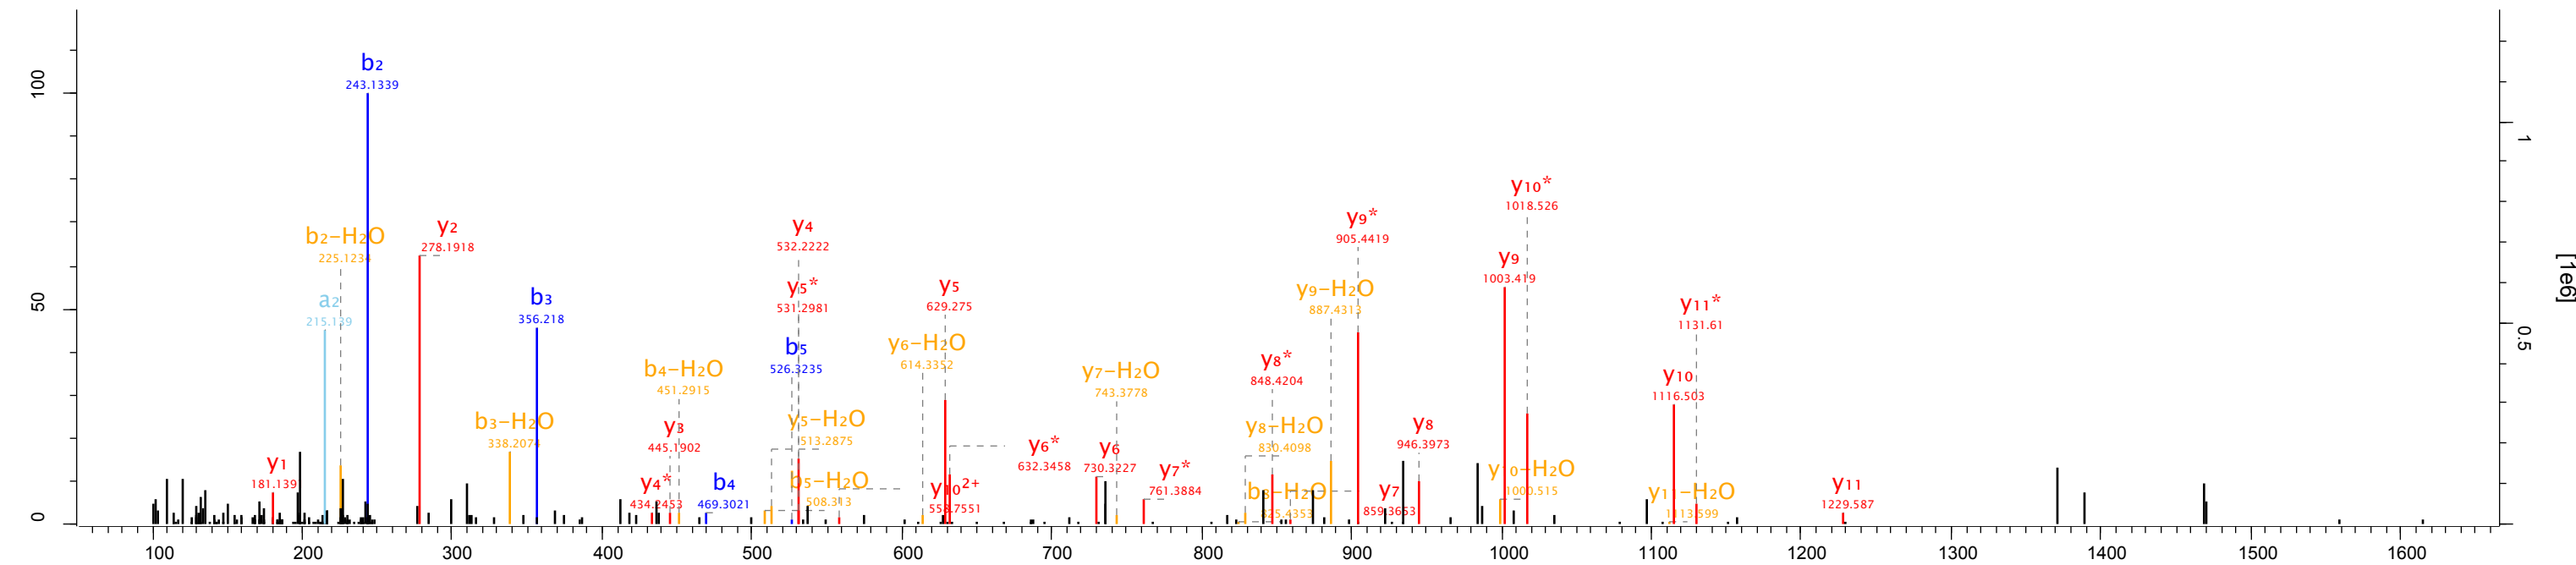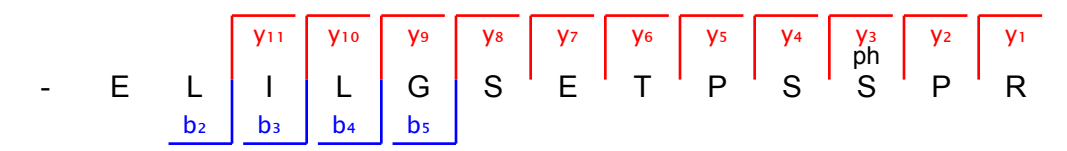

Raw file 20150814\_A375SR\_Phospho\_BR2\_06 Scan 16222 Method FTMS; HCD Score 84.65 m/z 538.92 Gene names RRN3;RRN3P2

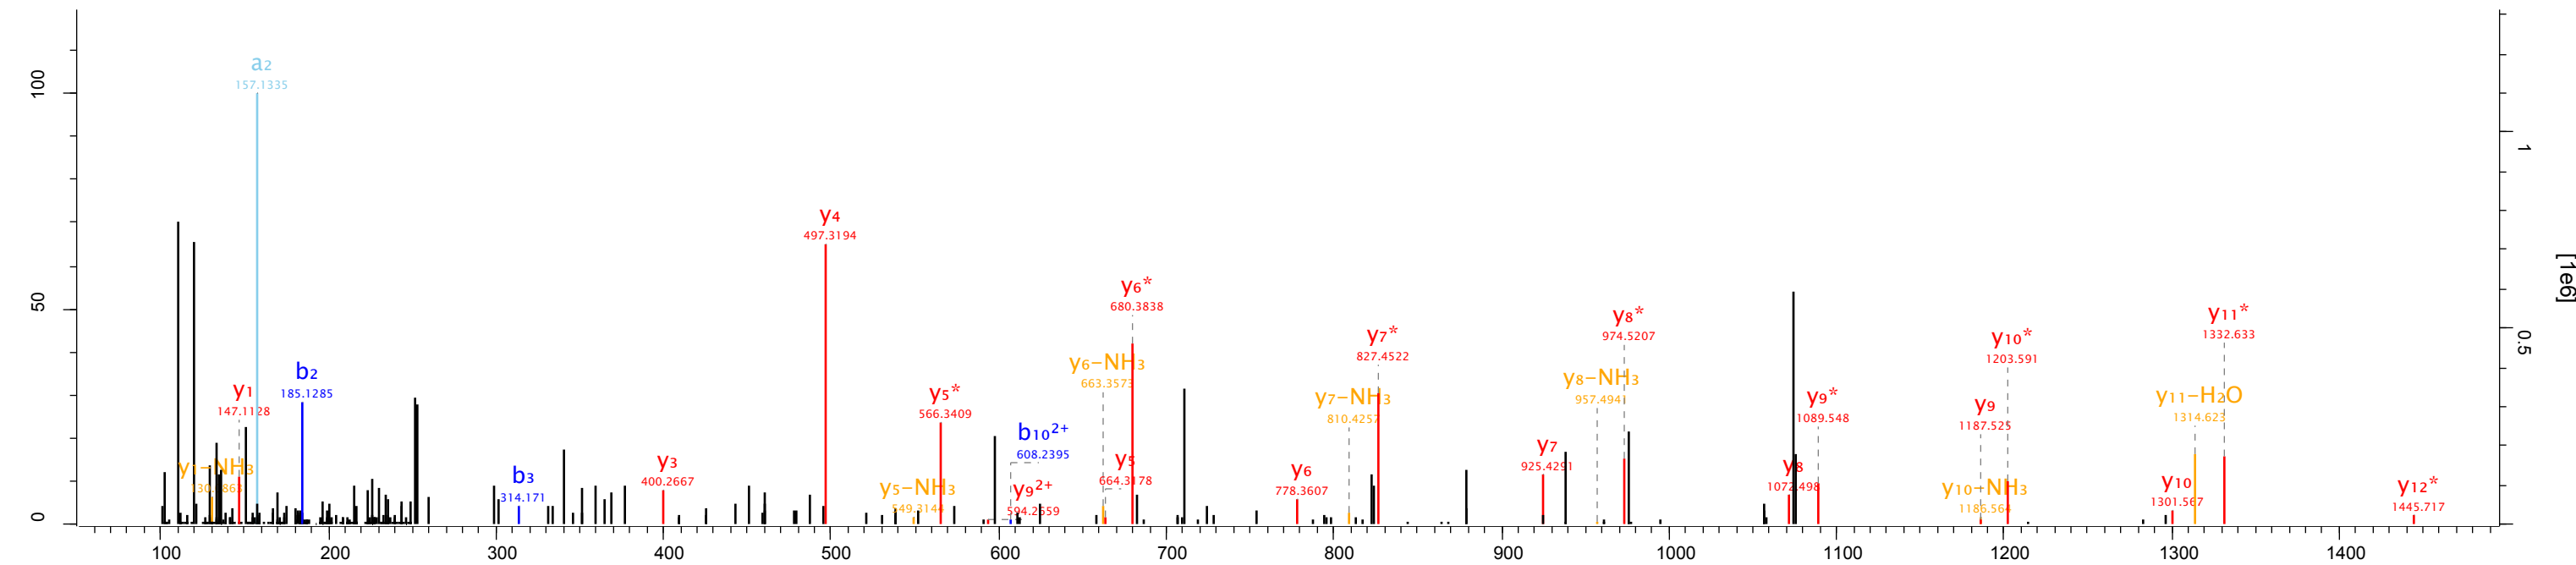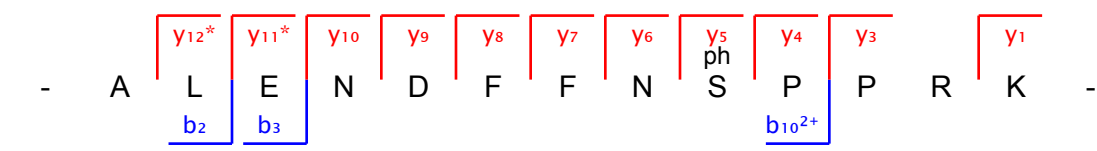

Raw file: 20150814\_A375SR\_Phospho\_BR2\_06  
 Scan: 16292 Method: FTMS; HCD Score: 176.23 m/z: 840.41 Gene names: ARAF

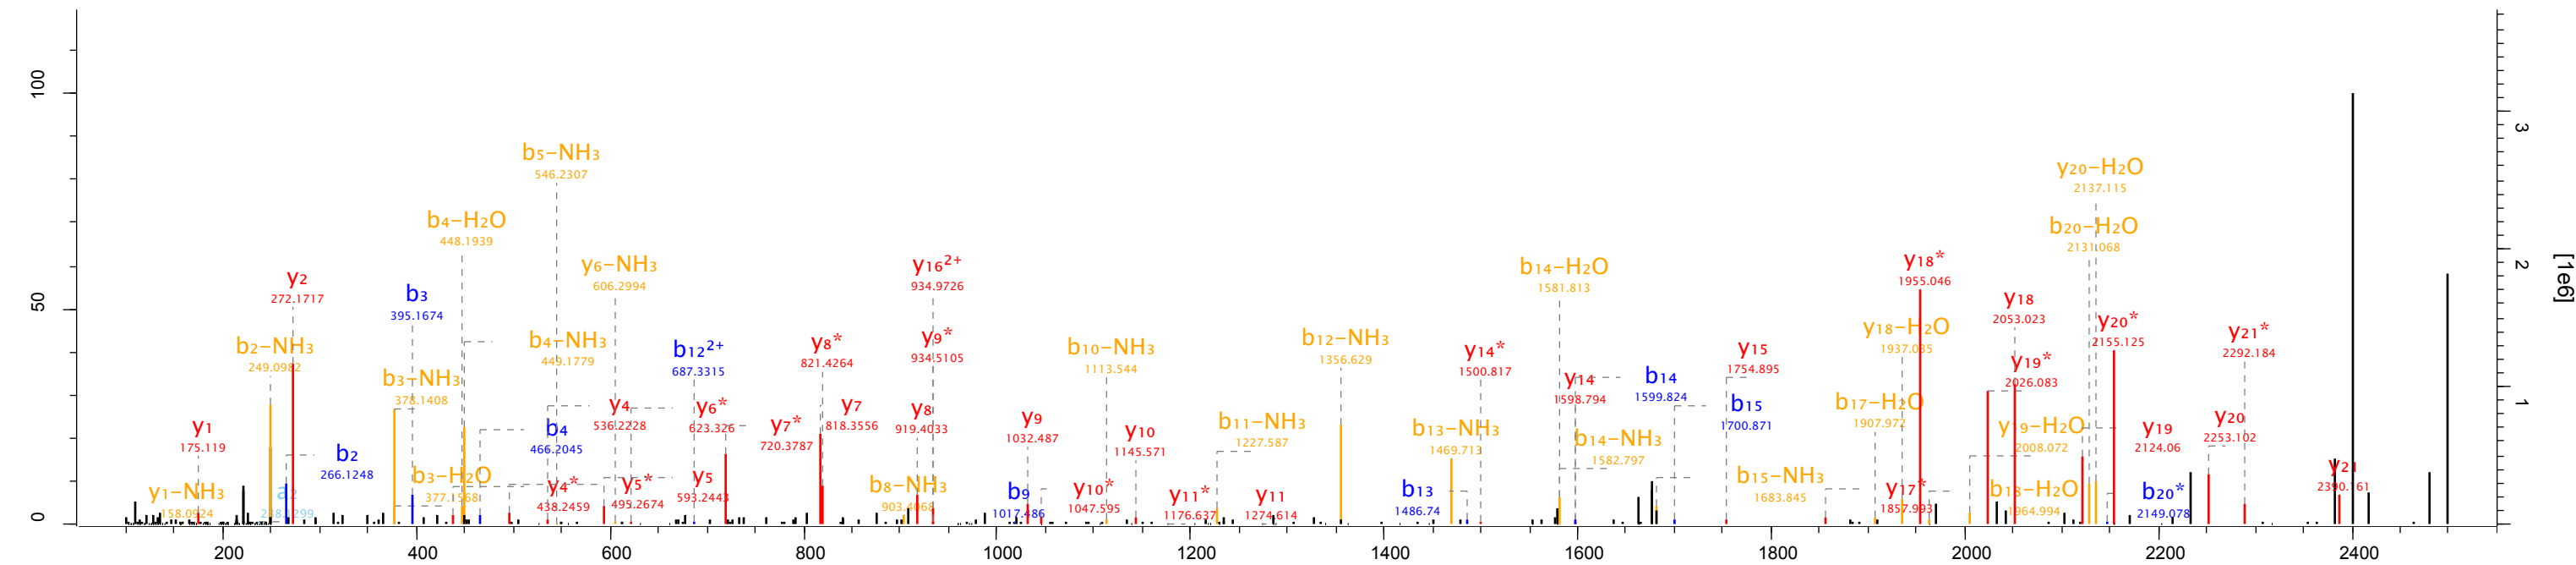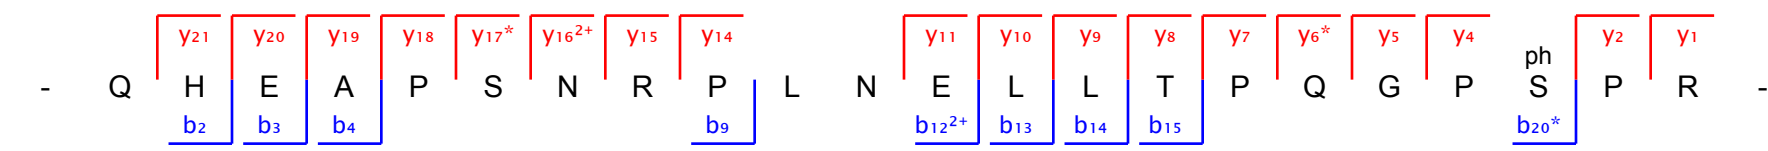

Raw file: 20150814\_A375SR\_Phospho\_BR2\_06  
 Scan: 16662 Method: FTMS; HCD Score: 146.67 m/z: 779.88 Gene names: SOX6

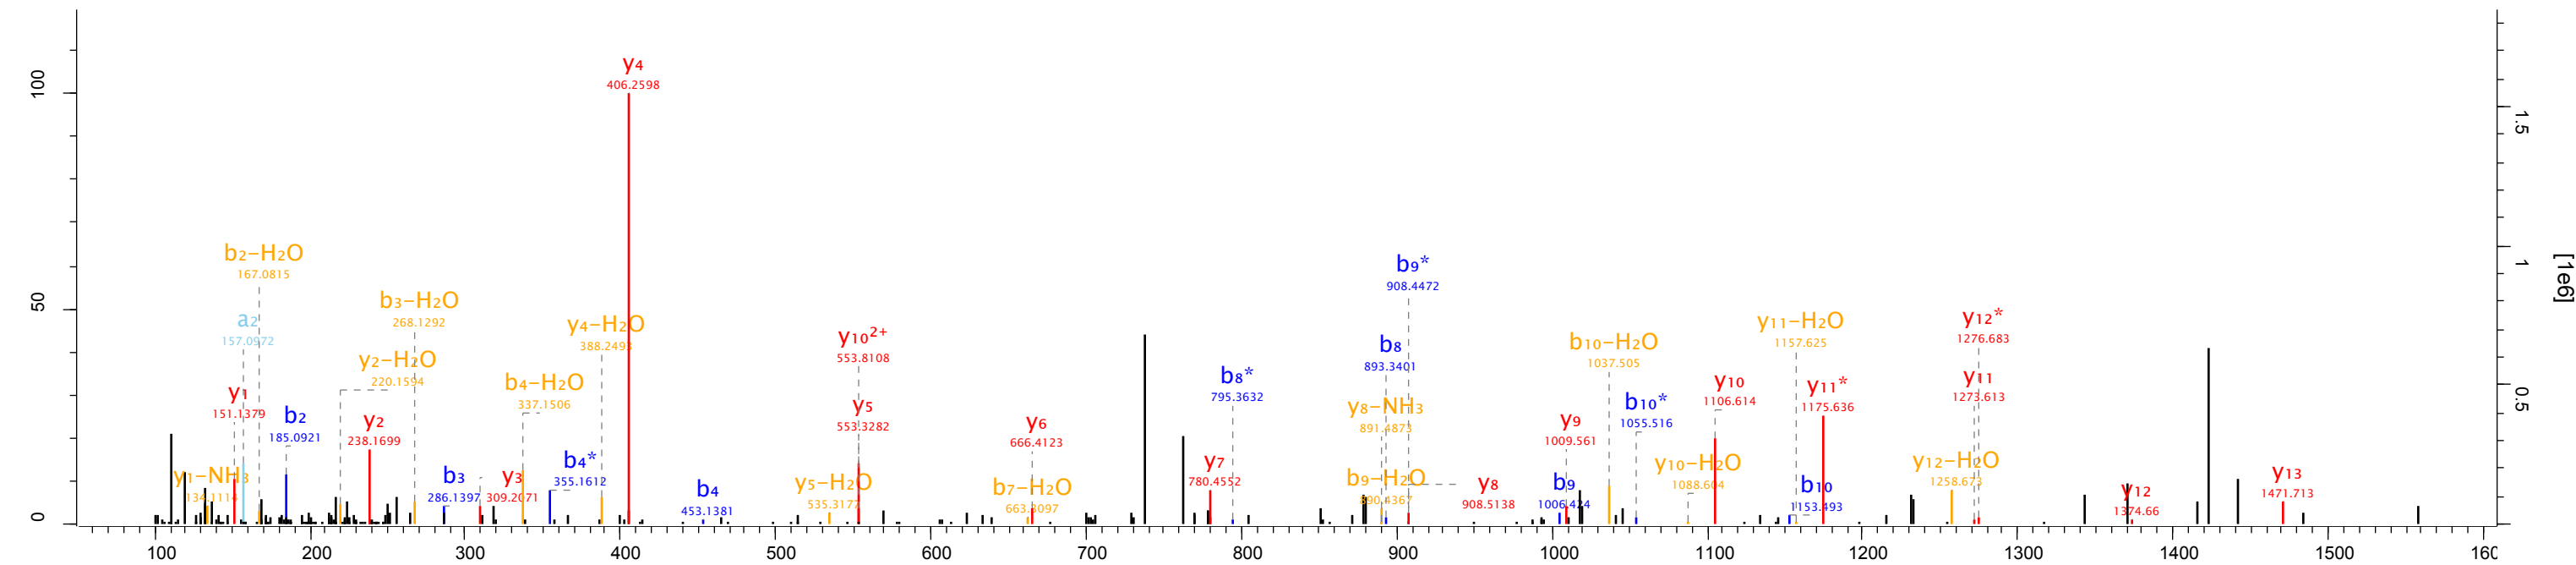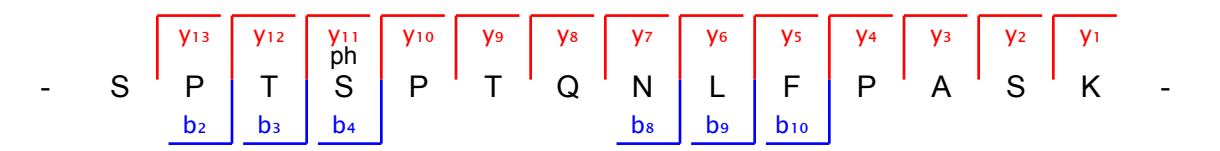

Raw file: 20150814\_A375SR\_Phospho\_BR2\_06  
 Scan: 16832 Method: FTMS; HCD Score: 228.41 m/z: 879.41 Gene names: CCDC86

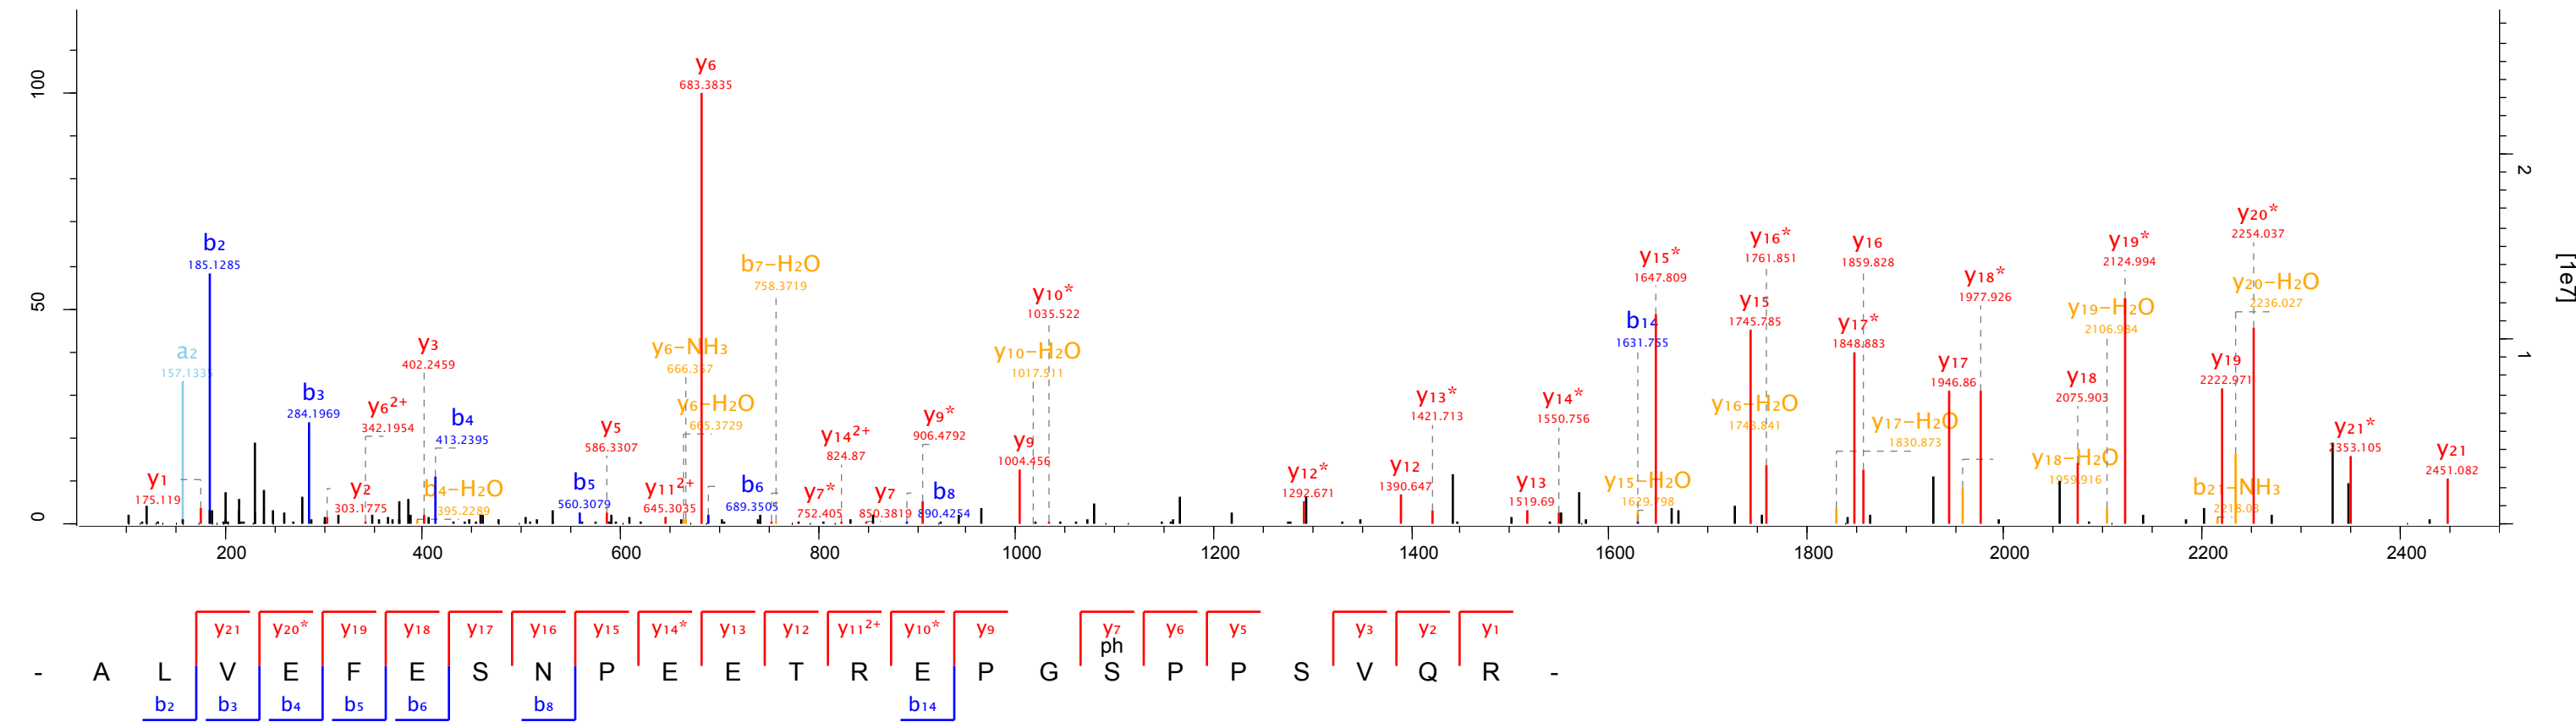

Raw file  
20150814\_A375SR\_Phospho\_BR2\_06

Scan 17332 Method FTMS; HCD Score 58.76 m/z 700 Gene names NELFA

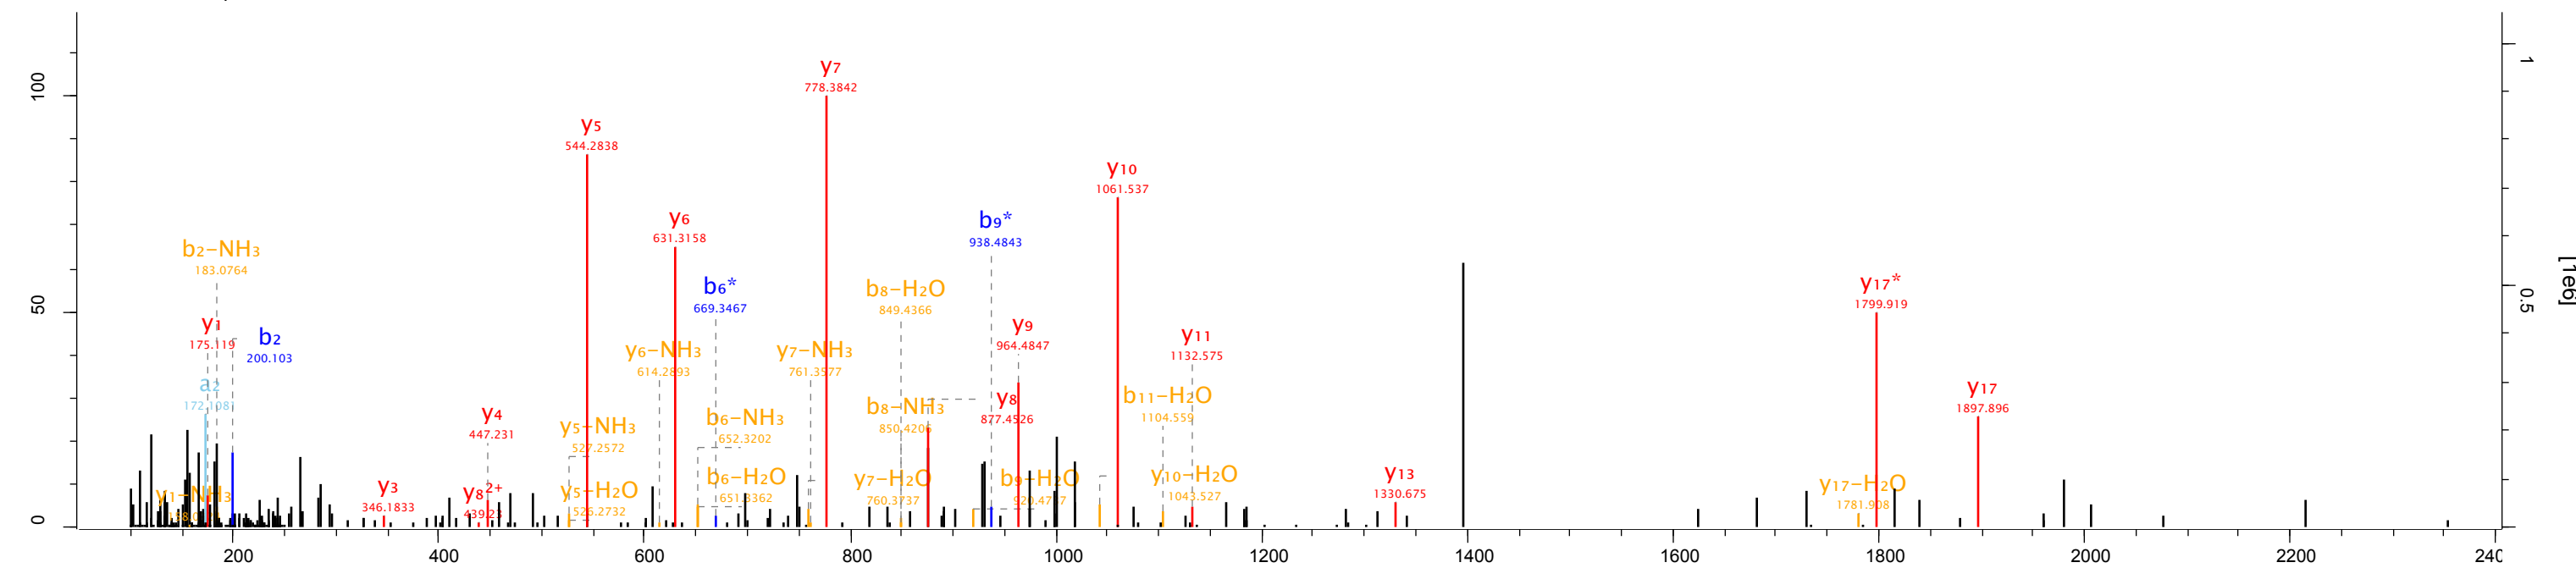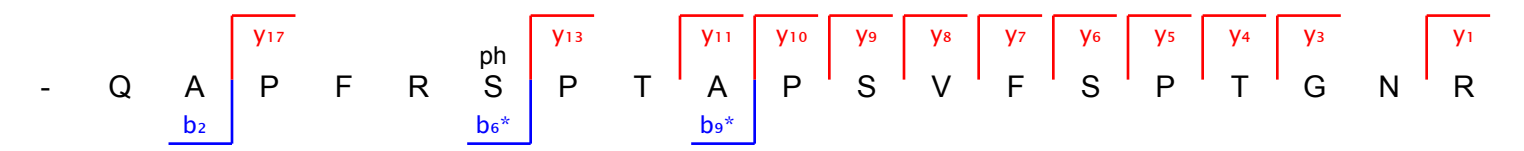



Raw file 20150814\_A375SR\_Phospho\_BR2\_06 Scan 17502 Method FTMS; HCD Score 155.75 m/z 869.89 Gene names SARM1

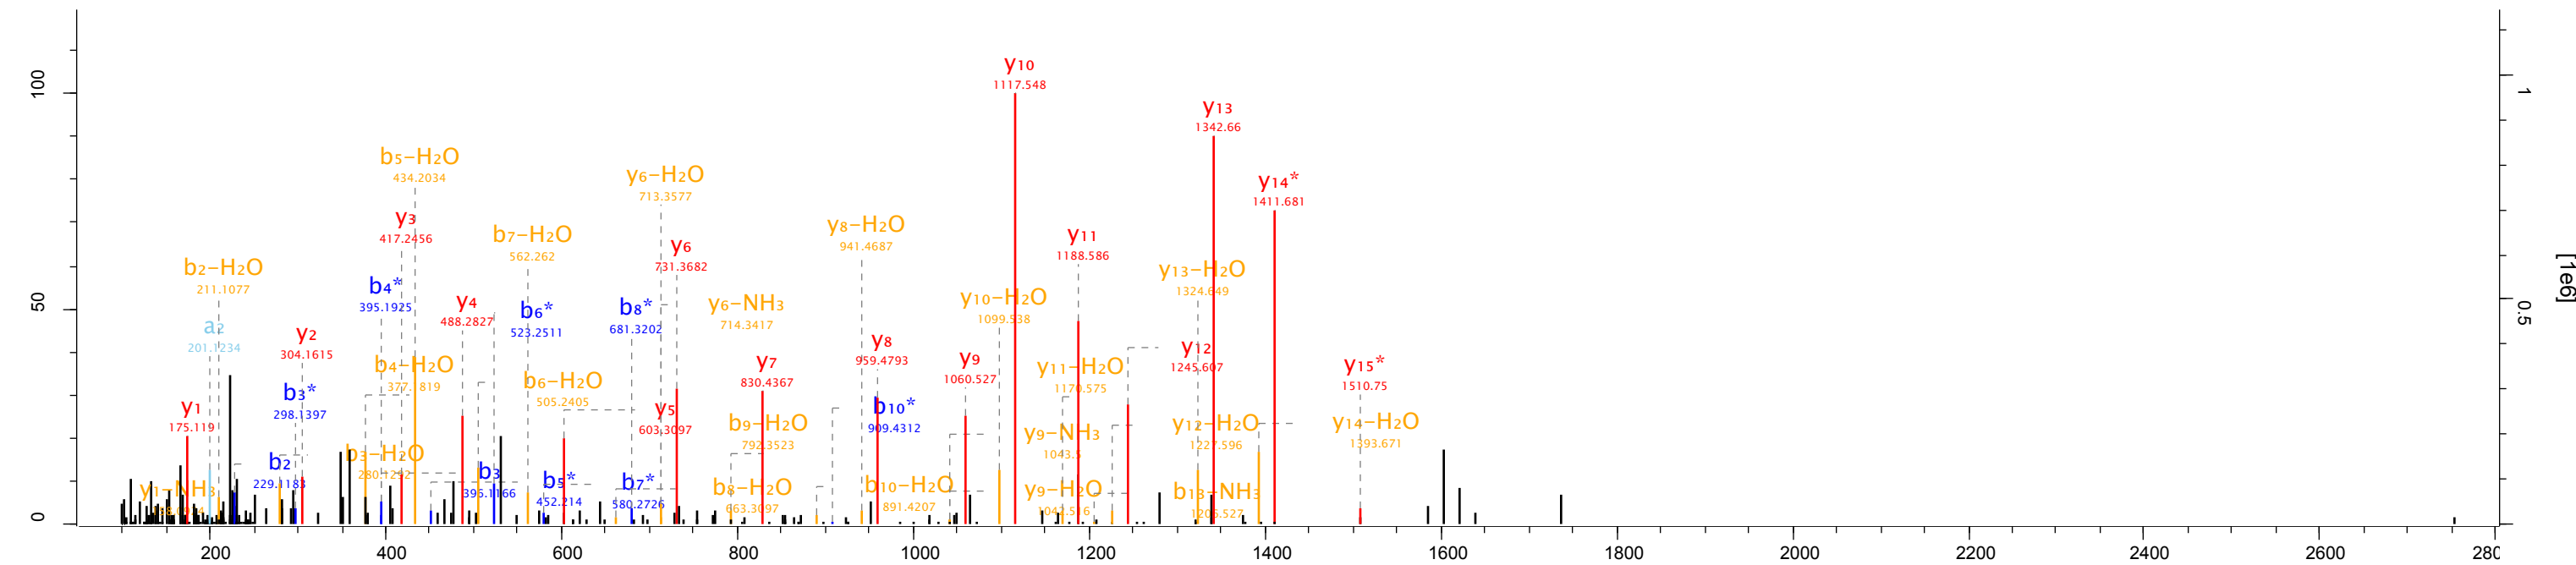

- E V S P G A G T E V Q D A L E R -

Fragmentation mapping (b-ions in blue, y-ions in red):

- b2: V
- b3: S
- b4\*: P
- b5\*: G
- b6\*: A
- b7\*: G
- b8\*: T
- b10\*: V
- y1: R
- y2: E
- y3: L
- y4: A
- y5: D
- y6: Q
- y7: V
- y8: E
- y9: T
- y10: G
- y11: A
- y12: P
- y13: S
- y14\*: S
- y15\*: V

Raw file: 20150814\_A375SR\_Phospho\_BR2\_06  
 Scan: 17902 Method: FTMS; HCD Score: 155.09 m/z: 892.4 Gene names: TJP1

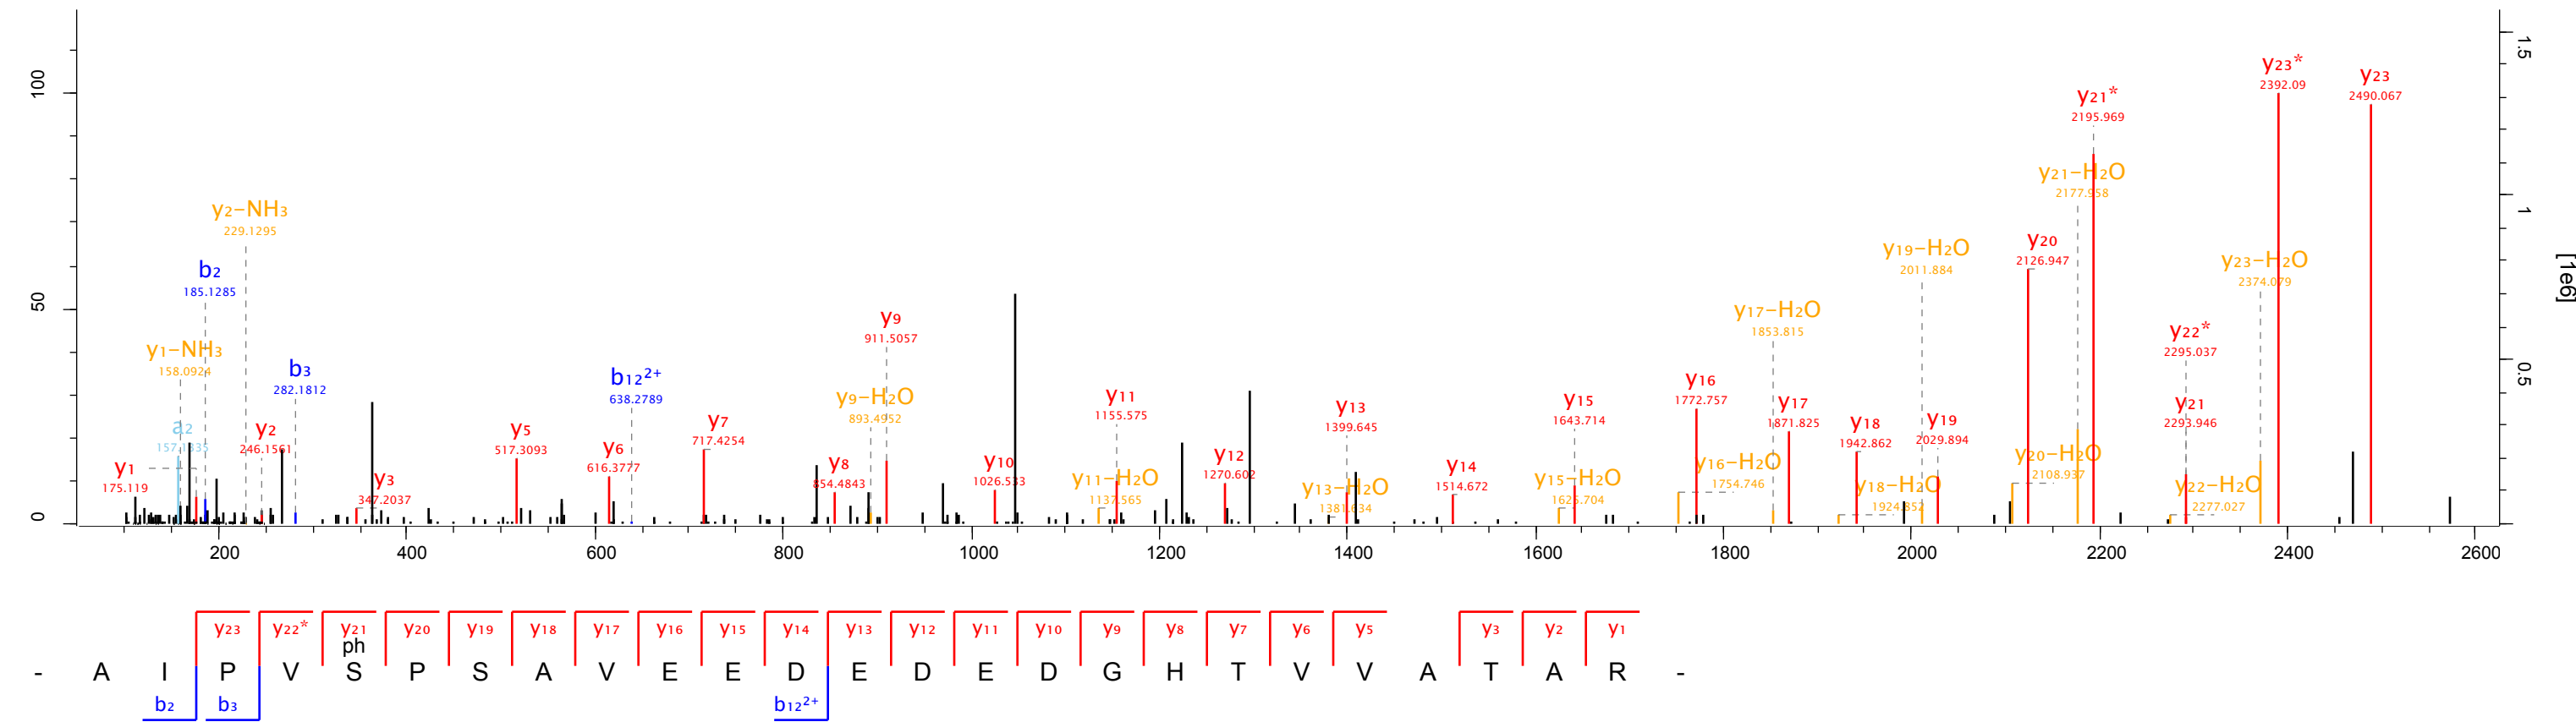

Raw file: 20150814\_A375SR\_Phospho\_BR2\_06  
 Scan: 17912 Method: FTMS; HCD Score: 180.1 m/z: 779.84 Gene names: PROSER2;C10orf47

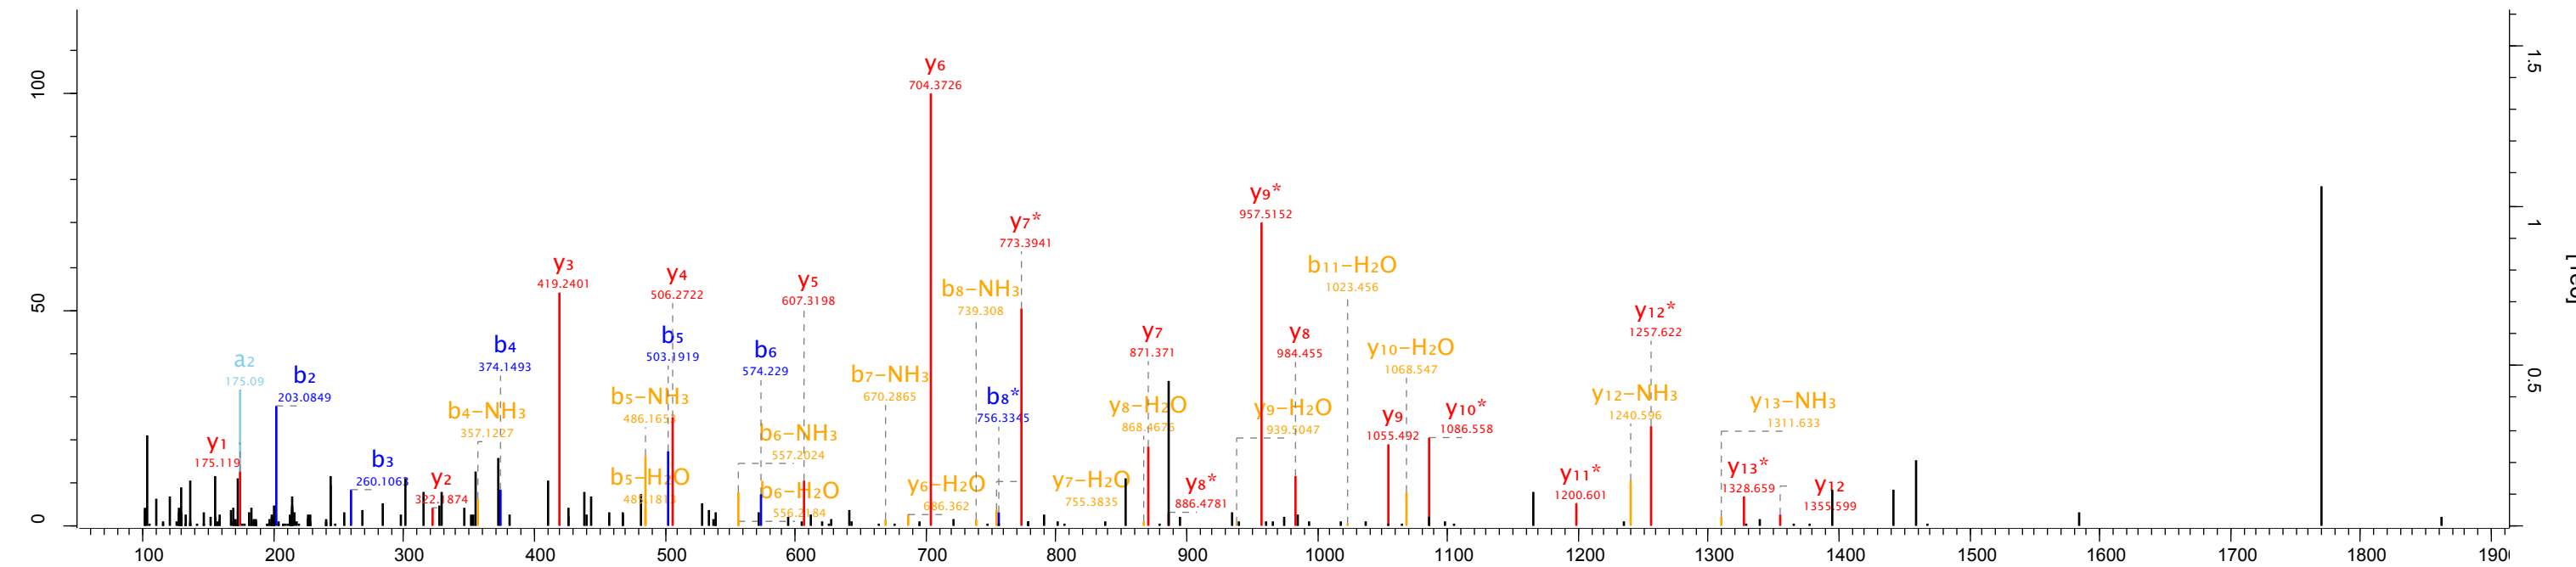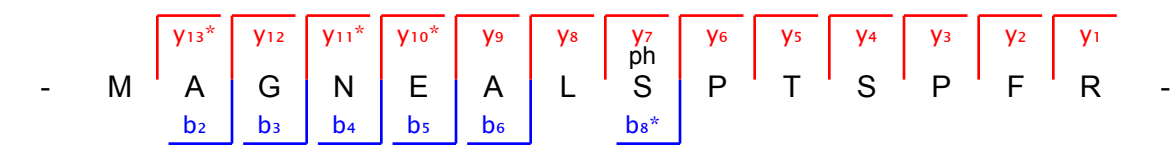

Raw file 20150814\_A375SR\_Phospho\_BR2\_06 Scan 18272 Method FTMS; HCD Score 105.63 m/z 1127.51 Gene names MTCL1

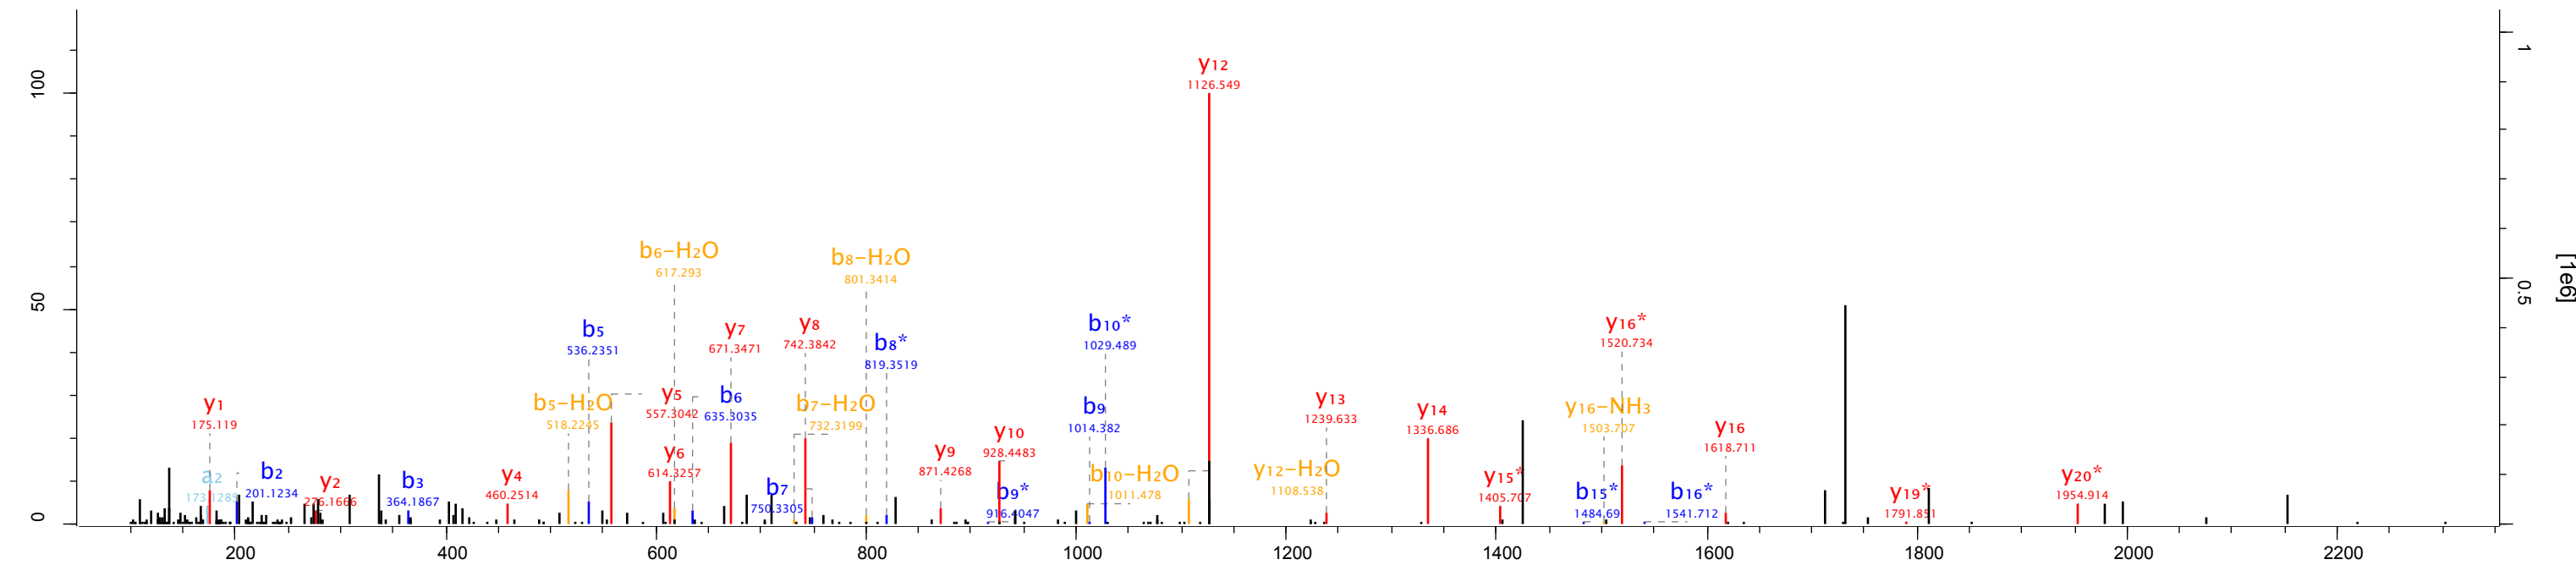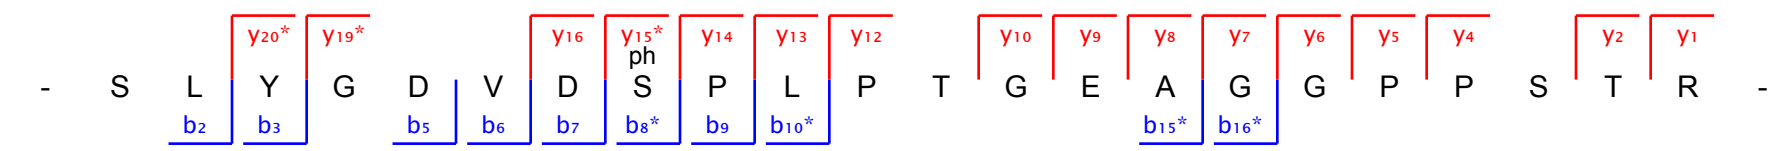

Raw file 20150814\_A375SR\_Phospho\_BR2\_06 Scan 19302 Method FTMS; HCD Score 126.54 m/z 699.03 Gene names LARP4B

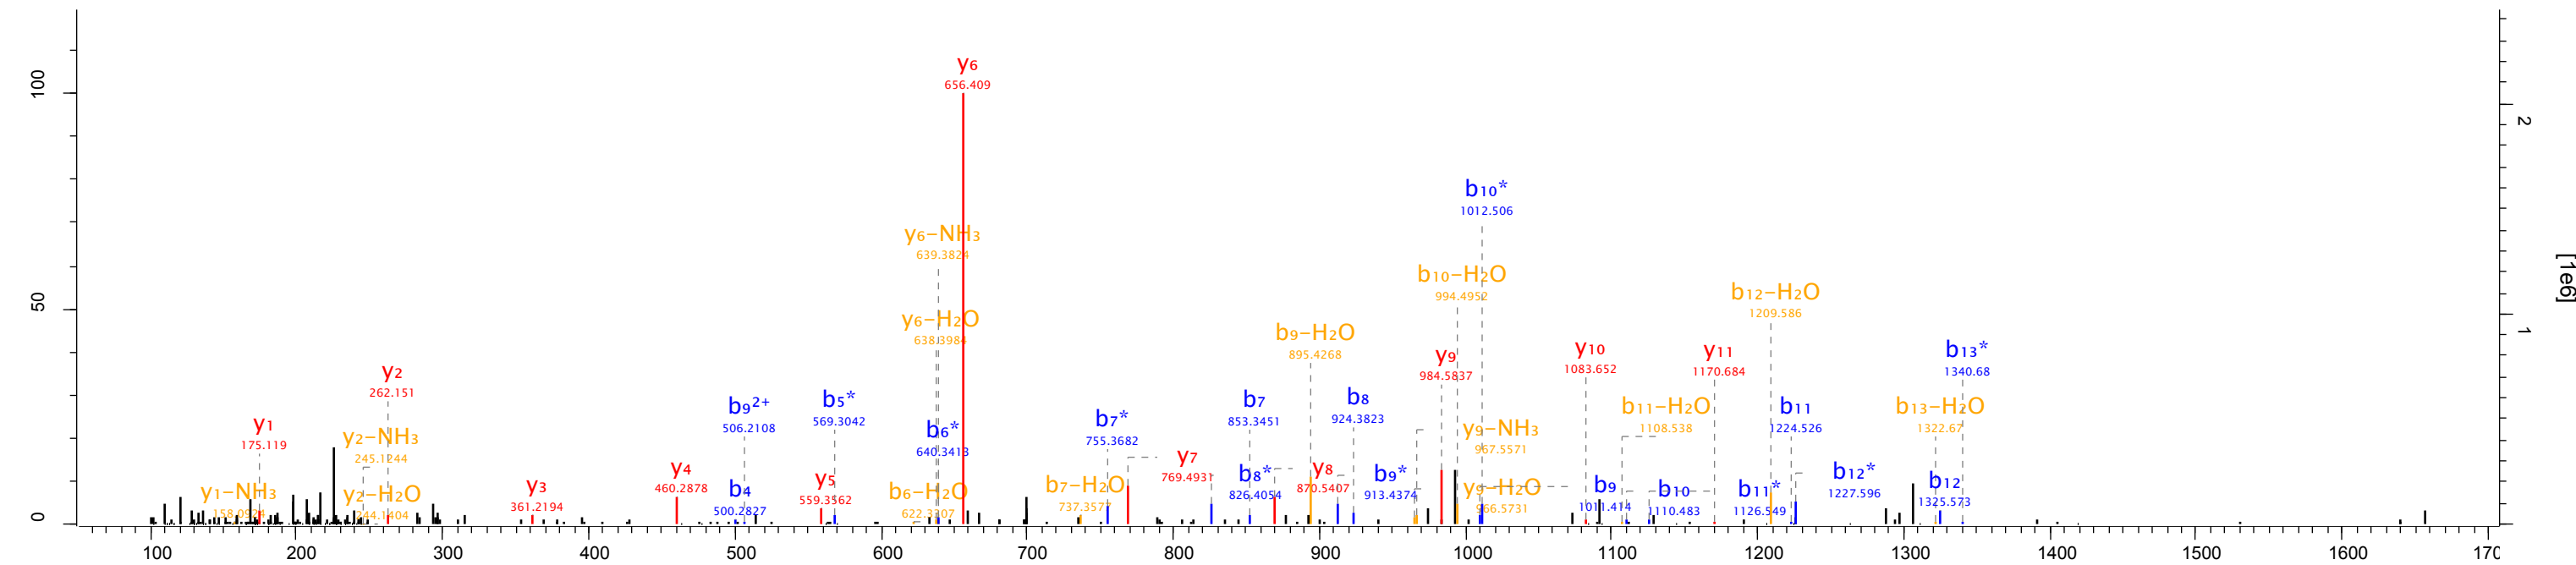

- E R T L S A D A S V N T L P V V V S R -

ph

b4 b5\* b6\* b7 b8 b9 b10 b11 b12 b13\*

y11 y10 y9 y8 y7 y6 y5 y4 y3 y2 y1

Raw file: 20150814\_A375SR\_Phospho\_BR2\_06  
 Scan: 19492 Method: FTMS; HCD Score: 118.77 m/z: 602.79 Gene names: PLEC

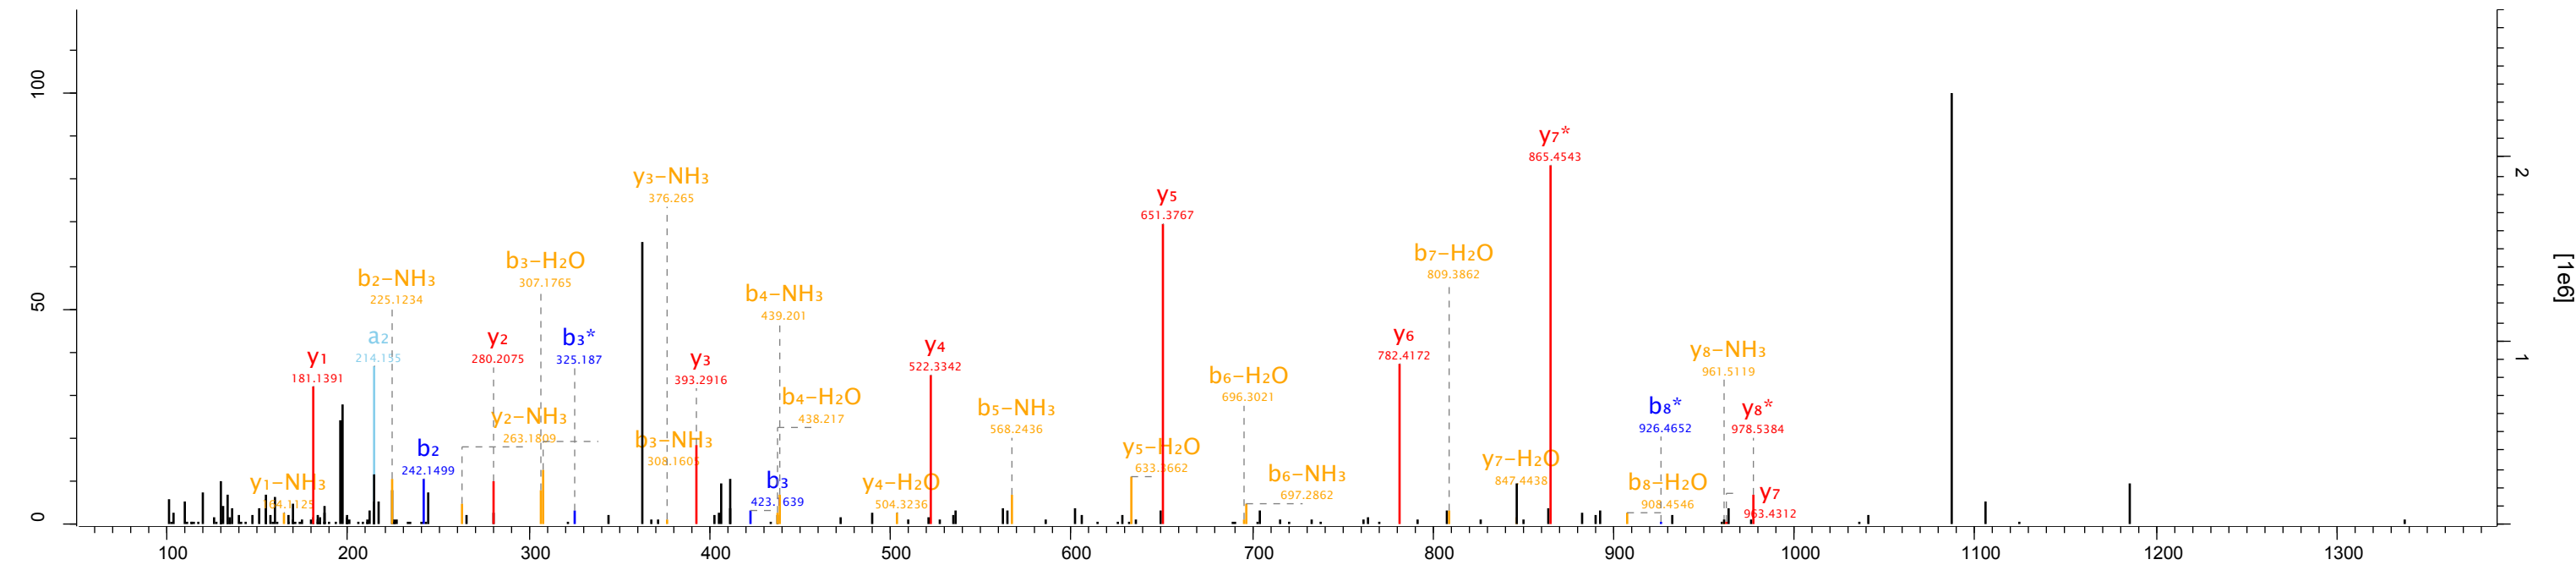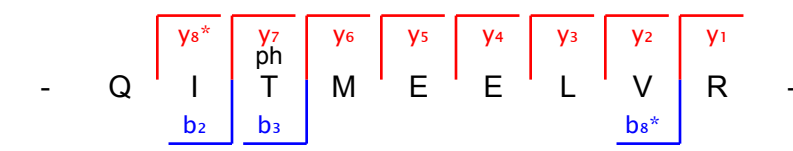

Raw file: 20150814\_A375SR\_Phospho\_BR2\_06  
 Scan: 19752 Method: FTMS; HCD Score: 134.42 m/z: 1167.88 Gene names: PALLD

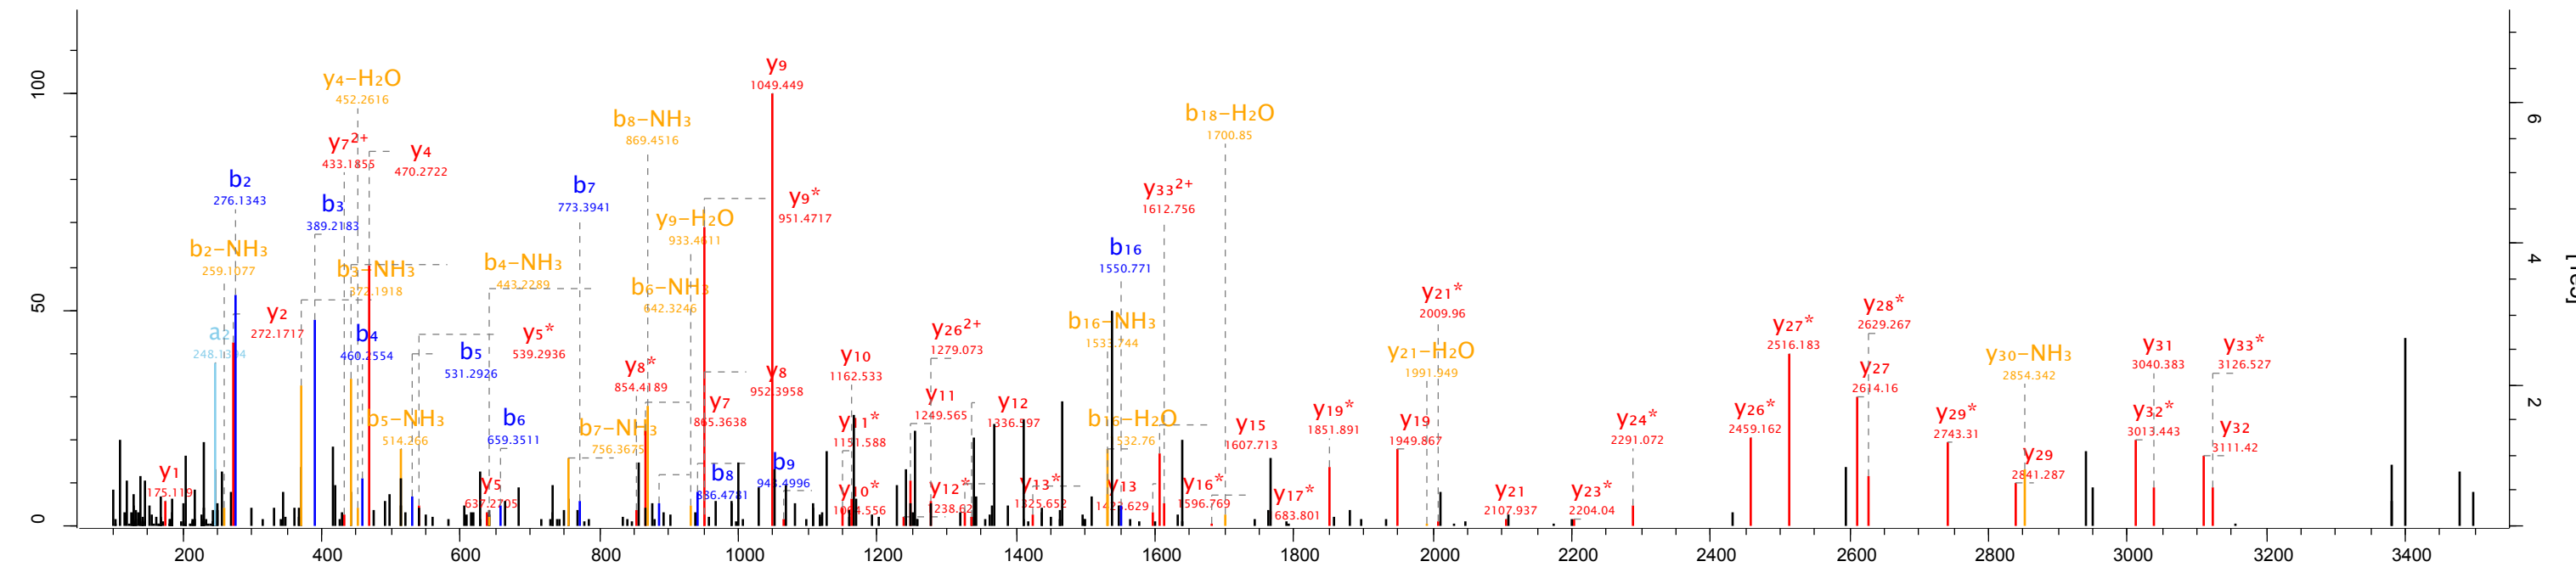

Sequence: - Q F I A A Q N L G P A S G H G T P A S S P S S S S L P S P M S P T P R -

Fragmentation sites (b ions): b<sub>2</sub> (F-I), b<sub>3</sub> (I-A), b<sub>4</sub> (A-A), b<sub>5</sub> (A-Q), b<sub>6</sub> (Q-N), b<sub>7</sub> (N-L), b<sub>8</sub> (L-G), b<sub>9</sub> (G-P), b<sub>16</sub> (T-P)

Fragmentation sites (y ions): y<sub>1</sub> (F), y<sub>2</sub> (I), y<sub>3</sub> (A), y<sub>4</sub> (A), y<sub>5</sub> (Q), y<sub>6</sub> (N), y<sub>7</sub> (L), y<sub>8</sub> (G), y<sub>9</sub> (P), y<sub>10</sub> (A), y<sub>11</sub> (S), y<sub>12</sub> (G), y<sub>13</sub> (H), y<sub>14</sub> (G), y<sub>15</sub> (T), y<sub>16</sub> (P), y<sub>17</sub> (A), y<sub>18</sub> (S), y<sub>19</sub> (S), y<sub>20</sub> (P), y<sub>21</sub> (S), y<sub>22</sub> (S), y<sub>23</sub> (S), y<sub>24</sub> (S), y<sub>25</sub> (L), y<sub>26</sub> (P), y<sub>27</sub> (S), y<sub>28</sub> (P), y<sub>29</sub> (M), y<sub>30</sub> (S), y<sub>31</sub> (P), y<sub>32</sub> (T), y<sub>33</sub> (P), y<sub>34</sub> (R)

Raw file 20150814\_A375SR\_Phospho\_BR2\_06 Scan 19822 Method FTMS; HCD Score 177.3 m/z 1035.01 Gene names VIPAS39

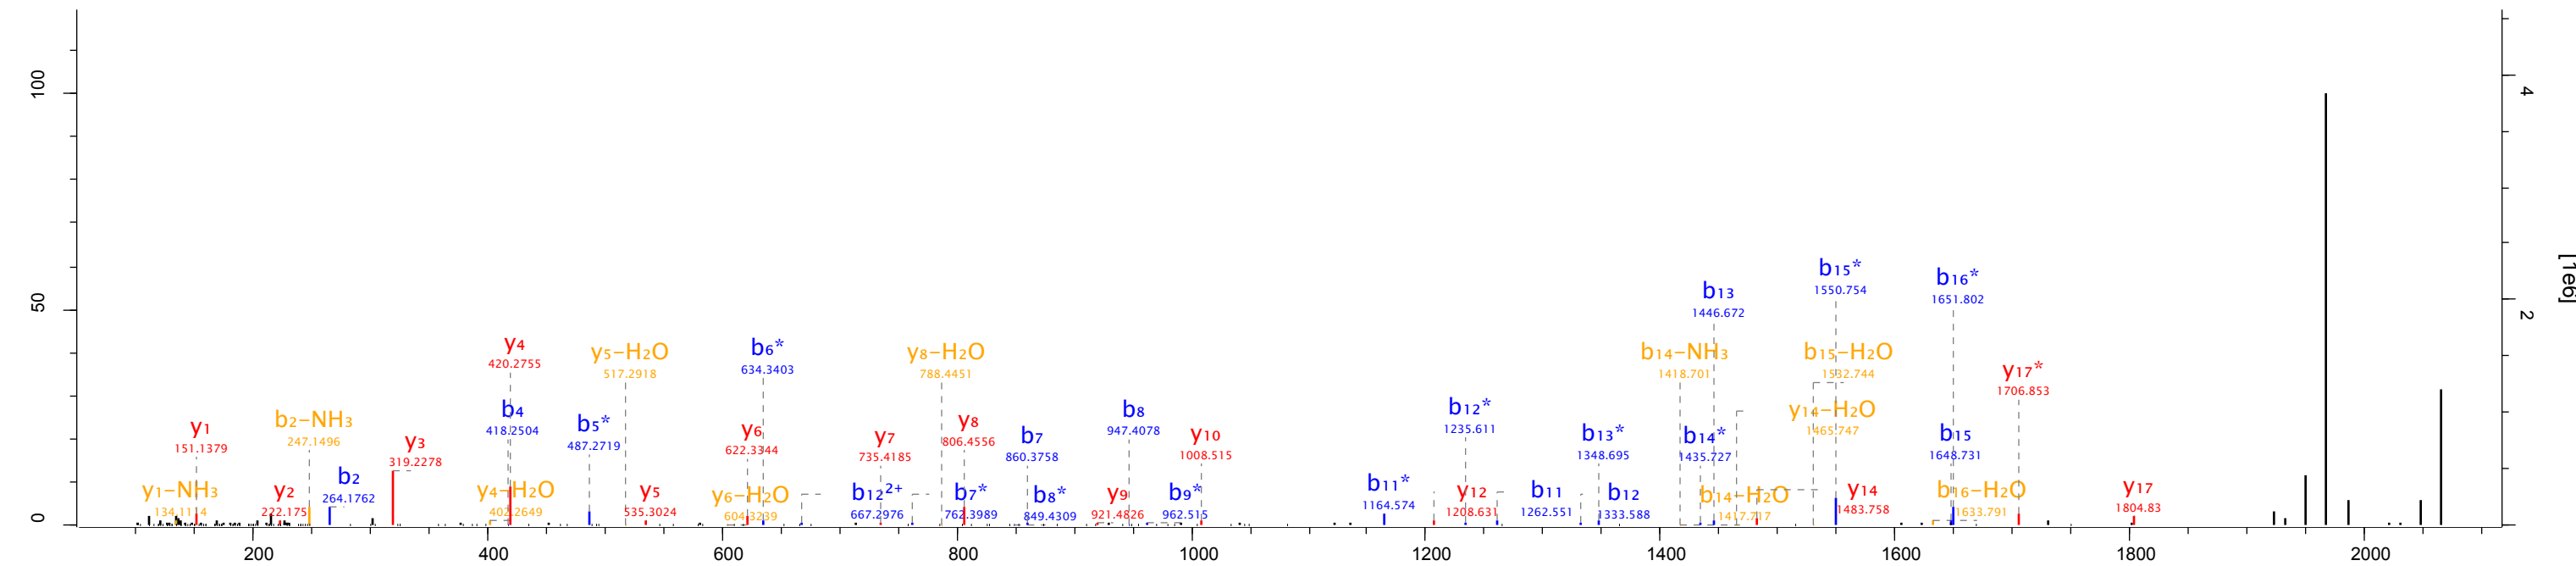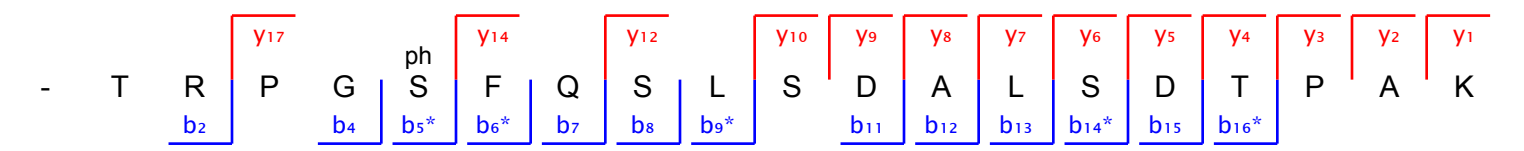



Raw file 20150814\_A375SR\_Phospho\_BR2\_06 Scan 20272 Method FTMS; HCD Score 146.16 m/z 543.26 Gene names OSBP

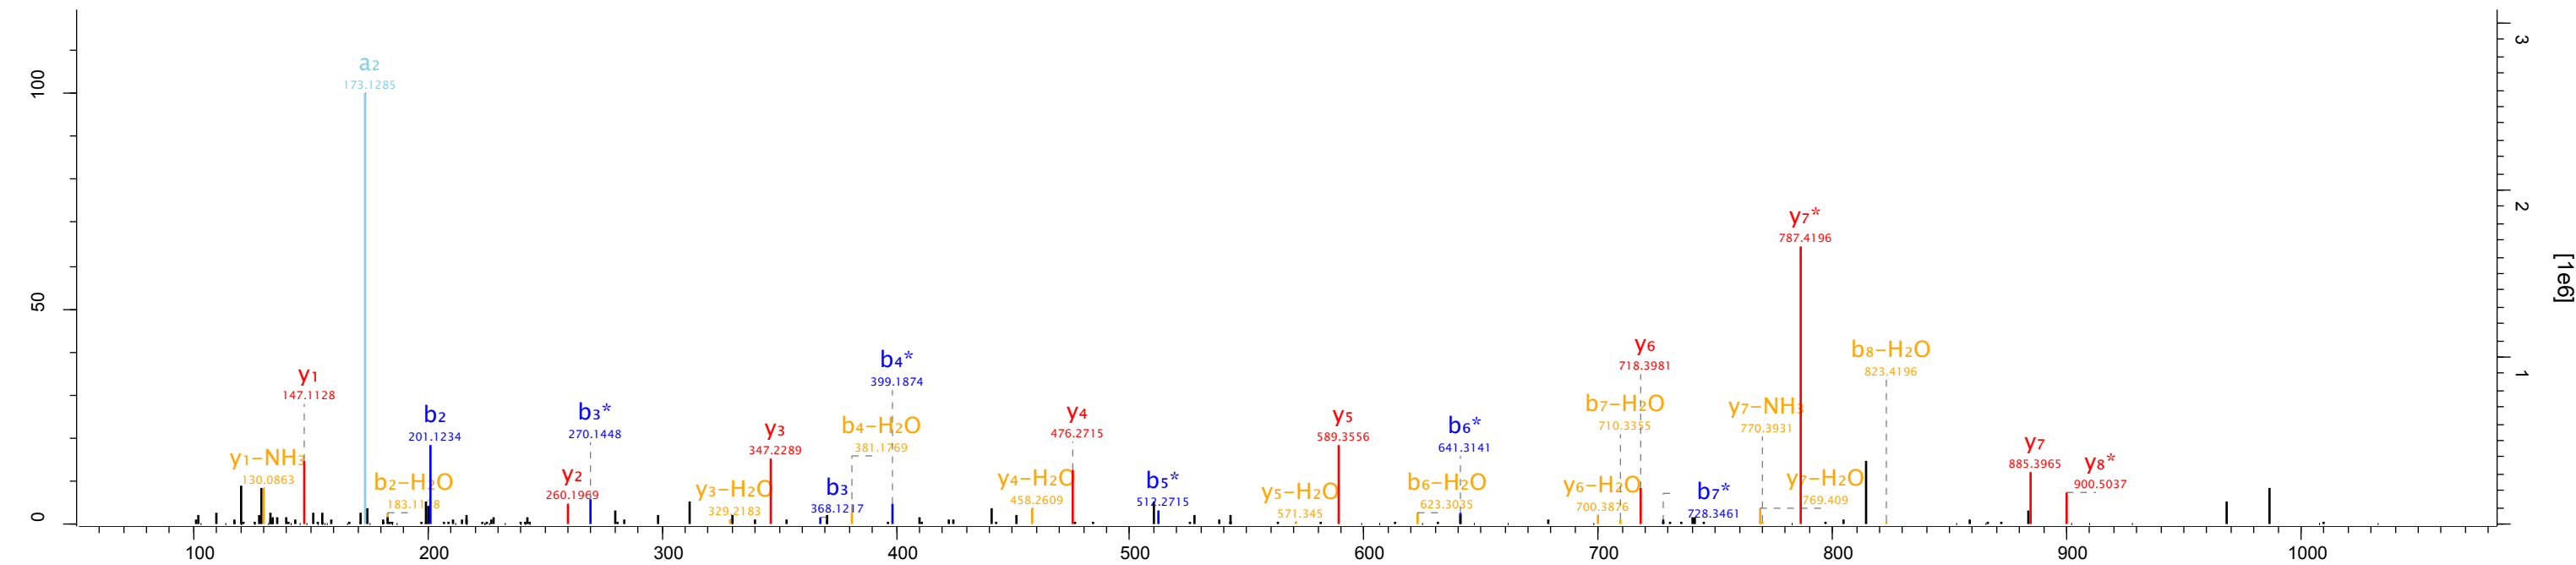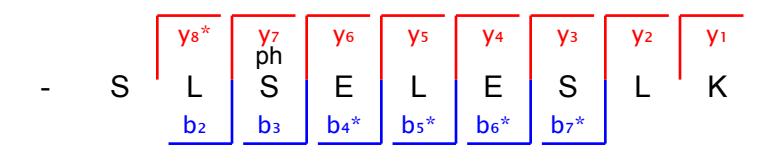

Raw file: 20150814\_A375SR\_Phospho\_BR2\_06  
 Scan: 20952 Method: FTMS; HCD Score: 110.57 m/z: 636.82 Gene names: RAB11FIP1

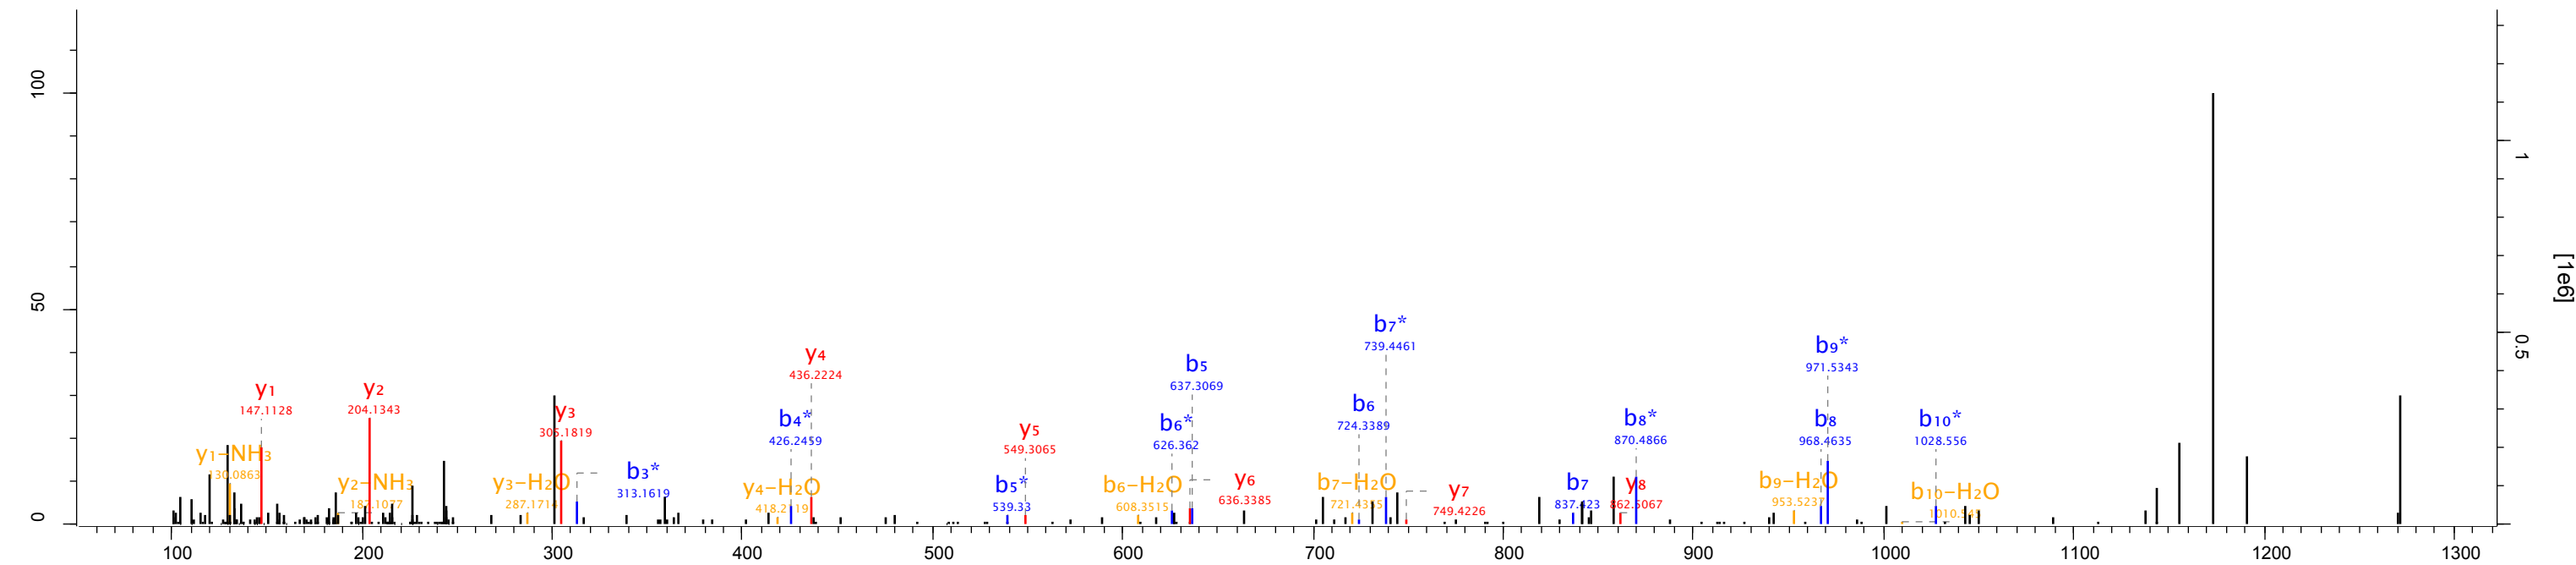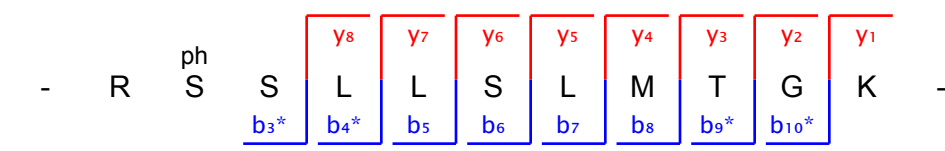

Raw file  
20150814\_A375SR\_Phospho\_BR2\_06

Scan 21462 Method FTMS; HCD Score 123.06 m/z 677.01 Gene names LYST

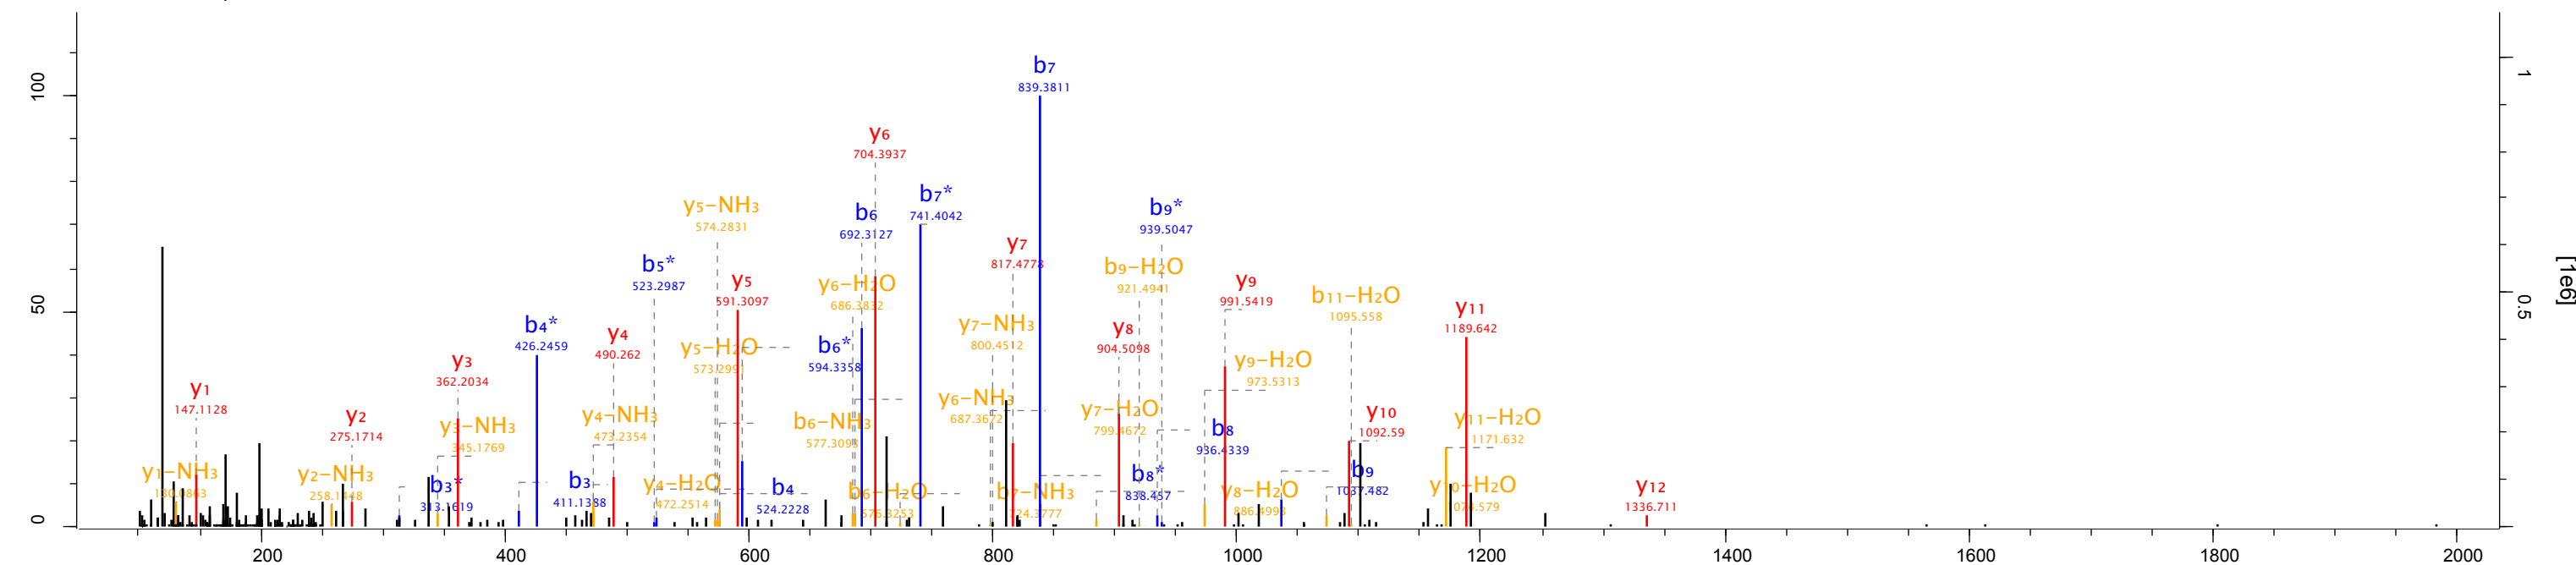

ph  
- S R S L P A F P T S S L L T Q S Q K -  
b3 b4 b5\* b6 b7 b8 b9

Raw file 20150814\_A375SR\_Phospho\_BR2\_06 Scan 21542 Method FTMS; HCD Score 86.18 m/z 666.29 Gene names TTC7A

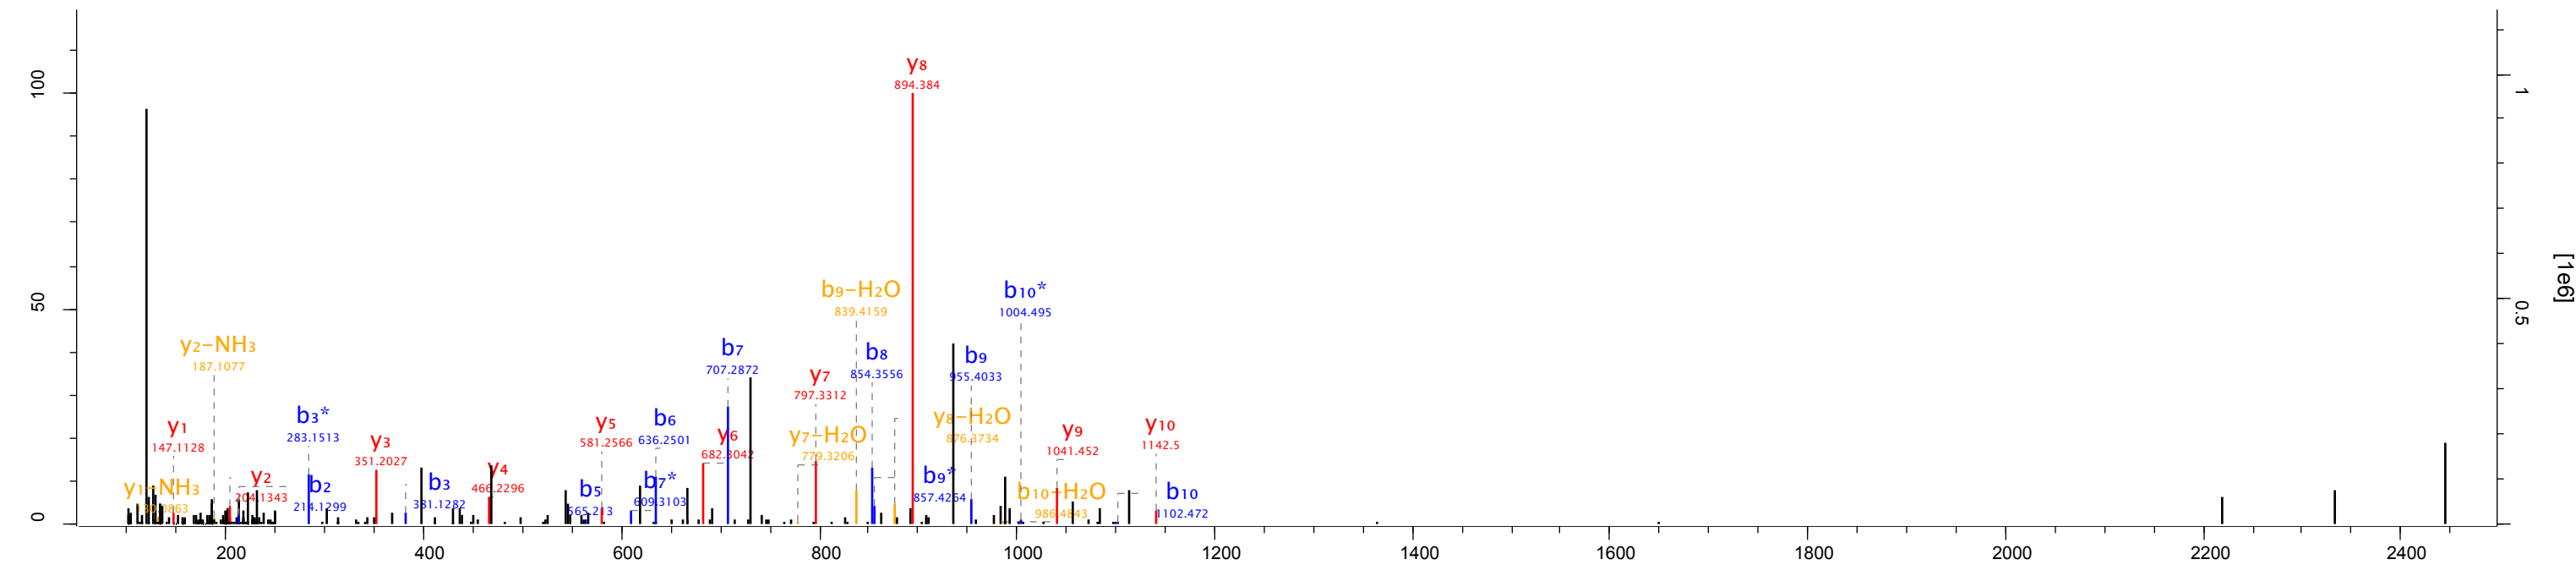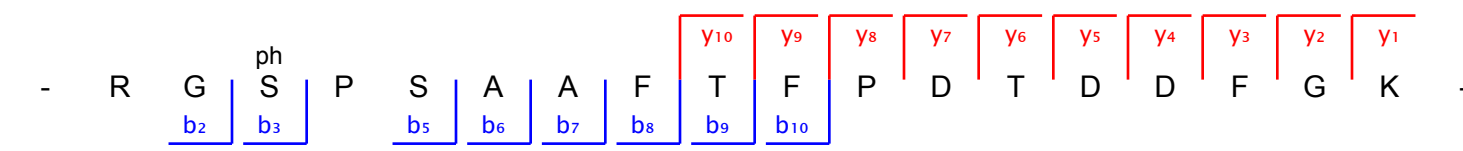

Raw file 20150814\_A375SR\_Phospho\_BR2\_06 Scan 21742 Method FTMS; HCD Score 147.67 m/z 1075 Gene names ZNF593

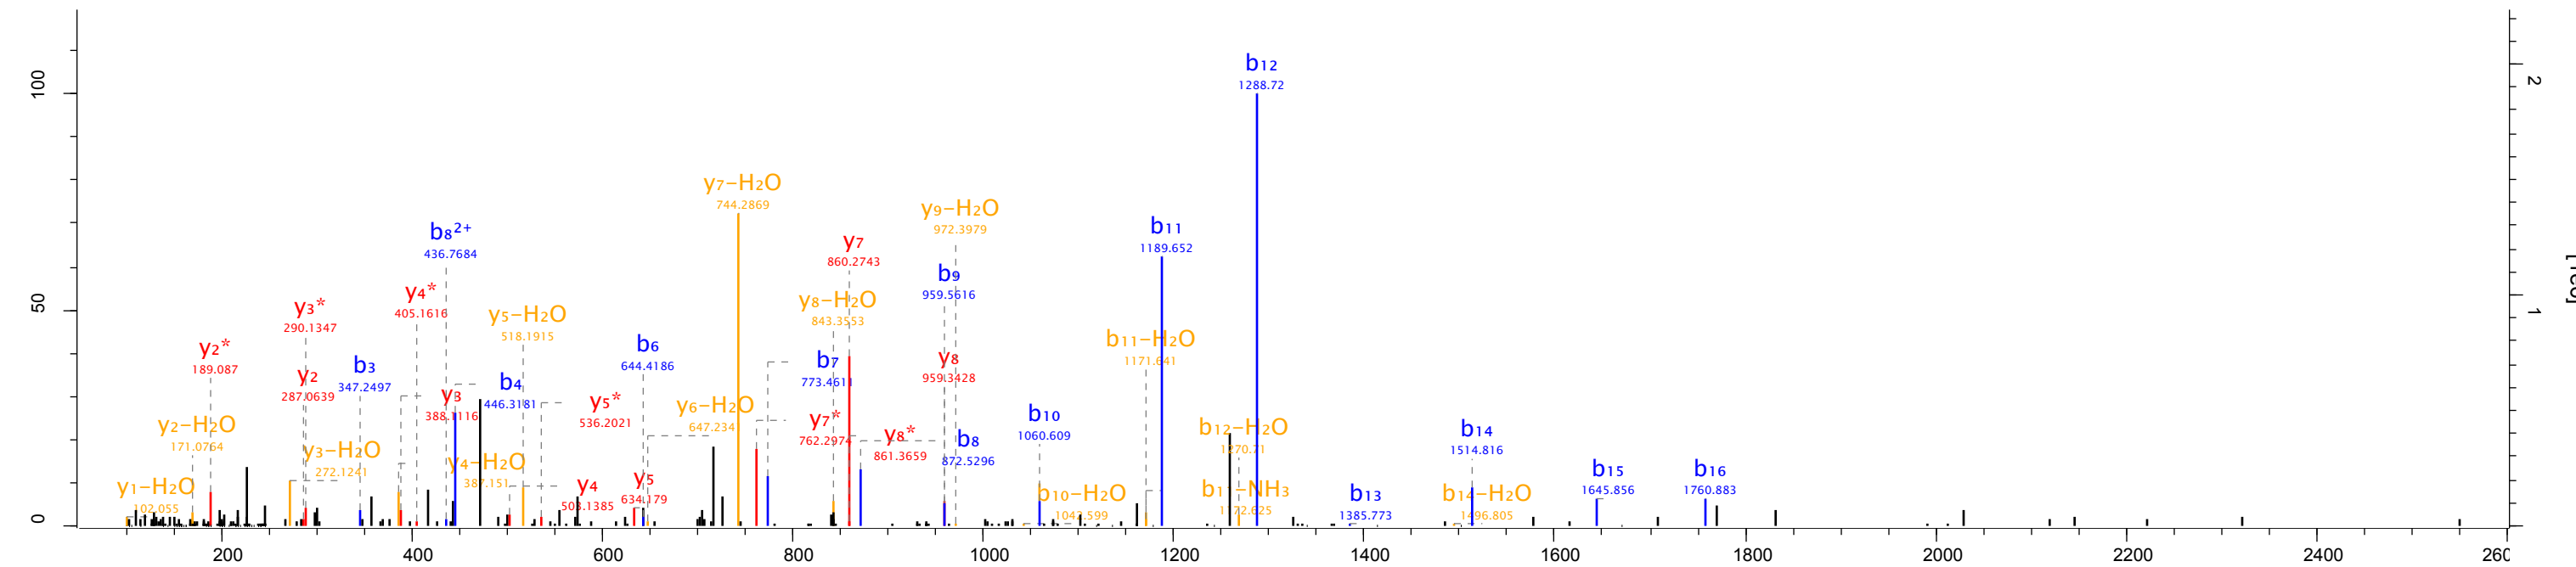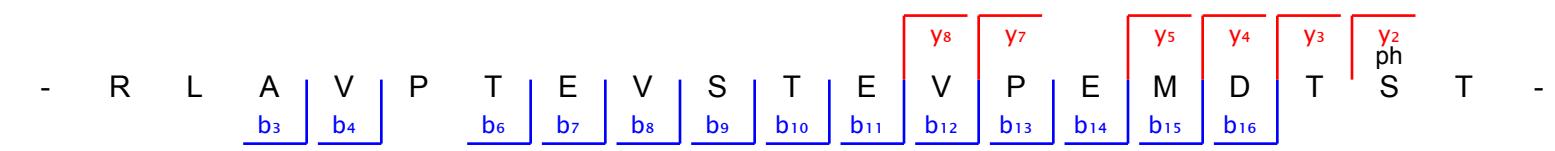

Raw file: 20150814\_A375SR\_Phospho\_BR2\_06  
 Scan: 22392 Method: FTMS; HCD Score: 194.79 m/z: 1114.2 Gene names: LMO7

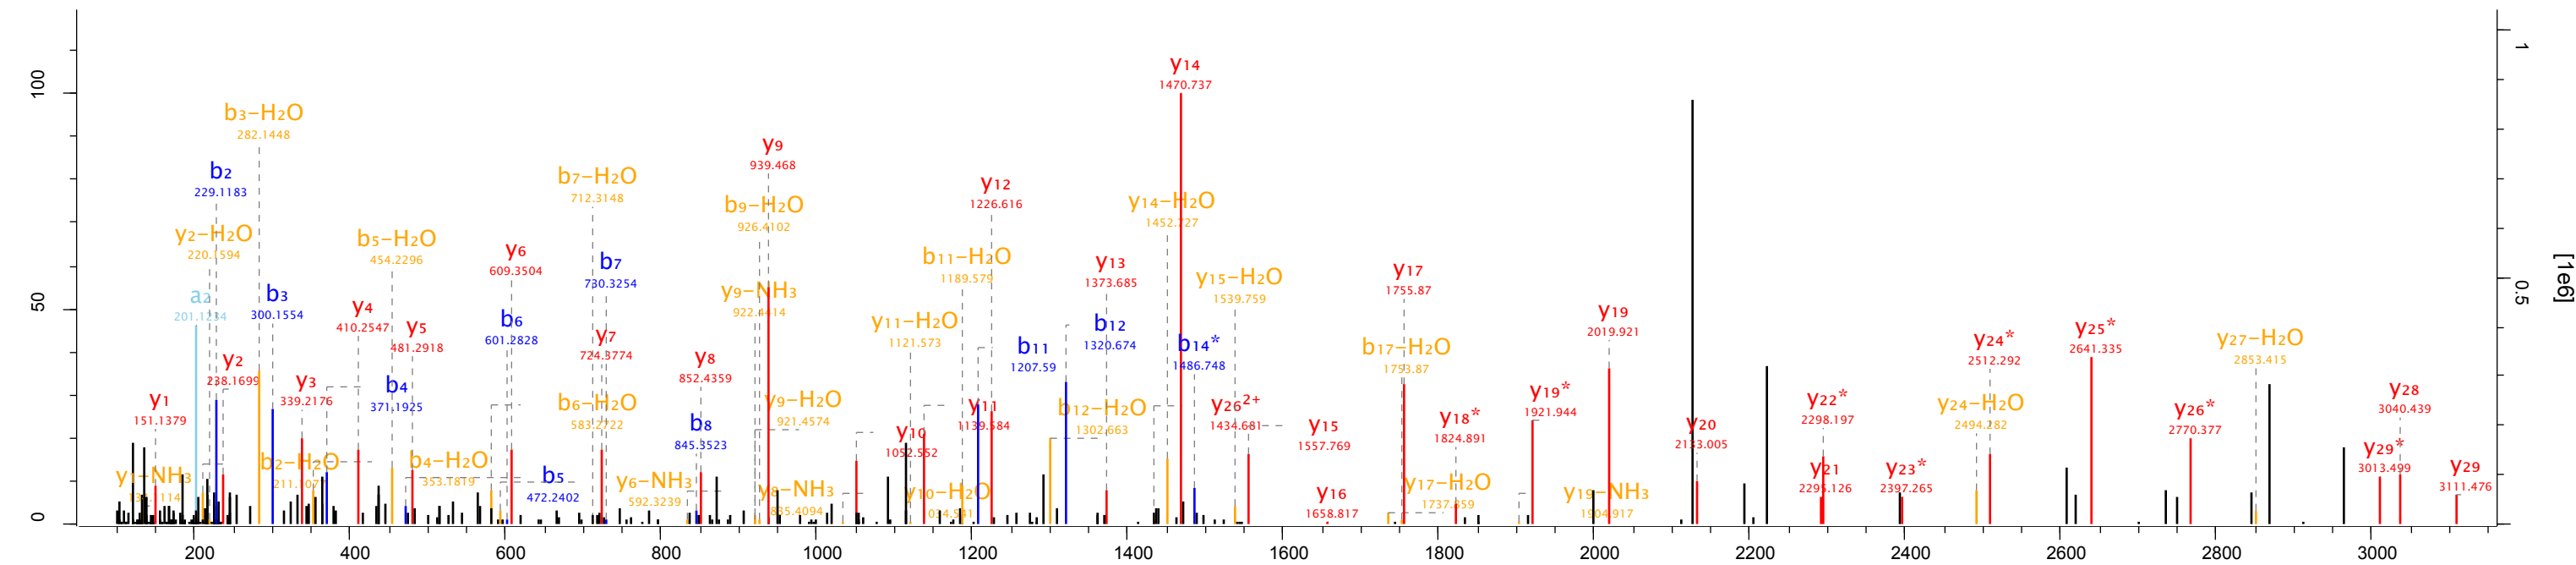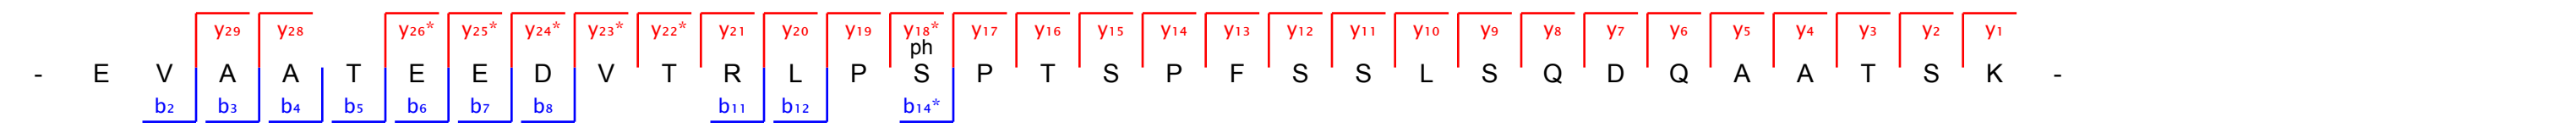

Raw file  
20150814\_A375SR\_Phospho\_BR2\_06

Scan 22592 Method FTMS; HCD Score 234.67 m/z 1148.78 Gene names NES

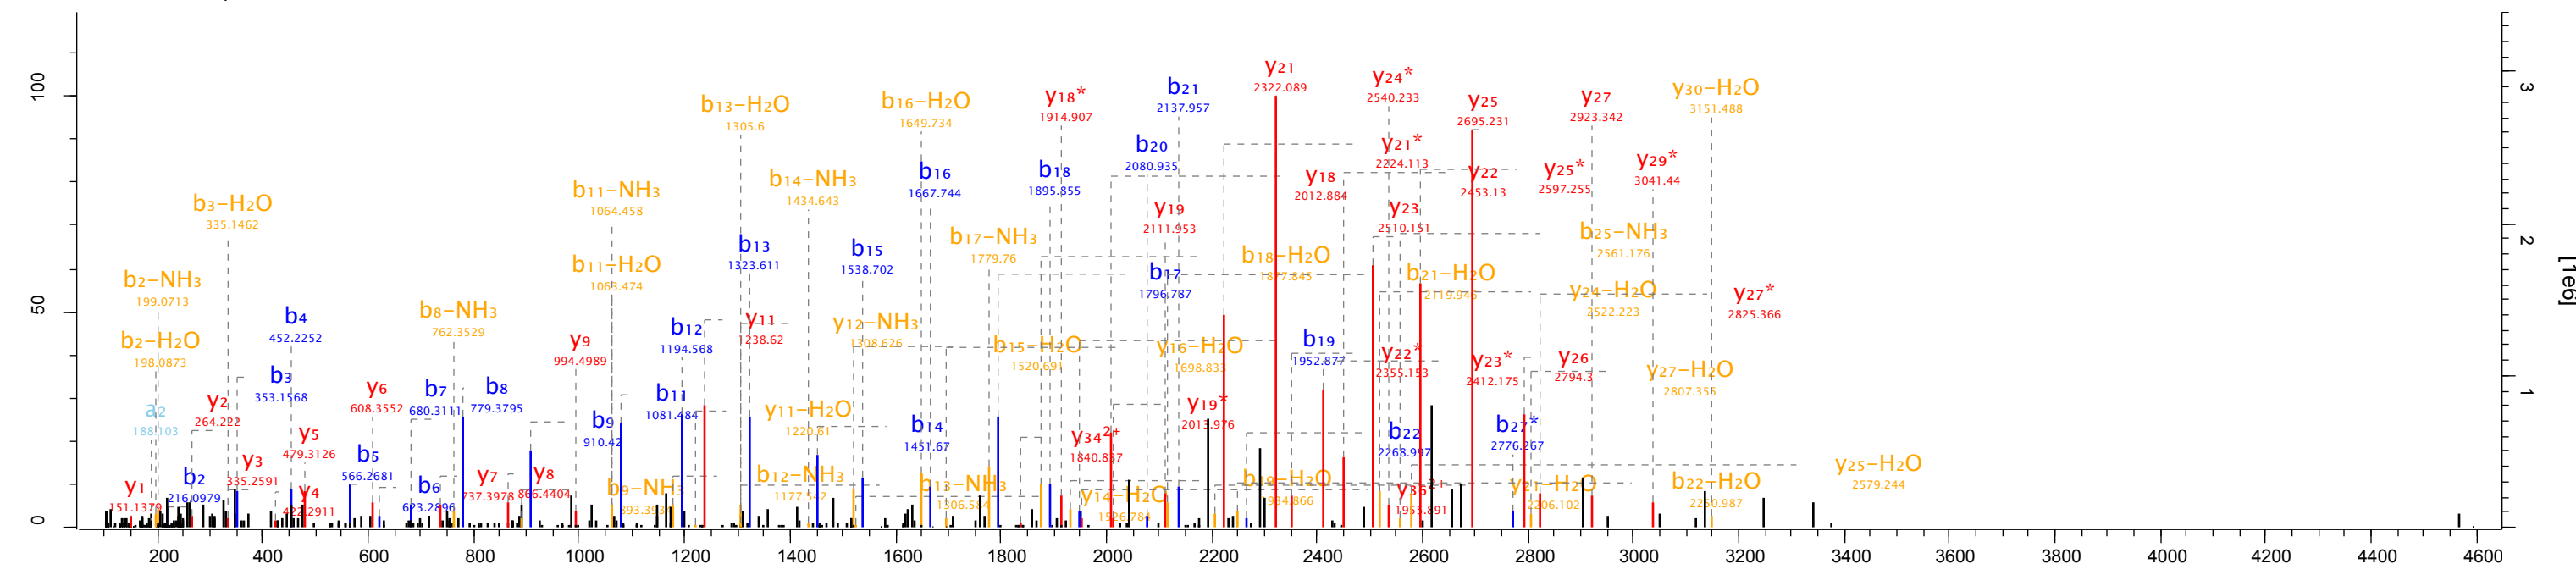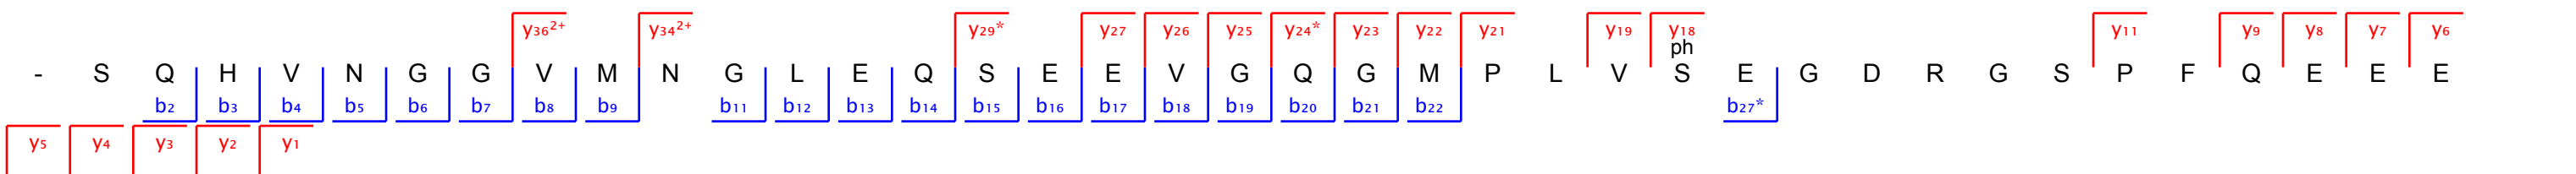

Raw file: 20150814\_A375SR\_Phospho\_BR2\_06  
 Scan: 23112 Method: FTMS; HCD Score: 234.62 m/z: 1320.13 Gene names: FAM122A

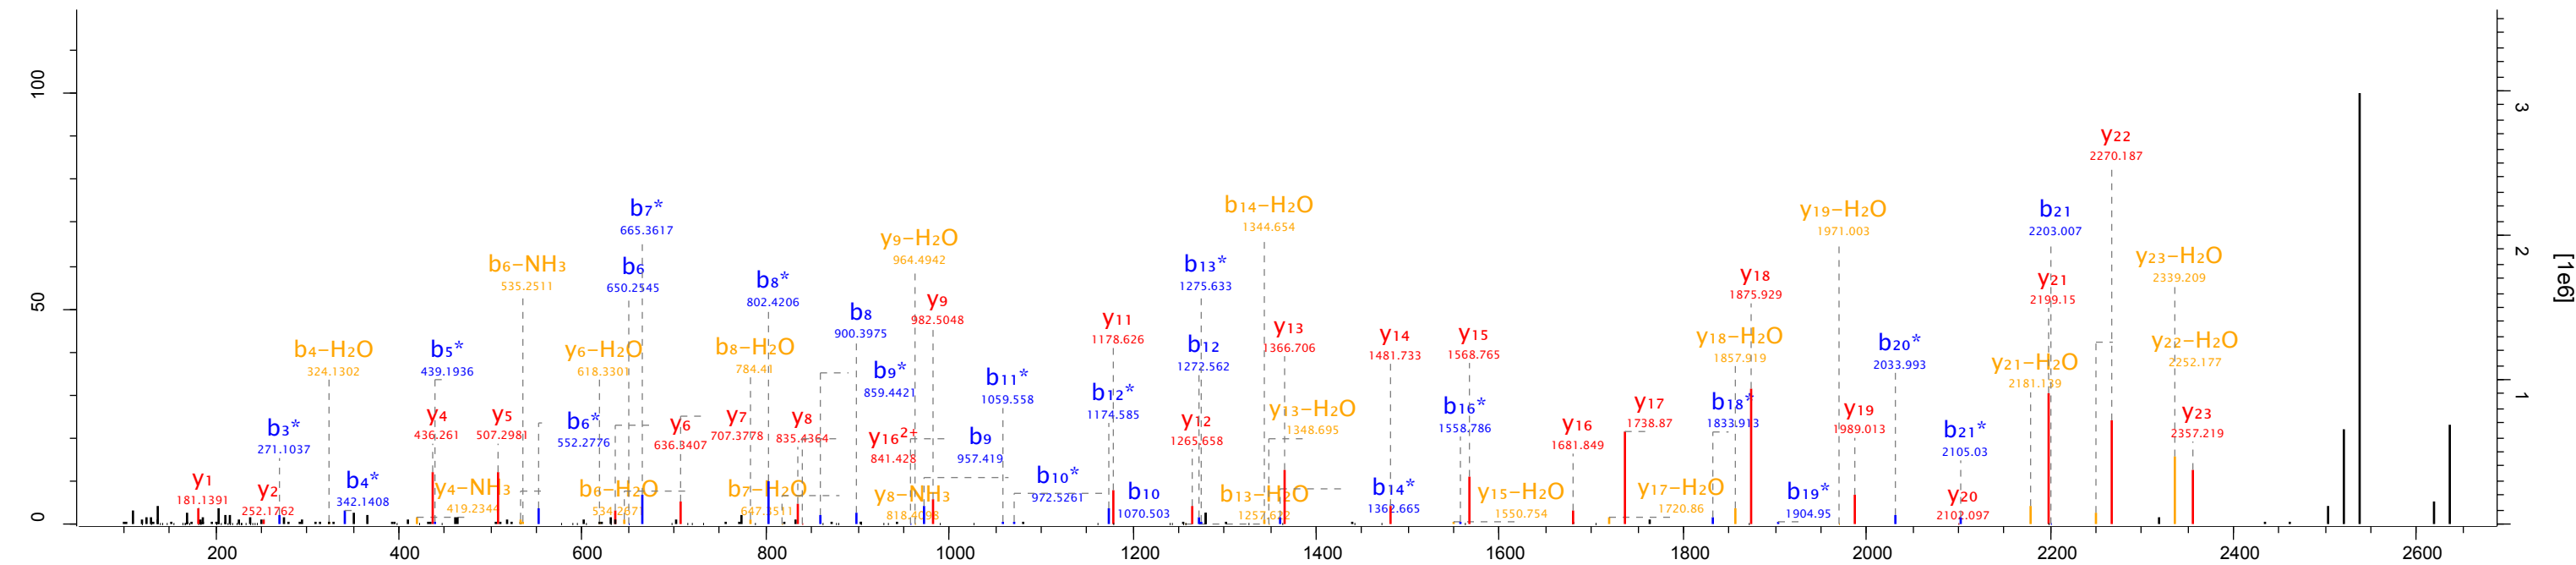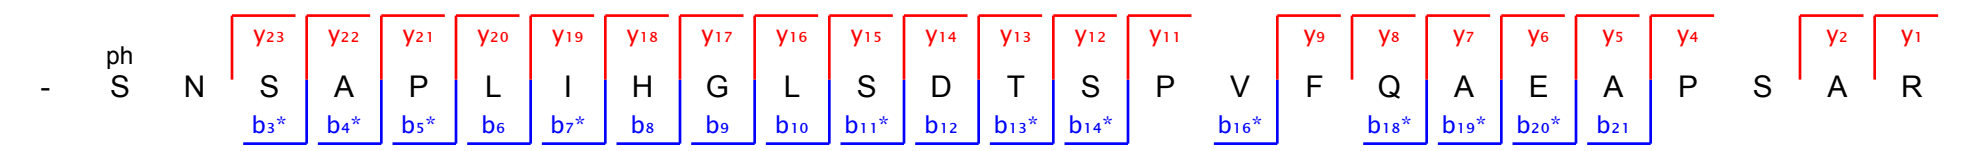



Raw file  
 20150814\_A375SR\_Phospho\_BR2\_06  
 Scan 2422 Method FTMS; HCD Score 87.72 m/z 377.18 Gene names LMNB1

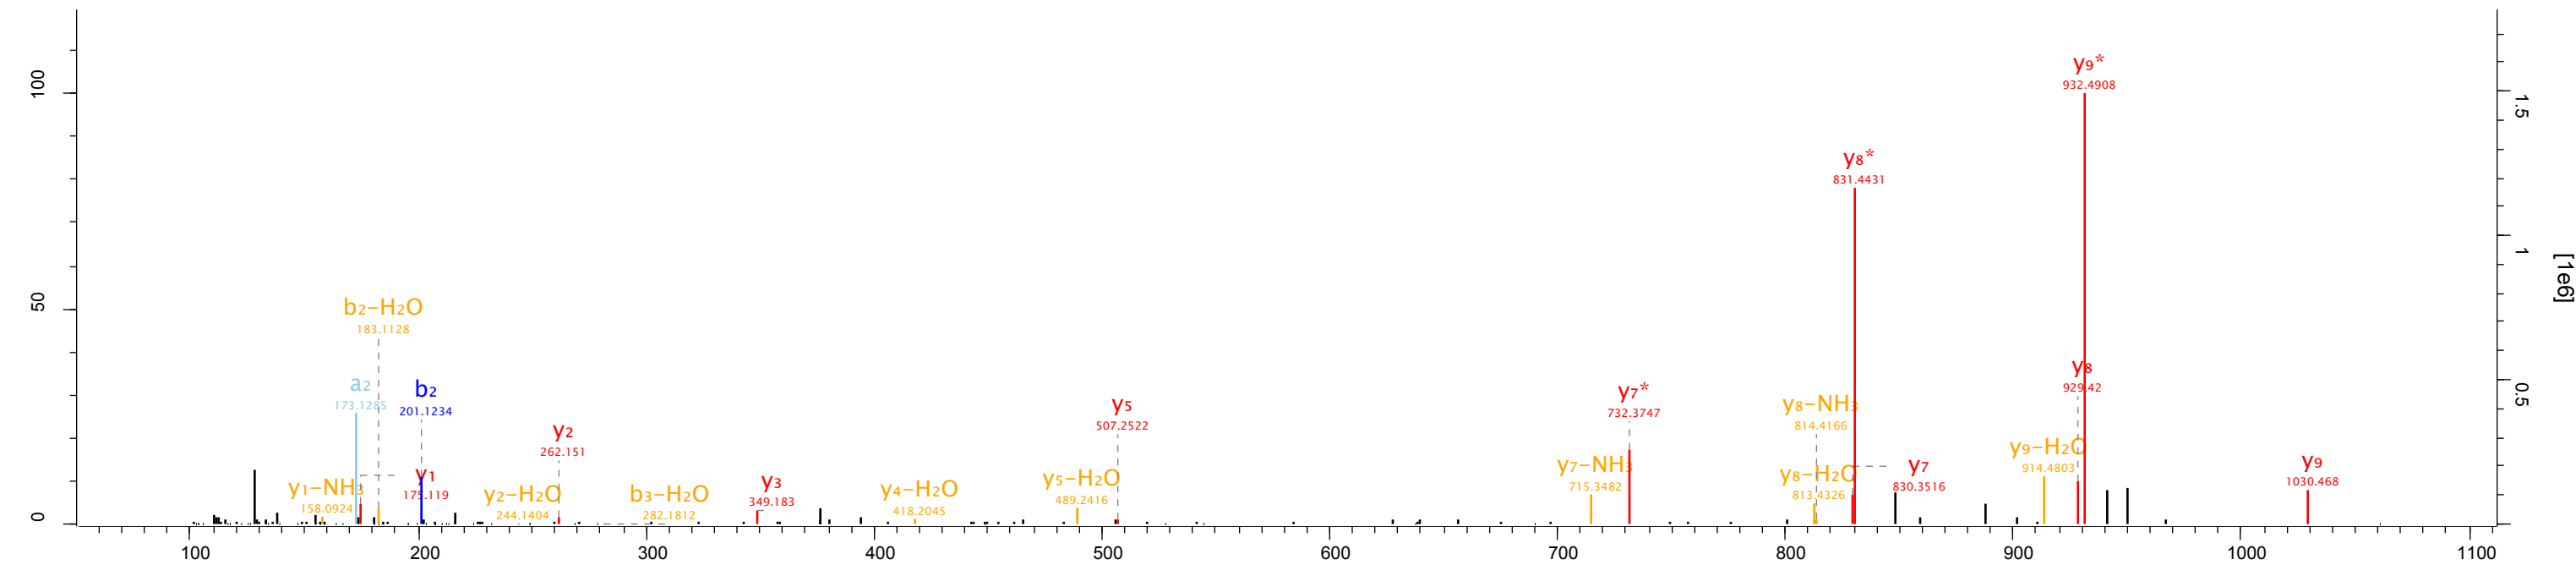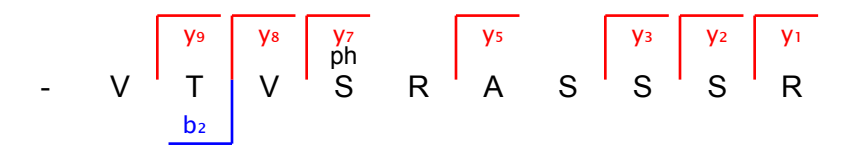

Raw file 20150814\_A375SR\_Phospho\_BR2\_06 Scan 24932 Method FTMS; HCD Score 97.07 m/z 814.84 Gene names TRMT112

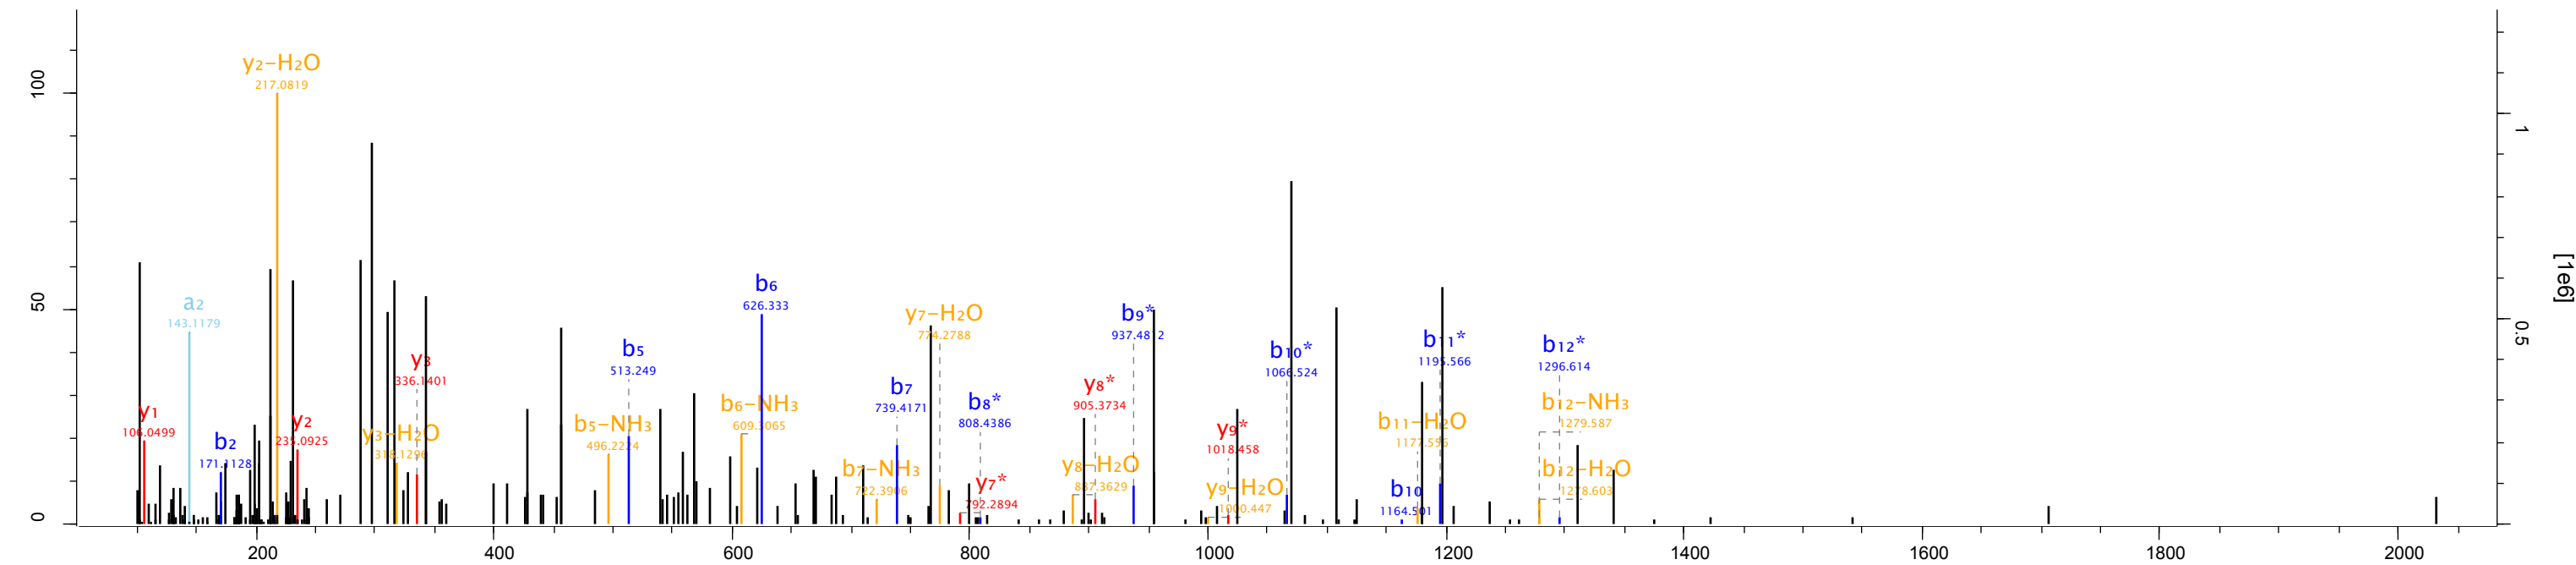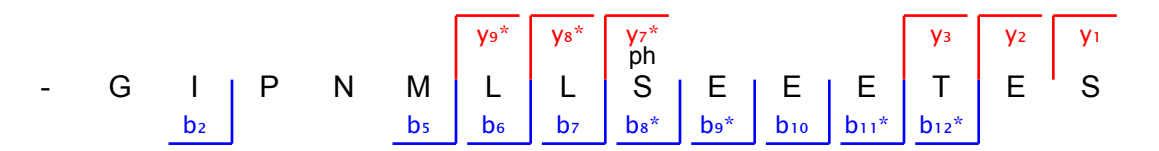

Raw file: 20150814\_A375SR\_Phospho\_BR2\_06  
 Scan: 25142 Method: FTMS; HCD Score: 73.99 m/z: 1021.52 Gene names: RTN4

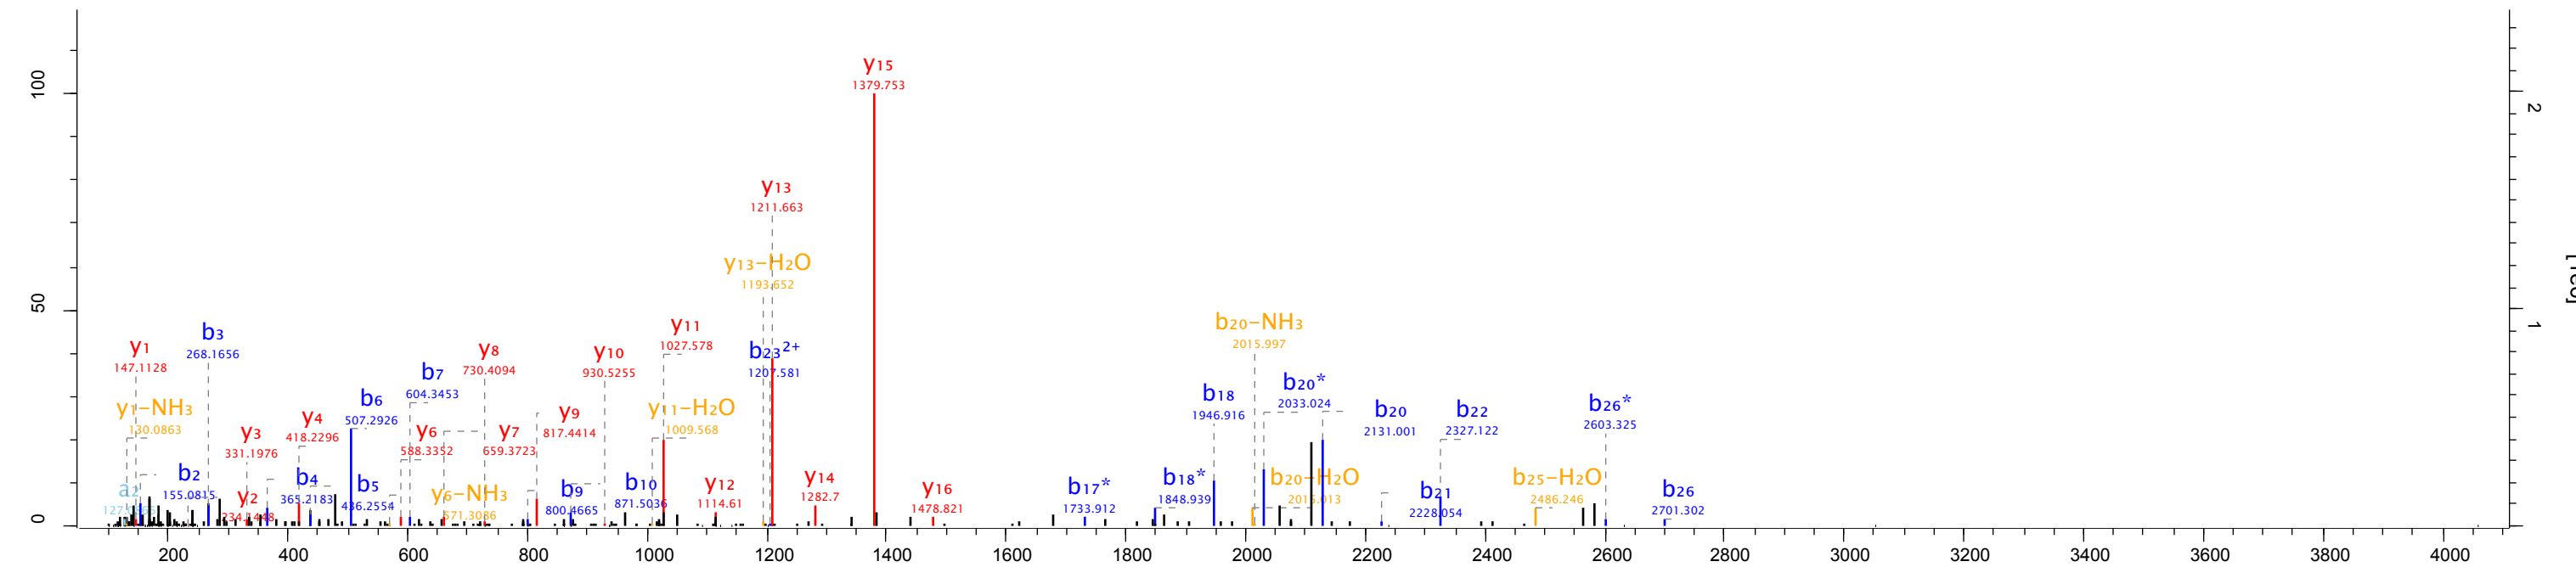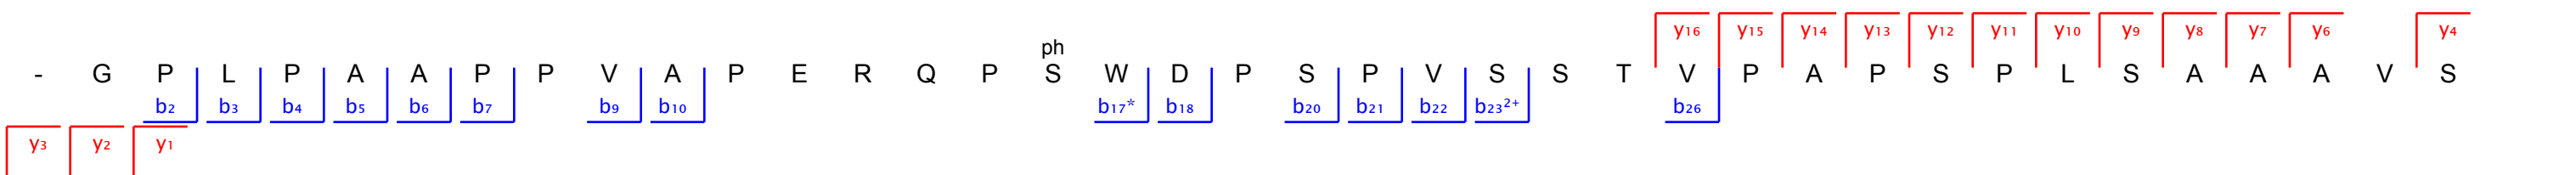

Raw file 20150814\_A375SR\_Phospho\_BR2\_06 Scan 26192 Method FTMS; HCD Score 84.89 m/z 771.71 Gene names MCM3

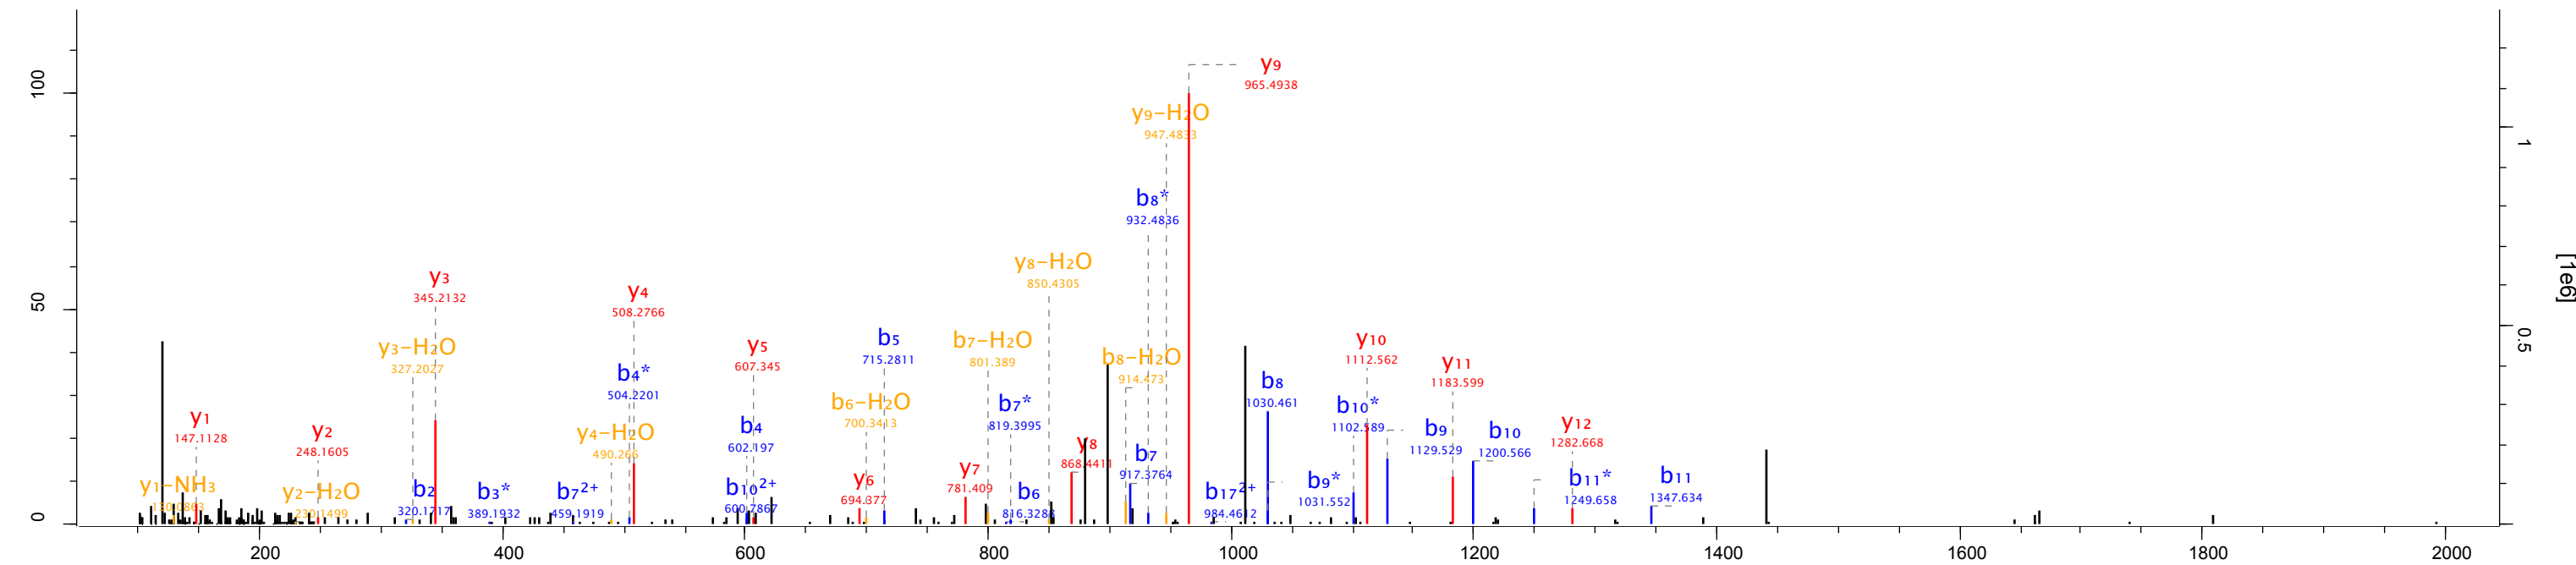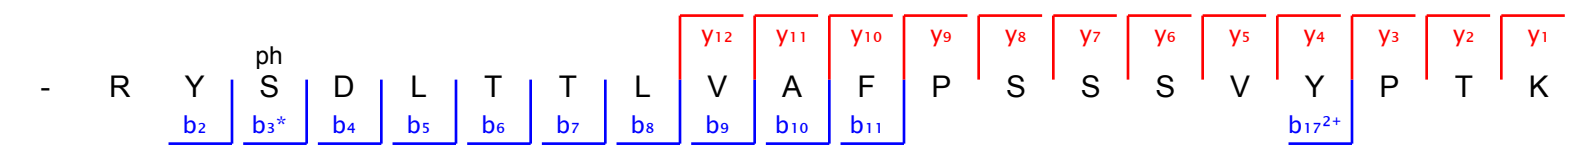

Raw file 20150814\_A375SR\_Phospho\_BR2\_06 Scan 26302 Method FTMS; HCD Score 68.41 m/z 830.77 Gene names AHNAK

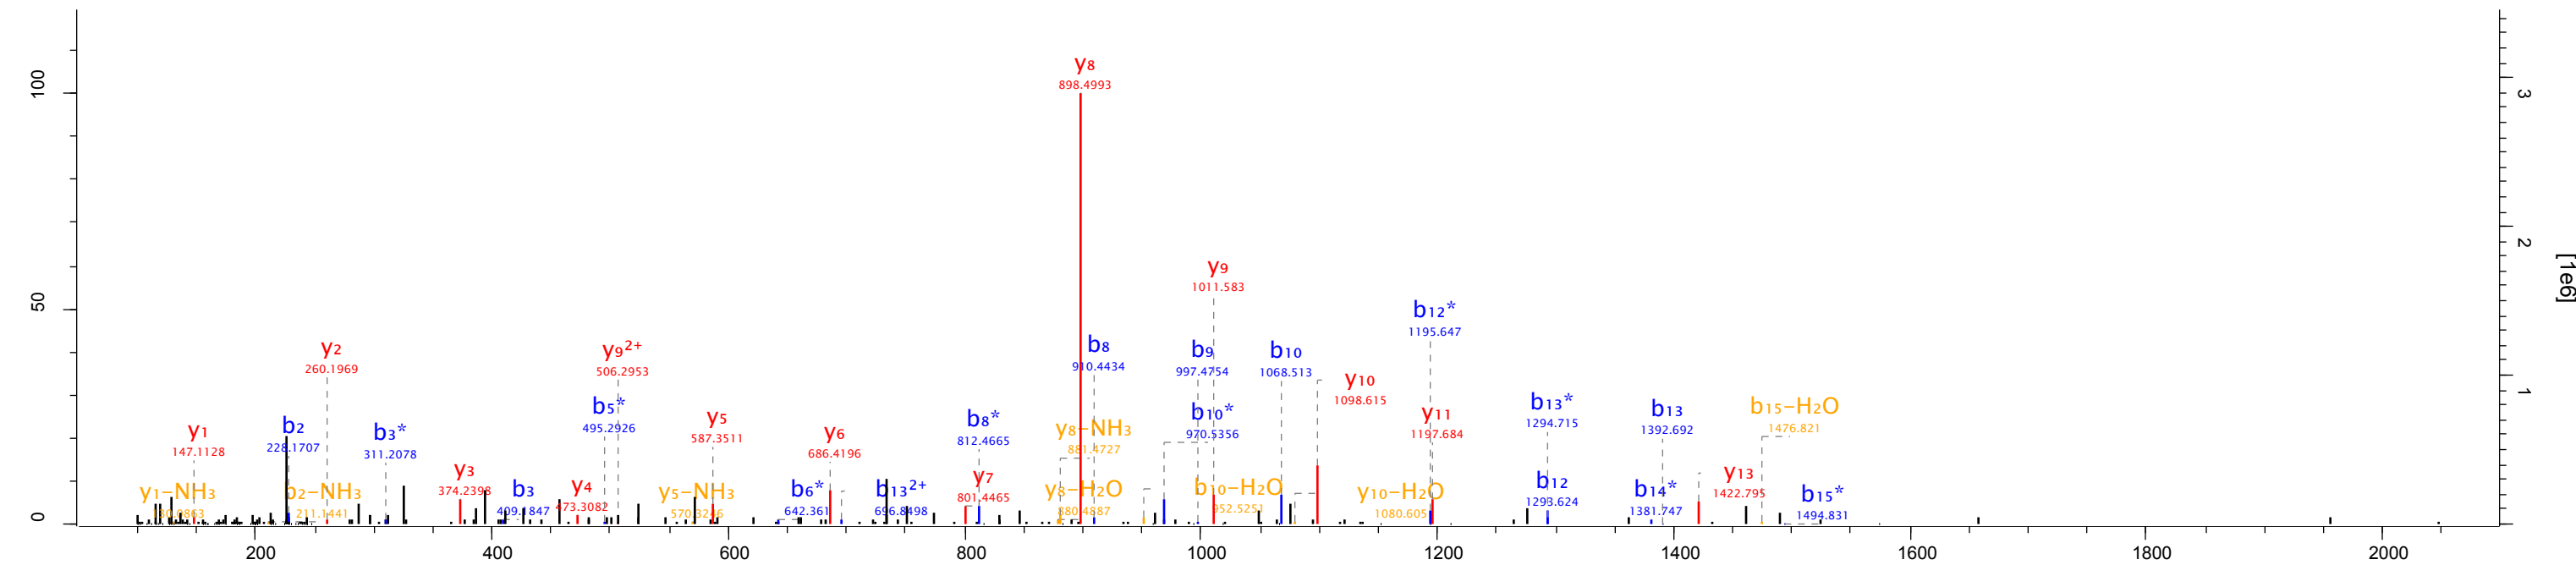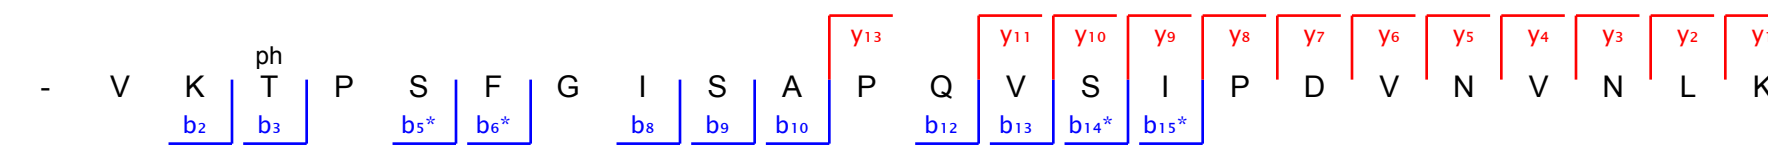

Raw file 20150814\_A375SR\_Phospho\_BR2\_06 Scan 26482 Method FTMS; HCD Score 275.37 m/z 1094.48 Gene names MYL12A;MYL12B;MYL9

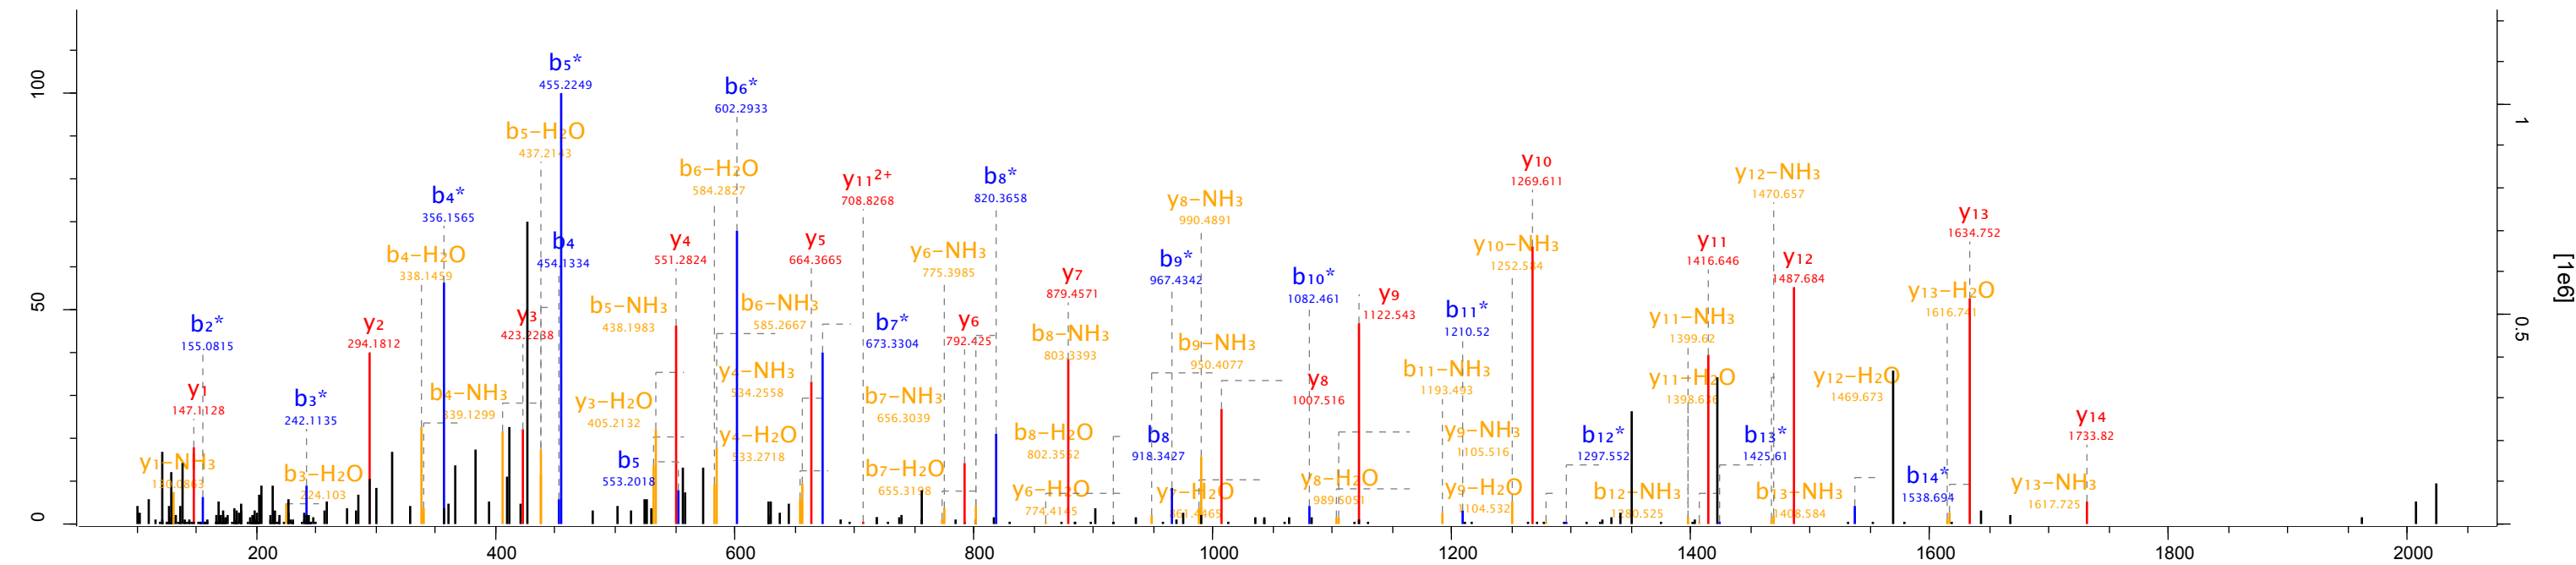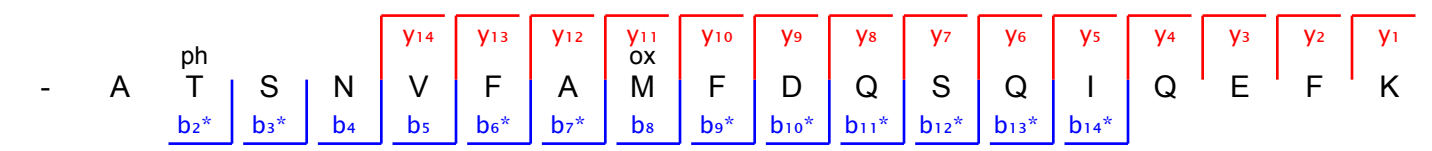

Raw file 20150814\_A375SR\_Phospho\_BR2\_06 Scan 26712 Method FTMS; HCD Score 121.98 m/z 1030.52 Gene names AHNAK

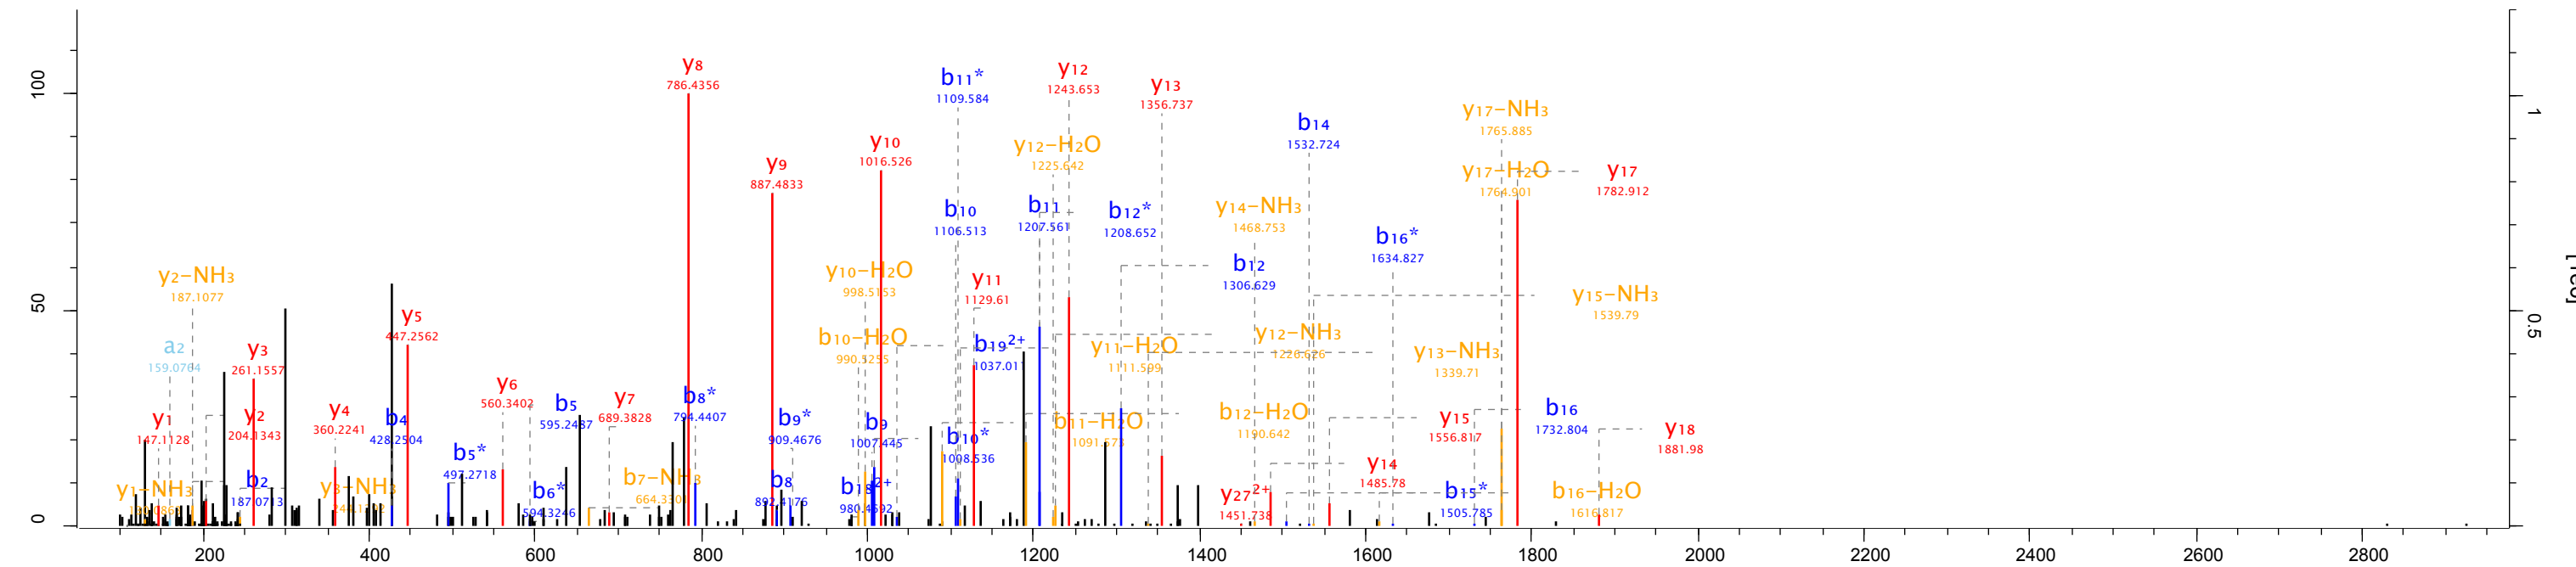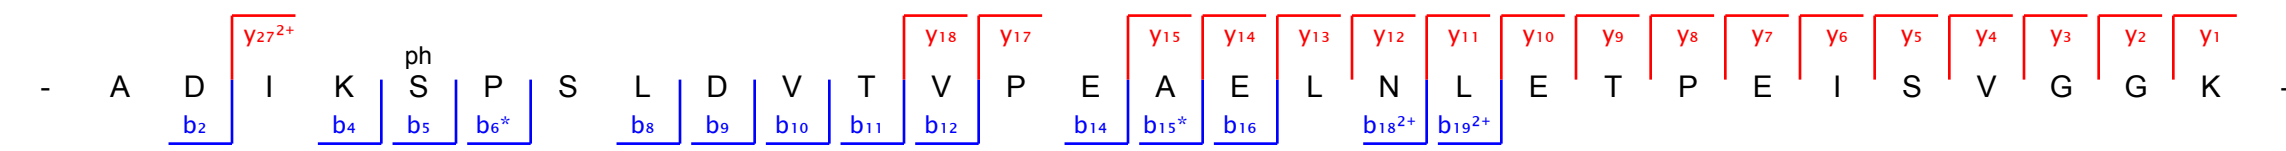

Raw file: 20150814\_A375SR\_Phospho\_BR2\_06  
 Scan: 26902 Method: FTMS; HCD Score: 64.84 m/z: 1261.56 Gene names: ARFGEF1

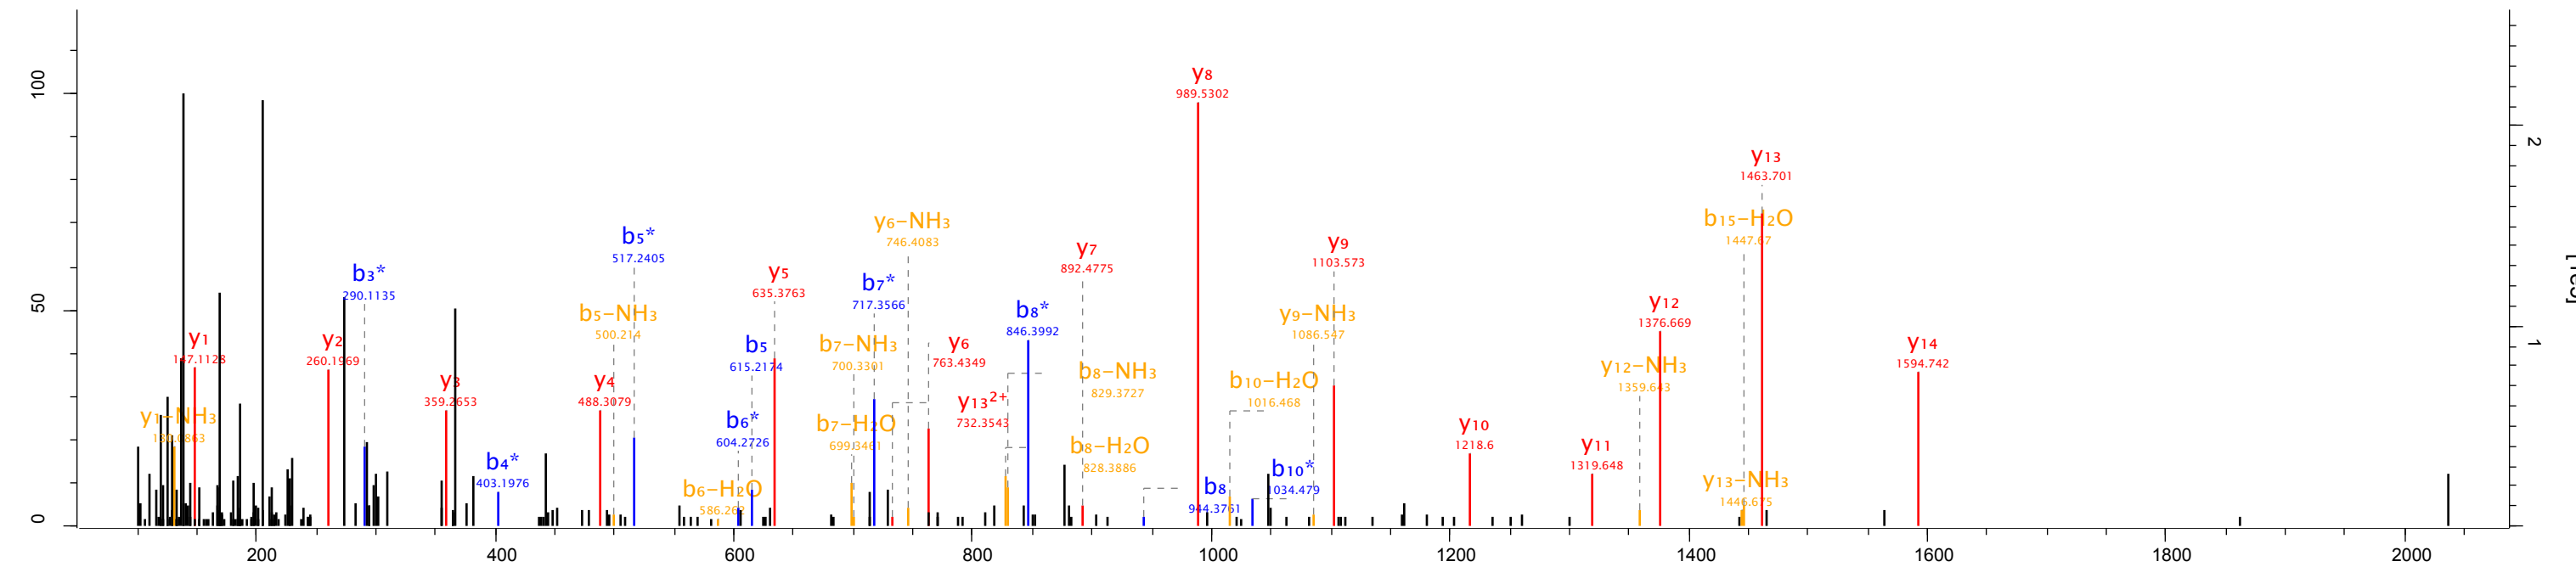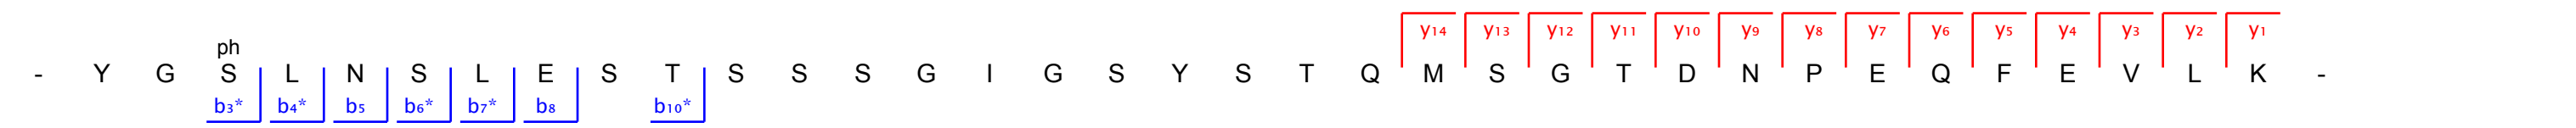



Raw file: 20150814\_A375SR\_Phospho\_BR2\_06  
 Scan: 27442 Method: FTMS; HCD Score: 116.55 m/z: 752.05 Gene names: IRF2BP1

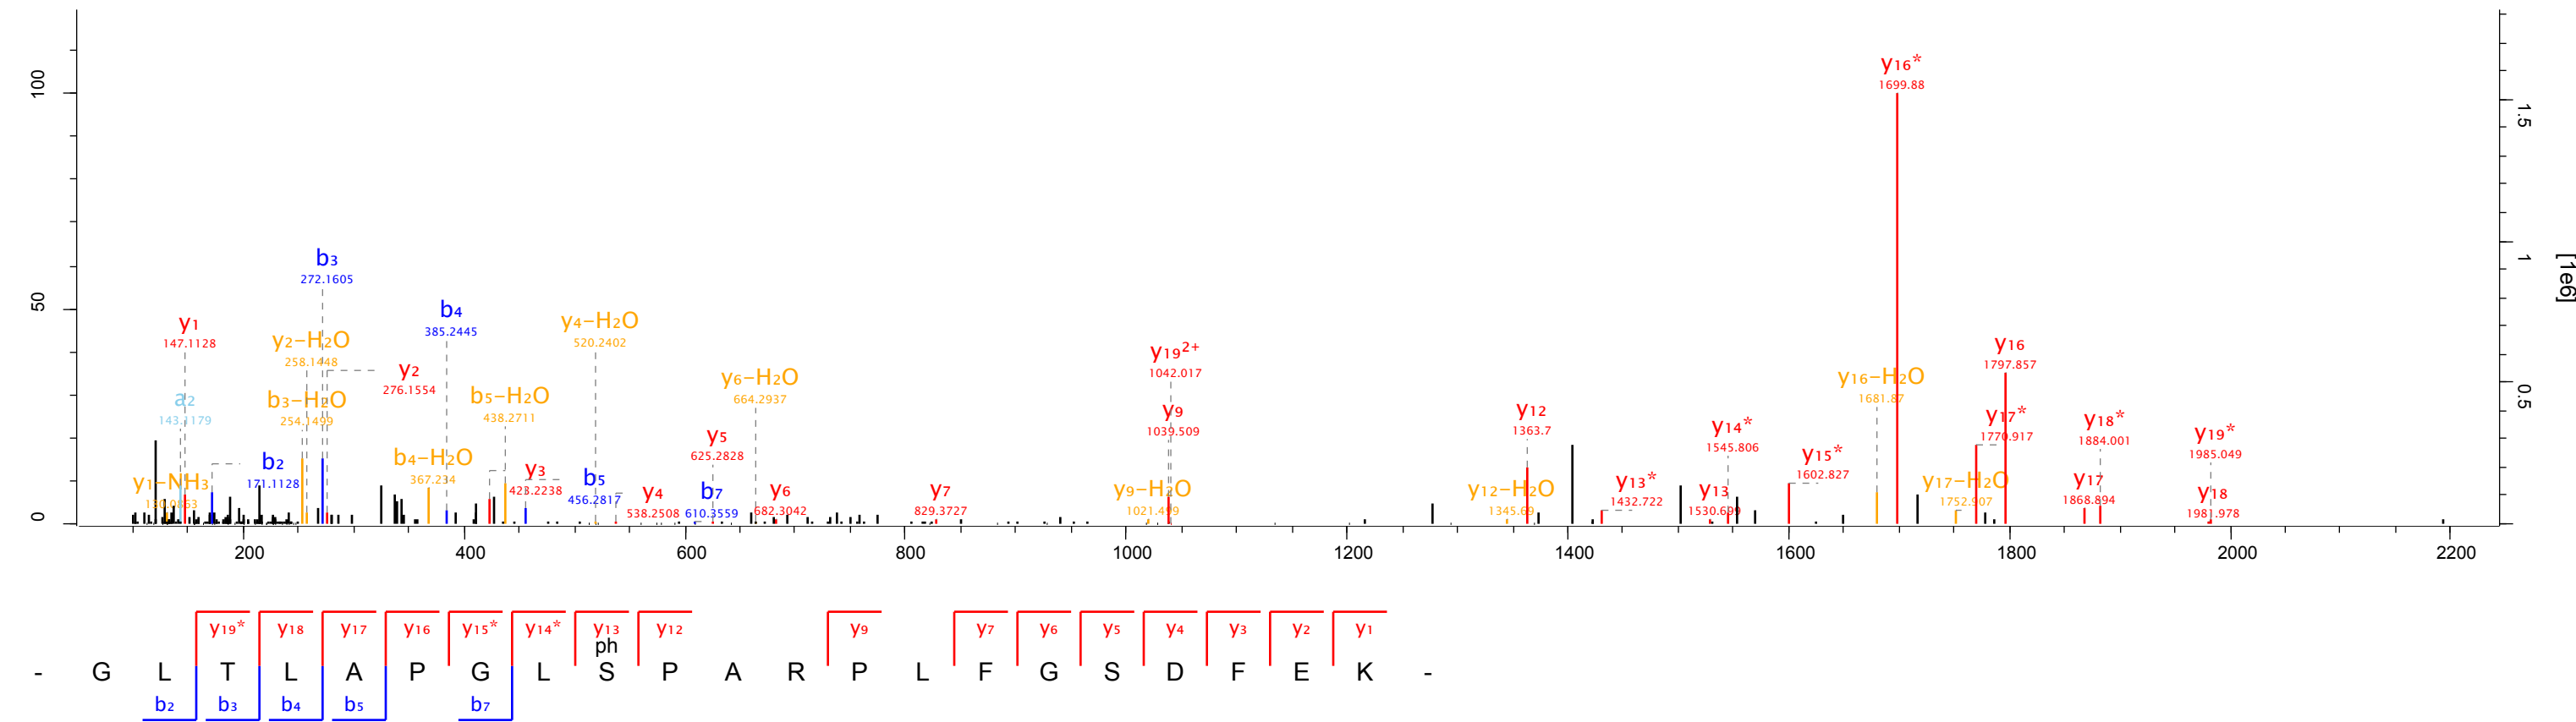

Raw file 20150814\_A375SR\_Phospho\_BR2\_06 Scan 27872 Method FTMS; HCD Score 59.01 m/z 909.14 Gene names DNAJA1

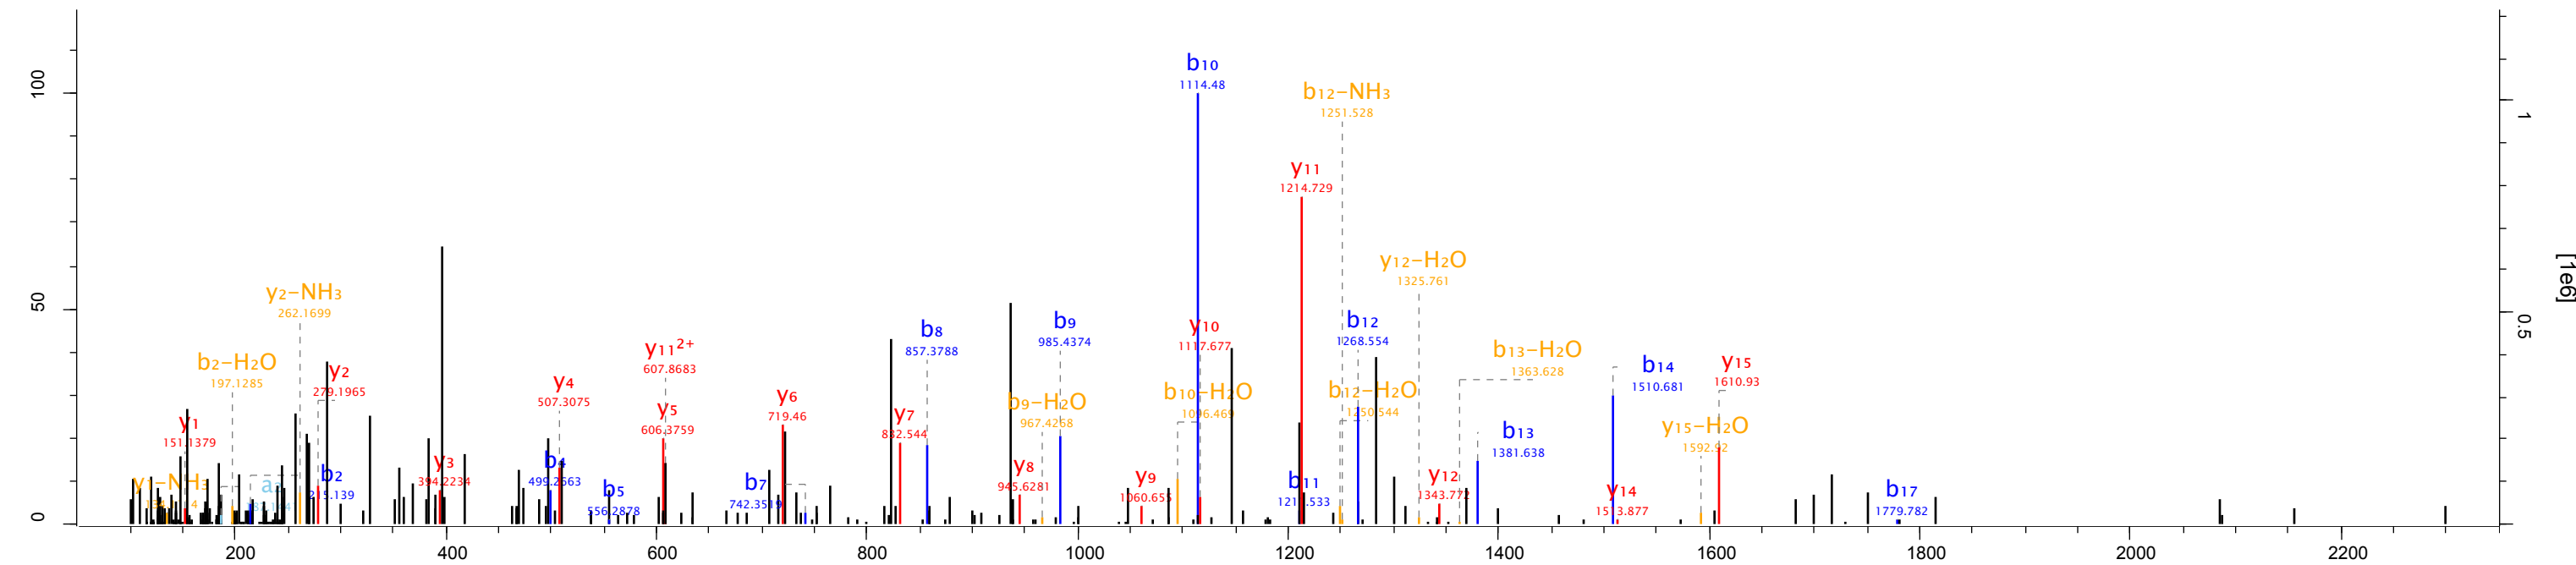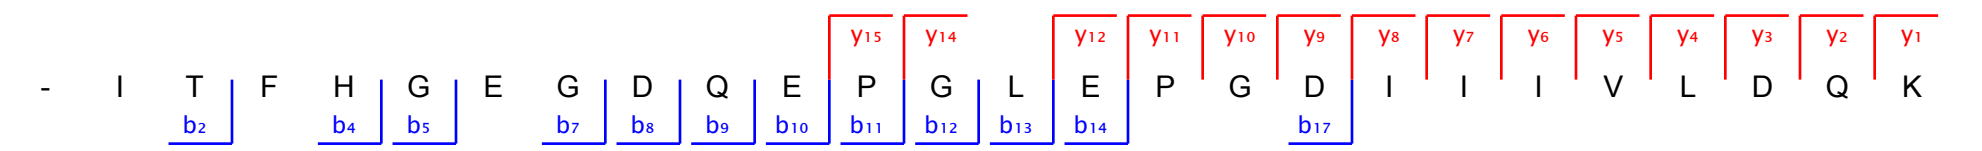

Raw file: 20150814\_A375SR\_Phospho\_BR2\_06  
 Scan: 28182 Method: FTMS; HCD Score: 101.05 m/z: 1000.16 Gene names: MKL2

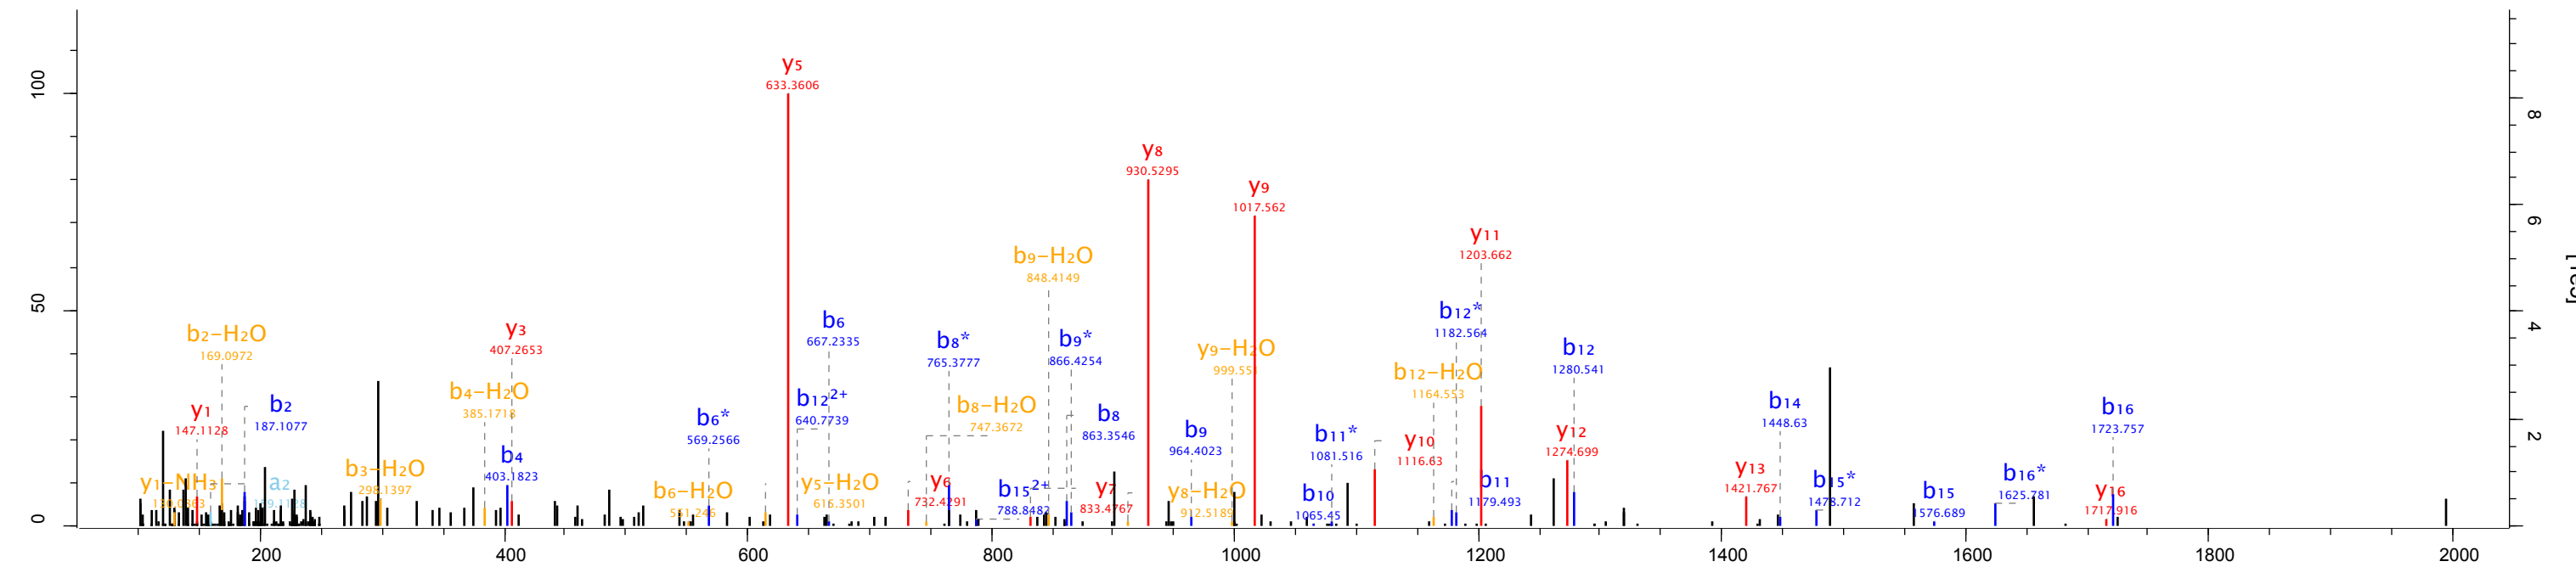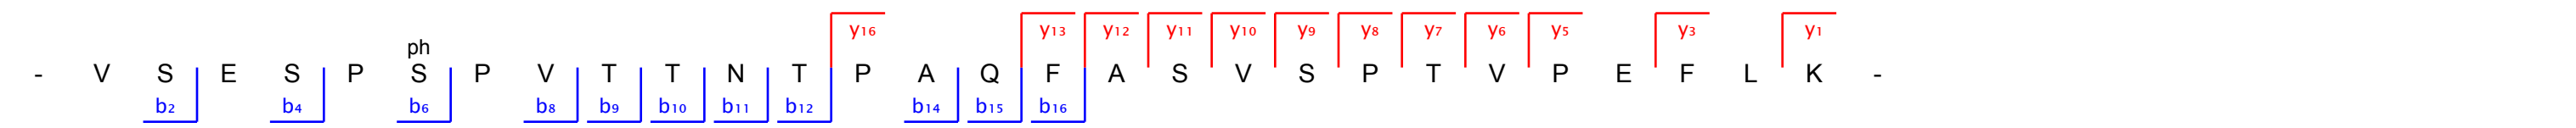

Raw file 20150814\_A375SR\_Phospho\_BR2\_06 Scan 7062 Method FTMS; HCD Score 60.16 m/z 487.74 Gene names GLTSCR1

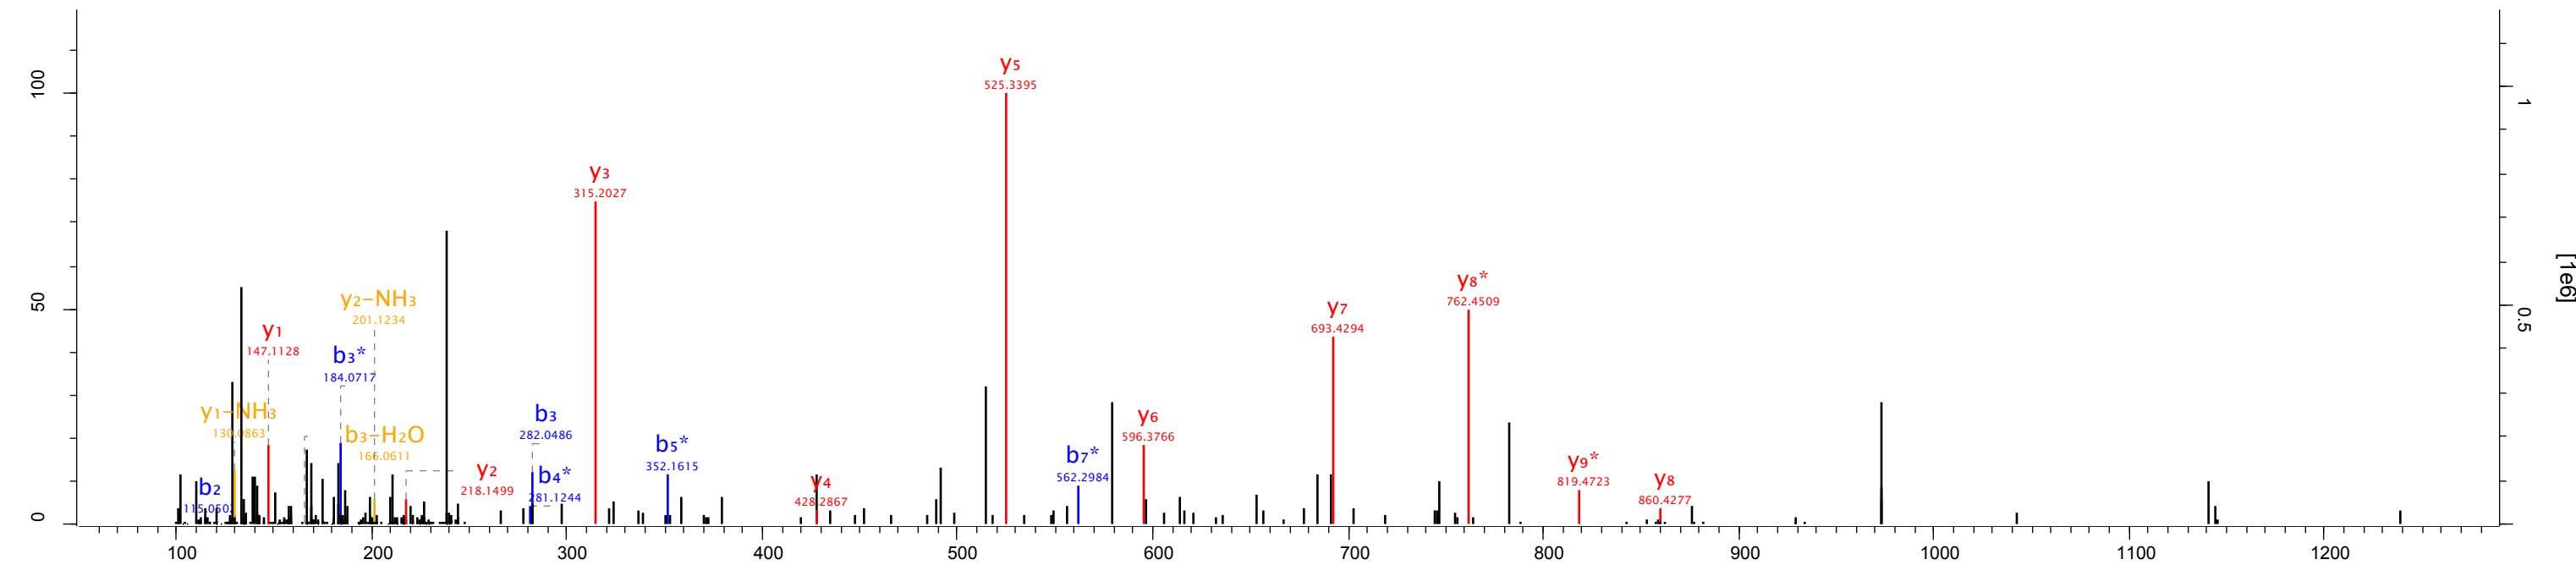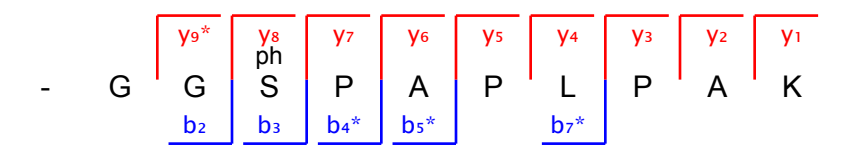

Raw file 20150814\_A375SR\_Phospho\_BR2\_06 Scan 7372 Method FTMS; HCD Score 49.26 m/z 555.94 Gene names POU2F1

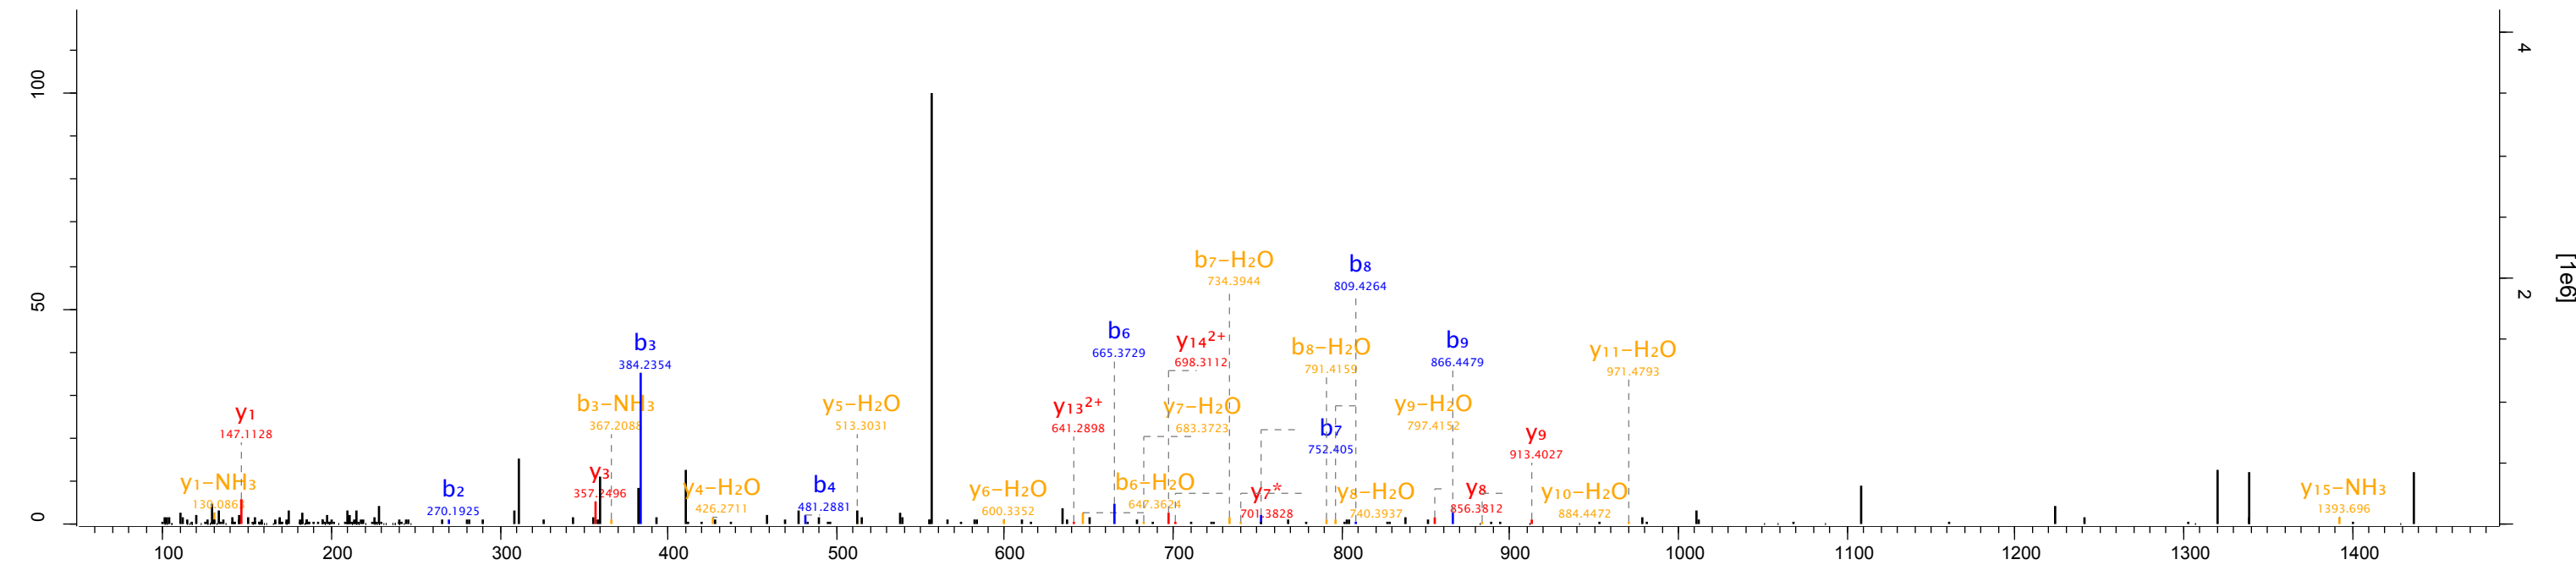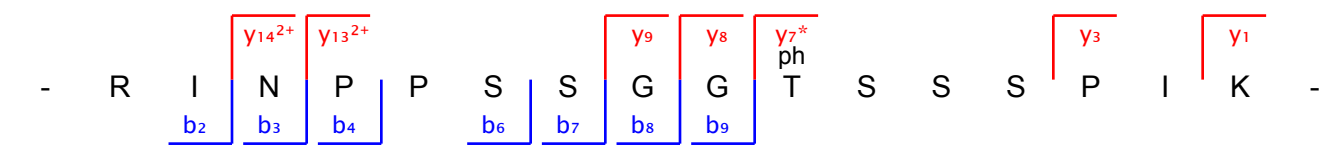

Raw file: 20150814\_A375SR\_Phospho\_BR2\_06  
 Scan: 7692 Method: FTMS; HCD Score: 119.27 m/z: 529.26 Gene names: RPL23A

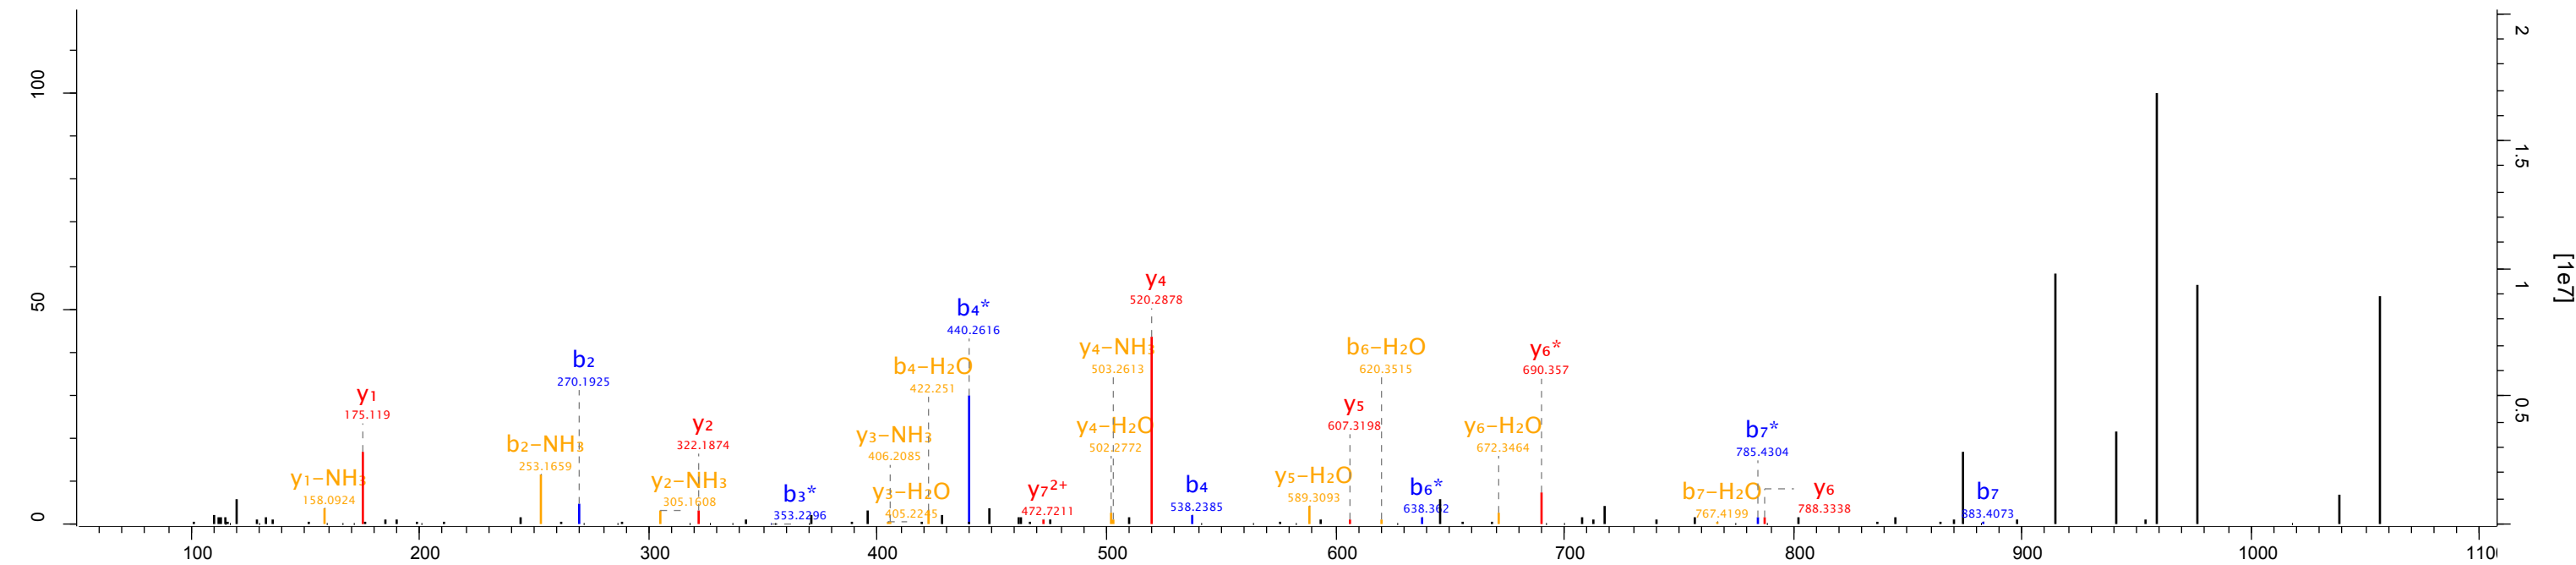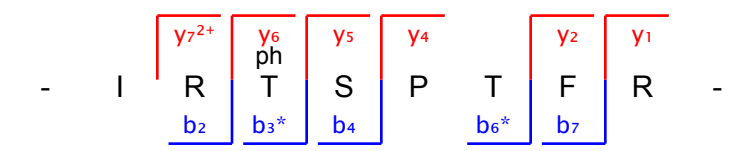

Raw file: 20150814\_A375SR\_Phospho\_BR2\_06  
 Scan: 8212 Method: FTMS; HCD Score: 144.73 m/z: 699.84 Gene names: NUP35

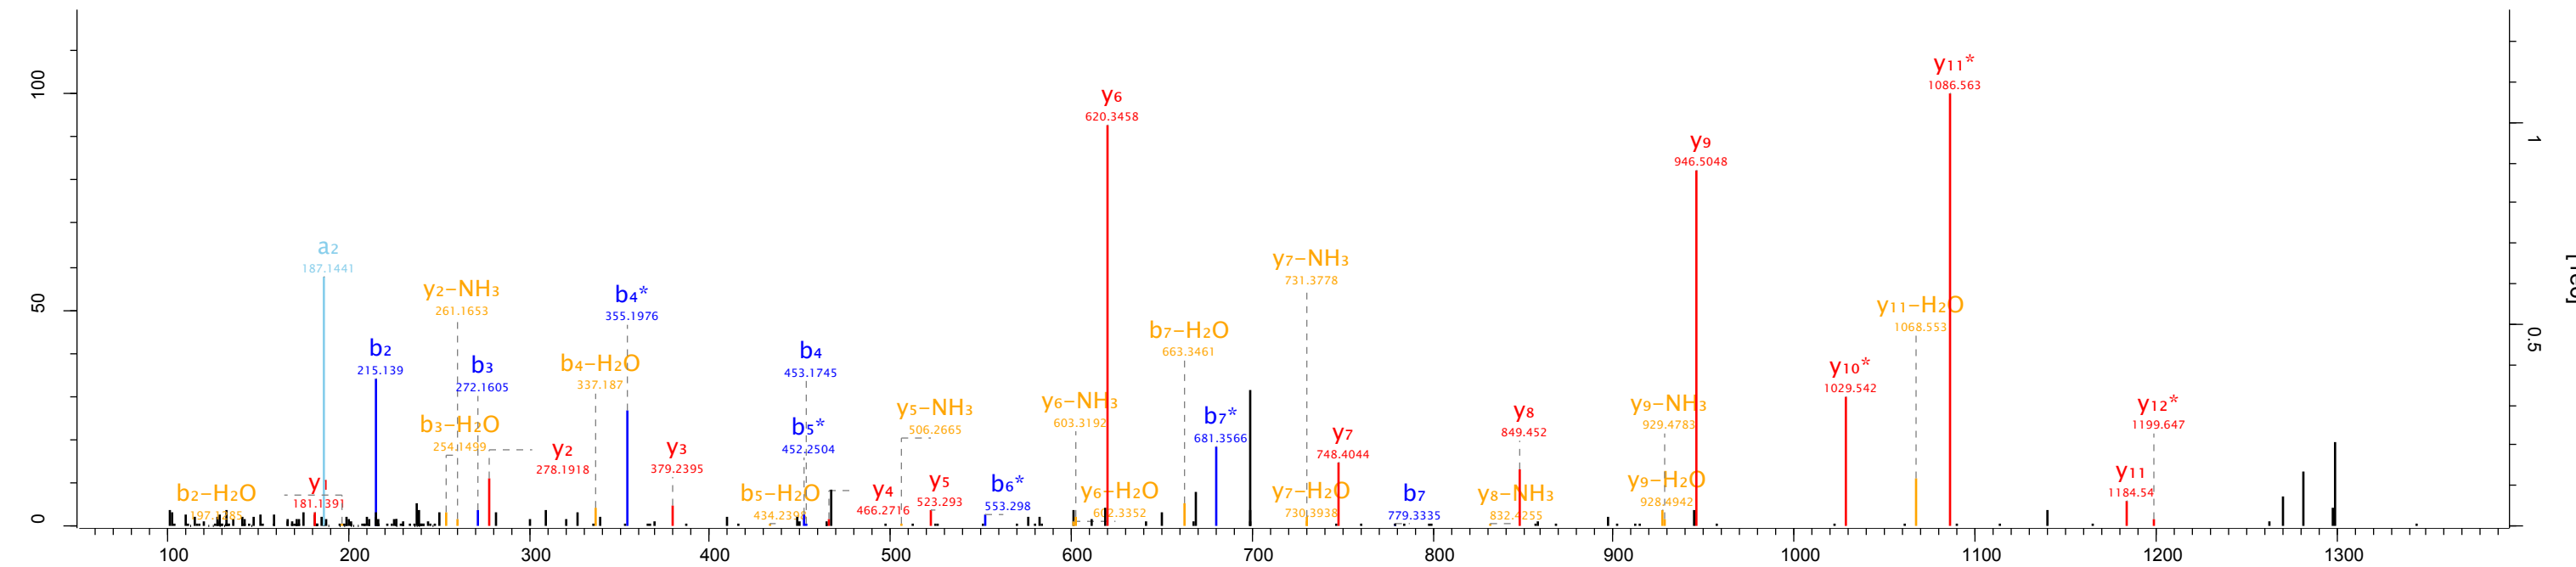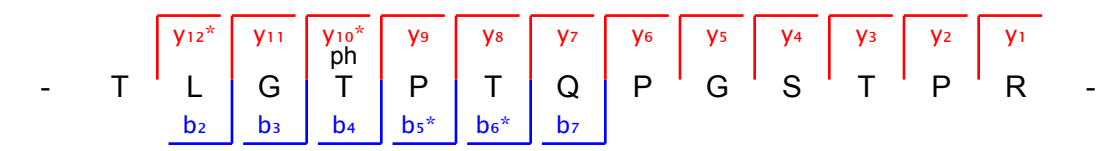

Raw file: 20150814\_A375SR\_Phospho\_BR2\_06  
 Scan: 8302 Method: FTMS; HCD Score: 87.18 m/z: 469.23 Gene names: TTC7A

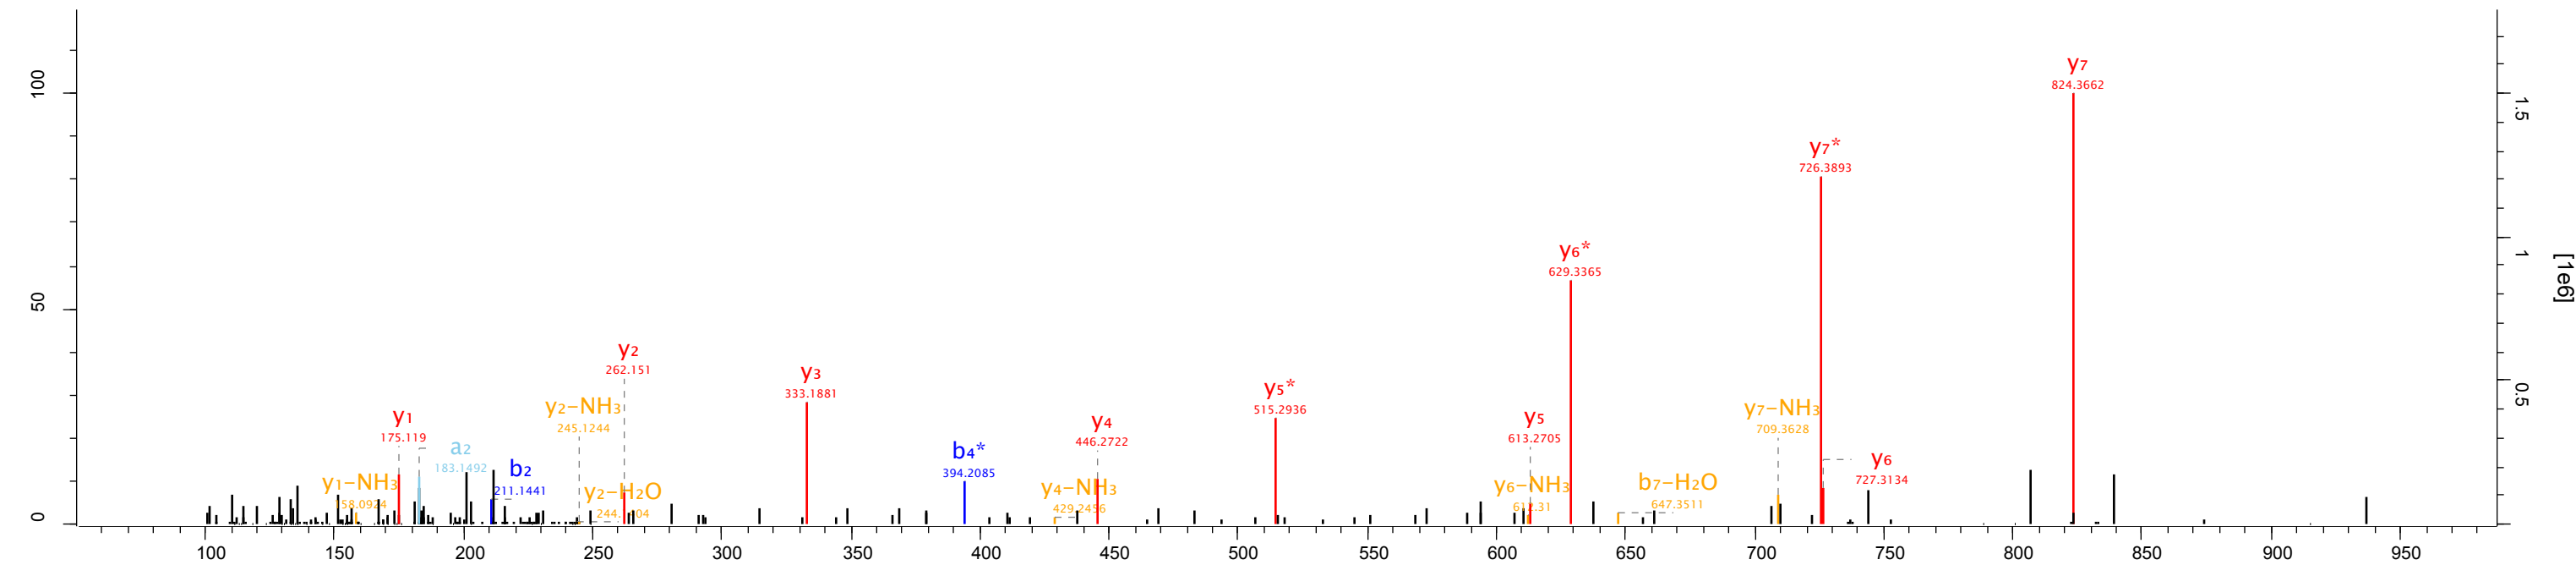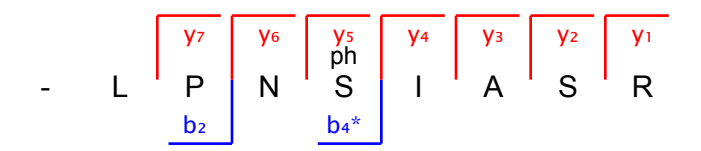



Raw file: 20150814\_A375SR\_Phospho\_BR2\_06  
 Scan: 8492 Method: FTMS; HCD Score: 165.45 m/z: 798.31 Gene names: EIF4G1

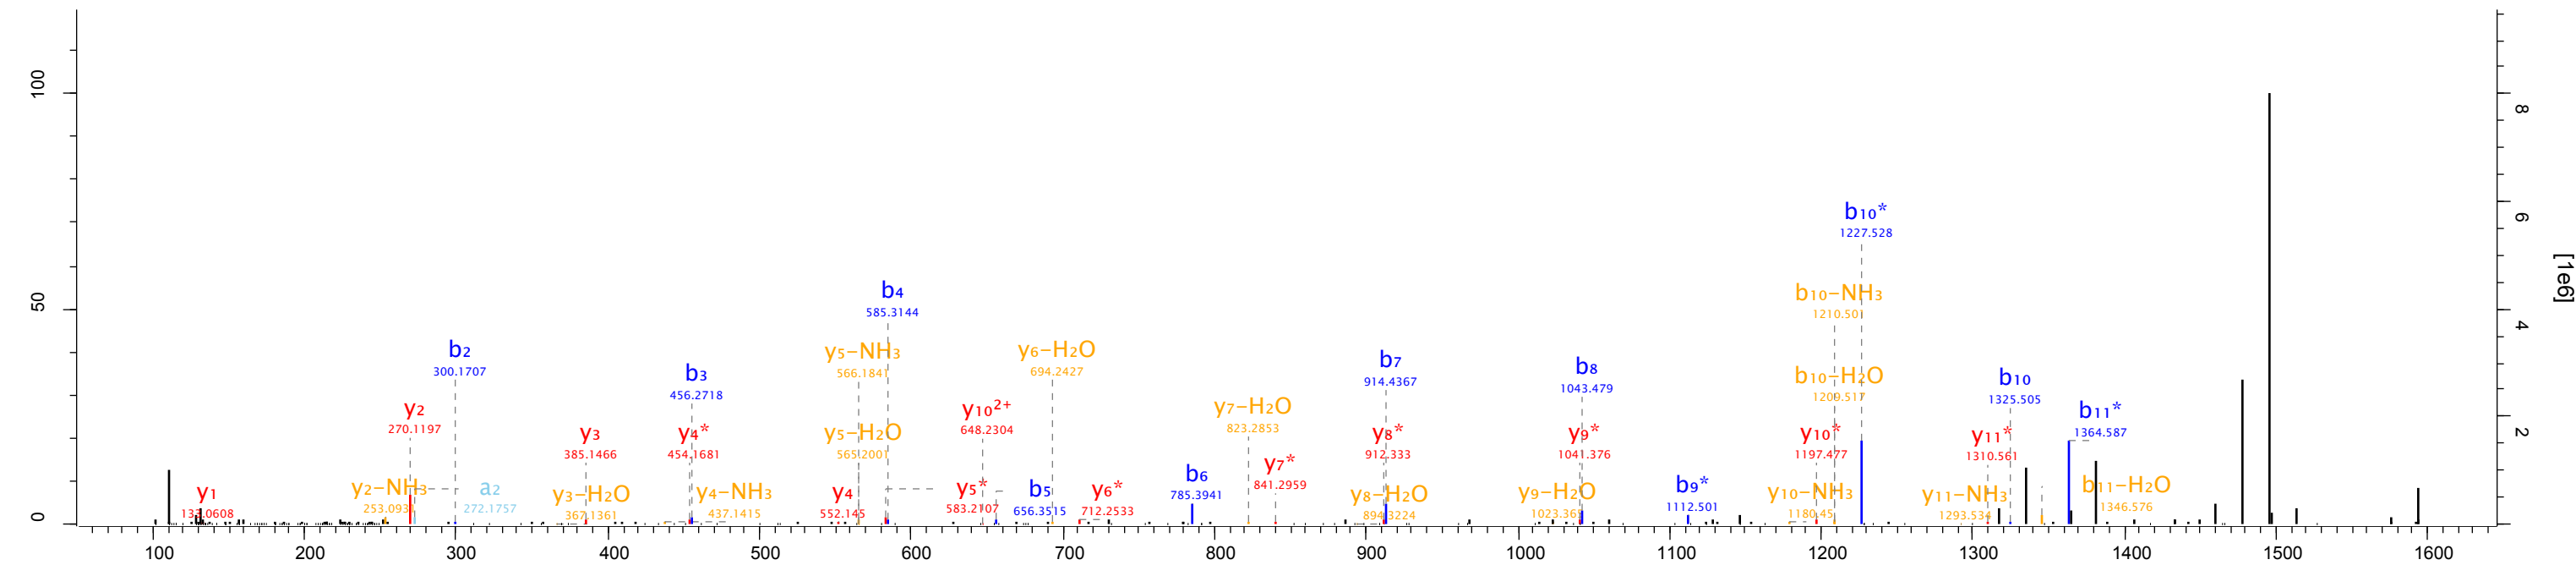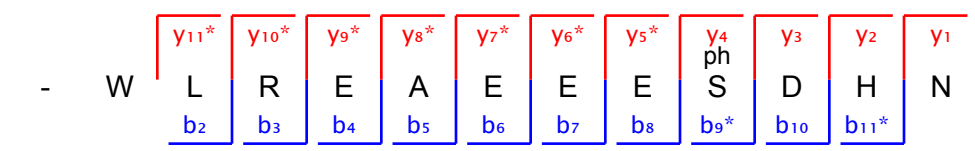

Raw file: 20150814\_A375SR\_Phospho\_BR2\_06  
 Scan: 8692 Method: FTMS; HCD Score: 143.5 m/z: 478.23 Gene names: RNF113A

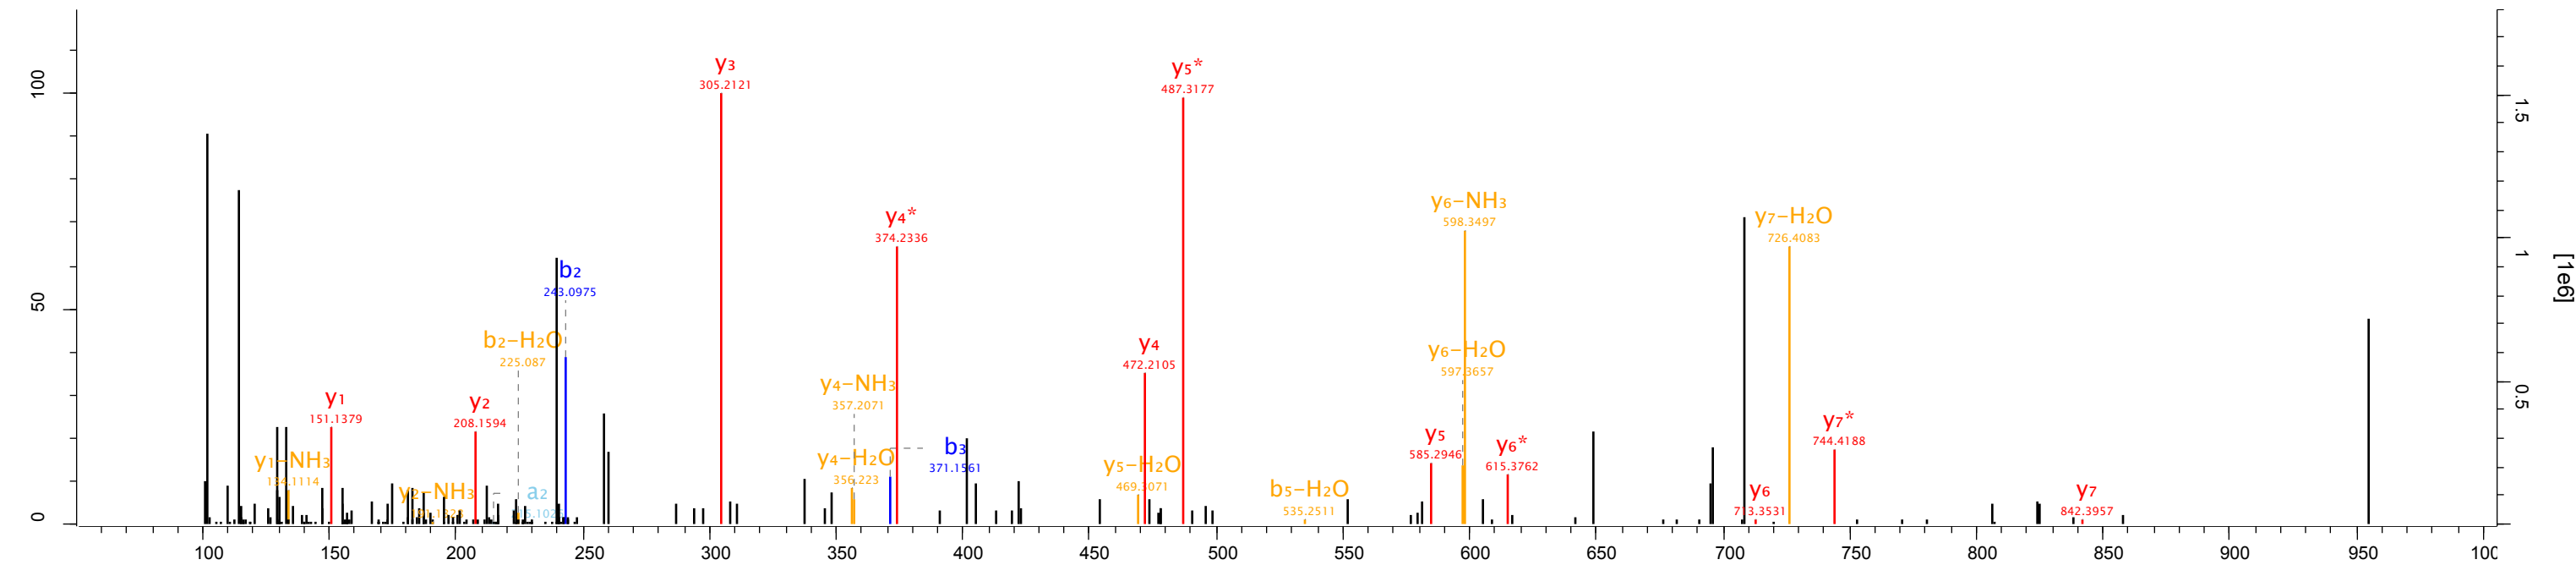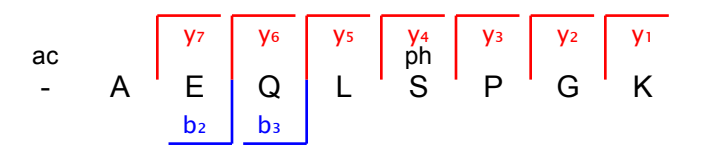

Raw file: 20150814\_A375SR\_Phospho\_BR2\_06  
 Scan: 9602 Method: FTMS; HCD Score: 138.66 m/z: 632.66 Gene names: EHBP1L1

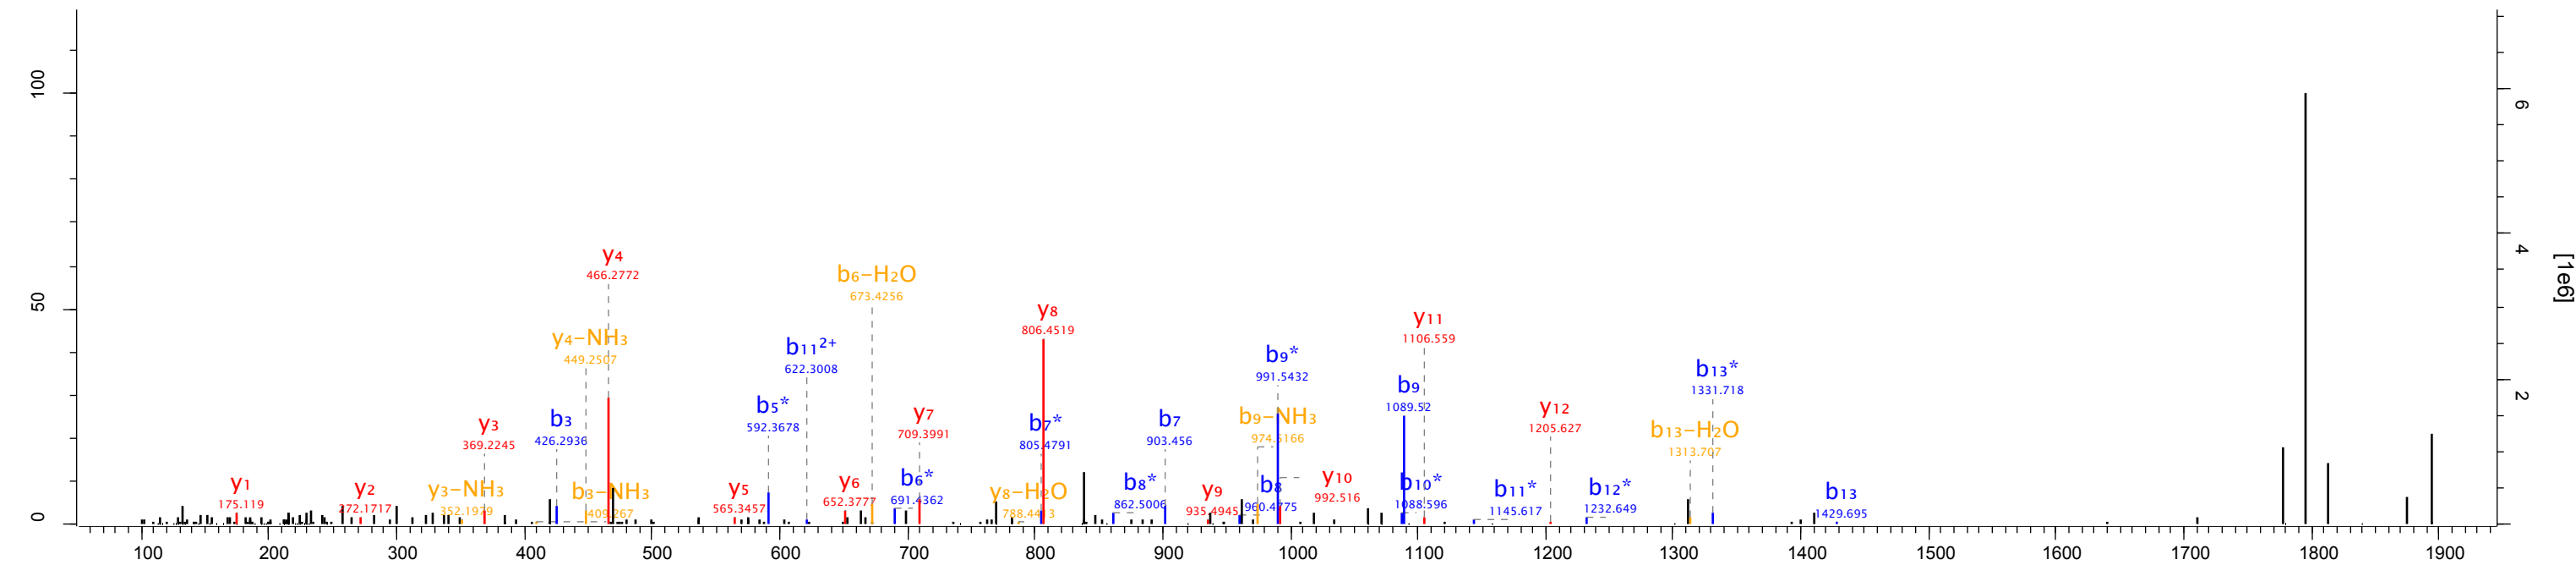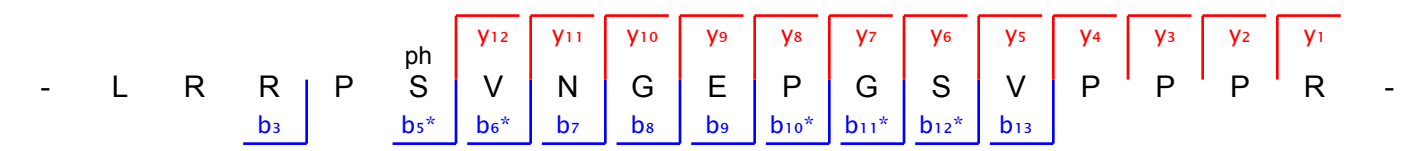

Raw file: 20150814\_A375SR\_Phospho\_BR2\_06  
 Scan: 9982 Method: FTMS; HCD Score: 158 m/z: 979.43 Gene names: PDS5B

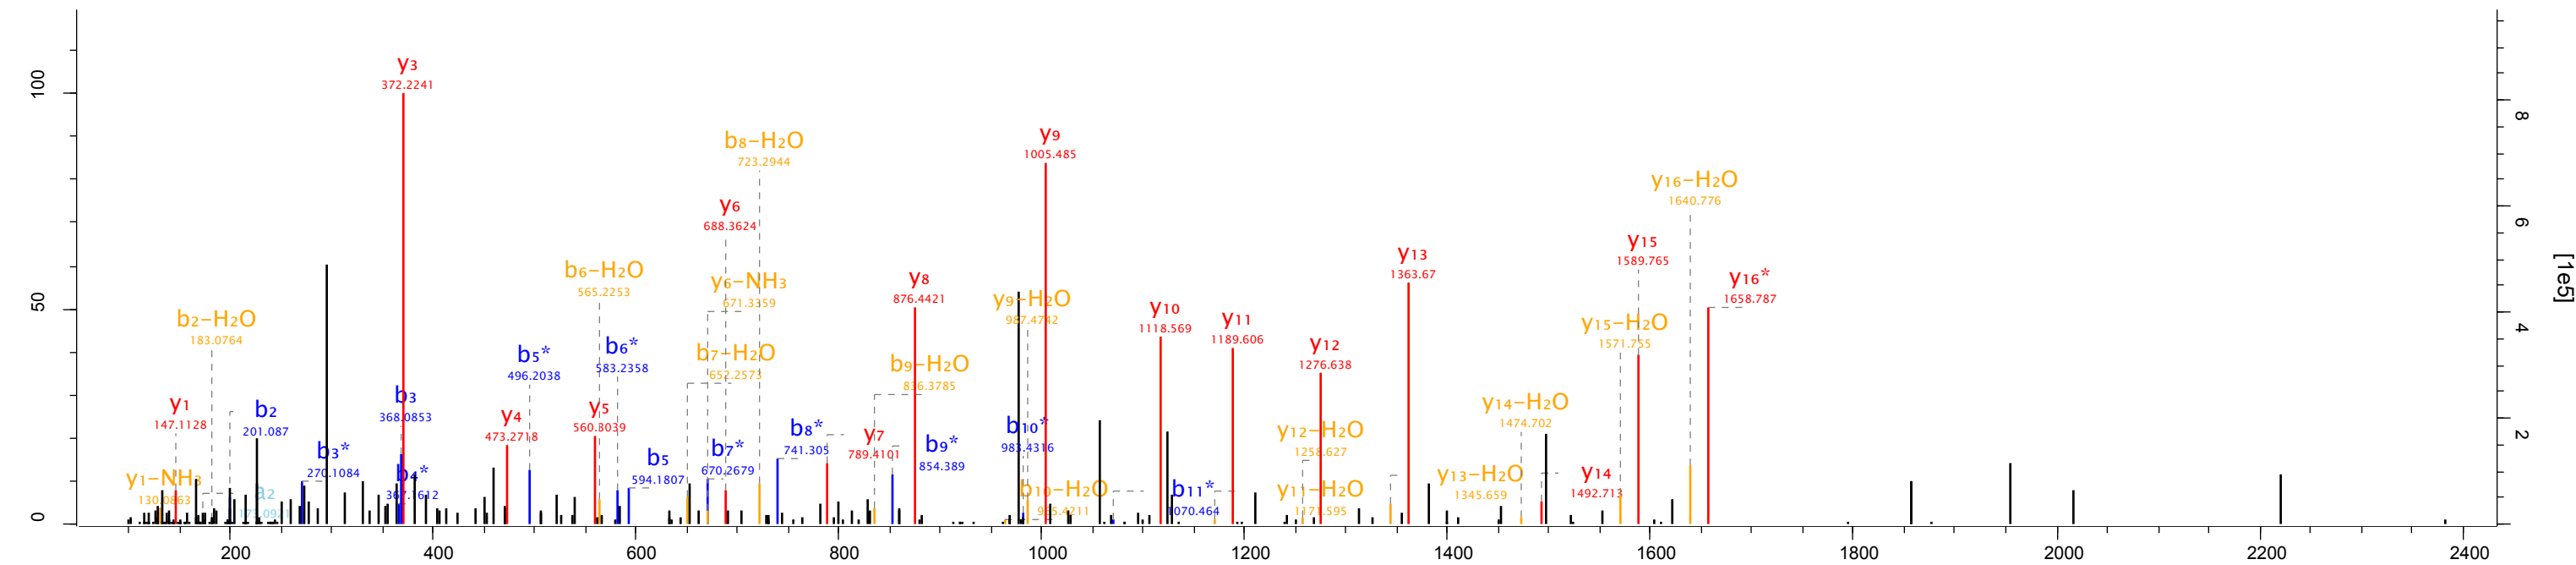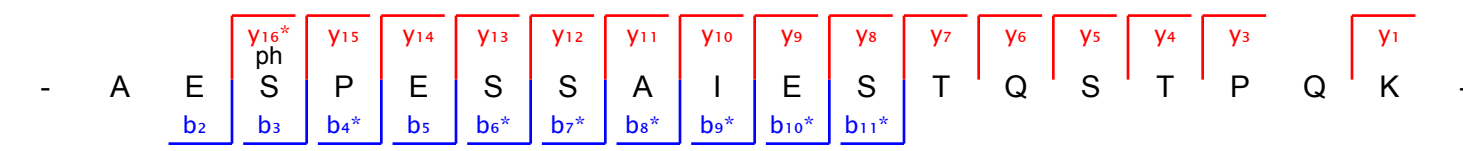

Raw file 20150814\_A375SR\_Phospho\_BR2\_07 Scan 12612 Method FTMS; HCD Score 66.84 m/z 658.85 Gene names GPI

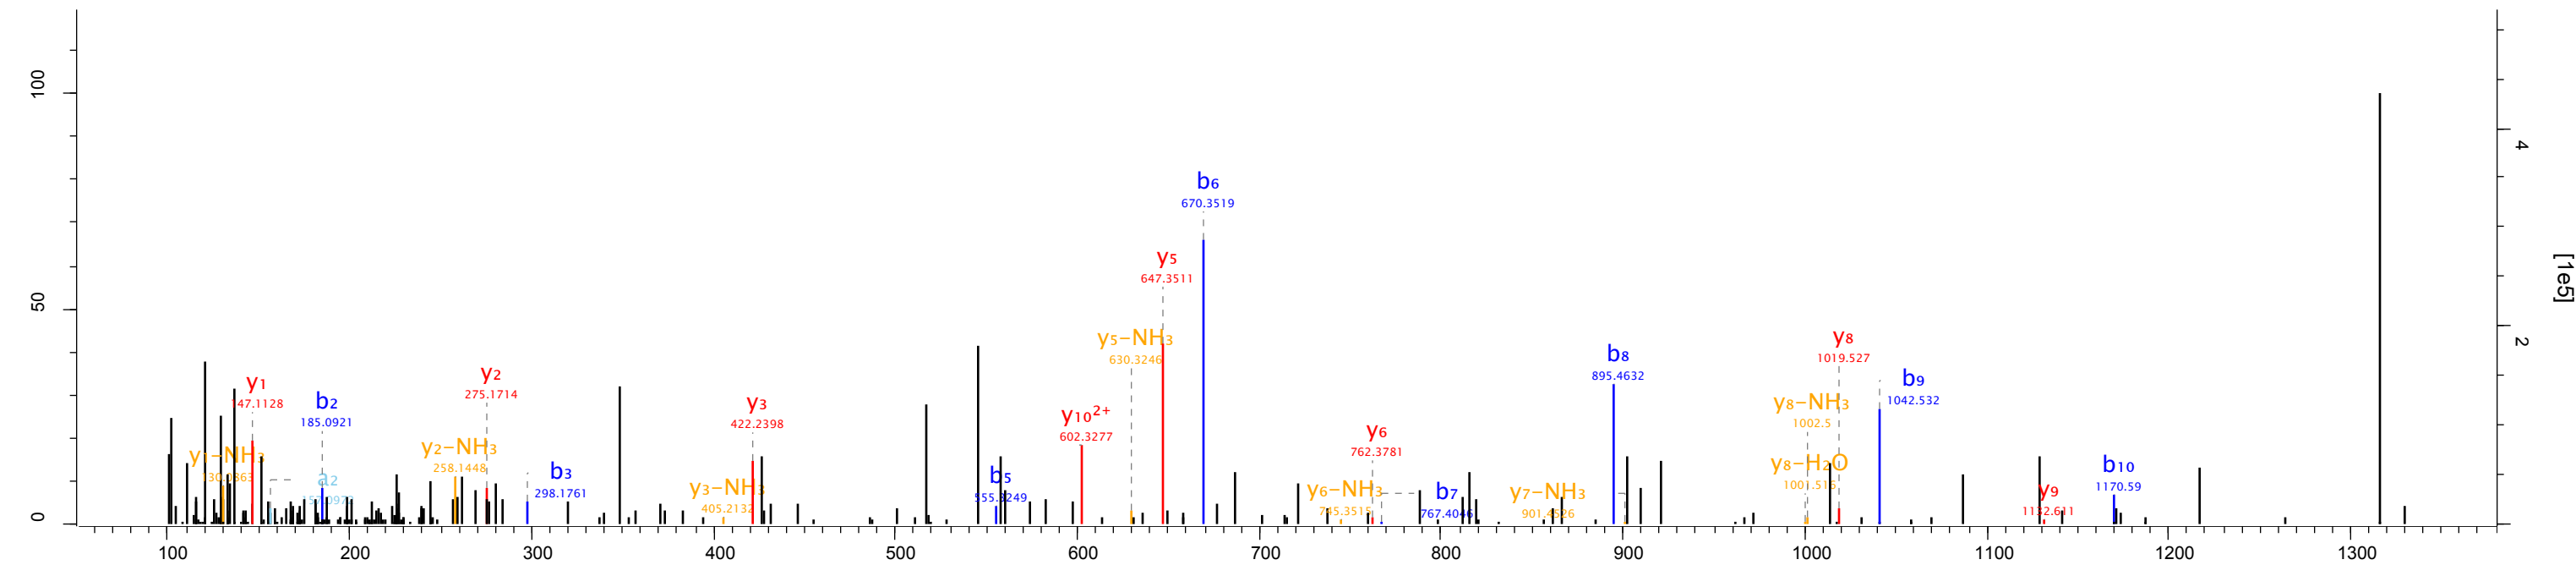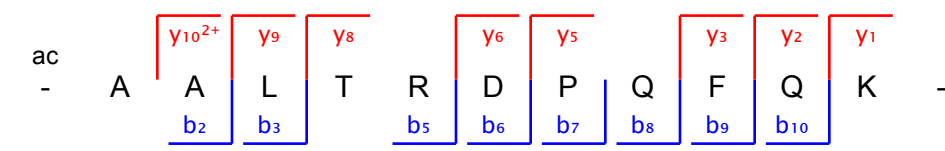

Raw file 20150814\_A375SR\_Phospho\_BR2\_07 Scan 1342 Method FTMS; HCD Score 70.78 m/z 484.56 Gene names PRCC

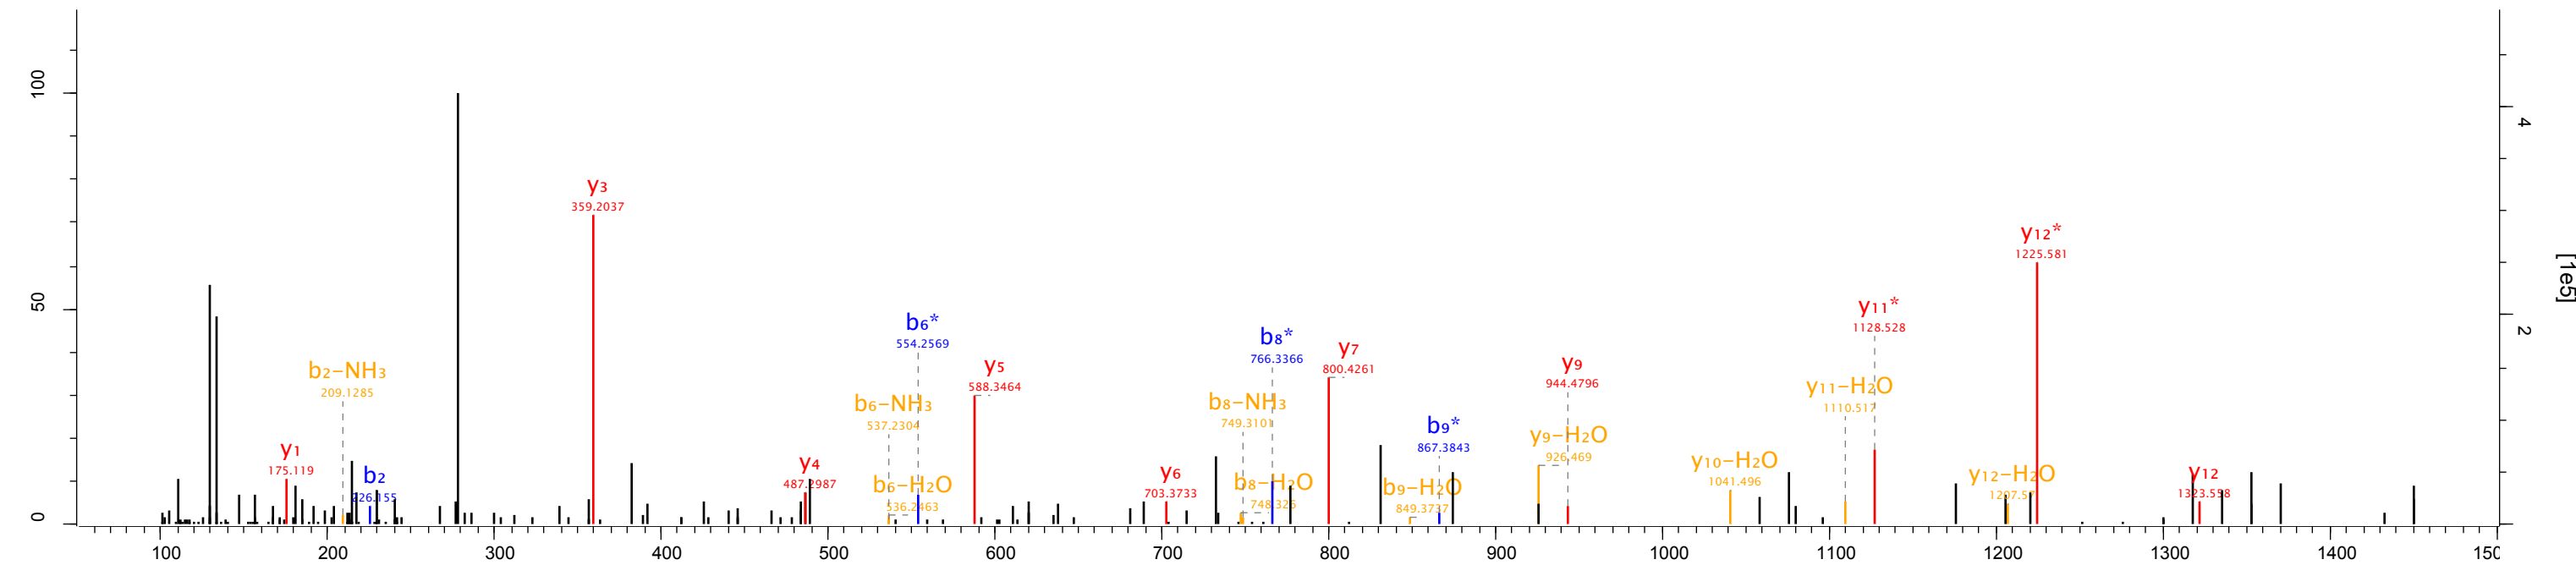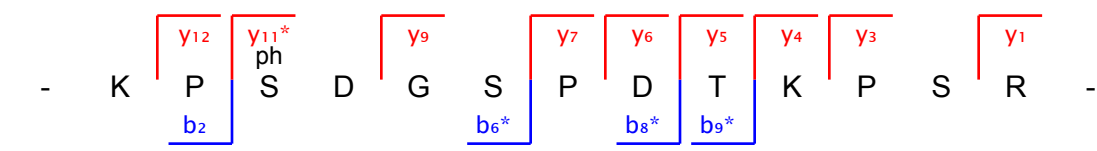

Raw file  
 20150814\_A375SR\_Phospho\_BR2\_07  
 Scan 1362 Method FTMS; HCD Score 72.2 m/z 471.19 Gene names ZNF622

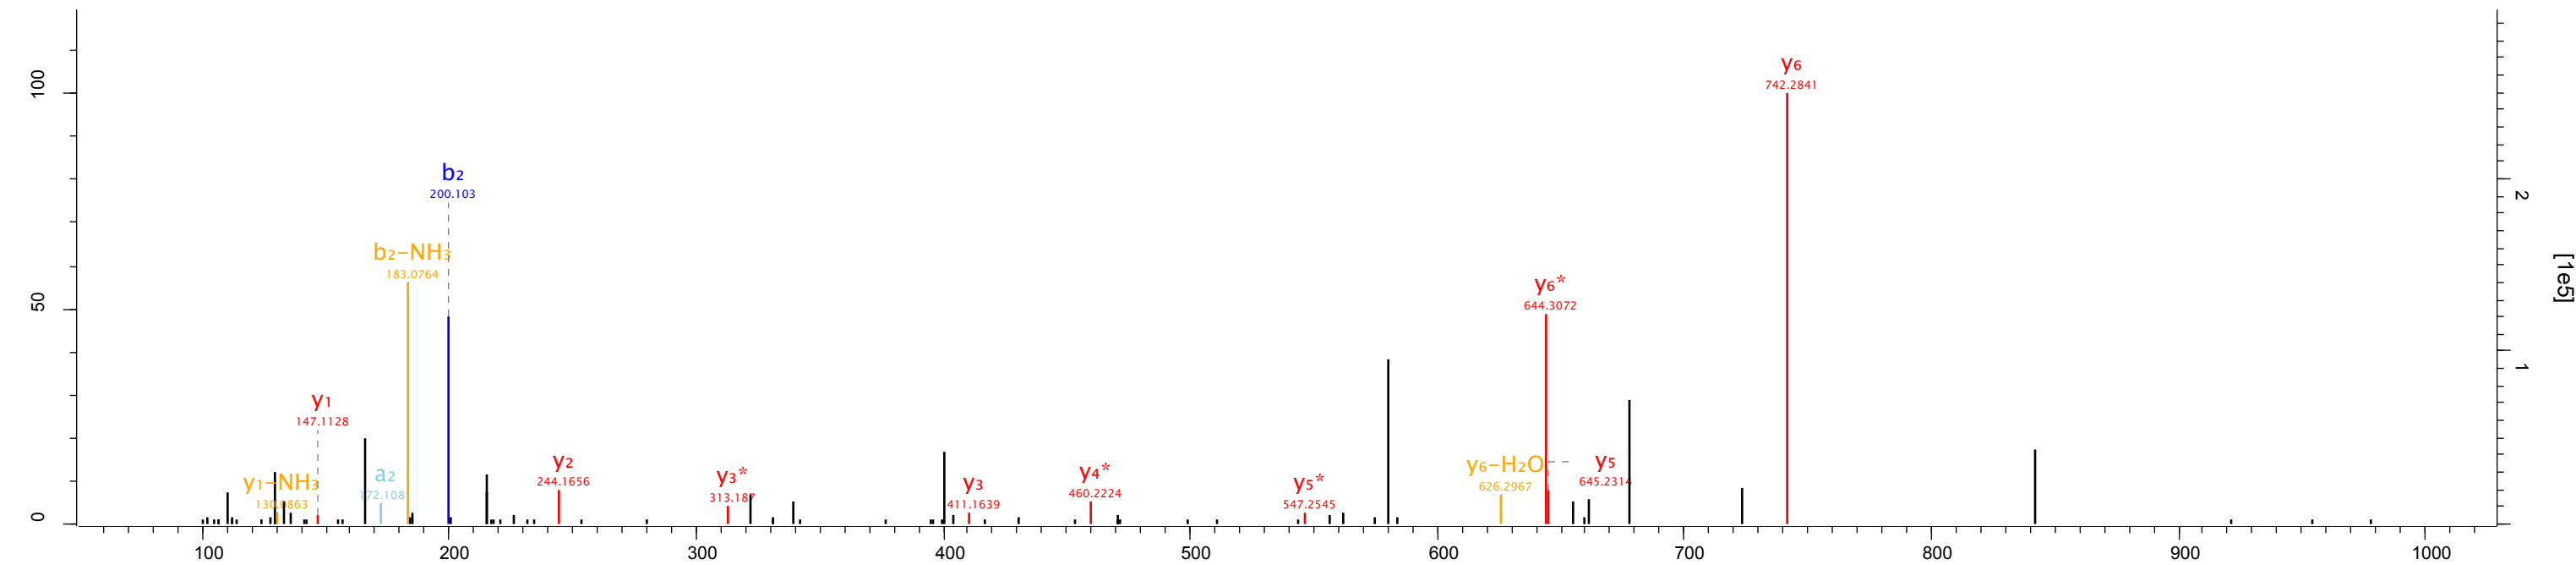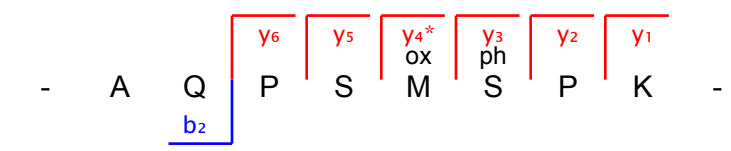

Raw file 20150814\_A375SR\_Phospho\_BR2\_07 Scan 14202 Method FTMS; HCD Score 160.67 m/z 860.4 Gene names MARK3

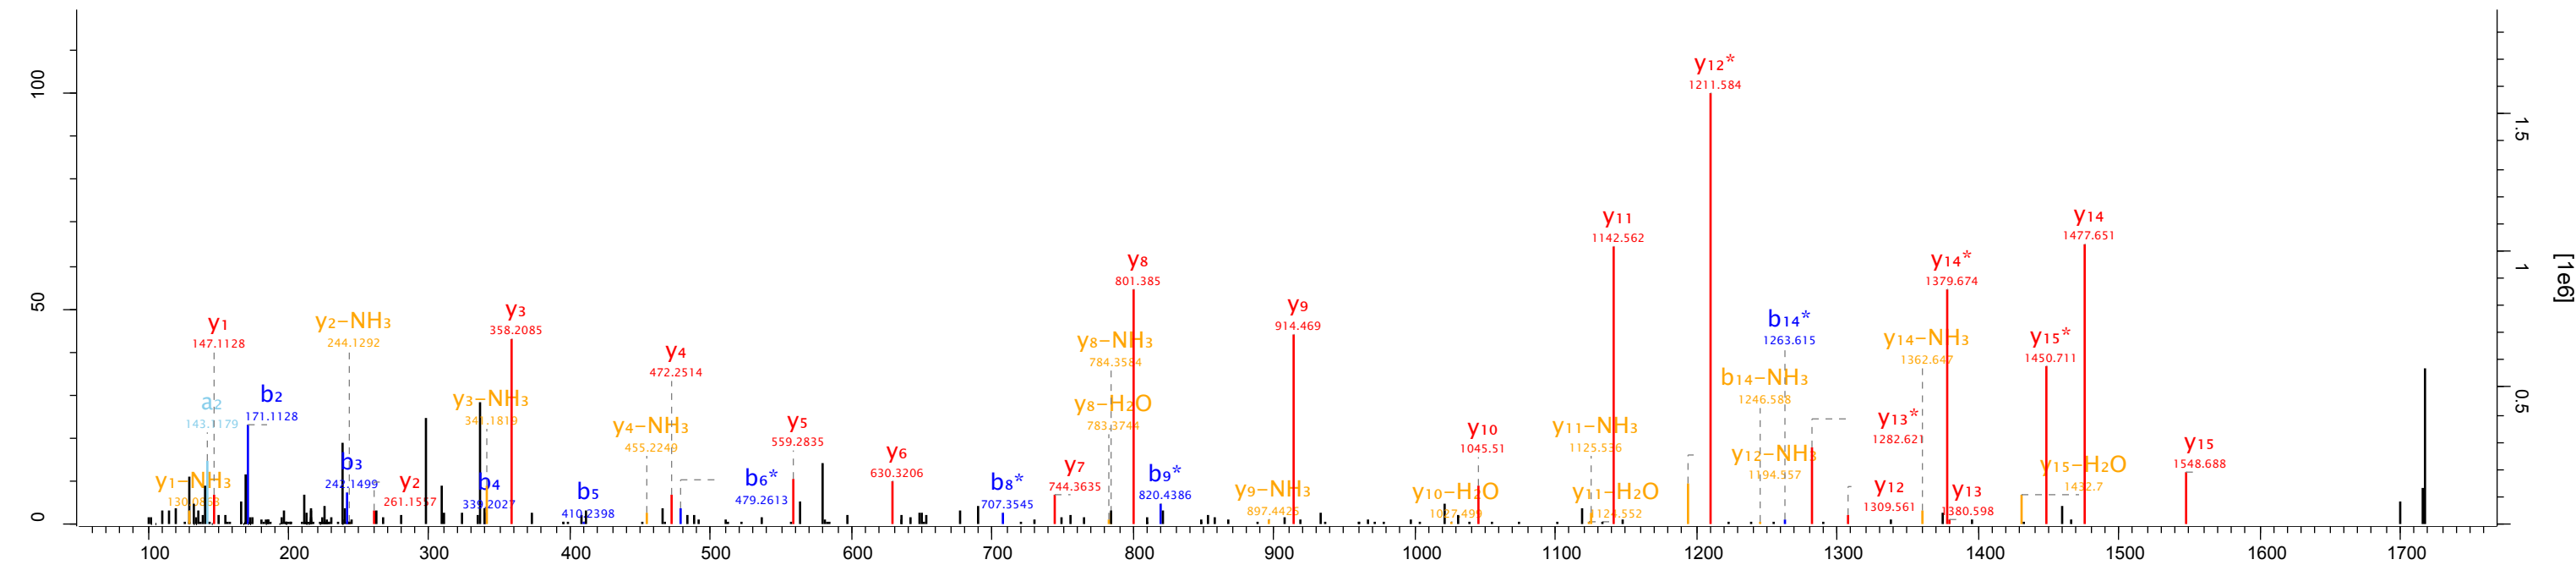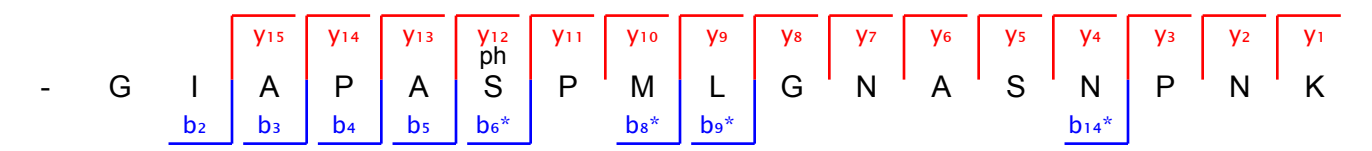



Raw file: 20150814\_A375SR\_Phospho\_BR2\_07  
 Scan: 14852 Method: FTMS; HCD Score: 61.69 m/z: 621.04 Gene names: YTHDC1

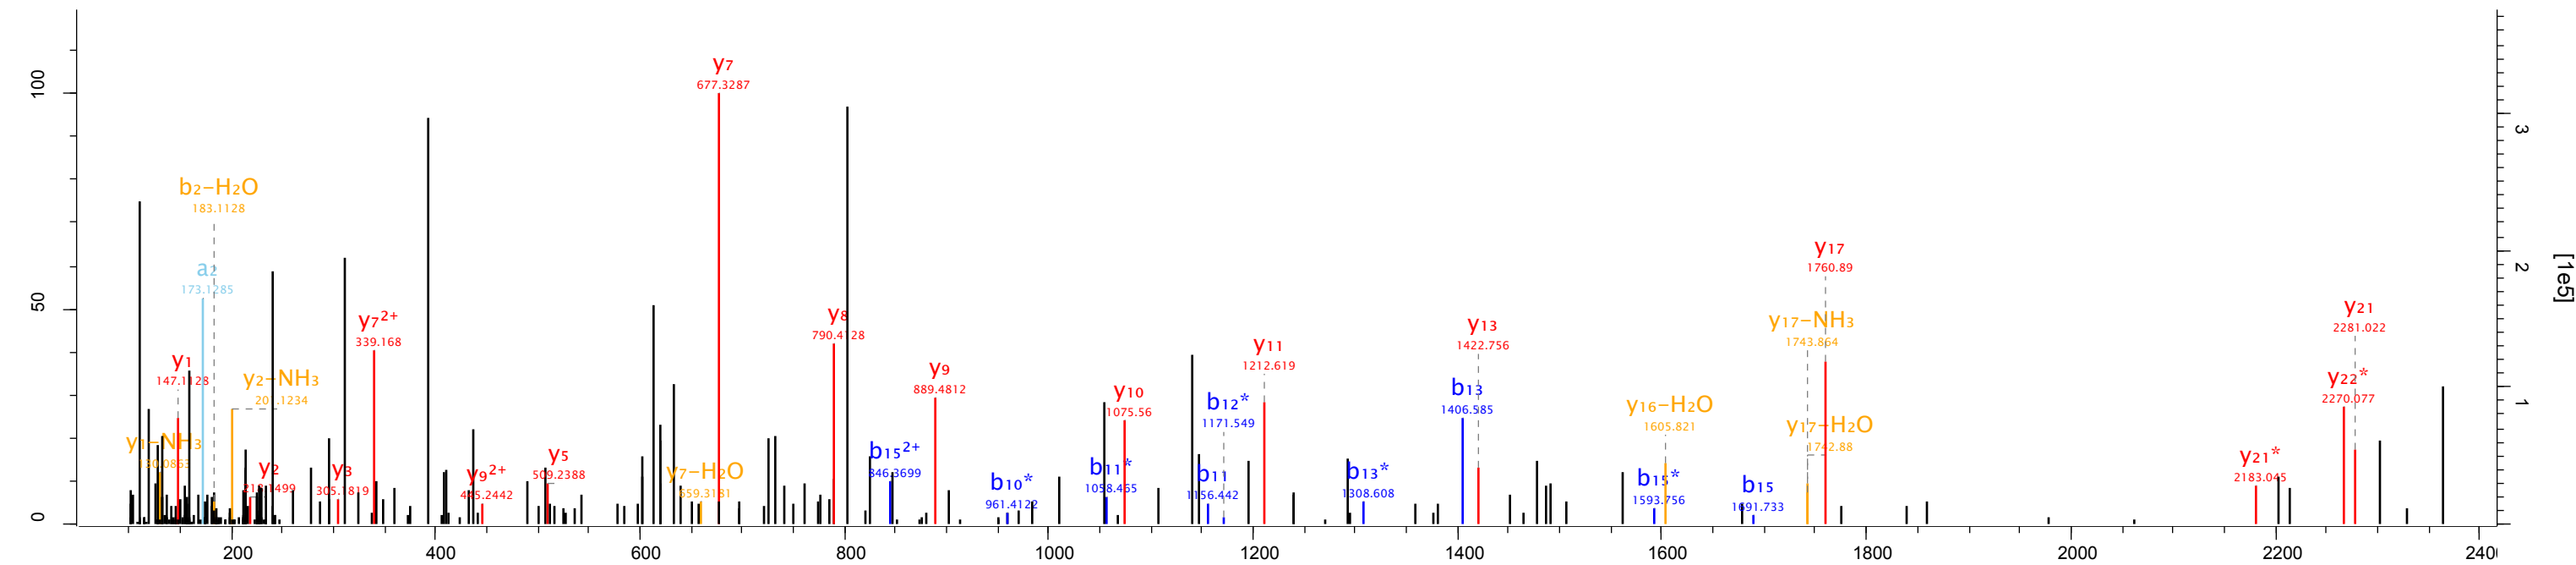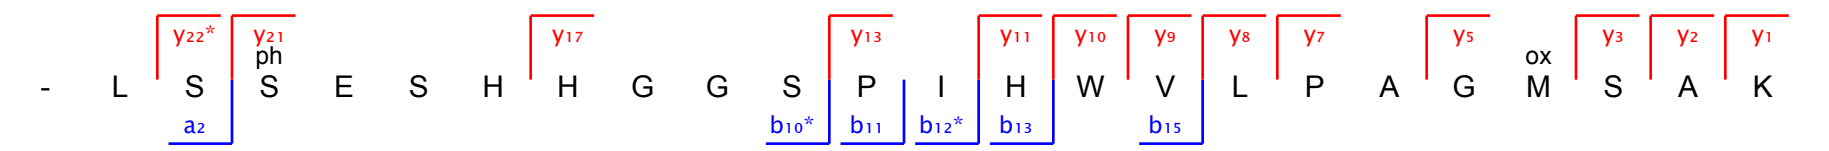

Raw file: 20150814\_A375SR\_Phospho\_BR2\_07  
 Scan: 15002  
 Method: FTMS; HCD  
 Score: 66.44  
 m/z: 834.72  
 Gene names: IRF2BP2

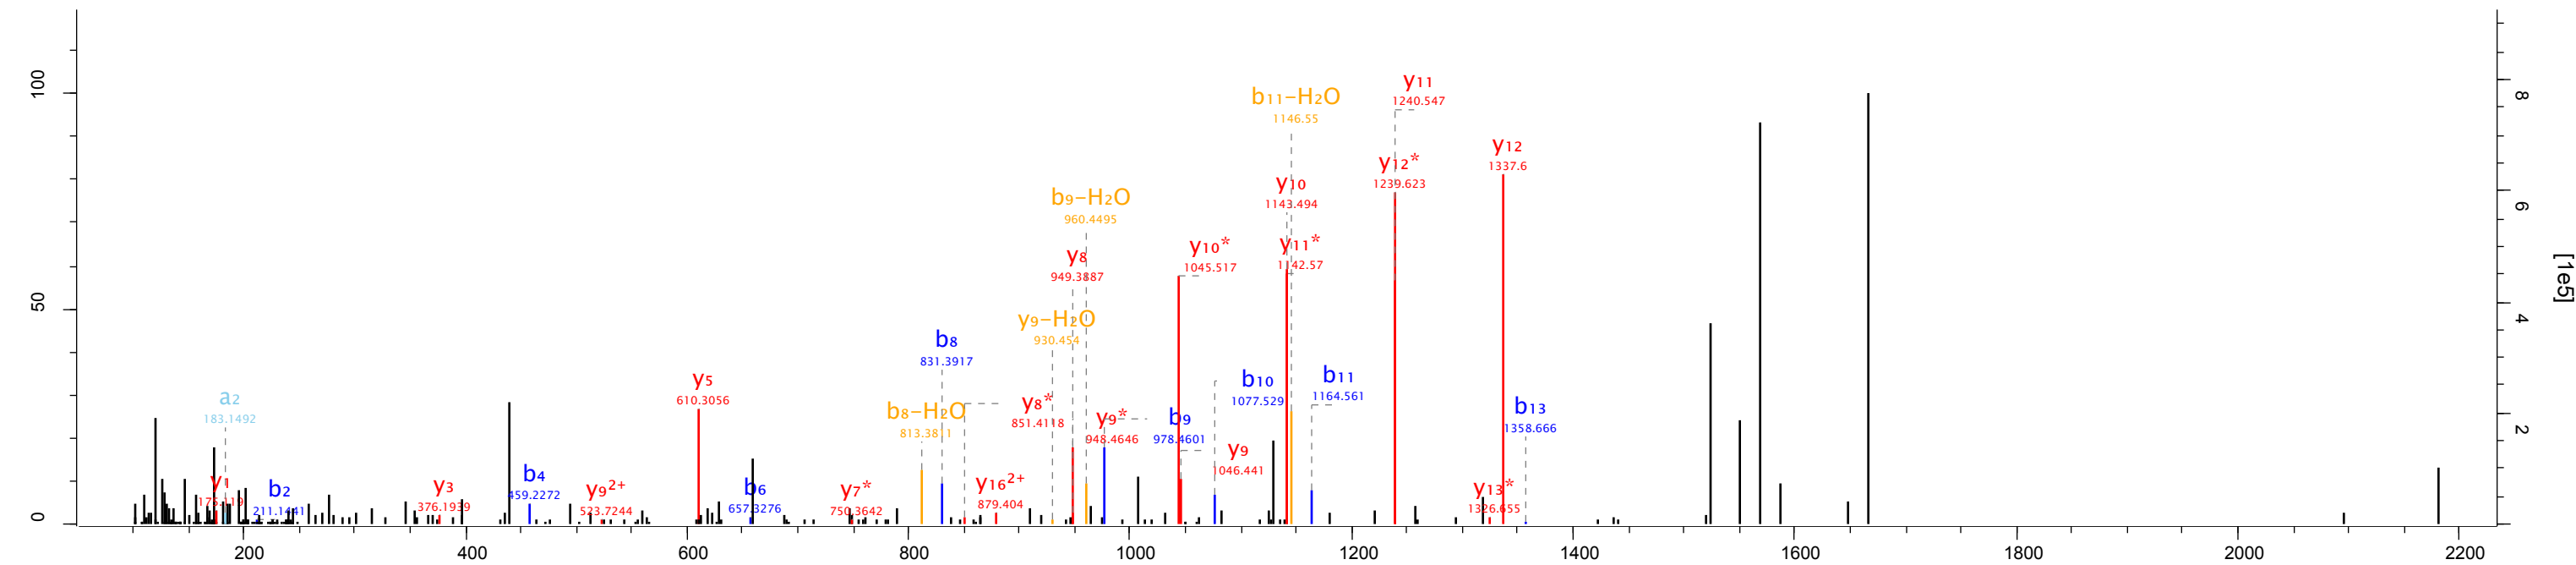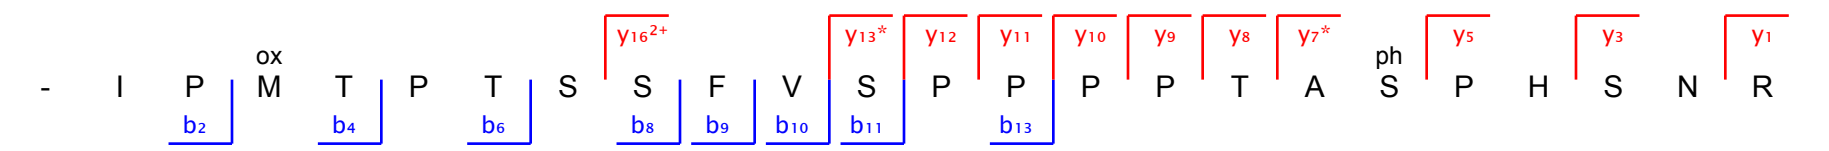

Raw file: 20150814\_A375SR\_Phospho\_BR2\_07  
 Scan: 15362 Method: FTMS; HCD Score: 143.14 m/z: 850.41 Gene names: ANKRD34A

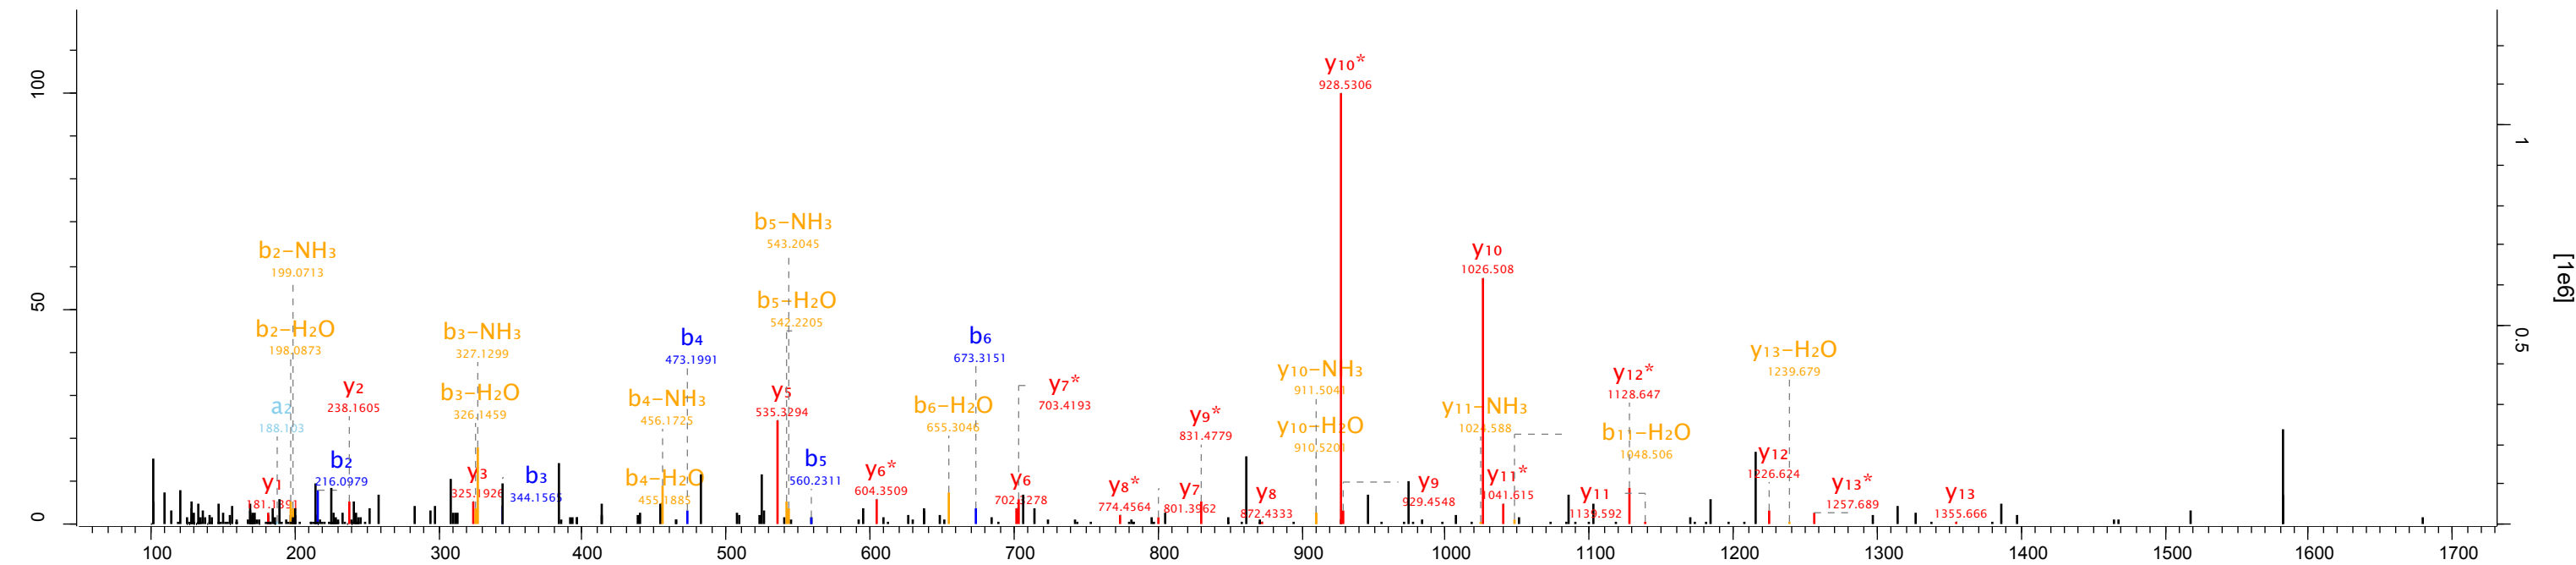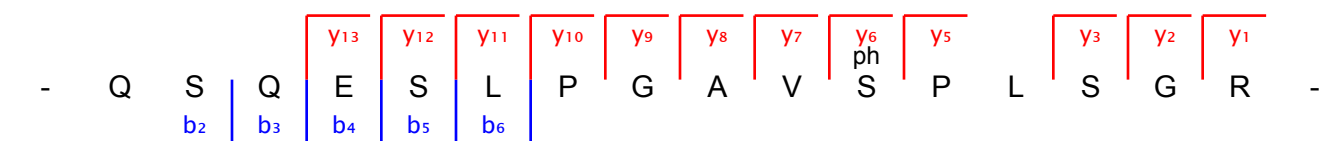

Raw file  
 20150814\_A375SR\_Phospho\_BR2\_07  
 Scan 16122 Method FTMS; HCD Score 65.8 m/z 775.02 Gene names LUZP1

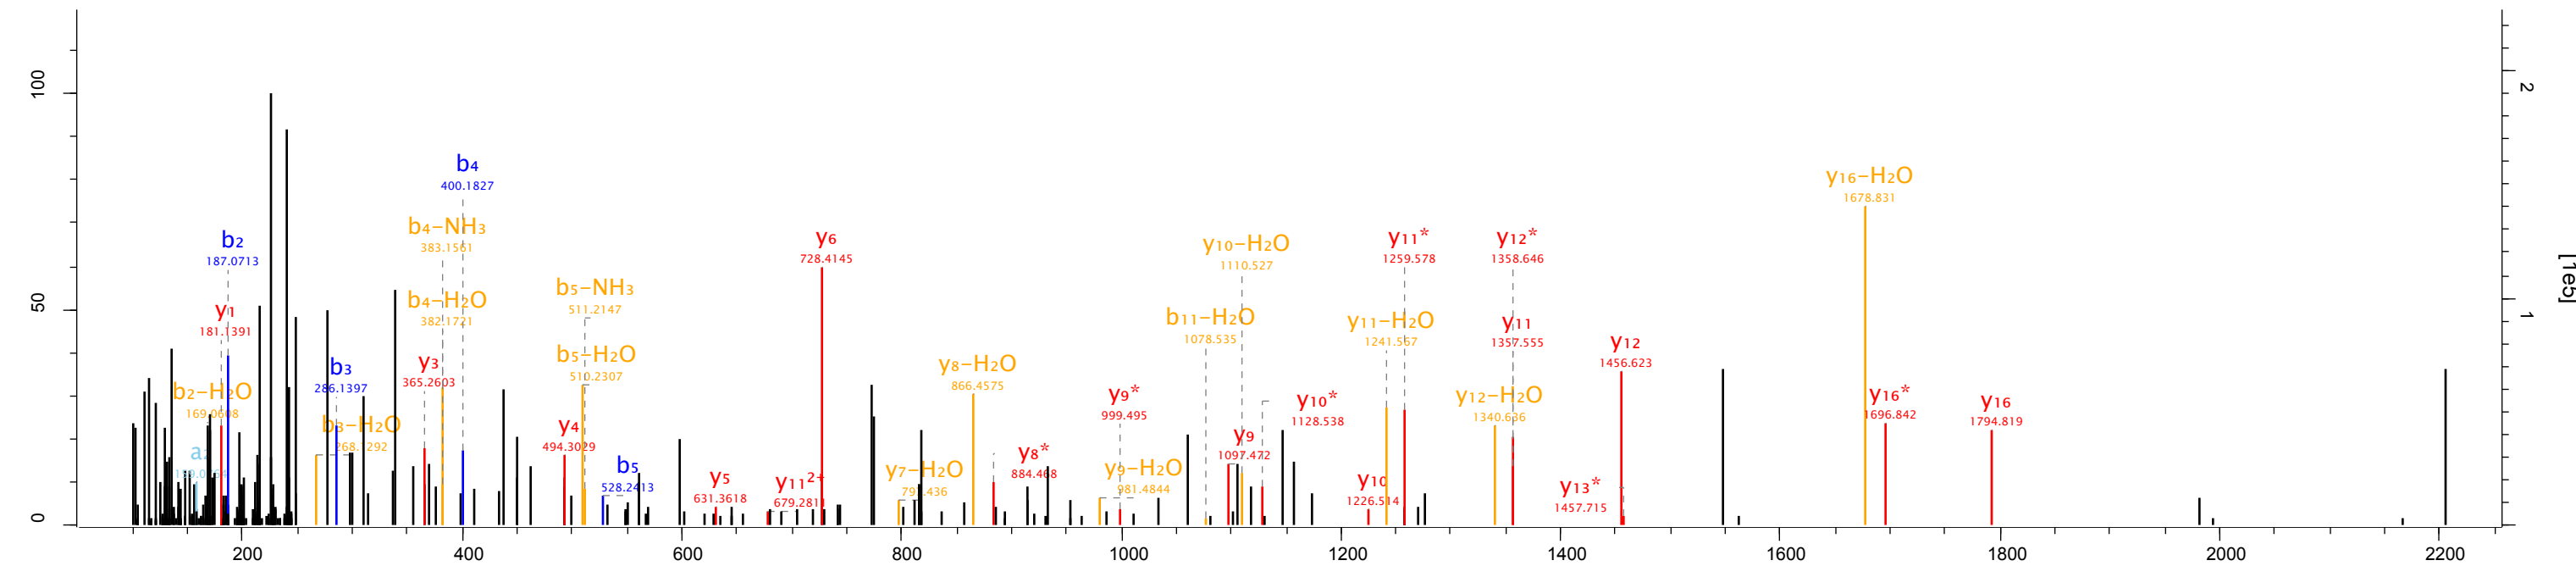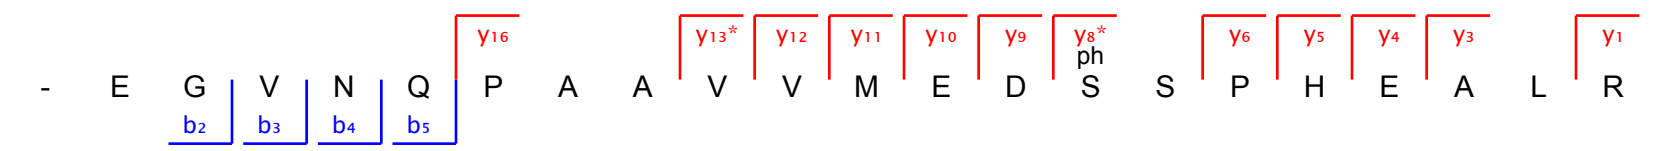

Raw file 20150814\_A375SR\_Phospho\_BR2\_07 Scan 17012 Method FTMS; HCD Score 76.02 m/z 656.63 Gene names OSBPL3

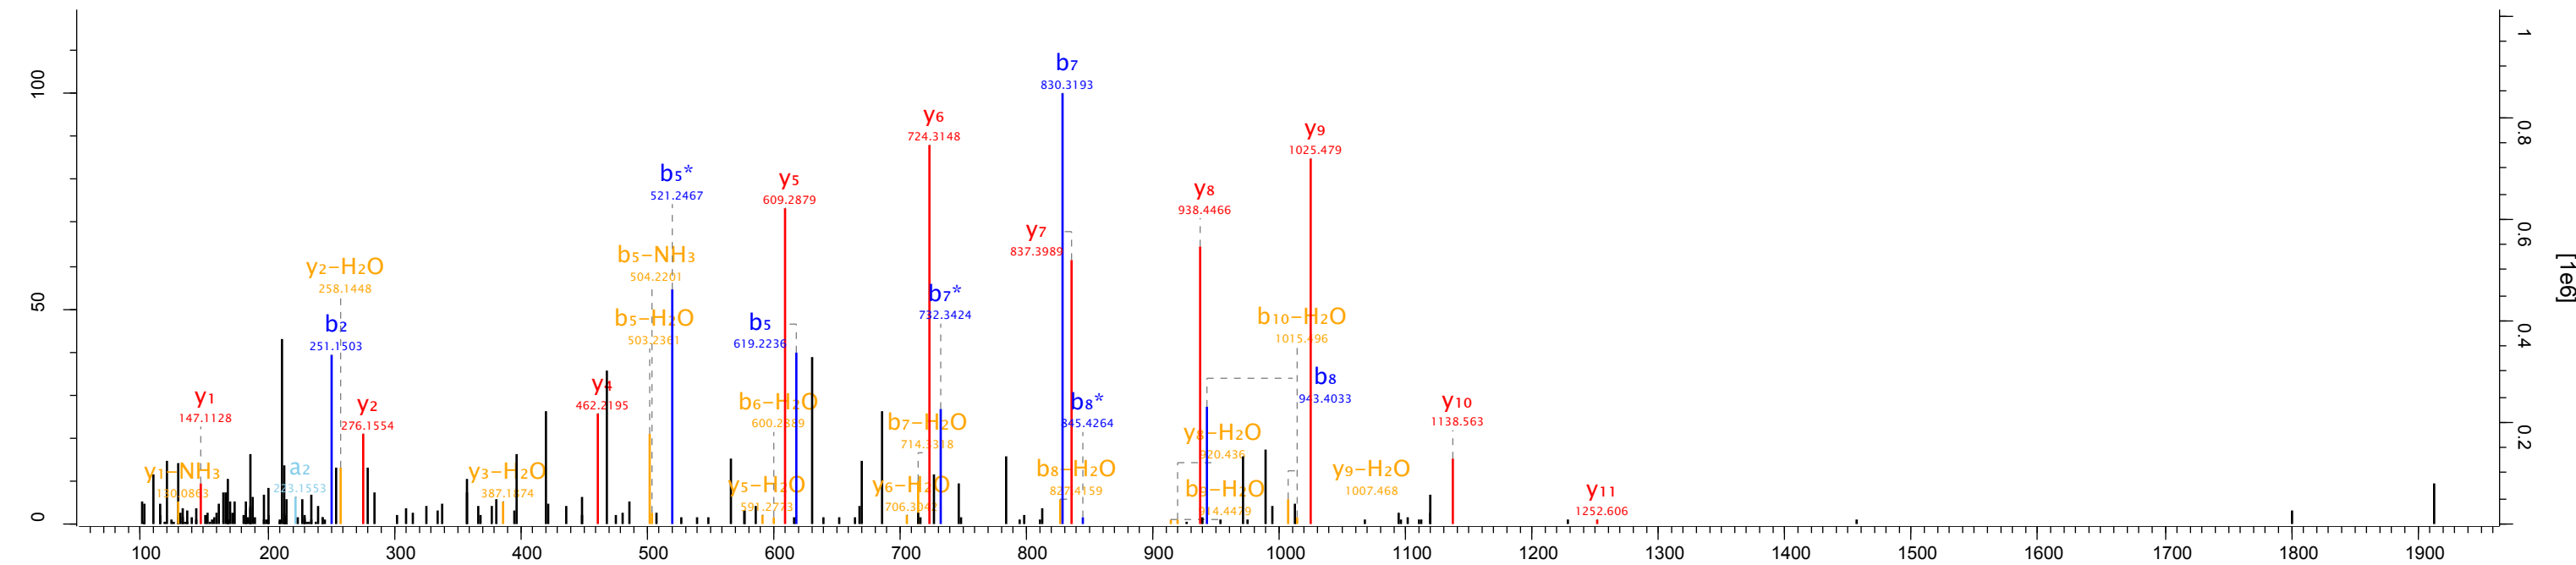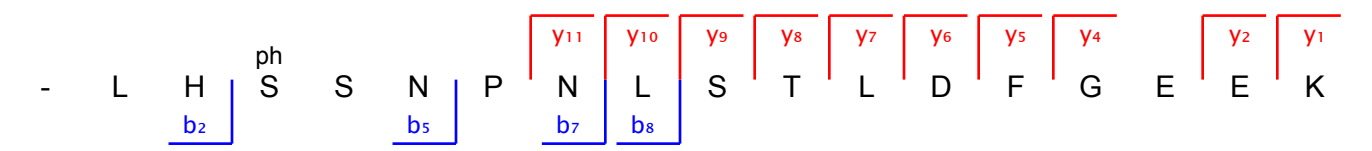

Raw file 20150814\_A375SR\_Phospho\_BR2\_07 Scan 17342 Method FTMS; HCD Score 206.81 m/z 748.89 Gene names MAP4

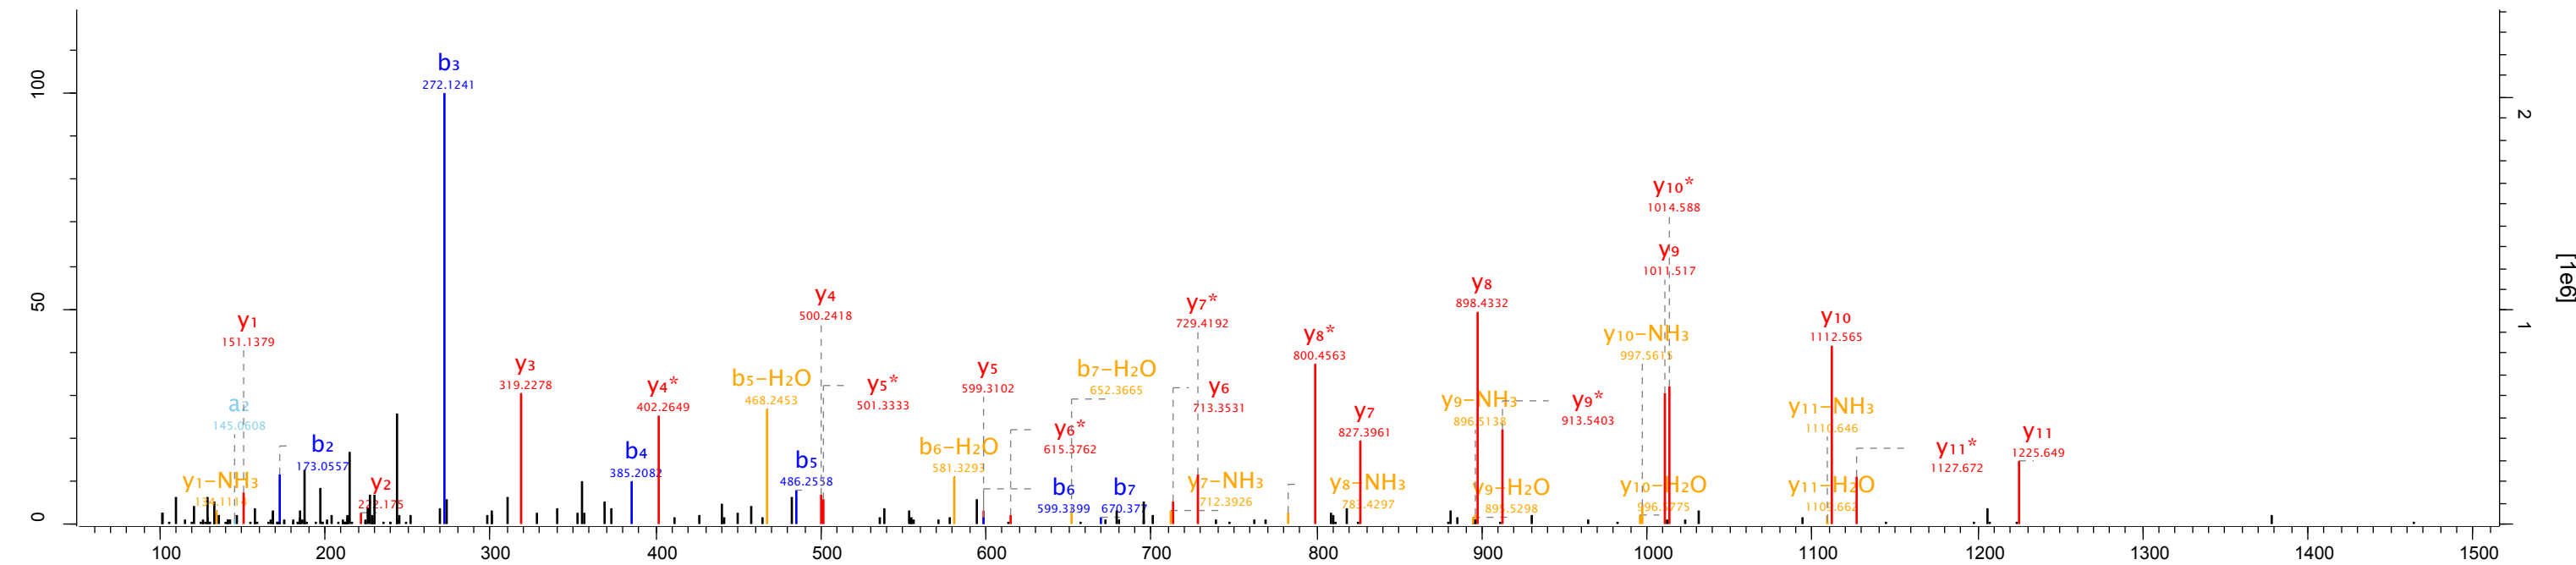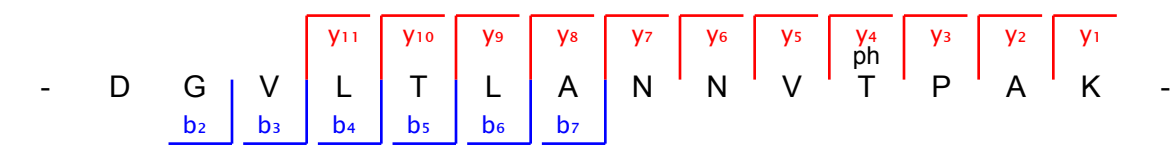

Raw file 20150814\_A375SR\_Phospho\_BR2\_07 Scan 17582 Method FTMS; HCD Score 200.52 m/z 687.1 Gene names RAPGEF2

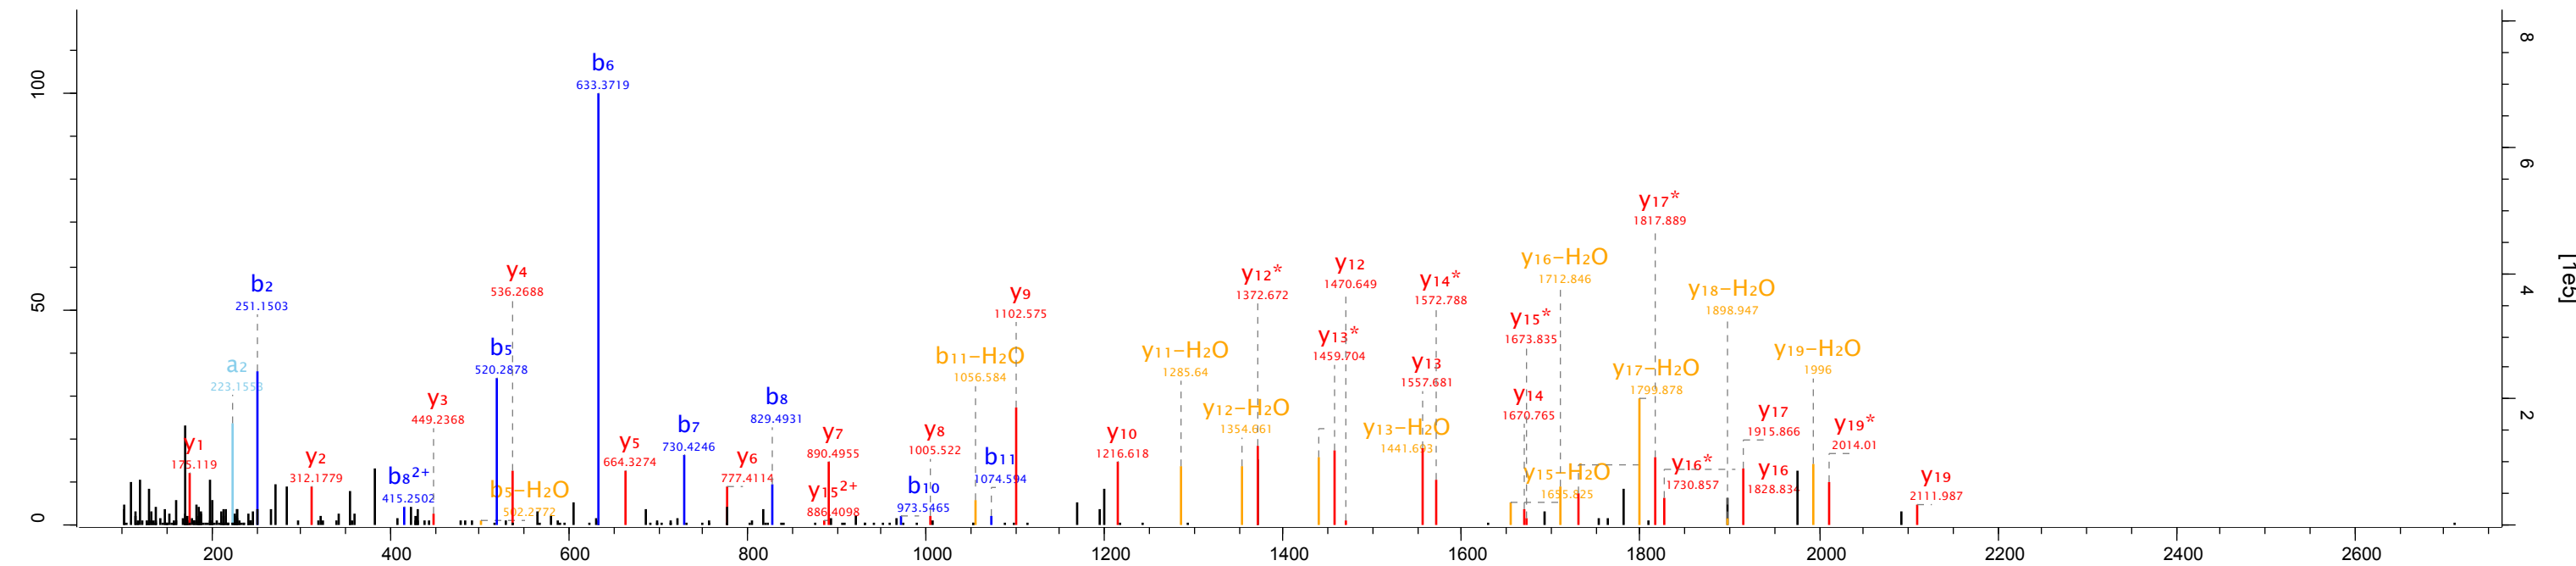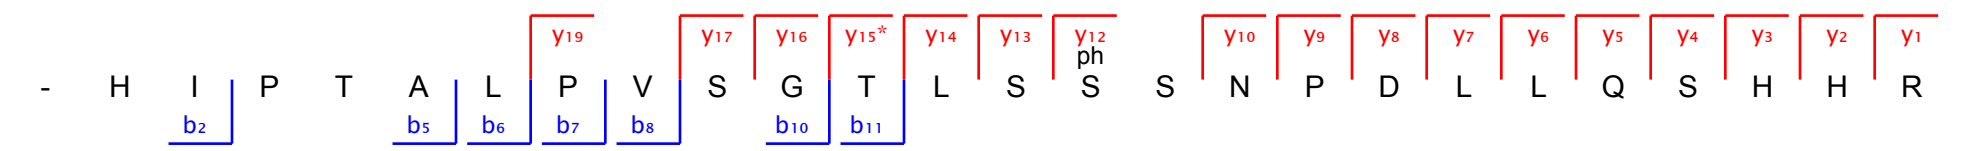

Raw file  
 20150814\_A375SR\_Phospho\_BR2\_07  
 Scan 19122 Method FTMS; HCD Score 66.89 m/z 633.81 Gene names EEF1G

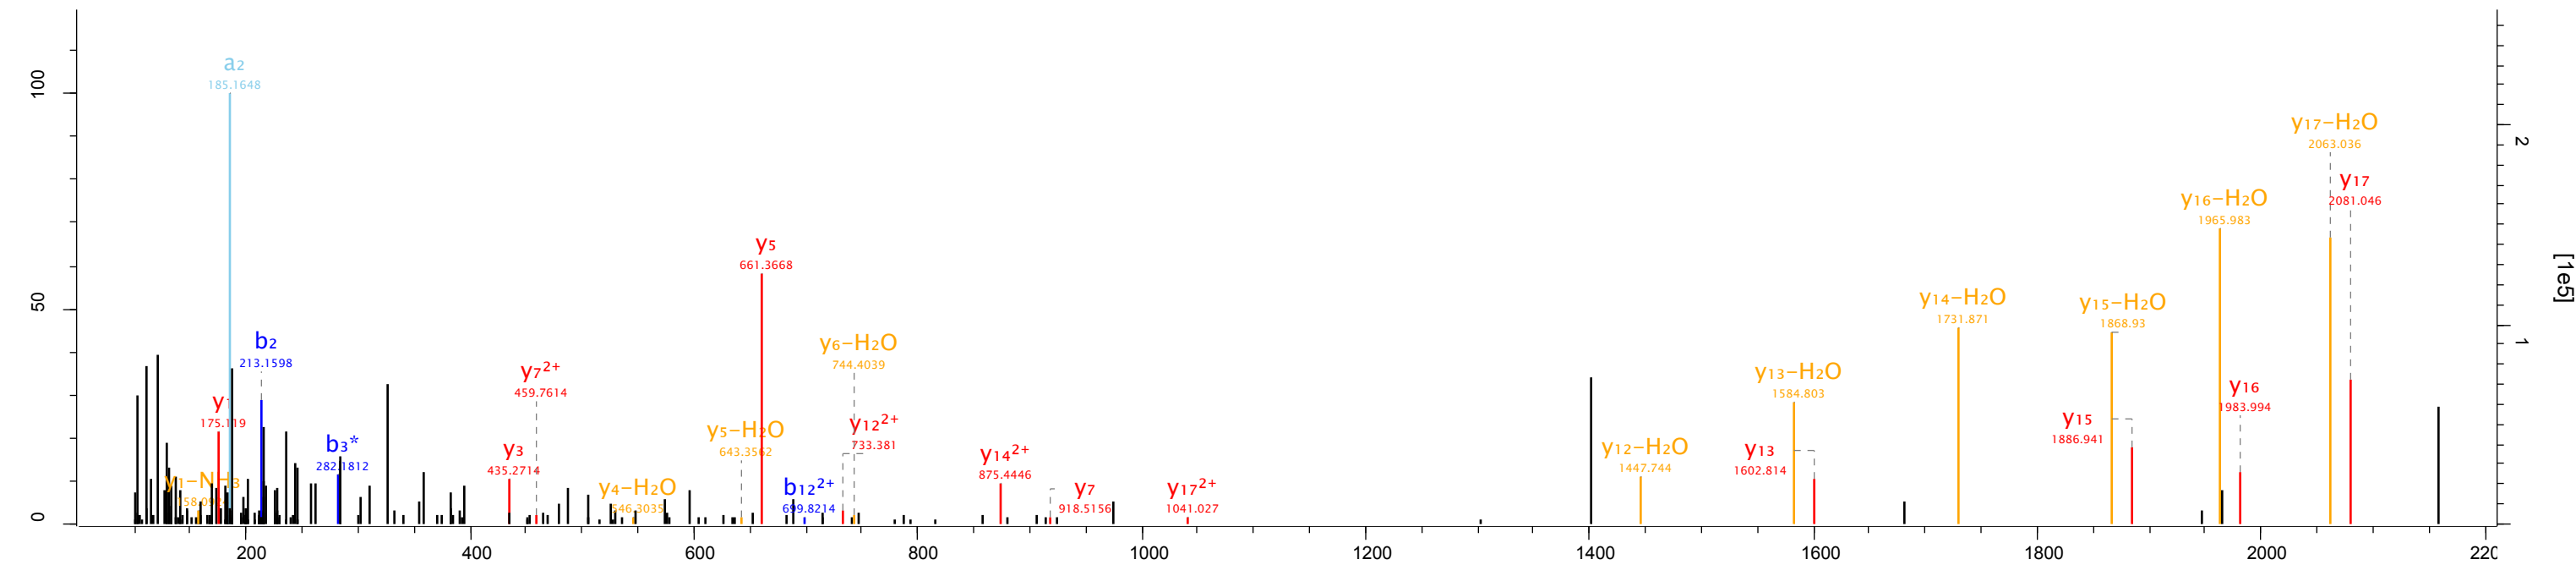

- V L S ph A P P H F H F G Q T N R T P E F L R -  
 b2 b3\* b12<sup>2+</sup> y17 y16 y15 y14<sup>2+</sup> y13 y12<sup>2+</sup> y7 y5 y3 y1



Raw file: 20150814\_A375SR\_Phospho\_BR2\_07  
 Scan: 19292 Method: FTMS; HCD Score: 76.97 m/z: 948.22 Gene names: RBM17

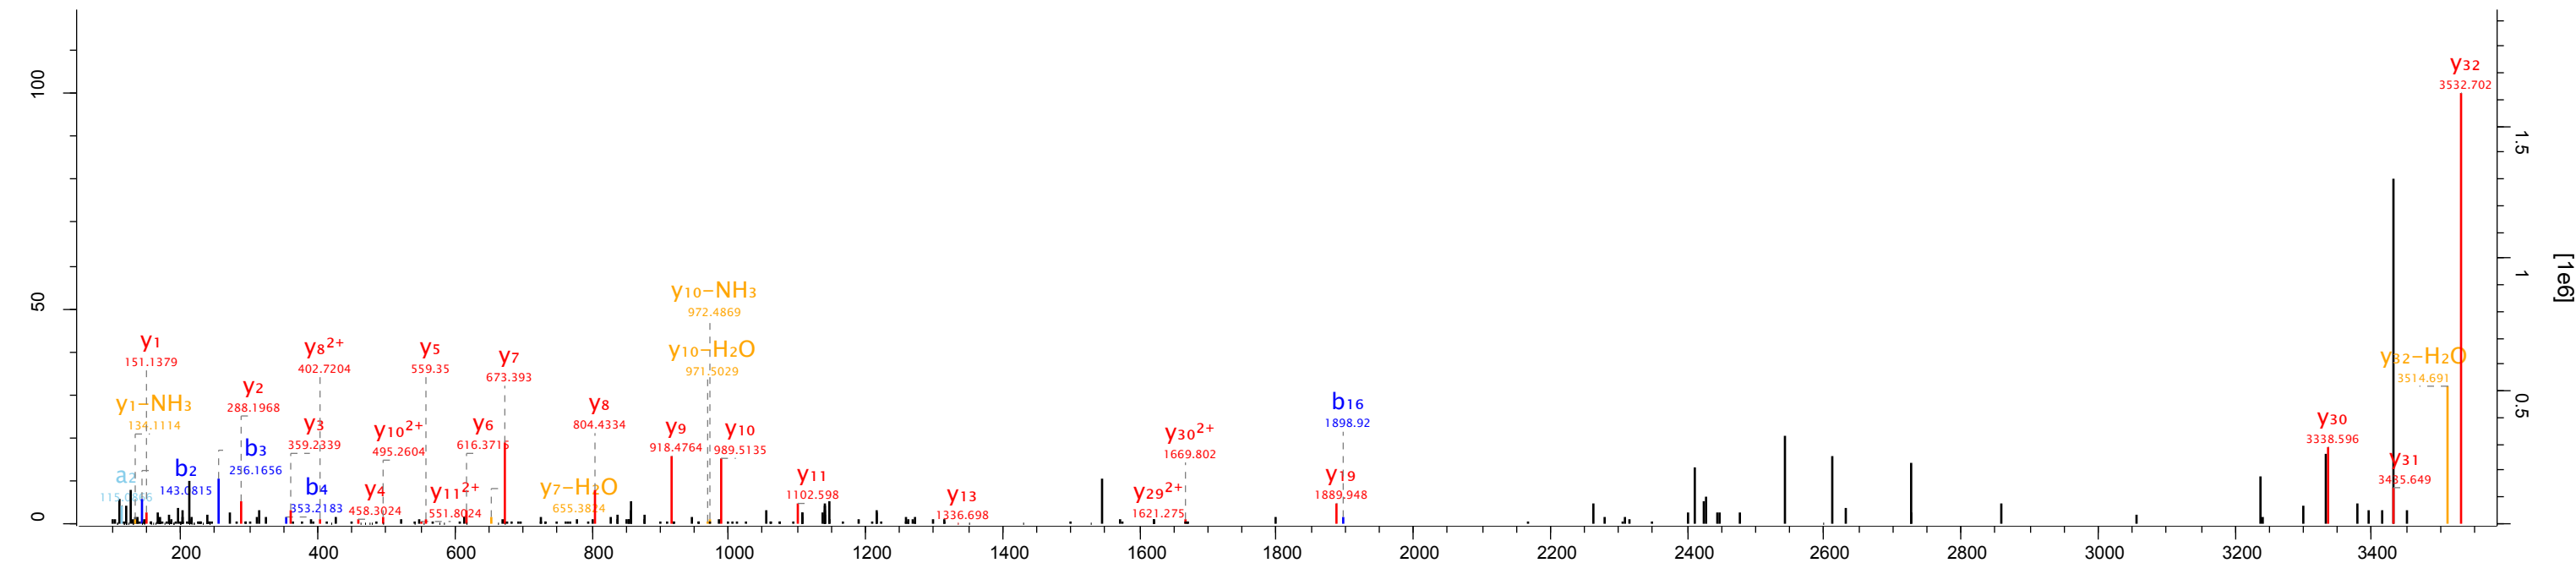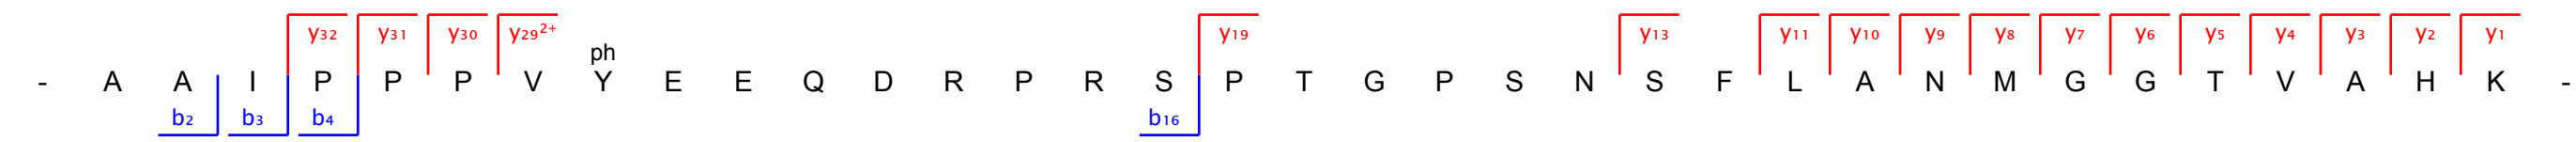

Raw file: 20150814\_A375SR\_Phospho\_BR2\_07  
 Scan: 19352 Method: FTMS; HCD Score: 84.86 m/z: 715.83 Gene names: CHMP7

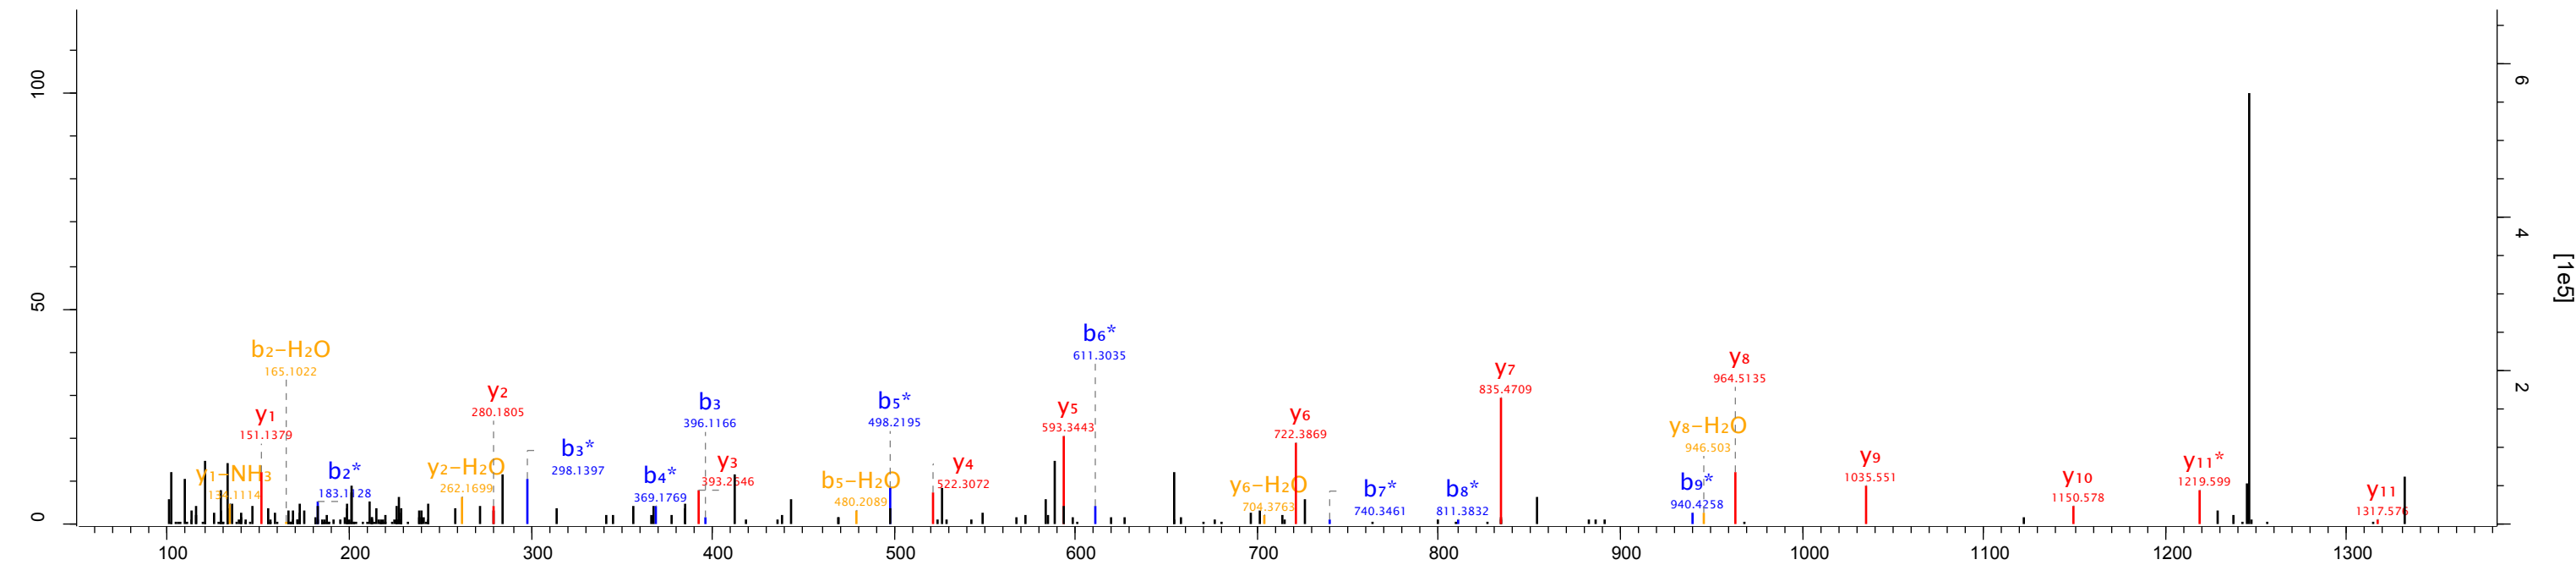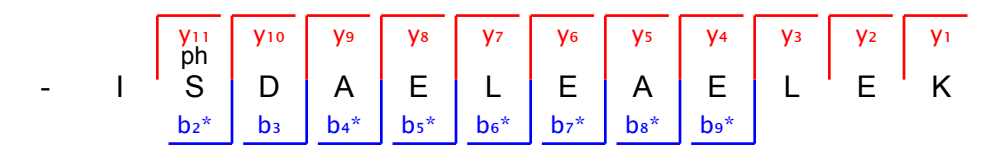

Raw file  
 20150814\_A375SR\_Phospho\_BR2\_07  
 Scan 20092 Method FTMS; HCD Score 143.57 m/z 827.93 Gene names ELAVL1

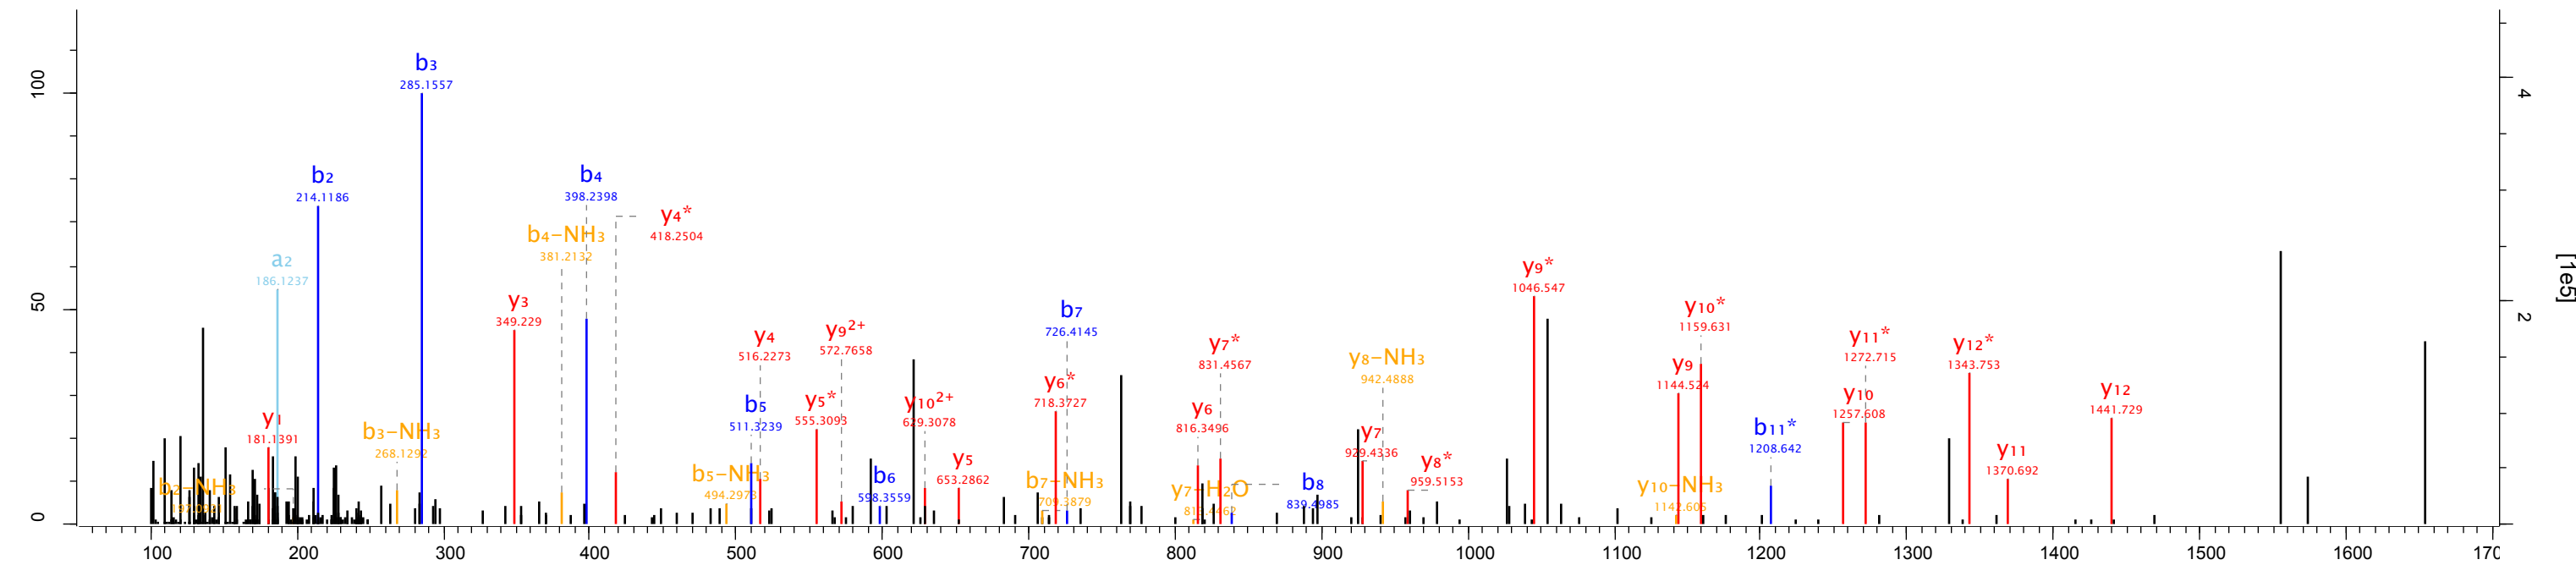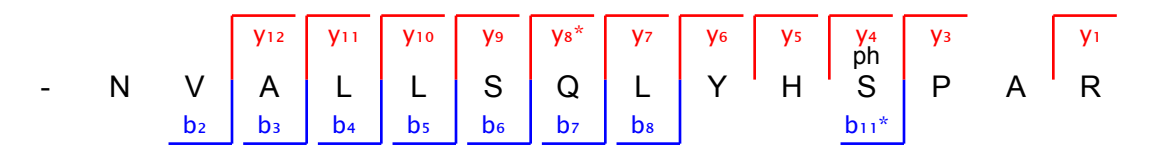

Raw file 20150814\_A375SR\_Phospho\_BR2\_07 Scan 20302 Method FTMS; HCD Score 182.89 m/z 706.32 Gene names BCLAF1

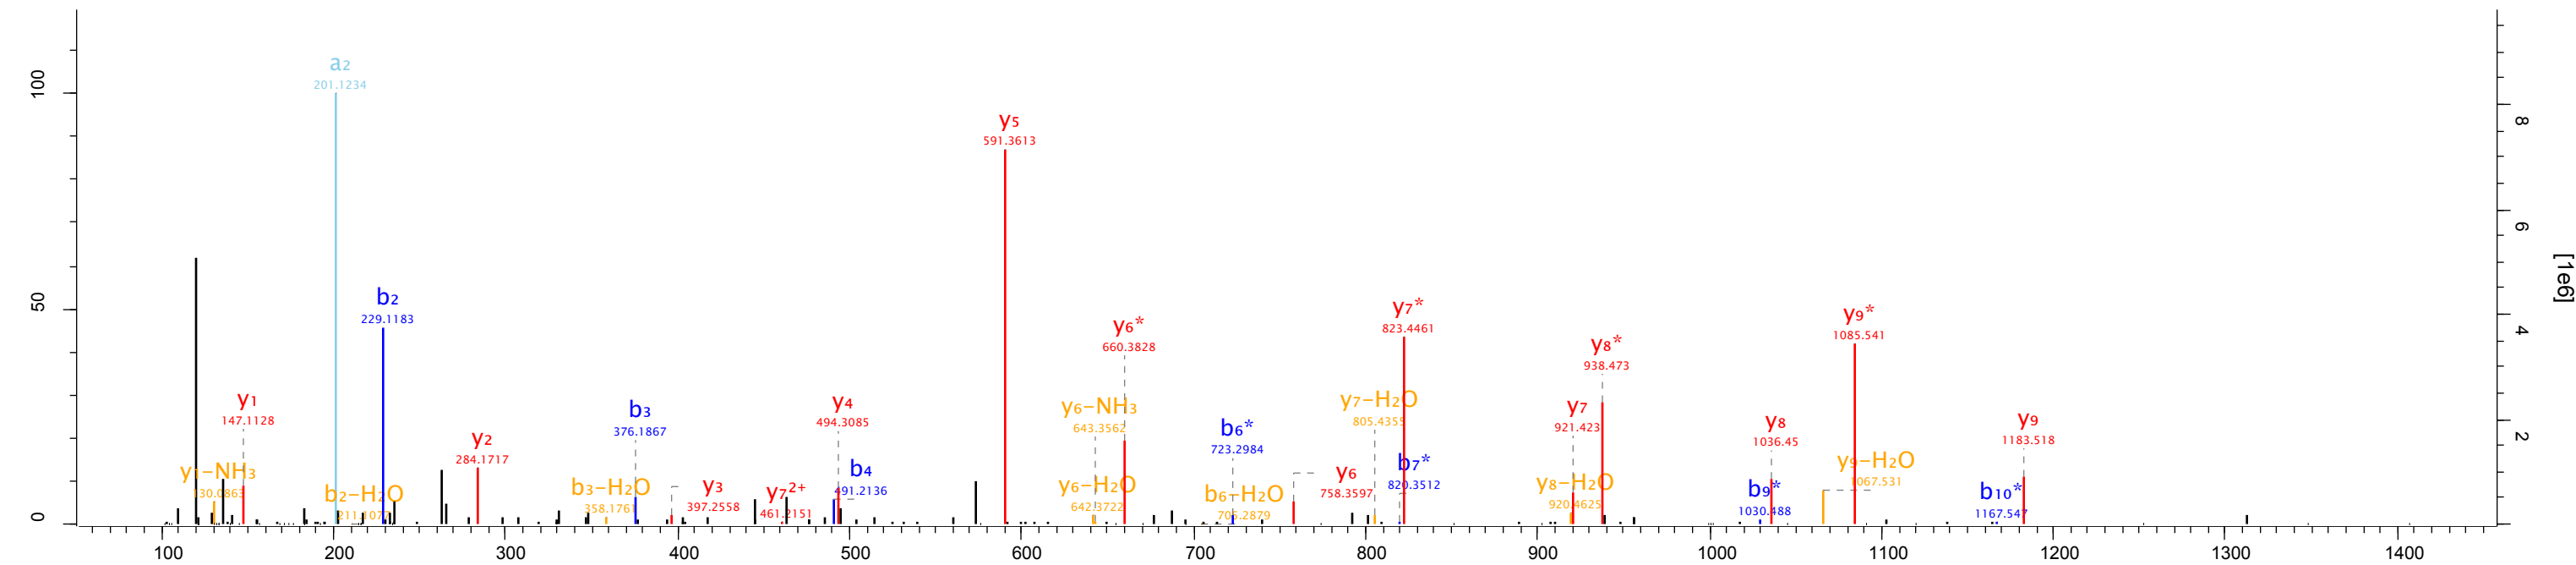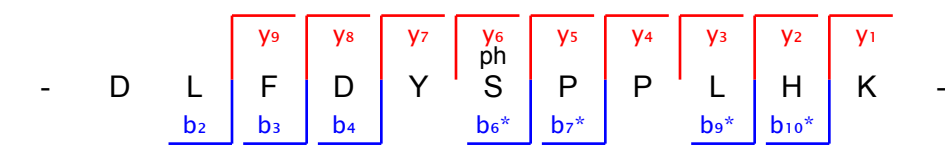

Raw file 20150814\_A375SR\_Phospho\_BR2\_07 Scan 20712 Method FTMS; HCD Score 91.4 m/z 700.85 Gene names SYNRG

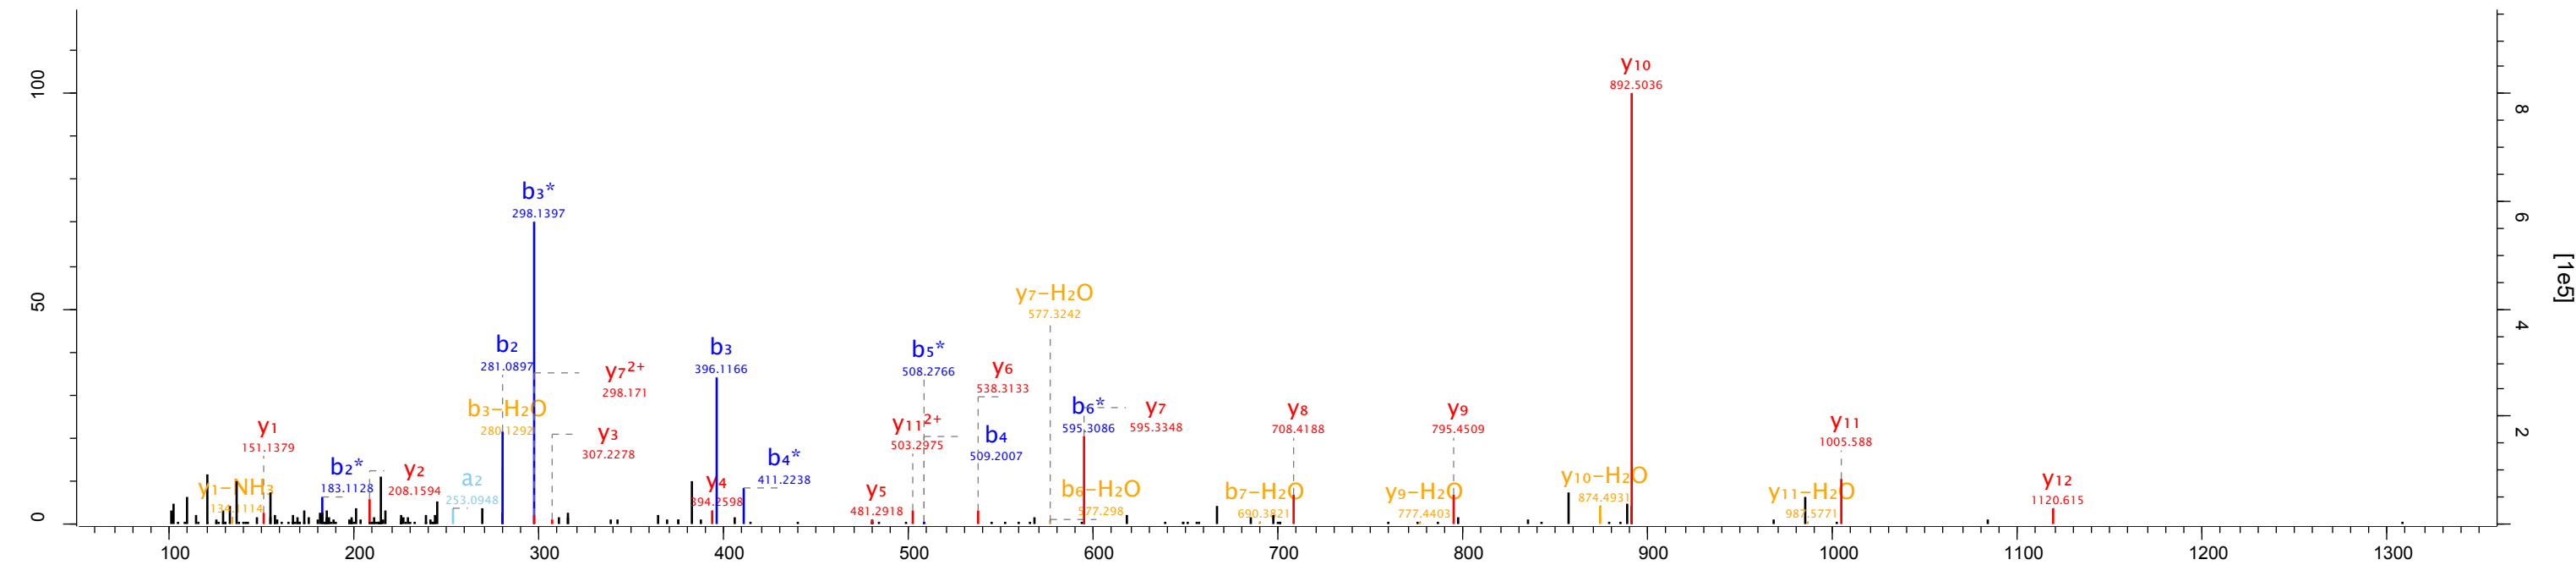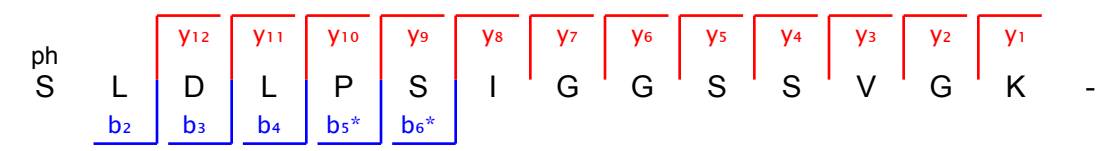

Raw file Scan Method Score m/z Gene names  
 20150814\_A375SR\_Phospho\_BR2\_07 20782 FTMS; HCD 168.42 745.86 ENO1

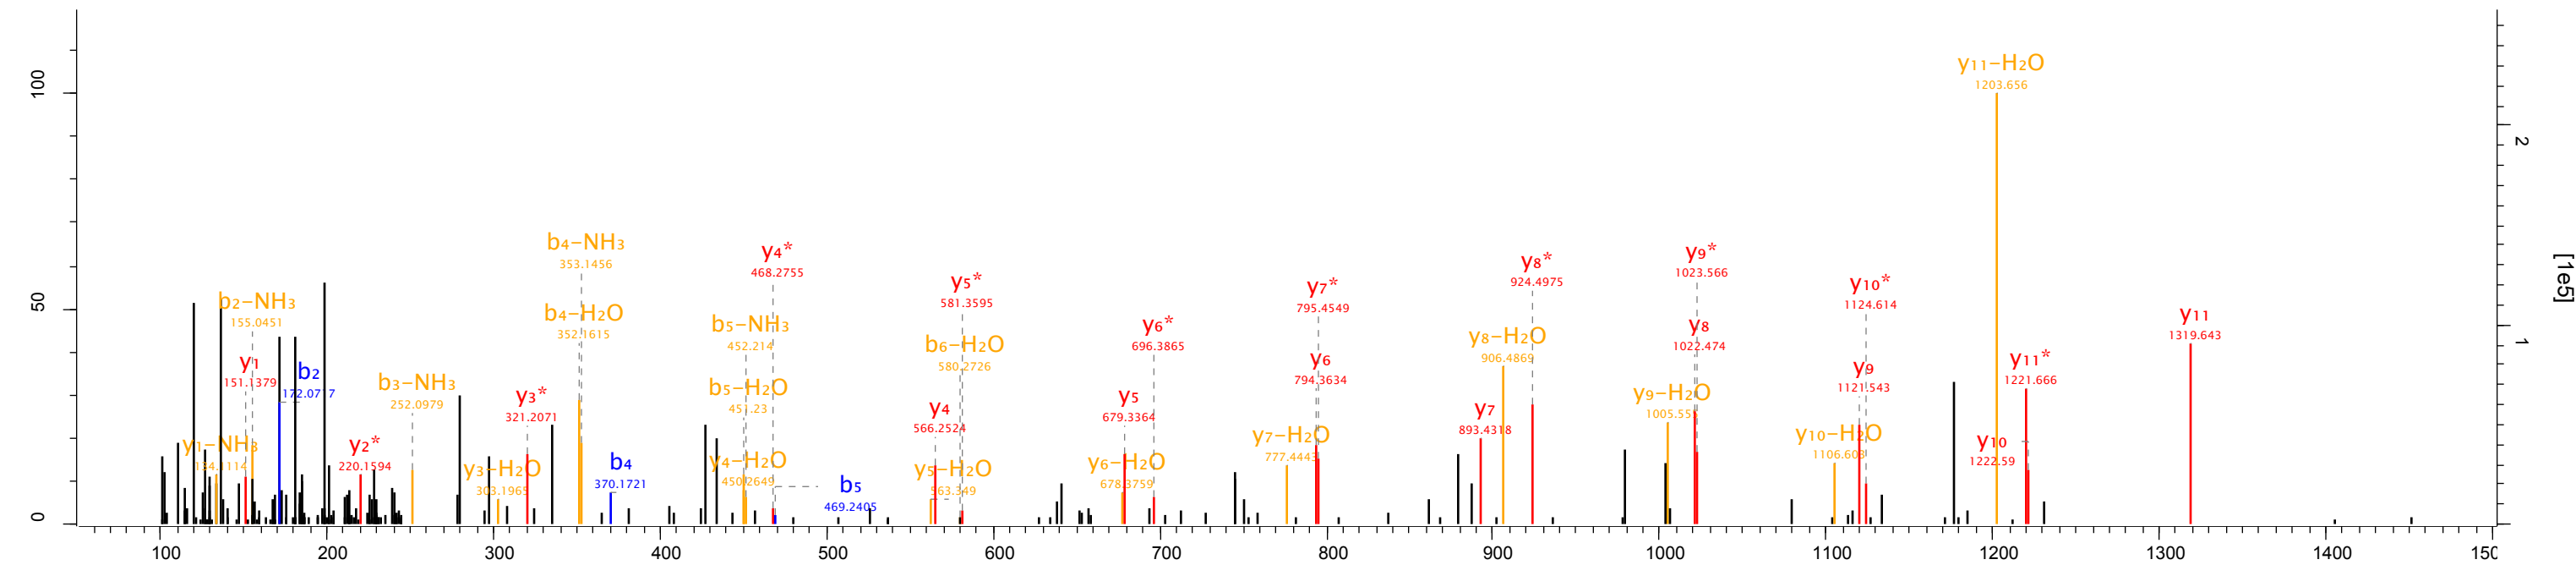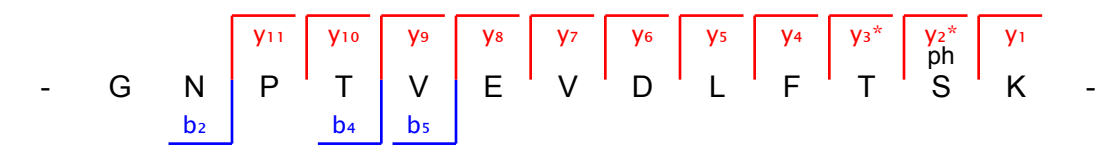

Raw file 20150814\_A375SR\_Phospho\_BR2\_07 Scan 21982 Method FTMS; HCD Score 176.89 m/z 618.32 Gene names MARCKS

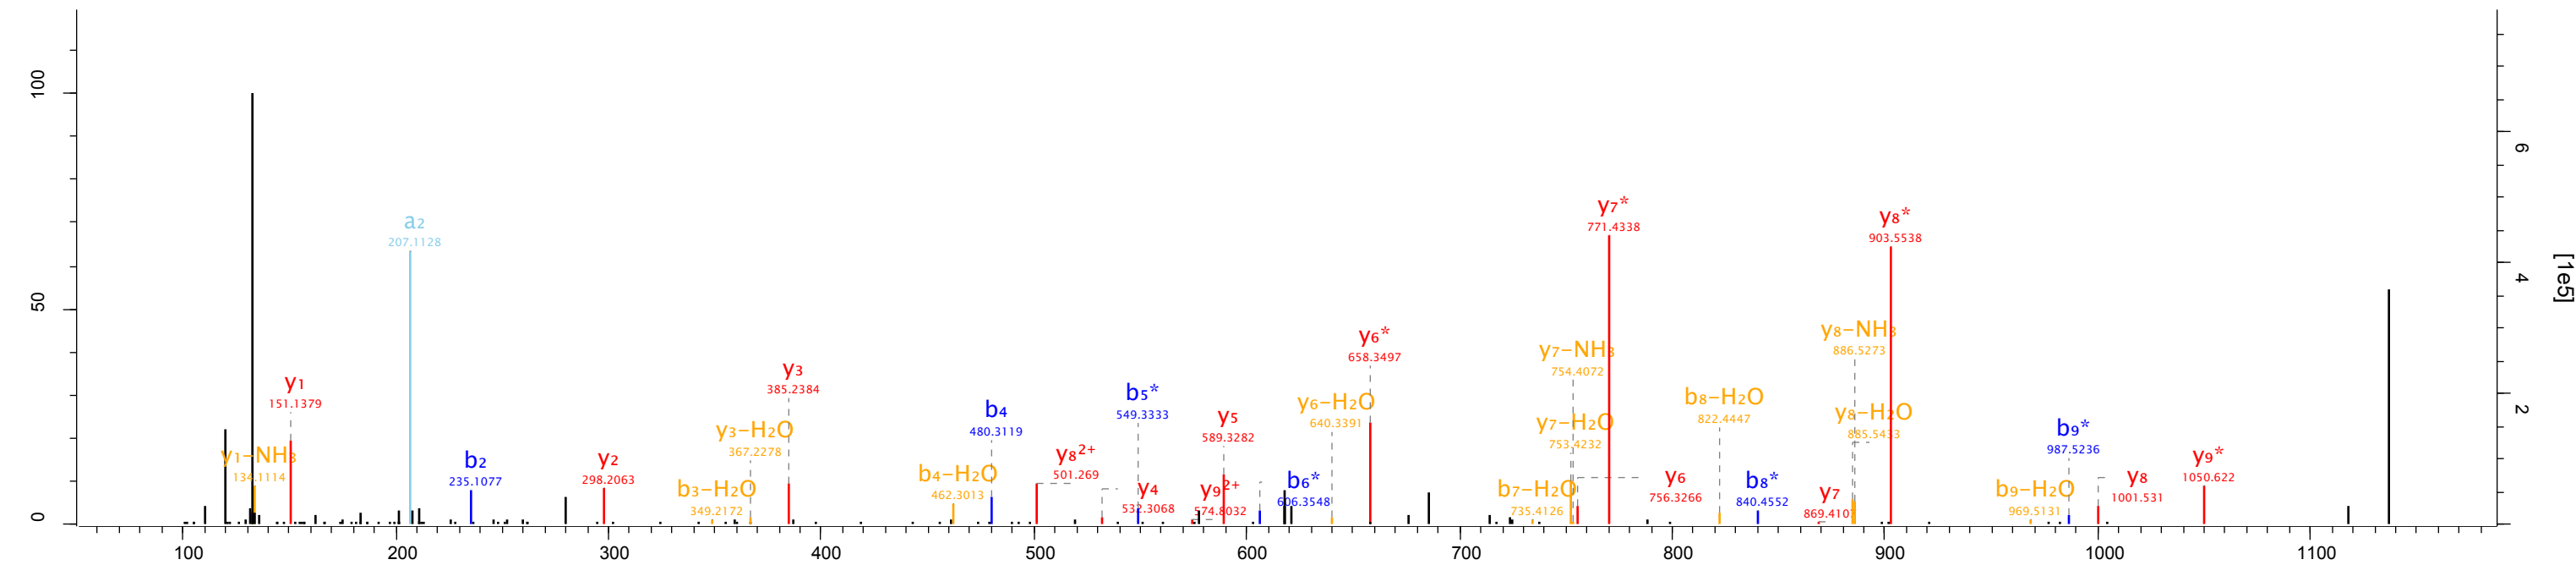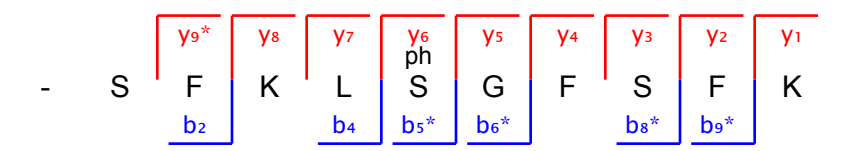

Raw file: 20150814\_A375SR\_Phospho\_BR2\_07  
 Scan: 22132 Method: FTMS; HCD Score: 259.7 m/z: 775.41 Gene names: GPALPP1

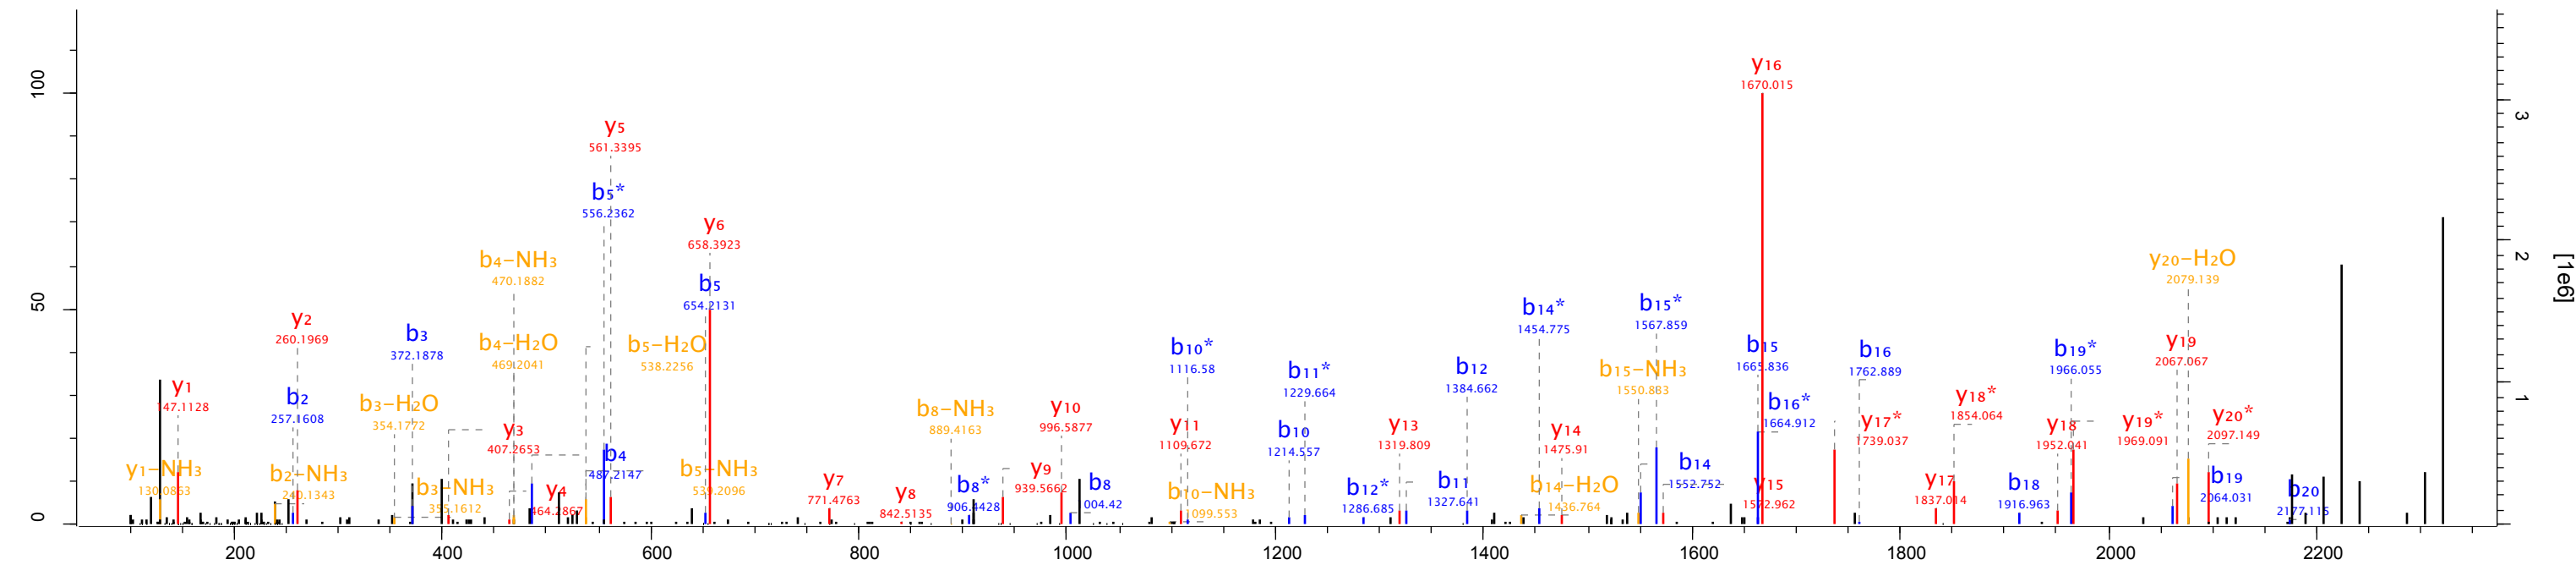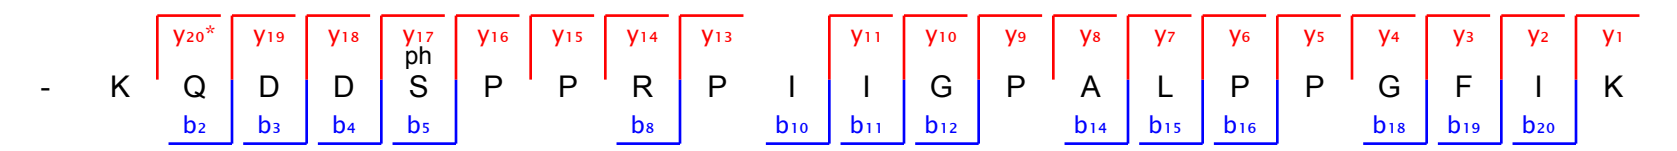



Raw file: 20150814\_A375SR\_Phospho\_BR2\_07  
 Scan: 2312 Method: FTMS; HCD Score: 91.32 m/z: 695.83 Gene names: REPS1

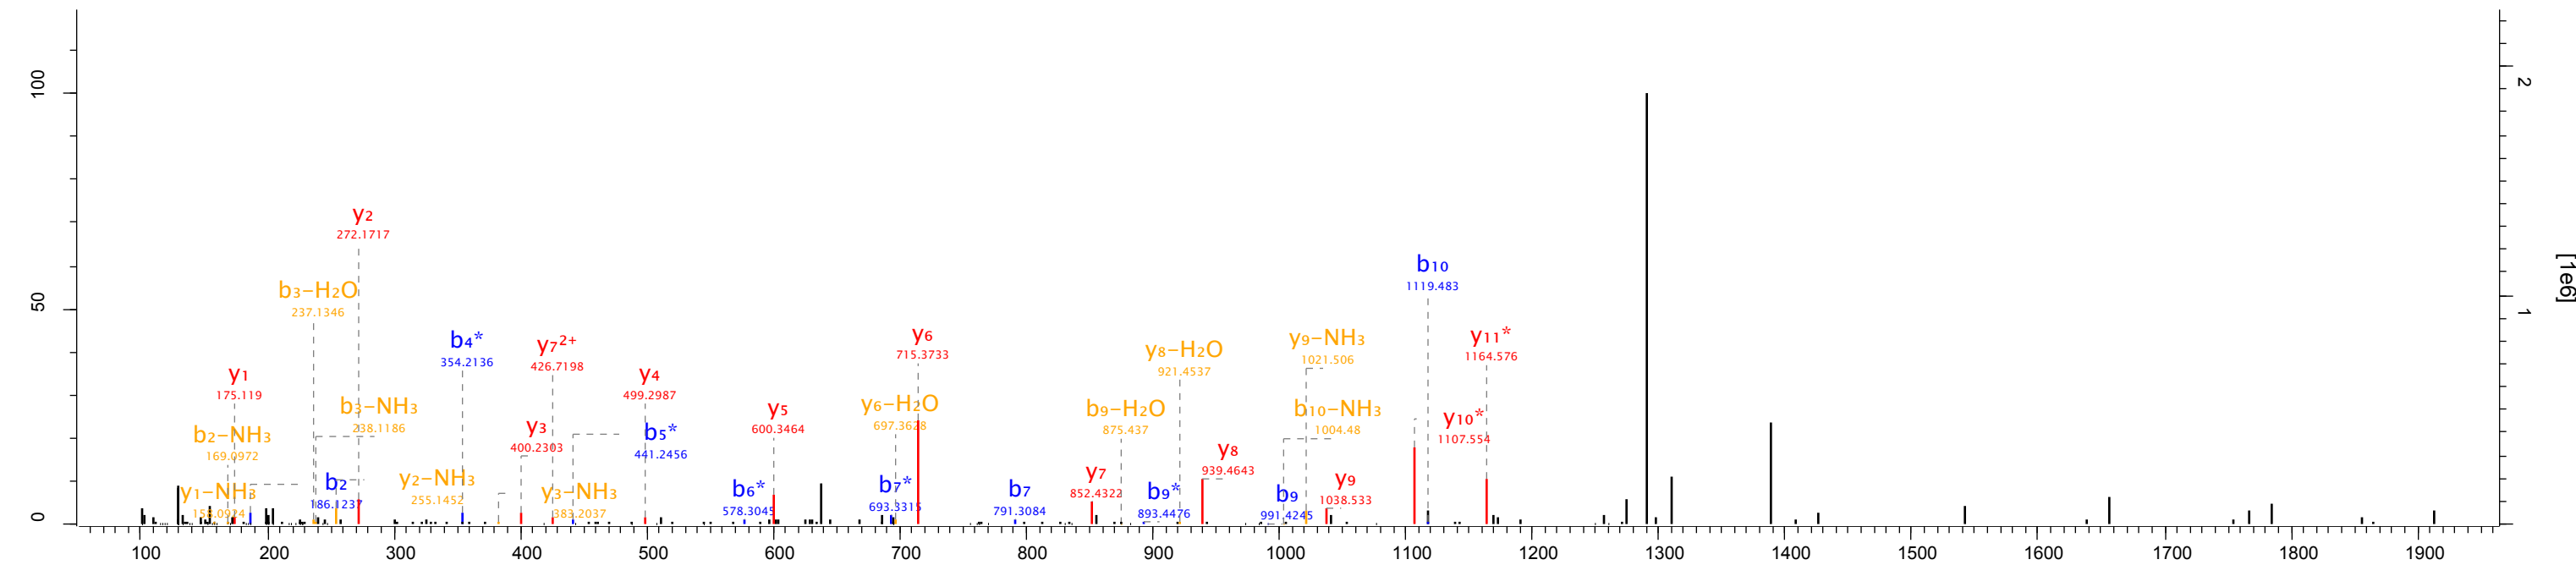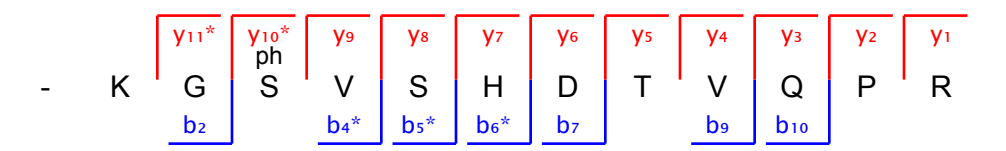

Raw file 20150814\_A375SR\_Phospho\_BR2\_07 Scan 28062 Method FTMS; HCD Score 43.5 m/z 921.81 Gene names NHSL1

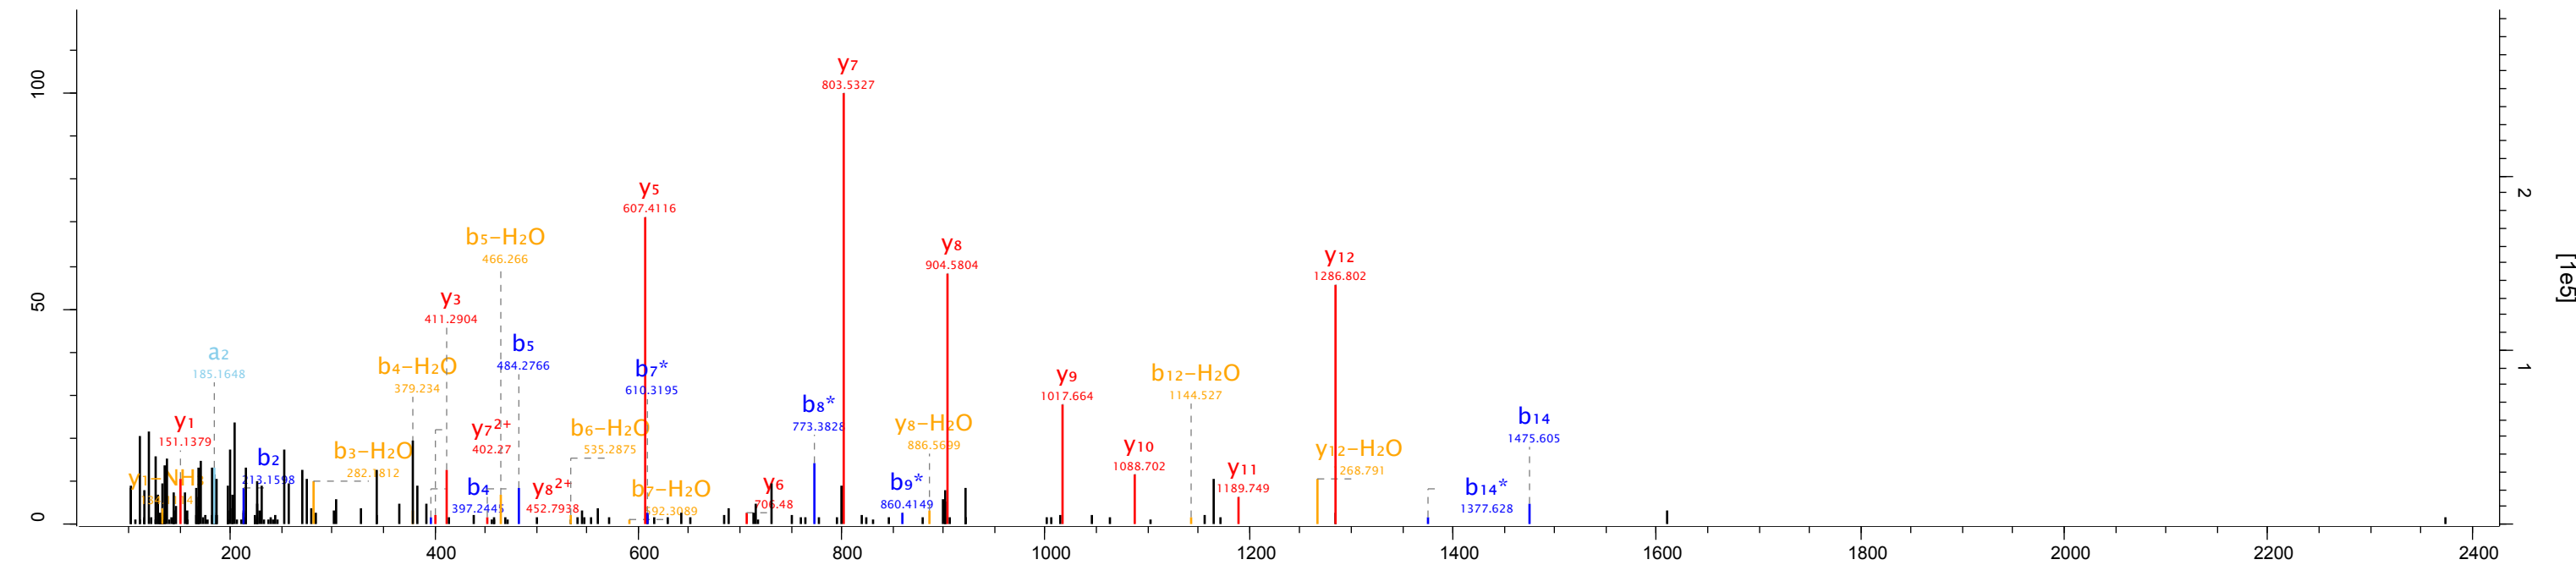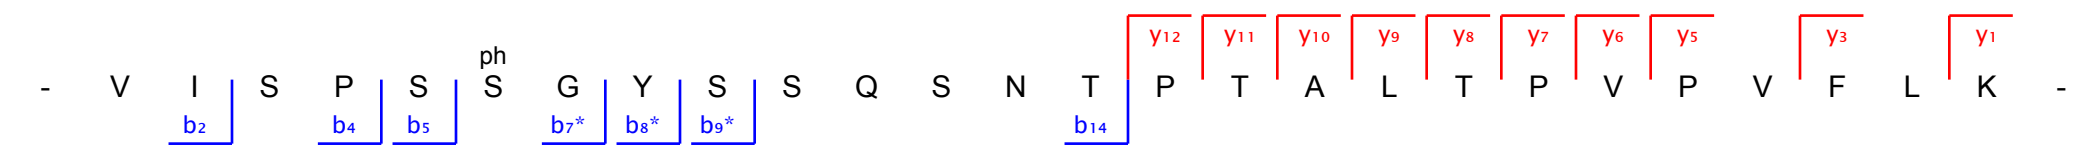

Raw file 20150814\_A375SR\_Phospho\_BR2\_07 Scan 28572 Method FTMS; HCD Score 62.67 m/z 868.44 Gene names SPACIA2;FAM122B

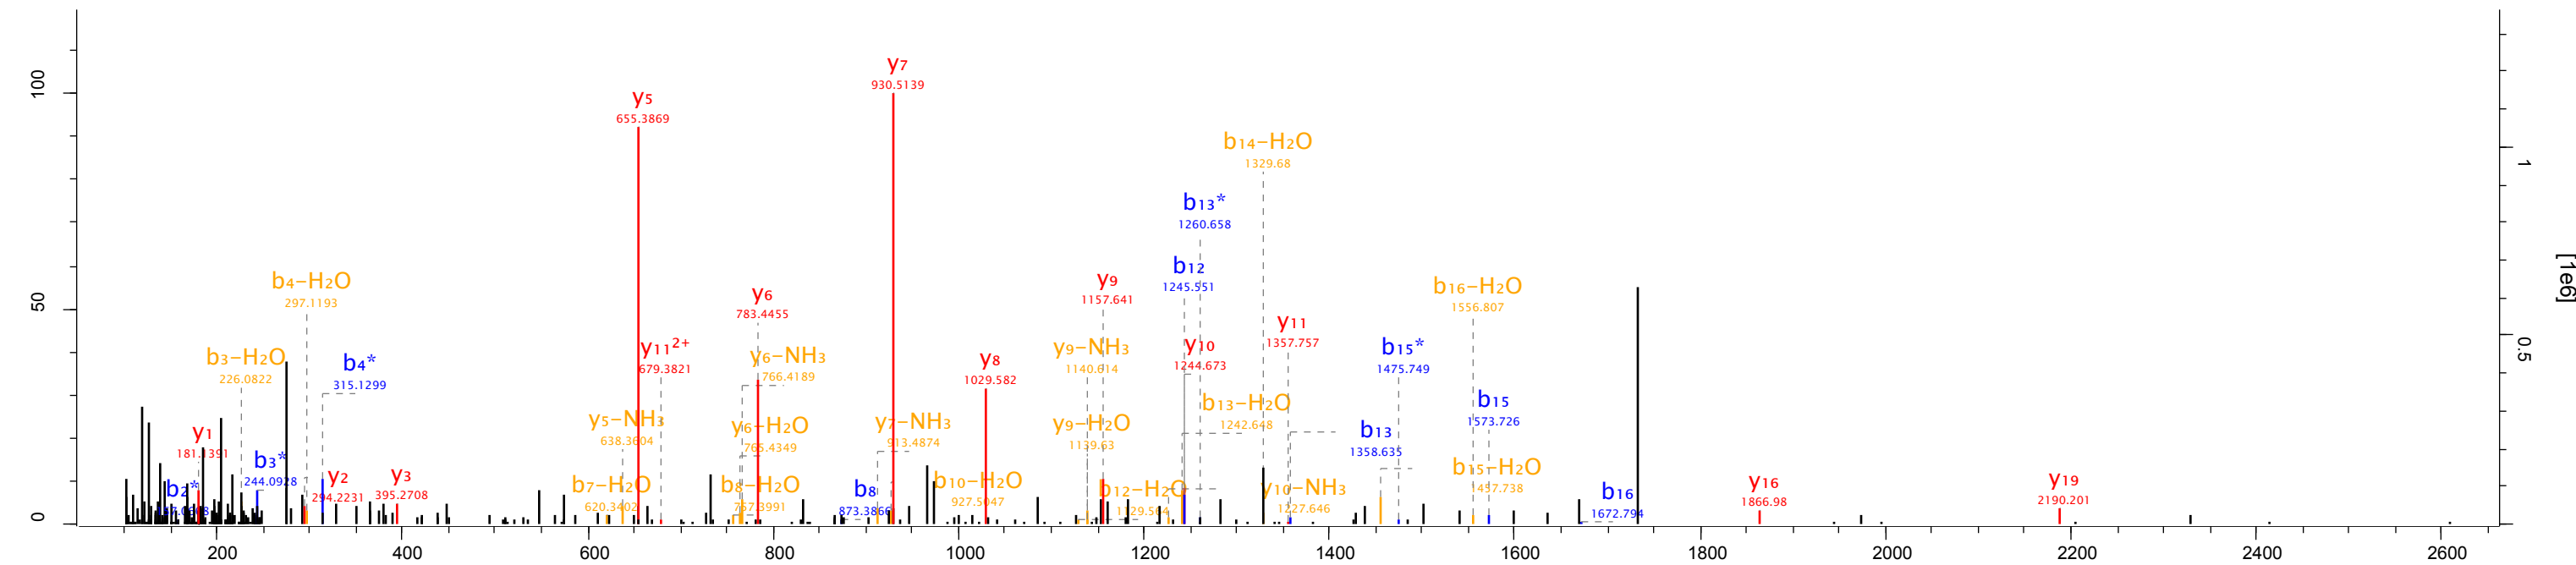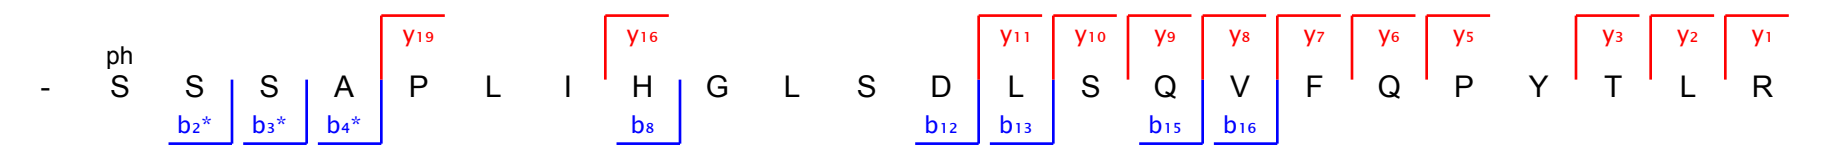

Raw file: 20150814\_A375SR\_Phospho\_BR2\_07  
 Scan: 4052 Method: FTMS; HCD Score: 182.77 m/z: 843.86 Gene names: AKAP12

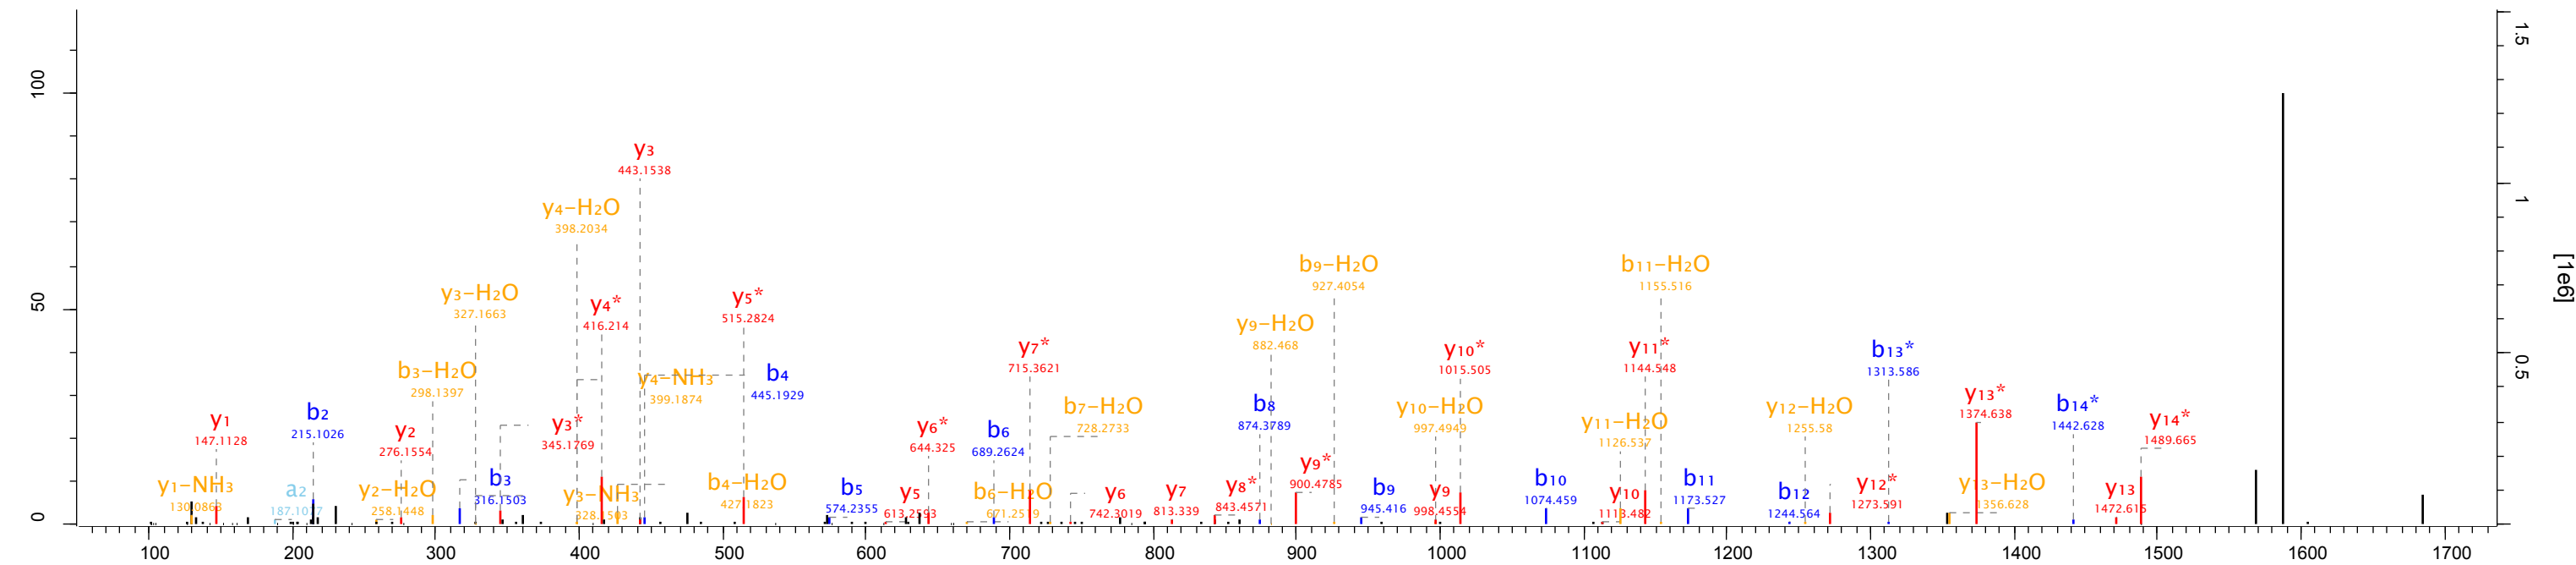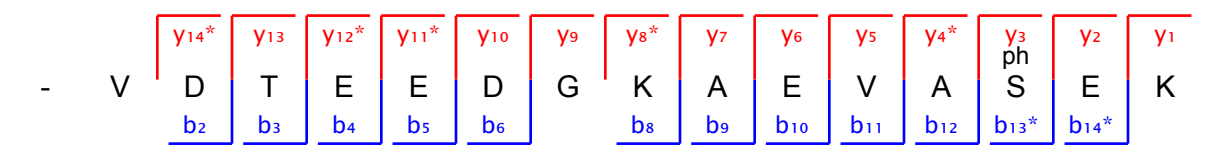

Raw file 20150814\_A375SR\_Phospho\_BR2\_07 Scan 5112 Method FTMS; HCD Score 40.49 m/z 448.23 Gene names USP36

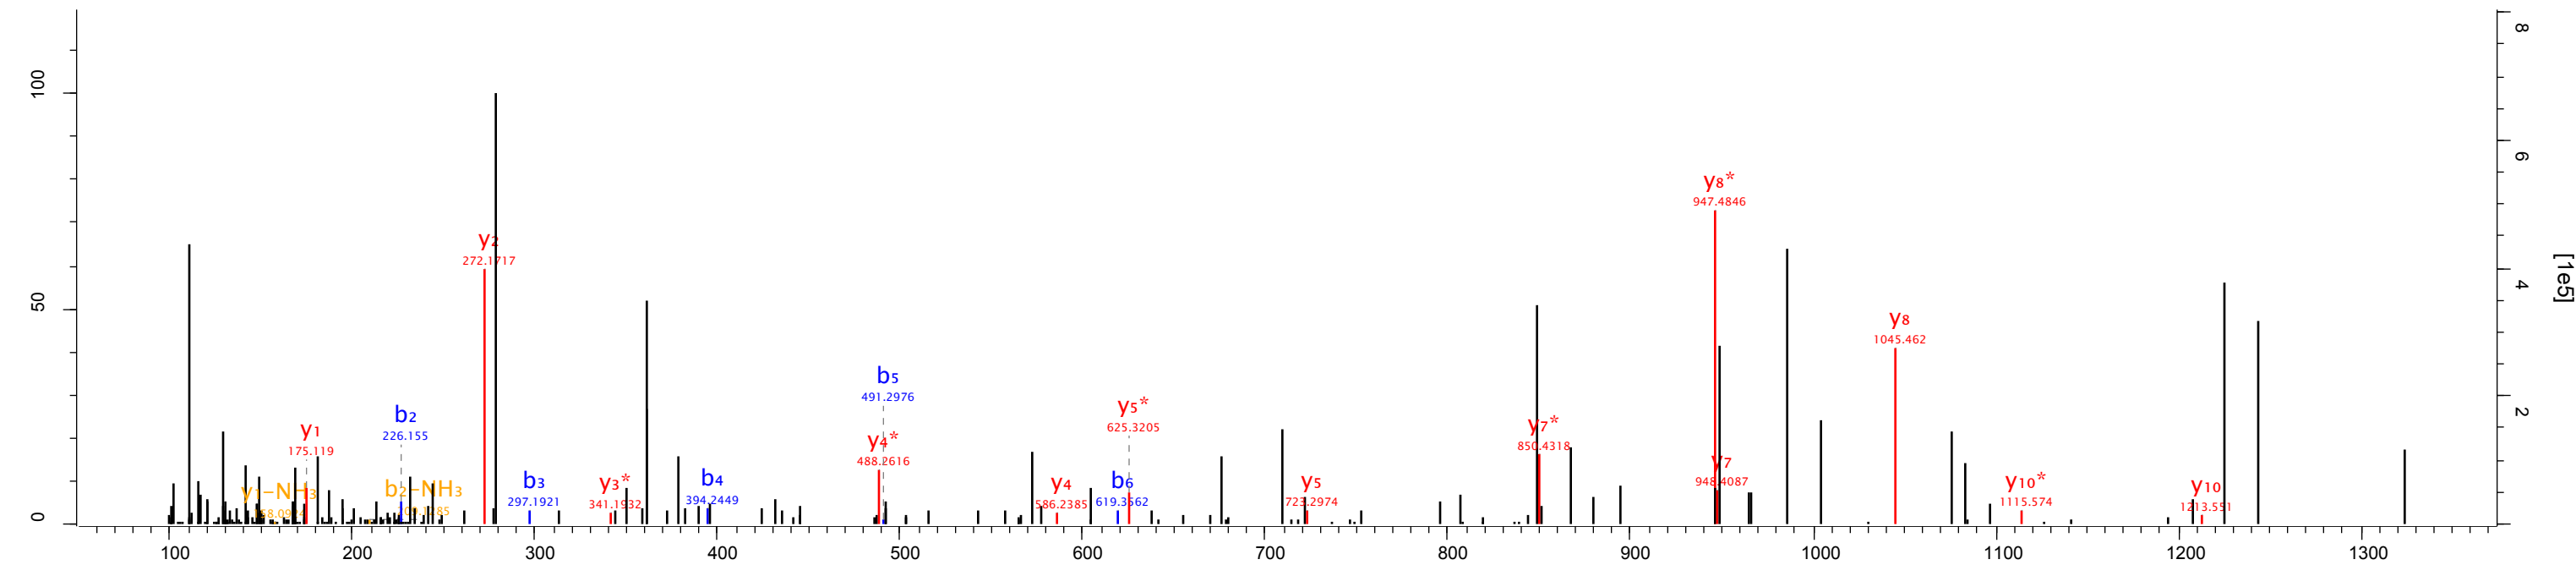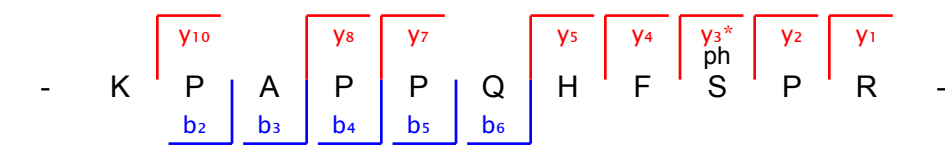

Raw file: 20150814\_A375SR\_Phospho\_BR2\_07  
 Scan: 5762 Method: FTMS; HCD Score: 119.55 m/z: 531.26 Gene names: NUP155

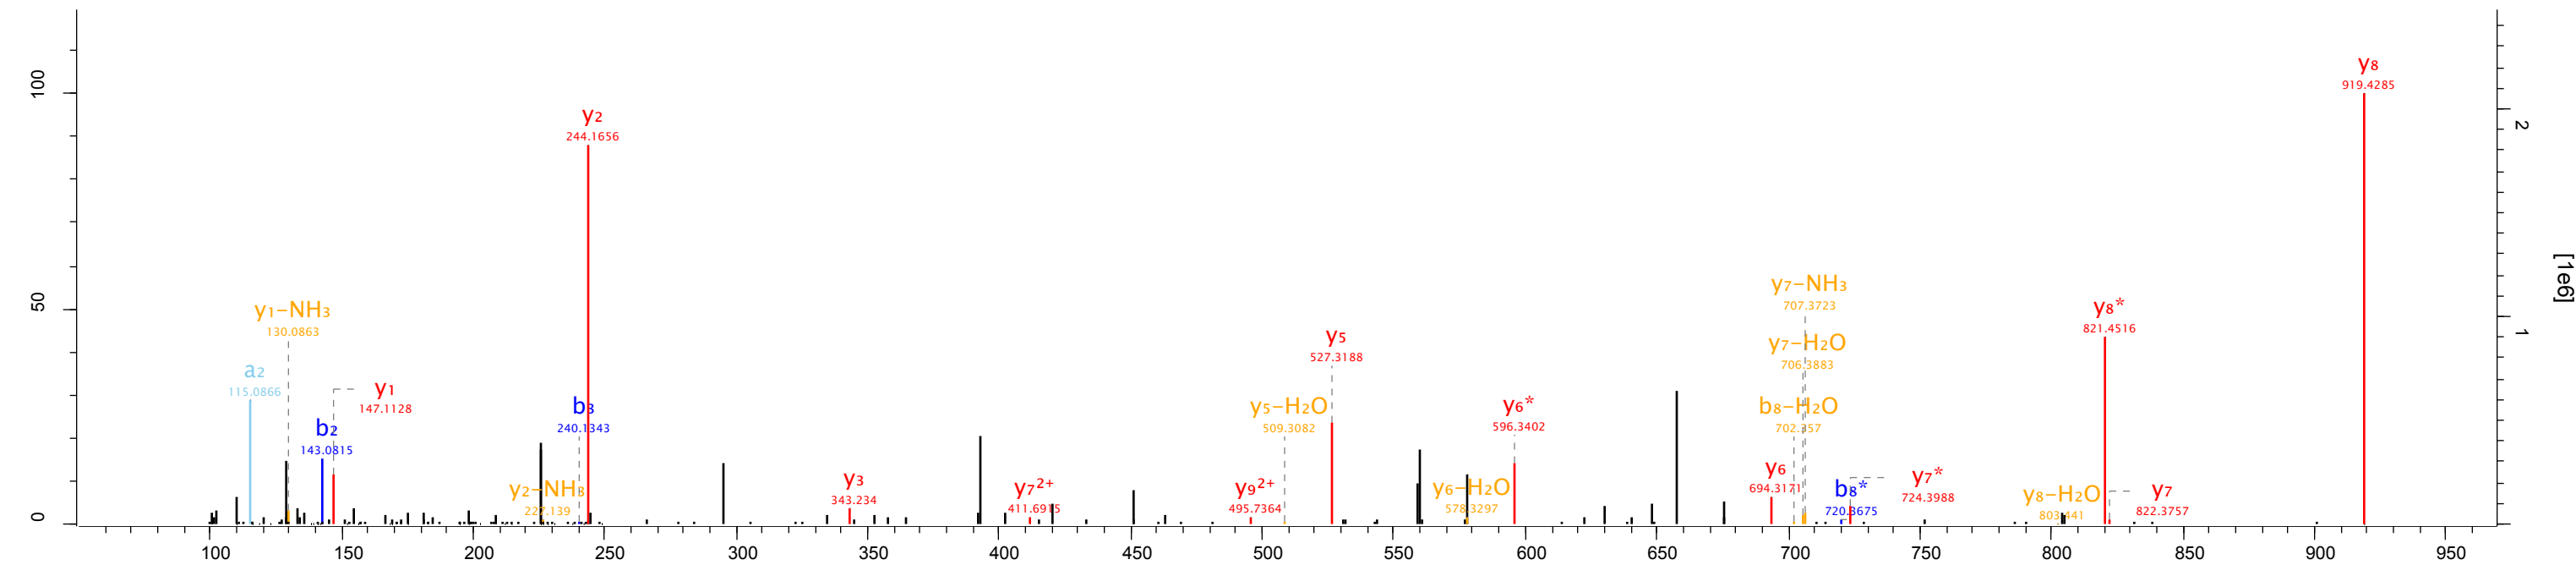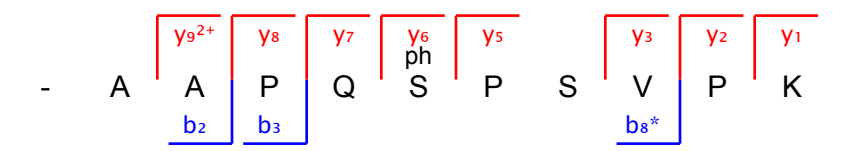

Raw file: 20150814\_A375SR\_Phospho\_BR2\_07  
 Scan: 6922 Method: FTMS; HCD Score: 48.03 m/z: 601.97 Gene names: HTT

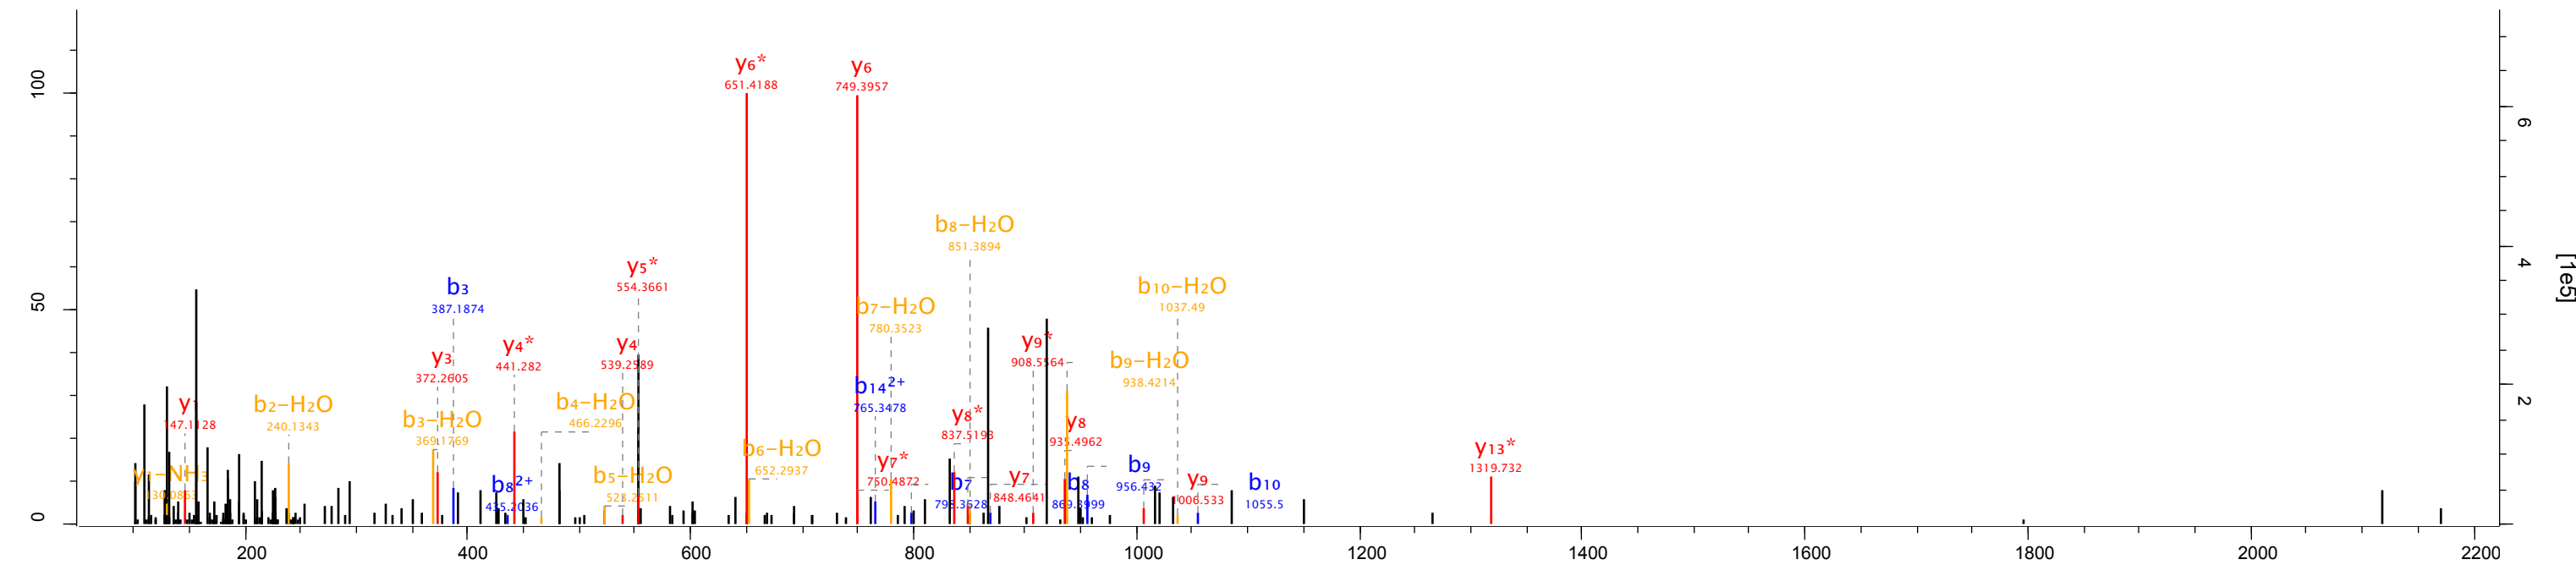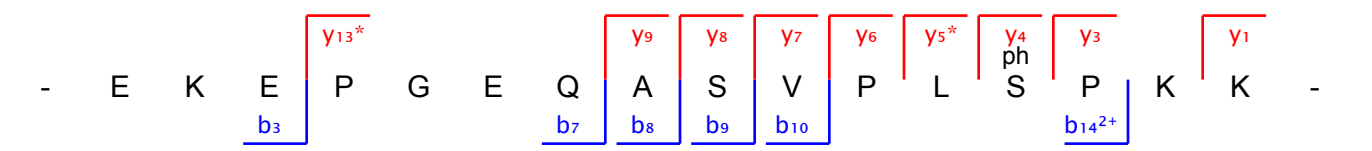

Raw file 20150814\_A375SR\_Phospho\_BR2\_07 Scan 9642 Method FTMS; HCD Score 40.14 m/z 1140.98 Gene names ATP8A1

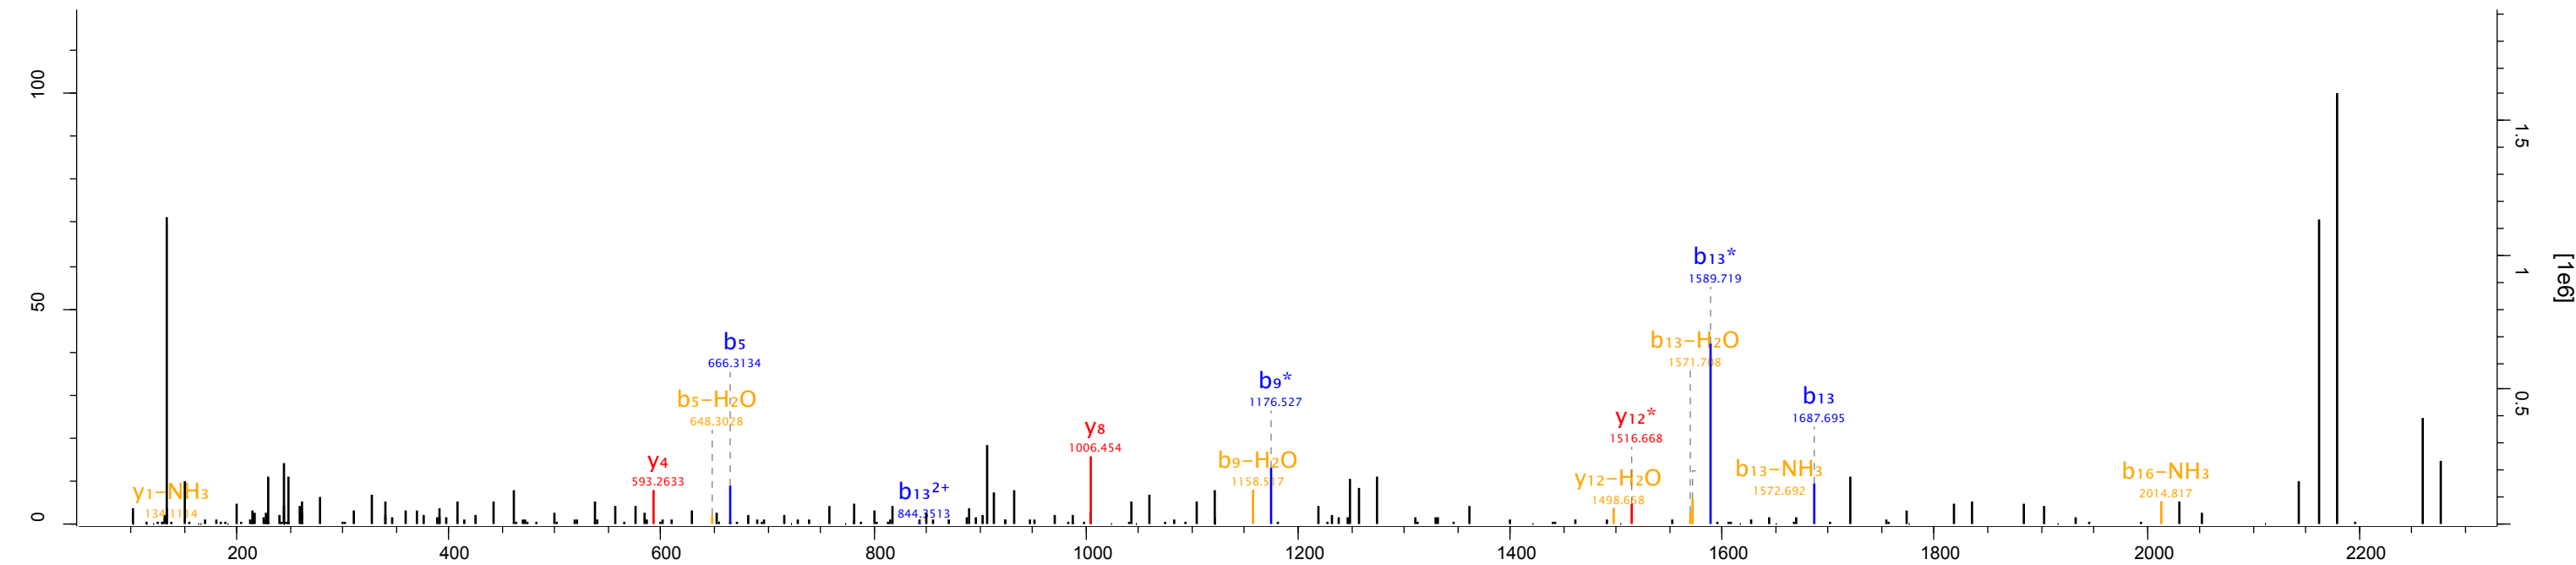

- Y P E L Y K T S Q N A L D F N T K -

Fragmentation mapping:  
 - b<sub>5</sub> (blue line) connects Y and K.  
 - y<sub>12</sub>\* (red line) connects K and N.  
 - b<sub>9</sub>\* (blue line) connects Q and N.  
 - y<sub>8</sub> (red line) connects N and A.  
 - b<sub>13</sub> (blue line) connects D and F.  
 - y<sub>4</sub> (red line) connects F and N.





Raw file: 20150814\_A375SR\_Phospho\_BR2\_08  
 Scan: 10062 Method: FTMS; HCD Score: 204.05 m/z: 825.37 Gene names: MYO18A

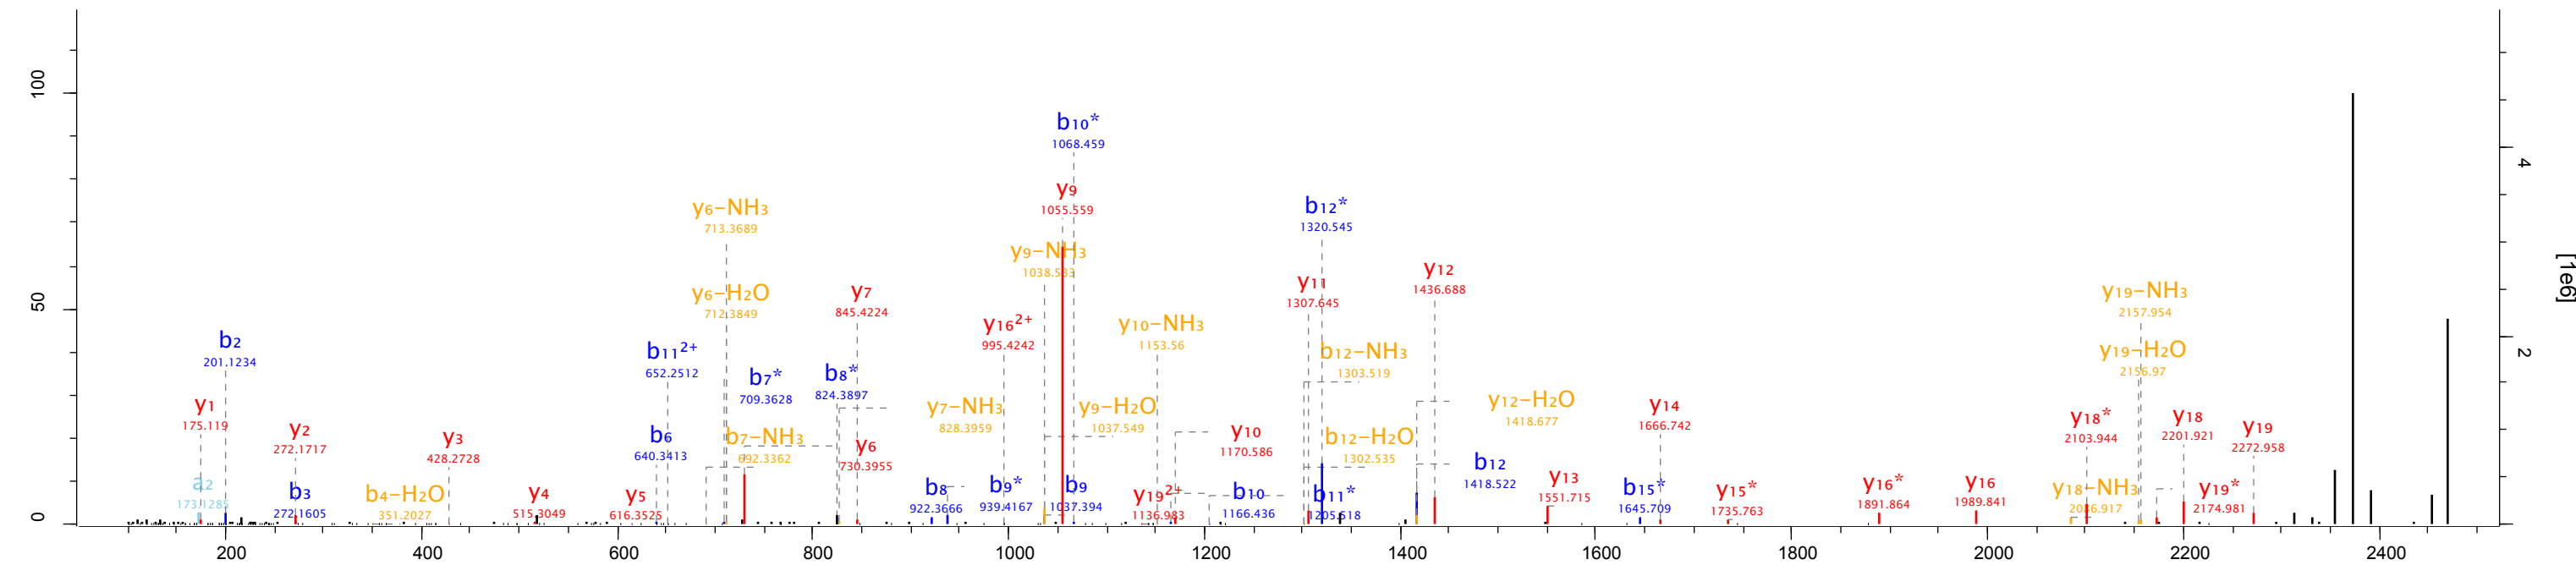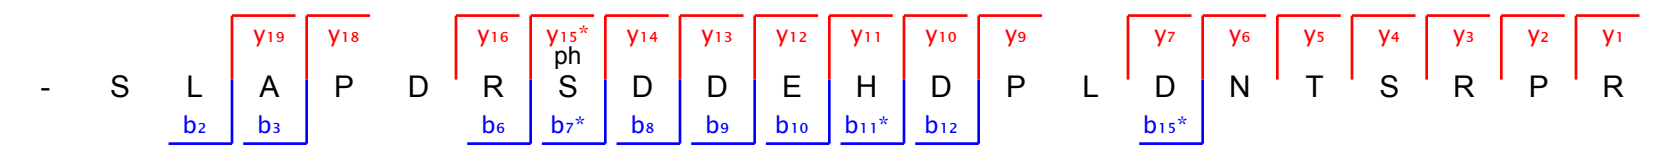

Raw file 20150814\_A375SR\_Phospho\_BR2\_08 Scan 10942 Method FTMS; HCD Score 81.65 m/z 709.33 Gene names SPAST

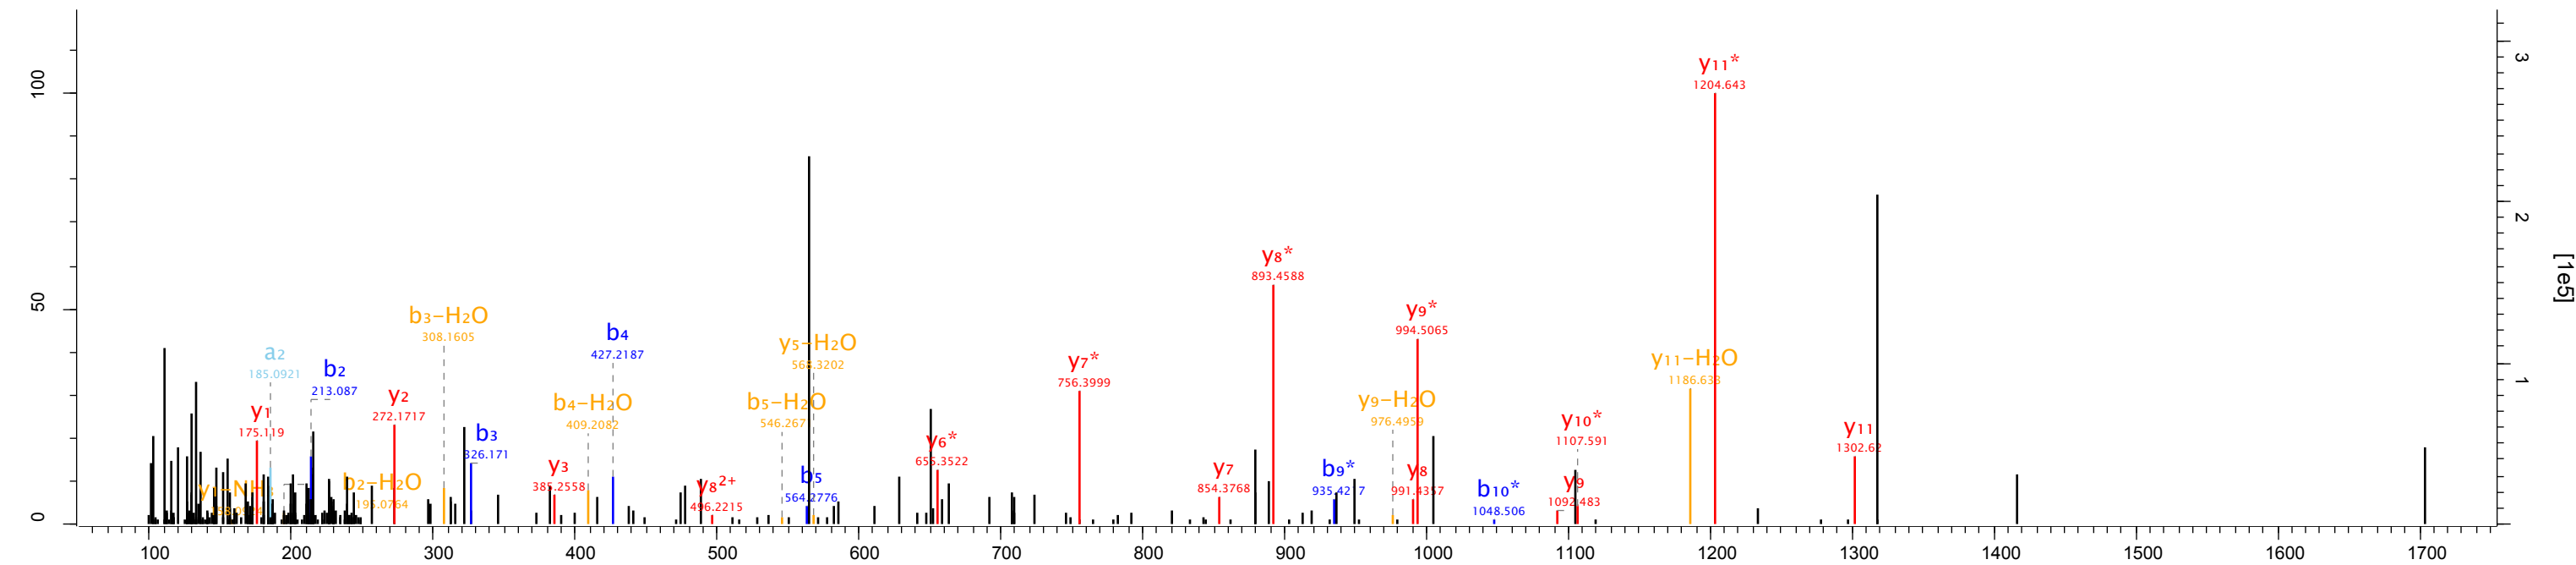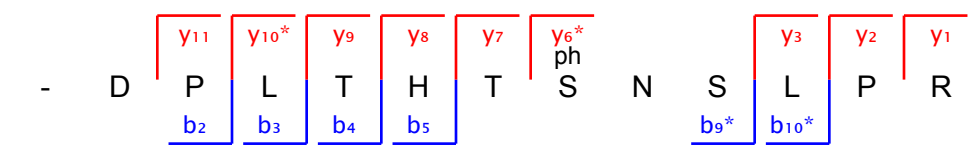

Raw file: 20150814\_A375SR\_Phospho\_BR2\_08  
 Scan: 12462 Method: FTMS; HCD Score: 83.09 m/z: 528.78 Gene names: EHBPI

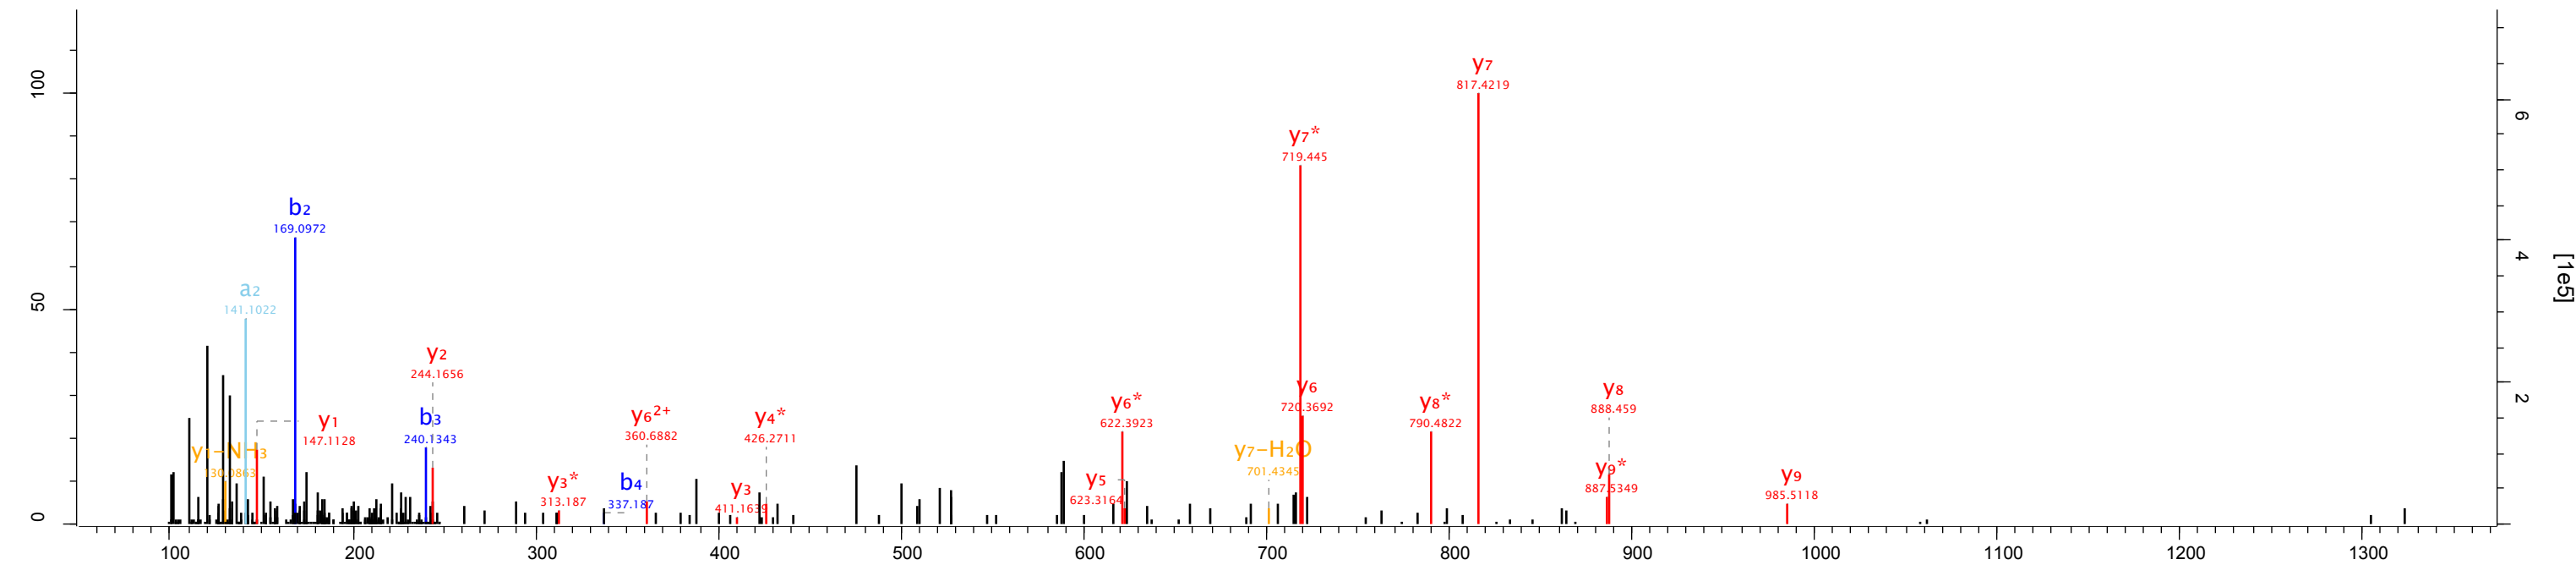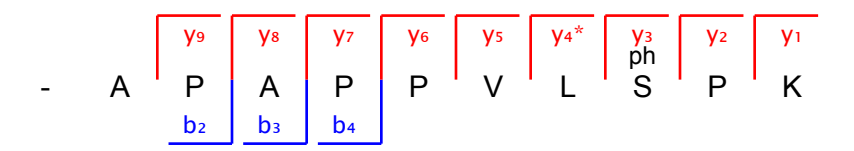

Raw file: 20150814\_A375SR\_Phospho\_BR2\_08  
 Scan: 12712 Method: FTMS; HCD Score: 125.03 m/z: 589.3 Gene names: ZZZ3

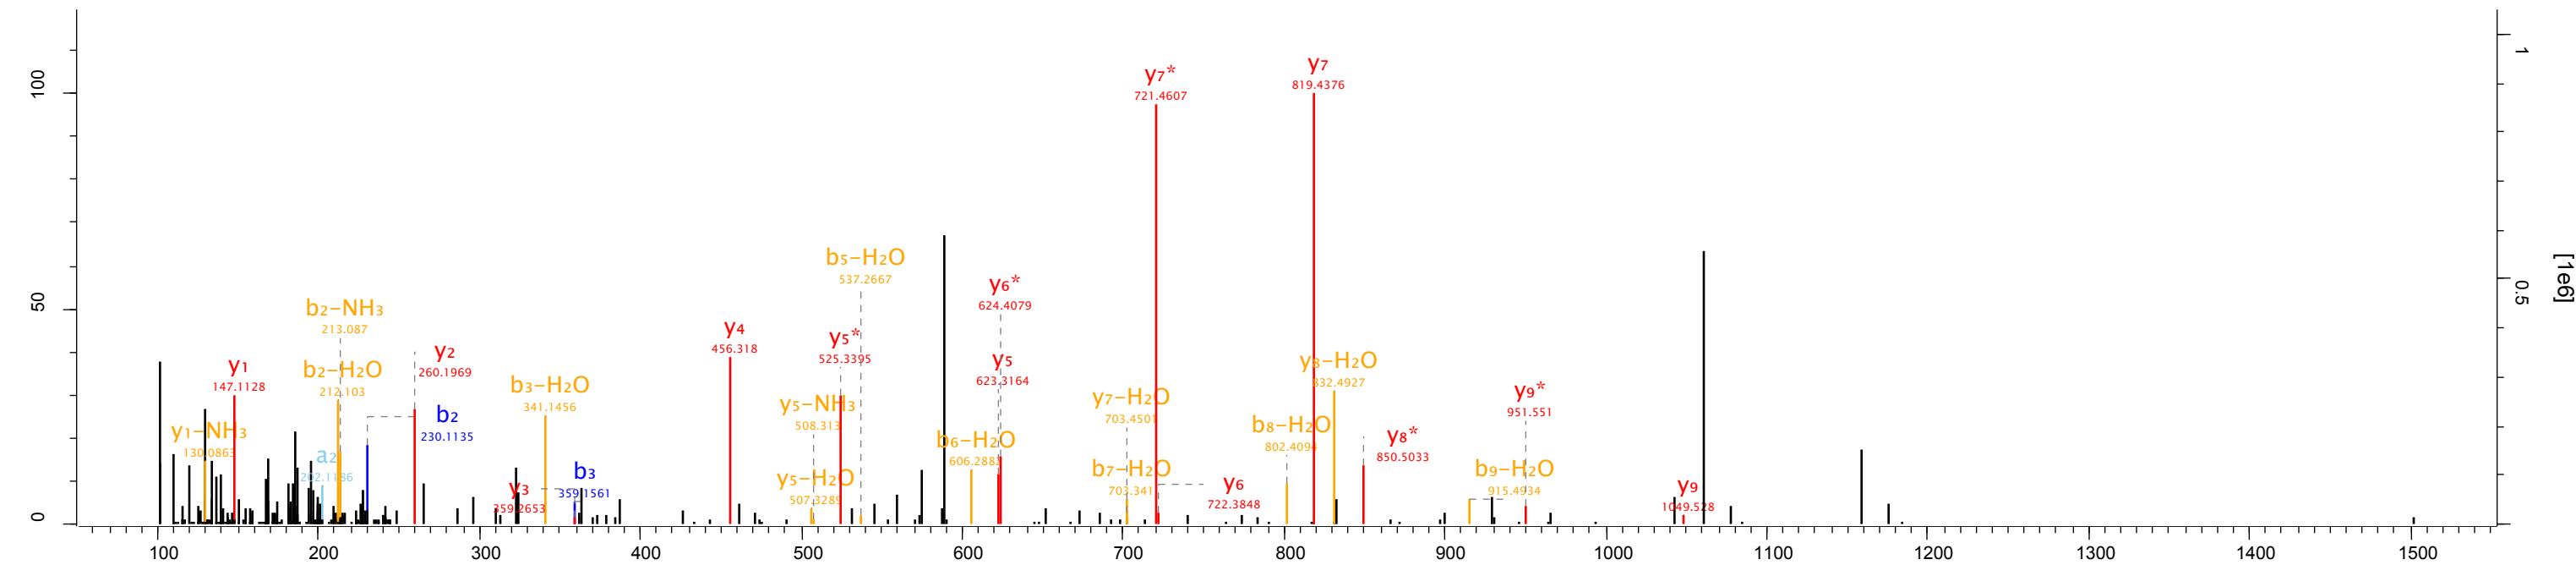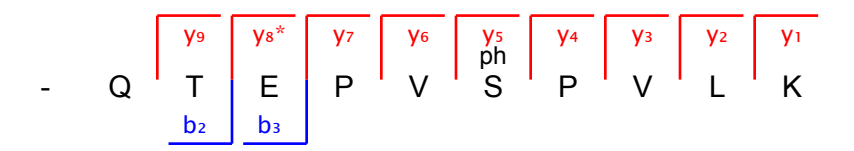



Raw file 20150814\_A375SR\_Phospho\_BR2\_08 Scan 13382 Method FTMS; HCD Score 60.95 m/z 800.34 Gene names EEF2K

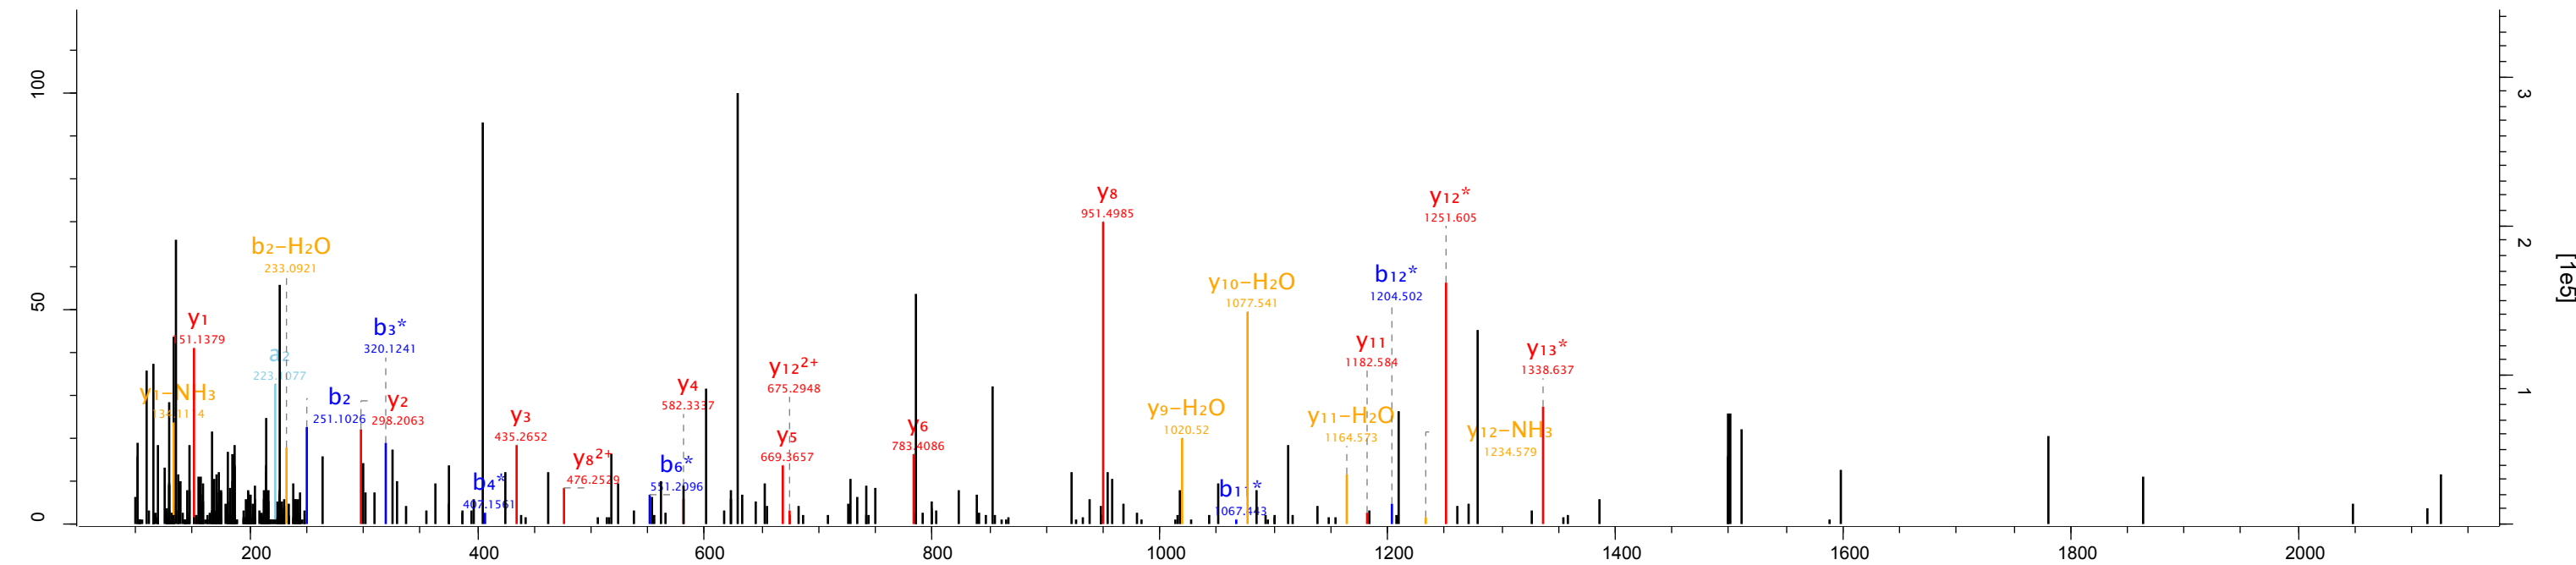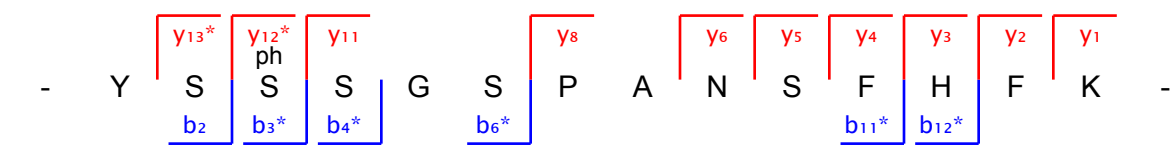

Raw file 20150814\_A375SR\_Phospho\_BR2\_08 Scan 14002 Method FTMS; HCD Score 89.27 m/z 695.35 Gene names EZH2

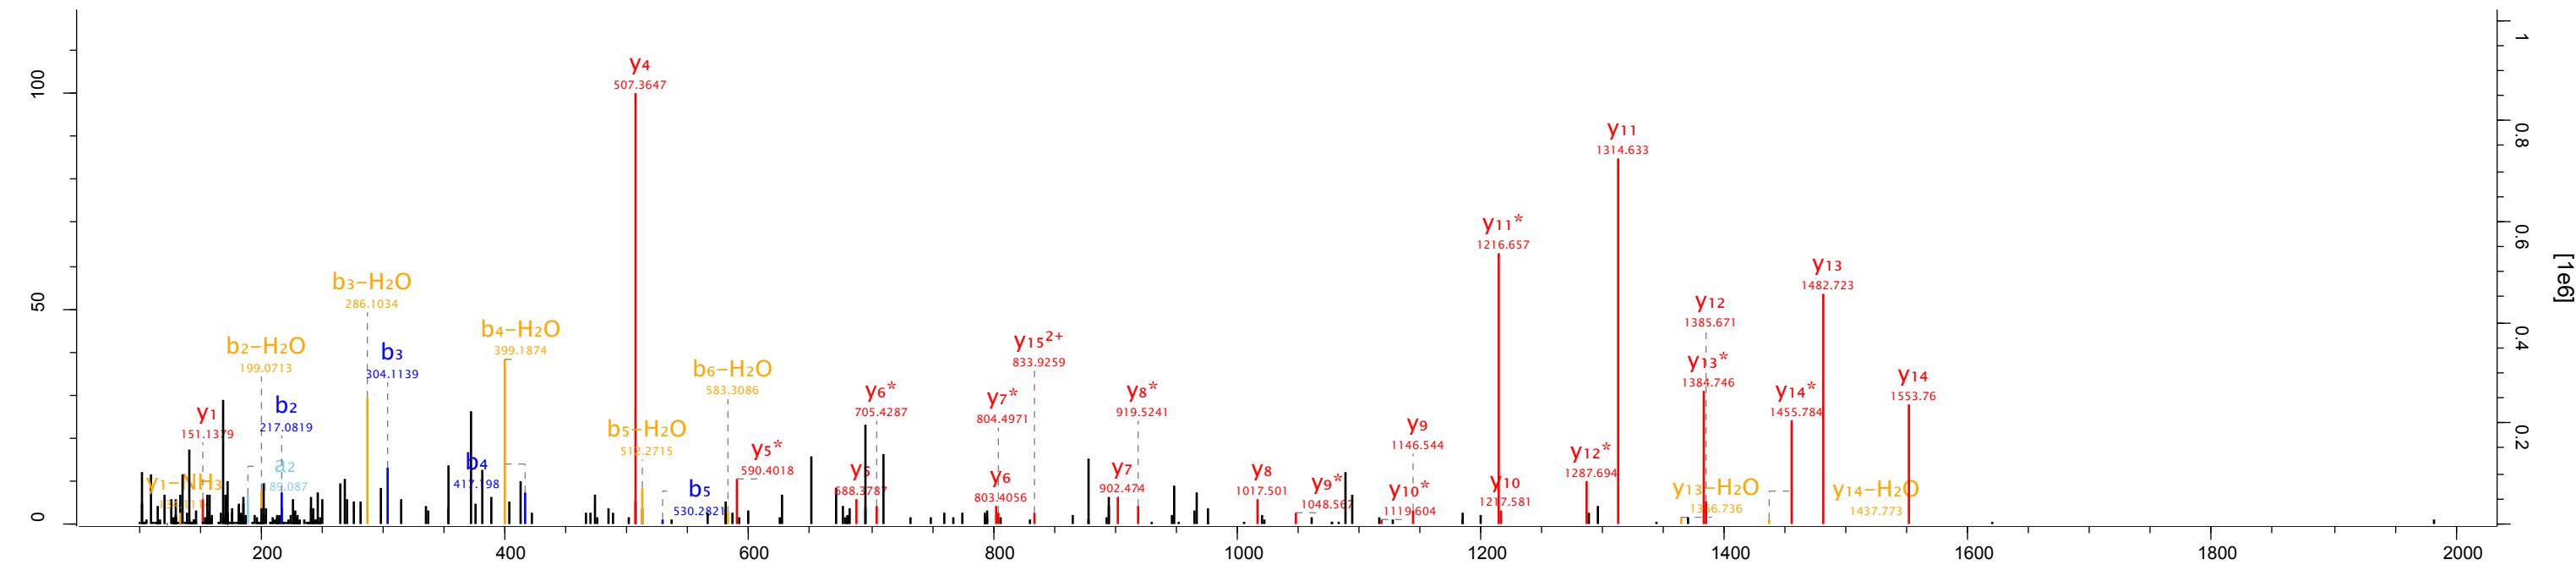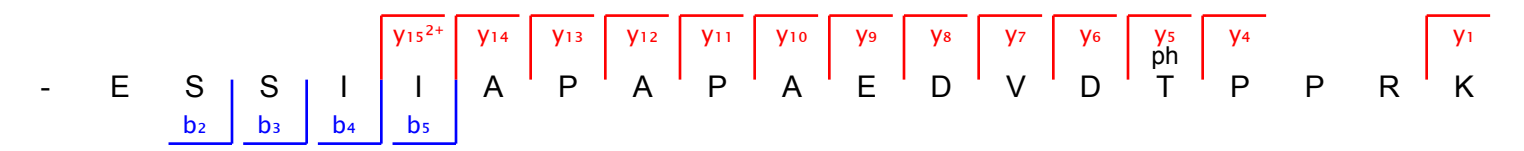



Raw file: 20150814\_A375SR\_Phospho\_BR2\_08  
 Scan: 15042 Method: FTMS; HCD Score: 135.55 m/z: 470.72 Gene names: CLSPN

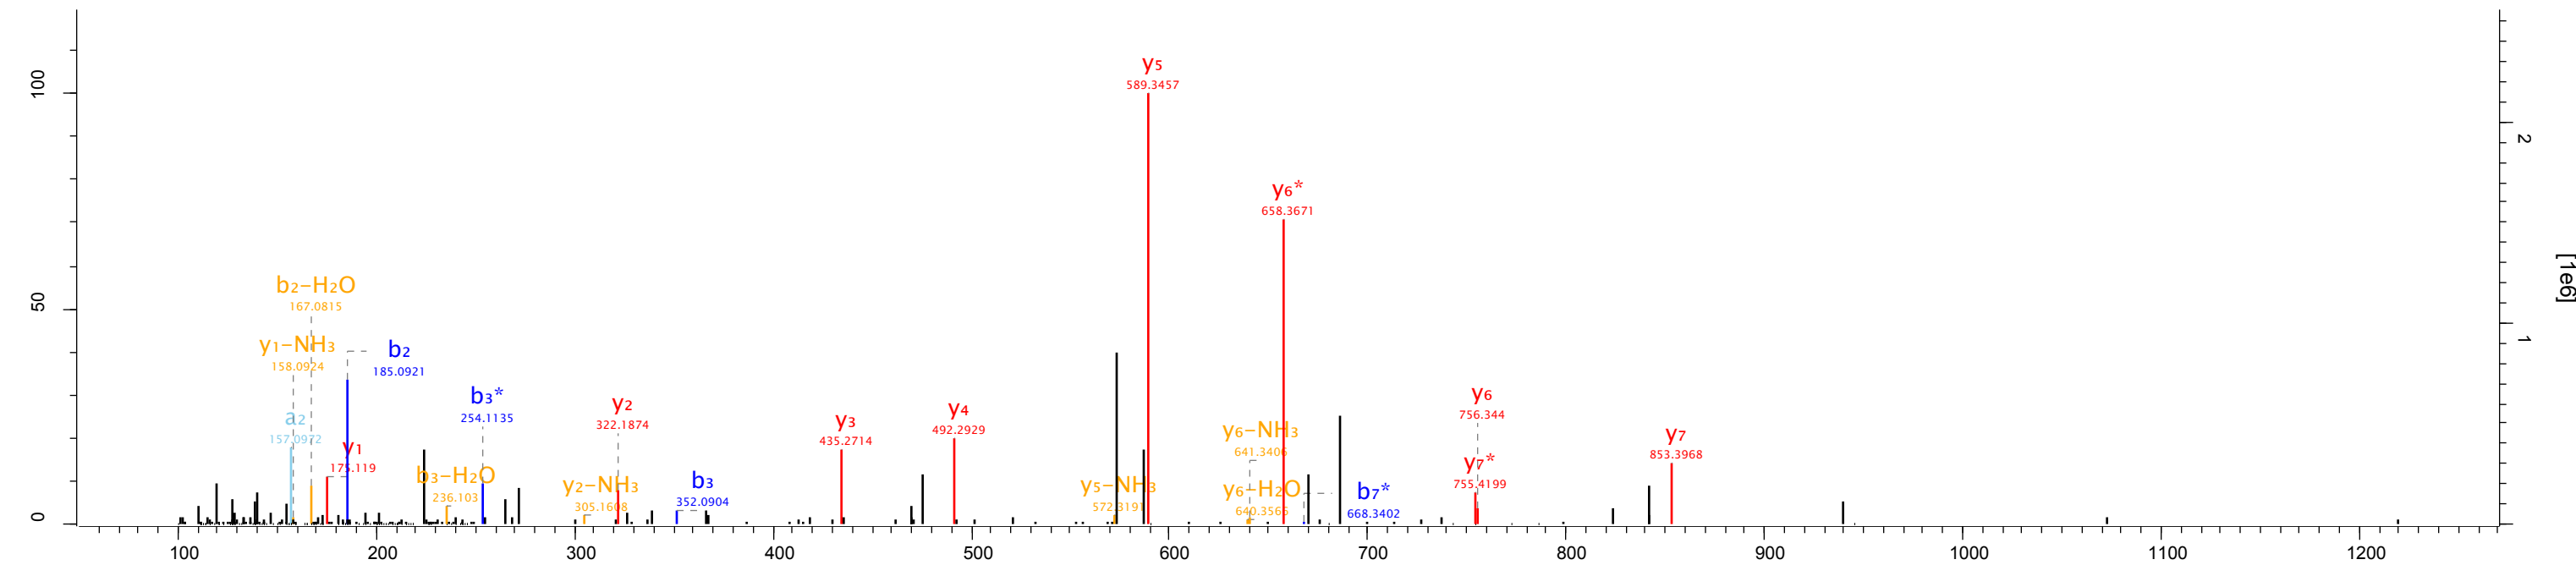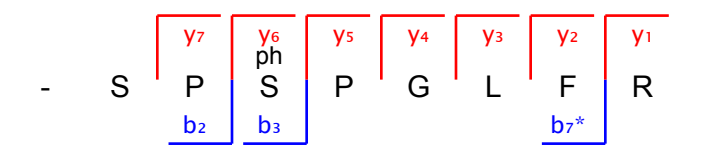

Raw file  
 20150814\_A375SR\_Phospho\_BR2\_08  
 Scan 16392 Method FTMS; HCD Score 122.35 m/z 976.98 Gene names G3BP2

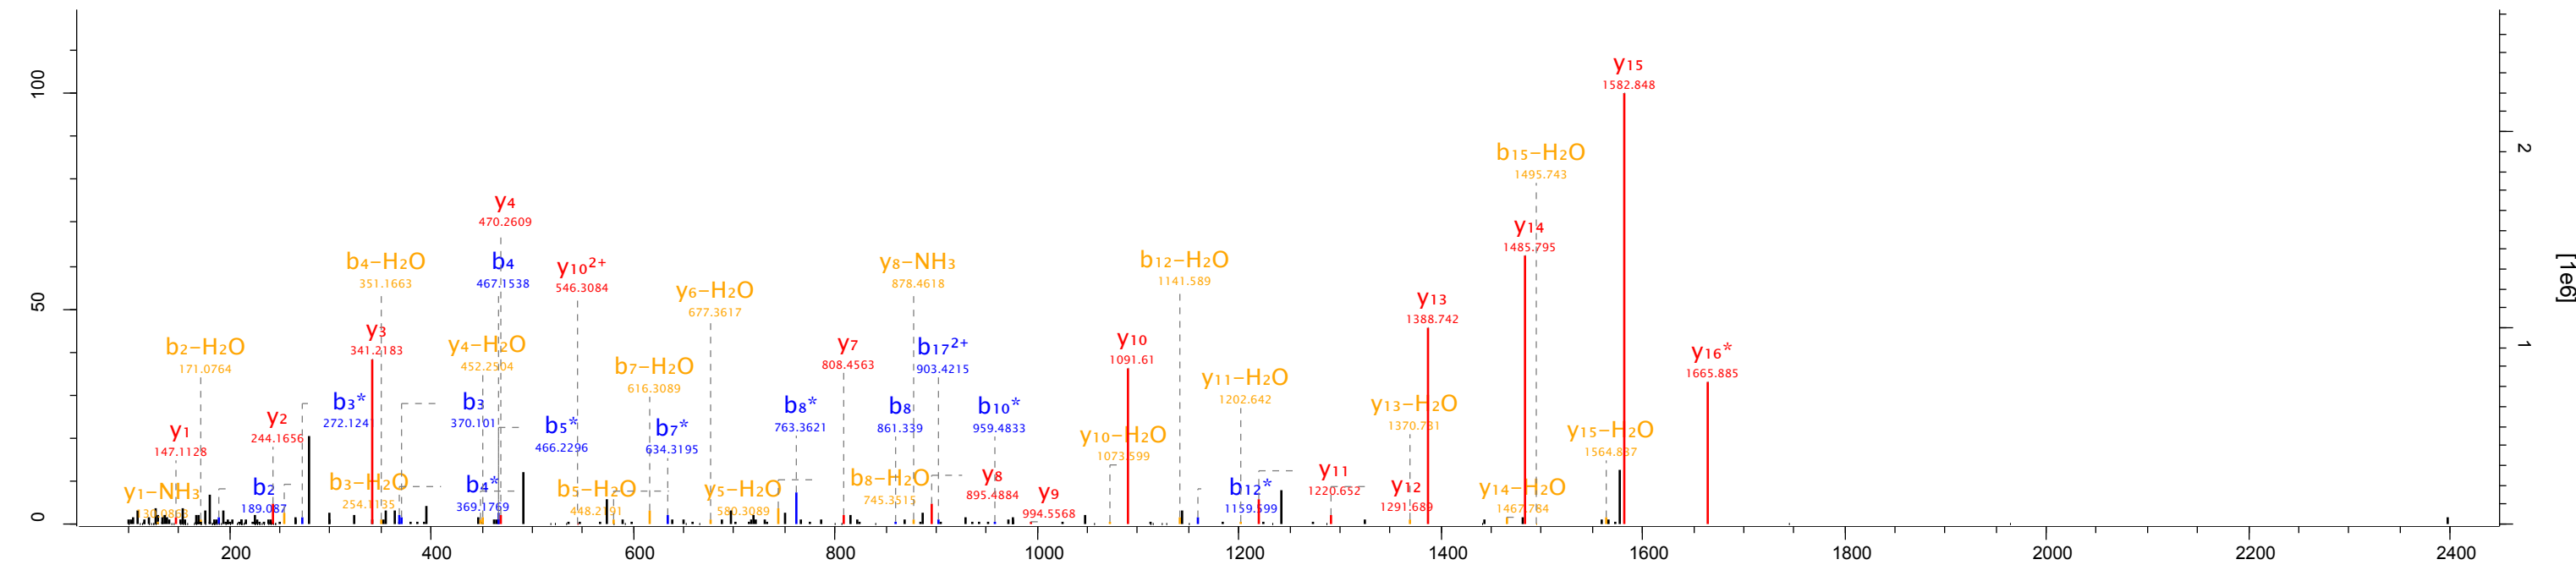

- S T T P P P A E P V S L P Q E P P K -

b<sub>2</sub>
b<sub>3</sub>
b<sub>4</sub>
b<sub>5</sub>\*
b<sub>7</sub>\*
b<sub>8</sub>
b<sub>10</sub>\*
b<sub>12</sub>\*
b<sub>17</sub><sup>2+</sup>

y<sub>16</sub>\*
y<sub>15</sub>
y<sub>14</sub>
y<sub>13</sub>
y<sub>12</sub>
y<sub>11</sub>
y<sub>10</sub>
y<sub>9</sub>
y<sub>8</sub>
y<sub>7</sub>
y<sub>4</sub>
y<sub>3</sub>
y<sub>2</sub>
y<sub>1</sub>

Raw file: 20150814\_A375SR\_Phospho\_BR2\_08  
 Scan: 16522 Method: FTMS; HCD Score: 159.26 m/z: 845.38 Gene names: LMO7

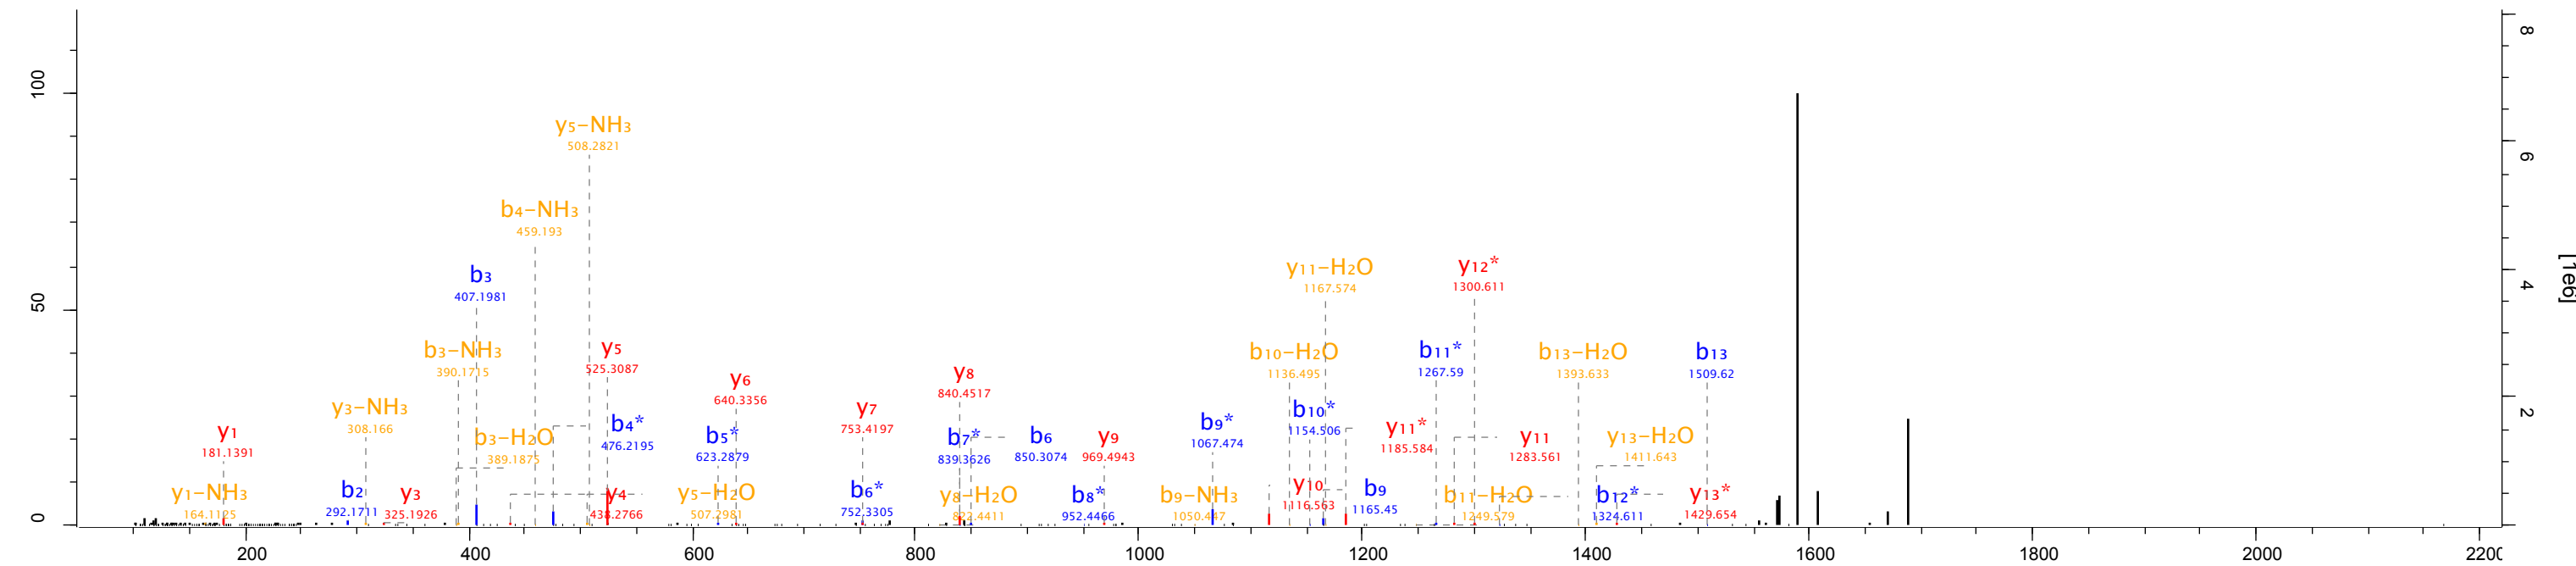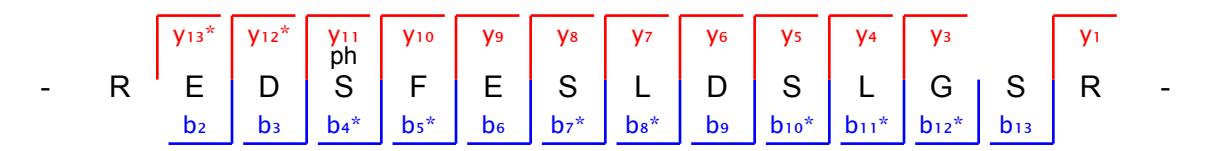

Raw file: 20150814\_A375SR\_Phospho\_BR2\_08  
 Scan: 16542 Method: FTMS; HCD Score: 232.62 m/z: 823.41 Gene names: VDAC2

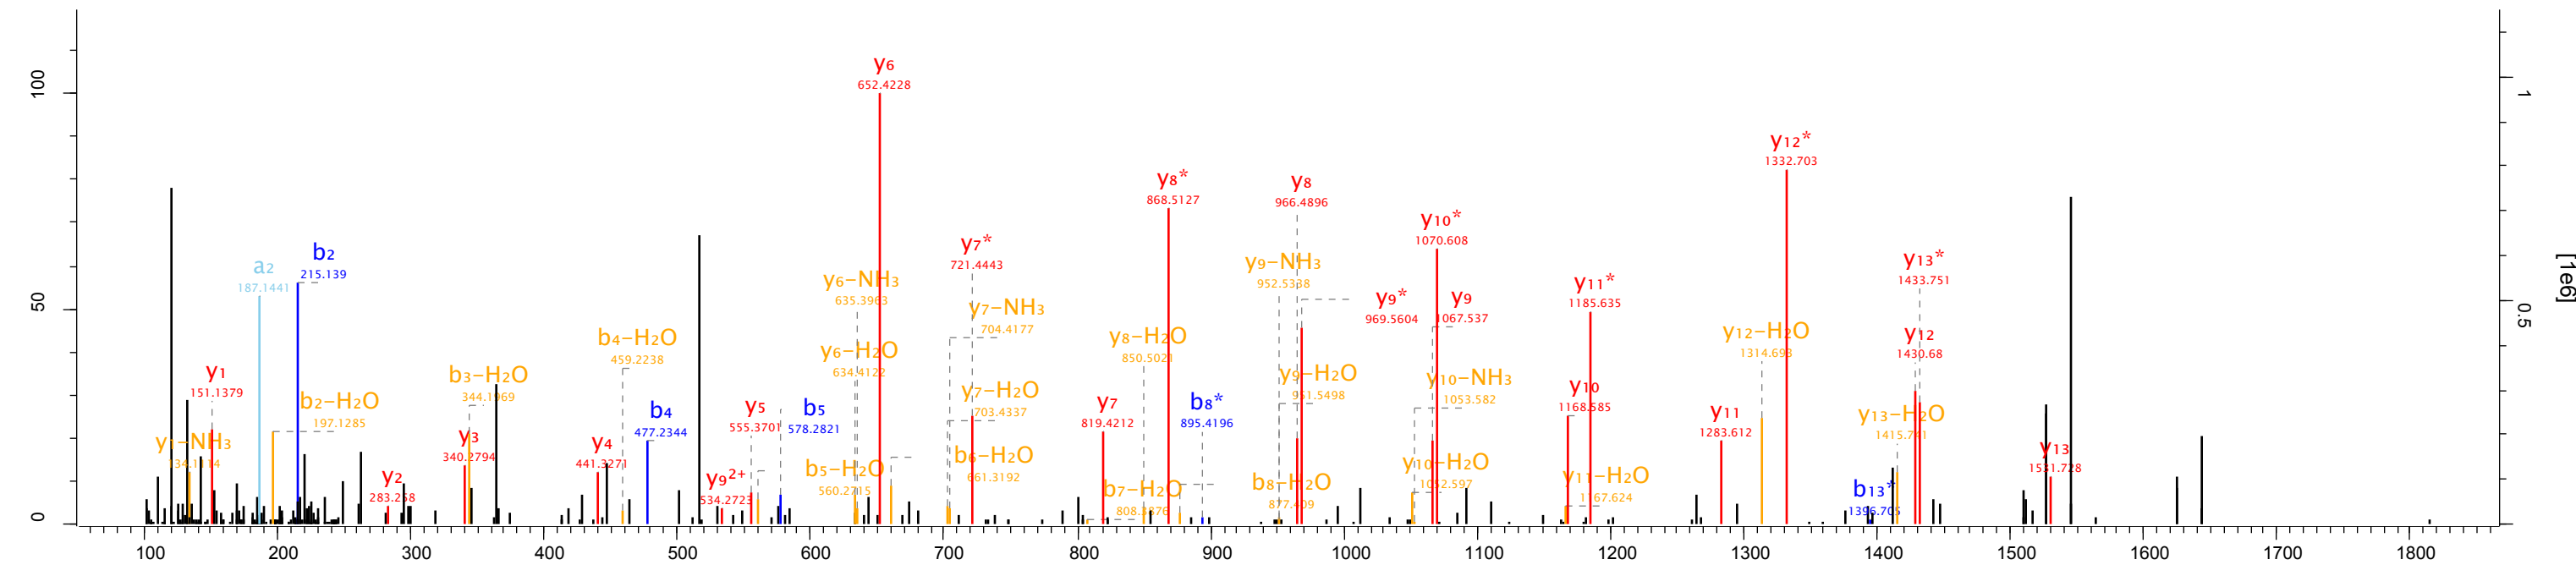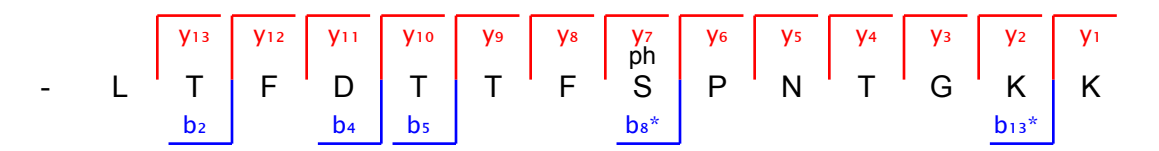

Raw file 20150814\_A375SR\_Phospho\_BR2\_08 Scan 16722 Method FTMS; HCD Score 130.09 m/z 927.91 Gene names DDX59

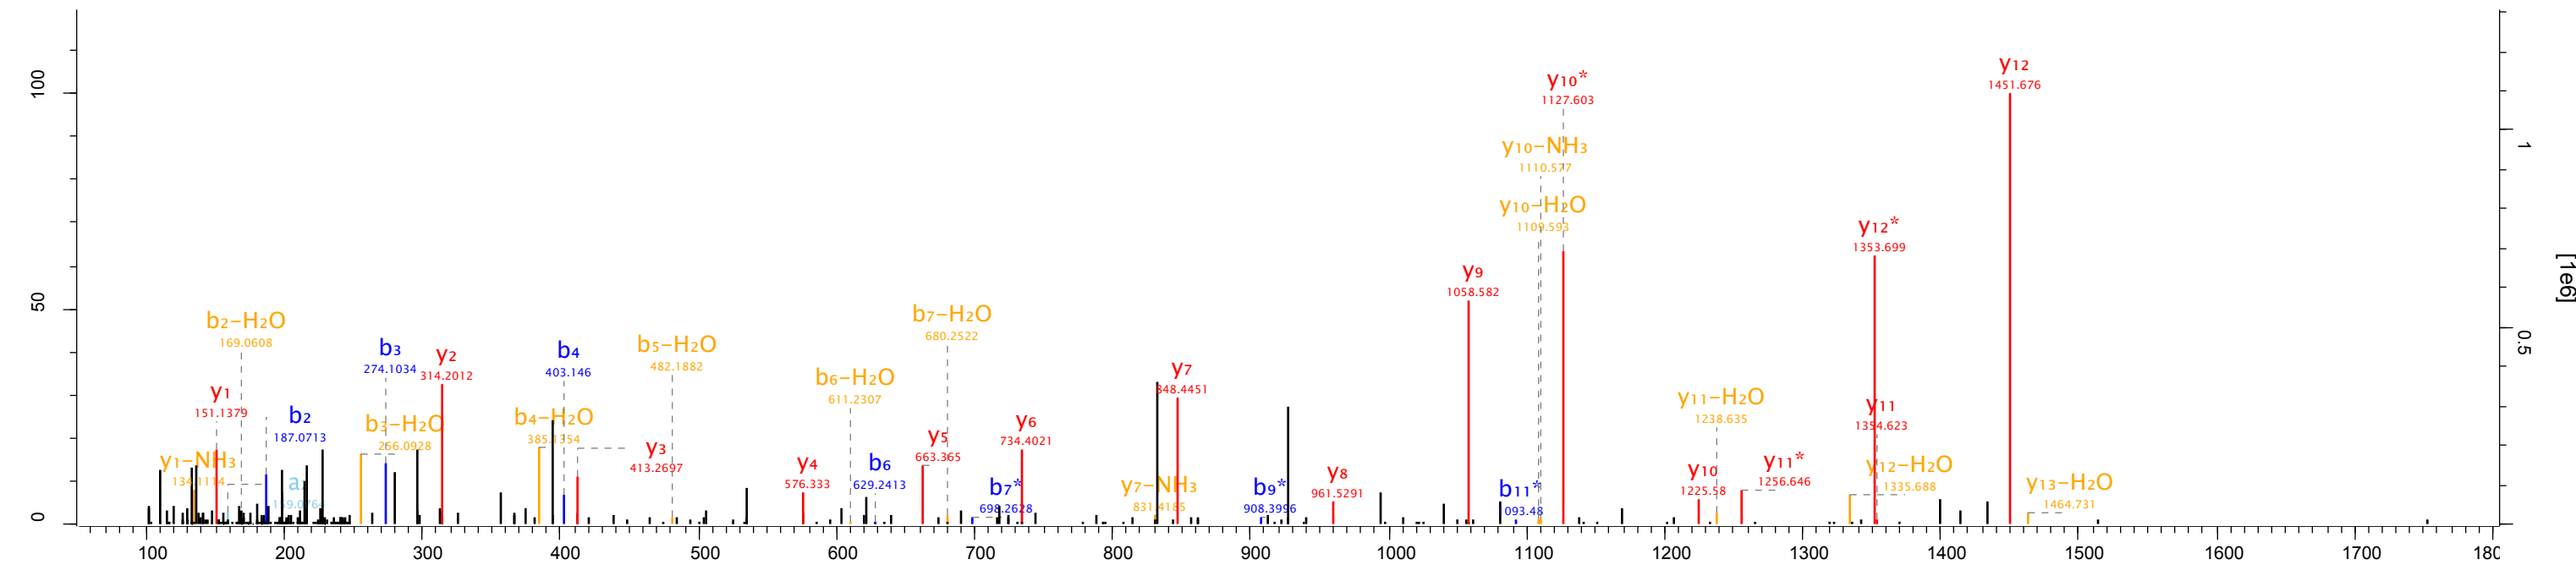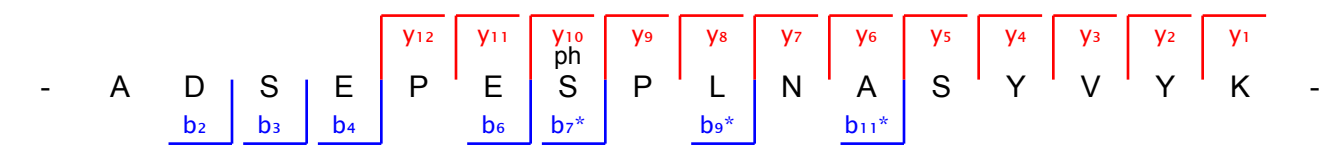

Raw file: 20150814\_A375SR\_Phospho\_BR2\_08  
 Scan: 16792 Method: FTMS; HCD Score: 181.07 m/z: 692.3 Gene names: SLC6A15

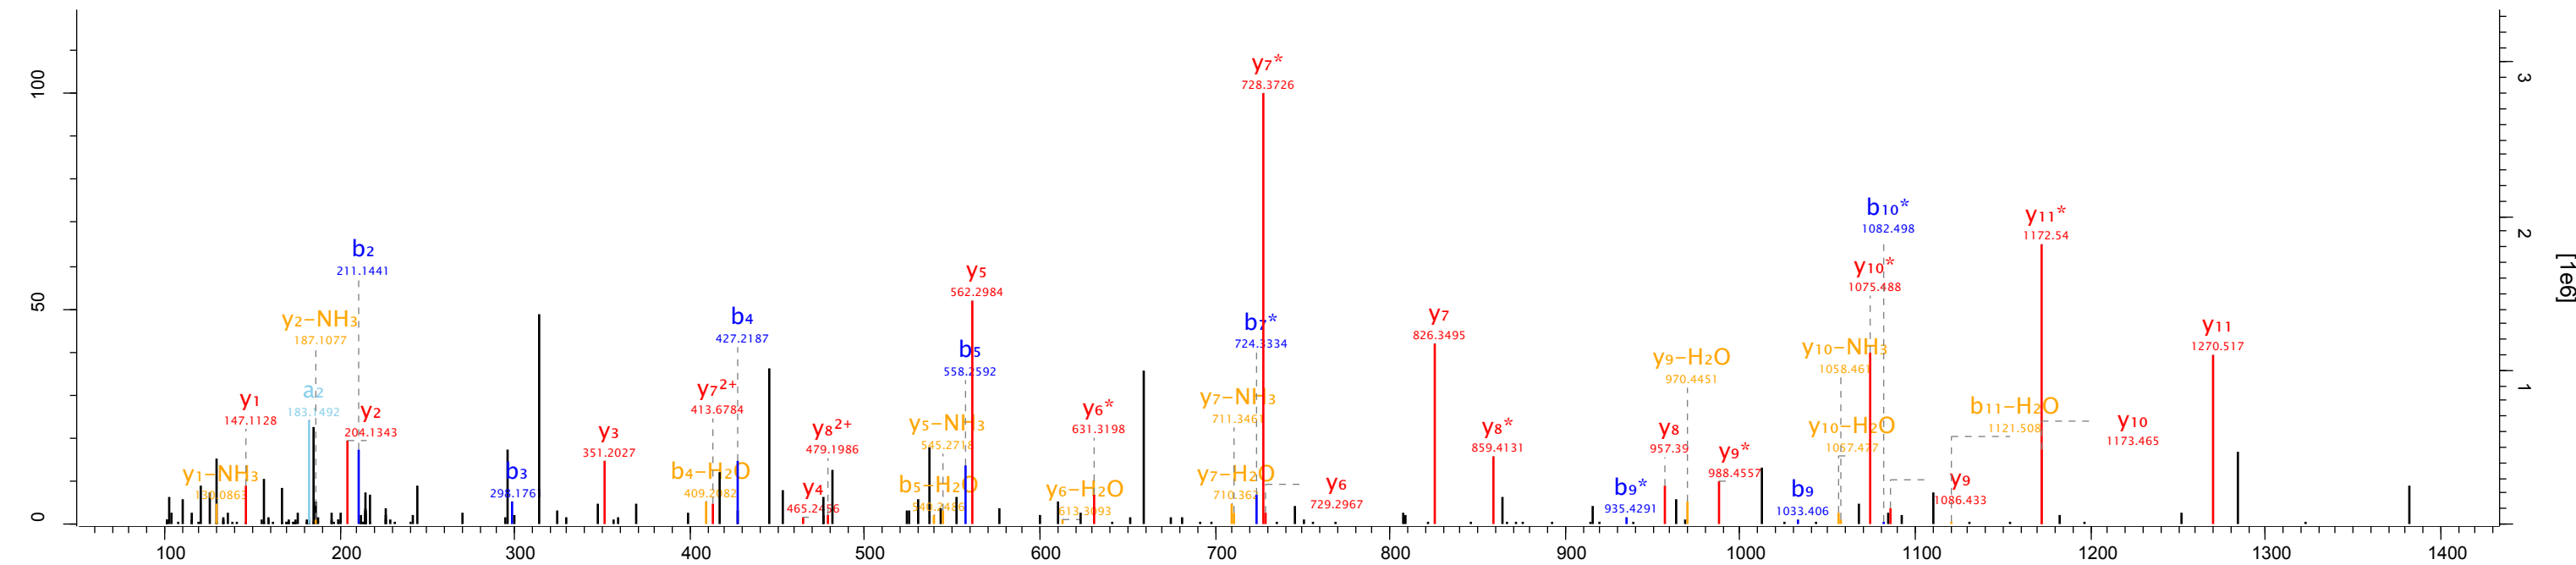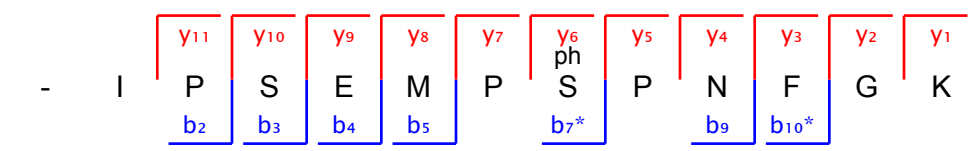

Raw file 20150814\_A375SR\_Phospho\_BR2\_08 Scan 16802 Method FTMS; HCD Score 49.77 m/z 547.61 Gene names ANLN

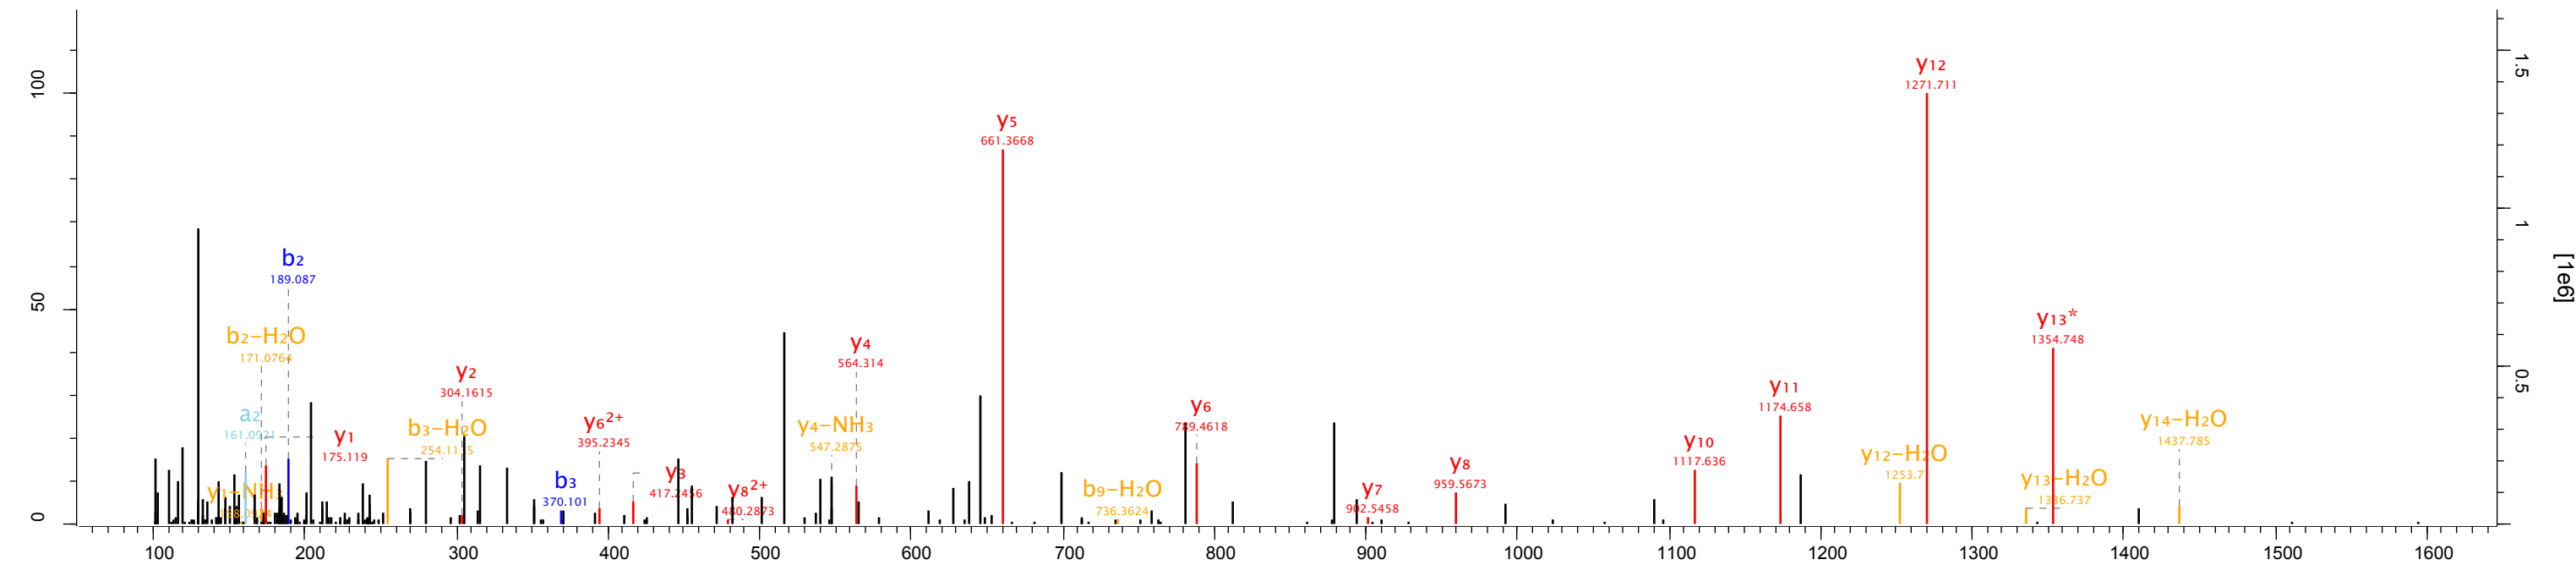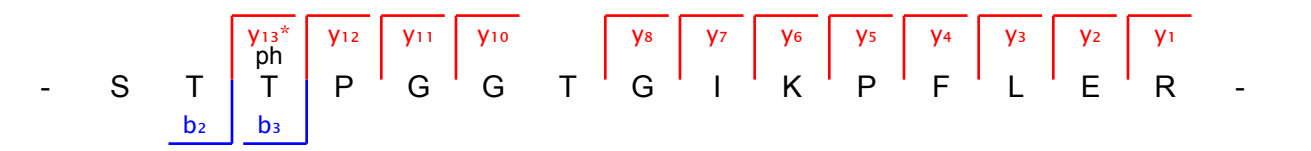

Raw file  
 20150814\_A375SR\_Phospho\_BR2\_08  
 Scan 17112 Method FTMS; HCD Score 110.44 m/z 601.31 Gene names EIF4G1

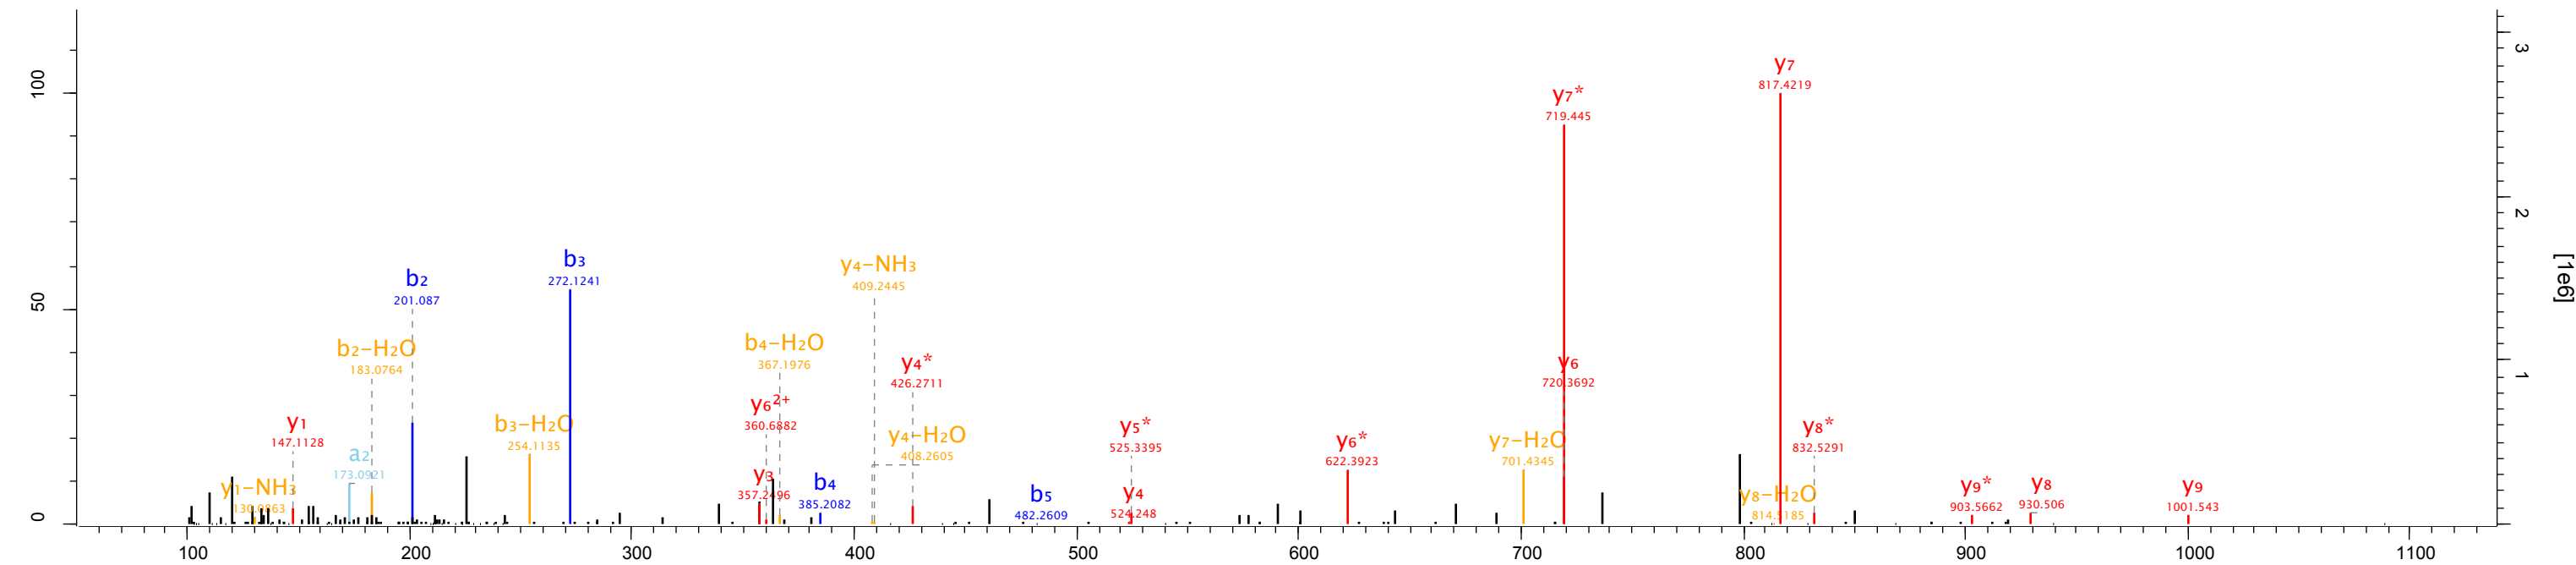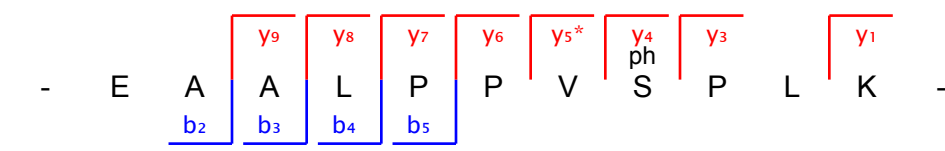



Raw file 20150814\_A375SR\_Phospho\_BR2\_08 Scan 17662 Method FTMS; HCD Score 40.2 m/z 766.4 Gene names ARHGAP21

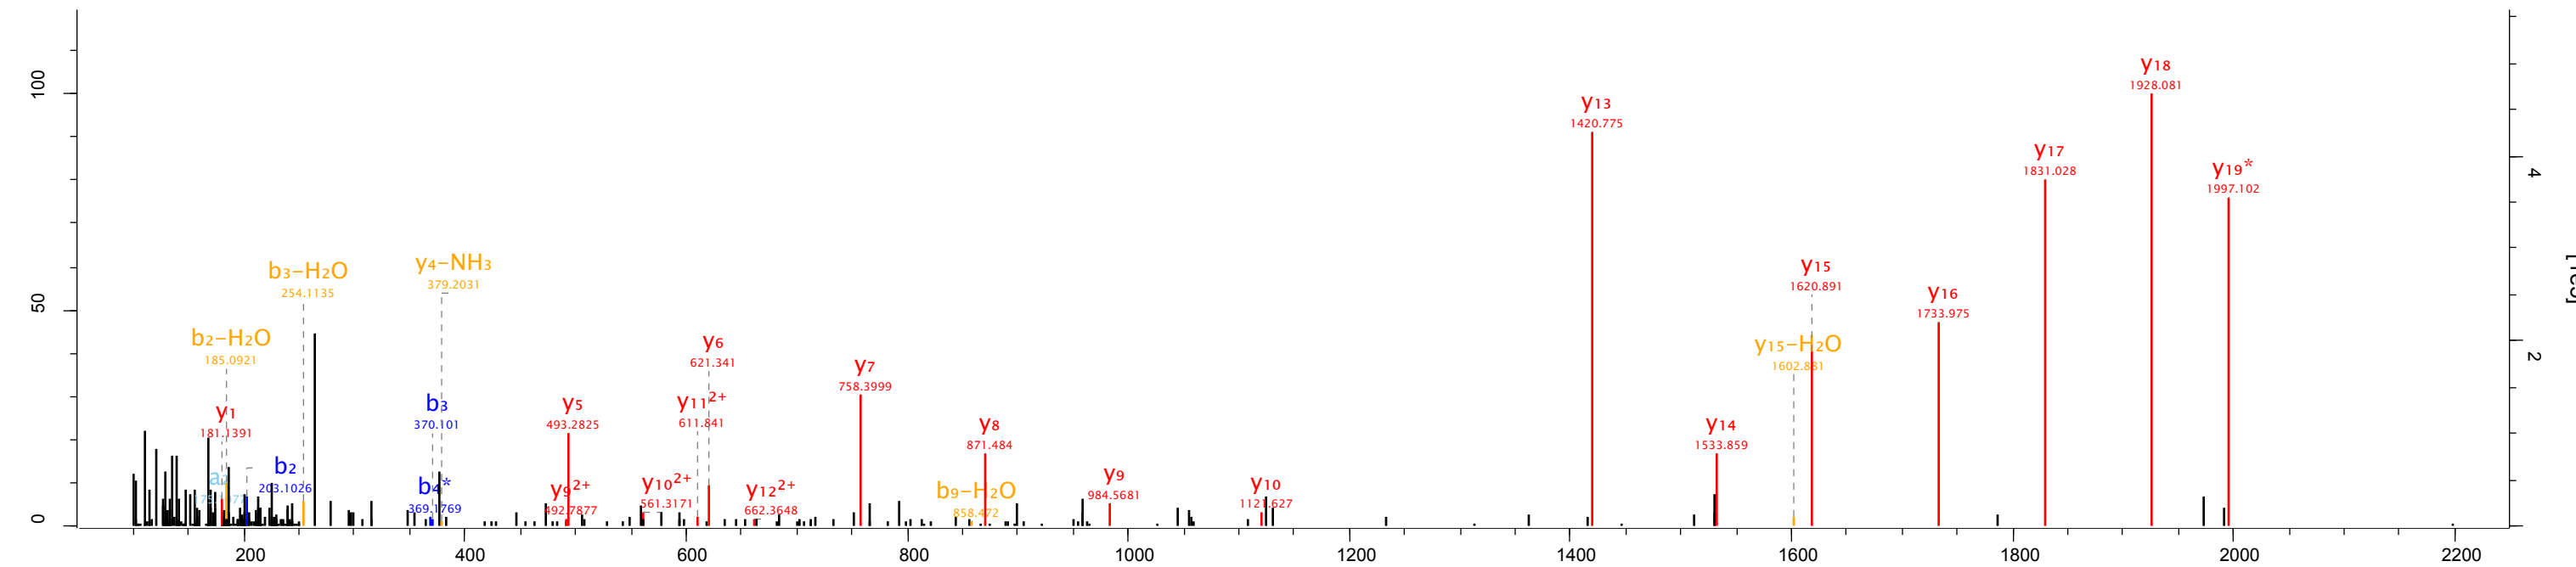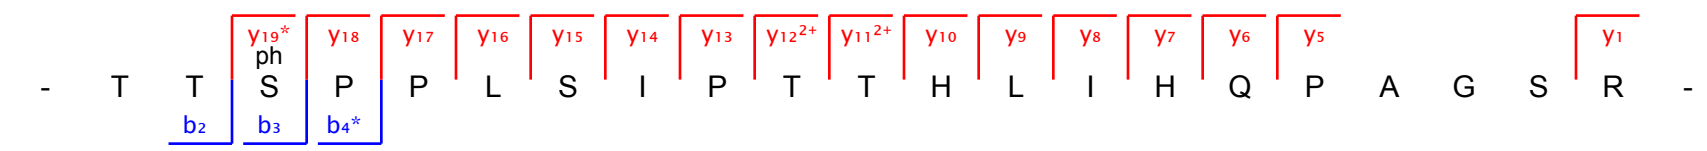

Raw file: 20150814\_A375SR\_Phospho\_BR2\_08  
 Scan: 18842 Method: FTMS; HCD Score: 133.72 m/z: 1011.13 Gene names: PEX14

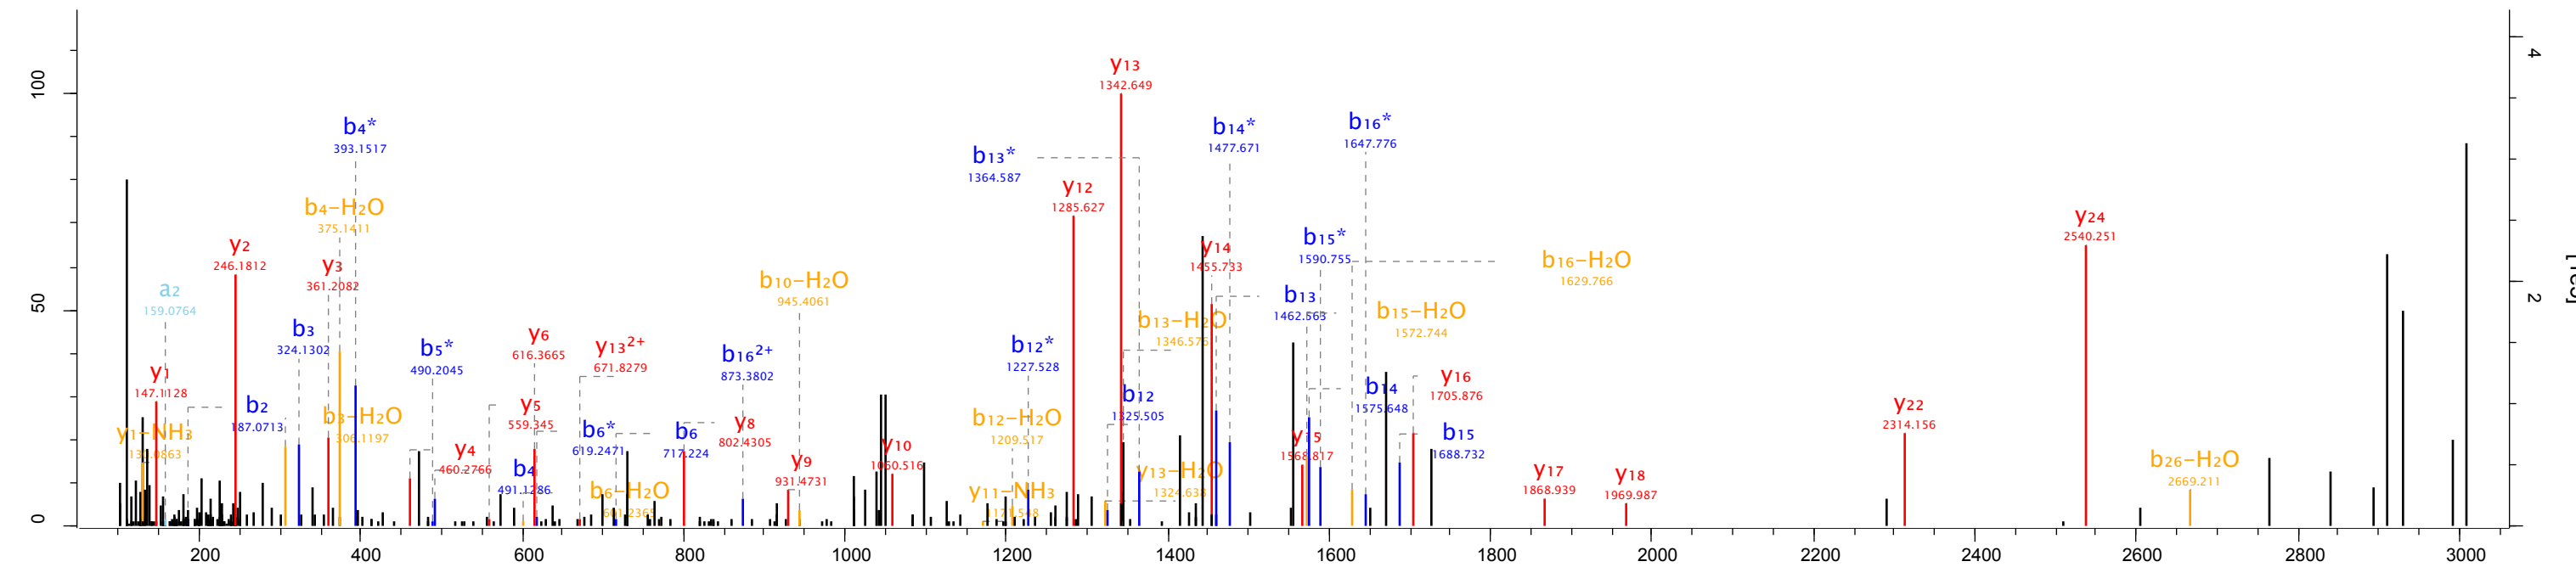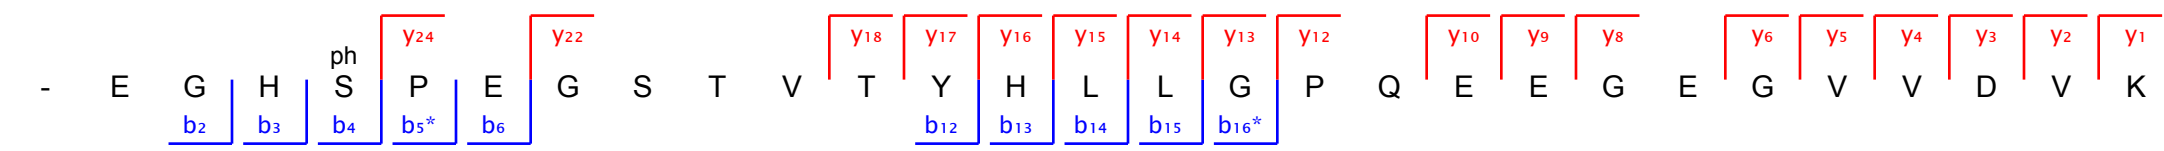

Raw file: 20150814\_A375SR\_Phospho\_BR2\_08  
 Scan: 19032 Method: FTMS; HCD Score: 174.53 m/z: 1042.48 Gene names: AKAP2

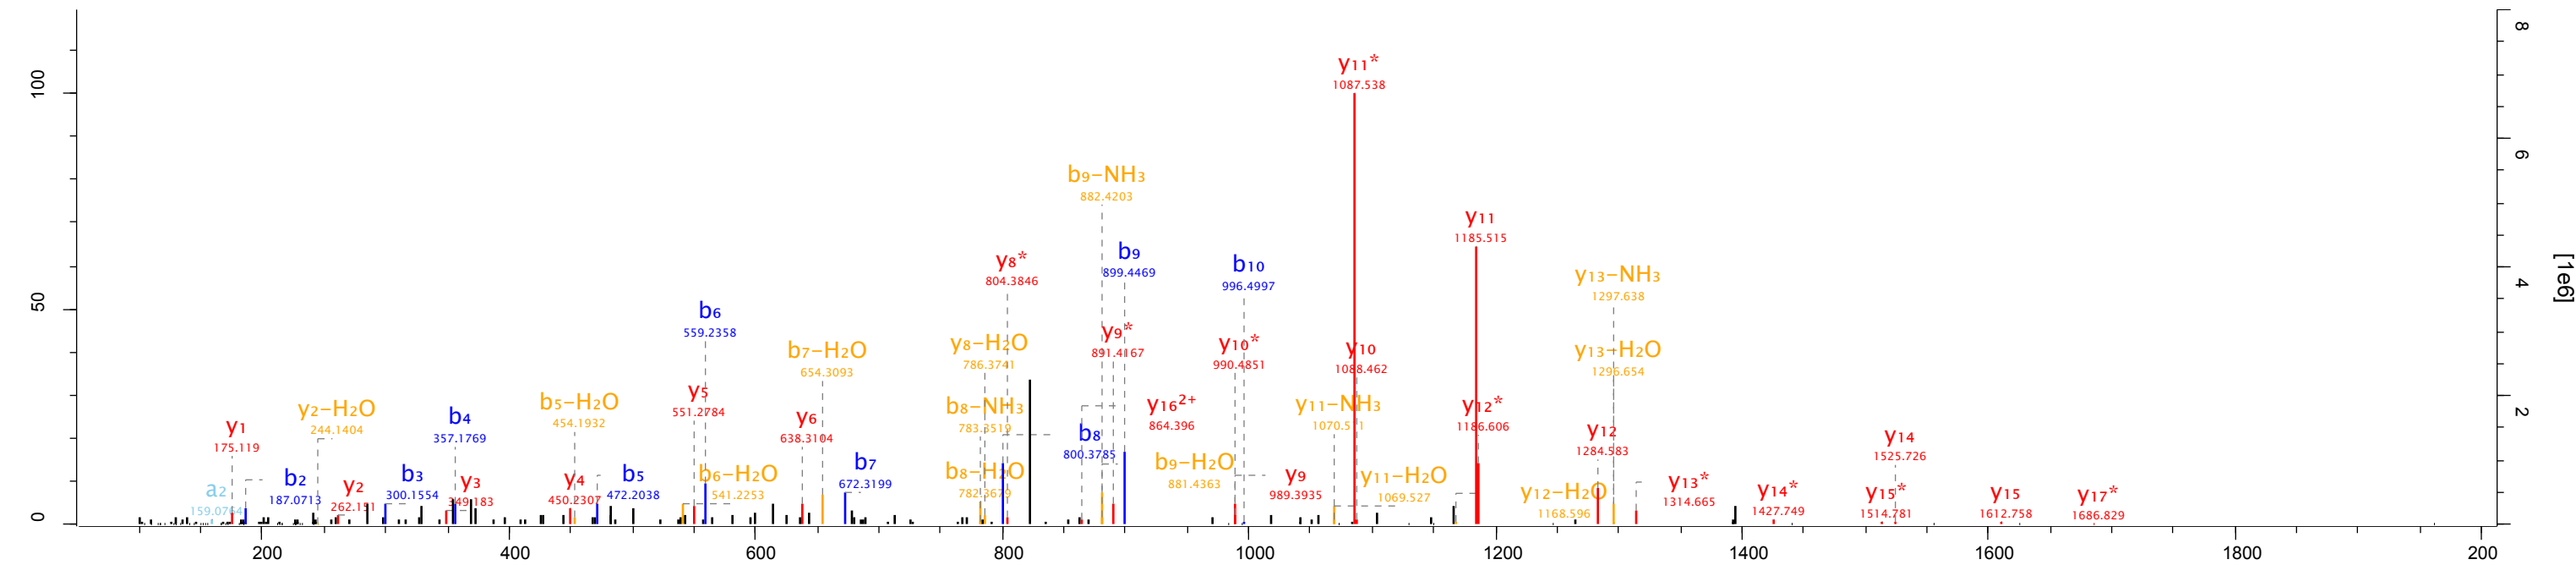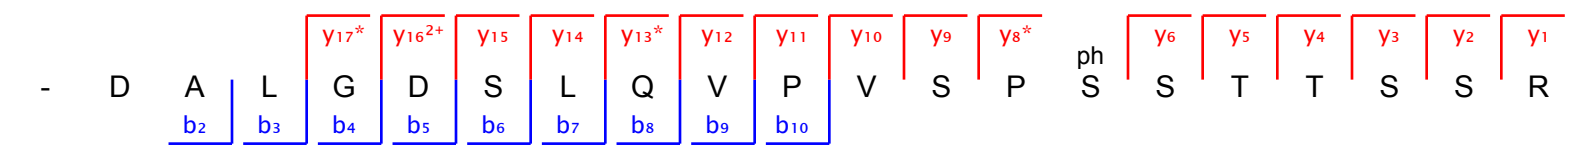



Raw file: 20150814\_A375SR\_Phospho\_BR2\_08  
 Scan: 21622 Method: FTMS; HCD Score: 117.23 m/z: 926.76 Gene names: MAP1A

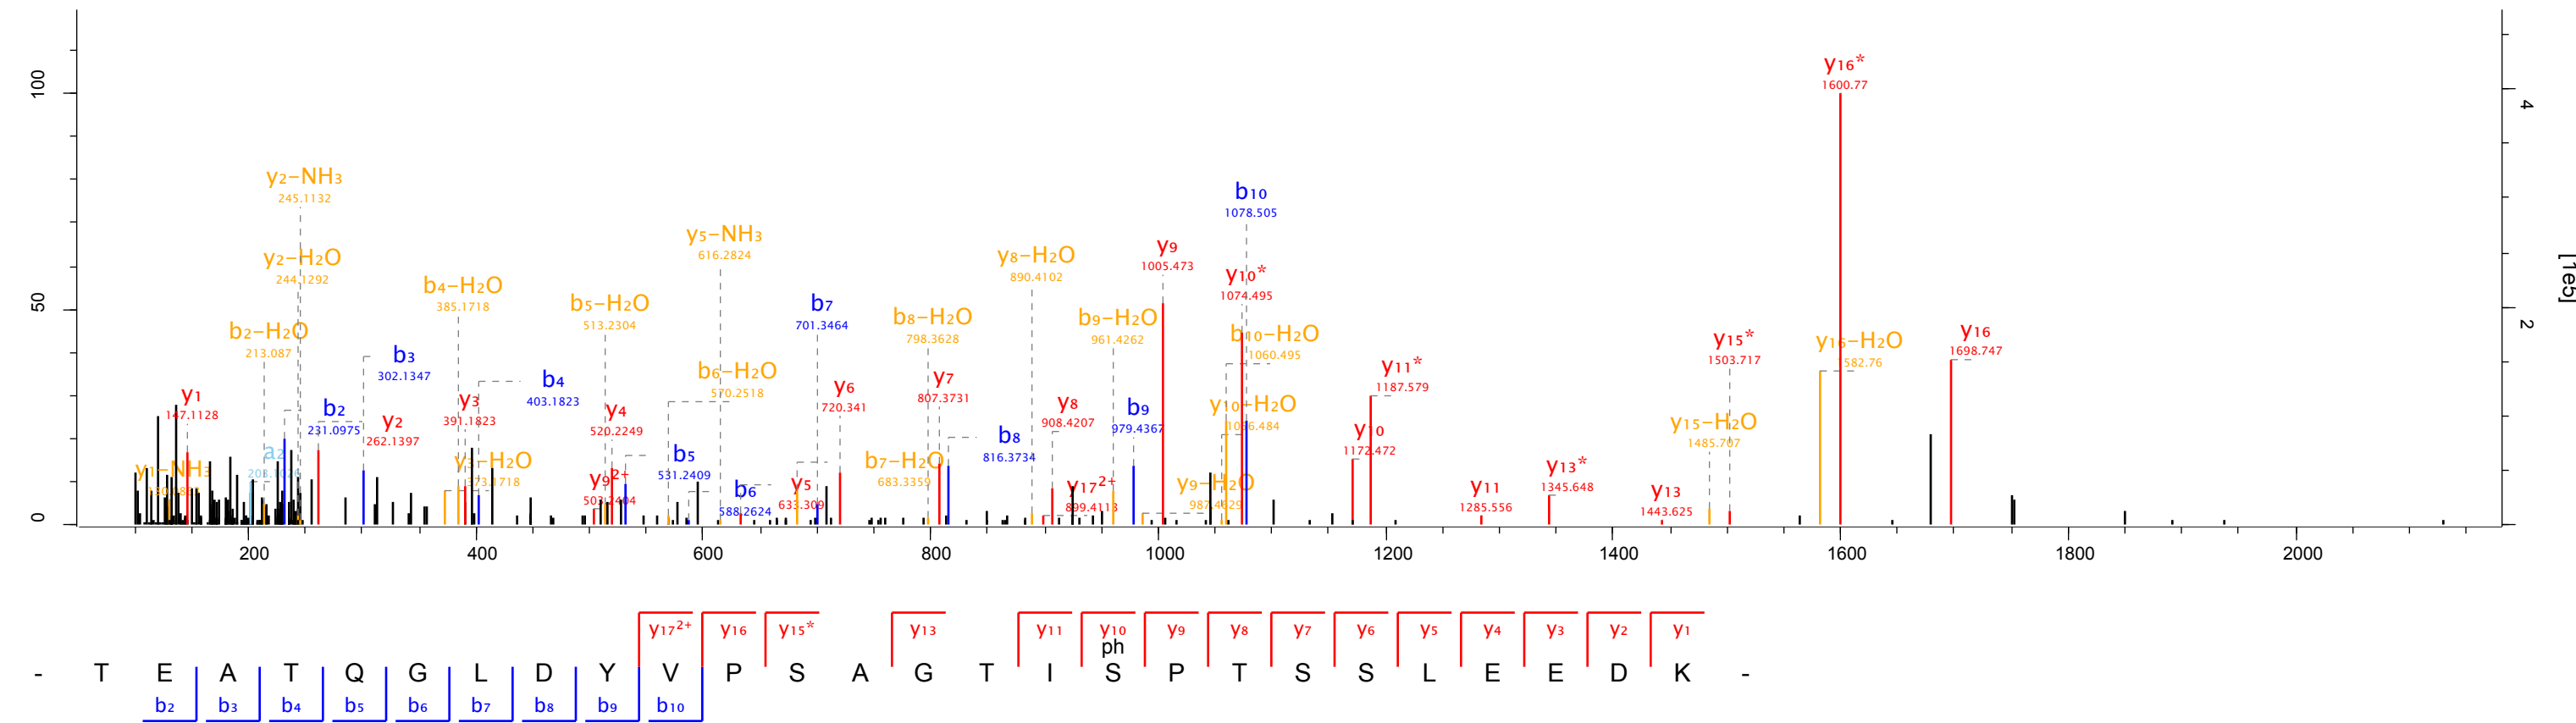

Raw file 20150814\_A375SR\_Phospho\_BR2\_08 Scan 22162 Method FTMS; HCD Score 104.55 m/z 675.34 Gene names MAP7D1

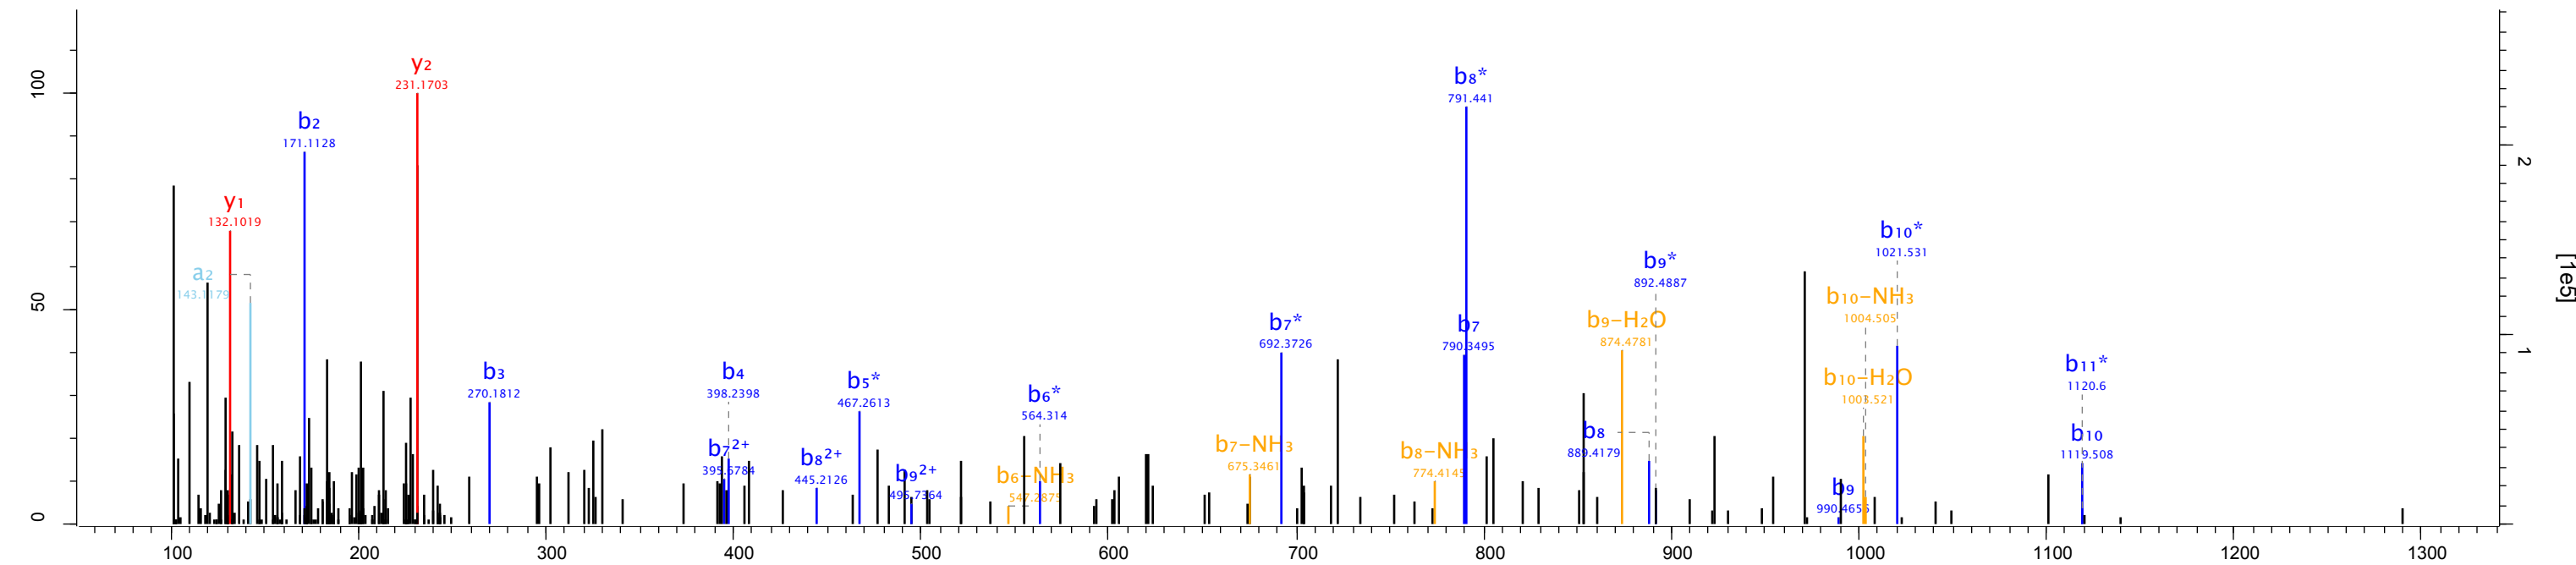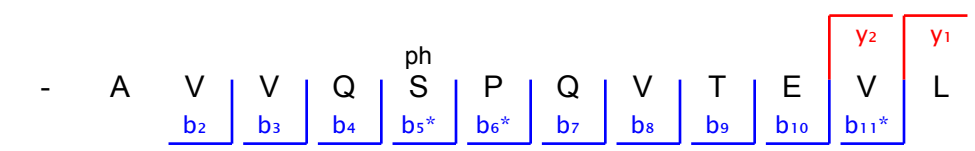

Raw file: 20150814\_A375SR\_Phospho\_BR2\_08  
 Scan: 23462 Method: FTMS; HCD Score: 79.91 m/z: 1102.89 Gene names: SH2B1

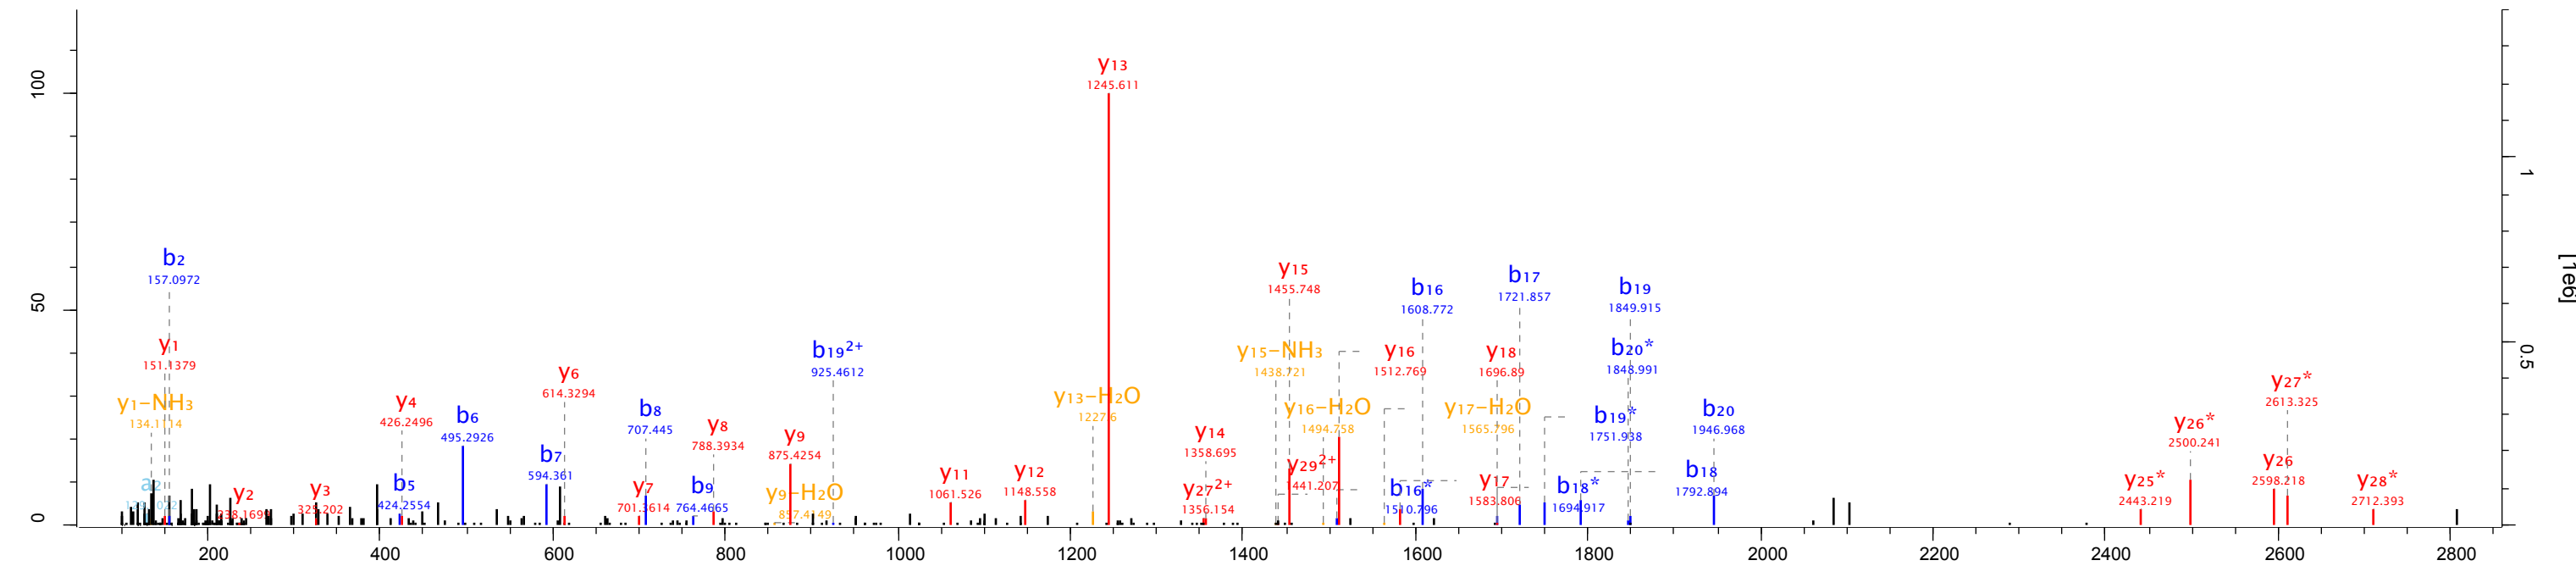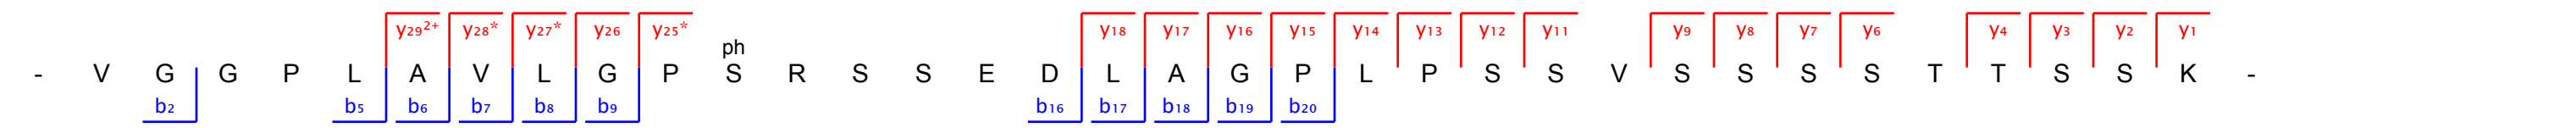

Raw file 20150814\_A375SR\_Phospho\_BR2\_08 Scan 24702 Method FTMS; HCD Score 43.36 m/z 1056.54 Gene names TRPS1

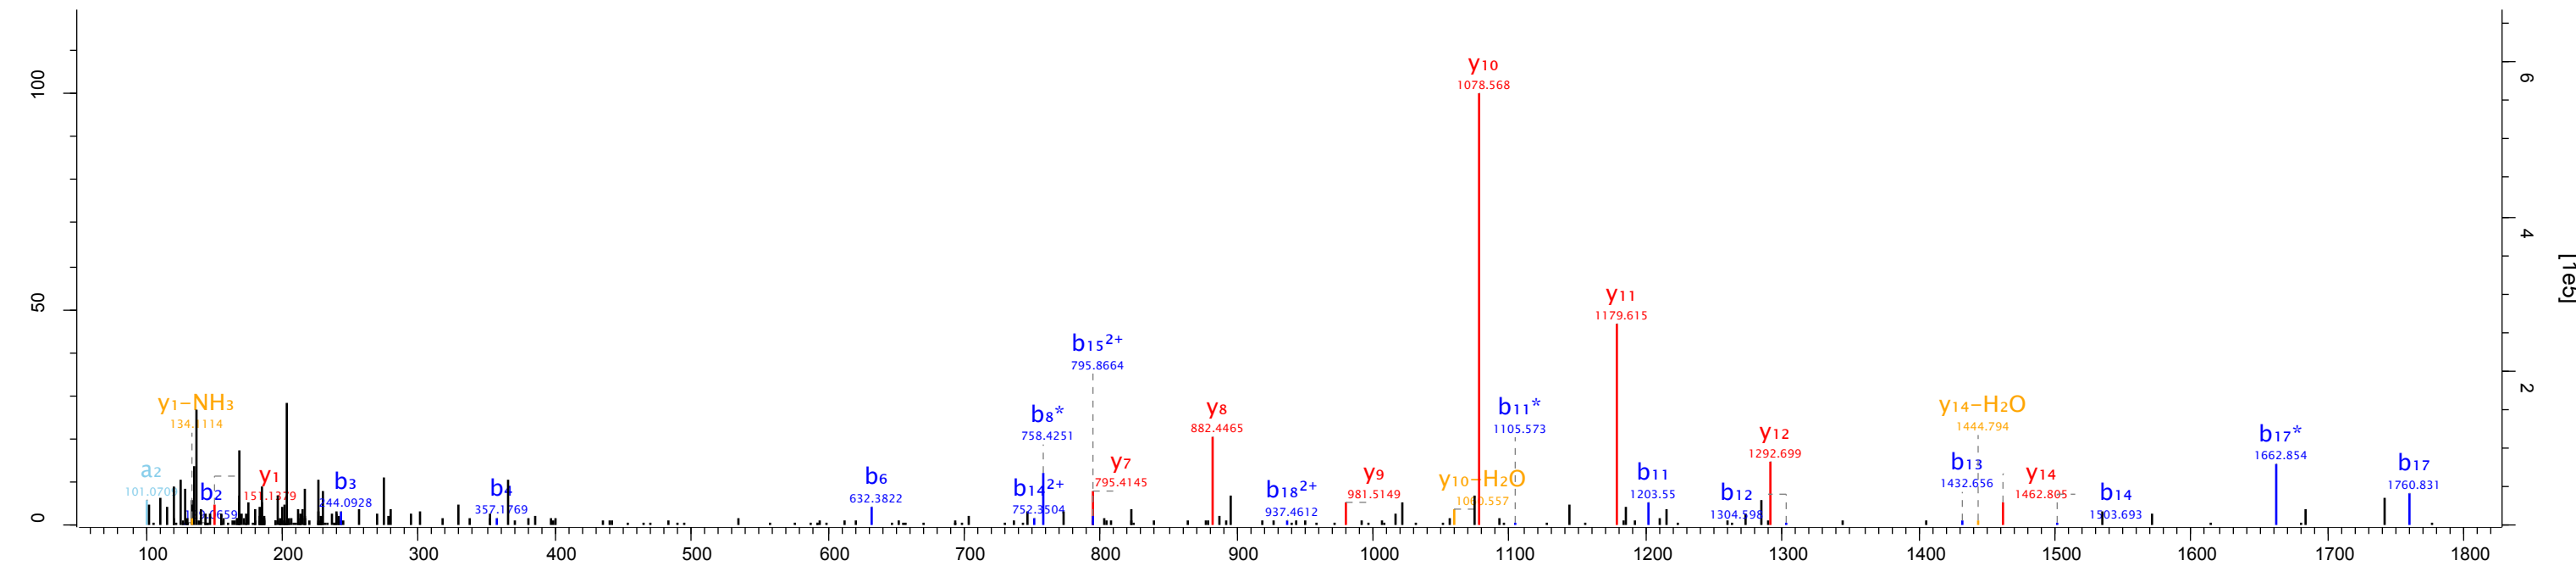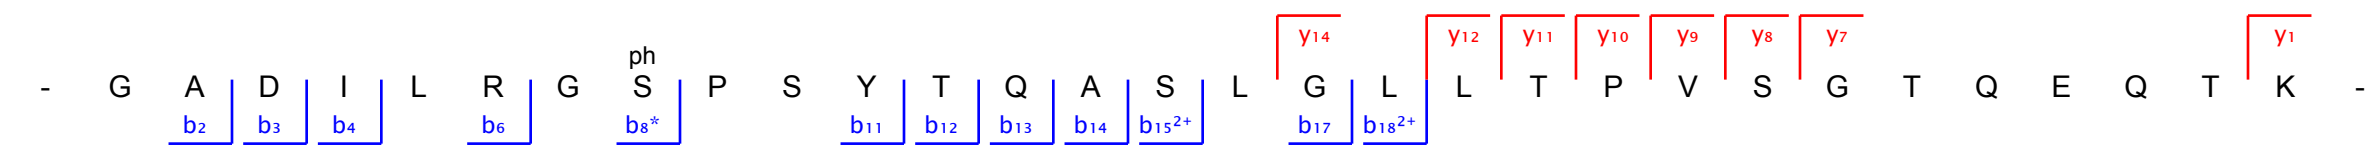



Raw file 20150814\_A375SR\_Phospho\_BR2\_08 Scan 26592 Method FTMS; HCD Score 44.31 m/z 771.72 Gene names EPN1

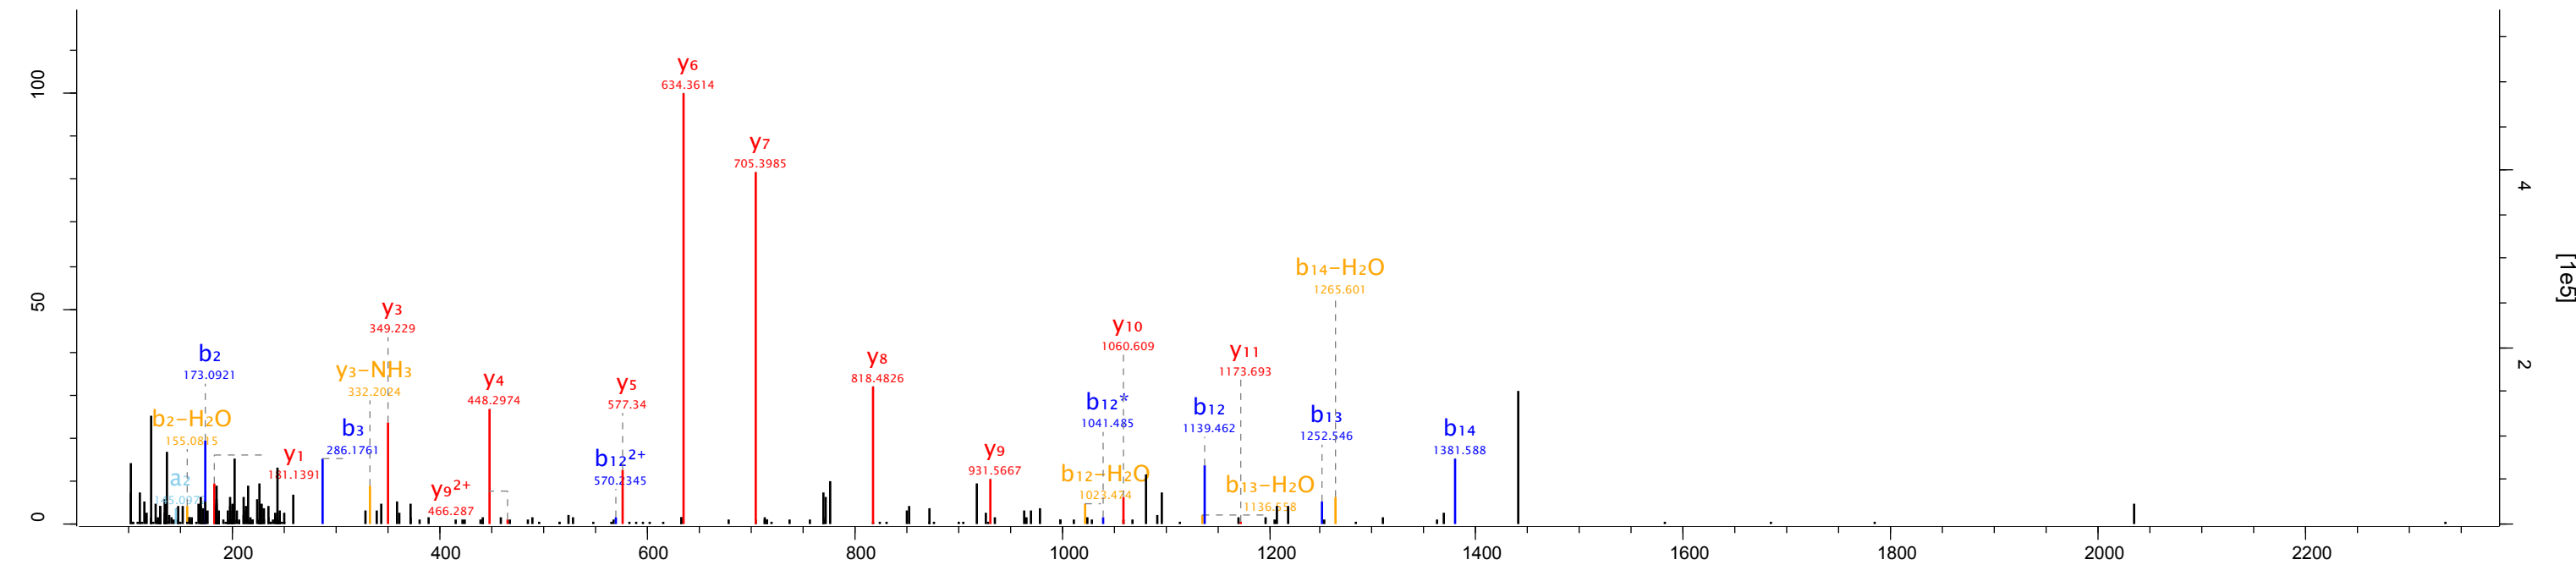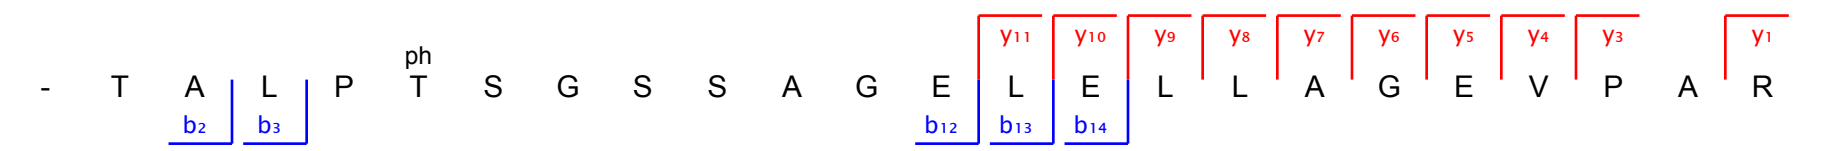

Raw file: 20150814\_A375SR\_Phospho\_BR2\_08  
 Scan: 27182 Method: FTMS; HCD Score: 146.7 m/z: 1174.25 Gene names: ZNHIT2

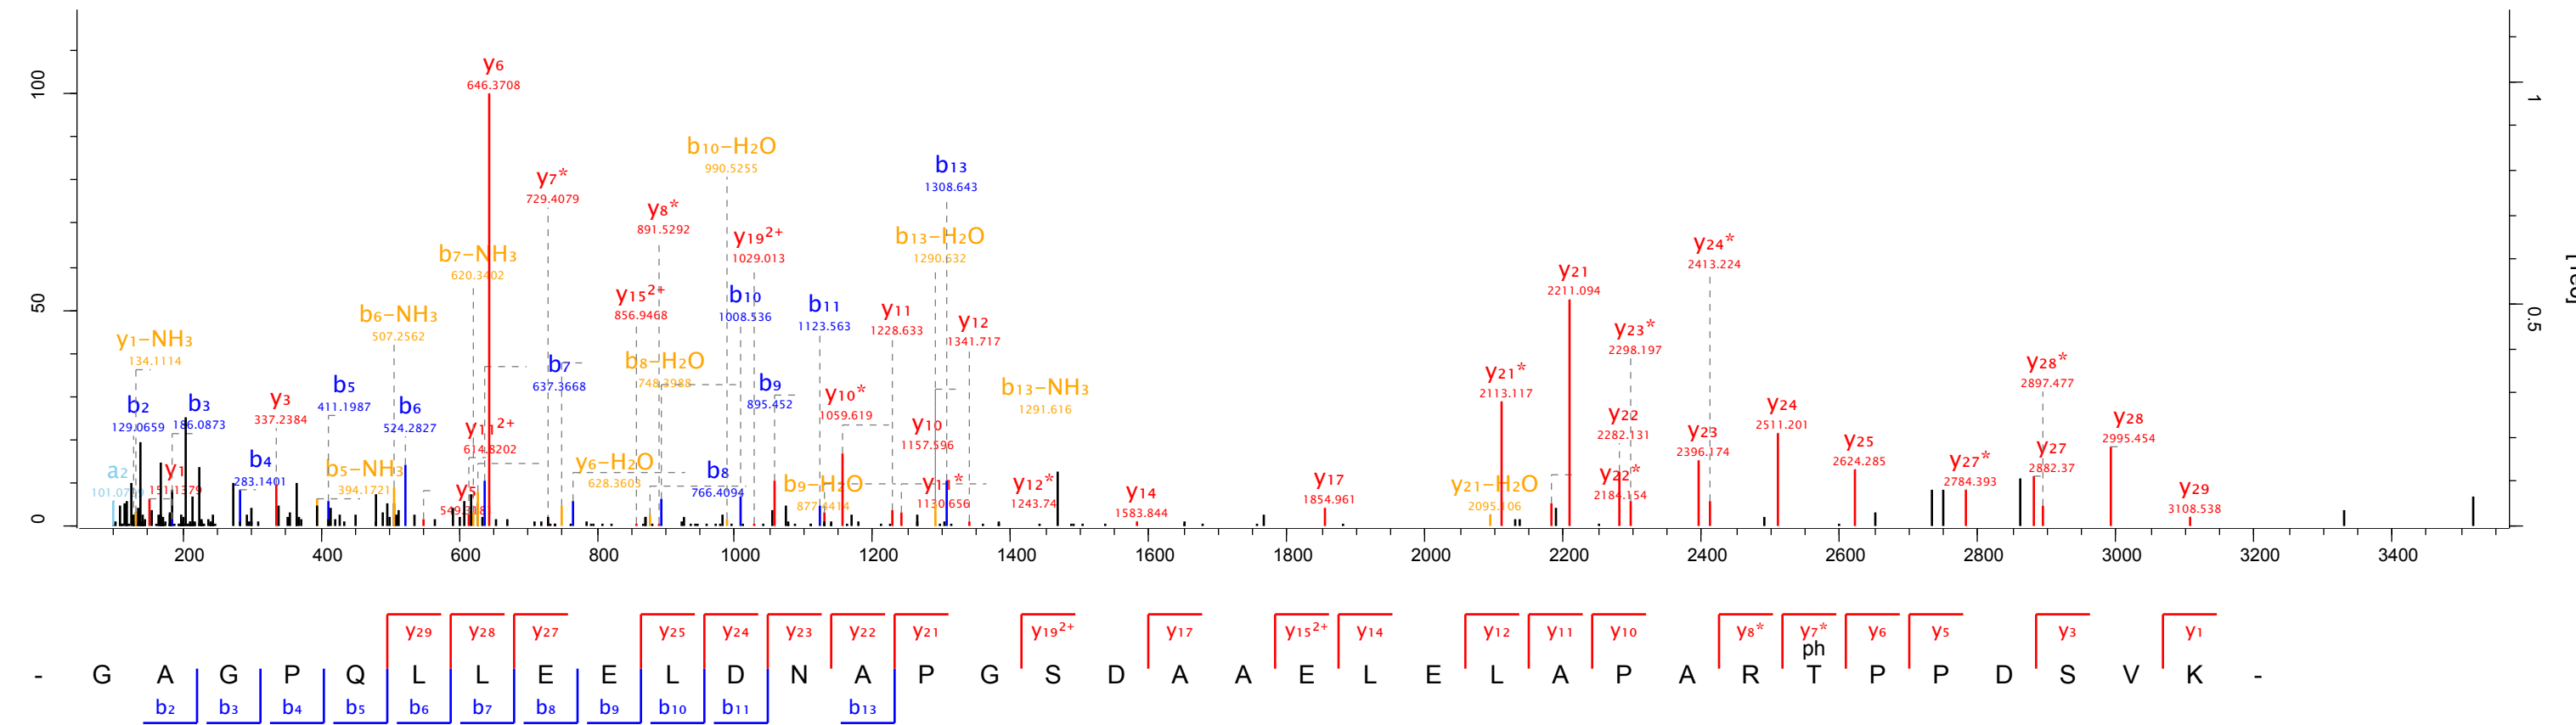

Raw file: 20150814\_A375SR\_Phospho\_BR2\_08  
 Scan: 28552 Method: FTMS; HCD Score: 87.09 m/z: 856 Gene names: VIM

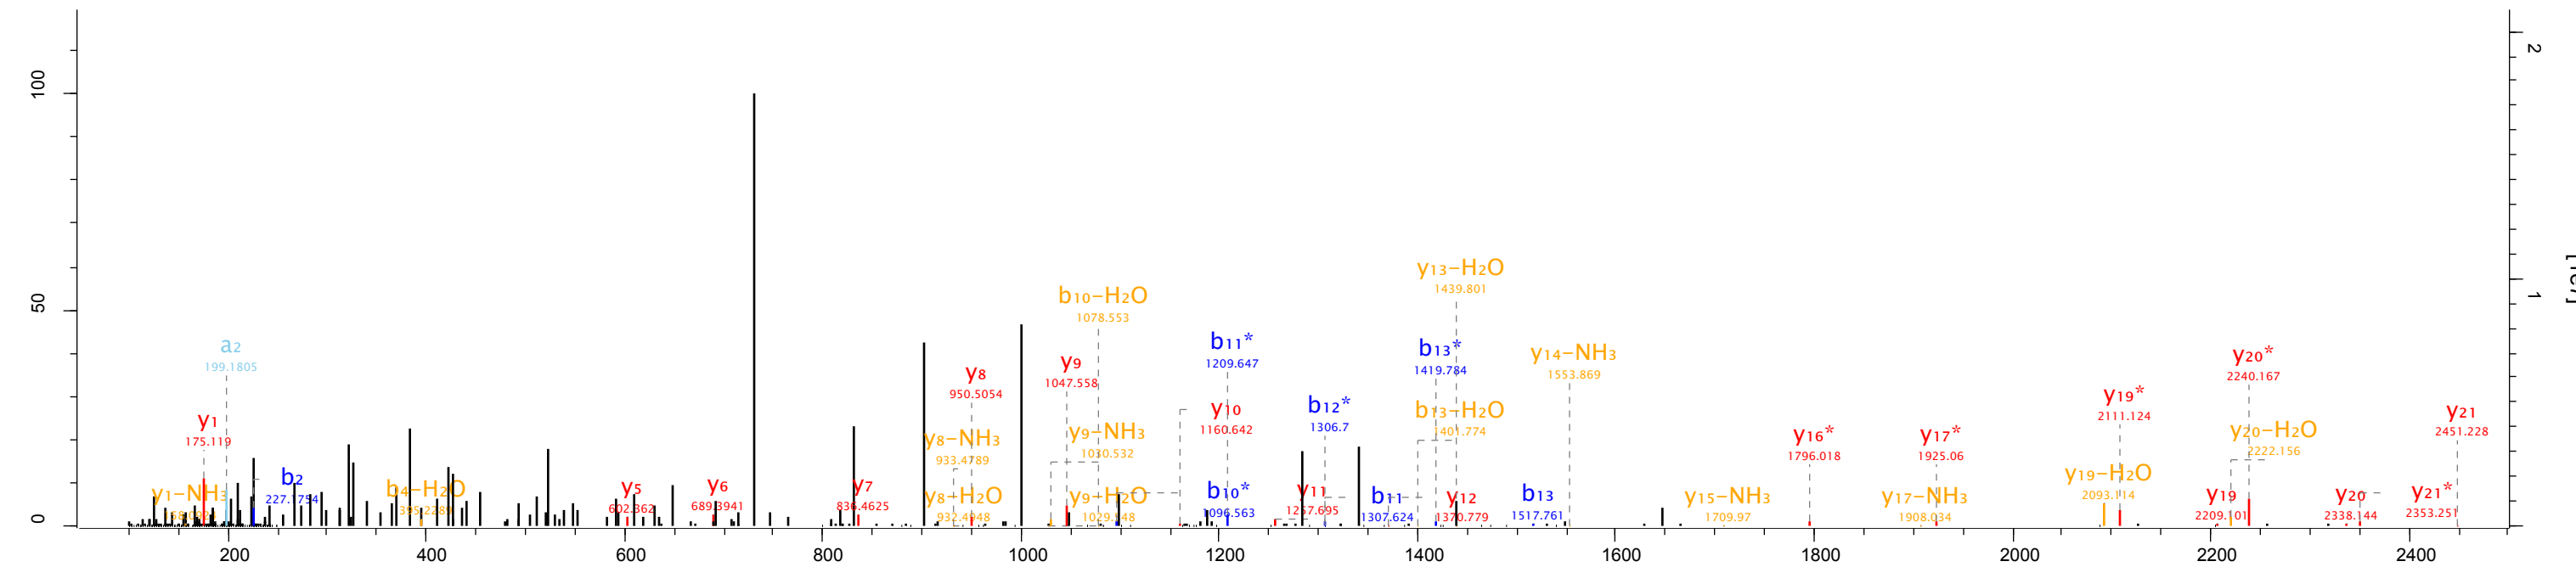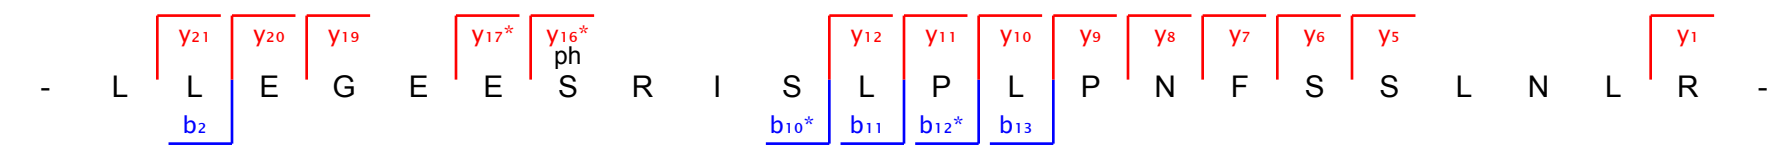

Raw file 20150814\_A375SR\_Phospho\_BR2\_08 Scan 3762 Method FTMS; HCD Score 110.44 m/z 648.31 Gene names LMNA

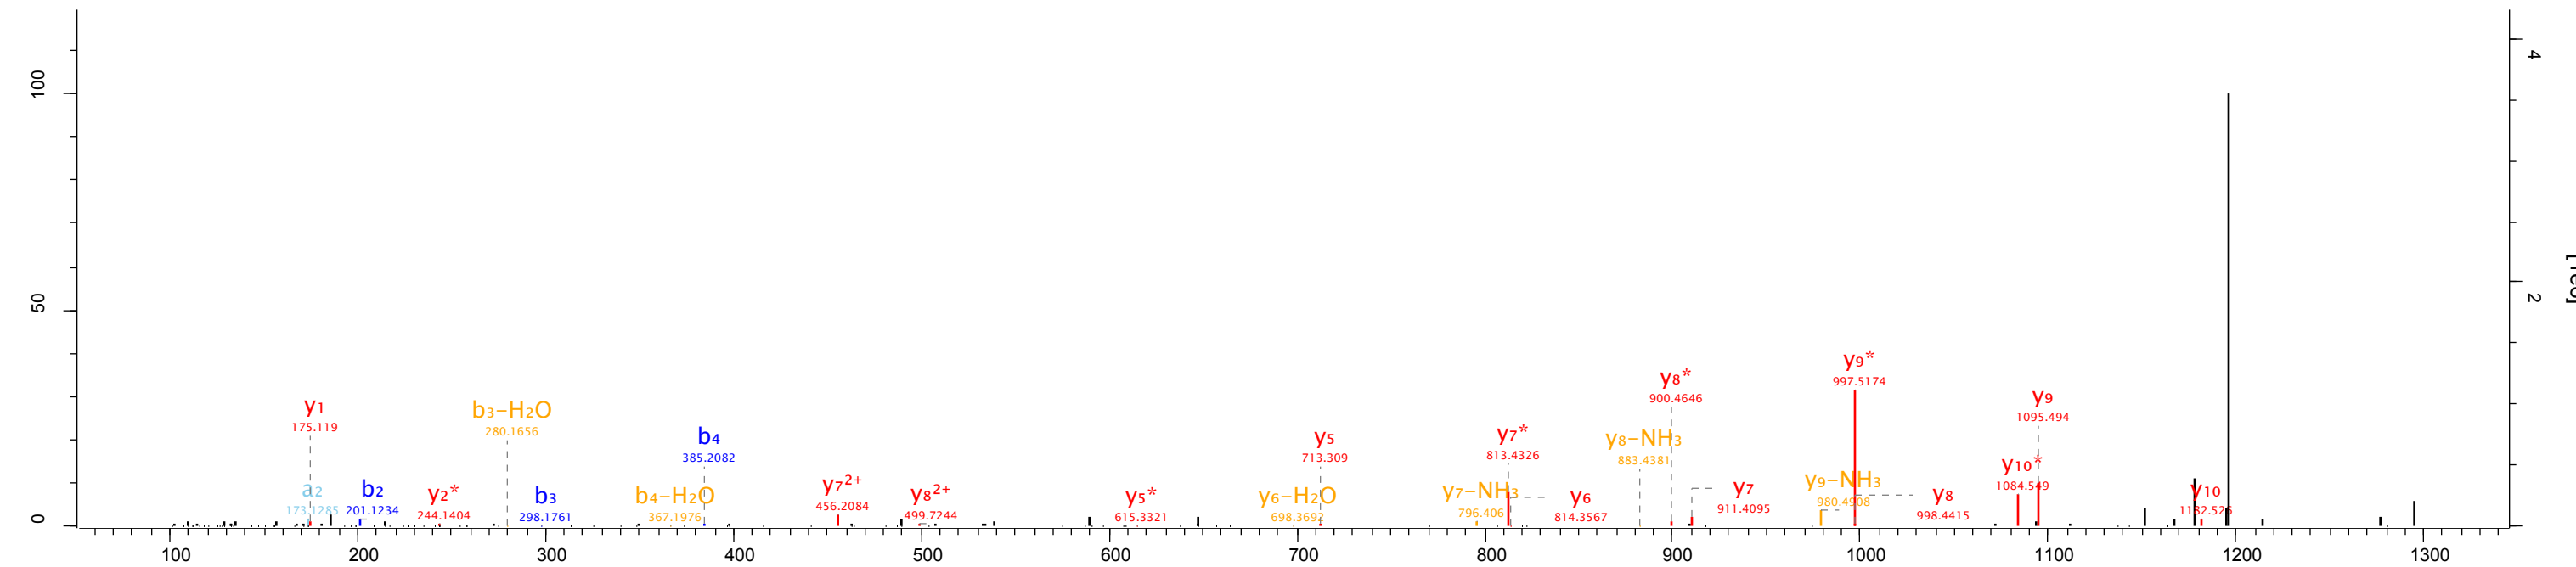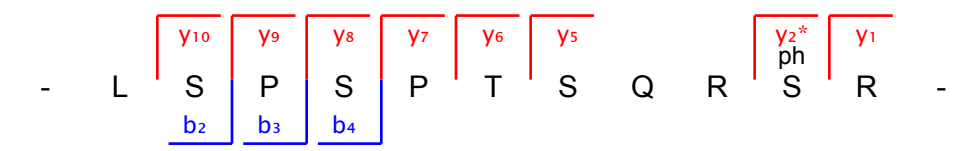

Raw file: 20150814\_A375SR\_Phospho\_BR2\_08  
 Scan: 4152 Method: FTMS; HCD Score: 73.23 m/z: 436.74 Gene names: BBX

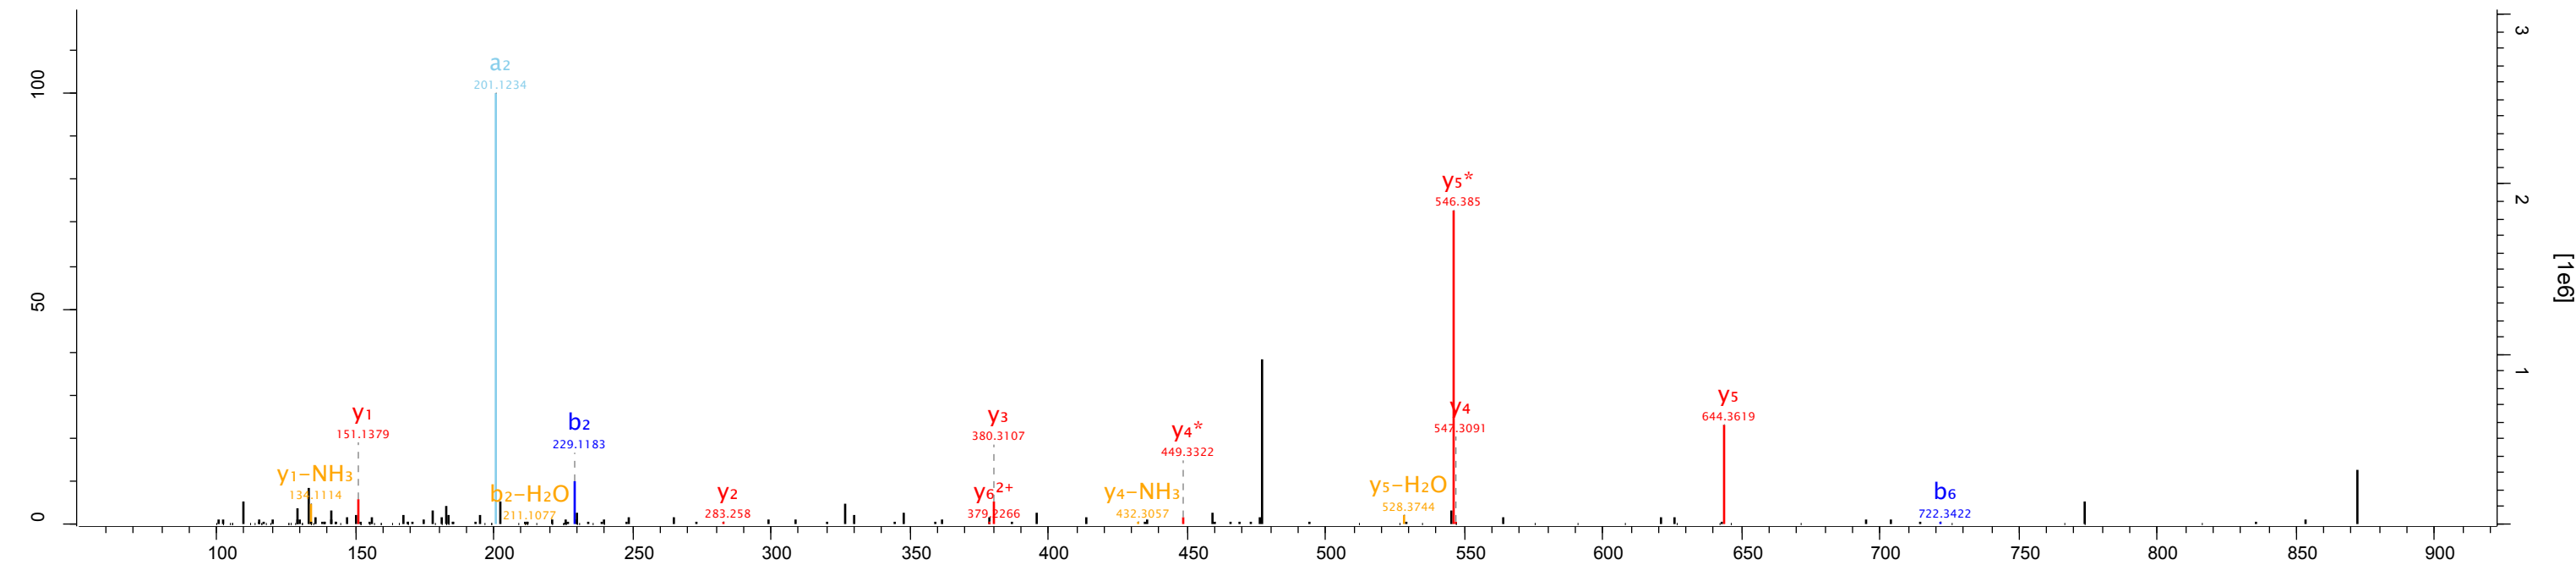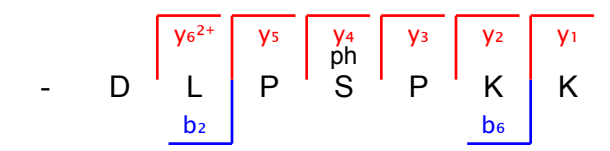

Raw file Scan Method Score m/z Gene names  
 20150814\_A375SR\_Phospho\_BR2\_08 4582 FTMS; HCD 61.44 483.59 PARVB

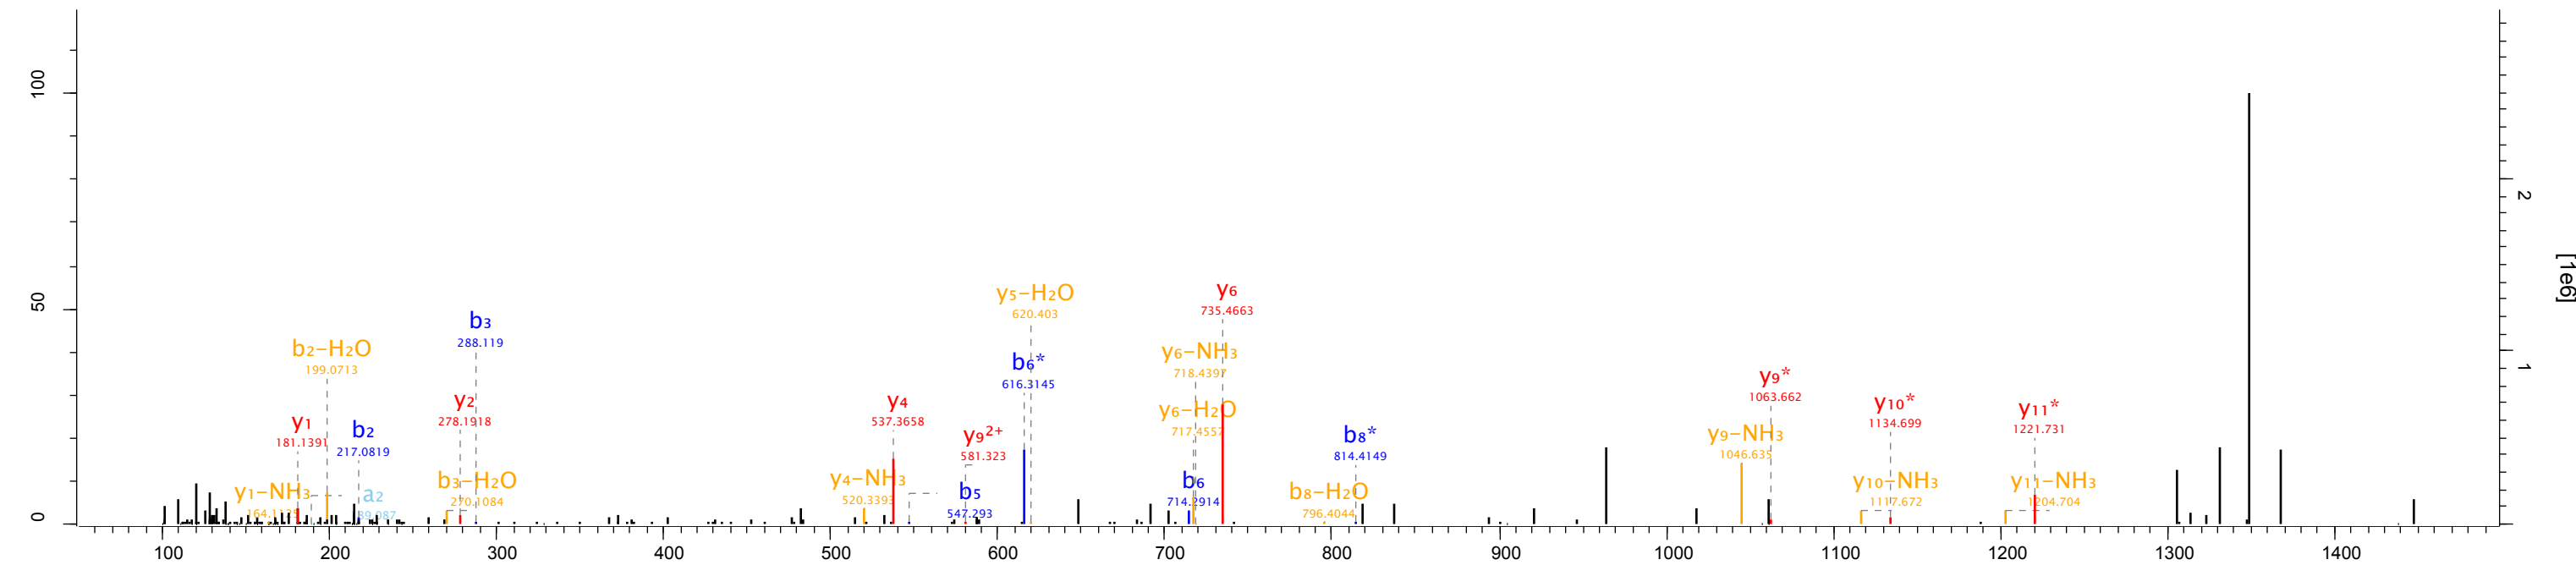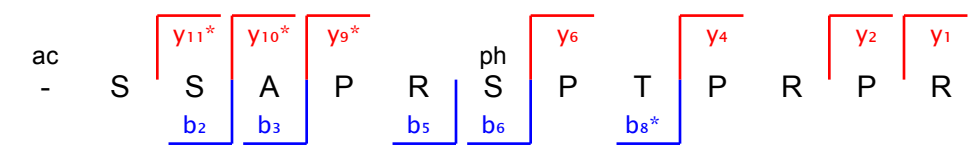

Raw file 20150814\_A375SR\_Phospho\_BR2\_08 Scan 5302 Method FTMS; HCD Score 72.21 m/z 703.33 Gene names SH3KBP1

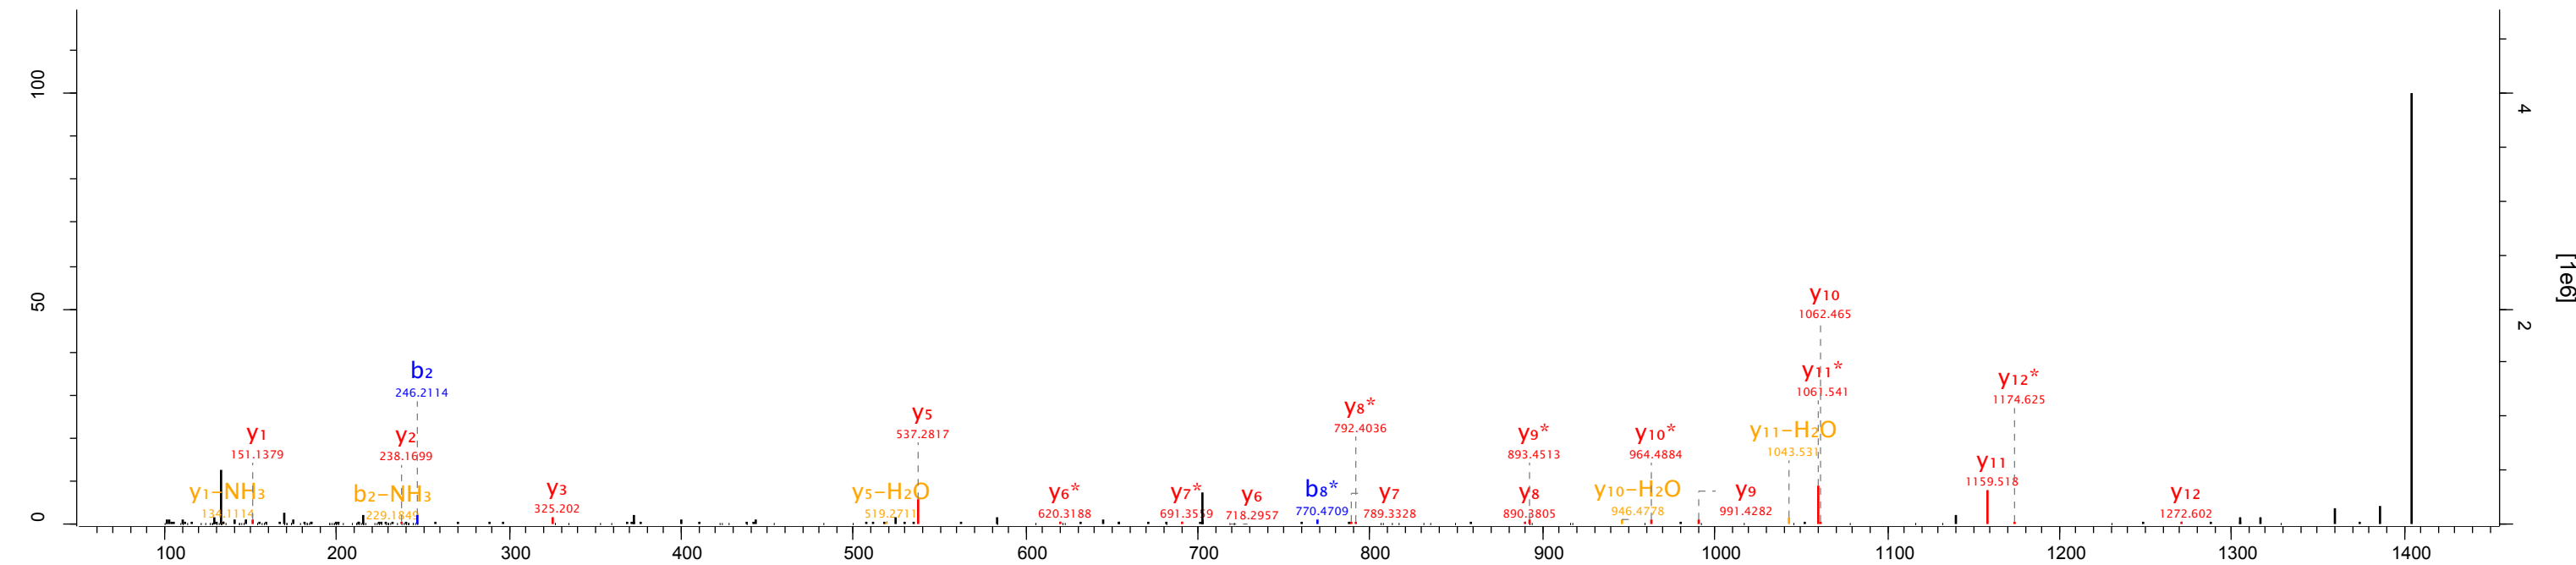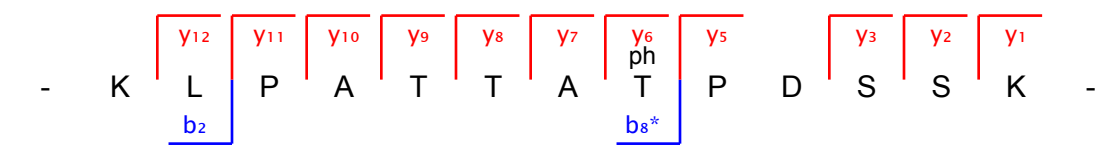

Raw file: 20150814\_A375SR\_Phospho\_BR2\_08  
 Scan: 5542 Method: FTMS; HCD Score: 122.33 m/z: 664.82 Gene names: PHF14

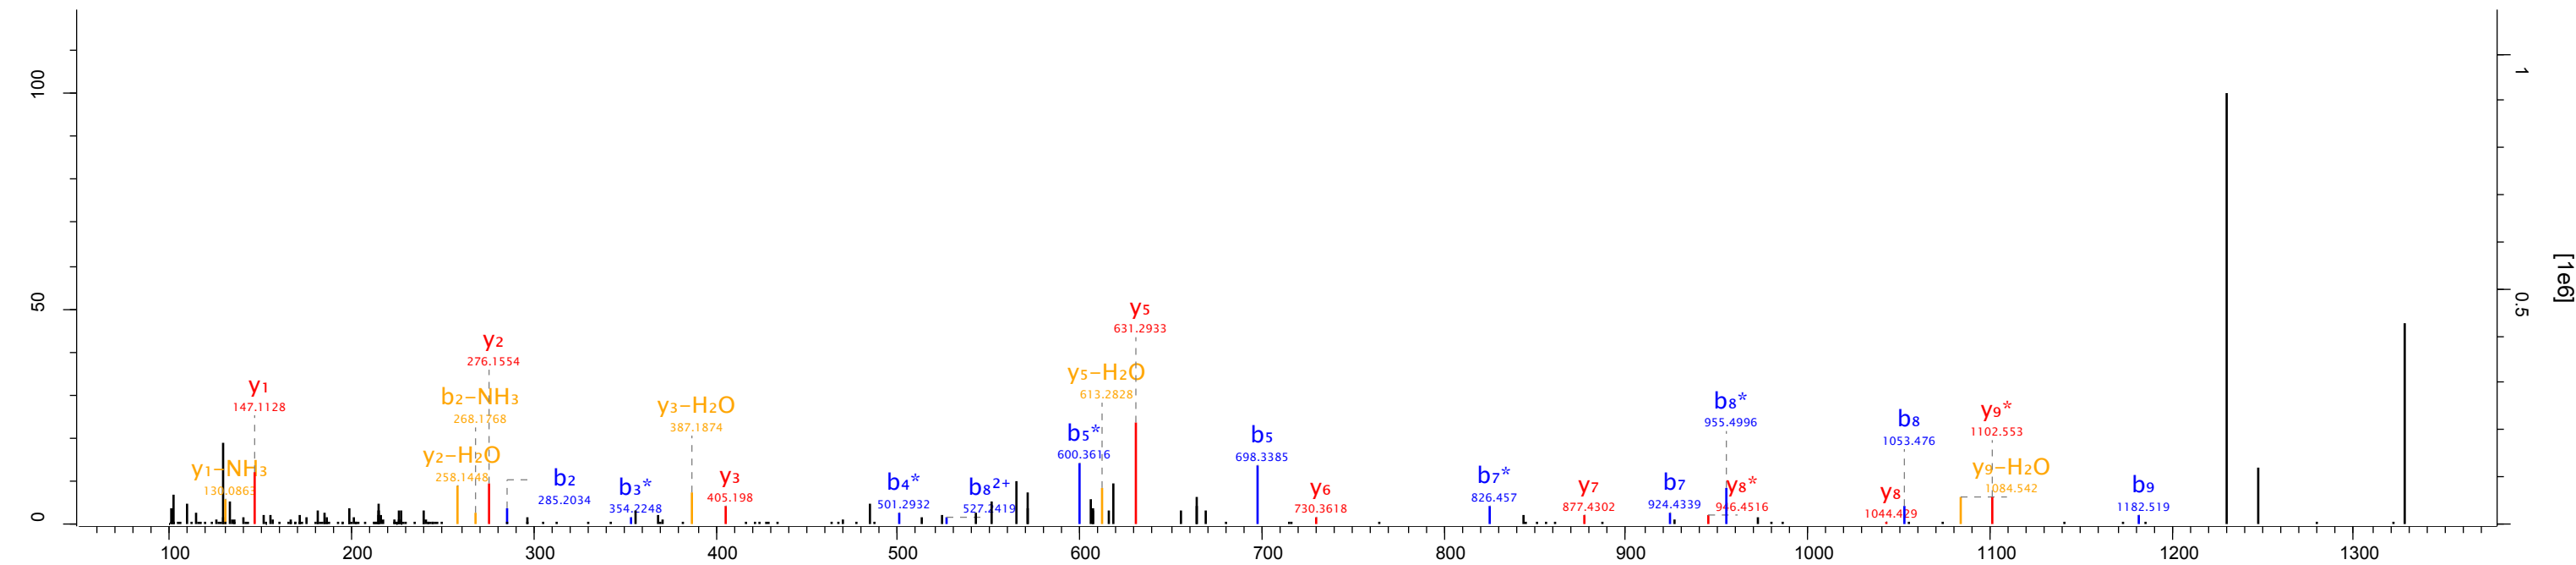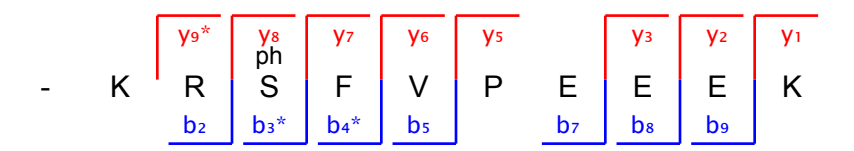



Raw file: 20150814\_A375SR\_Phospho\_BR2\_08  
 Scan: 6592 Method: FTMS; HCD Score: 189.07 m/z: 684.8 Gene names: SRRM2

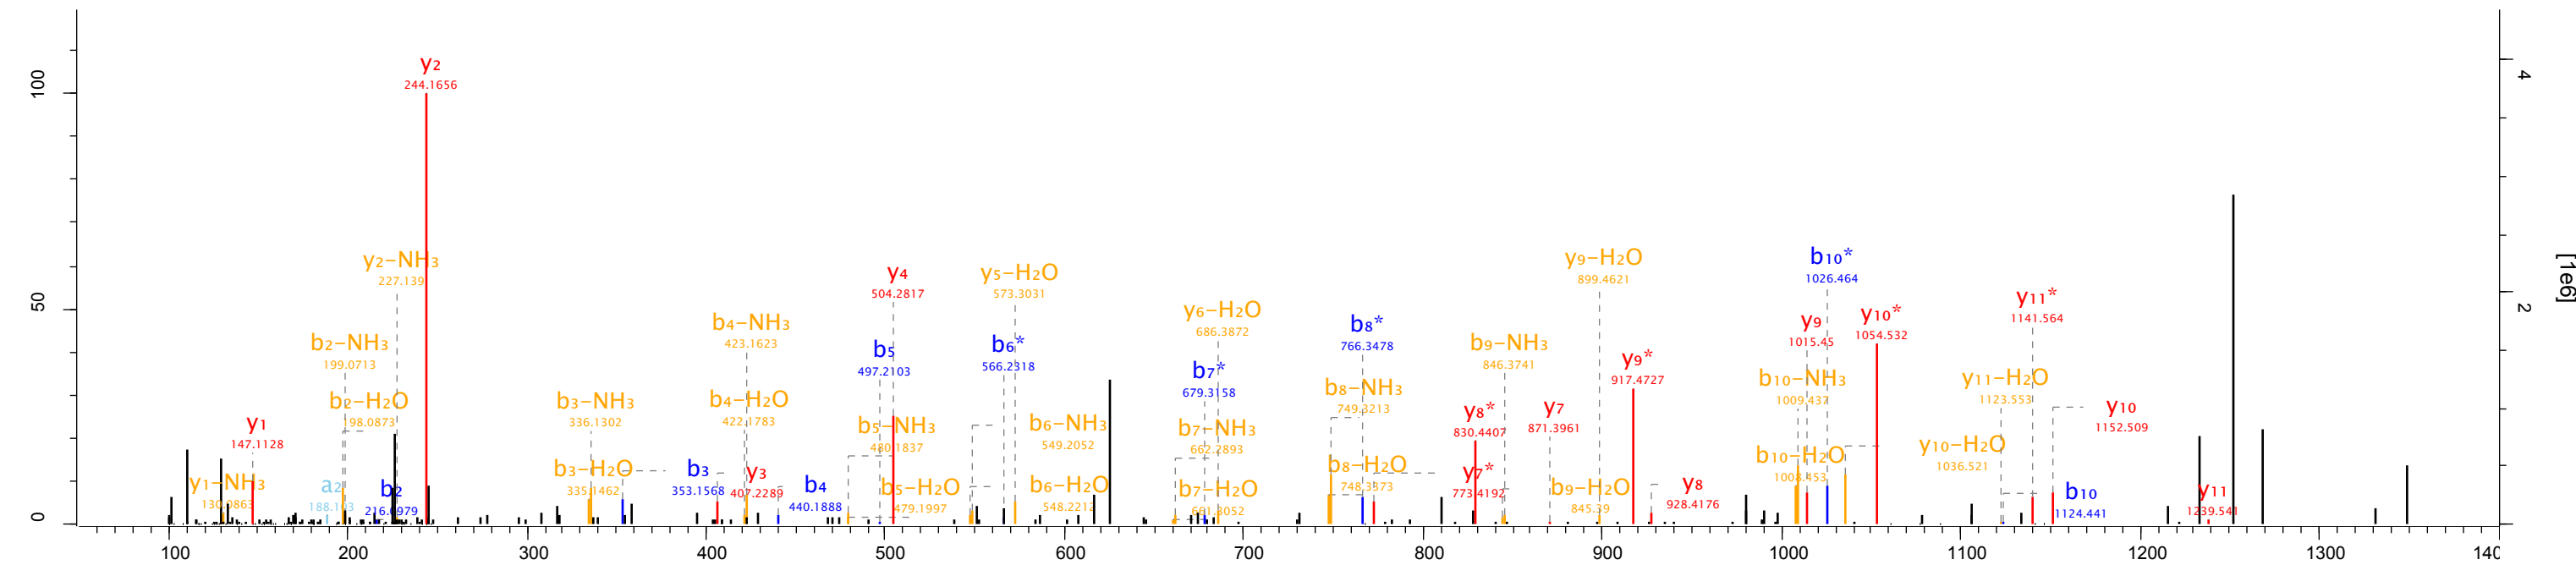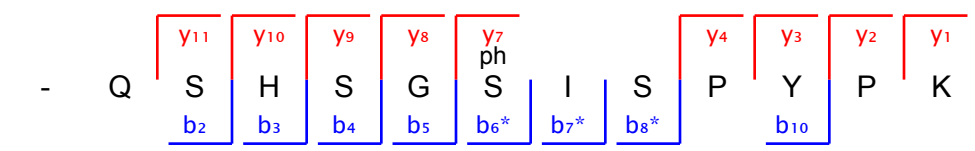

20150814\_A375SR\_Phospho\_BR2\_08 6962 FTMS; HCD 51.09 529.25 ZNF318

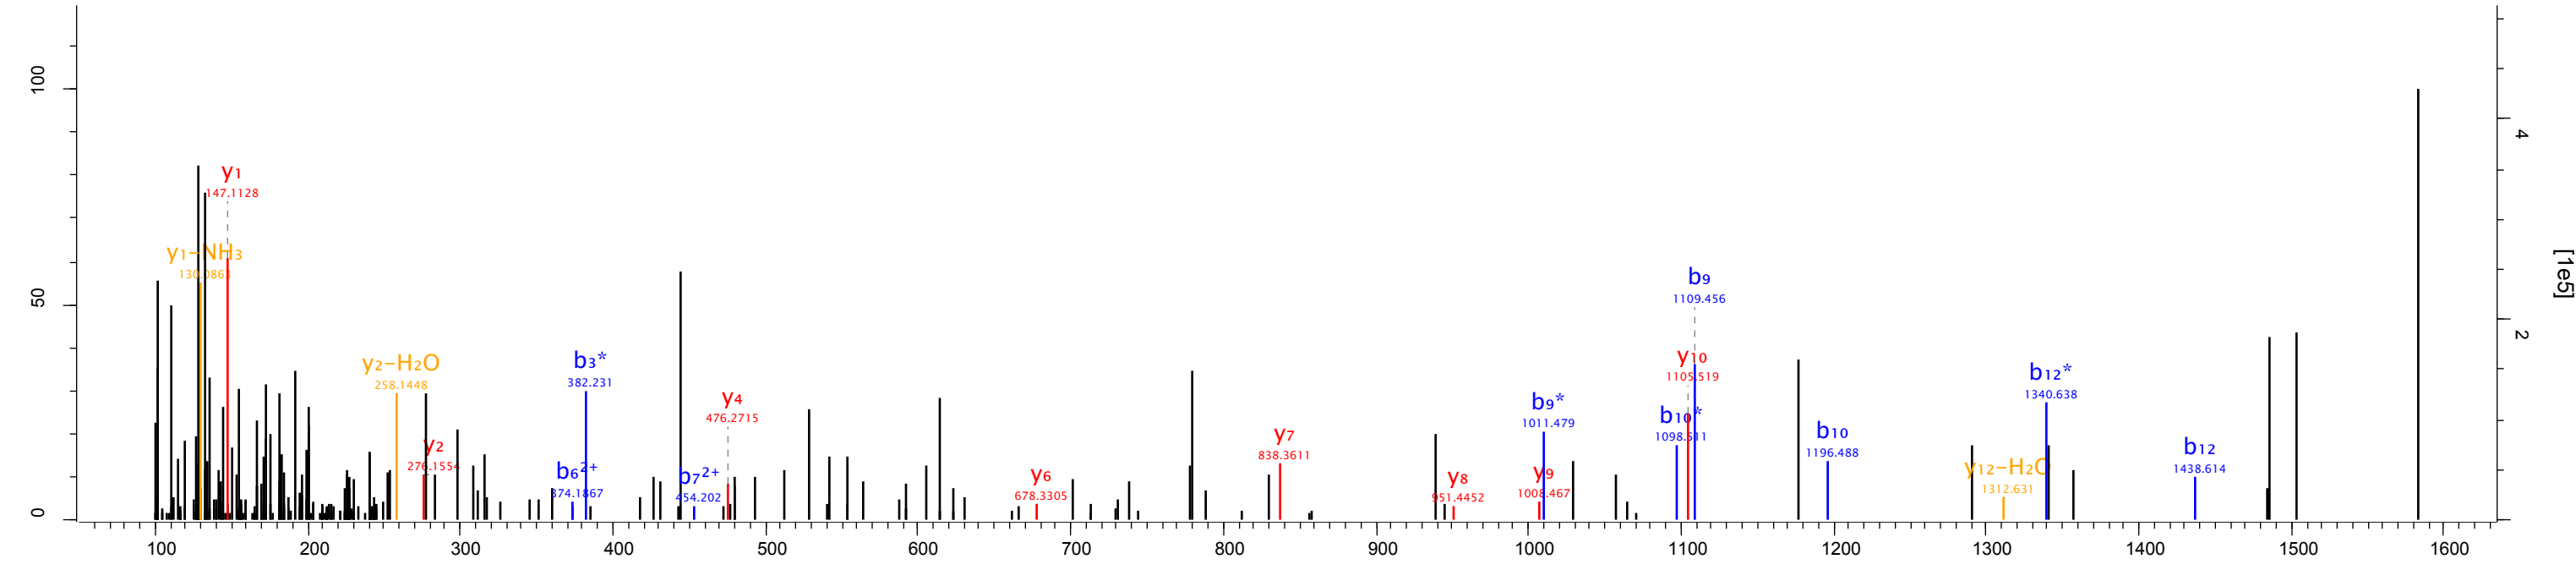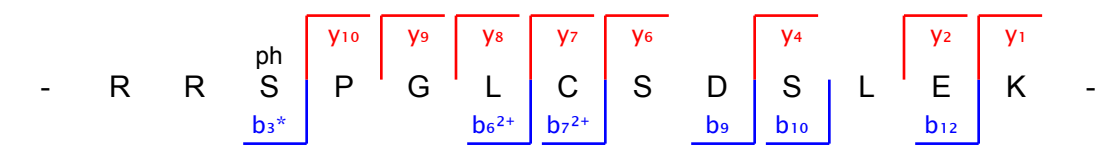

Raw file 20150814\_A375SR\_Phospho\_BR2\_08 Scan 7202 Method FTMS; HCD Score 99.69 m/z 589.81 Gene names ATR

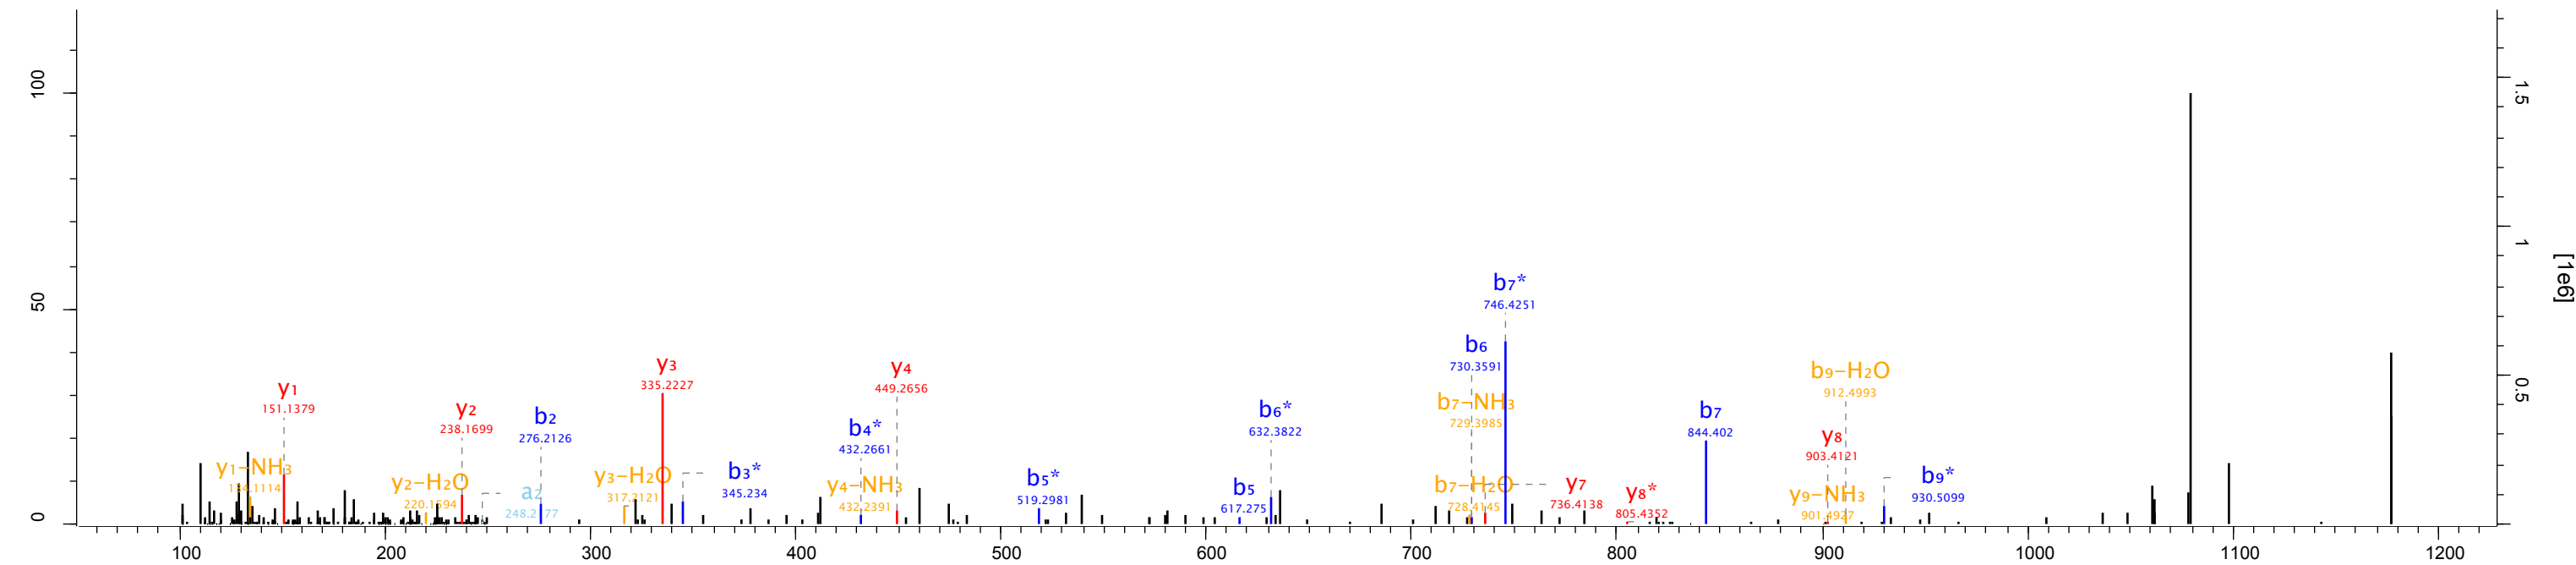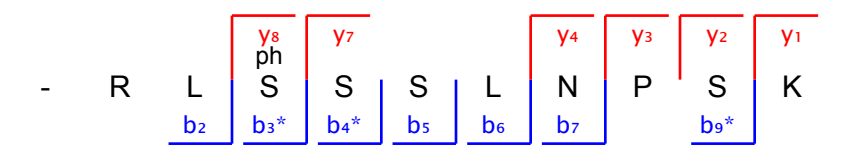

Raw file Scan Method Score m/z Gene names  
 20150814\_A375SR\_Phospho\_BR2\_08 7672 FTMS; HCD 151.66 554.79 SRRM1

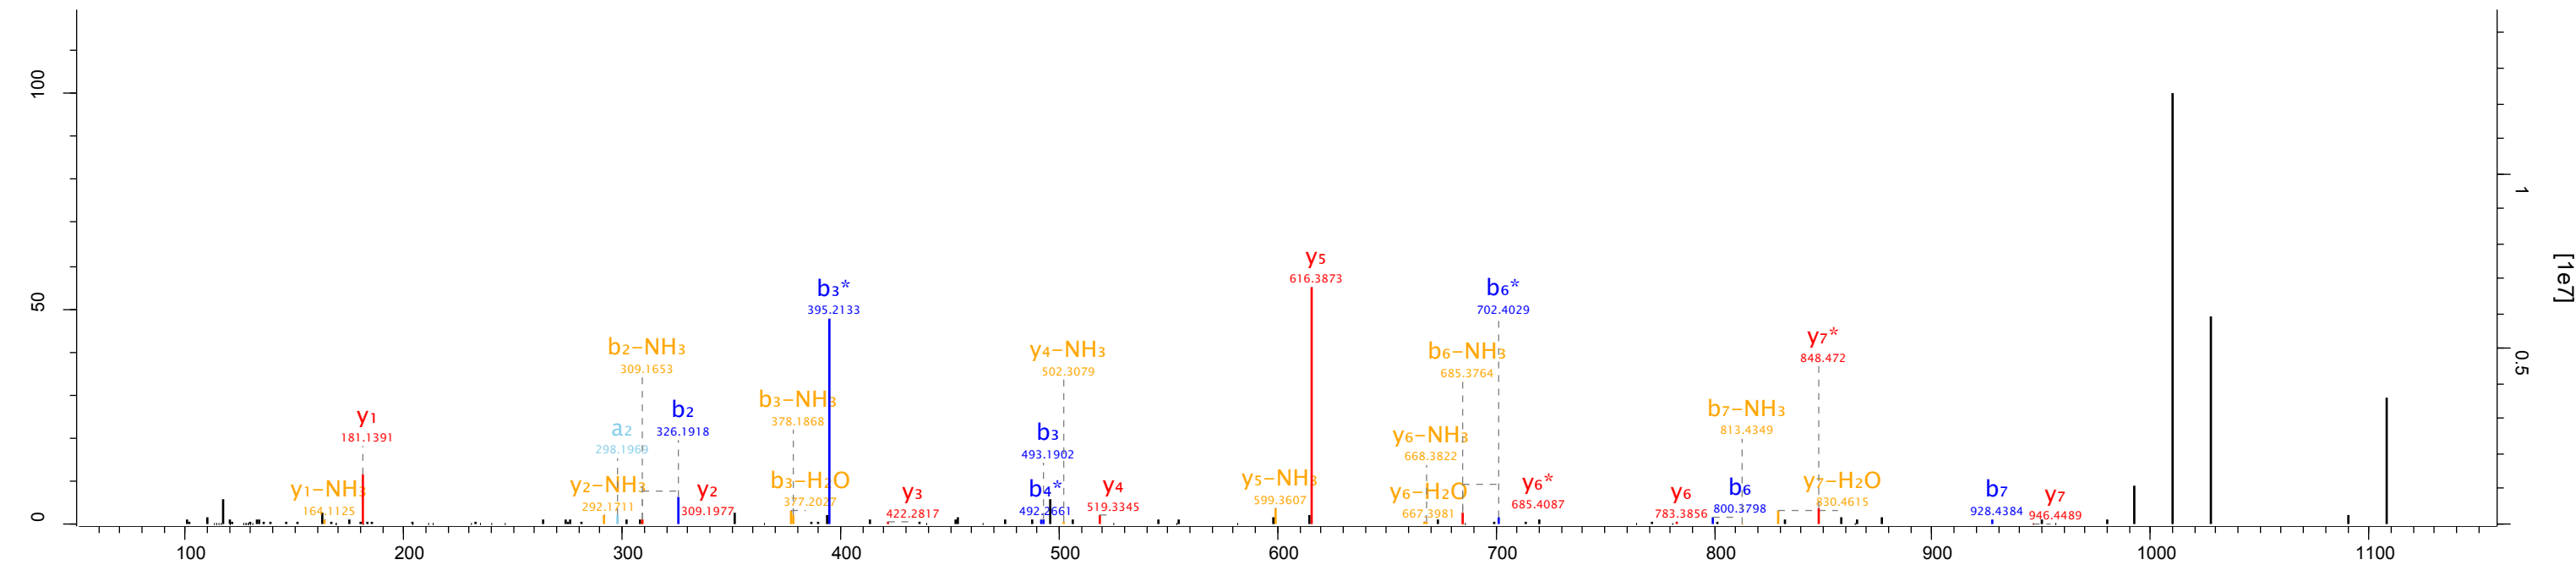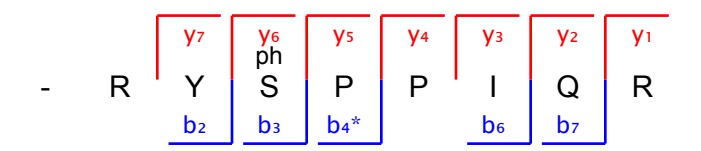

Raw file 20150814\_A375SR\_Phospho\_BR2\_08 Scan 7862 Method FTMS; HCD Score 47.37 m/z 616.96 Gene names CEP250

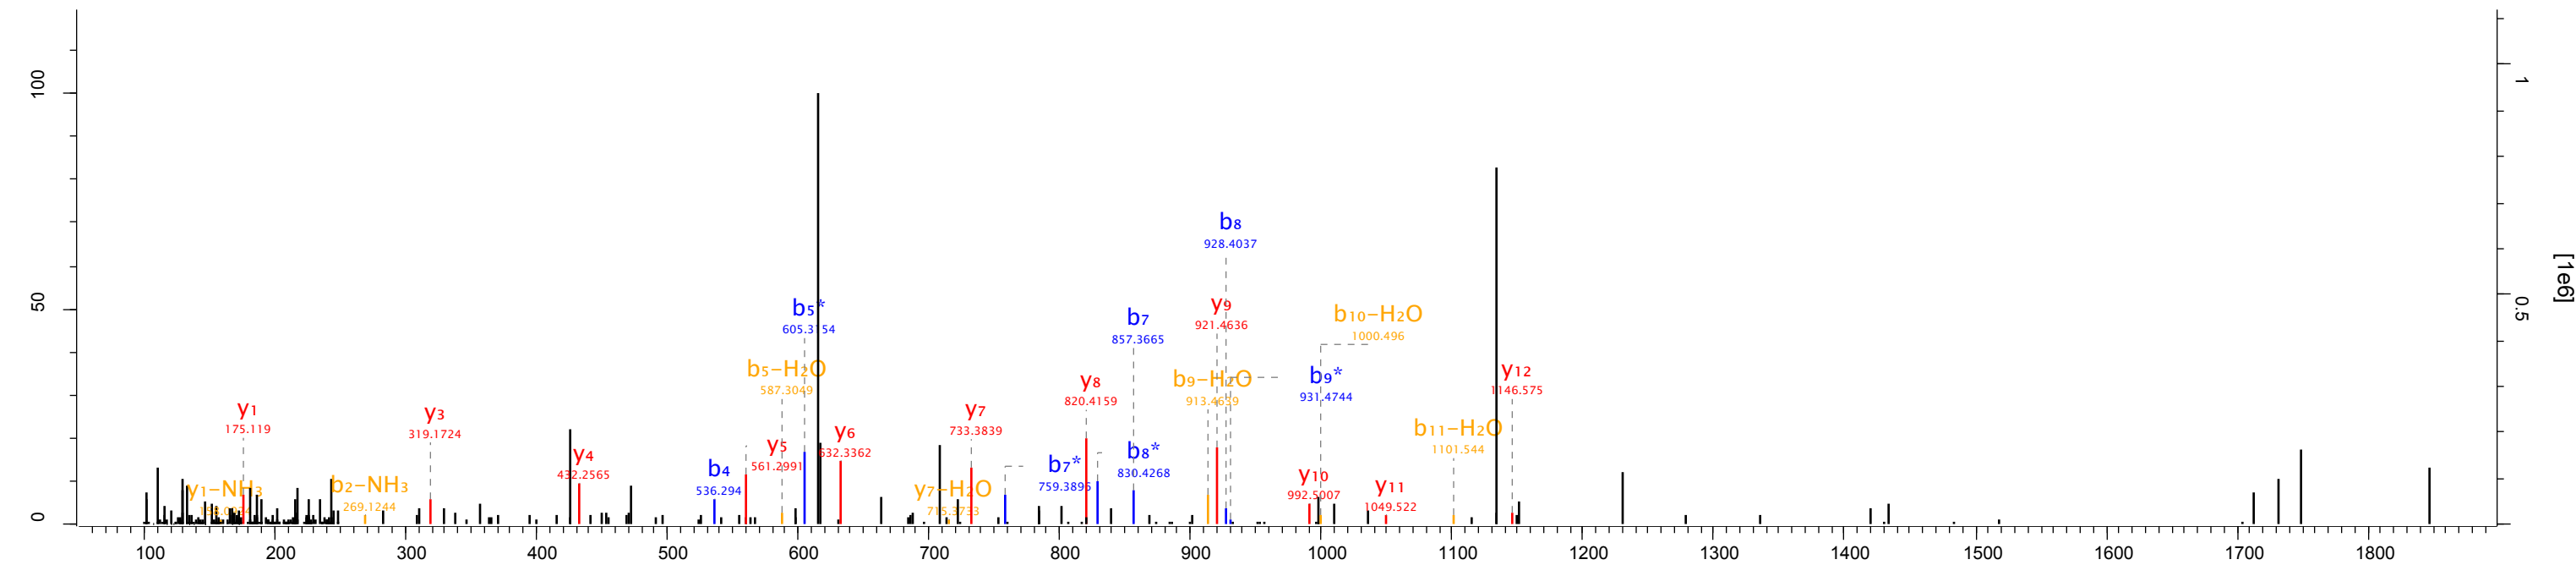

- E R L H S P G A T S T A E L G S R -

ph  
b<sub>4</sub> b<sub>5</sub>\* y<sub>12</sub> y<sub>11</sub> y<sub>10</sub> y<sub>9</sub> y<sub>8</sub> y<sub>7</sub> y<sub>6</sub> y<sub>5</sub> y<sub>4</sub> y<sub>3</sub> y<sub>1</sub>

b<sub>4</sub> b<sub>5</sub>\* b<sub>7</sub> b<sub>8</sub> b<sub>9</sub>\*

Raw file: 20150814\_A375SR\_Phospho\_BR2\_08  
 Scan: 8762 Method: FTMS; HCD Score: 115.73 m/z: 717.85 Gene names: DIDO1

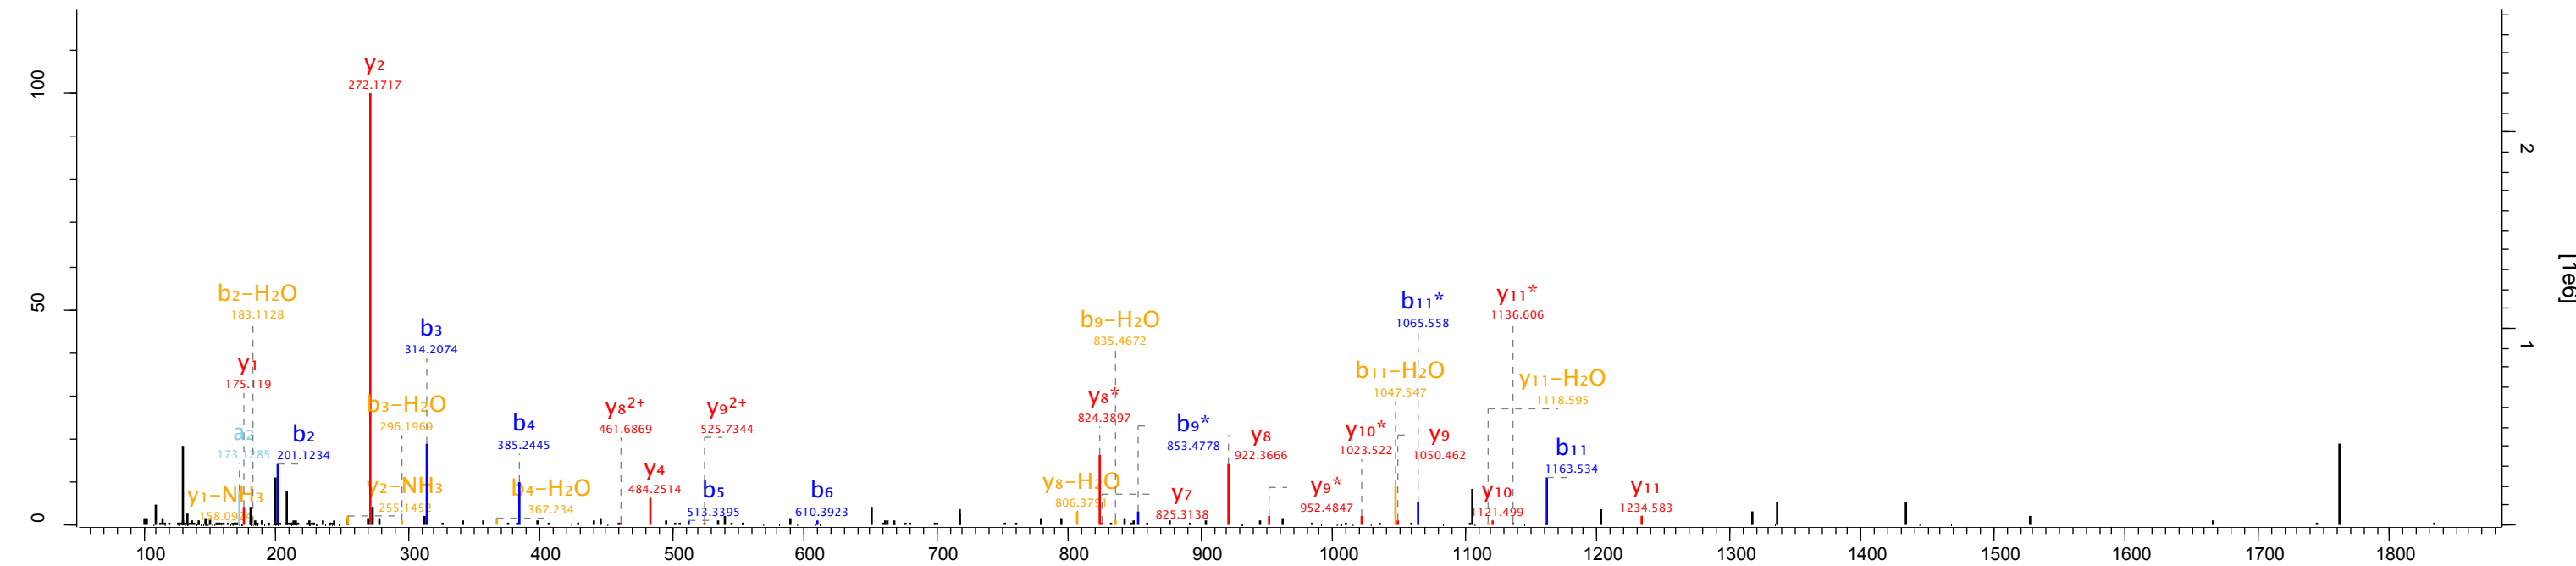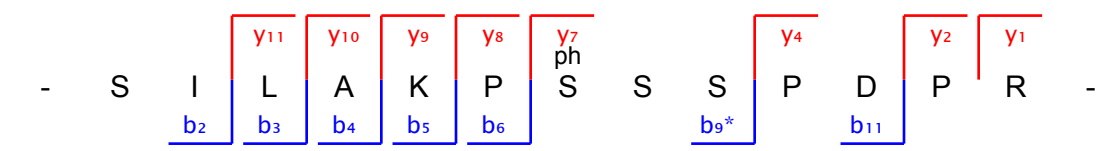

Raw file: 20150814\_A375SR\_Phospho\_BR2\_08  
 Scan: 9182 Method: FTMS; HCD Score: 129.02 m/z: 536.91 Gene names: GFPT2

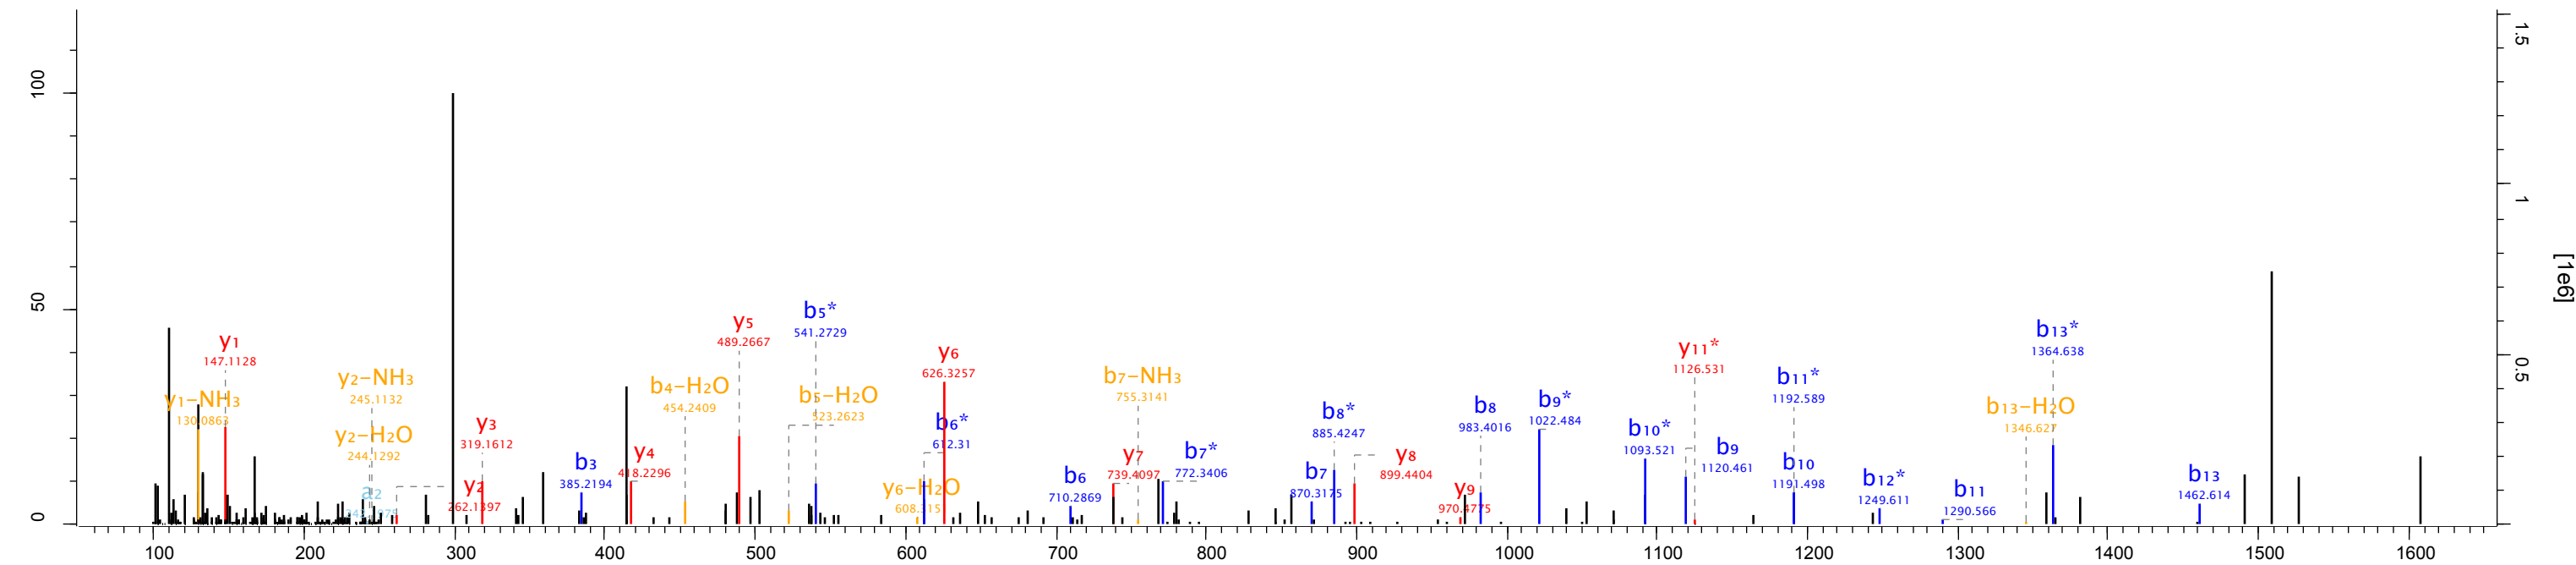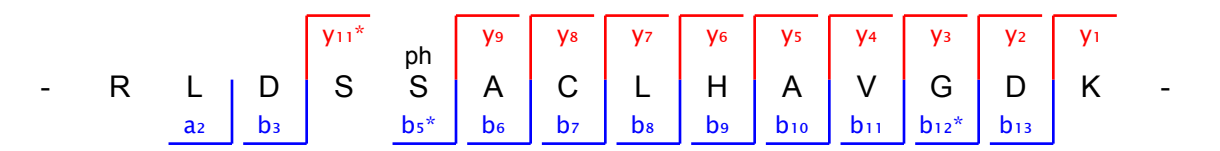

Raw file 20150814\_A375SR\_Phospho\_BR2\_09 Scan 10522 Method FTMS; HCD Score 119.27 m/z 865.39 Gene names MAP1B

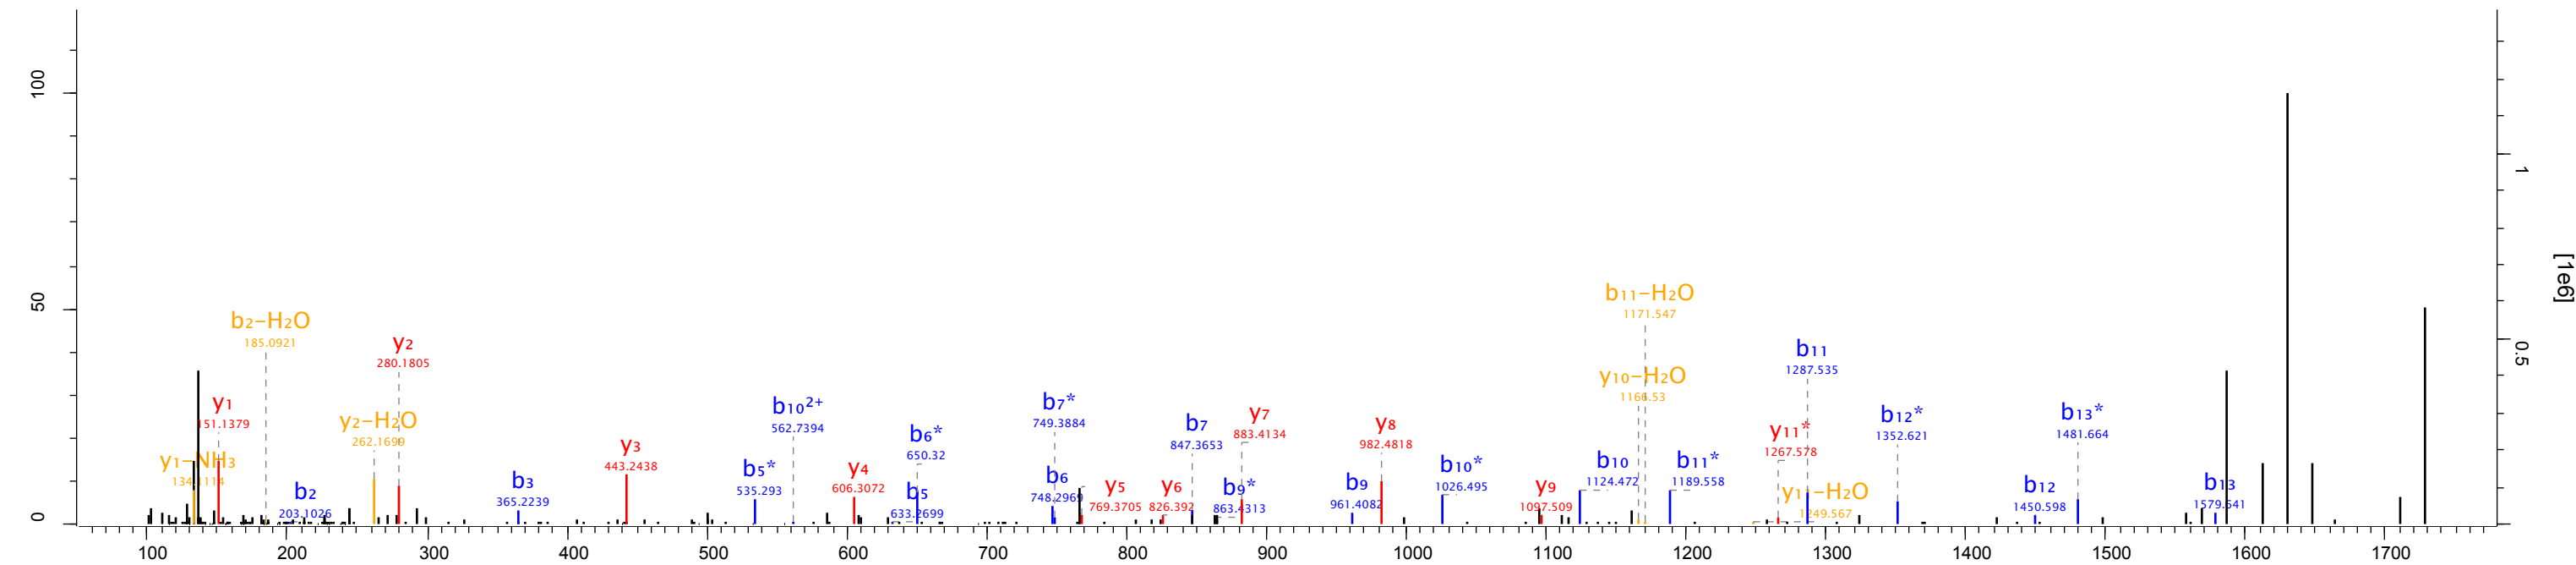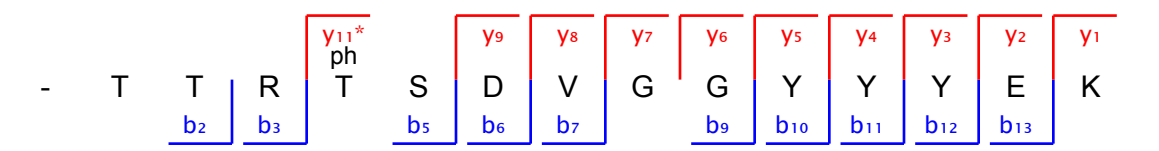



Raw file 20150814\_A375SR\_Phospho\_BR2\_09 Scan 14212 Method FTMS; HCD Score 125.16 m/z 399.21 Gene names NPM1

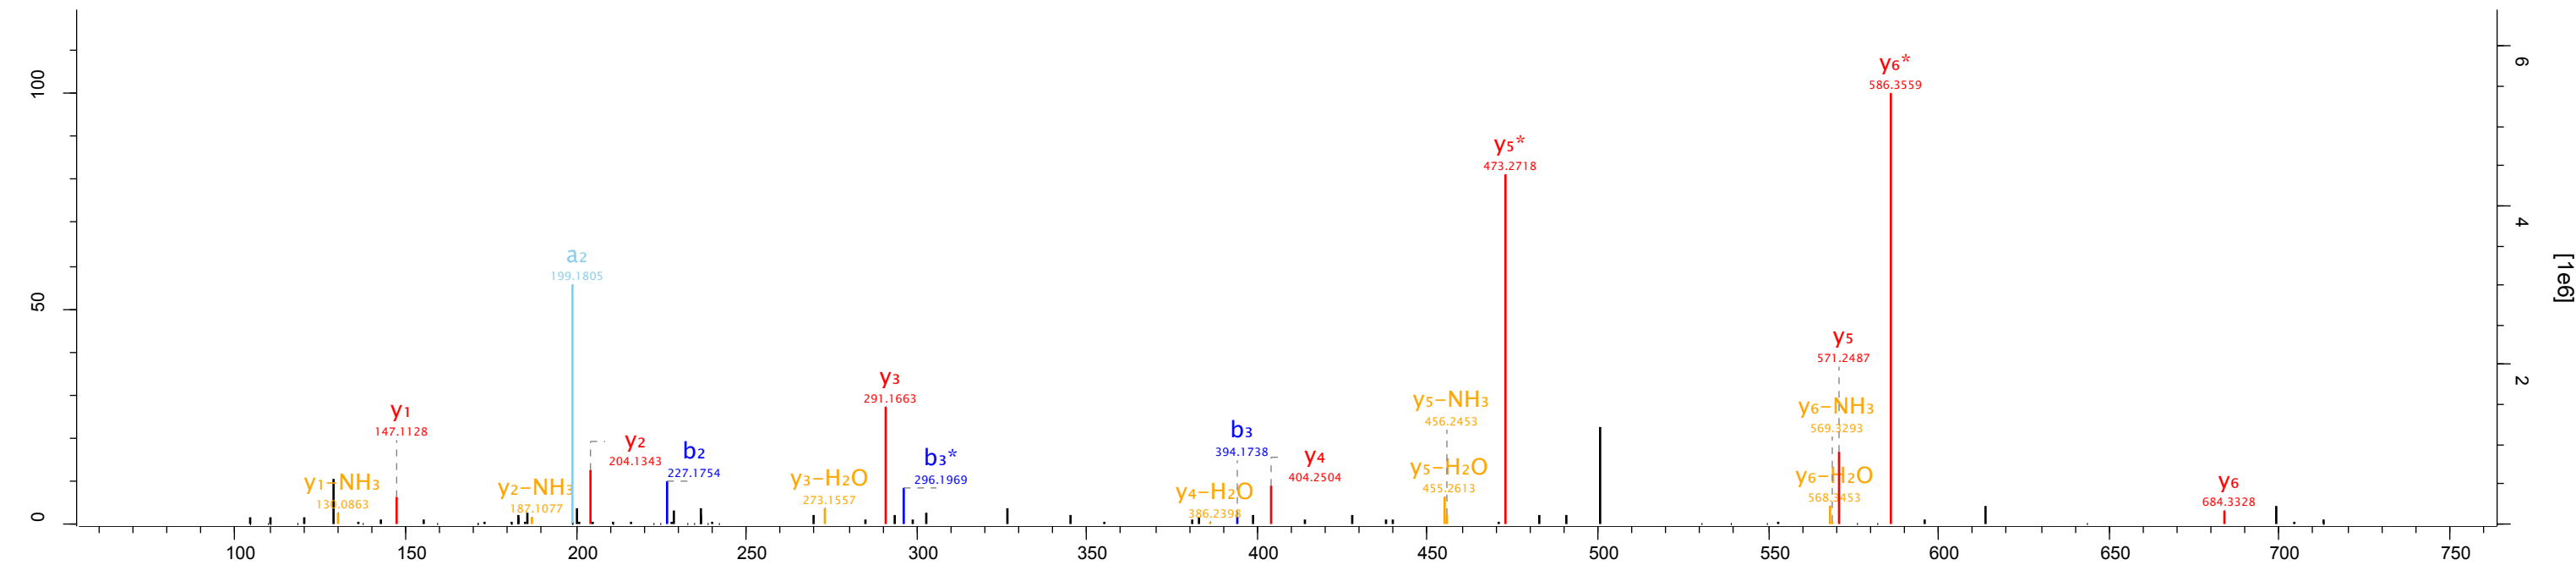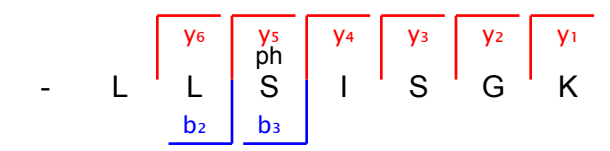

Raw file Scan Method Score m/z Gene names  
 20150814\_A375SR\_Phospho\_BR2\_09 14462 FTMS; HCD 168.16 702.88 KLC1

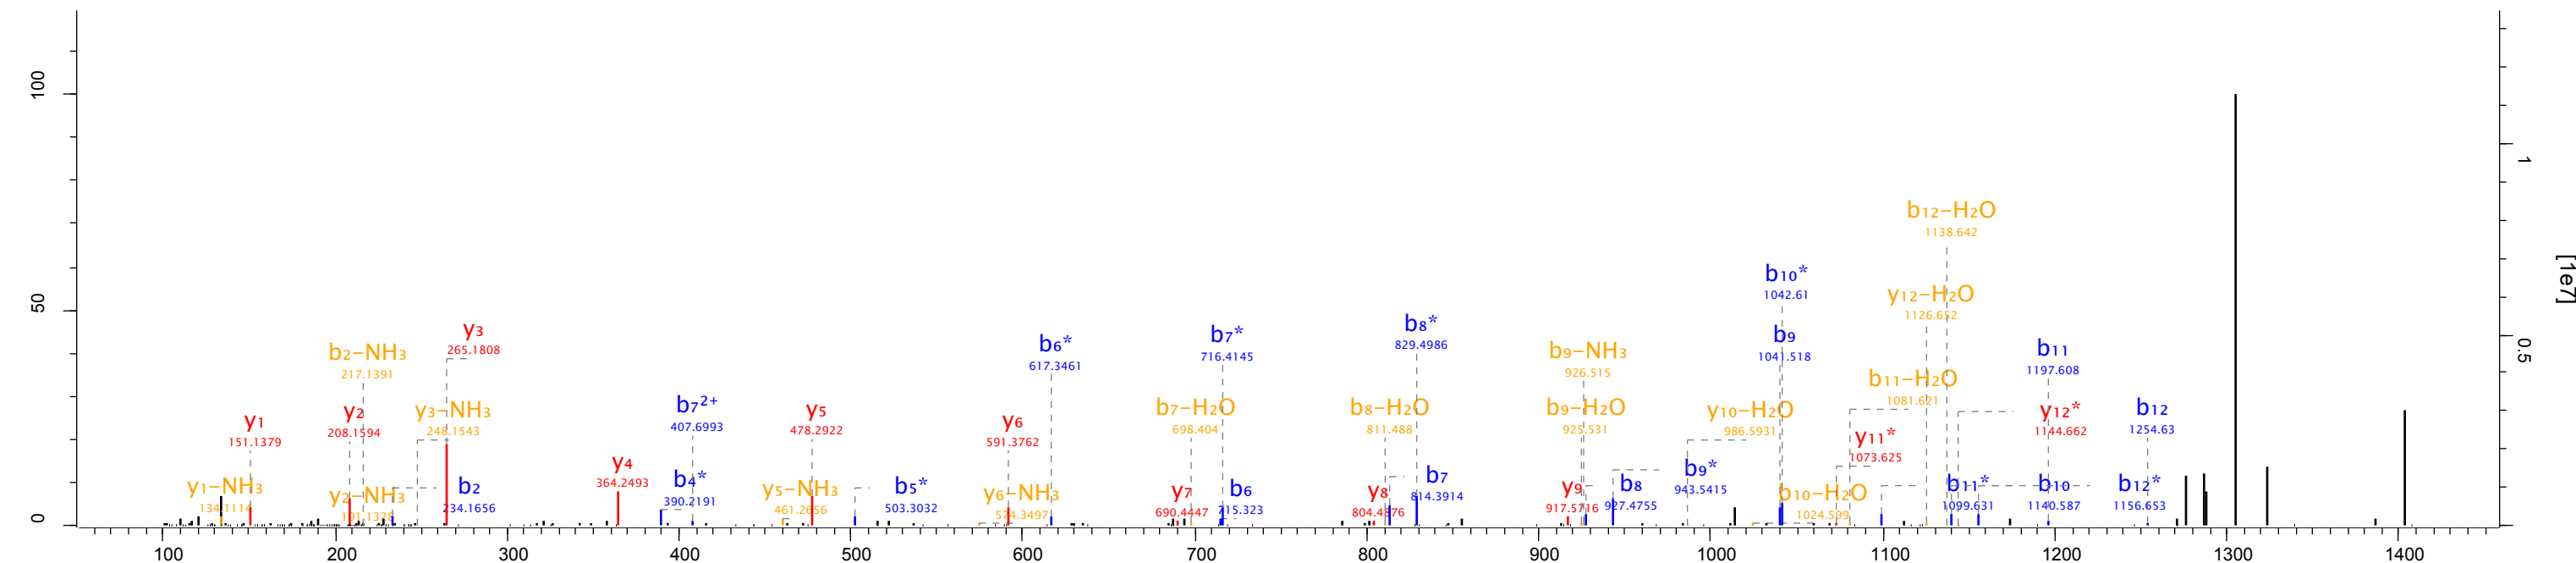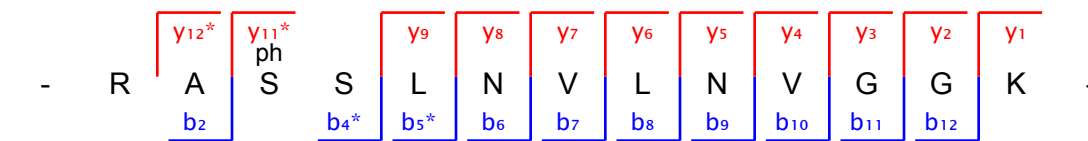

Raw file: 20150814\_A375SR\_Phospho\_BR2\_09  
 Scan: 15002 Method: FTMS; HCD Score: 285.95 m/z: 846.44 Gene names: TCOF1

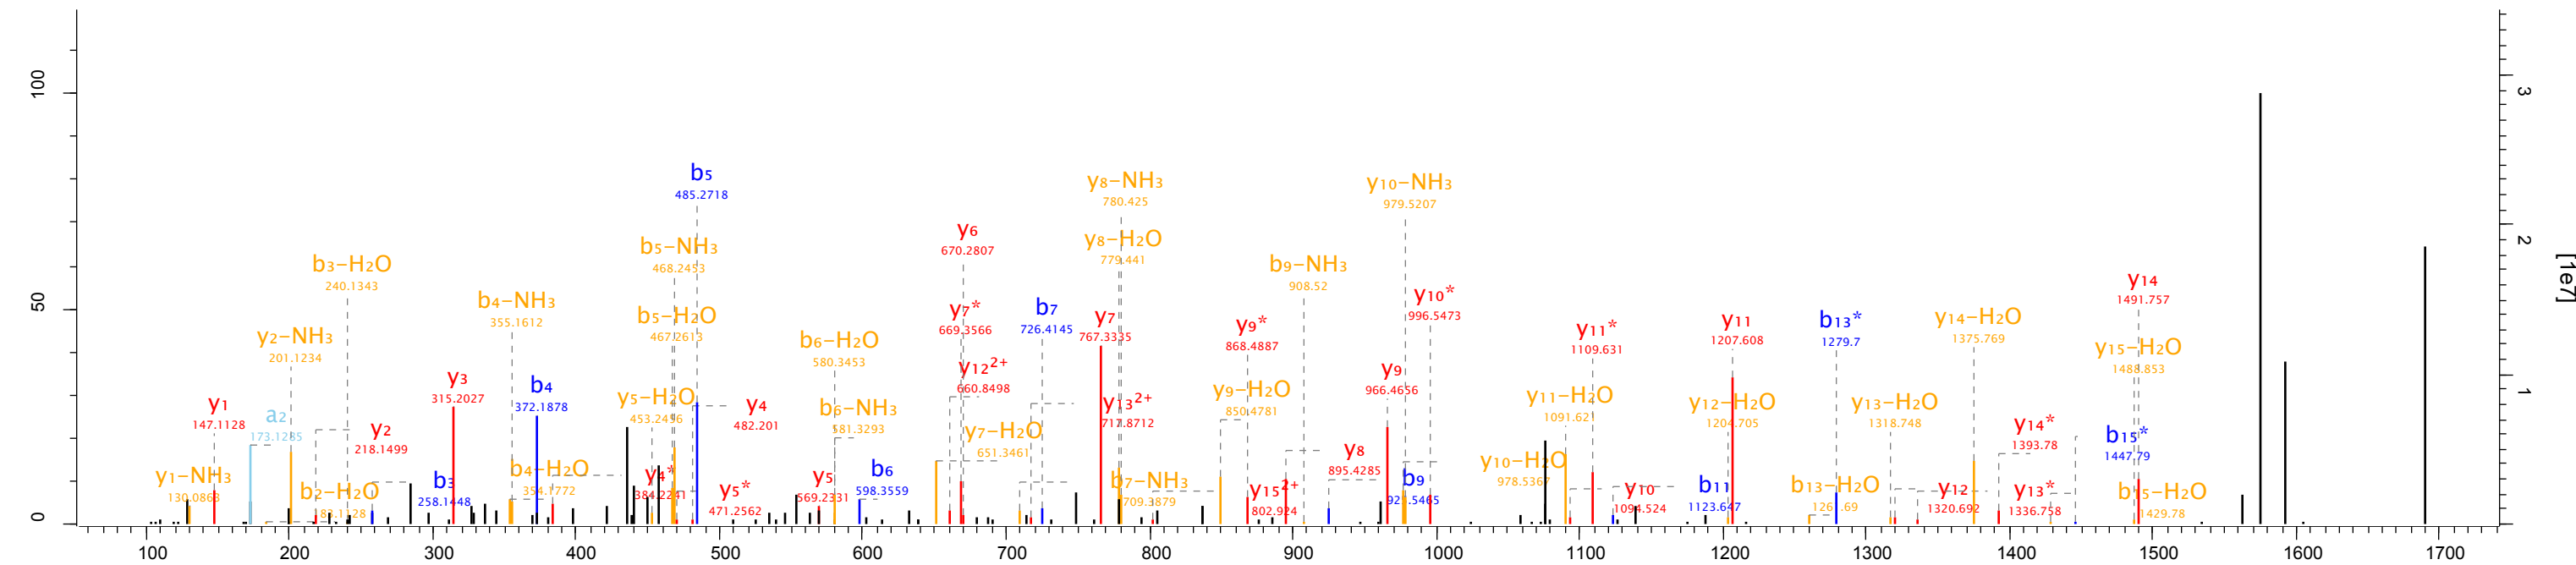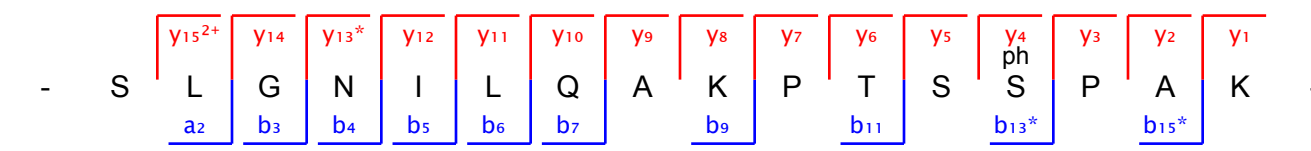

Raw file 20150814\_A375SR\_Phospho\_BR2\_09 Scan 15582 Method FTMS; HCD Score 47.22 m/z 563.28 Gene names PARD3

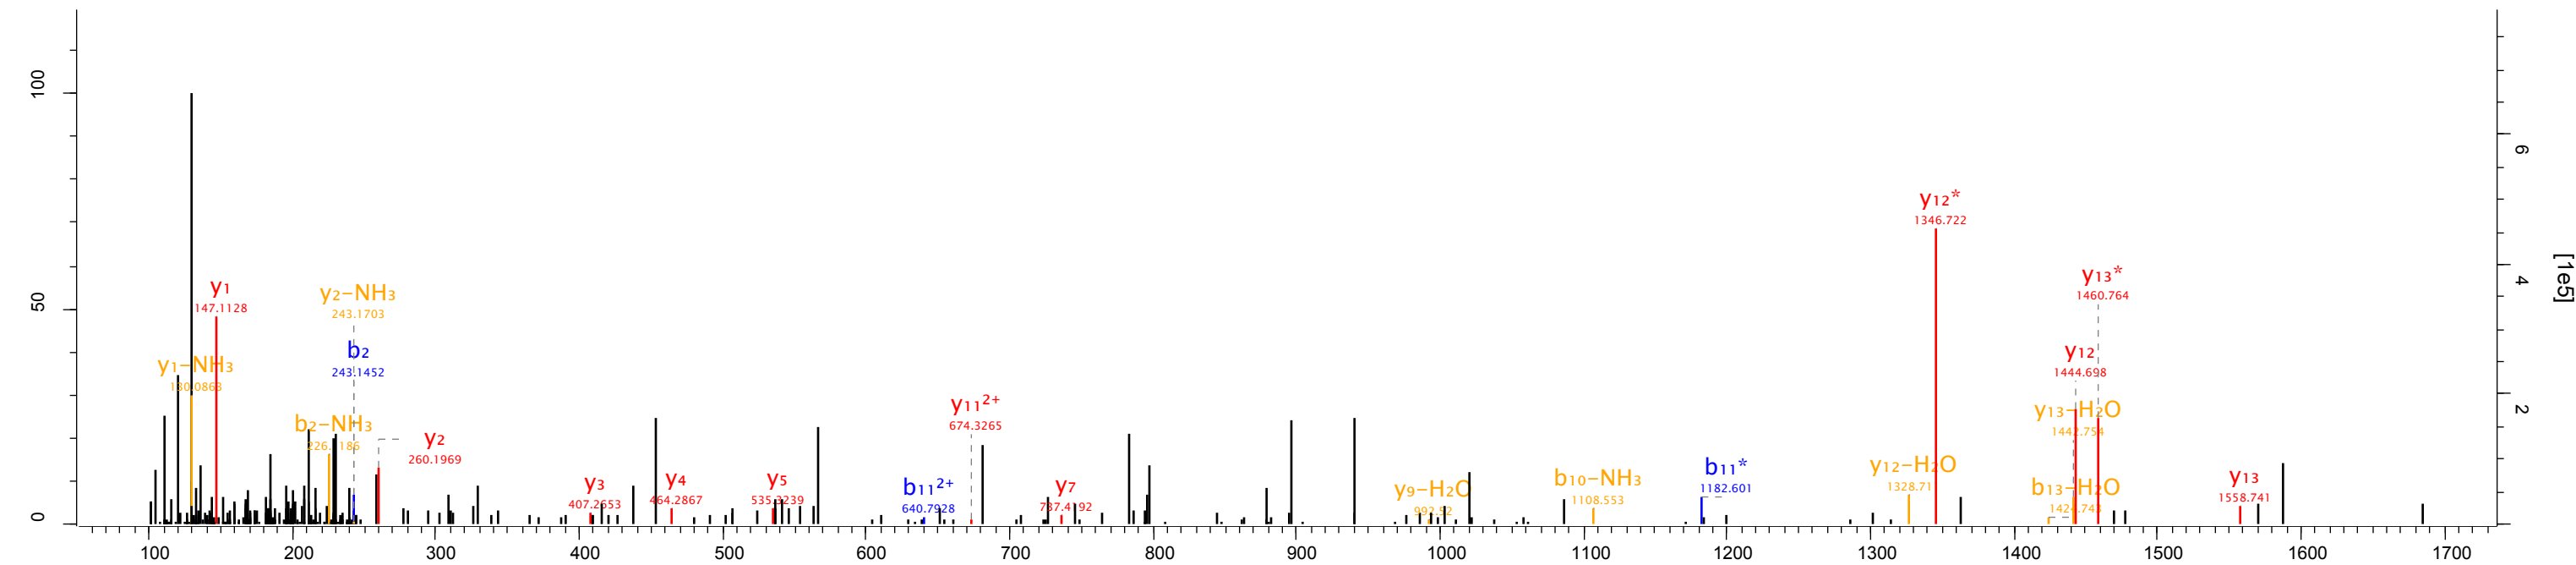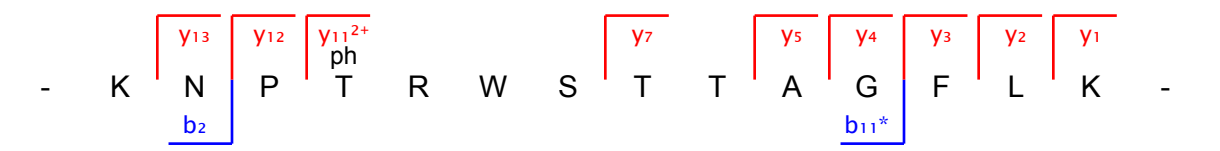

Raw file  
 20150814\_A375SR\_Phospho\_BR2\_09  
 Scan 15602 Method FTMS; HCD Score 54.15 m/z 592.97 Gene names CTNNB1

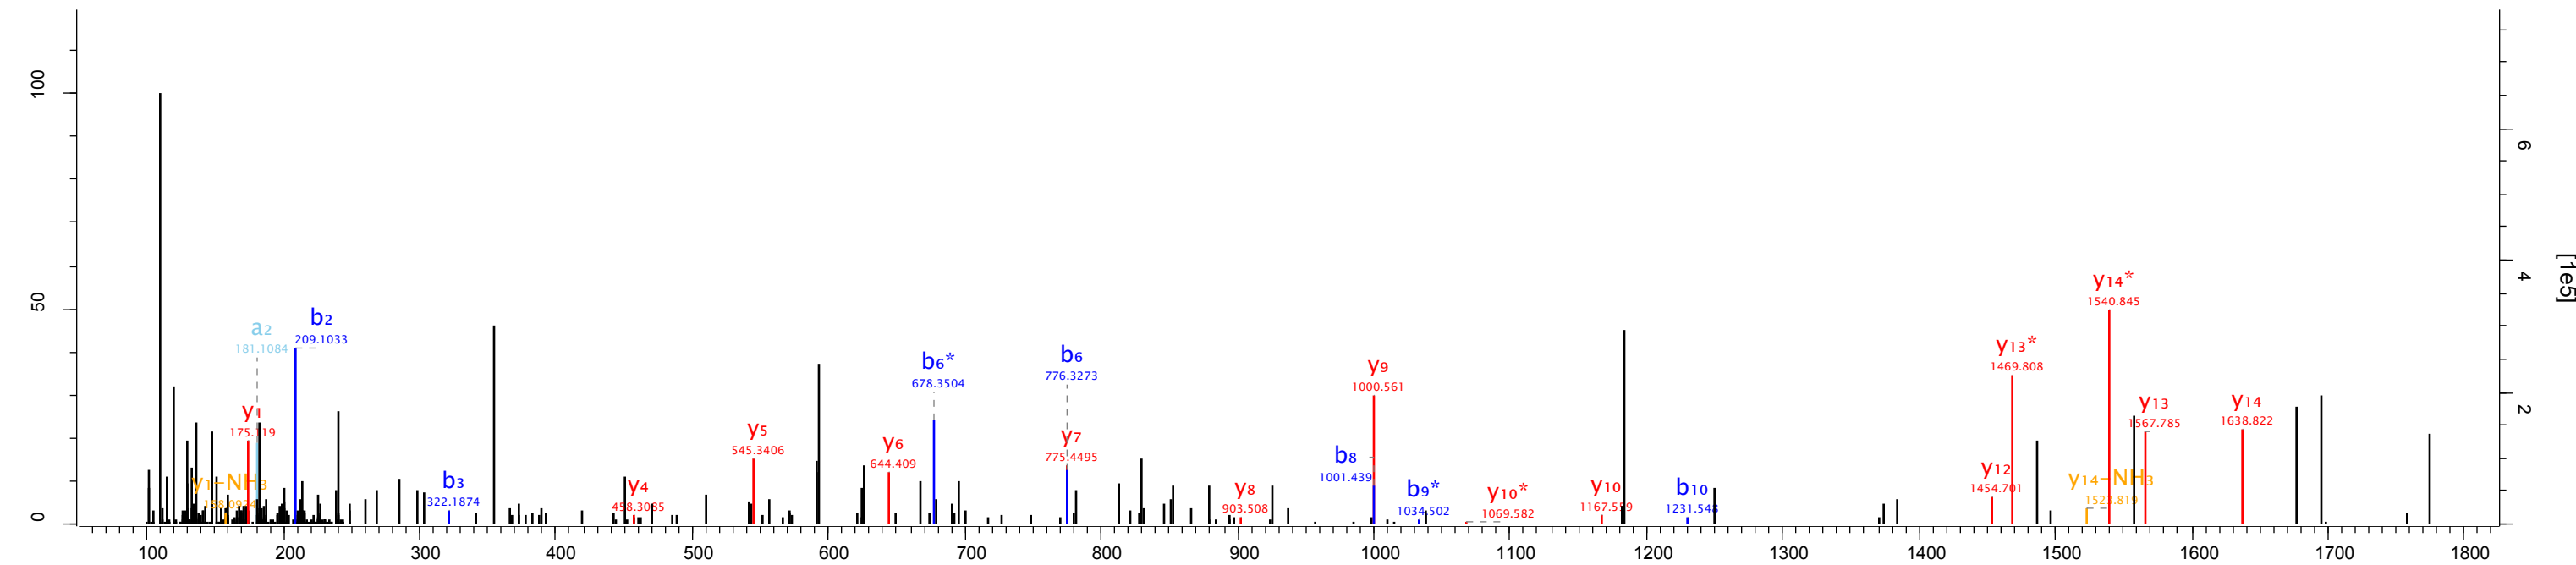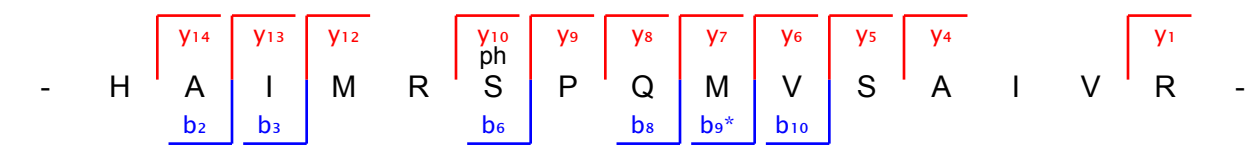

Raw file 20150814\_A375SR\_Phospho\_BR2\_09 Scan 16452 Method FTMS; HCD Score 280.11 m/z 1245.53 Gene names MAP1B

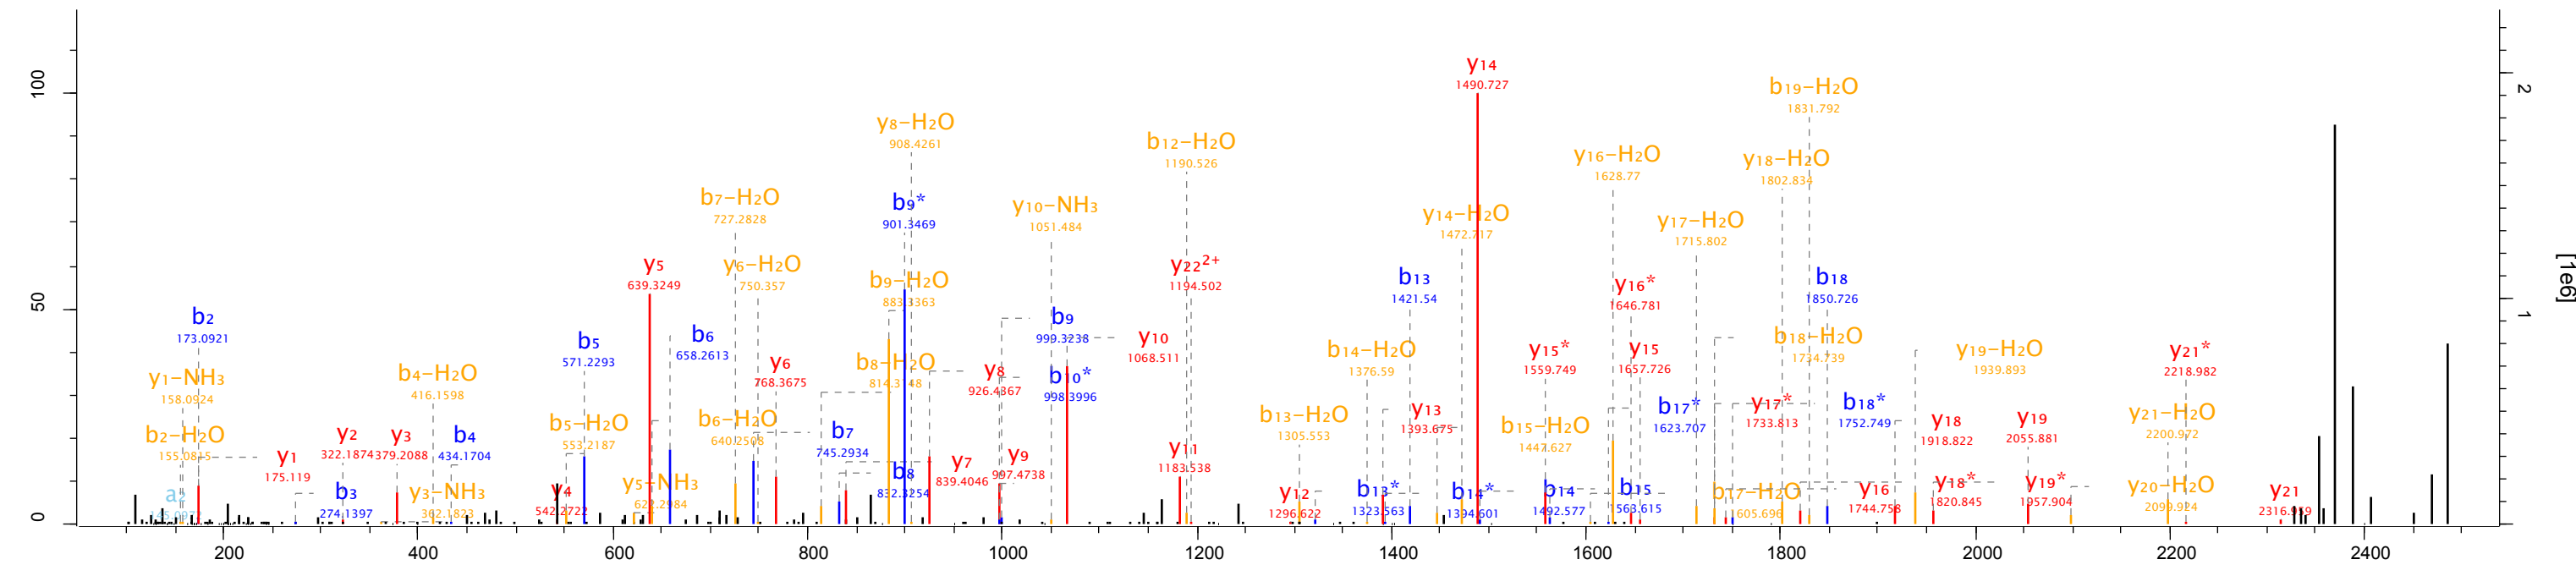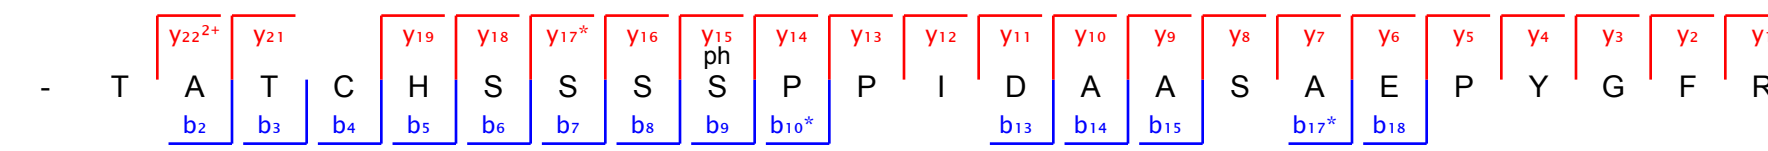

Raw file  
 20150814\_A375SR\_Phospho\_BR2\_09  
 Scan 1672 Method FTMS; HCD Score 92.15 m/z 622.77 Gene names TBC1D13

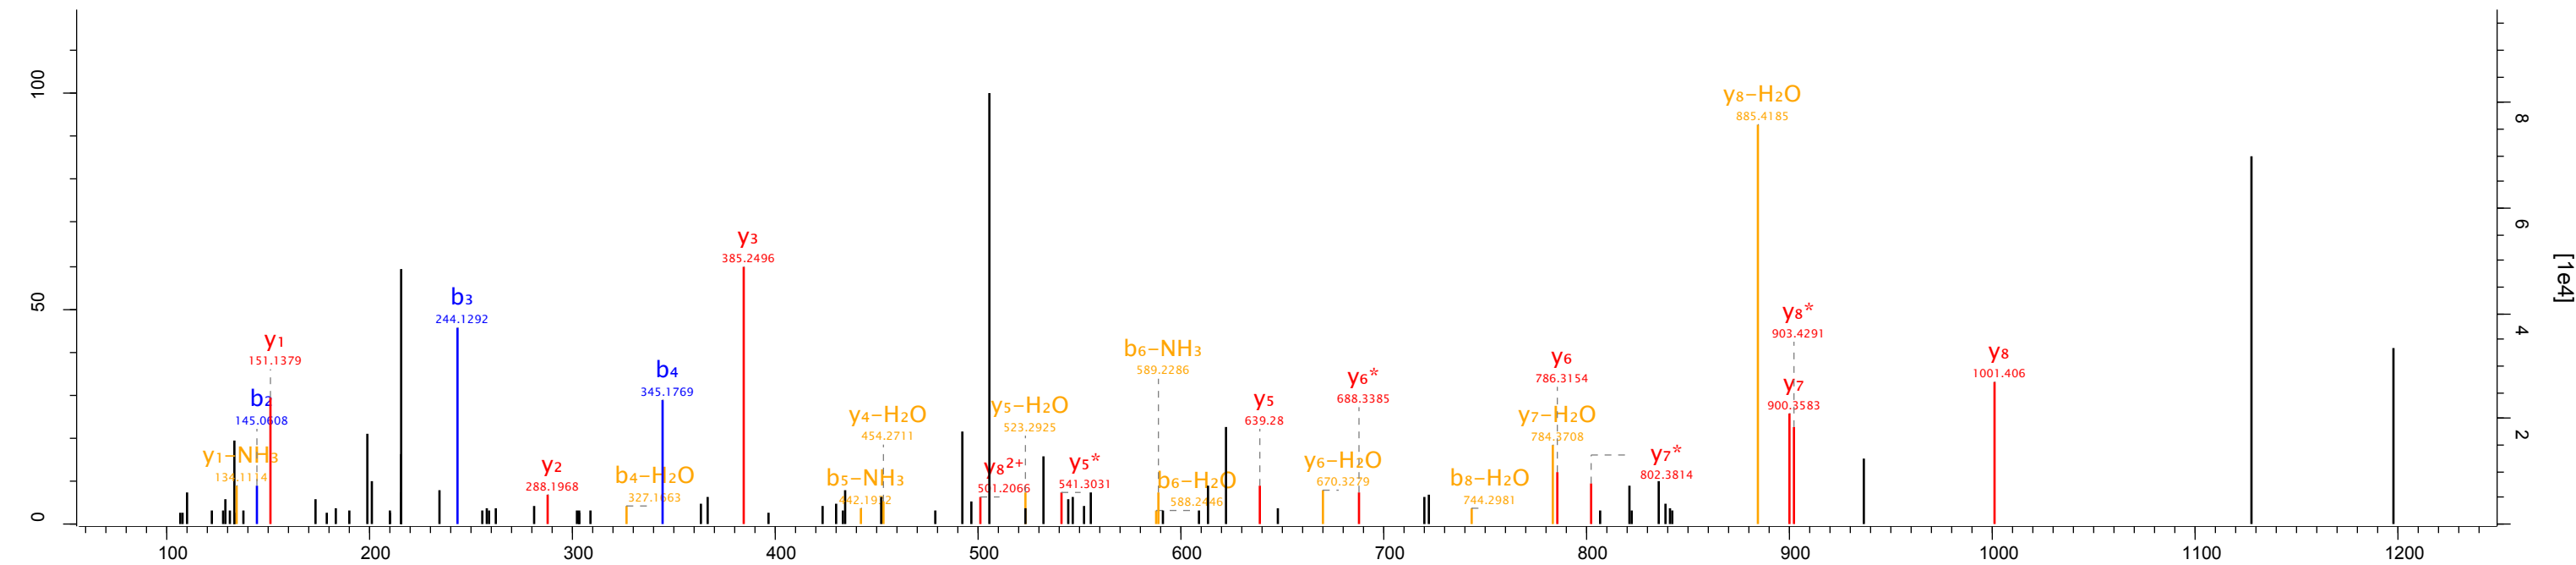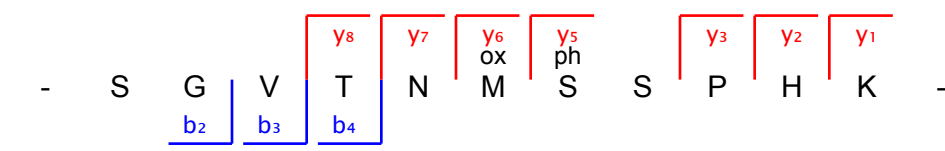

Raw file 20150814\_A375SR\_Phospho\_BR2\_09 Scan 17282 Method FTMS; HCD Score 178.85 m/z 842.78 Gene names PCBP2

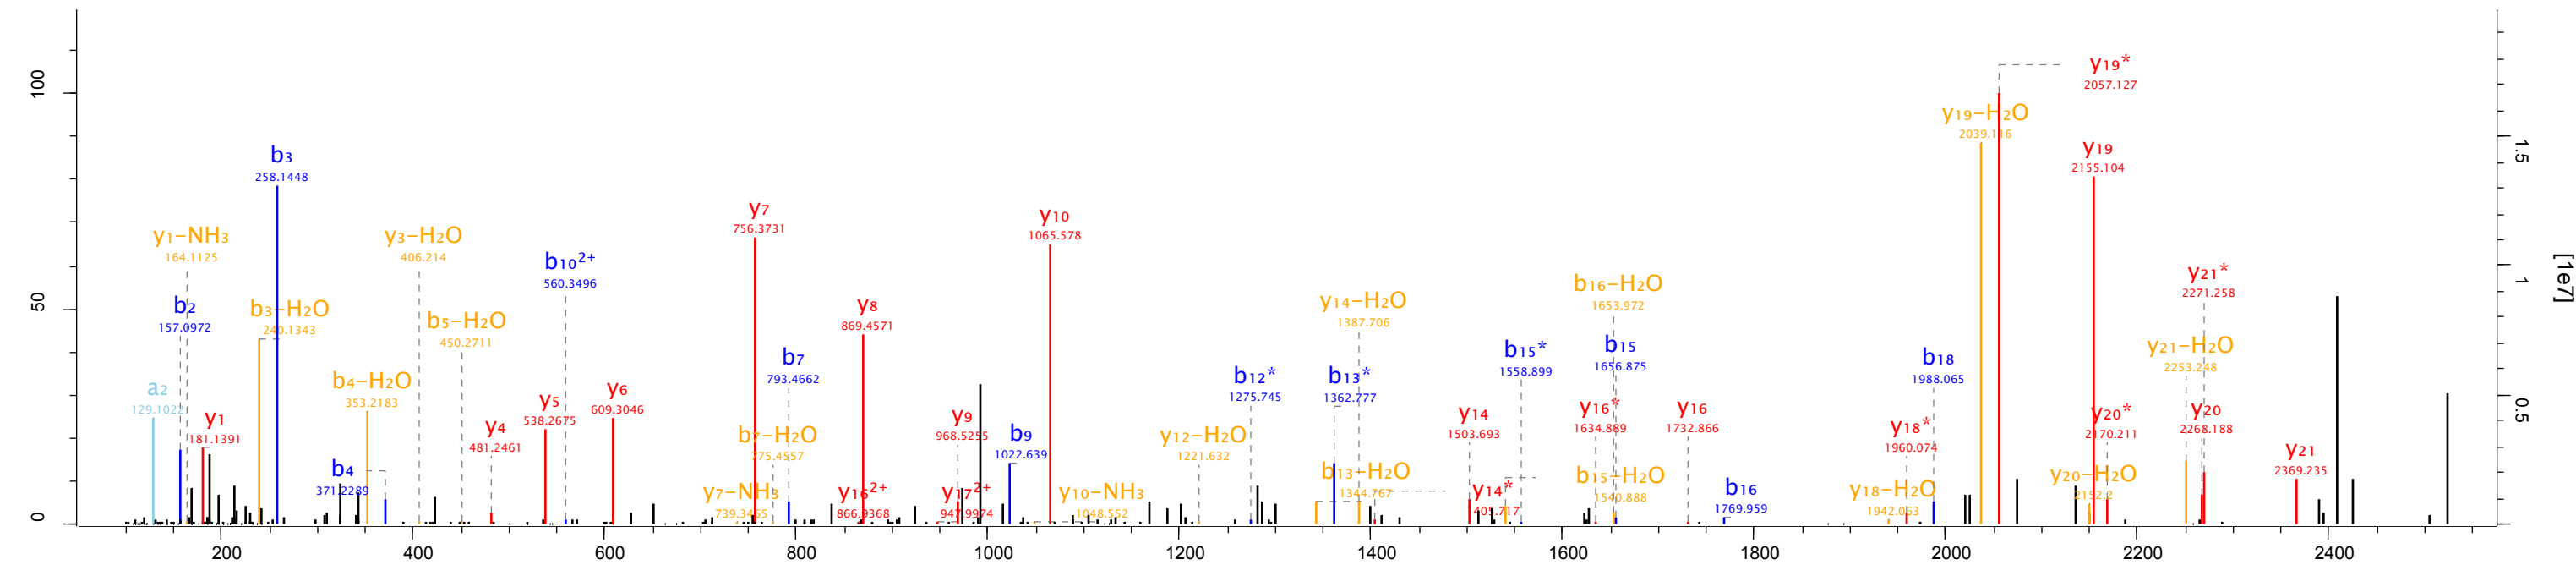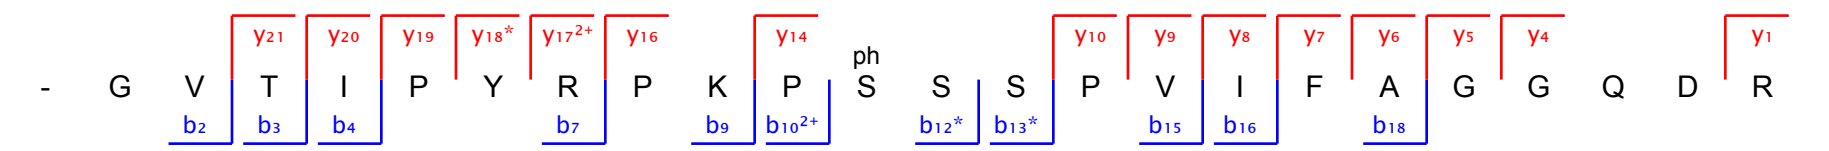



Raw file 20150814\_A375SR\_Phospho\_BR2\_09 Scan 17662 Method FTMS; HCD Score 180.48 m/z 764.37 Gene names TRIM28

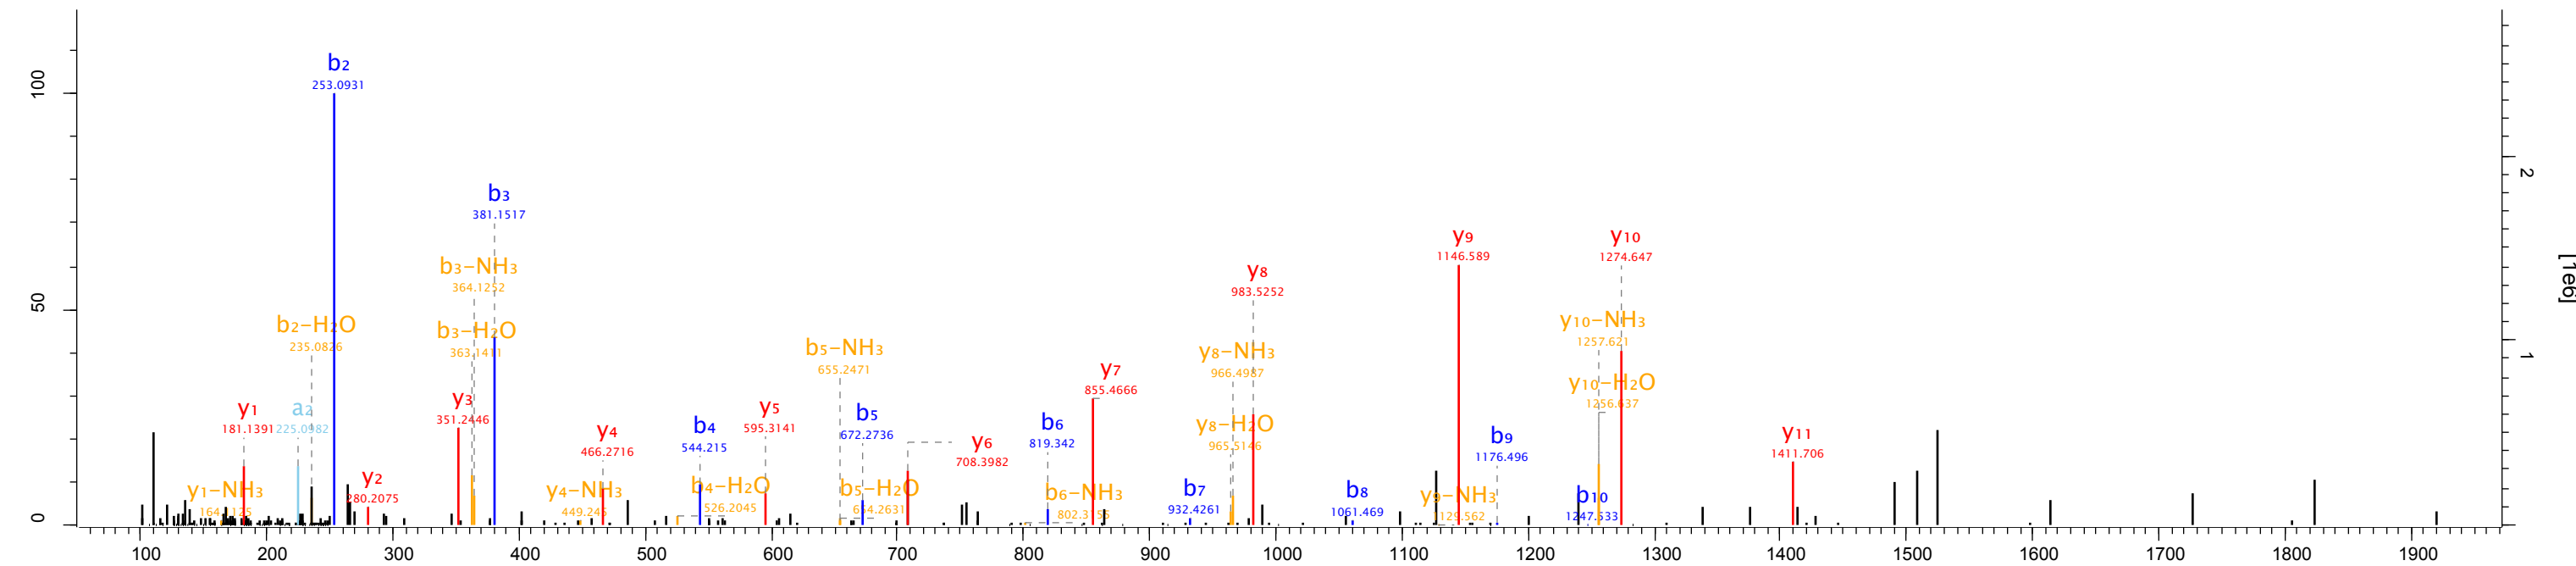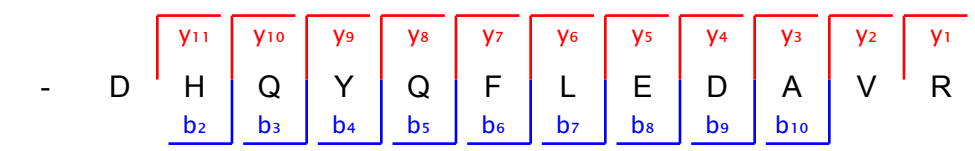

Raw file: 20150814\_A375SR\_Phospho\_BR2\_09  
 Scan: 1922 Method: FTMS; HCD Score: 65.04 m/z: 606.31 Gene names: OPTN

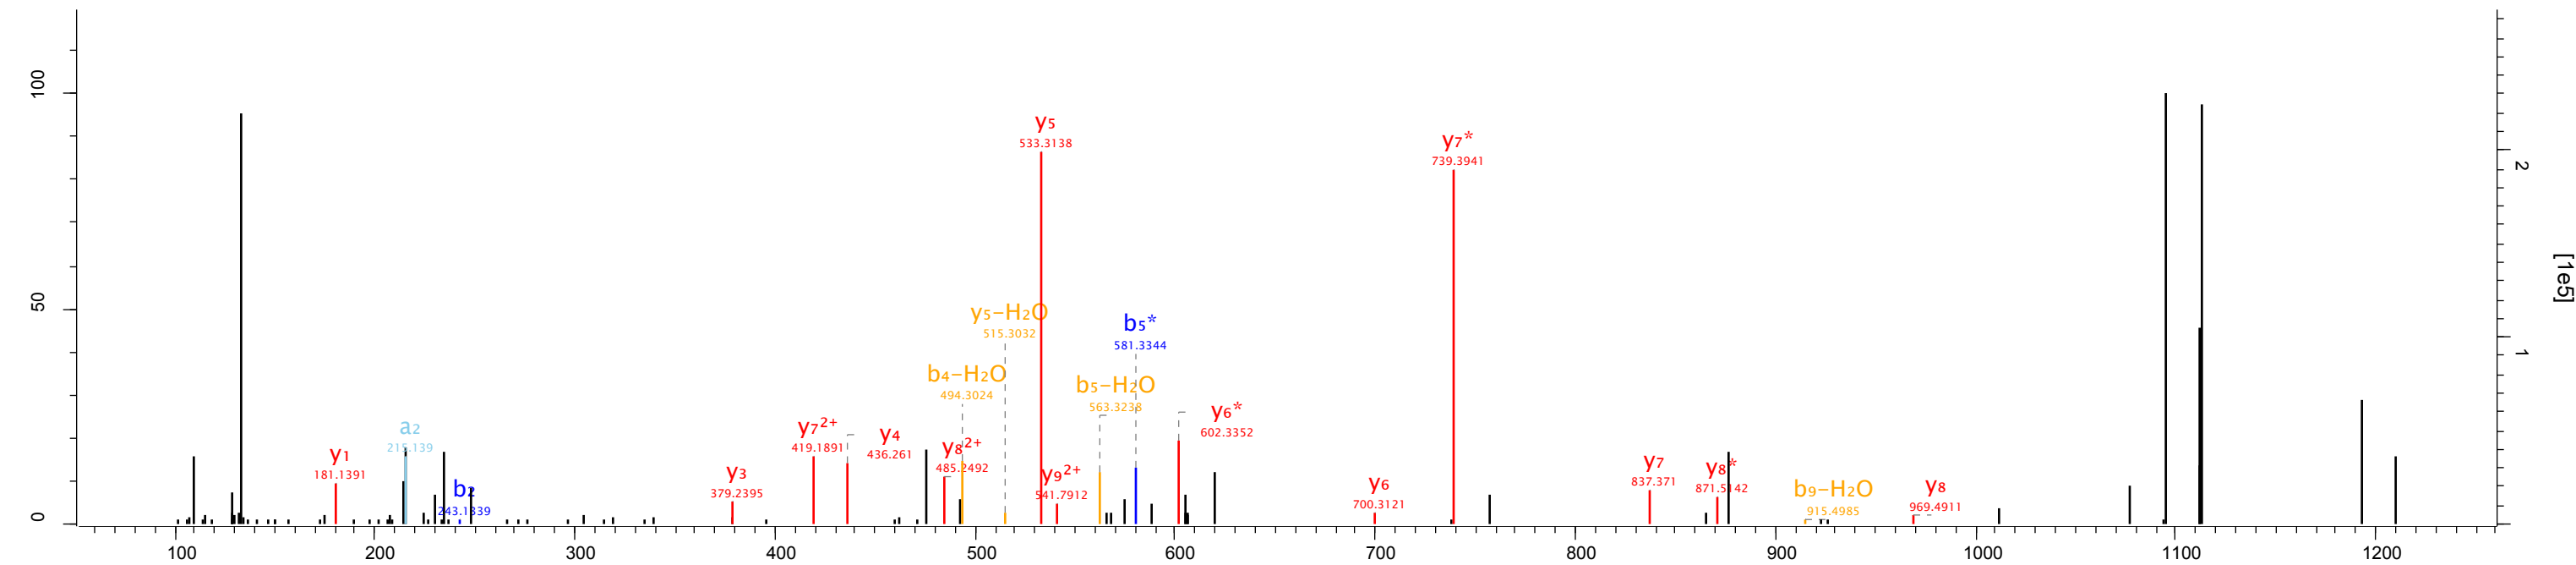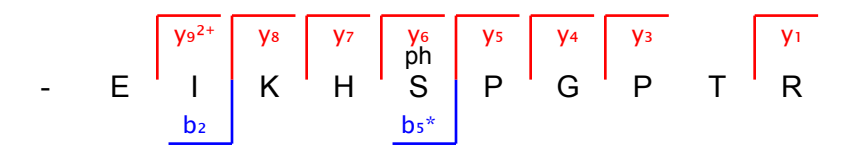

Raw file: 20150814\_A375SR\_Phospho\_BR2\_09  
 Scan: 20032 Method: FTMS; HCD Score: 130.09 m/z: 919.92 Gene names: ATP2B1

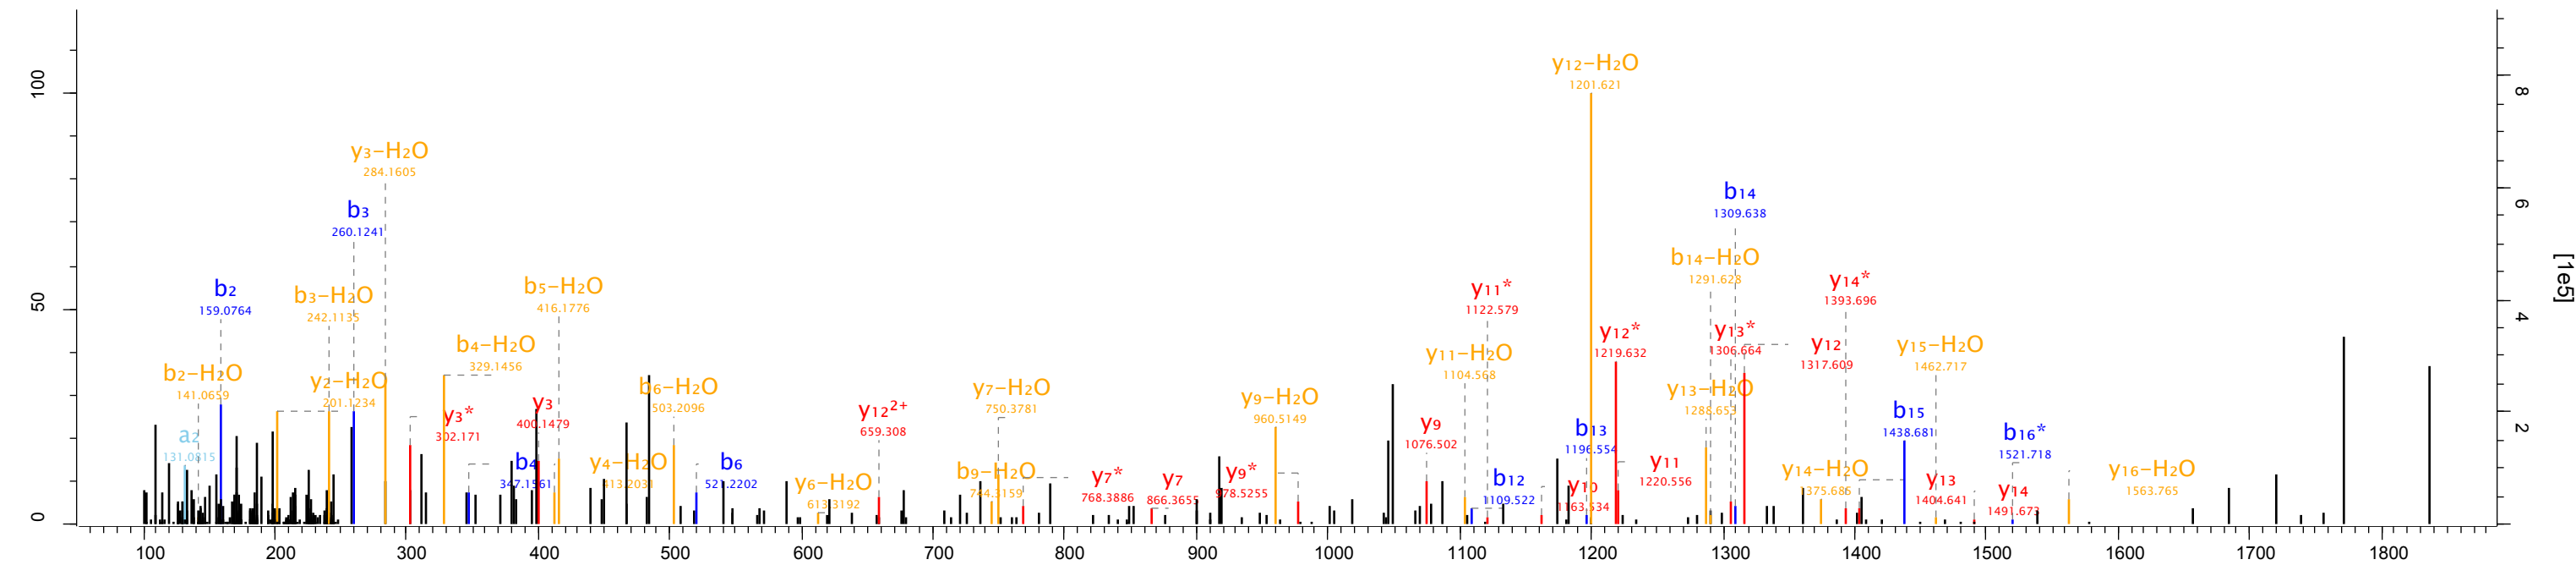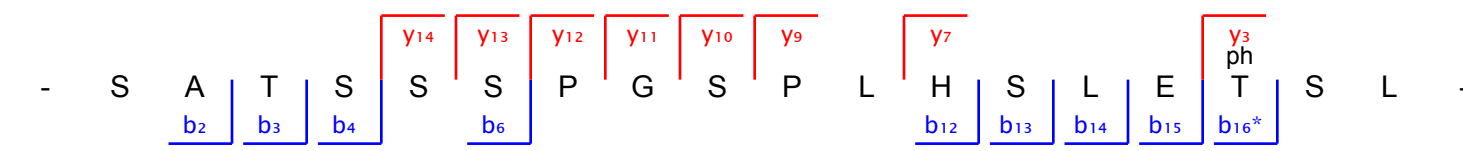

Raw file: 20150814\_A375SR\_Phospho\_BR2\_09  
 Scan: 2062 Method: FTMS; HCD Score: 108.14 m/z: 775.36 Gene names: SPAG1

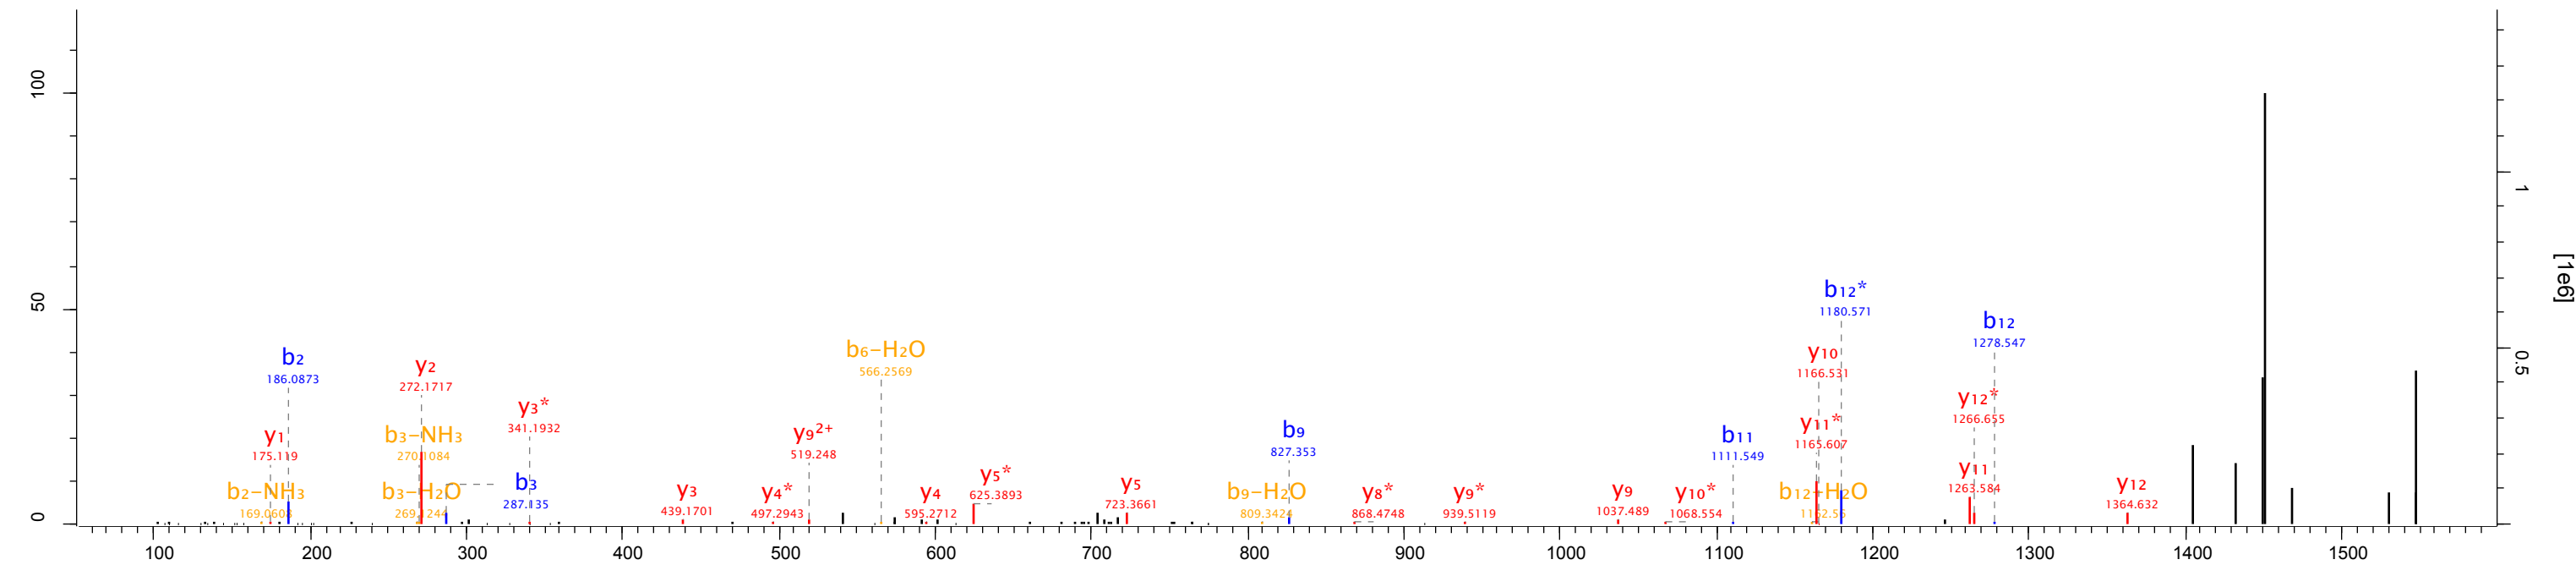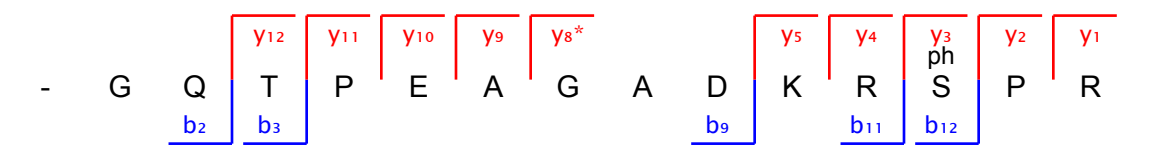

Raw file: 20150814\_A375SR\_Phospho\_BR2\_09  
 Scan: 20872 Method: FTMS; HCD Score: 76.29 m/z: 815.76 Gene names: EIF4H

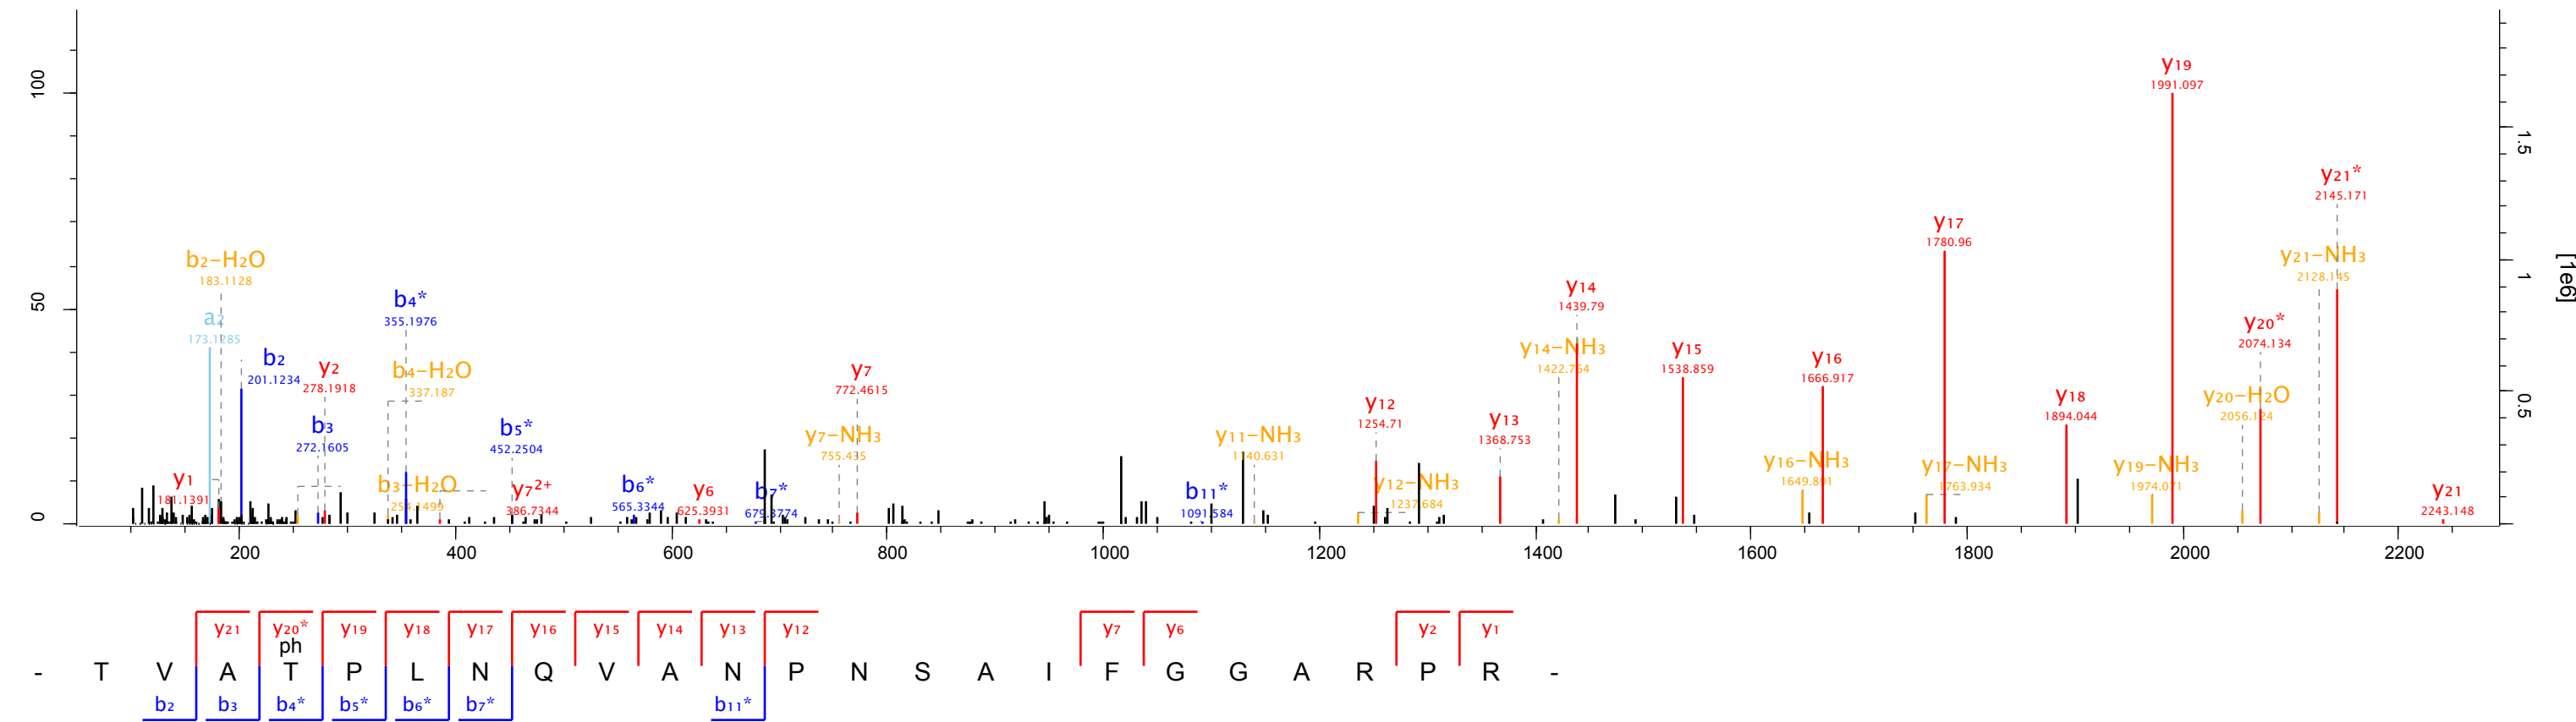

Raw file  
 20150814\_A375SR\_Phospho\_BR2\_09  
 Scan 21512 Method FTMS; HCD Score 76.34 m/z 602.29 Gene names GDA

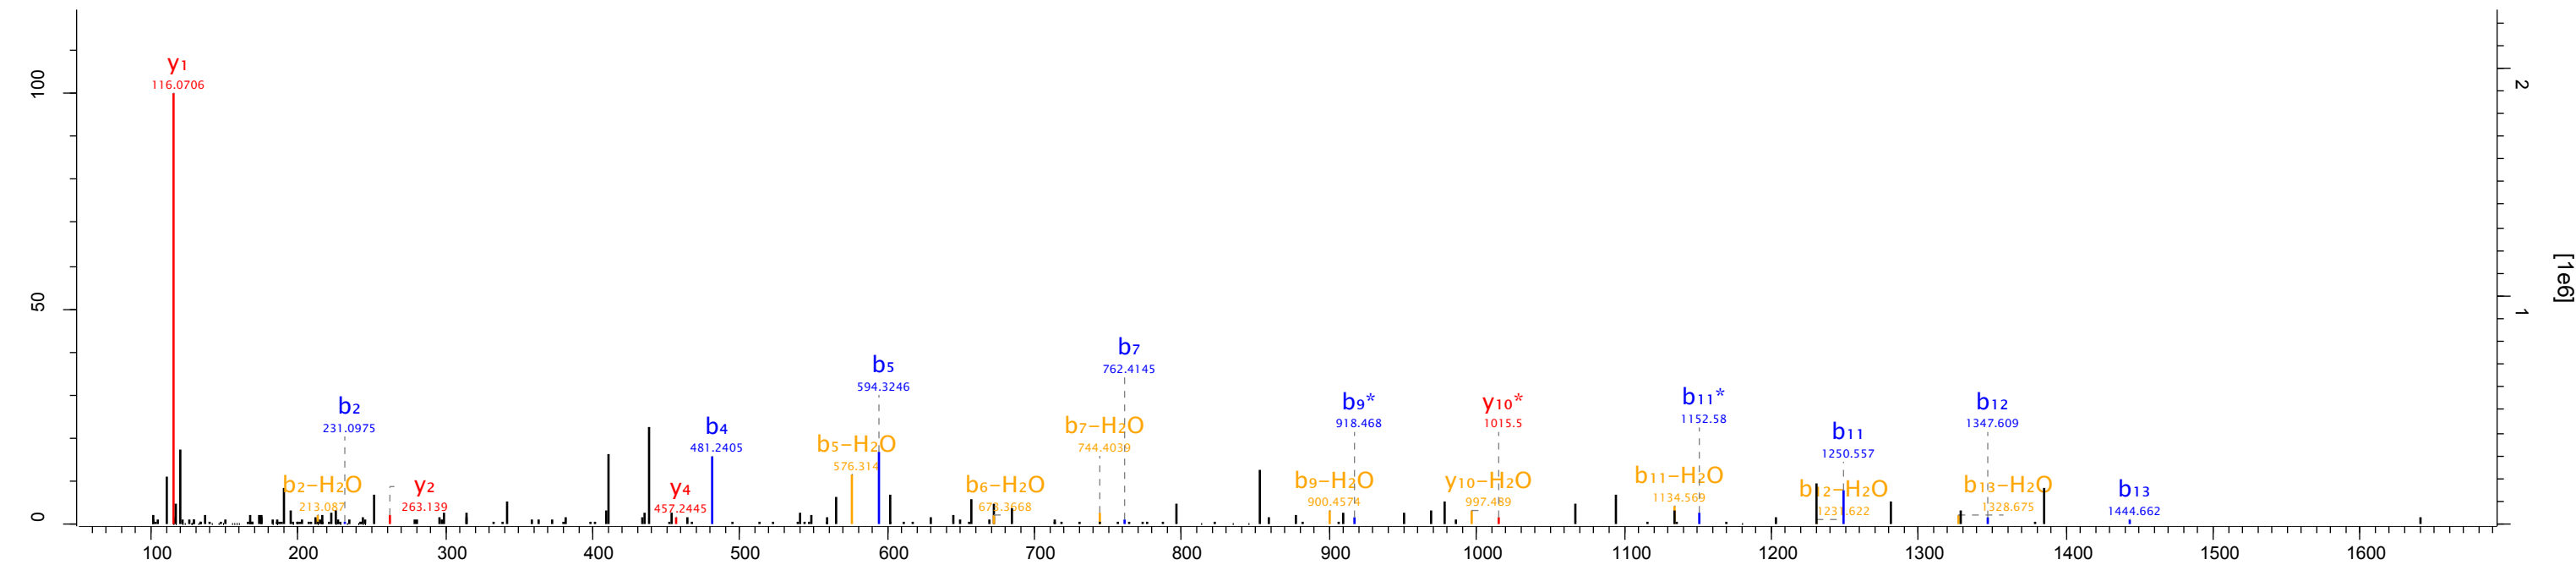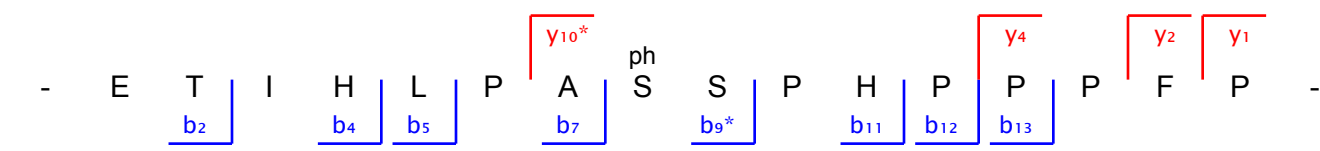

Raw file: 20150814\_A375SR\_Phospho\_BR2\_09  
 Scan: 22072 Method: FTMS; HCD Score: 47.73 m/z: 929.44 Gene names: SAFB

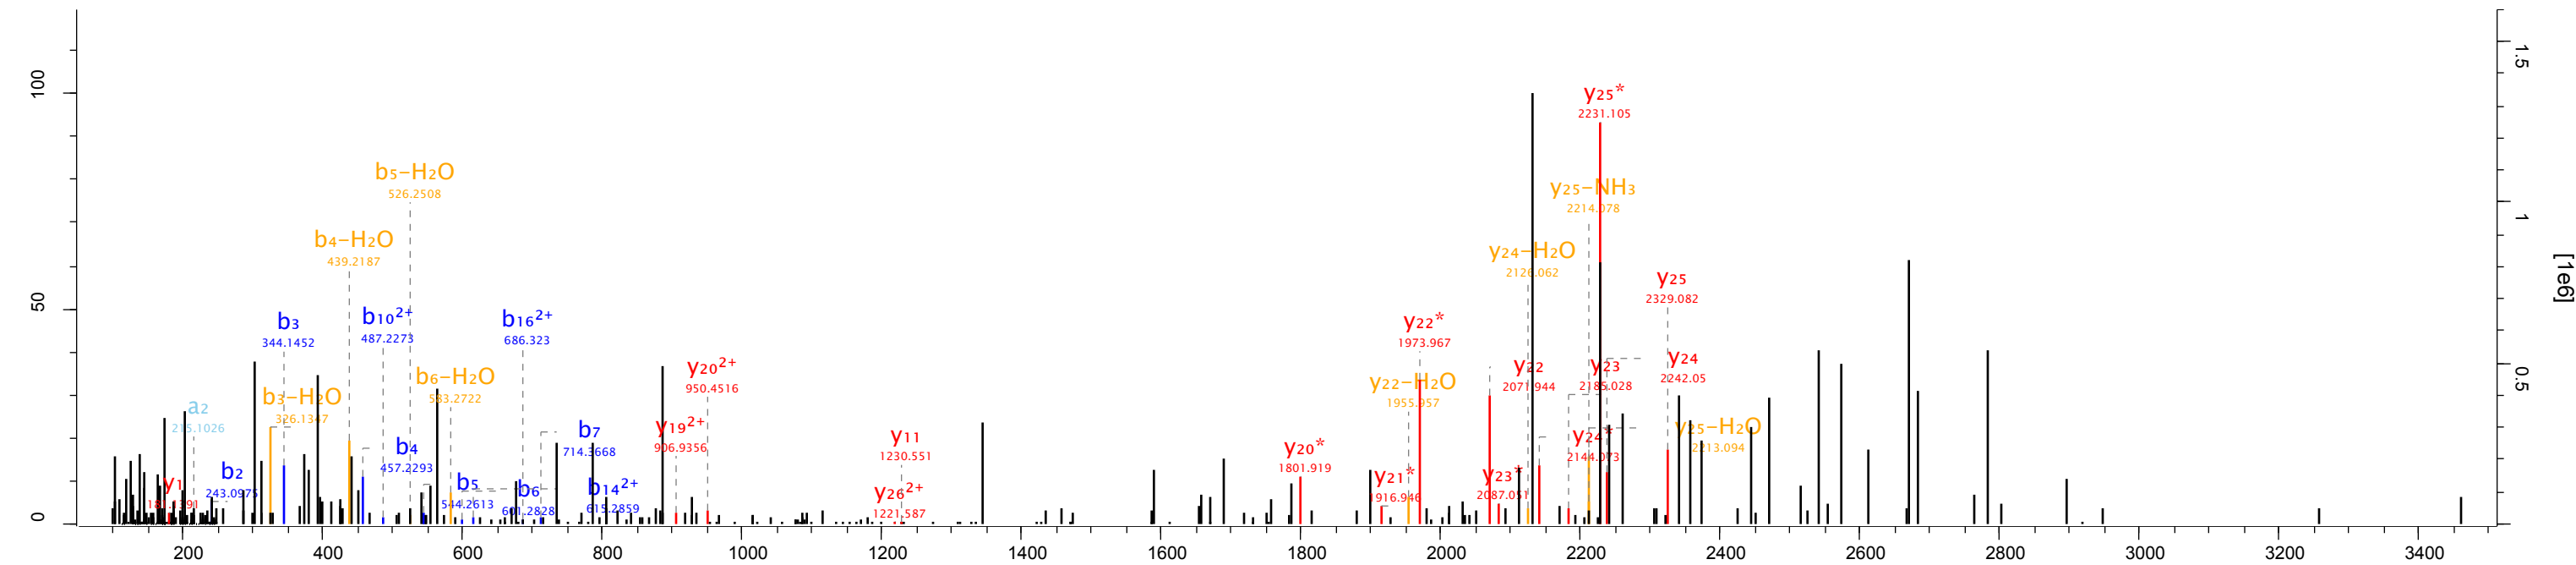

ac  
 - A E T L S G L G D S G A A G A A A L S S A S S E T G T R R -

Fragmentation mapping (b-ions in blue, y-ions in red):

- b<sub>2</sub> (E), b<sub>3</sub> (T), b<sub>4</sub> (L), b<sub>5</sub> (S), b<sub>6</sub> (G), b<sub>7</sub> (L), b<sub>10</sub><sup>2+</sup> (S)
- y<sub>19</sub><sup>2+</sup> (G), y<sub>20</sub><sup>\*</sup> (D), y<sub>21</sub><sup>\*</sup> (S), y<sub>22</sub> (G), y<sub>23</sub> (L), y<sub>24</sub> (S), y<sub>25</sub> (L), y<sub>26</sub><sup>2+</sup> (T)
- y<sub>11</sub> (S), y<sub>1</sub> (R)

Raw file 20150814\_A375SR\_Phospho\_BR2\_09 Scan 22322 Method FTMS; HCD Score 125.4 m/z 931.95 Gene names MAP4

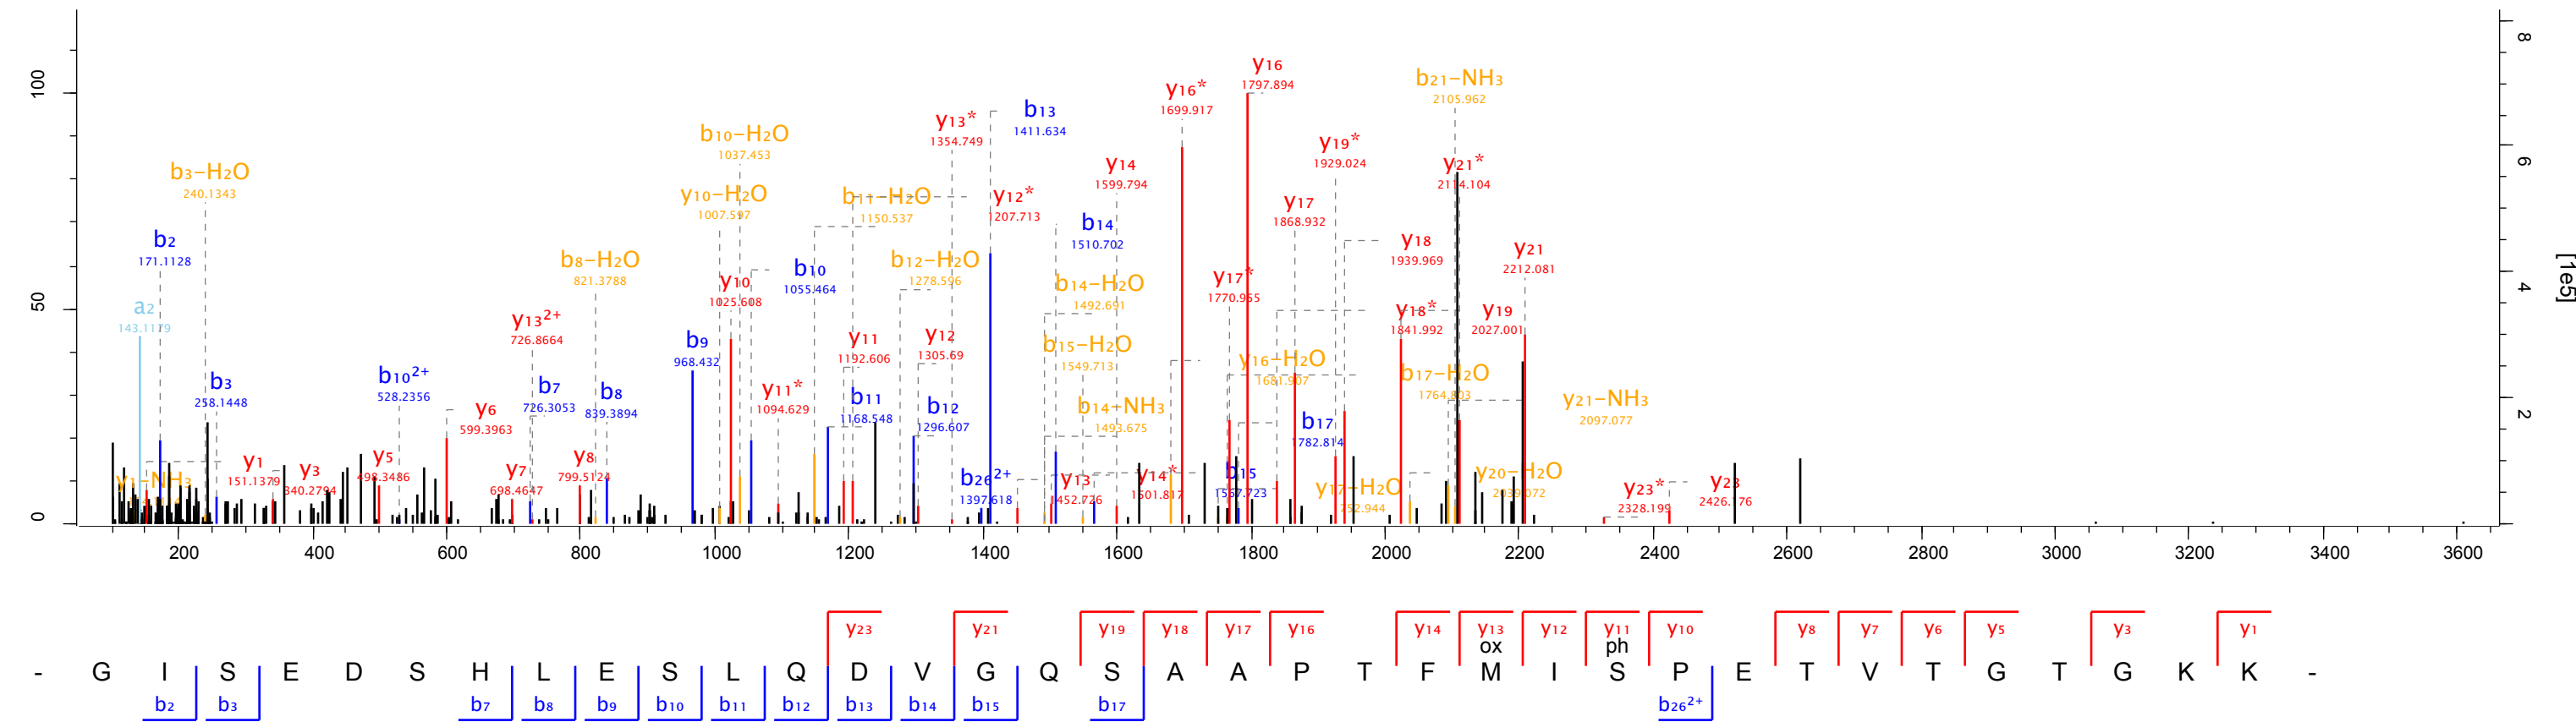



Raw file 20150814\_A375SR\_Phospho\_BR2\_09 Scan 22772 Method FTMS; HCD Score 73.6 m/z 927.94 Gene names FKBP15

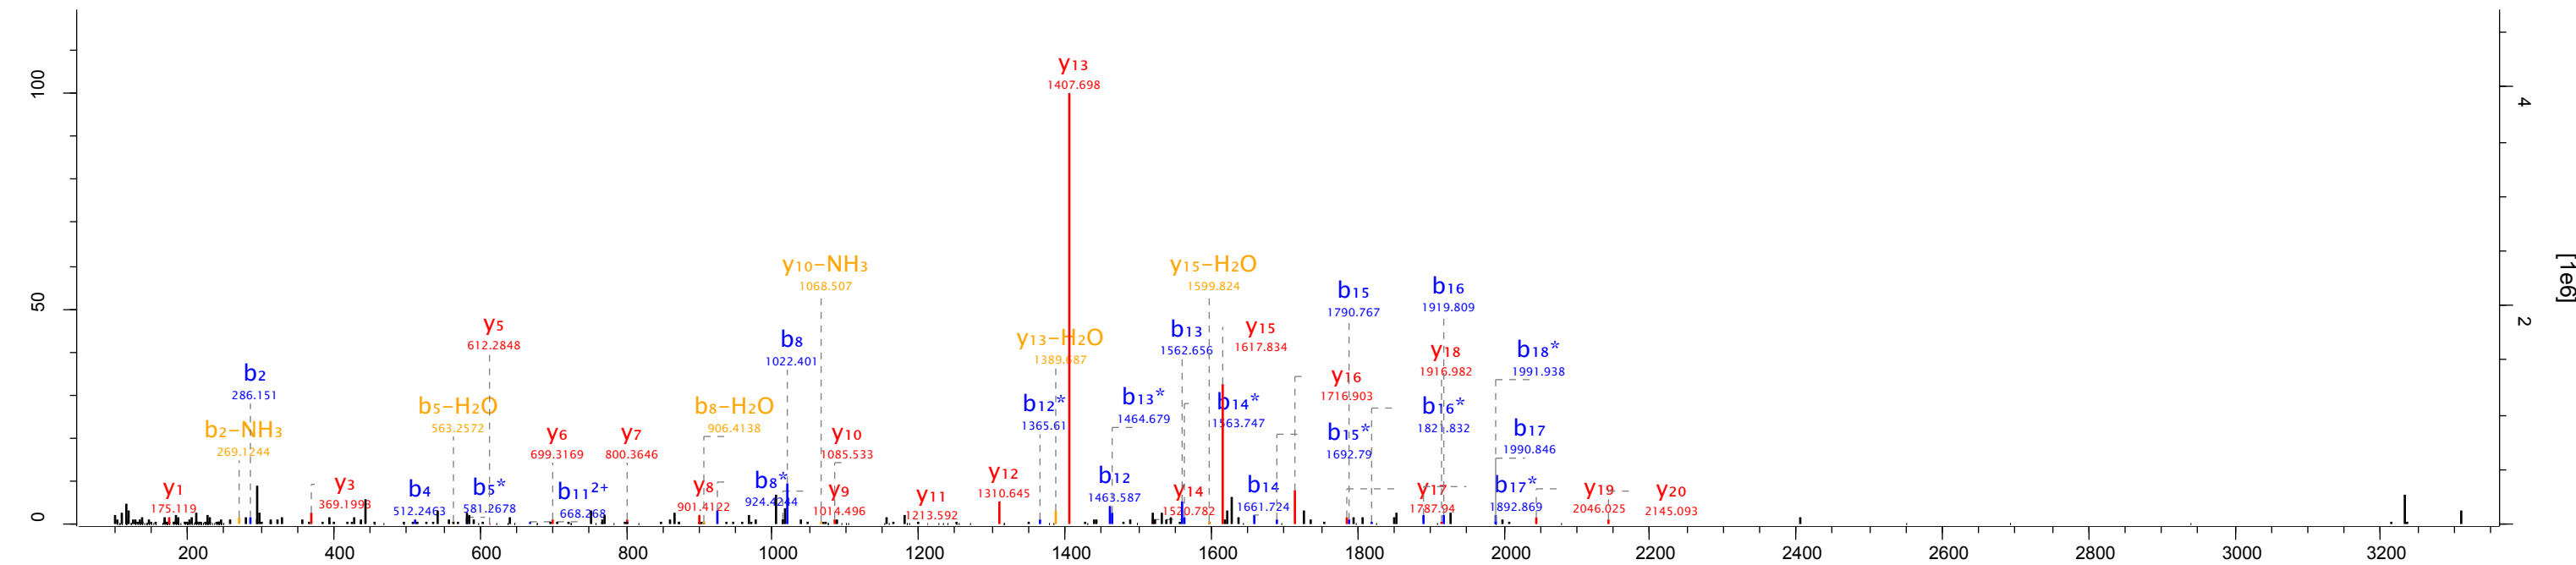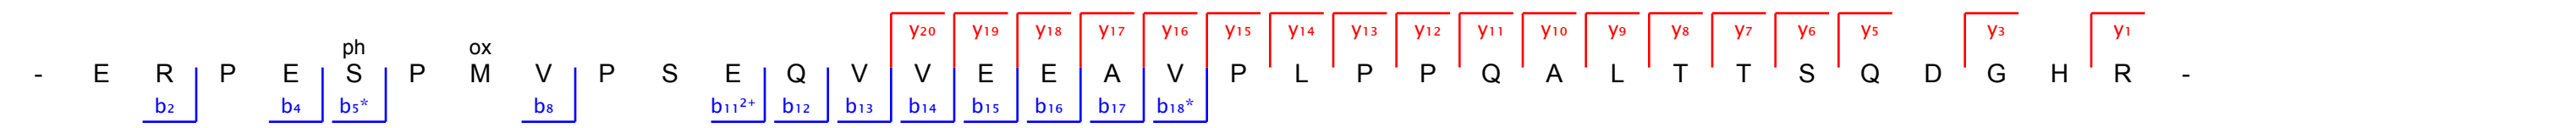

Raw file  
20150814\_A375SR\_Phospho\_BR2\_09

Scan 25032 Method FTMS; HCD Score 112.81 m/z 886.77 Gene names EP400;EP400NL

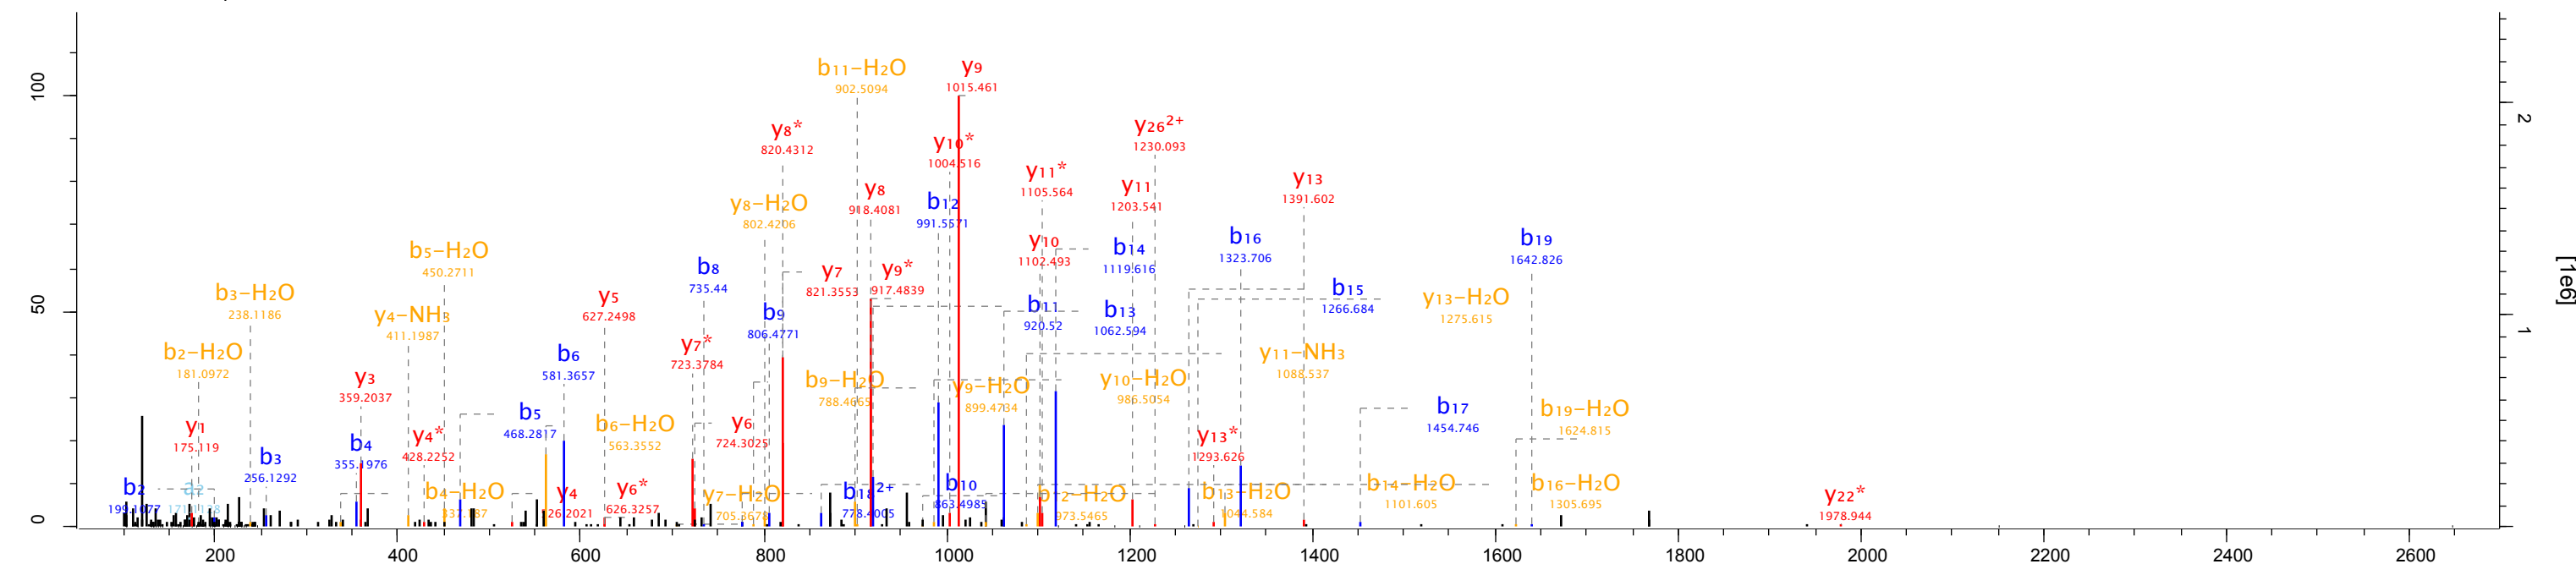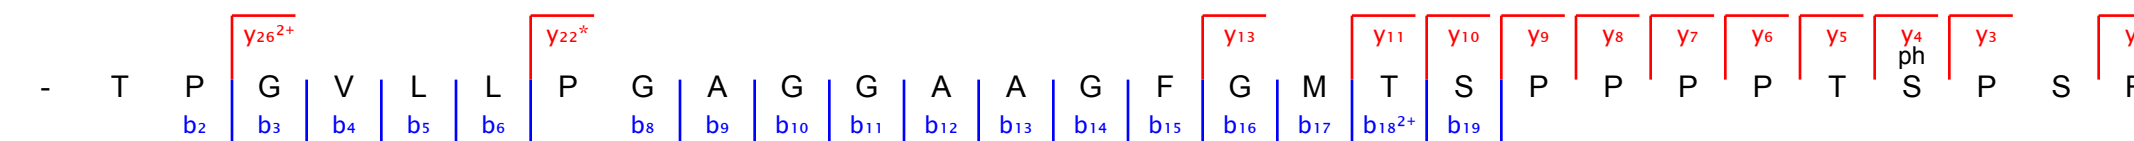

Raw file 20150814\_A375SR\_Phospho\_BR2\_09 Scan 25292 Method FTMS; HCD Score 155.04 m/z 1170.22 Gene names BIRC2

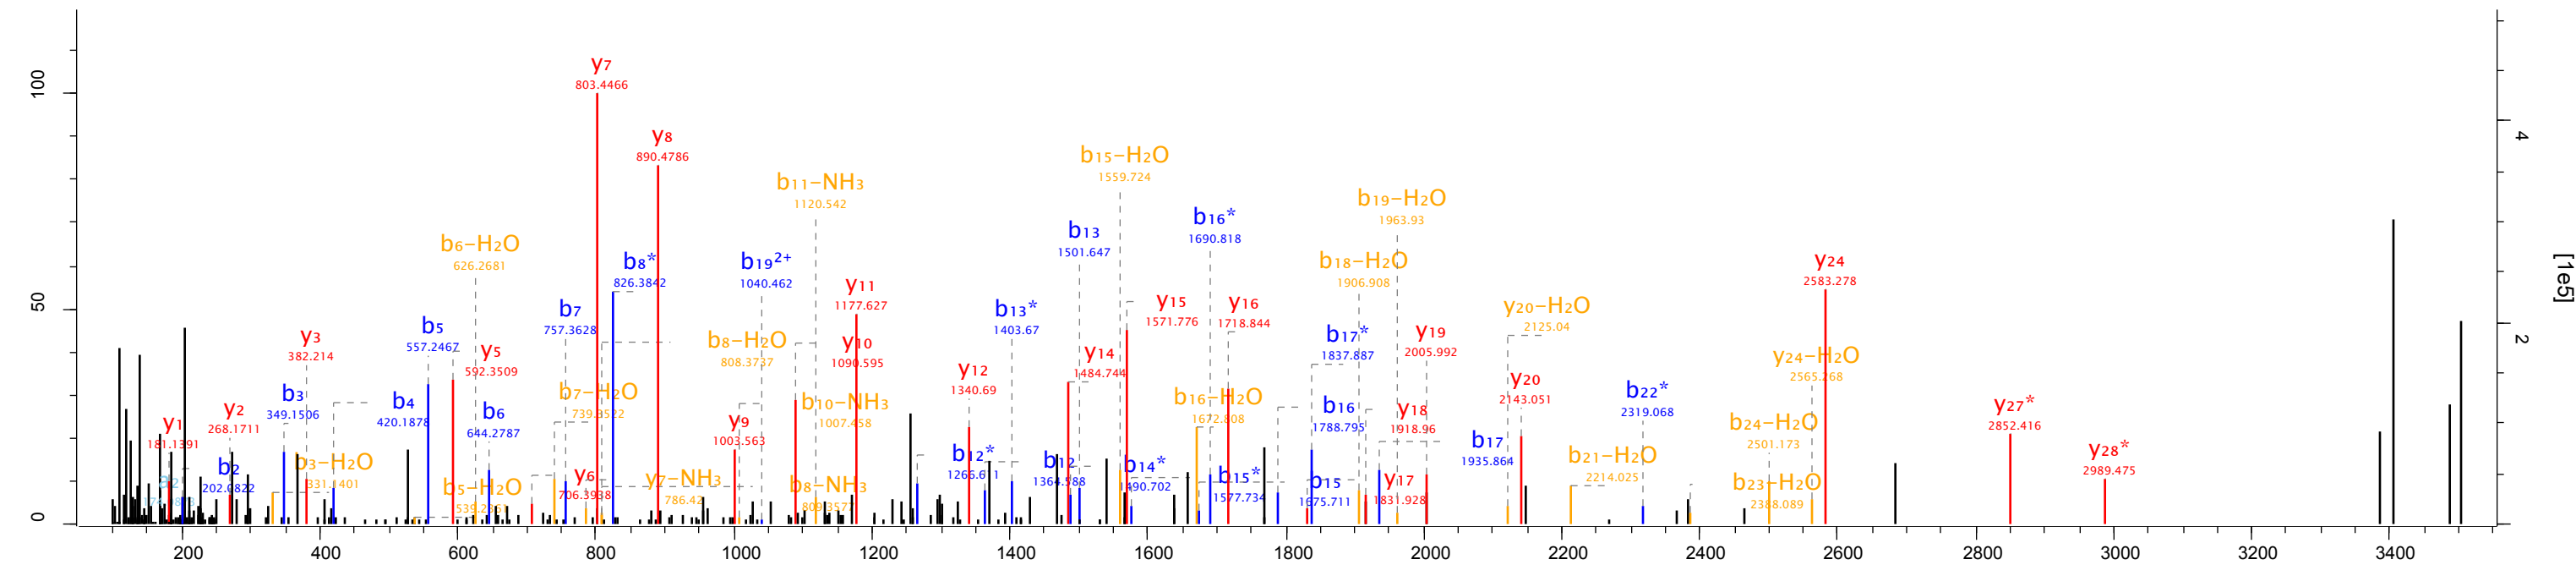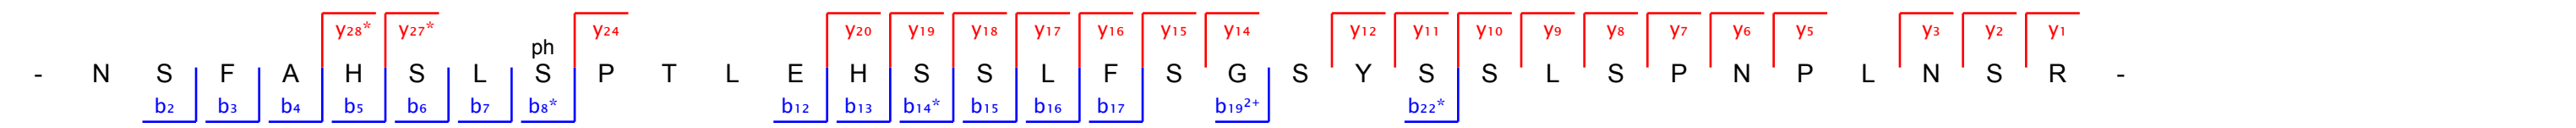

Raw file: 20150814\_A375SR\_Phospho\_BR2\_09  
 Scan: 25912 Method: FTMS; HCD Score: 128.24 m/z: 1112.79 Gene names: C17orf85

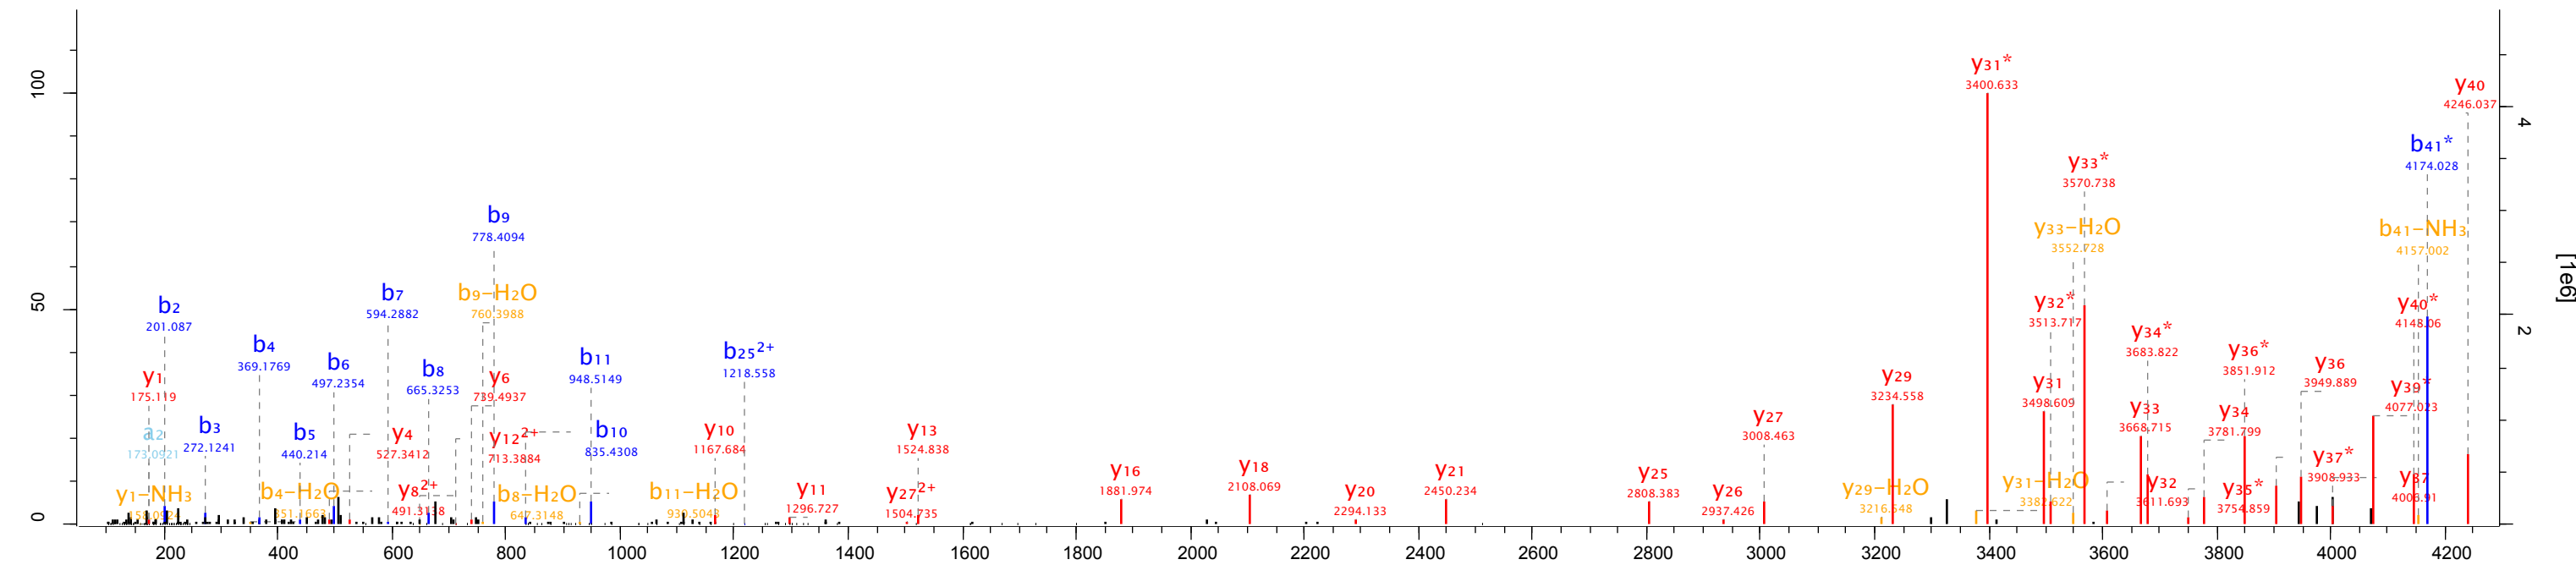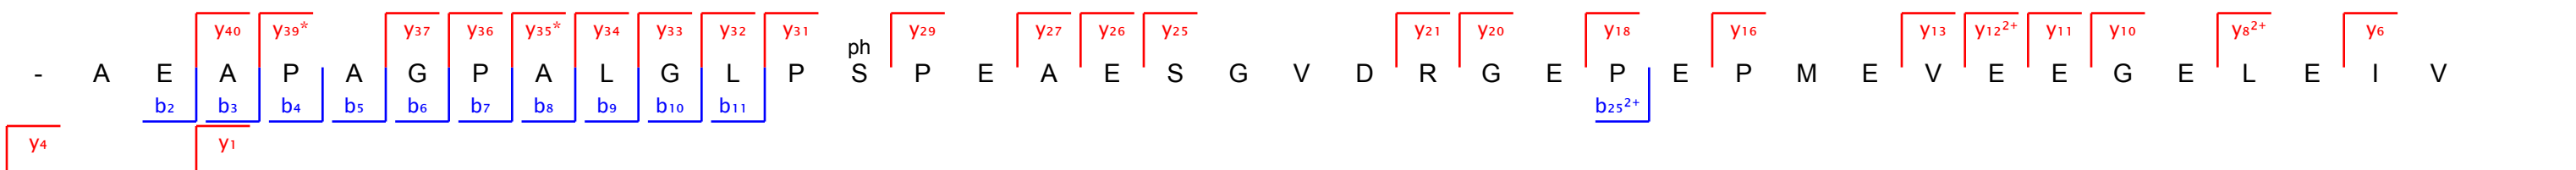



Raw file Scan Method Score m/z Gene names  
 20150814\_A375SR\_Phospho\_BR2\_09 28372 FTMS; HCD 172.17 863.12 PRRC2A

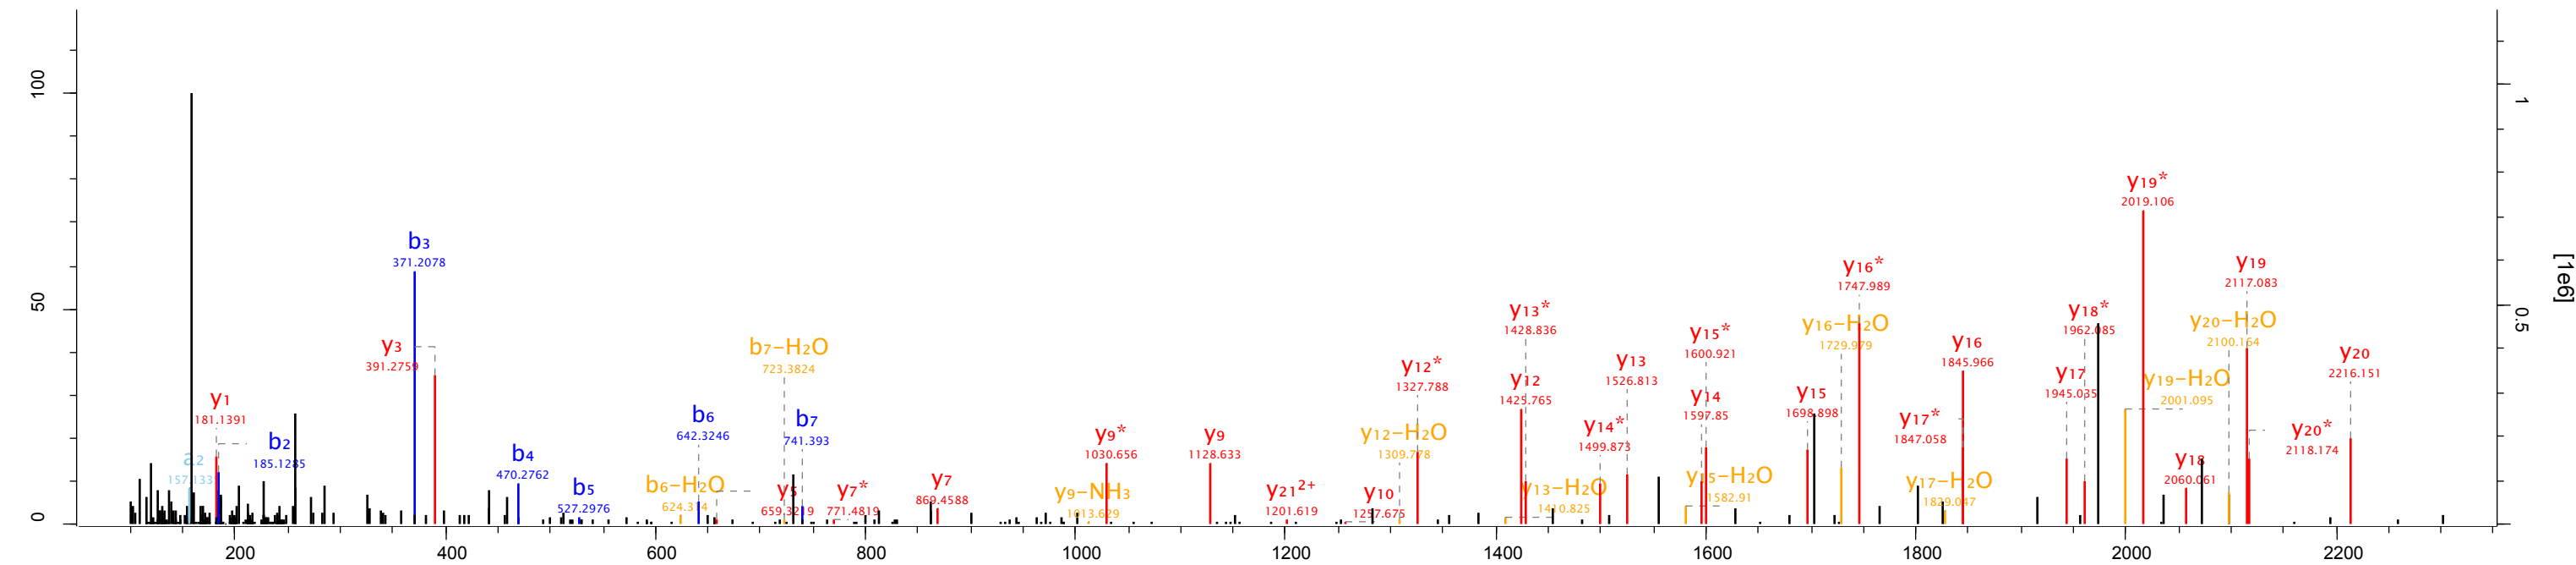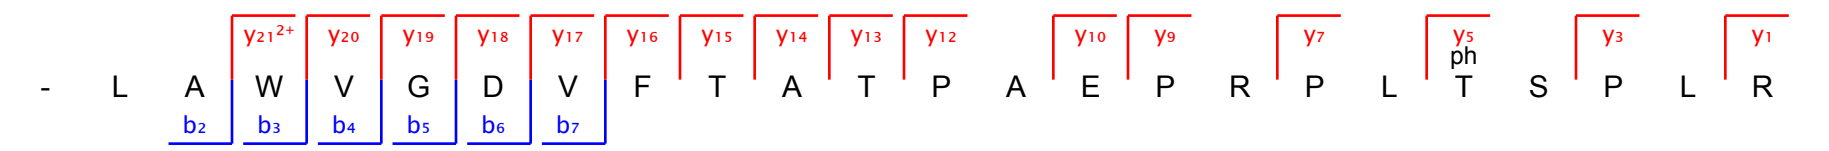

Raw file: 20150814\_A375SR\_Phospho\_BR2\_09  
 Scan: 3942 Method: FTMS; HCD Score: 193.48 m/z: 786.86 Gene names: THOC2

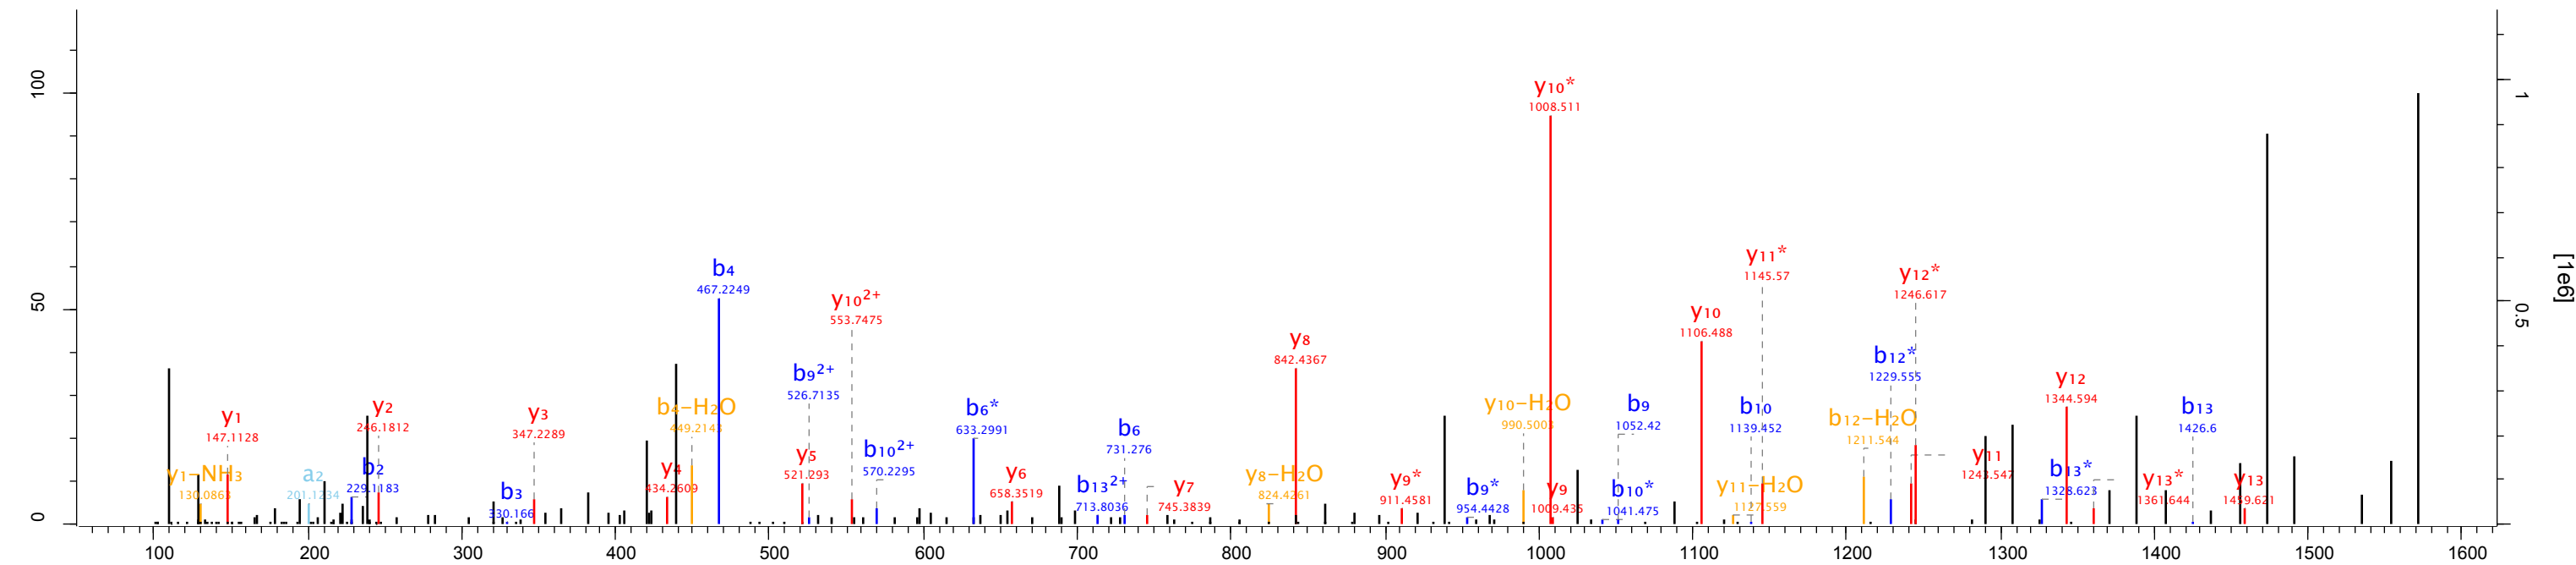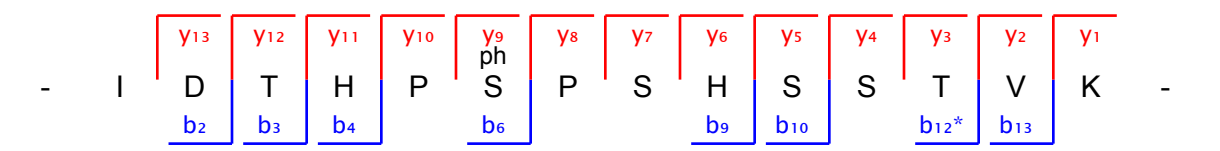

Raw file: 20150814\_A375SR\_Phospho\_BR2\_09  
 Scan: 4852    Method: FTMS; HCD    Score: 139.3    m/z: 669.81    Gene names: ARHGEF2

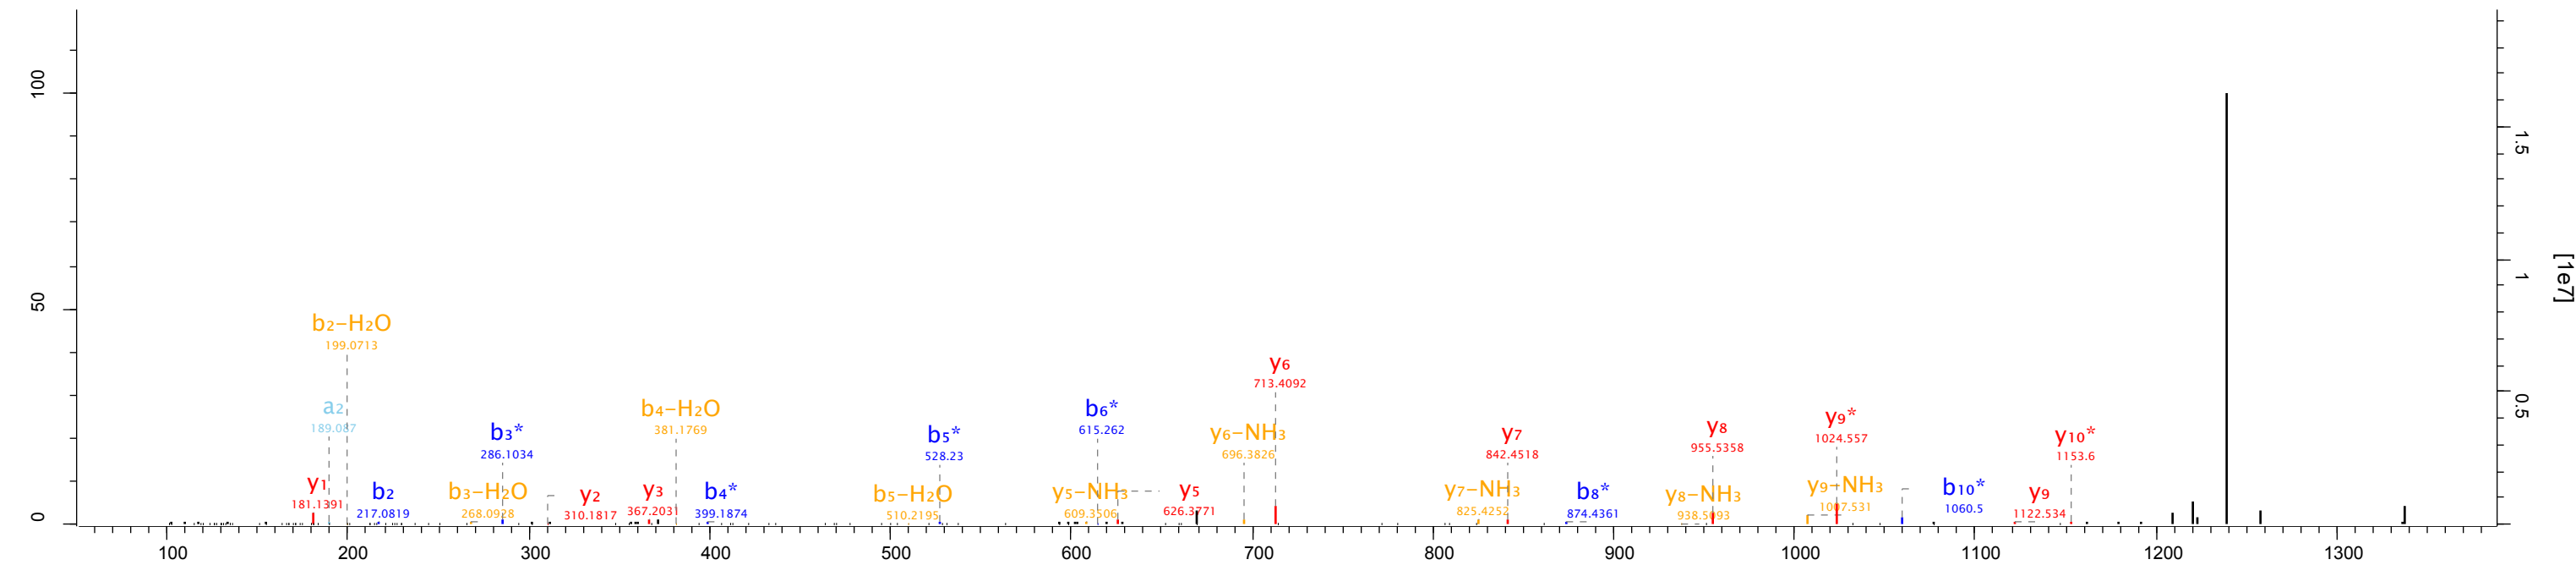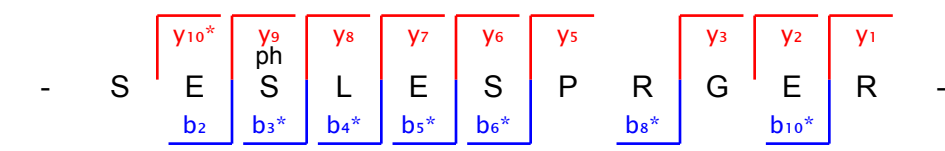



Raw file: 20150814\_A375SR\_Phospho\_BR2\_09  
 Scan: 5042 Method: FTMS; HCD Score: 216.9 m/z: 766.35 Gene names: FARP1

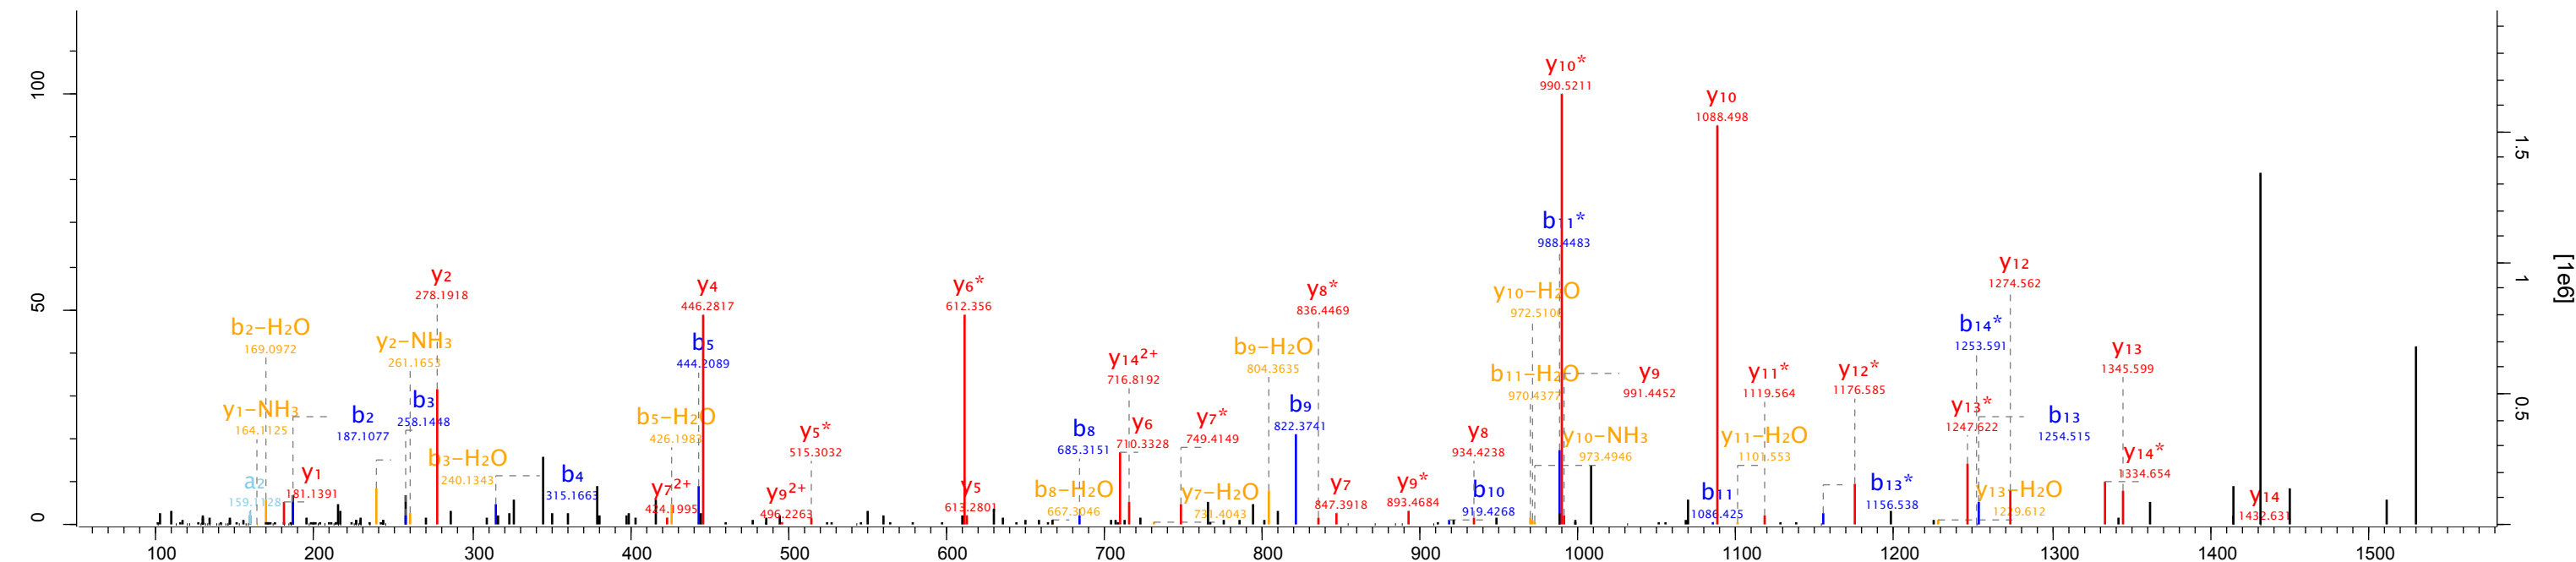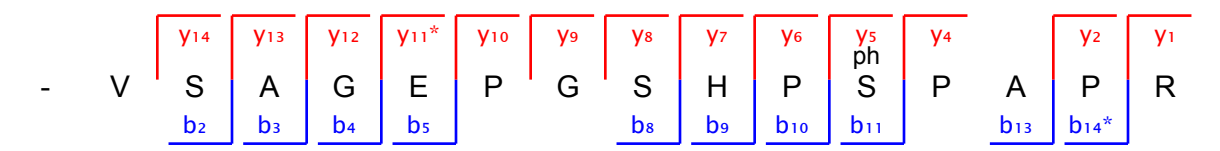

Raw file: 20150814\_A375SR\_Phospho\_BR2\_09  
 Scan: 5492 Method: FTMS; HCD Score: 134.21 m/z: 579.28 Gene names: FAM122A

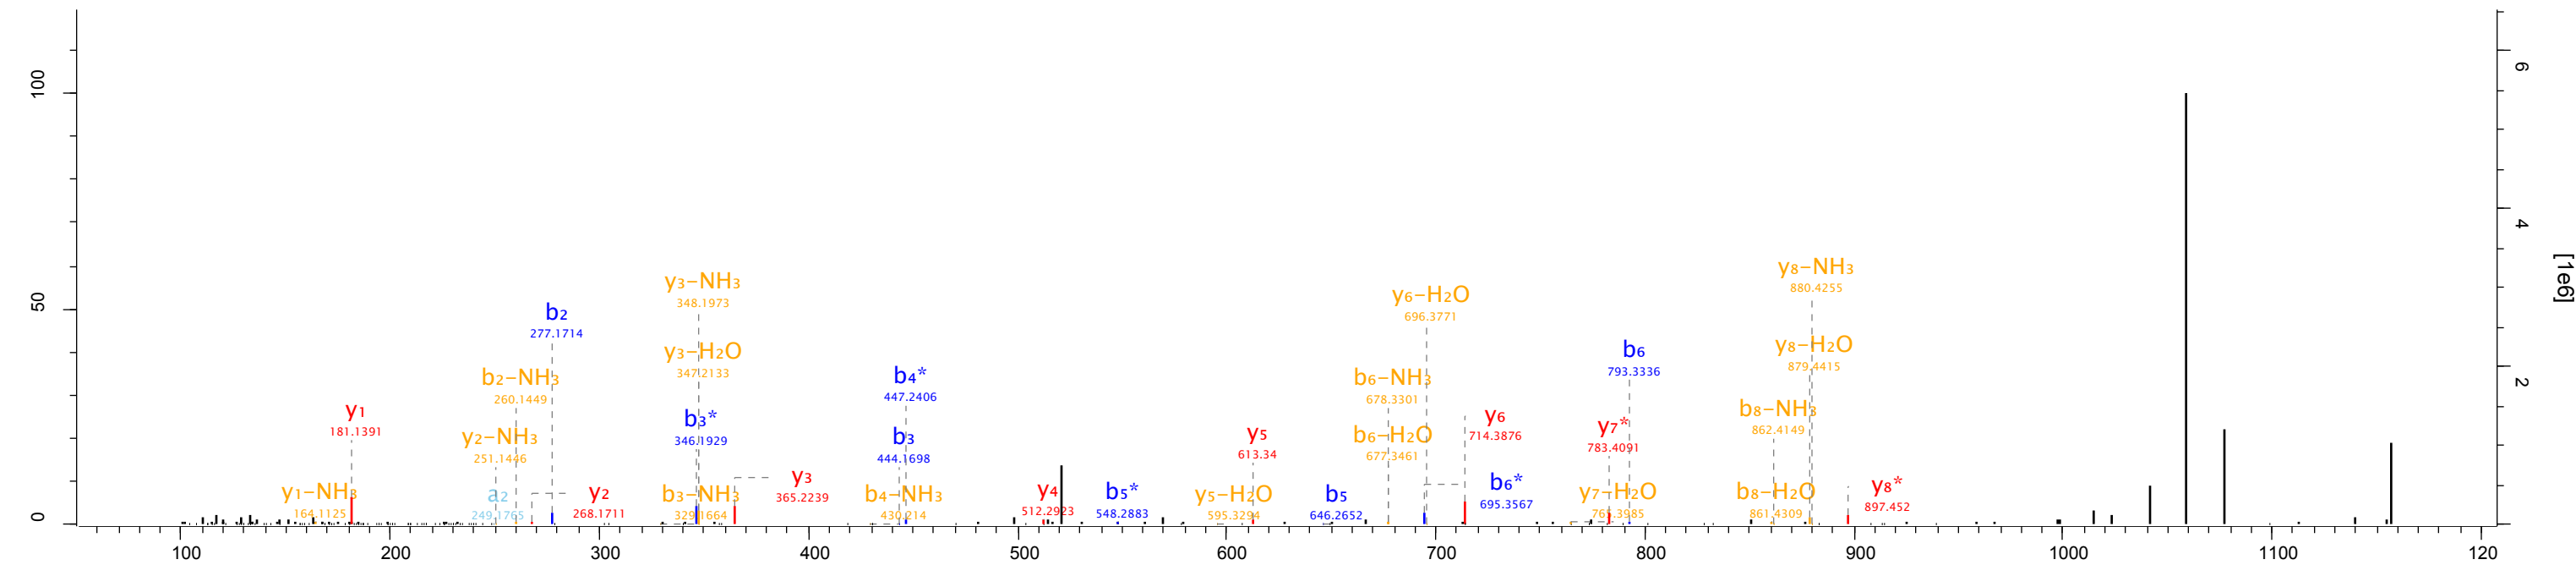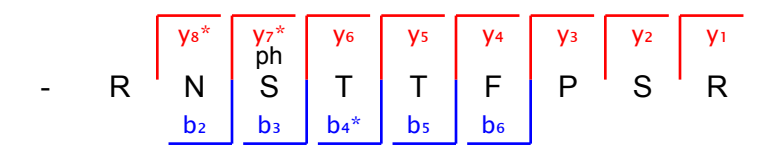

Raw file: 20150814\_A375SR\_Phospho\_BR2\_09  
 Scan: 6442 Method: FTMS; HCD Score: 99.5 m/z: 451.27 Gene names: IREB2;KMT2A

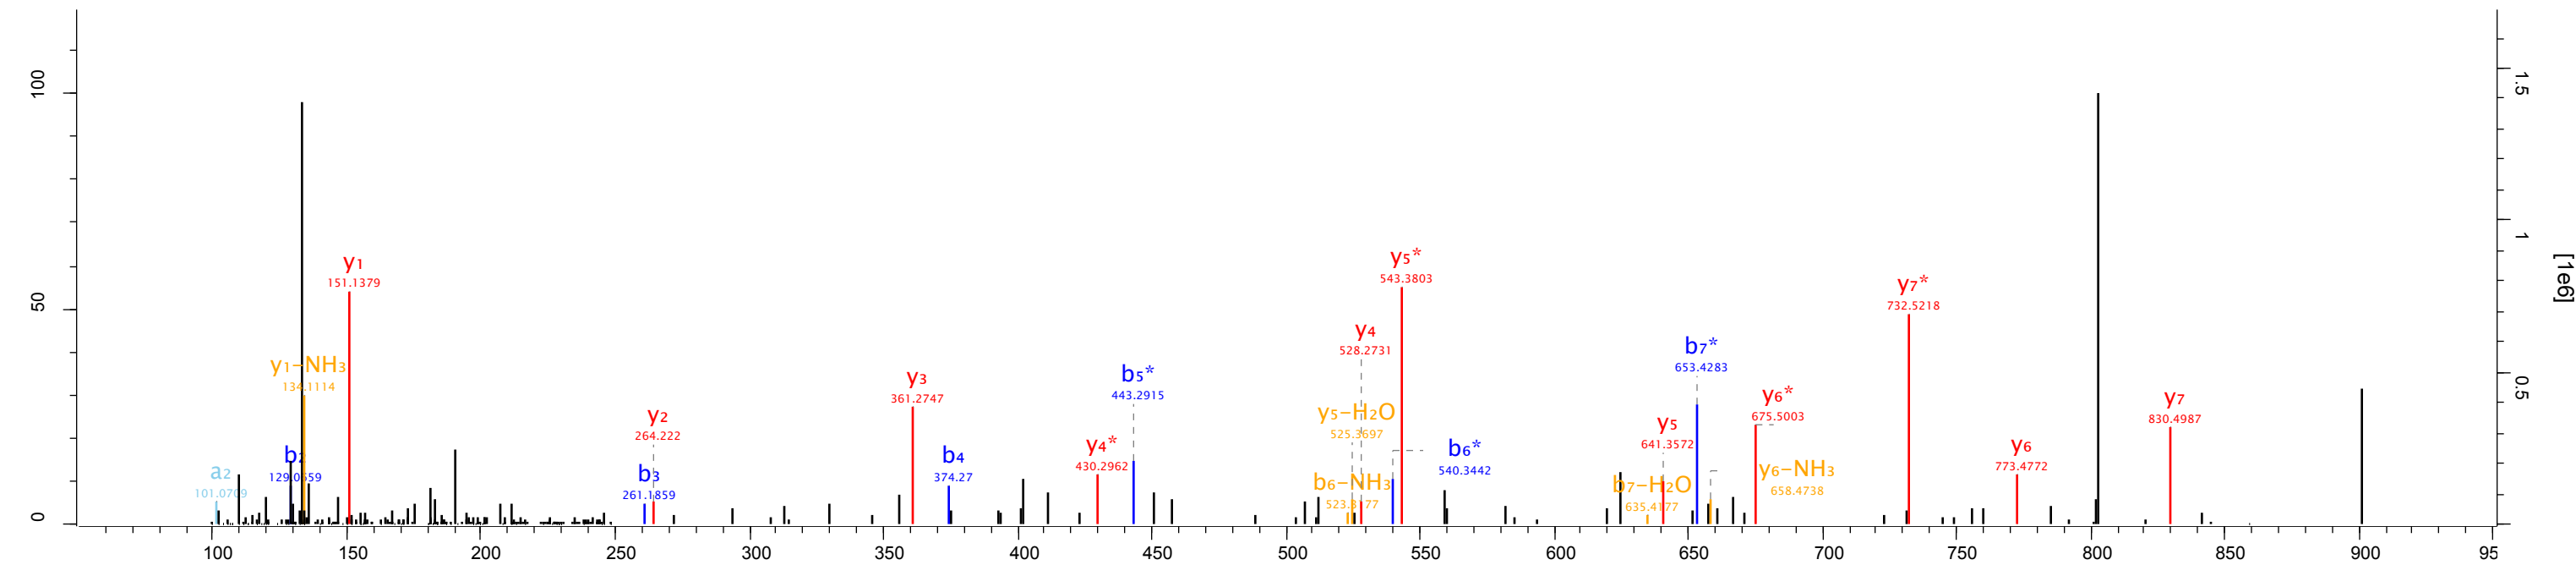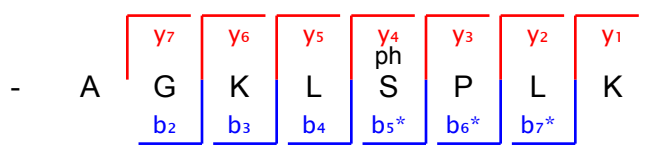

Raw file 20150814\_A375SR\_Phospho\_BR2\_09 Scan 7692 Method FTMS; HCD Score 70.2 m/z 531.58 Gene names NCOA5

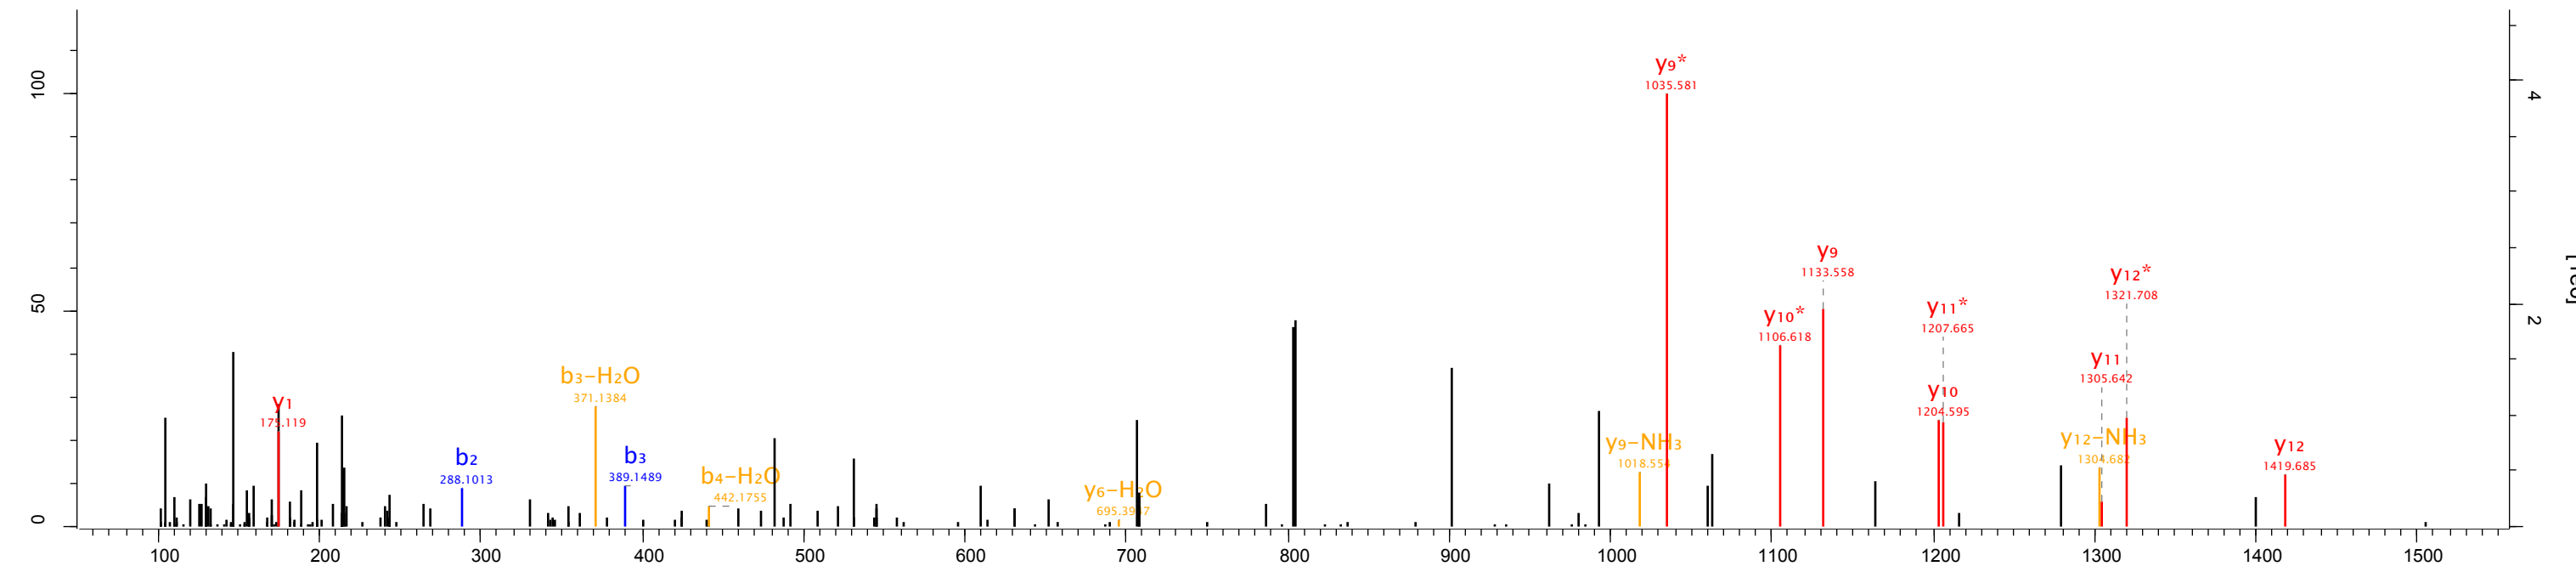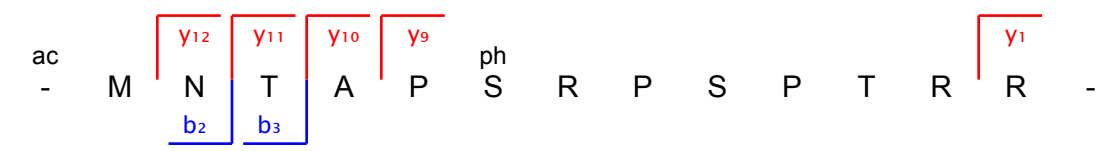

Raw file: 20150814\_A375SR\_Phospho\_BR2\_09  
 Scan: 7862 Method: FTMS; HCD Score: 79.34 m/z: 644.78 Gene names: TBC1D5

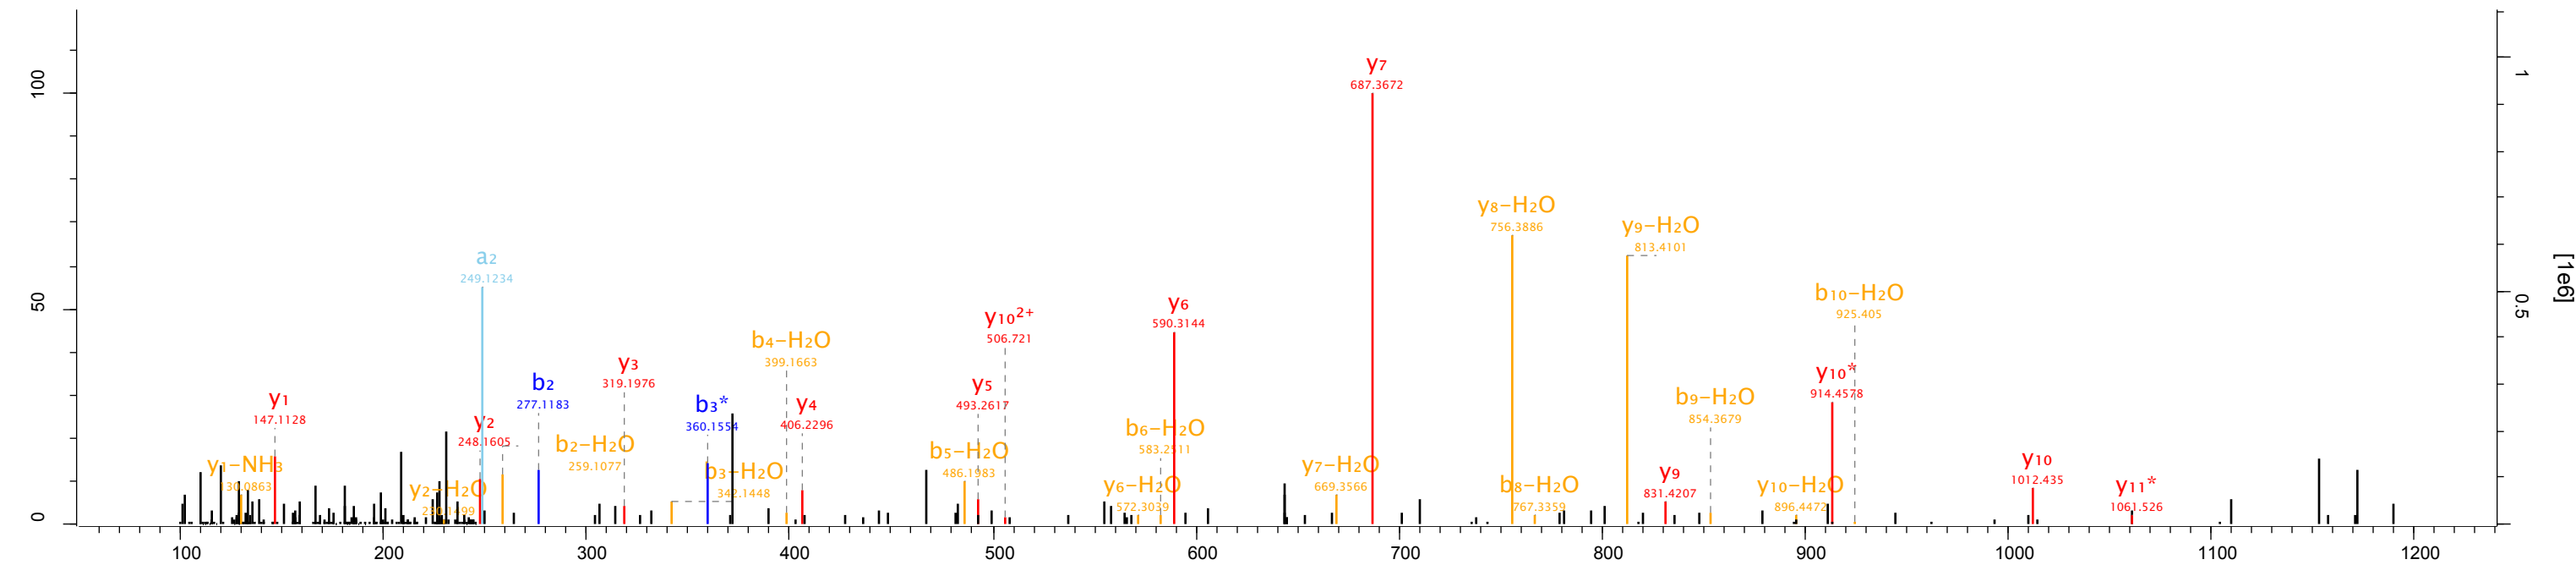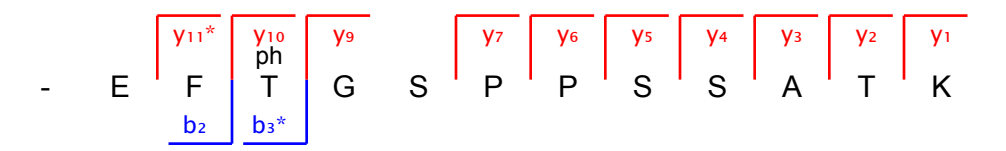

Raw file: 20150814\_A375SR\_Phospho\_BR2\_09  
 Scan: 8302 Method: FTMS; HCD Score: 40.21 m/z: 643.32 Gene names: DCAF10

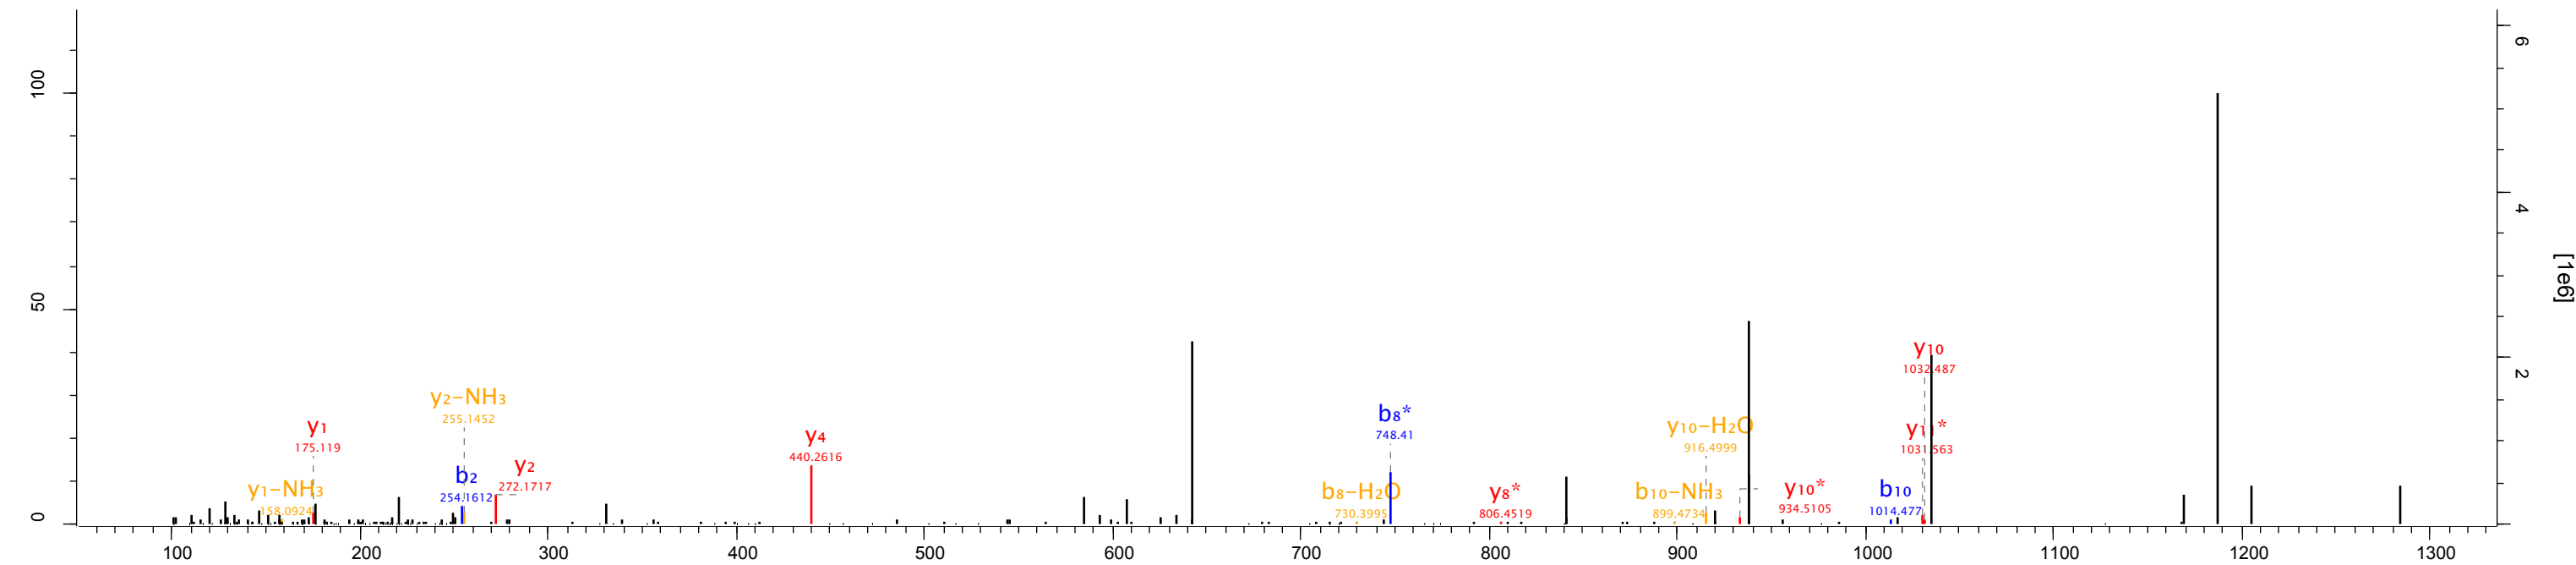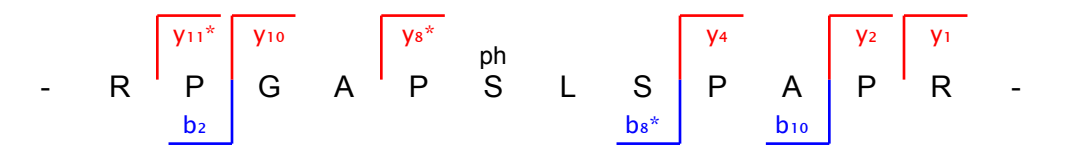

Raw file Scan Method Score m/z Gene names  
 20150814\_A375SR\_Phospho\_BR2\_09 8422 FTMS; HCD 121.82 793.86 VIM

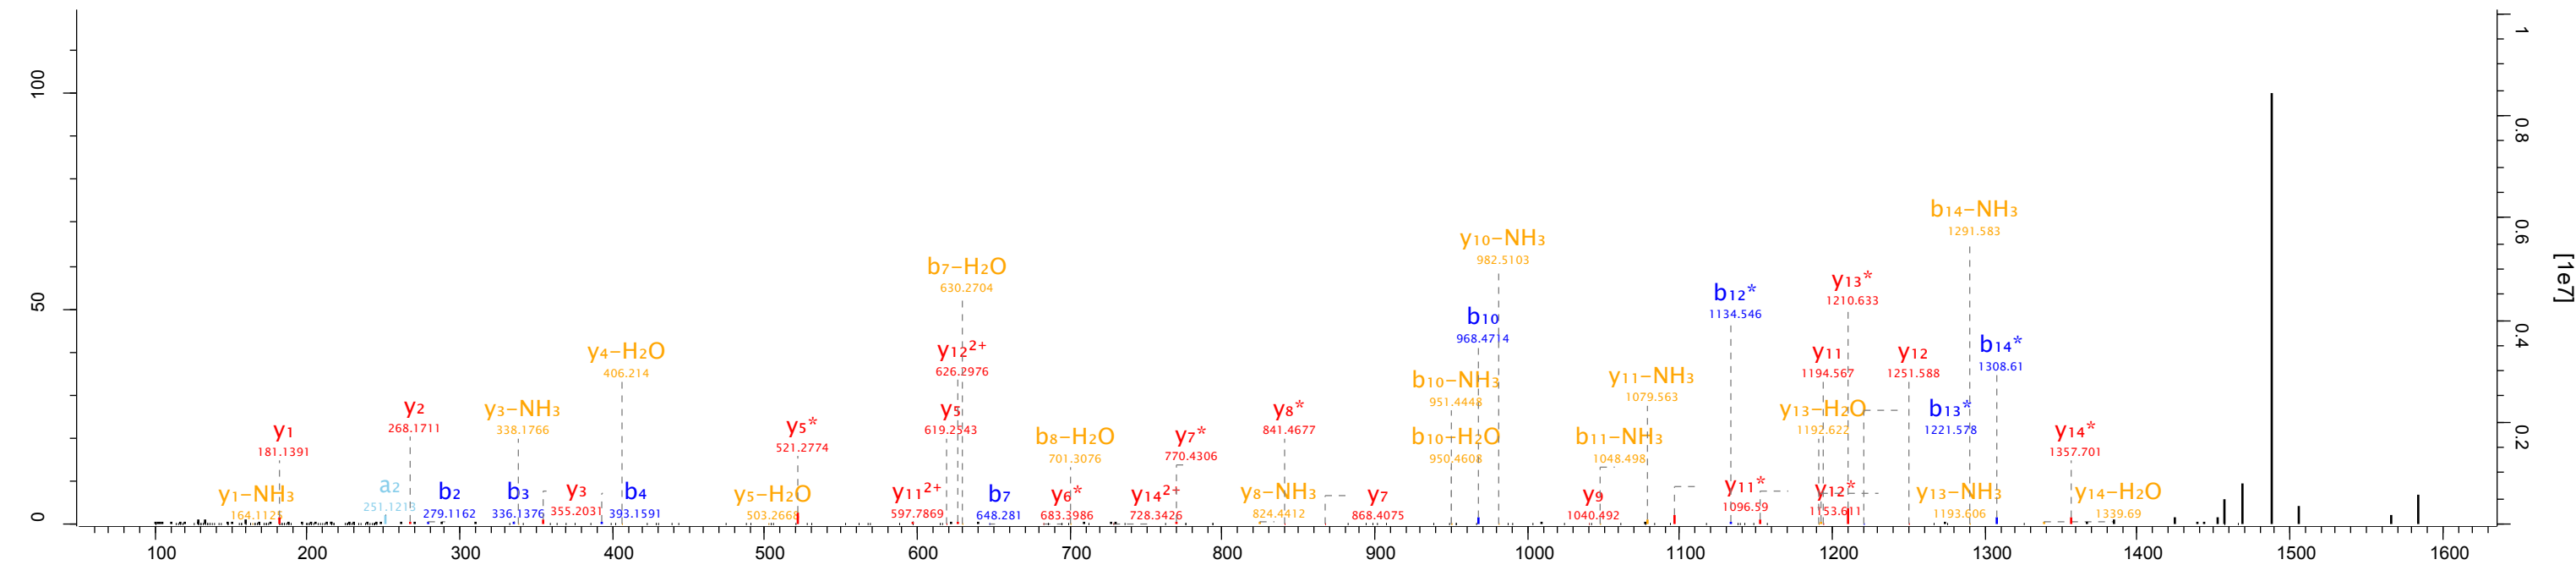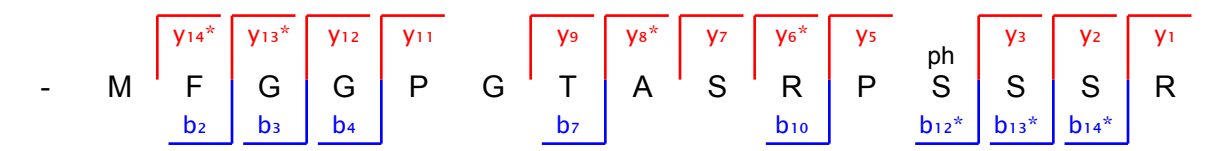

Raw file: 20150814\_A375SR\_Phospho\_BR2\_09  
 Scan: 8692 Method: FTMS; HCD Score: 174.78 m/z: 556.61 Gene names: SNIP1

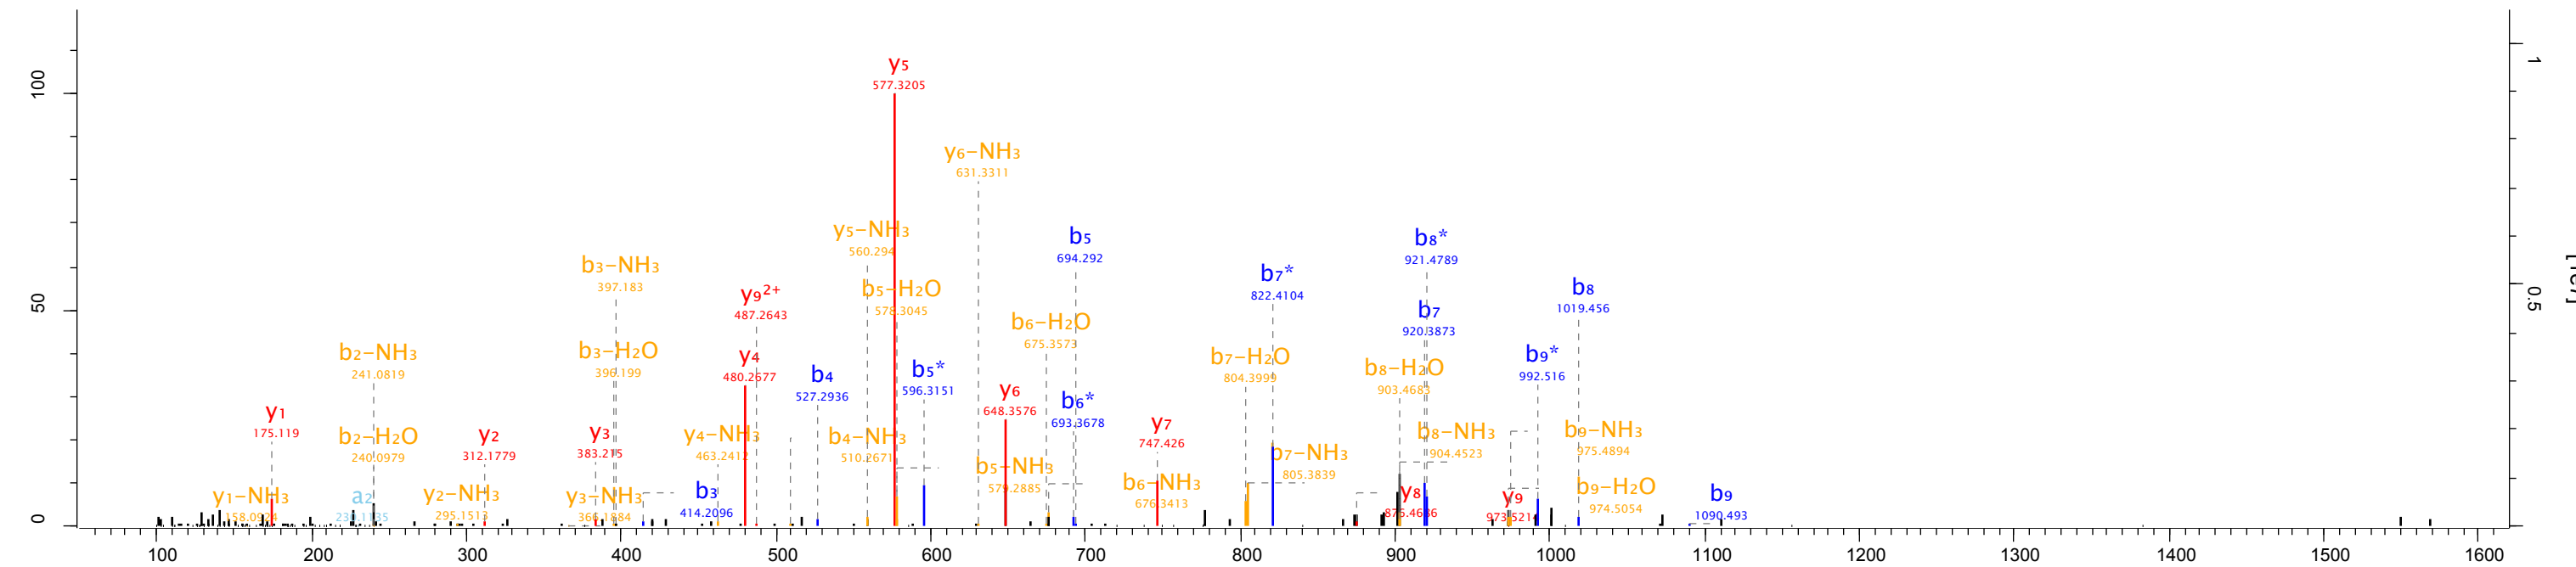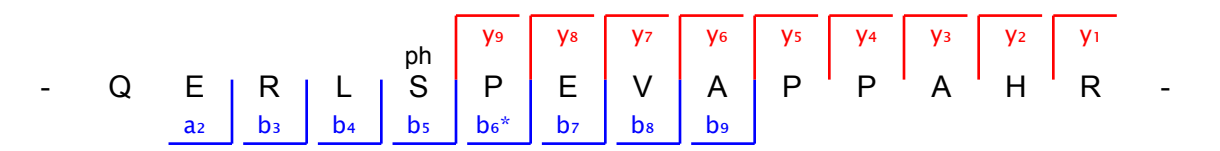



Raw file 20150814\_A375SR\_Phospho\_BR2\_09 Scan 8782 Method FTMS; HCD Score 238.3 m/z 779.4 Gene names CAP1

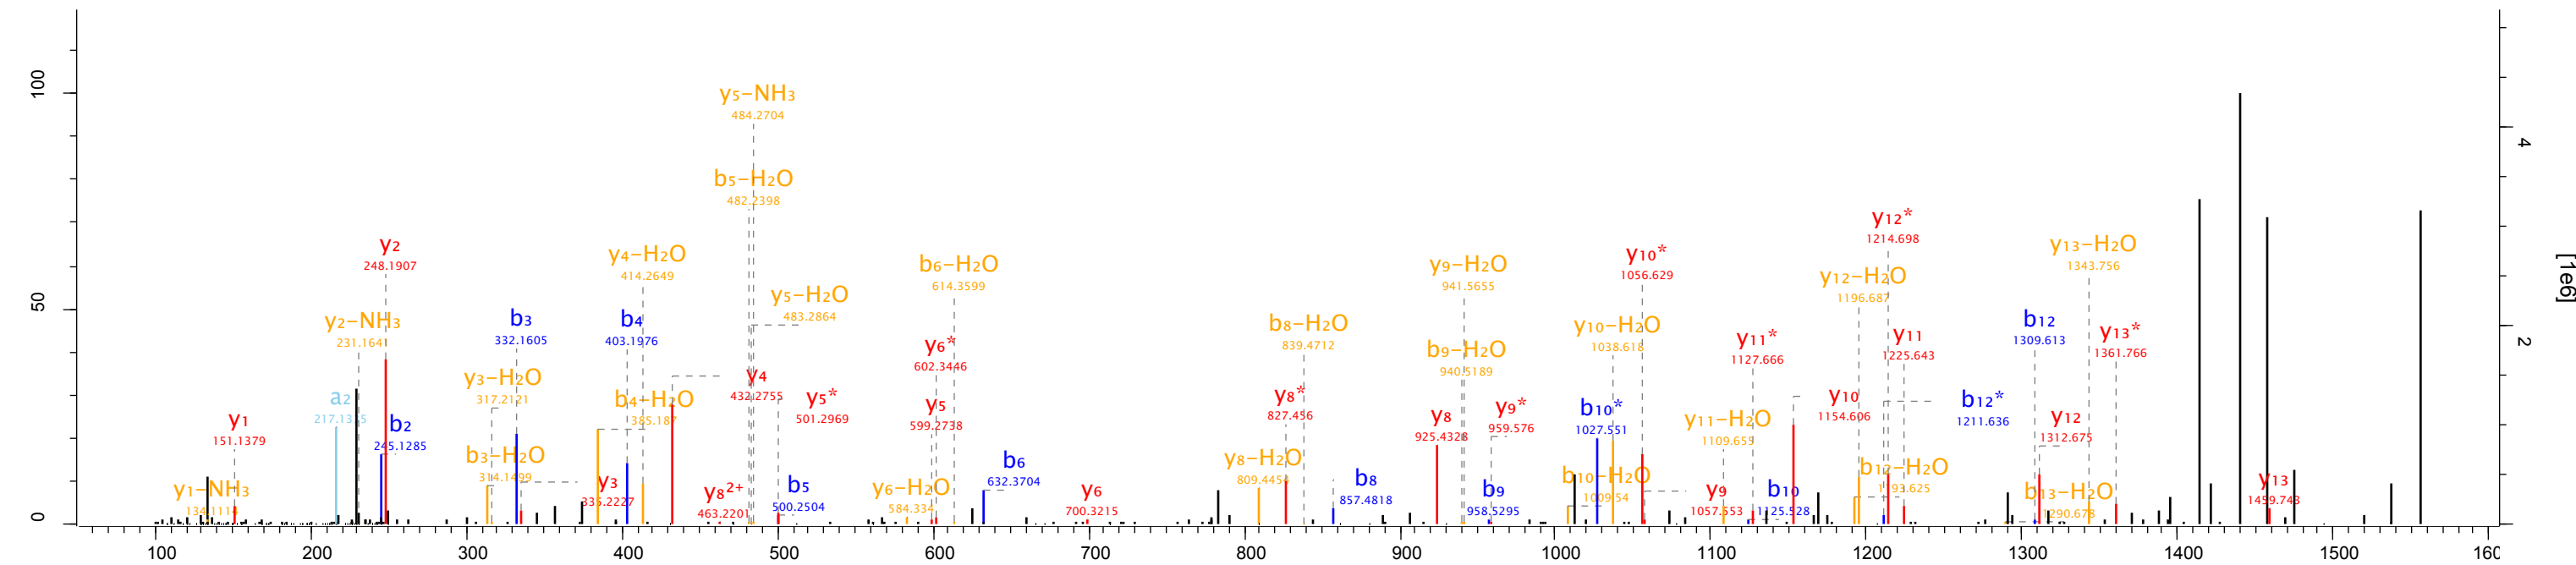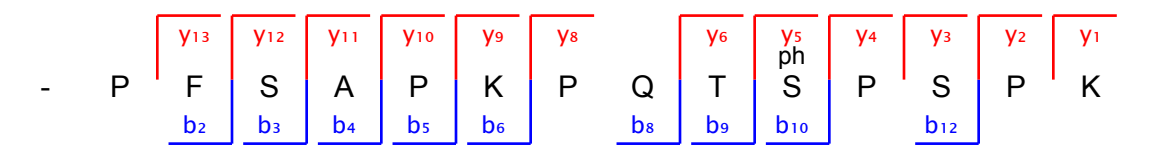

Raw file: 20150814\_A375SR\_Phospho\_BR2\_09  
 Scan: 9002 Method: FTMS; HCD Score: 116.45 m/z: 536.91 Gene names: GFPT2

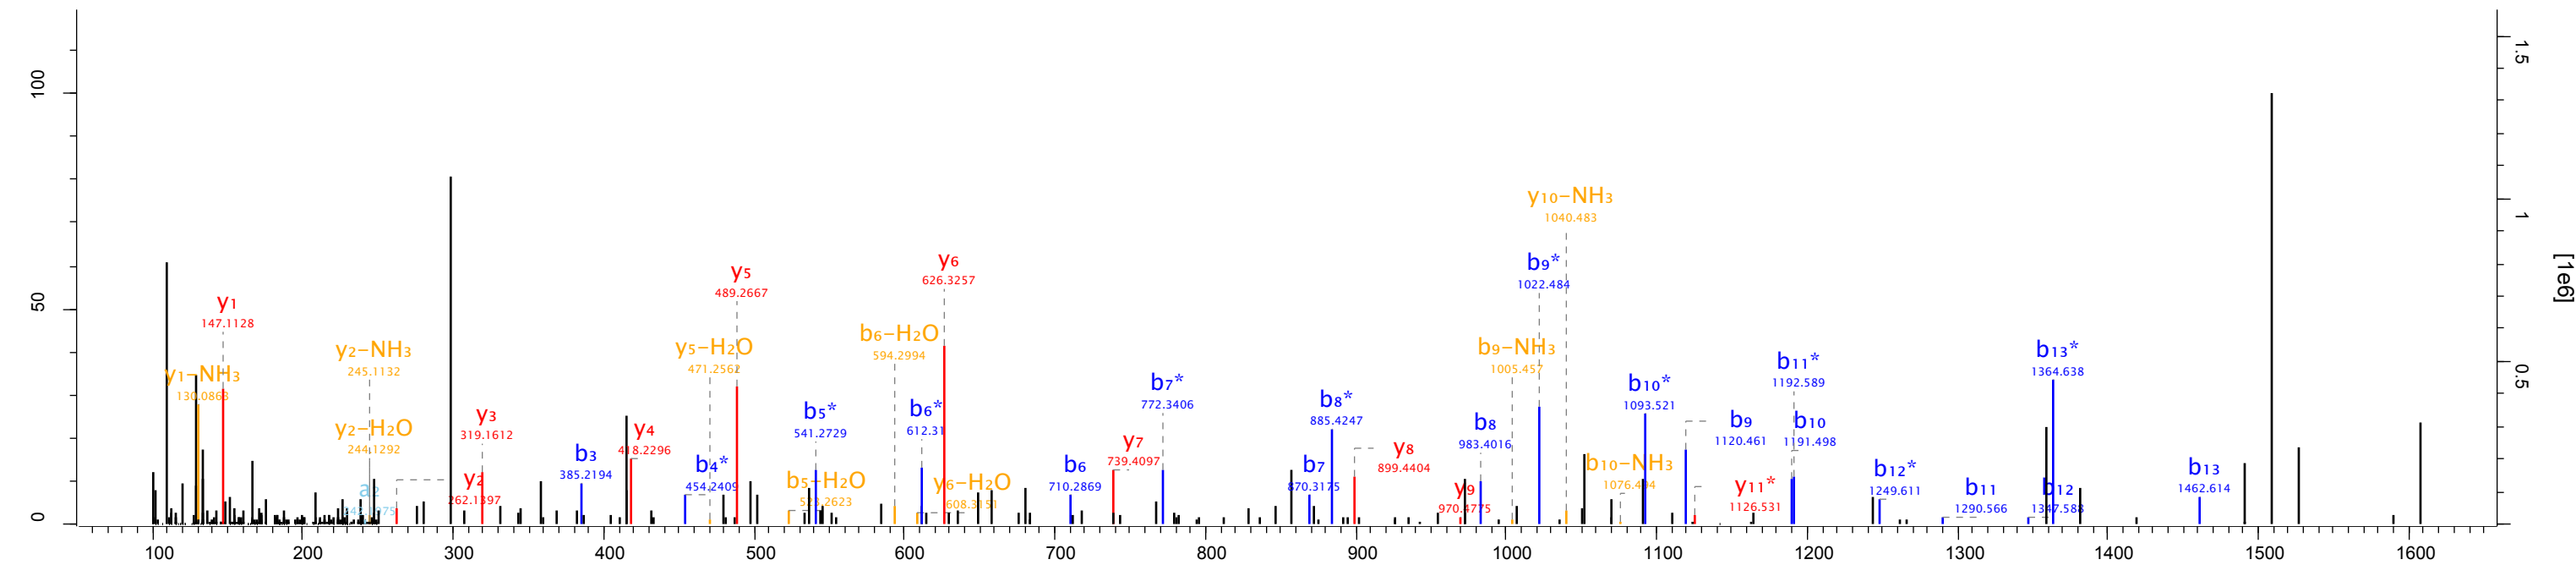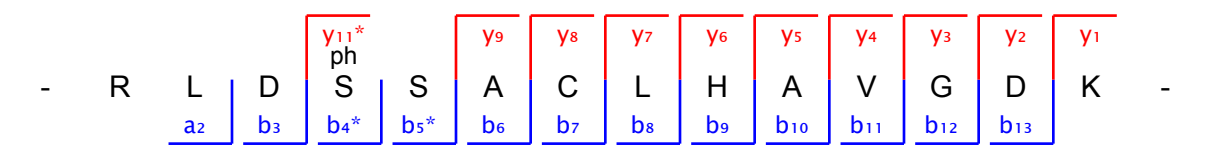

Raw file: 20150814\_A375SR\_Phospho\_BR2\_02  
 Scan: 10873 Method: FTMS; HCD Score: 93.13 m/z: 749 Gene names: BAP1

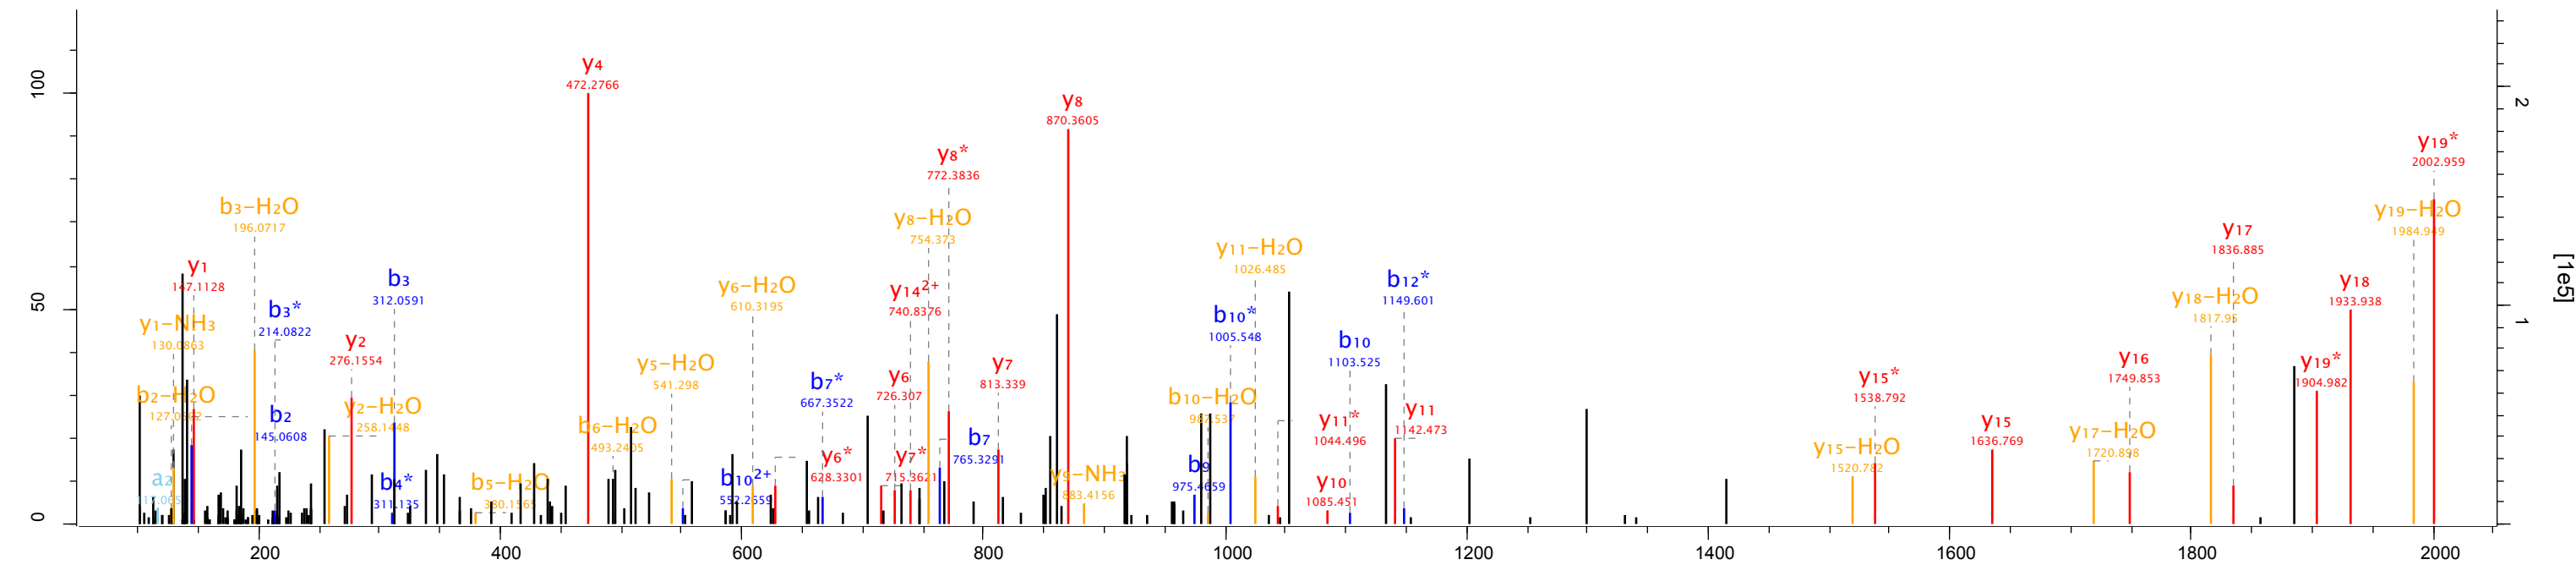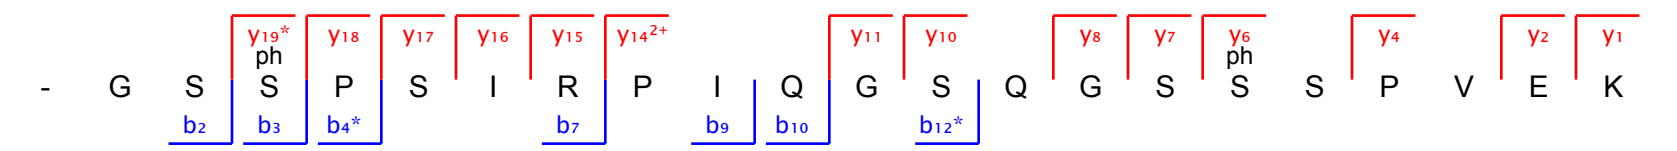

Raw file: 20150814\_A375SR\_Phospho\_BR2\_02  
 Scan: 12493 Method: FTMS; HCD Score: 59.98 m/z: 628.93 Gene names: WDR13

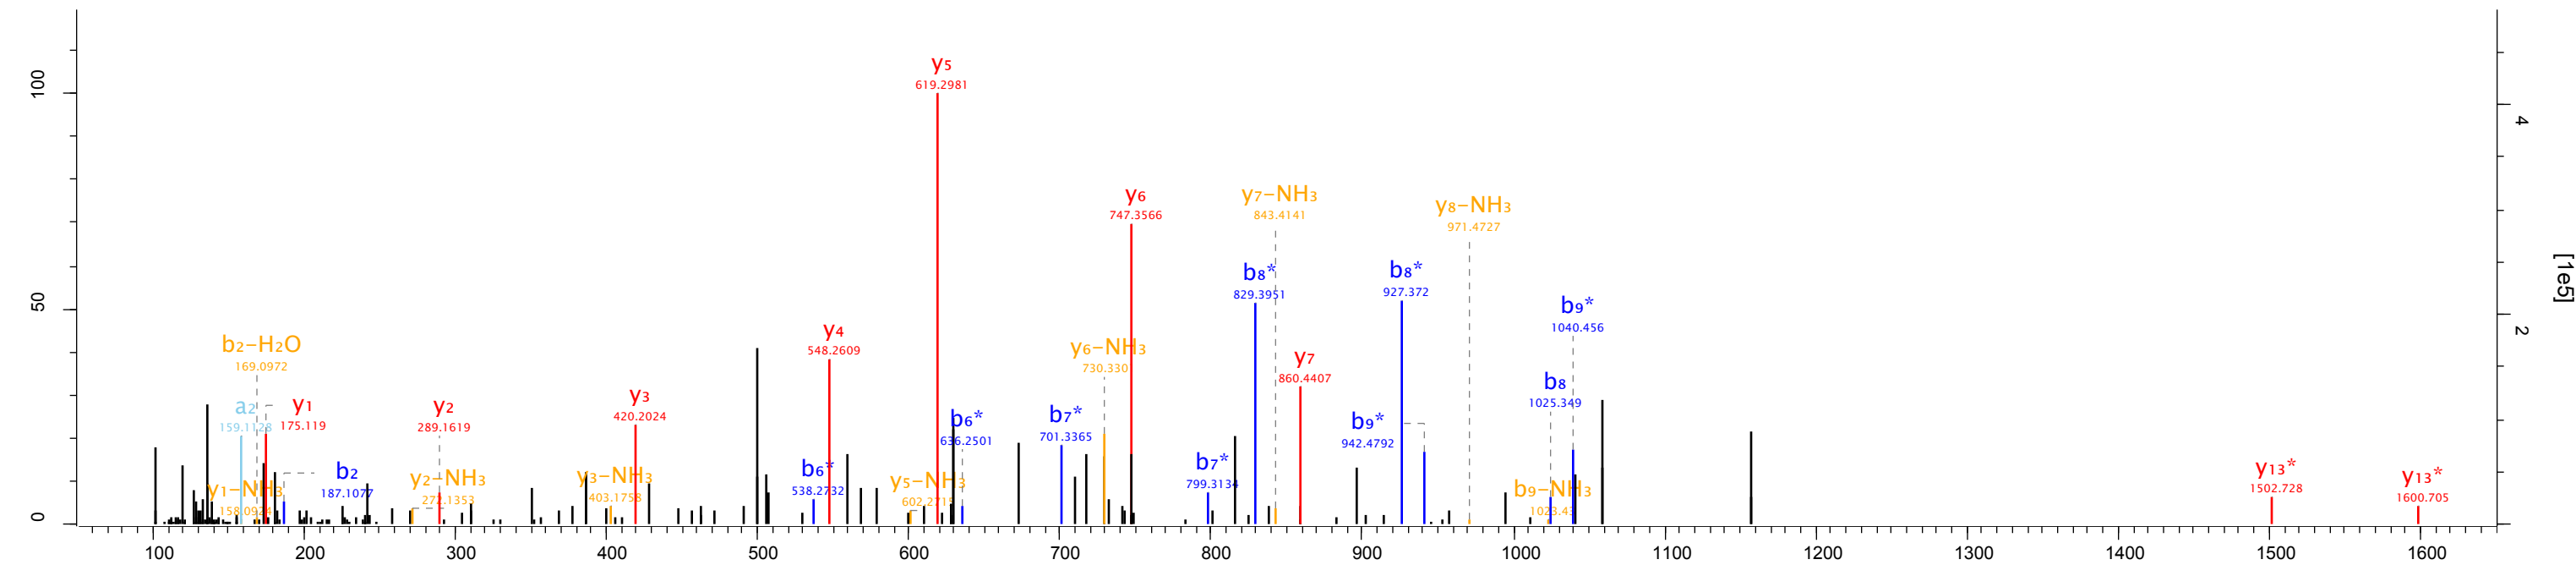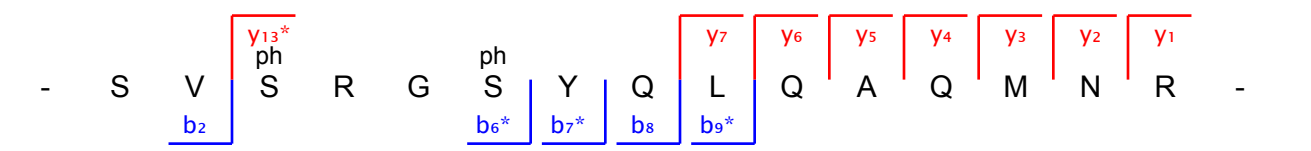

Raw file: 20150814\_A375SR\_Phospho\_BR2\_02  
 Scan: 12553 Method: FTMS; HCD Score: 53.48 m/z: 1104.47 Gene names: ZEB1

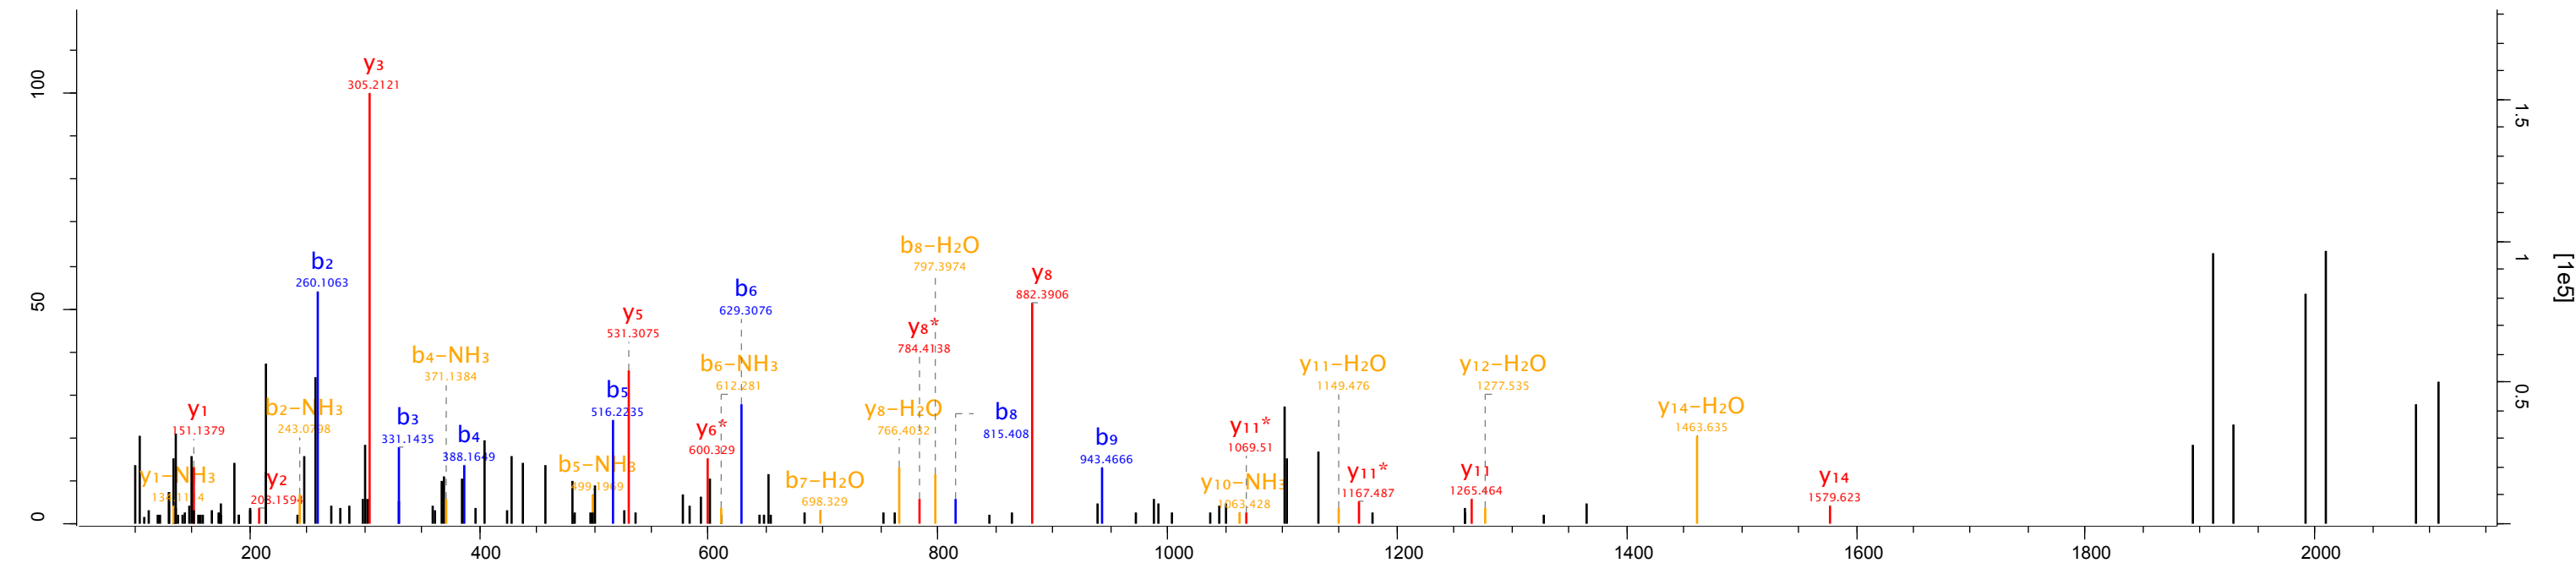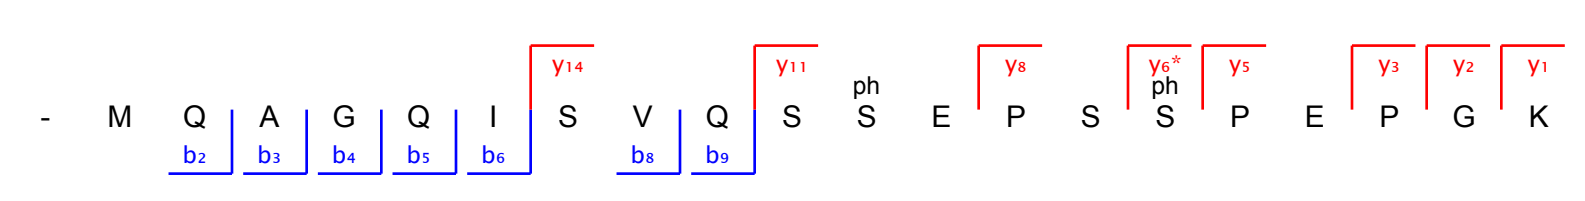

Raw file: 20150814\_A375SR\_Phospho\_BR2\_02  
 Scan: 12633 Method: FTMS; HCD Score: 106.62 m/z: 1088.94 Gene names: AKAP12

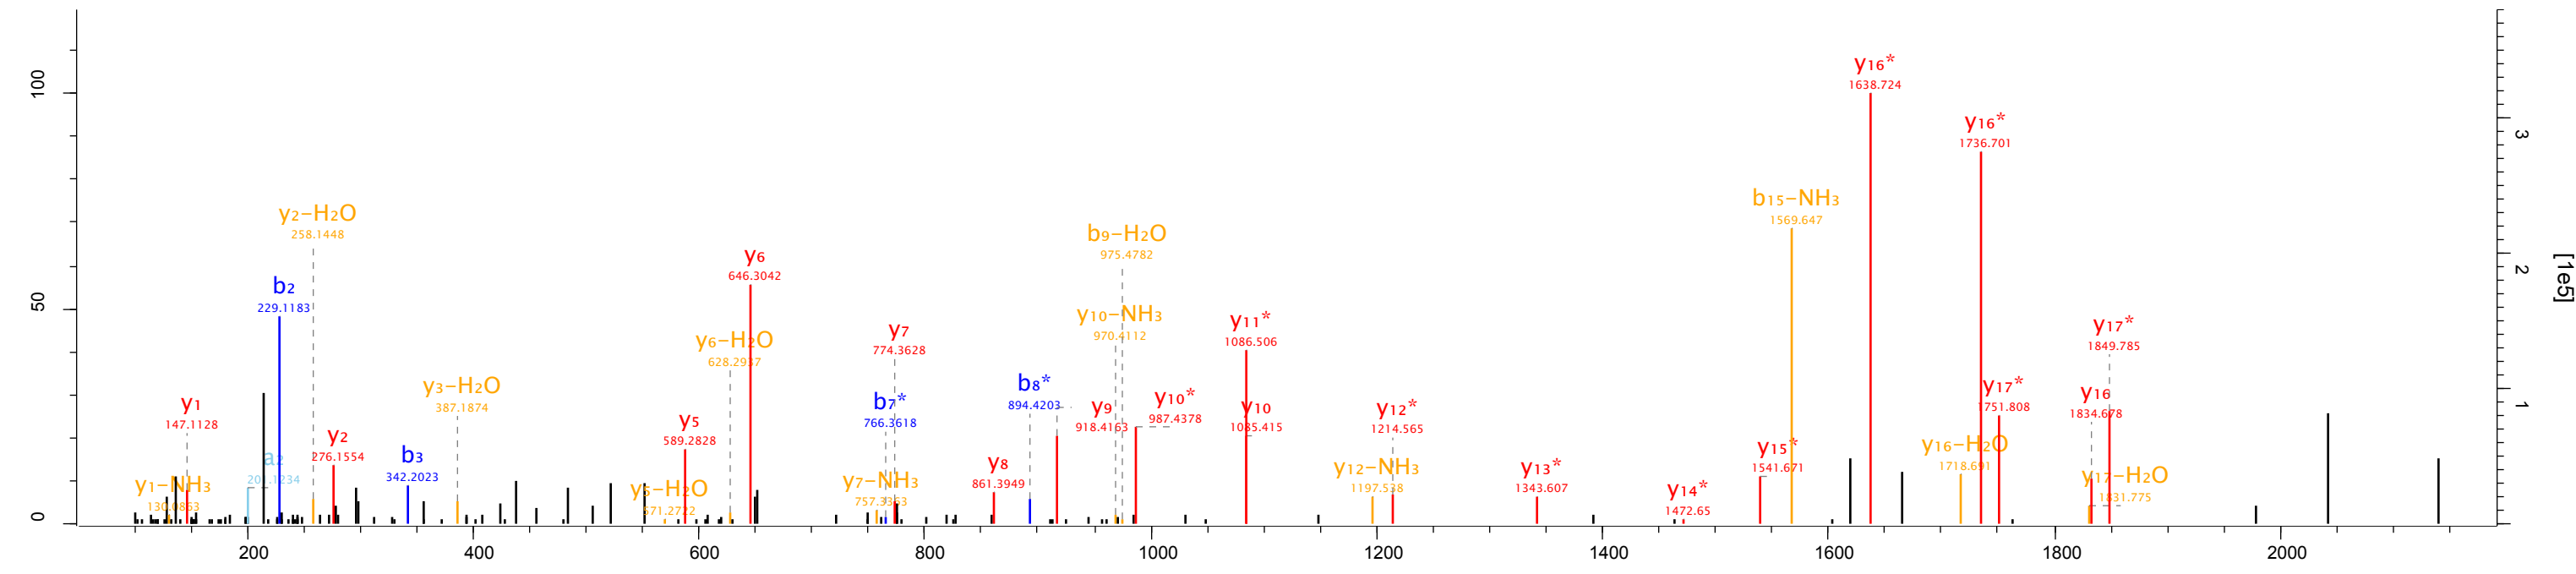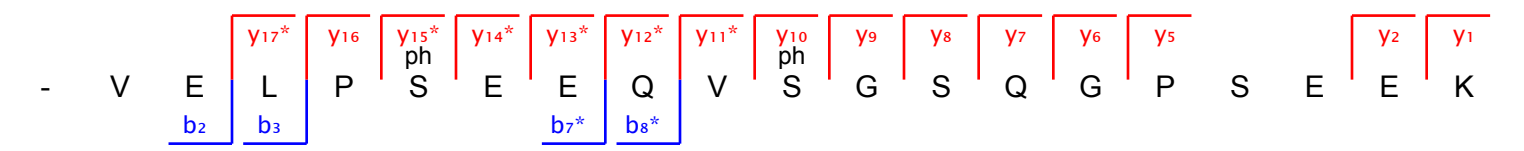

Raw file  
20150814\_A375SR\_Phospho\_BR2\_02

Scan 12813 Method FTMS; HCD Score 173.23 m/z 972.74 Gene names BCL7B

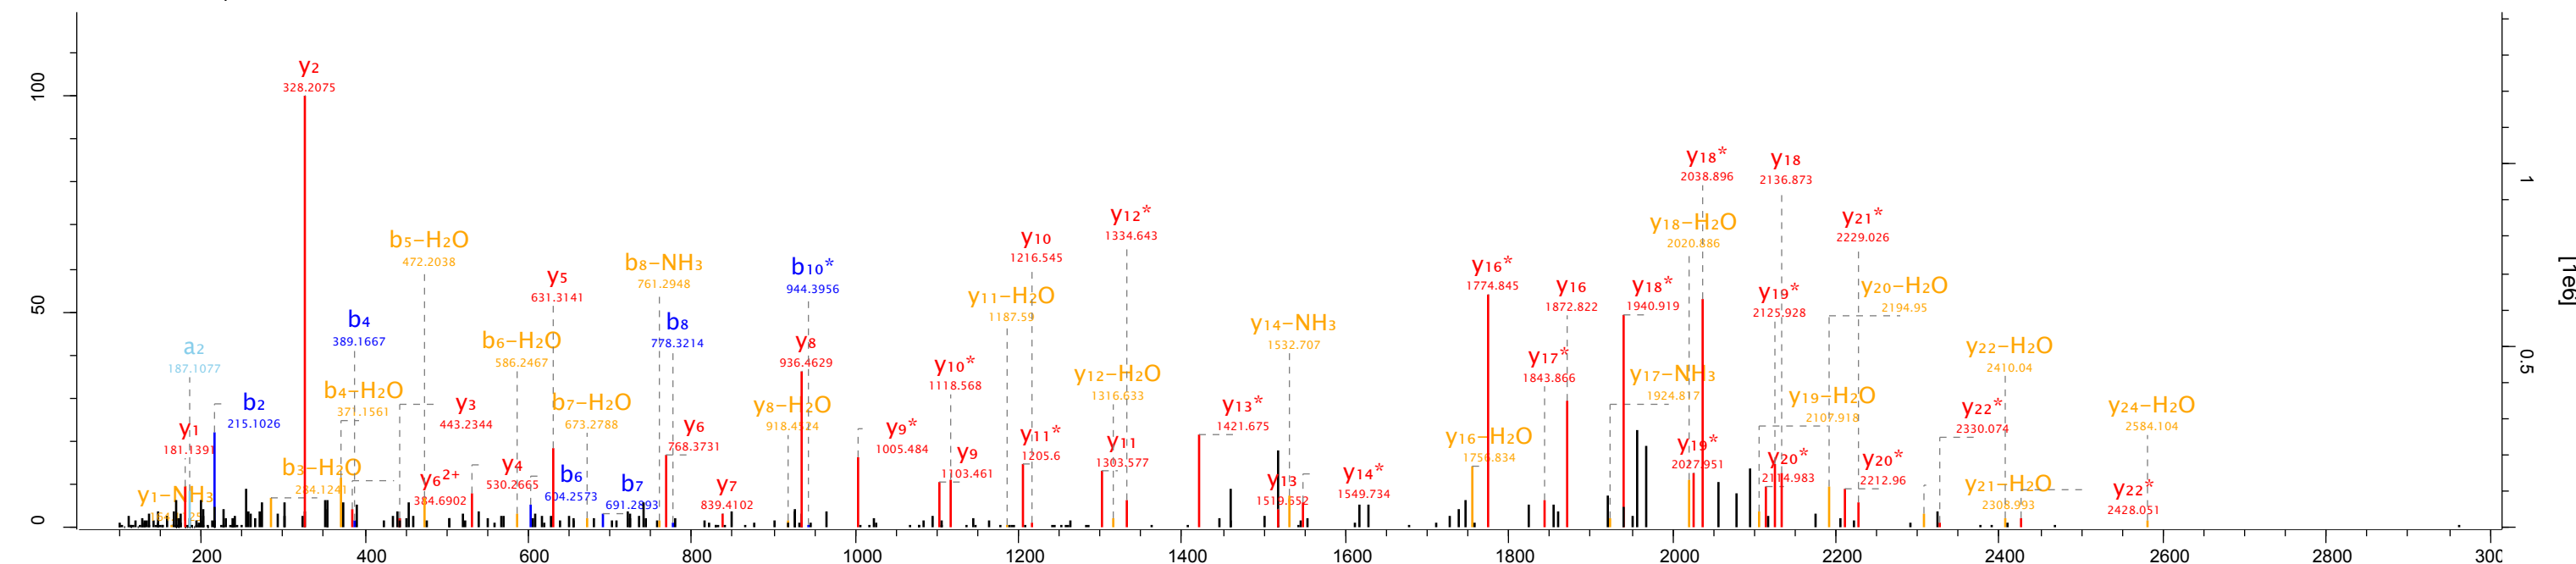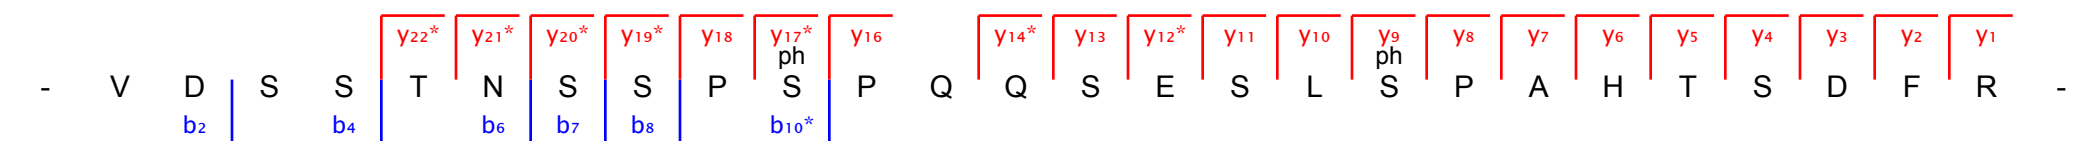

Raw file: 20150814\_A375SR\_Phospho\_BR2\_02  
 Scan: 13283 Method: FTMS; HCD Score: 107.73 m/z: 720.78 Gene names: VAPB

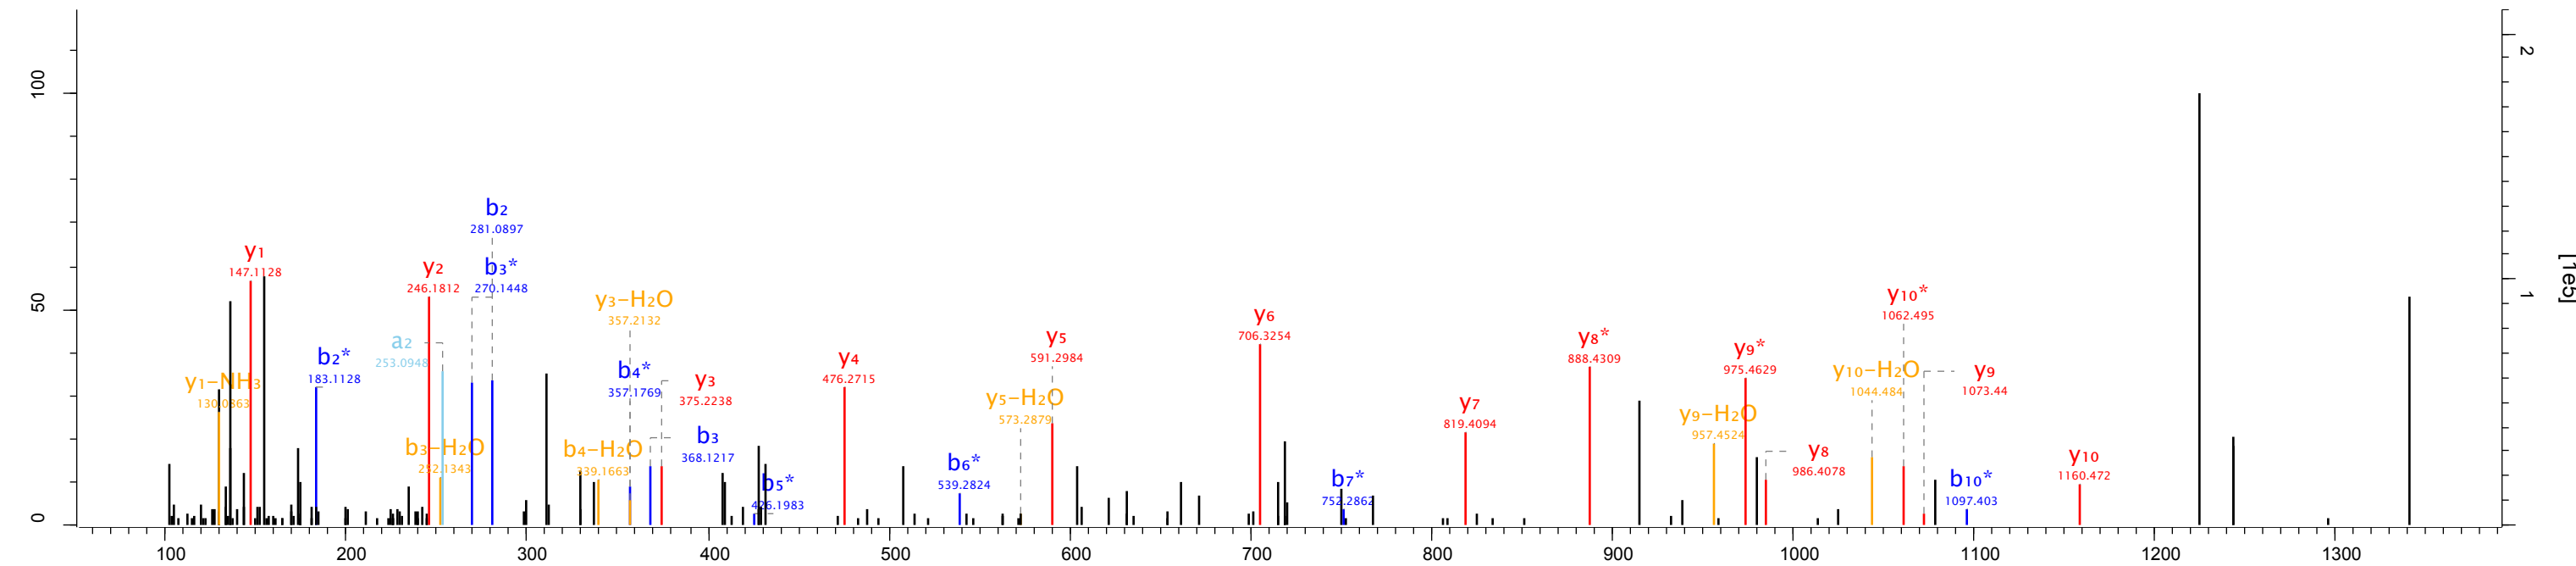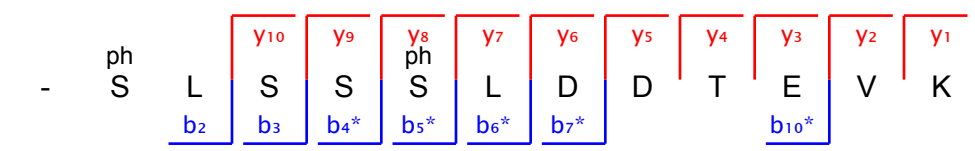



Raw file: 20150814\_A375SR\_Phospho\_BR2\_02  
 Scan: 13603 Method: FTMS; HCD Score: 62.86 m/z: 659.76 Gene names: ARHGEF11

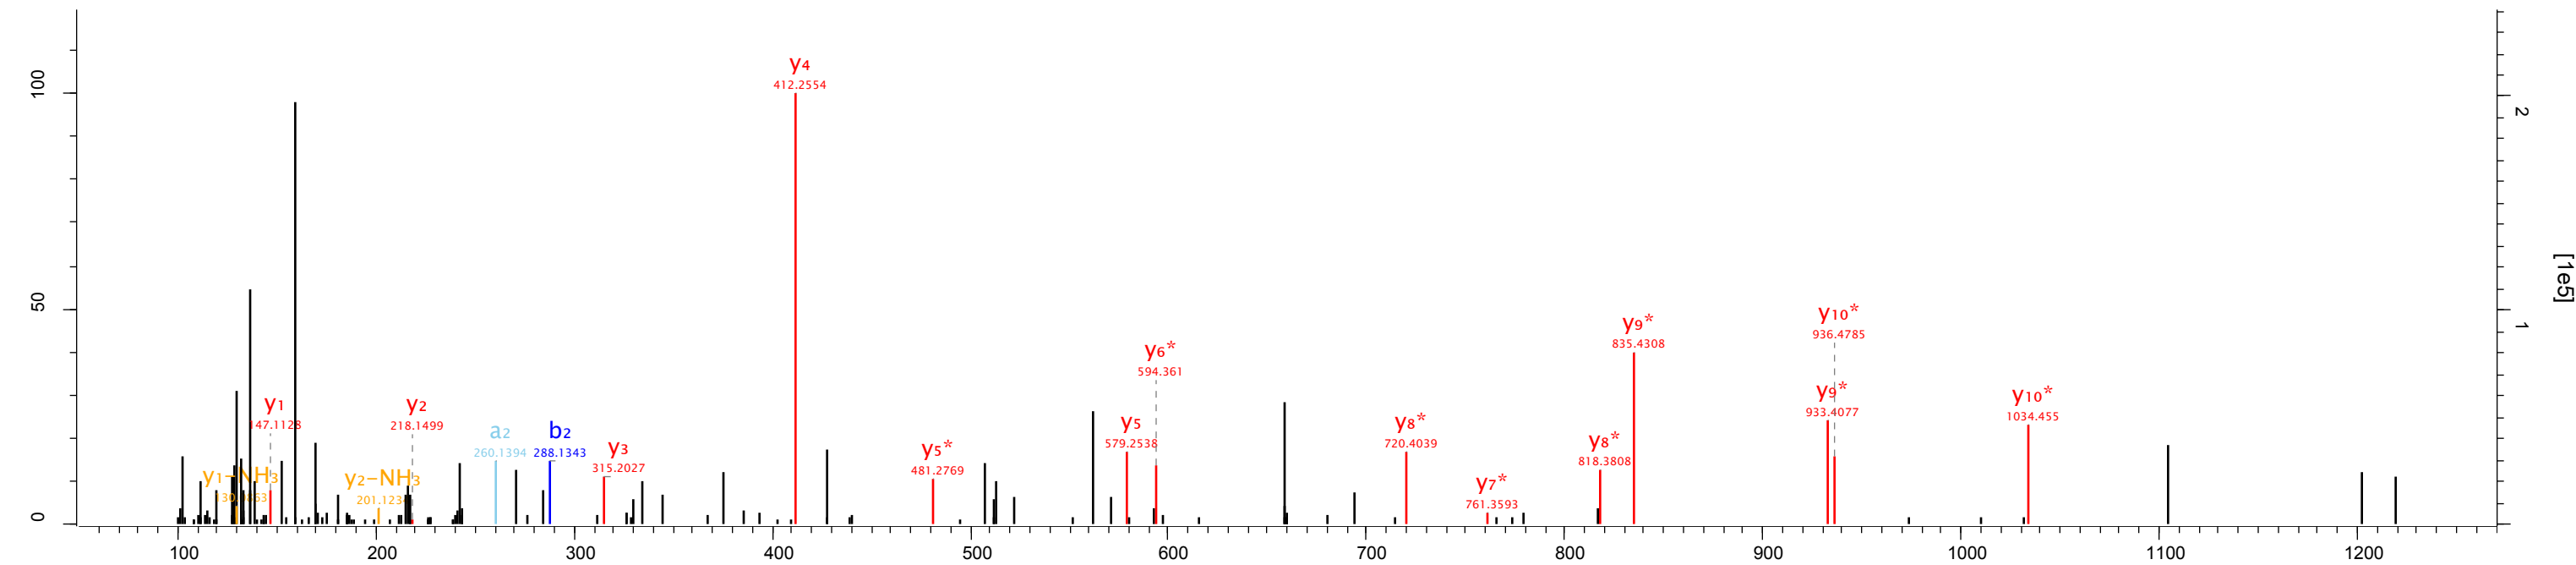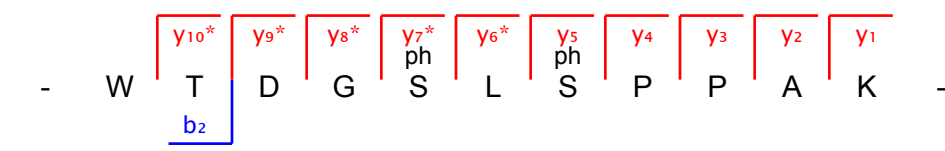

Raw file Scan Method Score m/z Gene names  
 20150814\_A375SR\_Phospho\_BR2\_02 13753 FTMS; HCD 56.21 805.69 USP32

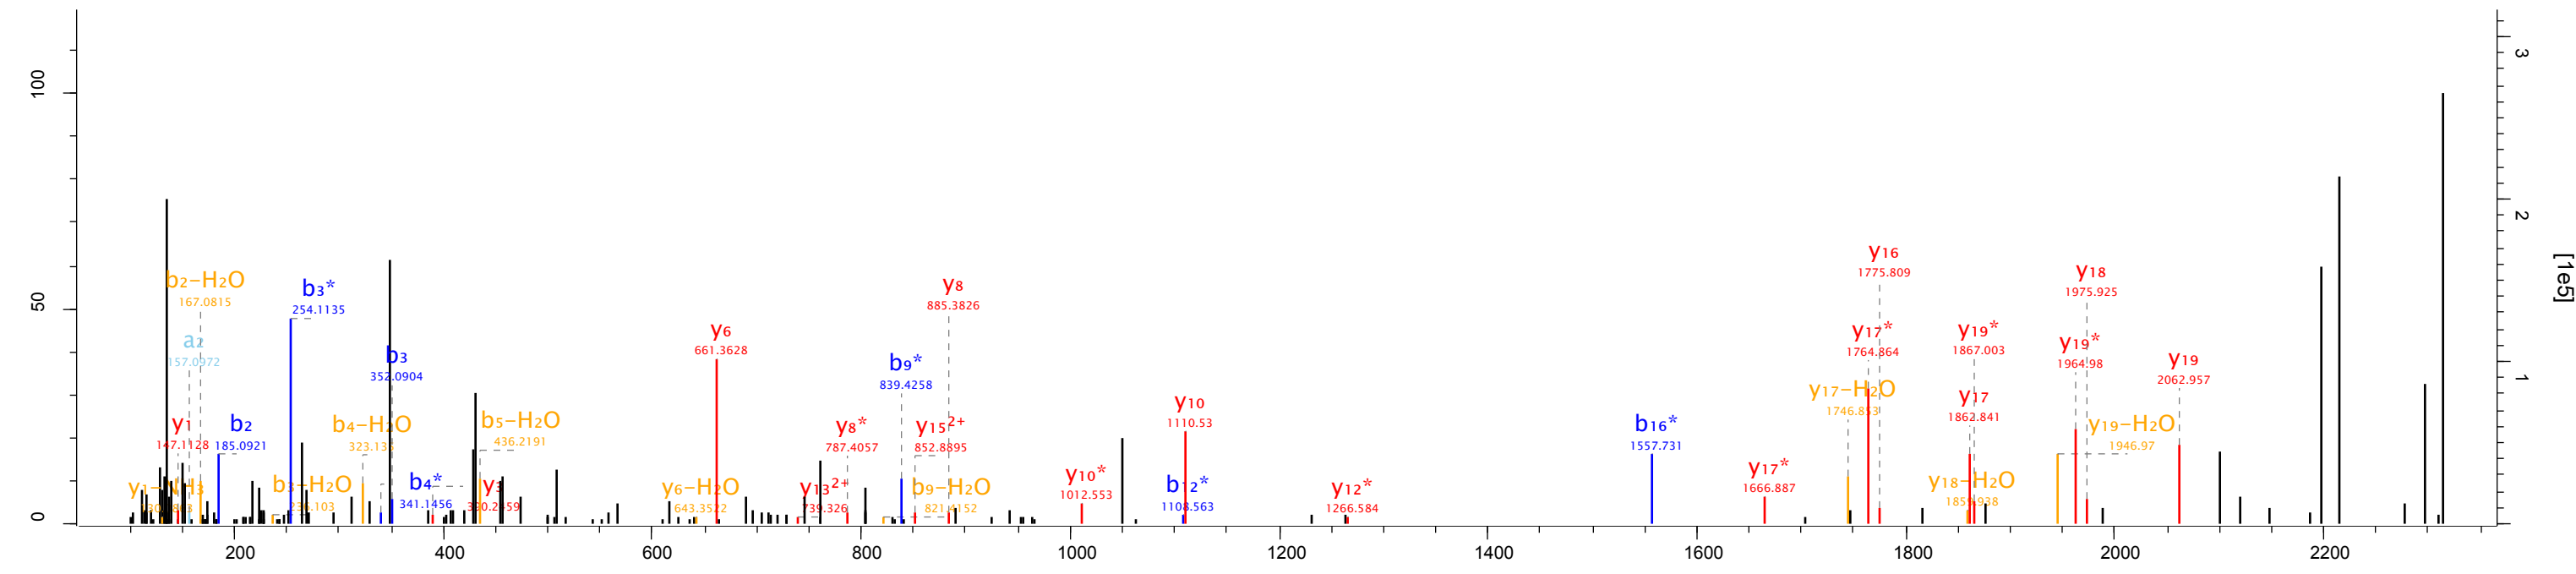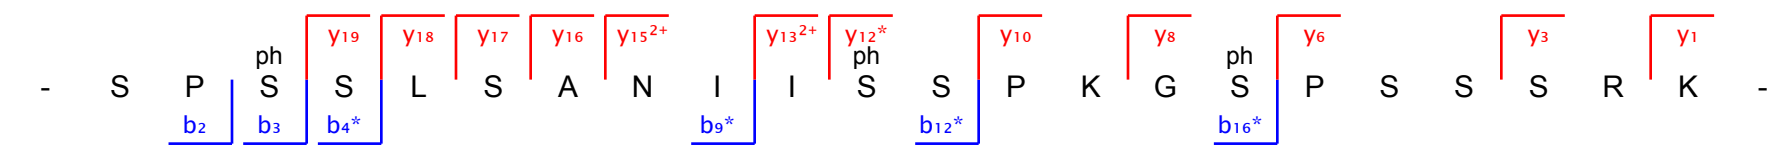

Raw file 20150814\_A375SR\_Phospho\_BR2\_02 Scan 14573 Method FTMS; HCD Score 114.54 m/z 686.28 Gene names MAP7D1

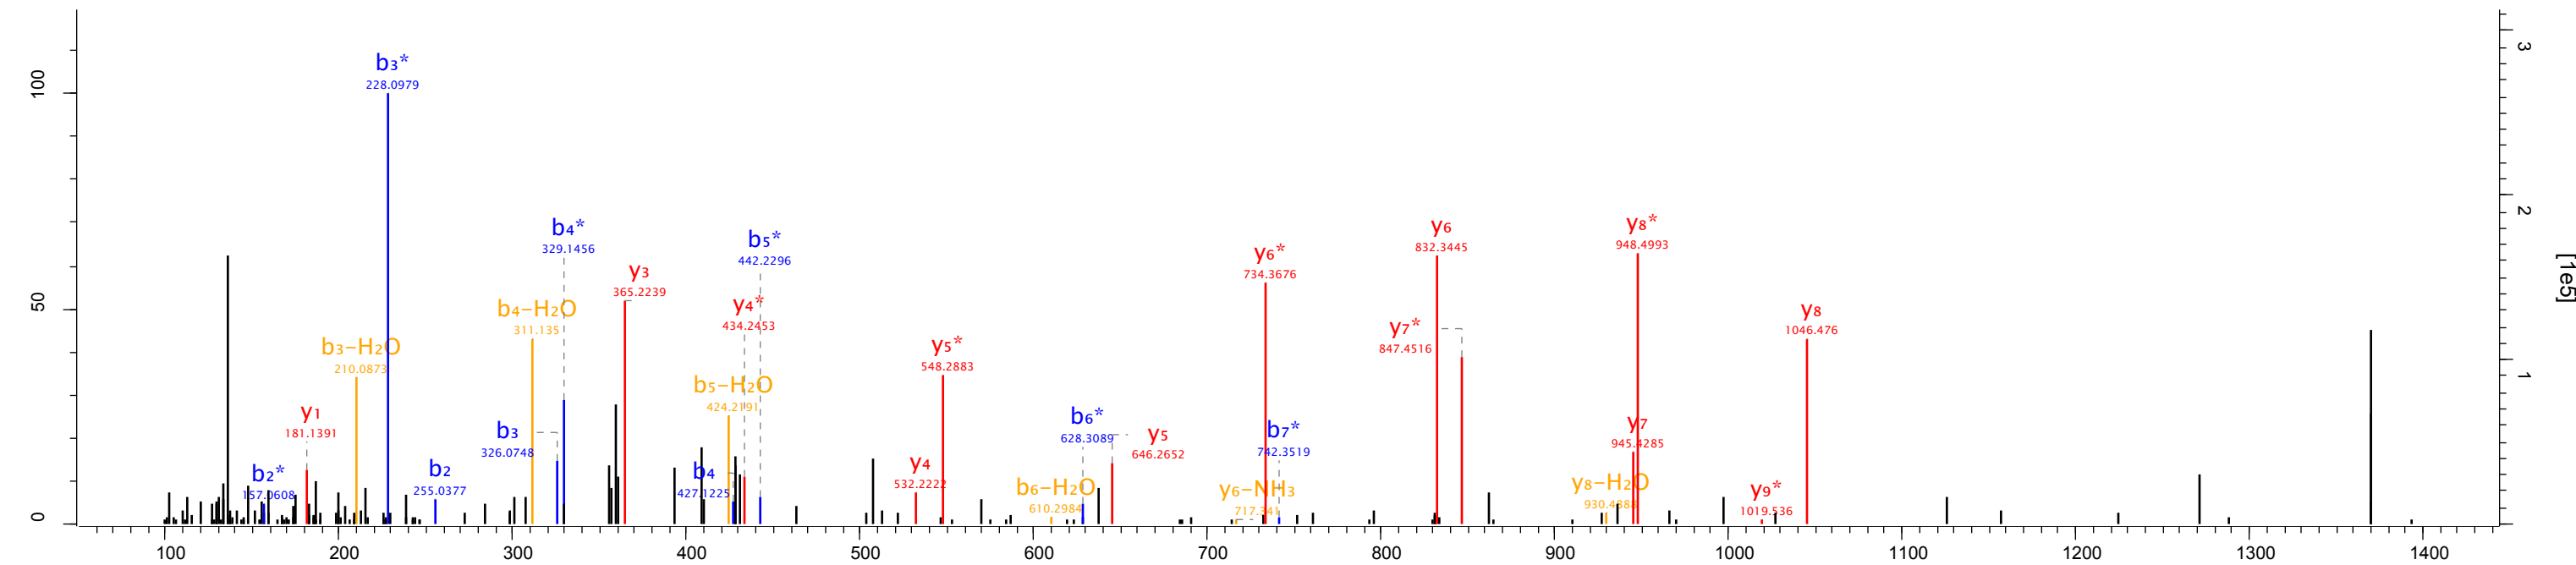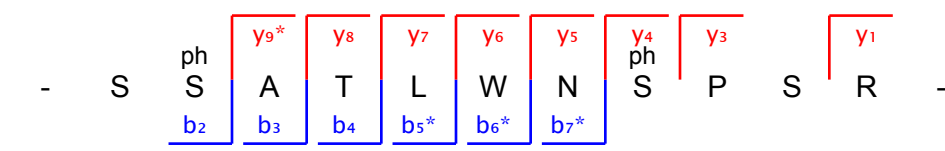

Raw file Scan Method Score m/z Gene names  
 20150814\_A375SR\_Phospho\_BR2\_02 15173 FTMS; HCD 162.37 729.32 GPR56

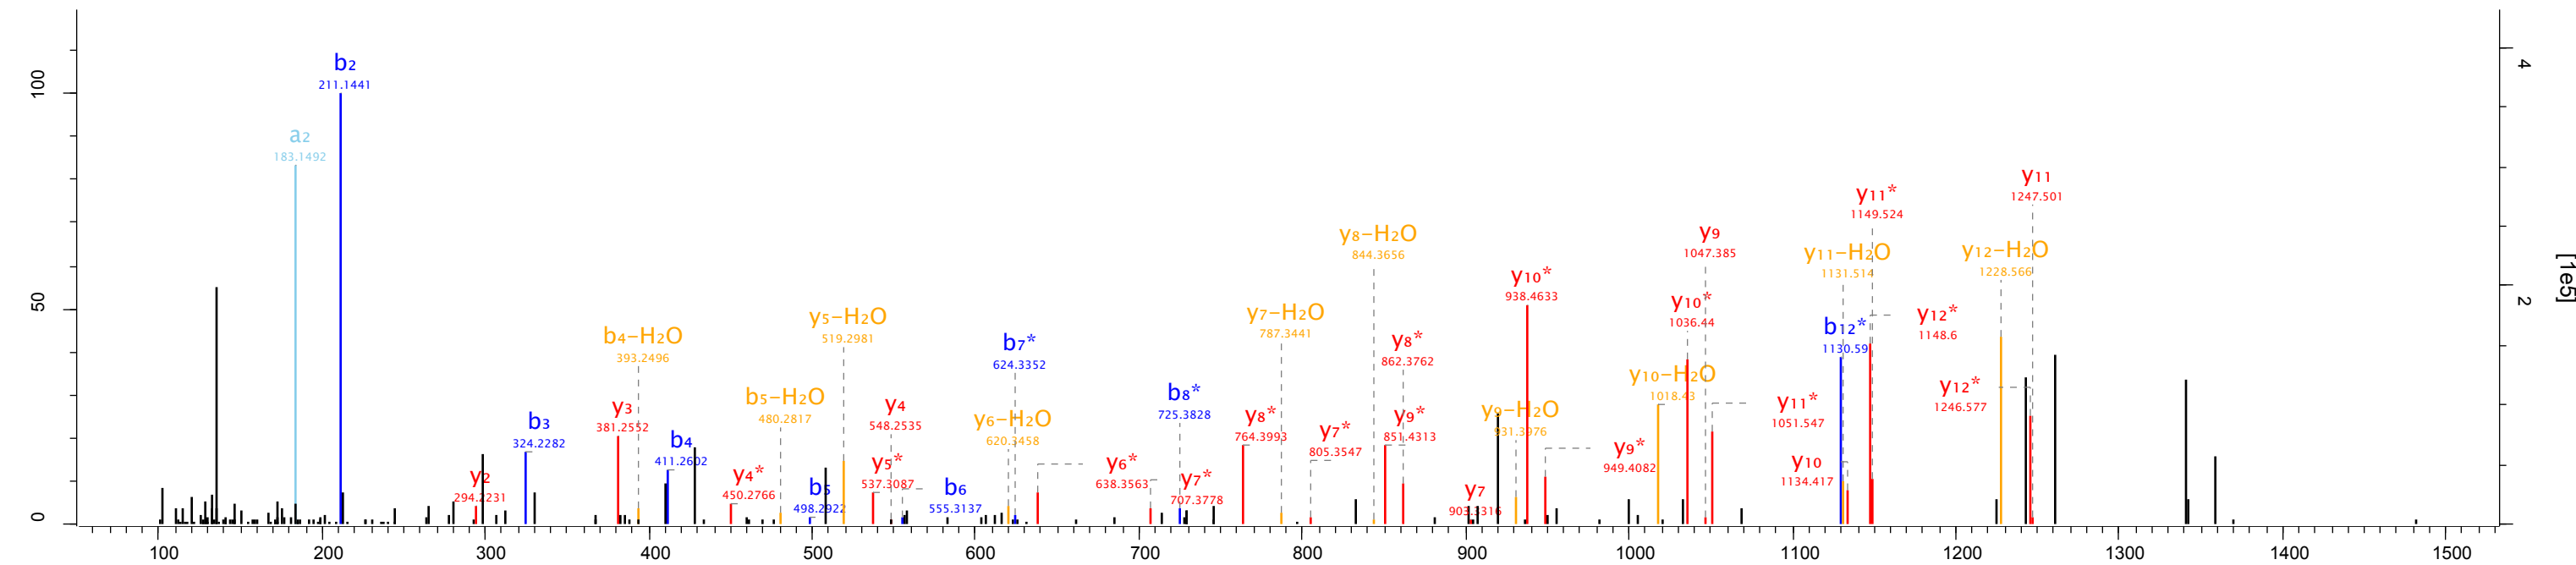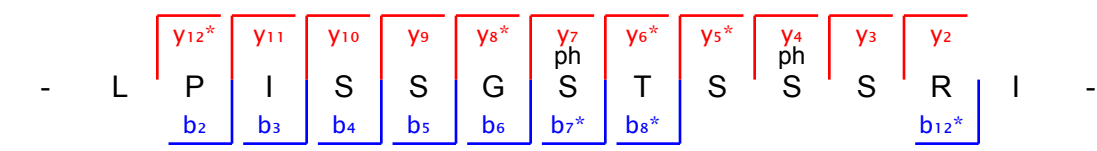

Raw file: 20150814\_A375SR\_Phospho\_BR2\_02  
 Scan: 15243 Method: FTMS; HCD Score: 54.44 m/z: 769.83 Gene names: ZNF106

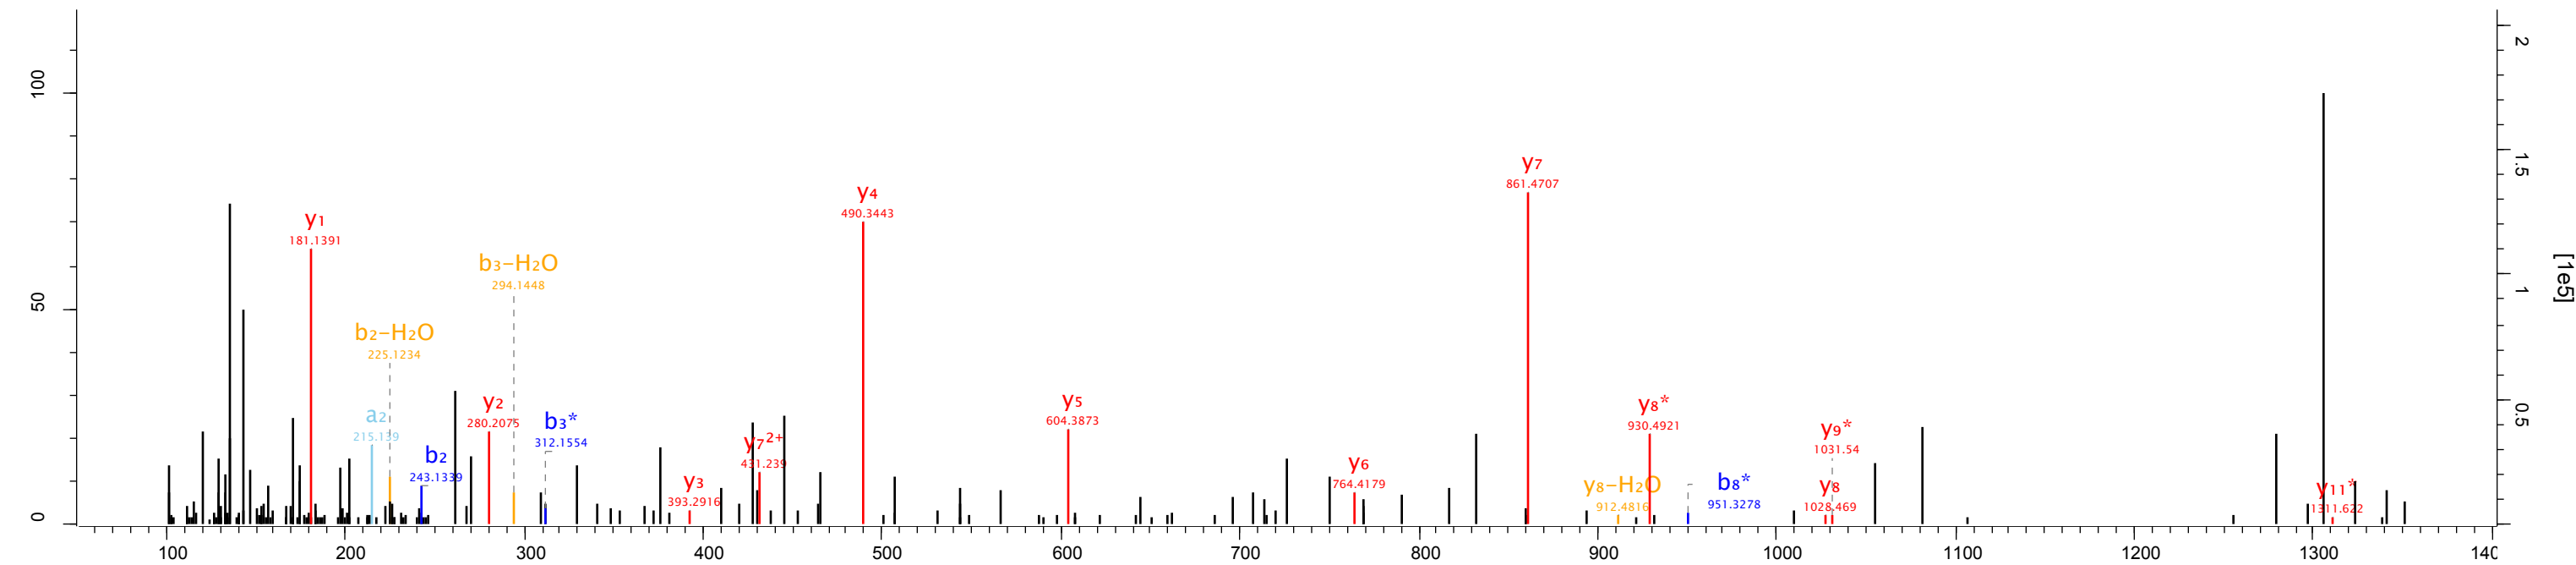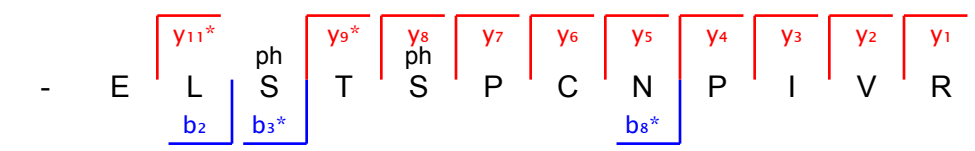

Raw file: 20150814\_A375SR\_Phospho\_BR2\_02  
 Scan: 15903 Method: FTMS; HCD Score: 114.62 m/z: 1333.25 Gene names: RNF20

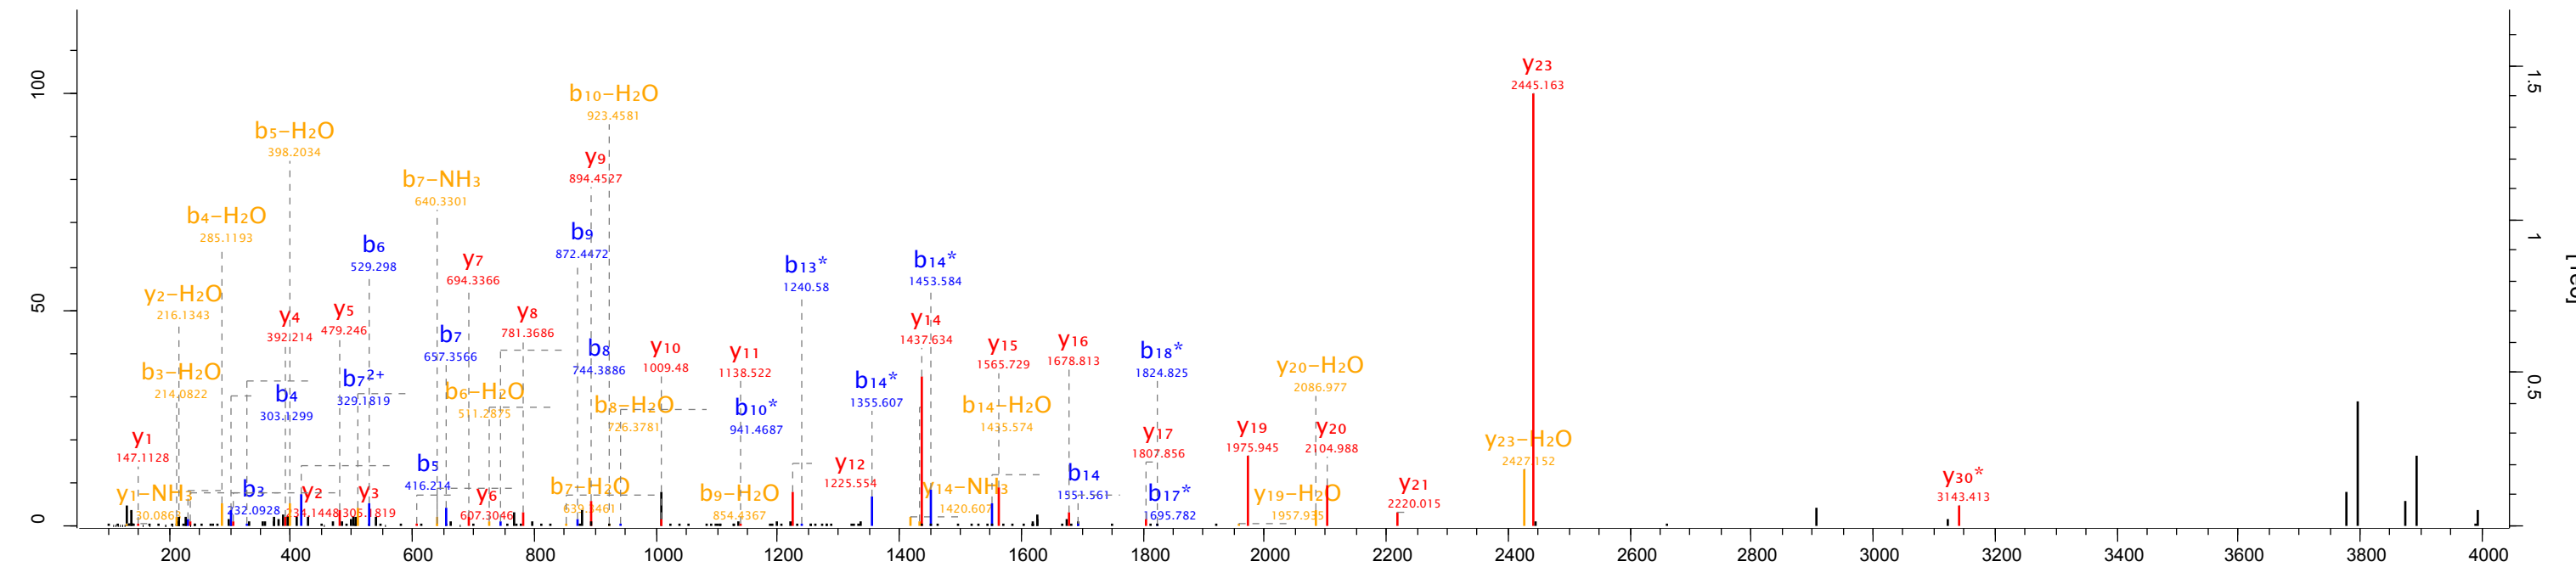

- S G S A L L Q S Q S ph ph S T E D P K D E P A E L K P D S E D L S S Q S S A S K -

Fragmentation sites are indicated by brackets below the sequence:

- Blue brackets (b ions): b3 (S), b4 (A), b5 (L), b6 (L), b7 (Q), b8 (S), b9 (Q), b10\* (S), b13\* (E), b14 (D)
- Red brackets (y ions): y21 (D), y20 (E), y19 (P), y17 (E), y16 (L), y15 (K), y14 (P), y12 (S), y11 (E), y10 (D), y9 (L), y8 (S), y7 (S), y6 (Q), y5 (S), y4 (S), y3 (A), y2 (S), y1 (K), y30\* (S)

Raw file 20150814\_A375SR\_Phospho\_BR2\_02 Scan 16243 Method FTMS; HCD Score 155.14 m/z 682.72 Gene names KRT80

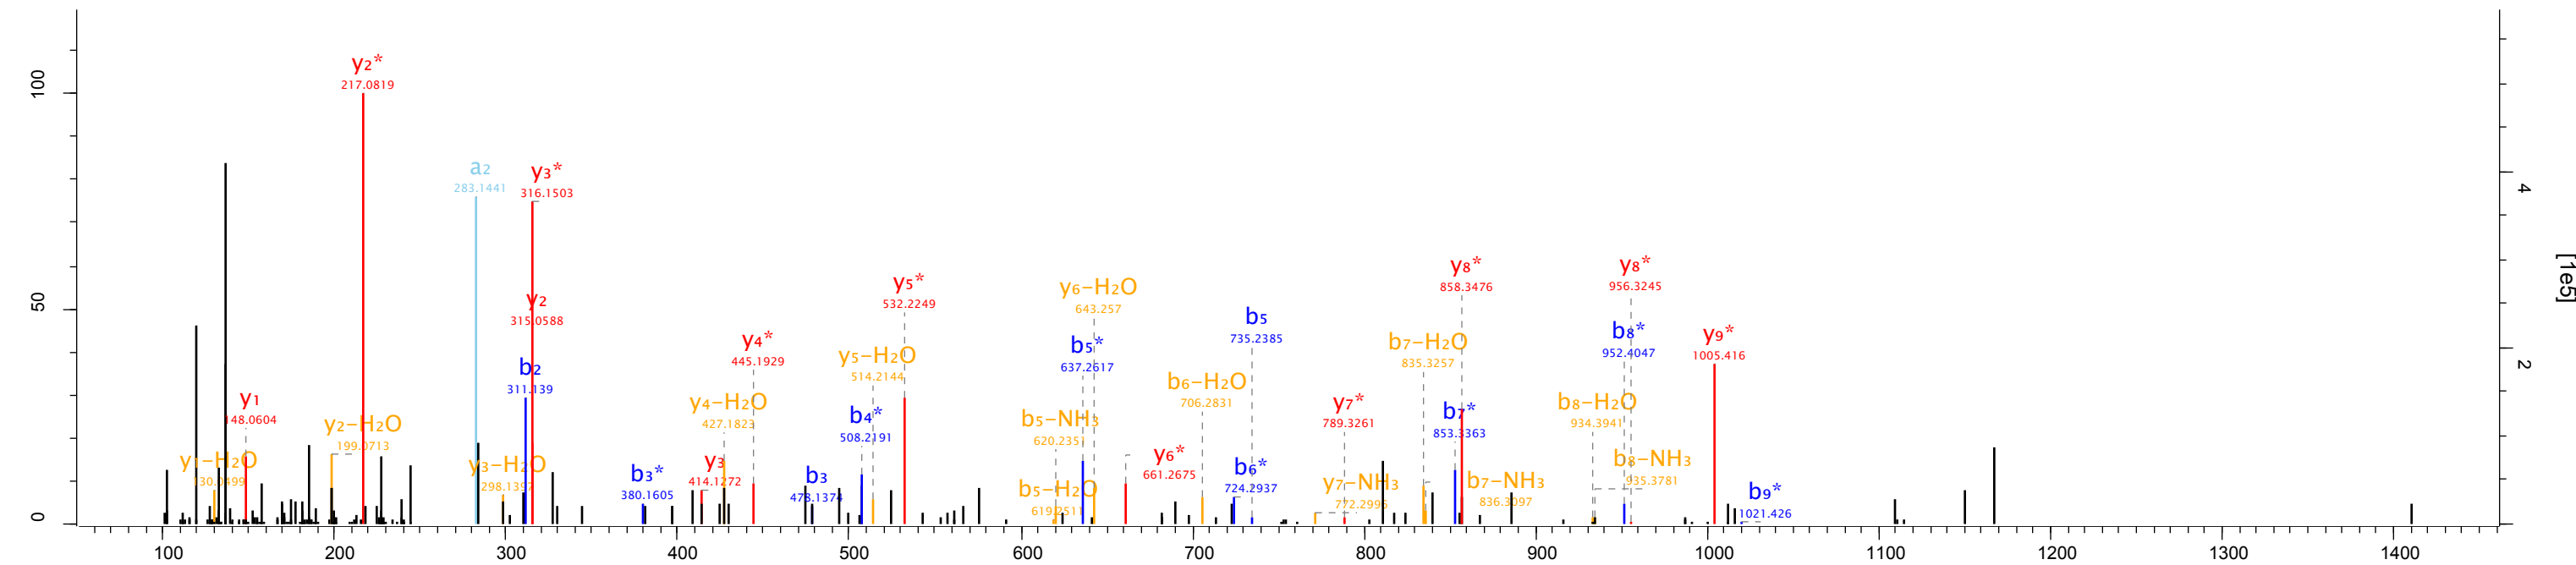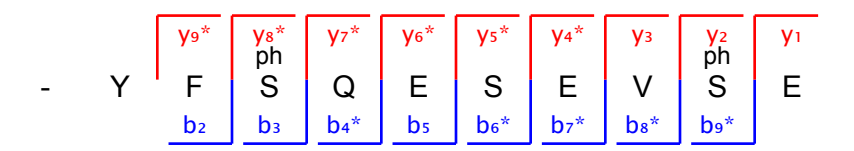

Raw file 20150814\_A375SR\_Phospho\_BR2\_02 Scan 16713 Method FTMS; HCD Score 211.18 m/z 1103.96 Gene names EPRS

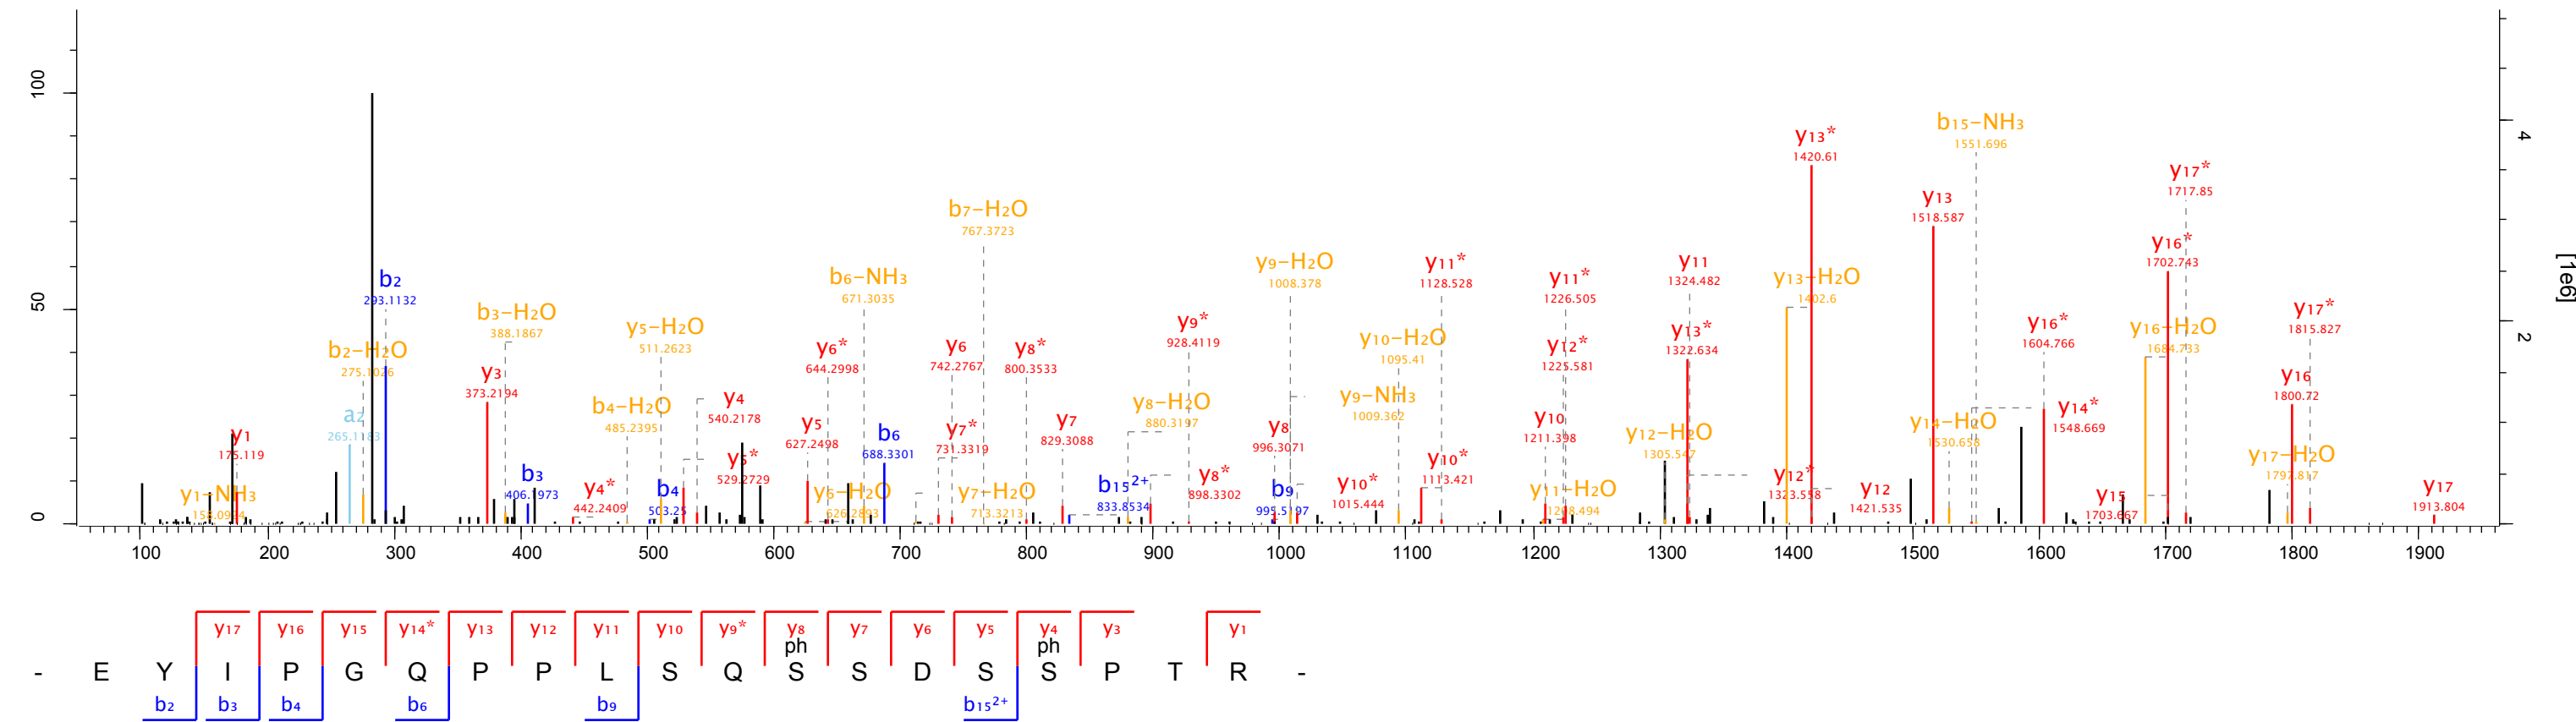





Raw file 20150814\_A375SR\_Phospho\_BR2\_02 Scan 17413 Method FTMS; HCD Score 89.23 m/z 723.76 Gene names CNN3

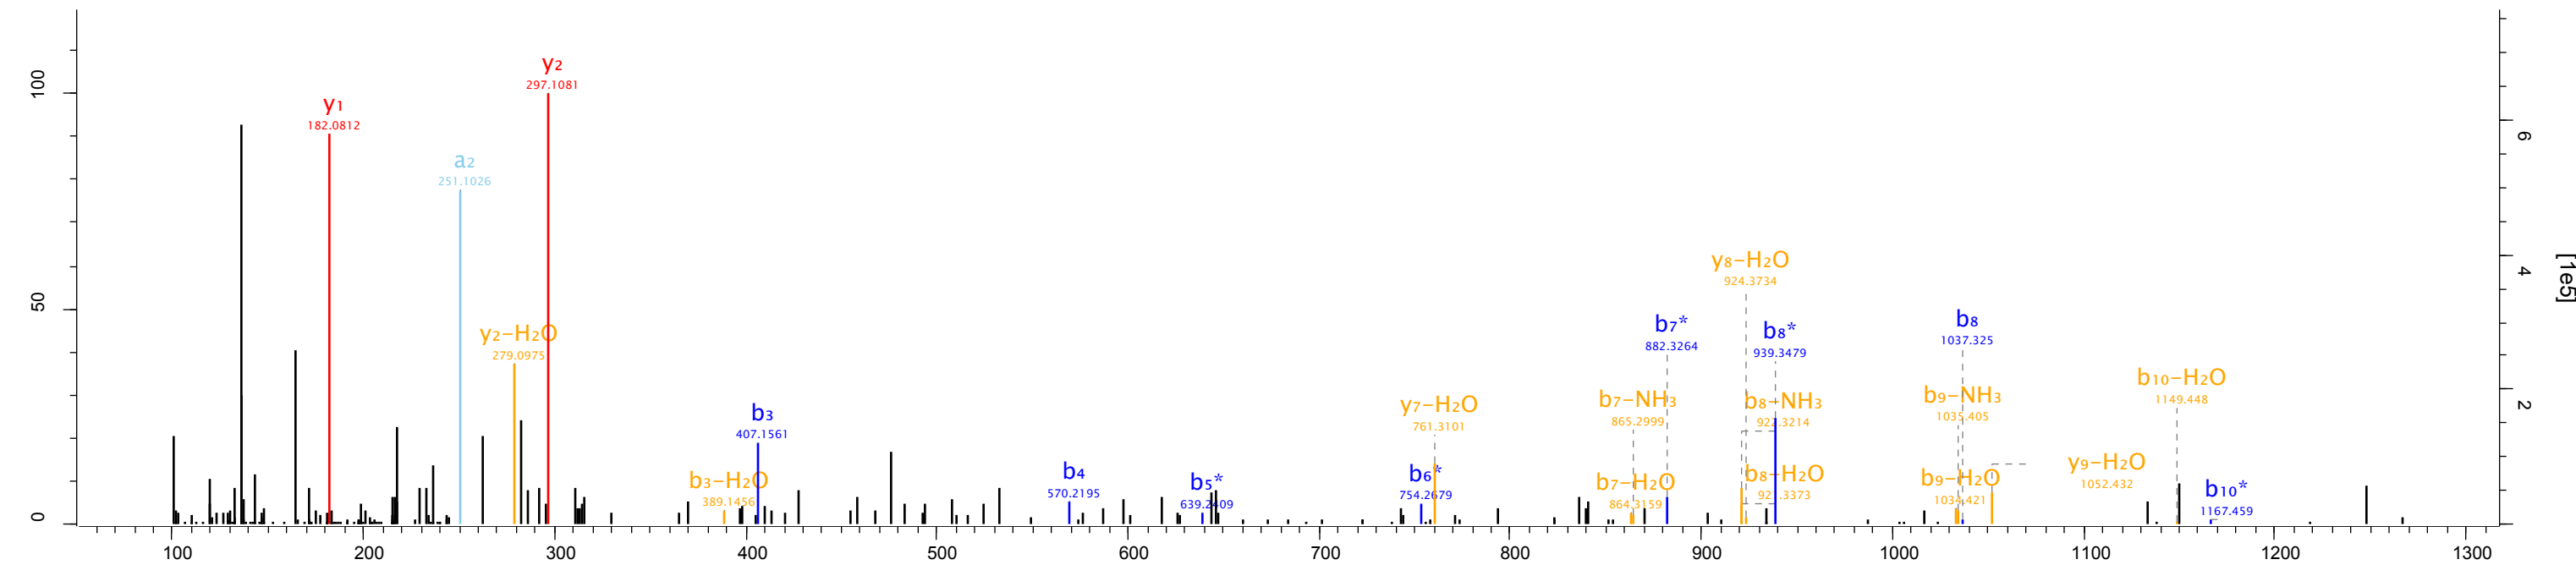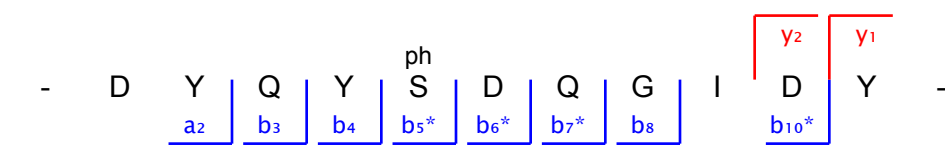

Raw file 20150814\_A375SR\_Phospho\_BR2\_02 Scan 17733 Method FTMS; HCD Score 44.34 m/z 832.36 Gene names DTL

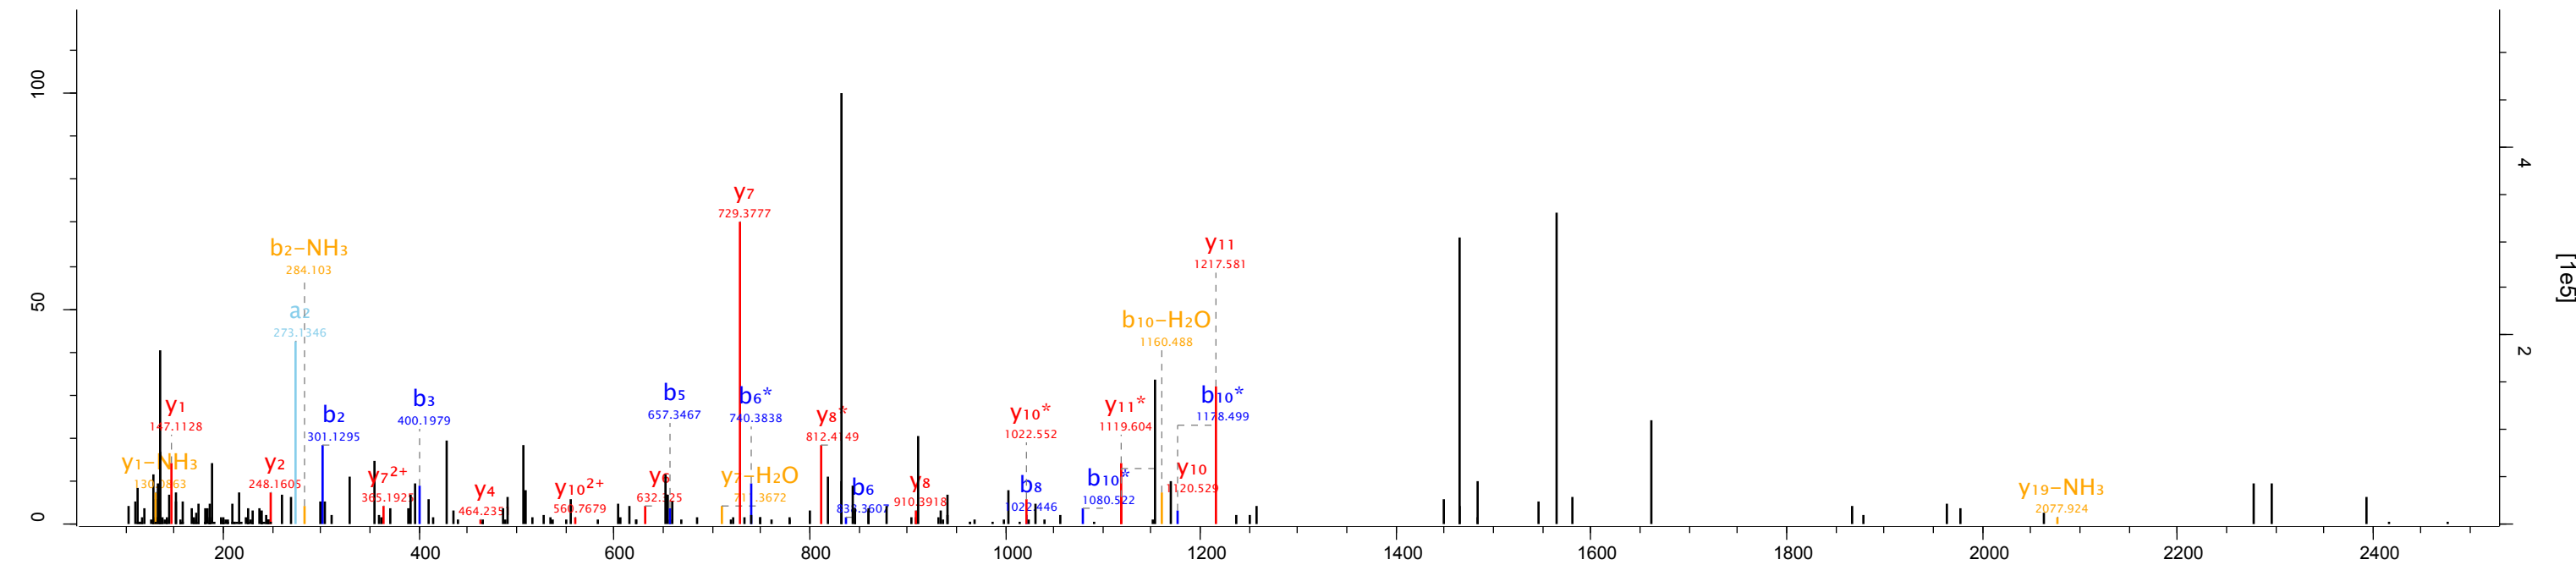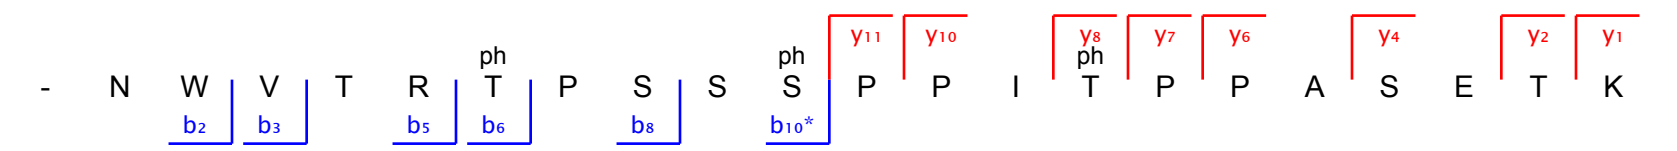

Raw file 20150814\_A375SR\_Phospho\_BR2\_02 Scan 18493 Method FTMS; HCD Score 230.52 m/z 1361.03 Gene names FTSJ3

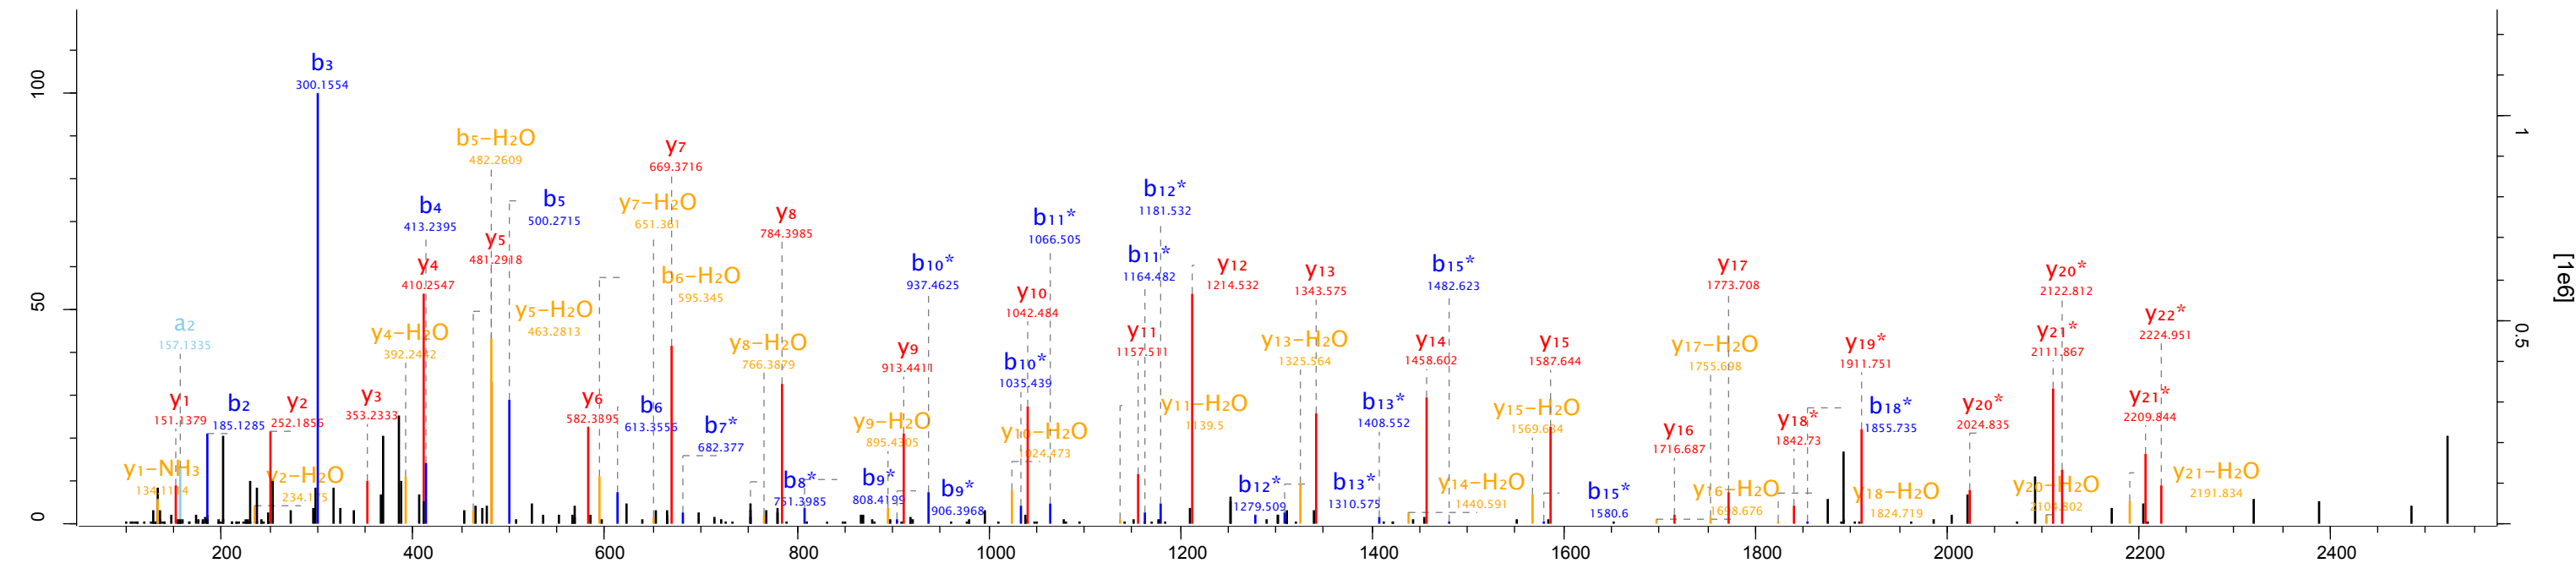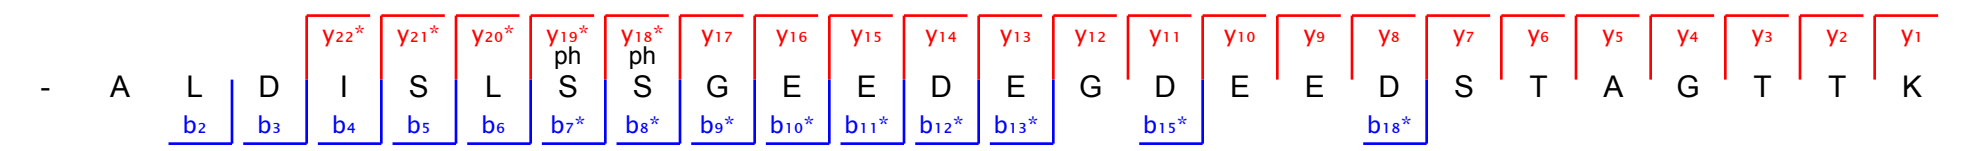

Raw file 20150814\_A375SR\_Phospho\_BR2\_02 Scan 18583 Method FTMS; HCD Score 142.79 m/z 903.88 Gene names GPR39

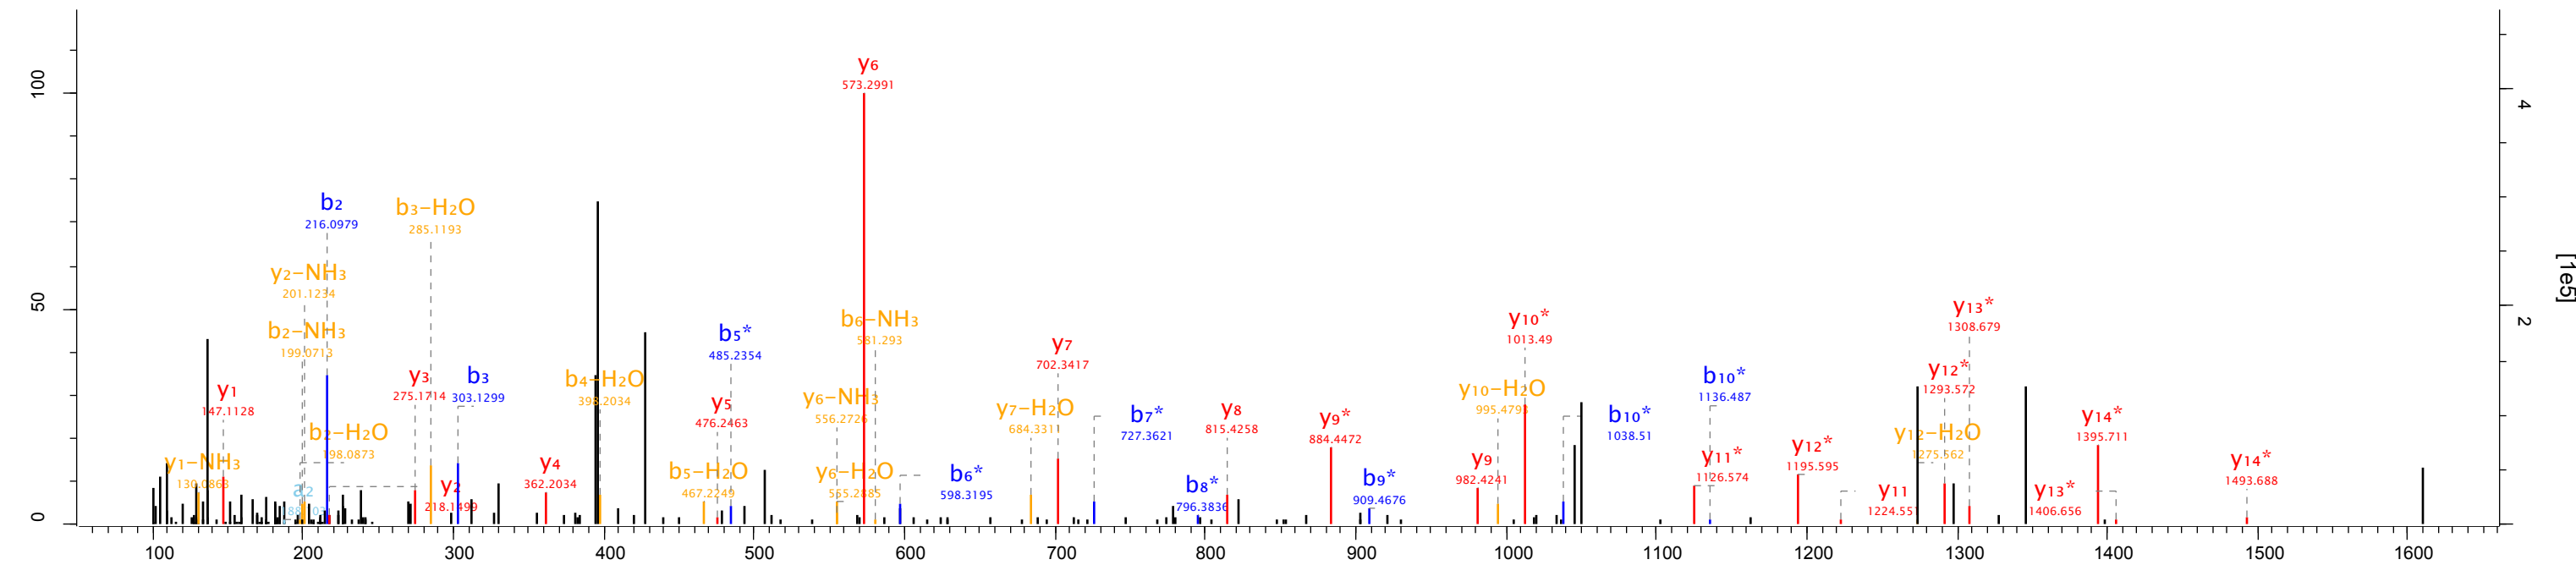

- S Q S L S L E S L E P N S G A K -

b<sub>2</sub>
b<sub>3</sub>
b<sub>5</sub>\*
b<sub>6</sub>\*
b<sub>7</sub>\*
b<sub>8</sub>\*
b<sub>9</sub>\*
b<sub>10</sub>\*

y<sub>14</sub>\*
y<sub>13</sub>\*
y<sub>12</sub>\*
y<sub>11</sub>
y<sub>10</sub>\*
y<sub>9</sub>
y<sub>8</sub>
y<sub>7</sub>
y<sub>6</sub>
y<sub>5</sub>
y<sub>4</sub>
y<sub>3</sub>
y<sub>2</sub>
y<sub>1</sub>

Raw file  
20150814\_A375SR\_Phospho\_BR2\_02

Scan 20083 Method FTMS; HCD Score 79.07 m/z 1369.96 Gene names NUMB

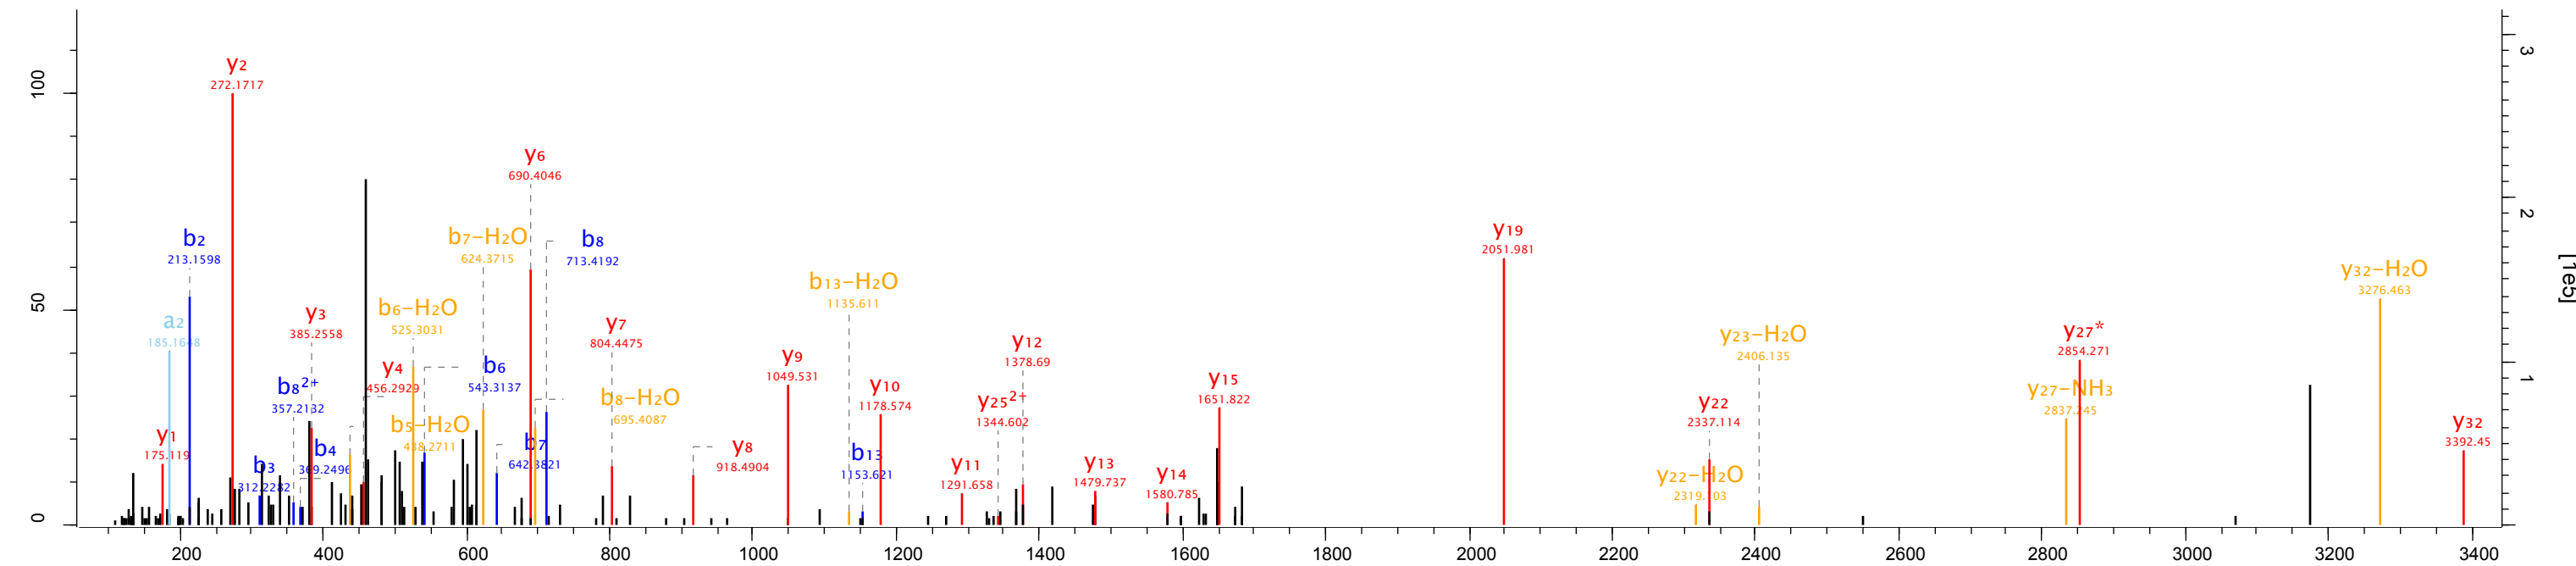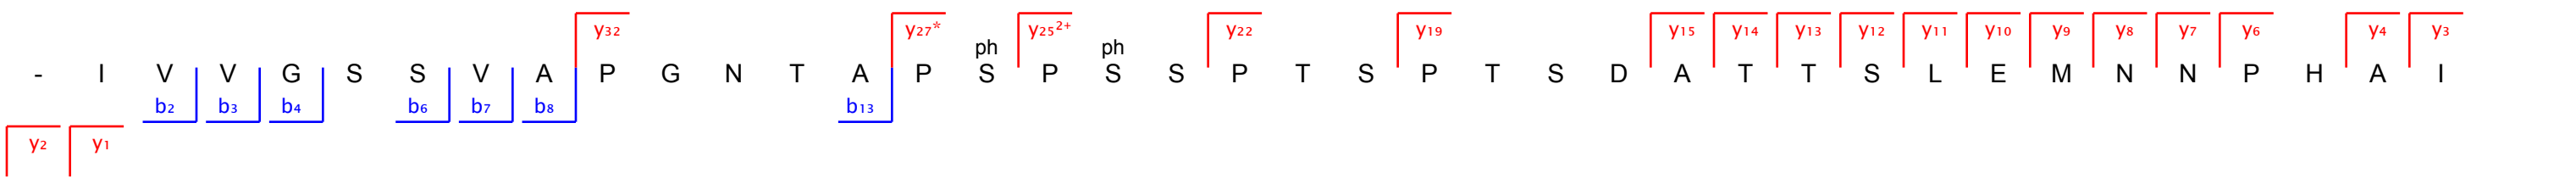

Raw file 20150814\_A375SR\_Phospho\_BR2\_02 Scan 20213 Method FTMS; HCD Score 119.85 m/z 832.29 Gene names SLC9A8

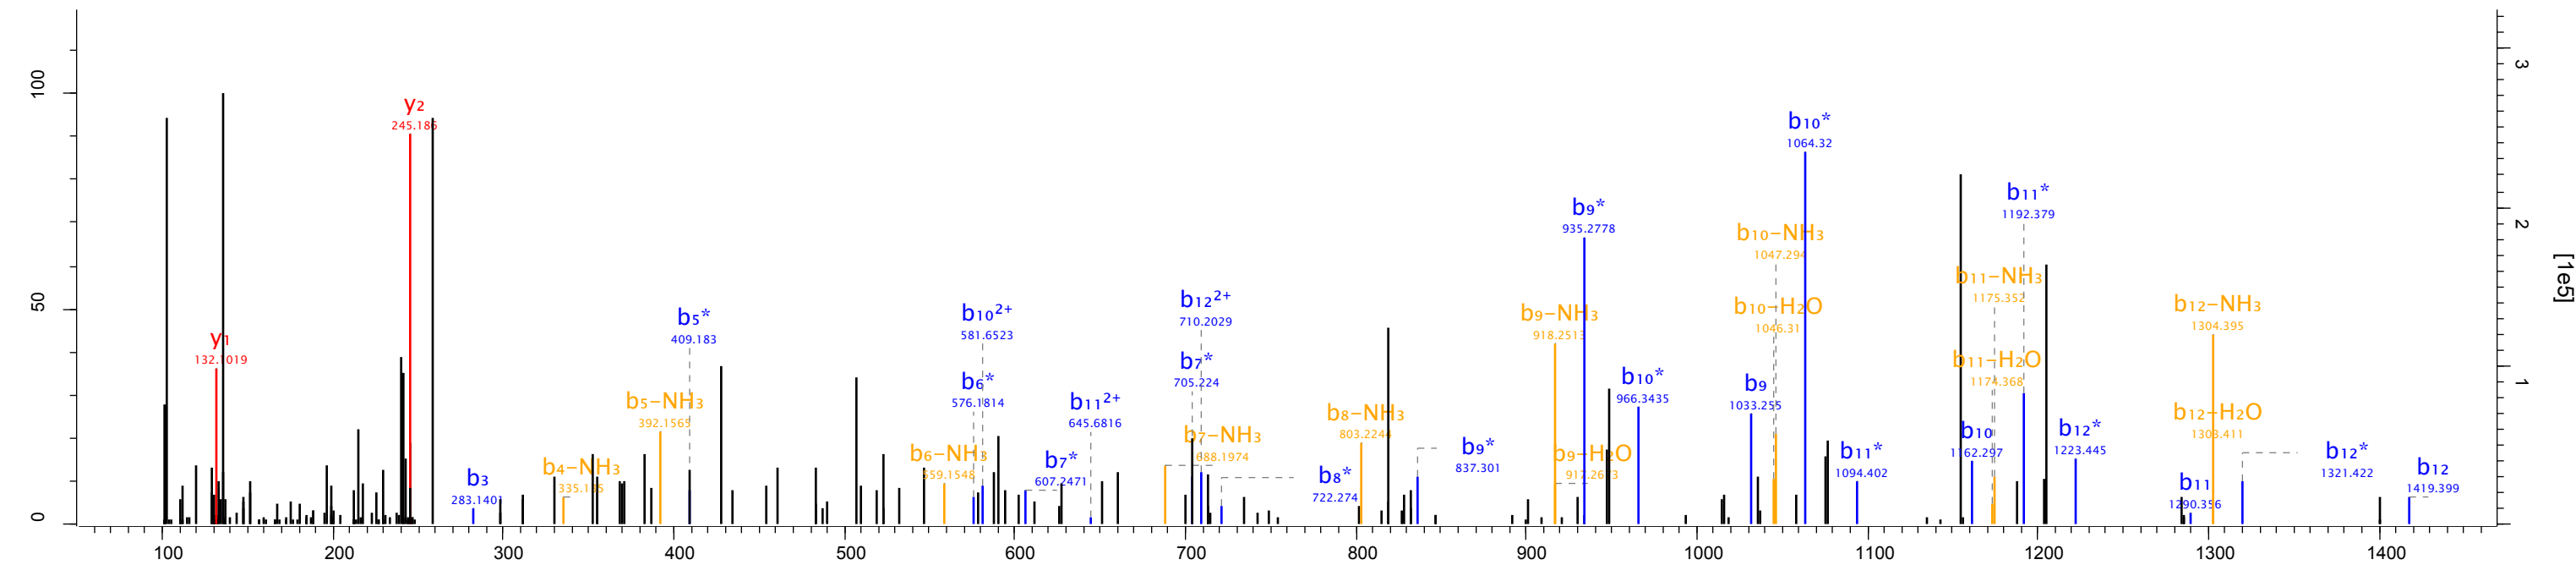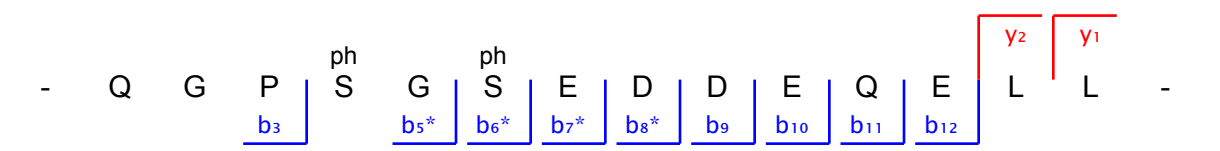

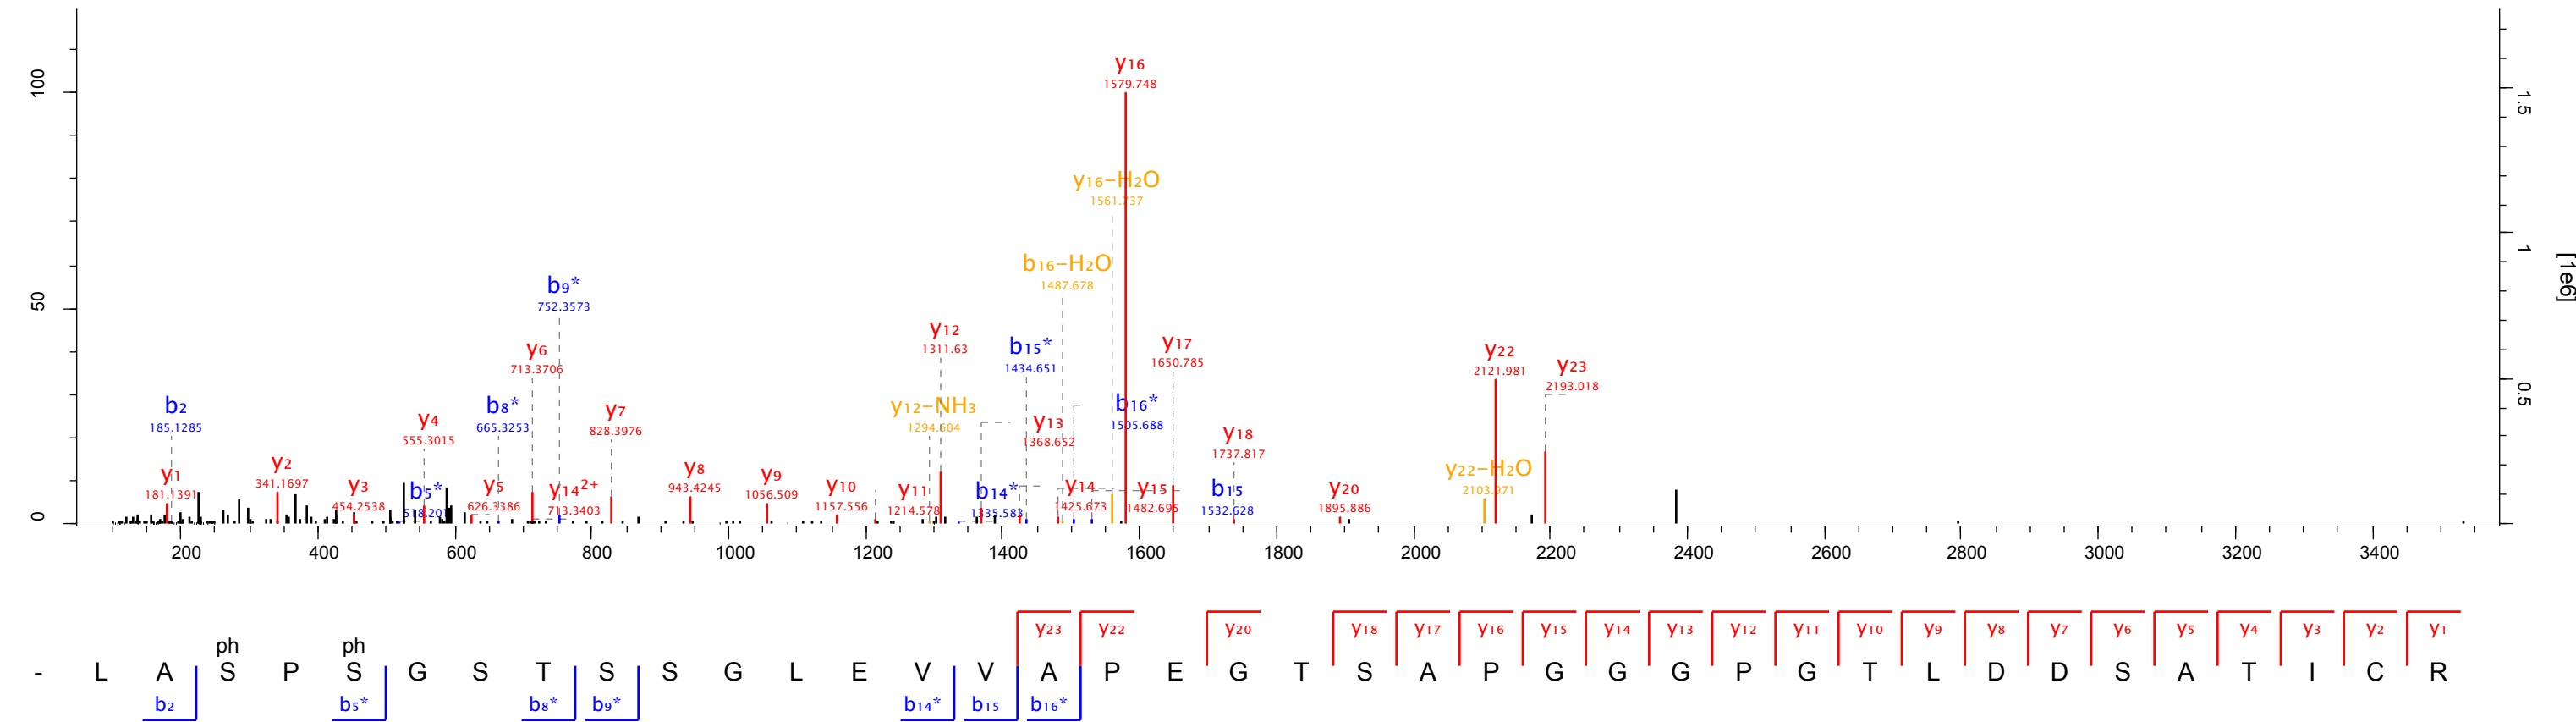



Raw file 20150814\_A375SR\_Phospho\_BR2\_02 Scan 22093 Method FTMS; HCD Score 46.25 m/z 1074.8 Gene names TACC2

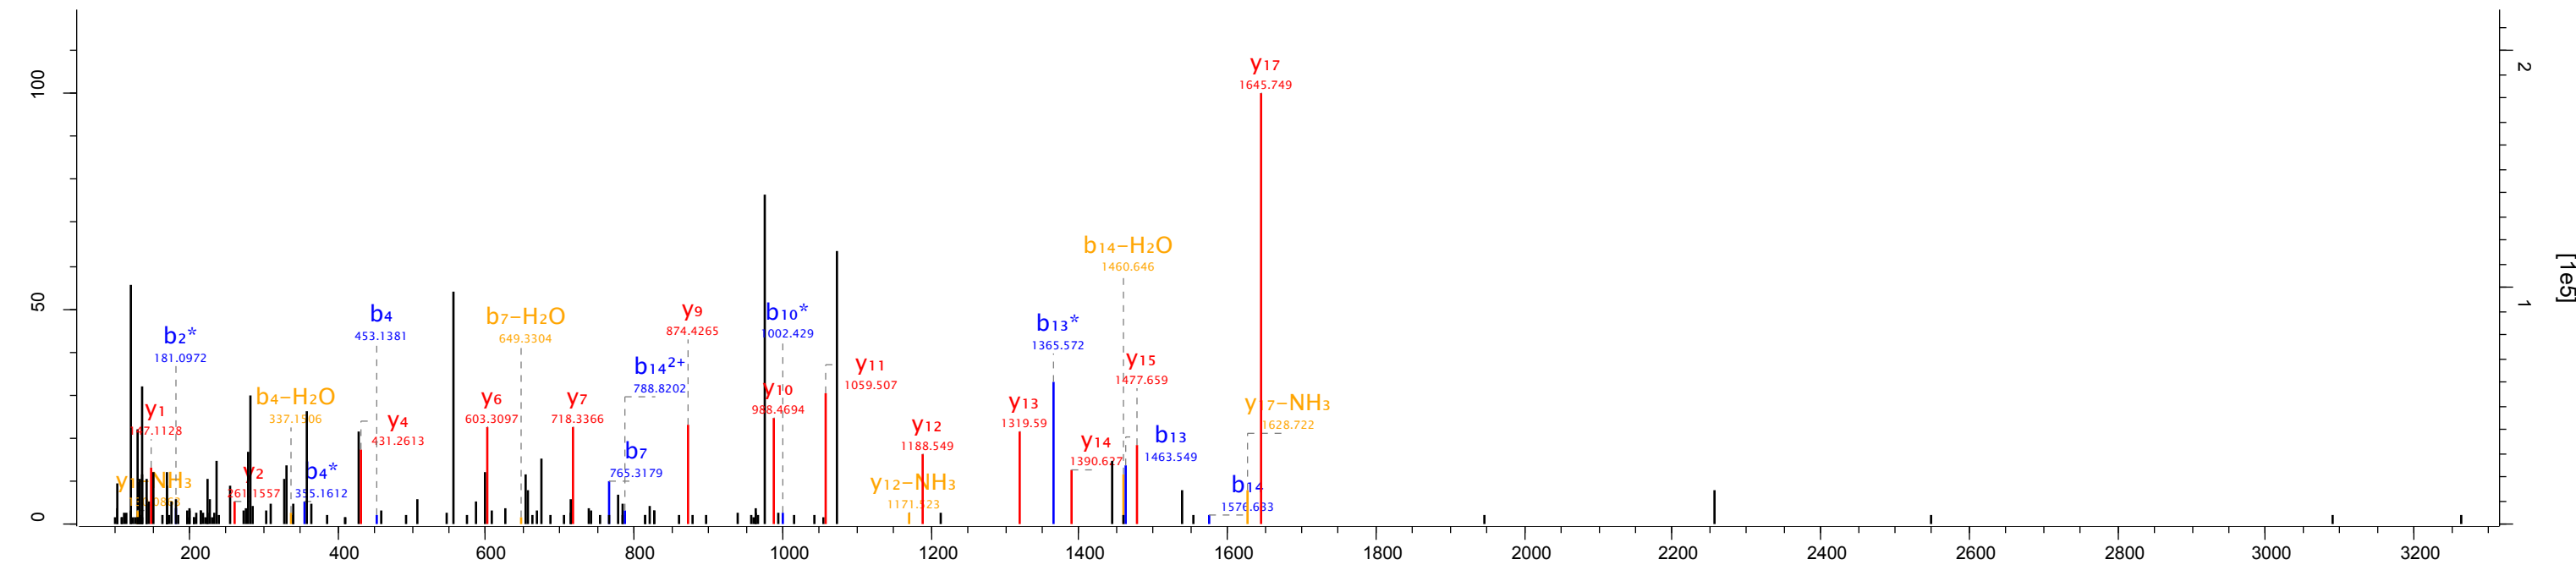

Sequence: - P T P S S P S K S P A S F E I P A S A M E A N G V D G D G L N K -

Fragmentation mapping (b ions in blue, y ions in red):

- b2\* (P)
- b4 (SS)
- b7 (K)
- b10\* (AS)
- b13 (EF)
- b14 (EI)
- y1 (K)
- y2 (S)
- y4 (D)
- y6 (G)
- y7 (D)
- y9 (G)
- y10 (A)
- y11 (E)
- y12 (M)
- y13 (S)
- y14 (A)
- y15 (S)
- y17 (P)

Raw file: 20150814\_A375SR\_Phospho\_BR2\_02  
 Scan: 2213 Method: FTMS; HCD Score: 133.48 m/z: 620.76 Gene names: CCNK

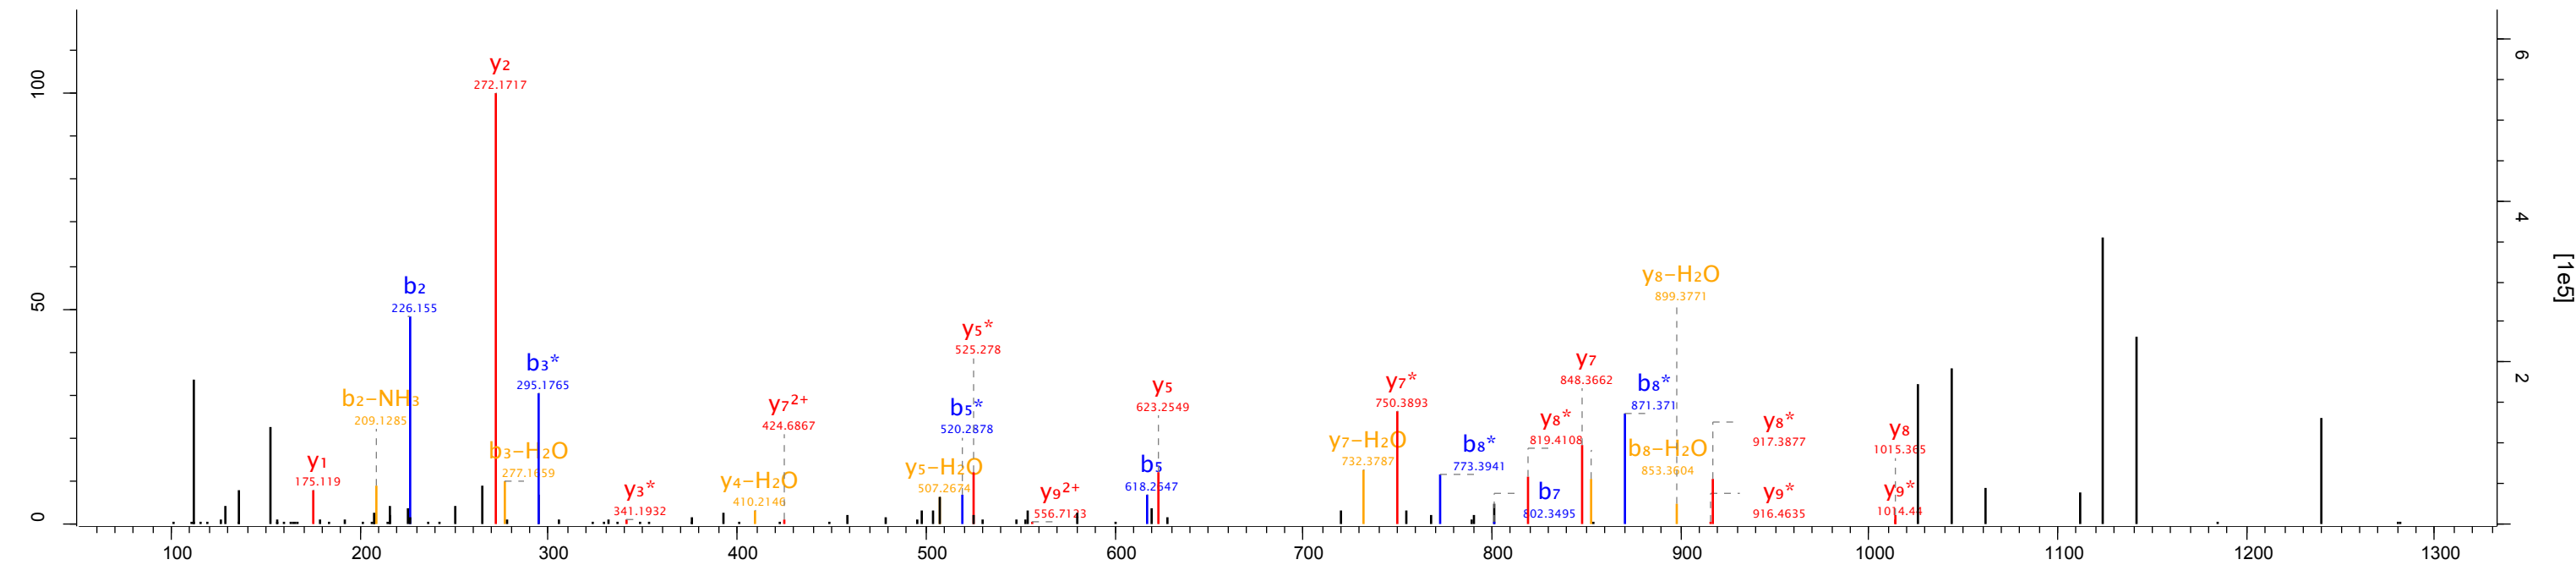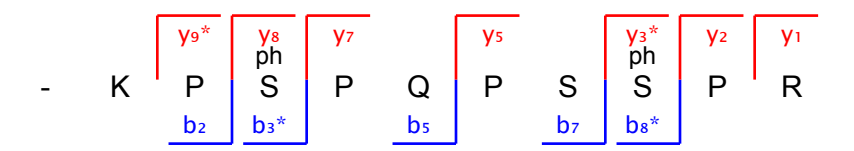

Raw file: 20150814\_A375SR\_Phospho\_BR2\_02  
 Scan: 23463 Method: FTMS; HCD Score: 114.35 m/z: 901.42 Gene names: CDK13

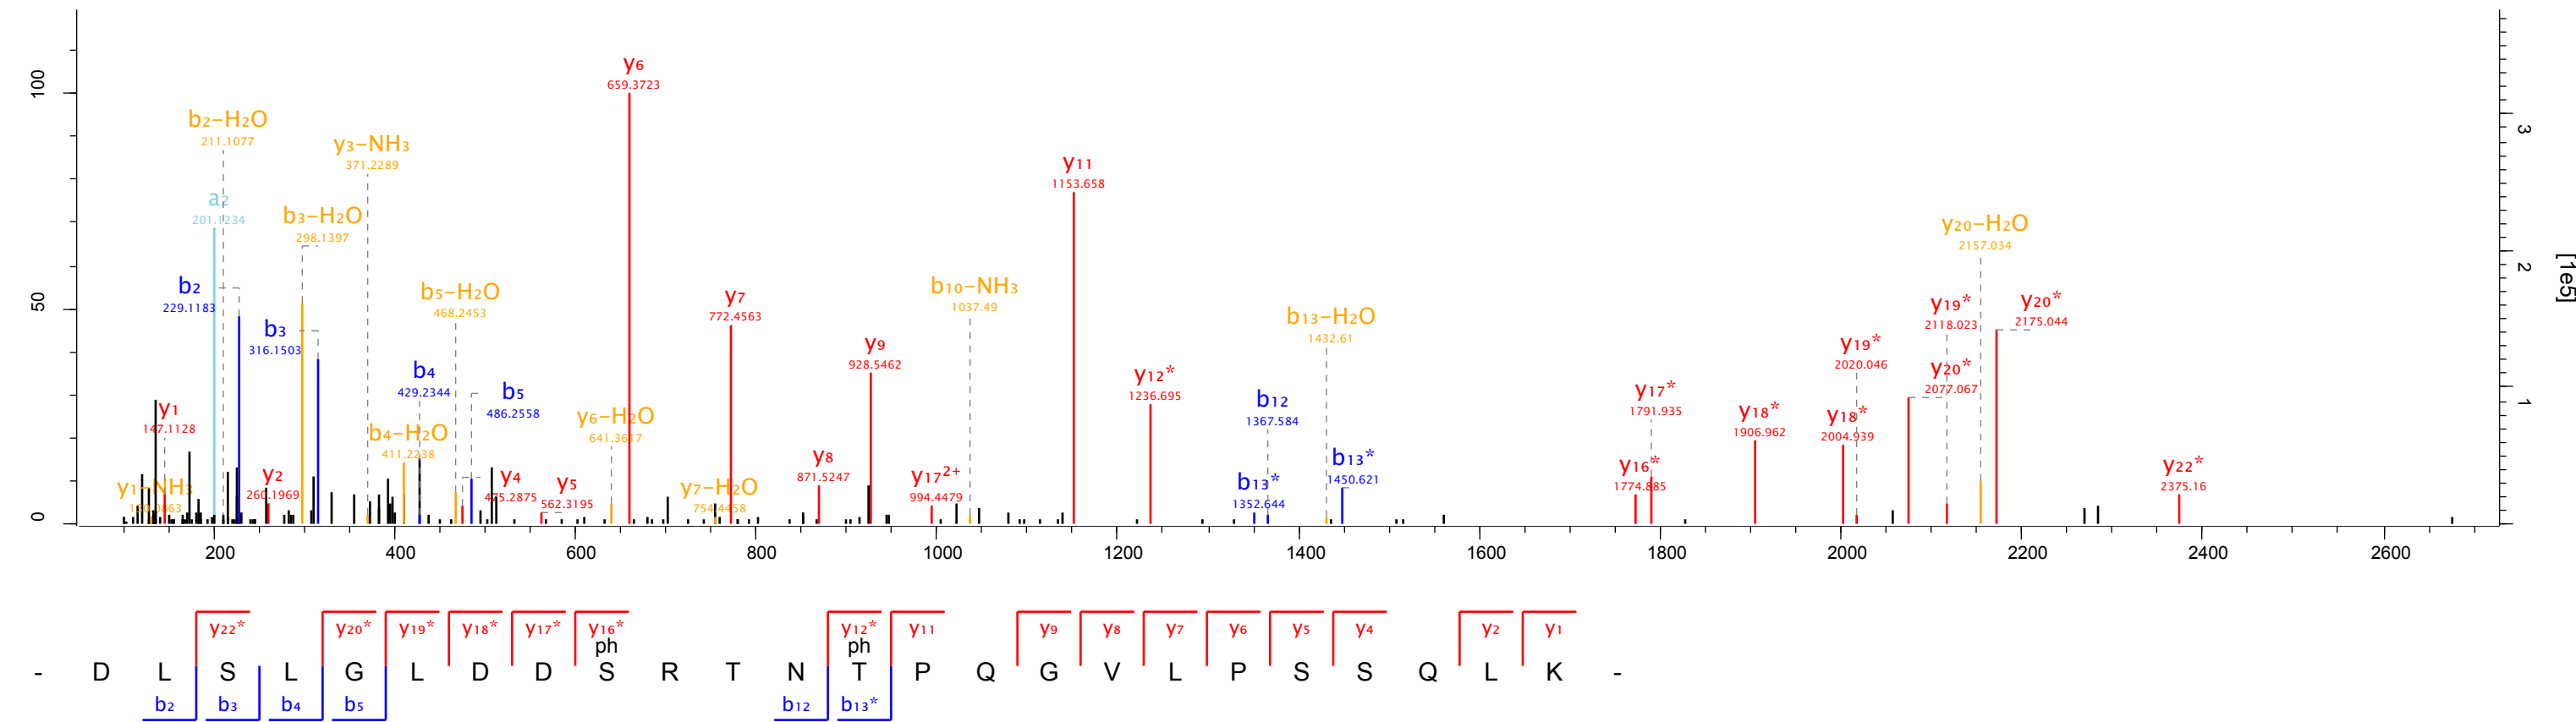

Raw file: 20150814\_A375SR\_Phospho\_BR2\_02  
 Scan: 4363 Method: FTMS; HCD Score: 94.84 m/z: 633.72 Gene names: NAA10

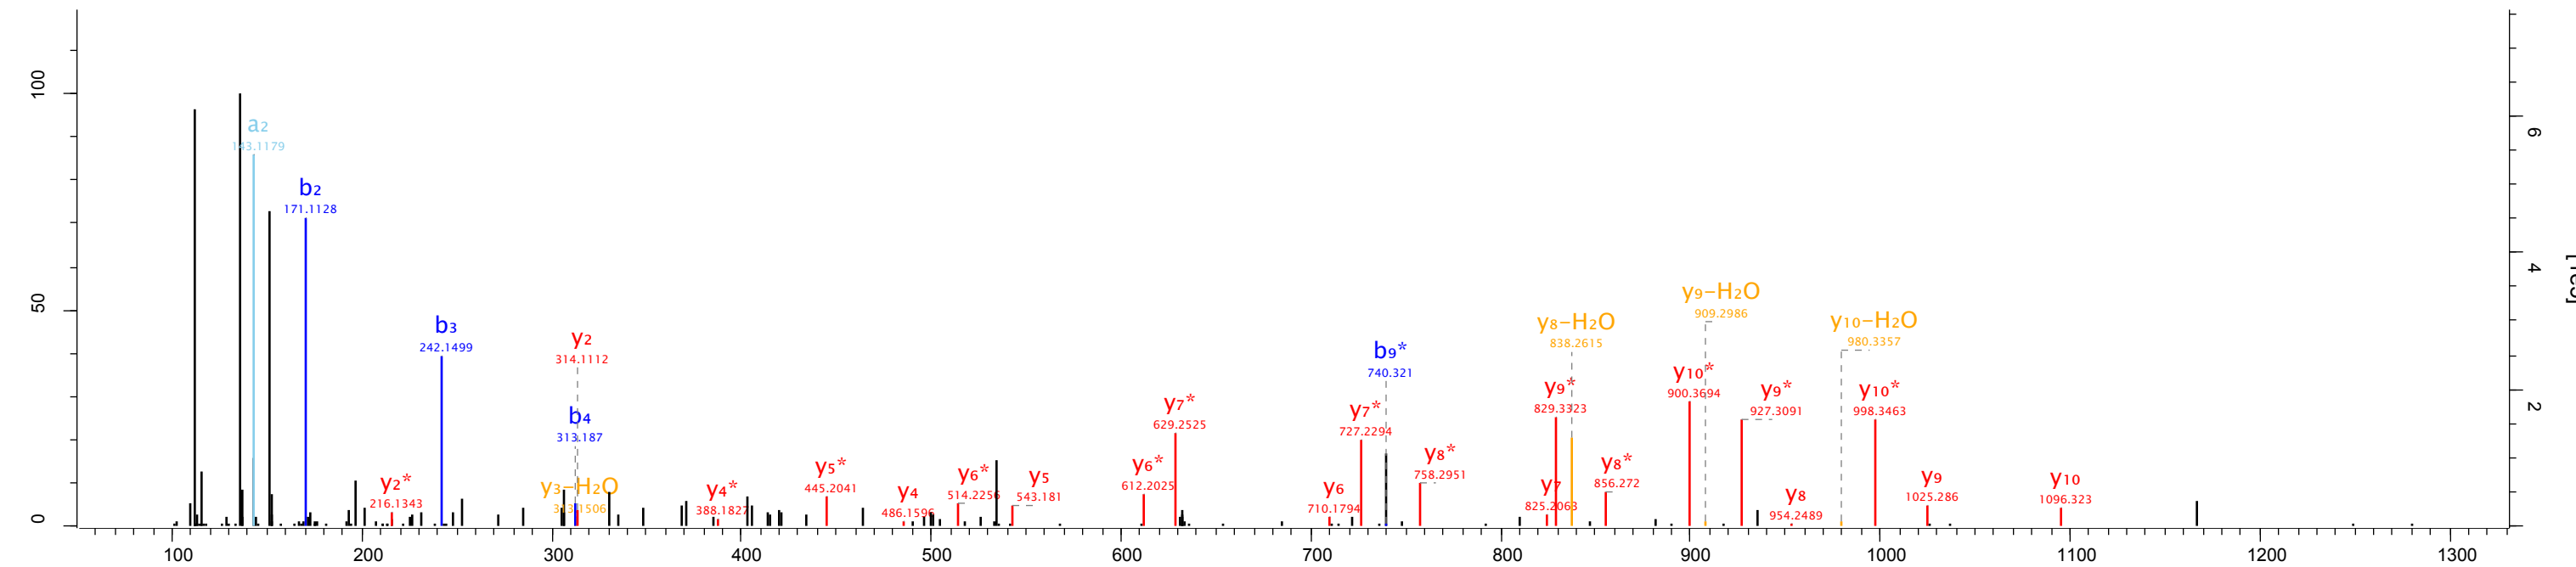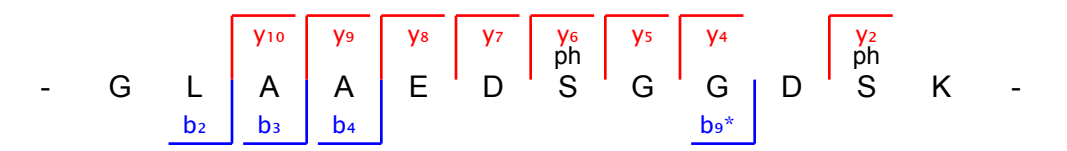

Raw file: 20150814\_A375SR\_Phospho\_BR2\_02  
 Scan: 4893 Method: FTMS; HCD Score: 46.37 m/z: 717.78 Gene names: LMNB2

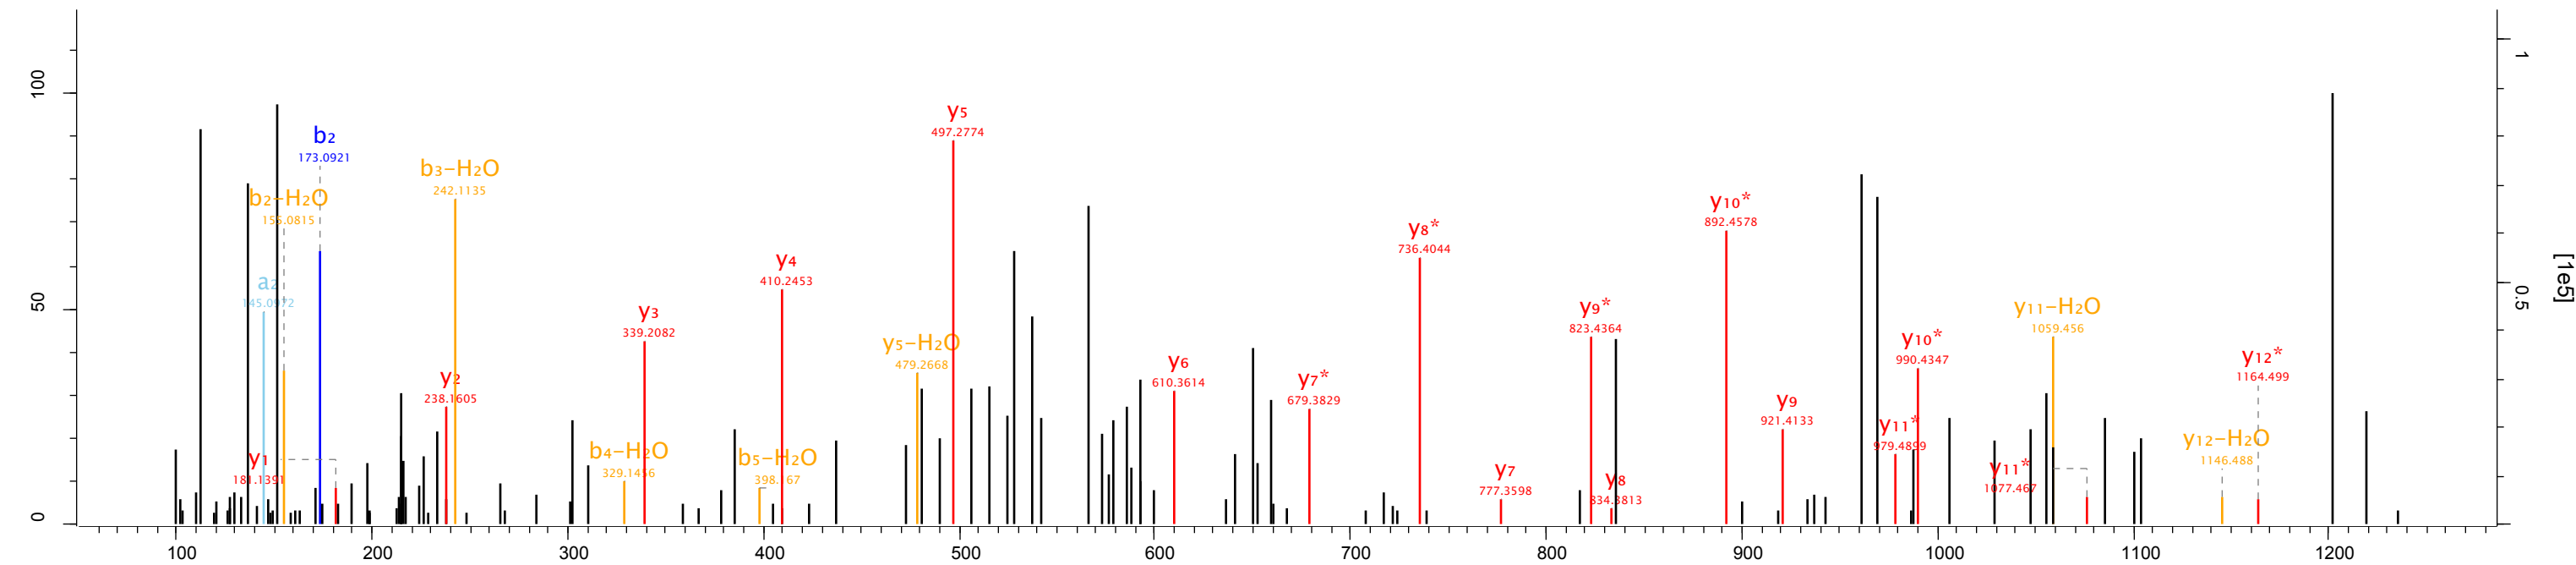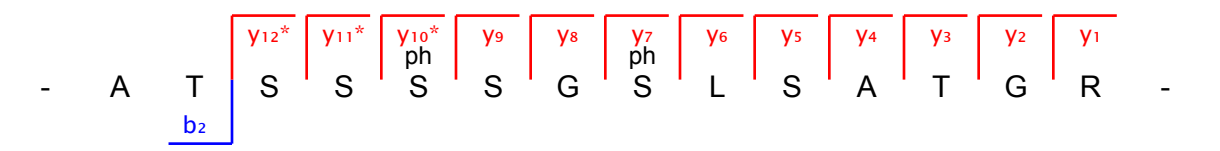

Raw file 20150814\_A375SR\_Phospho\_BR2\_02 Scan 5153 Method FTMS; HCD Score 132.83 m/z 745.63 Gene names TRA2B

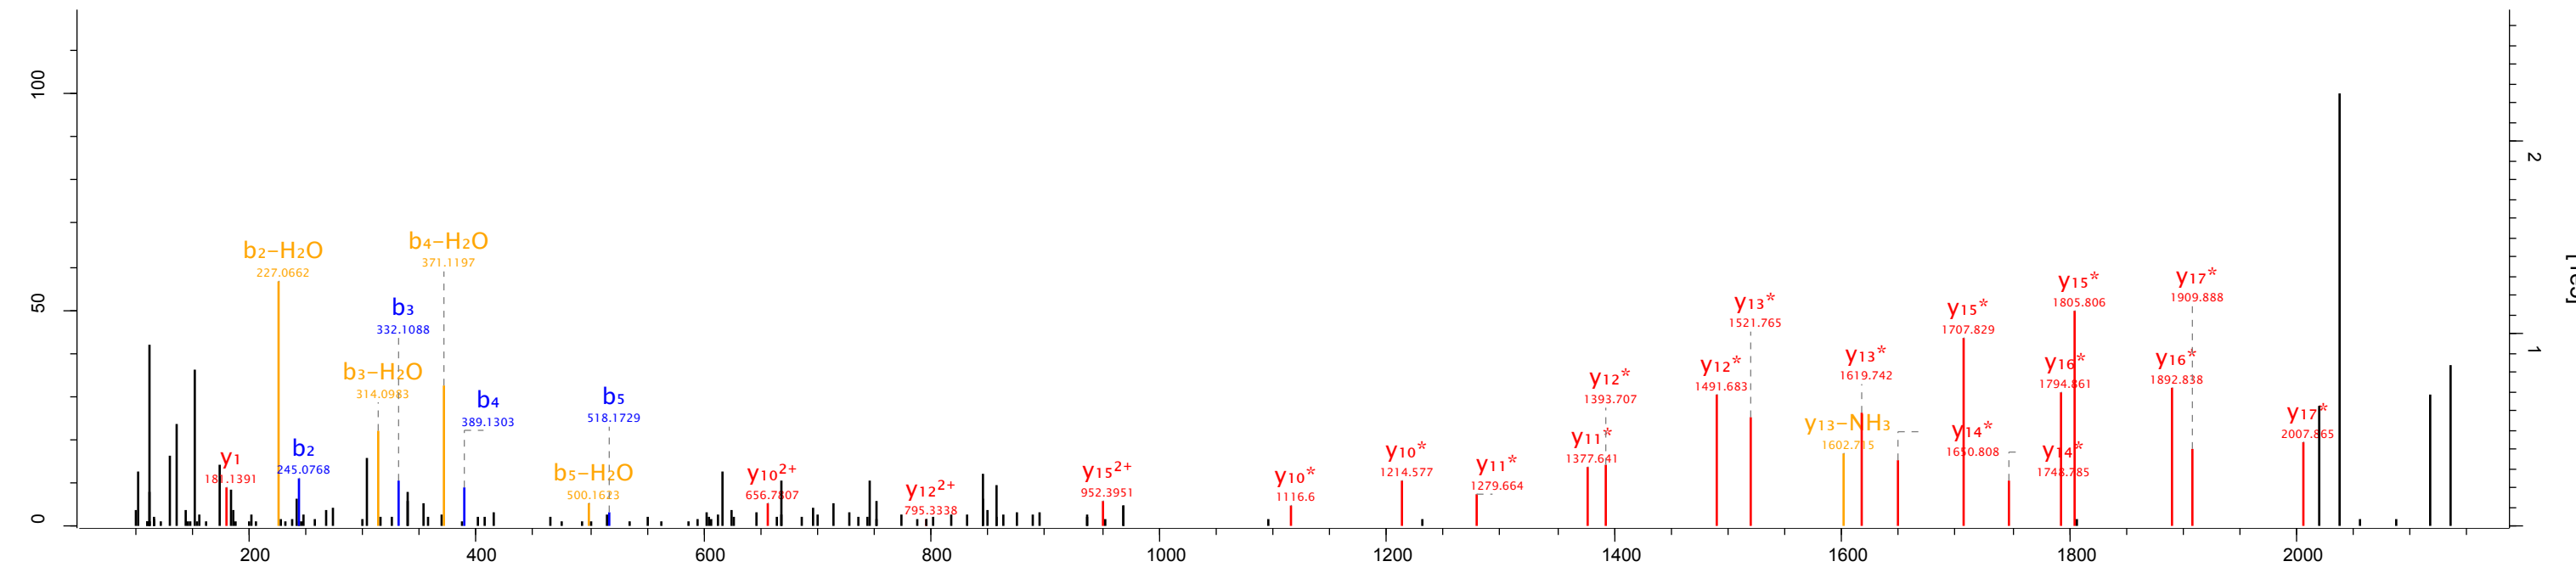

ac - S D S G E Q N Y G E R E S R S A S R -

b<sub>2</sub>
b<sub>3</sub>
b<sub>4</sub>
b<sub>5</sub>
y<sub>17</sub>\*
y<sub>16</sub>\*
y<sub>15</sub>\*
y<sub>14</sub>\*
y<sub>13</sub>\*
y<sub>12</sub>\*
y<sub>11</sub>\*
y<sub>10</sub>\*

Raw file: 20150814\_A375SR\_Phospho\_BR2\_02  
 Scan: 5403 Method: FTMS; HCD Score: 53.75 m/z: 1144.9 Gene names: DCAF6

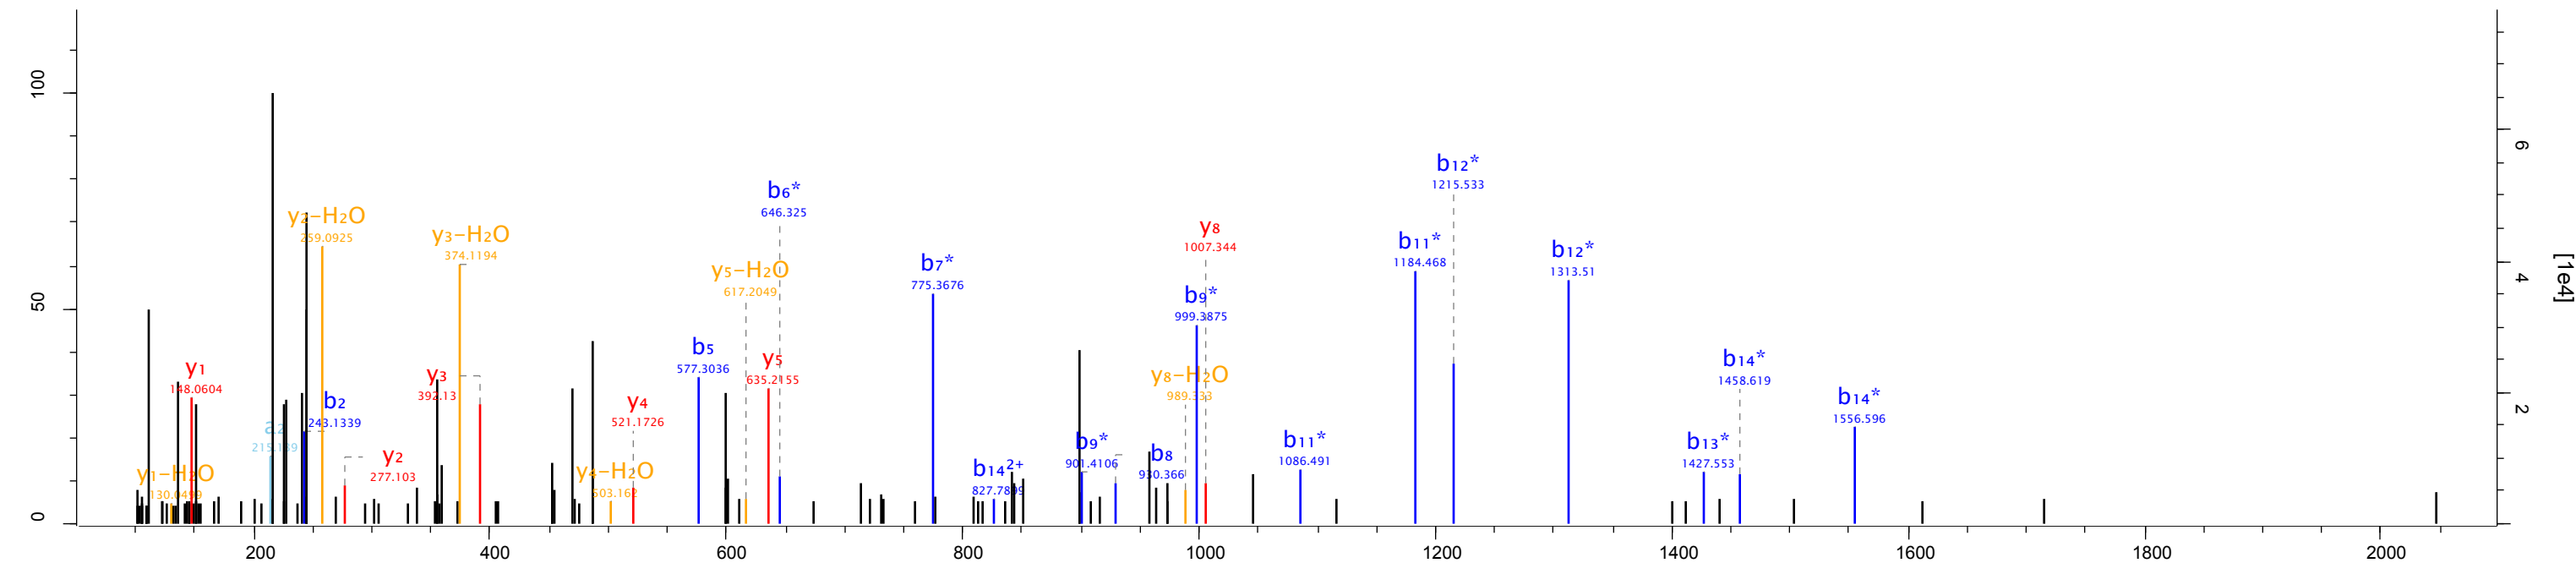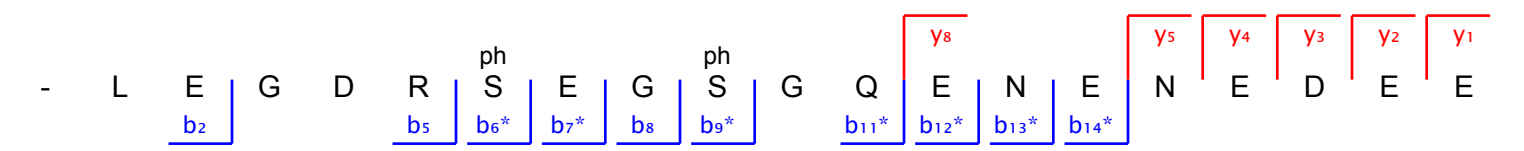

Raw file: 20150814\_A375SR\_Phospho\_BR2\_02  
 Scan: 5833 Method: FTMS; HCD Score: 122.13 m/z: 807.31 Gene names: MAP7D1

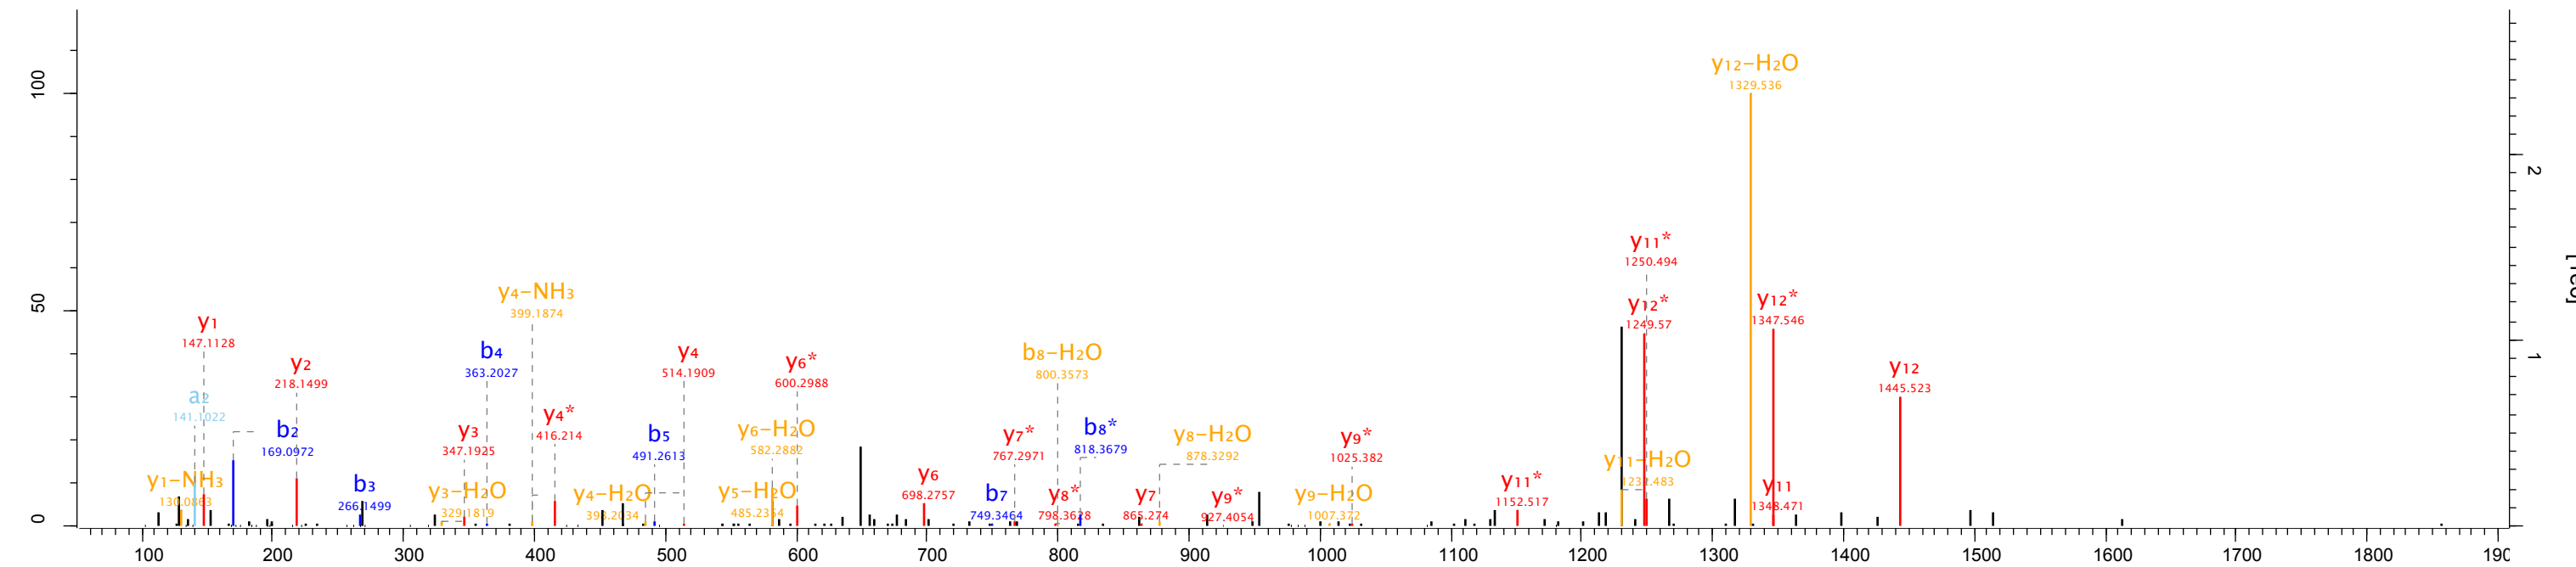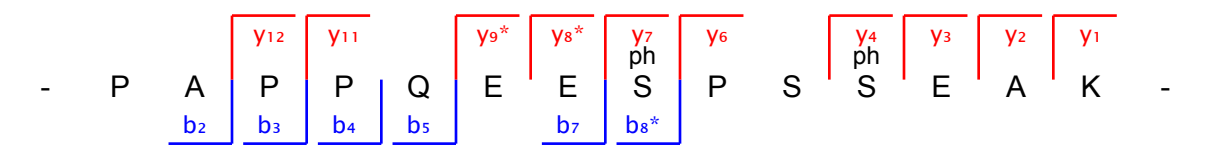



Raw file: 20150814\_A375SR\_Phospho\_BR2\_02  
 Scan: 5913 Method: FTMS; HCD Score: 121.45 m/z: 590.21 Gene names: PHLDB2

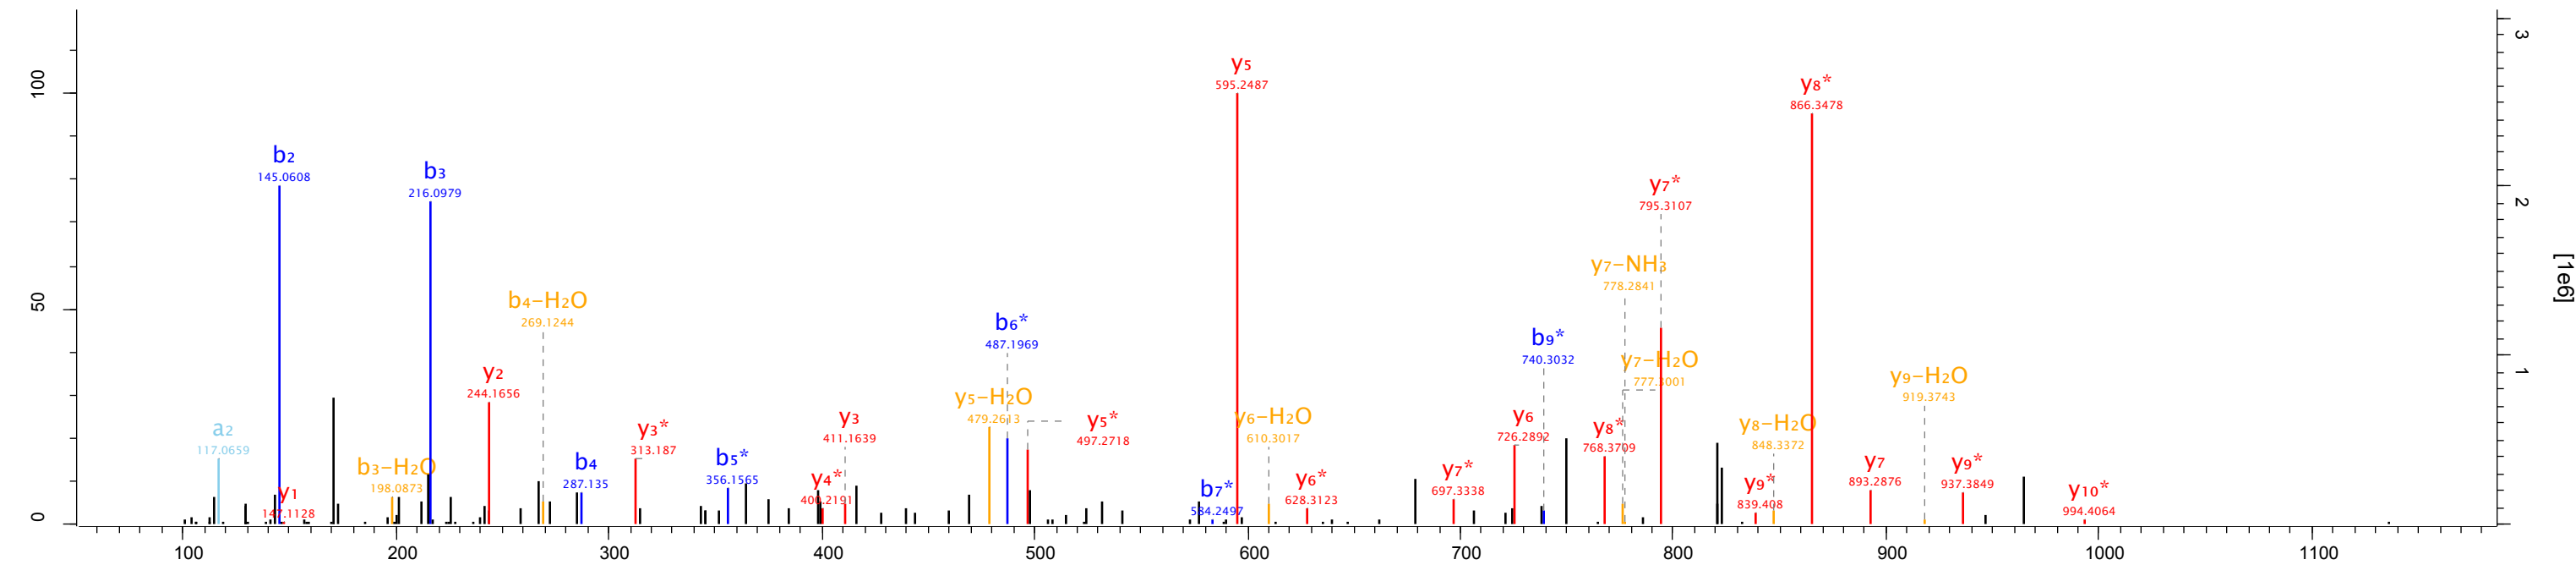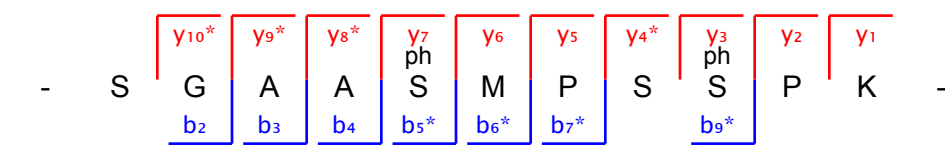

Raw file: 20150814\_A375SR\_Phospho\_BR2\_02  
 Scan: 7193 Method: FTMS; HCD Score: 86.8 m/z: 884.86 Gene names: TTYH3

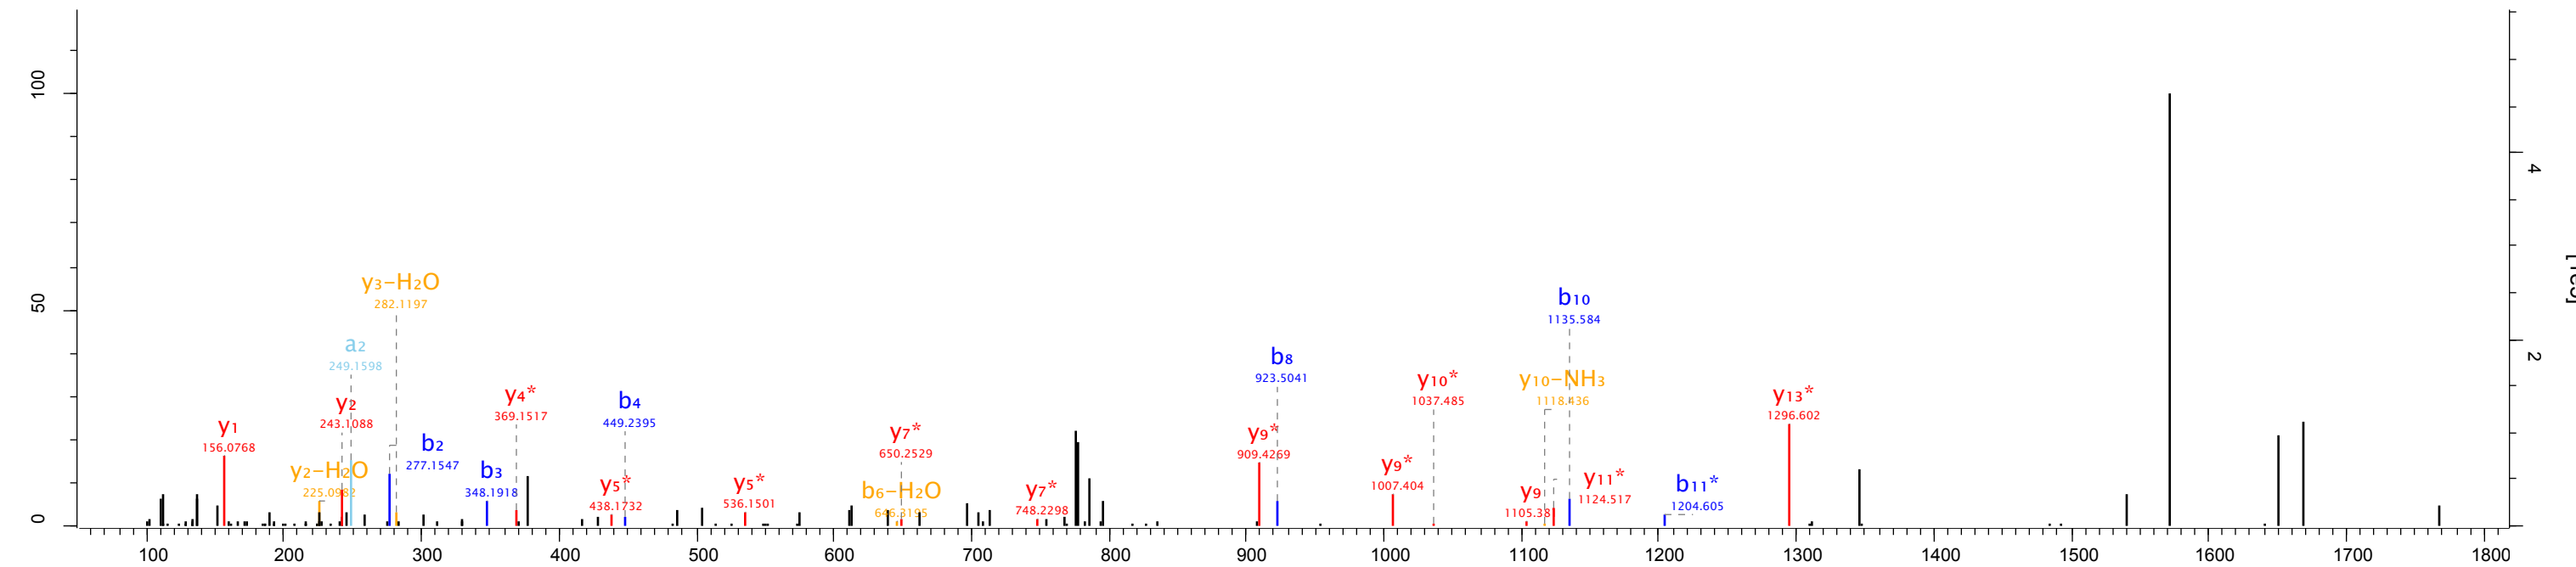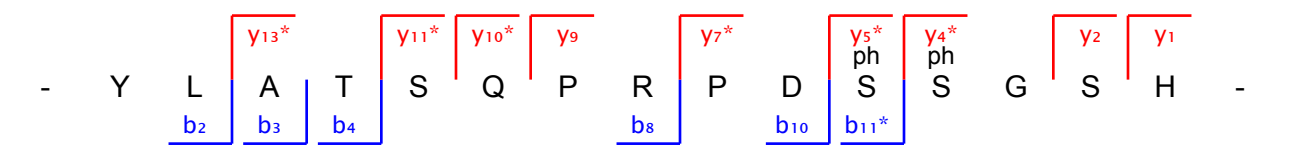

Raw file: 20150814\_A375SR\_Phospho\_BR2\_02  
 Scan: 7773 Method: FTMS; HCD Score: 48.57 m/z: 697.79 Gene names: SLAIN2

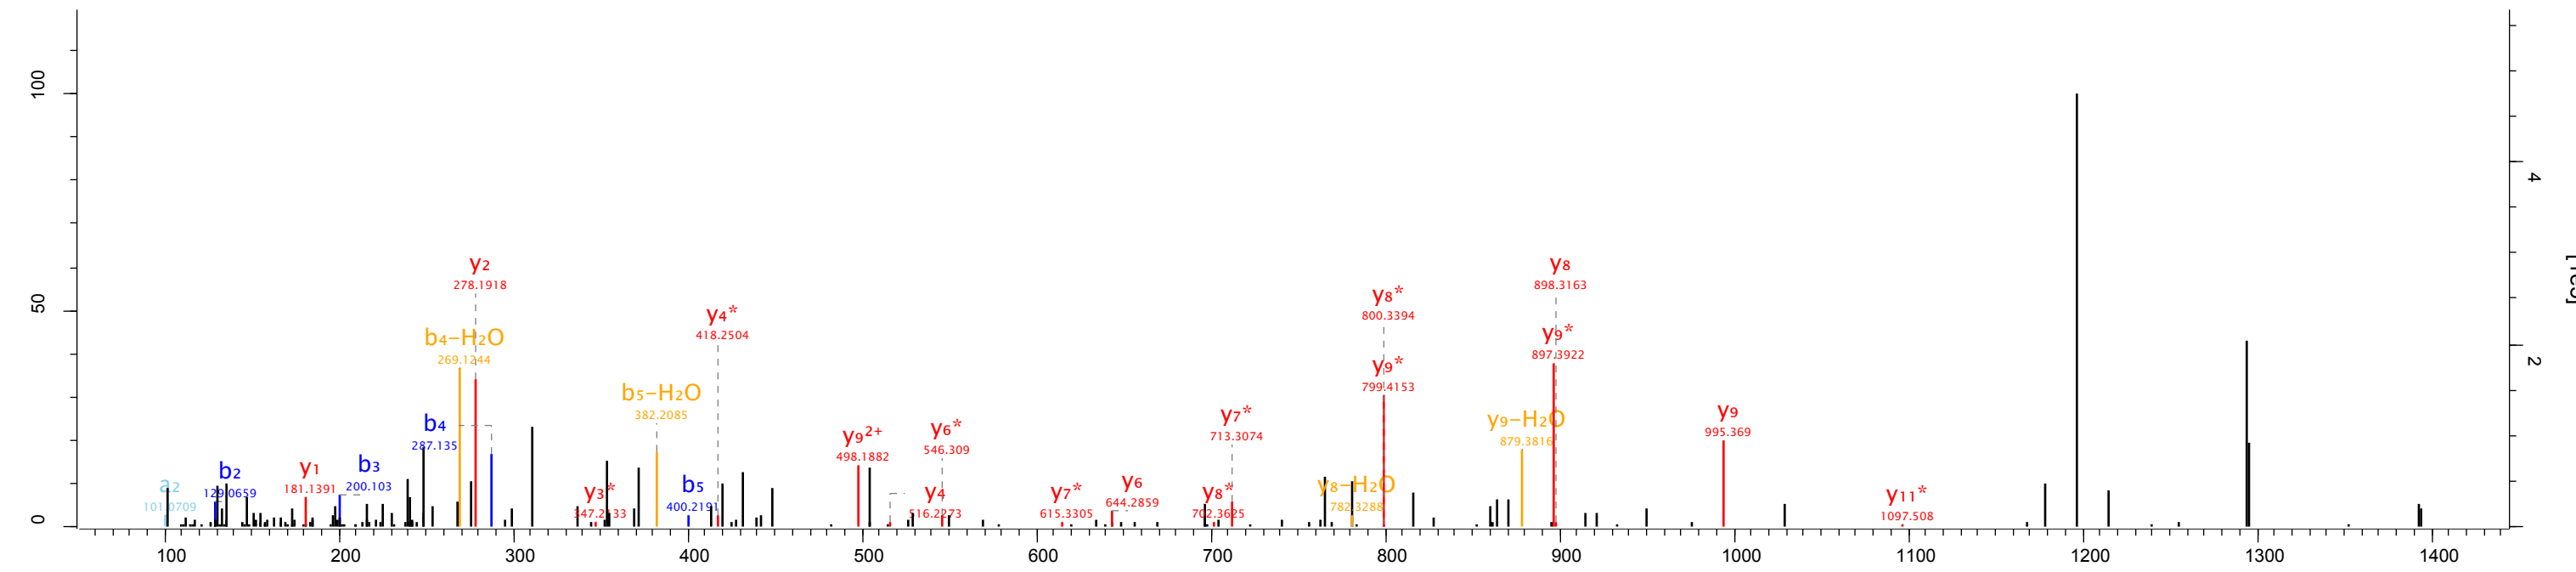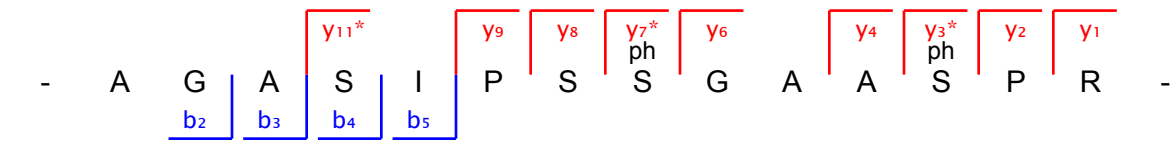

Raw file 20150814\_A375SR\_Phospho\_BR2\_02 Scan 8413 Method FTMS; HCD Score 227.96 m/z 1102.88 Gene names CLSPN

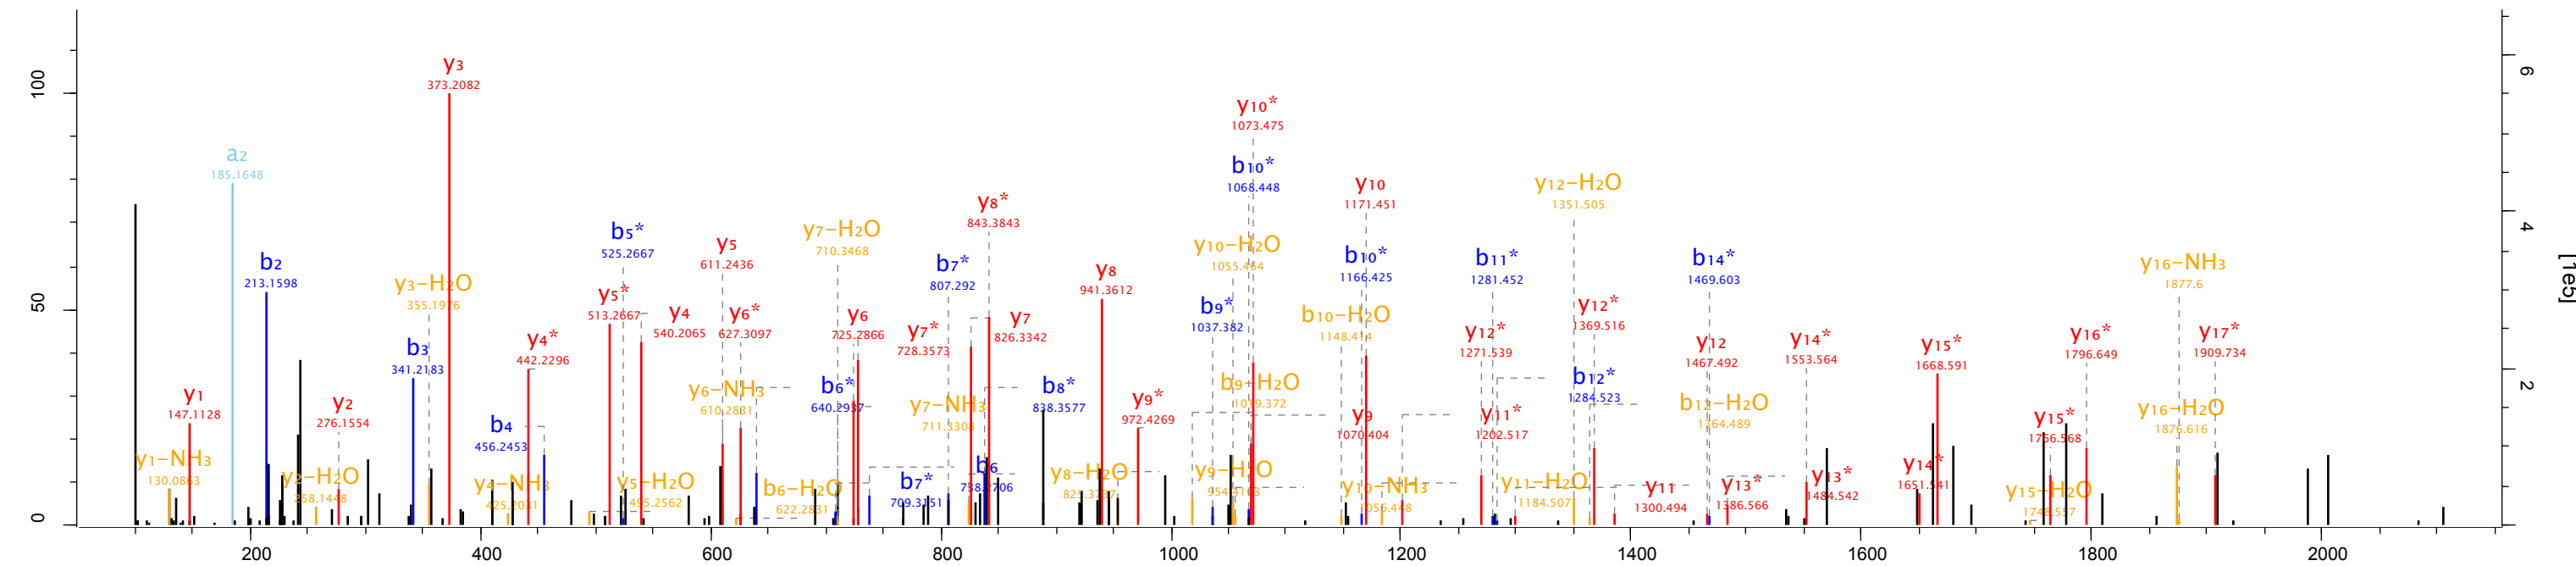

- V L Q D S D S E T E D T N A S P E K -

Fragmentation mapping (b and y ions) is shown below the sequence:

- b ions (blue boxes):** b<sub>2</sub> (L), b<sub>3</sub> (Q), b<sub>4</sub> (D), b<sub>5</sub><sup>\*</sup> (S), b<sub>6</sub> (D), b<sub>7</sub><sup>\*</sup> (S), b<sub>8</sub><sup>\*</sup> (E), b<sub>9</sub><sup>\*</sup> (T), b<sub>10</sub><sup>\*</sup> (E), b<sub>11</sub><sup>\*</sup> (D), b<sub>12</sub><sup>\*</sup> (T), b<sub>14</sub><sup>\*</sup> (A)
- y ions (red boxes):** y<sub>1</sub> (K), y<sub>2</sub> (E), y<sub>3</sub> (P), y<sub>4</sub> (S), y<sub>5</sub> (A), y<sub>6</sub> (N), y<sub>7</sub> (T), y<sub>8</sub> (D), y<sub>9</sub> (E), y<sub>10</sub> (T), y<sub>11</sub> (E), y<sub>12</sub> (S), y<sub>13</sub><sup>\*</sup> (D), y<sub>14</sub><sup>\*</sup> (S), y<sub>15</sub><sup>\*</sup> (D), y<sub>16</sub><sup>\*</sup> (Q), y<sub>17</sub><sup>\*</sup> (L)

Raw file: 20150814\_A375SR\_Phospho\_BR2\_02  
 Scan: 8573 Method: FTMS; HCD Score: 143.47 m/z: 1021.89 Gene names: SLC9A3R1

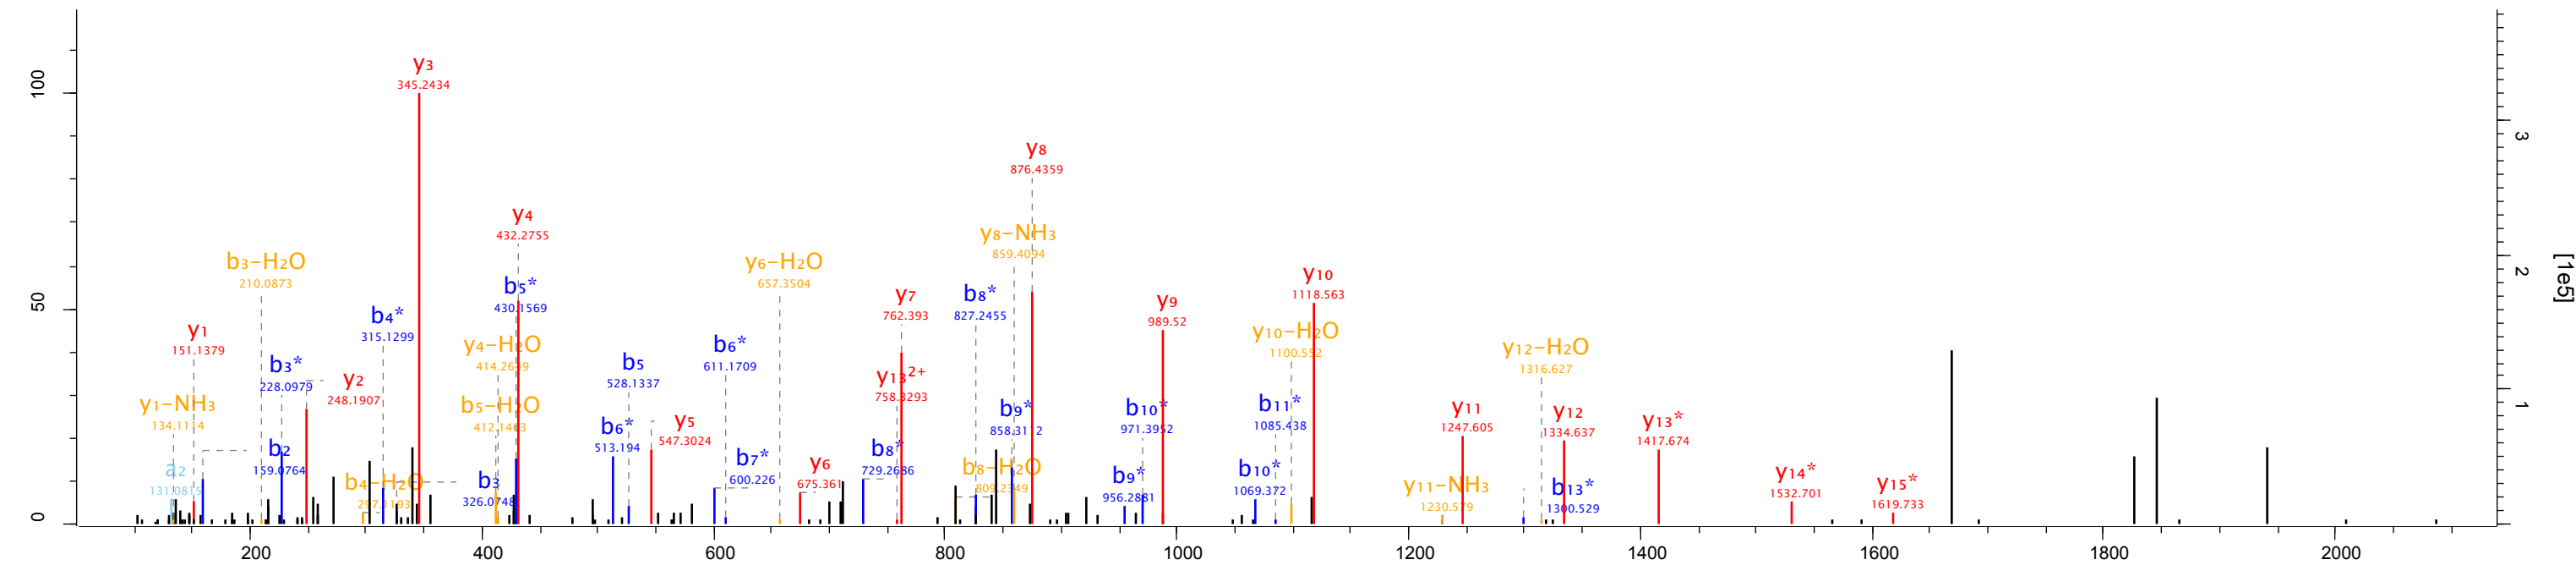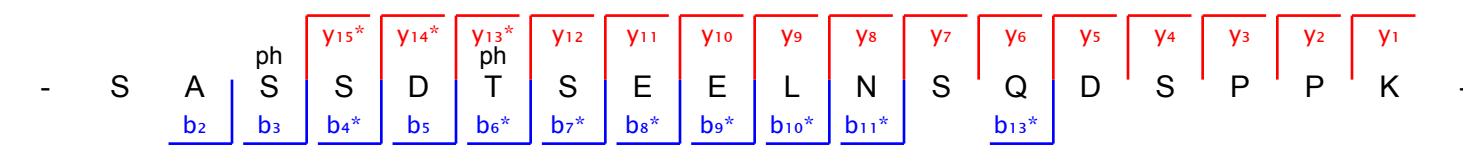



Raw file  
 20150814\_A375SR\_Phospho\_BR2\_03  
 Scan 10643 Method FTMS; HCD Score 135.92 m/z 843.71 Gene names GTF3C3

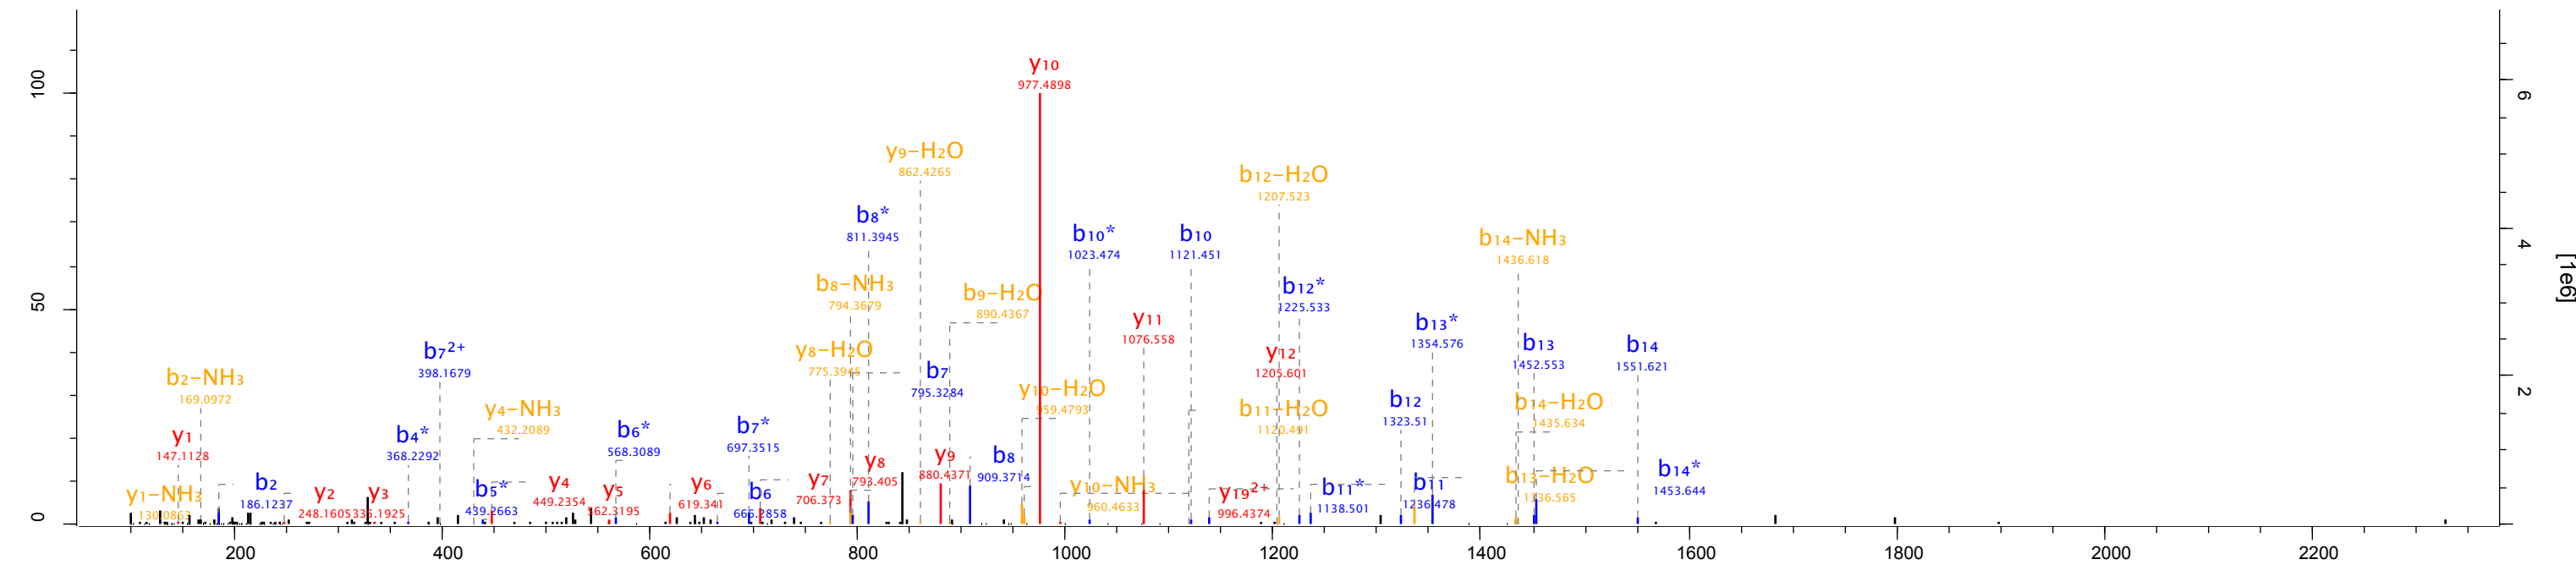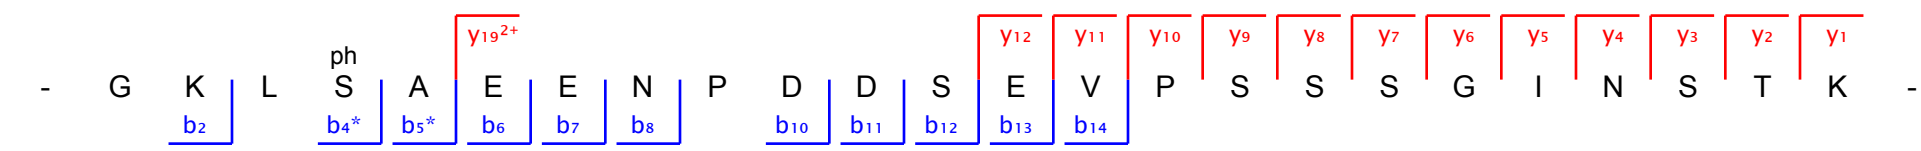

Raw file: 20150814\_A375SR\_Phospho\_BR2\_03  
 Scan: 10853 Method: FTMS; HCD Score: 117.02 m/z: 857.87 Gene names: PHLDB1

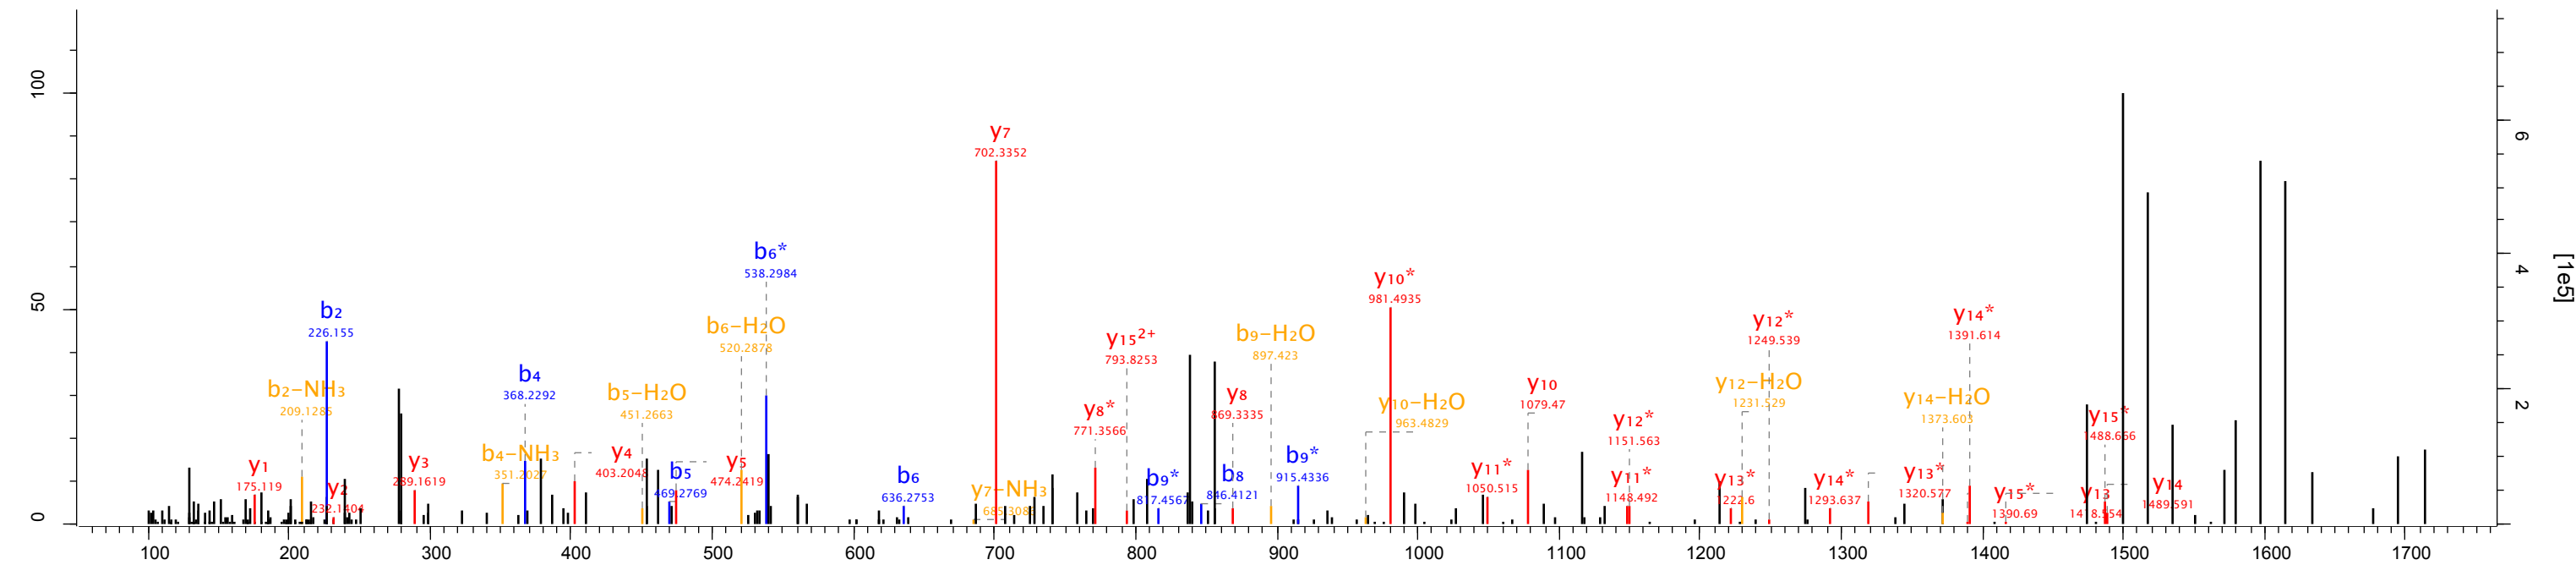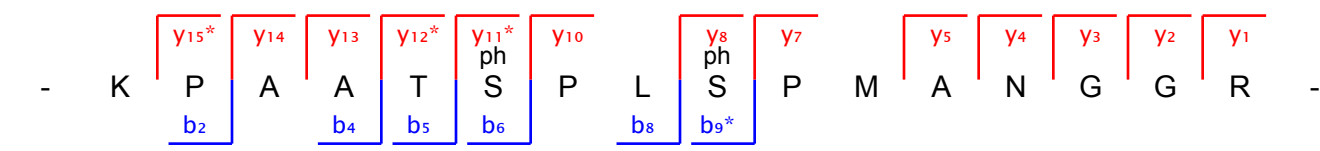



Raw file 20150814\_A375SR\_Phospho\_BR2\_03 Scan 10973 Method FTMS; HCD Score 154.34 m/z 897.86 Gene names SLC20A1

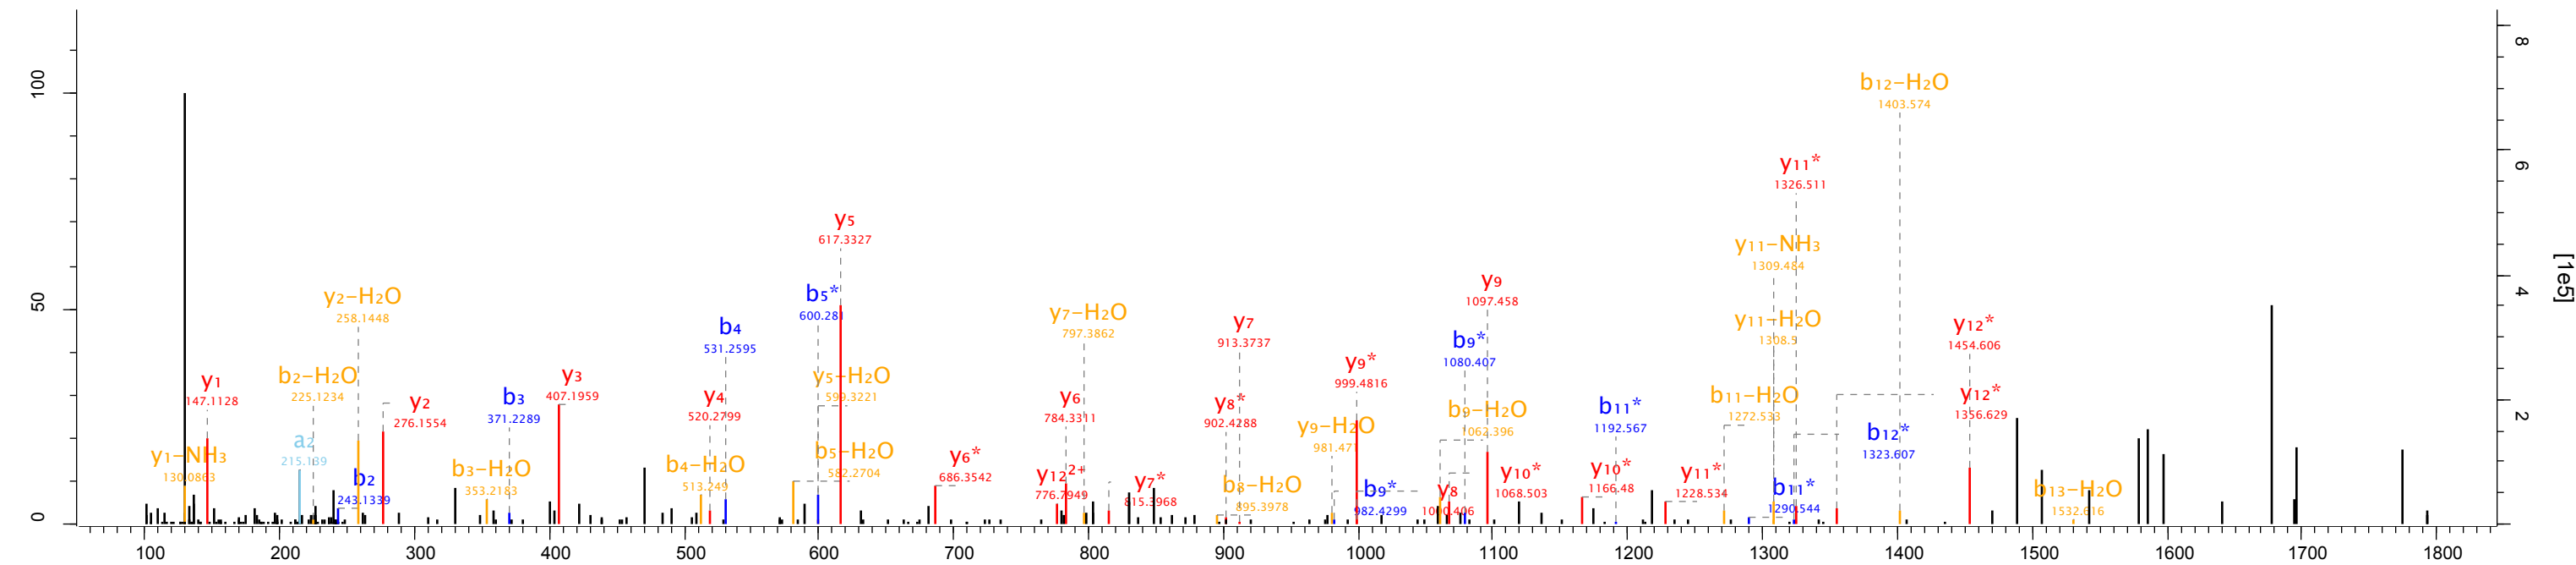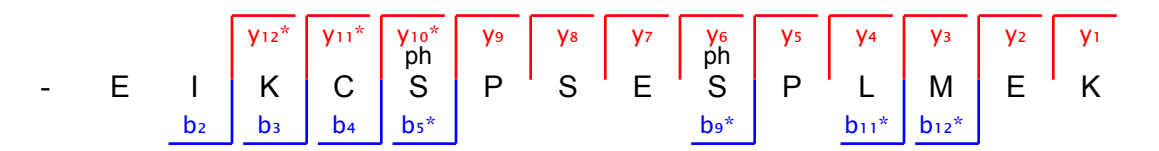

Raw file: 20150814\_A375SR\_Phospho\_BR2\_03  
 Scan: 11023  
 Method: FTMS; HCD  
 Score: 168.55  
 m/z: 1015.93  
 Gene names: TNKS1BP1

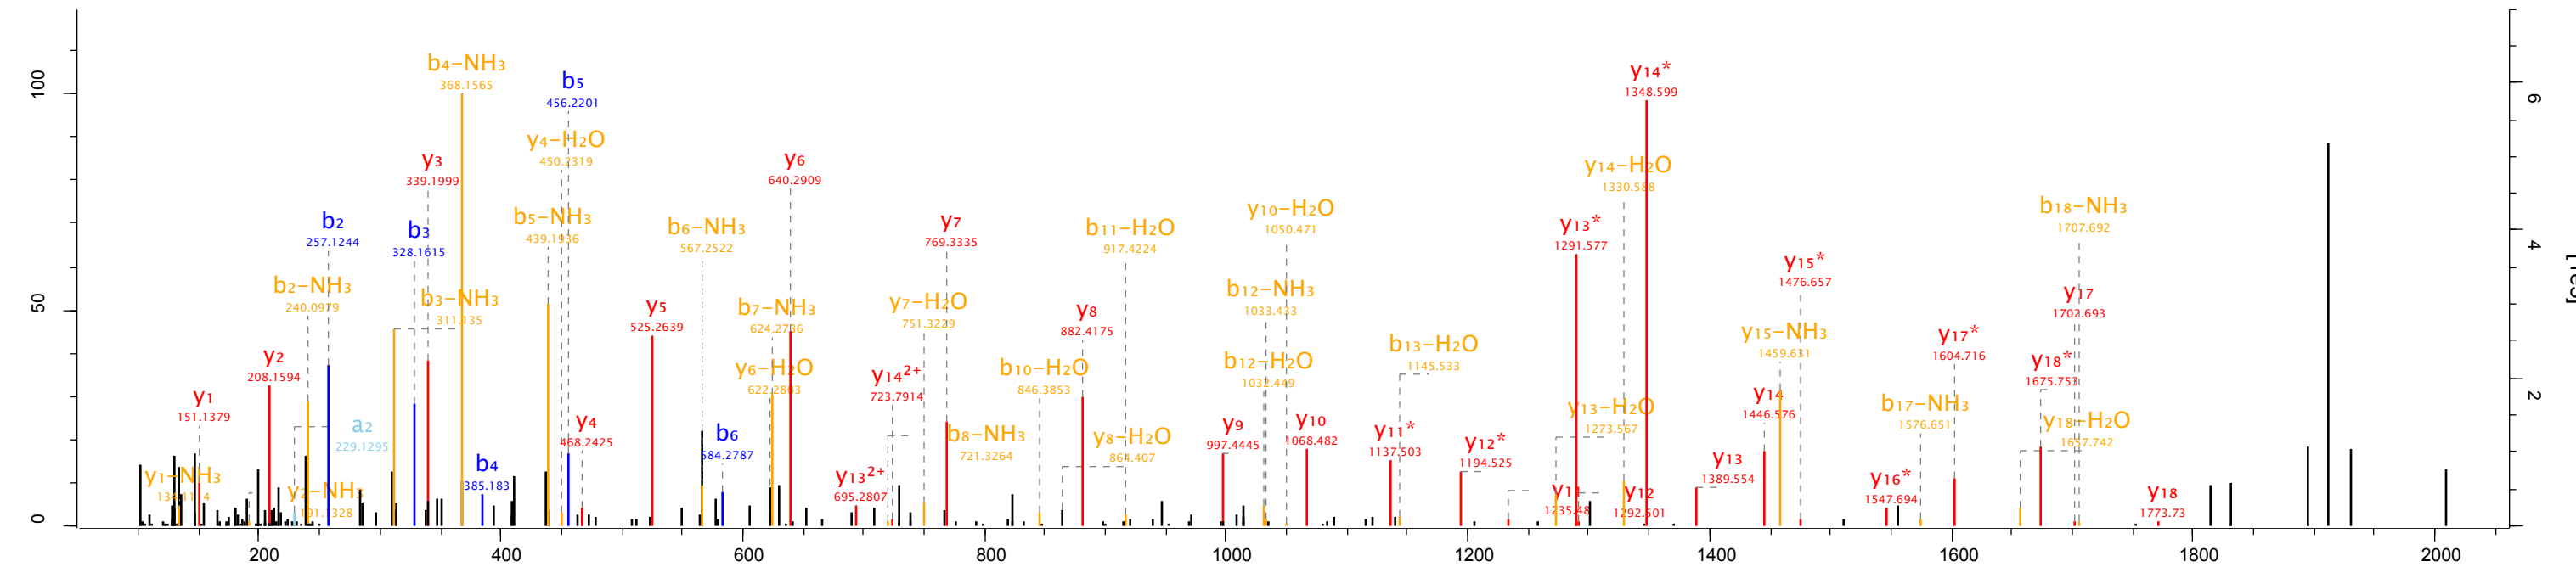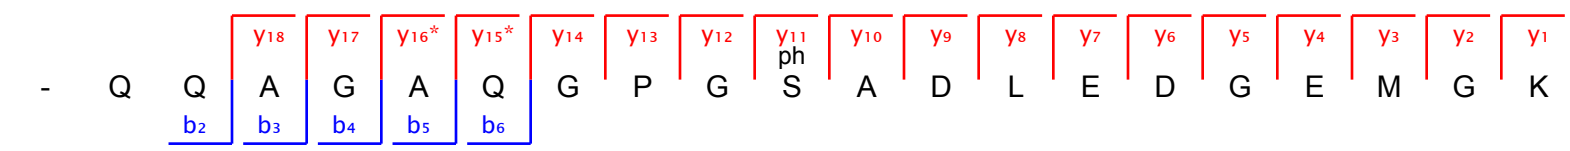

Raw file 20150814\_A375SR\_Phospho\_BR2\_03 Scan 11453 Method FTMS; HCD Score 133.54 m/z 628.81 Gene names CRTC3

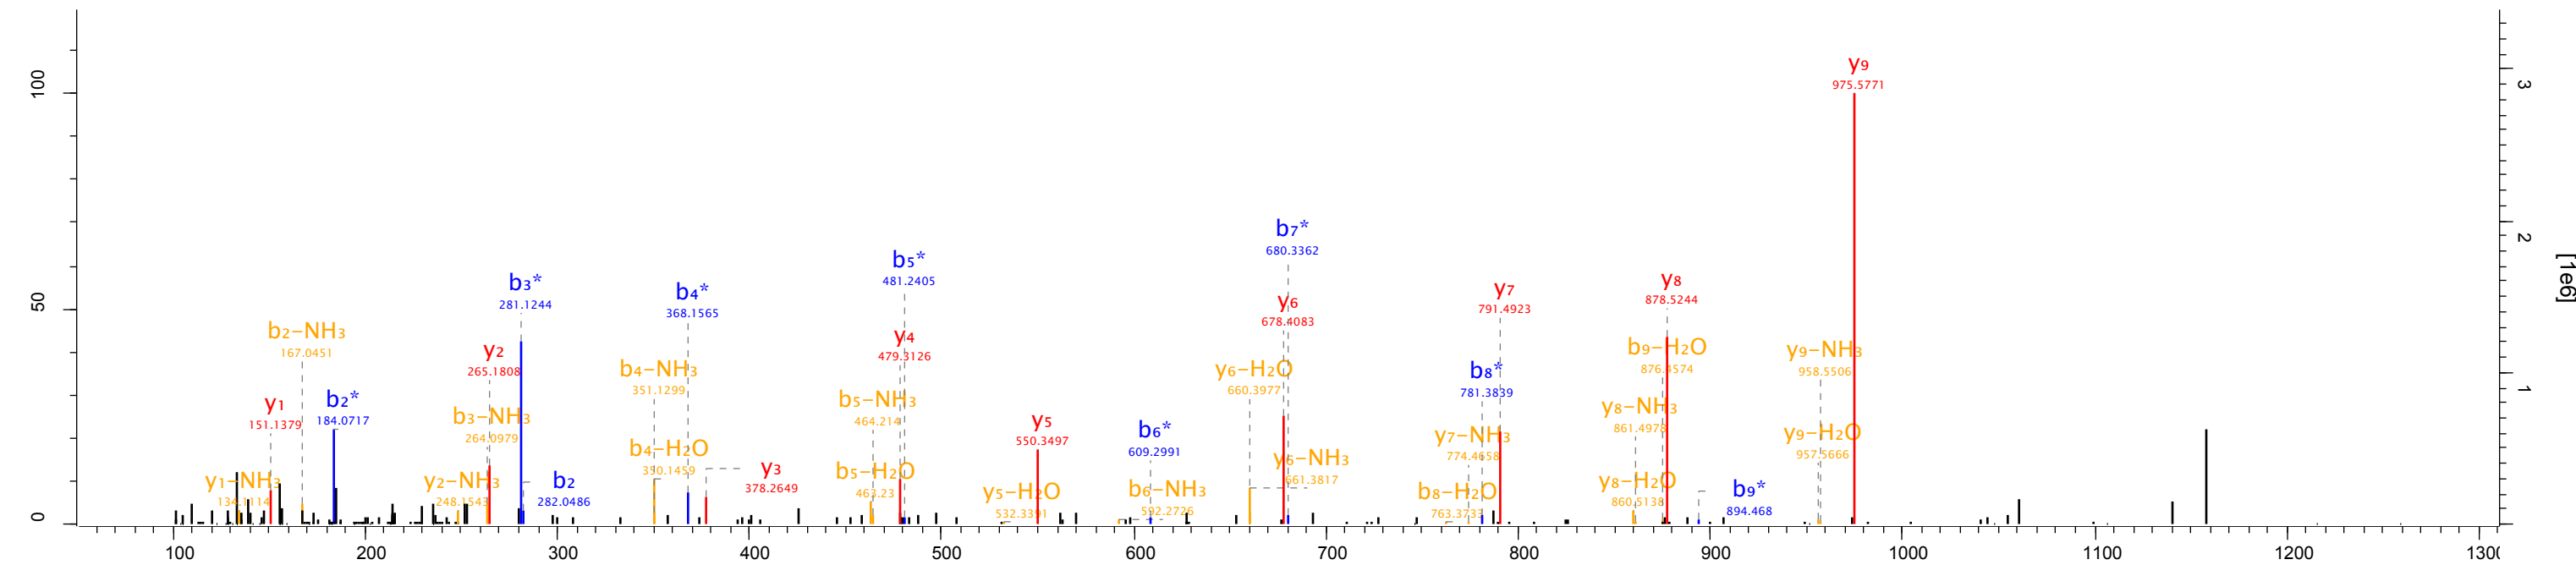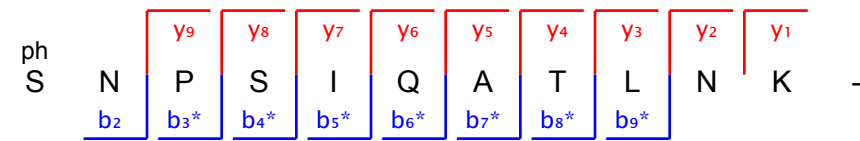

Raw file: 20150814\_A375SR\_Phospho\_BR2\_03  
 Scan: 11463 Method: FTMS; HCD Score: 137.72 m/z: 854.42 Gene names: TGFB11

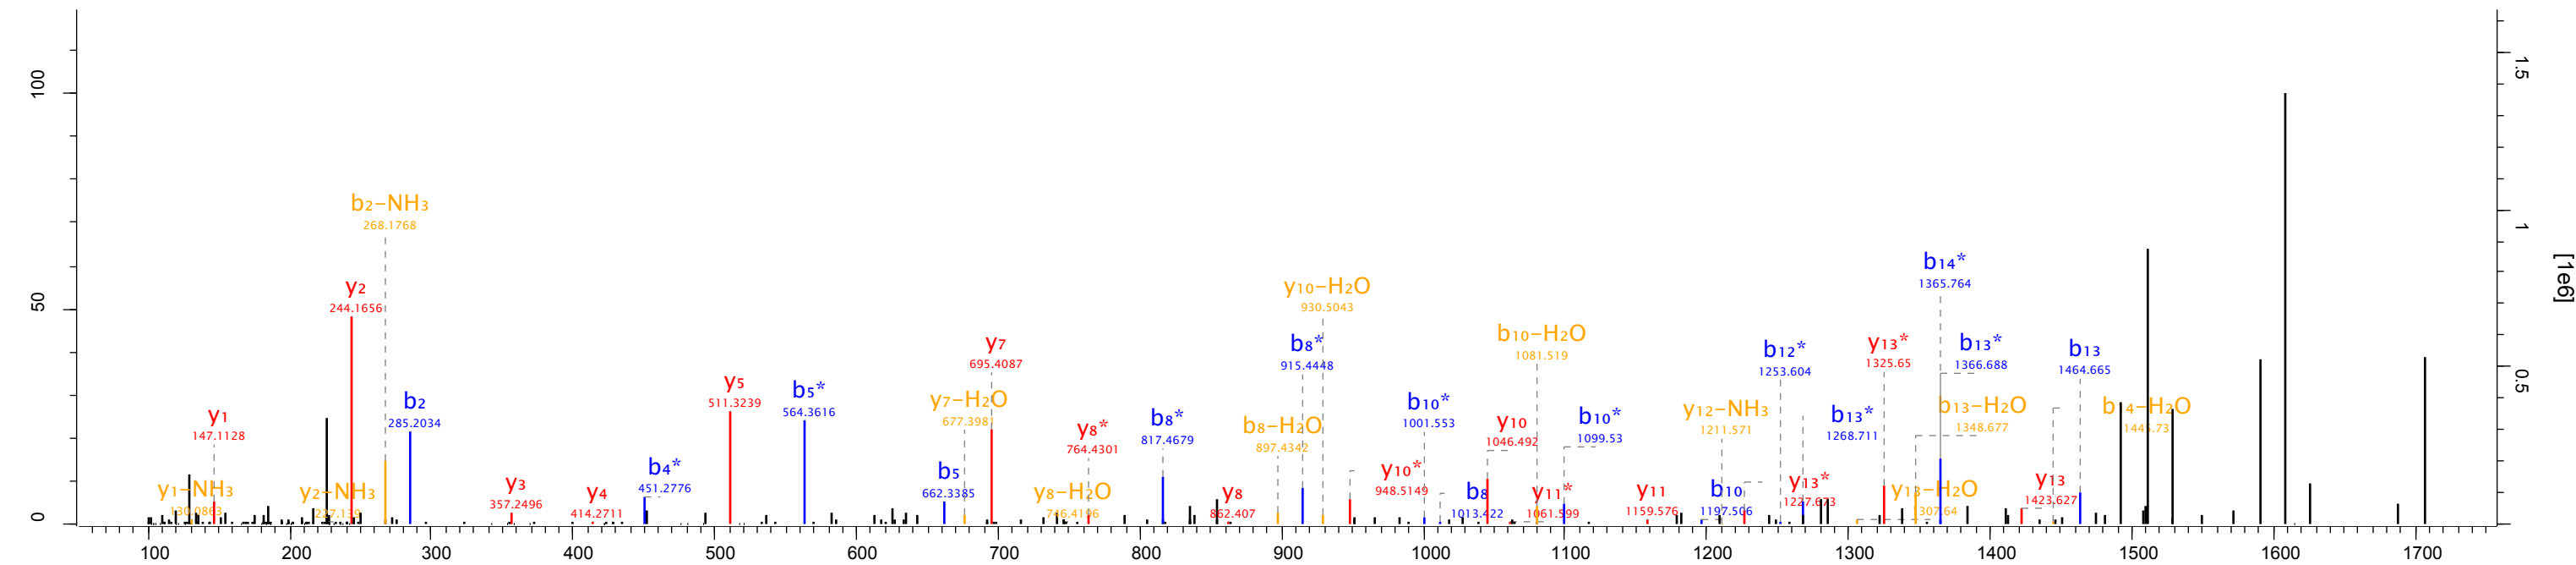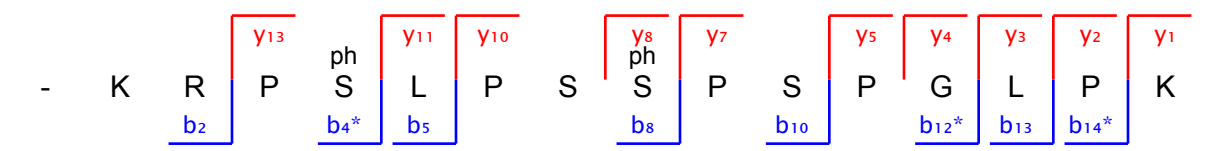

Raw file  
20150814\_A375SR\_Phospho\_BR2\_03

Scan 11523 Method FTMS; HCD Score 129.29 m/z 935.39 Gene names MKL1; mkl1

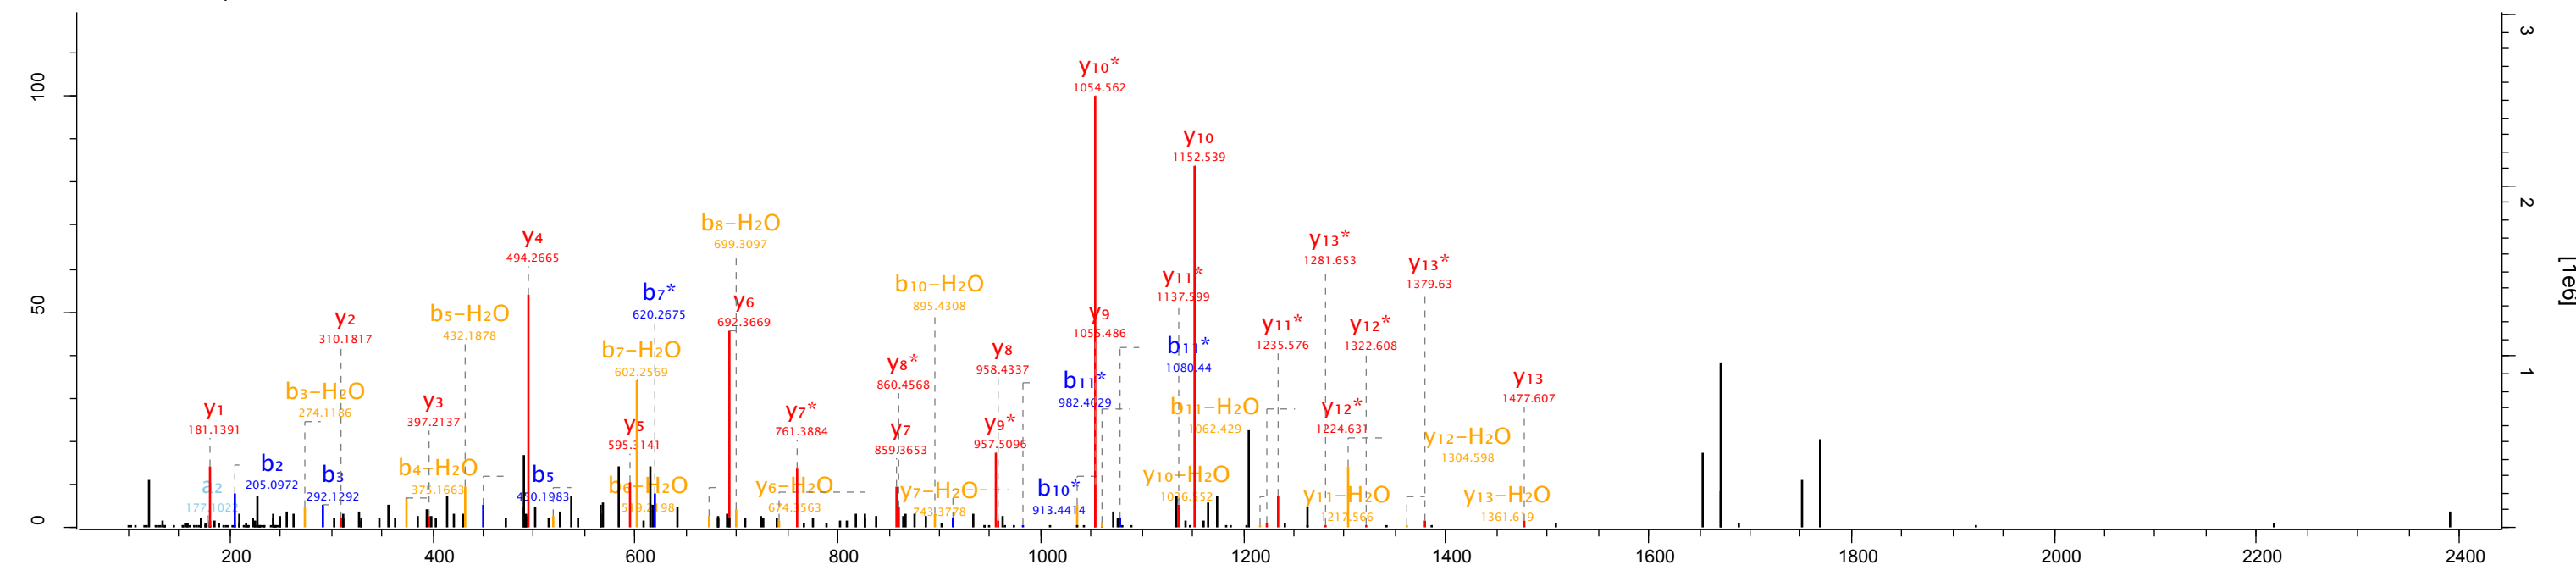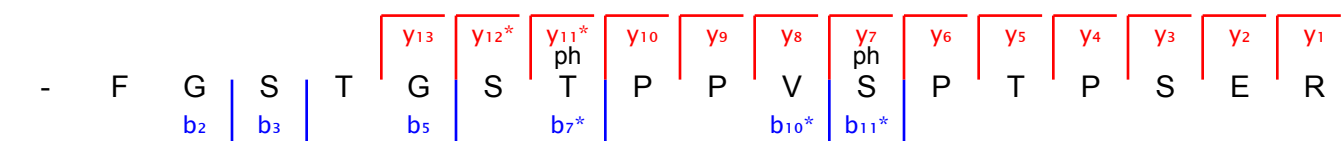

Raw file: 20150814\_A375SR\_Phospho\_BR2\_03  
 Scan: 11553 Method: FTMS; HCD Score: 188.29 m/z: 1191.01 Gene names: ANKRD17

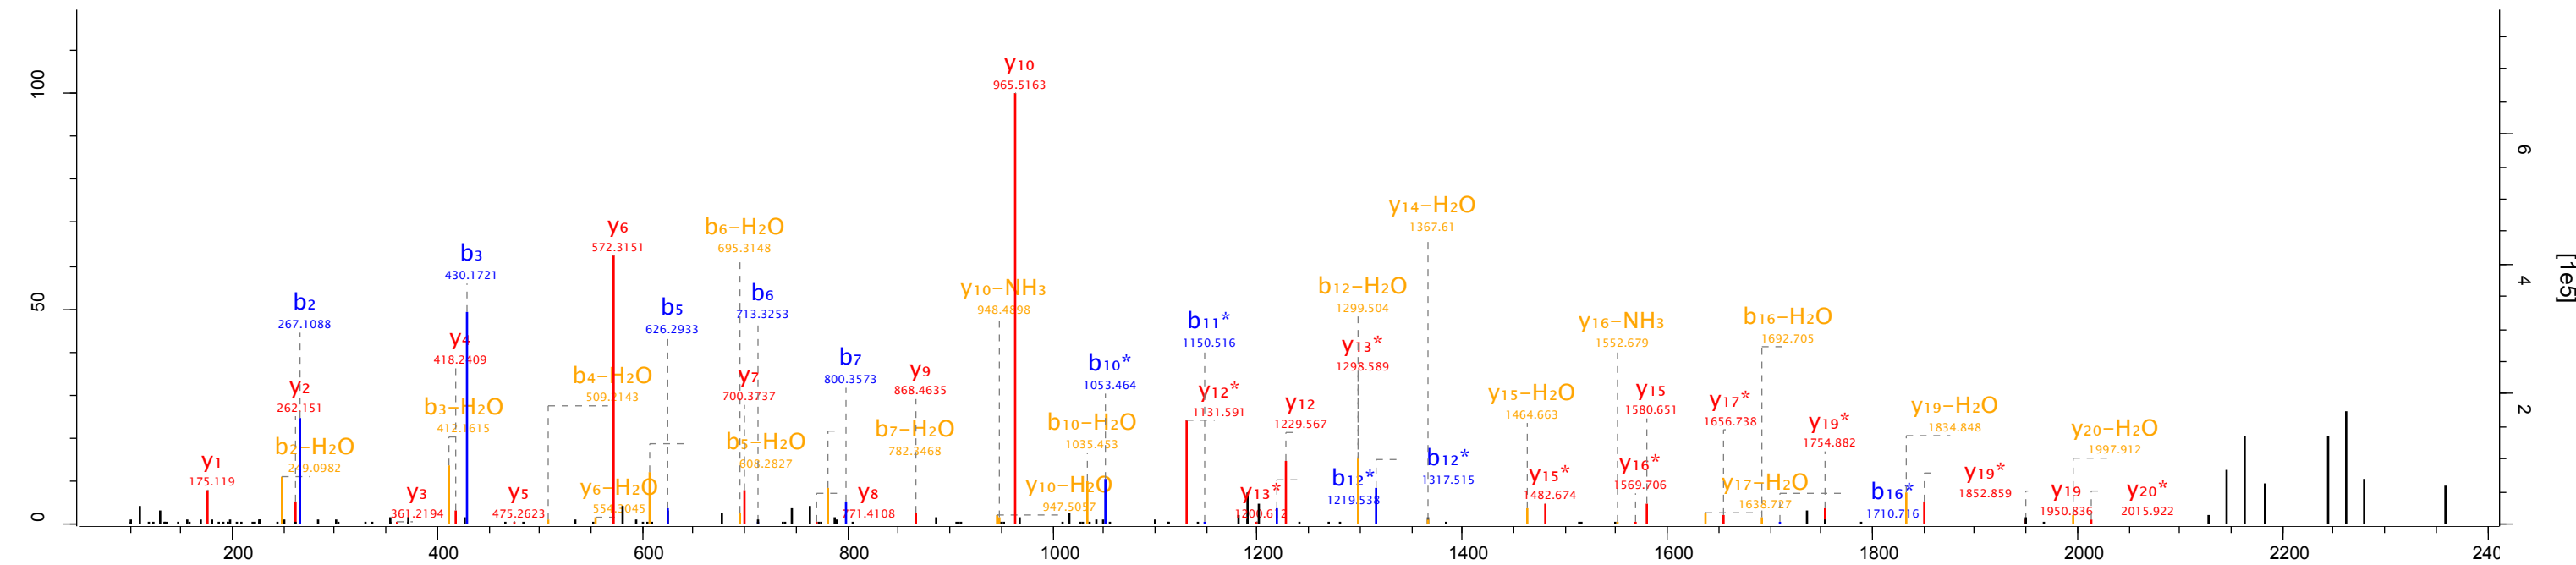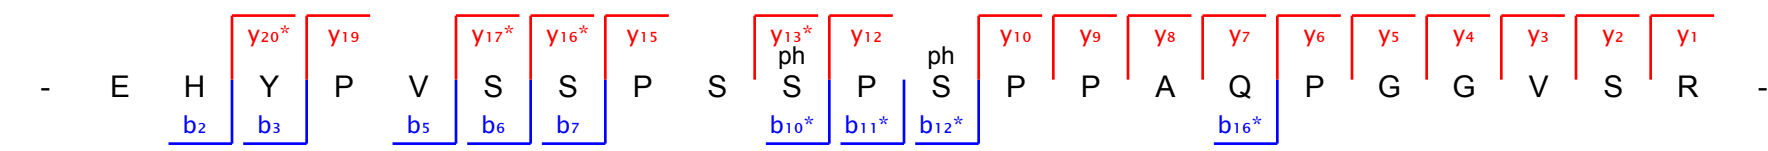

Raw file: 20150814\_A375SR\_Phospho\_BR2\_03  
 Scan: 11723 Method: FTMS; HCD Score: 117.28 m/z: 487.25 Gene names: LIMCH1

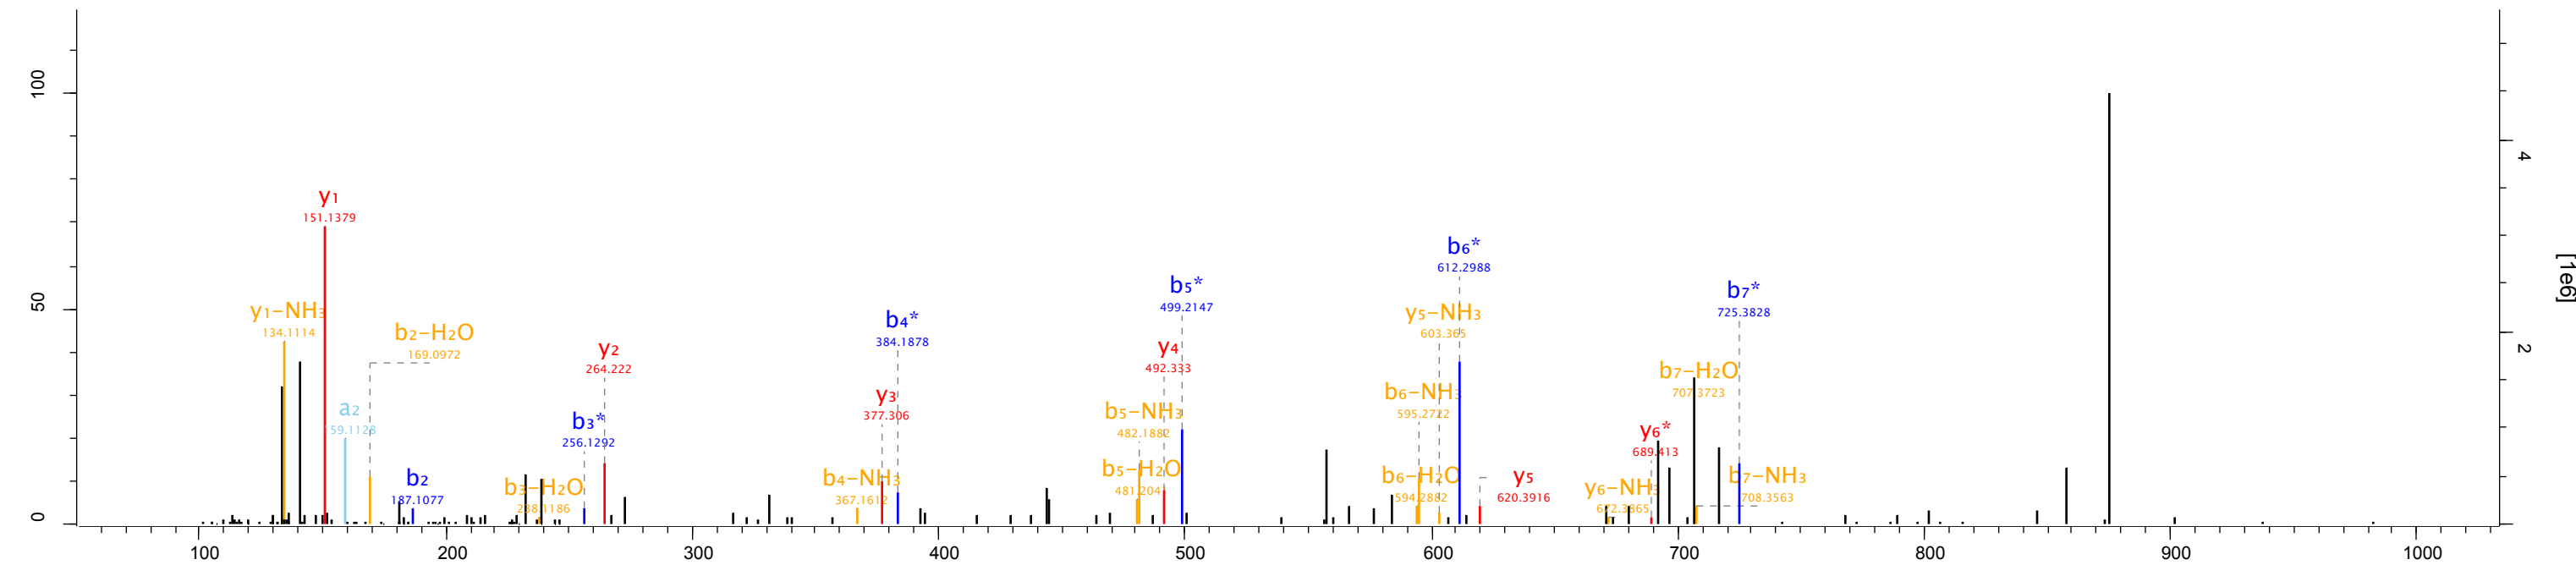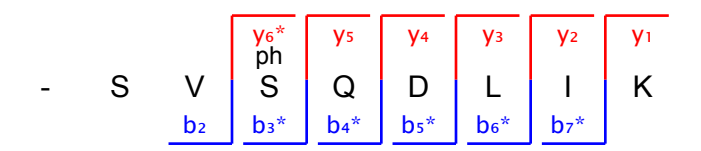

Raw file  
 20150814\_A375SR\_Phospho\_BR2\_03  
 Scan 11803 Method FTMS; HCD Score 76.96 m/z 961.97 Gene names STK10

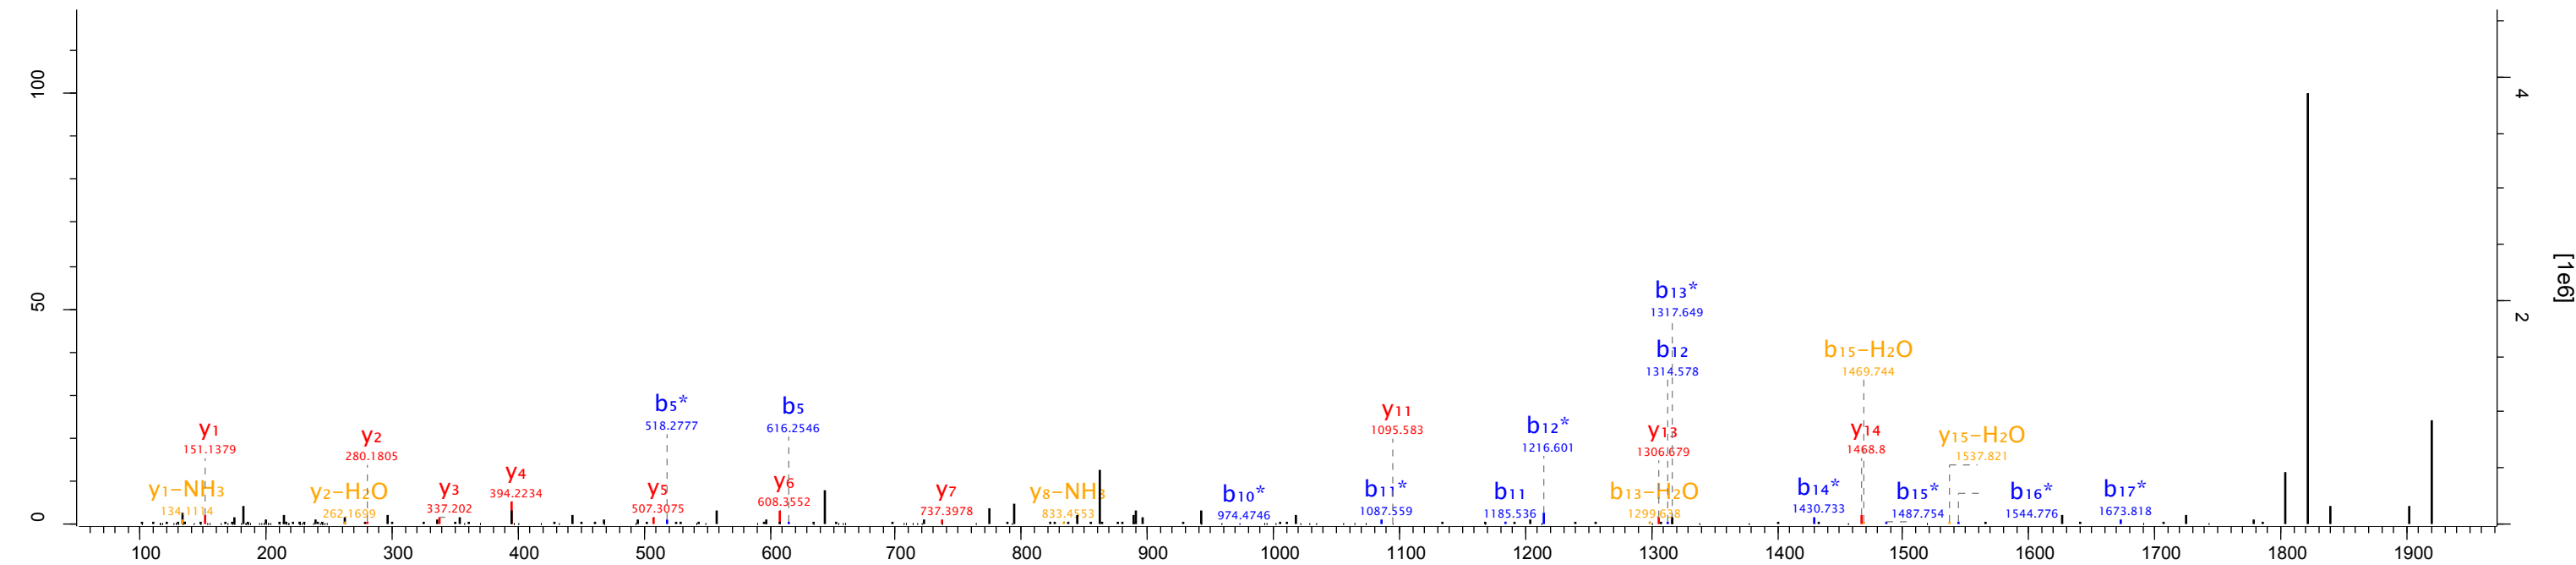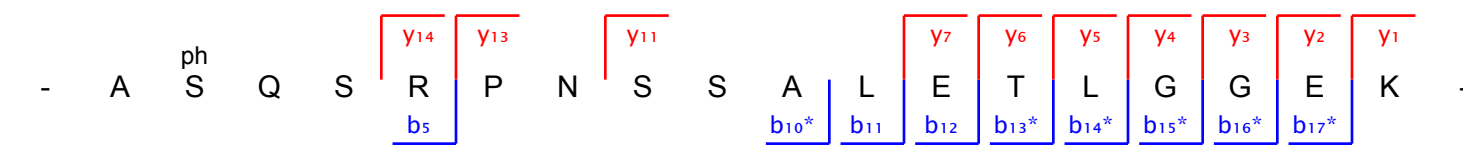



Raw file  
20150814\_A375SR\_Phospho\_BR2\_03

Scan 11973 Method FTMS; HCD Score 213.2 m/z 686.66 Gene names SLTM

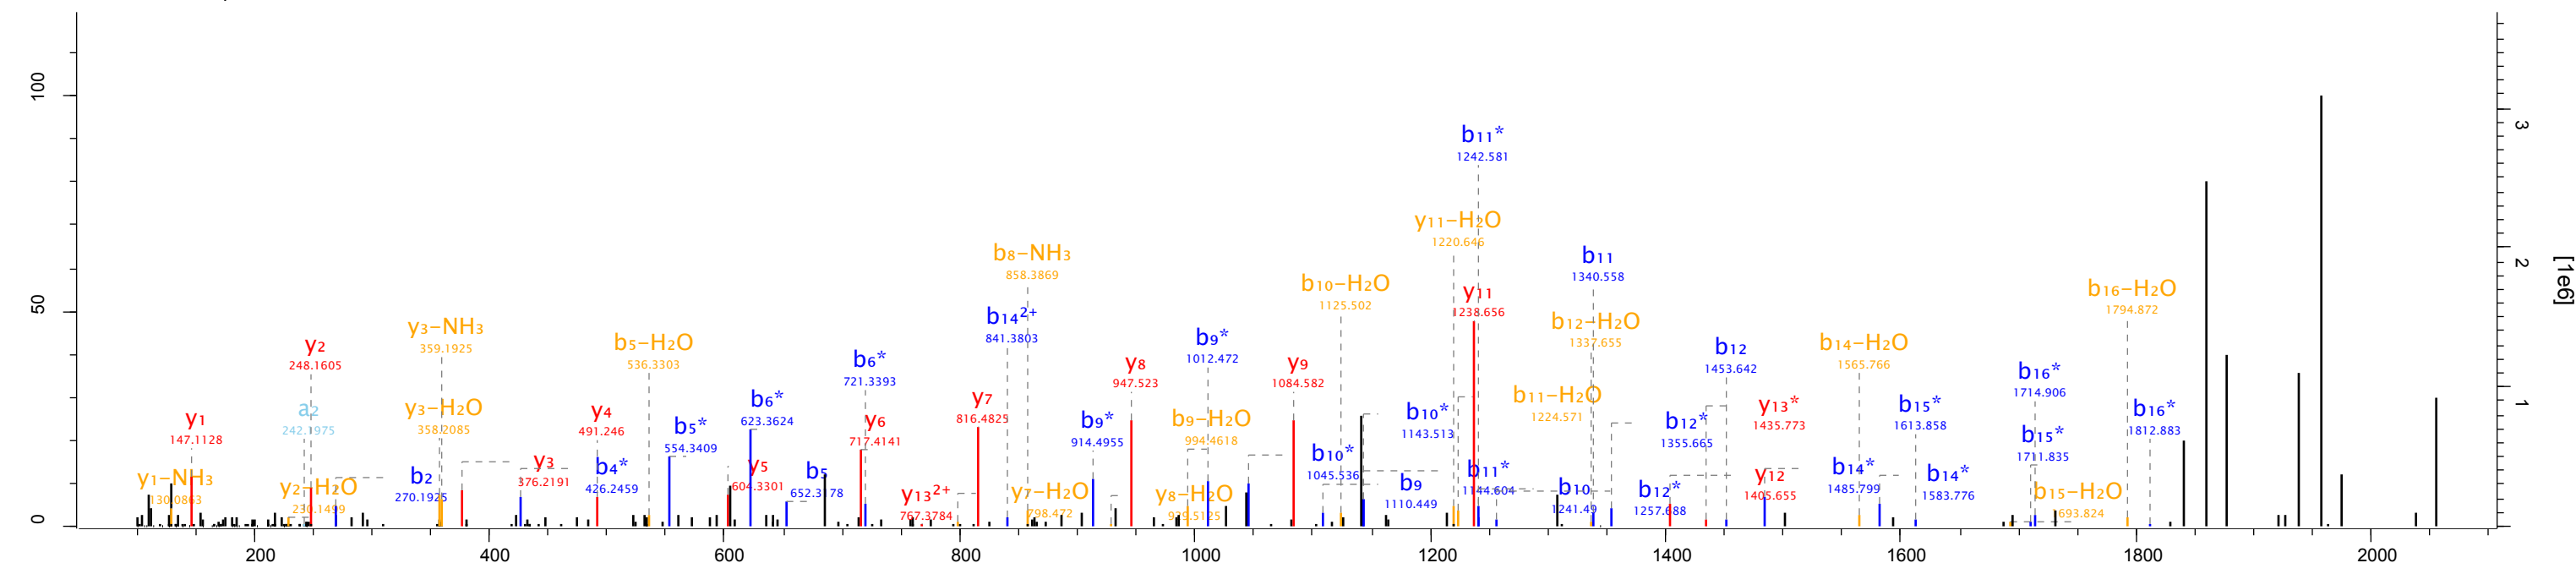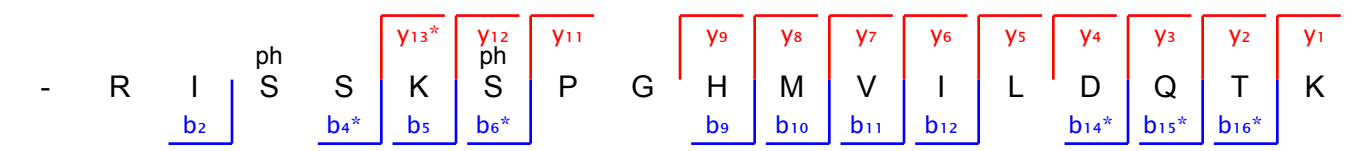

Raw file 20150814\_A375SR\_Phospho\_BR2\_03 Scan 12073 Method FTMS; HCD Score 46.53 m/z 706.31 Gene names RPTOR

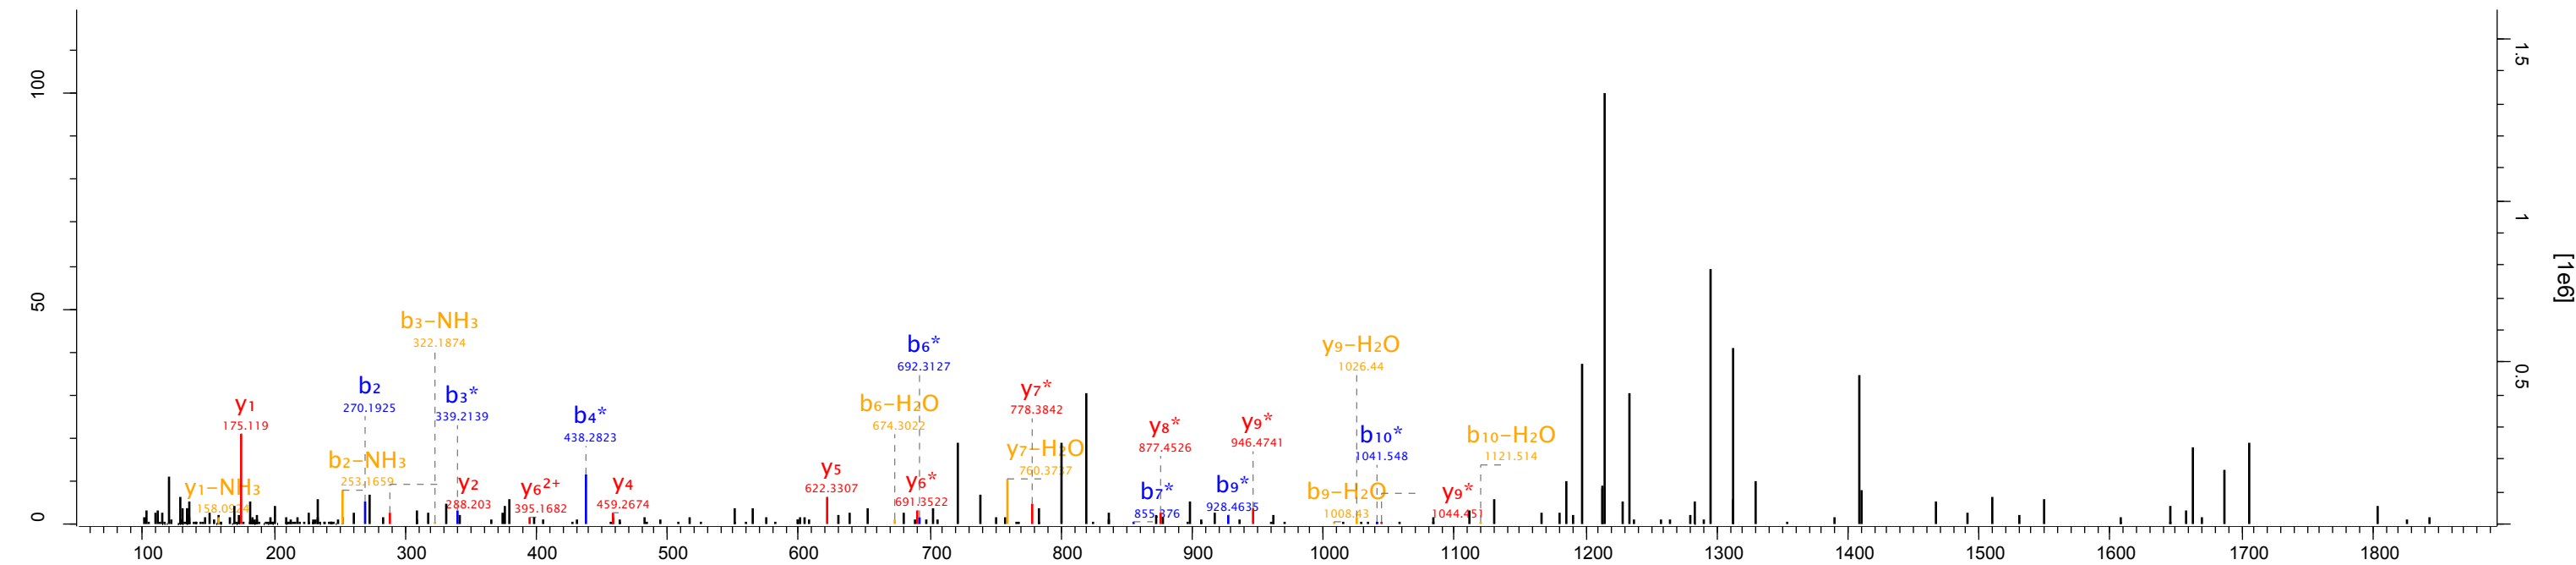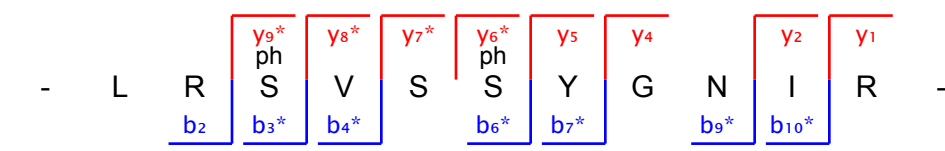

Raw file 20150814\_A375SR\_Phospho\_BR2\_03 Scan 12263 Method FTMS; HCD Score 83.37 m/z 646.78 Gene names RIF1

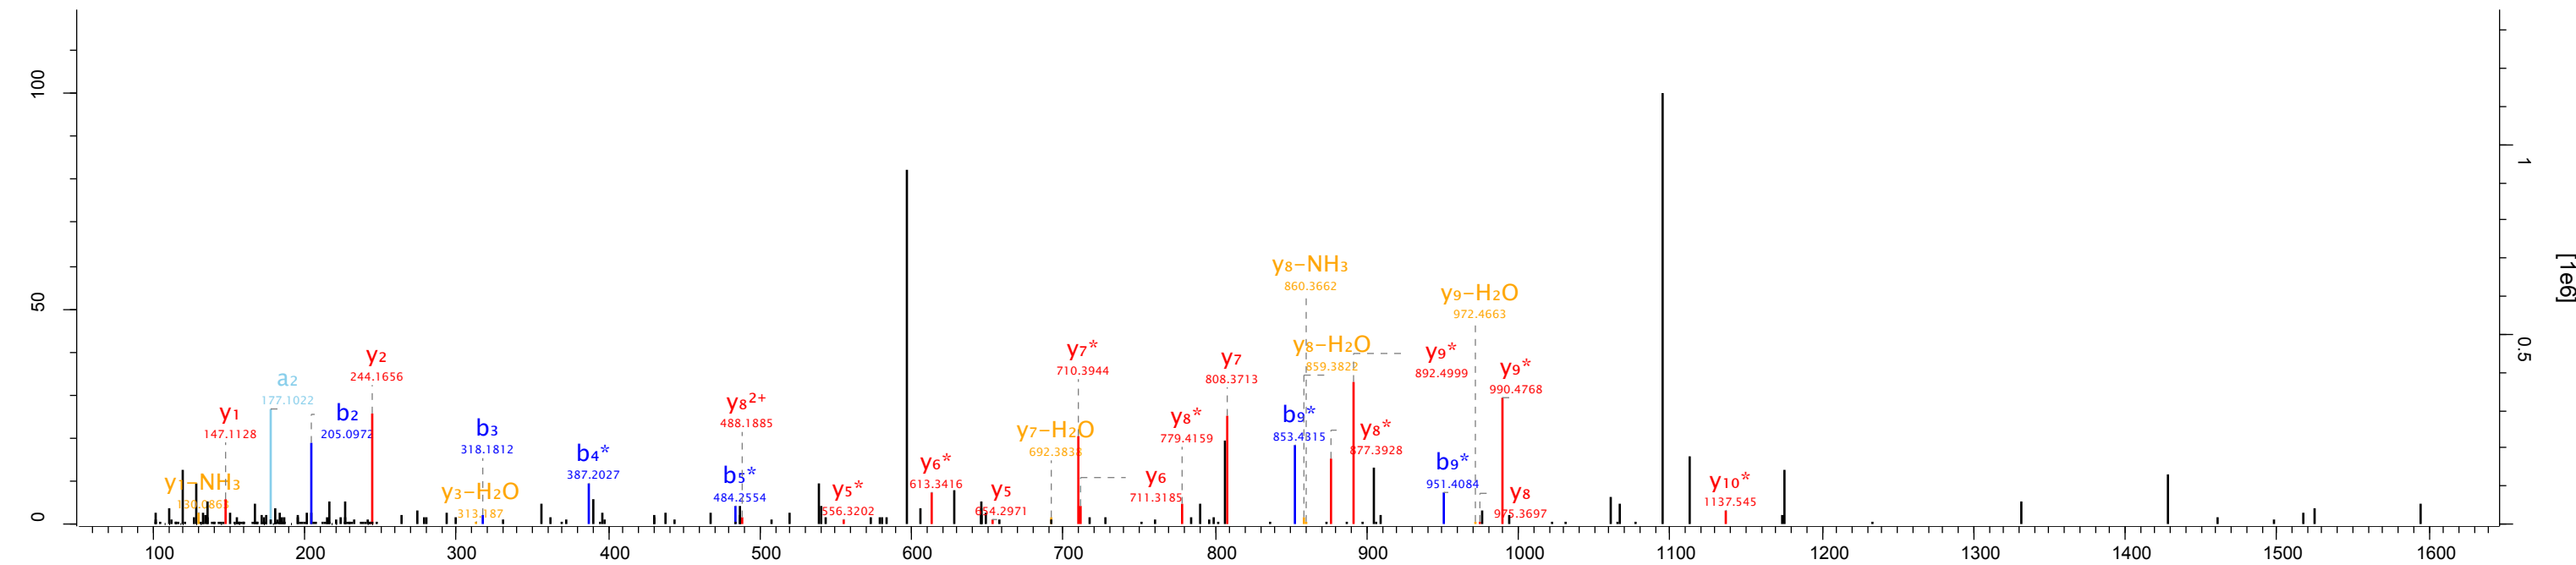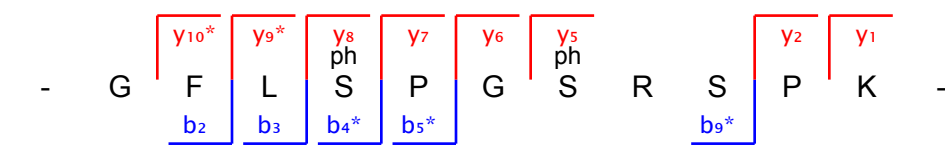

Raw file 20150814\_A375SR\_Phospho\_BR2\_03 Scan 12453 Method FTMS; HCD Score 111.12 m/z 632.77 Gene names KLC2

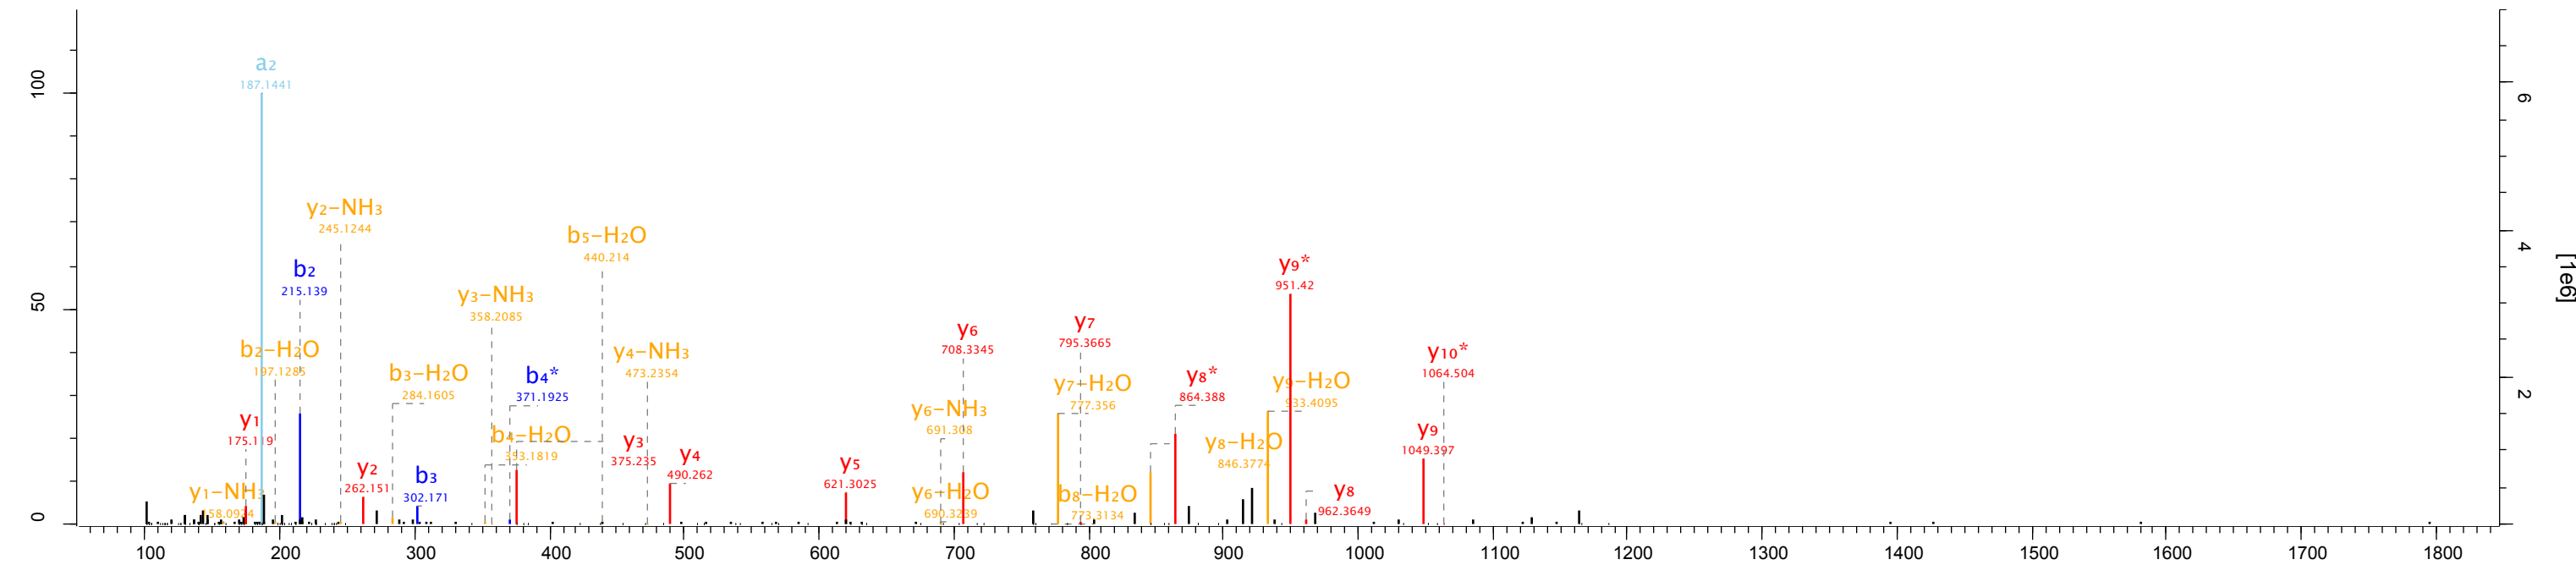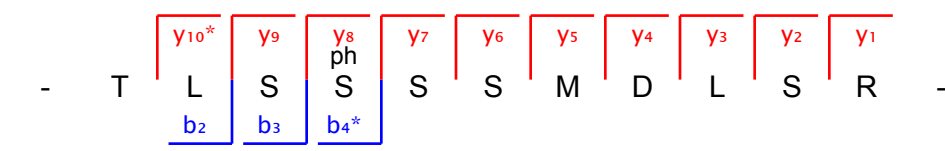

Raw file: 20150814\_A375SR\_Phospho\_BR2\_03  
 Scan: 12553 Method: FTMS; HCD Score: 54.34 m/z: 586.76 Gene names: ZC3HAV1

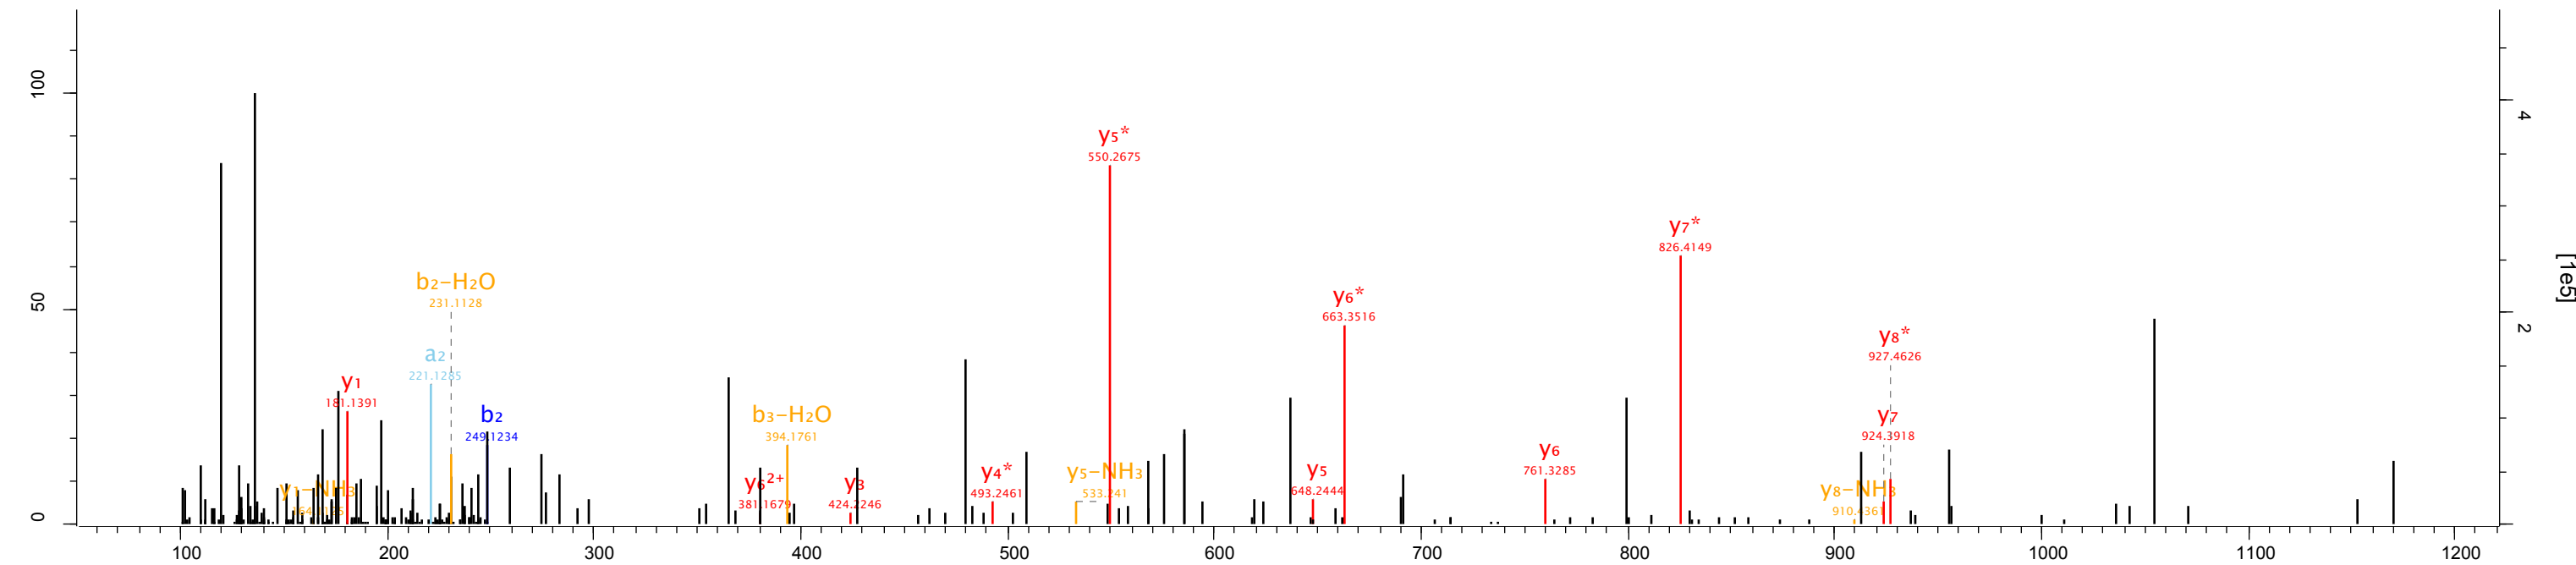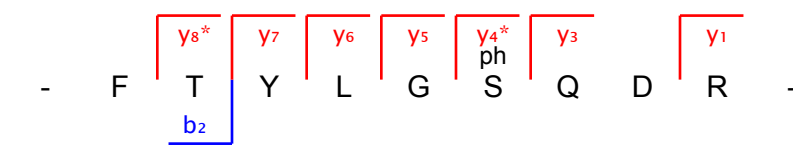

Raw file: 20150814\_A375SR\_Phospho\_BR2\_03  
 Scan: 1263 Method: FTMS; HCD Score: 78.96 m/z: 381.17 Gene names: SRRM2

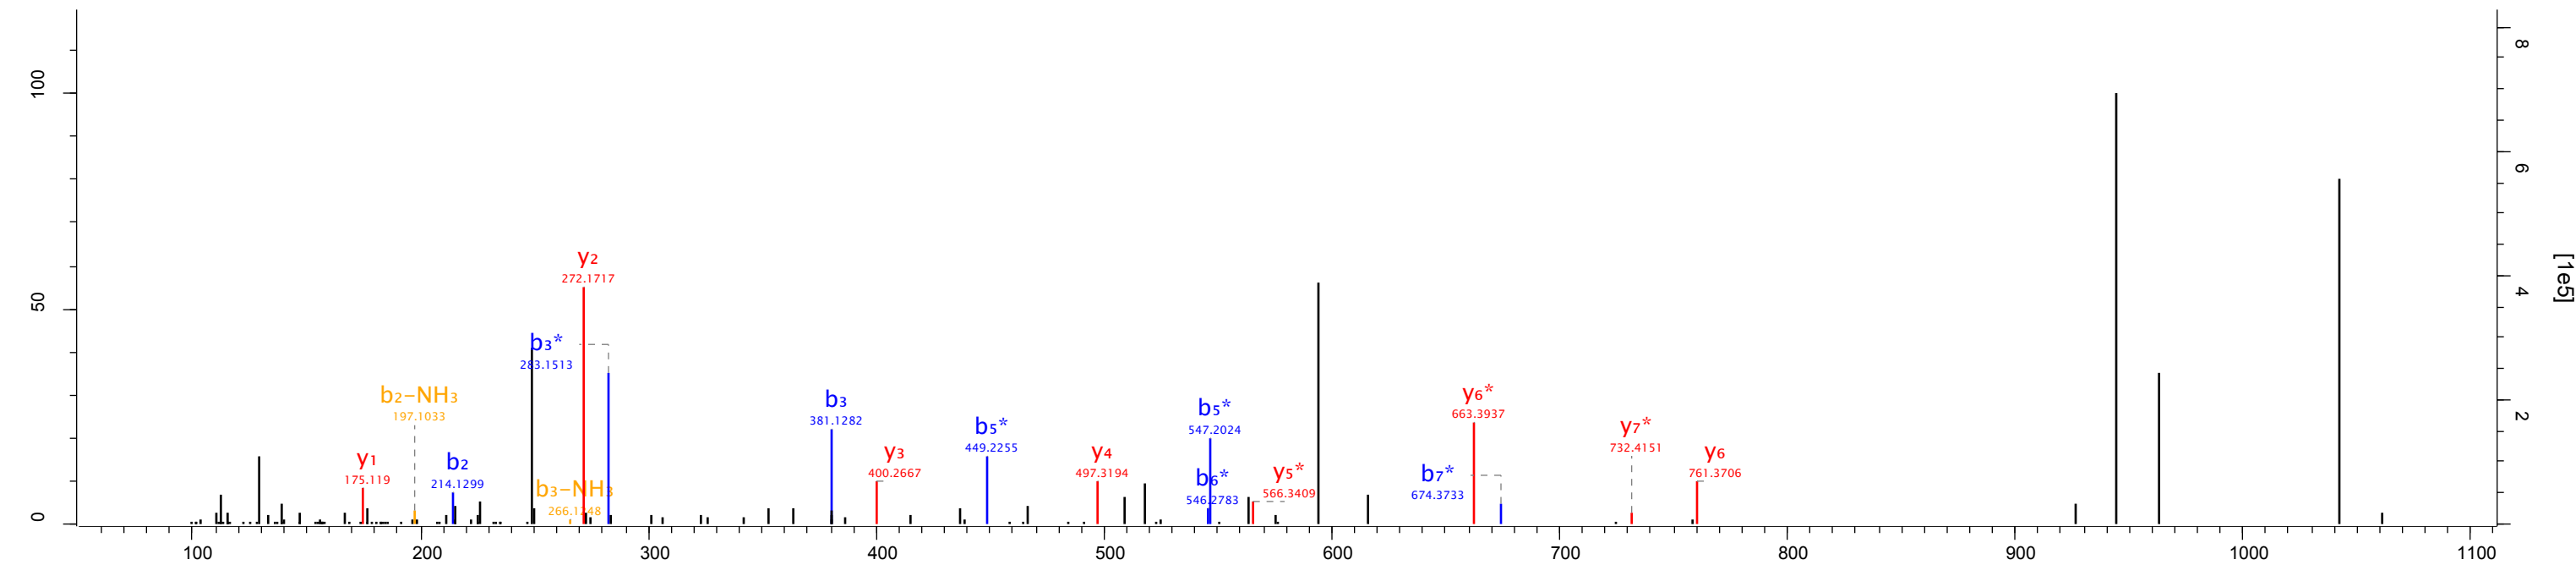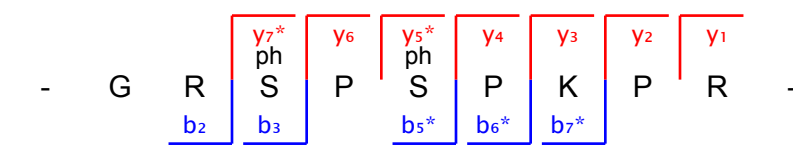

Raw file 20150814\_A375SR\_Phospho\_BR2\_03 Scan 12653 Method FTMS; HCD Score 244.33 m/z 893.89 Gene names ZC3HC1

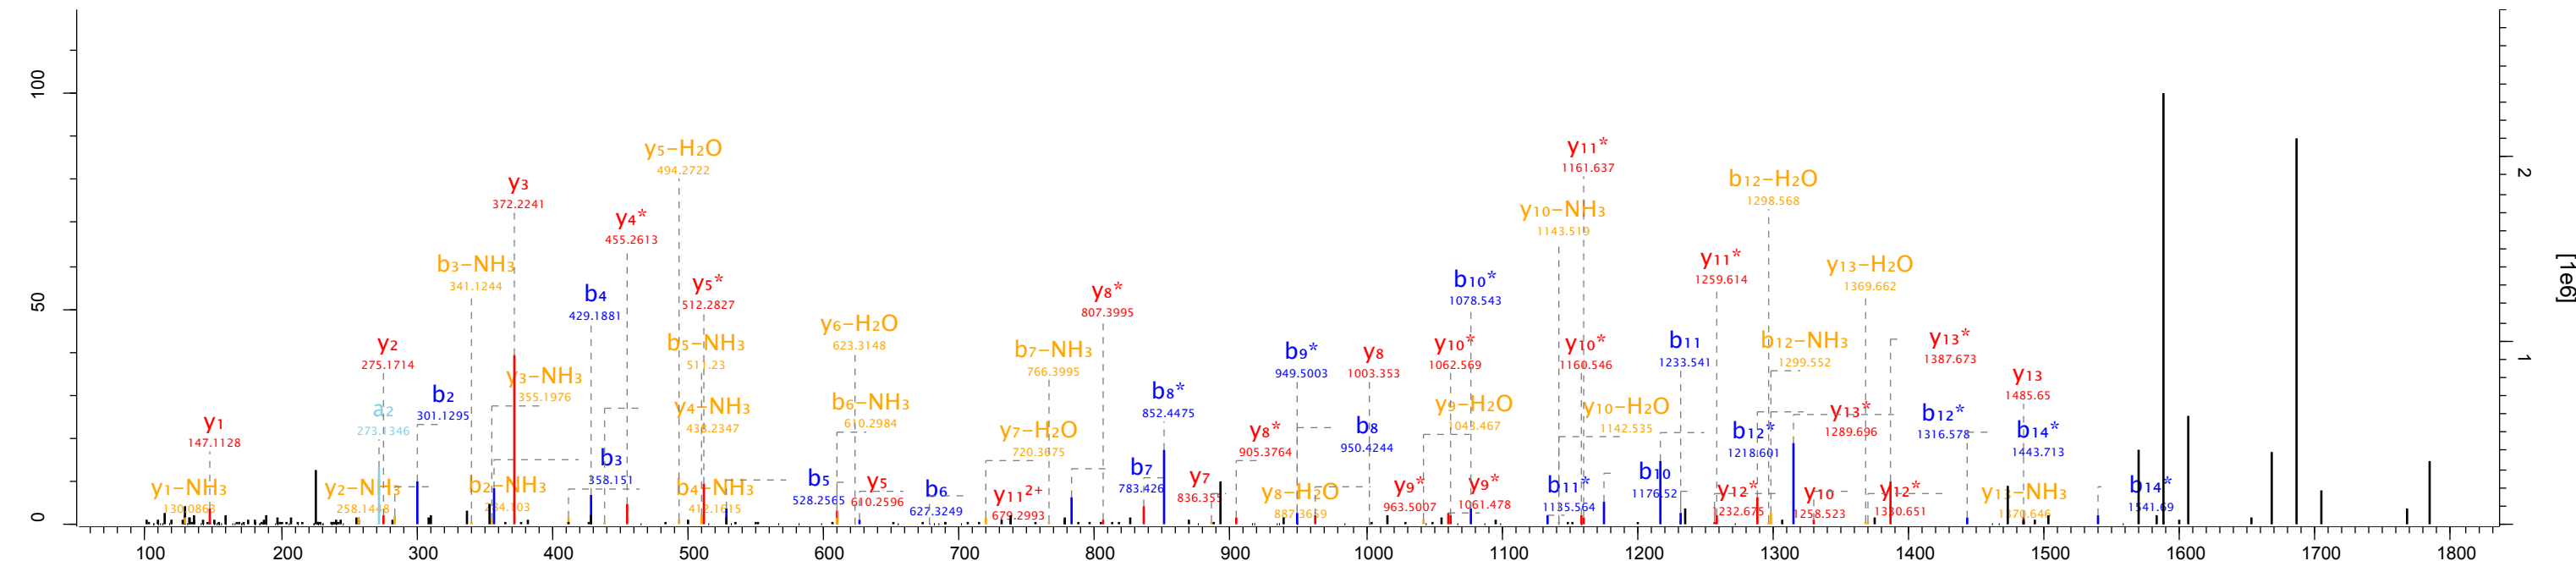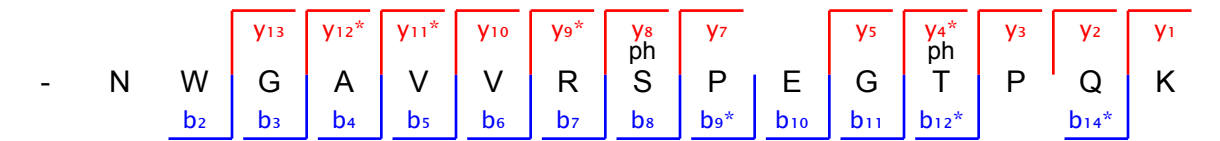

Raw file 20150814\_A375SR\_Phospho\_BR2\_03 Scan 12783 Method FTMS; HCD Score 91.17 m/z 833.84 Gene names RAB11FIP5

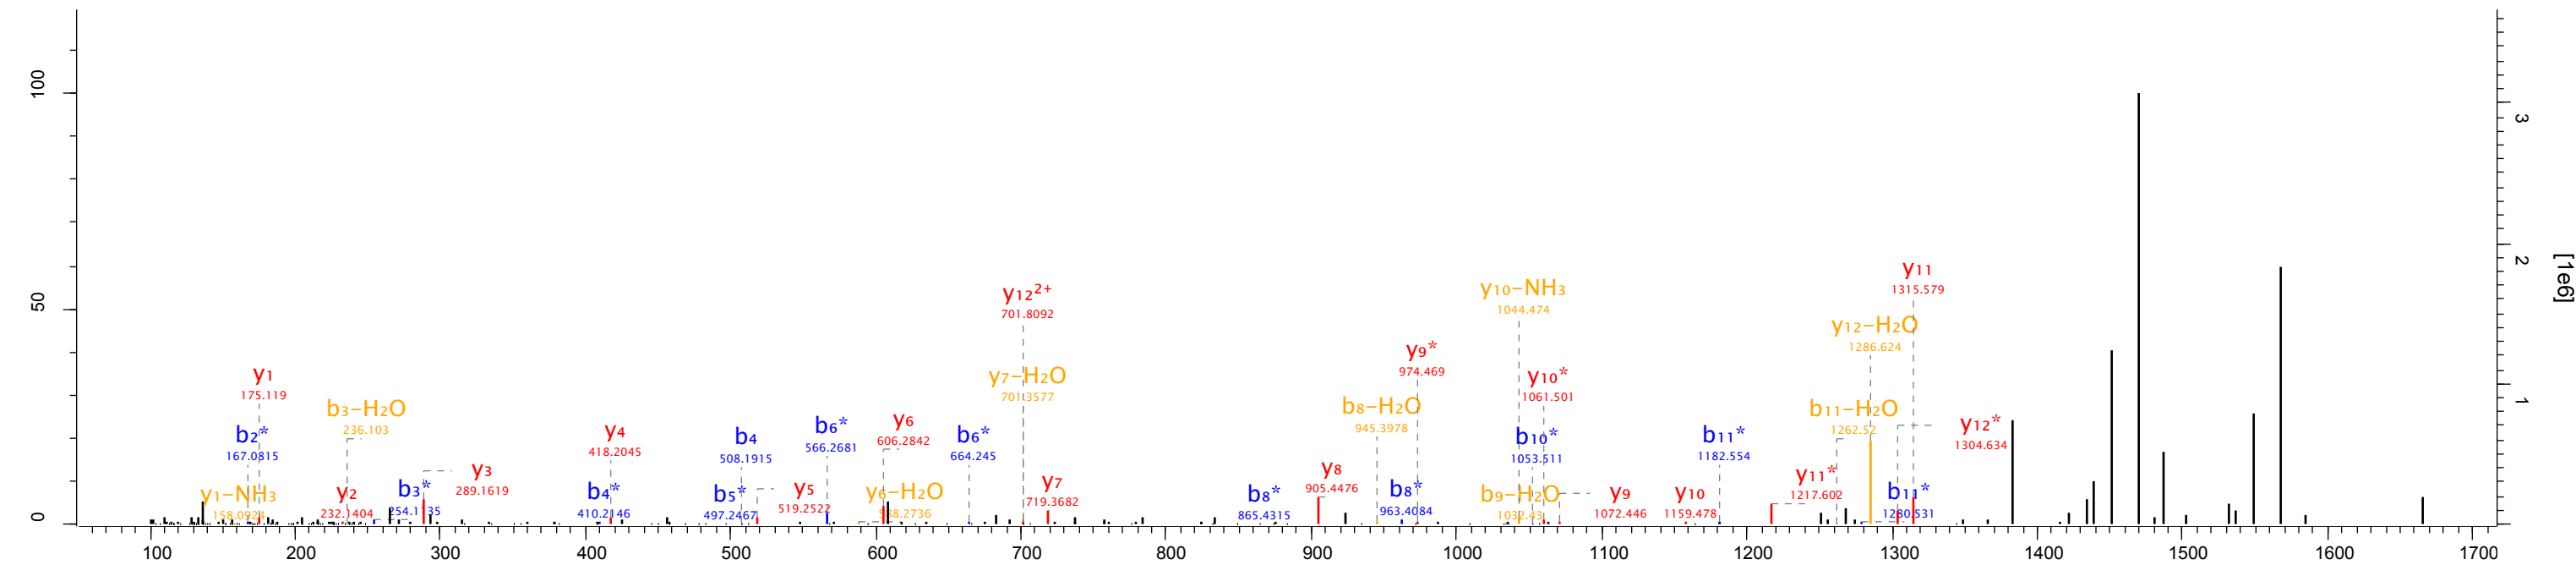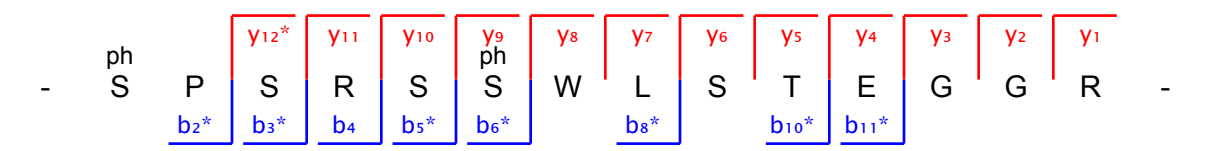



Raw file 20150814\_A375SR\_Phospho\_BR2\_03 Scan 13023 Method FTMS; HCD Score 65.51 m/z 952.75 Gene names IFI16

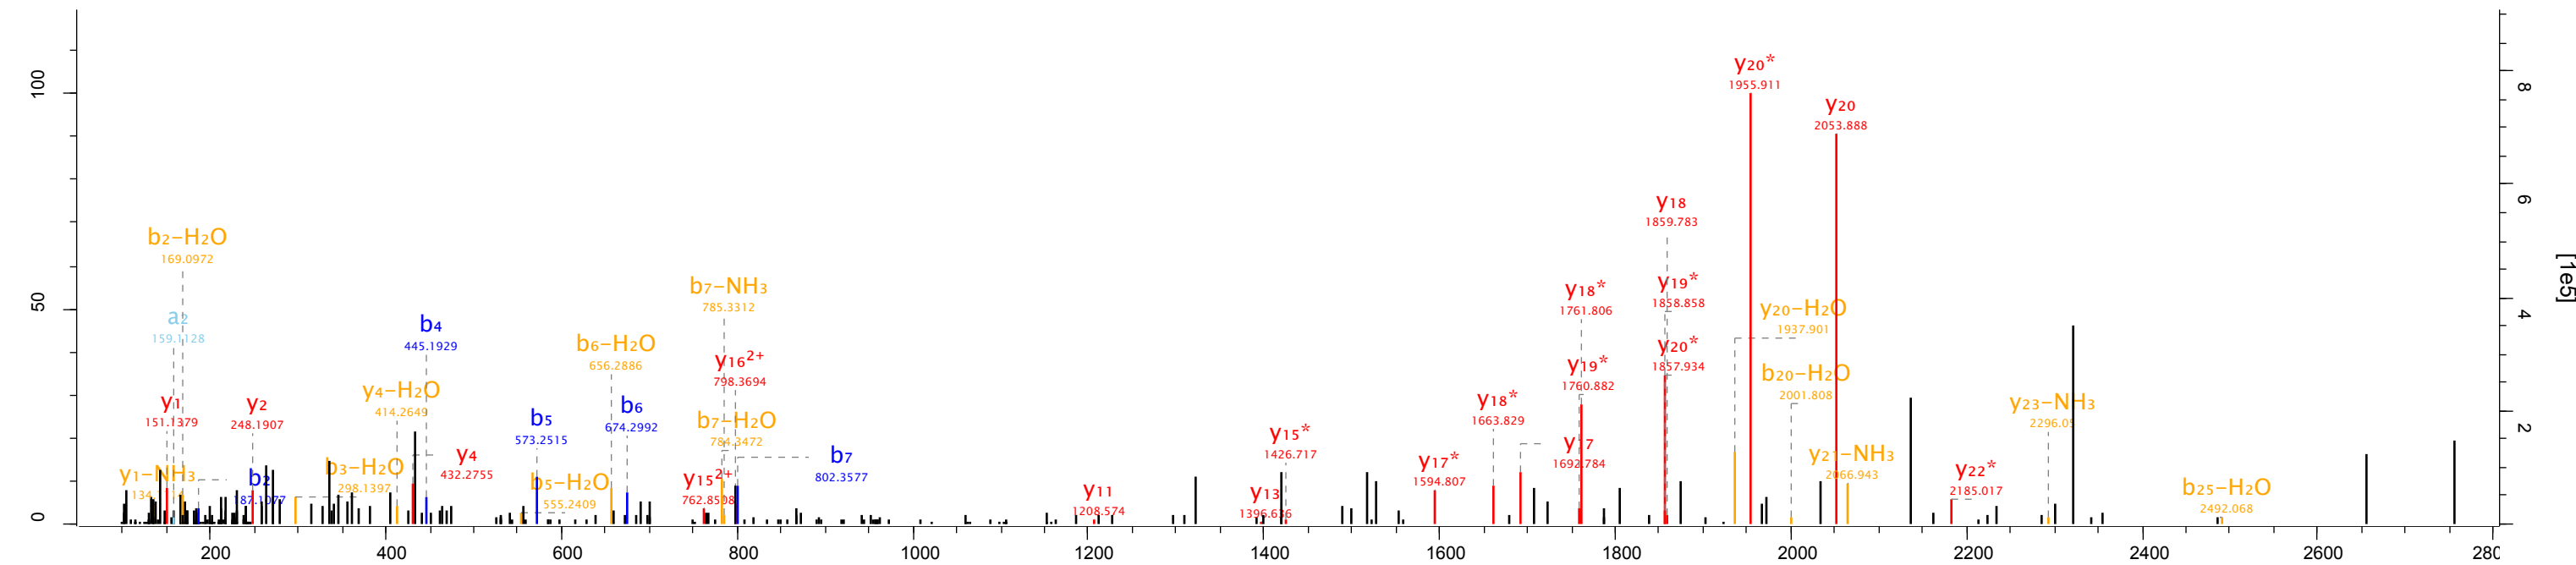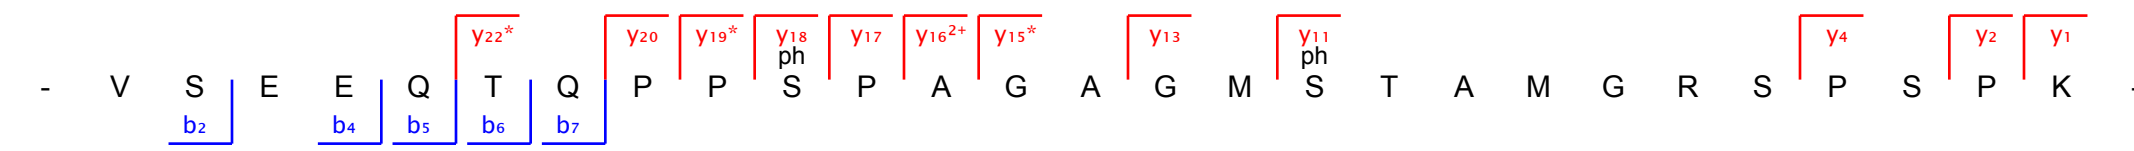

Raw file 20150814\_A375SR\_Phospho\_BR2\_03 Scan 13223 Method FTMS; HCD Score 357.72 m/z 933.92 Gene names LMNA

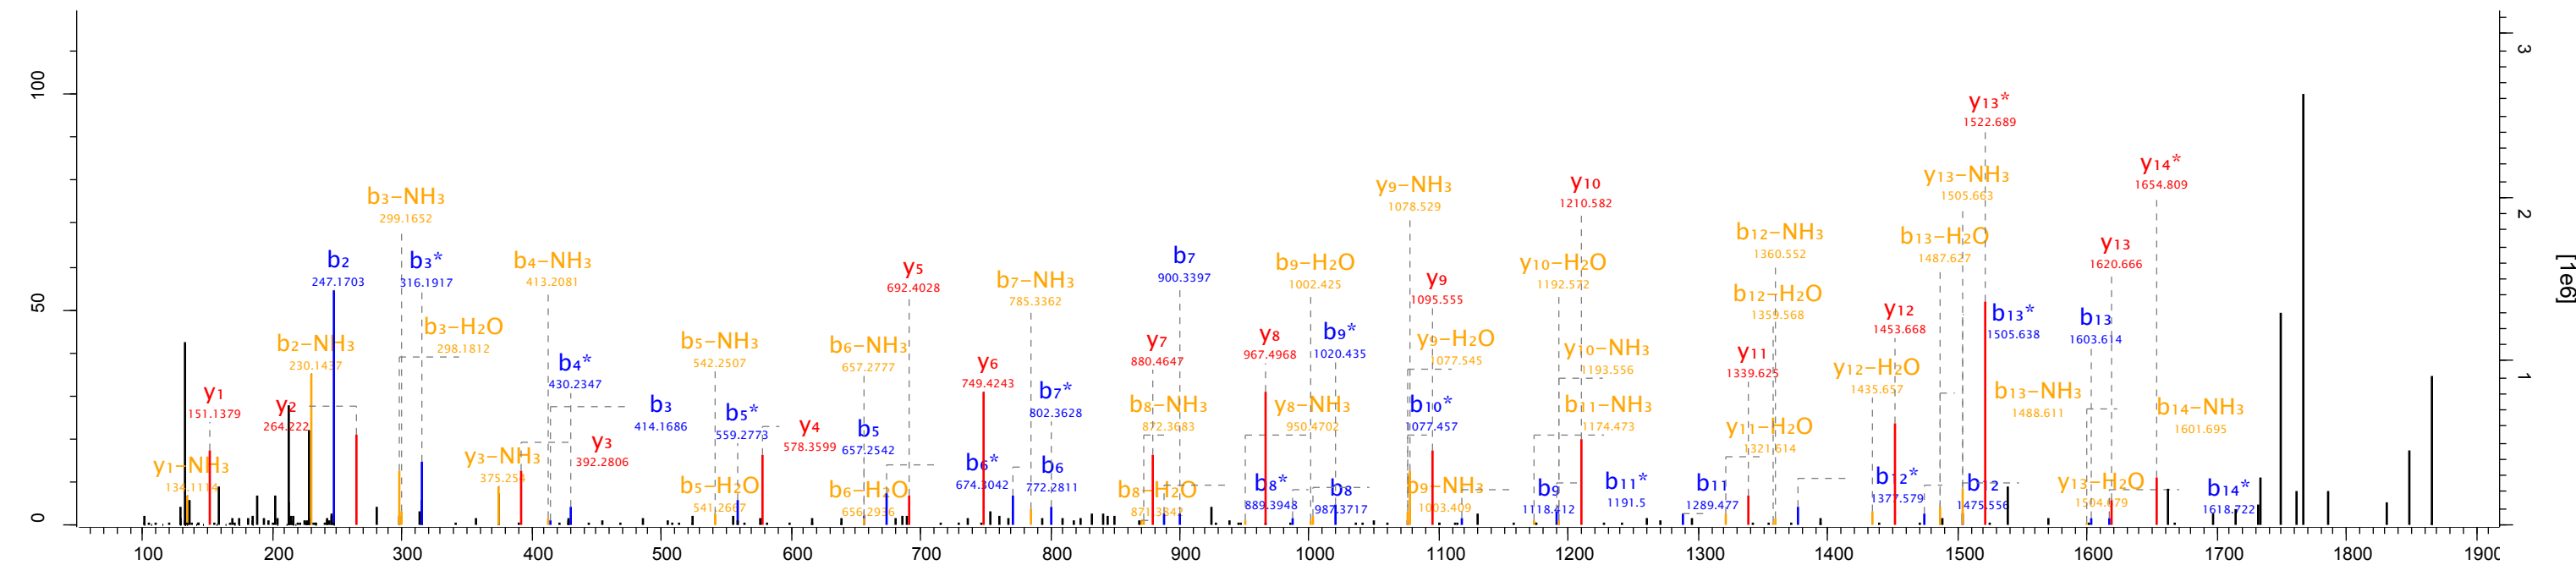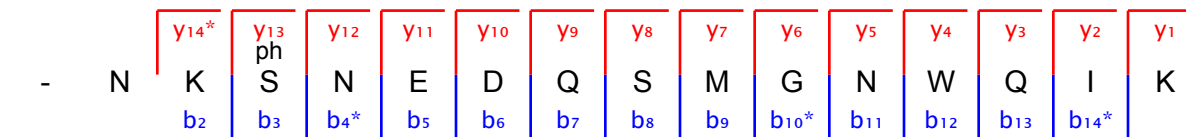

Raw file: 20150814\_A375SR\_Phospho\_BR2\_03  
 Scan: 13323 Method: FTMS; HCD Score: 160.52 m/z: 673.28 Gene names: CDK1;CDC2;CDK2;CDK3

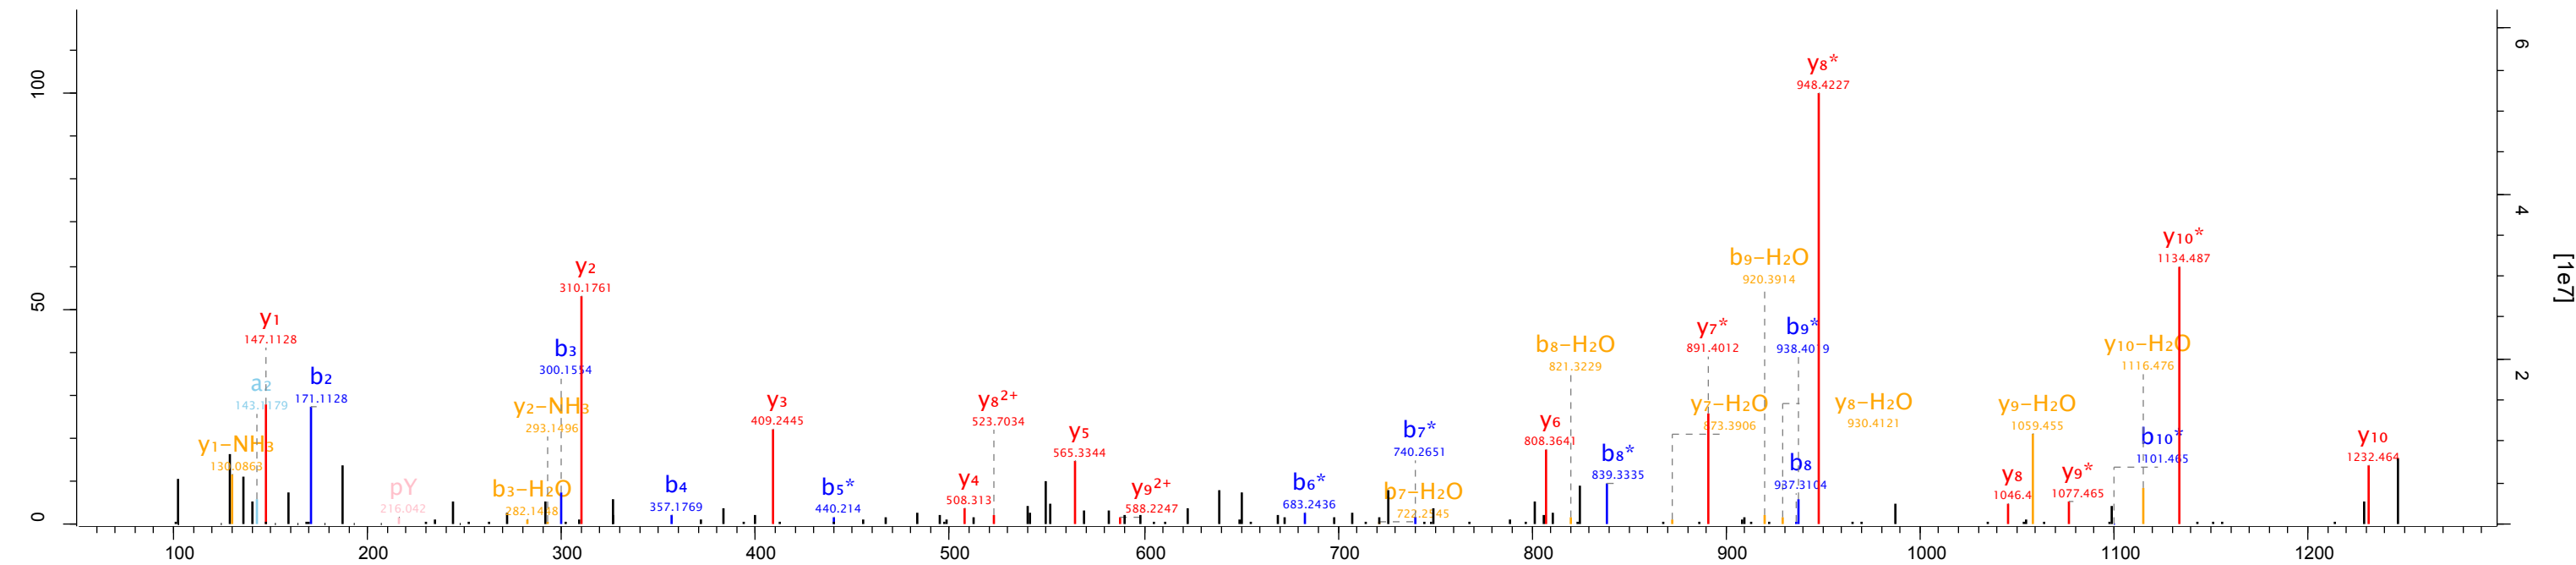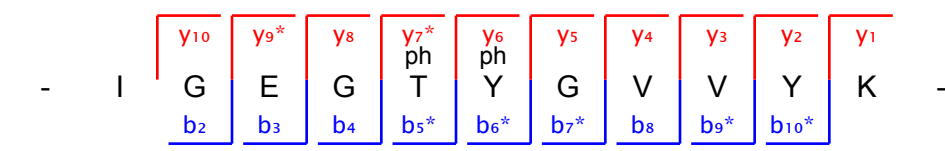

Raw file 20150814\_A375SR\_Phospho\_BR2\_03 Scan 13353 Method FTMS; HCD Score 111.96 m/z 860.88 Gene names ZC3H13

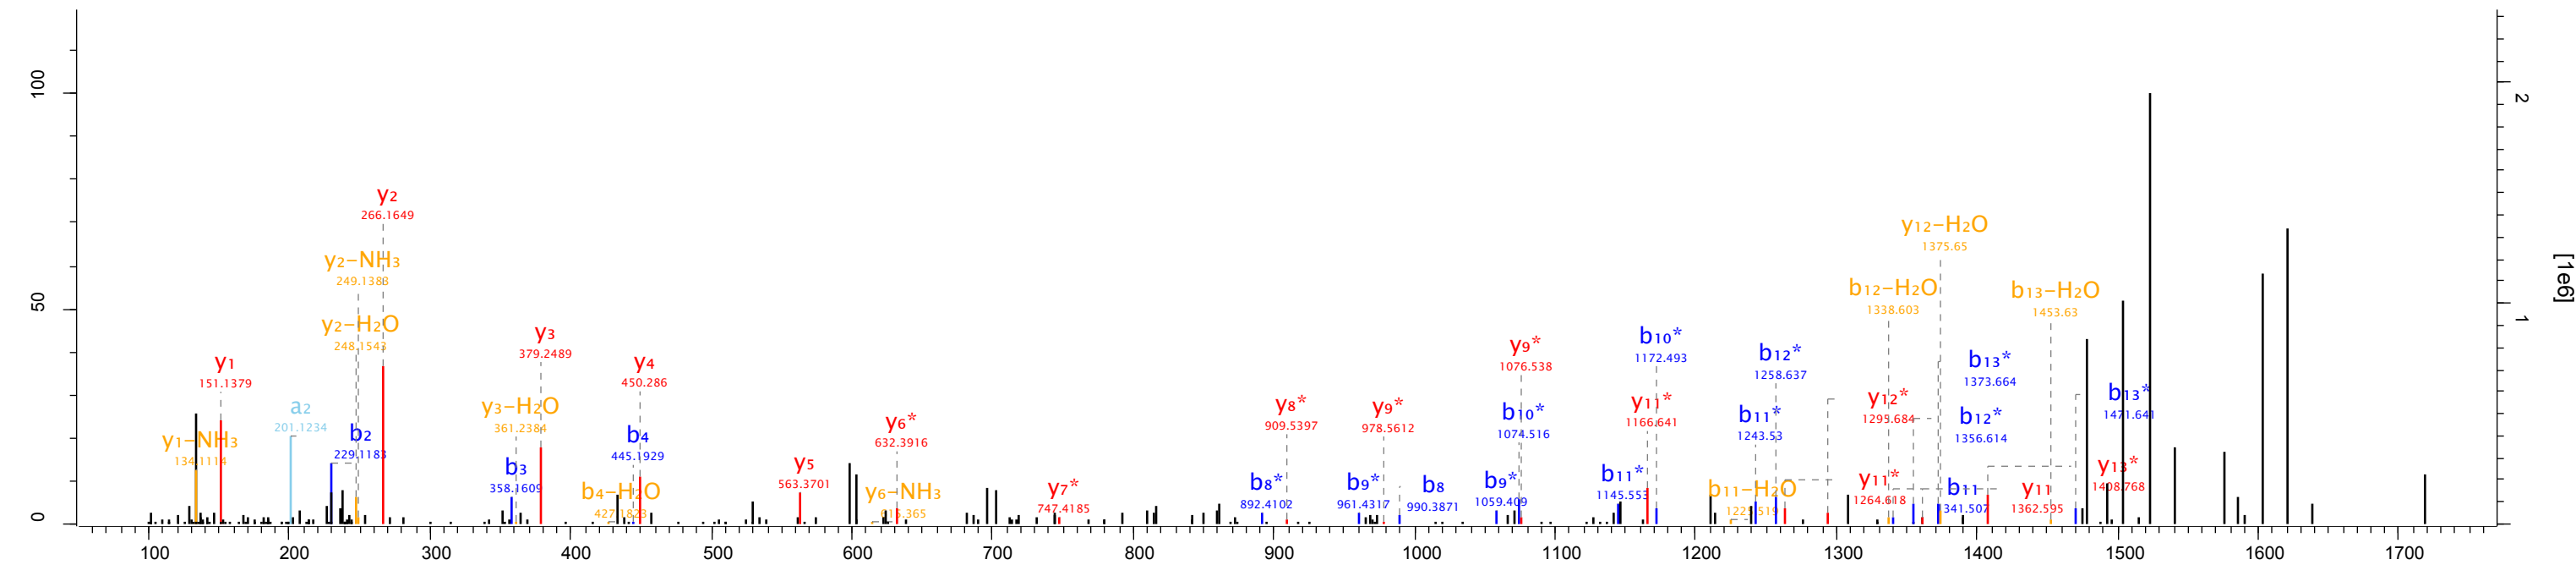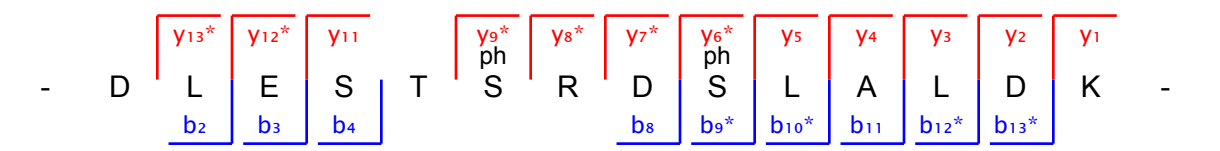

Raw file: 20150814\_A375SR\_Phospho\_BR2\_03  
 Scan: 13373 Method: FTMS; HCD Score: 262.68 m/z: 996.93 Gene names: STK10

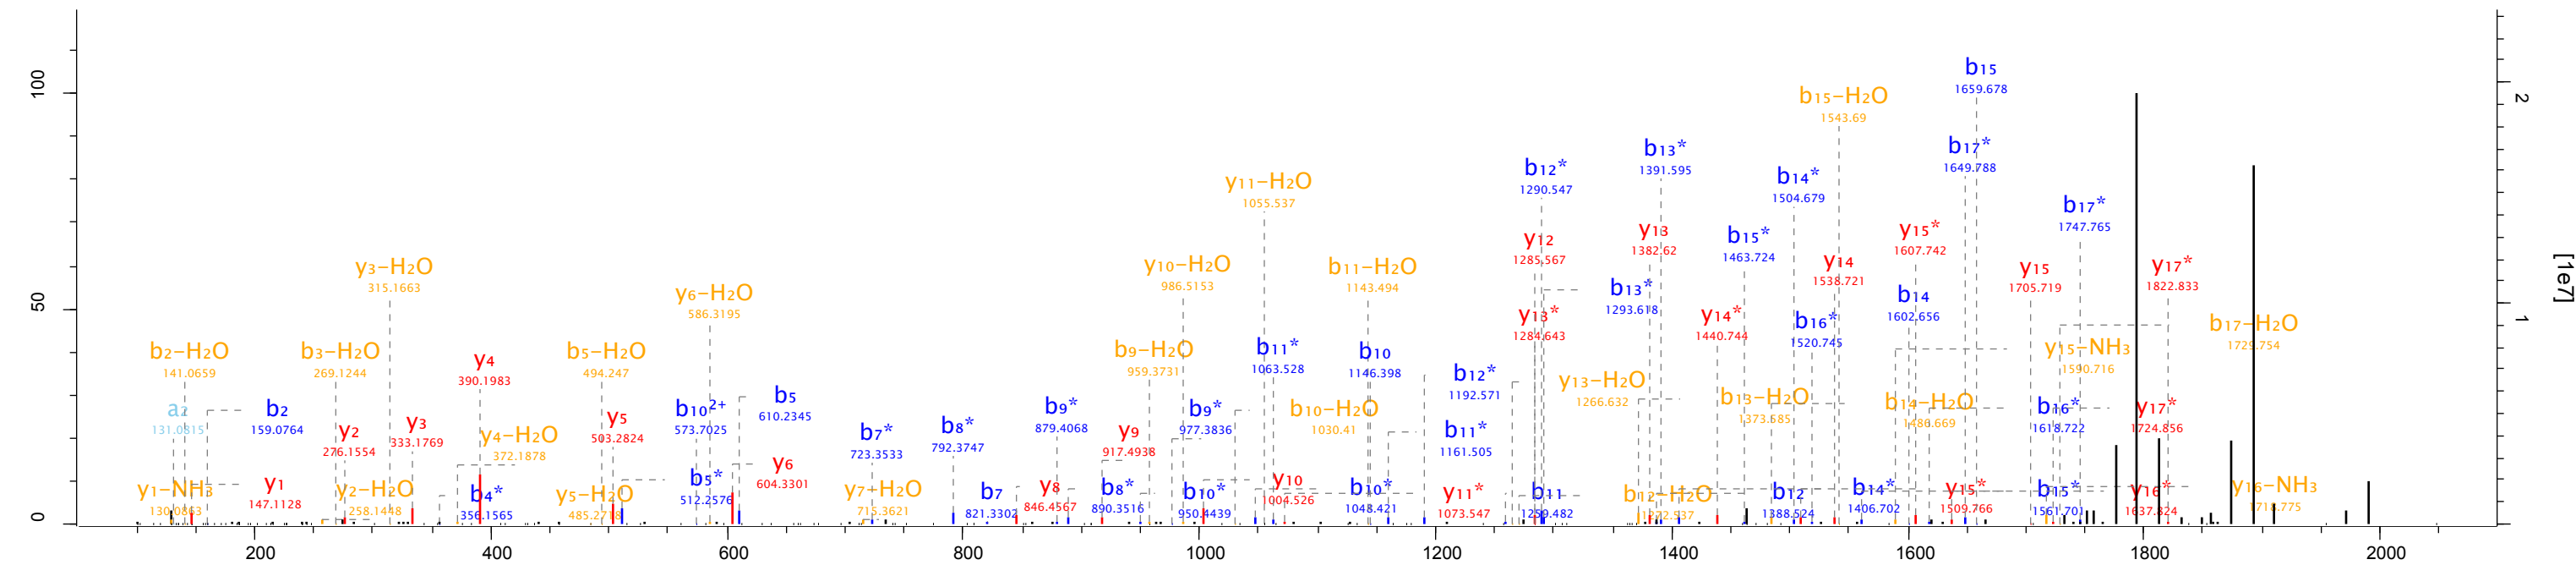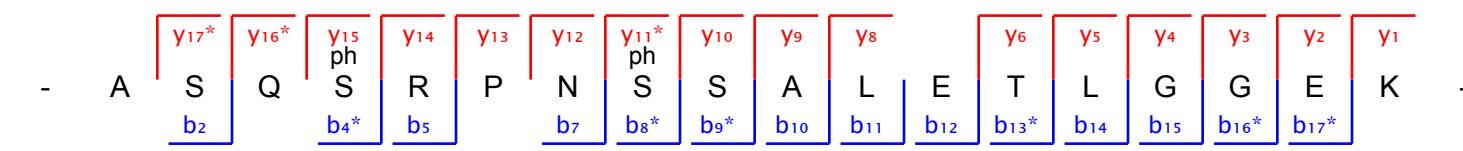

Raw file: 20150814\_A375SR\_Phospho\_BR2\_03  
 Scan: 13533 Method: FTMS; HCD Score: 82.54 m/z: 799.36 Gene names: GORASP2

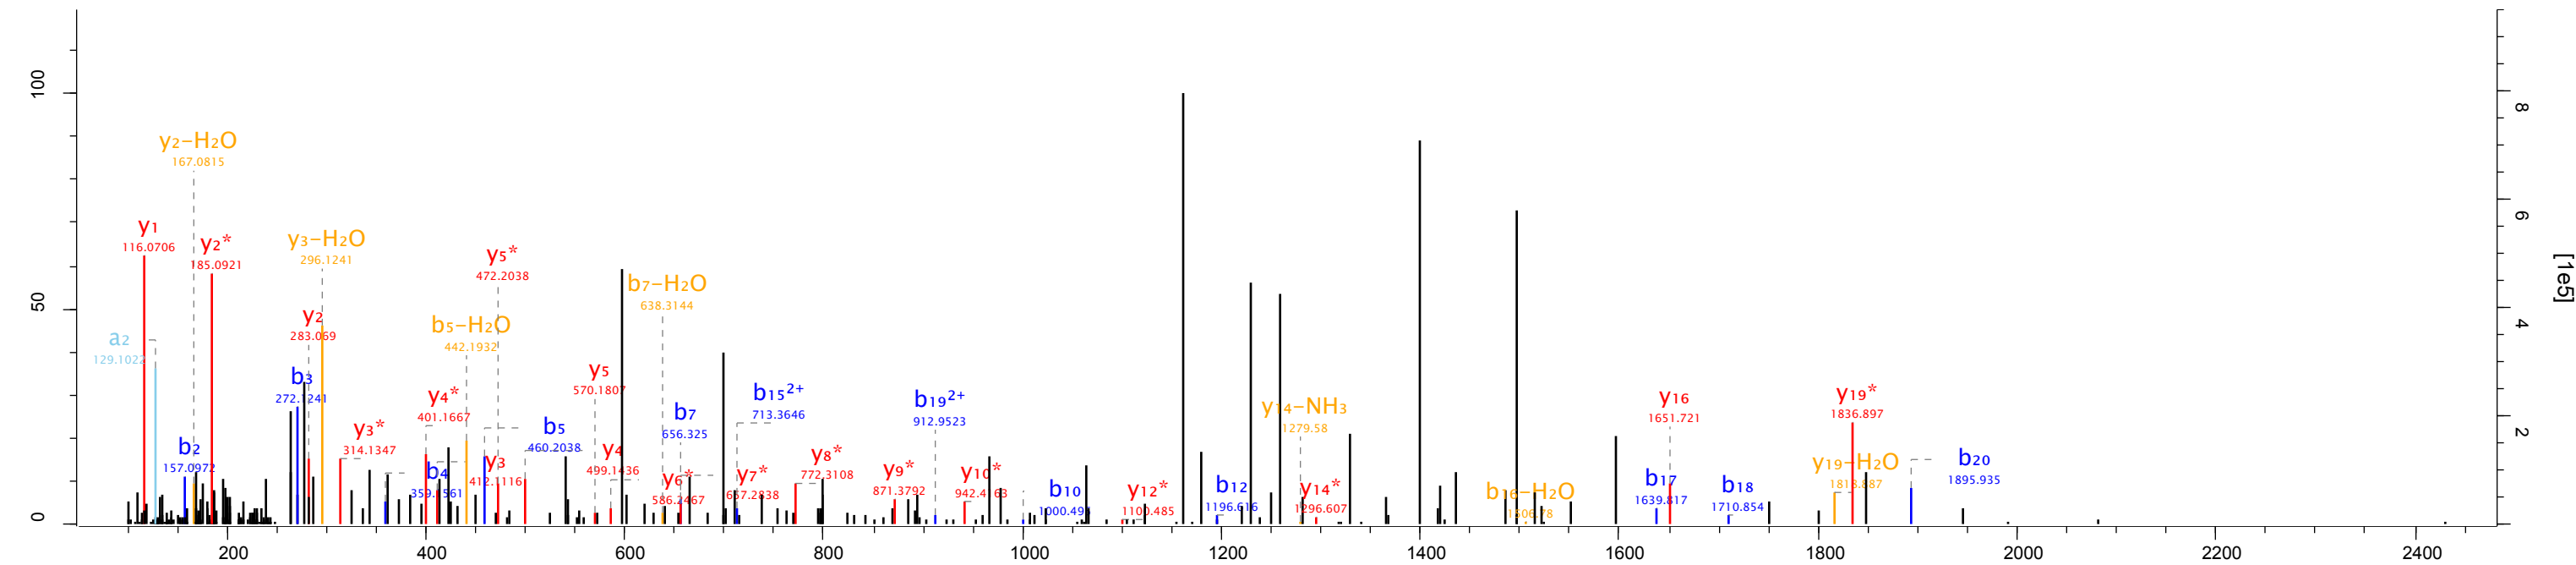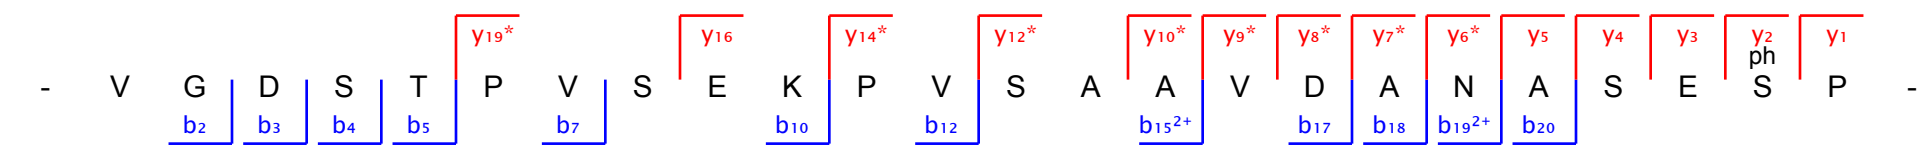

Raw file: 20150814\_A375SR\_Phospho\_BR2\_03  
 Scan: 13693 Method: FTMS; HCD Score: 166.36 m/z: 971.46 Gene names: USP15

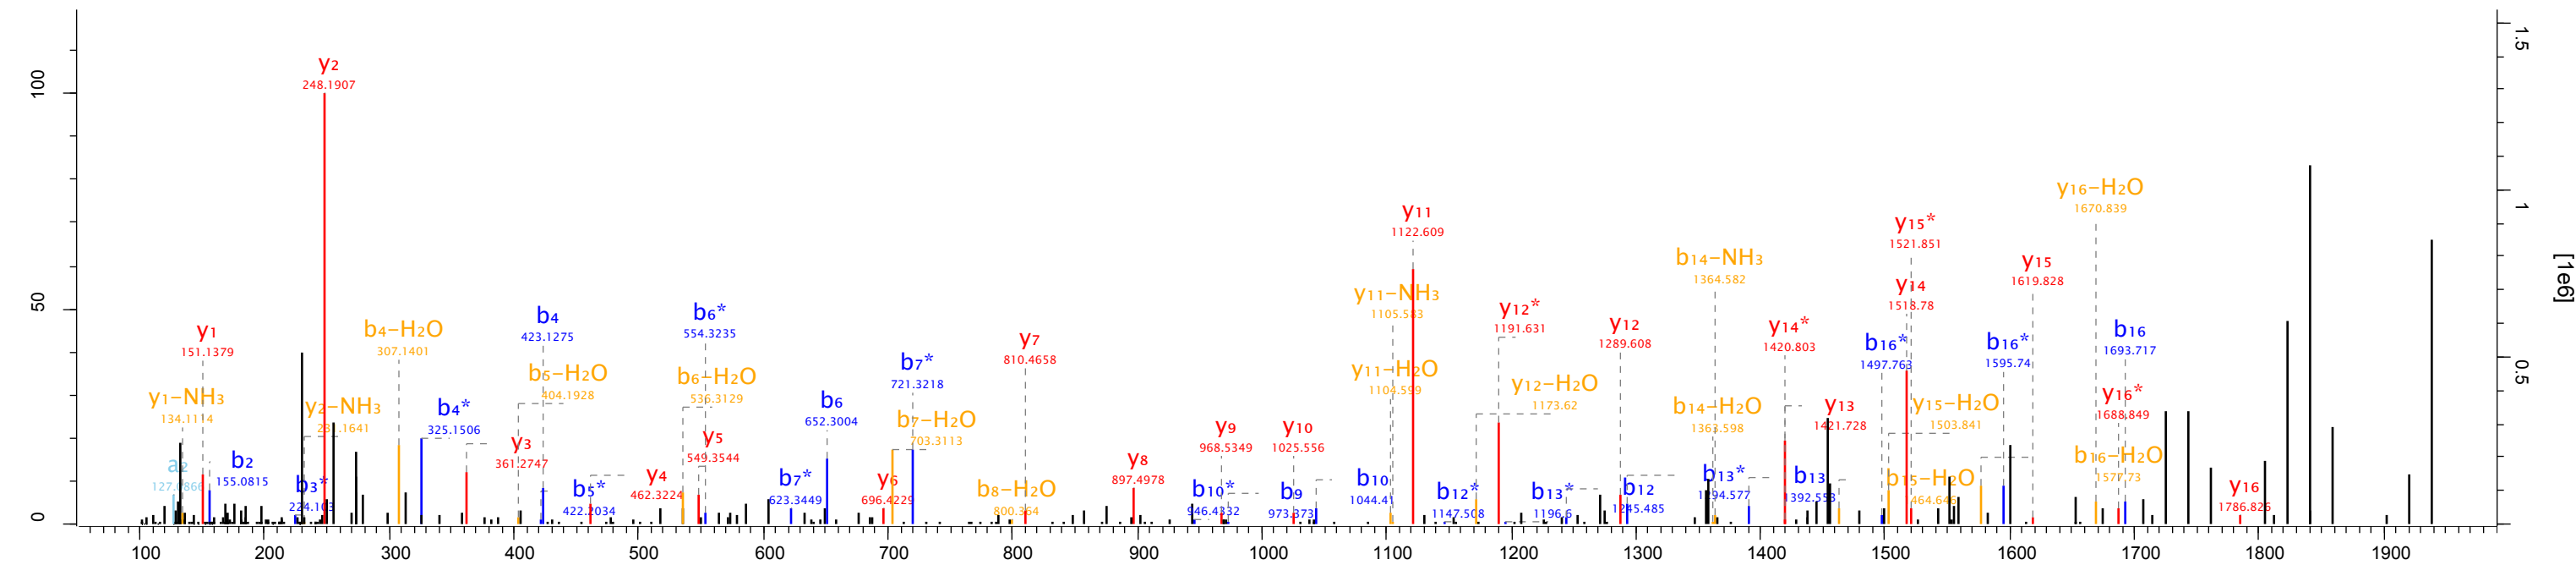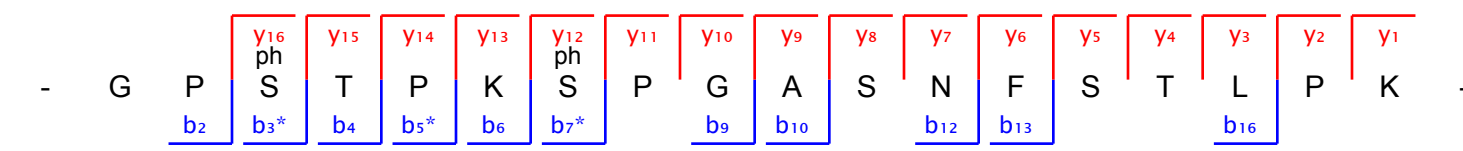

Raw file 20150814\_A375SR\_Phospho\_BR2\_03 Scan 13843 Method FTMS; HCD Score 117.88 m/z 742.98 Gene names PHLDB2

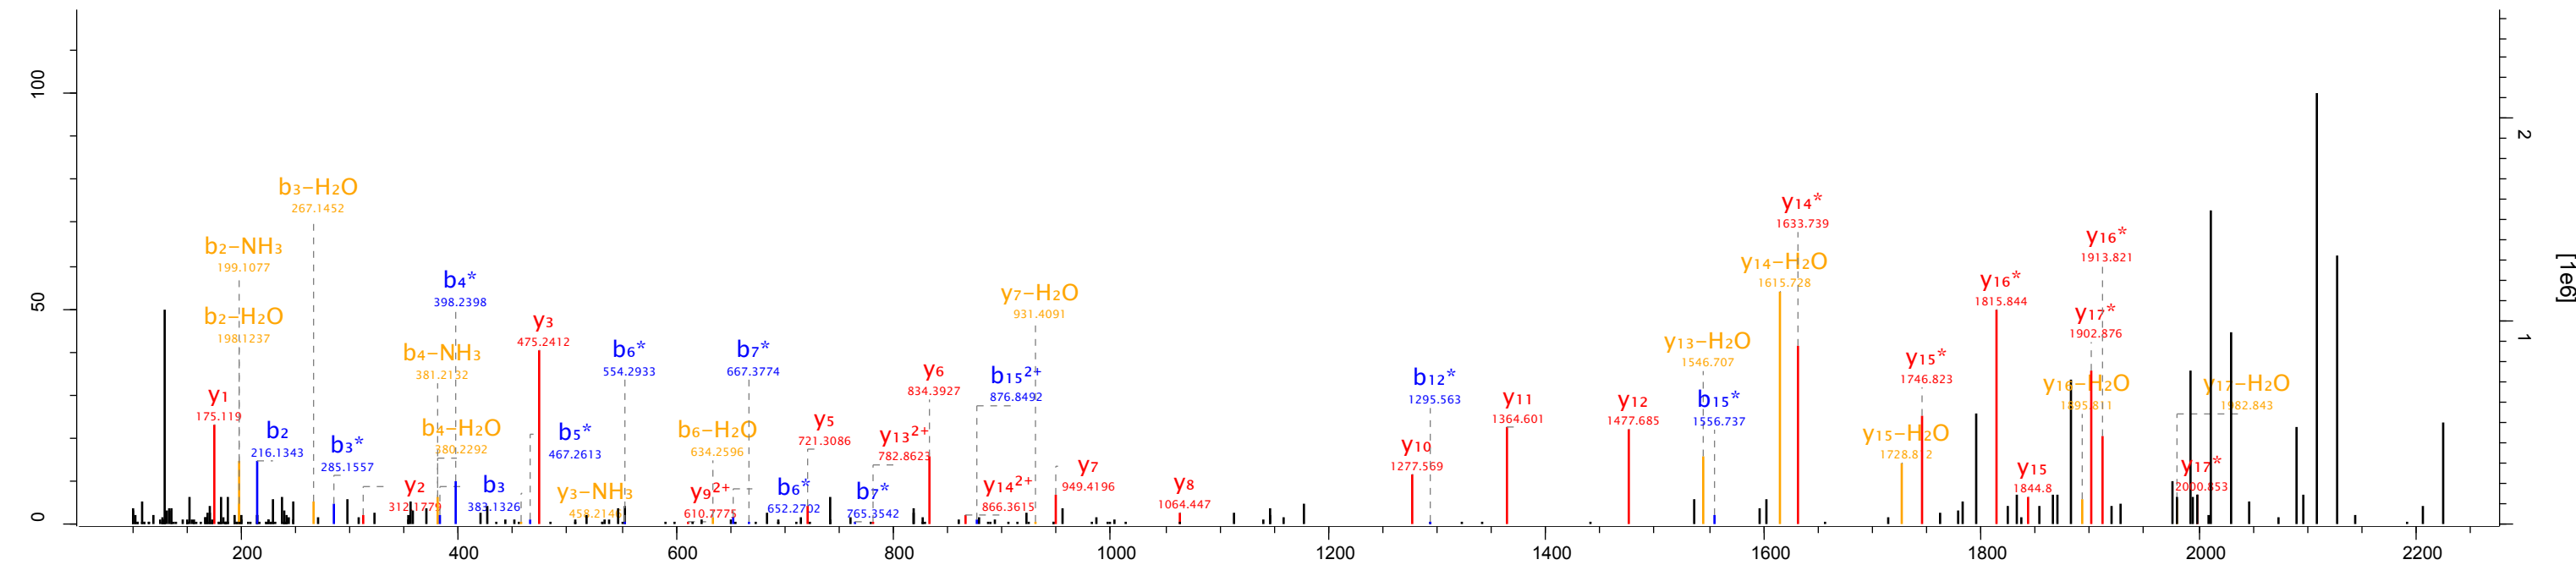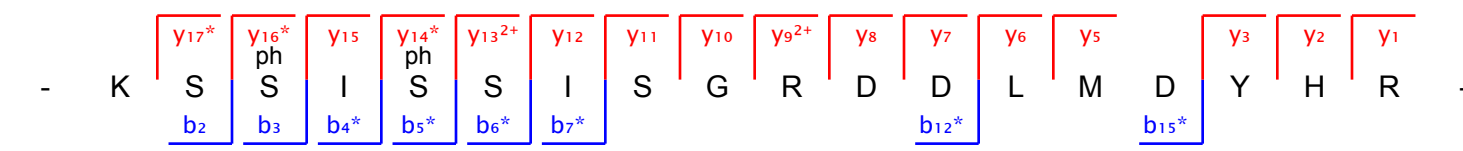



Raw file 20150814\_A375SR\_Phospho\_BR2\_03 Scan 14043 Method FTMS; HCD Score 139.46 m/z 973.93 Gene names ABCC4

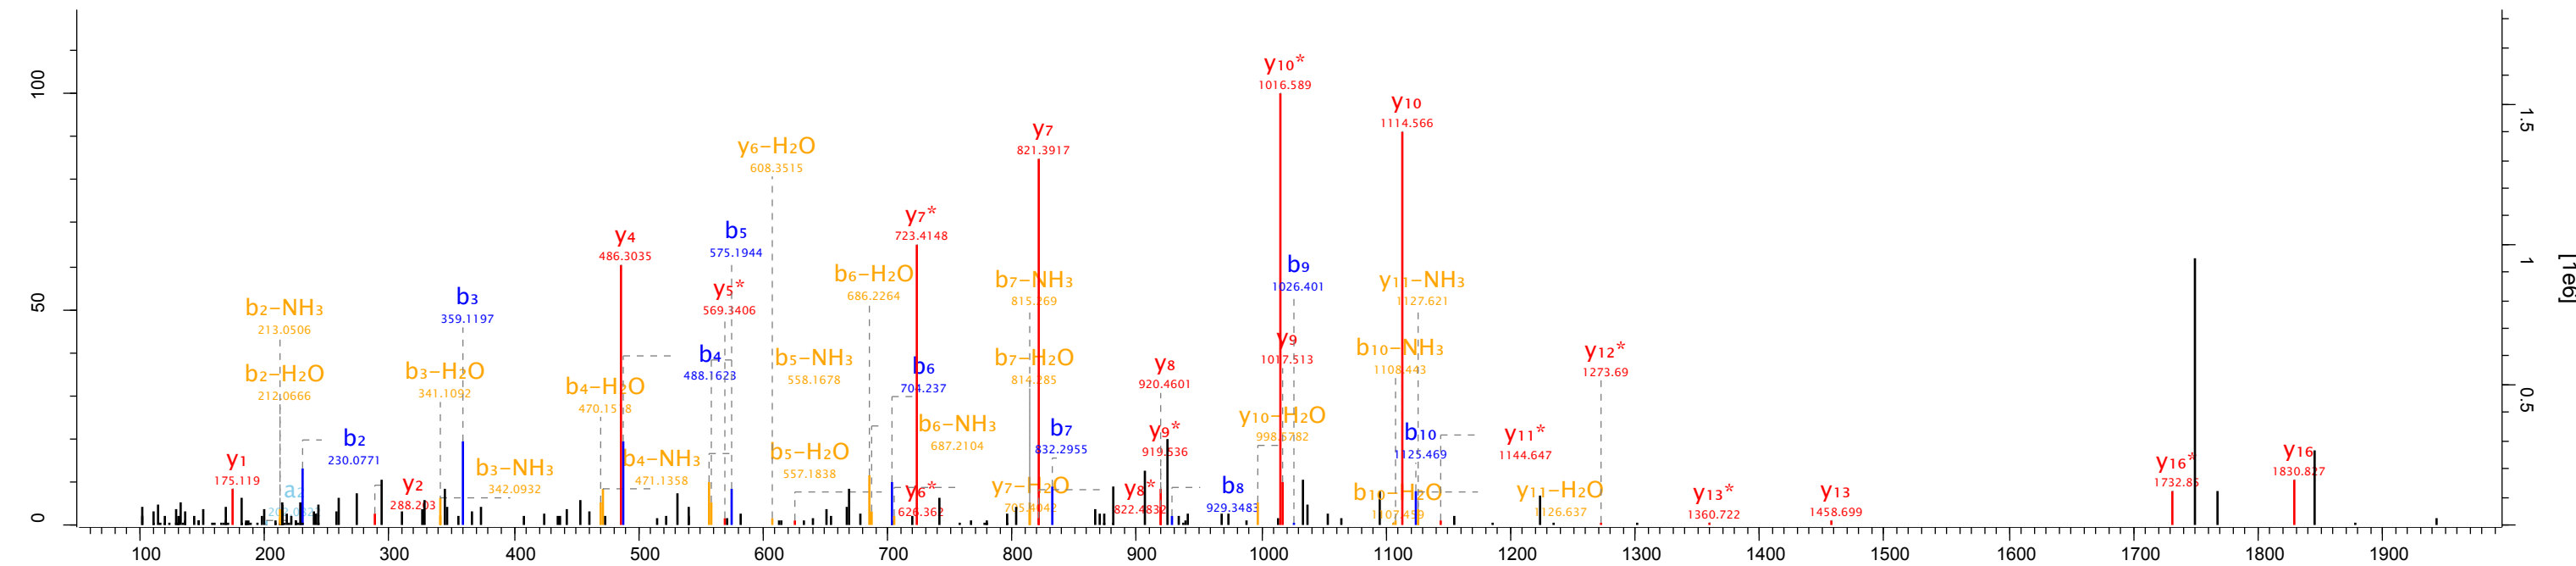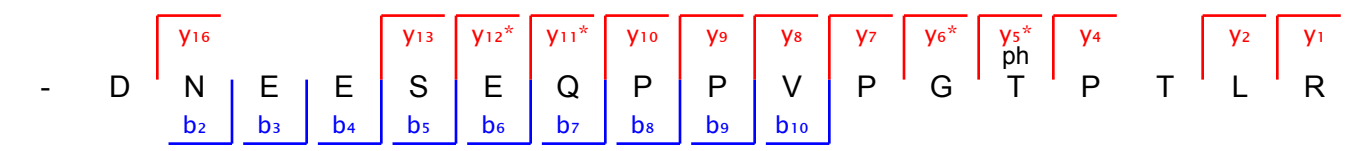

Raw file 20150814\_A375SR\_Phospho\_BR2\_03 Scan 14433 Method FTMS; HCD Score 68.39 m/z 682.32 Gene names PATL1

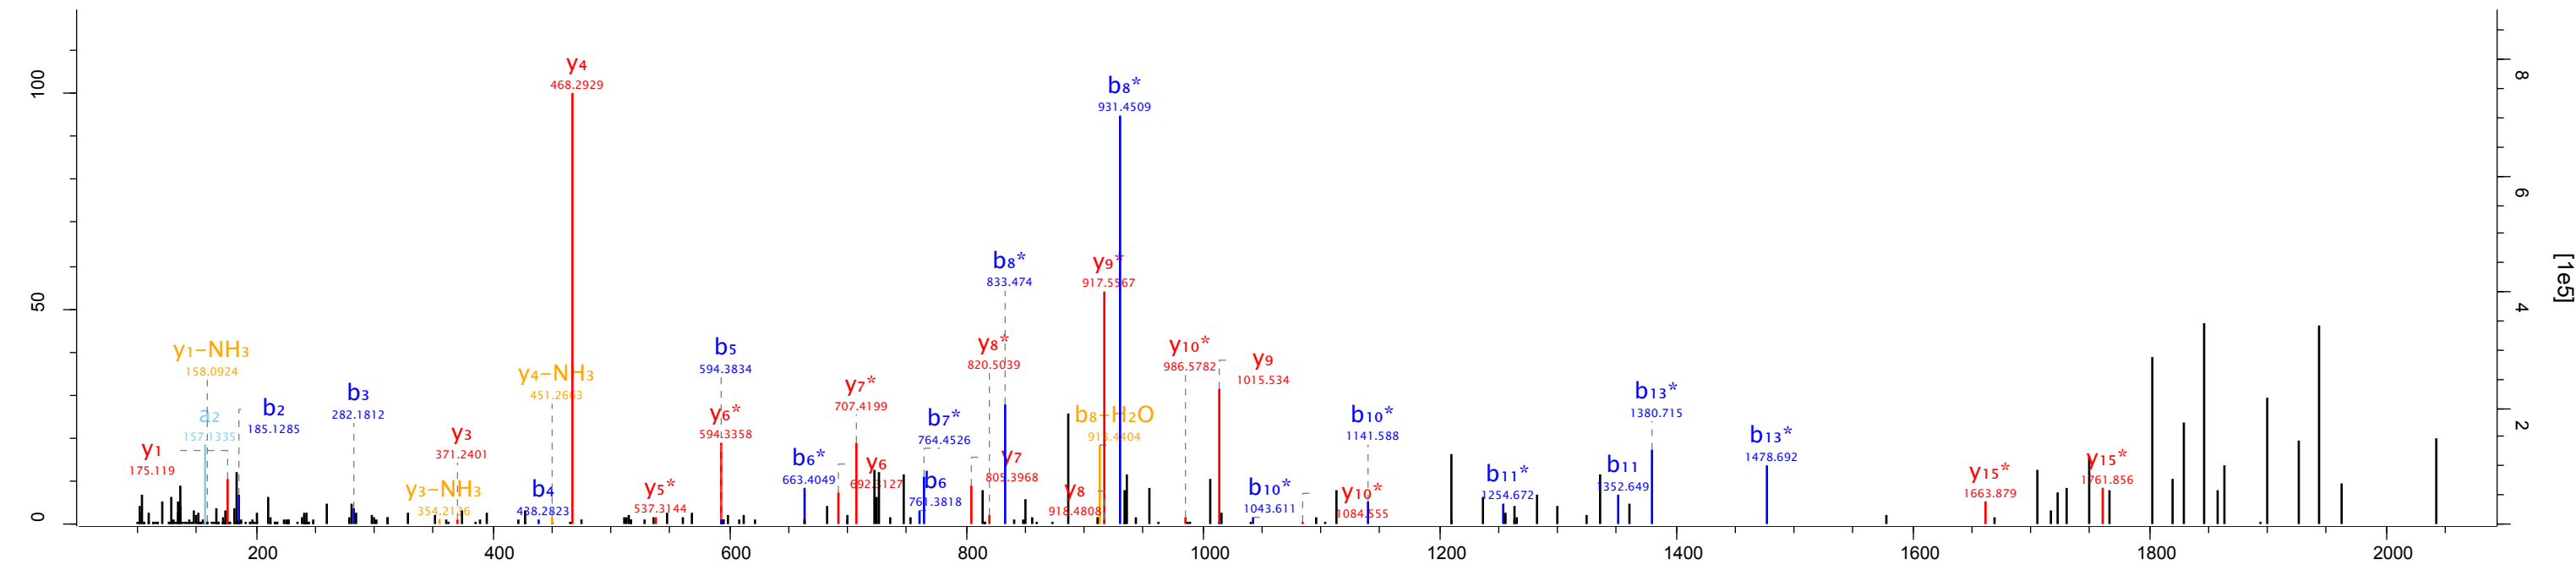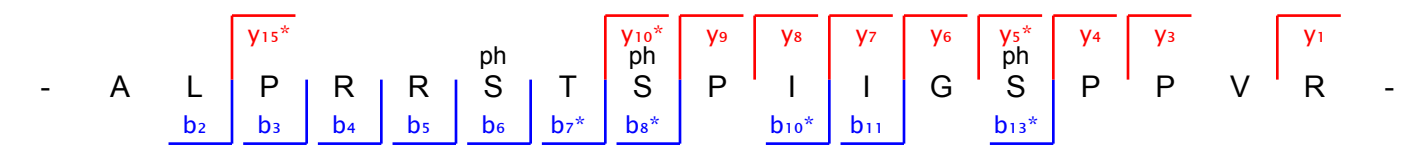

Raw file  
20150814\_A375SR\_Phospho\_BR2\_03

Scan 14483 Method FTMS; HCD Score 179.85 m/z 994.07 Gene names THOC5

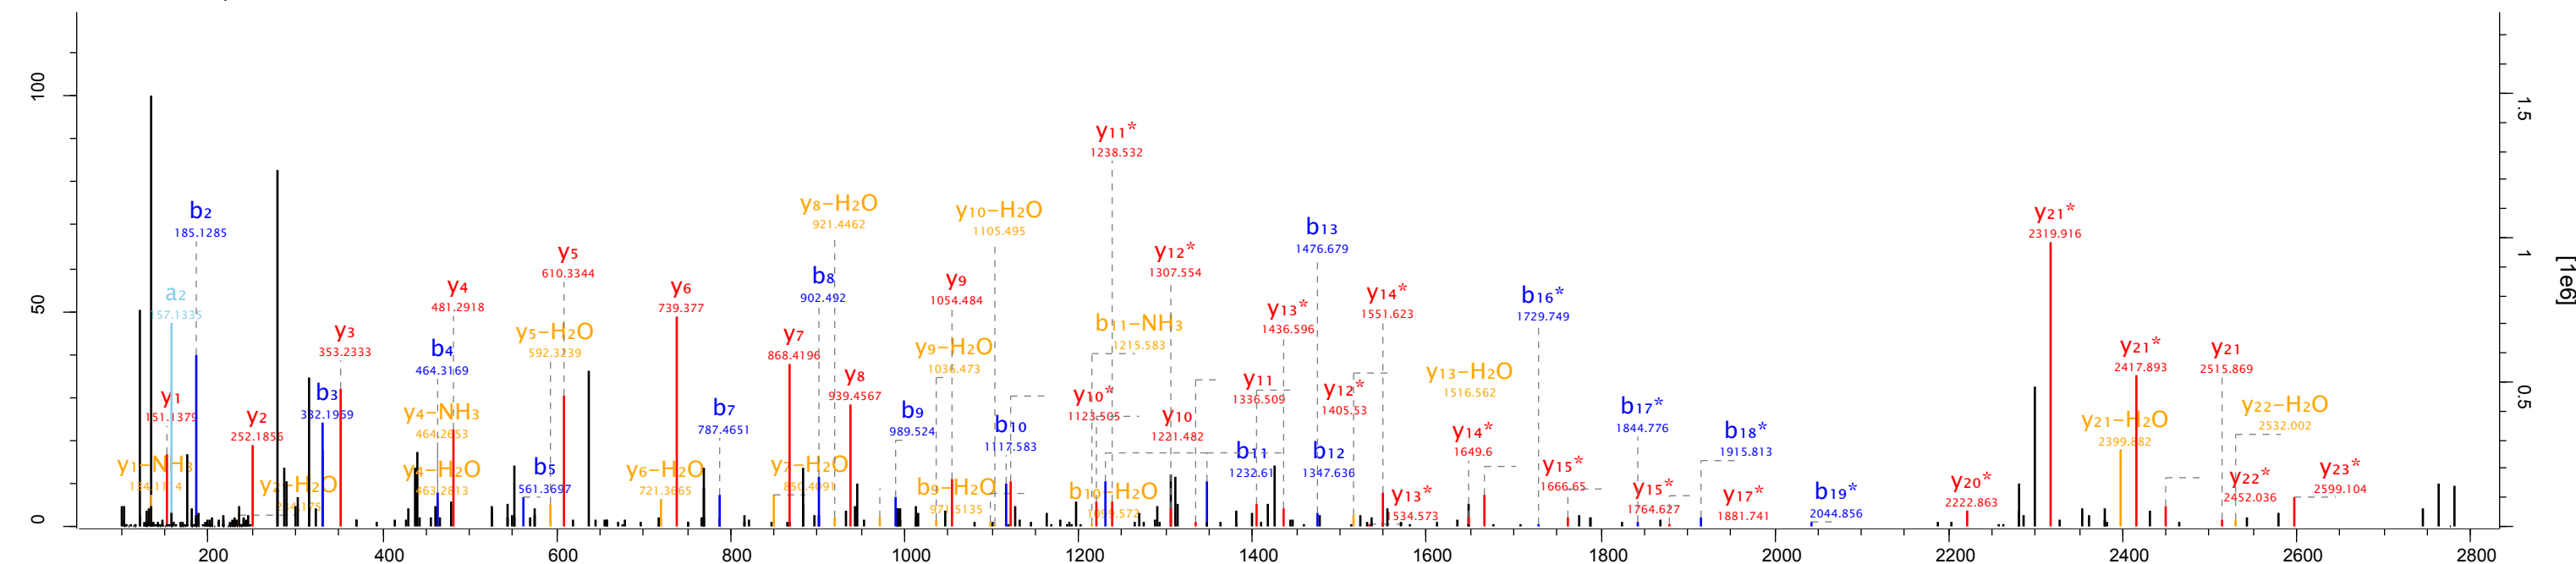

- A L F K P P E D S Q D D E S D ph S D ph S D A E E E Q T T K -

b<sub>2</sub> b<sub>3</sub> b<sub>4</sub> b<sub>5</sub> b<sub>7</sub> b<sub>8</sub> b<sub>9</sub> b<sub>10</sub> b<sub>11</sub> b<sub>12</sub> b<sub>13</sub> b<sub>16</sub>\* b<sub>17</sub>\* b<sub>18</sub>\* b<sub>19</sub>\*

y<sub>23</sub>\* y<sub>22</sub>\* y<sub>21</sub> y<sub>20</sub>\* y<sub>17</sub>\* y<sub>15</sub>\* y<sub>14</sub>\* y<sub>13</sub>\* y<sub>12</sub>\* y<sub>11</sub> y<sub>10</sub> ph y<sub>9</sub> y<sub>8</sub> y<sub>7</sub> y<sub>6</sub> y<sub>5</sub> y<sub>4</sub> y<sub>3</sub> y<sub>2</sub> y<sub>1</sub>

Raw file: 20150814\_A375SR\_Phospho\_BR2\_03  
 Scan: 14573 Method: FTMS; HCD Score: 77.22 m/z: 660.82 Gene names: SNX17

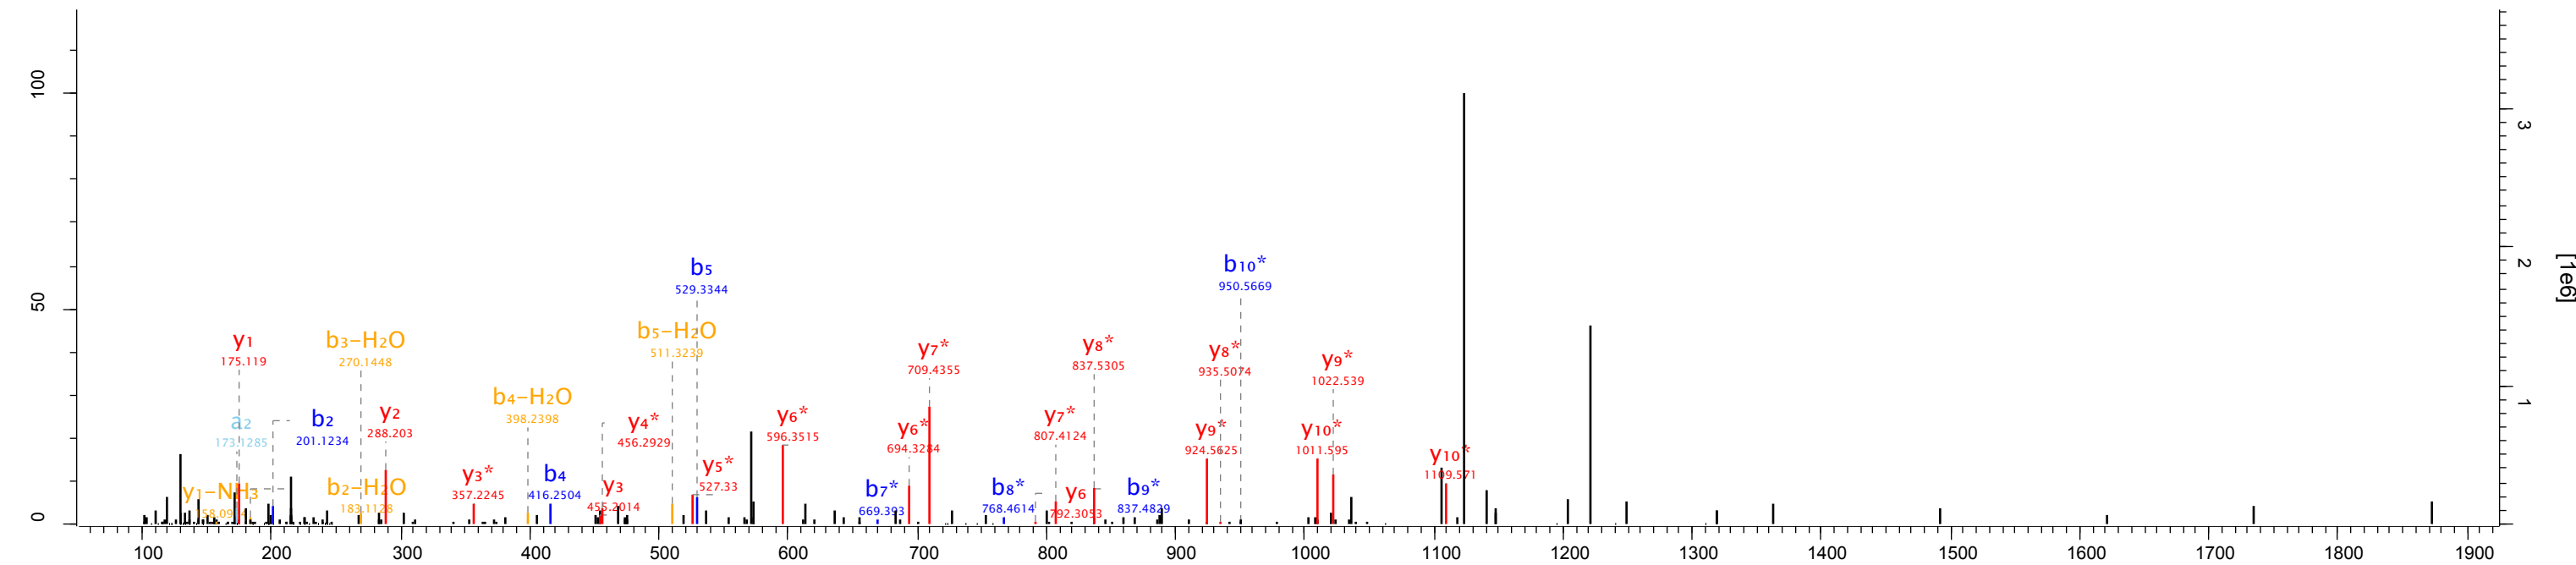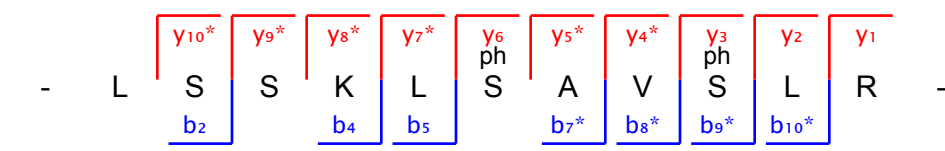

Raw file: 20150814\_A375SR\_Phospho\_BR2\_03  
 Scan: 14583 Method: FTMS; HCD Score: 94.71 m/z: 756.36 Gene names: TAF12

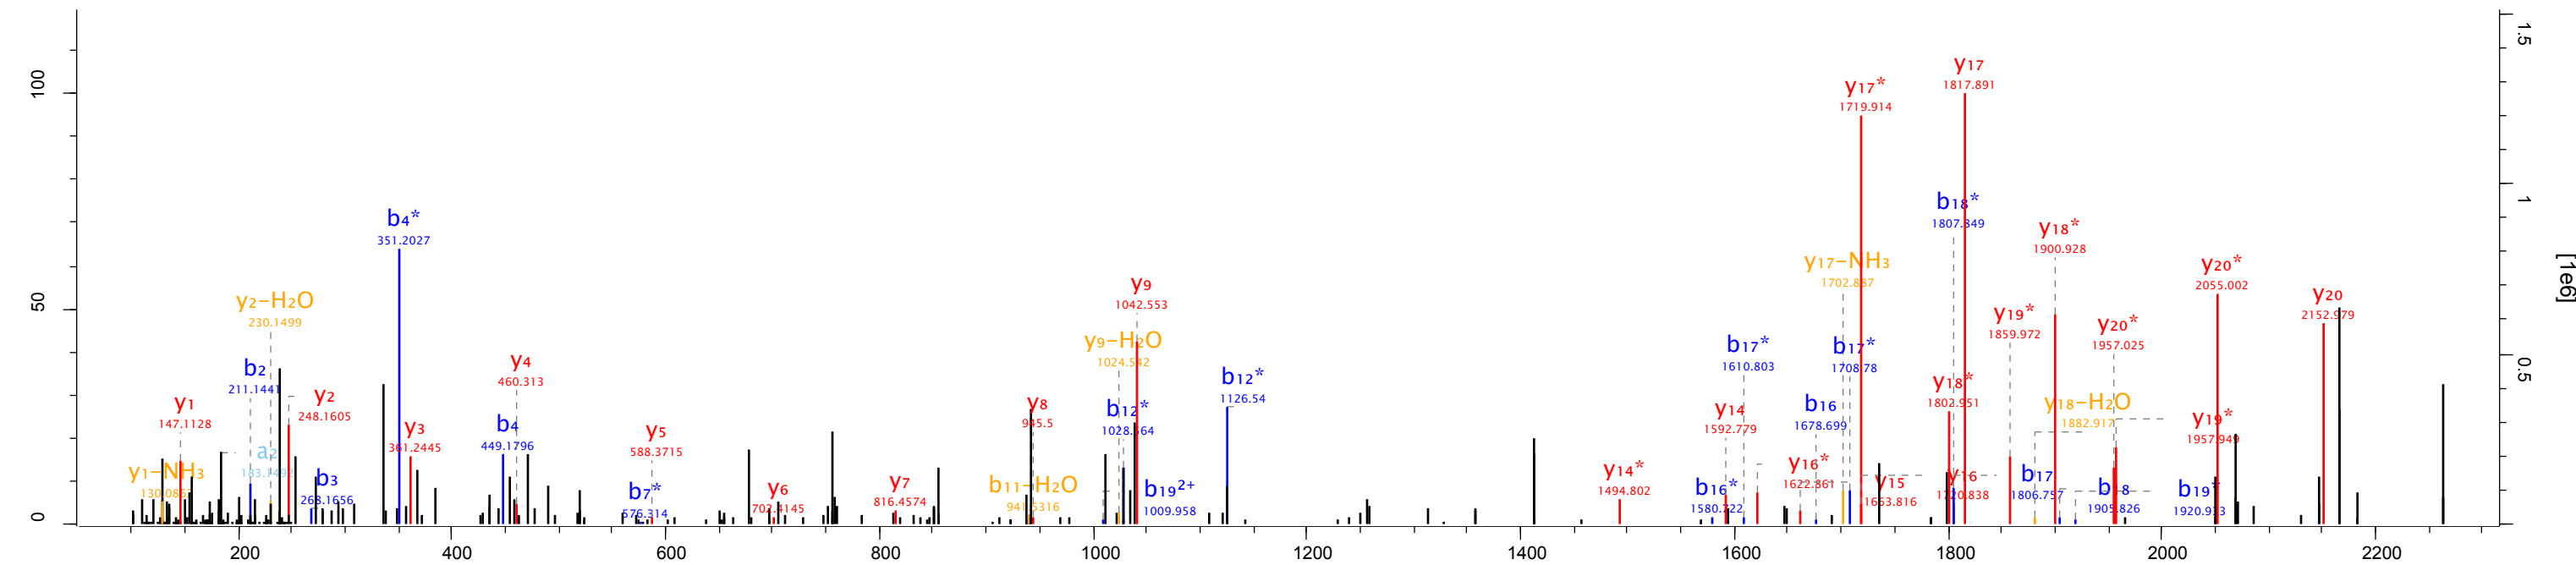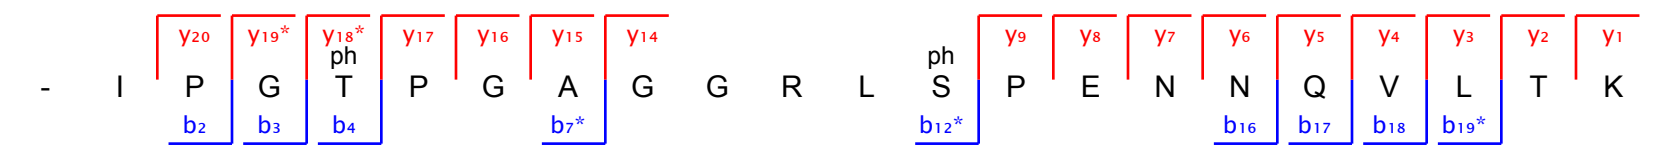

Raw file: 20150814\_A375SR\_Phospho\_BR2\_03  
 Scan: 14653  
 Method: FTMS; HCD  
 Score: 132.49  
 m/z: 1051.13  
 Gene names: NES

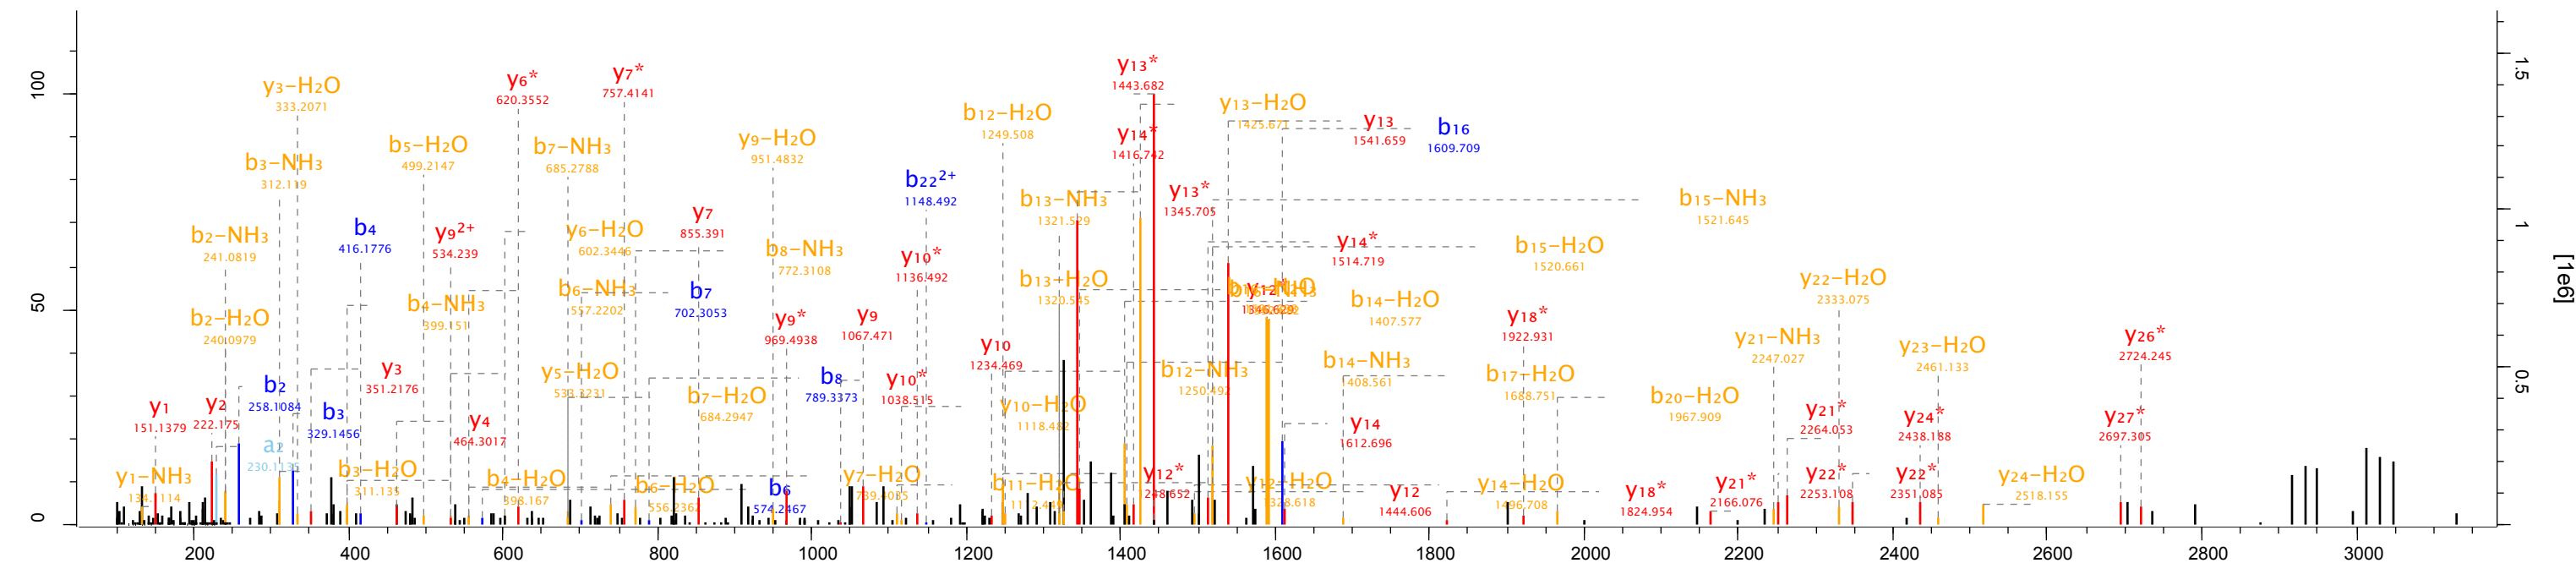

- Q E A S T G Q S P E D H A S L A P P L S P D H S S L E A K -

Fragmentation mapping (b-ions in blue, y-ions in red):

- b2: E
- b3: A
- b4: S
- b6: G
- b7: Q
- b8: S
- b16: A
- b22<sup>2+</sup>: D
- y1: K
- y2: E
- y3: L
- y4: S
- y6<sup>ph</sup>: S
- y7: H
- y9: P
- y10<sup>ph</sup>: S
- y12: P
- y13: P
- y14: A
- y18<sup>\*</sup>: H
- y21<sup>\*</sup>: S
- y22<sup>\*</sup>: S
- y24<sup>\*</sup>: G
- y26<sup>\*</sup>: A
- y27<sup>\*</sup>: E

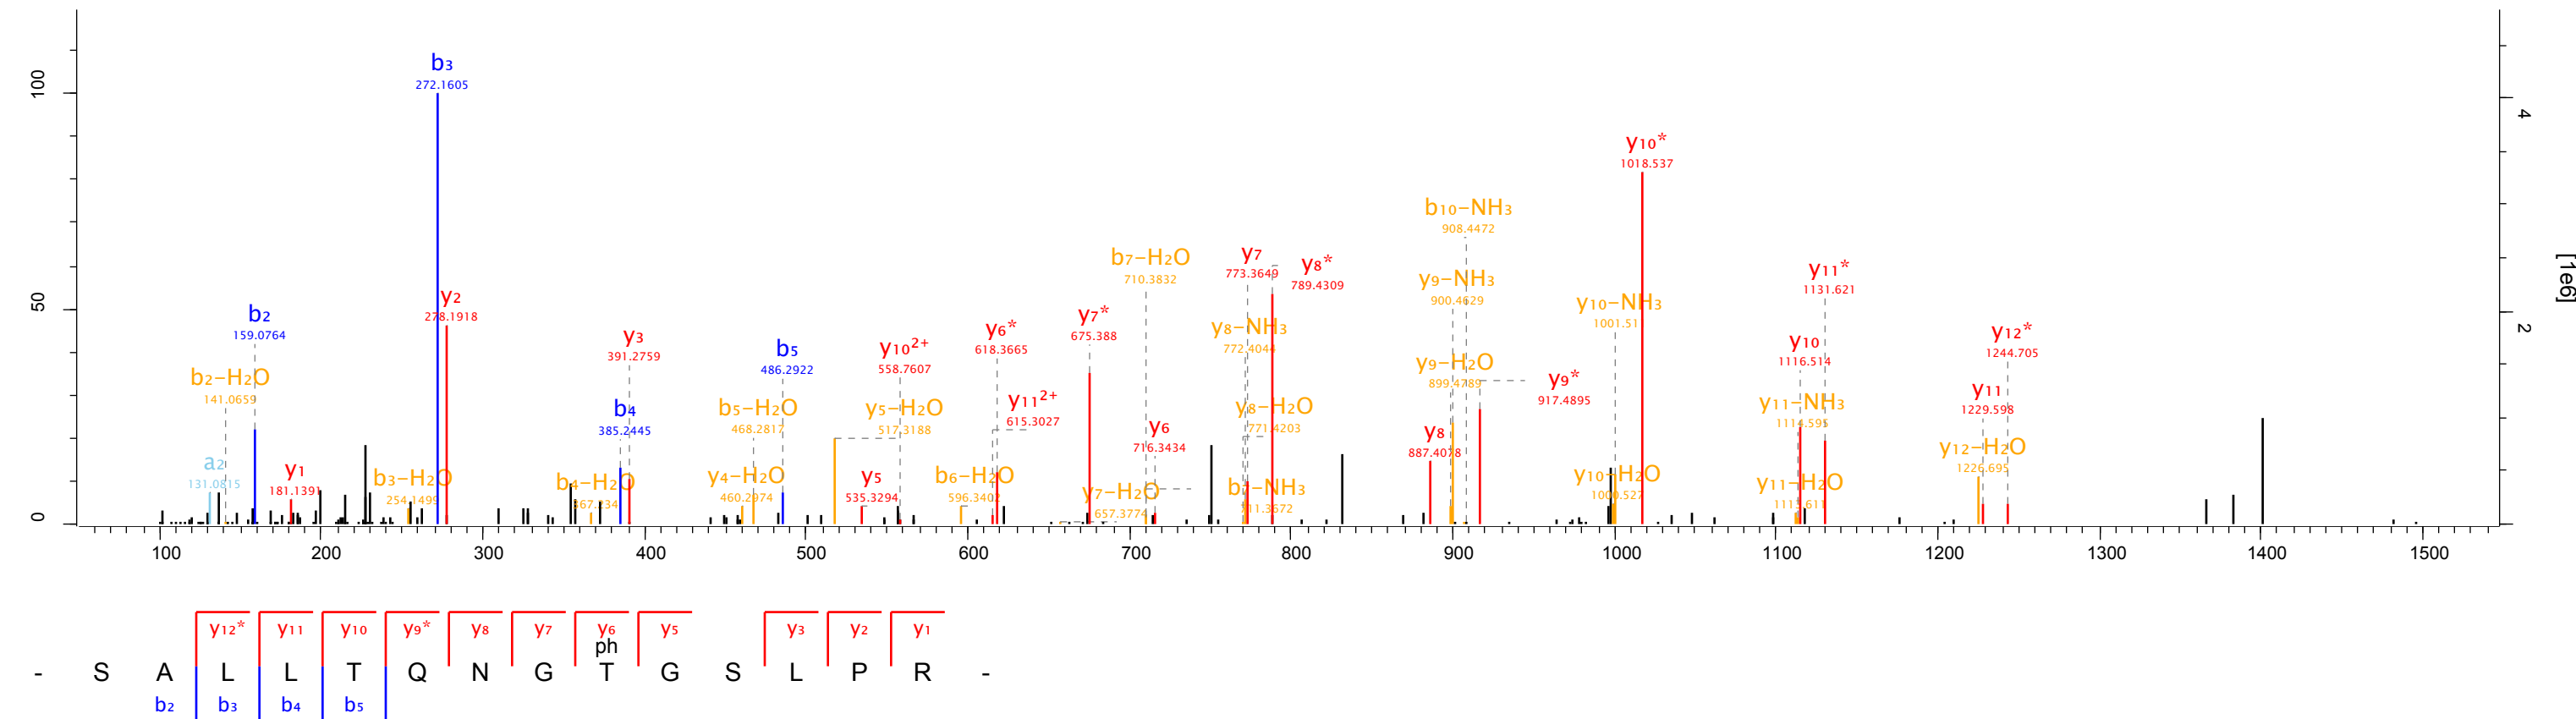

Raw file 20150814\_A375SR\_Phospho\_BR2\_03 Scan 14813 Method FTMS; HCD Score 169.44 m/z 491.23 Gene names ERFFI1

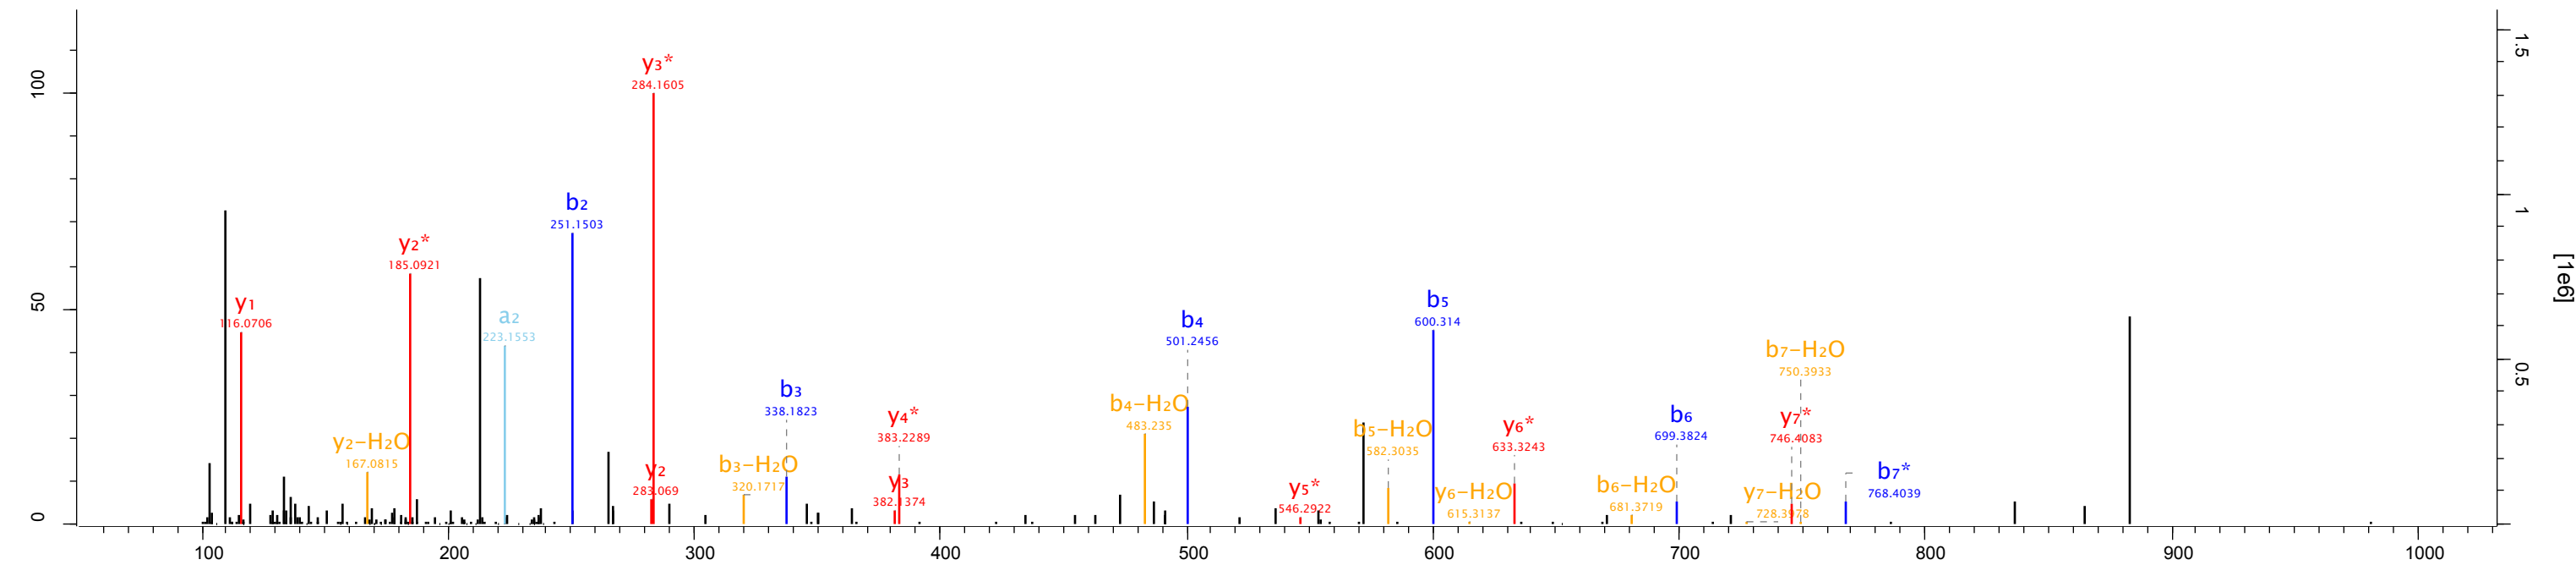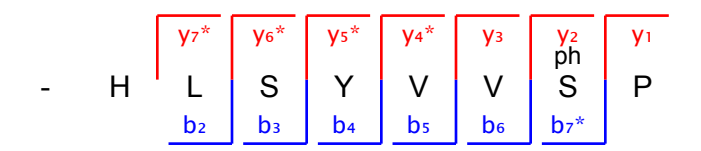



Raw file: 20150814\_A375SR\_Phospho\_BR2\_03  
 Scan: 14833 Method: FTMS; HCD Score: 291.15 m/z: 759.32 Gene names: FAM21C;FAM21A

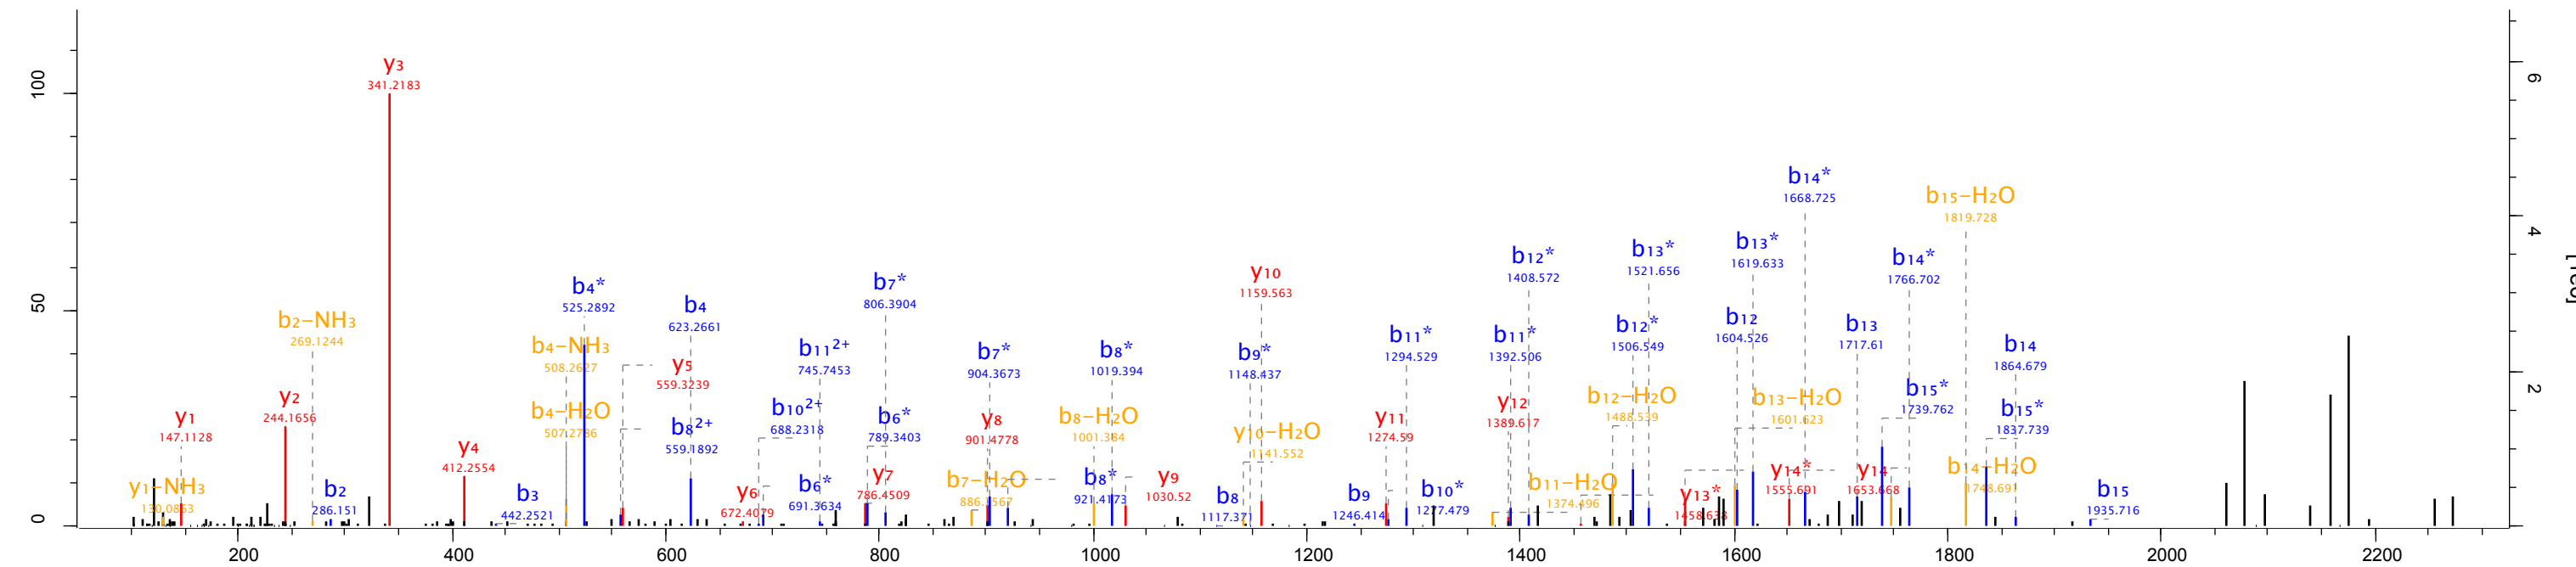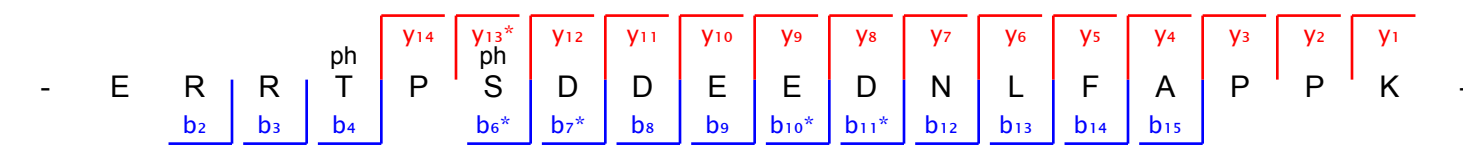

Raw file: 20150814\_A375SR\_Phospho\_BR2\_03  
 Scan: 14933 Method: FTMS; HCD Score: 69.09 m/z: 593.26 Gene names: NCOA5

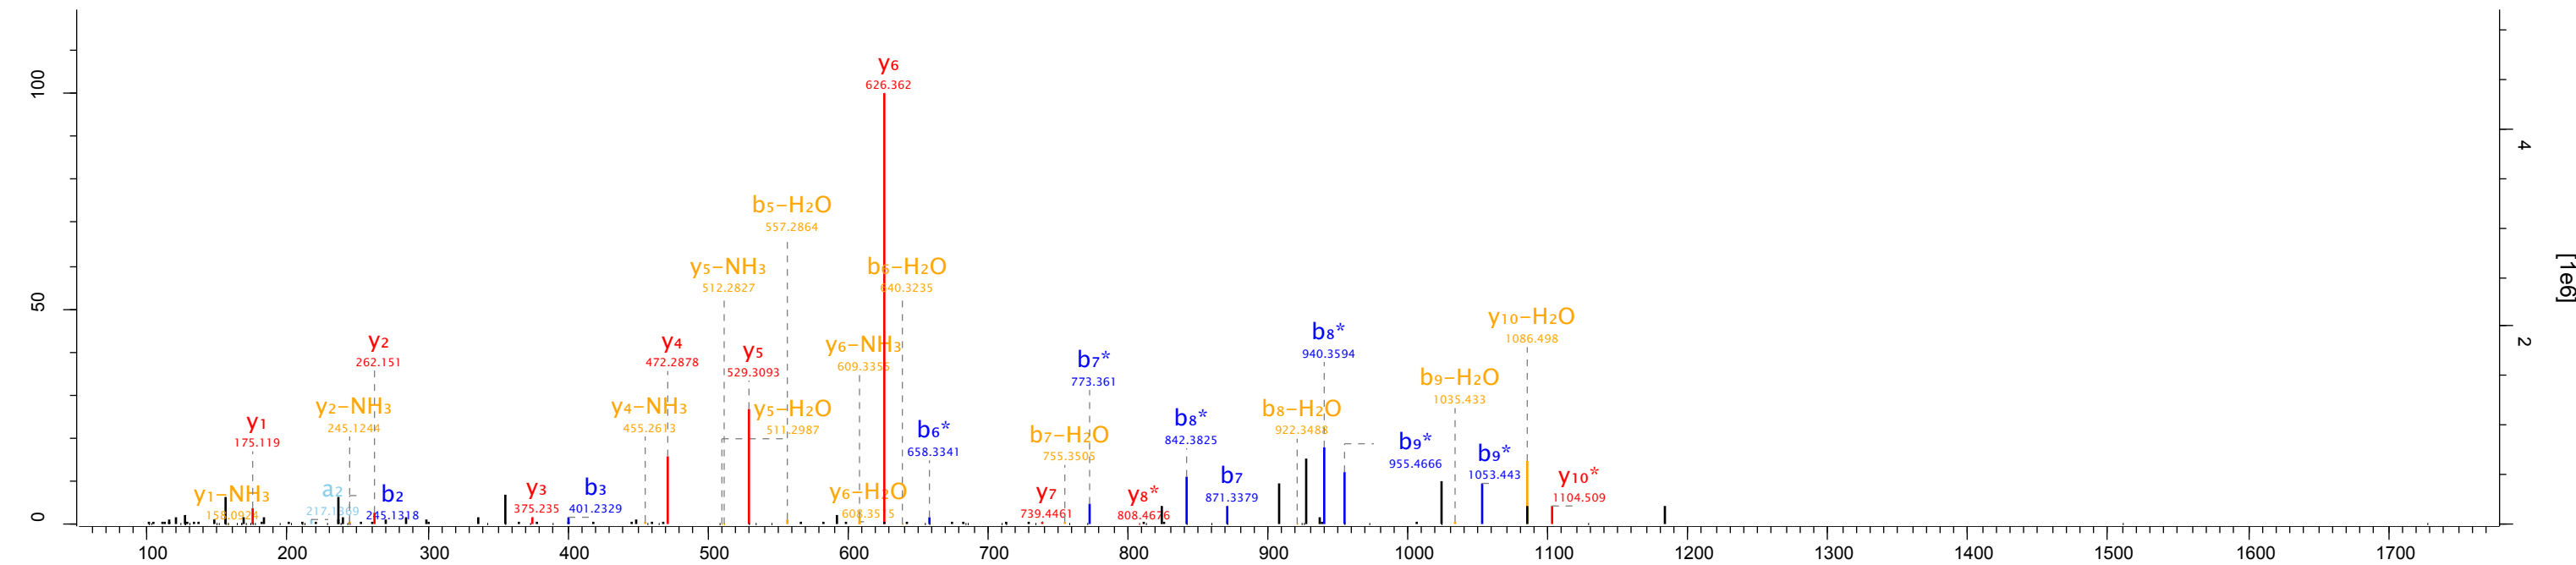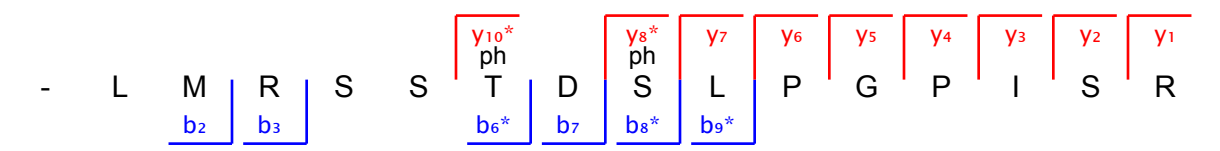

Raw file 20150814\_A375SR\_Phospho\_BR2\_03 Scan 14973 Method FTMS; HCD Score 91.59 m/z 926.11 Gene names PRKAR2A

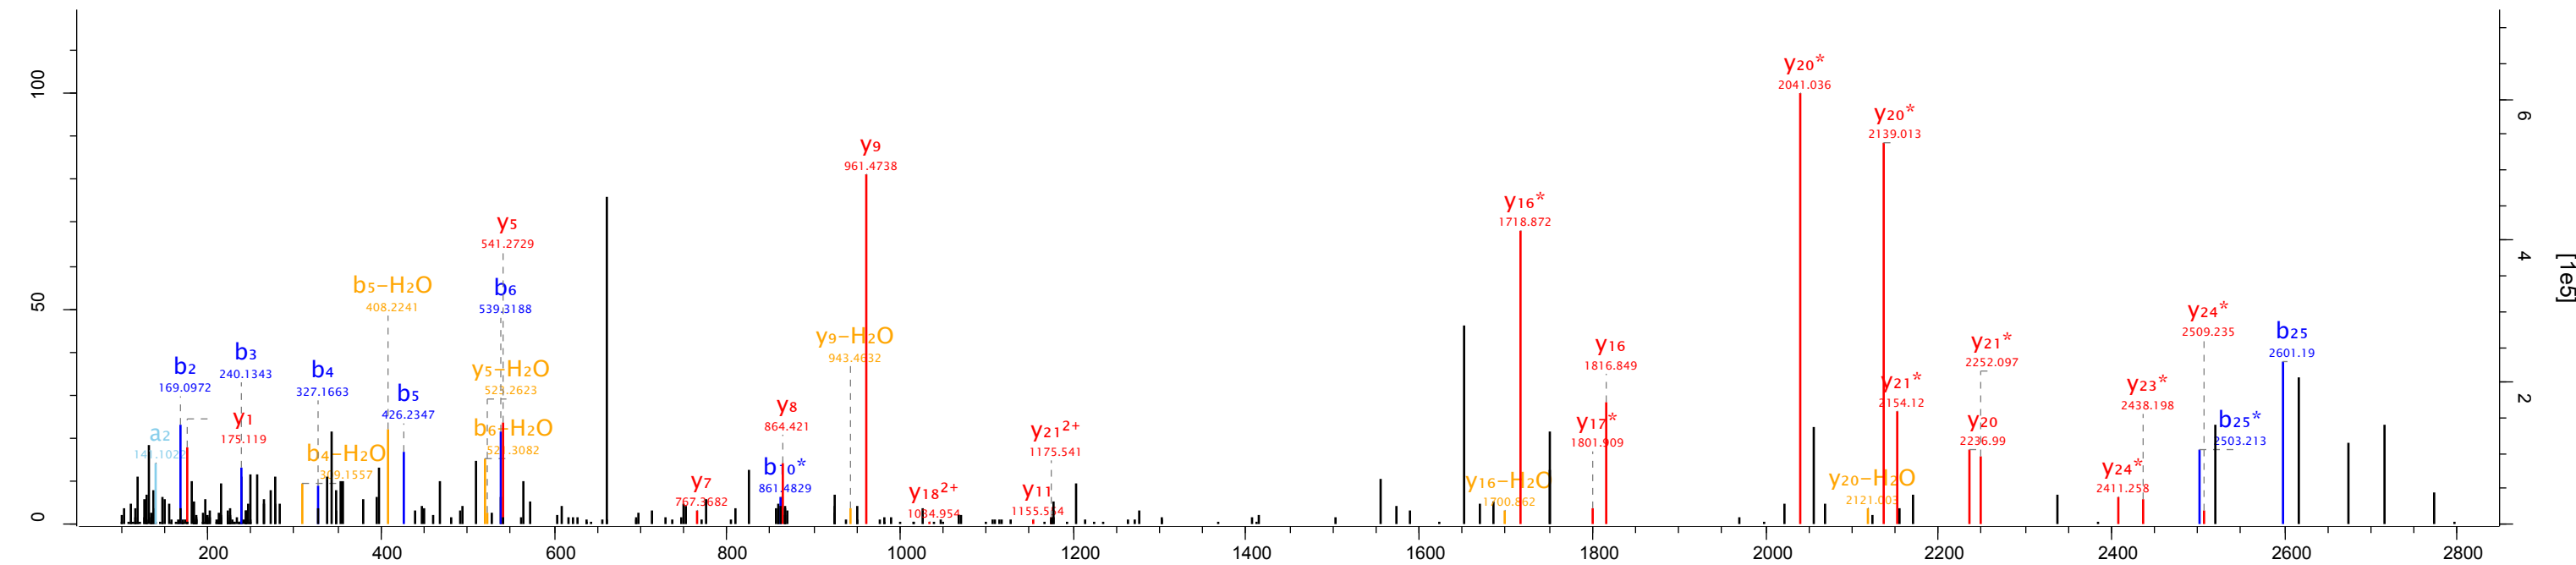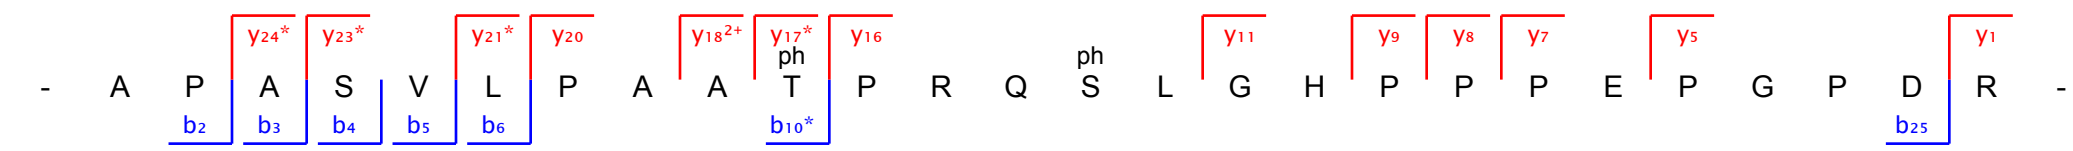

Raw file: 20150814\_A375SR\_Phospho\_BR2\_03  
 Scan: 15023 Method: FTMS; HCD Score: 311.46 m/z: 1393 Gene names: HNRNPC

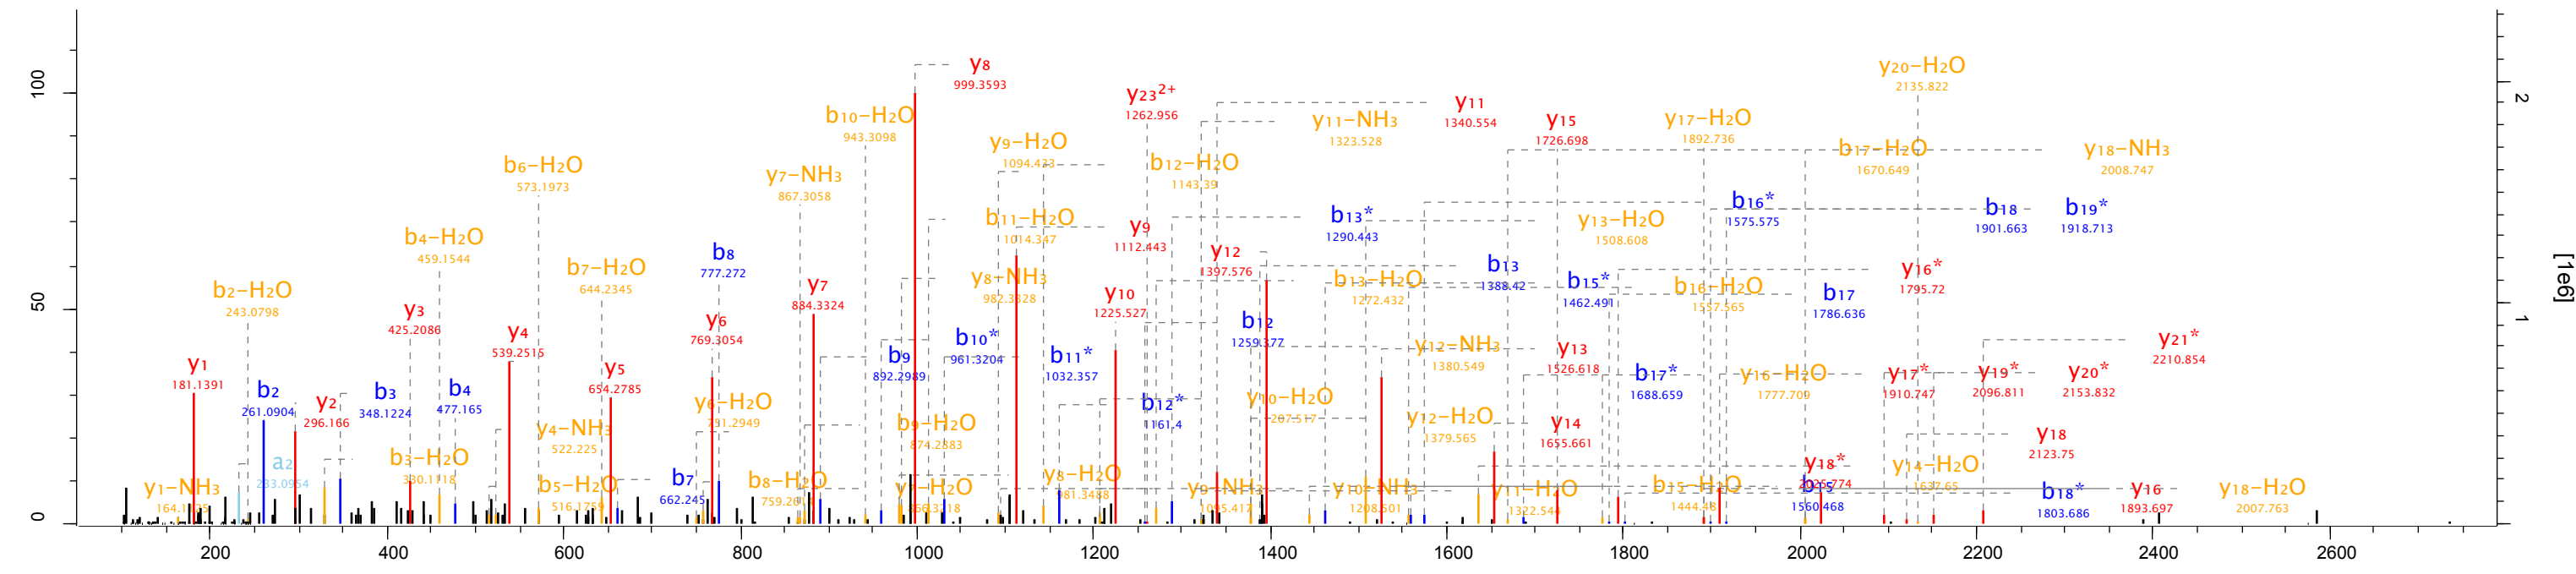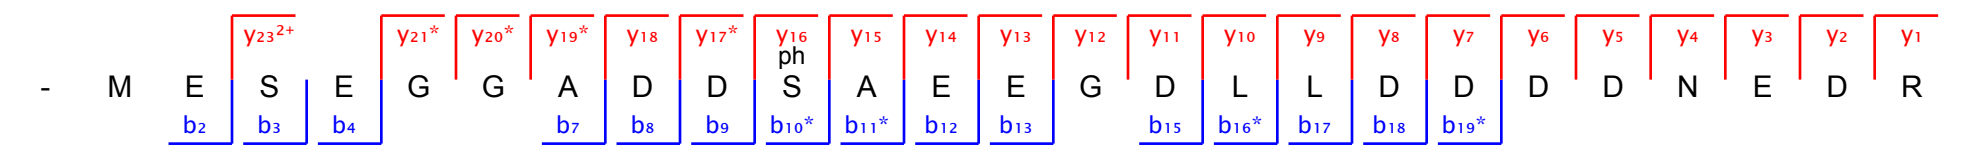

Raw file: 20150814\_A375SR\_Phospho\_BR2\_03  
 Scan: 15123 Method: FTMS; HCD Score: 300.09 m/z: 1218.53 Gene names: TJP1

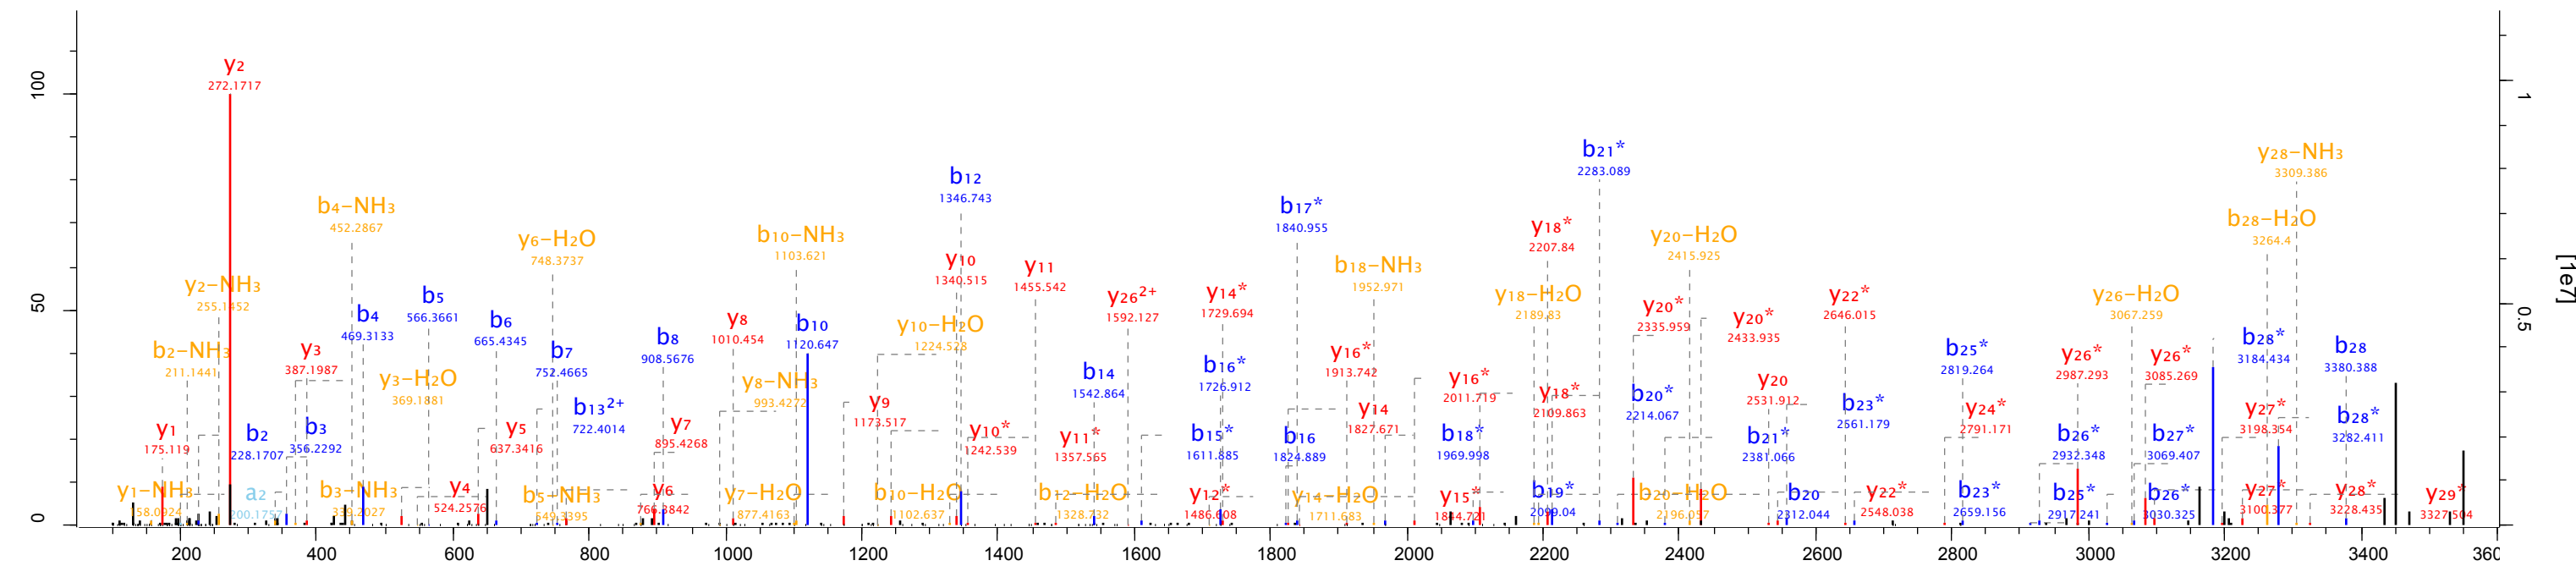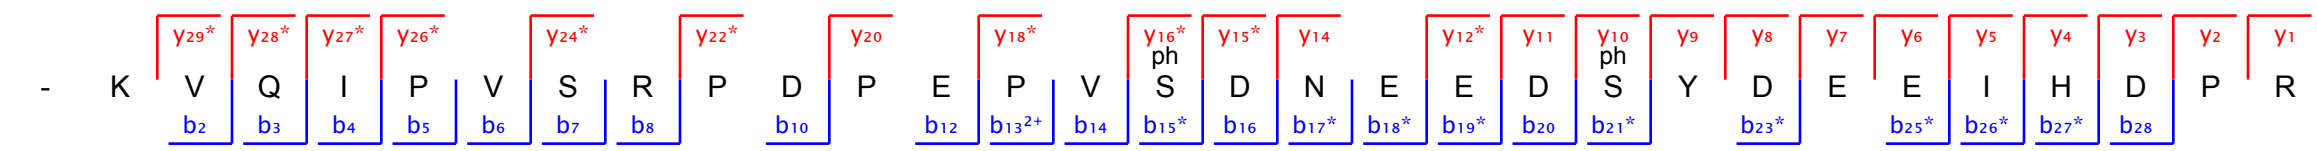

Raw file Scan Method Score m/z Gene names

20150814\_A375SR\_Phospho\_BR2\_03 15313 FTMS; HCD 150.17 713 RPS6KA1

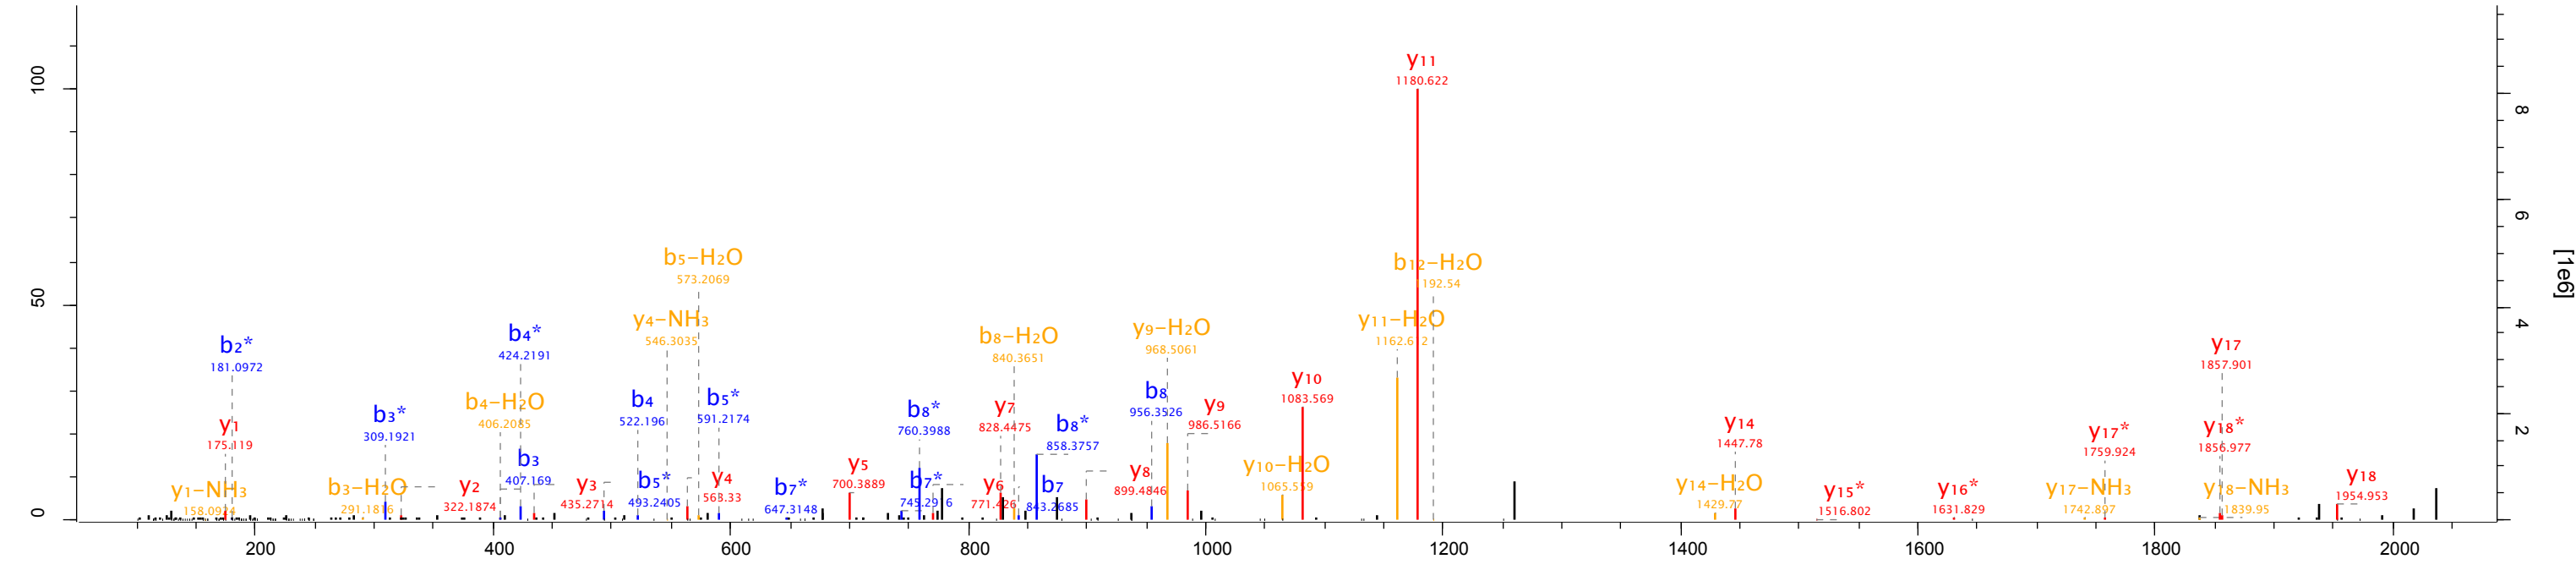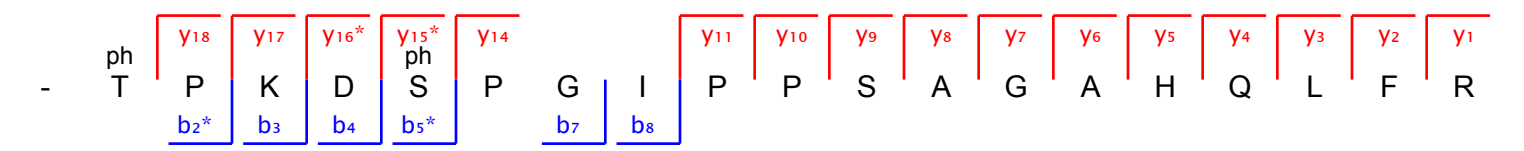

Raw file 20150814\_A375SR\_Phospho\_BR2\_03 Scan 15353 Method FTMS; HCD Score 126.68 m/z 903.06 Gene names IRS2

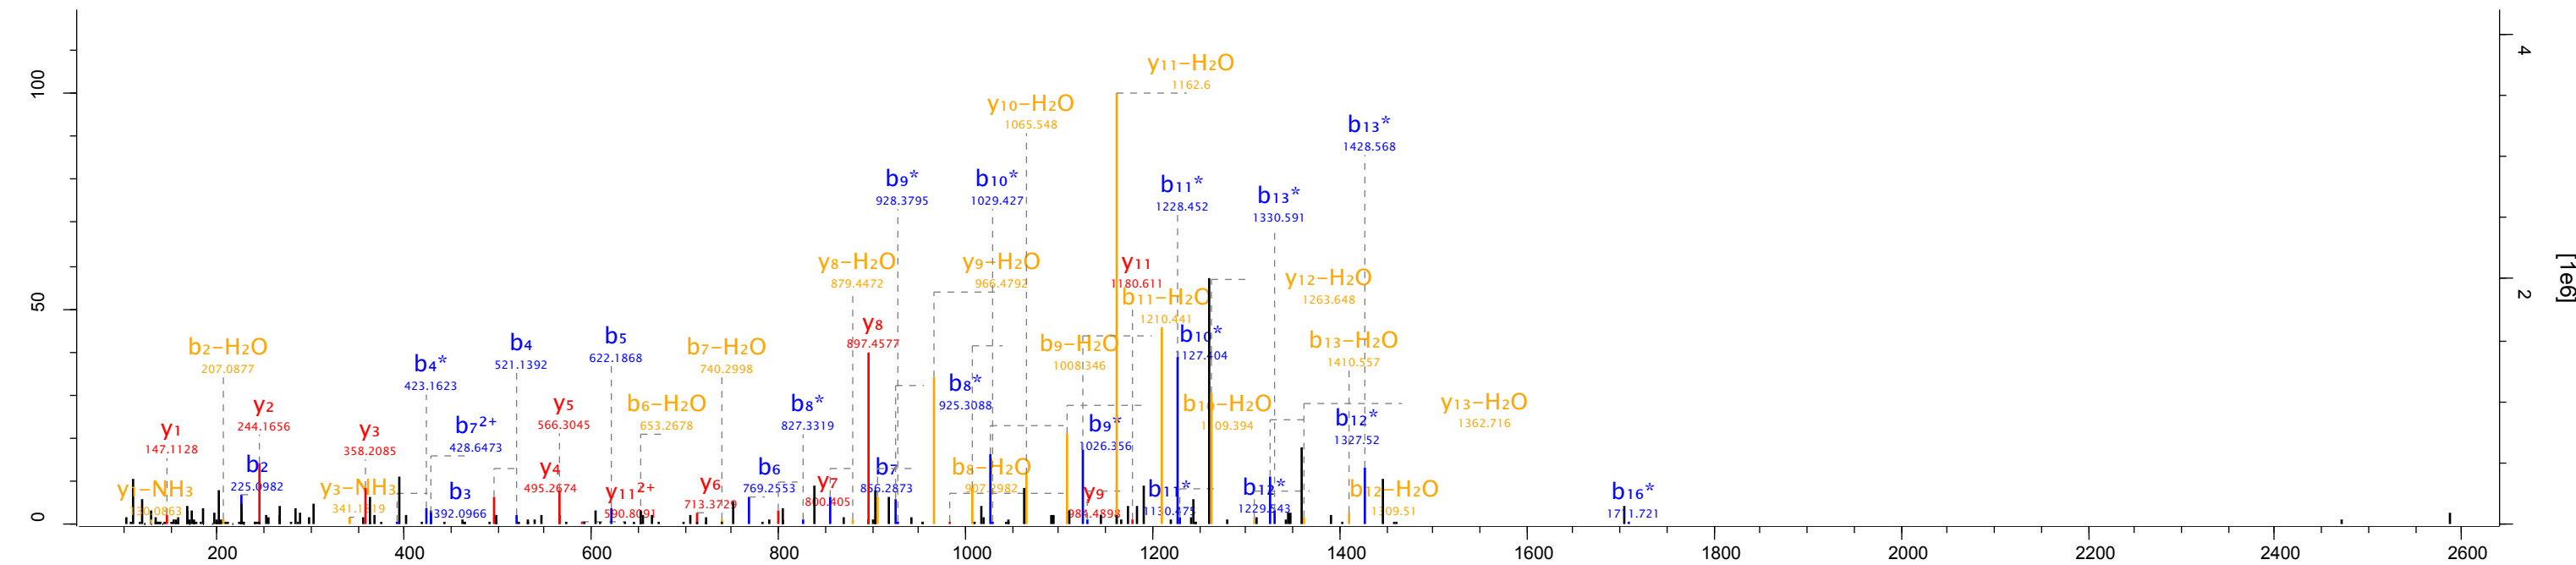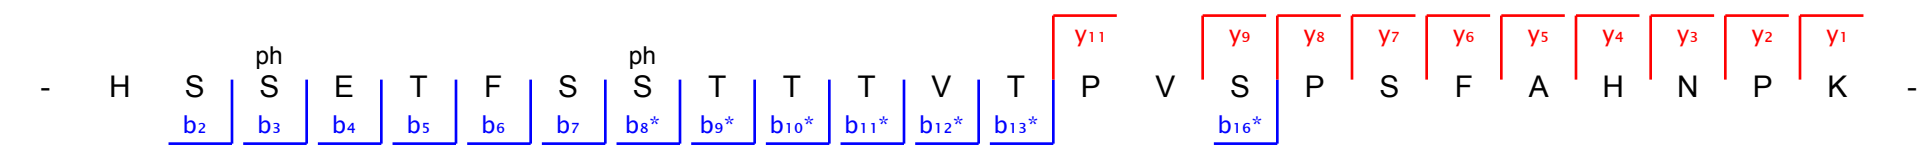

Raw file 20150814\_A375SR\_Phospho\_BR2\_03 Scan 15493 Method FTMS; HCD Score 148.45 m/z 1035.79 Gene names CT45A3;CT45A1

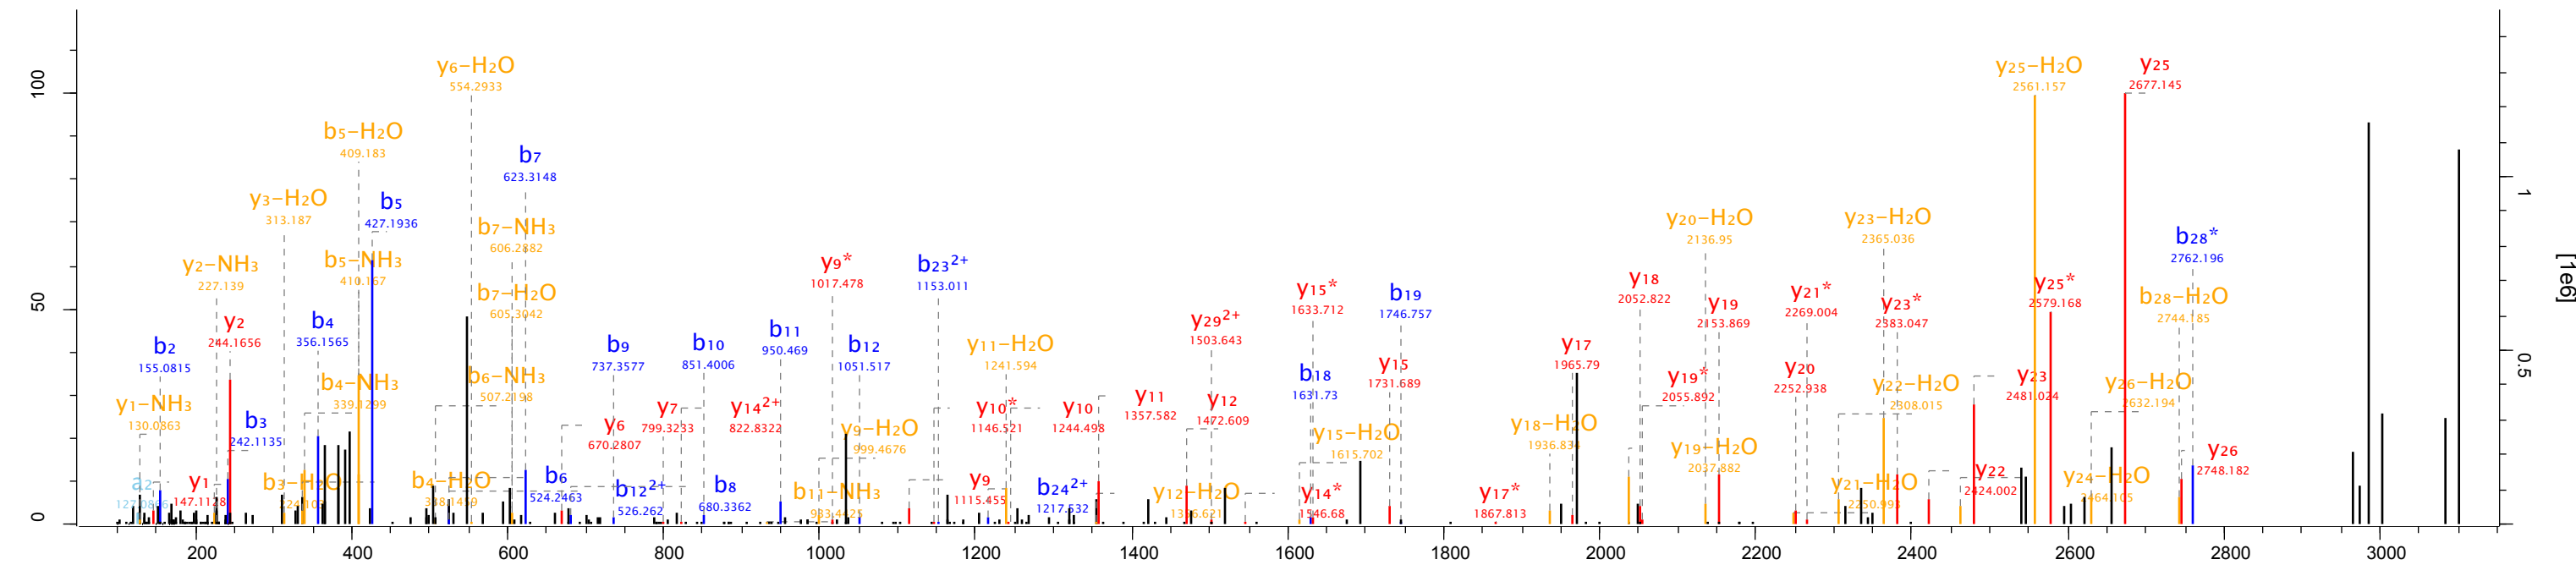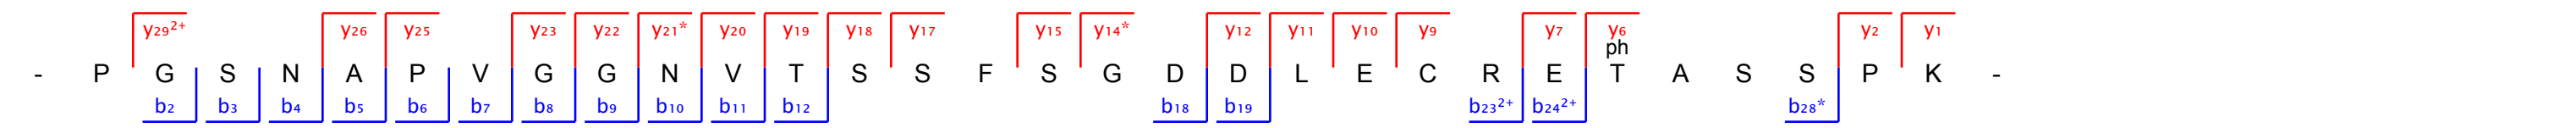



Raw file  
 20150814\_A375SR\_Phospho\_BR2\_03  
 Scan 15503 Method FTMS; HCD Score 124.25 m/z 836.88 Gene names CAMSAP2

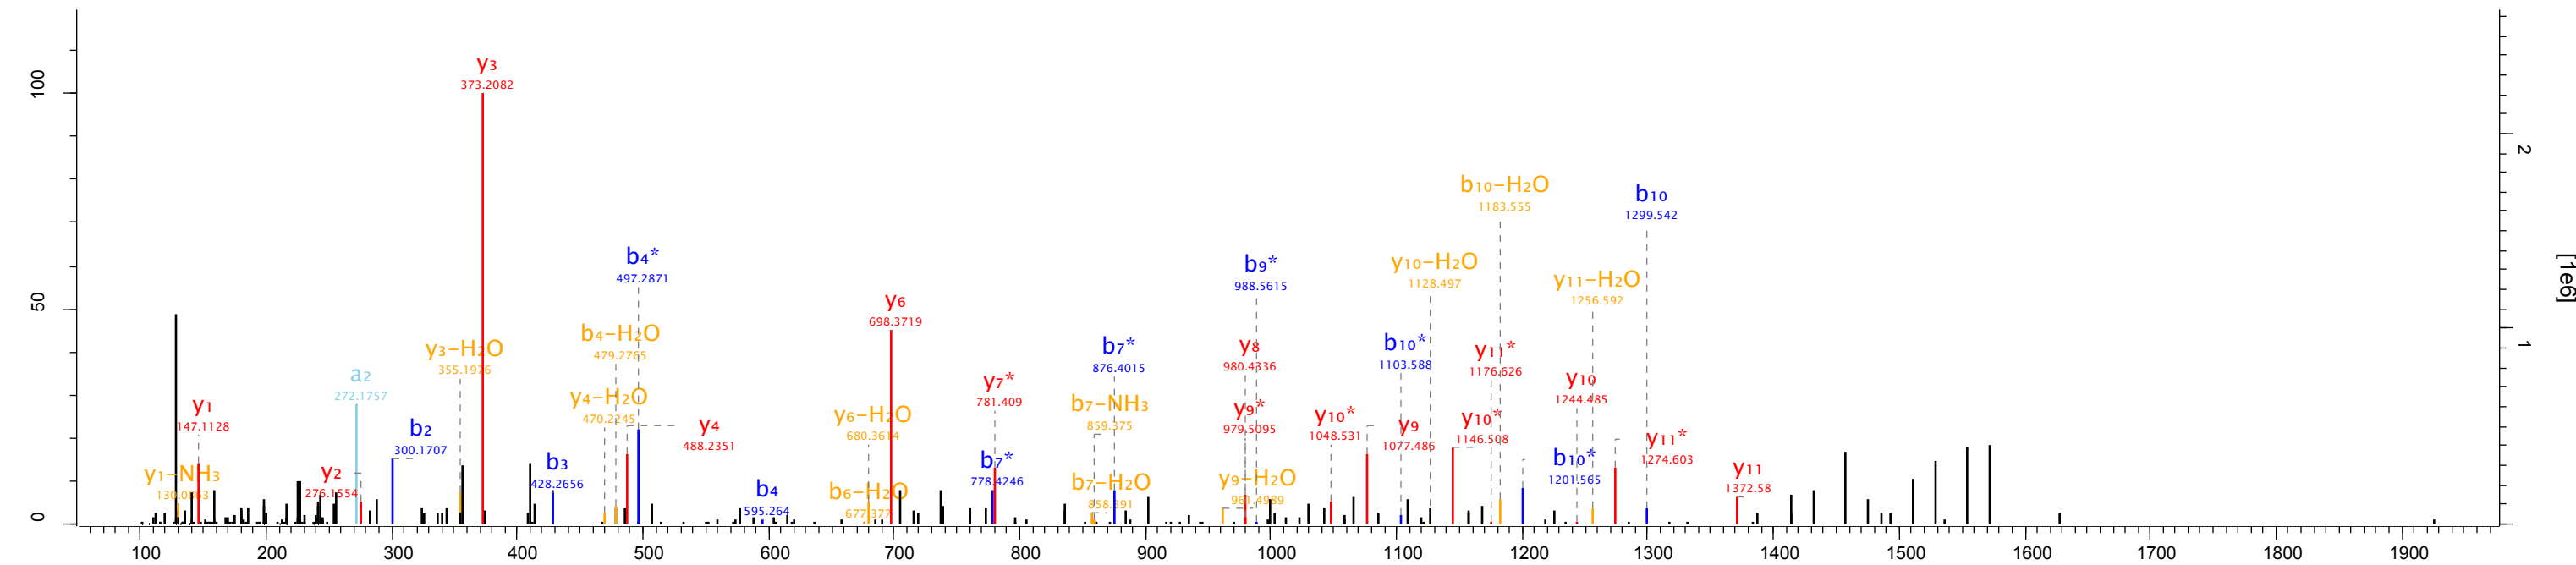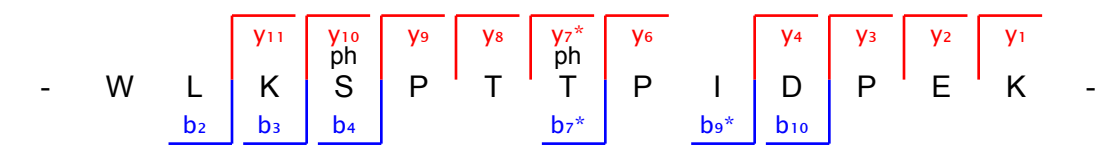

Raw file: 20150814\_A375SR\_Phospho\_BR2\_03  
 Scan: 15903 Method: FTMS; HCD Score: 97.77 m/z: 670.83 Gene names: SMARCD2

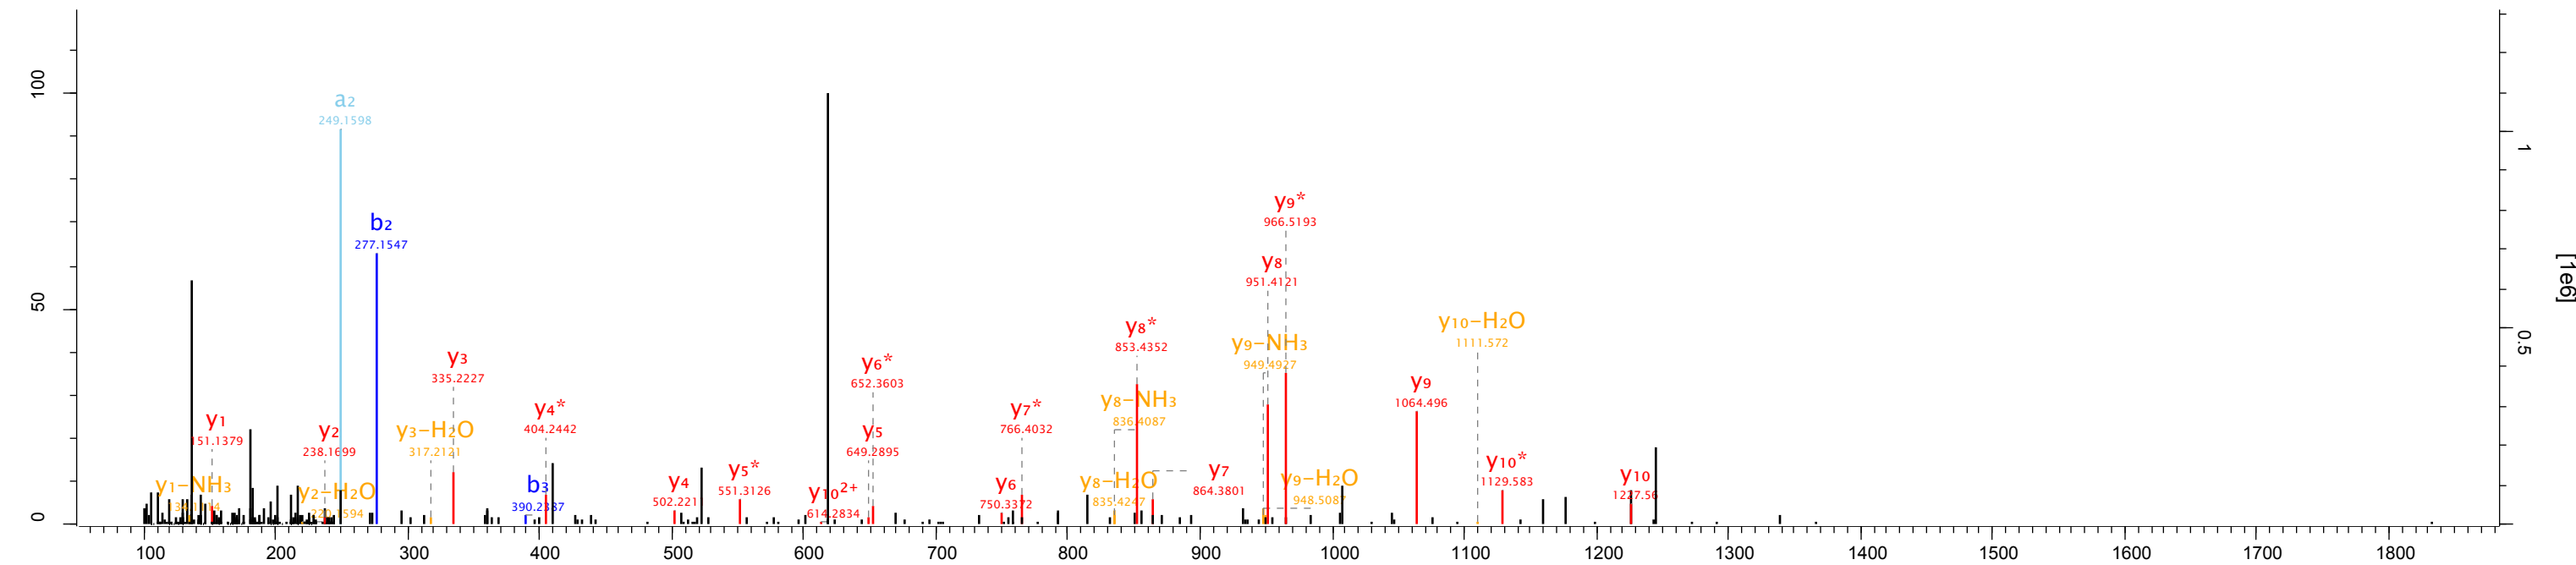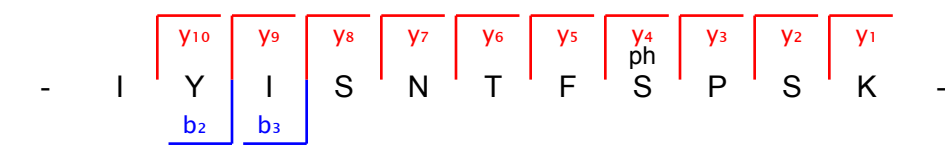

Raw file 20150814\_A375SR\_Phospho\_BR2\_03 Scan 15923 Method FTMS; HCD Score 106.54 m/z 632.29 Gene names CIAPIN1

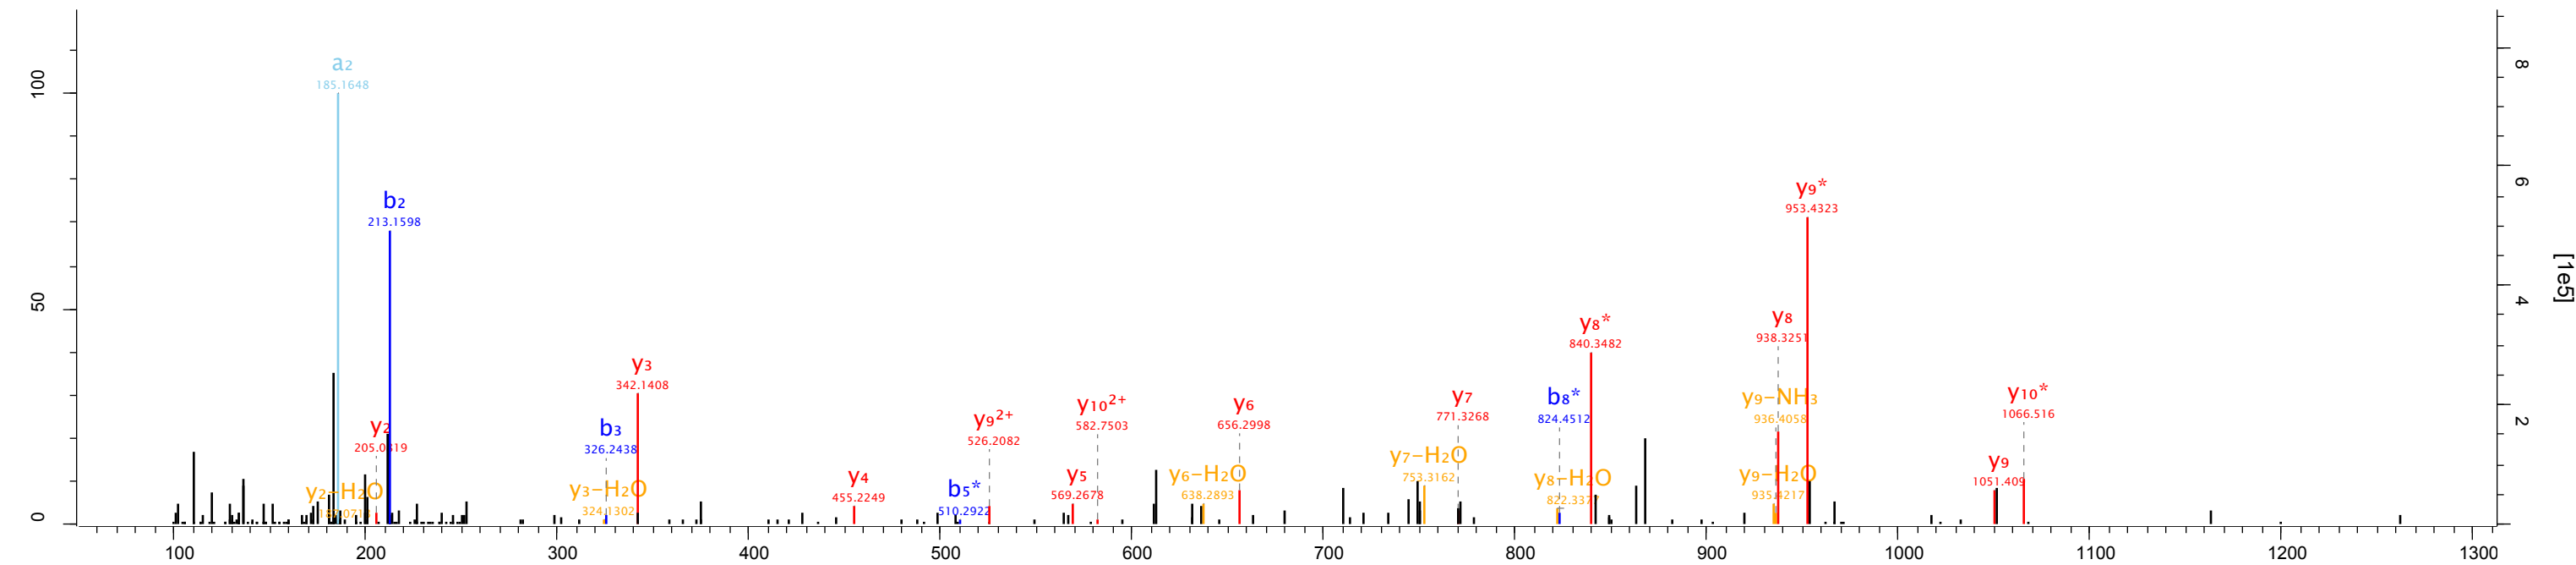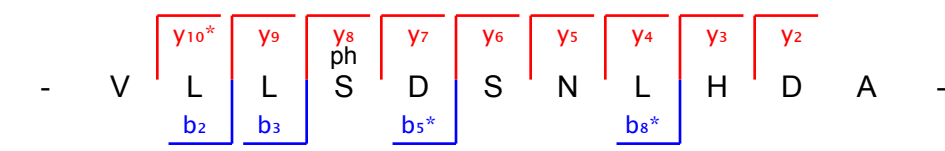

Raw file: 20150814\_A375SR\_Phospho\_BR2\_03  
 Scan: 16243 Method: FTMS; HCD Score: 132.25 m/z: 851.4 Gene names: ZNF395

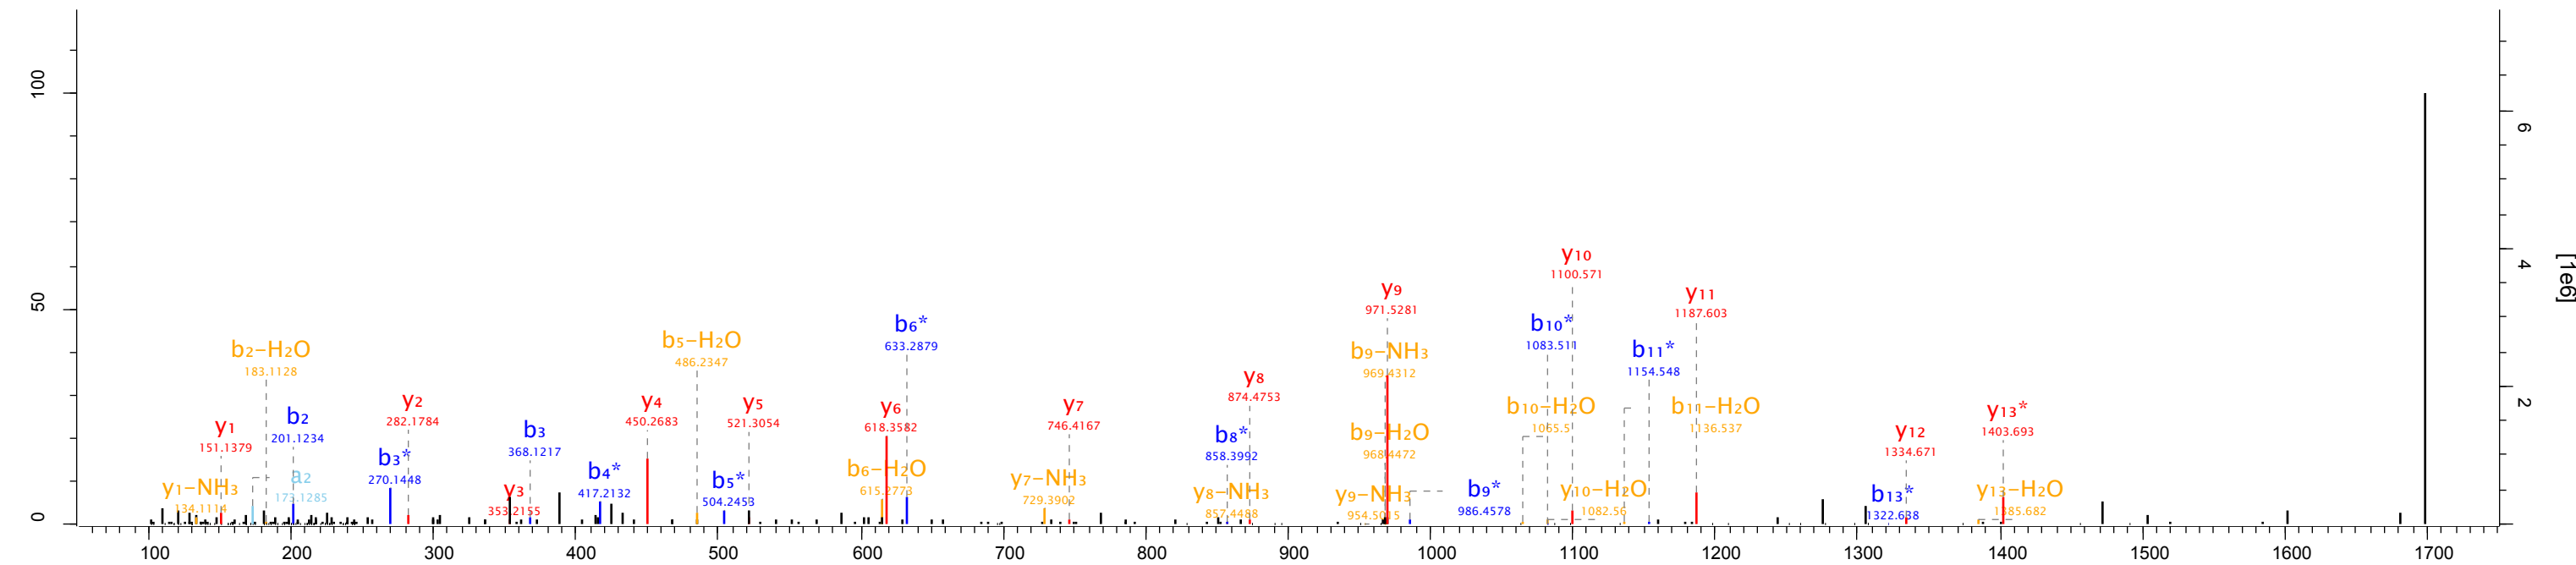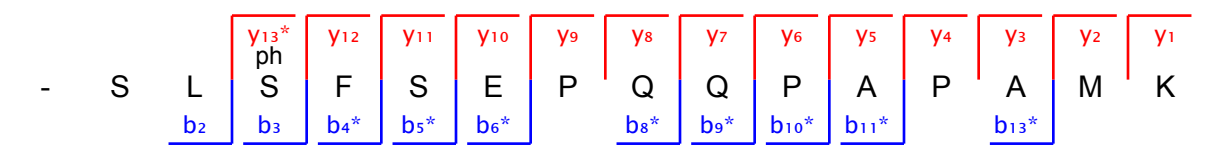

Raw file: 20150814\_A375SR\_Phospho\_BR2\_03  
 Scan: 16343 Method: FTMS; HCD Score: 297.48 m/z: 1063.45 Gene names: TOP2A

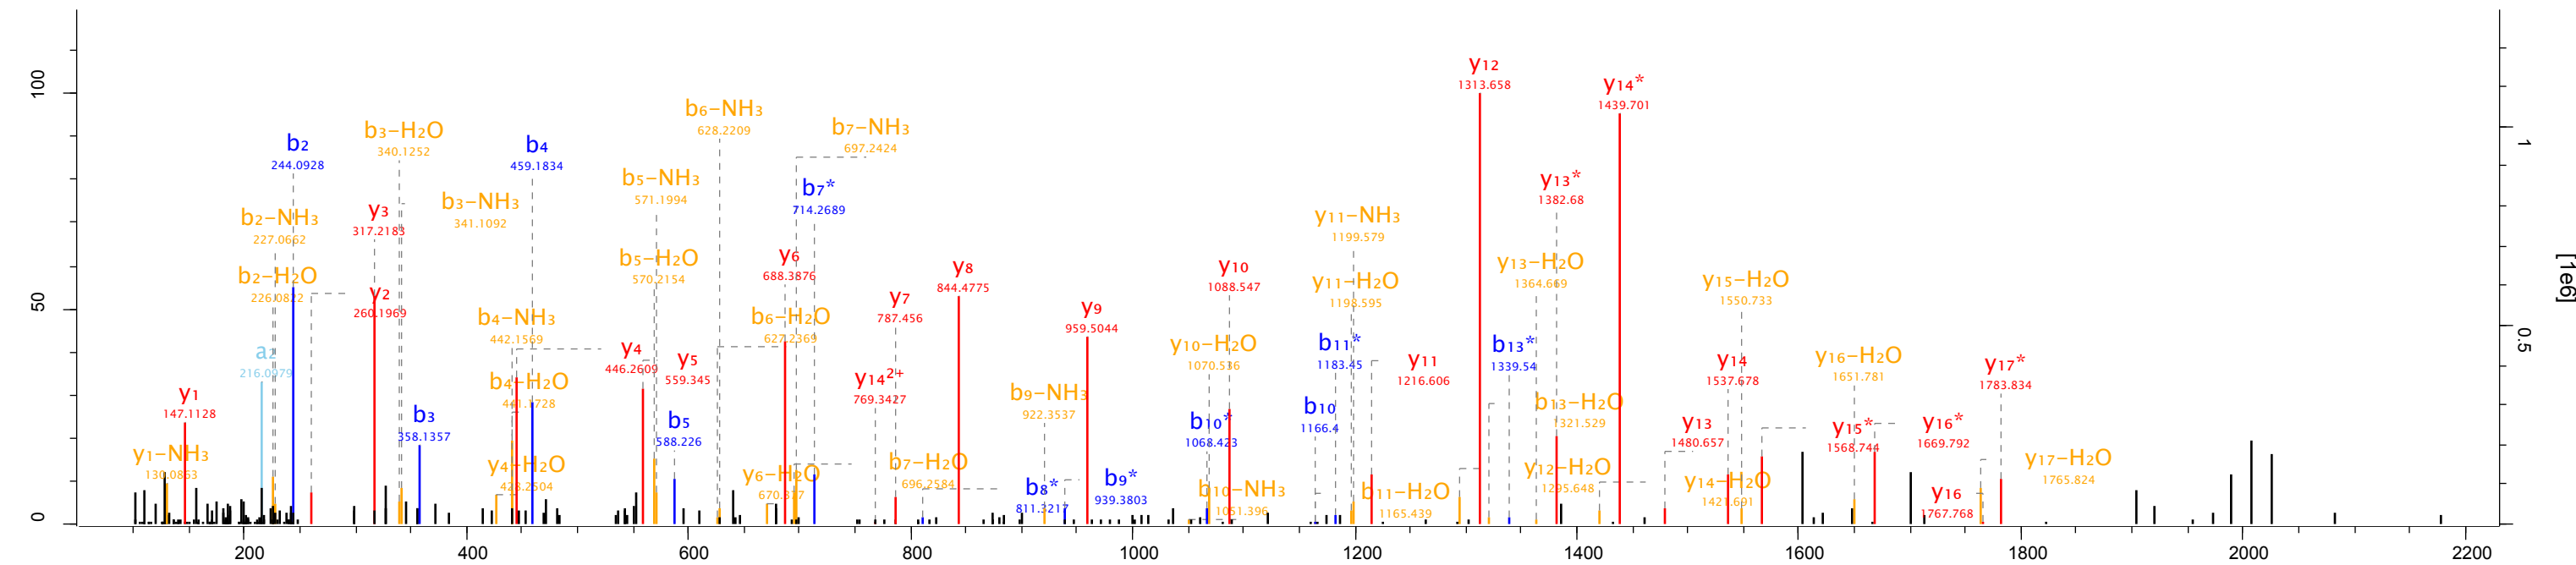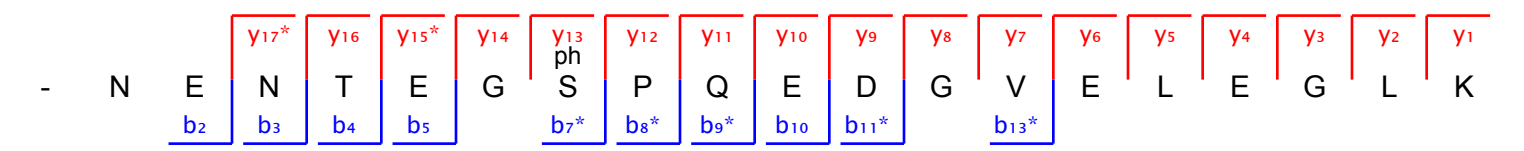

Raw file 20150814\_A375SR\_Phospho\_BR2\_03 Scan 16533 Method FTMS; HCD Score 211.29 m/z 1134.99 Gene names ABCF1

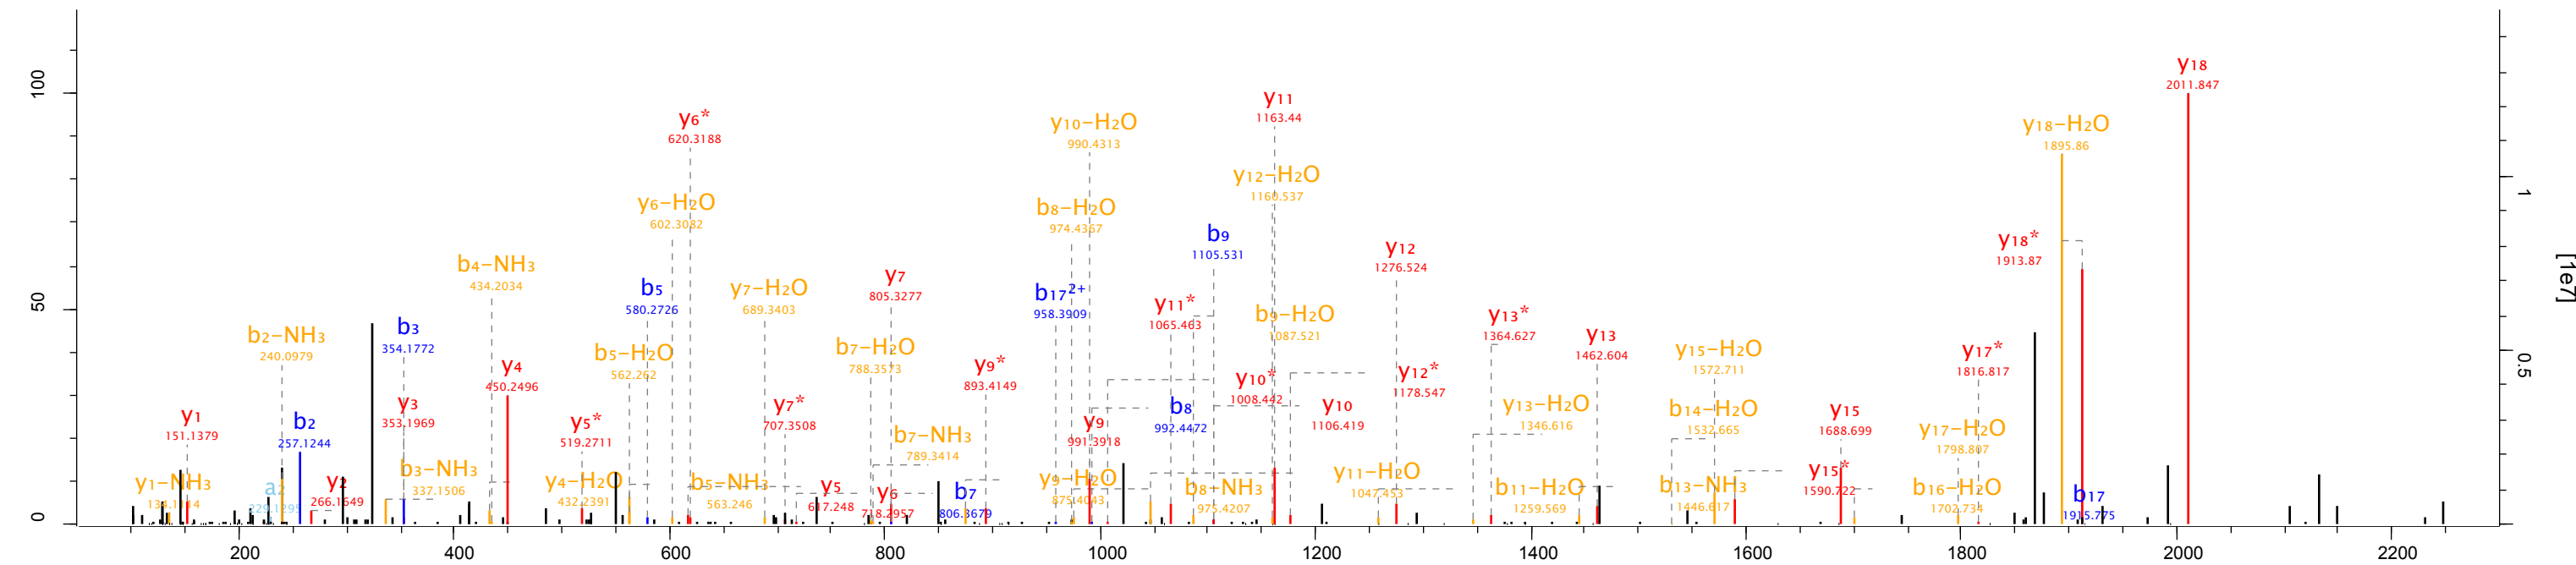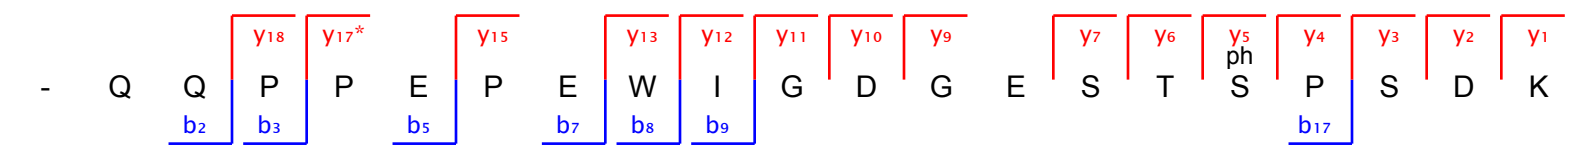

Raw file: 20150814\_A375SR\_Phospho\_BR2\_03  
 Scan: 16653 Method: FTMS; HCD Score: 69.07 m/z: 827.32 Gene names: PROSER2;C10orf47

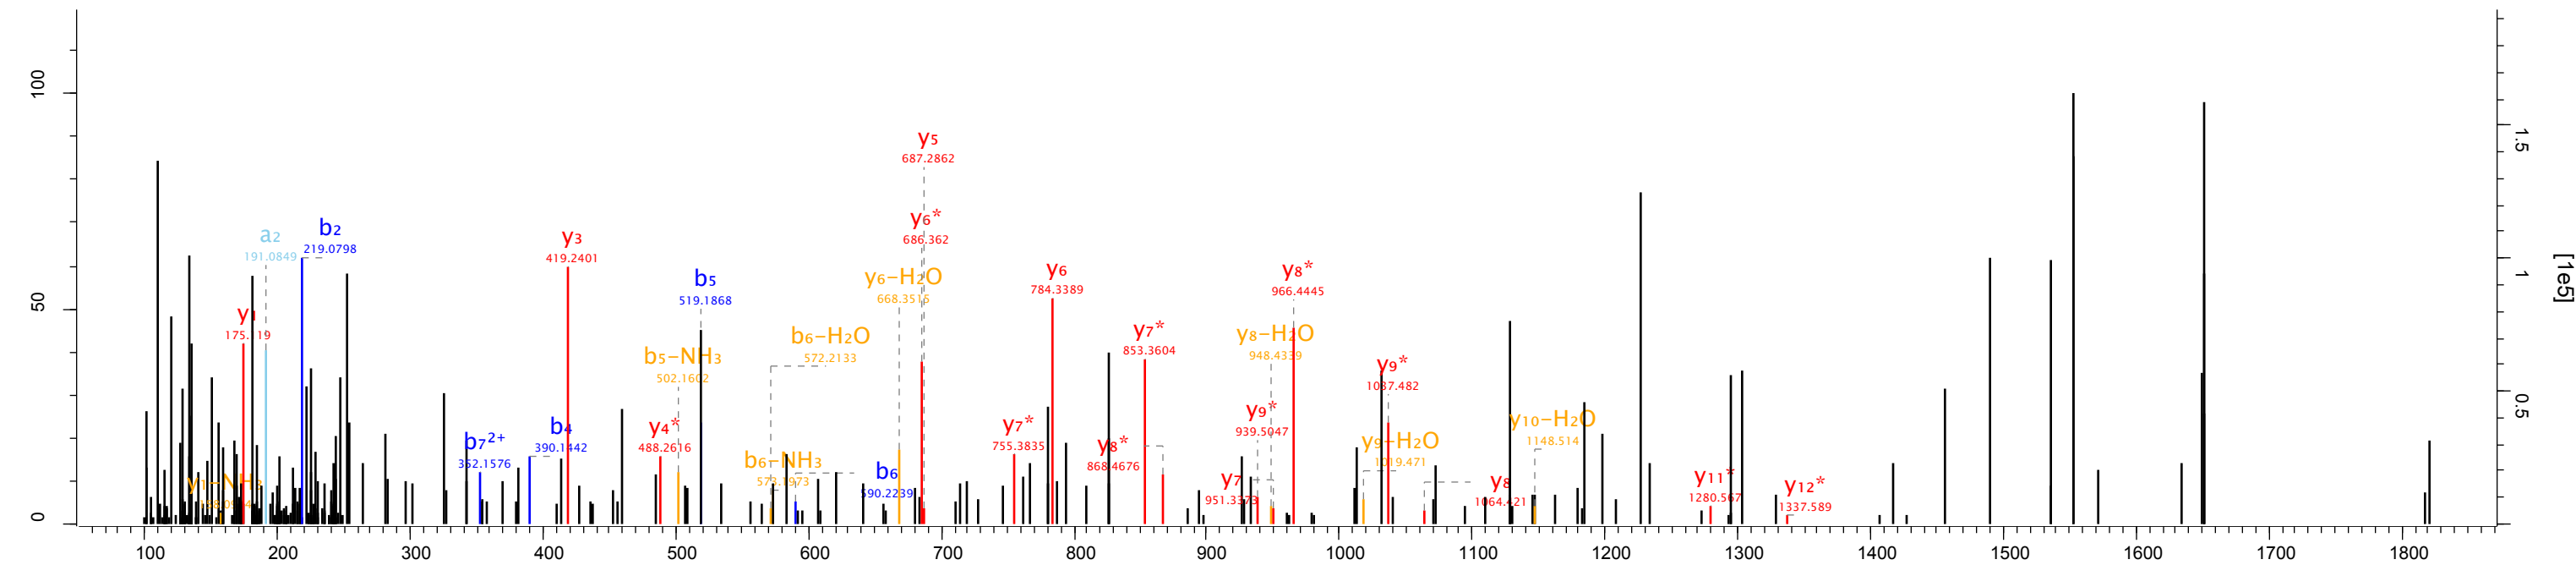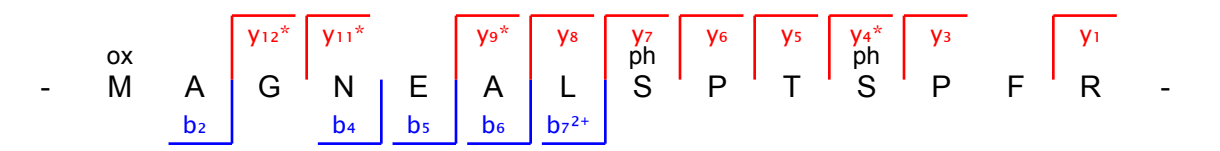

Raw file  
20150814\_A375SR\_Phospho\_BR2\_03

Scan 16733 Method FTMS; HCD Score 135.8 m/z 1290.01 Gene names BRD3

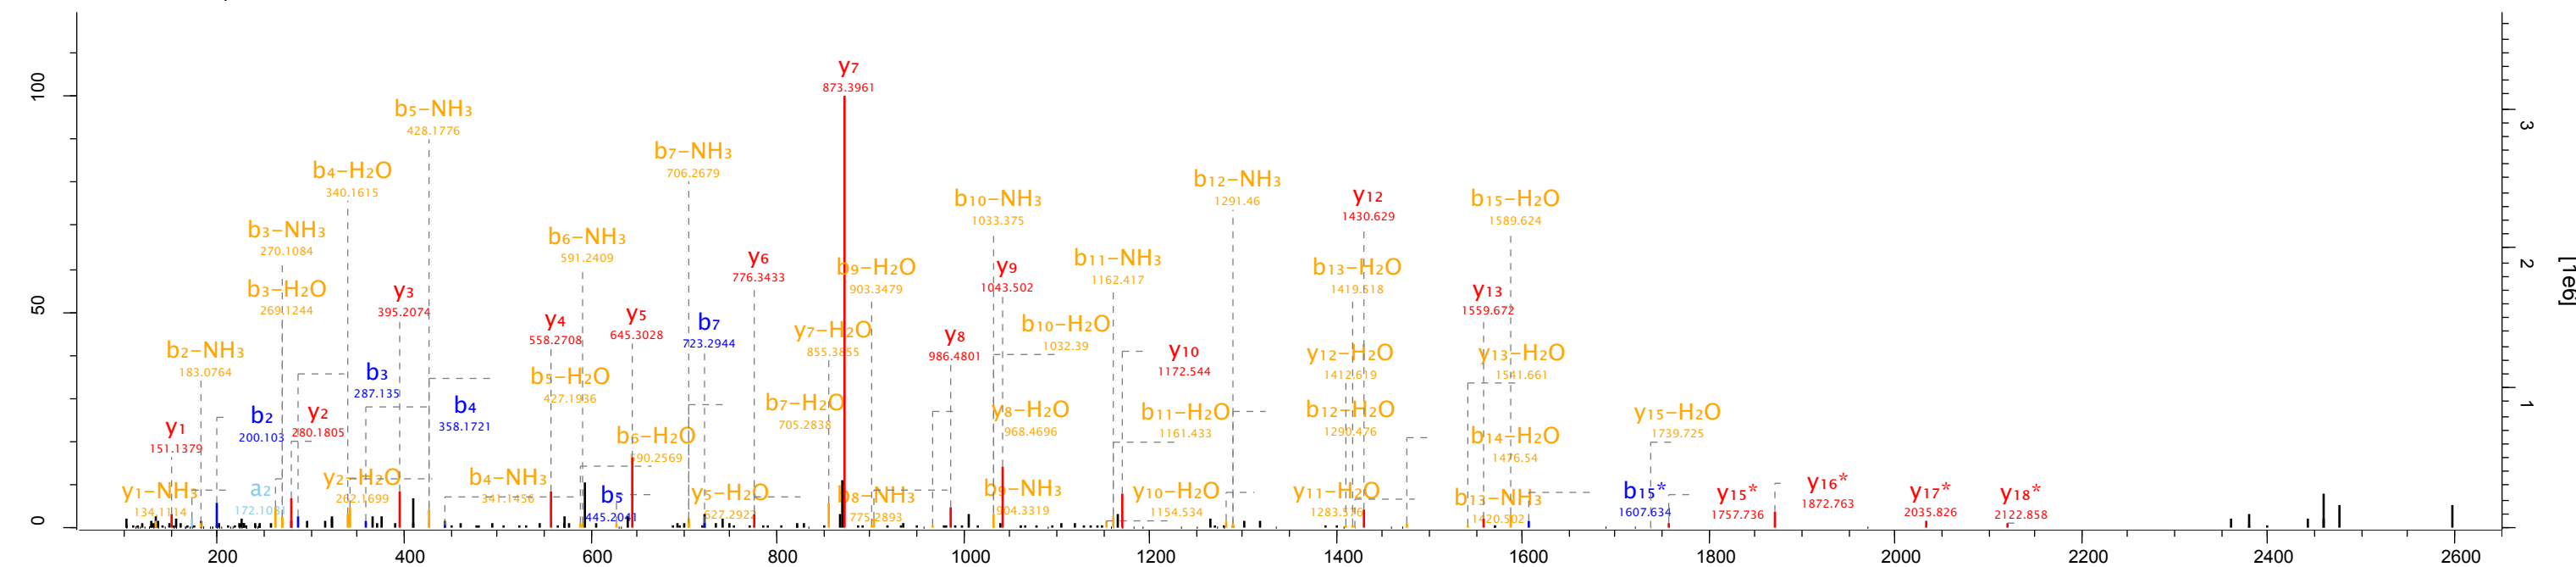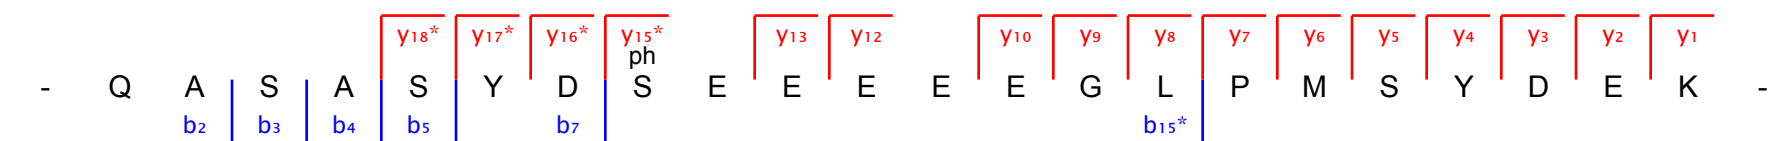





Raw file Scan Method Score m/z Gene names  
 20150814\_A375SR\_Phospho\_BR2\_03 17093 FTMS; HCD 105.45 1317.61 CSTF2

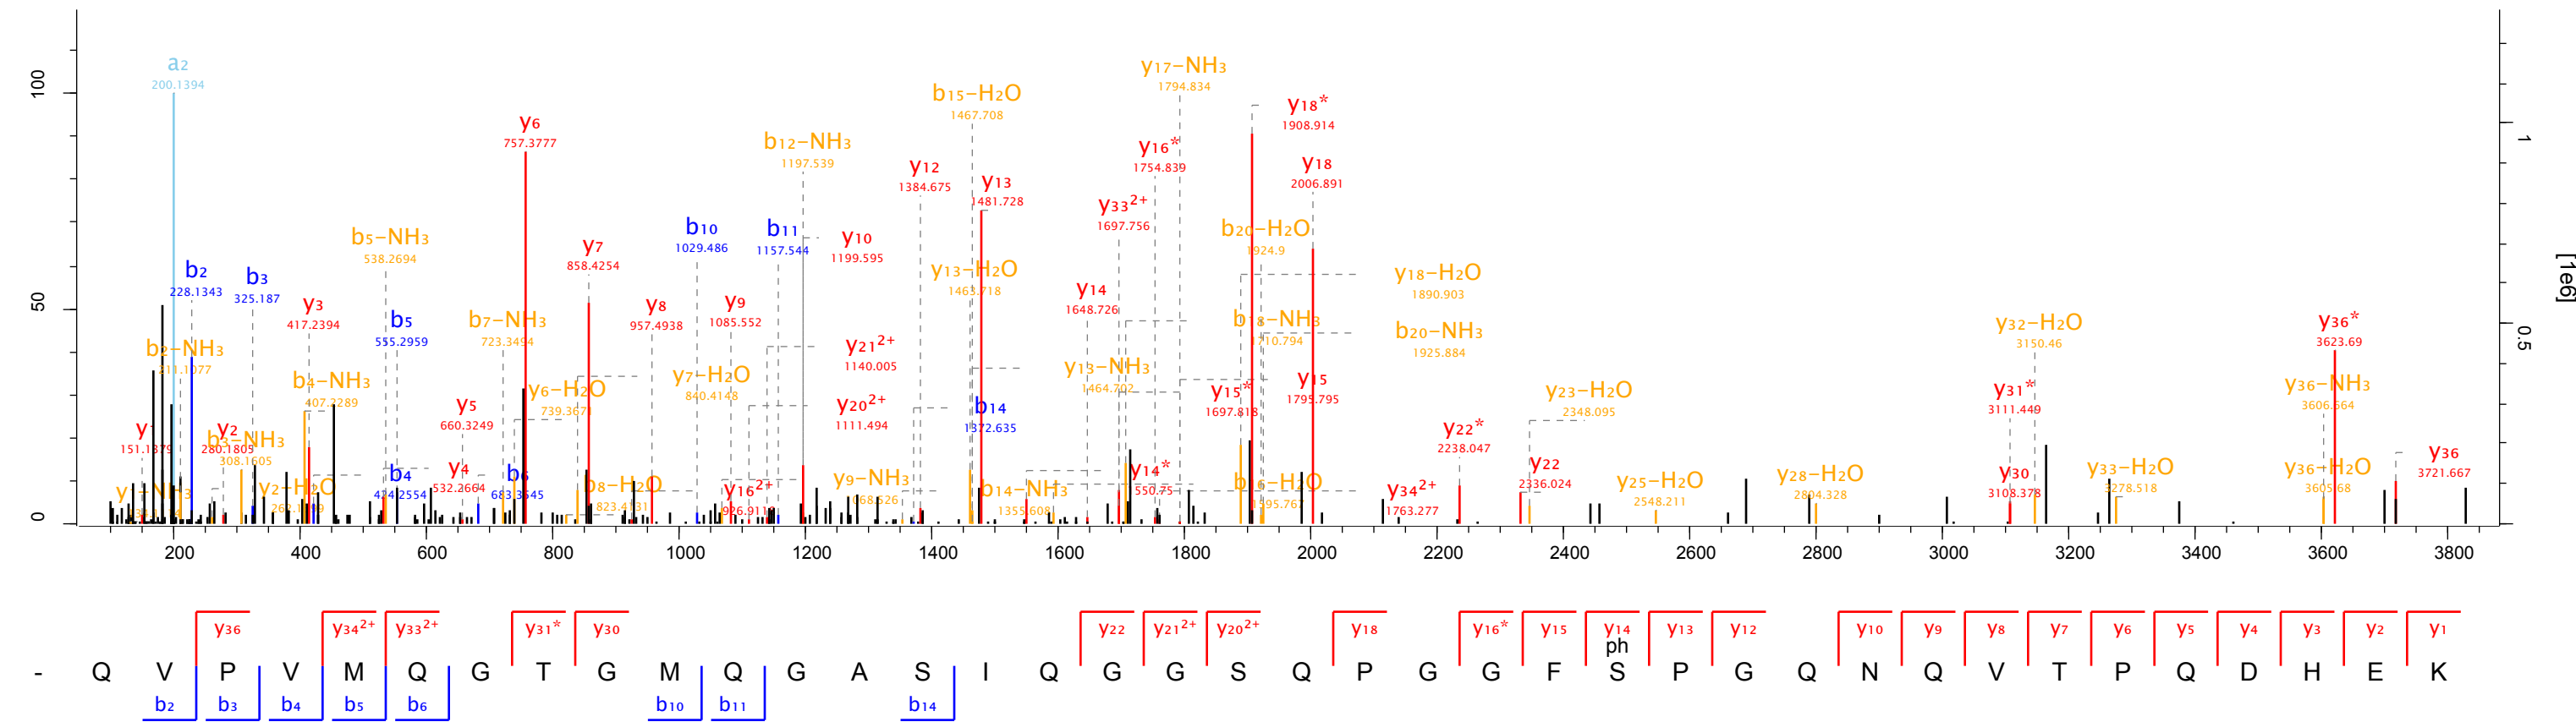

Raw file 20150814\_A375SR\_Phospho\_BR2\_03 Scan 17123 Method FTMS; HCD Score 215.82 m/z 847.43 Gene names INPP5F

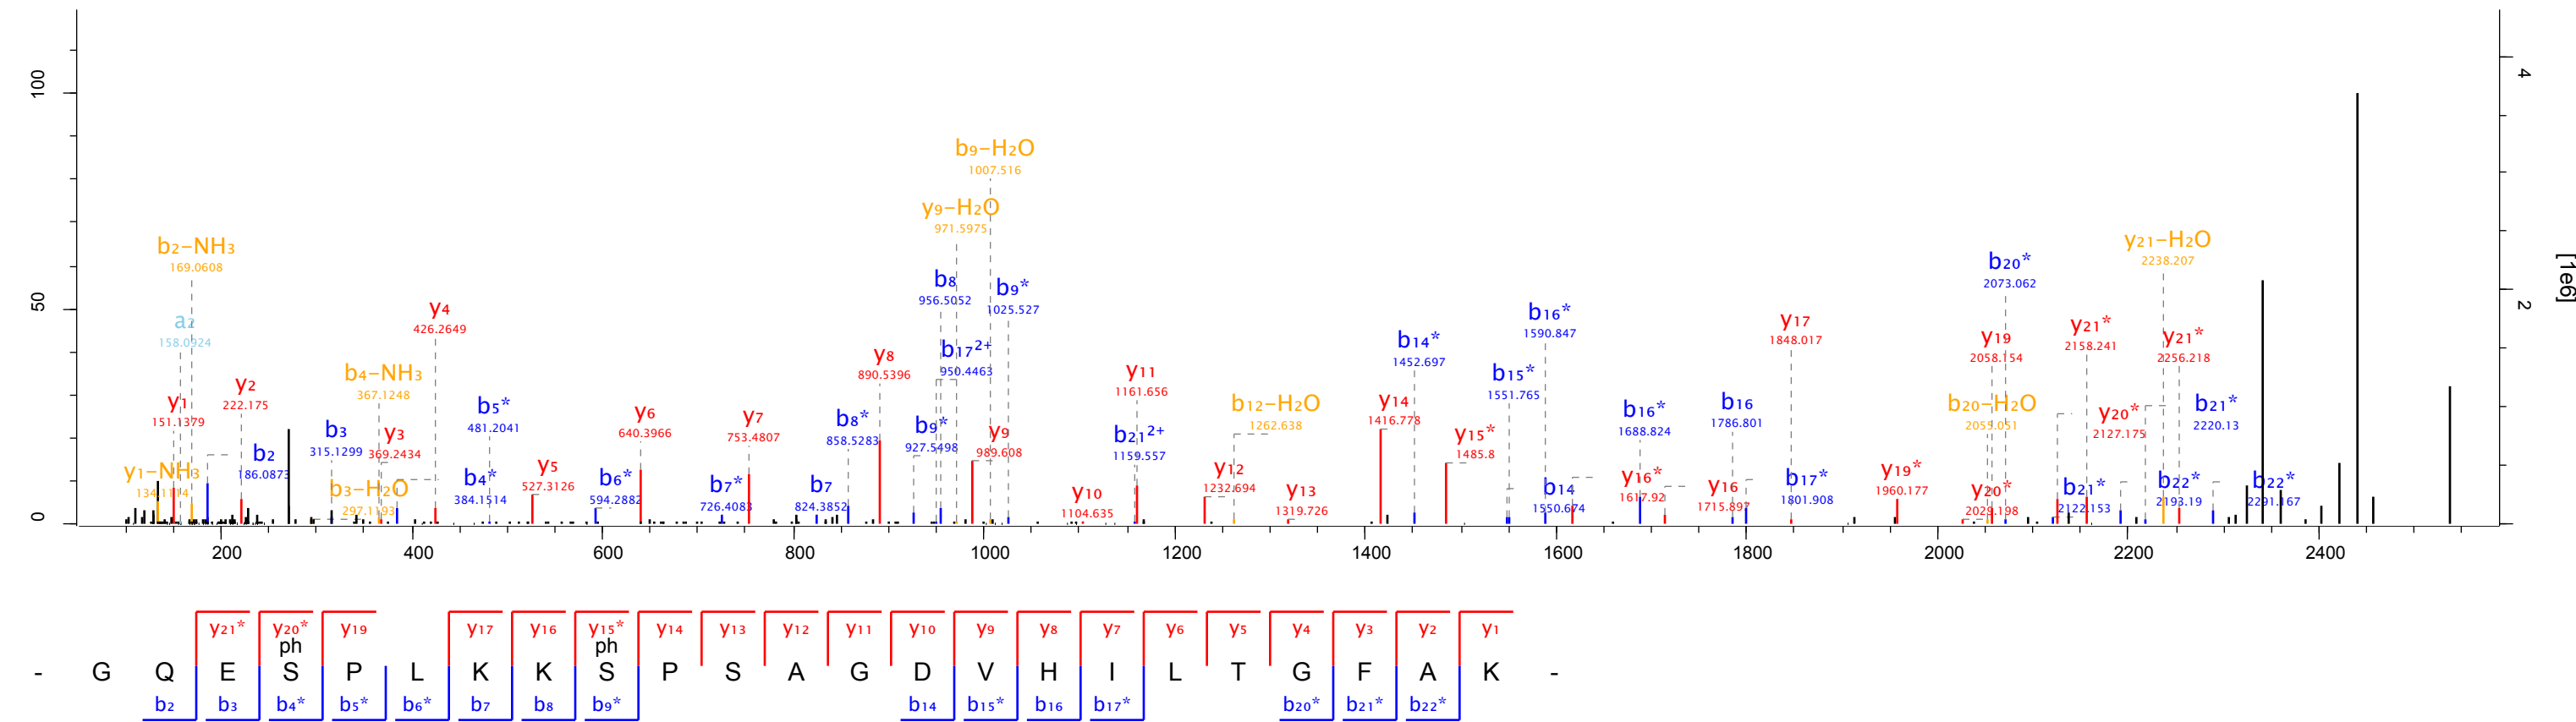

Raw file 20150814\_A375SR\_Phospho\_BR2\_03 Scan 17253 Method FTMS; HCD Score 66.02 m/z 596.27 Gene names SCARF2

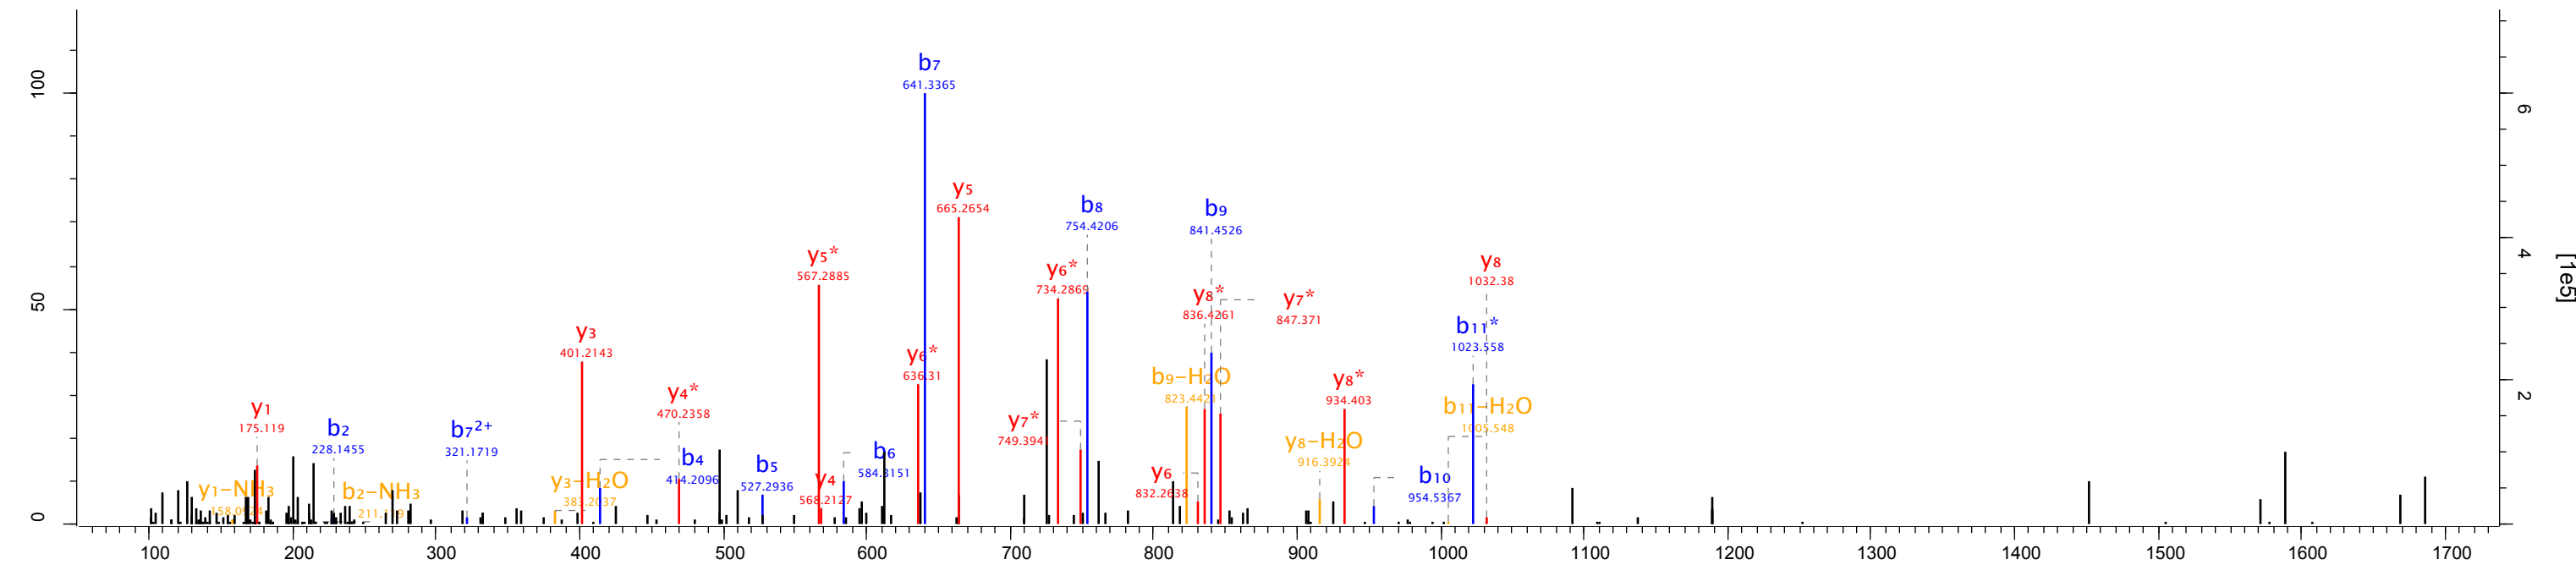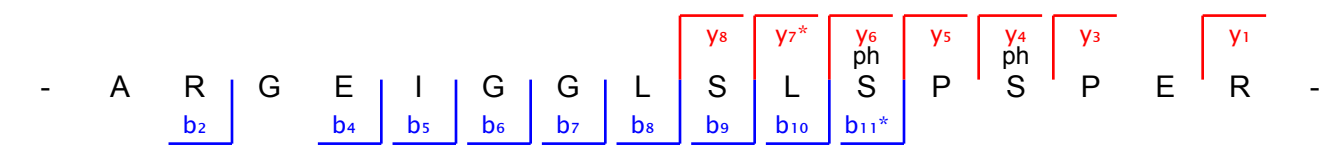

Raw file: 20150814\_A375SR\_Phospho\_BR2\_03  
 Scan: 17263 Method: FTMS; HCD Score: 110.93 m/z: 570.76 Gene names: GPATCH2L

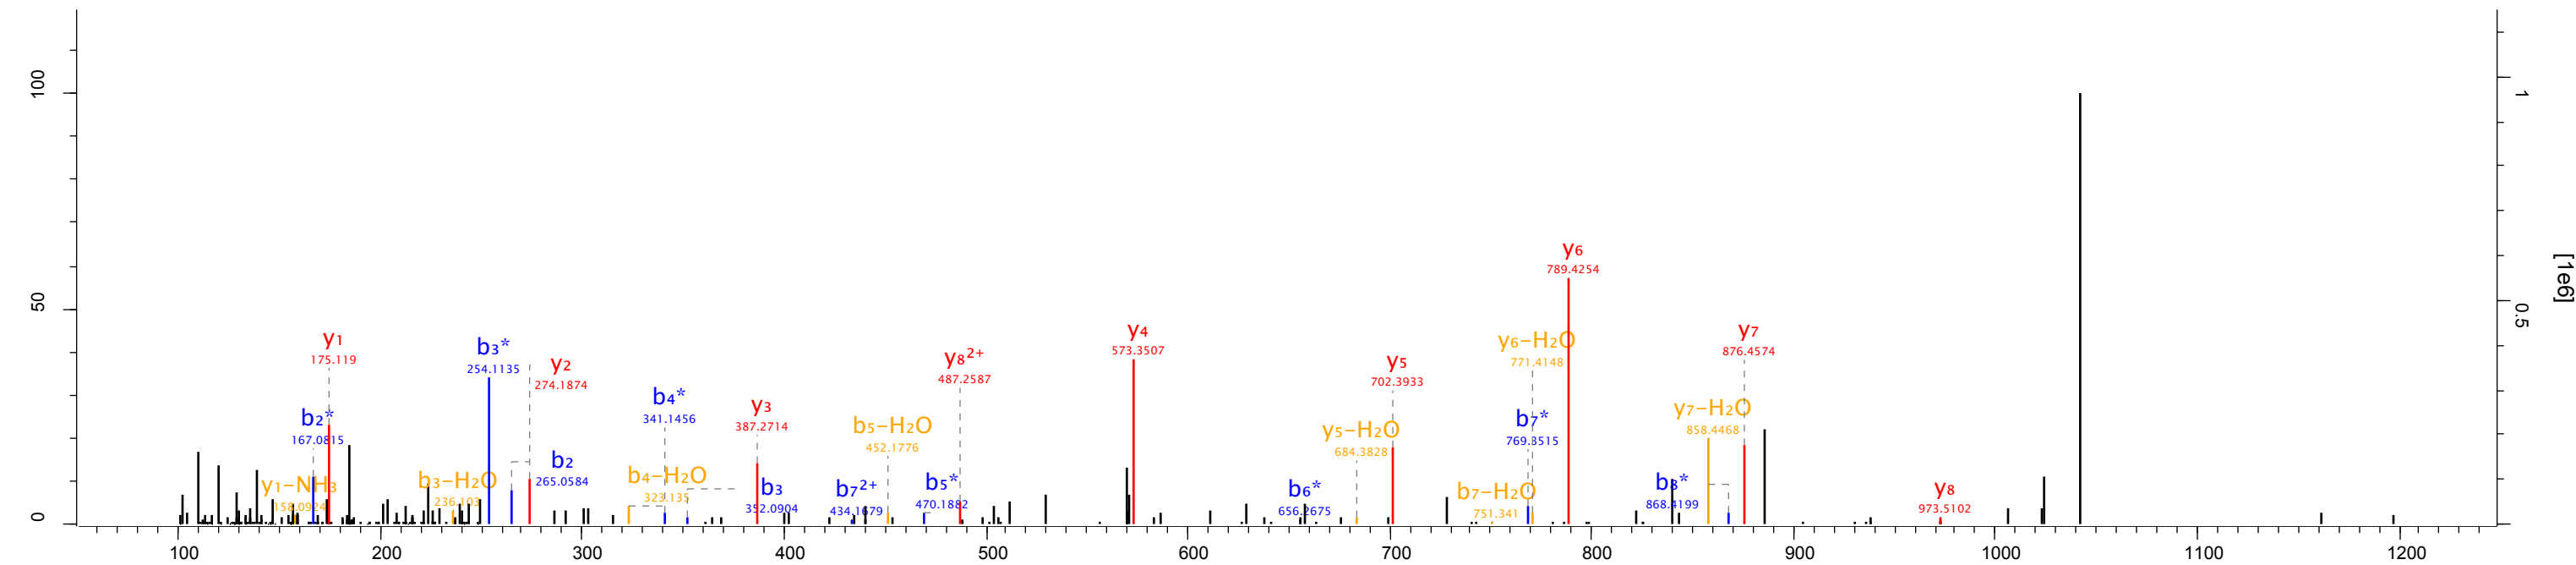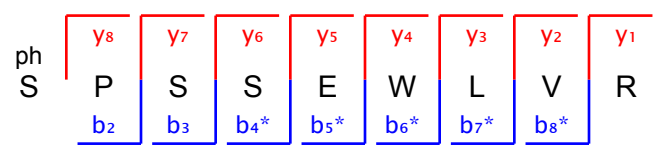

Raw file 20150814\_A375SR\_Phospho\_BR2\_03 Scan 17363 Method FTMS; HCD Score 122.46 m/z 954.82 Gene names MBD2

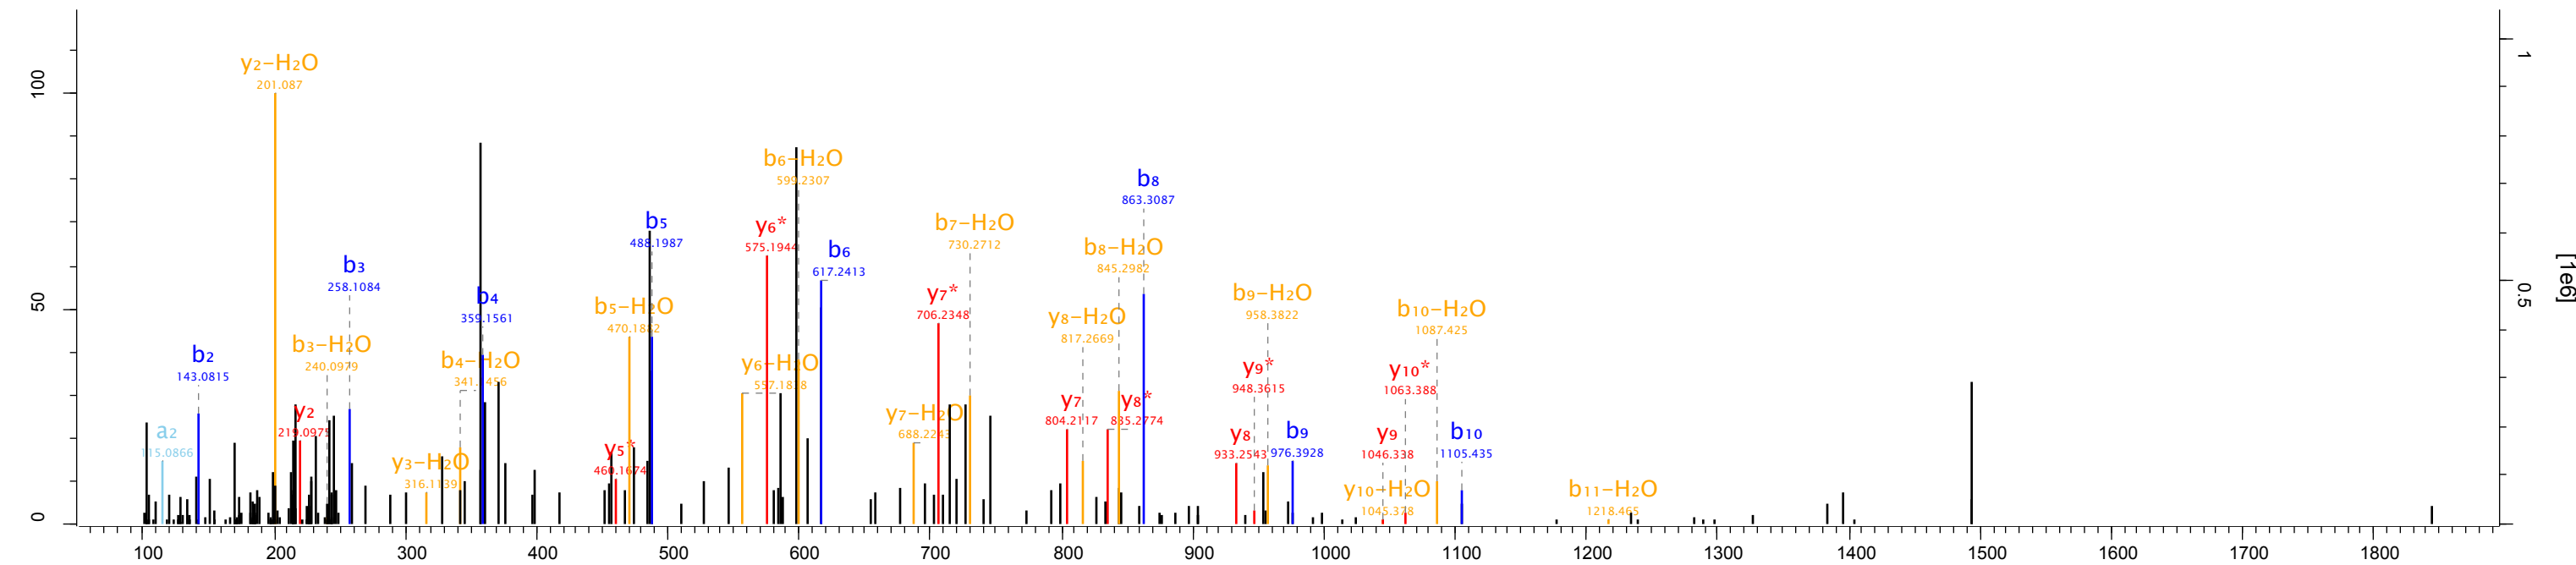

- A A D T E E M D I E M D S G D E A -

b<sub>2</sub>
b<sub>3</sub>
b<sub>4</sub>
b<sub>5</sub>
b<sub>6</sub>
y<sub>10</sub>\*
y<sub>9</sub>
y<sub>8</sub>
y<sub>7</sub>
y<sub>6</sub>\*
y<sub>5</sub>\*
ph
y<sub>2</sub>

Raw file 20150814\_A375SR\_Phospho\_BR2\_03 Scan 17373 Method FTMS; HCD Score 54.3 m/z 1030.41 Gene names COL4A3BP

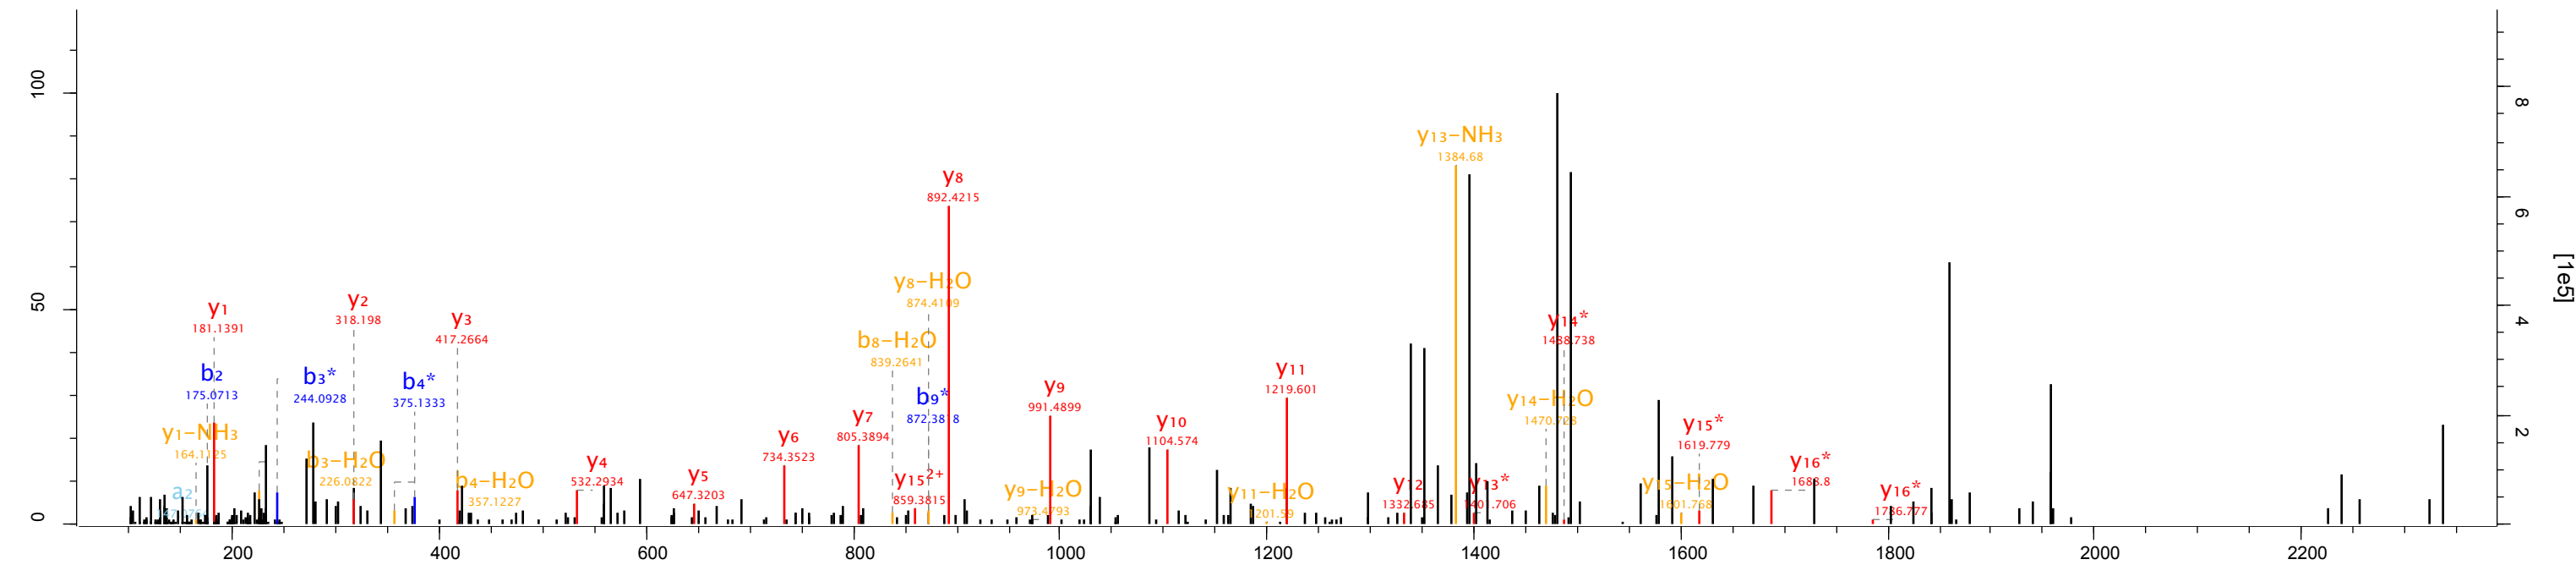

- S S S M S S I D L V S A S D D V H R -

Fragmentation labels below the sequence:

- b2 (under the first S)
- b3\* (under the second S)
- b4\* (under the M)
- b9\* (under the L)
- y16\* ph (under the first S)
- y15\* (under the M)
- y14\* (under the second S)
- y13\* ph (under the first S)
- y12 (under the I)
- y11 (under the D)
- y10 (under the L)
- y9 (under the V)
- y8 (under the S)
- y7 (under the A)
- y6 (under the S)
- y5 (under the D)
- y4 (under the D)
- y3 (under the V)
- y2 (under the H)
- y1 (under the R)

Raw file 20150814\_A375SR\_Phospho\_BR2\_03 Scan 18023 Method FTMS; HCD Score 143.7 m/z 871.37 Gene names RPS6KC1

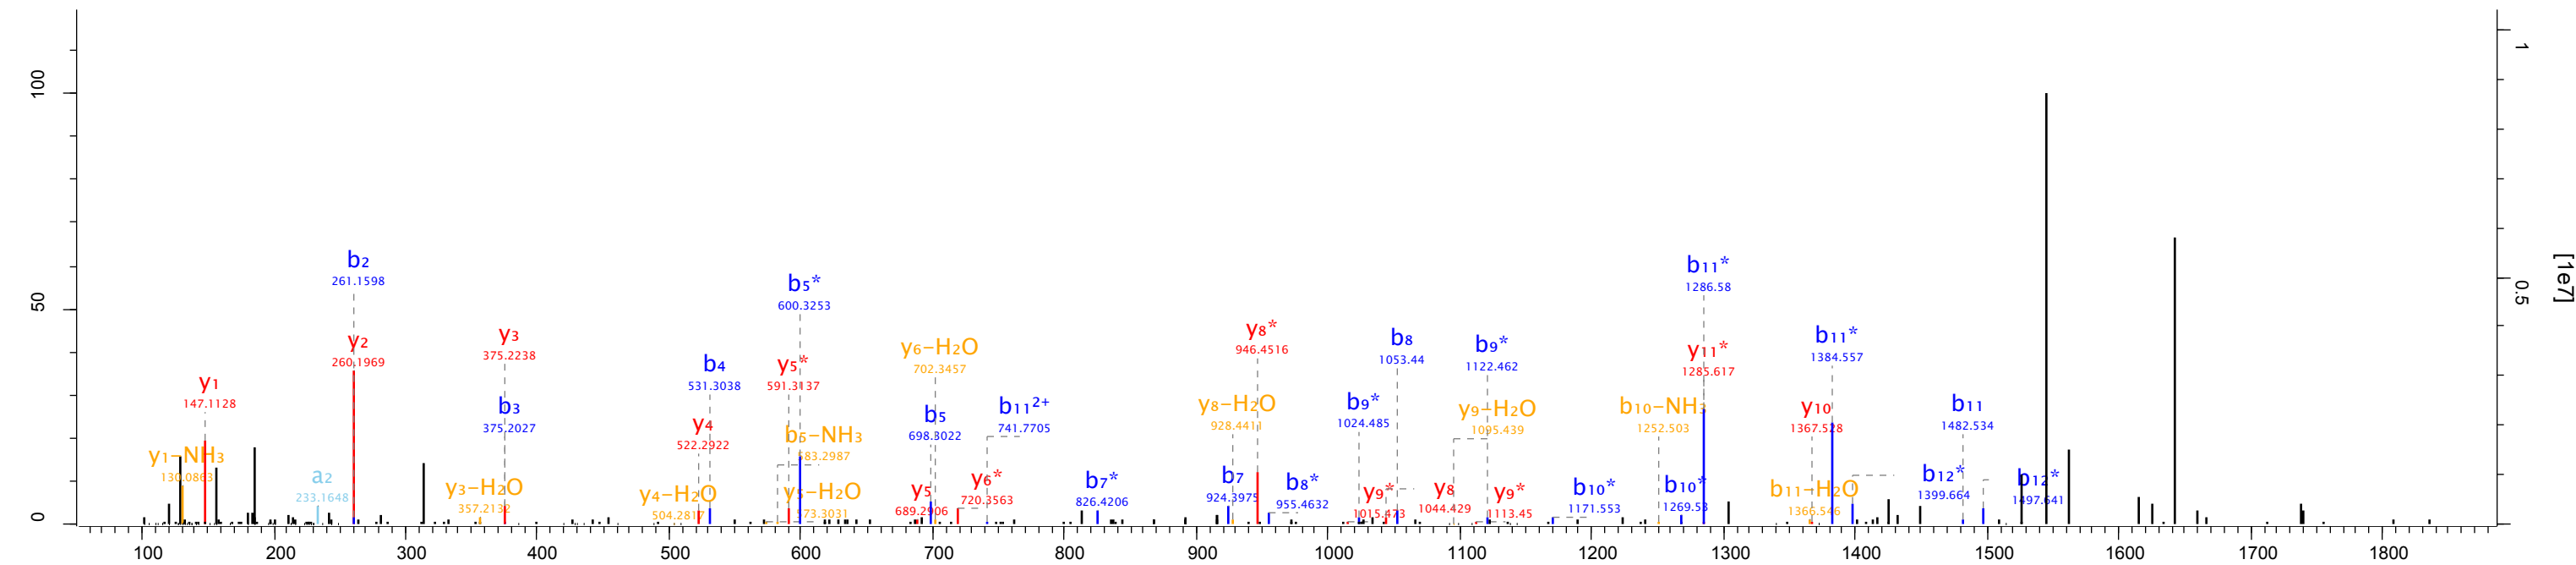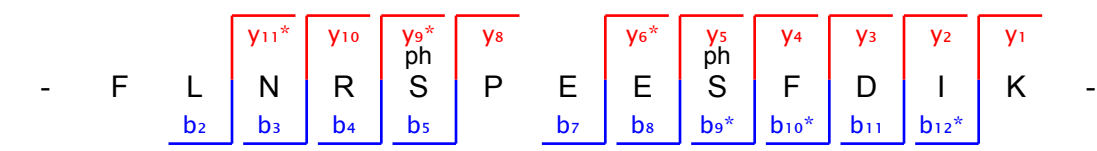



Raw file  
20150814\_A375SR\_Phospho\_BR2\_03

Scan 18143 Method FTMS; HCD Score 203.75 m/z 830.86 Gene names MISP

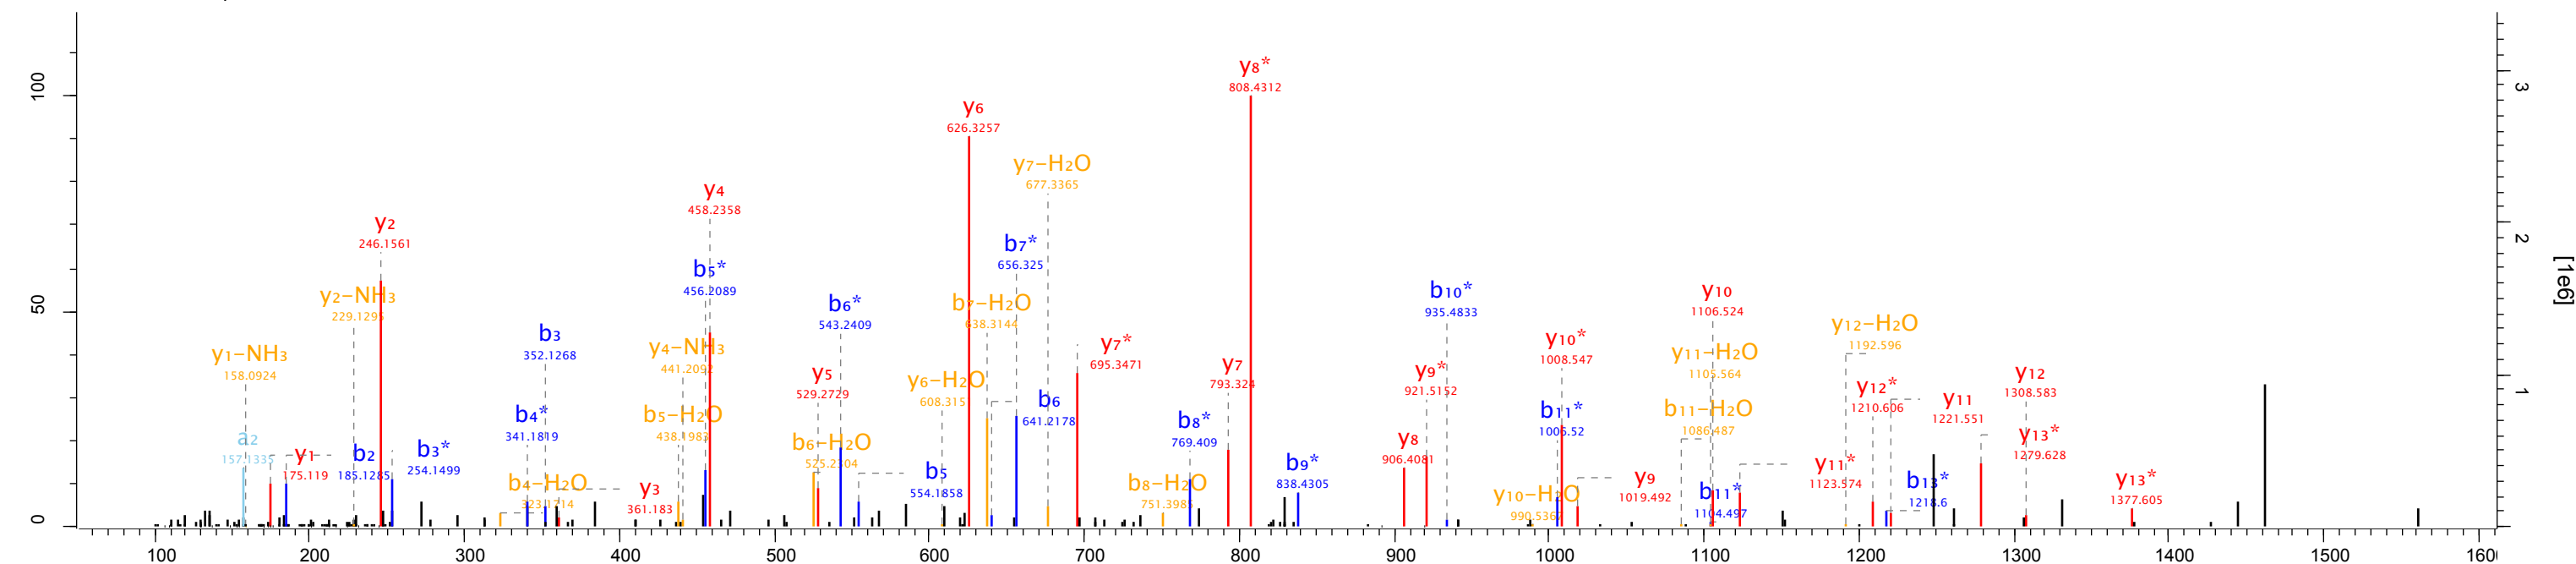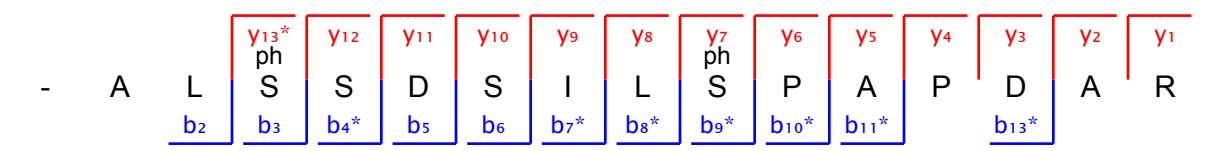

Raw file Scan Method Score m/z Gene names  
 20150814\_A375SR\_Phospho\_BR2\_03 18213 FTMS; HCD 260.14 818.01 PHLDB1

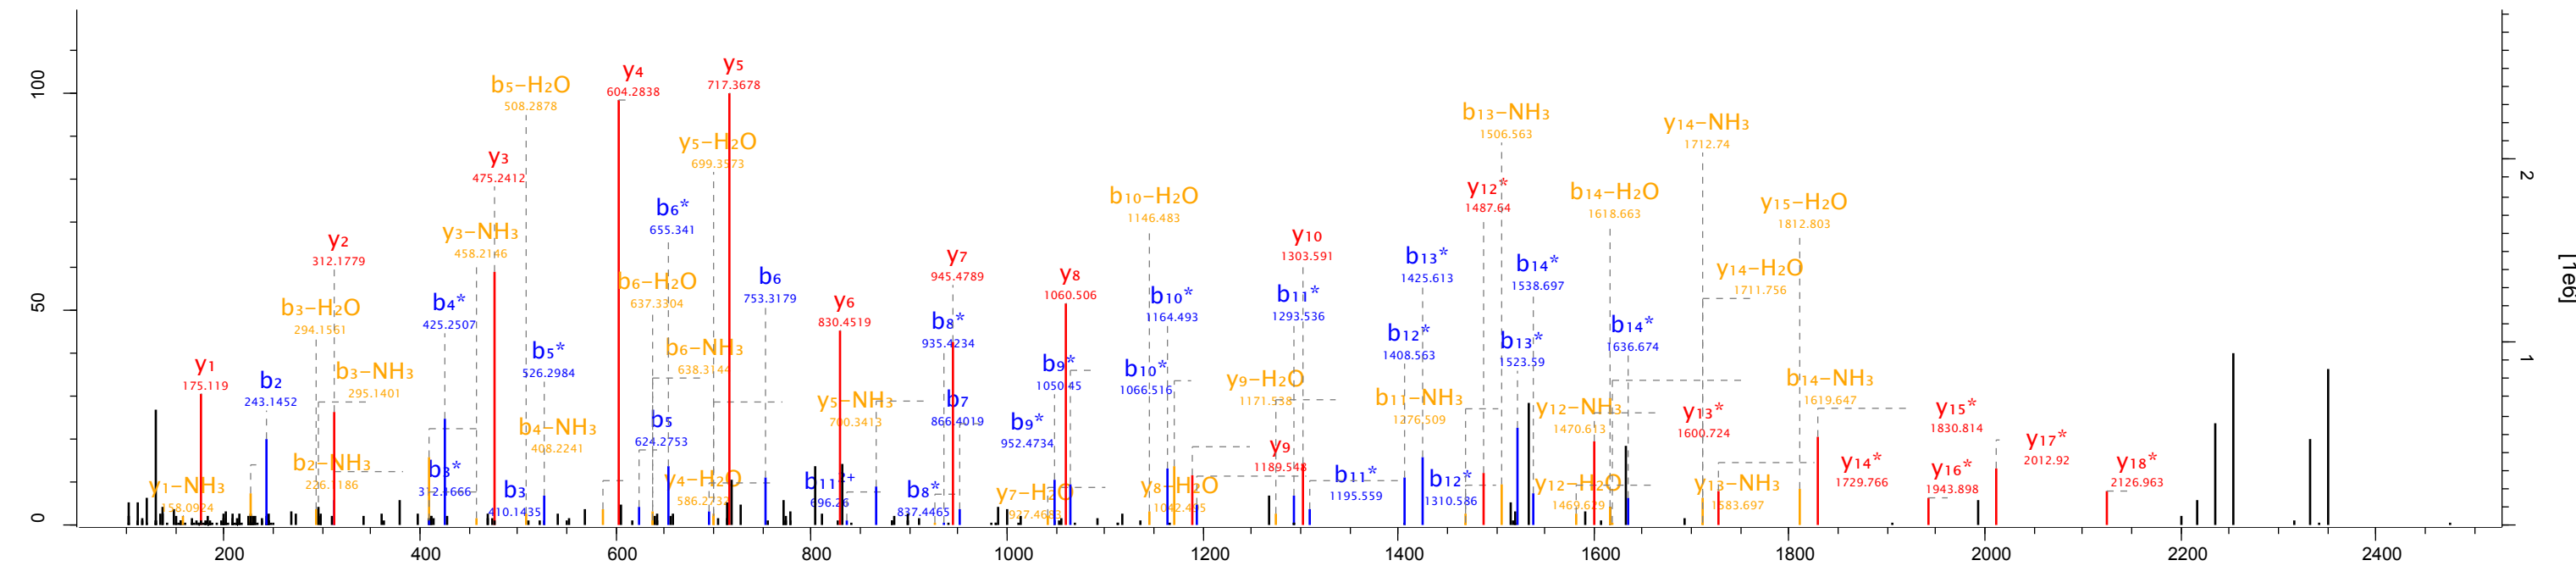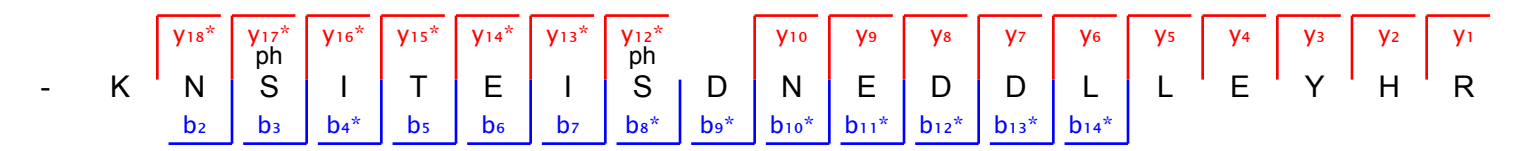

Raw file: 20150814\_A375SR\_Phospho\_BR2\_03  
 Scan: 18623 Method: FTMS; HCD Score: 144.27 m/z: 895.93 Gene names: HNRNPDL

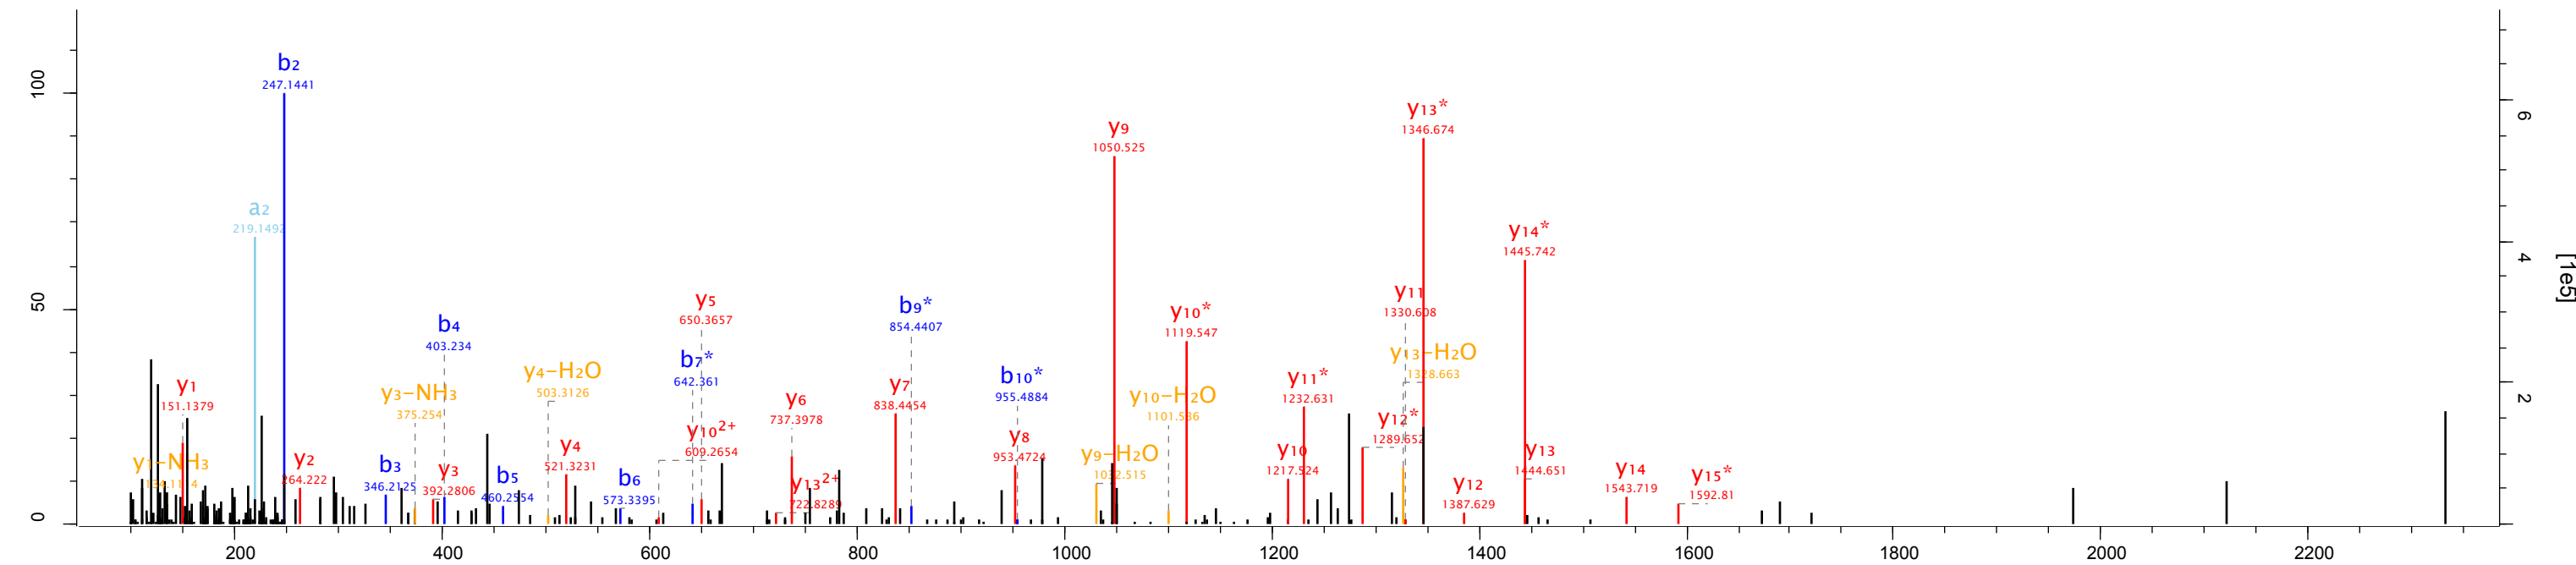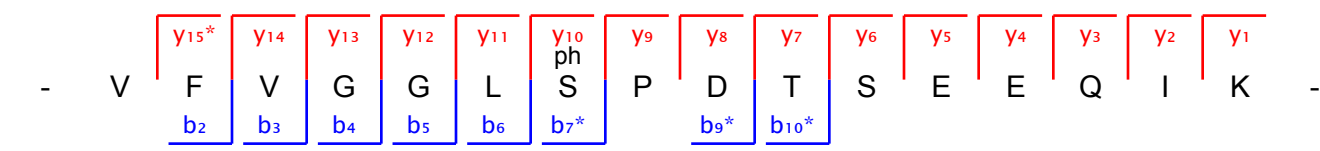

Raw file  
20150814\_A375SR\_Phospho\_BR2\_03

Scan 18693 Method FTMS; HCD Score 209.16 m/z 742.02 Gene names BCL9L

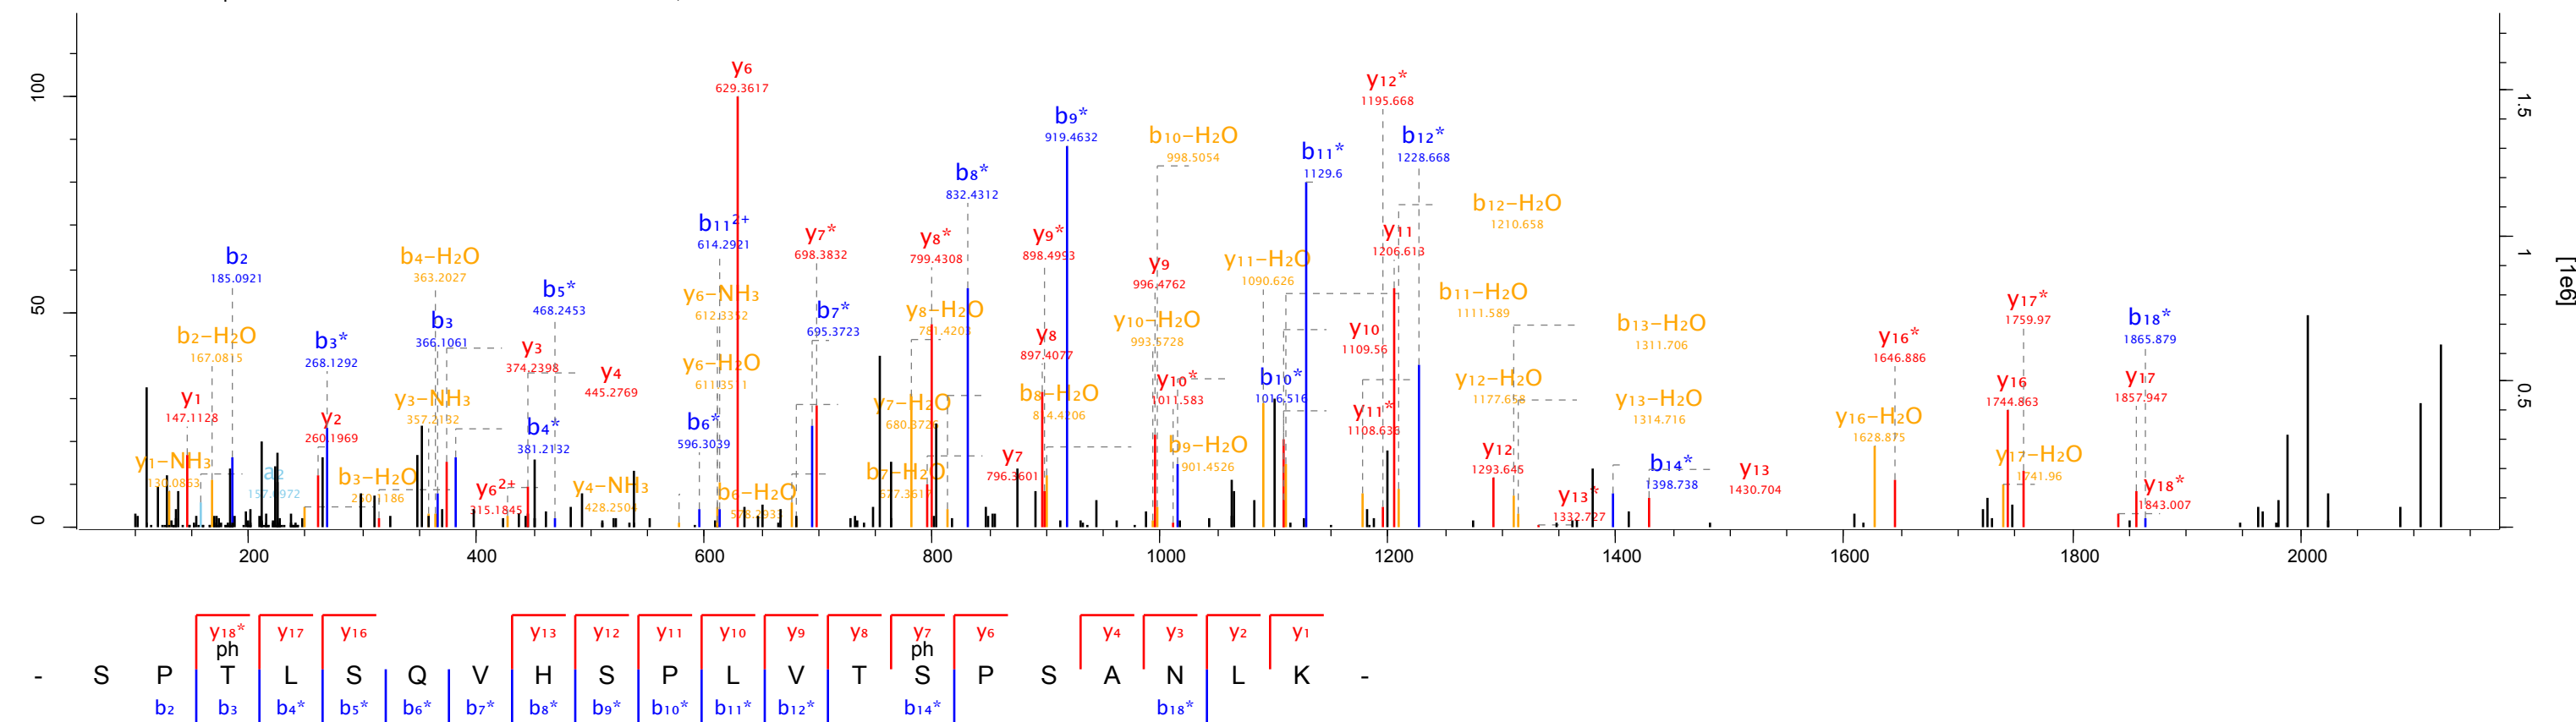

Raw file 20150814\_A375SR\_Phospho\_BR2\_03 Scan 18703 Method FTMS; HCD Score 308.57 m/z 790.05 Gene names RAD18

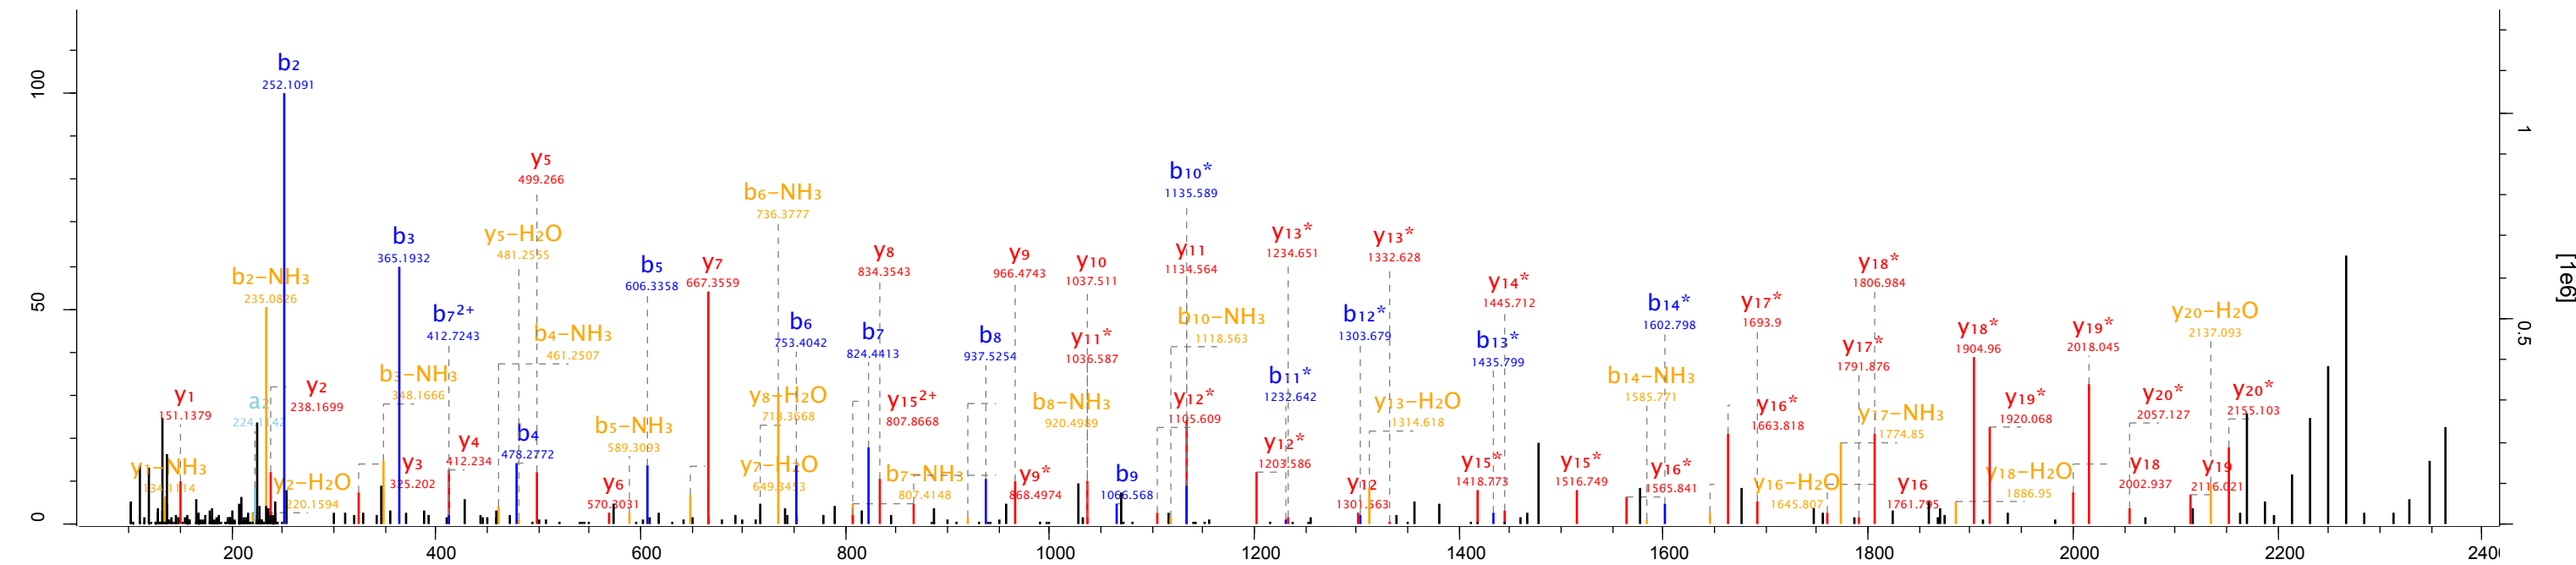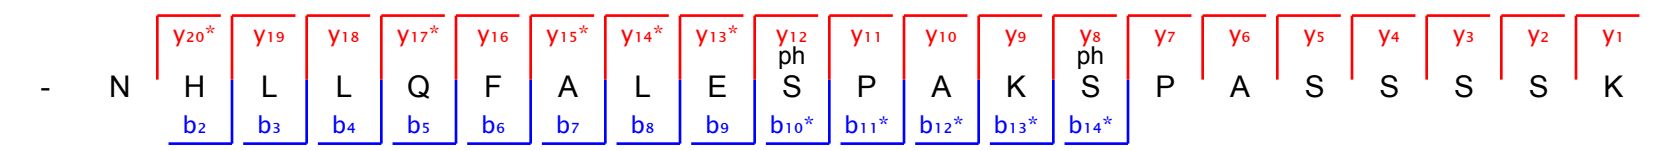

Raw file Scan Method Score m/z Gene names  
 20150814\_A375SR\_Phospho\_BR2\_03 18983 FTMS; HCD 323.58 1351.67 AGFG1

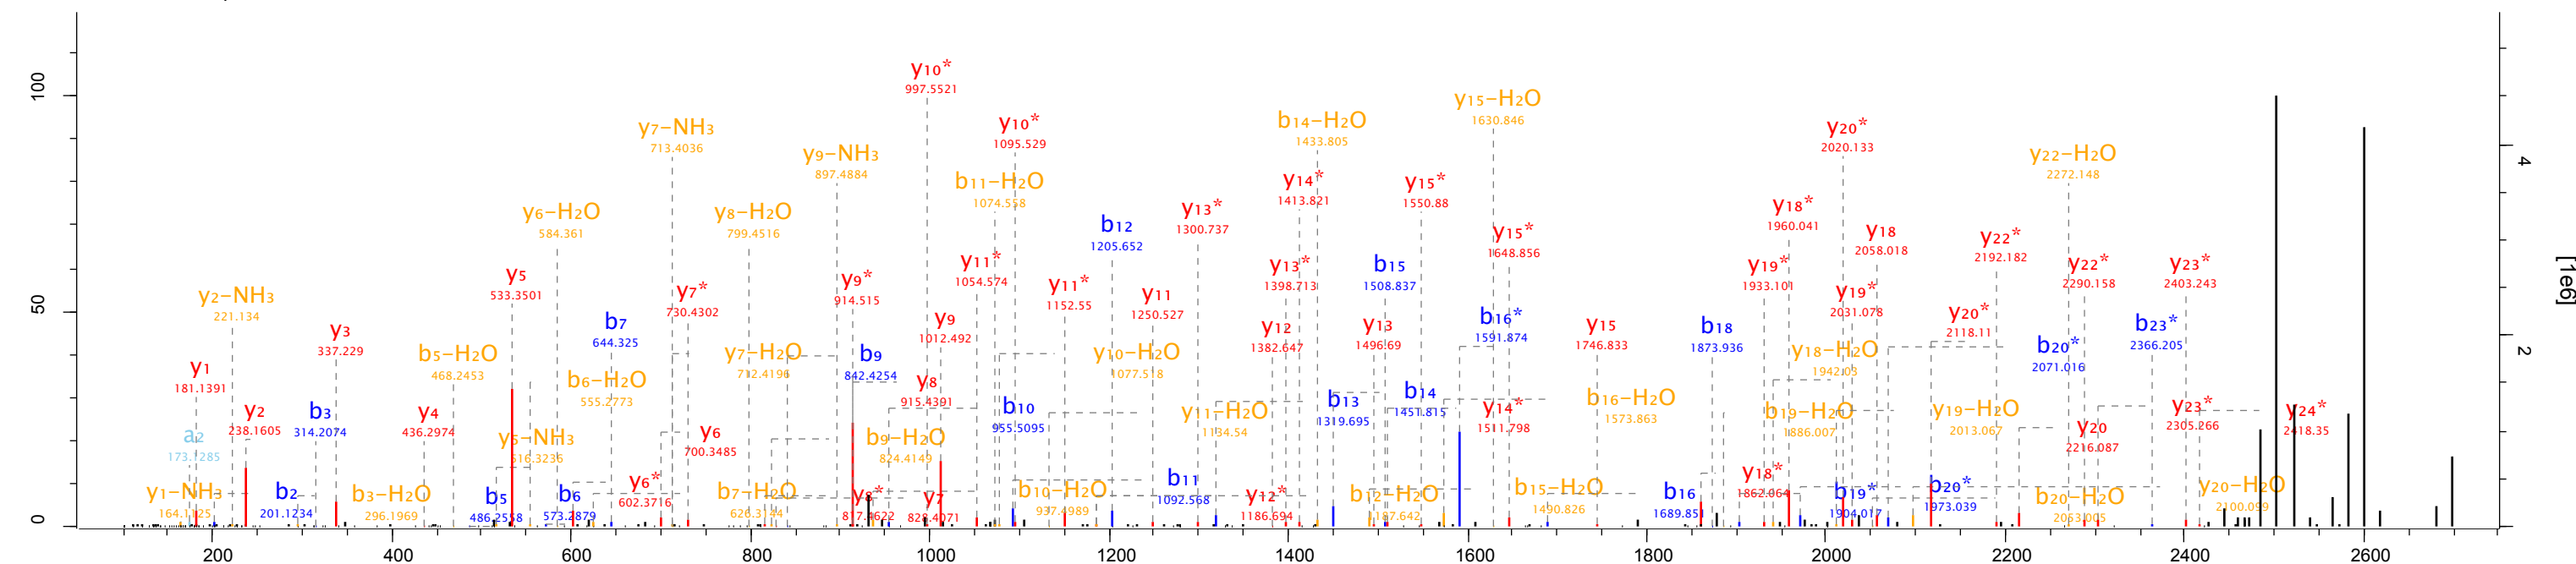

- S L L G D S A P T L H L N K G ph T P S Q S P V V G R -

Fragmentation mapping (b and y ions) is shown below the sequence:

- b ions (blue boxes):** b<sub>2</sub> (L), b<sub>3</sub> (L), b<sub>5</sub> (D), b<sub>6</sub> (S), b<sub>7</sub> (A), b<sub>9</sub> (T), b<sub>10</sub> (L), b<sub>11</sub> (H), b<sub>12</sub> (L), b<sub>13</sub> (N), b<sub>14</sub> (K), b<sub>15</sub> (G), b<sub>16</sub> (ph T), b<sub>18</sub> (S), b<sub>19</sub><sup>\*</sup> (Q), b<sub>20</sub><sup>\*</sup> (S), b<sub>23</sub><sup>\*</sup> (V).
- y ions (red boxes):** y<sub>18</sub> (A), y<sub>19</sub><sup>\*</sup> (S), y<sub>20</sub> (D), y<sub>22</sub><sup>\*</sup> (G), y<sub>23</sub><sup>\*</sup> (L), y<sub>24</sub><sup>\*</sup> (L).

Raw file: 20150814\_A375SR\_Phospho\_BR2\_03  
 Scan: 19073 Method: FTMS; HCD Score: 110.44 m/z: 1141.19 Gene names: SIRT1

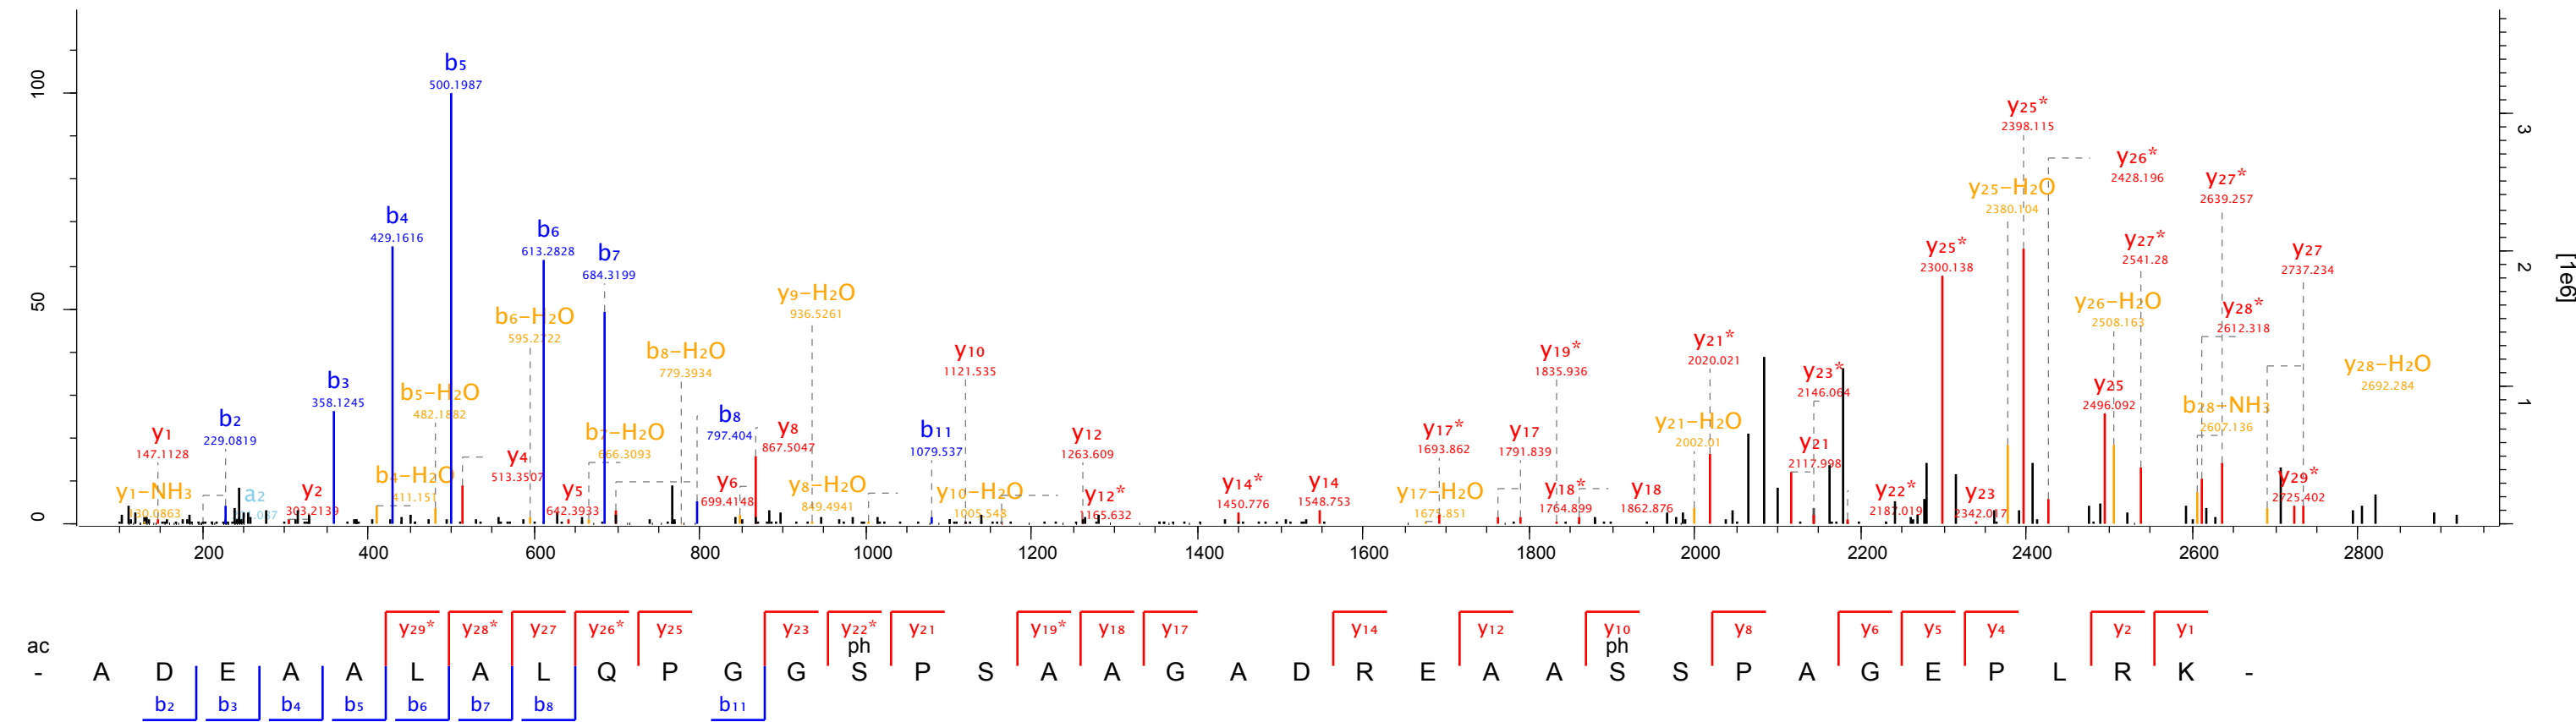

Raw file: 20150814\_A375SR\_Phospho\_BR2\_03  
 Scan: 19623 Method: FTMS; HCD Score: 113.53 m/z: 641.78 Gene names: ABLIM1

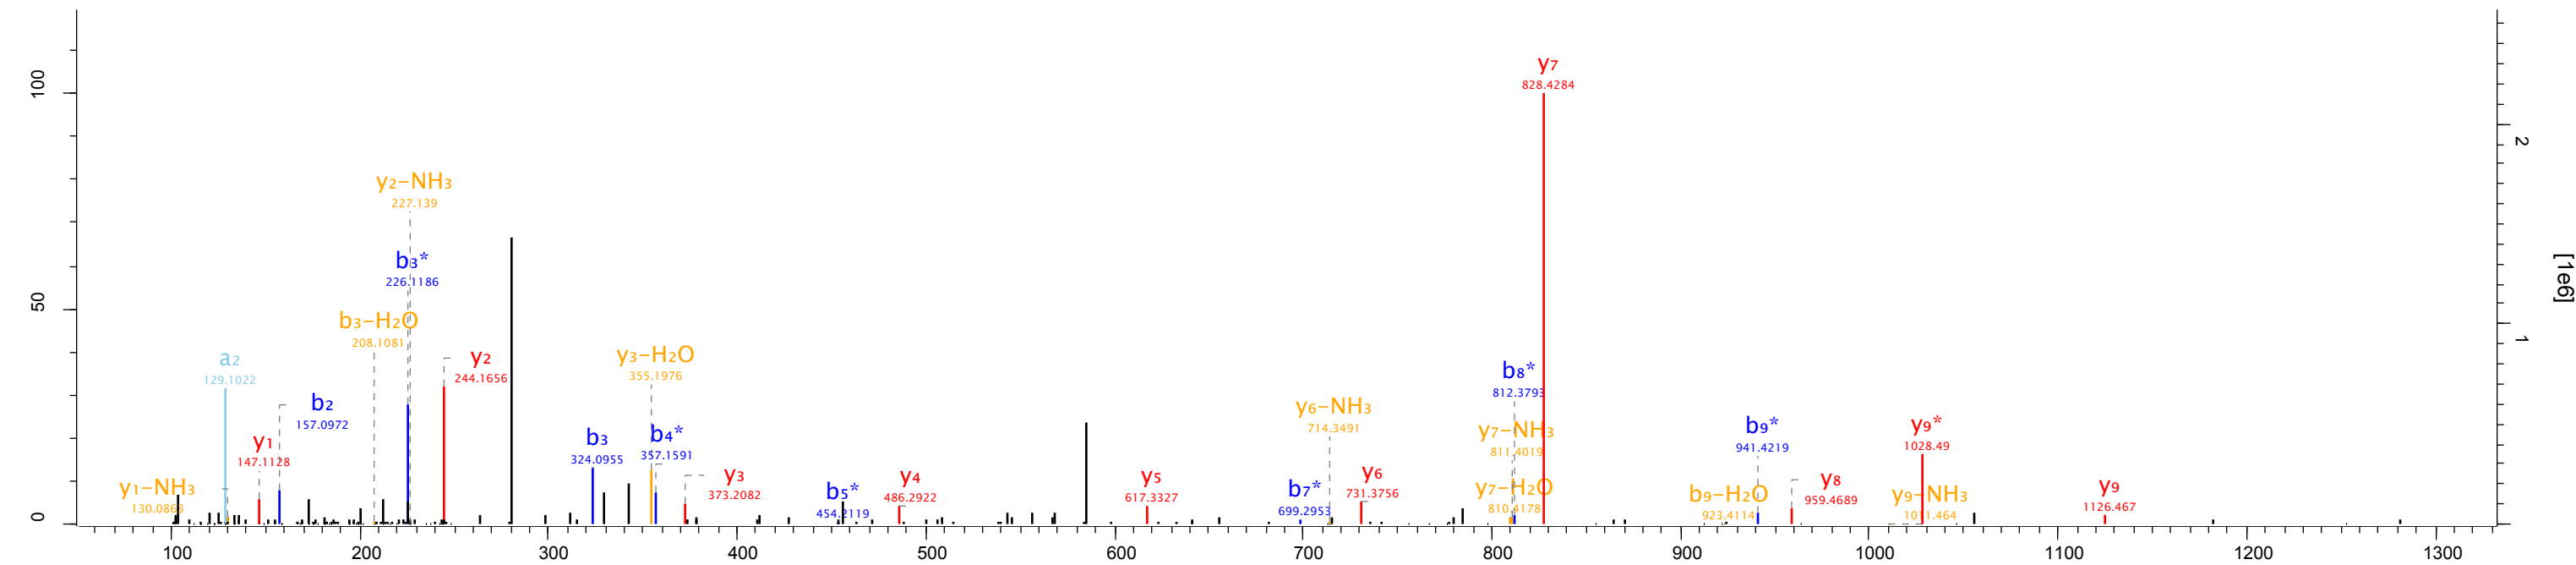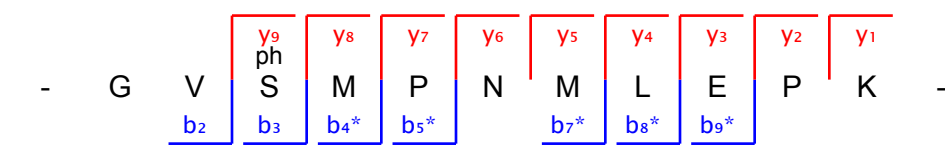



Raw file Scan Method Score m/z Gene names  
 20150814\_A375SR\_Phospho\_BR2\_03 20263 FTMS; HCD 190.92 1409.27 STRN

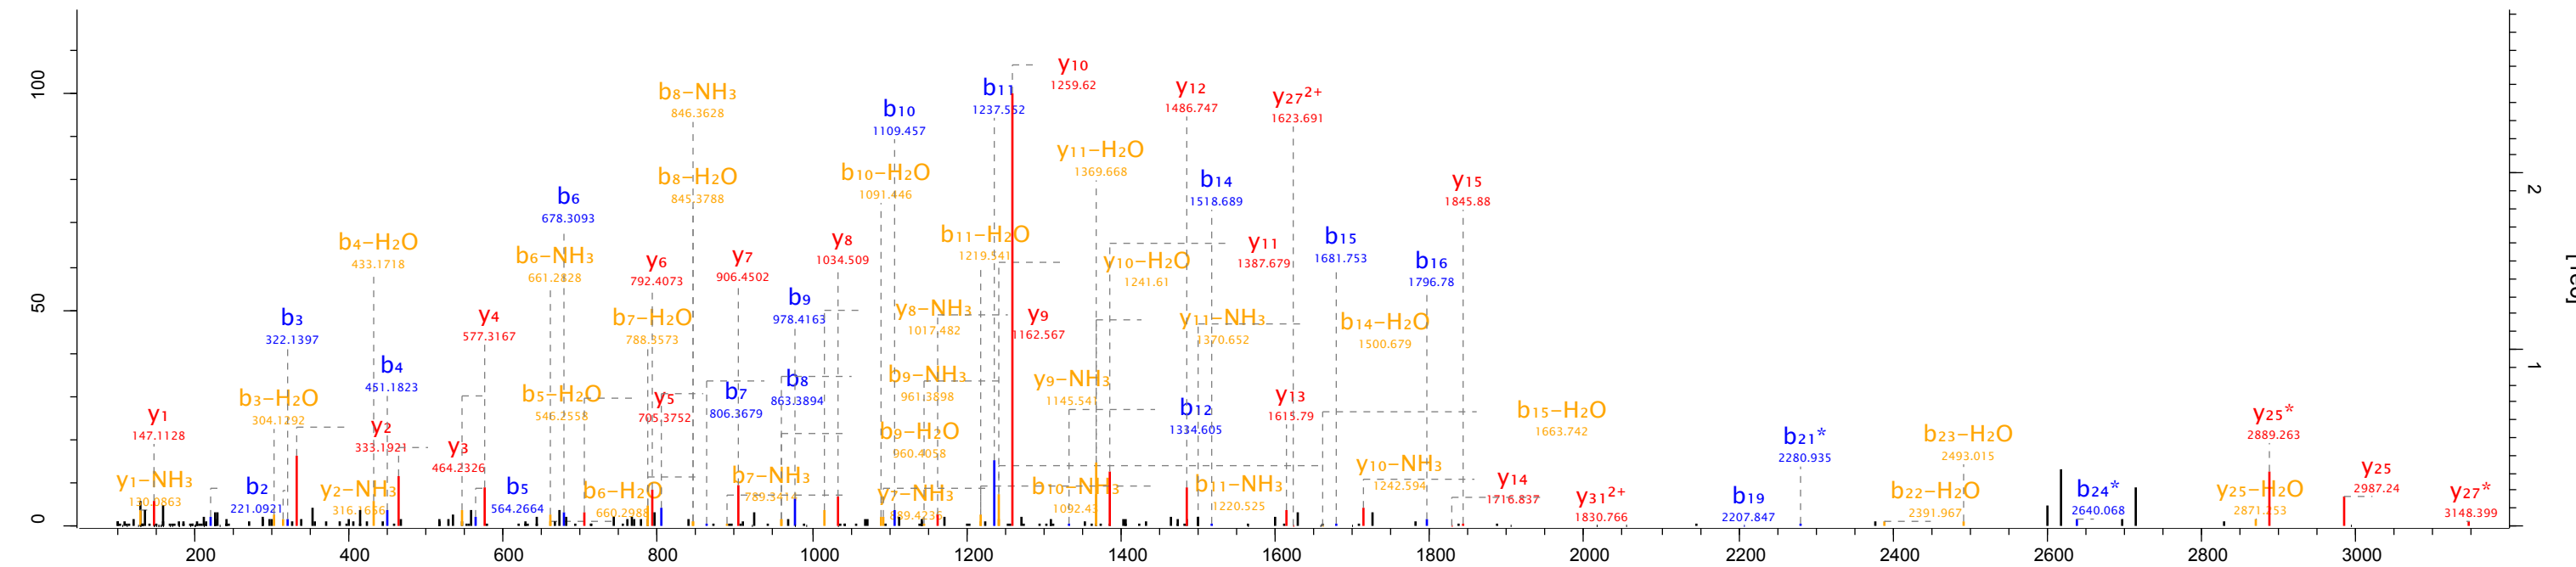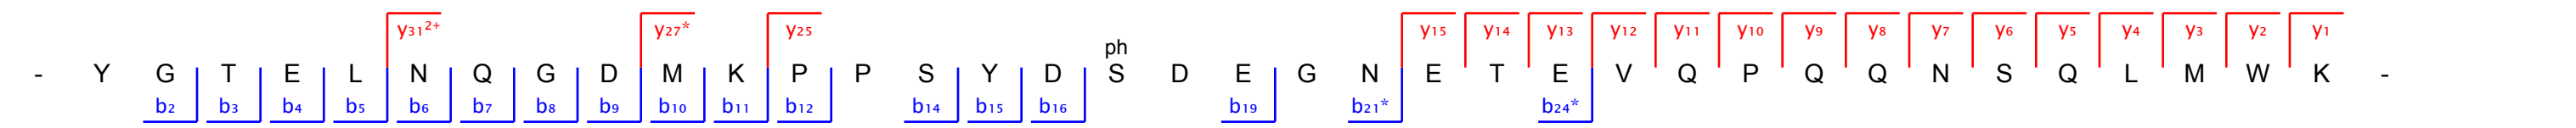

Raw file: 20150814\_A375SR\_Phospho\_BR2\_03  
 Scan: 20503 Method: FTMS; HCD Score: 186.94 m/z: 676.79 Gene names: AKAP11

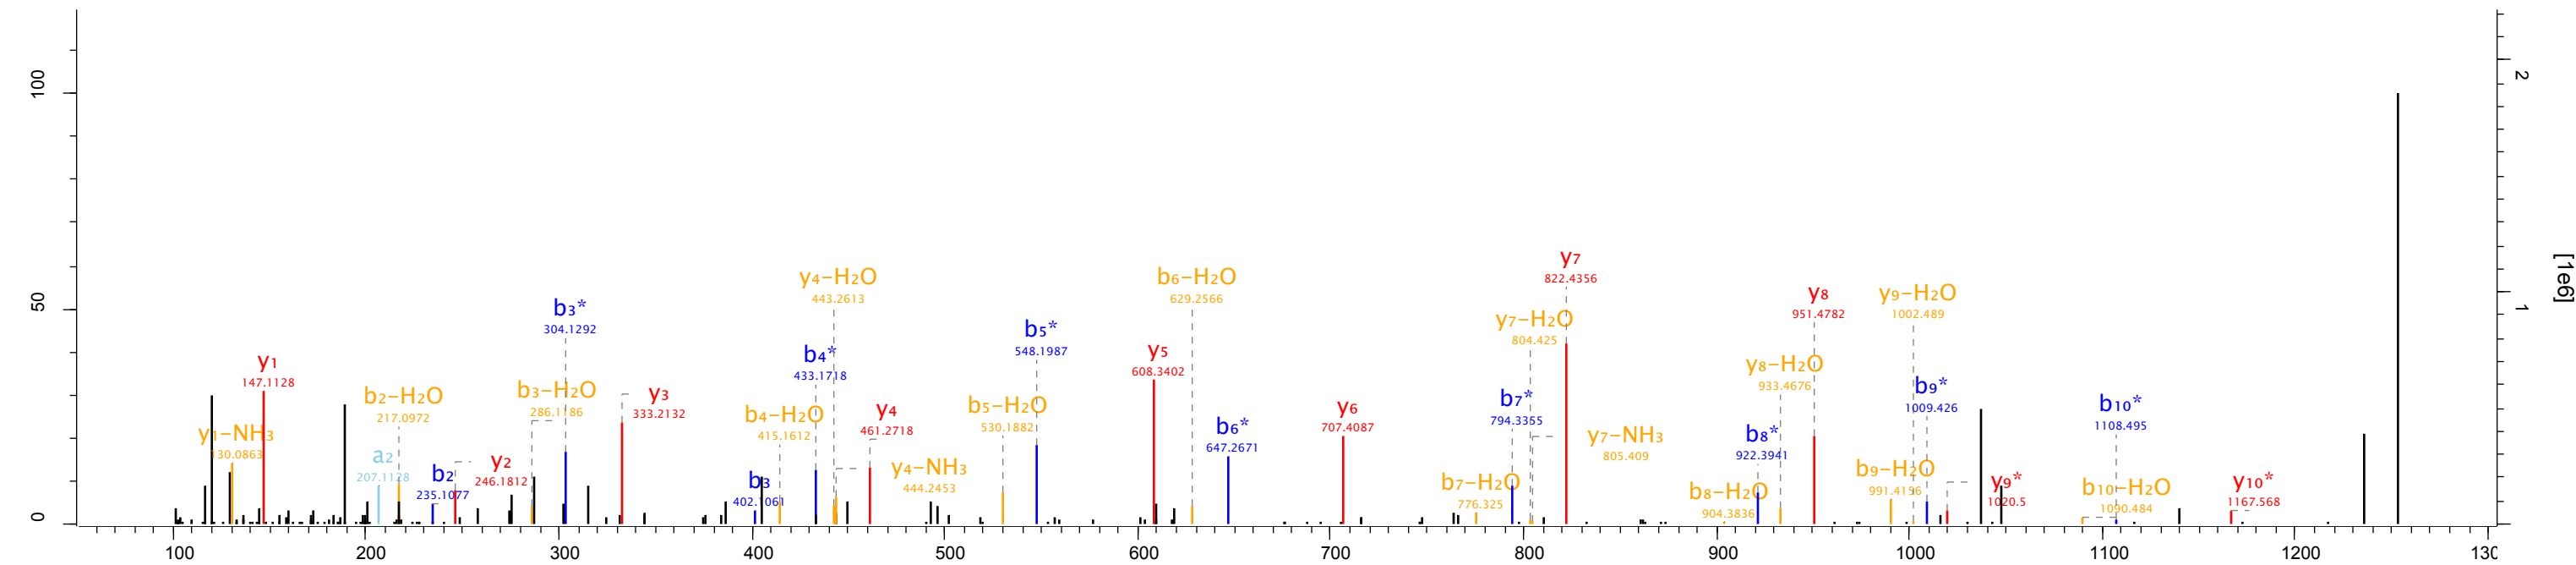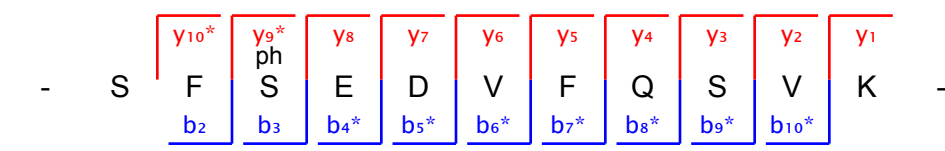

Raw file: 20150814\_A375SR\_Phospho\_BR2\_03  
 Scan: 20593 Method: FTMS; HCD Score: 112.91 m/z: 713.82 Gene names: SLC26A6

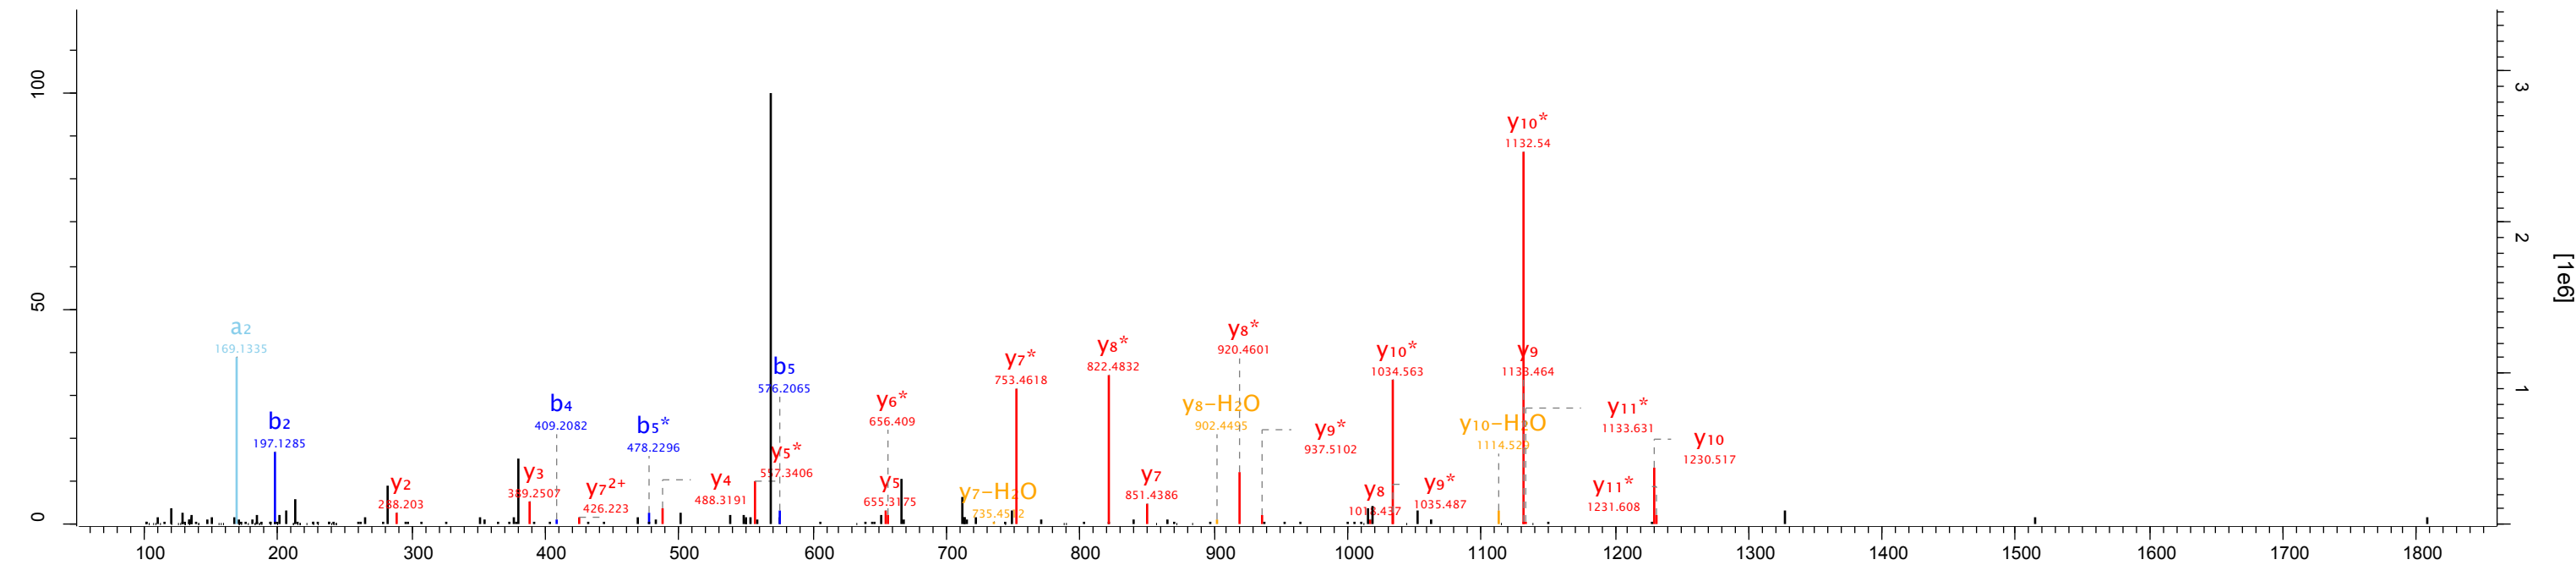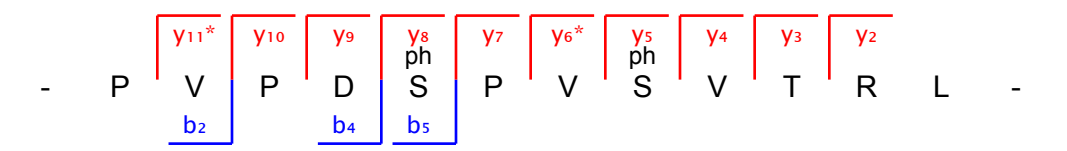

Raw file Scan Method Score m/z Gene names  
 20150814\_A375SR\_Phospho\_BR2\_03 21033 FTMS; HCD 143.96 1016.42 ERCC5;BIVM-ERCC5

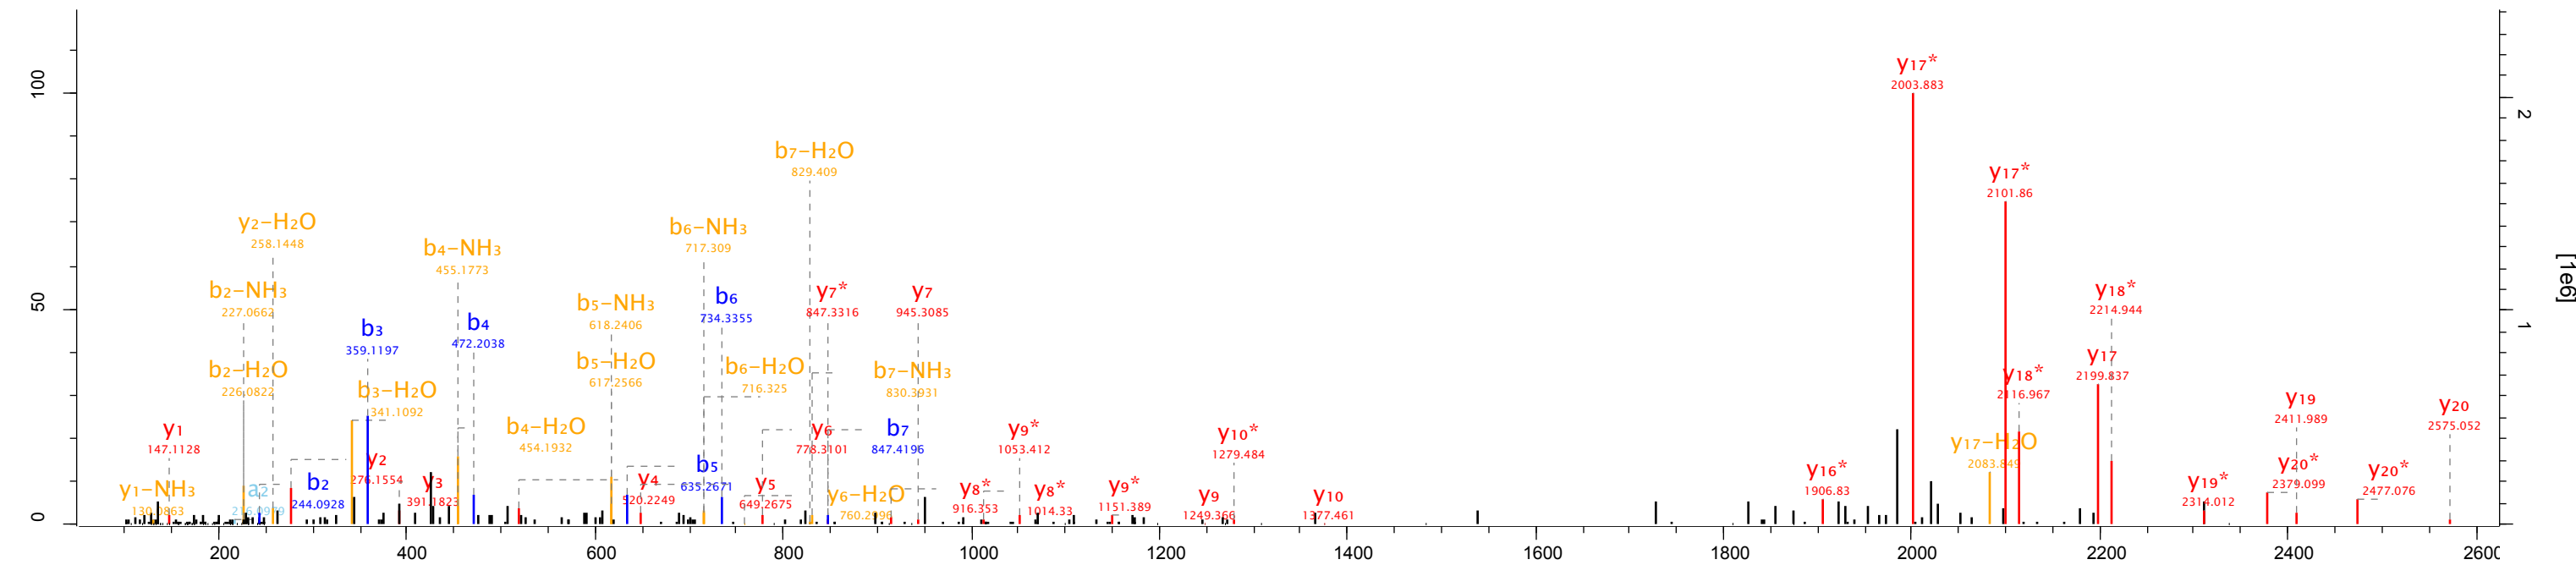

- E N D L Y V L P P L Q E E E K H S ph S E E E D E K -

Fragmentation mapping (b-ions in blue, y-ions in red):

- b2: N
- b3: D
- b4: L
- b5: Y
- b6: V
- b7: L
- y1: K
- y2: D
- y3: E
- y4: E
- y5: E
- y6: E
- y7: S
- y8: H
- y9: K
- y10: E
- y16: P
- y17: P
- y18: L
- y19: V
- y20: Y

Raw file: 20150814\_A375SR\_Phospho\_BR2\_03  
 Scan: 21053 Method: FTMS; HCD Score: 137.56 m/z: 855.33 Gene names: CDC42BPA

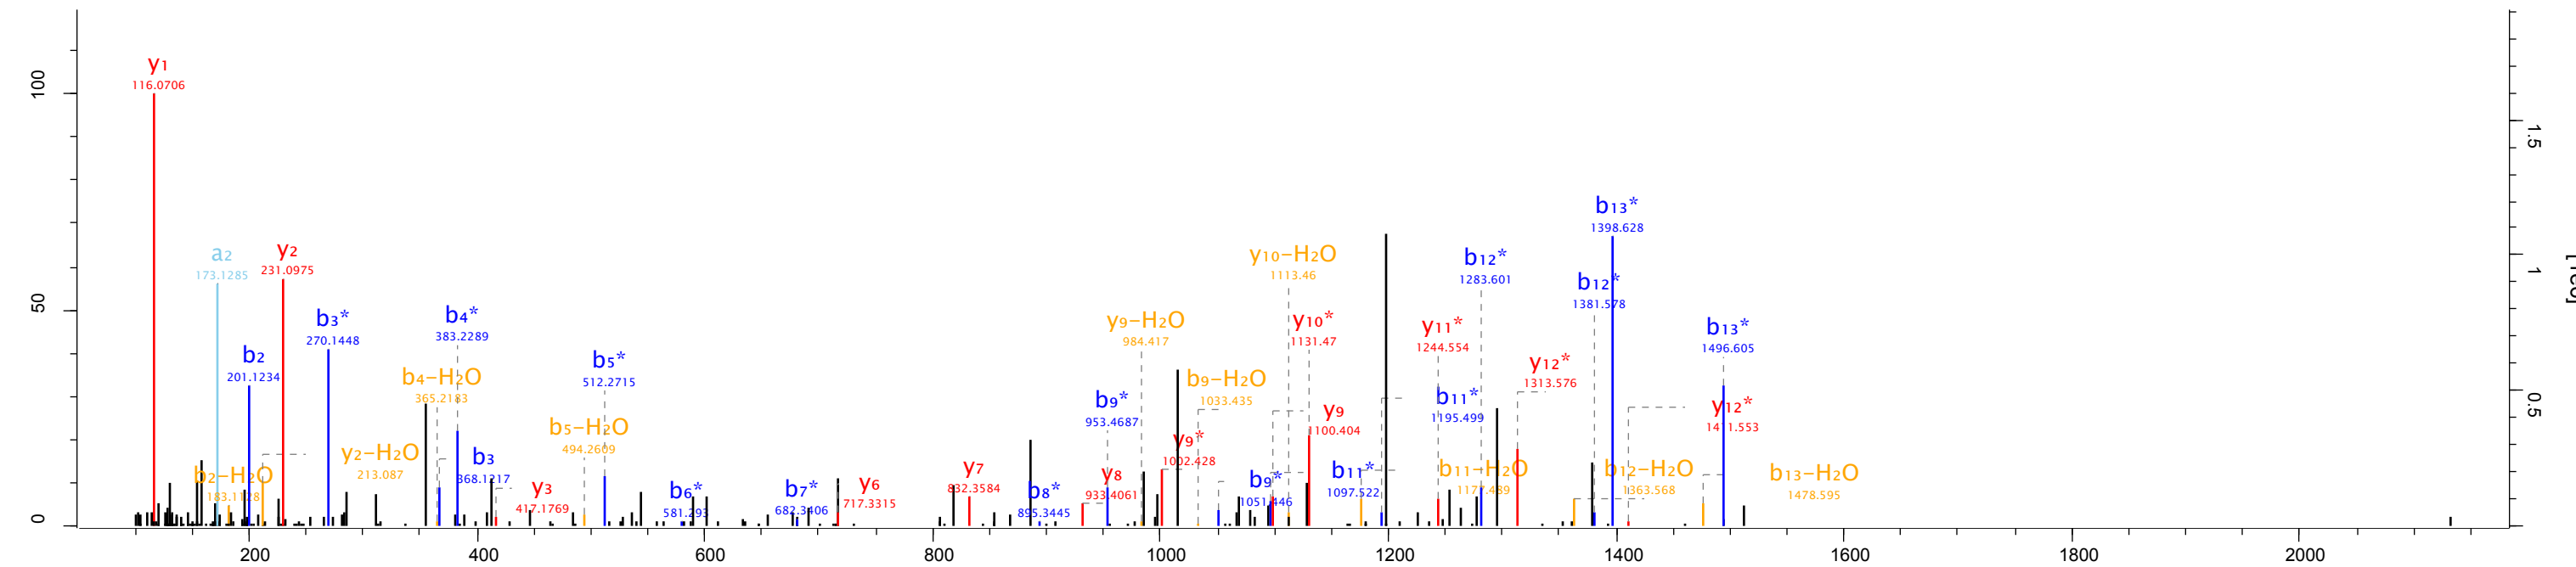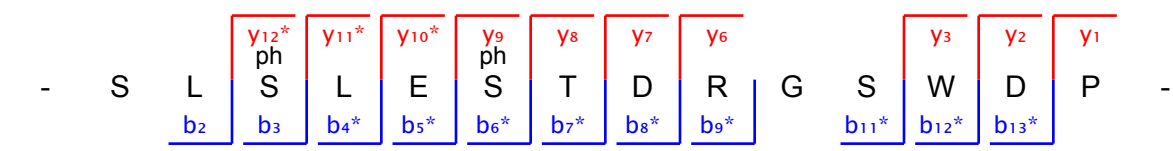

Raw file: 20150814\_A375SR\_Phospho\_BR2\_03  
 Scan: 21143 Method: FTMS; HCD Score: 68.42 m/z: 749.32 Gene names: RB1CC1

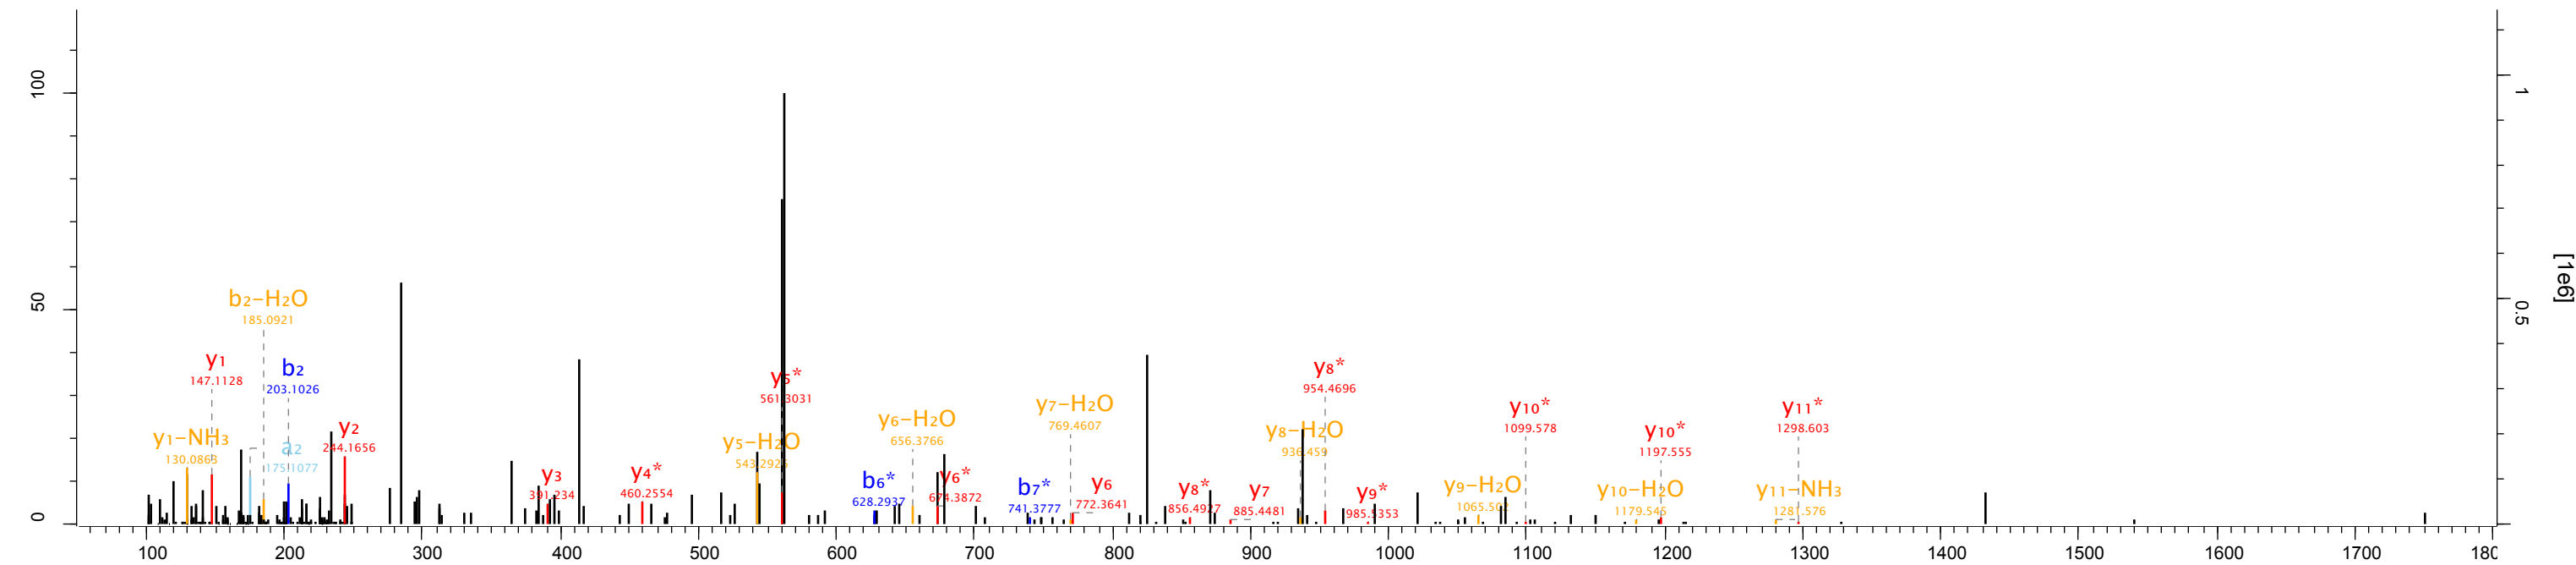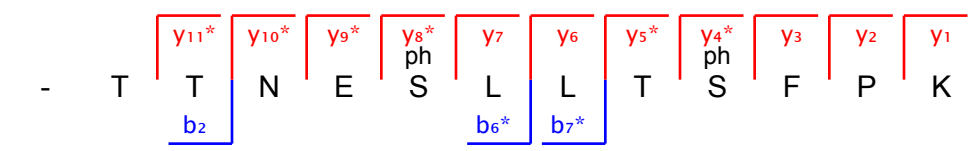

Raw file: 20150814\_A375SR\_Phospho\_BR2\_03  
 Scan: 21253 Method: FTMS; HCD Score: 190.44 m/z: 1017.45 Gene names: NES

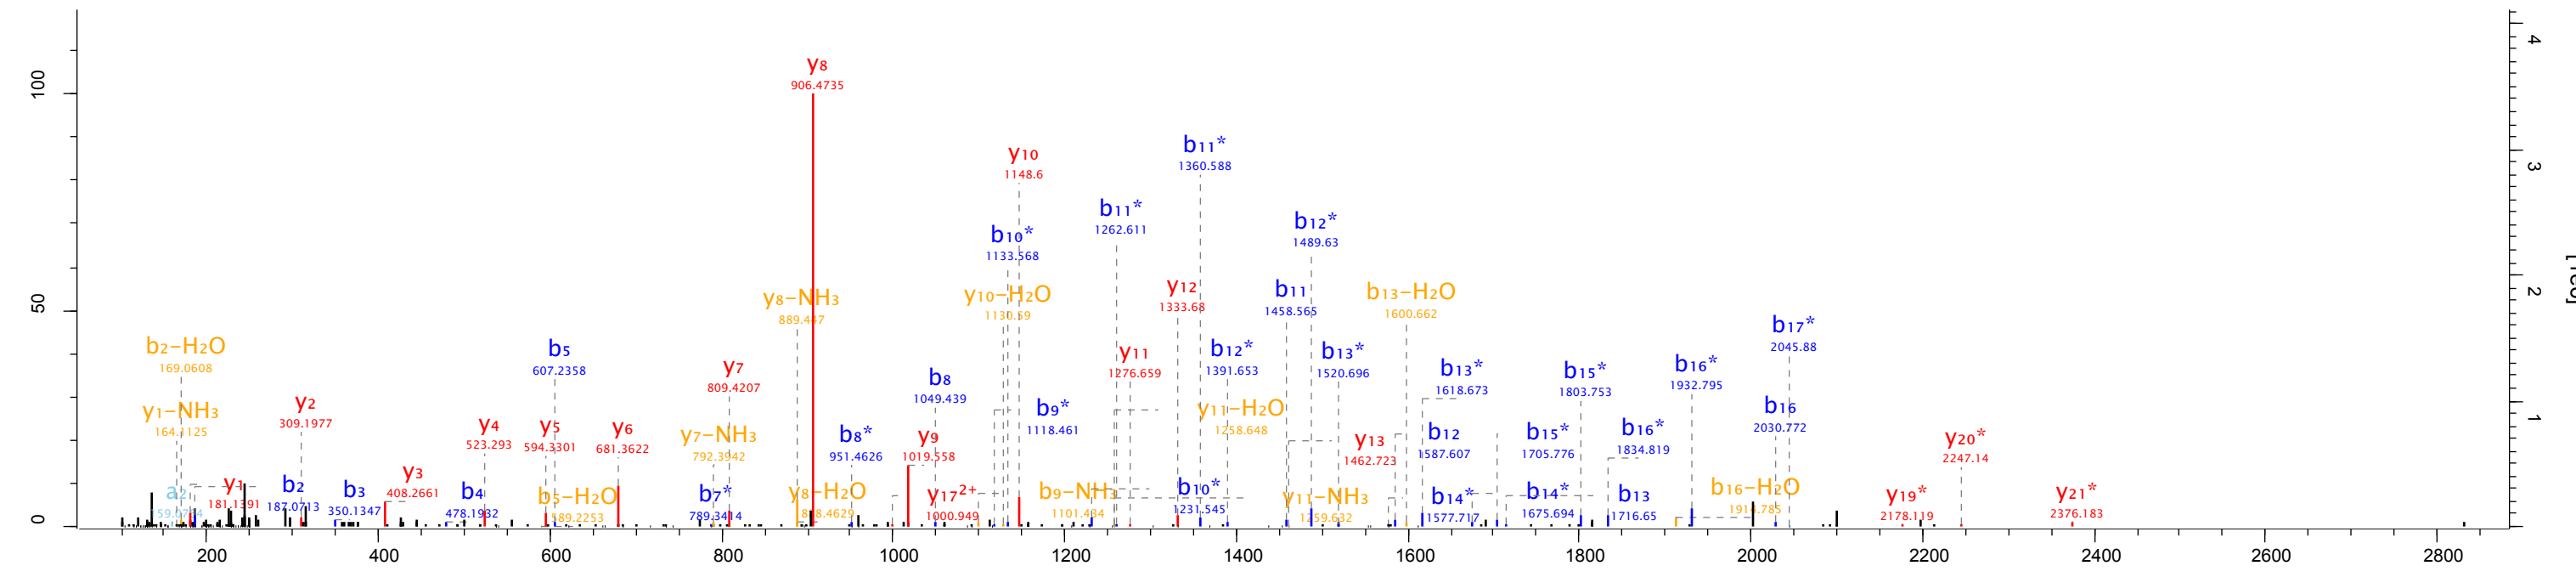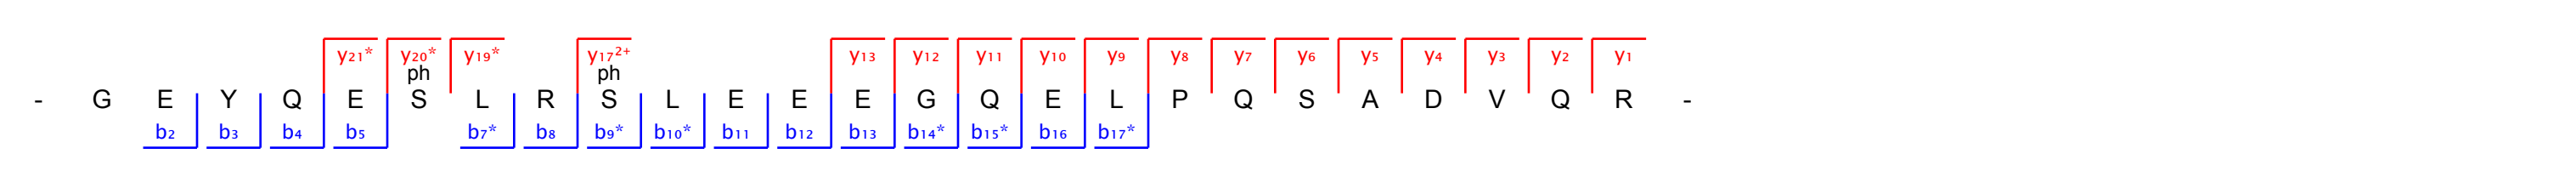

Raw file: 20150814\_A375SR\_Phospho\_BR2\_03  
 Scan: 2143 Method: FTMS; HCD Score: 304.74 m/z: 775.32 Gene names: PCM1

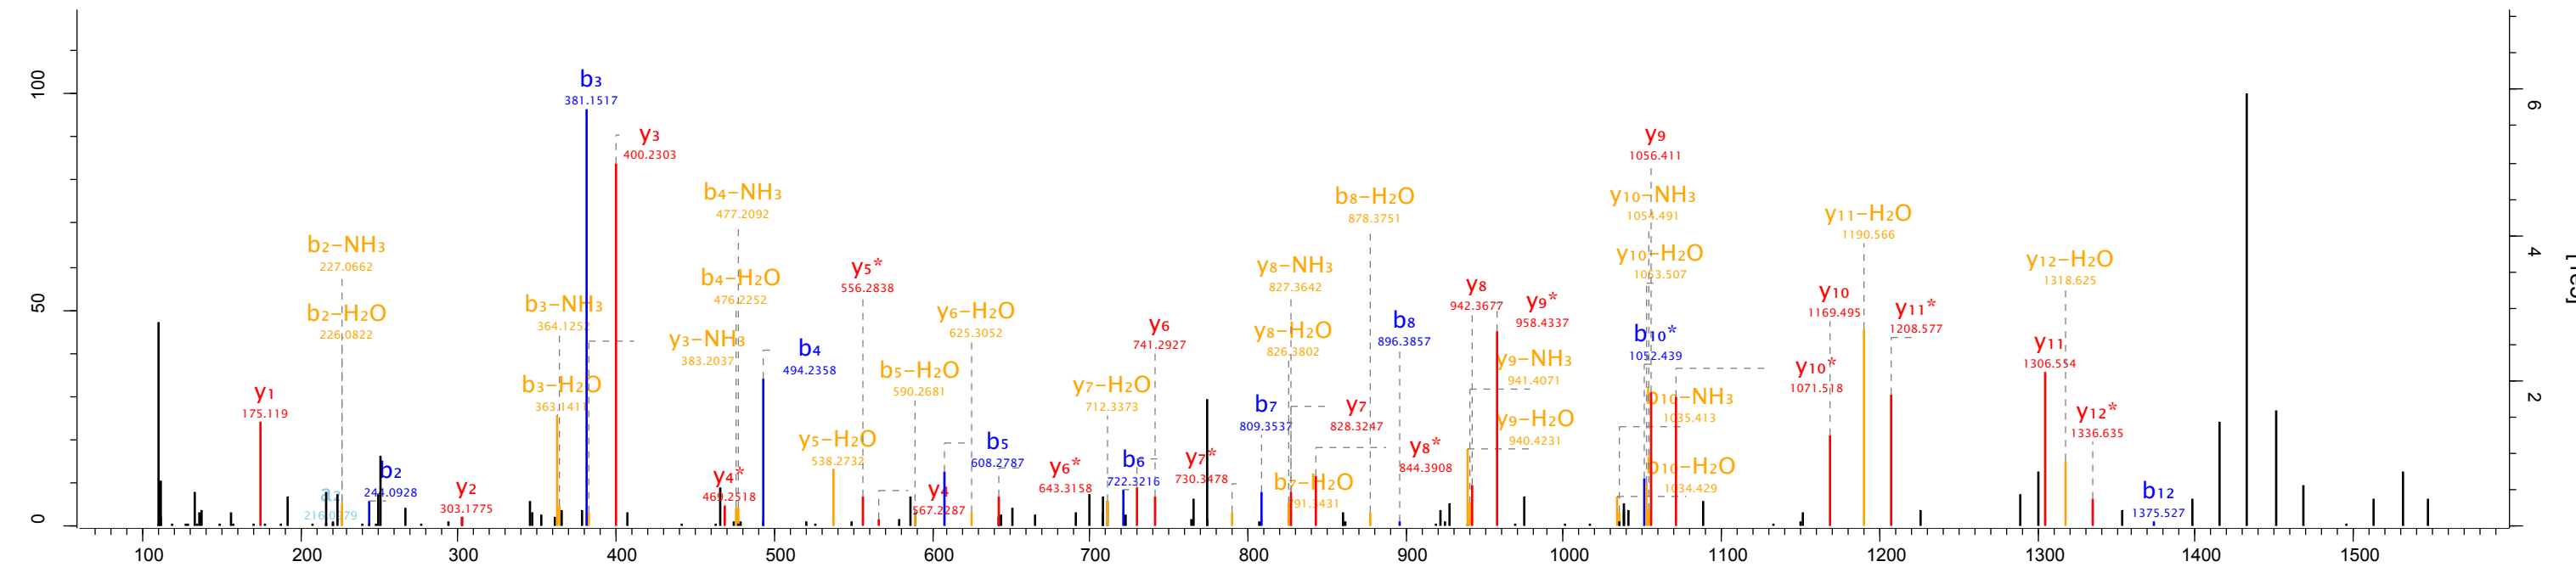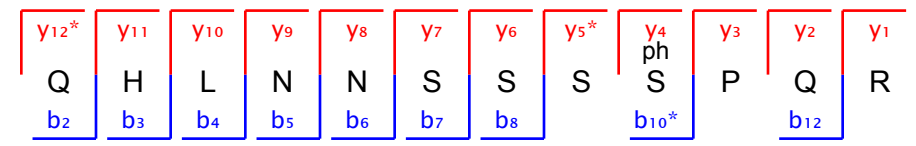



Raw file 20150814\_A375SR\_Phospho\_BR2\_03 Scan 21653 Method FTMS; HCD Score 183.58 m/z 1006.95 Gene names SHROOM3

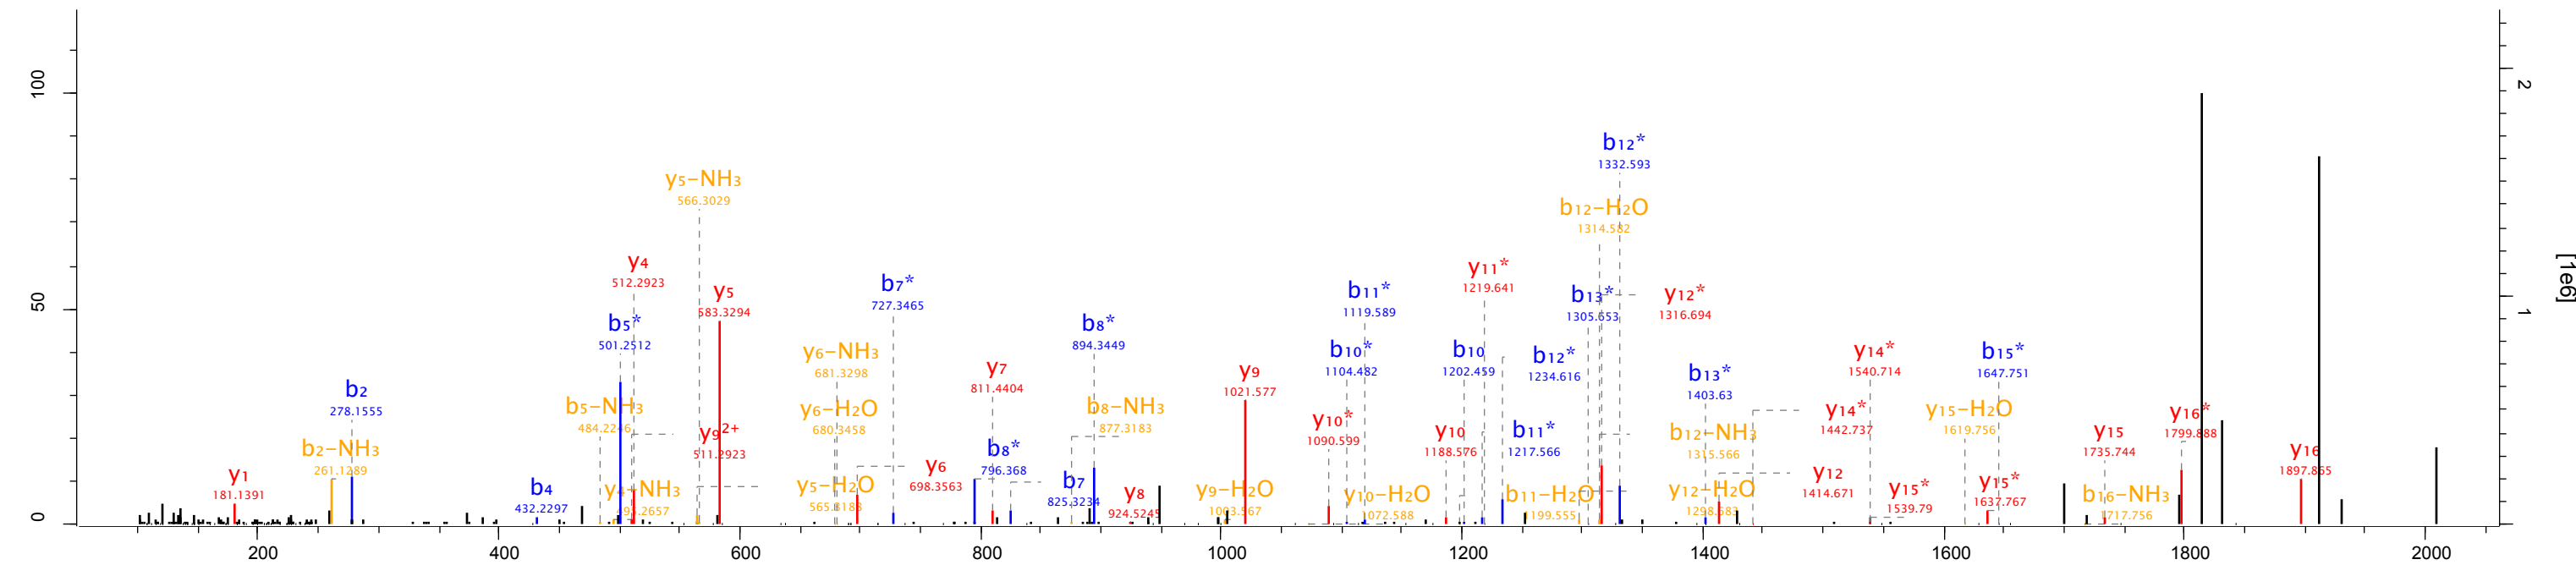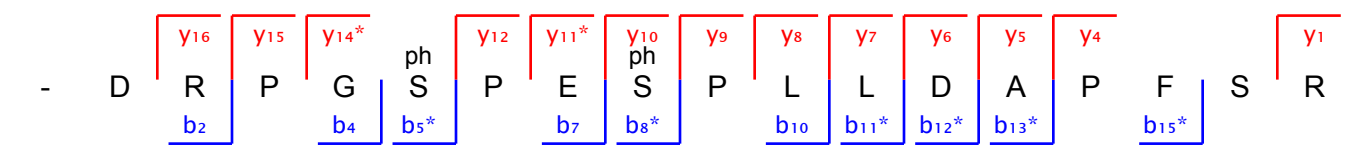

Raw file: 20150814\_A375SR\_Phospho\_BR2\_03  
 Scan: 22183 Method: FTMS; HCD Score: 62.83 m/z: 1176.2 Gene names: RFX7

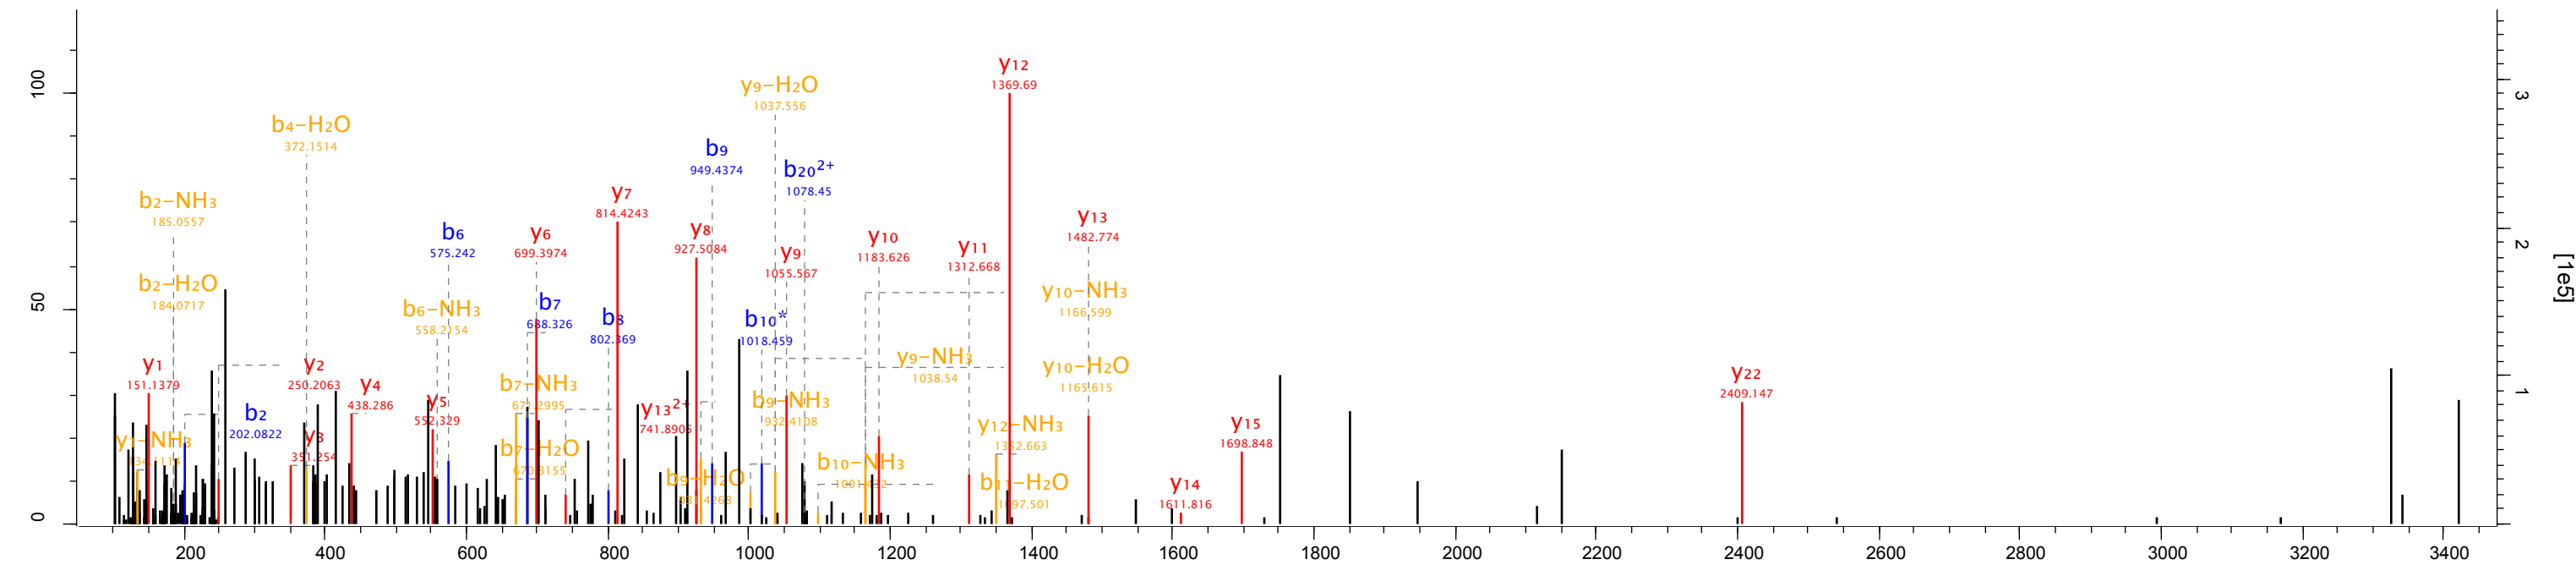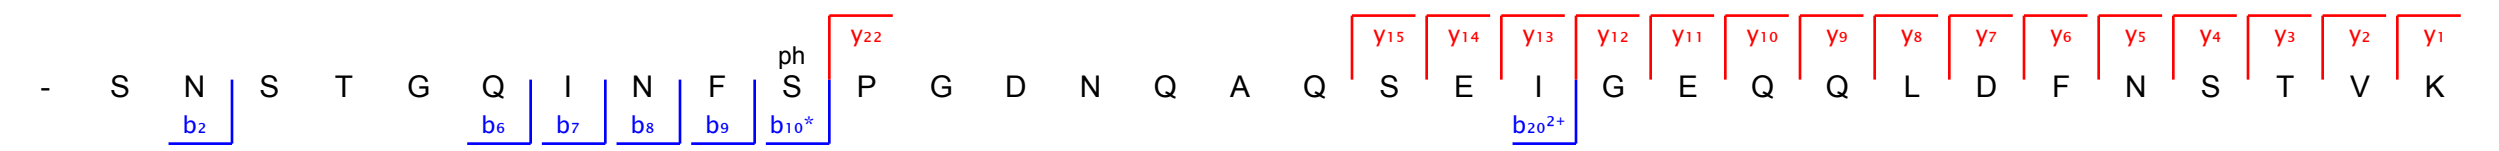

Raw file 20150814\_A375SR\_Phospho\_BR2\_03 Scan 22213 Method FTMS; HCD Score 248.45 m/z 1278.45 Gene names OXSR1

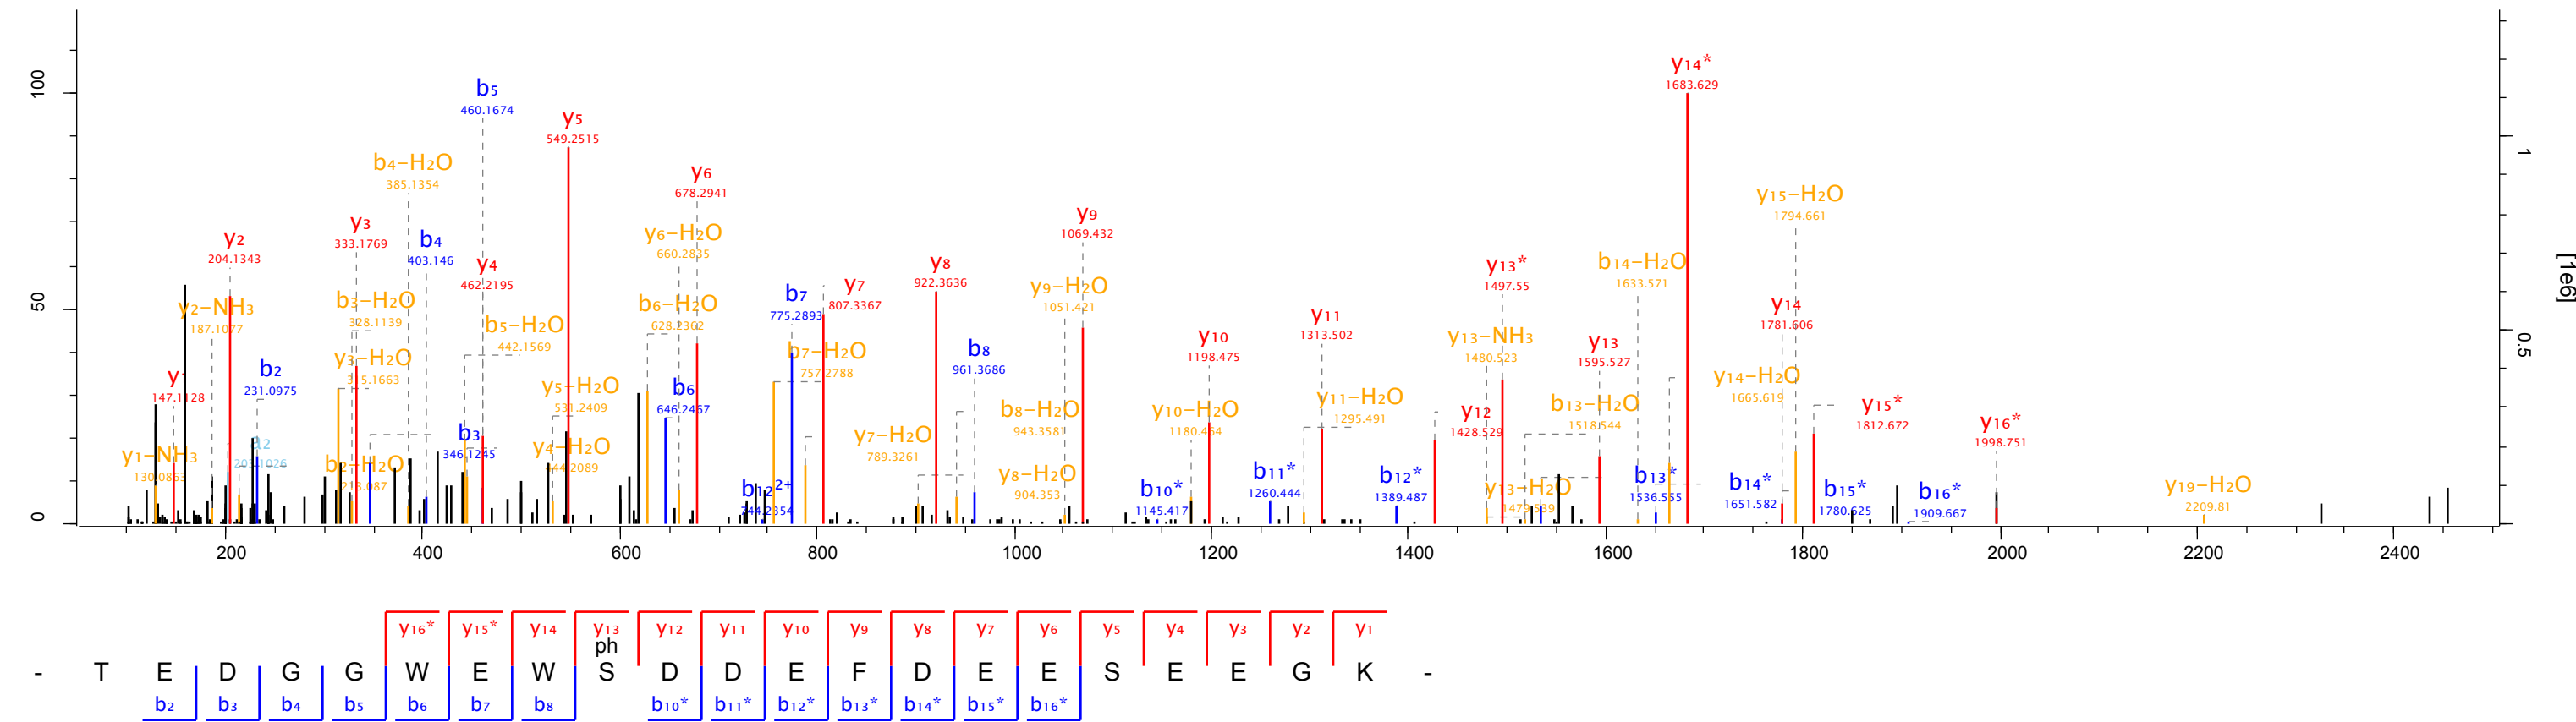

Raw file  
20150814\_A375SR\_Phospho\_BR2\_03

Scan 22393 Method FTMS; HCD Score 148.3 m/z 1412.58 Gene names MAP1B

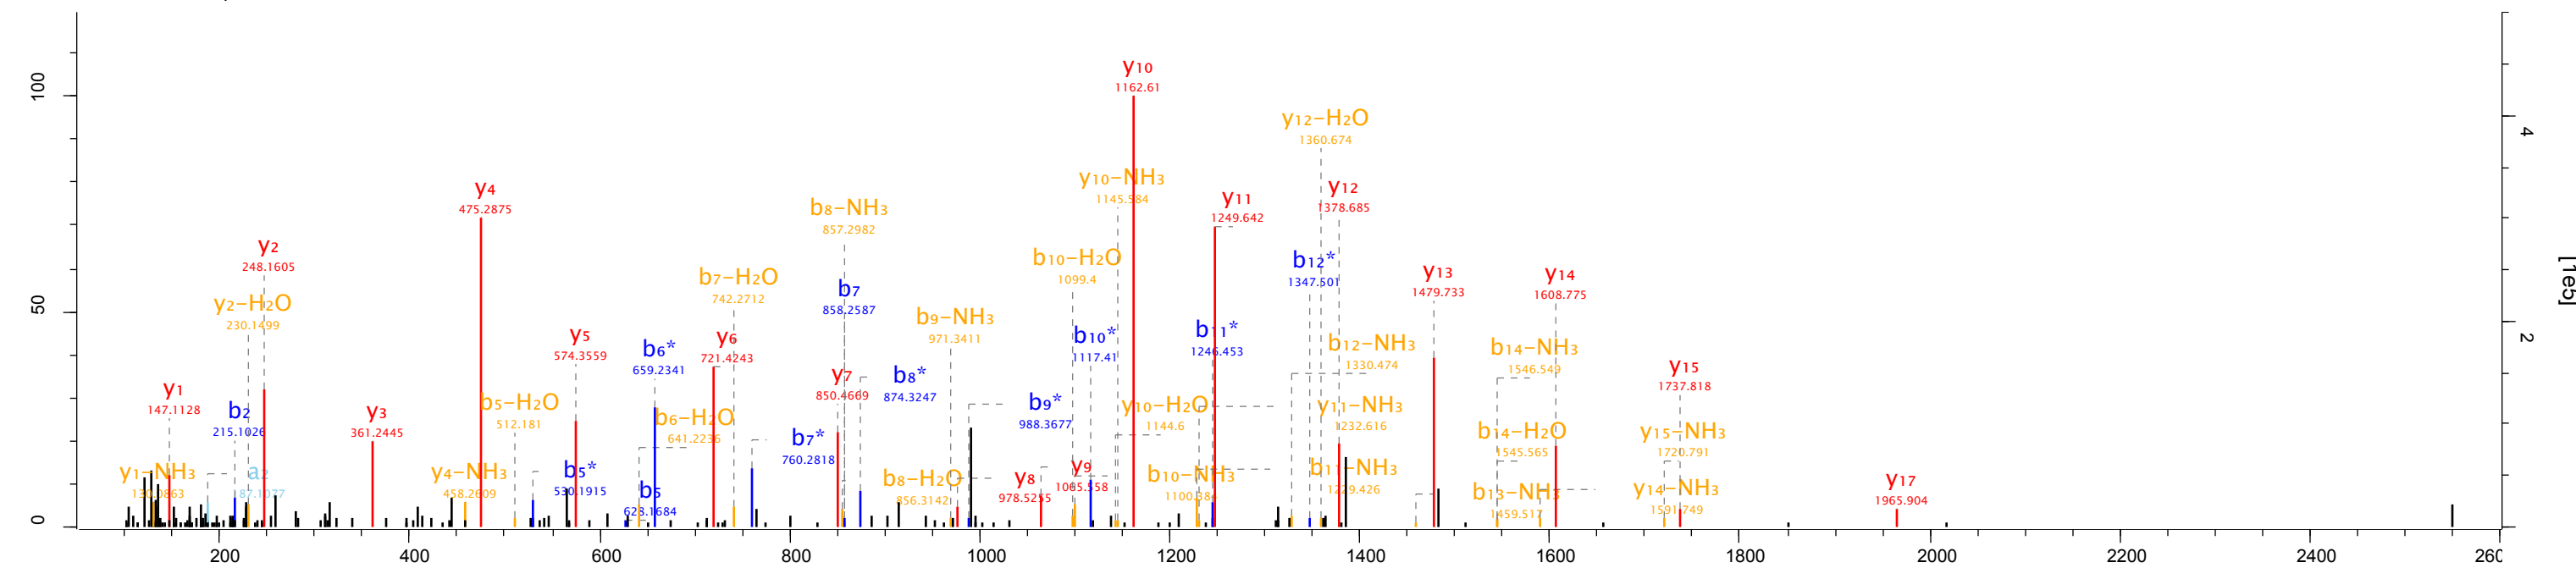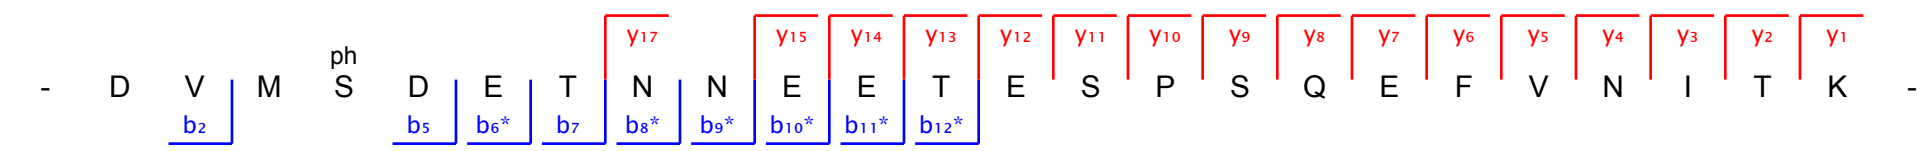

Raw file: 20150814\_A375SR\_Phospho\_BR2\_03  
 Scan: 22543 Method: FTMS; HCD Score: 126.42 m/z: 921.08 Gene names: PML

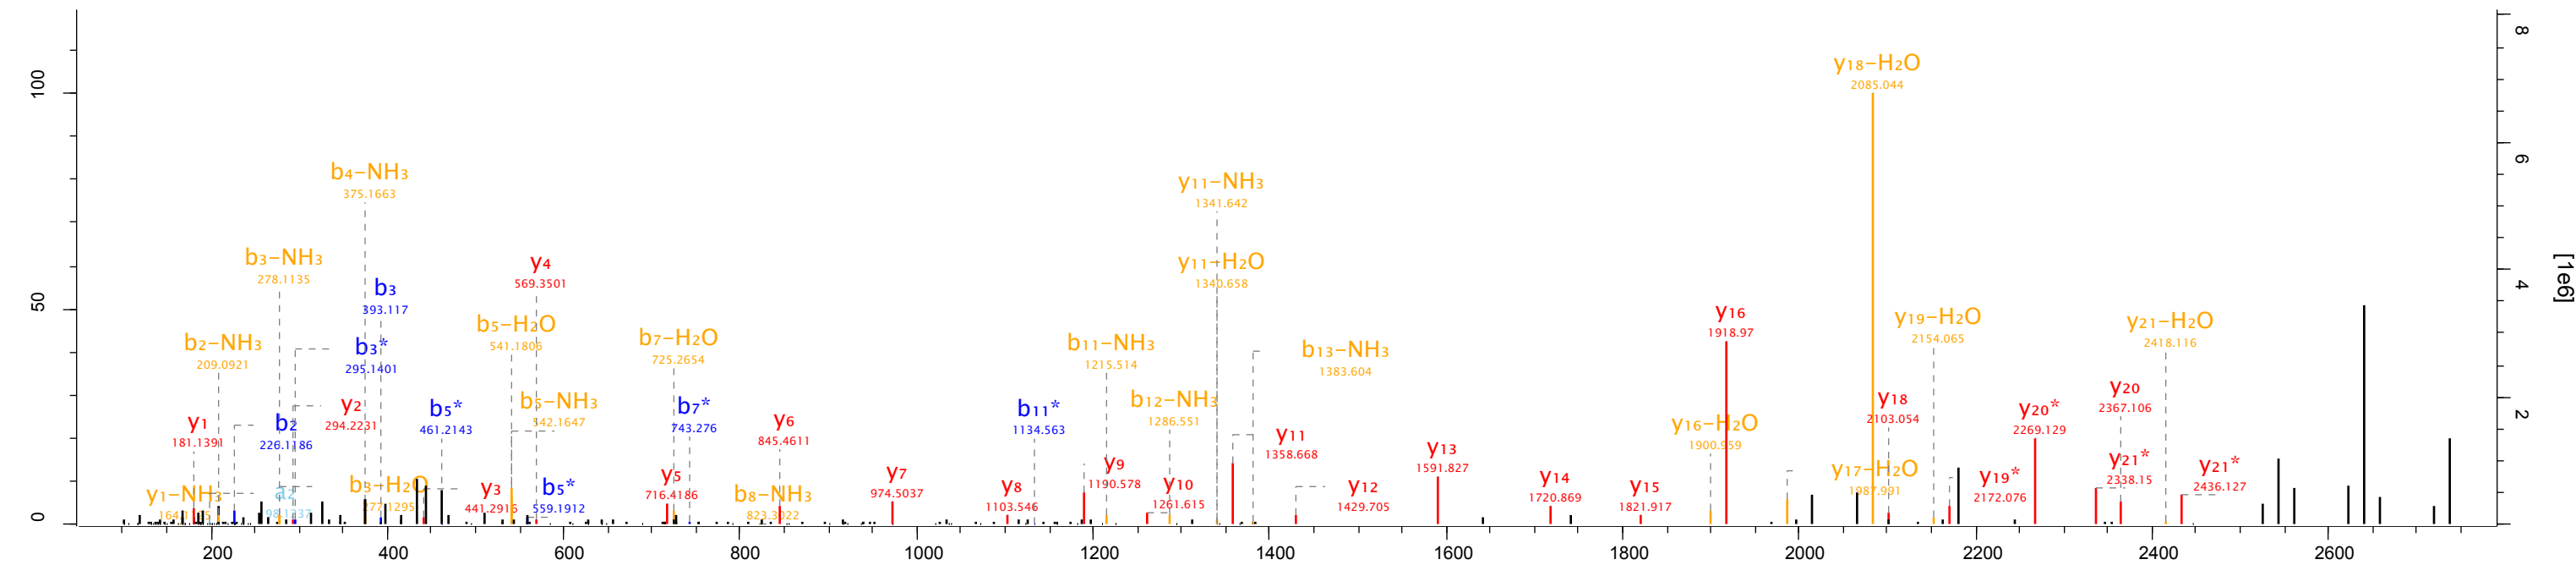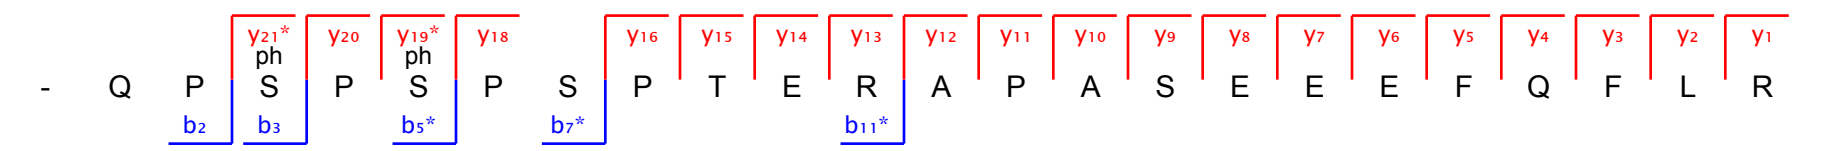

Raw file: 20150814\_A375SR\_Phospho\_BR2\_03  
 Scan: 22613 Method: FTMS; HCD Score: 230.85 m/z: 1205 Gene names: SOX10

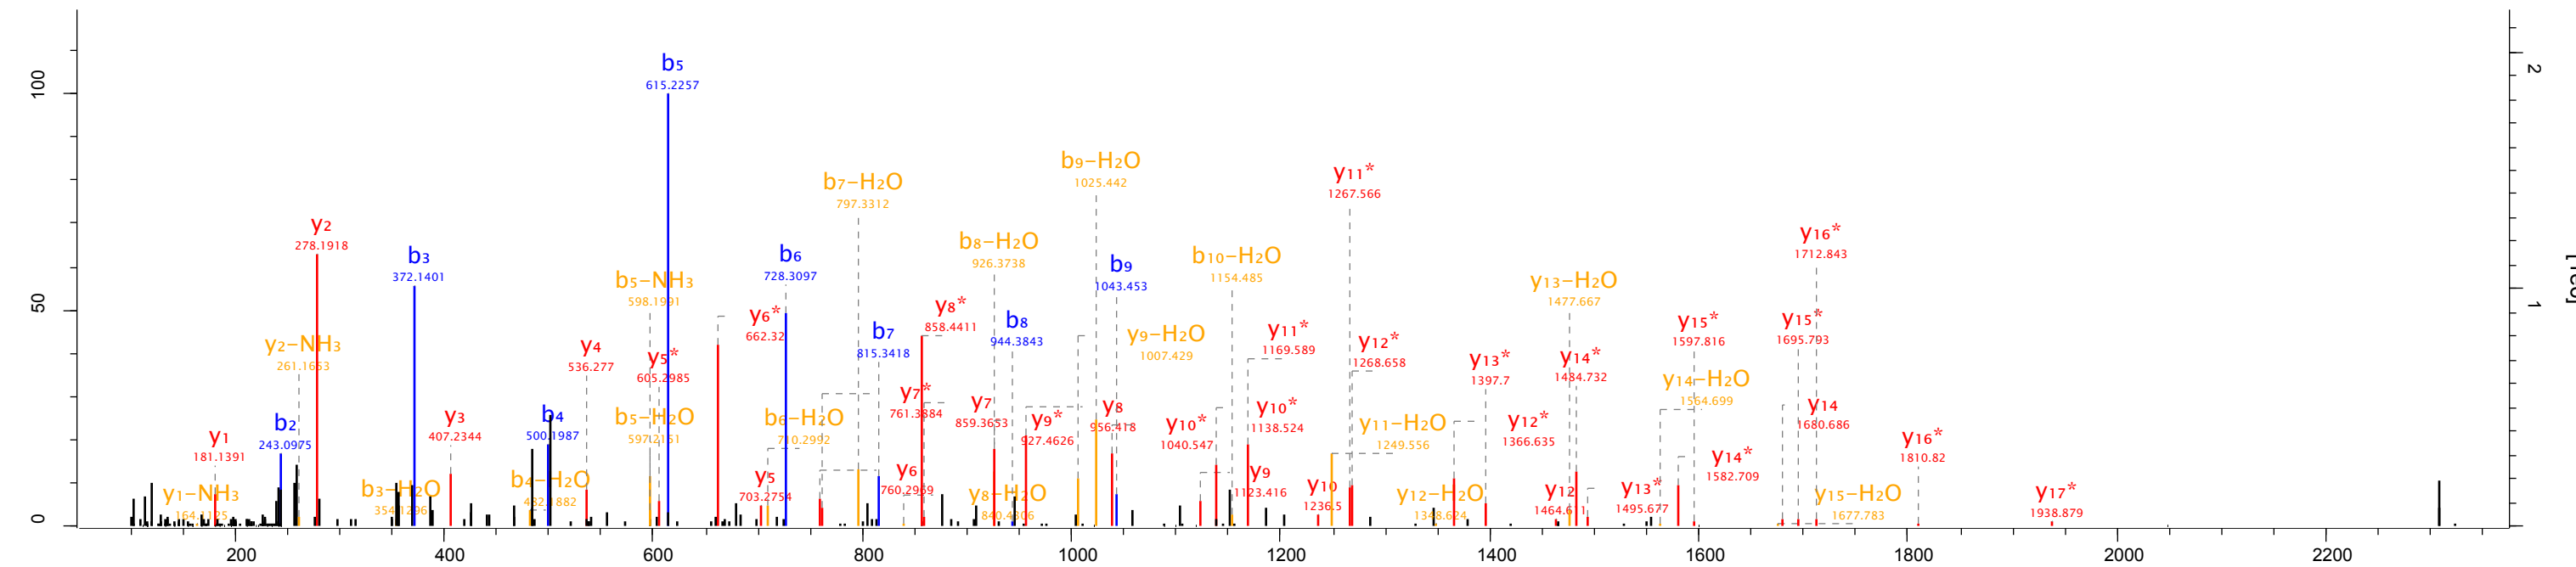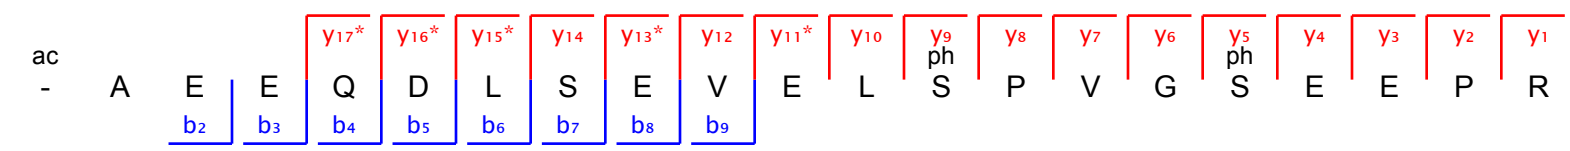

Raw file  
 20150814\_A375SR\_Phospho\_BR2\_03  
 Scan 22663 Method FTMS; HCD Score 238.59 m/z 1277.55 Gene names INPP5F

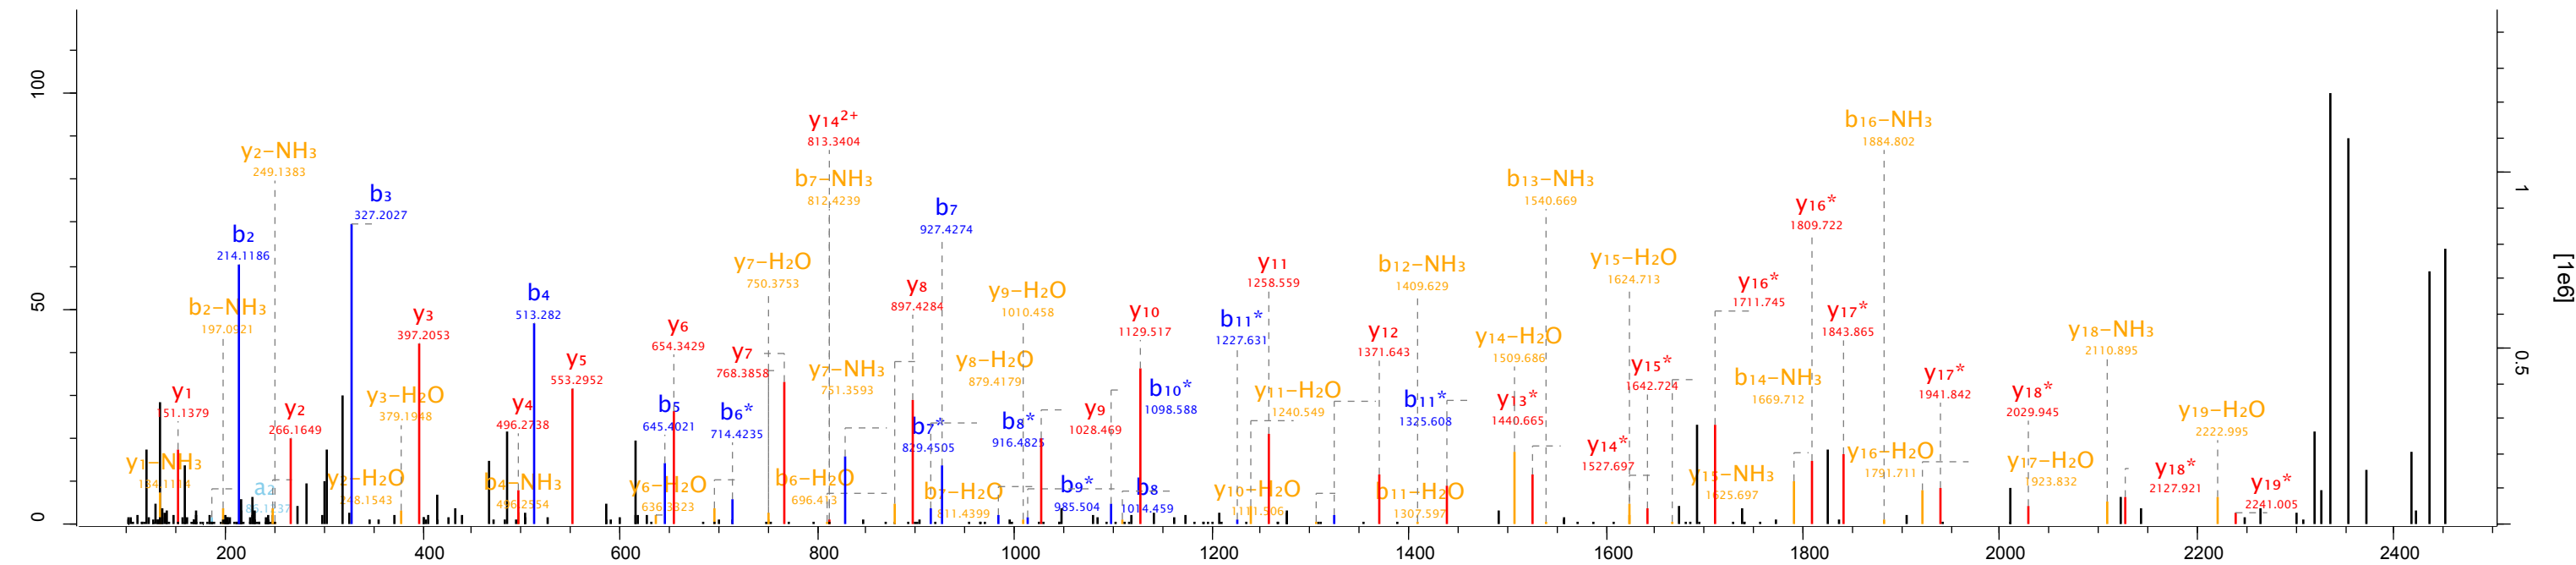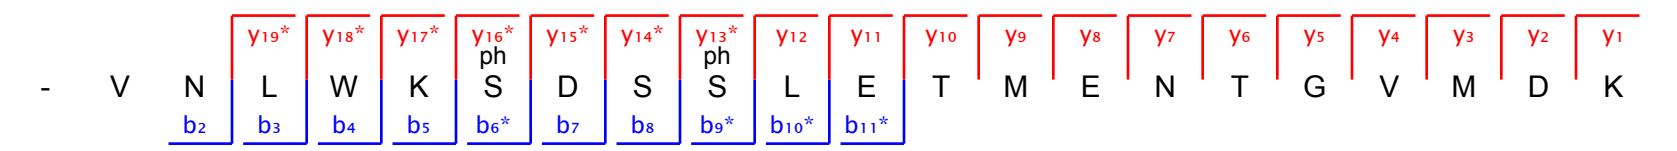

Raw file 20150814\_A375SR\_Phospho\_BR2\_03 Scan 22673 Method FTMS; HCD Score 245.38 m/z 1094.47 Gene names GTF21

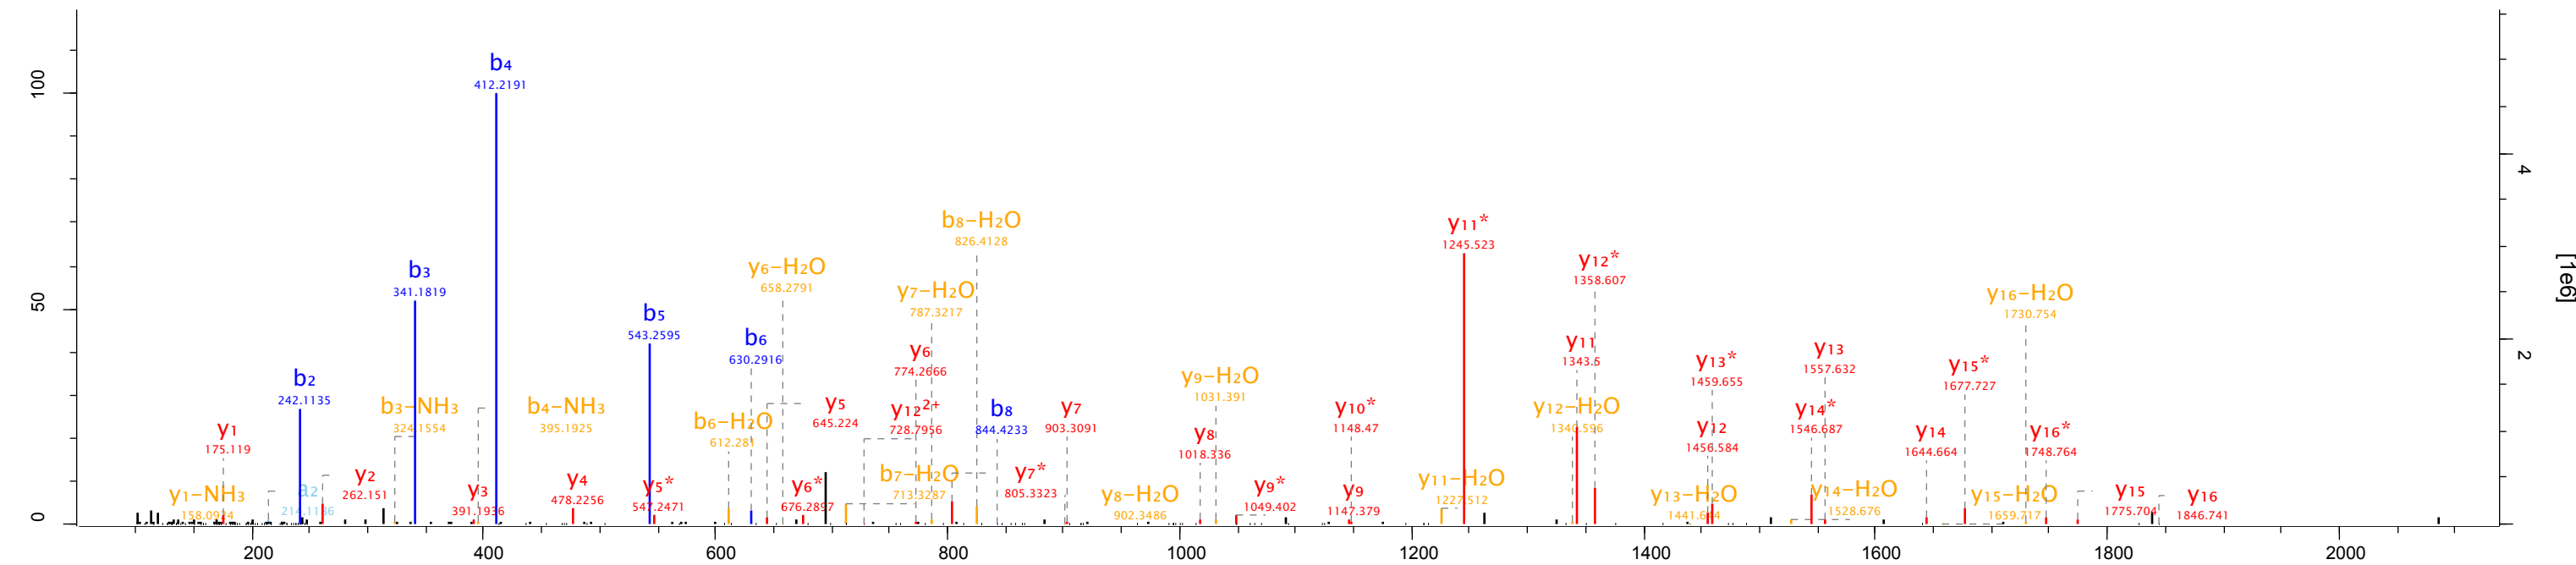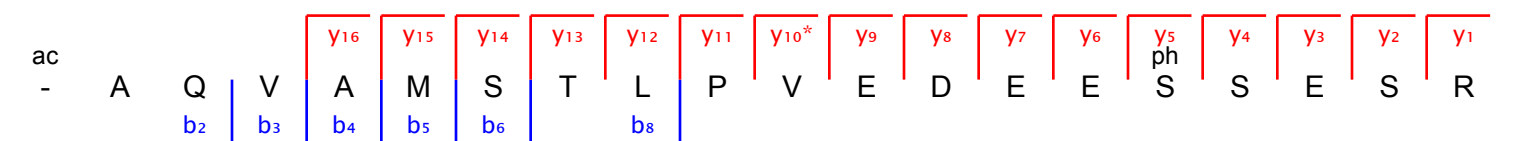



Raw file 20150814\_A375SR\_Phospho\_BR2\_03 Scan 22943 Method FTMS; HCD Score 195.46 m/z 1086.49 Gene names GATAD2B

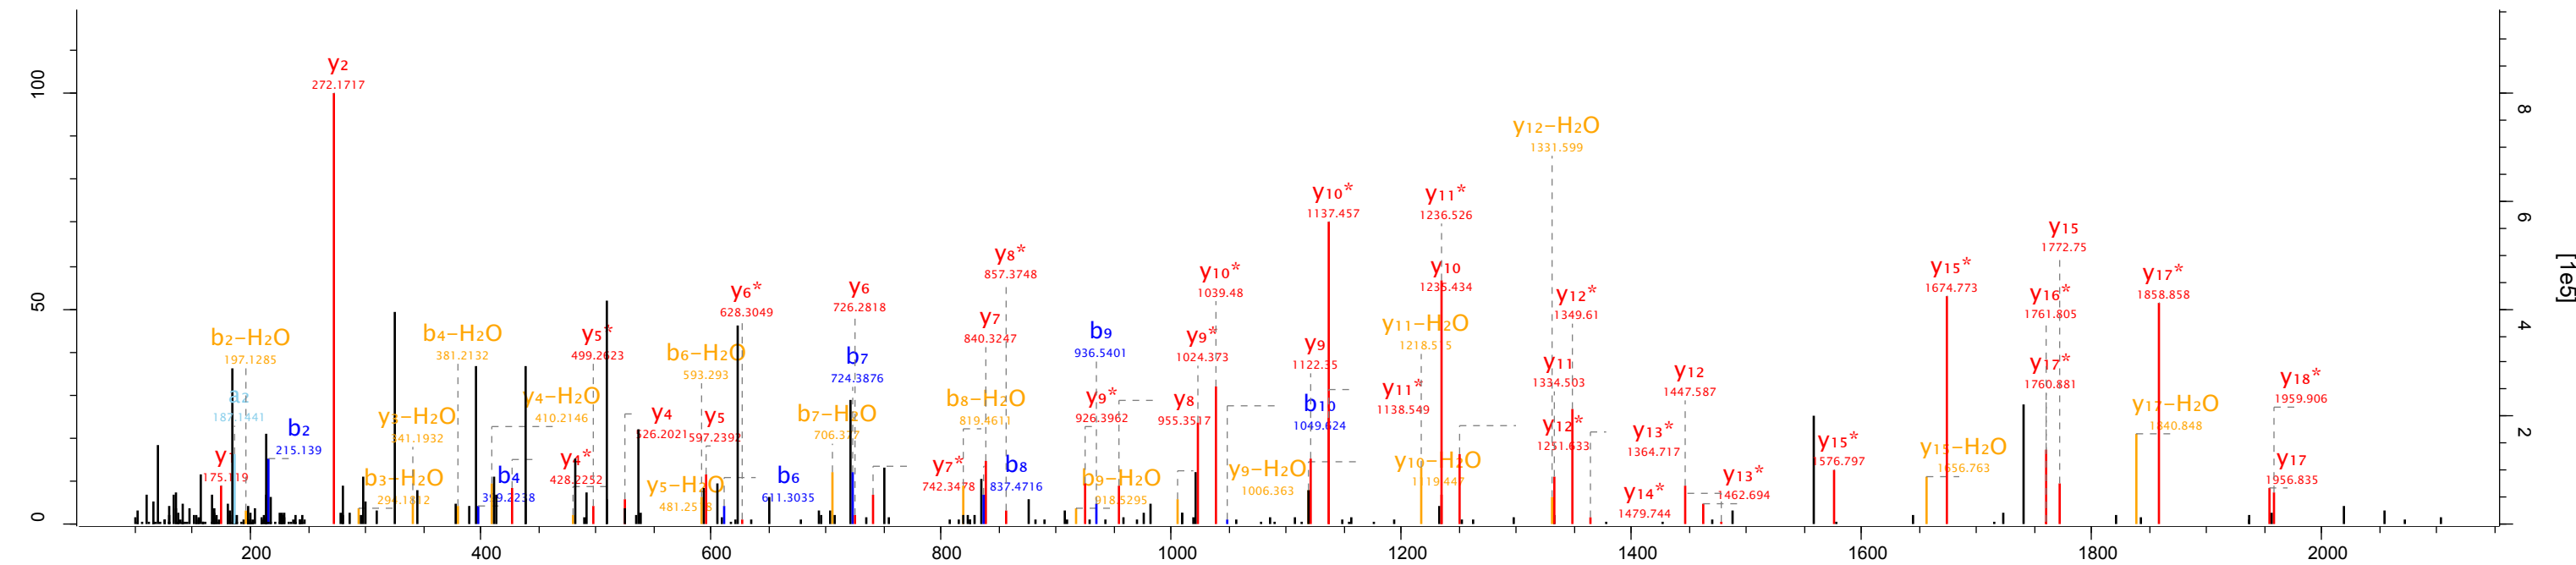

- L T P S P D I I V L S D N E A S S P R -

b<sub>2</sub>
b<sub>4</sub>
b<sub>6</sub>
b<sub>7</sub>
b<sub>8</sub>
b<sub>9</sub>
b<sub>10</sub>

Raw file: 20150814\_A375SR\_Phospho\_BR2\_03  
 Scan: 2303 Method: FTMS; HCD Score: 203.75 m/z: 883.37 Gene names: EIF4B

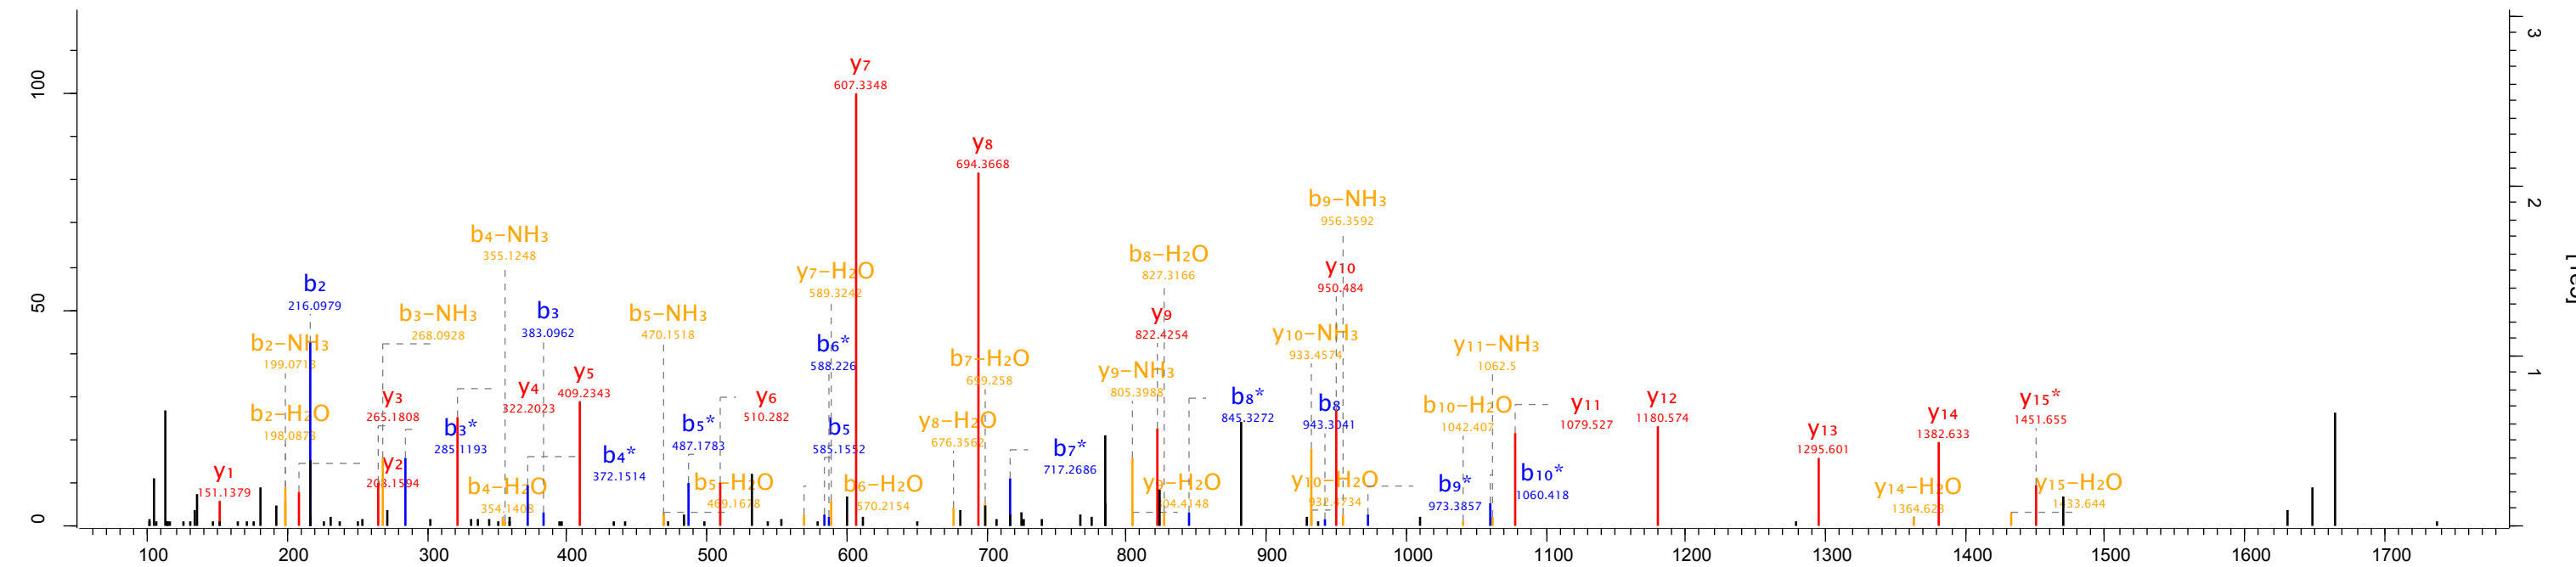

- S Q **Y15\*** **Y14** **Y13** **Y12** **Y11** **Y10** **Y9** **Y8** **Y7** **Y6** **Y5** **Y4** **Y3** **Y2** **Y1** -  
 - S Q **b2** **b3** **b4\*** **b5** **b6\*** **b7\*** **b8** **b9\*** **b10\*** P T S G G G K -

Raw file  
20150814\_A375SR\_Phospho\_BR2\_03

Scan 23313 Method FTMS; HCD Score 112.82 m/z 817.86 Gene names SEPSECS

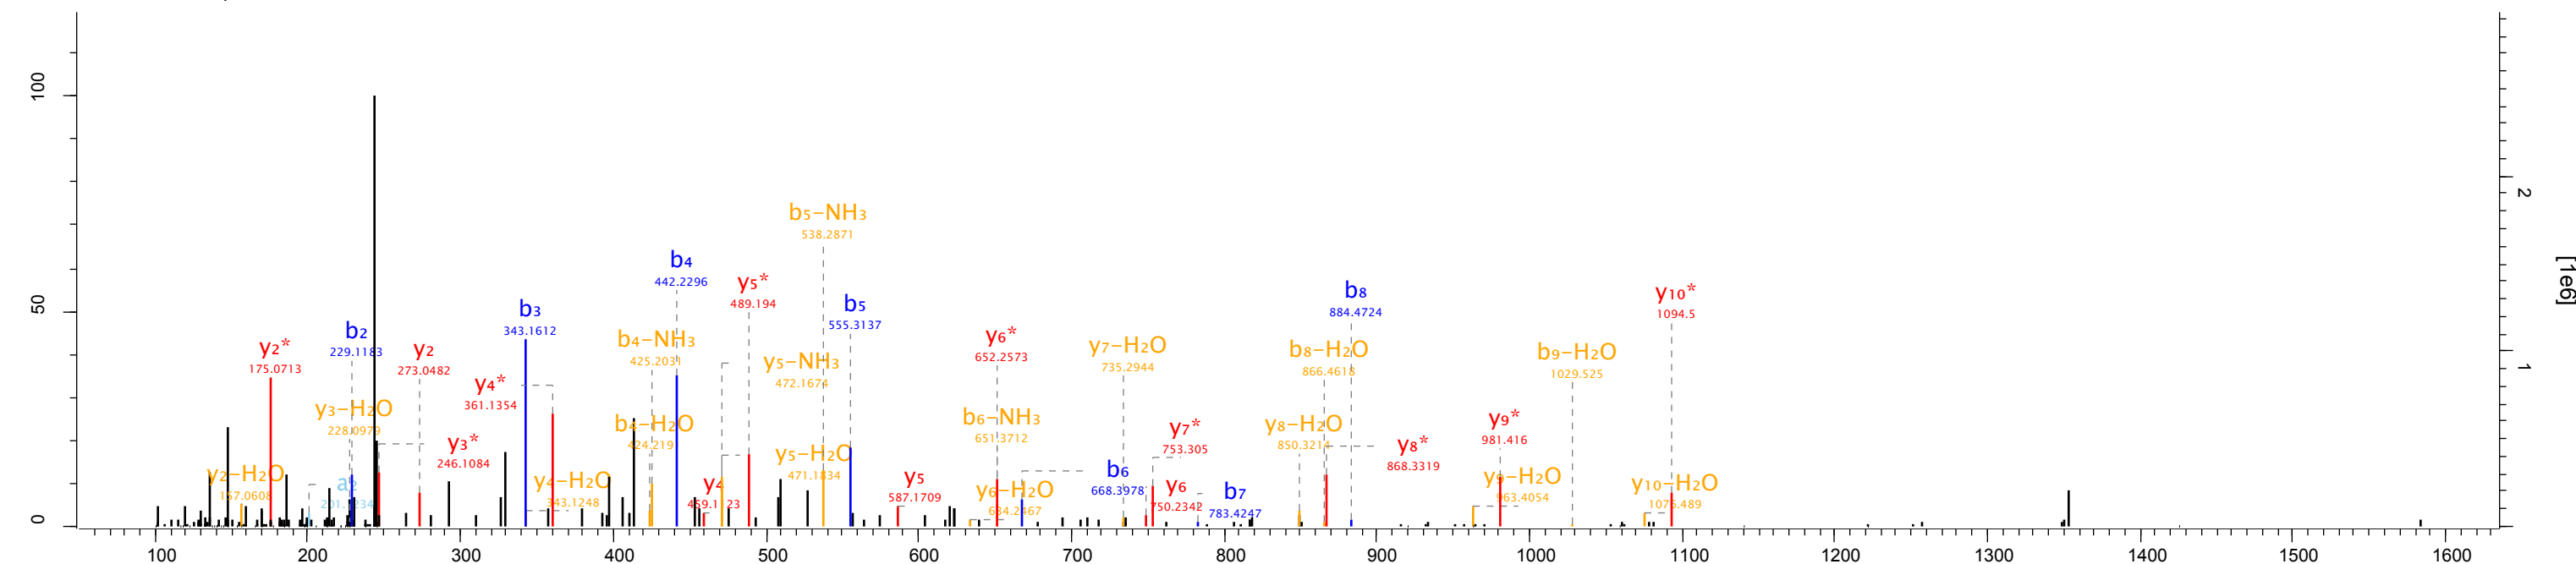

- L D N V L L D T Y Q D A S -  
          b2 b3 b4 b5 b6 b7 b8   ph S -

Raw file: 20150814\_A375SR\_Phospho\_BR2\_03  
 Scan: 2333 Method: FTMS; HCD Score: 172.54 m/z: 915.38 Gene names: NOC2L

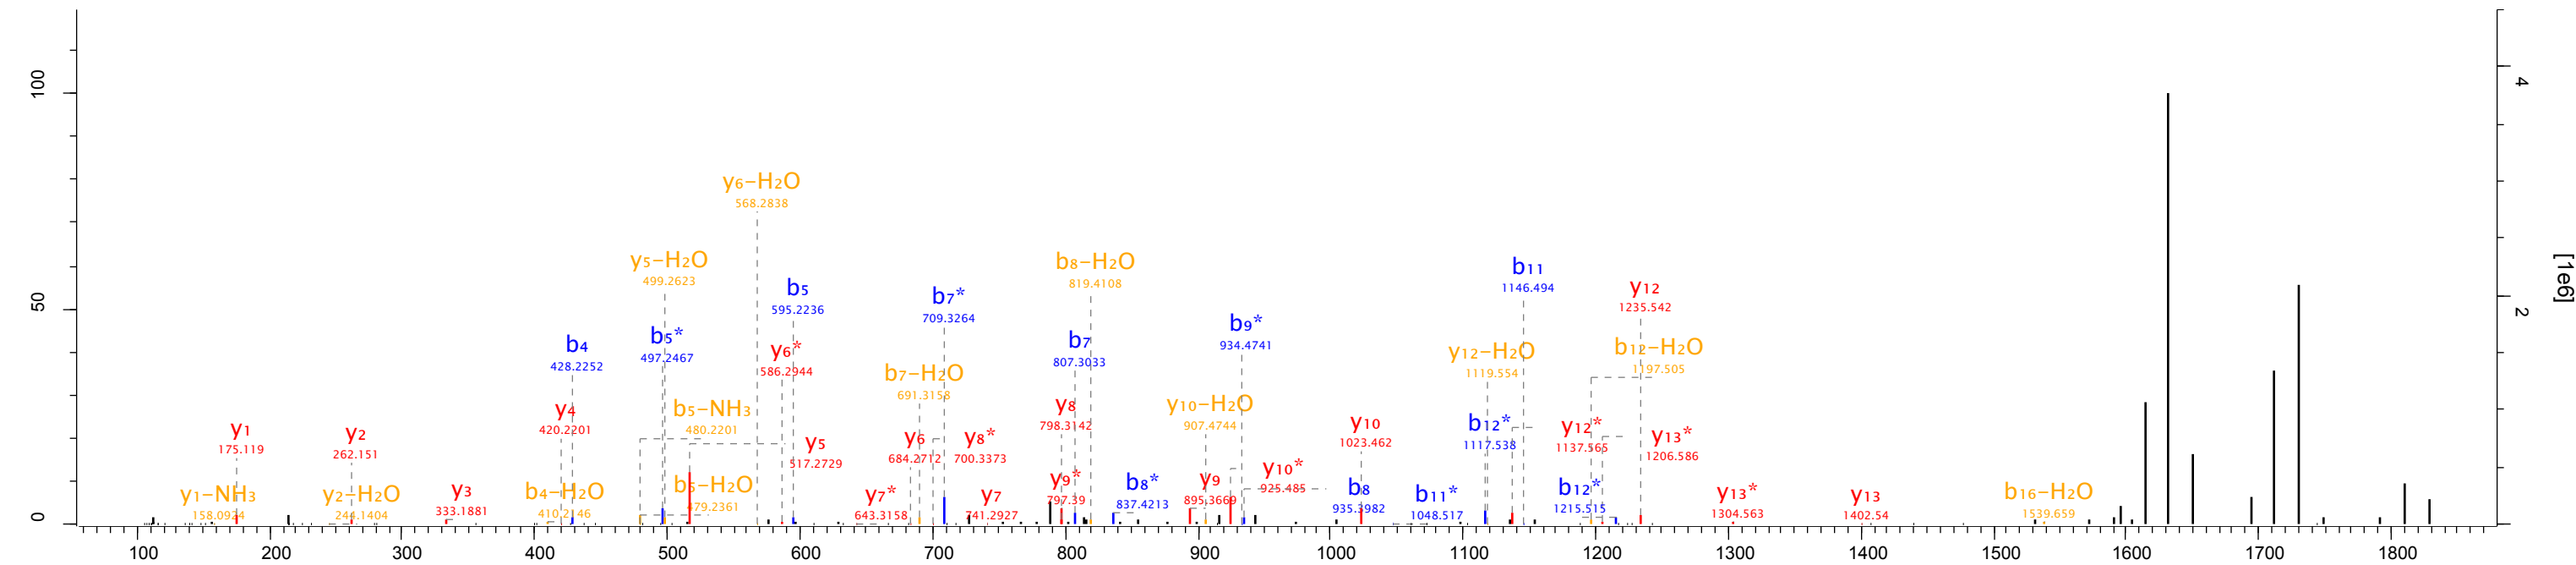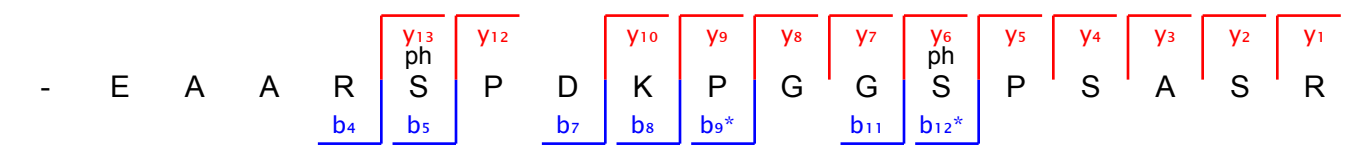

Raw file: 20150814\_A375SR\_Phospho\_BR2\_03  
 Scan: 23513 Method: FTMS; HCD Score: 118.1 m/z: 1229.86 Gene names: SQSTM1

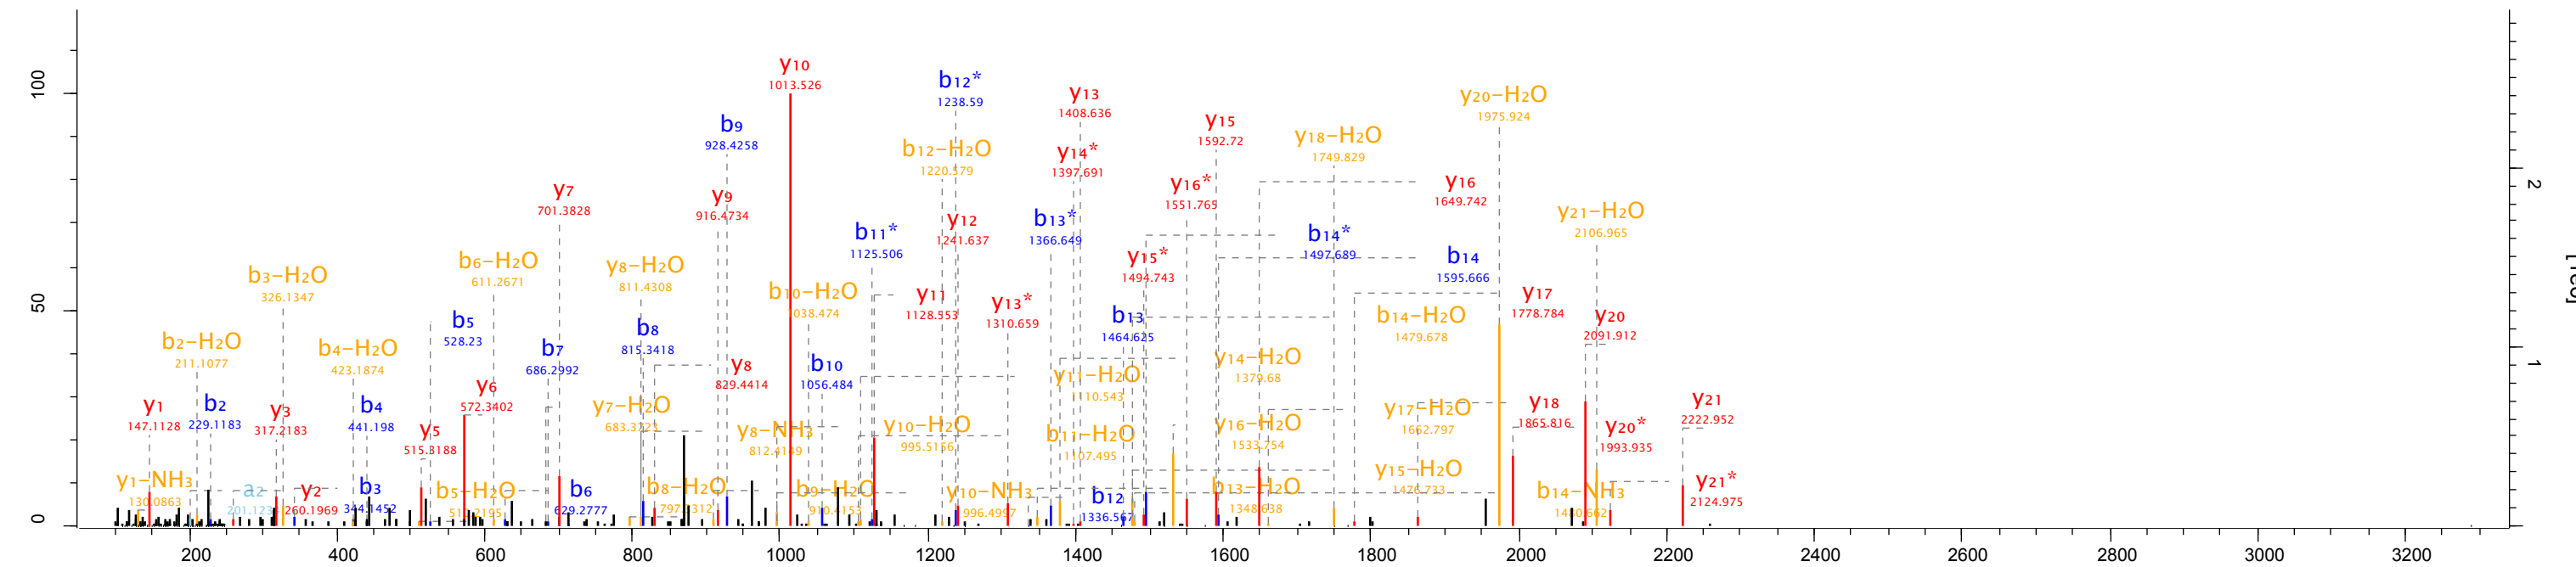

- E V D P S T G E L Q S ph L Q M P E S E G P S ph S L D P S Q E G P T G L K -  
 b<sub>2</sub> b<sub>3</sub> b<sub>4</sub> b<sub>5</sub> b<sub>6</sub> b<sub>7</sub> b<sub>8</sub> b<sub>9</sub> b<sub>10</sub> b<sub>11</sub>\* b<sub>12</sub> b<sub>13</sub> b<sub>14</sub> y<sub>21</sub> y<sub>20</sub> y<sub>18</sub> y<sub>17</sub> y<sub>16</sub> y<sub>15</sub> y<sub>14</sub>\* y<sub>13</sub> ph y<sub>12</sub> y<sub>11</sub> y<sub>10</sub> y<sub>9</sub> y<sub>8</sub> y<sub>7</sub> y<sub>6</sub> y<sub>5</sub> y<sub>3</sub> y<sub>2</sub> y<sub>1</sub>

Raw file Scan Method Score m/z Gene names  
 20150814\_A375SR\_Phospho\_BR2\_03 23853 FTMS; HCD 154.92 927.39 NUP107

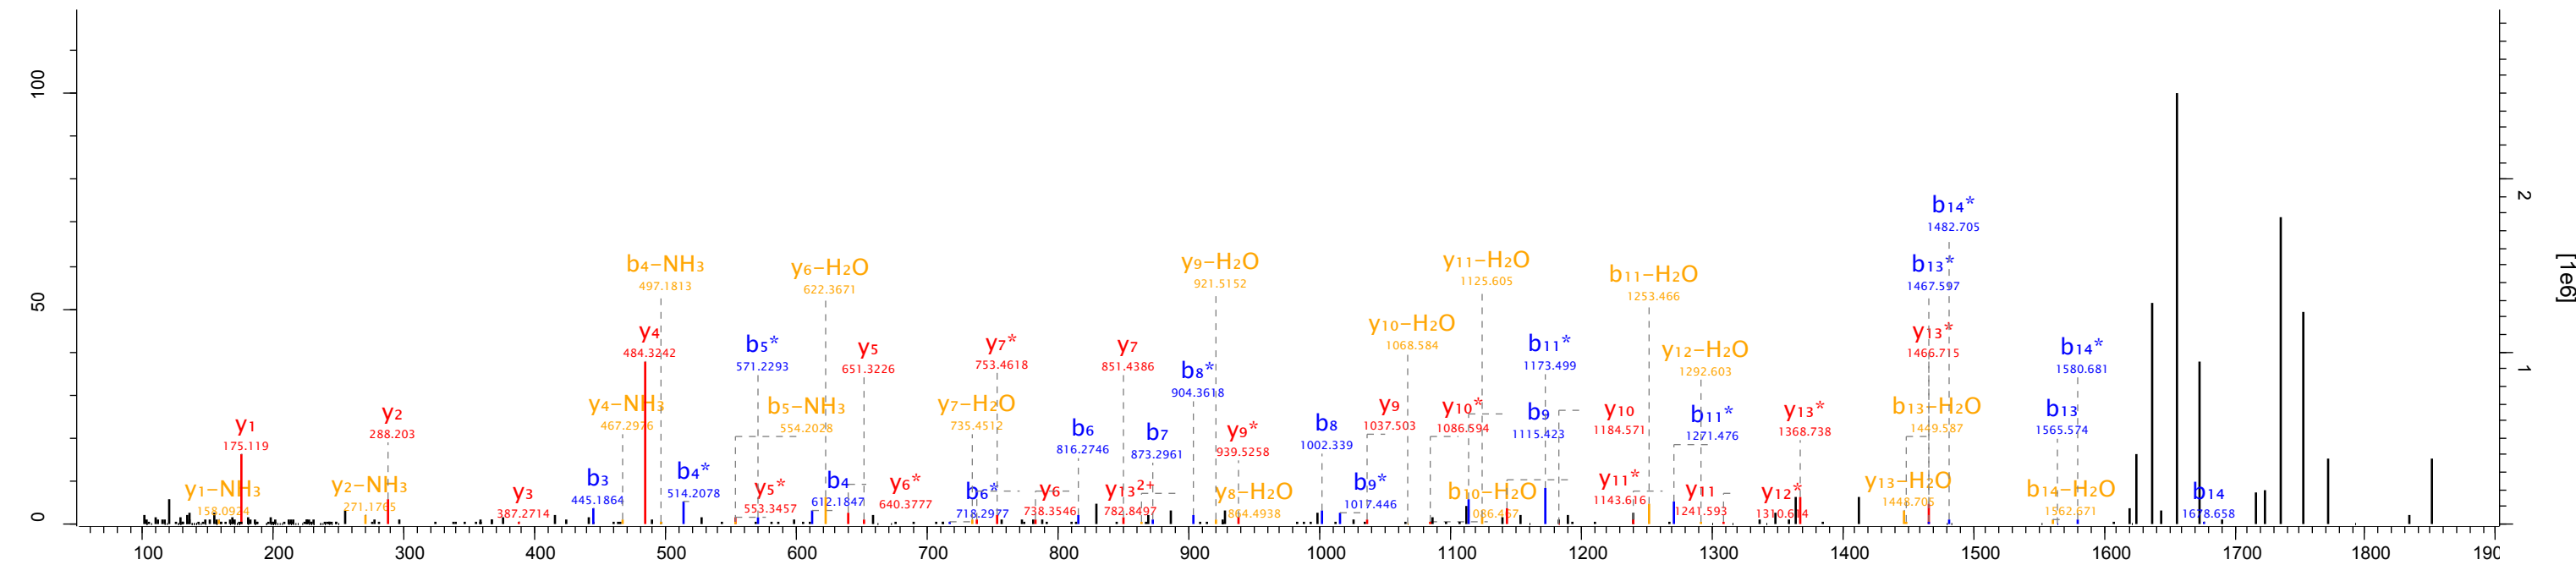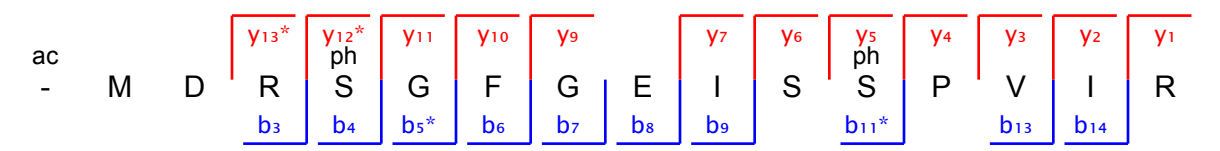

Raw file 20150814\_A375SR\_Phospho\_BR2\_03 Scan 23873 Method FTMS; HCD Score 176.86 m/z 1045.05 Gene names PPP2R3A

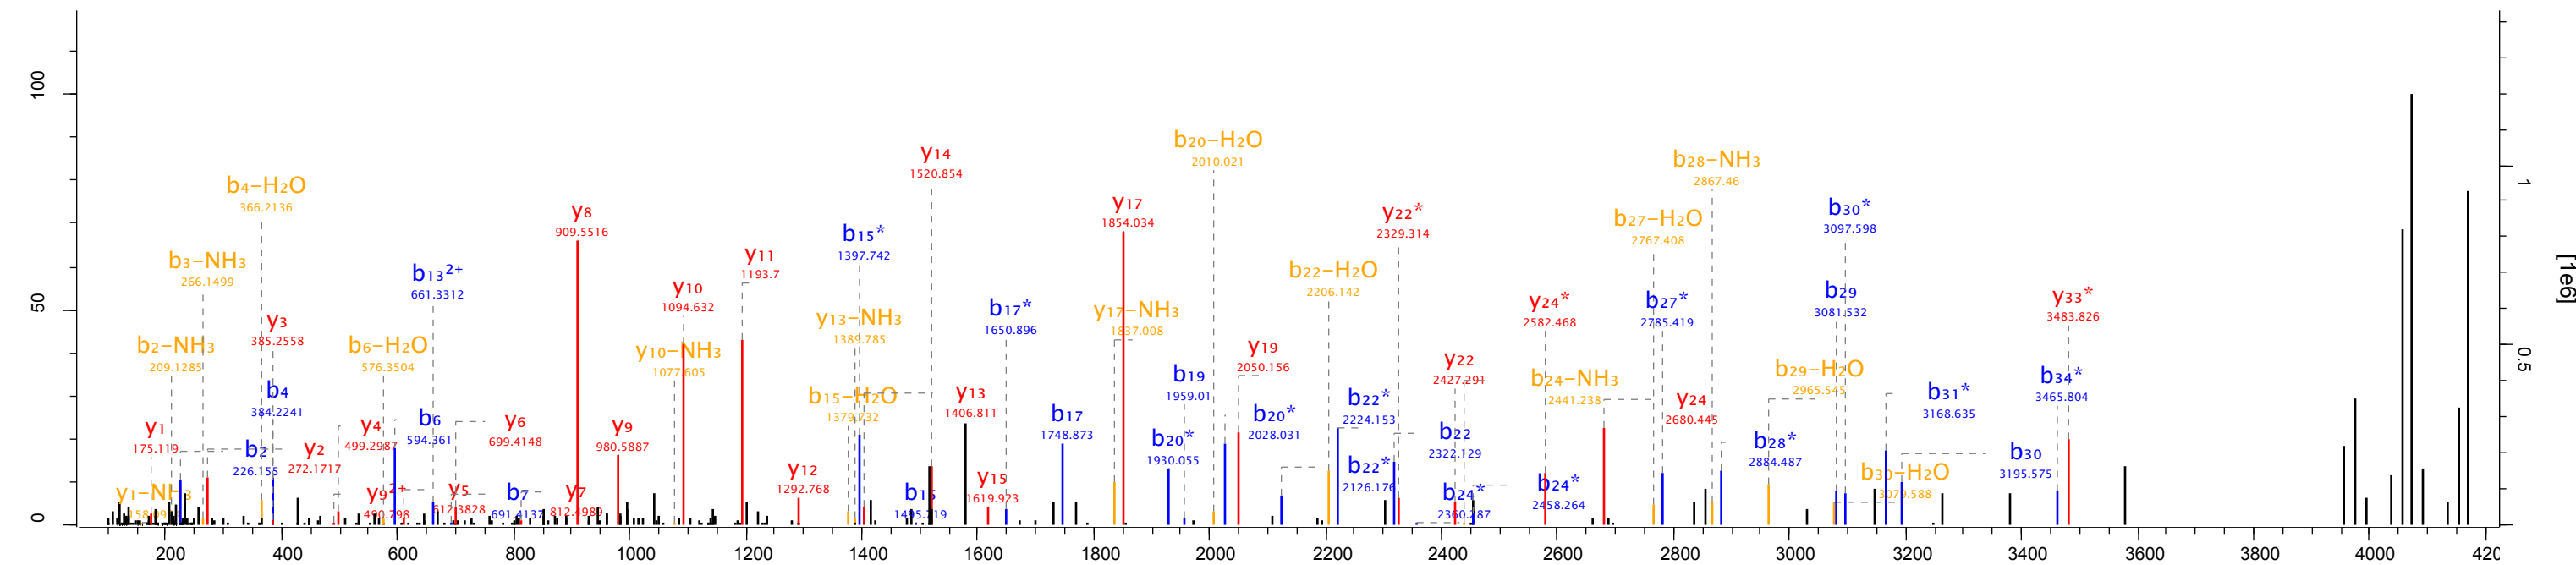

- K P G T P L P P P A T S P S S P R P L S P V P H V N N V V N A P L S I N I P

Fragmentation labels: y1, b2, b4, b6, b7, y33\*, b13<sup>2+</sup>, b15, b17, b19, b20\*, b22, b24\*, y15, y14, y13, y12, y11, y10, y9, y8, y7, y6, y5, y4, y3, y2

Raw file: 20150814\_A375SR\_Phospho\_BR2\_03  
 Scan: 24143  
 Method: FTMS; HCD  
 Score: 179  
 m/z: 733.69  
 Gene names: MAPK6

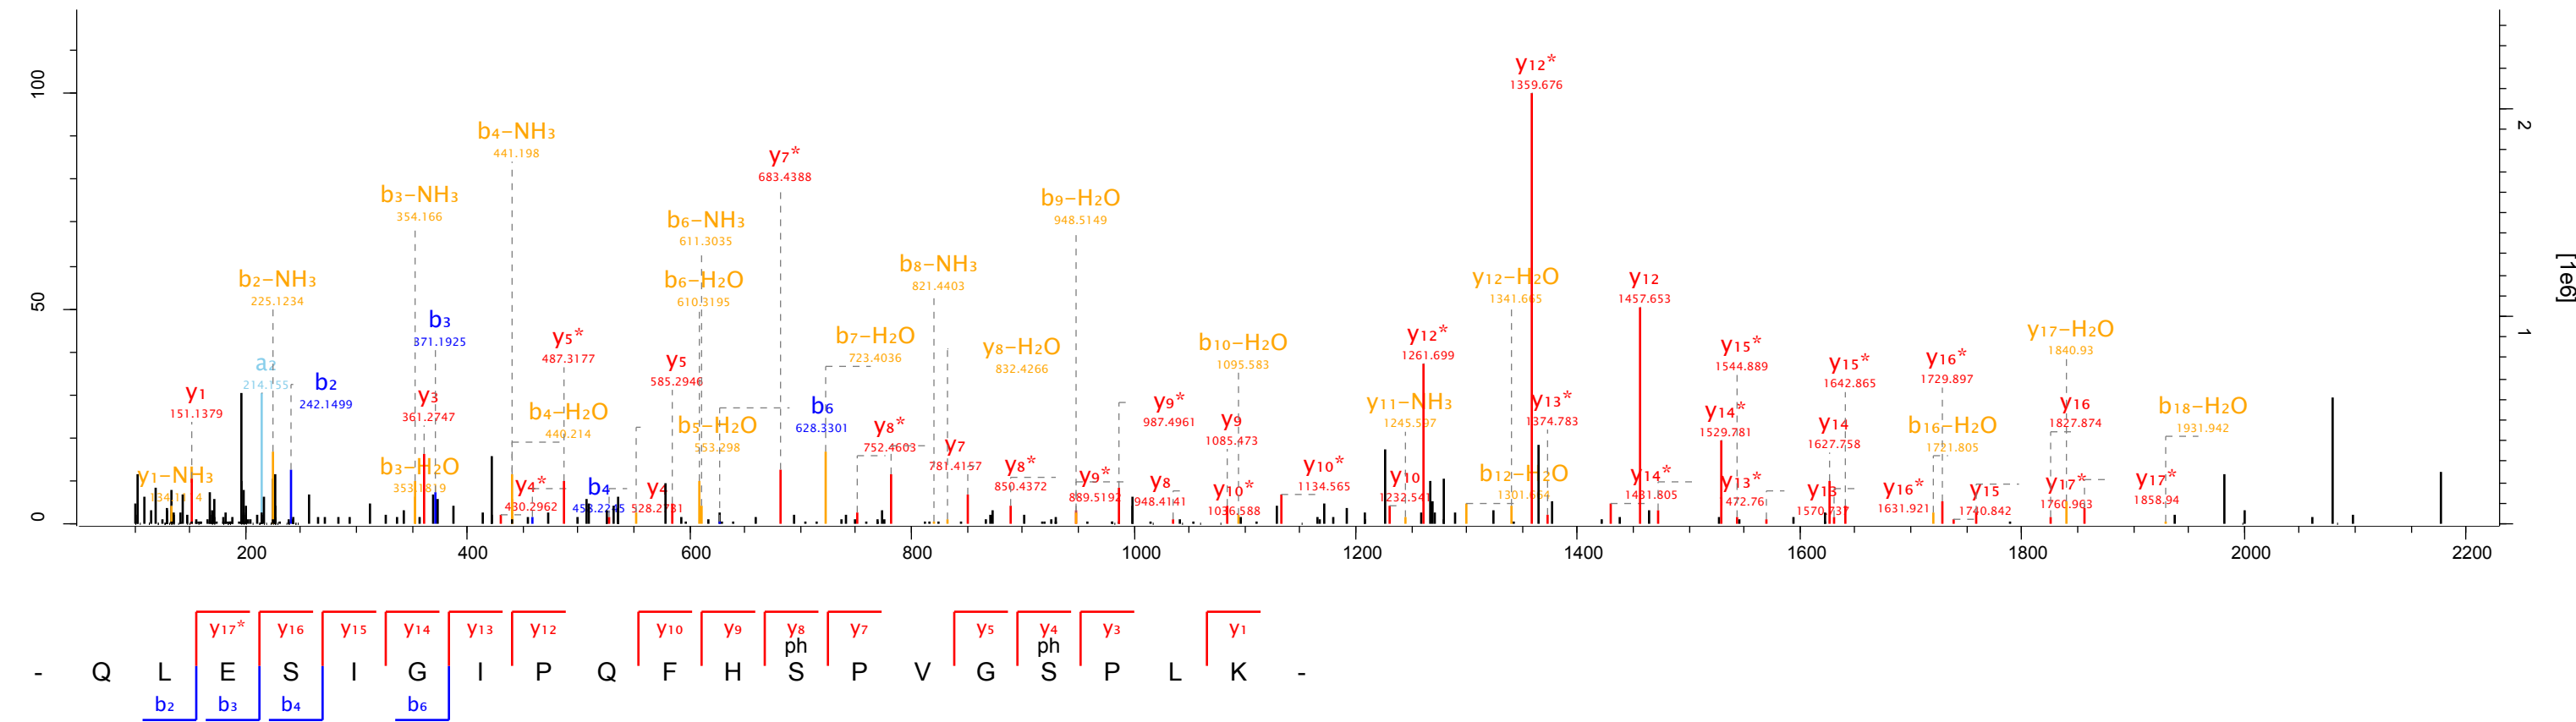



Raw file: 20150814\_A375SR\_Phospho\_BR2\_03  
 Scan: 24213 Method: FTMS; HCD Score: 313.77 m/z: 1381.15 Gene names: RTN4

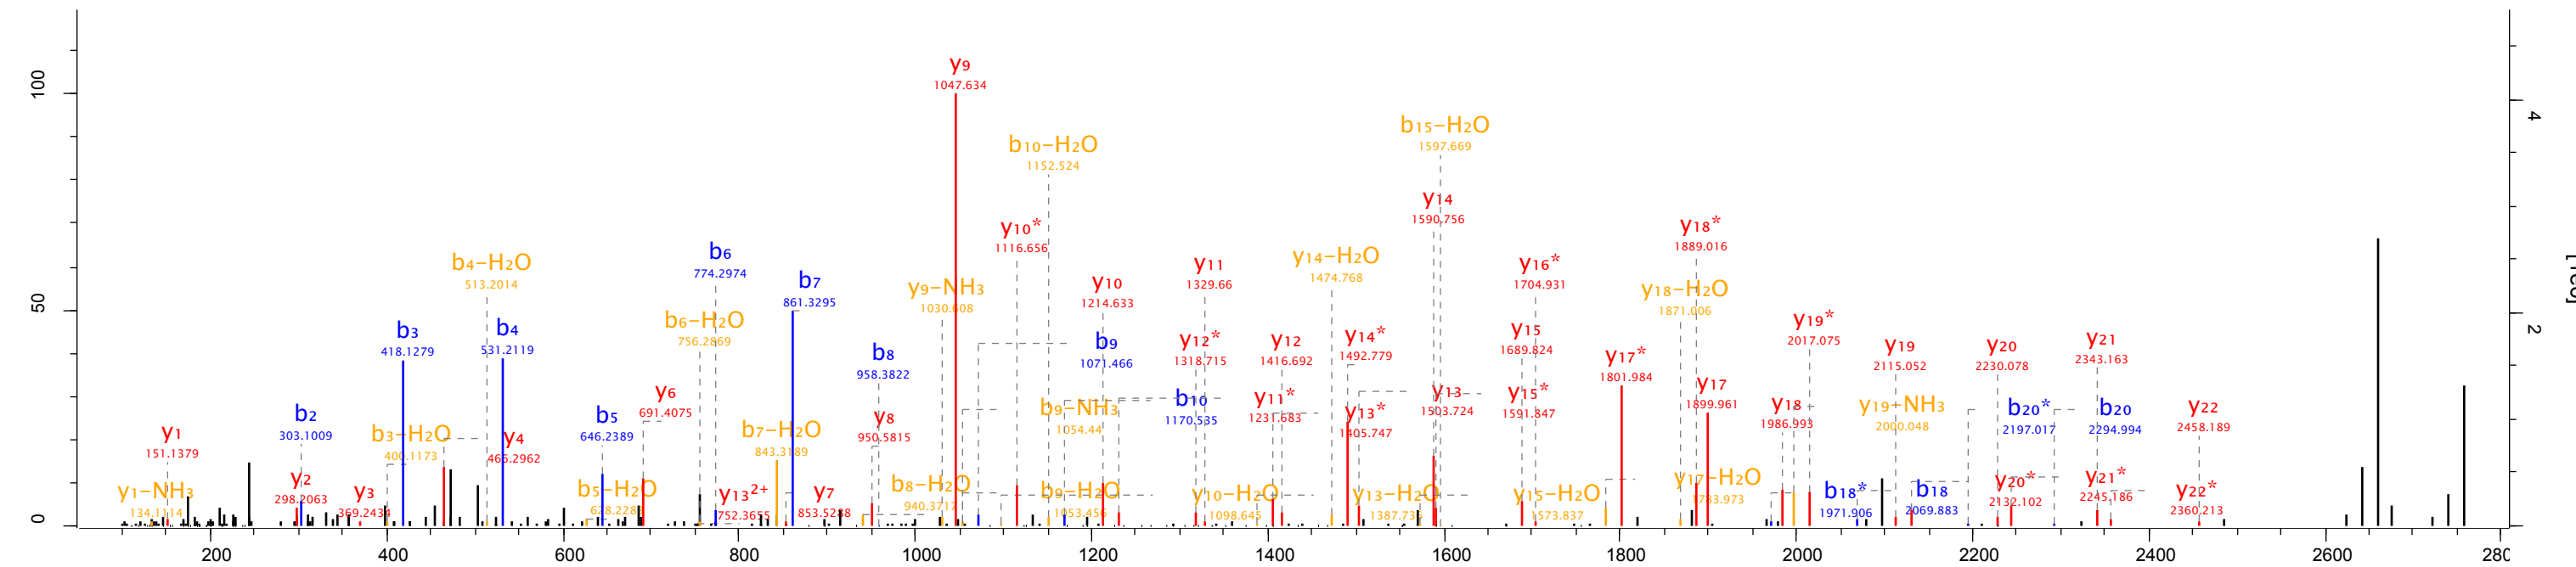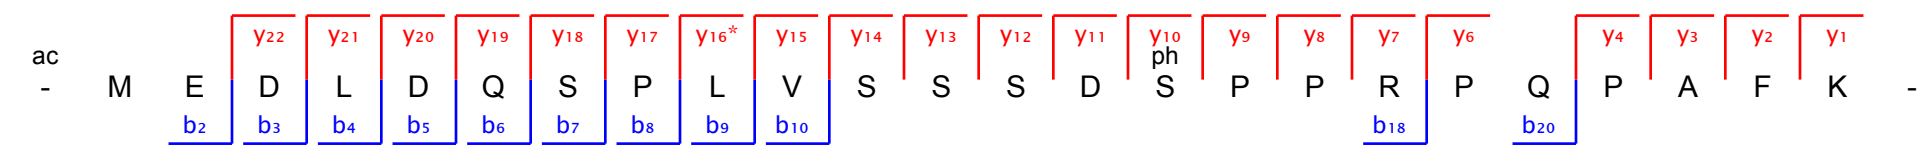

Raw file 20150814\_A375SR\_Phospho\_BR2\_03 Scan 24523 Method FTMS; HCD Score 160.77 m/z 1045.44 Gene names WDR44

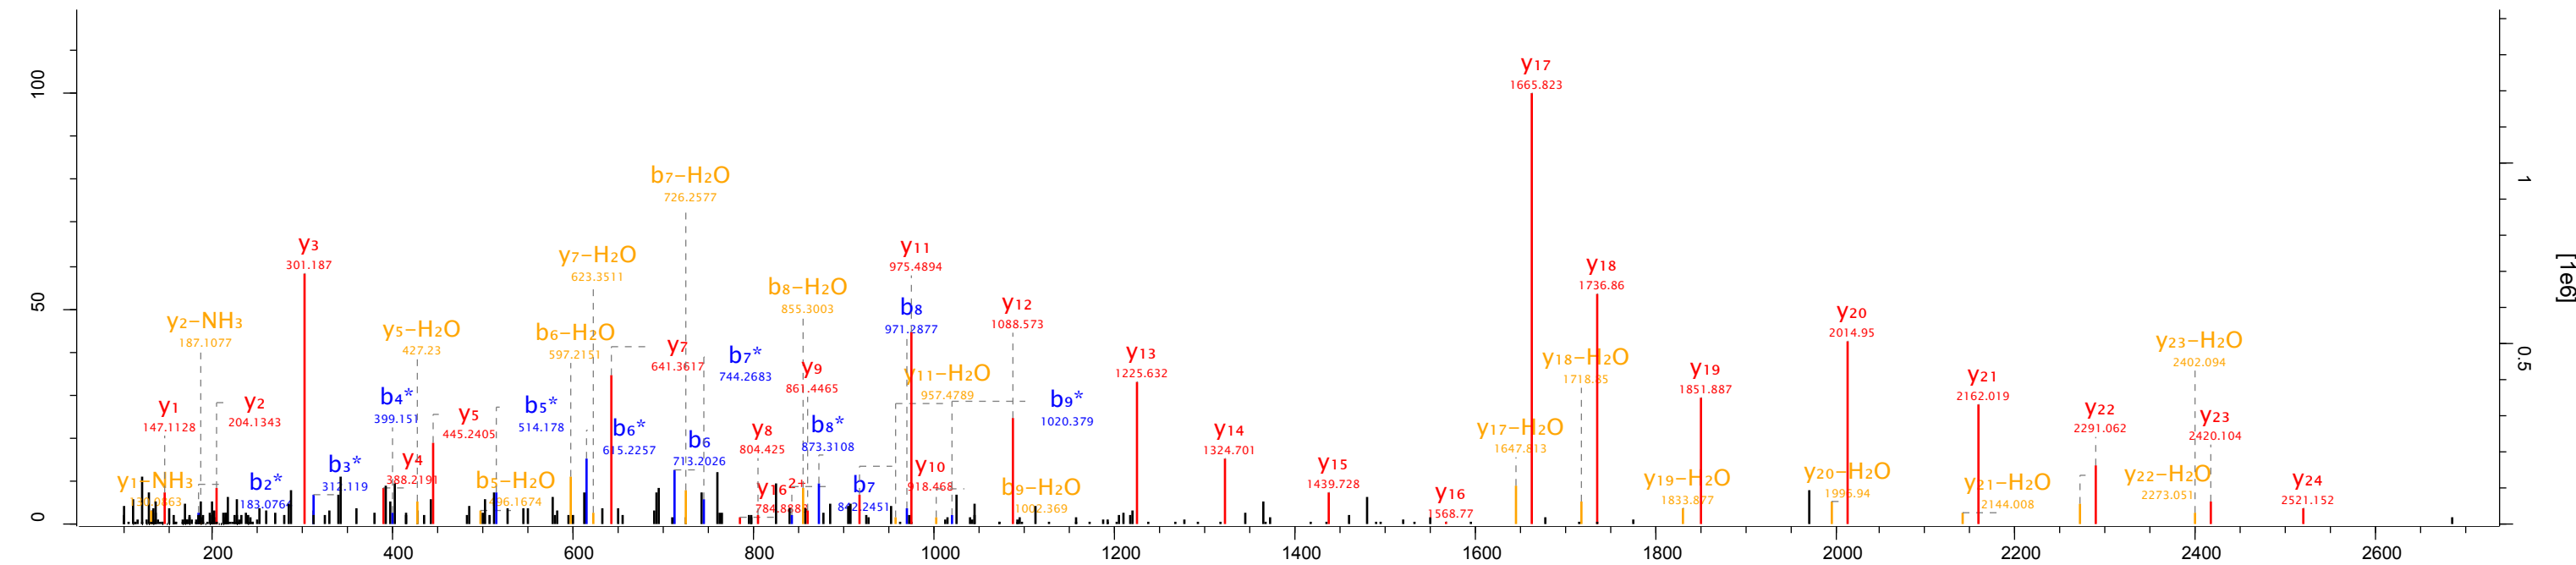

ac - A ph S E S D T E E F Y D A P E D V H L G G G Y P V G S P G K -

Fragmentation mapping: b2\* (S), b3\* (E), b4\* (S), b5\* (D), b6 (T), b7 (E), b8 (E), b9\* (F). y1 (K), y2 (G), y3 (P), y4 (S), y5 (G), y7 (P), y8 (Y), y9 (G), y10 (G), y11 (G), y12 (L), y13 (H), y14 (V), y15 (D), y16 (E), y17 (P), y18 (A), y19 (D), y20 (Y), y21 (F), y22 (E), y23 (E), y24 (T).

Raw file: 20150814\_A375SR\_Phospho\_BR2\_03  
 Scan: 24833 Method: FTMS; HCD Score: 242.54 m/z: 1104.49 Gene names: ATRX

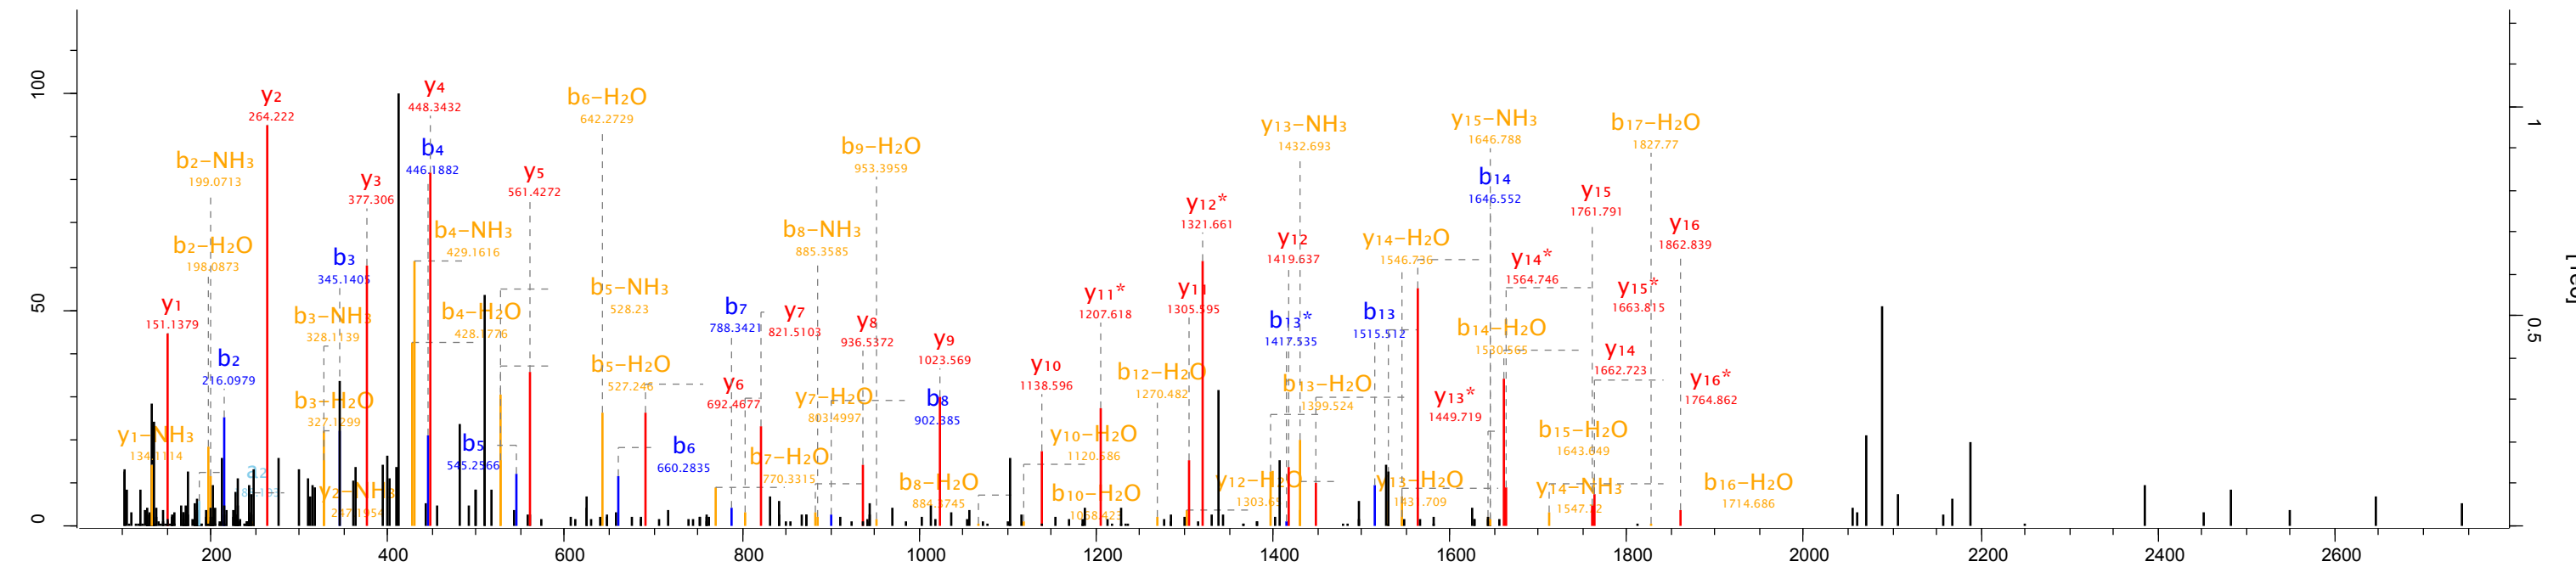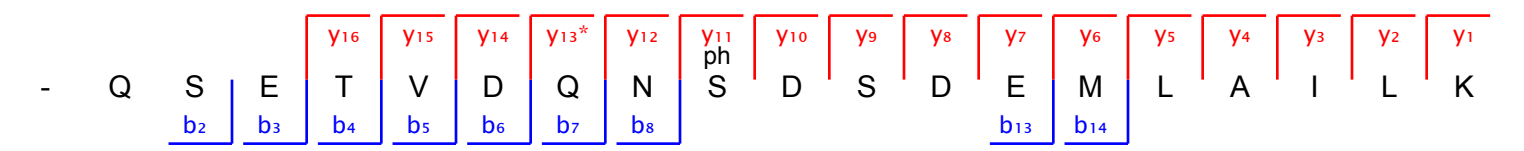

Raw file: 20150814\_A375SR\_Phospho\_BR2\_03  
 Scan: 24893 Method: FTMS; HCD Score: 169.13 m/z: 822.73 Gene names: TNK1

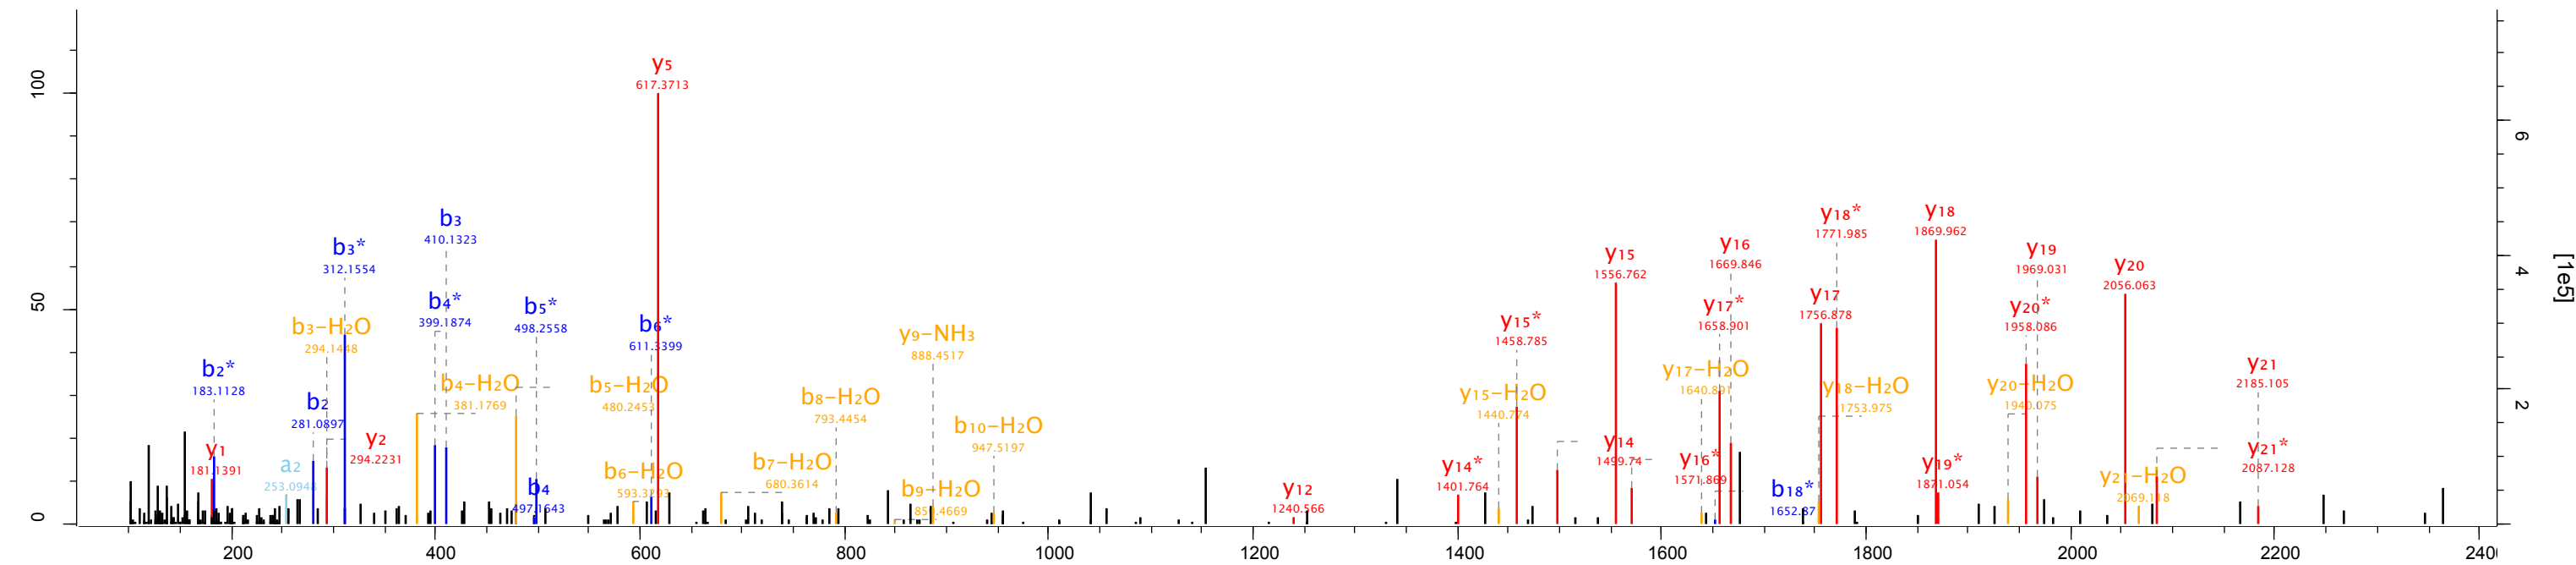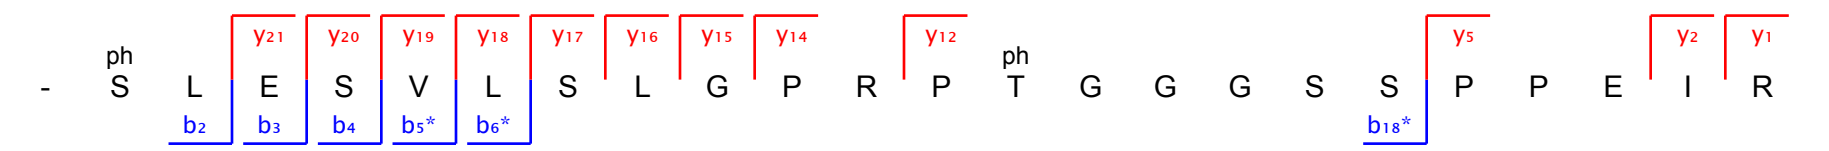

Raw file Scan Method Score m/z Gene names  
 20150814\_A375SR\_Phospho\_BR2\_03 24953 FTMS; HCD 189.88 883.35 AAGAB

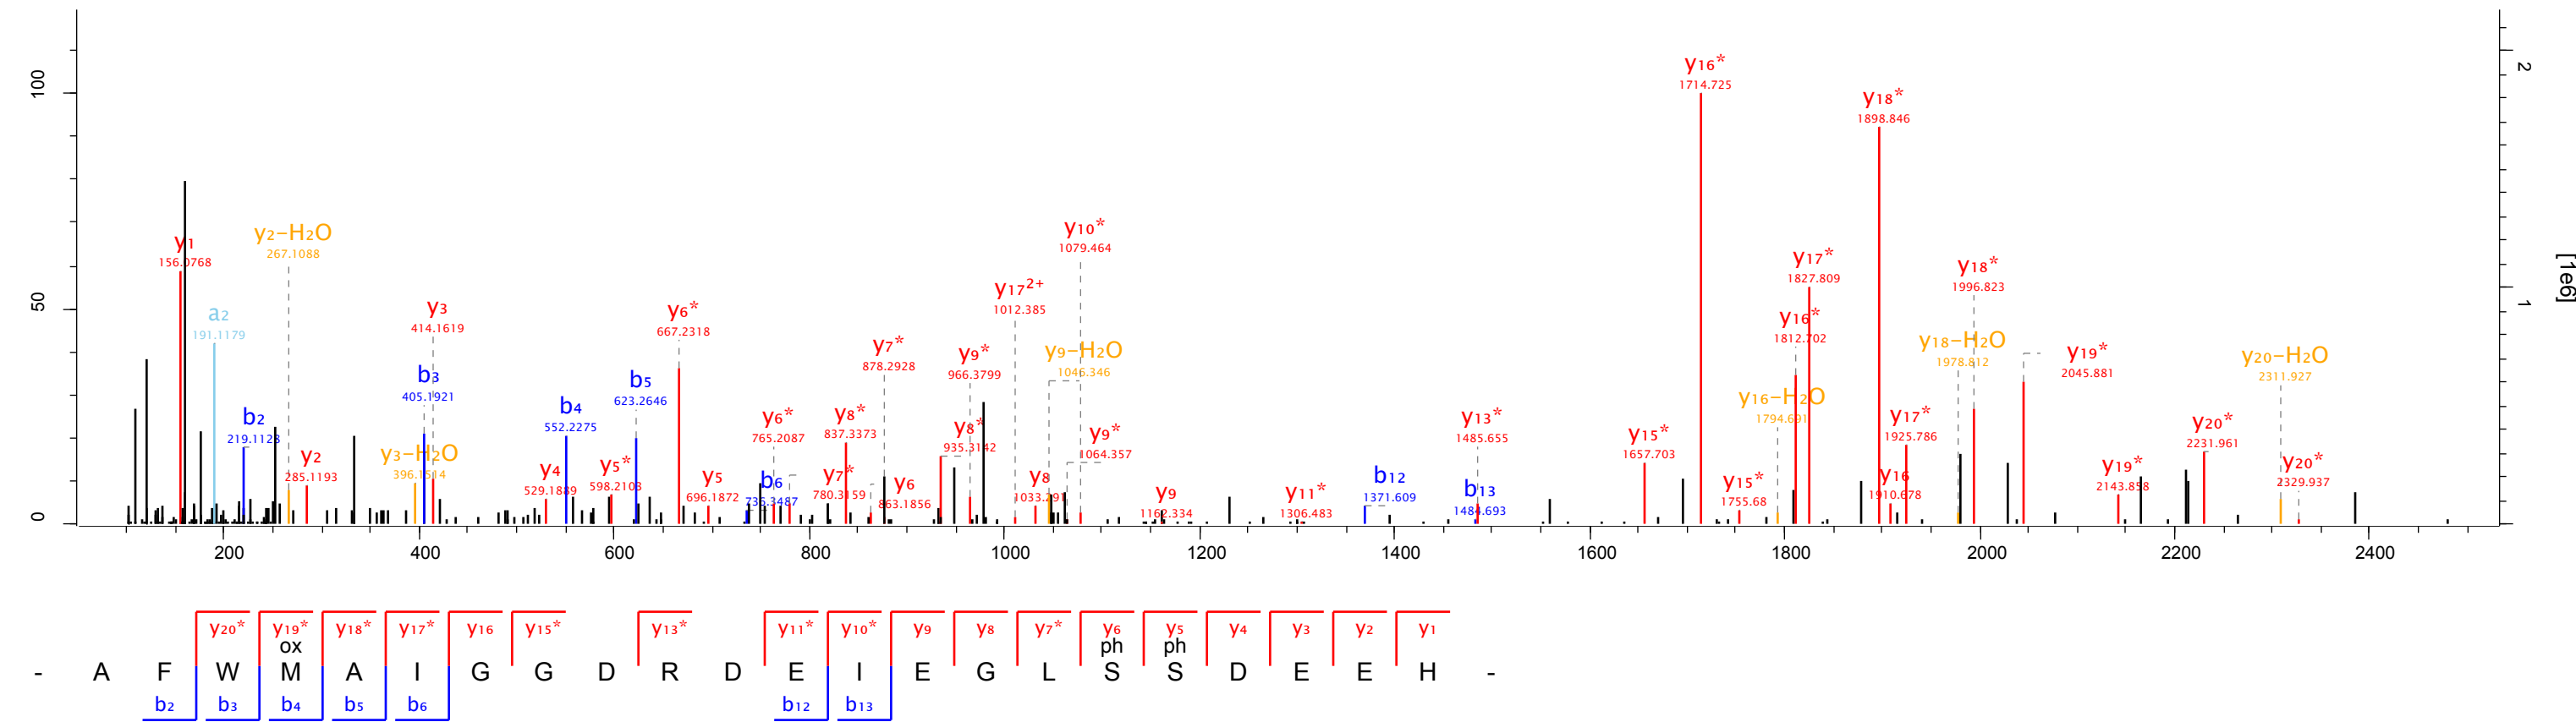

Raw file Scan Method m/z Gene names  
 20150814\_A375SR\_Phospho\_BR2\_03 25073 FTMS; HCD 55.45 1182.24 PPP6R1

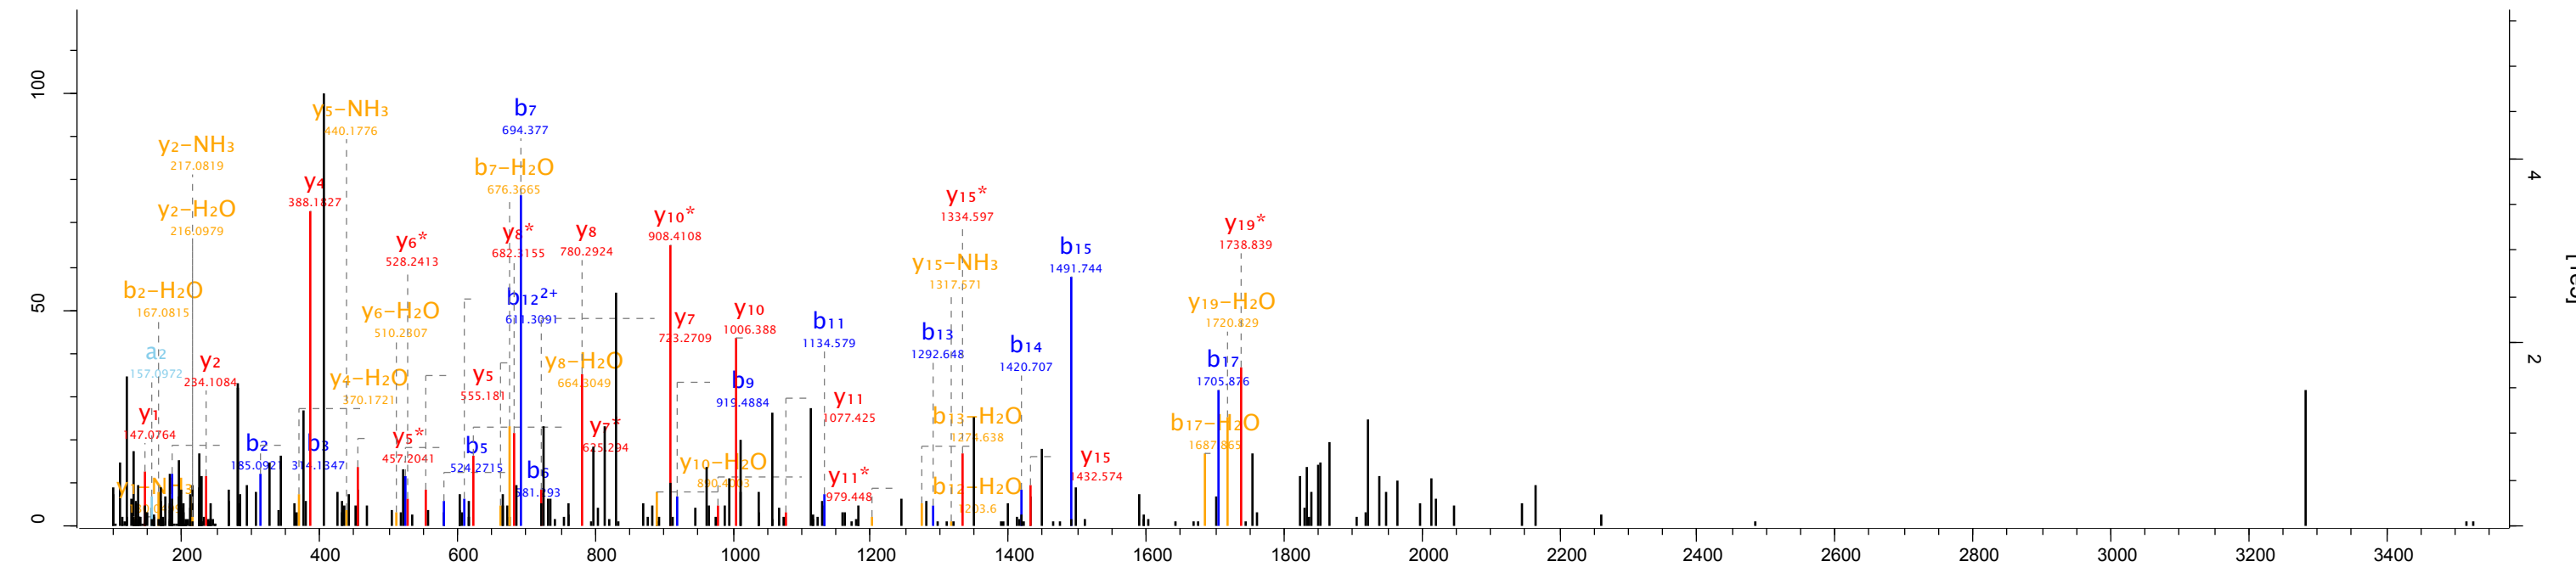

- S P E P L G L P Q S Q S A Q A L T P P P I P N G S A P E G P A S P G S Q -

Fragmentation sites are indicated by brackets below the amino acid sequence:

- Blue brackets (b-ions): b<sub>2</sub> (P), b<sub>3</sub> (E), b<sub>5</sub> (L), b<sub>6</sub> (G), b<sub>7</sub> (L), b<sub>9</sub> (Q), b<sub>11</sub> (S), b<sub>12</sub><sup>2+</sup> (S), b<sub>13</sub> (A), b<sub>14</sub> (Q), b<sub>15</sub> (A), b<sub>17</sub> (T)
- Red brackets (y-ions): y<sub>19</sub><sup>\*</sup> (P), y<sub>15</sub> (P), y<sub>11</sub> (A), y<sub>10</sub> (P), y<sub>8</sub> (G), y<sub>7</sub> (P), y<sub>6</sub><sup>\*</sup> (A), y<sub>5</sub><sup>ph</sup> (S), y<sub>4</sub> (P), y<sub>2</sub> (S), y<sub>1</sub> (Q)

Raw file: 20150814\_A375SR\_Phospho\_BR2\_03  
 Scan: 25143 Method: FTMS; HCD Score: 116.39 m/z: 873.91 Gene names: EPB41L2

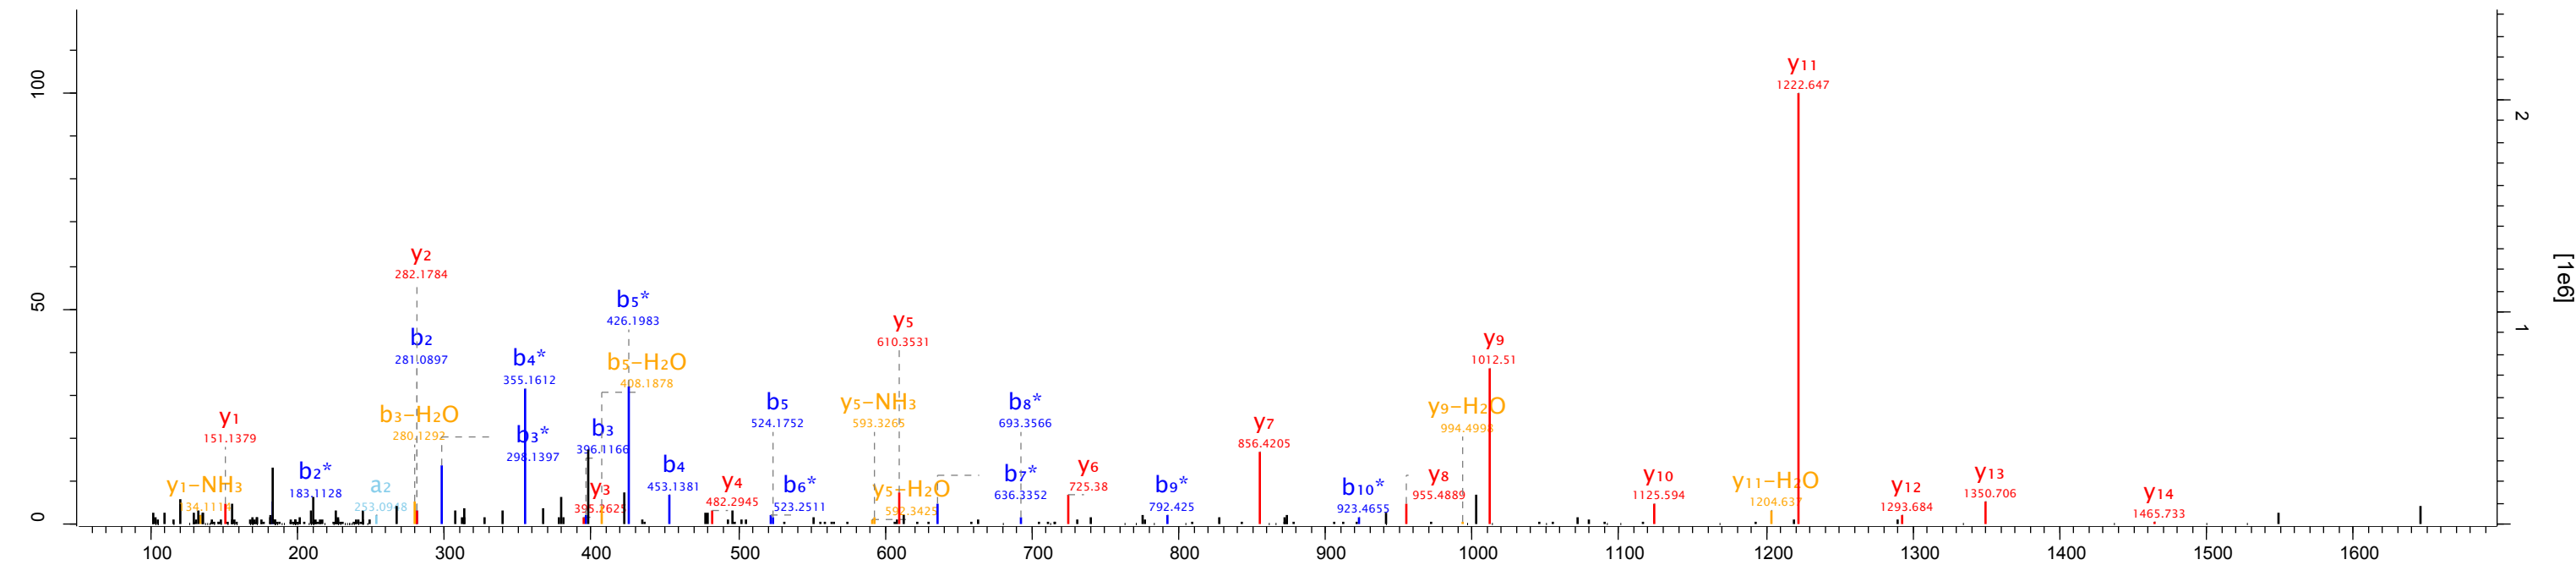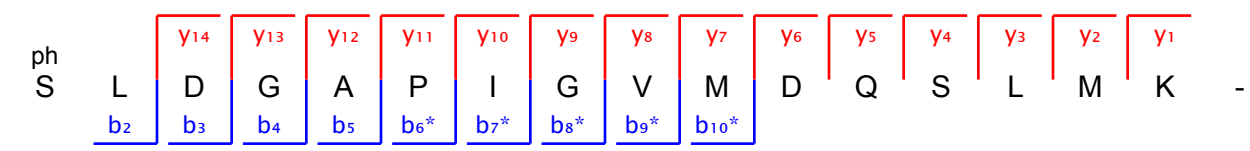

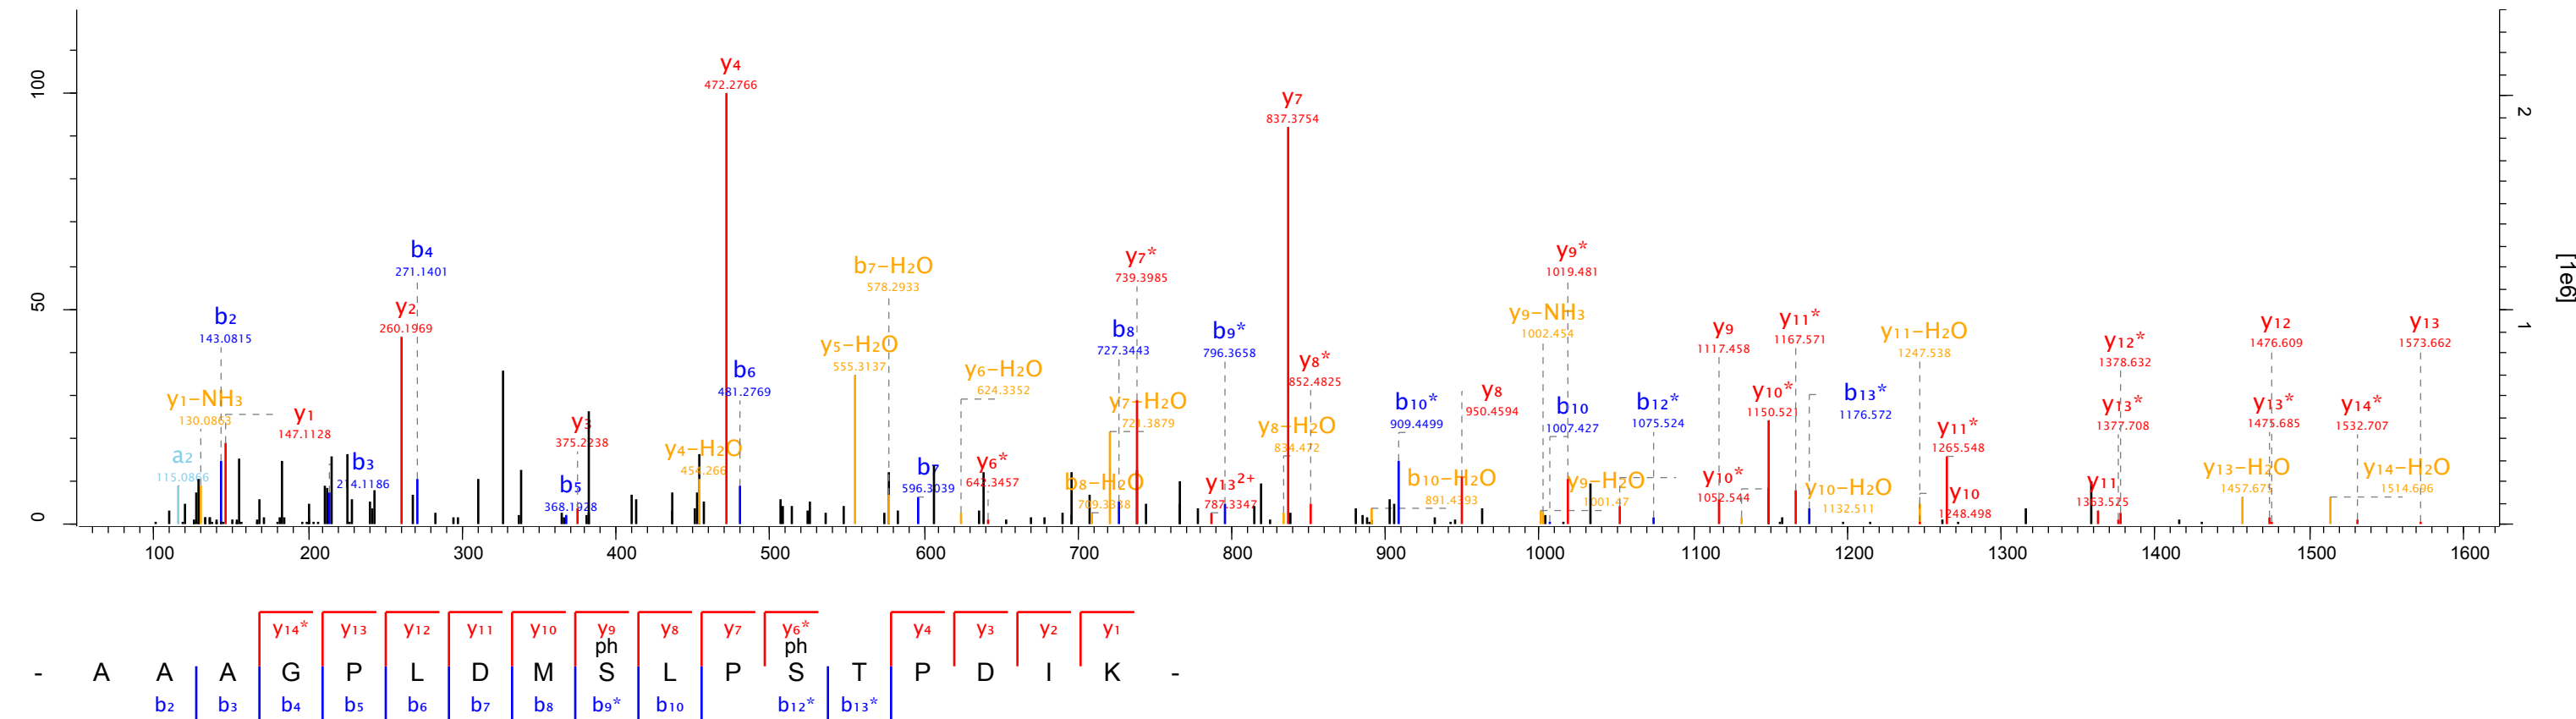



Raw file 20150814\_A375SR\_Phospho\_BR2\_03 Scan 25343 Method FTMS; HCD Score 79.89 m/z 736.32 Gene names MTMR10

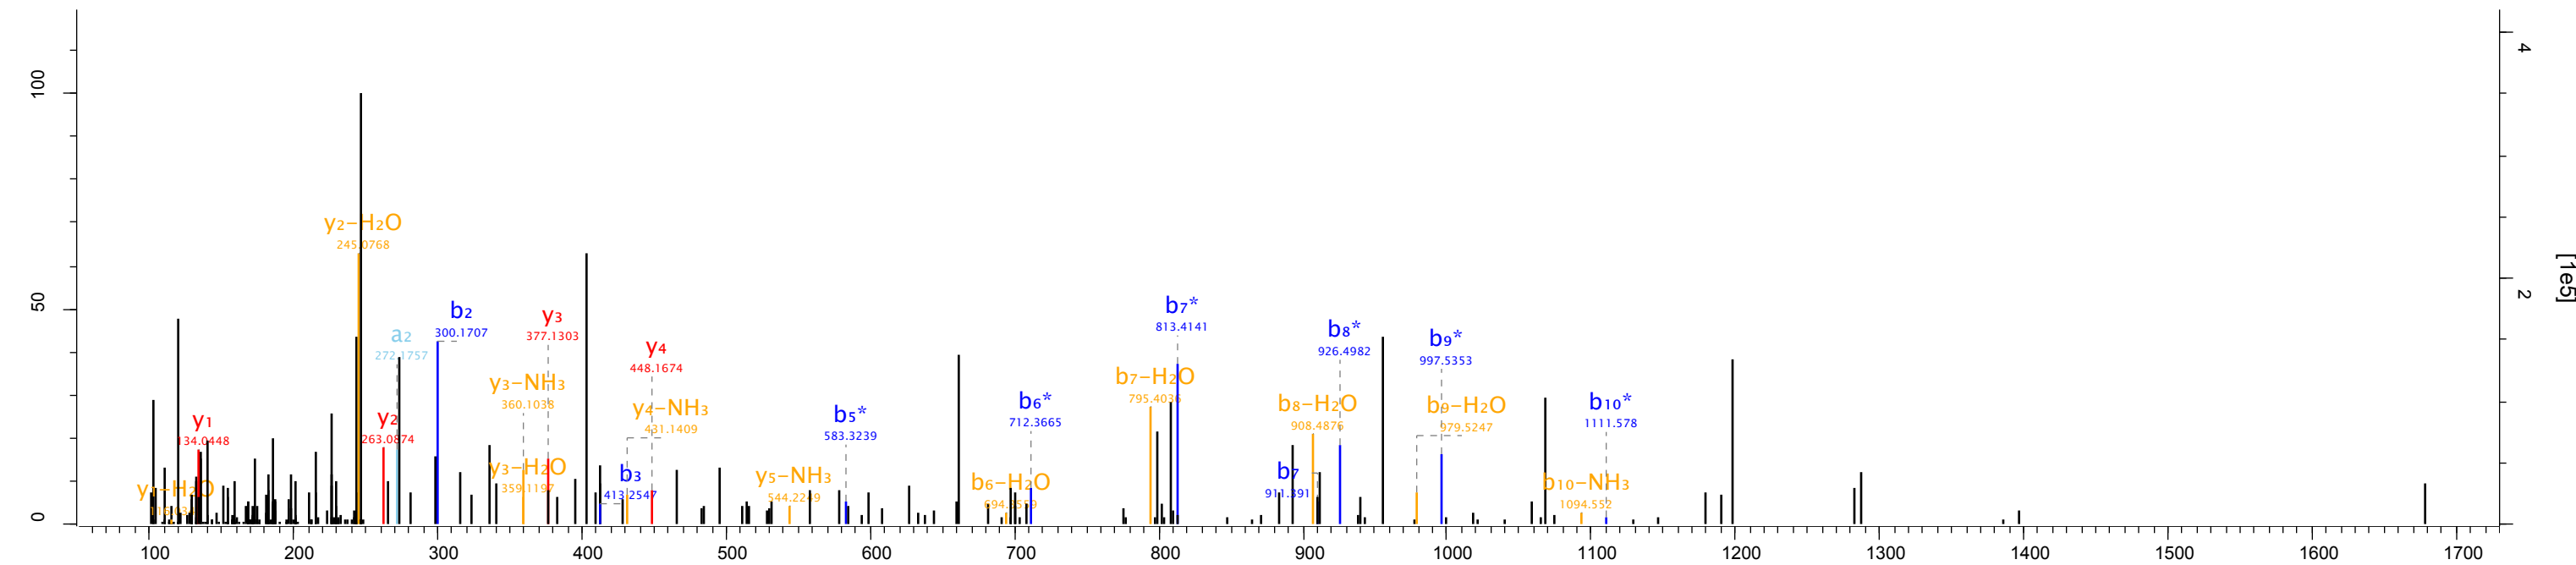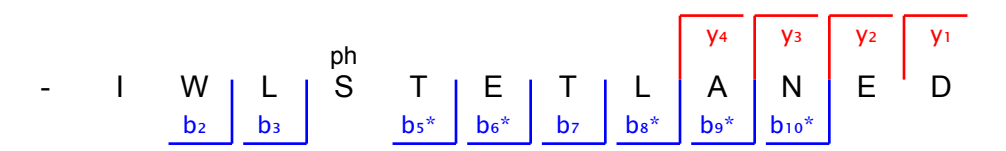

Raw file: 20150814\_A375SR\_Phospho\_BR2\_03  
 Scan: 25693 Method: FTMS; HCD Score: 85.65 m/z: 946.44 Gene names: FAM129A

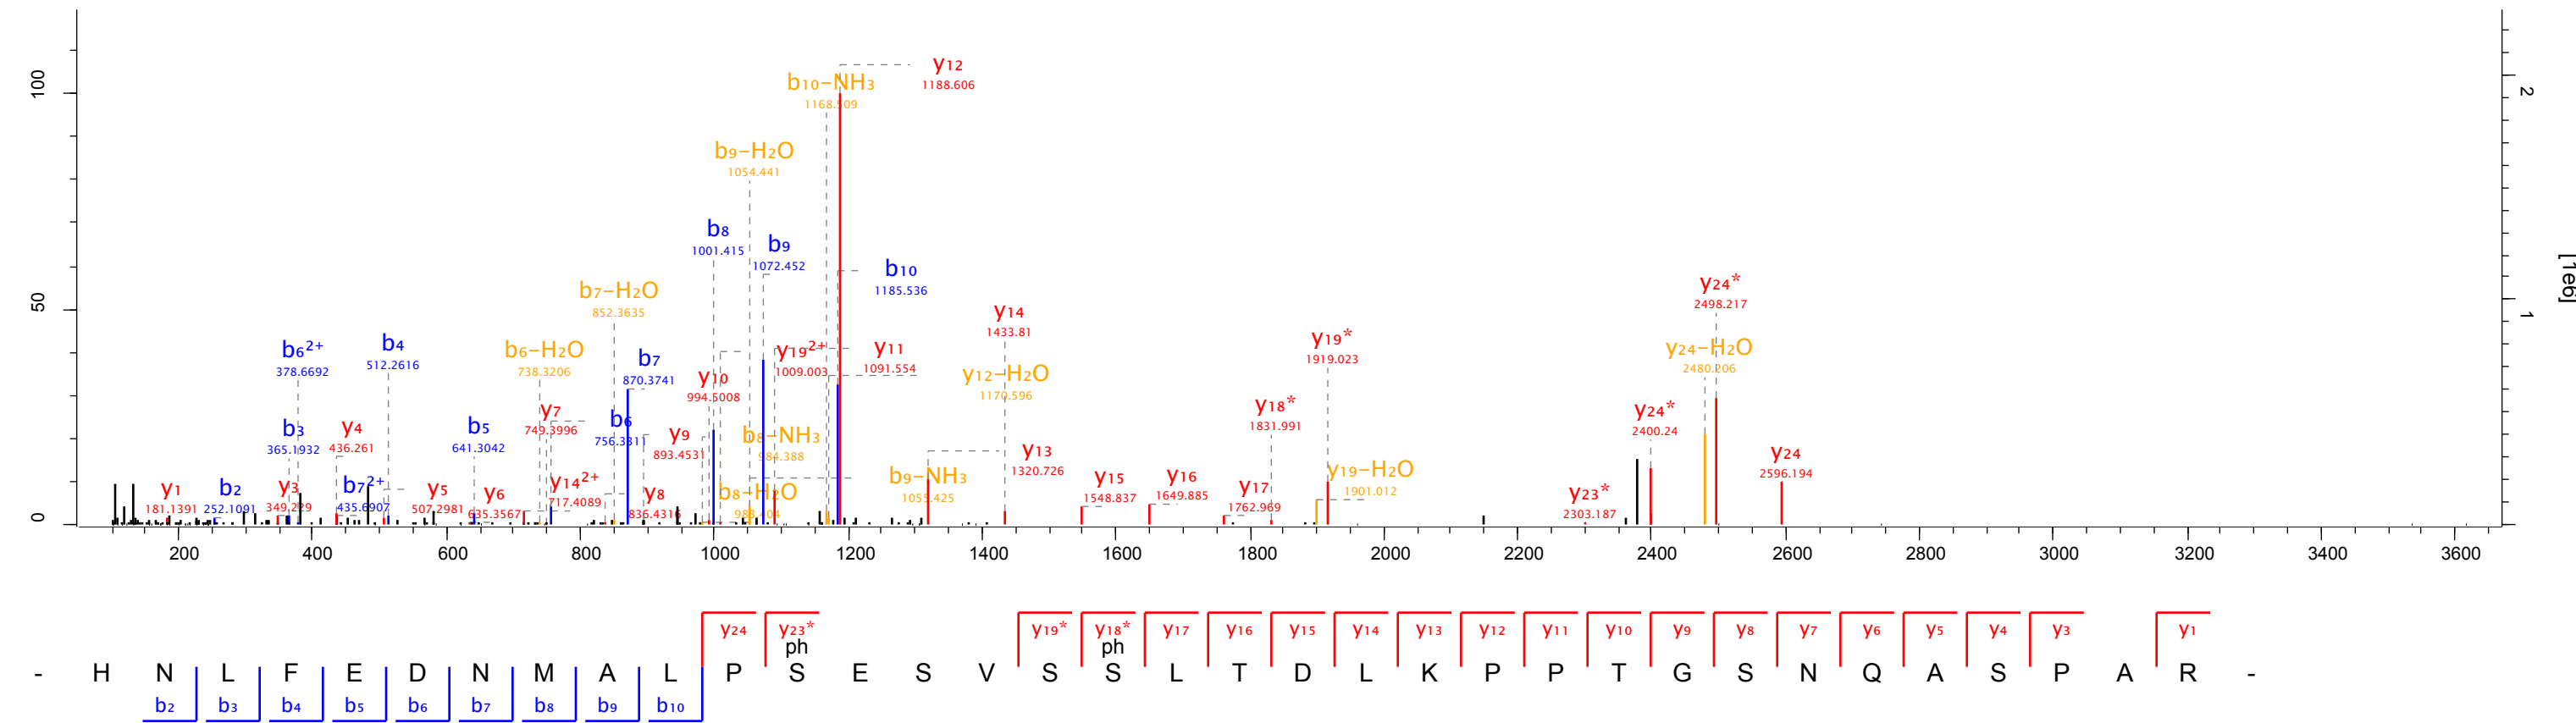

Raw file 20150814\_A375SR\_Phospho\_BR2\_03 Scan 25883 Method FTMS; HCD Score 238.58 m/z 1392.98 Gene names SCRIB

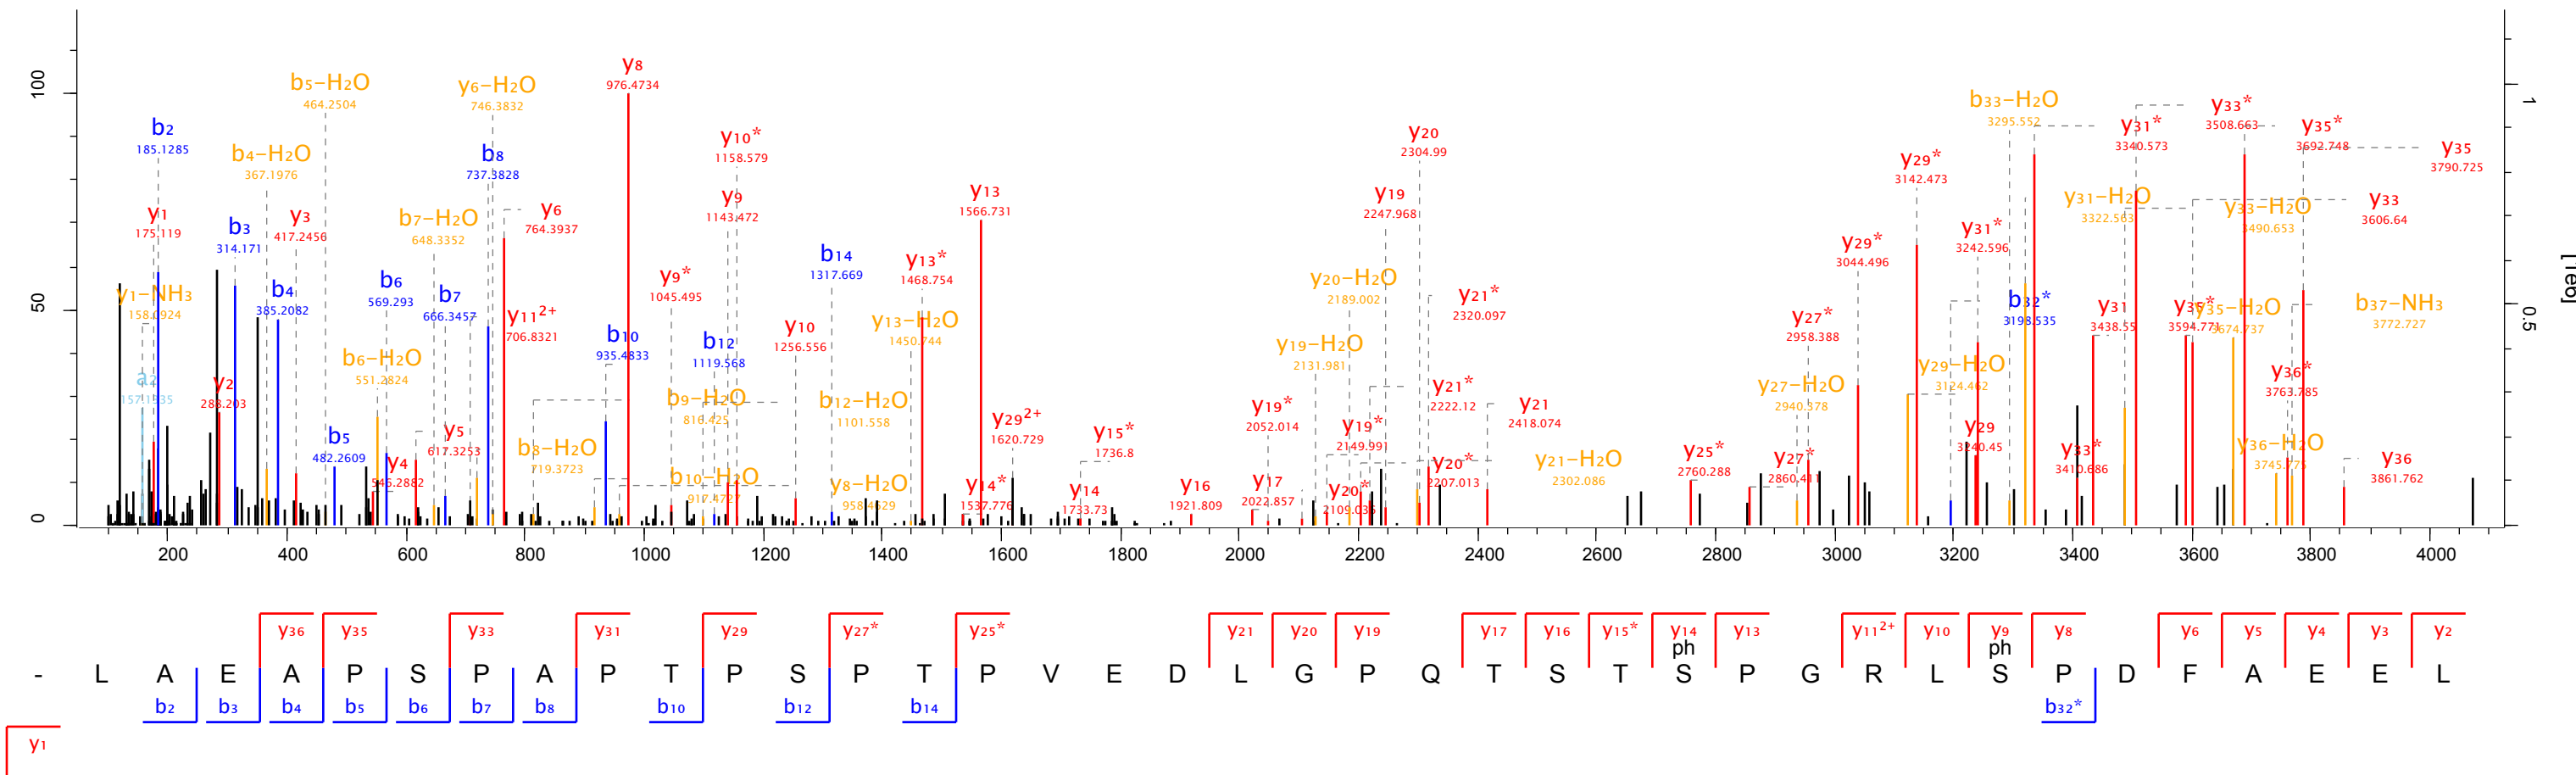

Raw file: 20150814\_A375SR\_Phospho\_BR2\_03  
 Scan: 26053 Method: FTMS; HCD Score: 53.09 m/z: 1207 Gene names: ERBB2

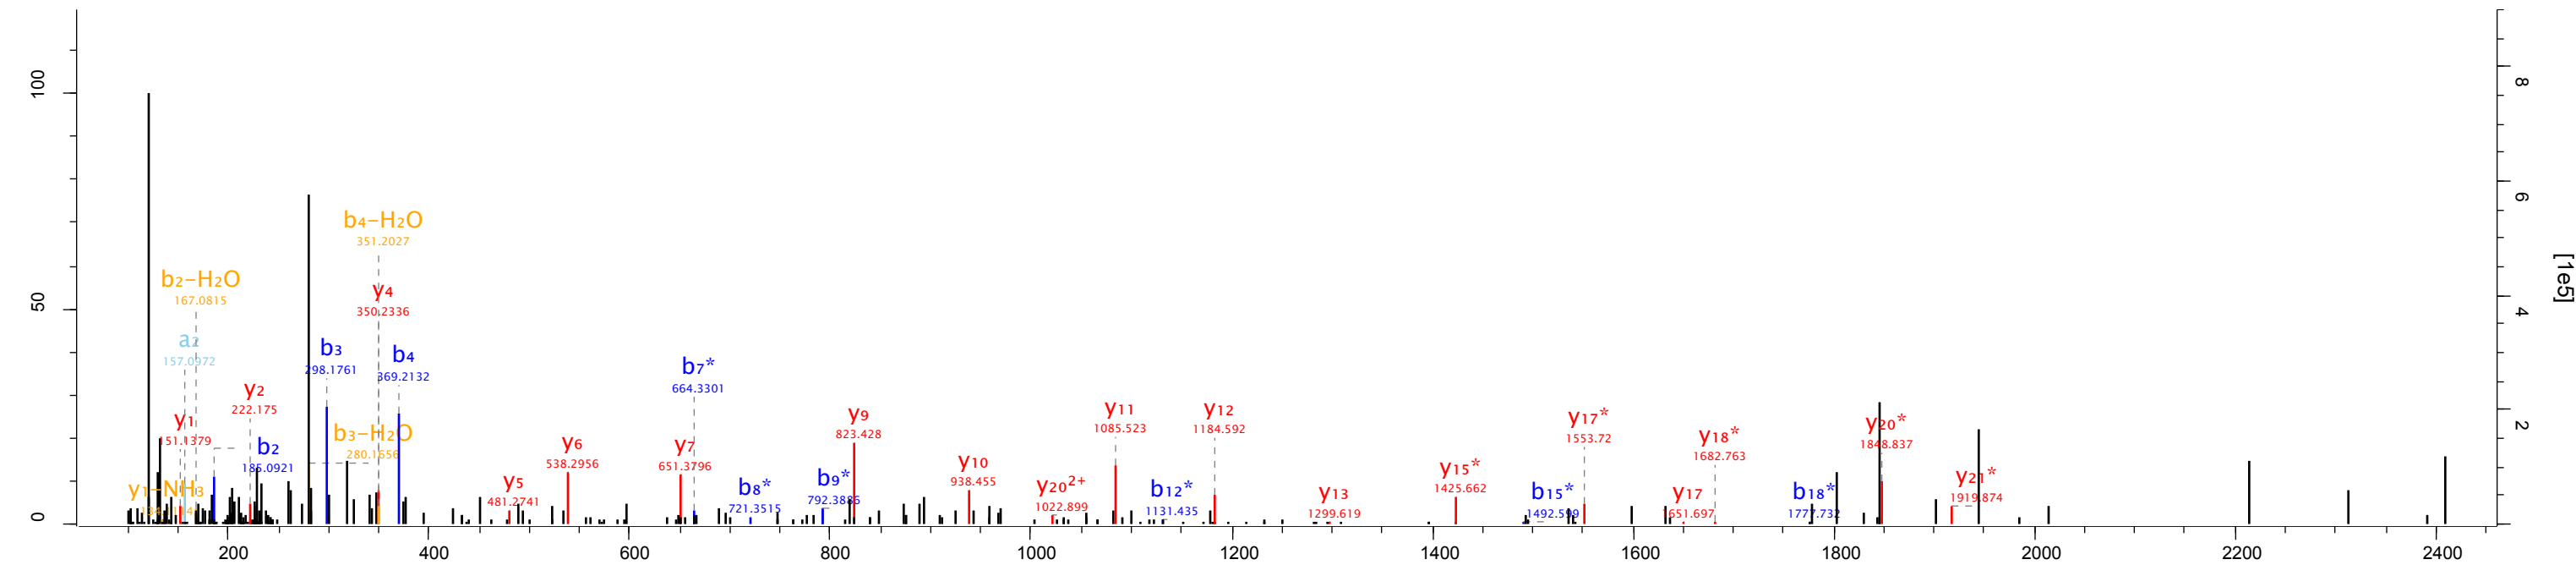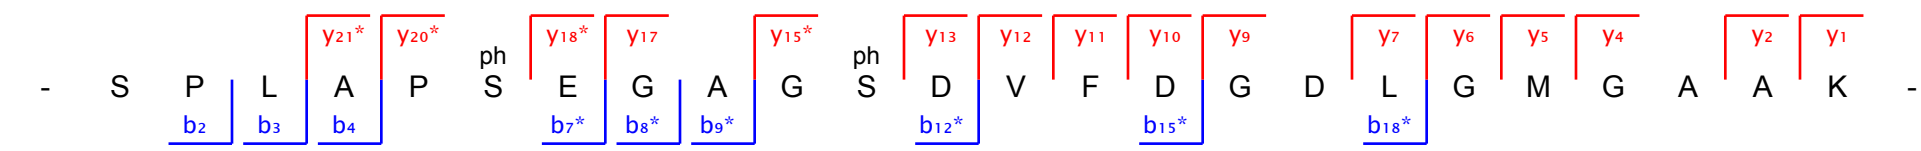

Raw file 20150814\_A375SR\_Phospho\_BR2\_03 Scan 26293 Method FTMS; HCD Score 173.23 m/z 1023.5 Gene names CTNND1

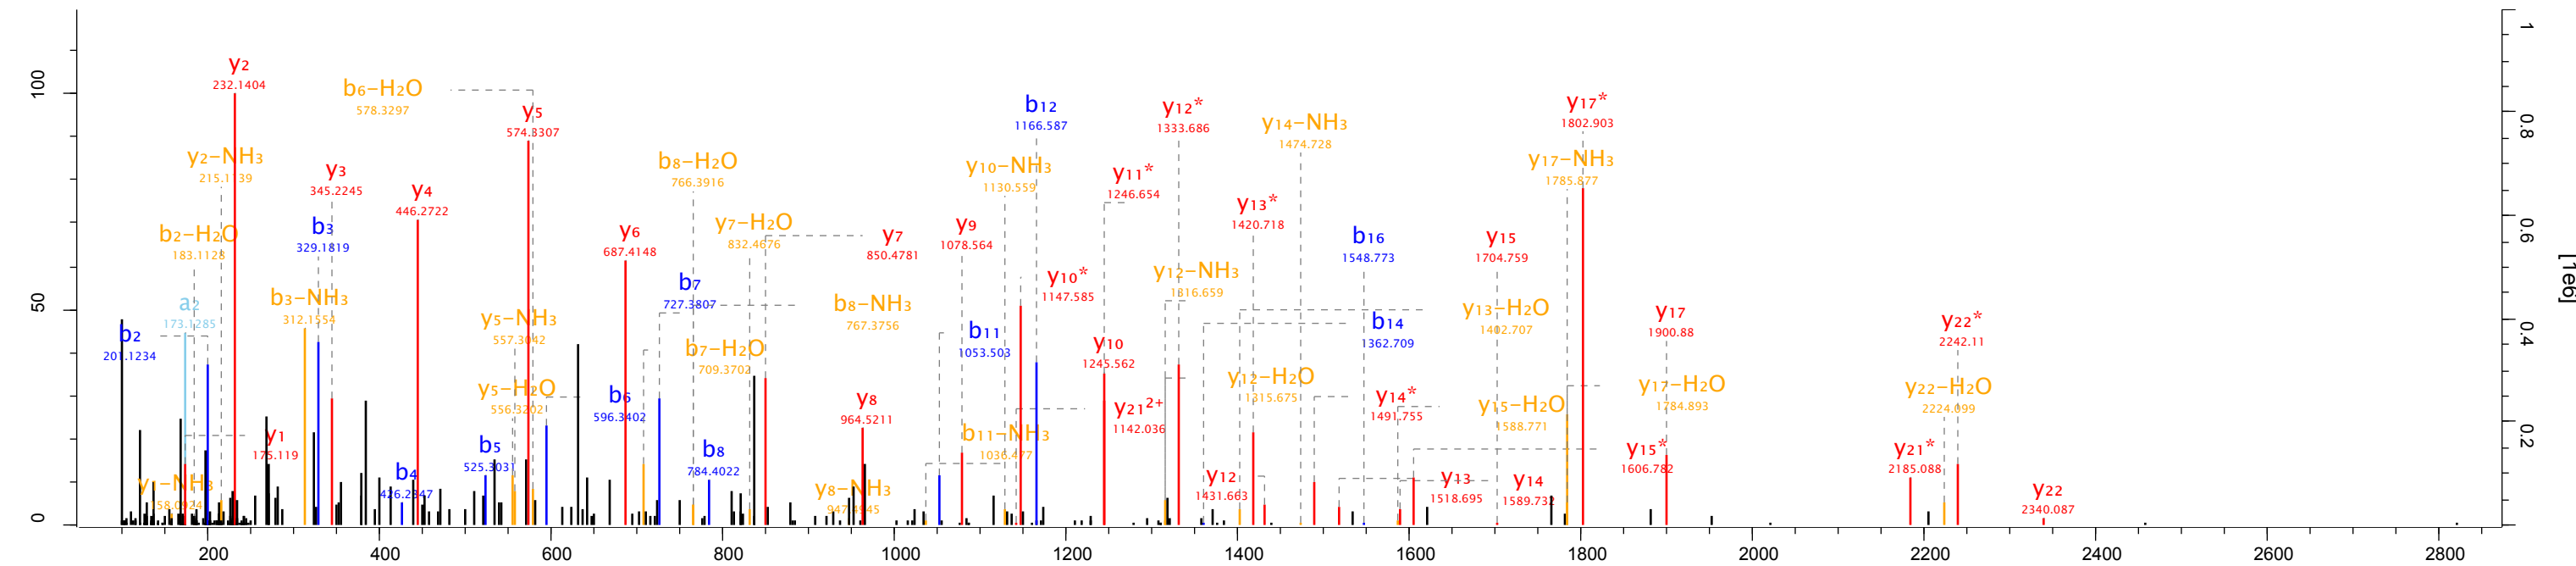

- T V Q P V A M G P D G L P V D A S S V S N N Y I Q T L G R -

b<sub>2</sub>
b<sub>3</sub>
b<sub>4</sub>
b<sub>5</sub>
b<sub>6</sub>
b<sub>7</sub>
b<sub>8</sub>
y<sub>22</sub>
y<sub>21</sub><sup>\*</sup>
y<sub>17</sub>
y<sub>15</sub>
y<sub>14</sub>
y<sub>13</sub>
y<sub>12</sub>
y<sub>11</sub><sup>\*</sup>
y<sub>10</sub>
y<sub>9</sub>
y<sub>8</sub>
y<sub>7</sub>
y<sub>6</sub>
y<sub>5</sub>
y<sub>4</sub>
y<sub>3</sub>
y<sub>2</sub>
y<sub>1</sub>

Raw file Scan Method Score m/z Gene names  
 20150814\_A375SR\_Phospho\_BR2\_03 26553 FTMS; HCD 231.58 1103.81 PTPN12

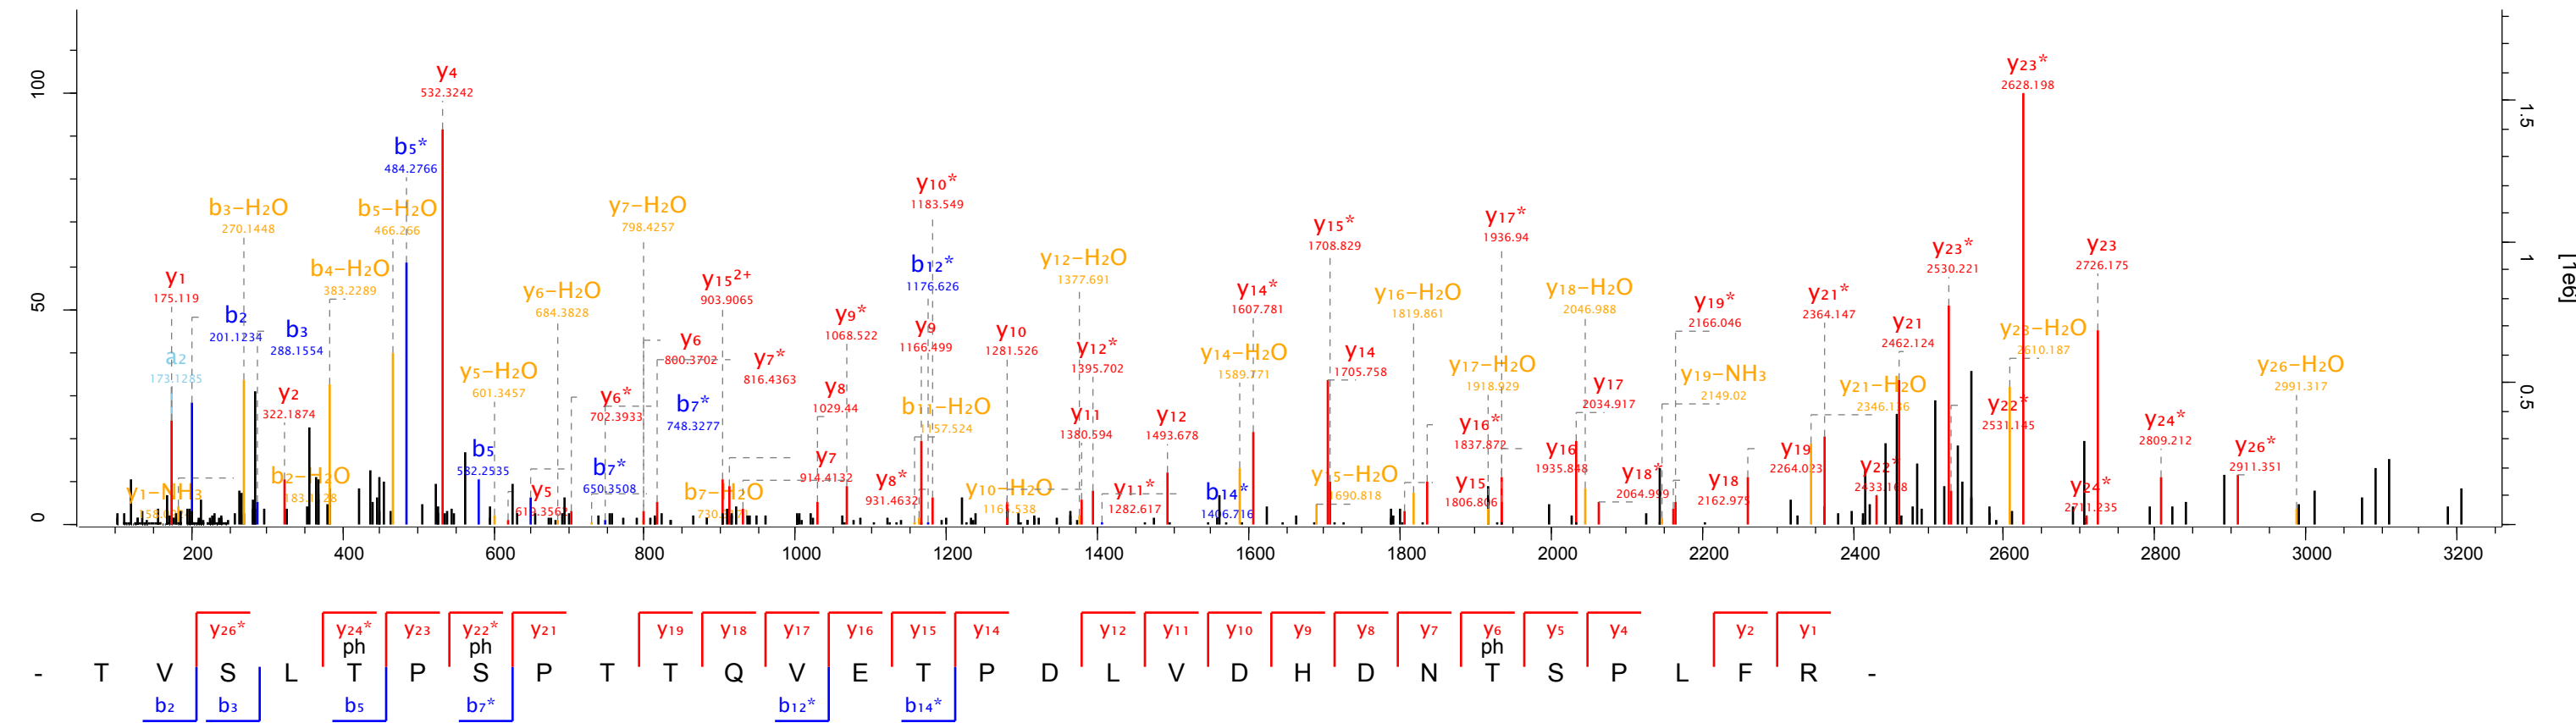

Raw file 20150814\_A375SR\_Phospho\_BR2\_03 Scan 26573 Method FTMS; HCD Score 68.28 m/z 910.77 Gene names CABLES1

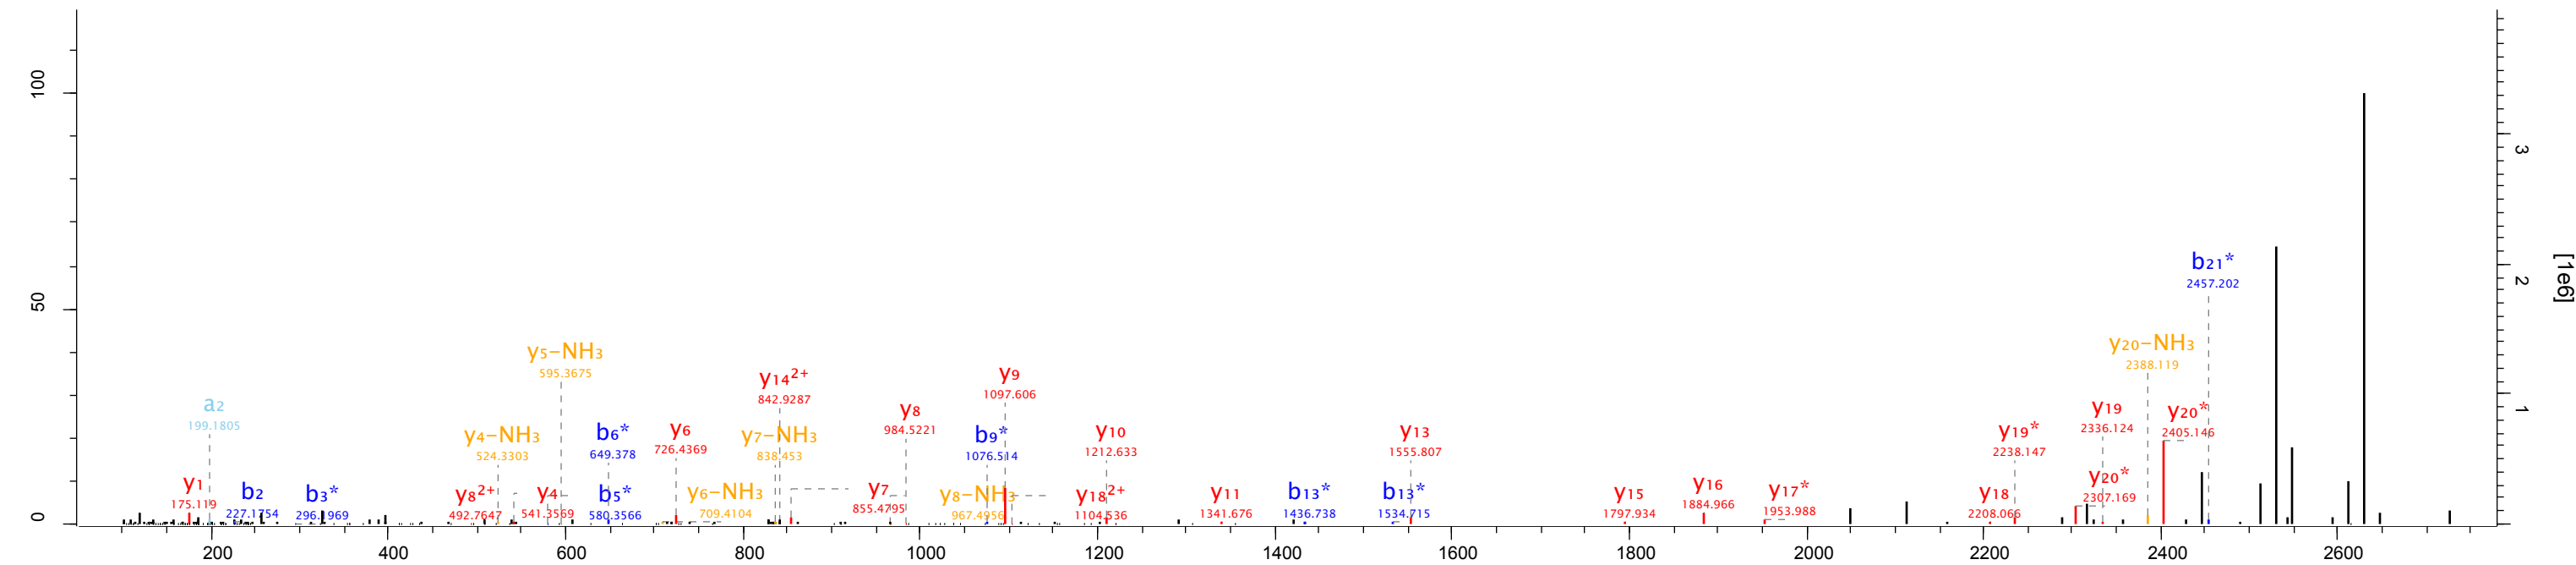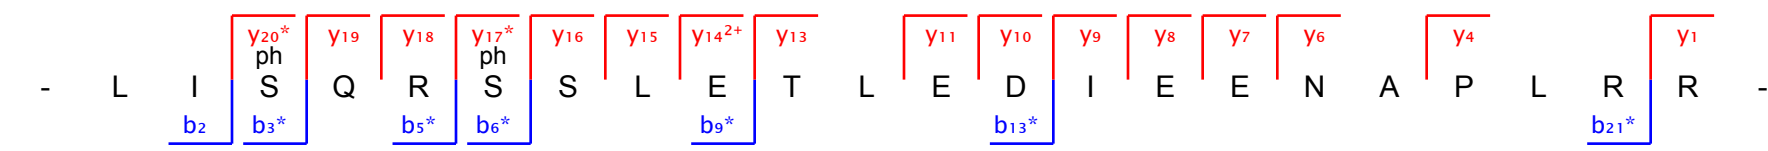

Raw file: 20150814\_A375SR\_Phospho\_BR2\_03  
 Scan: 26813 Method: FTMS; HCD Score: 176.01 m/z: 988.42 Gene names: ZNHIT3

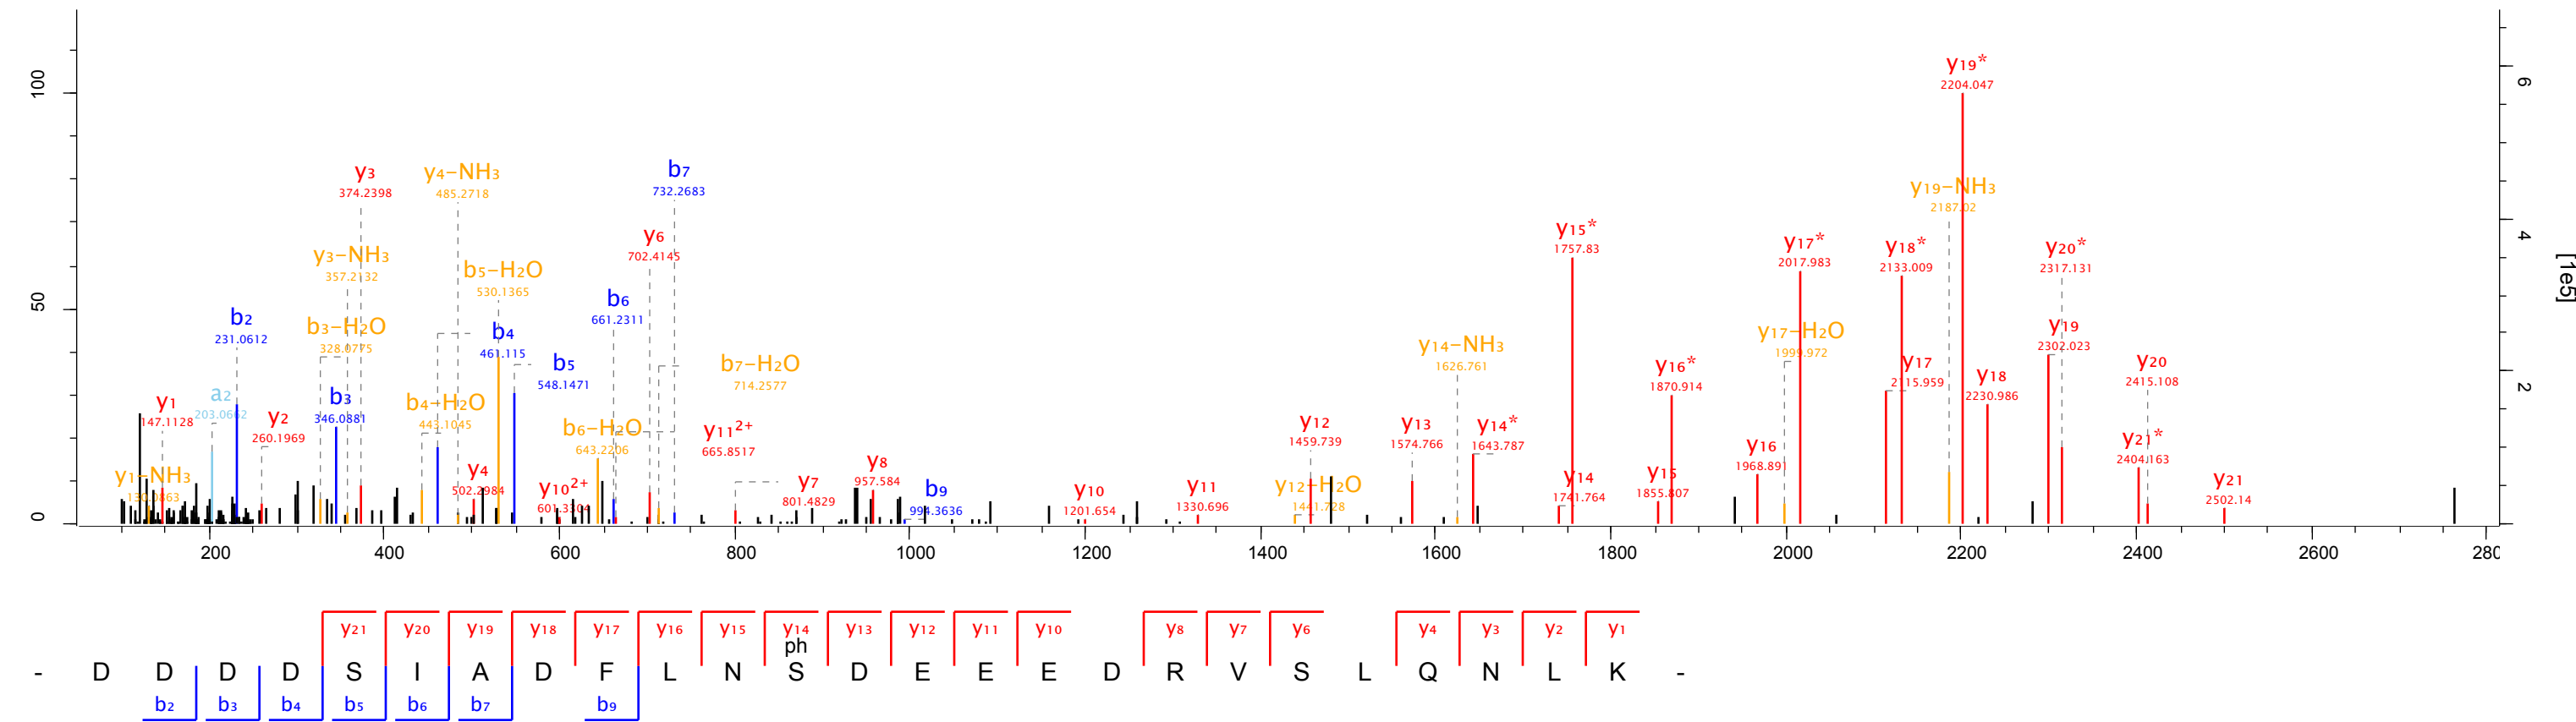



Raw file 20150814\_A375SR\_Phospho\_BR2\_03 Scan 27243 Method FTMS; HCD Score 72.47 m/z 699.94 Gene names SMN1

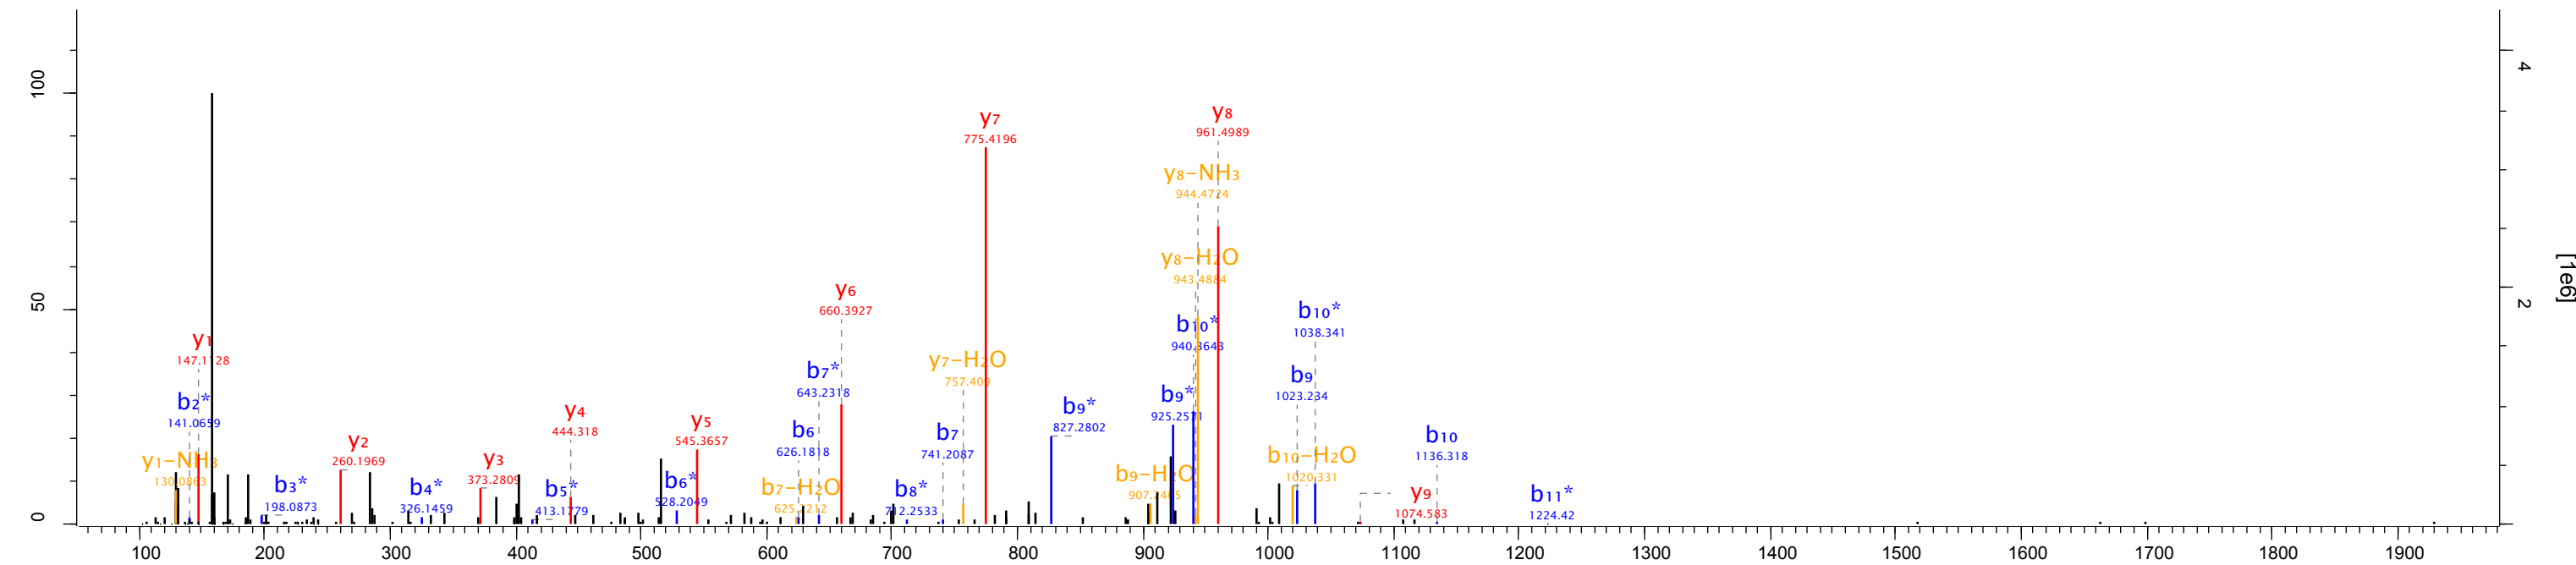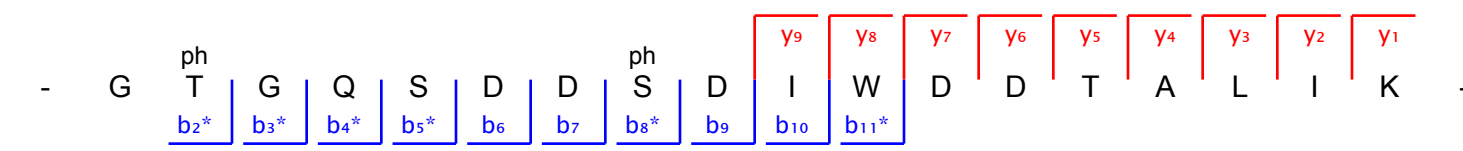

Raw file: 20150814\_A375SR\_Phospho\_BR2\_03  
 Scan: 27943 Method: FTMS; HCD Score: 121.61 m/z: 1031.15 Gene names: FAM129A

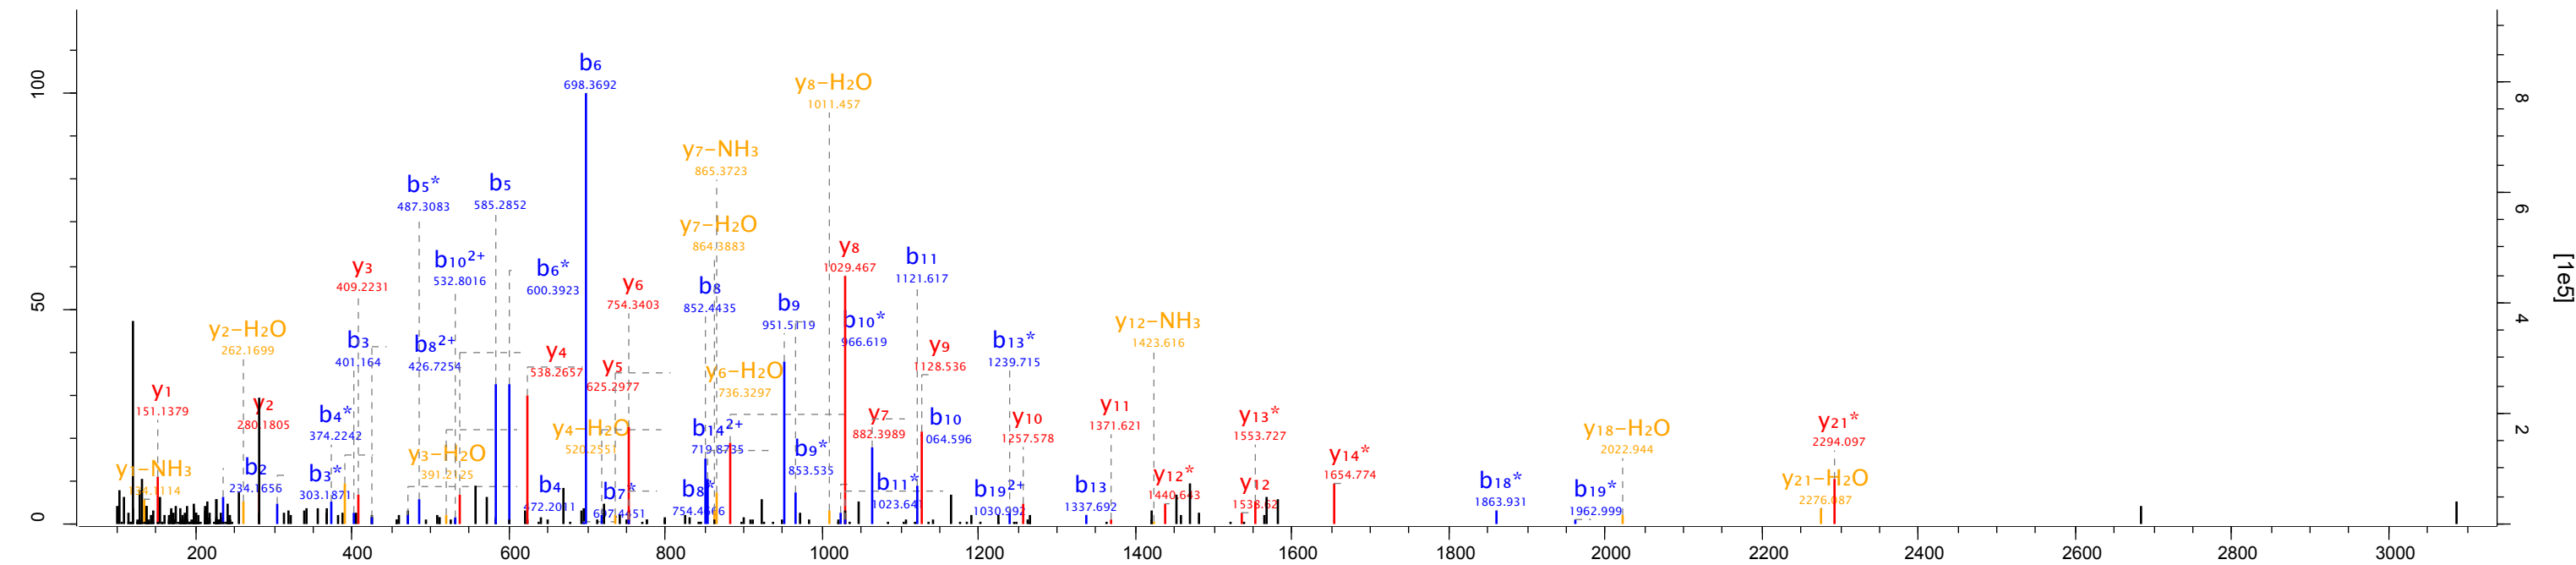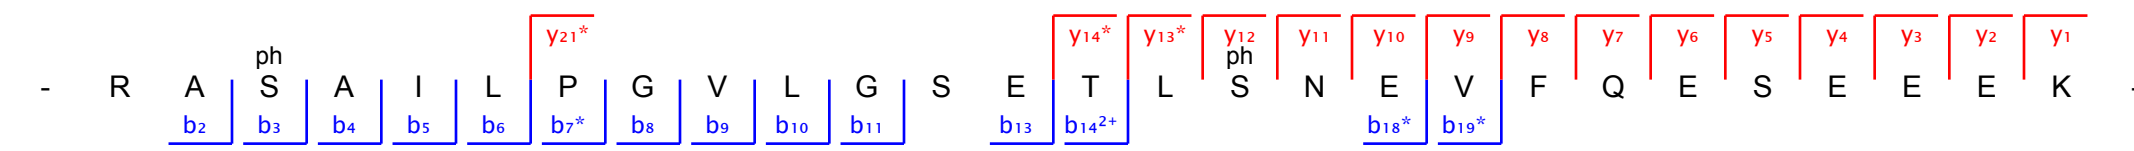

Raw file  
20150814\_A375SR\_Phospho\_BR2\_03

Scan 28003 Method FTMS; HCD Score 189.24 m/z 1152.5 Gene names SMARCAD1

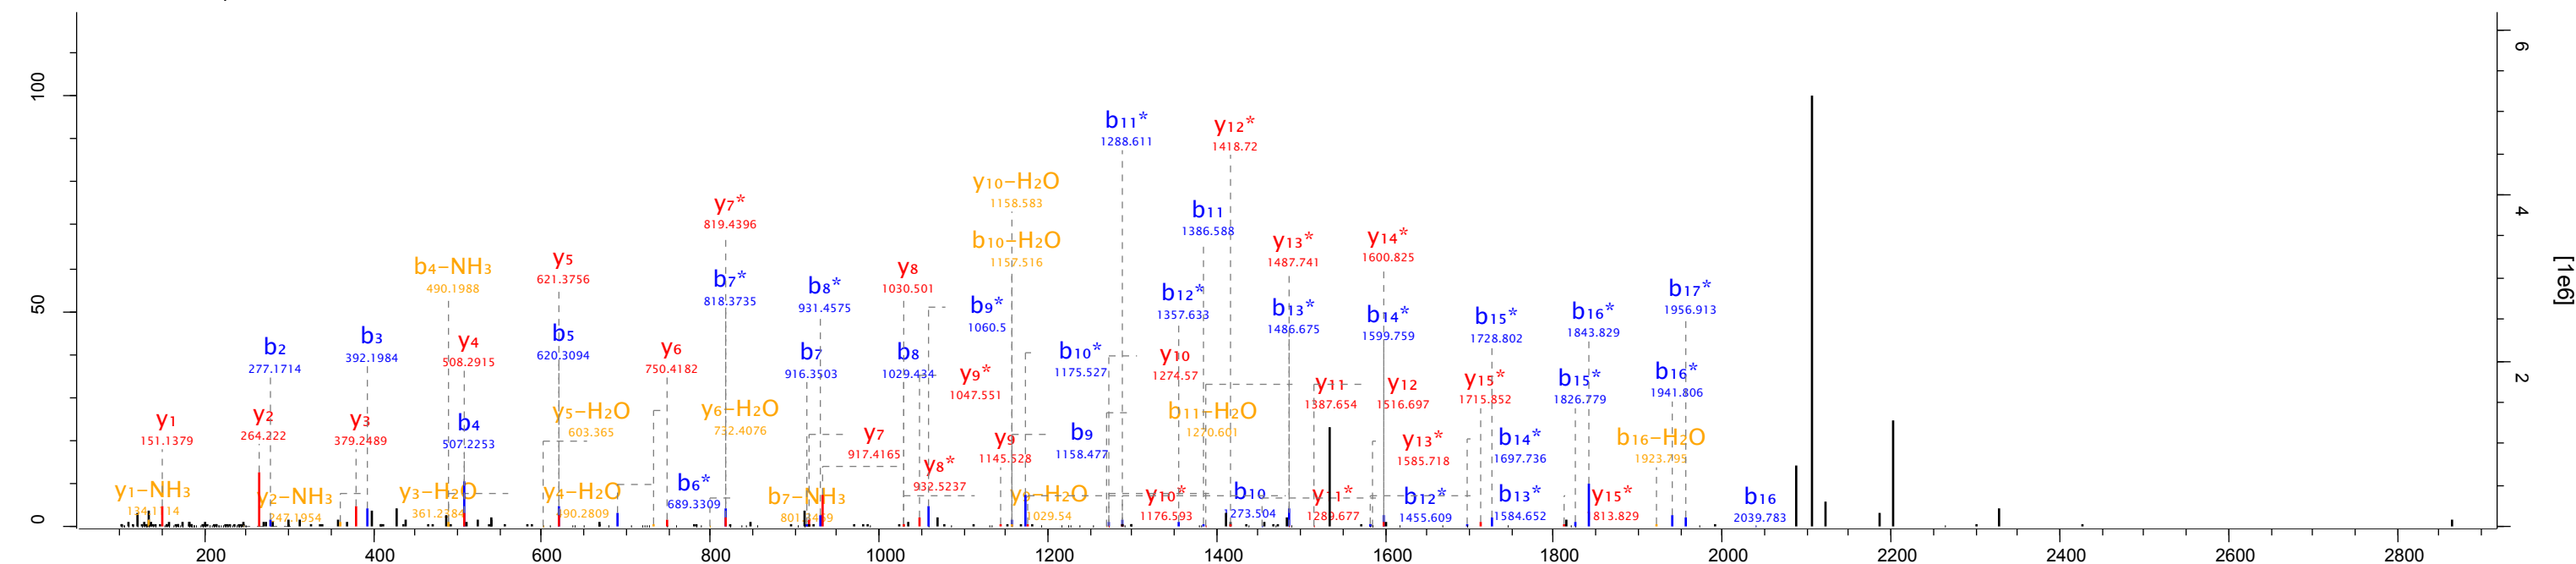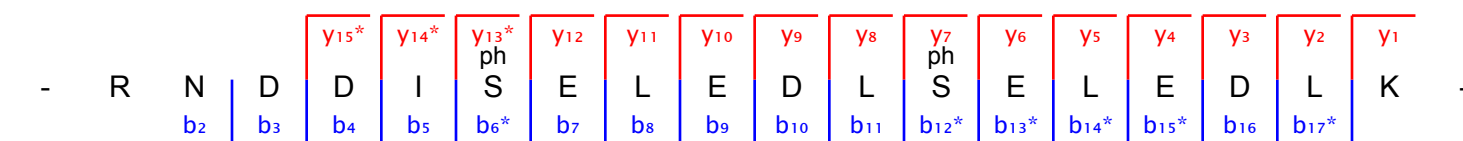

Raw file: 20150814\_A375SR\_Phospho\_BR2\_03  
 Scan: 28203 Method: FTMS; HCD Score: 120.23 m/z: 918.92 Gene names: SPRY2

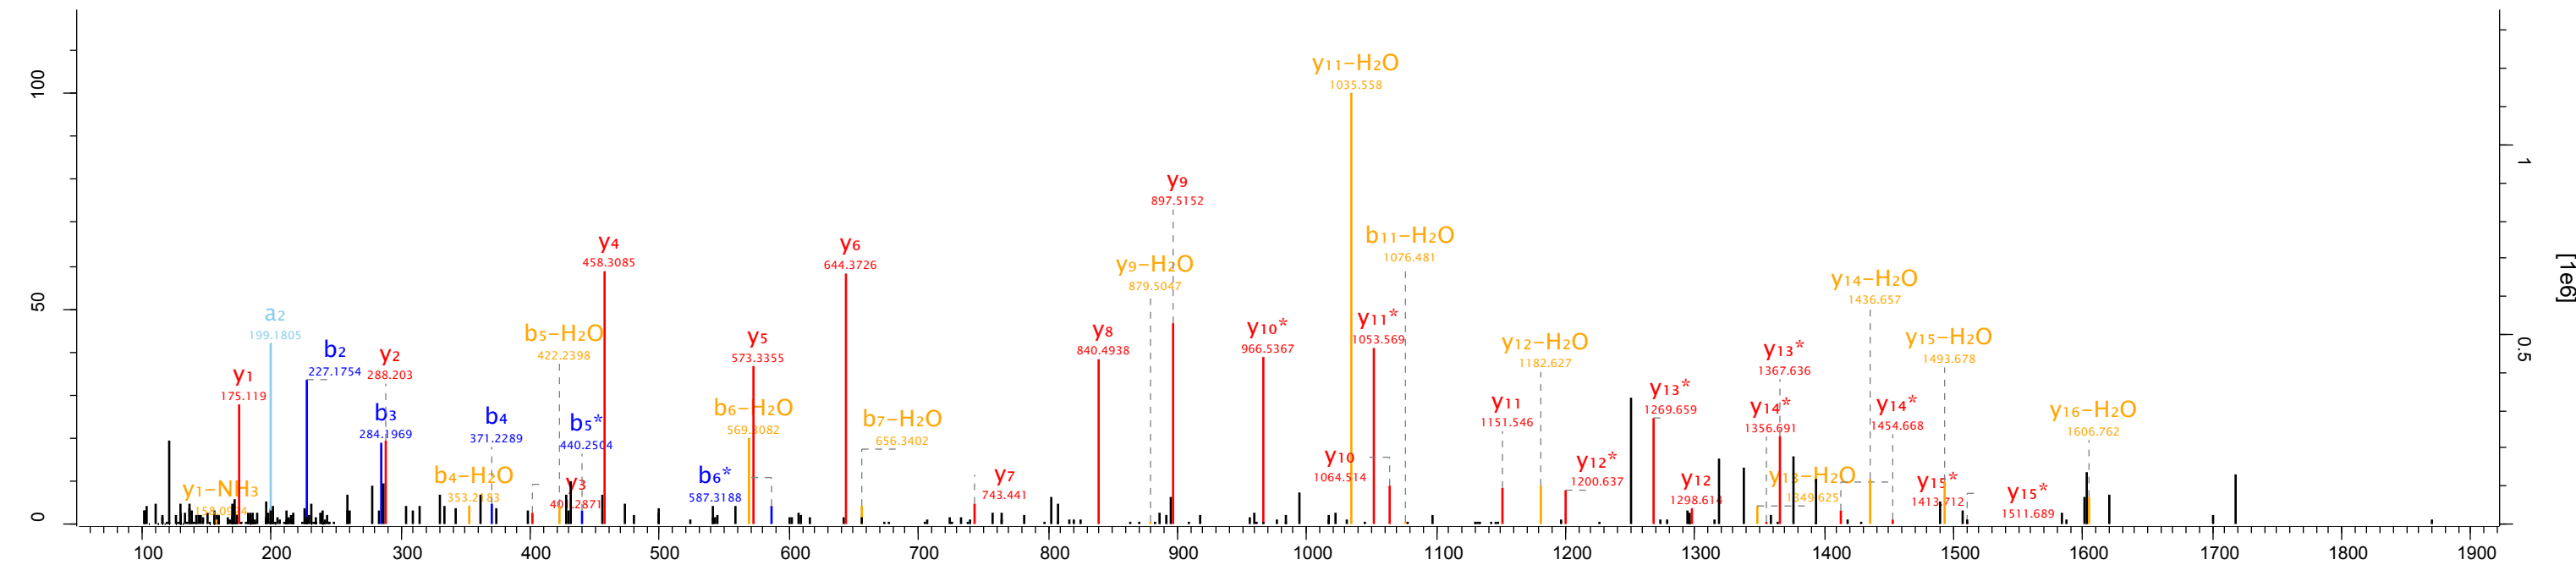

Sequence: - L L G S ph S F S S G P V A D G I I R -

Fragmentation mapping (b and y ions):

- b2: L
- b3: G
- b4: S
- b5\*: ph
- b6\*: S
- y1: R
- y2: I
- y3: I
- y4: D
- y5: A
- y6: V
- y7: P
- y8: G
- y9: S
- y10: S
- y11: S
- y12: F
- y13\*: ph
- y14\*: S
- y15\*: G

Raw file: 20150814\_A375SR\_Phospho\_BR2\_03  
 Scan: 28403 Method: FTMS; HCD Score: 177.91 m/z: 906.43 Gene names: CLASP2

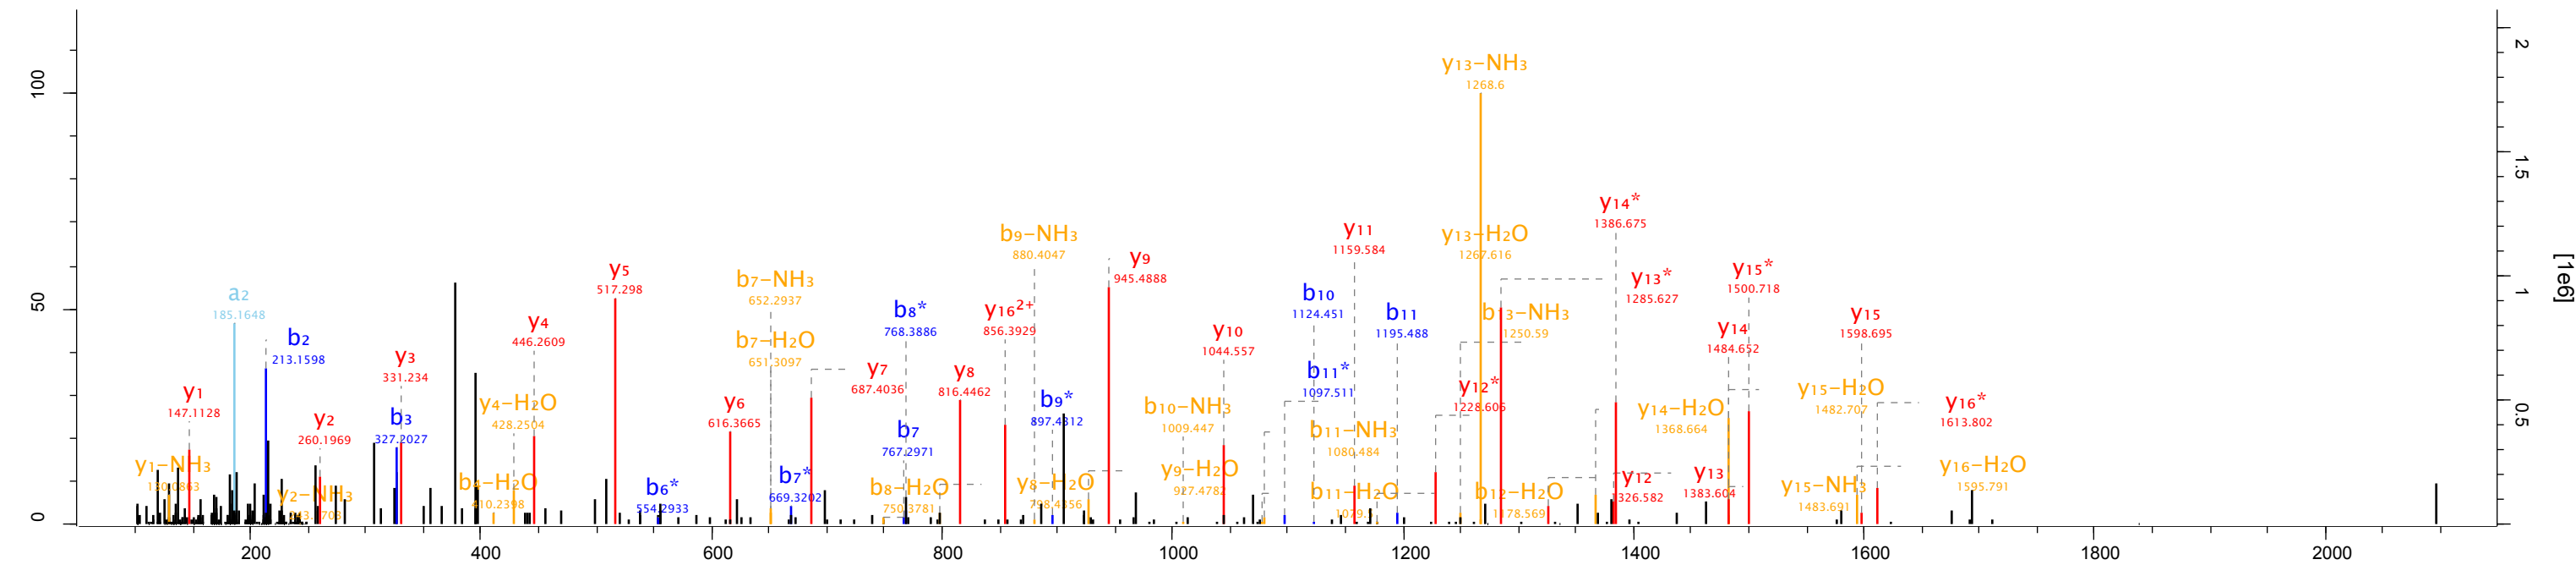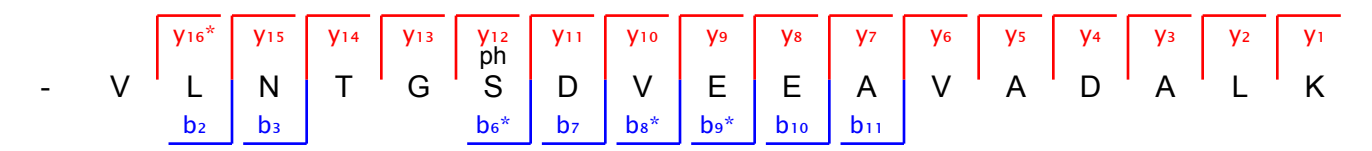

Raw file: 20150814\_A375SR\_Phospho\_BR2\_03  
 Scan: 28423 Method: FTMS; HCD Score: 104.42 m/z: 1125.84 Gene names: ADD1

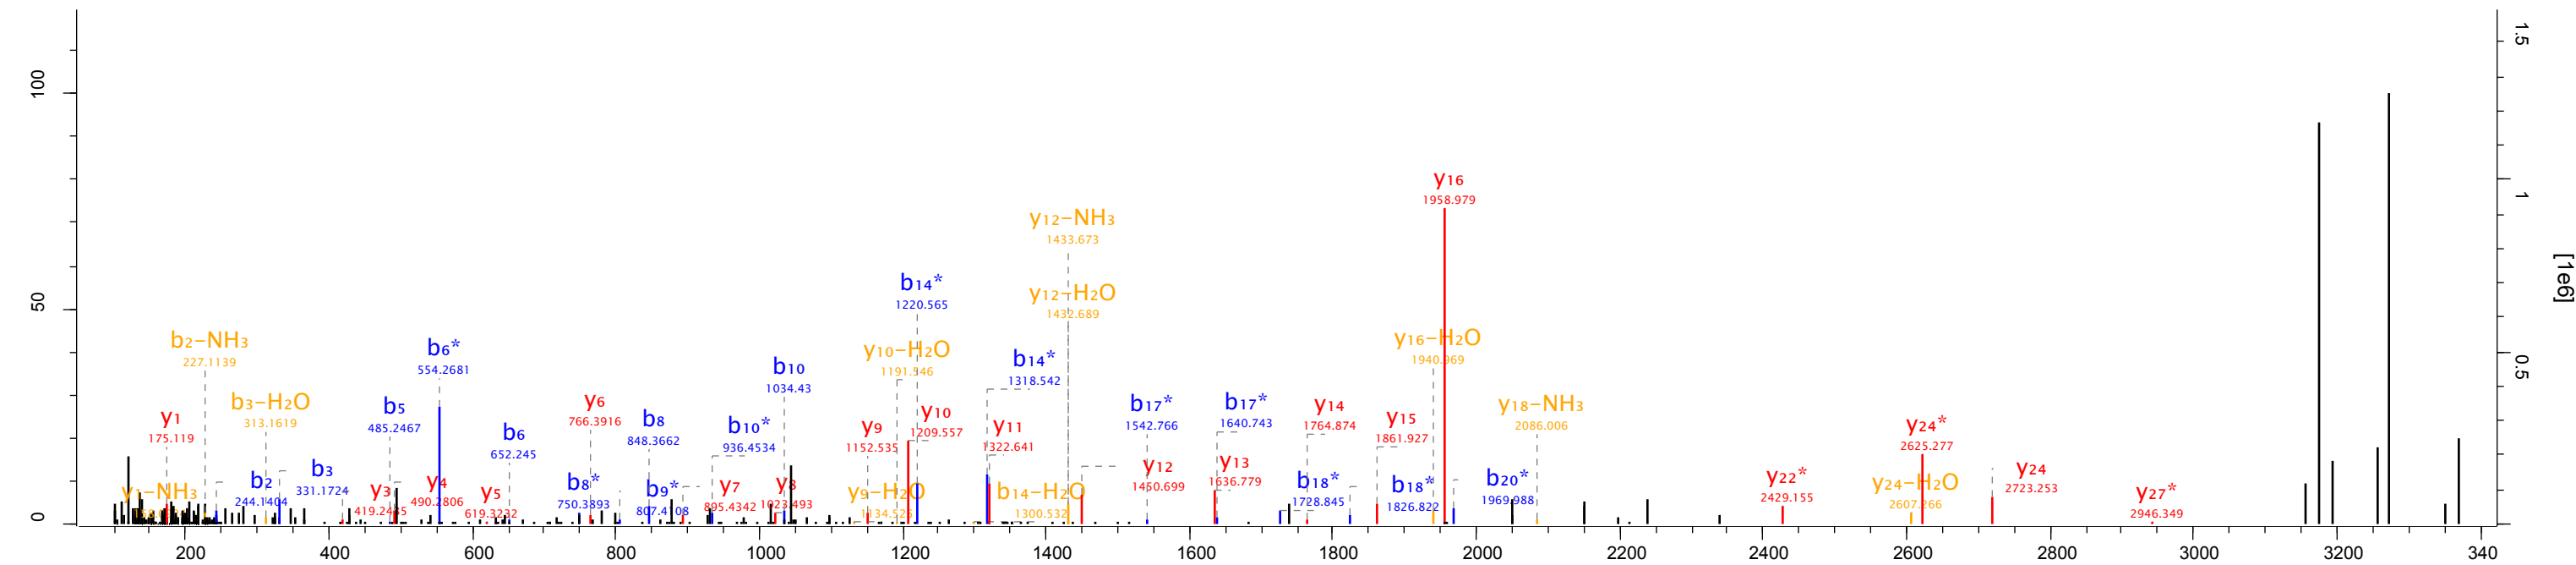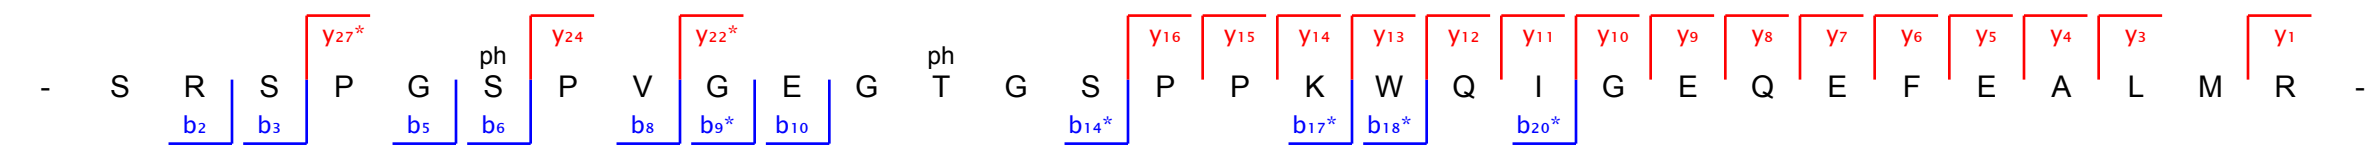

Raw file 20150814\_A375SR\_Phospho\_BR2\_03 Scan 28533 Method FTMS; HCD Score 144.84 m/z 947.19 Gene names HUWE1

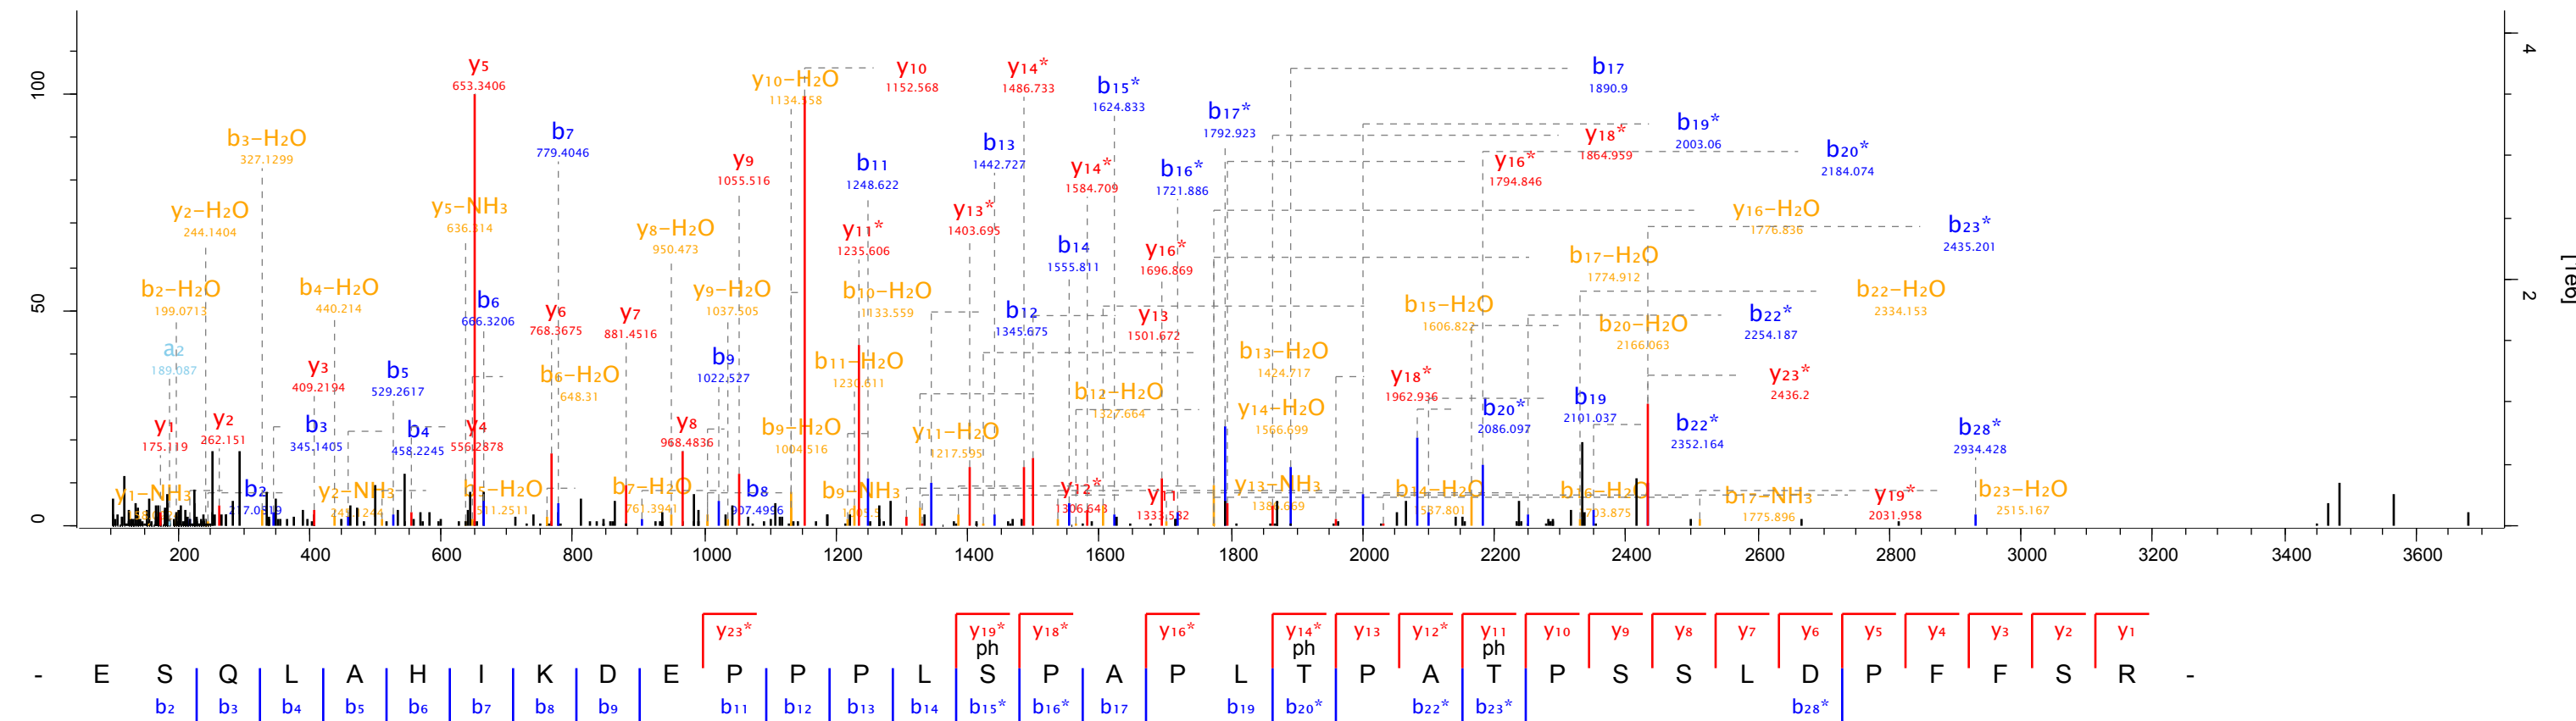

Raw file 20150814\_A375SR\_Phospho\_BR2\_03 Scan 28883 Method FTMS; HCD Score 305.48 m/z 728.84 Gene names NCAPG

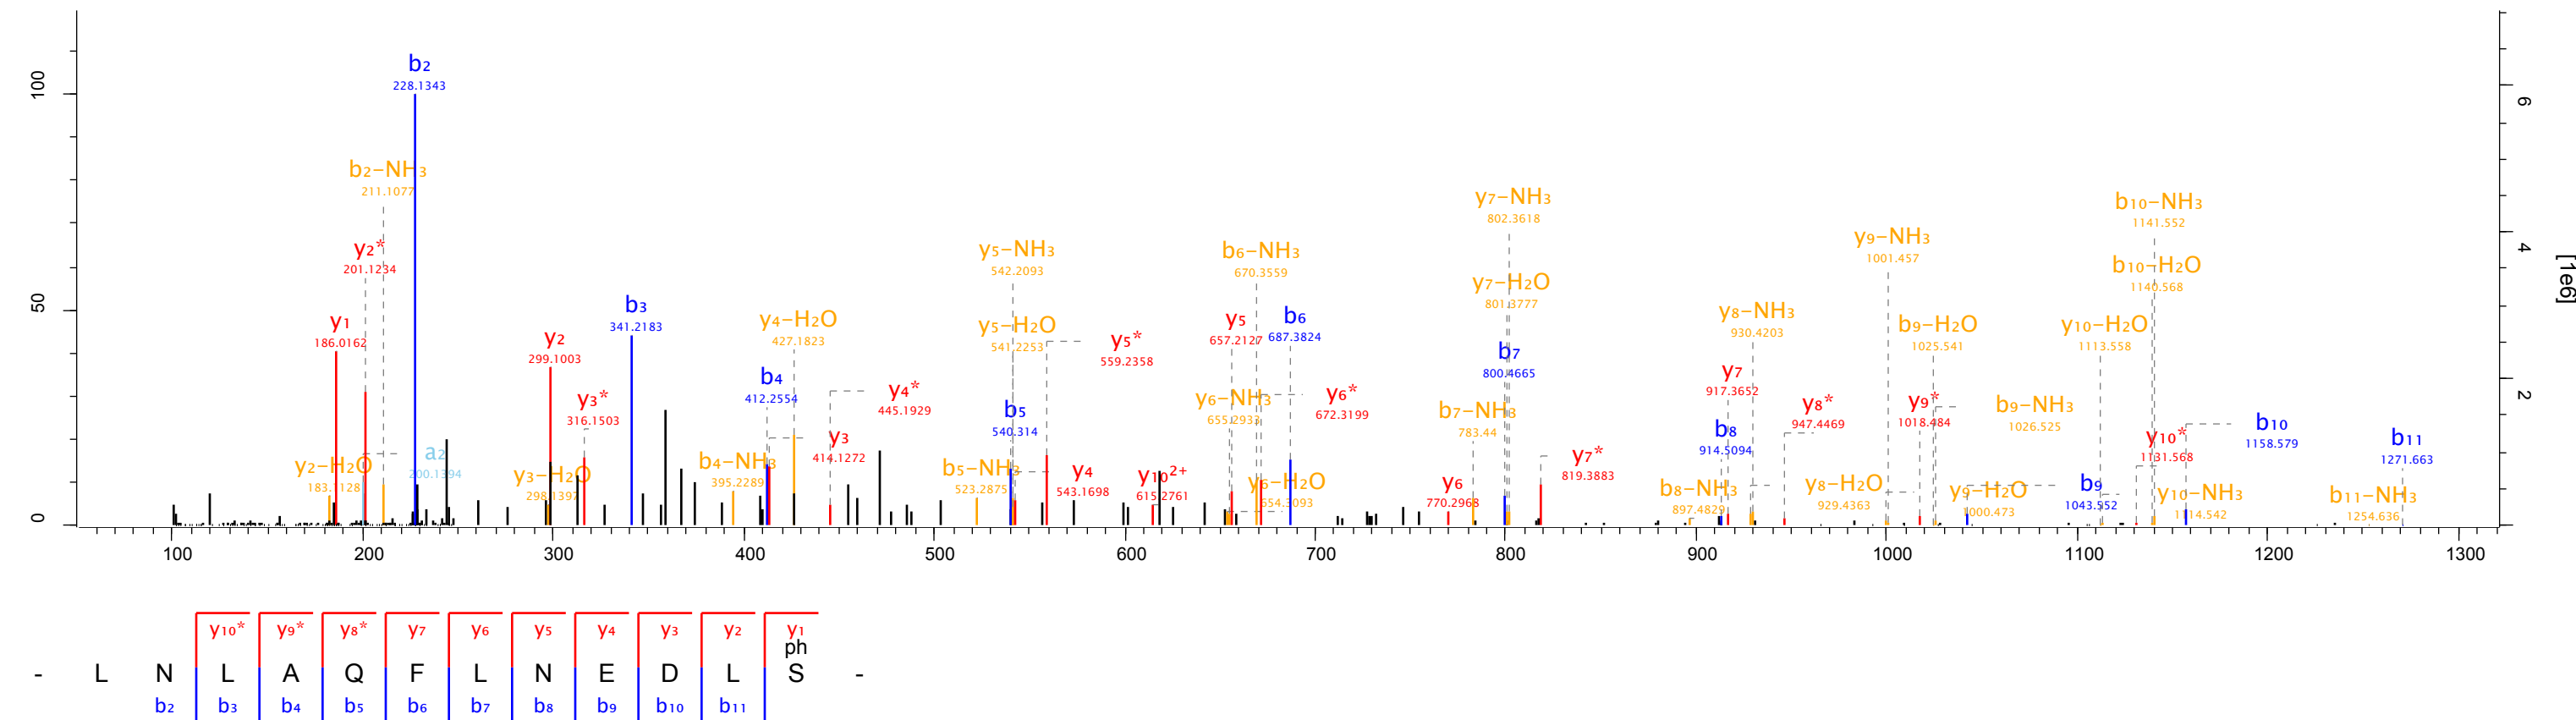



Raw file: 20150814\_A375SR\_Phospho\_BR2\_03  
 Scan: 2993 Method: FTMS; HCD Score: 109.62 m/z: 664.78 Gene names: SGK223

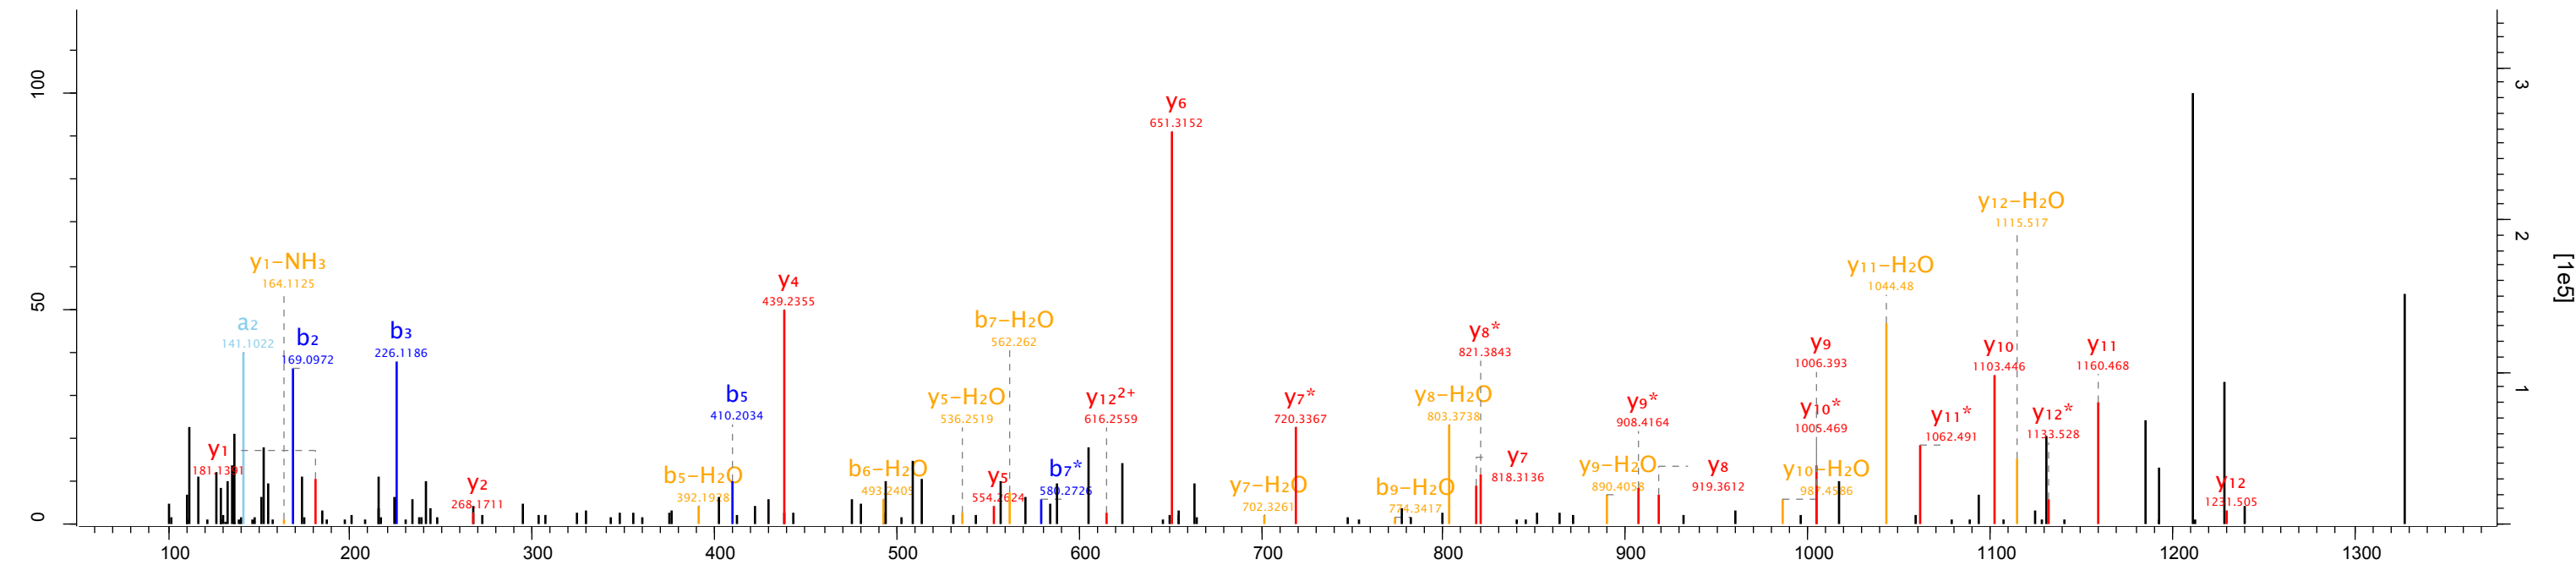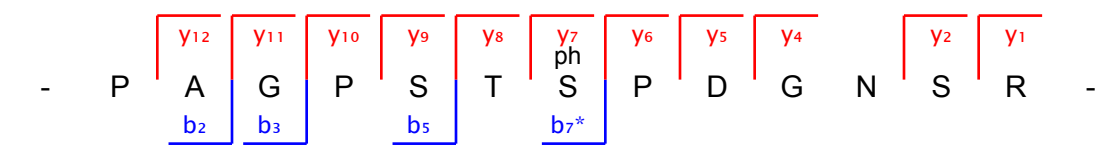



Raw file: 20150814\_A375SR\_Phospho\_BR2\_03  
 Scan: 3863 Method: FTMS; HCD Score: 96.14 m/z: 757.3 Gene names: SMG8

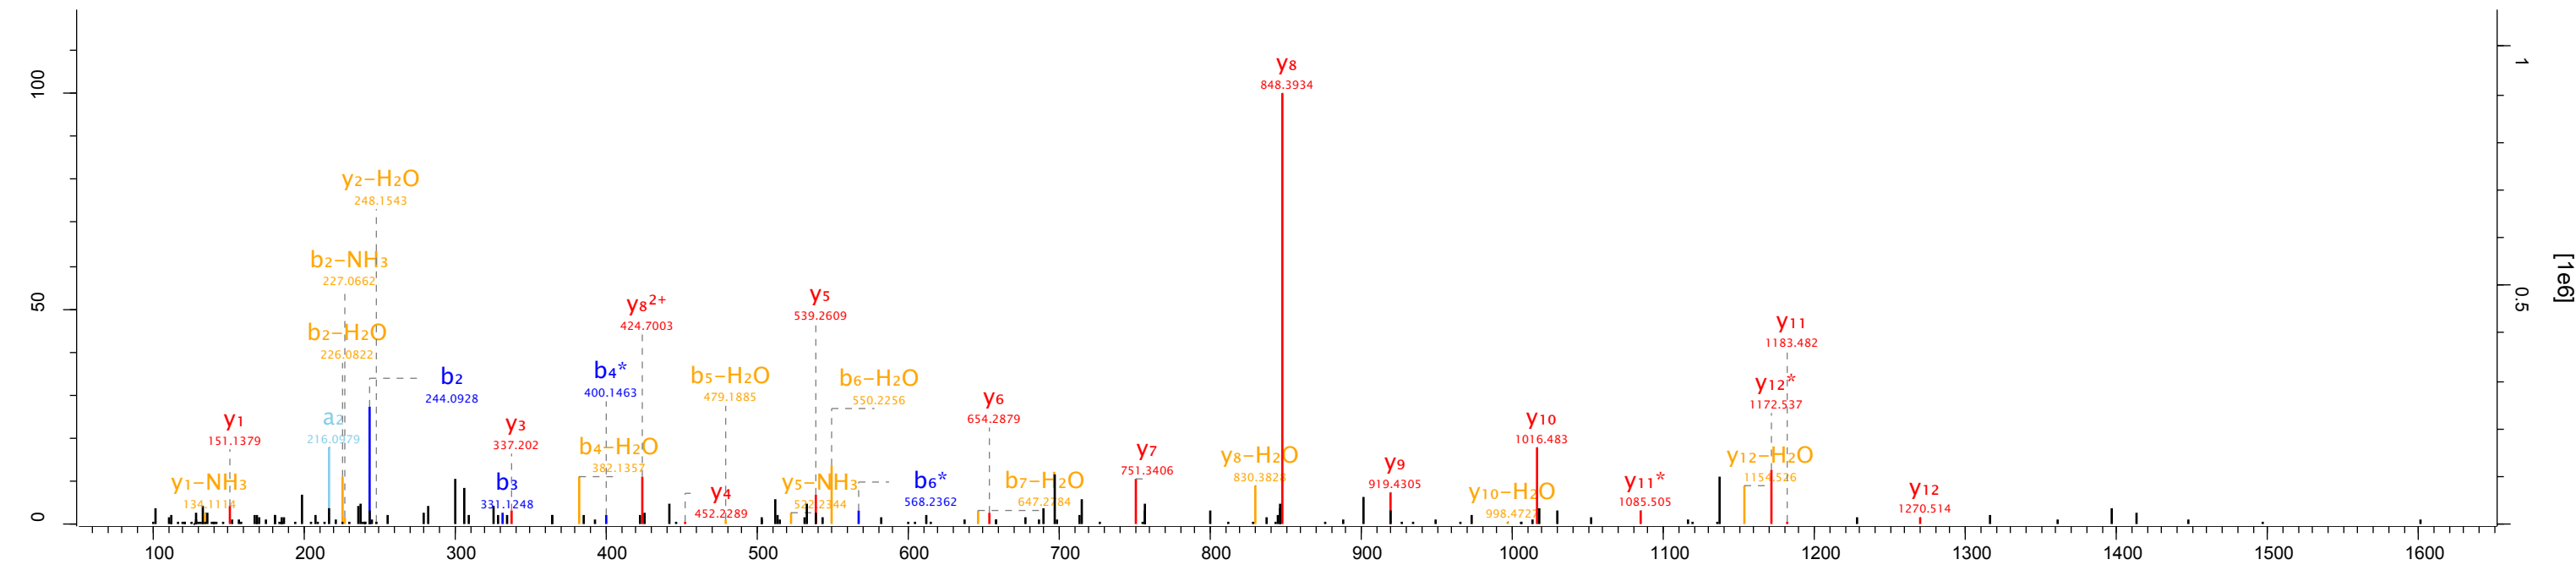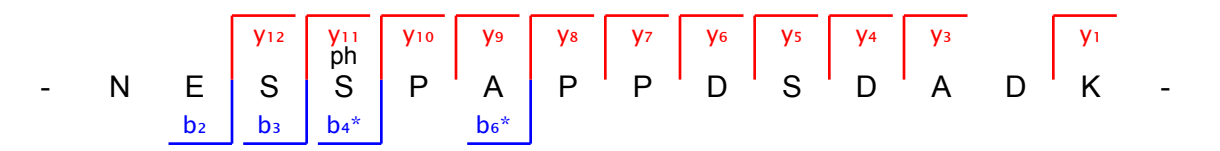

Raw file: 20150814\_A375SR\_Phospho\_BR2\_03  
 Scan: 3923 Method: FTMS; HCD Score: 135.14 m/z: 627.25 Gene names: ATXN2L

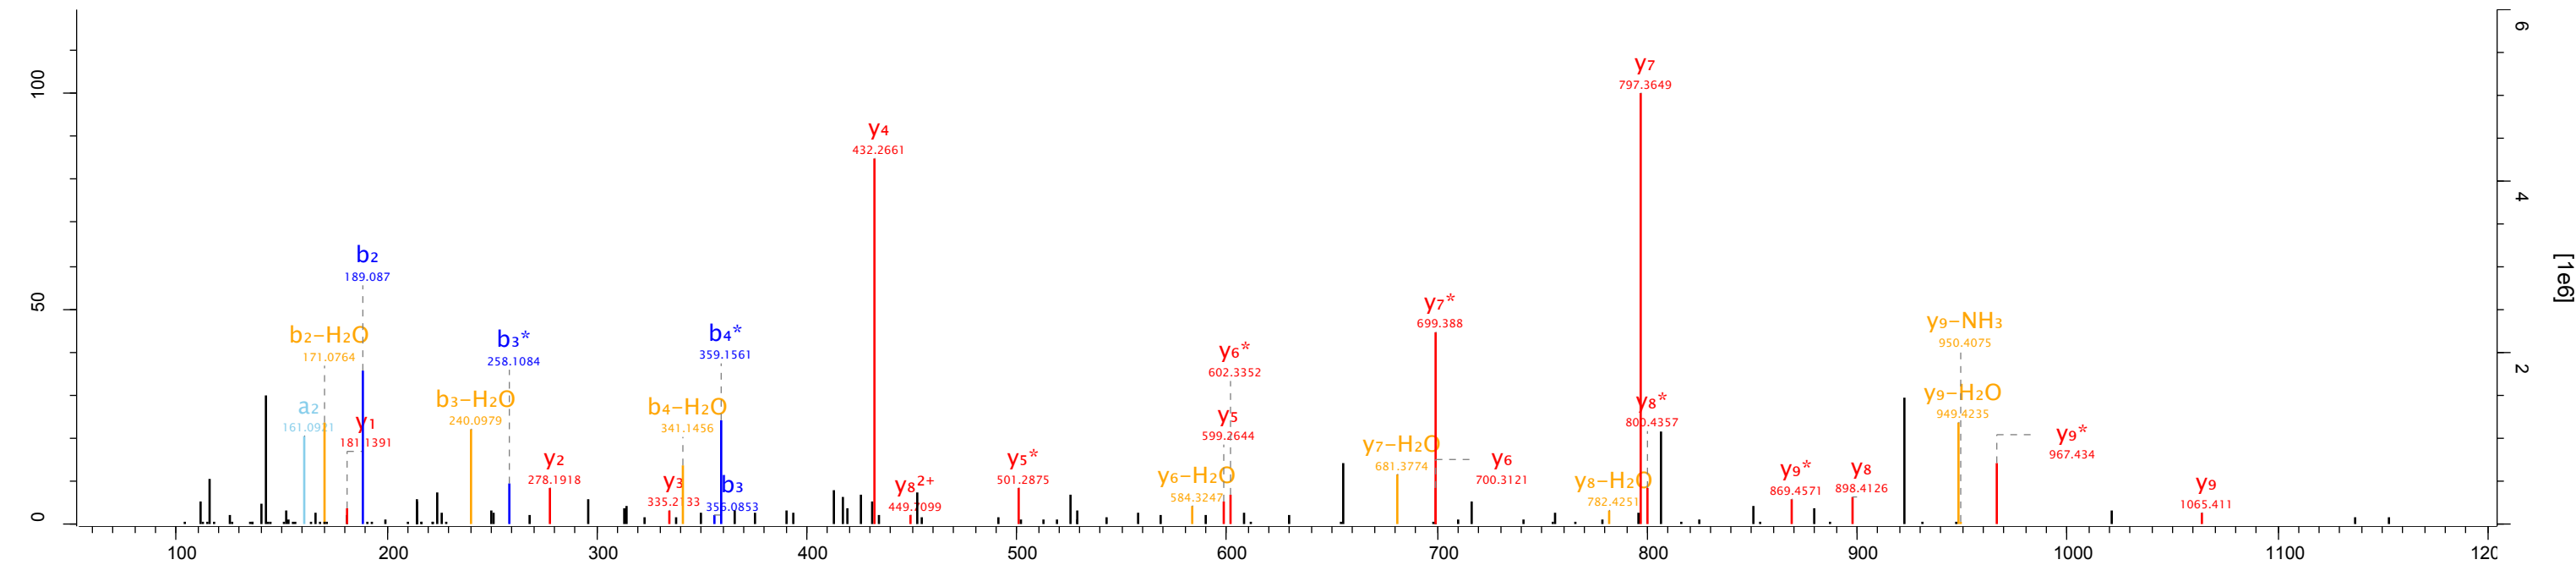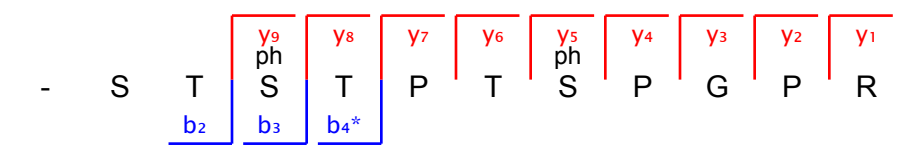

Raw file: 20150814\_A375SR\_Phospho\_BR2\_03  
 Scan: 4103 Method: FTMS; HCD Score: 139.04 m/z: 664.94 Gene names: SNIP1

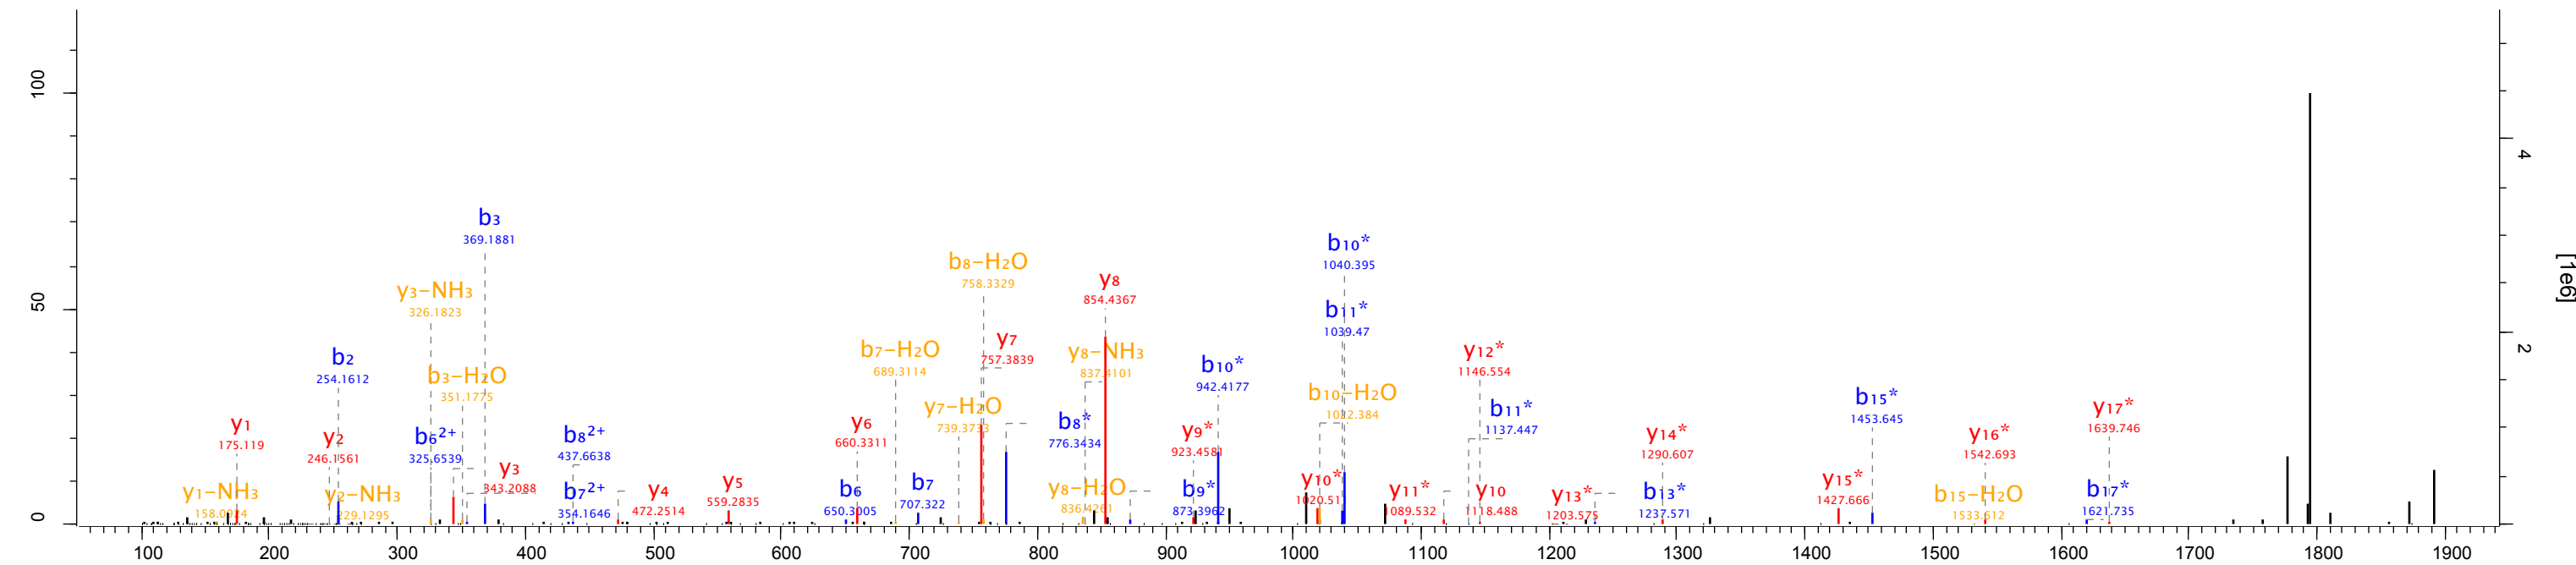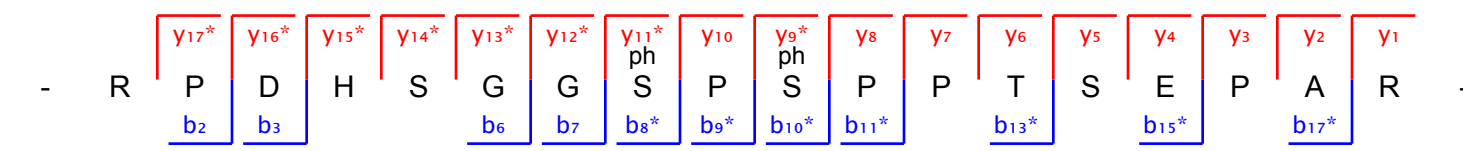

Raw file: 20150814\_A375SR\_Phospho\_BR2\_03  
 Scan: 4343 Method: FTMS; HCD Score: 191.44 m/z: 732.31 Gene names: THRAP3

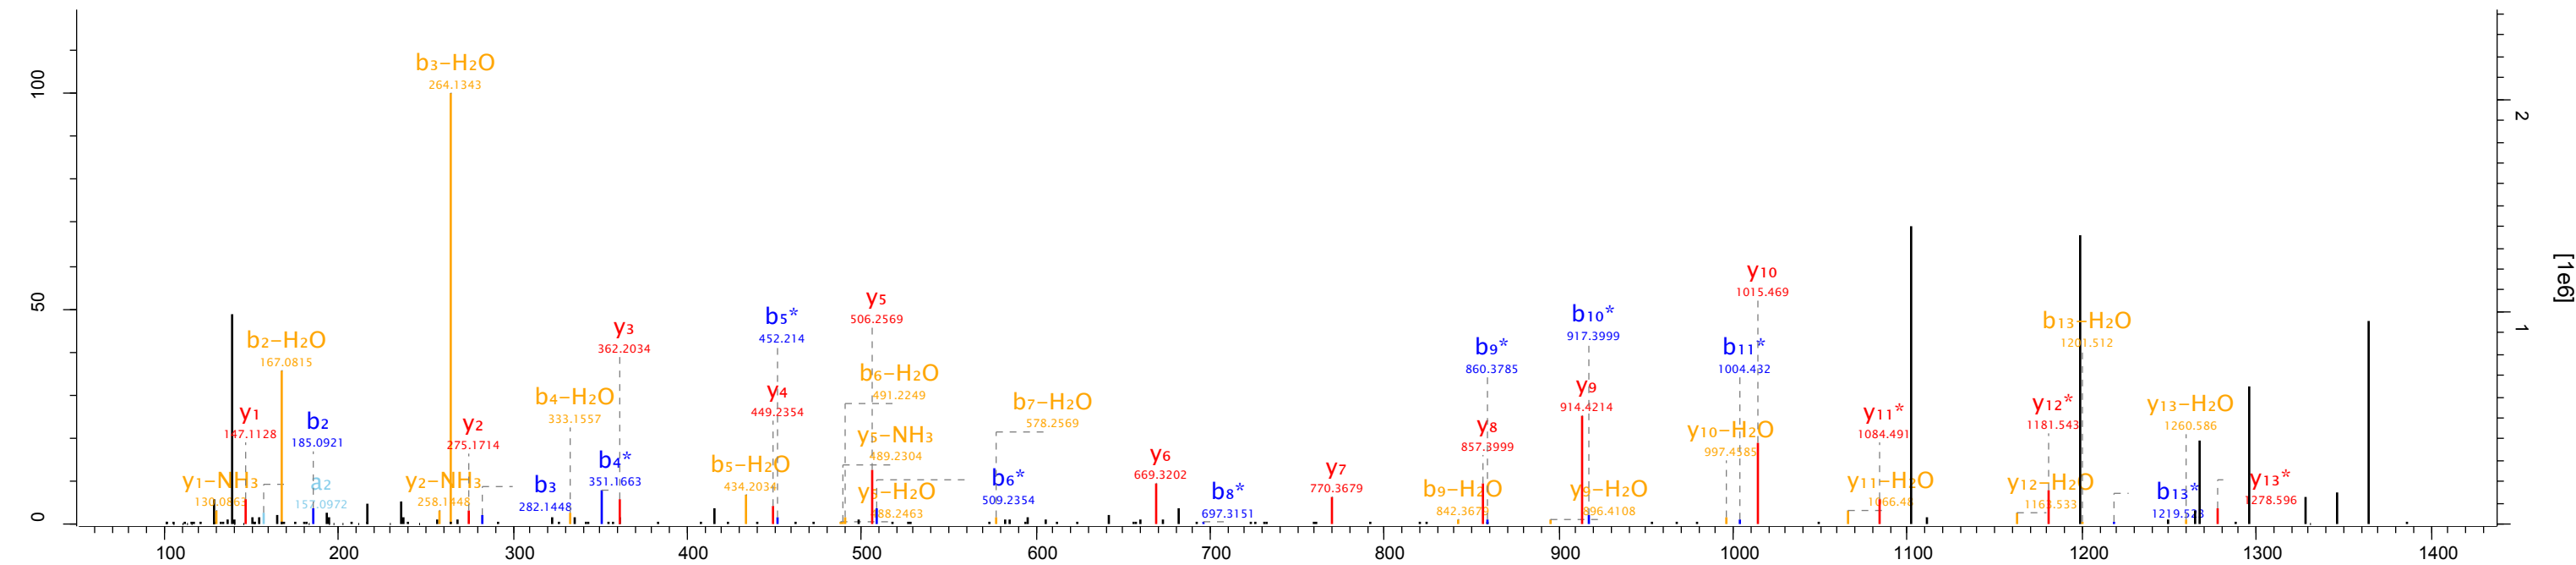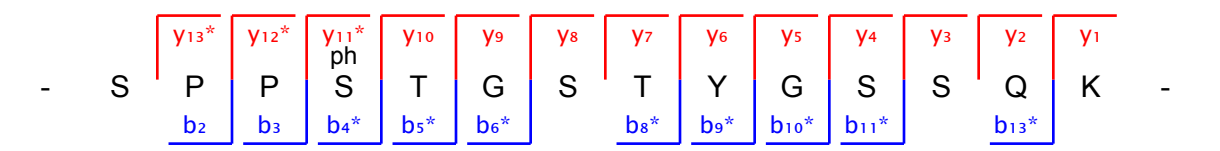

Raw file: 20150814\_A375SR\_Phospho\_BR2\_03  
 Scan: 4523 Method: FTMS; HCD Score: 205.52 m/z: 718.31 Gene names: TOR1AIP1

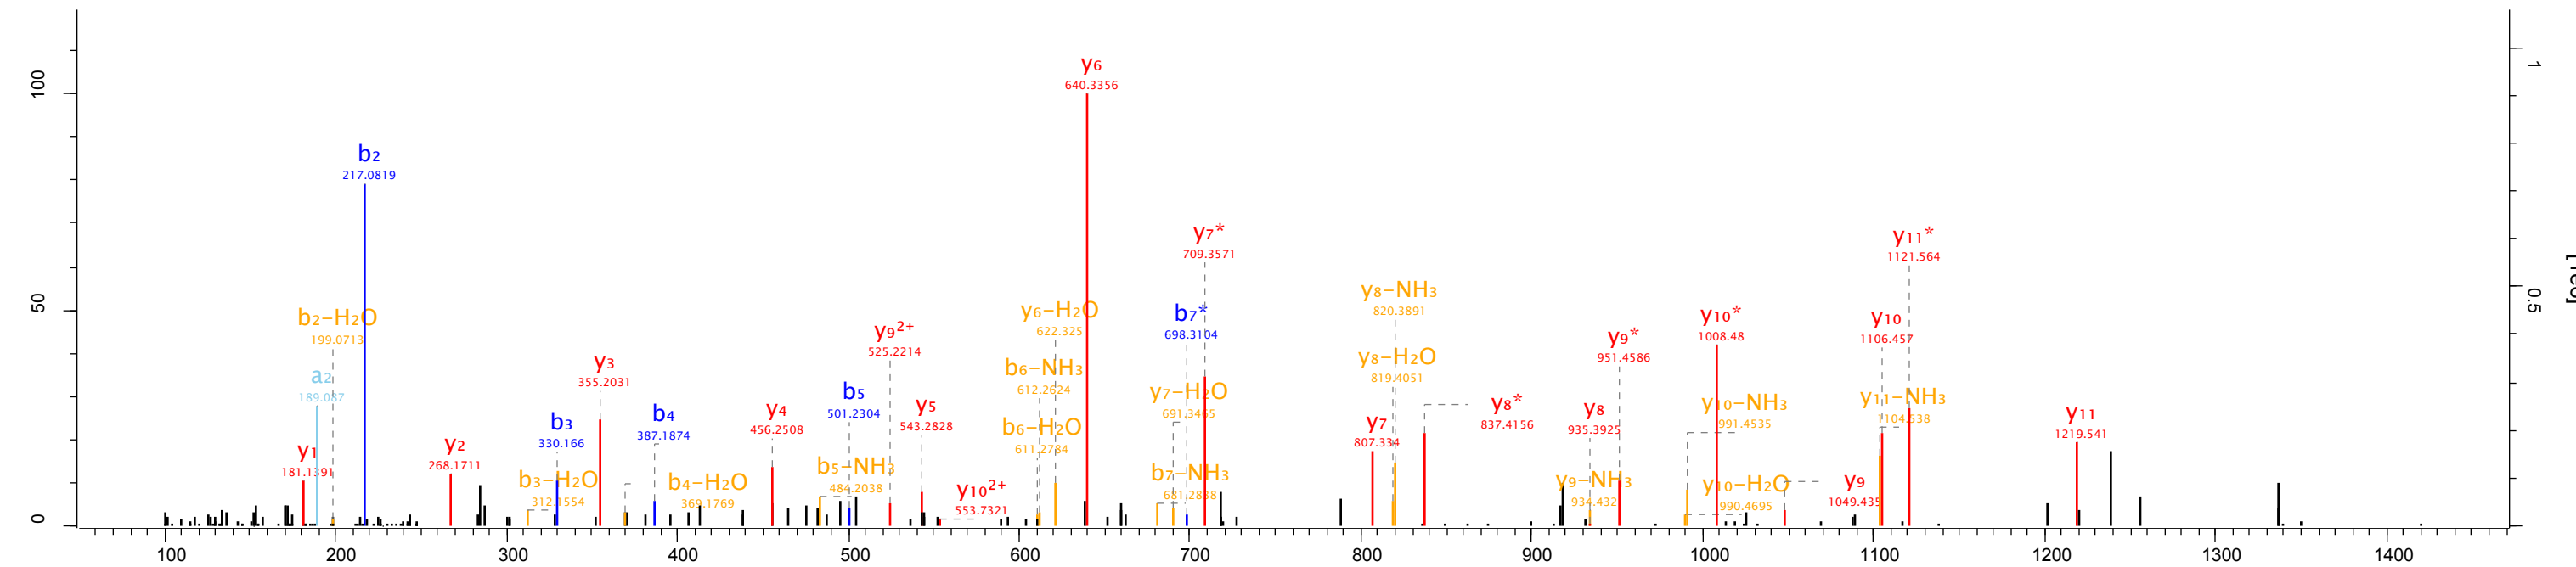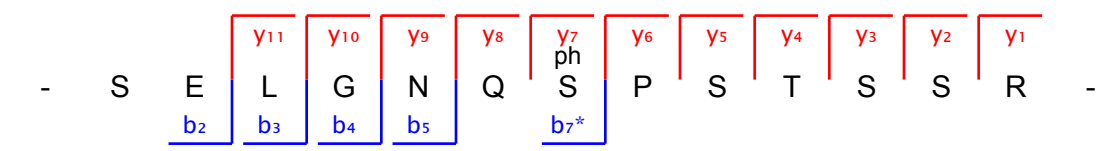

Raw file: 20150814\_A375SR\_Phospho\_BR2\_03  
 Scan: 4563 Method: FTMS; HCD Score: 212.82 m/z: 750.69 Gene names: RCOR1

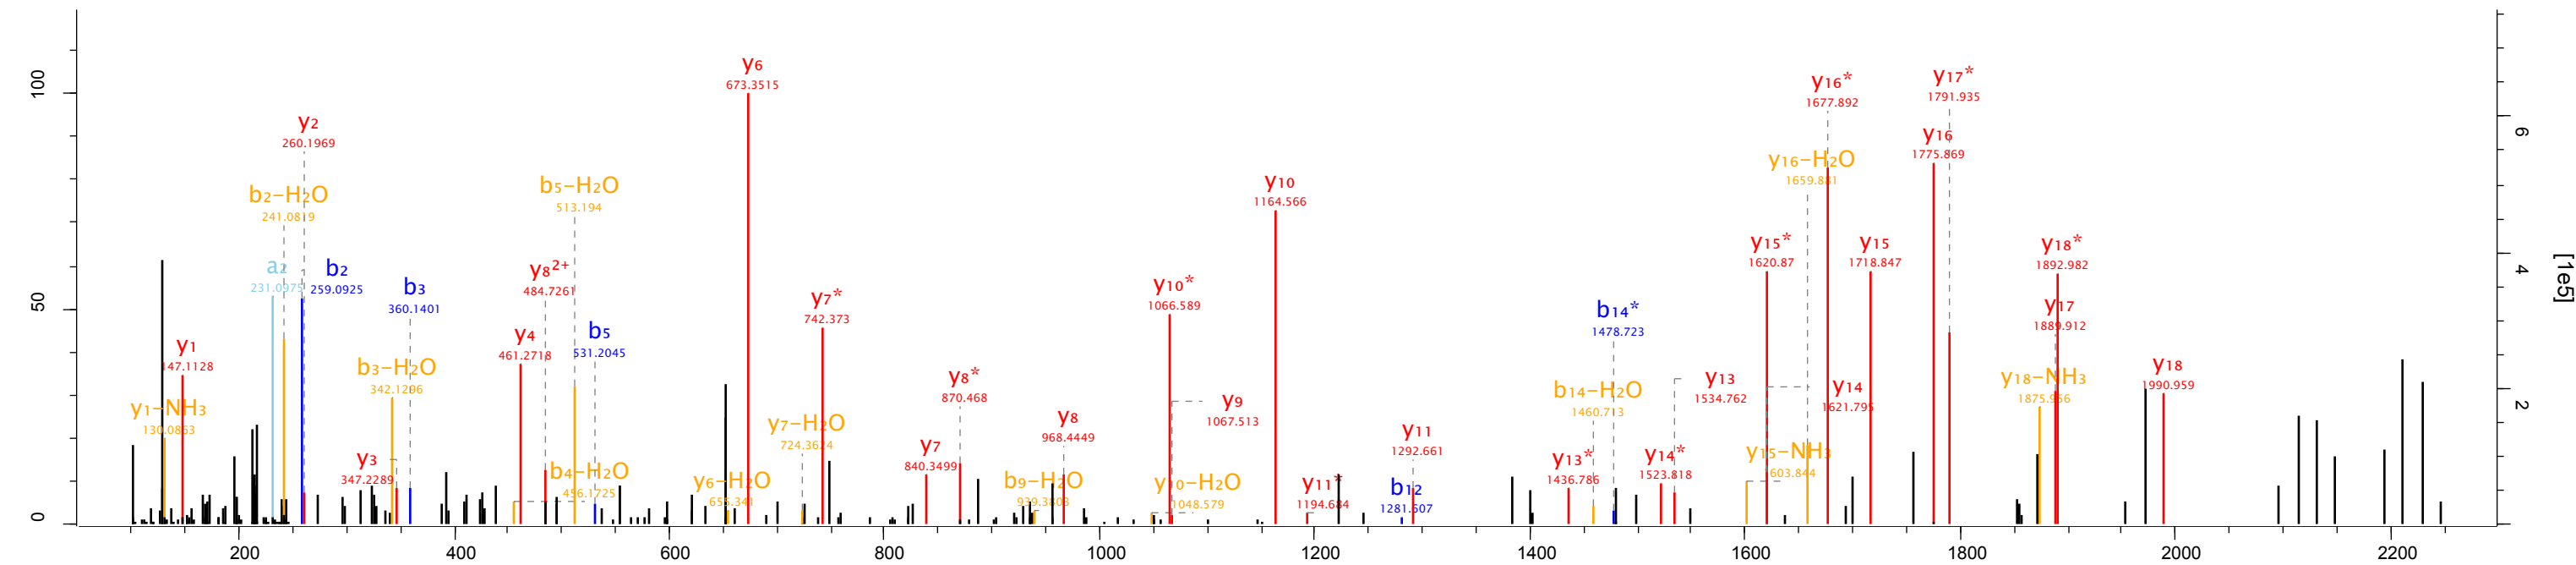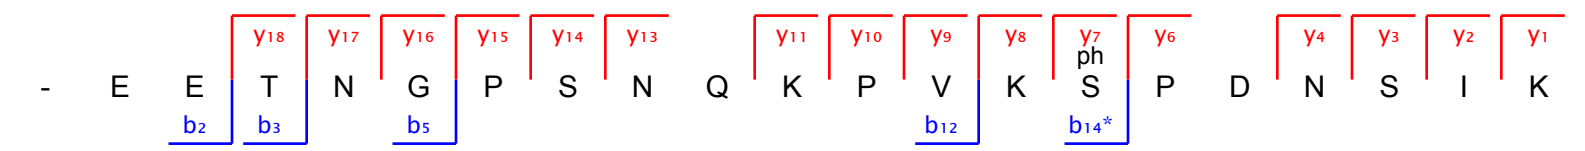



Raw file: 20150814\_A375SR\_Phospho\_BR2\_03  
 Scan: 4803 Method: FTMS; HCD Score: 112.73 m/z: 529.67 Gene names: SRSF7

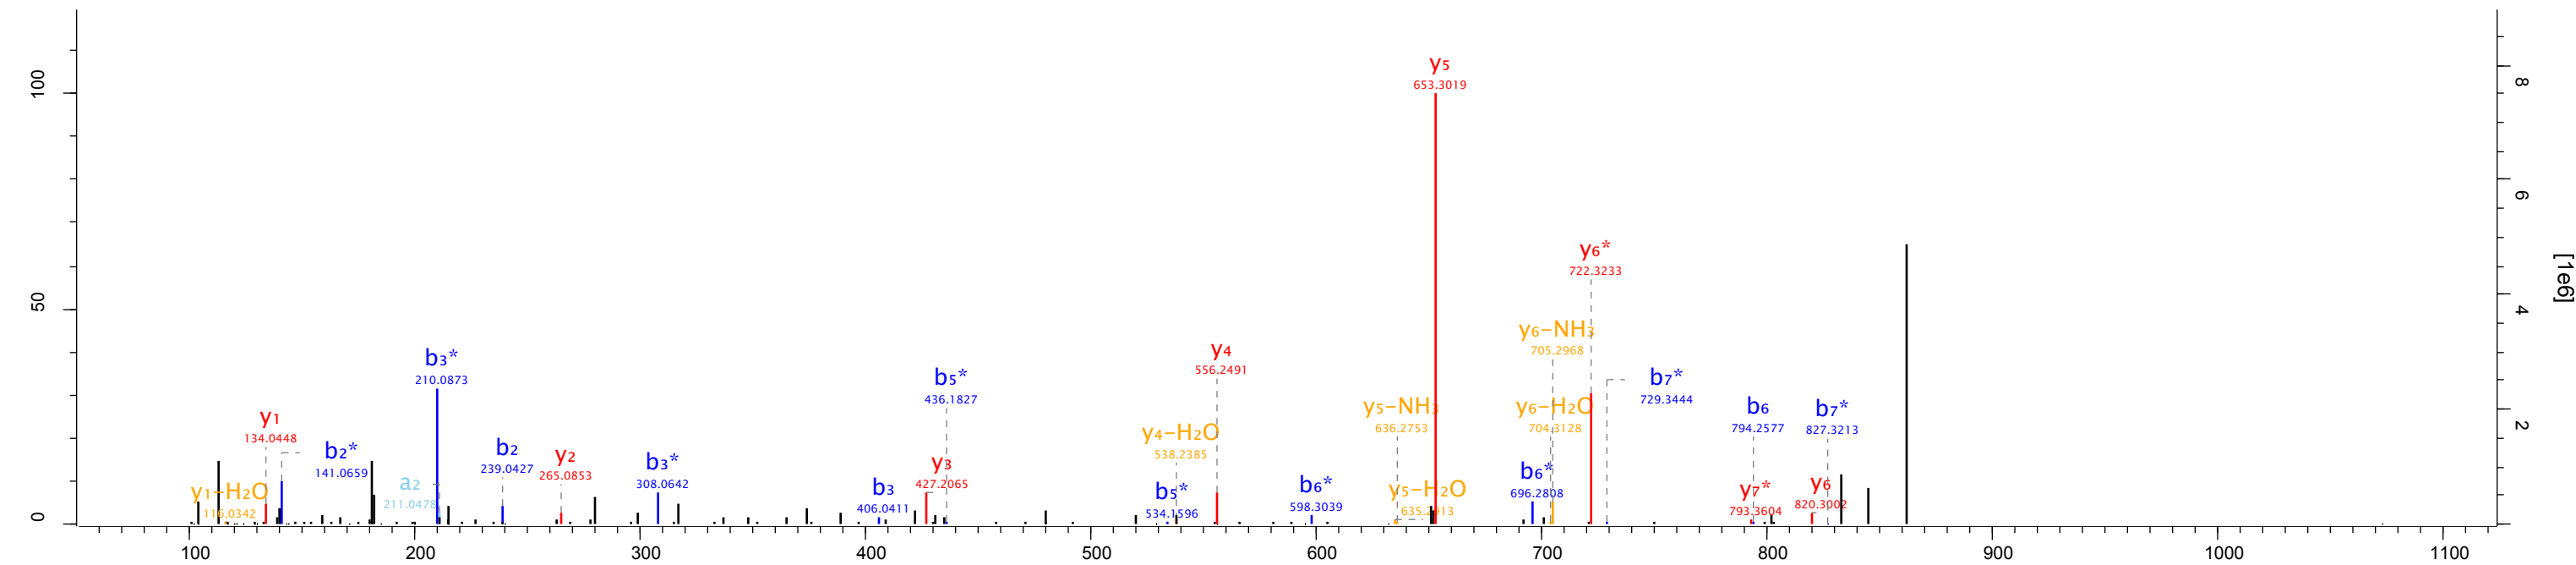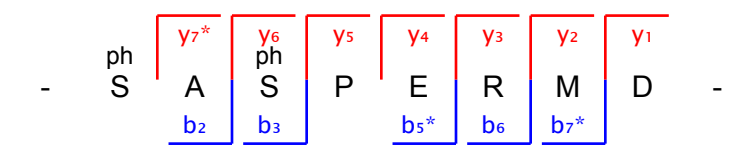

Raw file: 20150814\_A375SR\_Phospho\_BR2\_03  
 Scan: 4953 Method: FTMS; HCD Score: 253.13 m/z: 887.84 Gene names: HNRNPA1

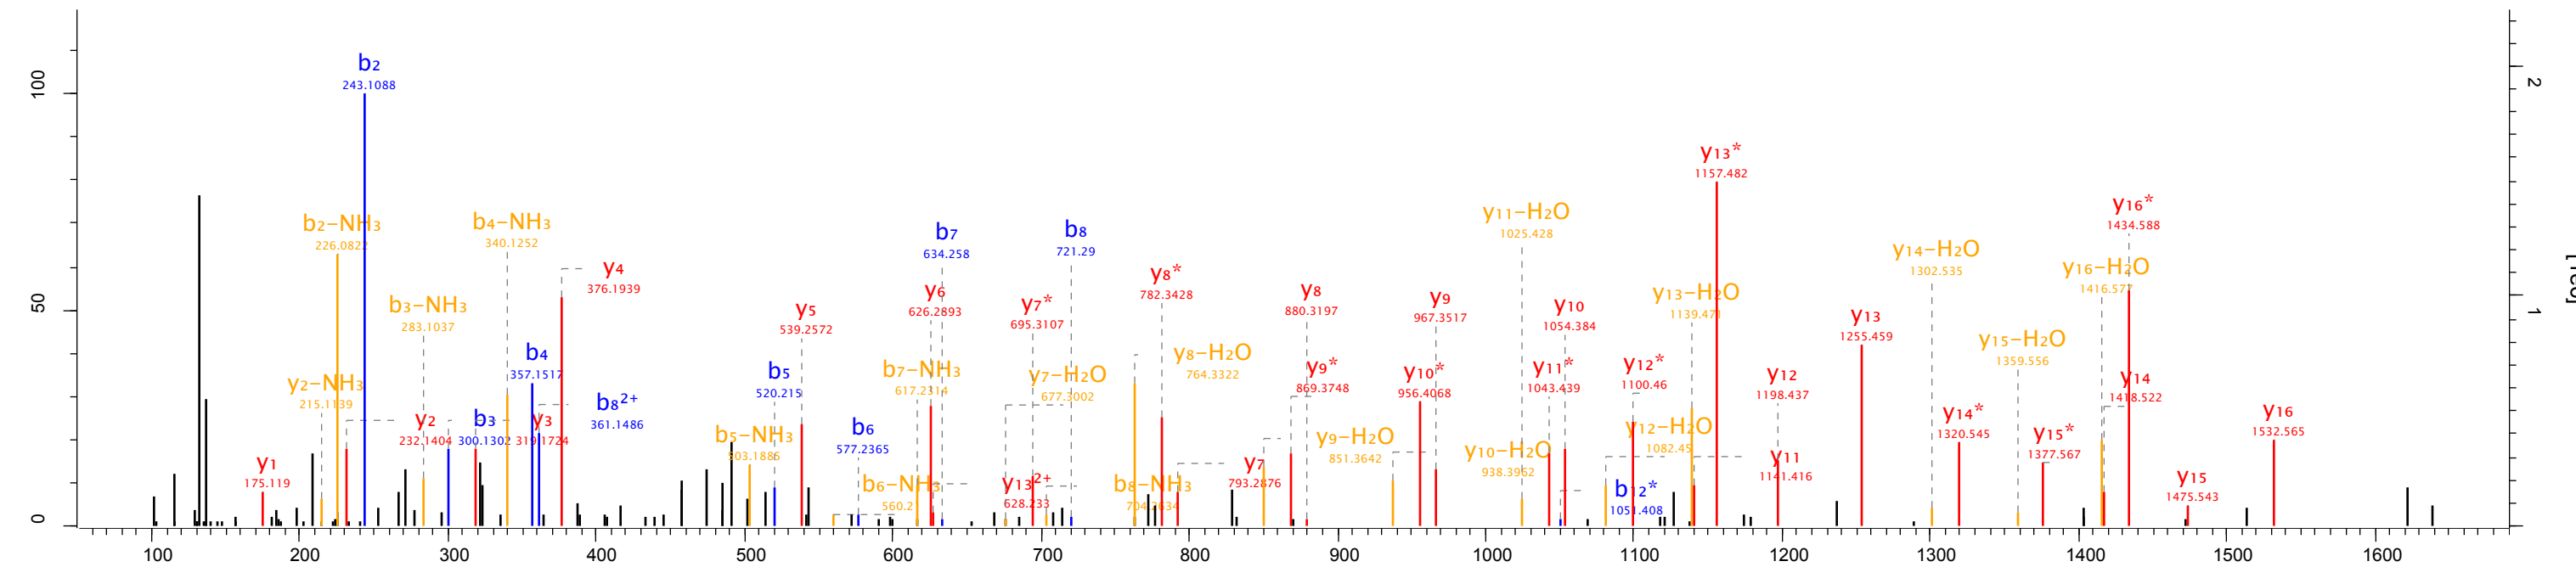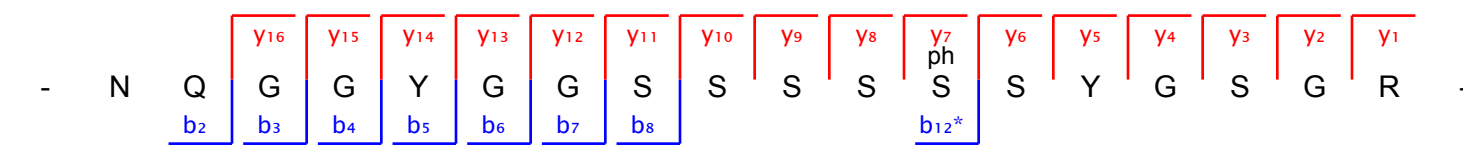

Raw file 20150814\_A375SR\_Phospho\_BR2\_03 Scan 5393 Method FTMS; HCD Score 53.01 m/z 527.75 Gene names BBX

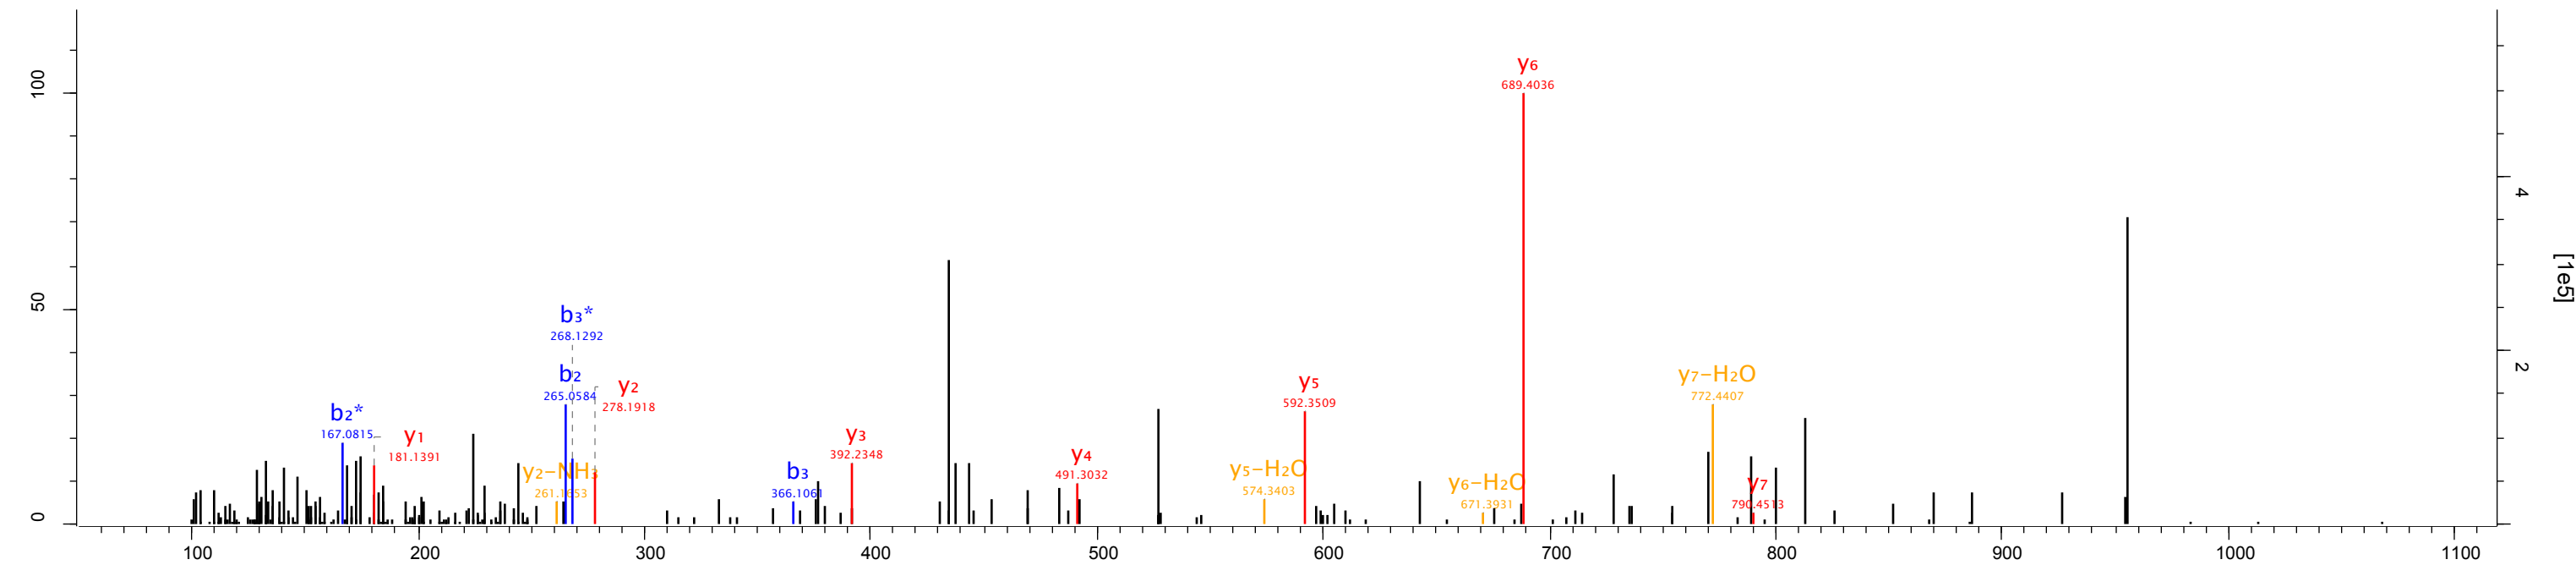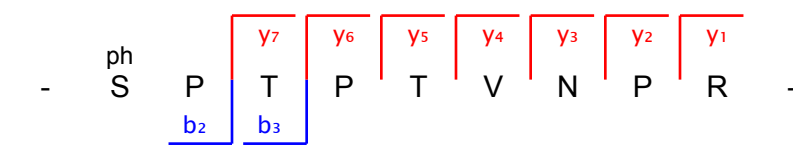

Raw file: 20150814\_A375SR\_Phospho\_BR2\_03  
 Scan: 5523 Method: FTMS; HCD Score: 115.58 m/z: 590.21 Gene names: PHLDB2

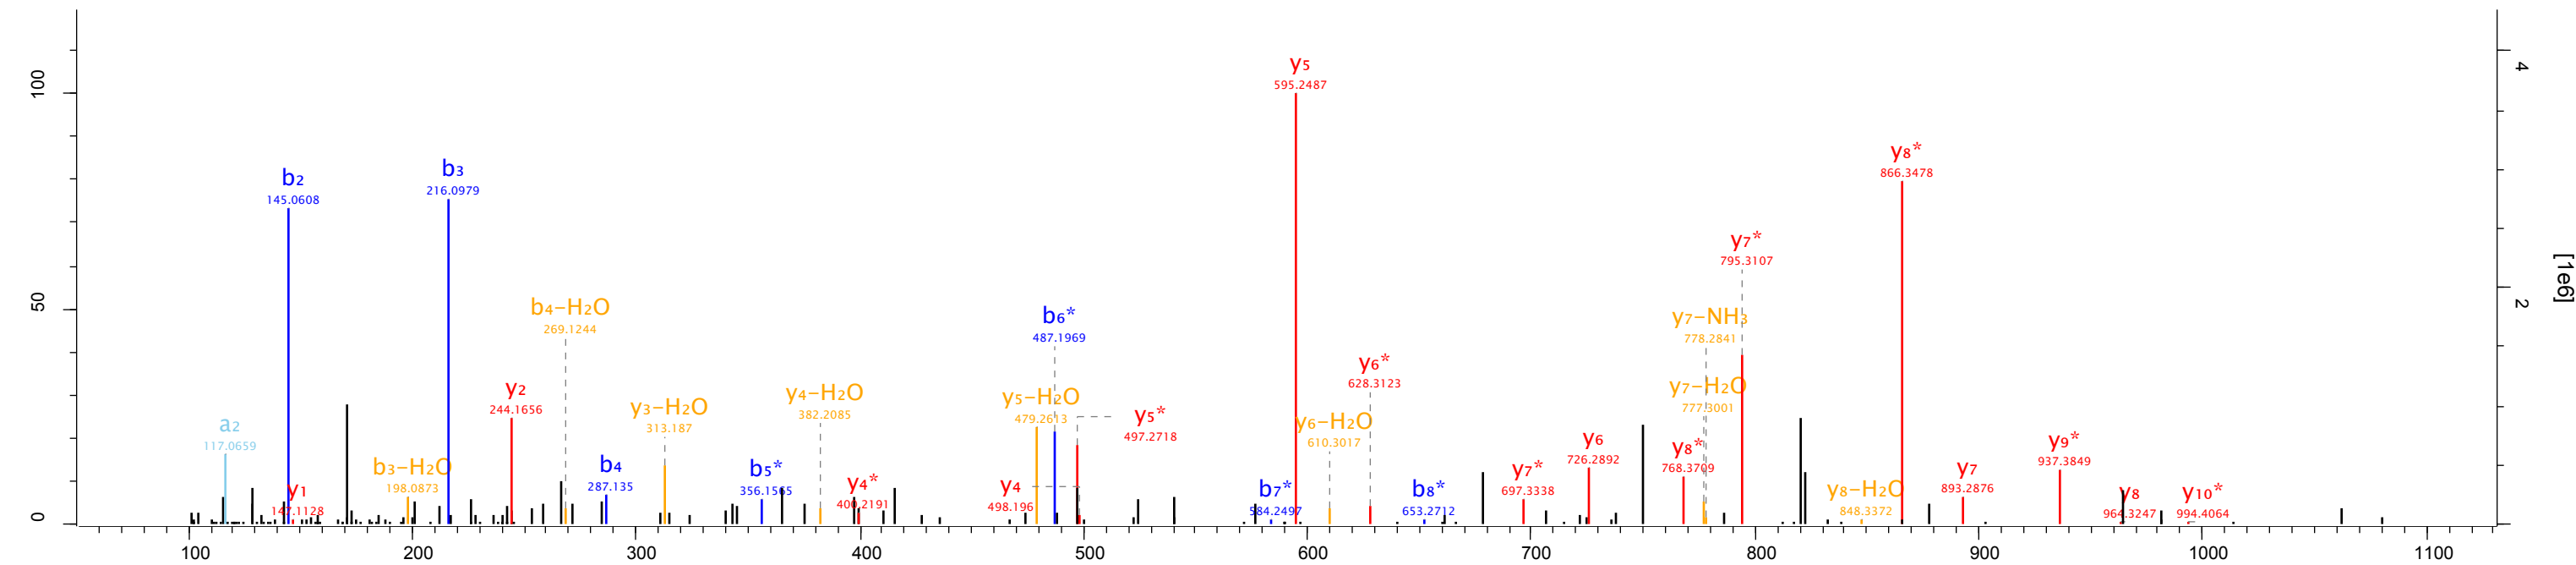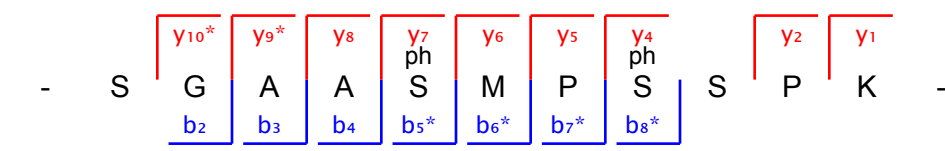

Raw file: 20150814\_A375SR\_Phospho\_BR2\_03  
 Scan: 5973 Method: FTMS; HCD Score: 218.98 m/z: 765.83 Gene names: LRRFIP2

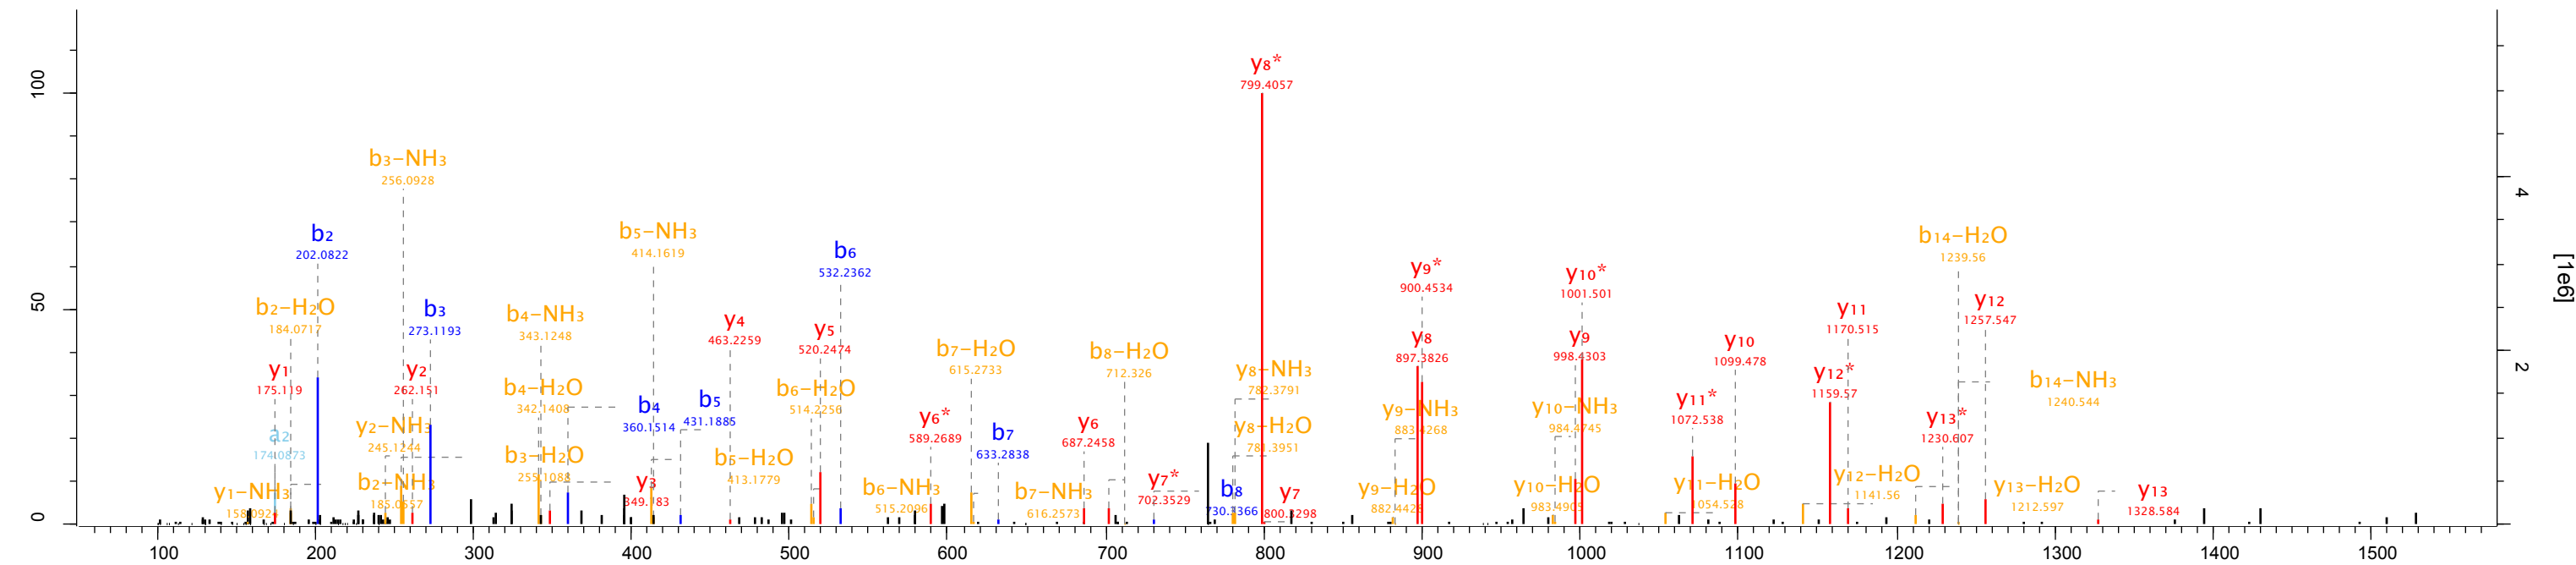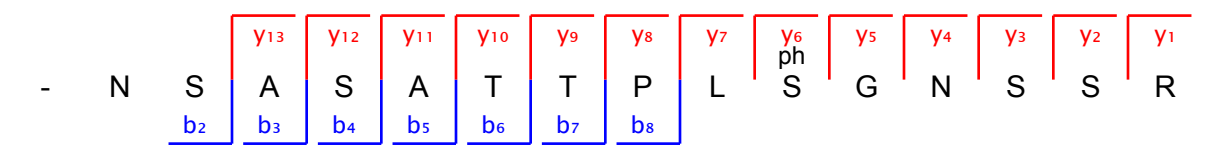

Raw file: 20150814\_A375SR\_Phospho\_BR2\_03  
 Scan: 6193 Method: FTMS; HCD Score: 204.81 m/z: 823.86 Gene names: GPS1

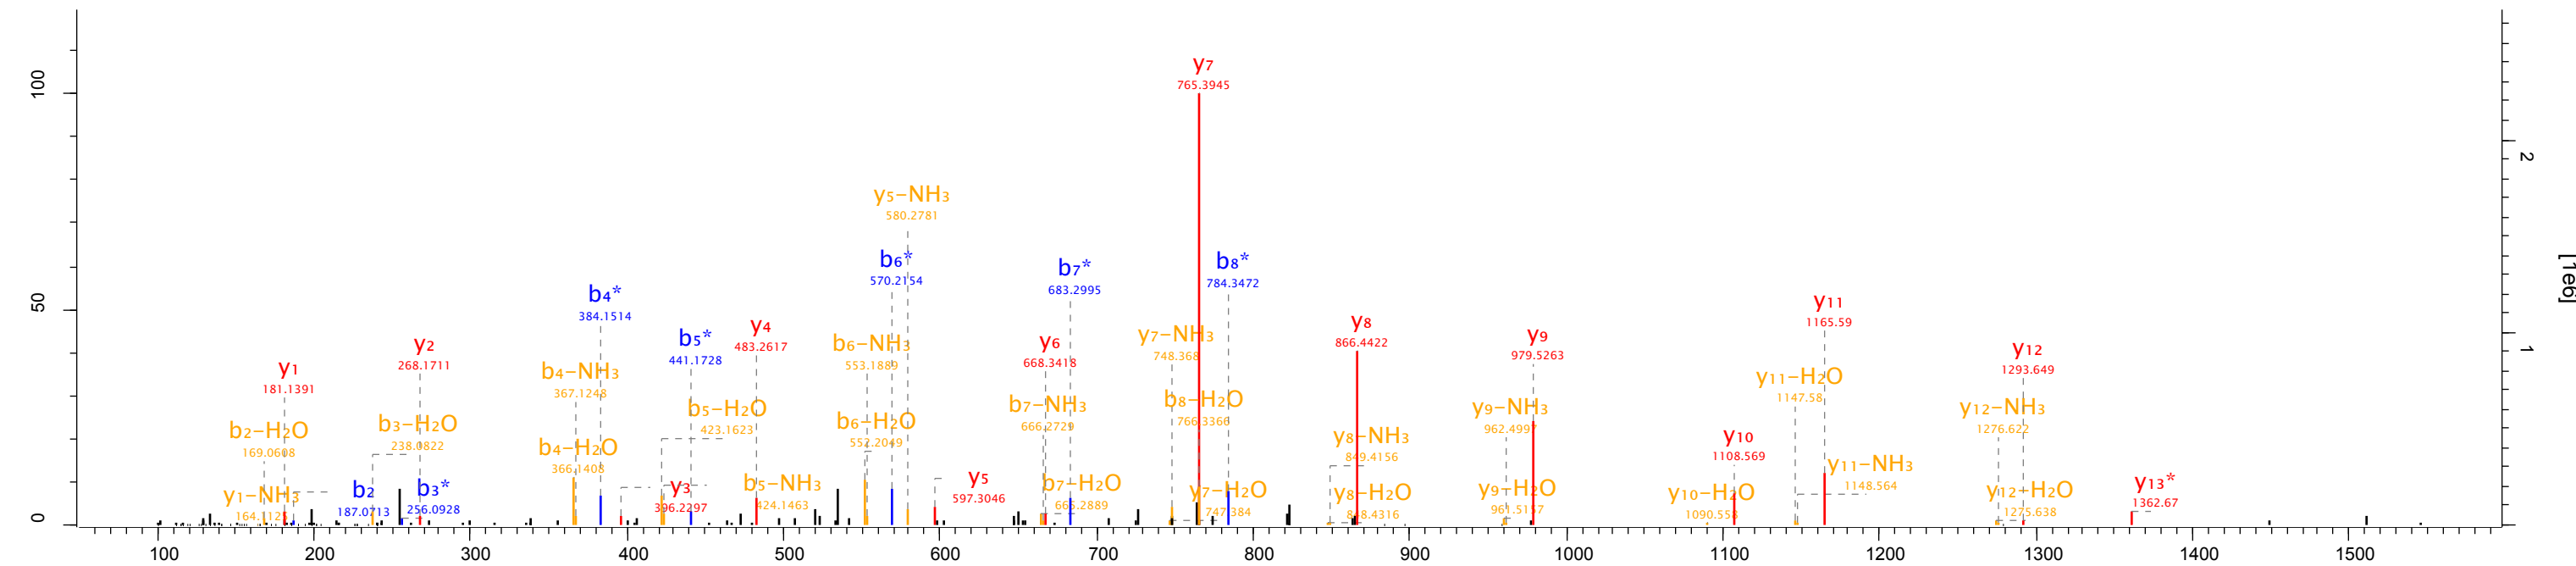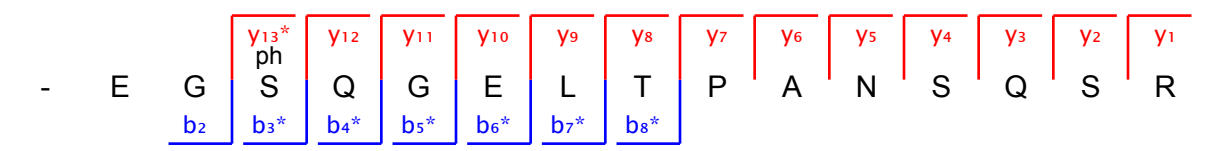

Raw file: 20150814\_A375SR\_Phospho\_BR2\_03  
 Scan: 7063 Method: FTMS; HCD Score: 86.22 m/z: 798.35 Gene names: LRRFIP1

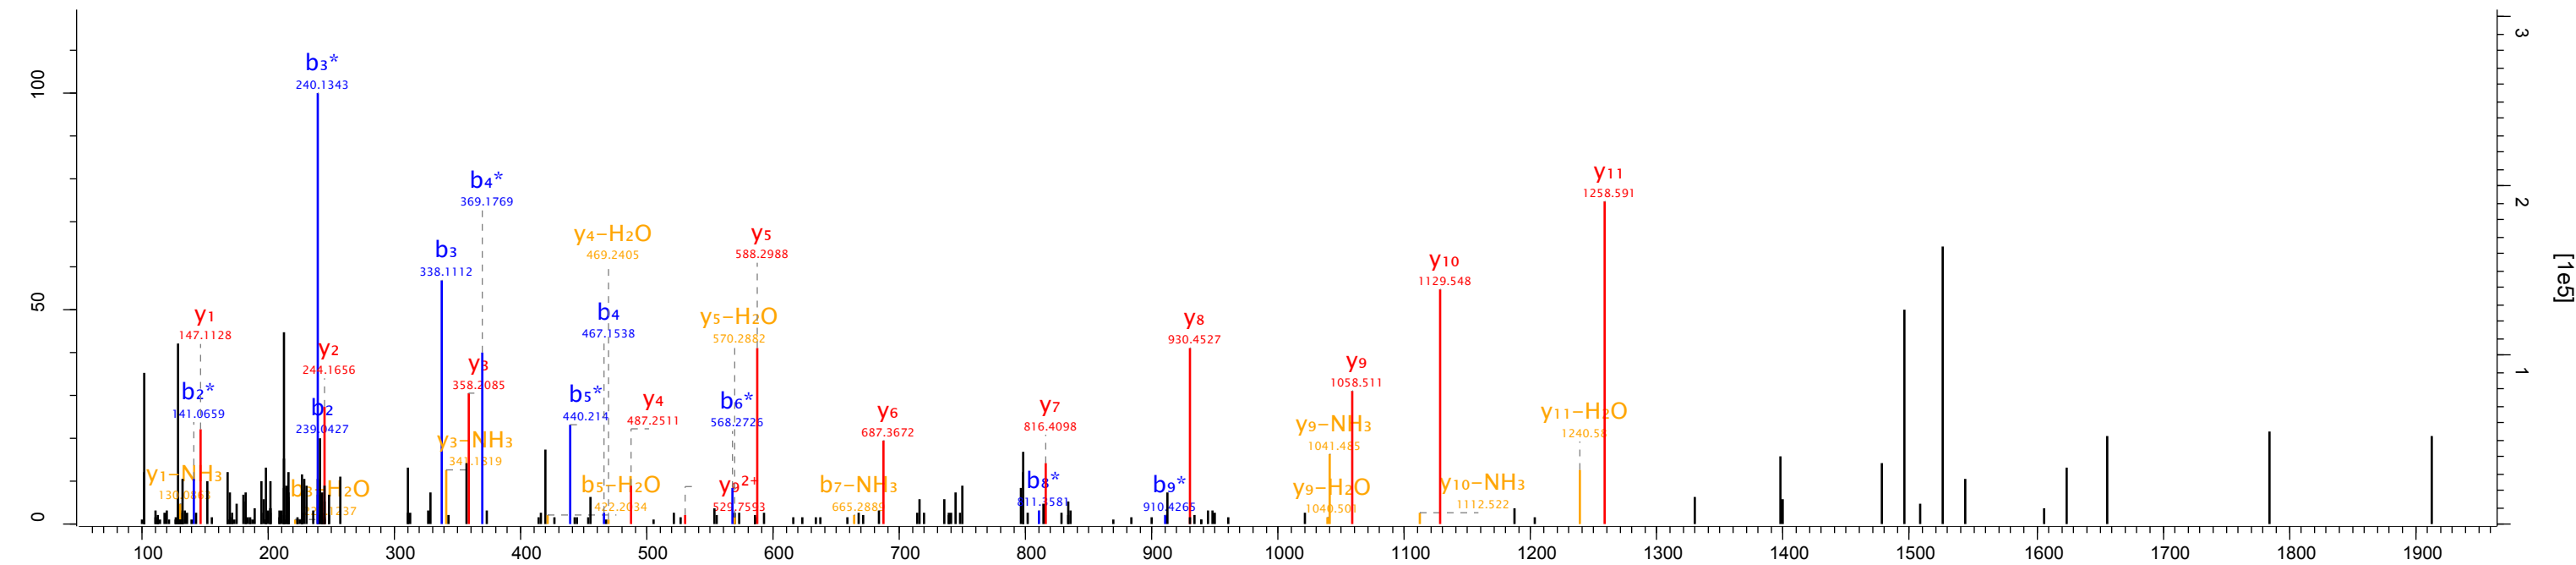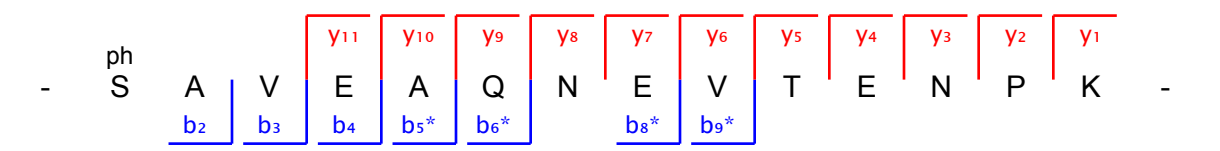

Raw file: 20150814\_A375SR\_Phospho\_BR2\_03  
 Scan: 7233 Method: FTMS; HCD Score: 51.2 m/z: 879.41 Gene names: CLASP1

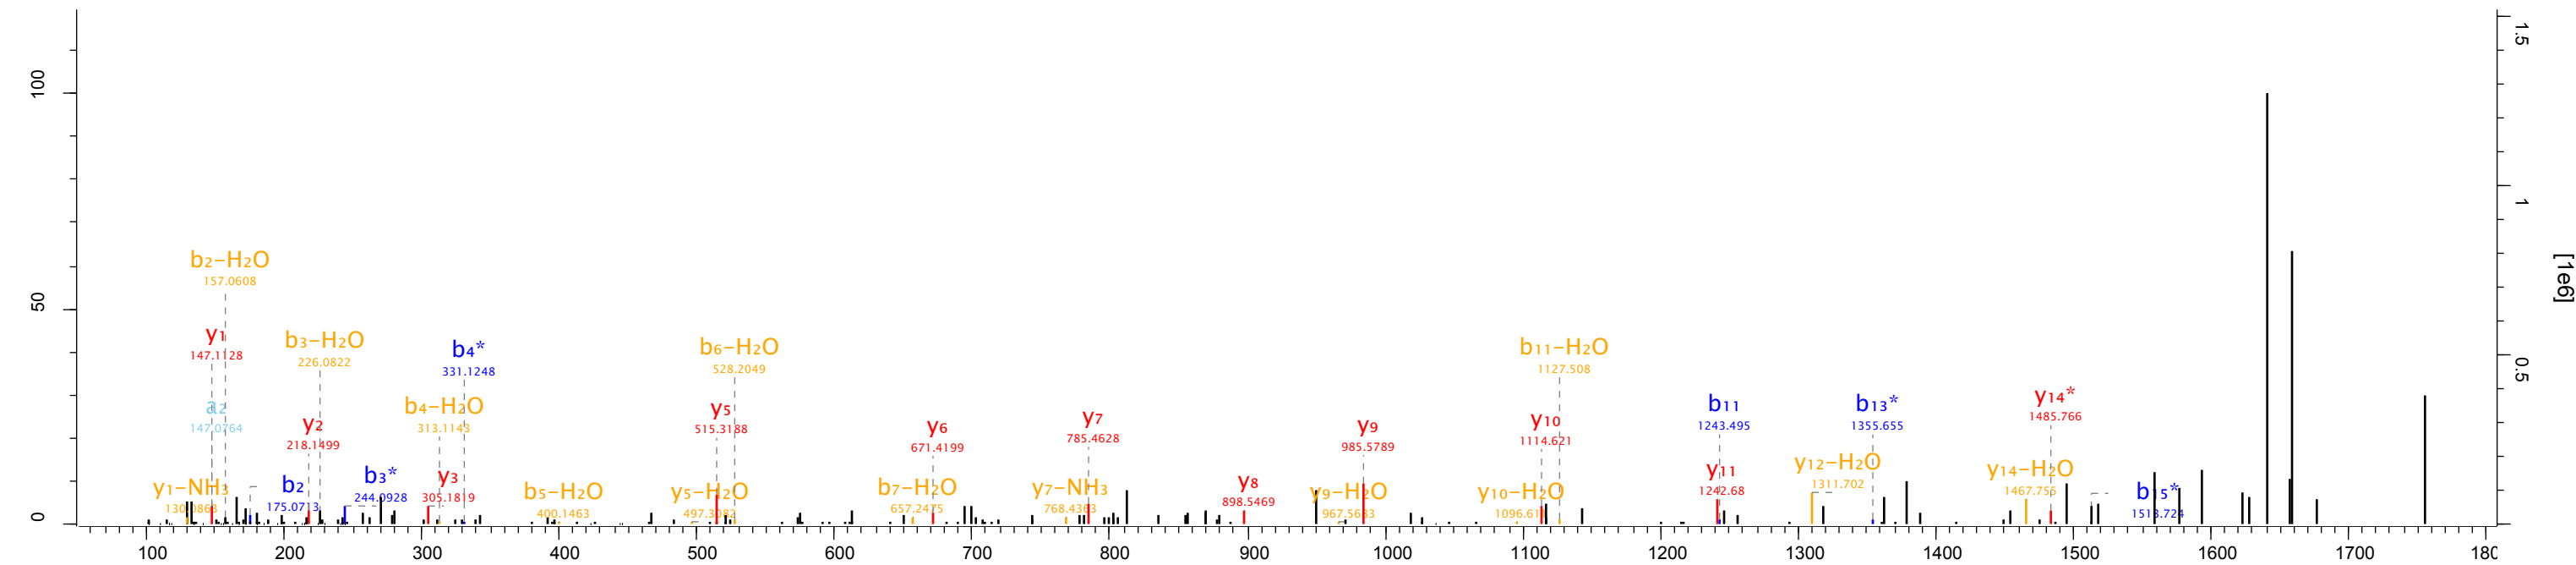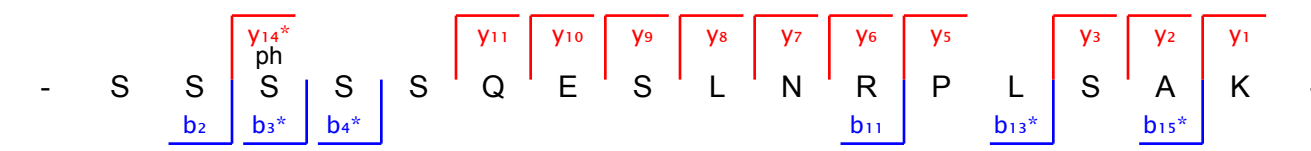



Raw file: 20150814\_A375SR\_Phospho\_BR2\_03  
 Scan: 7383 Method: FTMS; HCD Score: 134.52 m/z: 734.34 Gene names: VCPIP1

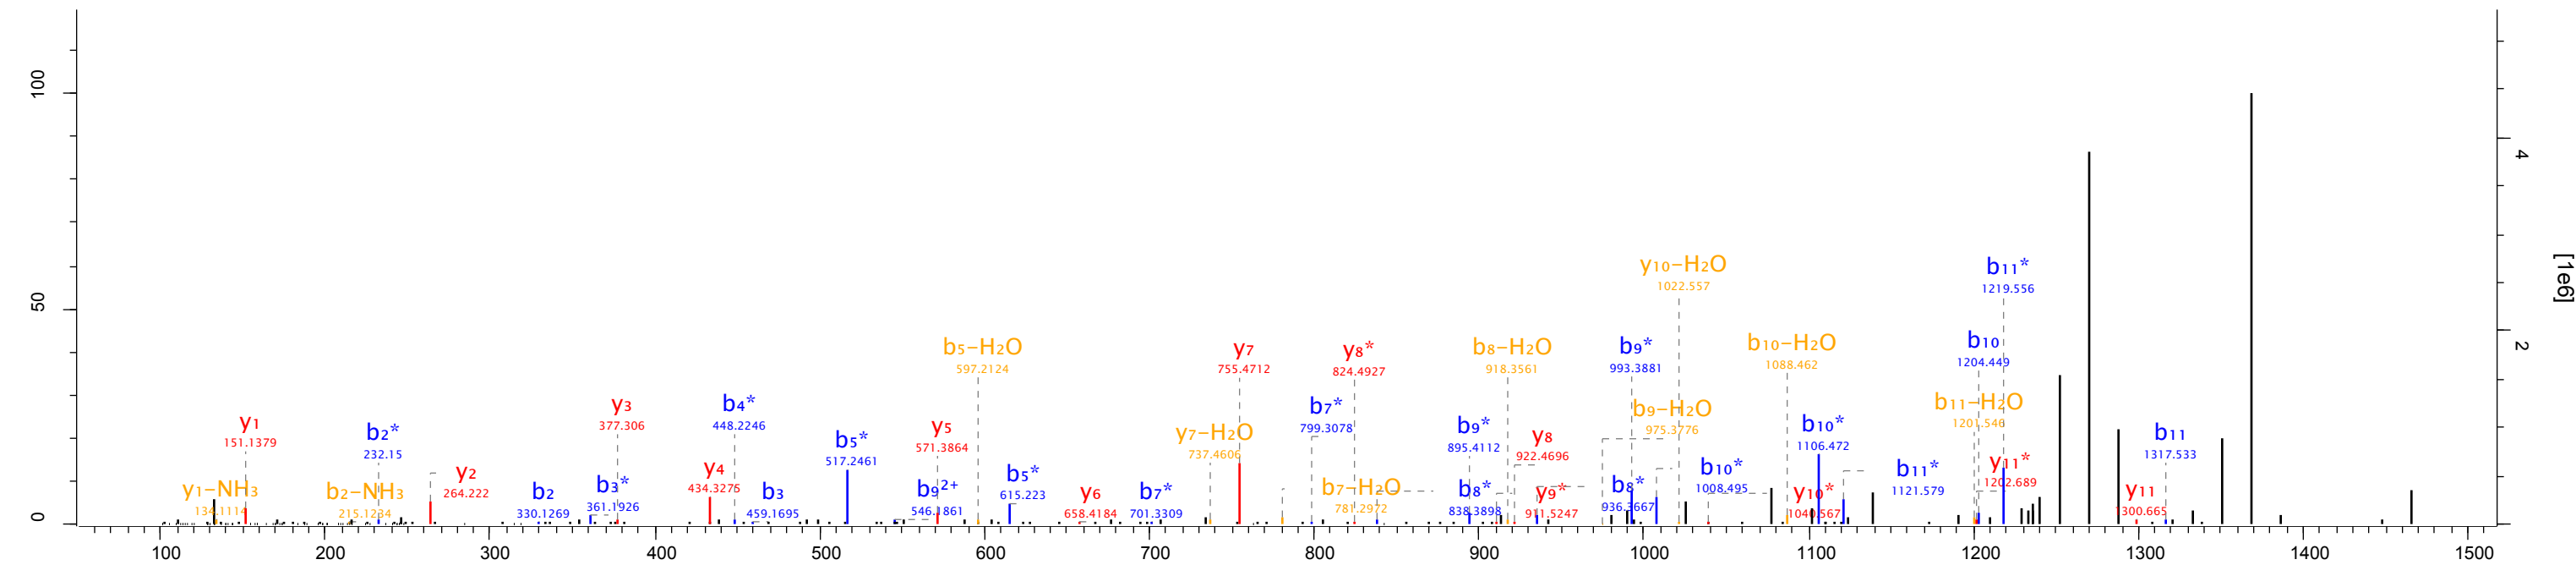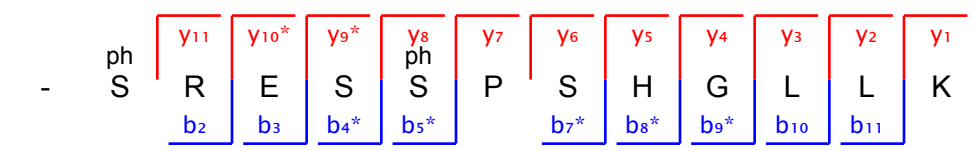

Raw file 20150814\_A375SR\_Phospho\_BR2\_03 Scan 8033 Method FTMS; HCD Score 119.5 m/z 759.35 Gene names FXR1

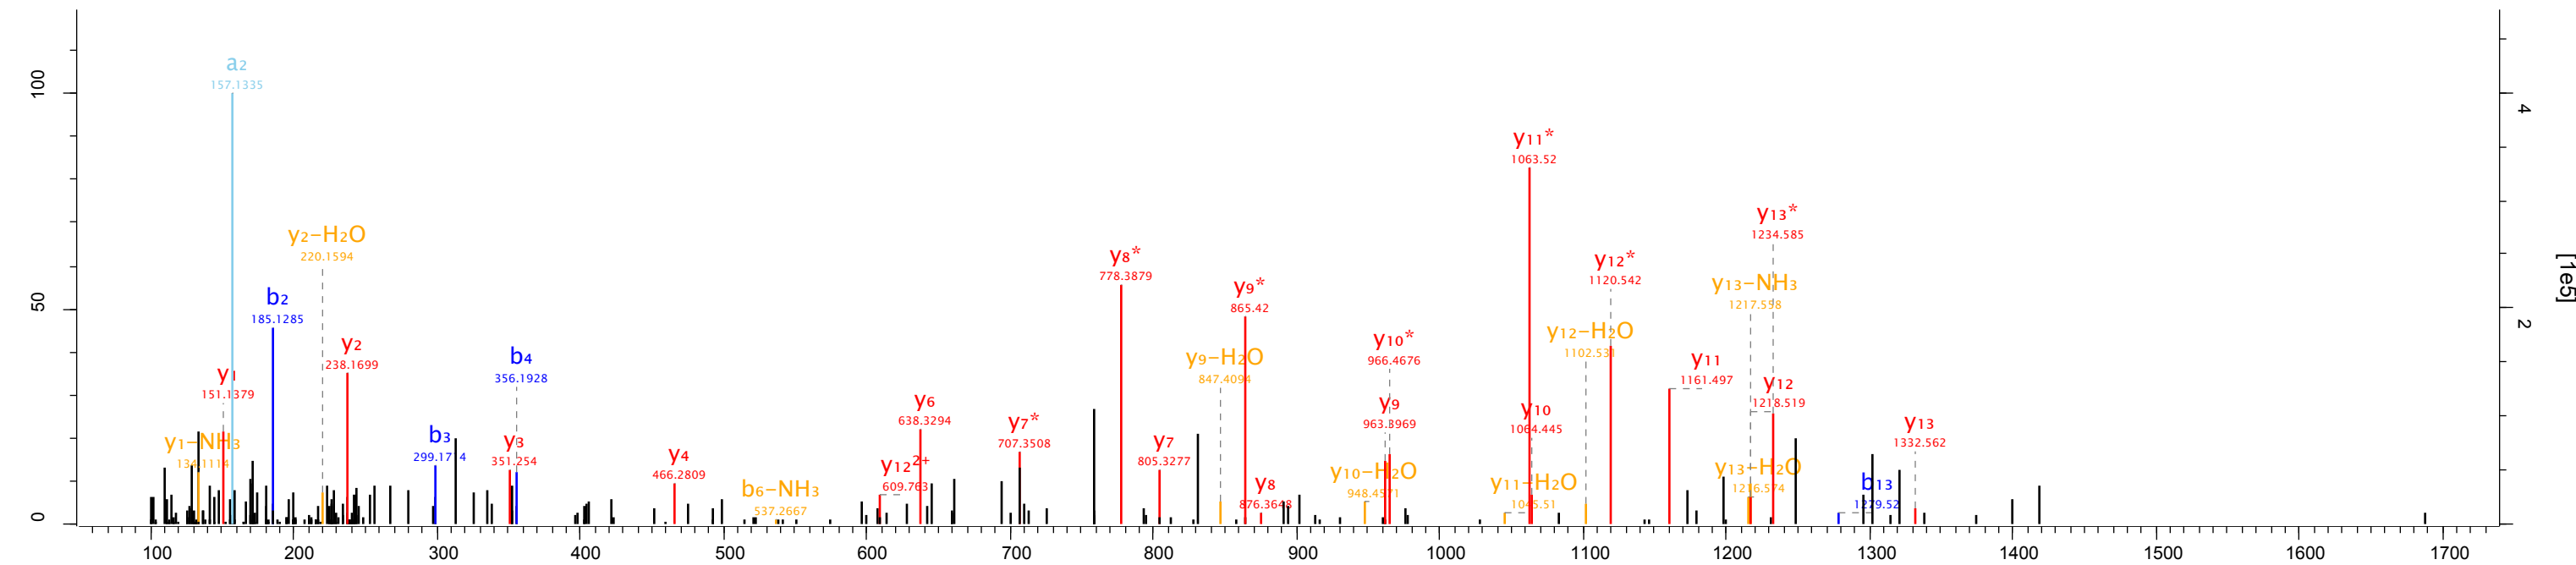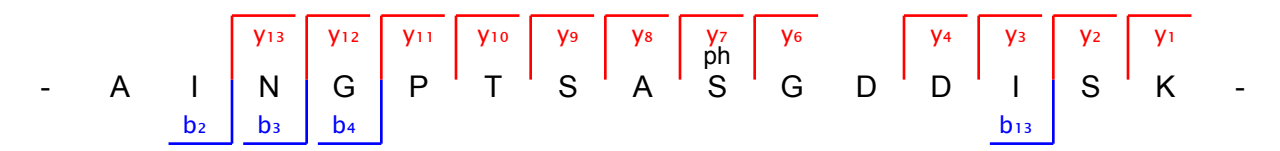

Raw file  
20150814\_A375SR\_Phospho\_BR2\_03

Scan 8713 Method FTMS; HCD Score 249.47 m/z 1152.48 Gene names CLUH

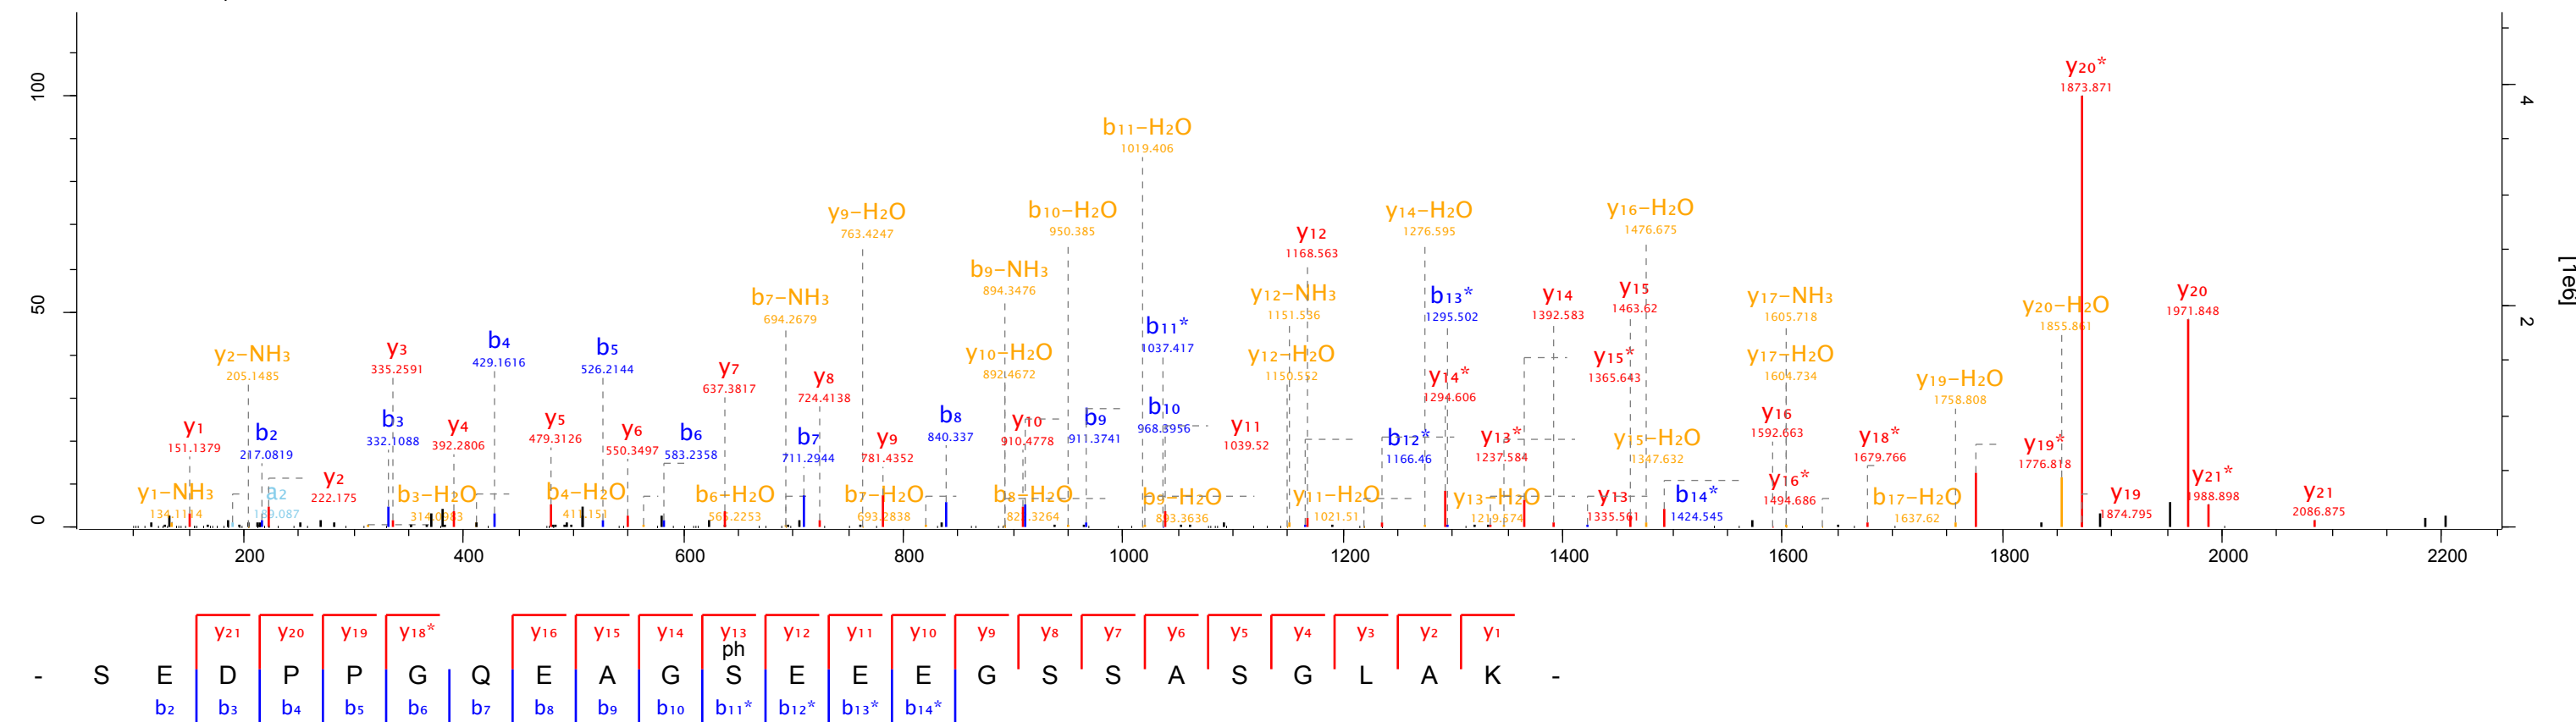

Raw file: 20150814\_A375SR\_Phospho\_BR2\_03  
 Scan: 8853 Method: FTMS; HCD Score: 175.49 m/z: 479.25 Gene names: BOD1L1

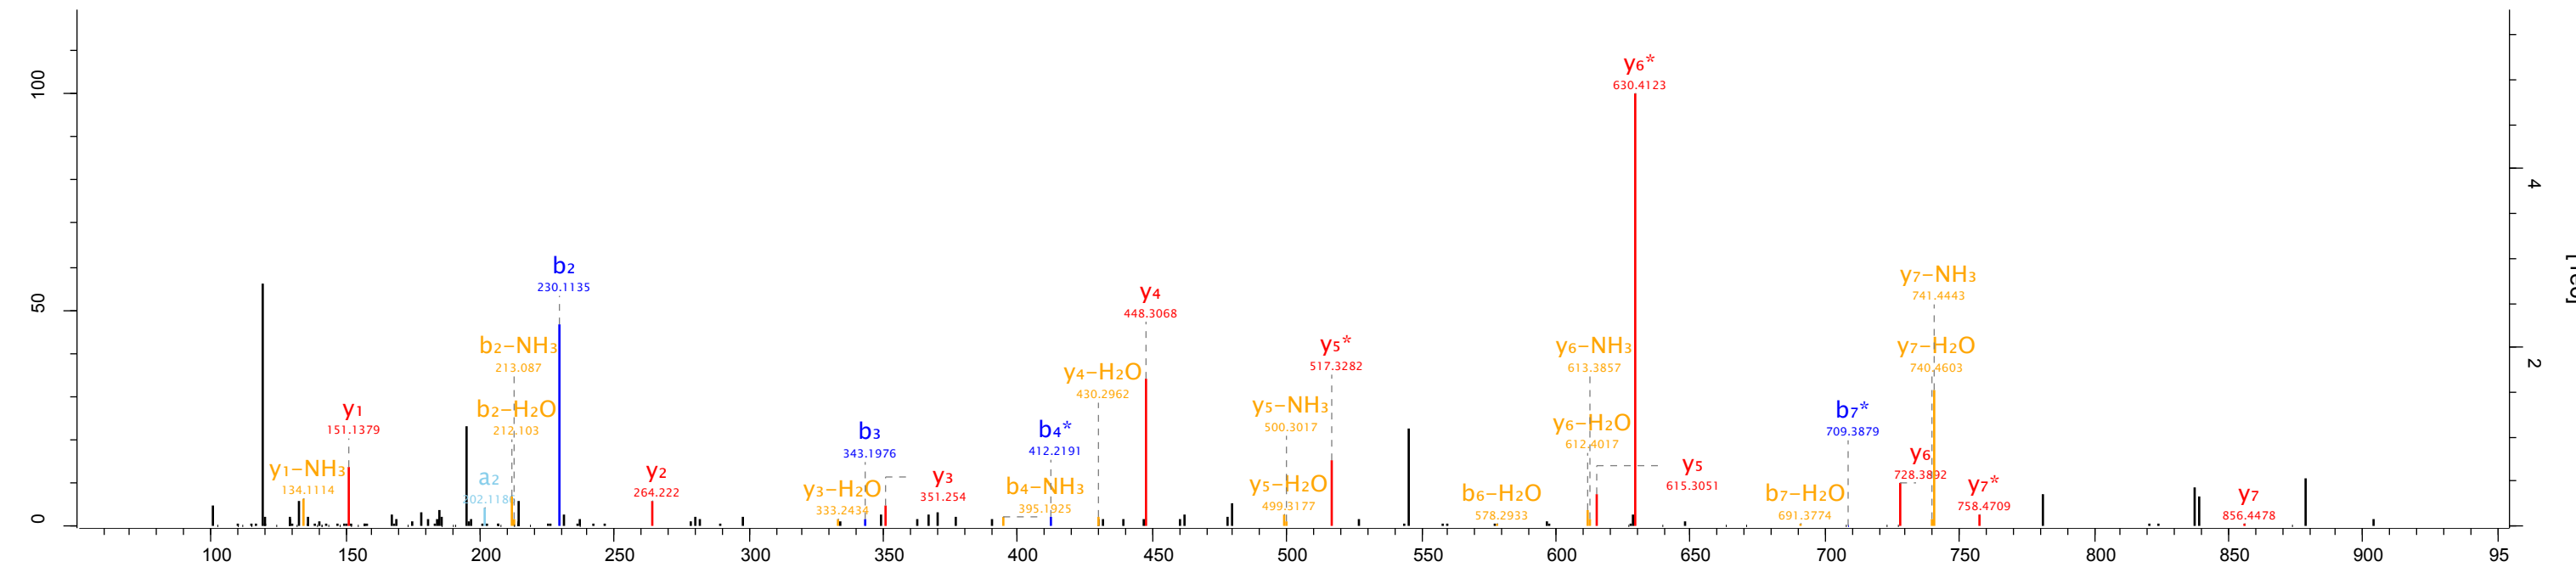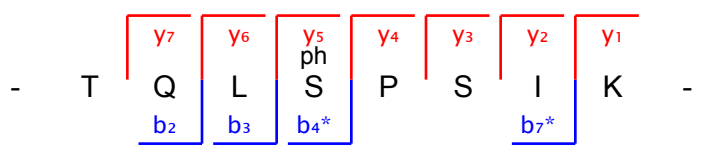

Raw file: 20150814\_A375SR\_Phospho\_BR2\_03  
 Scan: 9153 Method: FTMS; HCD Score: 100.97 m/z: 745.34 Gene names: FAM208A

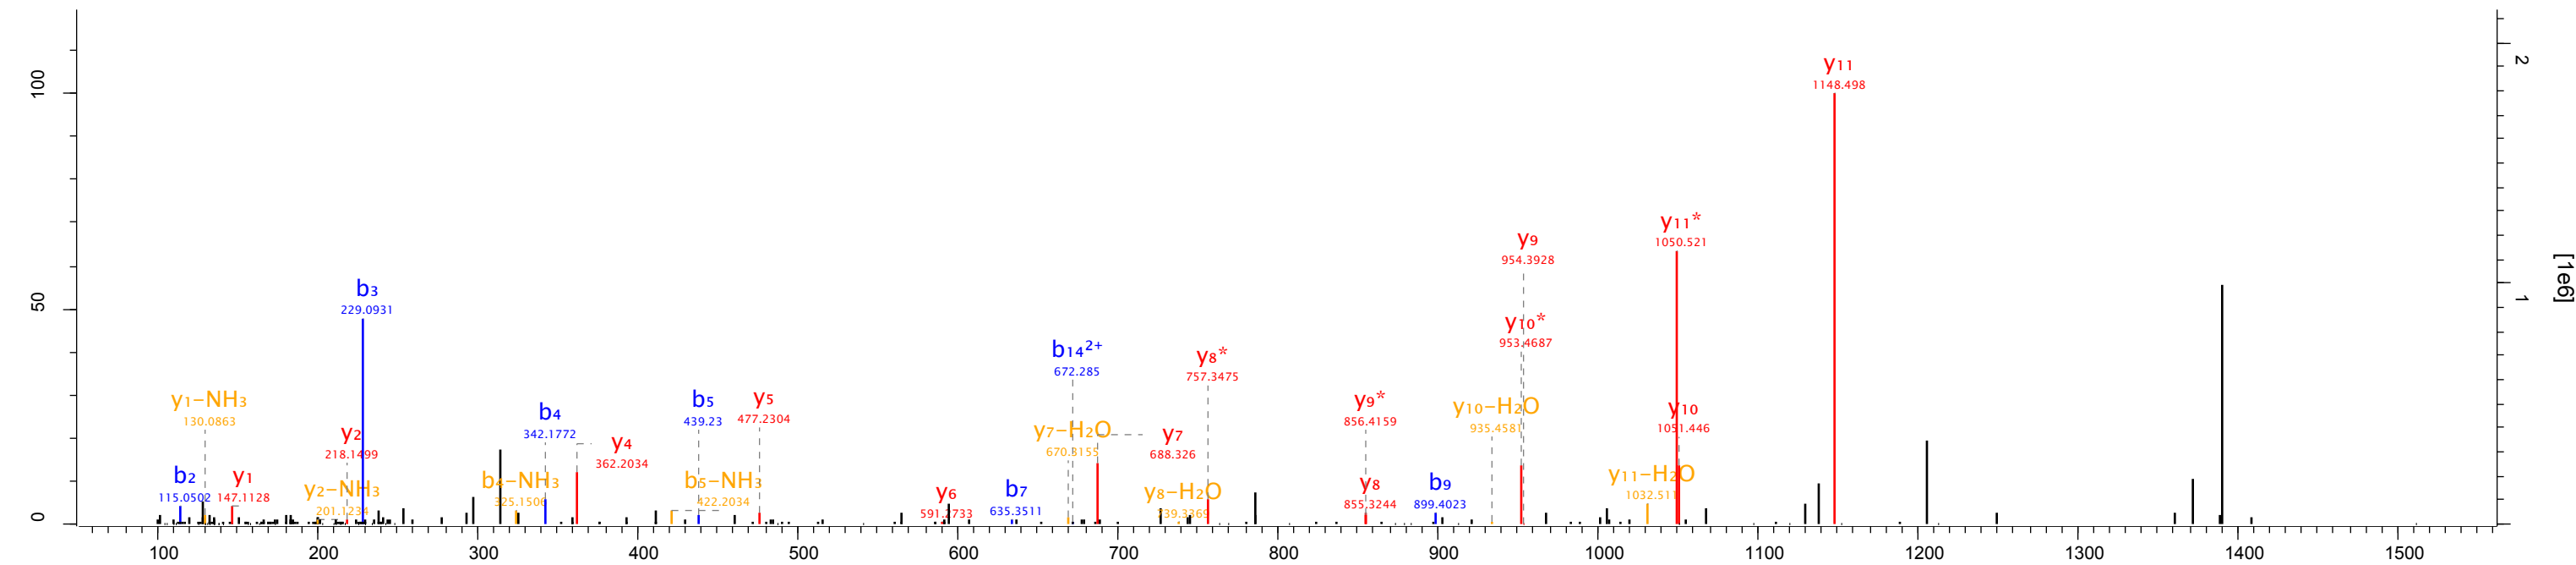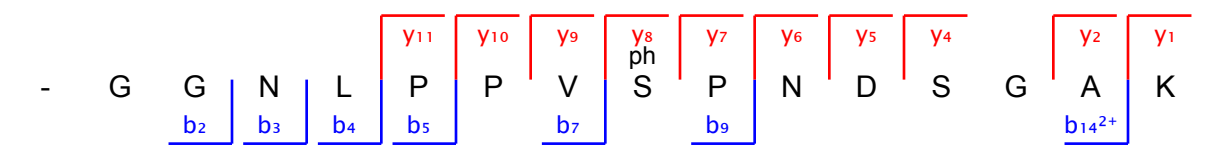

Raw file 20150814\_A375SR\_Phospho\_BR2\_03 Scan 9343 Method FTMS; HCD Score 187 m/z 790.31 Gene names PPP2R3A

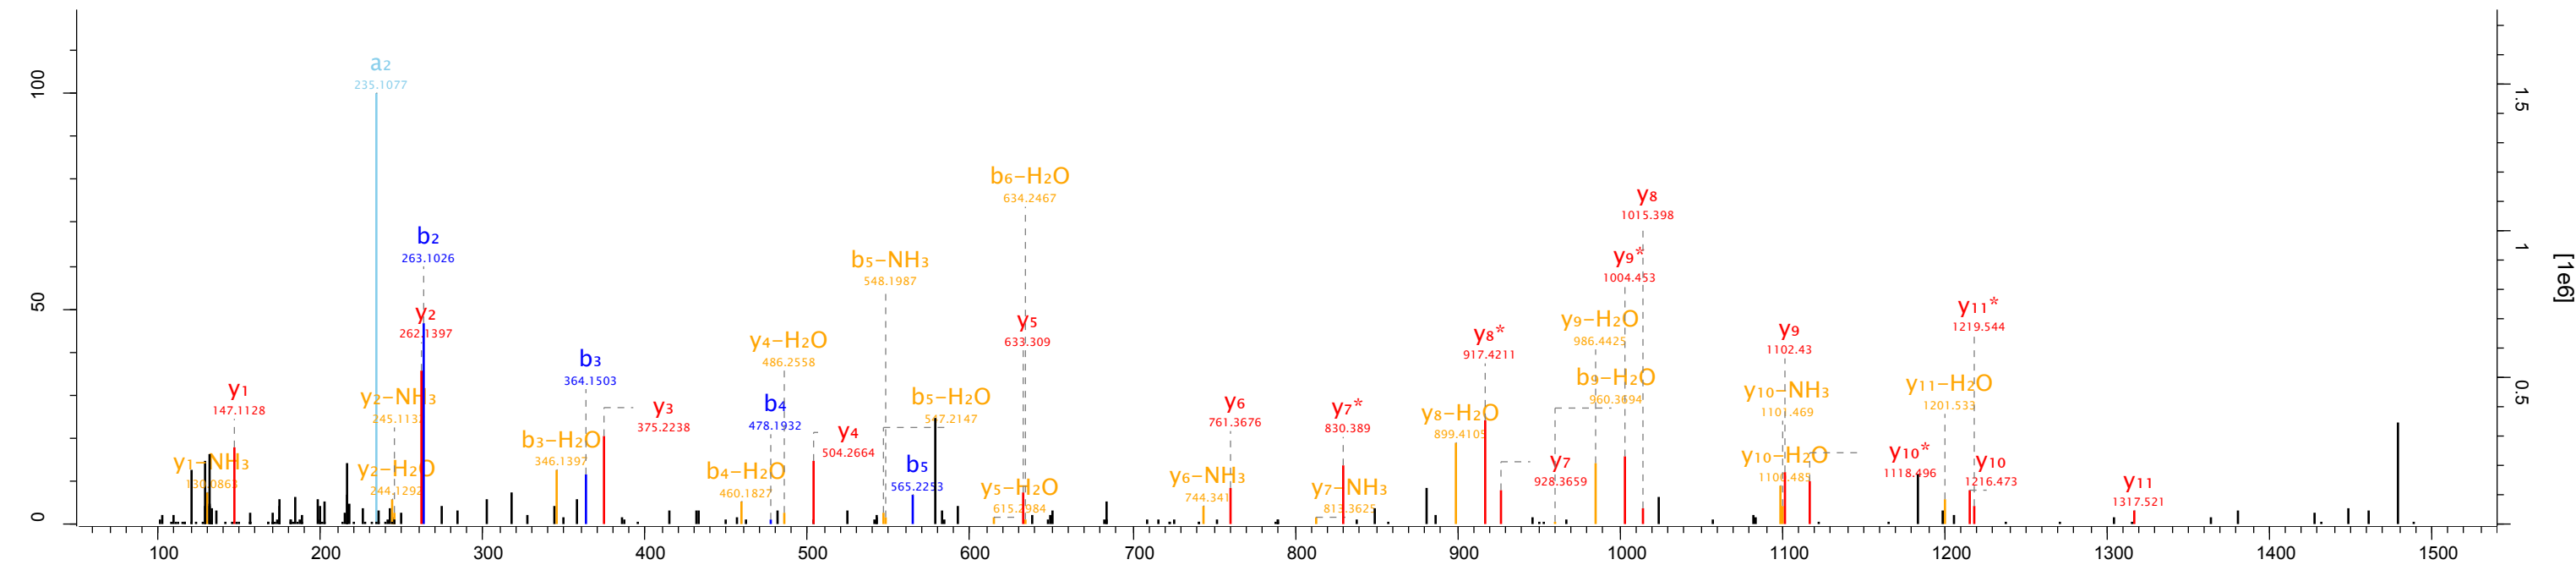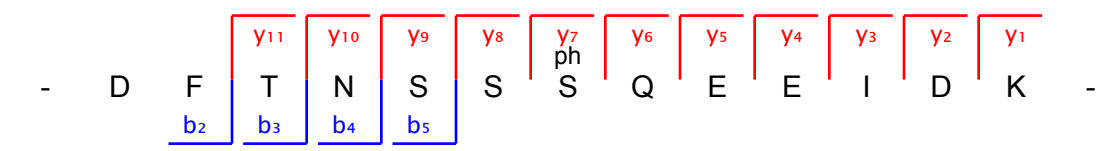

Raw file: 20150814\_A375SR\_Phospho\_BR2\_03  
 Scan: 9383 Method: FTMS; HCD Score: 117.7 m/z: 611.29 Gene names: WNK1

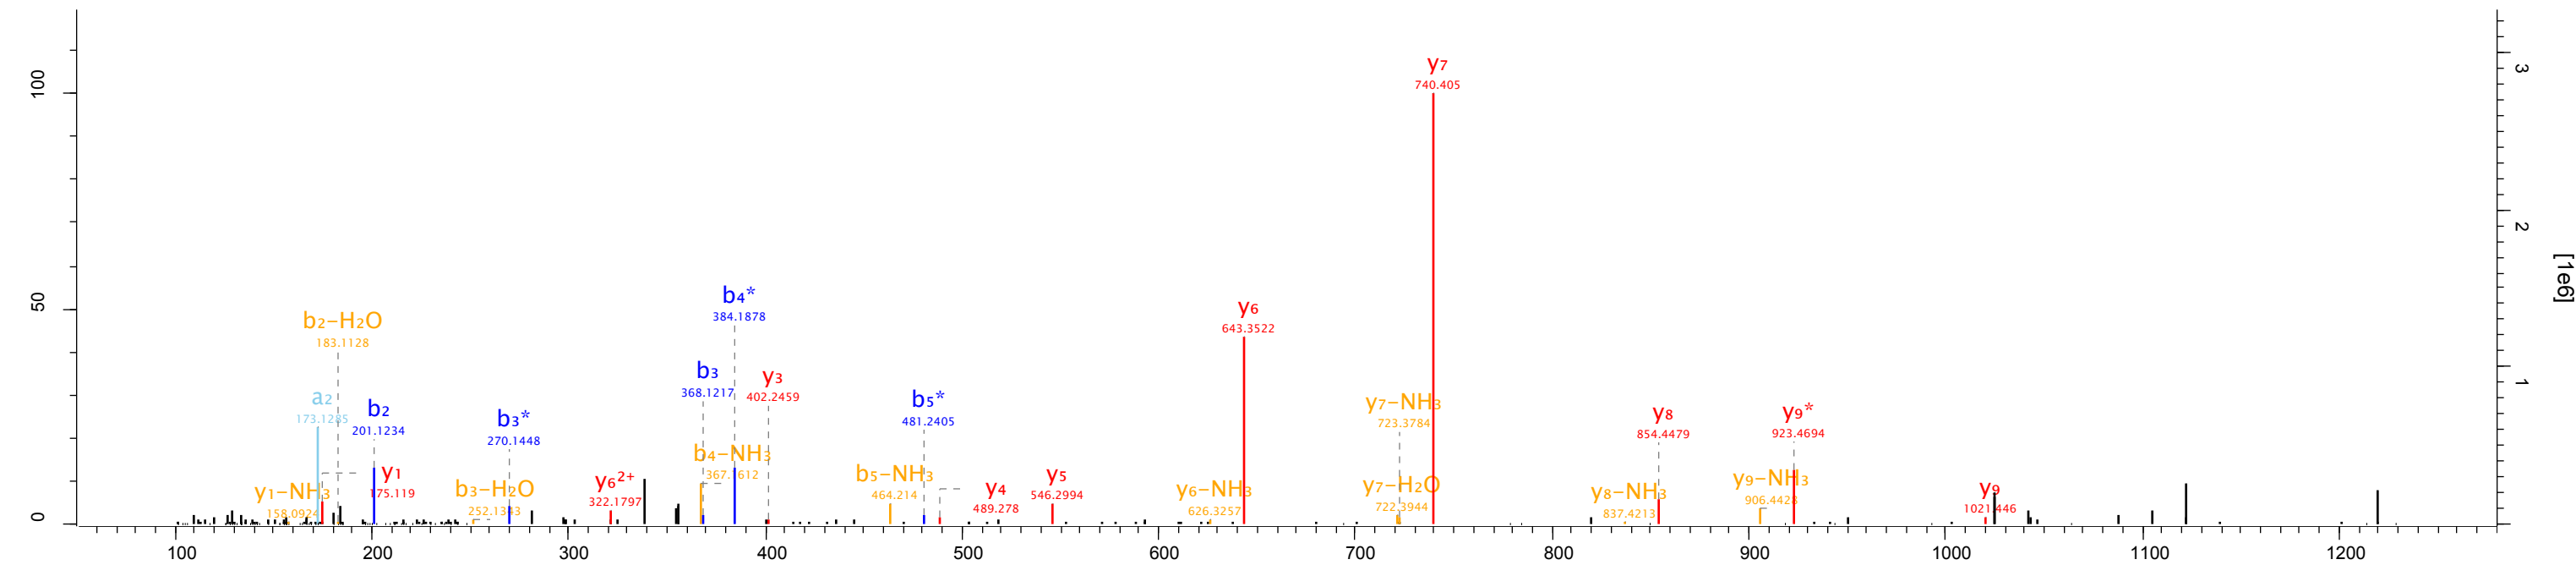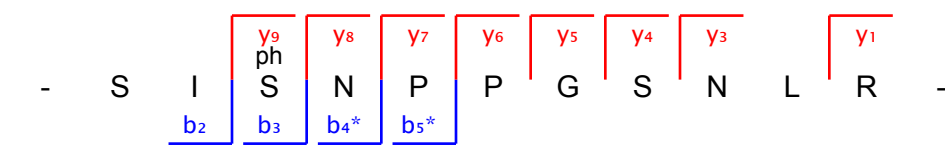

Raw file 20150814\_A375SR\_Phospho\_BR2\_03 Scan 9483 Method FTMS; HCD Score 96.72 m/z 754.65 Gene names ITGB4

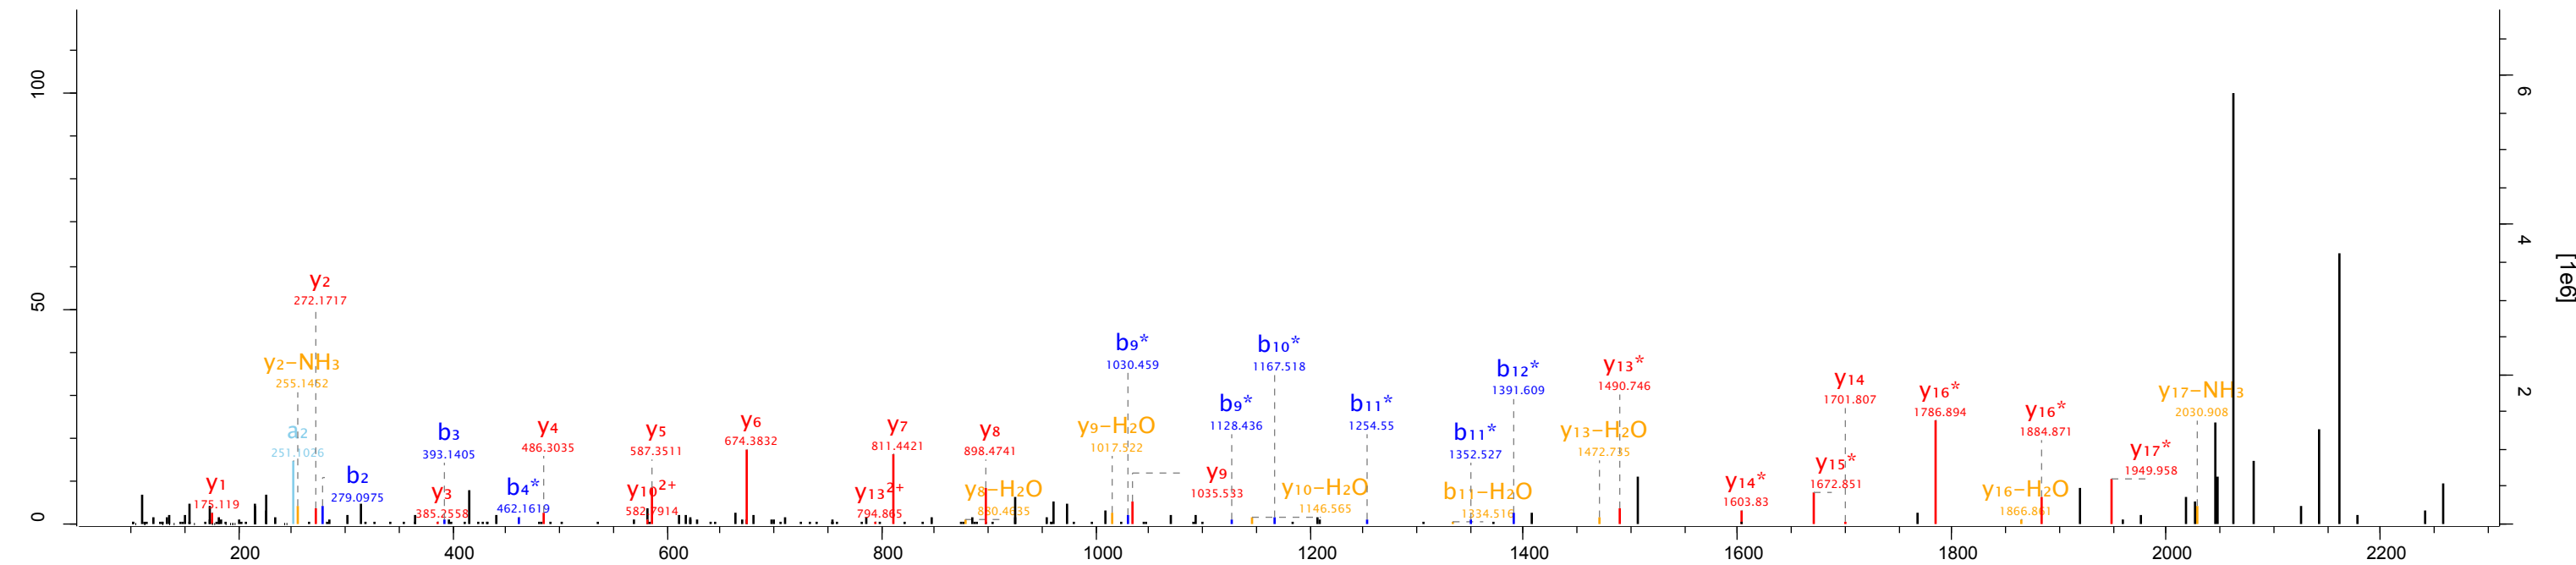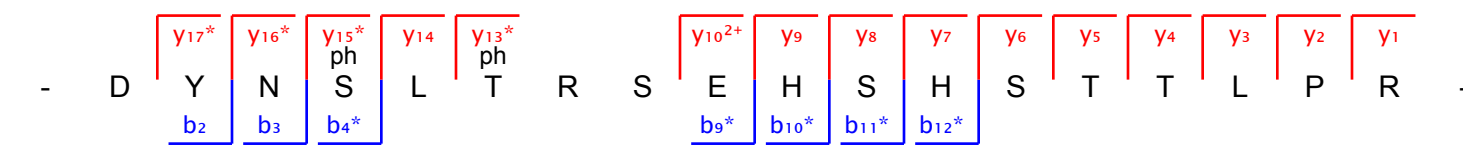



Raw file: 20150814\_A375SR\_Phospho\_BR2\_04  
 Scan: 10003 Method: FTMS; HCD Score: 59.8 m/z: 521.25 Gene names: VAC14

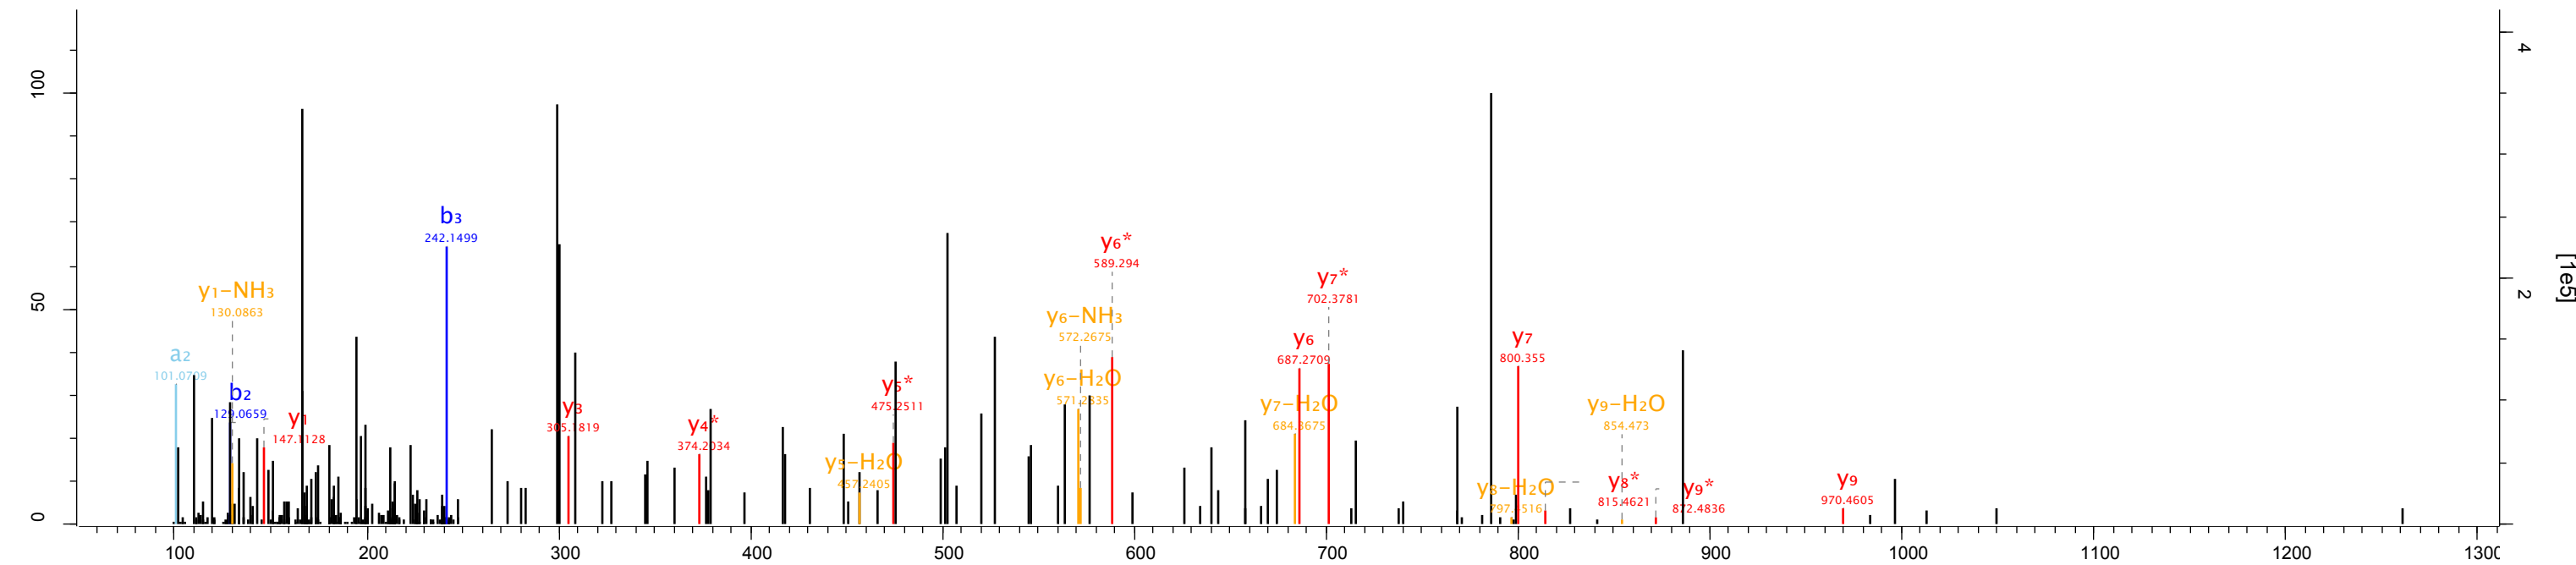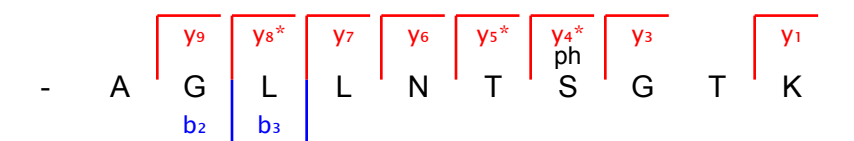

Raw file: 20150814\_A375SR\_Phospho\_BR2\_04  
 Scan: 10203 Method: FTMS; HCD Score: 89.01 m/z: 881.88 Gene names: CLSPN

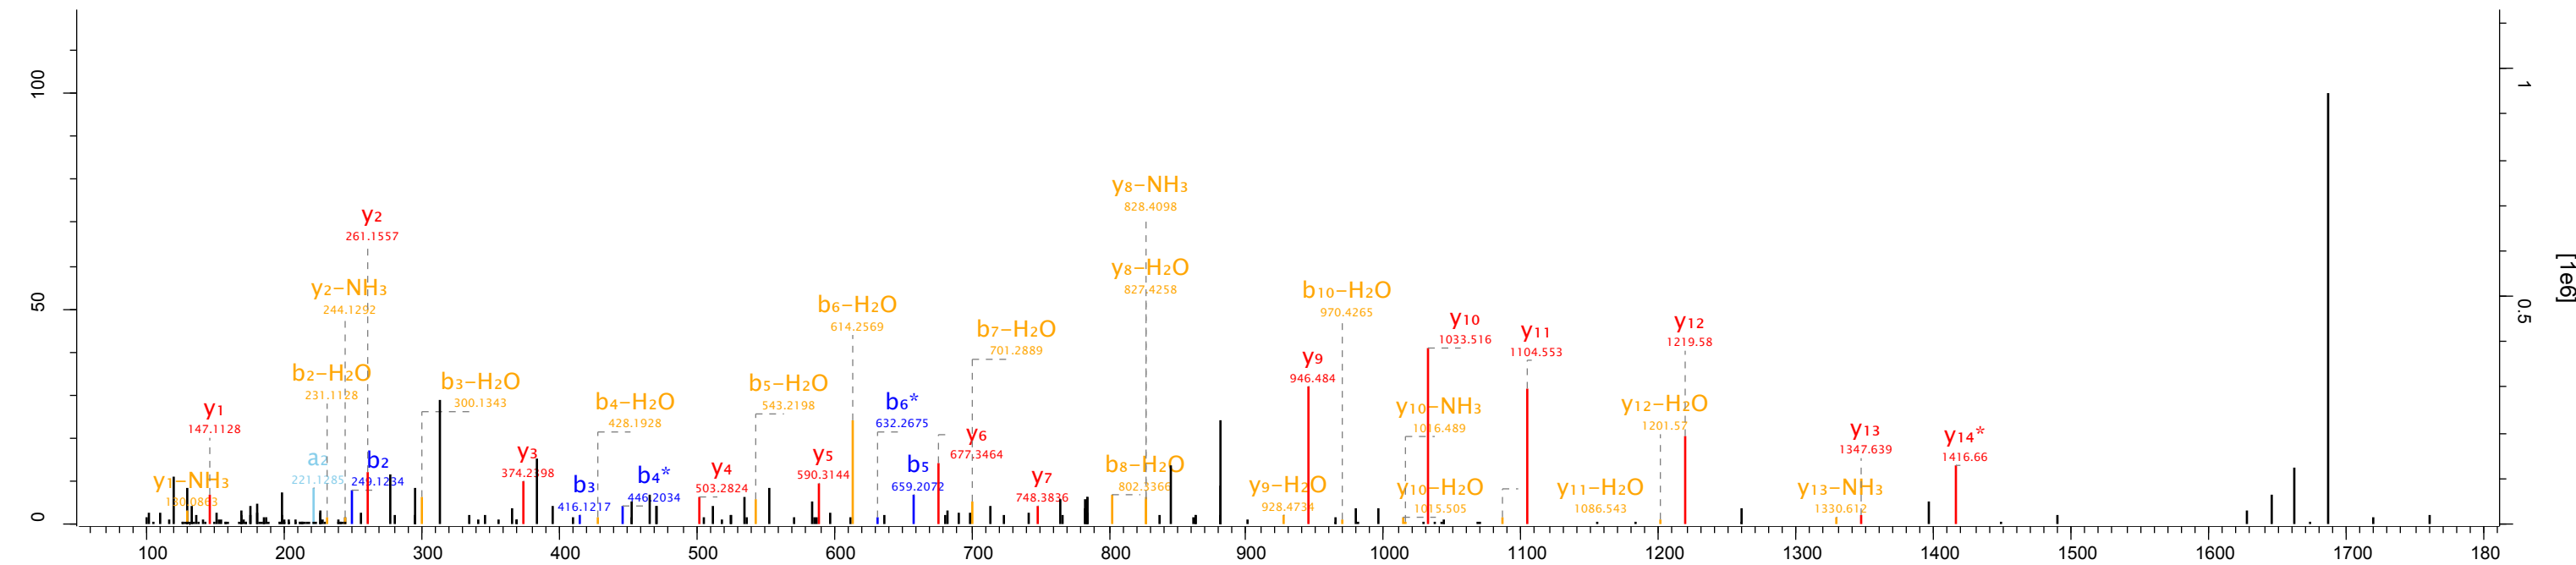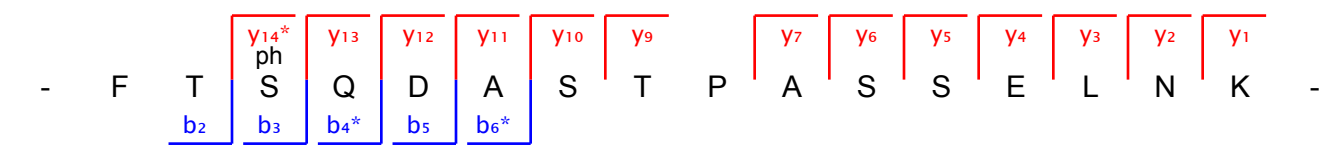

Raw file: 20150814\_A375SR\_Phospho\_BR2\_04  
 Scan: 10783 Method: FTMS; HCD Score: 104.17 m/z: 566.24 Gene names: CHAMP1

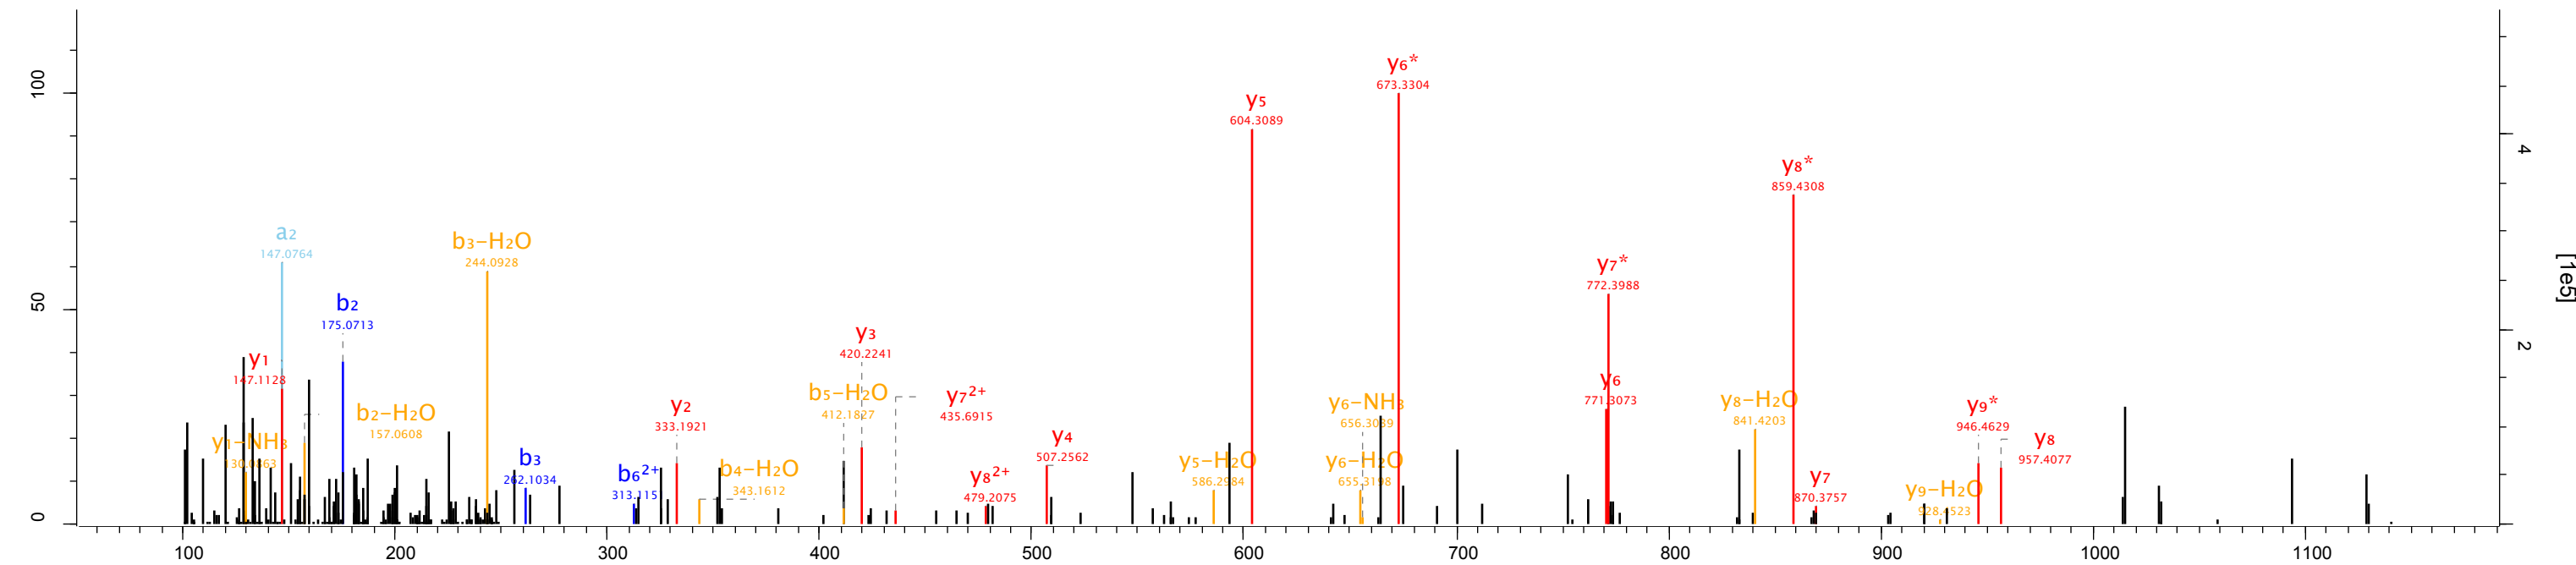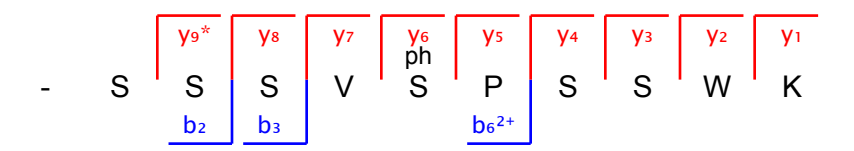

Raw file: 20150814\_A375SR\_Phospho\_BR2\_04  
 Scan: 11003  
 Method: FTMS; HCD  
 Score: 214.75  
 m/z: 1040.44  
 Gene names: PACSIN3

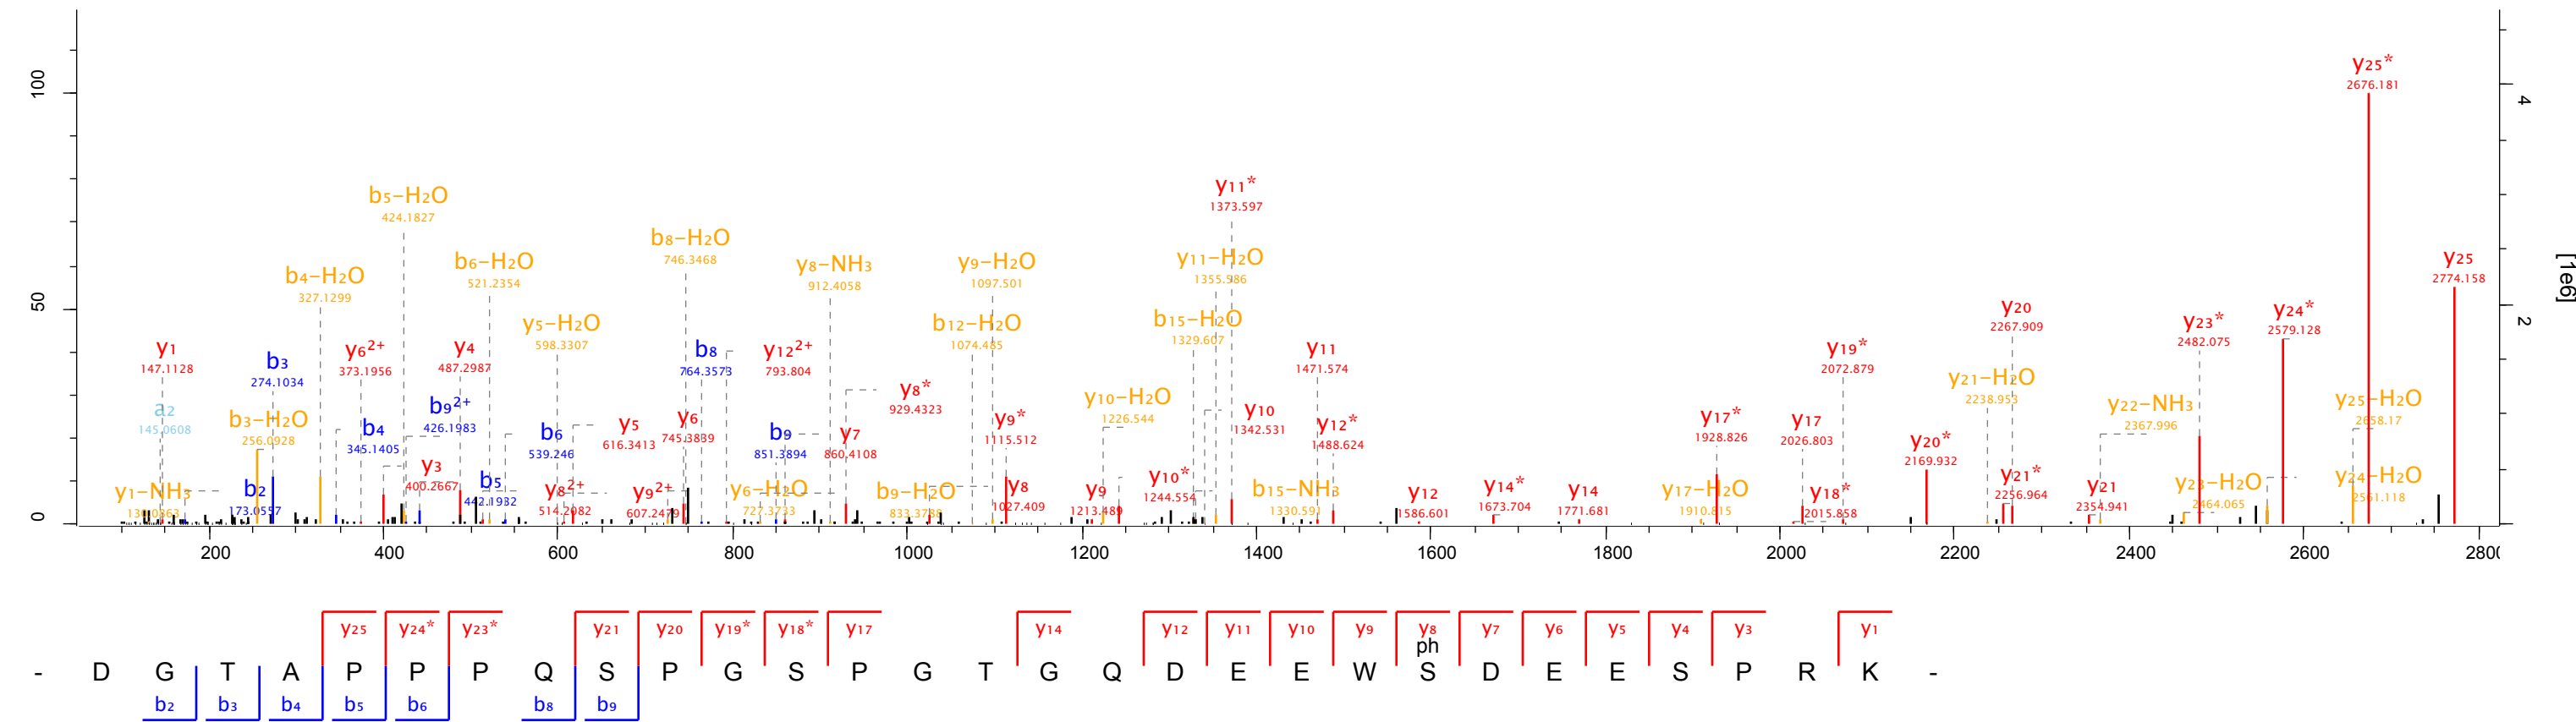

Raw file: 20150814\_A375SR\_Phospho\_BR2\_04  
 Scan: 11343 Method: FTMS; HCD Score: 172.57 m/z: 696.79 Gene names: PGAM1

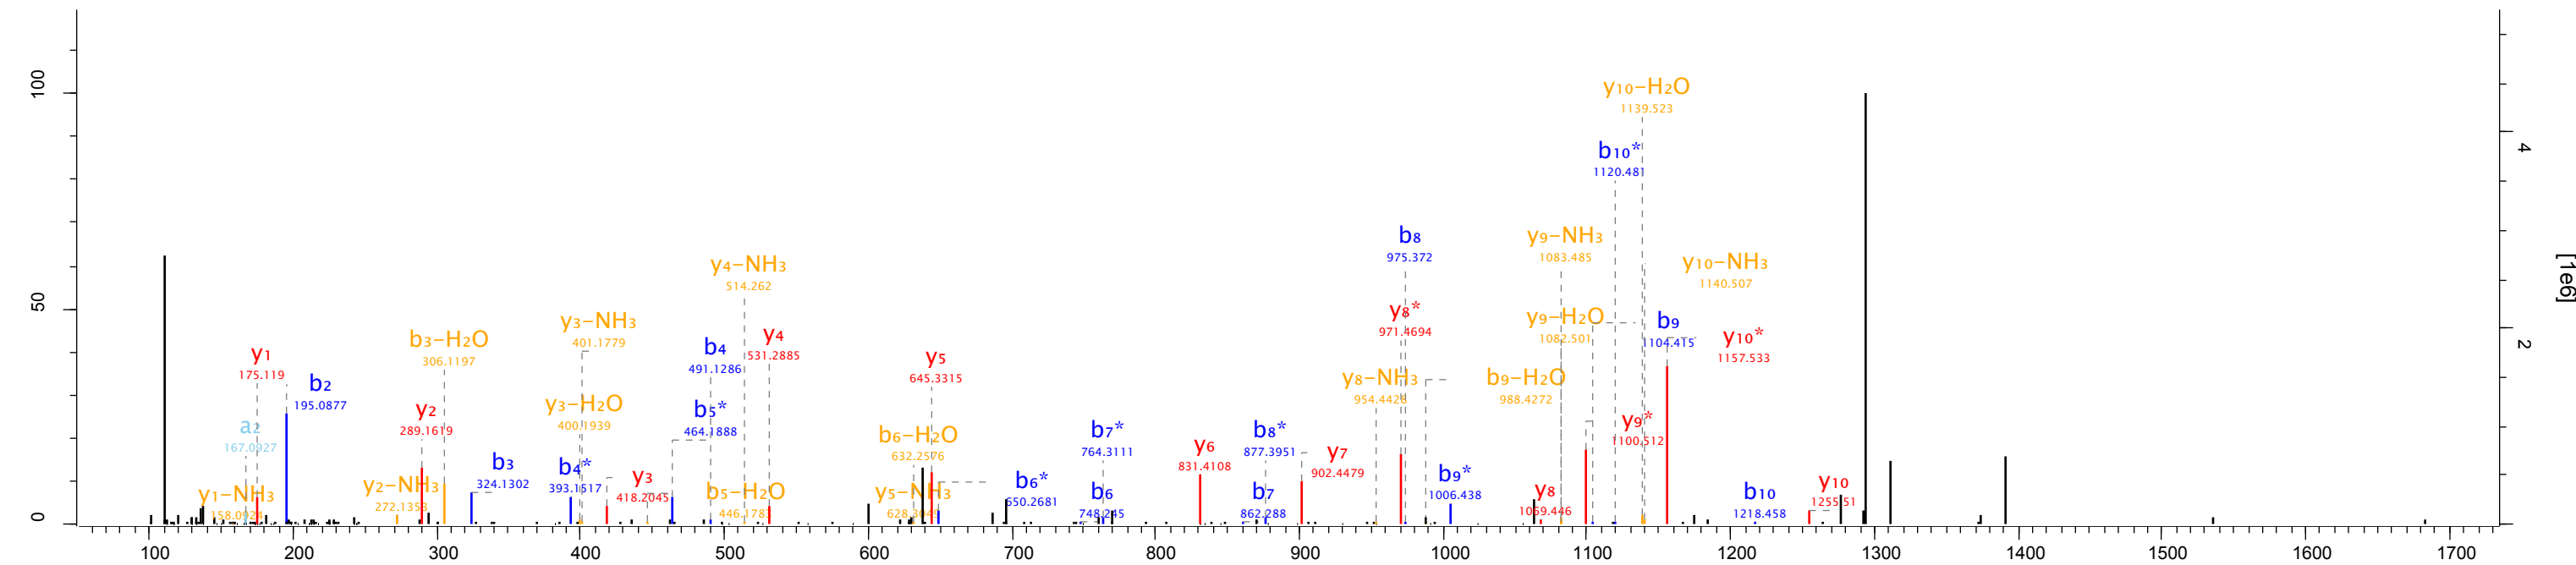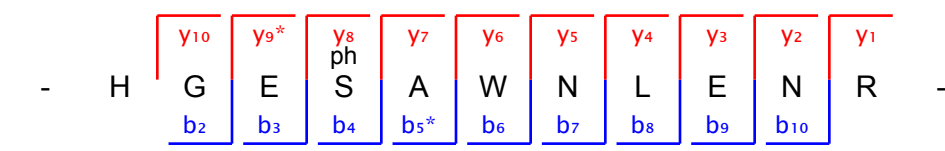

Raw file 20150814\_A375SR\_Phospho\_BR2\_04 Scan 11613 Method FTMS; HCD Score 101.45 m/z 822.36 Gene names TJP1

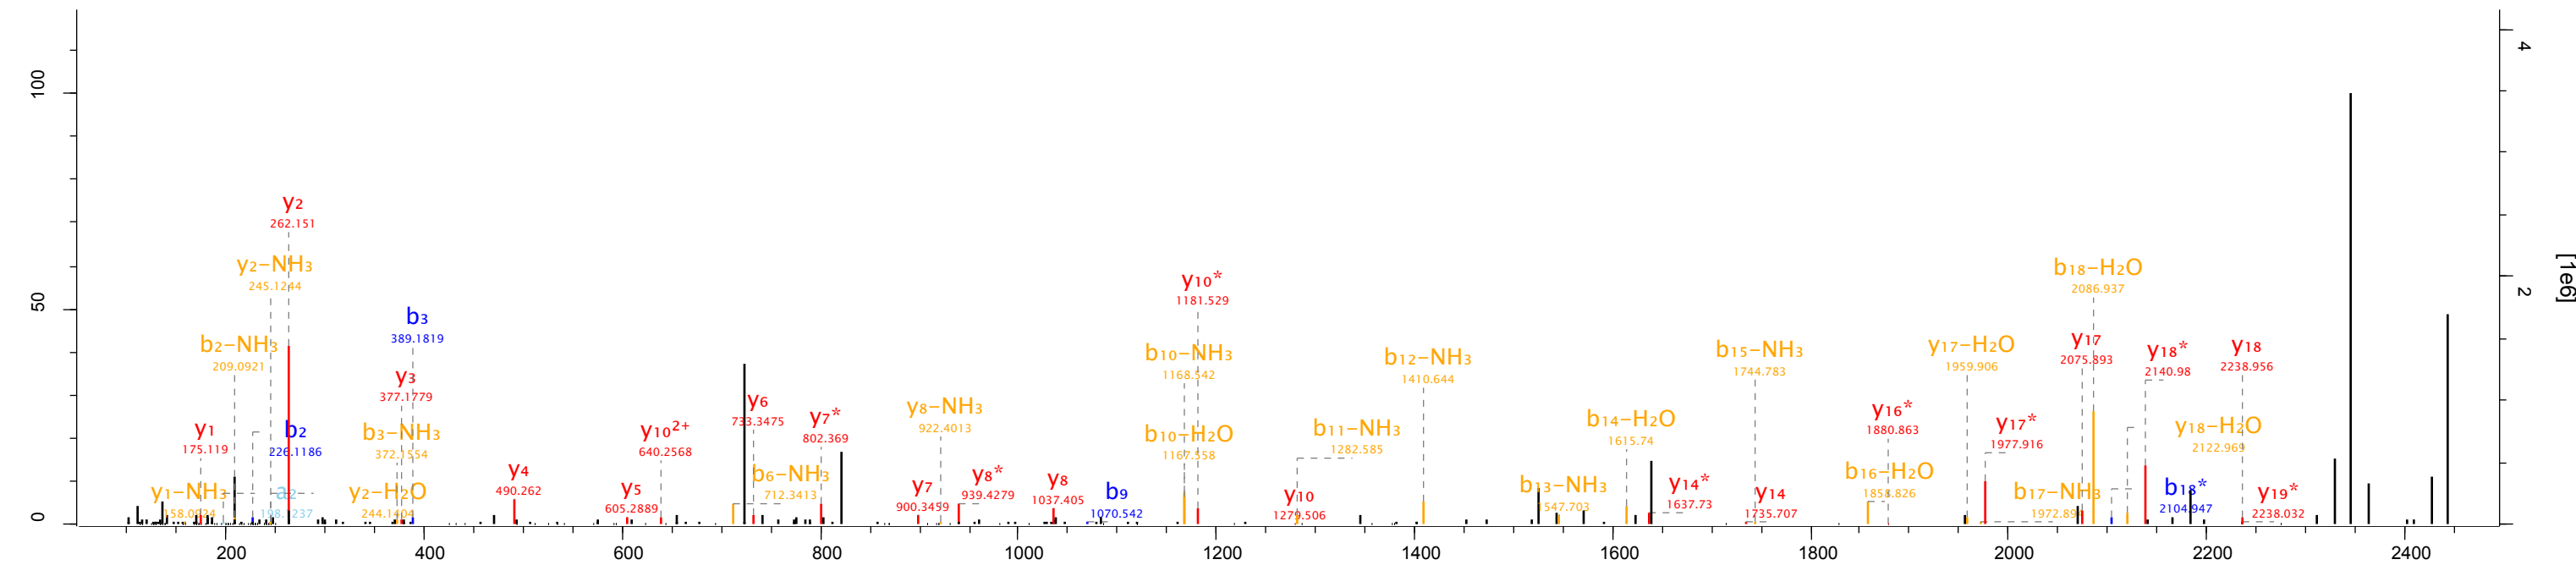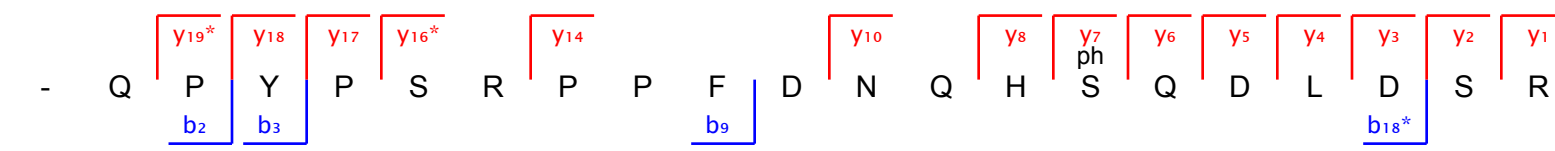

Raw file 20150814\_A375SR\_Phospho\_BR2\_04 Scan 11853 Method FTMS; HCD Score 70.34 m/z 674.27 Gene names AKAP8

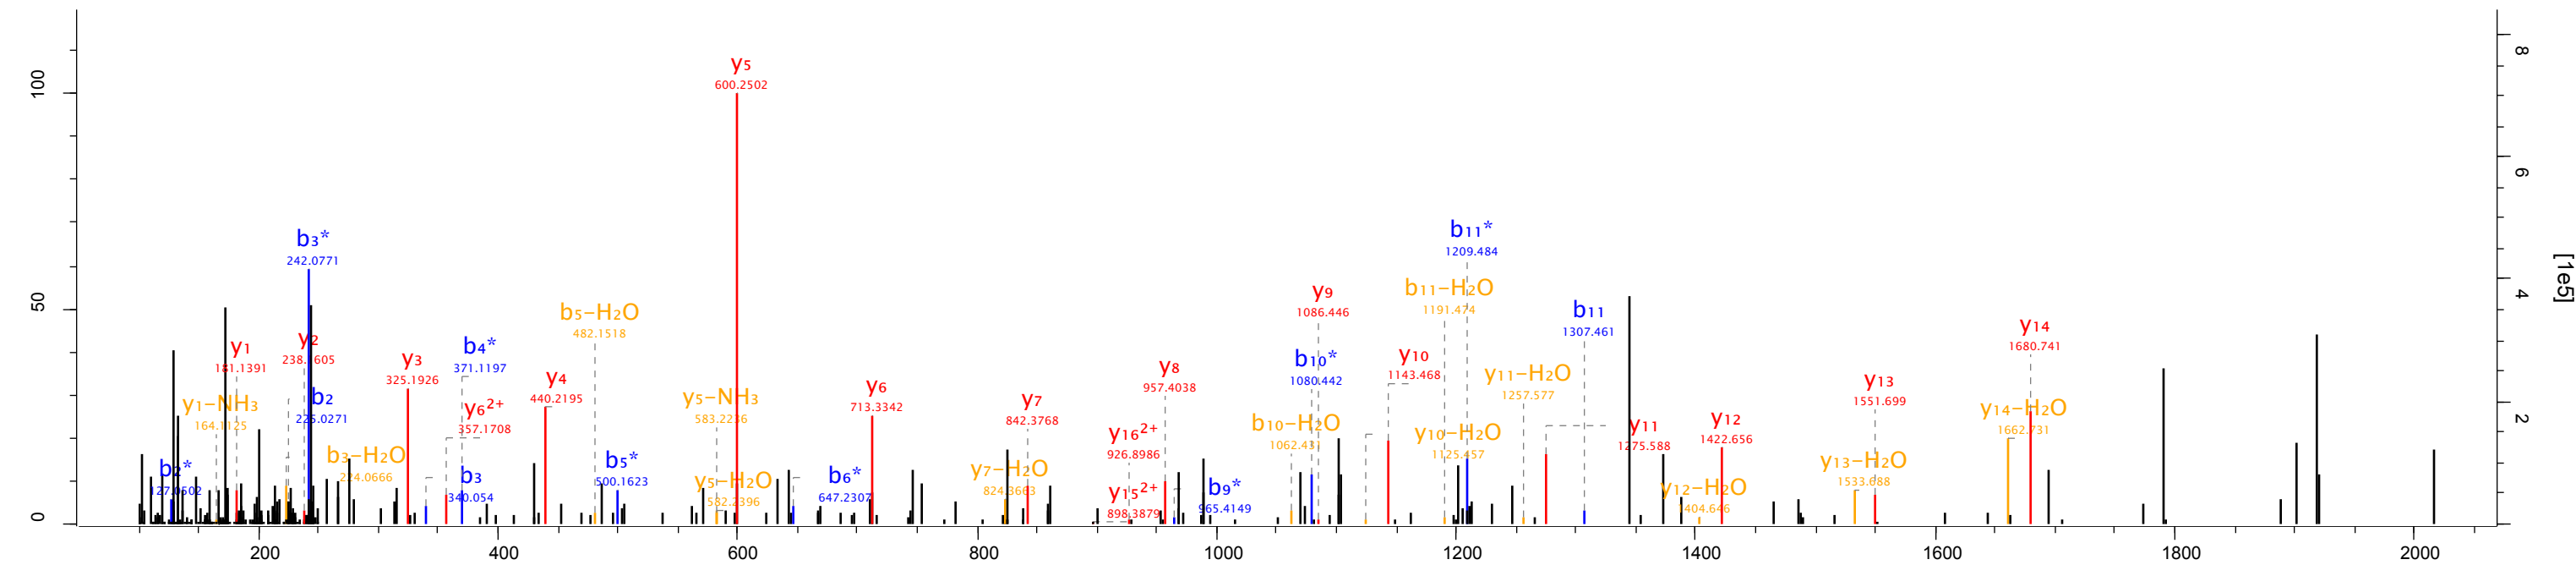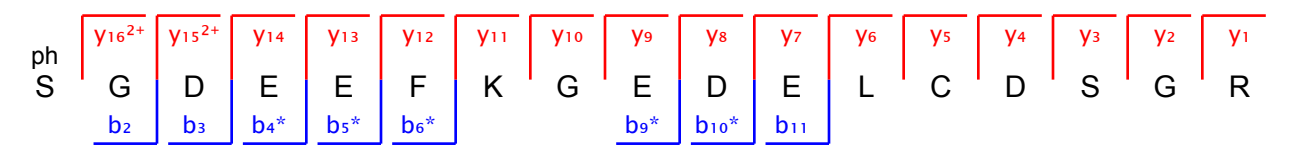

Raw file: 20150814\_A375SR\_Phospho\_BR2\_04  
 Scan: 12263 Method: FTMS; HCD Score: 164.48 m/z: 759.67 Gene names: MARK2

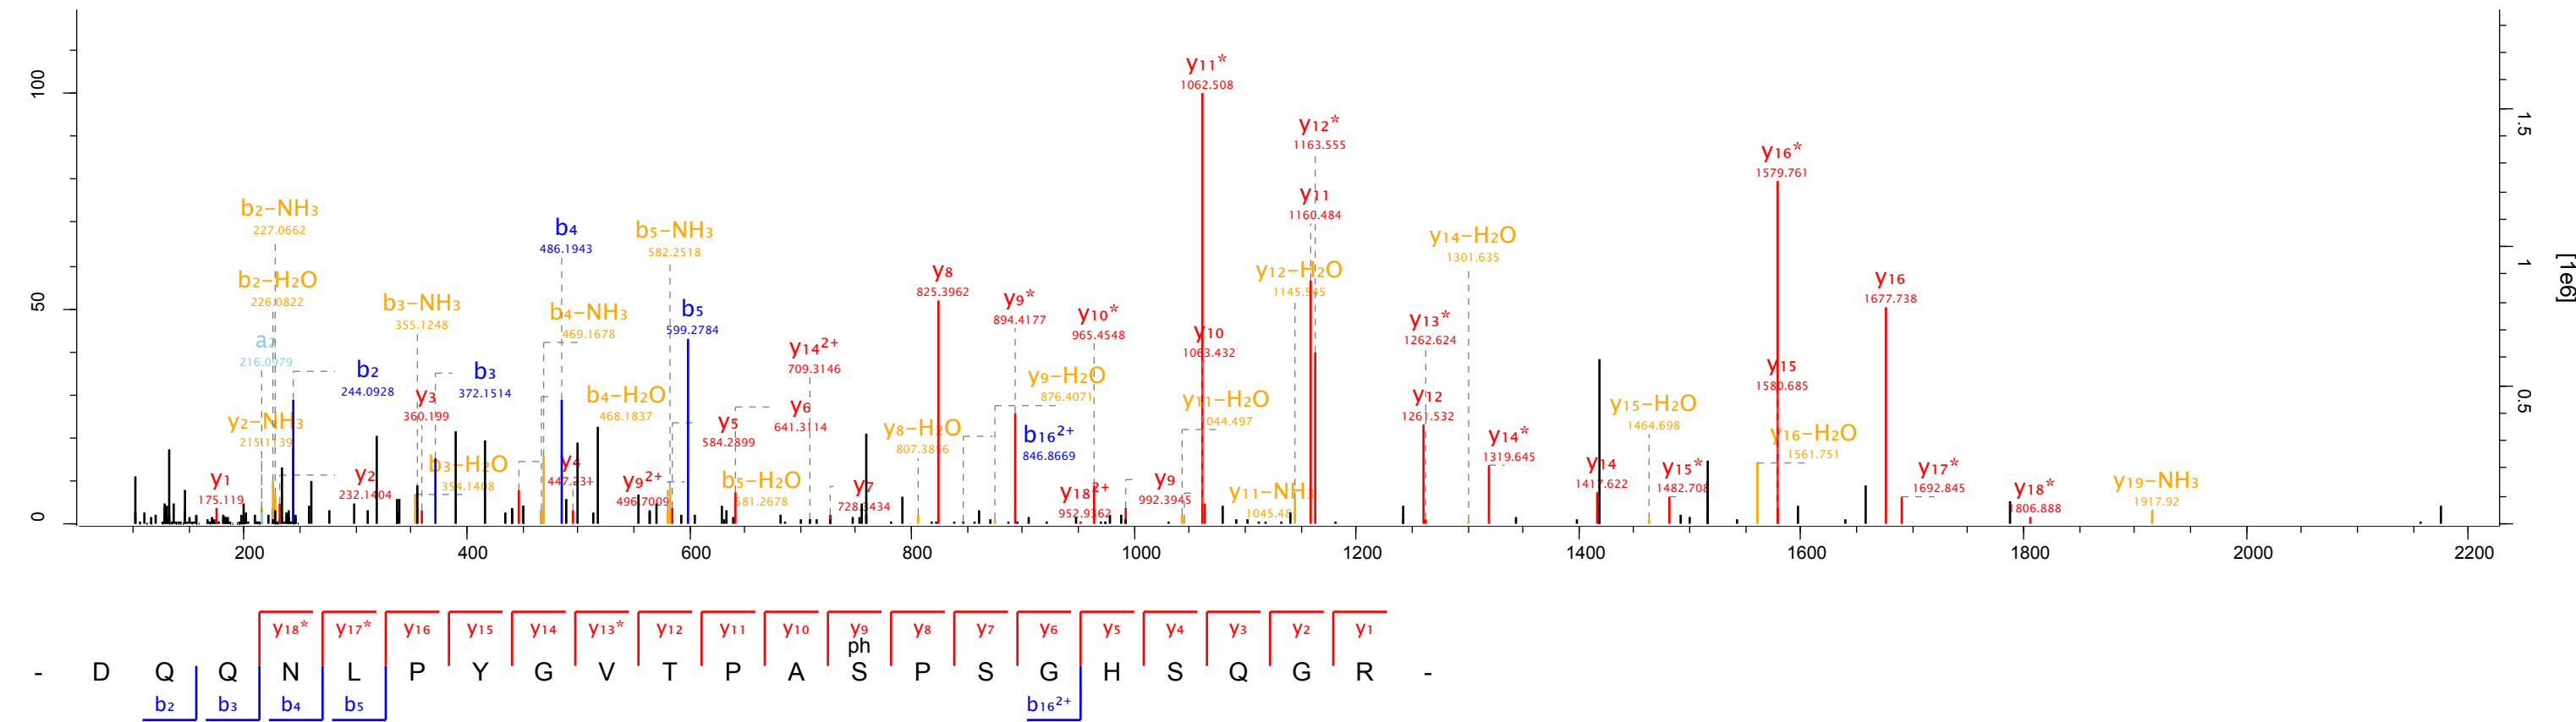



Raw file 20150814\_A375SR\_Phospho\_BR2\_04 Scan 12493 Method FTMS; HCD Score 154.51 m/z 802.84 Gene names TXLNG

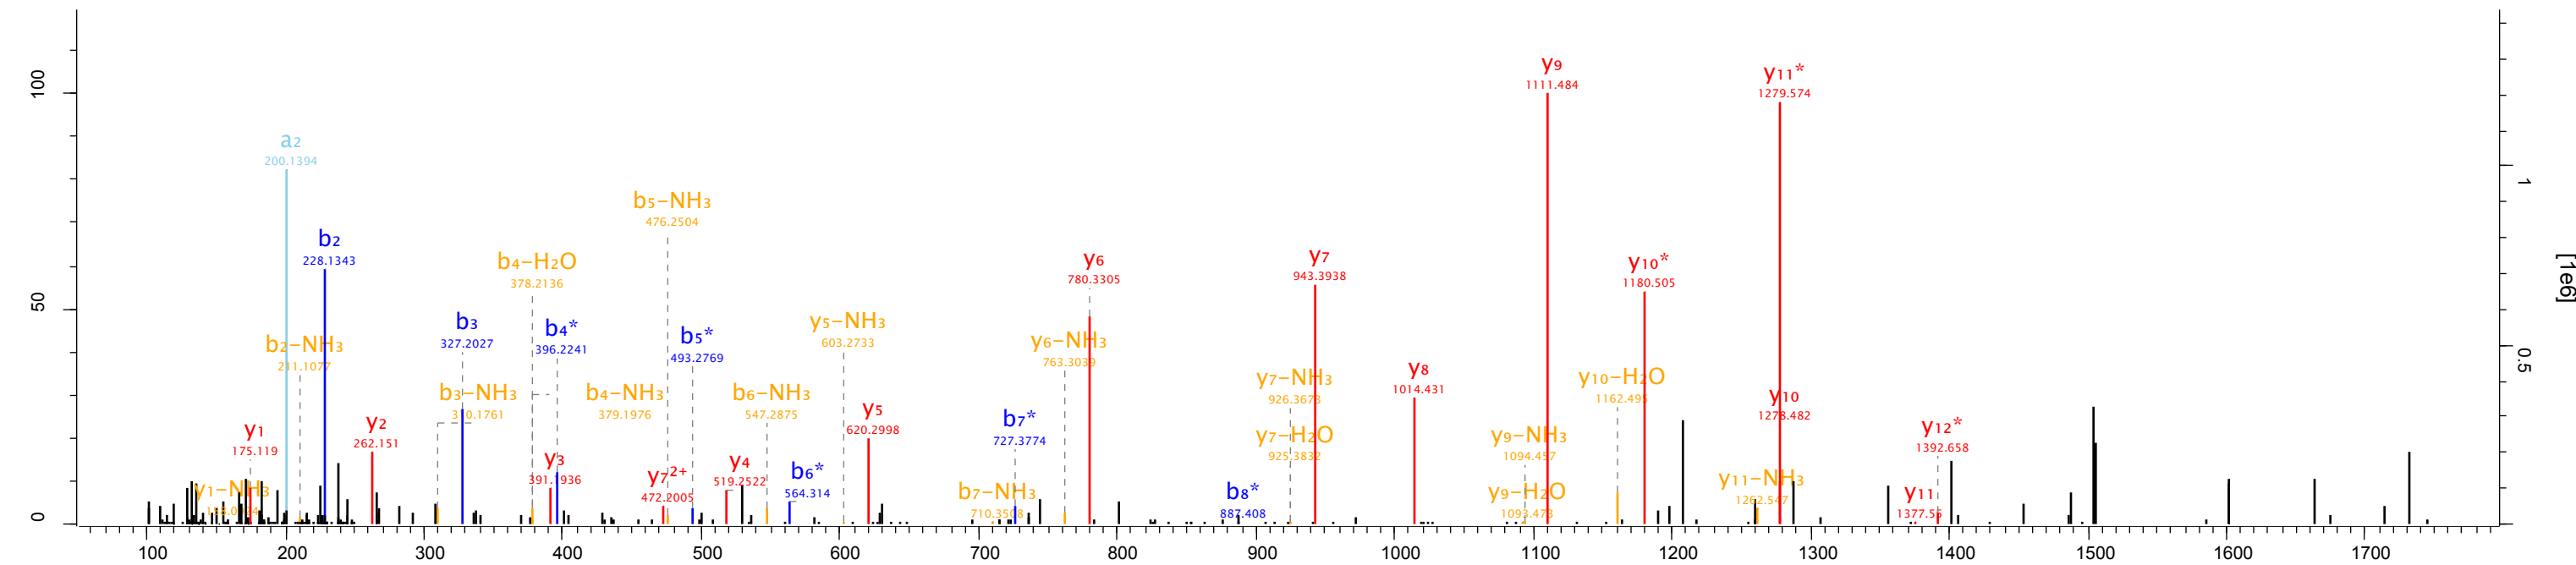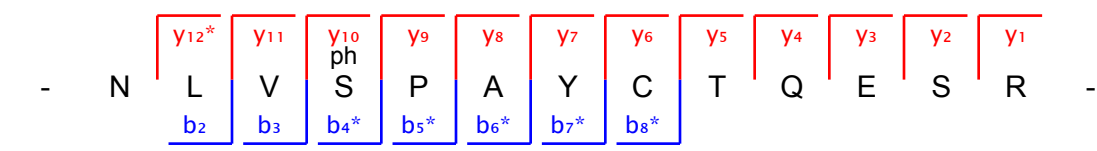

Raw file: 20150814\_A375SR\_Phospho\_BR2\_04  
 Scan: 12923 Method: FTMS; HCD Score: 151.22 m/z: 748.85 Gene names: ULK1

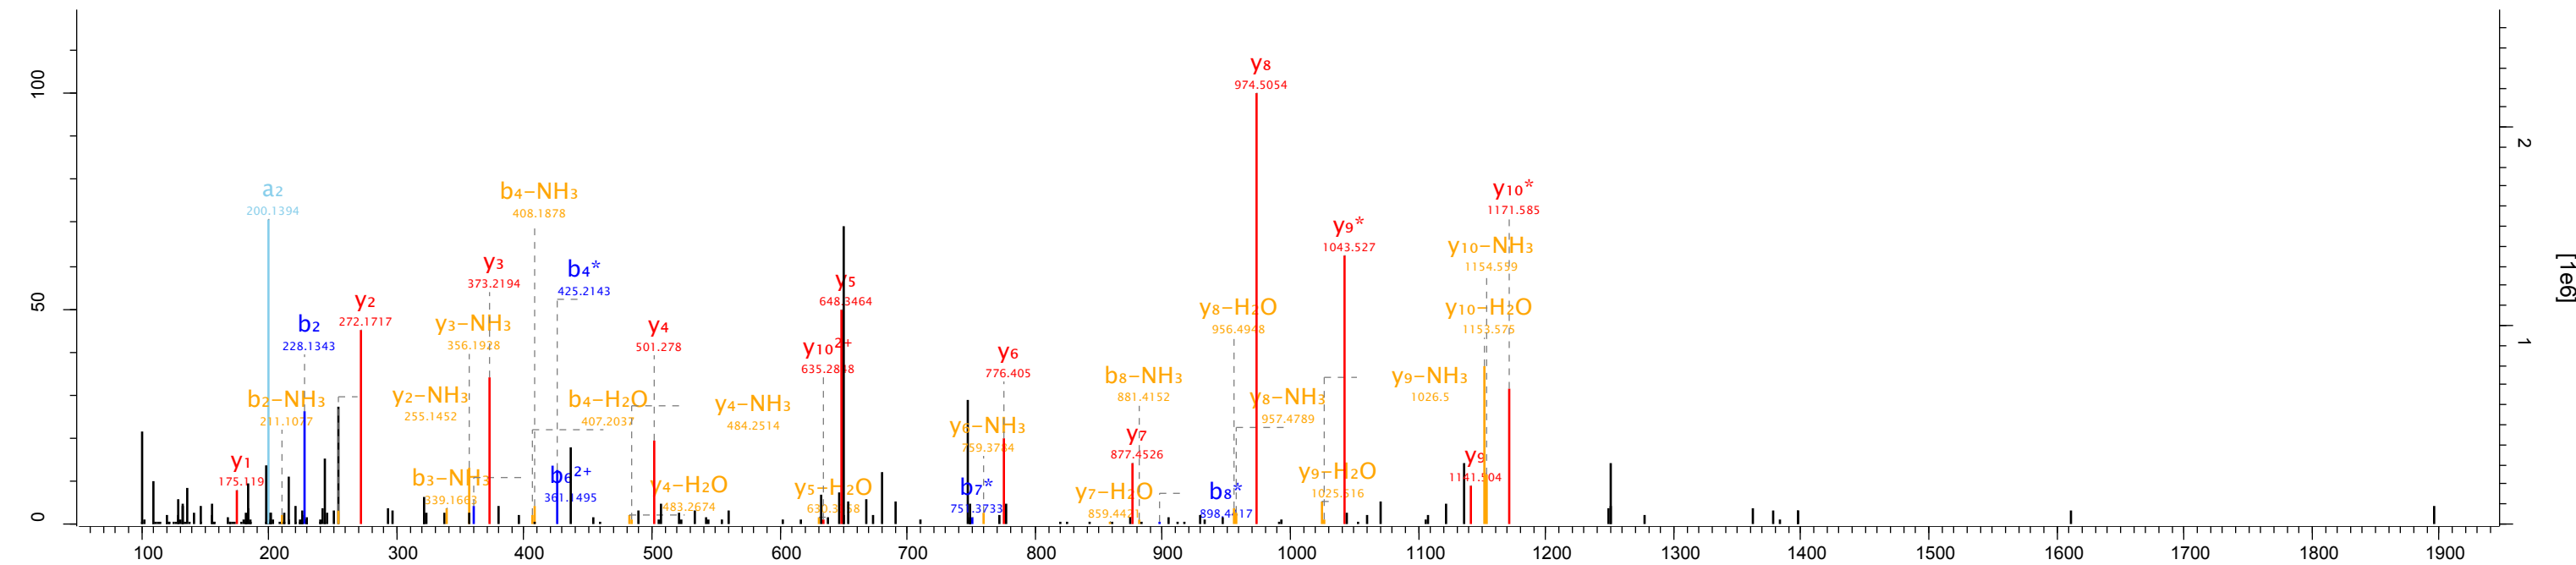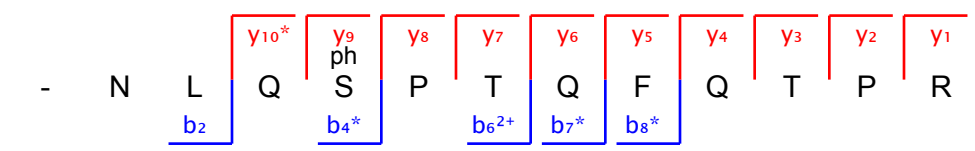

Raw file: 20150814\_A375SR\_Phospho\_BR2\_04  
 Scan: 1293 Method: FTMS; HCD Score: 83.46 m/z: 455.21 Gene names: WDR74

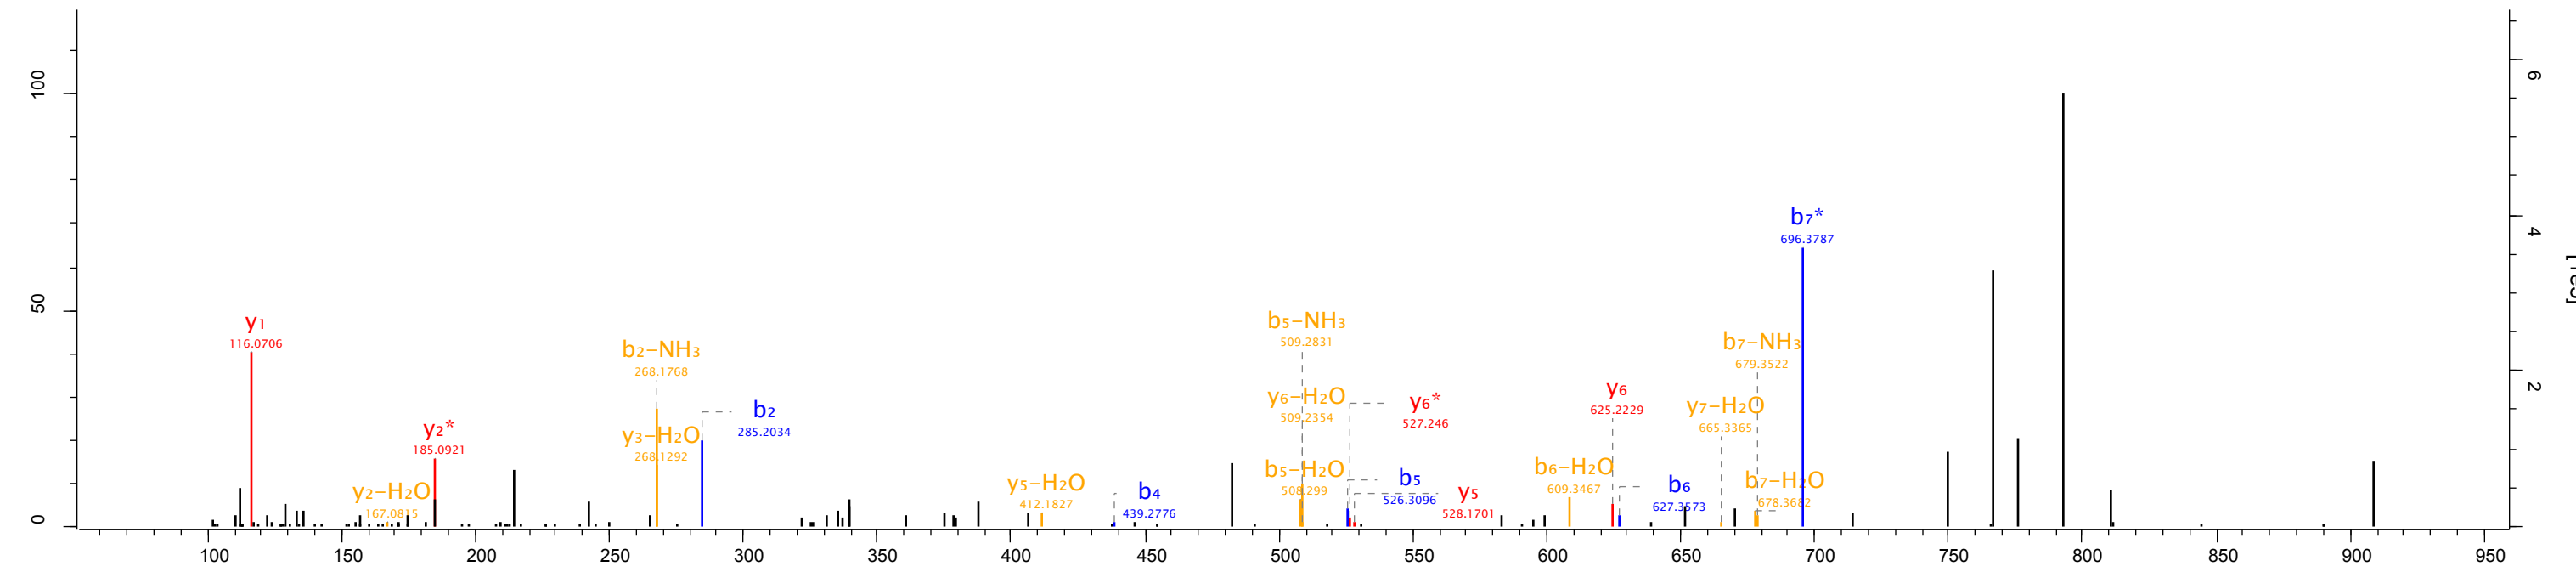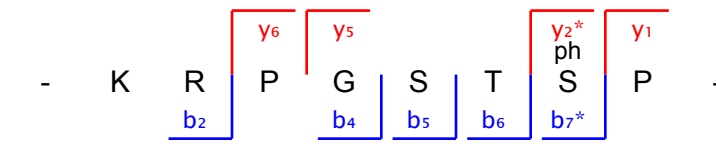

Raw file: 20150814\_A375SR\_Phospho\_BR2\_04  
 Scan: 13863 Method: FTMS; HCD Score: 162.23 m/z: 555.78 Gene names: SRSF4;SRSF6;SRSF5

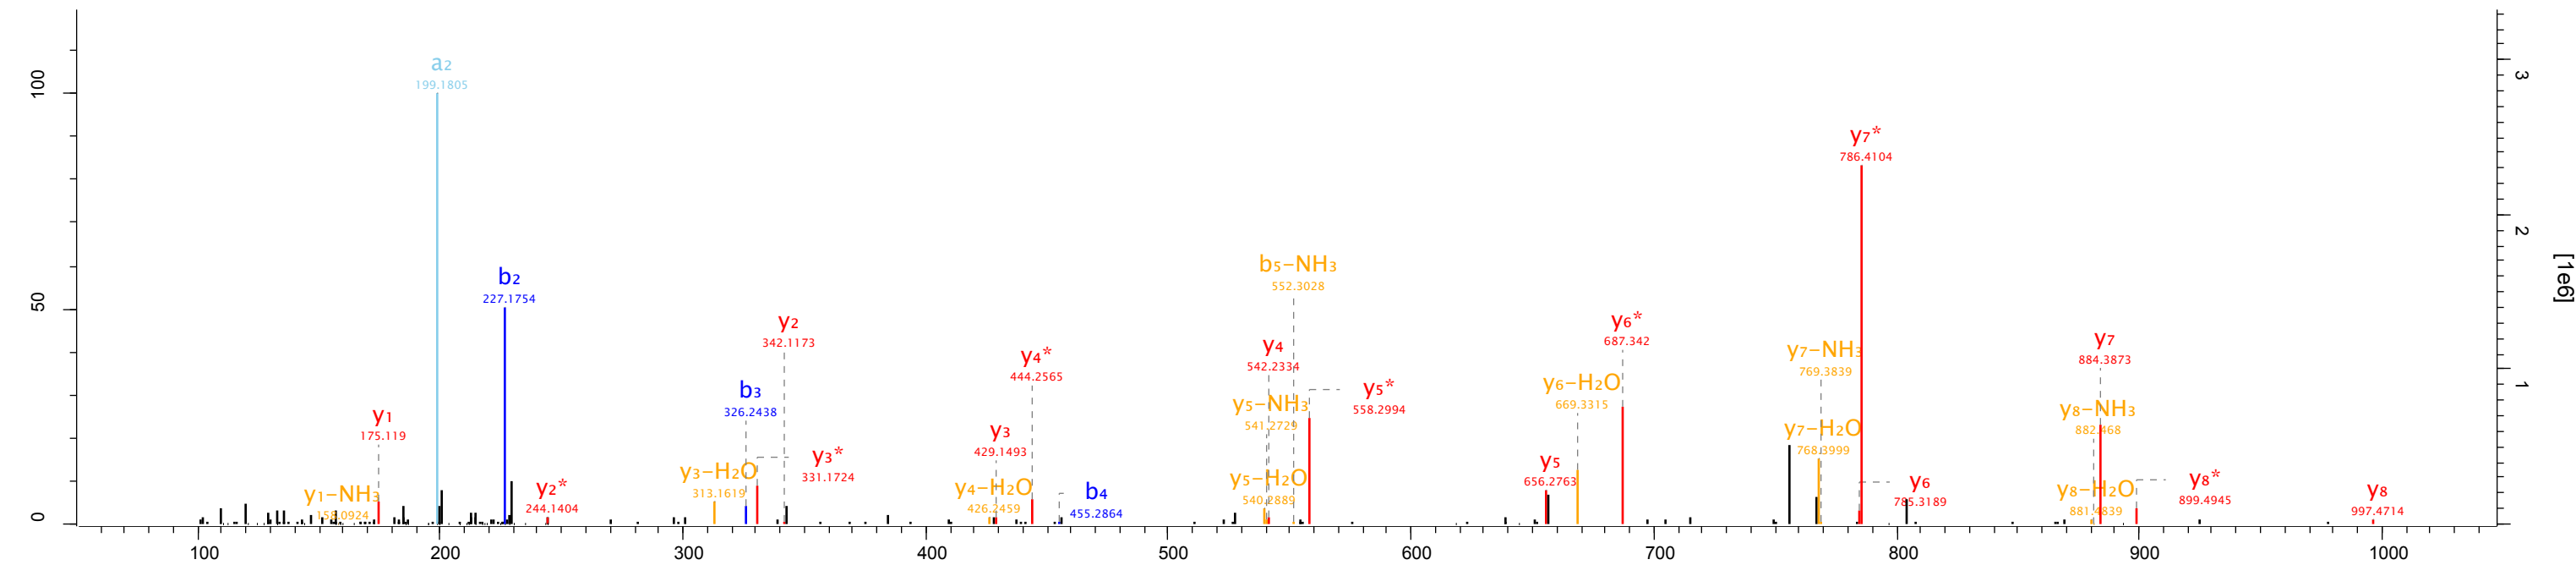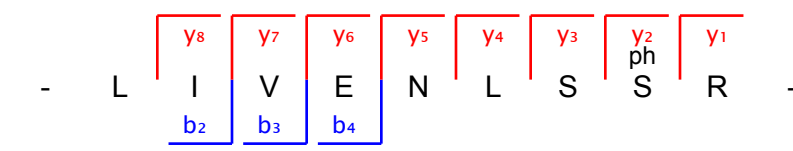

Raw file: 20150814\_A375SR\_Phospho\_BR2\_04  
 Scan: 14543 Method: FTMS; HCD Score: 151.96 m/z: 655.27 Gene names: TOP1

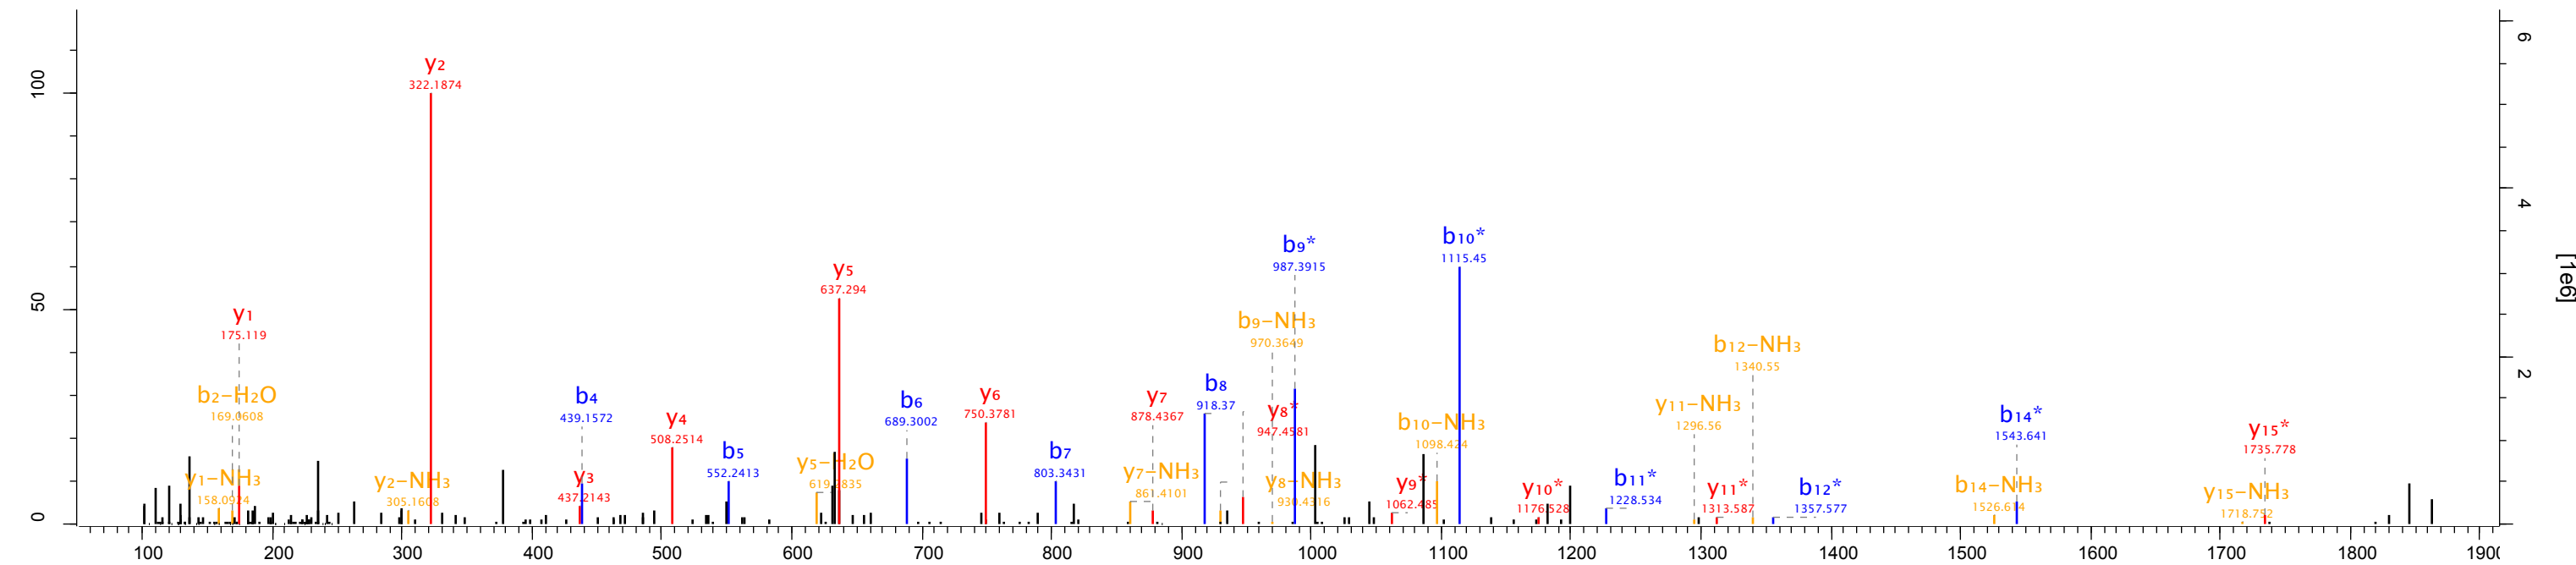

ac: S G D H L H N D S ph S Q I E A D F R -

b4 b5 b6 b7 b8 b9\* b10\* b11\* b12\* b14\*

y15\* y11\* y10\* y9\* y8\* y7 y6 y5 y4 y3 y2 y1

Raw file  
20150814\_A375SR\_Phospho\_BR2\_04

Scan 14923 Method FTMS; HCD Score 229.7 m/z 1032.15 Gene names PROSER2;C10orf47

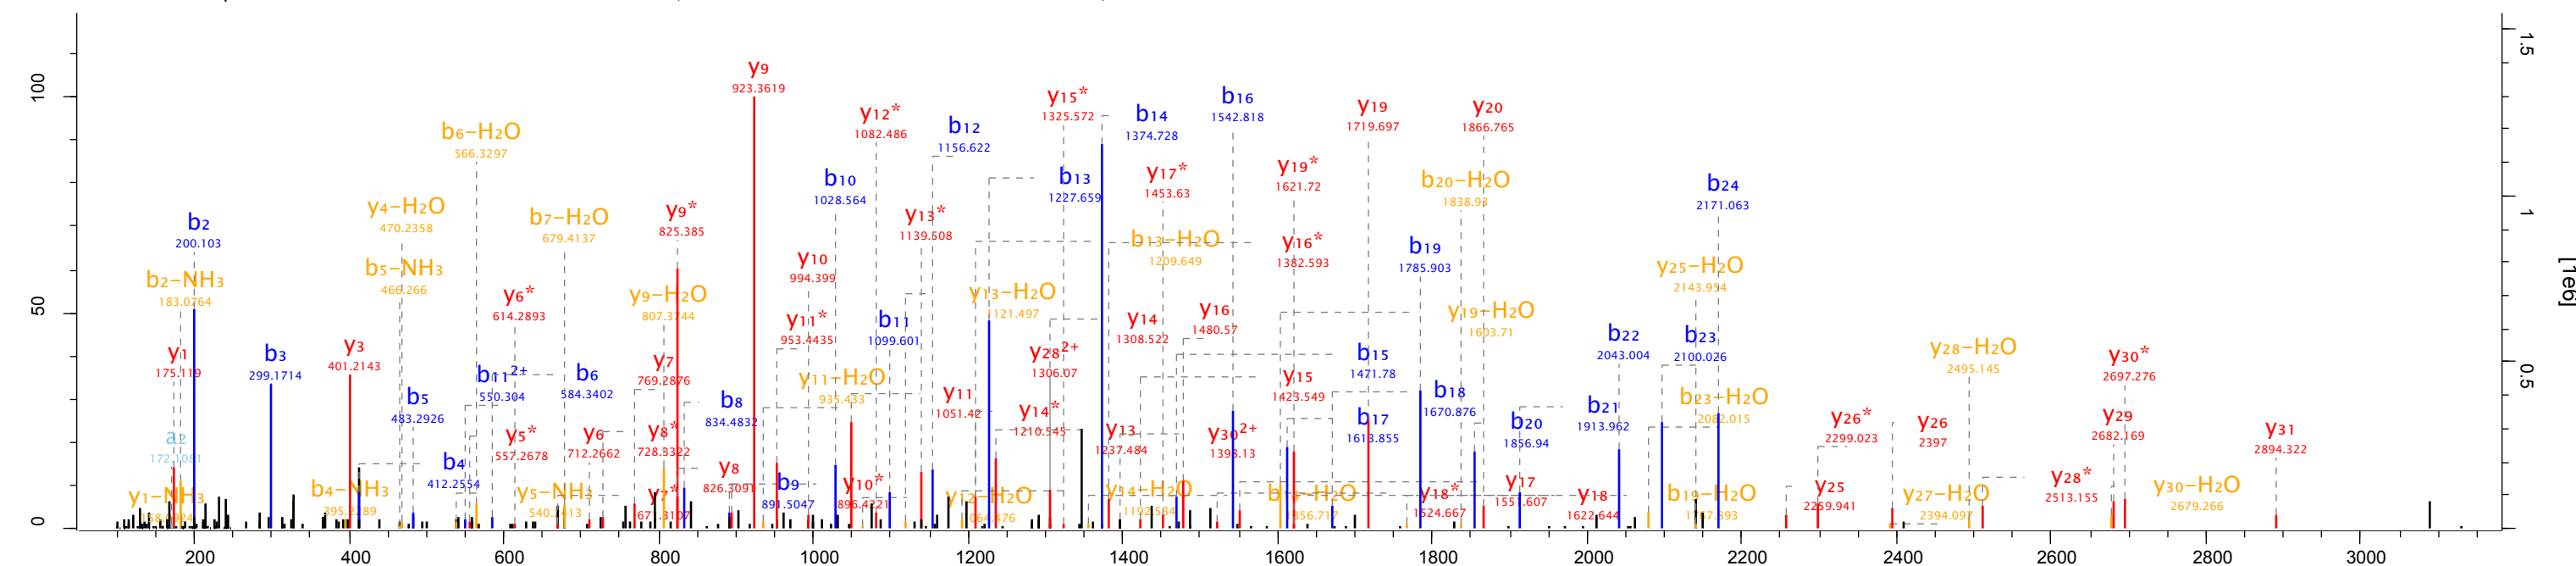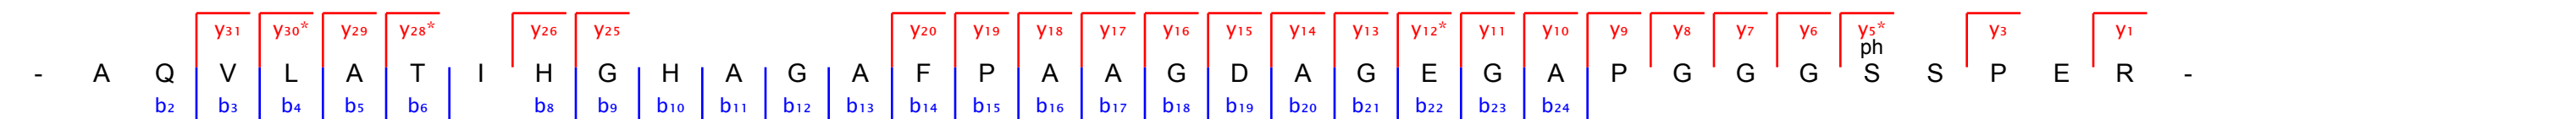

Raw file: 20150814\_A375SR\_Phospho\_BR2\_04  
 Scan: 15063 Method: FTMS; HCD Score: 240.95 m/z: 873.39 Gene names: SMG9

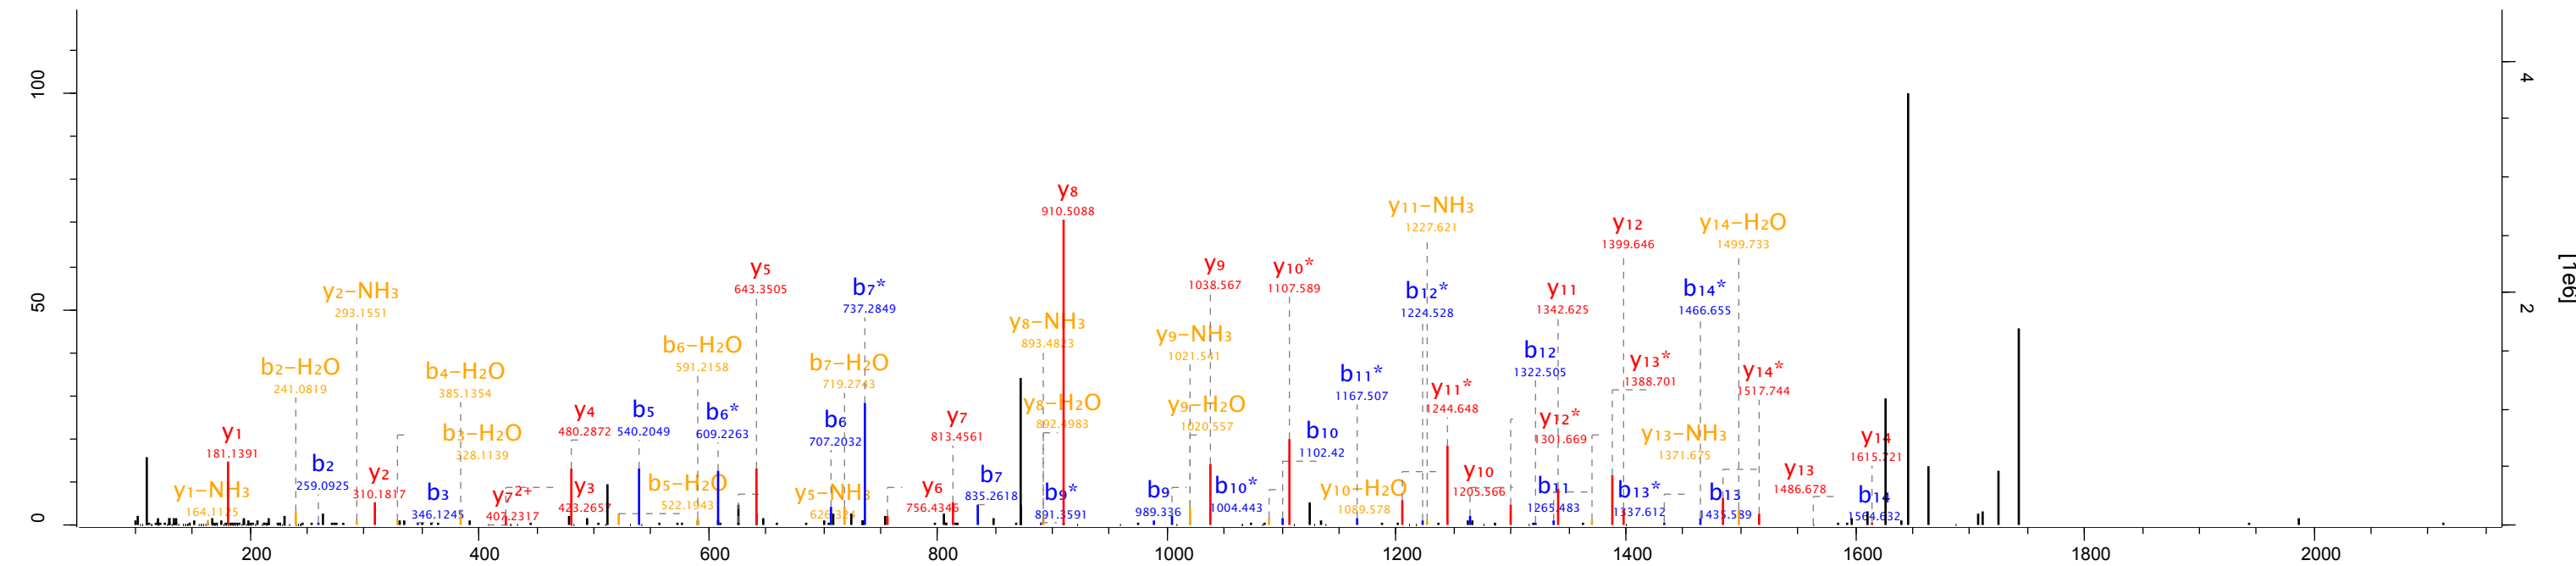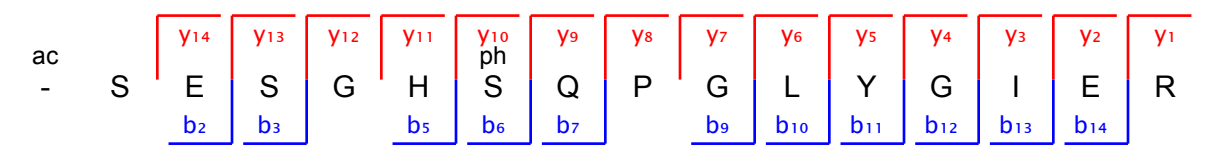

Raw file: 20150814\_A375SR\_Phospho\_BR2\_04  
 Scan: 15123 Method: FTMS; HCD Score: 142.58 m/z: 861.85 Gene names: KAT7

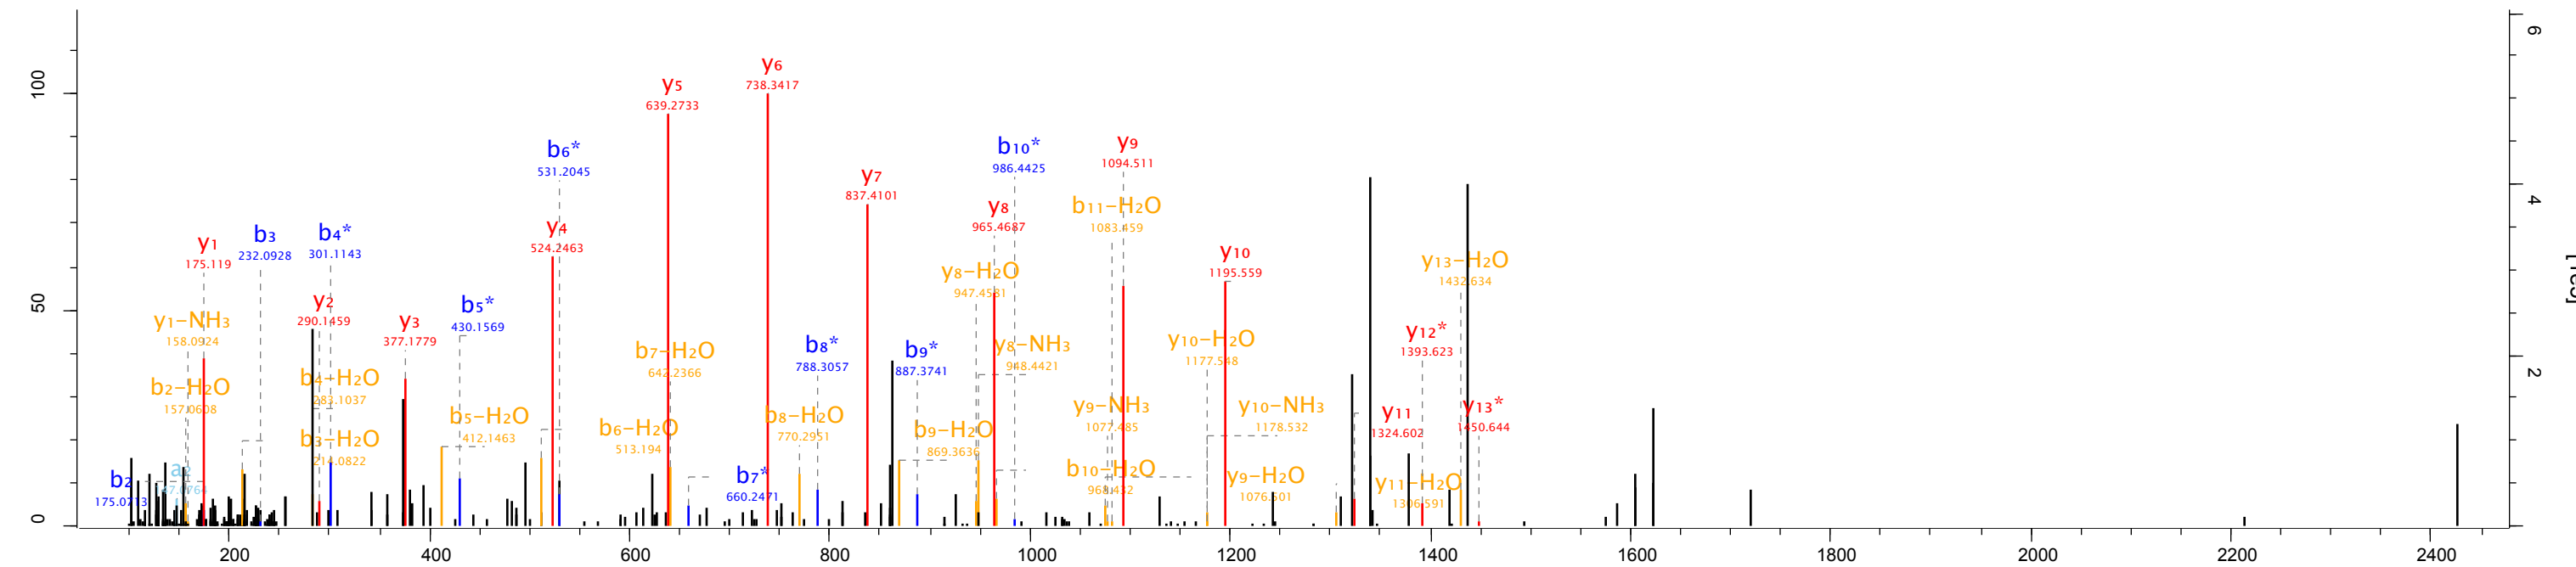

Sequence: - S S G S E T E Q V V D F S D R -

Fragmentation sites (b and y ions) are indicated by boxes below the sequence:

- Red boxes (y ions): y13\* (G), y12\* (S), y11 (E), y10 (T), y9 (E), y8 (Q), y7 (V), y6 (V), y5 (D), y4 (F), y3 (S), y2 (D), y1 (R)
- Blue boxes (b ions): b2 (S), b3 (G), b4\* (S), b5\* (E), b6\* (T), b7\* (E), b8\* (Q), b9\* (V), b10\* (V)



Raw file Scan Method Score m/z Gene names  
 20150814\_A375SR\_Phospho\_BR2\_04 15133 FTMS; HCD 271.25 1231.59 CDC26

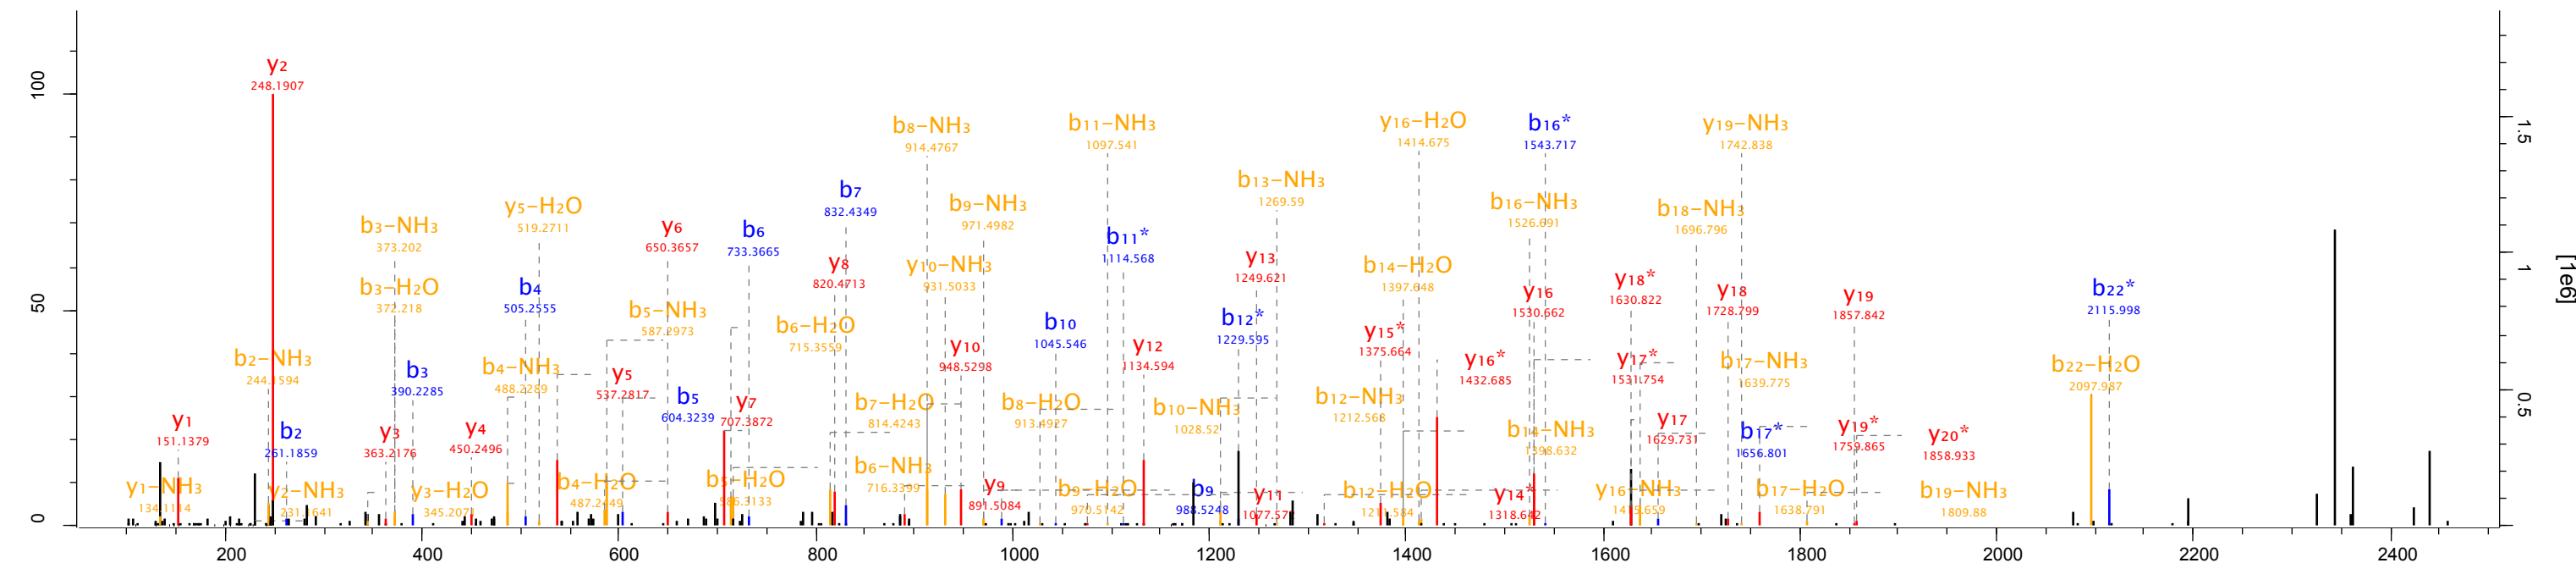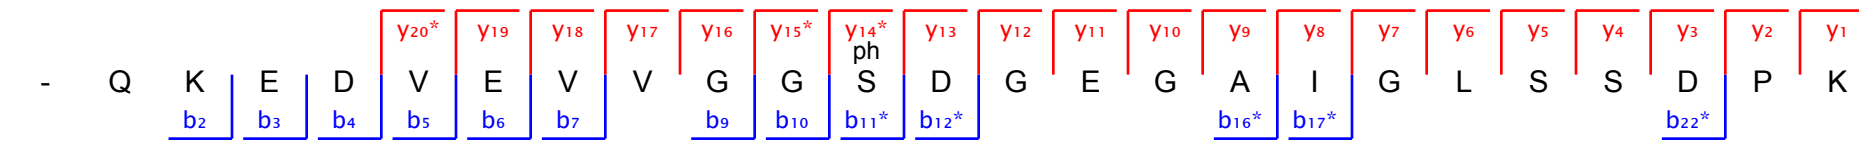

Raw file

Scan Method Score m/z Gene names

20150814\_A375SR\_Phospho\_BR2\_04

15343 FTMS; HCD 213.5 947.4 INF2

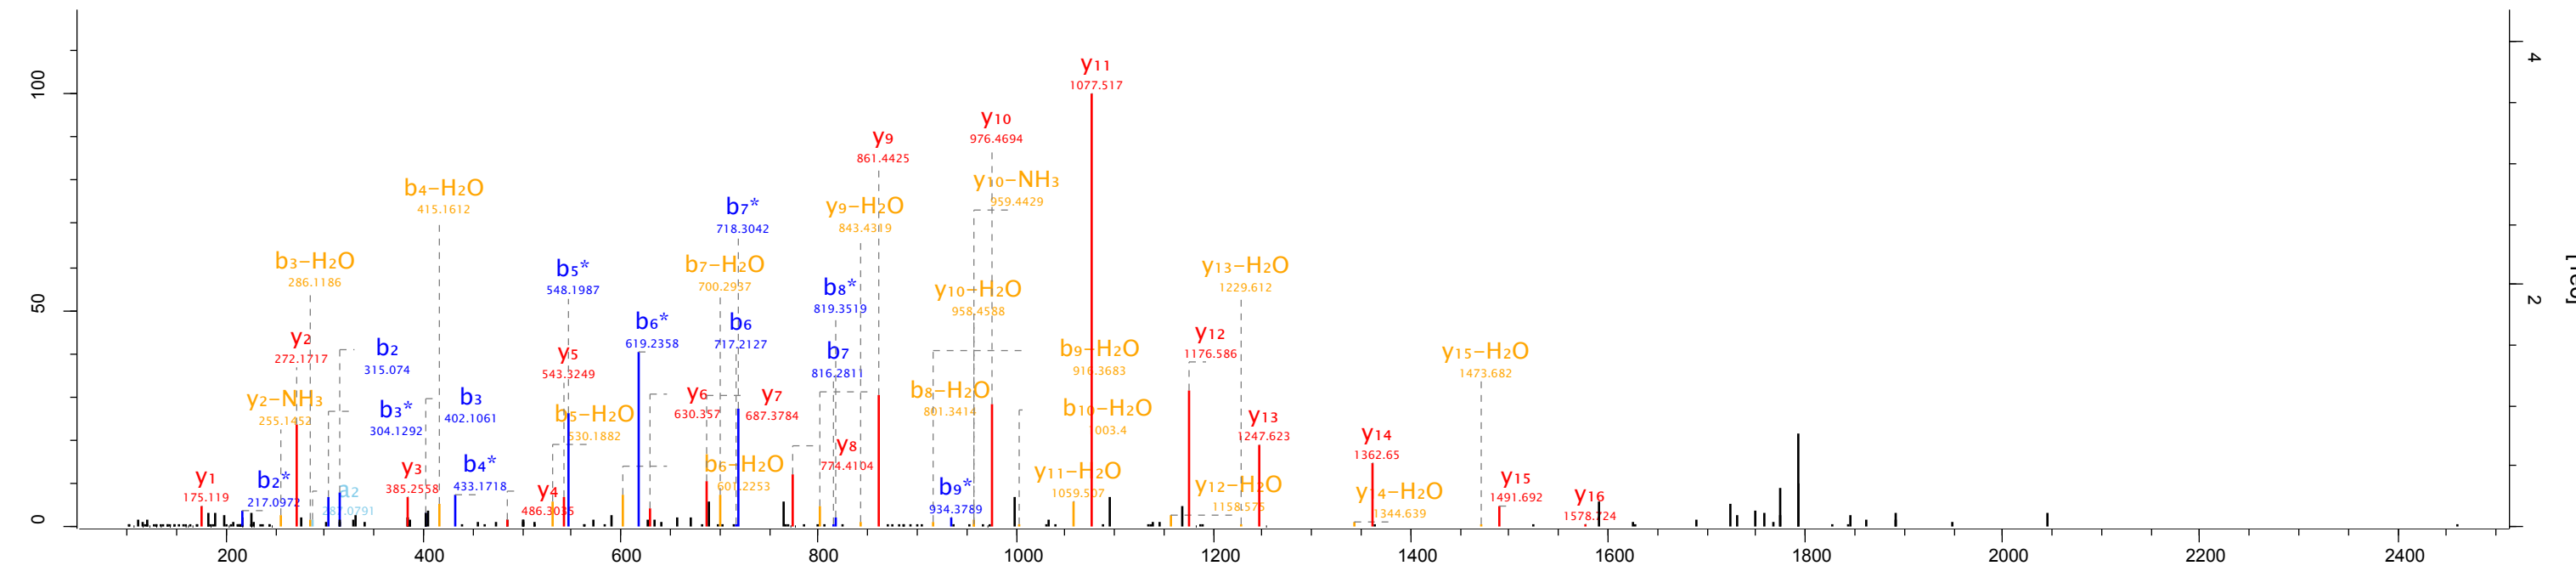

ph S

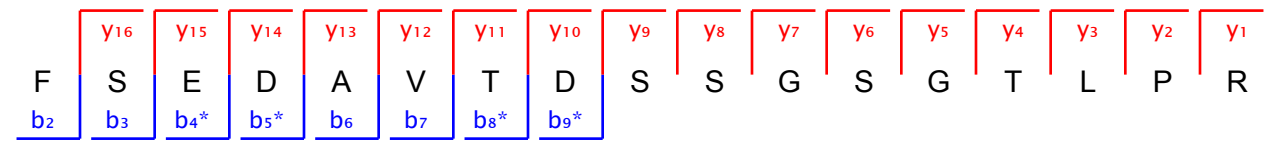

[1e6]

Raw file 20150814\_A375SR\_Phospho\_BR2\_04 Scan 15583 Method FTMS; HCD Score 234.36 m/z 888.42 Gene names FRMD4A

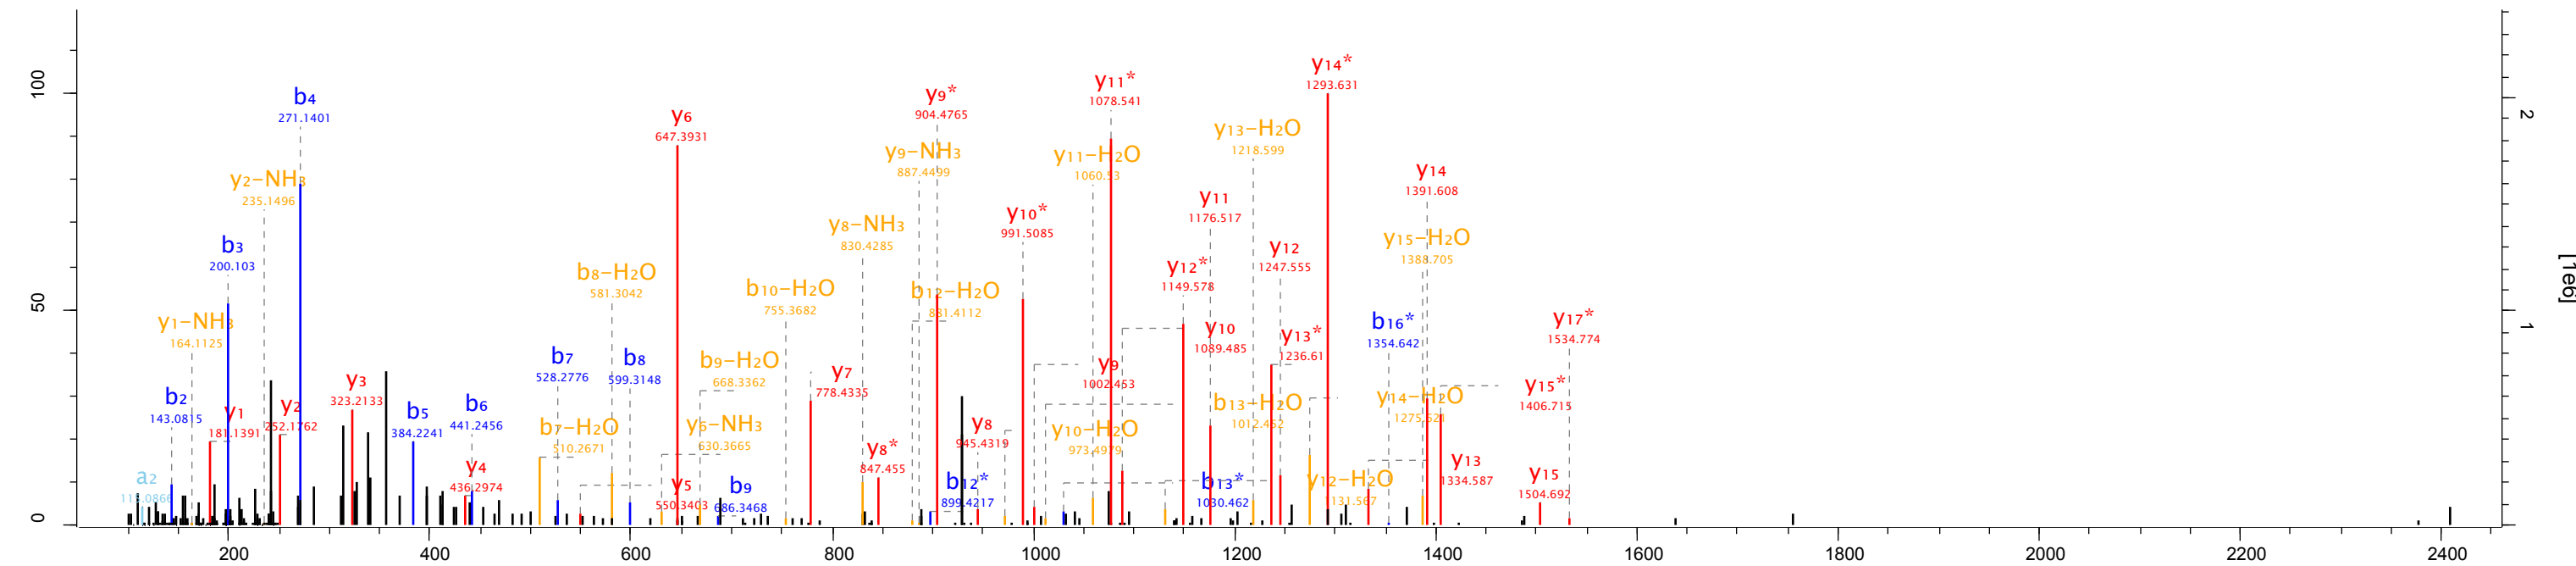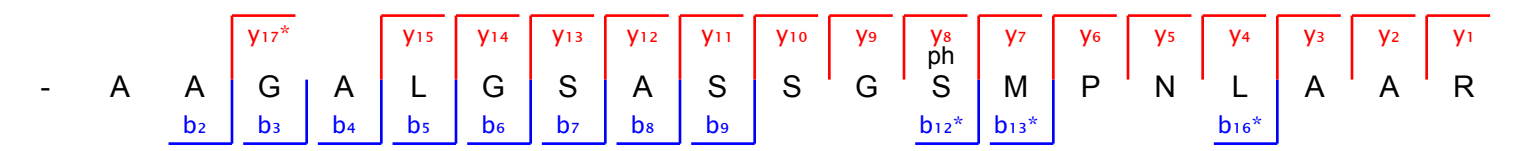

Raw file: 20150814\_A375SR\_Phospho\_BR2\_04  
 Scan: 15723 Method: FTMS; HCD Score: 133.86 m/z: 795.36 Gene names: VIM

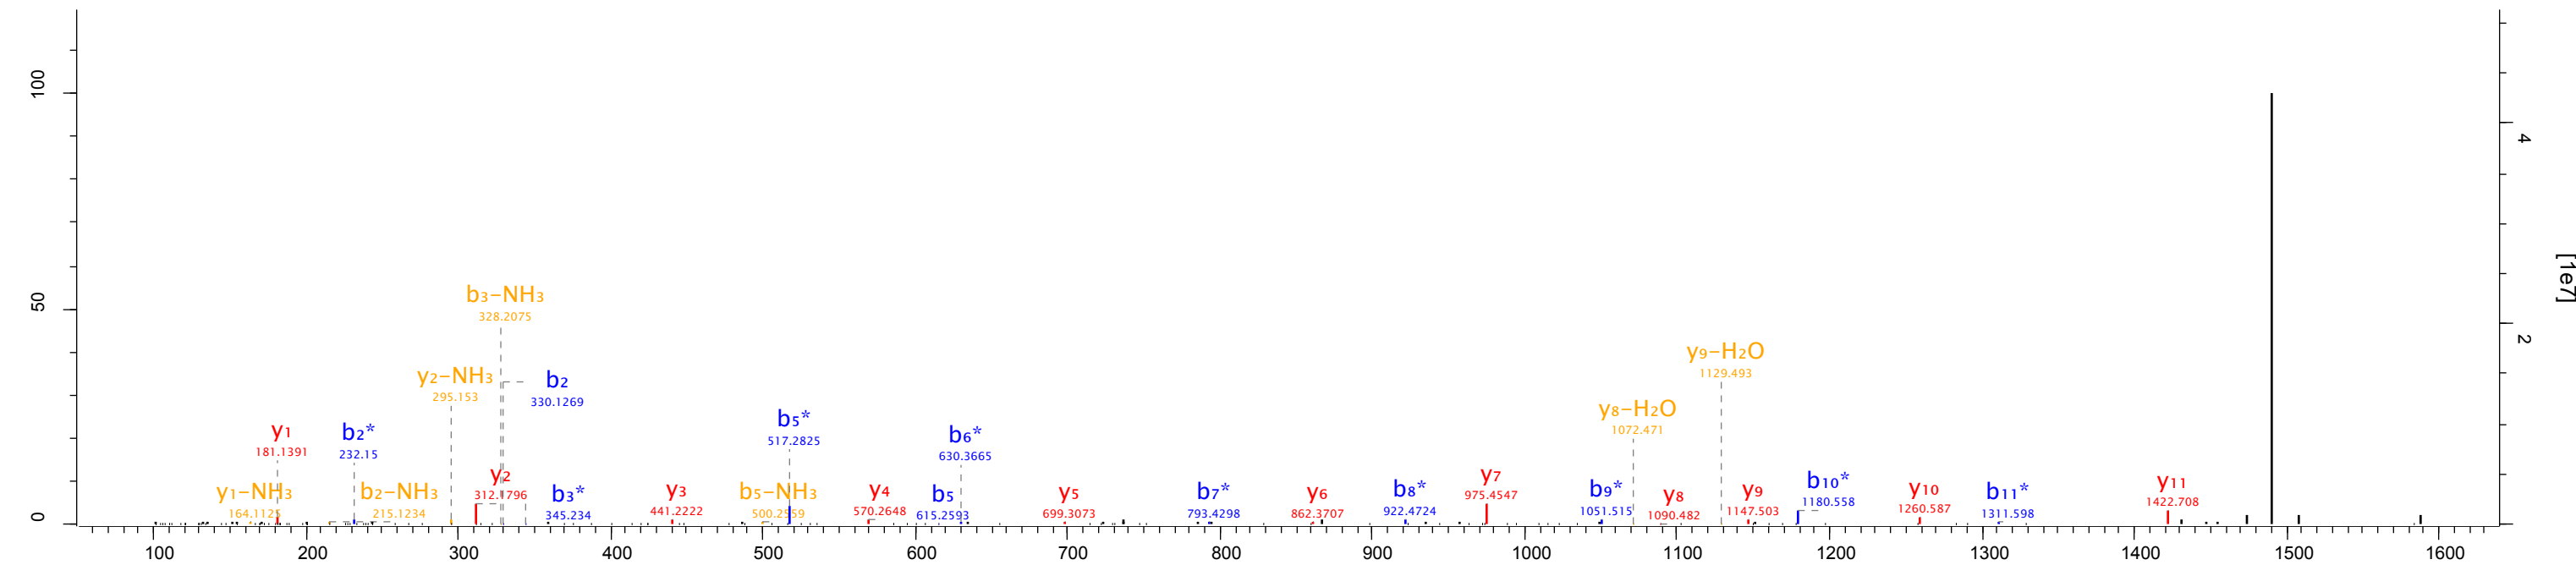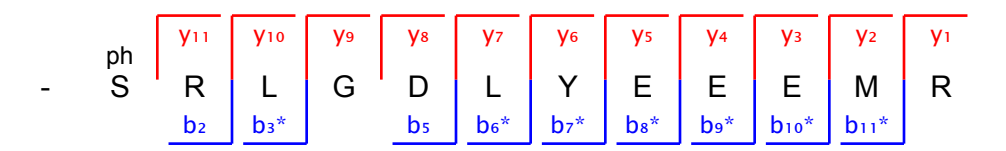

Raw file 20150814\_A375SR\_Phospho\_BR2\_04 Scan 15883 Method FTMS; HCD Score 140.48 m/z 523.24 Gene names CCM2

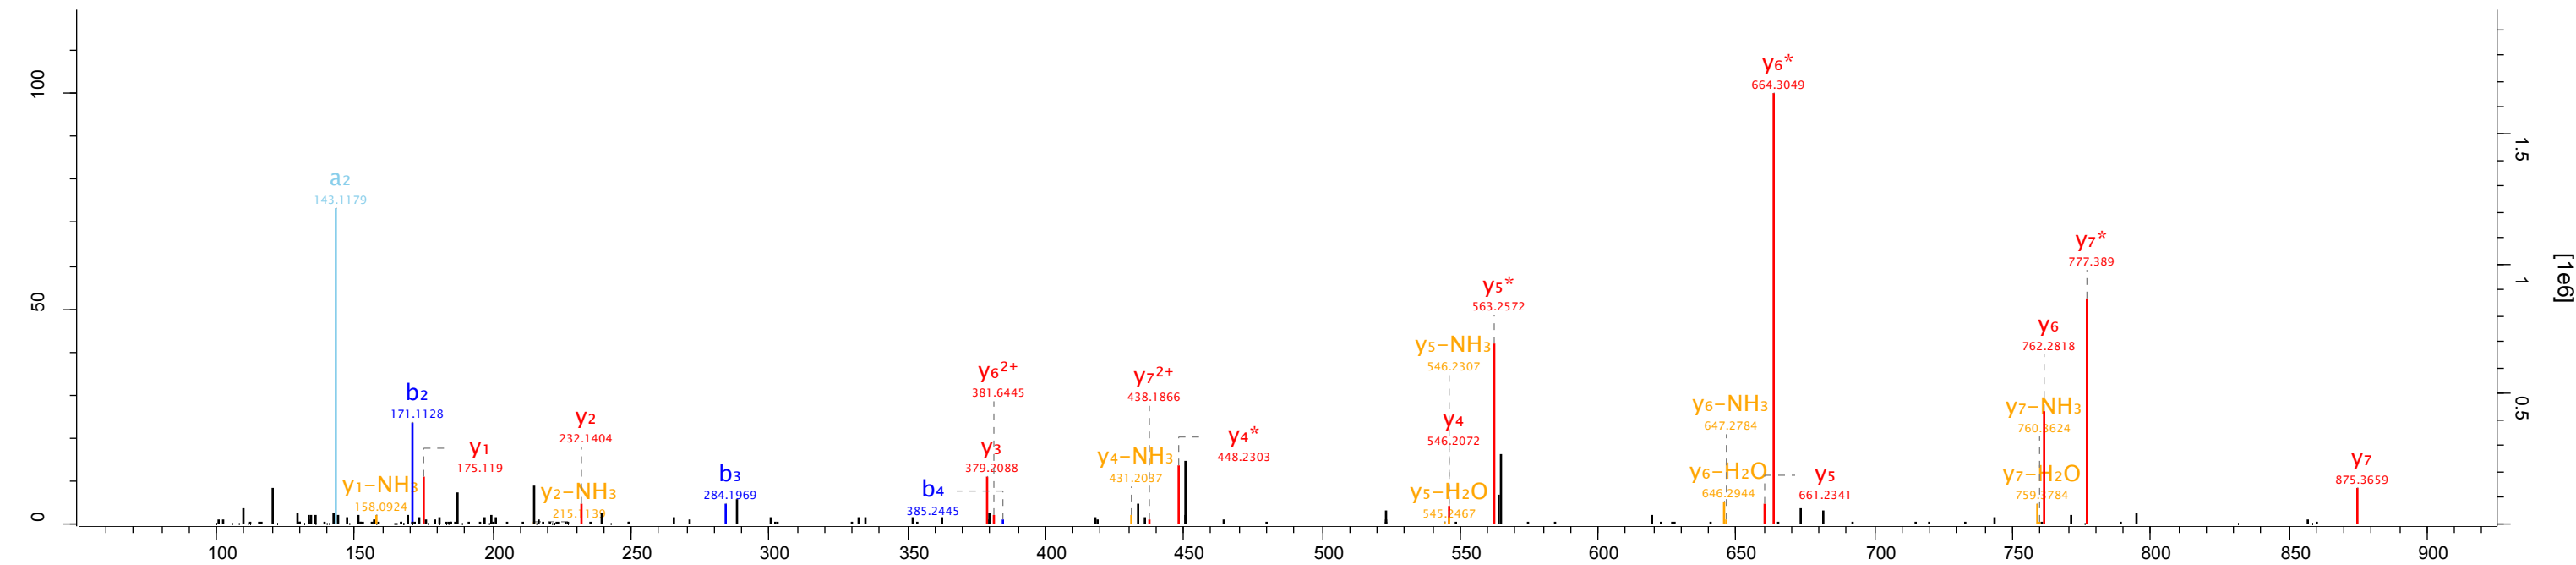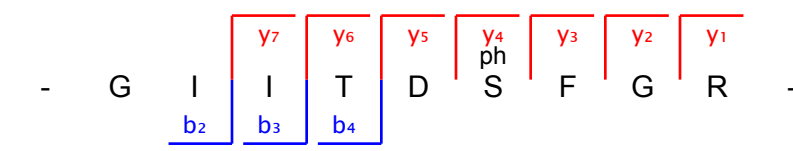

Raw file: 20150814\_A375SR\_Phospho\_BR2\_04  
 Scan: 15893 Method: FTMS; HCD Score: 156.2 m/z: 717.32 Gene names: WWTR1

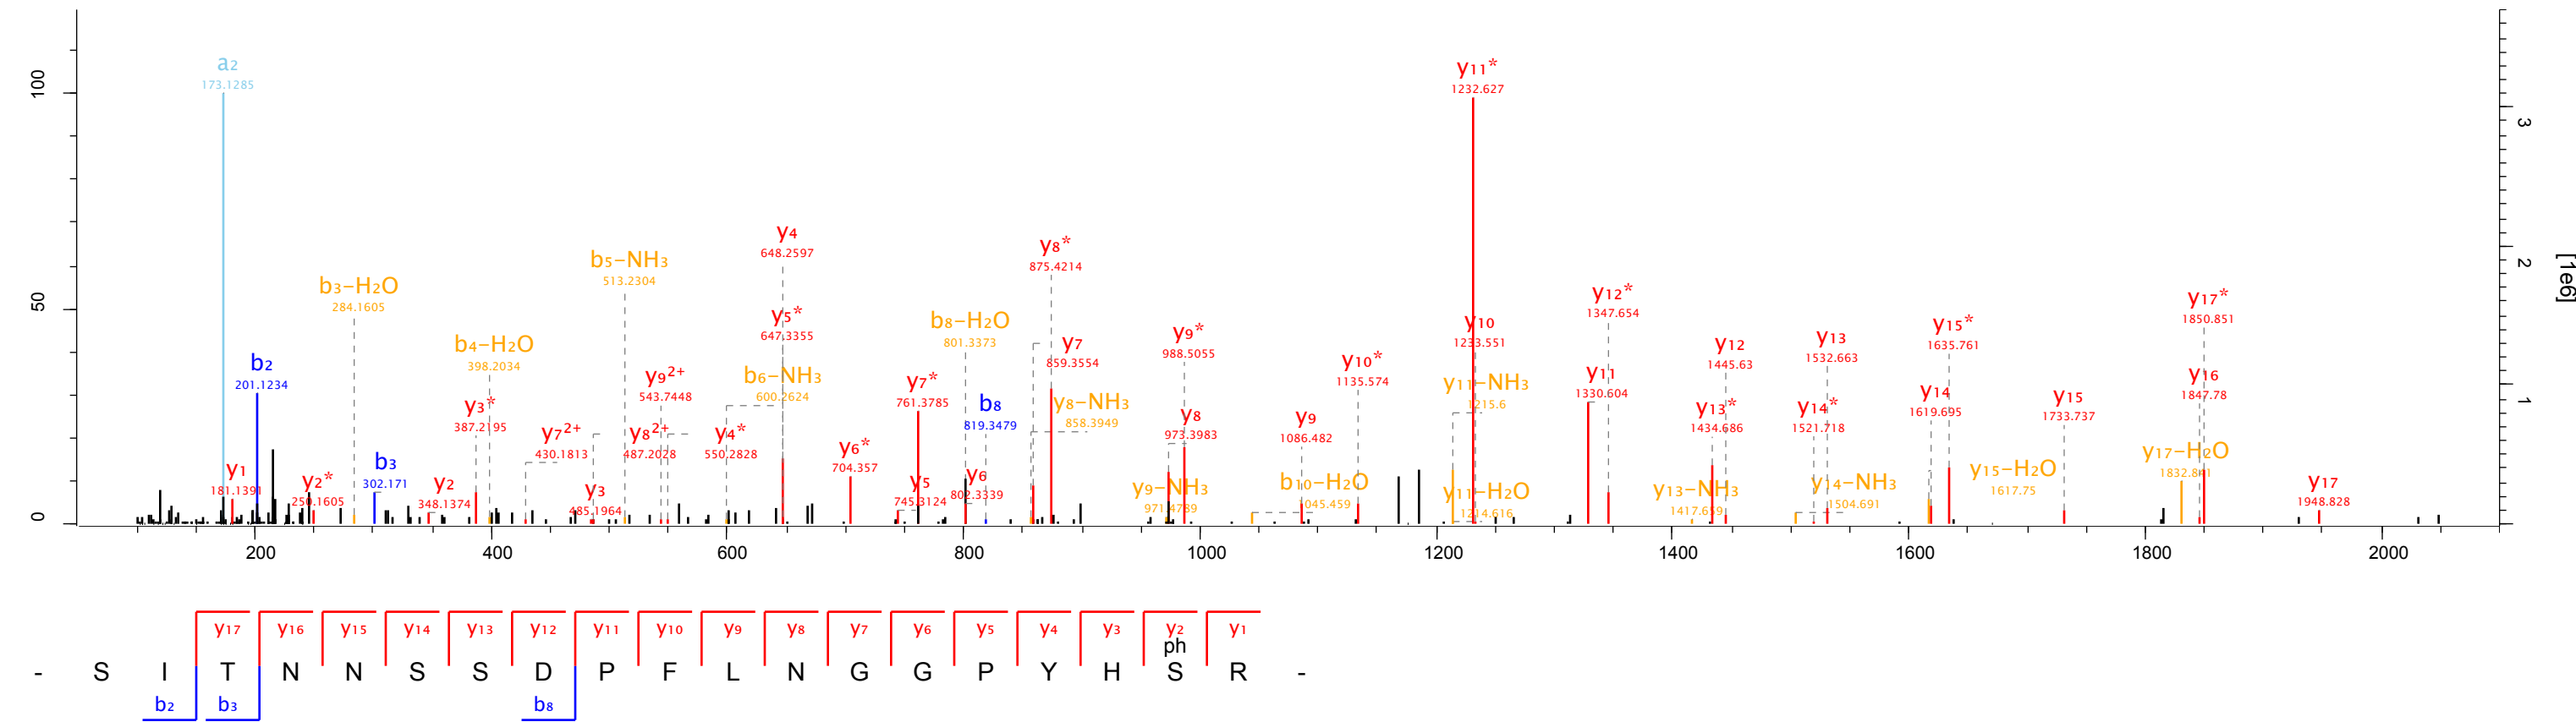

Raw file 20150814\_A375SR\_Phospho\_BR2\_04 Scan 16203 Method FTMS; HCD Score 115.12 m/z 587.28 Gene names CGN

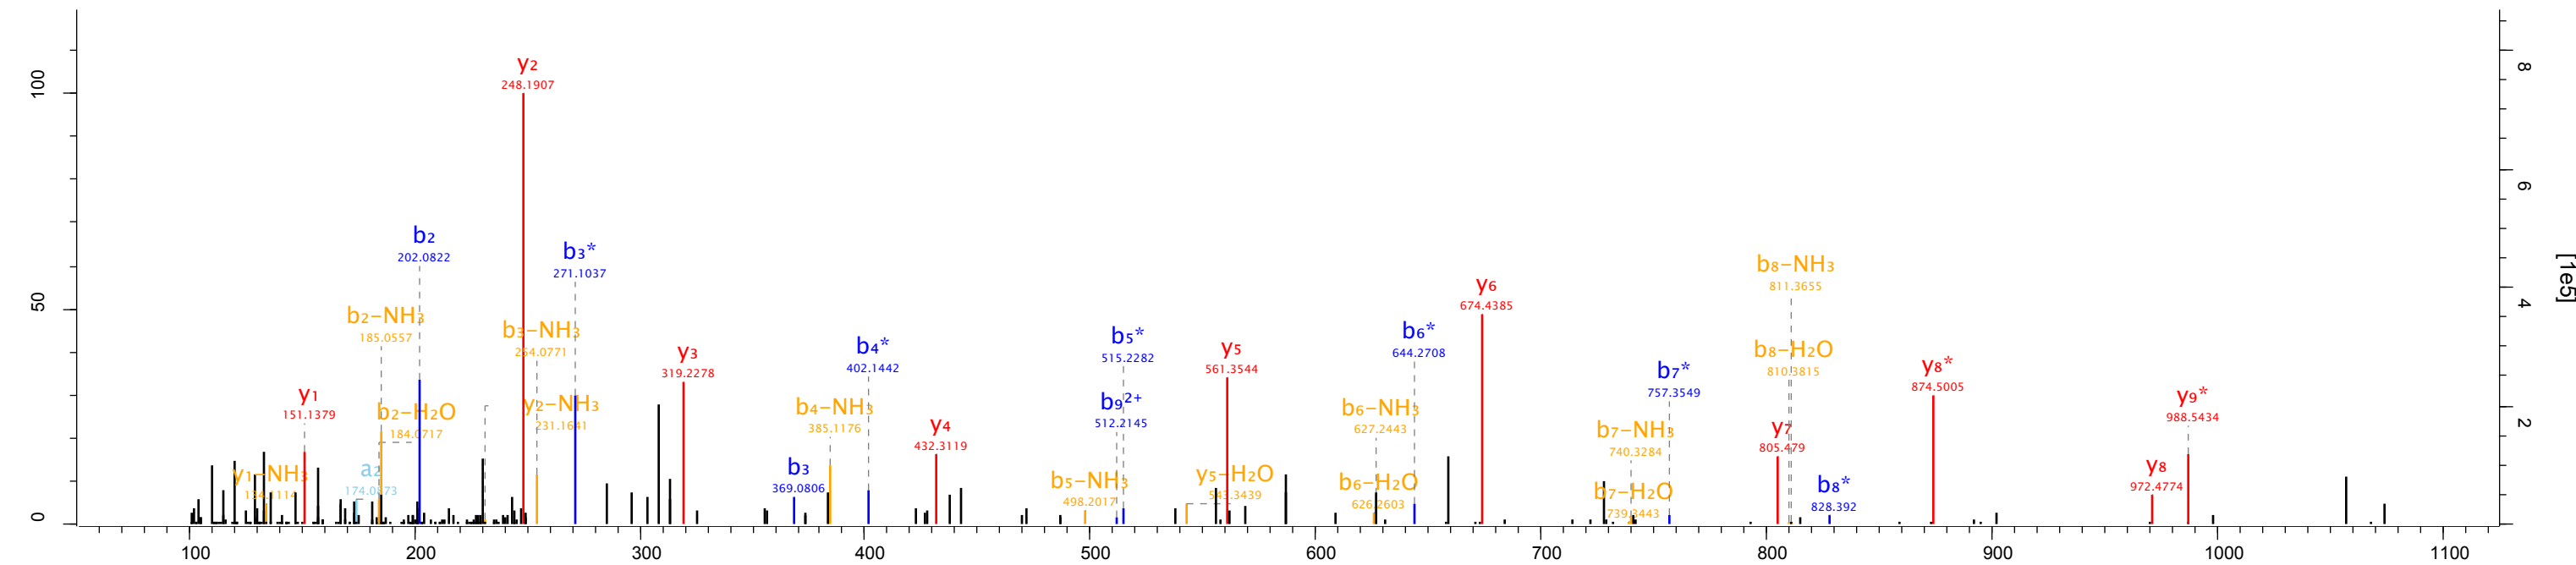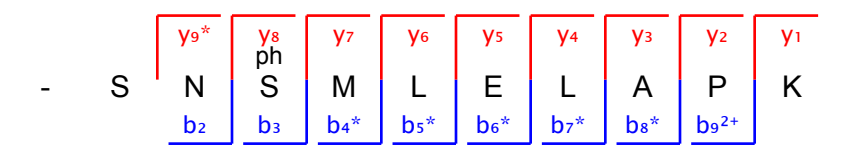

Raw file Scan Method Score m/z Gene names  
 20150814\_A375SR\_Phospho\_BR2\_04 16333 FTMS; HCD 128.38 716.99 WWTR1

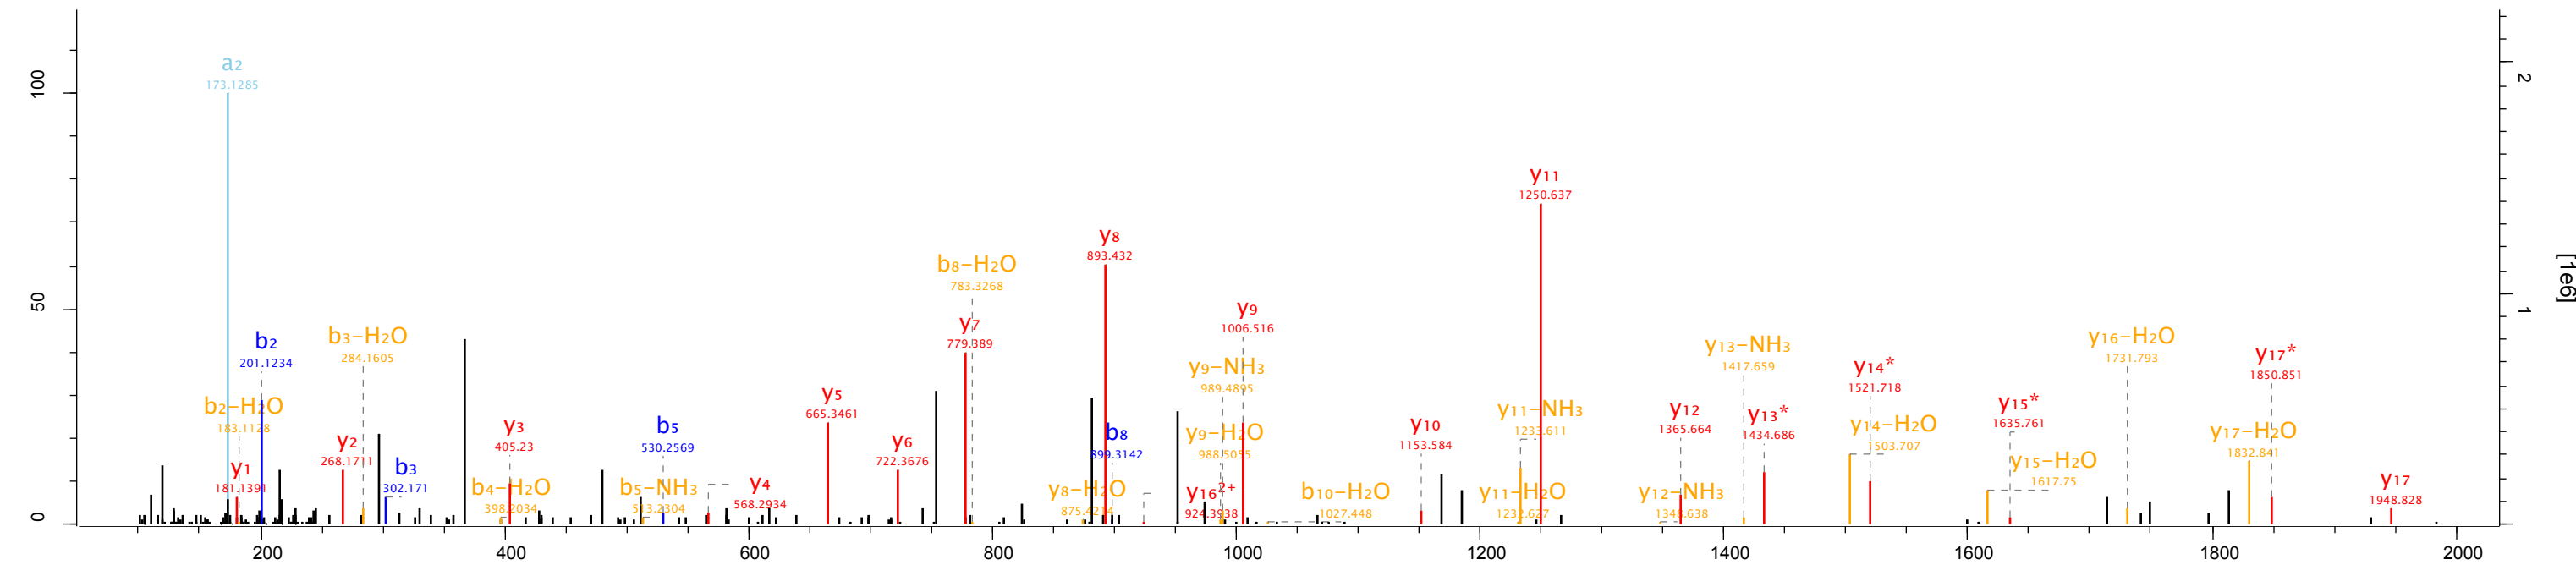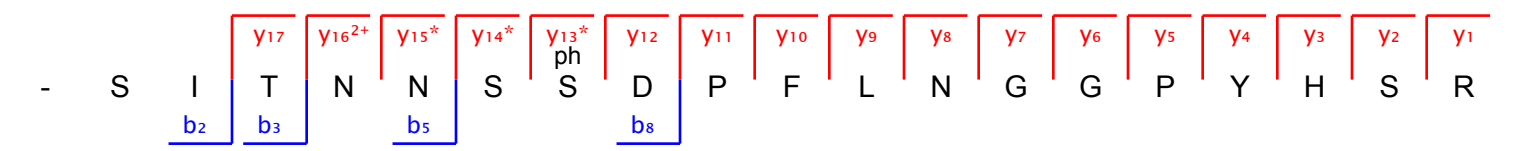



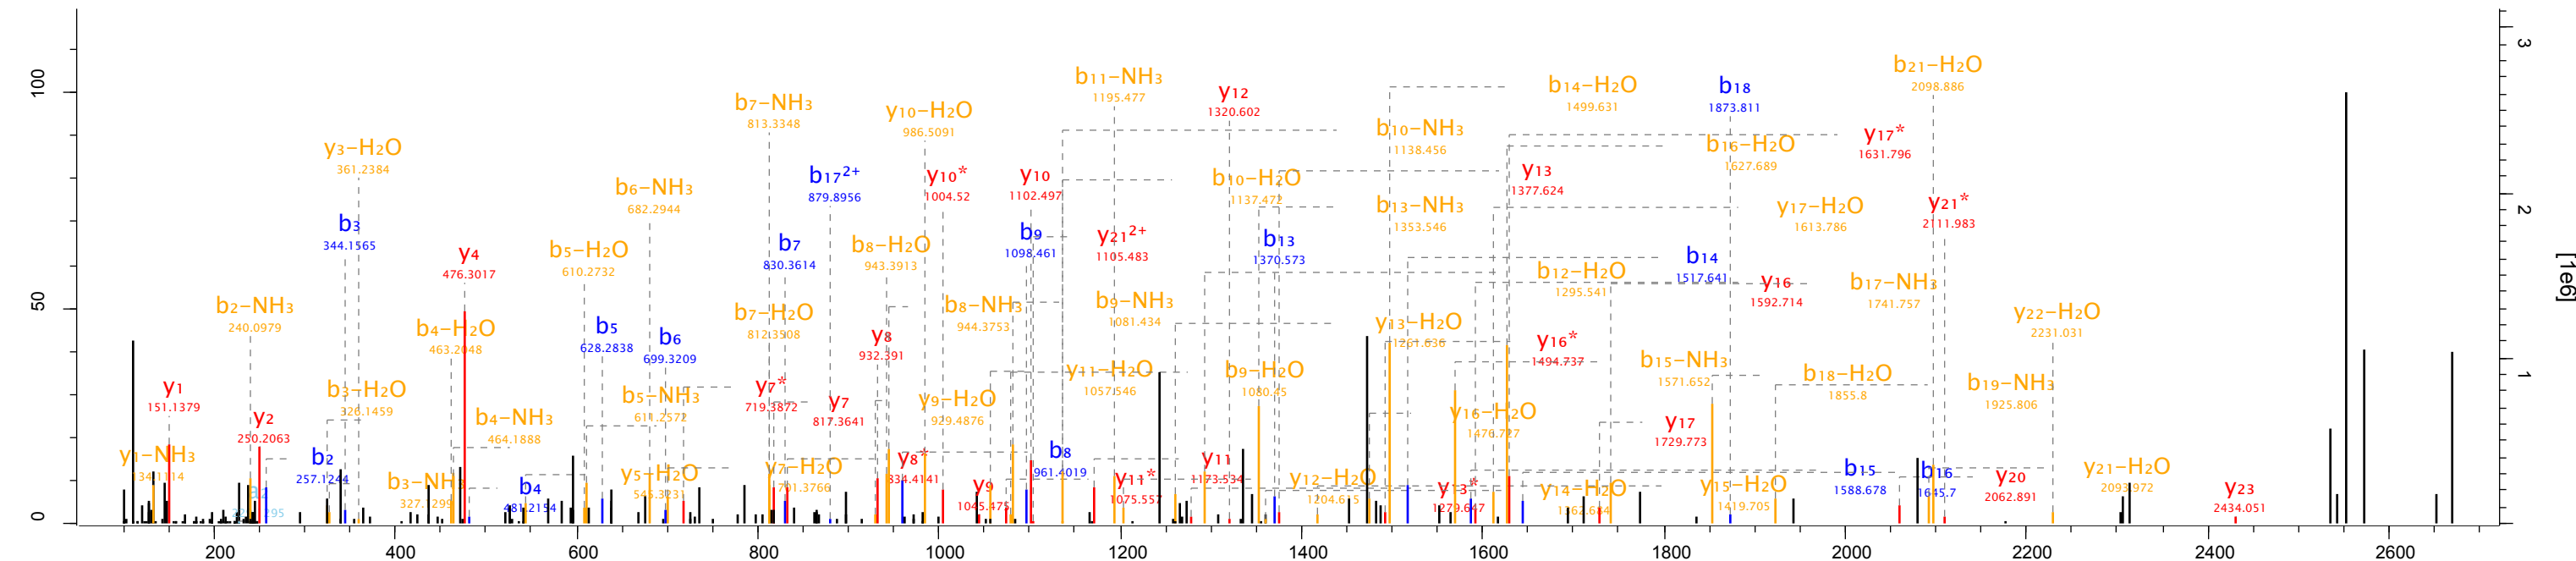

- Q Q S H F A M M H G G T G F A G I D S S S P E V K -

Fragmentation mapping (b and y ions) is shown below the sequence:

- Q (b<sub>2</sub>)
- Q (b<sub>3</sub>)
- S (b<sub>4</sub>)
- H (b<sub>5</sub>)
- F (b<sub>6</sub>)
- A (b<sub>7</sub>)
- M (b<sub>8</sub>)
- M (b<sub>9</sub>)
- H (b<sub>9</sub>)
- G (b<sub>9</sub>)
- G (b<sub>9</sub>)
- T (b<sub>9</sub>)
- G (b<sub>13</sub>)
- F (b<sub>14</sub>)
- A (b<sub>15</sub>)
- G (b<sub>16</sub>)
- I (b<sub>17</sub><sup>2+</sup>)
- D (b<sub>18</sub>)
- S (b<sub>18</sub>)
- S (b<sub>18</sub>)
- S (b<sub>18</sub>)
- P (b<sub>18</sub>)
- E (b<sub>18</sub>)
- V (b<sub>18</sub>)
- K (b<sub>18</sub>)

Fragmentation mapping (b and y ions) is shown above the sequence:

- y<sub>23</sub> (above S)
- y<sub>21</sub>\* (above F)
- y<sub>20</sub> (above A)
- y<sub>17</sub> (above H)
- y<sub>16</sub> (above G)
- y<sub>13</sub> (above G)
- y<sub>12</sub> (above F)
- y<sub>11</sub> (above A)
- y<sub>10</sub> (above G)
- y<sub>9</sub> (above I)
- y<sub>8</sub> (above D)
- y<sub>7</sub> (above S)
- y<sub>4</sub> (above P)
- y<sub>2</sub> (above V)
- y<sub>1</sub> (above K)

Raw file 20150814\_A375SR\_Phospho\_BR2\_04 Scan 16603 Method FTMS; HCD Score 108.71 m/z 657.33 Gene names ELAVL2

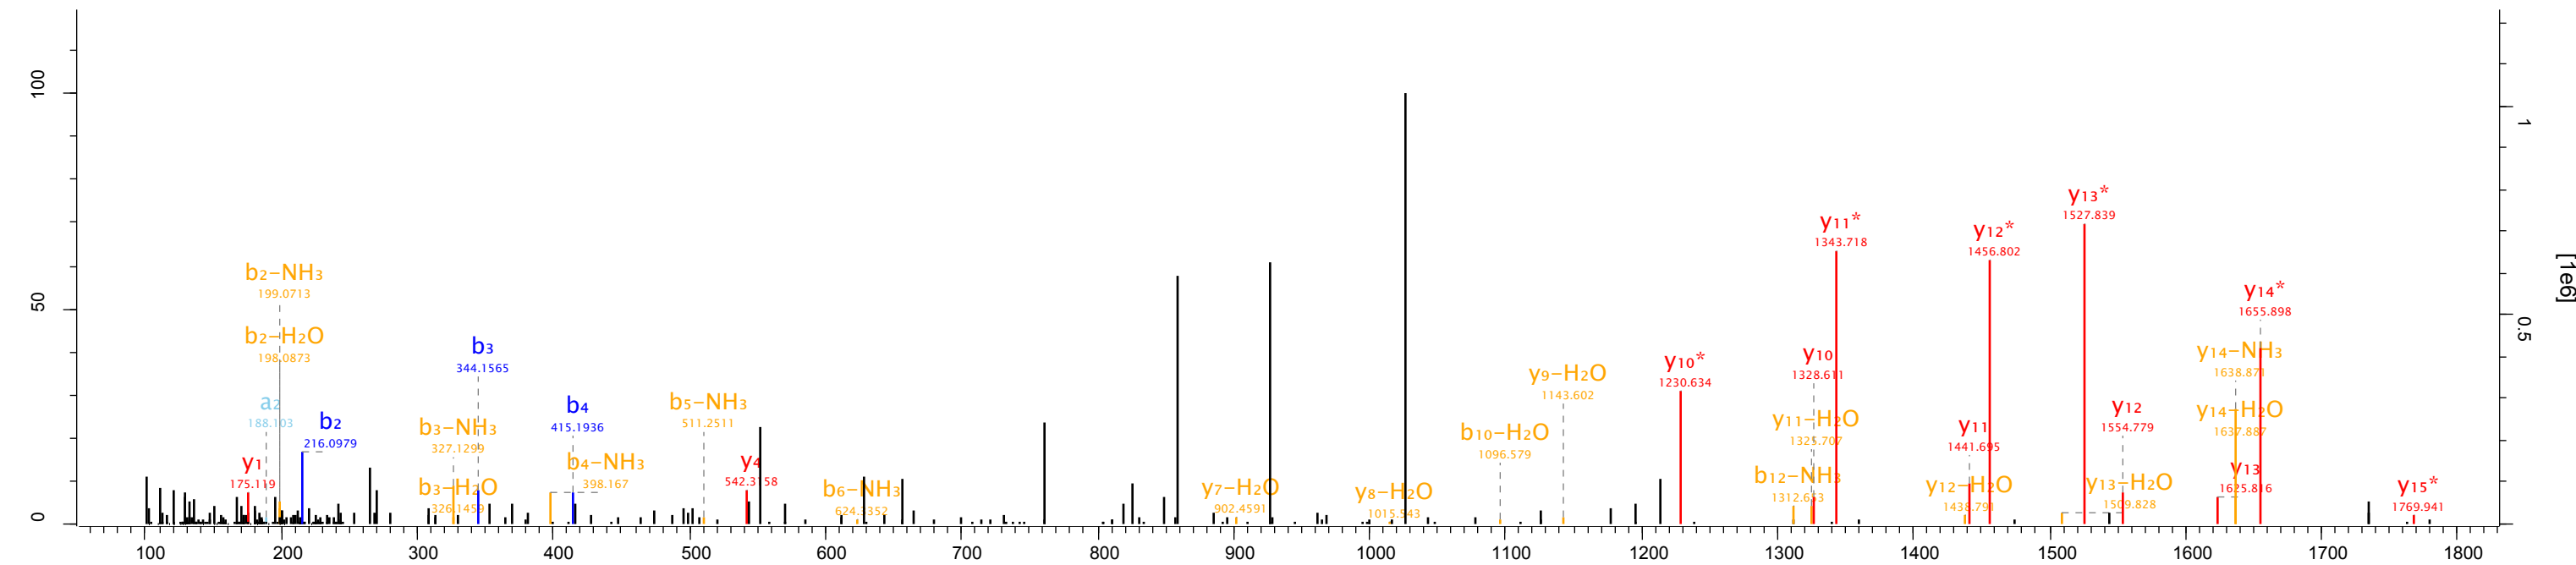

- T N Q A I L S Q L Y Q S P N R R -

b<sub>2</sub>
b<sub>3</sub>
b<sub>4</sub>
y<sub>15</sub>\*
y<sub>14</sub>\*
y<sub>13</sub>
y<sub>12</sub>
y<sub>11</sub>
y<sub>10</sub>ph
y<sub>4</sub>
y<sub>1</sub>

Raw file 20150814\_A375SR\_Phospho\_BR2\_04 Scan 16883 Method FTMS; HCD Score 190.25 m/z 826.41 Gene names MAST2

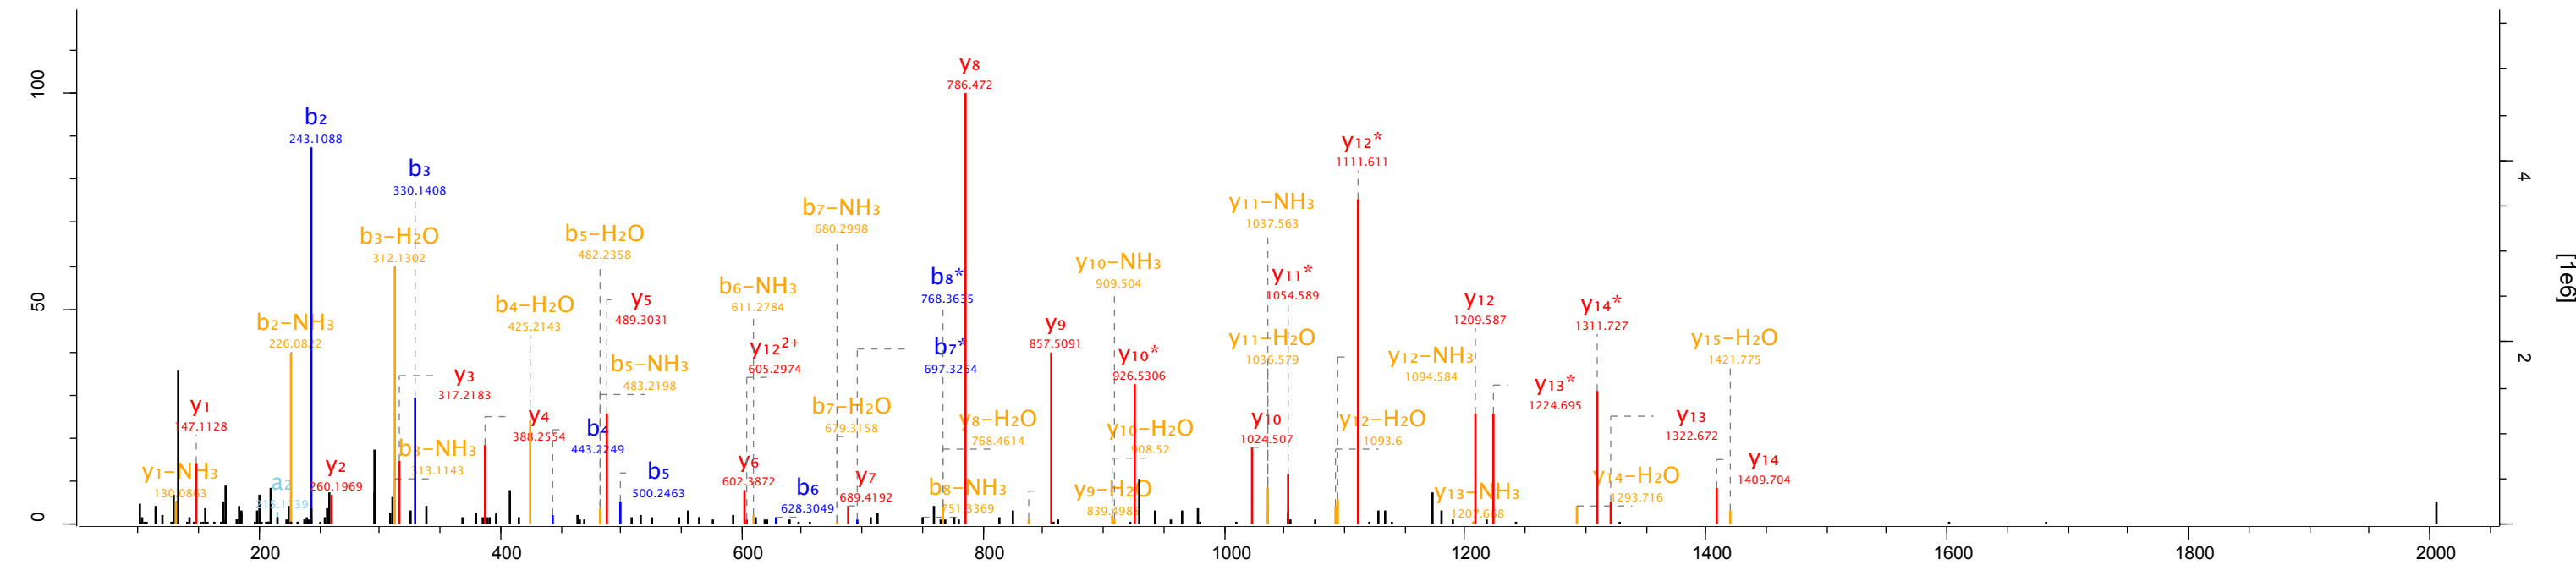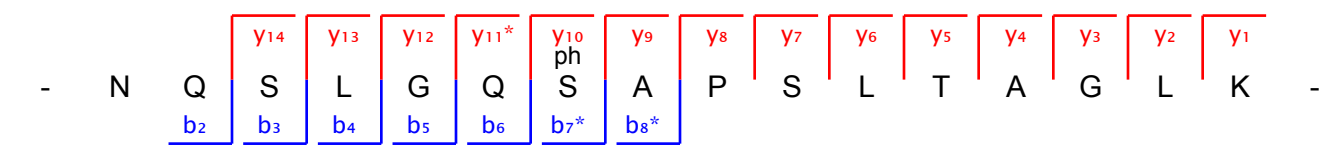

20150814\_A375SR\_Phospho\_BR2\_04 16933 FTMS; HCD 275.7 727 NCBP1

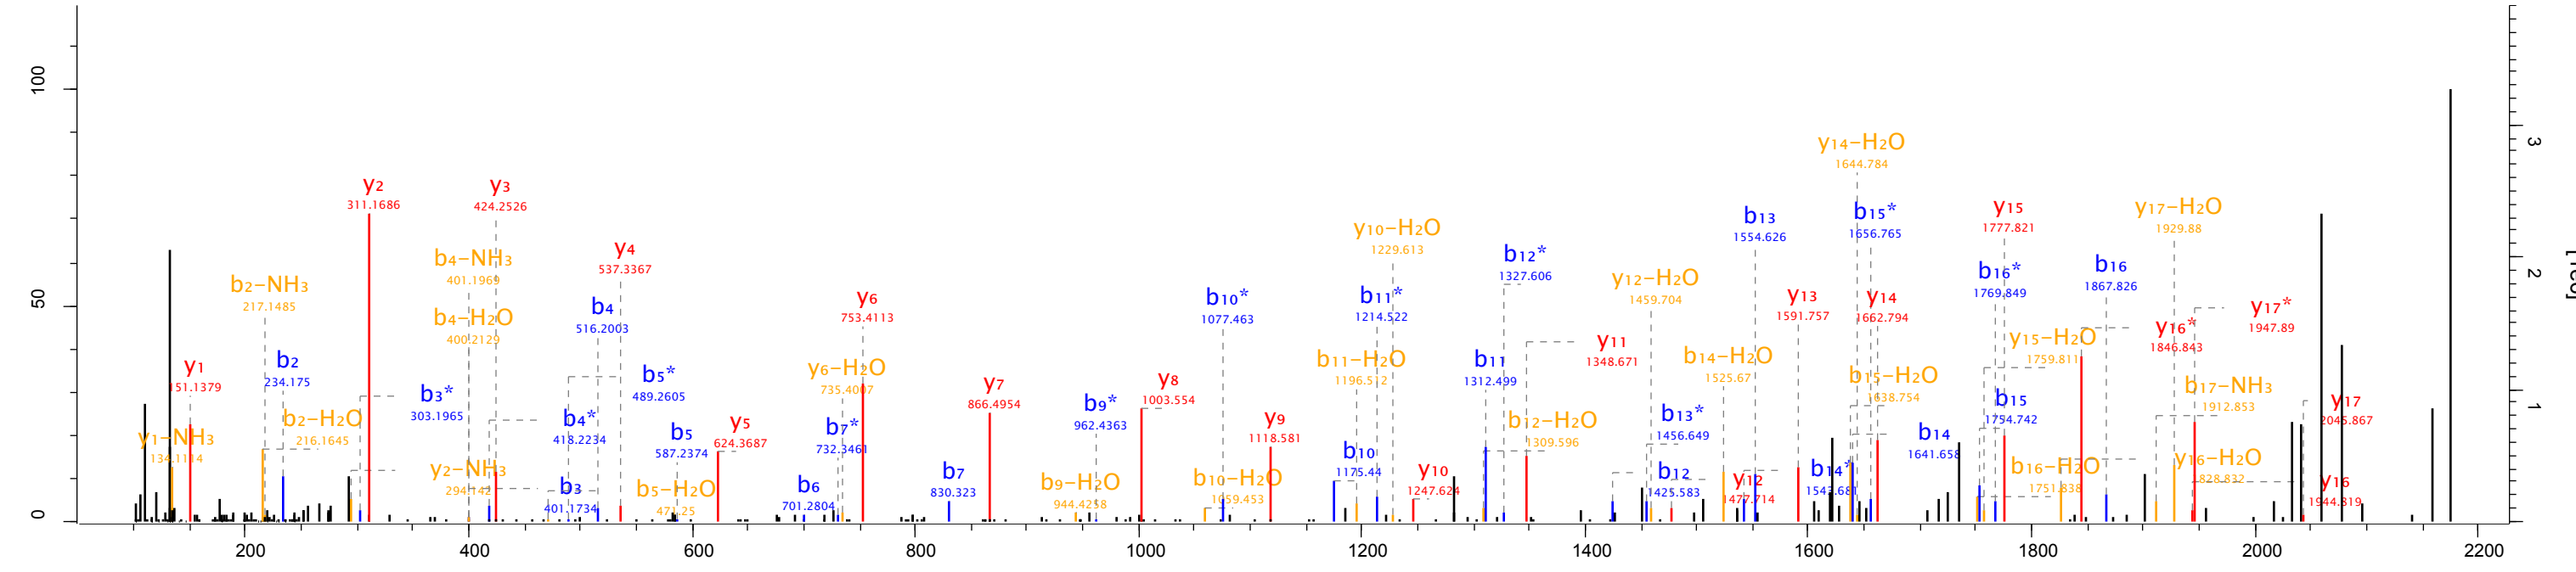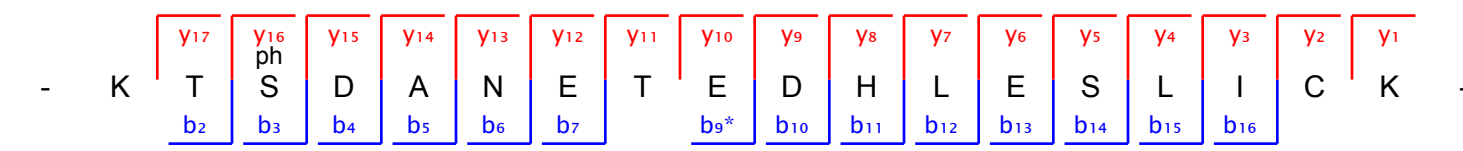

20150814\_A375SR\_Phospho\_BR2\_04 1703 FTMS; HCD 113.93 798.32 DNMBP

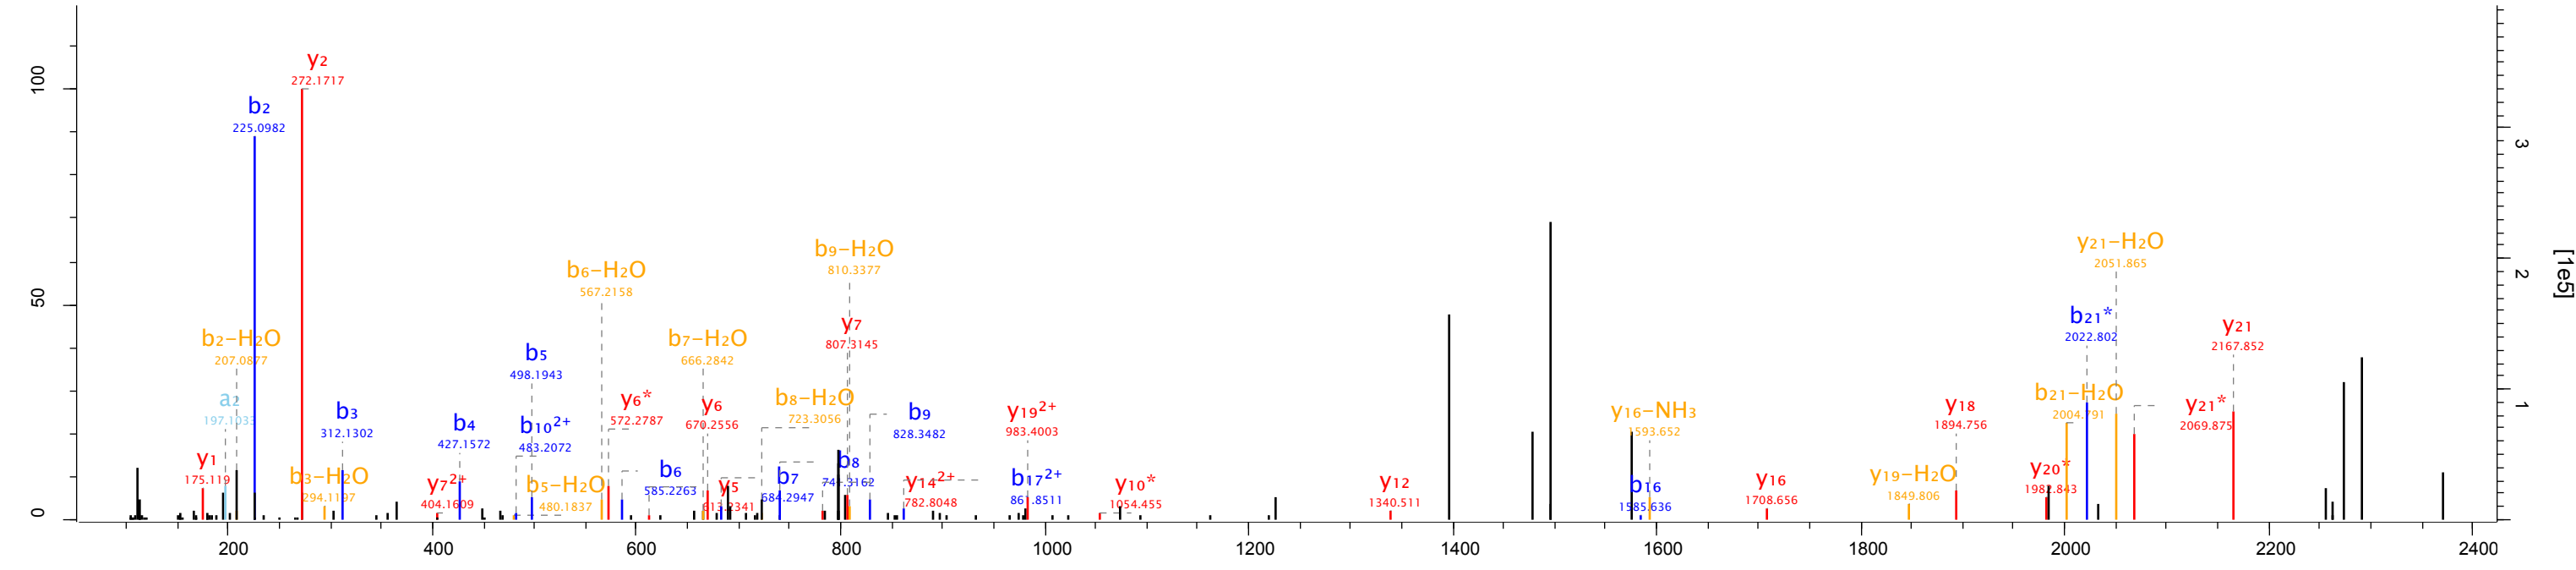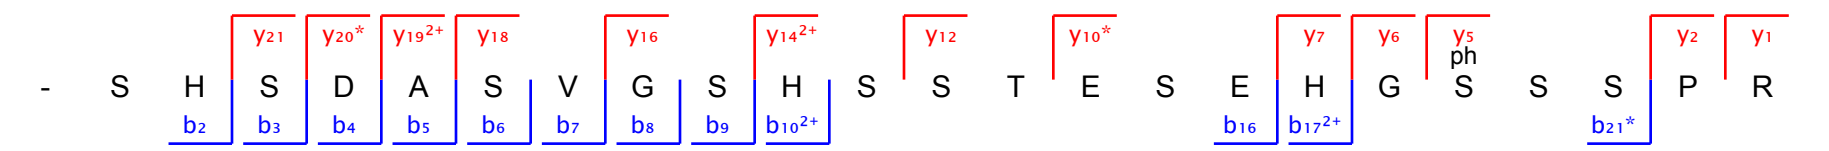

Raw file 20150814\_A375SR\_Phospho\_BR2\_04 Scan 17093 Method FTMS; HCD Score 179.68 m/z 597.3 Gene names RIPK2

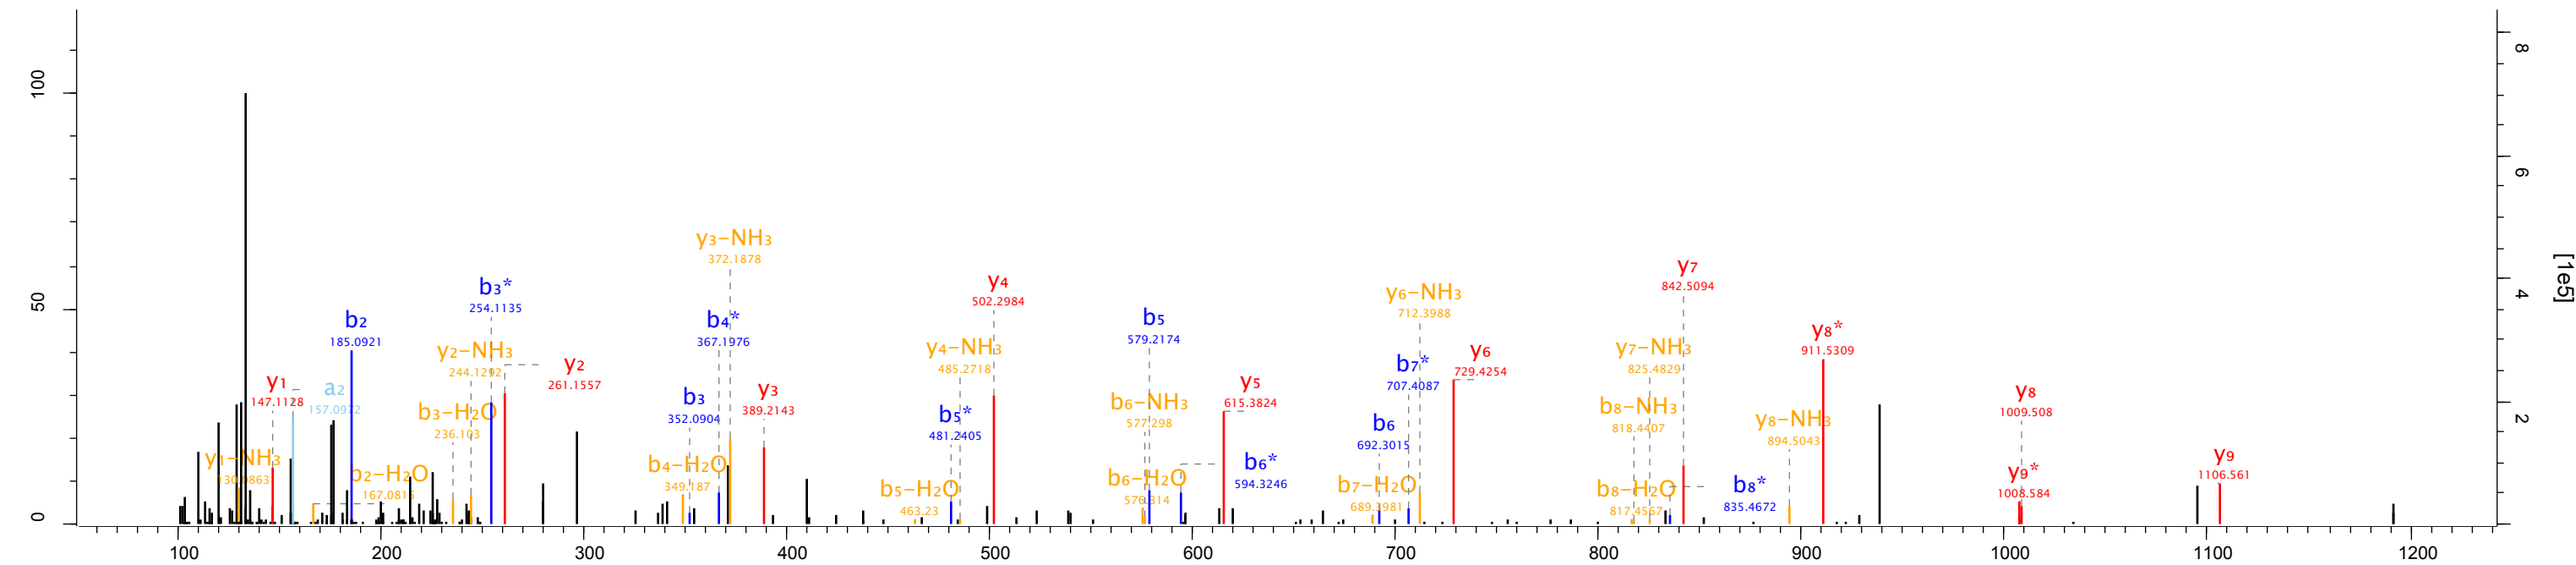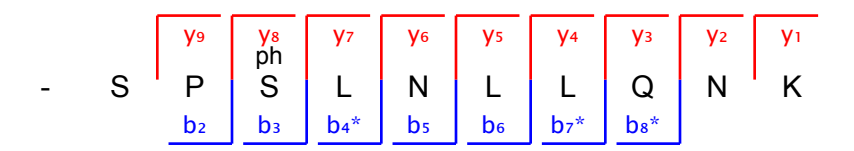

Raw file  
 20150814\_A375SR\_Phospho\_BR2\_04  
 Scan 17243 Method FTMS; HCD Score 183.67 m/z 922.06 Gene names NFYA

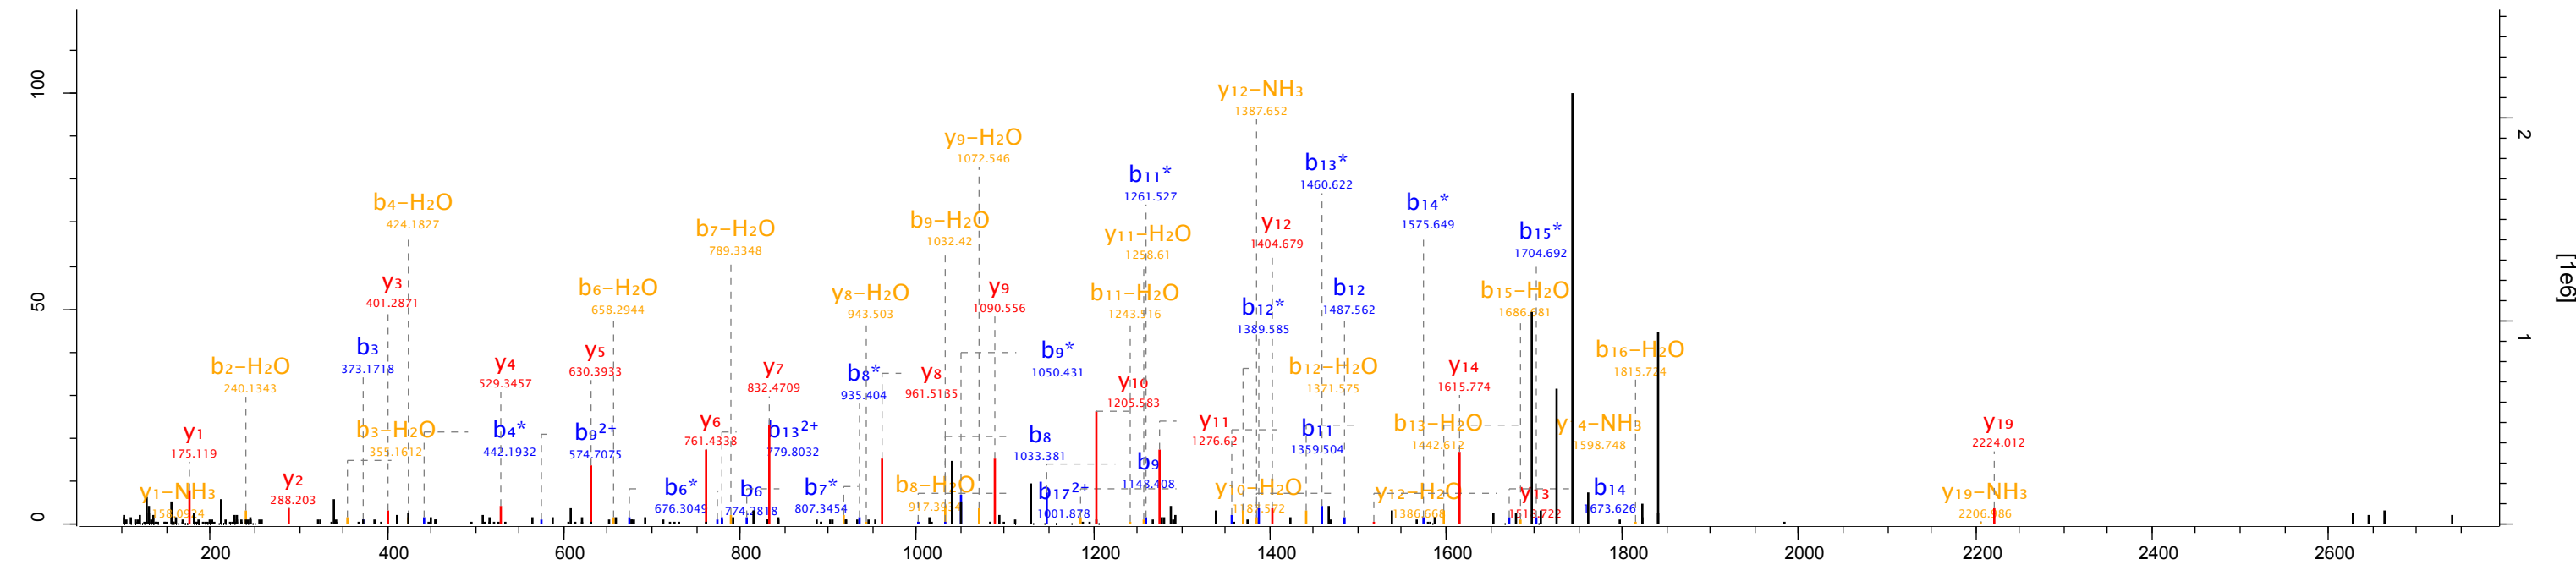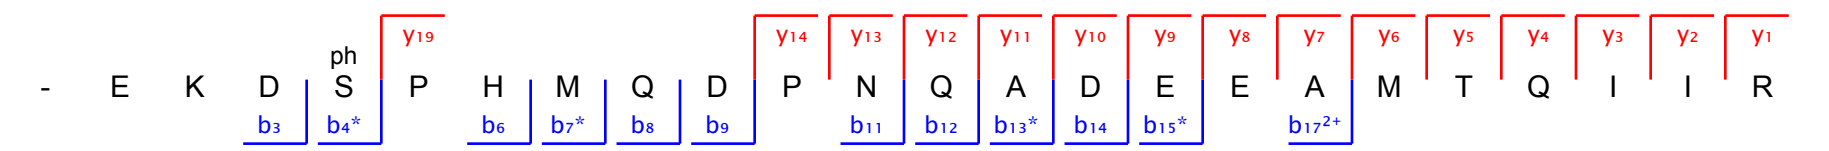

Raw file: 20150814\_A375SR\_Phospho\_BR2\_04  
 Scan: 17493 Method: FTMS; HCD Score: 260.25 m/z: 1182.49 Gene names: MAP1B

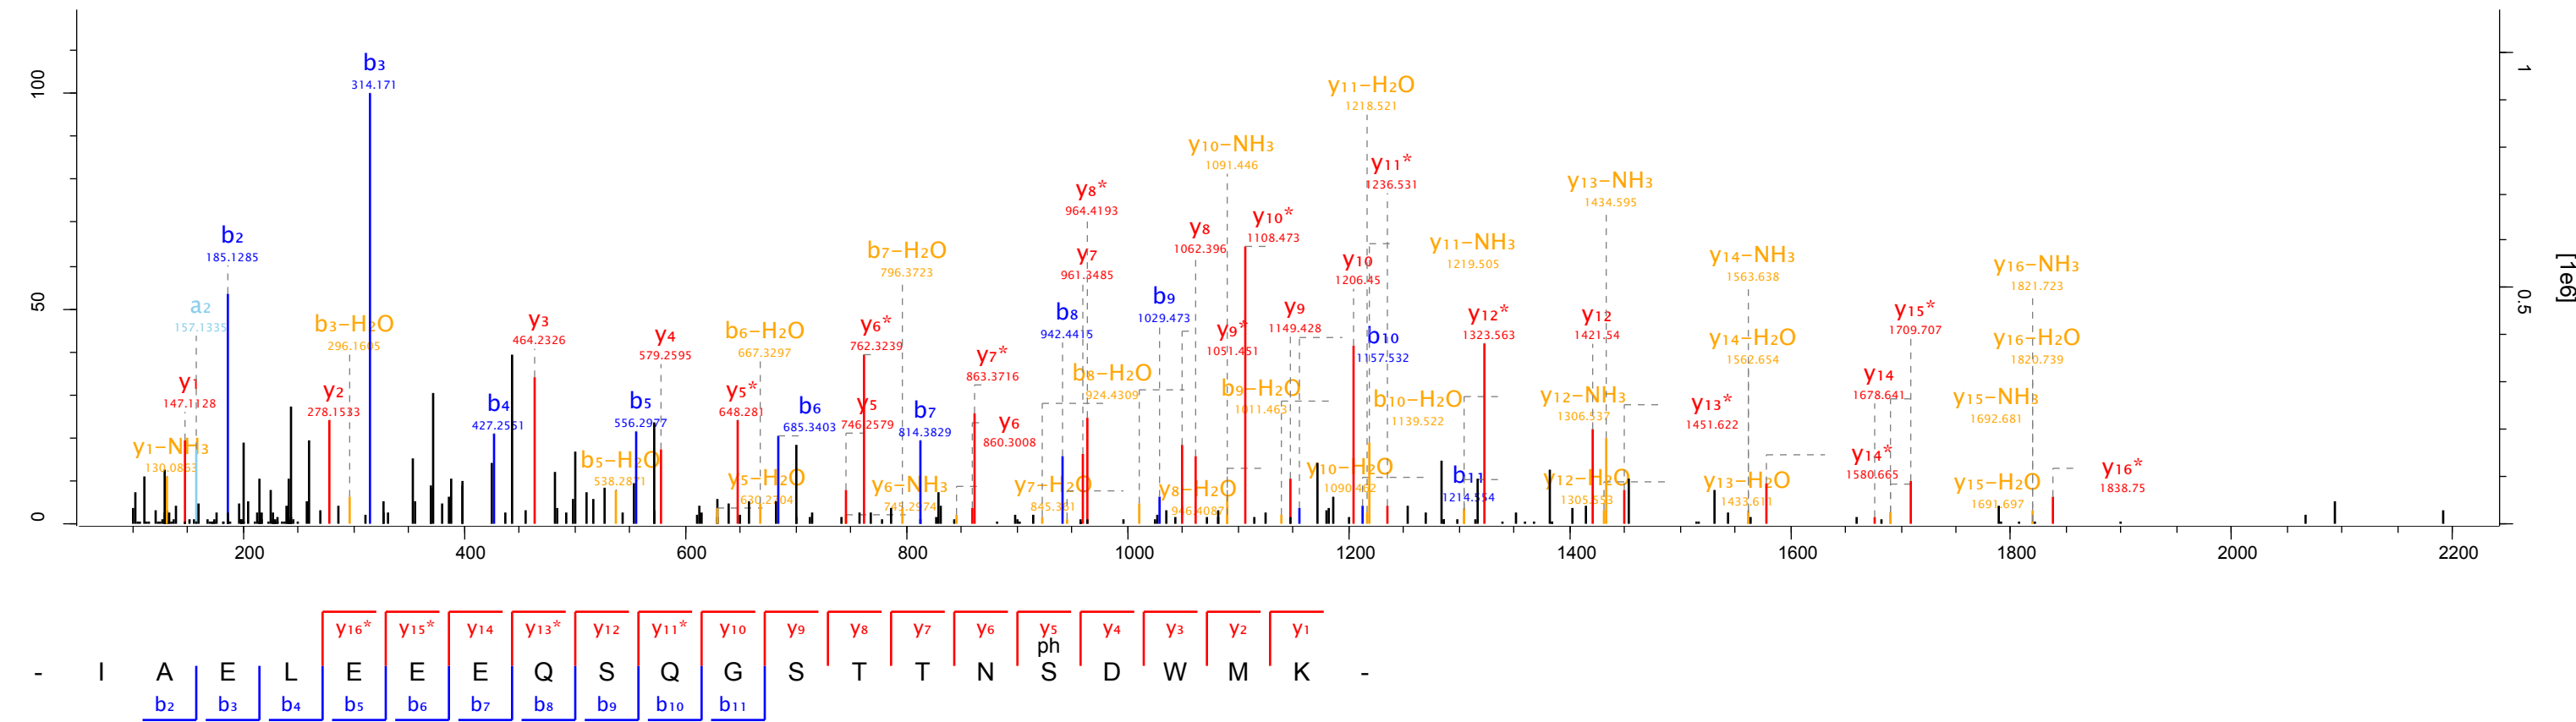



Raw file: 20150814\_A375SR\_Phospho\_BR2\_04  
 Scan: 18233 Method: FTMS; HCD Score: 174.72 m/z: 821.41 Gene names: HUWE1

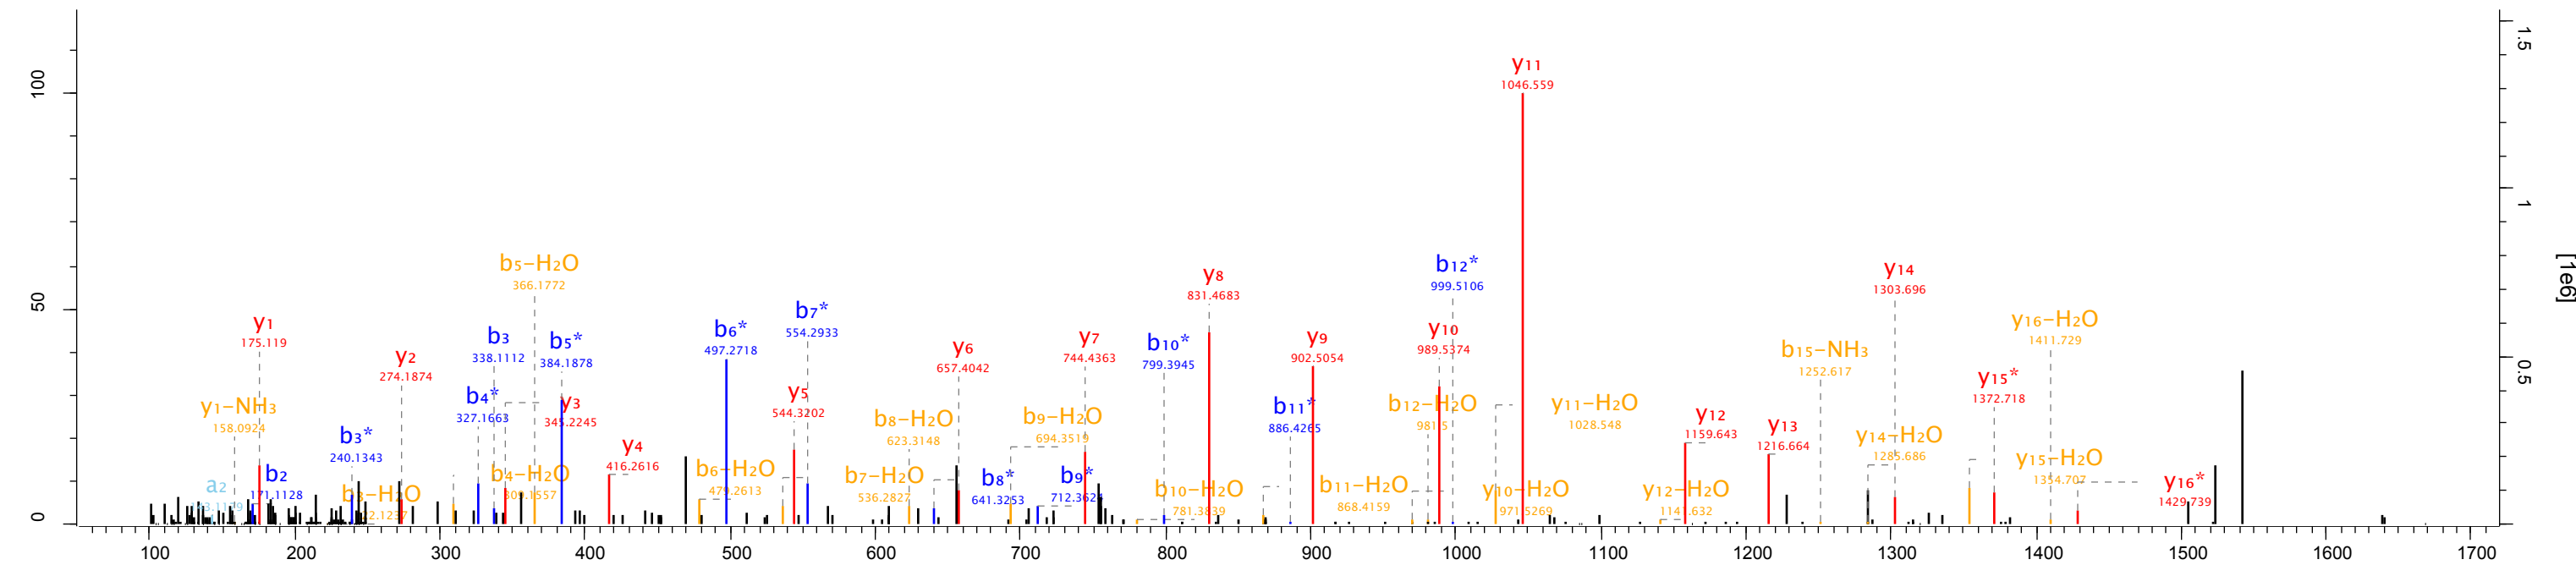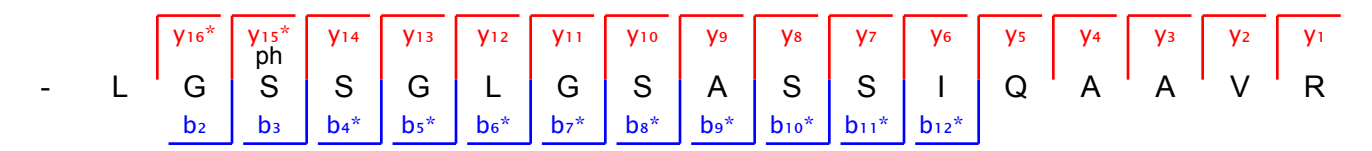

Raw file 20150814\_A375SR\_Phospho\_BR2\_04 Scan 18503 Method FTMS; HCD Score 196.43 m/z 1316.26 Gene names NACA

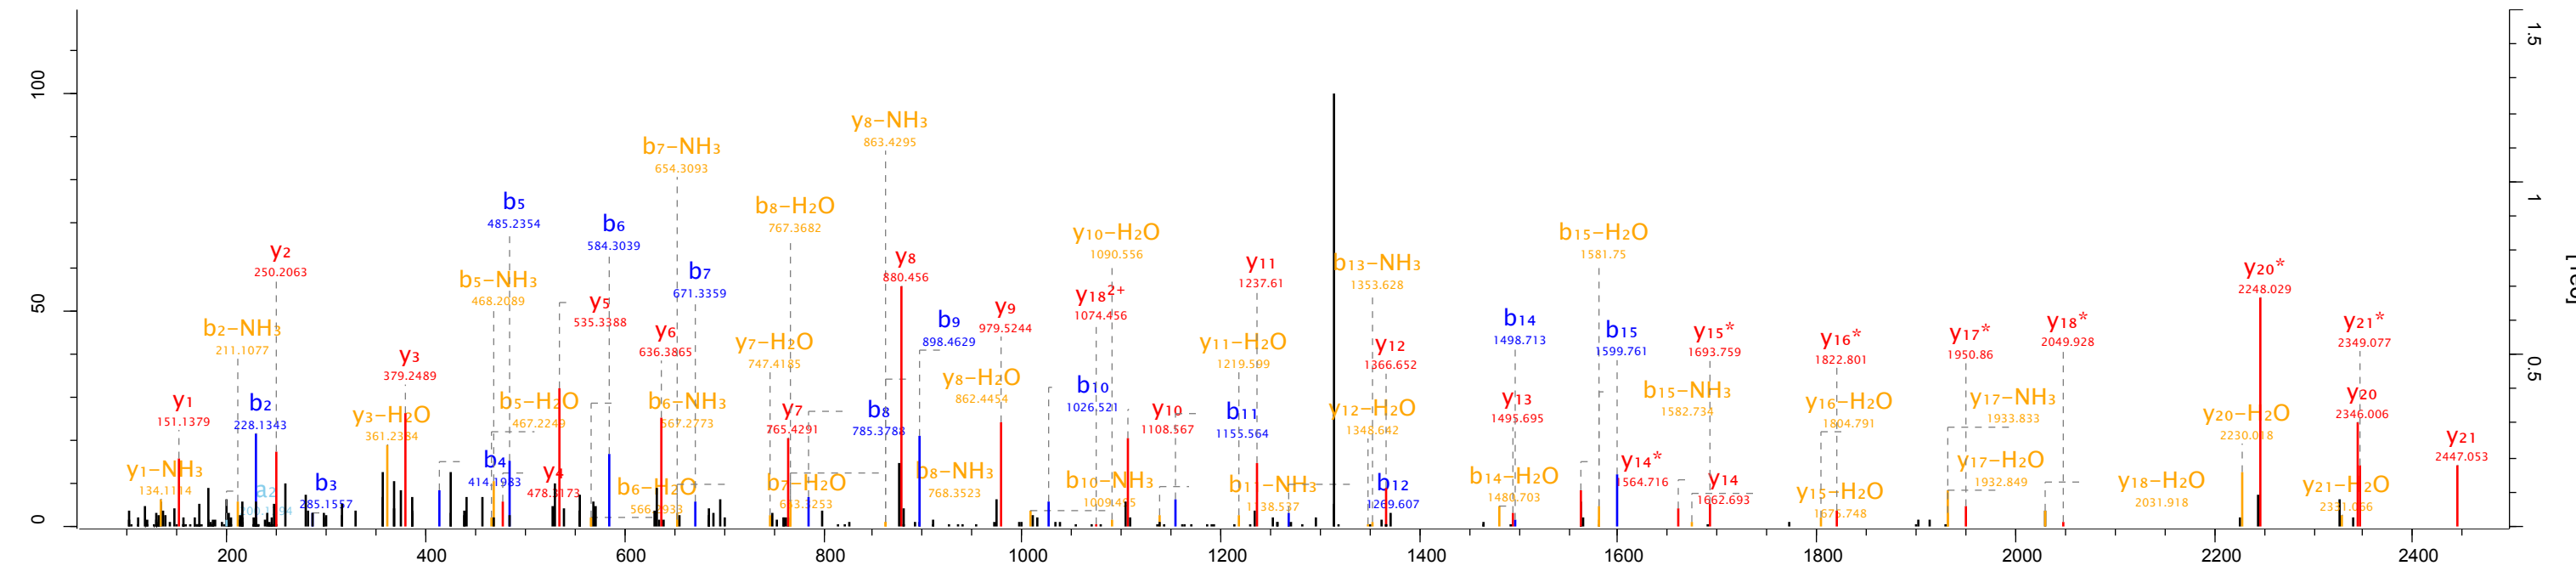

- V Q G E A V S N I Q E N T Q T P T V Q E E S E E E V D E T G V E V K -

b<sub>2</sub>
b<sub>3</sub>
b<sub>4</sub>
b<sub>5</sub>
b<sub>6</sub>
b<sub>7</sub>
b<sub>8</sub>
b<sub>9</sub>
b<sub>10</sub>
b<sub>11</sub>
b<sub>12</sub>
b<sub>14</sub>
b<sub>15</sub>
y<sub>21</sub>
y<sub>20</sub>
y<sub>18</sub>\*
y<sub>17</sub>\*
y<sub>16</sub>\*
y<sub>15</sub>\*
y<sub>14</sub>ph
y<sub>13</sub>
y<sub>12</sub>
y<sub>11</sub>
y<sub>10</sub>
y<sub>9</sub>
y<sub>8</sub>
y<sub>7</sub>
y<sub>6</sub>
y<sub>5</sub>
y<sub>4</sub>
y<sub>3</sub>
y<sub>2</sub>
y<sub>1</sub>

Raw file  
 20150814\_A375SR\_Phospho\_BR2\_04  
 Scan 18553 Method FTMS; HCD Score 119 m/z 708.8 Gene names ZDHHC5

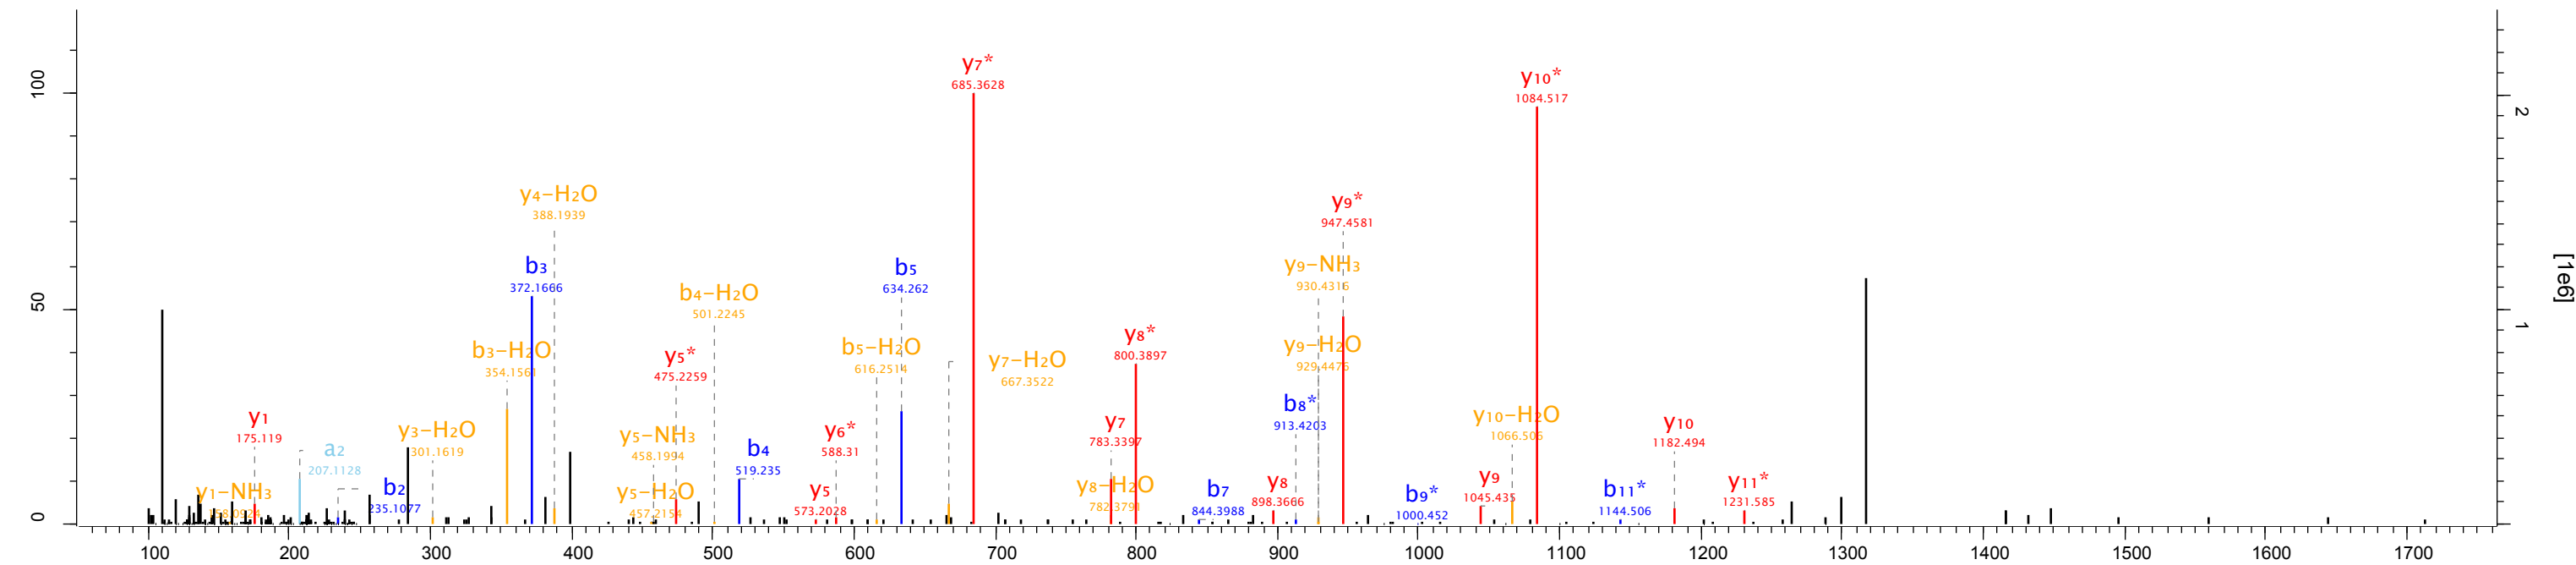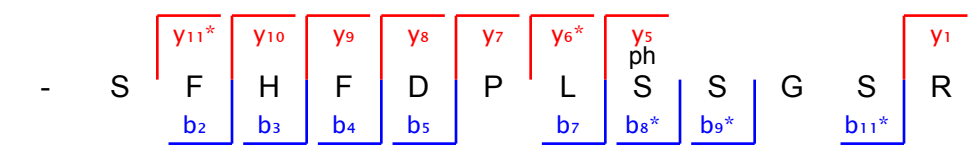

Raw file: 20150814\_A375SR\_Phospho\_BR2\_04  
 Scan: 19063 Method: FTMS; HCD Score: 279.11 m/z: 1230.55 Gene names: GEMIN5

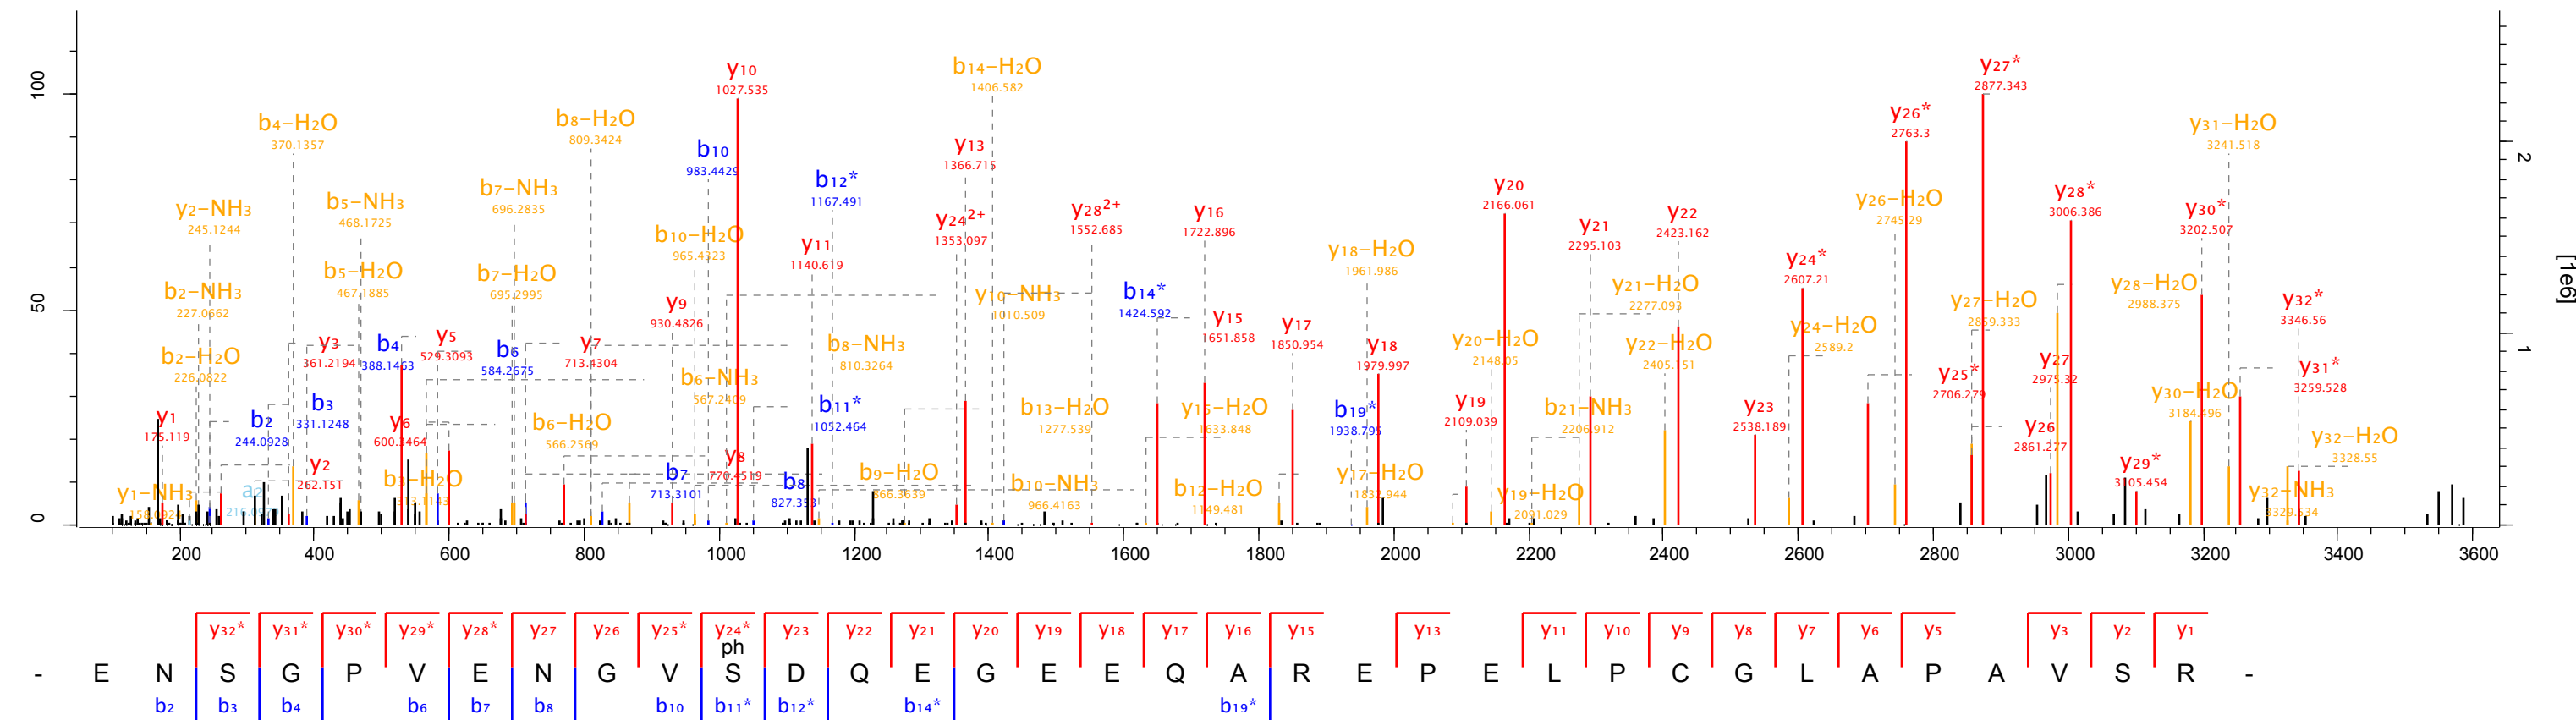

Raw file: 20150814\_A375SR\_Phospho\_BR2\_04  
 Scan: 19093 Method: FTMS; HCD Score: 190.44 m/z: 715.85 Gene names: MACF1

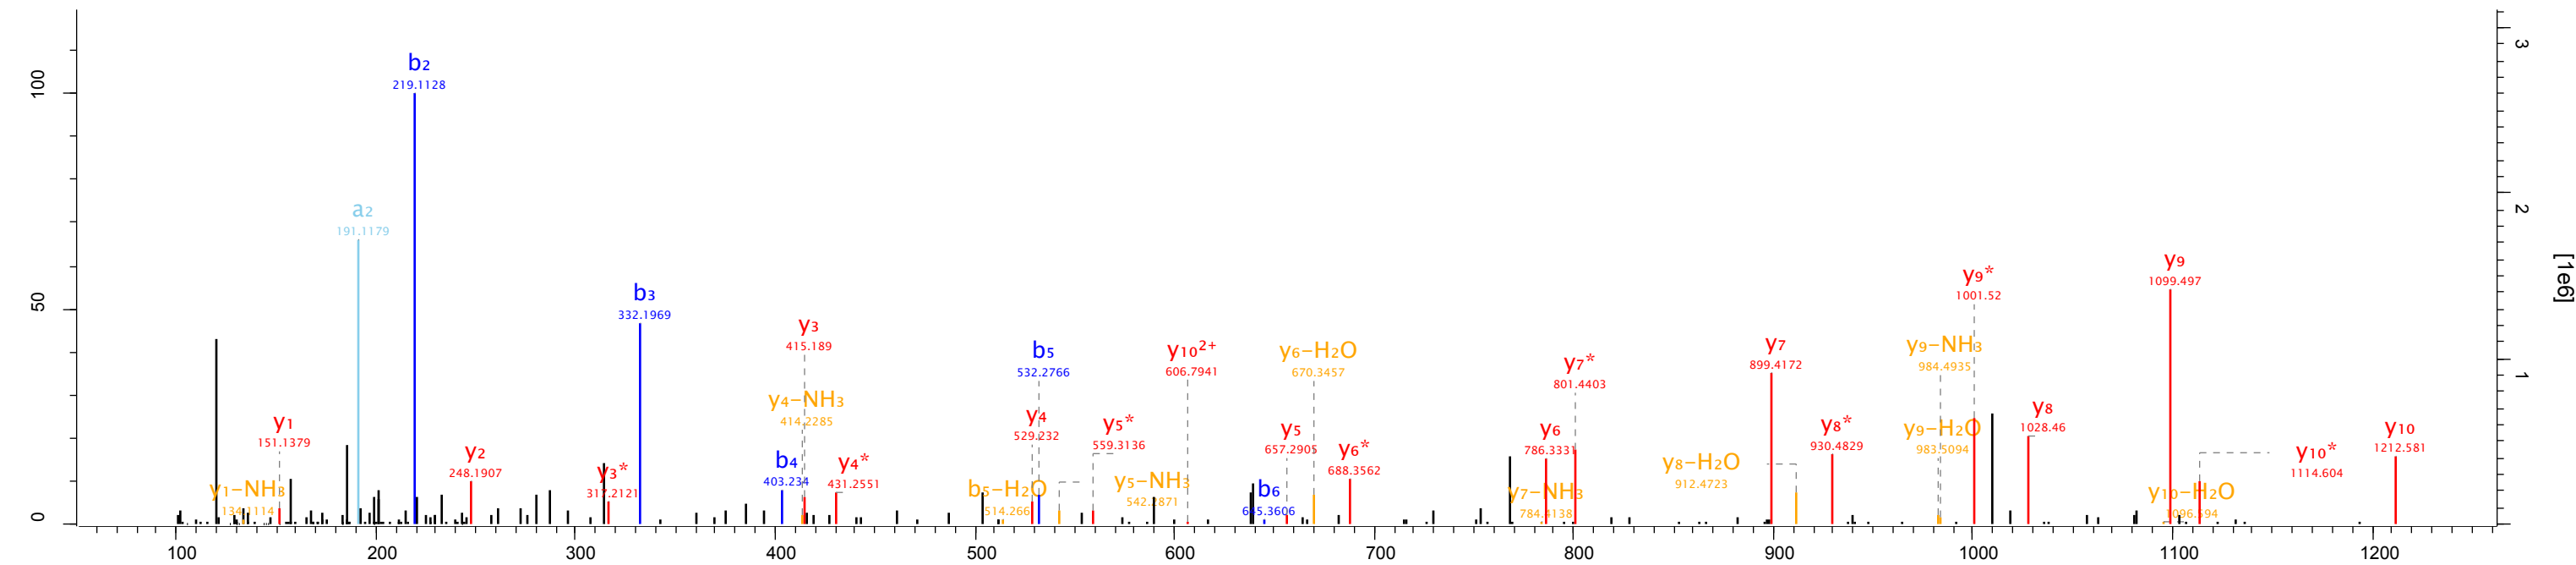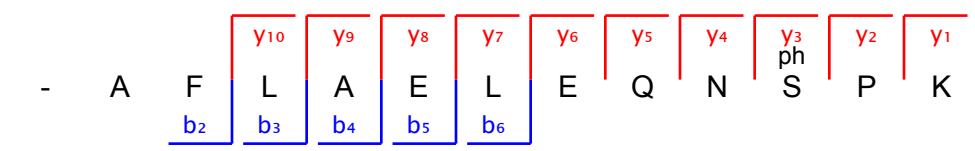

Raw file Scan Method Score m/z Gene names

20150814\_A375SR\_Phospho\_BR2\_04 1933 FTMS; HCD 183.39 666.81 NOC2L

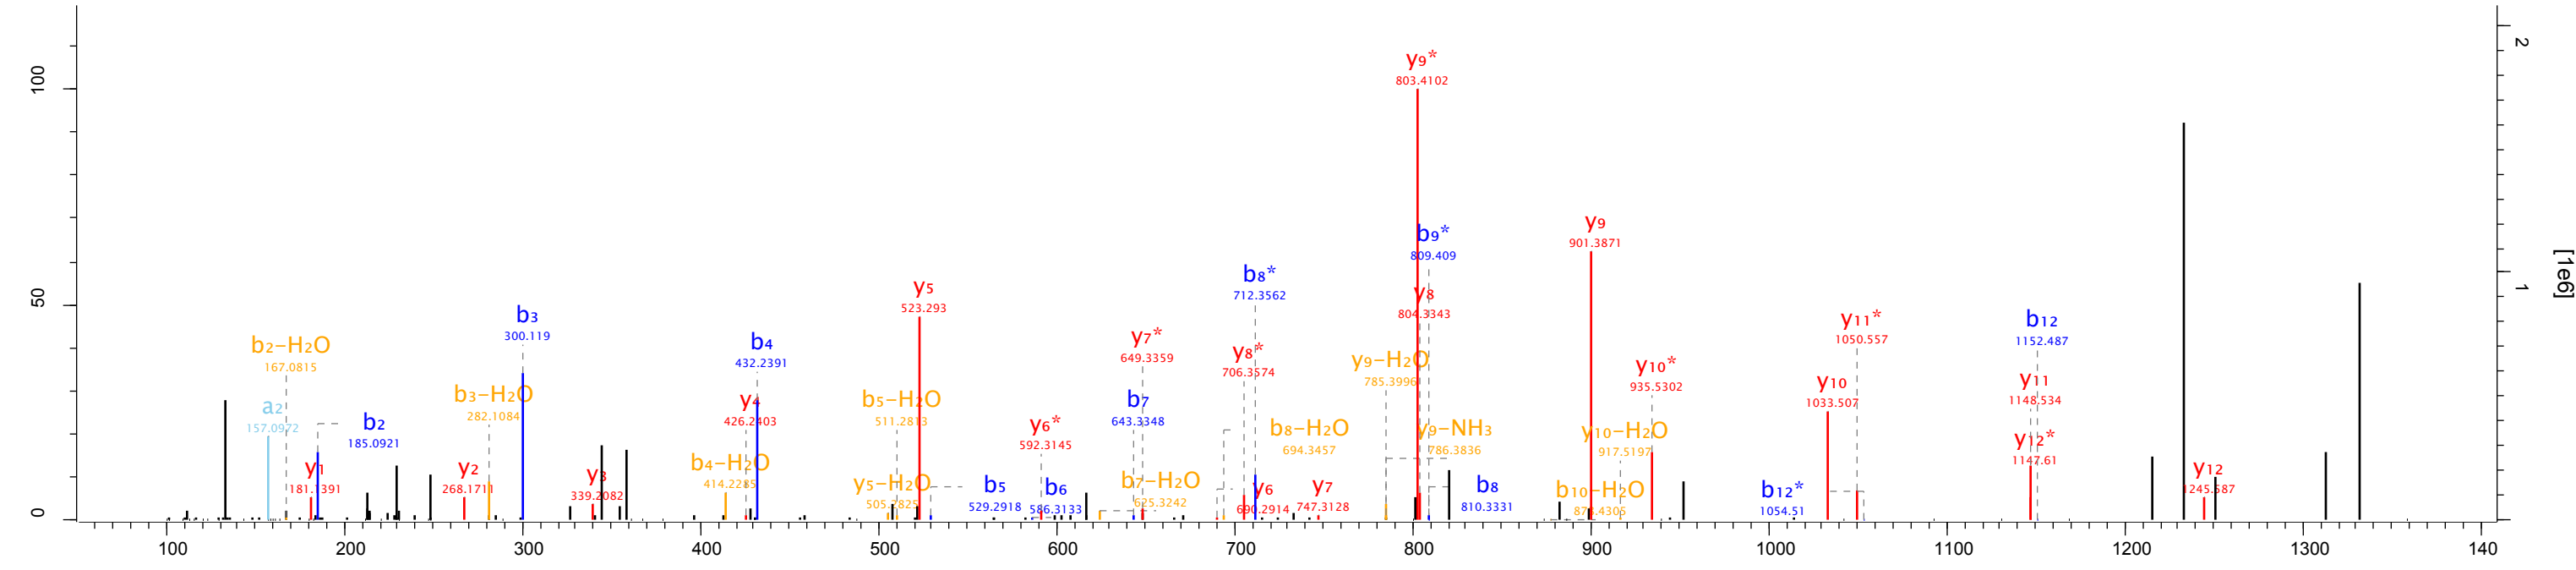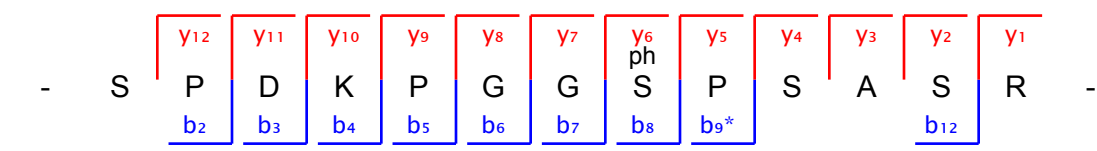

Raw file: 20150814\_A375SR\_Phospho\_BR2\_04  
 Scan: 19353 Method: FTMS; HCD Score: 124.25 m/z: 711.84 Gene names: PCGF1

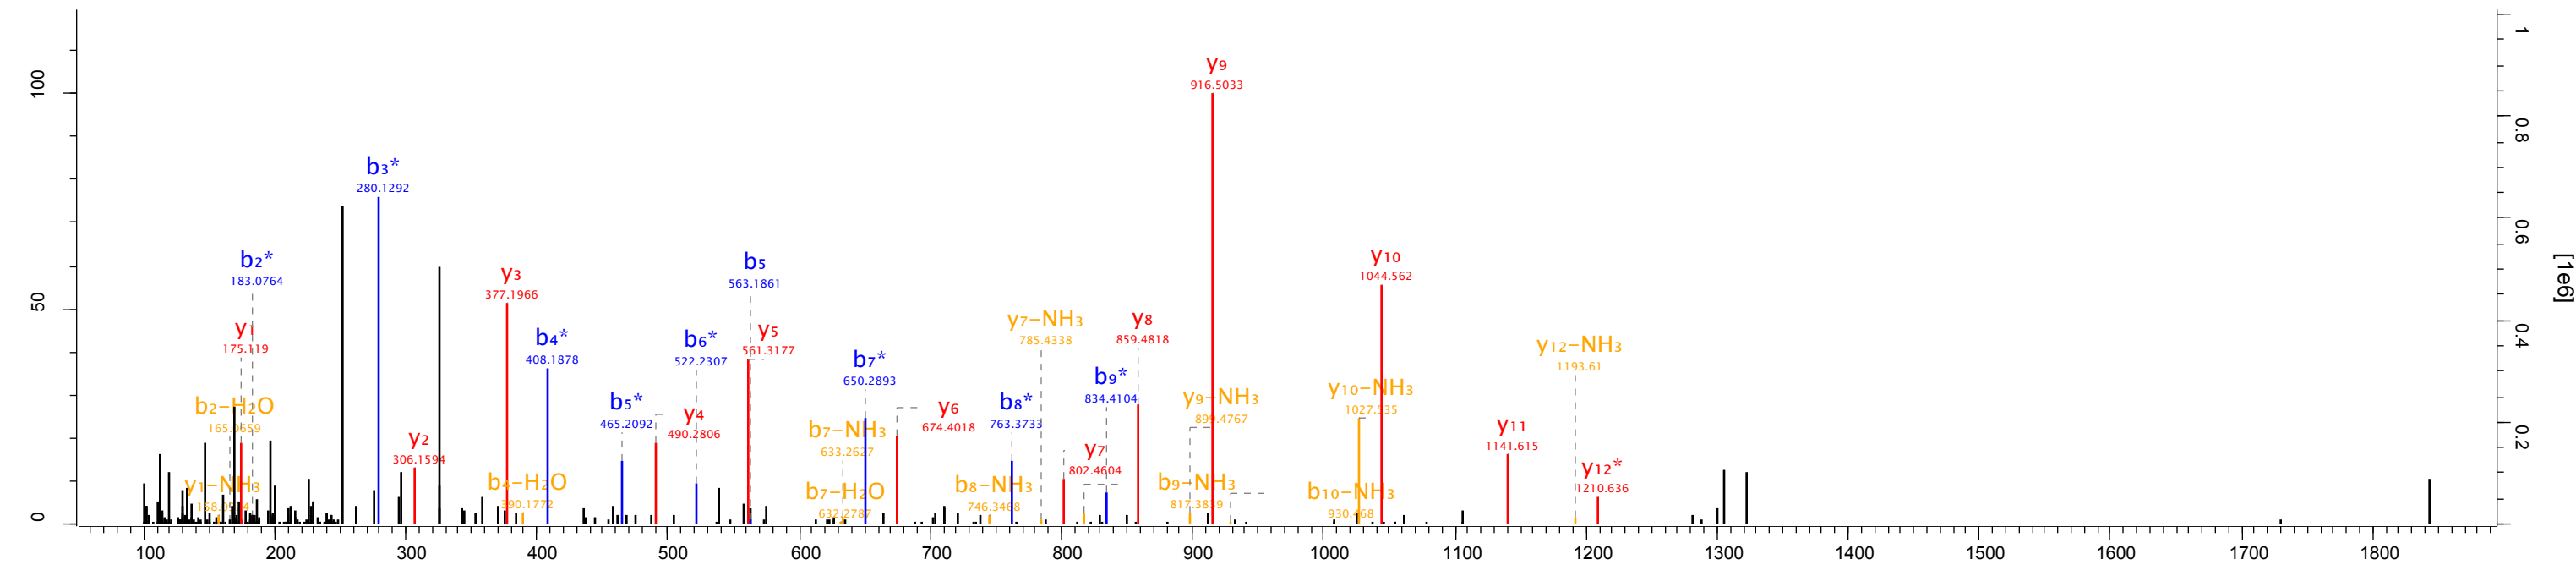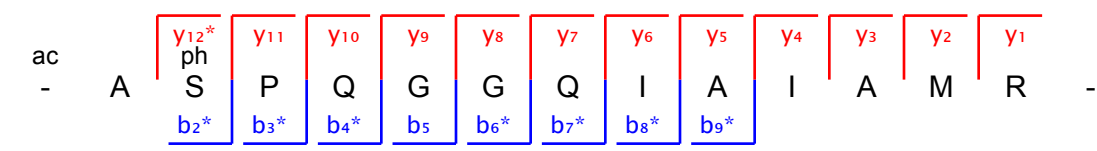

Raw file 20150814\_A375SR\_Phospho\_BR2\_04 Scan 19623 Method FTMS; HCD Score 149.67 m/z 946.43 Gene names YAP1

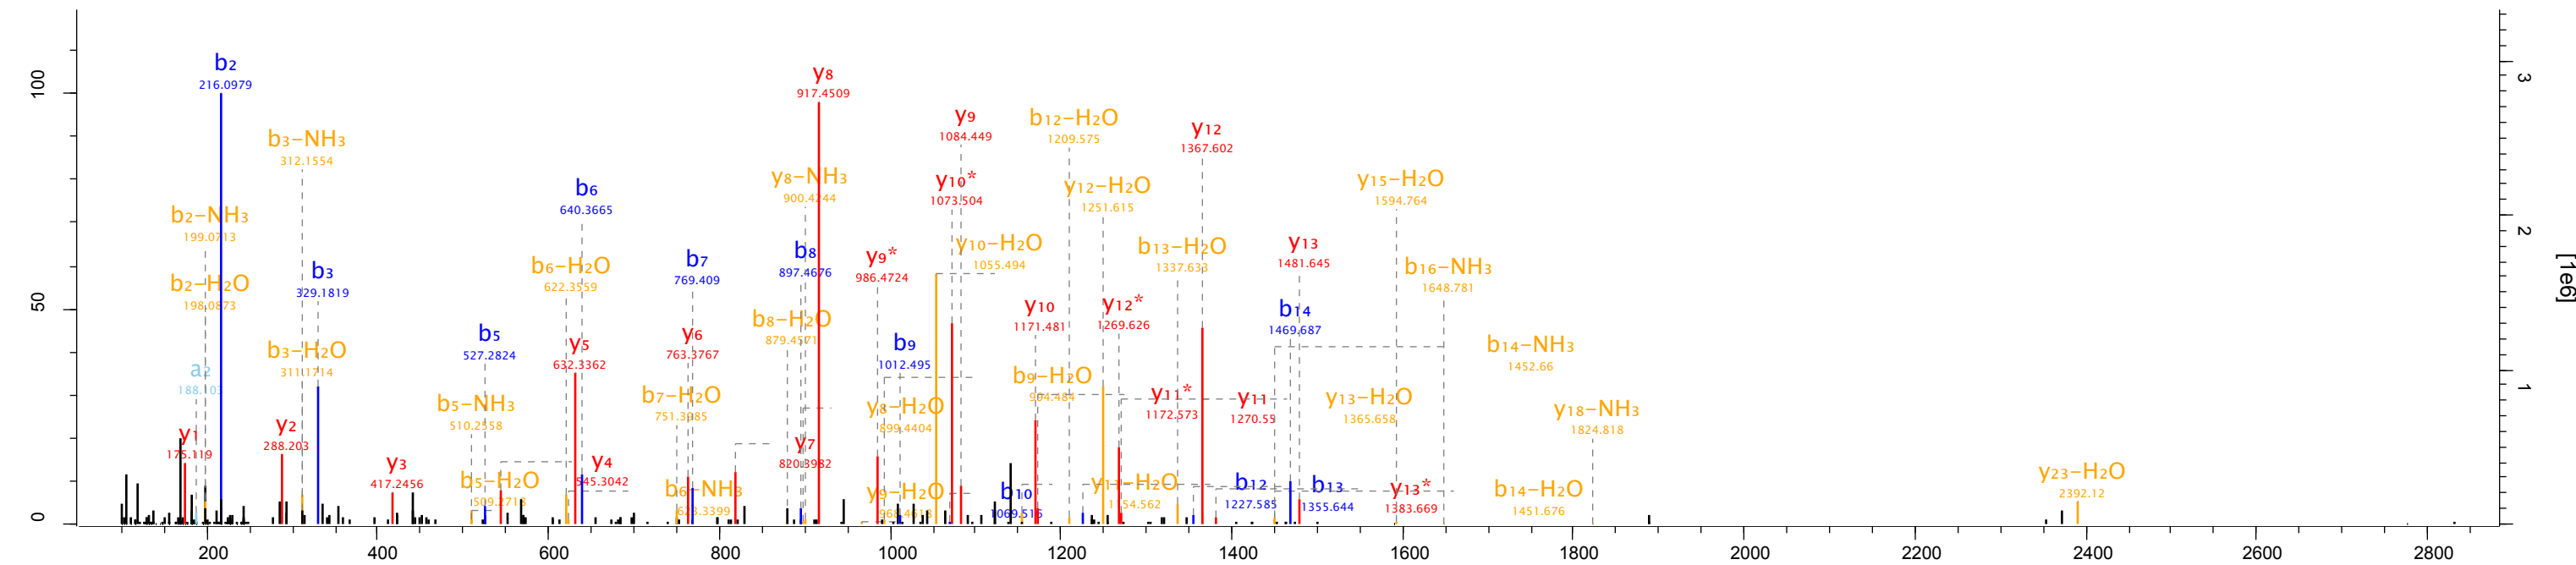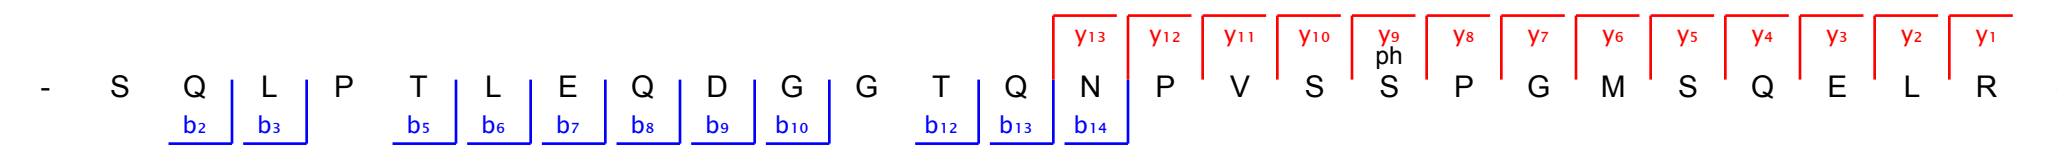



Raw file: 20150814\_A375SR\_Phospho\_BR2\_04  
 Scan: 1973 Method: FTMS; HCD Score: 130.36 m/z: 533.23 Gene names: SPAG9

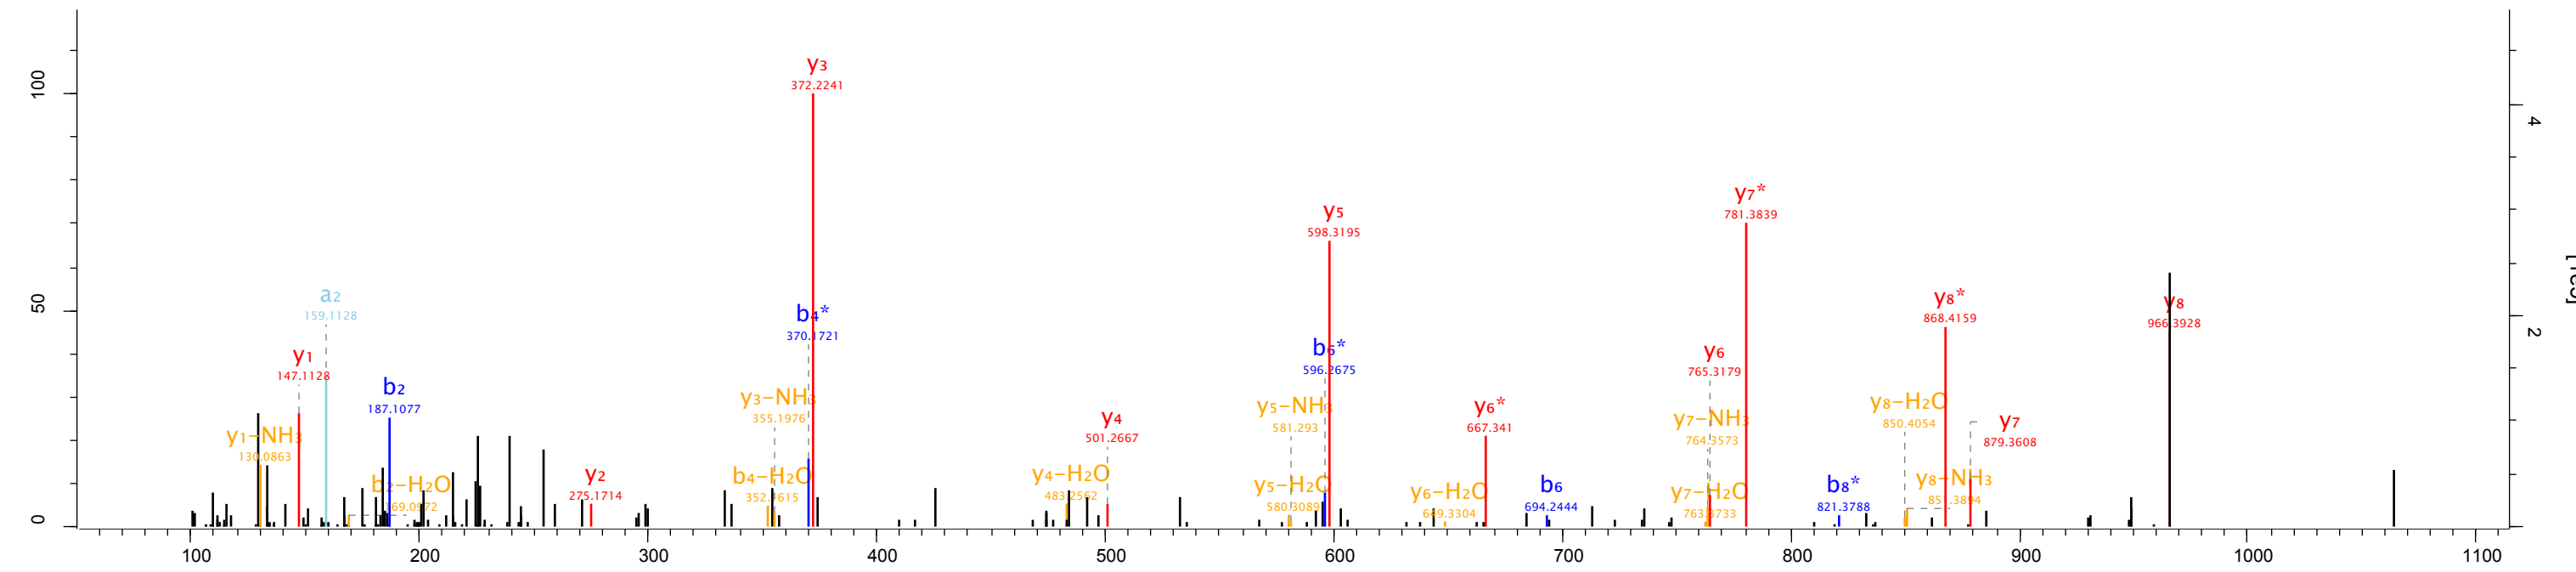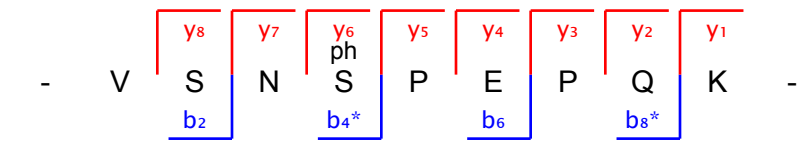

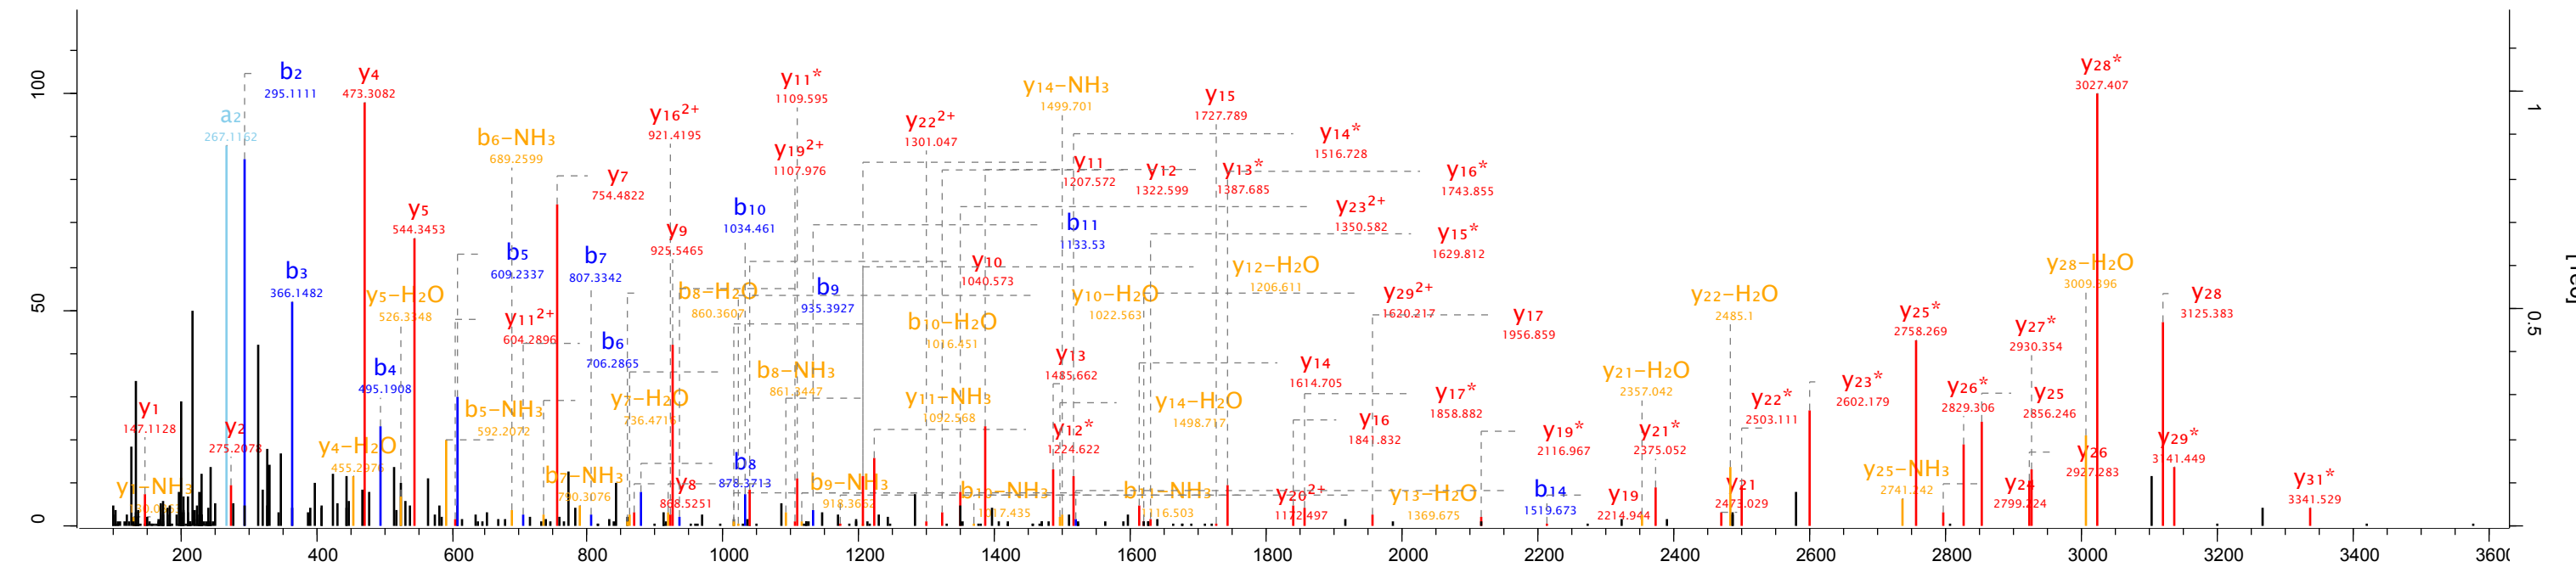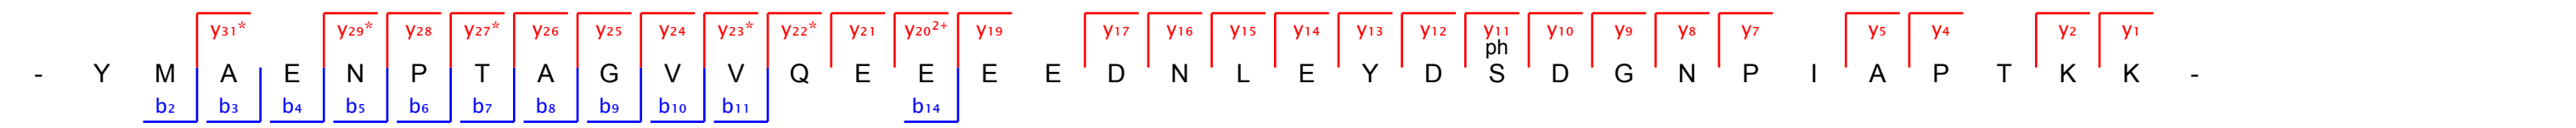

Raw file: 20150814\_A375SR\_Phospho\_BR2\_04  
 Scan: 19893 Method: FTMS; HCD Score: 109.71 m/z: 921.13 Gene names: RAB3IL1

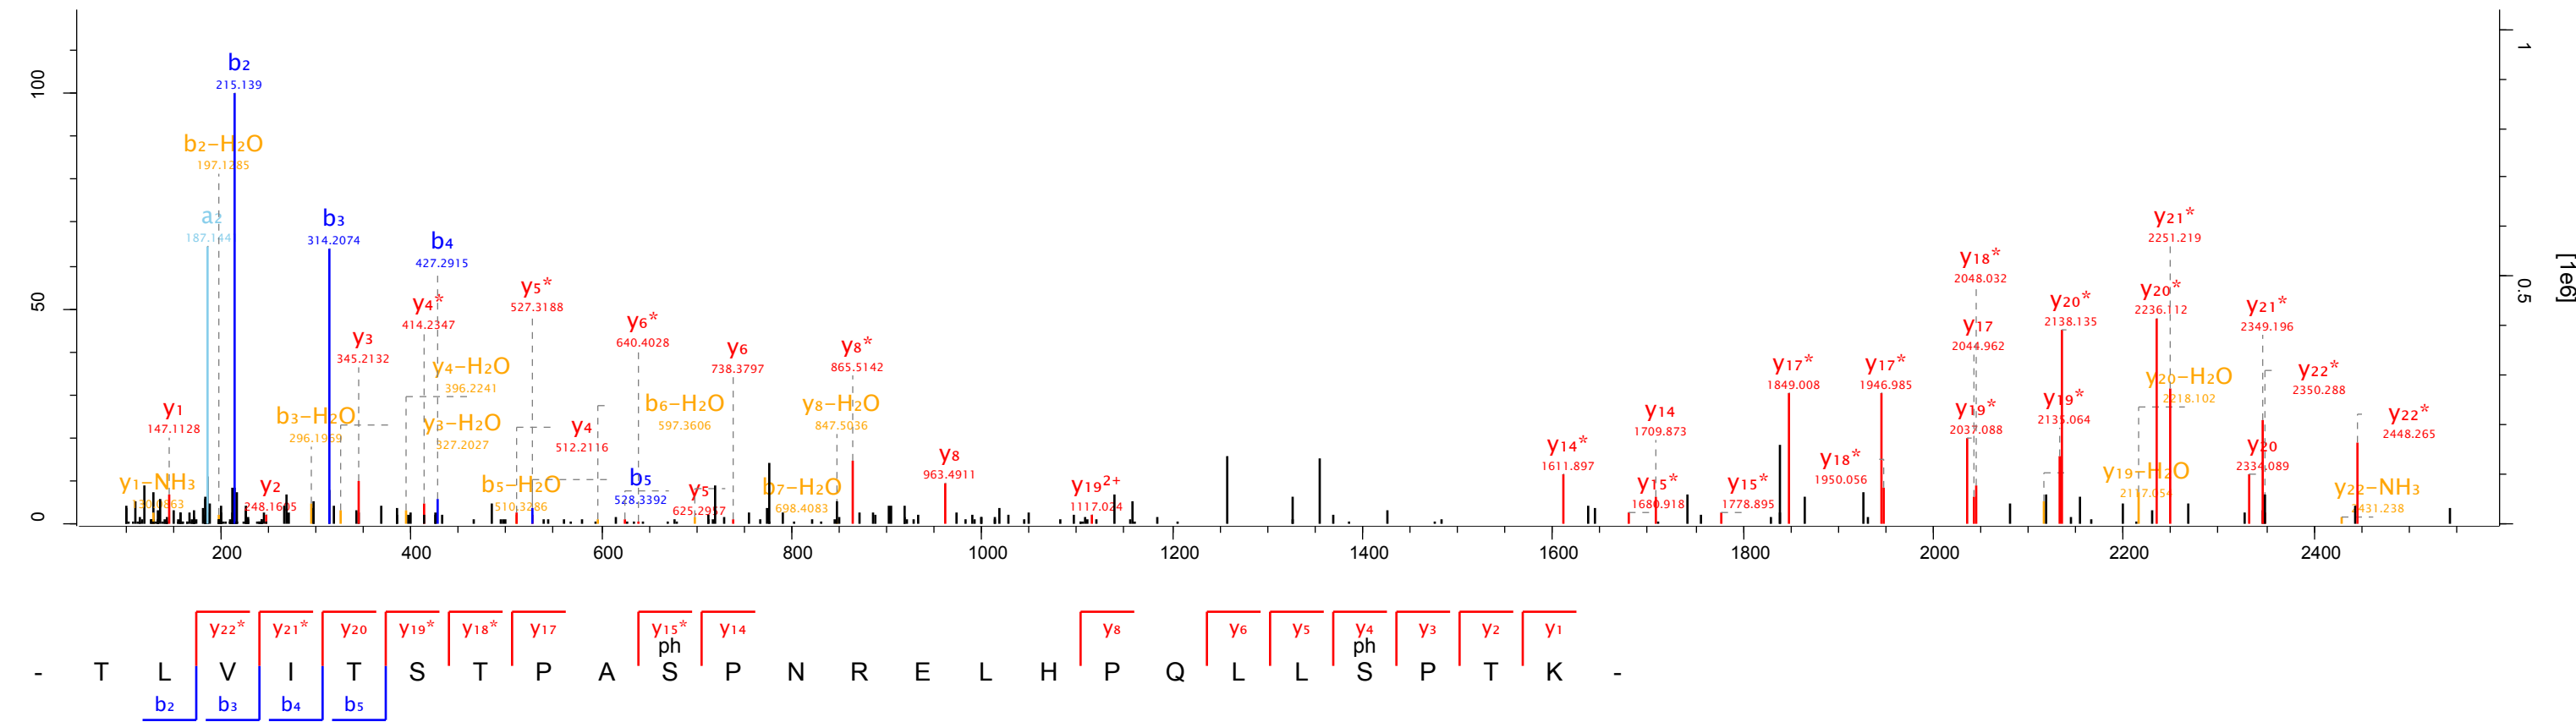

Raw file: 20150814\_A375SR\_Phospho\_BR2\_04  
 Scan: 20023 Method: FTMS; HCD Score: 306.29 m/z: 1014.45 Gene names: MED24

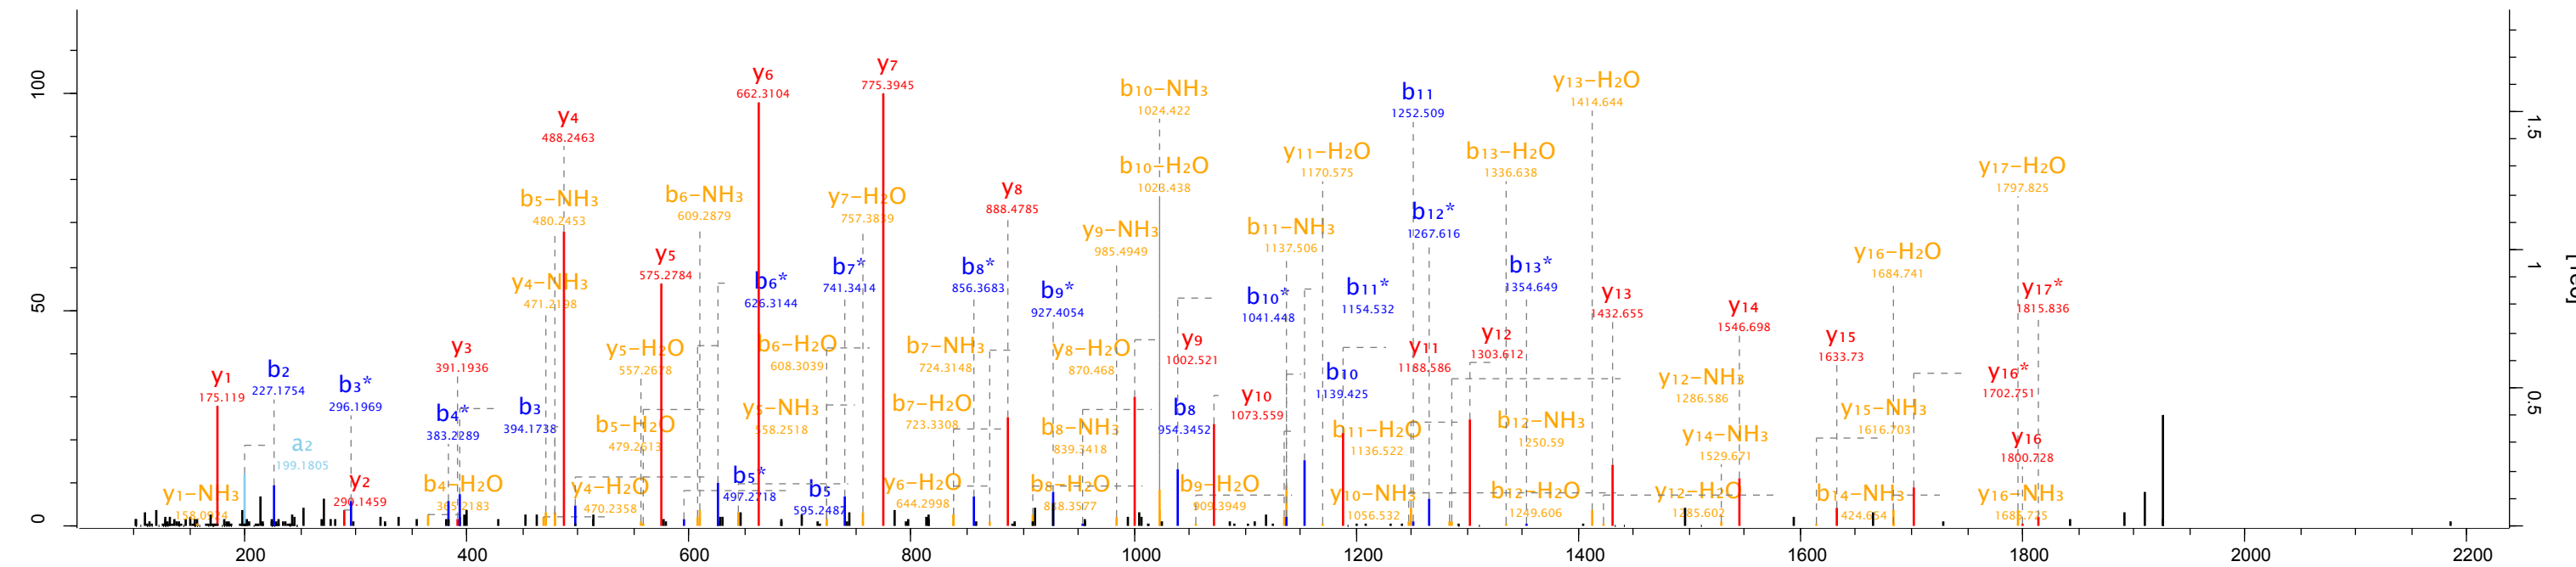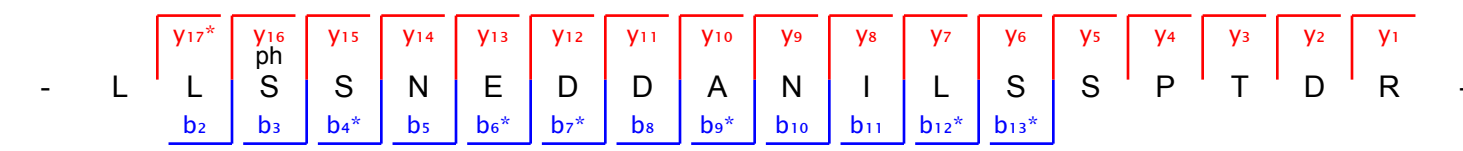

Raw file: 20150814\_A375SR\_Phospho\_BR2\_04  
 Scan: 20113 Method: FTMS; HCD Score: 63.03 m/z: 558.63 Gene names: MASTL

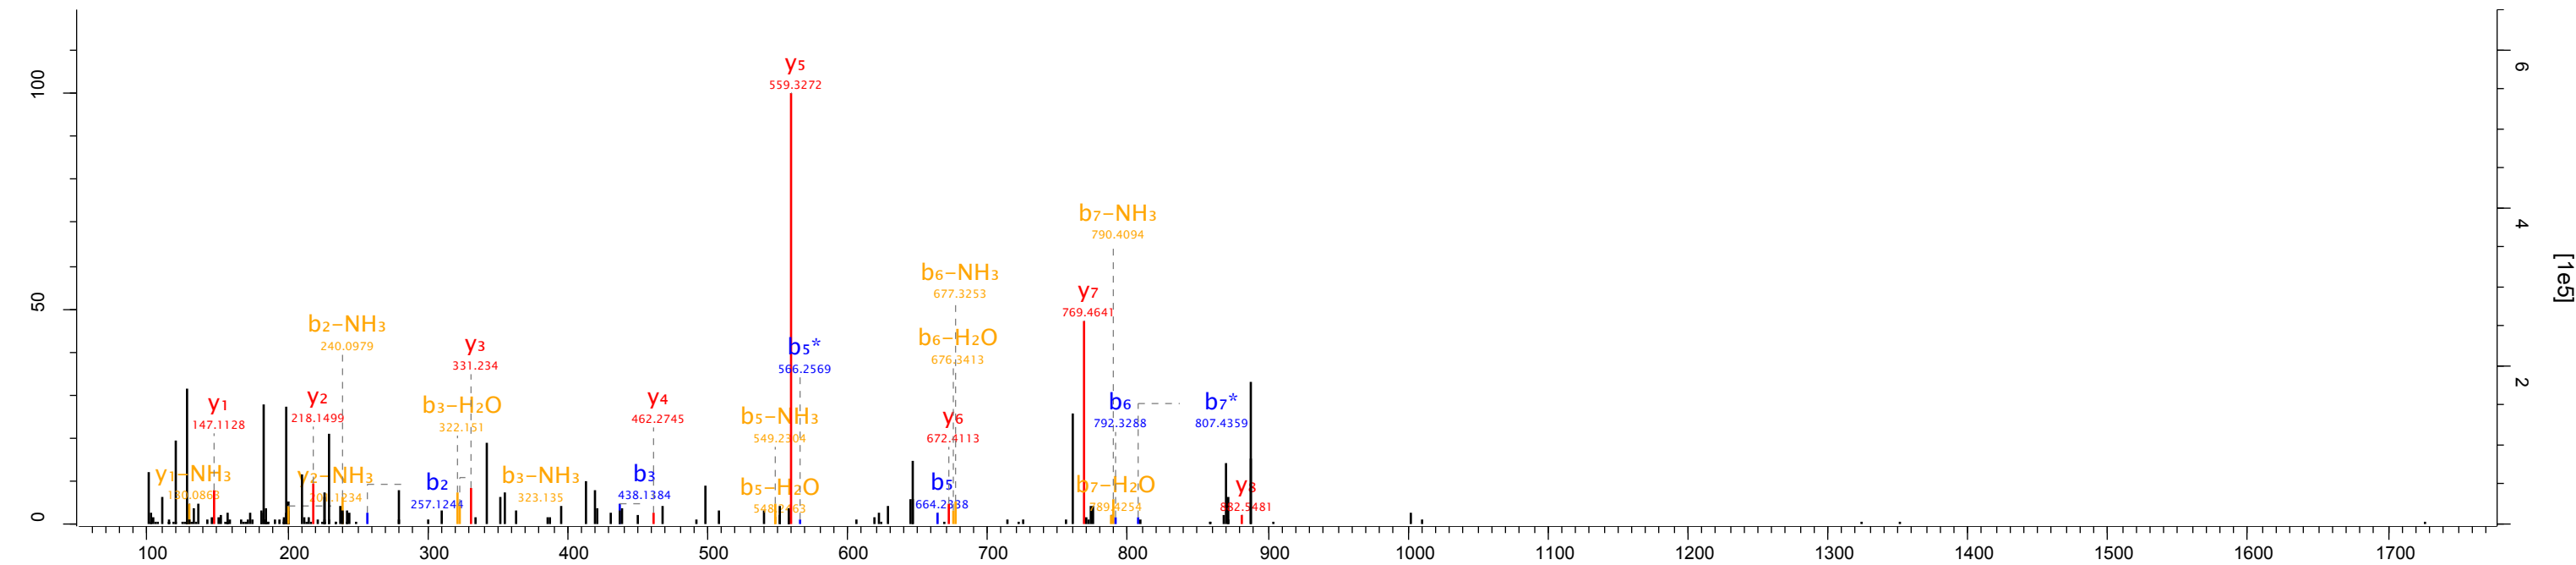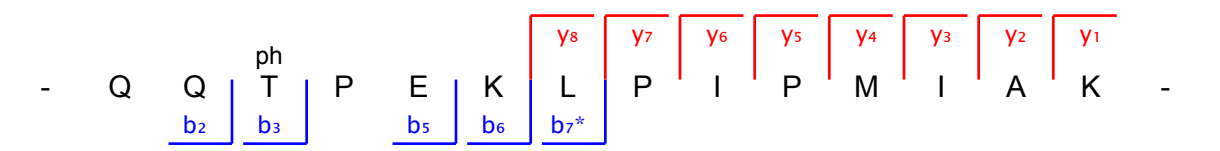

Raw file: 20150814\_A375SR\_Phospho\_BR2\_04  
 Scan: 20543 Method: FTMS; HCD Score: 308.3 m/z: 1101.52 Gene names: ARHGEF2

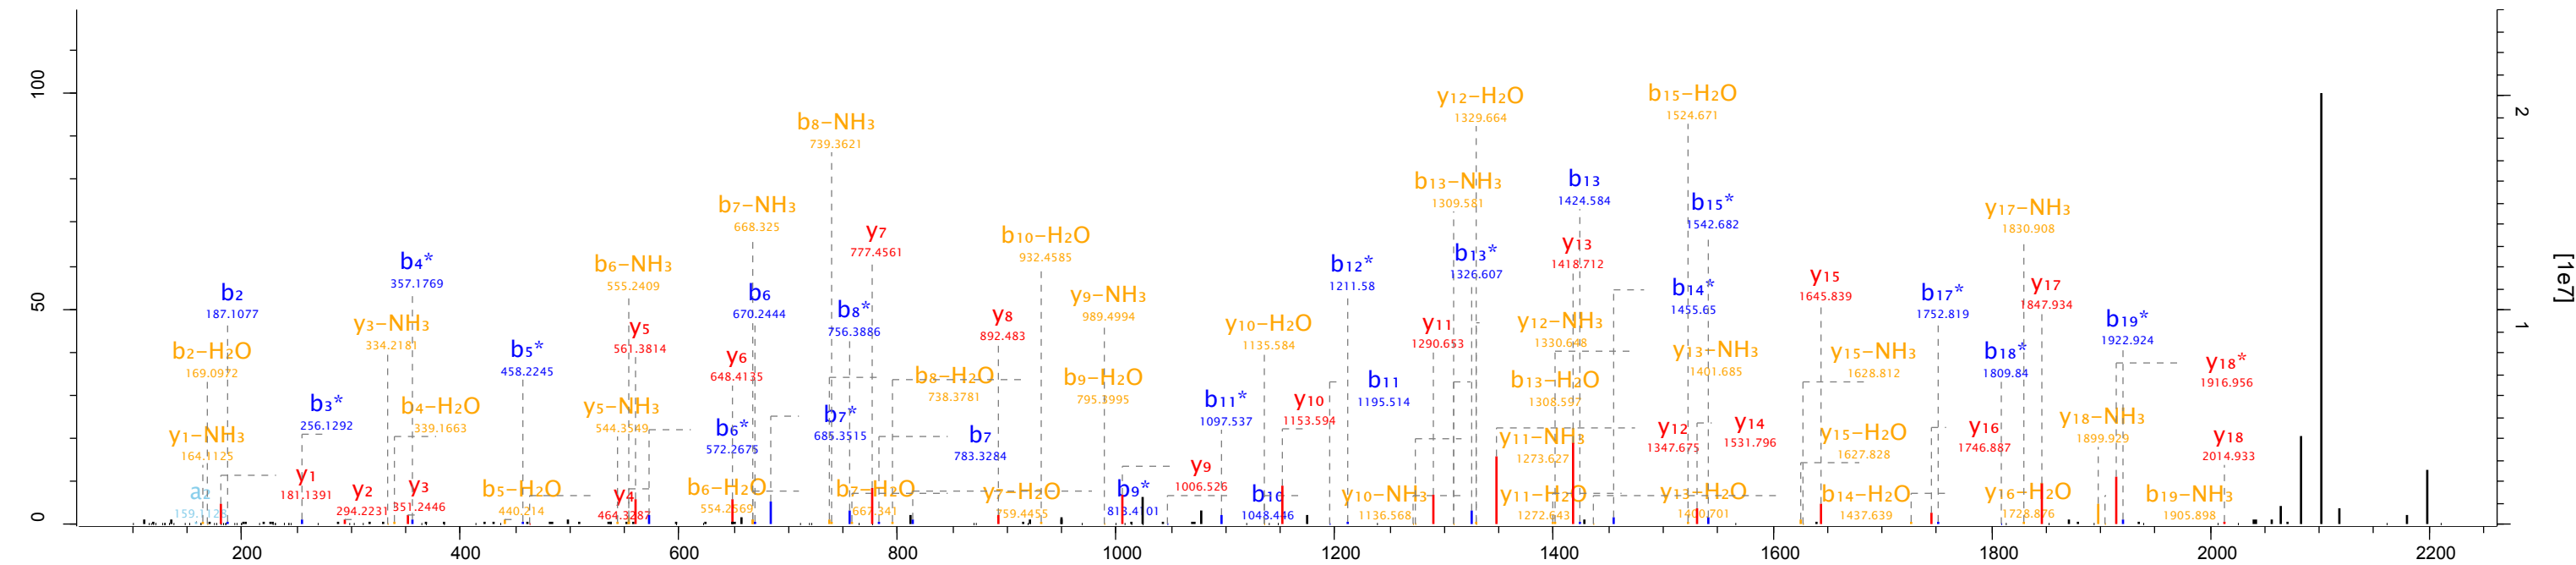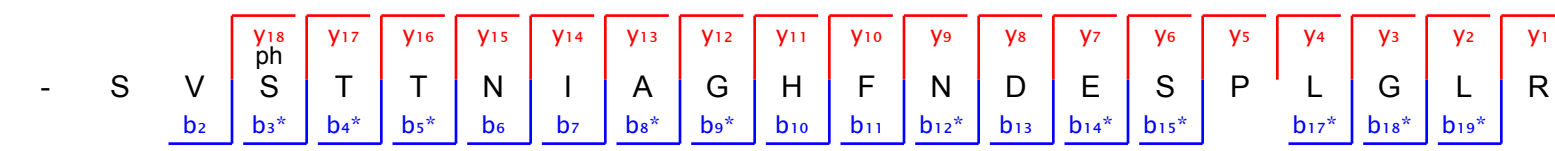

Raw file: 20150814\_A375SR\_Phospho\_BR2\_04  
 Scan: 20713 Method: FTMS; HCD Score: 260.25 m/z: 1120.44 Gene names: MPHOSP8

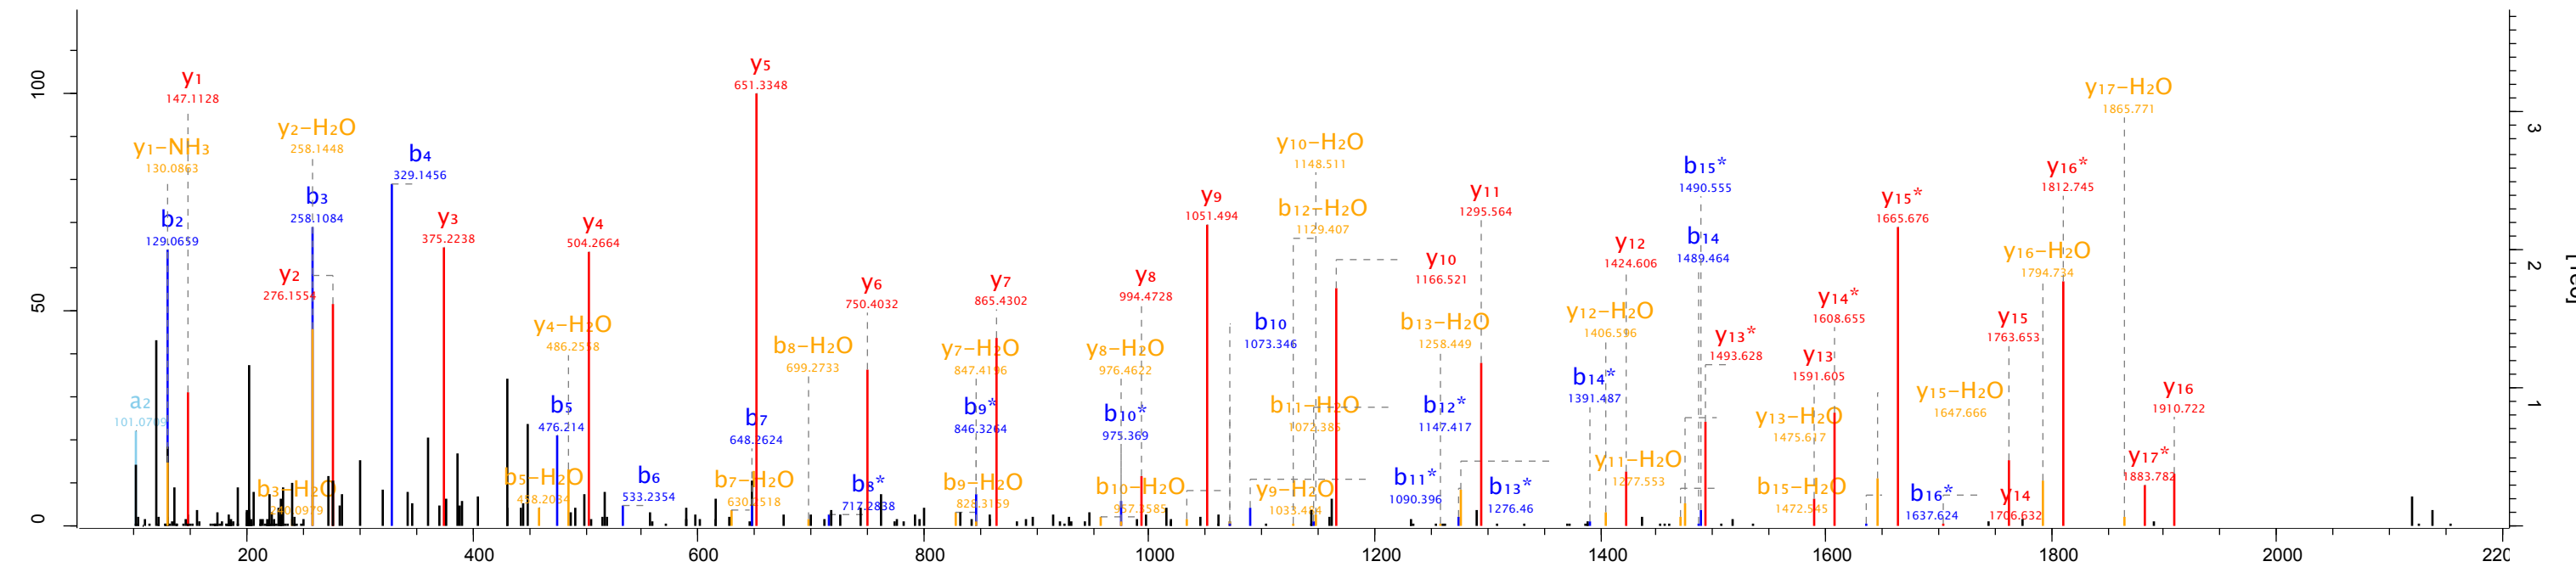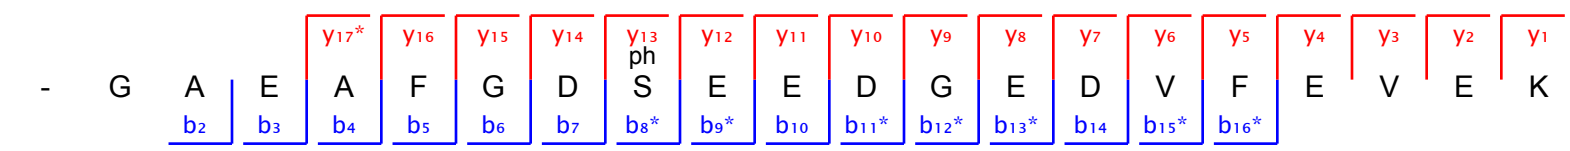

Raw file: 20150814\_A375SR\_Phospho\_BR2\_04  
 Scan: 20873 Method: FTMS; HCD Score: 106.19 m/z: 797.83 Gene names: TRAPPC9

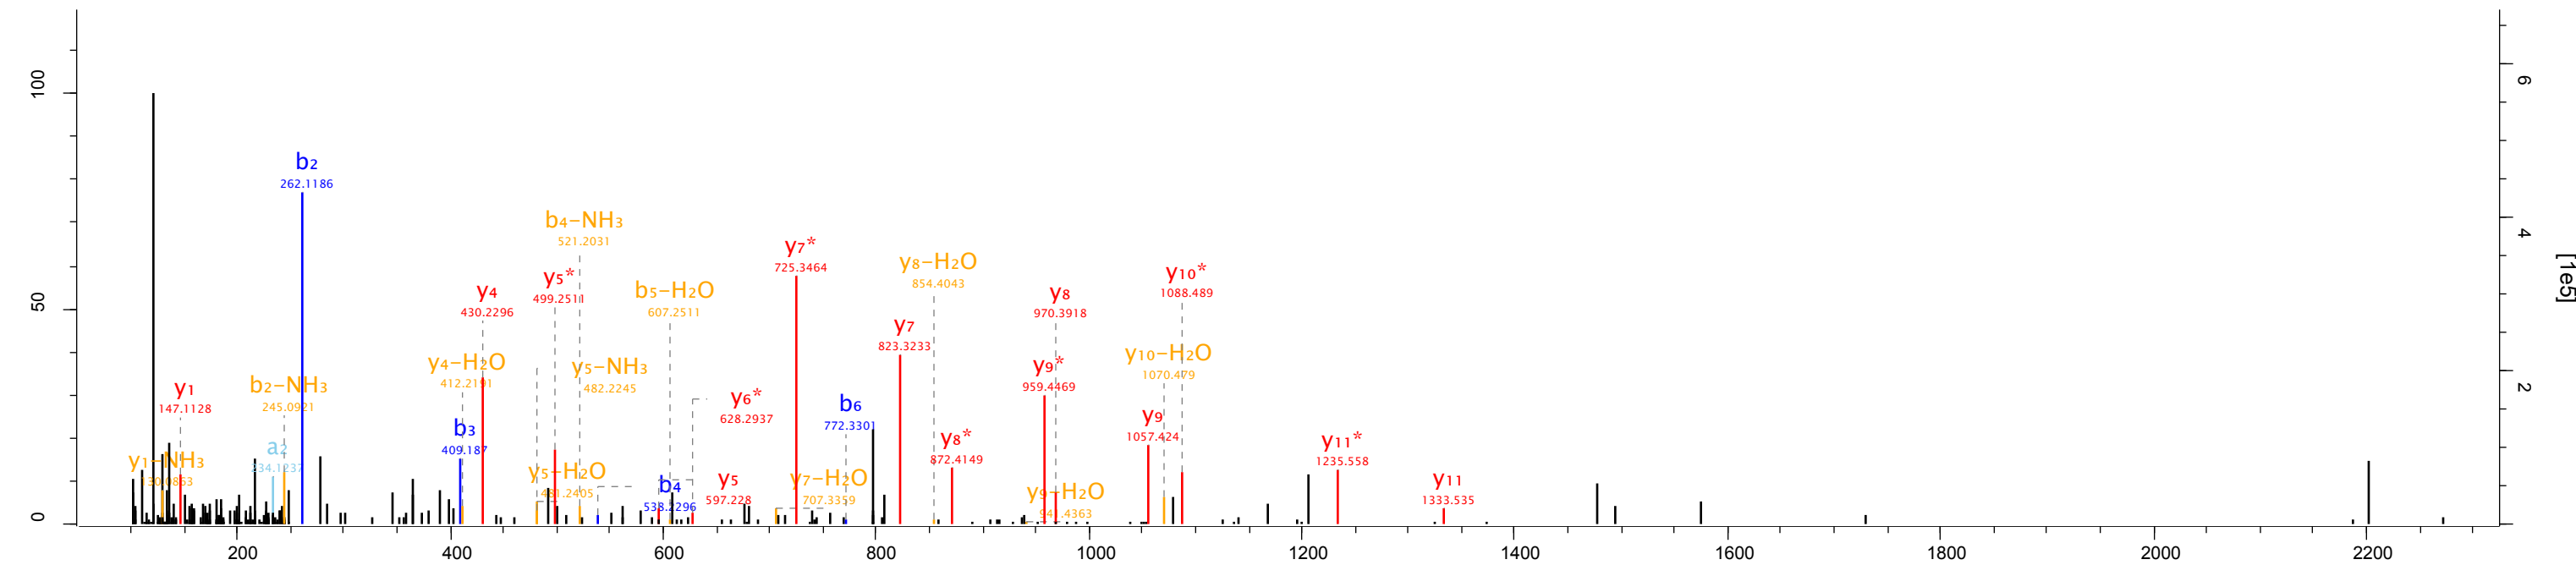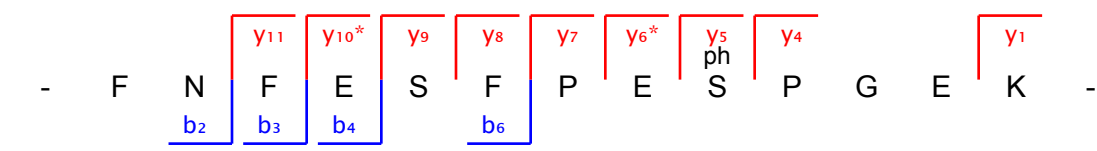



Raw file: 20150814\_A375SR\_Phospho\_BR2\_04  
 Scan: 20893 Method: FTMS; HCD Score: 71.43 m/z: 714.31 Gene names: ARHGAP5

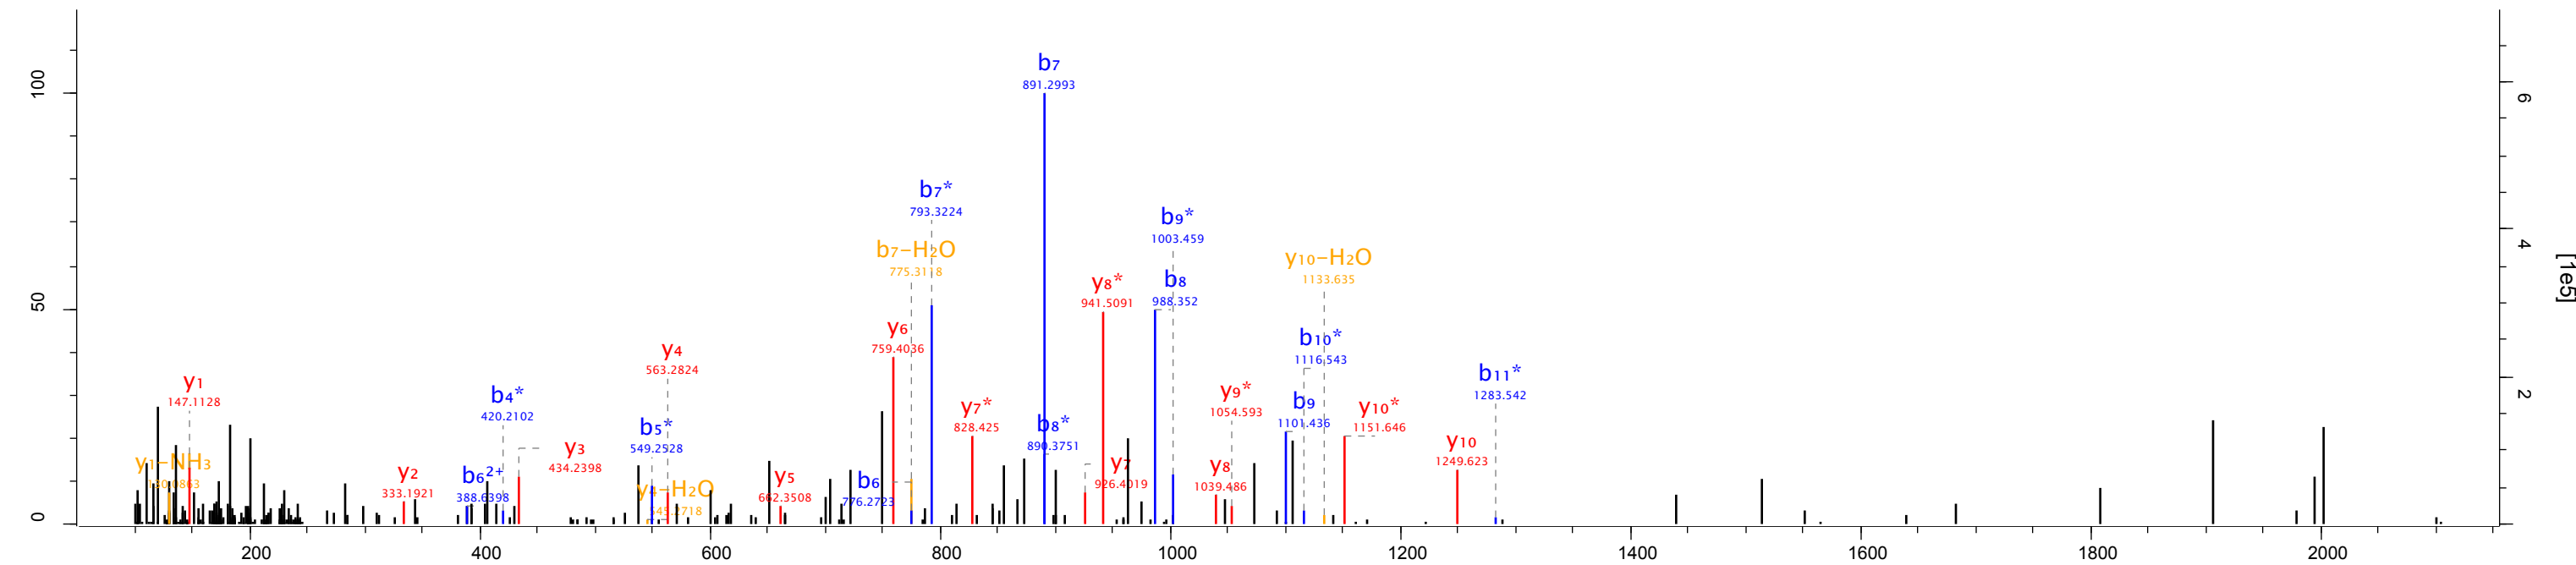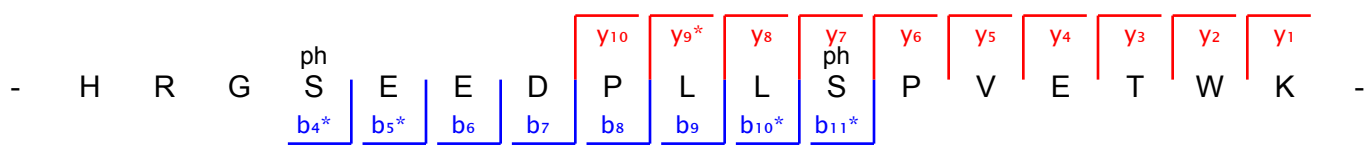

Raw file: 20150814\_A375SR\_Phospho\_BR2\_04  
 Scan: 20983 Method: FTMS; HCD Score: 133.16 m/z: 738.33 Gene names: DLG5

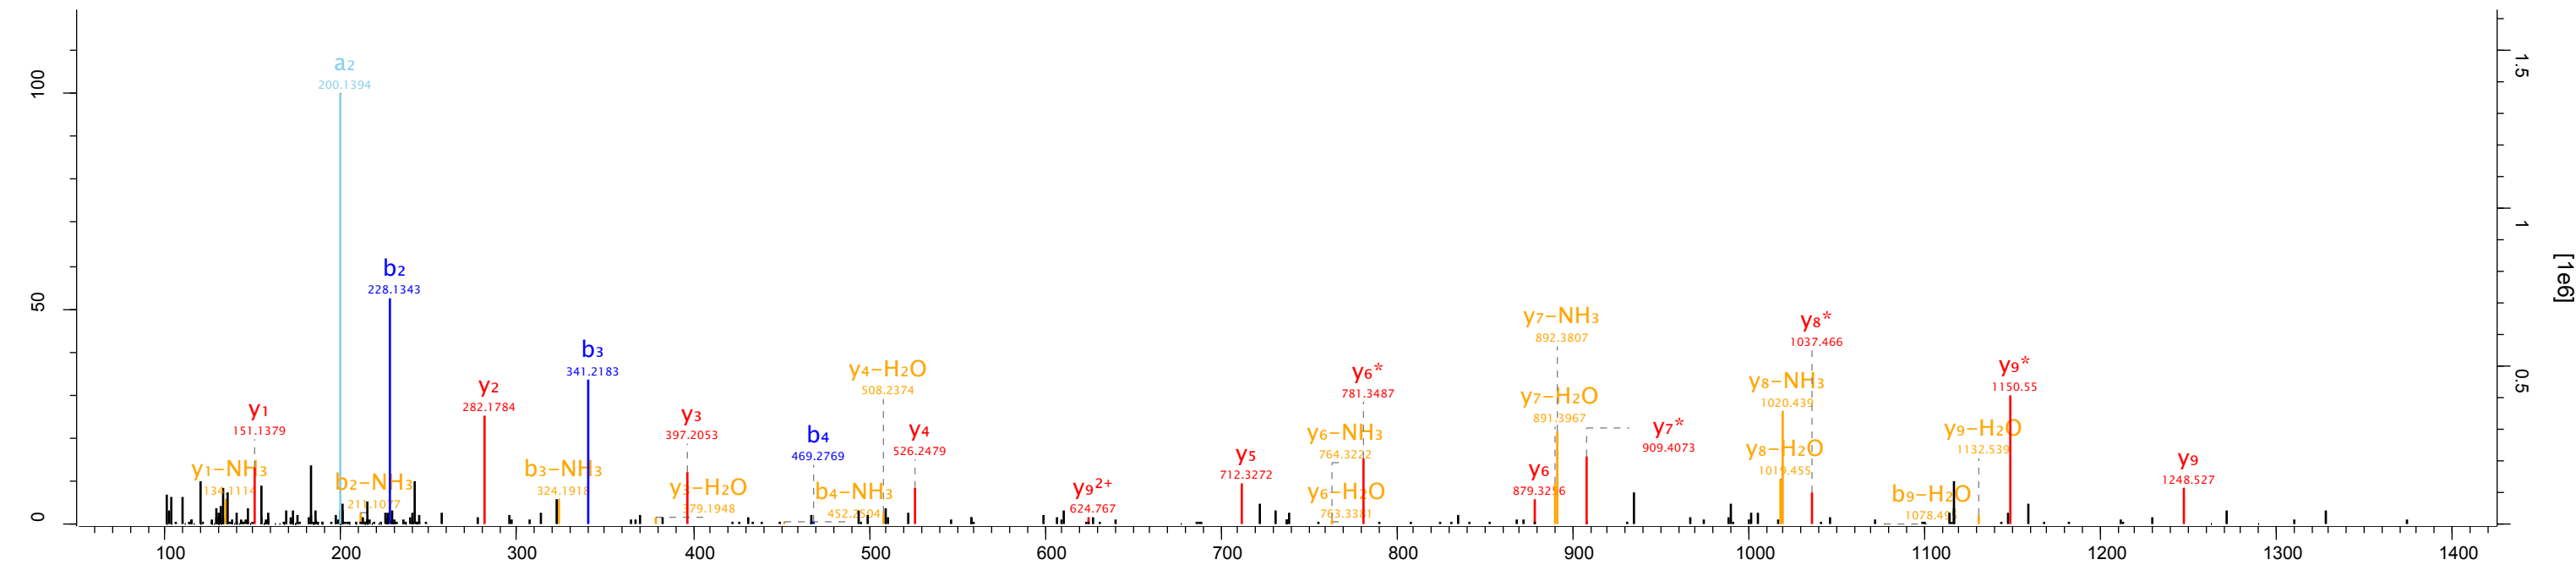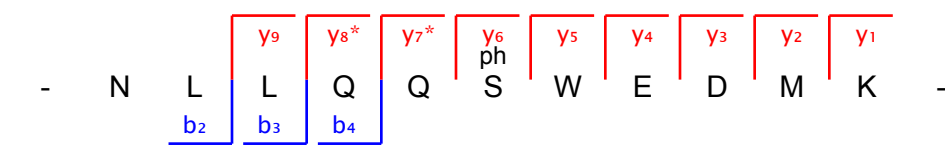

Raw file: 20150814\_A375SR\_Phospho\_BR2\_04  
 Scan: 21193 Method: FTMS; HCD Score: 160.52 m/z: 1052.95 Gene names: ADD3

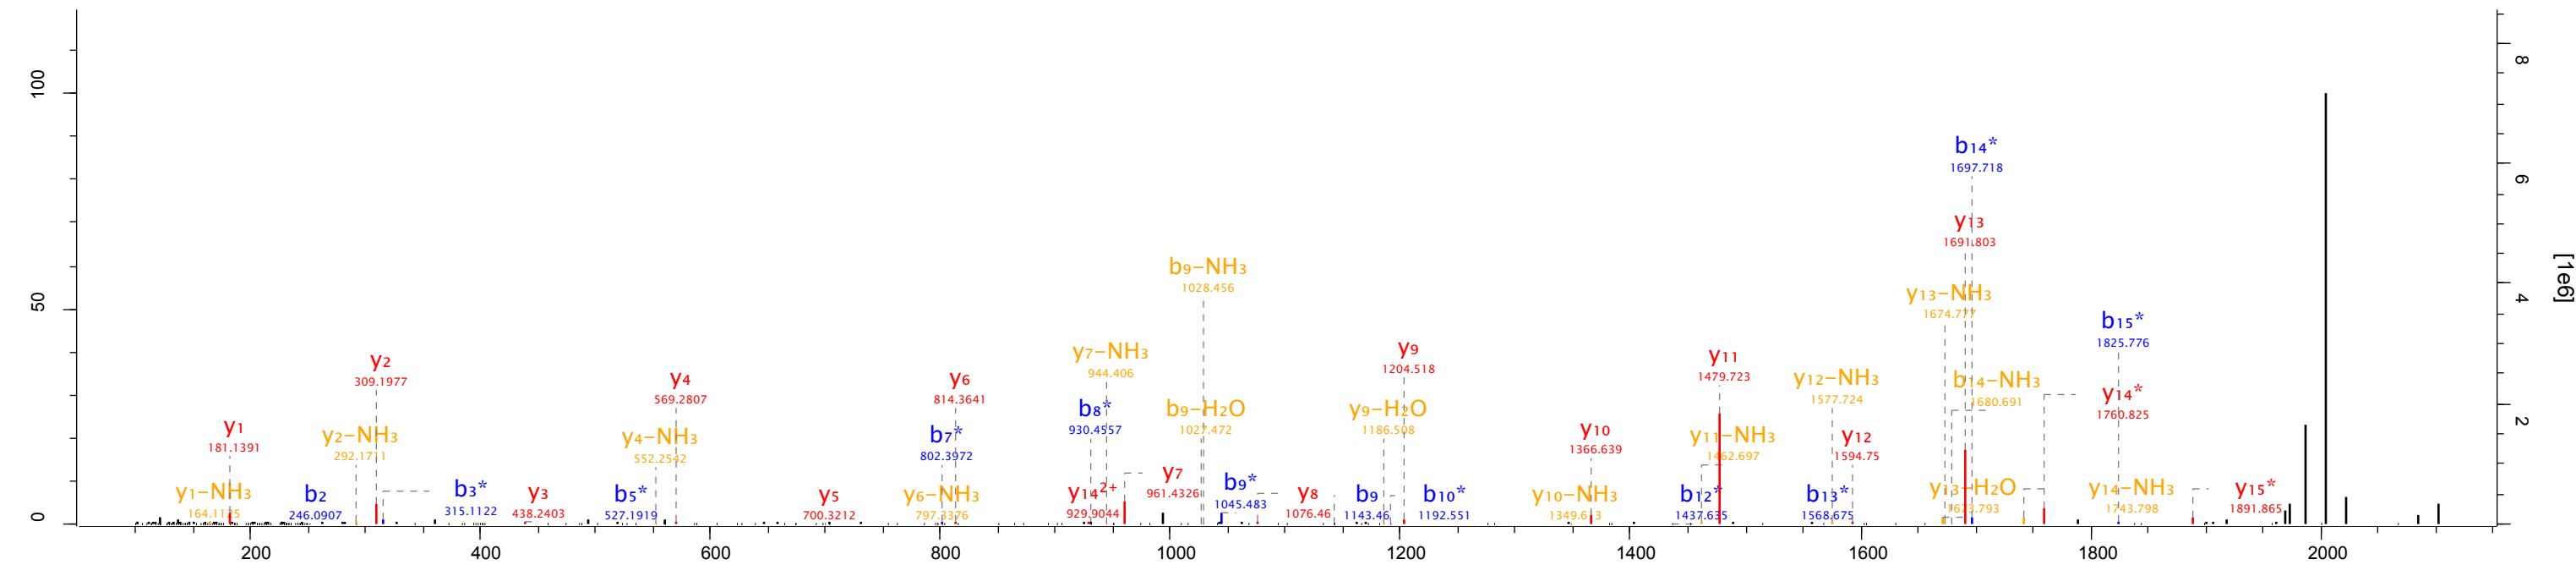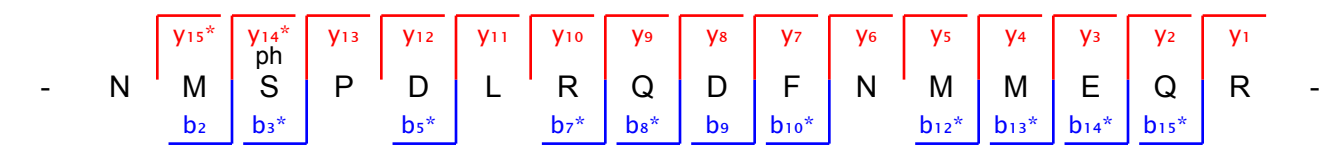

Raw file  
20150814\_A375SR\_Phospho\_BR2\_04

Scan 2143 Method FTMS; HCD Score 271.73 m/z 566.91 Gene names ILF3

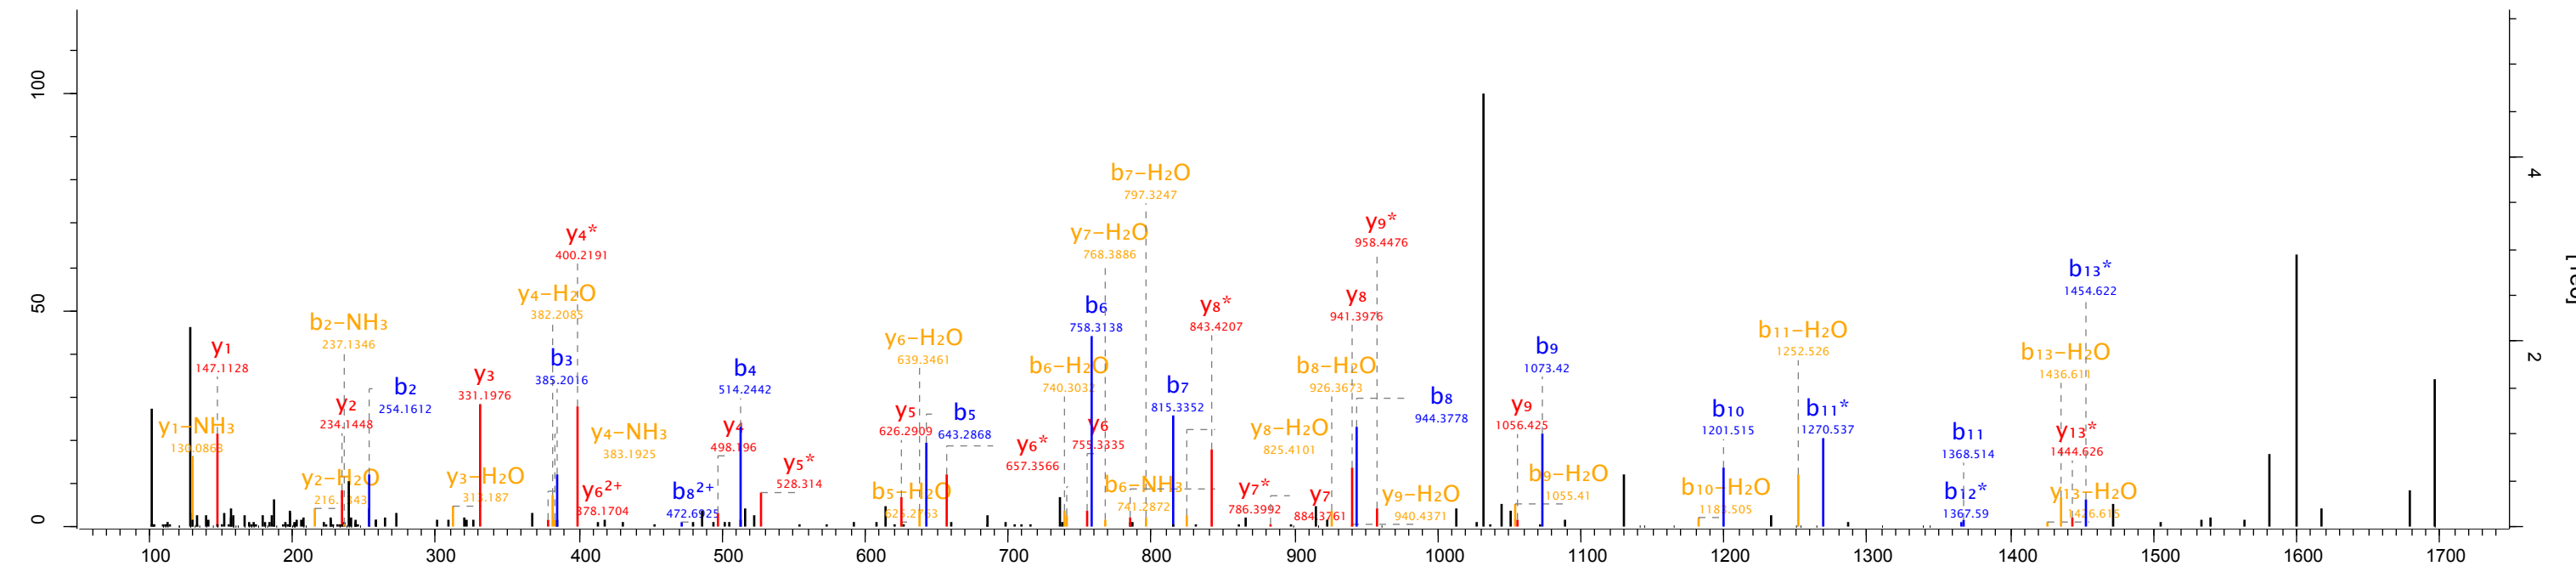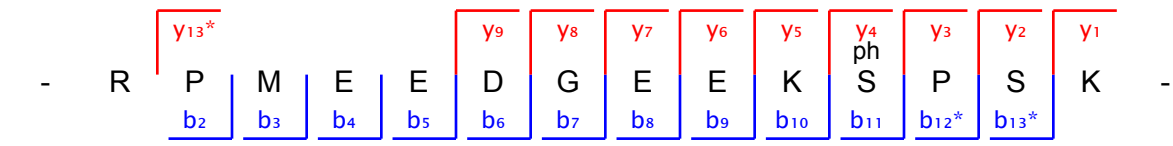

Raw file: 20150814\_A375SR\_Phospho\_BR2\_04  
 Scan: 21463 Method: FTMS; HCD Score: 142.41 m/z: 699.35 Gene names: SPECC1

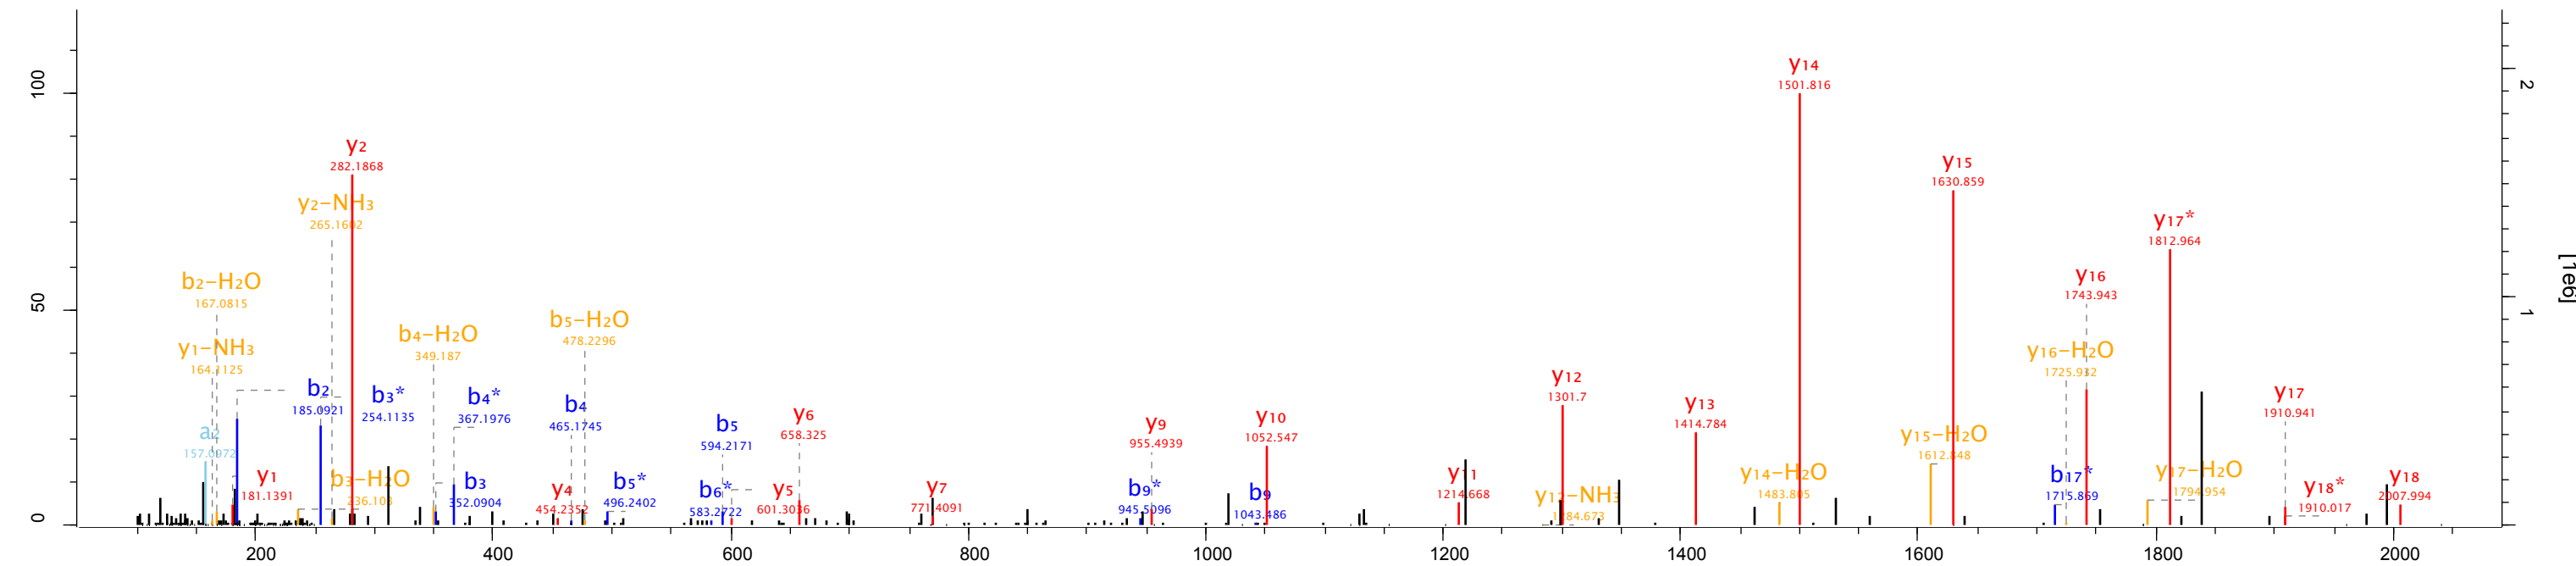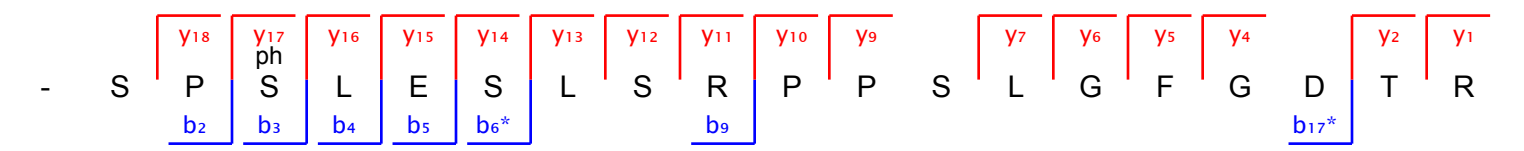

Raw file: 20150814\_A375SR\_Phospho\_BR2\_04  
 Scan: 21493  
 Method: FTMS; HCD  
 Score: 120.44  
 m/z: 1070.46  
 Gene names: HUWE1

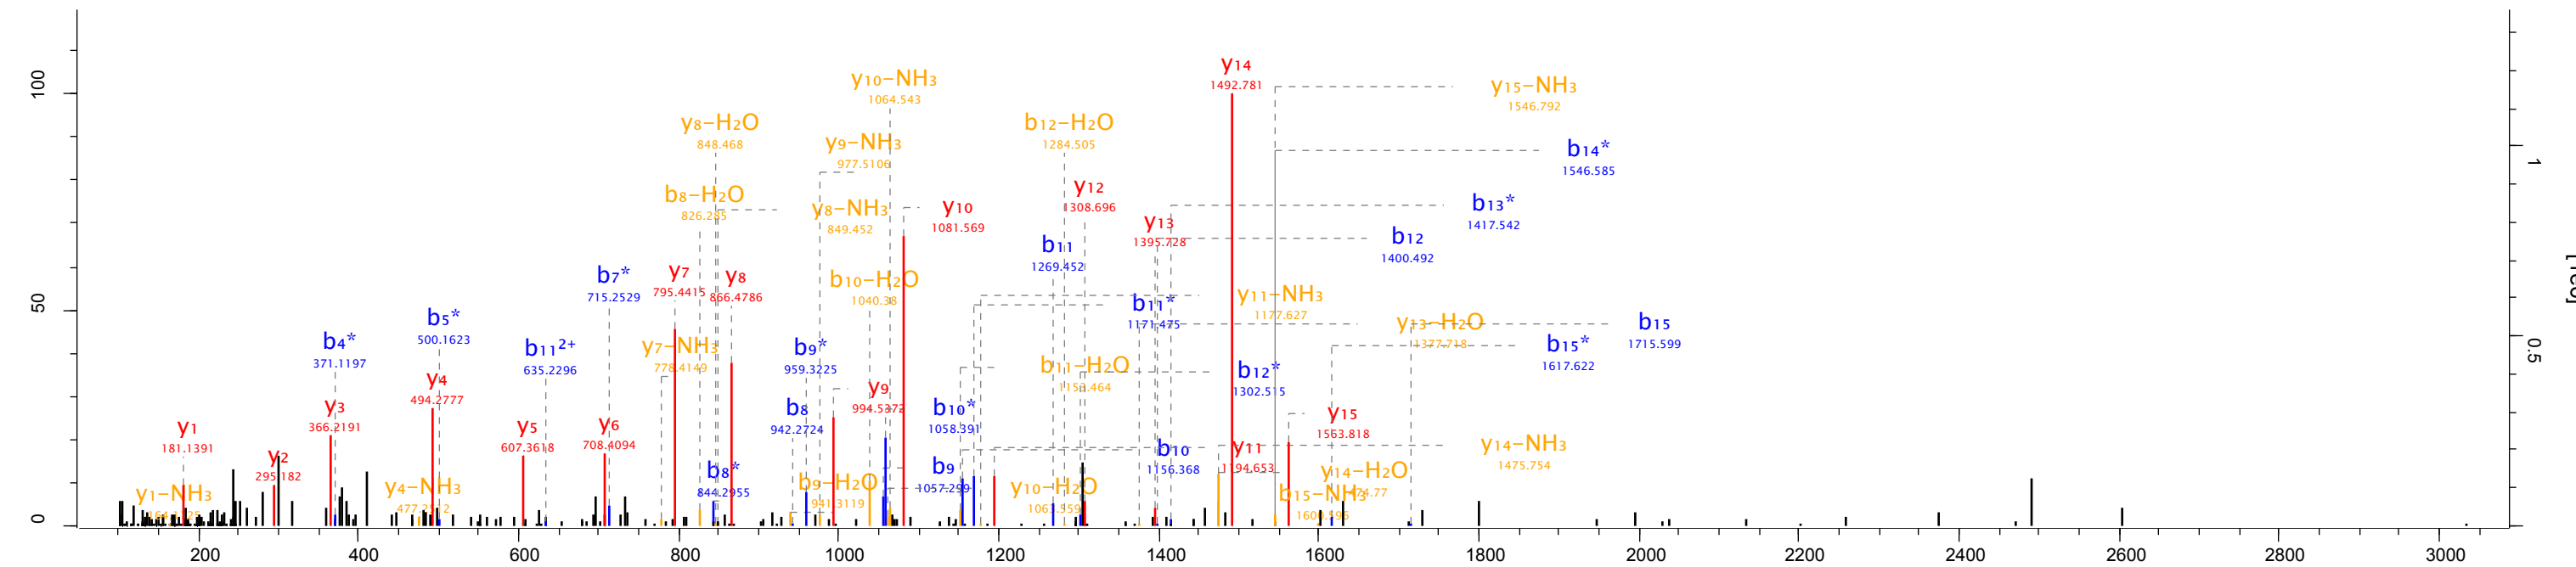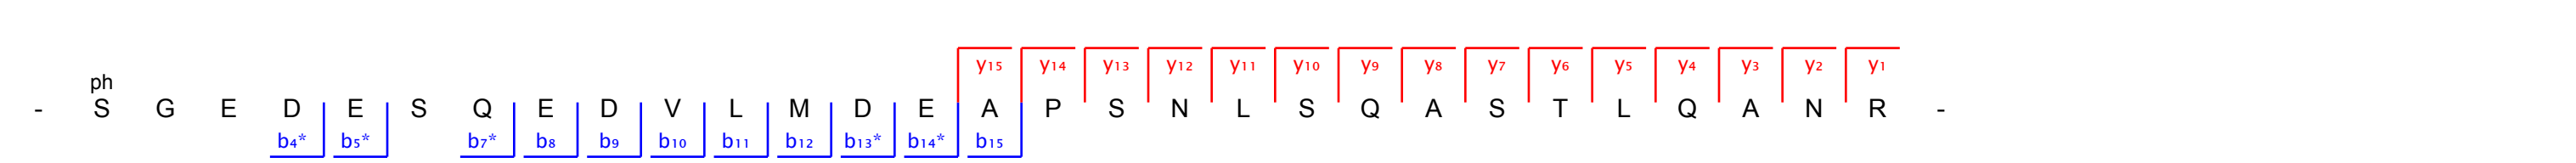

Raw file  
 20150814\_A375SR\_Phospho\_BR2\_04  
 Scan 21833 Method FTMS; HCD Score 187.89 m/z 932.75 Gene names RALGAPA1

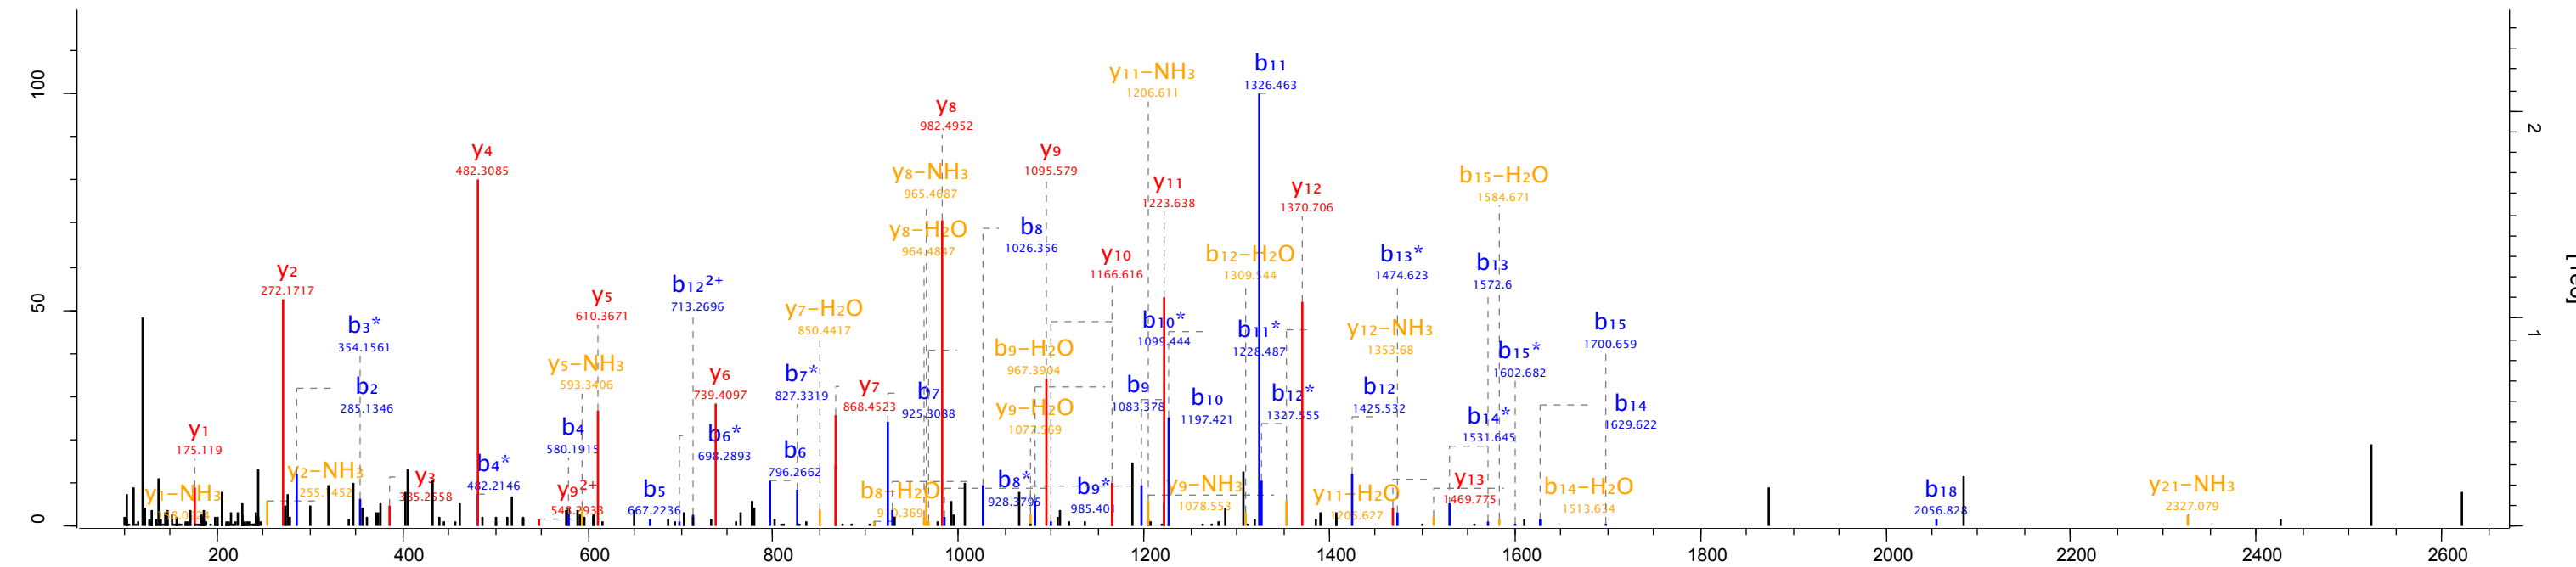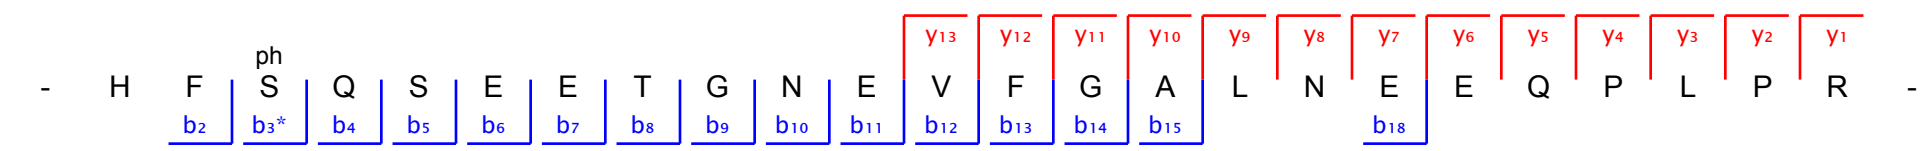

Raw file 20150814\_A375SR\_Phospho\_BR2\_04 Scan 22693 Method FTMS; HCD Score 119.58 m/z 1530.19 Gene names TP53BP1

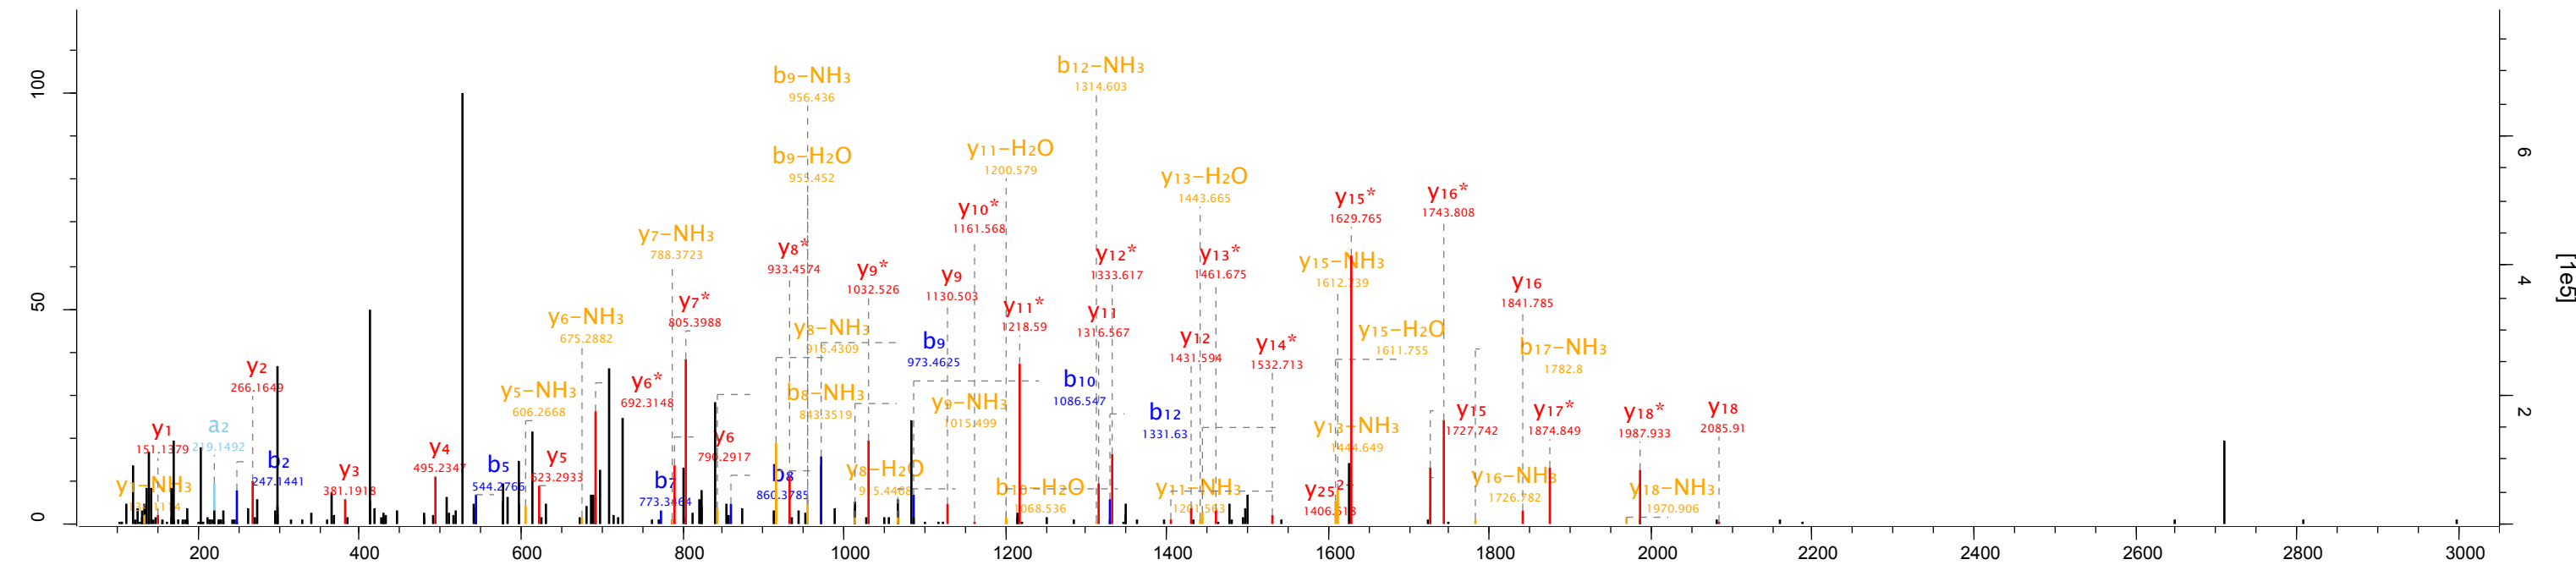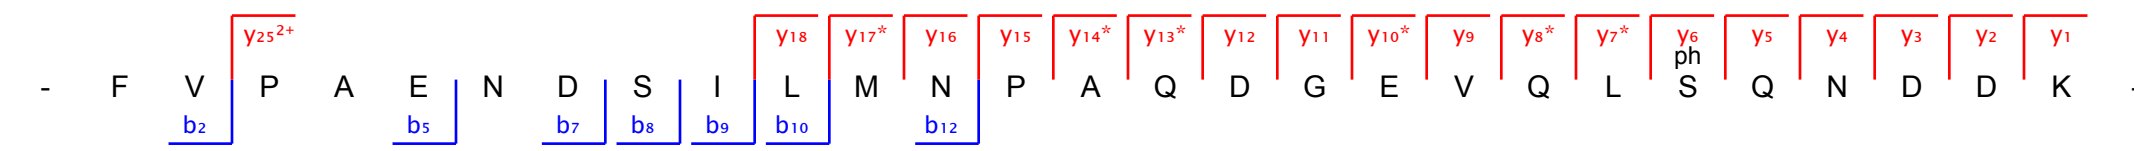



Raw file 20150814\_A375SR\_Phospho\_BR2\_04 Scan 23543 Method FTMS; HCD Score 96.85 m/z 877.95 Gene names DMAP1

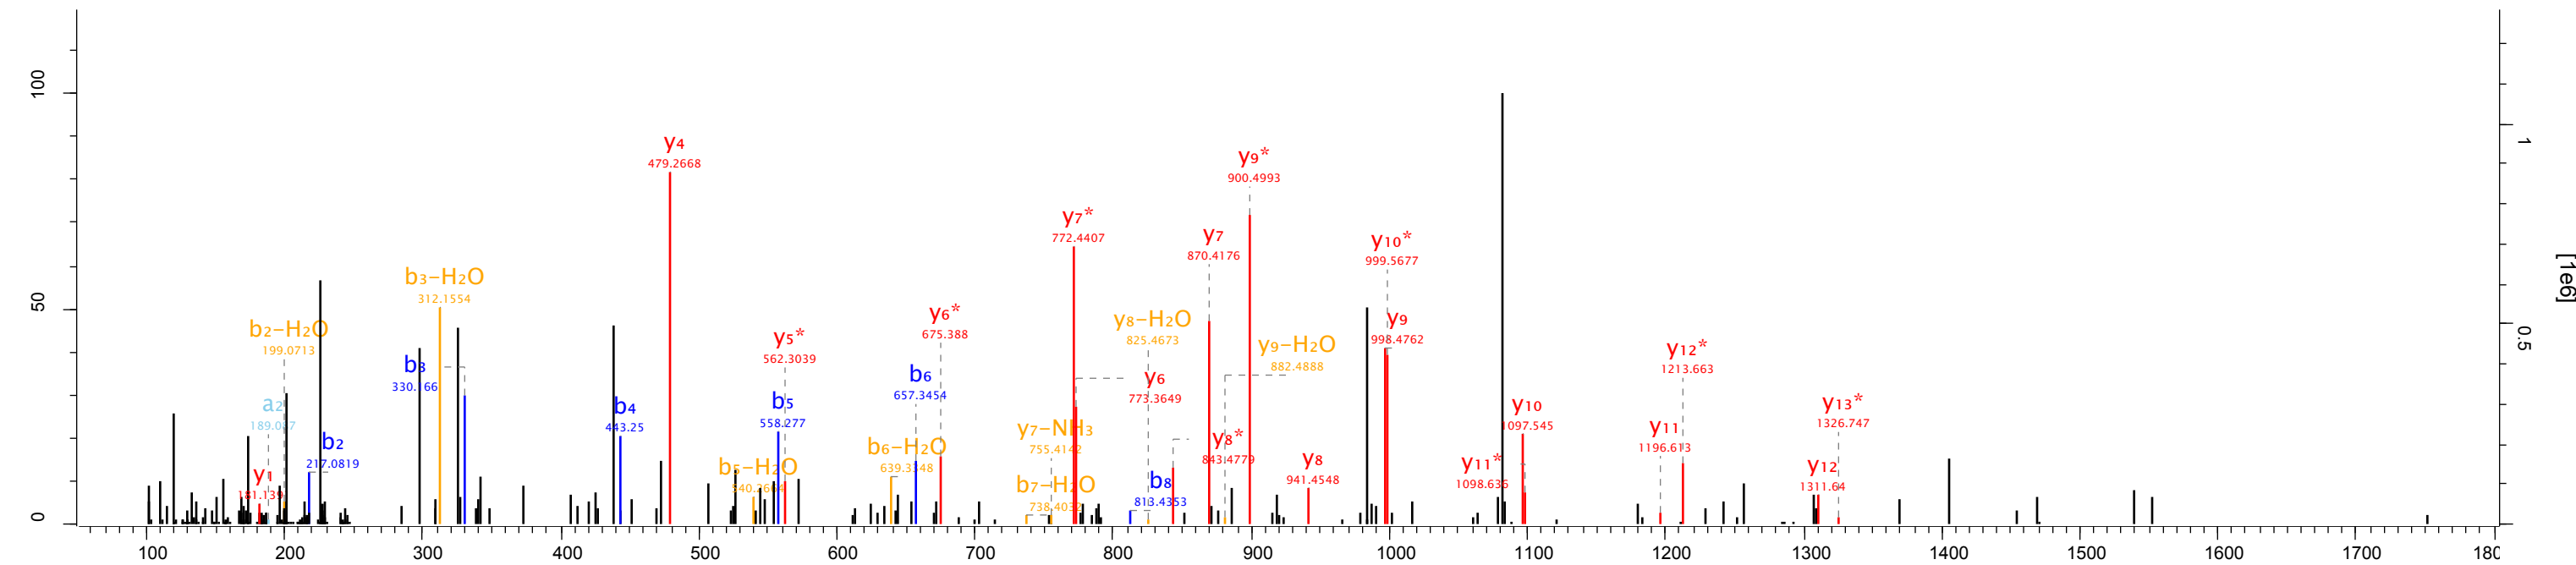

- D T I I D V V G A P L T P N S R -

b<sub>2</sub>
b<sub>3</sub>
b<sub>4</sub>
b<sub>5</sub>
b<sub>6</sub>
b<sub>8</sub>
y<sub>13</sub>\*
y<sub>12</sub>
y<sub>11</sub>
y<sub>10</sub>
y<sub>9</sub>
y<sub>8</sub>
y<sub>7</sub>
y<sub>6</sub>
y<sub>5</sub>\*
y<sub>4</sub>
y<sub>1</sub>

Raw file: 20150814\_A375SR\_Phospho\_BR2\_04  
 Scan: 24173 Method: FTMS; HCD Score: 77.49 m/z: 829.74 Gene names: PHLDB2

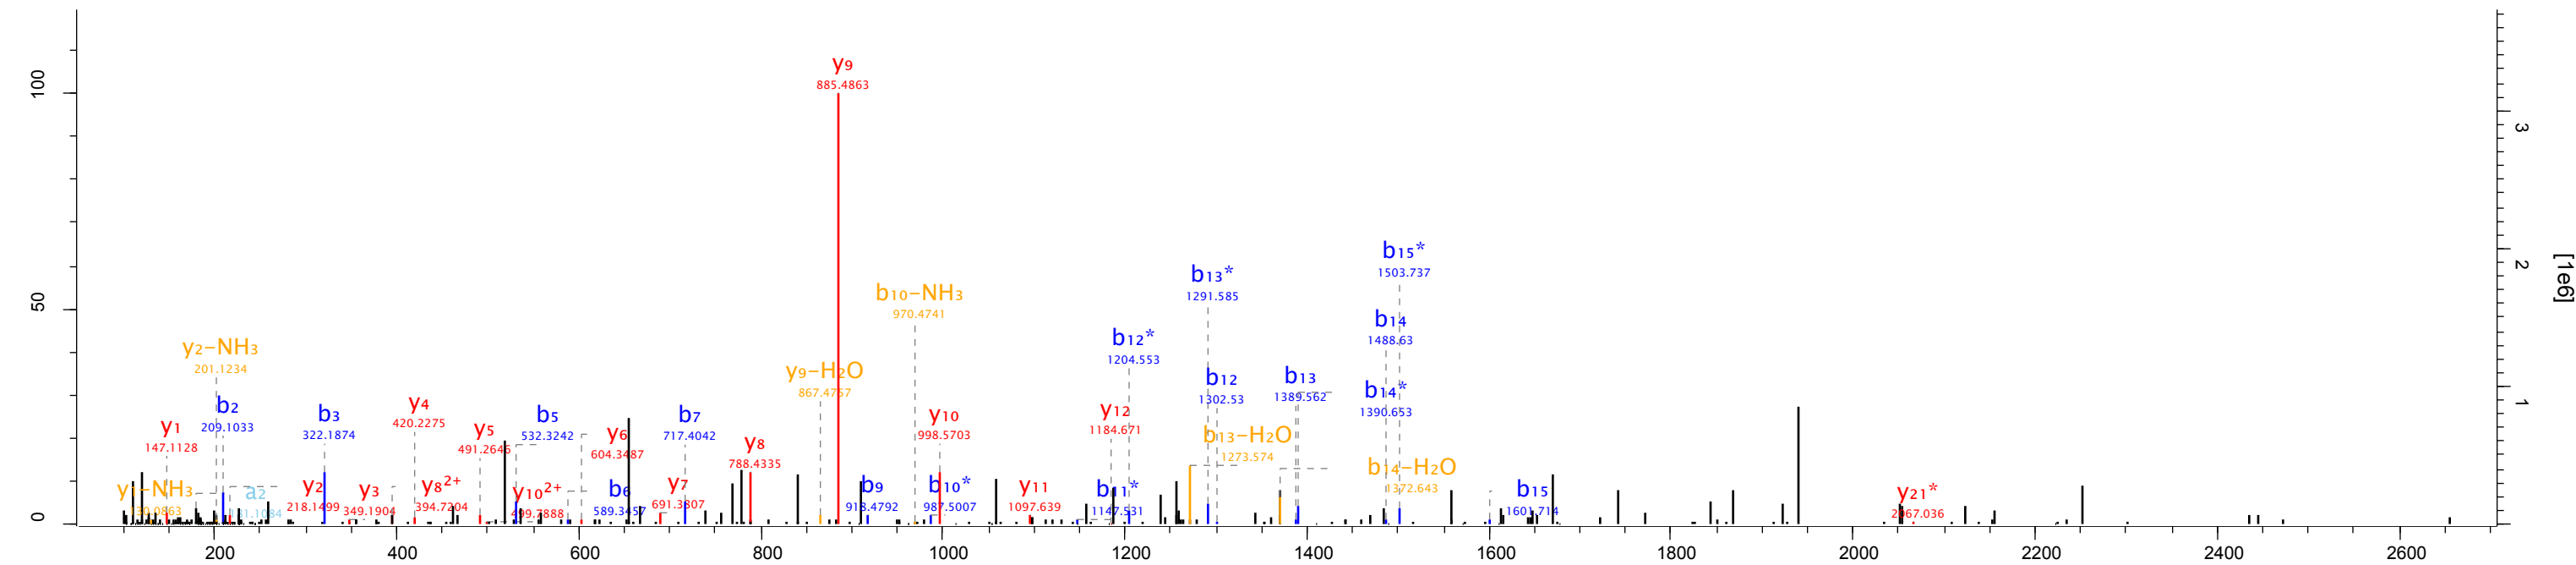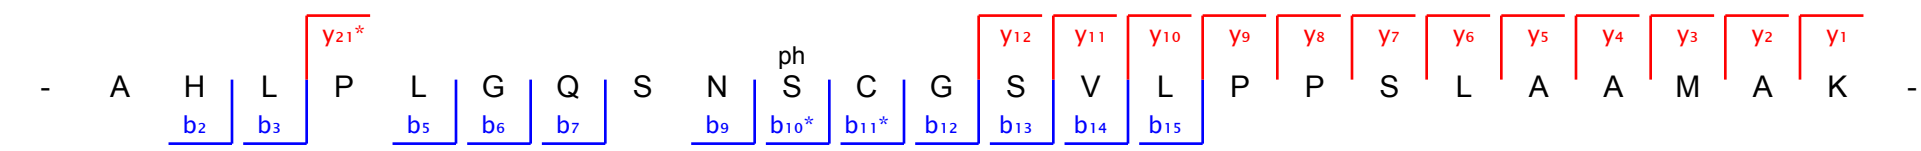

Raw file: 20150814\_A375SR\_Phospho\_BR2\_04  
 Scan: 24373 Method: FTMS; HCD Score: 128.01 m/z: 936.48 Gene names: INCENP

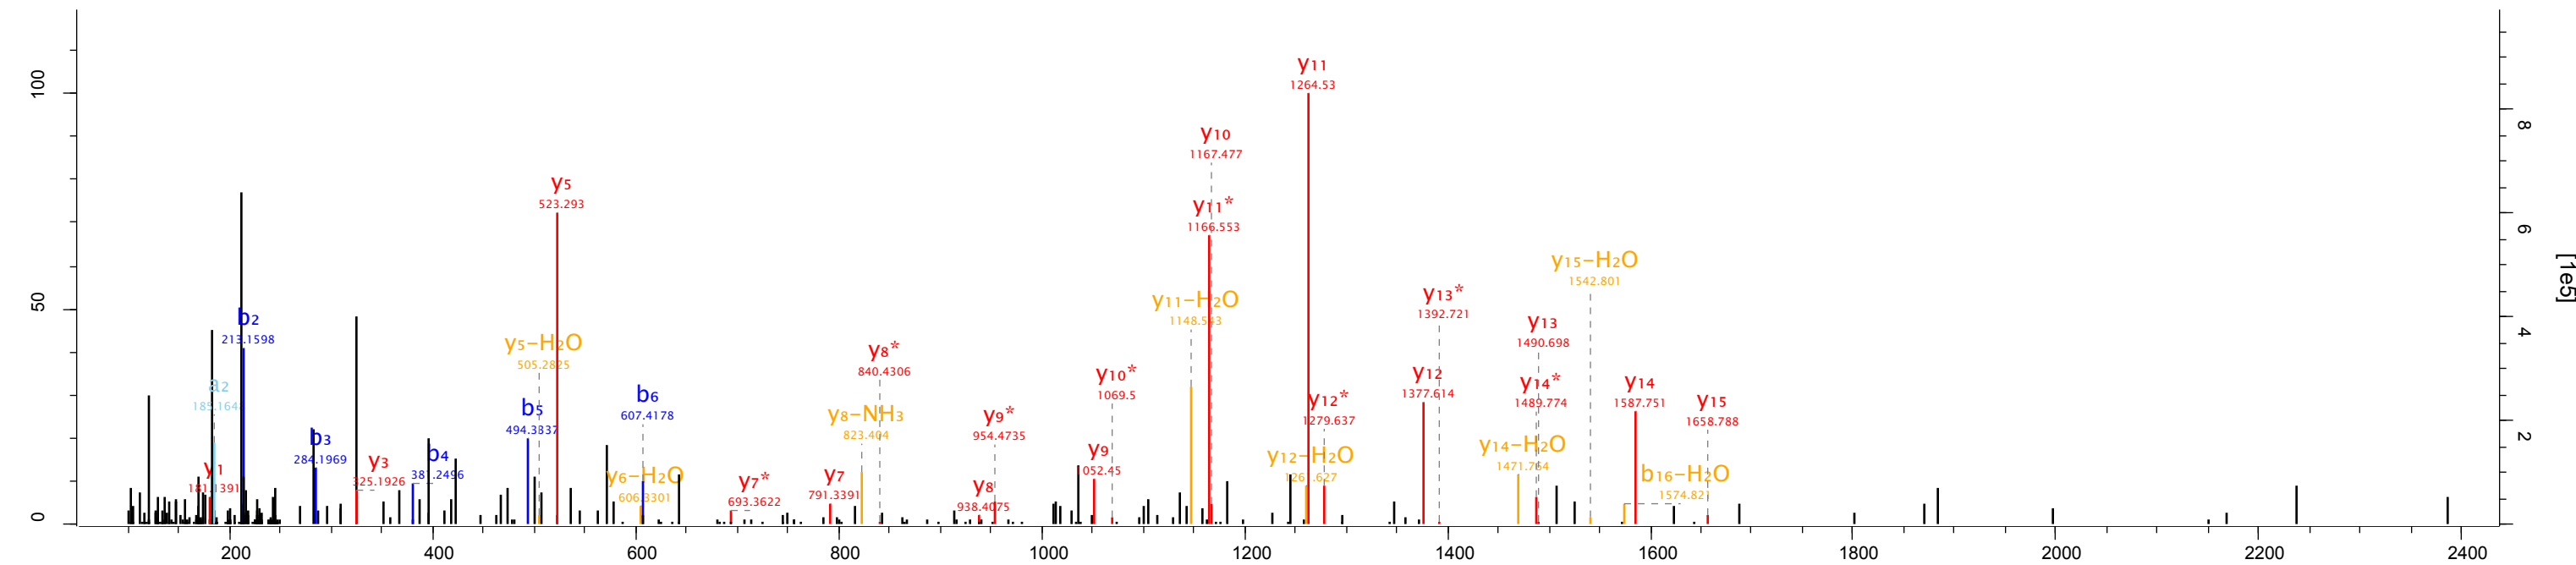

Raw file 20150814\_A375SR\_Phospho\_BR2\_04 Scan 25173 Method FTMS; HCD Score 146.13 m/z 989.47 Gene names LIMCH1

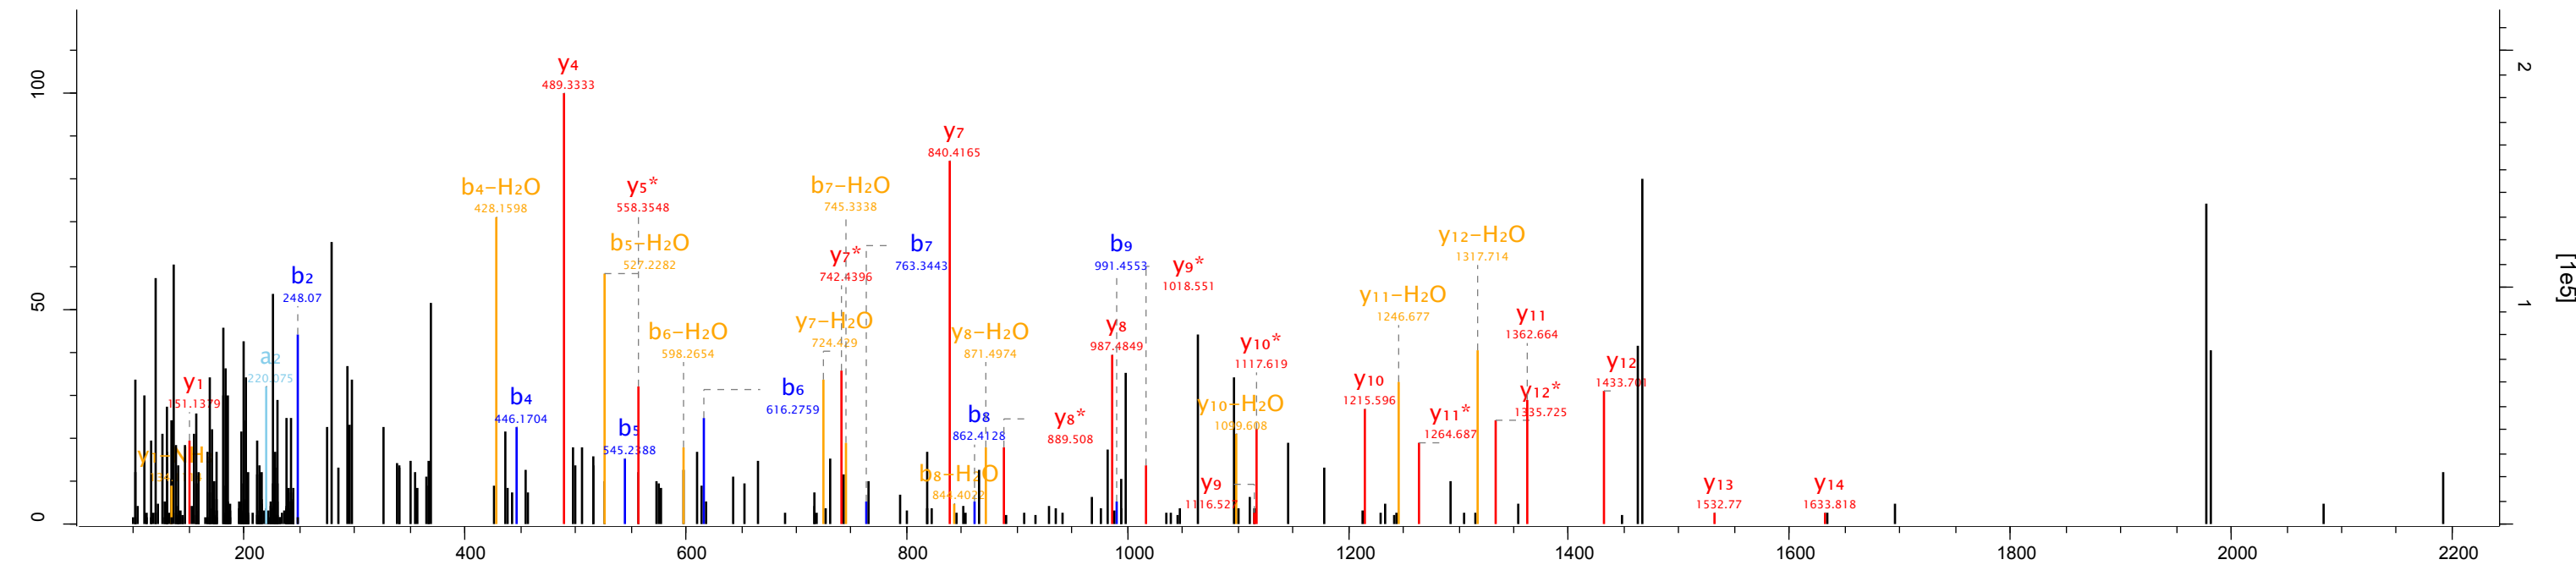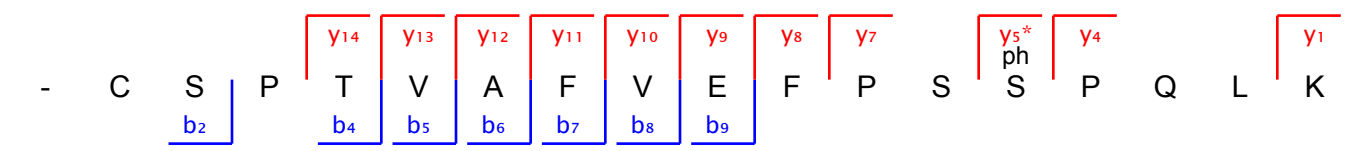

Raw file: 20150814\_A375SR\_Phospho\_BR2\_04  
 Scan: 2523 Method: FTMS; HCD Score: 96.49 m/z: 495.24 Gene names: WRNIP1

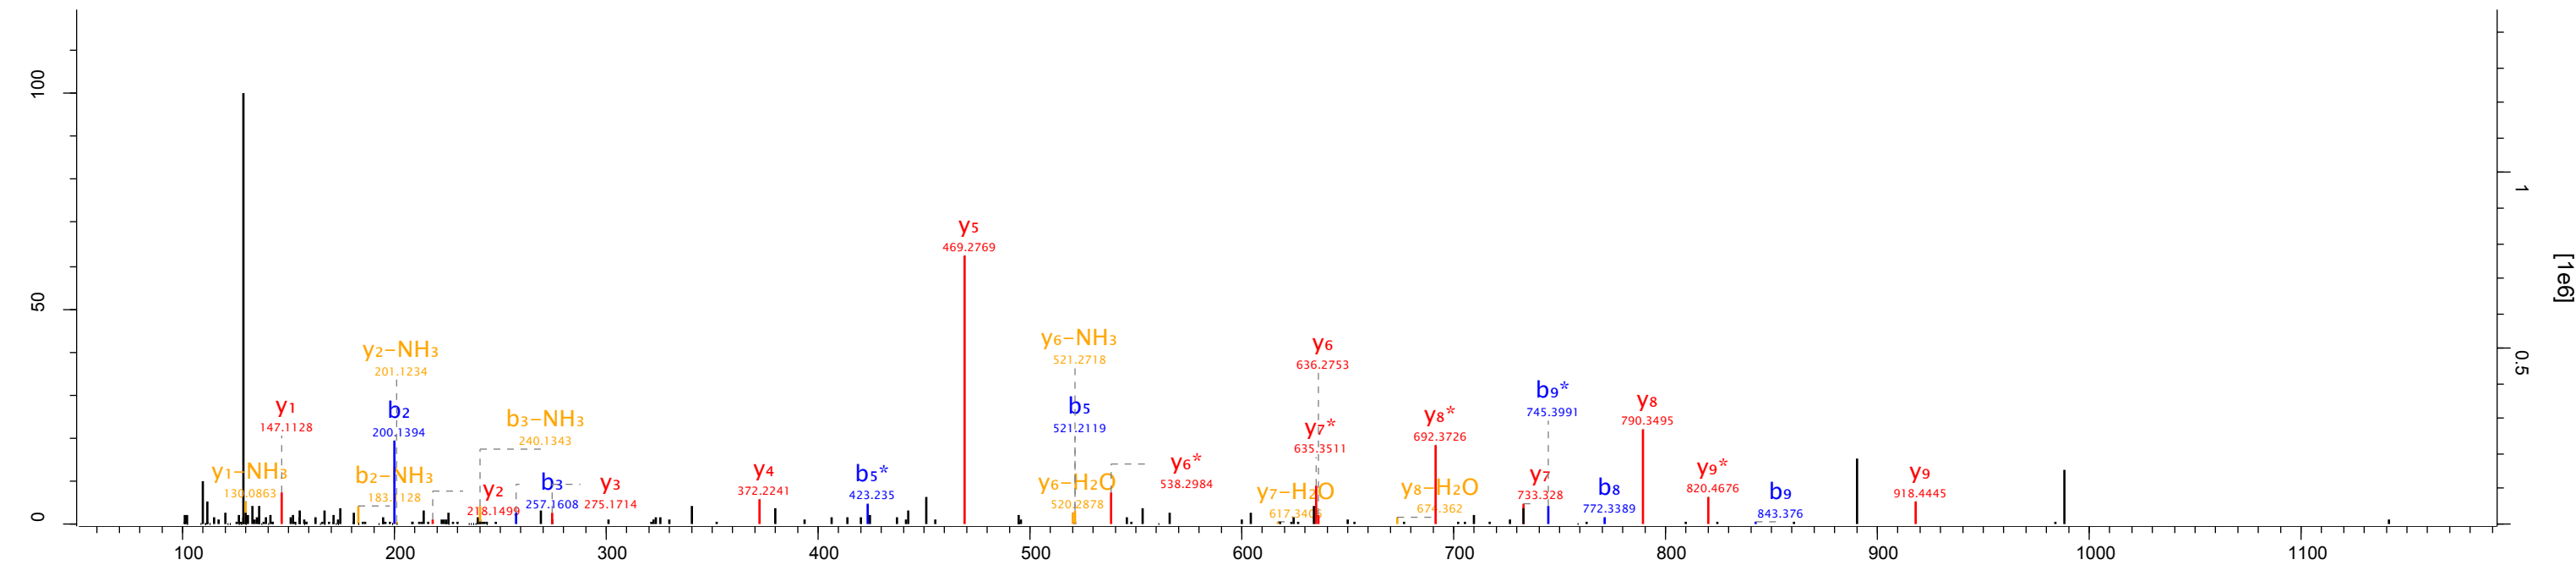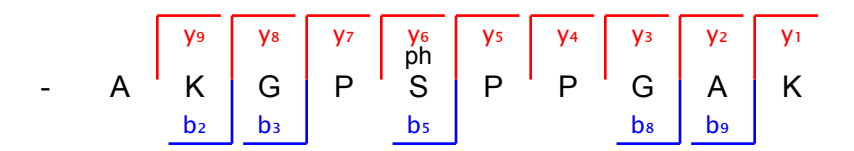

Raw file: 20150814\_A375SR\_Phospho\_BR2\_04  
 Scan: 25323 Method: FTMS; HCD Score: 120.42 m/z: 858.44 Gene names: RFX7

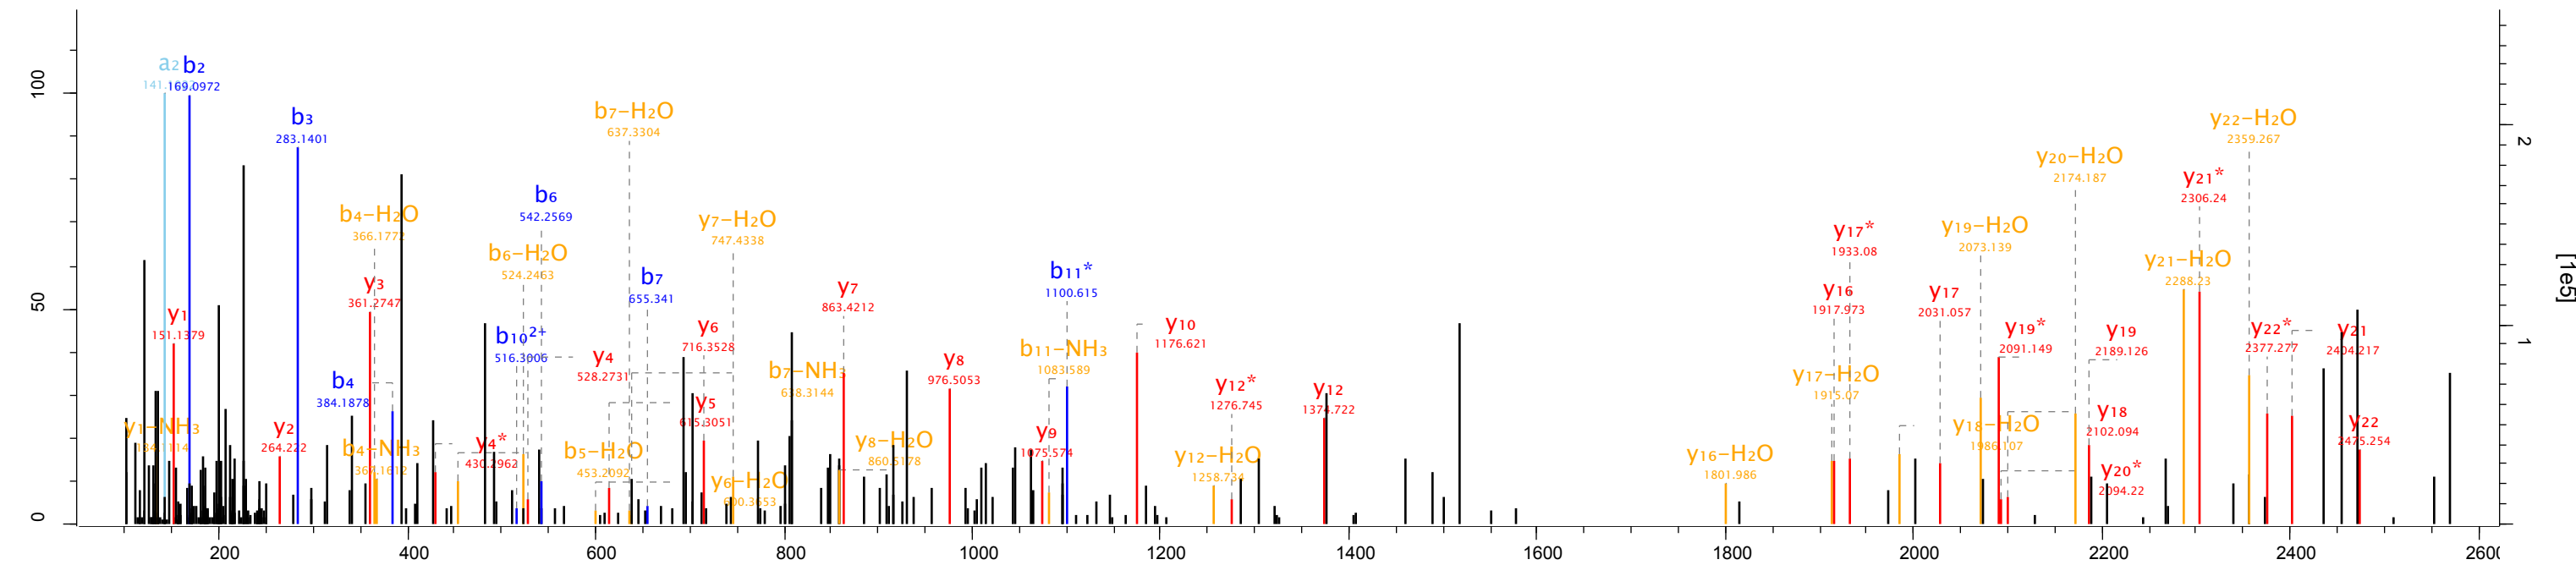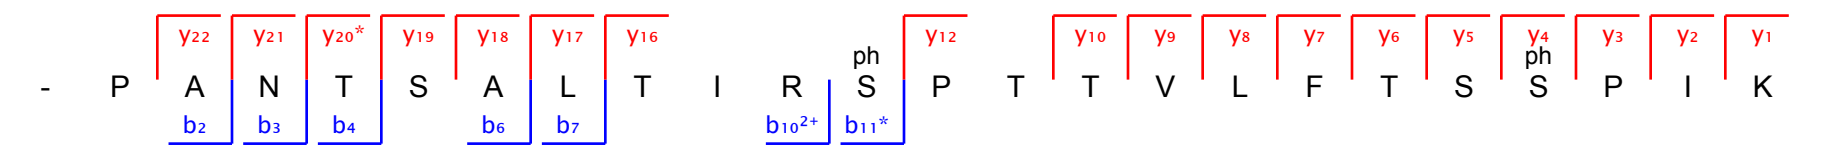

Raw file: 20150814\_A375SR\_Phospho\_BR2\_04  
 Scan: 25643 Method: FTMS; HCD Score: 157.85 m/z: 1048.76 Gene names: CCDC6

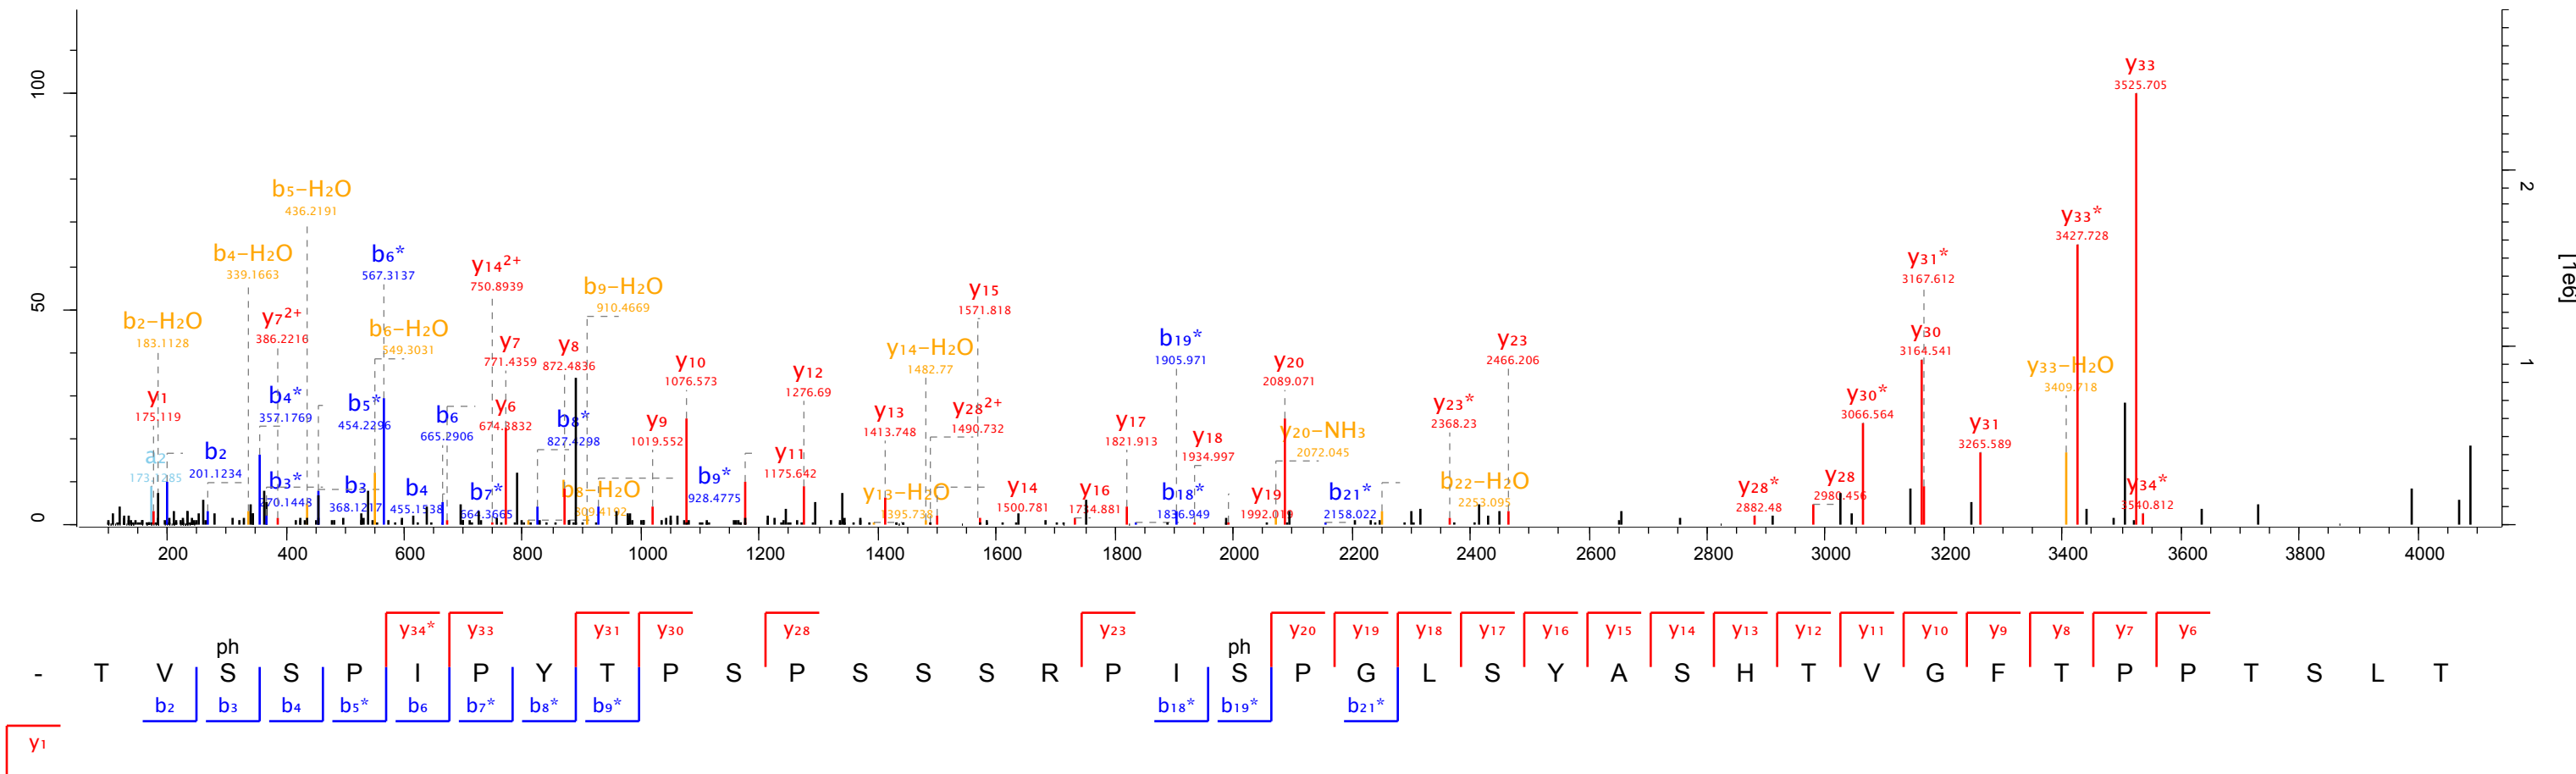

Raw file: 20150814\_A375SR\_Phospho\_BR2\_04  
 Scan: 25653 Method: FTMS; HCD Score: 76.31 m/z: 823.37 Gene names: SNX15

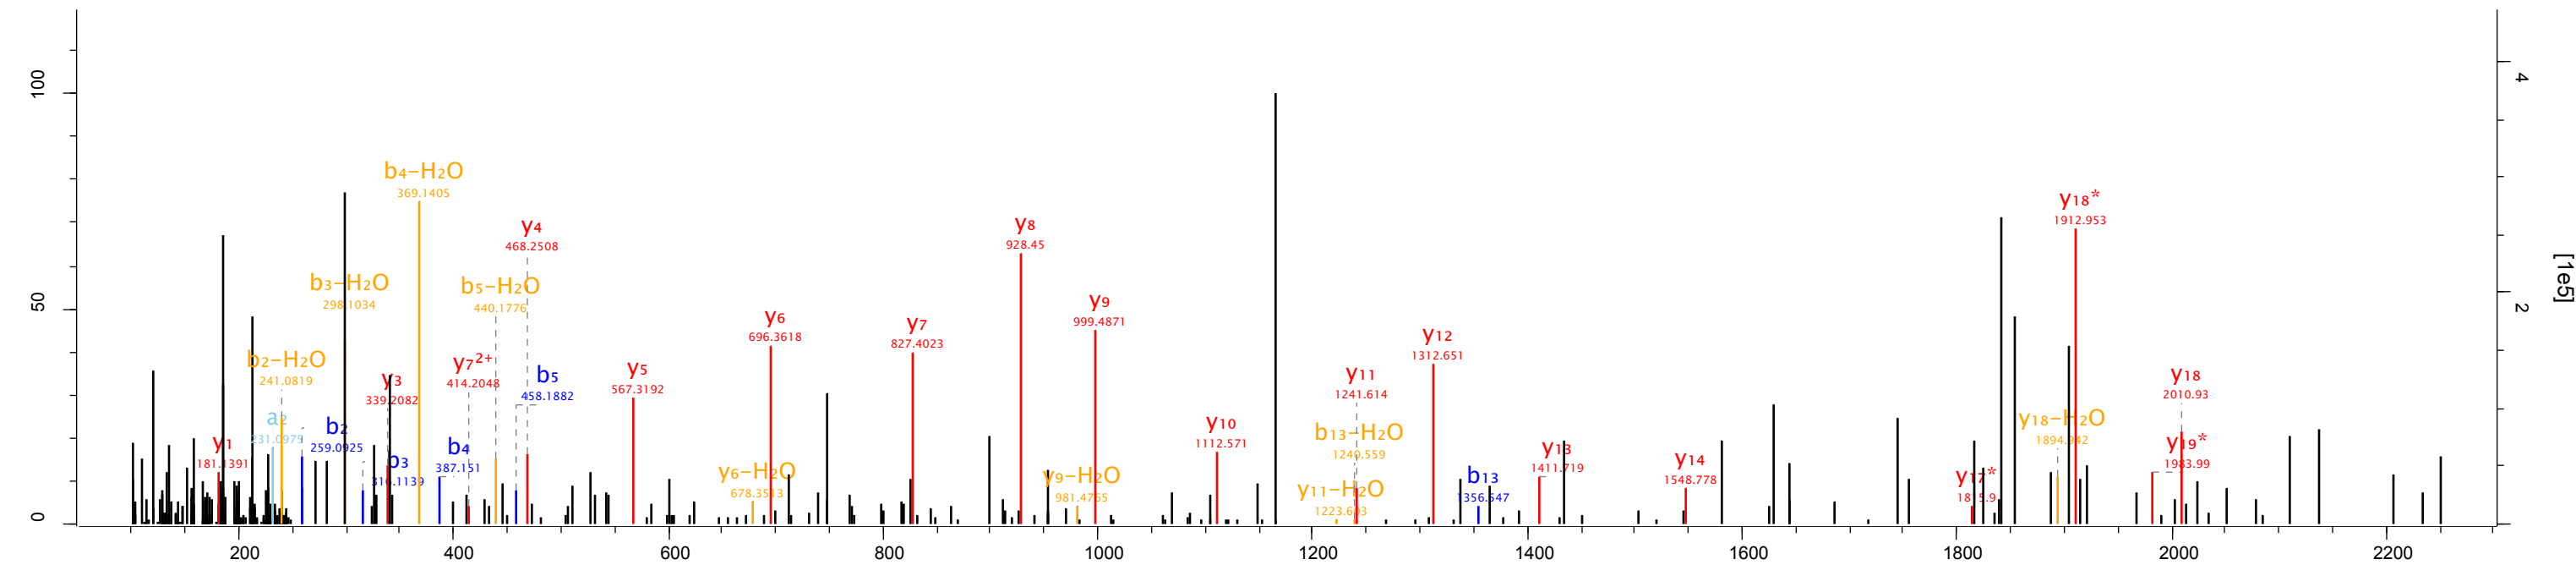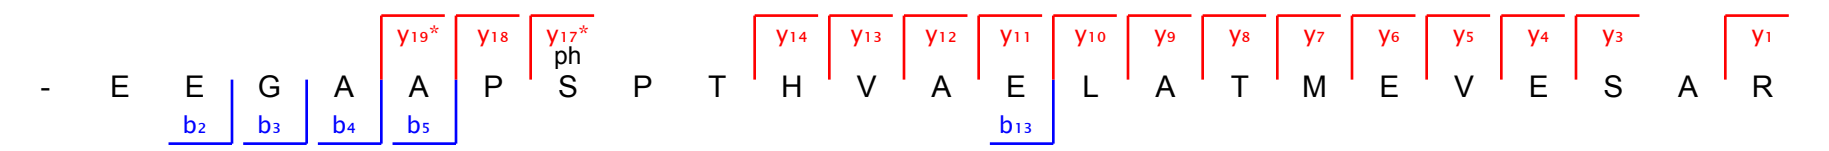



Raw file: 20150814\_A375SR\_Phospho\_BR2\_04  
 Scan: 25763 Method: FTMS; HCD Score: 97.39 m/z: 711.67 Gene names: L3MBTL2

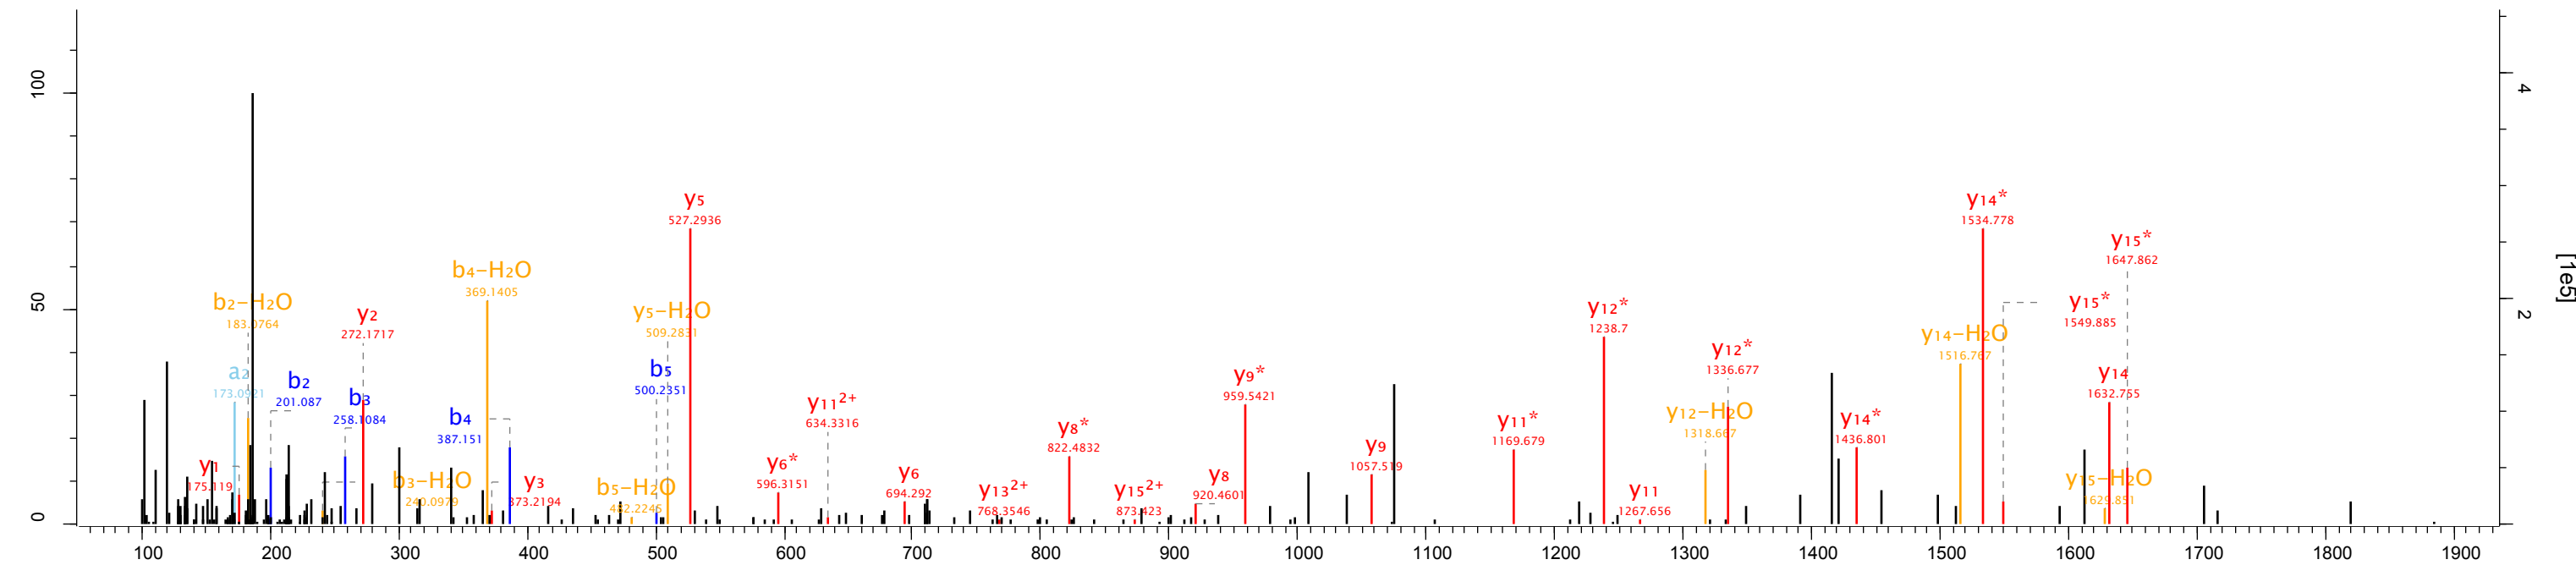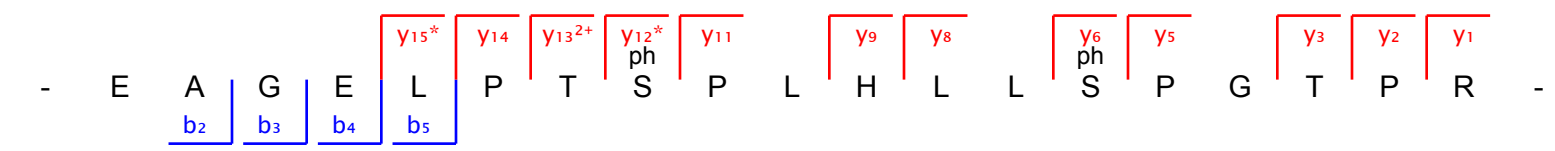

Raw file: 20150814\_A375SR\_Phospho\_BR2\_04  
 Scan: 2583 Method: FTMS; HCD Score: 54.43 m/z: 664.29 Gene names: TSC22D4

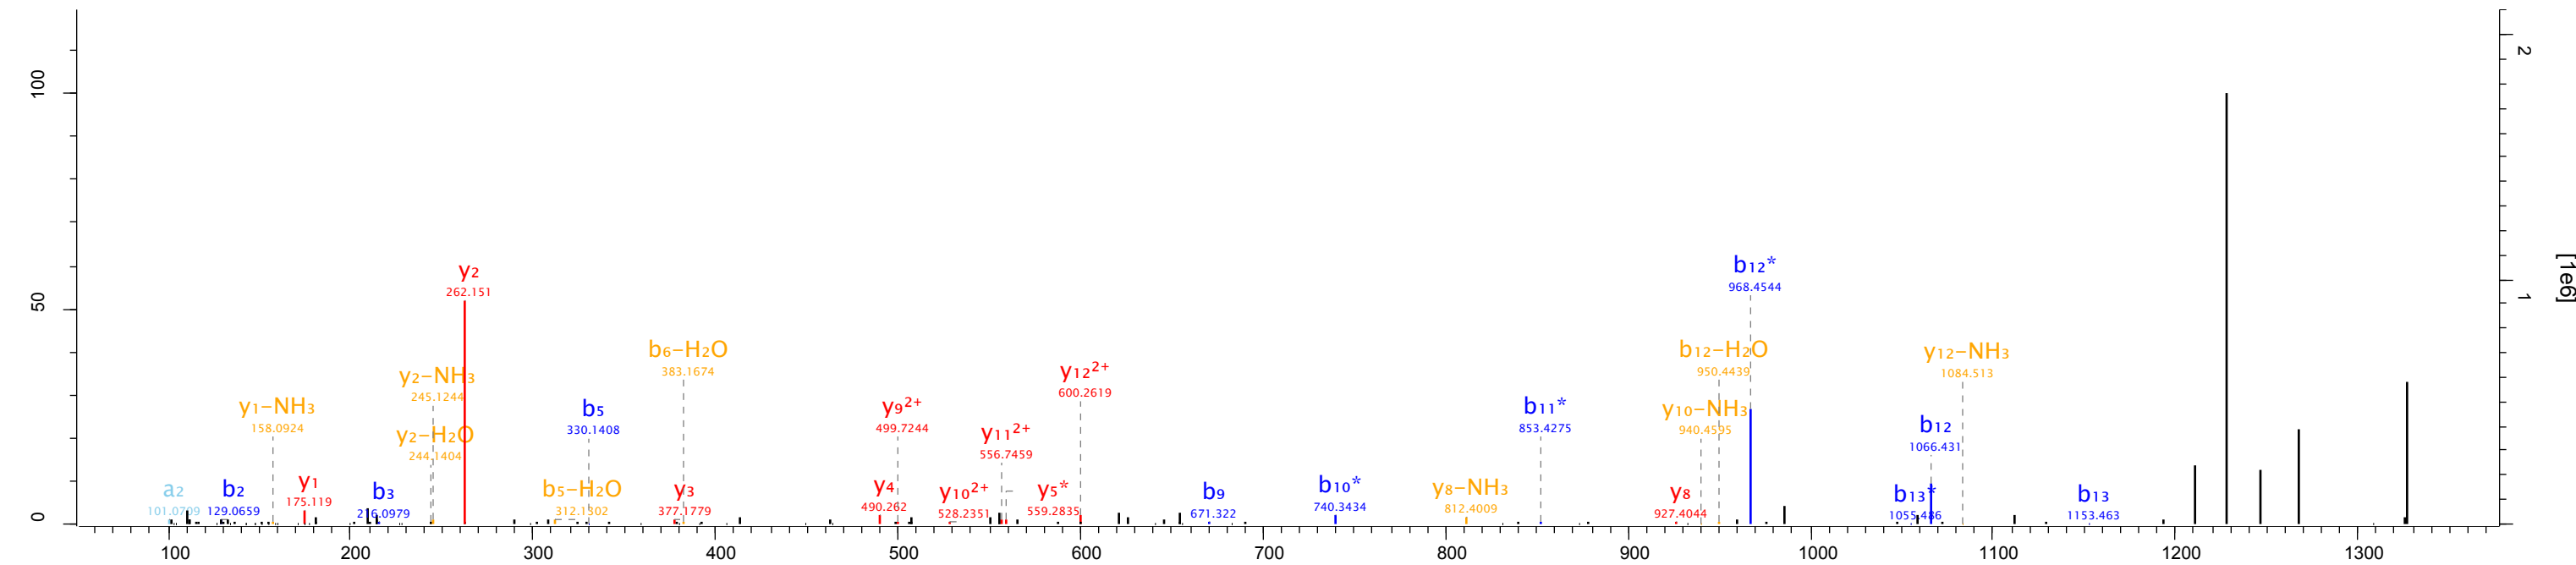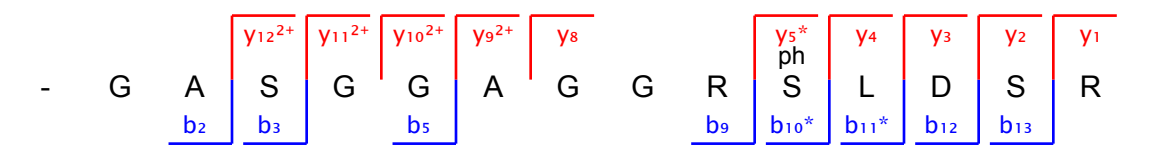

Raw file: 20150814\_A375SR\_Phospho\_BR2\_04  
 Scan: 26043 Method: FTMS; HCD Score: 116.61 m/z: 960.43 Gene names: BCAR3

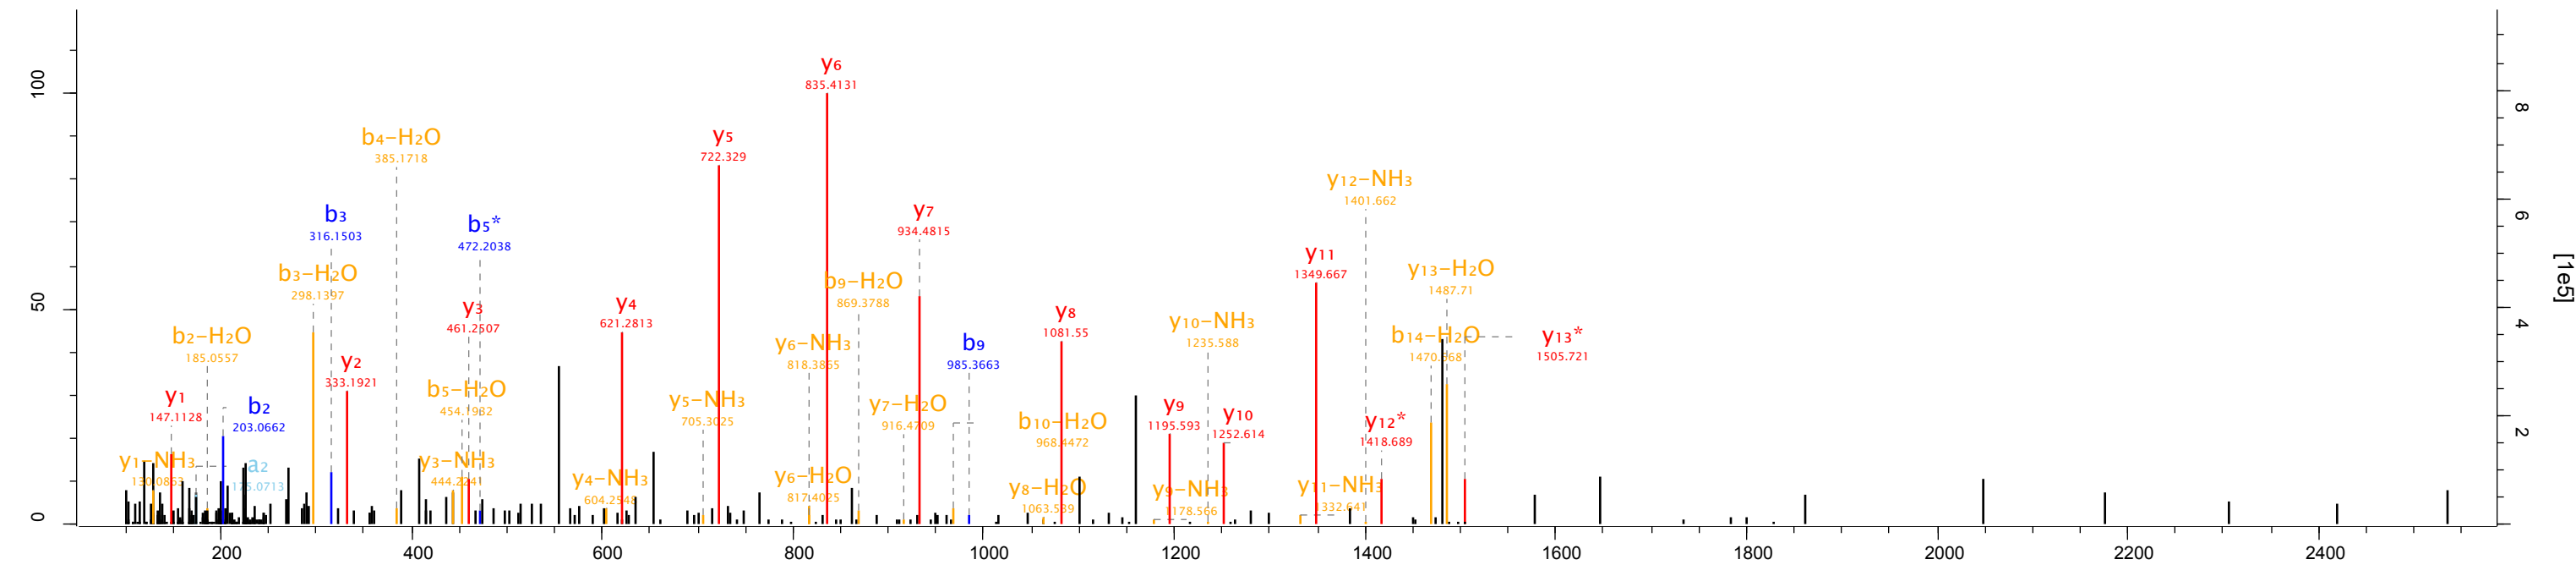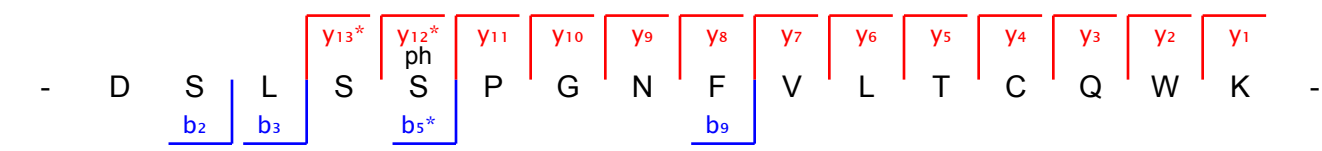

Raw file: 20150814\_A375SR\_Phospho\_BR2\_04  
 Scan: 26733 Method: FTMS; HCD Score: 203.82 m/z: 630.32 Gene names: MPRIP

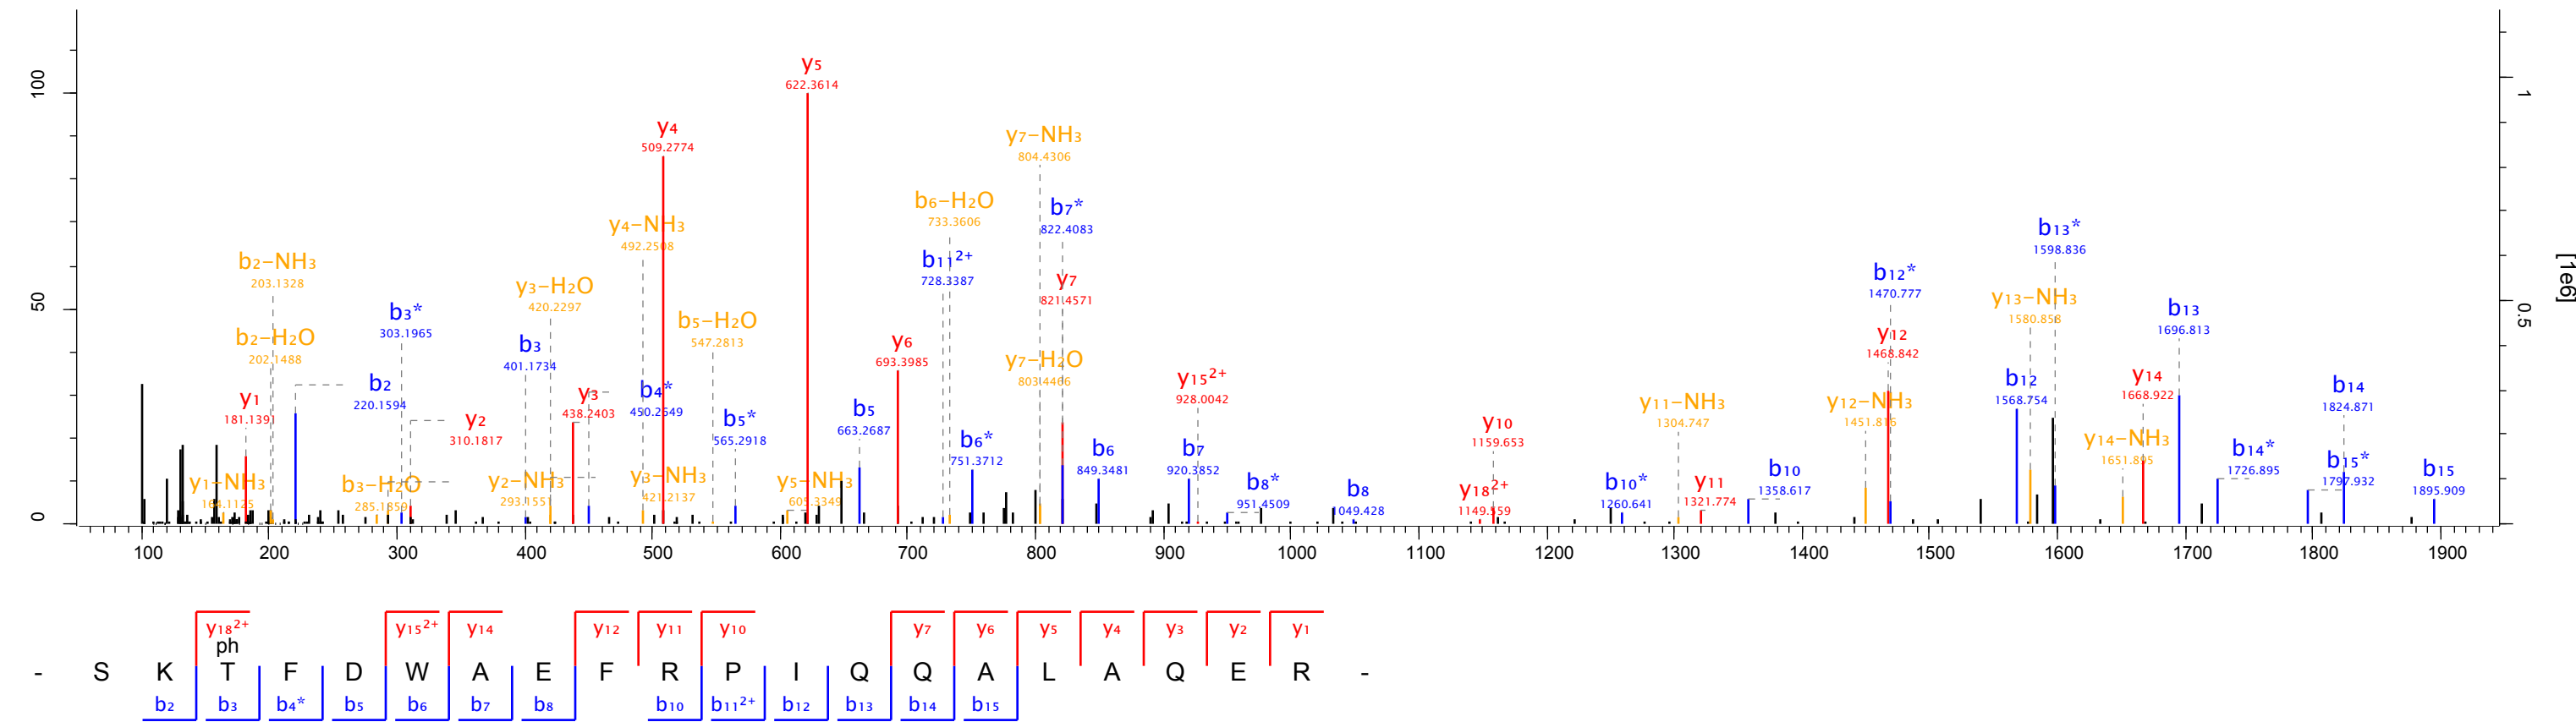

Raw file: 20150814\_A375SR\_Phospho\_BR2\_04  
 Scan: 27713 Method: FTMS; HCD Score: 238.85 m/z: 1129.54 Gene names: EHBP1

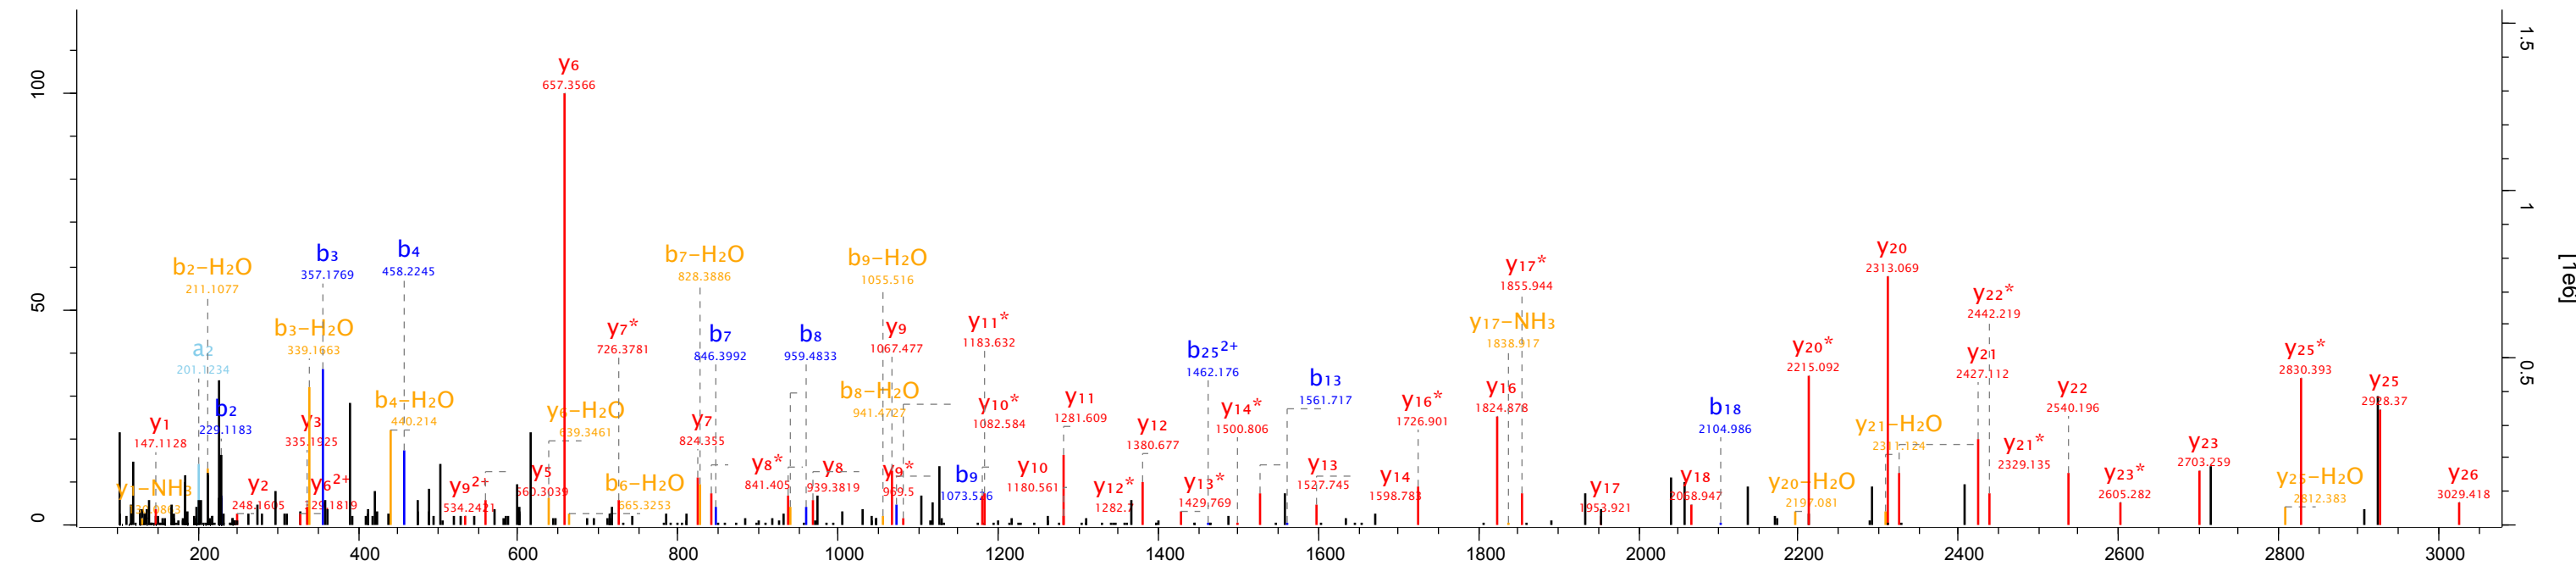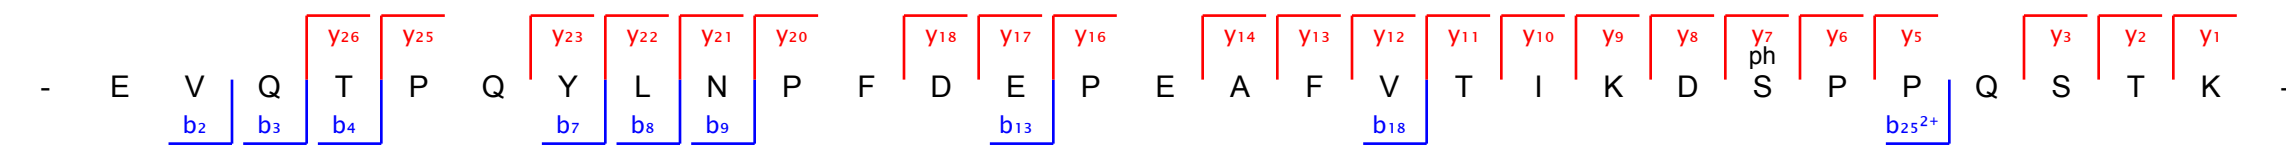

Raw file 20150814\_A375SR\_Phospho\_BR2\_04 Scan 27723 Method FTMS; HCD Score 69.49 m/z 1161.26 Gene names KIF13B

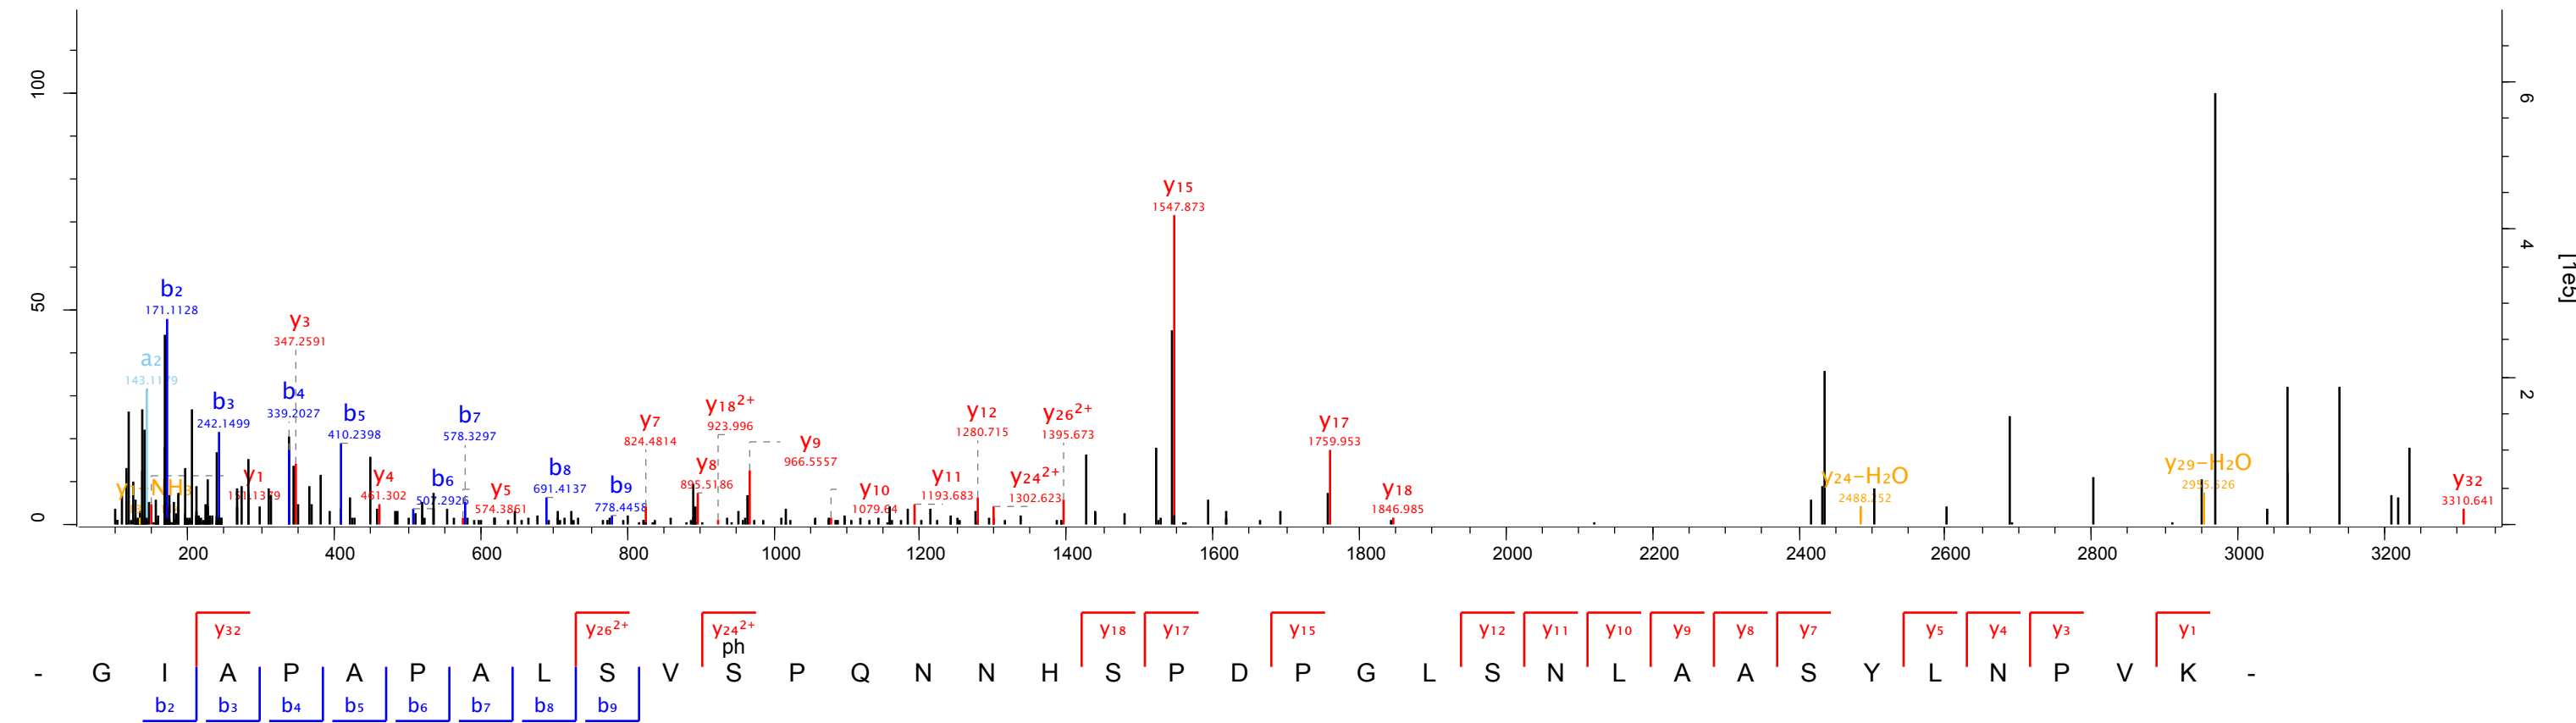

Raw file: 20150814\_A375SR\_Phospho\_BR2\_04  
 Scan: 27923 Method: FTMS; HCD Score: 200.4 m/z: 1014.54 Gene names: CAD

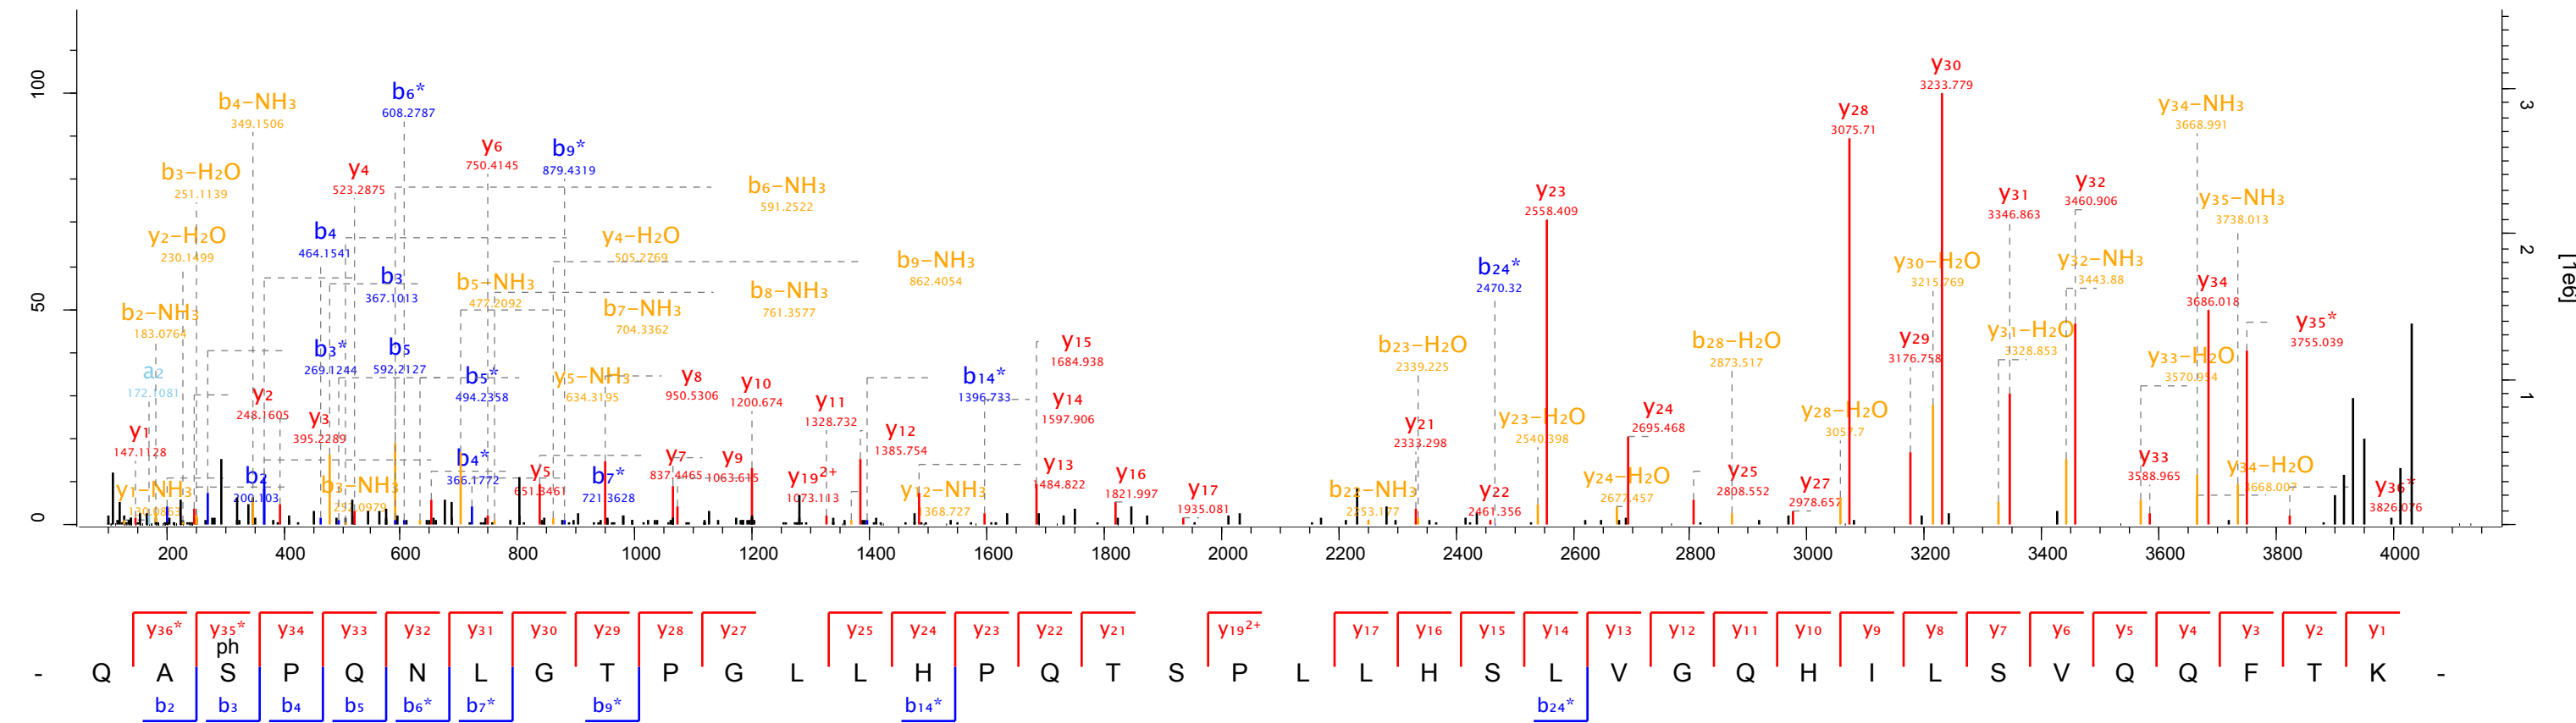

Raw file: 20150814\_A375SR\_Phospho\_BR2\_04  
 Scan: 28003 Method: FTMS; HCD Score: 52.81 m/z: 1260.96 Gene names: NISCH

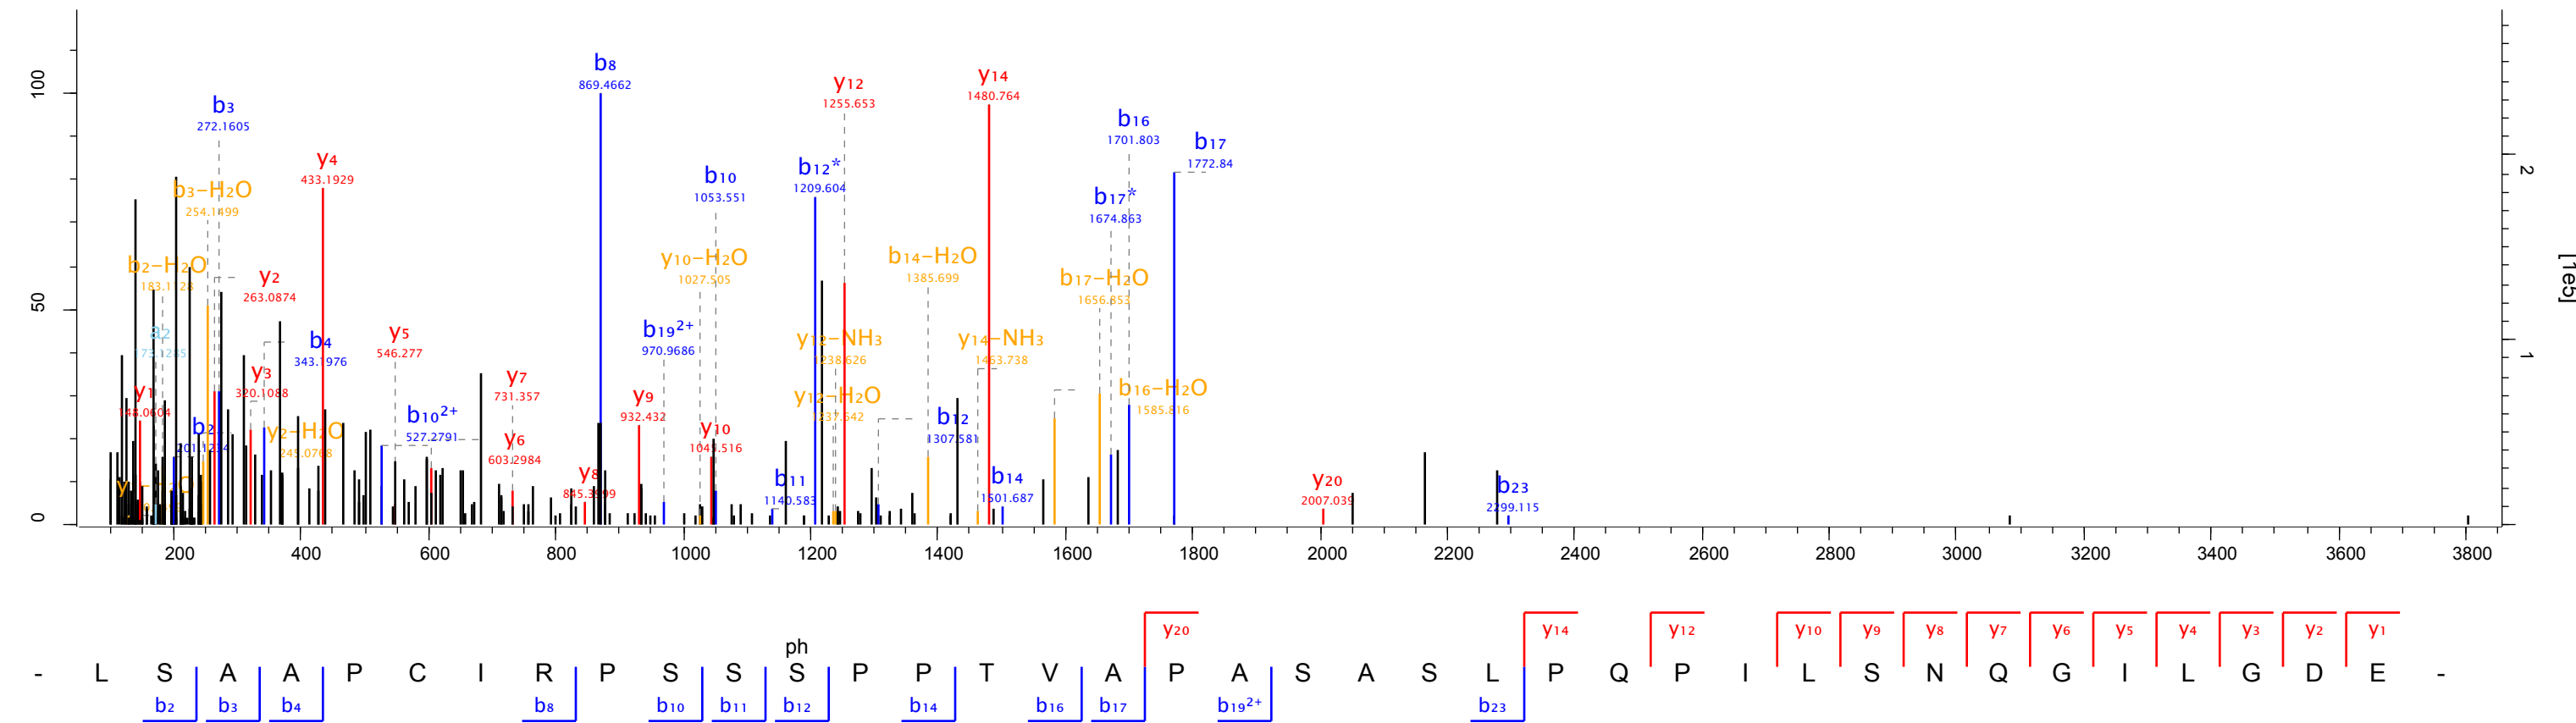



Raw file: 20150814\_A375SR\_Phospho\_BR2\_04  
 Scan: 28013 Method: FTMS; HCD Score: 62.79 m/z: 1083.55 Gene names: EP400;EP400NL

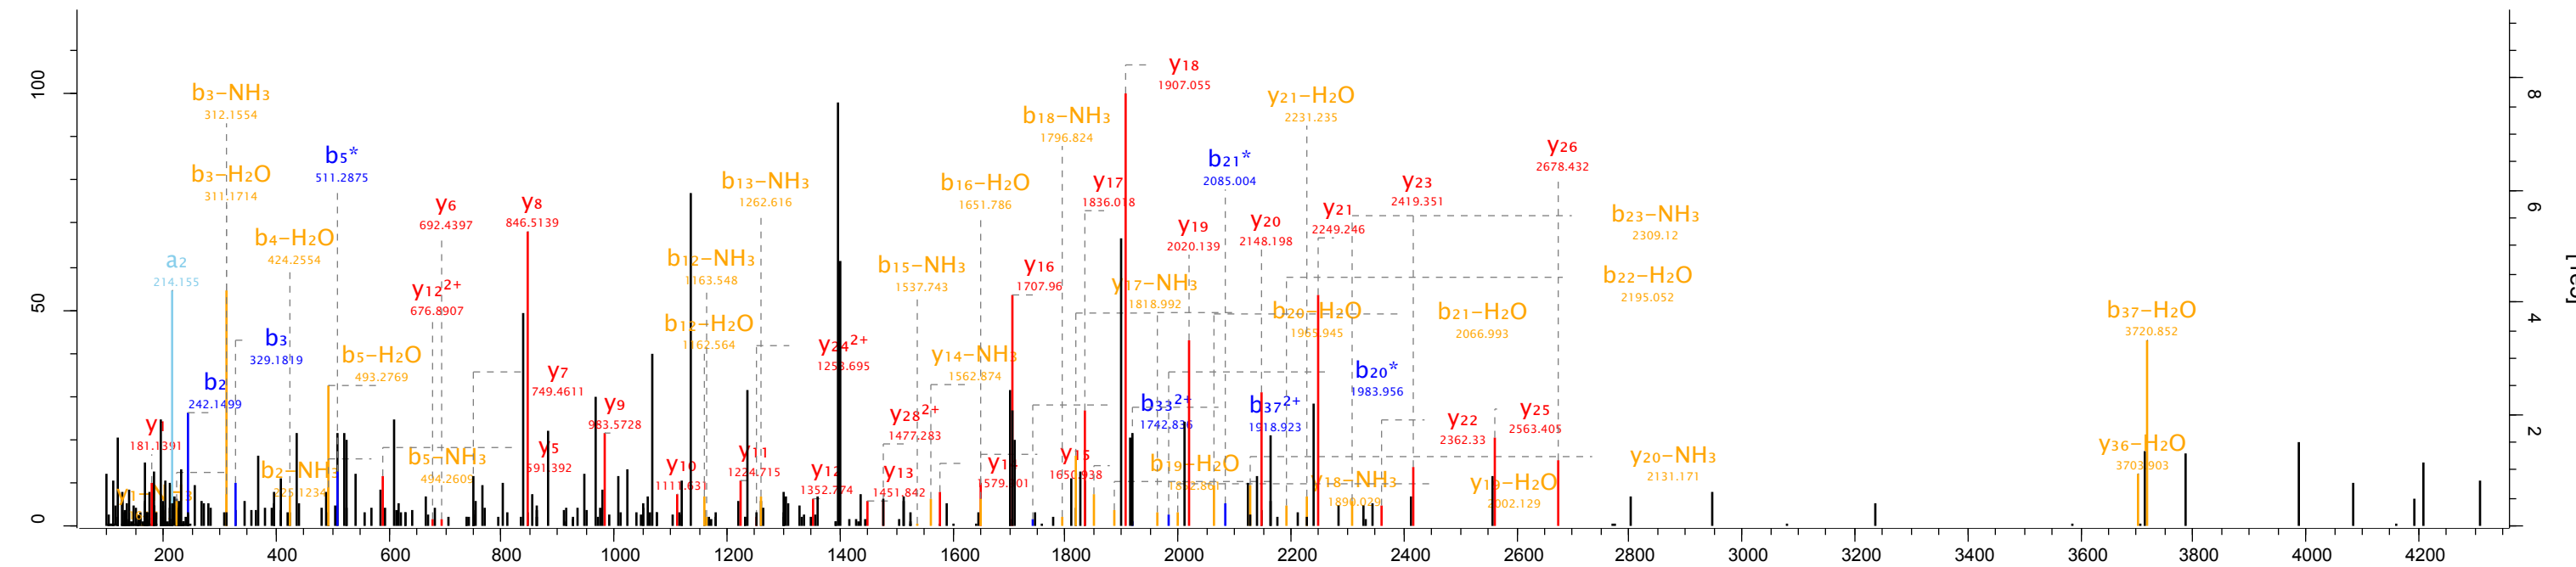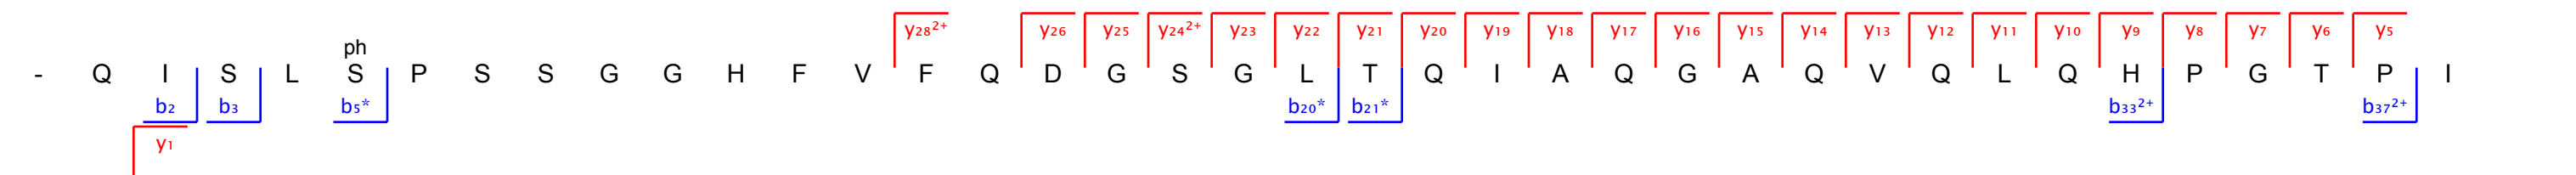

Raw file: 20150814\_A375SR\_Phospho\_BR2\_04  
 Scan: 2803 Method: FTMS; HCD Score: 71.38 m/z: 845.31 Gene names: SLK

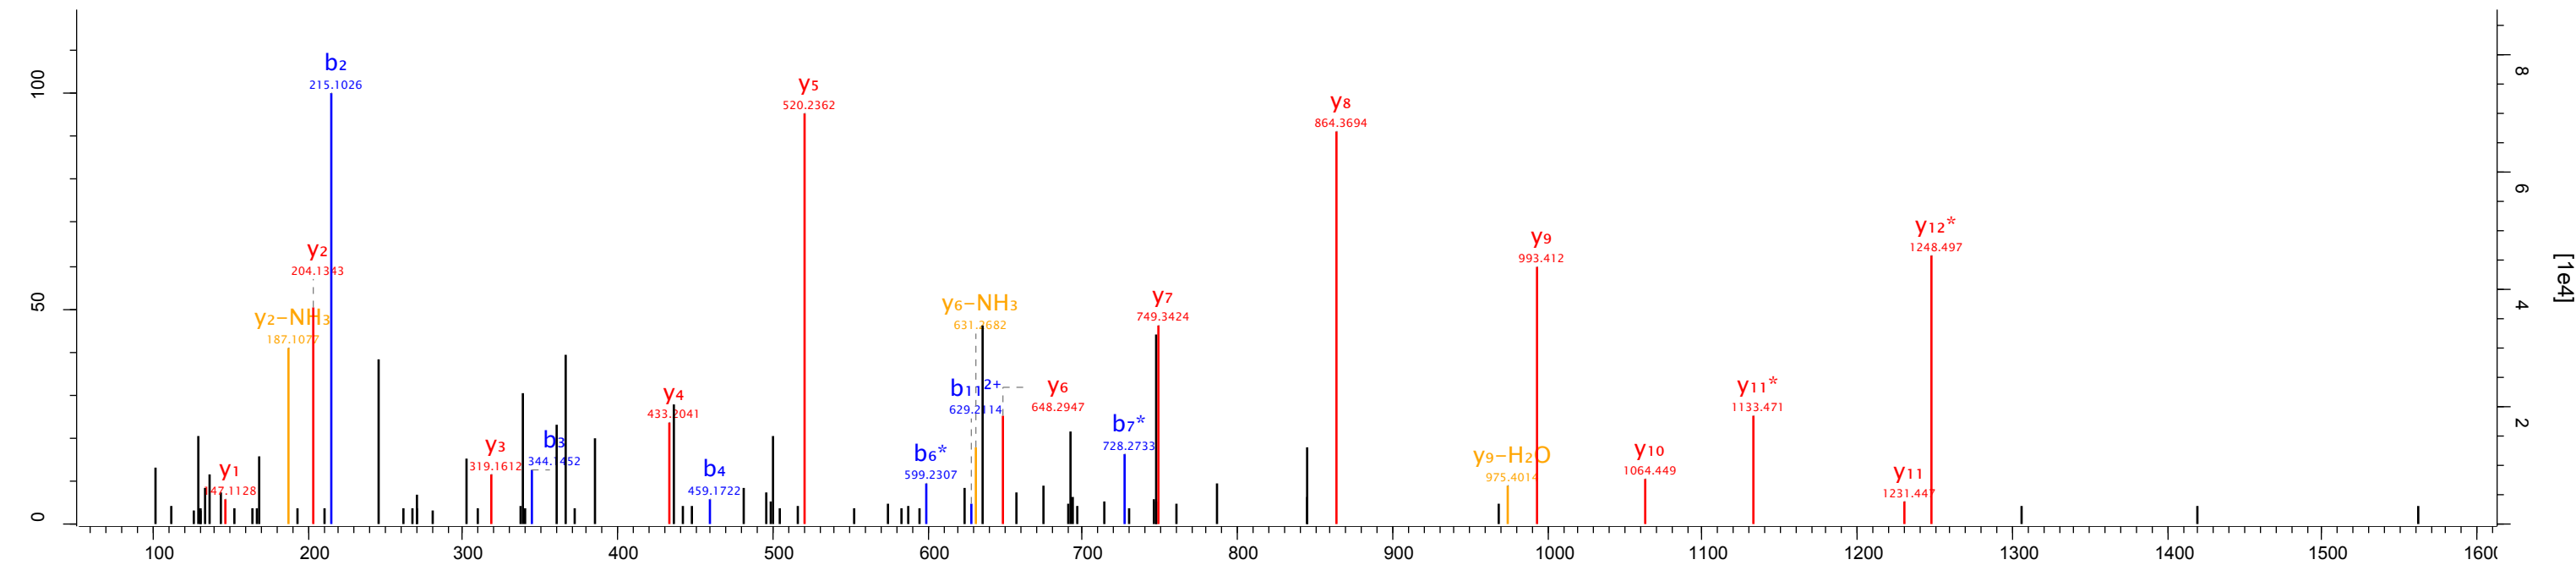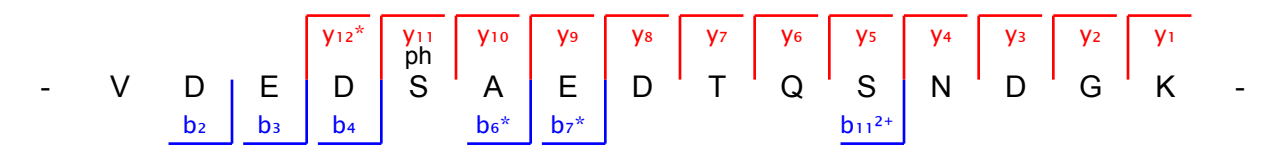

Raw file: 20150814\_A375SR\_Phospho\_BR2\_04  
 Scan: 28043 Method: FTMS; HCD Score: 145.04 m/z: 950 Gene names: TBC1D10B

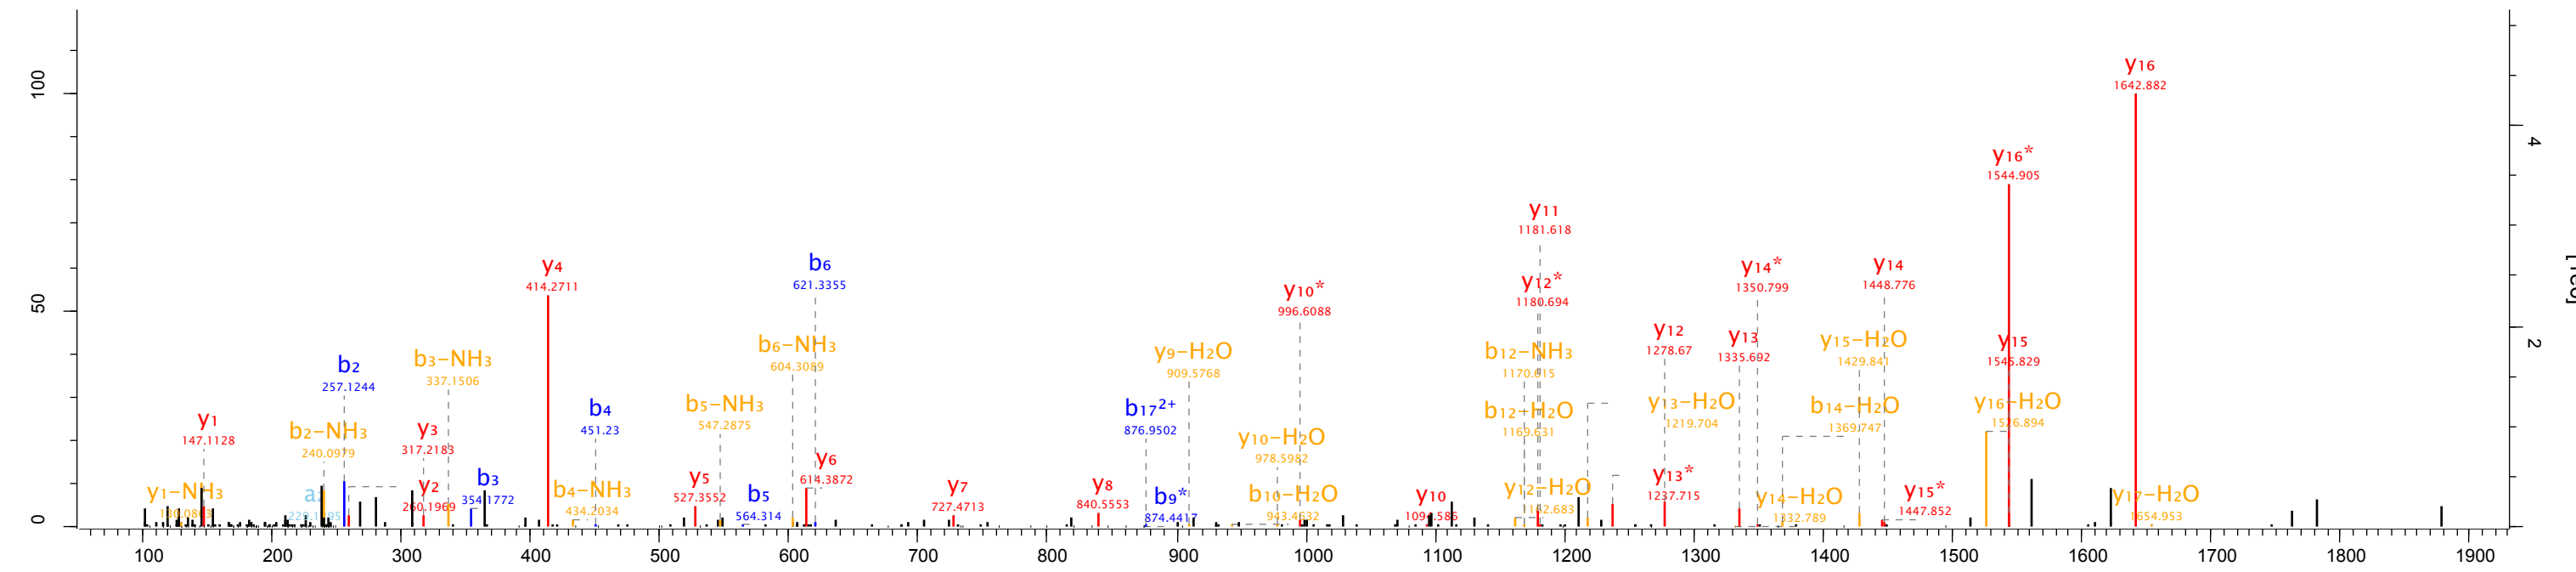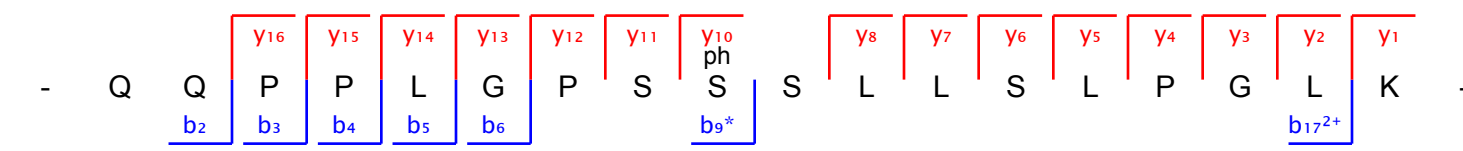

Raw file 20150814\_A375SR\_Phospho\_BR2\_04 Scan 28353 Method FTMS; HCD Score 179.18 m/z 1254.63 Gene names SHROOM1

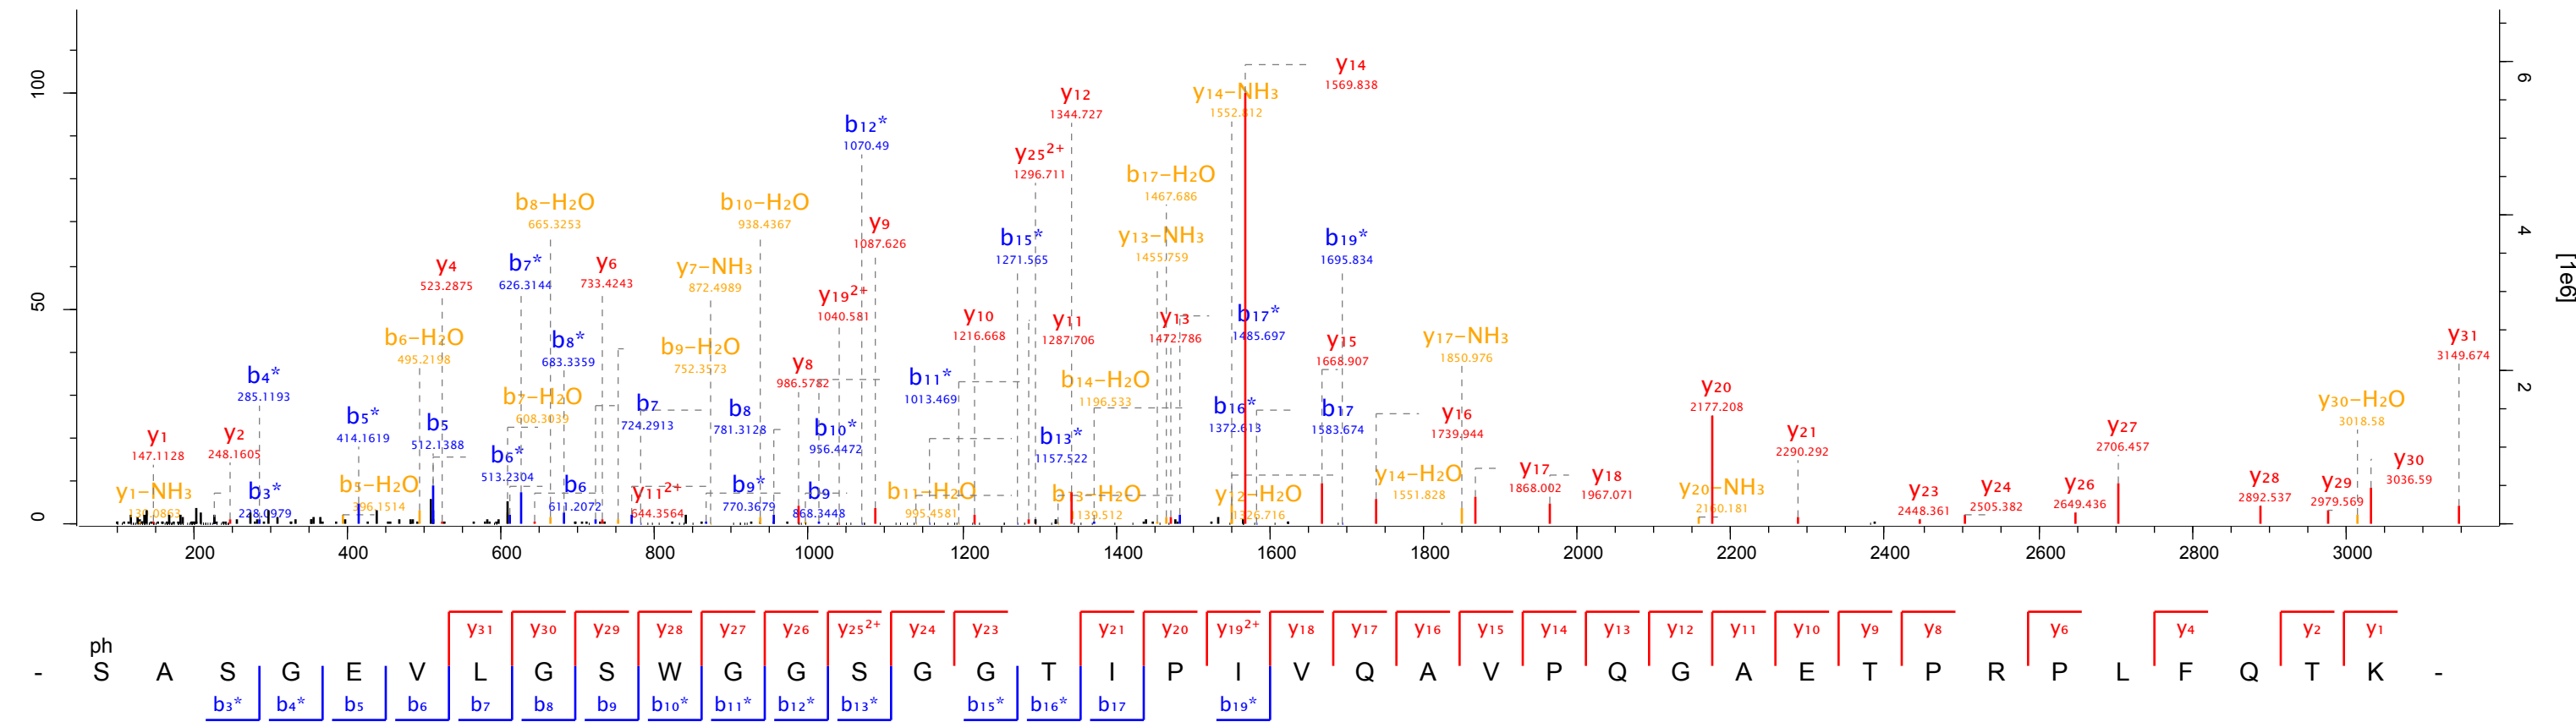

Raw file: 20150814\_A375SR\_Phospho\_BR2\_04  
 Scan: 28433 Method: FTMS; HCD Score: 116.24 m/z: 853.7 Gene names: SLC4A1AP

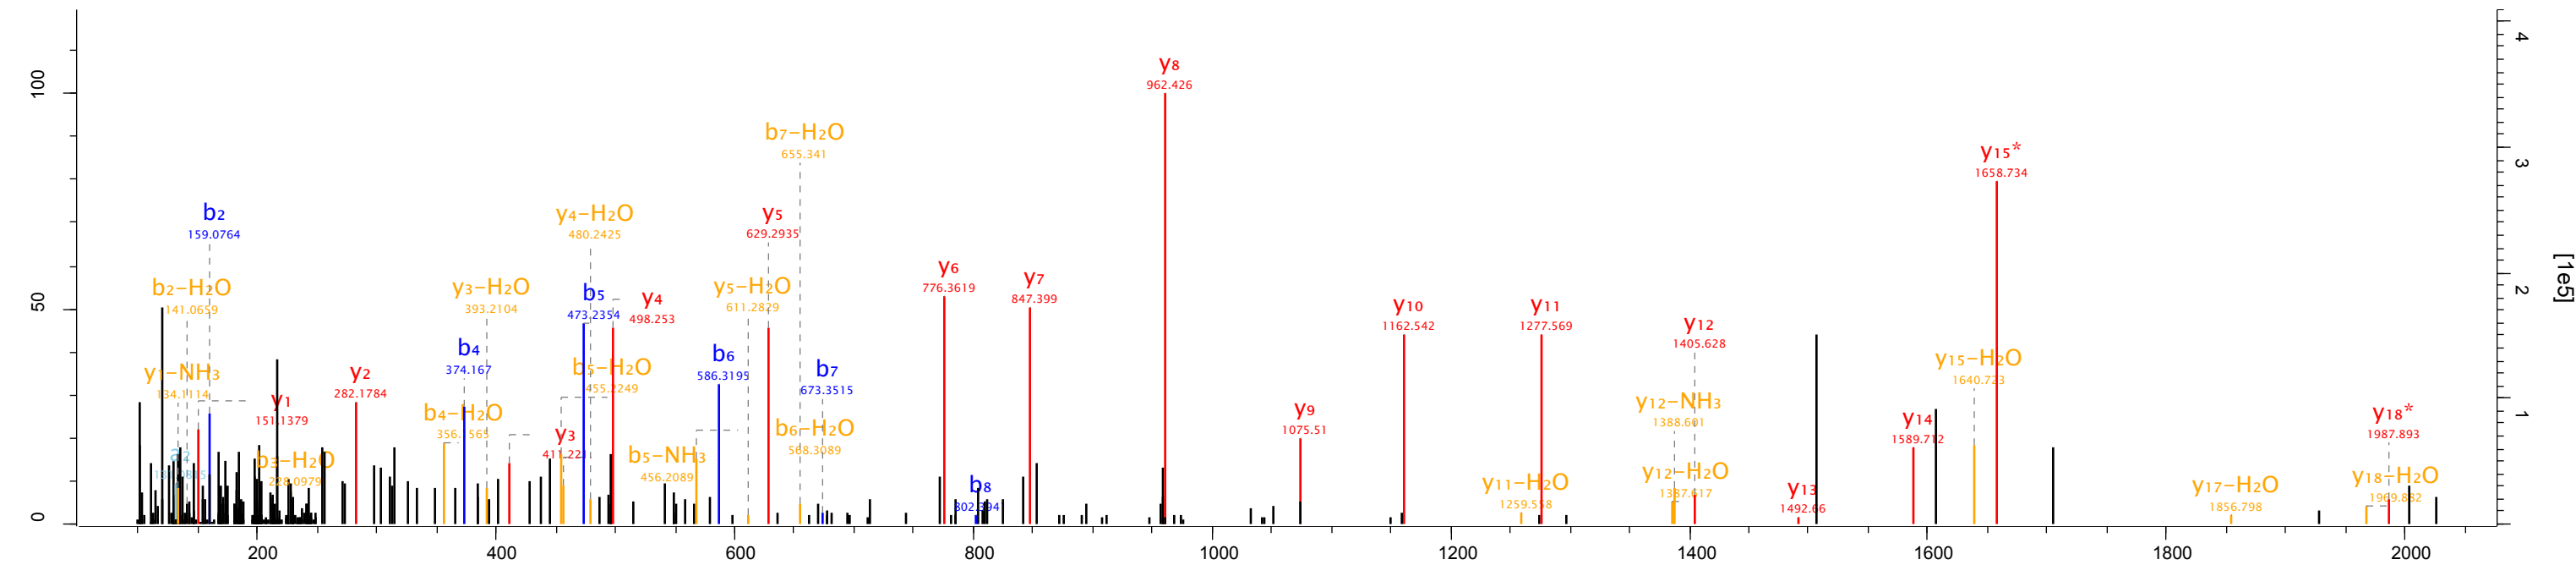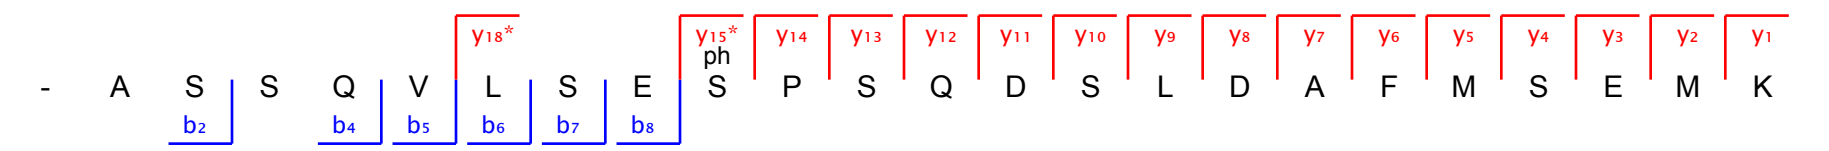

Raw file: 20150814\_A375SR\_Phospho\_BR2\_04  
 Scan: 28453 Method: FTMS; HCD Score: 167.61 m/z: 928.09 Gene names: PUM1

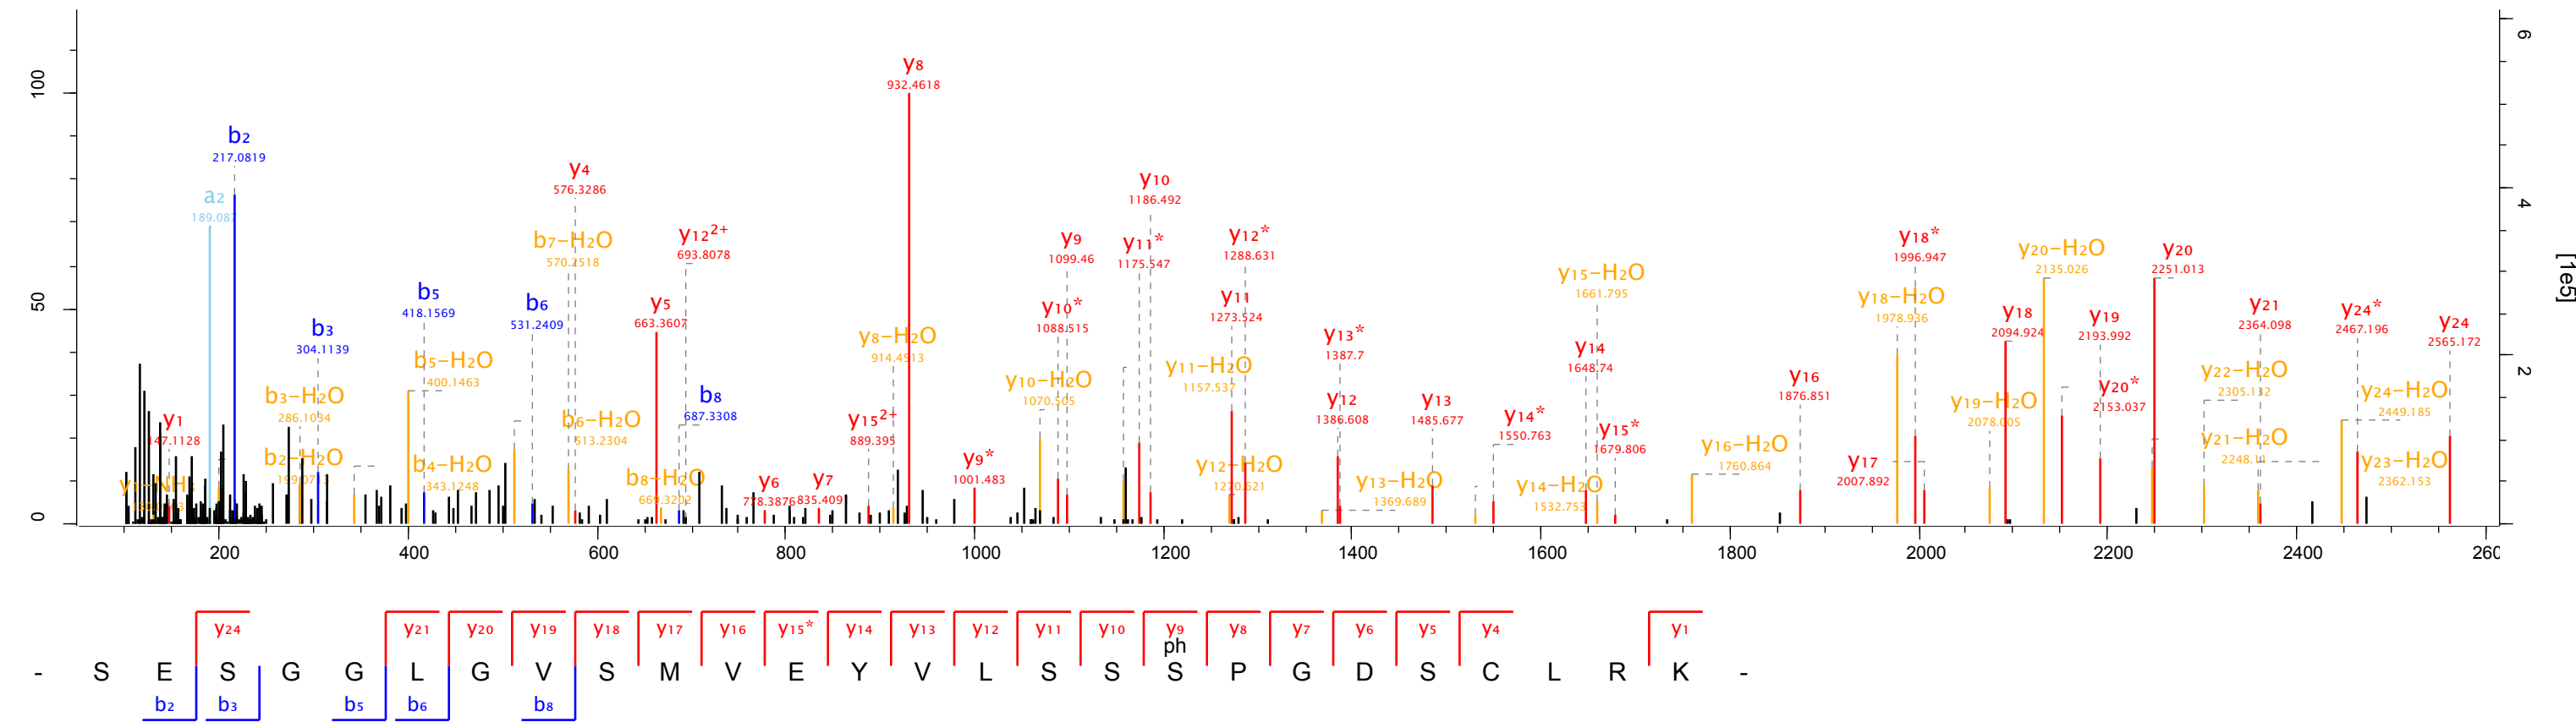

Raw file: 20150814\_A375SR\_Phospho\_BR2\_04  
 Scan: 28683 Method: FTMS; HCD Score: 274.96 m/z: 1079.98 Gene names: NOB1

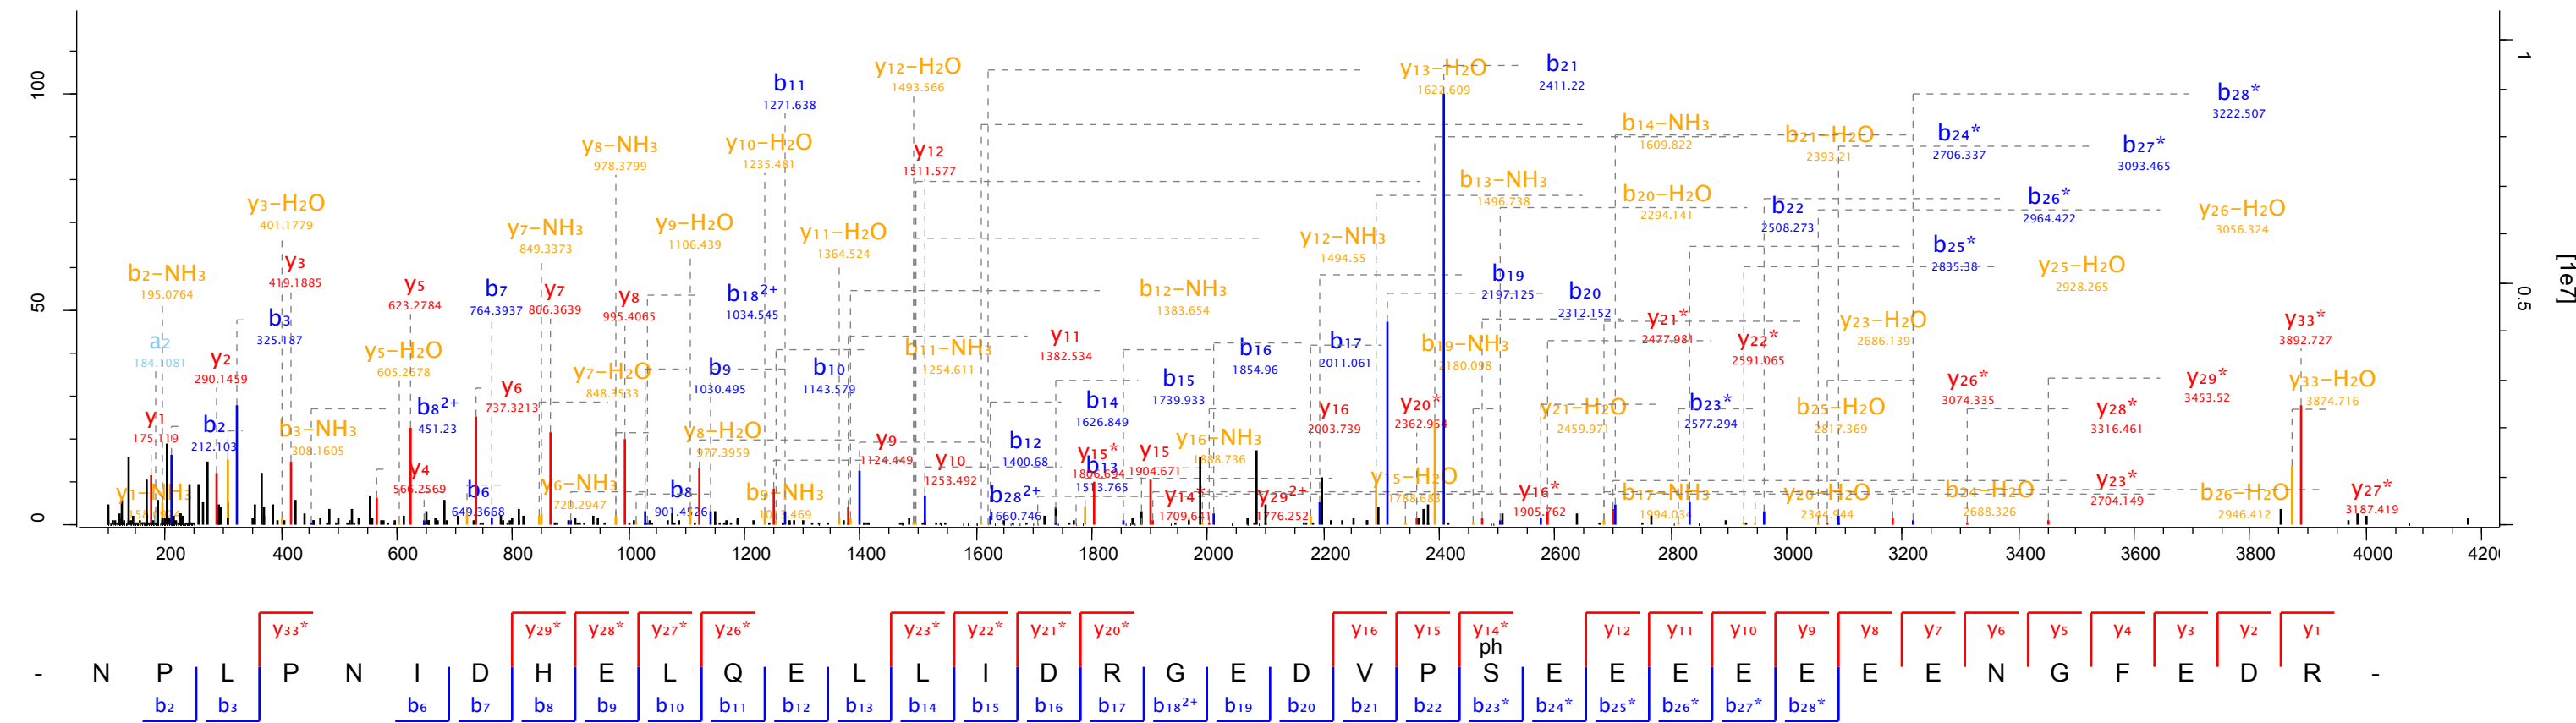

Raw file 20150814\_A375SR\_Phospho\_BR2\_04 Scan 28713 Method FTMS; HCD Score 57.24 m/z 677.37 Gene names PKP4

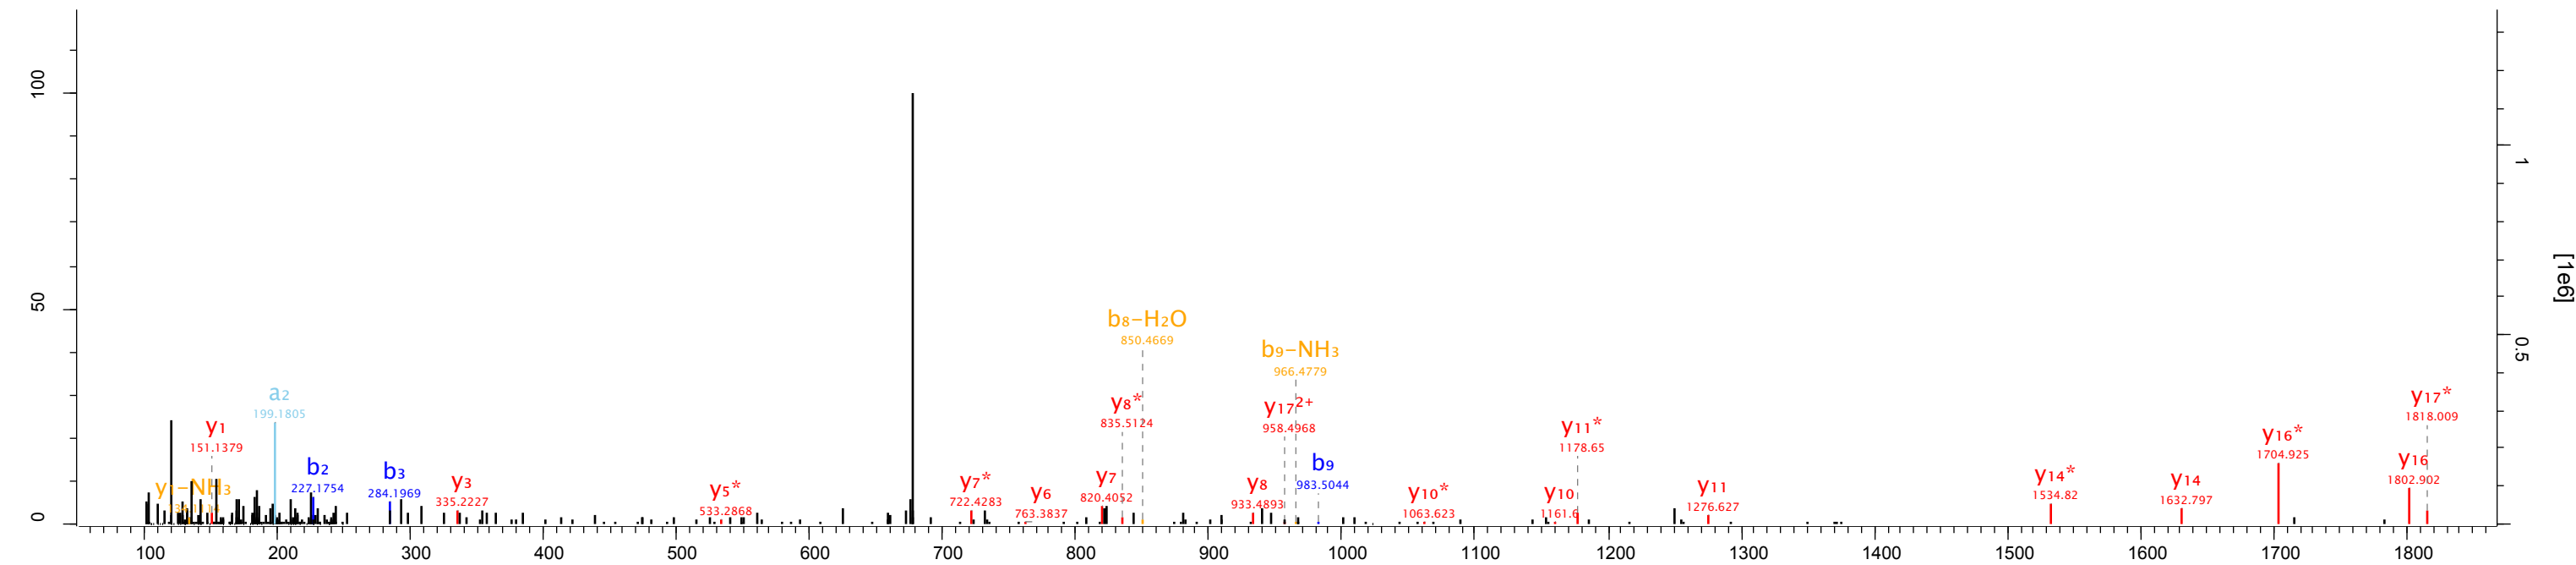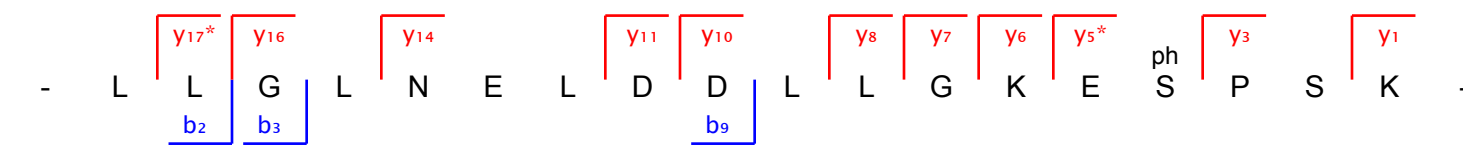



Raw file: 20150814\_A375SR\_Phospho\_BR2\_04  
 Scan: 28723 Method: FTMS; HCD Score: 192.23 m/z: 1024.83 Gene names: CIC

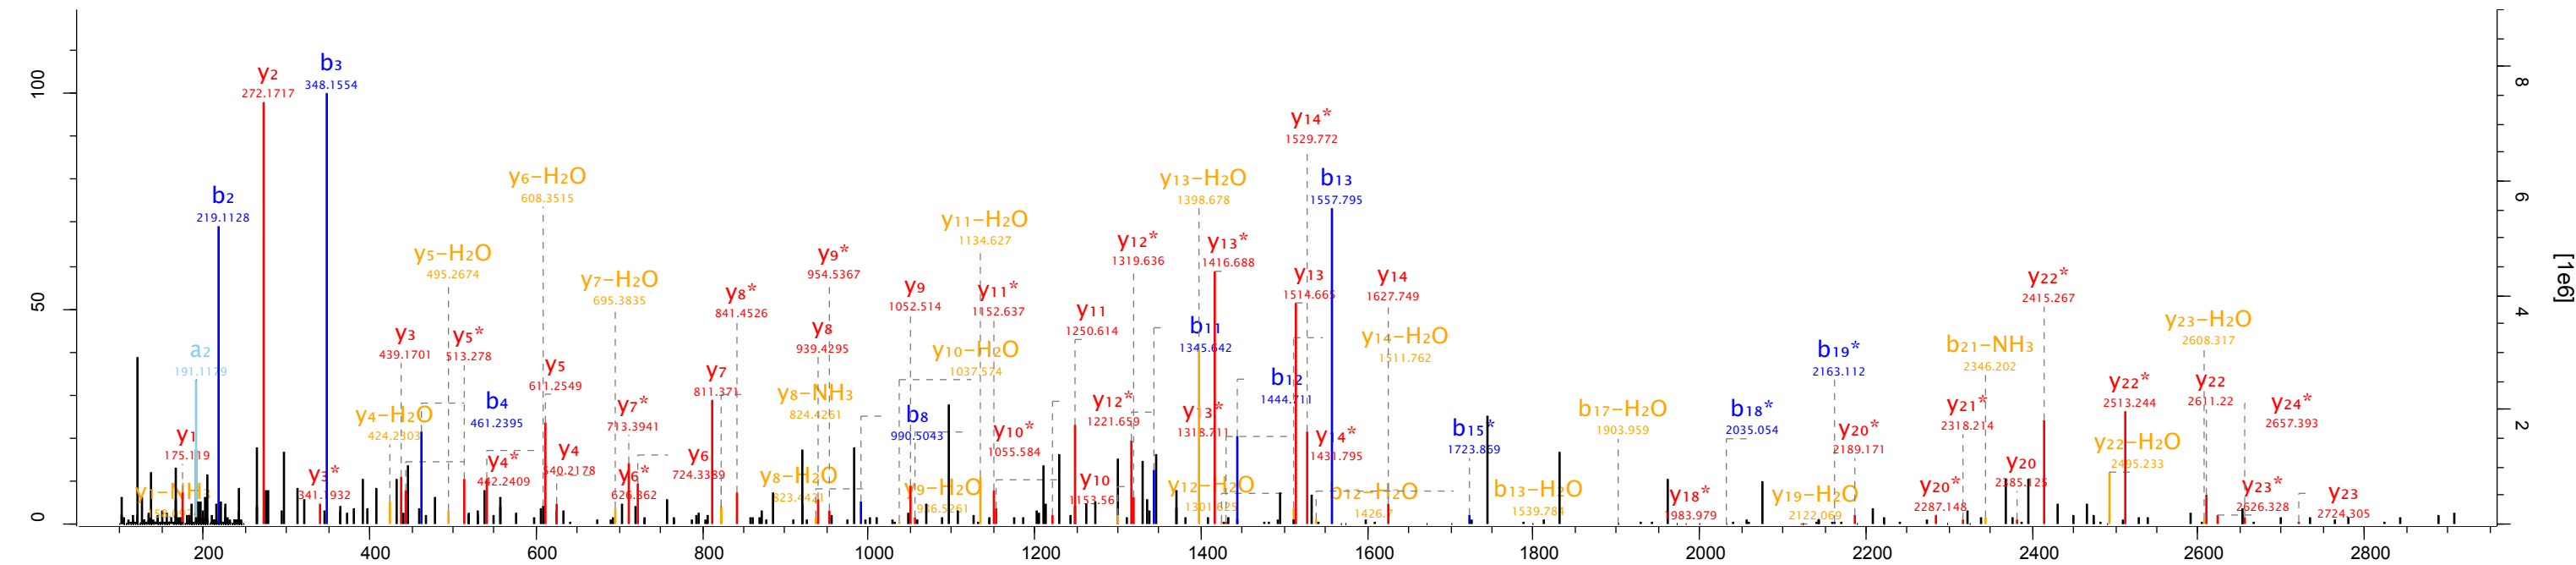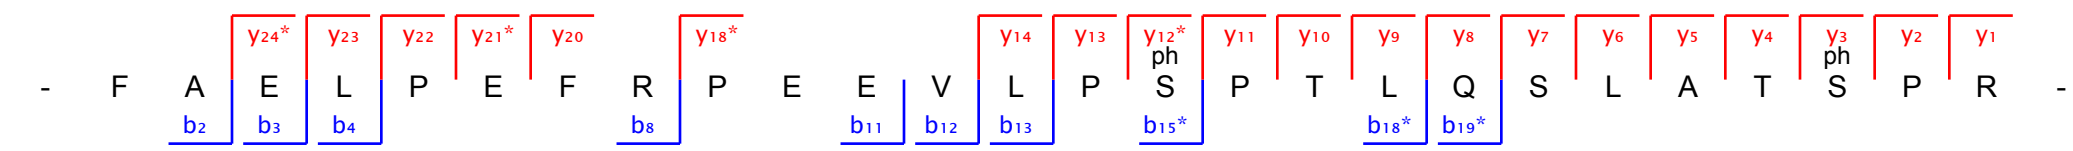

Raw file 20150814\_A375SR\_Phospho\_BR2\_04 Scan 28803 Method FTMS; HCD Score 42.35 m/z 950.96

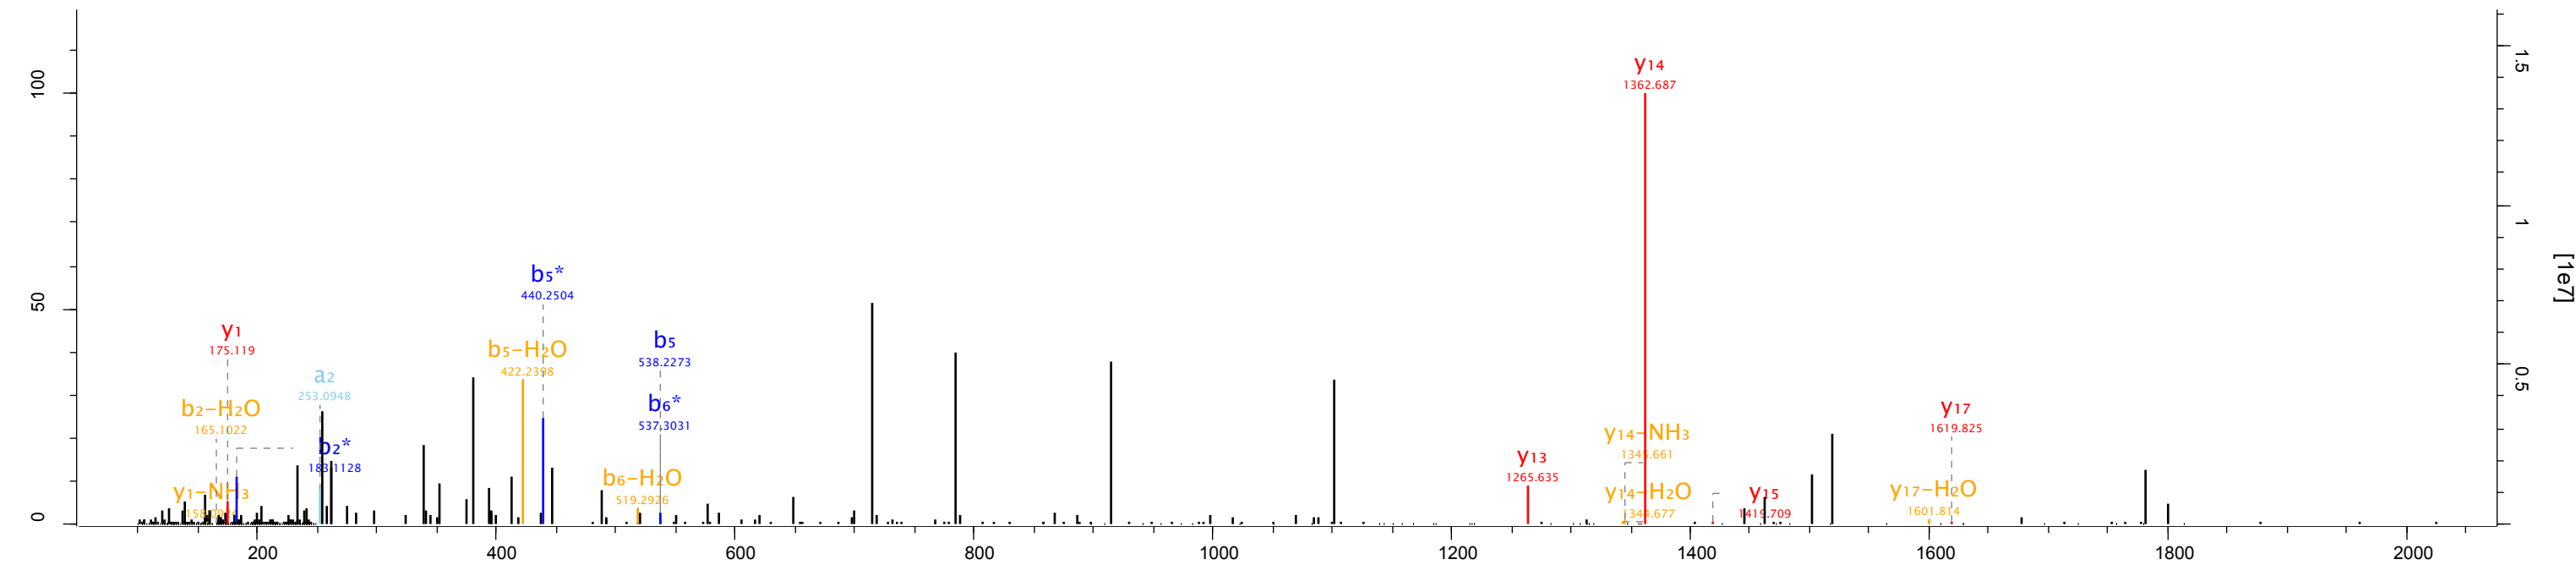

ph S L S L G P S Q E P A P G G G R G P R -

b<sub>2</sub>\* y<sub>17</sub> y<sub>15</sub> y<sub>14</sub> y<sub>13</sub> y<sub>1</sub>

b<sub>5</sub> b<sub>6</sub>\*

Raw file: 20150814\_A375SR\_Phospho\_BR2\_04  
 Scan: 2903 Method: FTMS; HCD Score: 115.38 m/z: 514.21 Gene names: PPHLN1

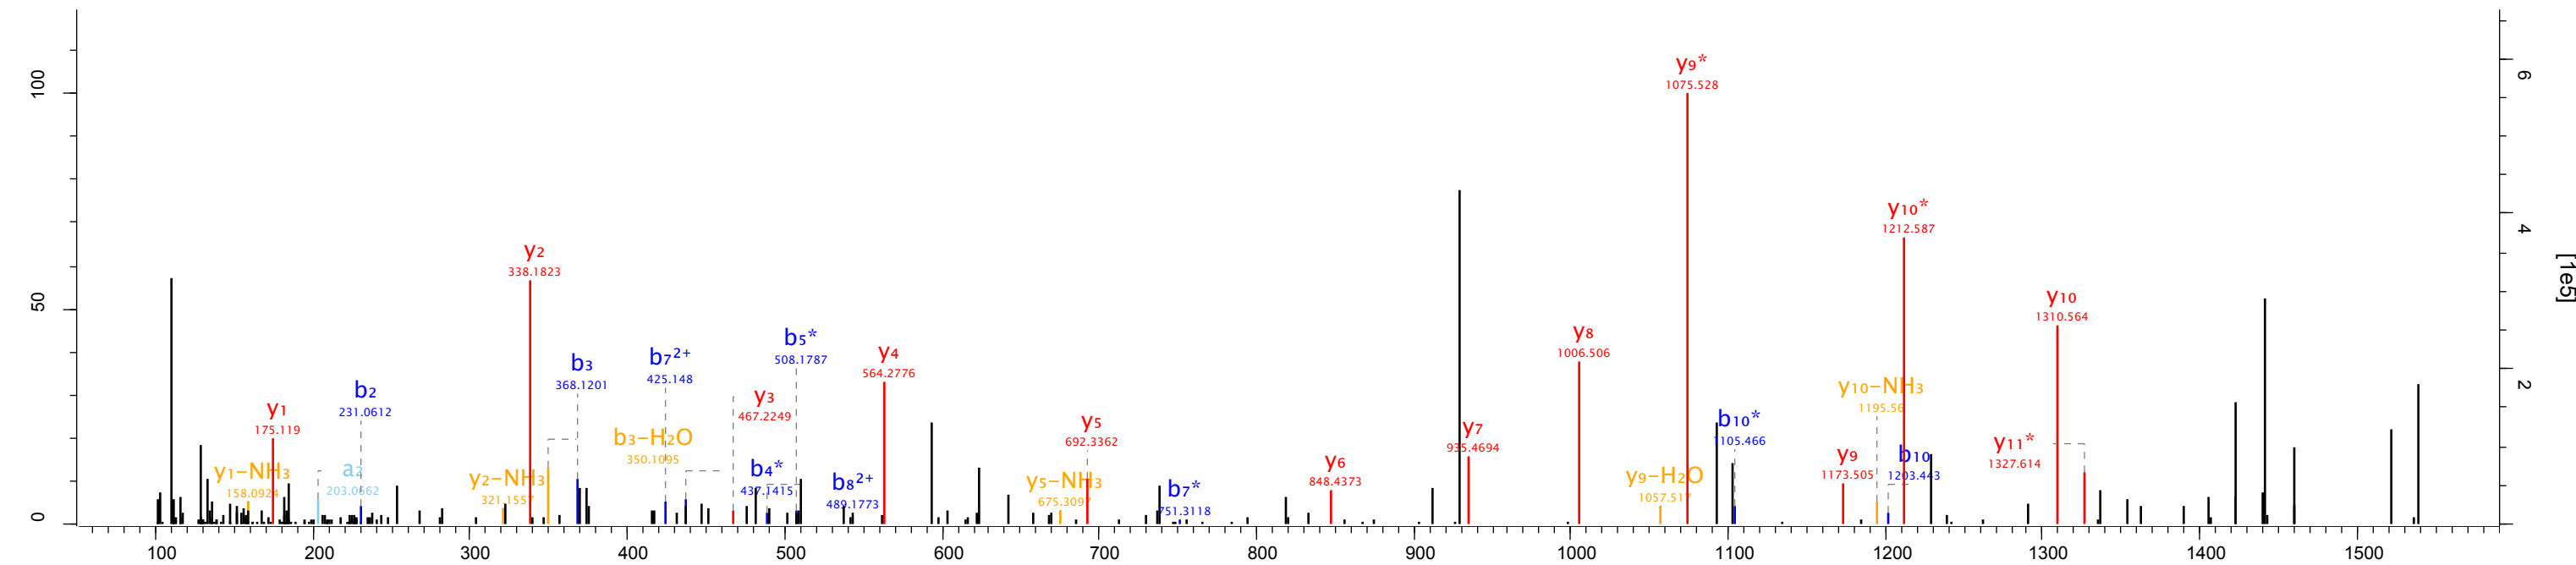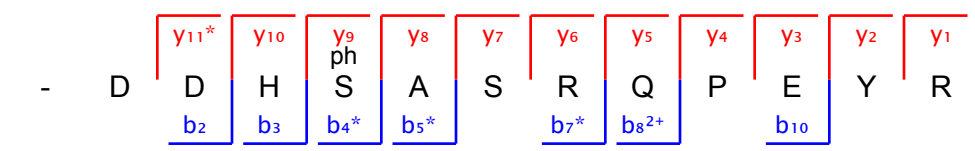

Raw file: 20150814\_A375SR\_Phospho\_BR2\_04  
 Scan: 3213 Method: FTMS; HCD Score: 130.64 m/z: 622.3 Gene names: ZNRF2

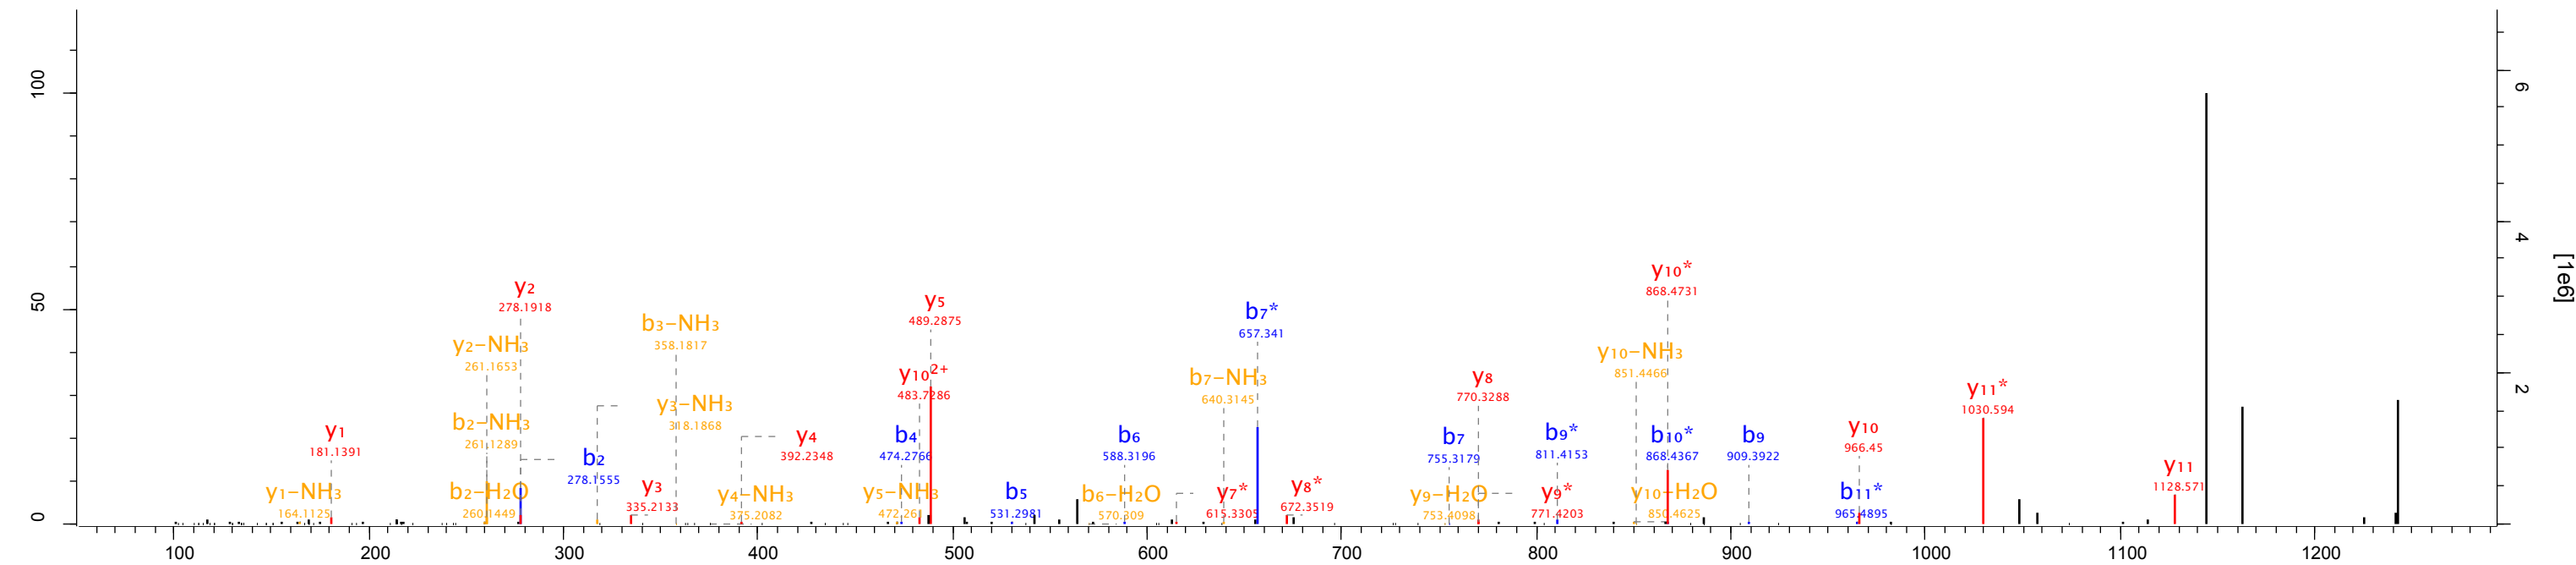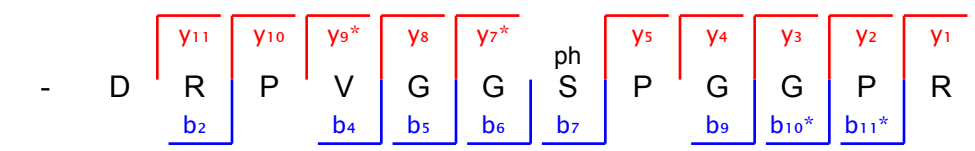

Raw file: 20150814\_A375SR\_Phospho\_BR2\_04  
 Scan: 3303 Method: FTMS; HCD Score: 118.37 m/z: 644.62 Gene names: SMARCC1

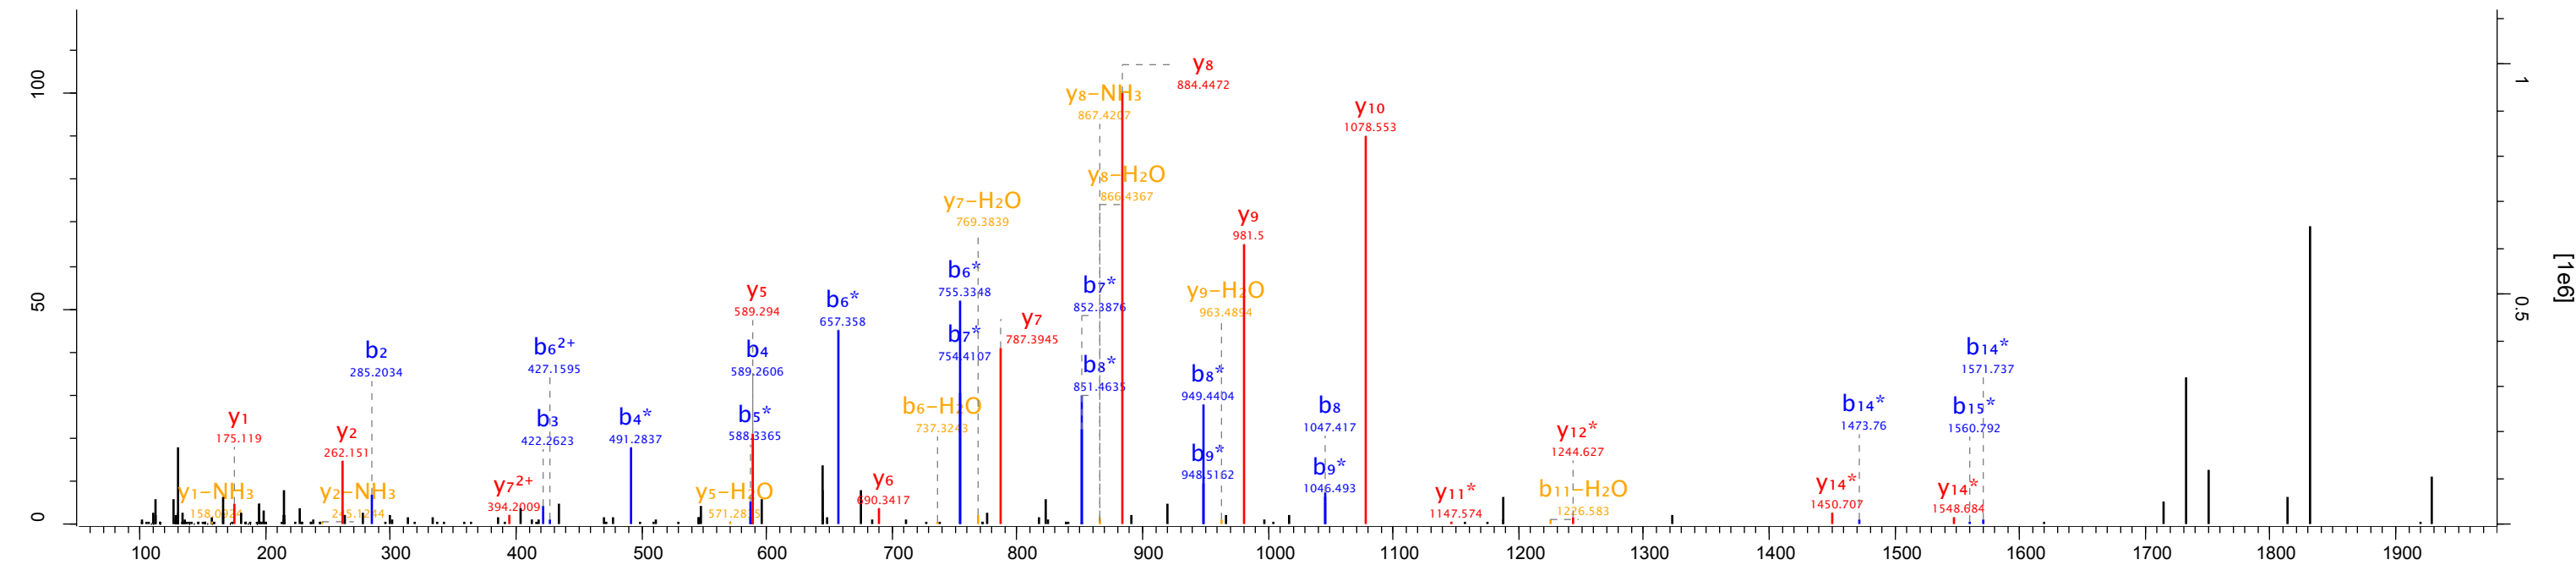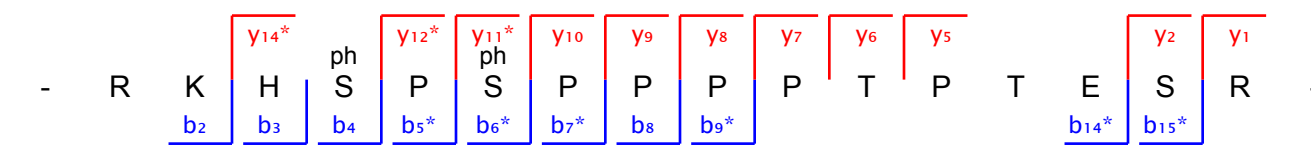

Raw file: 20150814\_A375SR\_Phospho\_BR2\_04  
 Scan: 4543 Method: FTMS; HCD Score: 92.64 m/z: 573.26 Gene names: SPACIA2;FAM122B

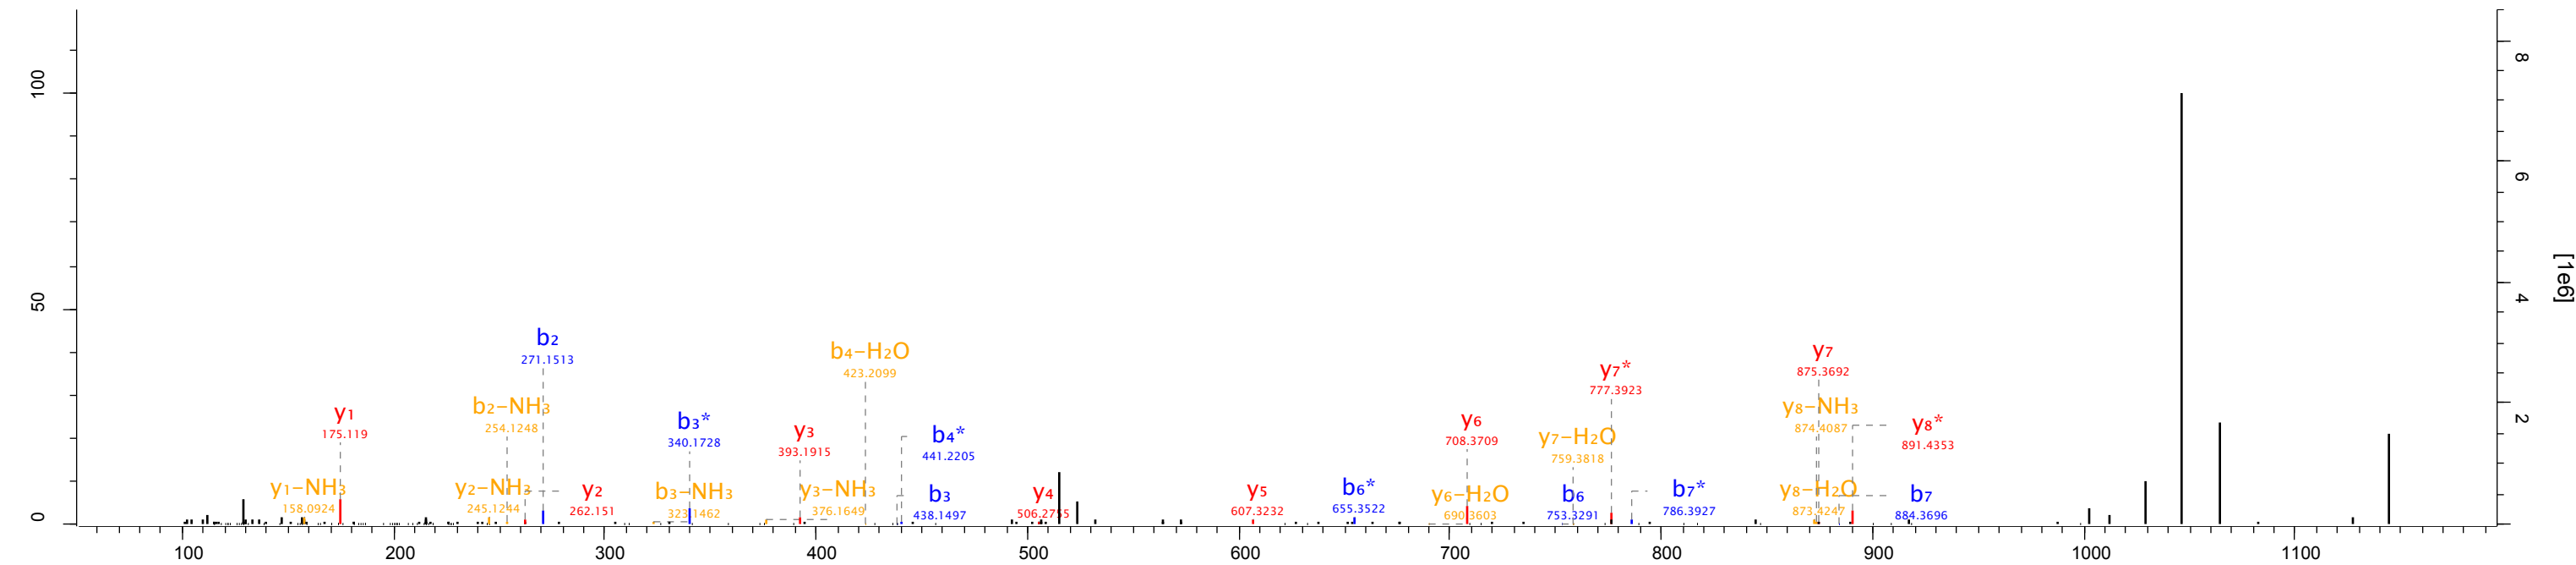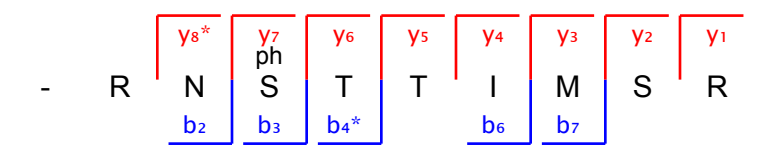

Raw file: 20150814\_A375SR\_Phospho\_BR2\_04  
 Scan: 4703 Method: FTMS; HCD Score: 230.93 m/z: 843.91 Gene names: ADD1

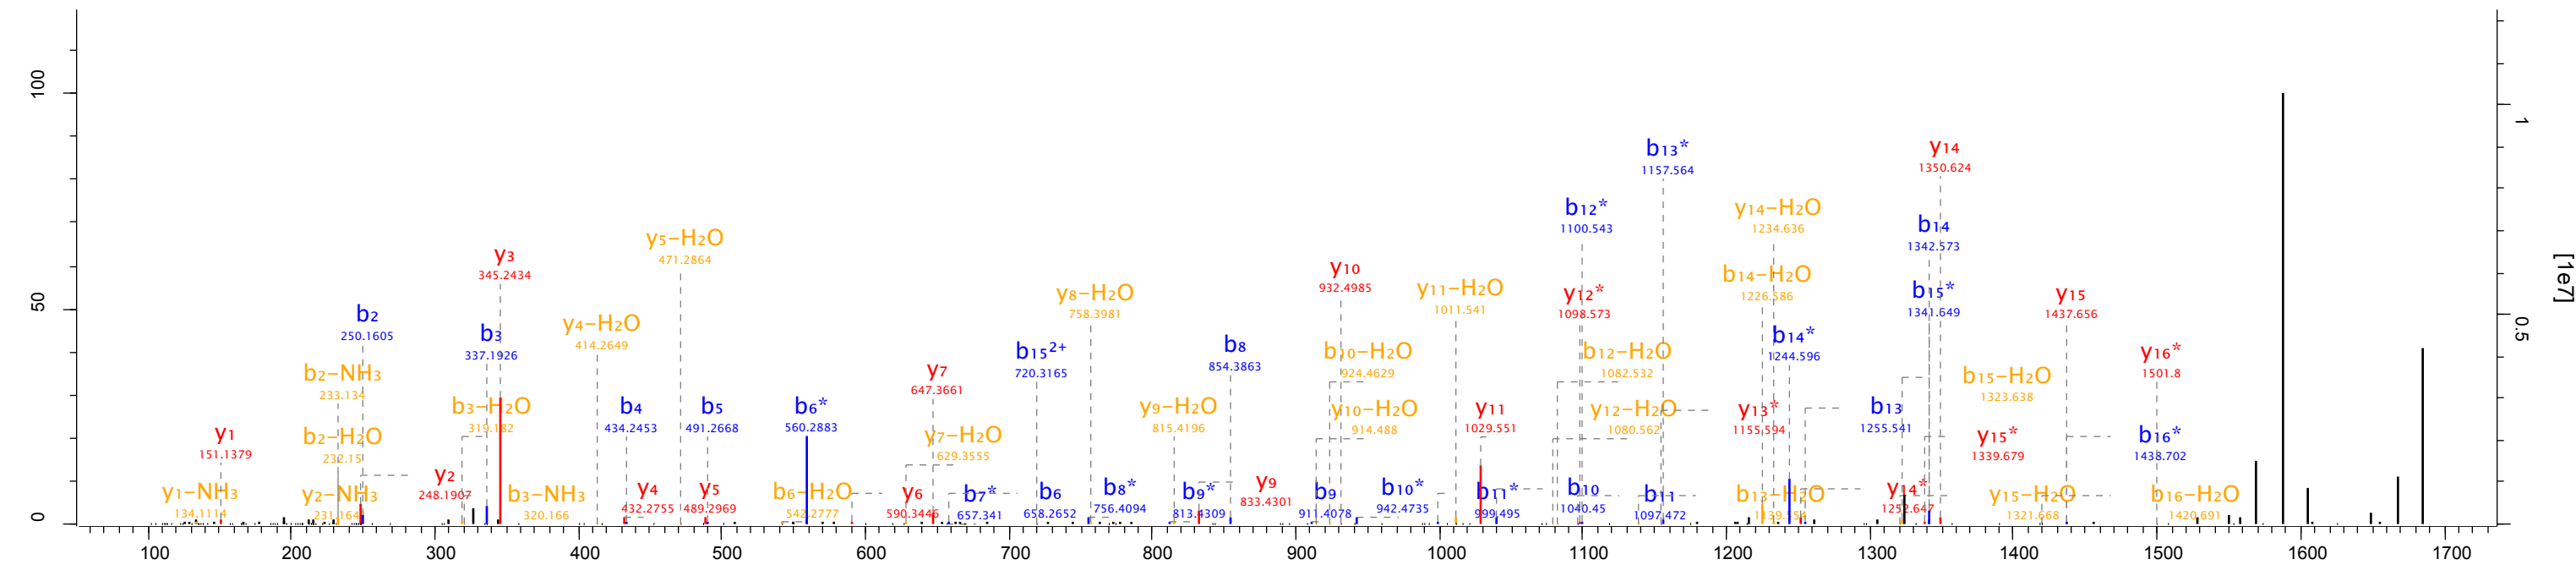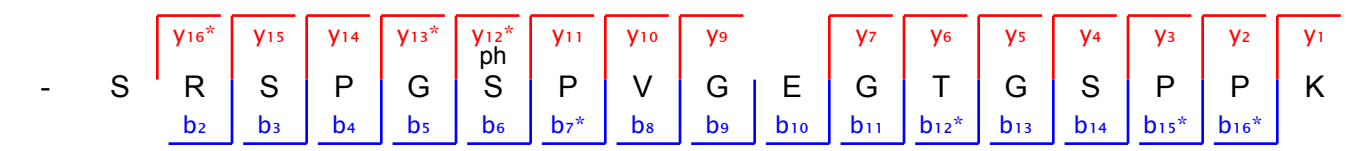

Raw file: 20150814\_A375SR\_Phospho\_BR2\_04  
 Scan: 5543 Method: FTMS; HCD Score: 239.43 m/z: 847.85 Gene names: SNAPC4

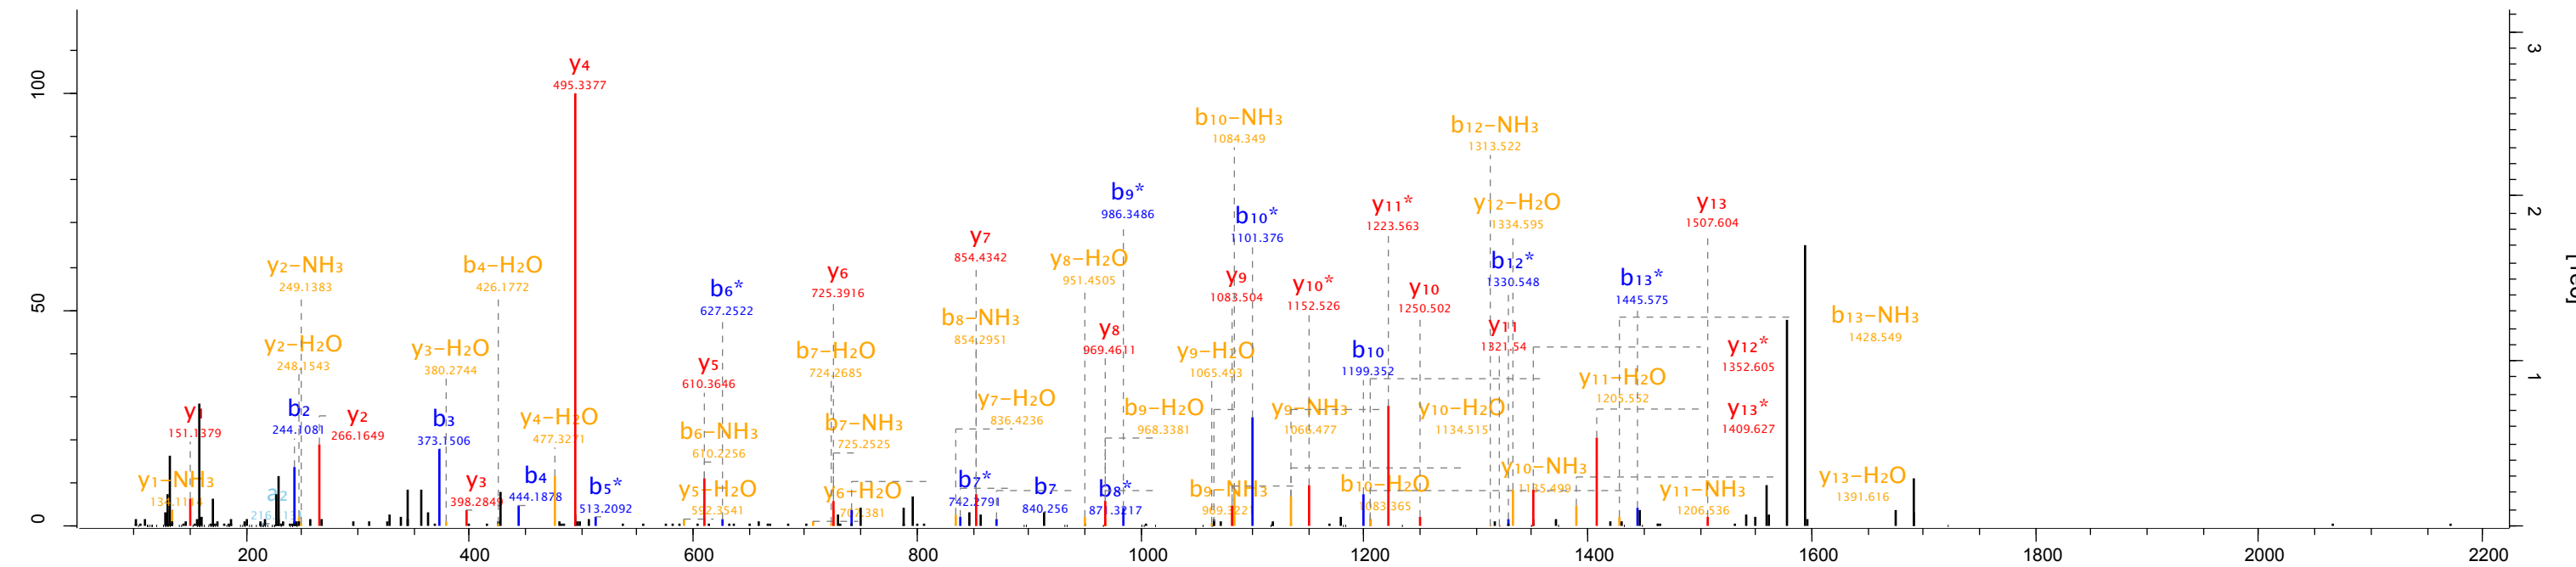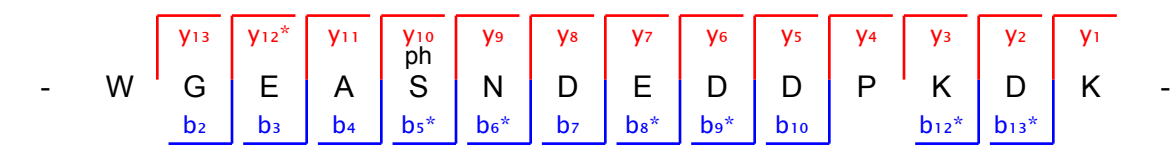



Raw file: 20150814\_A375SR\_Phospho\_BR2\_04  
 Scan: 5583 Method: FTMS; HCD Score: 195.36 m/z: 841.34 Gene names: YAF2

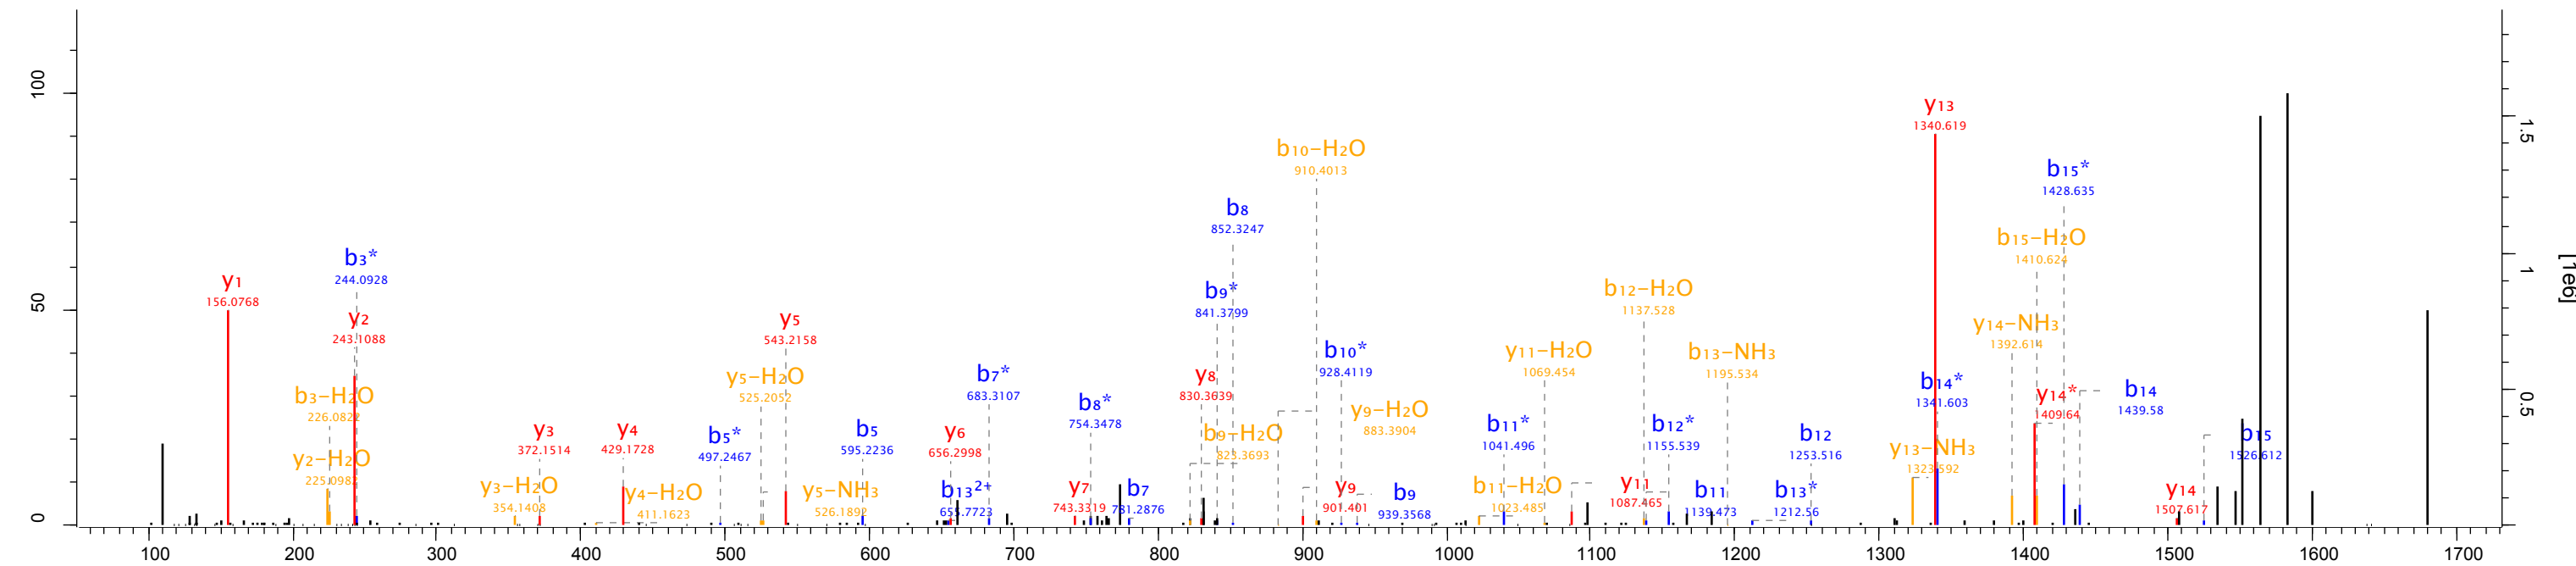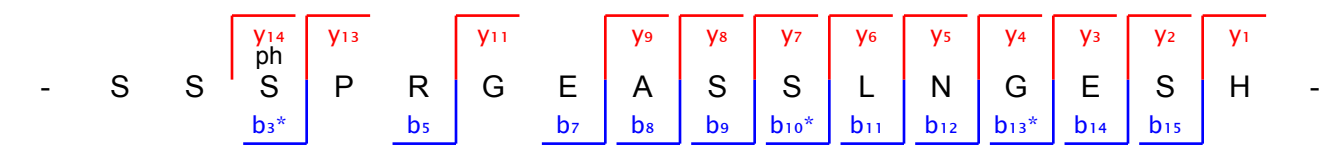

Raw file: 20150814\_A375SR\_Phospho\_BR2\_04  
 Scan: 5763 Method: FTMS; HCD Score: 106.42 m/z: 830.87 Gene names: POLM

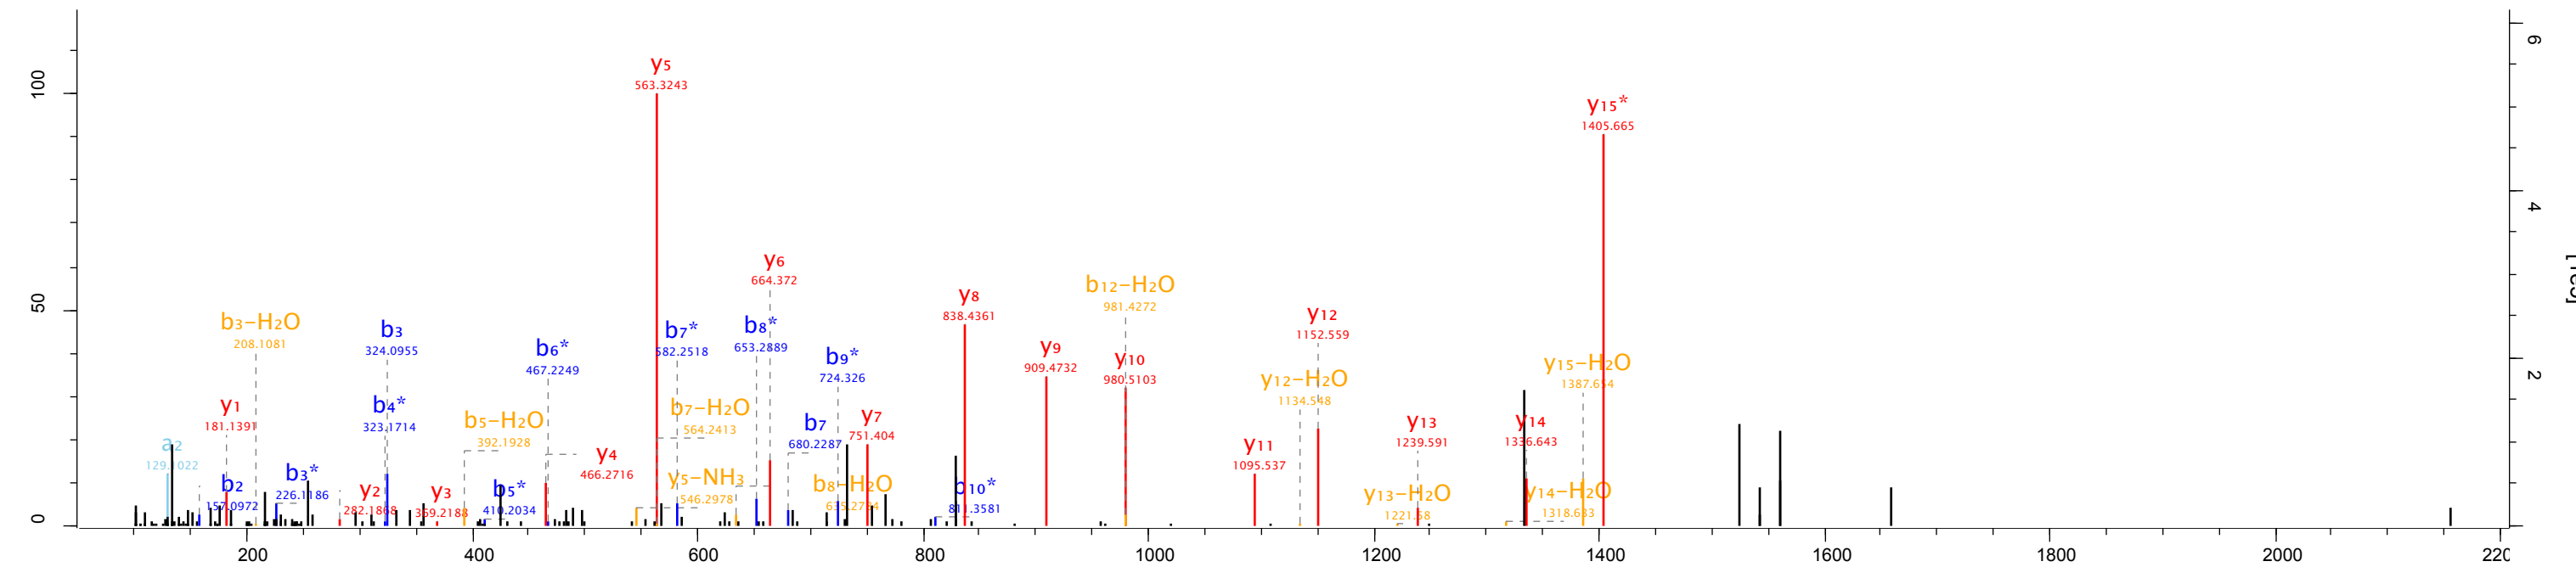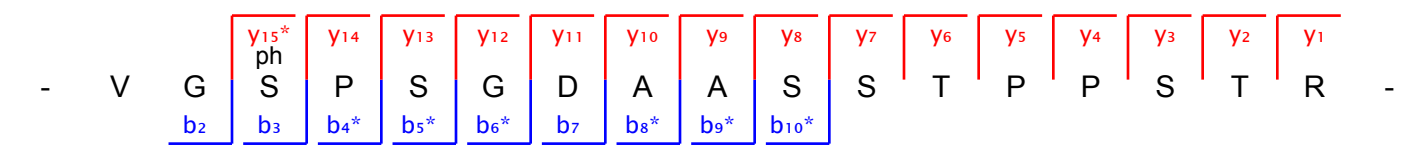

Raw file: 20150814\_A375SR\_Phospho\_BR2\_04  
 Scan: 6103 Method: FTMS; HCD Score: 146.75 m/z: 664.33 Gene names: TLN1

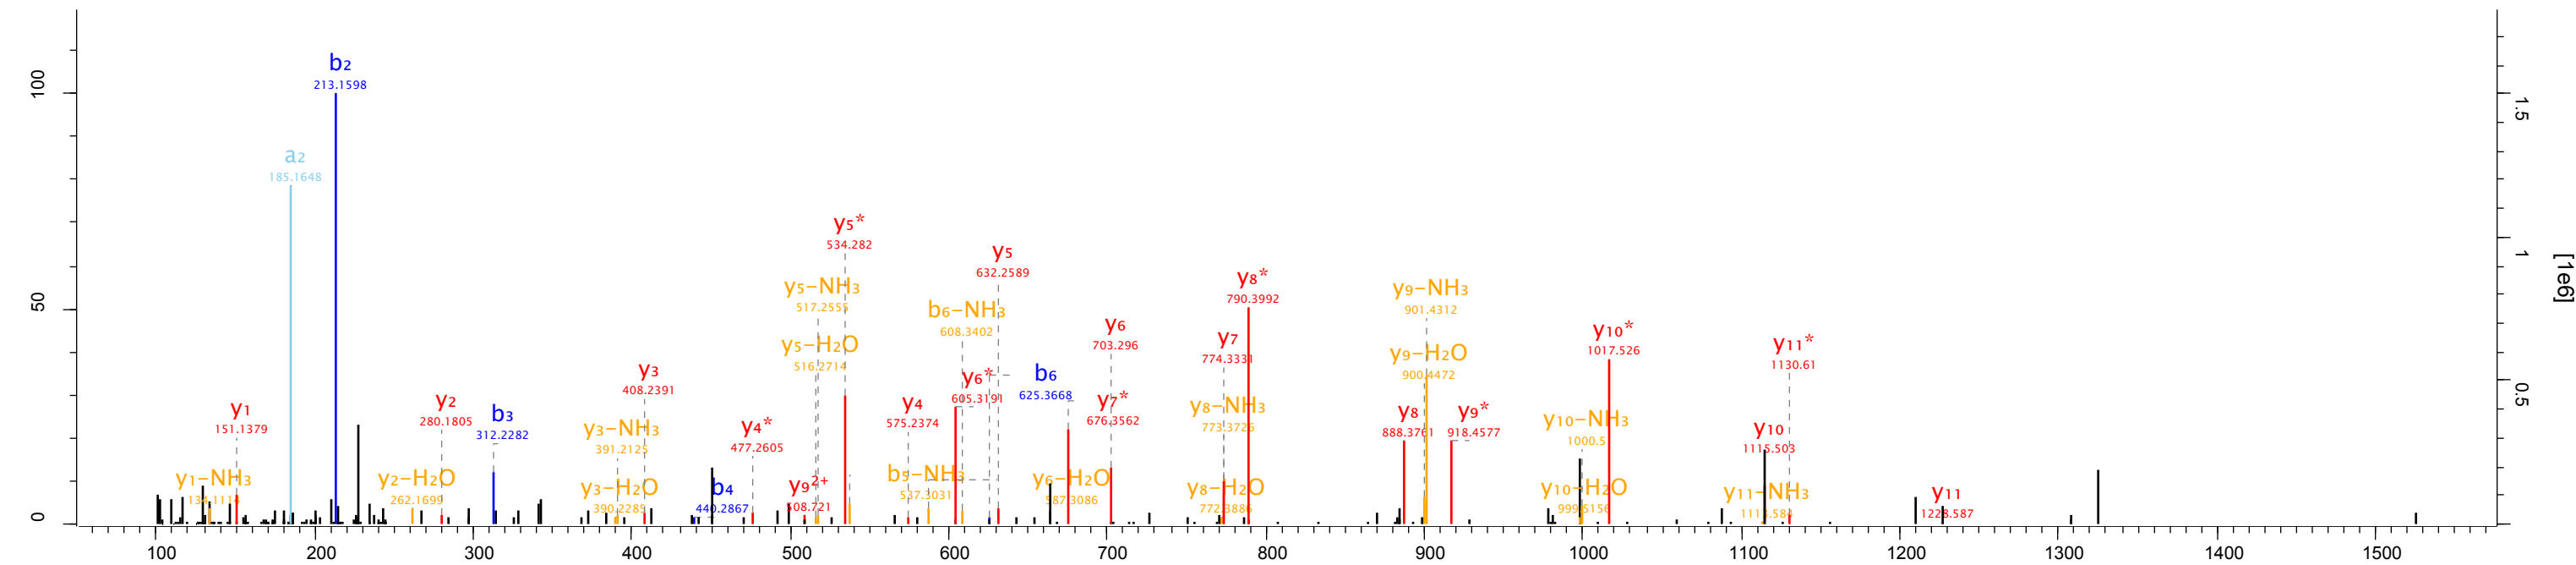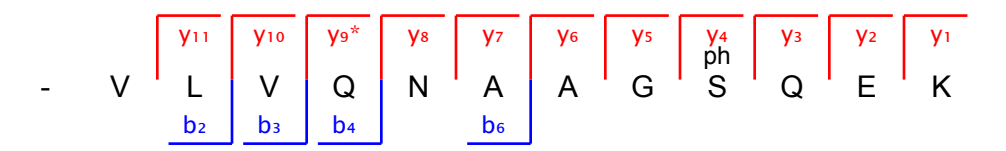

20150814\_A375SR\_Phospho\_BR2\_04 6733 FTMS; HCD 221.59 745.3 CTNND1

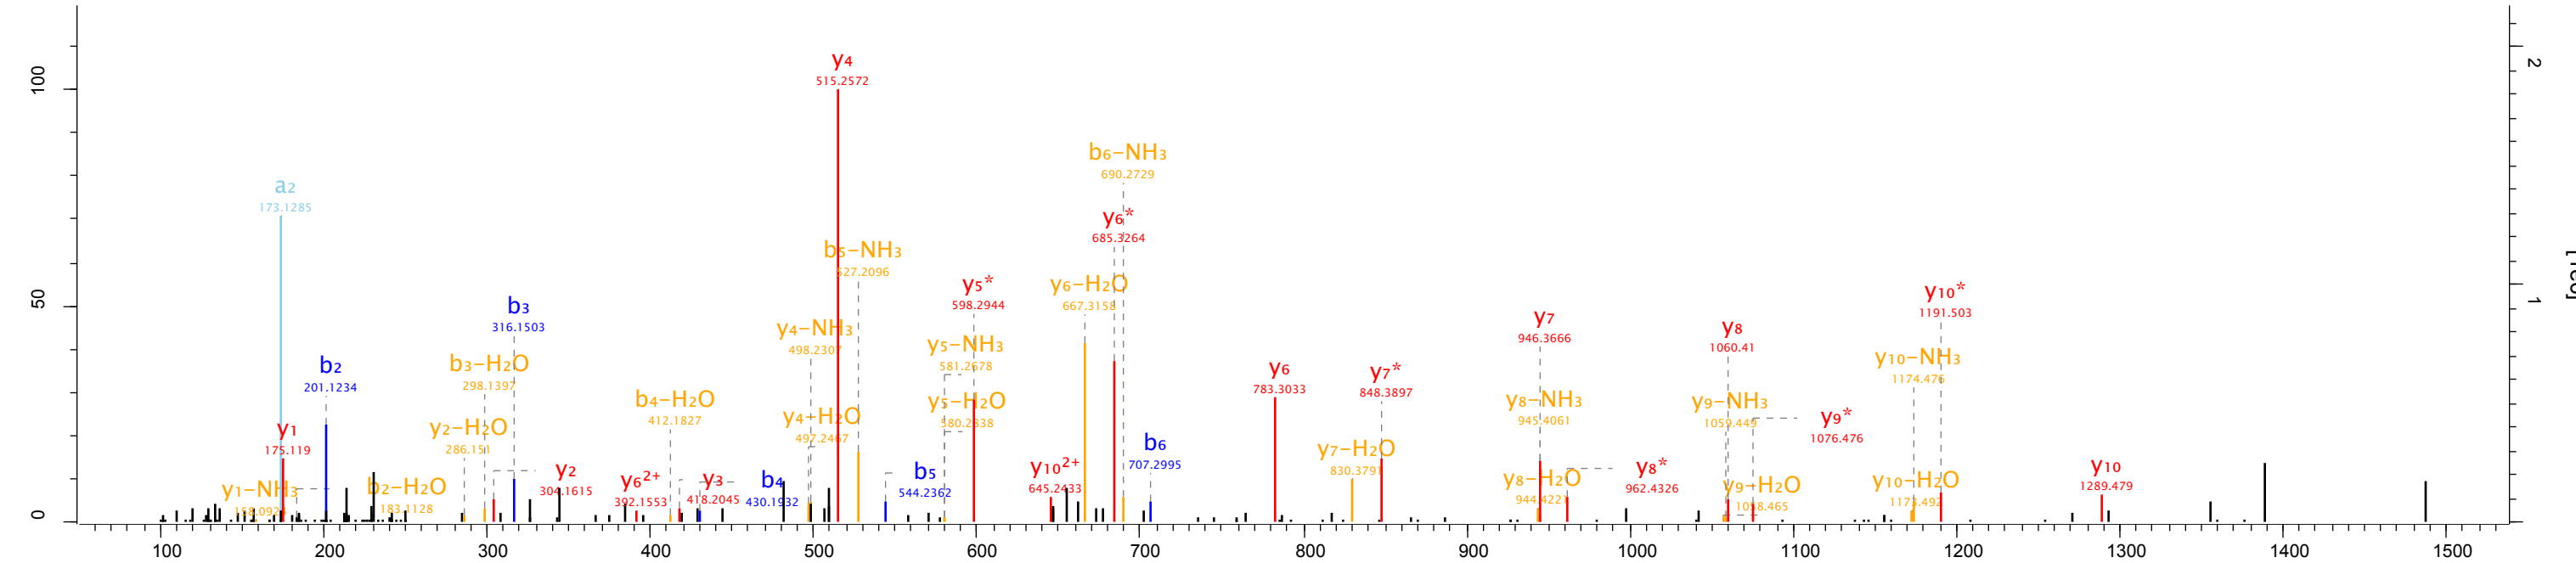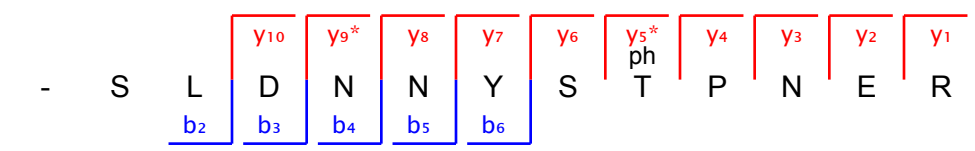

Raw file 20150814\_A375SR\_Phospho\_BR2\_04  
 Scan 6863 Method FTMS; HCD Score 176.94 m/z 735.86 Gene names MCC

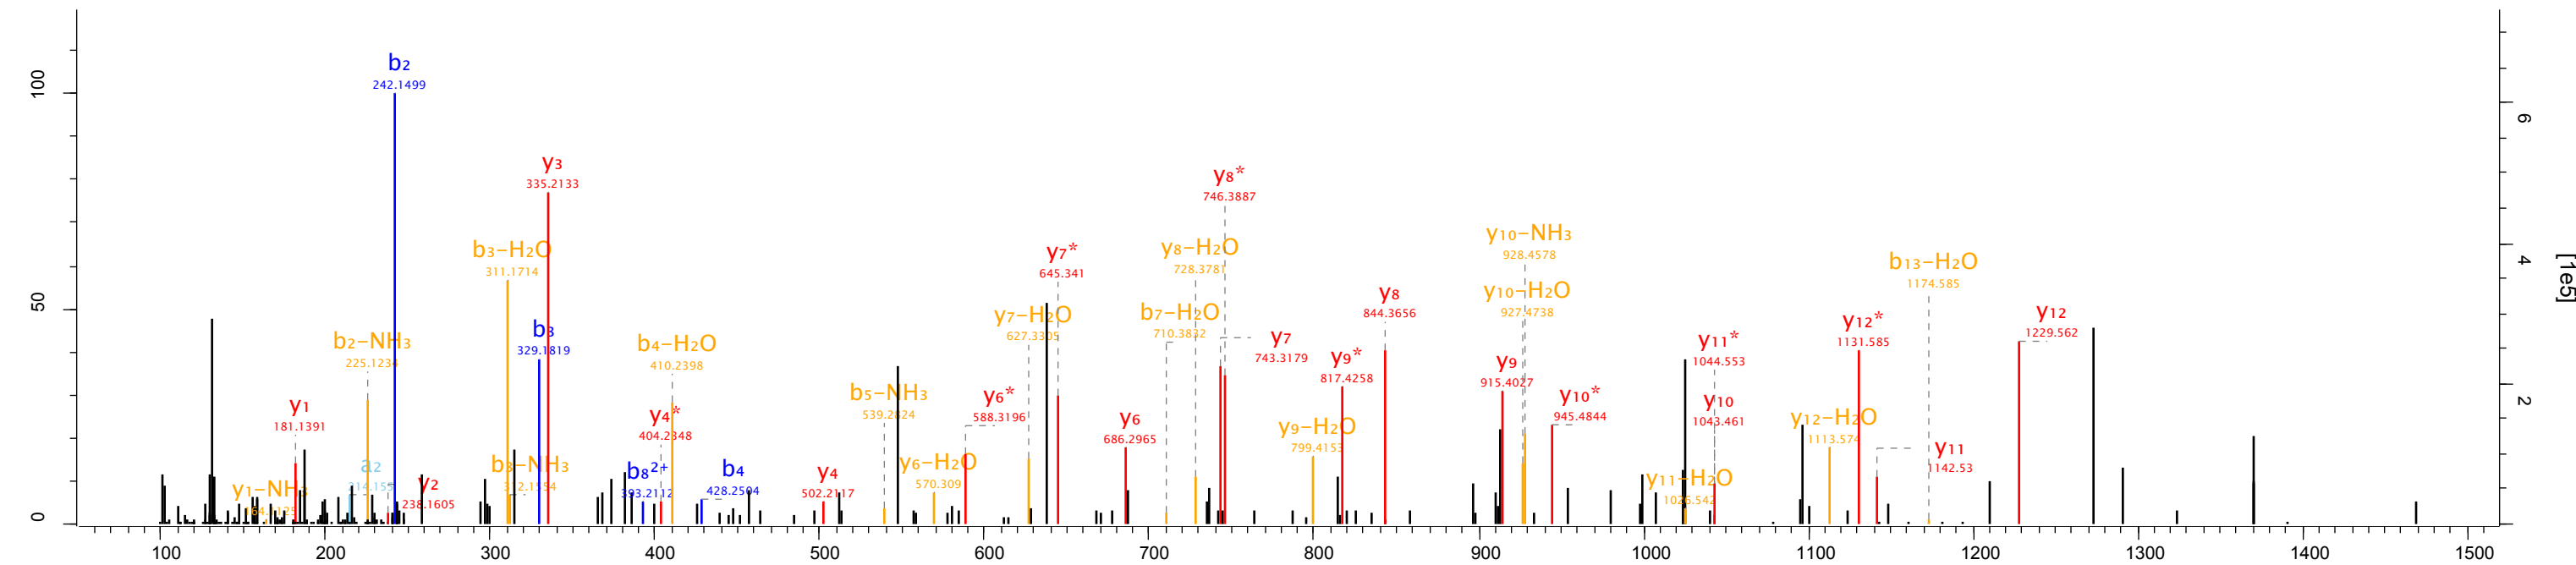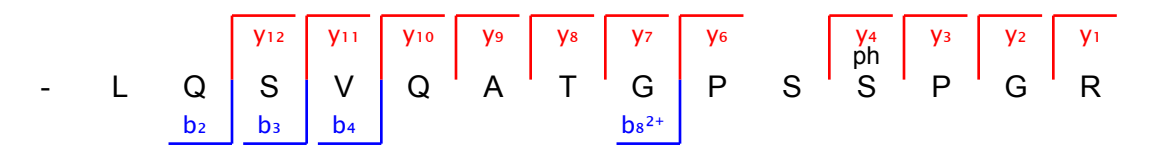

Raw file: 20150814\_A375SR\_Phospho\_BR2\_04  
 Scan: 6903 Method: FTMS; HCD Score: 229.6 m/z: 825.83 Gene names: DTD1

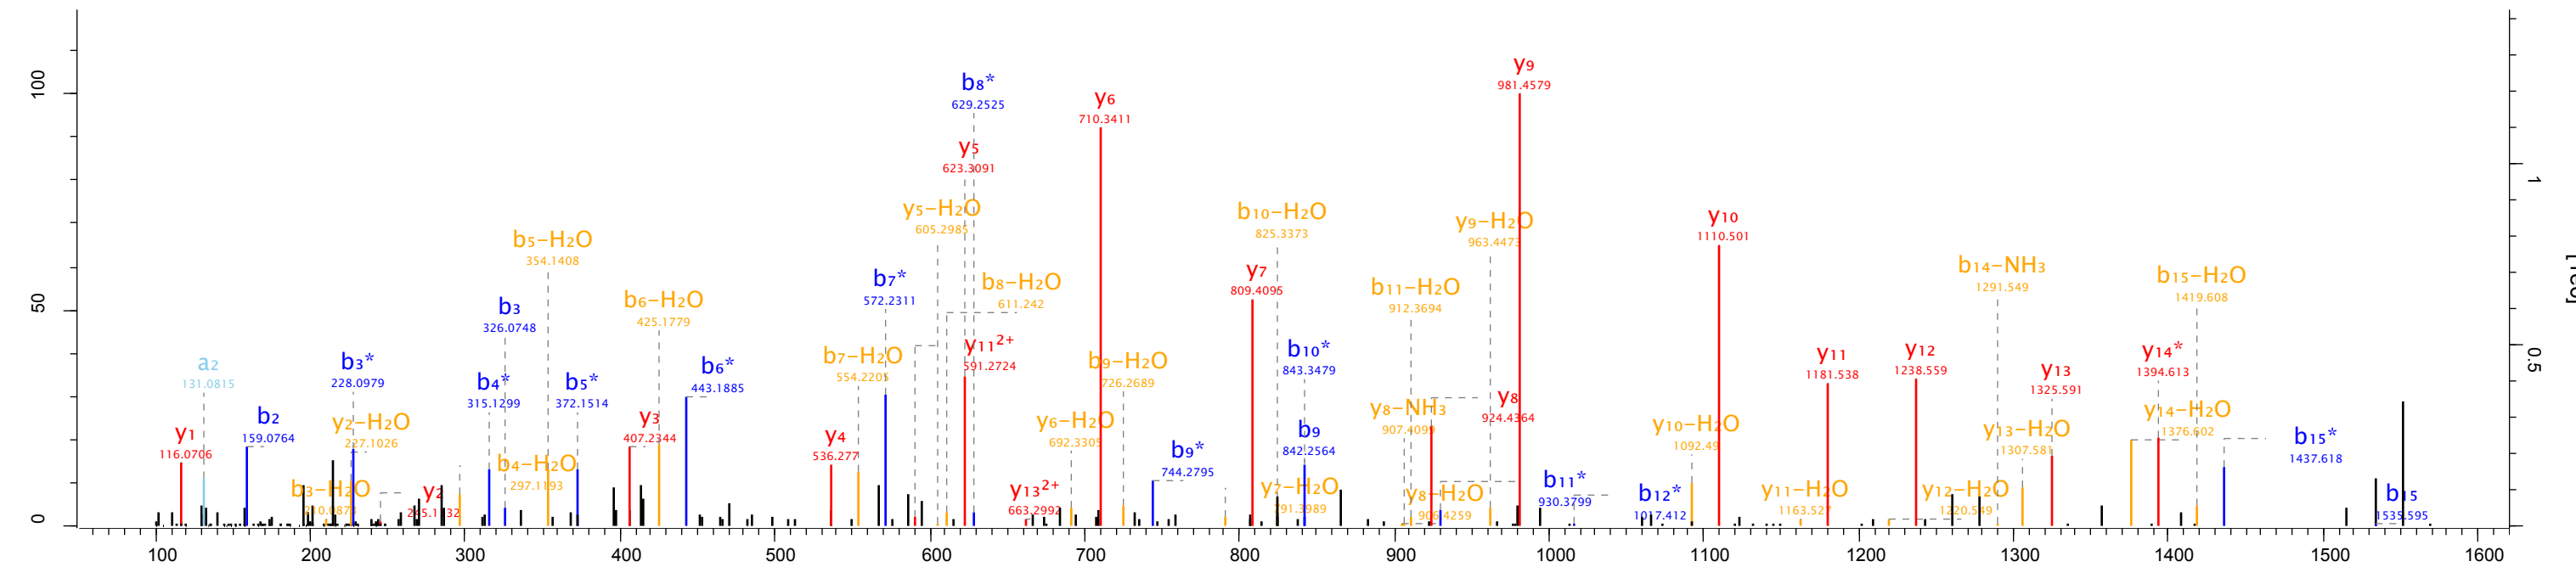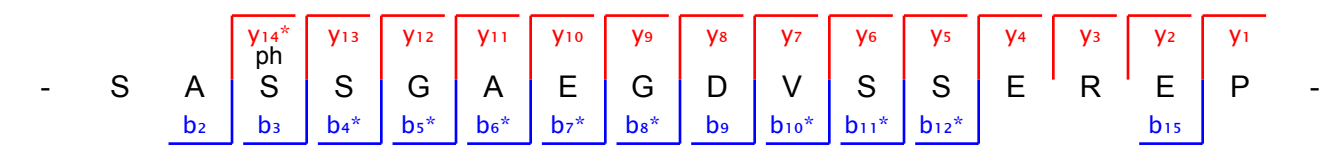

Raw file: 20150814\_A375SR\_Phospho\_BR2\_04  
 Scan: 7283 Method: FTMS; HCD Score: 140.31 m/z: 694.82 Gene names: TRIP11

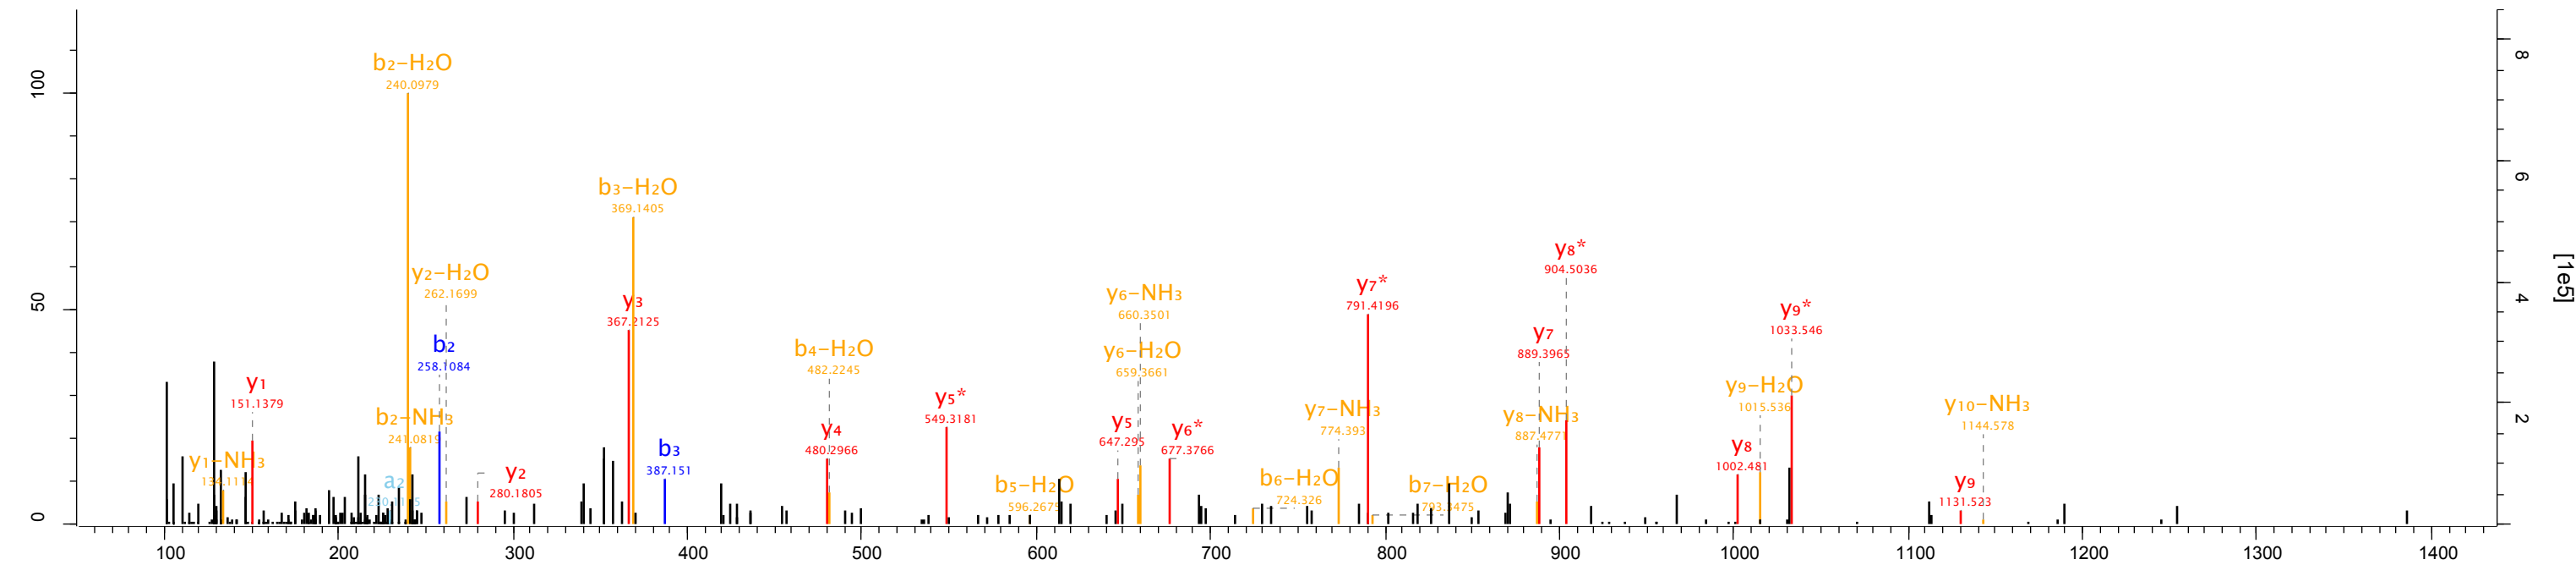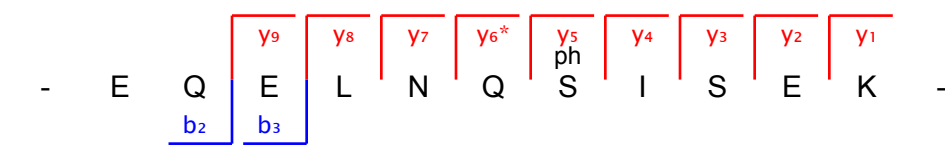

Raw file: 20150814\_A375SR\_Phospho\_BR2\_04  
 Scan: 7483 Method: FTMS; HCD Score: 352.82 m/z: 1055.97 Gene names: ZMYM4

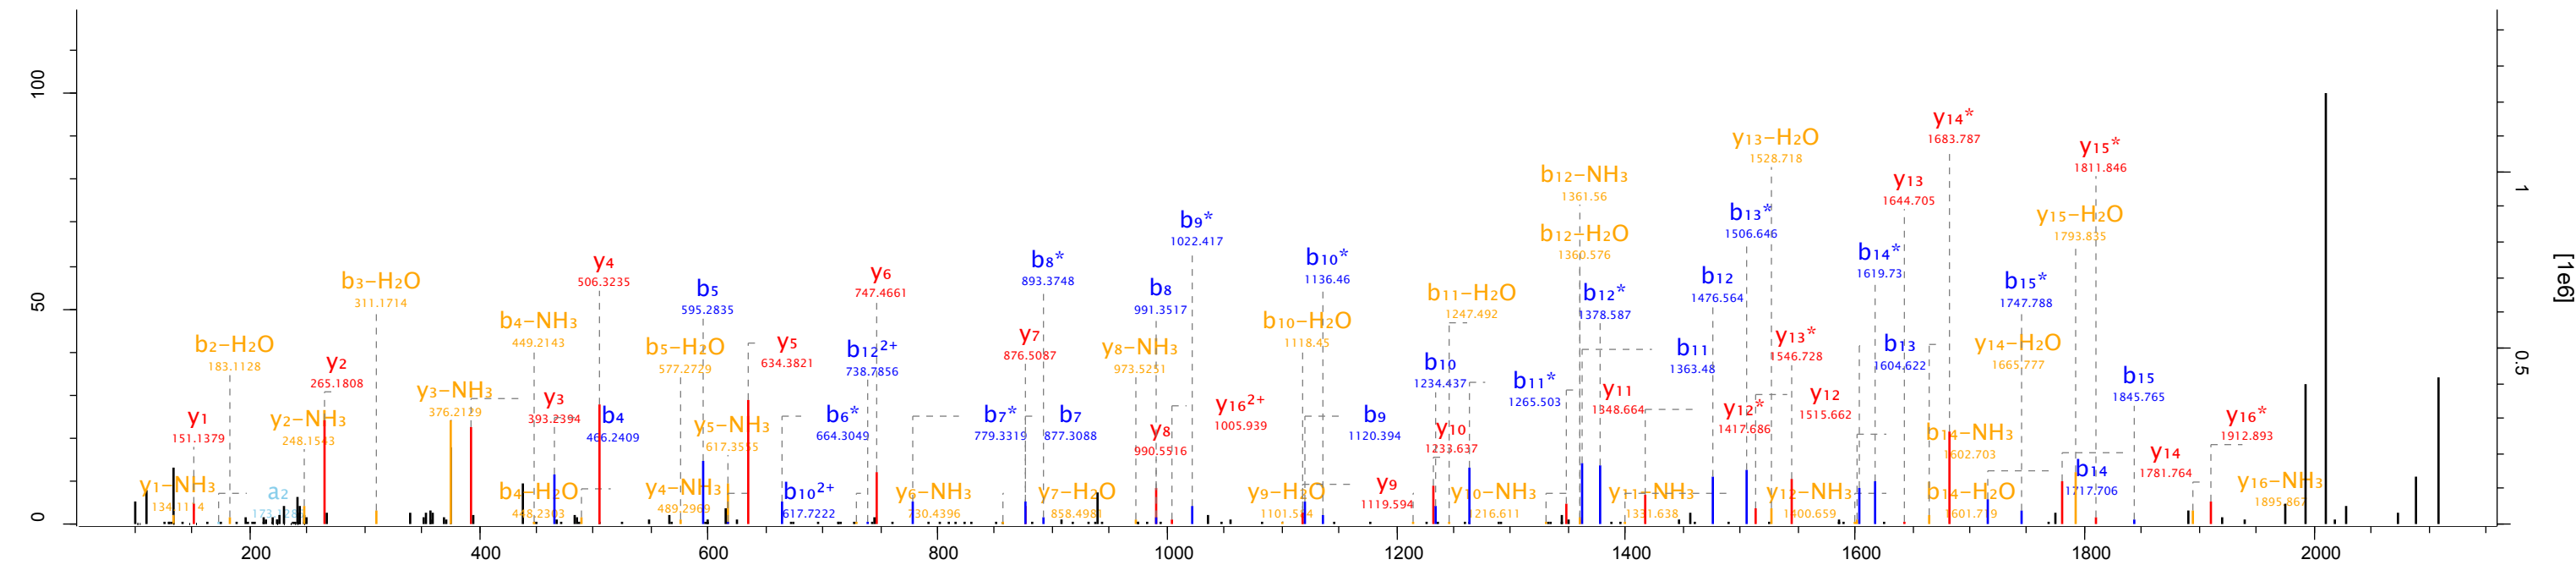

- V T Q H E S D N E N E I Q I Q N K -

y16\*
y15\*
y14
y13
y12<sup>ph</sup>
y11
y10
y9
y8
y7
y6
y5
y4
y3
y2
y1

a2
b4
b5
b6\*
b7
b8
b9
b10
b11
b12
b13
b14
b15



Raw file: 20150814\_A375SR\_Phospho\_BR2\_04  
 Scan: 7493 Method: FTMS; HCD Score: 307.72 m/z: 853.88 Gene names: LMO7

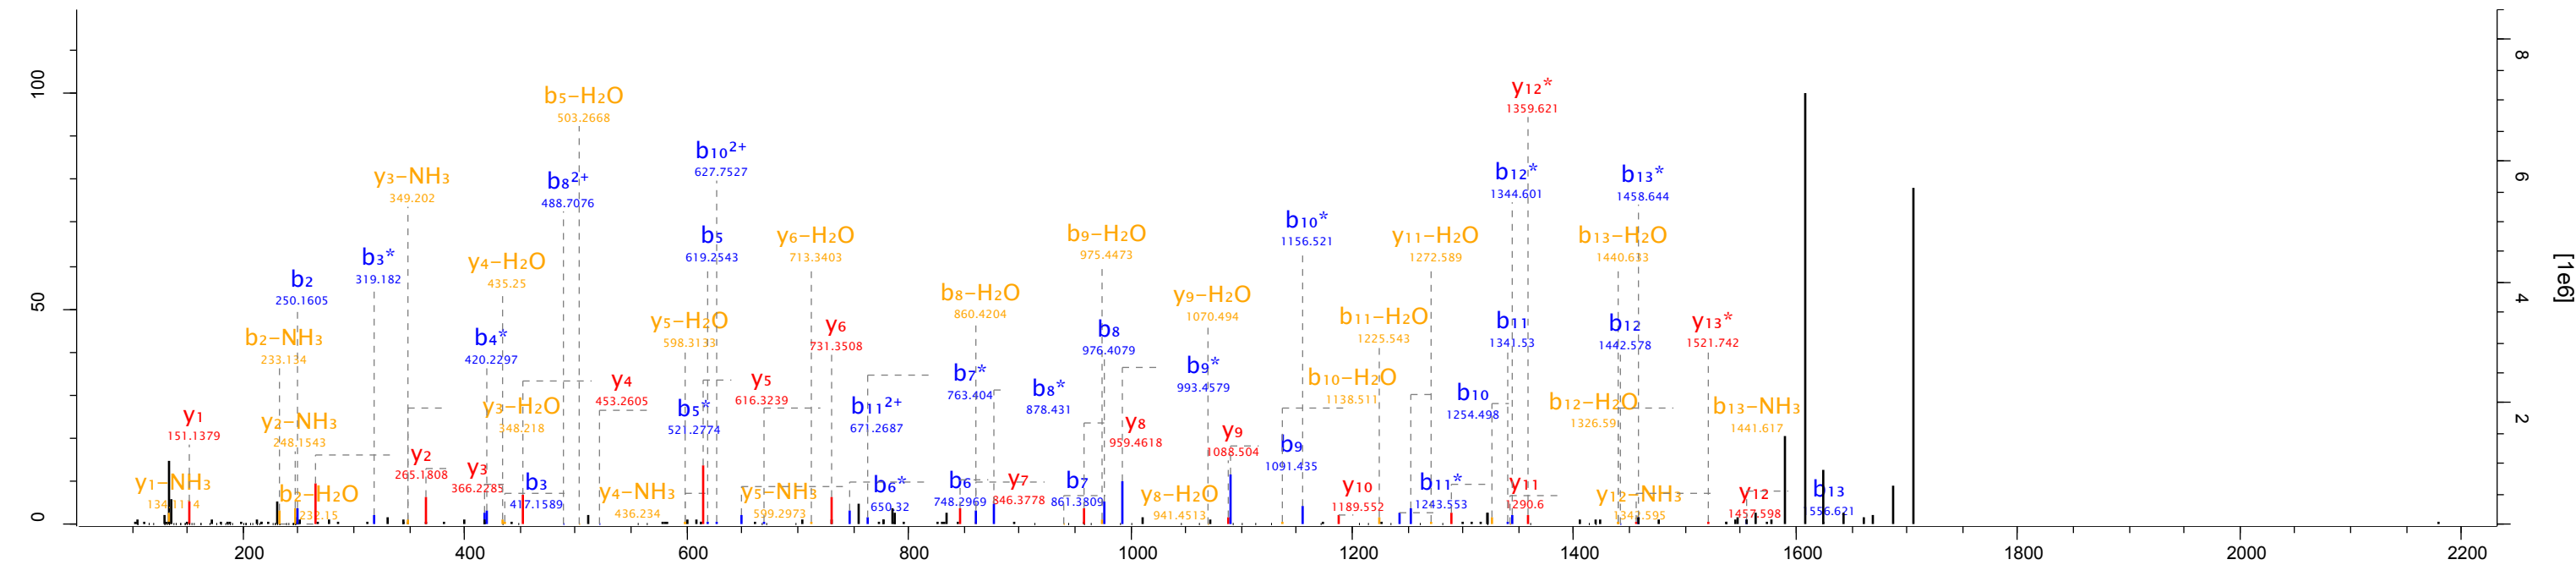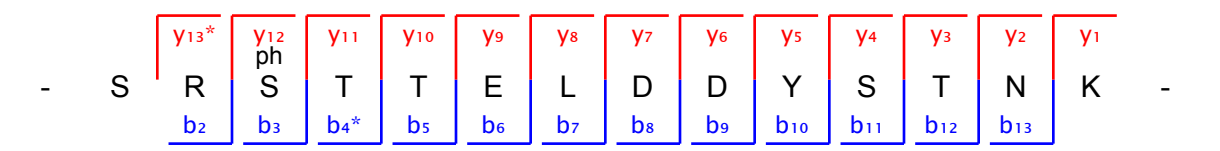

Raw file: 20150814\_A375SR\_Phospho\_BR2\_04  
 Scan: 8723 Method: FTMS; HCD Score: 122.64 m/z: 781.37 Gene names: ACLY

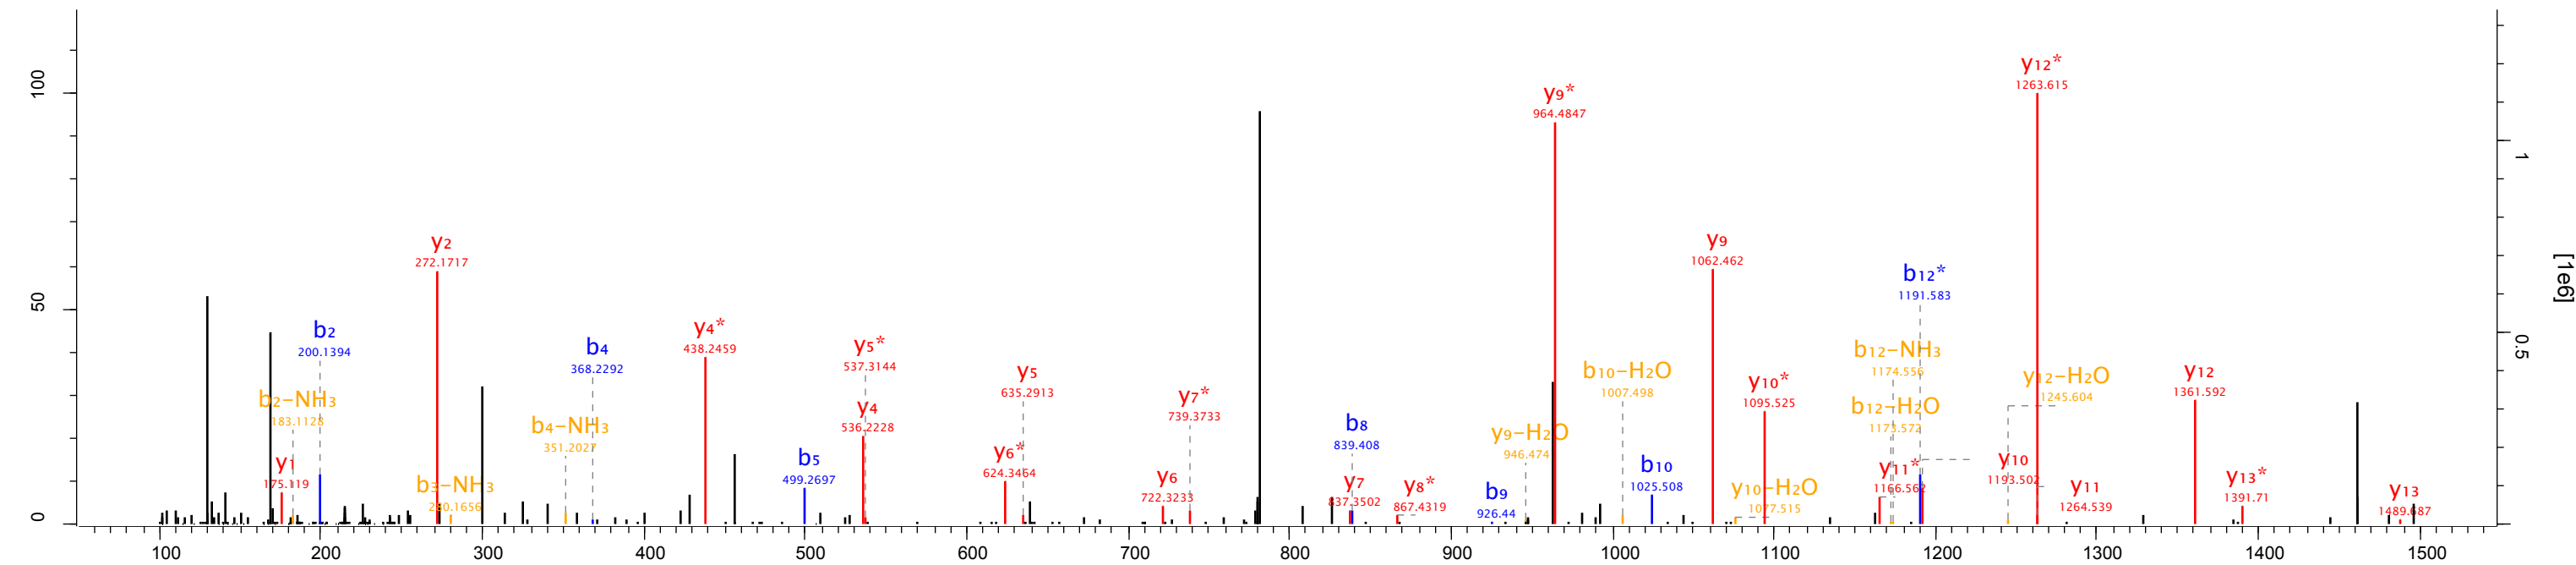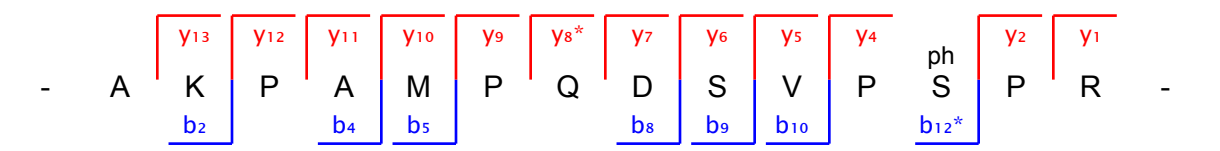

Raw file: 20150814\_A375SR\_Phospho\_BR2\_04  
 Scan: 9243 Method: FTMS; HCD Score: 91.93 m/z: 728.82 Gene names: CAMSAP2

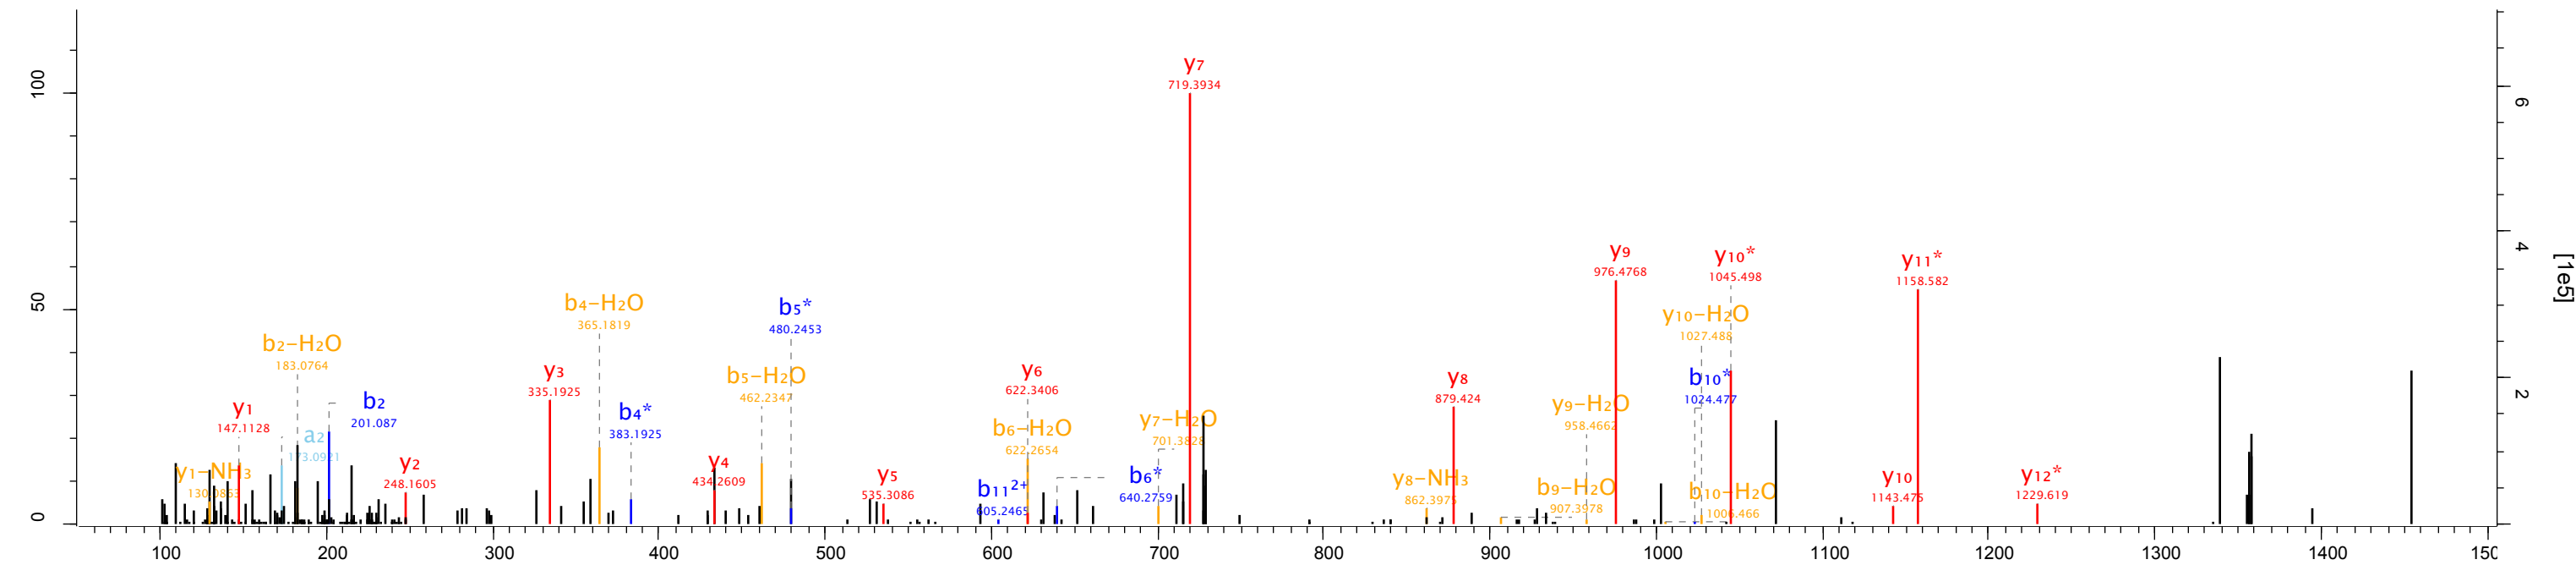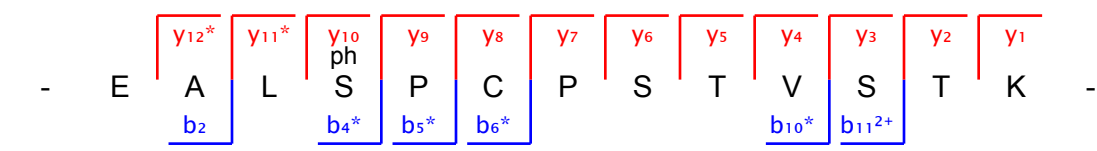

20150814\_A375SR\_Phospho\_BR2\_04 9503 FTMS; HCD 172.91 736.33 DBNL

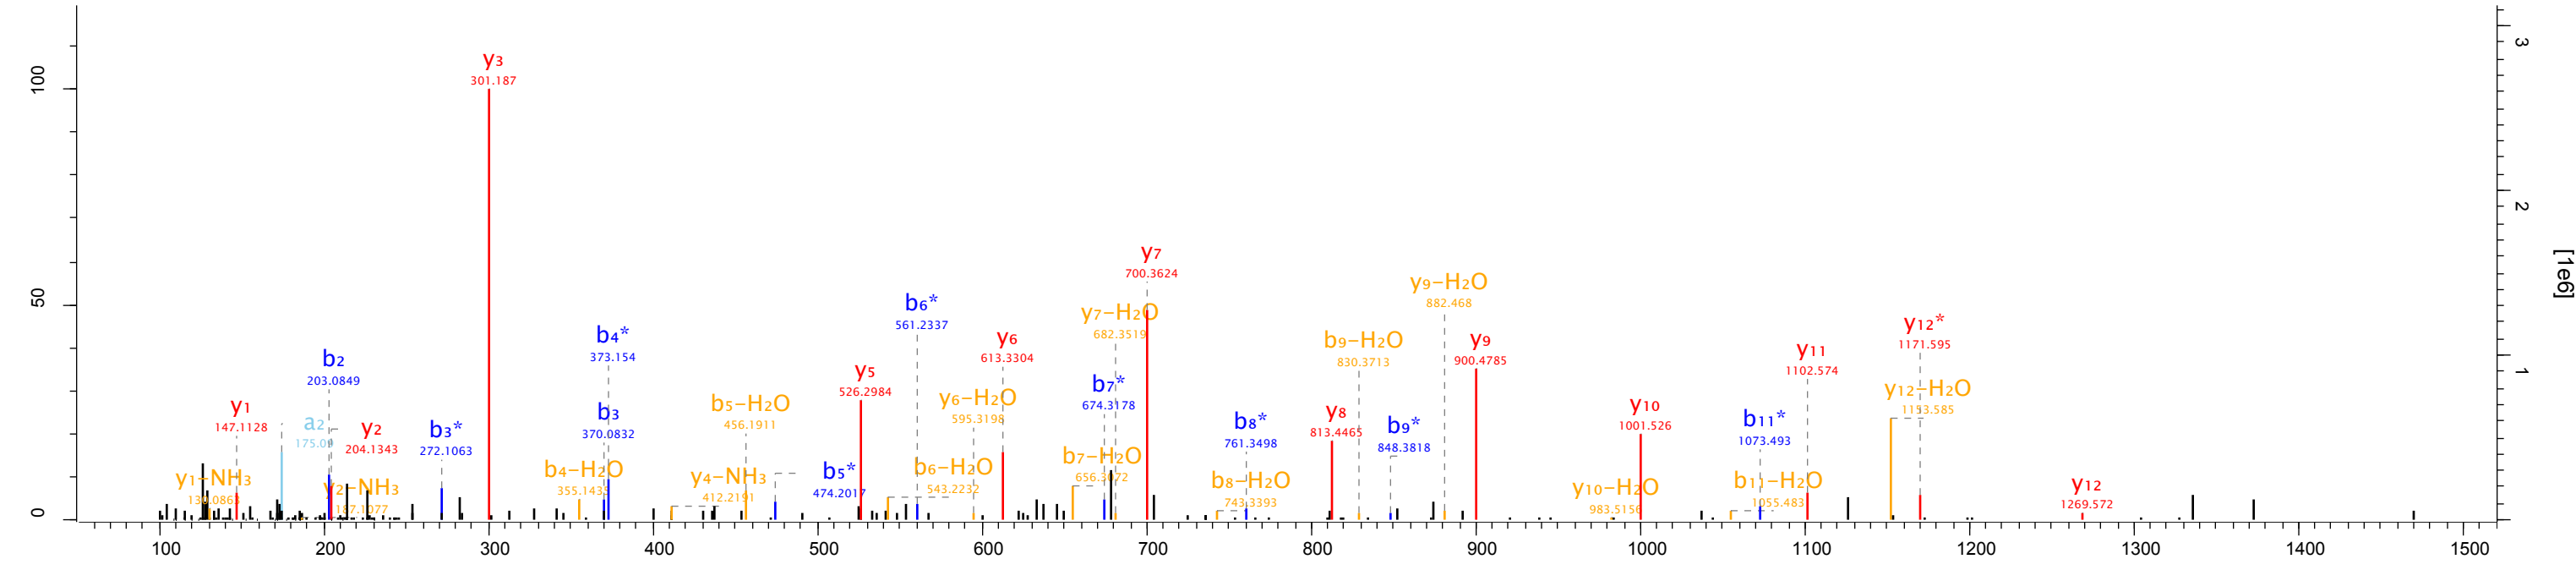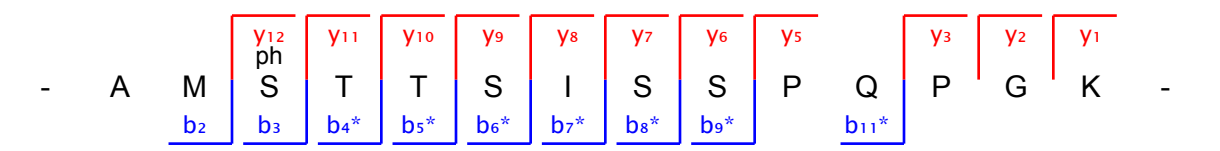

Raw file 20150814\_A375SR\_Phospho\_BR2\_04 Scan 9643 Method FTMS; HCD Score 48.38 m/z 564.25 Gene names TMEM2

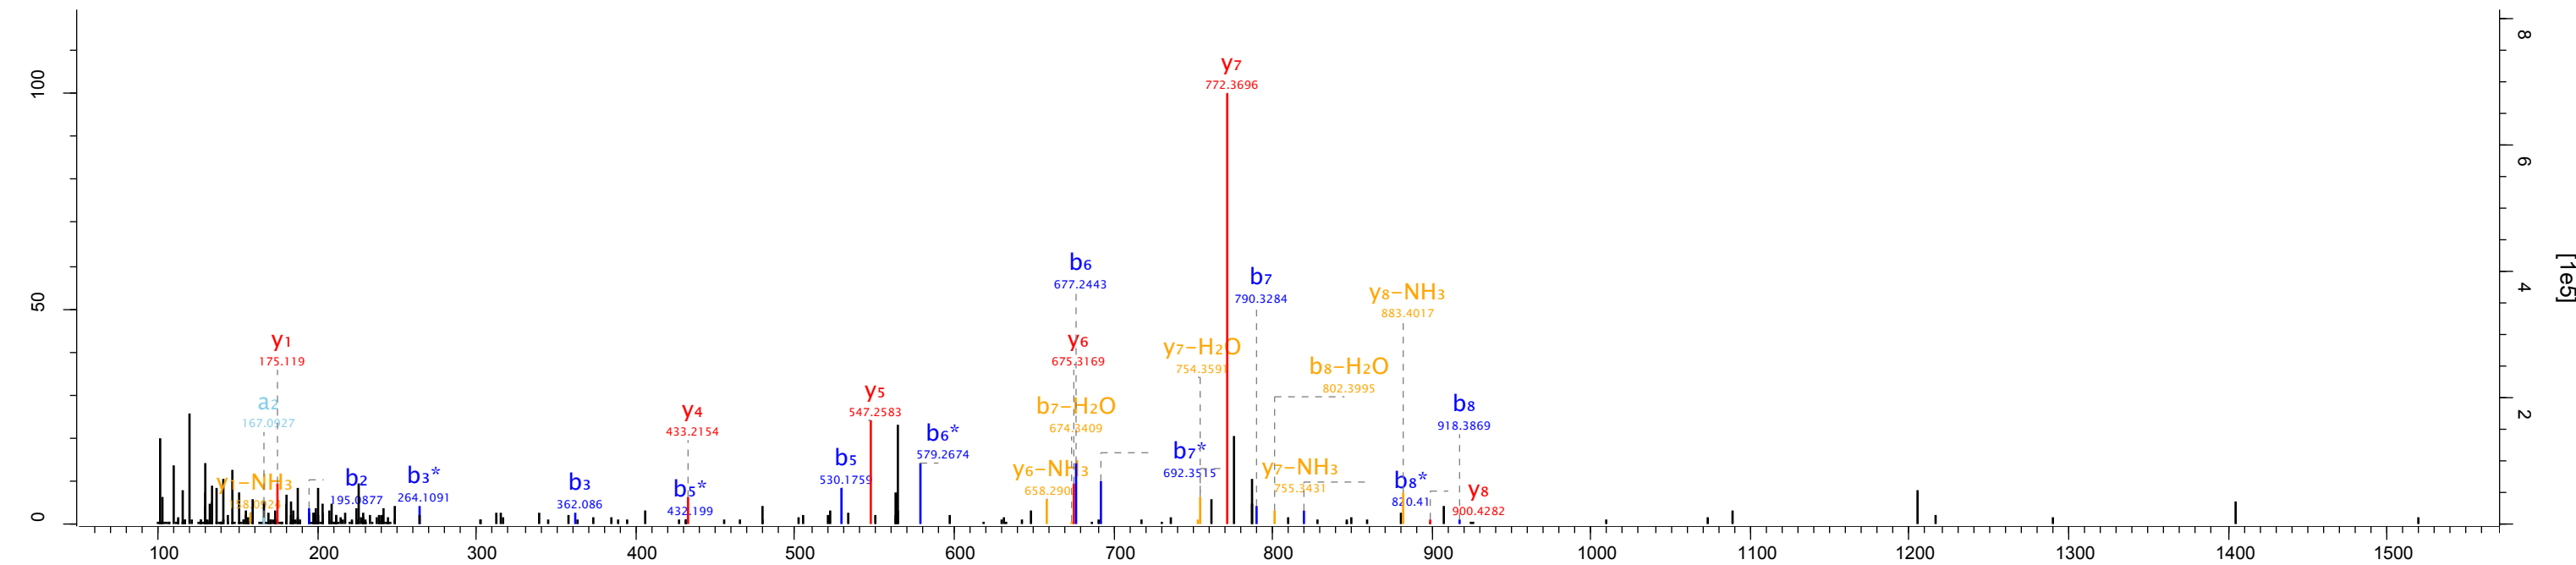

- G H S ph P A F L Q P Q N G N S R -

Fragmentation scheme showing b and y ions for the peptide sequence: G H S ph P A F L Q P Q N G N S R. The b ions are shown in blue boxes below the sequence, and the y ions are shown in red boxes above the sequence. The b ions are labeled b2, b3, b5, b6, b7, b8. The y ions are labeled y8, y7, y6, y5, y4, y1.

Raw file: 20150814\_A375SR\_Phospho\_BR2\_05  
 Scan: 10483 Method: FTMS; HCD Score: 231.16 m/z: 861.72 Gene names: PHRF1

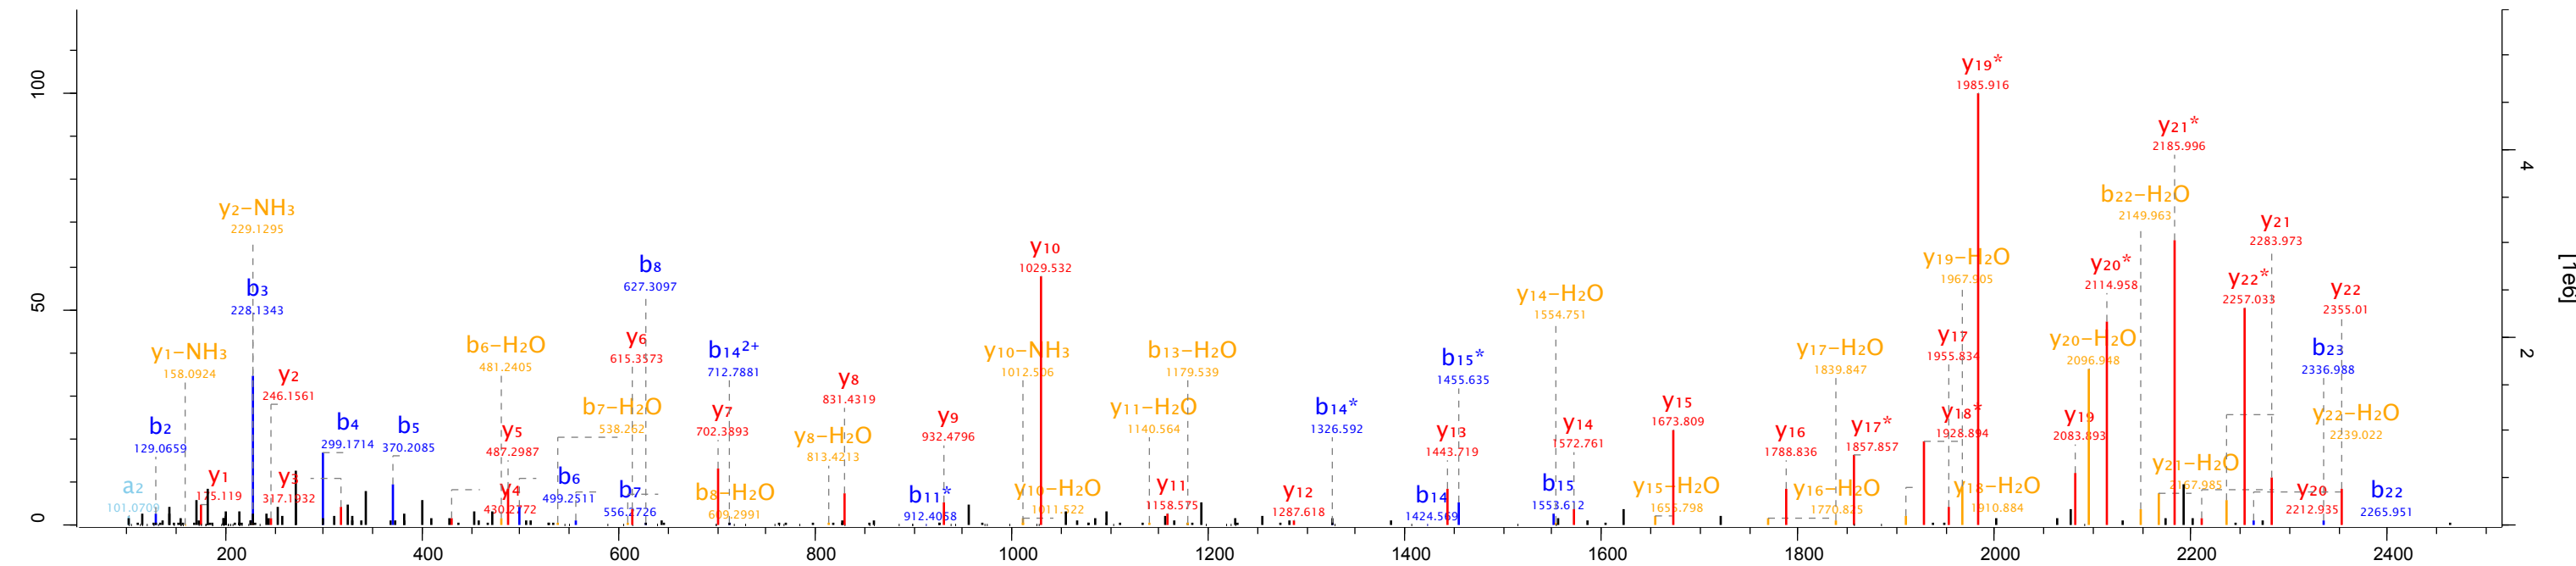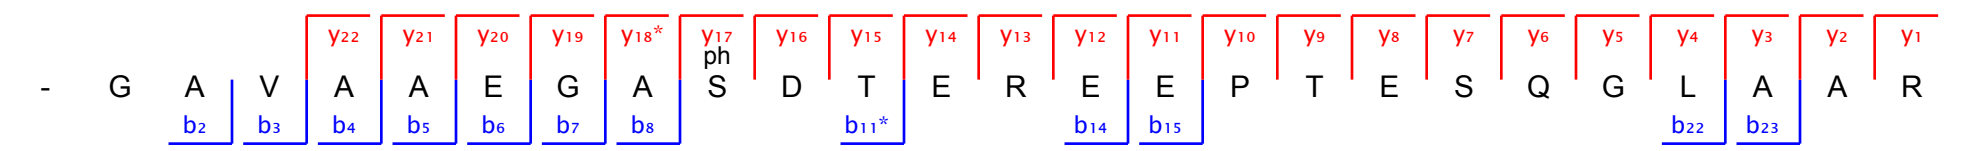

Raw file 20150814\_A375SR\_Phospho\_BR2\_05 Scan 10603 Method FTMS; HCD Score 59.23 m/z 912.39 Gene names APOL2

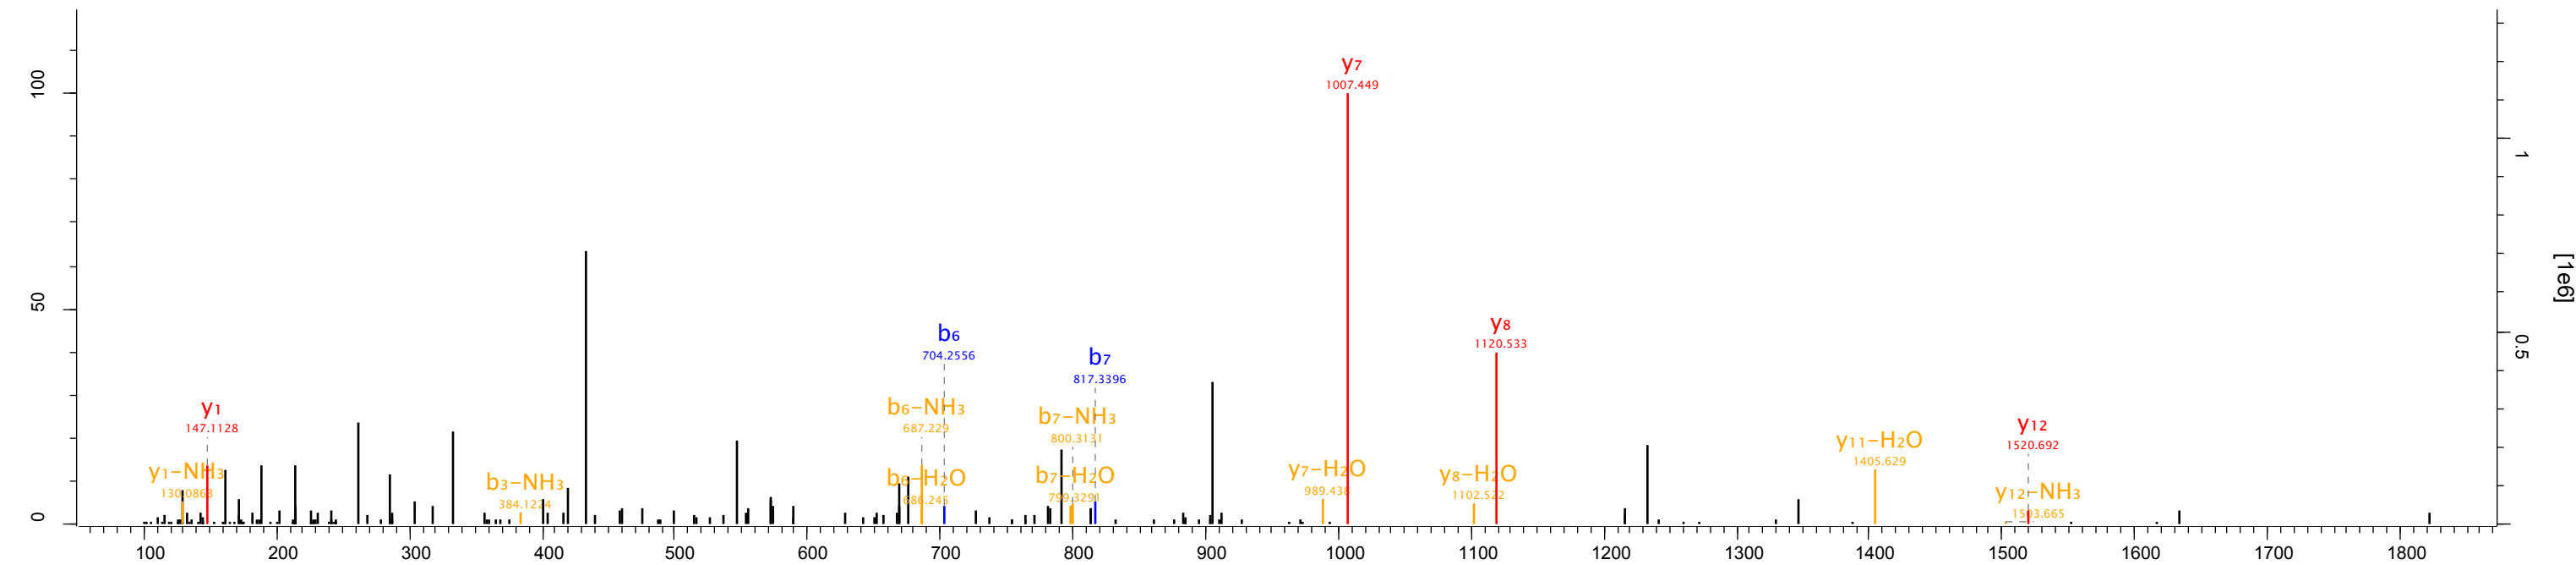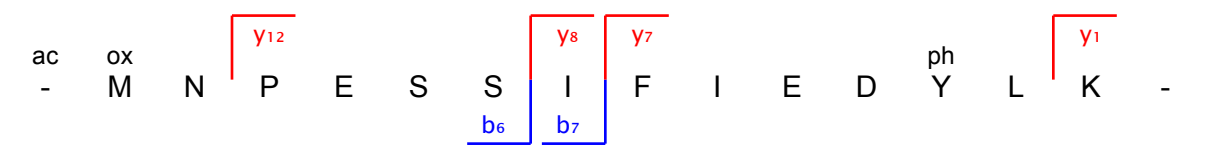

Raw file 20150814\_A375SR\_Phospho\_BR2\_05 Scan 11073 Method FTMS; HCD Score 59.86 m/z 669.76 Gene names KLC4

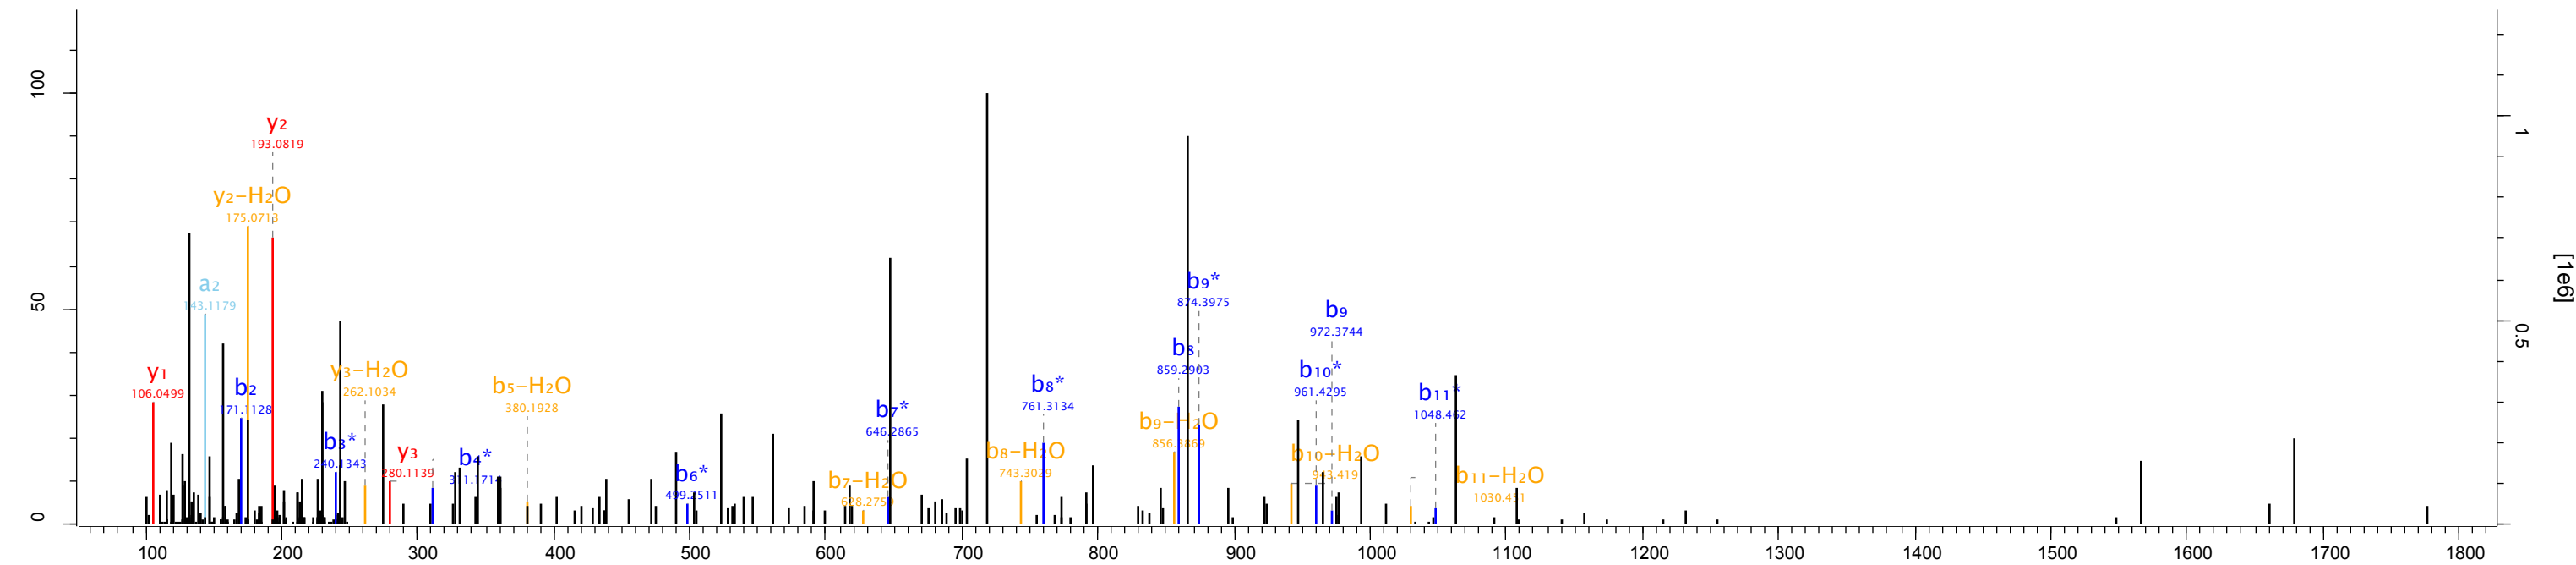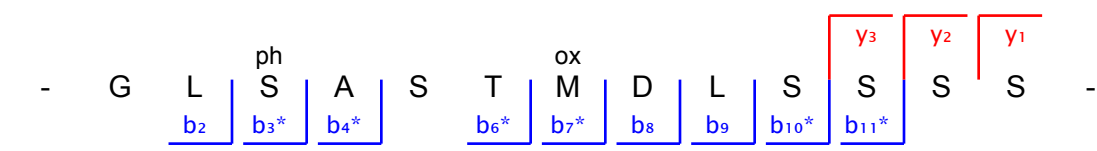



Raw file 20150814\_A375SR\_Phospho\_BR2\_05 Scan 11393 Method FTMS; HCD Score 112.41 m/z 622.59 Gene names DENND4C

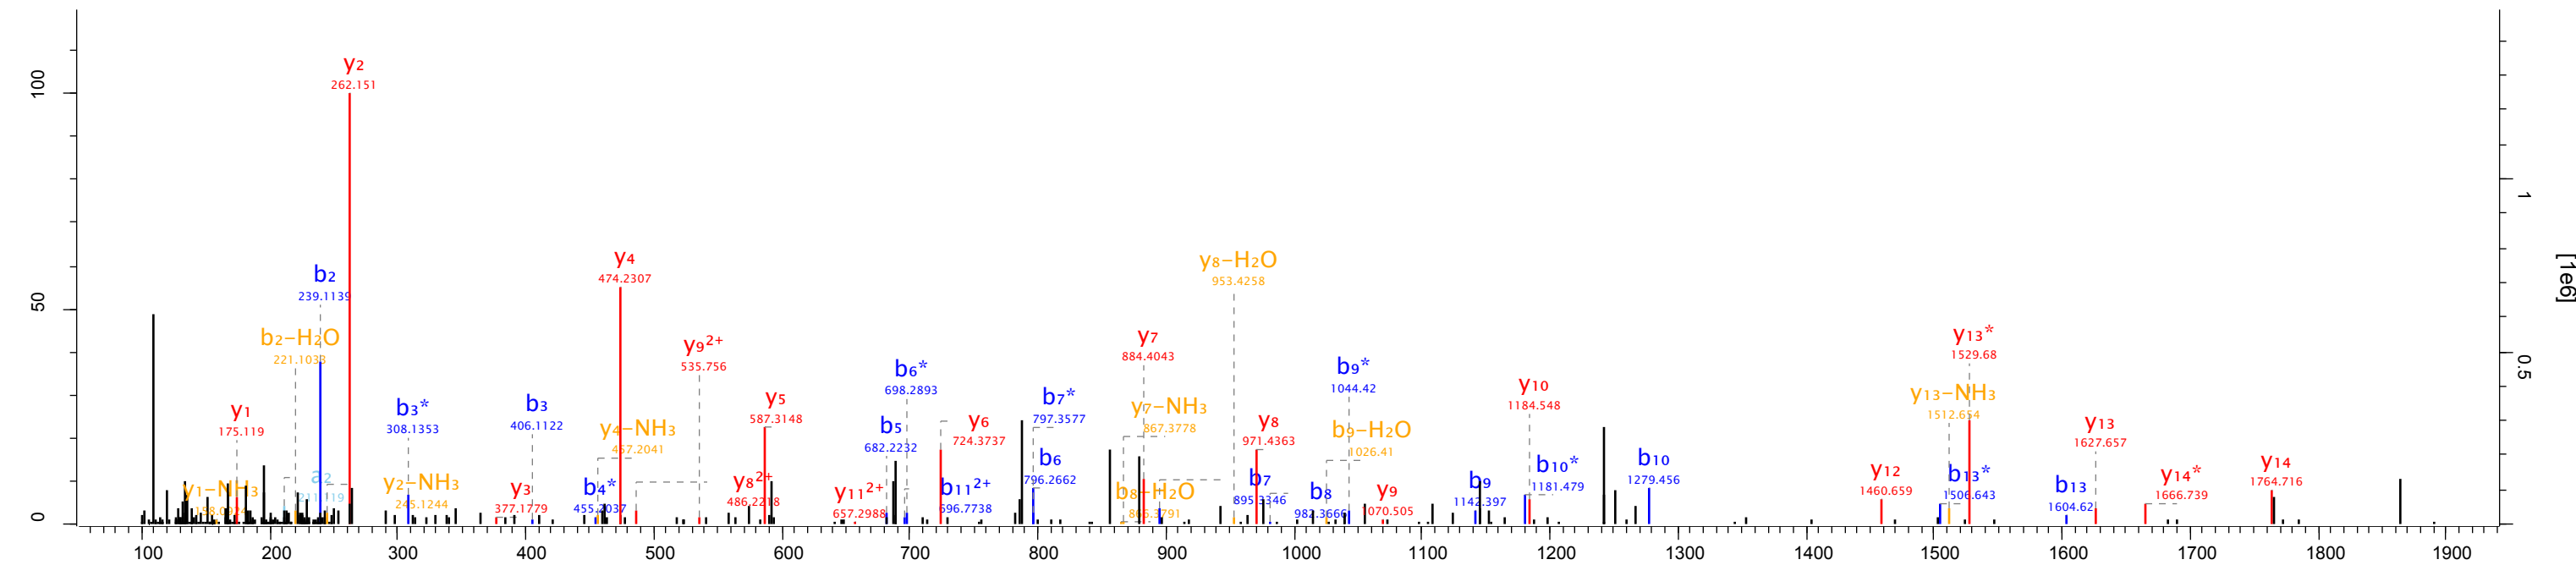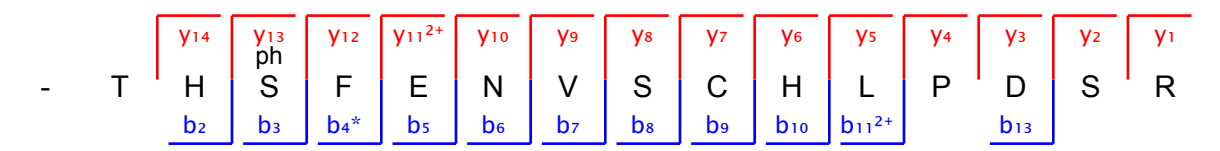

Raw file: 20150814\_A375SR\_Phospho\_BR2\_05  
 Scan: 11403 Method: FTMS; HCD Score: 93.84 m/z: 502.25 Gene names: NFRKB

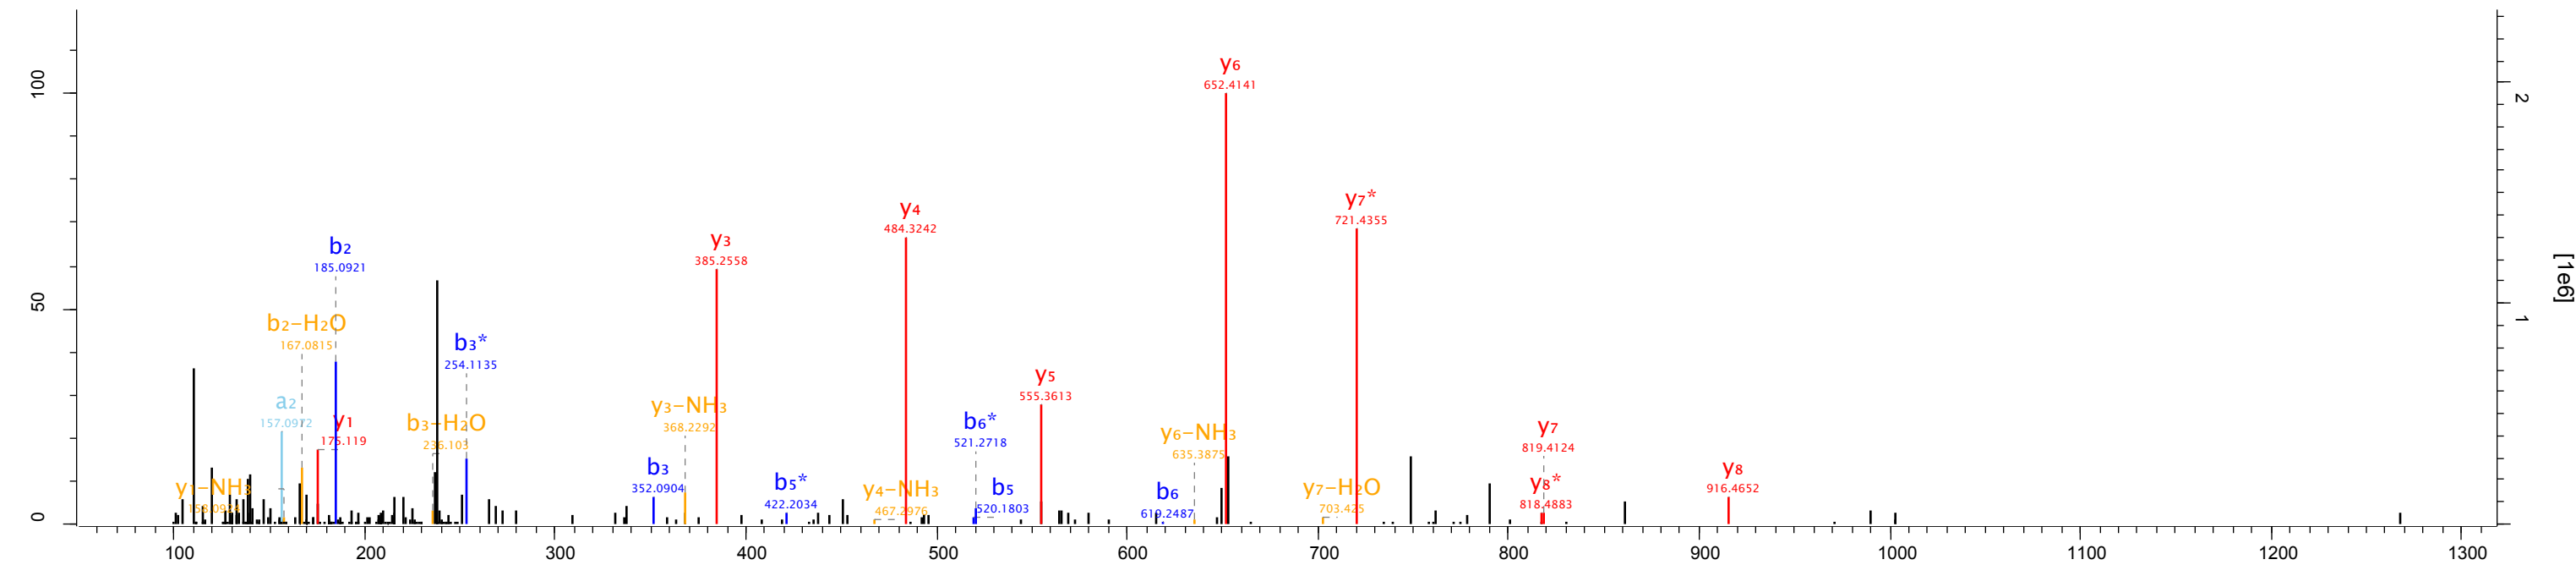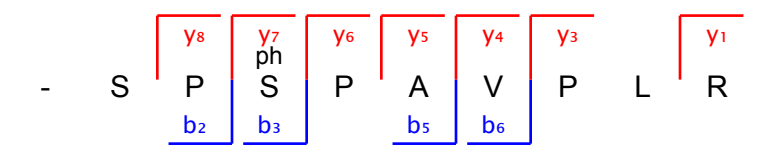

Raw file: 20150814\_A375SR\_Phospho\_BR2\_05  
 Scan: 1173 Method: FTMS; HCD Score: 163.9 m/z: 642.3 Gene names: GTF2I

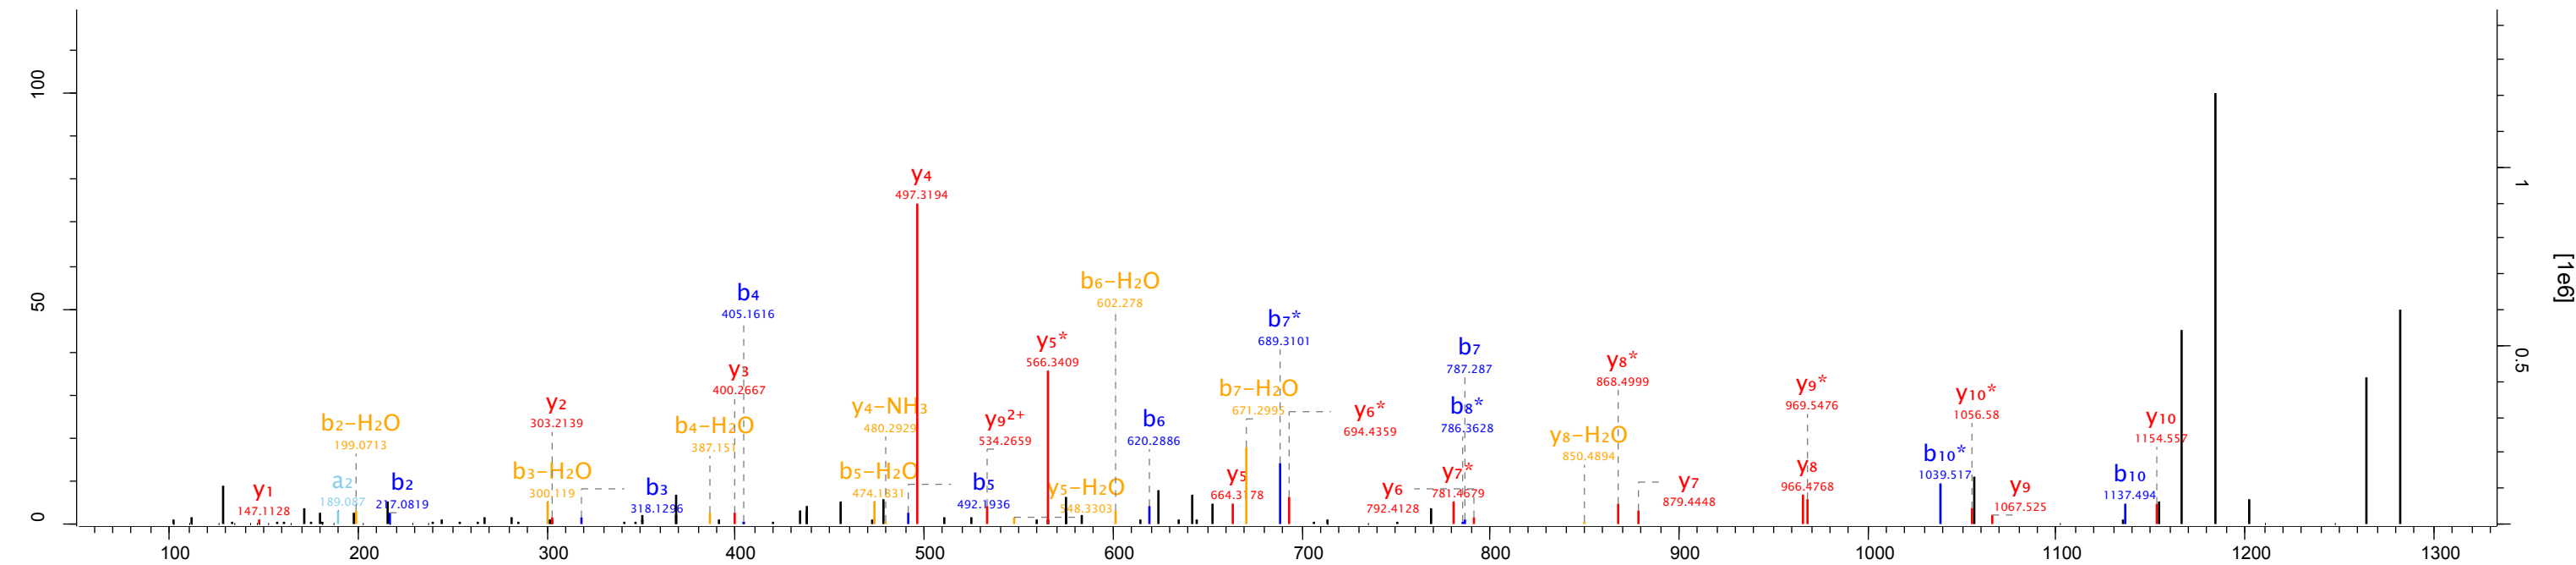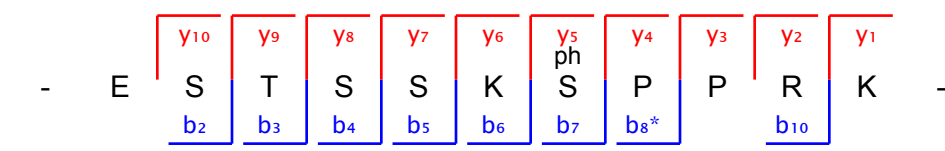

Raw file: 20150814\_A375SR\_Phospho\_BR2\_05  
 Scan: 11793 Method: FTMS; HCD Score: 108.93 m/z: 491.73 Gene names: RAB11FIP2

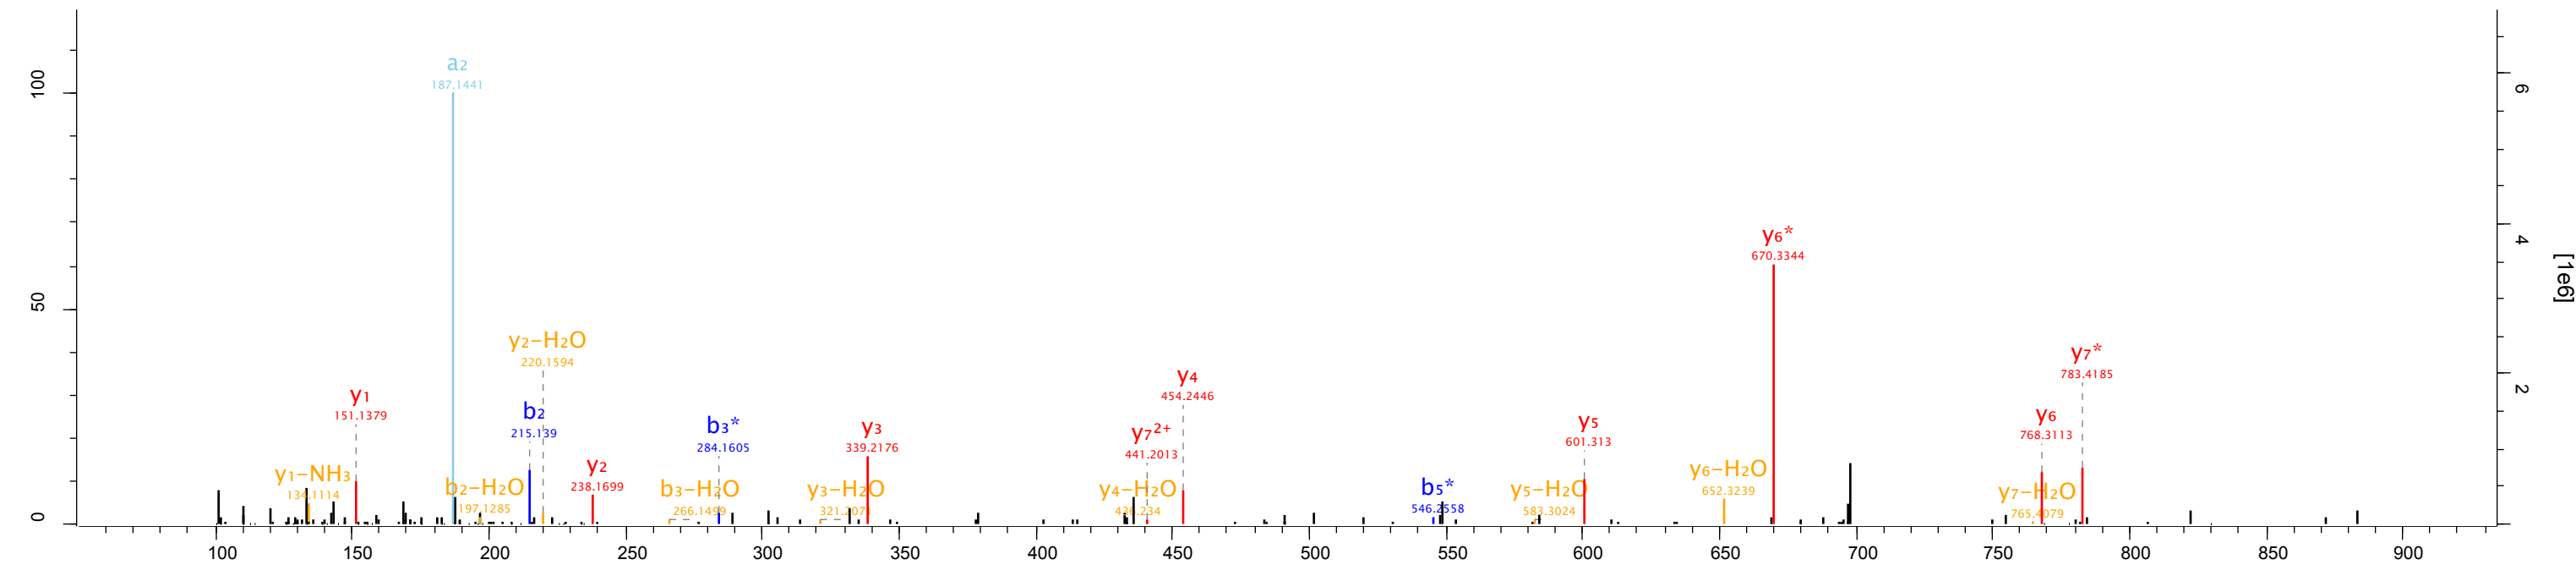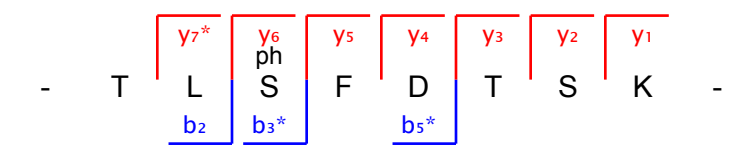

Raw file Scan Method Score m/z Gene names  
 20150814\_A375SR\_Phospho\_BR2\_05 11883 FTMS; HCD 102.65 799.88 MAP1A

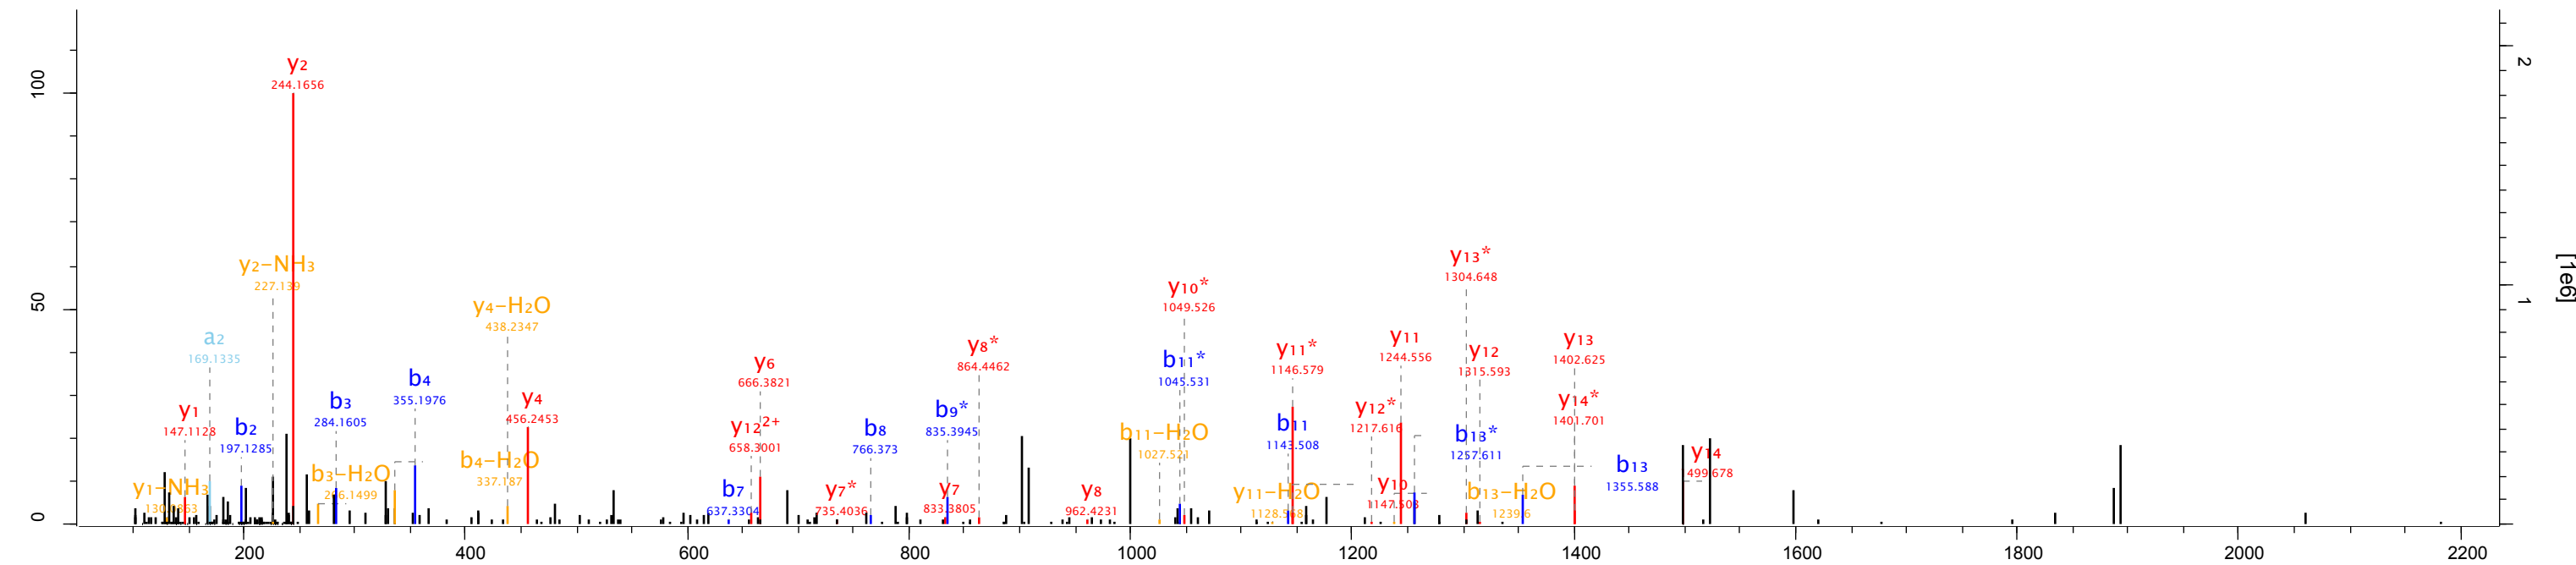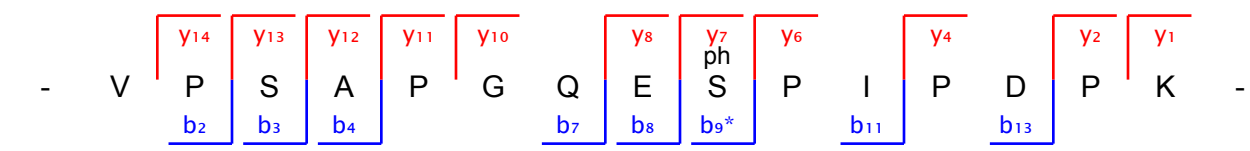

Raw file: 20150814\_A375SR\_Phospho\_BR2\_05  
 Scan: 11923 Method: FTMS; HCD Score: 155.57 m/z: 625.28 Gene names: CCP110

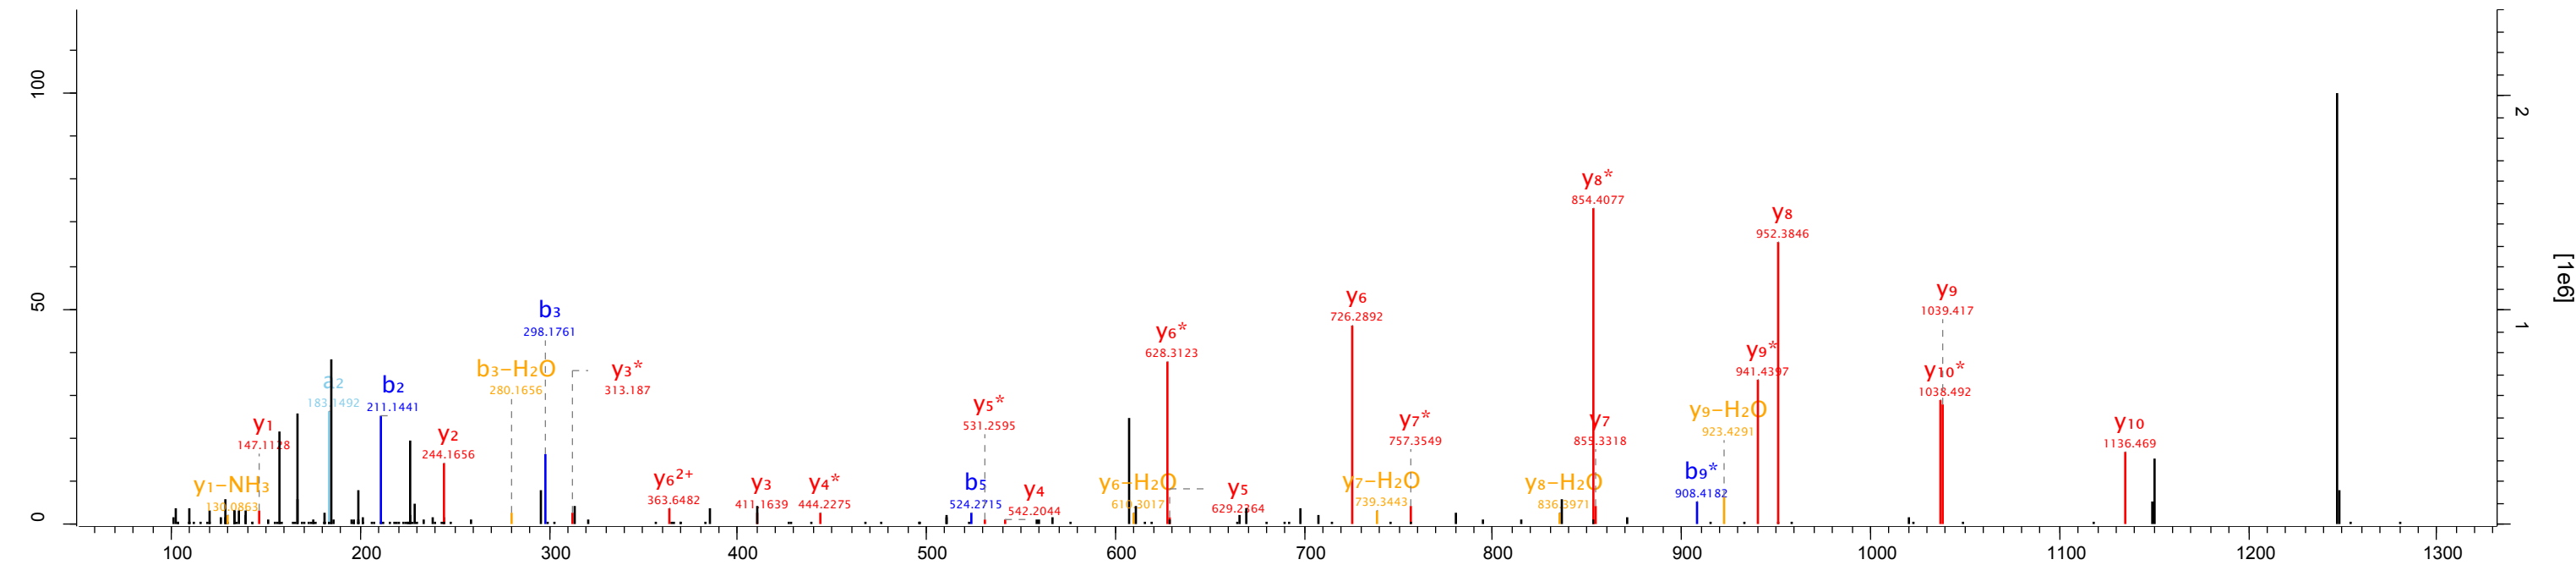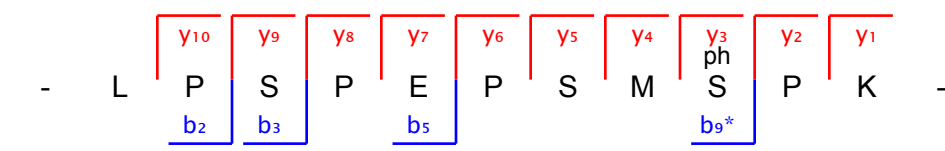

Raw file: 20150814\_A375SR\_Phospho\_BR2\_05  
 Scan: 12043 Method: FTMS; HCD Score: 99.82 m/z: 436.72 Gene names: SLAIN2

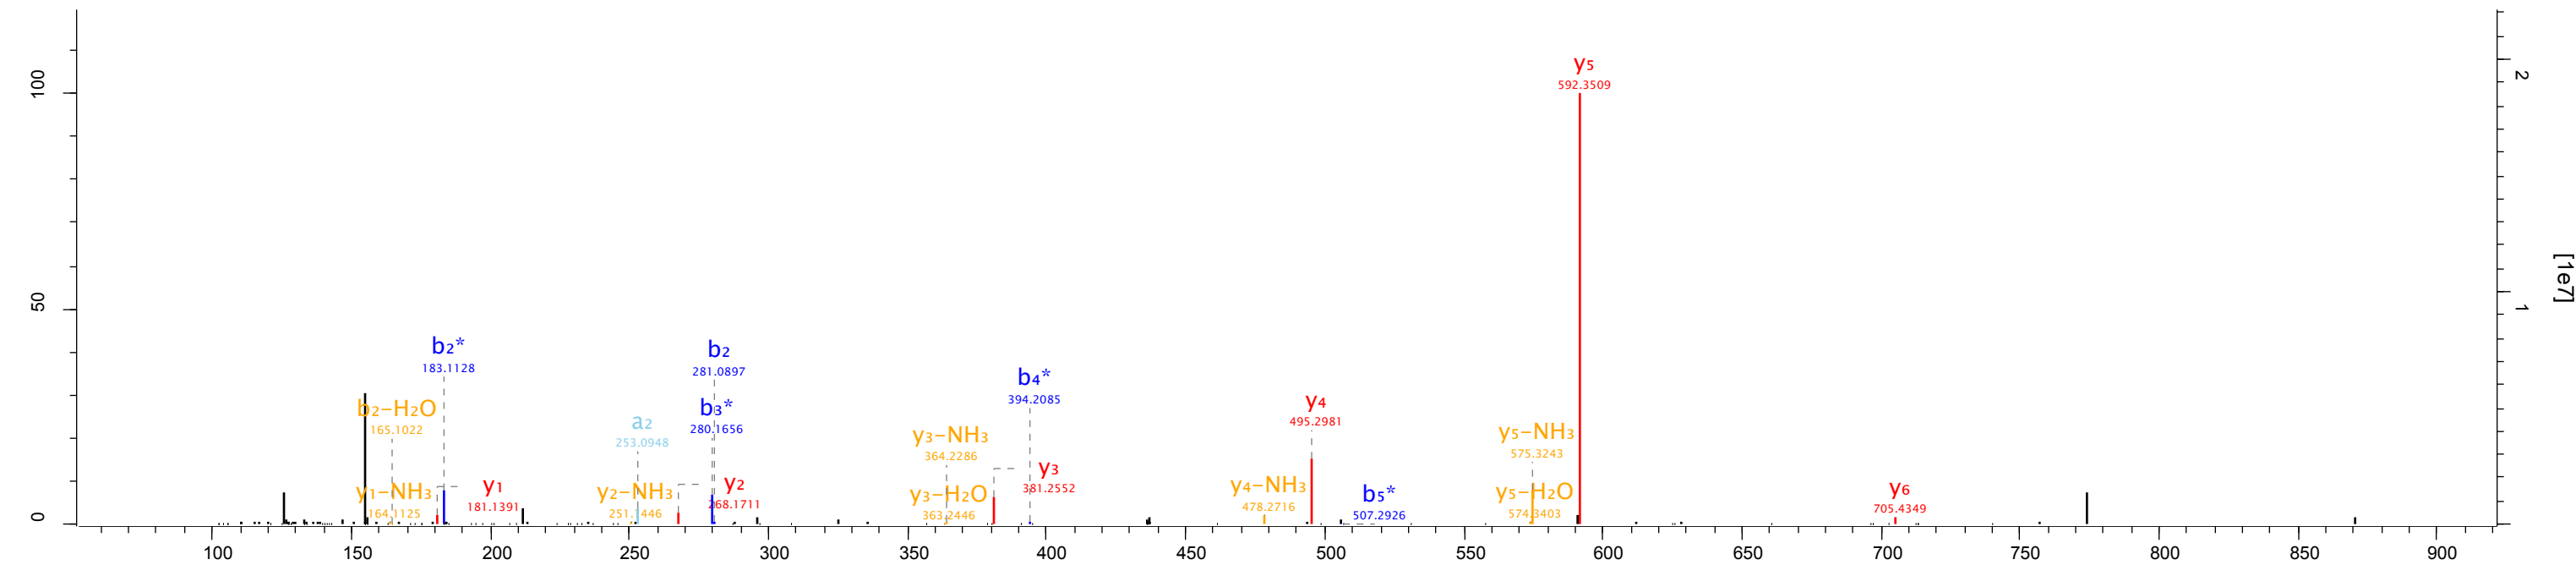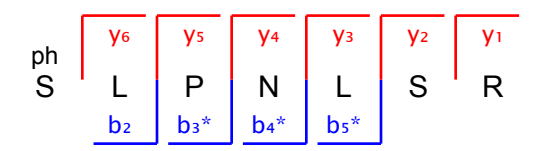

Raw file: 20150814\_A375SR\_Phospho\_BR2\_05  
 Scan: 13023 Method: FTMS; HCD Score: 71.31 m/z: 609.3 Gene names: CBX8

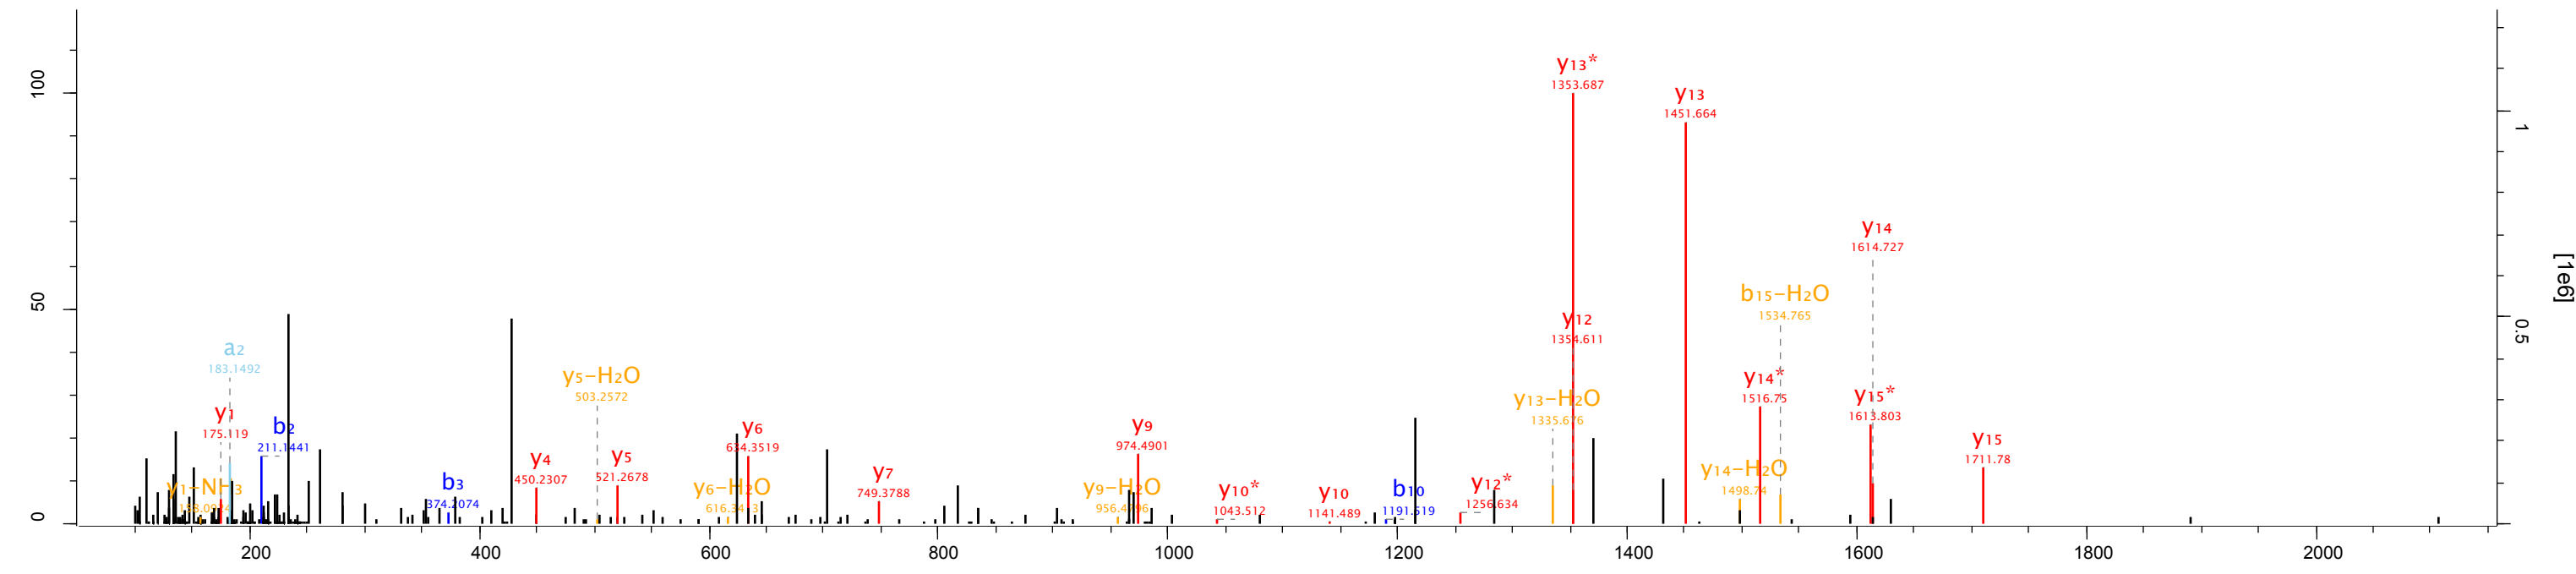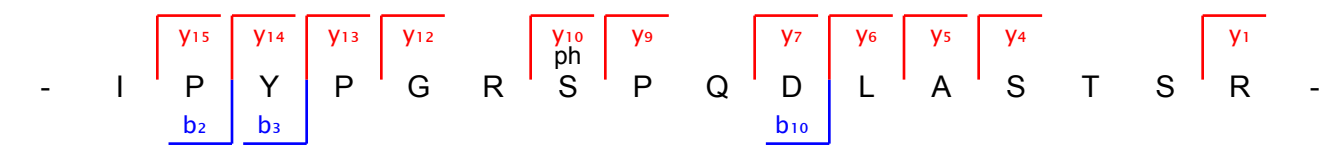



Raw file 20150814\_A375SR\_Phospho\_BR2\_05 Scan 13143 Method FTMS; HCD Score 107.41 m/z 840.4 Gene names CEP170

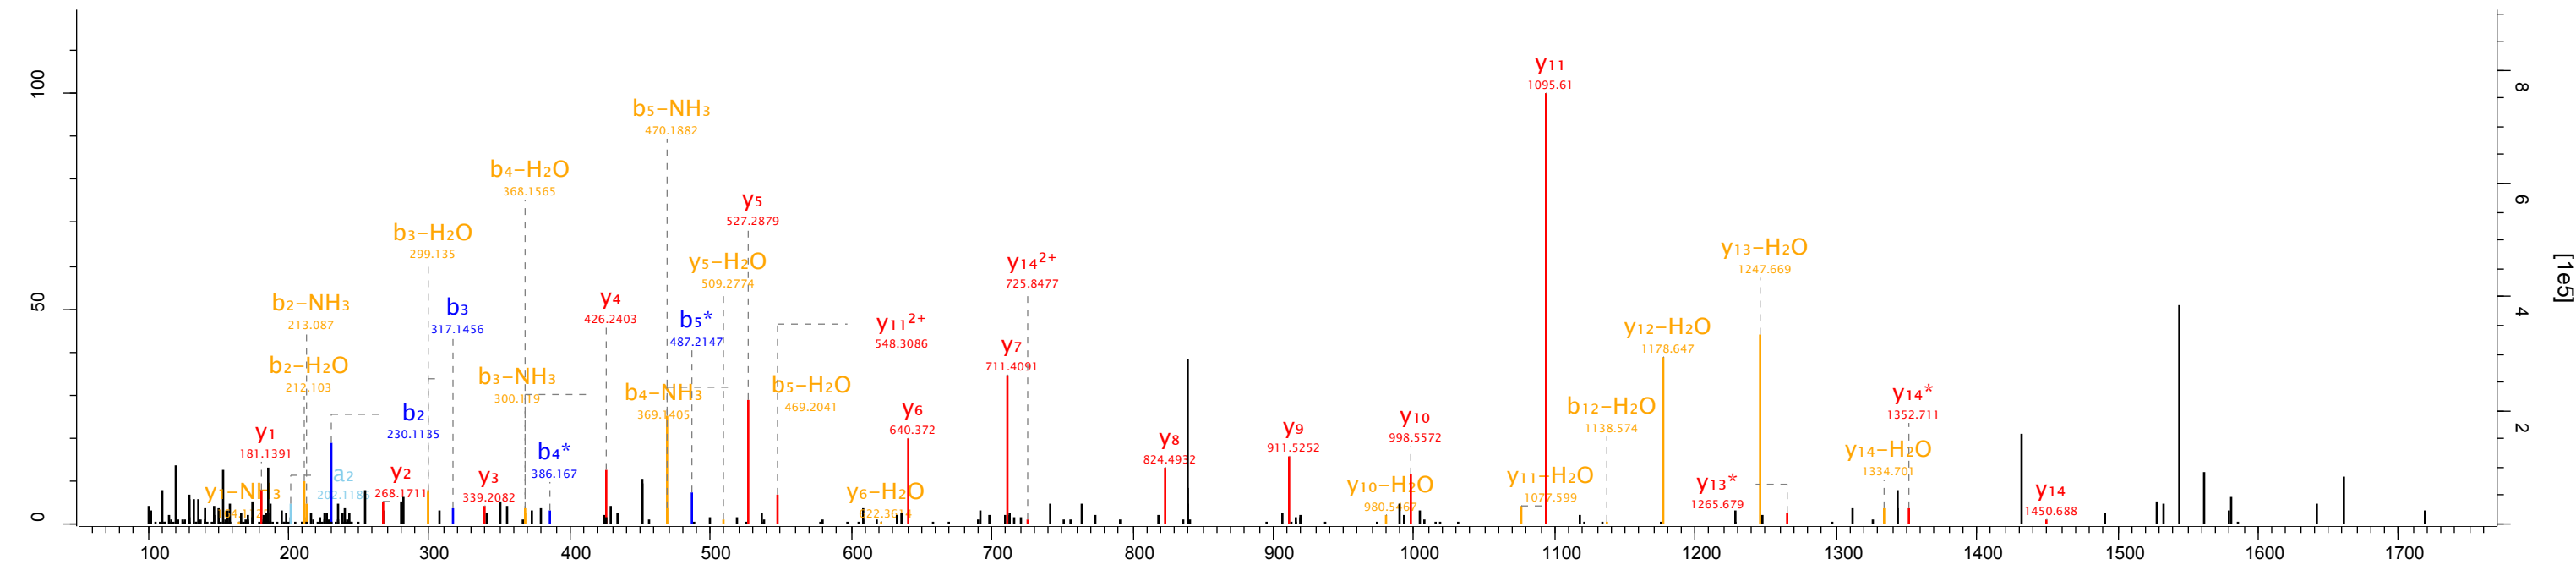

- Q T S S T P S S L A L T S A S R -

Fragmentation mapping (b and y ions) is shown below the sequence:

- Blue boxes: b<sub>2</sub> (T), b<sub>3</sub> (S), b<sub>4</sub>\* (S), b<sub>5</sub>\* (T)
- Red boxes: y<sub>1</sub> (R), y<sub>2</sub> (S), y<sub>3</sub> (A), y<sub>4</sub> (S), y<sub>5</sub> (T), y<sub>6</sub> (L), y<sub>7</sub> (A), y<sub>8</sub> (L), y<sub>9</sub> (S), y<sub>10</sub> (S), y<sub>11</sub> (P), y<sub>13</sub>\* (S), y<sub>14</sub> (S)

Raw file: 20150814\_A375SR\_Phospho\_BR2\_05  
 Scan: 14123 Method: FTMS; HCD Score: 161.14 m/z: 741.38 Gene names: MAST2

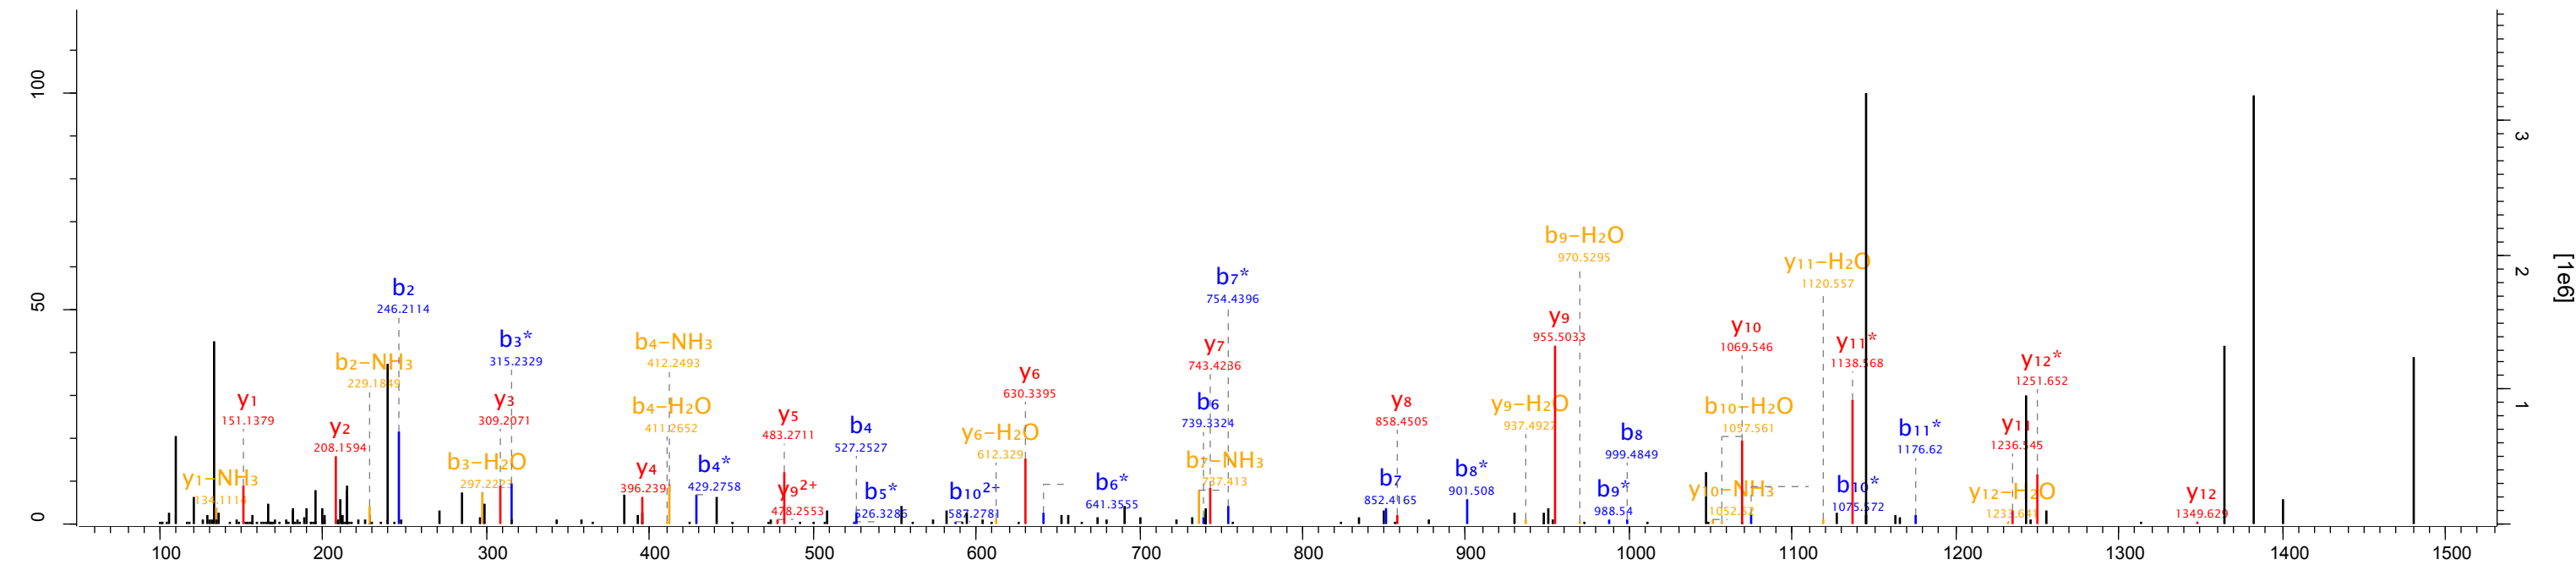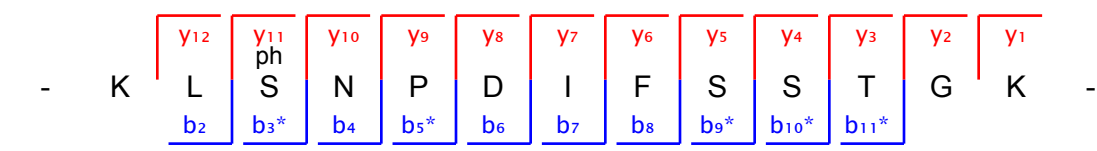

Raw file: 20150814\_A375SR\_Phospho\_BR2\_05  
 Scan: 15383 Method: FTMS; HCD Score: 149.9 m/z: 1086.46 Gene names: CEP170

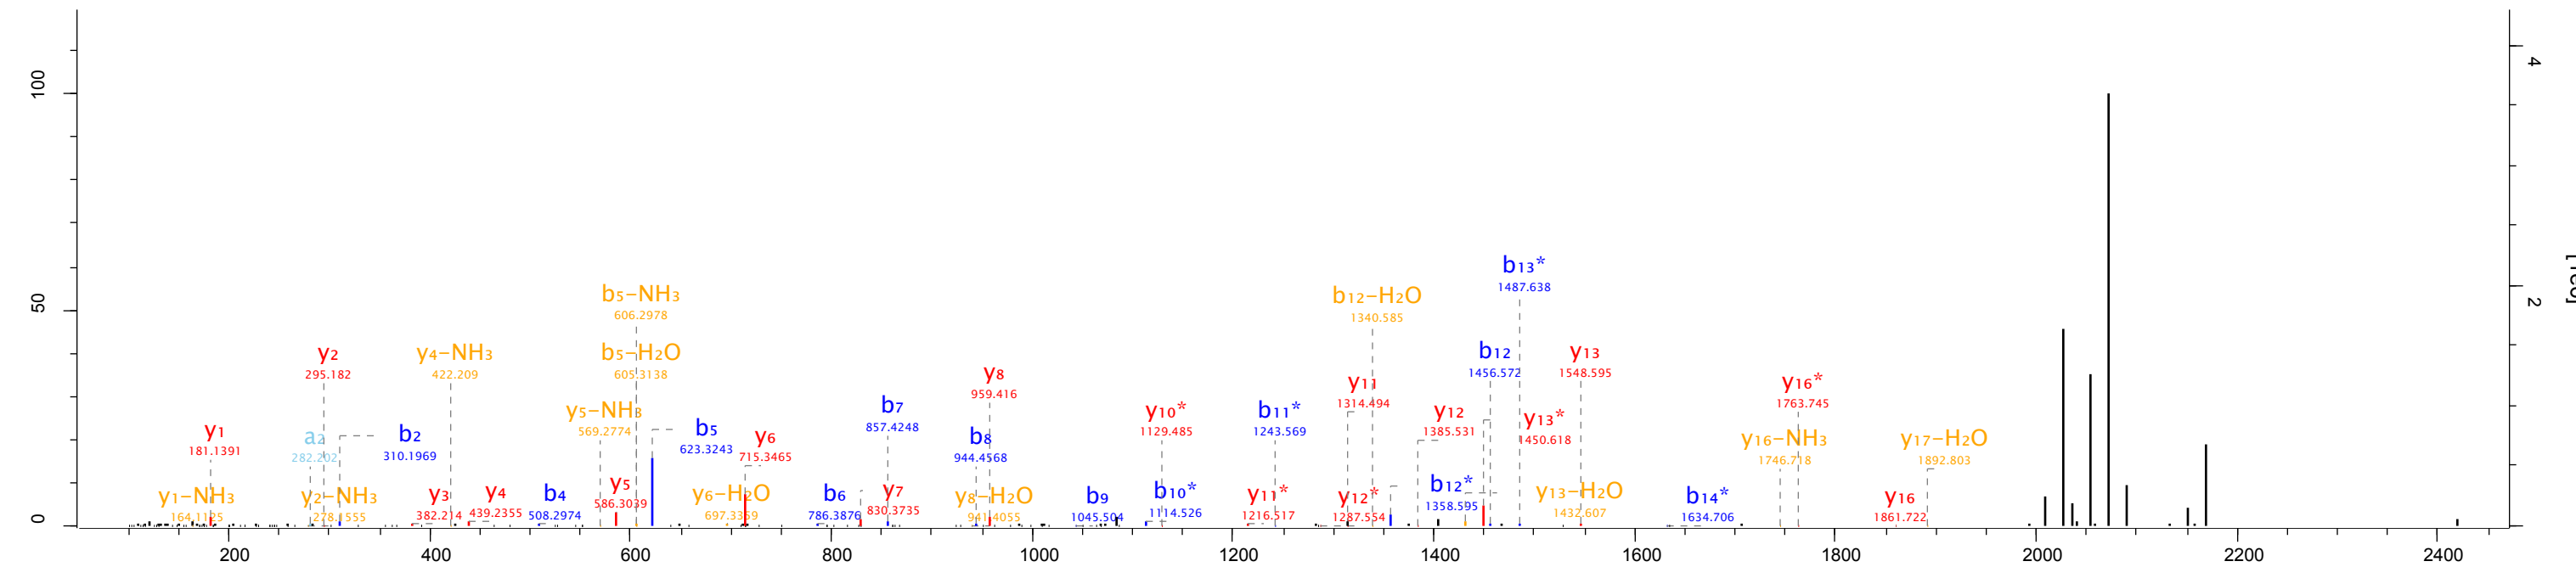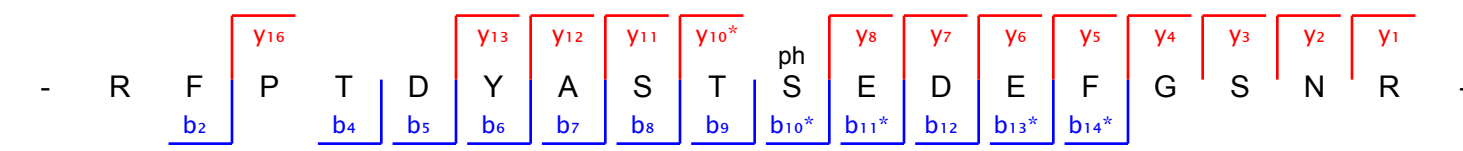

Raw file: 20150814\_A375SR\_Phospho\_BR2\_05  
 Scan: 16003 Method: FTMS; HCD Score: 177.77 m/z: 1069.84 Gene names: MAP7D1

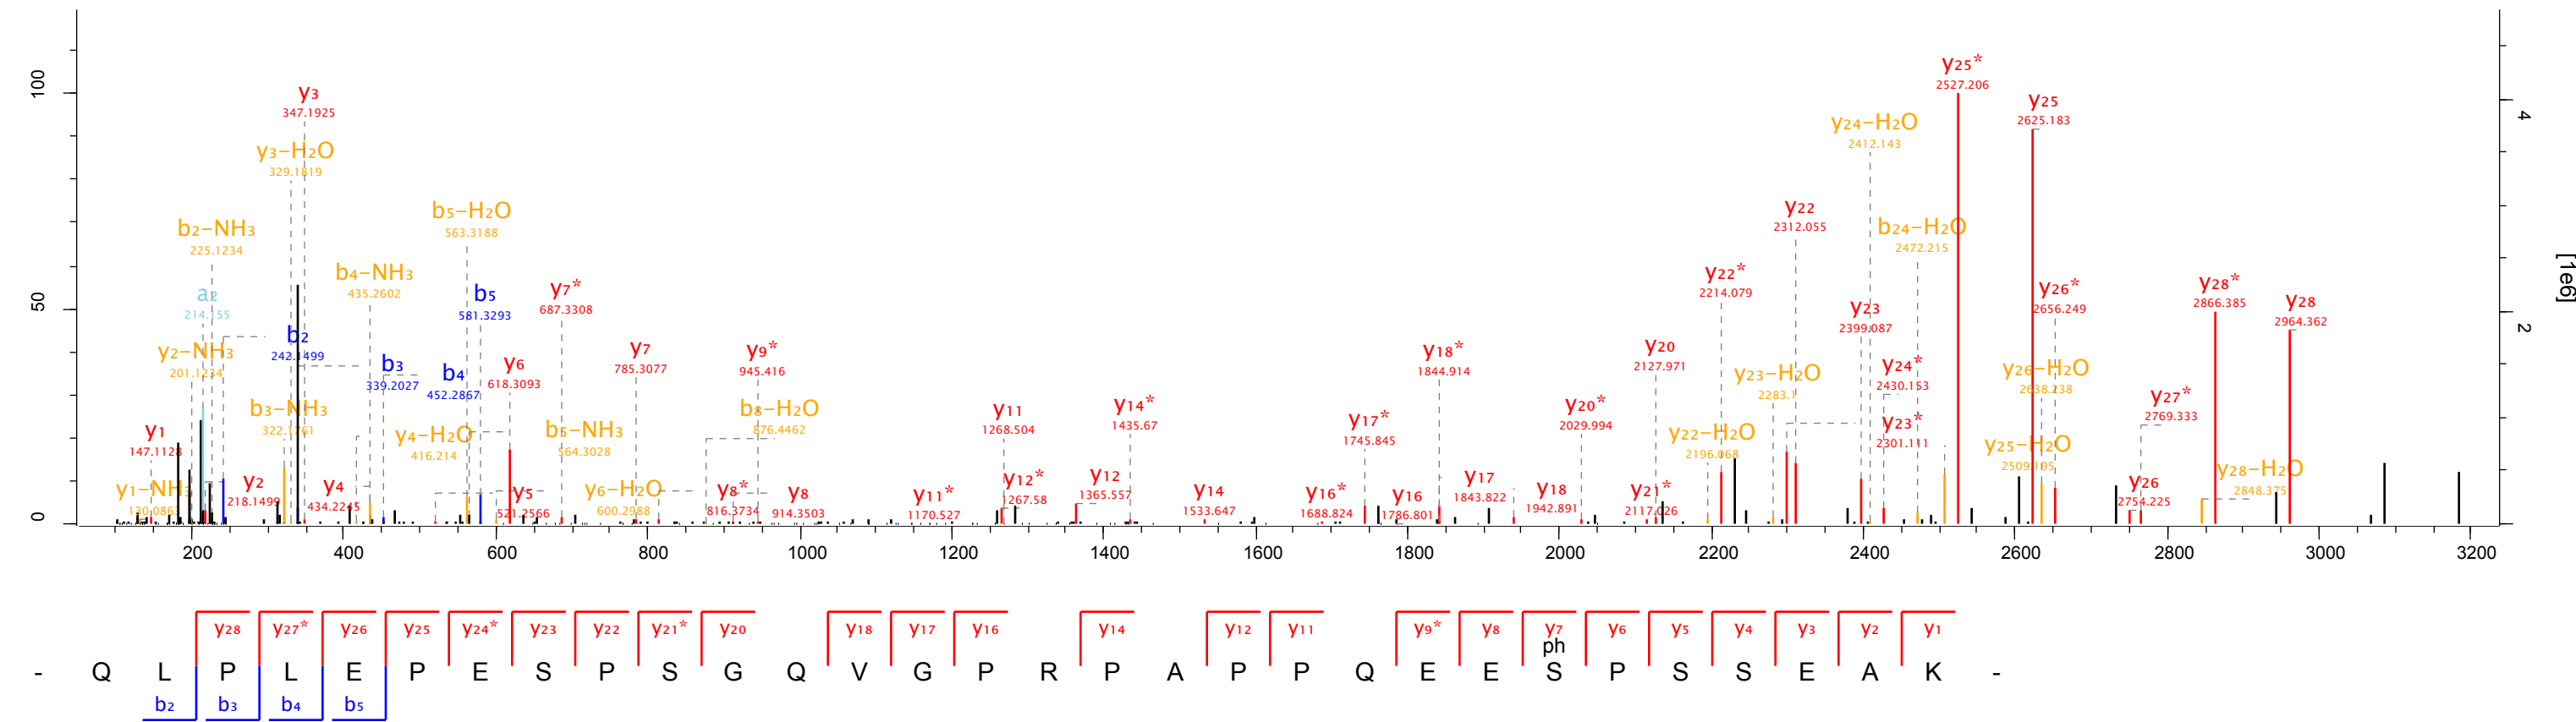

Raw file: 20150814\_A375SR\_Phospho\_BR2\_05  
 Scan: 16023 Method: FTMS; HCD Score: 67.33 m/z: 629.32 Gene names: MAGOHB;MAGOH

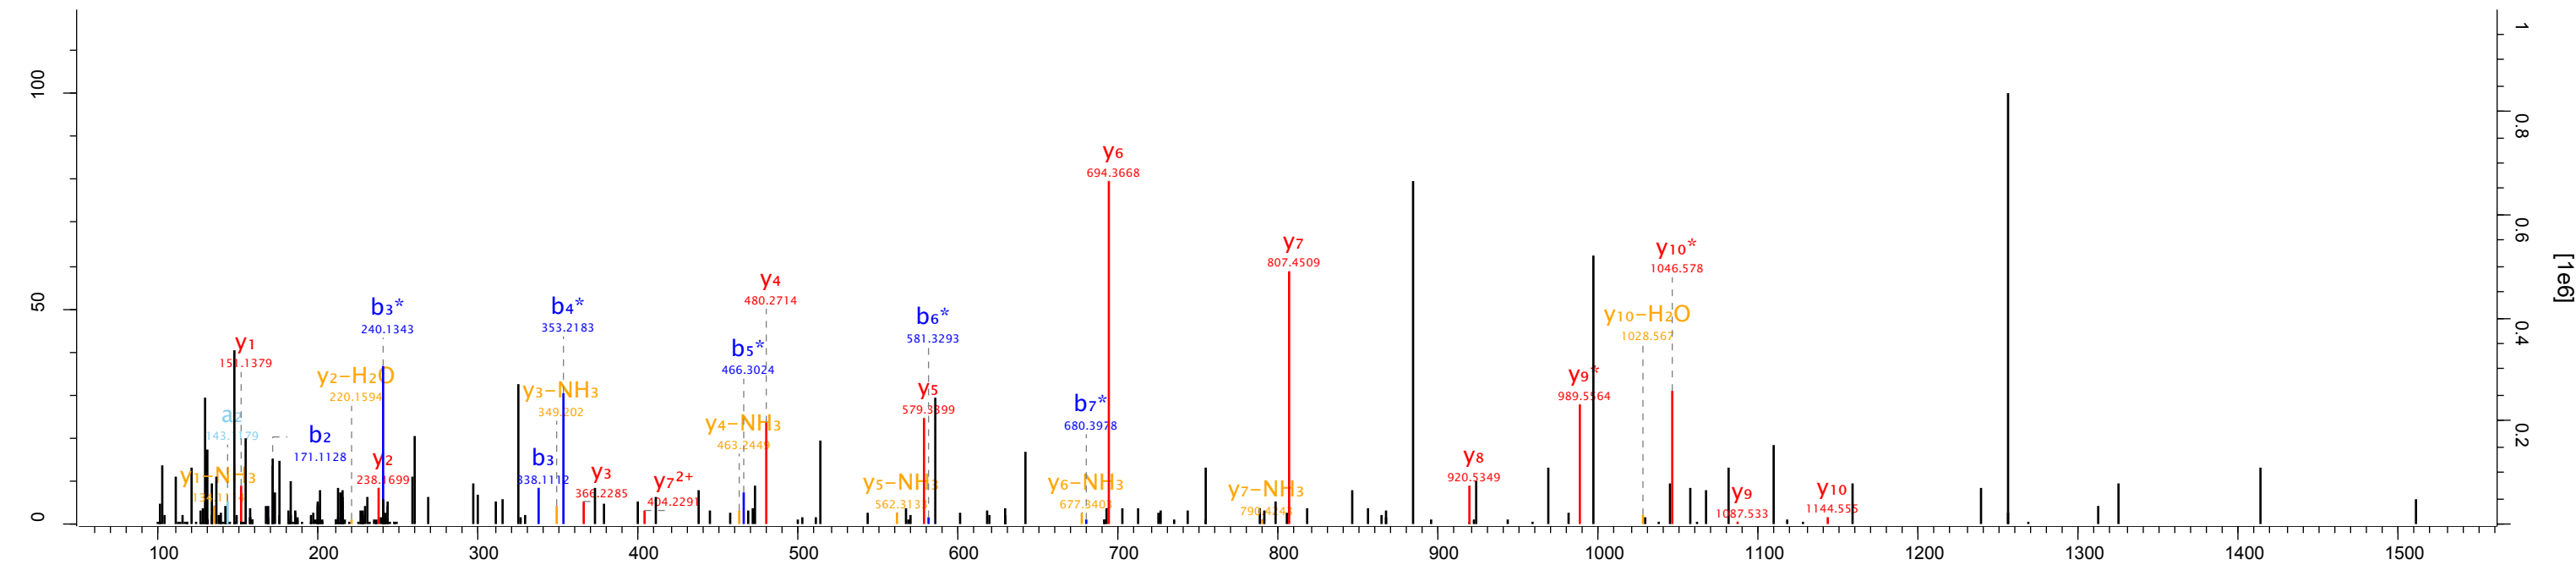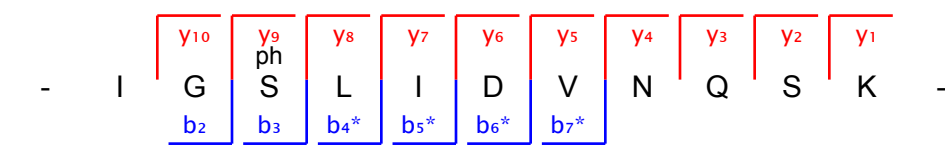

Raw file 20150814\_A375SR\_Phospho\_BR2\_05 Scan 17043 Method FTMS; HCD Score 135.23 m/z 824.37 Gene names NAGK

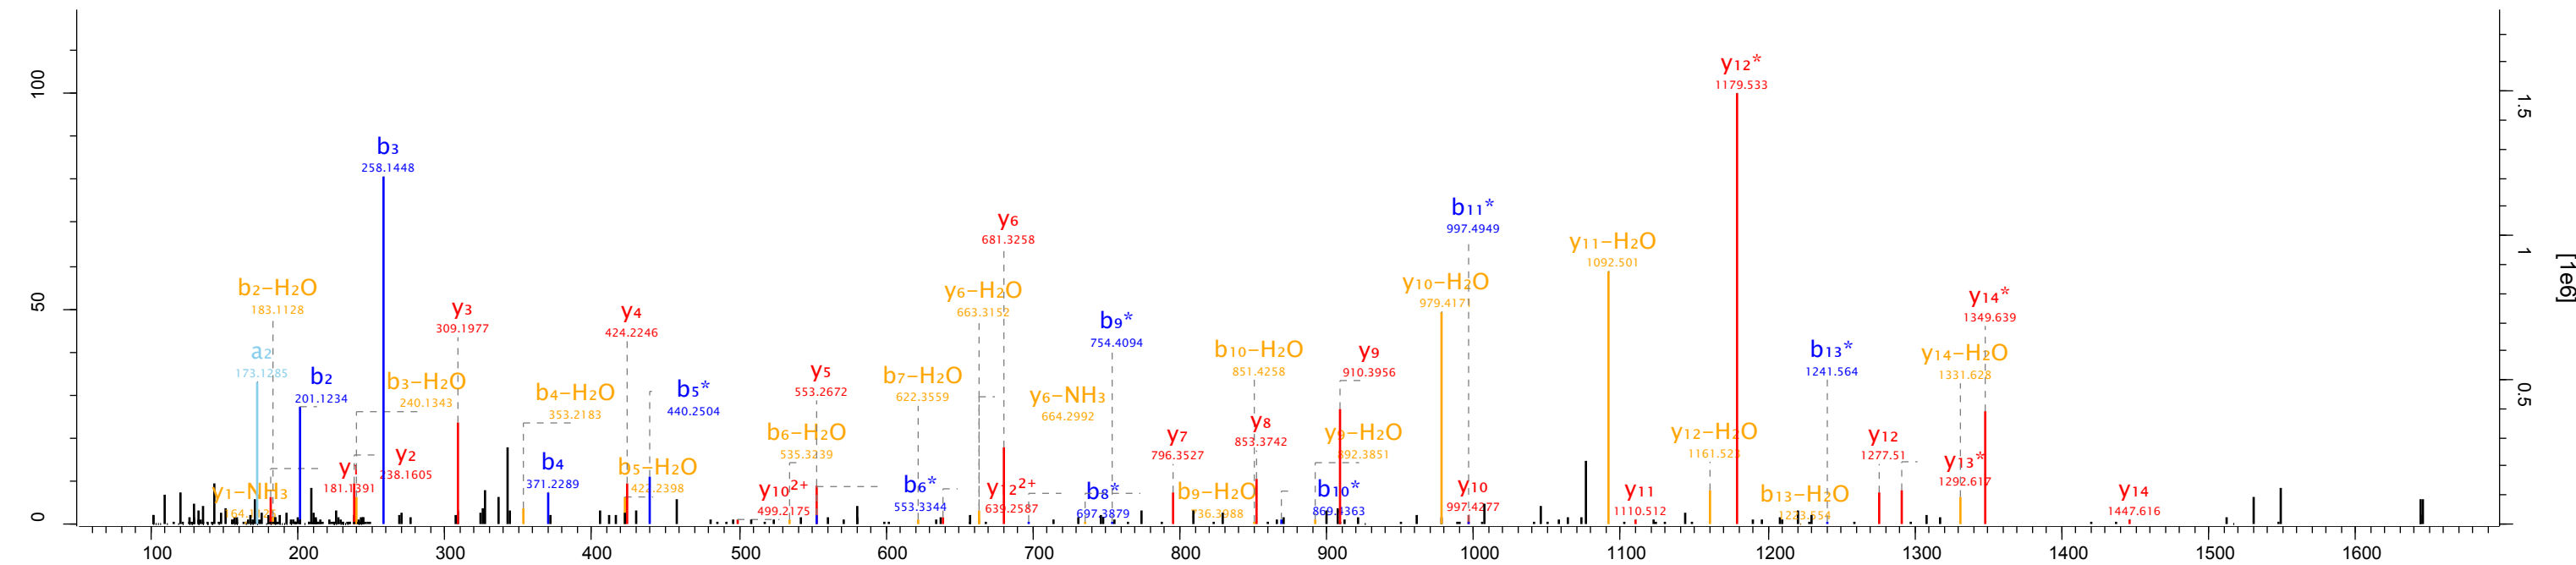

- S L G L G L S G G D Q E D A G R -

Fragmentation mapping (b-ions in blue, y-ions in red):

- b2: L
- b3: G
- b4: L
- b5\*: G
- b6\*: L
- b8\*: G
- b9\*: G
- b10\*: D
- b11\*: Q
- b13\*: D
- y1: R
- y2: G
- y3: A
- y4: D
- y5: E
- y6: Q
- y7: D
- y8: G
- y9: G
- y10: S
- y11: L
- y12: G
- y13\*: G
- y14: R

Raw file: 20150814\_A375SR\_Phospho\_BR2\_05  
 Scan: 1753 Method: FTMS; HCD Score: 108.98 m/z: 485.23 Gene names: SRRM2

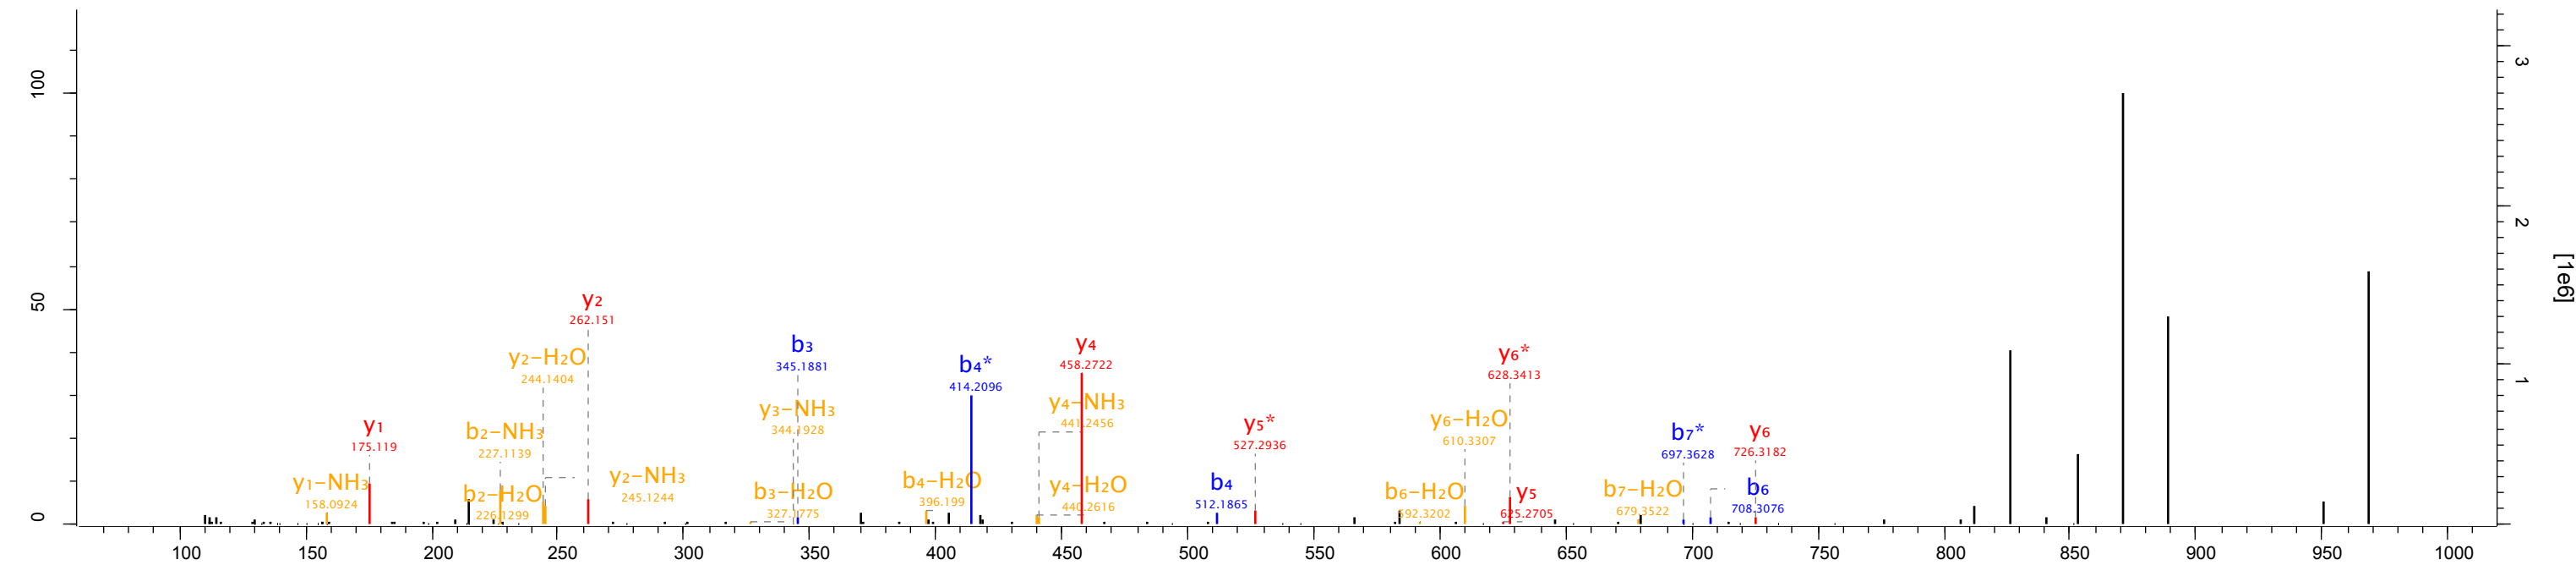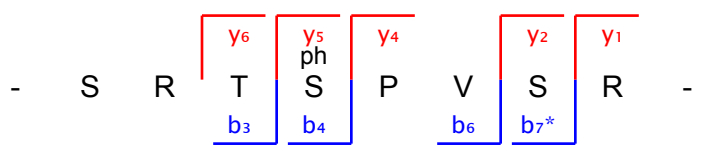

Raw file: 20150814\_A375SR\_Phospho\_BR2\_05  
 Scan: 18393 Method: FTMS; HCD Score: 187.78 m/z: 1120.01 Gene names: KHSRP

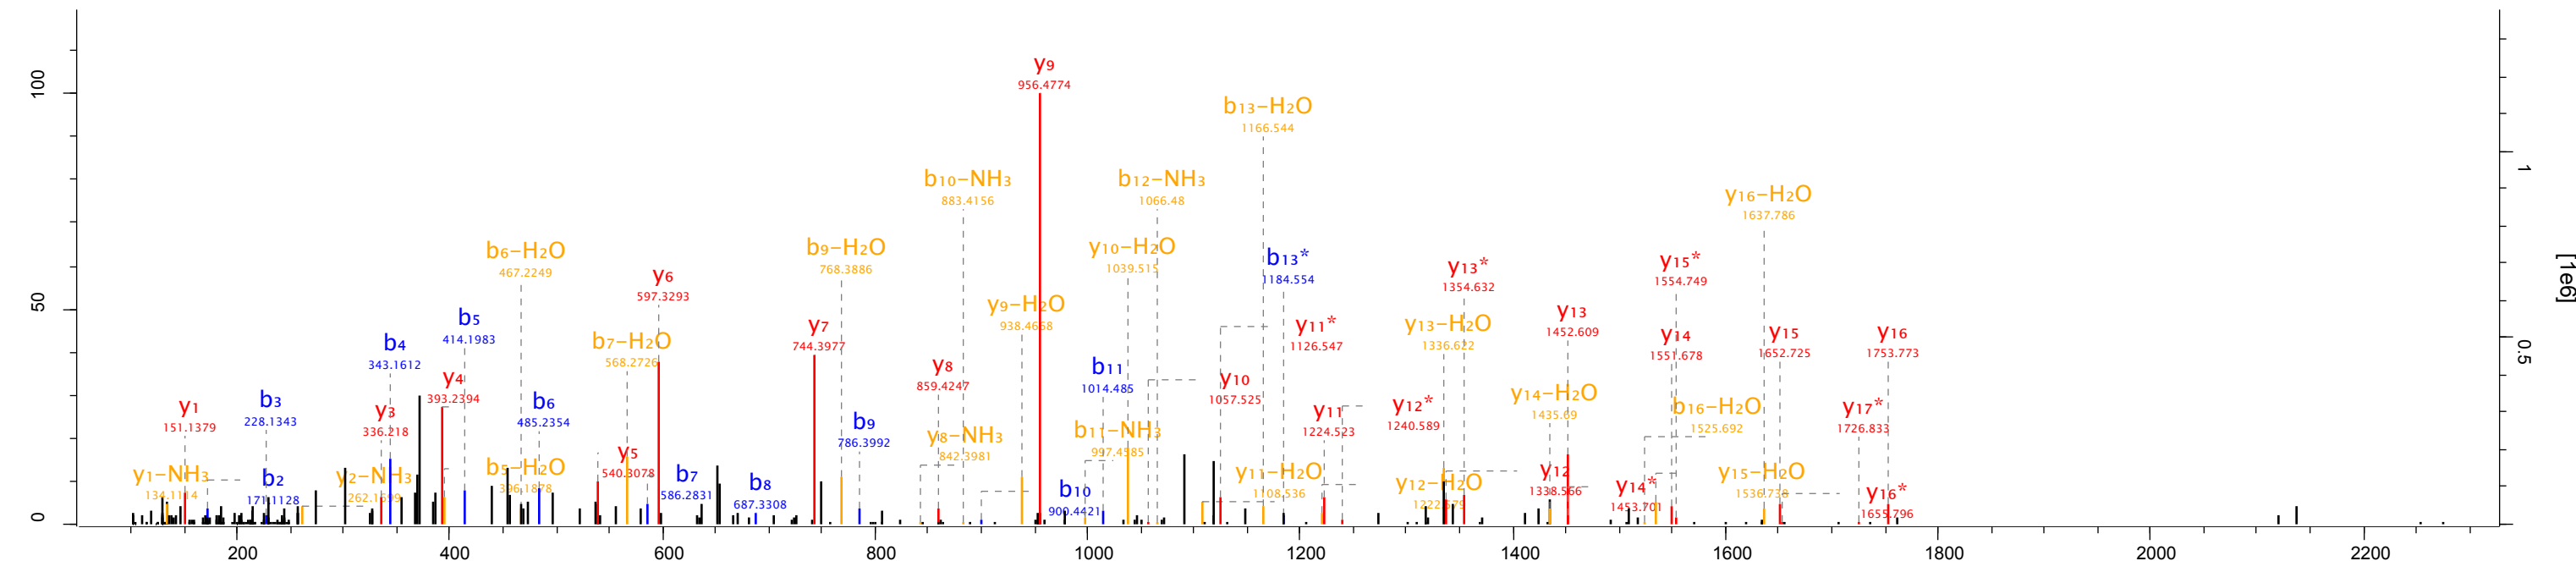

- I G G D A A T T V N N S T P D F G F G G Q K -  
 b<sub>2</sub> b<sub>3</sub> b<sub>4</sub> b<sub>5</sub> b<sub>6</sub> b<sub>7</sub> b<sub>8</sub> b<sub>9</sub> b<sub>10</sub> b<sub>11</sub> b<sub>13</sub><sup>\*</sup> y<sub>17</sub><sup>\*</sup> y<sub>16</sub> y<sub>15</sub> y<sub>14</sub> y<sub>13</sub> y<sub>12</sub> y<sub>11</sub> y<sub>10</sub> y<sub>9</sub> y<sub>8</sub> y<sub>7</sub> y<sub>6</sub> y<sub>5</sub> y<sub>4</sub> y<sub>3</sub> y<sub>1</sub>



Raw file: 20150814\_A375SR\_Phospho\_BR2\_05  
 Scan: 18513 Method: FTMS; HCD Score: 126.4 m/z: 921.45 Gene names: LIMCH1

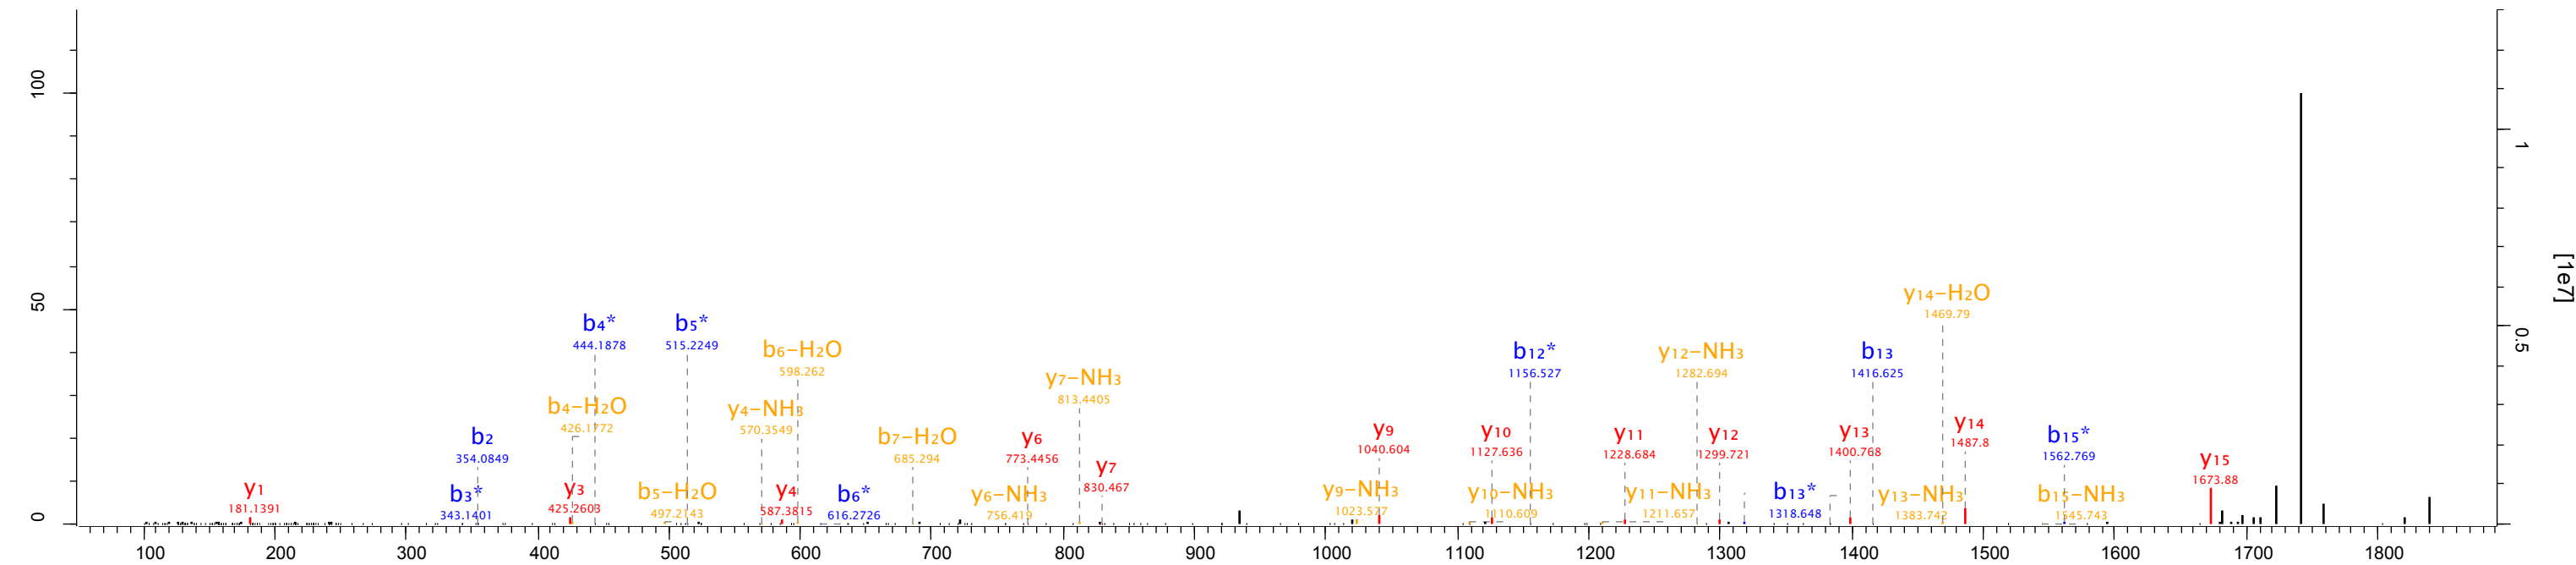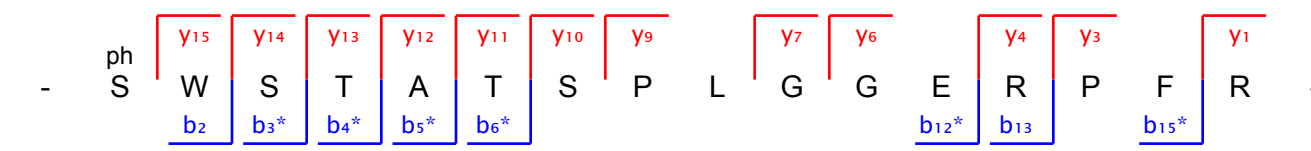

Raw file: 20150814\_A375SR\_Phospho\_BR2\_05  
 Scan: 18773 Method: FTMS; HCD Score: 71.87 m/z: 657.37 Gene names: RPL4

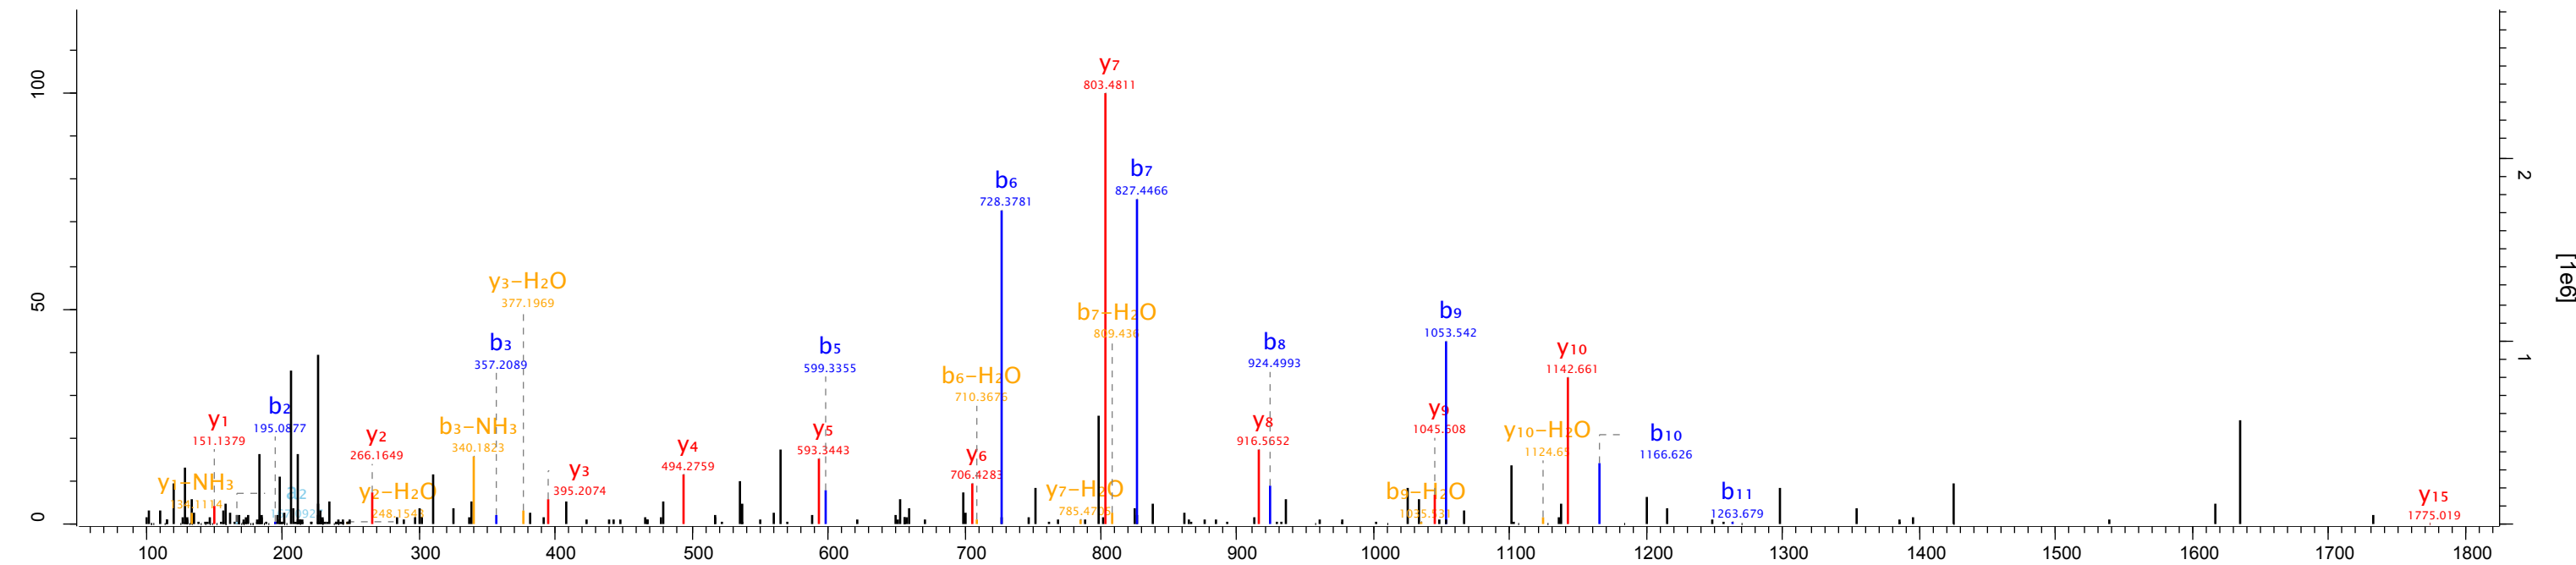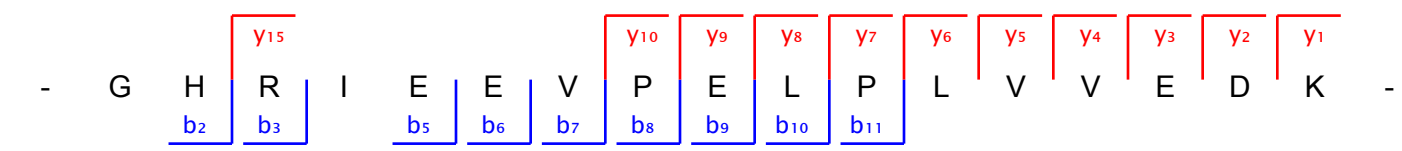

Raw file 20150814\_A375SR\_Phospho\_BR2\_05 Scan 19033 Method FTMS; HCD Score 50.78 m/z 774.04 Gene names BCL9L

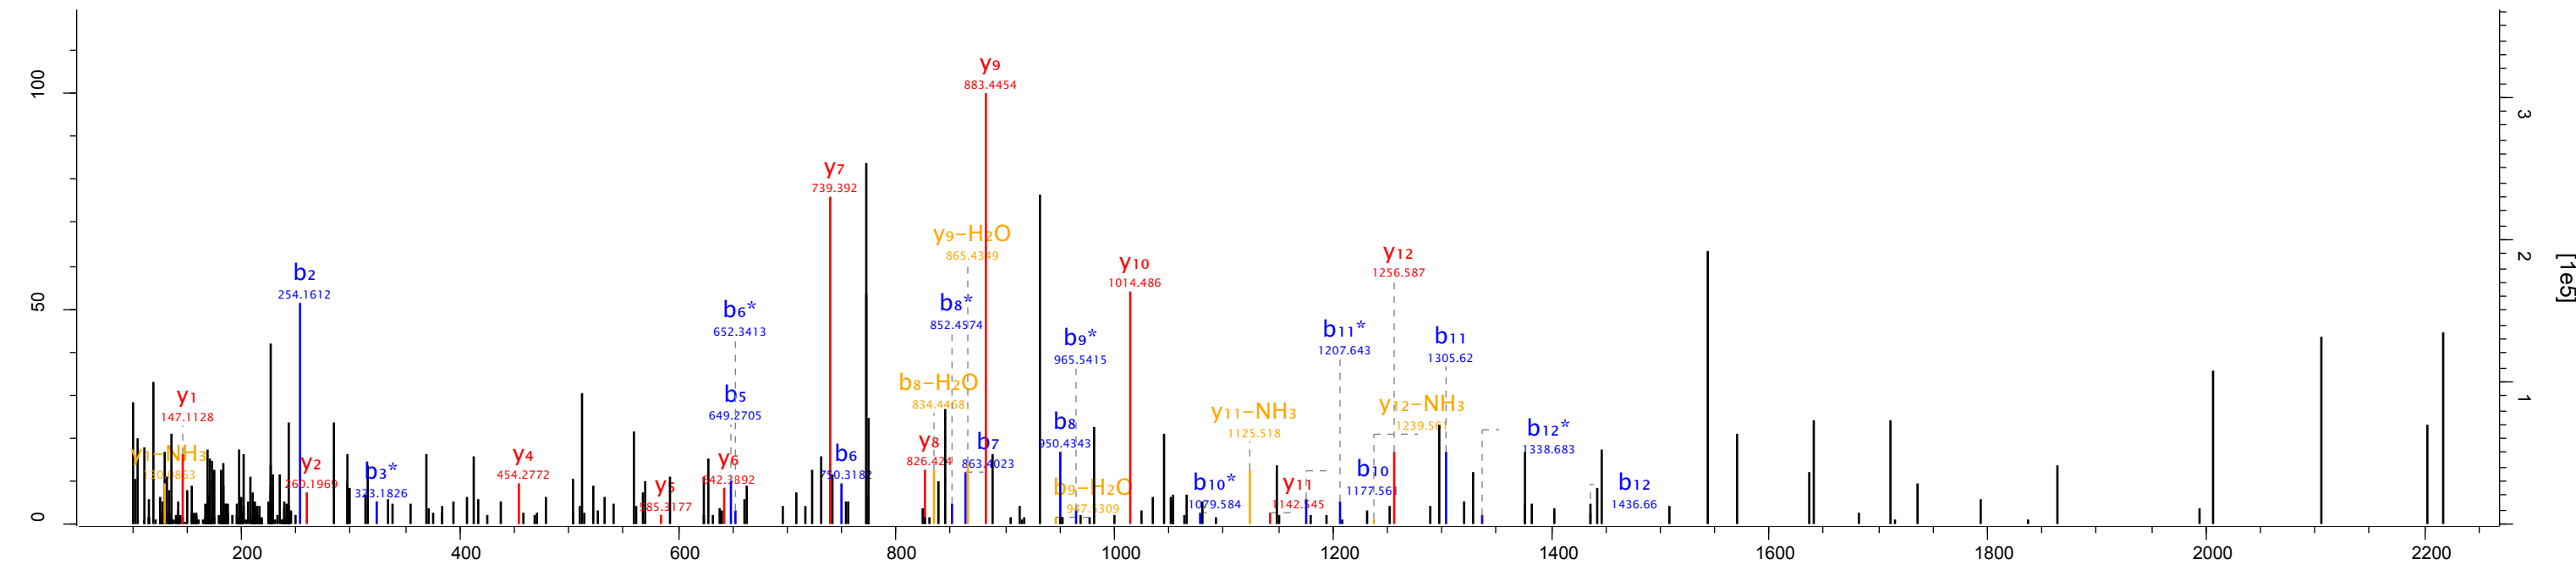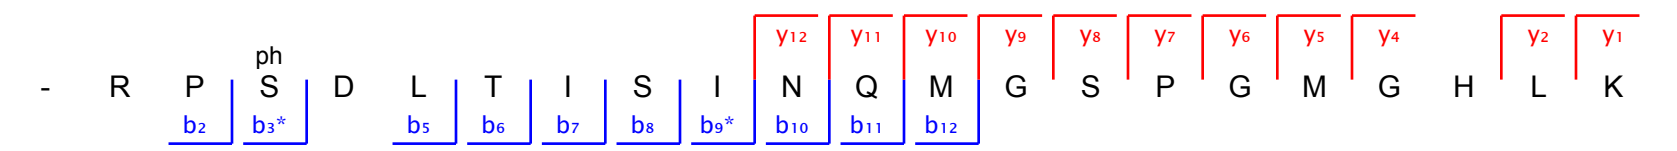

Raw file 20150814\_A375SR\_Phospho\_BR2\_05 Scan 19683 Method FTMS; HCD Score 213.72 m/z 1055.48 Gene names RRP1B

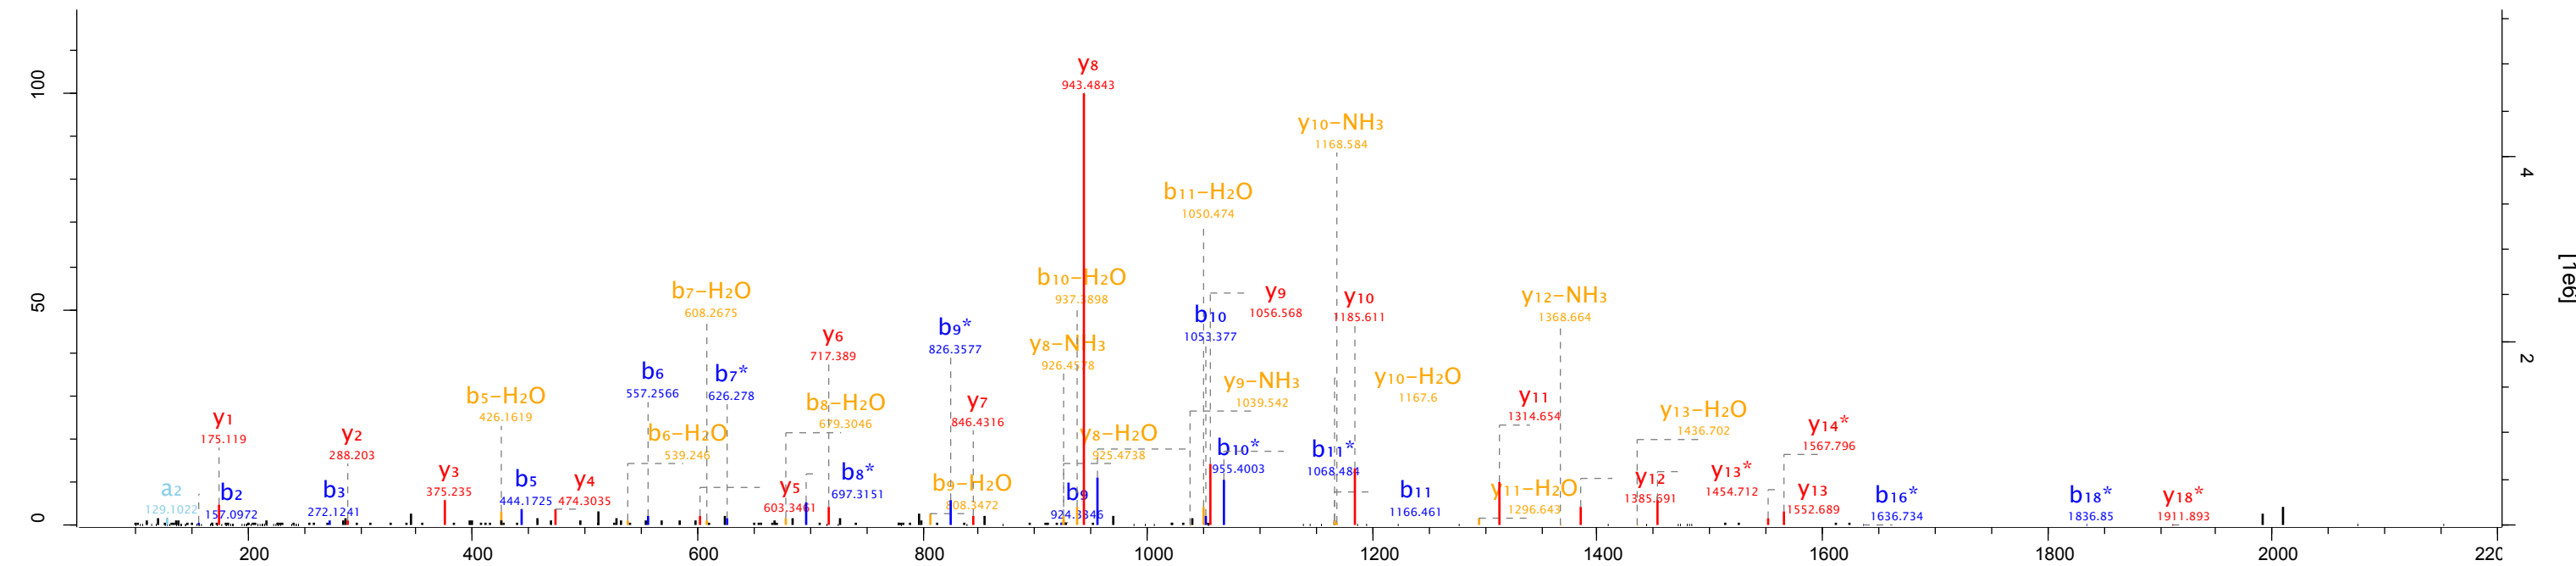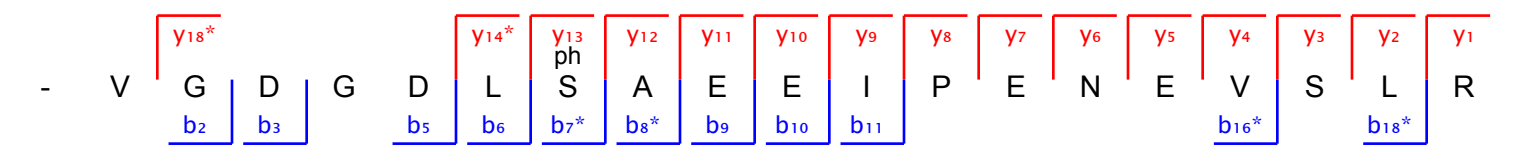

Raw file: 20150814\_A375SR\_Phospho\_BR2\_05  
 Scan: 19763 Method: FTMS; HCD Score: 210.11 m/z: 1352.06 Gene names: PCNP

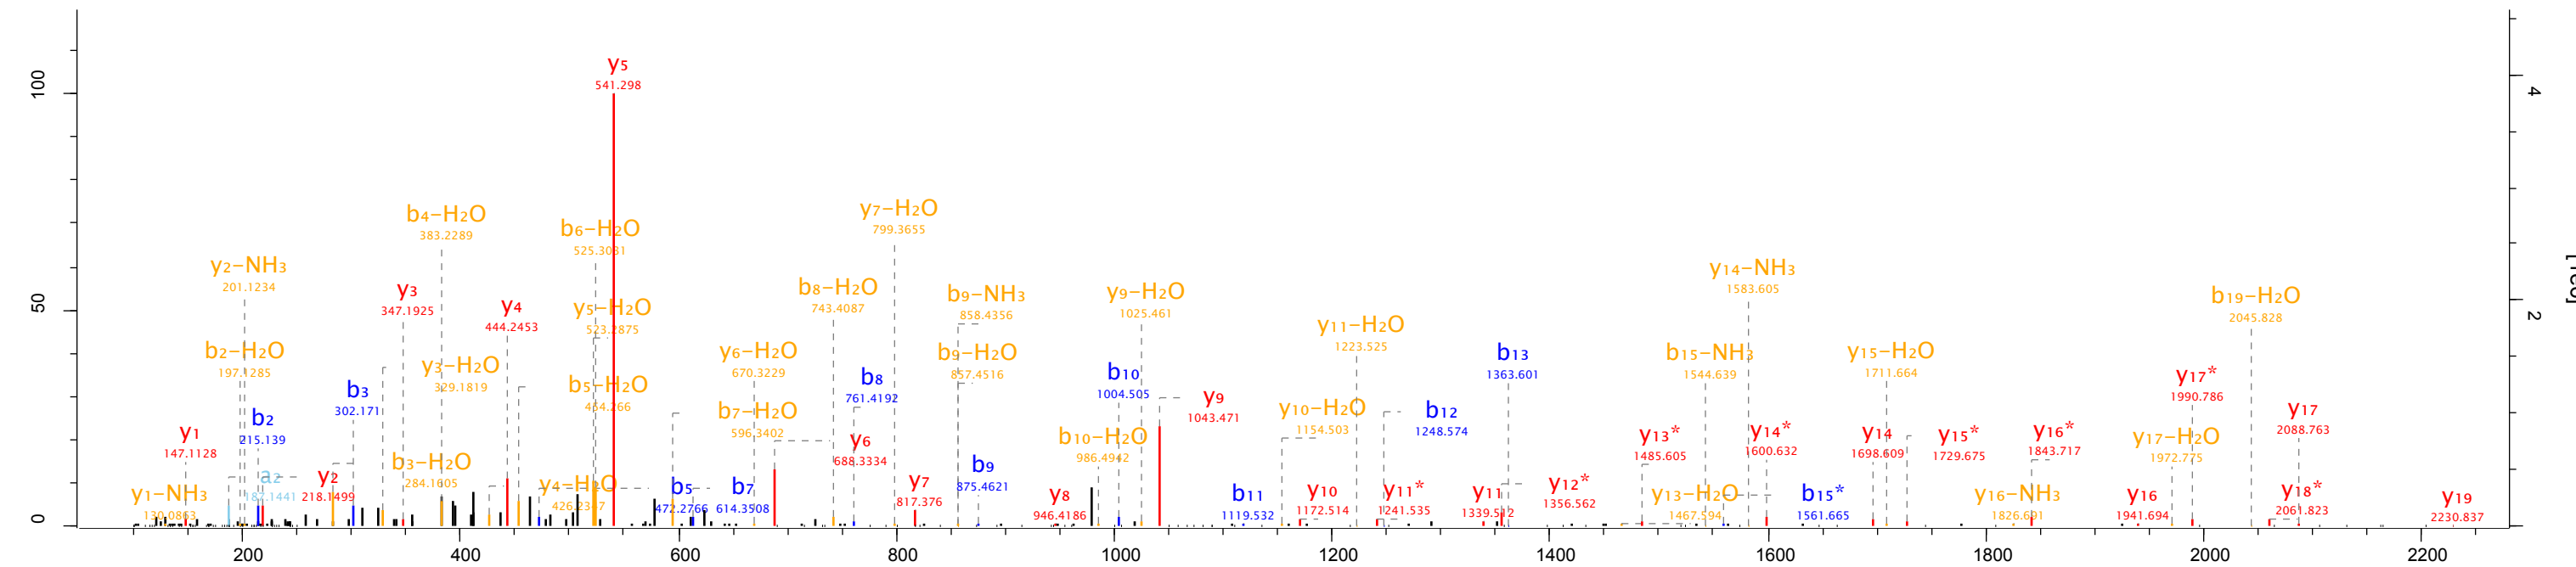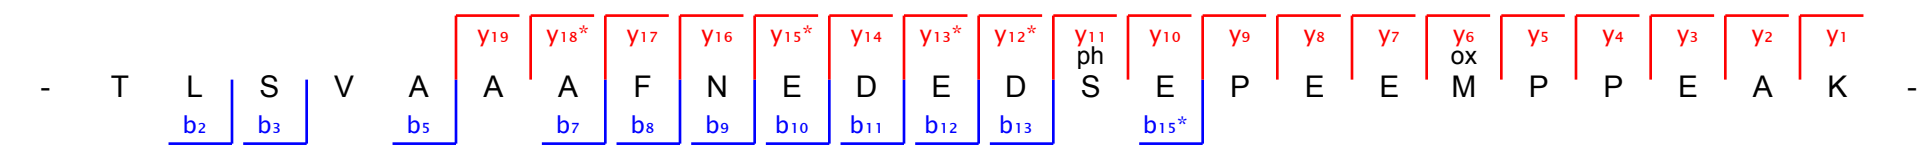

Raw file 20150814\_A375SR\_Phospho\_BR2\_05 Scan 19813 Method FTMS; HCD Score 307.06 m/z 763.62 Gene names PRPSAP2

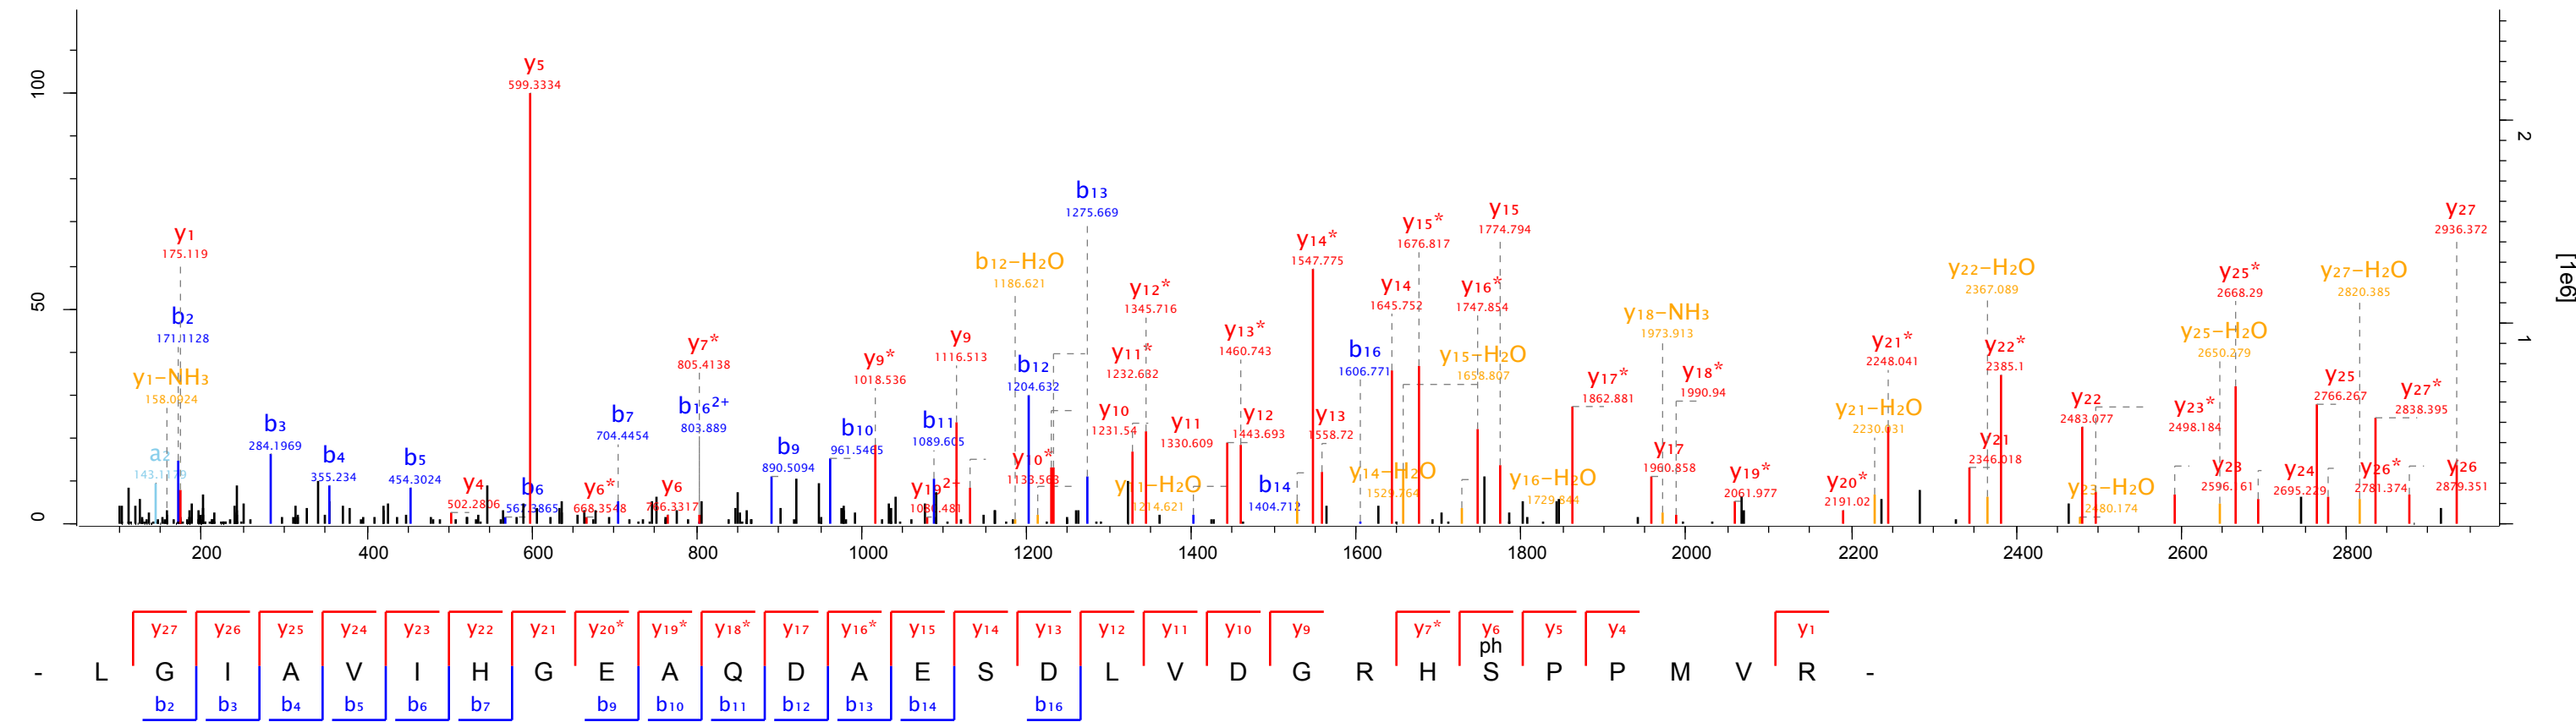

Raw file 20150814\_A375SR\_Phospho\_BR2\_05 Scan 20133 Method FTMS; HCD Score 189.45 m/z 945.95 Gene names NES

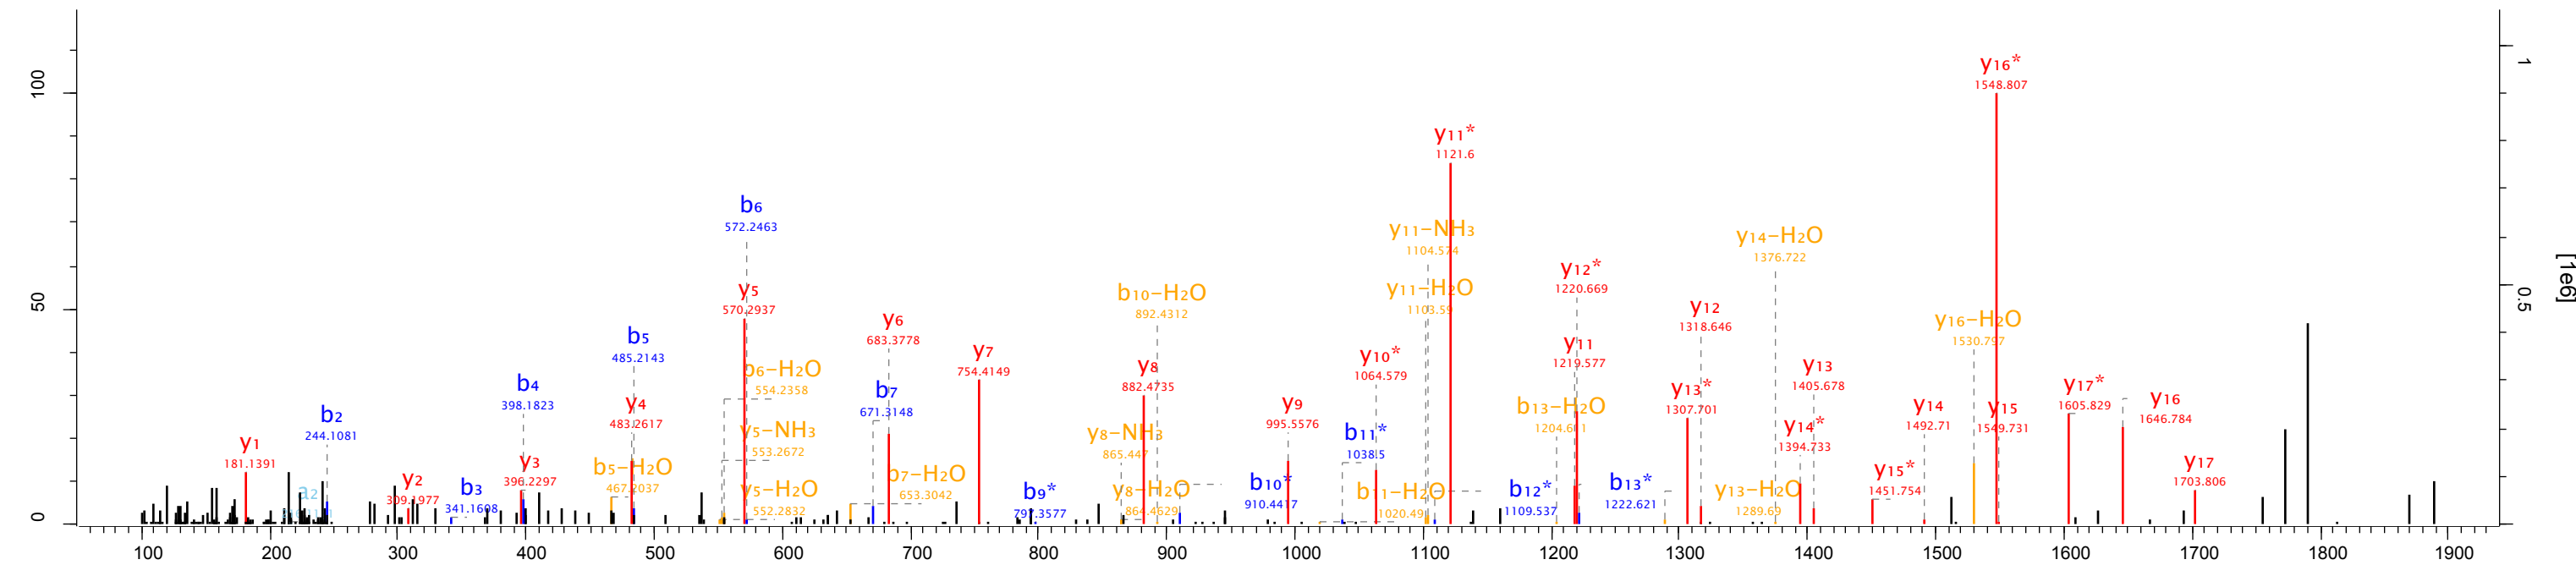

- W G P G S S V G S L Q A L S S S Q R -

y17 y16 y15 y14 y13 y12 y11 y10\* y9 y8 y7 y6 y5 y4 y3 y2 y1  
b2 b3 b4 b5 b6 b7 b9\* b10\* b11\* b12\* b13\*

Raw file: 20150814\_A375SR\_Phospho\_BR2\_05  
 Scan: 2023 Method: FTMS; HCD Score: 48.05 m/z: 660.65 Gene names: TRIP12

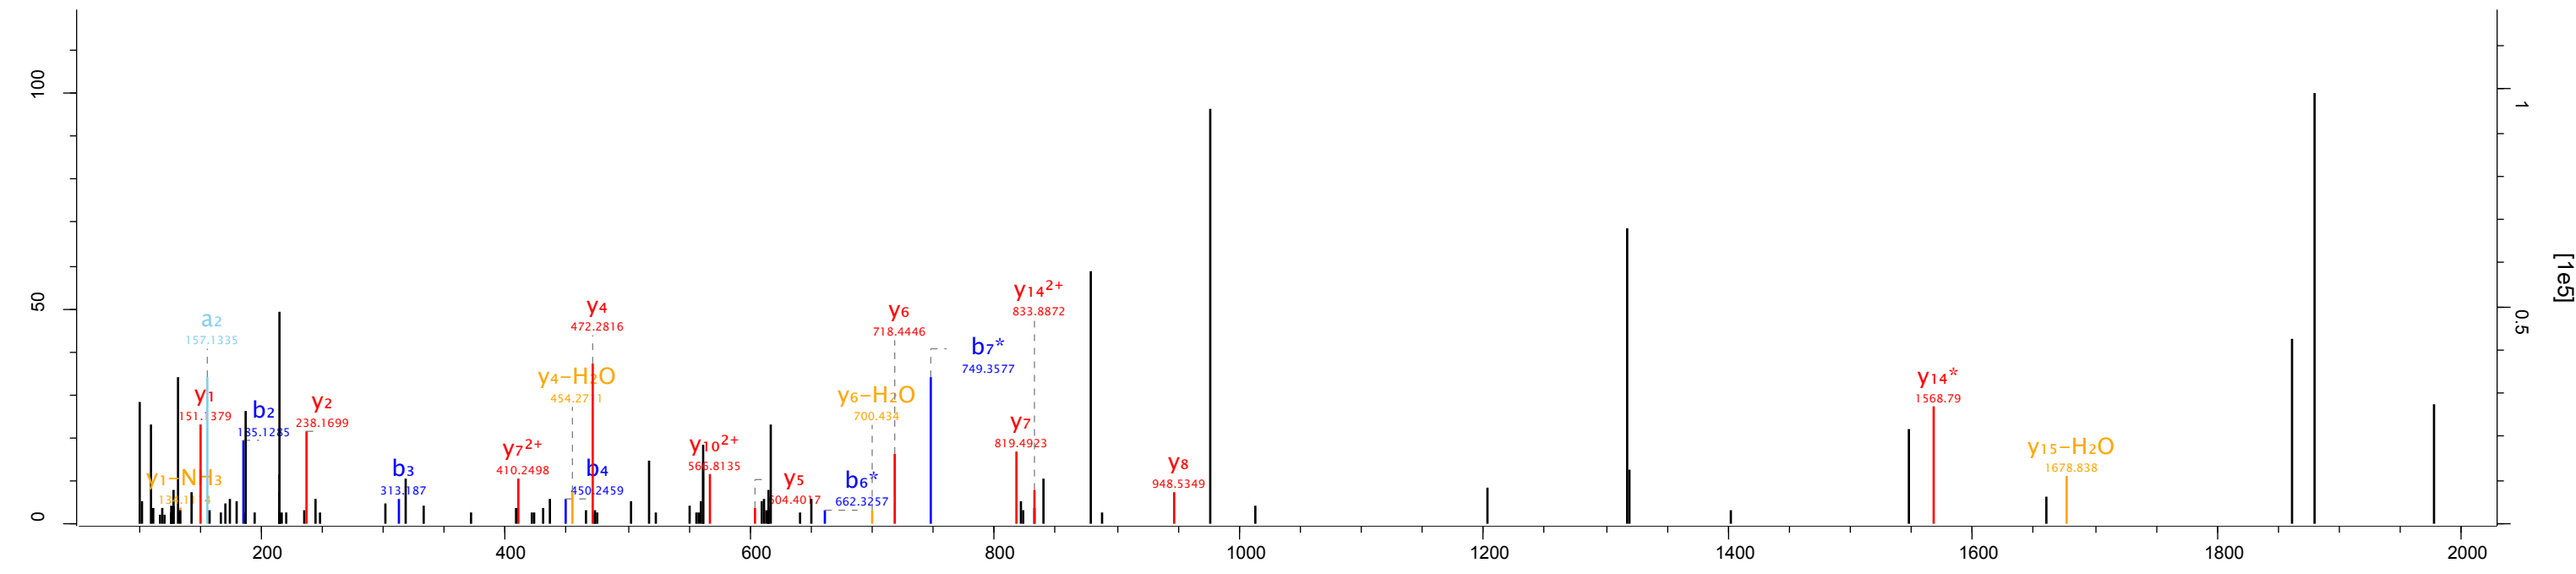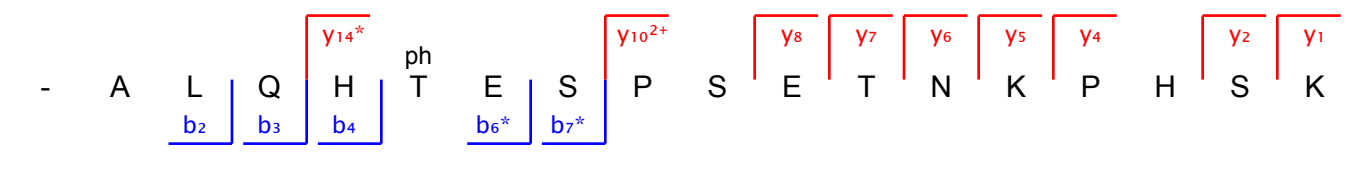



Raw file: 20150814\_A375SR\_Phospho\_BR2\_05  
 Scan: 20553 Method: FTMS; HCD Score: 195.92 m/z: 833.38 Gene names: ARHGAP35

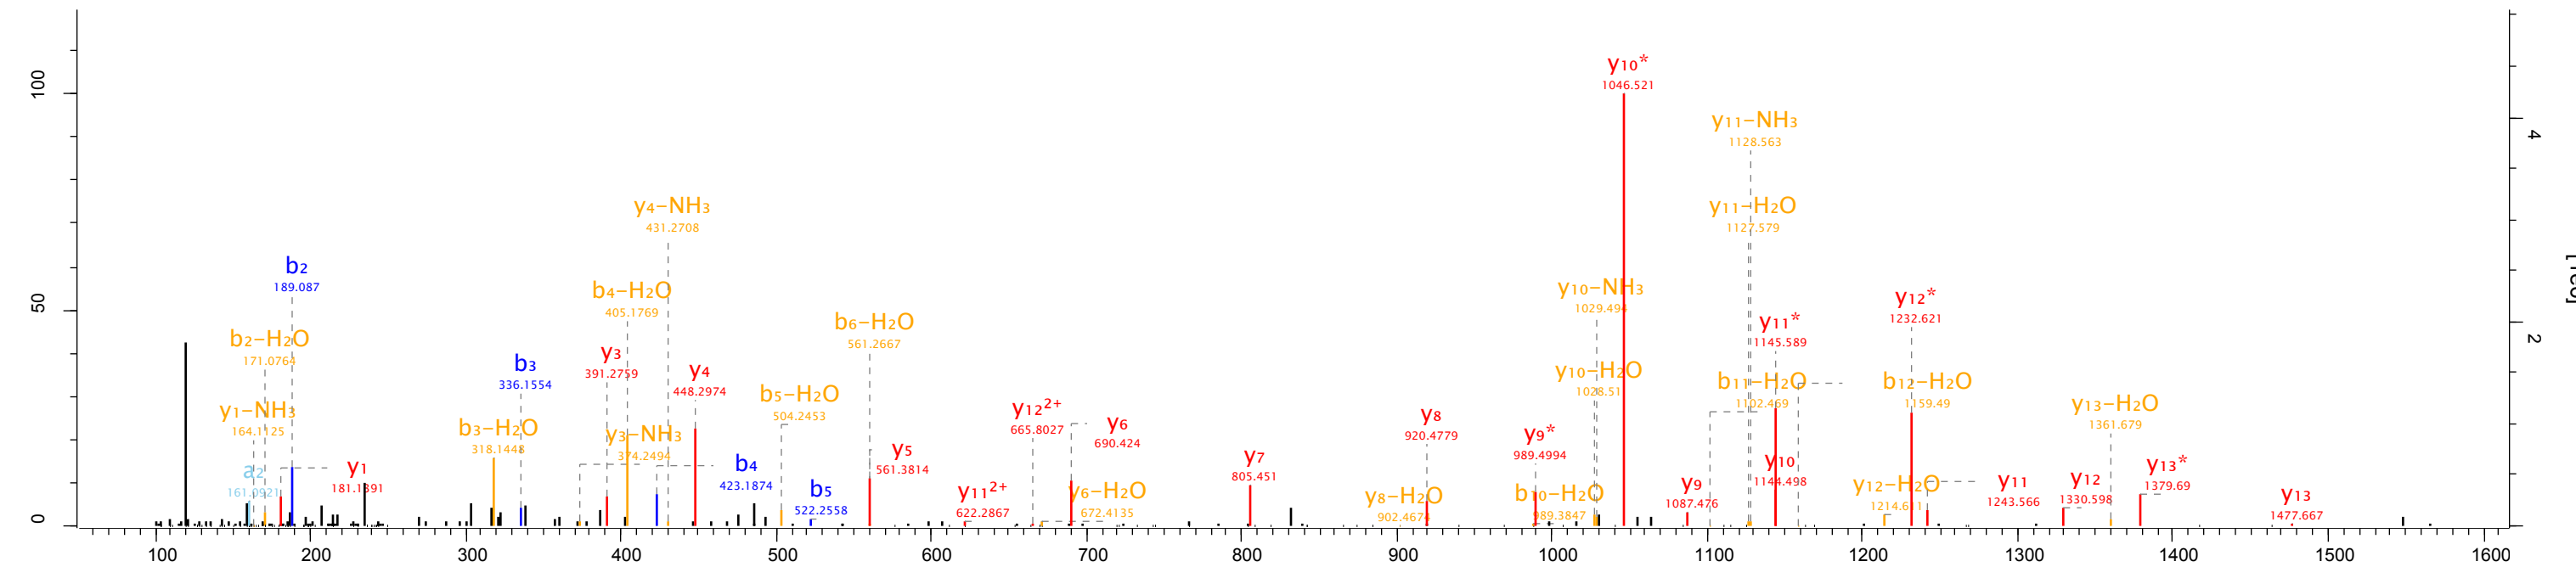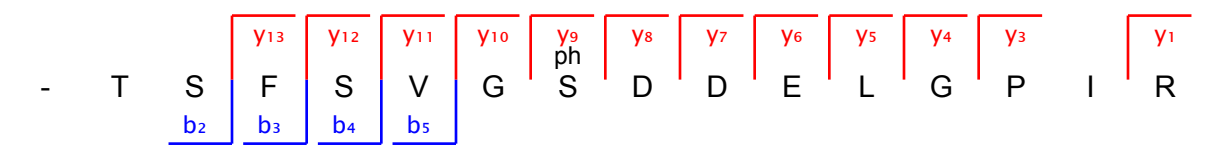

Raw file 20150814\_A375SR\_Phospho\_BR2\_05 Scan 20973 Method FTMS; HCD Score 127.37 m/z 582.28 Gene names SYNC

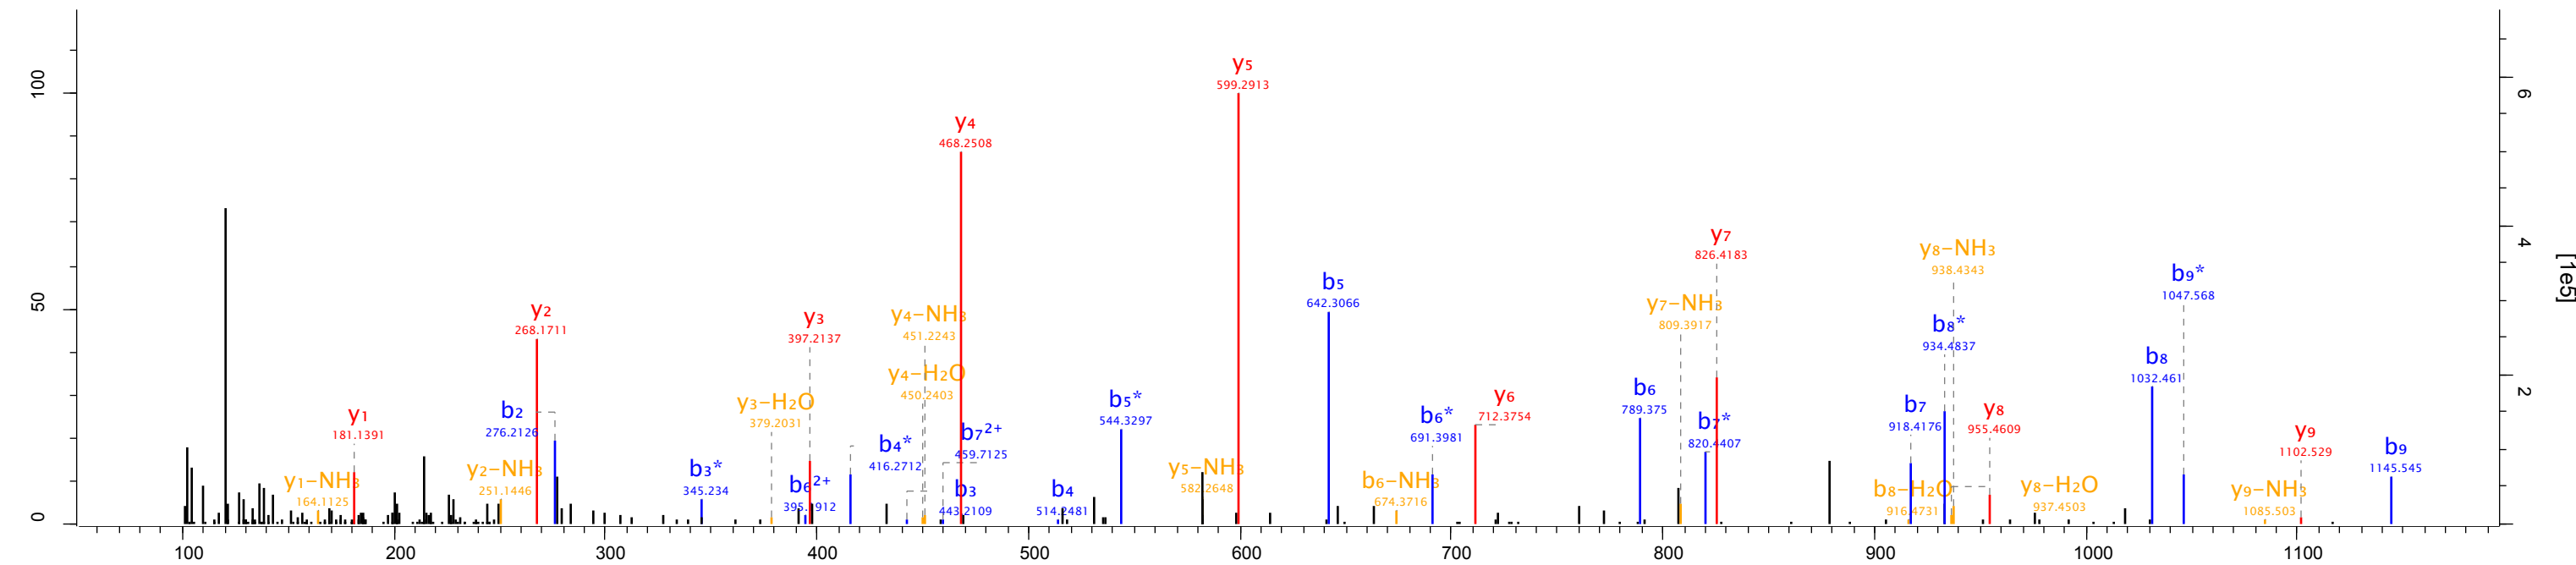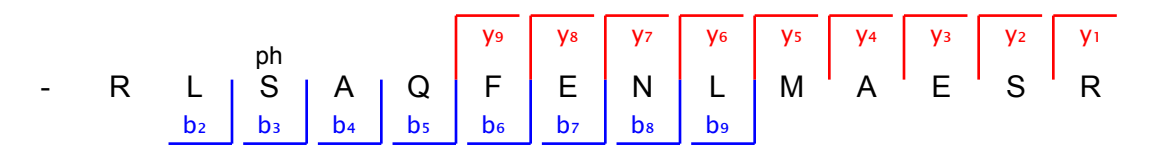

Raw file  
 20150814\_A375SR\_Phospho\_BR2\_05  
 Scan 21613 Method FTMS; HCD Score 66.89 m/z 754.37 Gene names NUFIP2

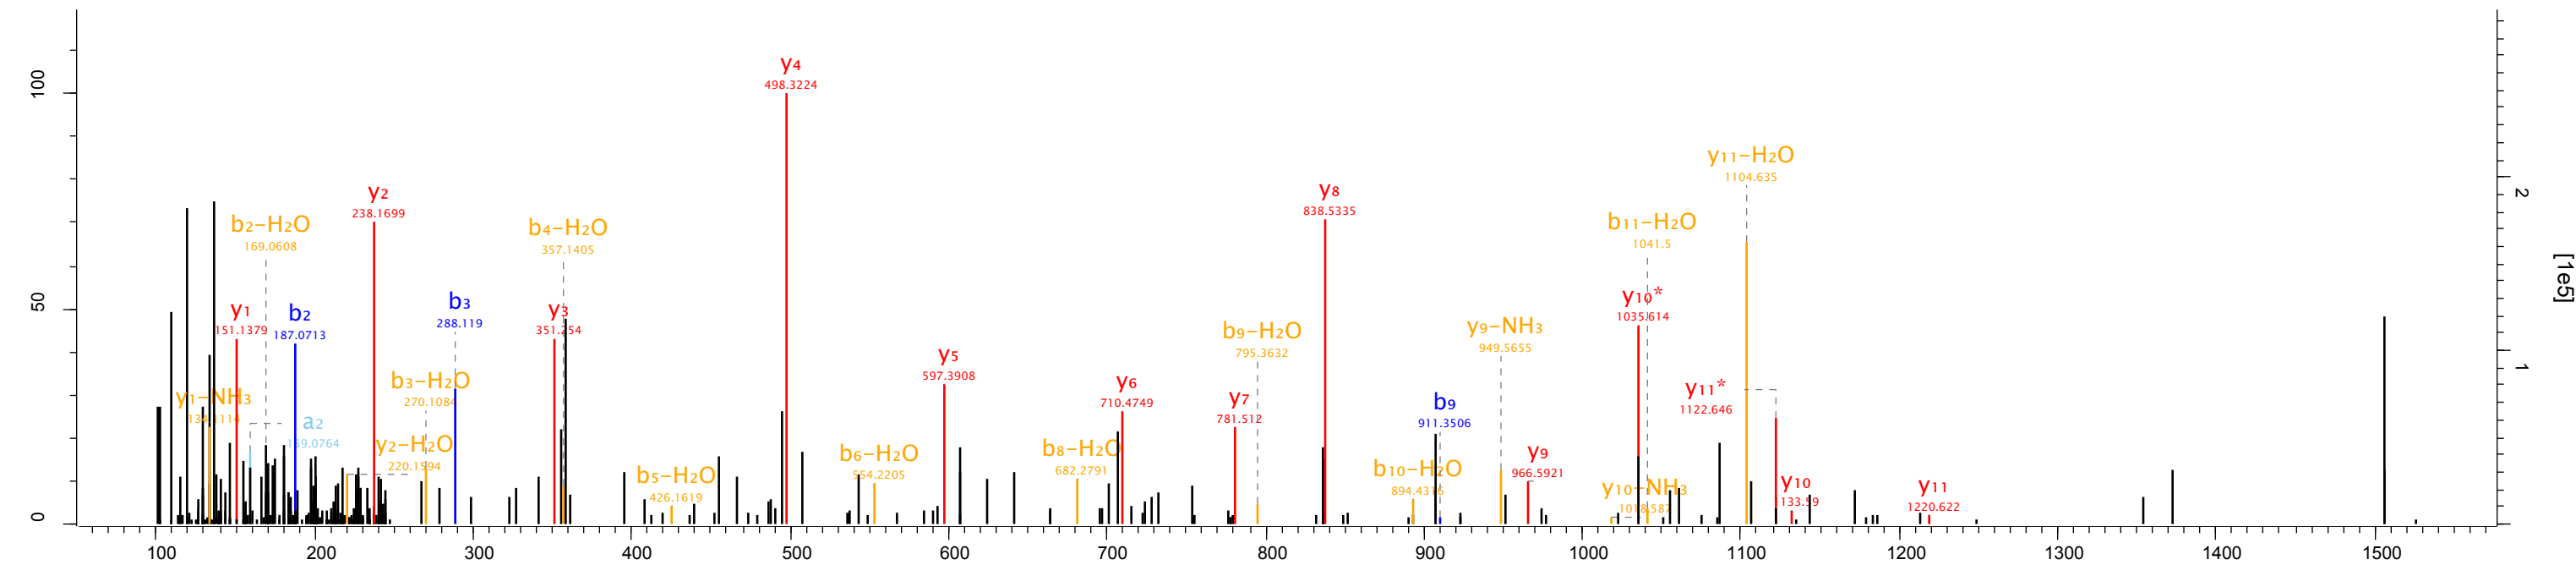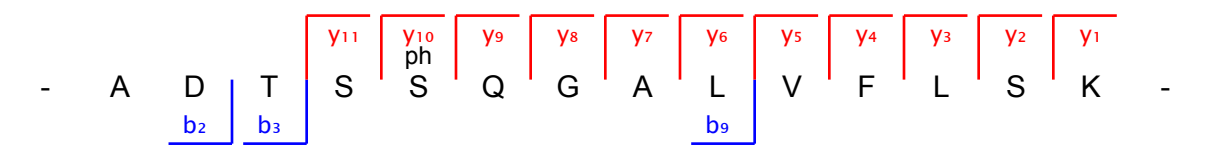

Raw file: 20150814\_A375SR\_Phospho\_BR2\_05  
 Scan: 2163 Method: FTMS; HCD Score: 152.77 m/z: 590.3 Gene names: SLTM

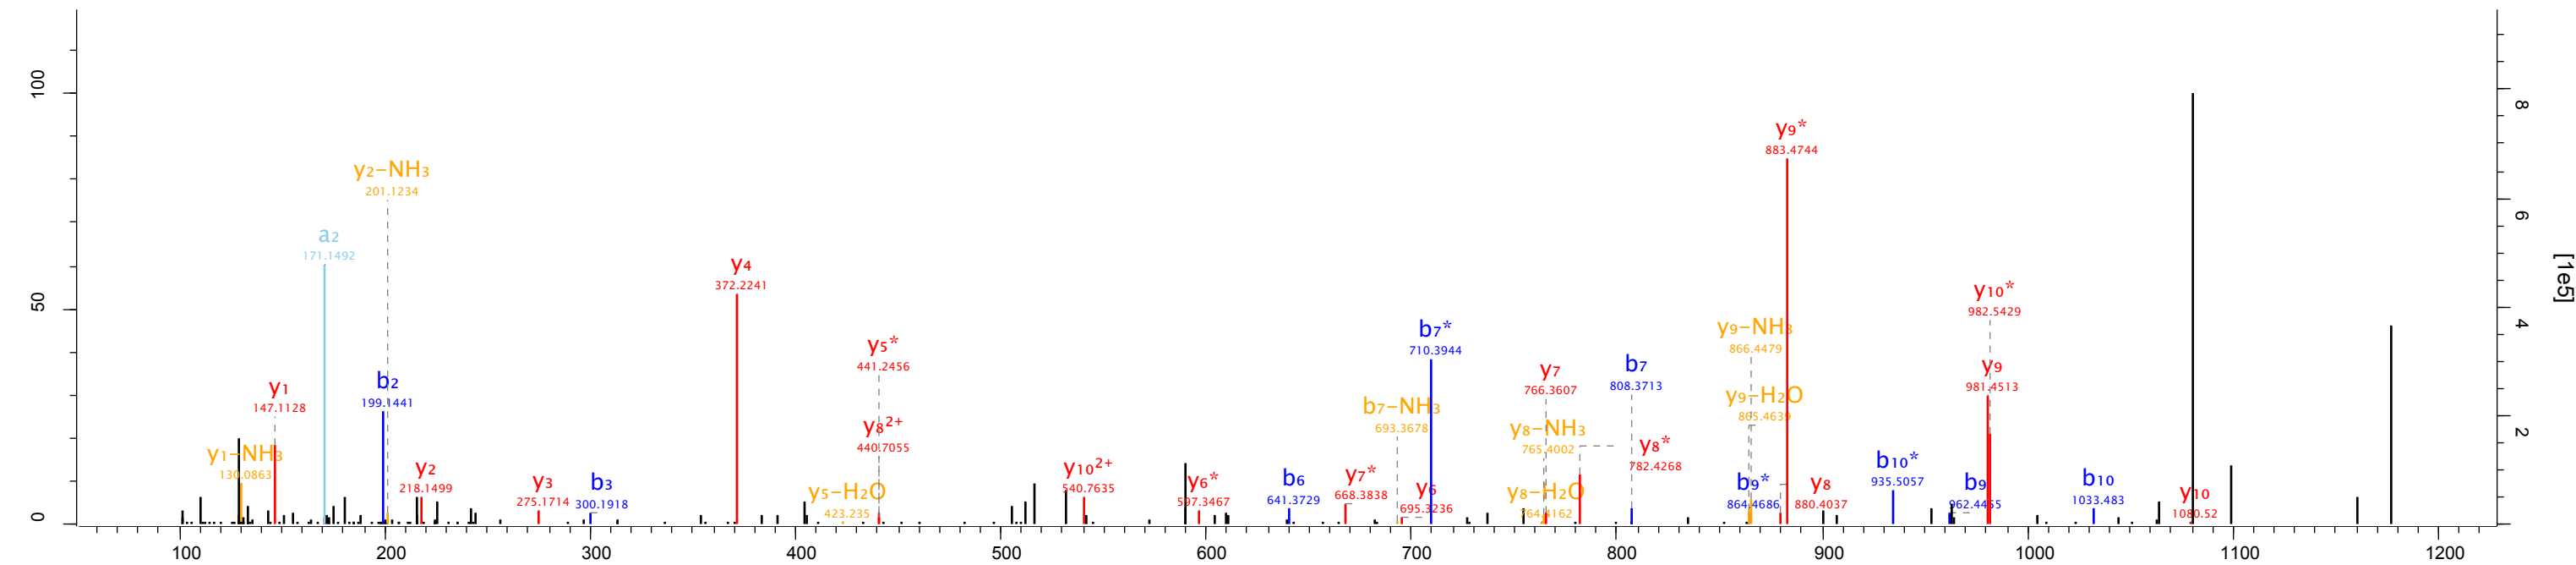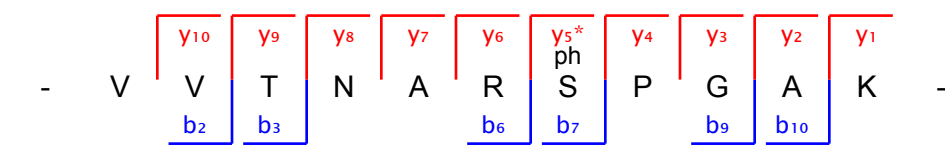

Raw file 20150814\_A375SR\_Phospho\_BR2\_05 Scan 22083 Method FTMS; HCD Score 245.11 m/z 982.79 Gene names PTPN14

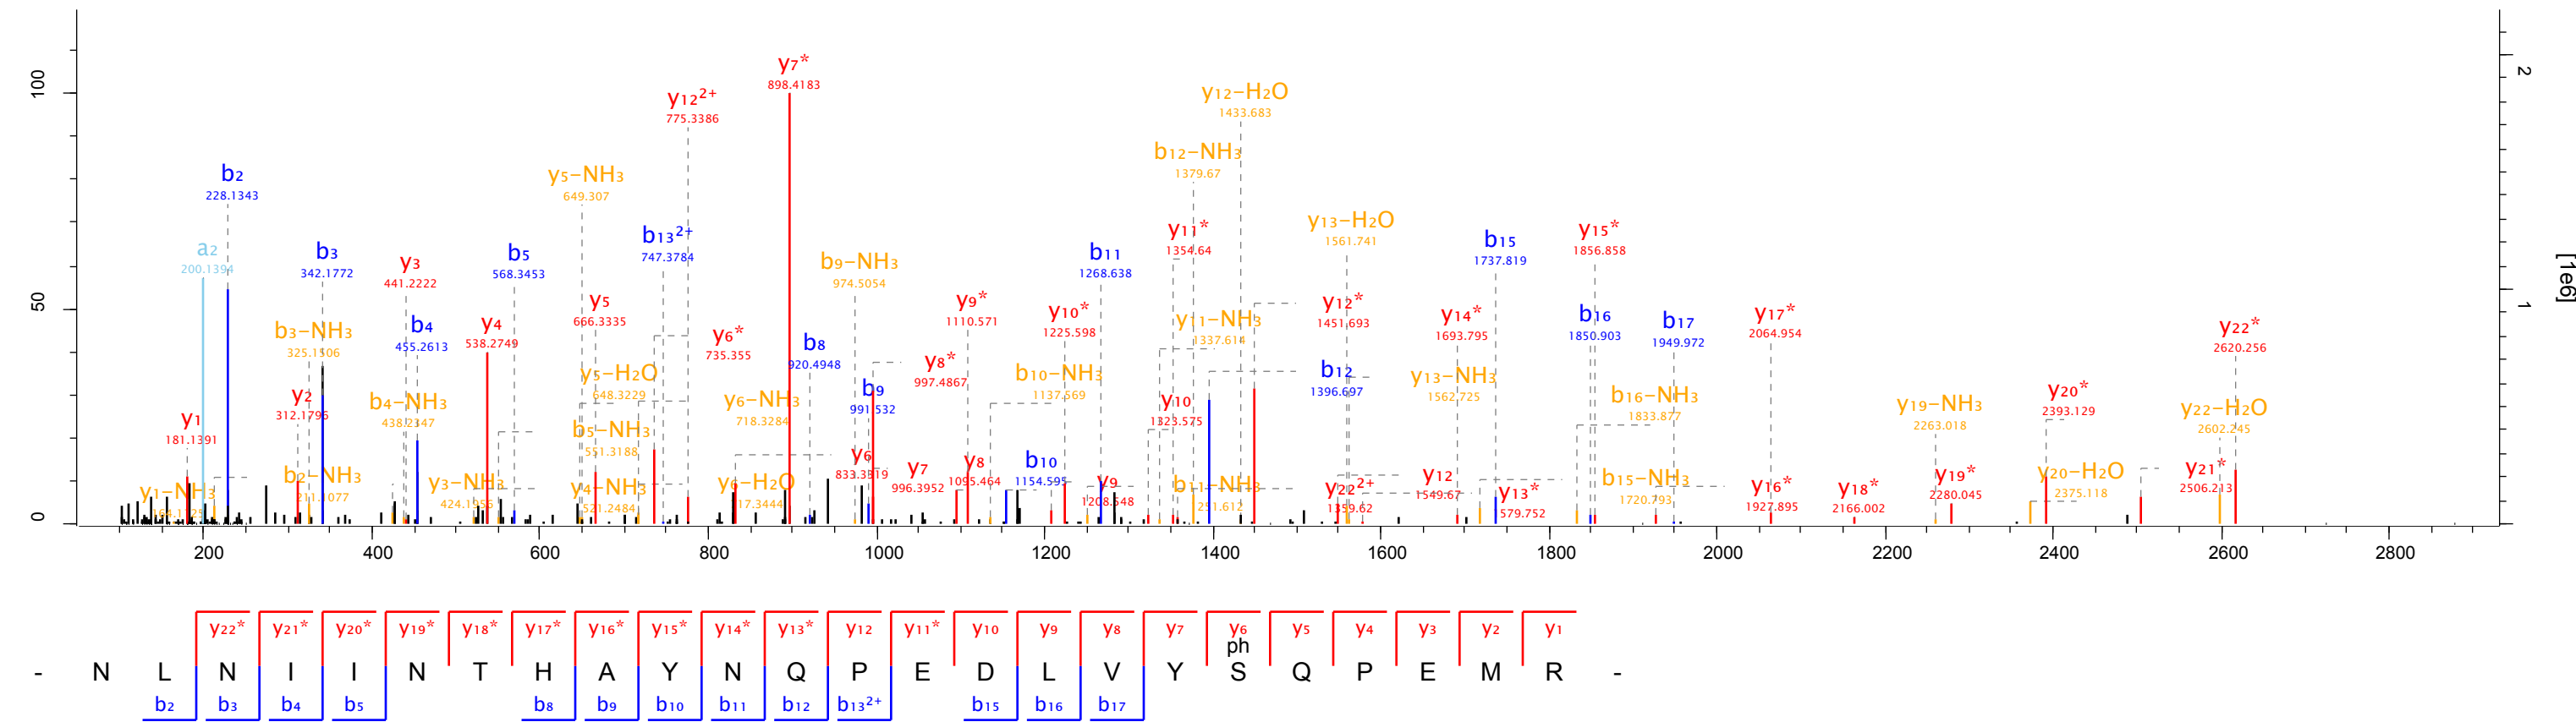

Raw file: 20150814\_A375SR\_Phospho\_BR2\_05  
 Scan: 22843 Method: FTMS; HCD Score: 128.72 m/z: 882.38 Gene names: SGK223

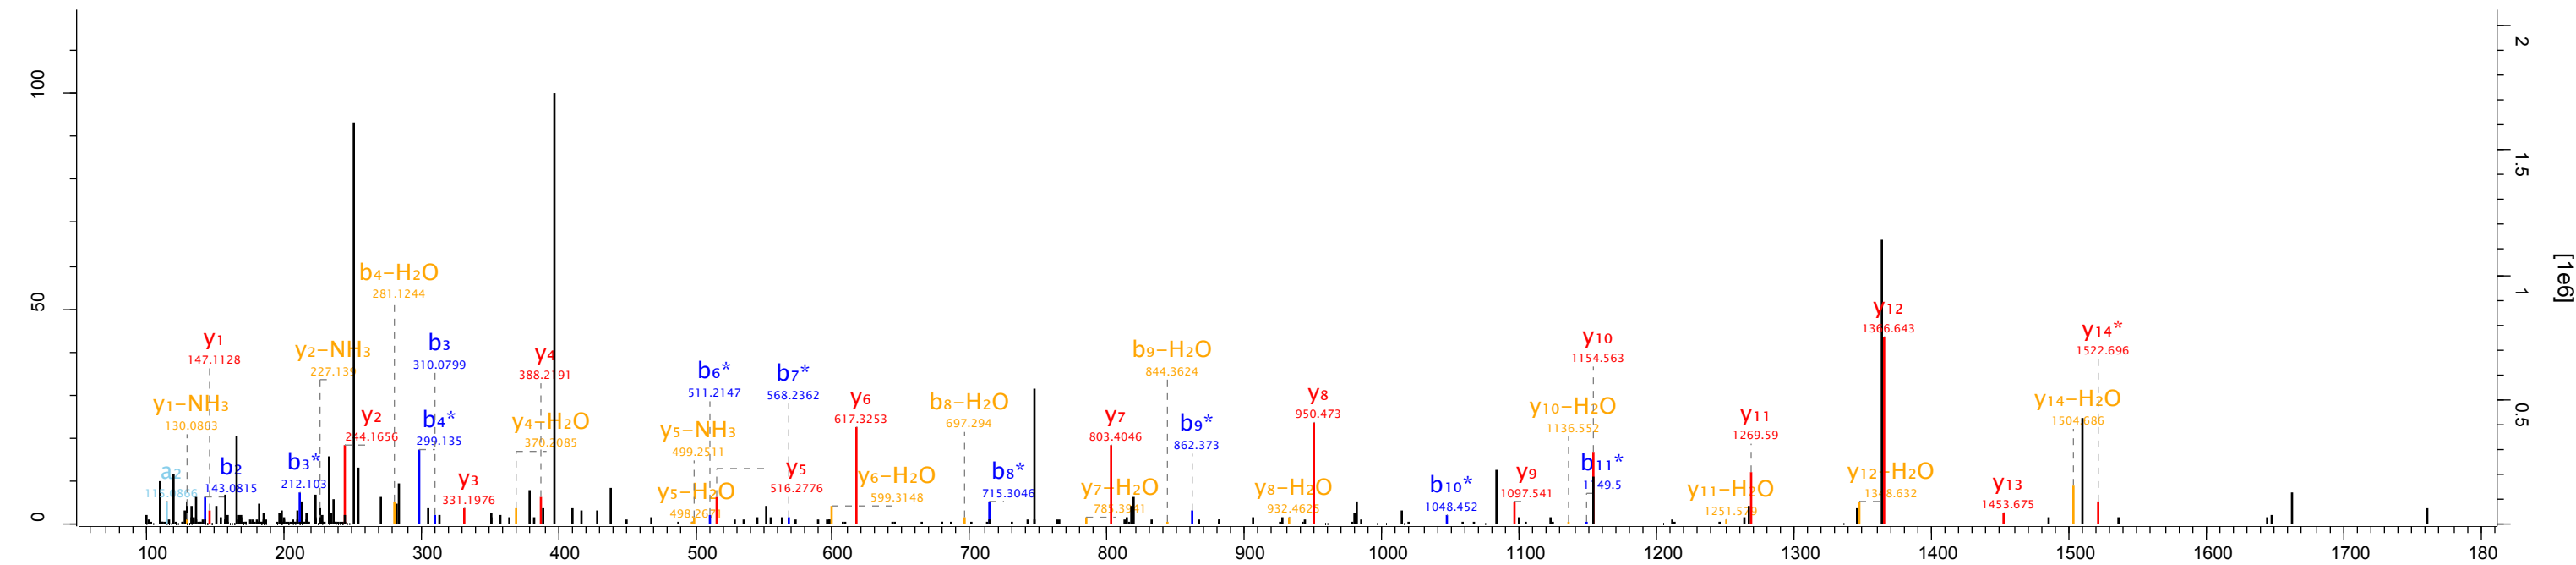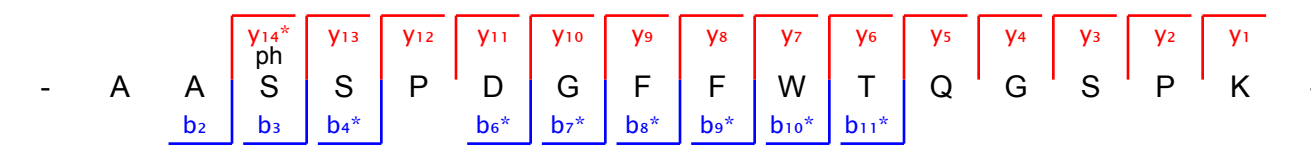

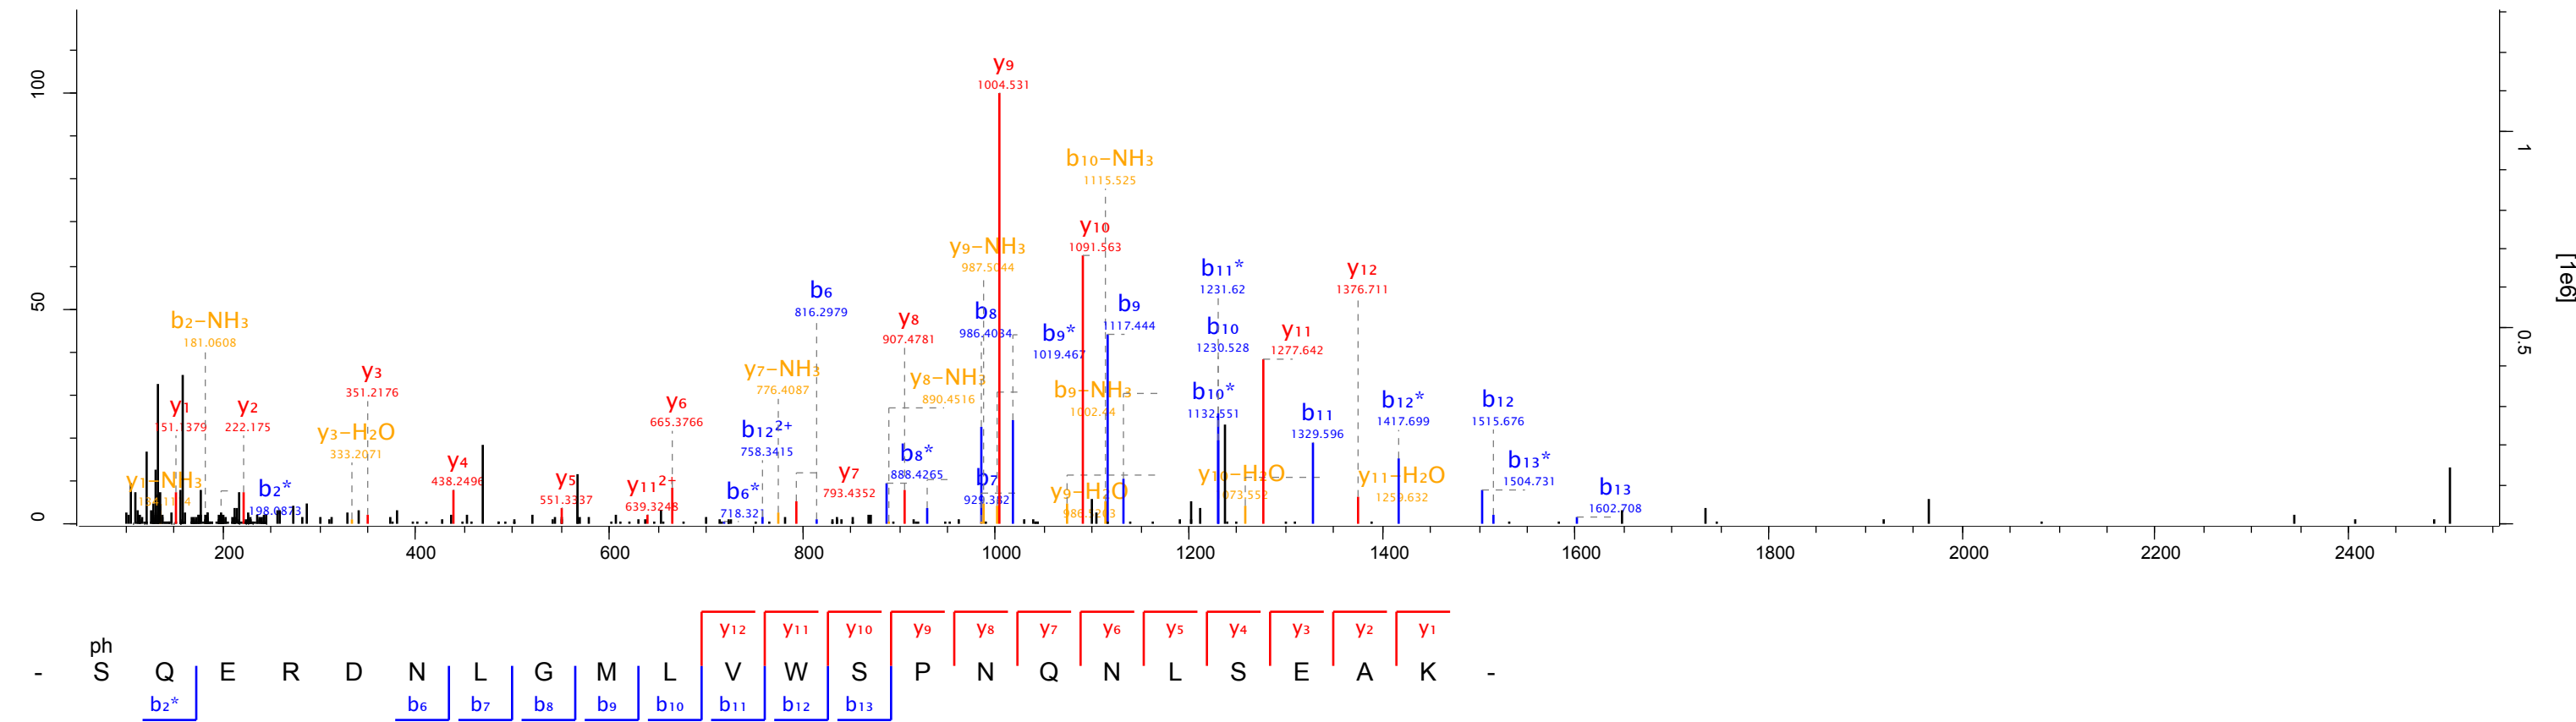

Raw file: 20150814\_A375SR\_Phospho\_BR2\_05  
 Scan: 23613 Method: FTMS; HCD Score: 54.3 m/z: 1215.21 Gene names: DDX39A

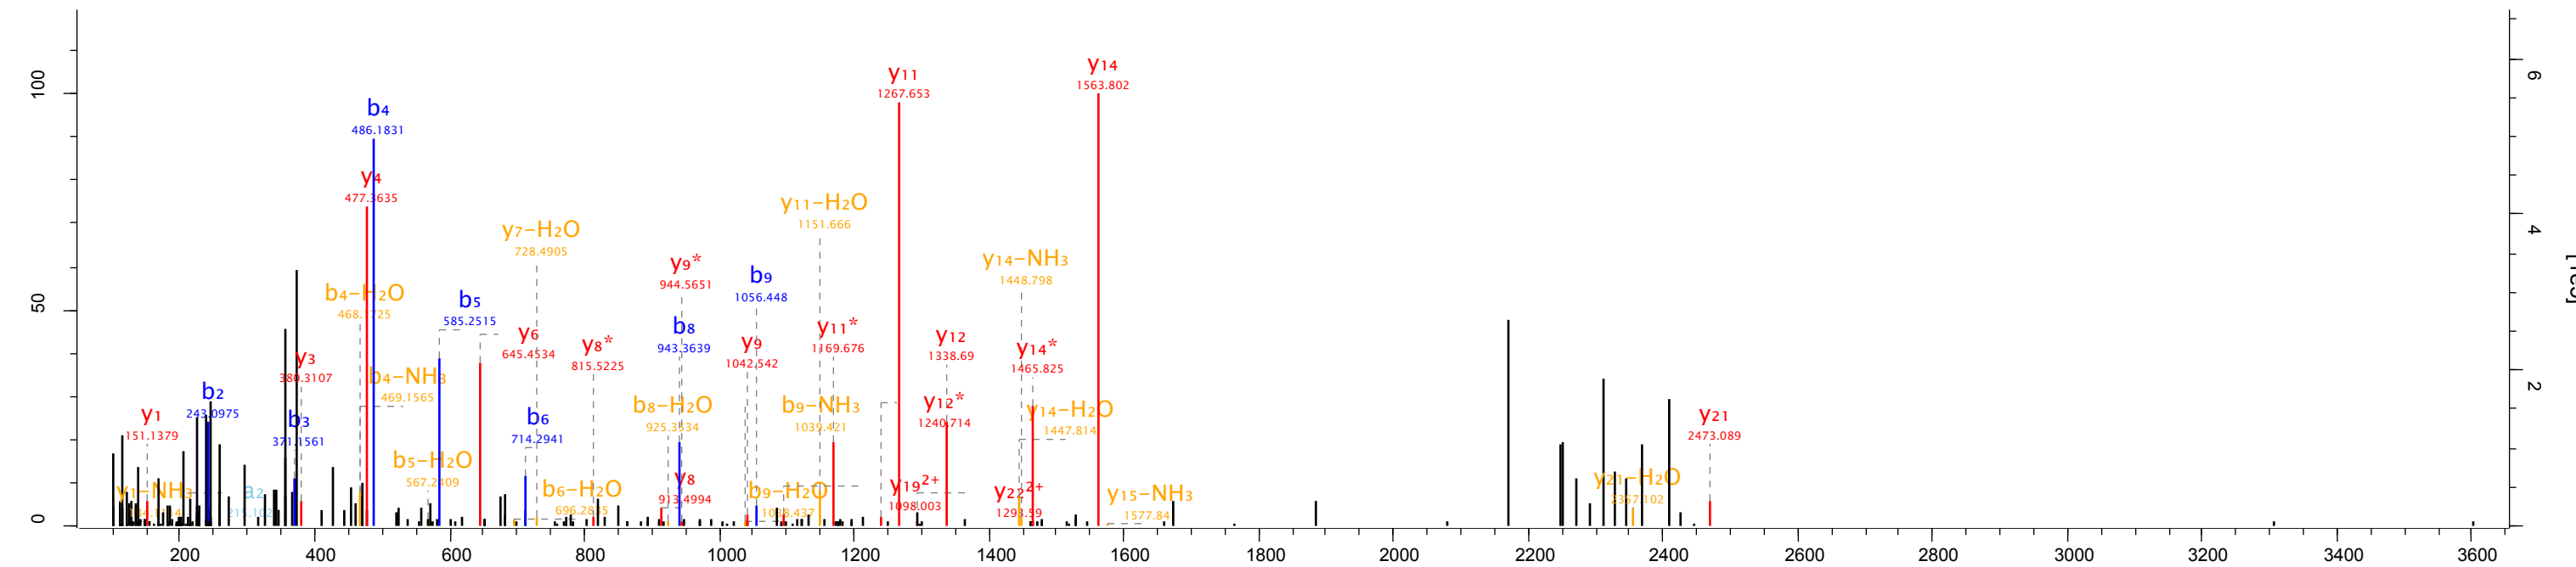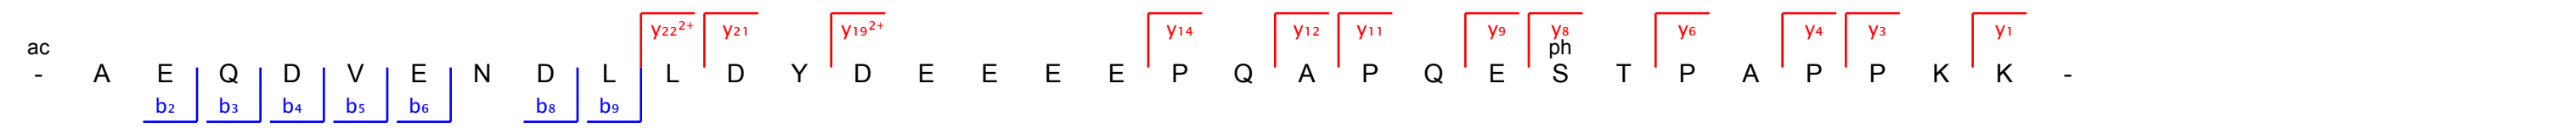



Raw file: 20150814\_A375SR\_Phospho\_BR2\_05  
 Scan: 24003 Method: FTMS; HCD Score: 117.52 m/z: 1376.62 Gene names: MKL2

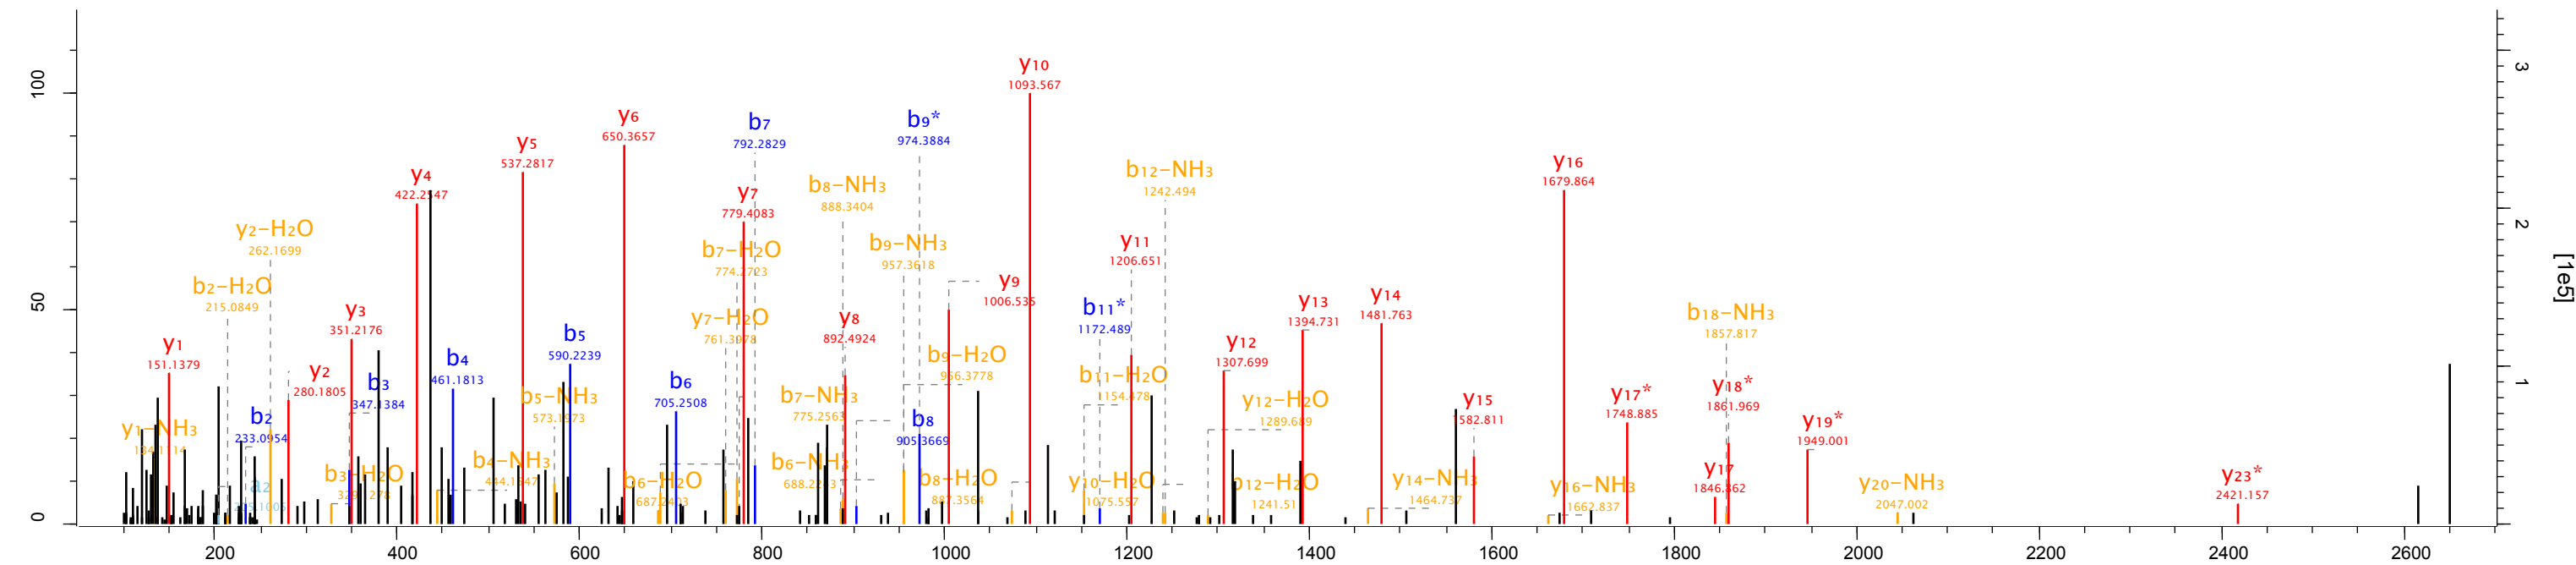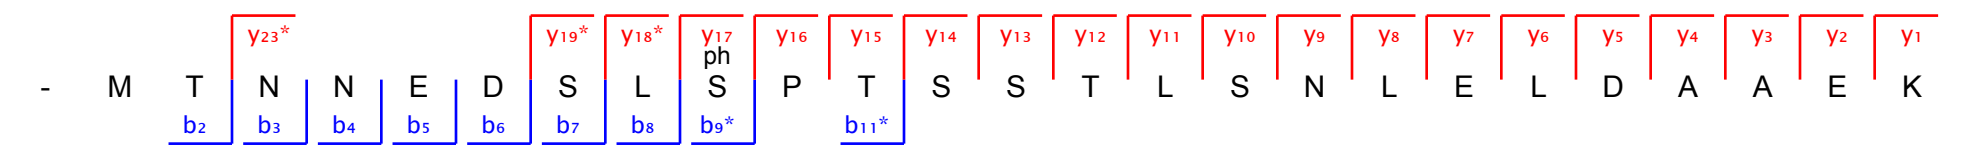

Raw file 20150814\_A375SR\_Phospho\_BR2\_05 Scan 24253 Method FTMS; HCD Score 147.1 m/z 919.41 Gene names ATP2B1

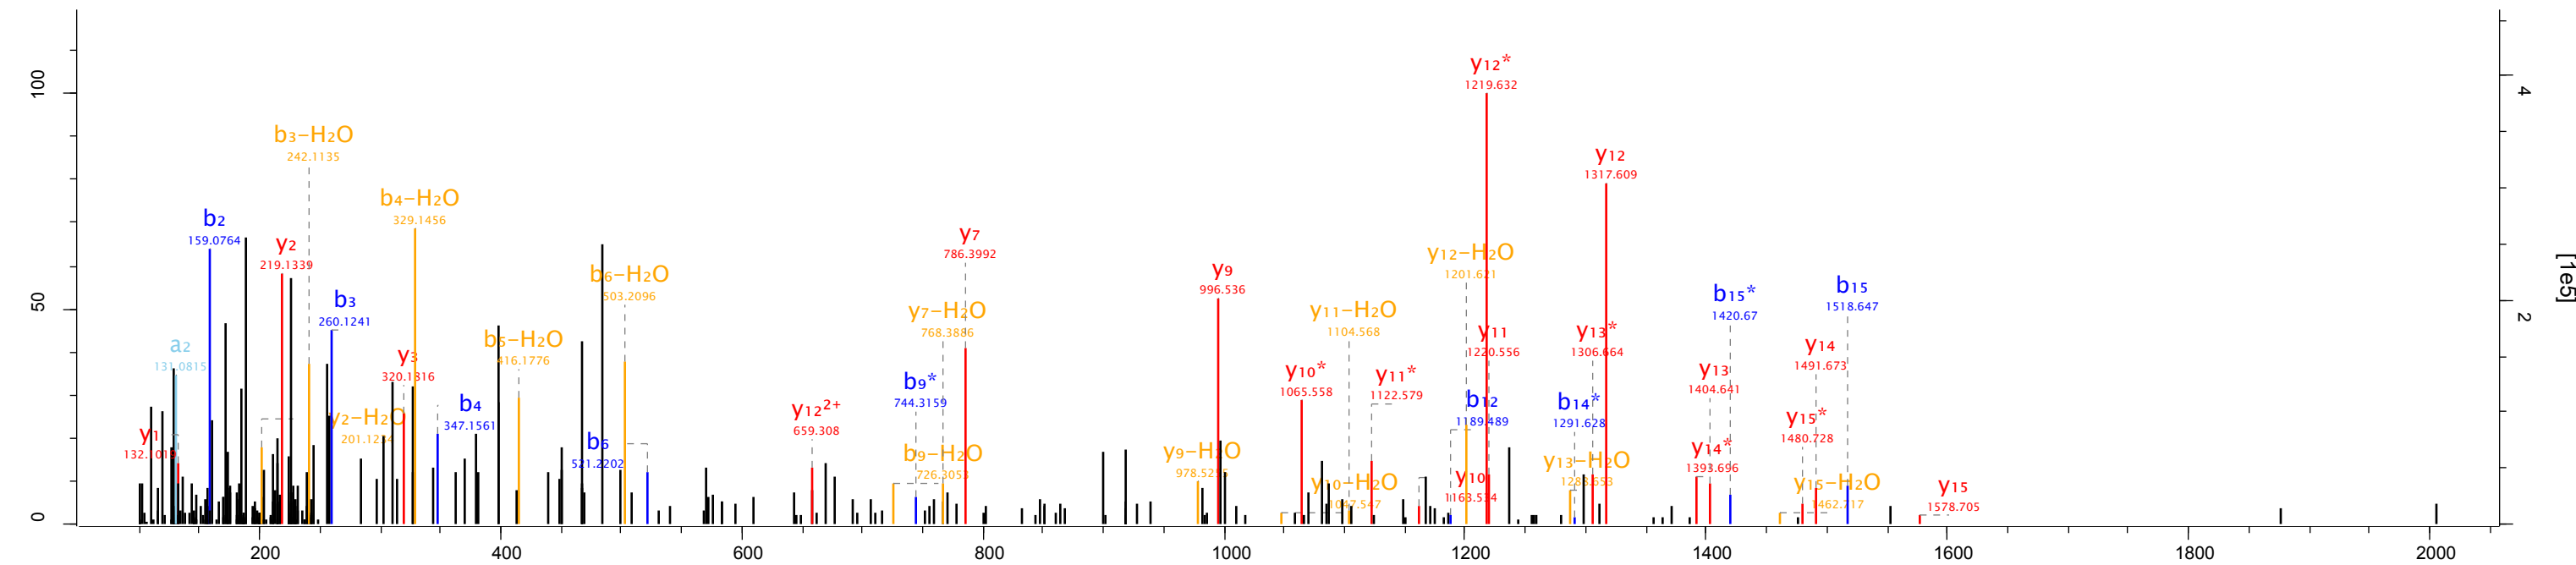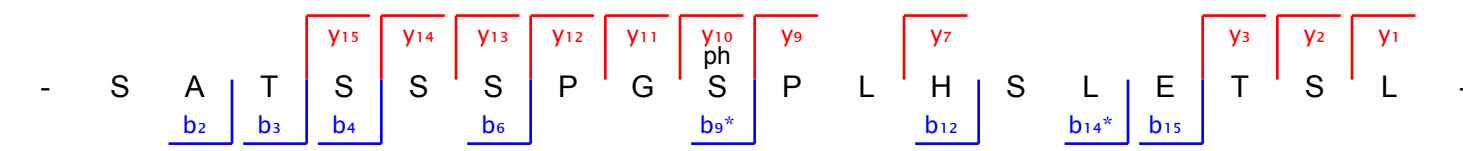

Raw file 20150814\_A375SR\_Phospho\_BR2\_05 Scan 25143 Method FTMS; HCD Score 135.02 m/z 940.08 Gene names ZNF318

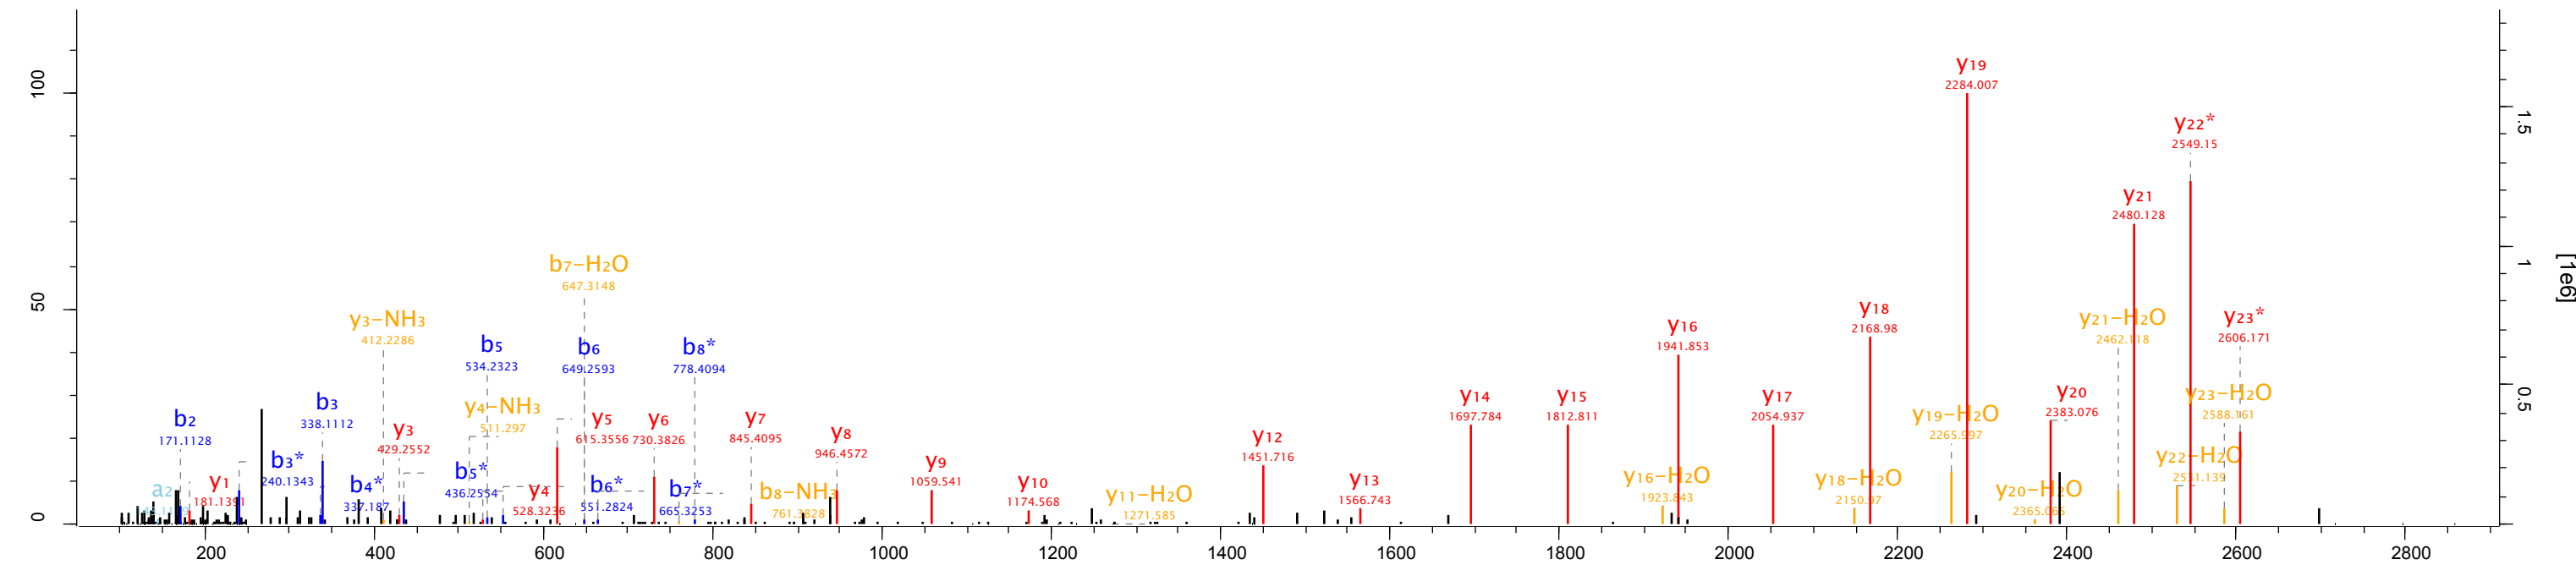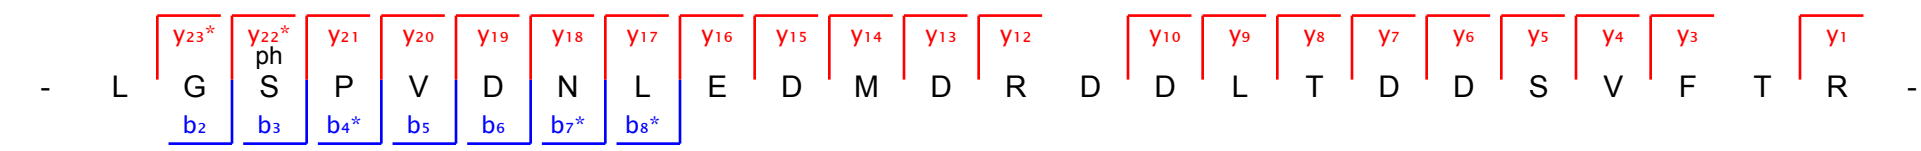

Raw file: 20150814\_A375SR\_Phospho\_BR2\_05  
 Scan: 25173 Method: FTMS; HCD Score: 130.4 m/z: 808.84 Gene names: SIPA1L2

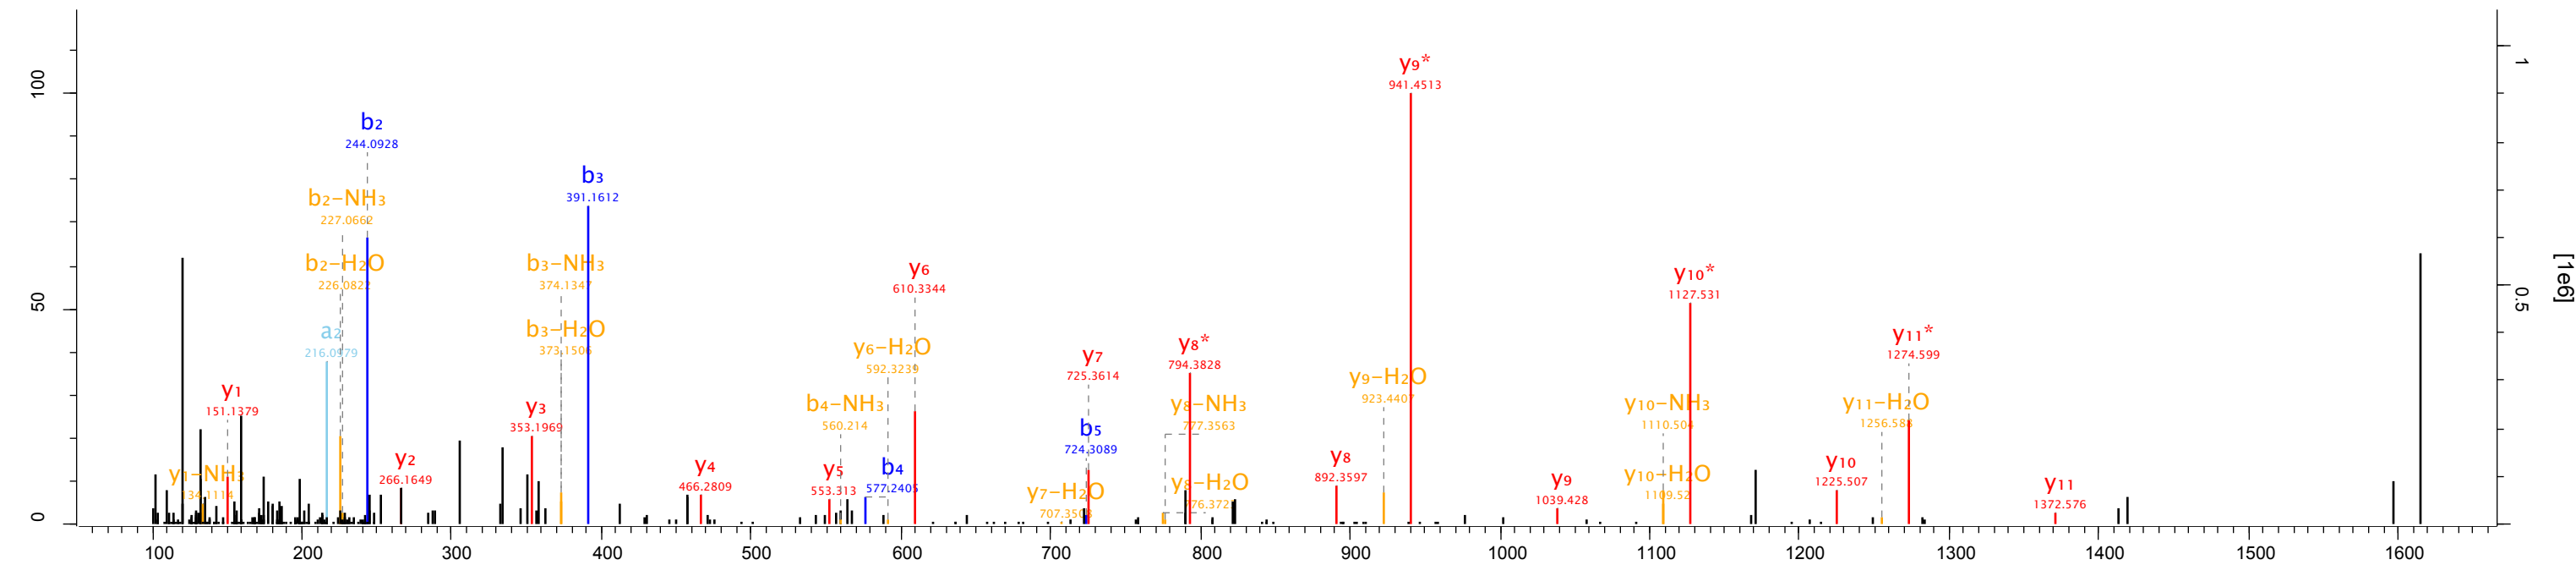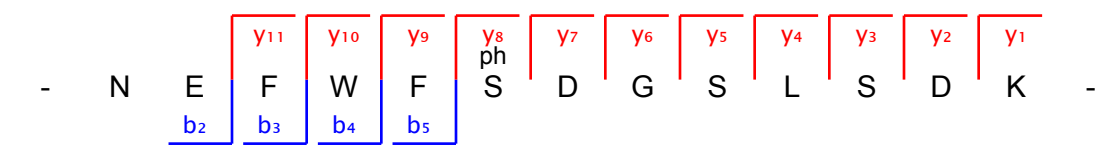

Raw file 20150814\_A375SR\_Phospho\_BR2\_05 Scan 25643 Method FTMS; HCD Score 132.9 m/z 736.82 Gene names MTMR10

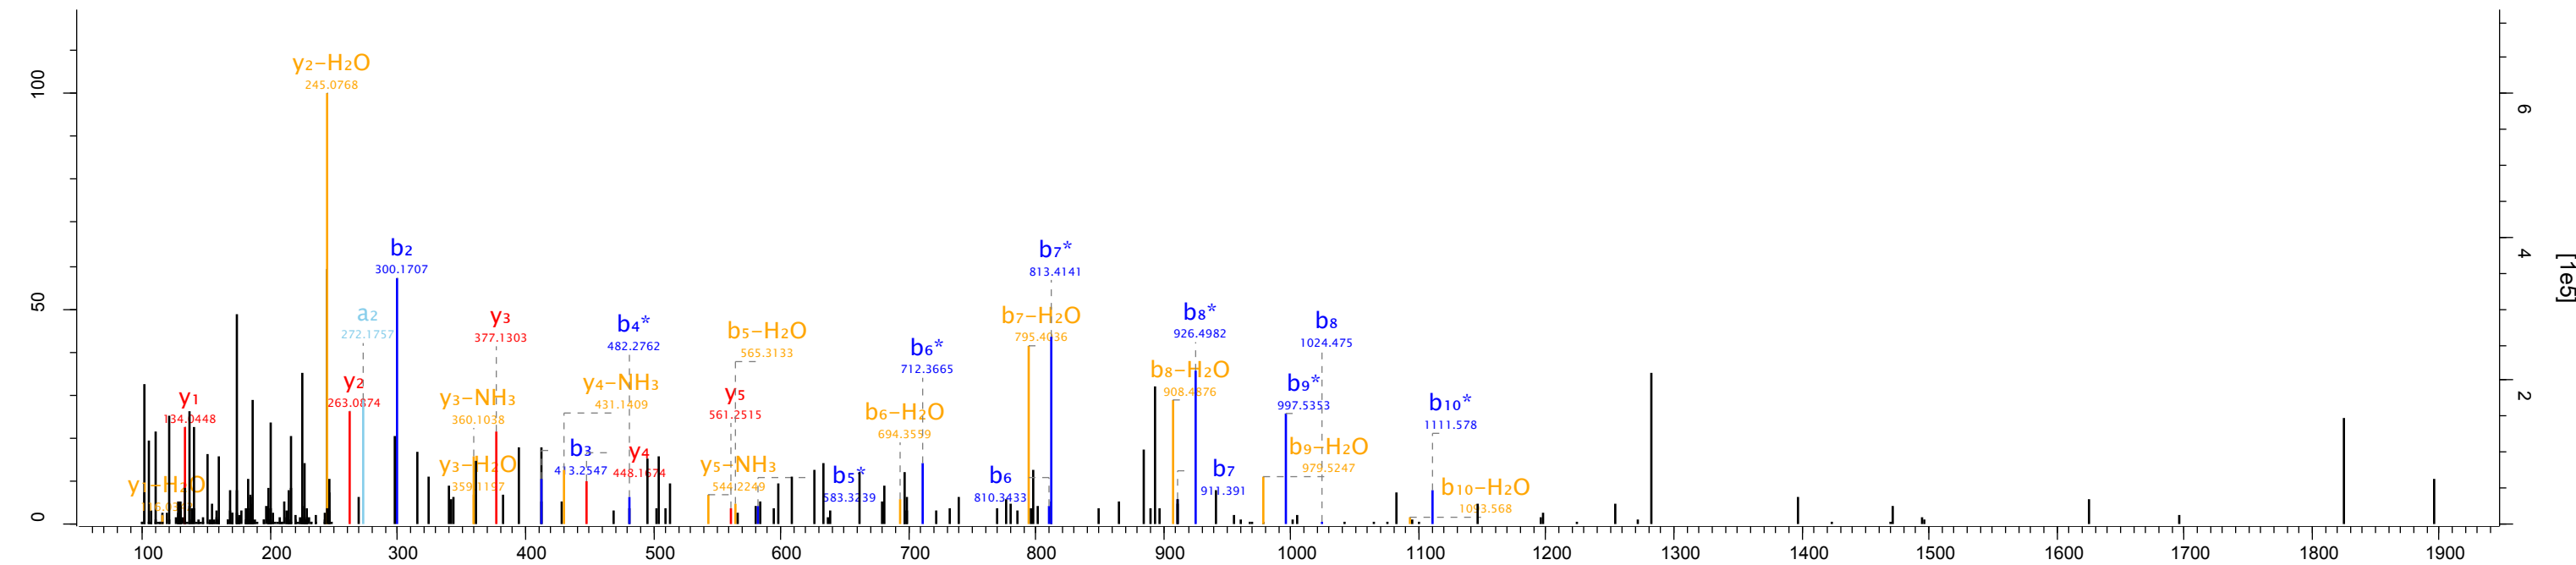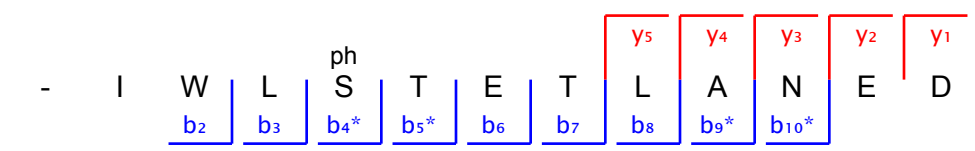

Raw file 20150814\_A375SR\_Phospho\_BR2\_05 Scan 25803 Method FTMS; HCD Score 228.8 m/z 1173.06 Gene names TP53BP1

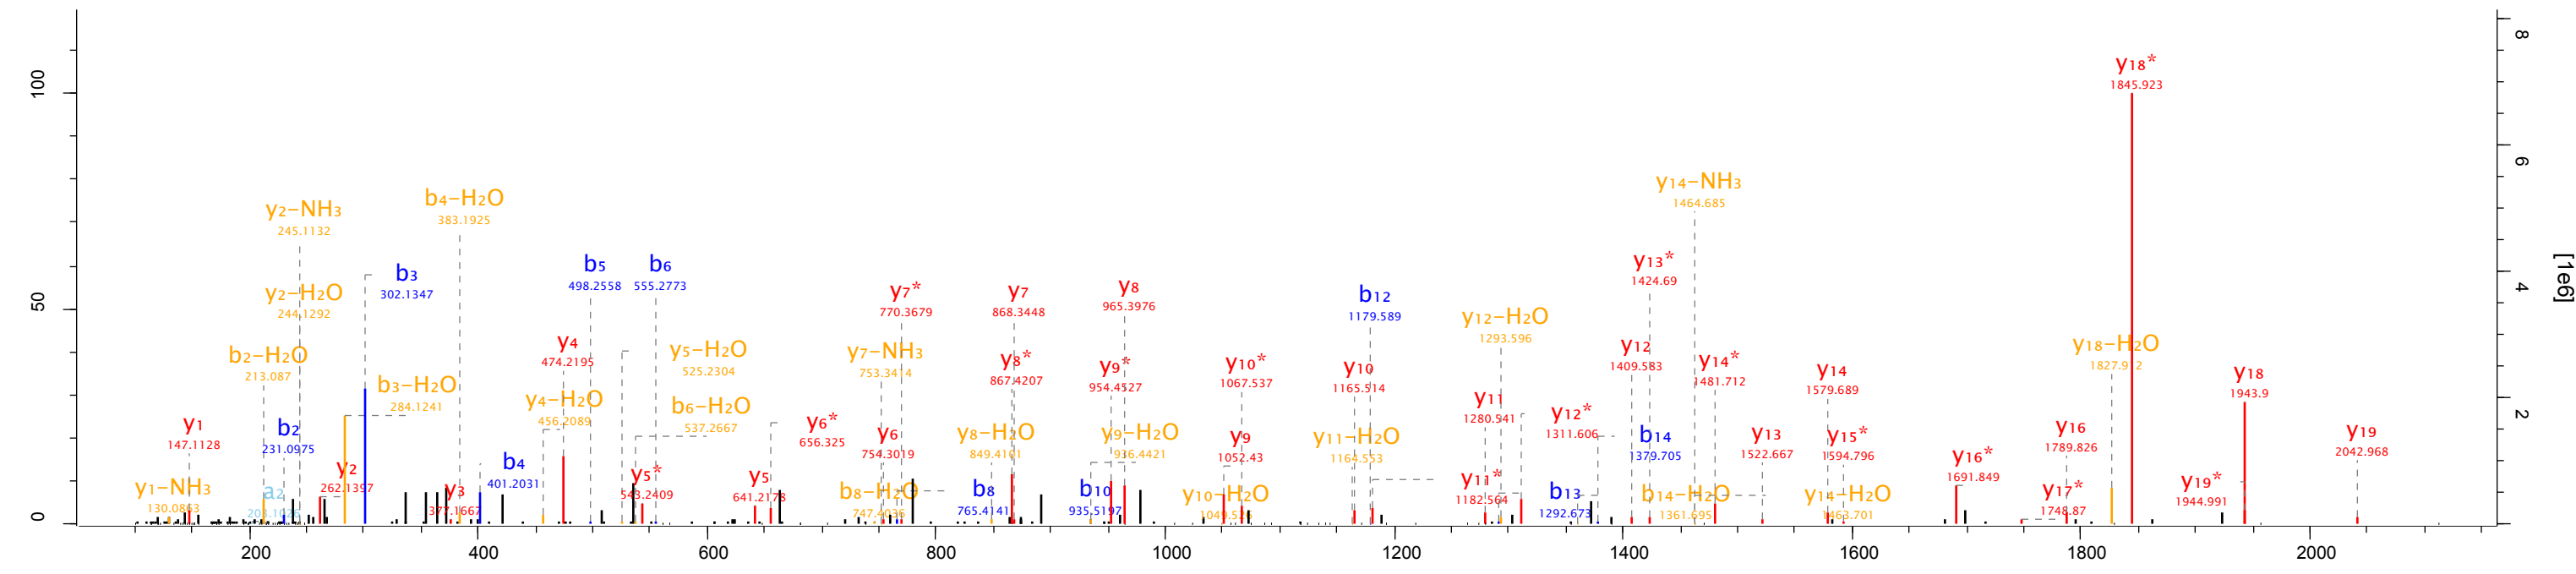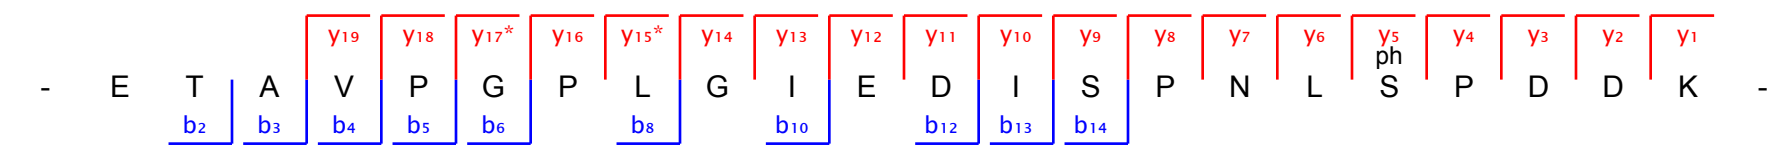

Raw file 20150814\_A375SR\_Phospho\_BR2\_05 Scan 25843 Method FTMS; HCD Score 173.86 m/z 1223.03 Gene names MISP

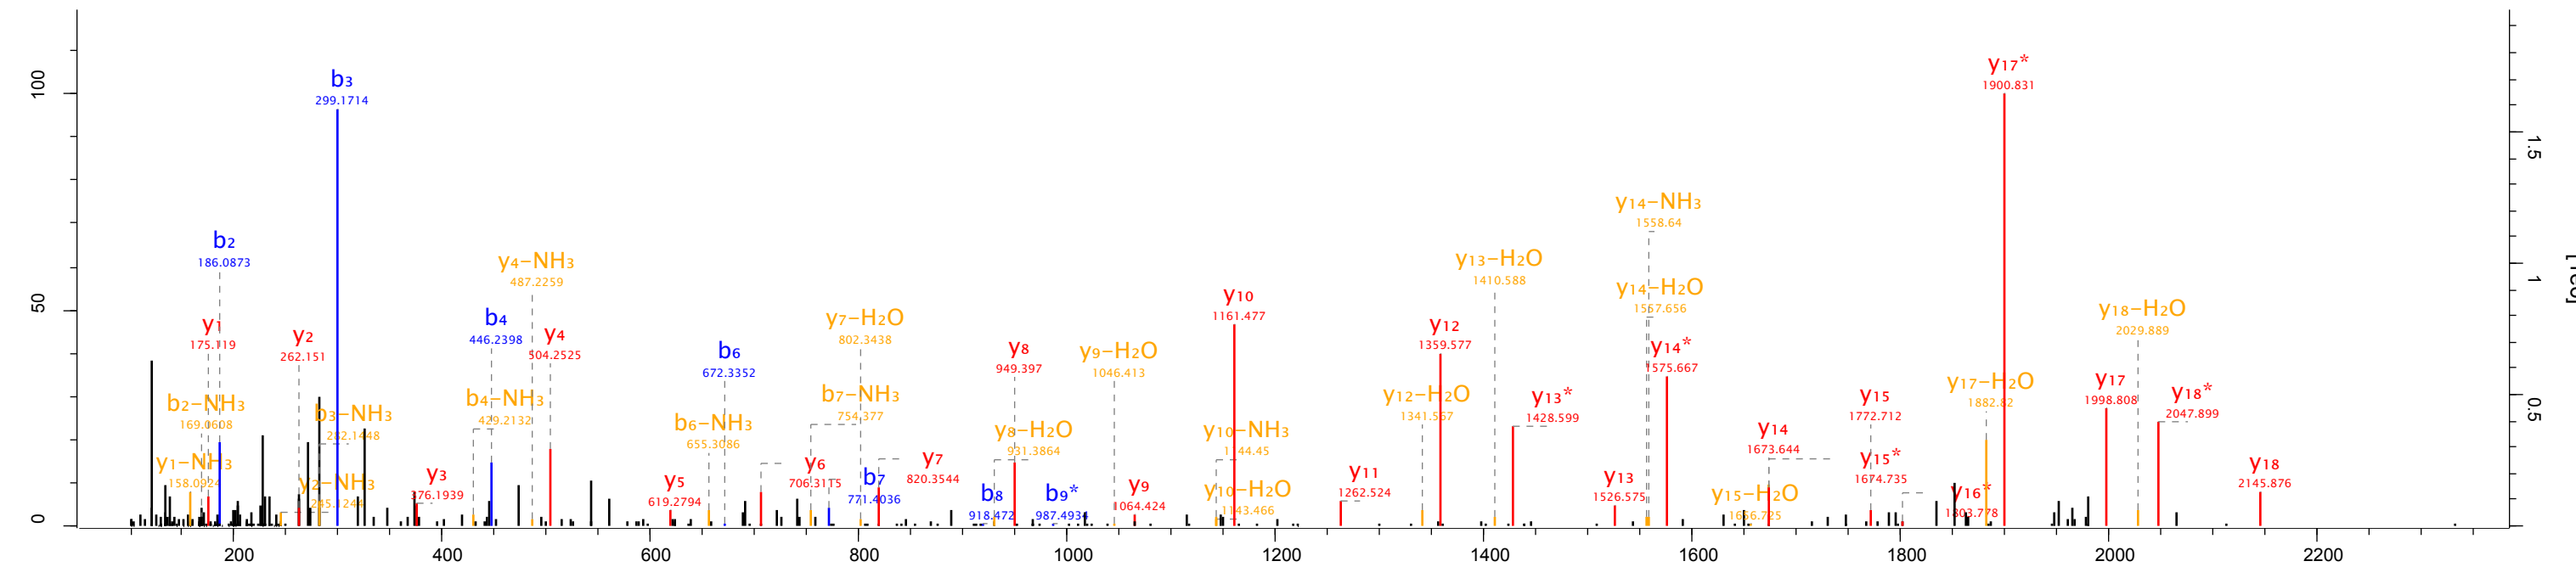

- N A L F P E V F S P T P D E N S D Q N S R -  
 b2 b3 b4 b6 b7 b8 b9\*

Raw file: 20150814\_A375SR\_Phospho\_BR2\_05  
 Scan: 26103  
 Method: FTMS; HCD  
 Score: 242.53  
 m/z: 1012.46  
 Gene names: PAGR1

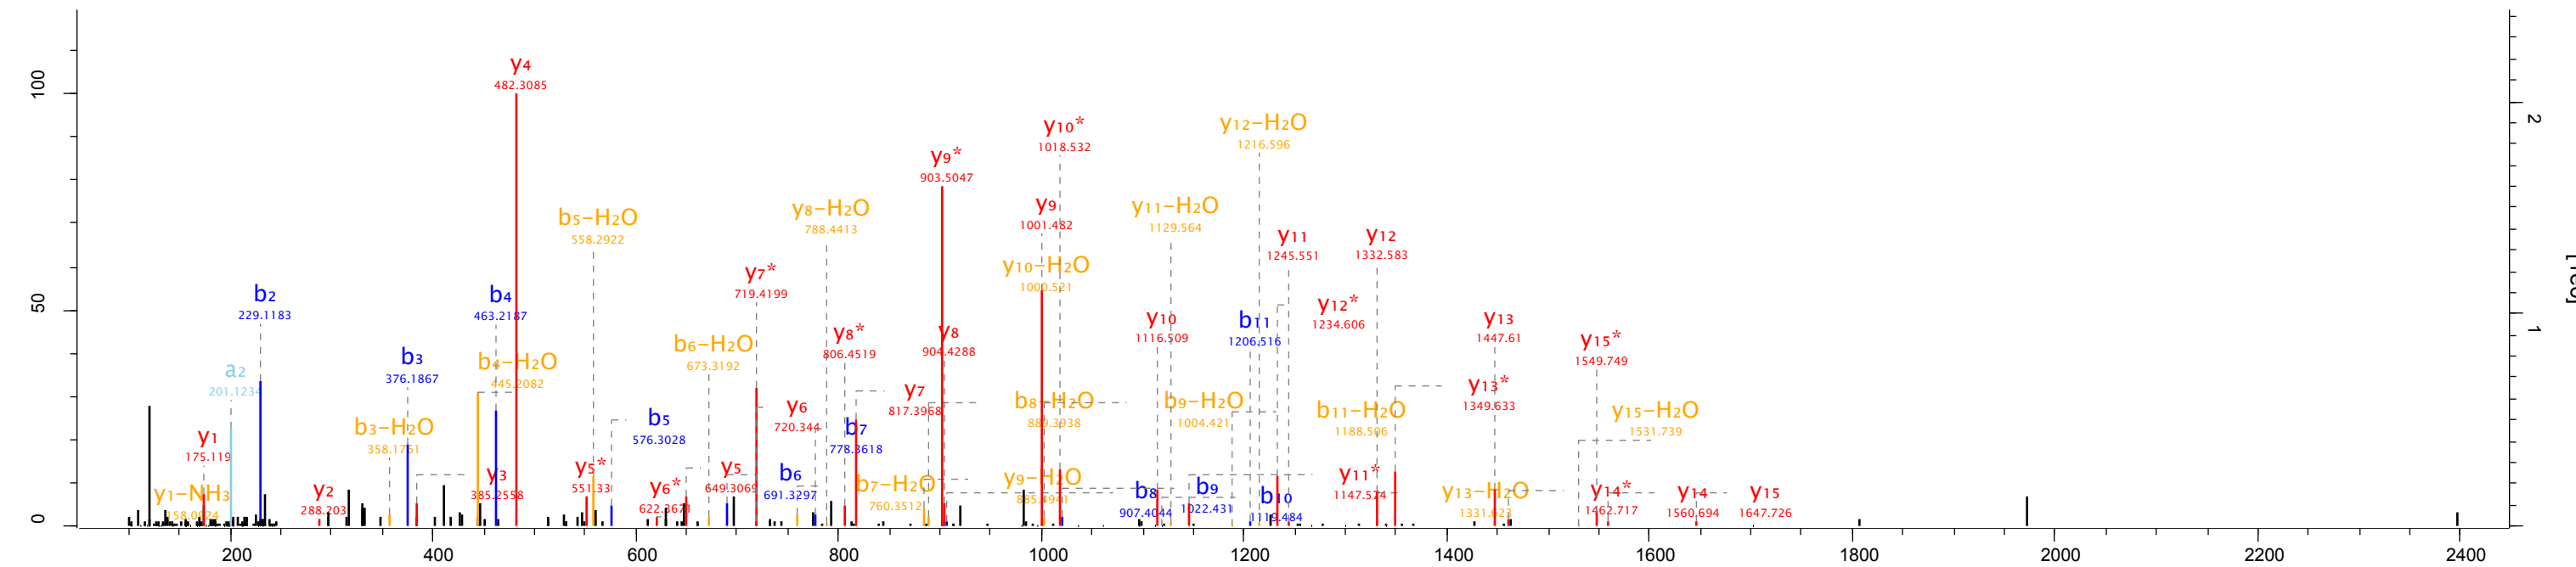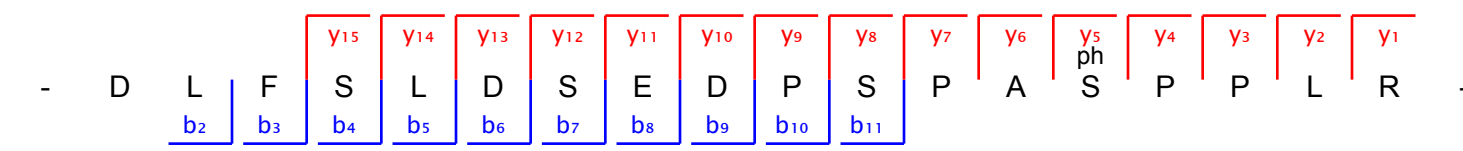



Raw file: 20150814\_A375SR\_Phospho\_BR2\_05  
 Scan: 26553 Method: FTMS; HCD Score: 216.71 m/z: 1241.05 Gene names: RRAGC

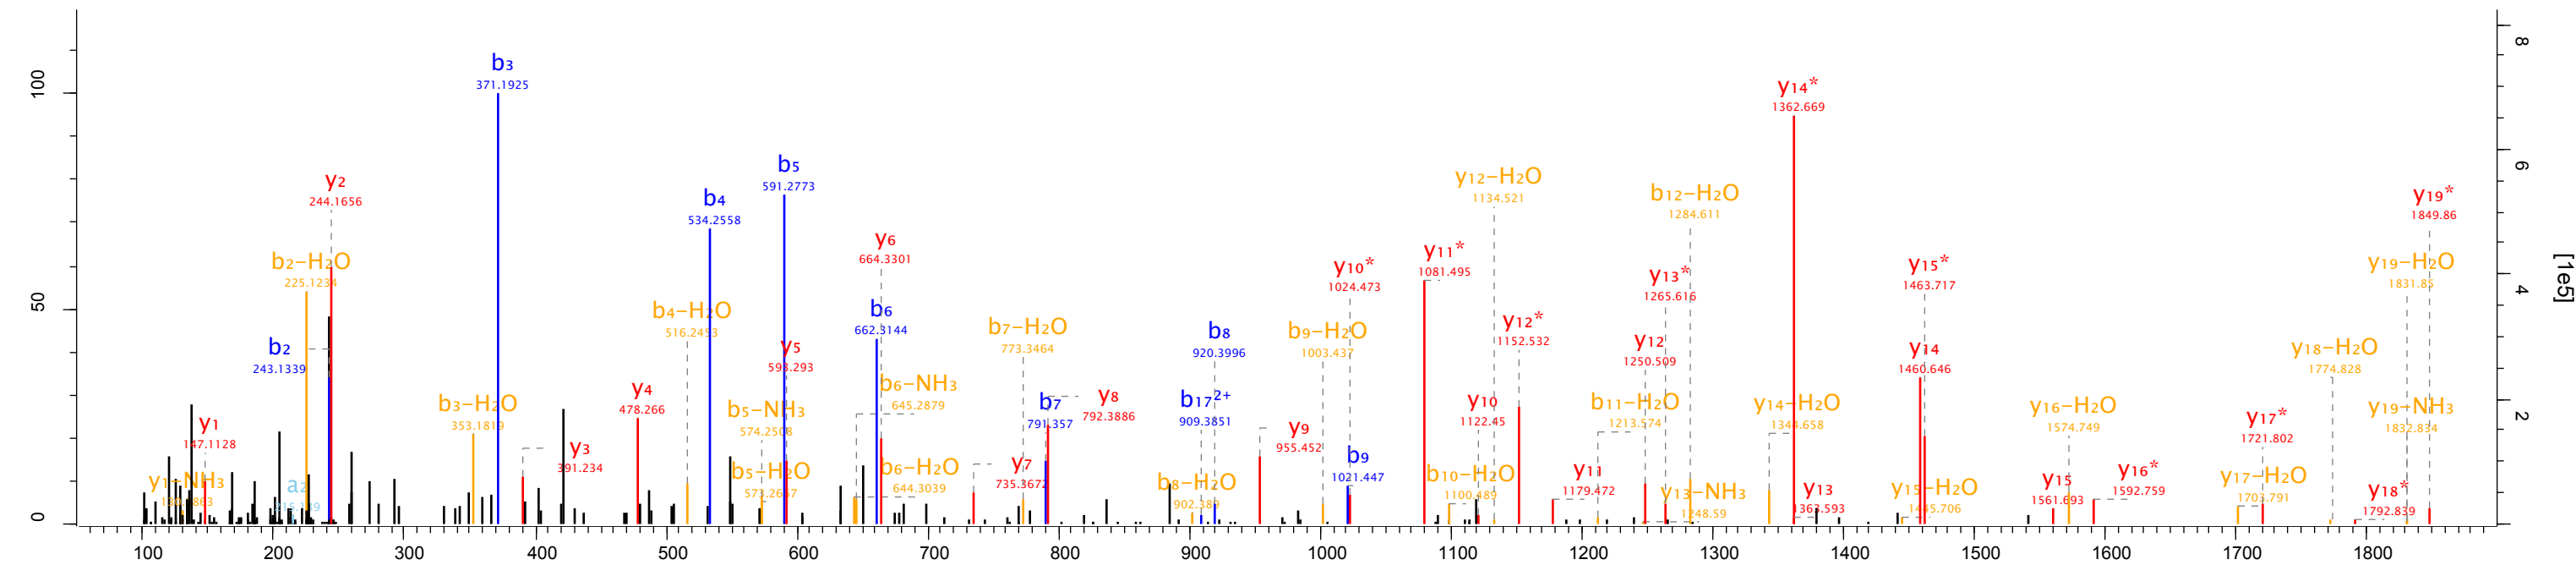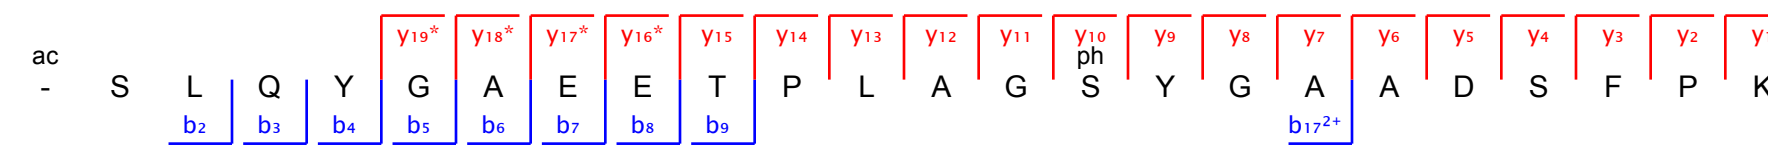

Raw file: 20150814\_A375SR\_Phospho\_BR2\_05  
 Scan: 26583 Method: FTMS; HCD Score: 87.99 m/z: 907.09 Gene names: RELL1

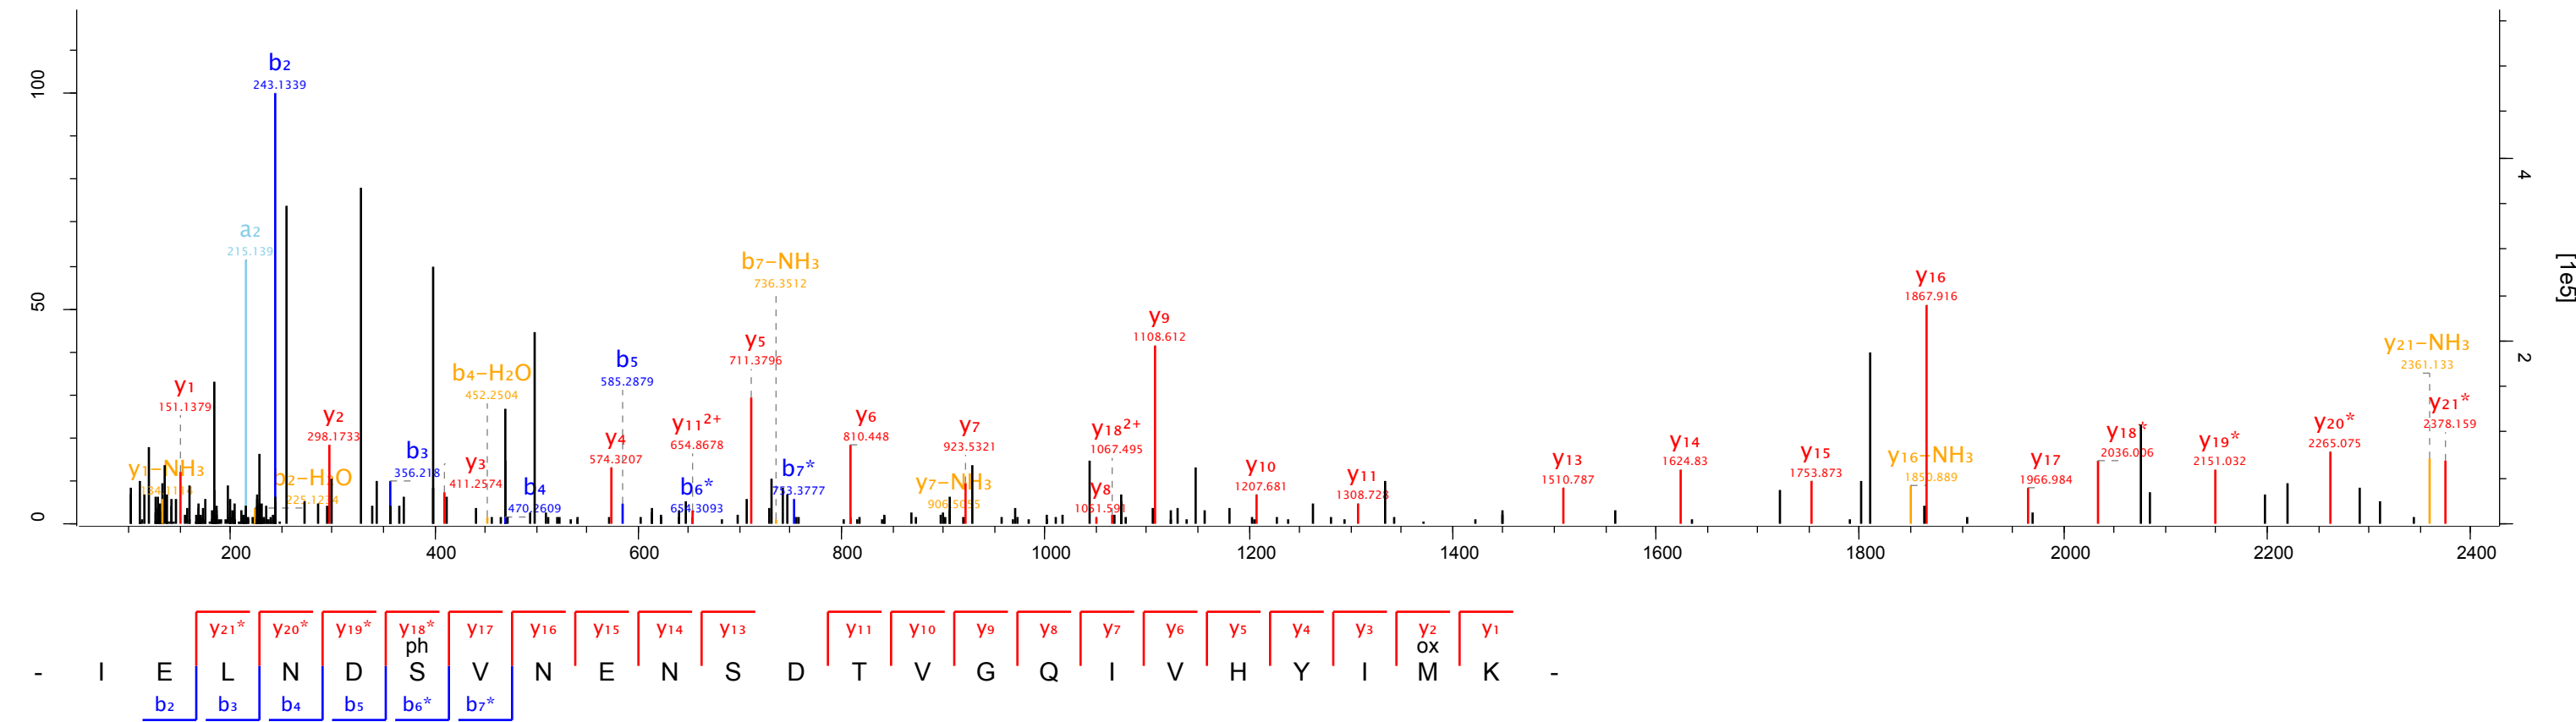

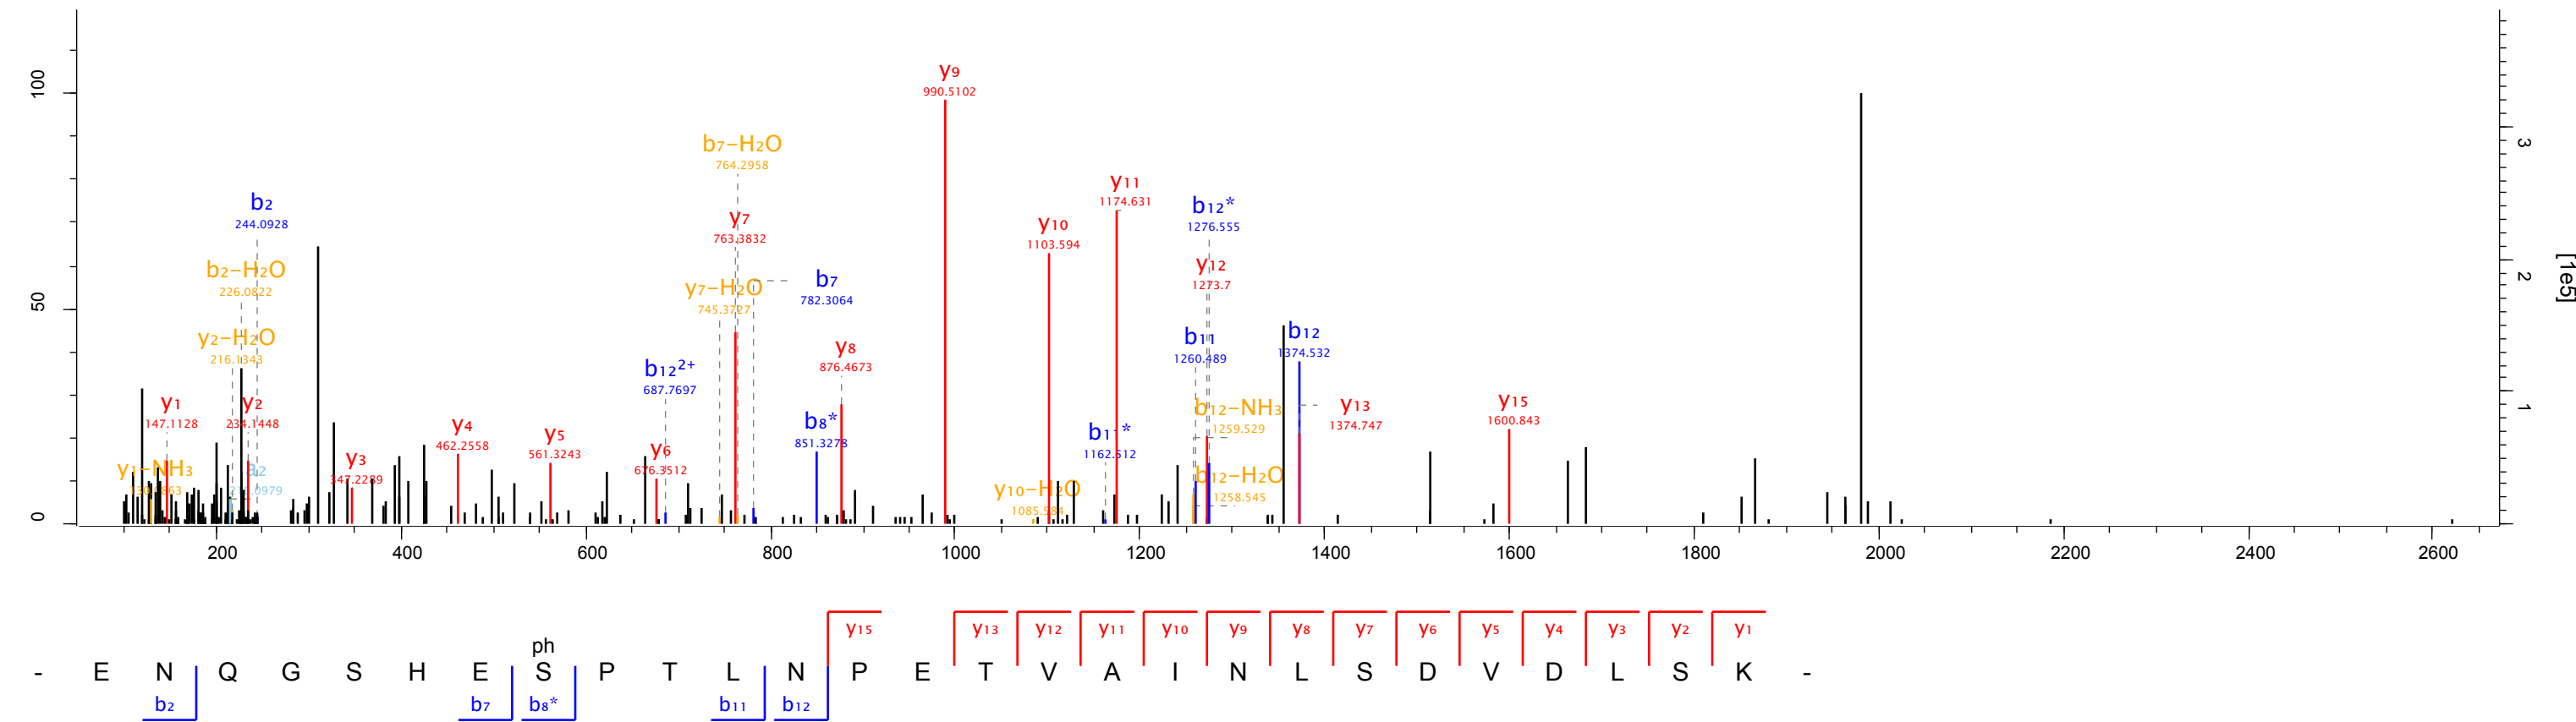

Raw file 20150814\_A375SR\_Phospho\_BR2\_05 Scan 26993 Method FTMS; HCD Score 188.07 m/z 819.35 Gene names MORC3

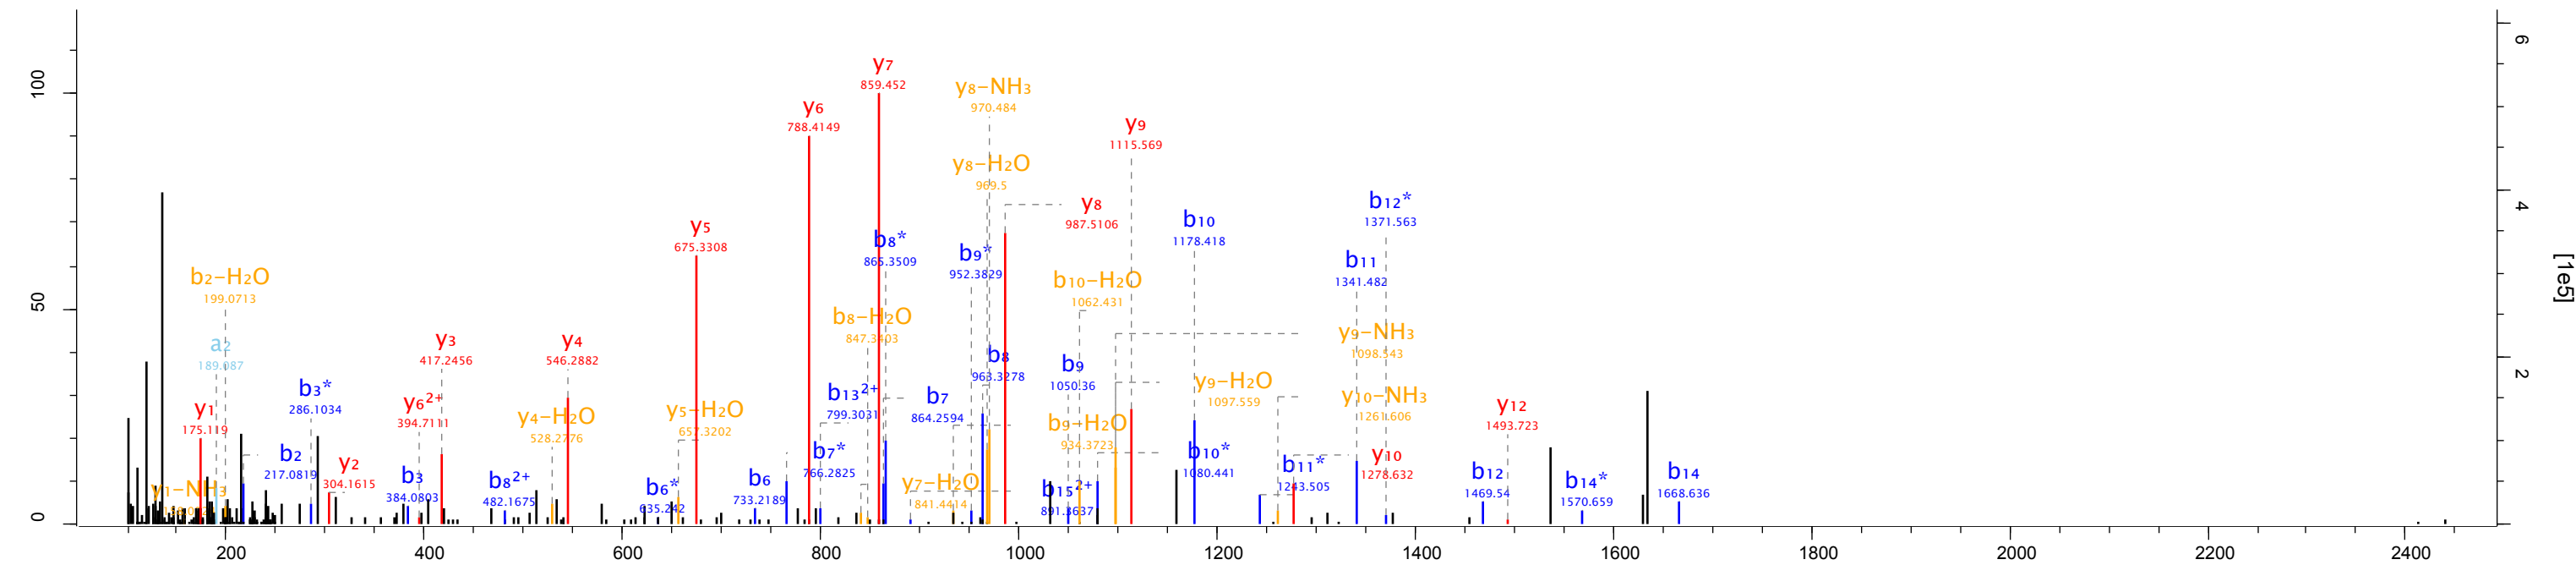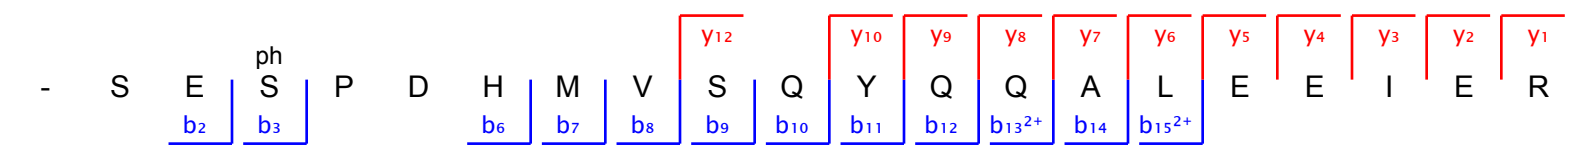

Raw file: 20150814\_A375SR\_Phospho\_BR2\_05  
 Scan: 27703  
 Method: FTMS; HCD  
 Score: 337.33  
 m/z: 1090.53  
 Gene names: EHD4

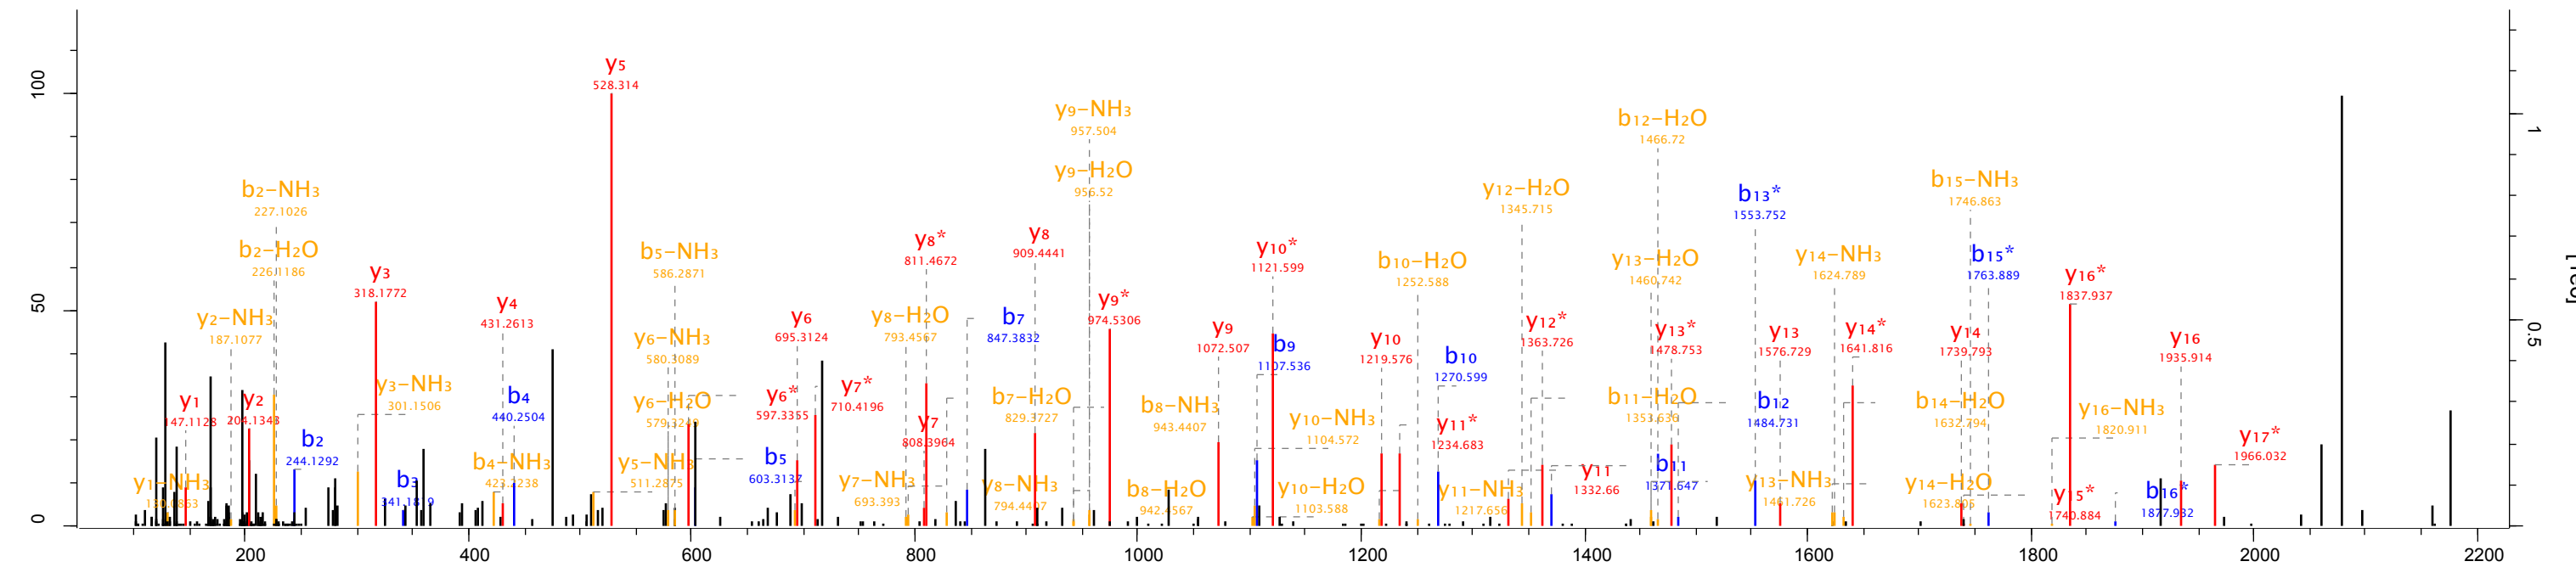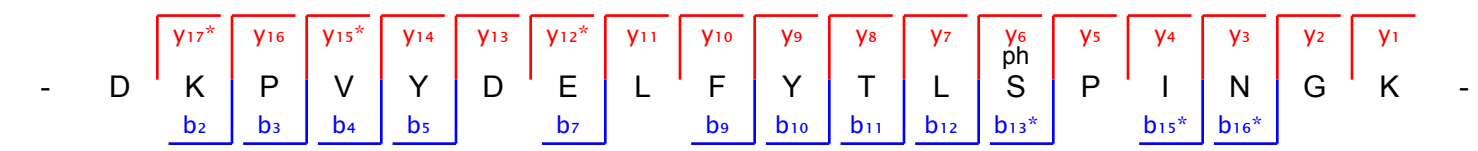

Raw file 20150814\_A375SR\_Phospho\_BR2\_05 Scan 27923 Method FTMS; HCD Score 228.31 m/z 1138.52 Gene names ACACA

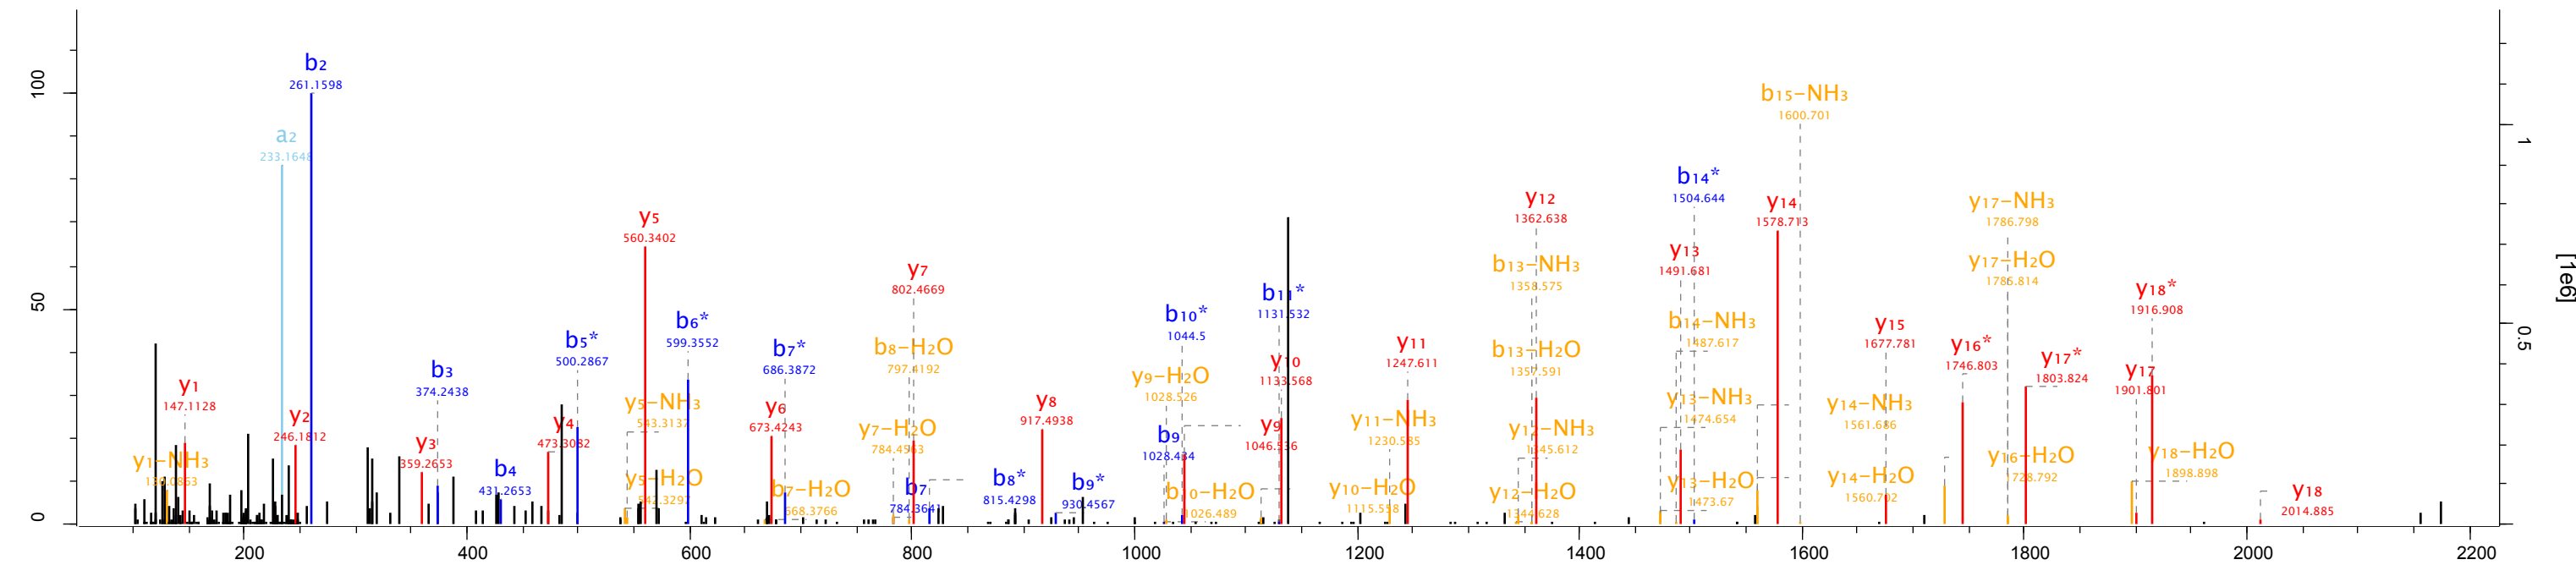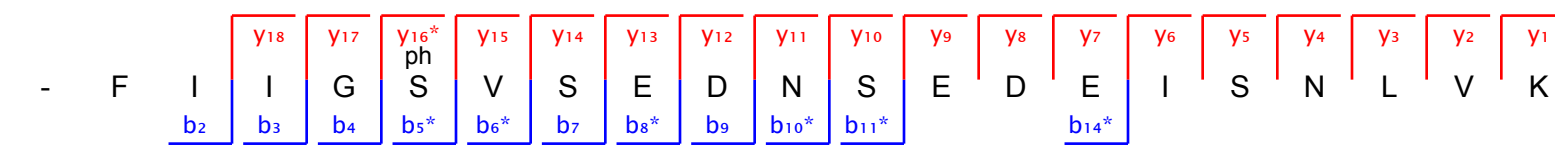

Raw file: 20150814\_A375SR\_Phospho\_BR2\_05  
 Scan: 28243 Method: FTMS; HCD Score: 53.43 m/z: 1153.23 Gene names: GIT2

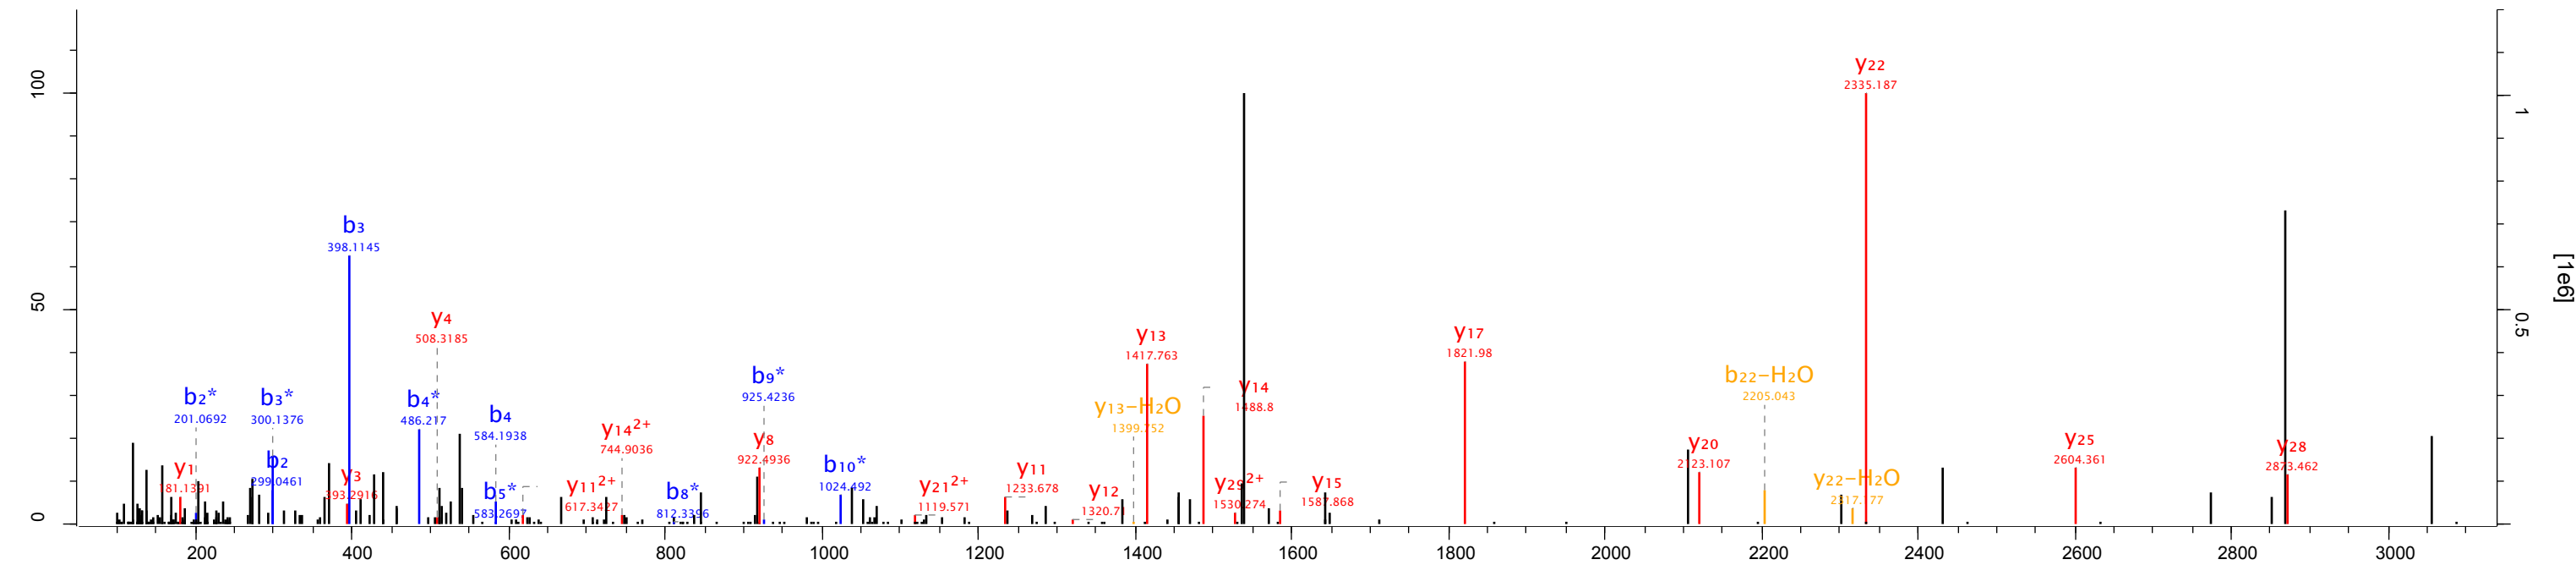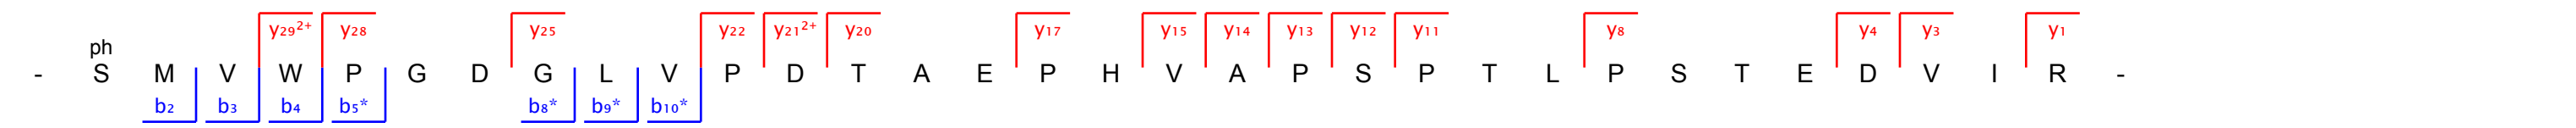

Raw file 20150814\_A375SR\_Phospho\_BR2\_05 Scan 28623 Method FTMS; HCD Score 171.19 m/z 766.1 Gene names DCAF8

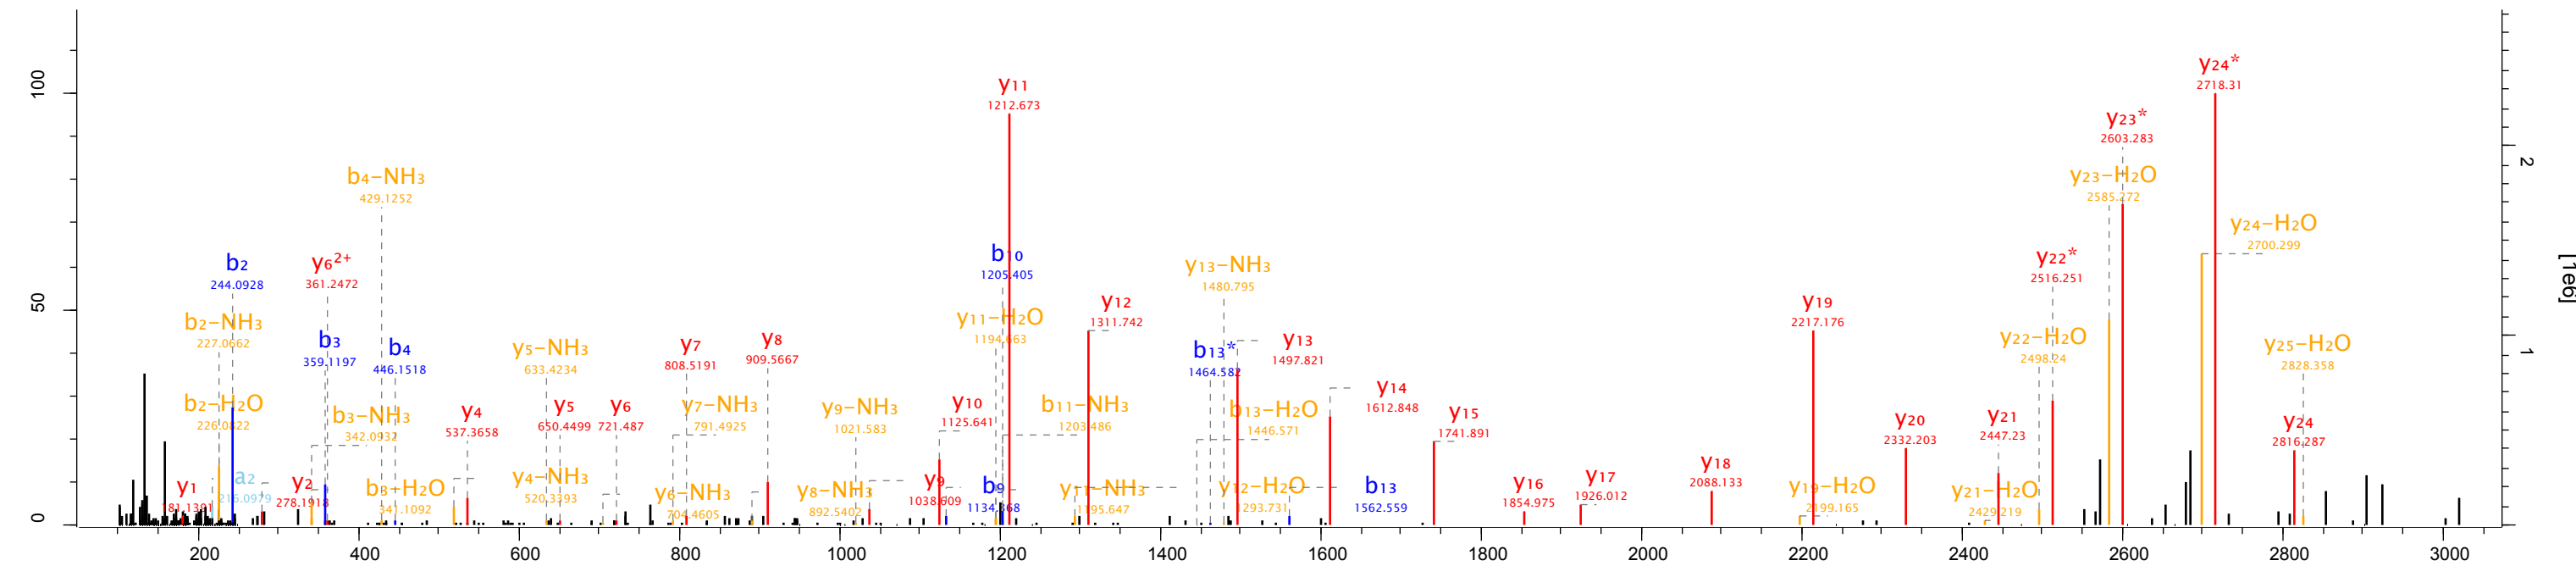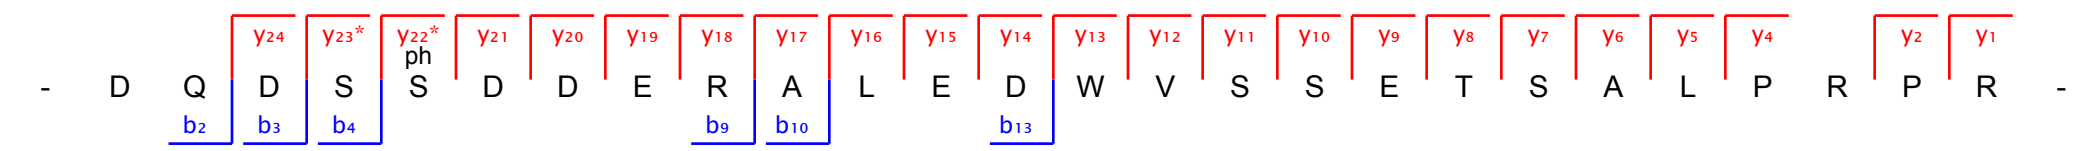



Raw file  
 20150814\_A375SR\_Phospho\_BR2\_05  
 Scan 28693 Method FTMS; HCD Score 249.19 m/z 1093.57 Gene names CDC42EP1

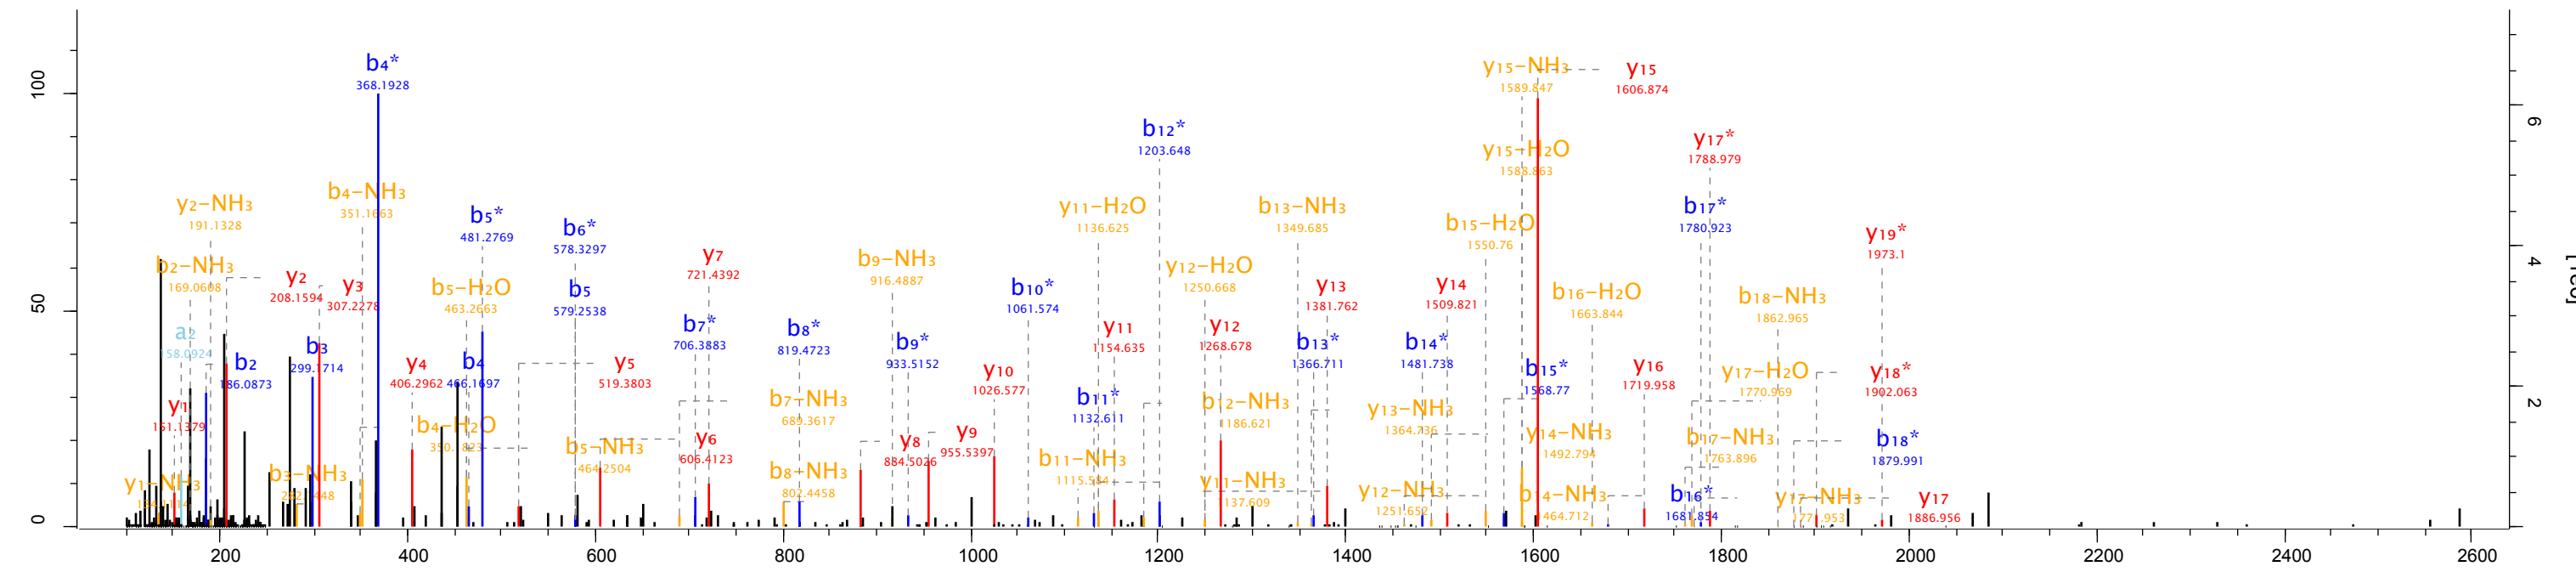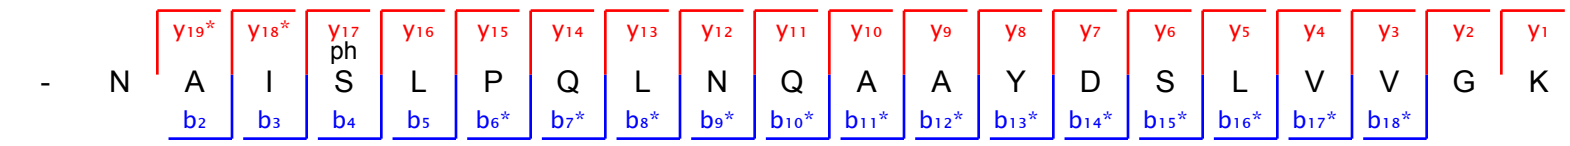

Raw file  
 20150814\_A375SR\_Phospho\_BR2\_05  
 Scan 28763 Method FTMS; HCD Score 266.81 m/z 1178.52 Gene names CDC37

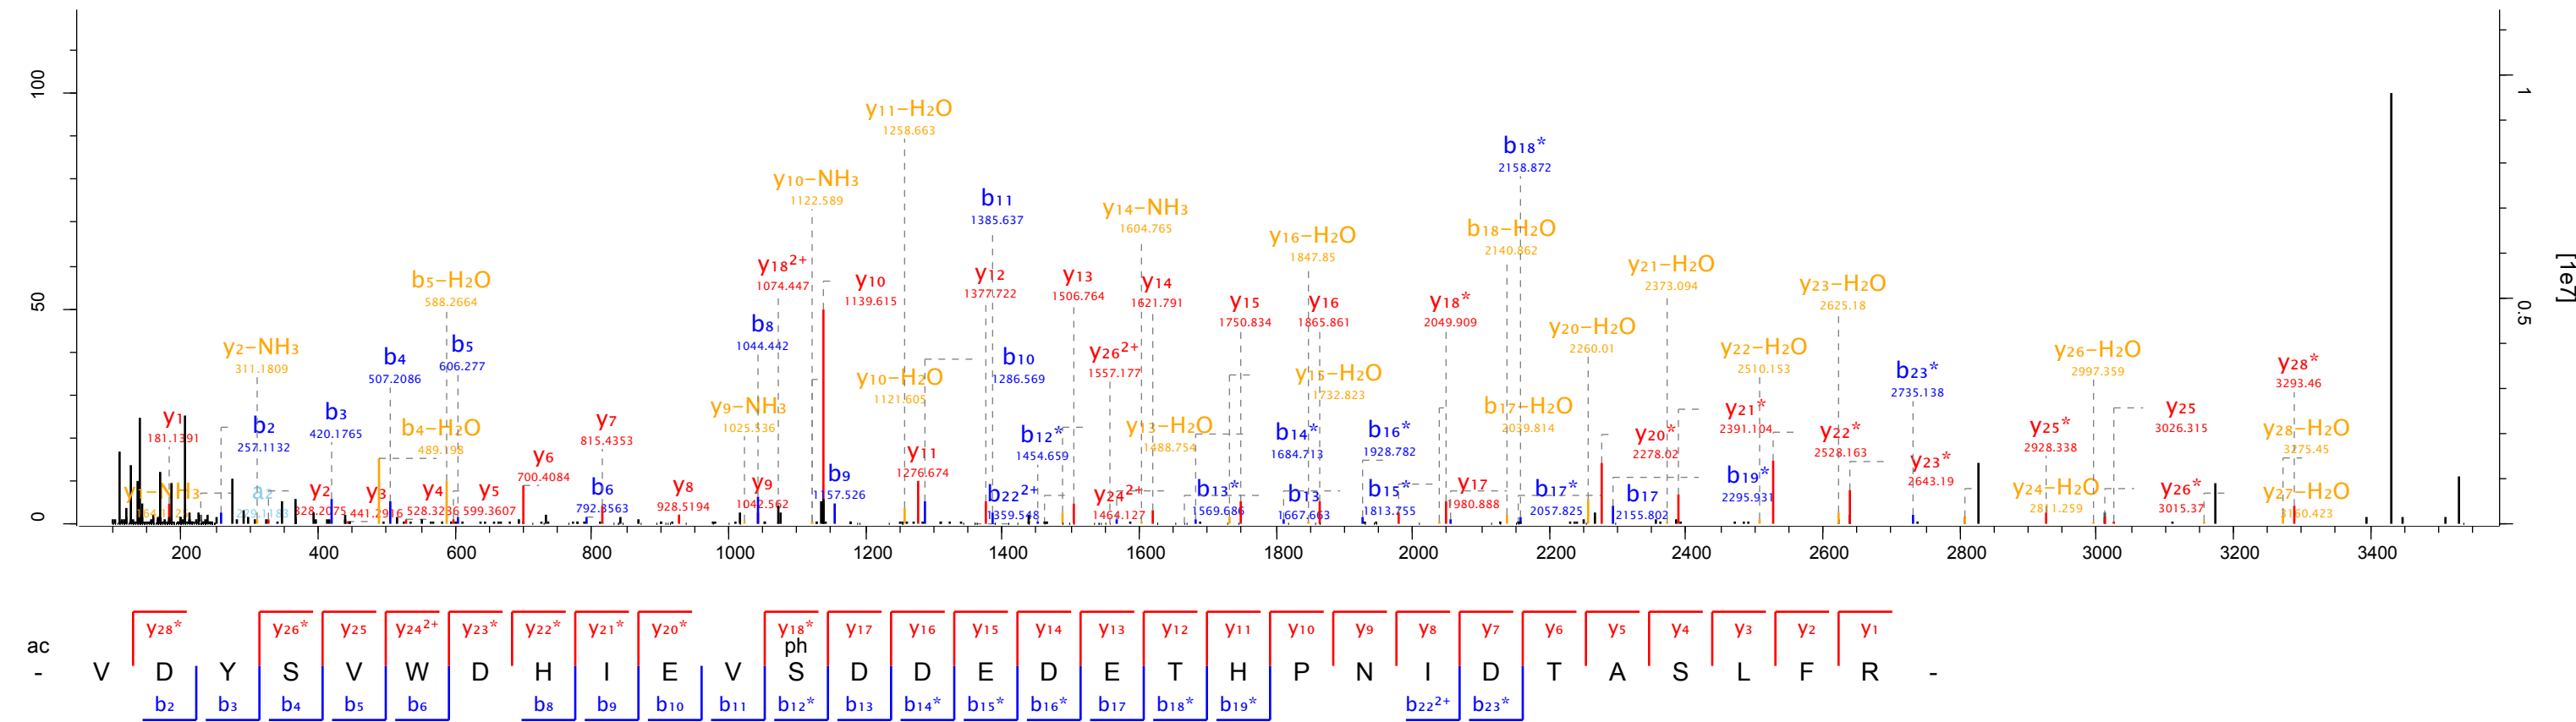

Raw file Scan Method Score m/z Gene names  
 20150814\_A375SR\_Phospho\_BR2\_05 28803 FTMS; HCD 155.16 851.74 WRAP53

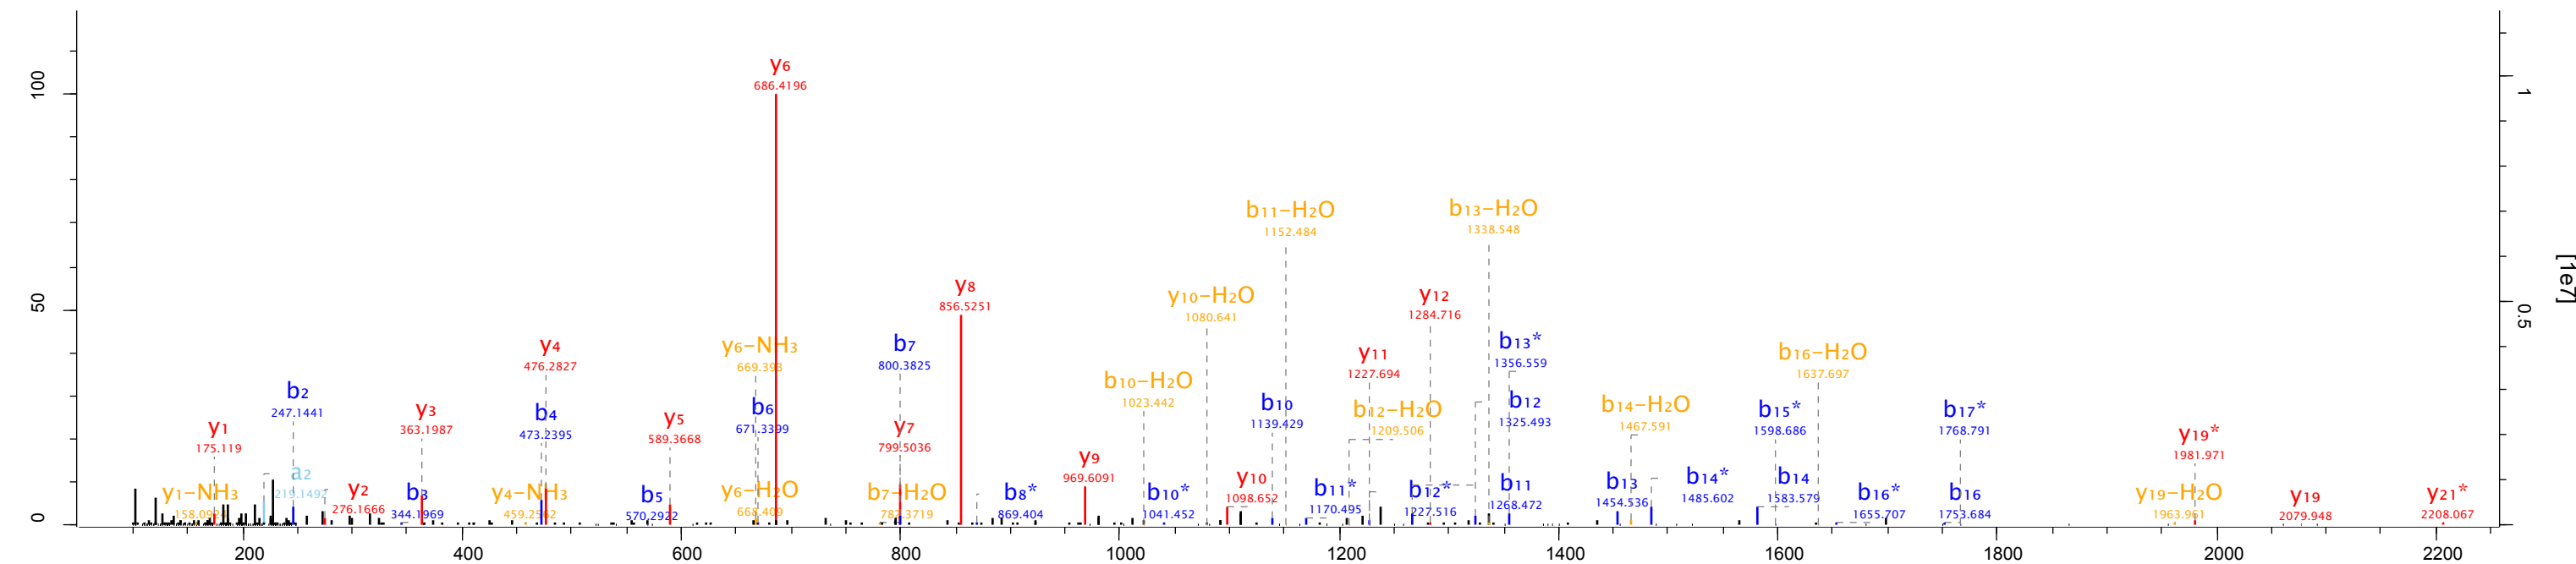

- V F P E P T E S G D E G E E L G L P L L S T R -

y<sub>21</sub>\*
y<sub>19</sub>
y<sub>12</sub>
y<sub>11</sub>
y<sub>10</sub>
y<sub>9</sub>
y<sub>8</sub>
y<sub>7</sub>
y<sub>6</sub>
y<sub>5</sub>
y<sub>4</sub>
y<sub>3</sub>
y<sub>2</sub>
y<sub>1</sub>

b<sub>2</sub>
b<sub>3</sub>
b<sub>4</sub>
b<sub>5</sub>
b<sub>6</sub>
b<sub>7</sub>
b<sub>8</sub>\*
b<sub>10</sub>
b<sub>11</sub>
b<sub>12</sub>
b<sub>13</sub>
b<sub>14</sub>
b<sub>15</sub>\*
b<sub>16</sub>
b<sub>17</sub>\*

Raw file  
20150814\_A375SR\_Phospho\_BR2\_05

Scan 28823 Method FTMS; HCD Score 195.31 m/z 779.72 Gene names TBC1D15

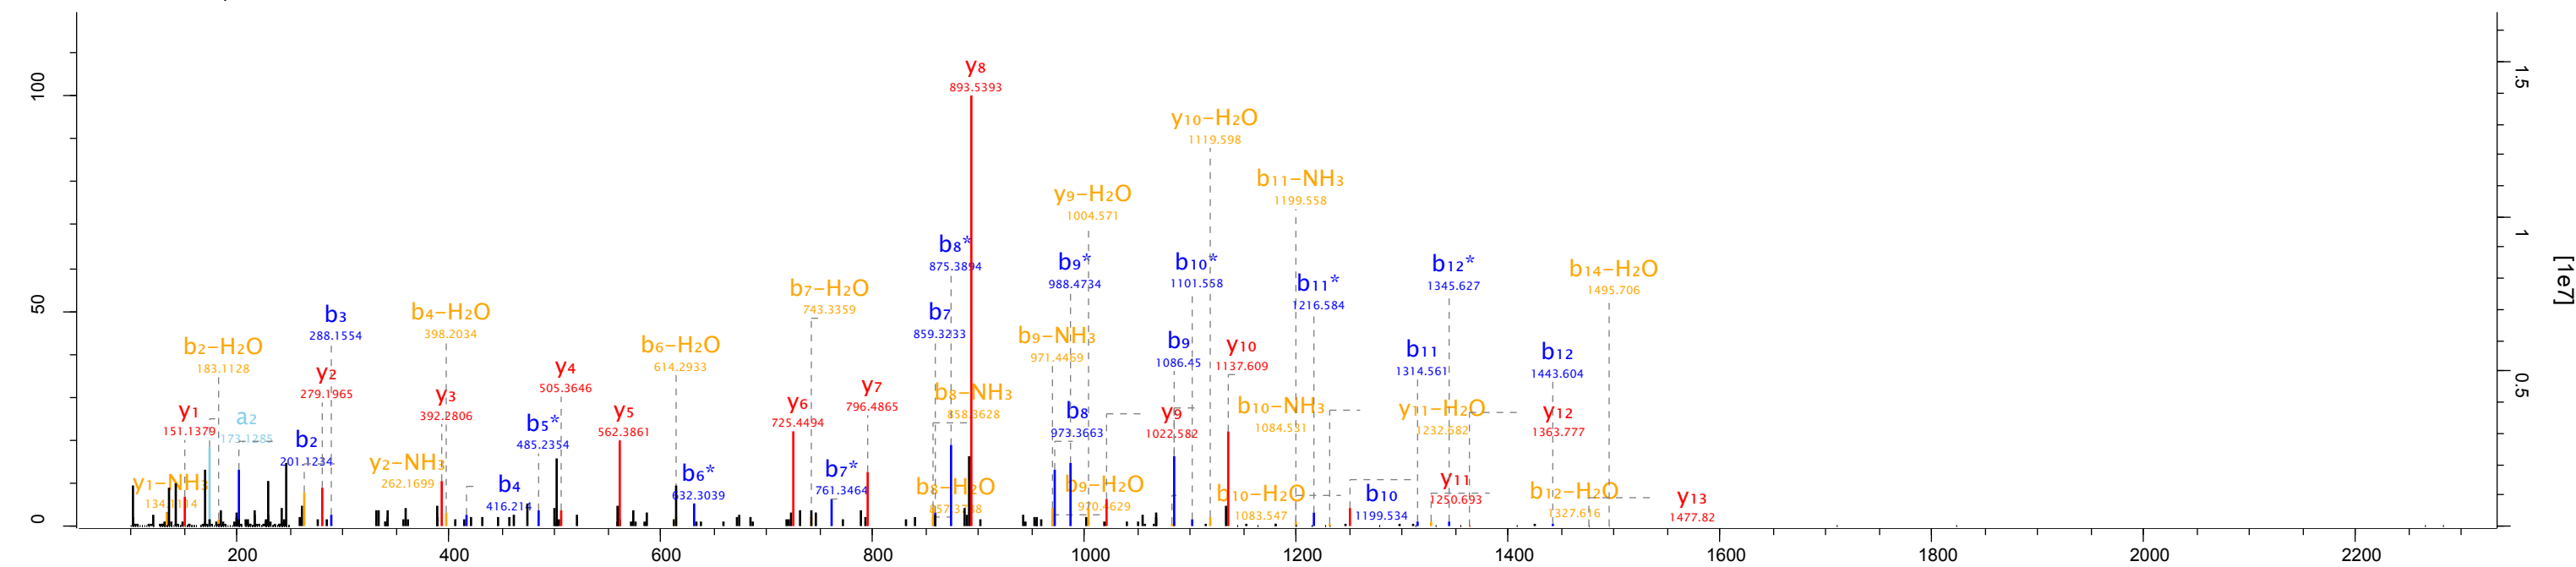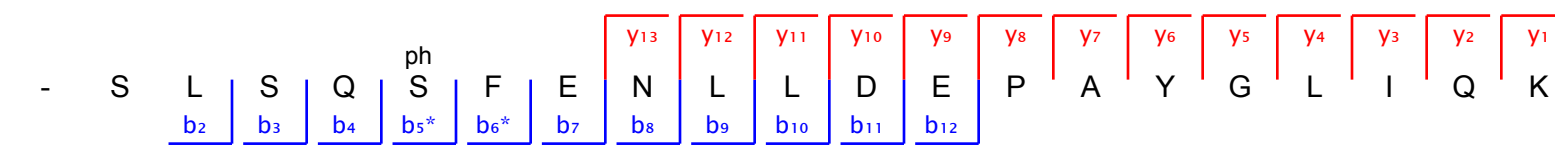

Raw file: 20150814\_A375SR\_Phospho\_BR2\_05  
 Scan: 2883 Method: FTMS; HCD Score: 91.31 m/z: 487.23 Gene names: ATXN2

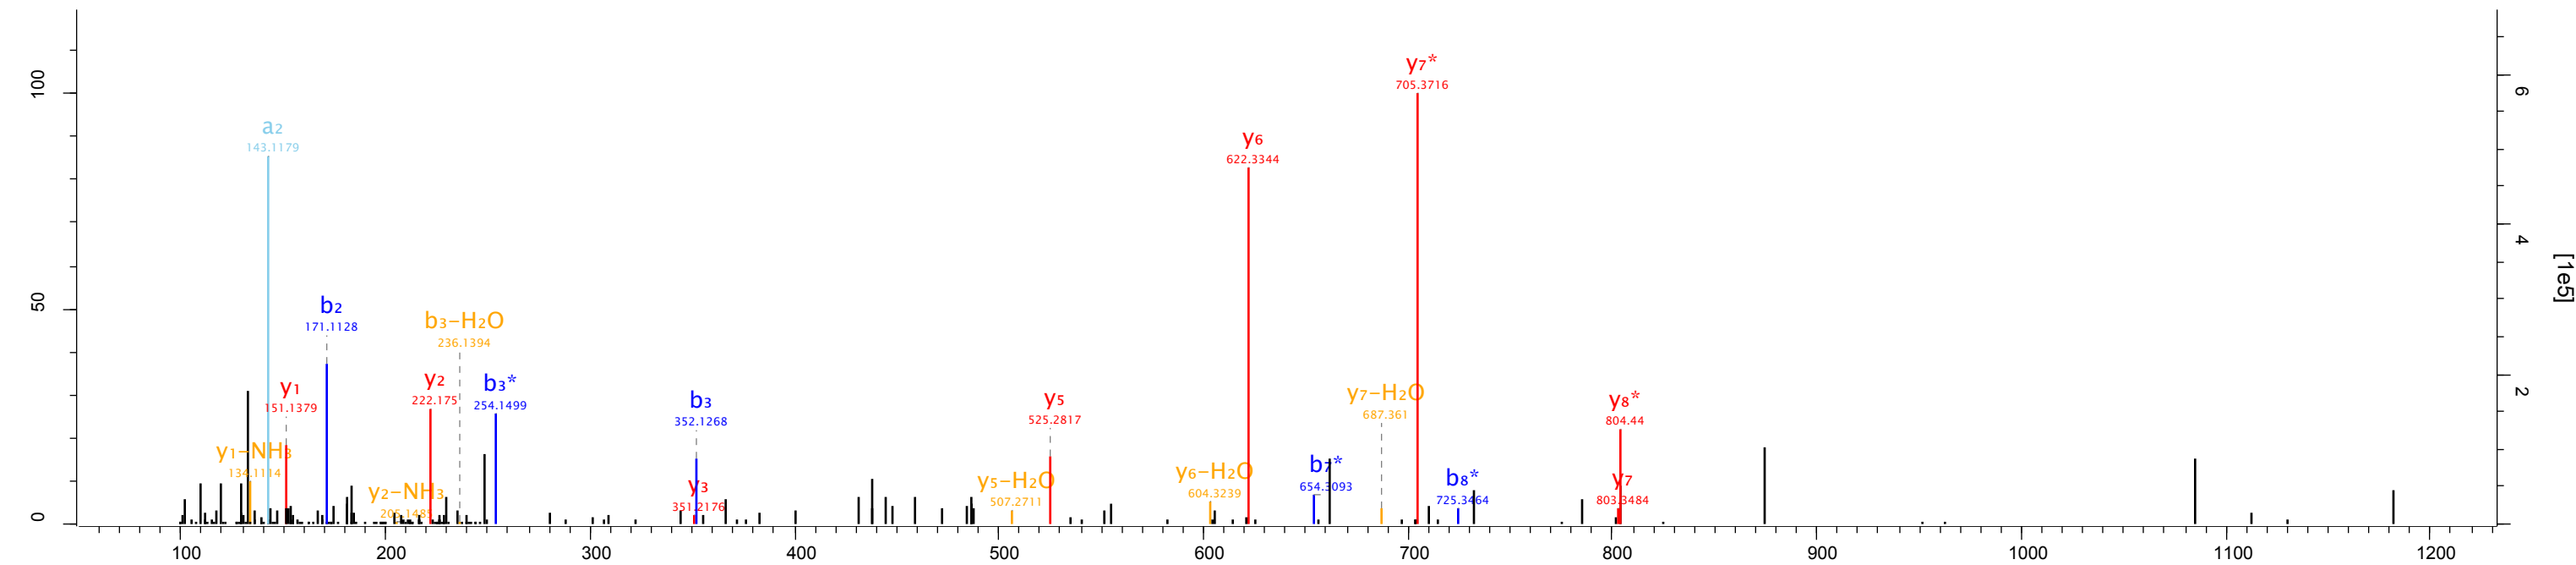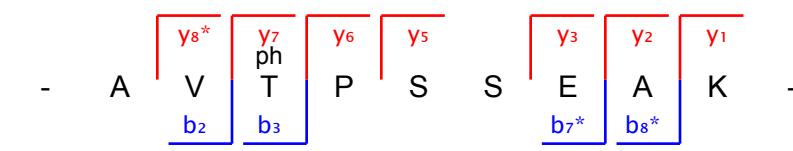

Raw file 20150814\_A375SR\_Phospho\_BR2\_05 Scan 28843 Method FTMS; HCD Score 119.08 m/z 682.02 Gene names TKT

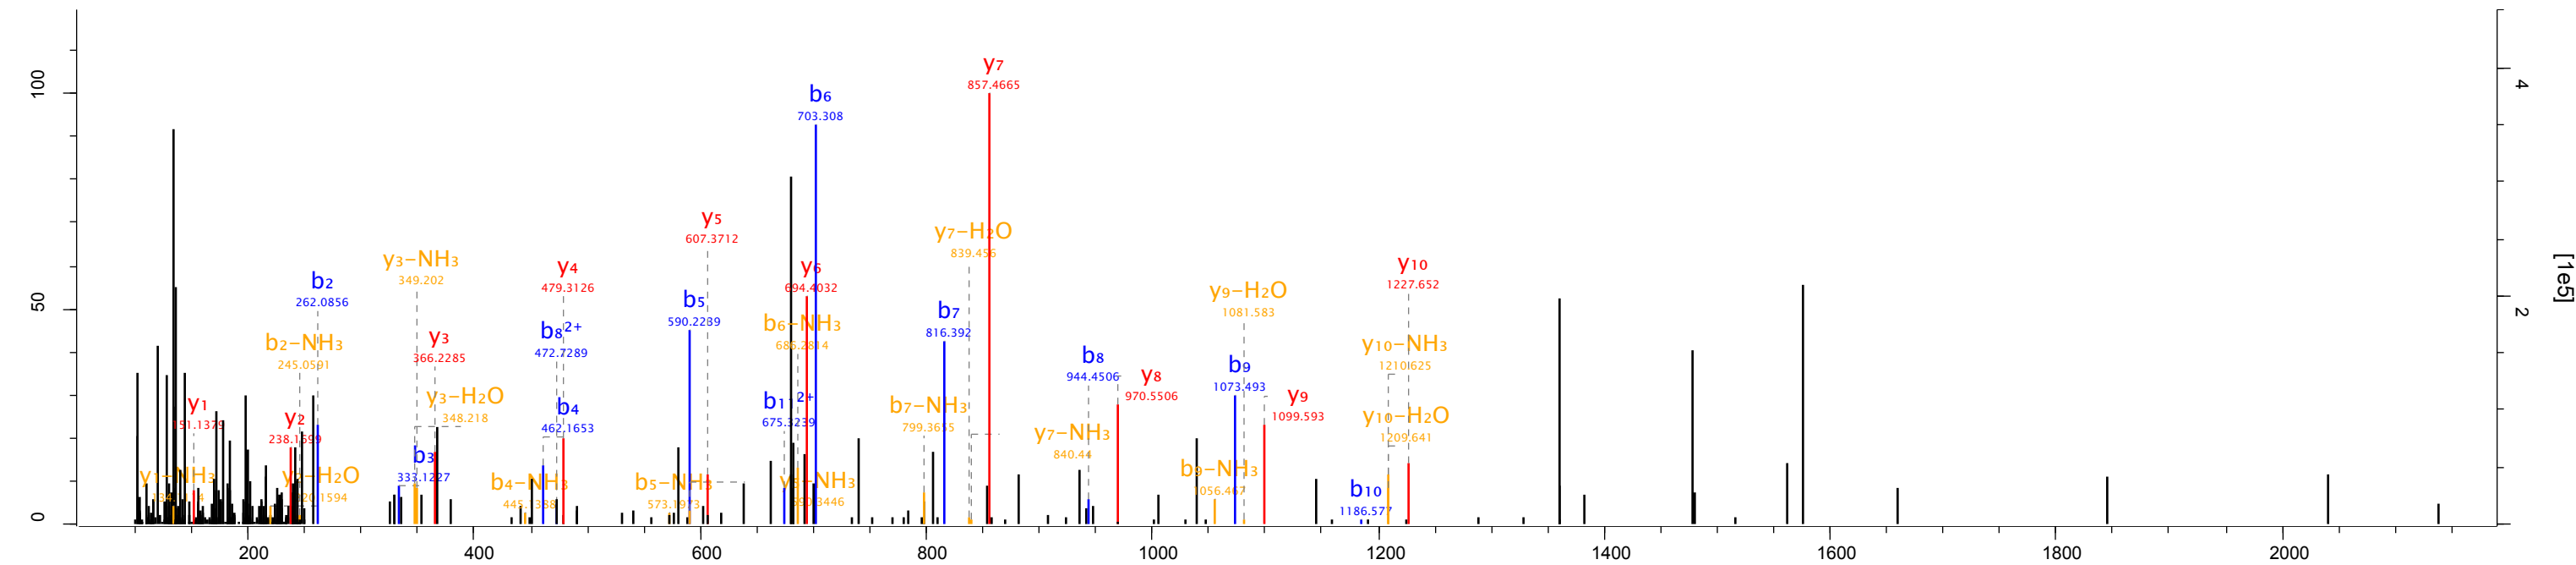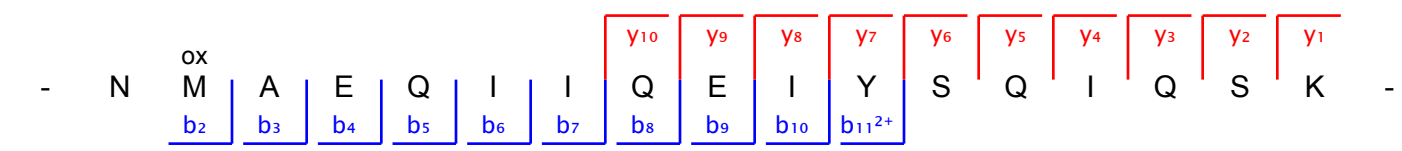

Raw file: 20150814\_A375SR\_Phospho\_BR2\_05  
 Scan: 28863 Method: FTMS; HCD Score: 255.72 m/z: 825.94 Gene names: VIM

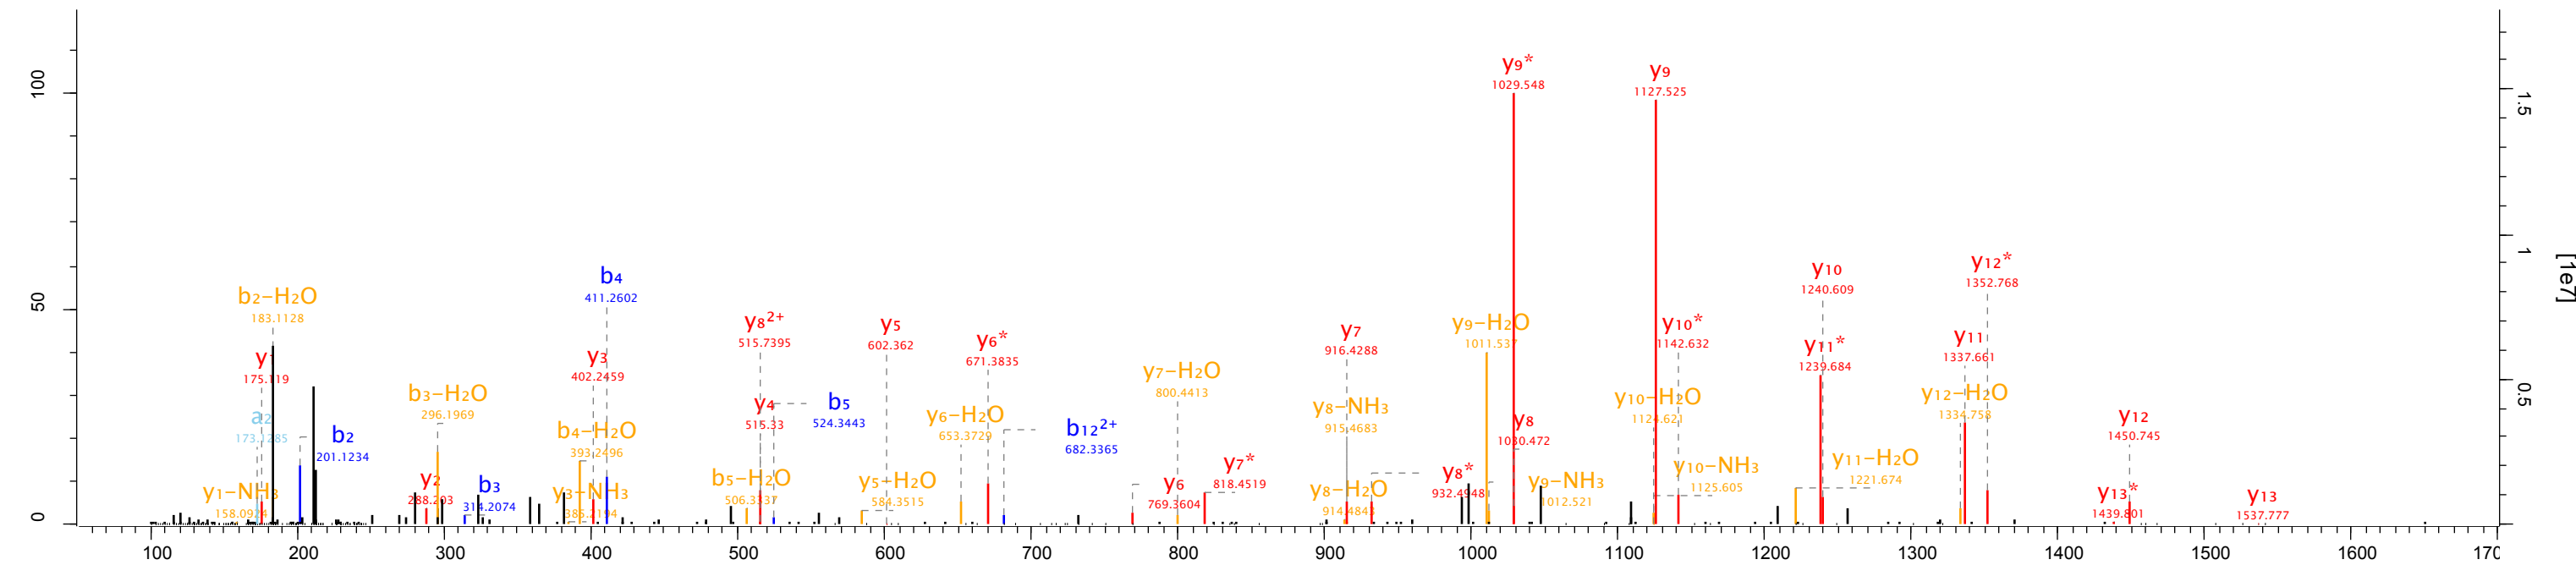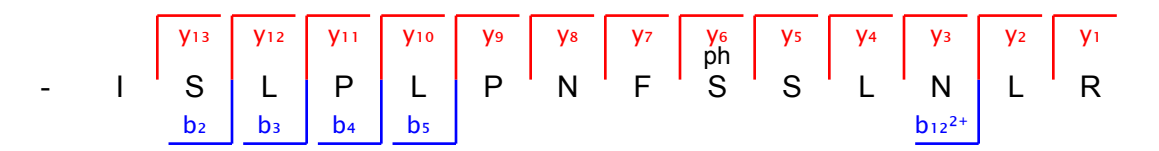

Raw file 20150814\_A375SR\_Phospho\_BR2\_05 Scan 3383 Method FTMS; HCD Score 51.73 m/z 561.77 Gene names ABI1

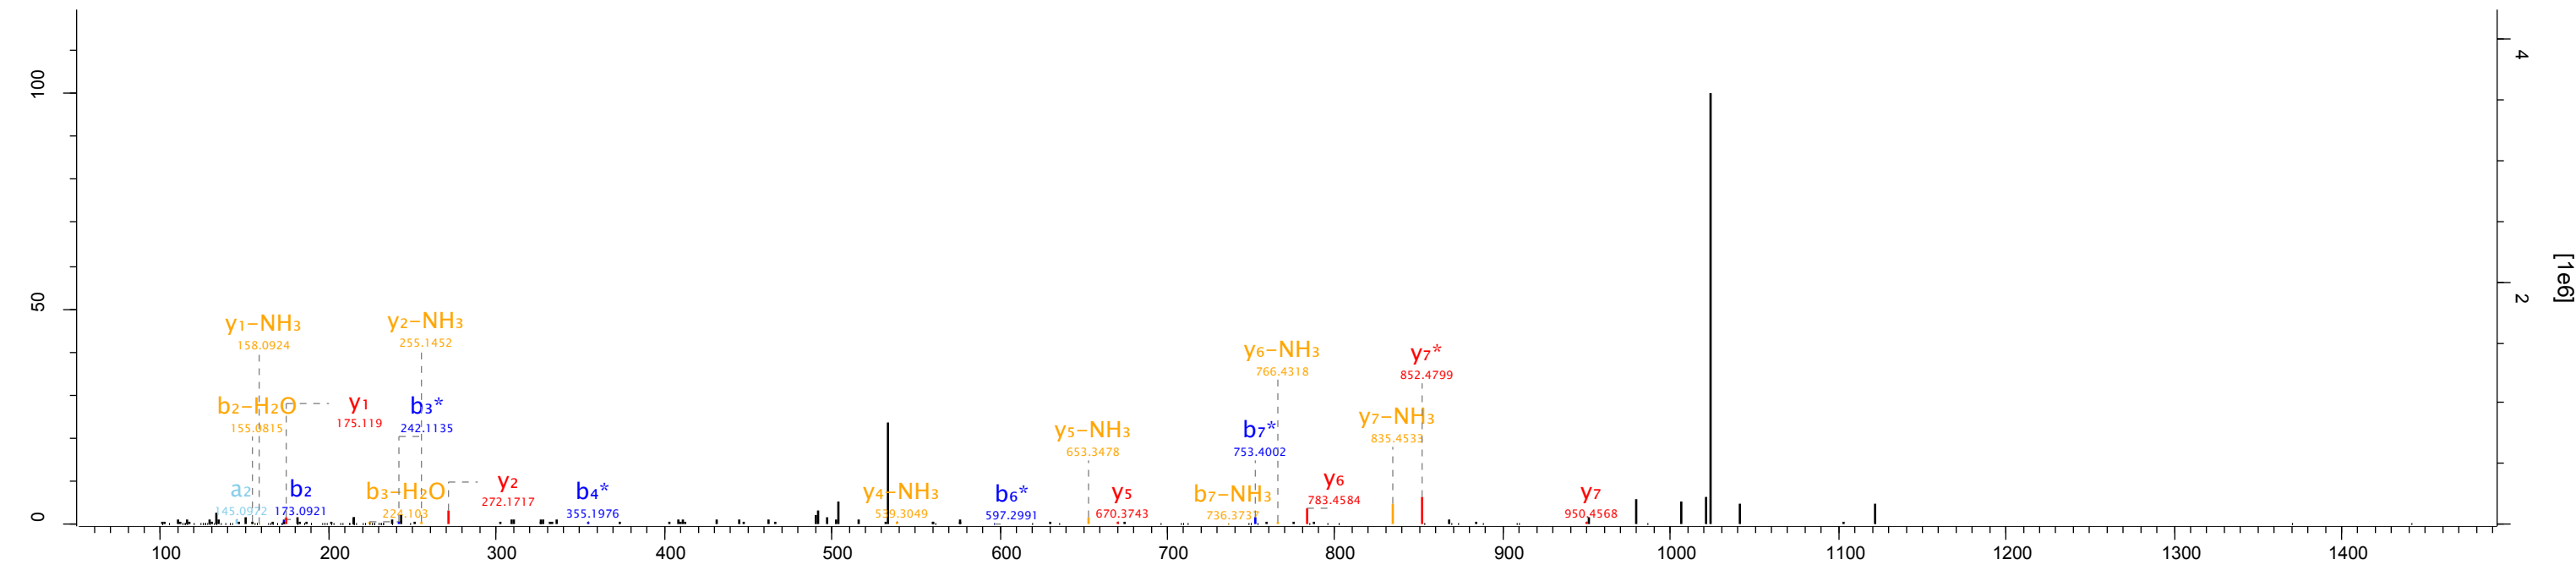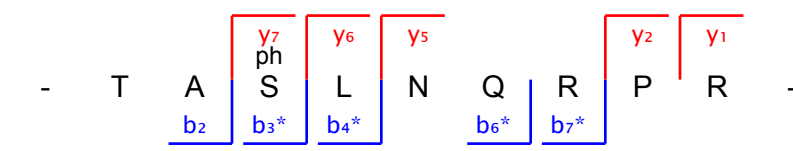



Raw file: 20150814\_A375SR\_Phospho\_BR2\_05  
 Scan: 3443 Method: FTMS; HCD Score: 49.77 m/z: 555.26 Gene names: SNTA1

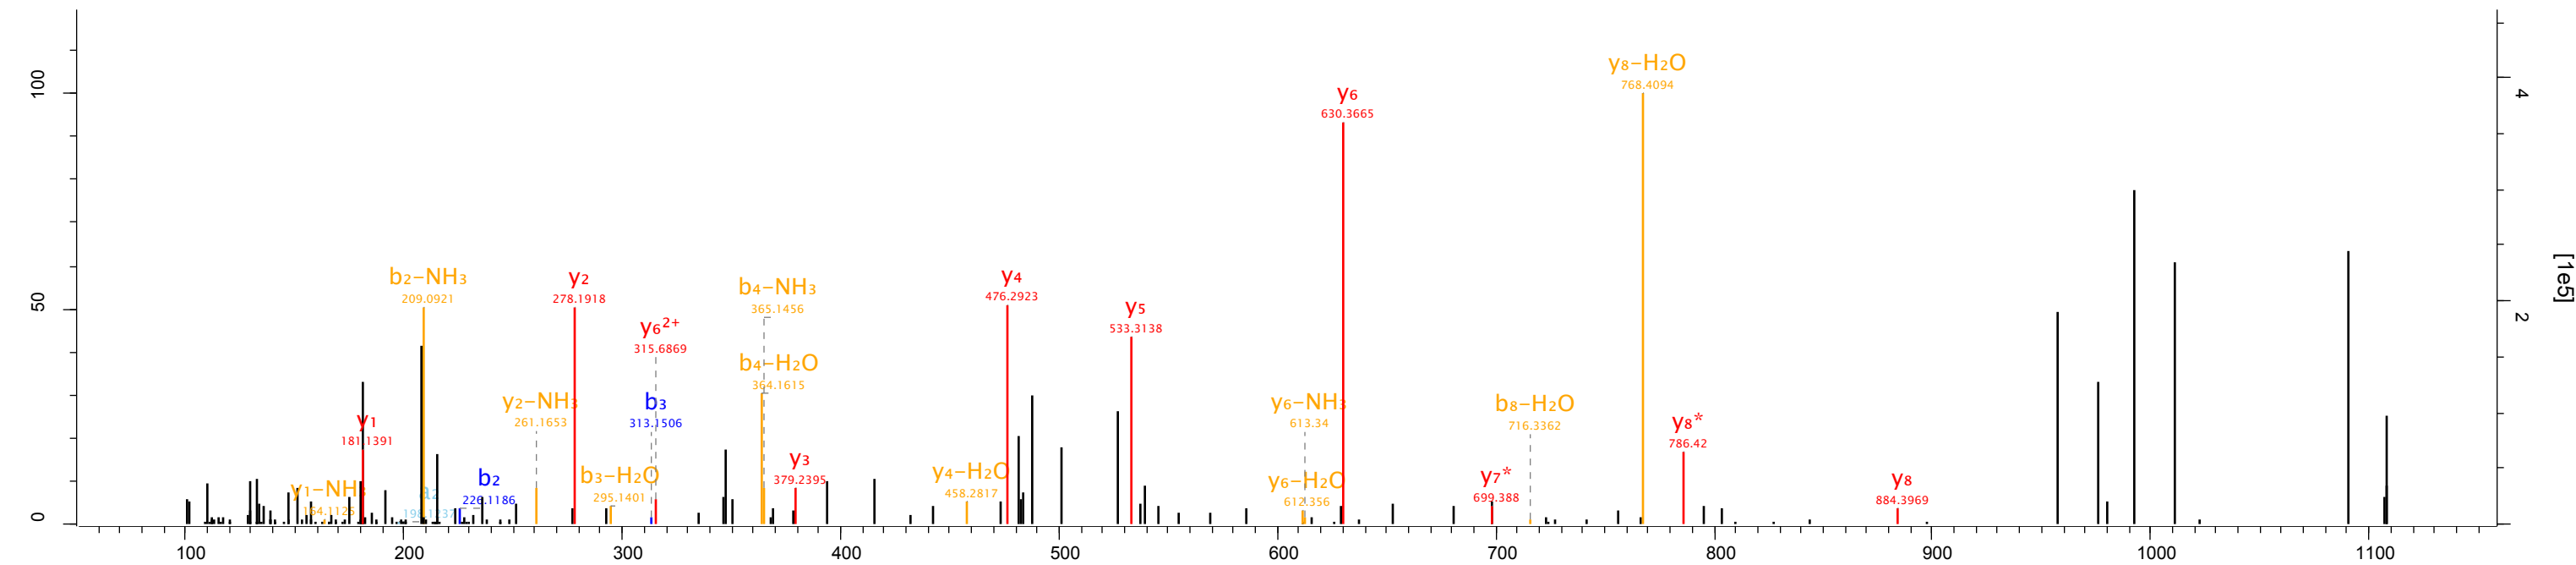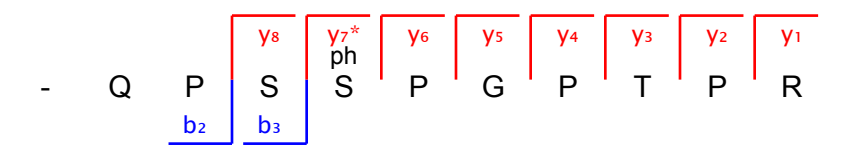

Raw file: 20150814\_A375SR\_Phospho\_BR2\_05  
 Scan: 3883 Method: FTMS; HCD Score: 74.3 m/z: 615.32 Gene names: ASPSCR1

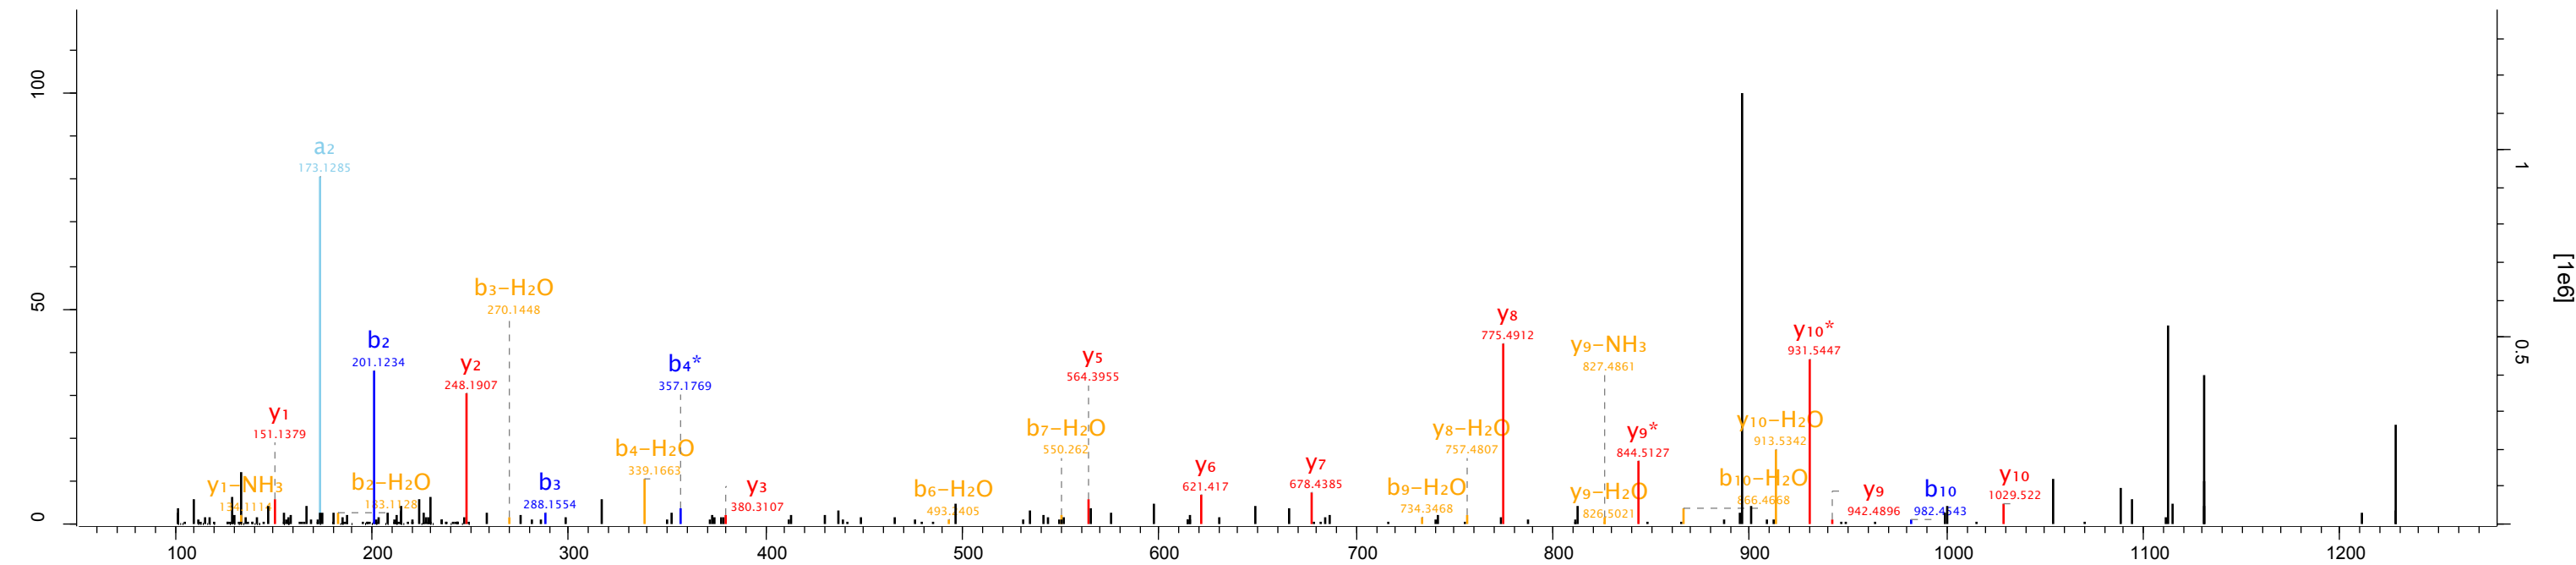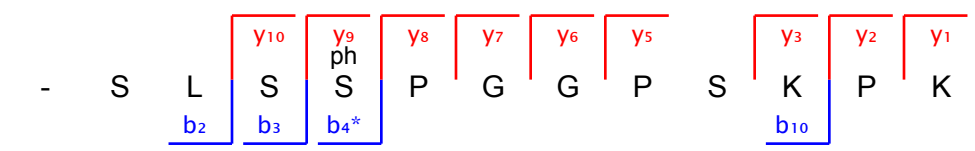

Raw file: 20150814\_A375SR\_Phospho\_BR2\_05  
 Scan: 4303 Method: FTMS; HCD Score: 175.15 m/z: 630.29 Gene names: FAM76B

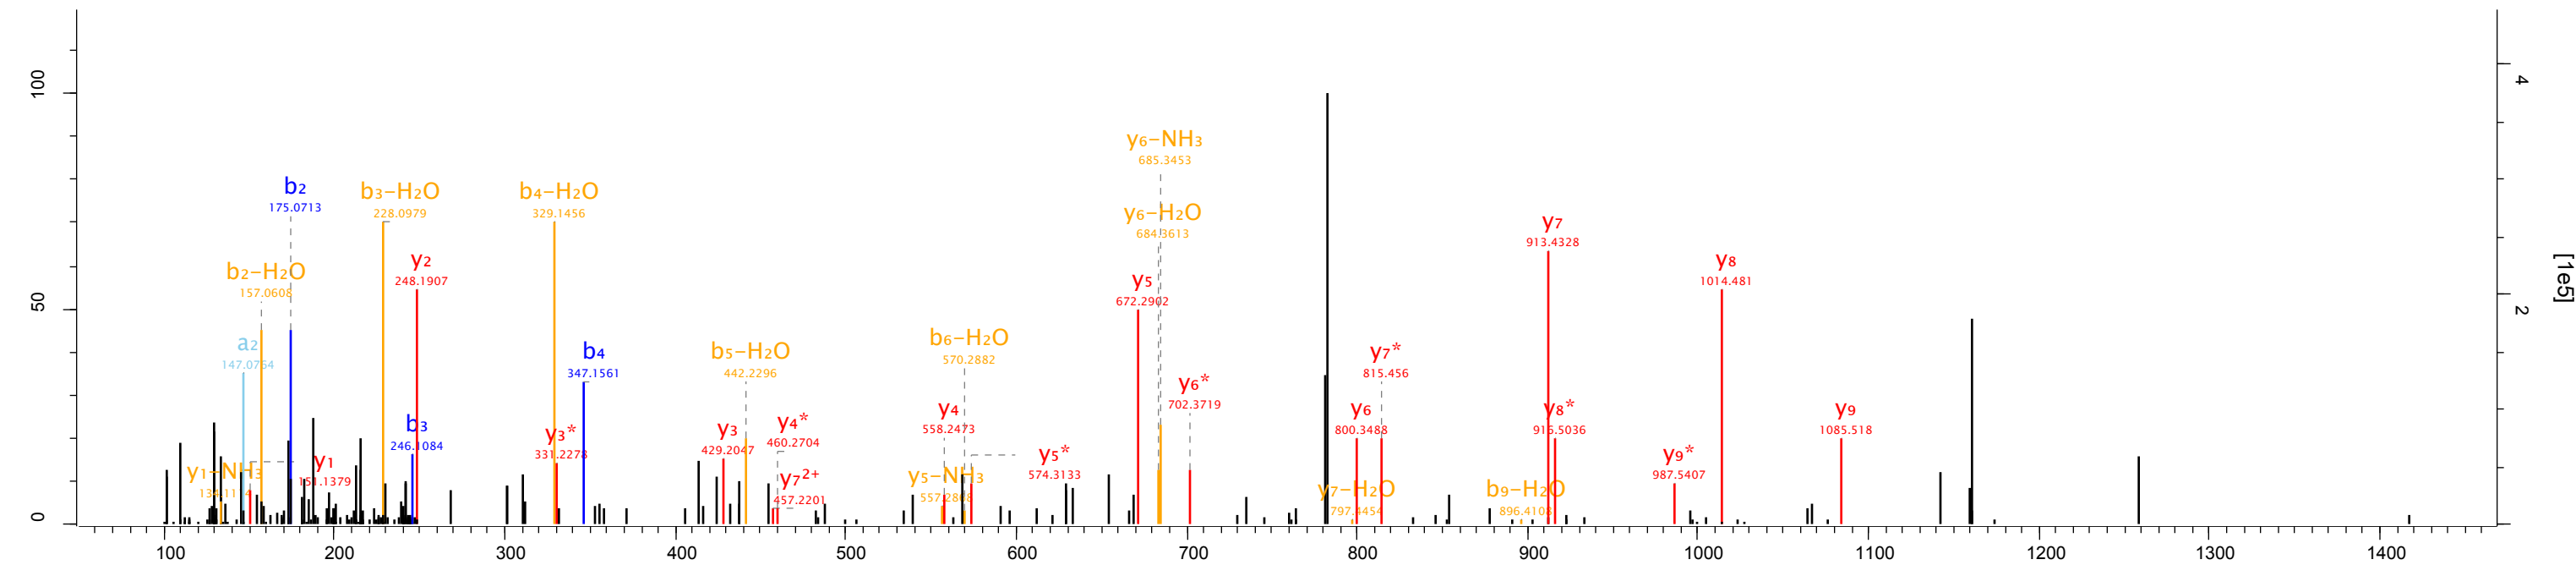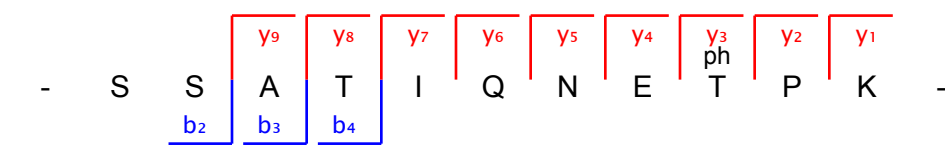

Raw file: 20150814\_A375SR\_Phospho\_BR2\_05  
 Scan: 4583 Method: FTMS; HCD Score: 71.08 m/z: 609.79 Gene names: GLYAT;BICD1

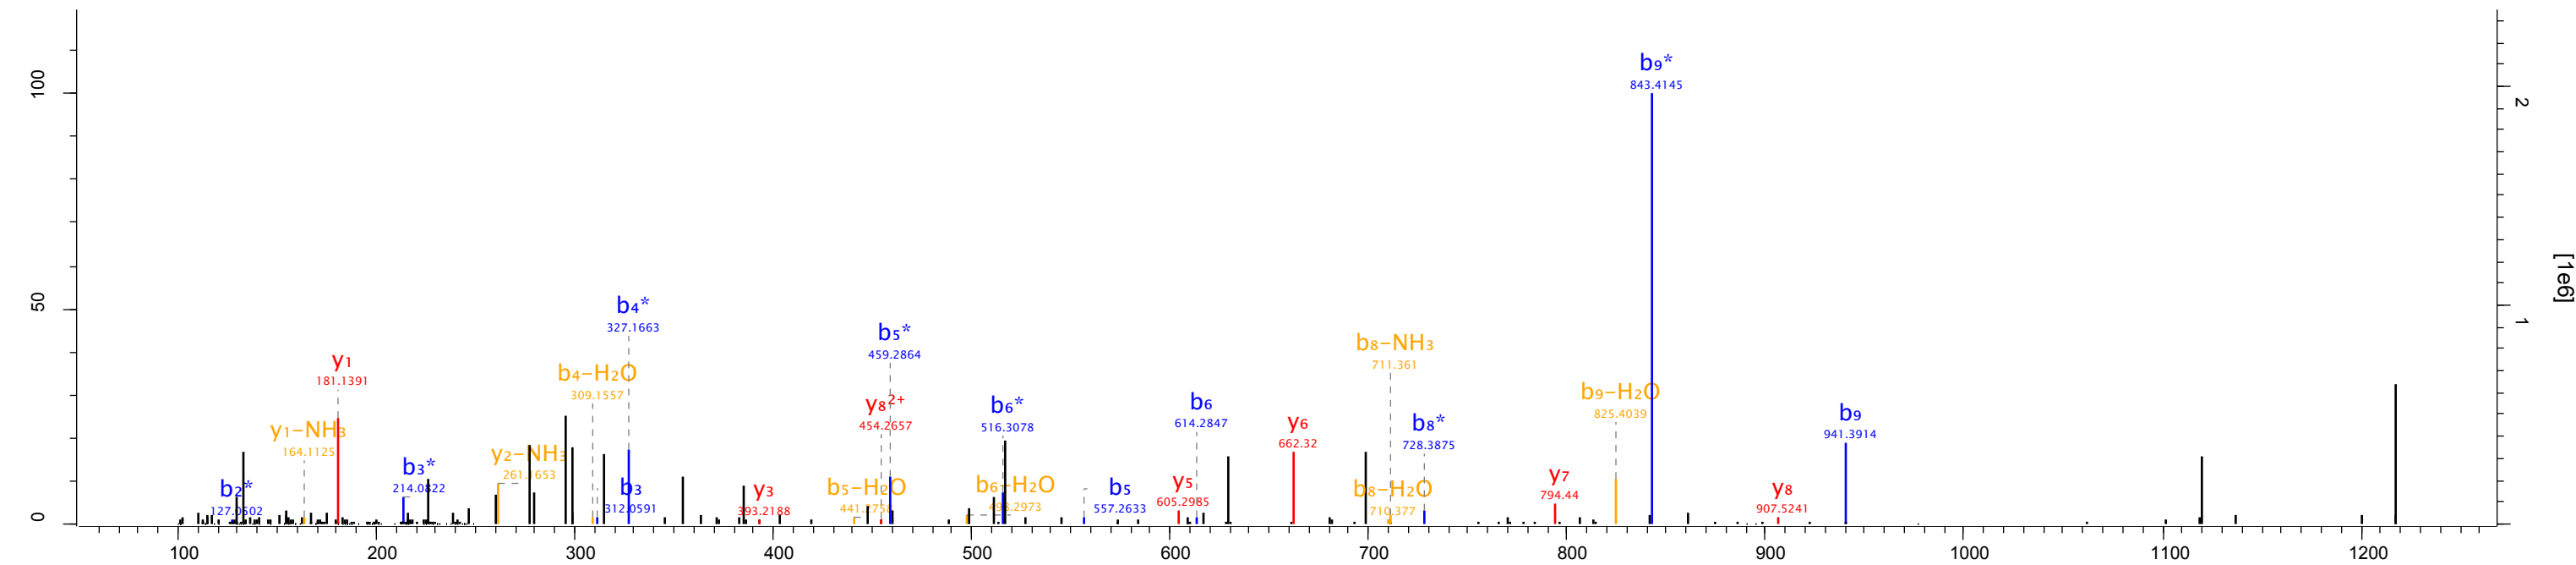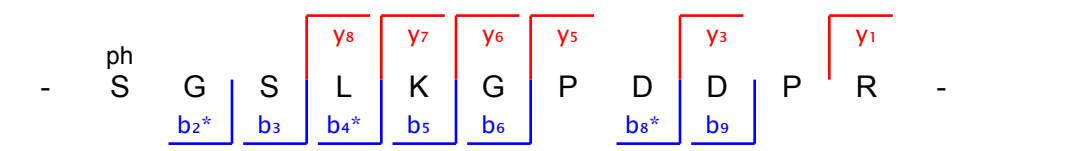

Raw file: 20150814\_A375SR\_Phospho\_BR2\_05  
 Scan: 4633 Method: FTMS; HCD Score: 271.42 m/z: 922.36 Gene names: ZC3H15

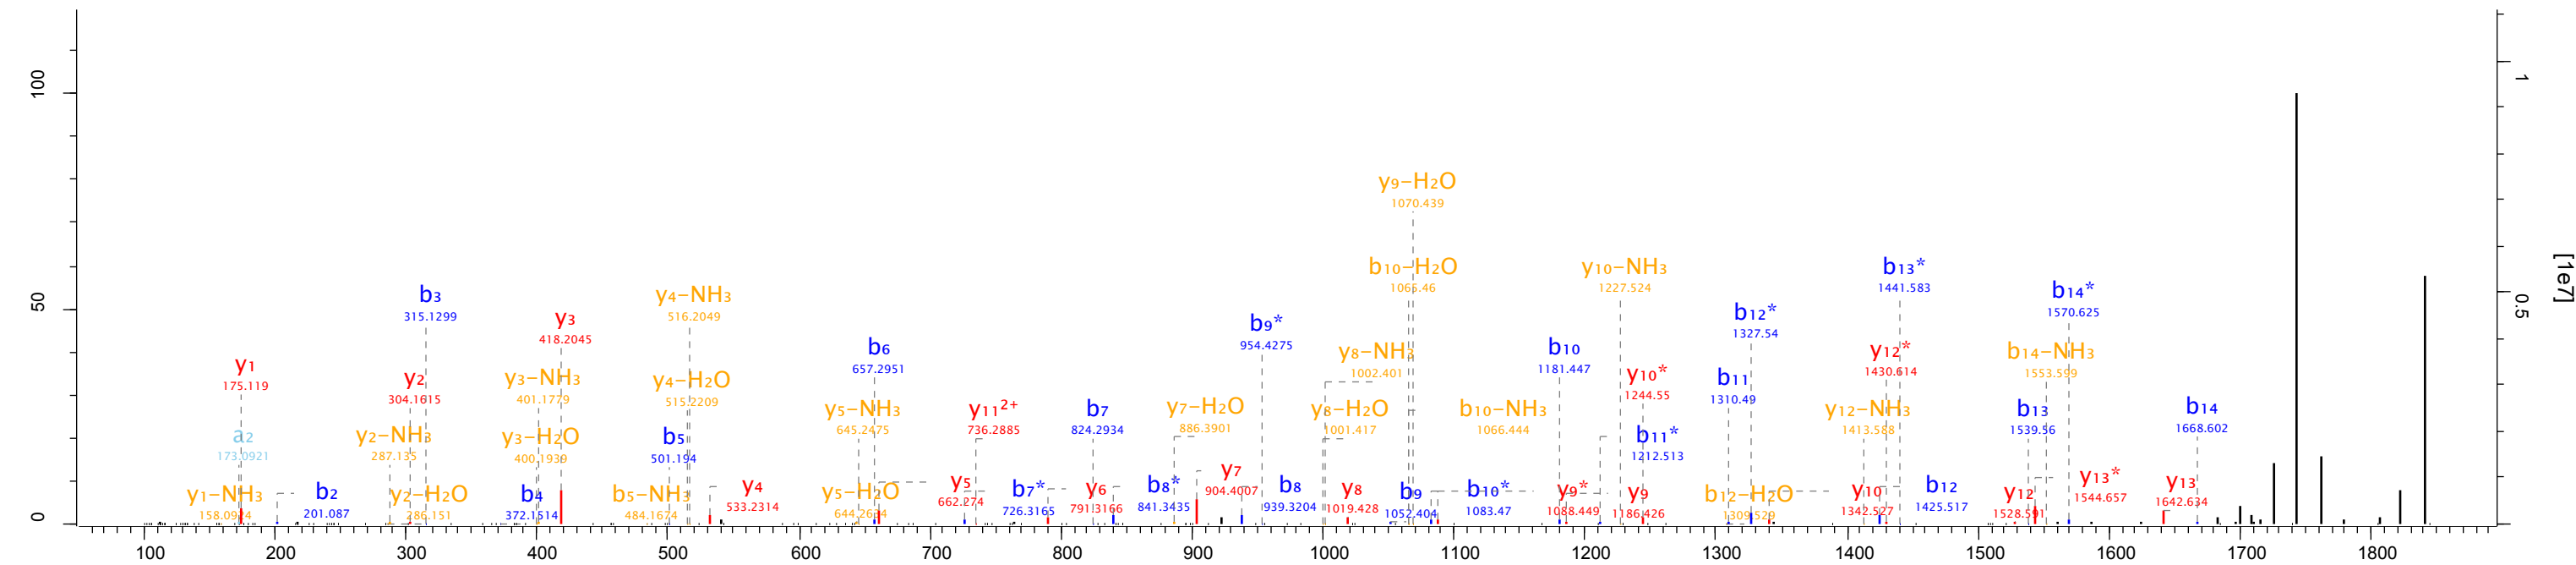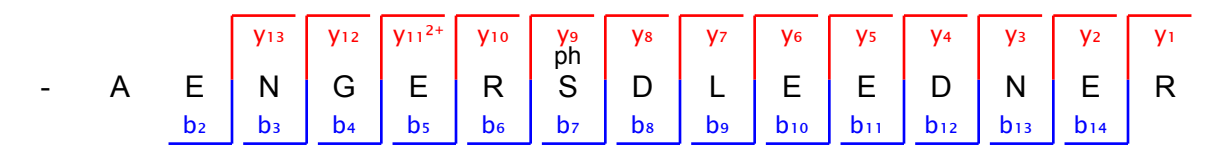

Raw file 20150814\_A375SR\_Phospho\_BR2\_05 Scan 4683 Method FTMS; HCD Score 98.41 m/z 613.24 Gene names RBMX

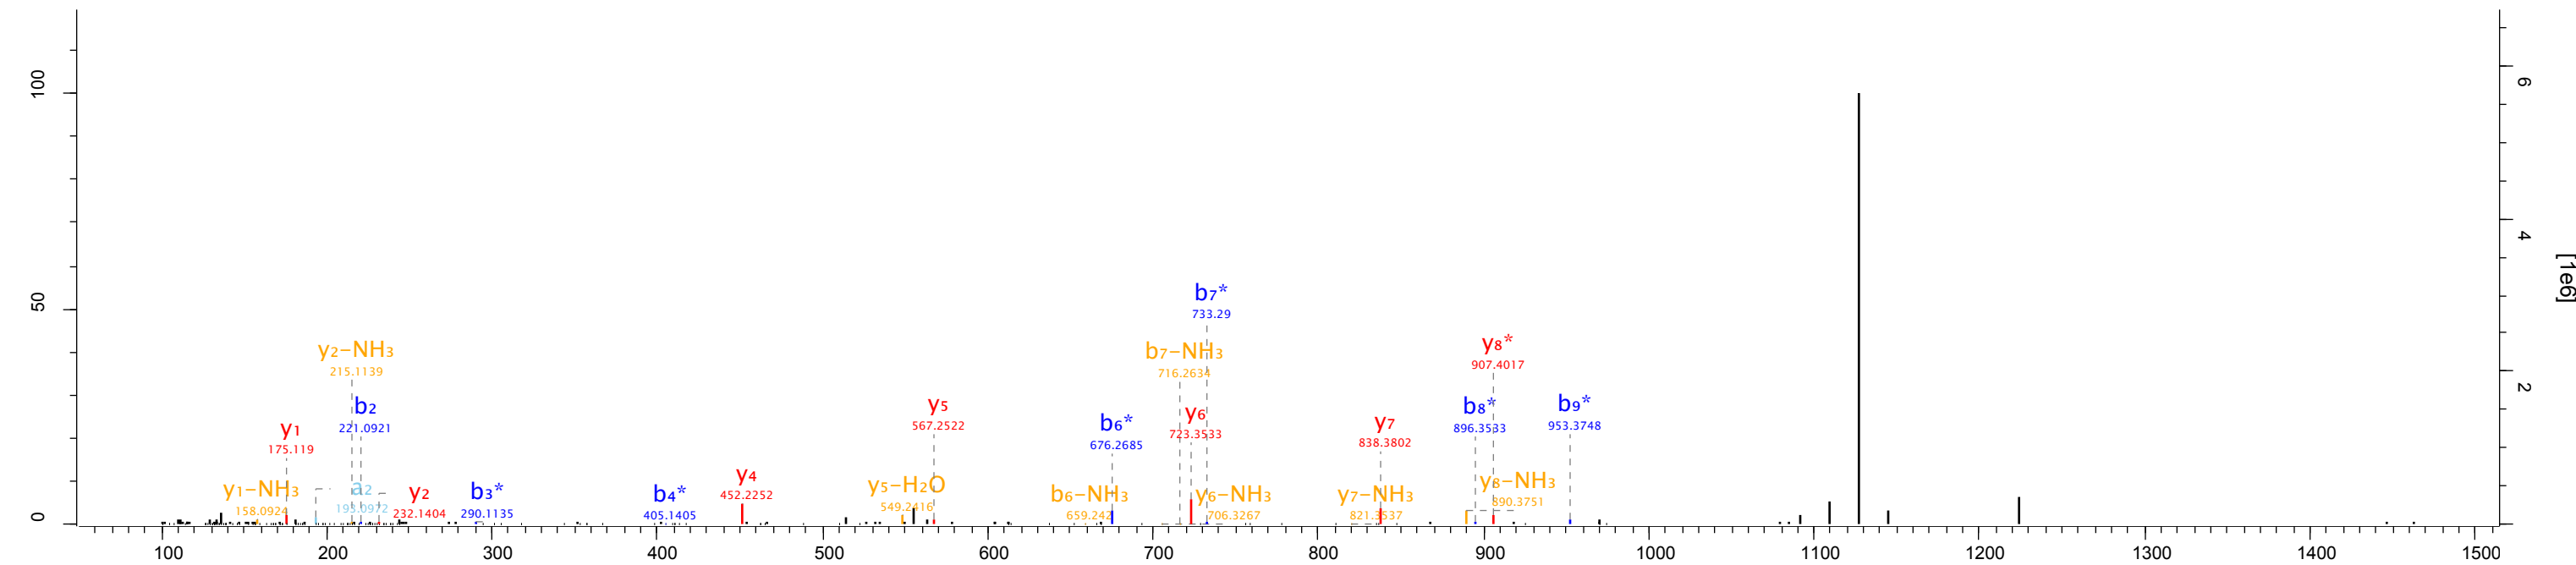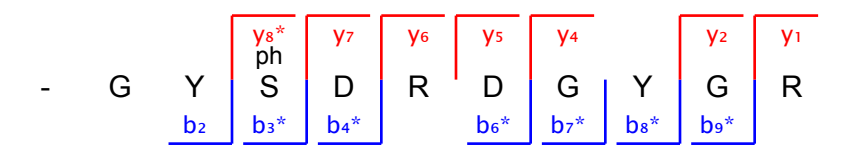

Raw file 20150814\_A375SR\_Phospho\_BR2\_05 Scan 6343 Method FTMS; HCD Score 134.61 m/z 569.73 Gene names MACF1

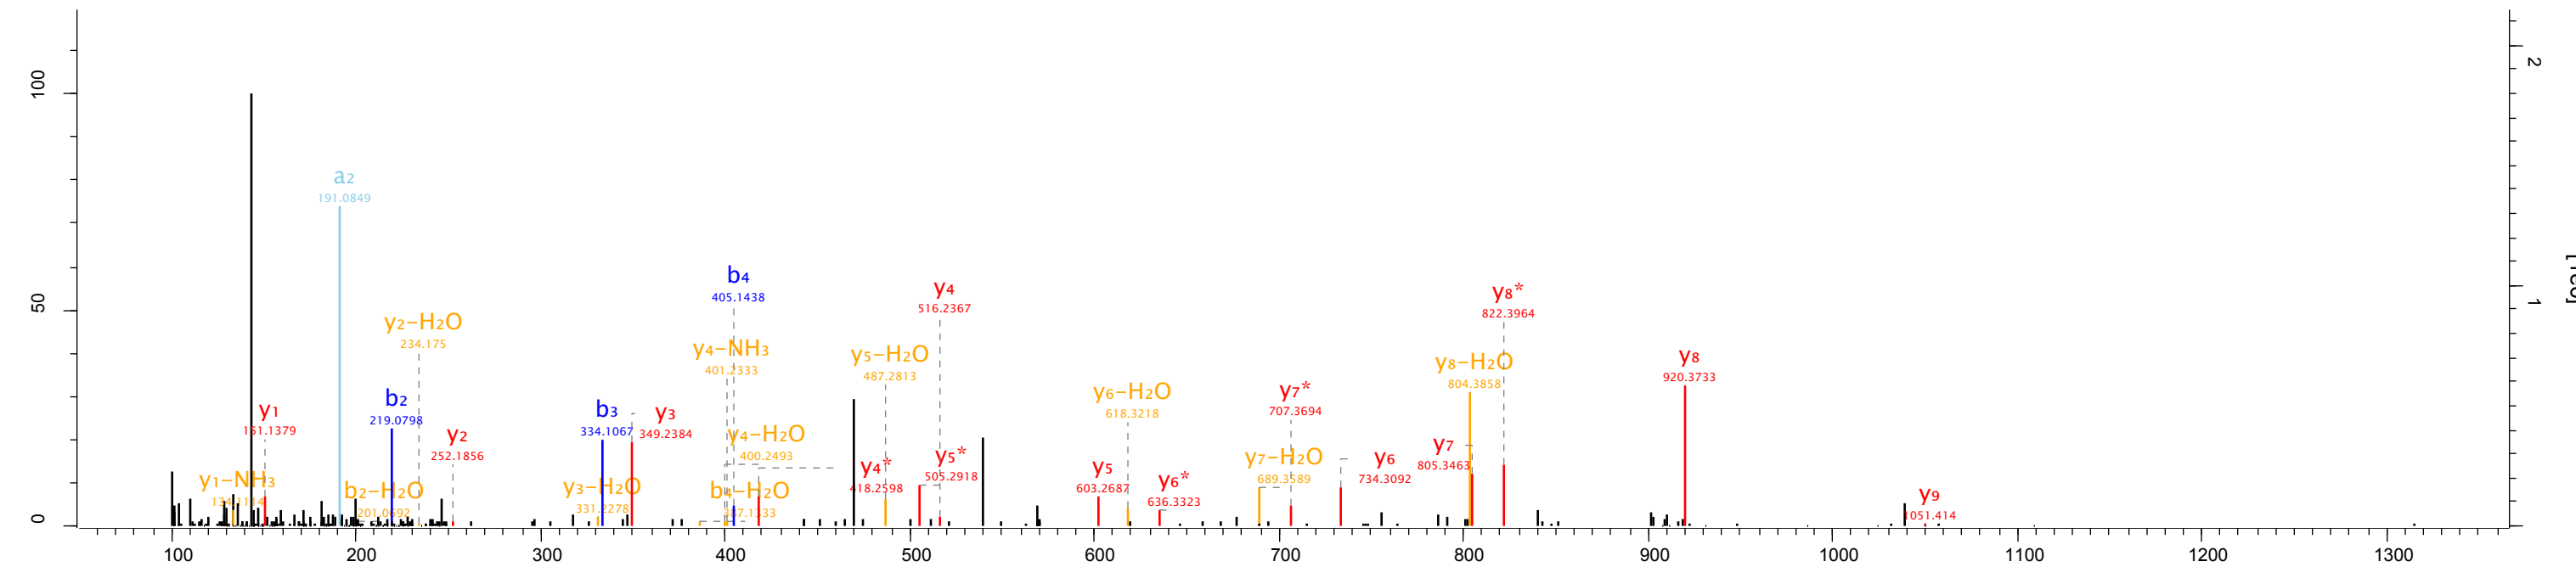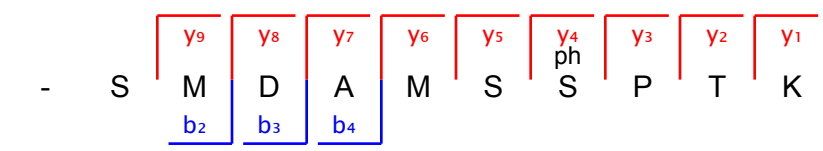

Raw file 20150814\_A375SR\_Phospho\_BR2\_05 Scan 7263 Method FTMS; HCD Score 119.54 m/z 578.94 Gene names PTPN14

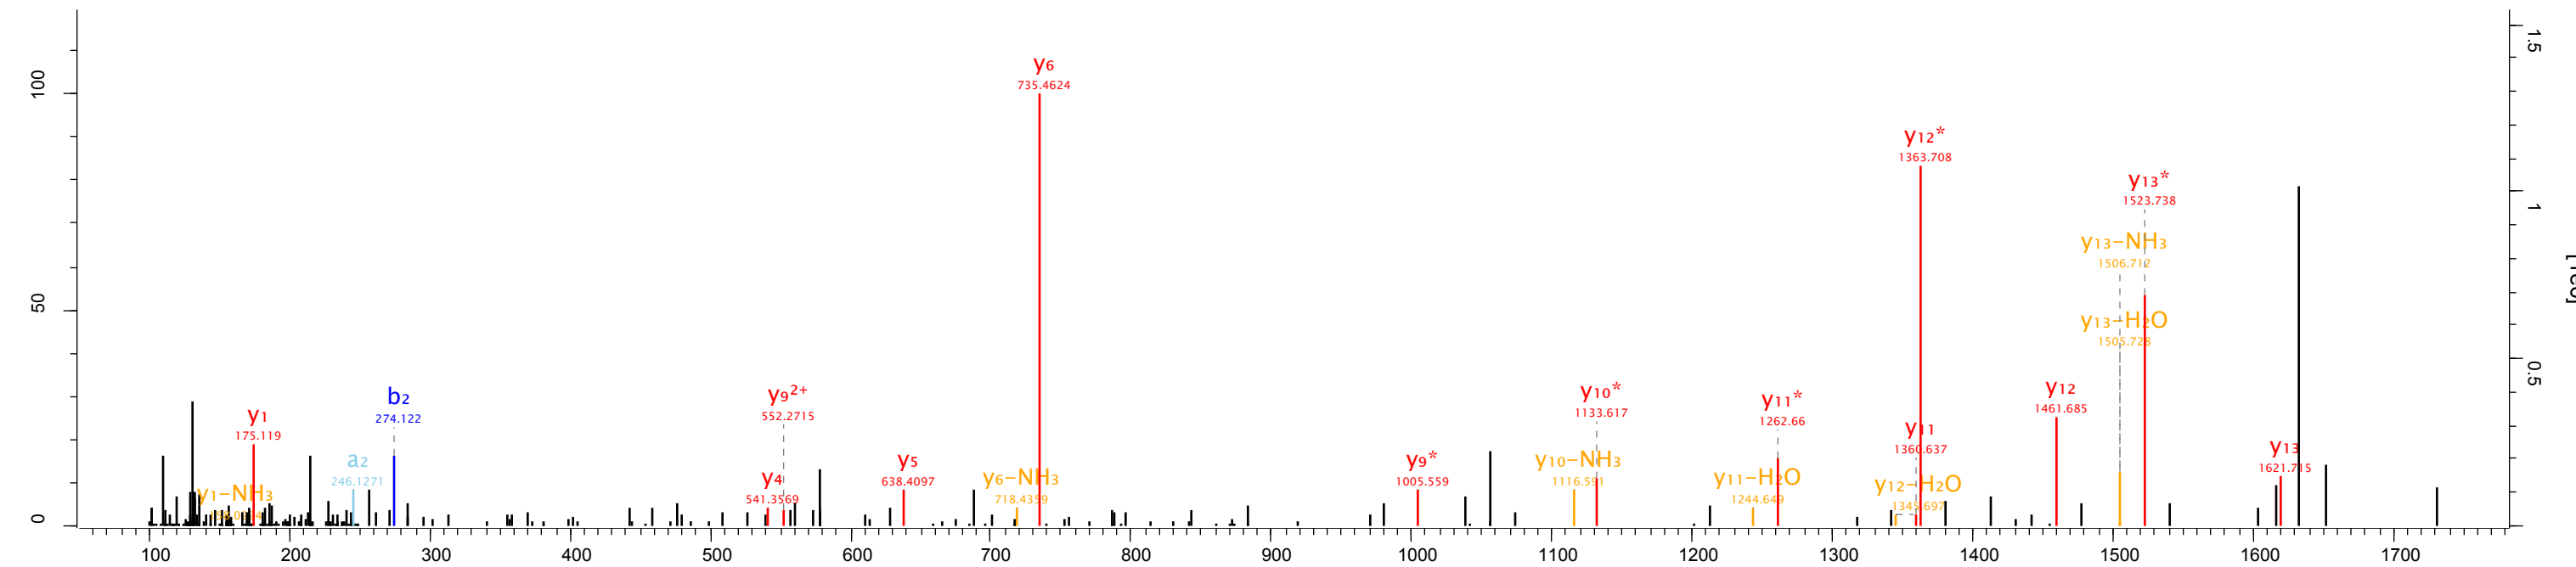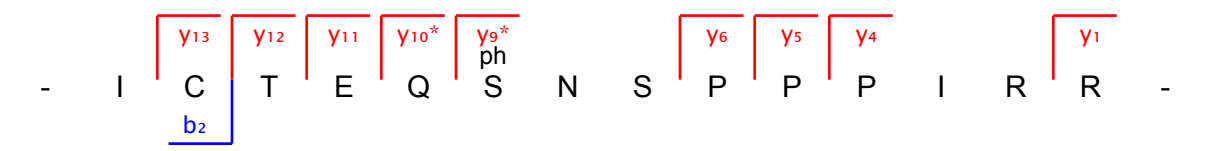



Raw file 20150814\_A375SR\_Phospho\_BR2\_05 Scan 7883 Method FTMS; HCD Score 317.96 m/z 736.33 Gene names UBAP2L

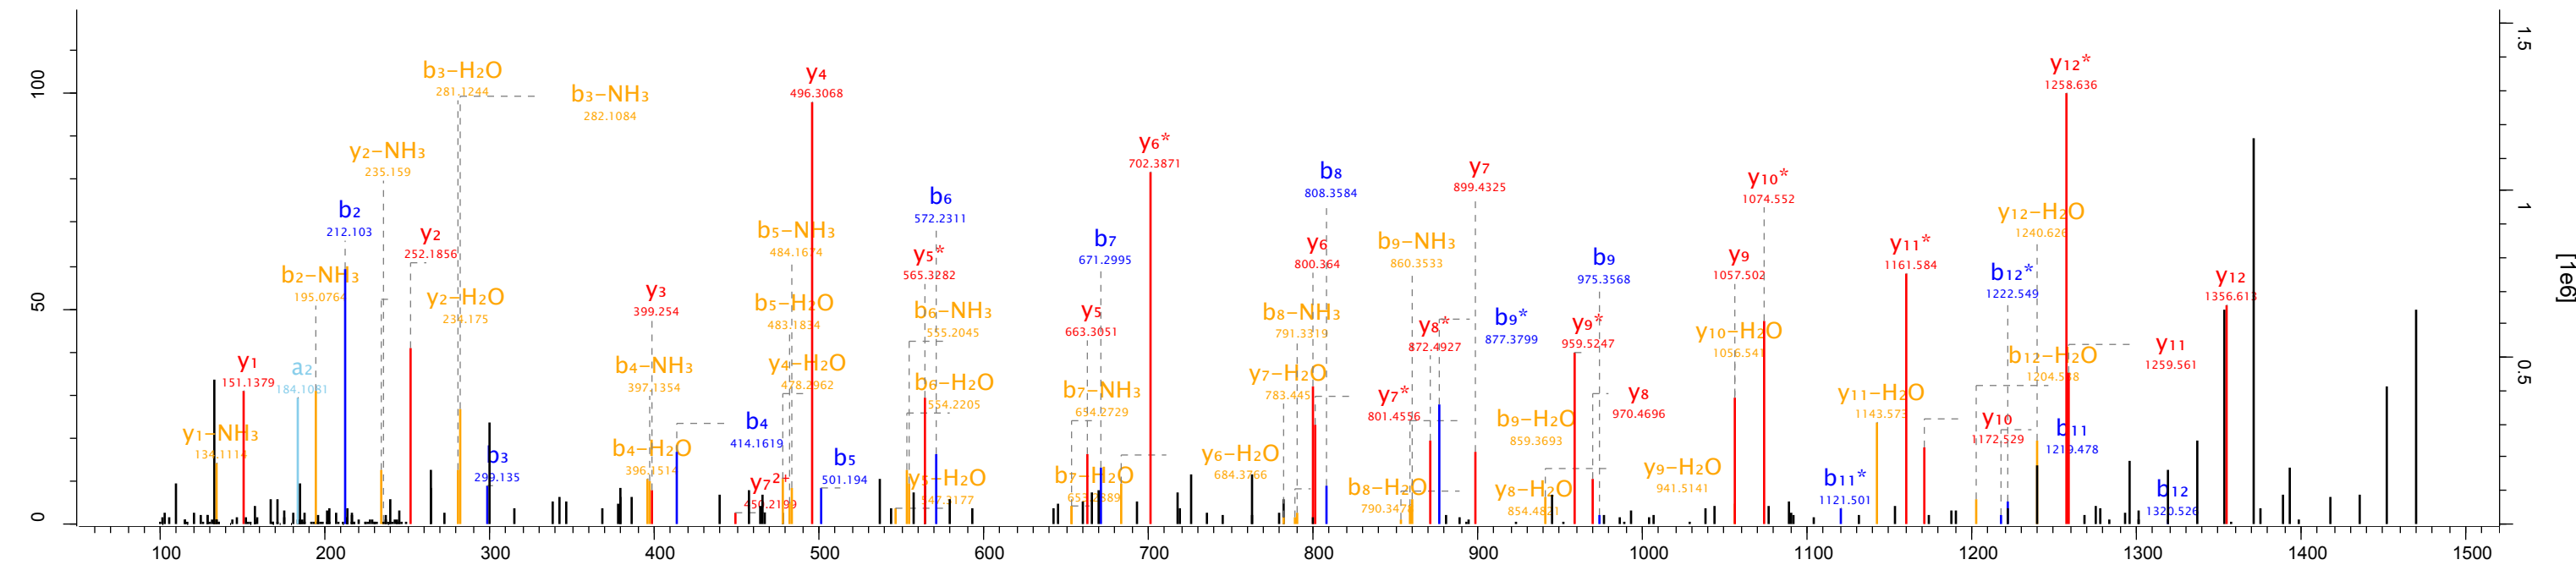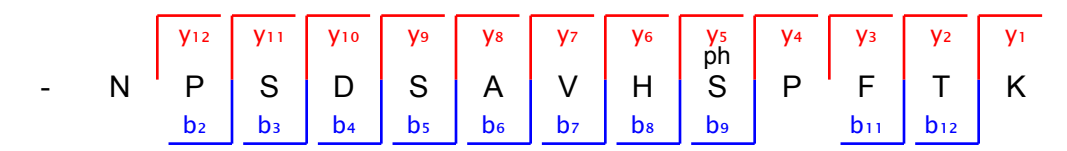

Raw file: 20150814\_A375SR\_Phospho\_BR2\_05  
 Scan: 8063 Method: FTMS; HCD Score: 77.8 m/z: 739.31 Gene names: DLG5

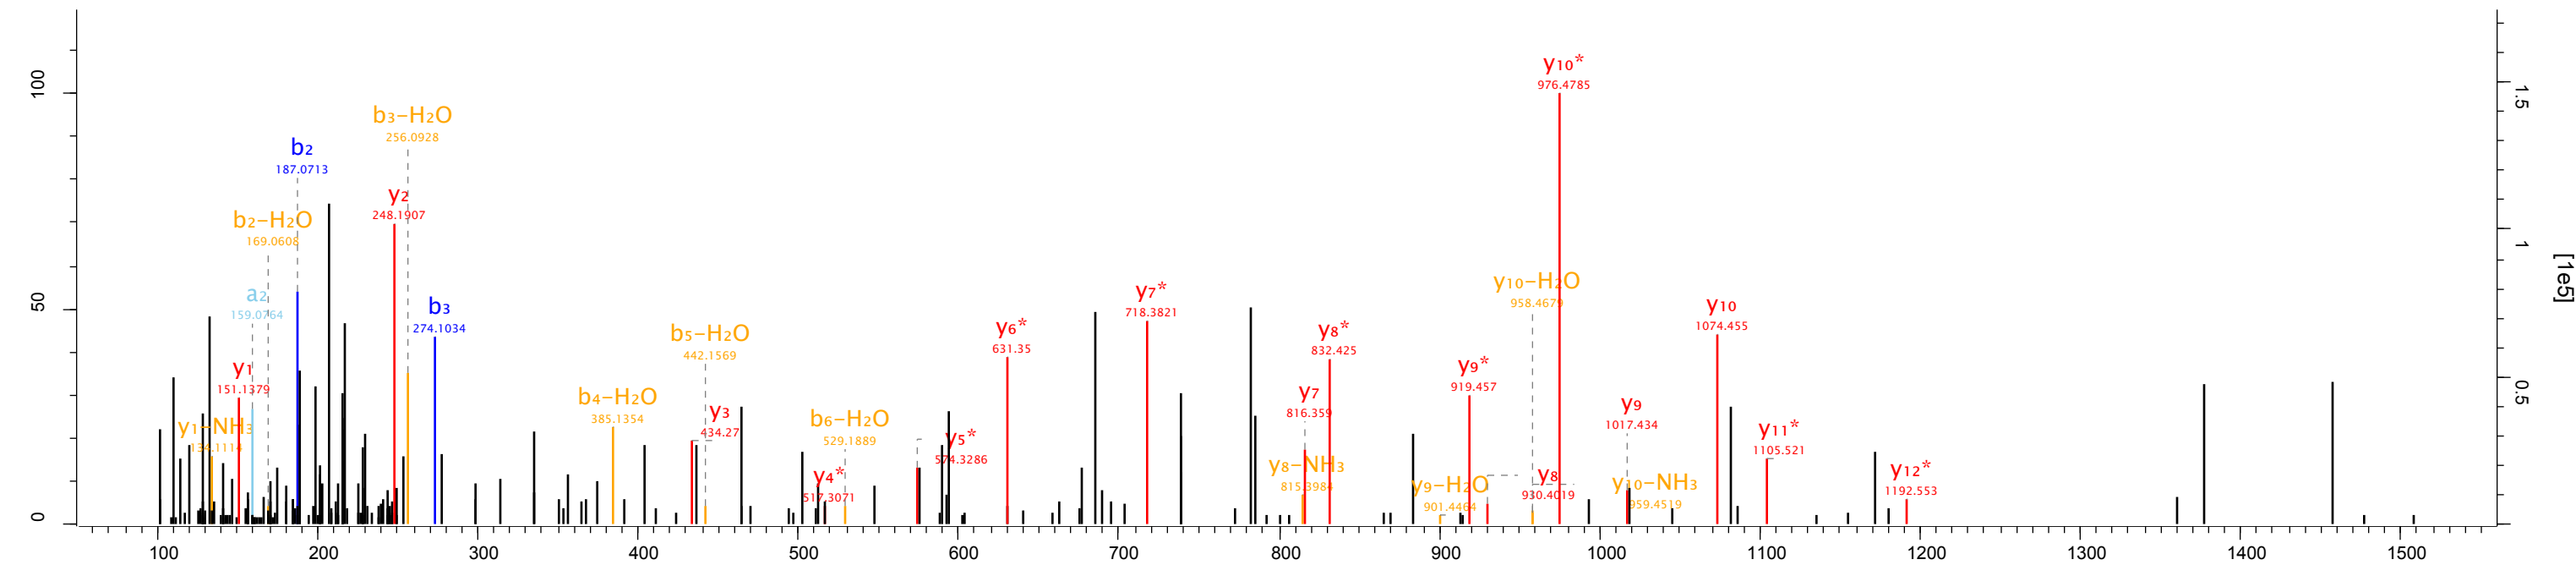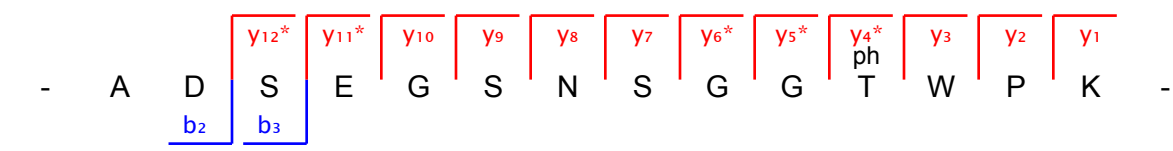

Raw file: 20150814\_A375SR\_Phospho\_BR2\_05  
 Scan: 8623 Method: FTMS; HCD Score: 128.06 m/z: 680.82 Gene names: SAMD4B

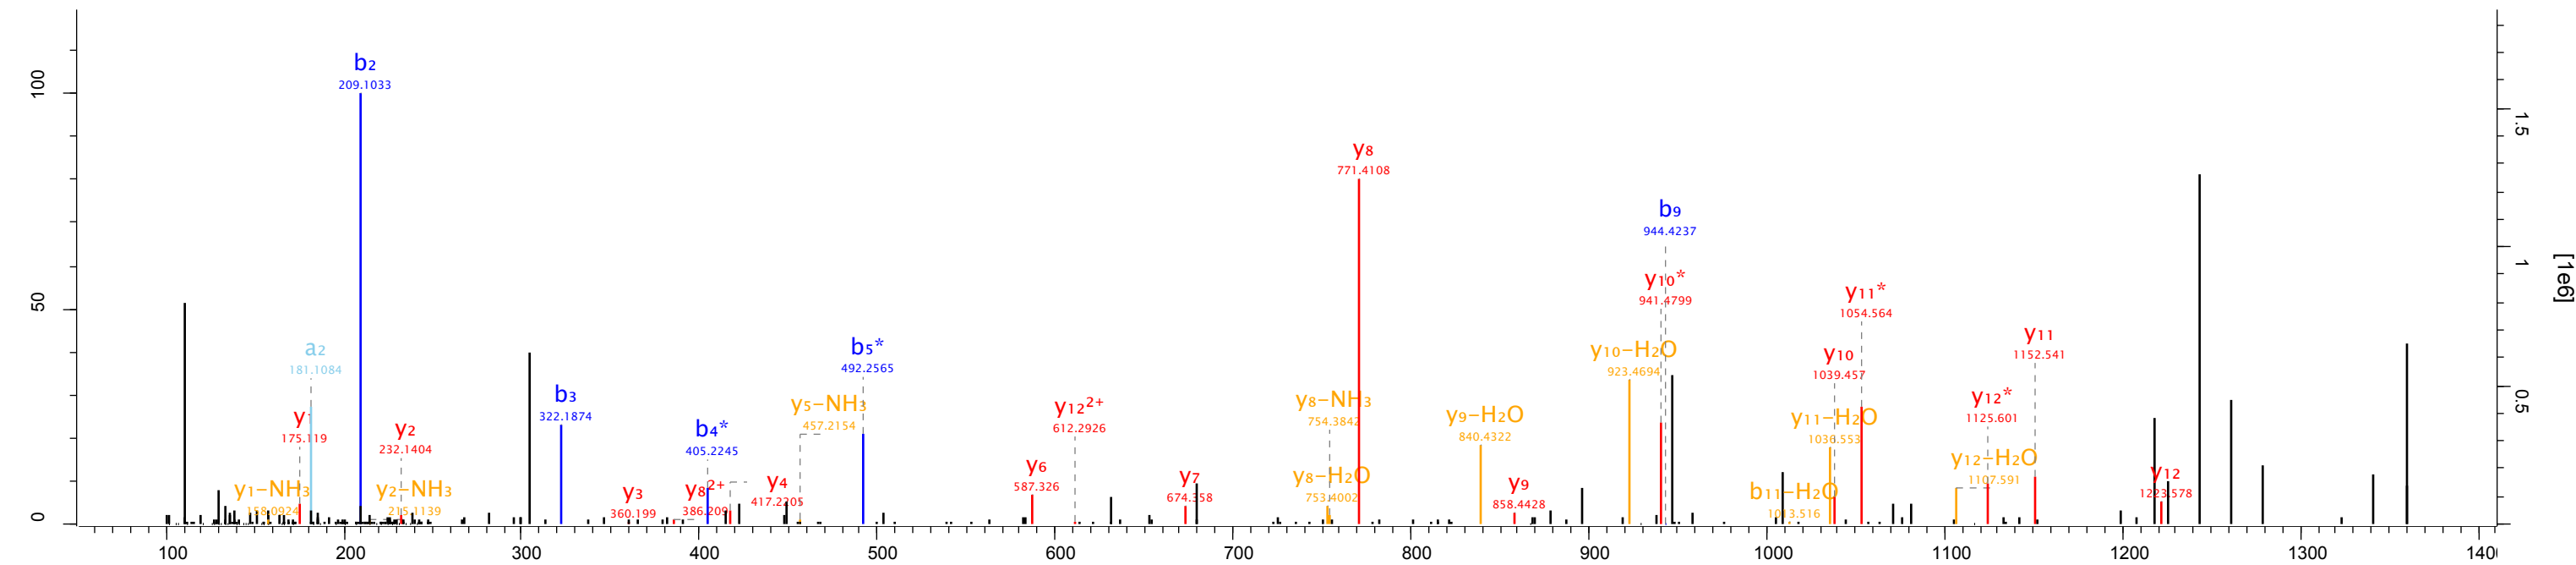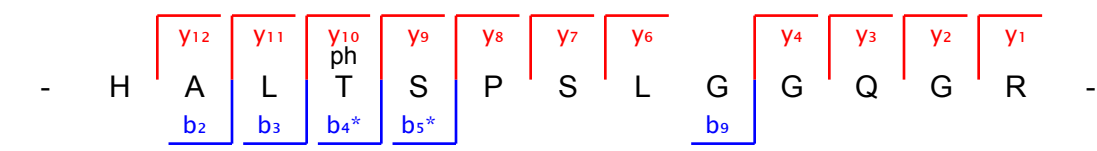

Raw file 20150814\_A375SR\_Phospho\_BR2\_05 Scan 9663 Method FTMS; HCD Score 40.19 m/z 558.61 Gene names MASTL

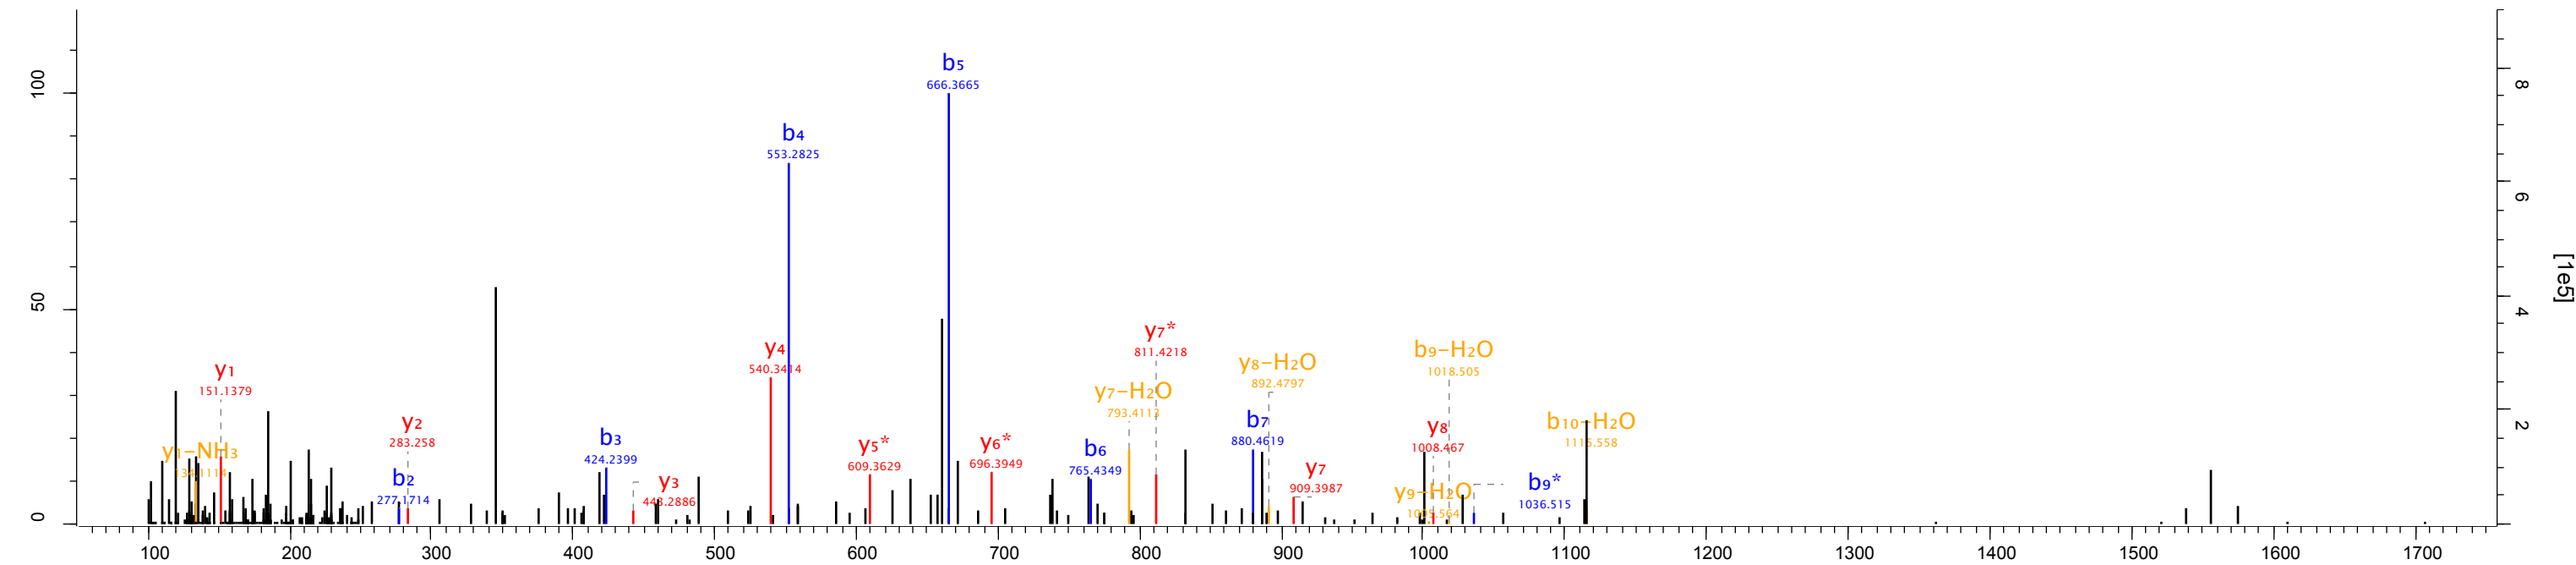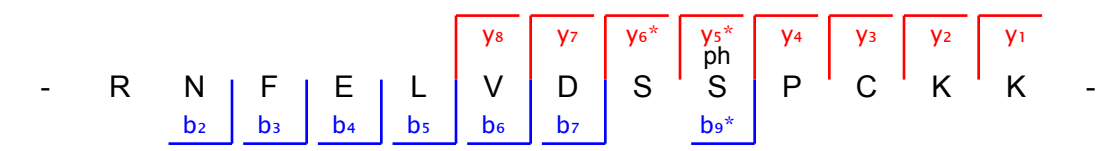

Raw file: 20150814\_A375SR\_Phospho\_BR2\_06  
 Scan: 11003  
 Method: FTMS; HCD  
 Score: 392.42  
 m/z: 1029.47  
 Gene names: AKAP12

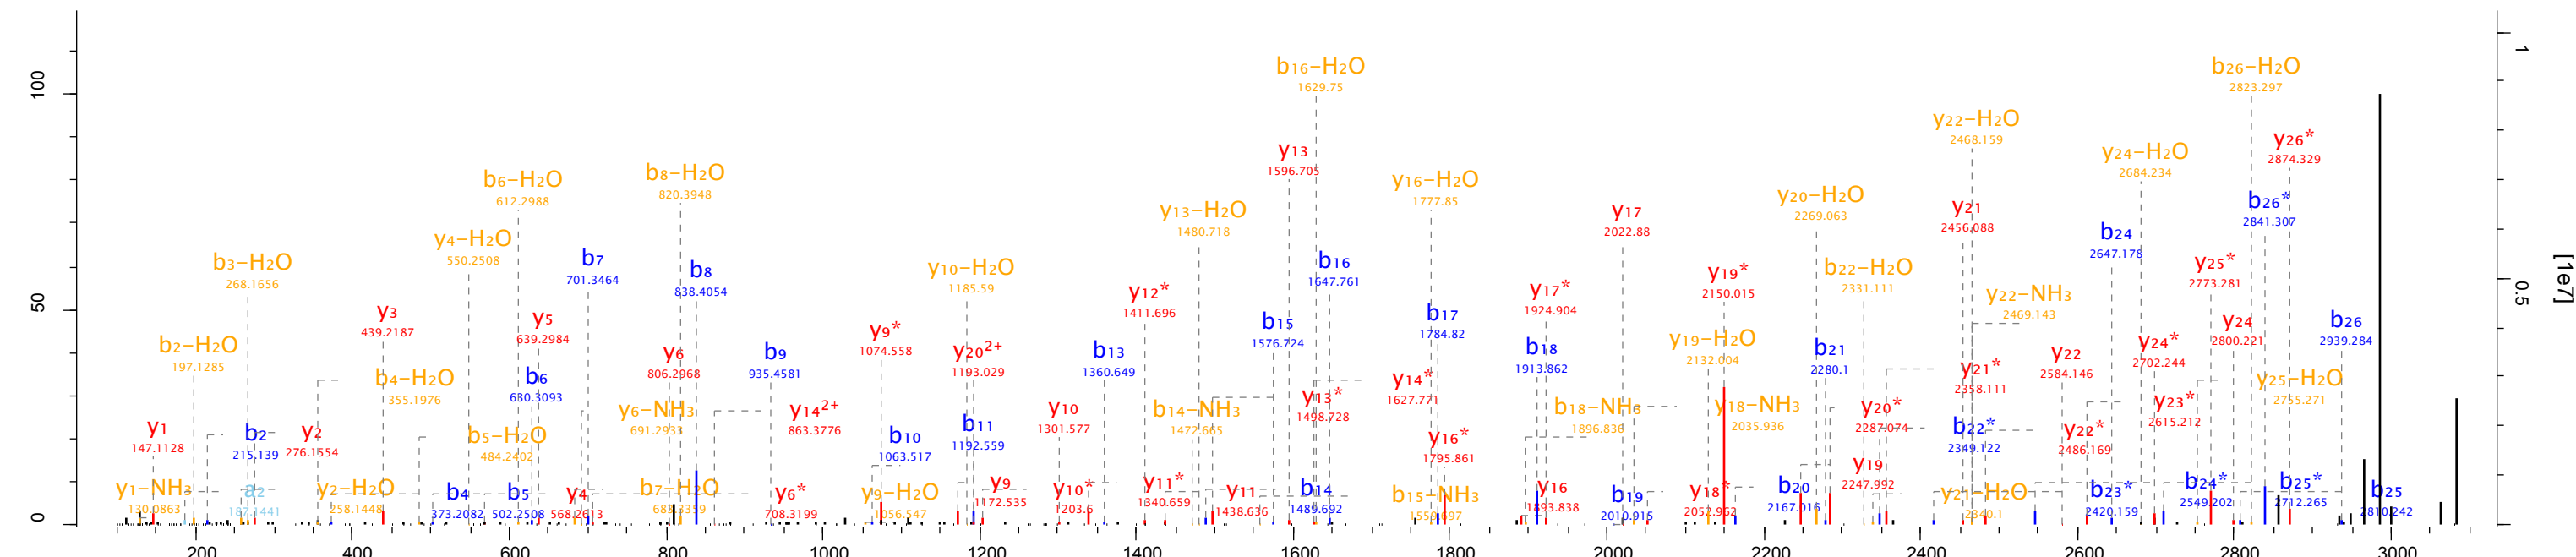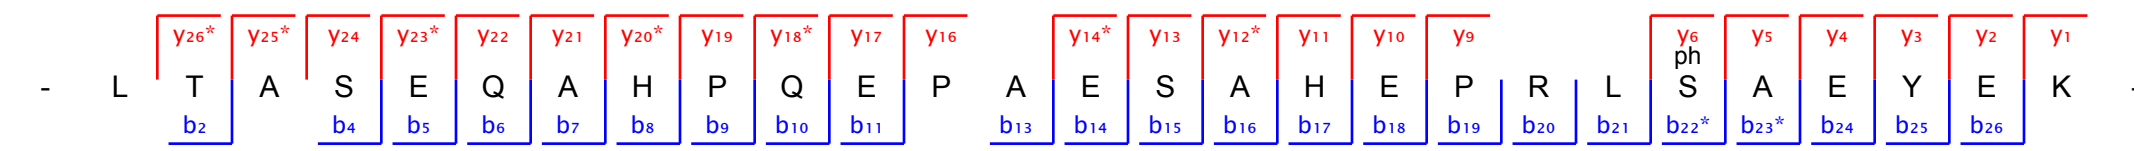

Raw file 20150814\_A375SR\_Phospho\_BR2\_06 Scan 11533 Method FTMS; HCD Score 103.26 m/z 489.23 Gene names TBC1D1

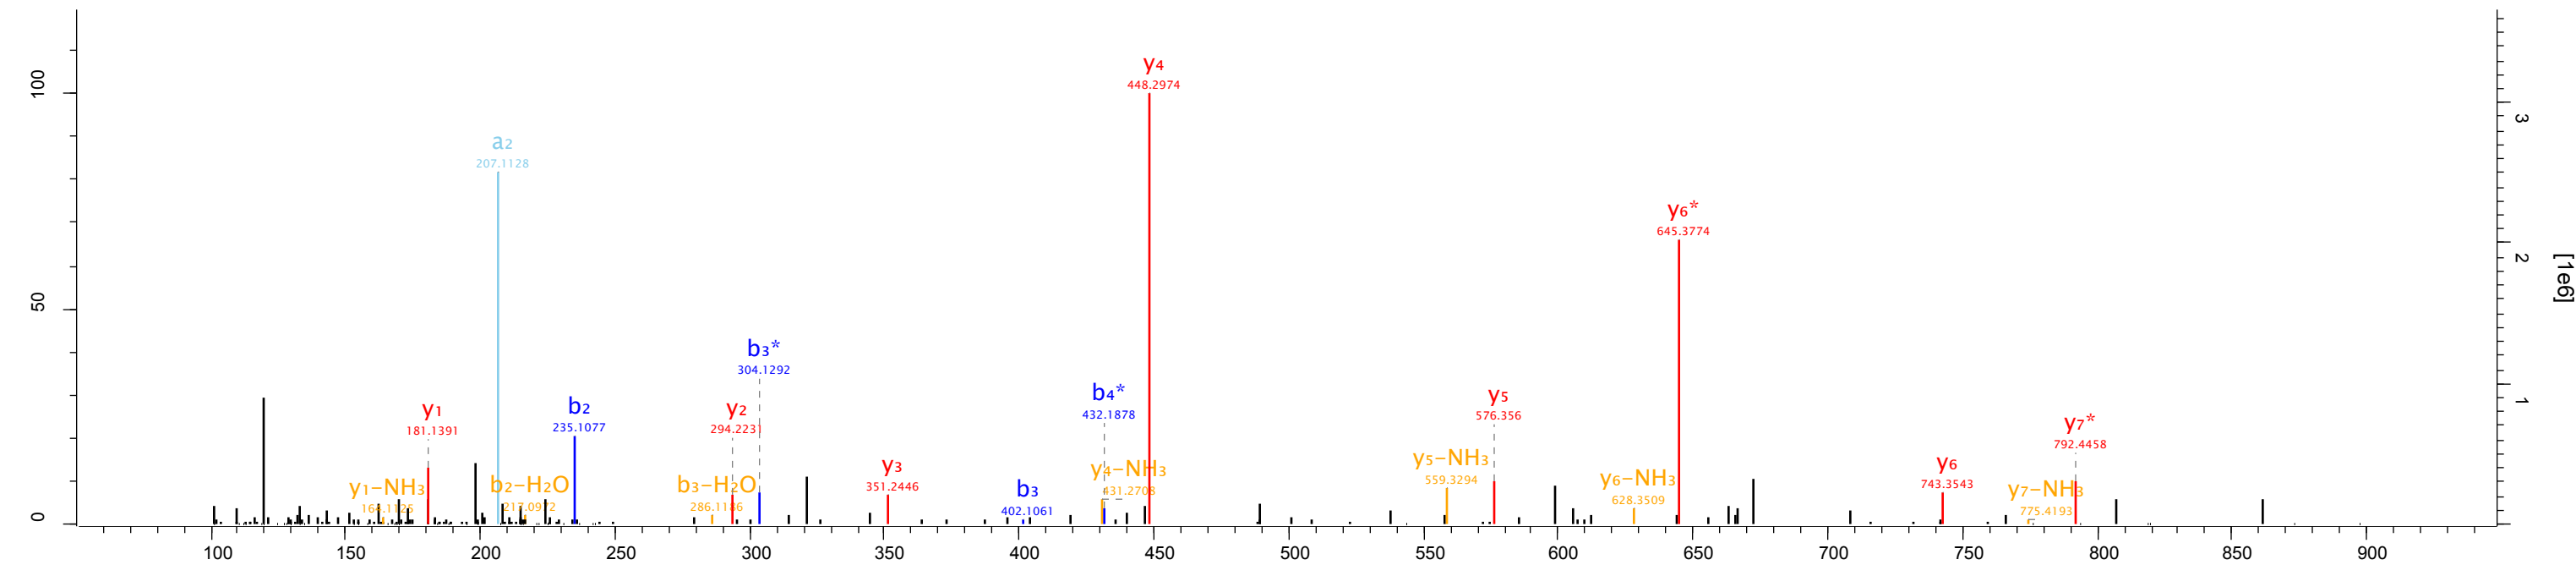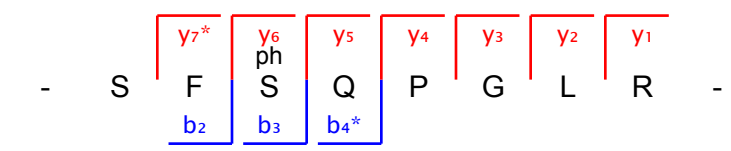

Raw file Scan Method Score m/z Gene names  
 20150814\_A375SR\_Phospho\_BR2\_06 11713 FTMS; HCD 107.15 844.36 GTF3C2

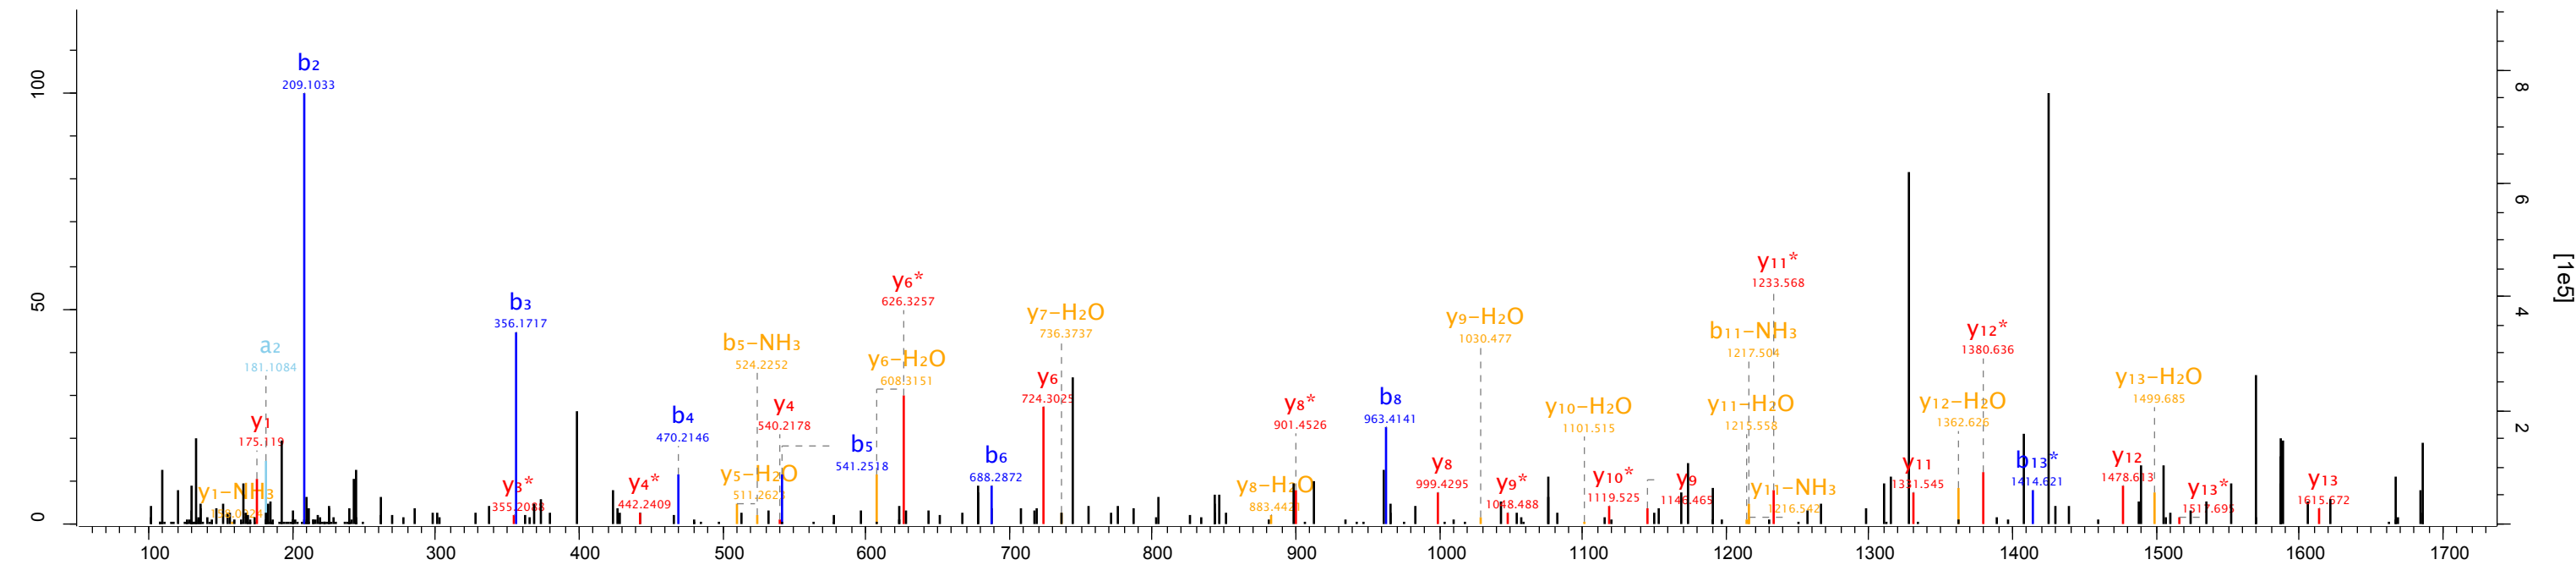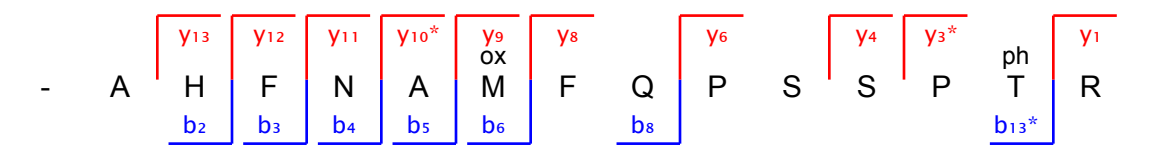

Raw file 20150814\_A375SR\_Phospho\_BR2\_06 Scan 13003 Method FTMS; HCD Score 121.42 m/z 927.78 Gene names KCTD3

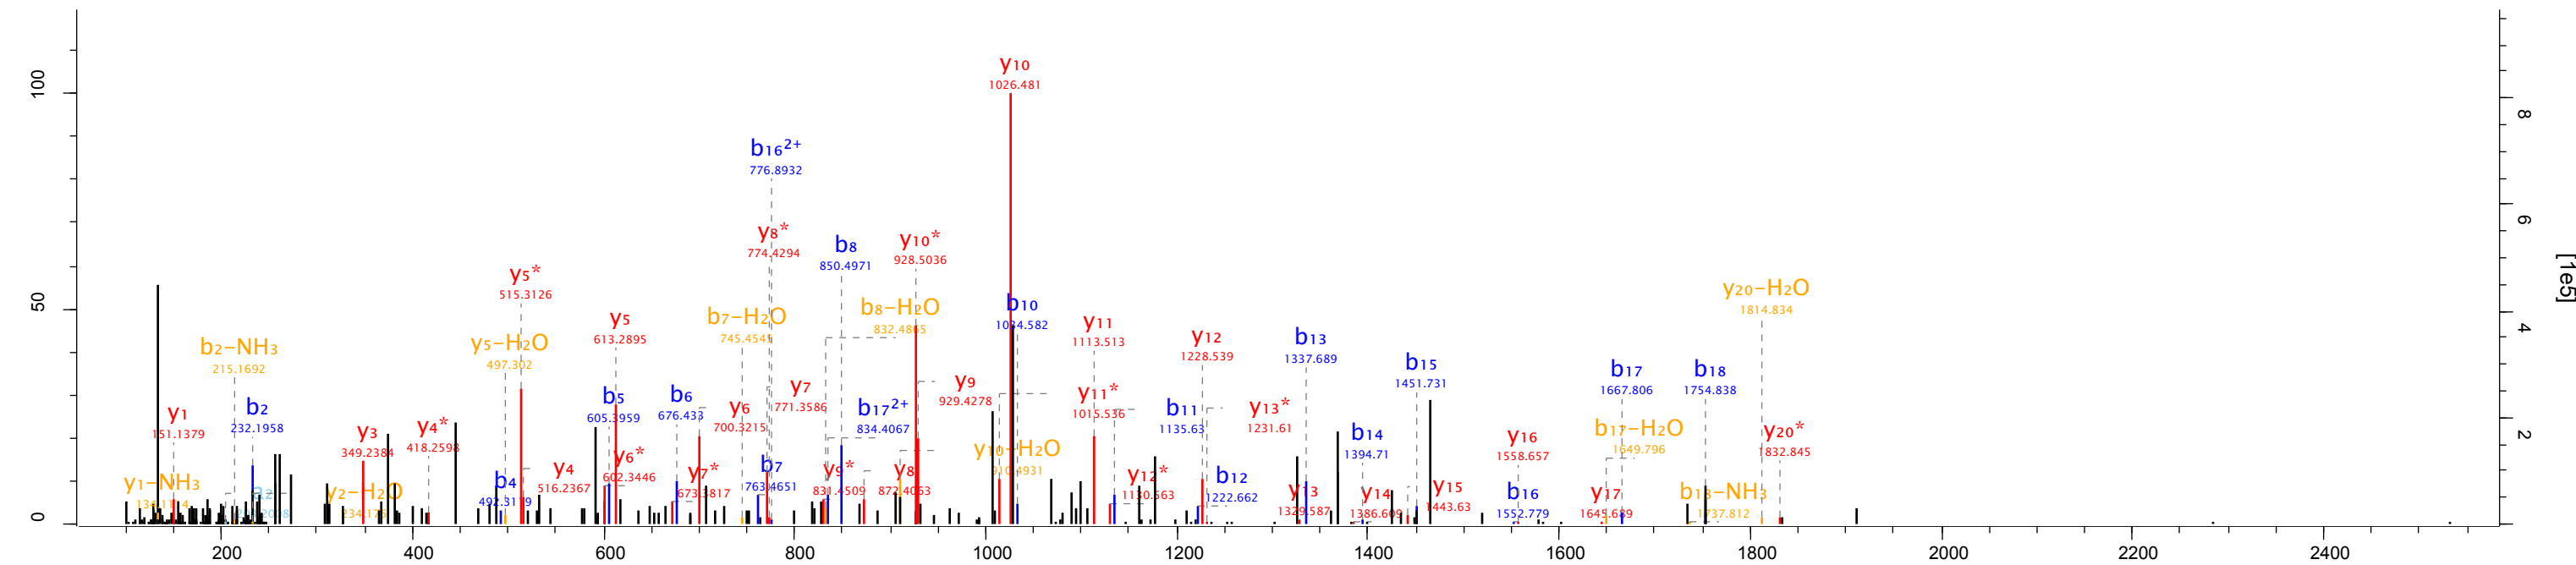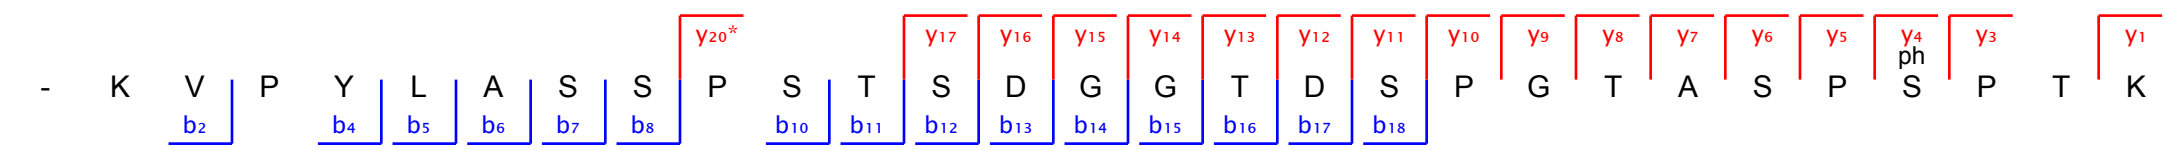



Raw file: 20150814\_A375SR\_Phospho\_BR2\_06  
 Scan: 13793 Method: FTMS; HCD Score: 92.79 m/z: 652.67 Gene names: KANK2

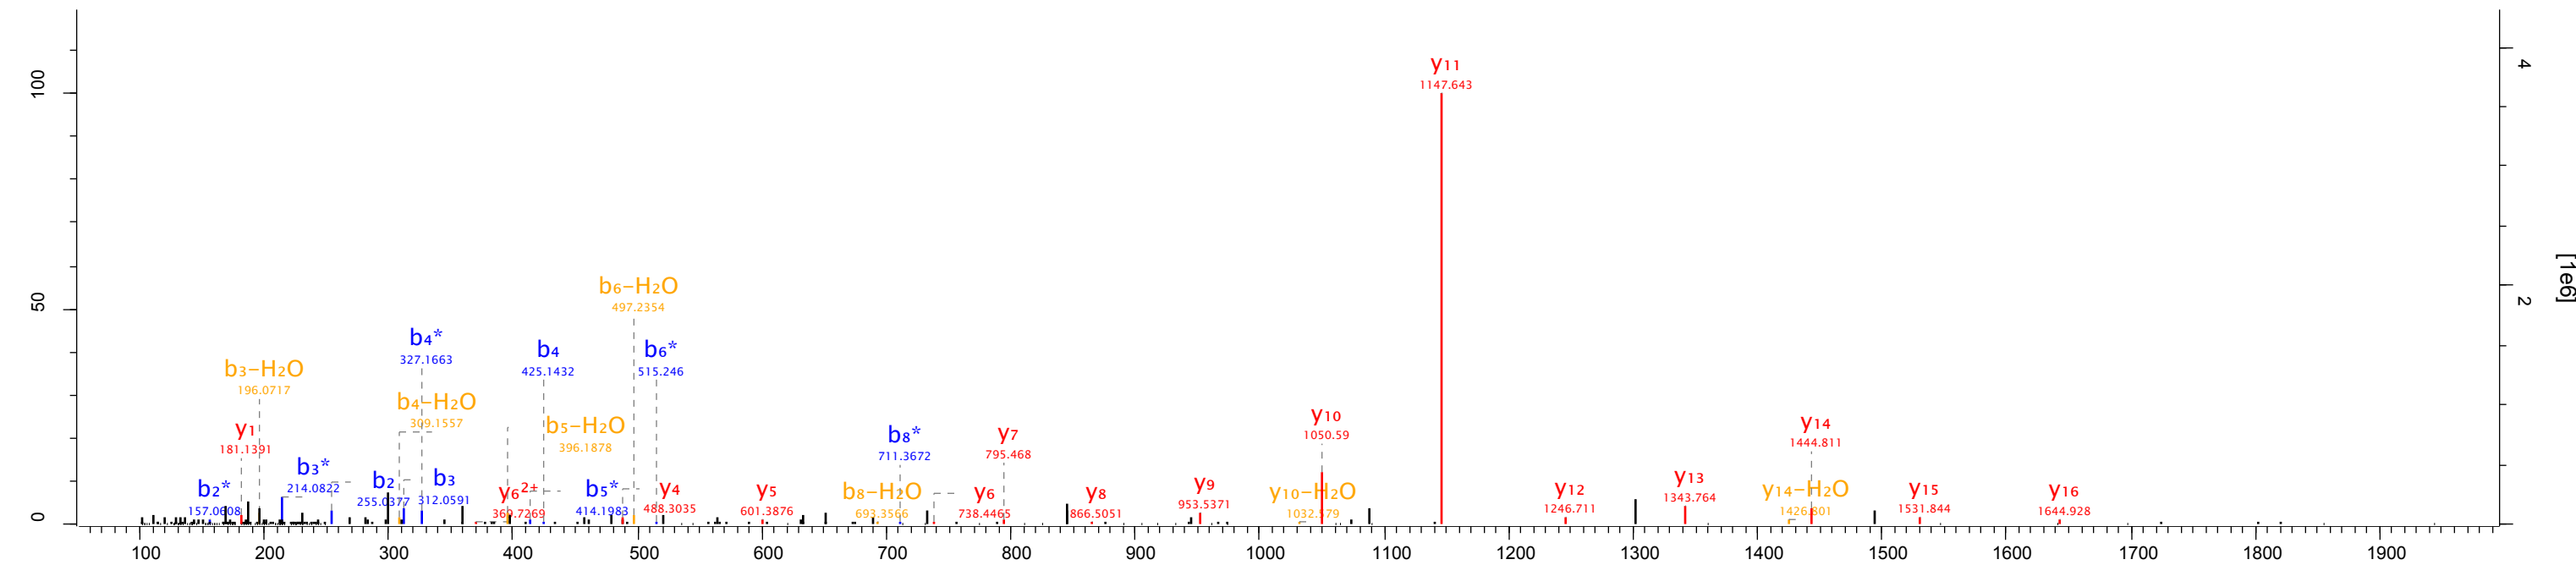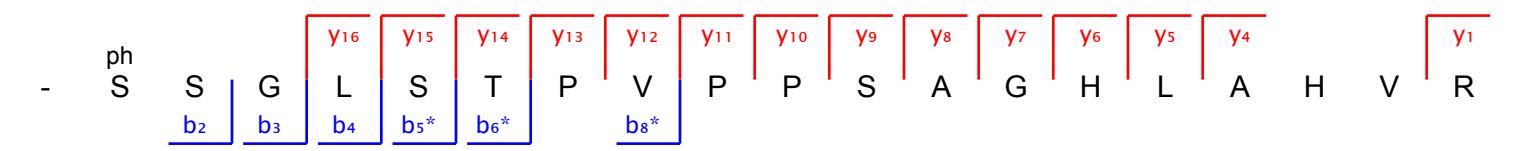

Raw file: 20150814\_A375SR\_Phospho\_BR2\_06  
 Scan: 14033 Method: FTMS; HCD Score: 70.01 m/z: 884.43 Gene names: PRR12

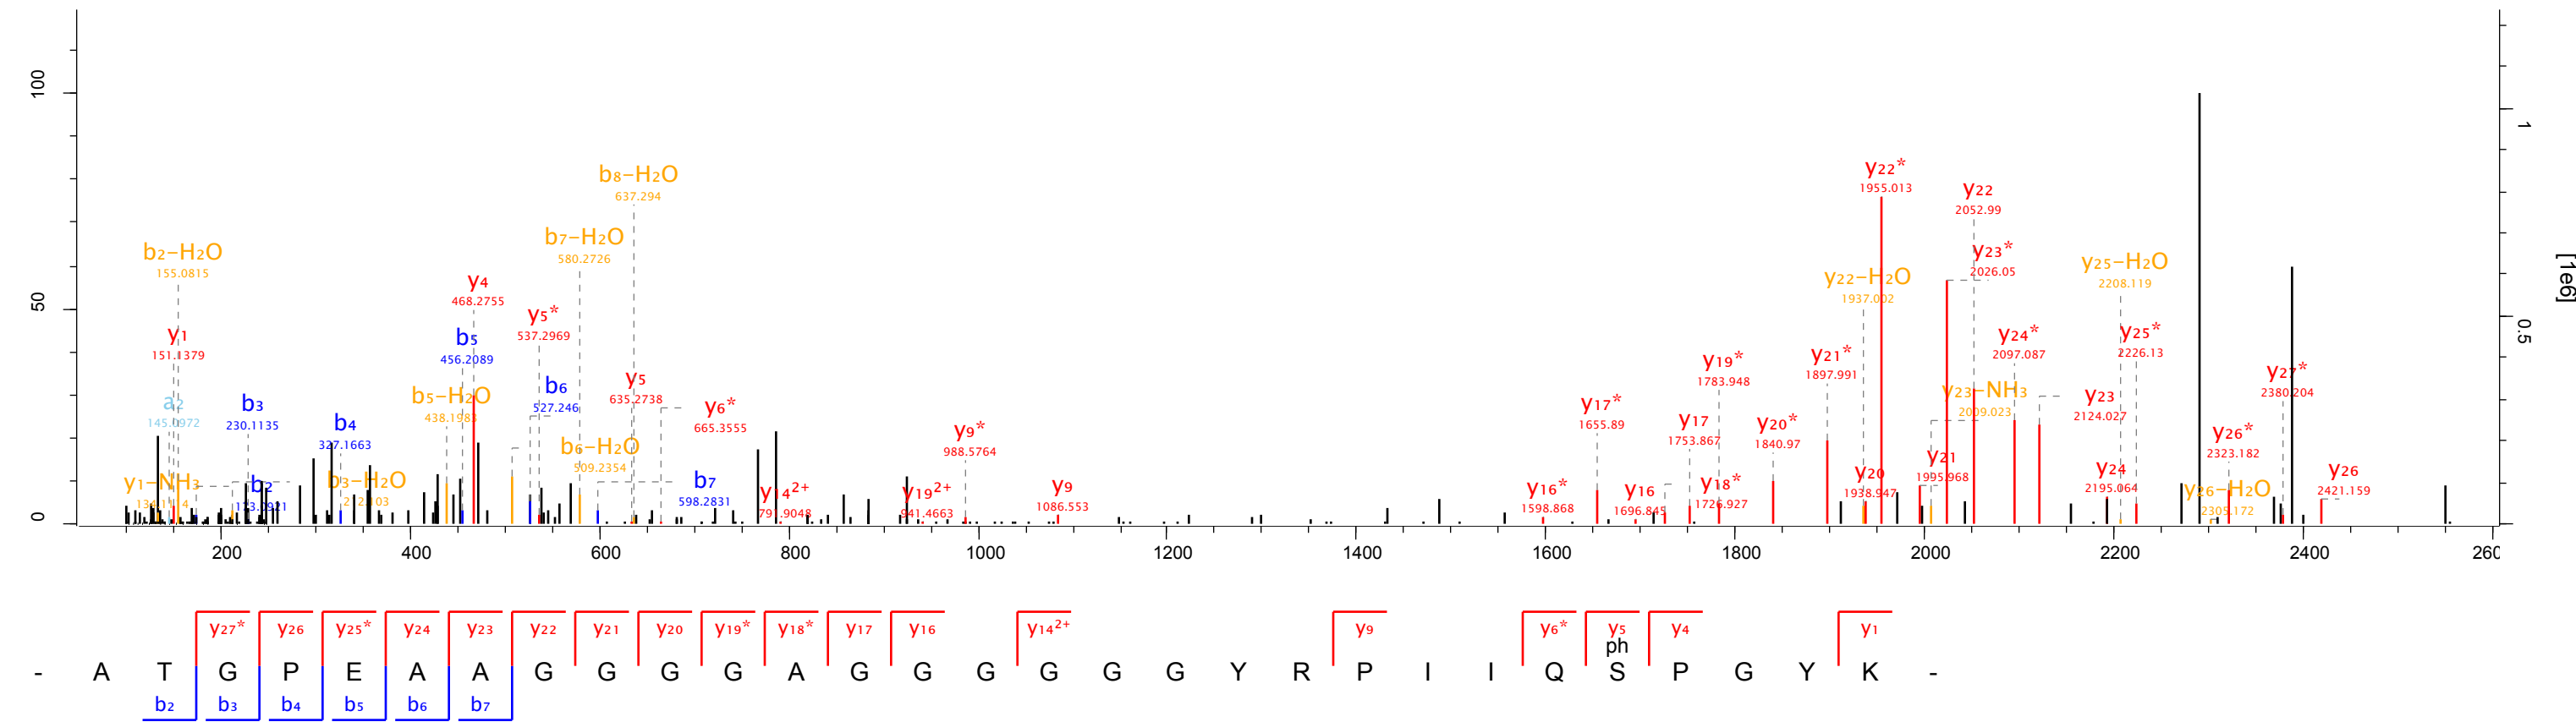

Raw file  
20150814\_A375SR\_Phospho\_BR2\_06

Scan 14613 Method FTMS; HCD Score 117.62 m/z 656.65 Gene names ARID4B

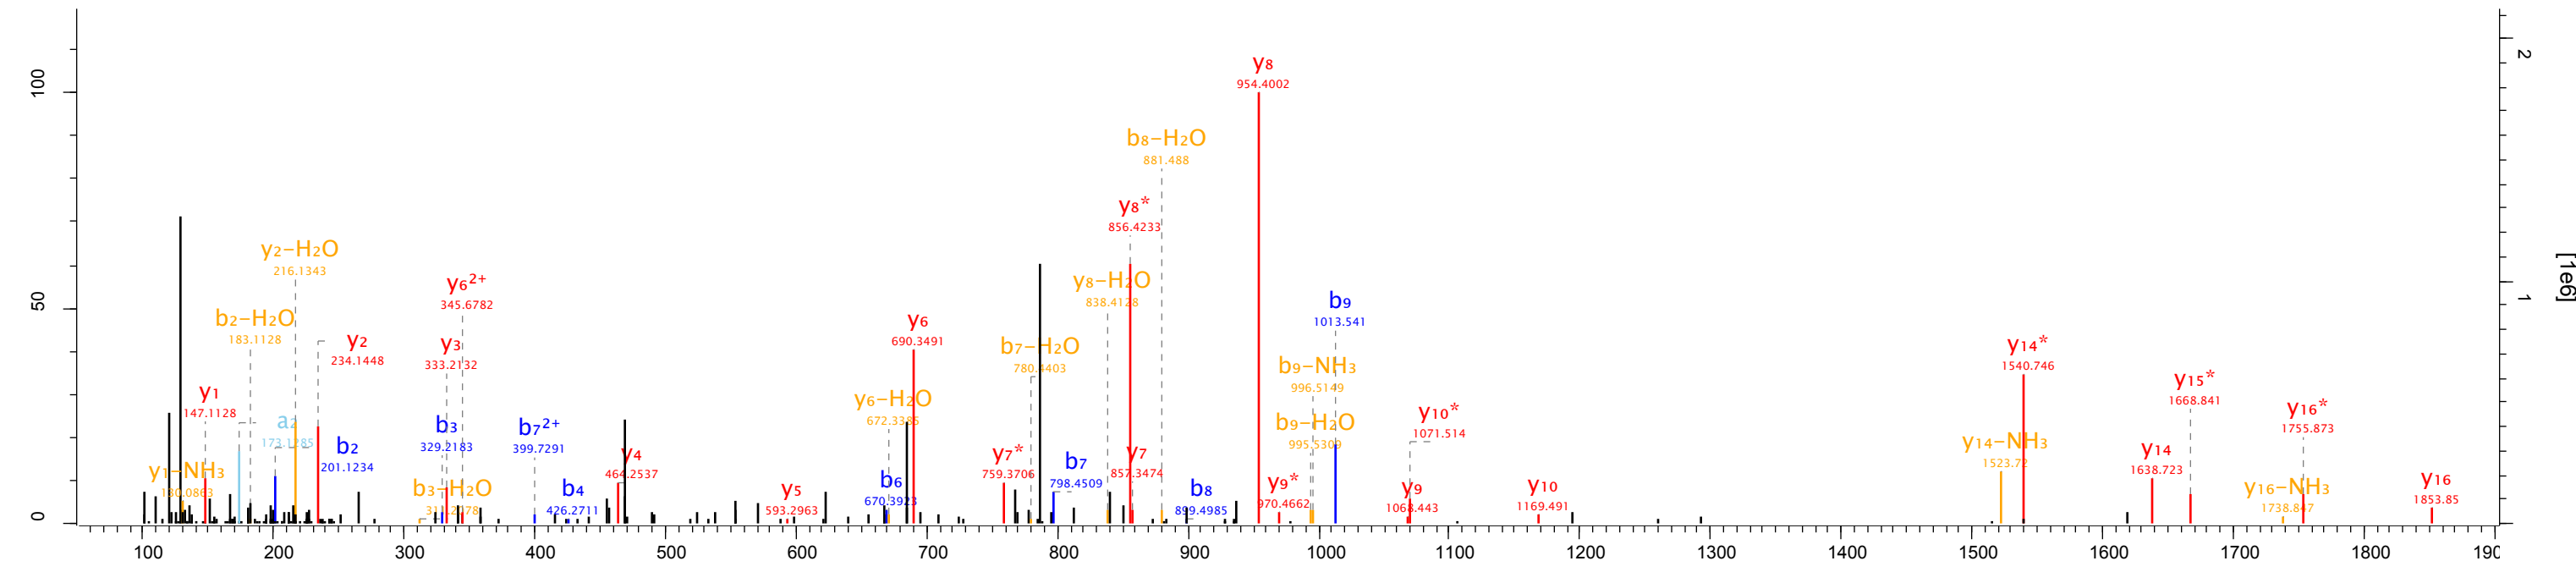

- L S K P P F Q T N P S P E M V S K -  
b2 b3 b4 b6 b7 b8 b9

Raw file: 20150814\_A375SR\_Phospho\_BR2\_06  
 Scan: 15293 Method: FTMS; HCD Score: 273.43 m/z: 862.35 Gene names: RSF1

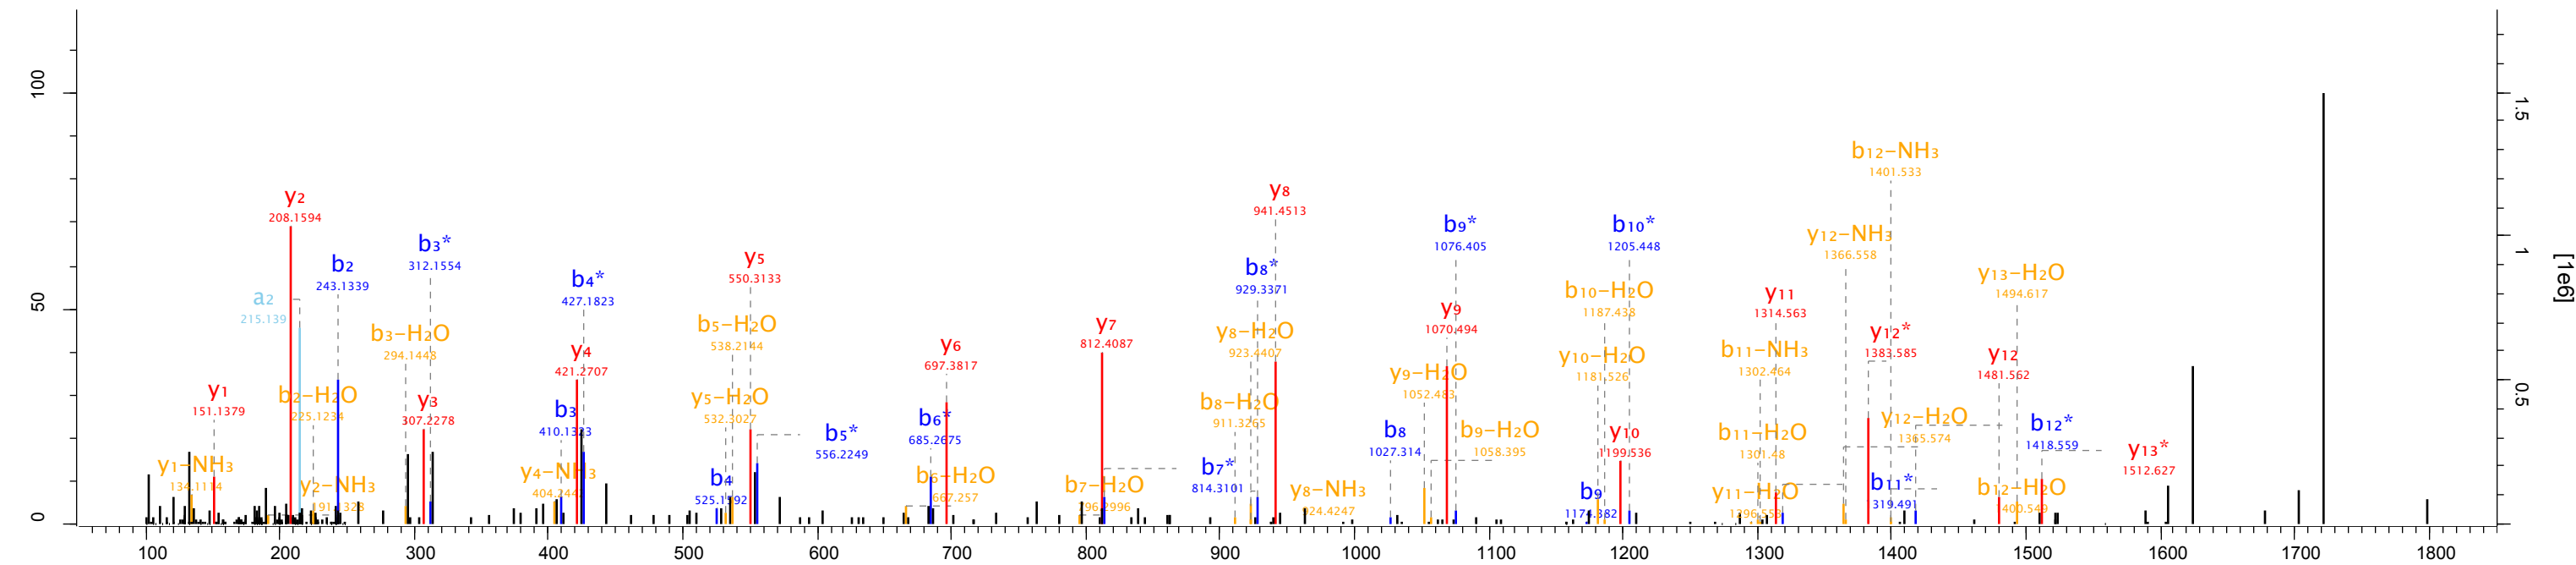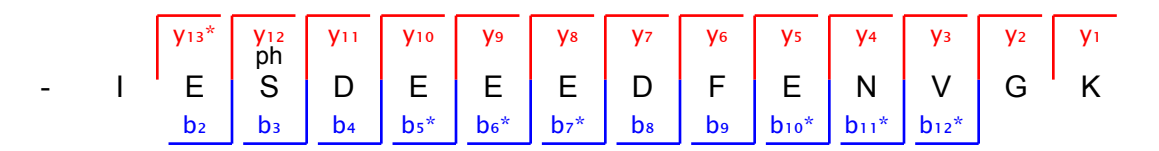

Raw file 20150814\_A375SR\_Phospho\_BR2\_06 Scan 15553 Method FTMS; HCD Score 139.47 m/z 793.03 Gene names GSK3B

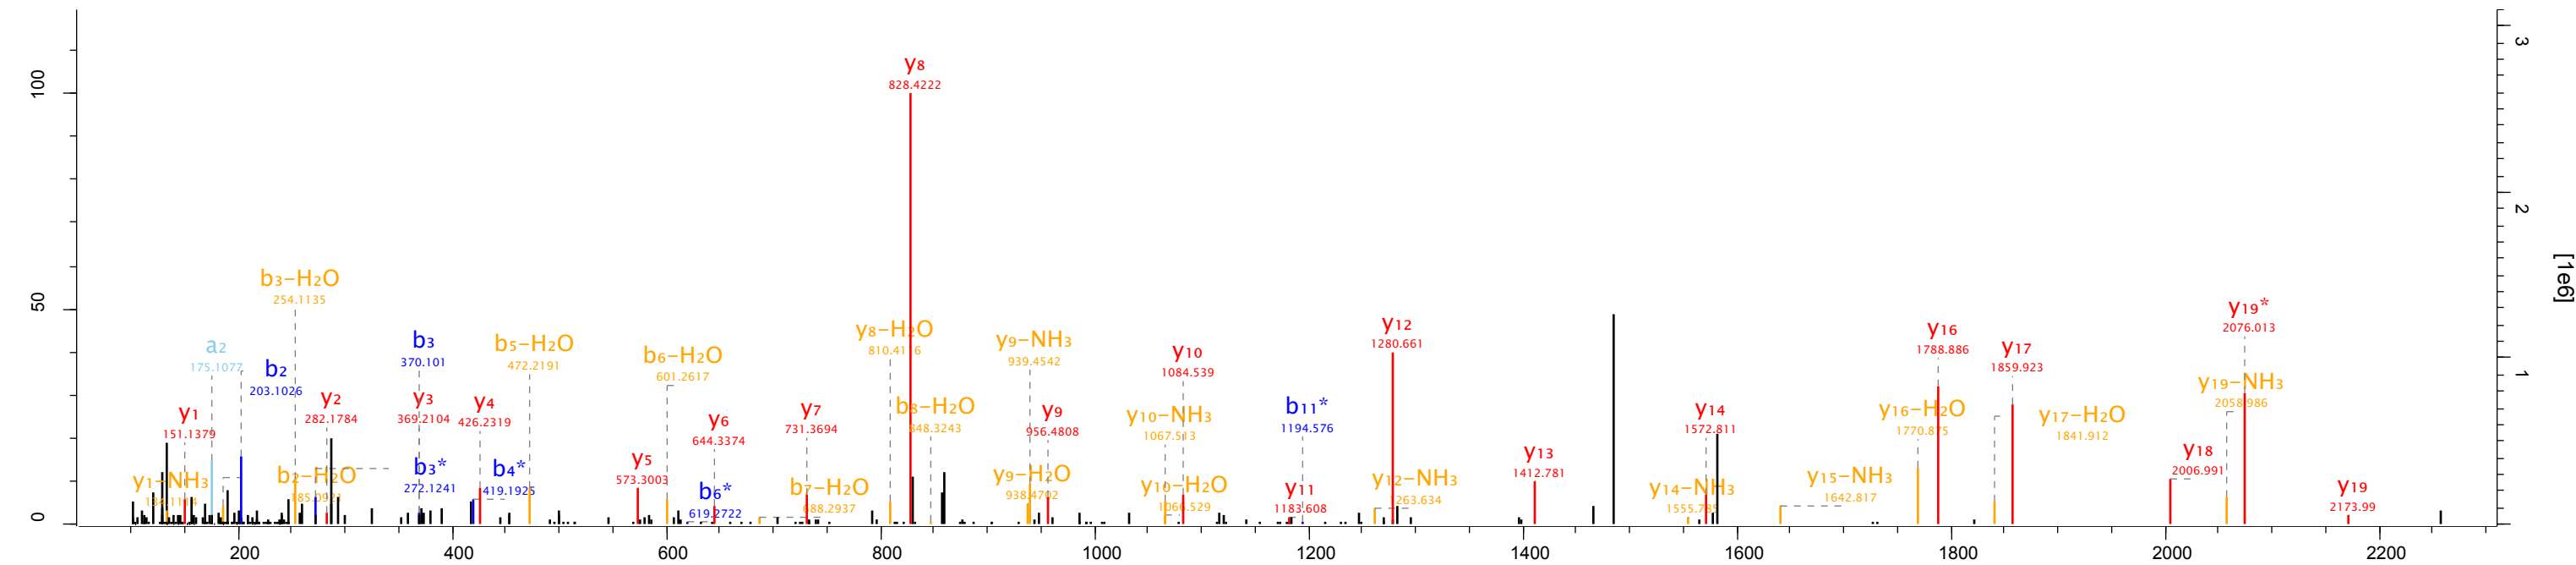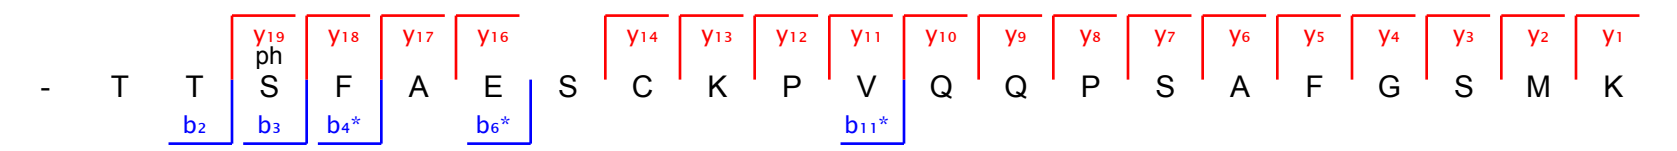

Raw file: 20150814\_A375SR\_Phospho\_BR2\_06  
 Scan: 16073  
 Method: FTMS; HCD  
 Score: 113.05  
 m/z: 975.41  
 Gene names: SRRM2

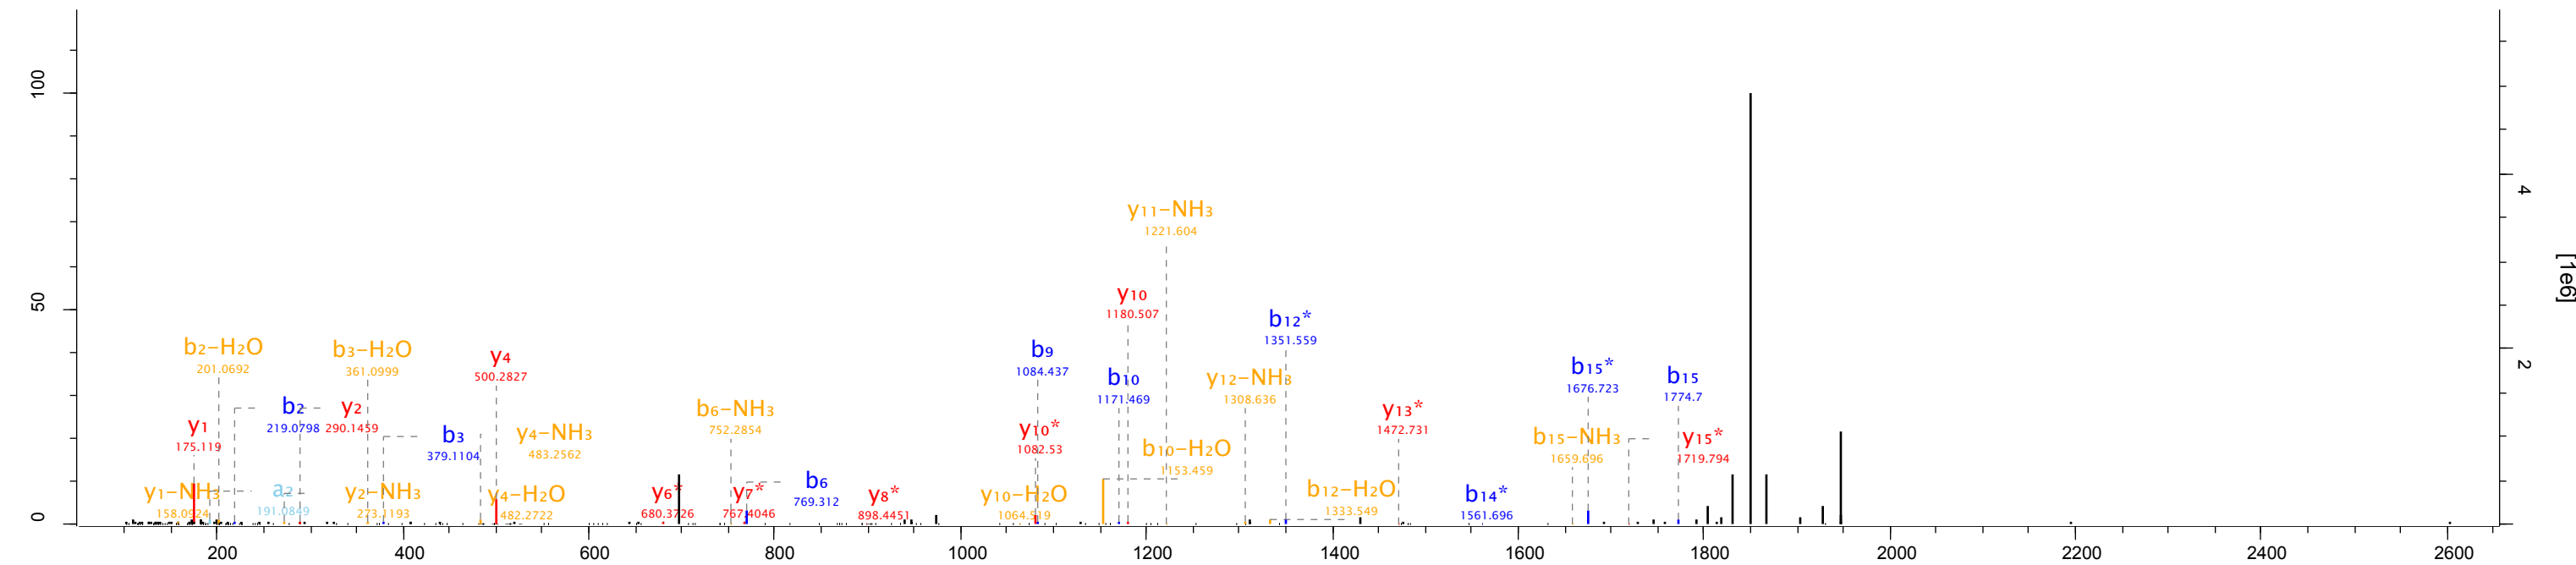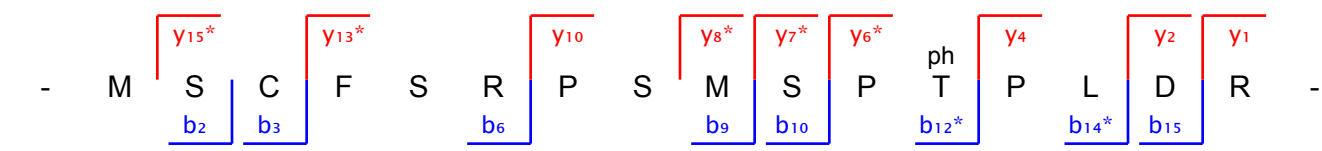

Raw file 20150814\_A375SR\_Phospho\_BR2\_06 Scan 16453 Method FTMS; HCD Score 152.01 m/z 774.91 Gene names PIAS1

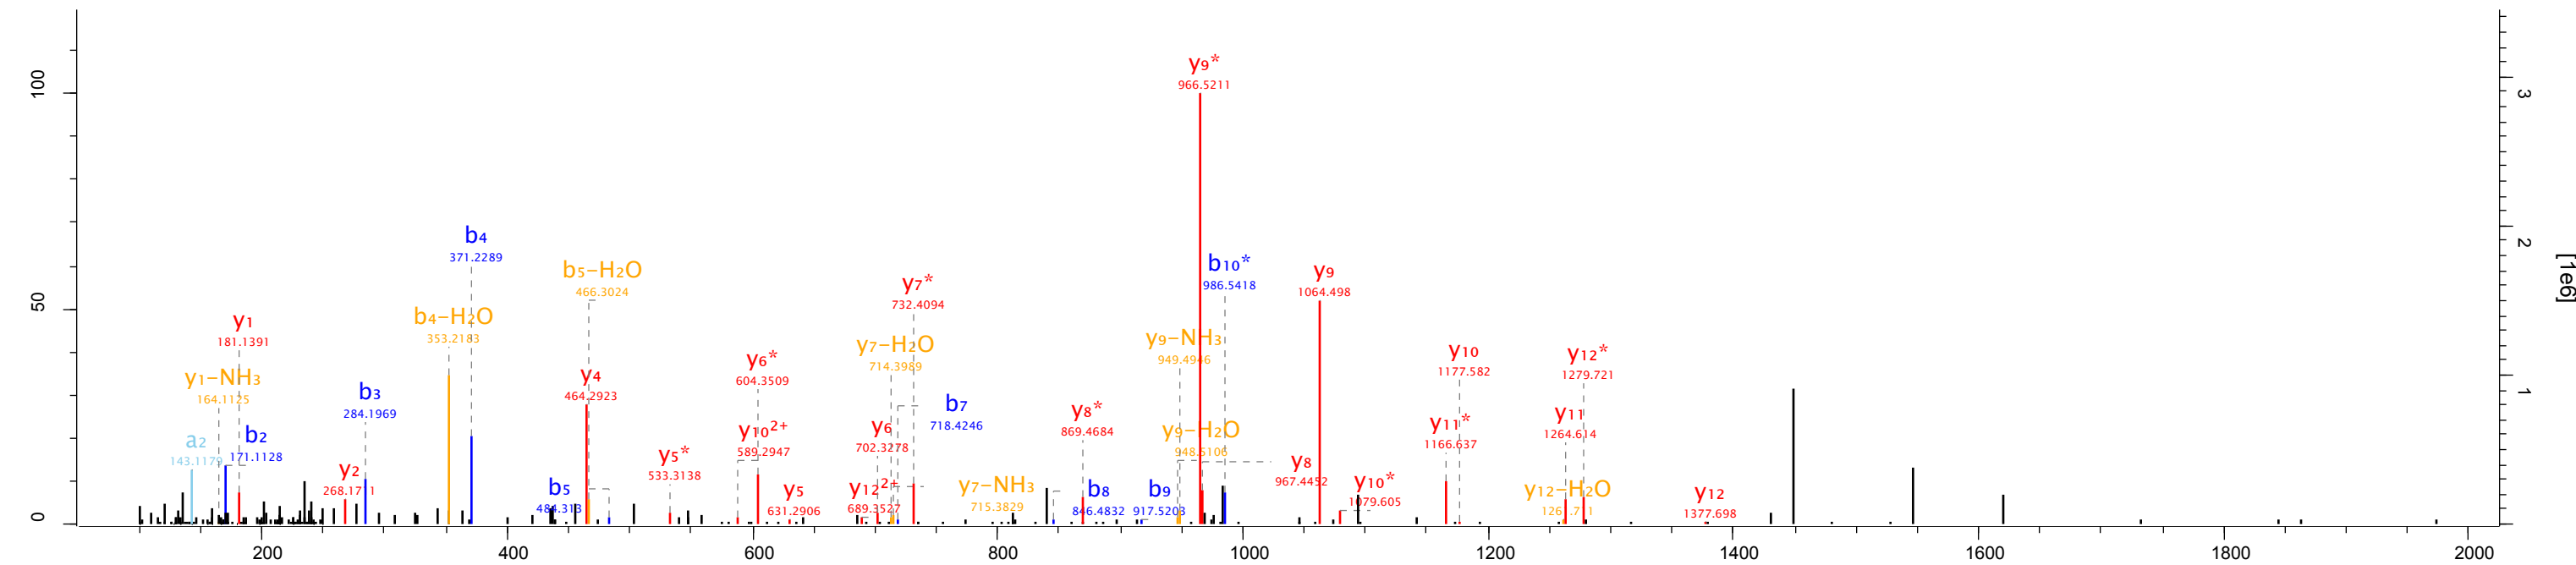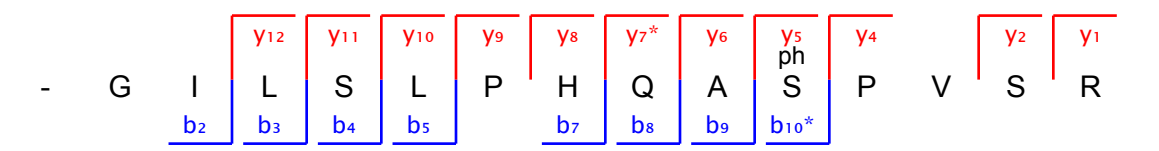

Raw file 20150814\_A375SR\_Phospho\_BR2\_06 Scan 16593 Method FTMS; HCD Score 75.82 m/z 782.8 Gene names ASXL1; ASXH1

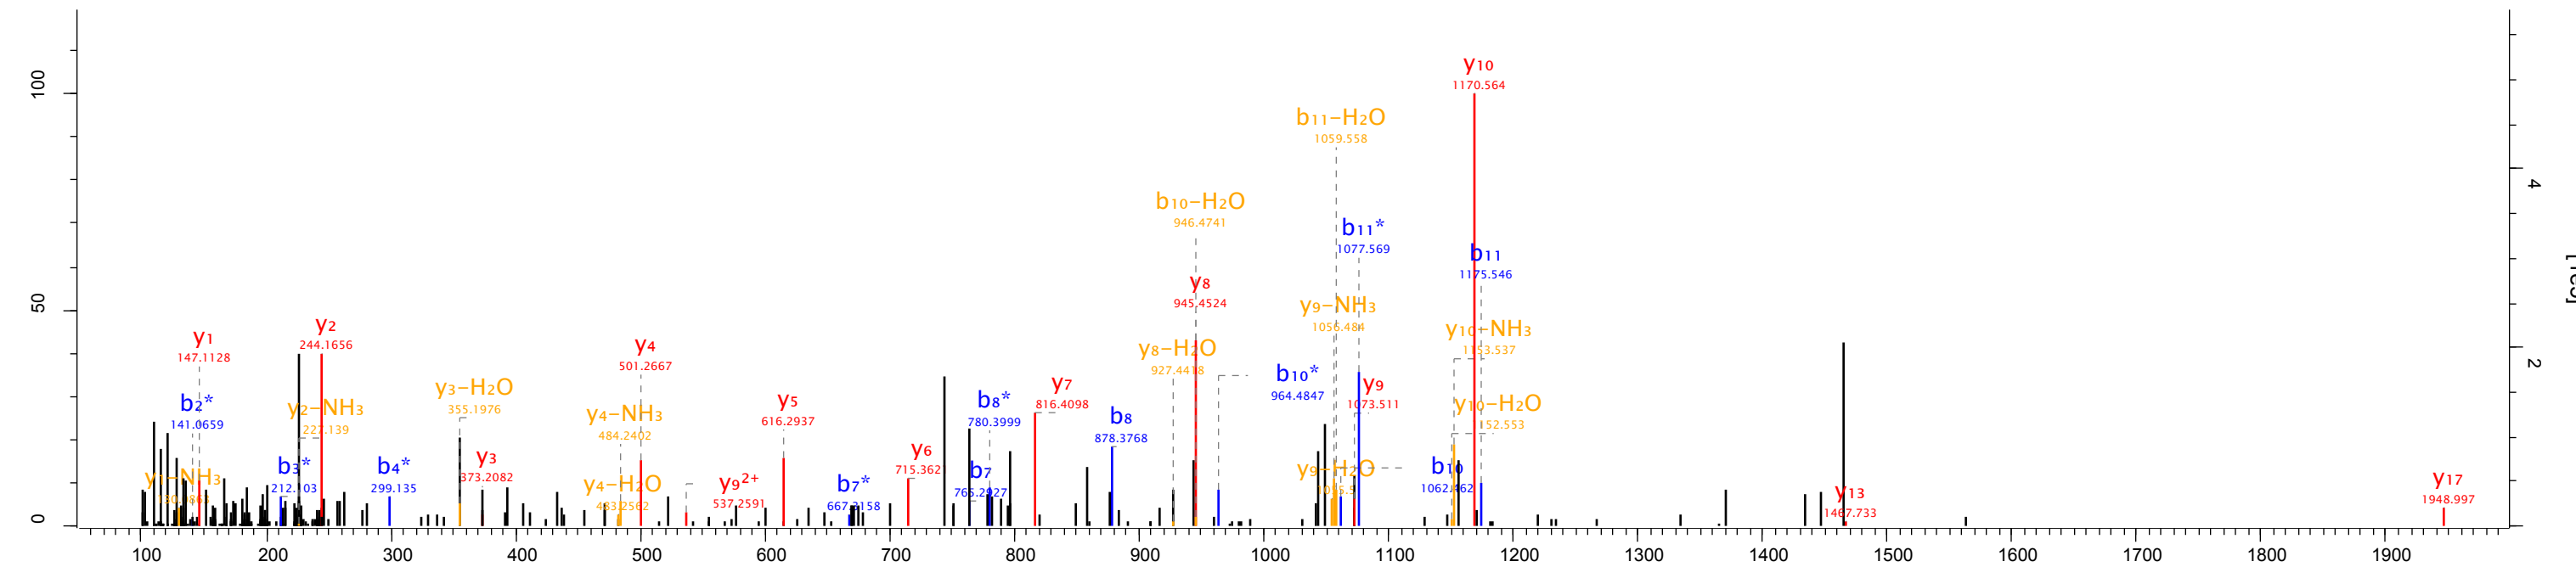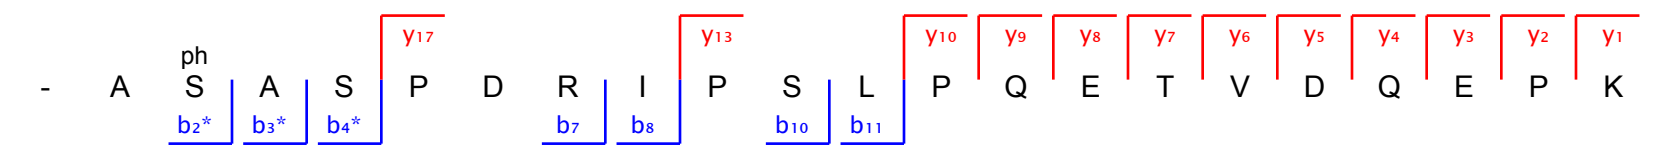



20150814\_A375SR\_Phospho\_BR2\_06 17253 FTMS; HCD 113.04 1098.03 SRCAP

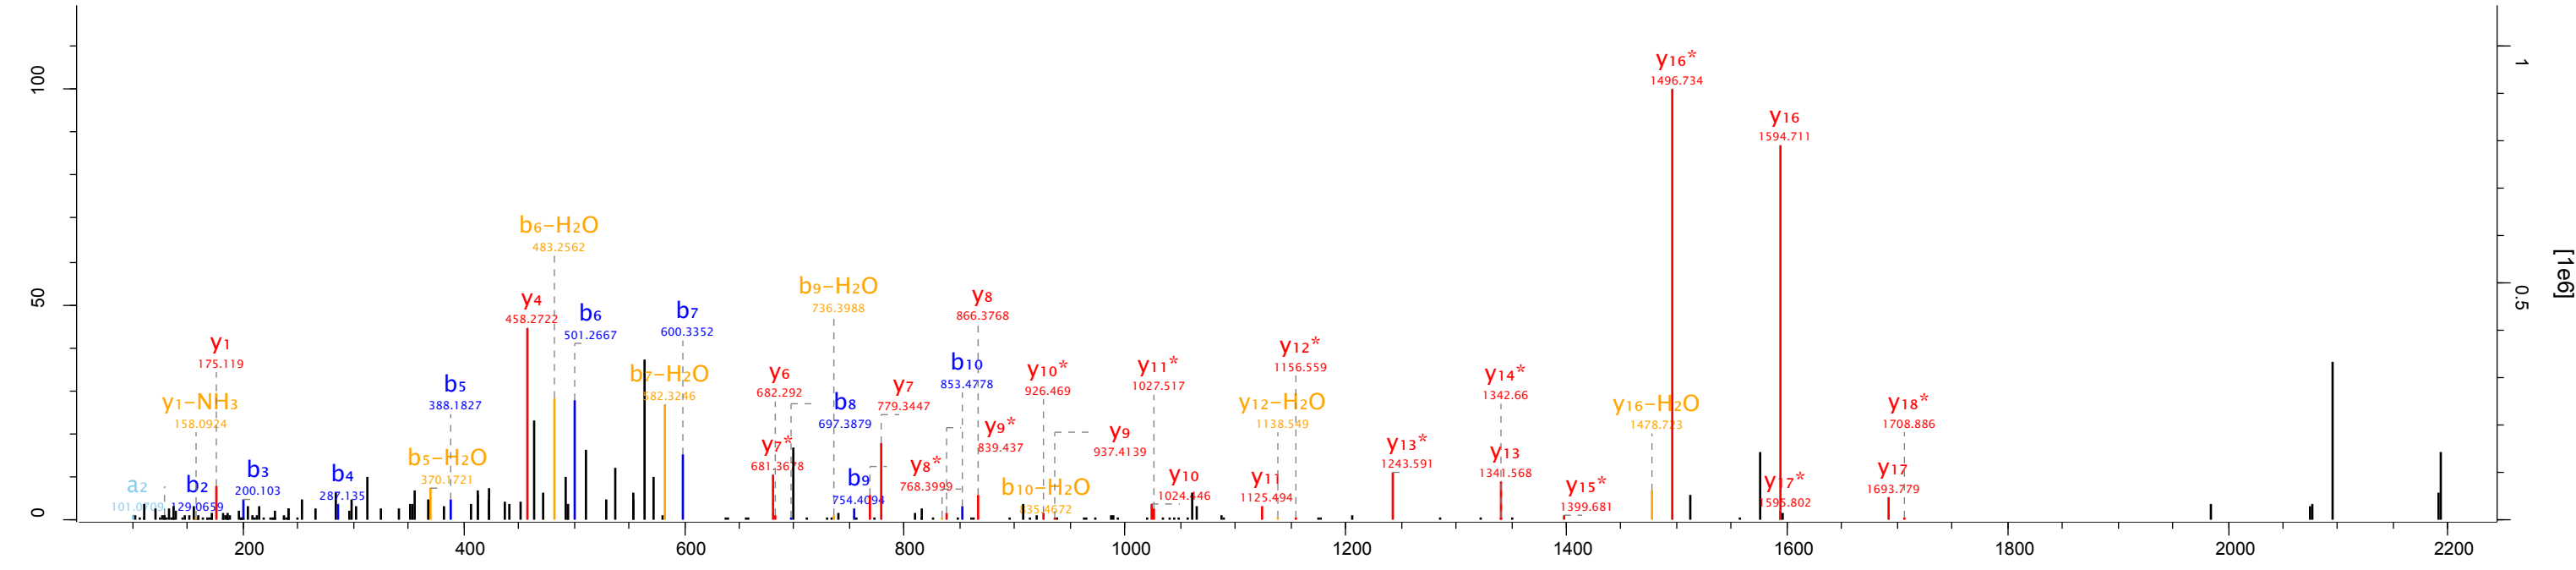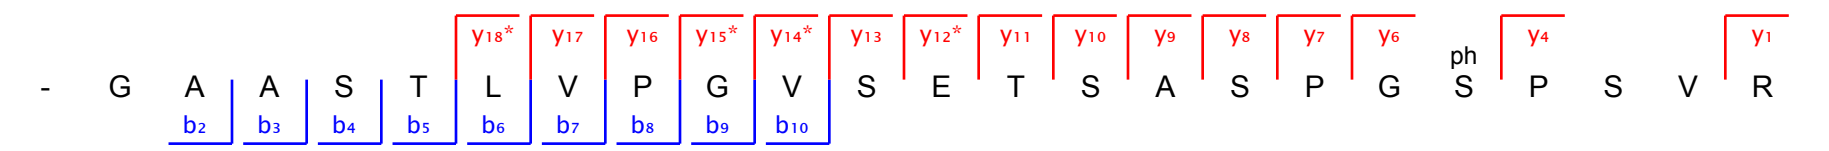

Raw file: 20150814\_A375SR\_Phospho\_BR2\_06  
 Scan: 17273 Method: FTMS; HCD Score: 128.75 m/z: 1057.61 Gene names: VDAC2

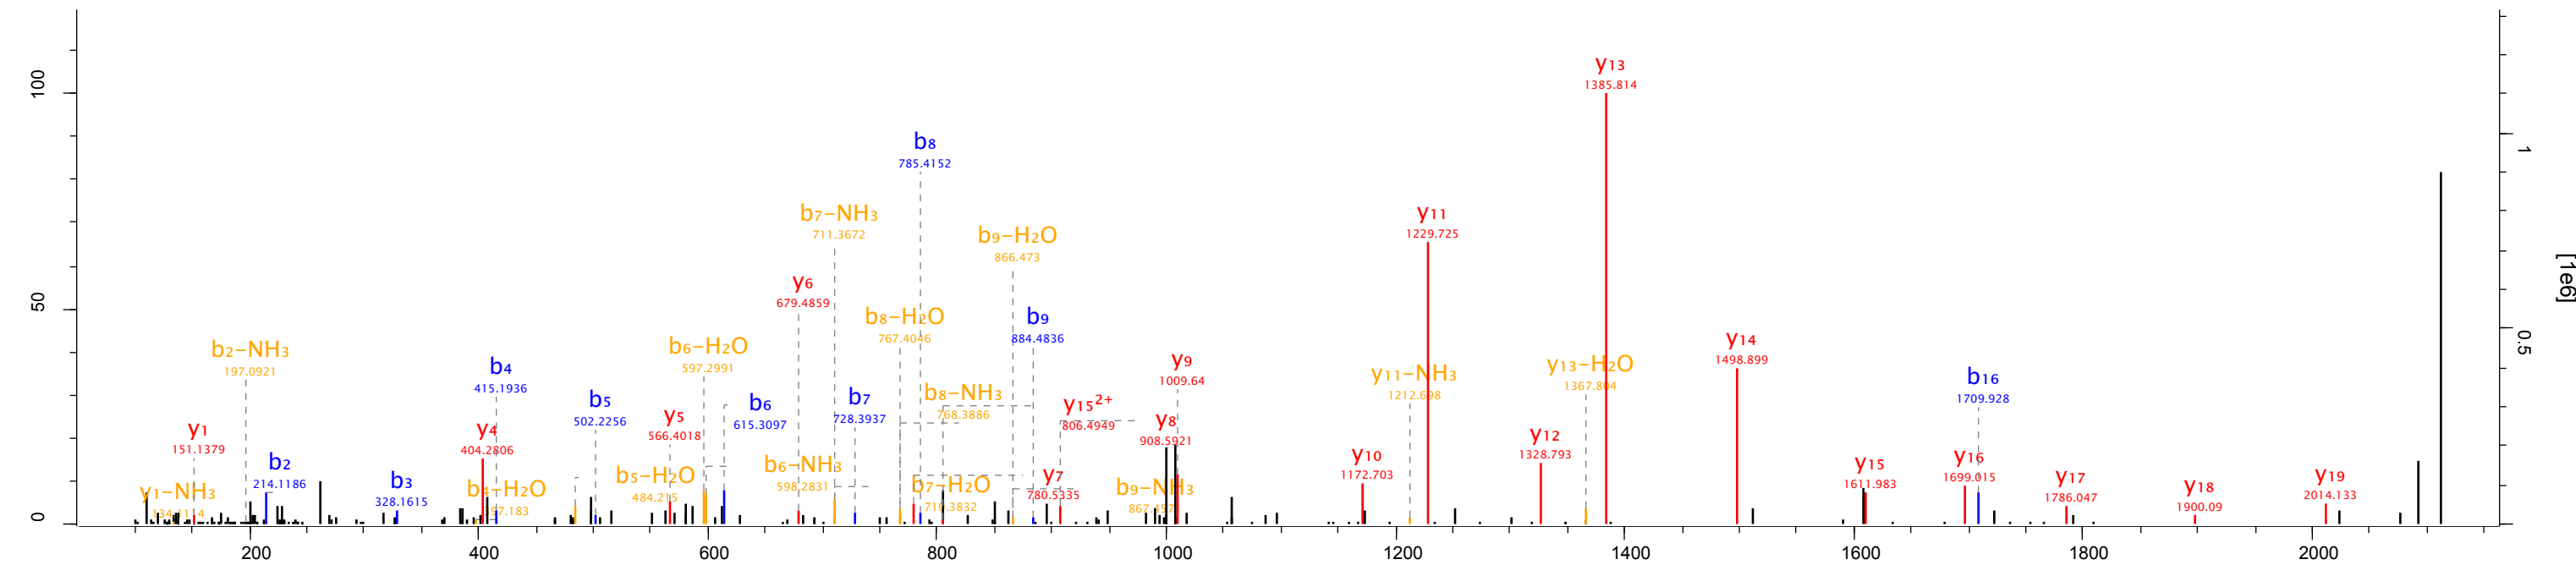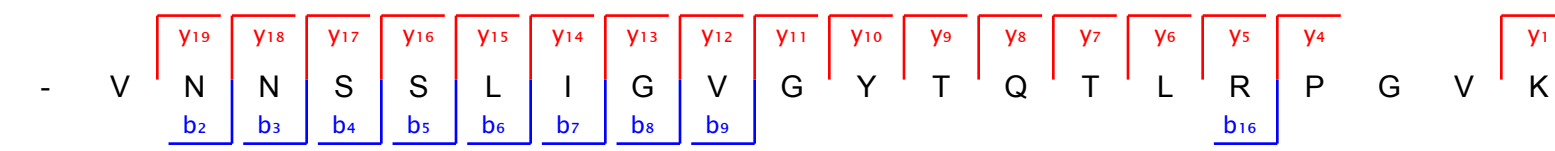

Raw file Scan Method Score m/z Gene names  
 20150814\_A375SR\_Phospho\_BR2\_06 17633 FTMS; HCD 172.92 878.73 OTUD5

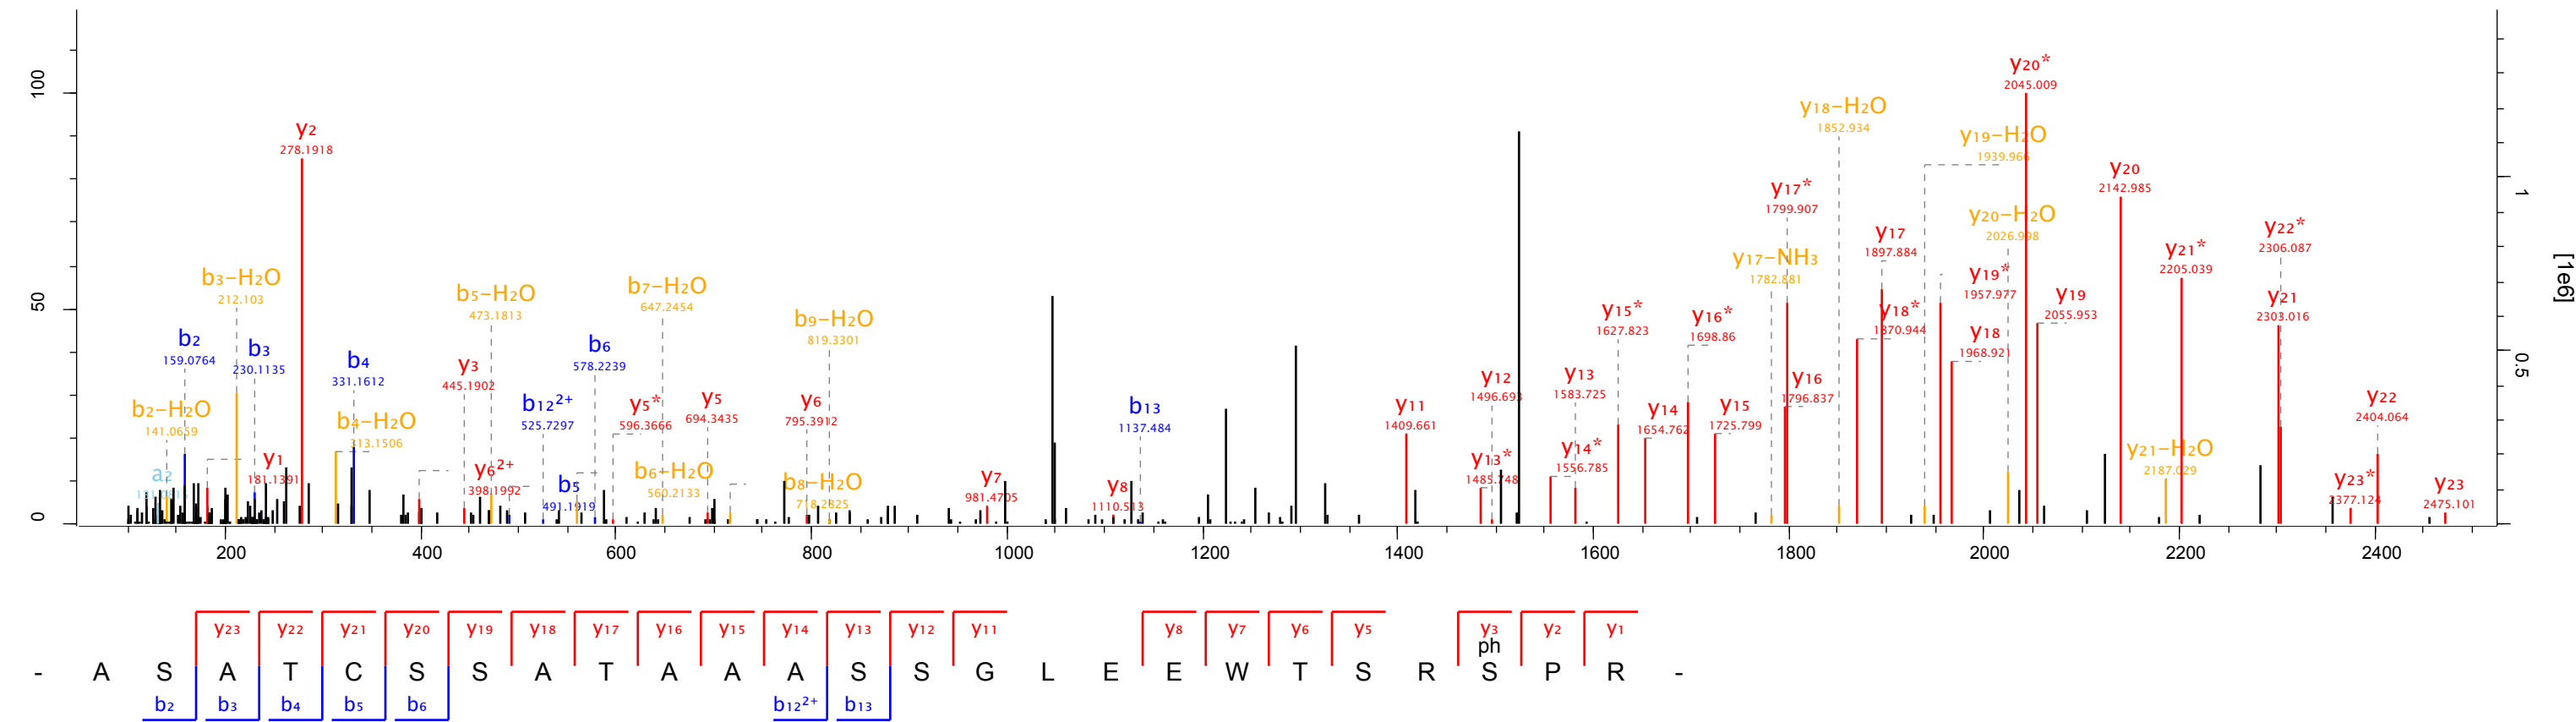

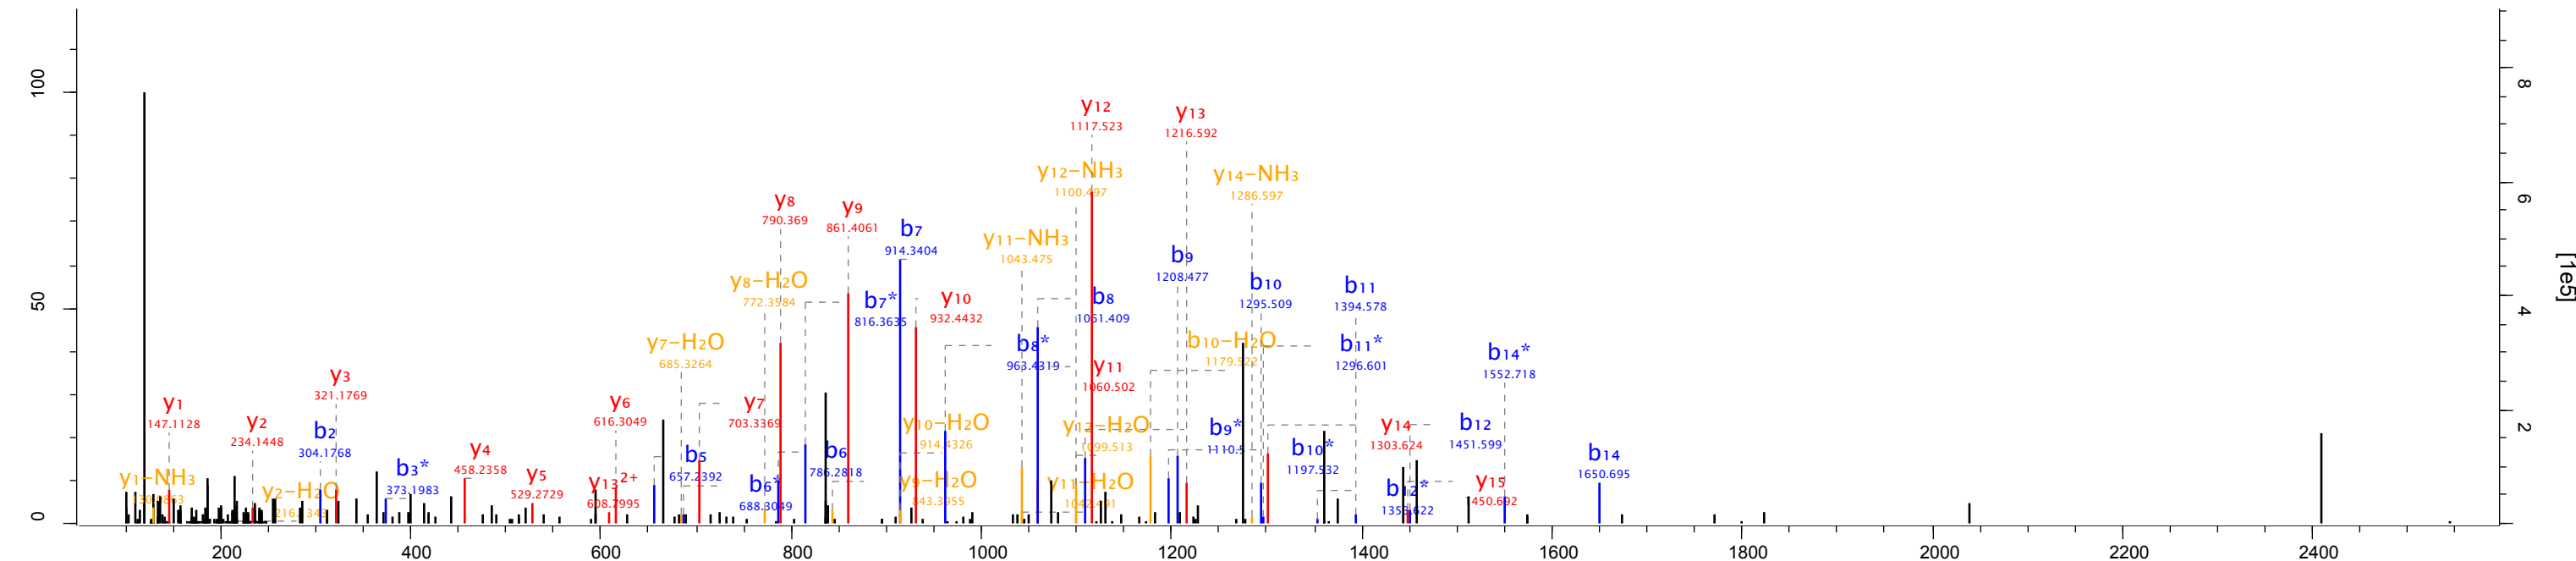

- R F S<sup>ph</sup> A D E Q F F S V G Q A A S S S A H S S K -

b<sub>2</sub> b<sub>3</sub><sup>\*</sup> b<sub>5</sub> b<sub>6</sub> b<sub>7</sub> b<sub>8</sub> b<sub>9</sub> b<sub>10</sub> b<sub>11</sub> b<sub>12</sub> b<sub>14</sub> y<sub>15</sub> y<sub>14</sub> y<sub>13</sub> y<sub>12</sub> y<sub>11</sub> y<sub>10</sub> y<sub>9</sub> y<sub>8</sub> y<sub>7</sub> y<sub>6</sub> y<sub>5</sub> y<sub>4</sub> y<sub>3</sub> y<sub>2</sub> y<sub>1</sub>

Raw file 20150814\_A375SR\_Phospho\_BR2\_06 Scan 18243 Method FTMS; HCD Score 100.92 m/z 933.44 Gene names CTNND1

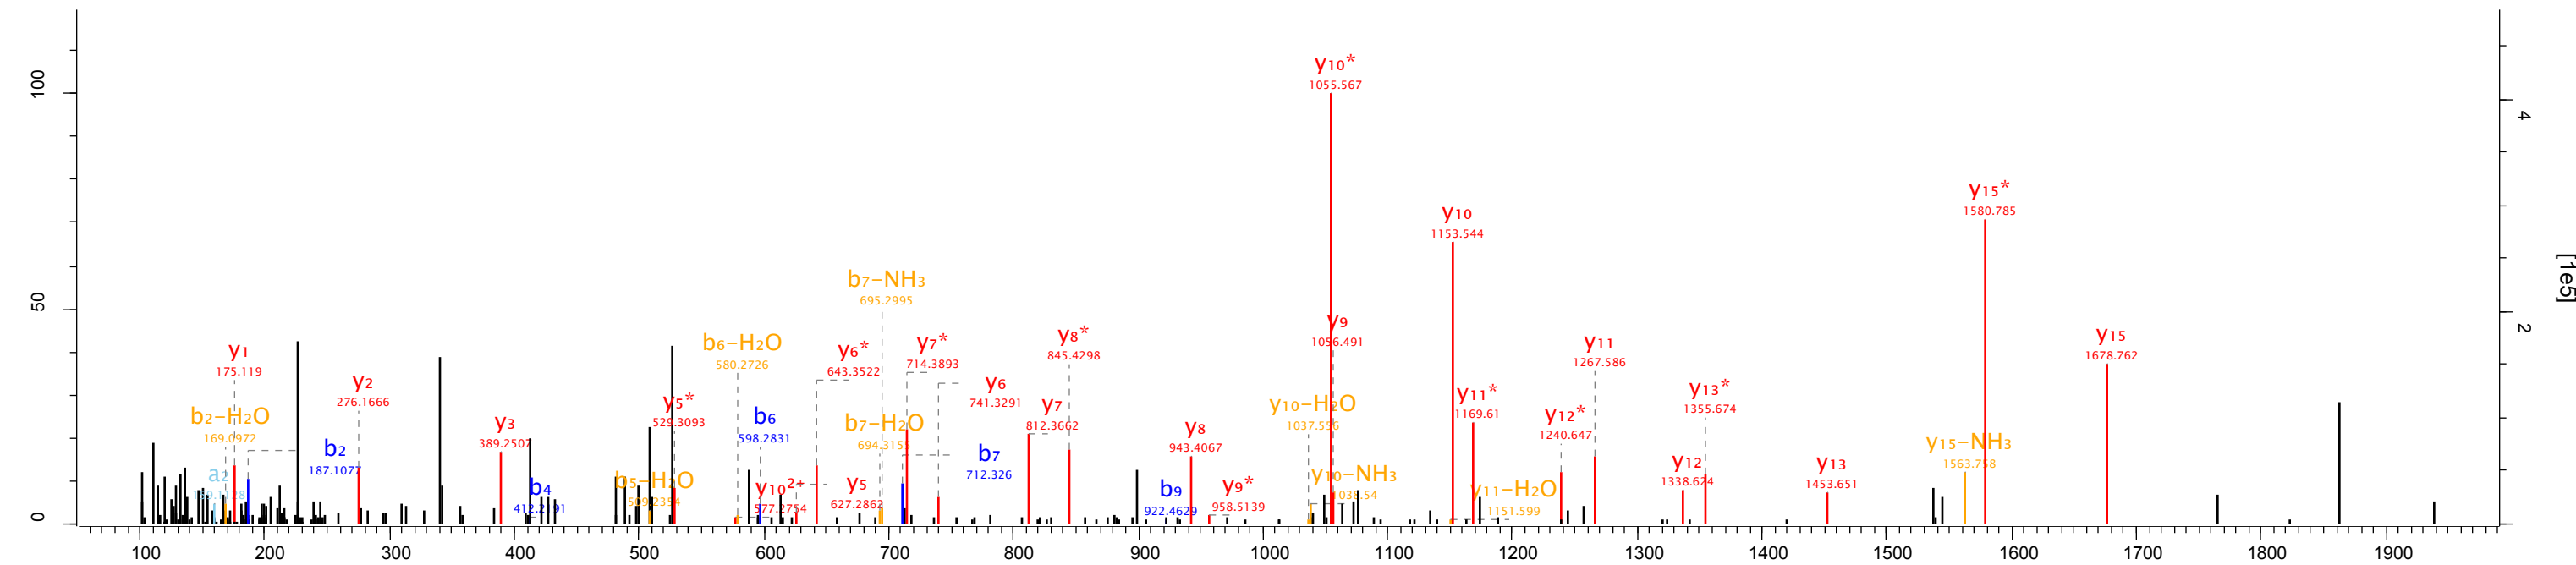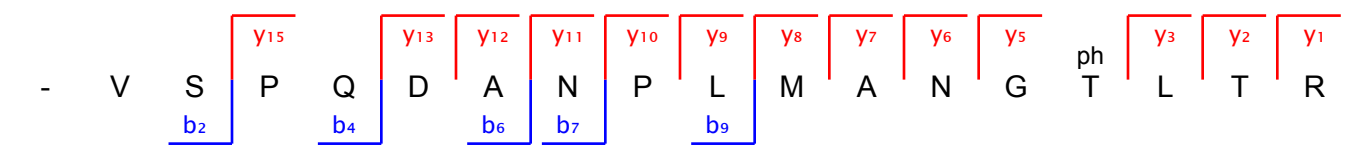

Raw file 20150814\_A375SR\_Phospho\_BR2\_06 Scan 18503 Method FTMS; HCD Score 179 m/z 850.88 Gene names DPYSL2

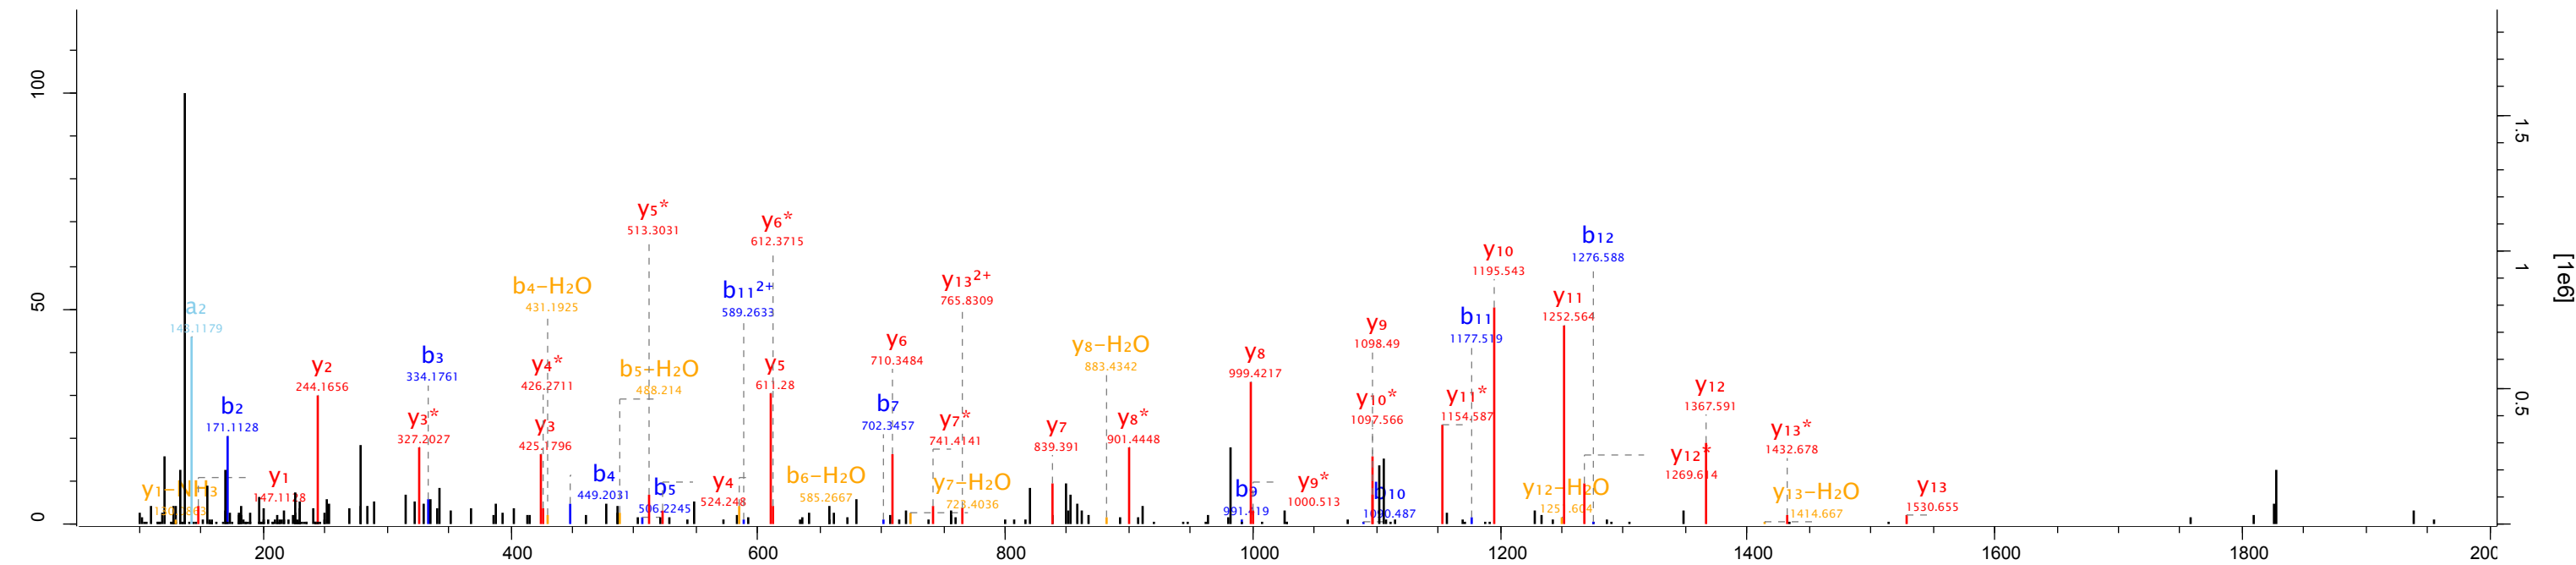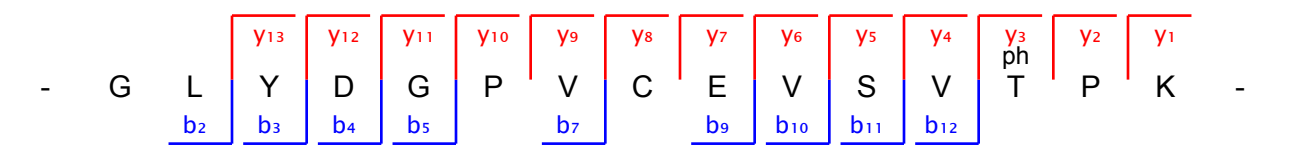

Raw file: 20150814\_A375SR\_Phospho\_BR2\_06  
 Scan: 18603 Method: FTMS; HCD Score: 177.91 m/z: 750.35 Gene names: ETV3

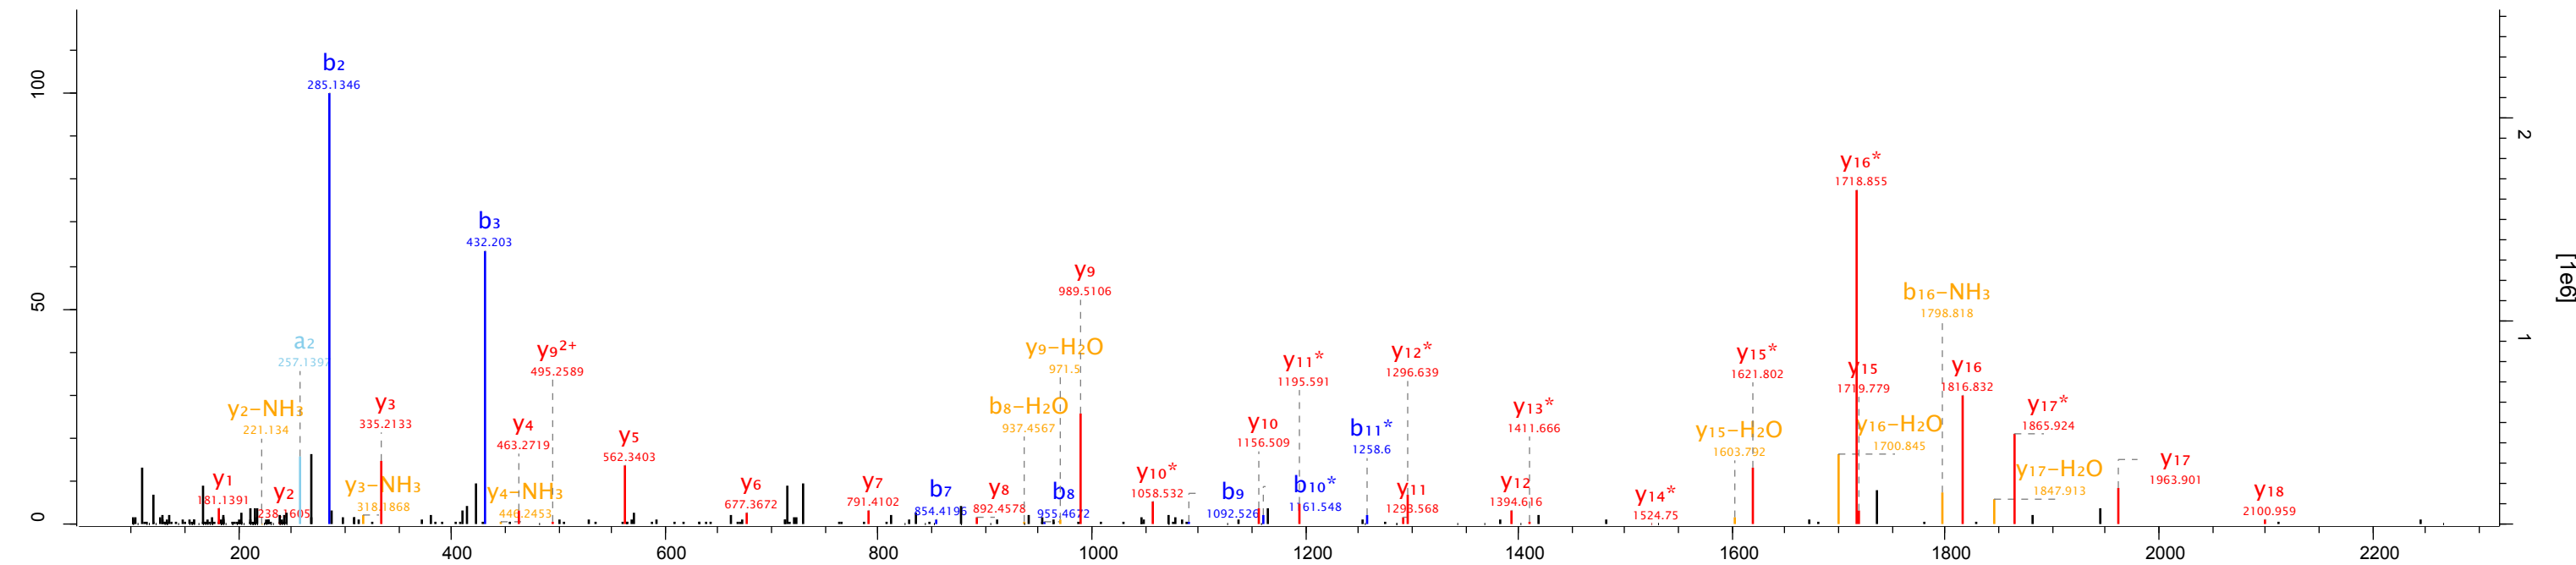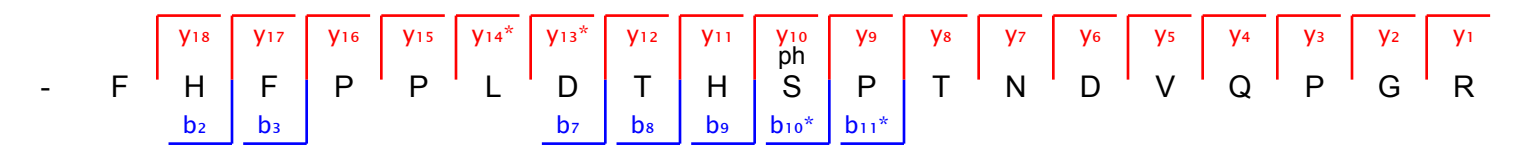

Raw file: 20150814\_A375SR\_Phospho\_BR2\_06  
 Scan: 18693 Method: FTMS; HCD Score: 146.13 m/z: 827.87 Gene names: TMSB10

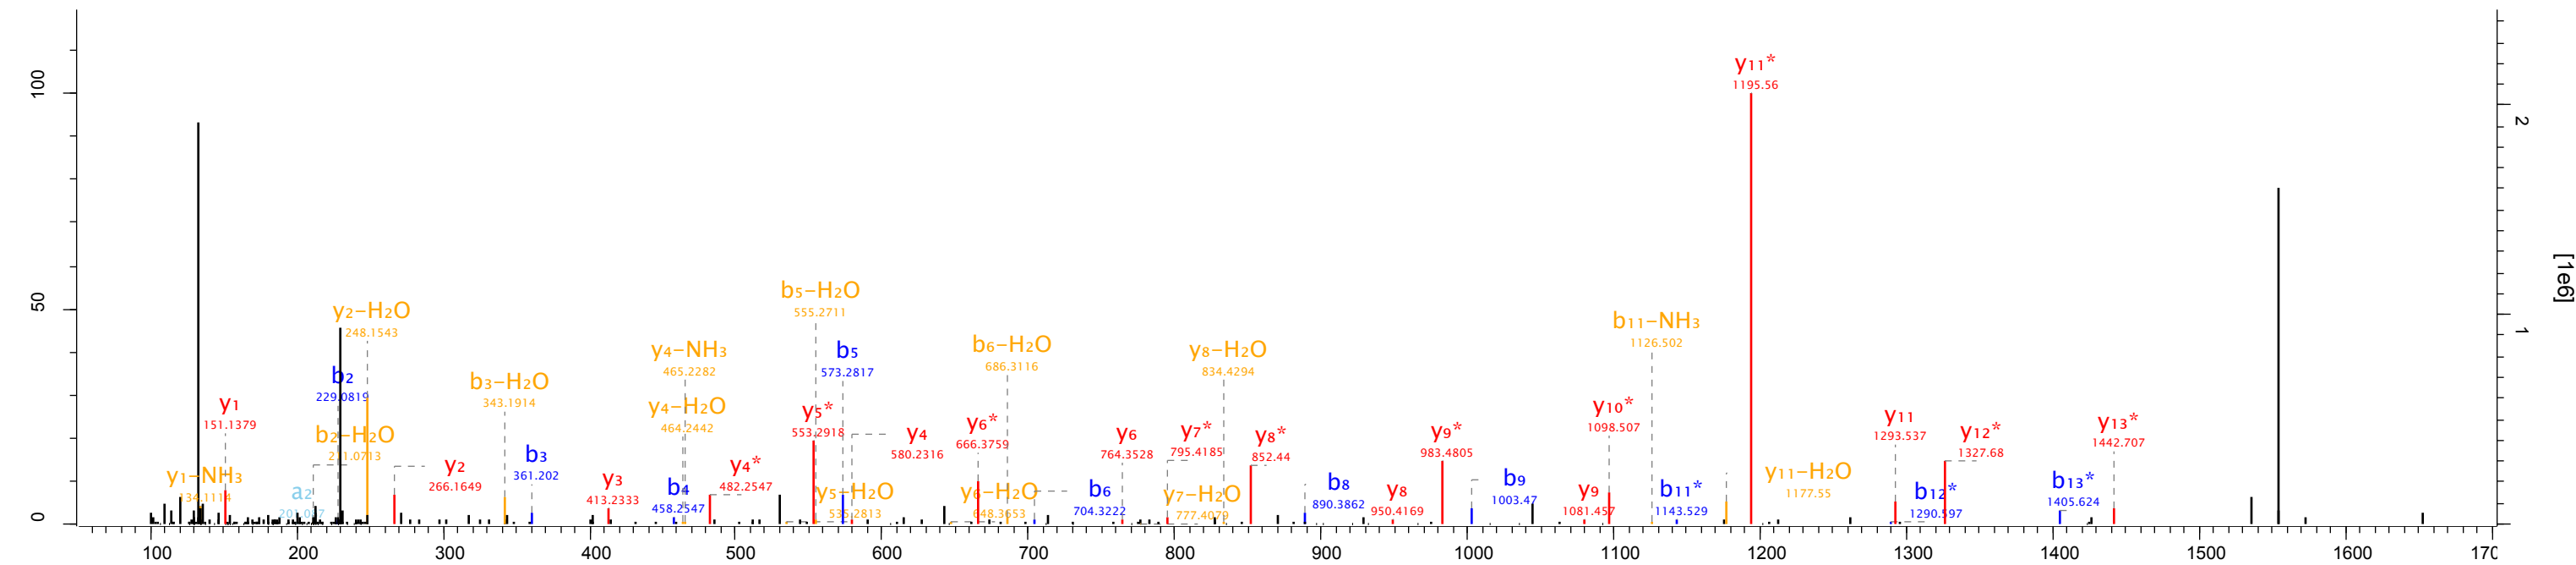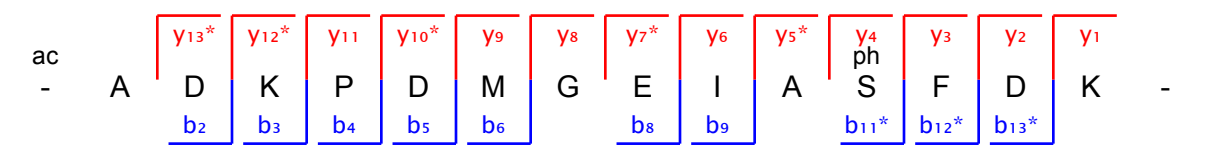



Raw file  
 20150814\_A375SR\_Phospho\_BR2\_06  
 Scan 18863 Method FTMS; HCD Score 284.65 m/z 989.42 Gene names SMC4

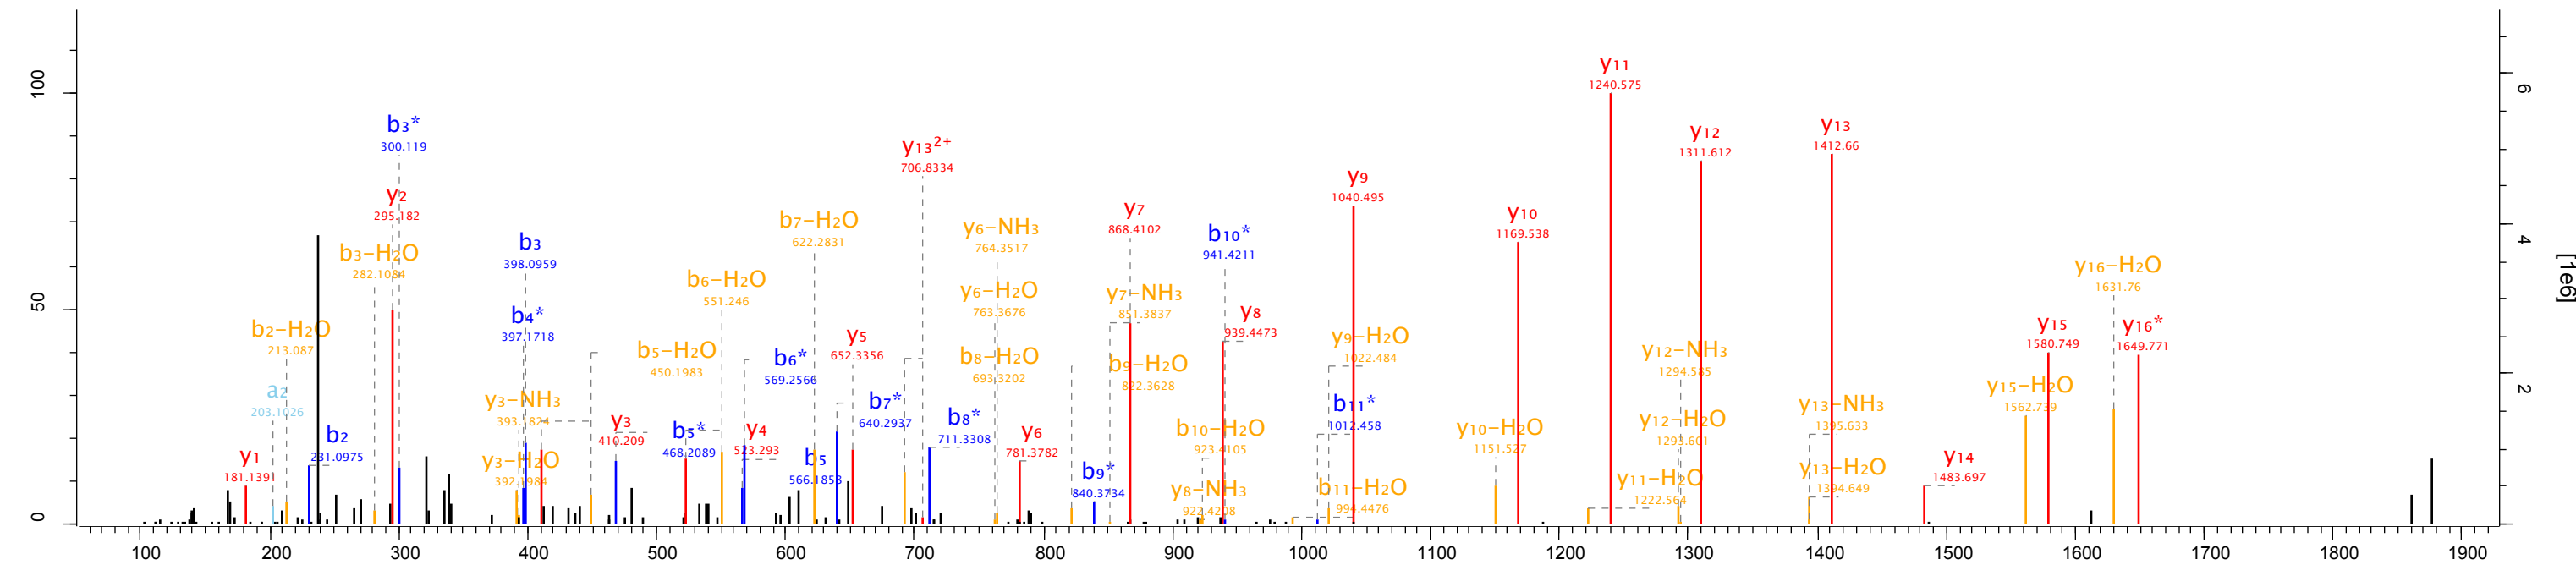

- T E S P A T A A E T A S E E L D N R -

b<sub>2</sub>
y<sub>16</sub><sup>\*</sup>ph
y<sub>15</sub>
y<sub>14</sub>
y<sub>13</sub>
y<sub>12</sub>
y<sub>11</sub>
y<sub>10</sub>
y<sub>9</sub>
y<sub>8</sub>
y<sub>7</sub>
y<sub>6</sub>
y<sub>5</sub>
y<sub>4</sub>
y<sub>3</sub>
y<sub>2</sub>
y<sub>1</sub>

Raw file: 20150814\_A375SR\_Phospho\_BR2\_06  
 Scan: 19103 Method: FTMS; HCD Score: 113.53 m/z: 968.78 Gene names: ZNF687

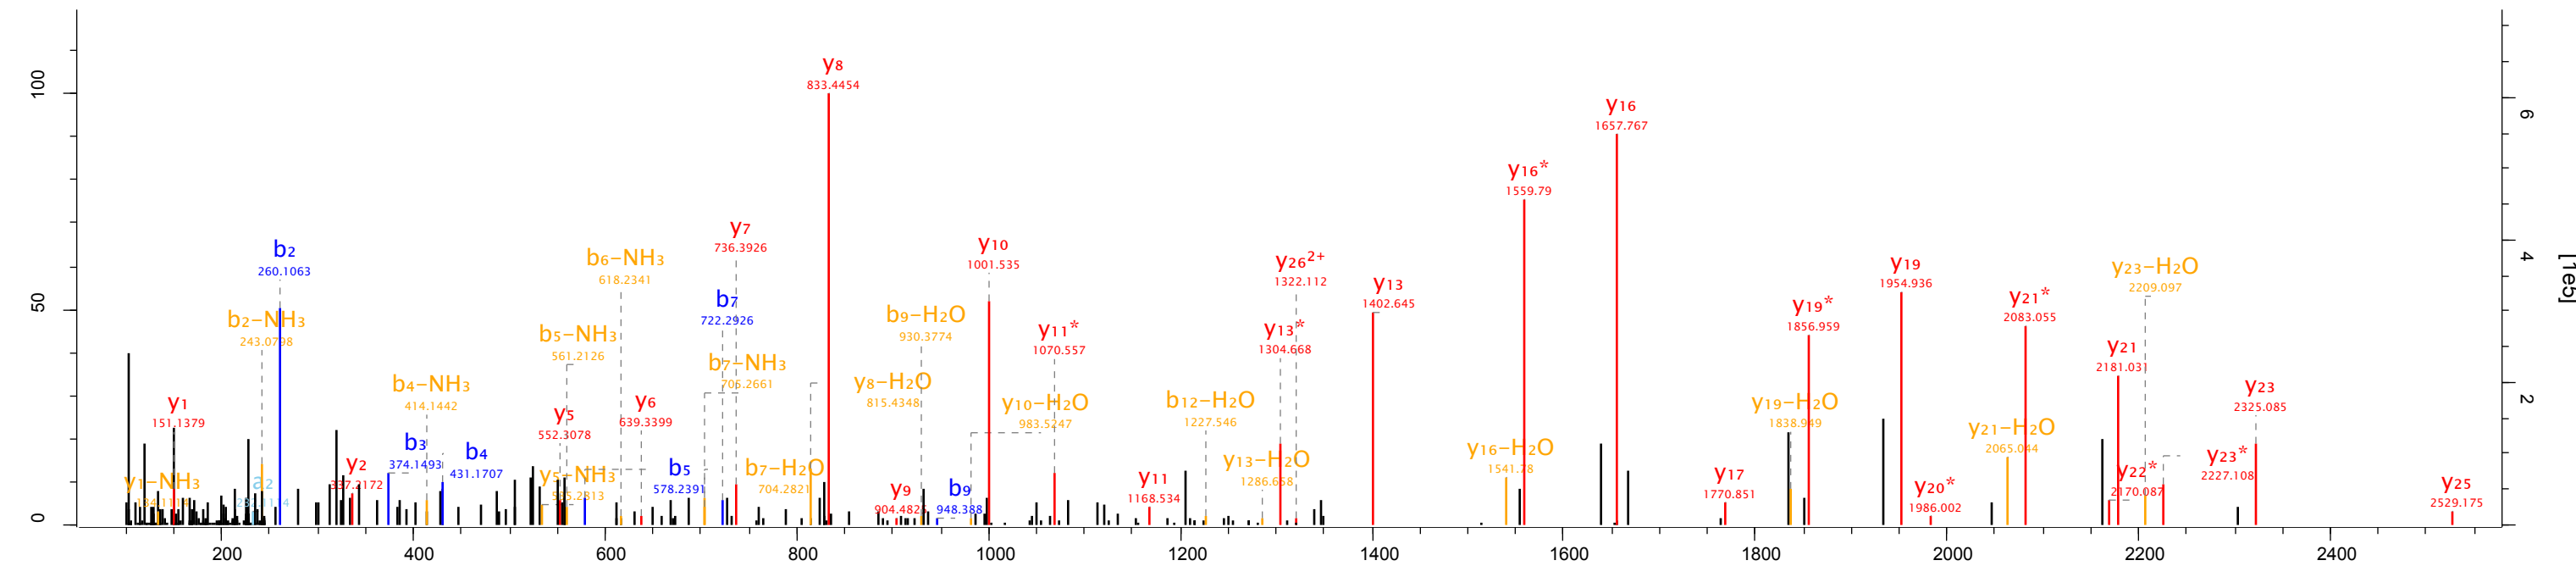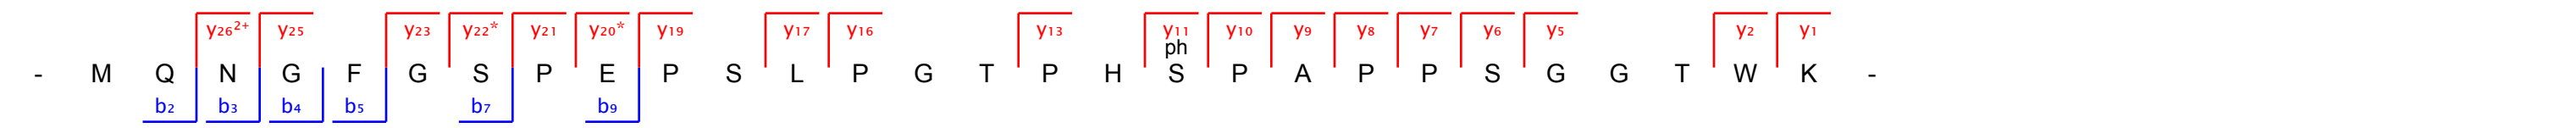

Raw file  
 20150814\_A375SR\_Phospho\_BR2\_06  
 Scan 19283 Method FTMS; HCD Score 135.34 m/z 956 Gene names GAS2L3

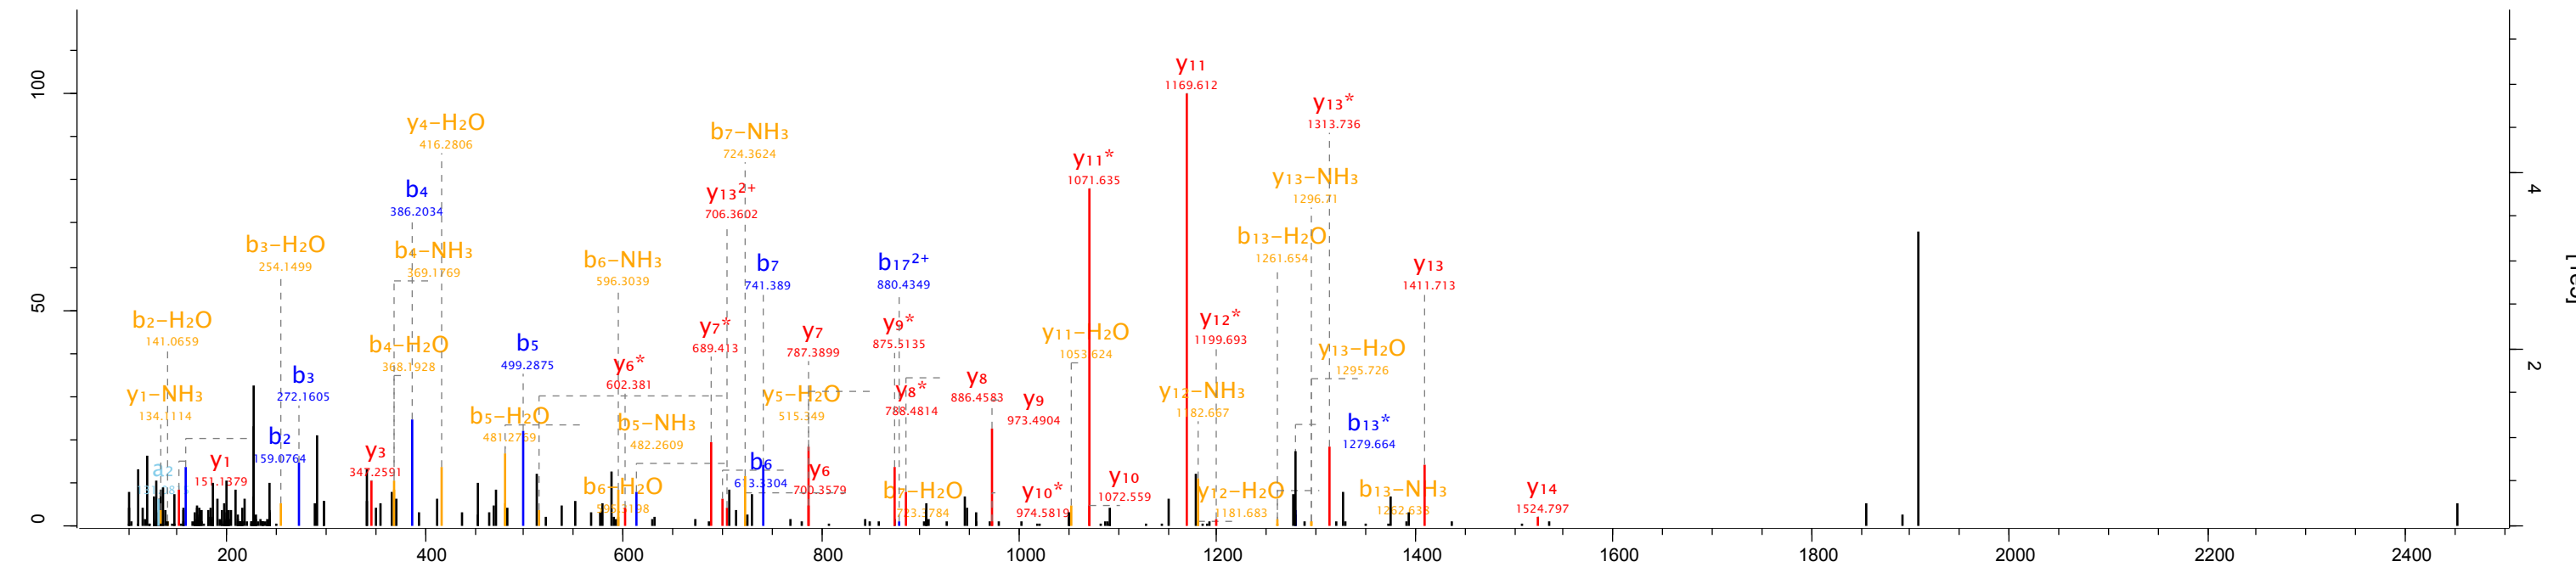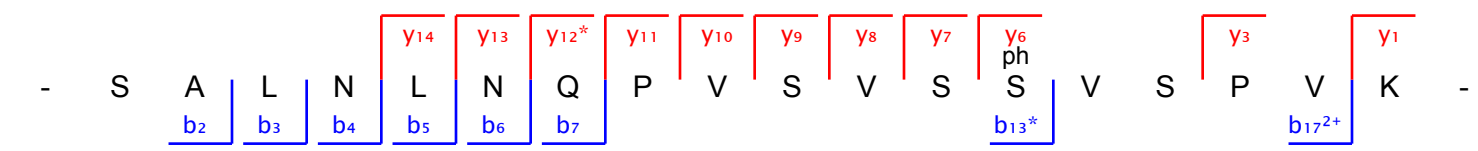

Raw file 20150814\_A375SR\_Phospho\_BR2\_06 Scan 19853 Method FTMS; HCD Score 335.64 m/z 1240.03 Gene names NEMF

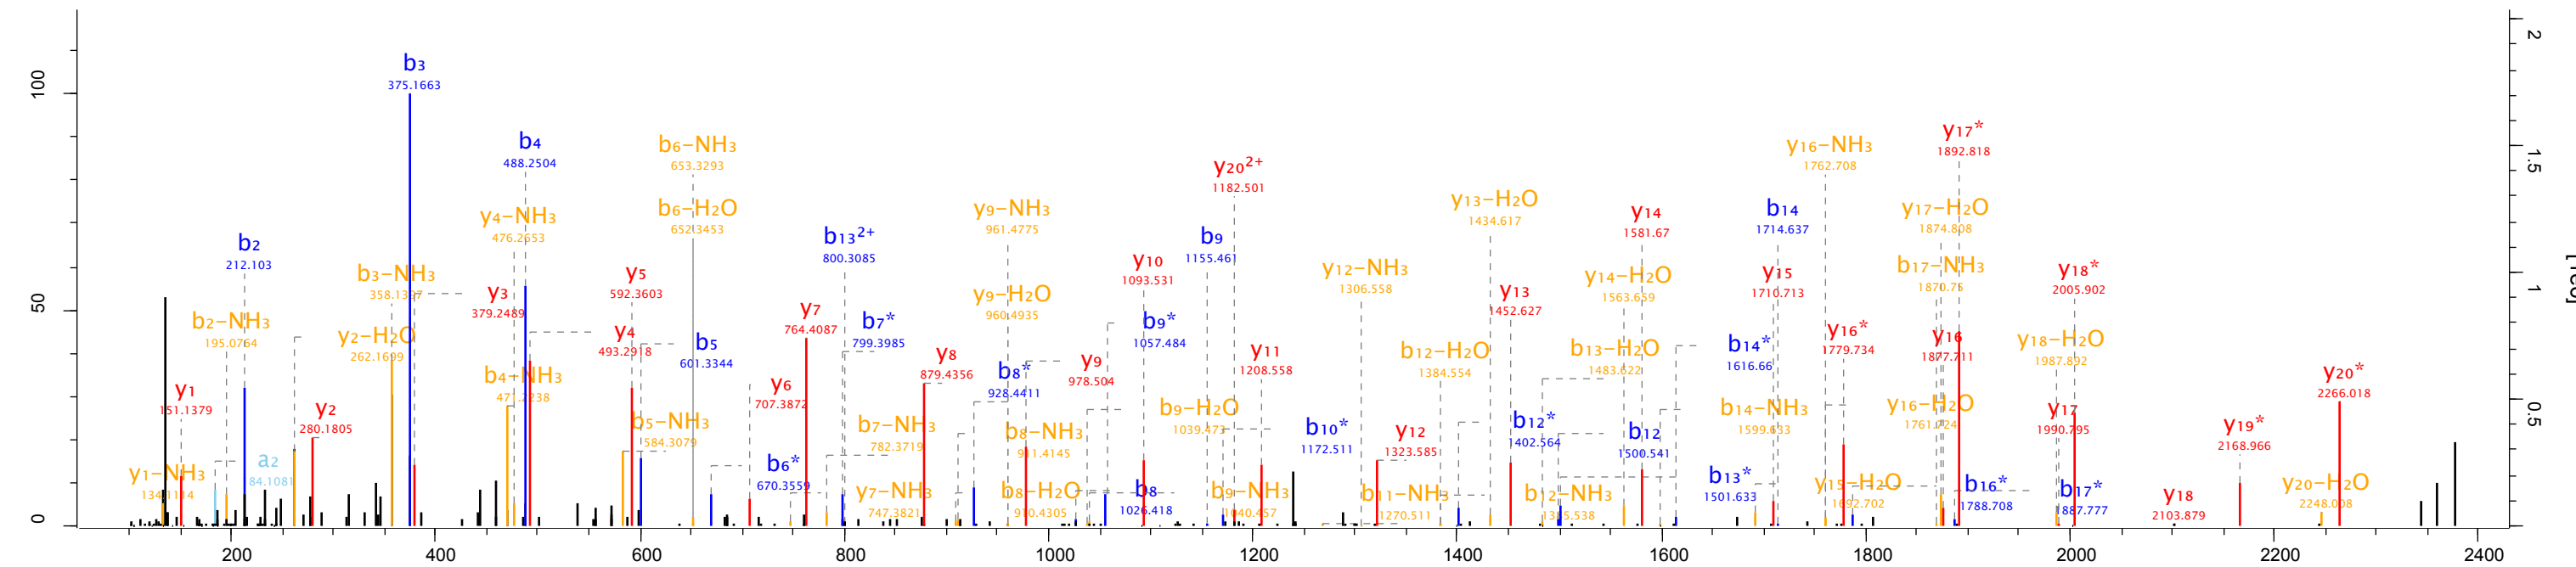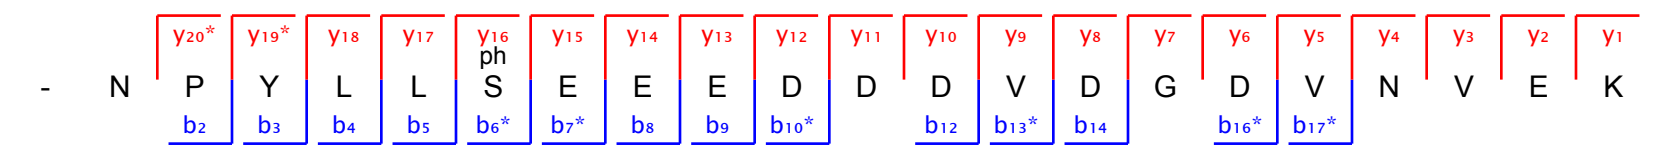

Raw file 20150814\_A375SR\_Phospho\_BR2\_06 Scan 21013 Method FTMS; HCD Score 73.76 m/z 618.31 Gene names ROBO1

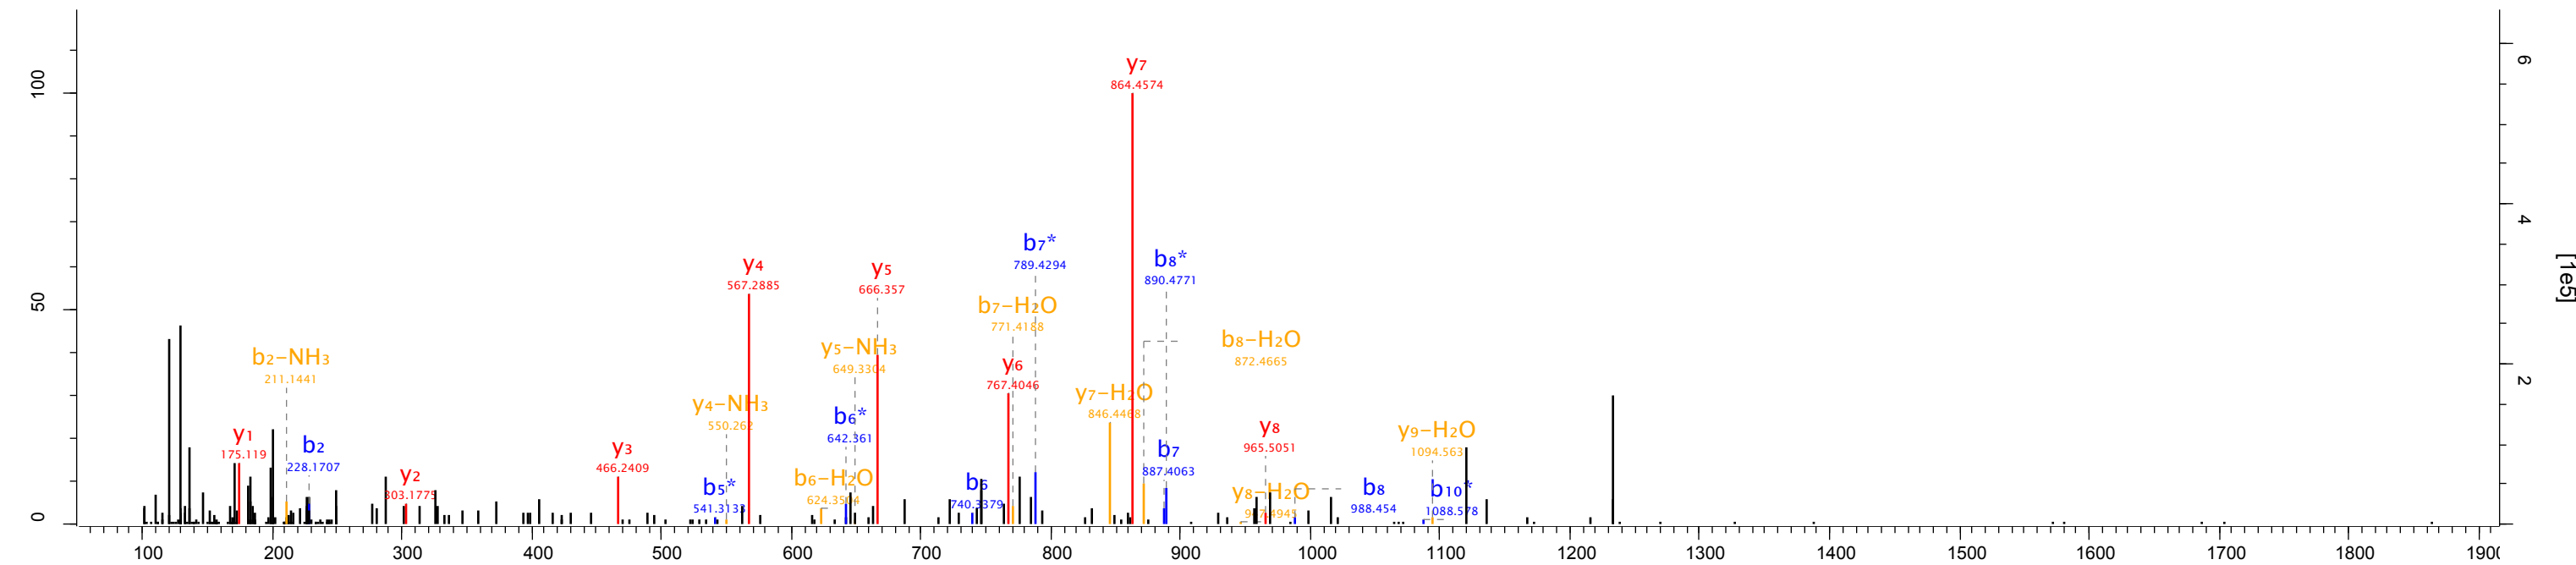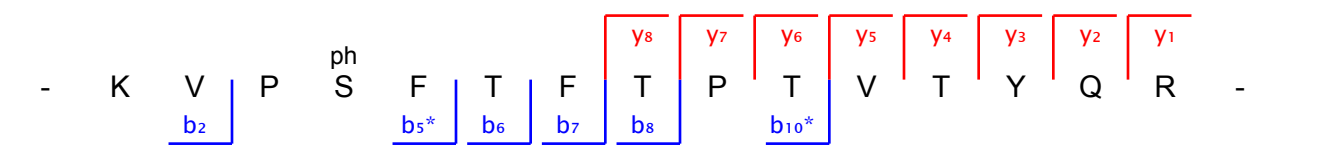

Raw file  
20150814\_A375SR\_Phospho\_BR2\_06

Scan 21663 Method FTMS; HCD Score 102.98 m/z 886.45 Gene names MGA

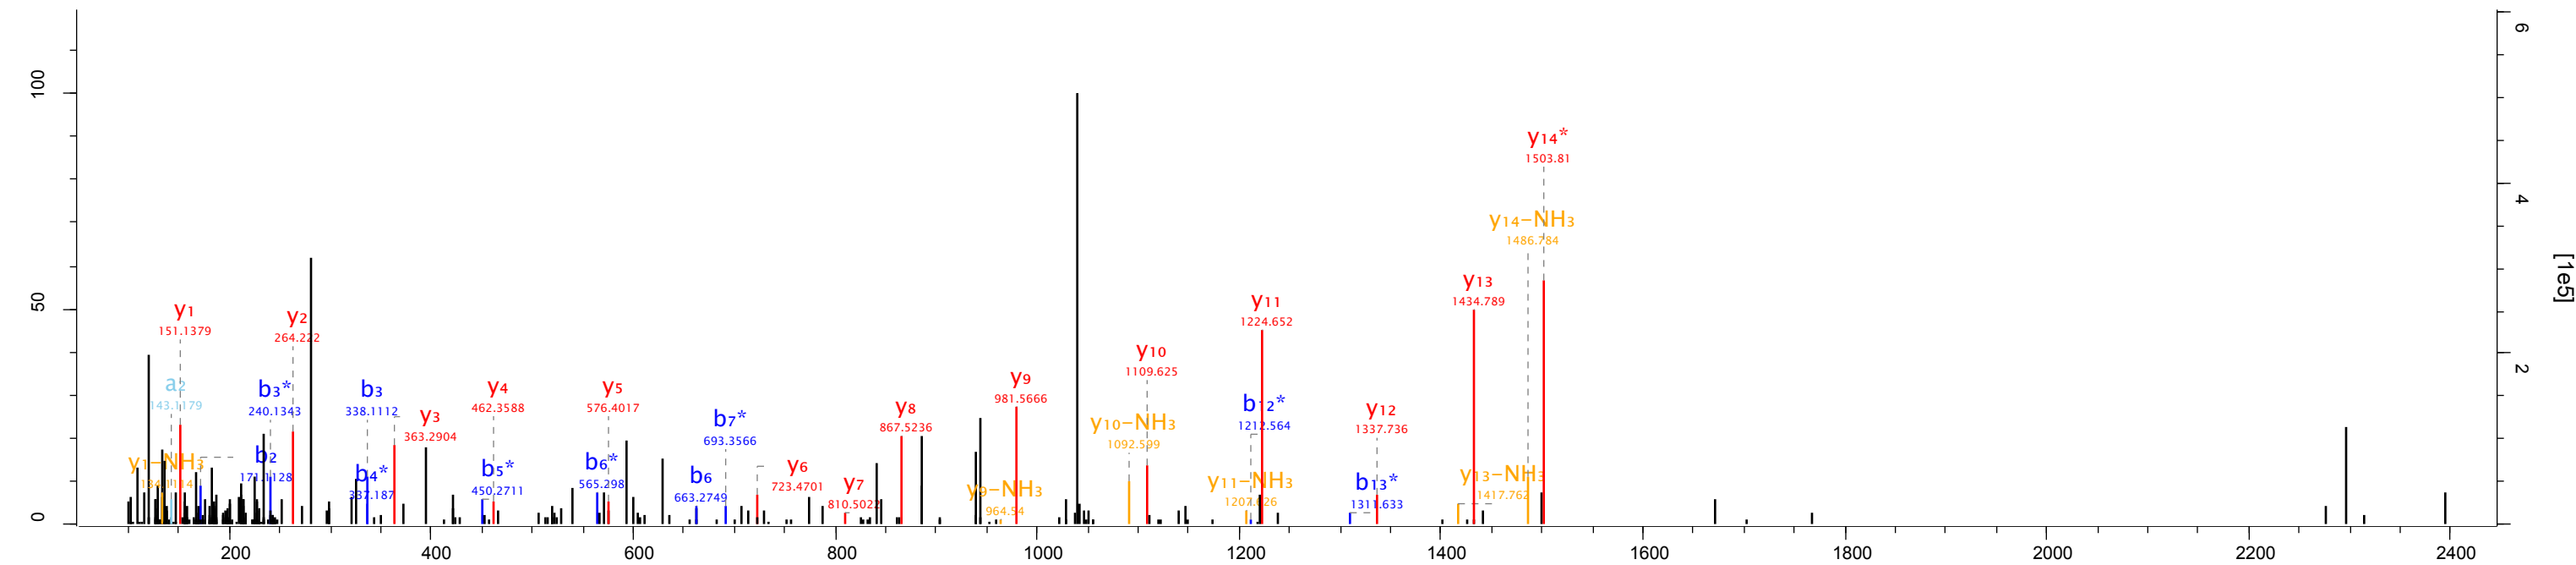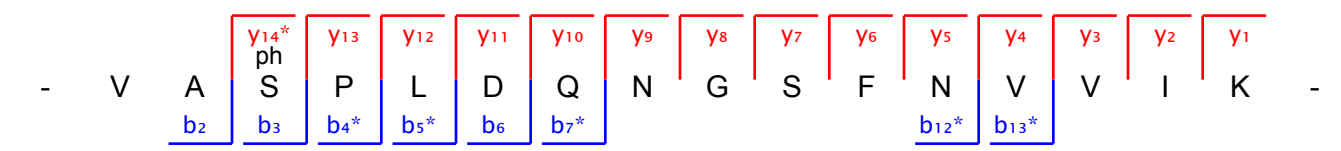

Raw file: 20150814\_A375SR\_Phospho\_BR2\_06  
 Scan: 21923 Method: FTMS; HCD Score: 124.68 m/z: 806.38 Gene names: GIT1

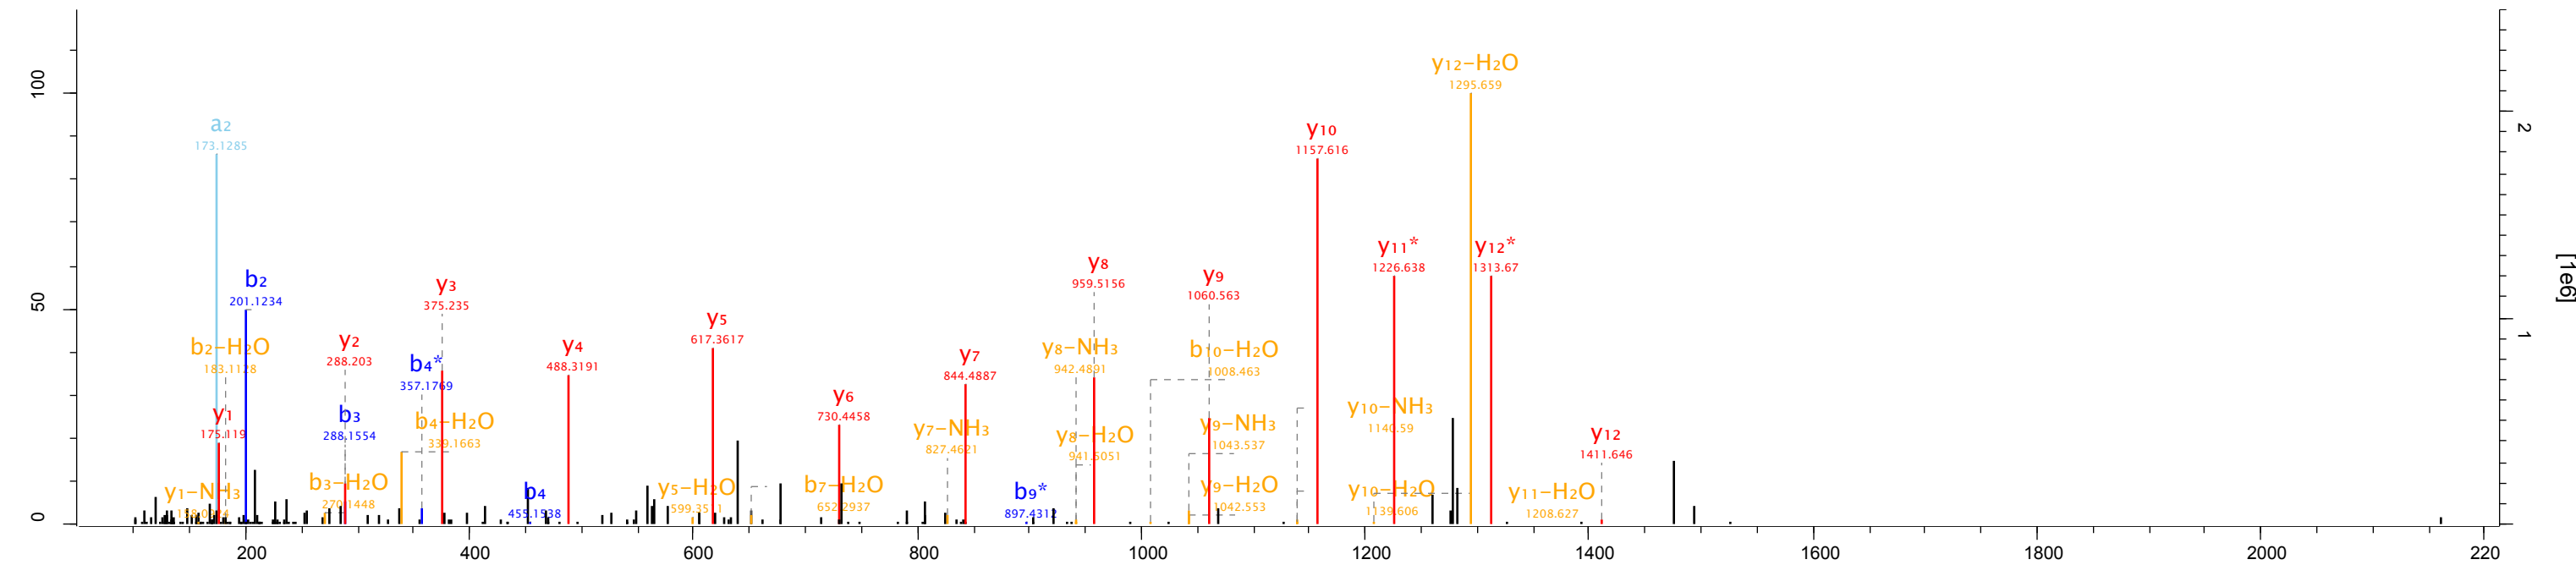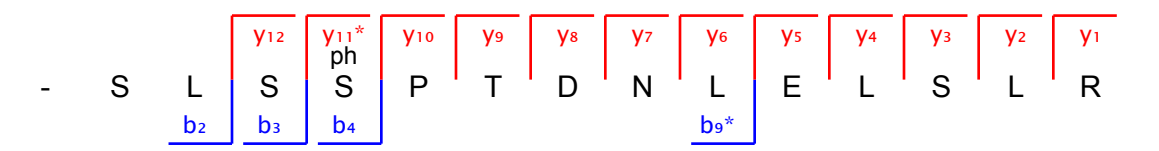

Raw file  
20150814\_A375SR\_Phospho\_BR2\_06

Scan 21943 Method FTMS; HCD Score 97.35 m/z 916.13 Gene names ATAT1

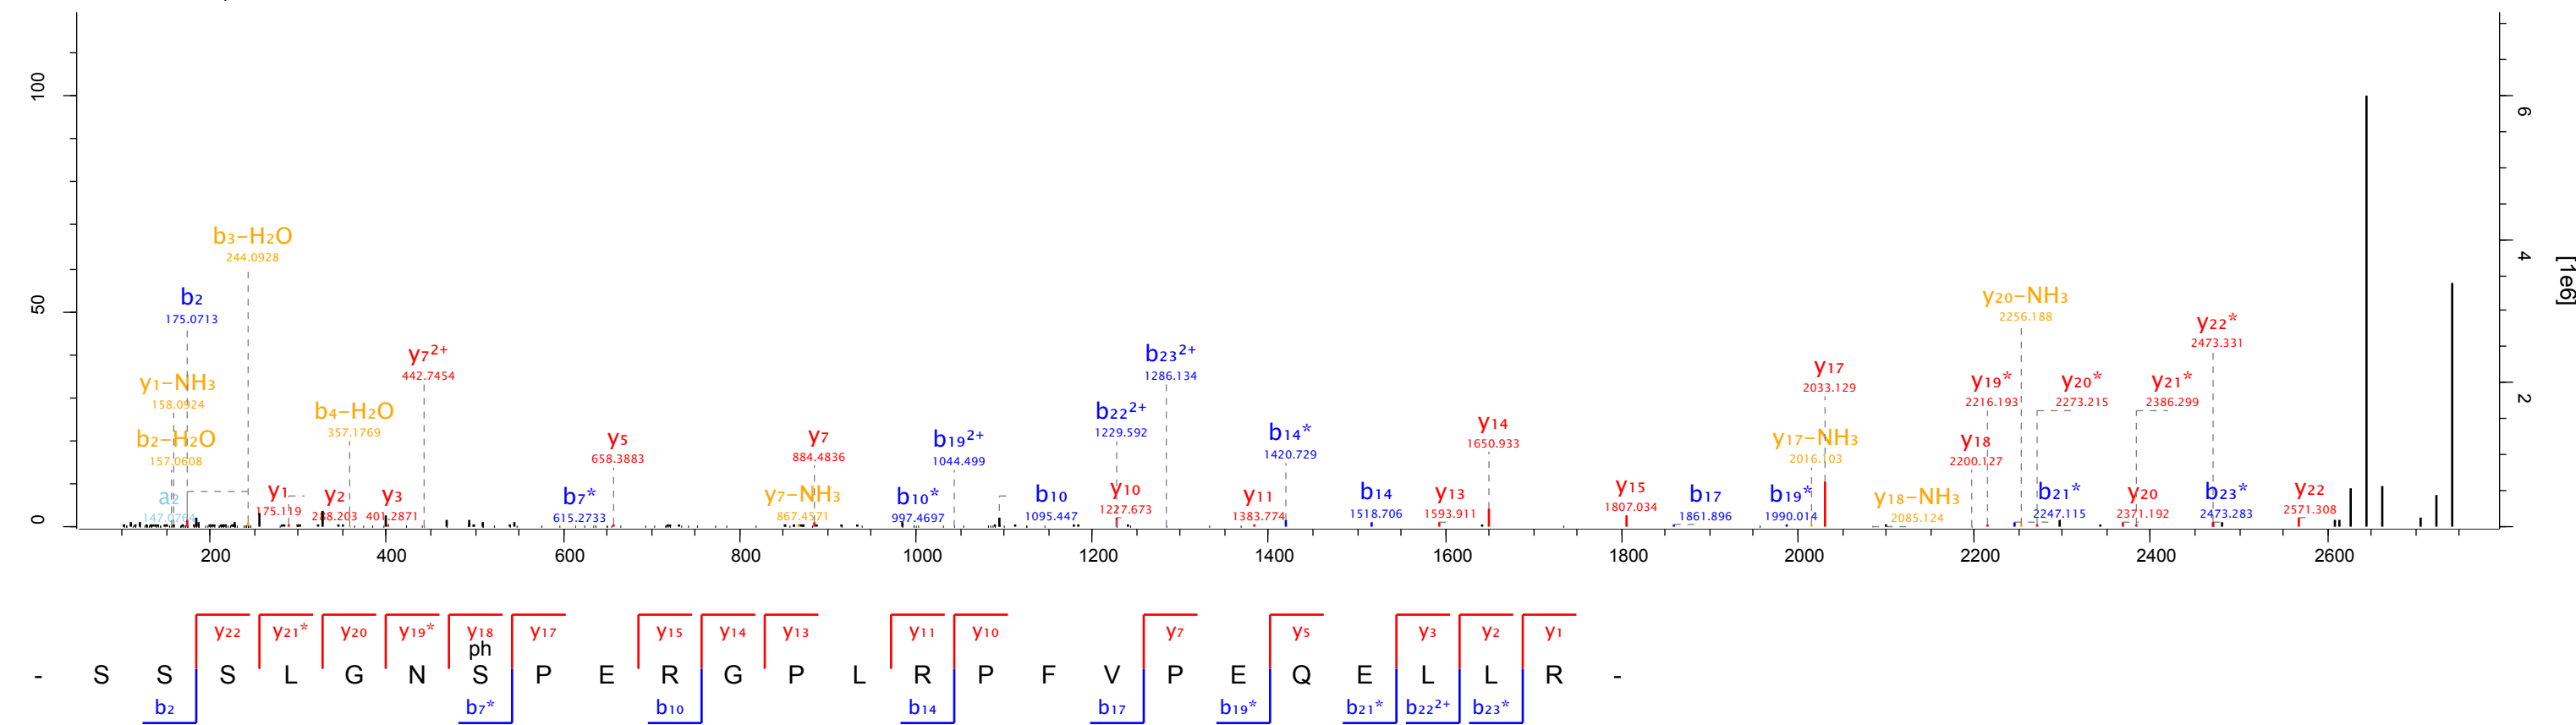



Raw file 20150814\_A375SR\_Phospho\_BR2\_06 Scan 22933 Method FTMS; HCD Score 195.27 m/z 1278.58 Gene names PCBP1

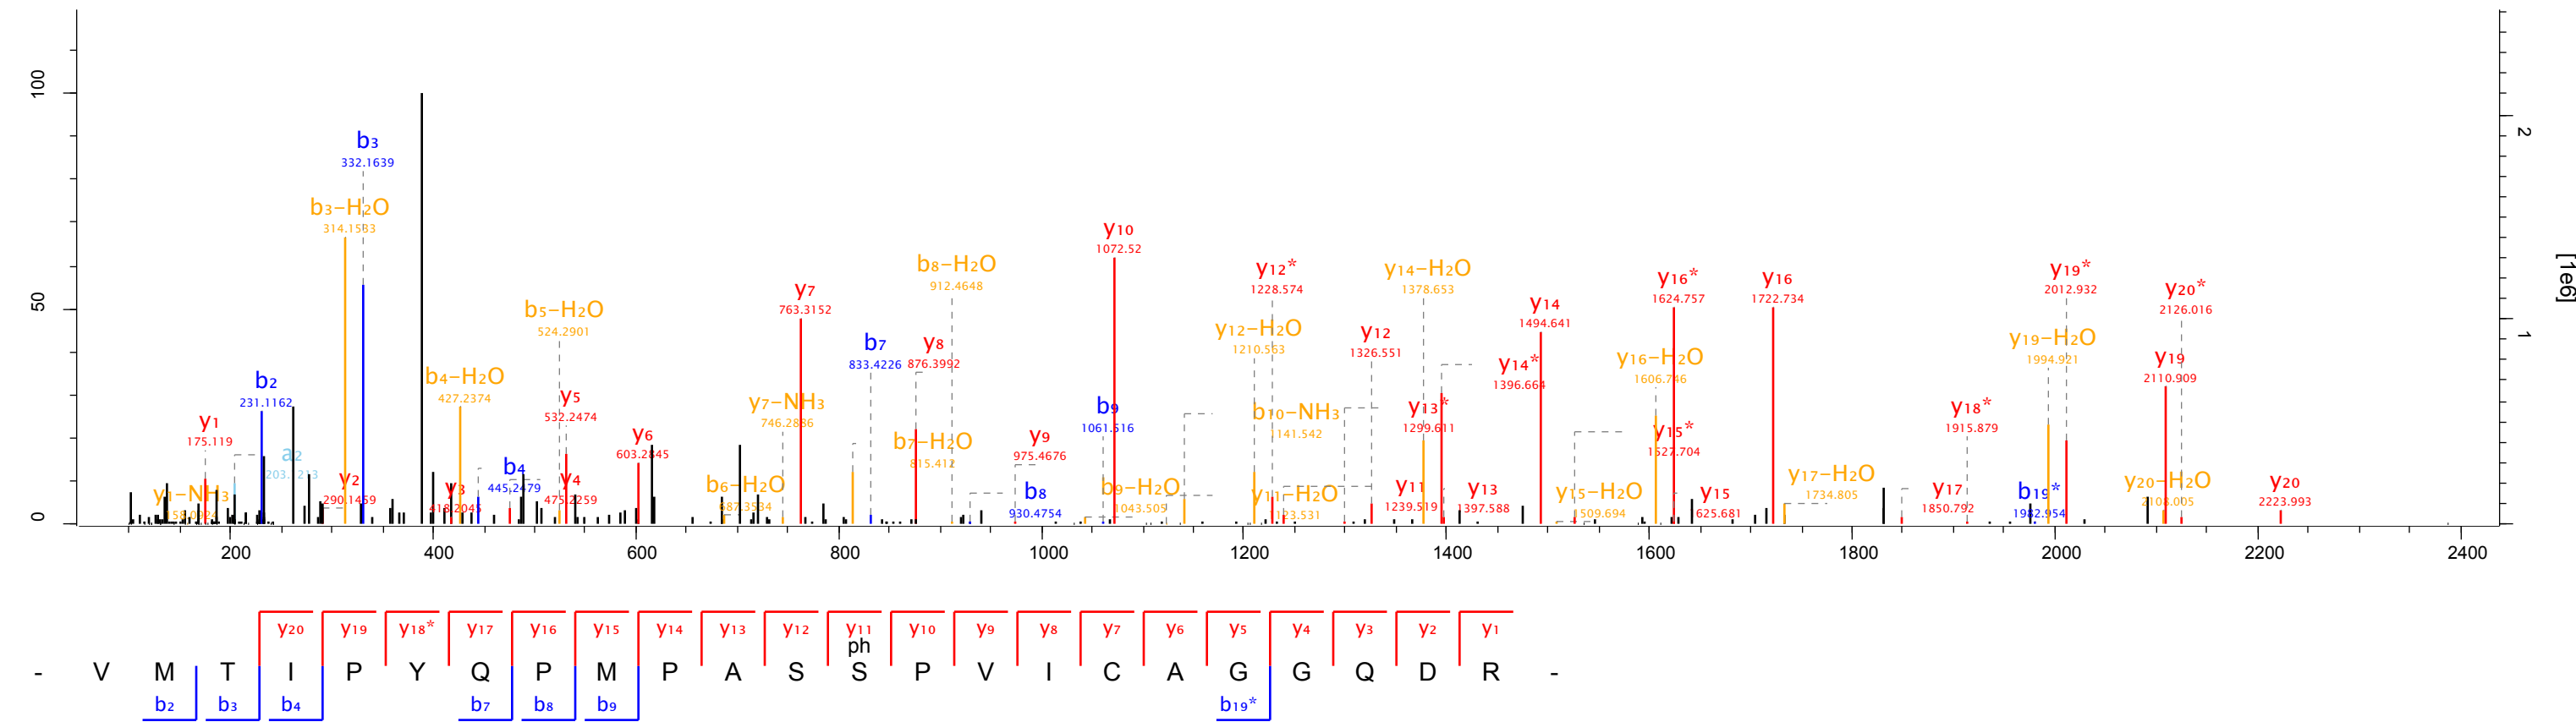

Raw file 20150814\_A375SR\_Phospho\_BR2\_06 Scan 23383 Method FTMS; HCD Score 136.24 m/z 652.3 Gene names FIP1L1

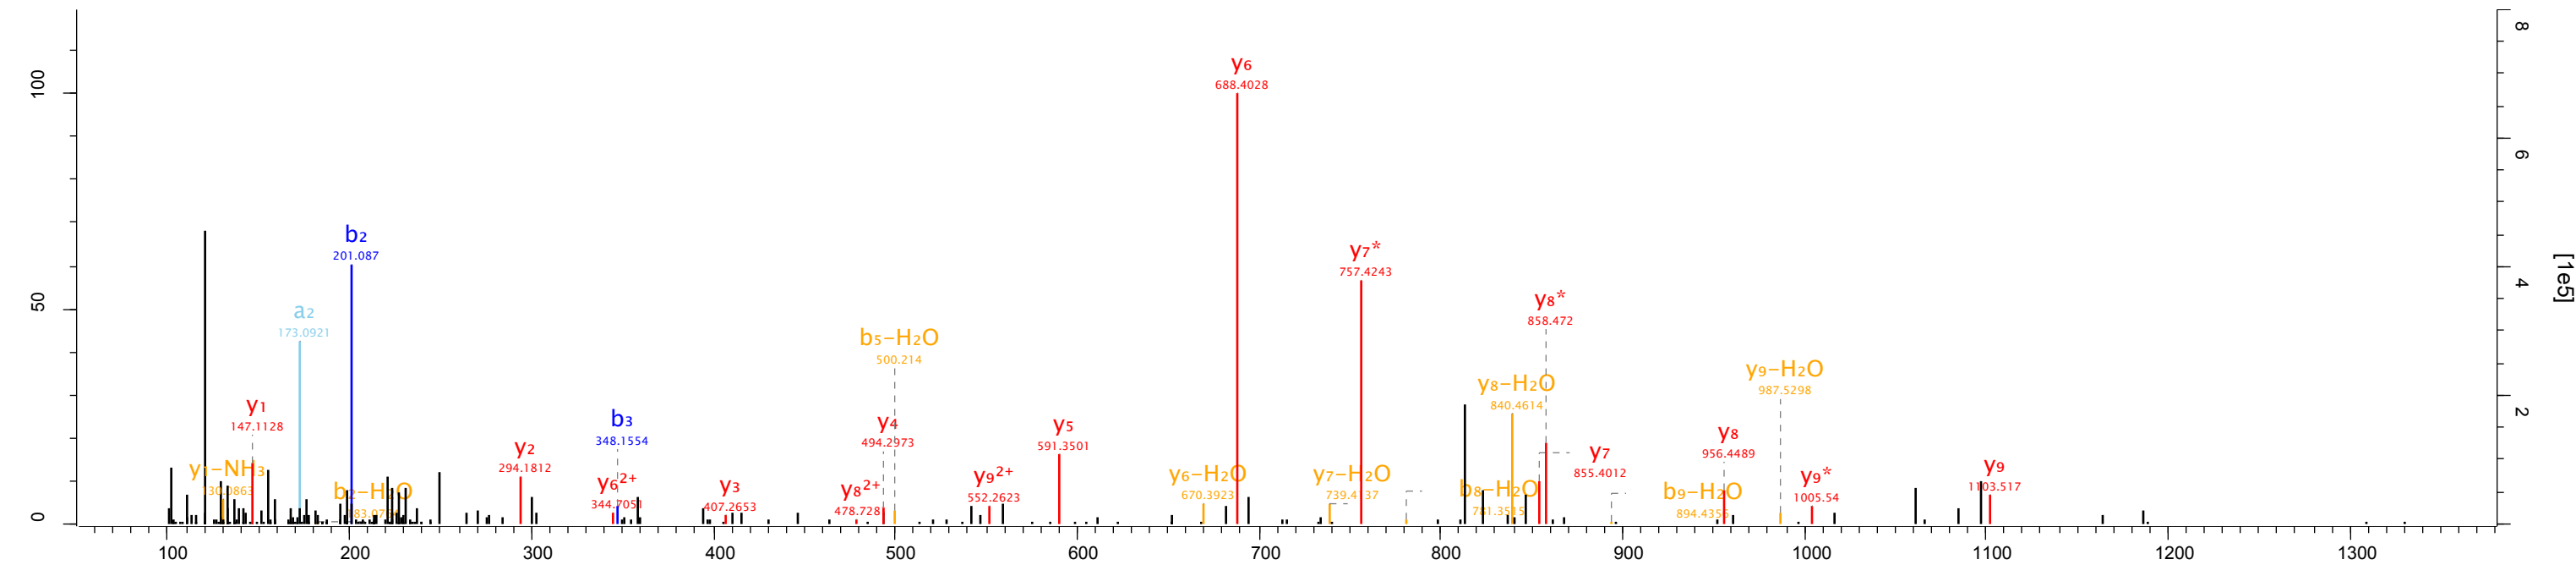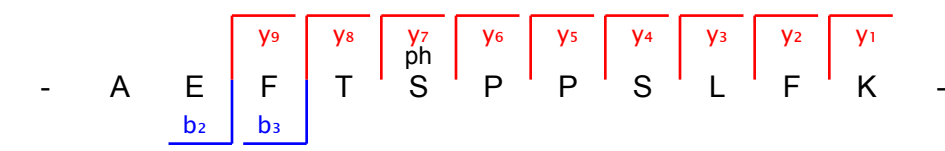

Raw file: 20150814\_A375SR\_Phospho\_BR2\_06  
 Scan: 24363 Method: FTMS; HCD Score: 94.39 m/z: 1160.88 Gene names: CCAR2

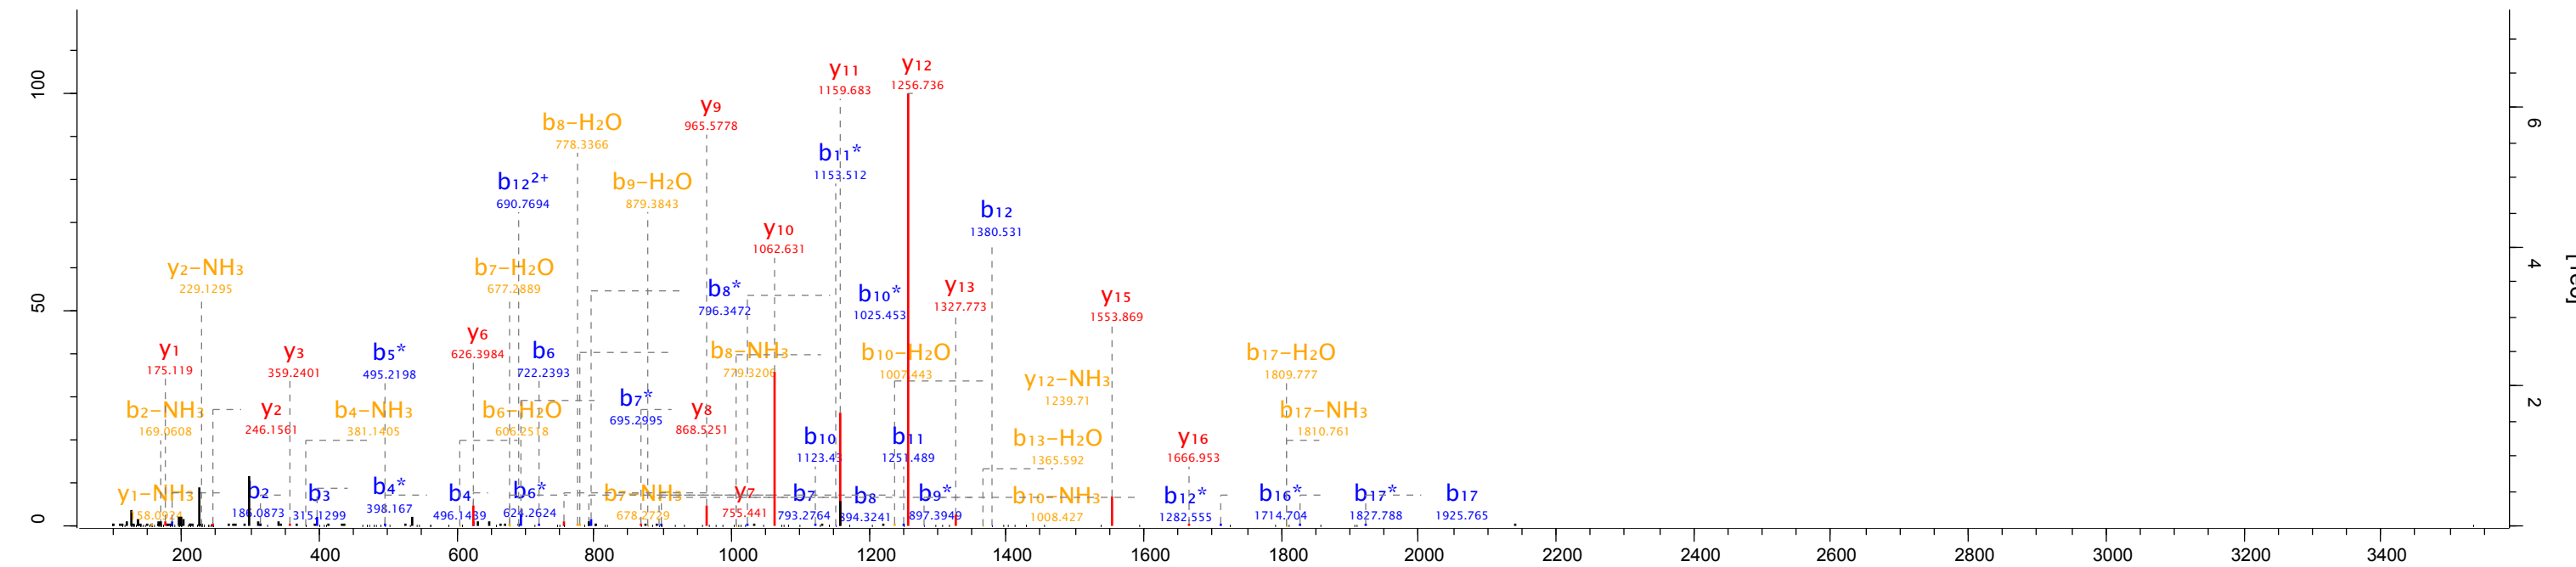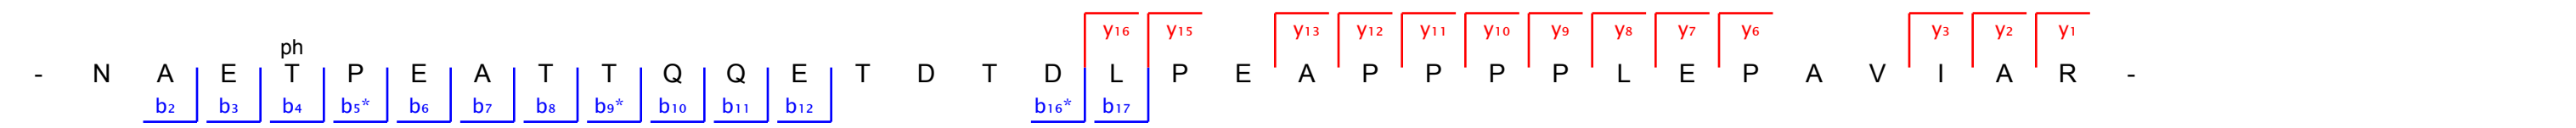

Raw file  
20150814\_A375SR\_Phospho\_BR2\_06

Scan 24493 Method FTMS; HCD Score 184 m/z 1177.07 Gene names PRC1

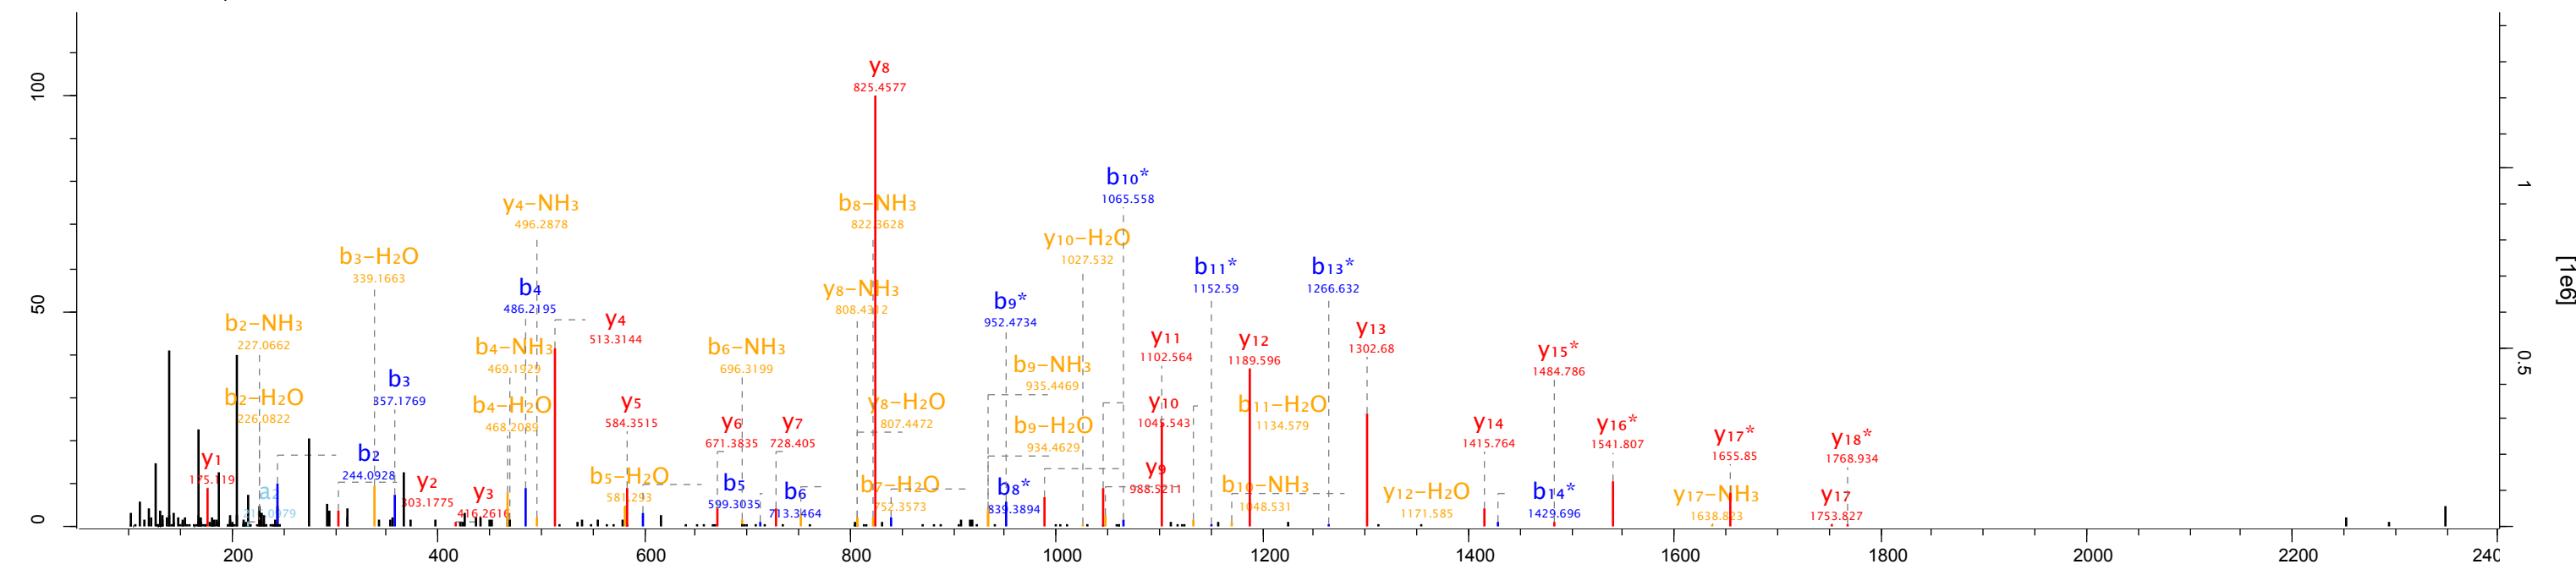

- E N L E L N G S I L S G G Y P G S A P L Q R -

b2 b3 b4 b5 b6 b8\* b9\* b10\* b11\* b13\* b14\*

y18\* y17 y16\* y15\* y14 y13 y12 y11 y10 y9 y8 y7 y6 y5 y4 y3 y2 y1

Raw file 20150814\_A375SR\_Phospho\_BR2\_06 Scan 25463 Method FTMS; HCD Score 57.61 m/z 908.77 Gene names RAI1

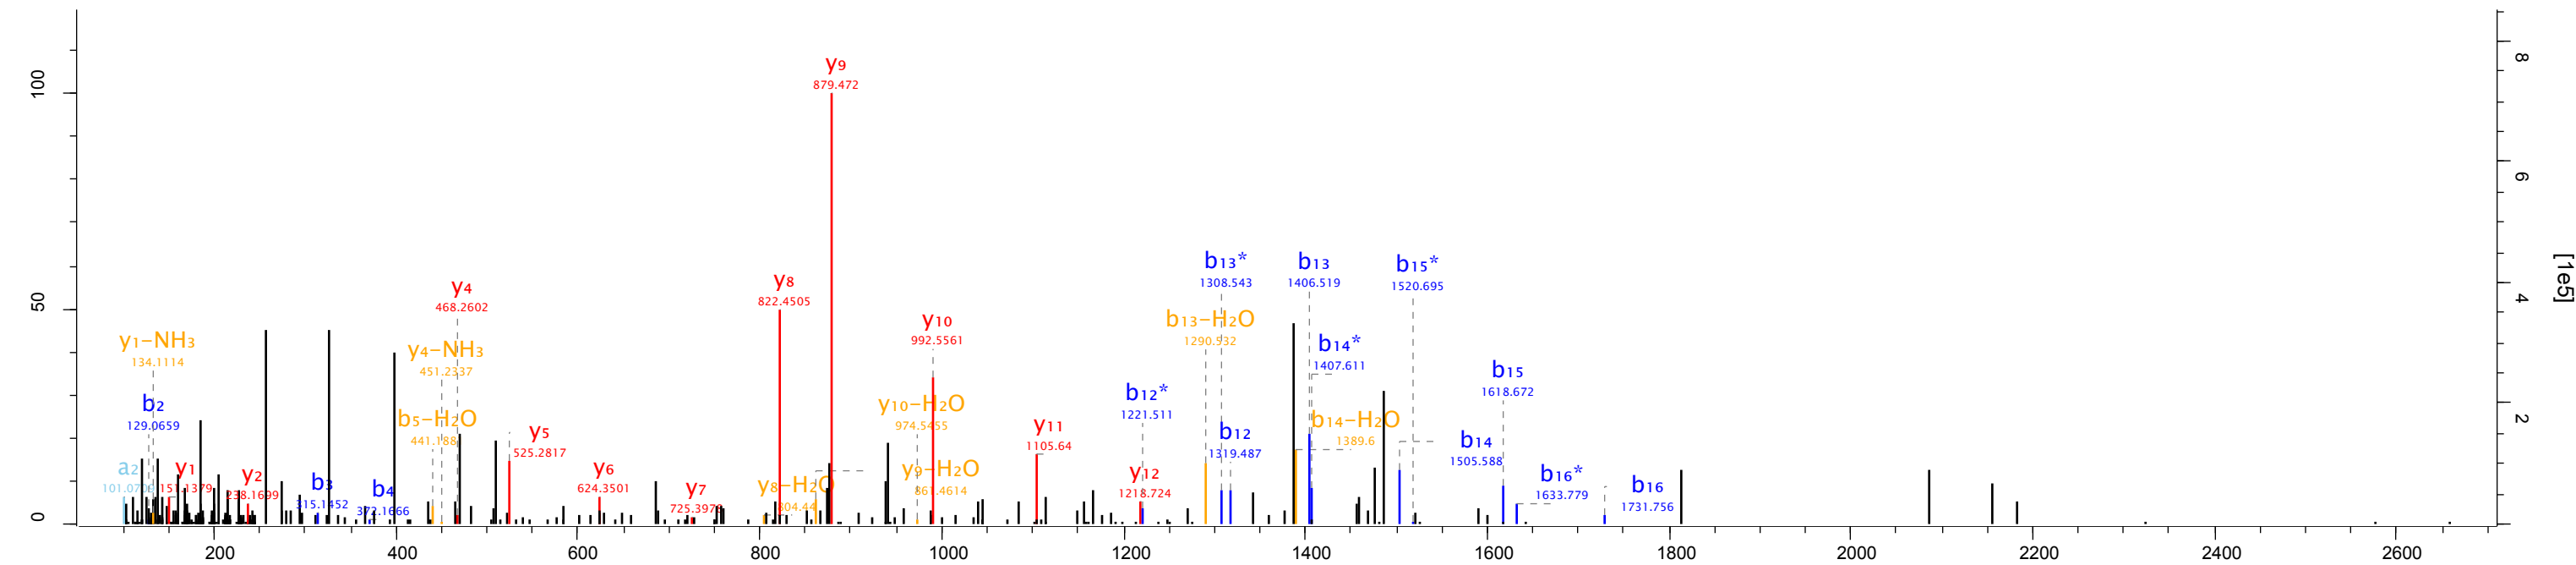

- A G W G S P C H L S G E S V I L L G P T V G T E S K -

ph

b<sub>2</sub> b<sub>3</sub> b<sub>4</sub> b<sub>12</sub> b<sub>13</sub> b<sub>14</sub> b<sub>15</sub> b<sub>16</sub> y<sub>12</sub> y<sub>11</sub> y<sub>10</sub> y<sub>9</sub> y<sub>8</sub> y<sub>7</sub> y<sub>6</sub> y<sub>5</sub> y<sub>4</sub> y<sub>2</sub> y<sub>1</sub>

Raw file: 20150814\_A375SR\_Phospho\_BR2\_06  
 Scan: 26023 Method: FTMS; HCD Score: 87.72 m/z: 1065.01 Gene names: DENND2A

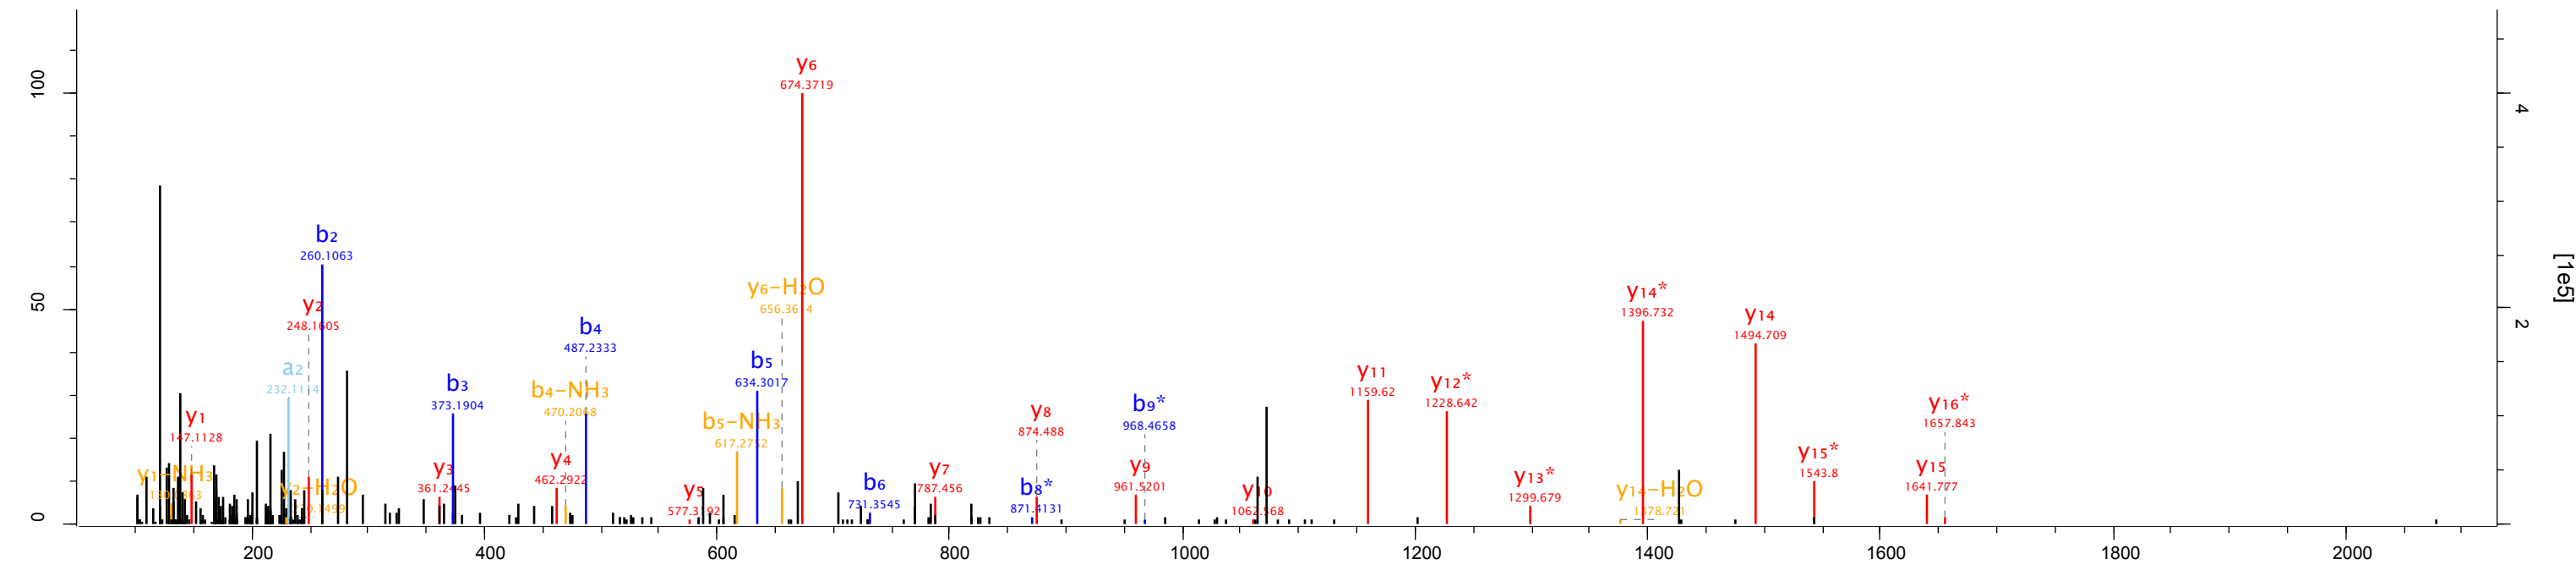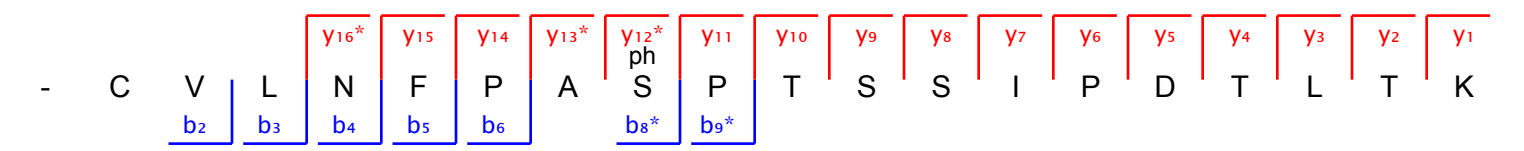

Raw file: 20150814\_A375SR\_Phospho\_BR2\_06  
 Scan: 26203  
 Method: FTMS; HCD  
 Score: 112.91  
 m/z: 1226.58  
 Gene names: RRP1B

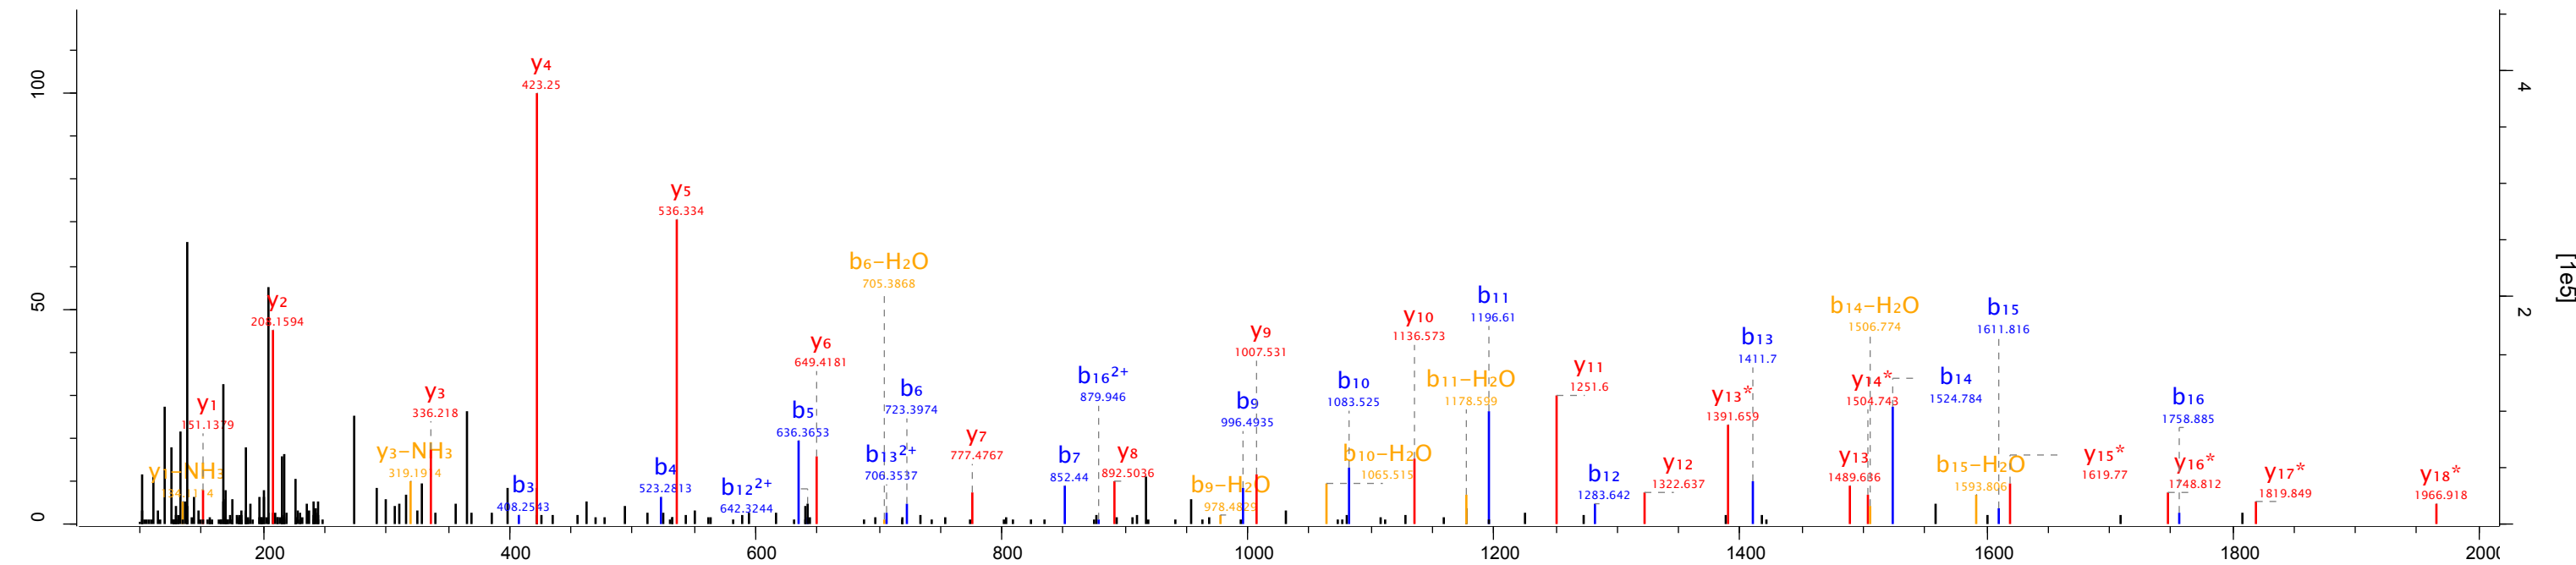

Protein sequence: - K F Q D L S E G S S I S Q L S F A E D I S A D E D D Q I L S Q G K -

Fragmentation sites (b ions): b3 (Q), b4 (D), b5 (L), b6 (S), b7 (E), b9 (S), b10 (S), b11 (I), b12 (S), b13 (Q), b14 (L), b15 (S), b16 (F)

Fragmentation sites (y ions): y1 (K), y2 (G), y3 (Q), y4 (S), y5 (L), y6 (I), y7 (D), y8 (D), y9 (E), y10 (A), y11 (D), y12 (S), y13 (ph), y14 (I), y15 (D), y16 (E), y17 (A), y18 (F)

Raw file Scan Method Score m/z Gene names  
 20150814\_A375SR\_Phospho\_BR2\_06 26573 FTMS; HCD 169.13 989.81 SNRK

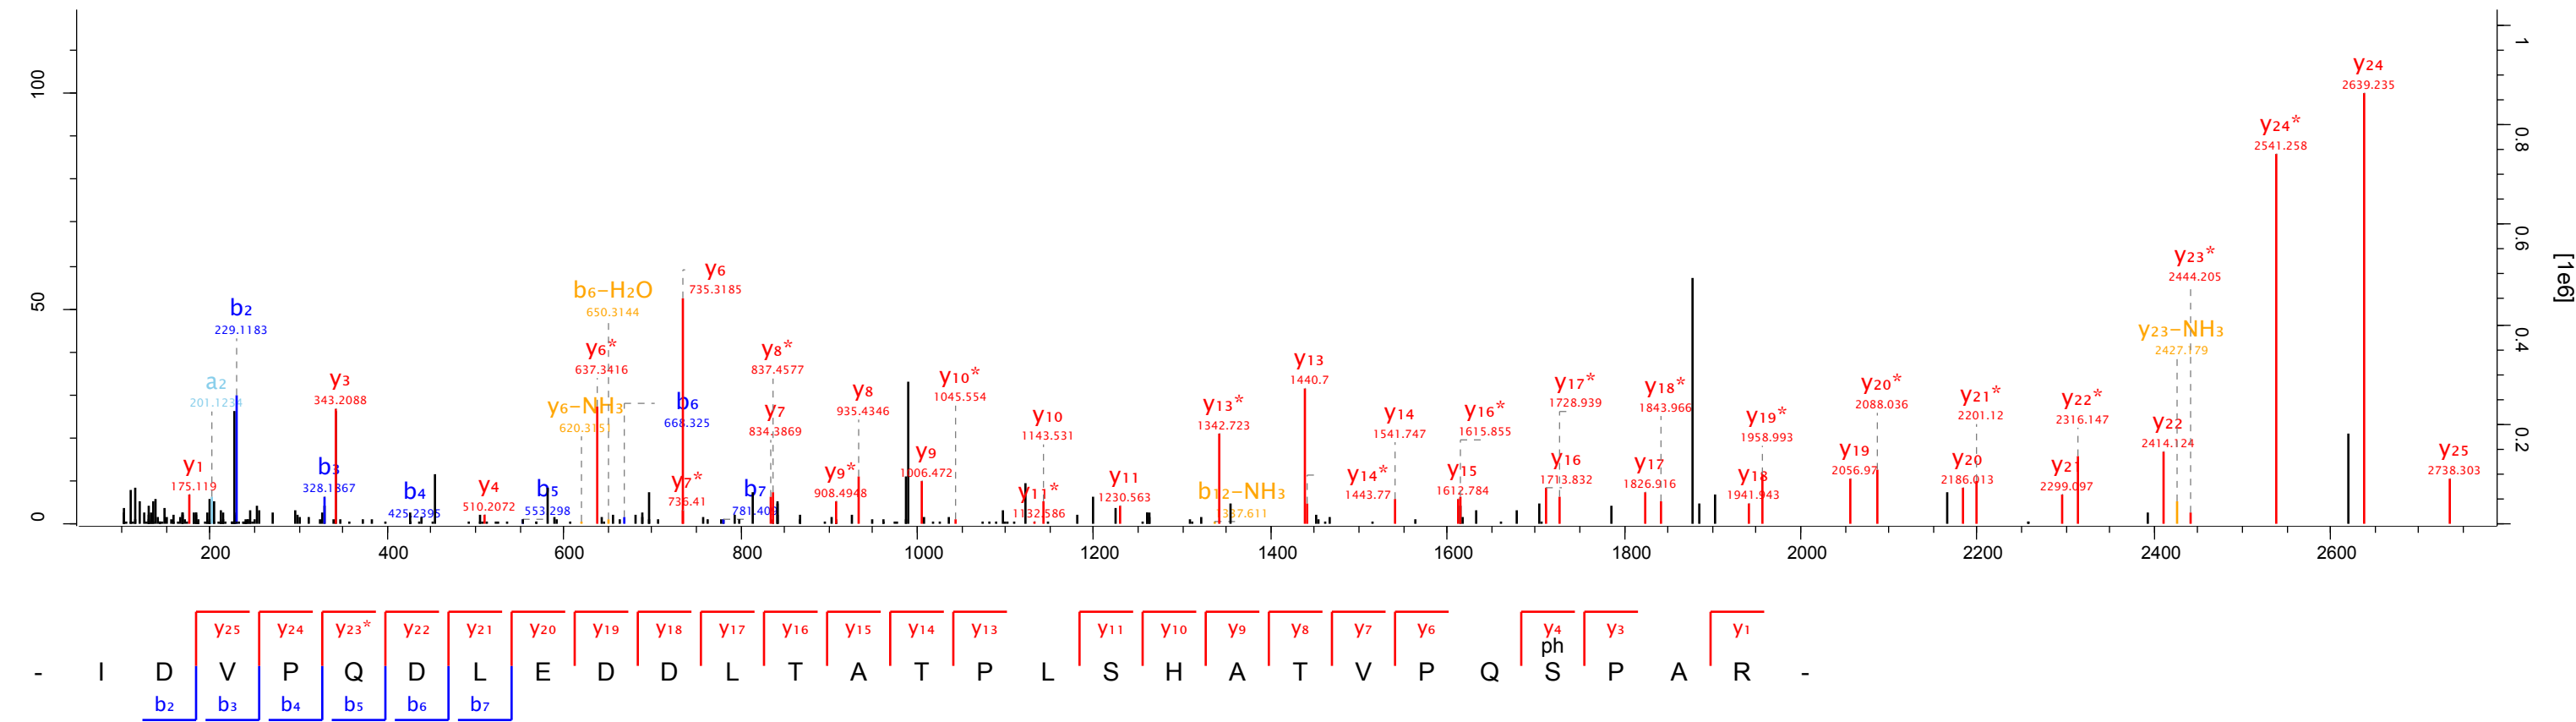



Raw file 20150814\_A375SR\_Phospho\_BR2\_06 Scan 27663 Method FTMS; HCD Score 88.02 m/z 578.26 Gene names SCLT1

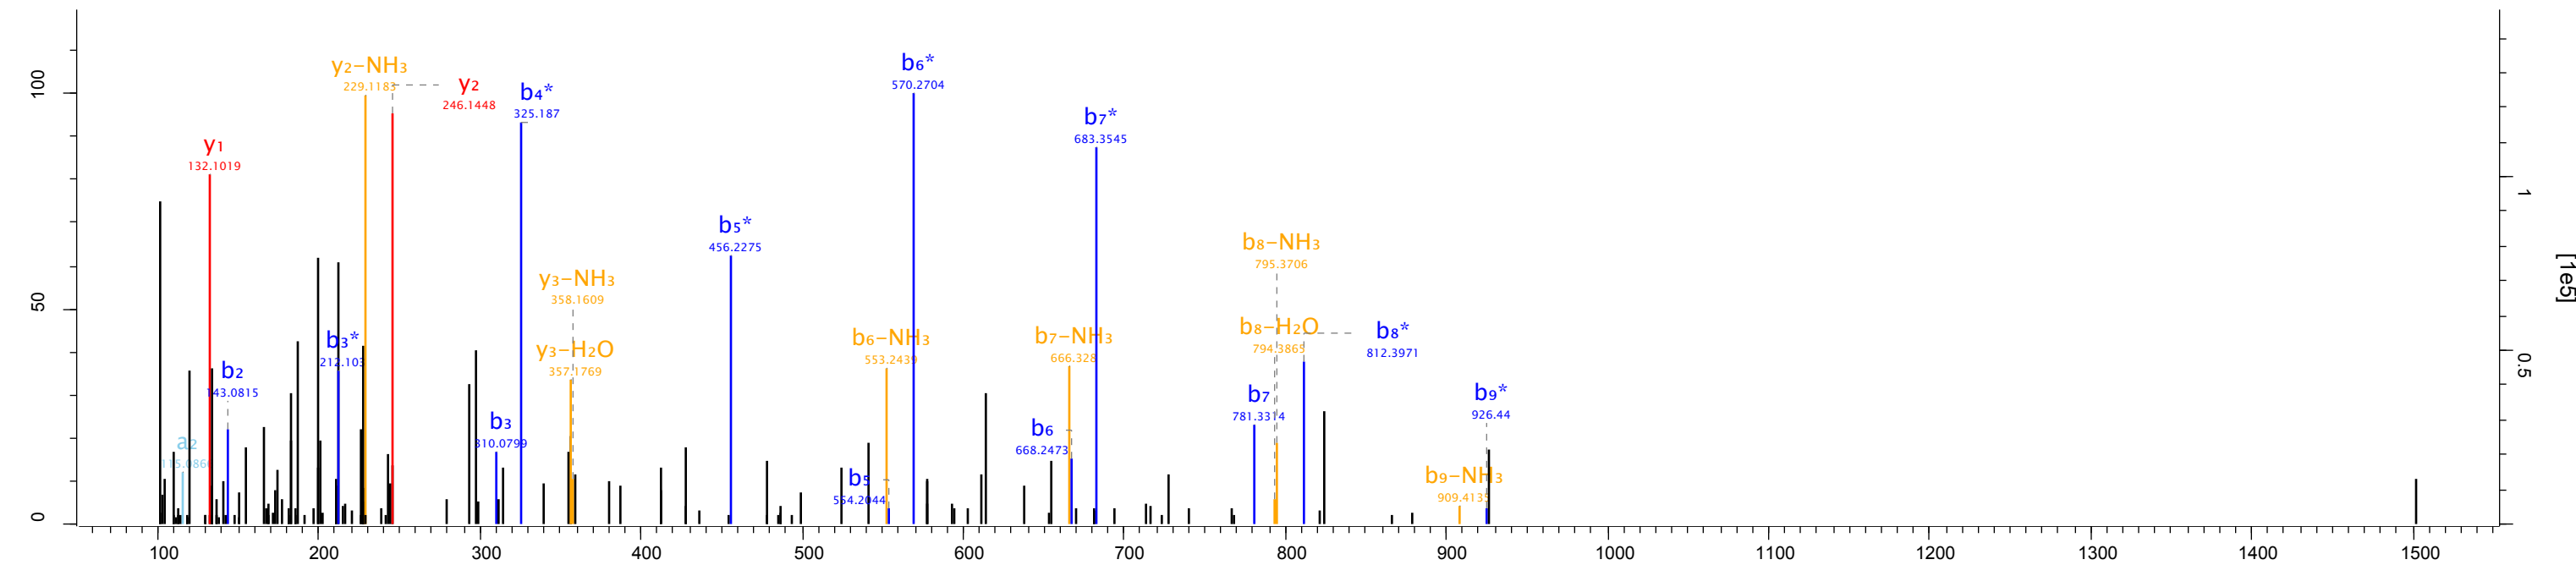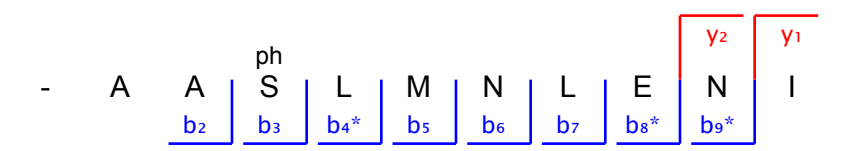

Raw file 20150814\_A375SR\_Phospho\_BR2\_06 Scan 28143 Method FTMS; HCD Score 94.92 m/z 714.39 Gene names TNKS1BP1

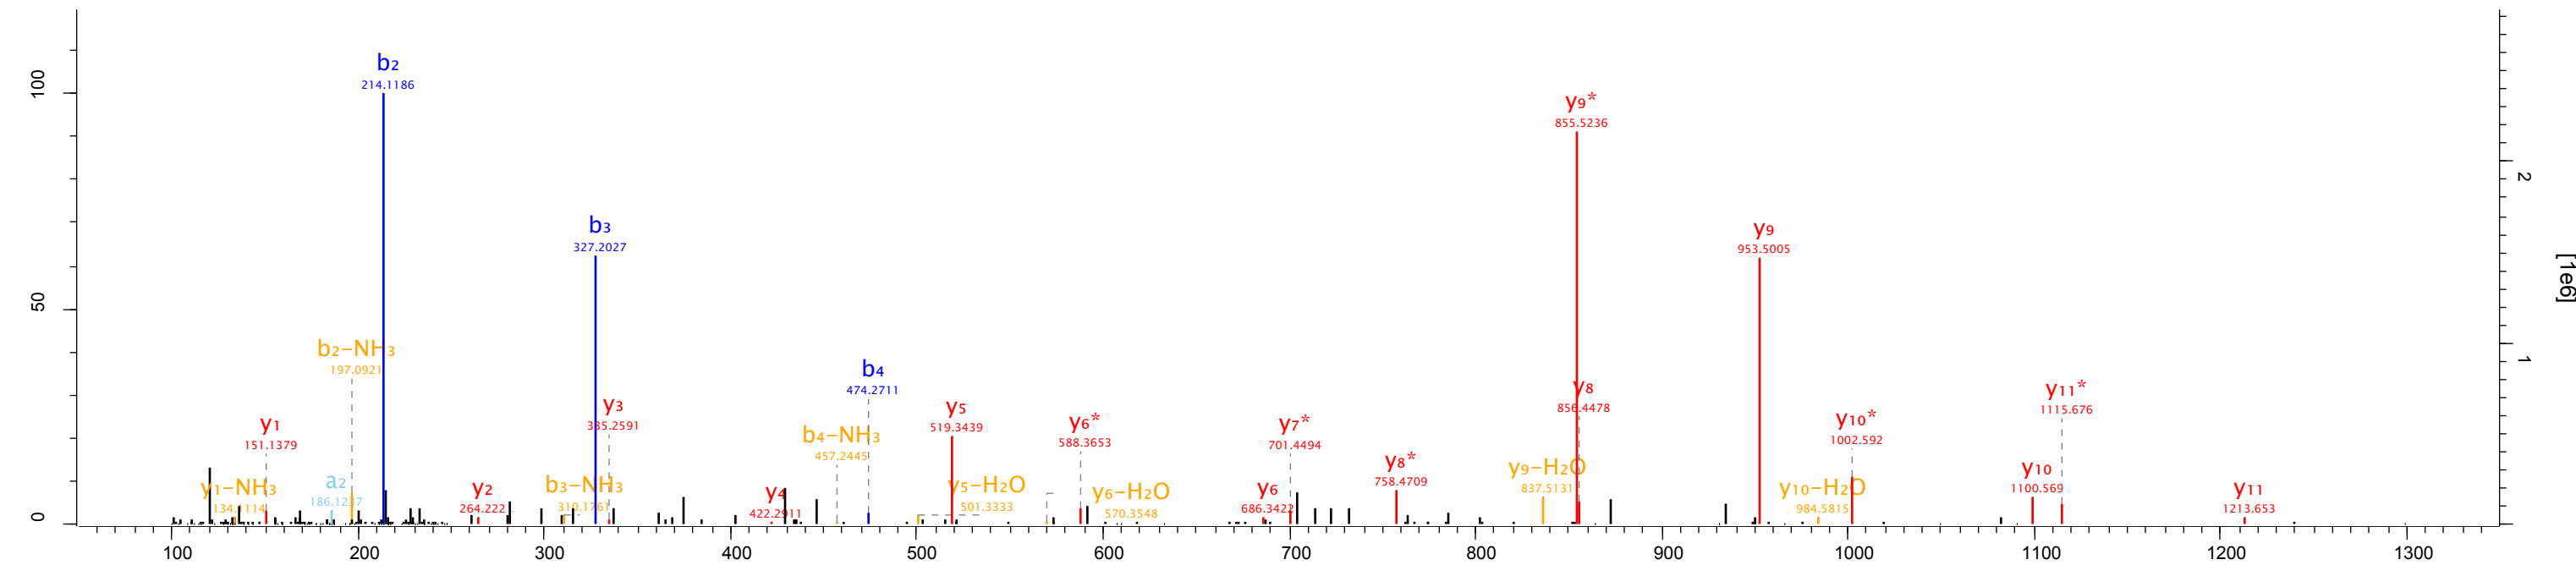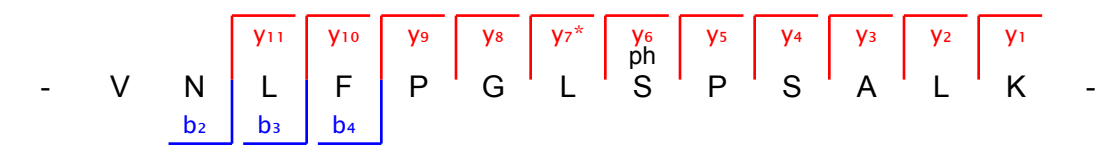

Raw file 20150814\_A375SR\_Phospho\_BR2\_06 Scan 28213 Method FTMS; HCD Score 139.63 m/z 1094.52 Gene names FOSL1

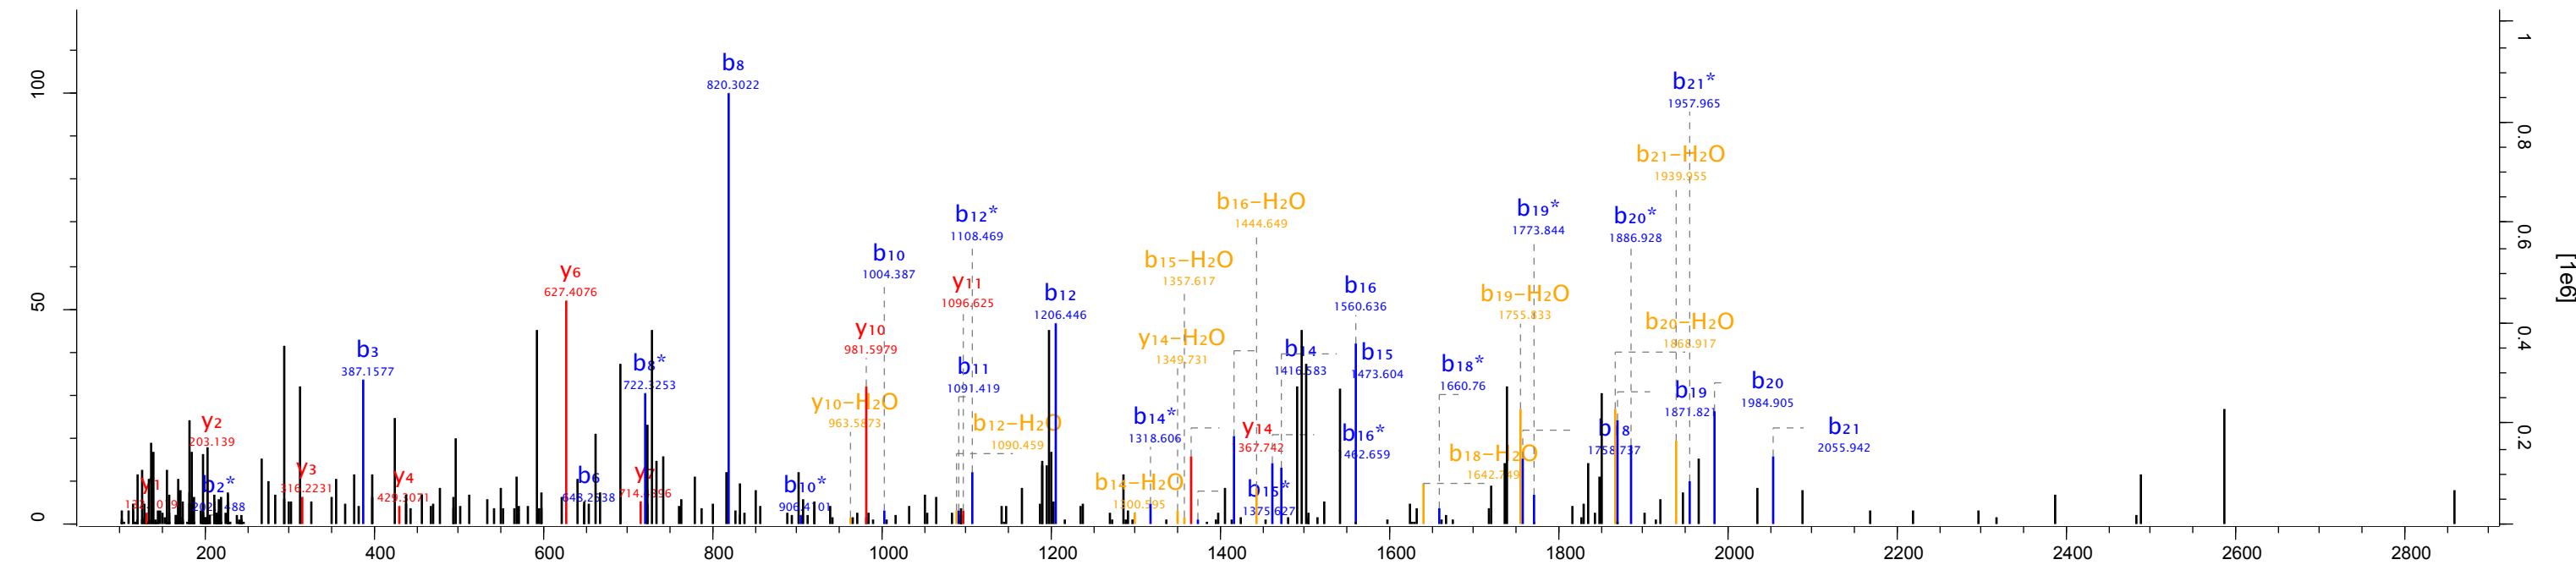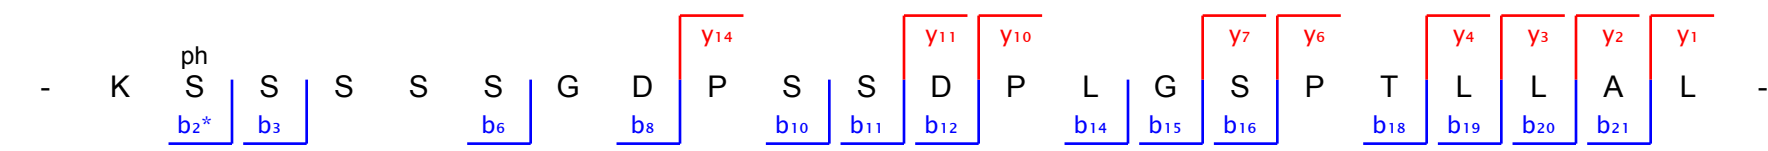

Raw file 20150814\_A375SR\_Phospho\_BR2\_06 Scan 28743 Method FTMS; HCD Score 188.55 m/z 994.83 Gene names EDC4

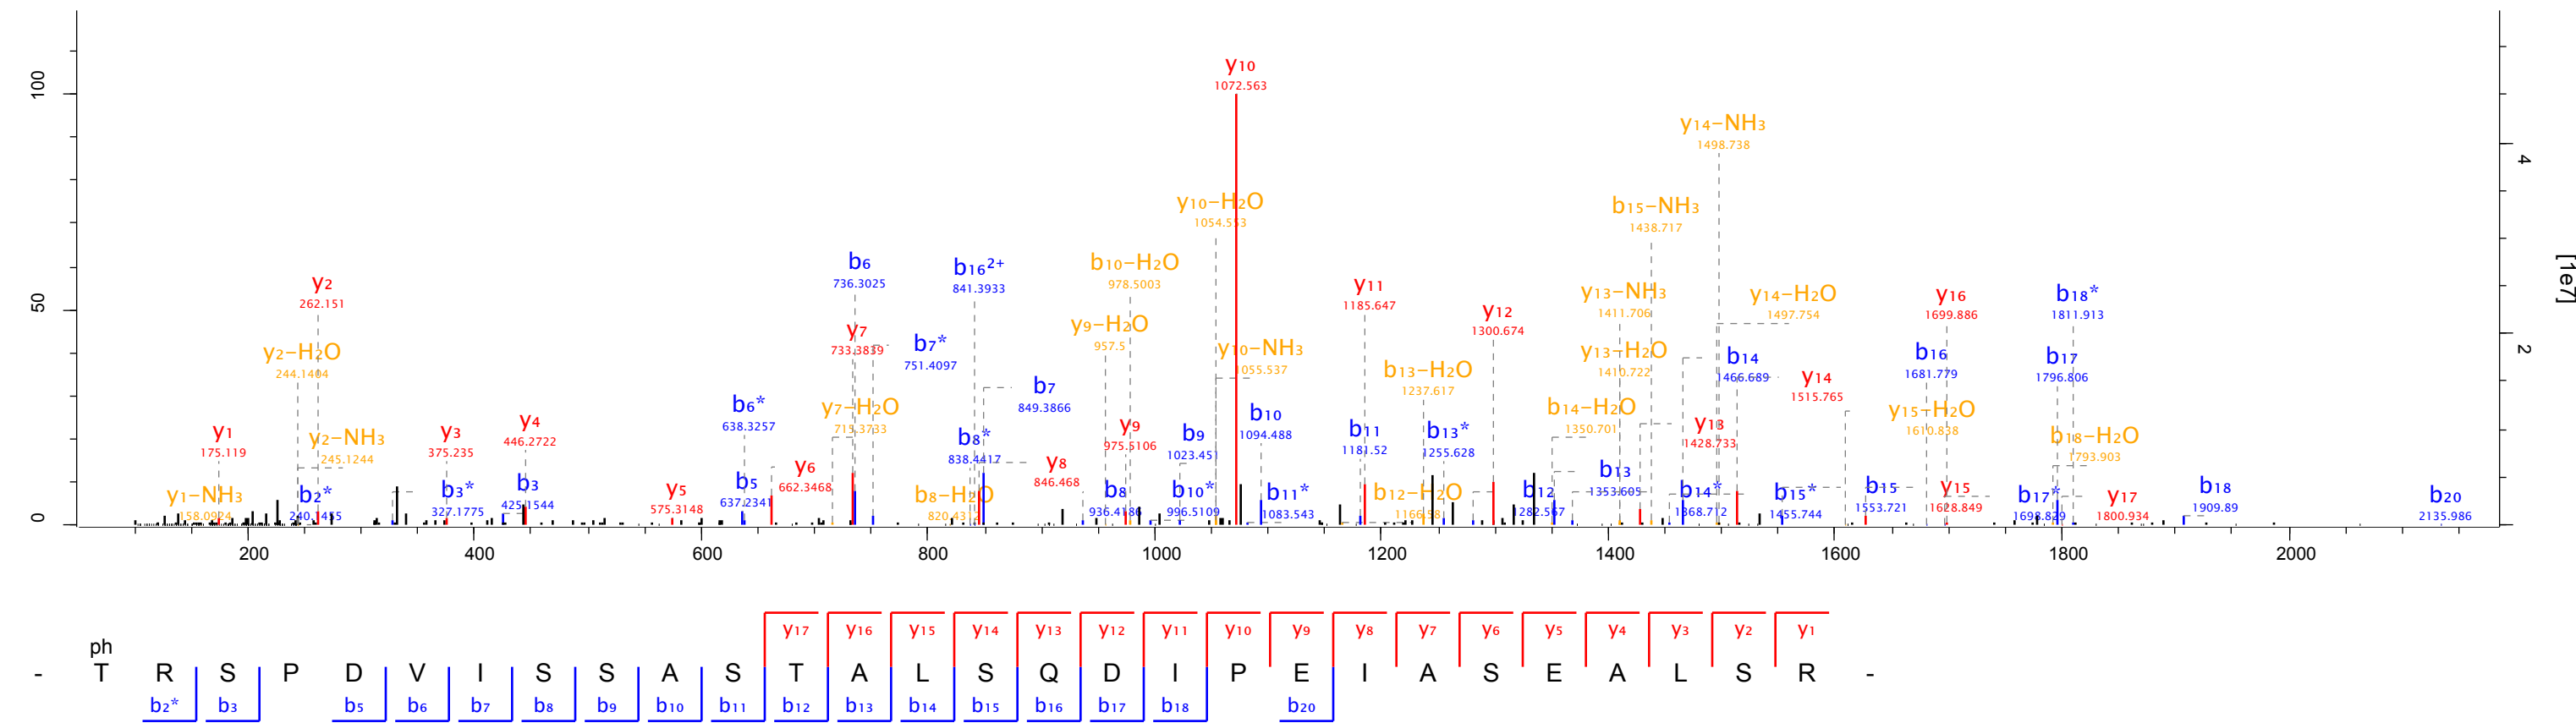

Raw file: 20150814\_A375SR\_Phospho\_BR2\_06  
 Scan: 3643 Method: FTMS; HCD Score: 107.93 m/z: 612.27 Gene names: MEF2D

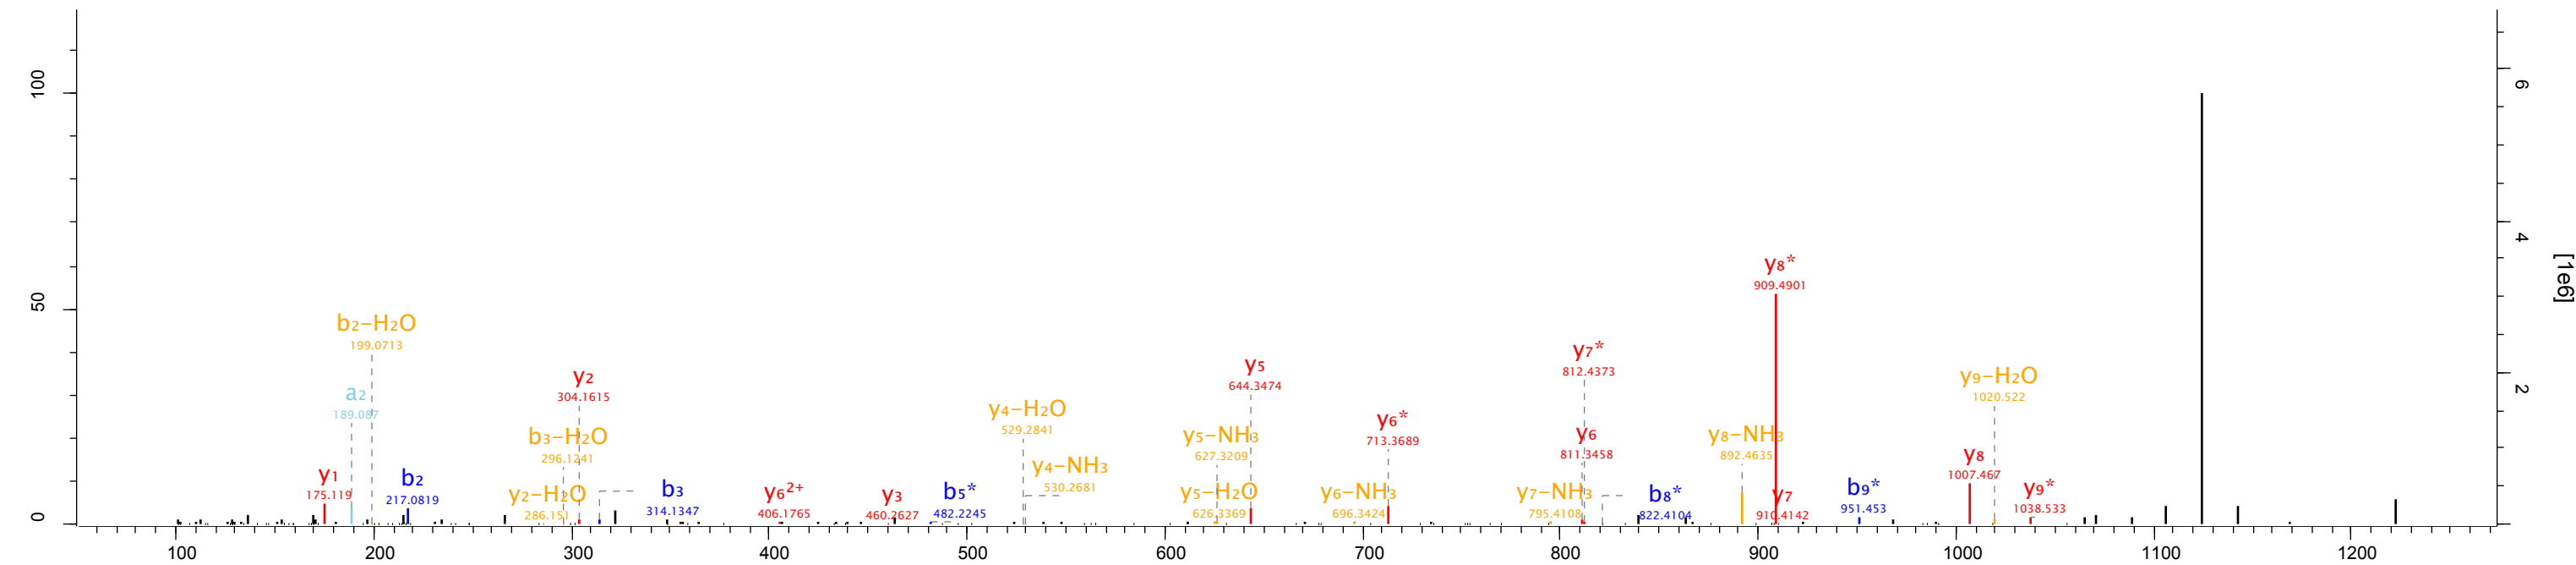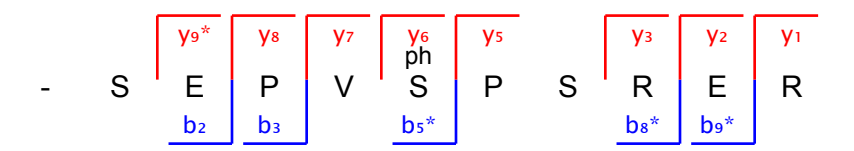

Raw file 20150814\_A375SR\_Phospho\_BR2\_06 Scan 5733 Method FTMS; HCD Score 53.37 m/z 618.26 Gene names RBMX

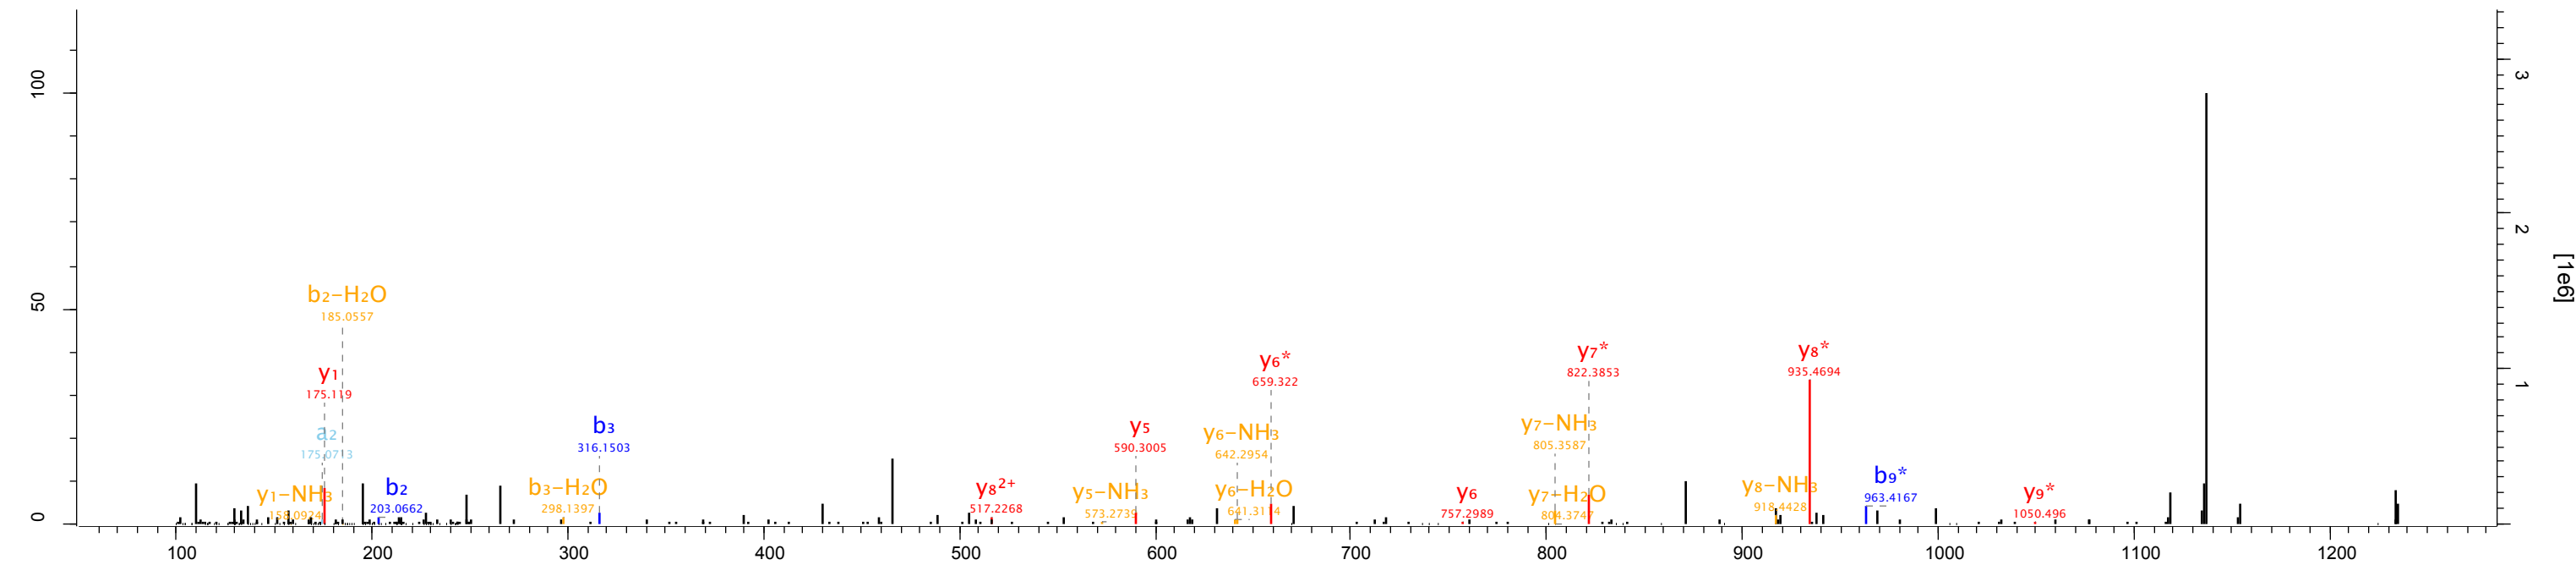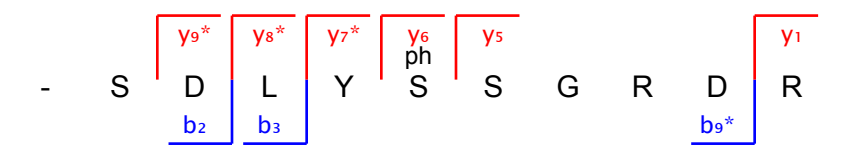

Raw file  
 20150814\_A375SR\_Phospho\_BR2\_06  
 Scan 6513 Method FTMS; HCD Score 91.24 m/z 939.98 Gene names BBX

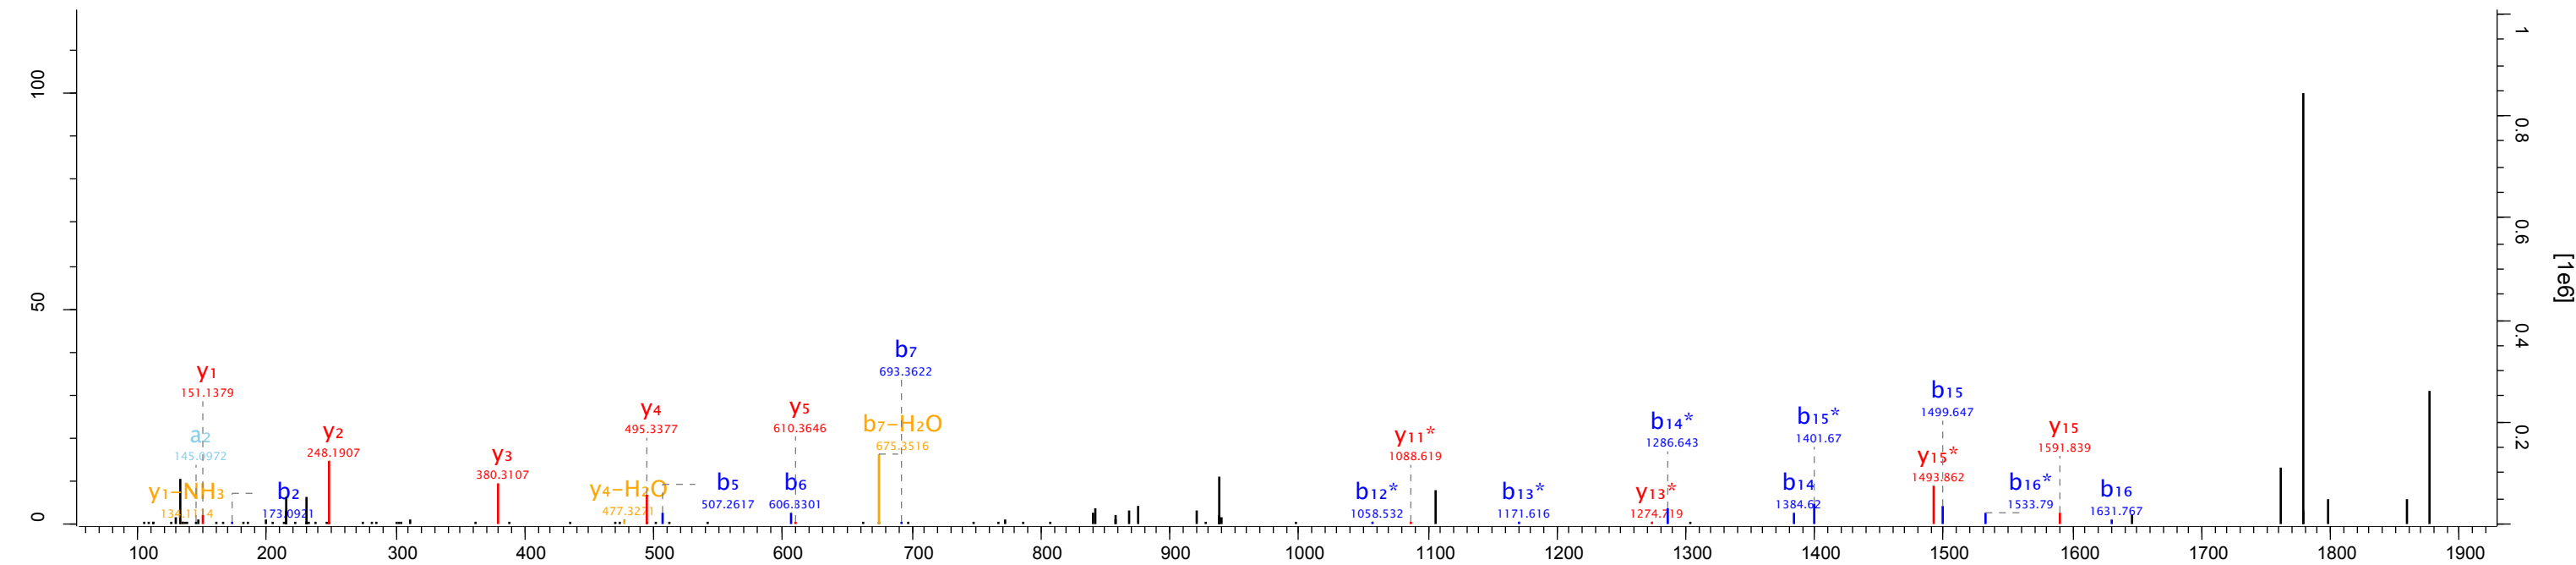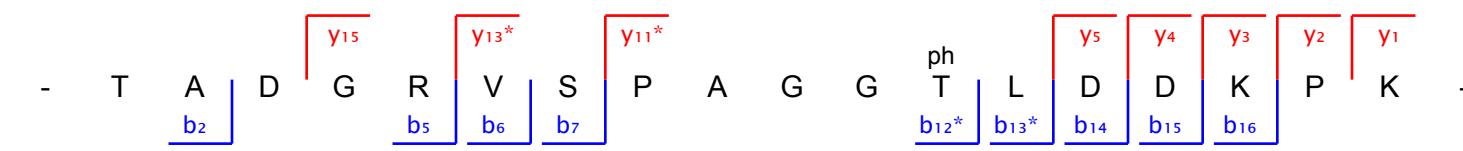

Raw file: 20150814\_A375SR\_Phospho\_BR2\_06  
 Scan: 7973 Method: FTMS; HCD Score: 157.55 m/z: 699.64 Gene names: AJUBA

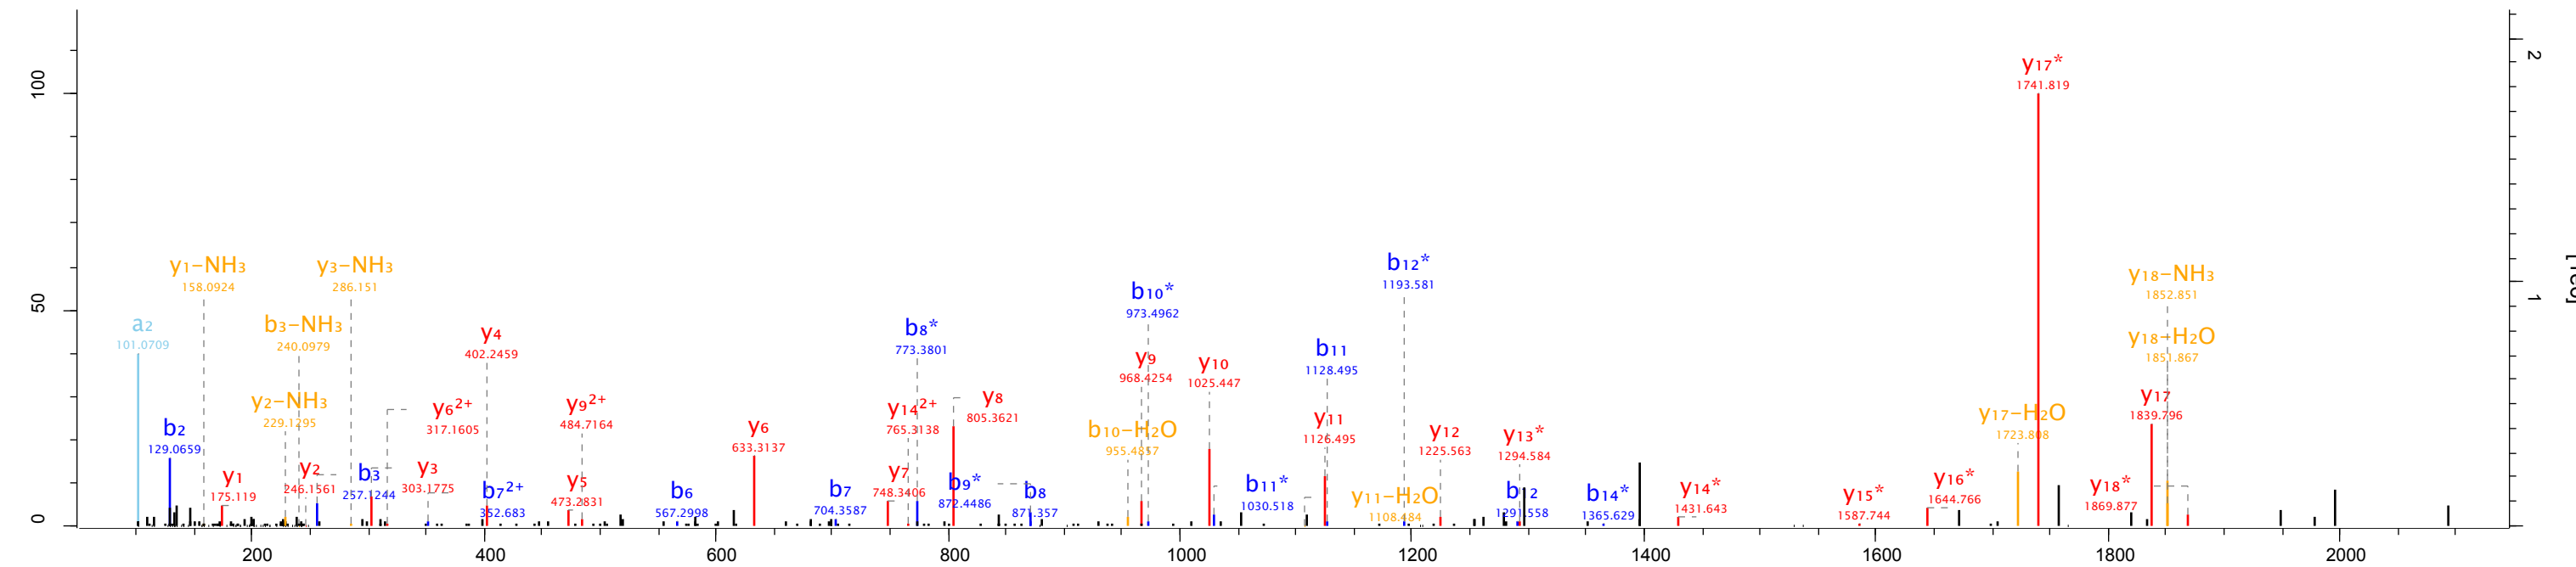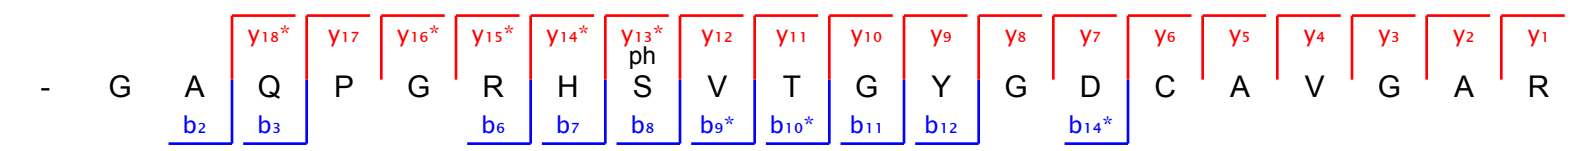



Raw file: 20150814\_A375SR\_Phospho\_BR2\_06  
 Scan: 8713 Method: FTMS; HCD Score: 131.48 m/z: 763.83 Gene names: CENPC

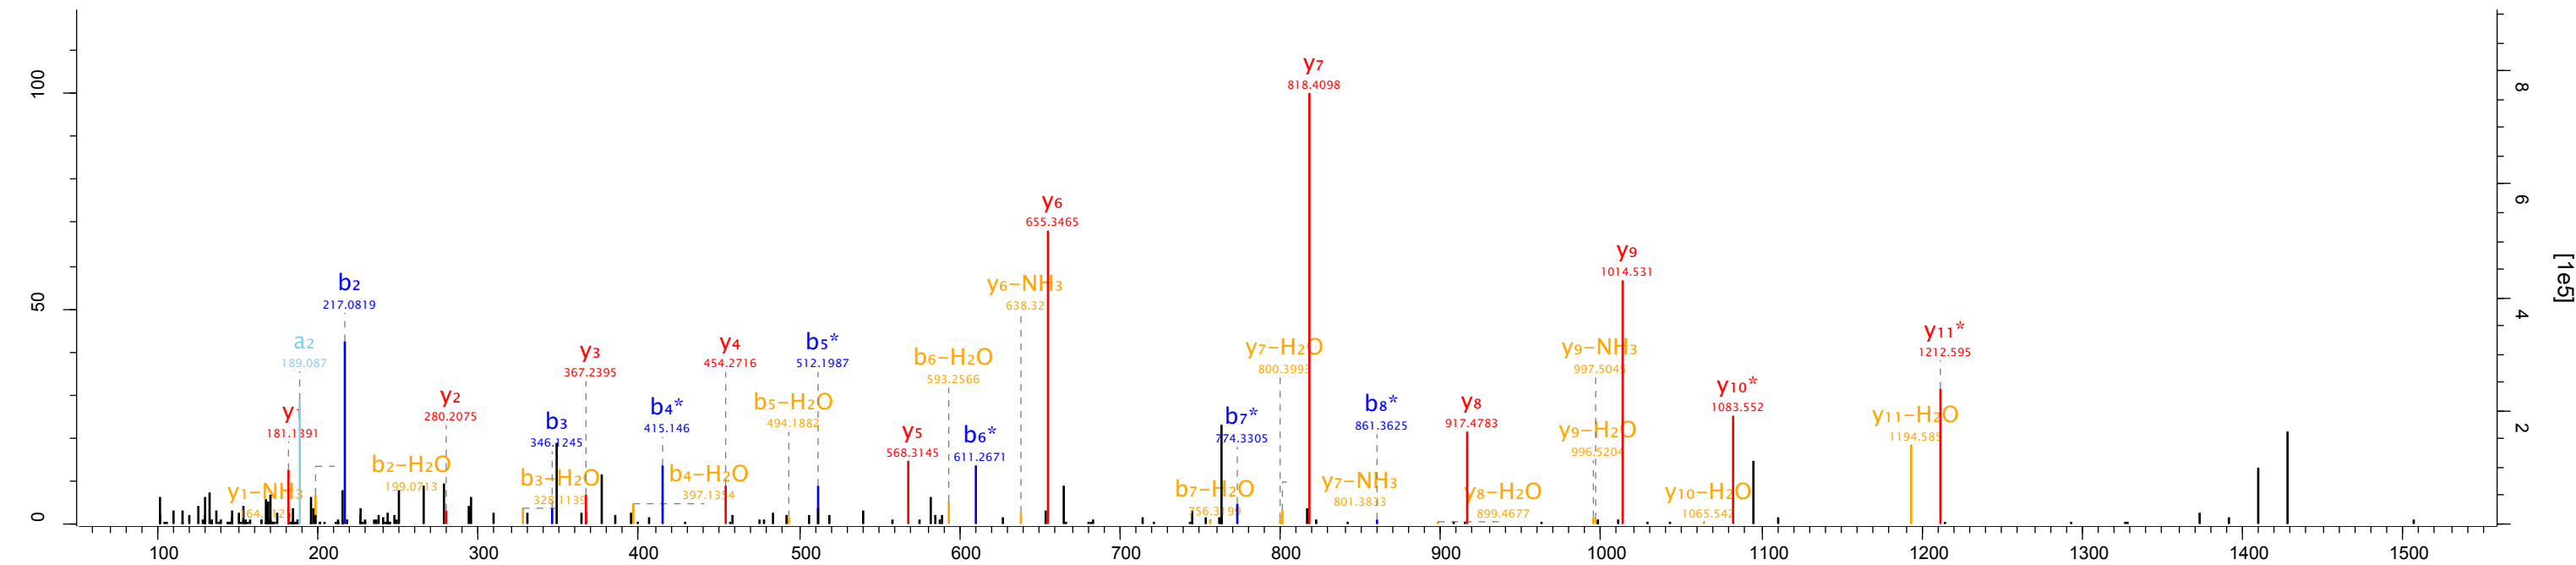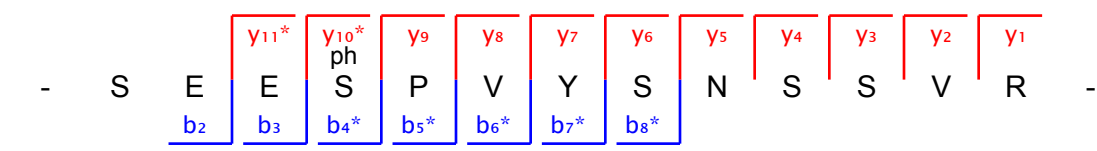

Raw file 20150814\_A375SR\_Phospho\_BR2\_07 Scan 11273 Method FTMS; HCD Score 146.58 m/z 581.28 Gene names HSPB1

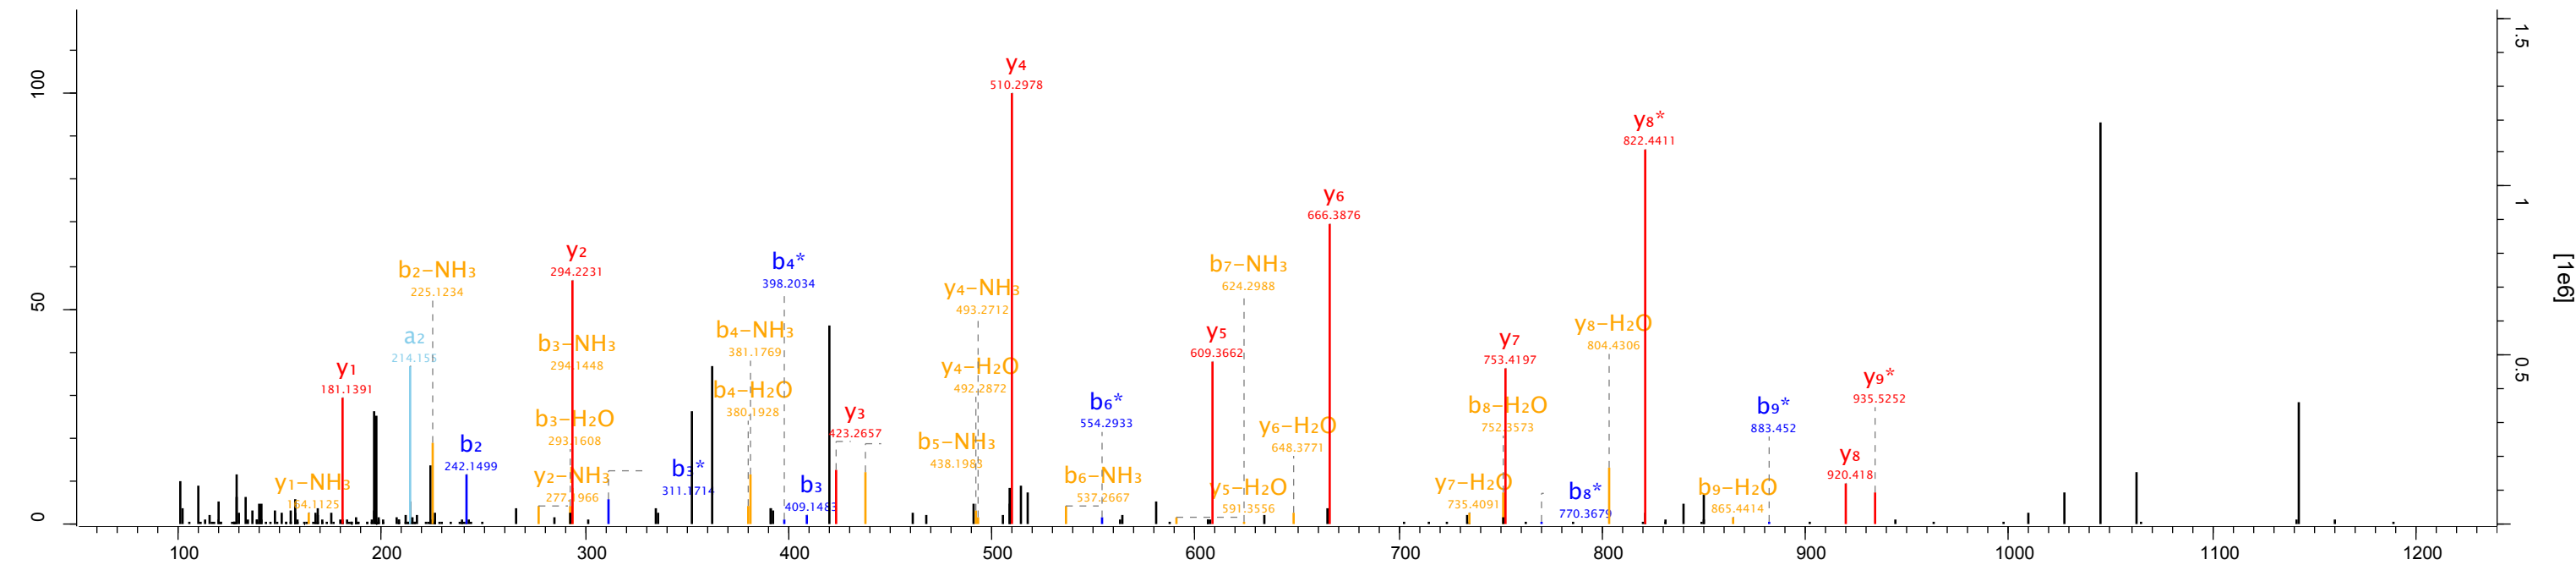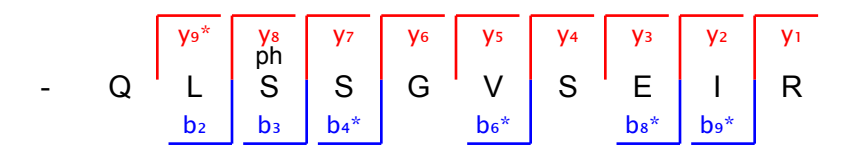

Raw file 20150814\_A375SR\_Phospho\_BR2\_07 Scan 11923 Method FTMS; HCD Score 169.06 m/z 745.88 Gene names EIF3J

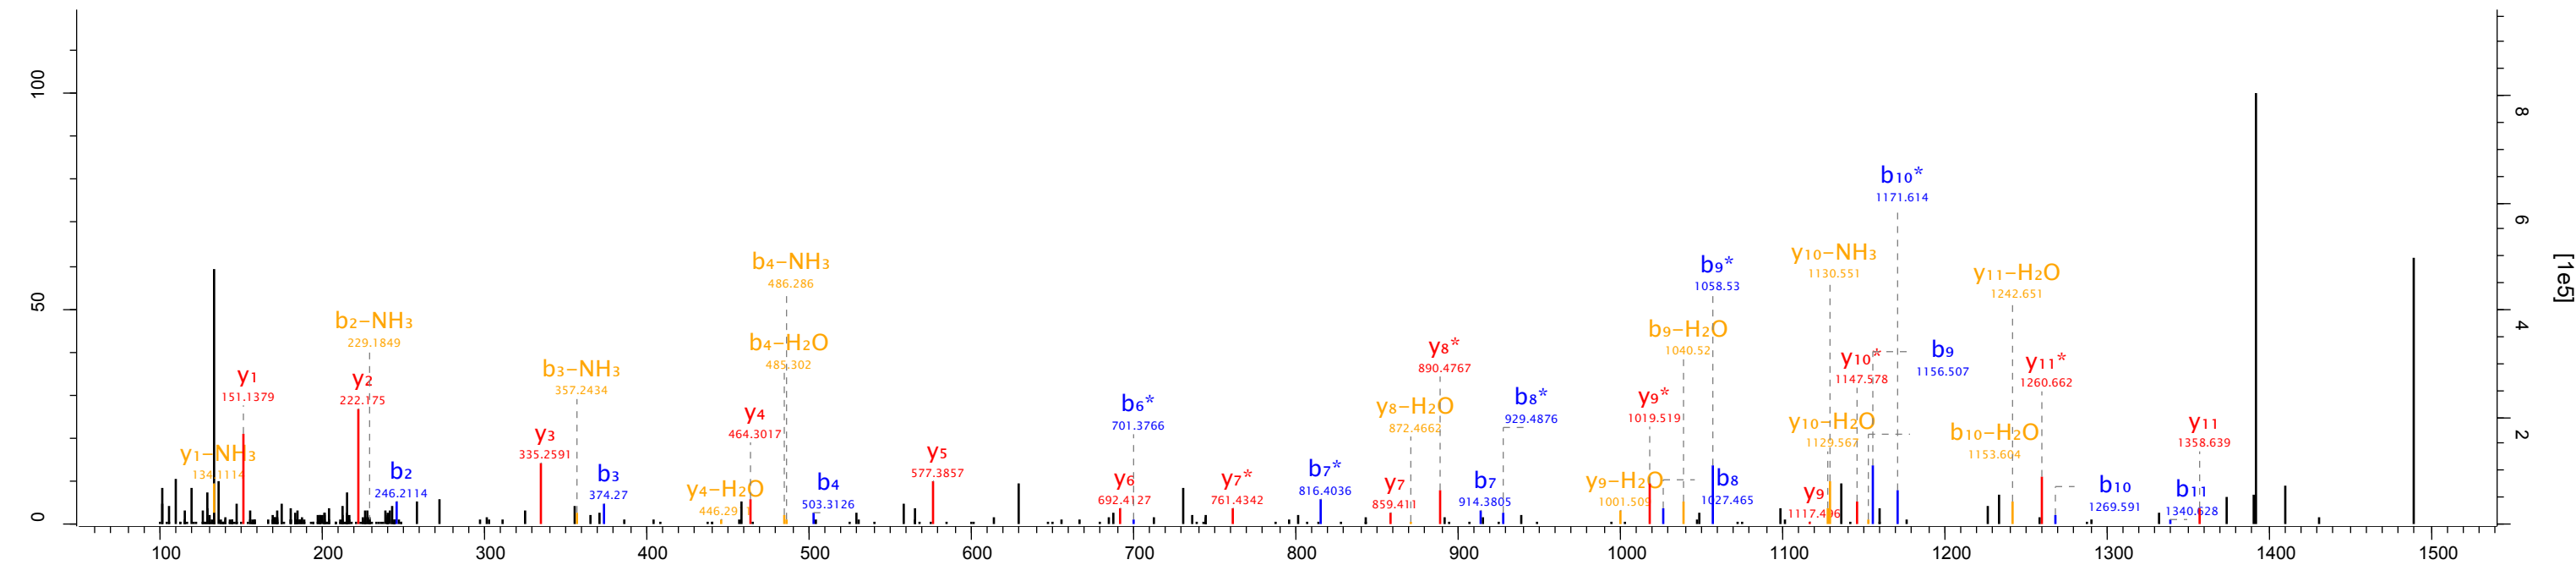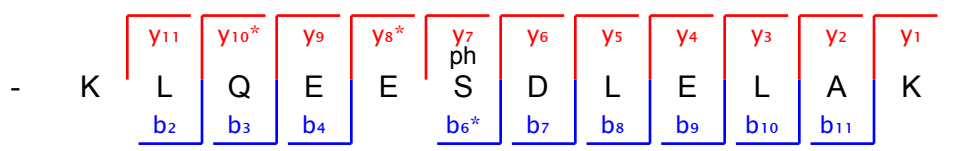

Raw file  
 20150814\_A375SR\_Phospho\_BR2\_07  
 Scan 14153 Method FTMS; HCD Score 229.56 m/z 821.04 Gene names MCM3AP

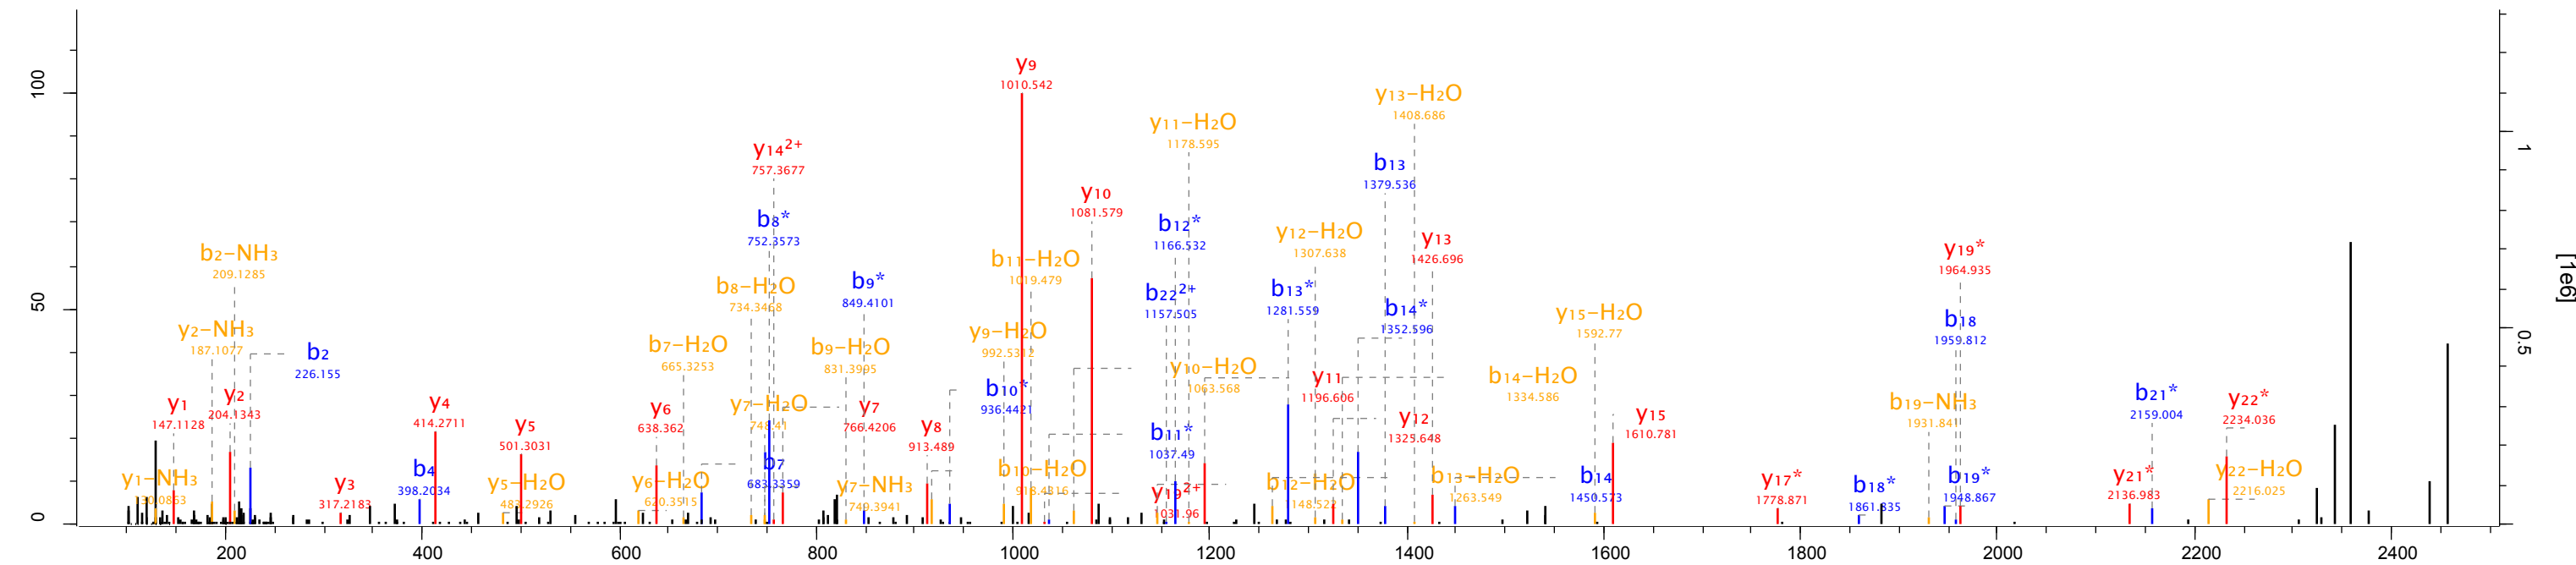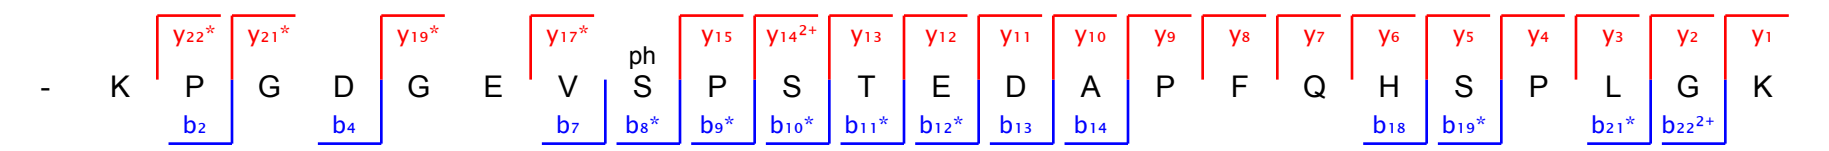

Raw file: 20150814\_A375SR\_Phospho\_BR2\_07  
 Scan: 14383 Method: FTMS; HCD Score: 98.74 m/z: 844.16 Gene names: PHLDA2

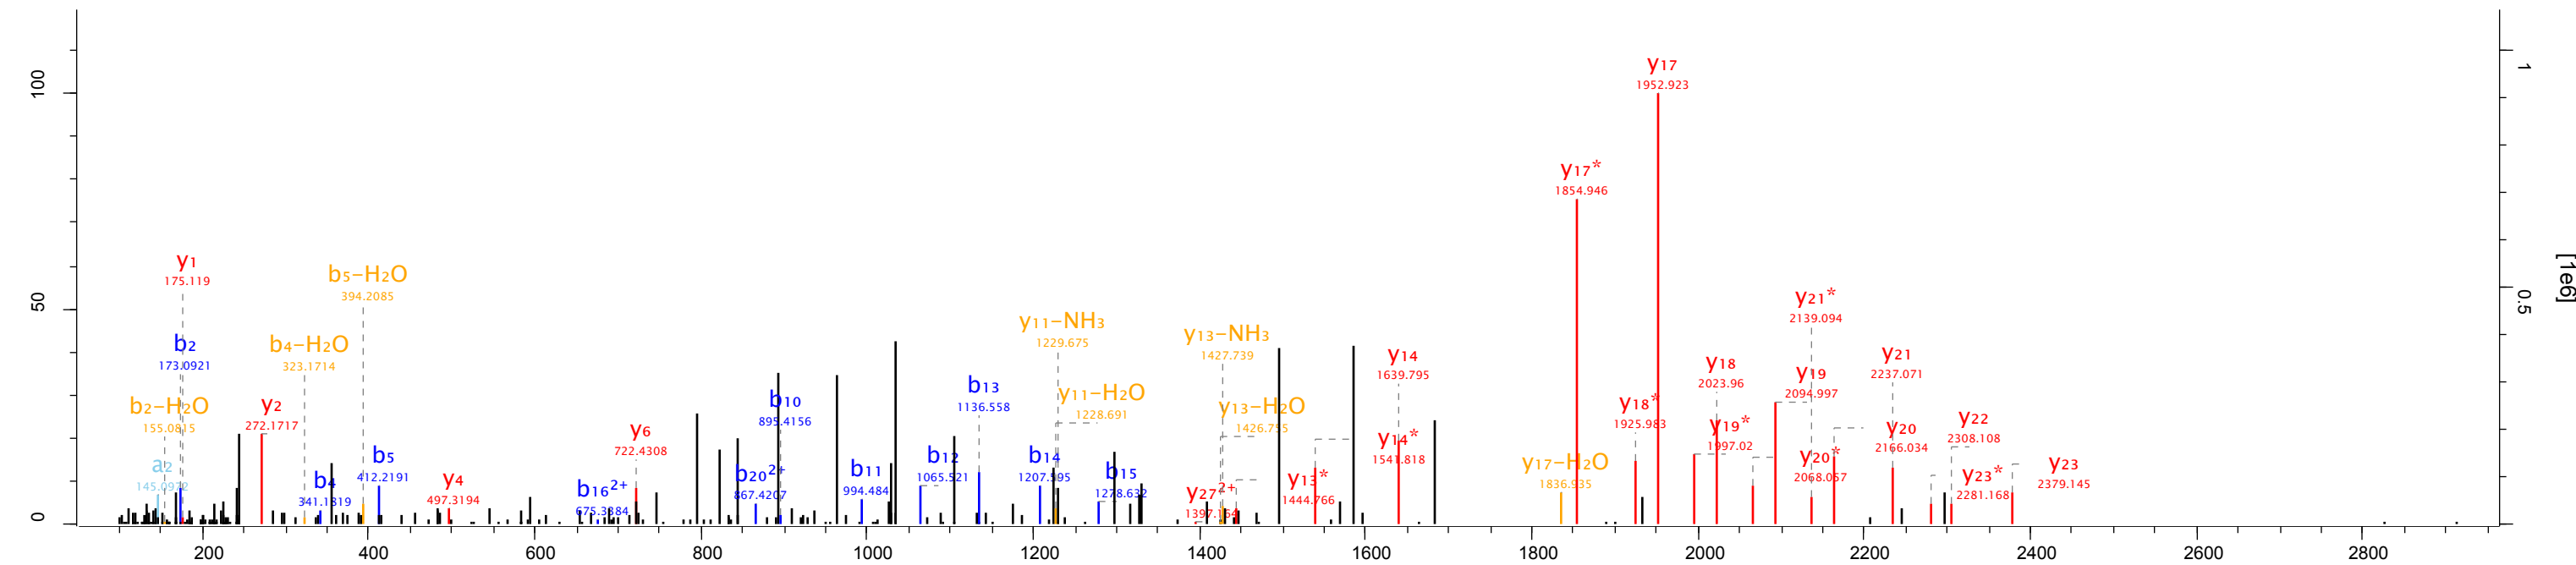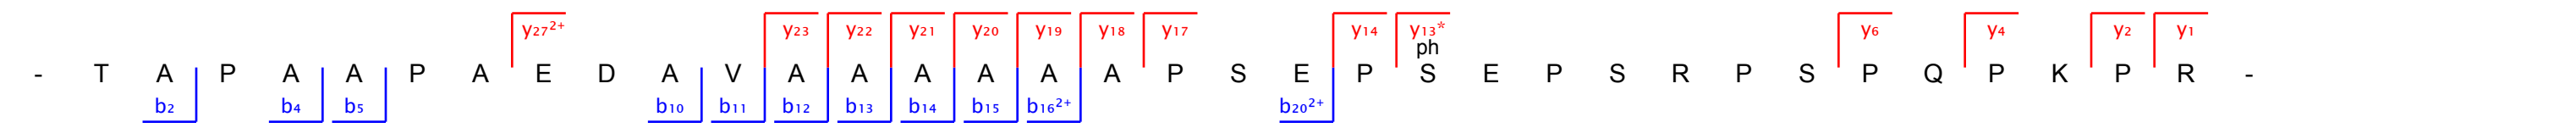

Raw file Scan Method Score m/z  
 20150814\_A375SR\_Phospho\_BR2\_07 14513 FTMS; HCD 462.58 1100.99

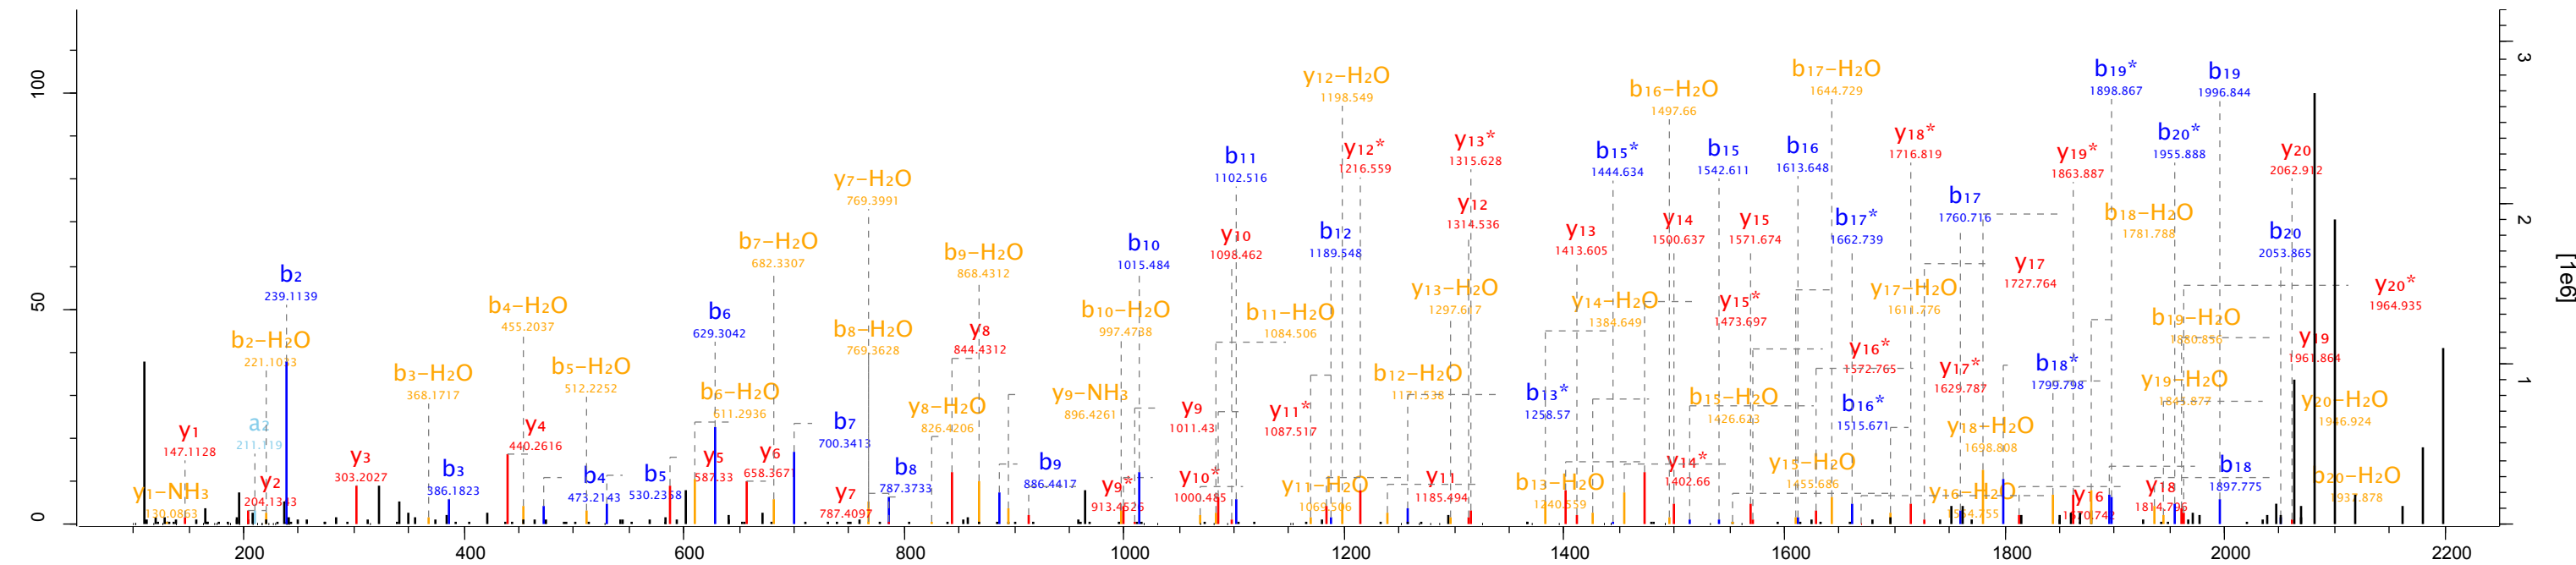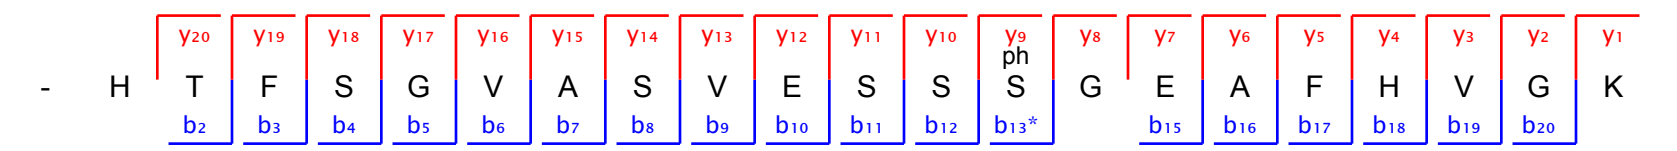

Raw file: 20150814\_A375SR\_Phospho\_BR2\_07  
 Scan: 15303 Method: FTMS; HCD Score: 91.55 m/z: 458.73 Gene names: PAICS

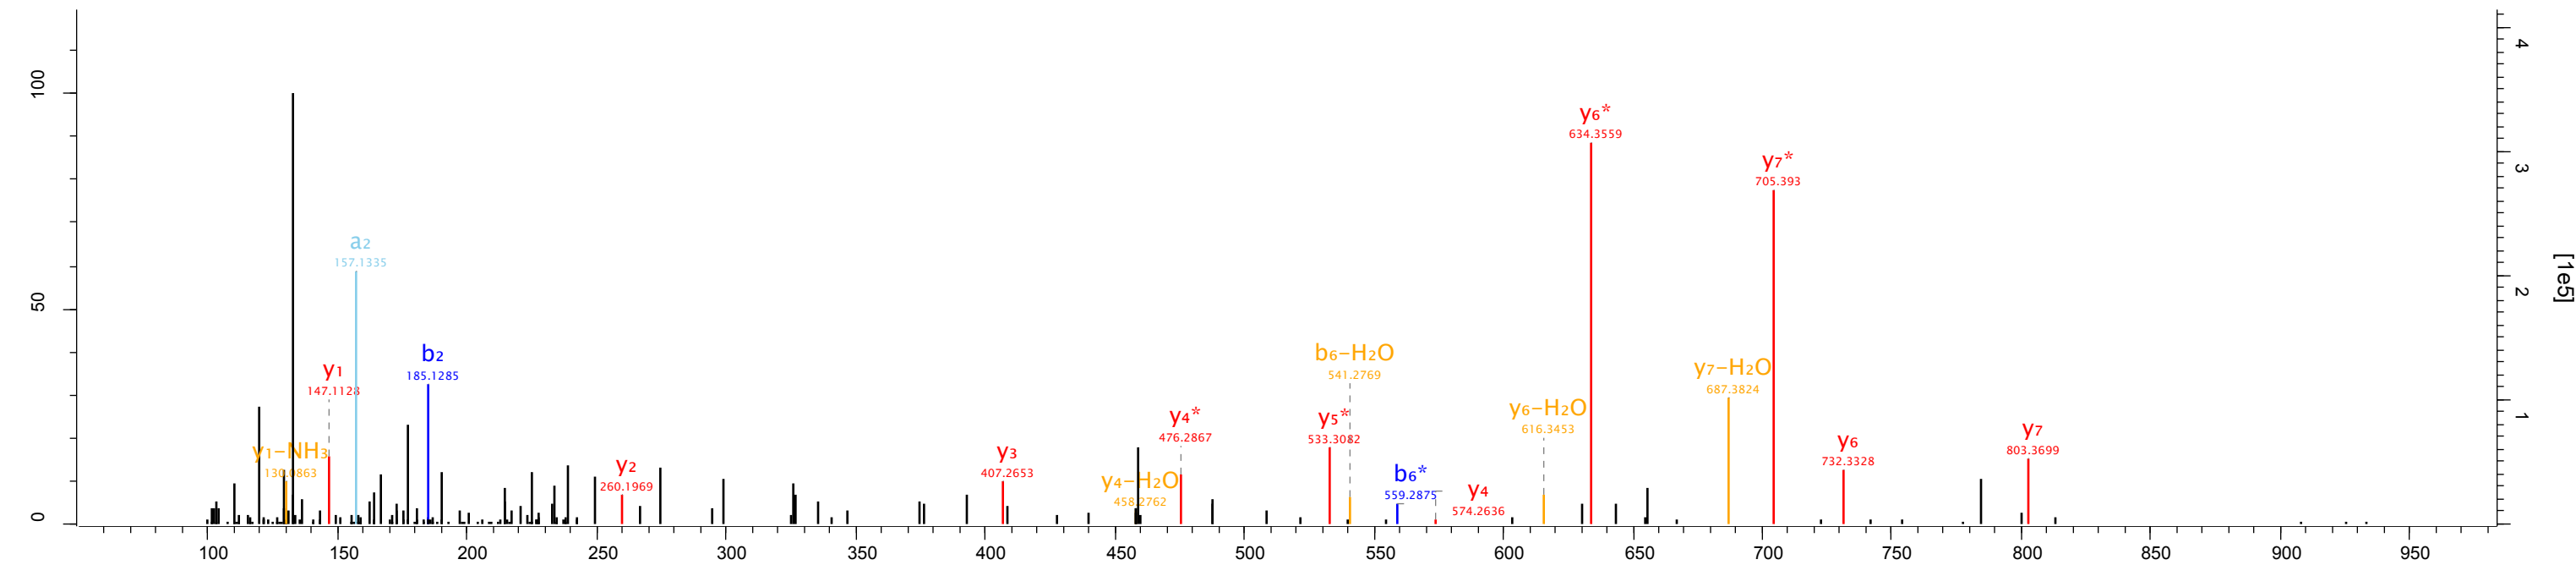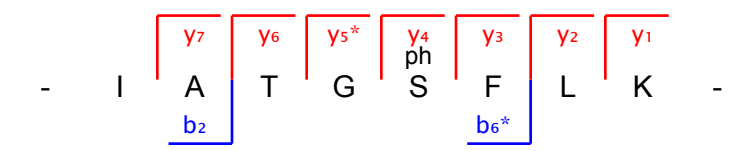

Raw file: 20150814\_A375SR\_Phospho\_BR2\_07  
 Scan: 15313 Method: FTMS; HCD Score: 183.49 m/z: 746.04 Gene names: PRPF40B

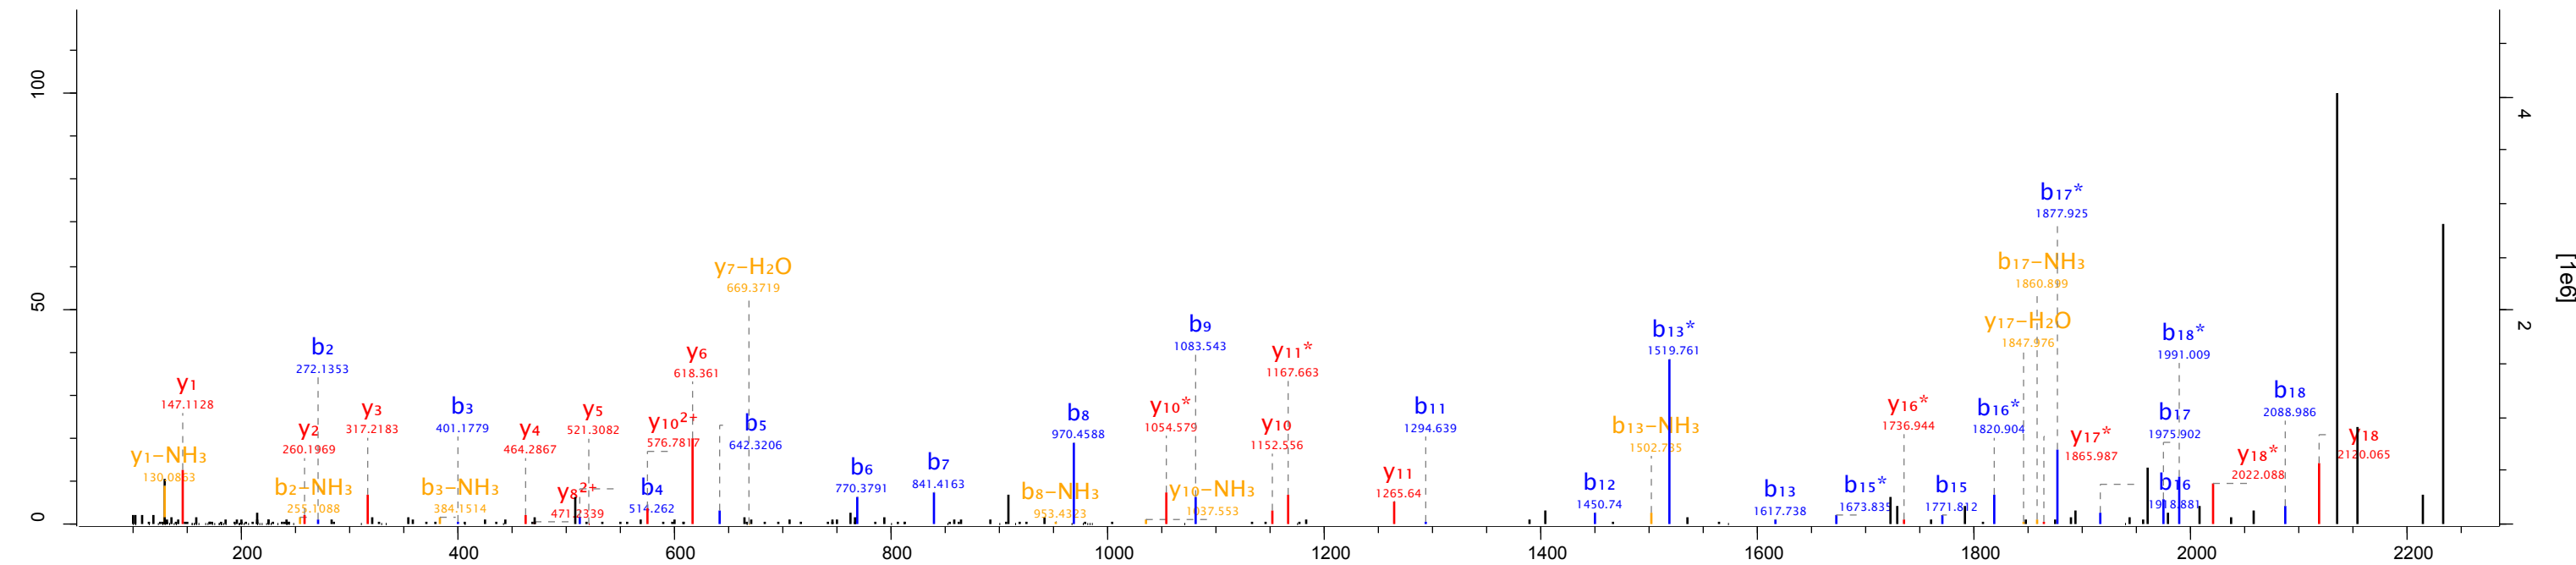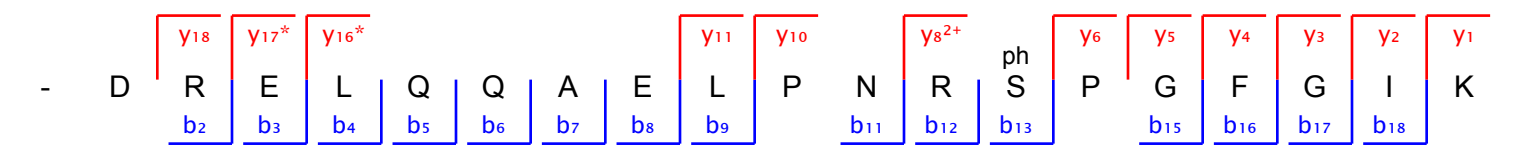



Raw file: 20150814\_A375SR\_Phospho\_BR2\_07  
 Scan: 16553 Method: FTMS; HCD Score: 210.61 m/z: 1032.46 Gene names: ITGA5

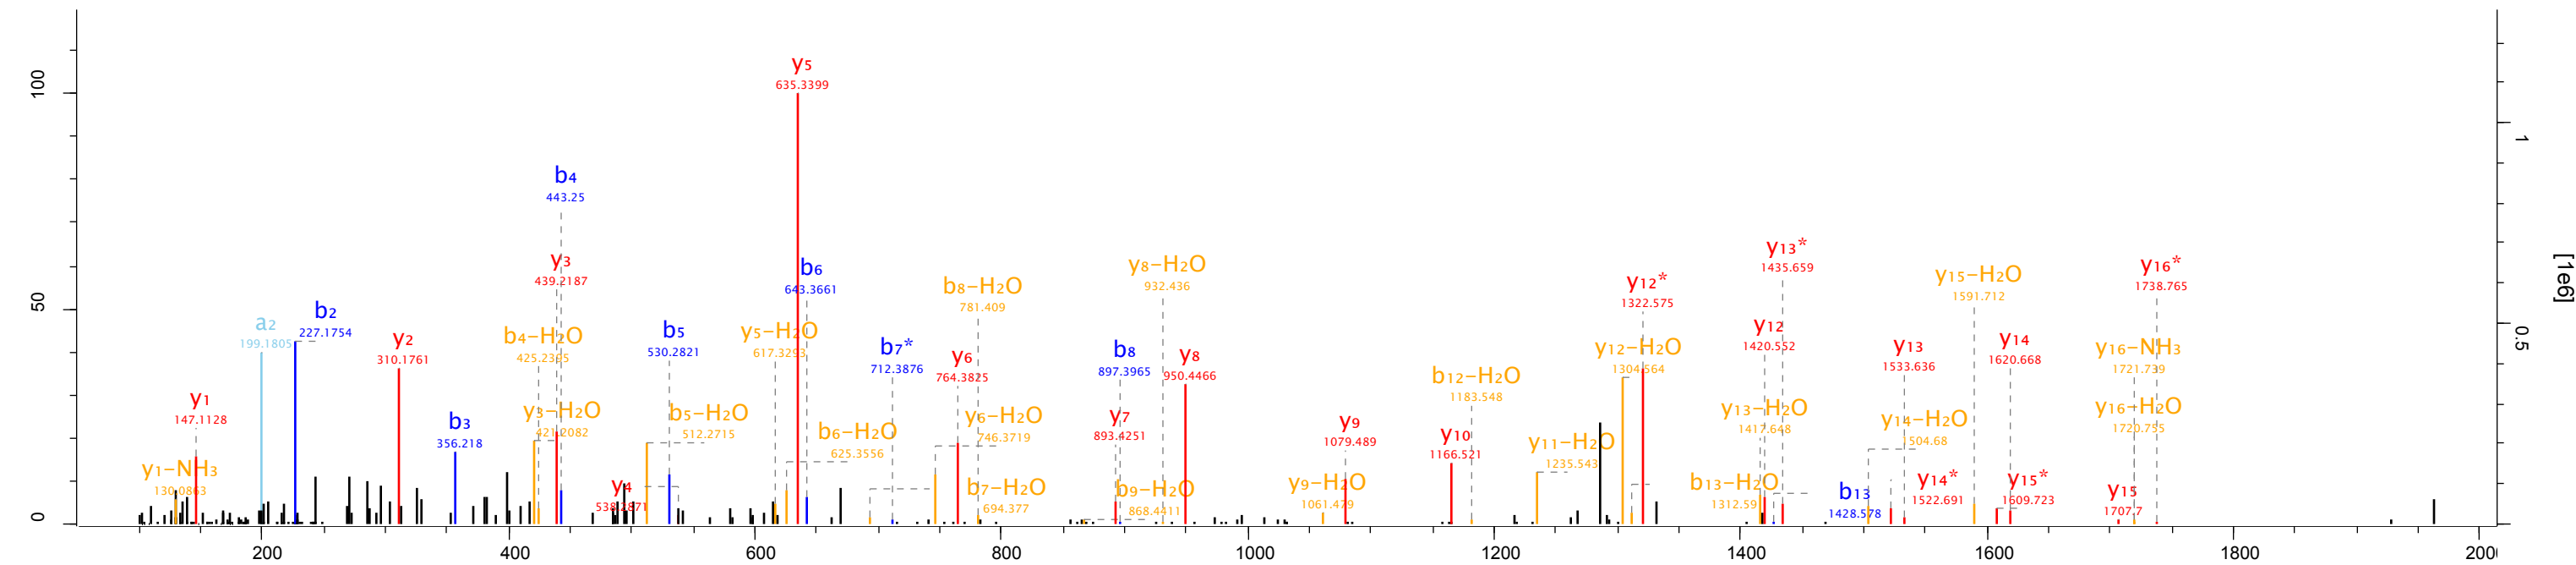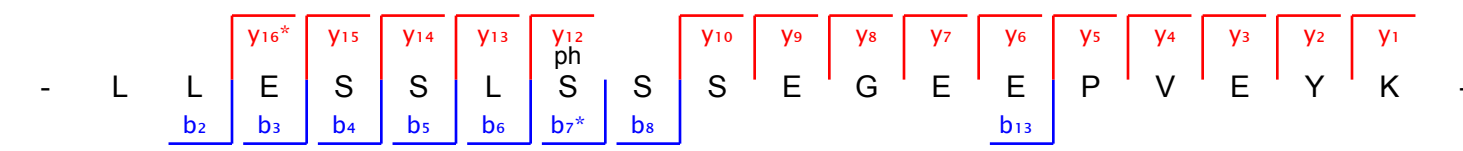

Raw file 20150814\_A375SR\_Phospho\_BR2\_07 Scan 16583 Method FTMS; HCD Score 126.84 m/z 1135.76 Gene names EIF3B

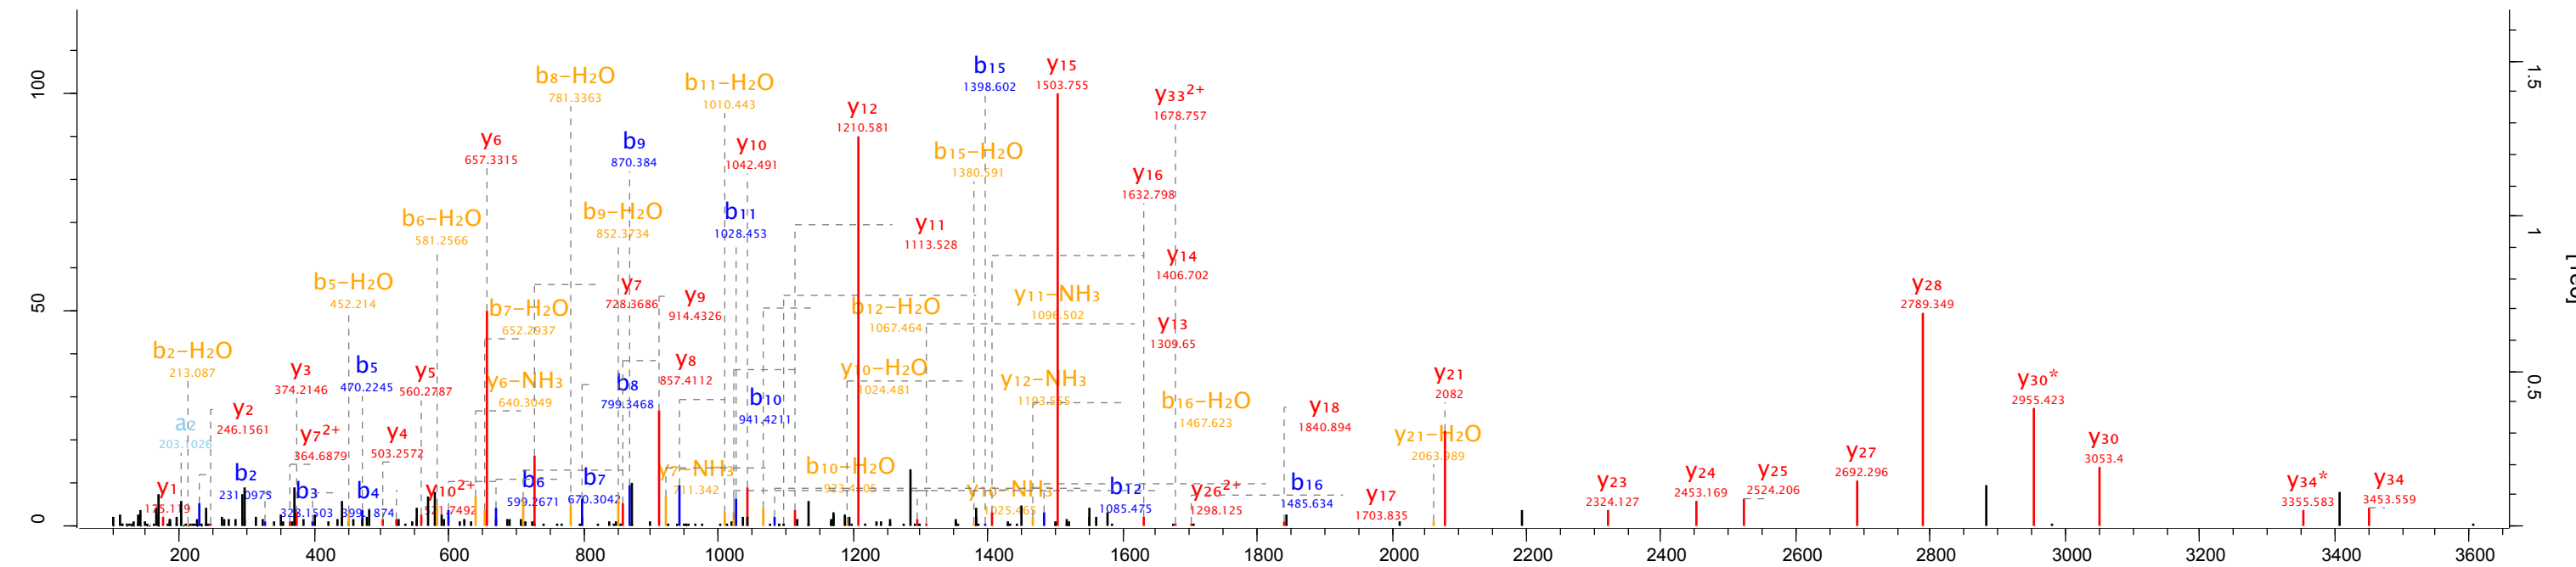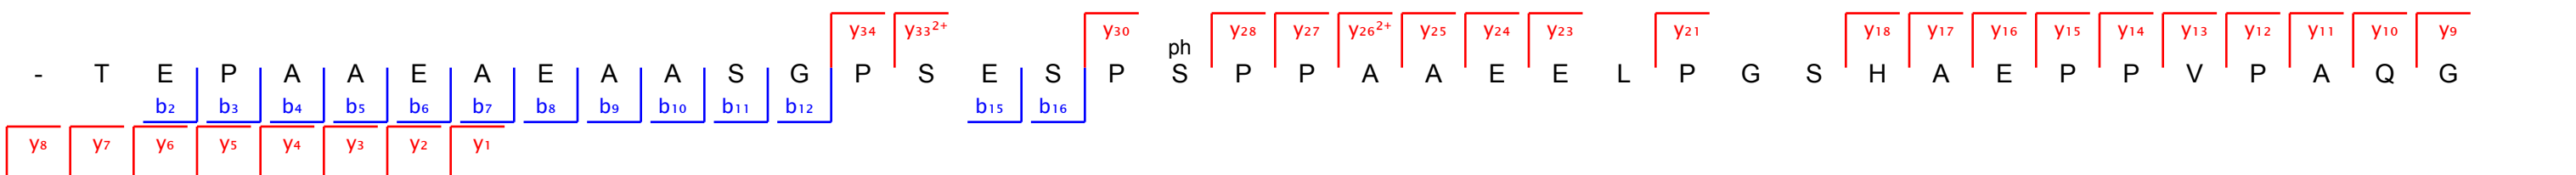

Raw file: 20150814\_A375SR\_Phospho\_BR2\_07  
 Scan: 17413 Method: FTMS; HCD Score: 93.81 m/z: 851.41 Gene names: ZBED6

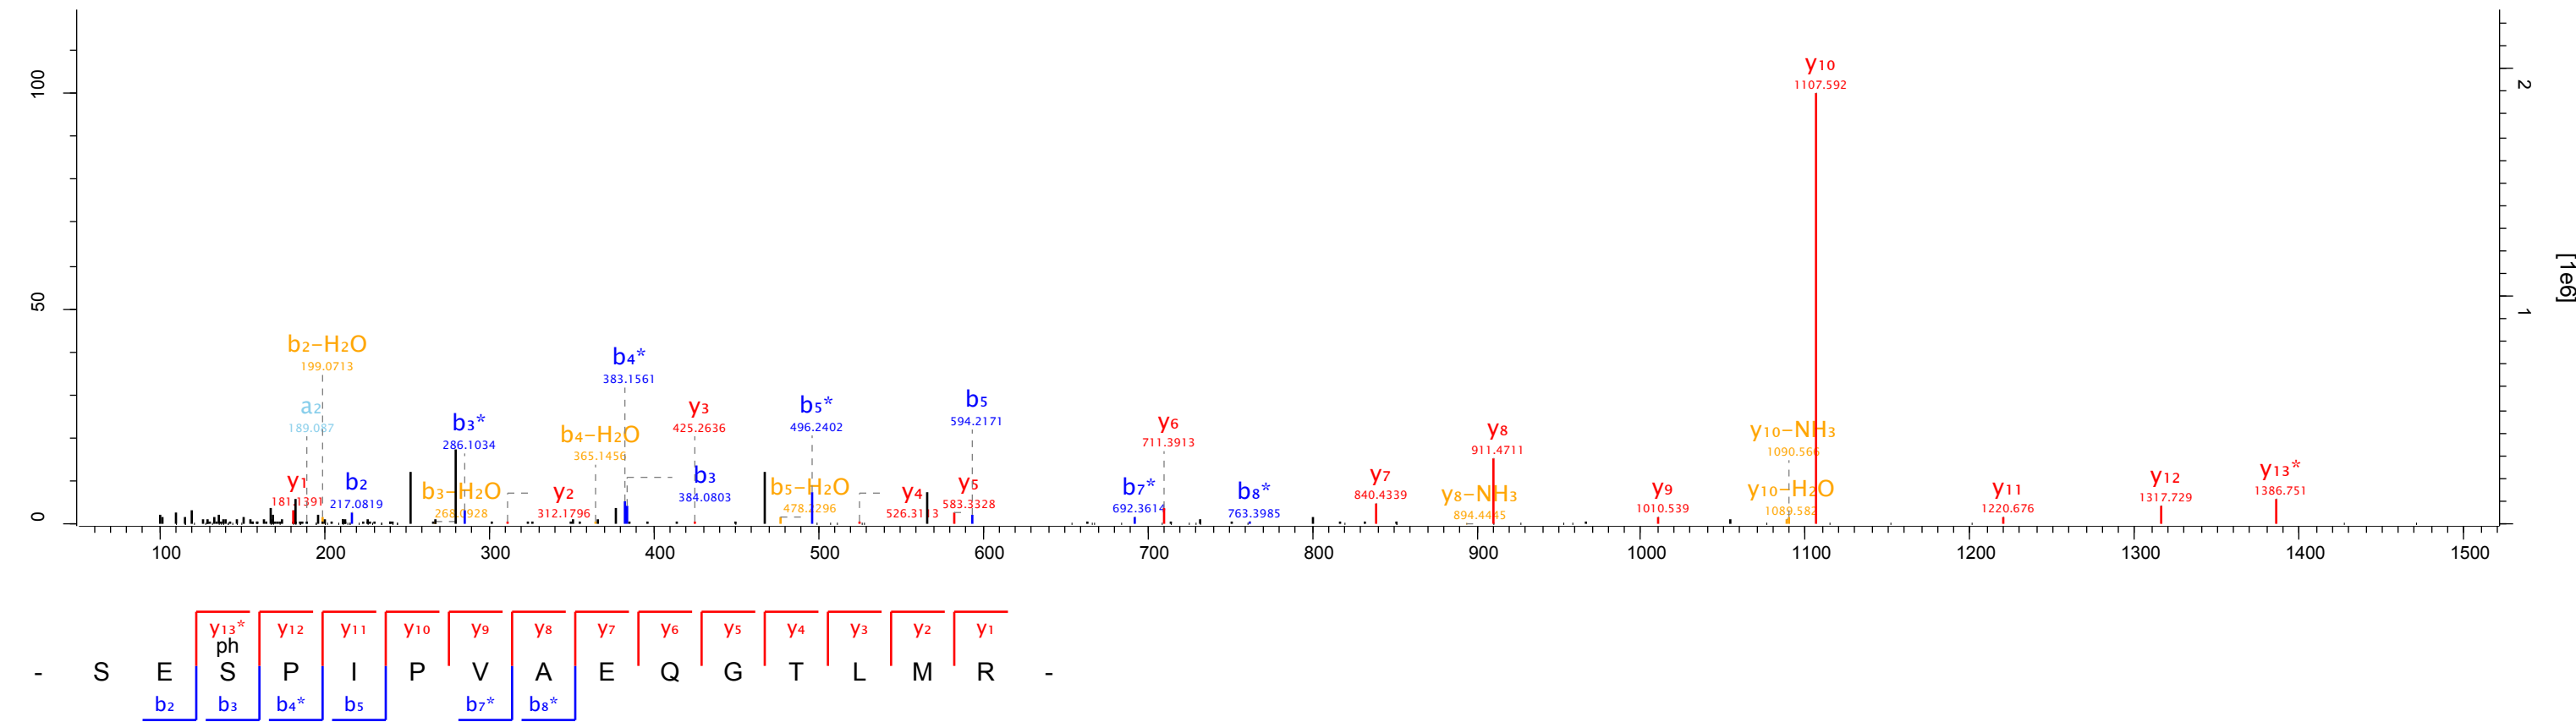

Raw file 20150814\_A375SR\_Phospho\_BR2\_07 Scan 21353 Method FTMS; HCD Score 73.46 m/z 1122.52 Gene names AP2A1

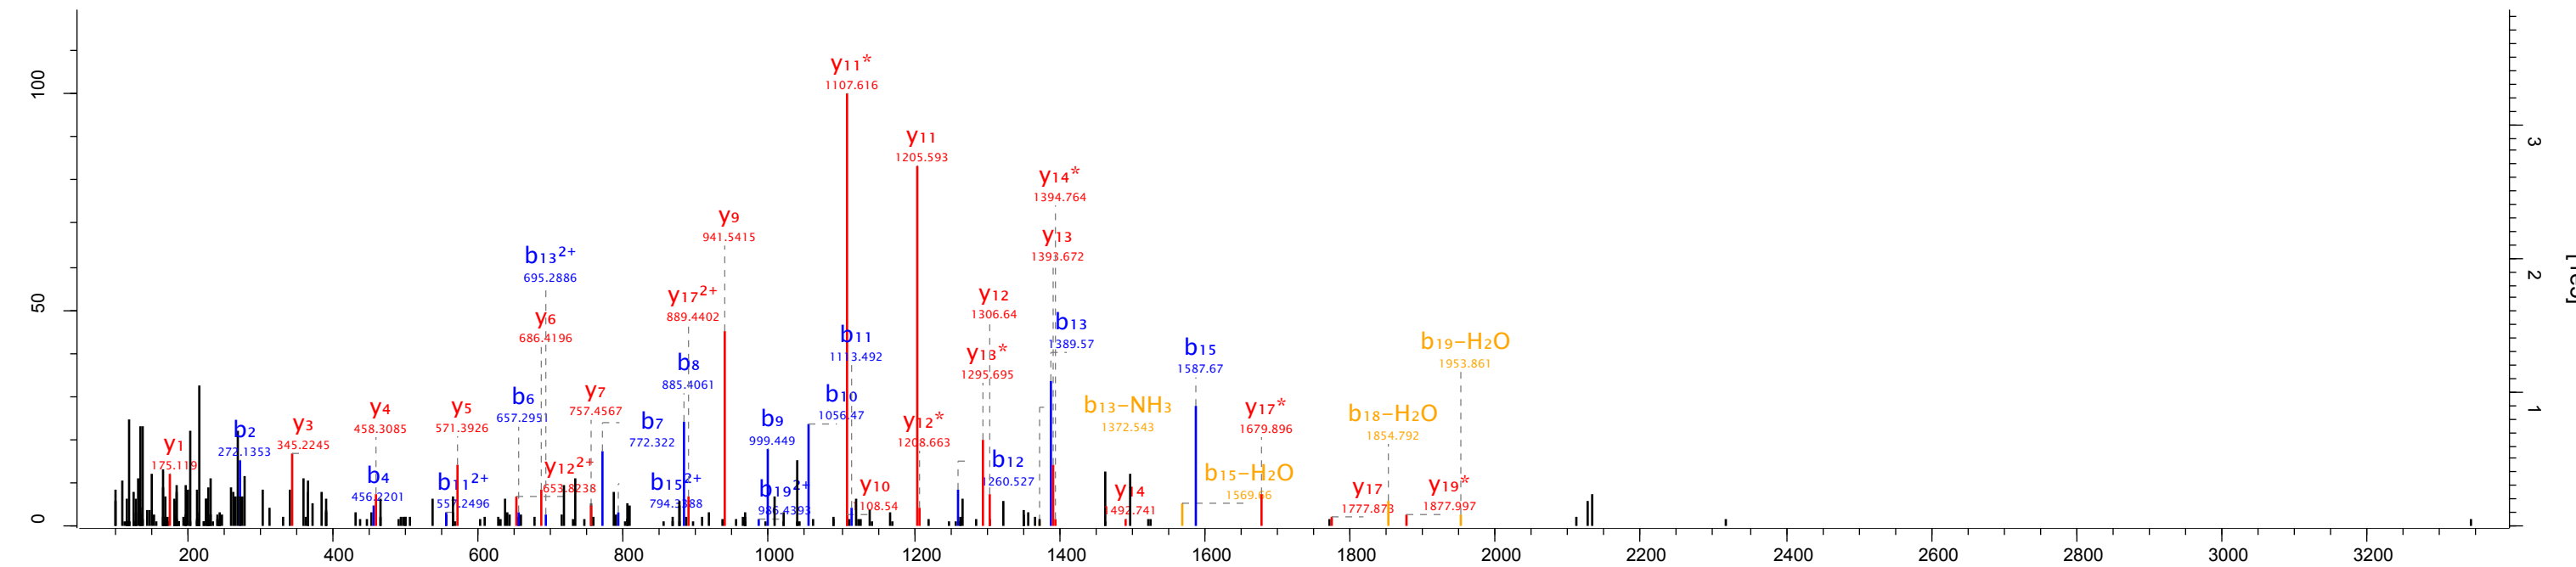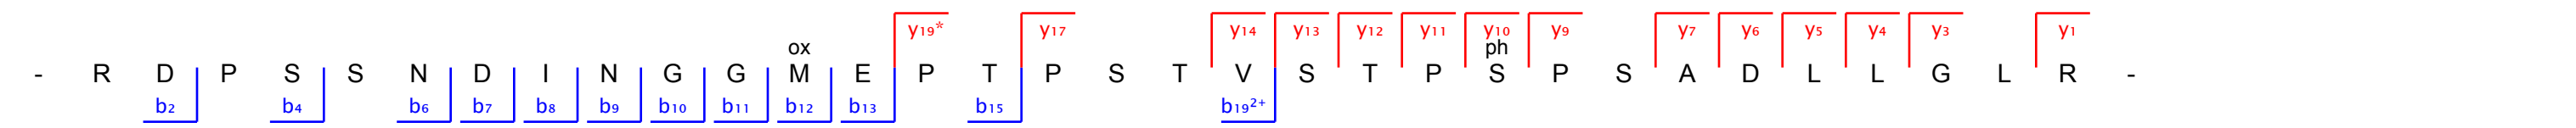

Raw file Scan Method Score m/z Gene names  
 20150814\_A375SR\_Phospho\_BR2\_07 21703 FTMS; HCD 171.04 862.92 FLNB

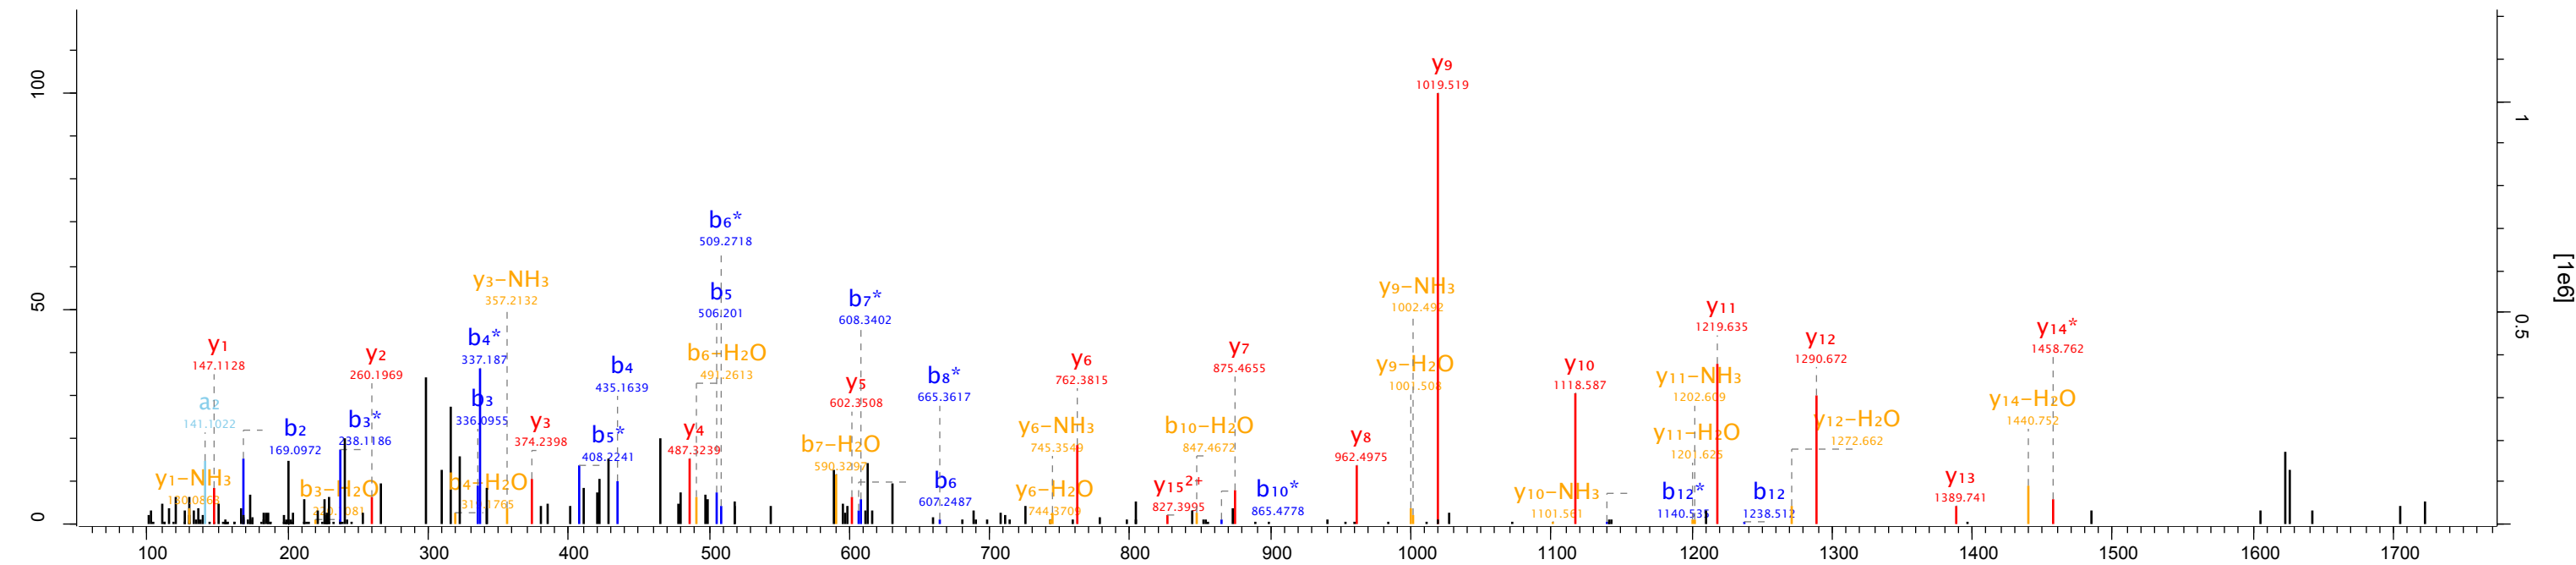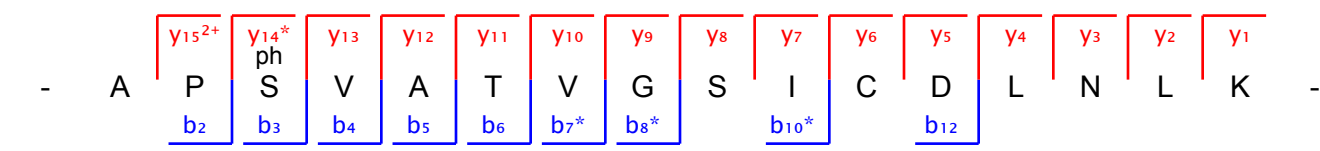

Raw file: 20150814\_A375SR\_Phospho\_BR2\_07  
 Scan: 21873 Method: FTMS; HCD Score: 129.27 m/z: 805.39 Gene names: FAM129A

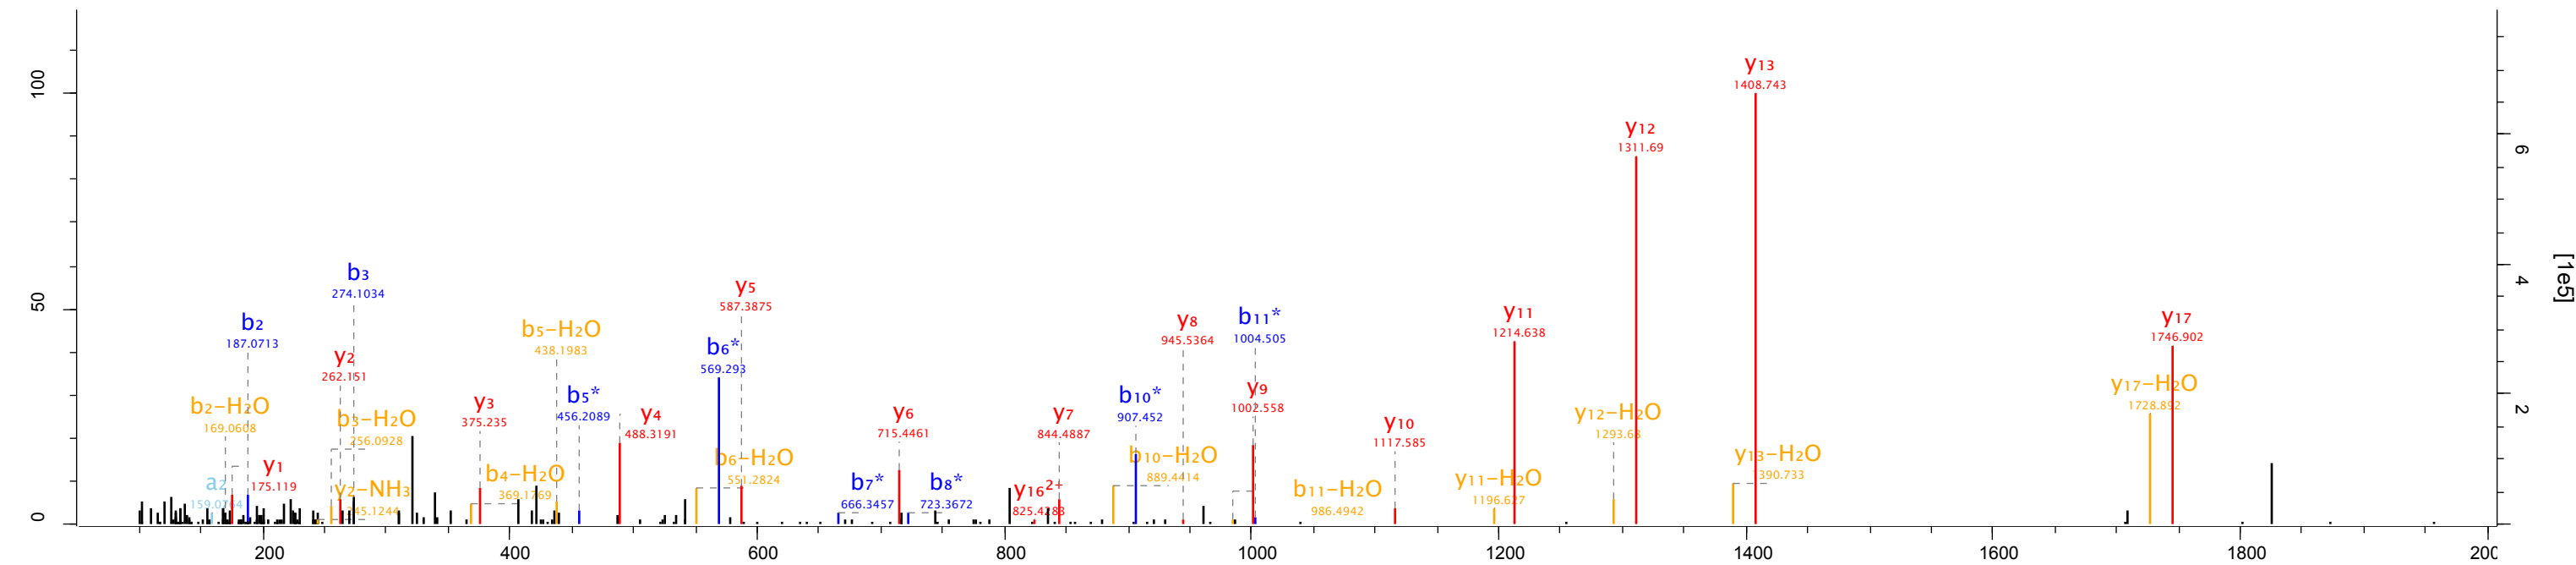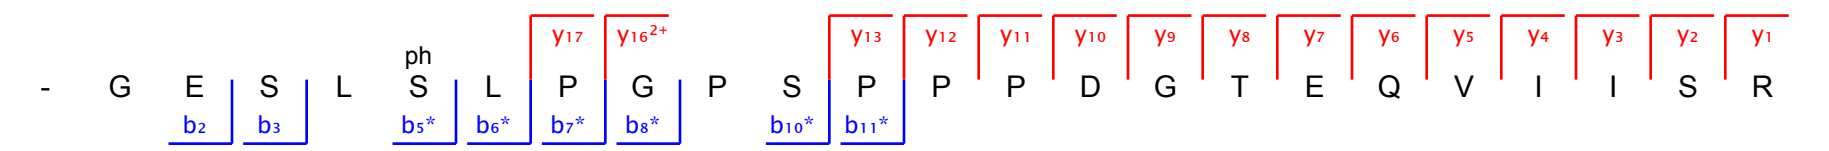

Raw file  
20150814\_A375SR\_Phospho\_BR2\_07

Scan 23473 Method FTMS; HCD Score 136.61 m/z 1022.53 Gene names FCHO2

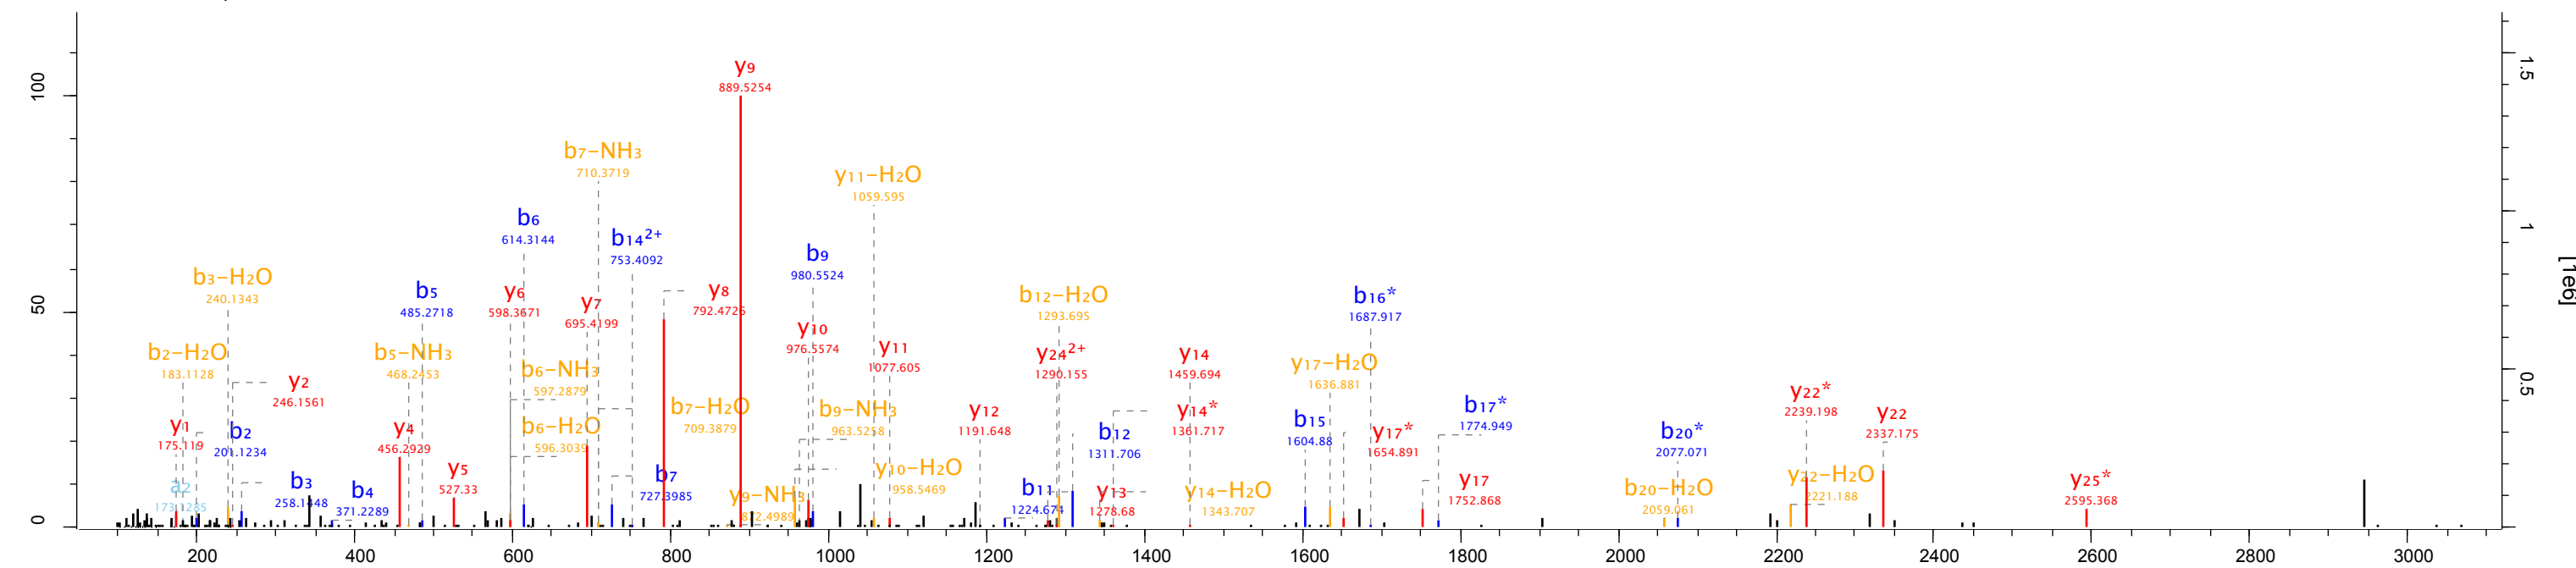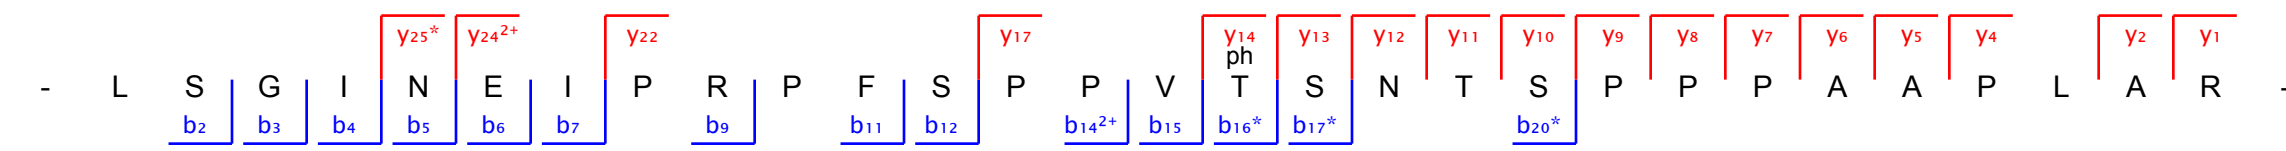

Raw file: 20150814\_A375SR\_Phospho\_BR2\_07  
 Scan: 25493 Method: FTMS; HCD Score: 58.73 m/z: 1495.4 Gene names: TRMT1L

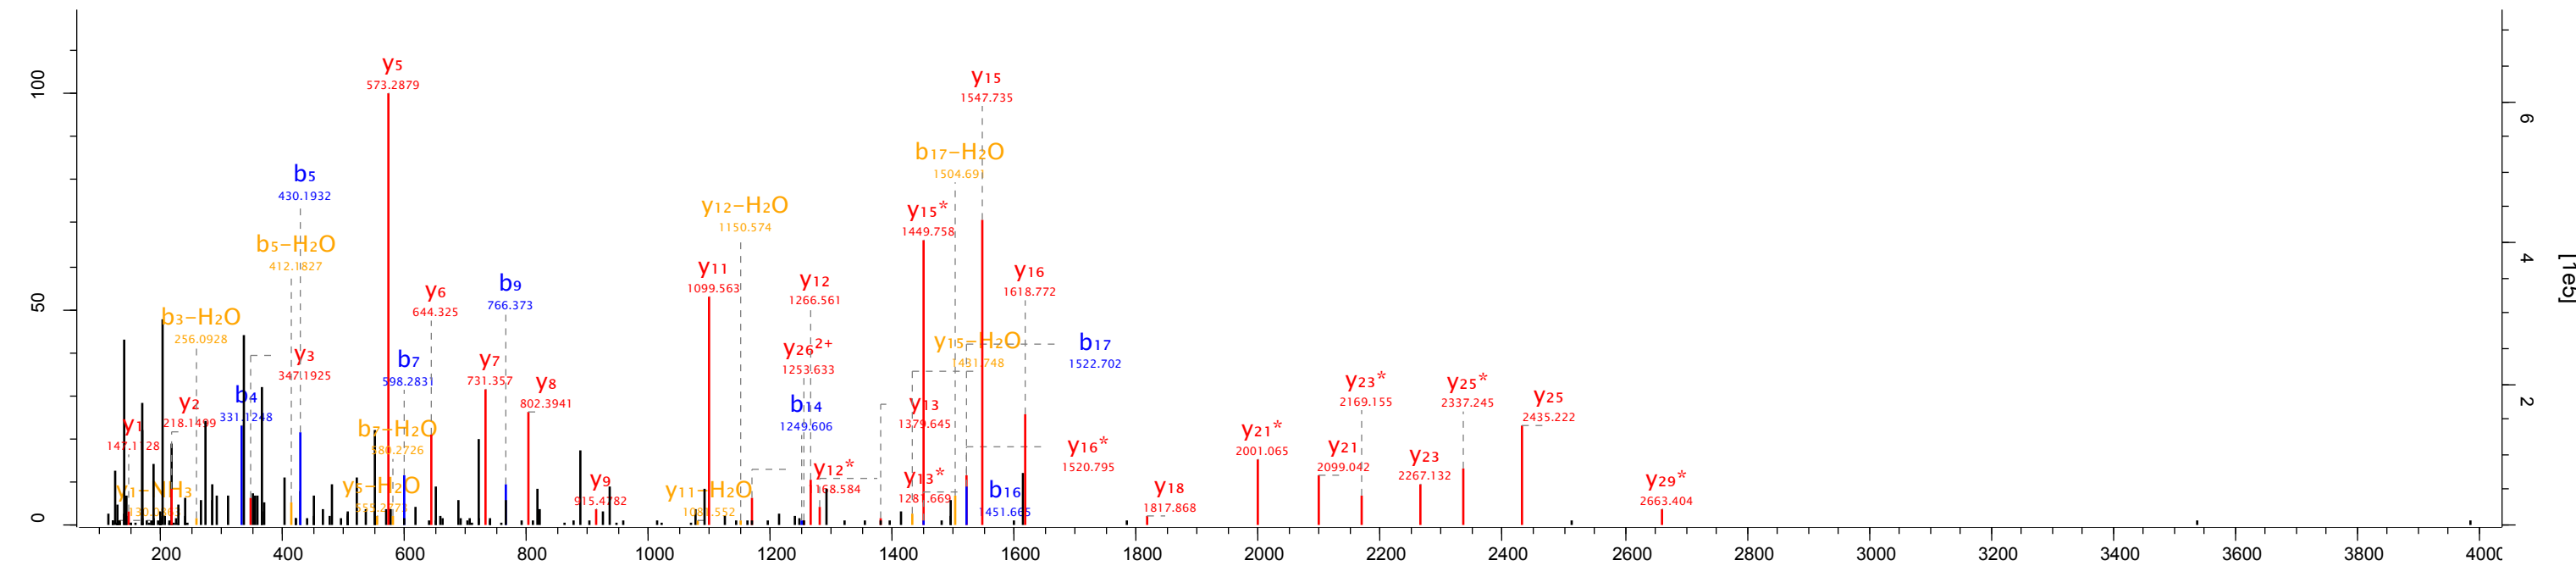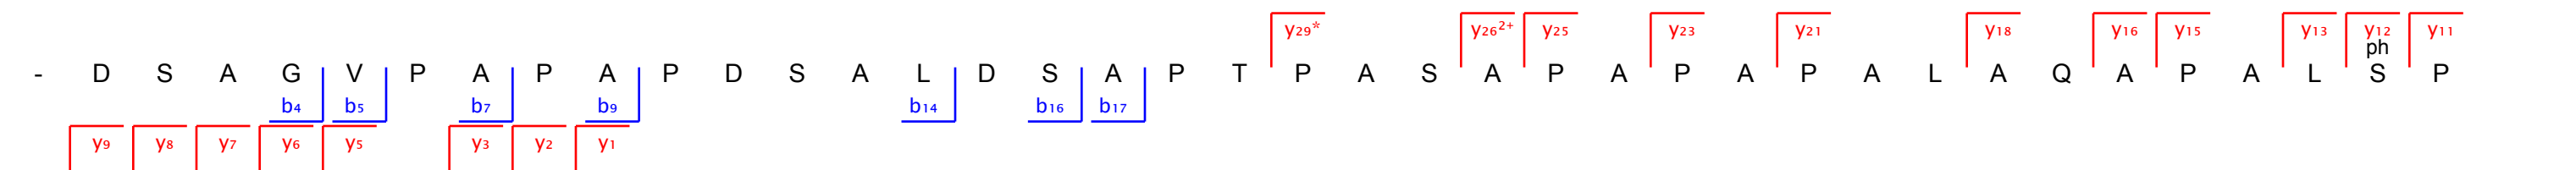



Raw file: 20150814\_A375SR\_Phospho\_BR2\_07  
 Scan: 2643 Method: FTMS; HCD Score: 240.66 m/z: 771.38 Gene names: HMGA2

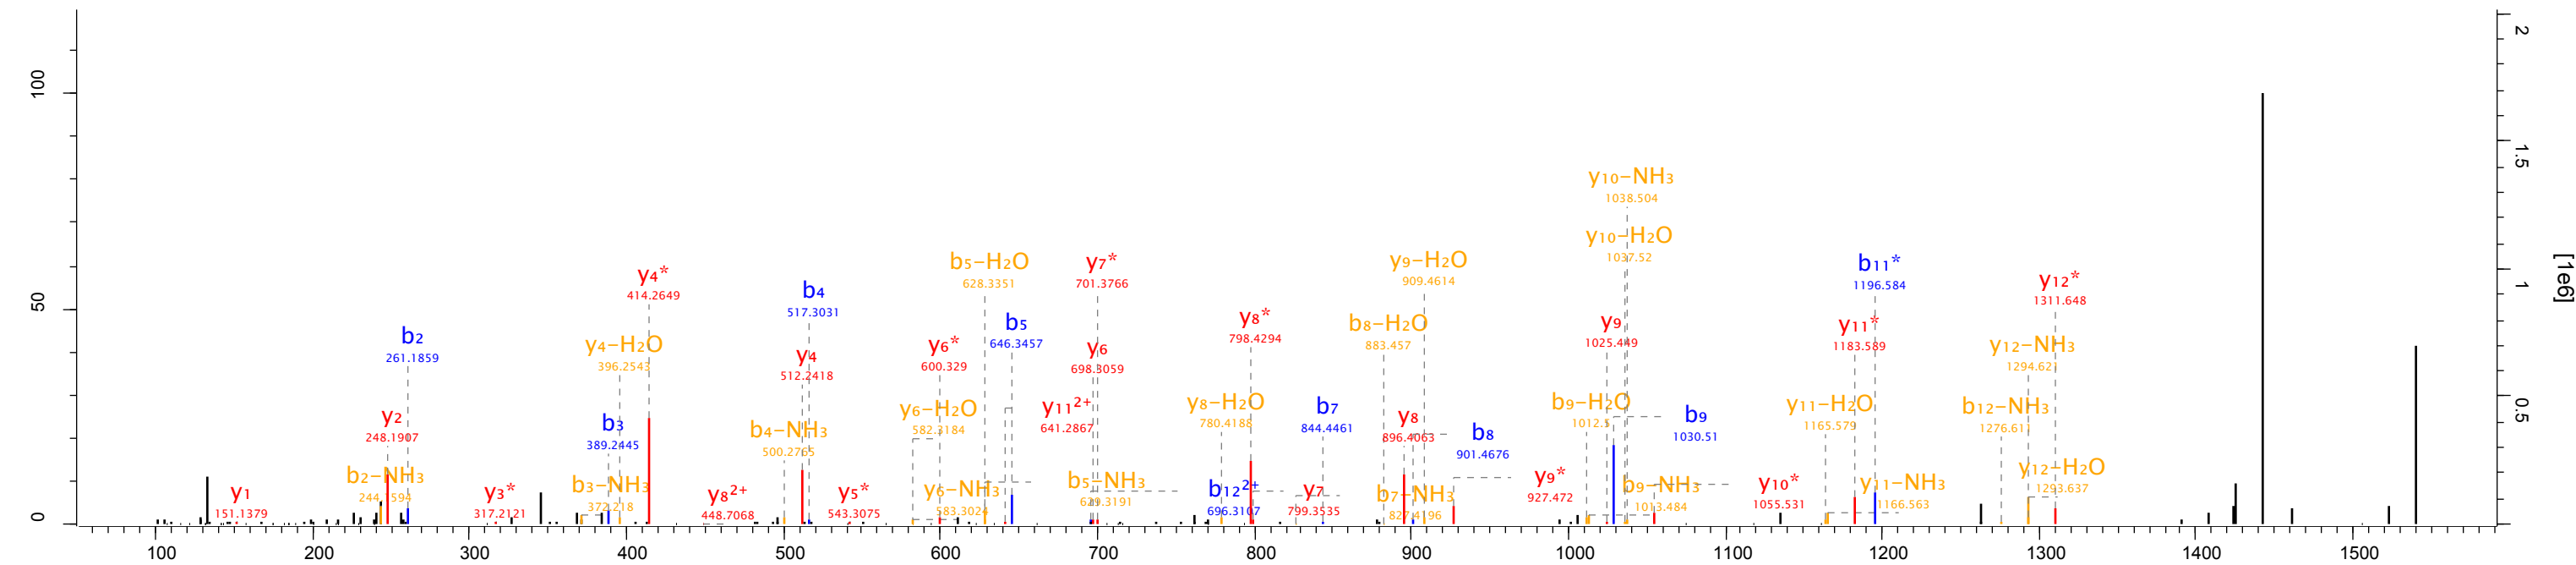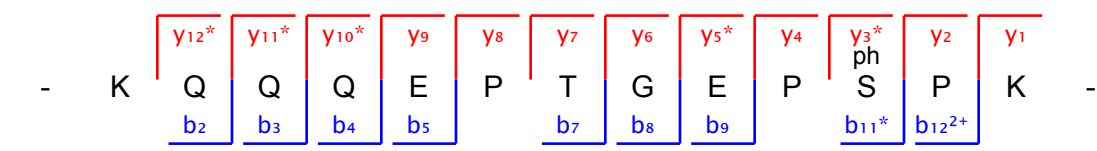

Raw file: 20150814\_A375SR\_Phospho\_BR2\_07  
 Scan: 28303 Method: FTMS; HCD Score: 107.05 m/z: 1296.63 Gene names: TNS3

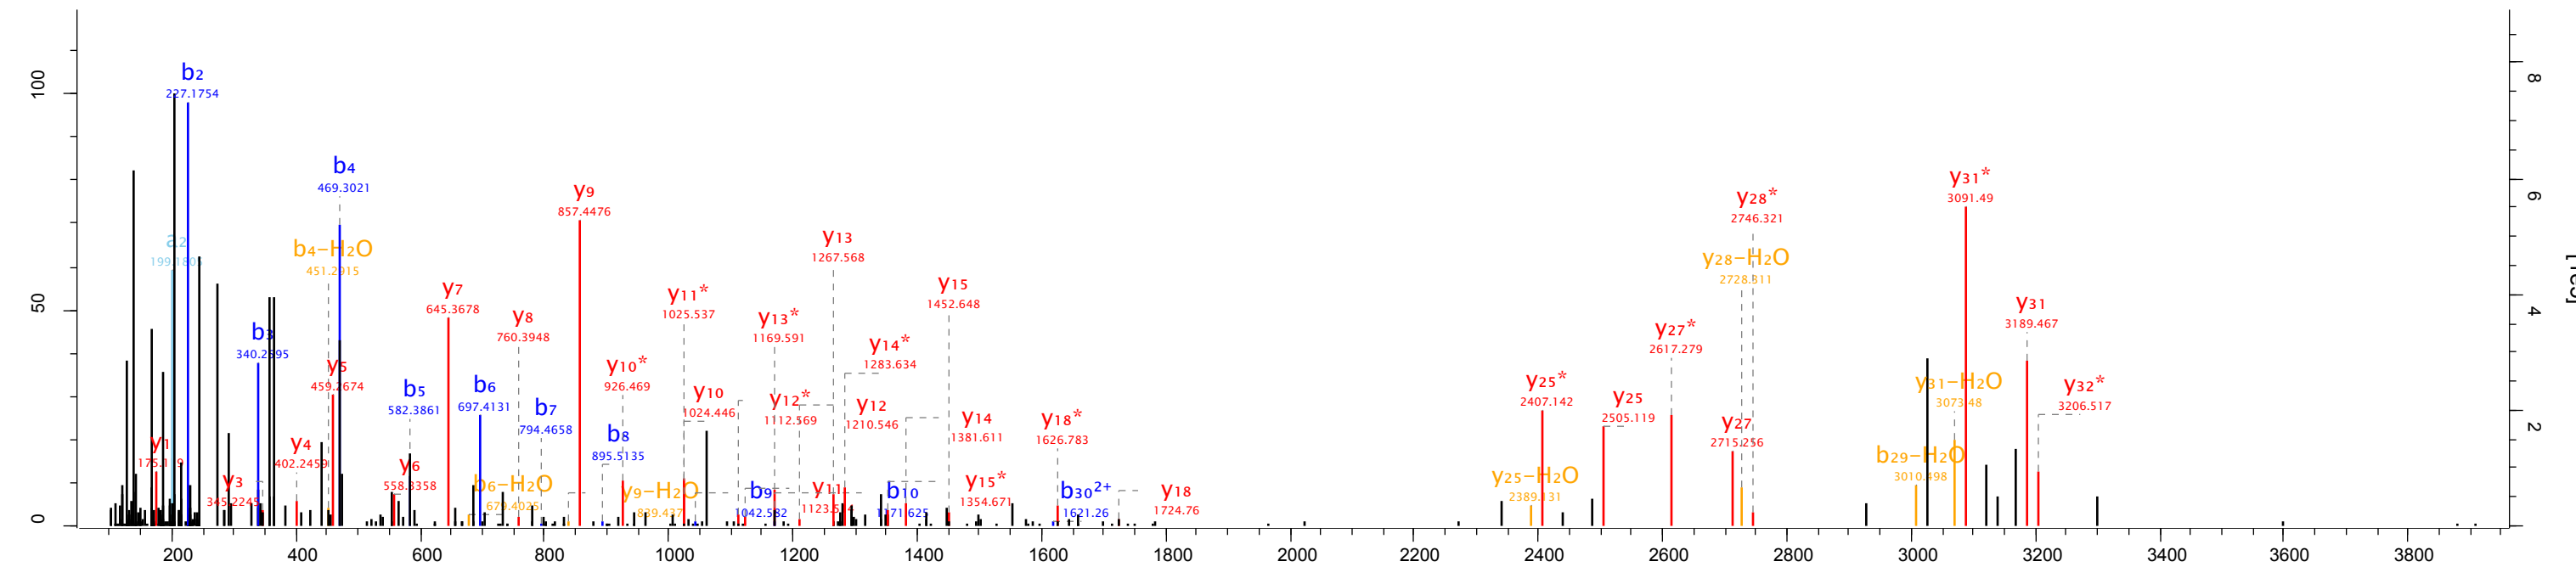

- L I L E L D P T F E P I P T H ox M N A L G S Q A N G S V S P D S V G G L R -

b<sub>2</sub>
b<sub>3</sub>
b<sub>4</sub>
b<sub>5</sub>
b<sub>6</sub>
b<sub>7</sub>
b<sub>8</sub>
b<sub>9</sub>
b<sub>10</sub>
b<sub>30</sub><sup>2+</sup>
y<sub>32</sub><sup>\*</sup>
y<sub>31</sub>
y<sub>28</sub><sup>\*</sup>
y<sub>27</sub>
y<sub>25</sub>
y<sub>18</sub>
y<sub>15</sub>
y<sub>14</sub>
y<sub>13</sub>
y<sub>12</sub>
y<sub>11</sub>
y<sub>10</sub>
y<sub>9</sub>
y<sub>8</sub>
y<sub>7</sub>
y<sub>6</sub>
y<sub>5</sub>
y<sub>4</sub>
y<sub>3</sub>
y<sub>1</sub>

Raw file 20150814\_A375SR\_Phospho\_BR2\_07 Scan 28363 Method FTMS; HCD Score 119.92 m/z 963.23 Gene names LARP4B

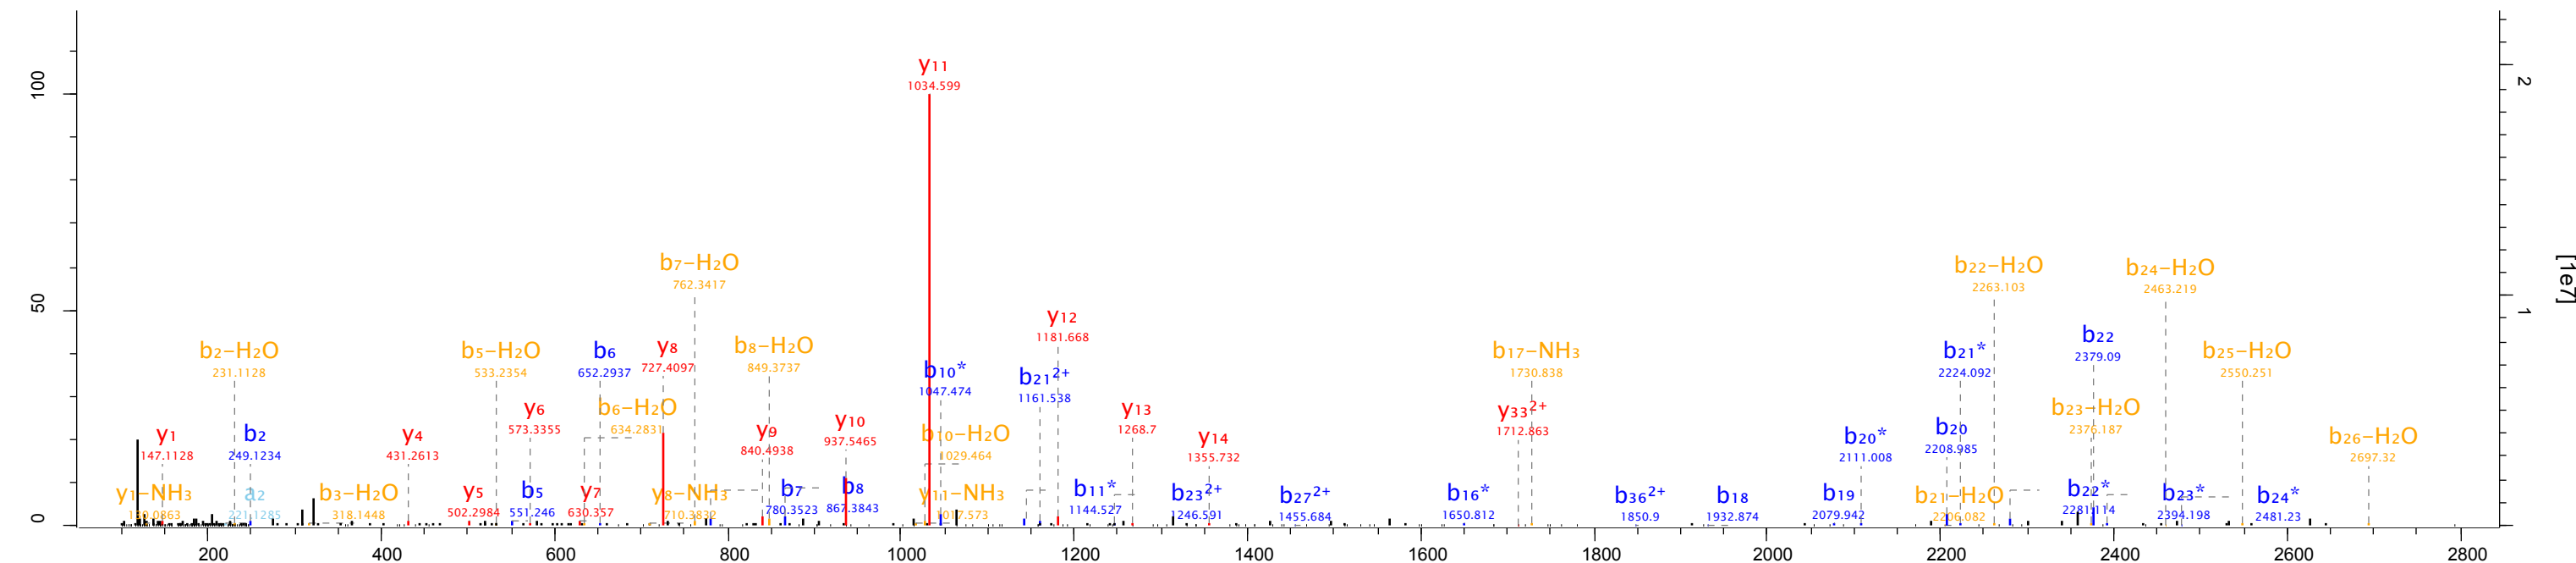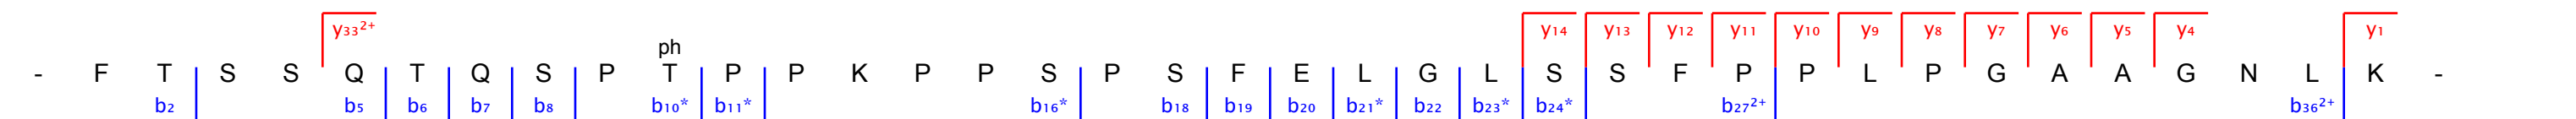

Raw file 20150814\_A375SR\_Phospho\_BR2\_07 Scan 2933 Method FTMS; HCD Score 96.23 m/z 614.77 Gene names GARS

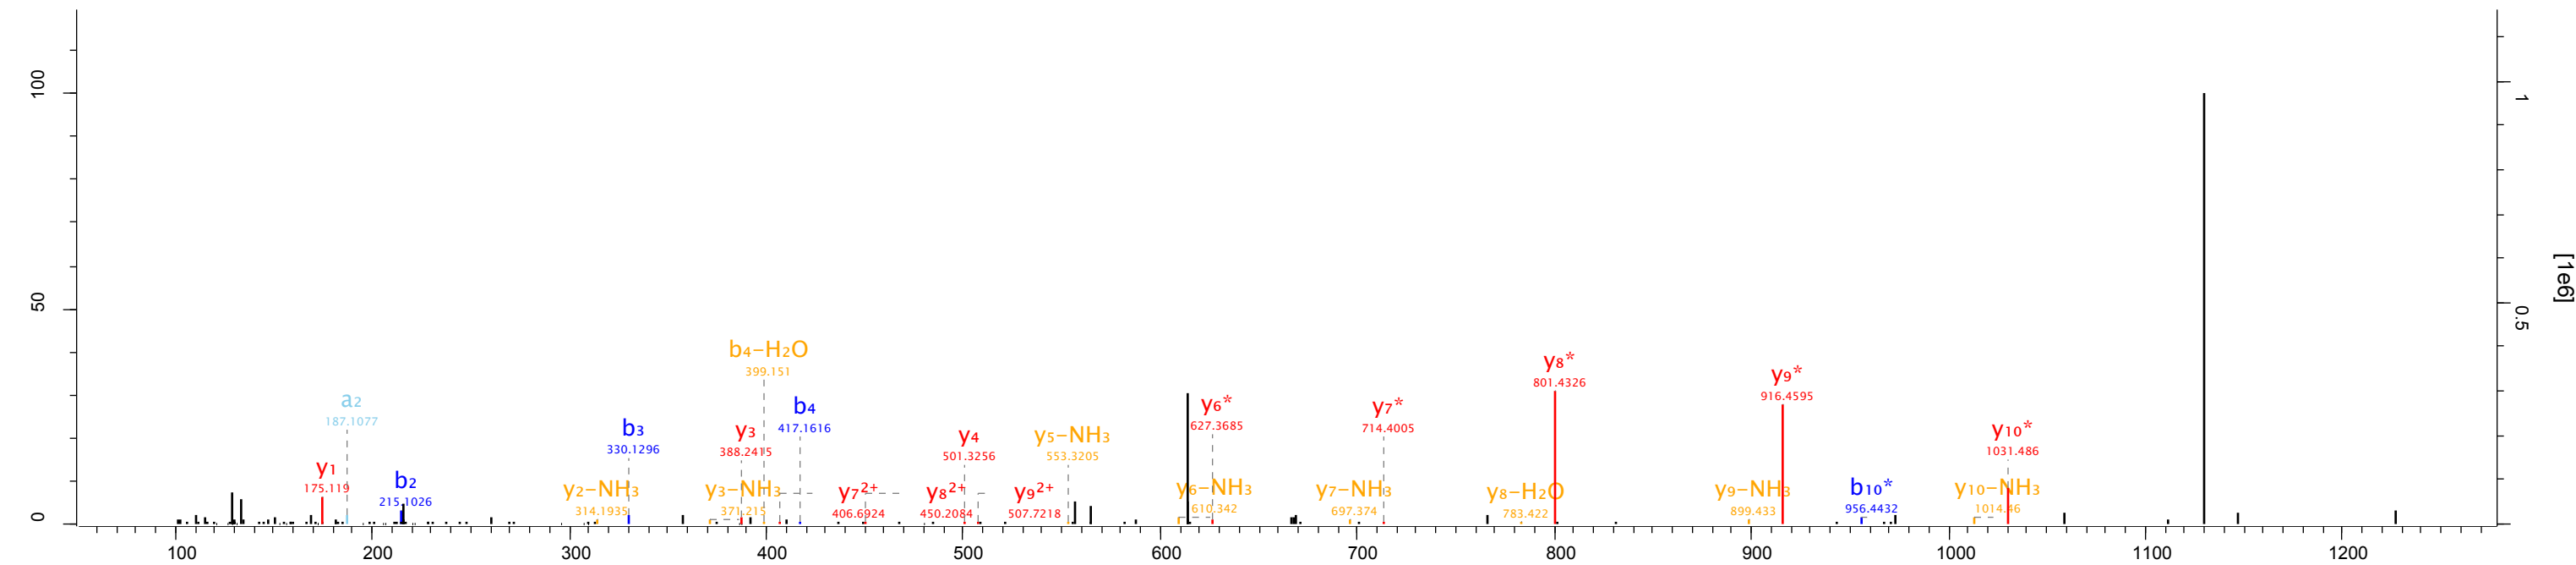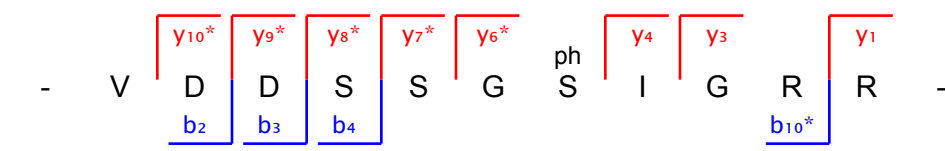

Raw file: 20150814\_A375SR\_Phospho\_BR2\_07  
 Scan: 3293 Method: FTMS; HCD Score: 101.35 m/z: 547.77 Gene names: NKTR

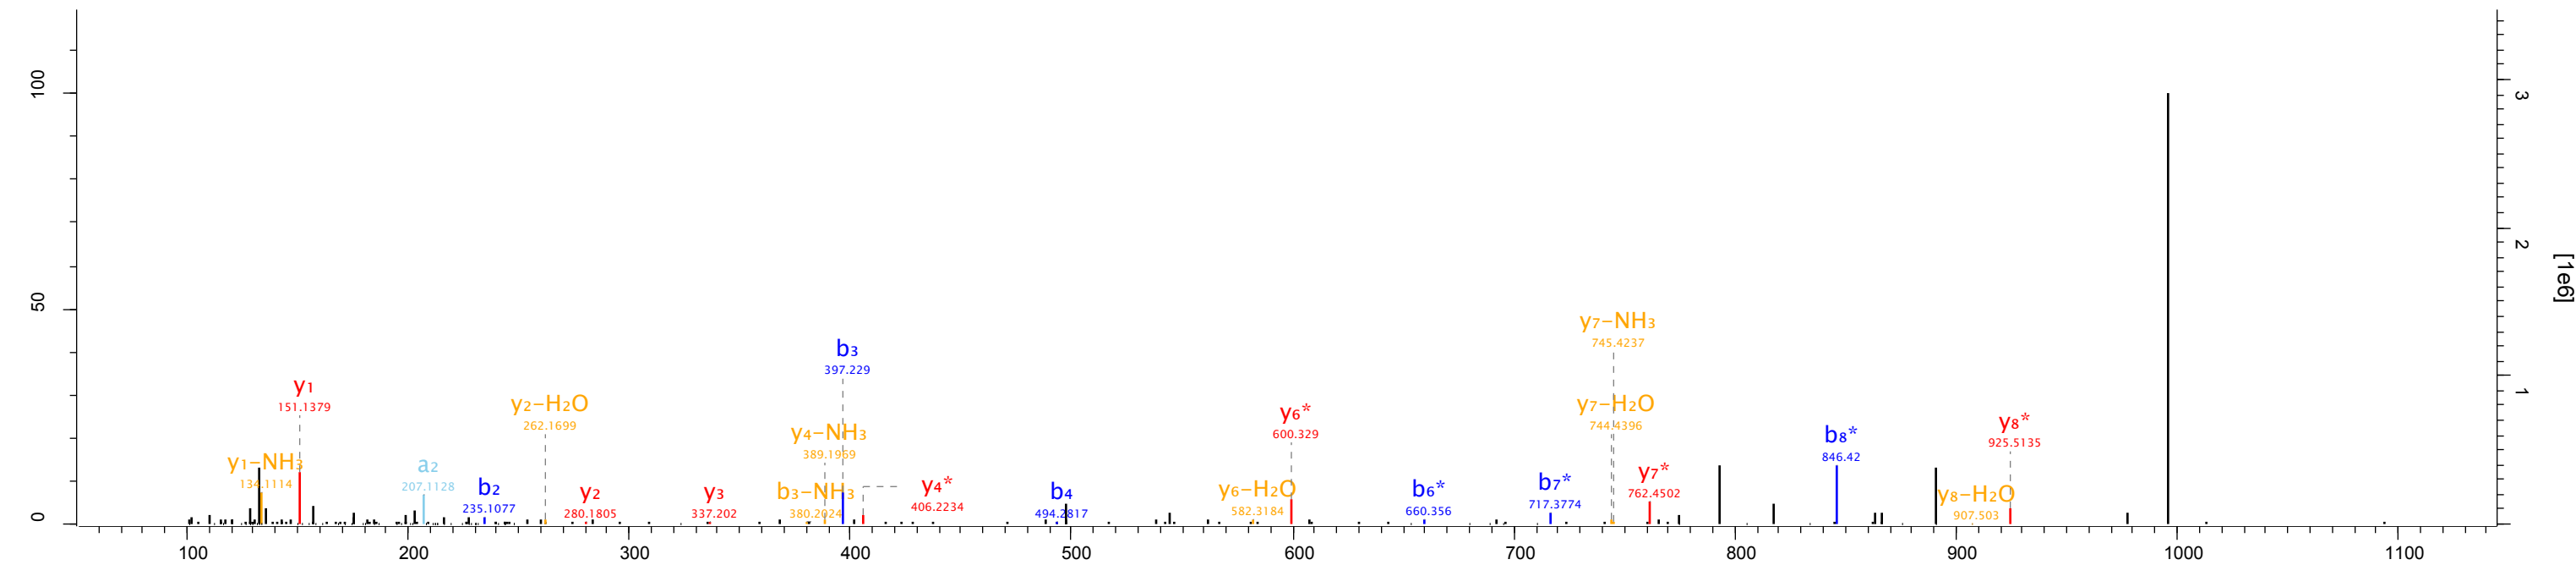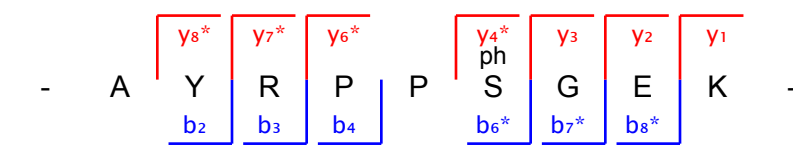

Raw file 20150814\_A375SR\_Phospho\_BR2\_07 Scan 3403 Method FTMS; HCD Score 258.9 m/z 821.38 Gene names AKAP12

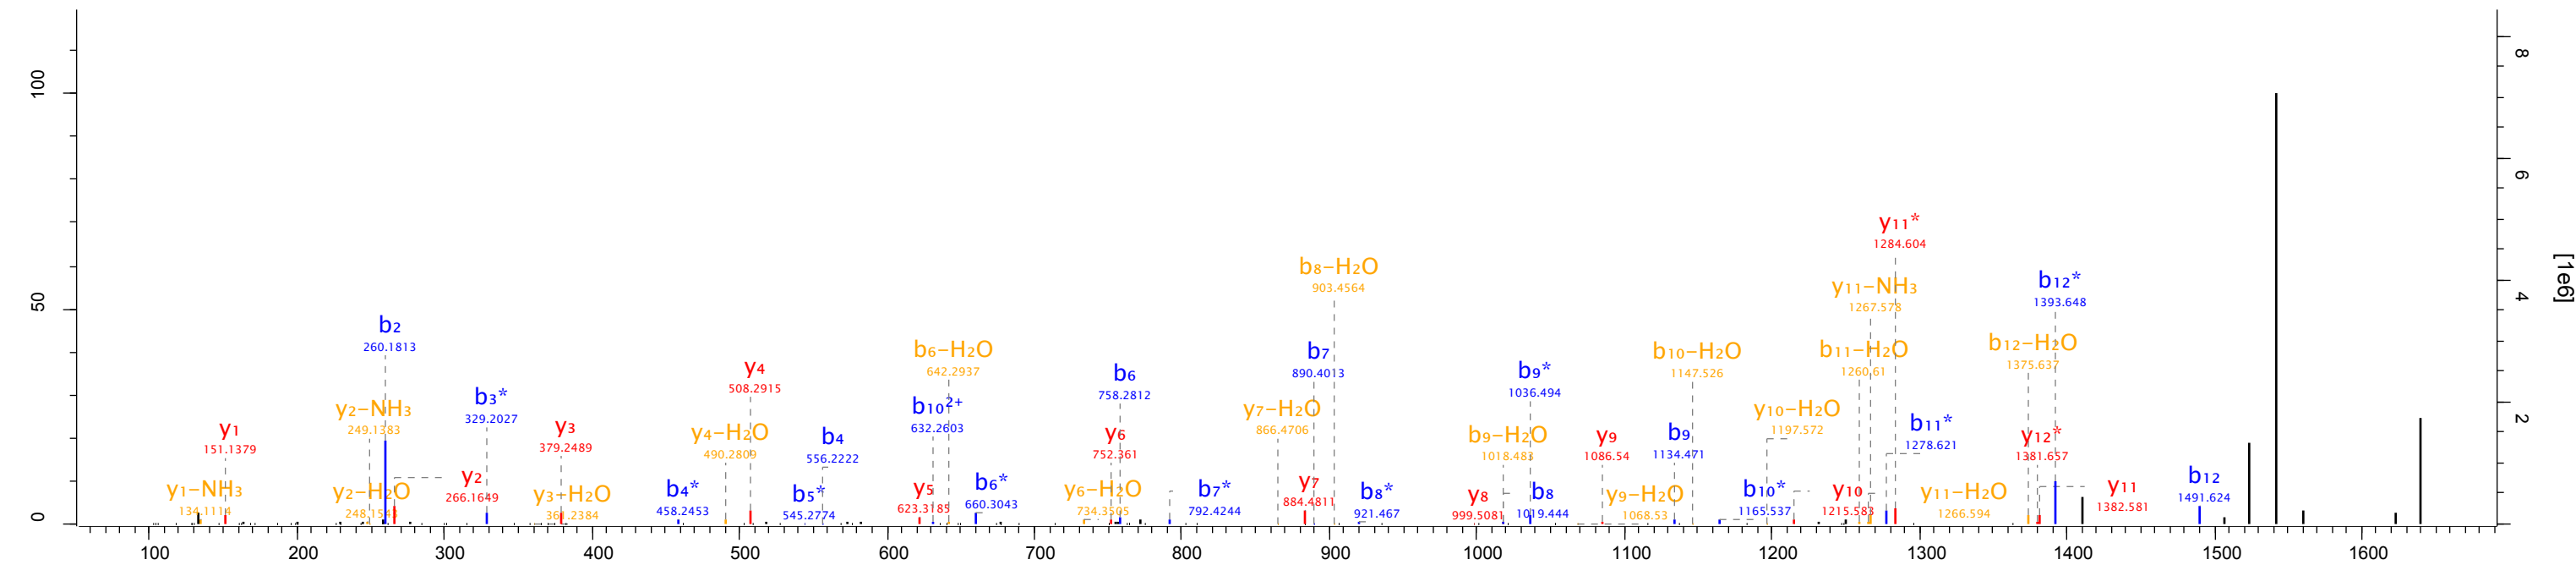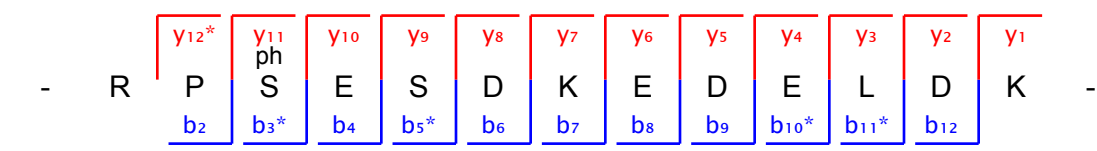

Raw file: 20150814\_A375SR\_Phospho\_BR2\_07  
 Scan: 4133 Method: FTMS; HCD Score: 104.17 m/z: 446.9 Gene names: SRRM2

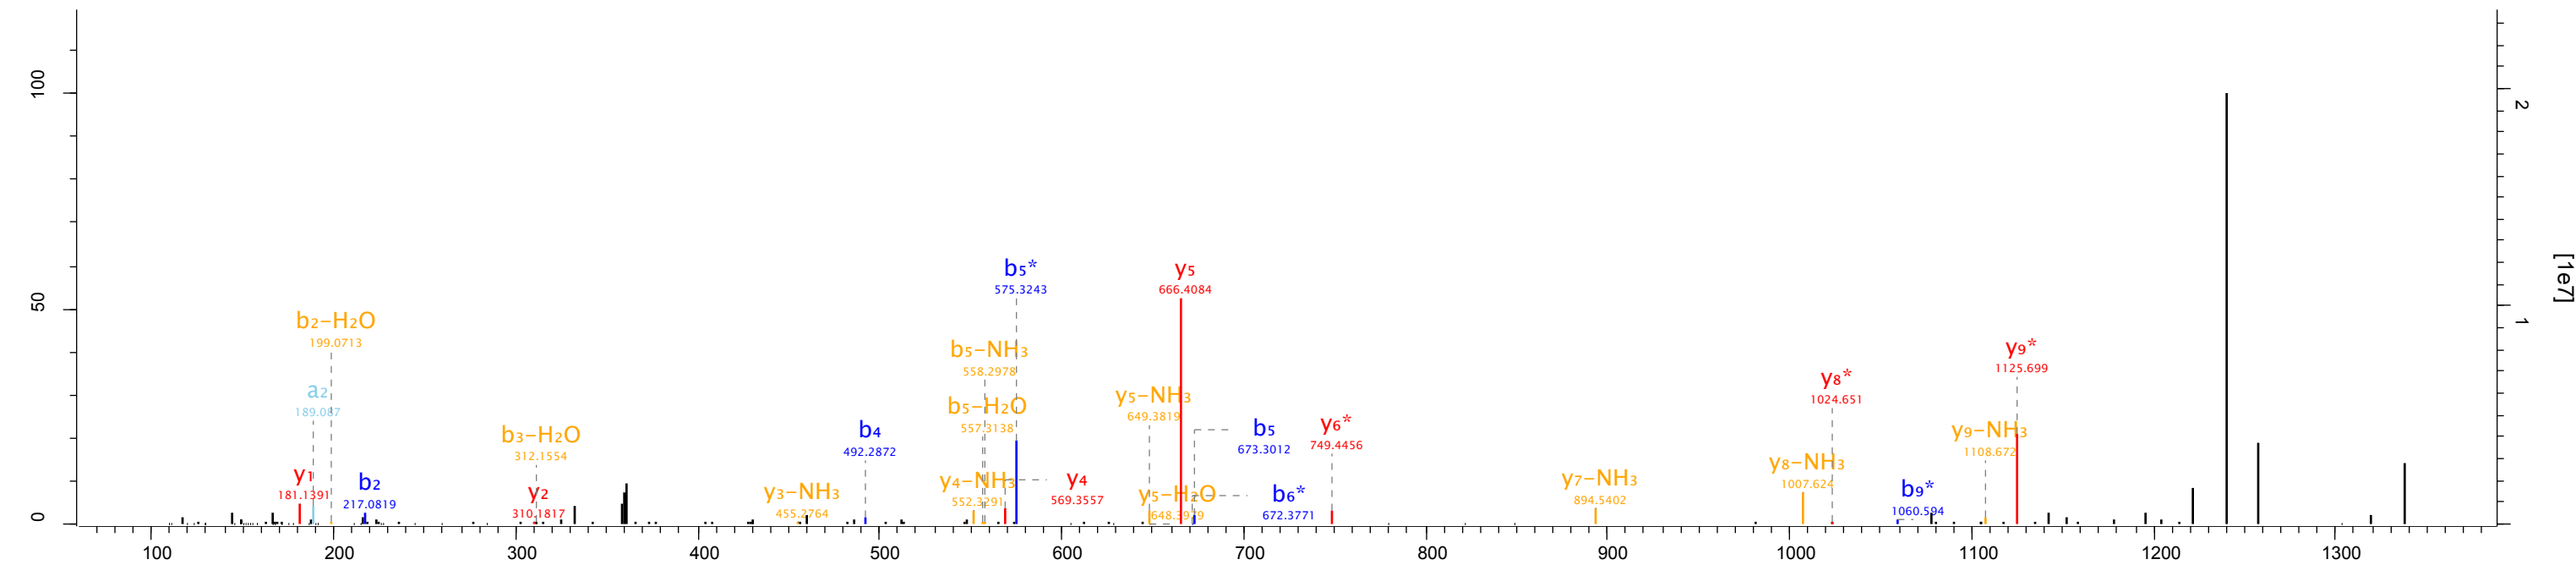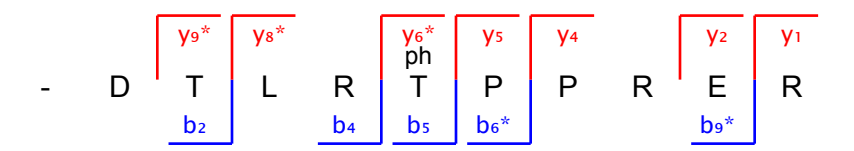

Raw file 20150814\_A375SR\_Phospho\_BR2\_07 Scan 4673 Method FTMS; HCD Score 136.8 m/z 586.27 Gene names PDCD4

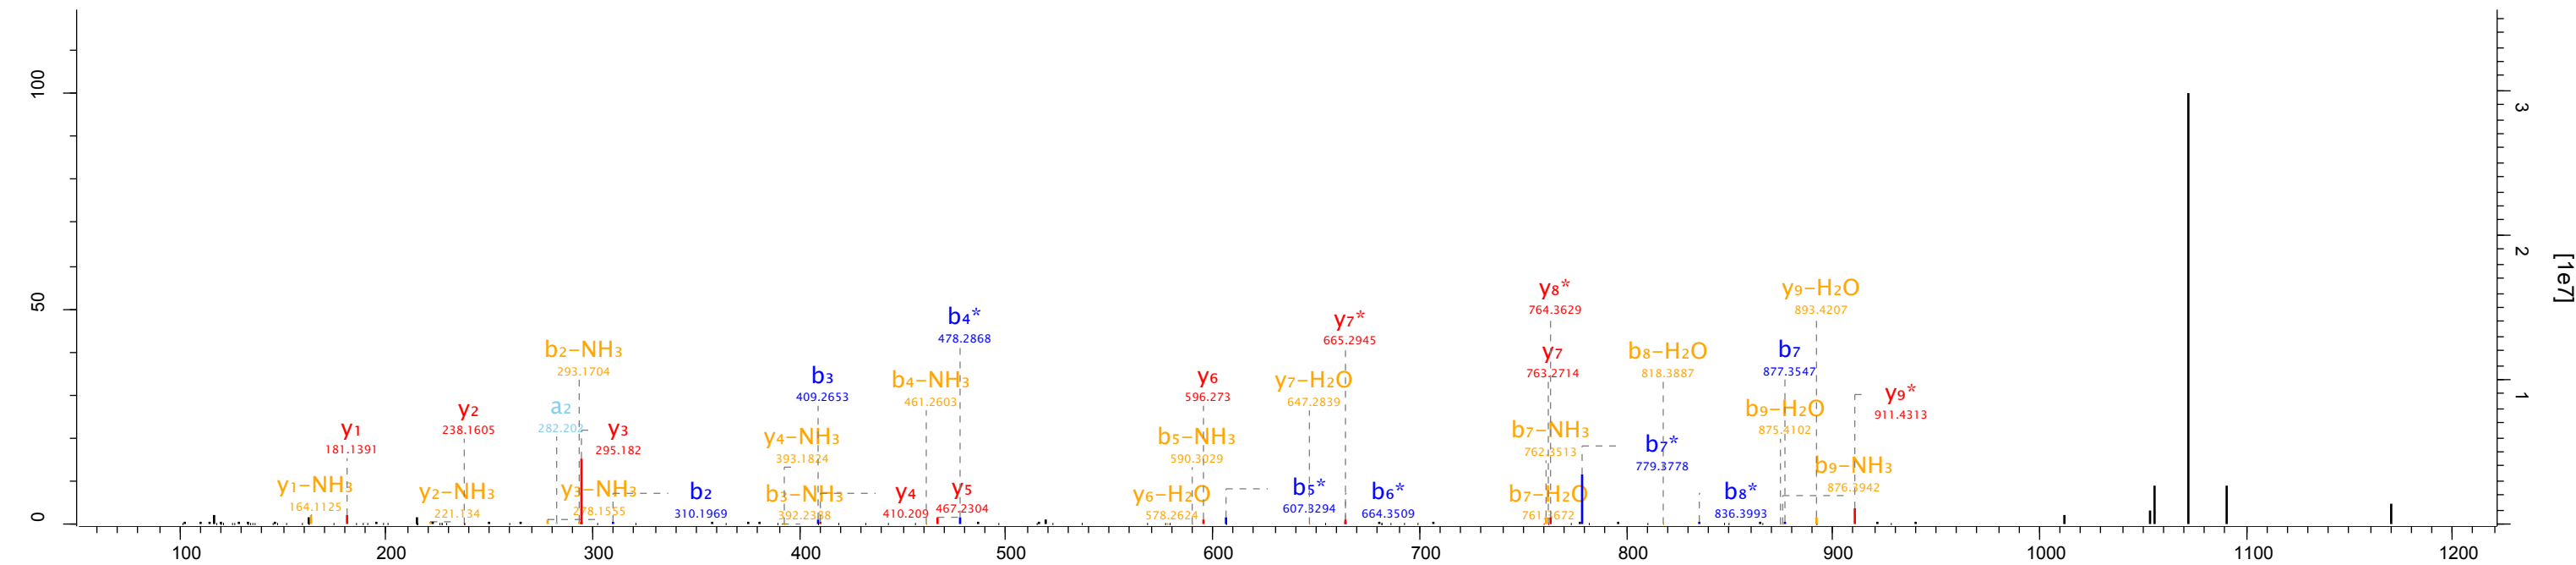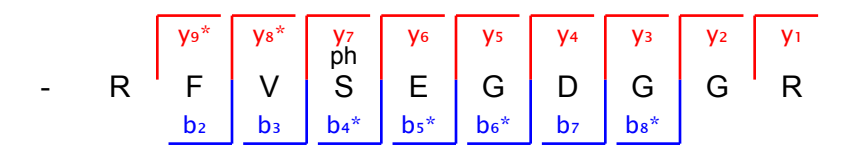



Raw file 20150814\_A375SR\_Phospho\_BR2\_07 Scan 4883 Method FTMS; HCD Score 75.06 m/z 621.99 Gene names CSPP1

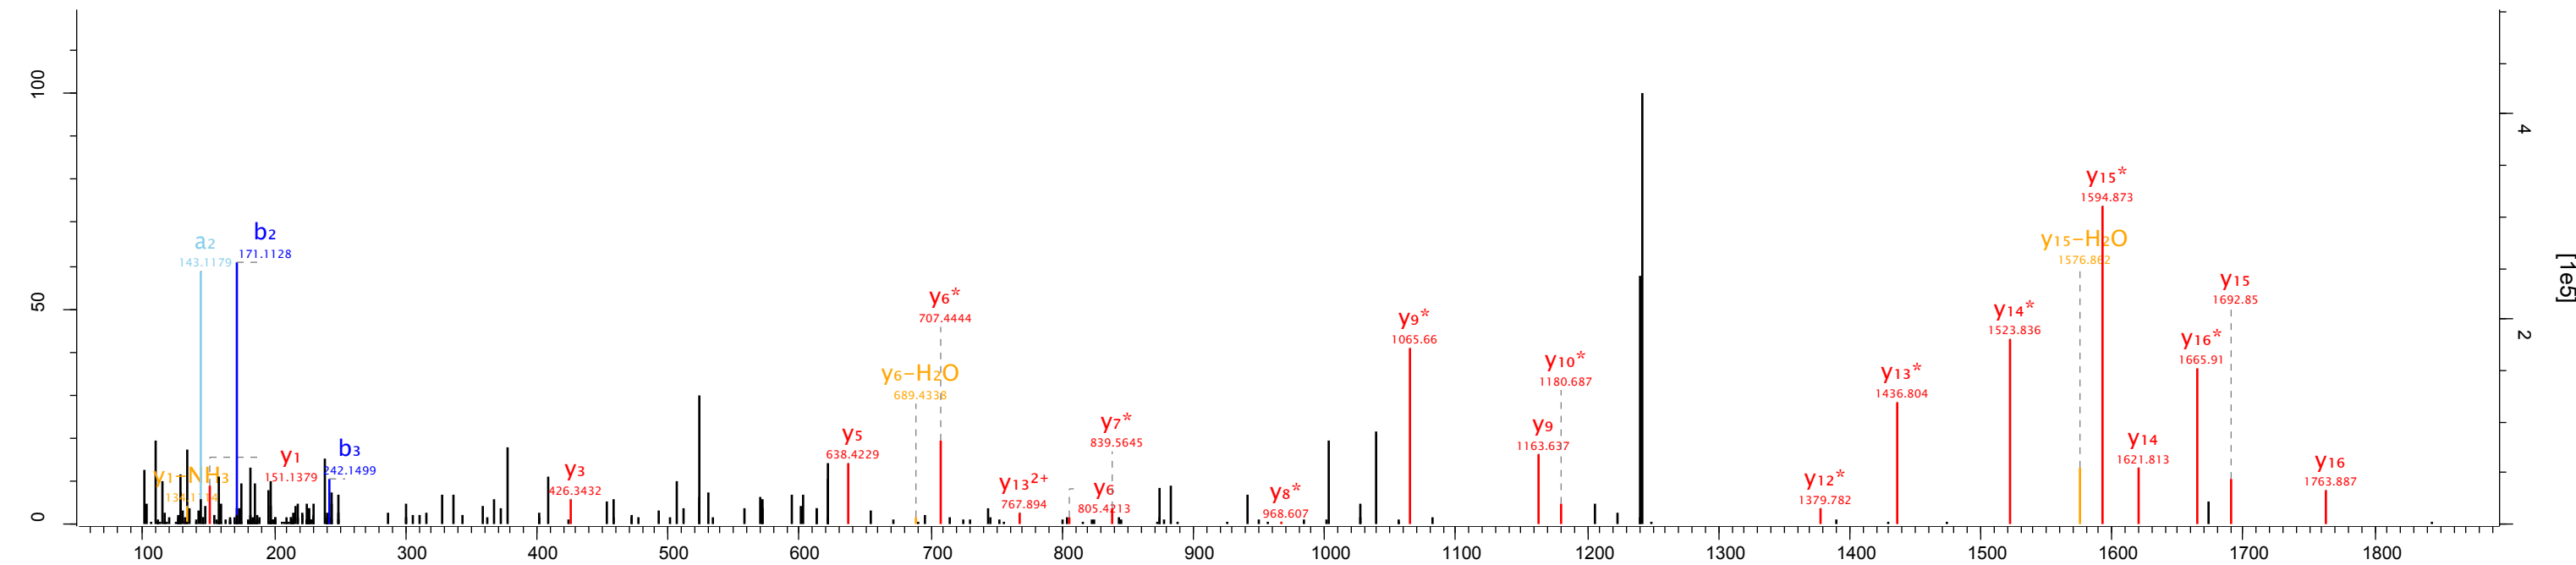

- V A A S G A Q D P E K S P D R L K -

Fragmentation sites are indicated by brackets above the amino acid sequence:

- Red brackets: y<sub>16</sub> (A), y<sub>15</sub> (A), y<sub>14</sub> (S), y<sub>13</sub>\* (G), y<sub>12</sub>\* (A), y<sub>10</sub>\* (D), y<sub>9</sub> (P), y<sub>8</sub>\* (E), y<sub>7</sub>\* (K), y<sub>6</sub> (S), y<sub>5</sub> (P), y<sub>3</sub> (D), y<sub>1</sub> (K)
- Blue brackets: b<sub>2</sub> (A), b<sub>3</sub> (A)

Raw file: 20150814\_A375SR\_Phospho\_BR2\_07  
 Scan: 6813 Method: FTMS; HCD Score: 158.73 m/z: 717.06 Gene names: TRIM56

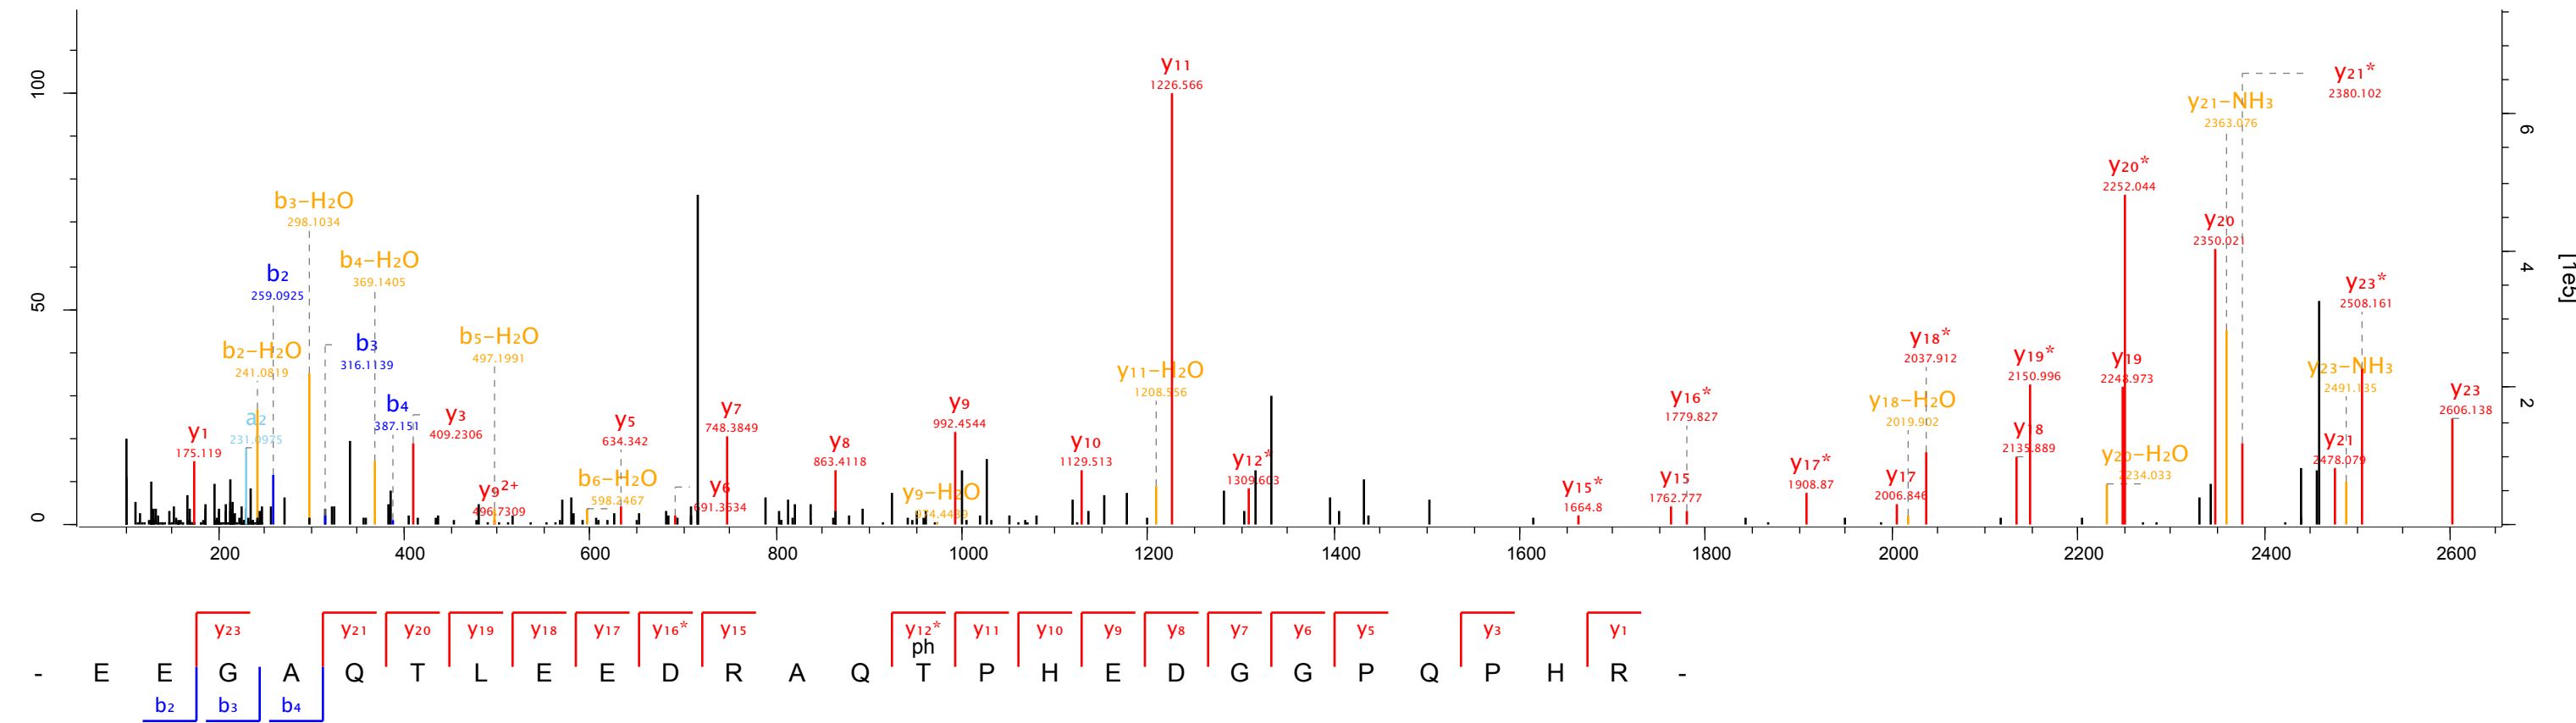

Raw file: 20150814\_A375SR\_Phospho\_BR2\_07  
 Scan: 6873 Method: FTMS; HCD Score: 138.25 m/z: 529.26 Gene names: RPL23A

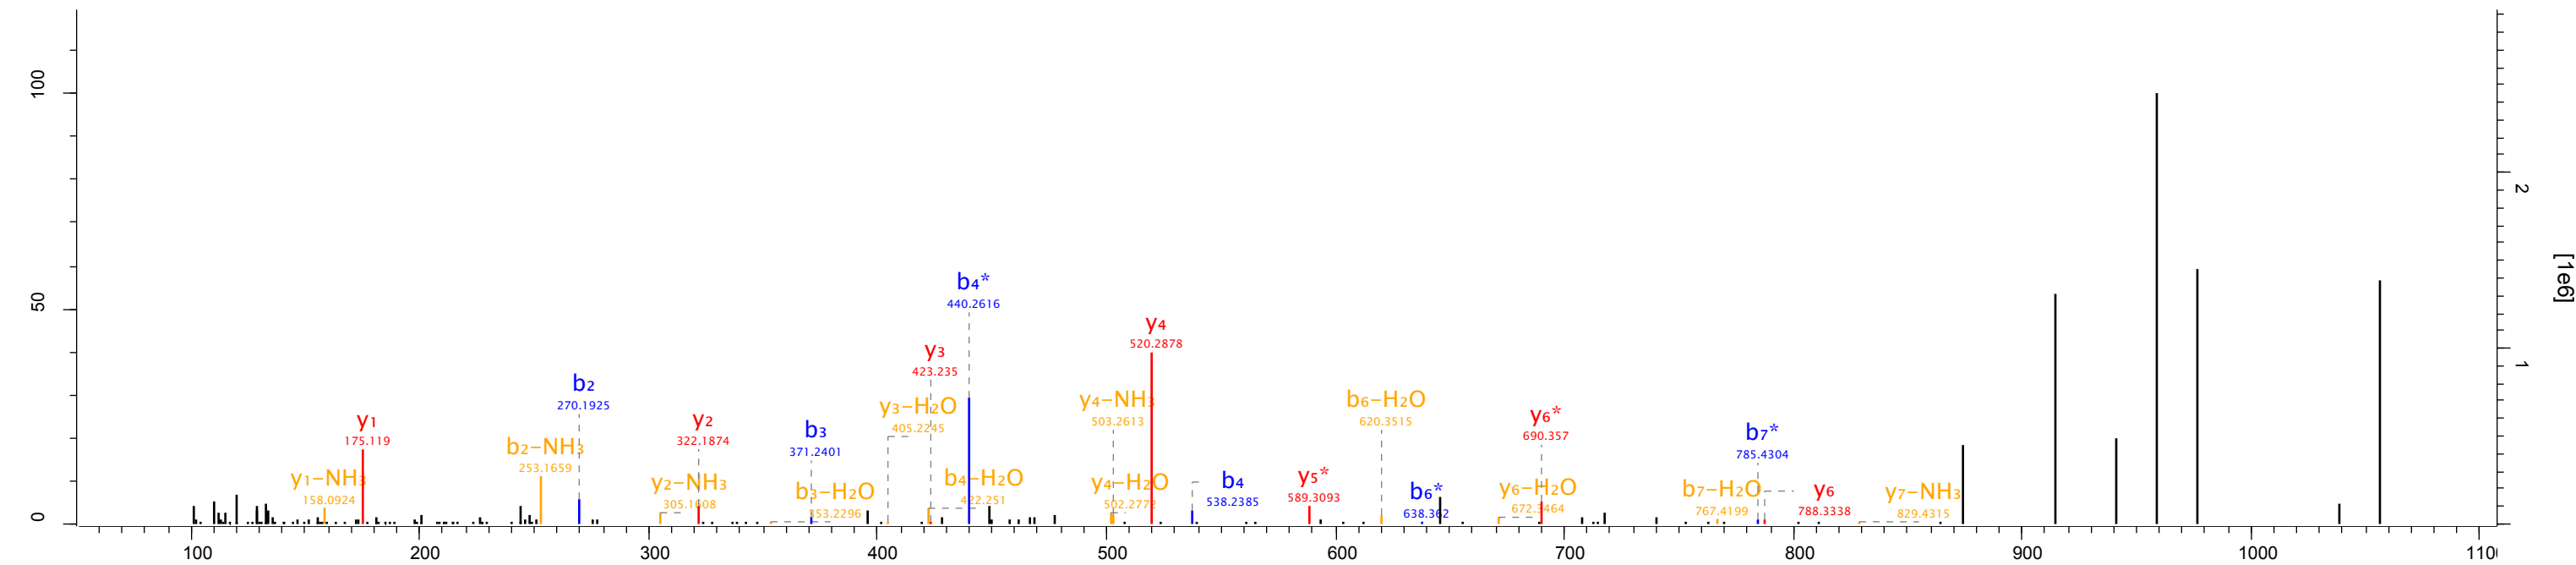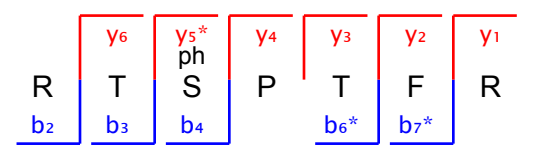



Raw file: 20150814\_A375SR\_Phospho\_BR2\_07  
 Scan: 7913 Method: FTMS; HCD Score: 160.44 m/z: 670.8 Gene names: LARP4B

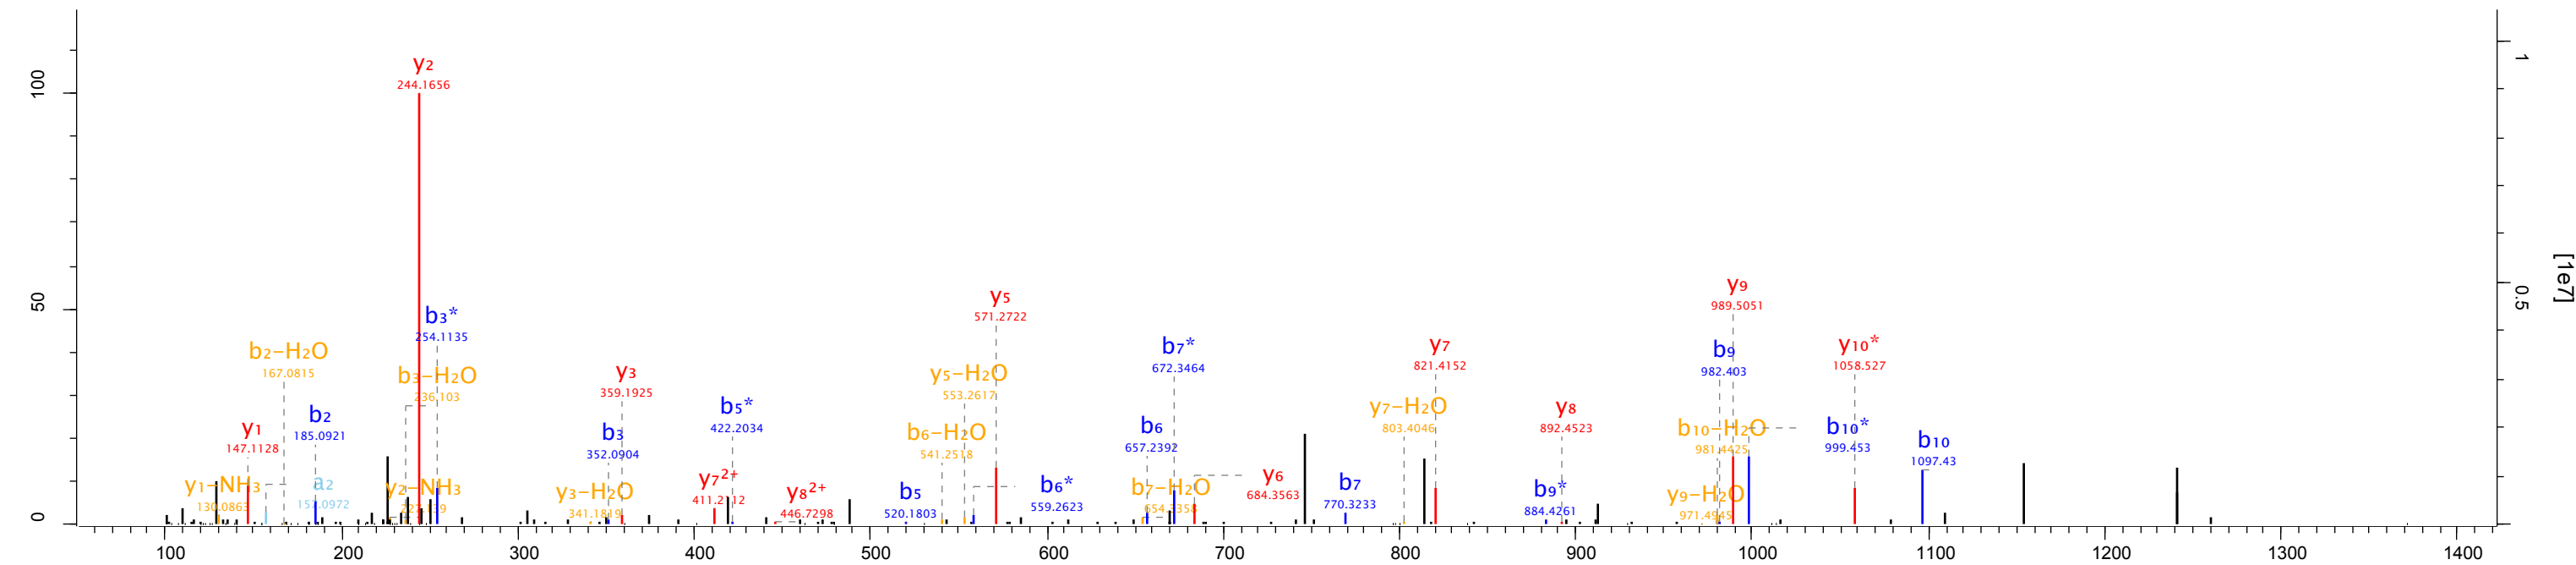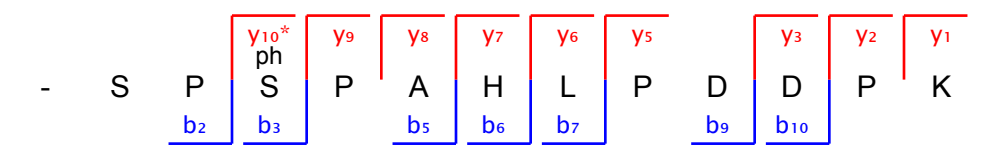

Raw file: 20150814\_A375SR\_Phospho\_BR2\_07  
 Scan: 8593 Method: FTMS; HCD Score: 109.39 m/z: 554.79 Gene names: CLASRP

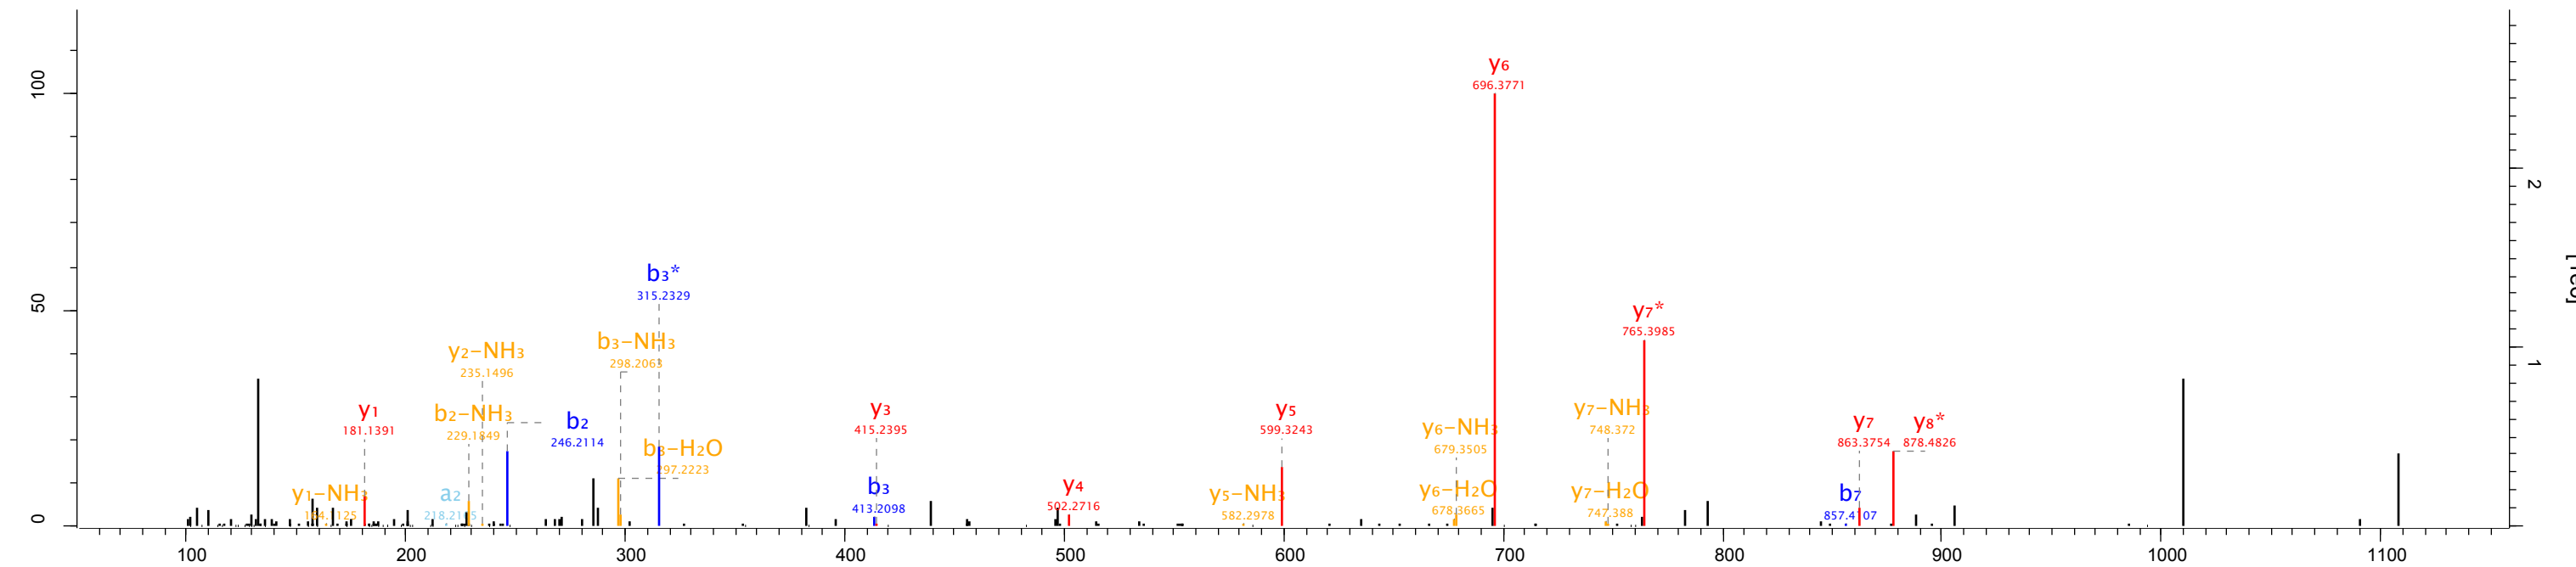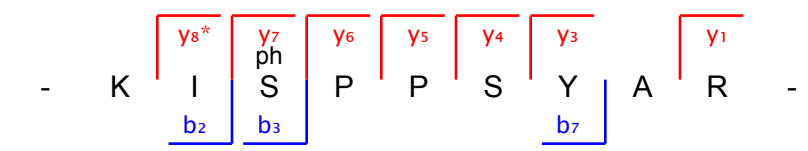

Raw file: 20150814\_A375SR\_Phospho\_BR2\_07  
 Scan: 9753 Method: FTMS; HCD Score: 166.47 m/z: 857.47 Gene names: MAPRE3

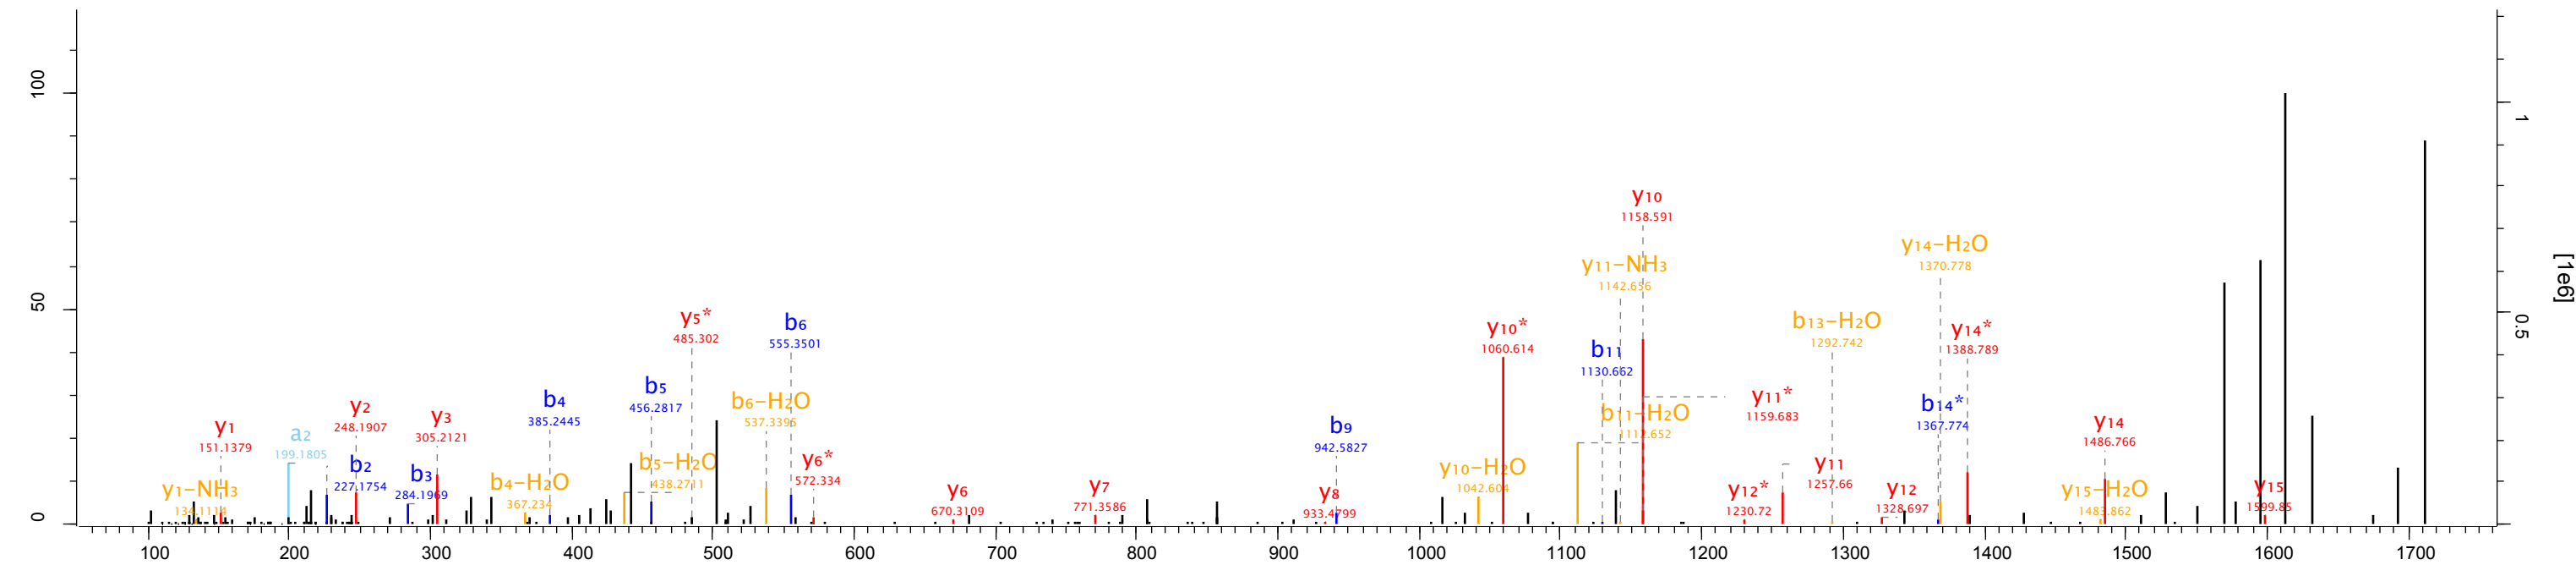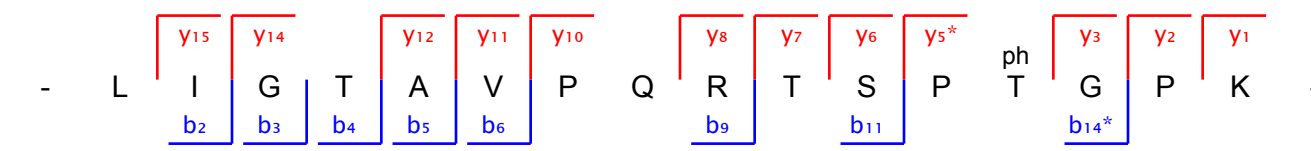

Raw file 20150814\_A375SR\_Phospho\_BR2\_08 Scan 10573 Method FTMS; HCD Score 107.45 m/z 483.71 Gene names RBMX

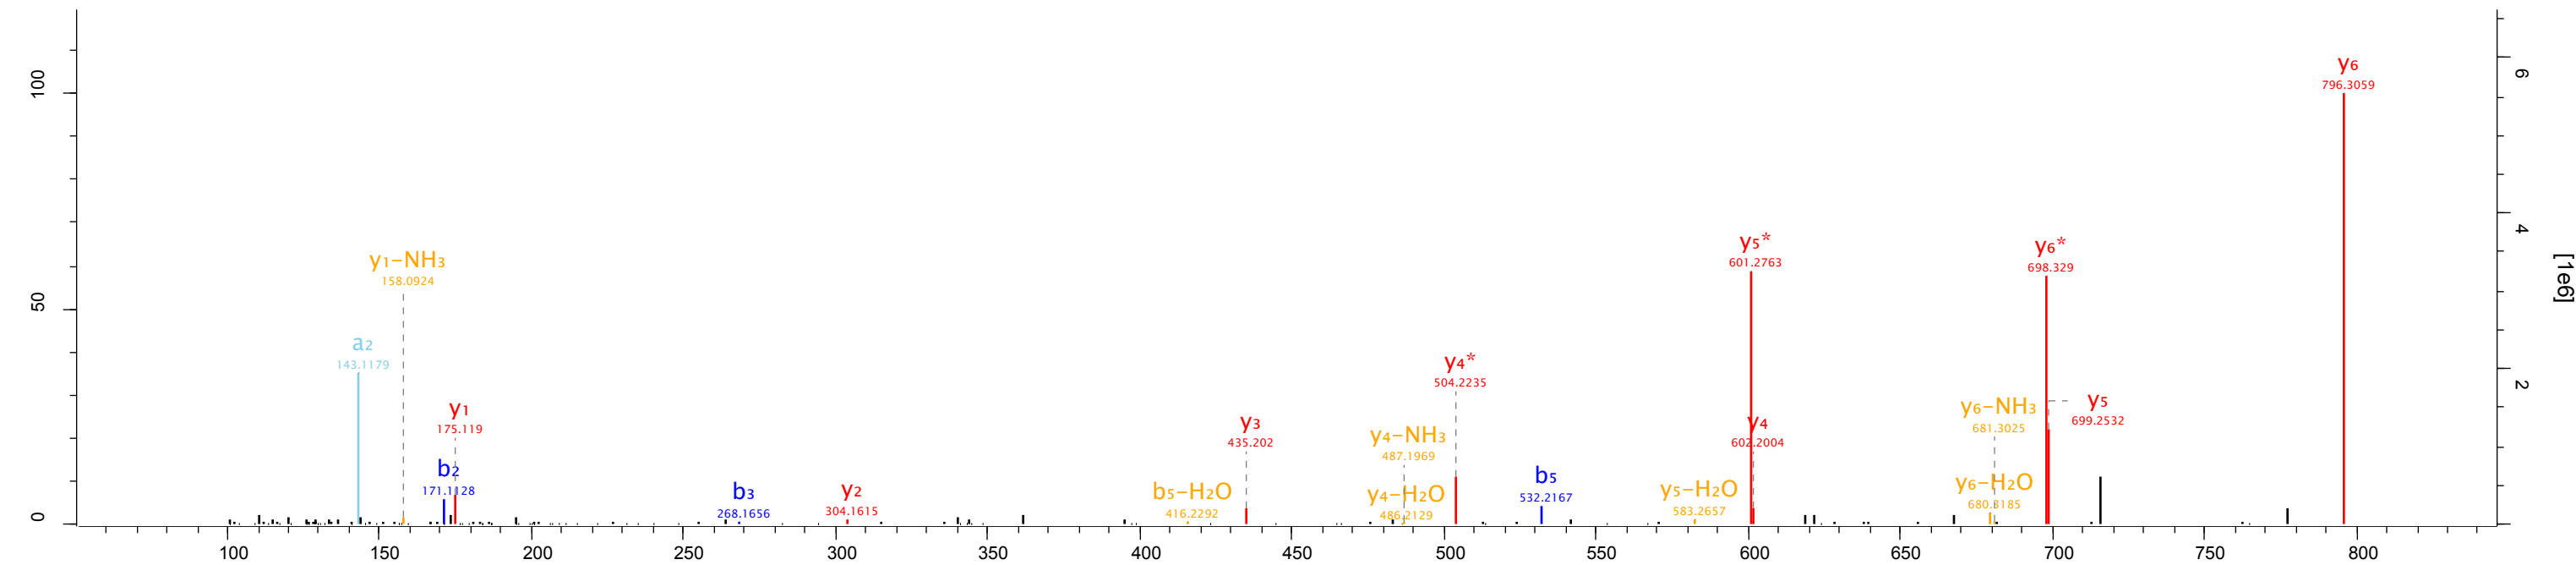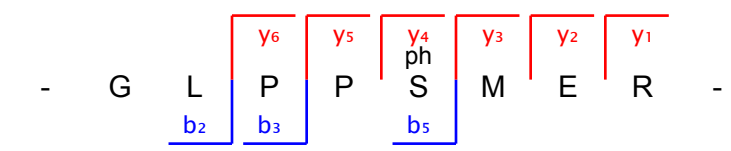



Raw file 20150814\_A375SR\_Phospho\_BR2\_08 Scan 10823 Method FTMS; HCD Score 218.6 m/z 642.27 Gene names EXOSC9

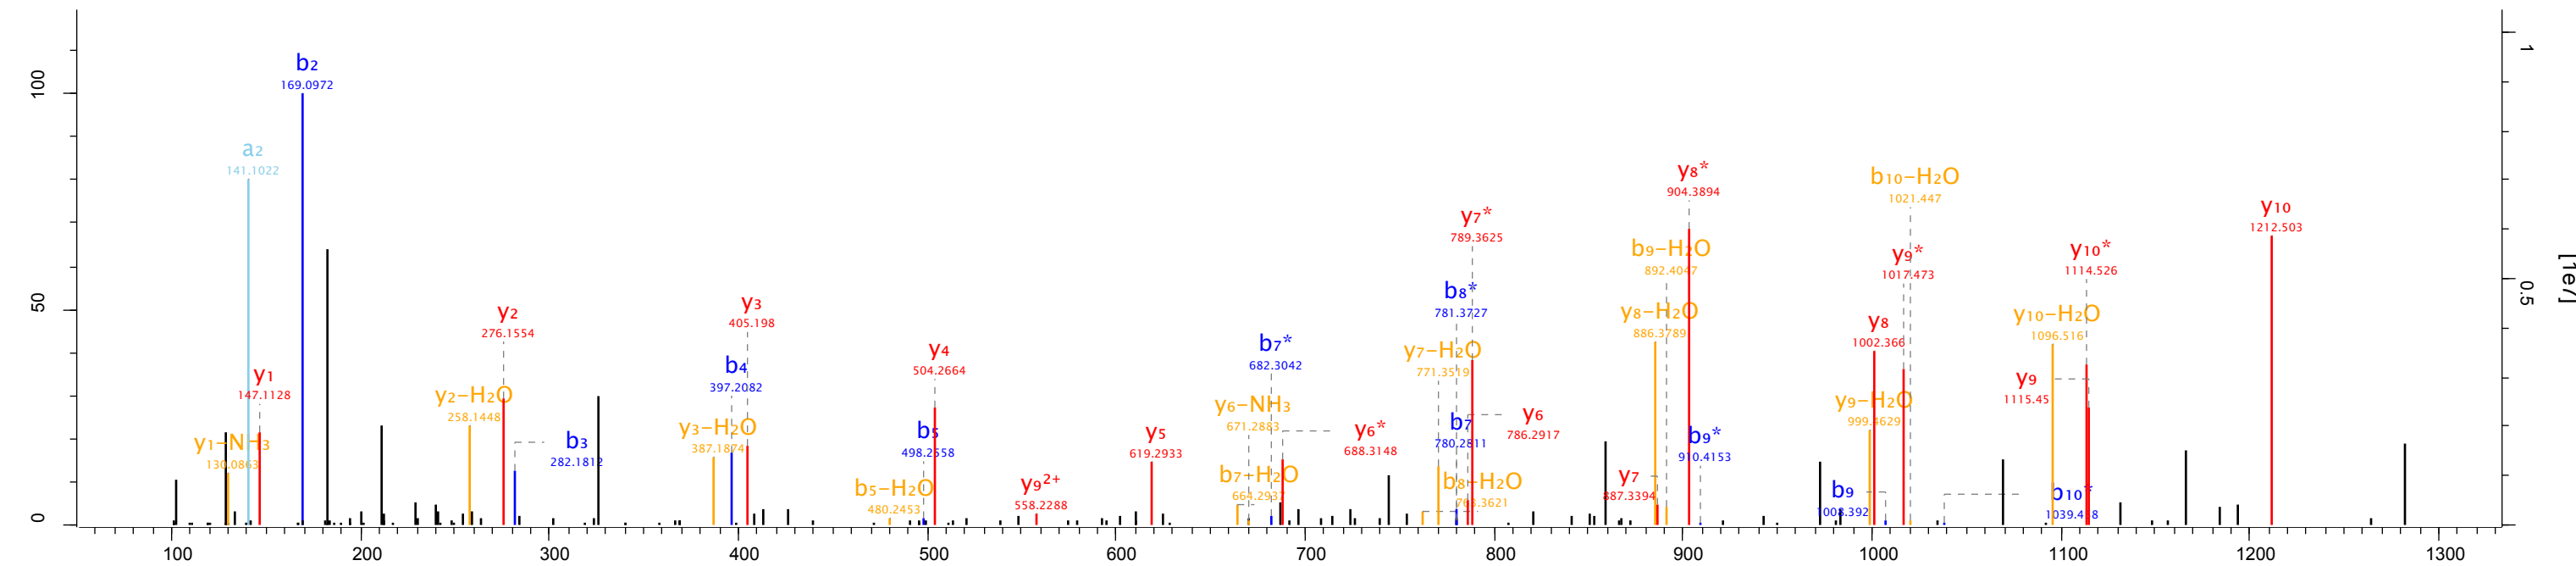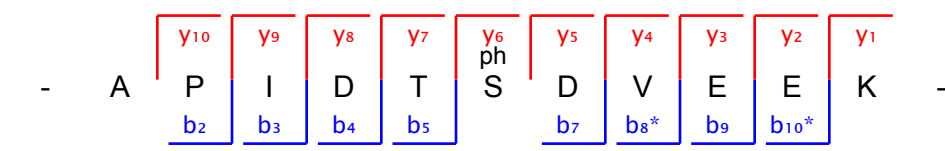

Raw file: 20150814\_A375SR\_Phospho\_BR2\_08  
 Scan: 10913 Method: FTMS; HCD Score: 239.73 m/z: 869.4 Gene names: CEP170

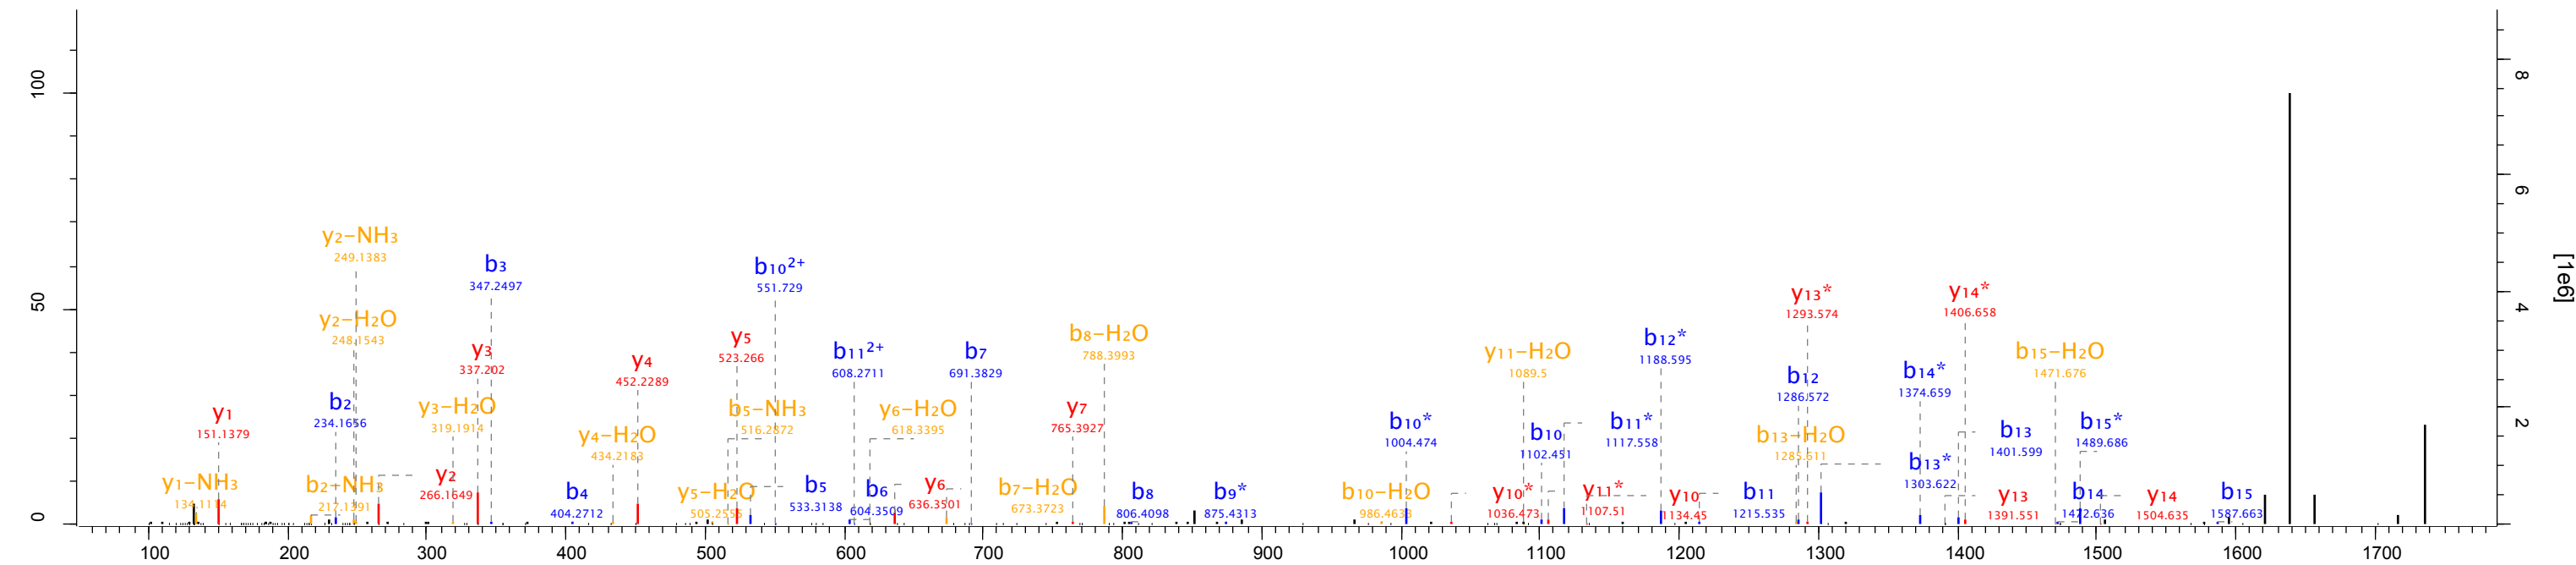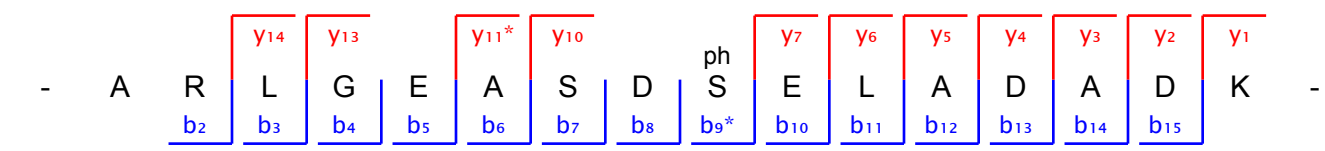

Raw file: 20150814\_A375SR\_Phospho\_BR2\_08  
 Scan: 11053 Method: FTMS; HCD Score: 117.62 m/z: 890.89 Gene names: ARHGEF12

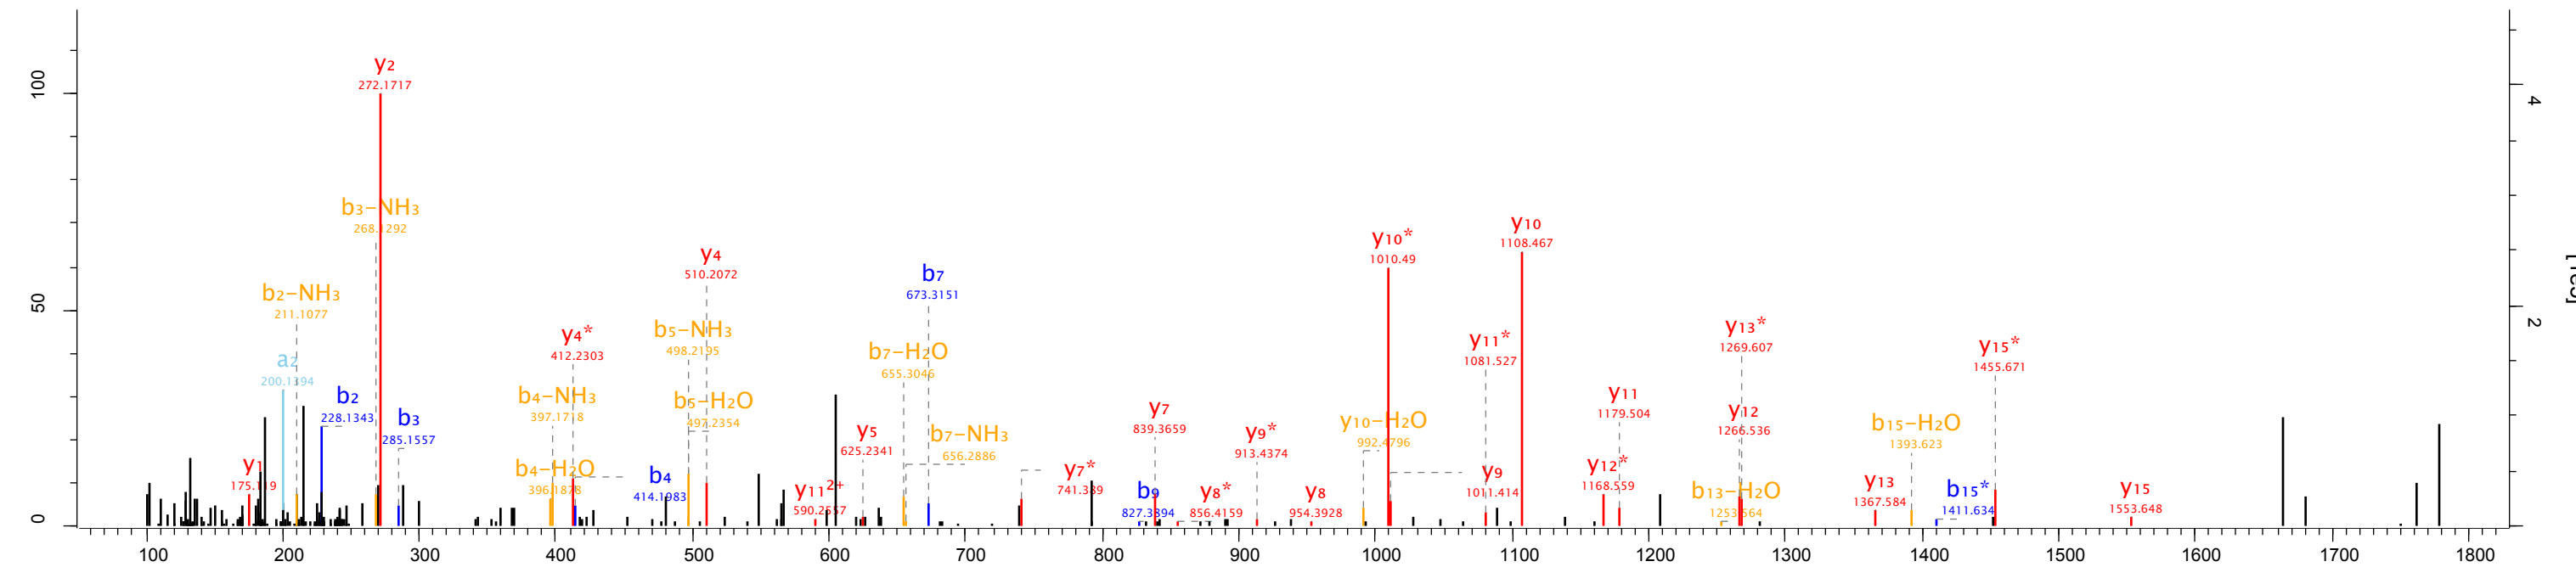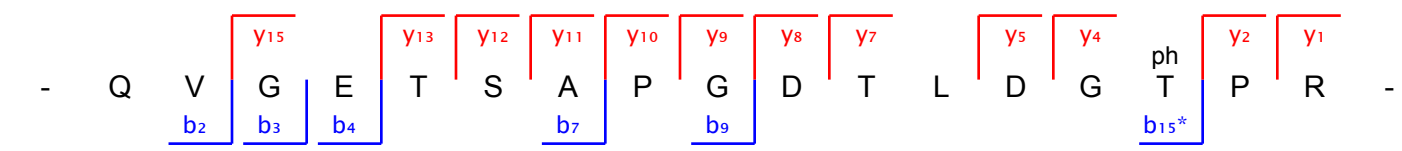

Raw file 20150814\_A375SR\_Phospho\_BR2\_08 Scan 11173 Method FTMS; HCD Score 207.92 m/z 713.86 Gene names RRP1B

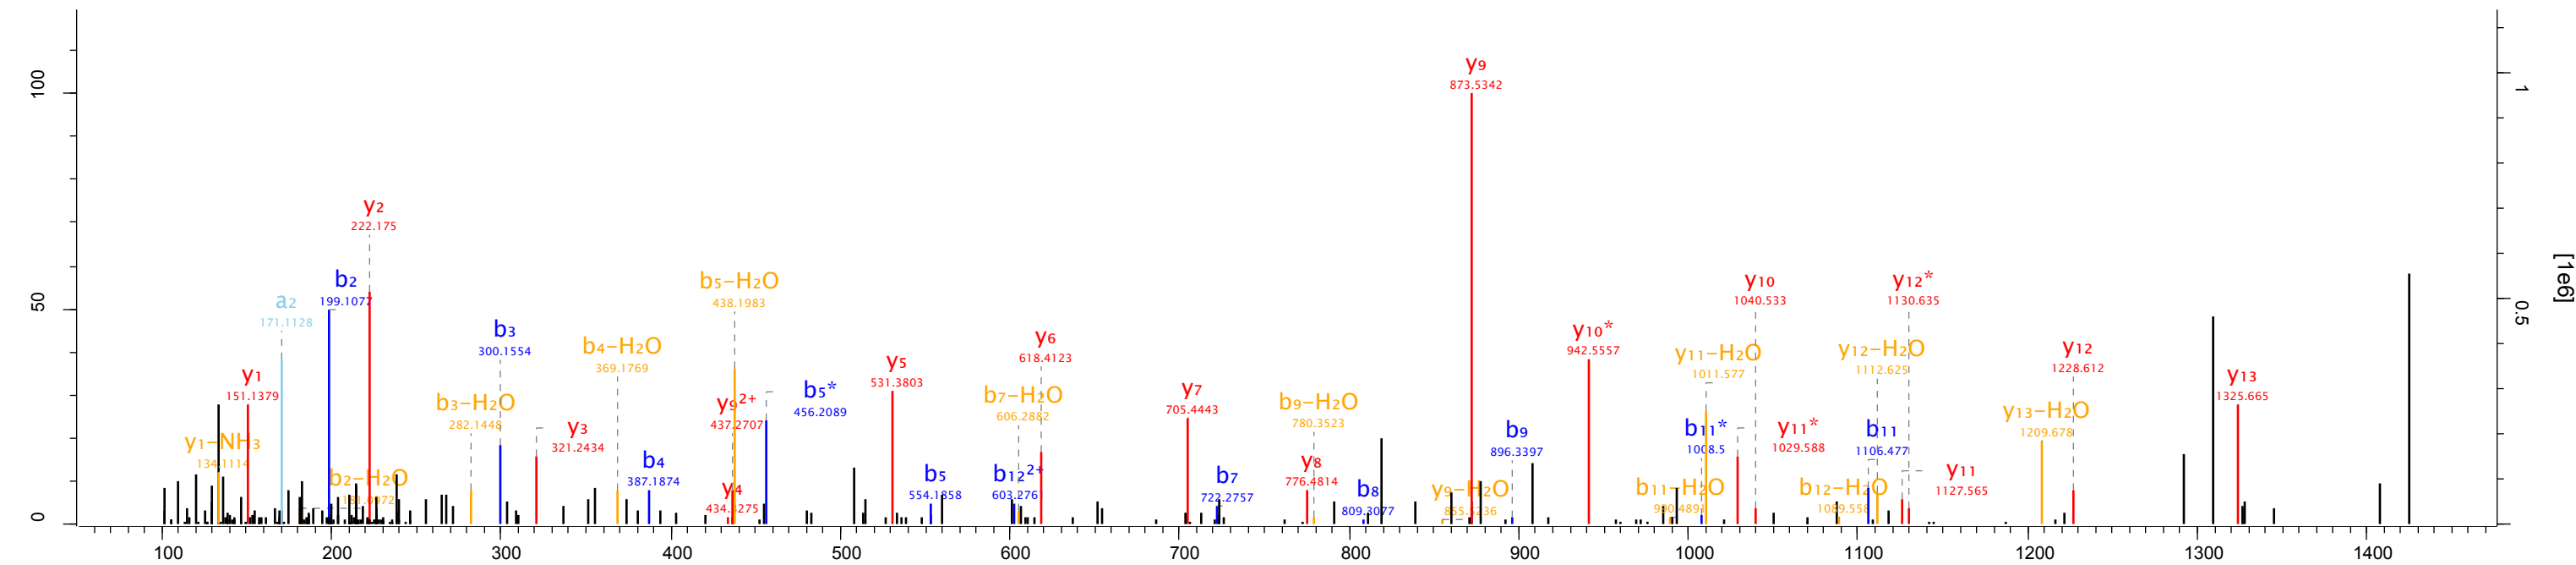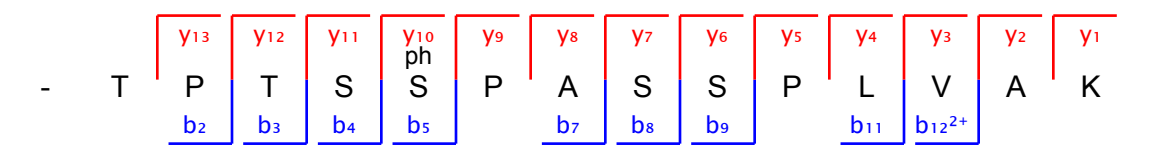

Raw file: 20150814\_A375SR\_Phospho\_BR2\_08  
 Scan: 12203 Method: FTMS; HCD Score: 77.22 m/z: 1014.94 Gene names: COIL

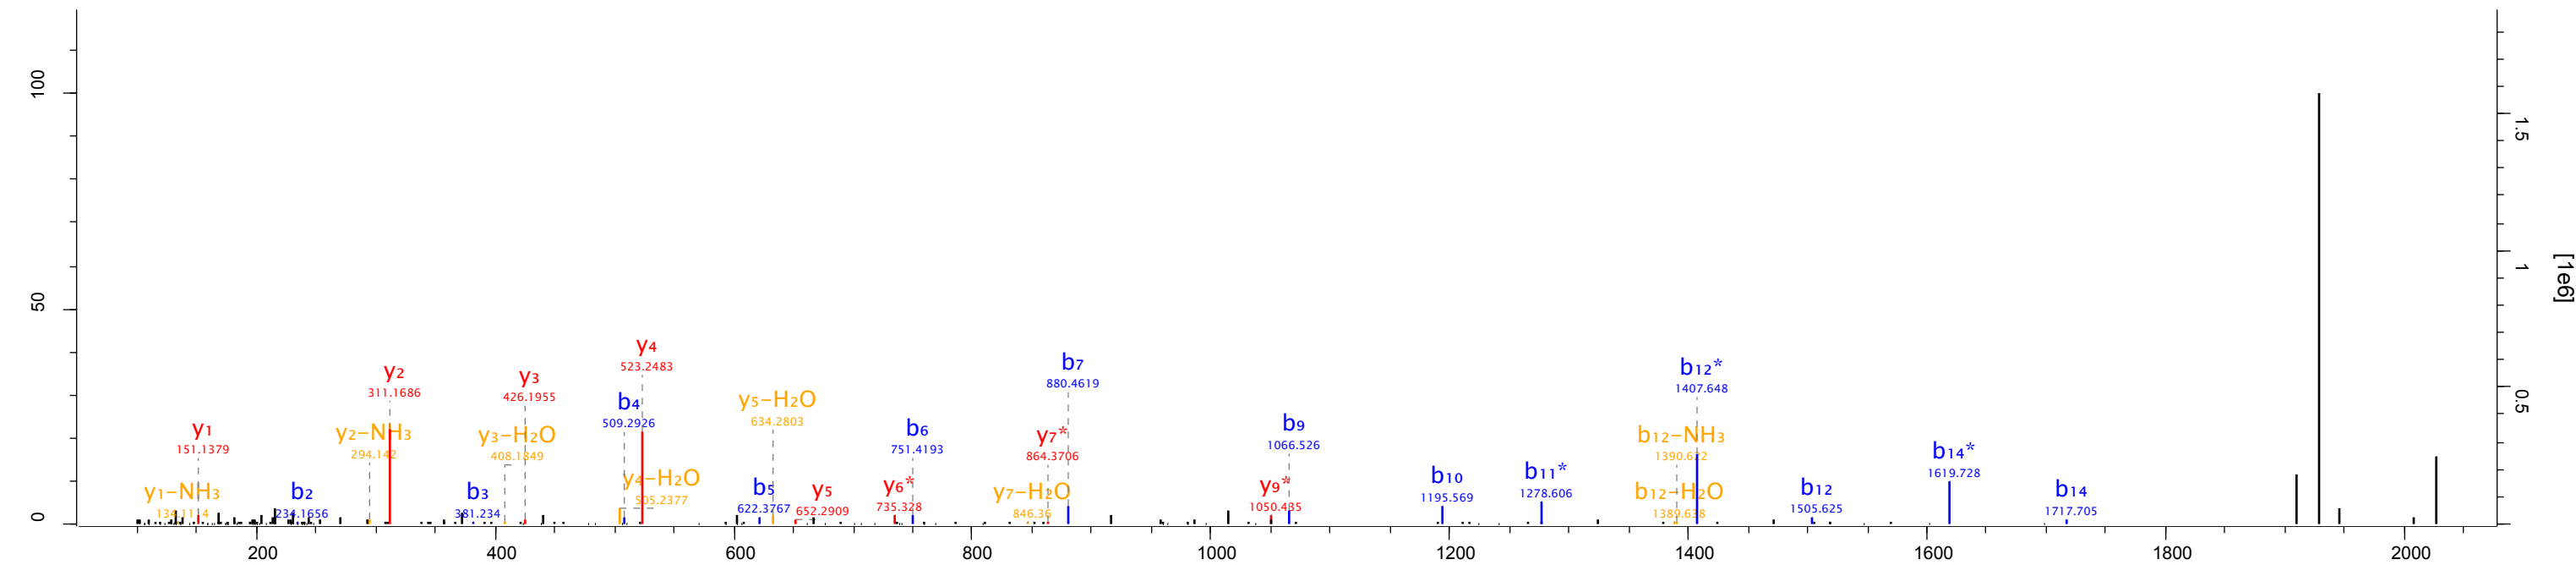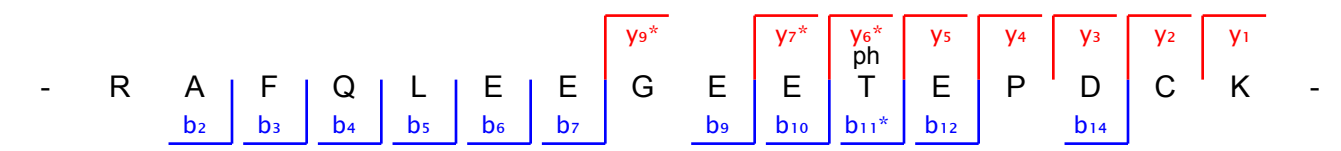

Raw file 20150814\_A375SR\_Phospho\_BR2\_08 Scan 12533 Method FTMS; HCD Score 69.98 m/z 602.28 Gene names RAB3GAP1

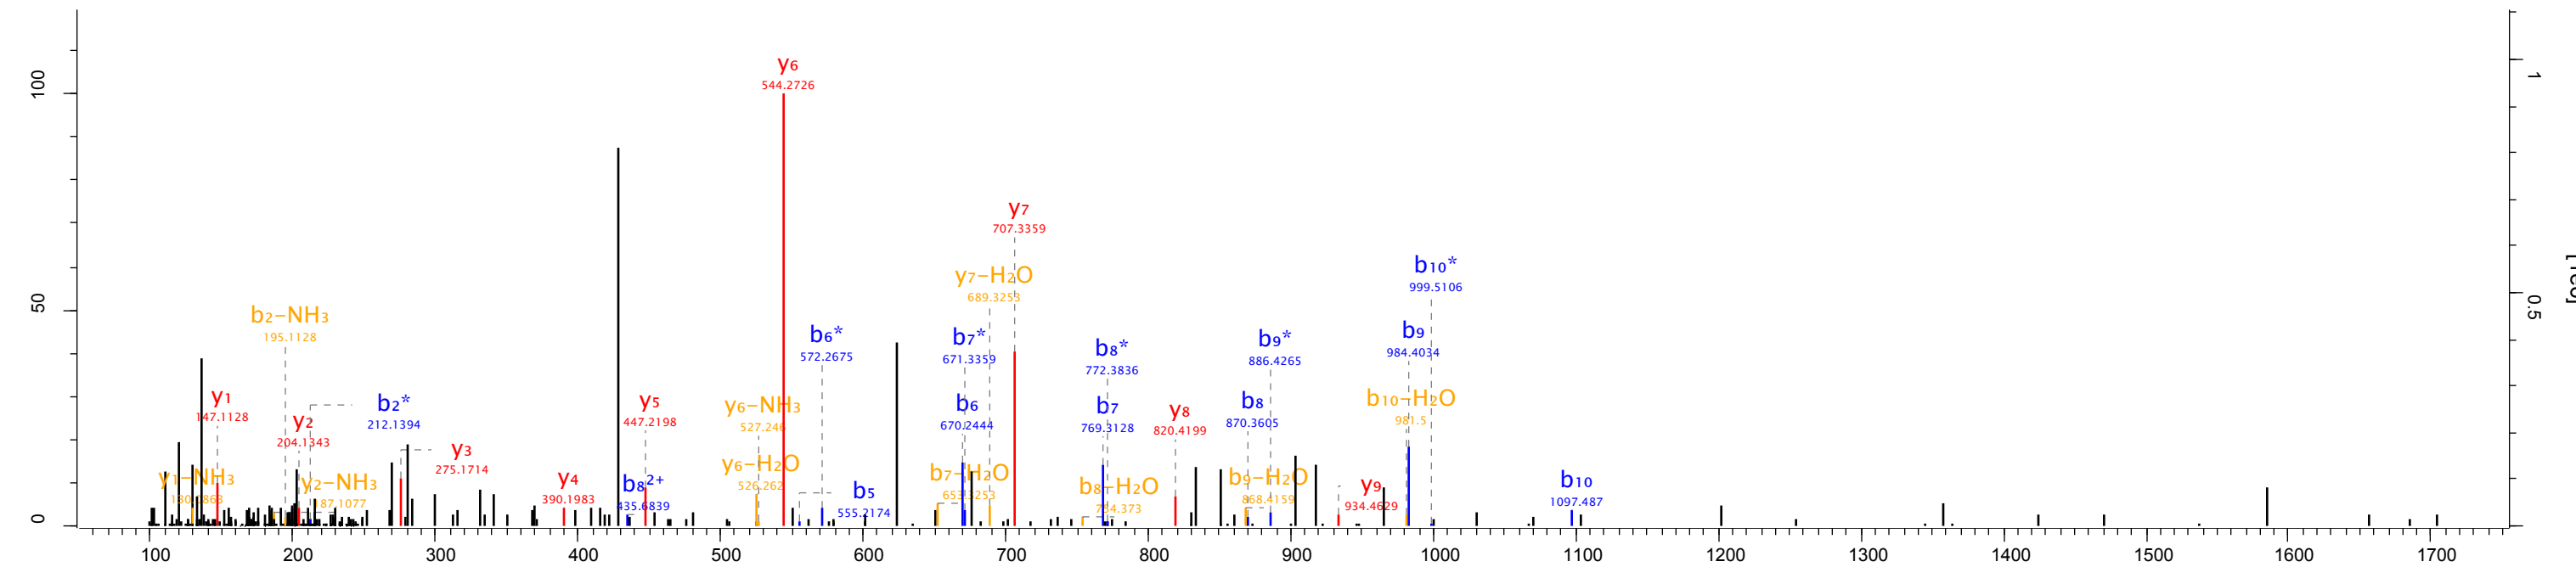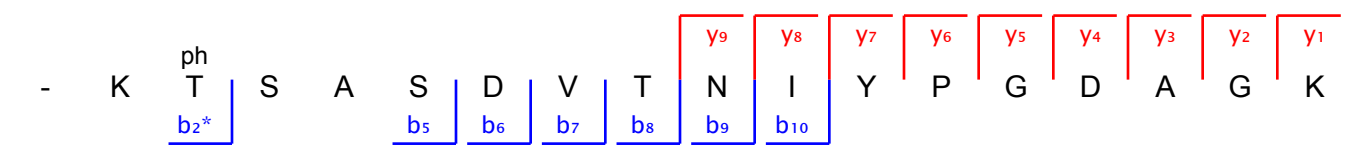

Raw file: 20150814\_A375SR\_Phospho\_BR2\_08  
 Scan: 12643 Method: FTMS; HCD Score: 45.79 m/z: 1054.44 Gene names: BABAM1

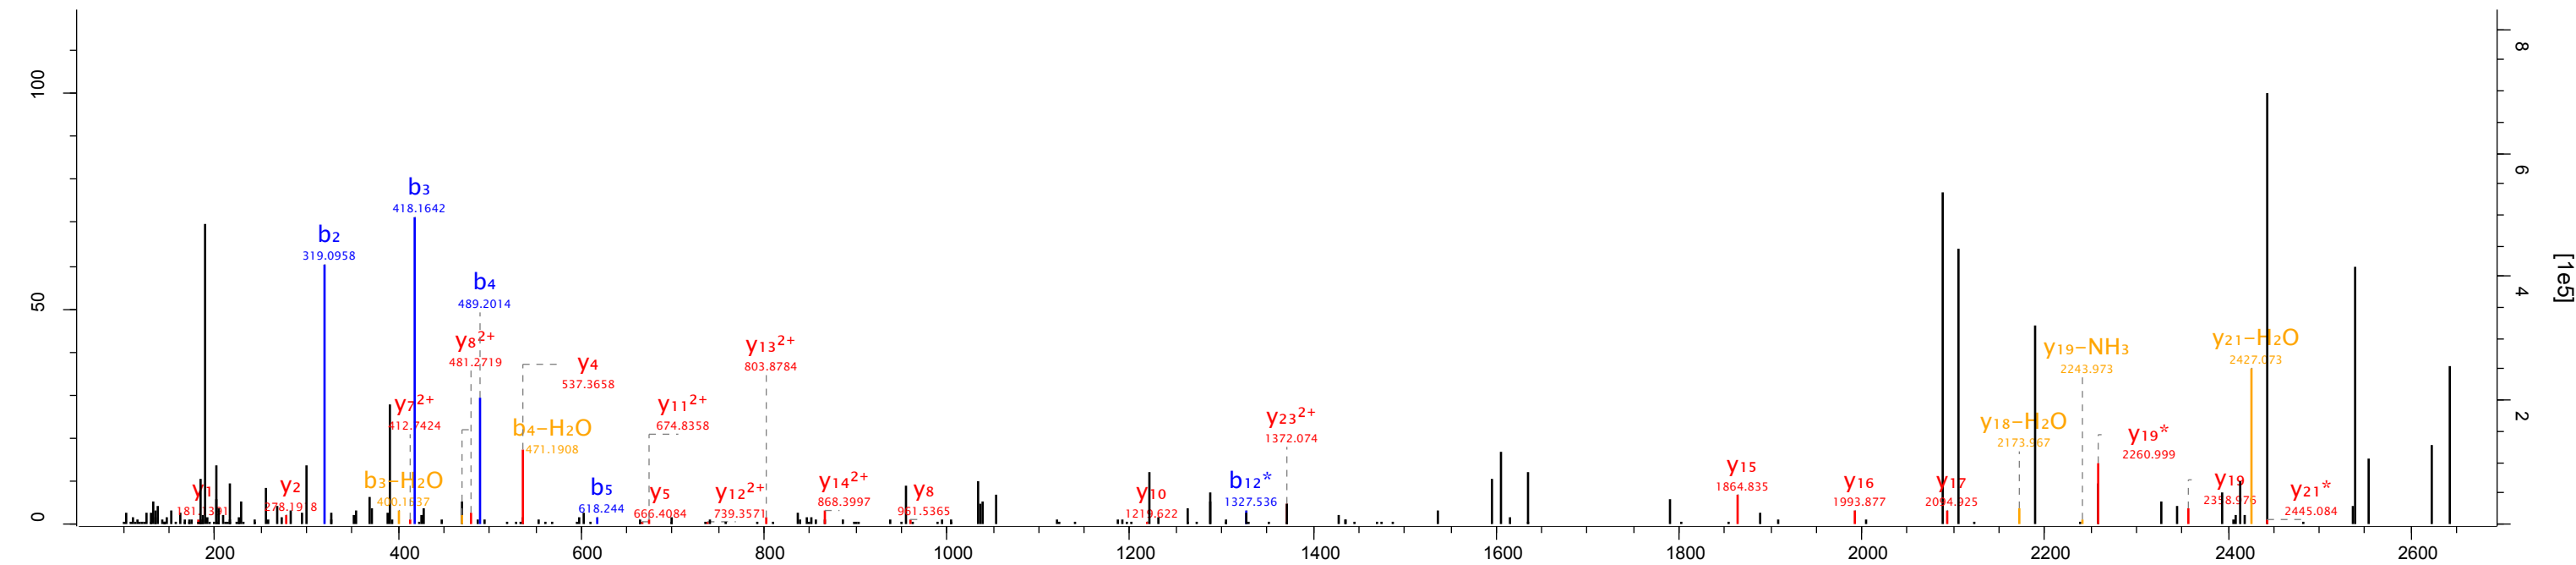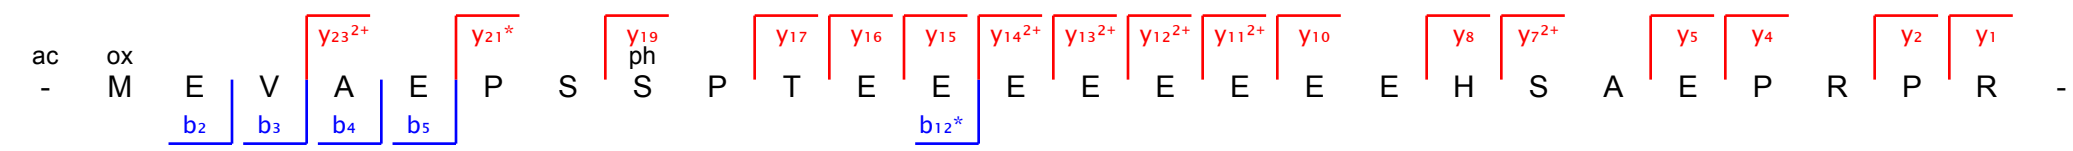

Raw file 20150814\_A375SR\_Phospho\_BR2\_08 Scan 12963 Method FTMS; HCD Score 81.32 m/z 791.05 Gene names ATXN2L

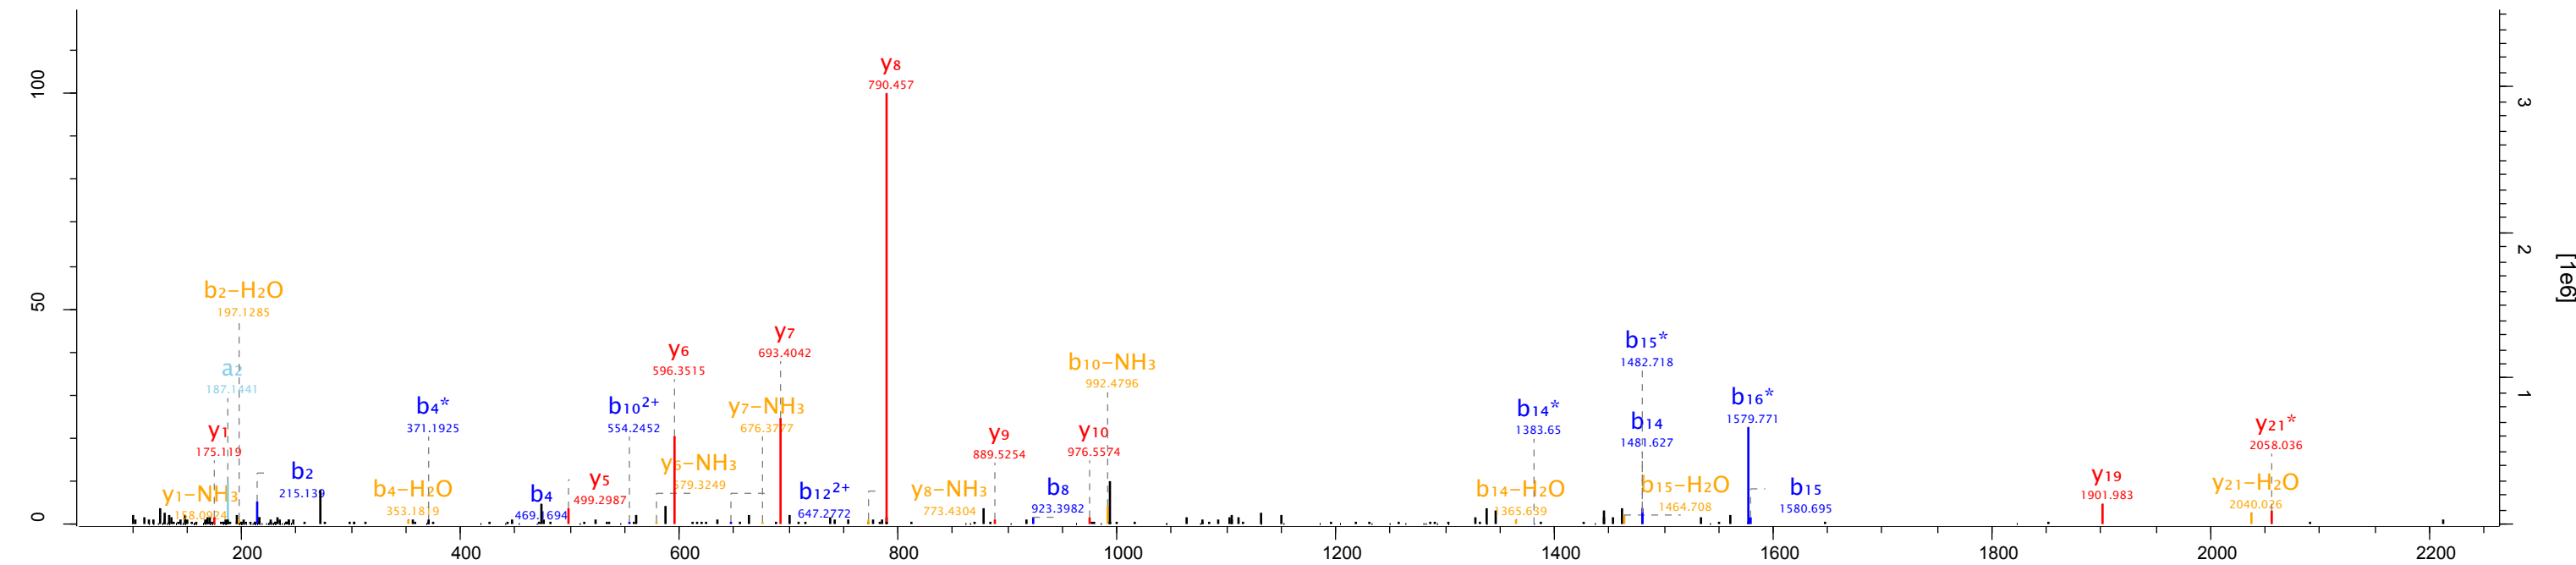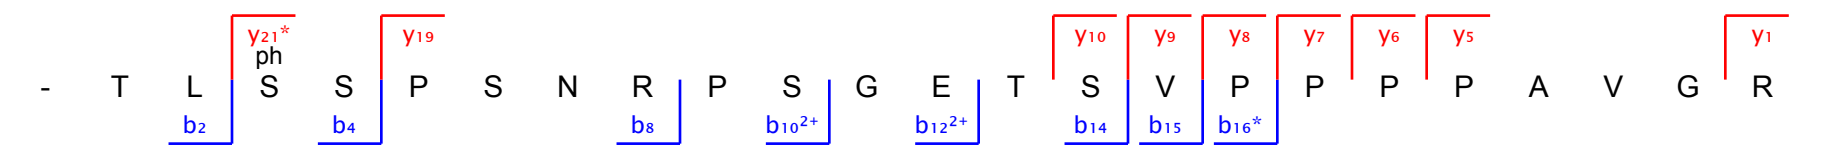



Raw file  
20150814\_A375SR\_Phospho\_BR2\_08

Scan 14563 Method FTMS; HCD Score 340.25 m/z 908.03 Gene names SF3A1

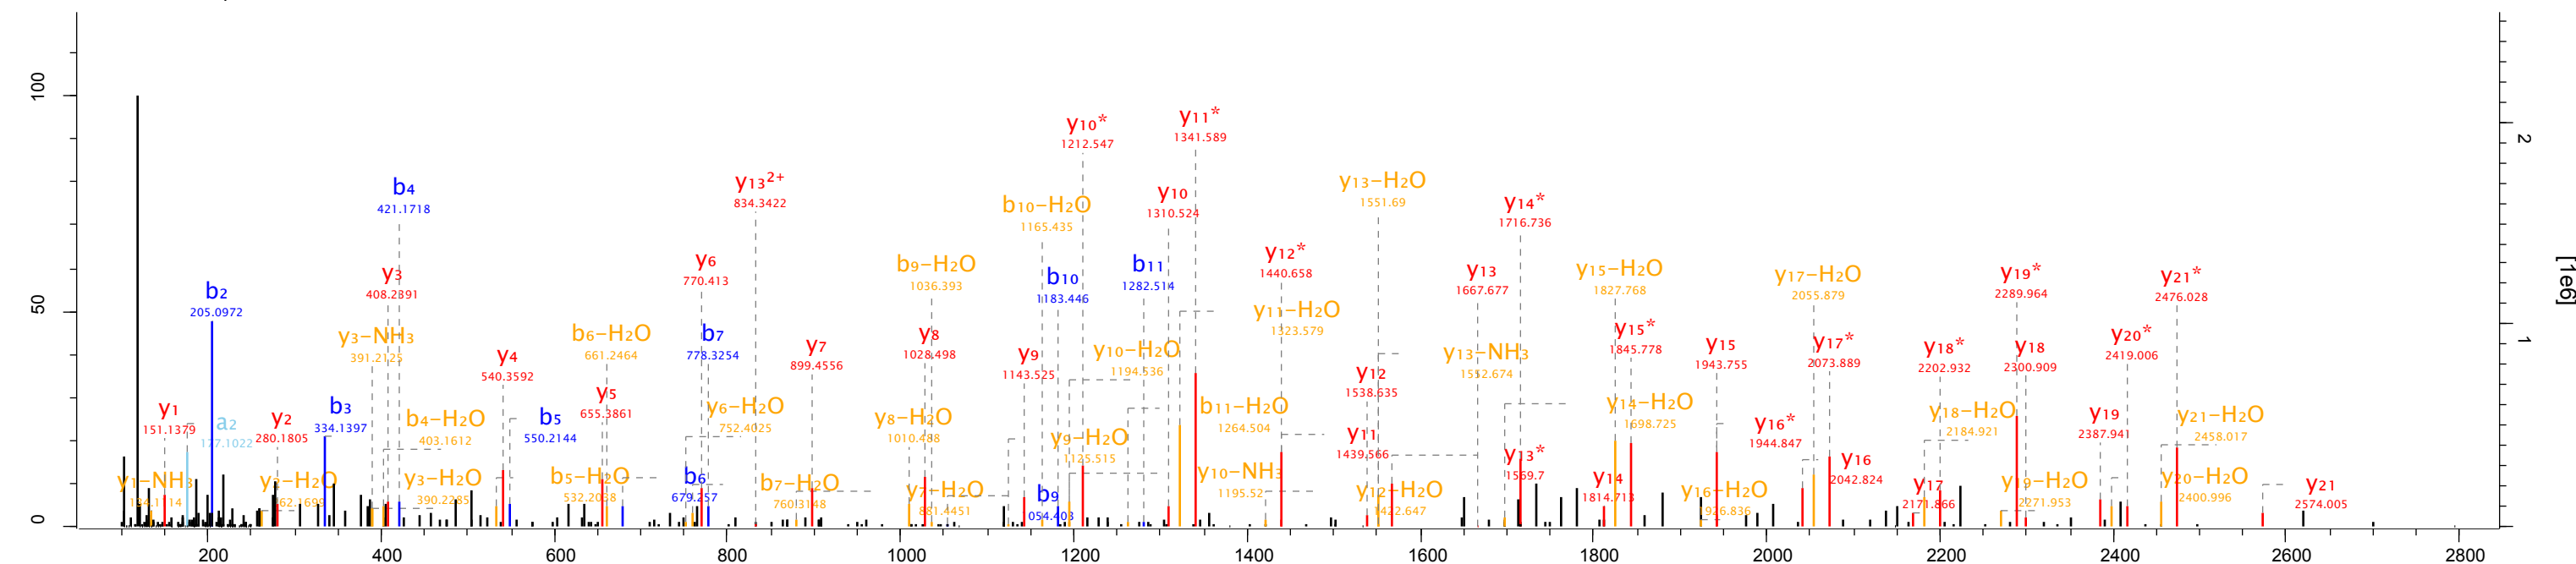

- F G E S E E V E M E V E S D E E D D K Q E K -

Fragmentation mapping: b<sub>2</sub> (G), b<sub>3</sub> (E), b<sub>4</sub> (S), b<sub>5</sub> (E), b<sub>6</sub> (E), b<sub>7</sub> (V), b<sub>9</sub> (M), b<sub>10</sub> (E), b<sub>11</sub> (V)

Raw file 20150814\_A375SR\_Phospho\_BR2\_08 Scan 15043 Method FTMS; HCD Score 169.05 m/z 948.47 Gene names TNS1

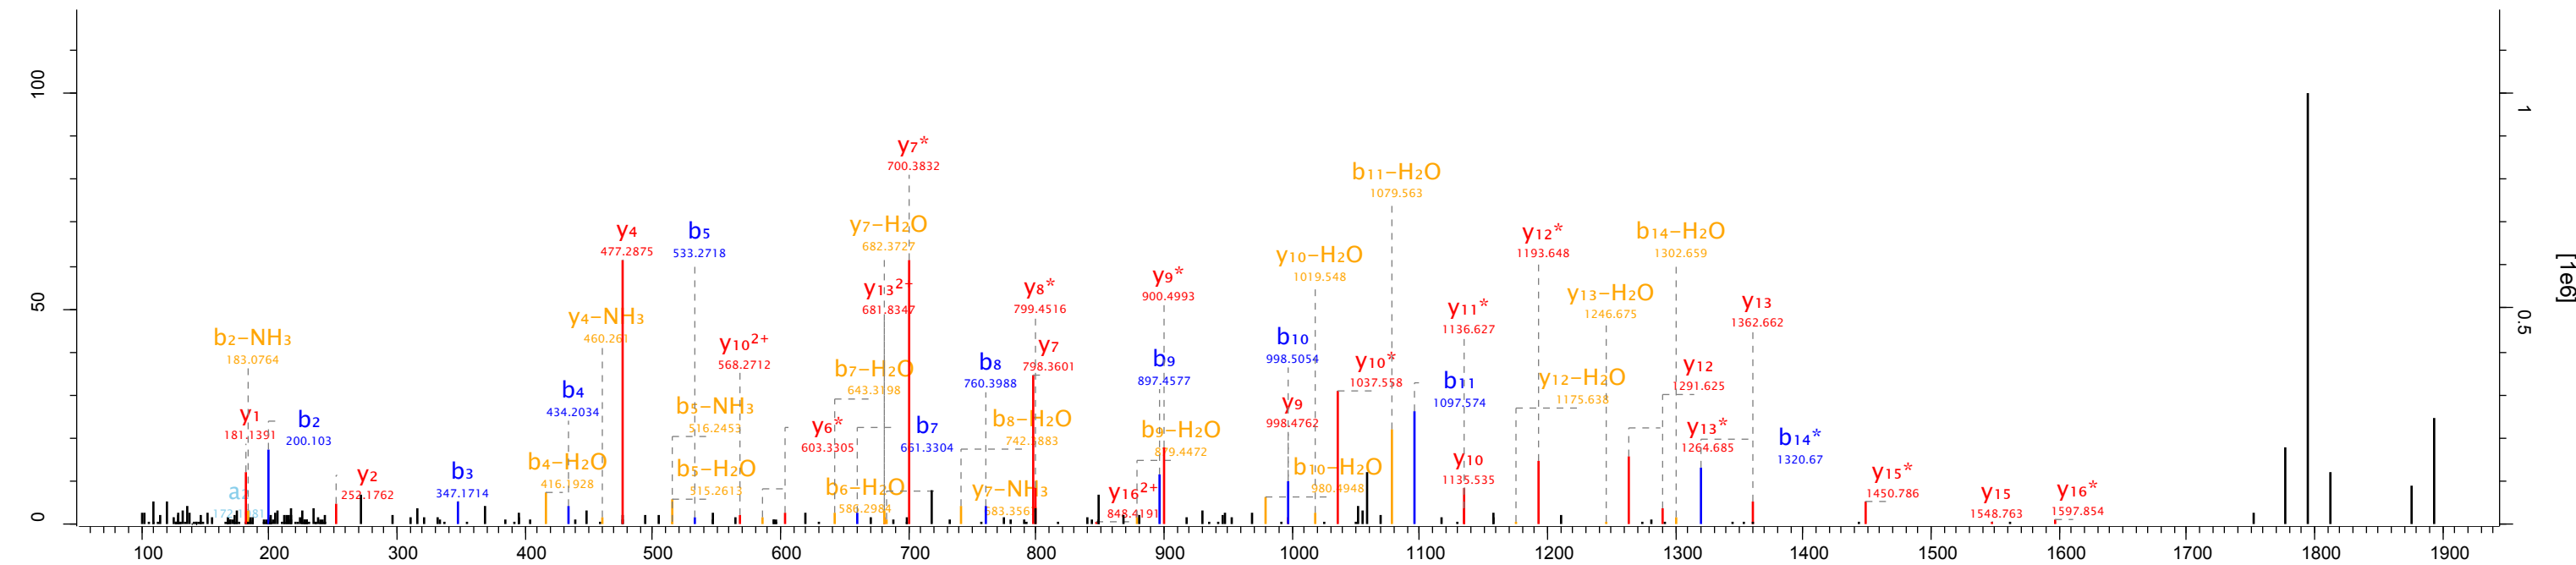

- A Q F S V A G V H T V P G ph S P Q A R -

b<sub>2</sub>
b<sub>3</sub>
b<sub>4</sub>
b<sub>5</sub>
b<sub>7</sub>
b<sub>8</sub>
b<sub>9</sub>
b<sub>10</sub>
b<sub>11</sub>
b<sub>14</sub>\*

y<sub>16</sub>\*
y<sub>15</sub>
y<sub>13</sub>
y<sub>12</sub>
y<sub>11</sub>\*
y<sub>10</sub>
y<sub>9</sub>
y<sub>8</sub>\*
y<sub>7</sub>
y<sub>6</sub>\*
y<sub>4</sub>
y<sub>2</sub>
y<sub>1</sub>

Raw file 20150814\_A375SR\_Phospho\_BR2\_08 Scan 15363 Method FTMS; HCD Score 200.77 m/z 714.4 Gene names RBBP6

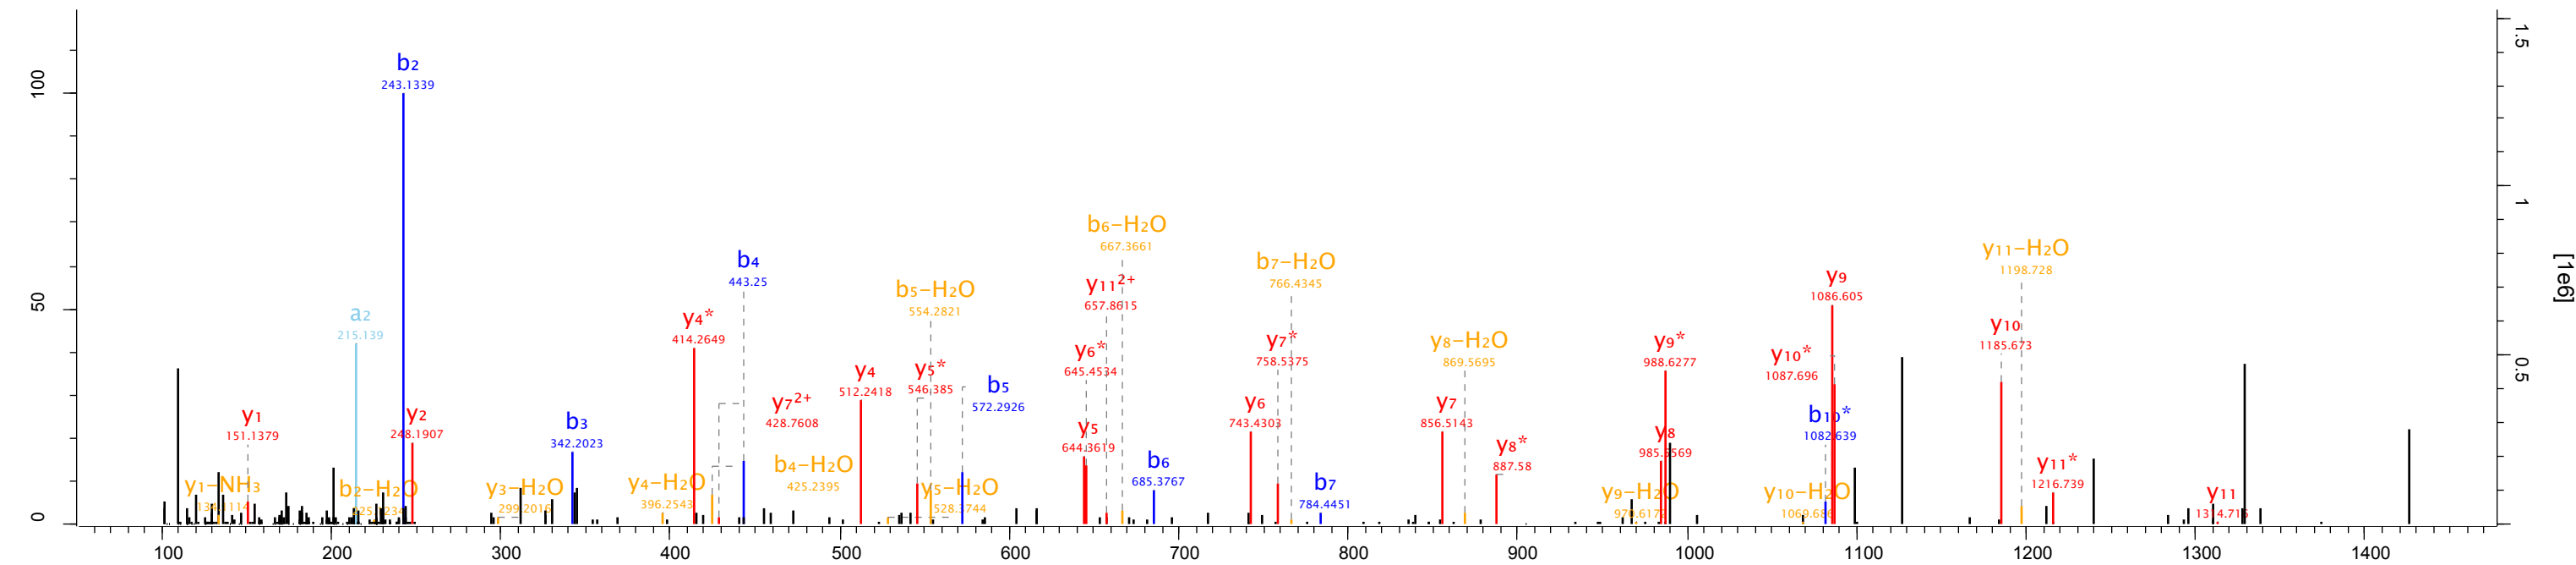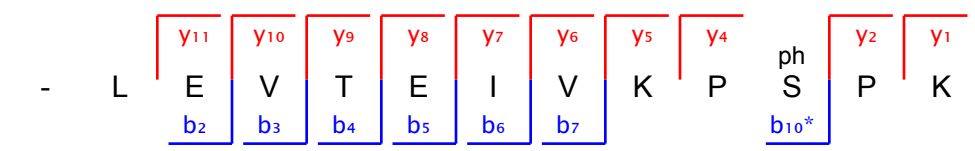

Raw file 20150814\_A375SR\_Phospho\_BR2\_08 Scan 15383 Method FTMS; HCD Score 190.24 m/z 726.36 Gene names LARP4

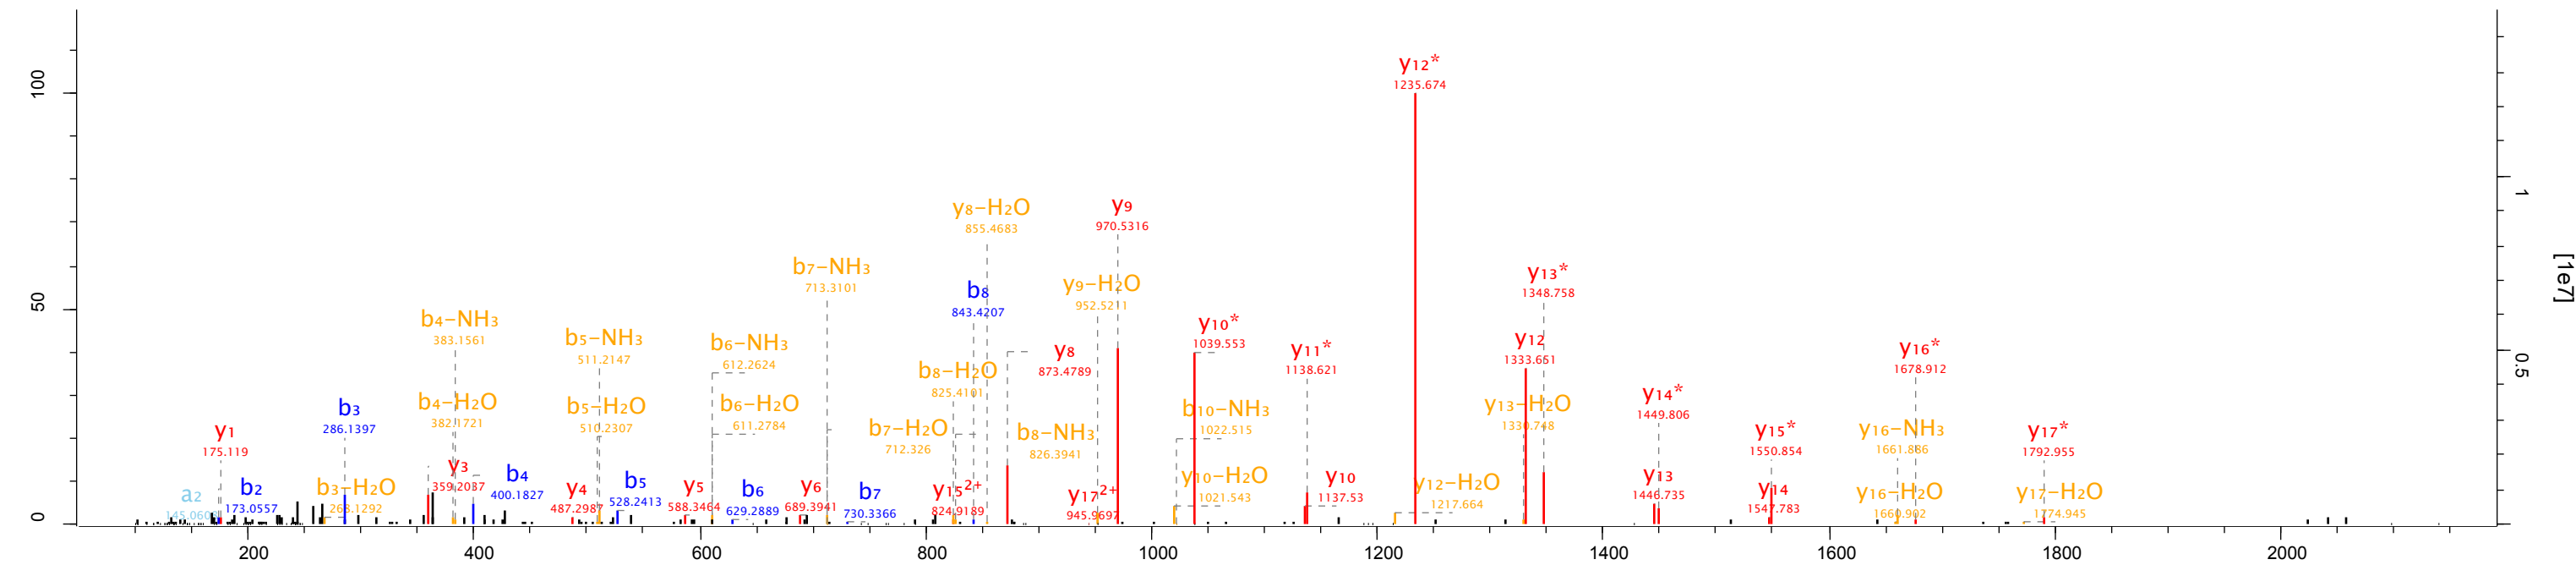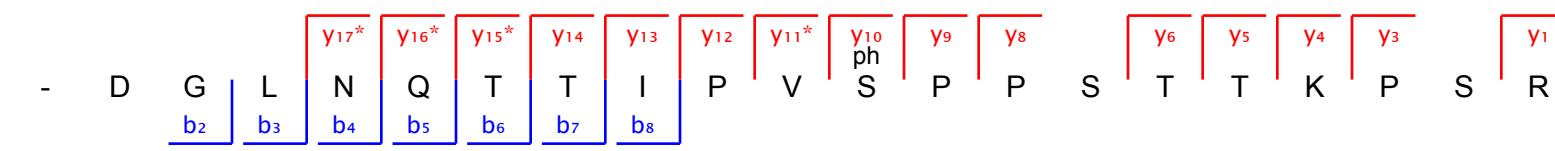

Raw file: 20150814\_A375SR\_Phospho\_BR2\_08  
 Scan: 15493 Method: FTMS; HCD Score: 60.56 m/z: 573.94 Gene names: KIF13B

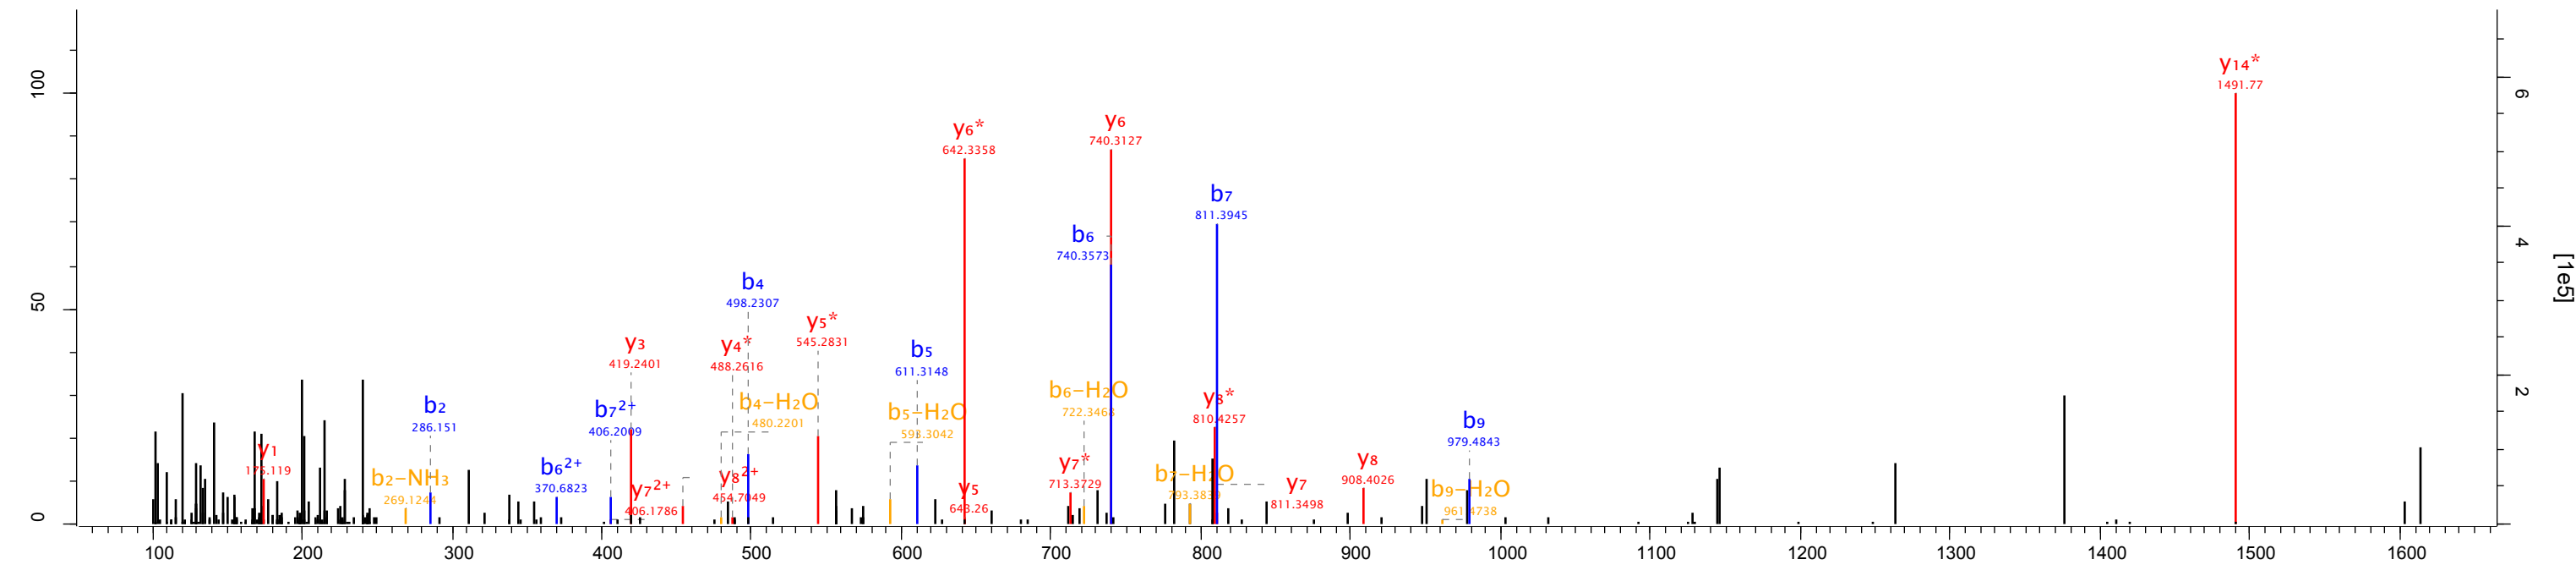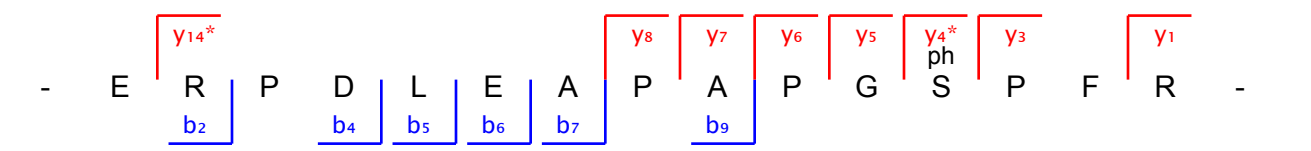

Raw file 20150814\_A375SR\_Phospho\_BR2\_08 Scan 15563 Method FTMS; HCD Score 90.71 m/z 493.28 Gene names RASSF8

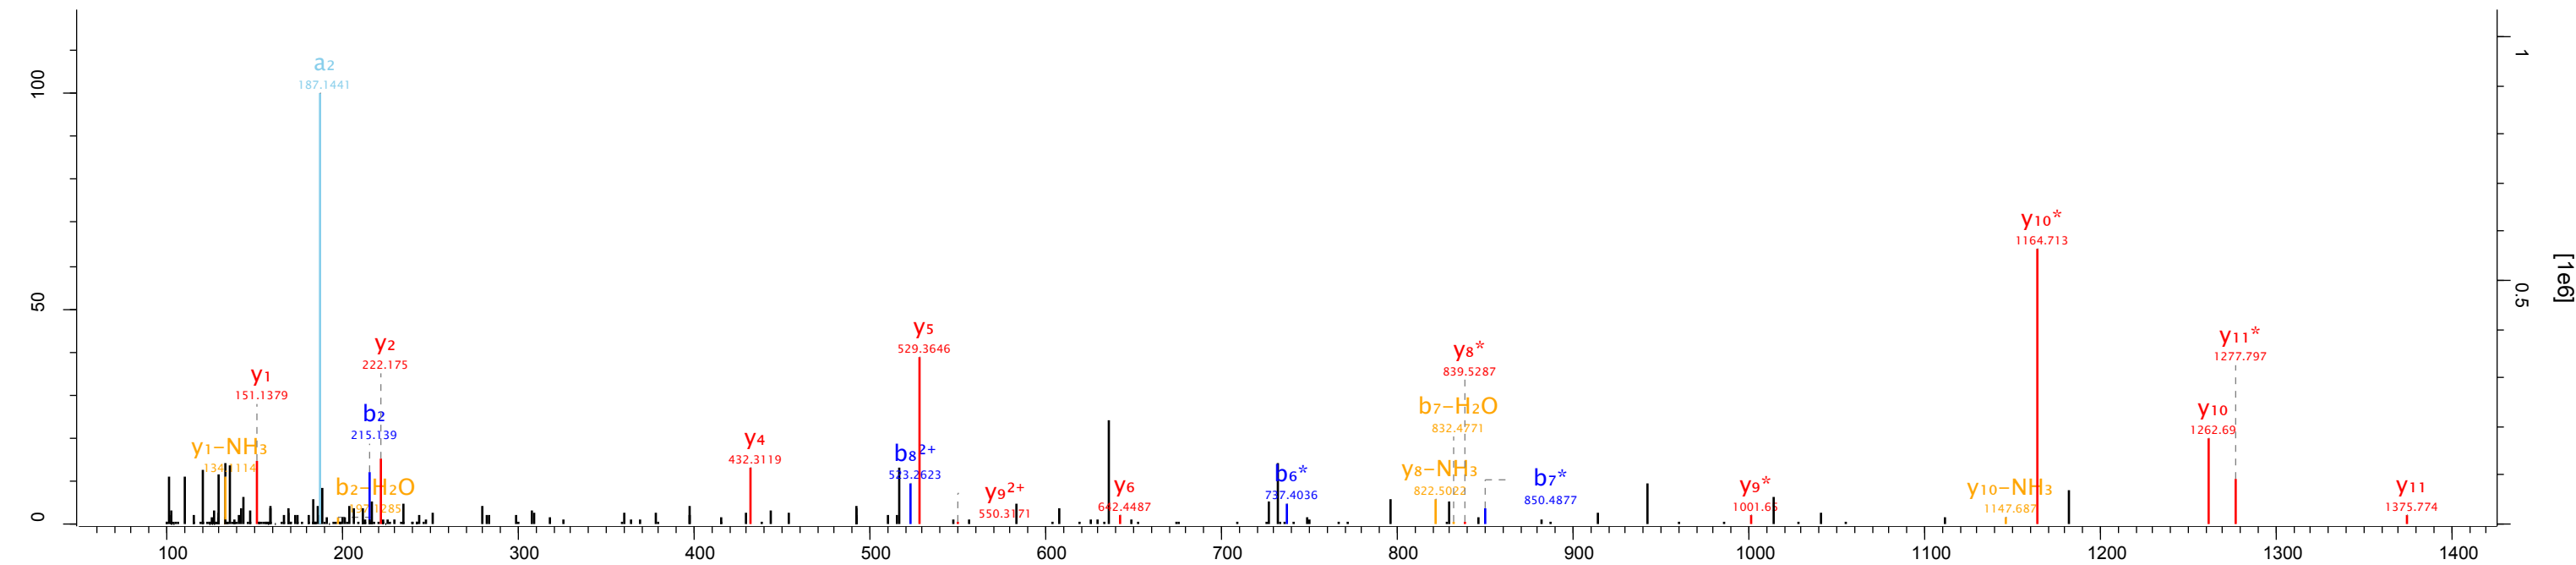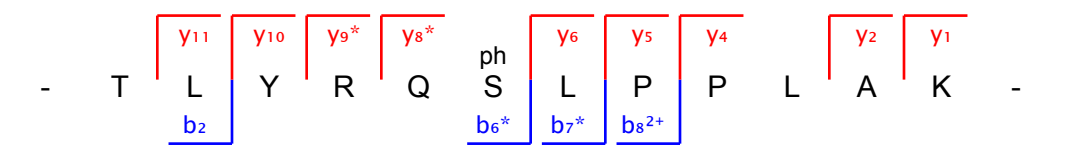

Raw file: 20150814\_A375SR\_Phospho\_BR2\_08  
 Scan: 16763 Method: FTMS; HCD Score: 78.08 m/z: 938.07 Gene names: RBFOX2

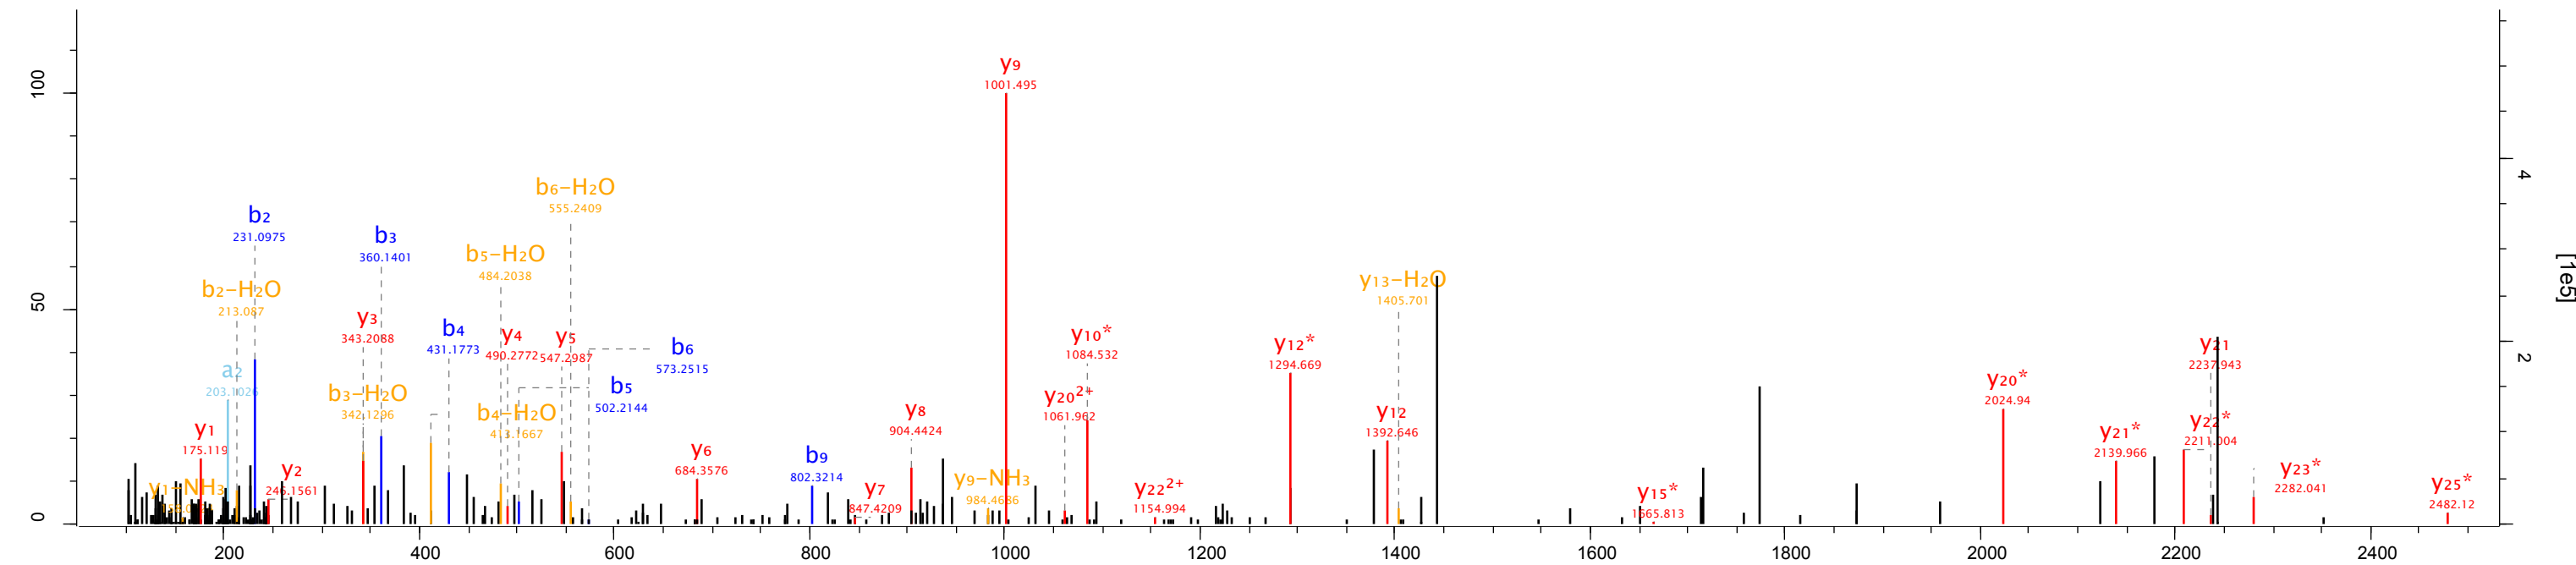

- T E E A A A D G G G M Q N E P L T P G Y H G F P A R -

Fragmentation mapping (b and y ions) is shown below the sequence:

- b<sub>2</sub> (E), b<sub>3</sub> (EE), b<sub>4</sub> (EEA), b<sub>5</sub> (EEAA), b<sub>6</sub> (EEAAA), b<sub>9</sub> (GGGGM)
- y<sub>1</sub> (R), y<sub>2</sub> (PA), y<sub>3</sub> (PAF), y<sub>4</sub> (PAFG), y<sub>5</sub> (PAFGH), y<sub>6</sub> (PAFGHY), y<sub>7</sub> (PAFGHYG), y<sub>8</sub> (PAFGHYGP), y<sub>9</sub> (PAFGHYGPT), y<sub>10</sub><sup>\*</sup> (PAFGHYGPTph), y<sub>12</sub> (EP), y<sub>15</sub><sup>\*</sup> (MQ), y<sub>20</sub><sup>\*</sup> (D), y<sub>21</sub> (DA), y<sub>22</sub><sup>\*</sup> (DAA), y<sub>23</sub><sup>\*</sup> (DAAA), y<sub>25</sub><sup>\*</sup> (DAEEE)

Raw file: 20150814\_A375SR\_Phospho\_BR2\_08  
 Scan: 17393 Method: FTMS; HCD Score: 154.26 m/z: 784.46 Gene names: EIF4G3

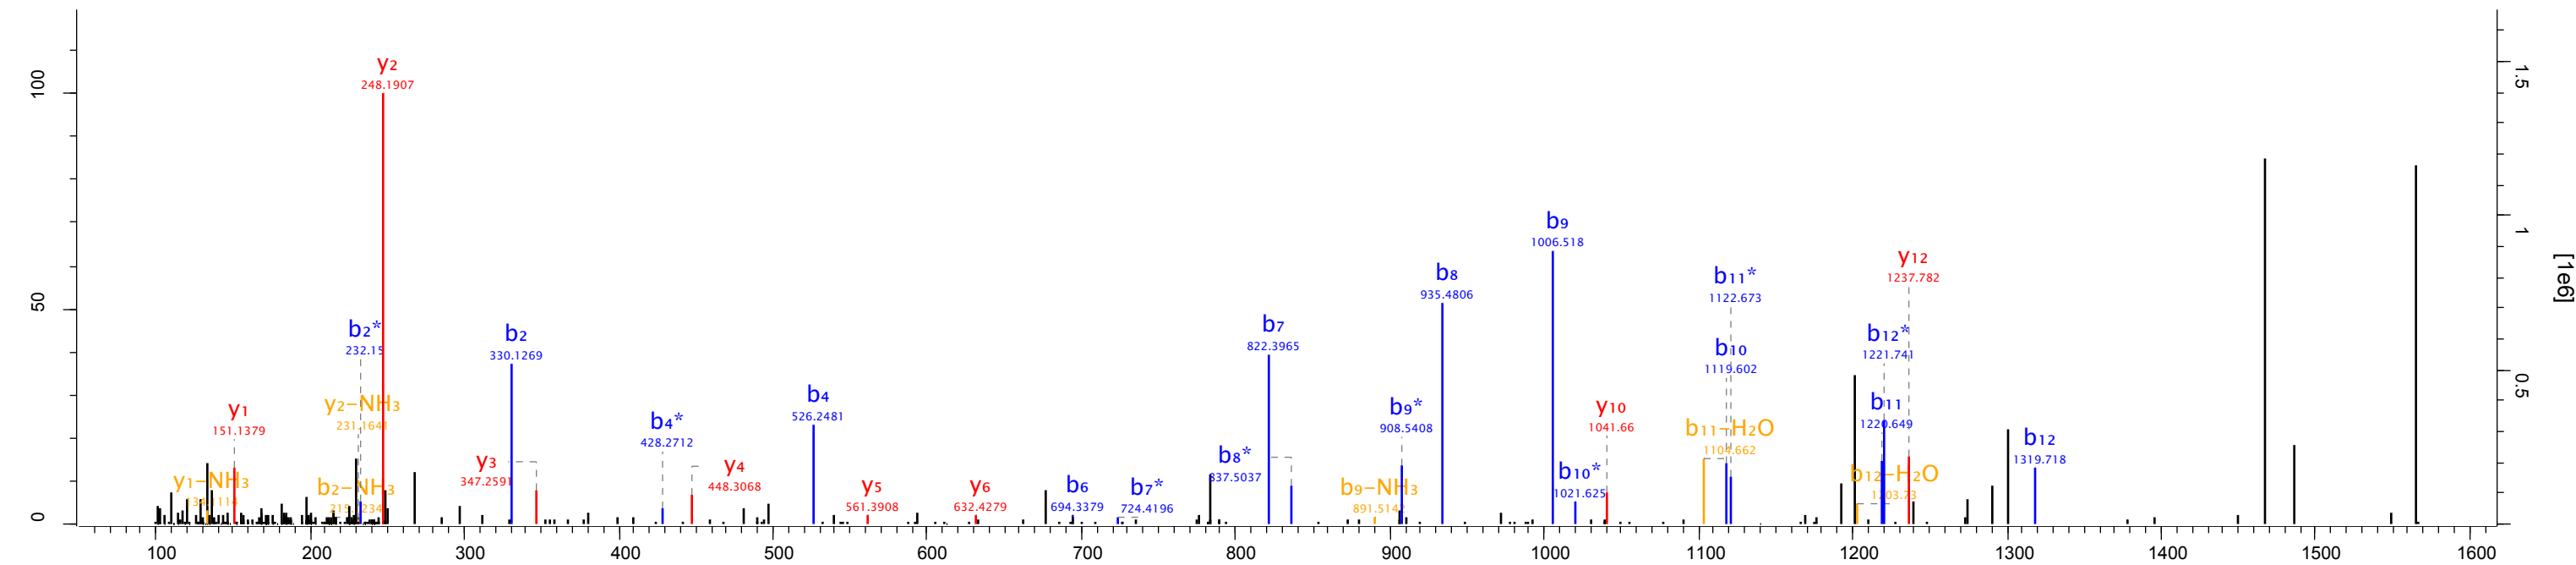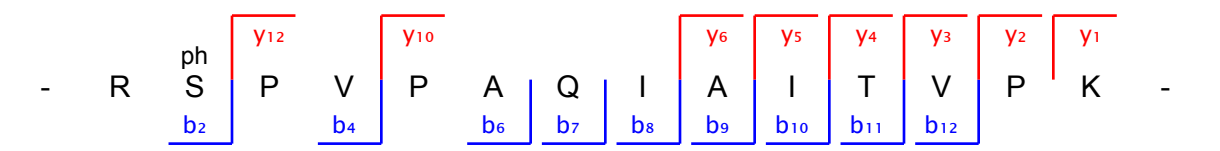



Raw file 20150814\_A375SR\_Phospho\_BR2\_08 Scan 18113 Method FTMS; HCD Score 133.9 m/z 758.39 Gene names DNTTIP2

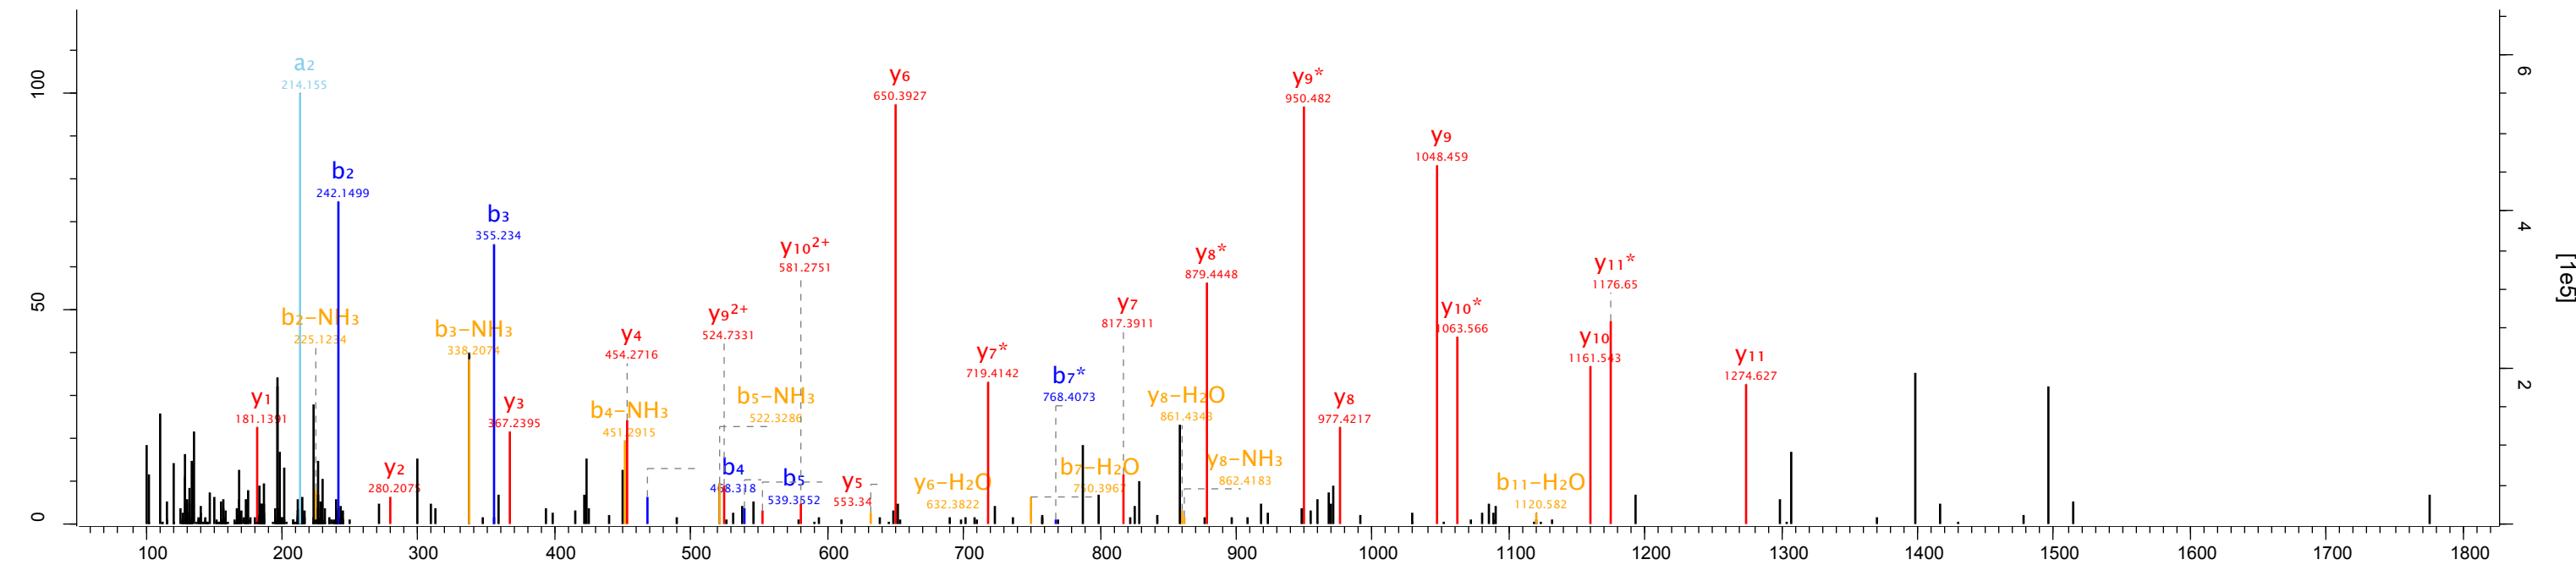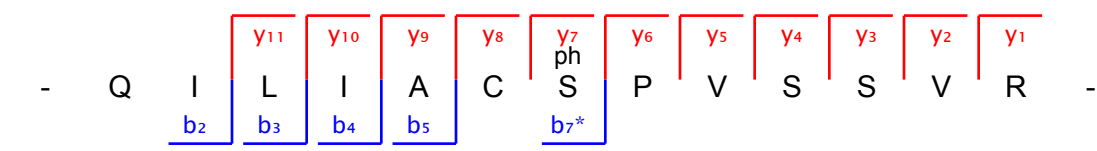

Raw file Scan Method Score m/z Gene names  
 20150814\_A375SR\_Phospho\_BR2\_08 18523 FTMS; HCD 187.75 636.82 CDK16

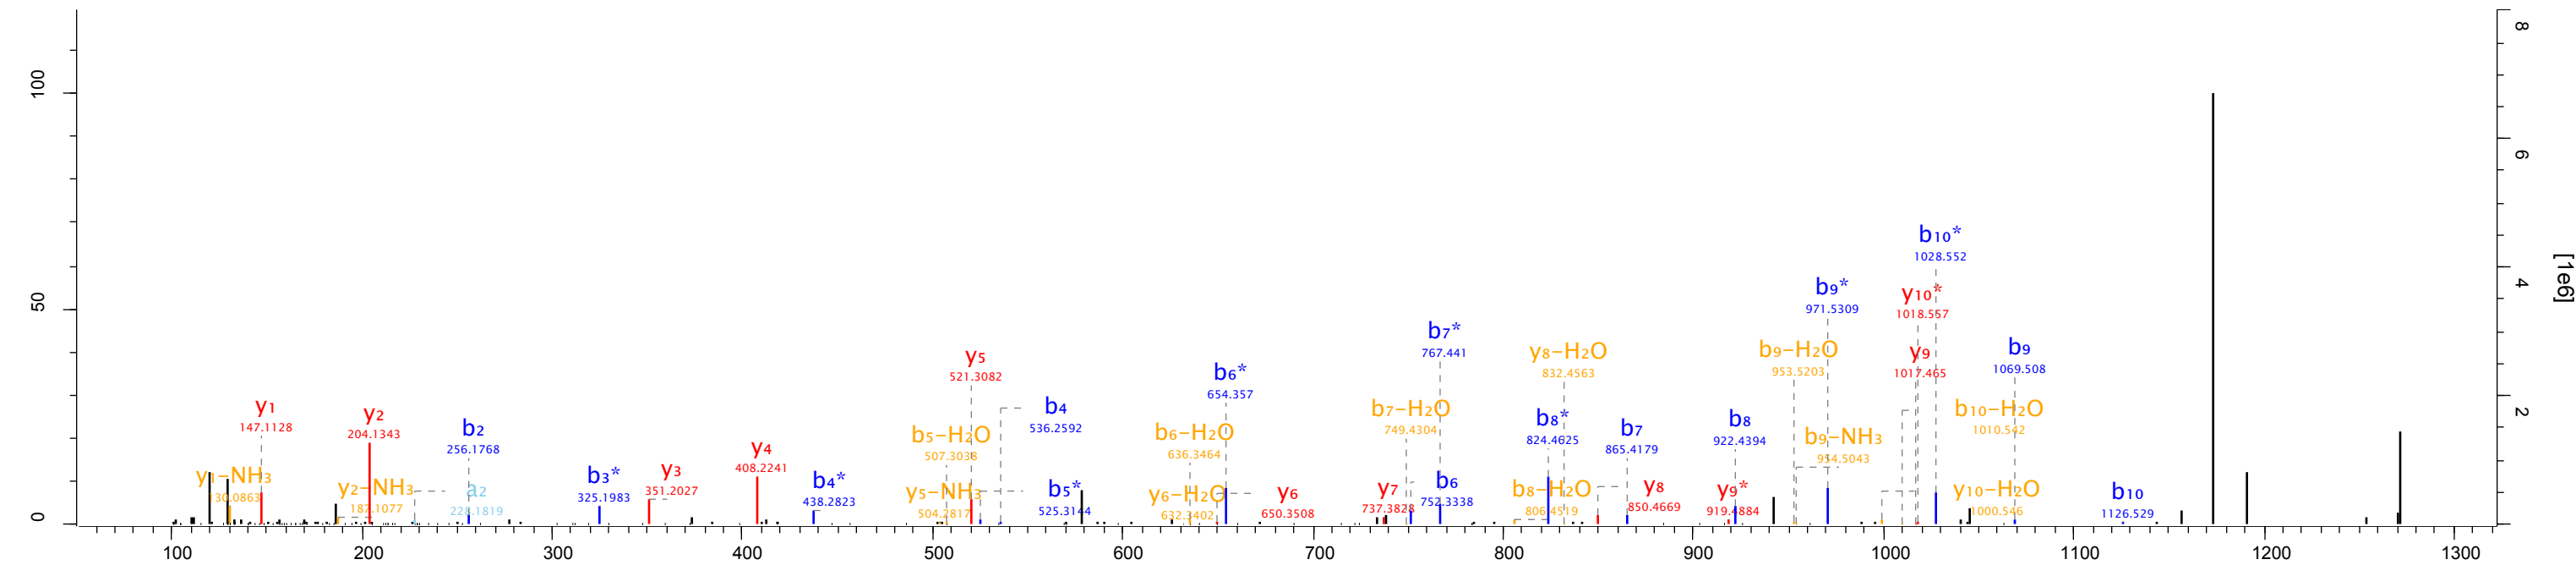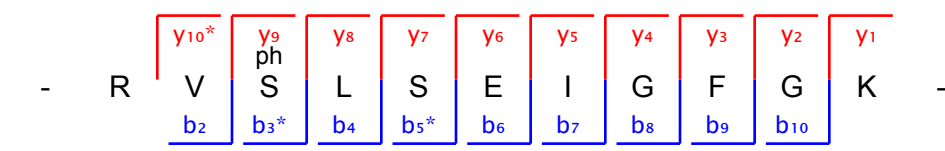

Raw file 20150814\_A375SR\_Phospho\_BR2\_08 Scan 18683 Method FTMS; HCD Score 67.66 m/z 753.03 Gene names TAB2

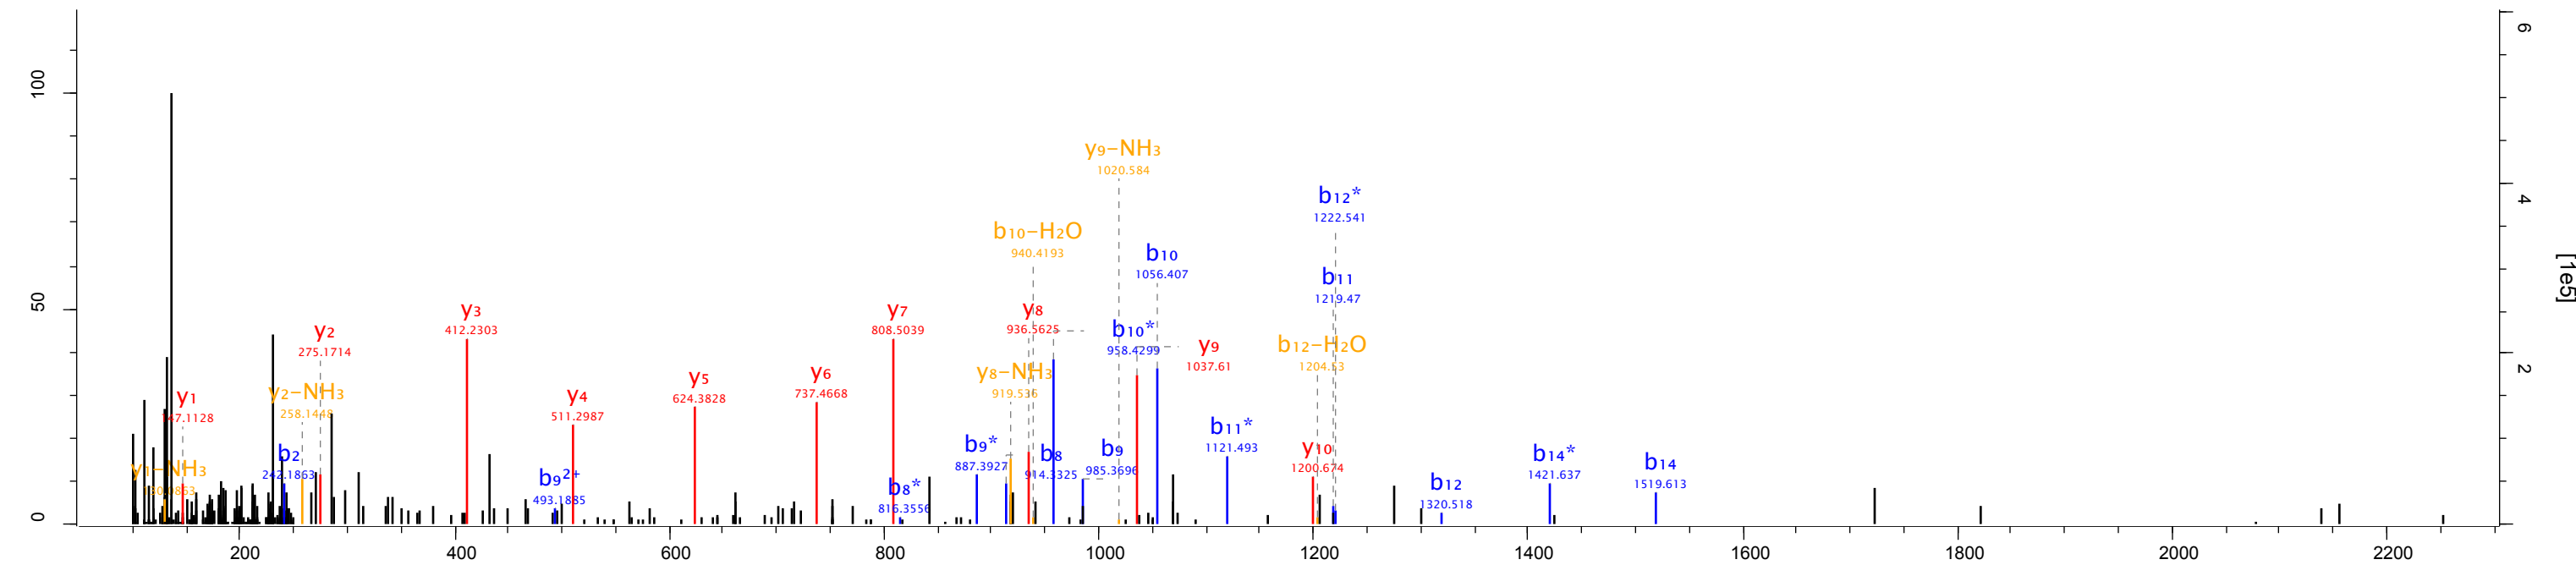

- K L S ph M G S D D A A Y T Q A L L V H Q K -

Fragmentation mapping (b and y ions):

- b<sub>2</sub> (L)
- b<sub>8</sub> (D)
- b<sub>9</sub> (A)
- b<sub>10</sub> (A)
- b<sub>11</sub> (Y)
- b<sub>12</sub> (T)
- b<sub>14</sub> (A)
- y<sub>1</sub> (K)
- y<sub>2</sub> (Q)
- y<sub>3</sub> (H)
- y<sub>4</sub> (V)
- y<sub>5</sub> (L)
- y<sub>6</sub> (L)
- y<sub>7</sub> (A)
- y<sub>8</sub> (Q)
- y<sub>9</sub> (T)
- y<sub>10</sub> (Y)

Raw file 20150814\_A375SR\_Phospho\_BR2\_08 Scan 19033 Method FTMS; HCD Score 382.6 m/z 818.66 Gene names HMGCS1

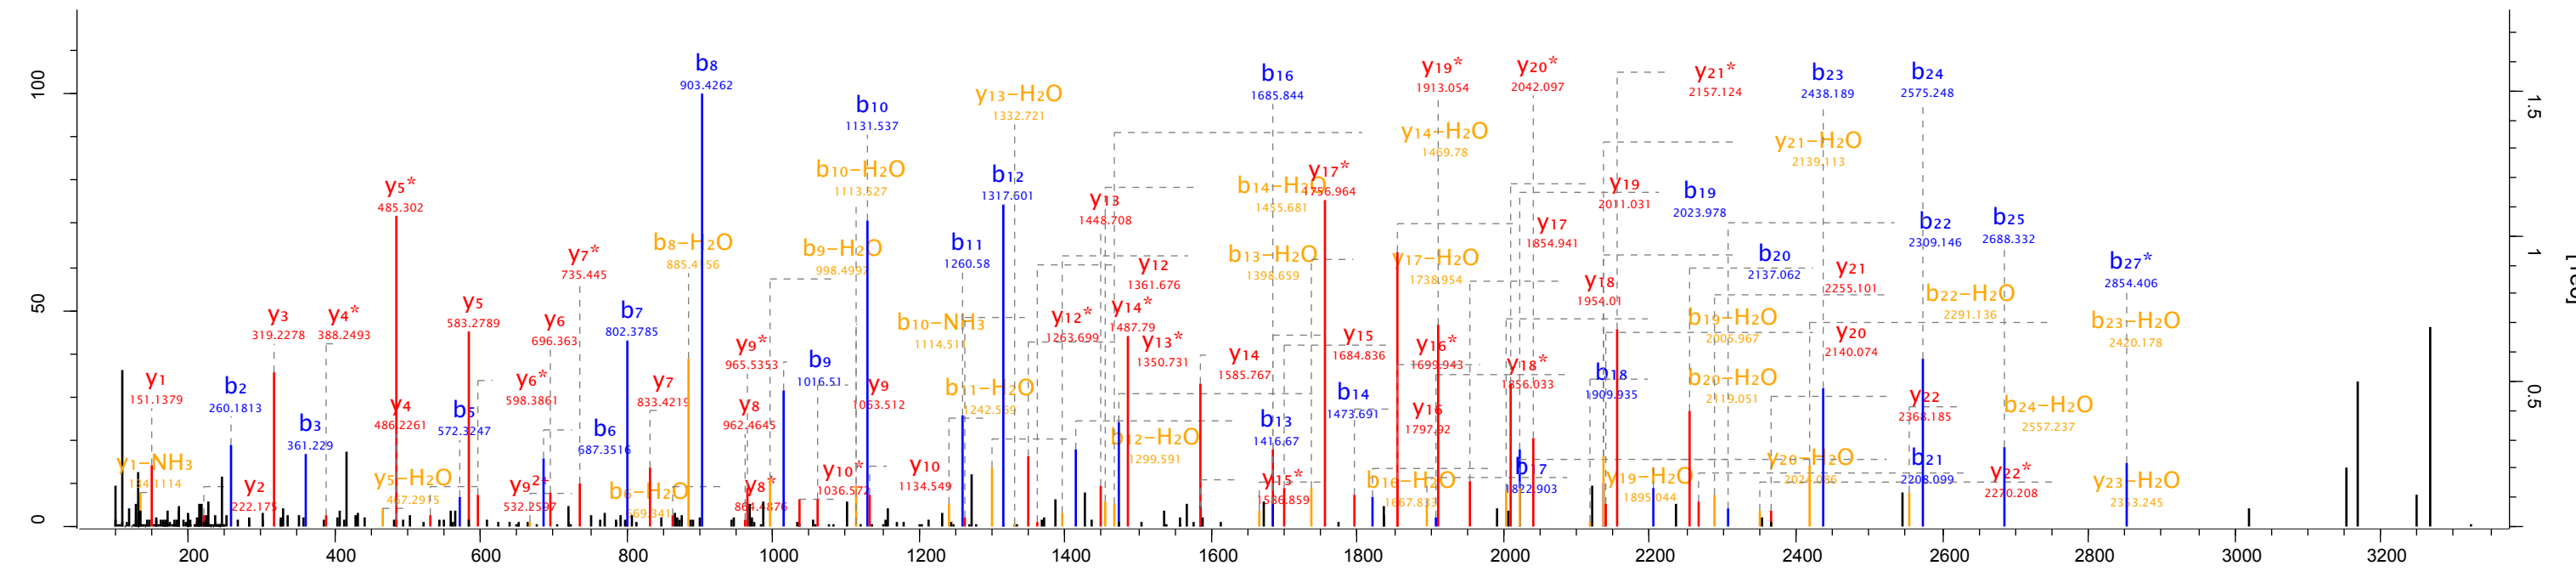

- R P T P N D D T L D E G V G L V H S N I A T E H I P S P A K -

b<sub>2</sub>
b<sub>3</sub>
b<sub>5</sub>
b<sub>6</sub>
b<sub>7</sub>
b<sub>8</sub>
b<sub>9</sub>
b<sub>10</sub>
b<sub>11</sub>
b<sub>12</sub>
b<sub>13</sub>
b<sub>14</sub>
b<sub>16</sub>
b<sub>17</sub>
b<sub>18</sub>
b<sub>19</sub>
b<sub>20</sub>
b<sub>21</sub>
b<sub>22</sub>
b<sub>23</sub>
b<sub>24</sub>
b<sub>25</sub>
b<sub>27</sub>\*
y<sub>22</sub>
y<sub>21</sub>
y<sub>20</sub>
y<sub>19</sub>
y<sub>18</sub>
y<sub>17</sub>
y<sub>16</sub>
y<sub>15</sub>
y<sub>14</sub>
y<sub>13</sub>
y<sub>12</sub>
y<sub>10</sub>
y<sub>9</sub>
y<sub>8</sub>
y<sub>7</sub>
y<sub>6</sub>
y<sub>5</sub>
y<sub>4</sub>
y<sub>3</sub>
y<sub>2</sub>
y<sub>1</sub>

Raw file 20150814\_A375SR\_Phospho\_BR2\_08 Scan 19113 Method FTMS; HCD Score 179.33 m/z 652.83 Gene names NEXN

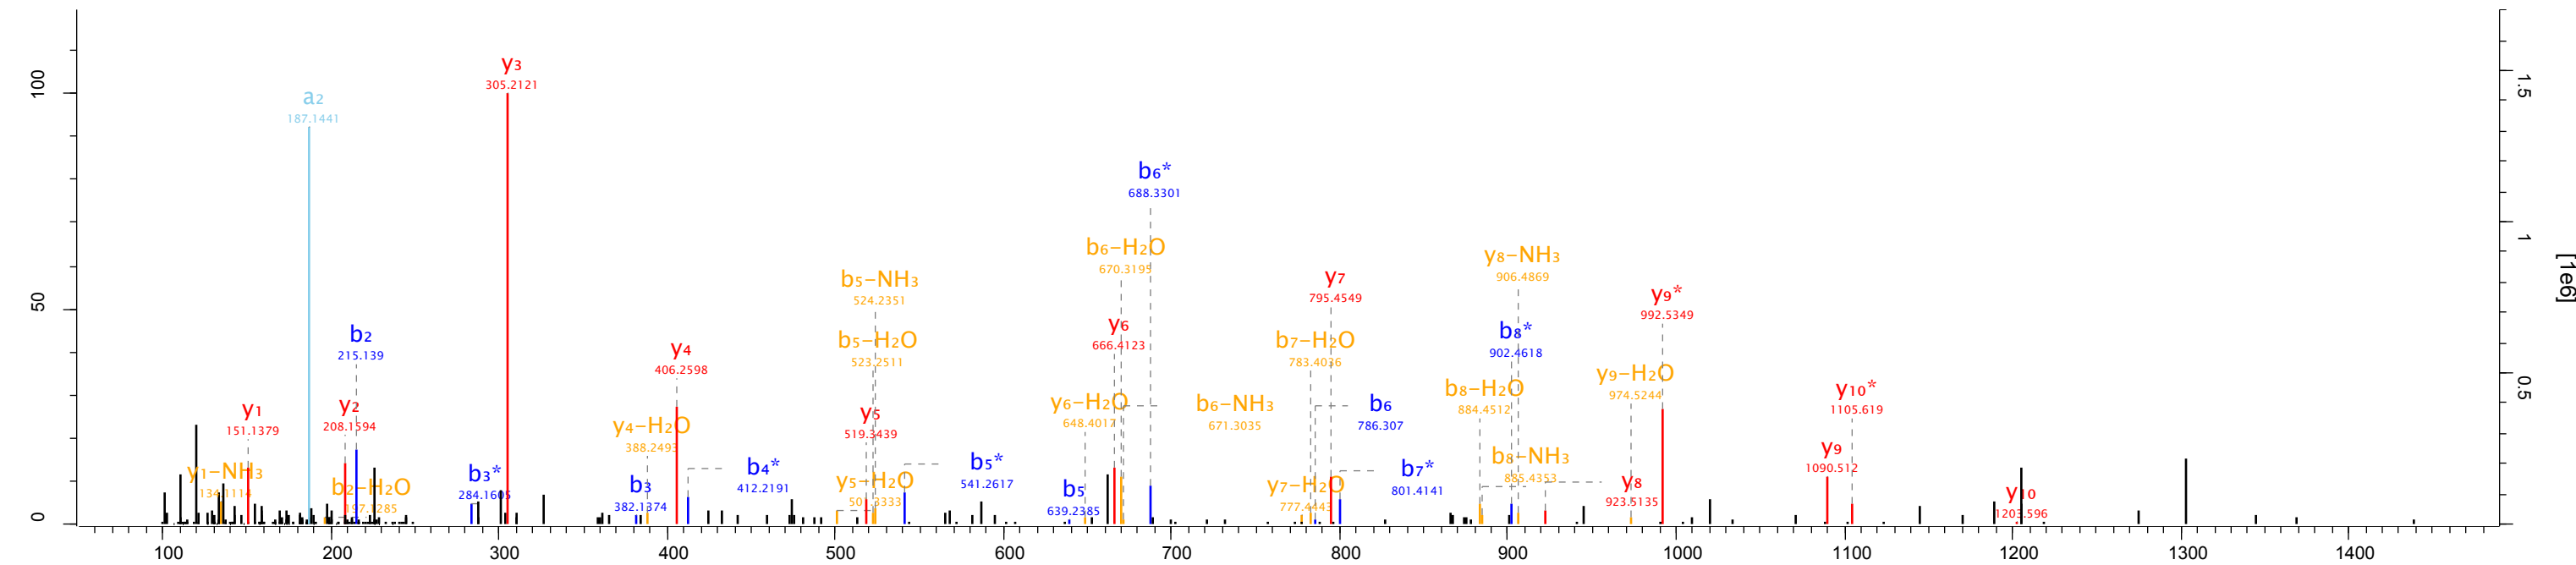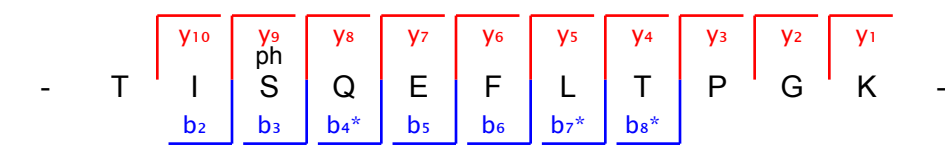

Raw file: 20150814\_A375SR\_Phospho\_BR2\_08  
 Scan: 20563 Method: FTMS; HCD Score: 77.52 m/z: 800.41 Gene names: PRRC2A

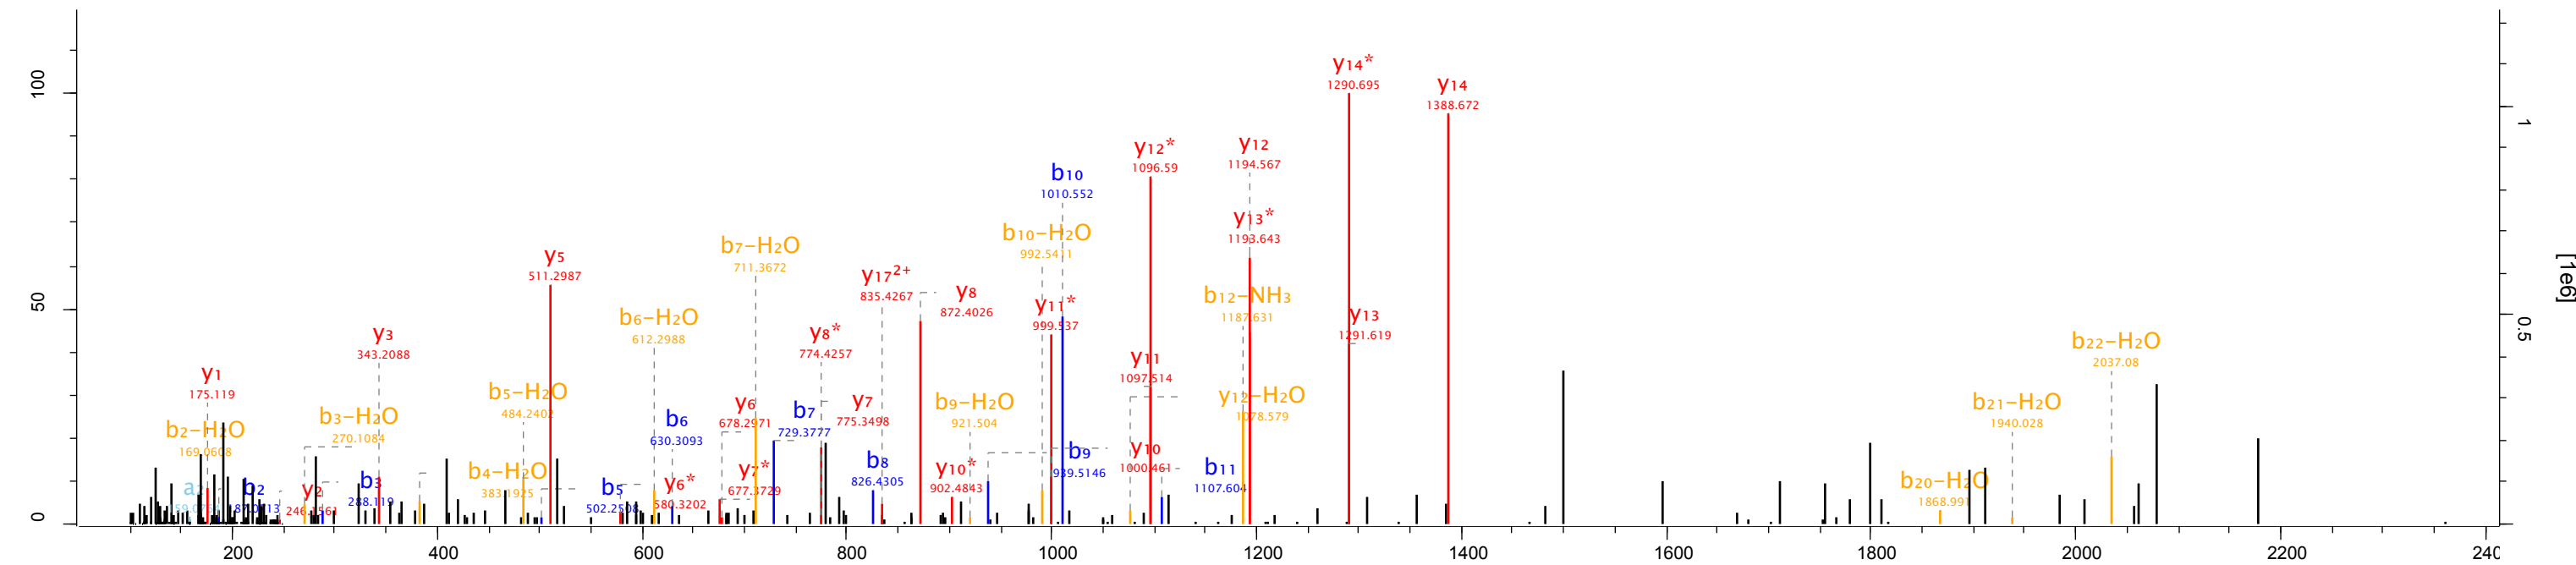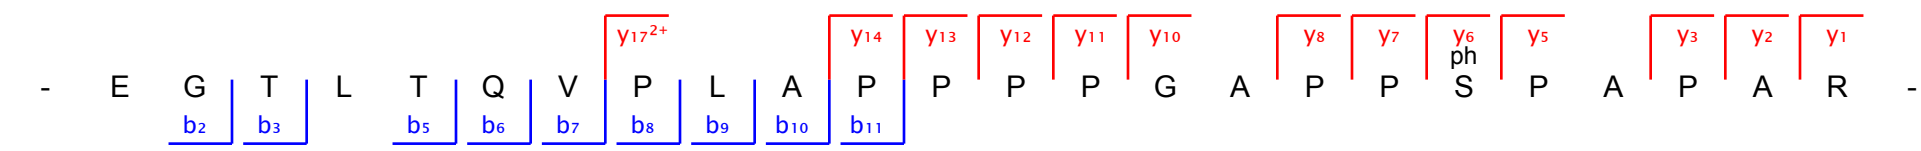

Raw file: 20150814\_A375SR\_Phospho\_BR2\_08  
 Scan: 20783 Method: FTMS; HCD Score: 117.89 m/z: 484.72 Gene names: WARS

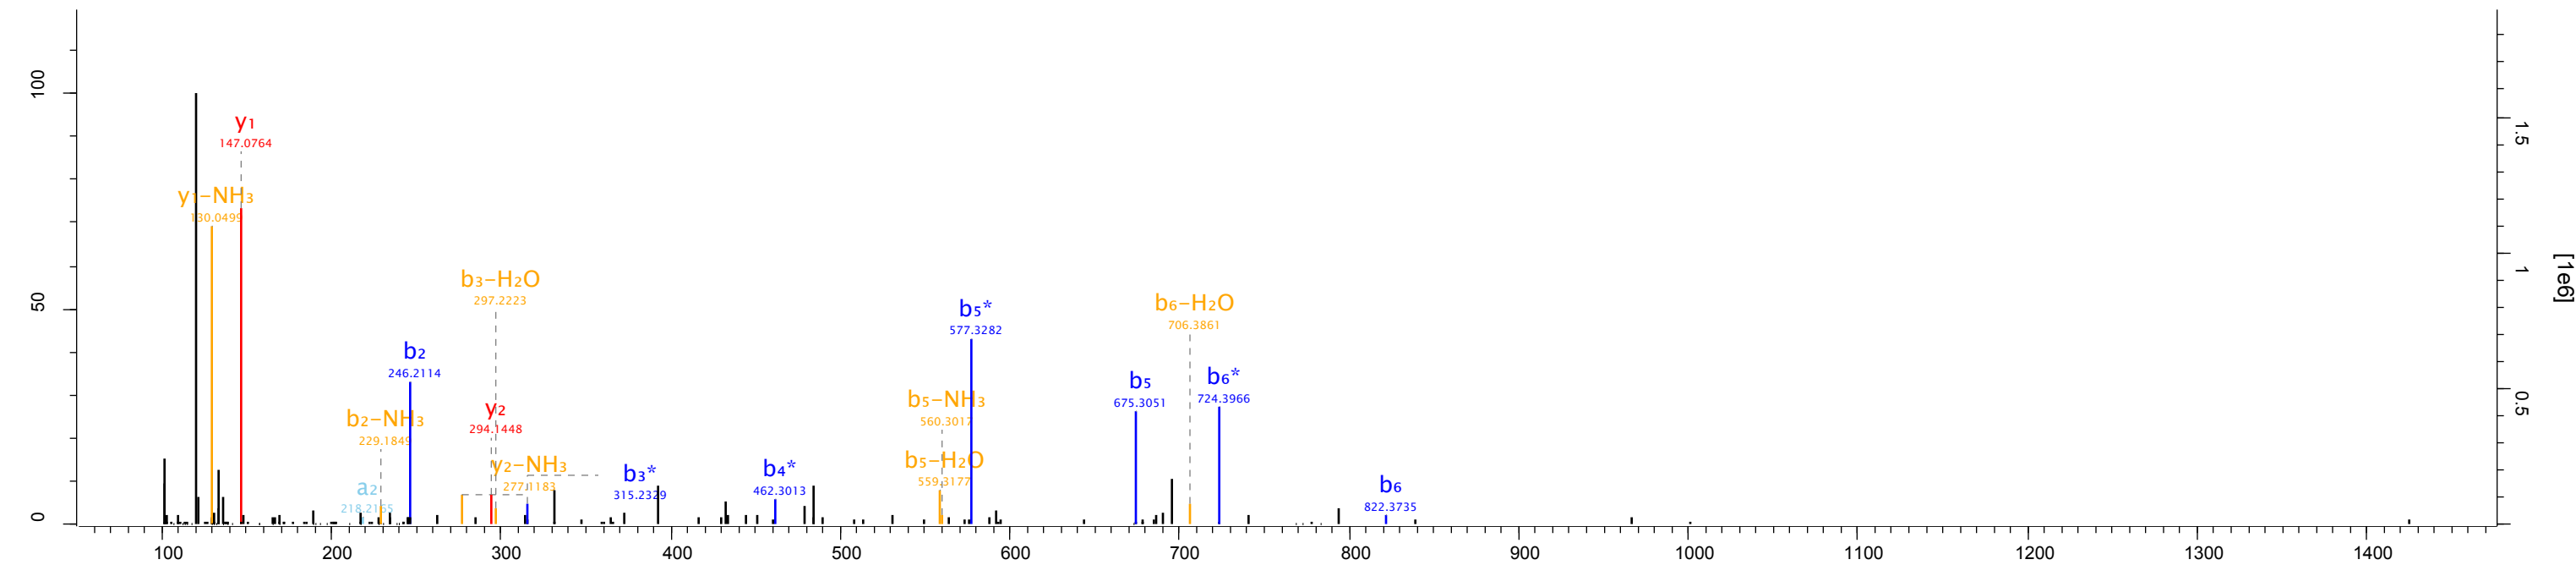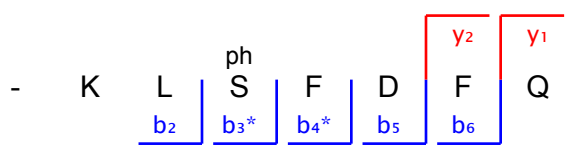

Raw file: 20150814\_A375SR\_Phospho\_BR2\_08  
 Scan: 21783 Method: FTMS; HCD Score: 99.6 m/z: 805.41 Gene names: PPIP5K2

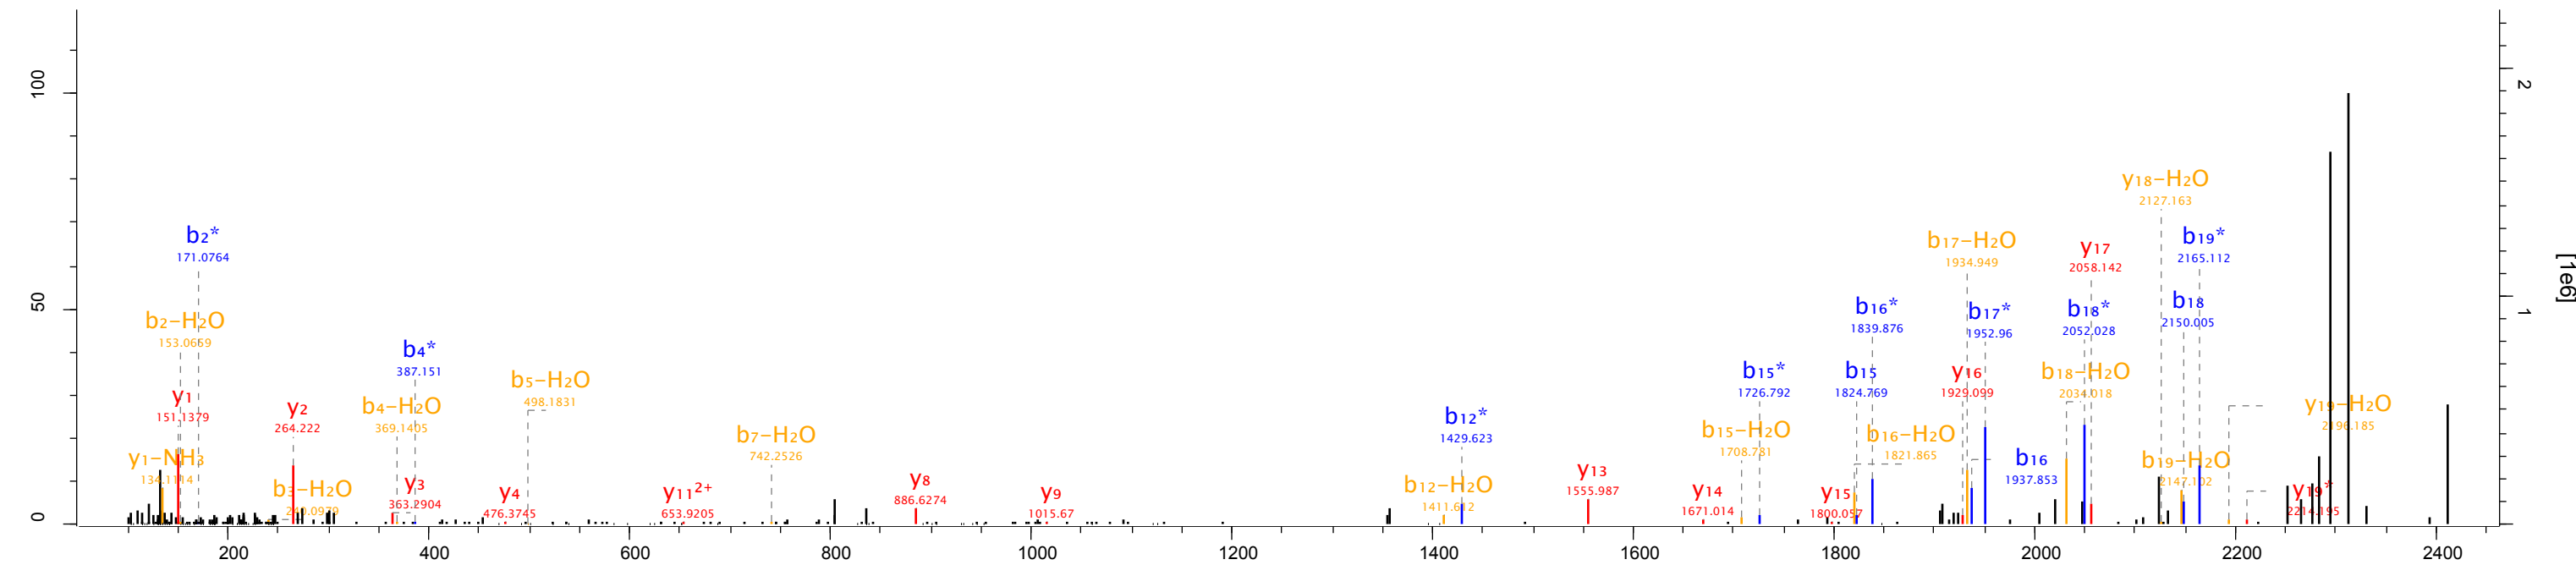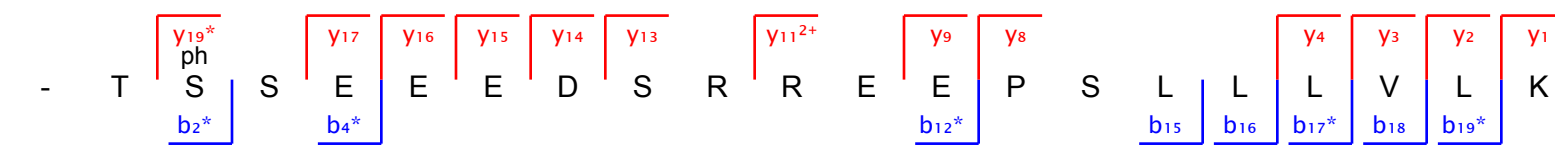



Raw file 20150814\_A375SR\_Phospho\_BR2\_08 Scan 22723 Method FTMS; HCD Score 391.72 m/z 812.43 Gene names TPI1

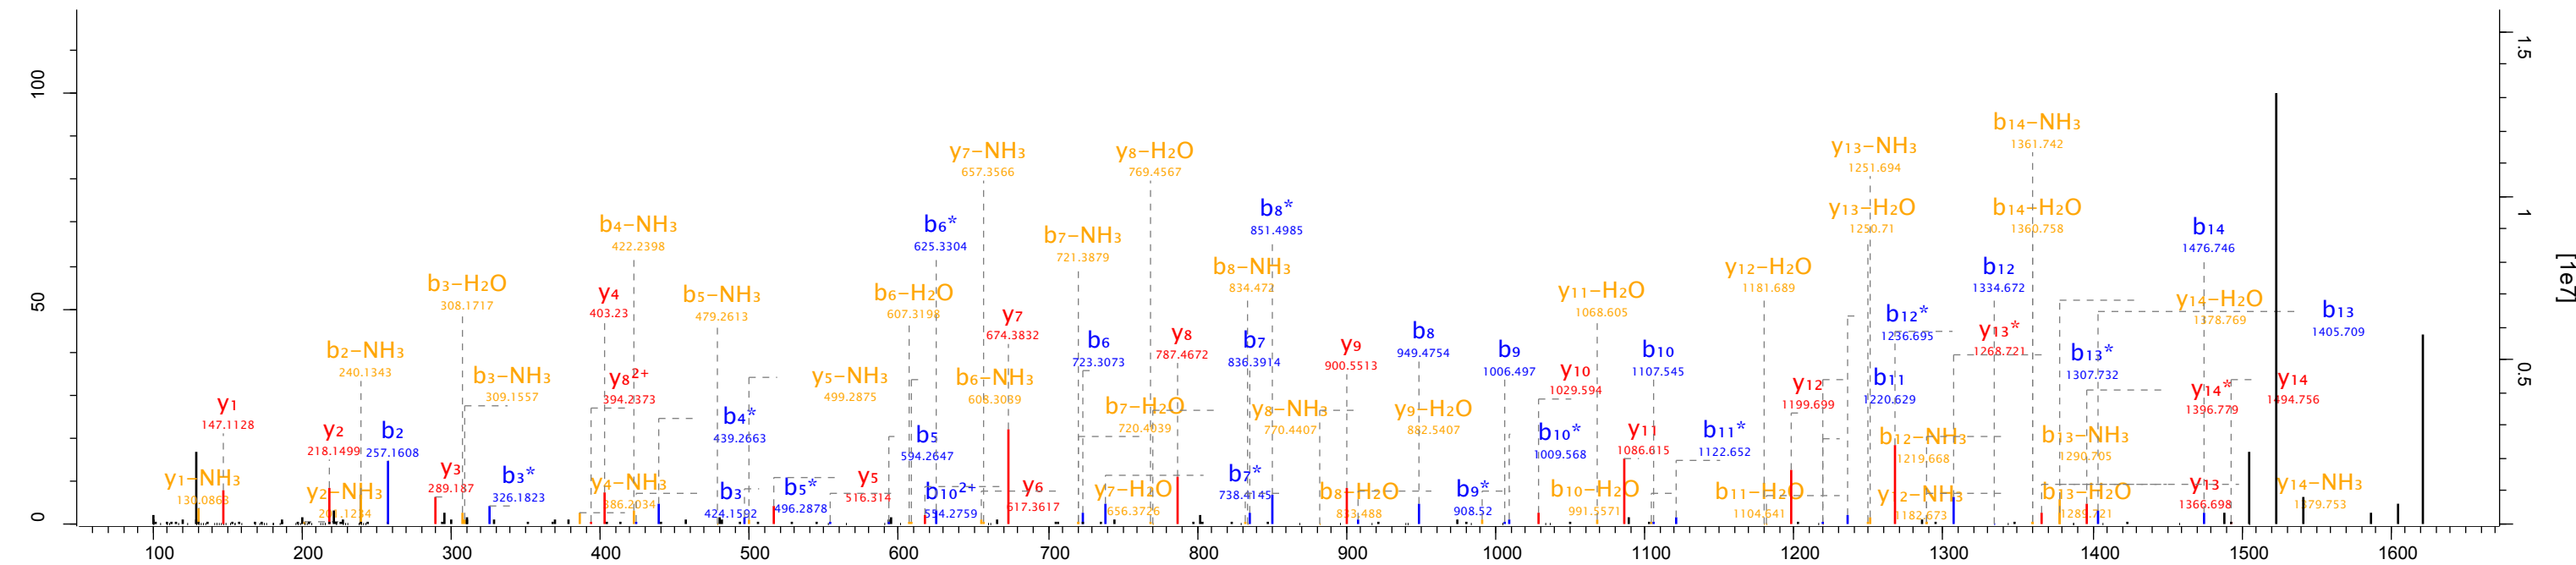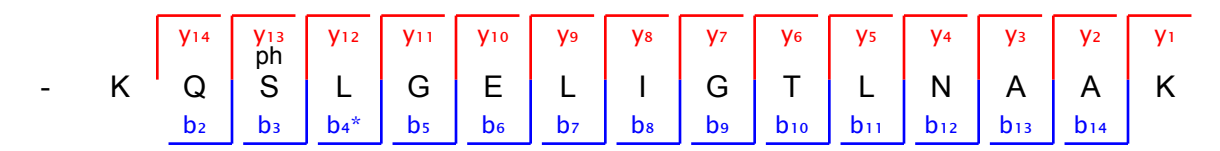

Raw file: 20150814\_A375SR\_Phospho\_BR2\_08  
 Scan: 2383 Method: FTMS; HCD Score: 72.34 m/z: 478.23 Gene names: CCT2

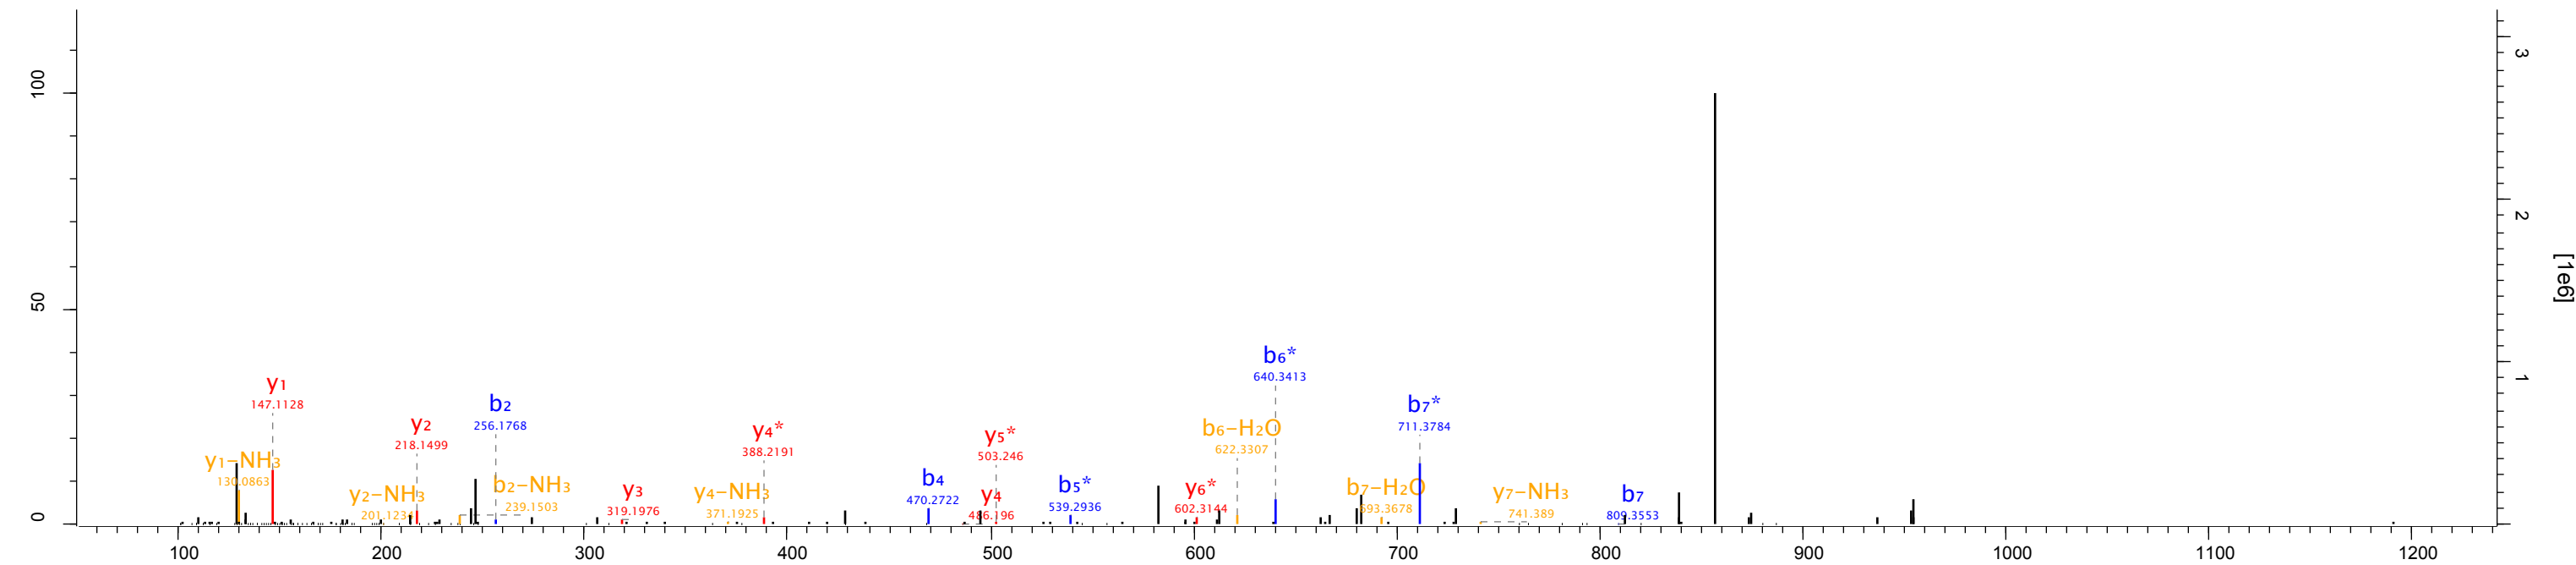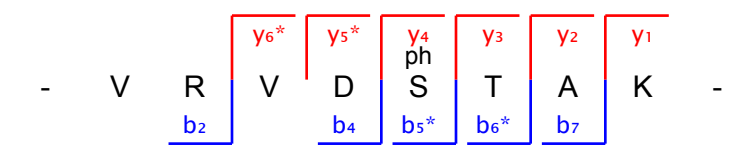

Raw file: 20150814\_A375SR\_Phospho\_BR2\_08  
 Scan: 25613 Method: FTMS; HCD Score: 148.08 m/z: 1248.24 Gene names: ERC1

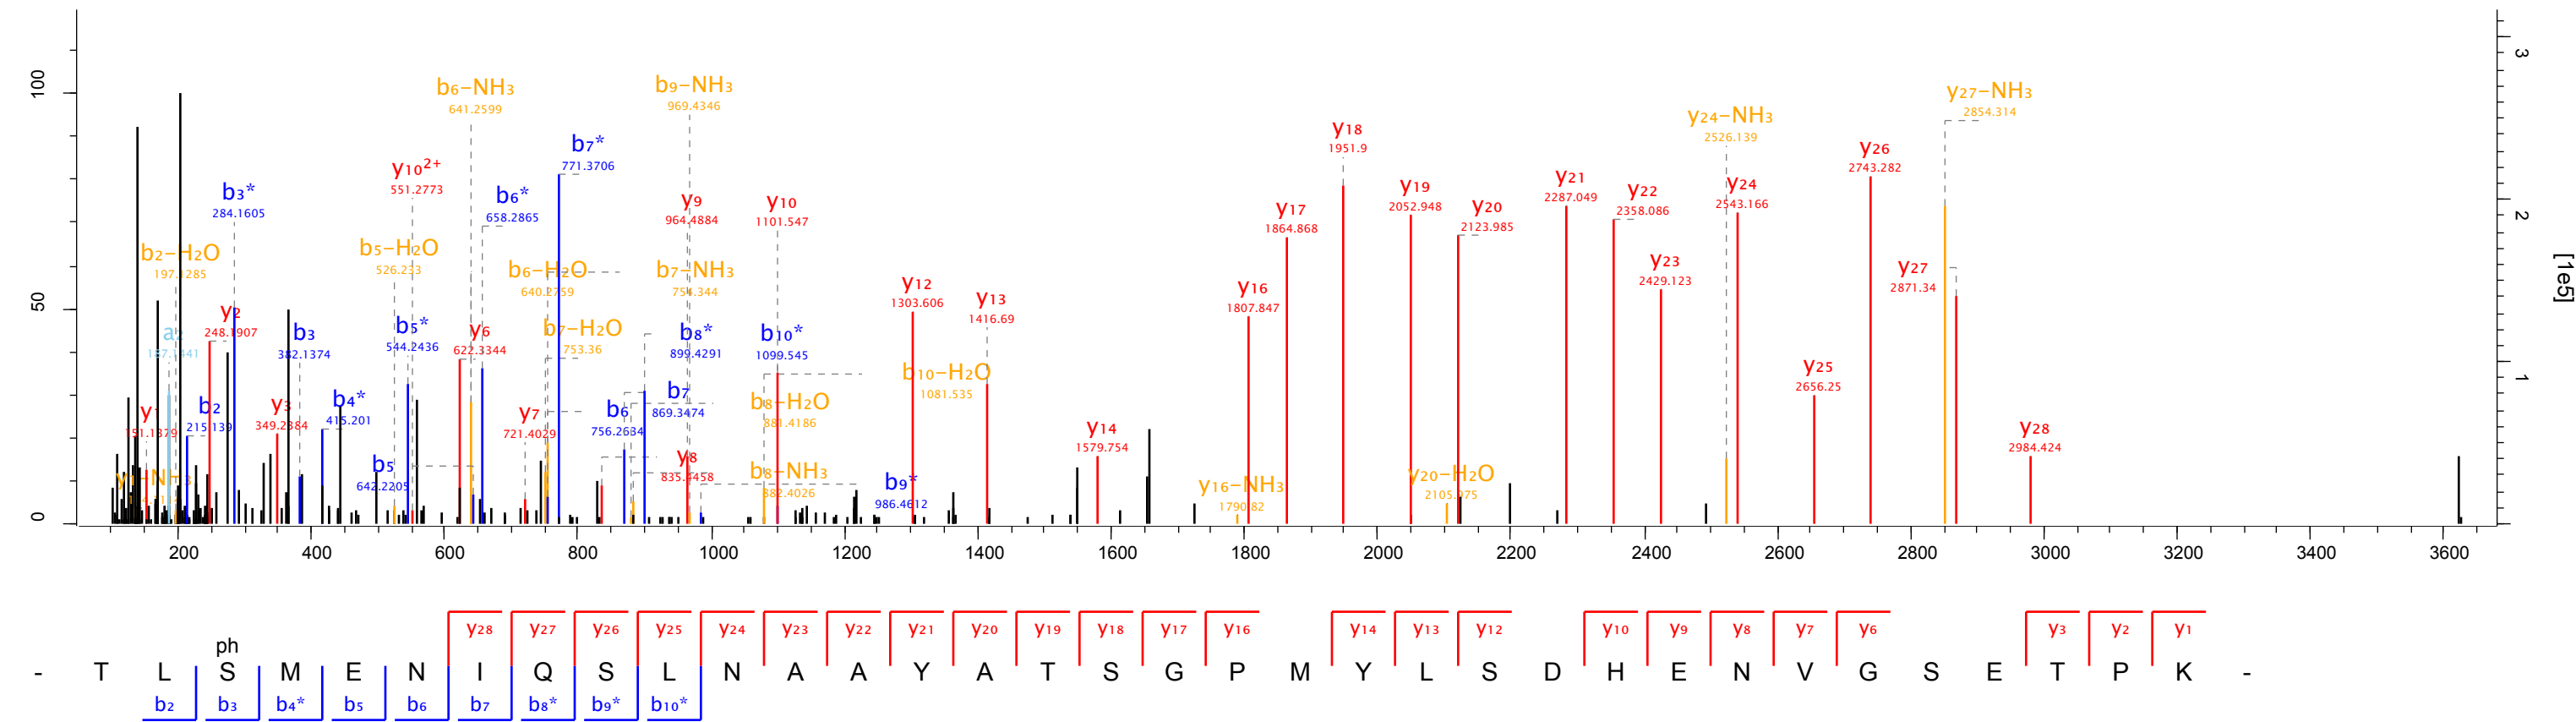

Raw file 20150814\_A375SR\_Phospho\_BR2\_08 Scan 25733 Method FTMS; HCD Score 186.13 m/z 1279.62 Gene names WDR44

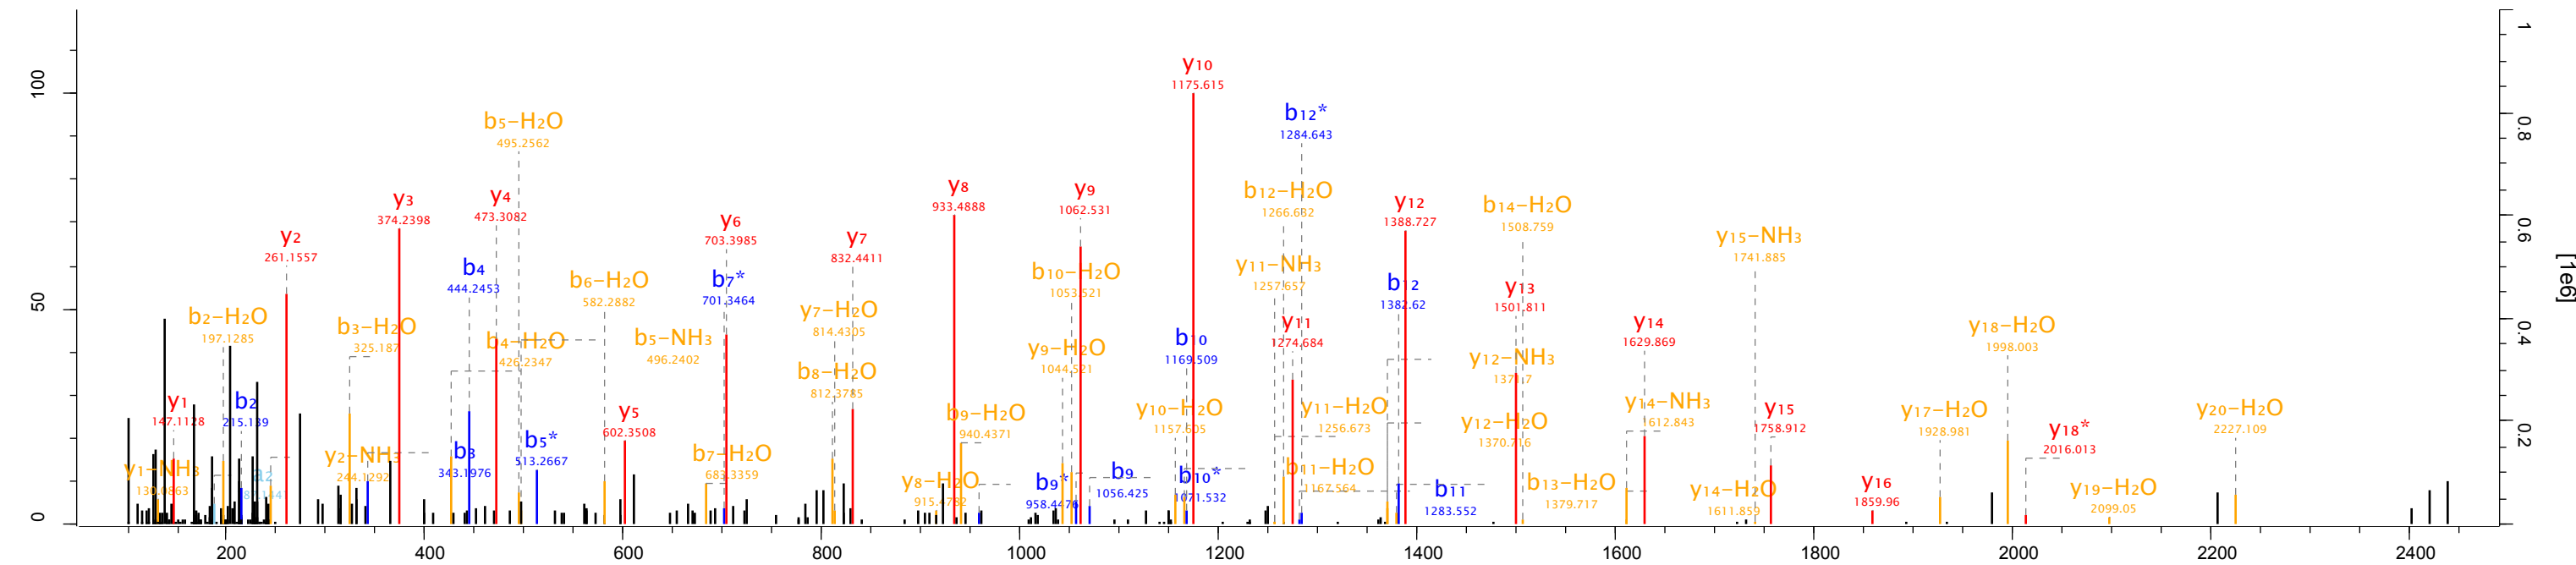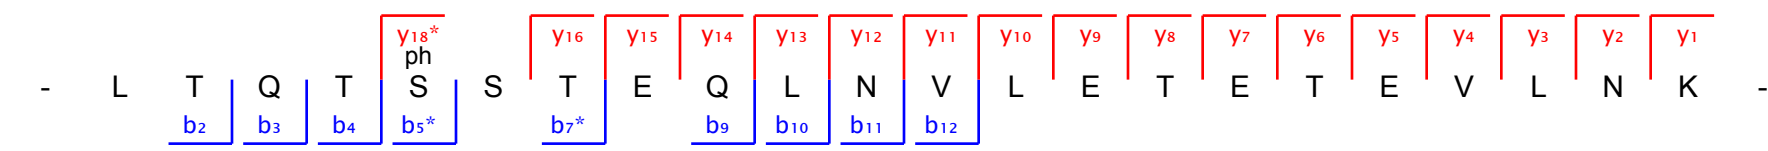

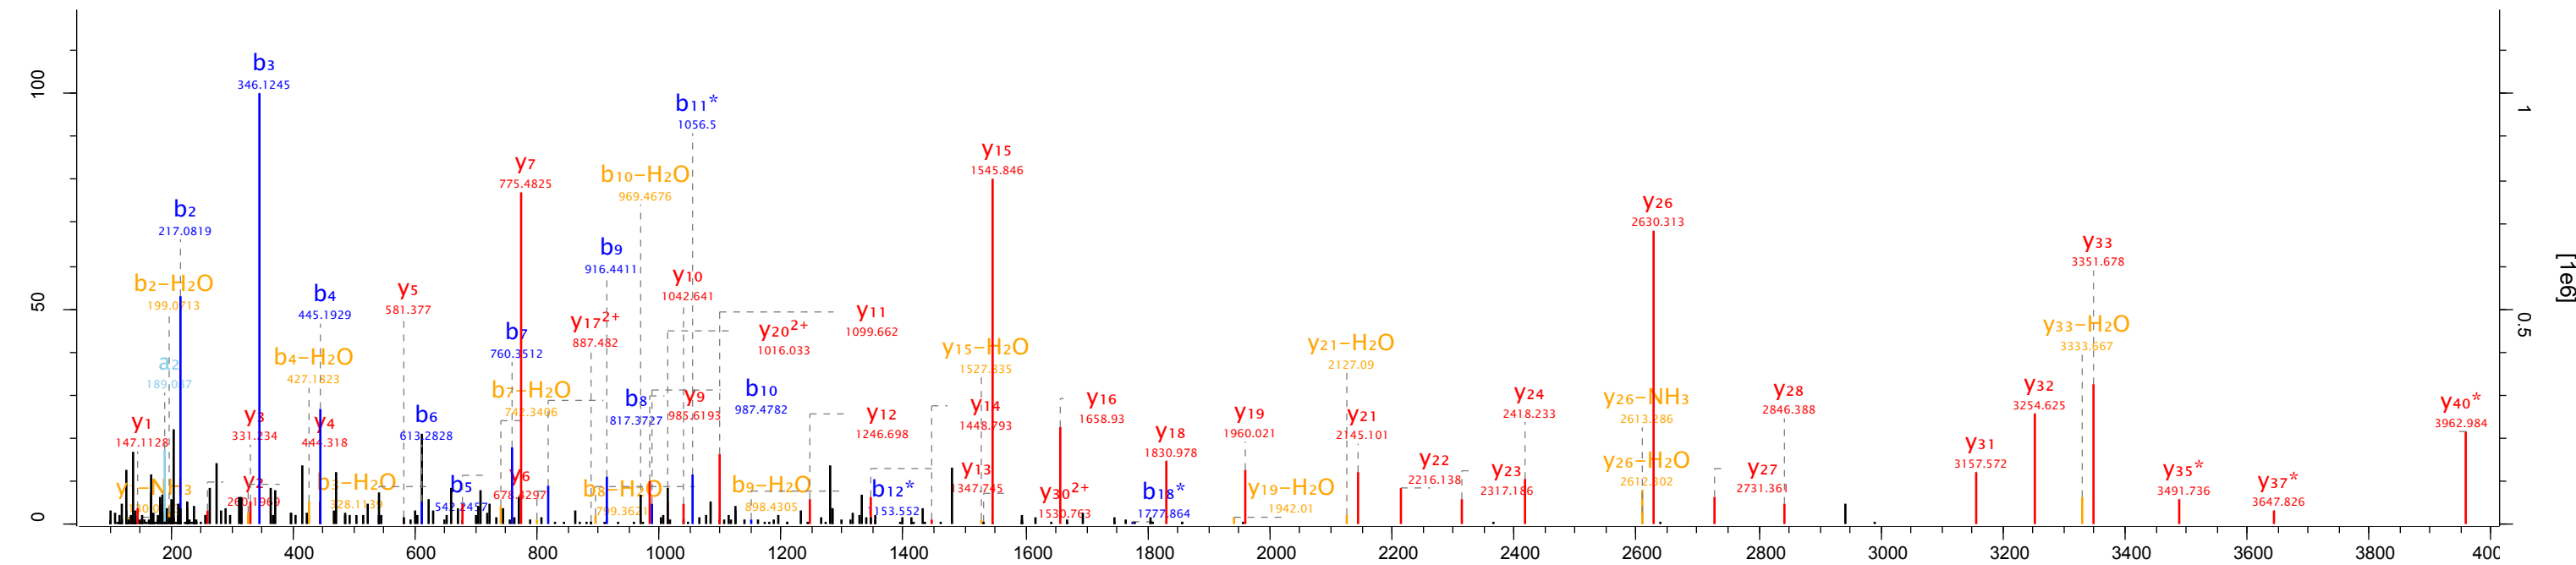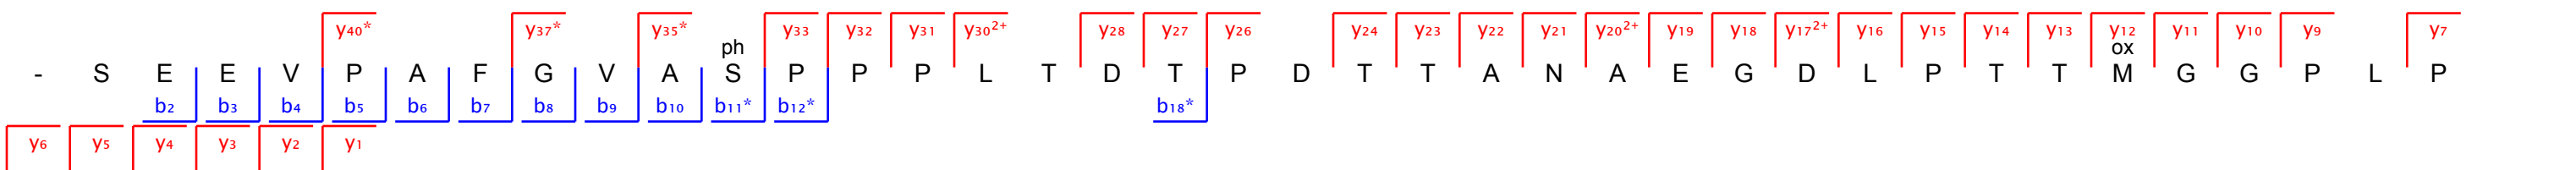

Raw file  
20150814\_A375SR\_Phospho\_BR2\_08

Scan Method Score m/z Gene names  
28093 FTMS; HCD 162.44 950.51 TBC1D10B

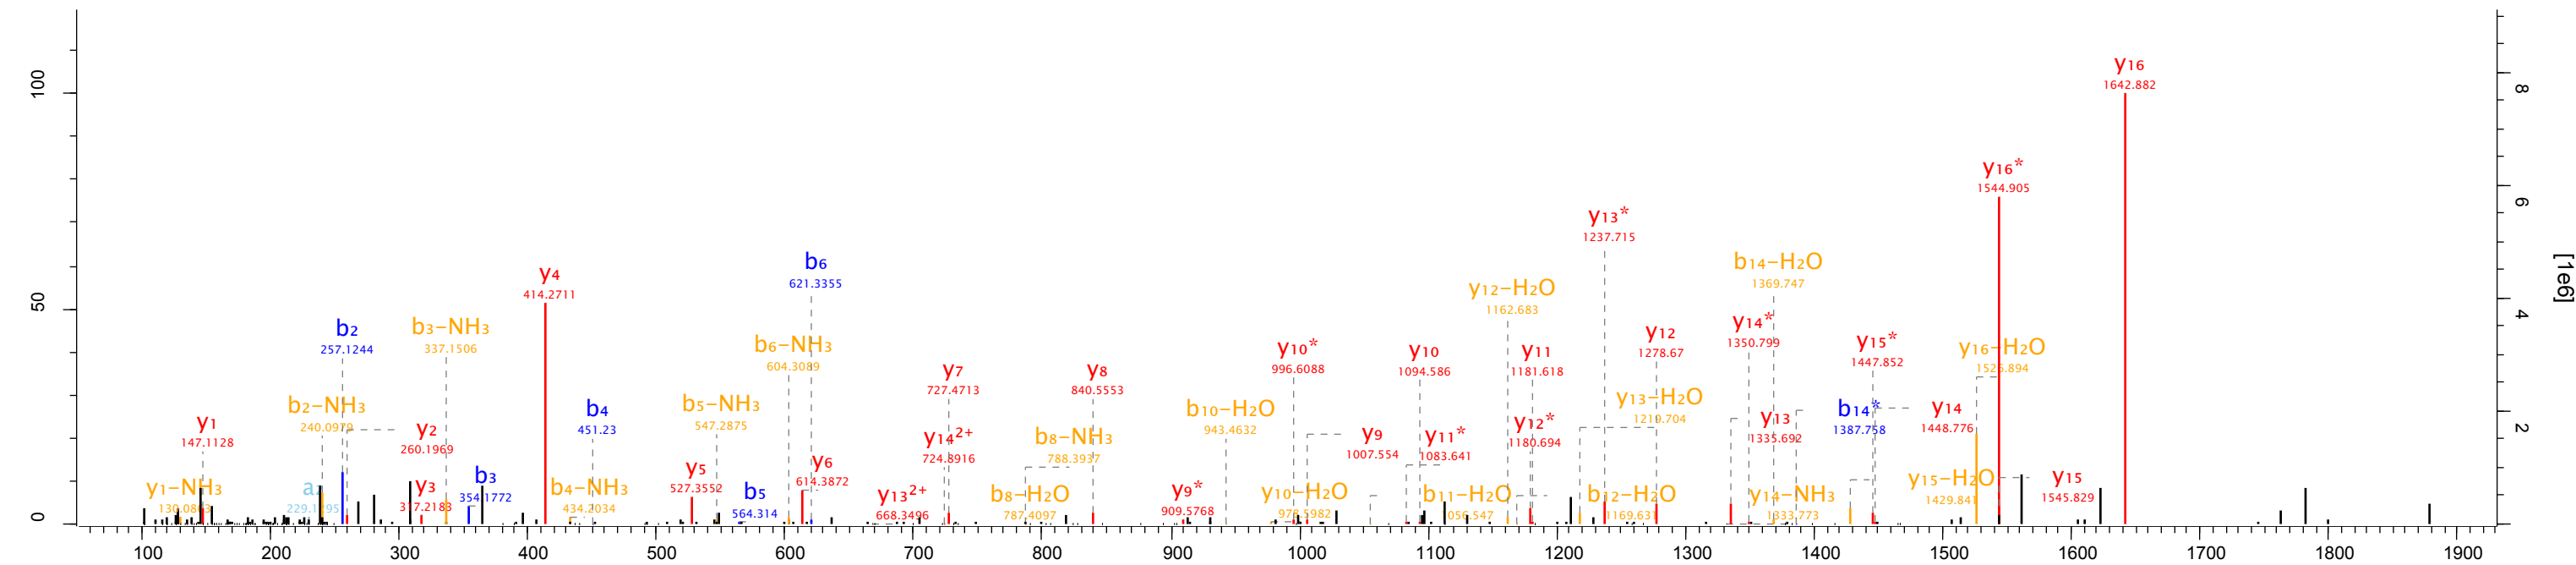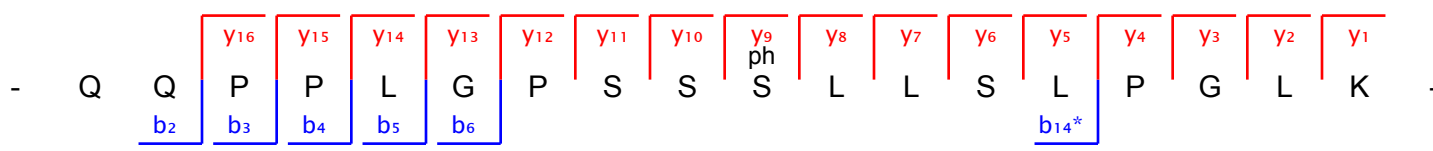

Raw file: 20150814\_A375SR\_Phospho\_BR2\_08  
 Scan: 2903 Method: FTMS; HCD Score: 126.56 m/z: 483.56 Gene names: SMARCC1

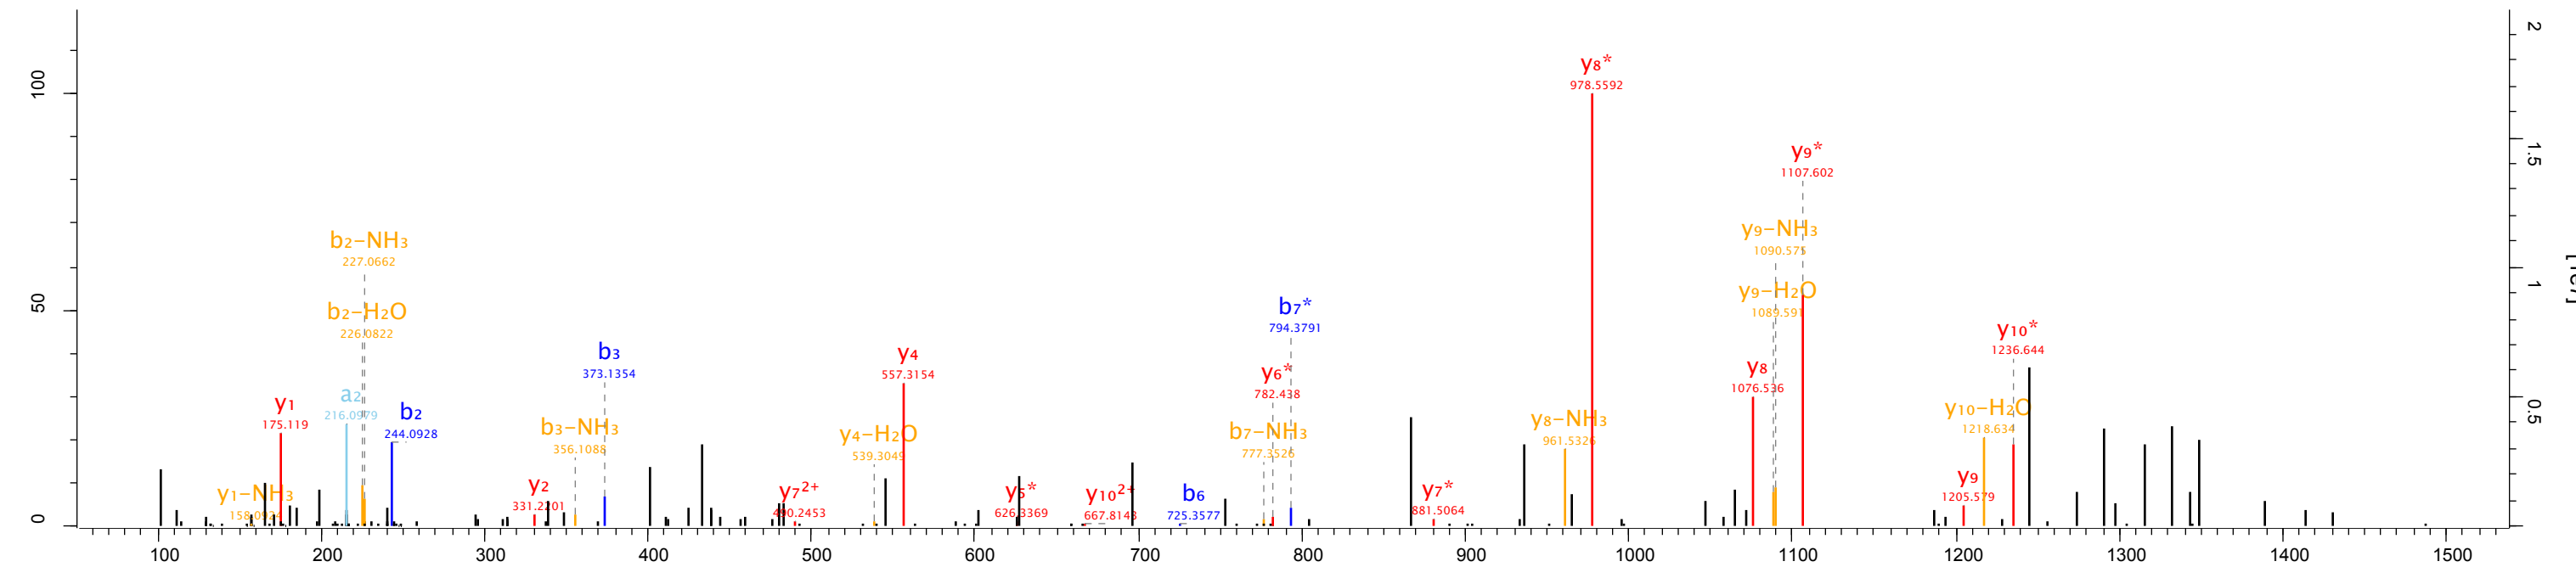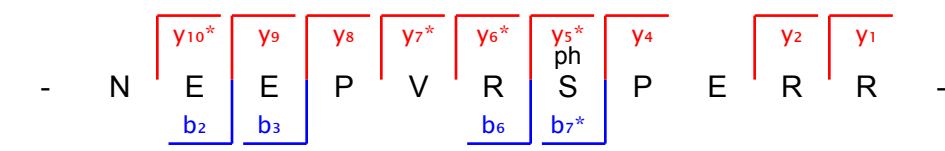

Raw file 20150814\_A375SR\_Phospho\_BR2\_08 Scan 3253 Method FTMS; HCD Score 45.31 m/z 365.86 Gene names PANK2

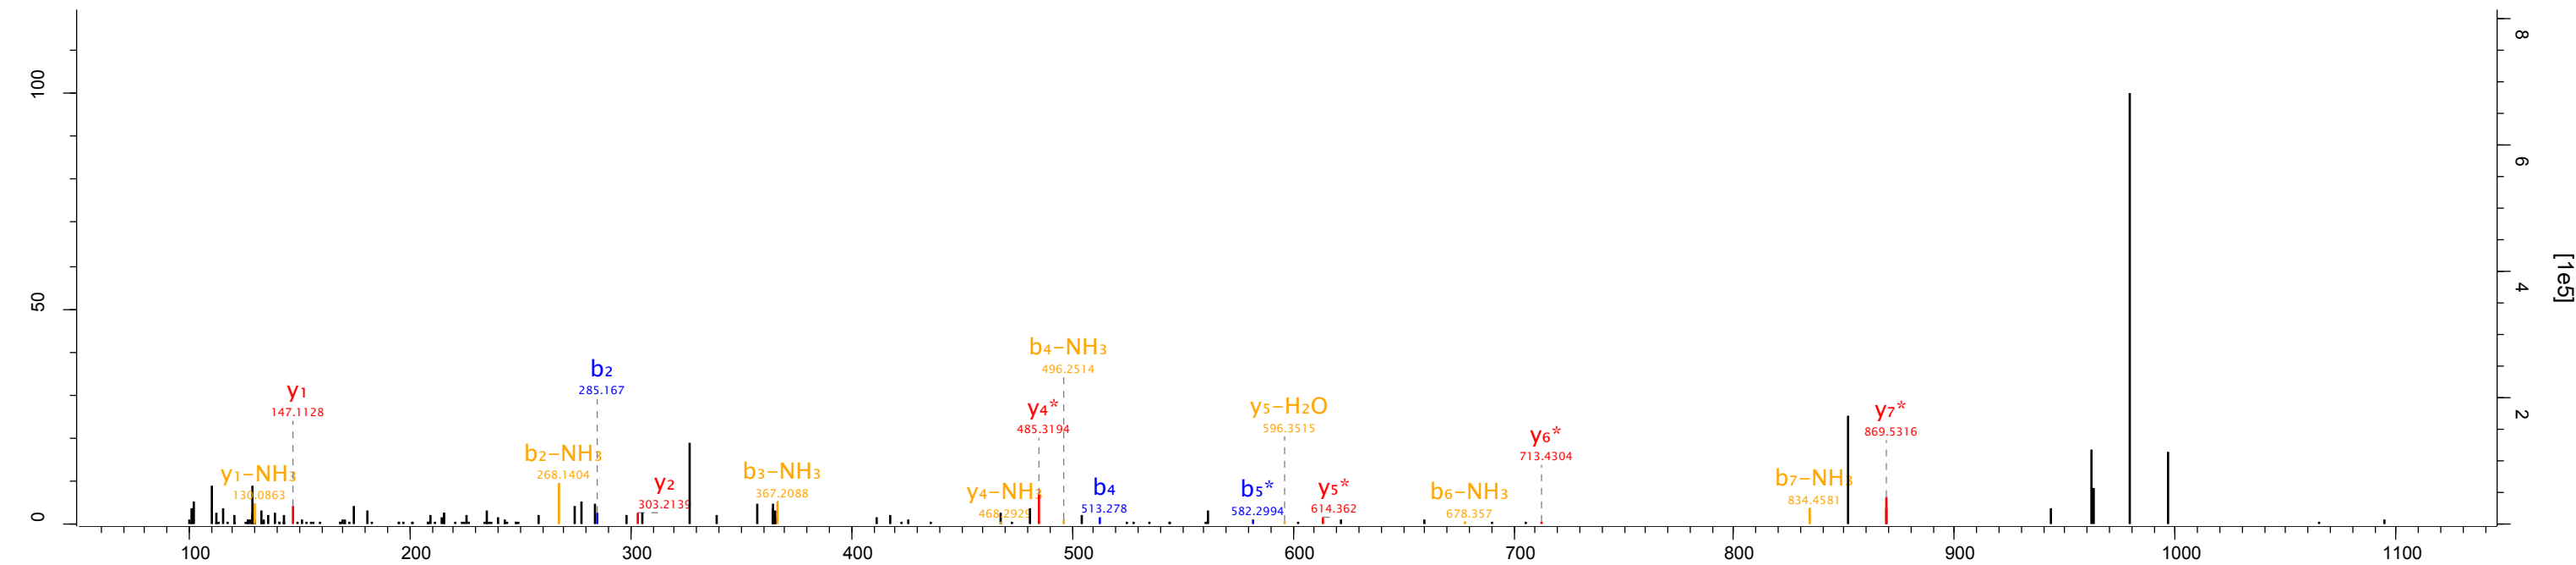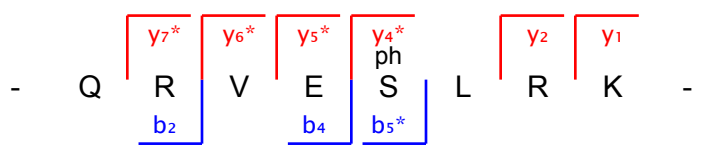



Raw file 20150814\_A375SR\_Phospho\_BR2\_08 Scan 3603 Method FTMS; HCD Score 116.87 m/z 638.79 Gene names DOCK4

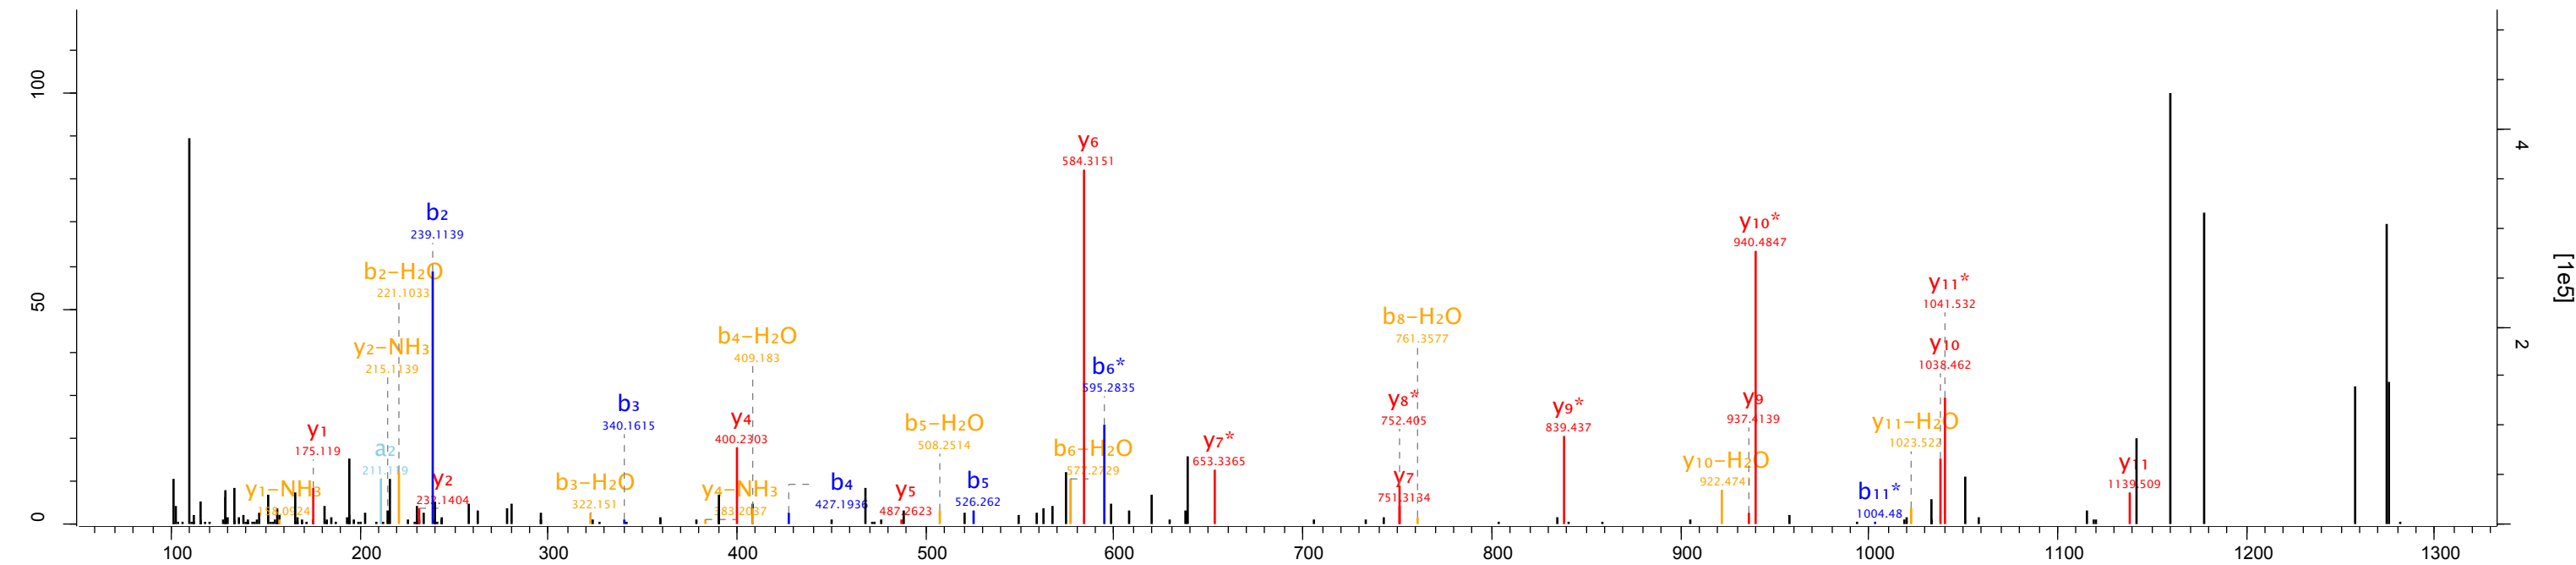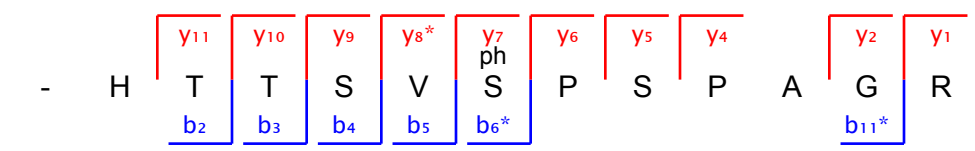

Raw file: 20150814\_A375SR\_Phospho\_BR2\_08  
 Scan: 4963 Method: FTMS; HCD Score: 113.18 m/z: 626.3 Gene names: SMARCC2

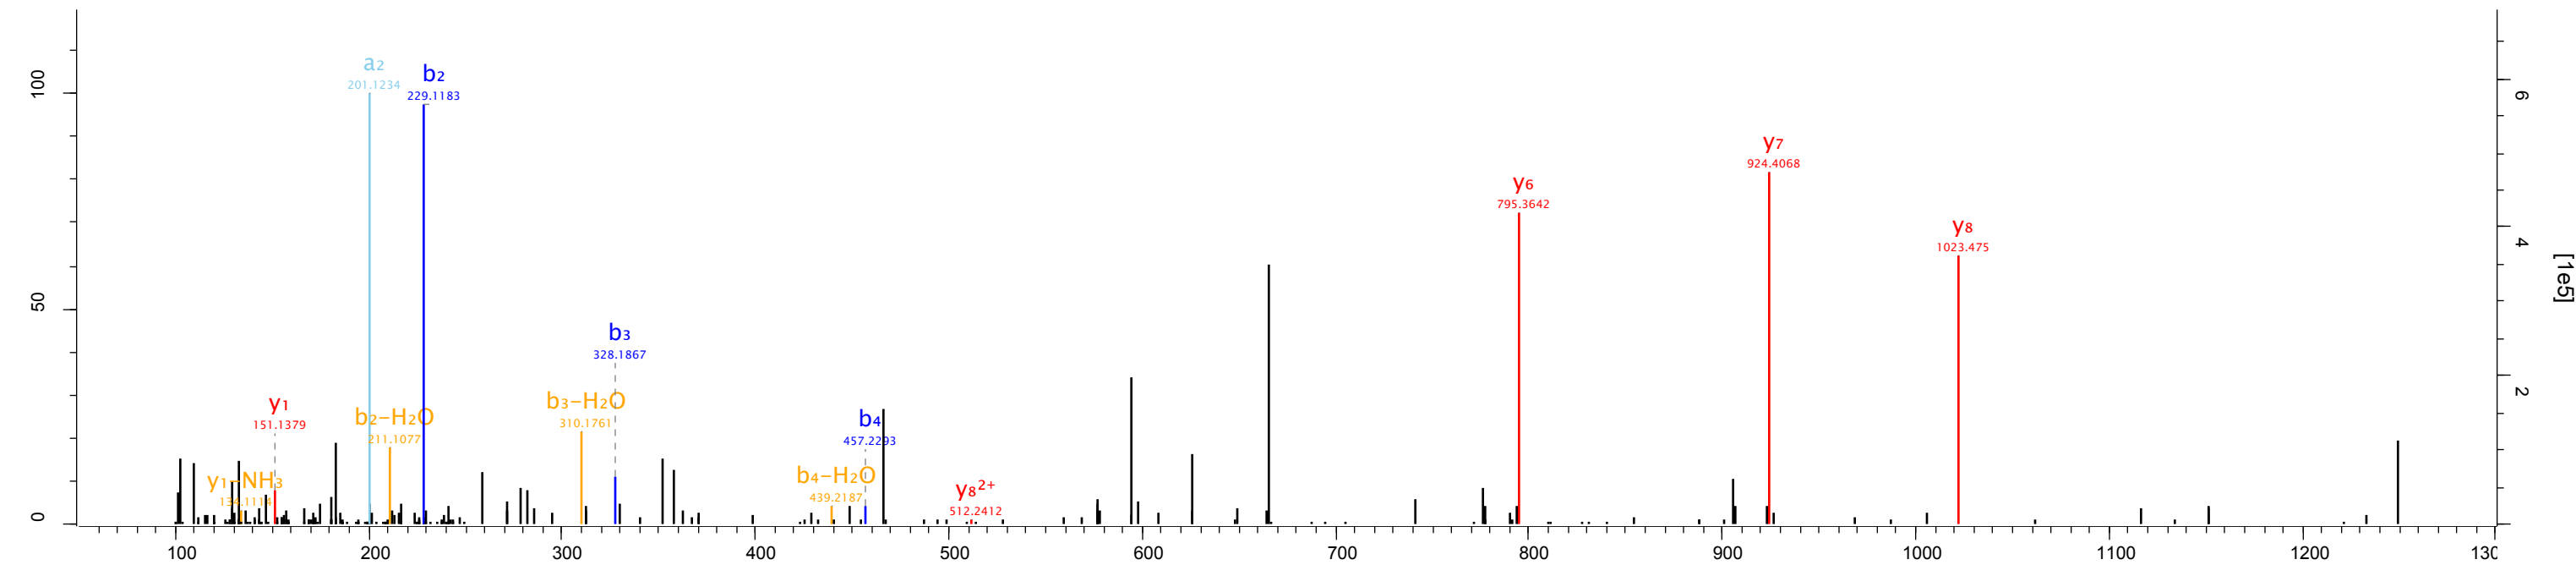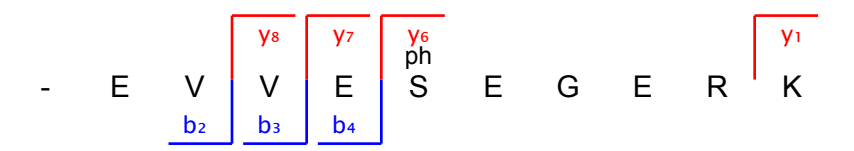

Raw file: 20150814\_A375SR\_Phospho\_BR2\_08  
 Scan: 5033 Method: FTMS; HCD Score: 121.48 m/z: 714.82 Gene names: MARCKS

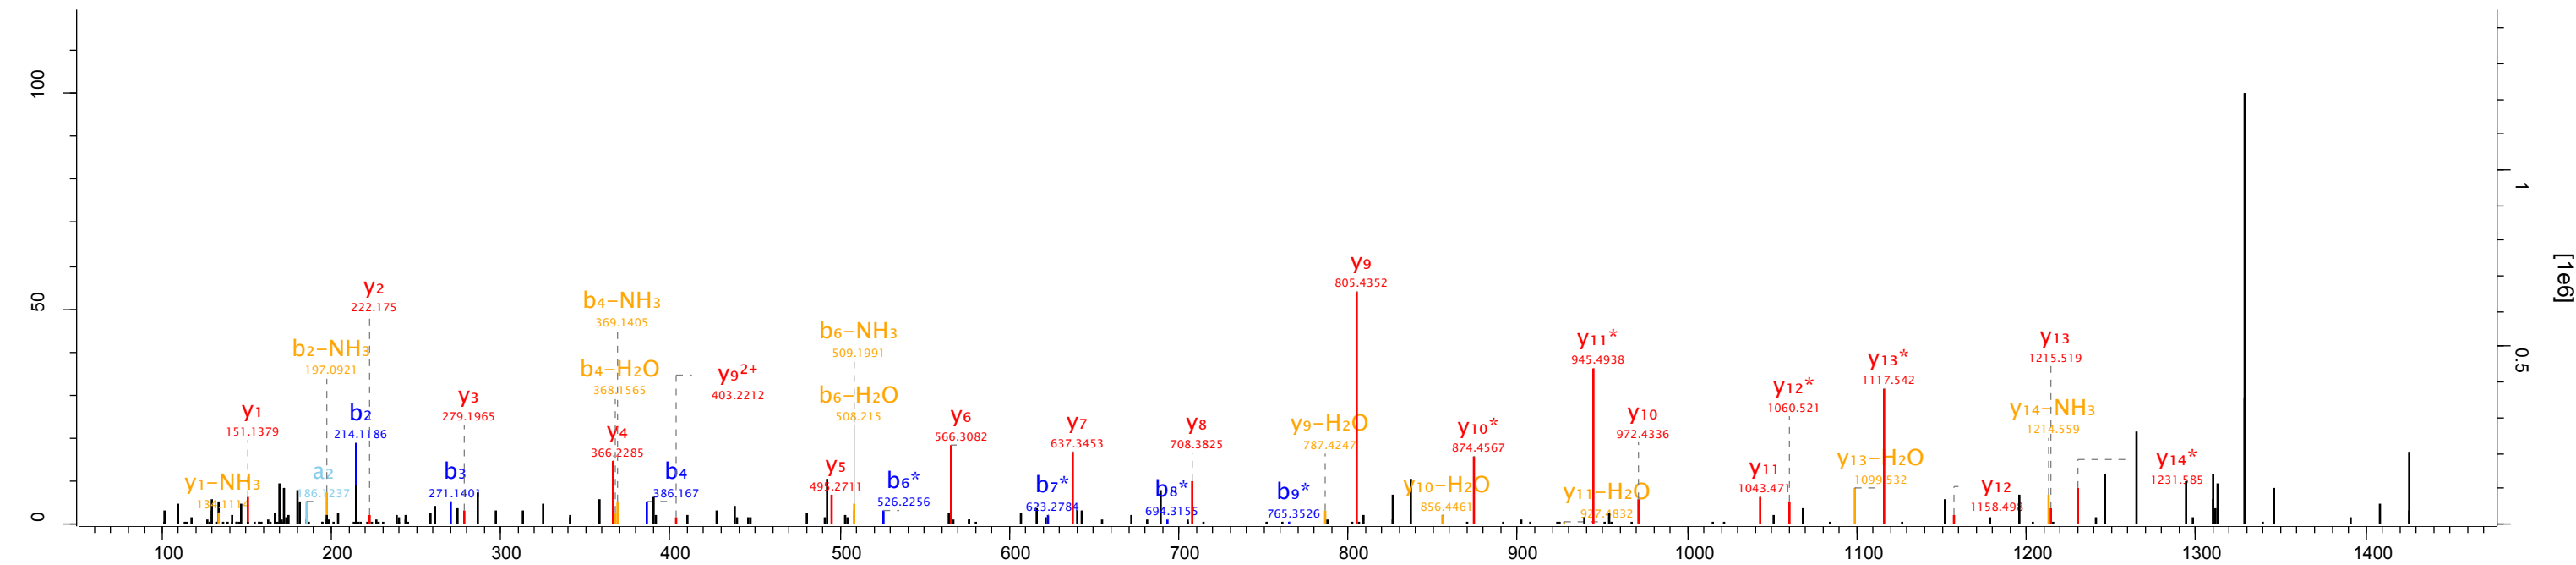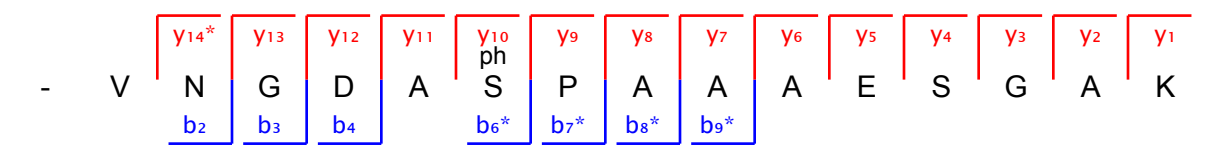

Raw file: 20150814\_A375SR\_Phospho\_BR2\_08  
 Scan: 6043 Method: FTMS; HCD Score: 100.45 m/z: 578.25 Gene names: SUPT5H

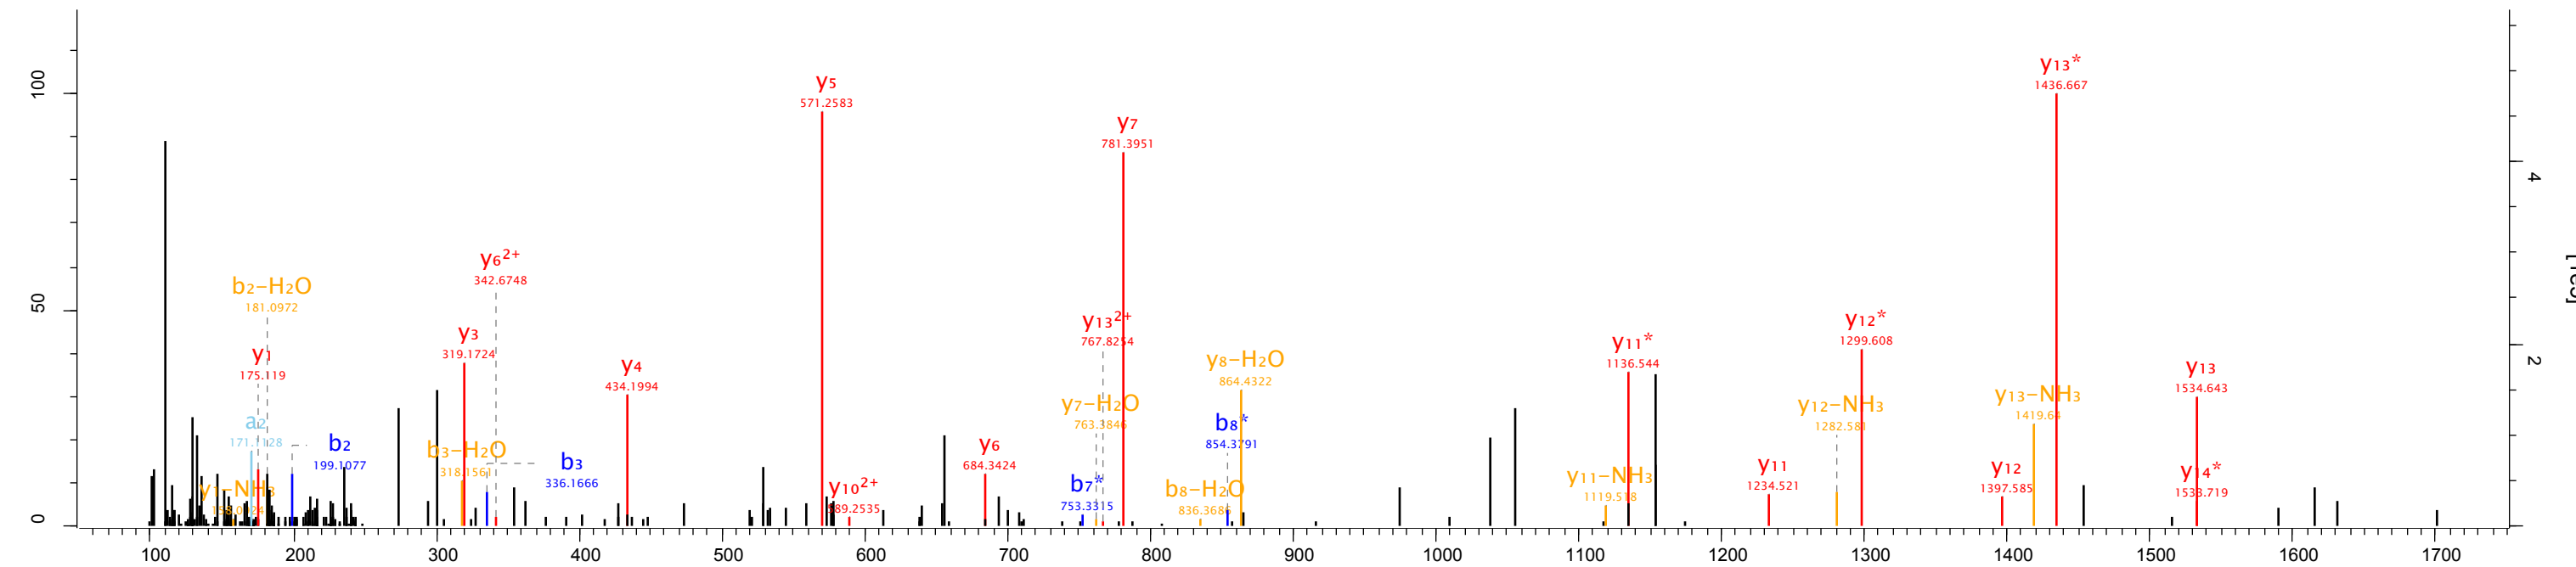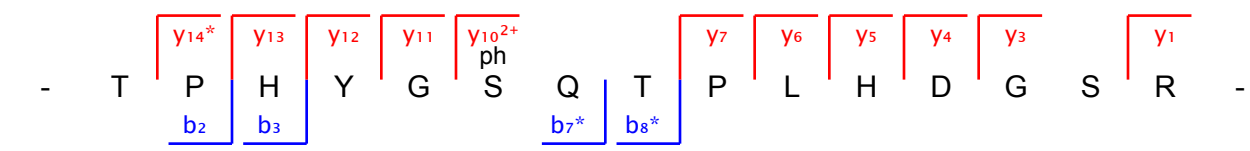

Raw file: 20150814\_A375SR\_Phospho\_BR2\_08  
 Scan: 6373 Method: FTMS; HCD Score: 73.27 m/z: 526.77 Gene names: PCF11

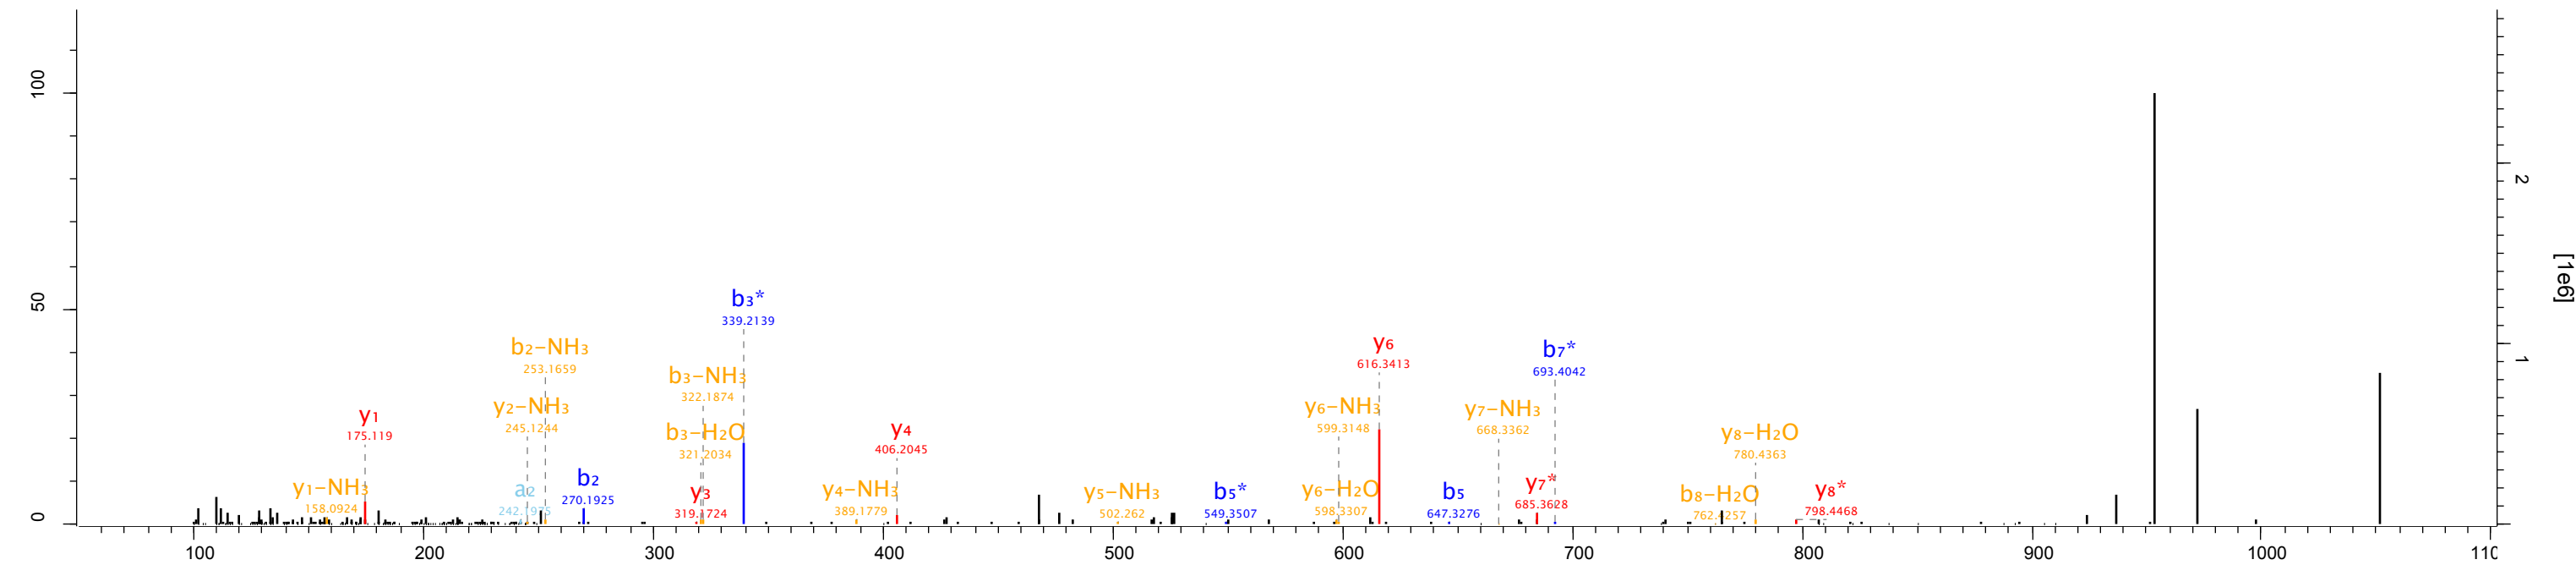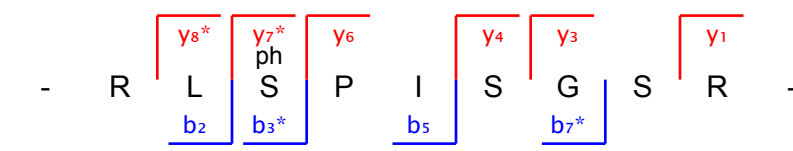

Raw file: 20150814\_A375SR\_Phospho\_BR2\_08  
 Scan: 6733 Method: FTMS; HCD Score: 87.12 m/z: 489.26 Gene names: LIMA1;TRMT1

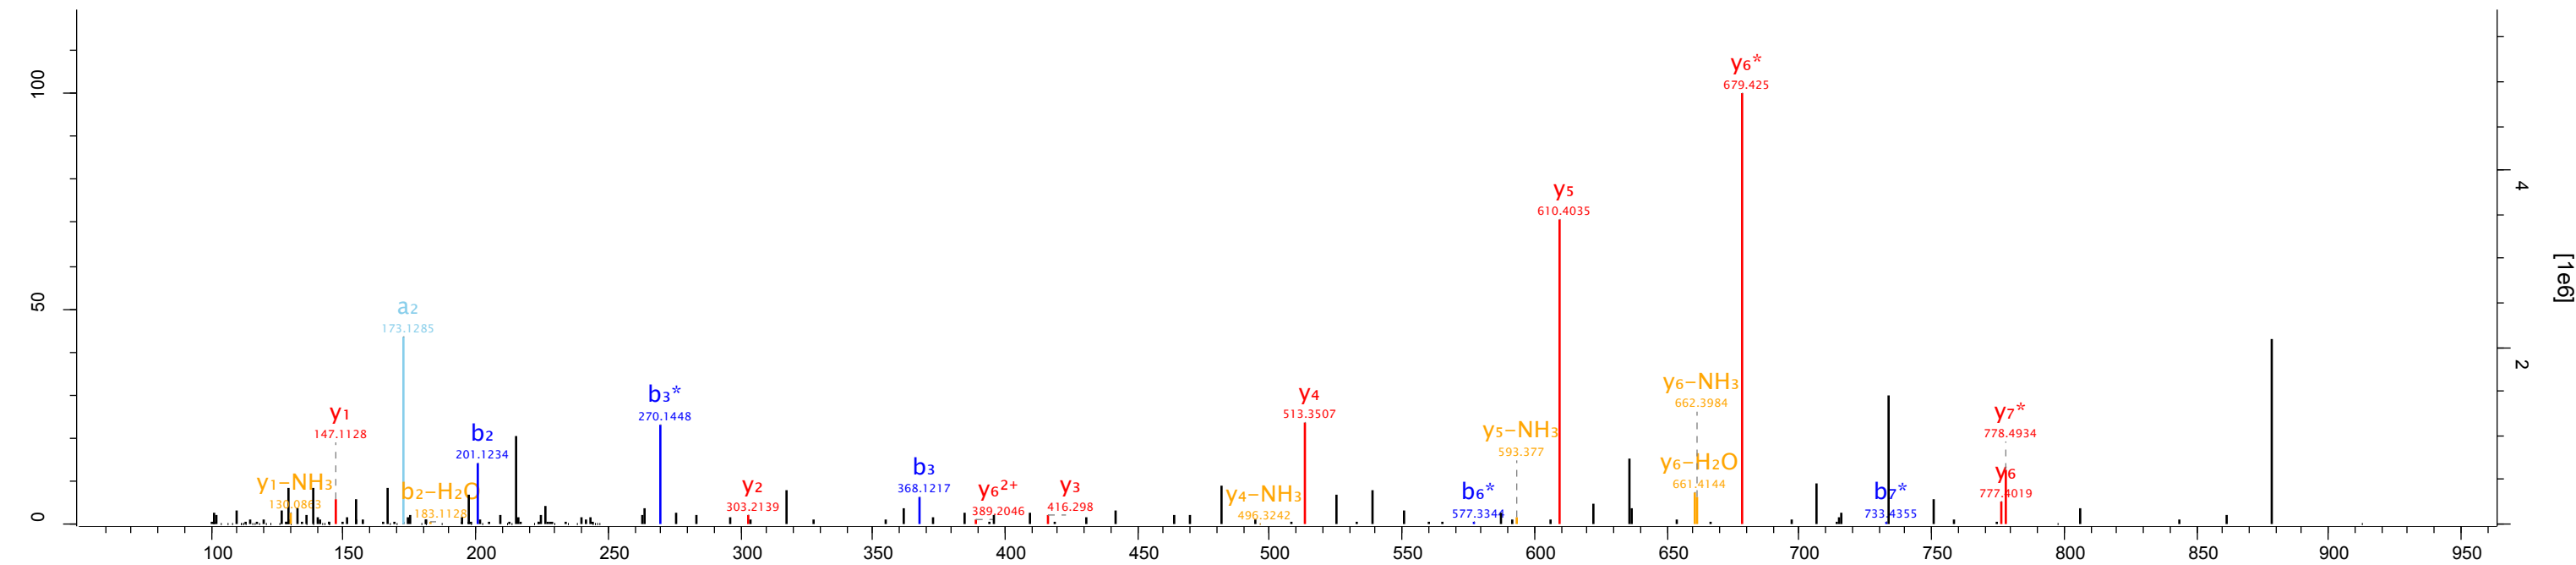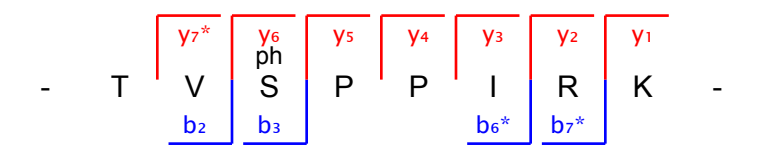

Raw file: 20150814\_A375SR\_Phospho\_BR2\_08  
 Scan: 6843 Method: FTMS; HCD Score: 70.56 m/z: 510.74 Gene names: NUMA1

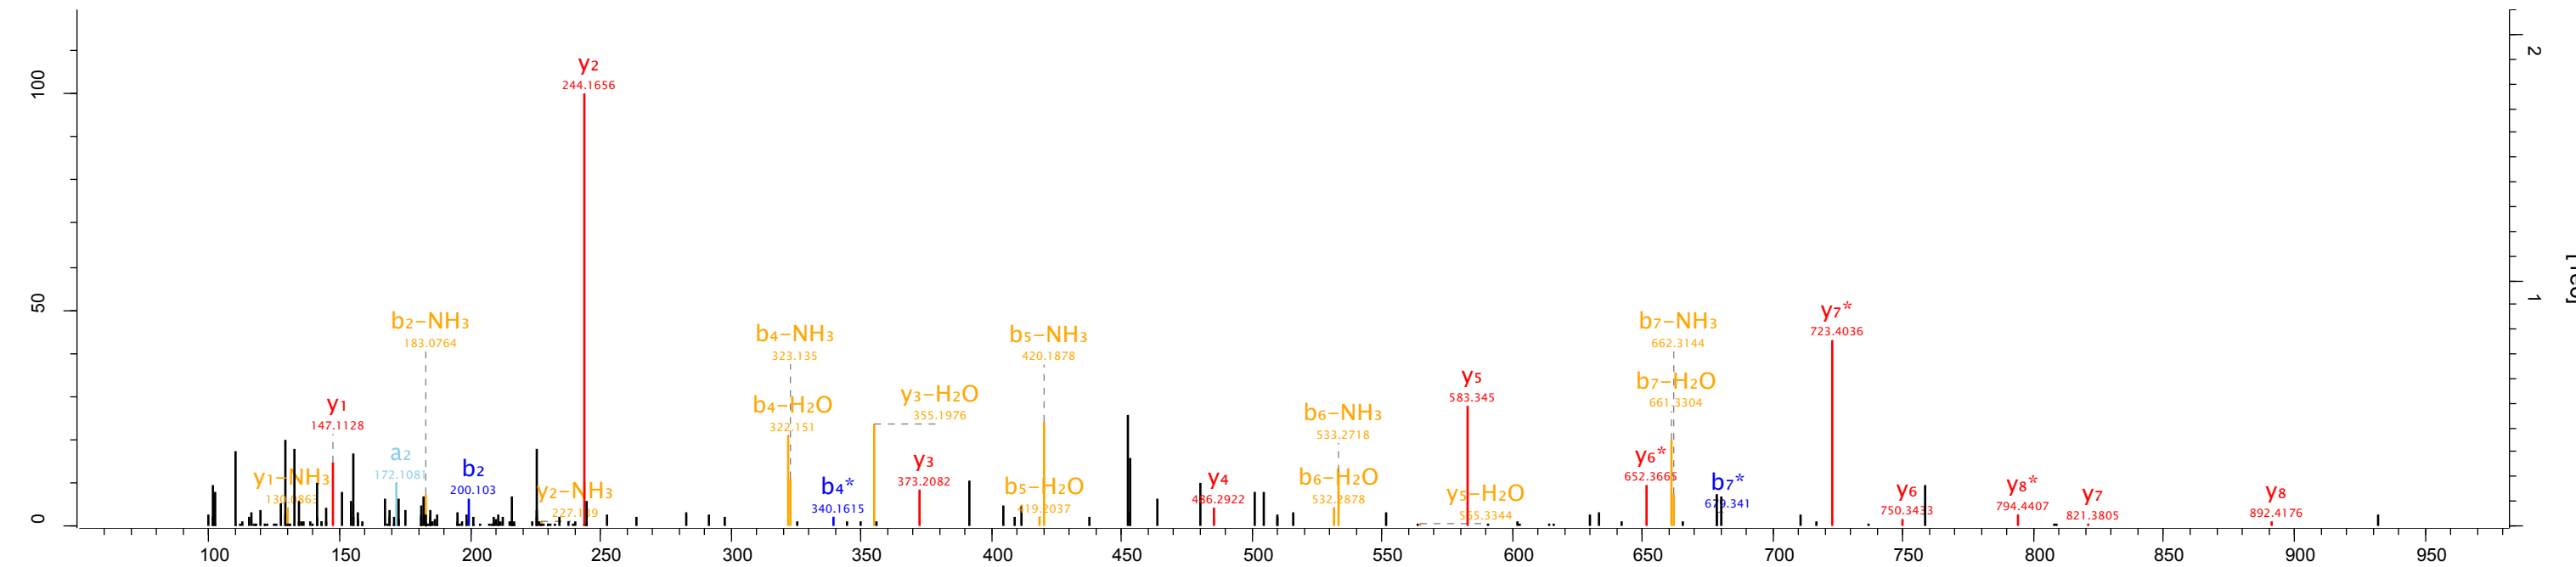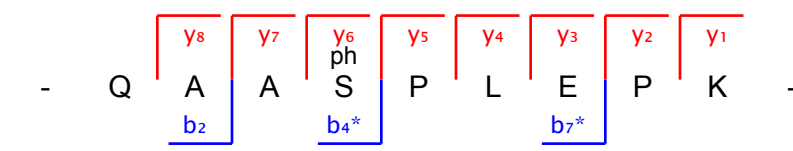

Raw file: 20150814\_A375SR\_Phospho\_BR2\_08  
 Scan: 7523 Method: FTMS; HCD Score: 86.74 m/z: 556.75 Gene names: NPAT

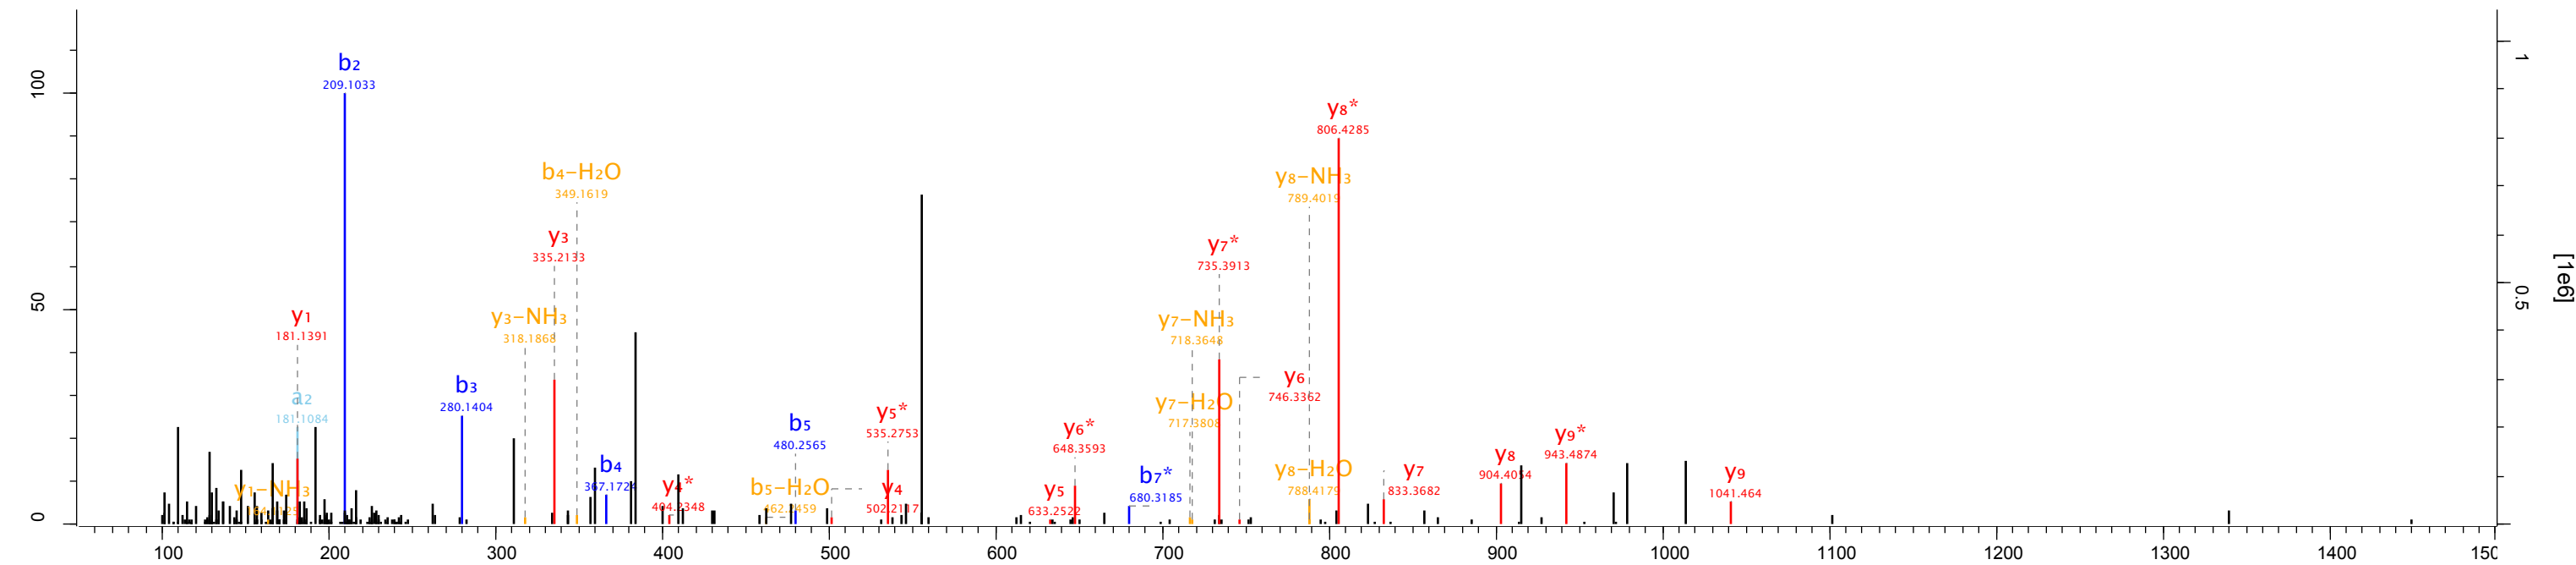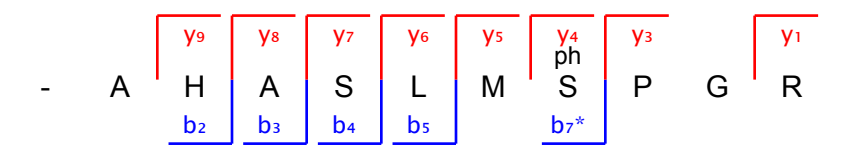



Raw file: 20150814\_A375SR\_Phospho\_BR2\_08  
 Scan: 8153 Method: FTMS; HCD Score: 98.57 m/z: 753.83 Gene names: RAVR1

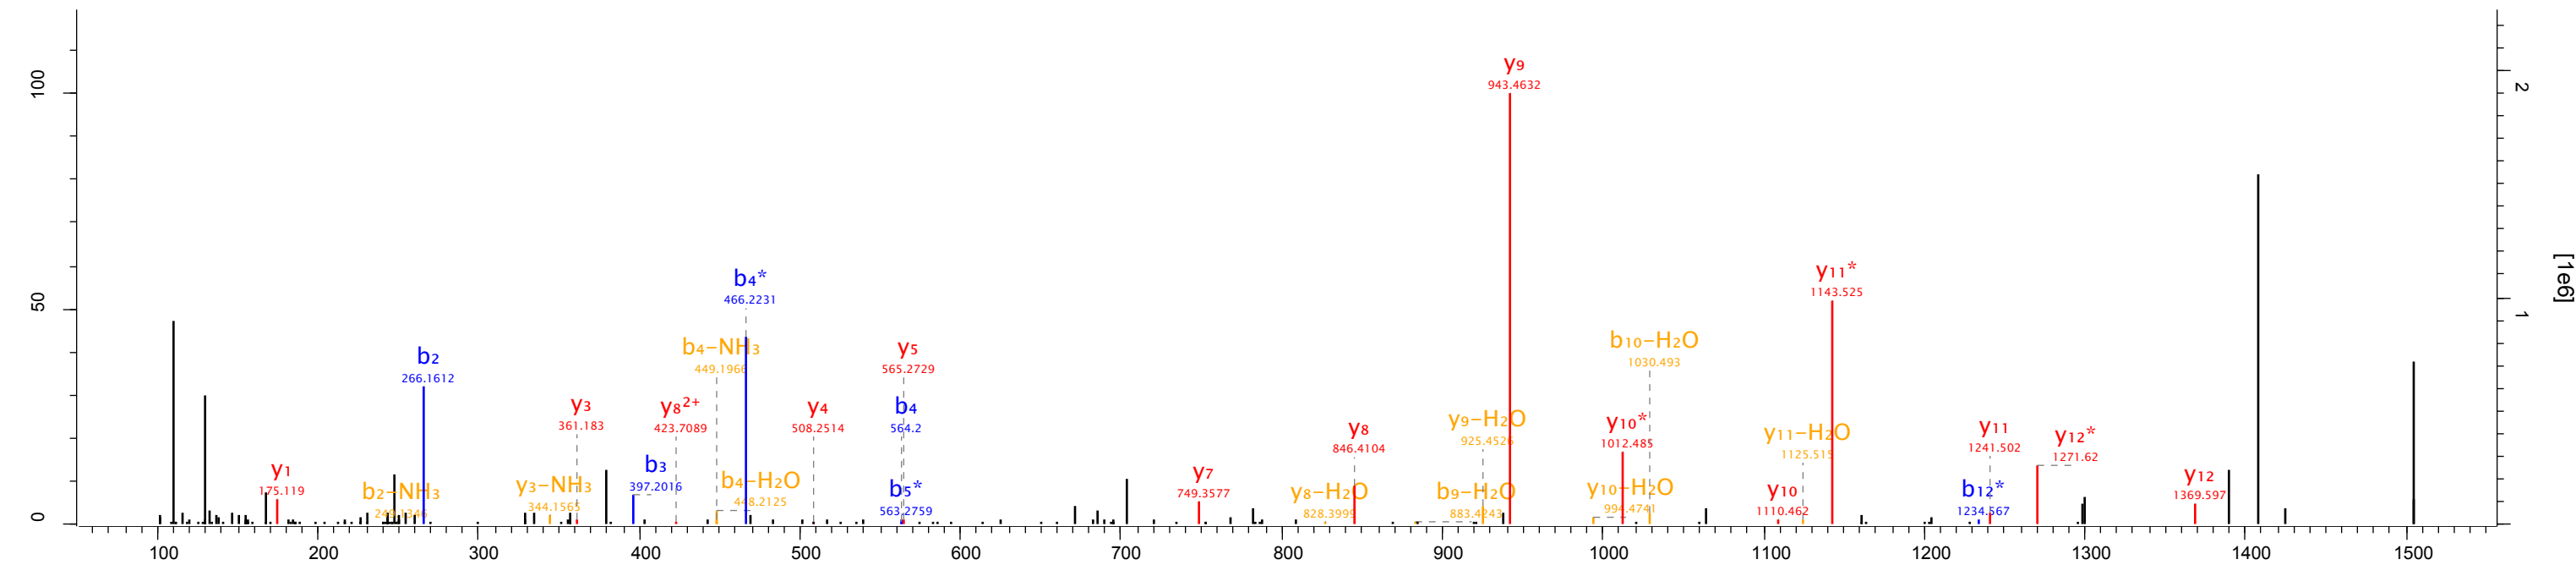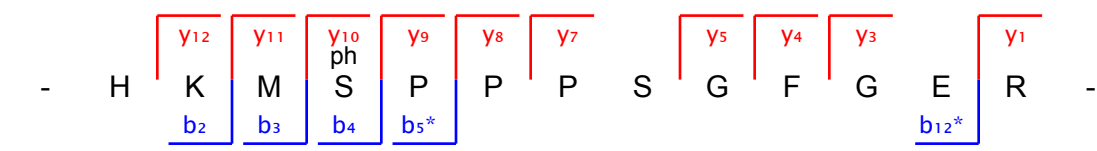

Raw file 20150814\_A375SR\_Phospho\_BR2\_09 Scan 10053 Method FTMS; HCD Score 102.21 m/z 667.36 Gene names ELF1

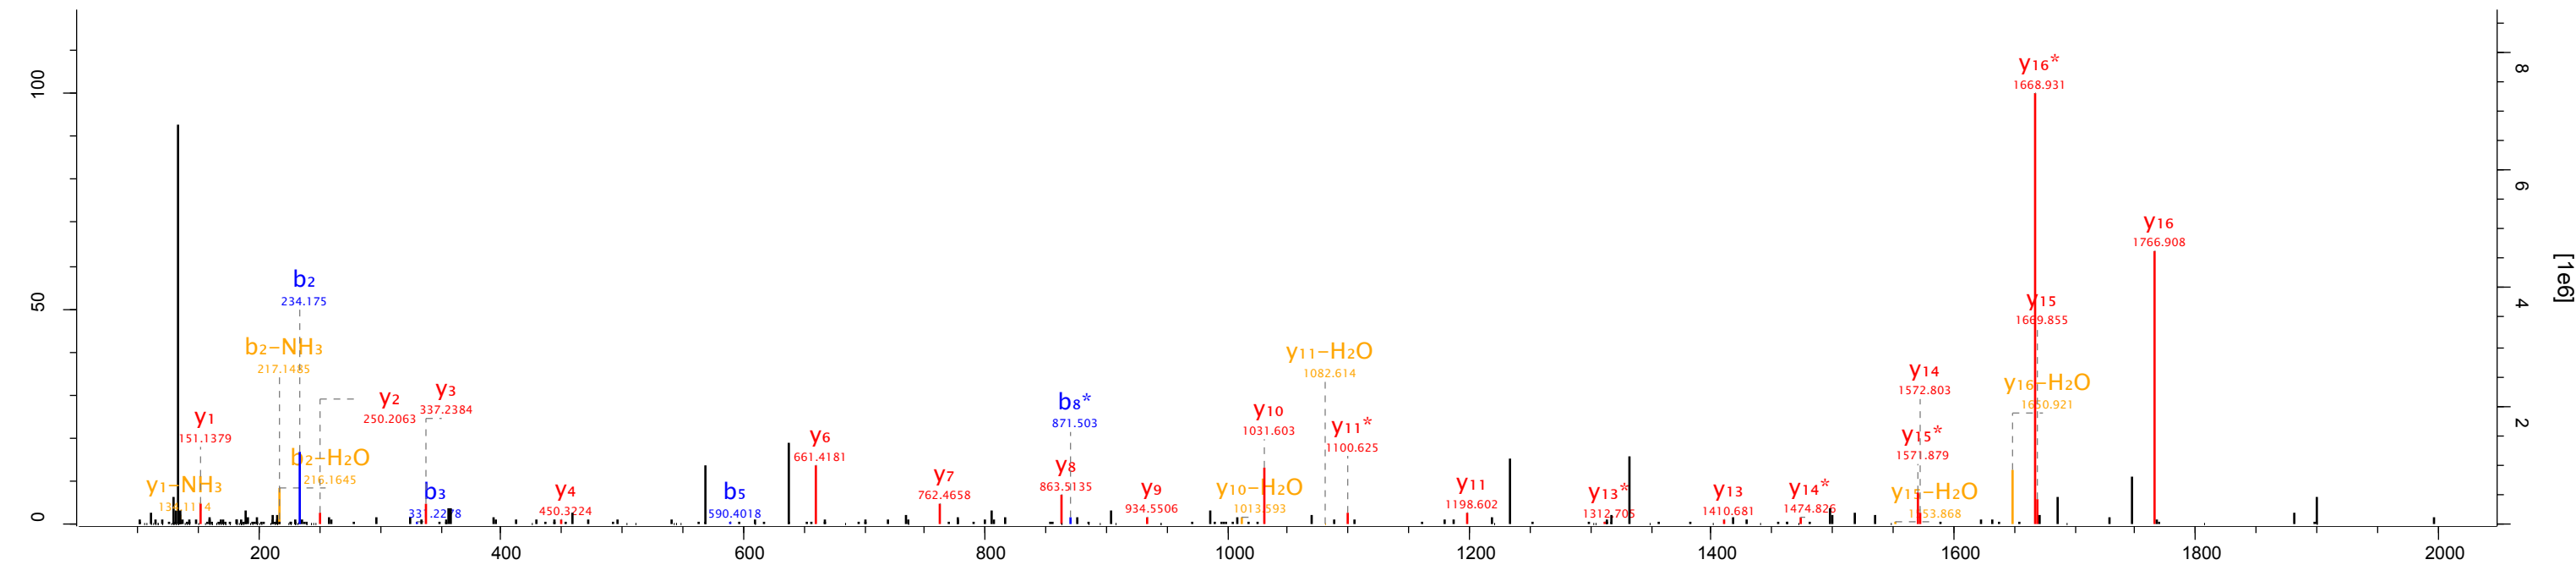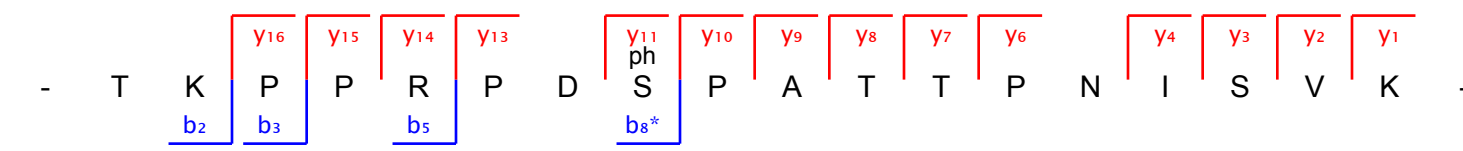

Raw file 20150814\_A375SR\_Phospho\_BR2\_09 Scan 10613 Method FTMS; HCD Score 111.46 m/z 421.19 Gene names AIFM1

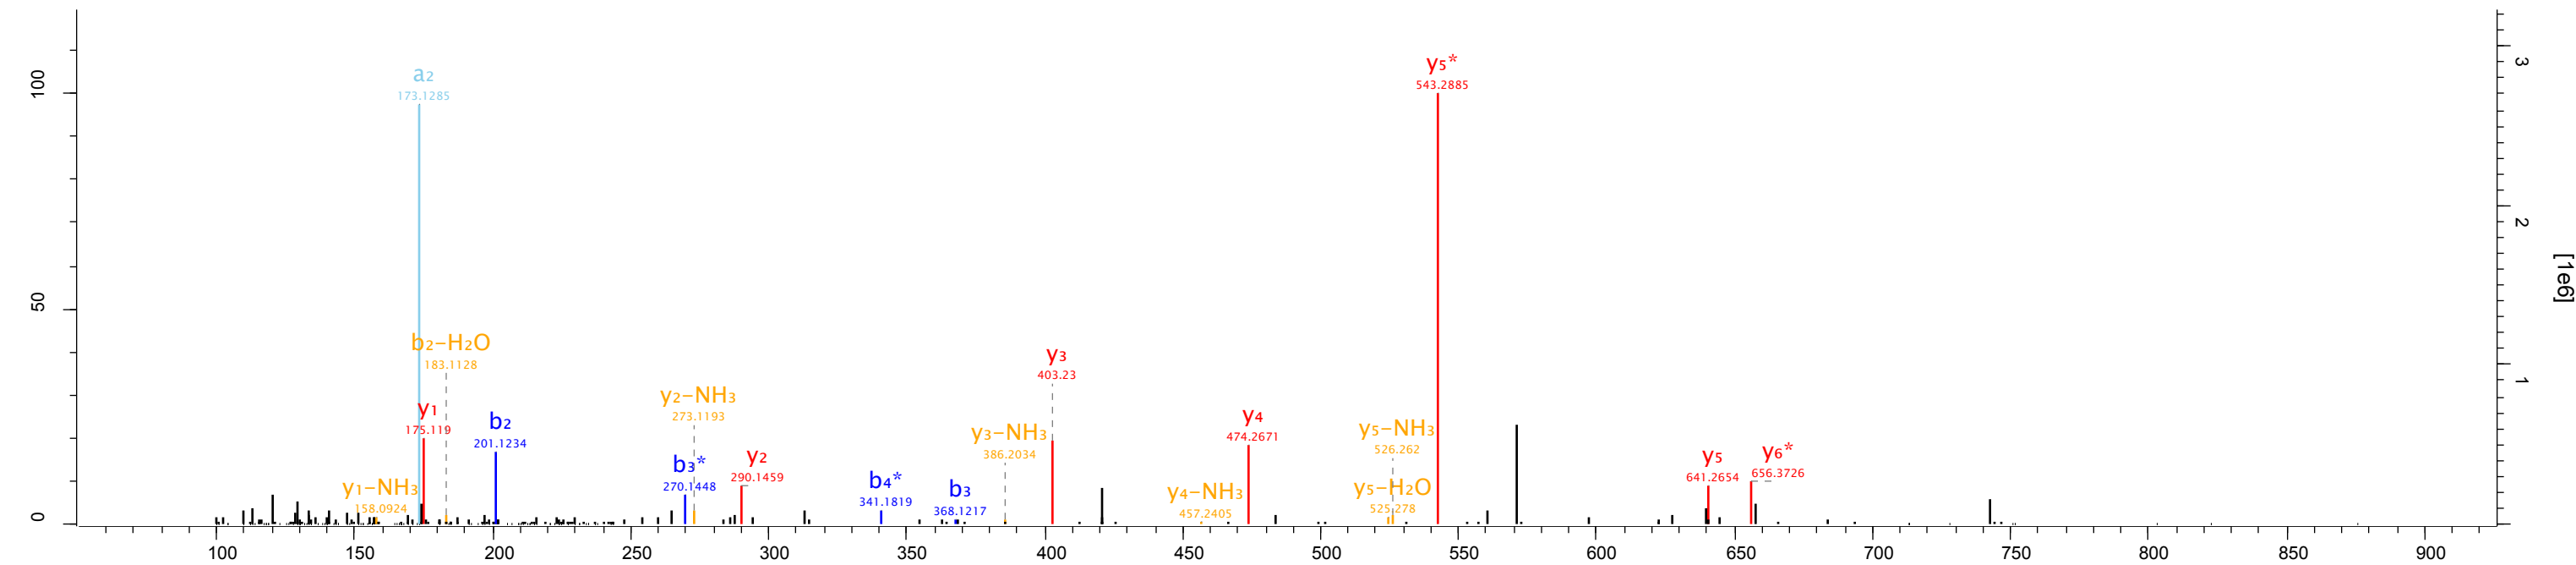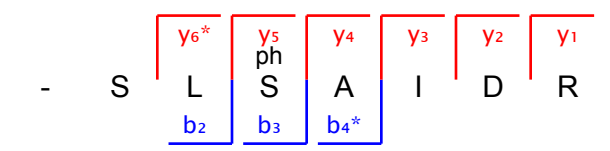

Raw file: 20150814\_A375SR\_Phospho\_BR2\_09  
 Scan: 10913 Method: FTMS; HCD Score: 180.88 m/z: 799.36 Gene names: POLR2A

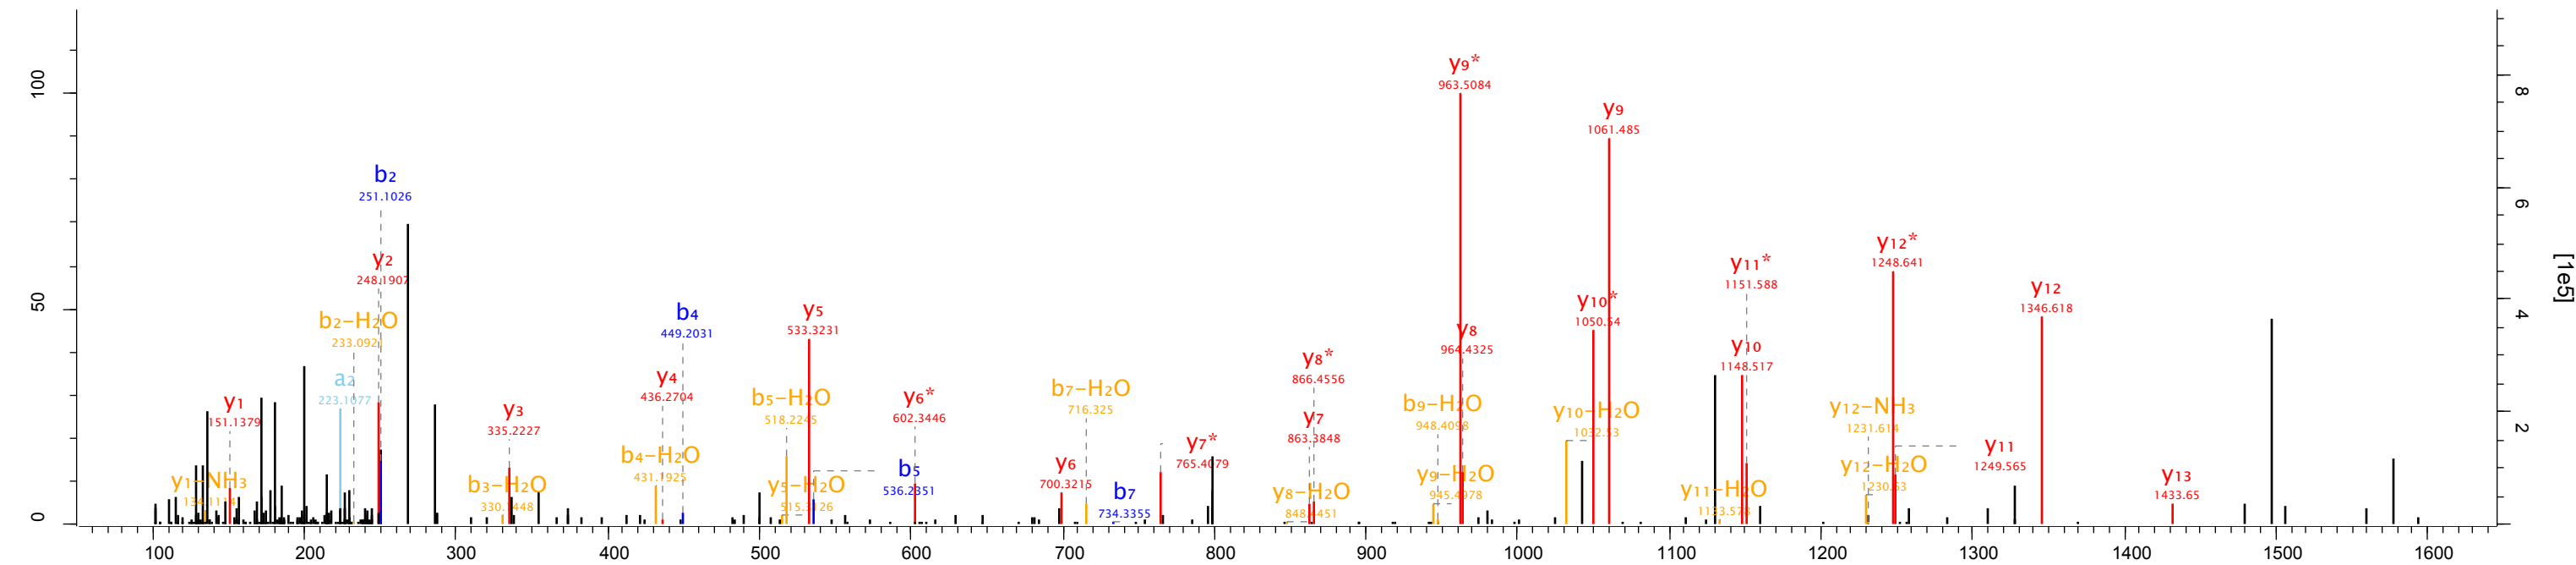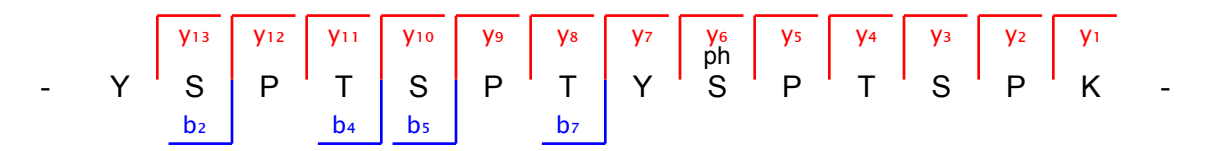

Raw file: 20150814\_A375SR\_Phospho\_BR2\_09  
 Scan: 11463 Method: FTMS; HCD Score: 153.19 m/z: 607.6 Gene names: AMOTL2

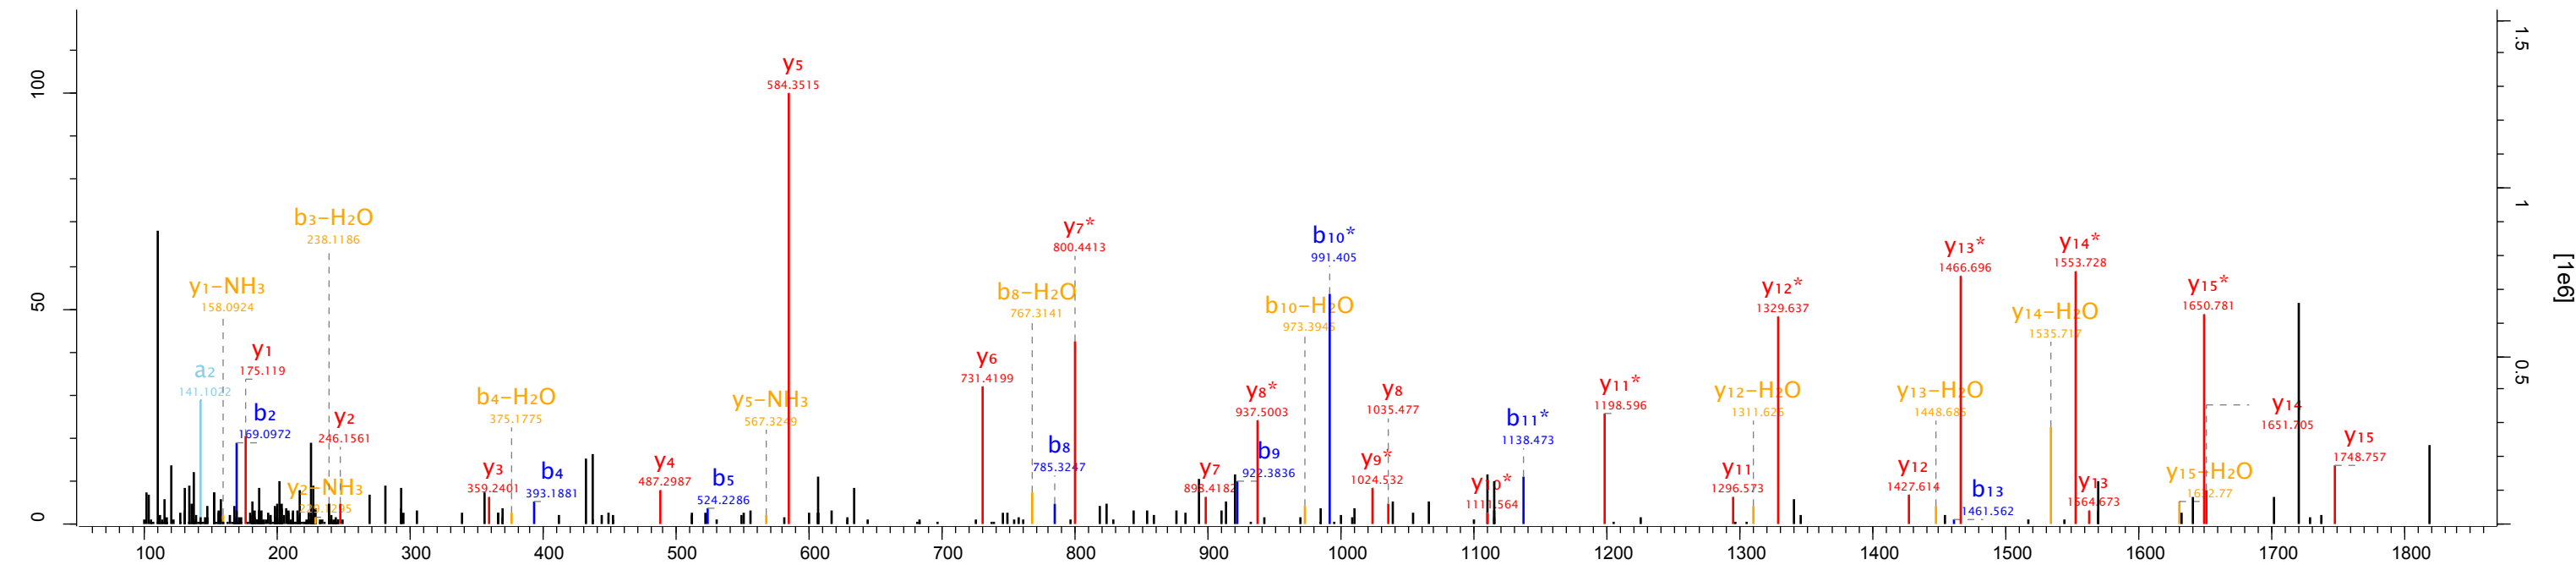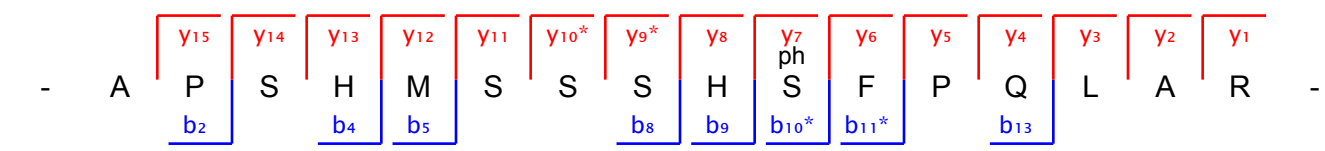

Raw file 20150814\_A375SR\_Phospho\_BR2\_09 Scan 11843 Method FTMS; HCD Score 114.96 m/z 560.61 Gene names MTMR6

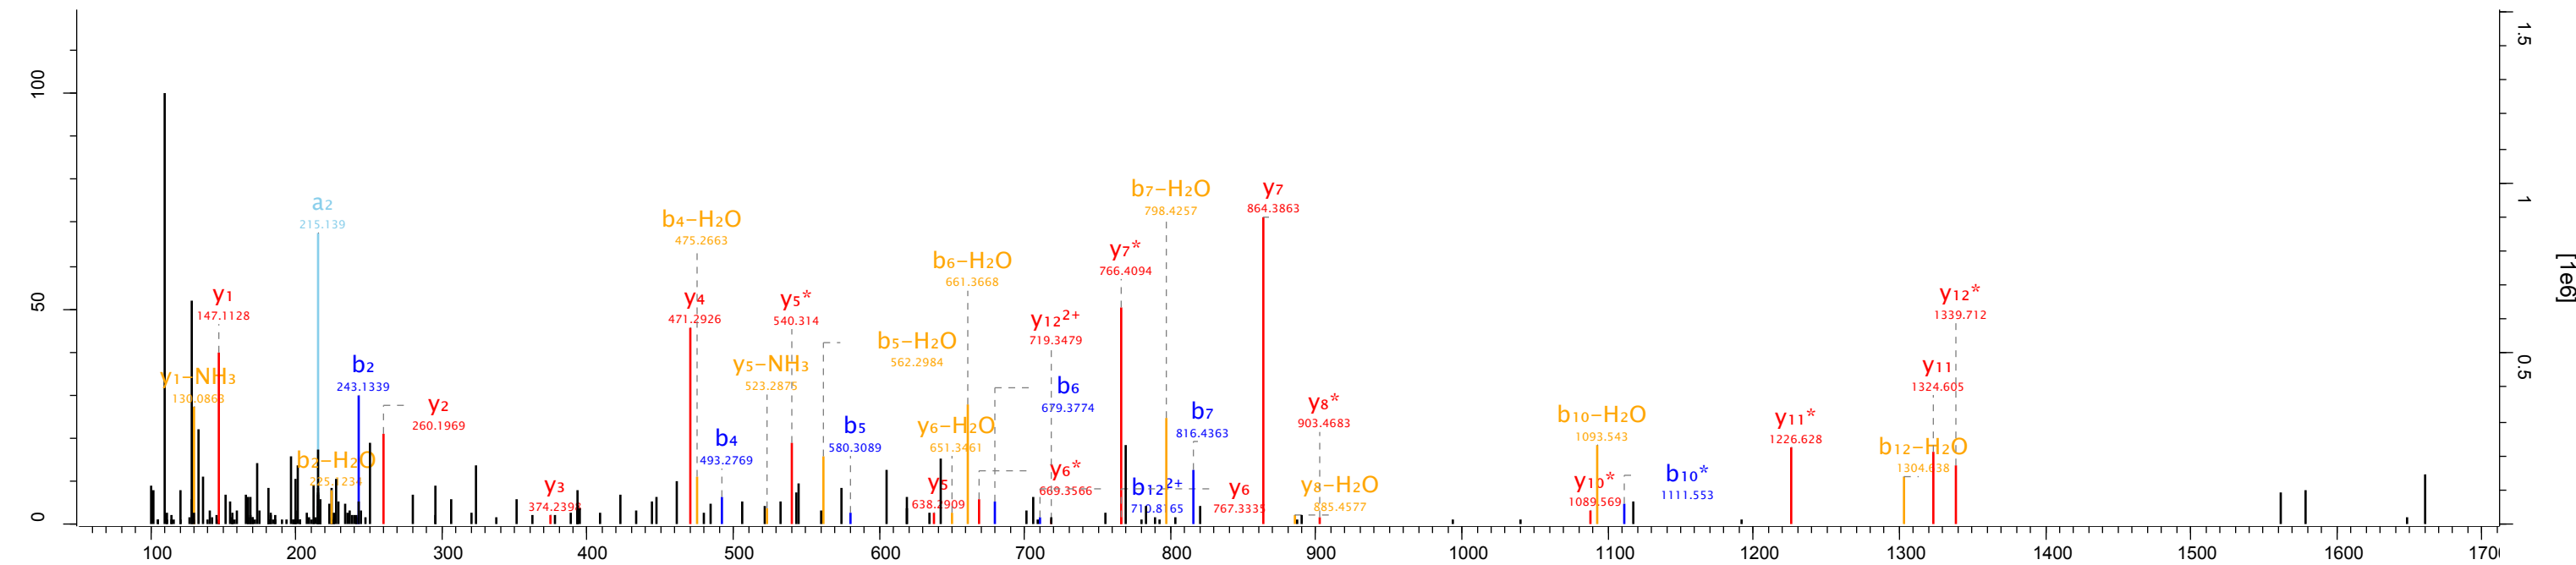

- E L L H S V H P E S P N L K -

Fragmentation scheme showing b and y ions for the peptide sequence: E L L H S V H P E S P N L K.

Red boxes indicate y ions: y12\*, y11, y10\*, y8\*, y7, y6, y5-ph, y4, y3, y2, y1.

Blue boxes indicate b ions: b2, b4, b5, b6, b7, b10\*, b12<sup>2+</sup>.

Raw file 20150814\_A375SR\_Phospho\_BR2\_09 Scan 12223 Method FTMS; HCD Score 146.04 m/z 746.34 Gene names KMT2D

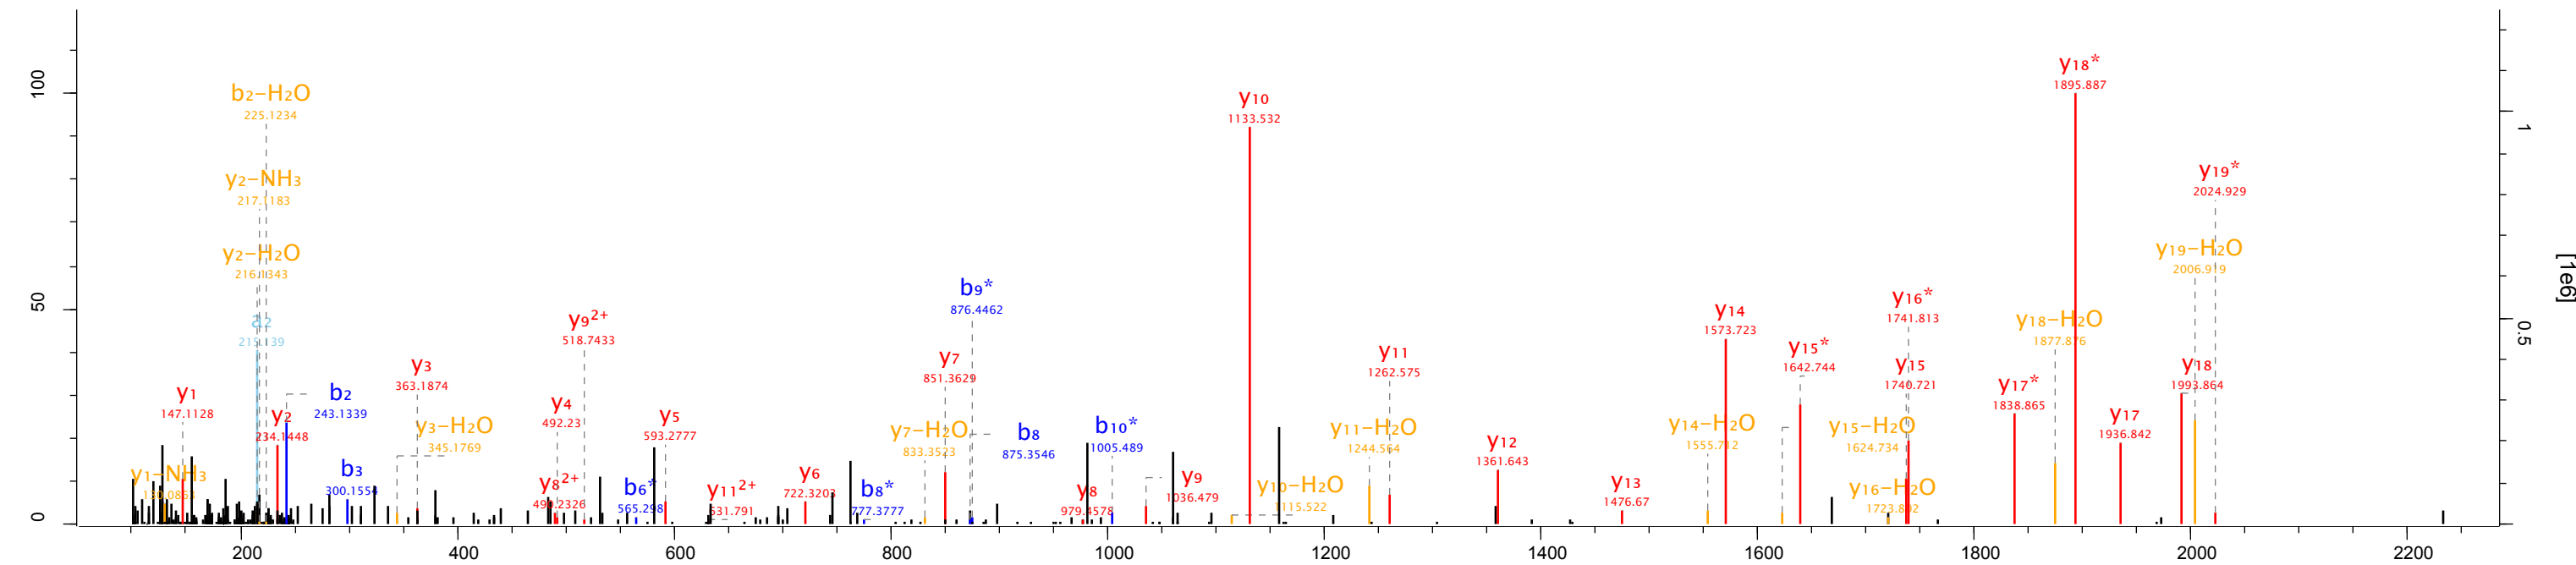

- L E G P V S P D V E P G K E E T E E S K -

b<sub>2</sub>
b<sub>3</sub>
b<sub>6</sub><sup>\*</sup>
b<sub>8</sub>
b<sub>9</sub><sup>\*</sup>
b<sub>10</sub><sup>\*</sup>
y<sub>1</sub>
y<sub>2</sub>
y<sub>3</sub>
y<sub>4</sub>
y<sub>5</sub>
y<sub>6</sub>
y<sub>7</sub>
y<sub>8</sub>
y<sub>9</sub>
y<sub>10</sub>
y<sub>11</sub>
y<sub>12</sub>
y<sub>13</sub>
y<sub>14</sub>
y<sub>15</sub><sup>ph</sup>
y<sub>16</sub><sup>\*</sup>
y<sub>17</sub>
y<sub>18</sub>
y<sub>19</sub><sup>\*</sup>

Raw file: 20150814\_A375SR\_Phospho\_BR2\_09  
 Scan: 12643  
 Method: FTMS; HCD  
 Score: 106.2  
 m/z: 399.21  
 Gene names: NPM1

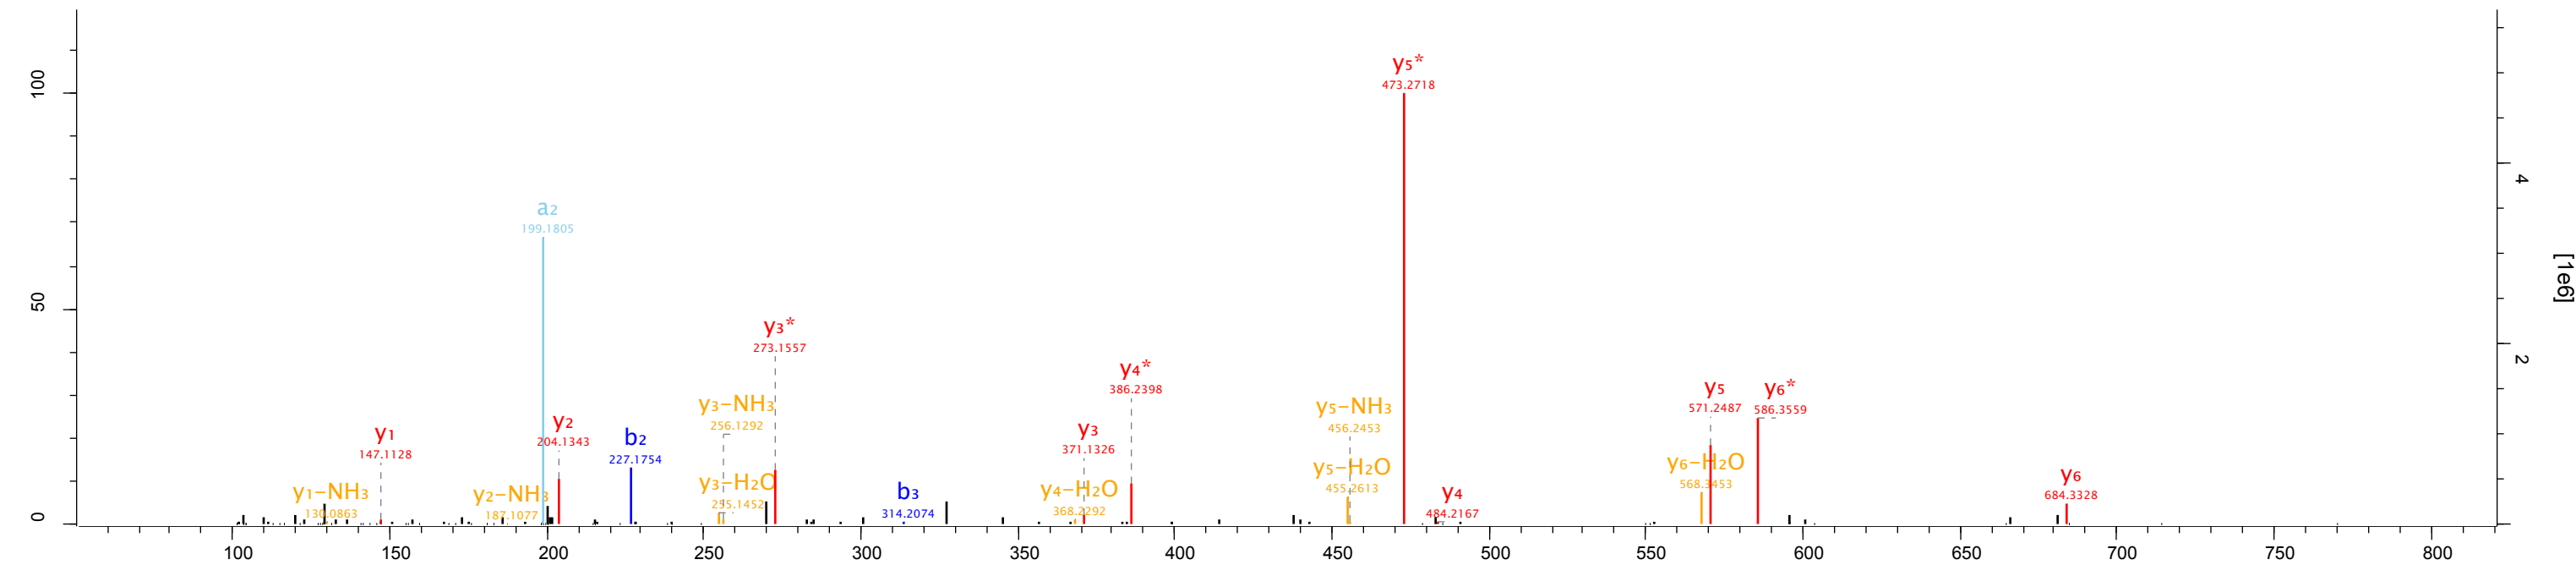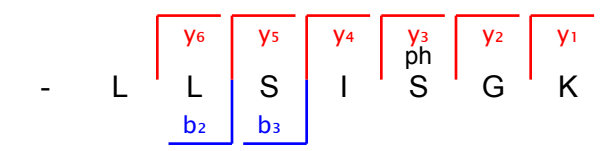



Raw file 20150814\_A375SR\_Phospho\_BR2\_09 Scan 13103 Method FTMS; HCD Score 47.23 m/z 547.59 Gene names ACIN1

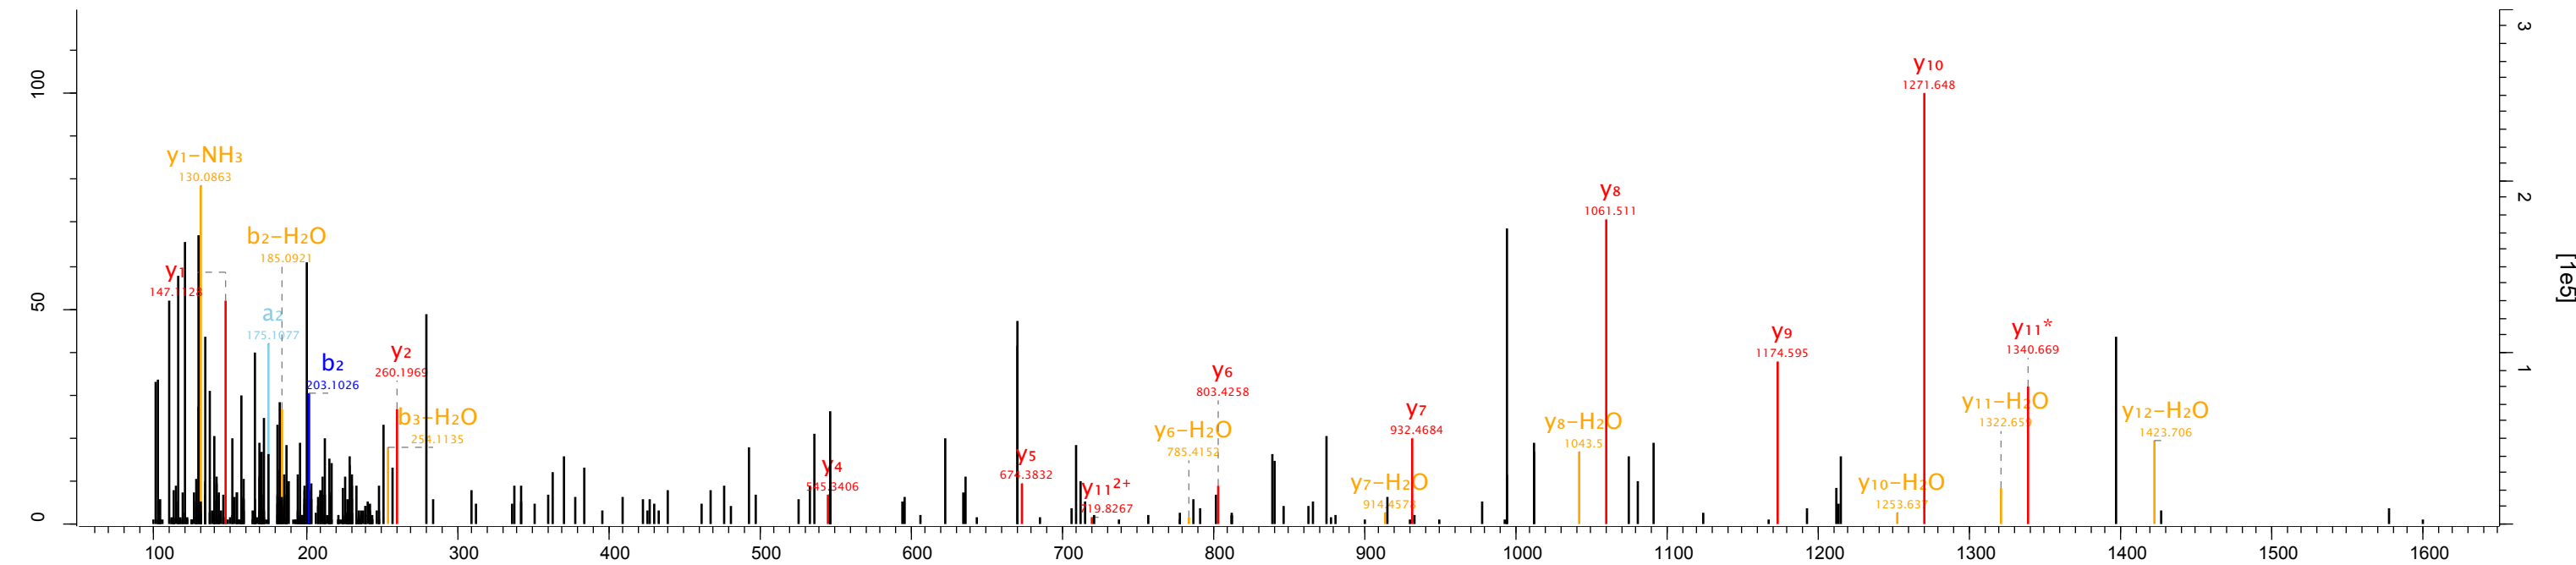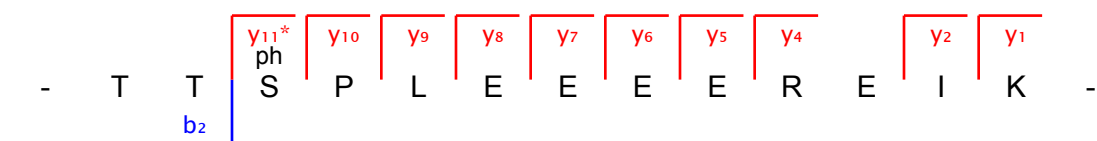

Raw file 20150814\_A375SR\_Phospho\_BR2\_09 Scan 13303 Method FTMS; HCD Score 194.33 m/z 937.45 Gene names ZDHHC5

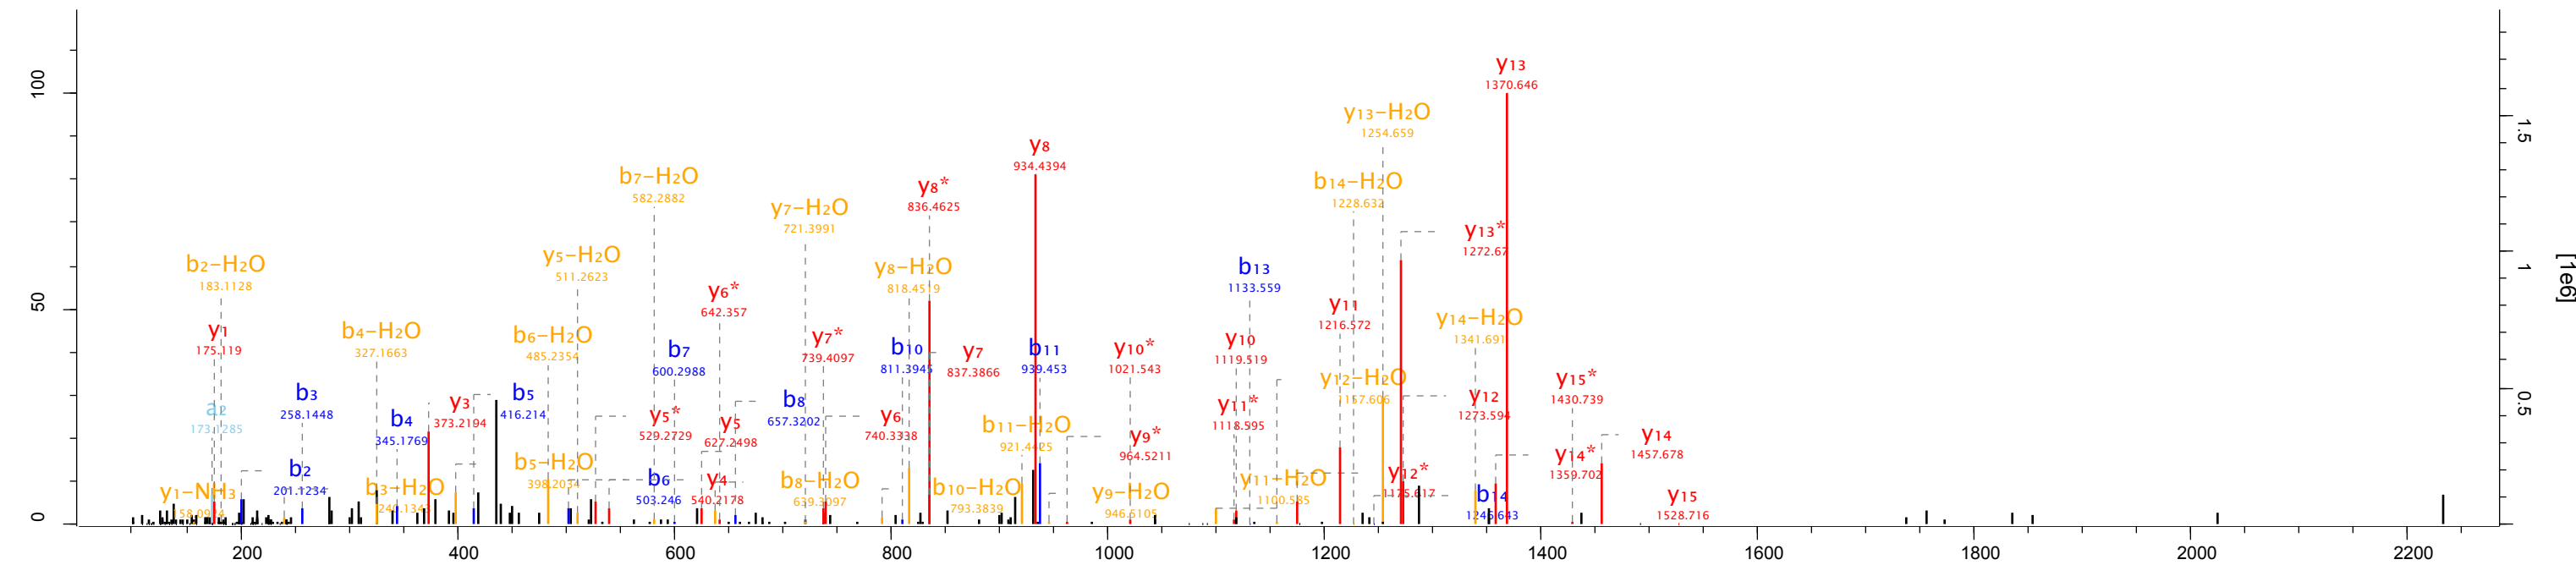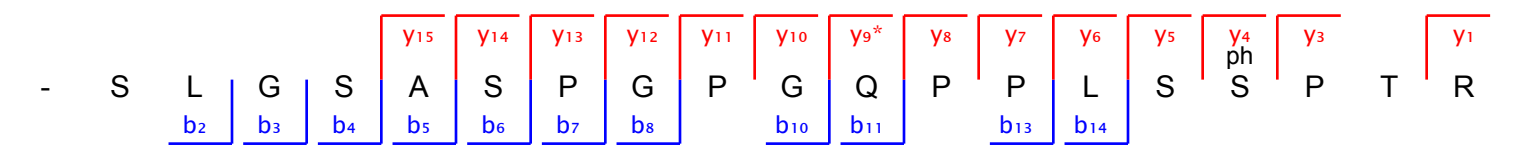

Raw file 20150814\_A375SR\_Phospho\_BR2\_09 Scan 13393 Method FTMS; HCD Score 111.22 m/z 732.41 Gene names WDR77

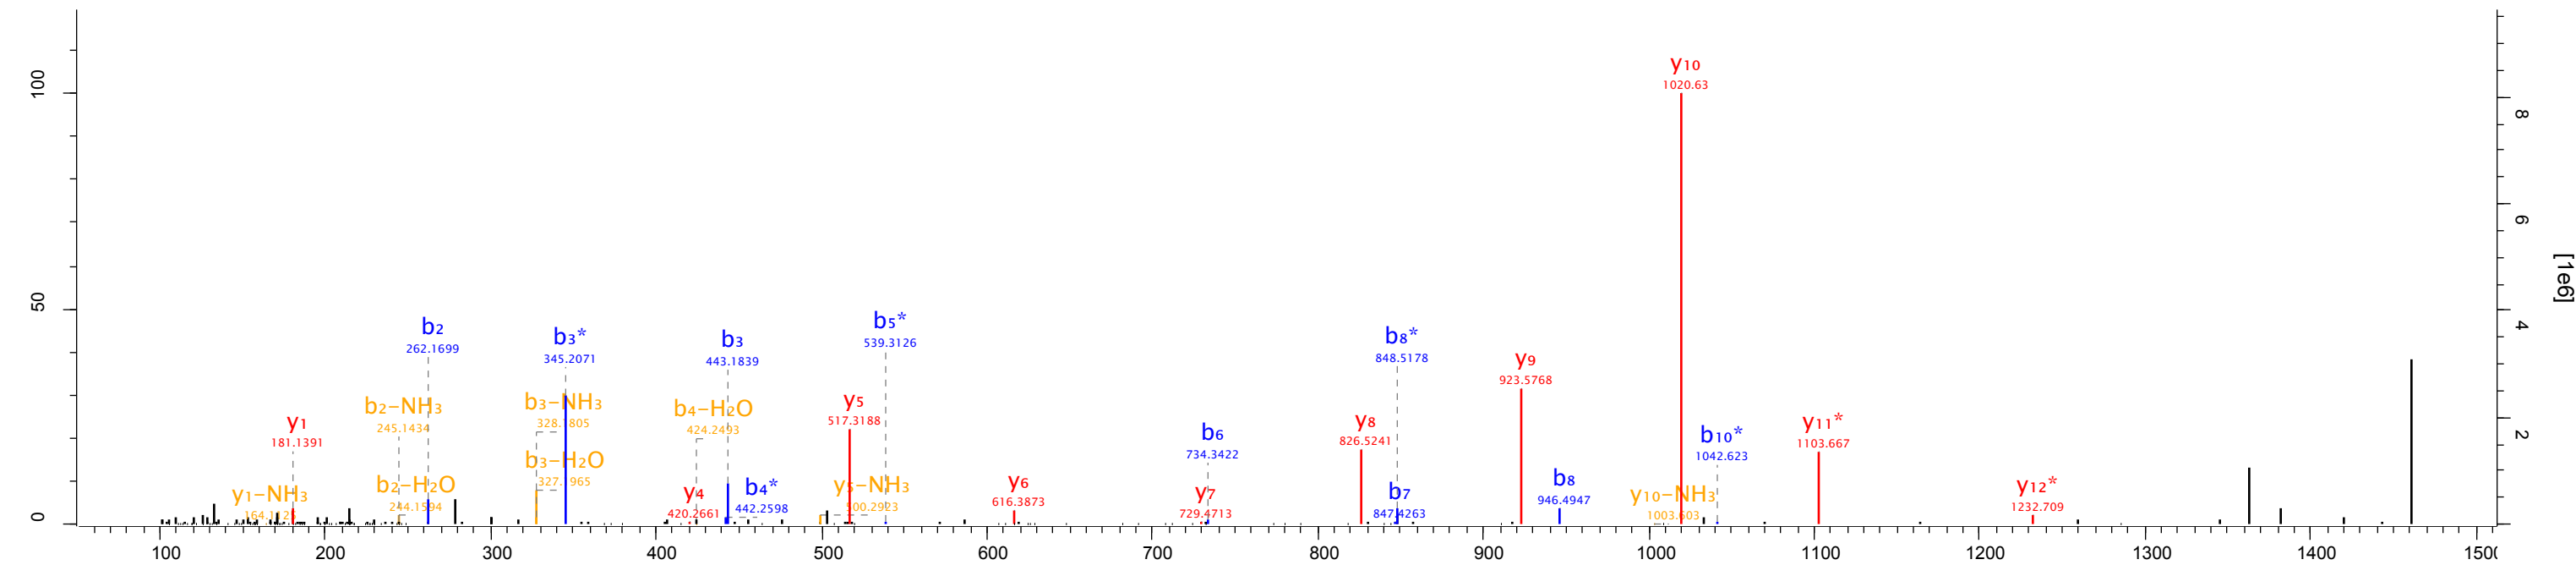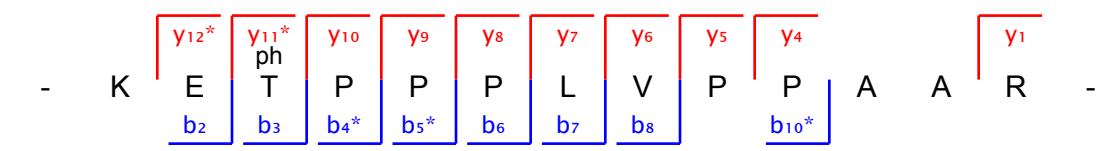

Raw file: 20150814\_A375SR\_Phospho\_BR2\_09  
 Scan: 13423 Method: FTMS; HCD Score: 212.82 m/z: 1071.52 Gene names: ZMYND8

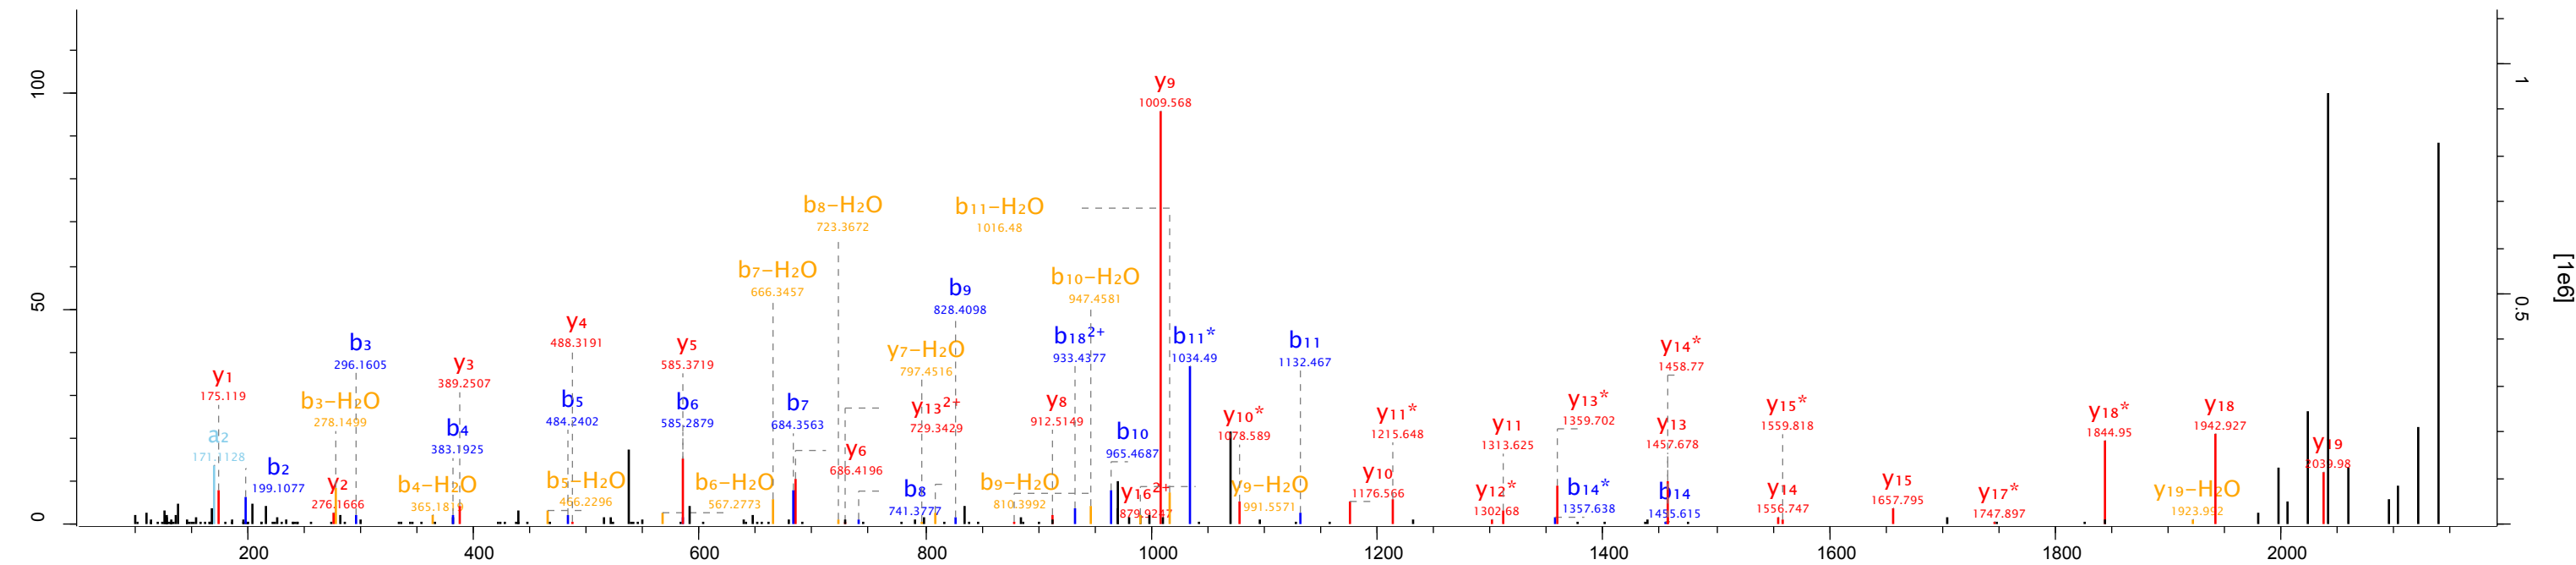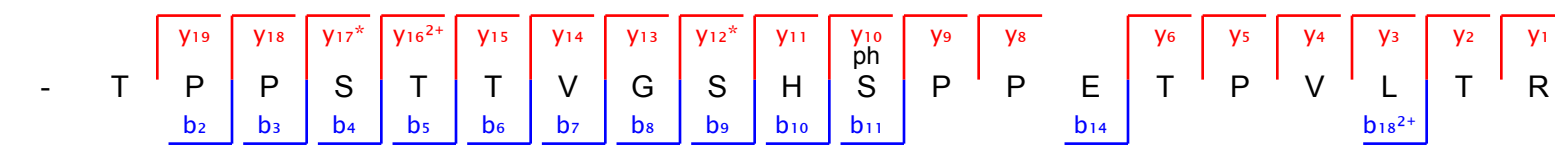

Raw file 20150814\_A375SR\_Phospho\_BR2\_09 Scan 13703 Method FTMS; HCD Score 140.22 m/z 700.82 Gene names NHSL1

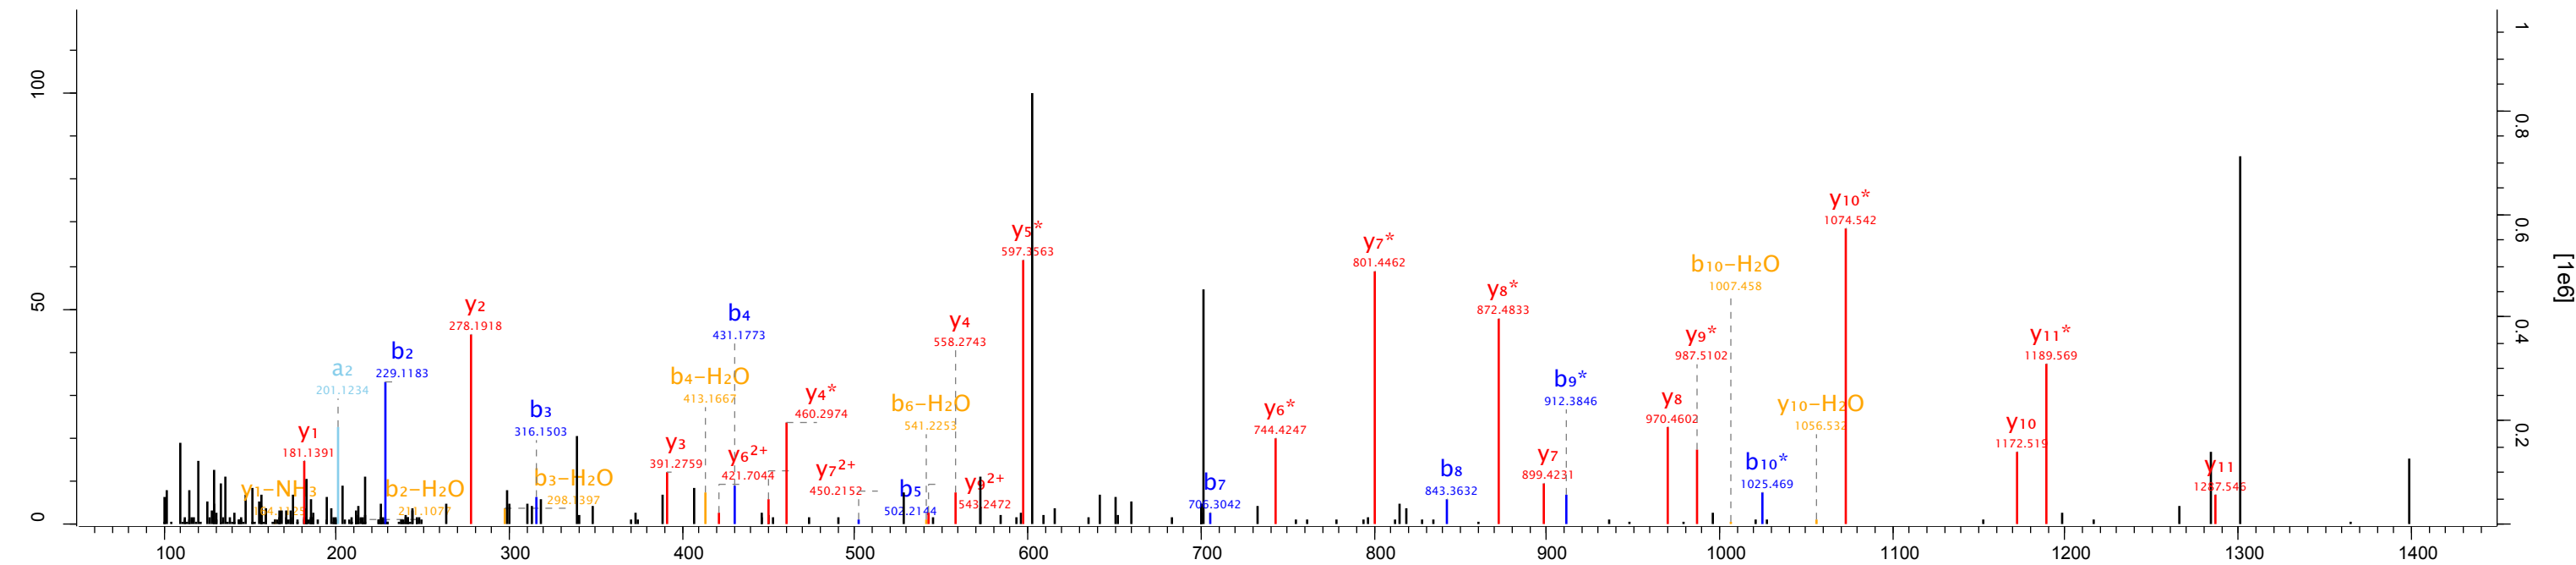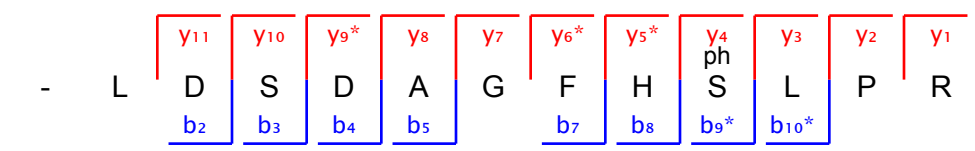

Raw file 20150814\_A375SR\_Phospho\_BR2\_09 Scan 14263 Method FTMS; HCD Score 69.58 m/z 814.08 Gene names E2F7

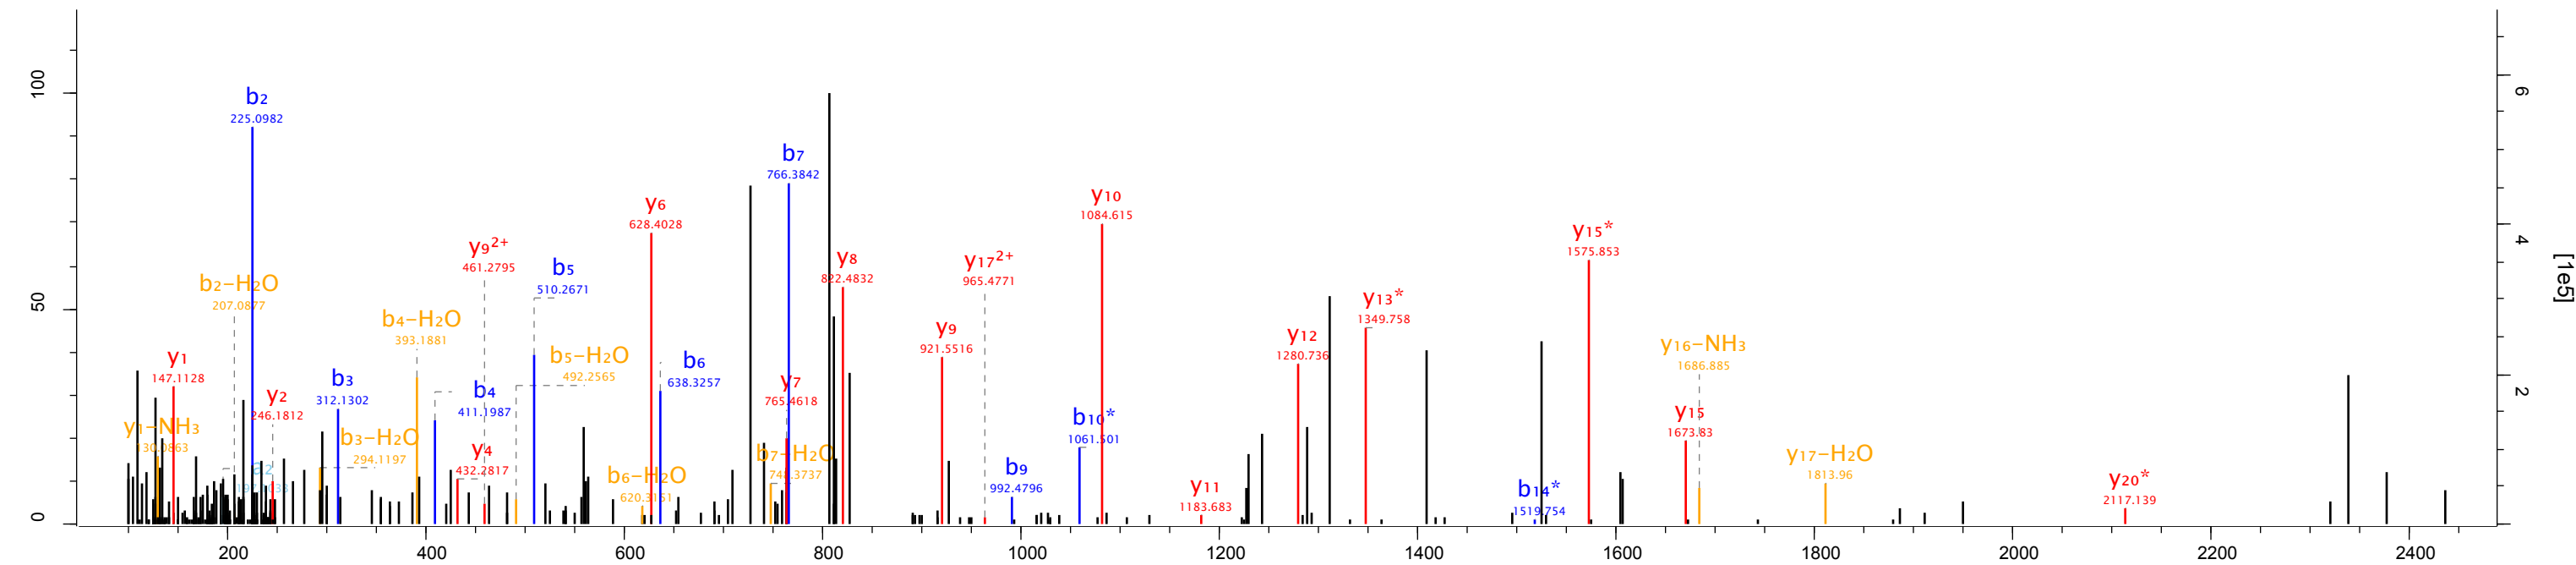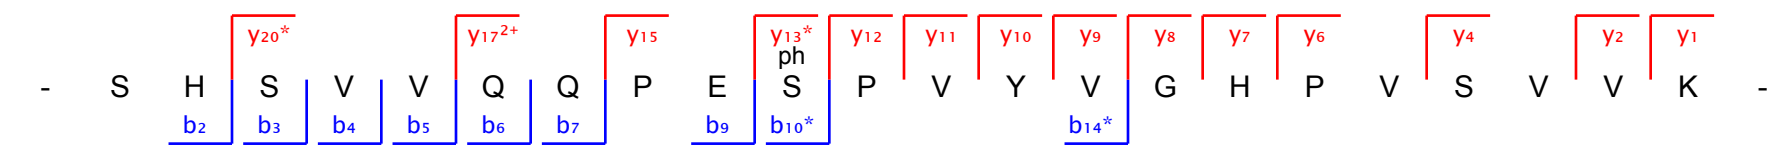

Raw file 20150814\_A375SR\_Phospho\_BR2\_09 Scan 14833 Method FTMS; HCD Score 149.32 m/z 665.85 Gene names MEF2D

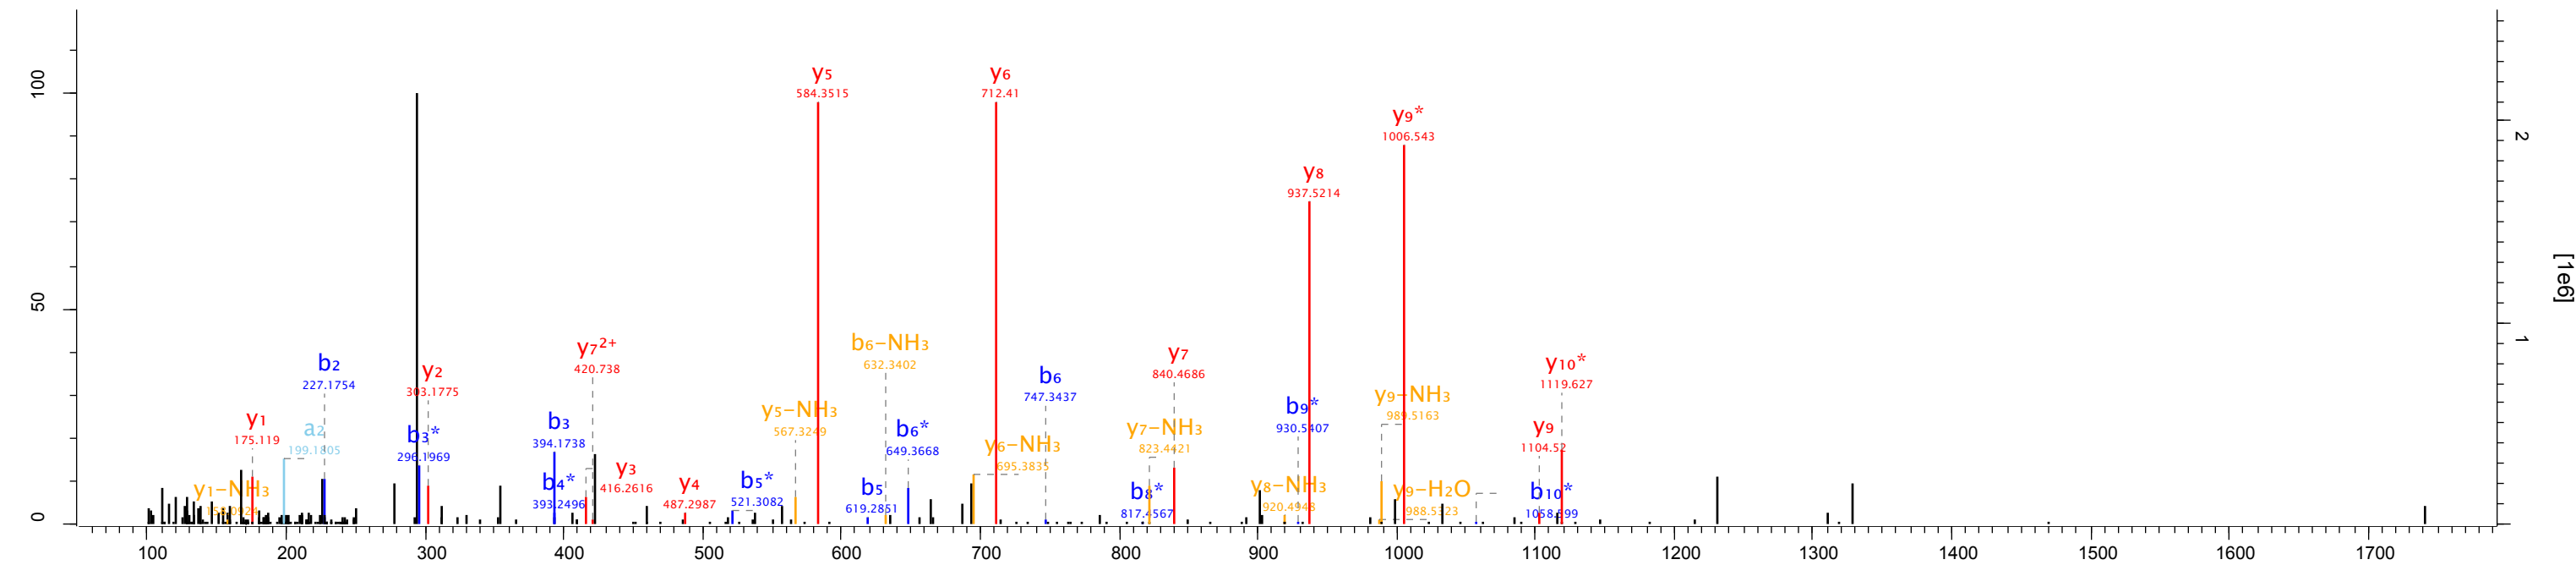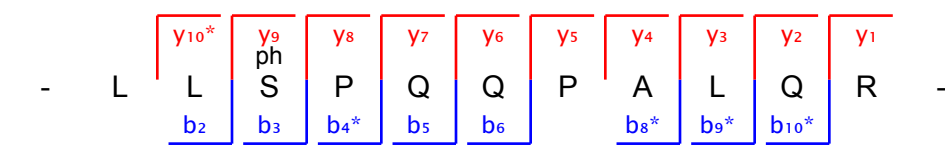

Raw file 20150814\_A375SR\_Phospho\_BR2\_09 Scan 15863 Method FTMS; HCD Score 86.14 m/z 660.65 Gene names LRRC16A

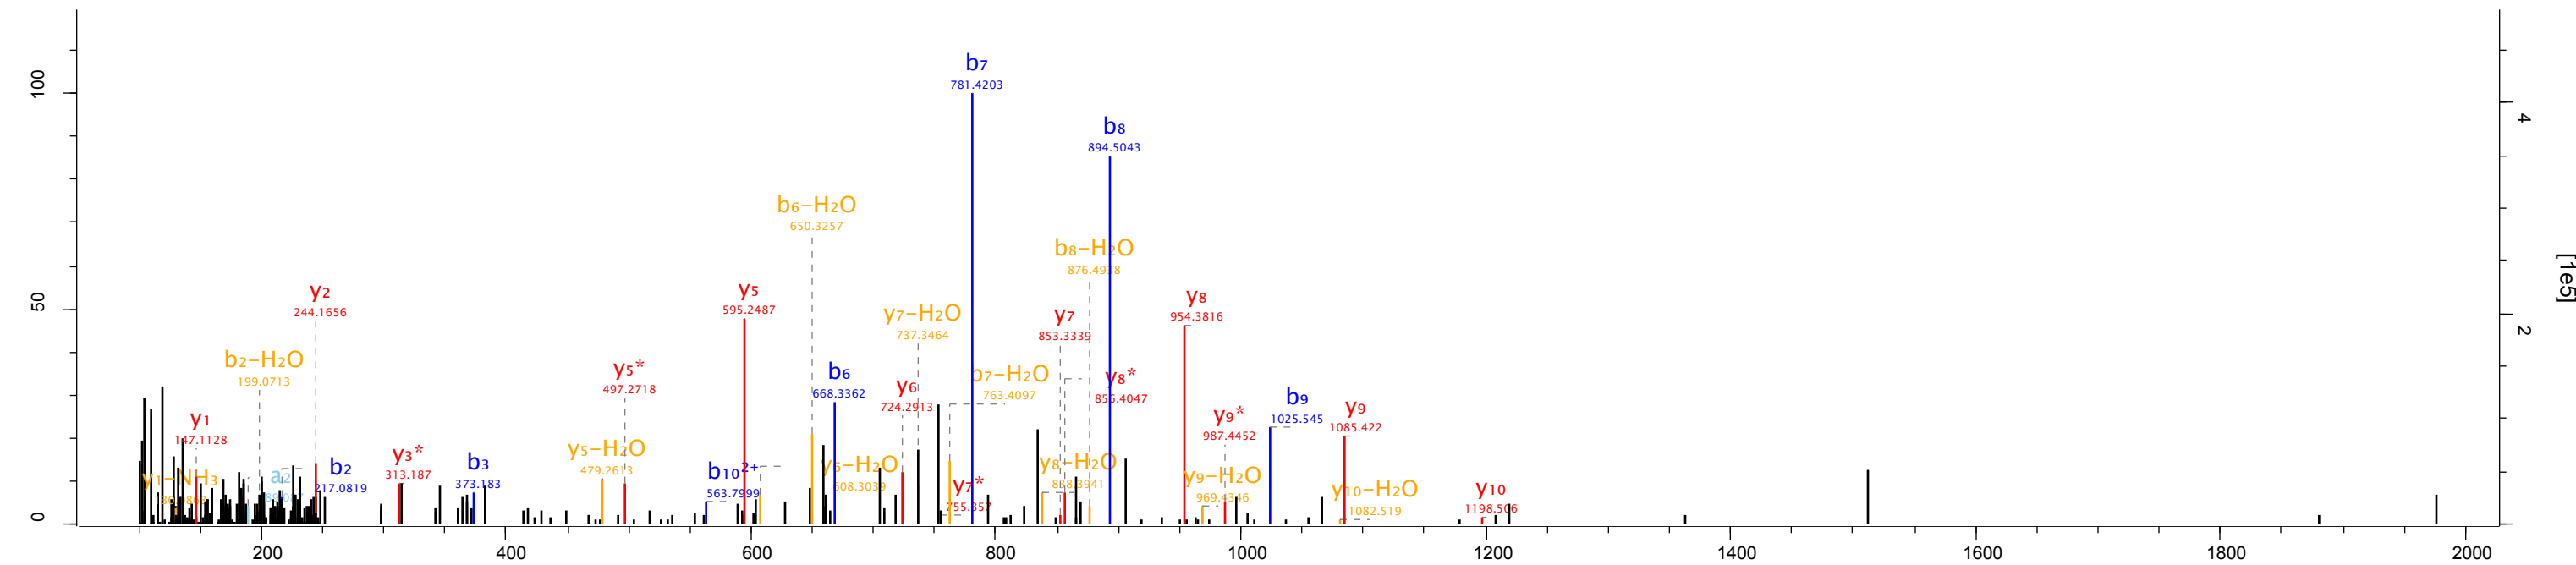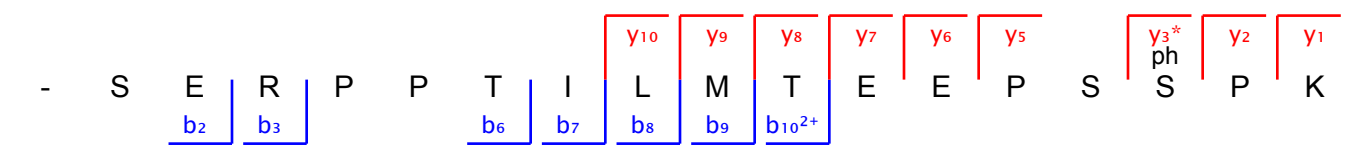



Raw file 20150814\_A375SR\_Phospho\_BR2\_09 Scan 16253 Method FTMS; HCD Score 85.29 m/z 661.82 Gene names EIF3J

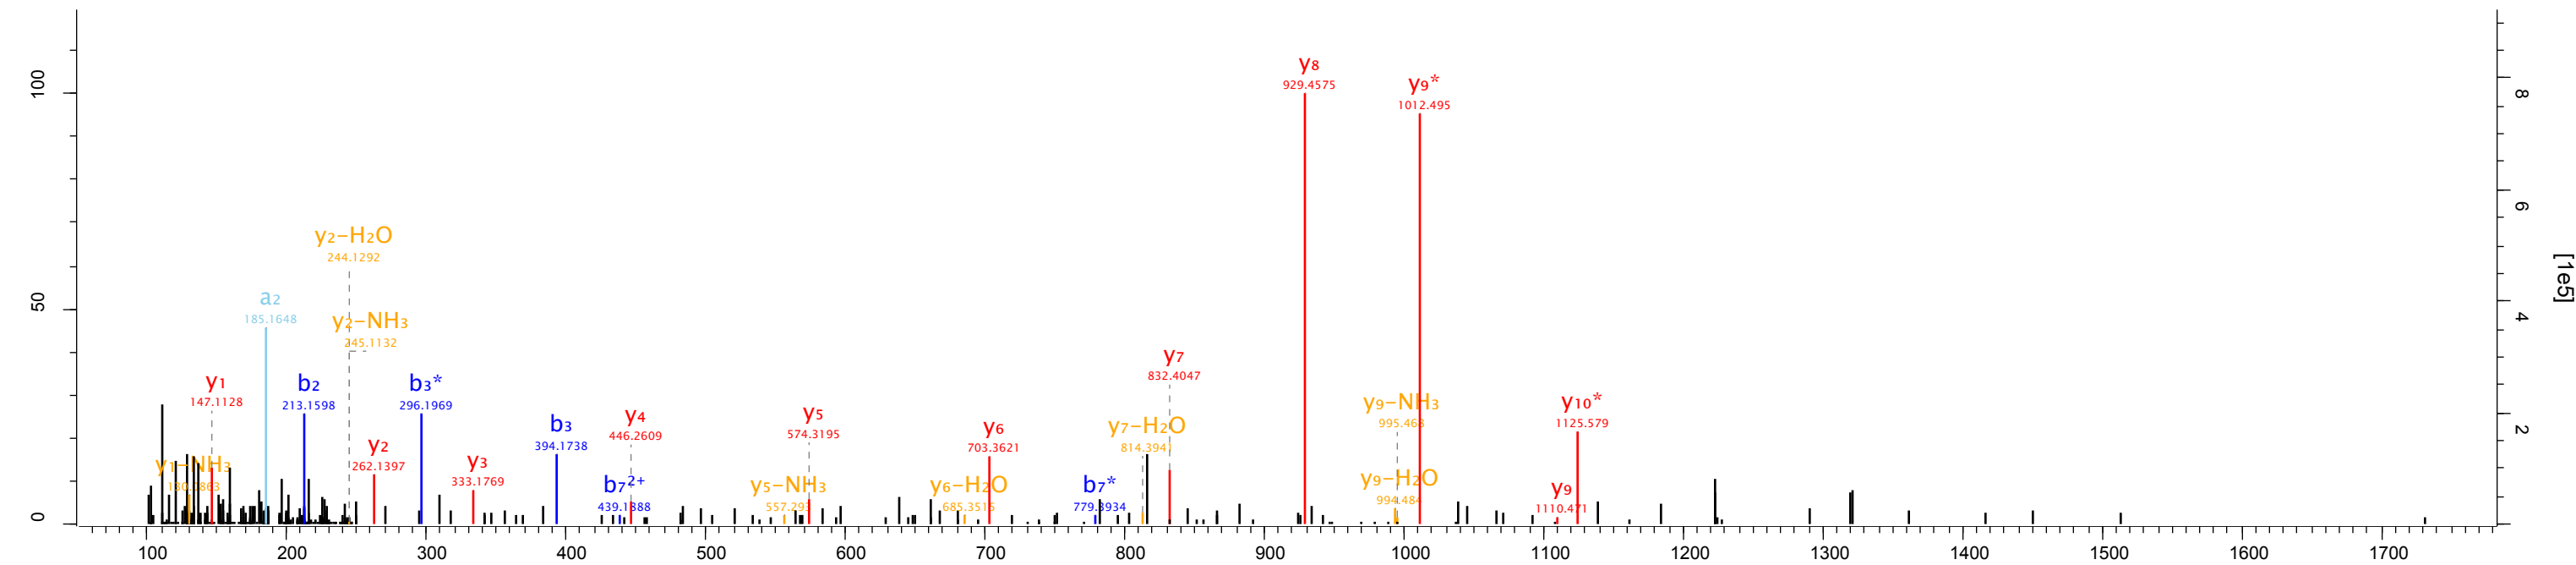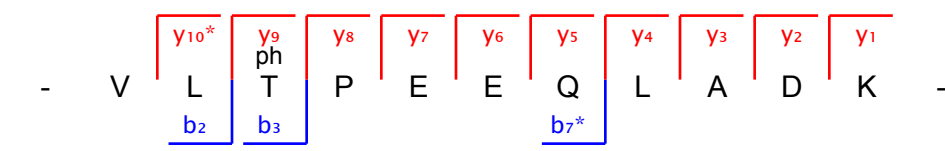

Raw file 20150814\_A375SR\_Phospho\_BR2\_09 Scan 17243 Method FTMS; HCD Score 143.99 m/z 554.98 Gene names PHACTR4

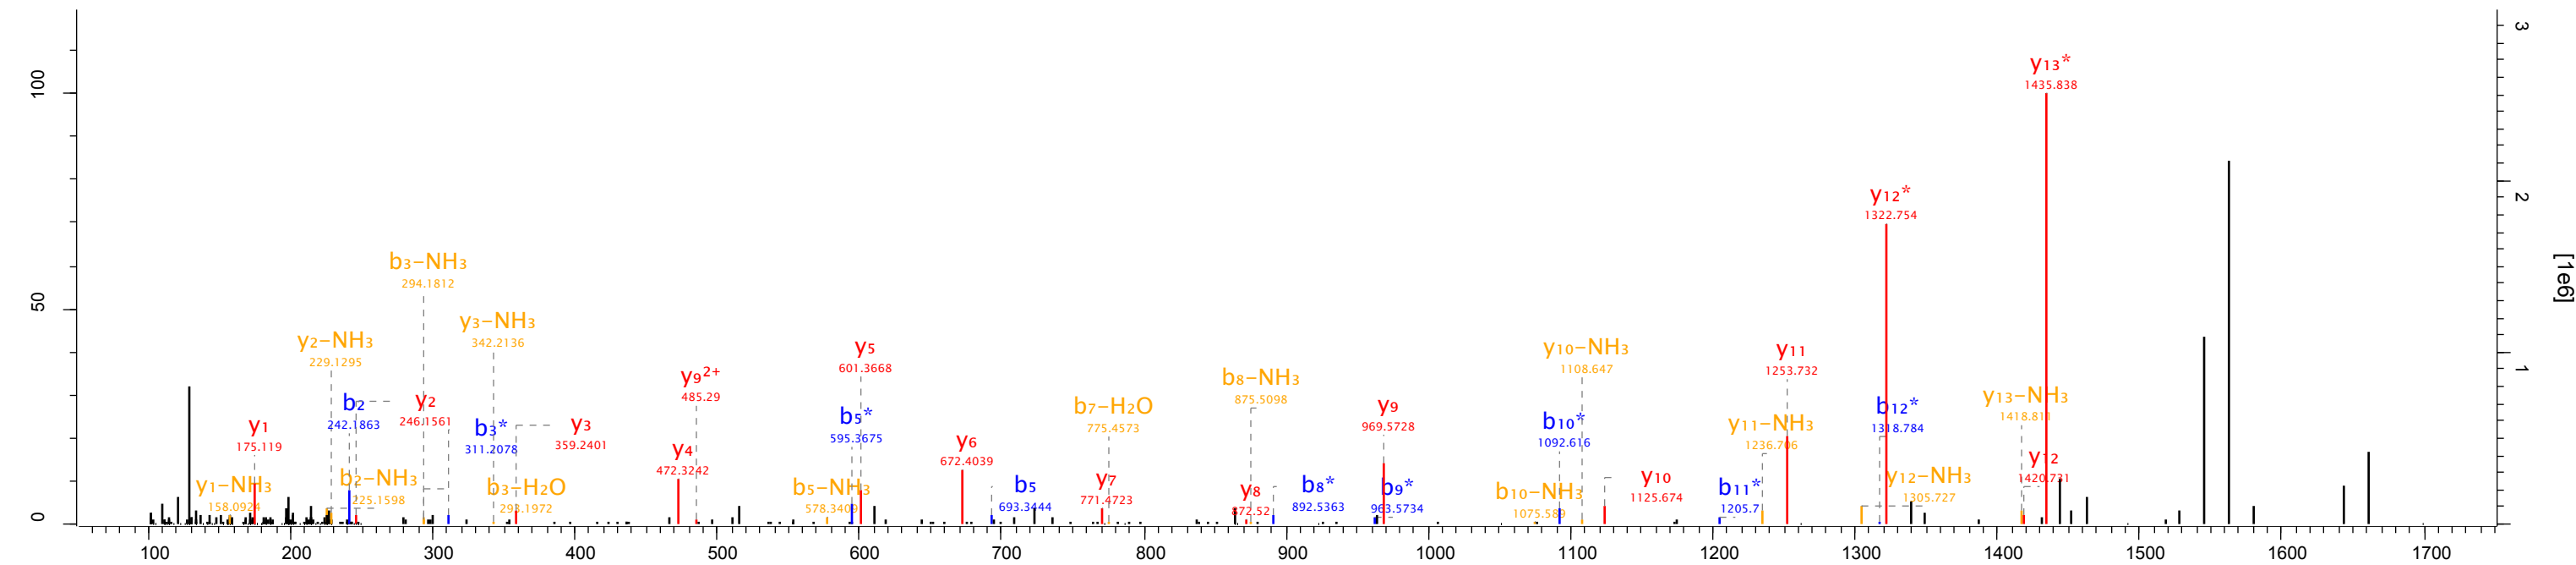

- K y13\* y12  
ph y11 y10 y9 y8 y7 y6 y5 y4 y3 y2 y1 -  
L S Q R P T V A E L L A R -  
b2 b3\* b5 b8\* b9\* b10\* b11\* b12\*

Raw file Scan Method Score m/z Gene names  
 20150814\_A375SR\_Phospho\_BR2\_09 17703 FTMS; HCD 112.16 770.88 CREB1

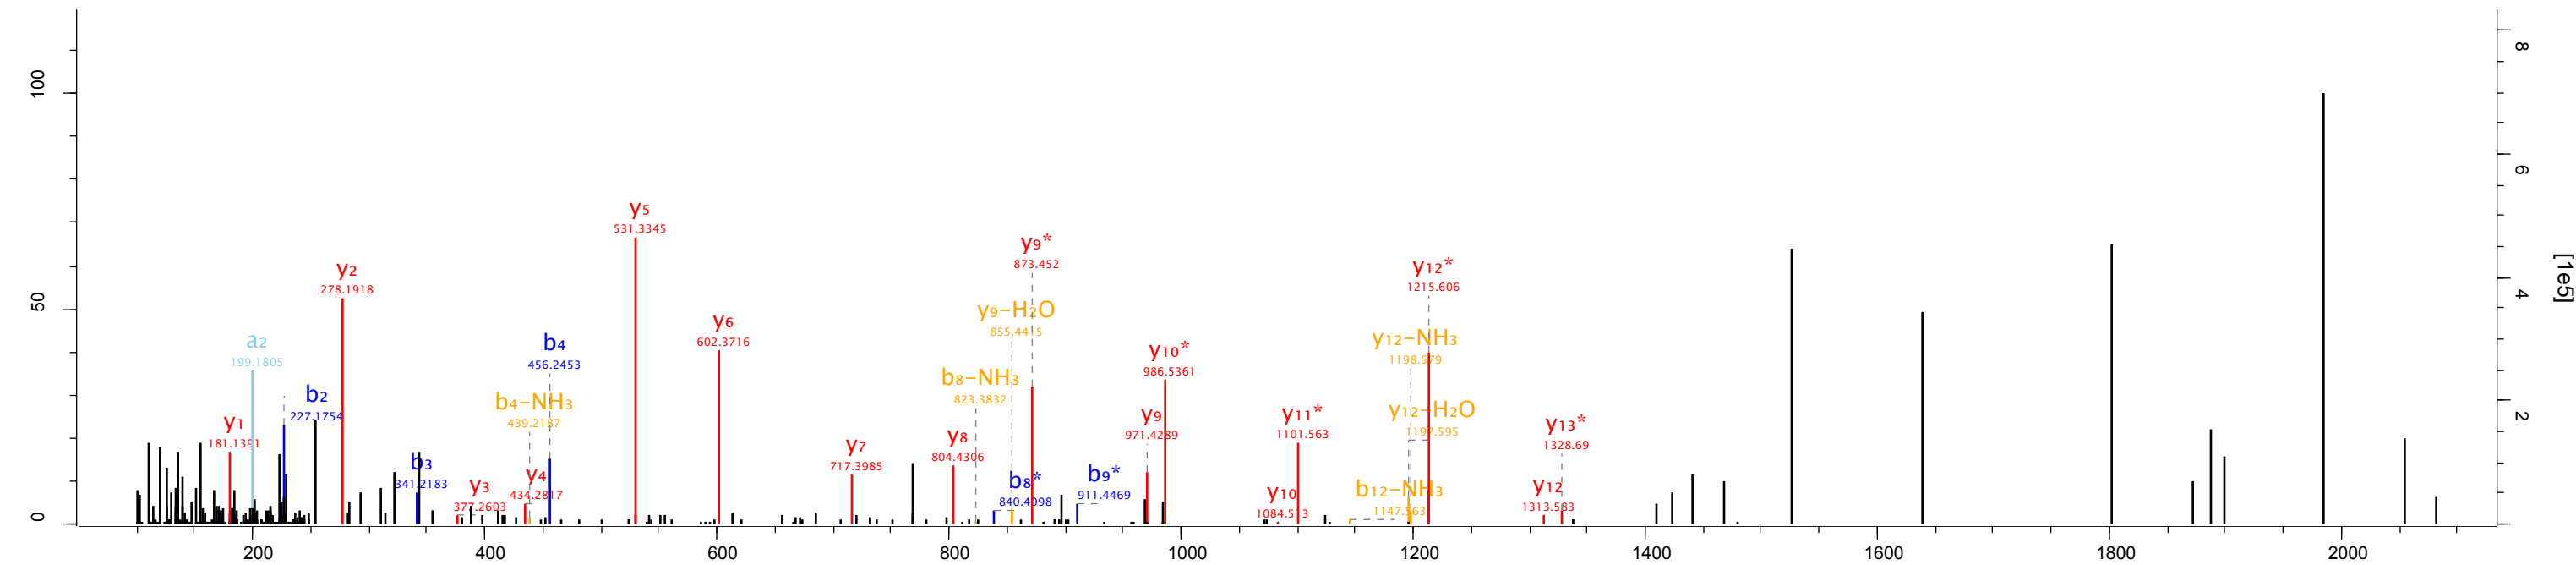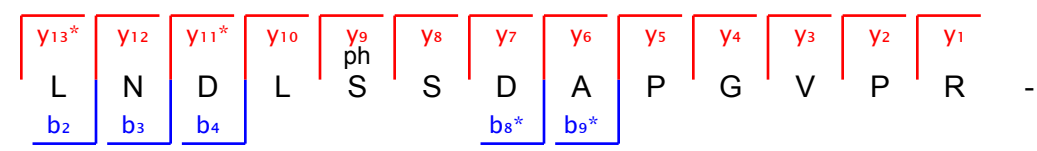

Raw file: 20150814\_A375SR\_Phospho\_BR2\_09  
 Scan: 17833 Method: FTMS; HCD Score: 190.68 m/z: 1234.56 Gene names: AHNAK

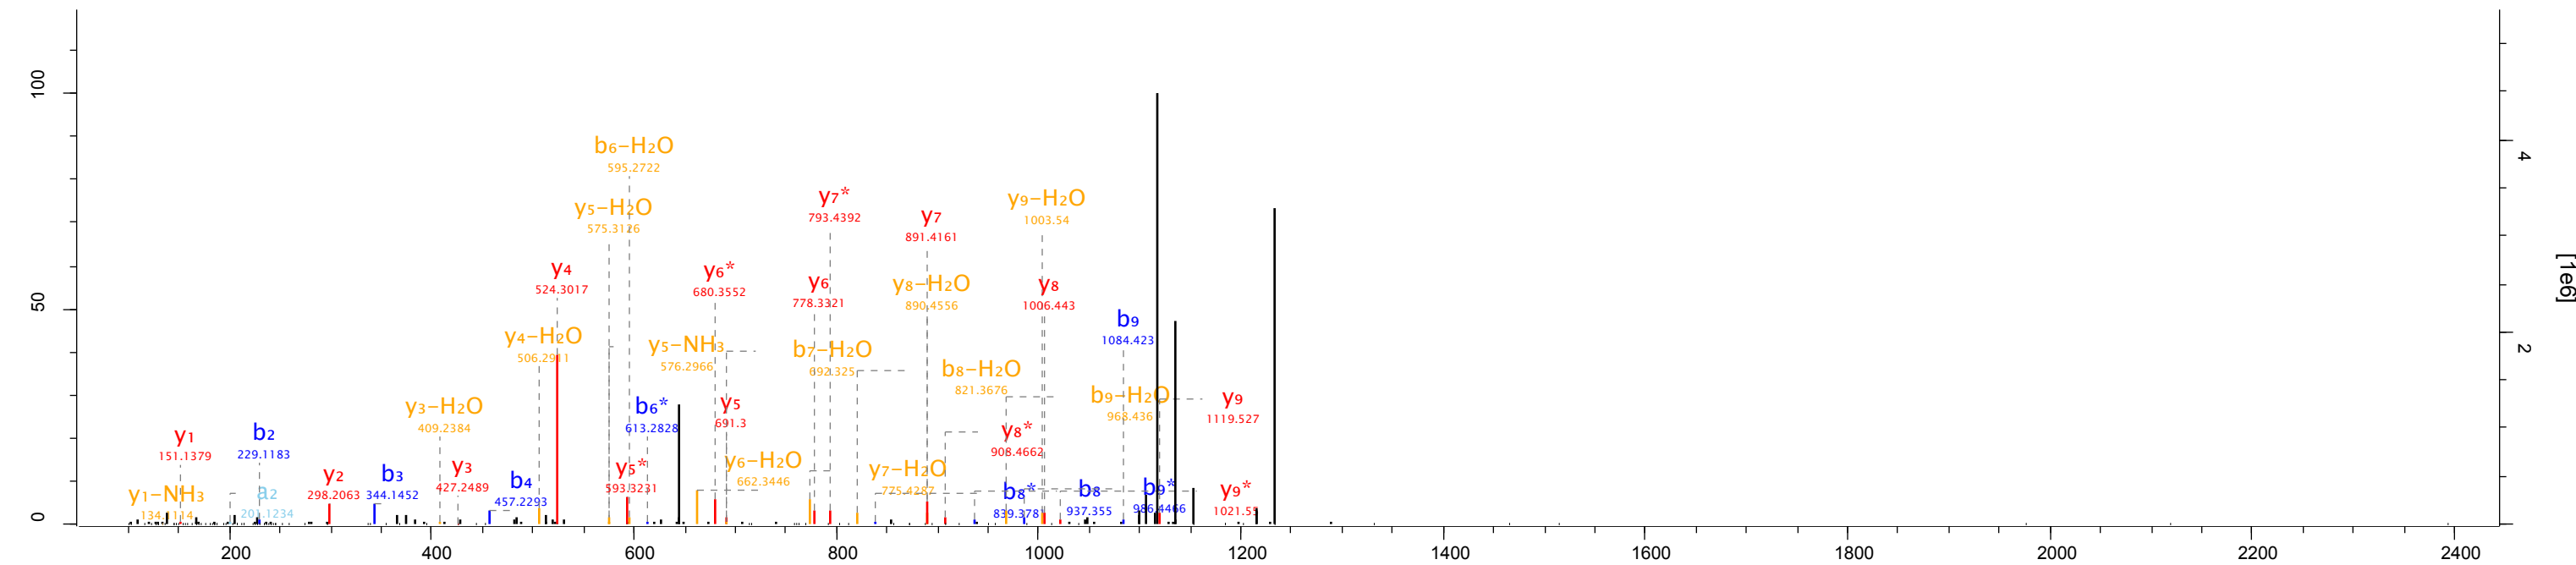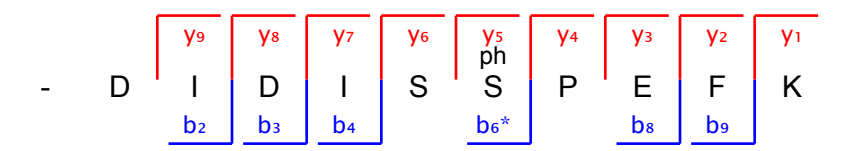

Raw file: 20150814\_A375SR\_Phospho\_BR2\_09  
 Scan: 18863 Method: FTMS; HCD Score: 114.72 m/z: 576.79 Gene names: FAM53C

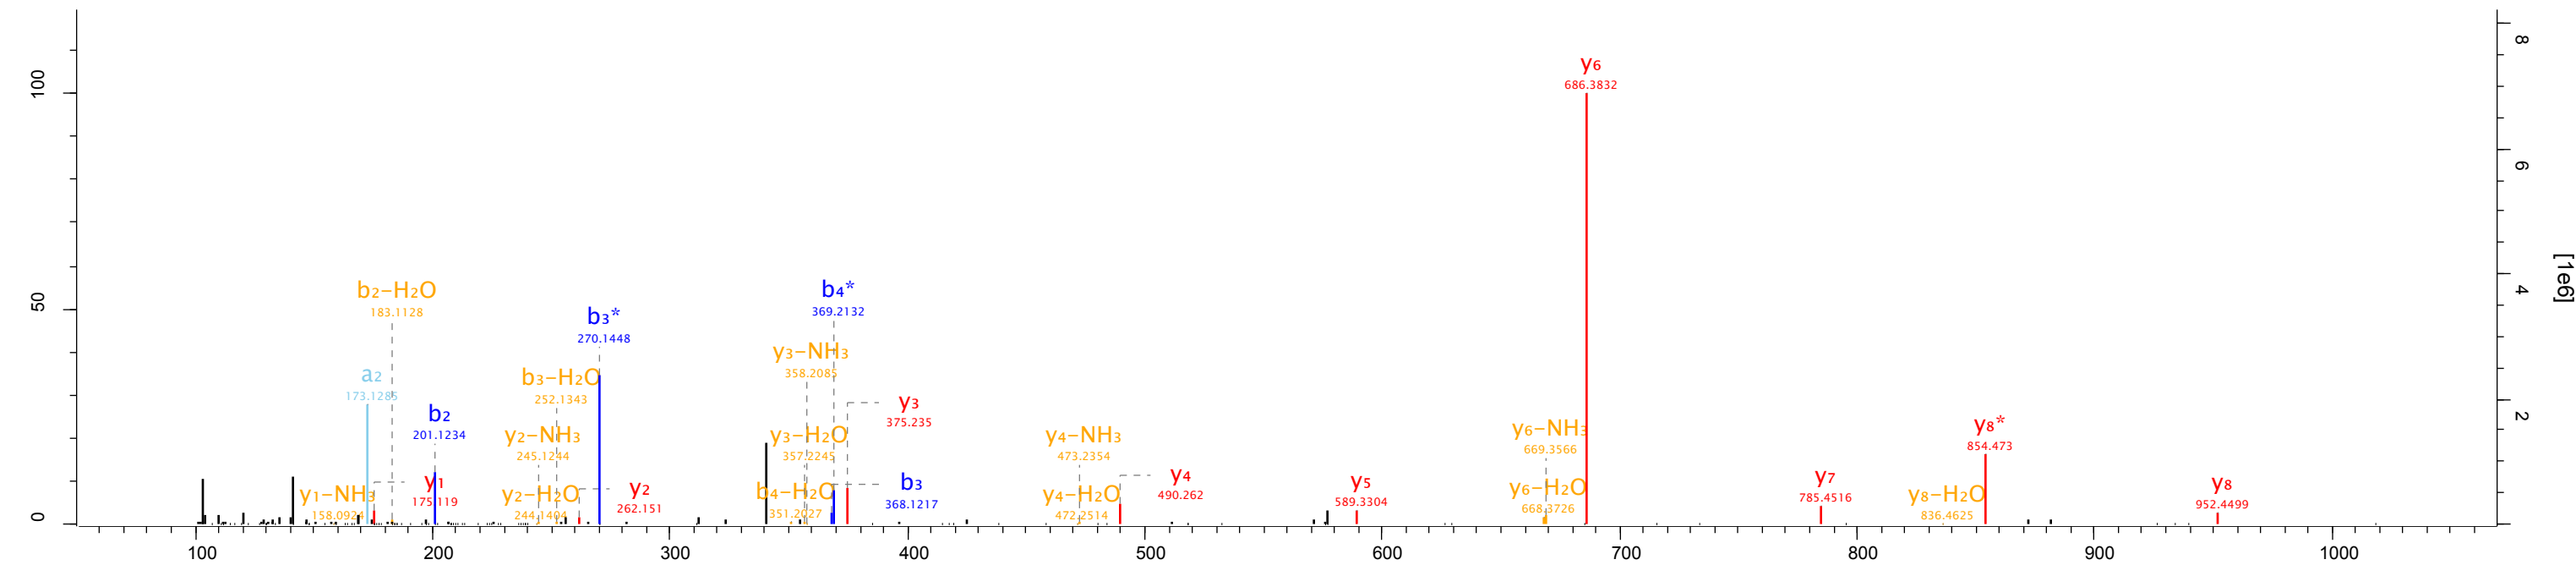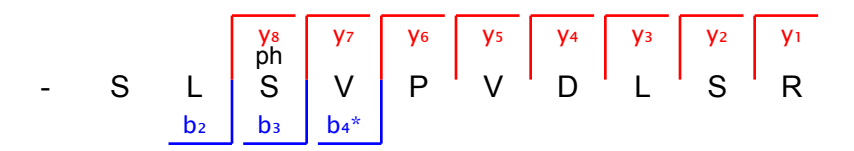

Raw file 20150814\_A375SR\_Phospho\_BR2\_09 Scan 19333 Method FTMS; HCD Score 52.75 m/z 946.03 Gene names NECAP2

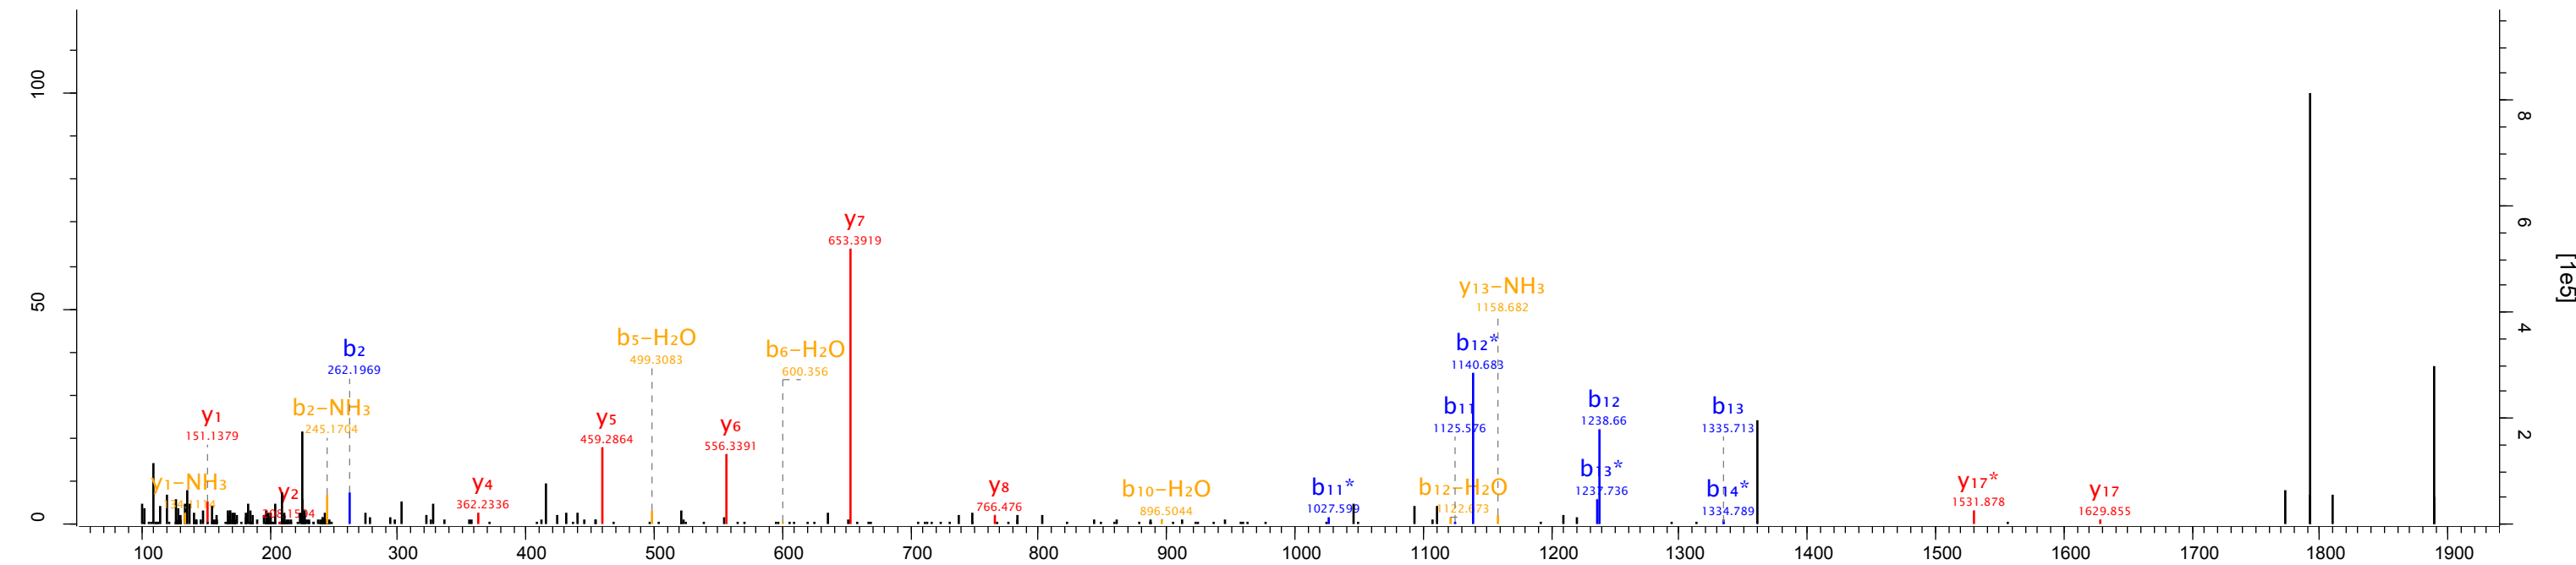

- V R P A S T G G L S L L P P P G G K -

Fragmentation mapping (b and y ions) is shown below the sequence:

- Red boxes above the sequence indicate y ions: y<sub>17</sub> (above P), y<sub>8</sub> (above L), y<sub>7</sub> (above P), y<sub>6</sub> (above P), y<sub>5</sub> (above P), y<sub>4</sub> (above P), y<sub>2</sub> (above G), y<sub>1</sub> (above K).
- Blue boxes below the sequence indicate b ions: b<sub>2</sub> (below R), b<sub>11</sub> (below L), b<sub>12</sub> (below L), b<sub>13</sub> (below P), b<sub>14</sub>\* (below P).

Raw file  
 20150814\_A375SR\_Phospho\_BR2\_09  
 Scan 19453 Method FTMS; HCD Score 110.91 m/z 660.97 Gene names PRR12

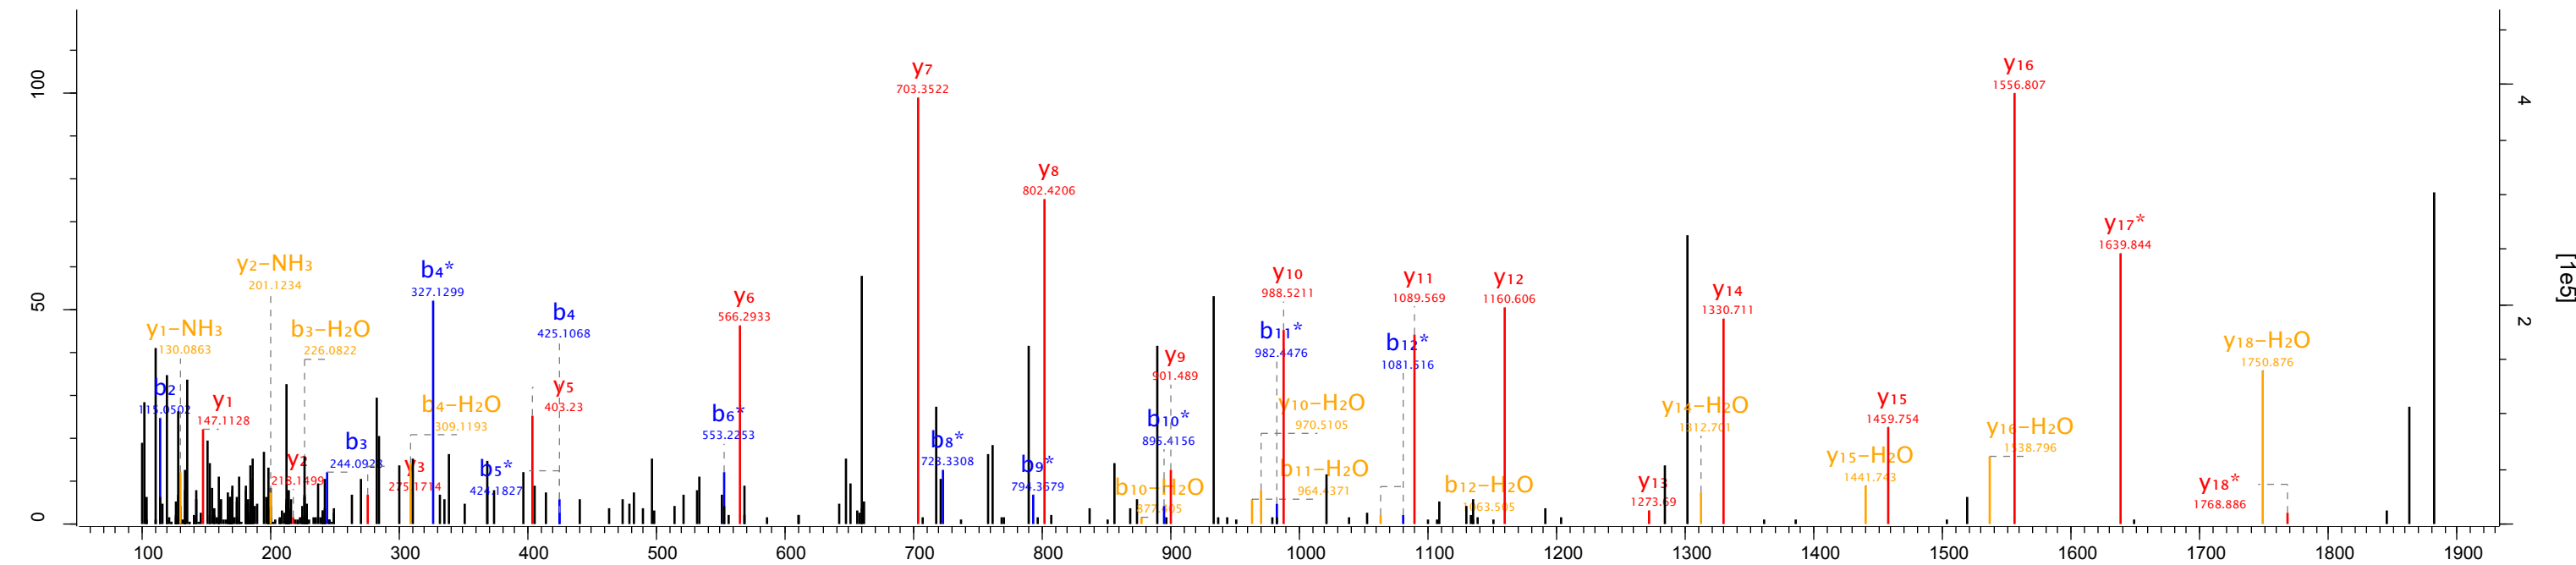

- G G E T P E G L A T S V V H Y G A G A K -

Fragmentation mapping (b-ions in blue, y-ions in red):

- b2: G
- b3: E
- b4: T
- b5\*: P
- b6\*: E
- b8\*: L
- b9\*: A
- b10\*: T
- b11\*: S
- b12\*: V
- y1: G
- y2: A
- y3: G
- y5: G
- y6: Y
- y7: H
- y8: V
- y9: V
- y10: S
- y11: T
- y12: A
- y13: G
- y14: A
- y15: P
- y16: E
- y17\*: T
- y18\*: G

Raw file: 20150814\_A375SR\_Phospho\_BR2\_09  
 Scan: 19463 Method: FTMS; HCD Score: 137.62 m/z: 633.82 Gene names: EEF1G

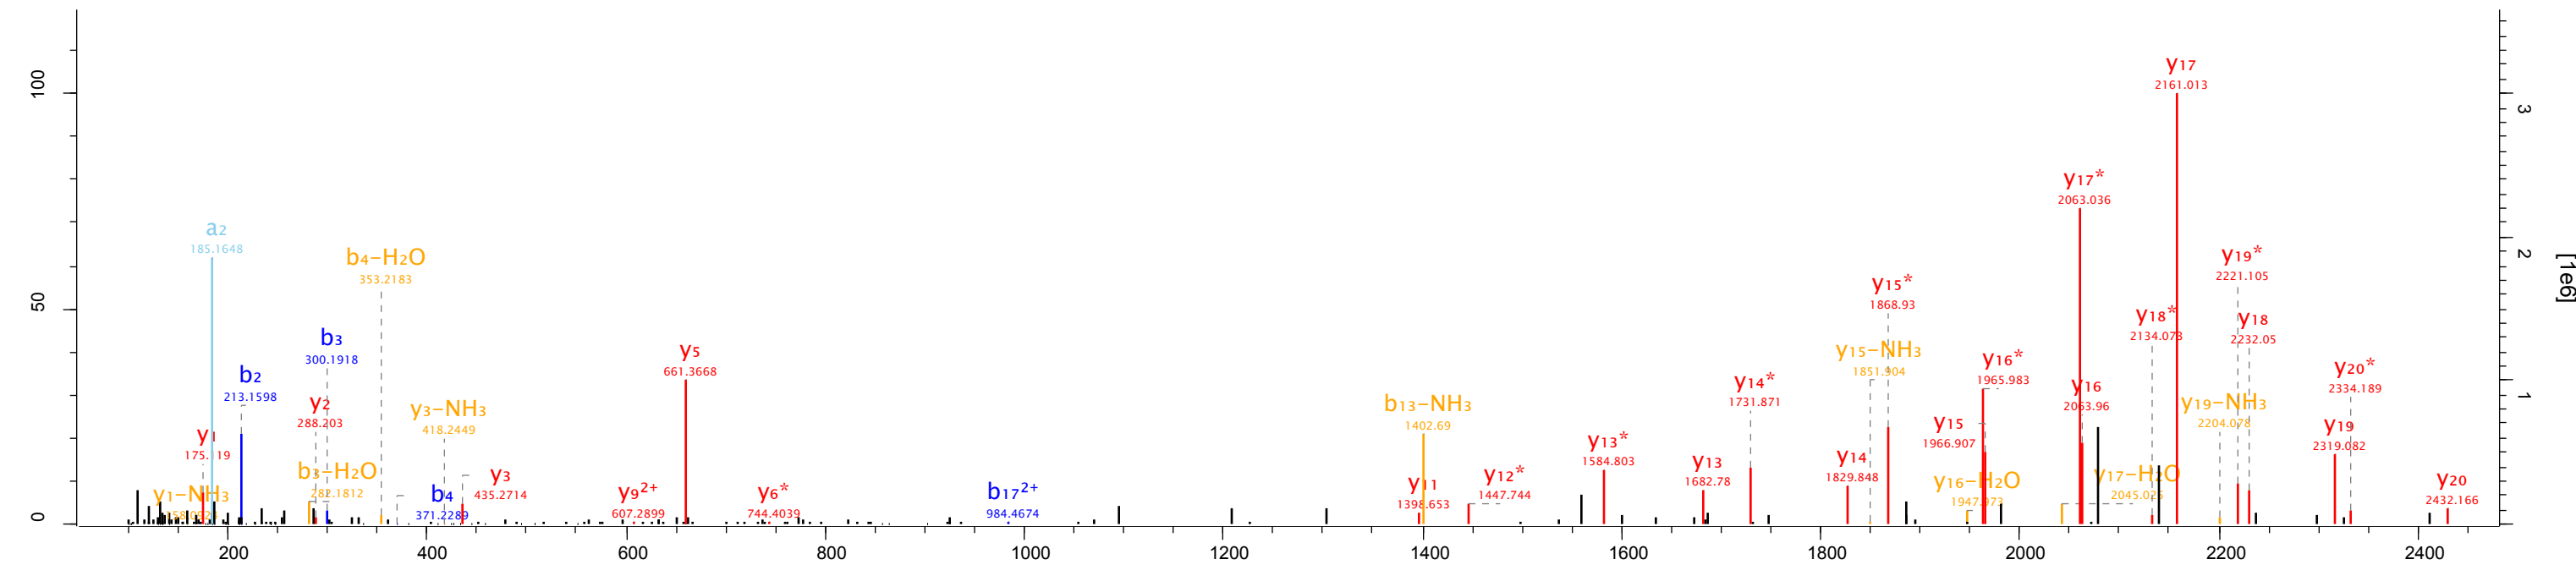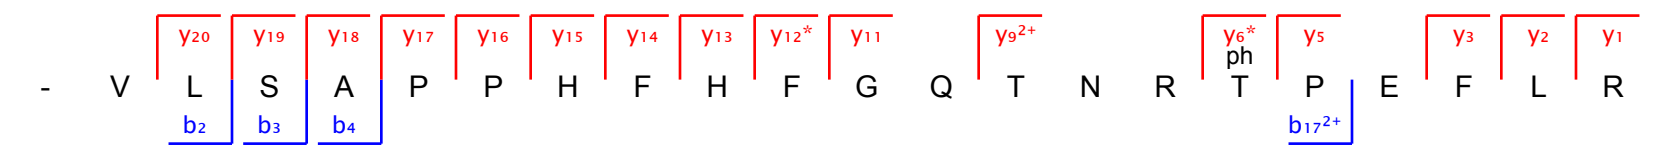



Raw file 20150814\_A375SR\_Phospho\_BR2\_09 Scan 20953 Method FTMS; HCD Score 275.2 m/z 1262.57 Gene names PRPF4B

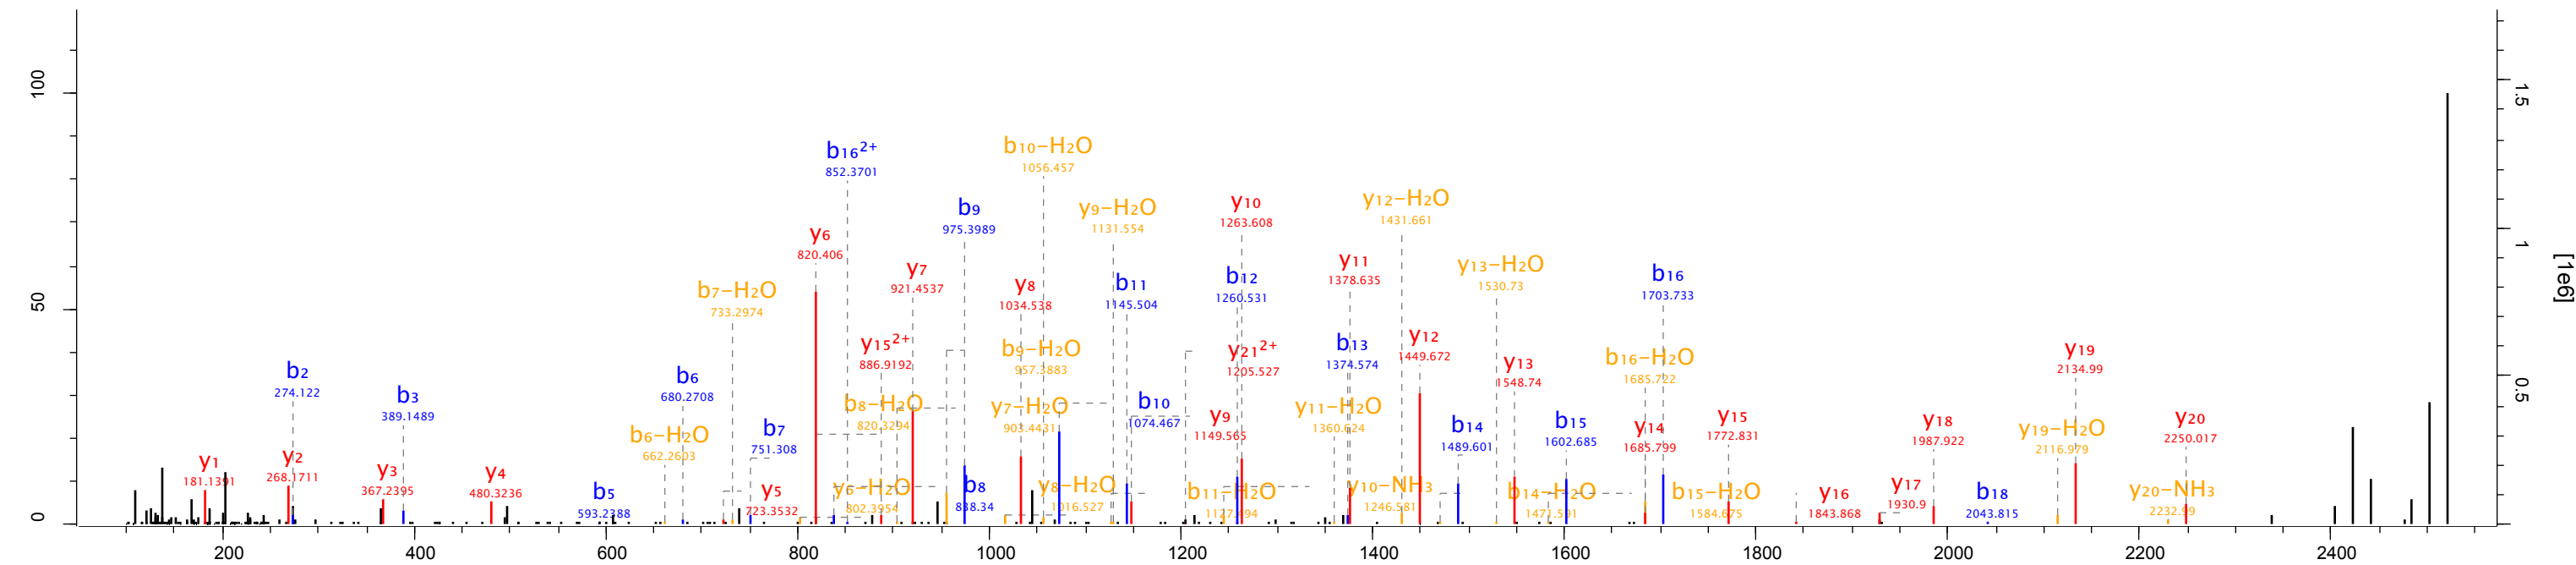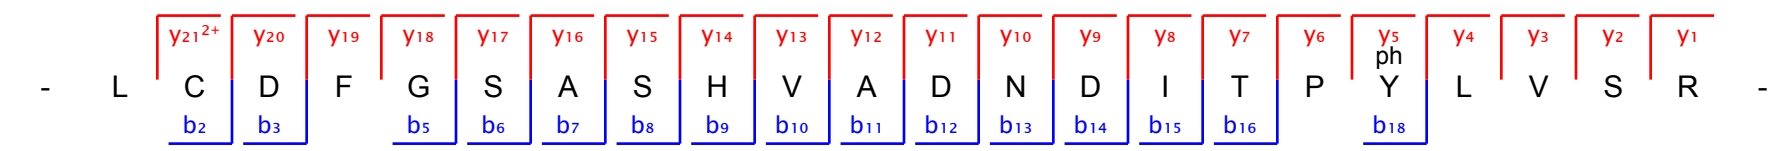

Raw file 20150814\_A375SR\_Phospho\_BR2\_09 Scan 22053 Method FTMS; HCD Score 56.77 m/z 920.24 Gene names PHF23

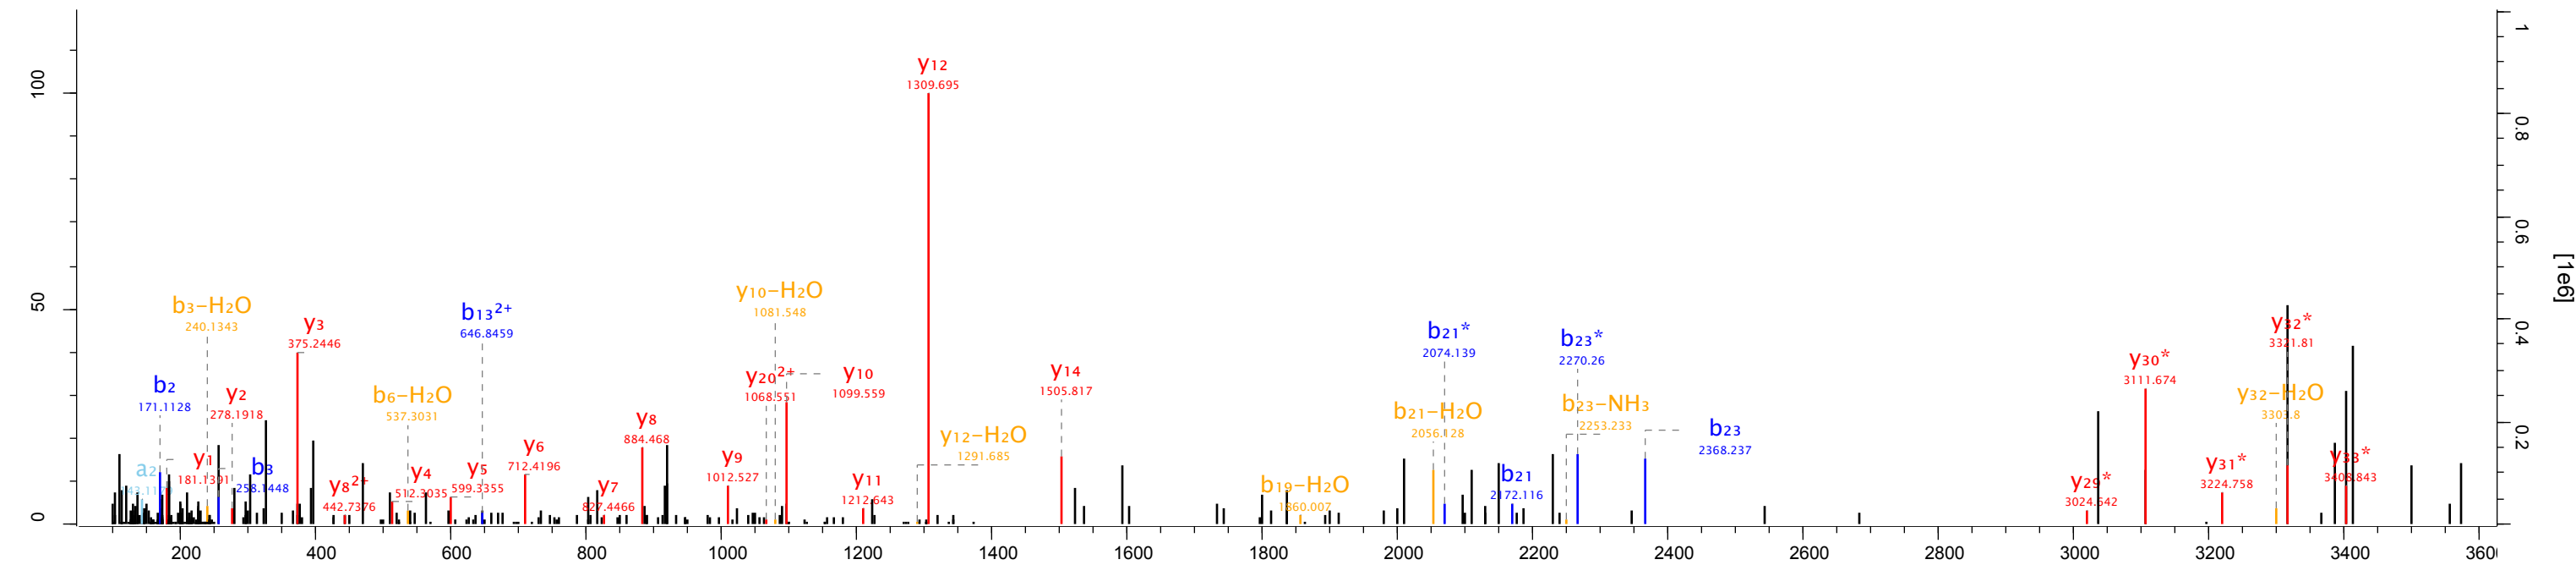

- V A S P L S P T S L T H T S R P P A A L p h T P V P L S Q G D L S H P P R -

b<sub>2</sub>
b<sub>3</sub>
b<sub>13</sub><sup>2+</sup>
b<sub>21</sub>
b<sub>23</sub>
y<sub>14</sub>
y<sub>12</sub>
y<sub>11</sub>
y<sub>10</sub>
y<sub>9</sub>
y<sub>8</sub>
y<sub>7</sub>
y<sub>6</sub>
y<sub>5</sub>
y<sub>4</sub>
y<sub>3</sub>
y<sub>2</sub>
y<sub>1</sub>
y<sub>29</sub>\*
y<sub>30</sub>\*
y<sub>31</sub>\*
y<sub>32</sub>\*
y<sub>32</sub>-H<sub>2</sub>O
y<sub>33</sub>\*
y<sub>20</sub><sup>2+</sup>

Raw file 20150814\_A375SR\_Phospho\_BR2\_09 Scan 22903 Method FTMS; HCD Score 68.9 m/z 885.1 Gene names AHNAK

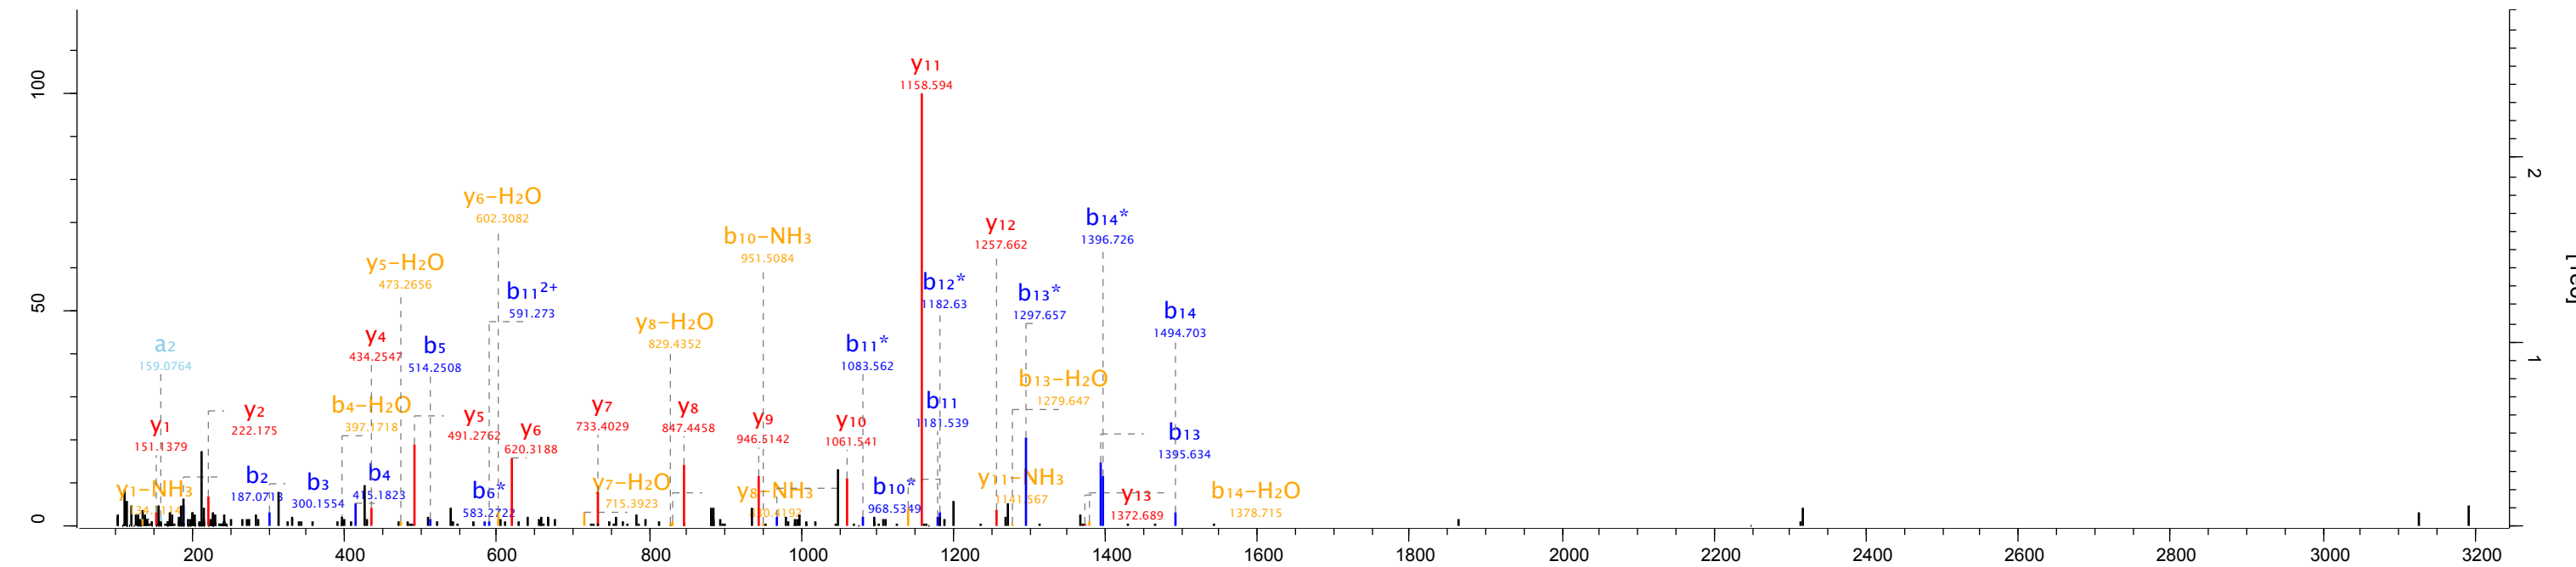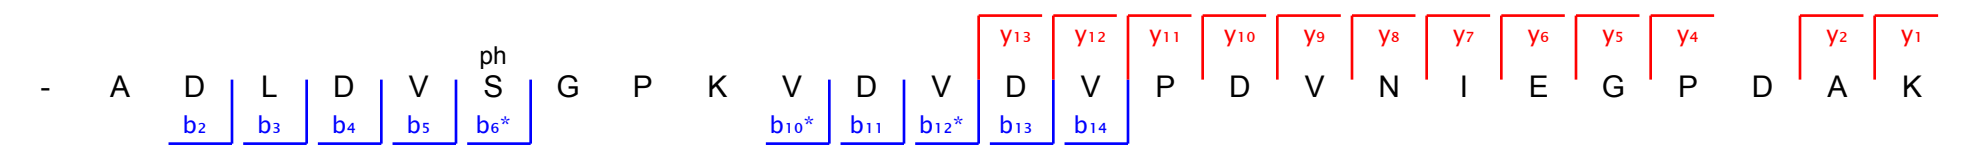

Raw file Scan Method Score m/z Gene names  
 20150814\_A375SR\_Phospho\_BR2\_09 23263 FTMS; HCD 166.44 868.07 KANK1

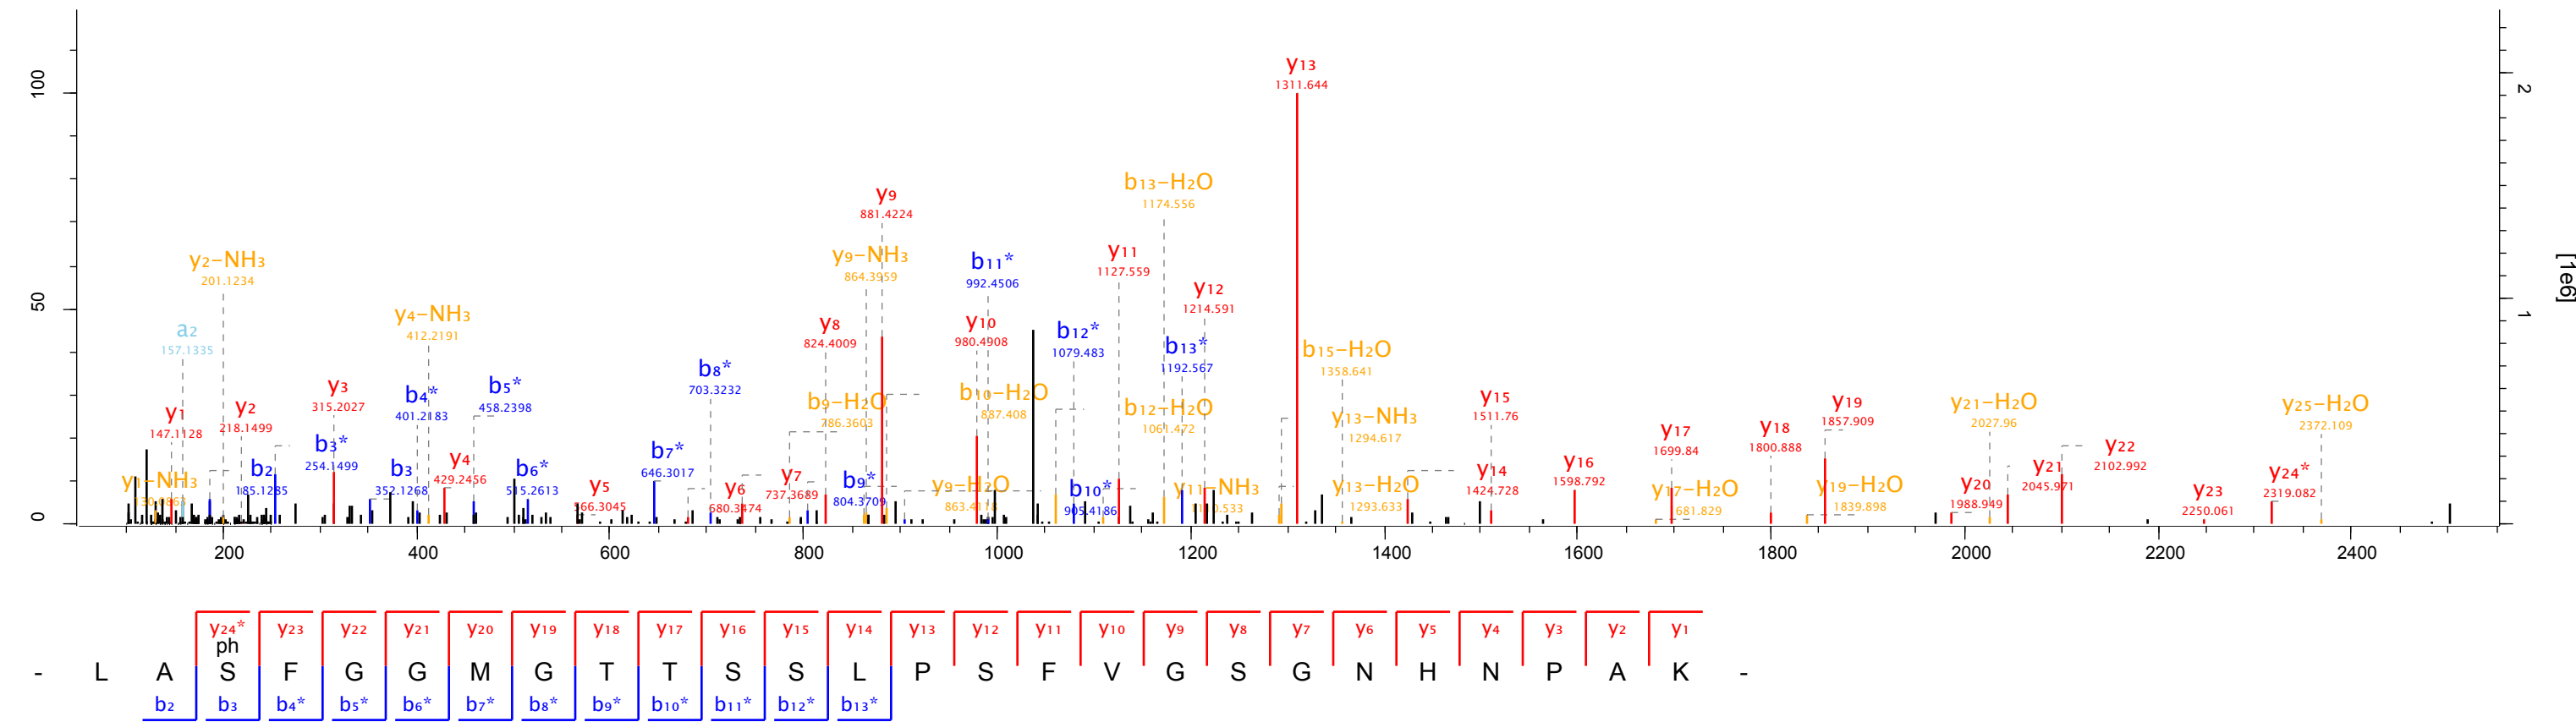

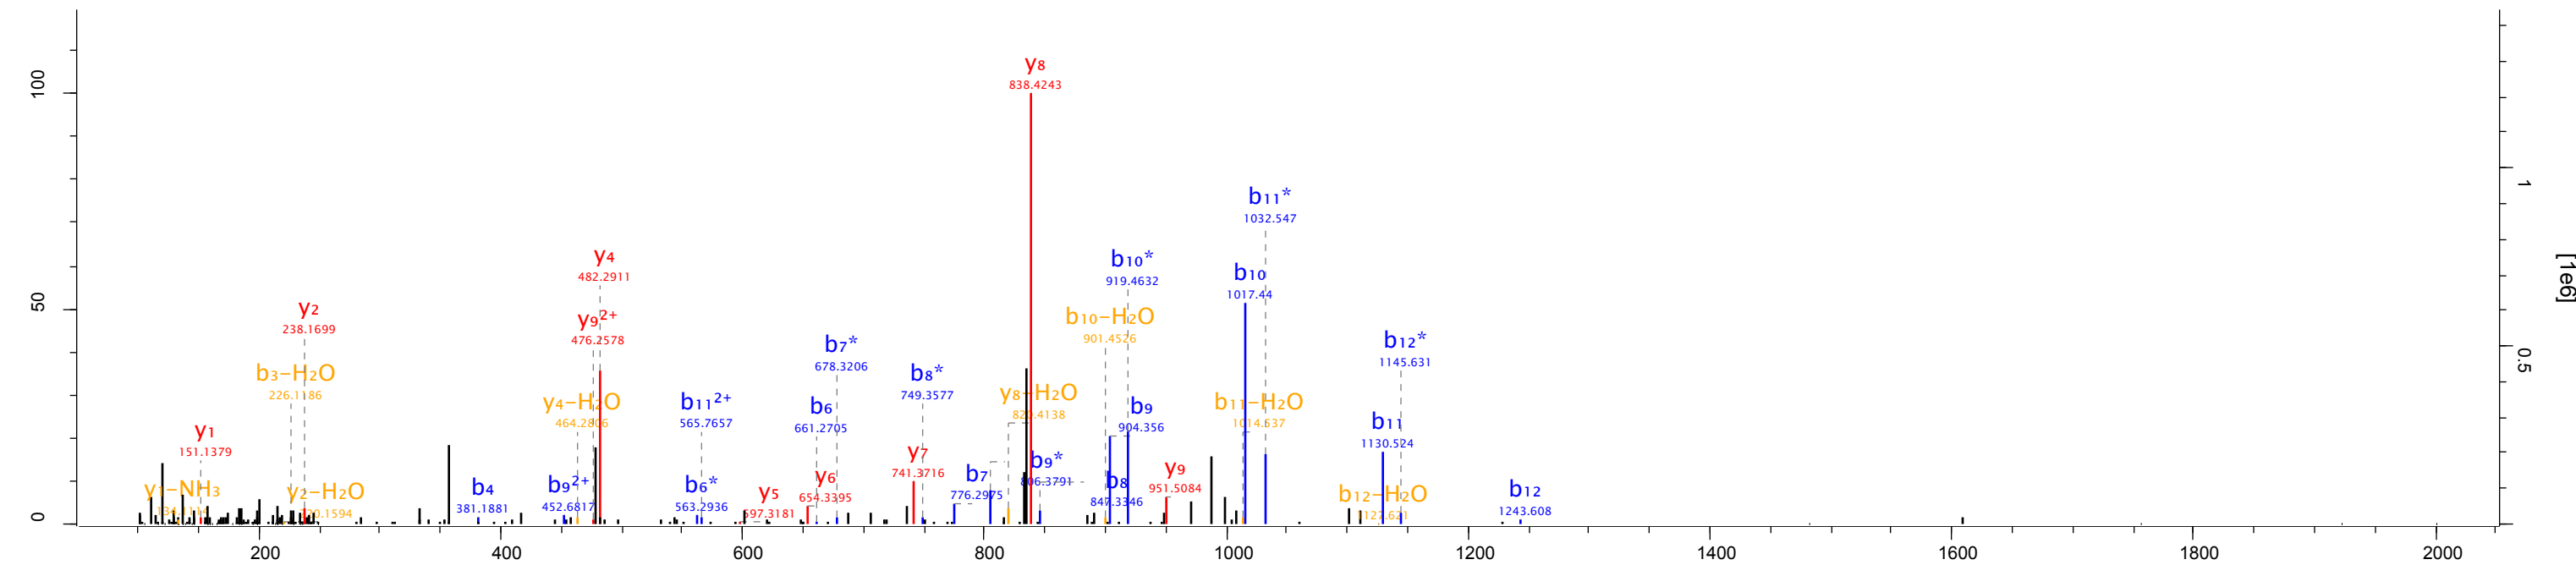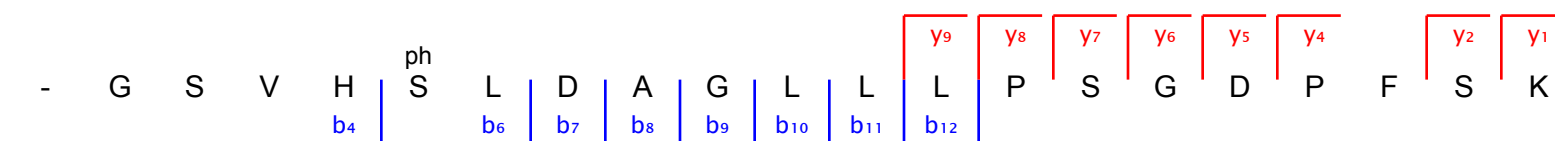

Raw file 20150814\_A375SR\_Phospho\_BR2\_09 Scan 26673 Method FTMS; HCD Score 113.15 m/z 1157.08 Gene names EPN1

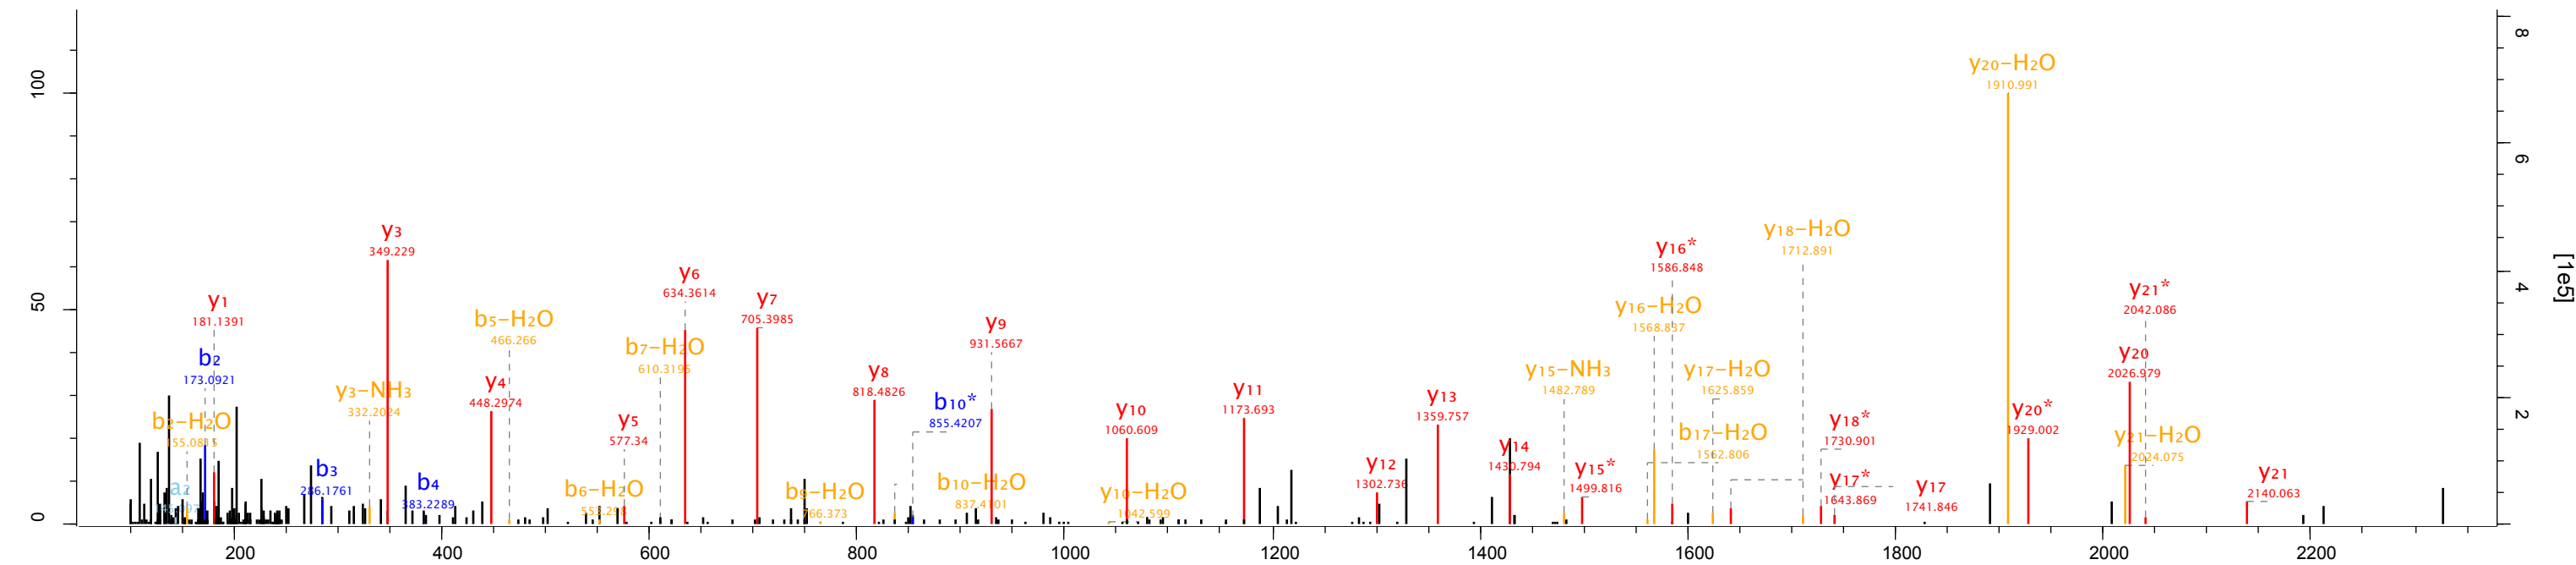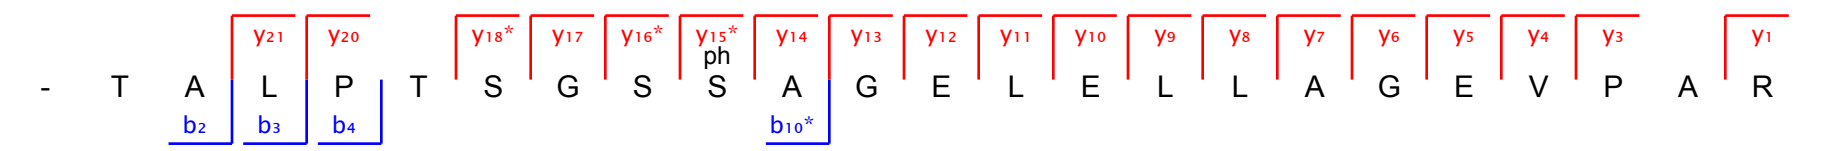

Raw file: 20150814\_A375SR\_Phospho\_BR2\_09  
 Scan: 26773 Method: FTMS; HCD Score: 110.01 m/z: 973.12 Gene names: FAM21C;FAM21A

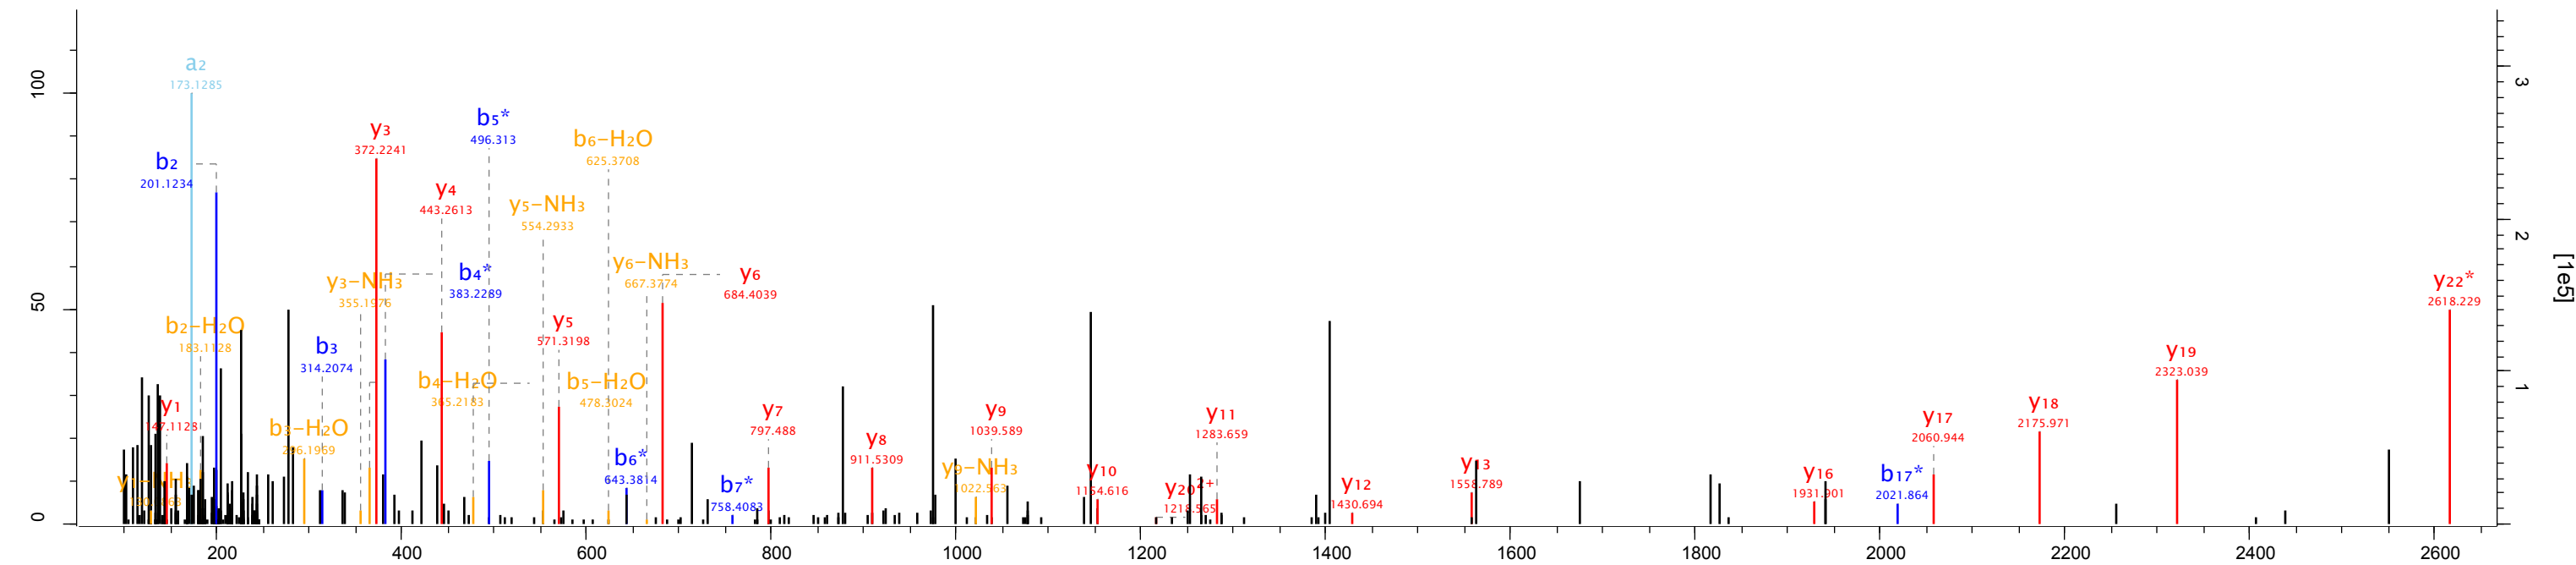

Peptide sequence: T V L S L F D E E D K M E D Q N I I Q A P Q K -

Fragmentation sites (b ions): b2 (V-L), b3 (L-S), b4\* (S-L), b5\* (L-F), b6\* (F-D), b7\* (D-E), b17\* (N-I).

Fragmentation sites (y ions): y1 (K), y3 (P-A), y4 (A-Q), y5 (Q-I), y6 (I-I), y7 (I-D), y8 (D-Q), y9 (Q-E), y10 (E-D), y11 (D-M), y12 (M-K), y13 (K-D), y16 (E-L), y17 (L-S), y18 (S-L), y19 (L-F), y20<sup>2+</sup> (F-L), y22\* (K).

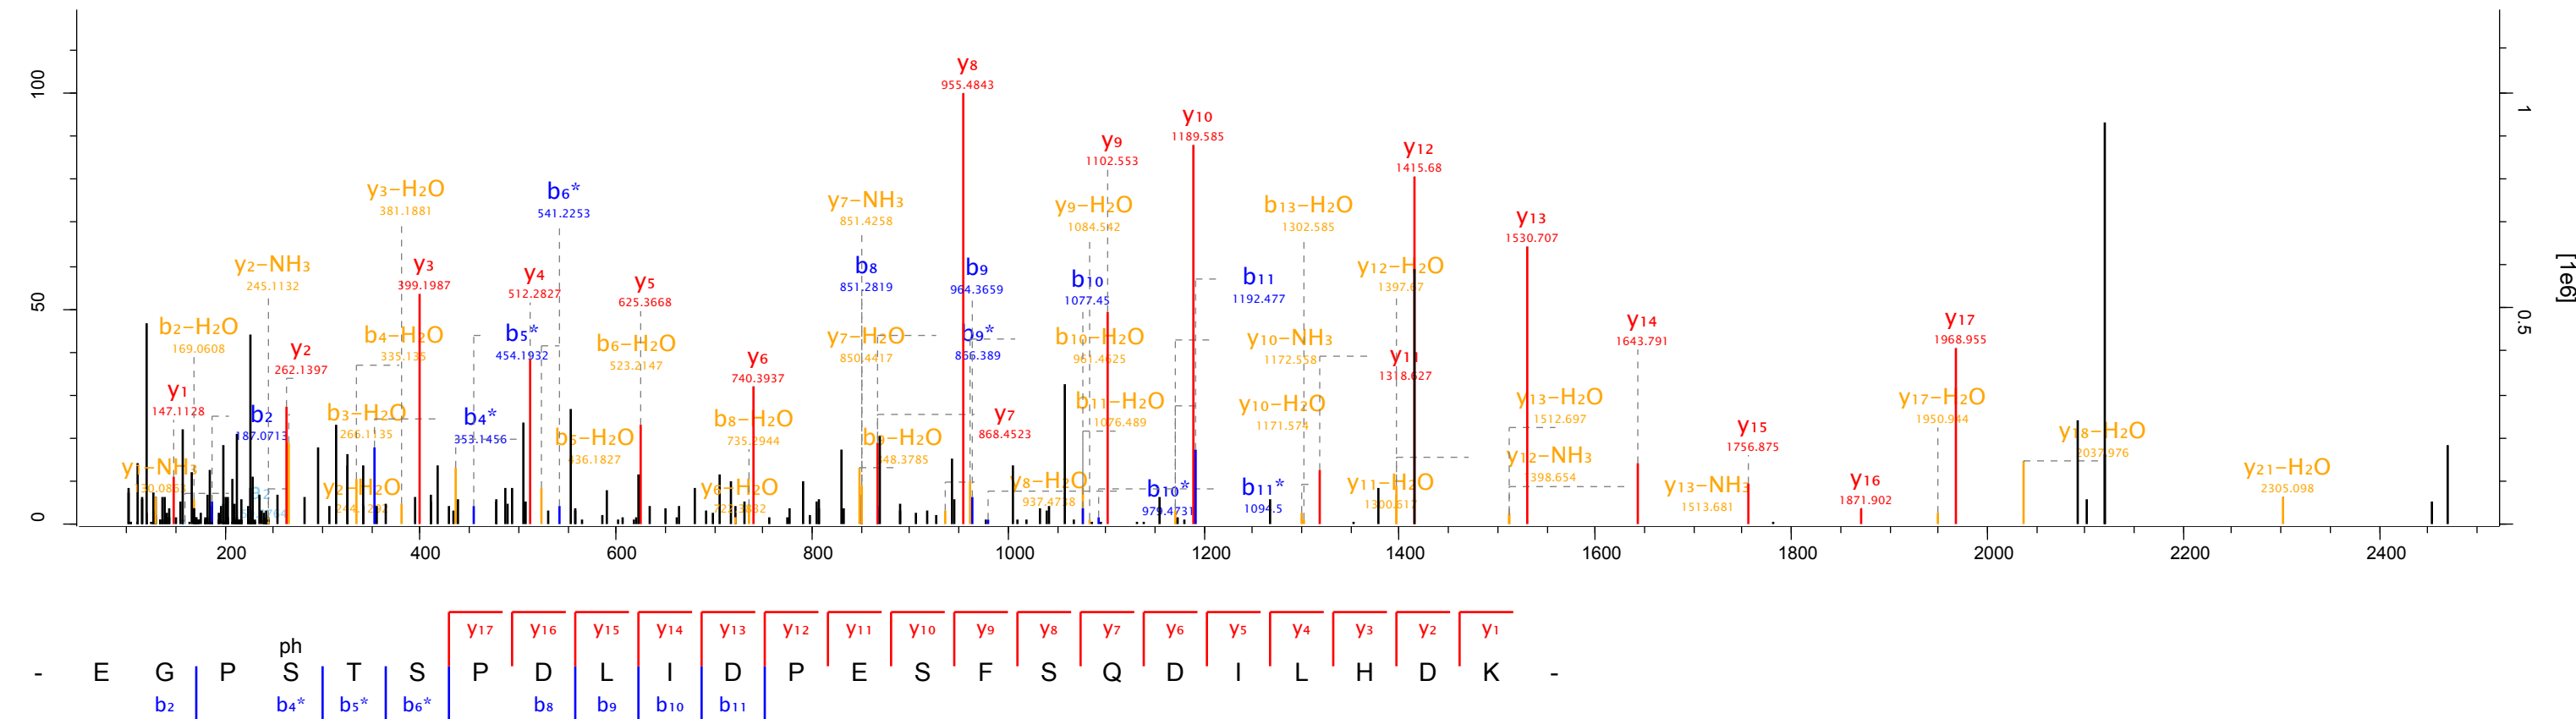



Raw file 20150814\_A375SR\_Phospho\_BR2\_09 Scan 27863 Method FTMS; HCD Score 109.77 m/z 1022.5 Gene names INTS4

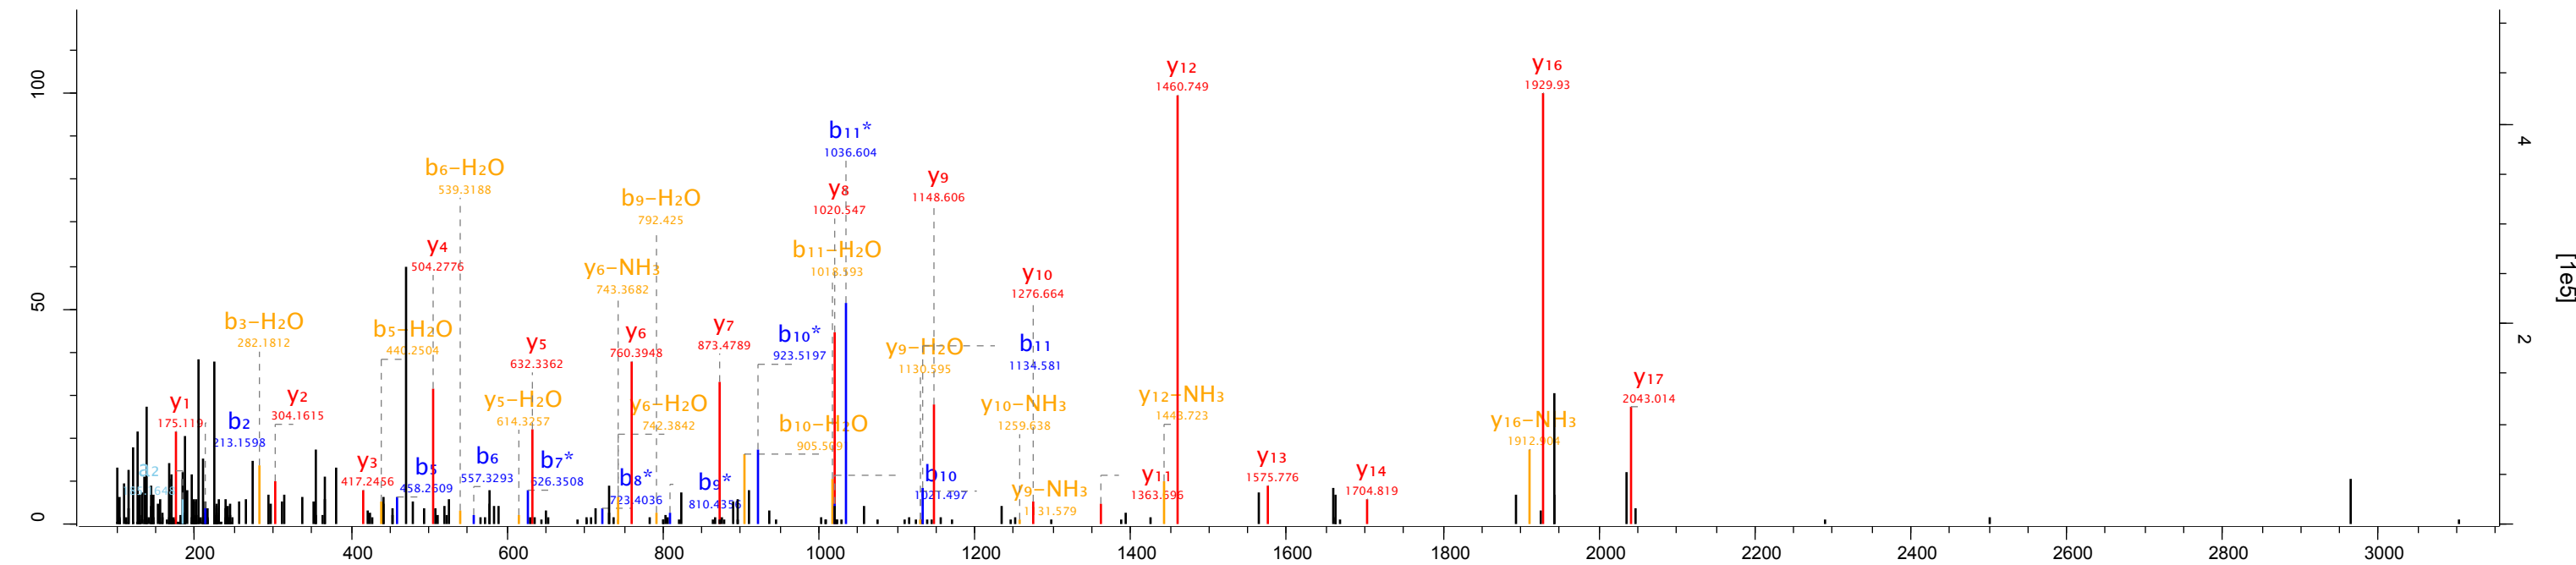

- L V S S A V S P S I I P Q E D P S Q Q F L Q Q S L E R -

Fragmentation labels below the sequence:

- Blue boxes: b<sub>2</sub> (under V), b<sub>5</sub> (under A), b<sub>6</sub> (under V), b<sub>7</sub>\* (under S), b<sub>8</sub>\* (under P), b<sub>9</sub>\* (under S), b<sub>10</sub> (under I), b<sub>11</sub> (under I)
- Red boxes: y<sub>17</sub> (over I), y<sub>16</sub> (over P), y<sub>14</sub> (over E), y<sub>13</sub> (over D), y<sub>12</sub> (over P), y<sub>11</sub> (over S), y<sub>10</sub> (over Q), y<sub>9</sub> (over Q), y<sub>8</sub> (over F), y<sub>7</sub> (over L), y<sub>6</sub> (over Q), y<sub>5</sub> (over Q), y<sub>4</sub> (over S), y<sub>3</sub> (over L), y<sub>2</sub> (over E), y<sub>1</sub> (over R)

Raw file: 20150814\_A375SR\_Phospho\_BR2\_09  
 Scan: 28263 Method: FTMS; HCD Score: 50.18 m/z: 1269.57 Gene names: KRT8

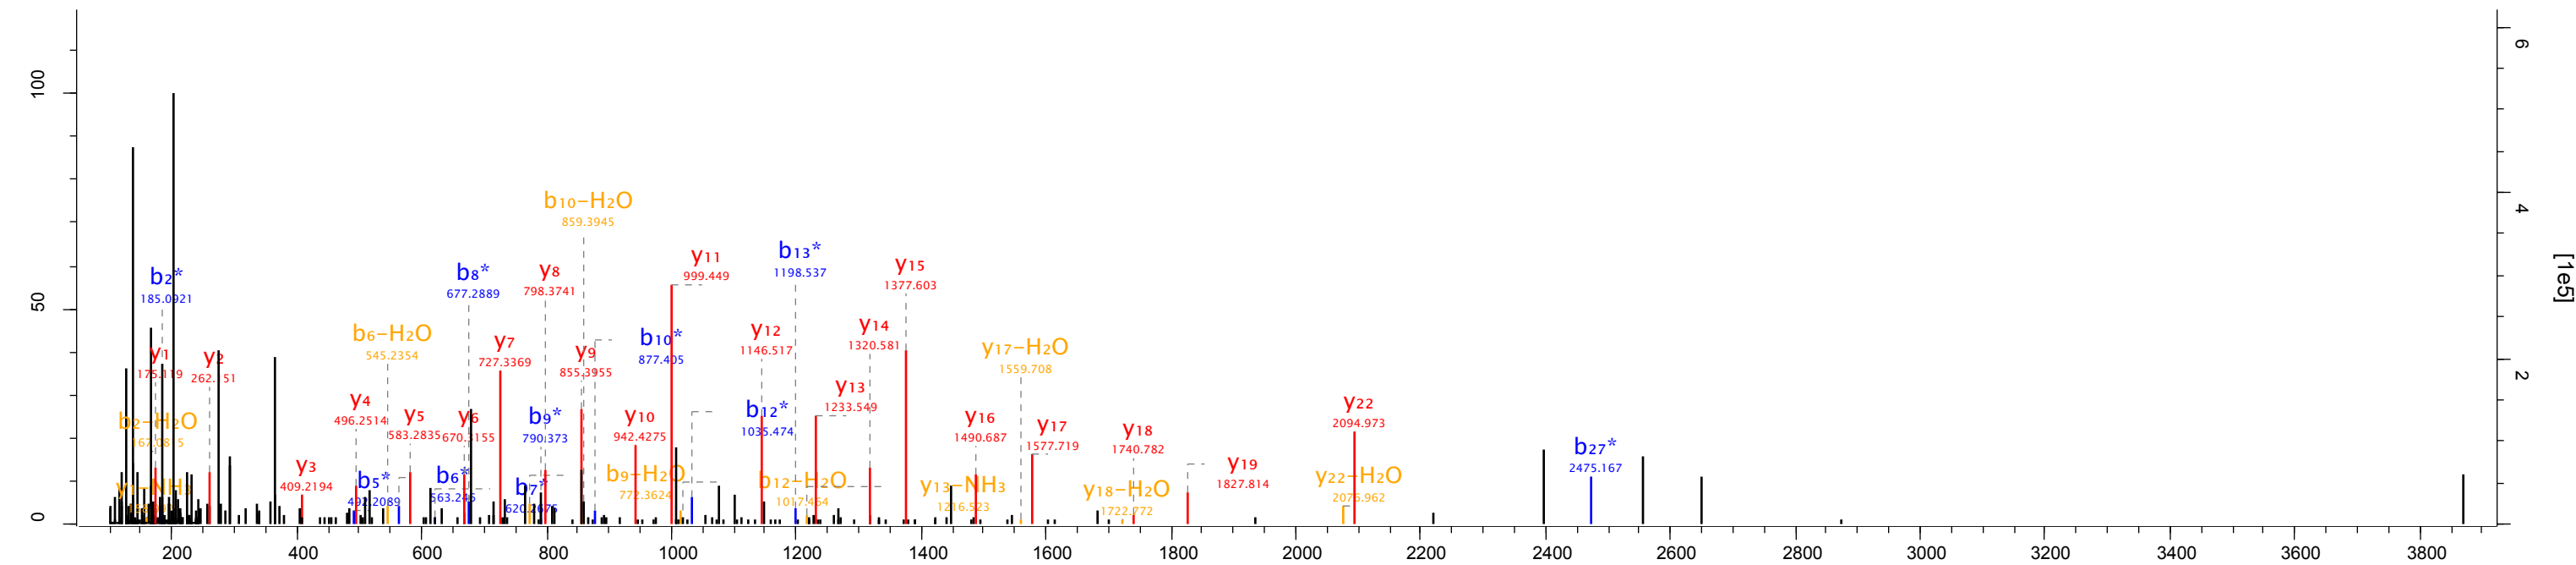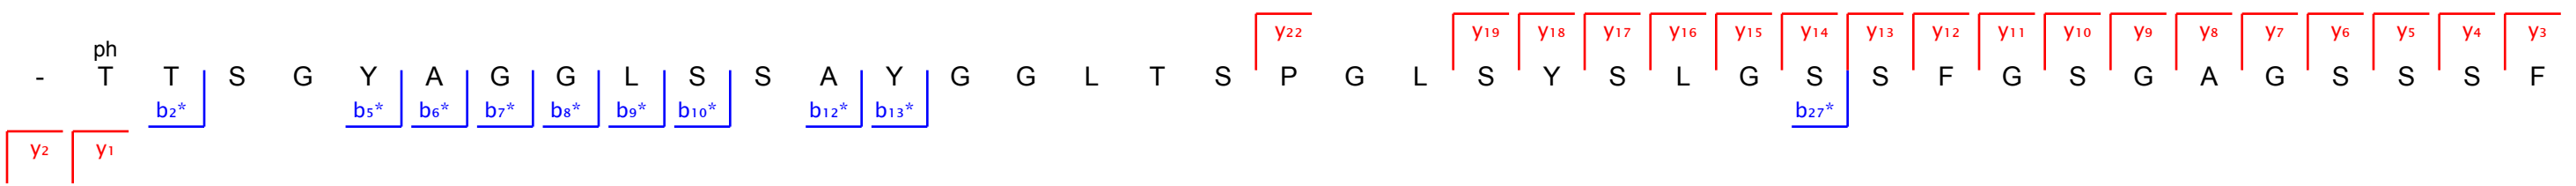

Raw file 20150814\_A375SR\_Phospho\_BR2\_09 Scan 28273 Method FTMS; HCD Score 119.37 m/z 970.91 Gene names MACF1

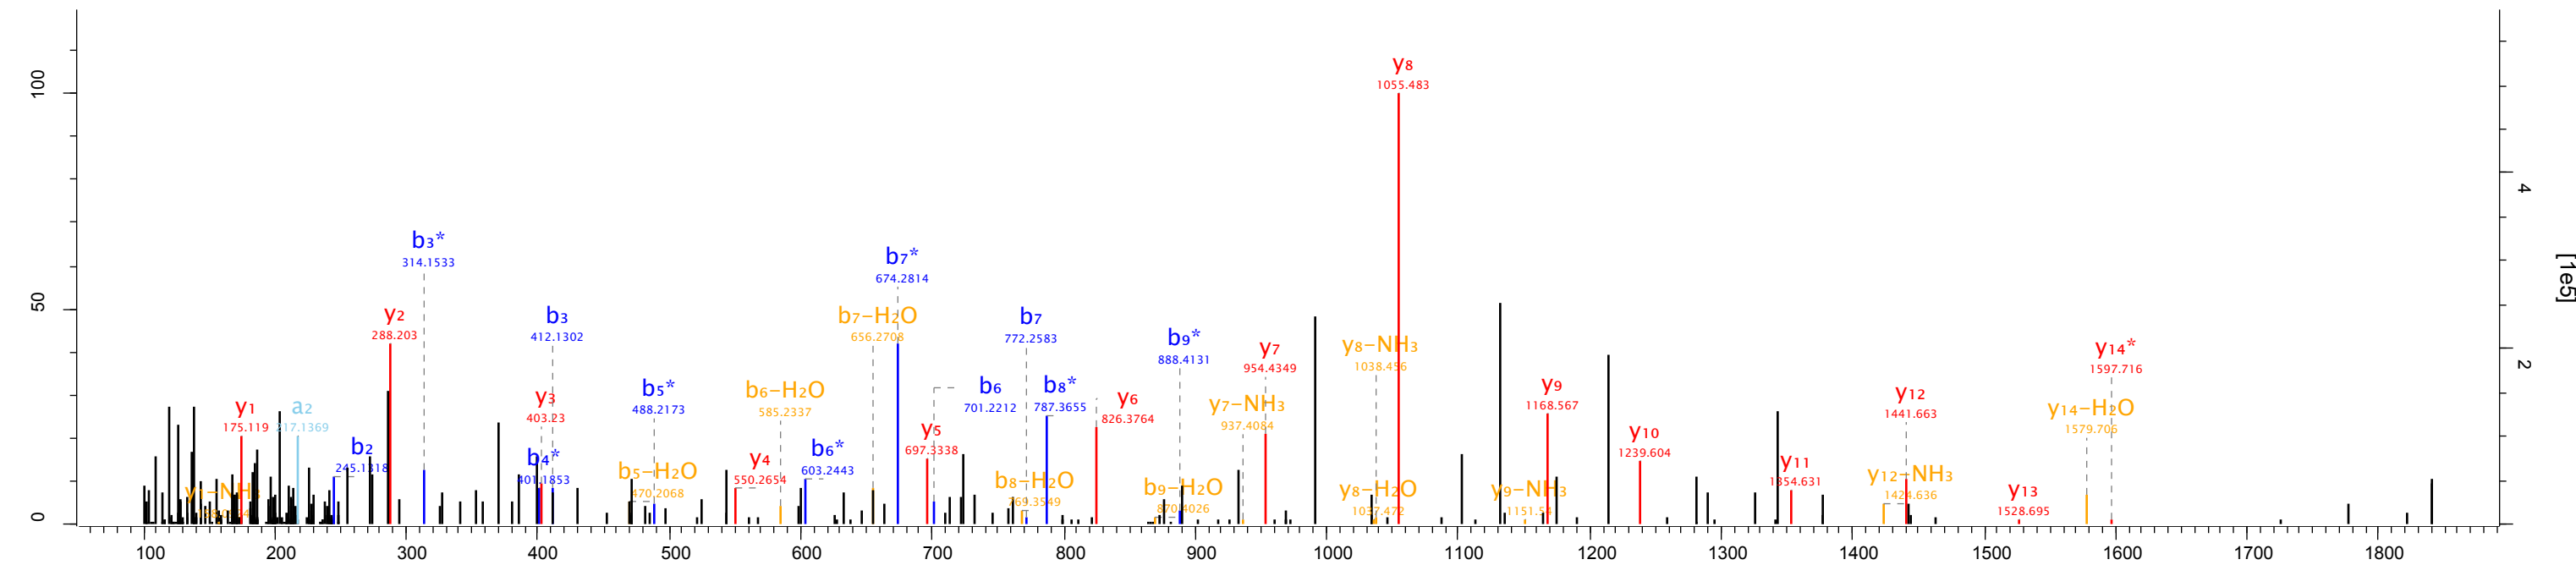

- M L Y14\*  
ph Y13  
S Y12  
S Y11  
D Y10  
A Y9  
I Y8  
T Y7  
Q Y6  
E Y5  
F Y4  
OX  
M Y3  
D Y2  
L Y1  
R -

b2 b3 b4\* b5\* b6 b7 b8\* b9\*

Raw file 20150814\_A375SR\_Phospho\_BR2\_09 Scan 28463 Method FTMS; HCD Score 69.99 m/z 728.36 Gene names hCG\_2039718;RFFL

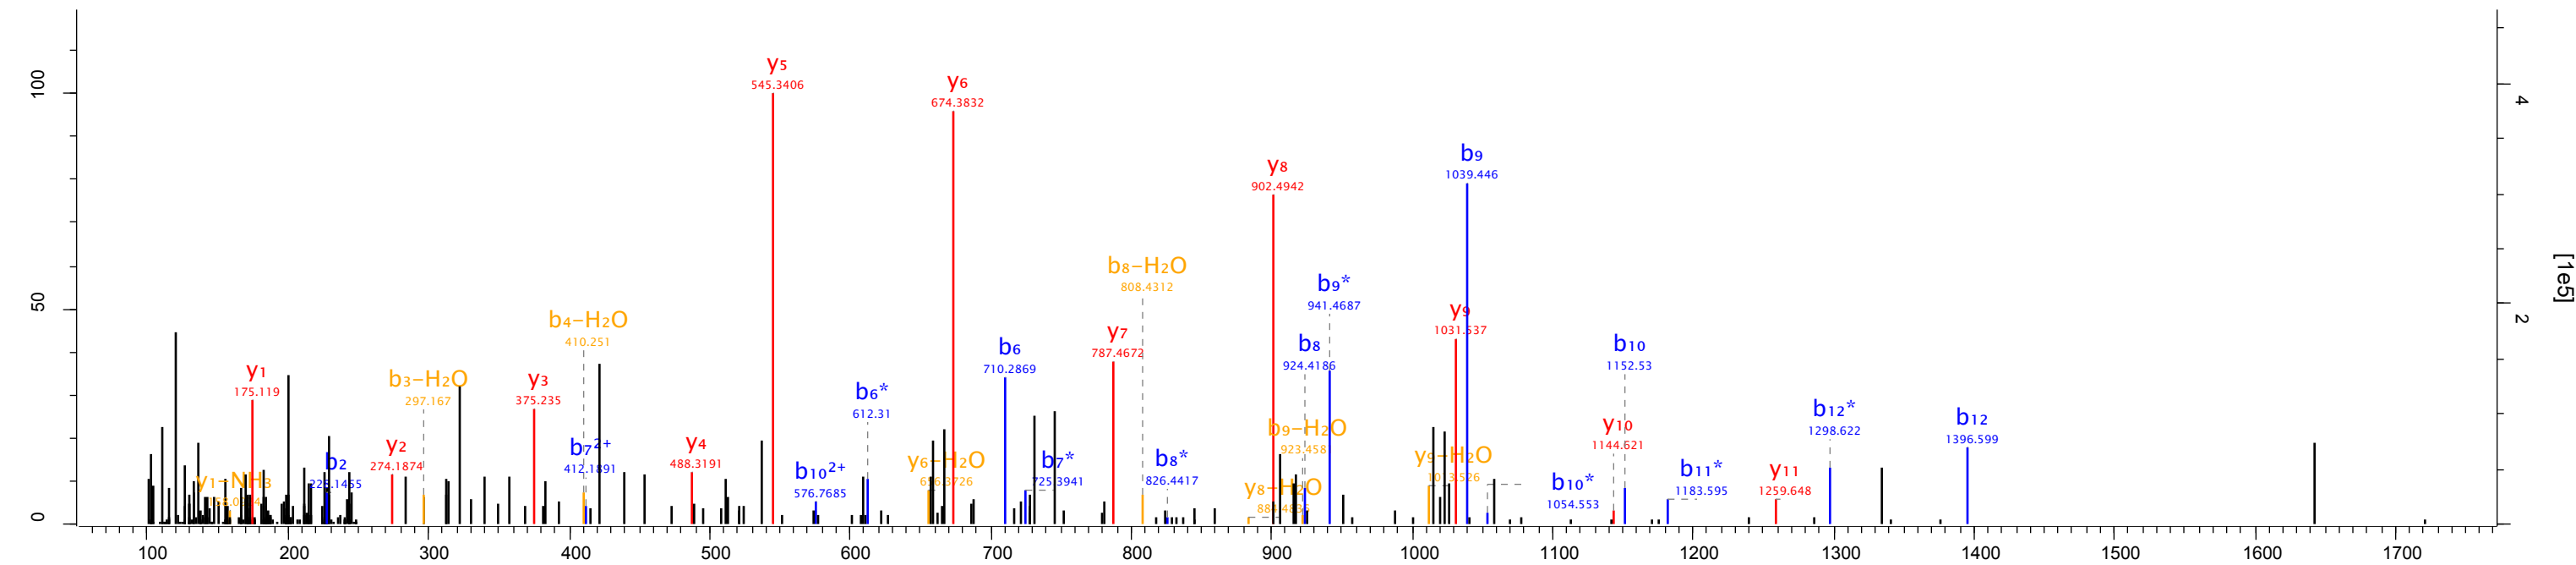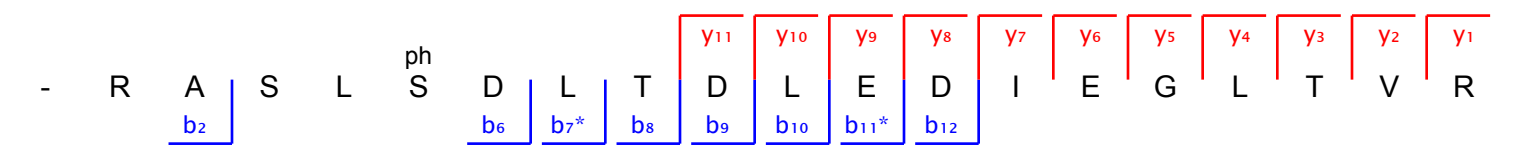

Raw file: 20150814\_A375SR\_Phospho\_BR2\_09  
 Scan: 28573 Method: FTMS; HCD Score: 131.56 m/z: 858.77 Gene names: KANK2

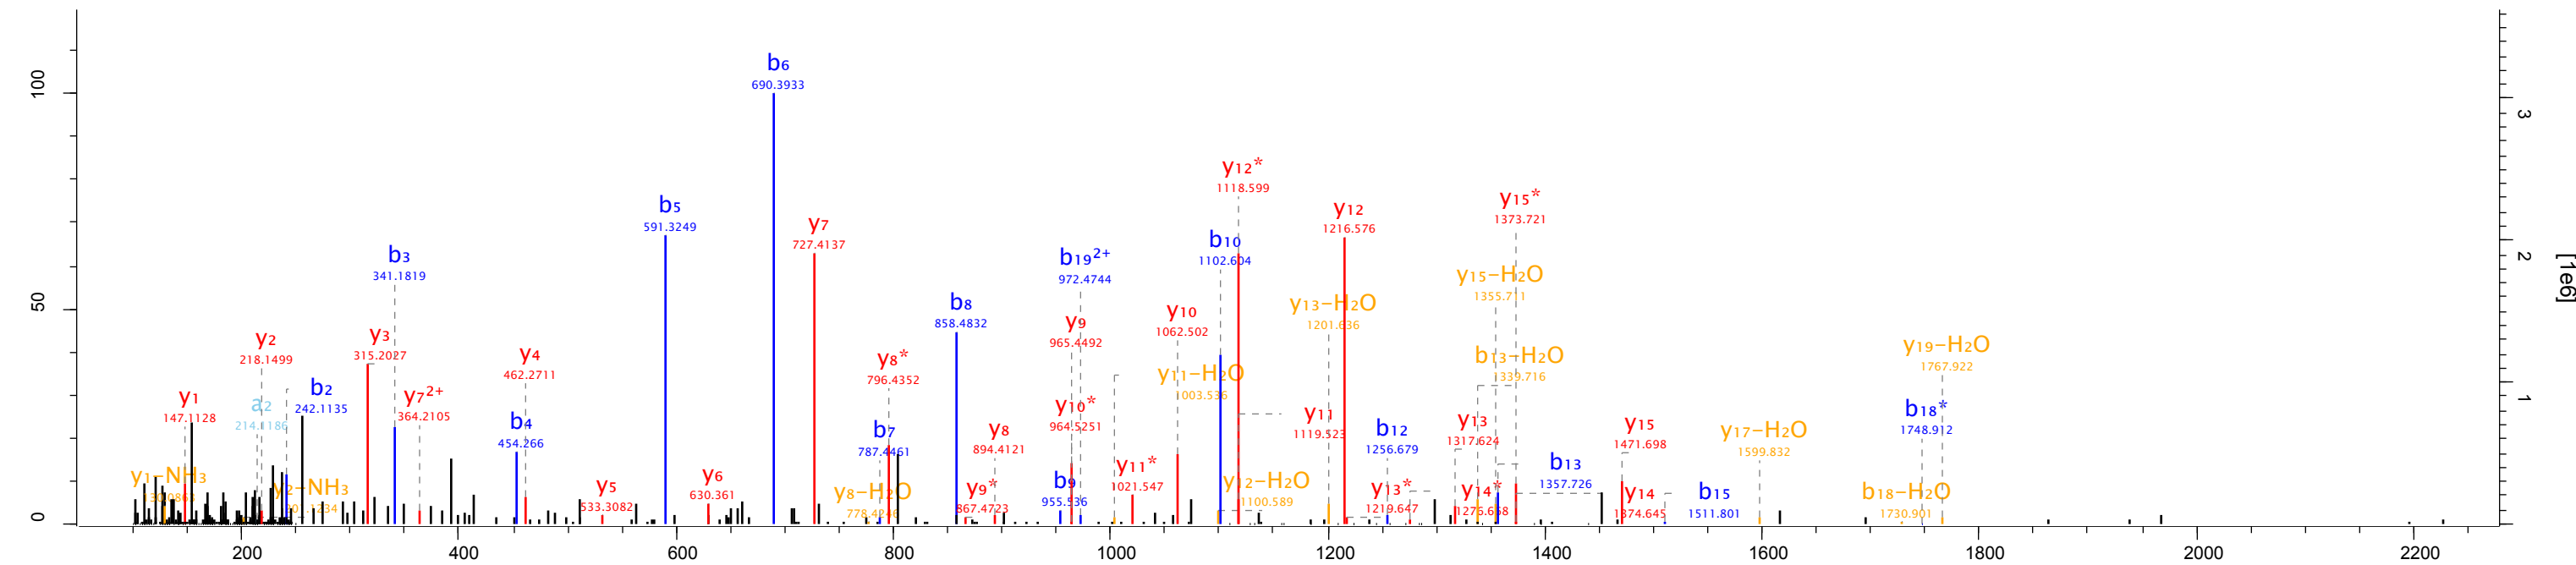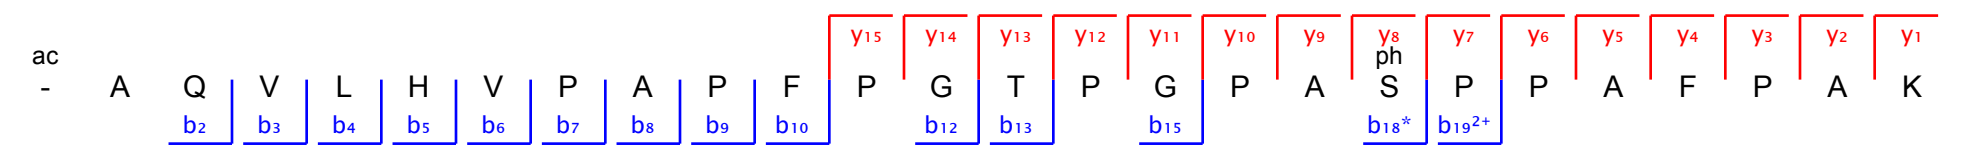

Raw file: 20150814\_A375SR\_Phospho\_BR2\_09  
 Scan: 28673 Method: FTMS; HCD Score: 84.75 m/z: 1020.27 Gene names: ACBD3

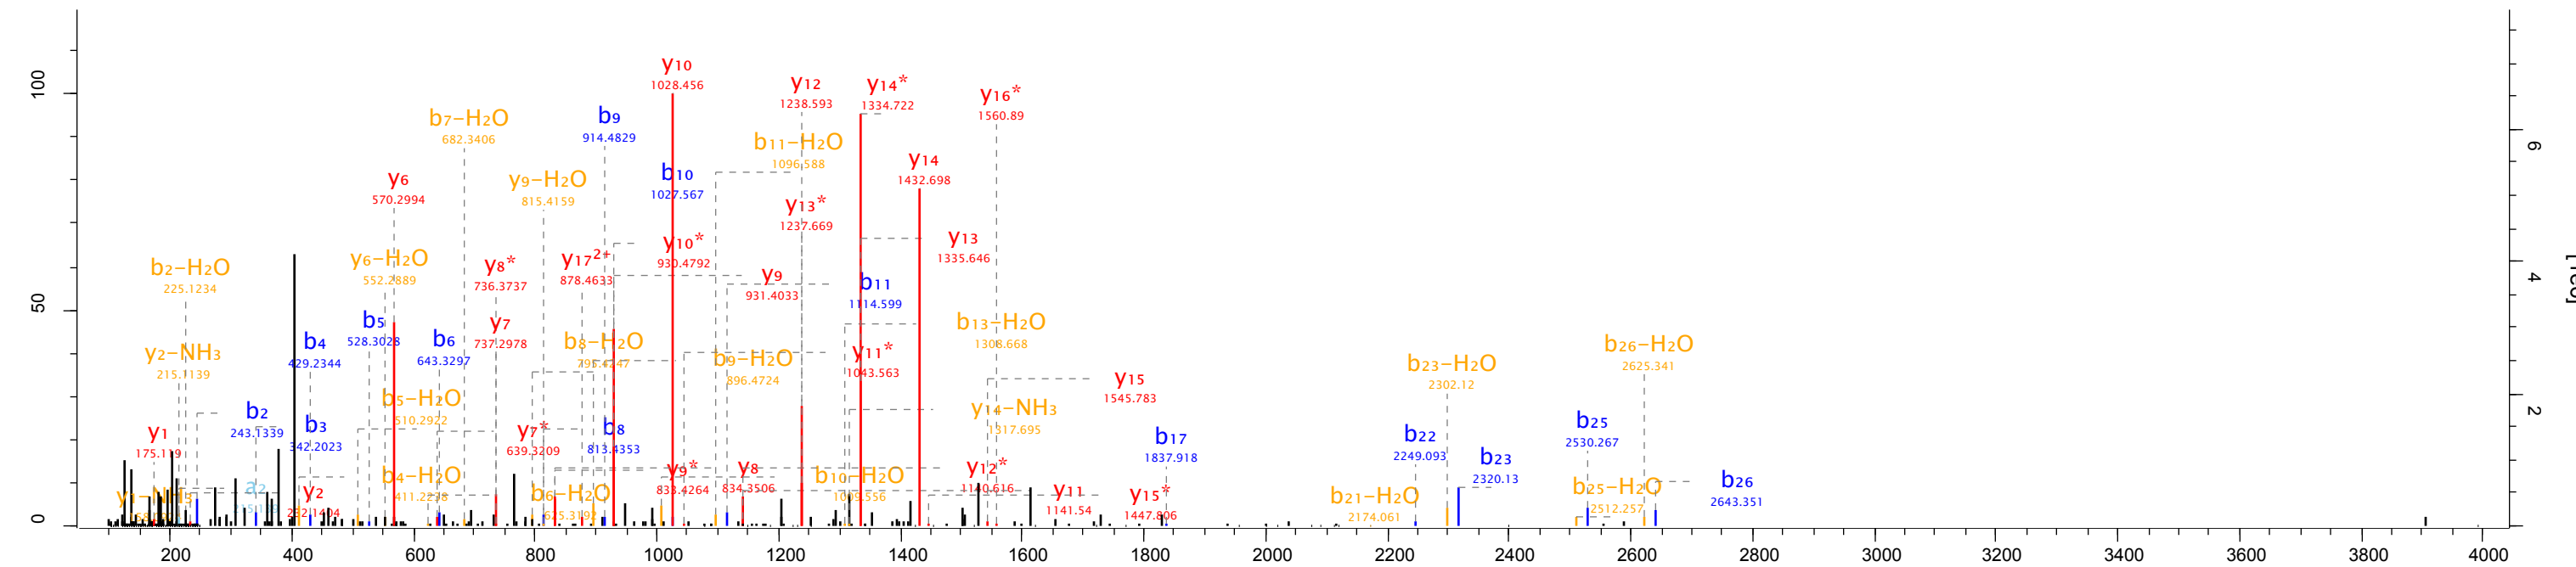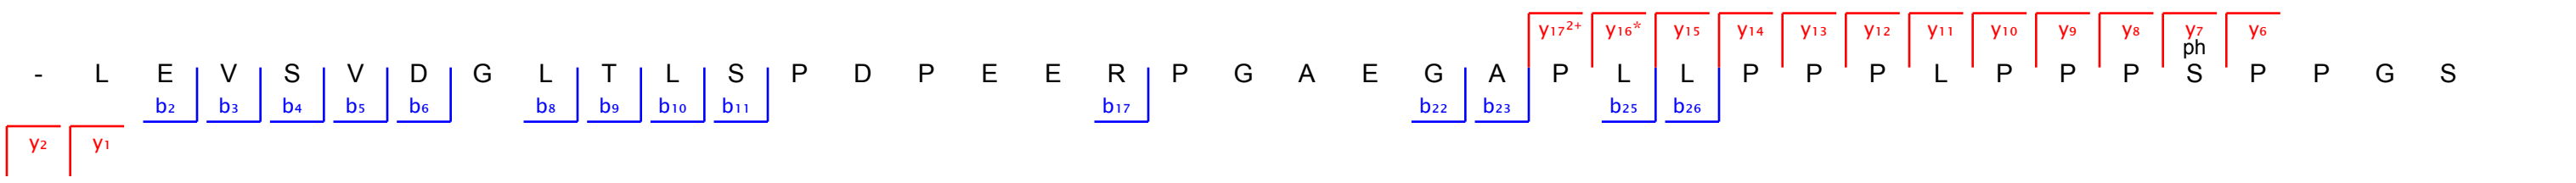

Raw file: 20150814\_A375SR\_Phospho\_BR2\_09  
 Scan: 28893 Method: FTMS; HCD Score: 107.11 m/z: 703.87 Gene names: SMAD2

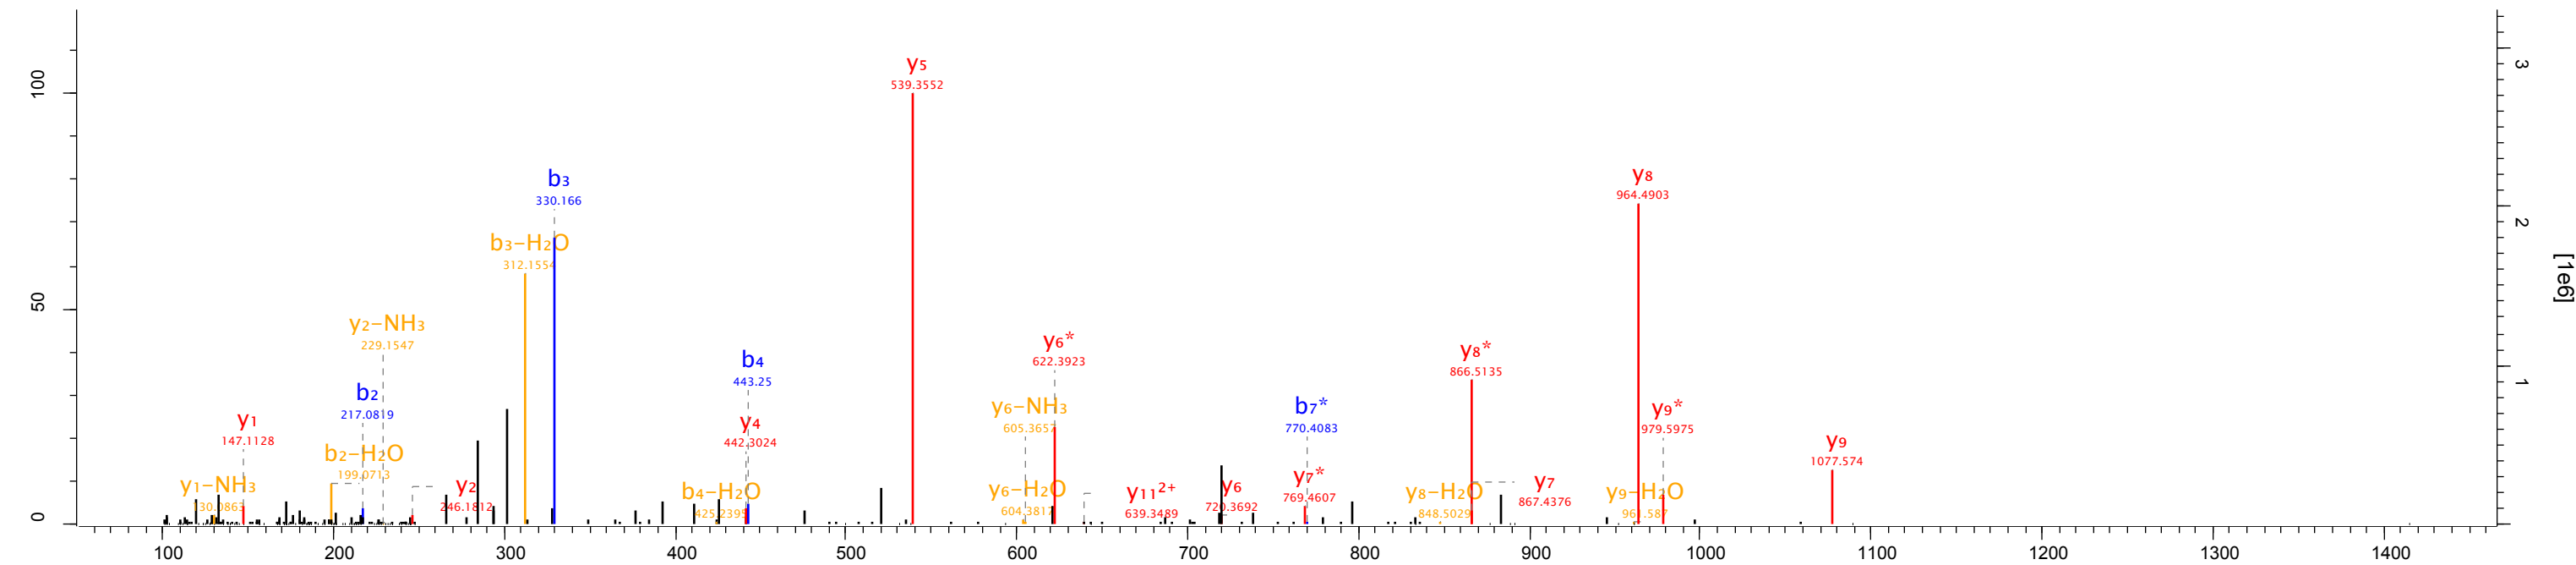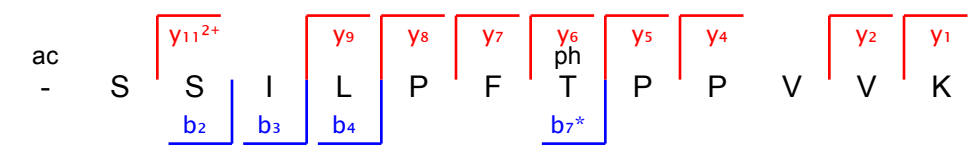

Raw file 20150814\_A375SR\_Phospho\_BR2\_09 Scan 4023 Method FTMS; HCD Score 98.68 m/z 520.25 Gene names ATRX

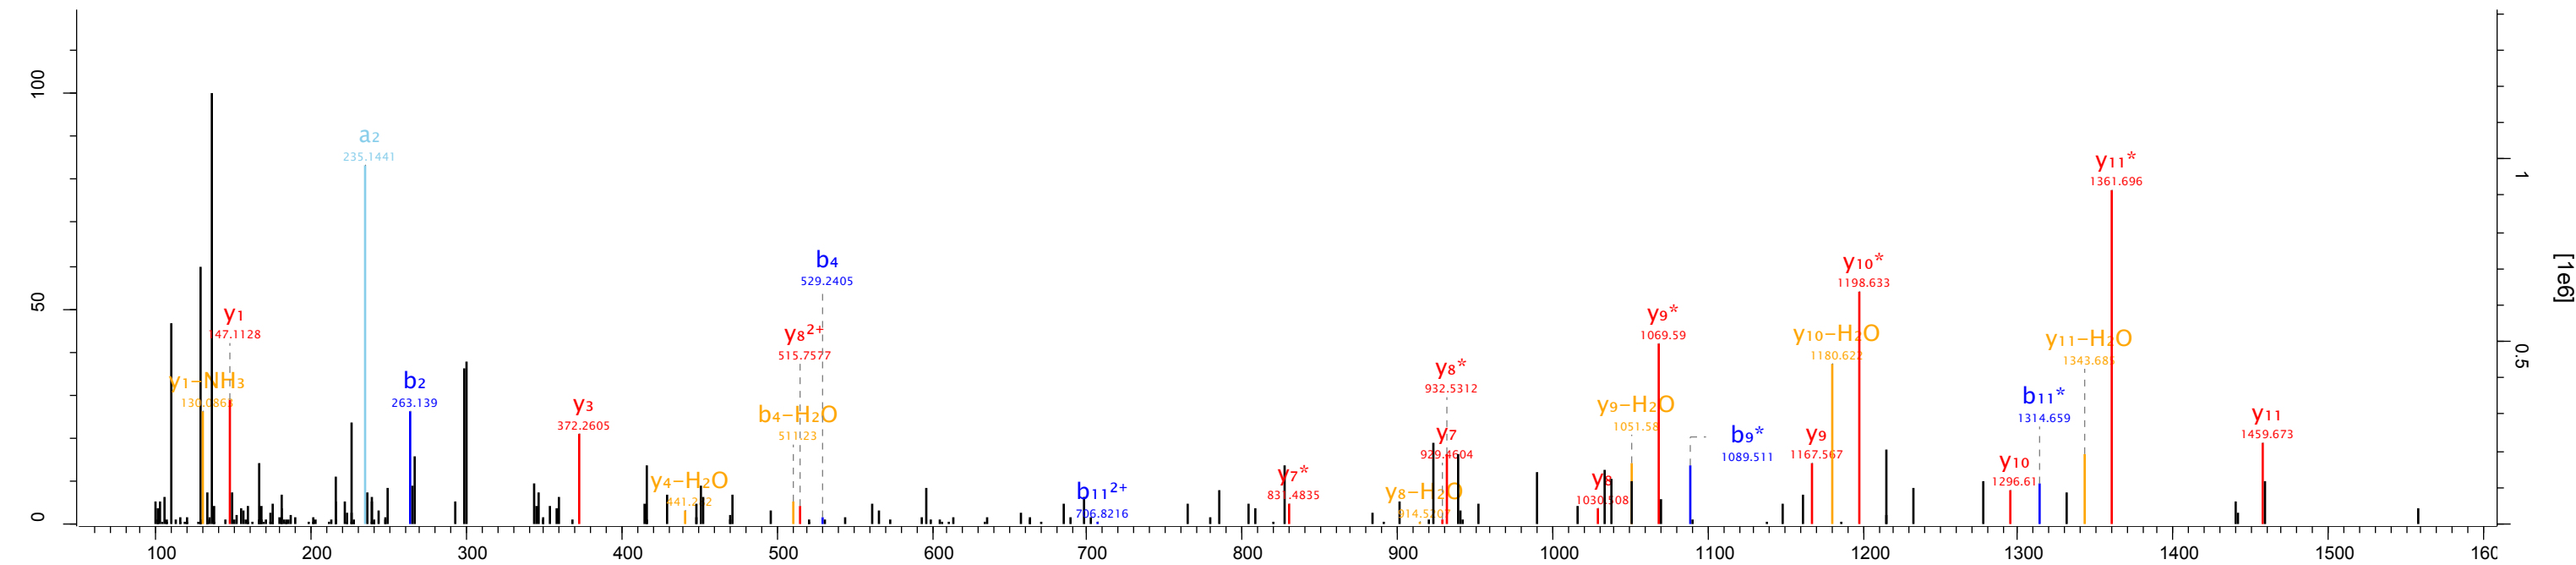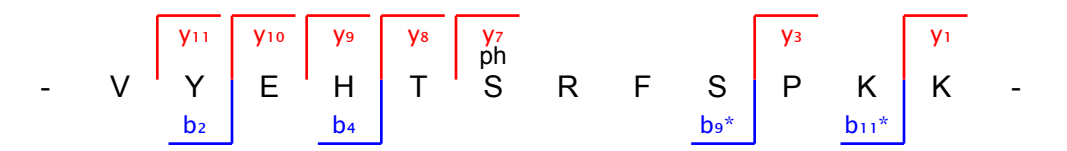



Raw file: 20150814\_A375SR\_Phospho\_BR2\_09  
 Scan: 4623 Method: FTMS; HCD Score: 128.82 m/z: 694.81 Gene names: HNRNPL

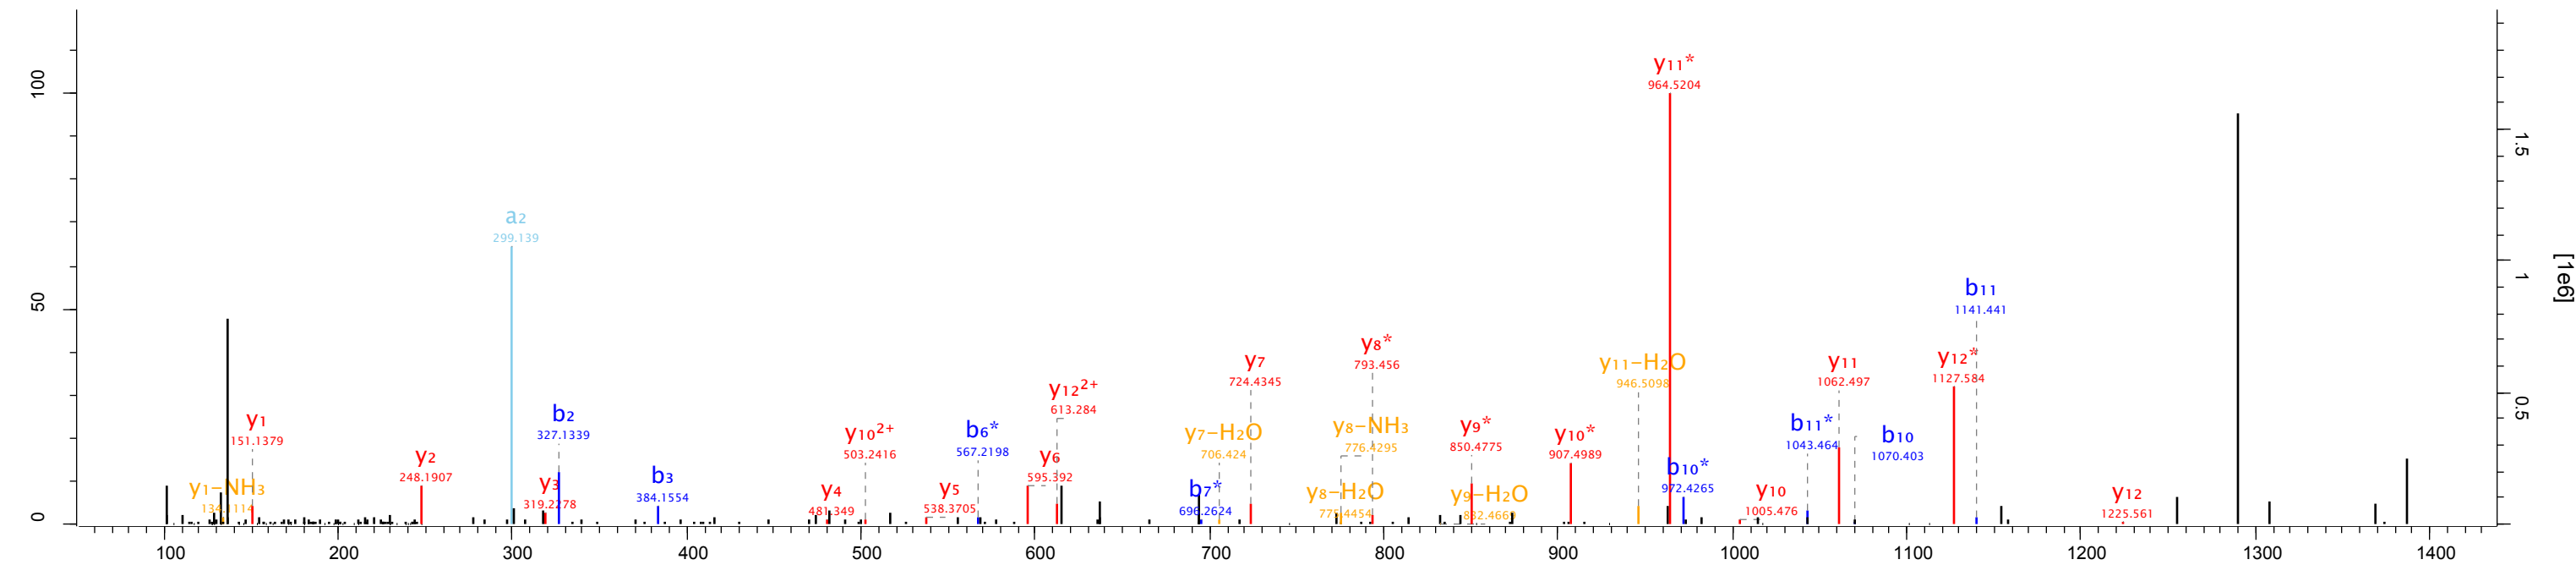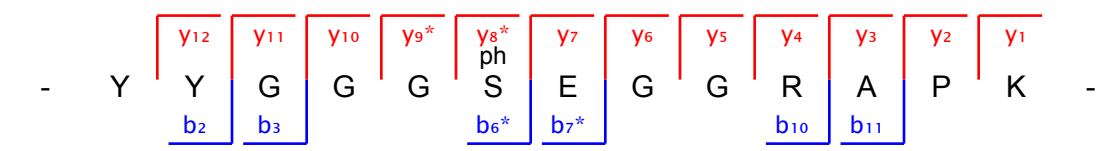

Raw file: 20150814\_A375SR\_Phospho\_BR2\_09  
 Scan: 4813 Method: FTMS; HCD Score: 128.28 m/z: 408.21 Gene names: CALD1

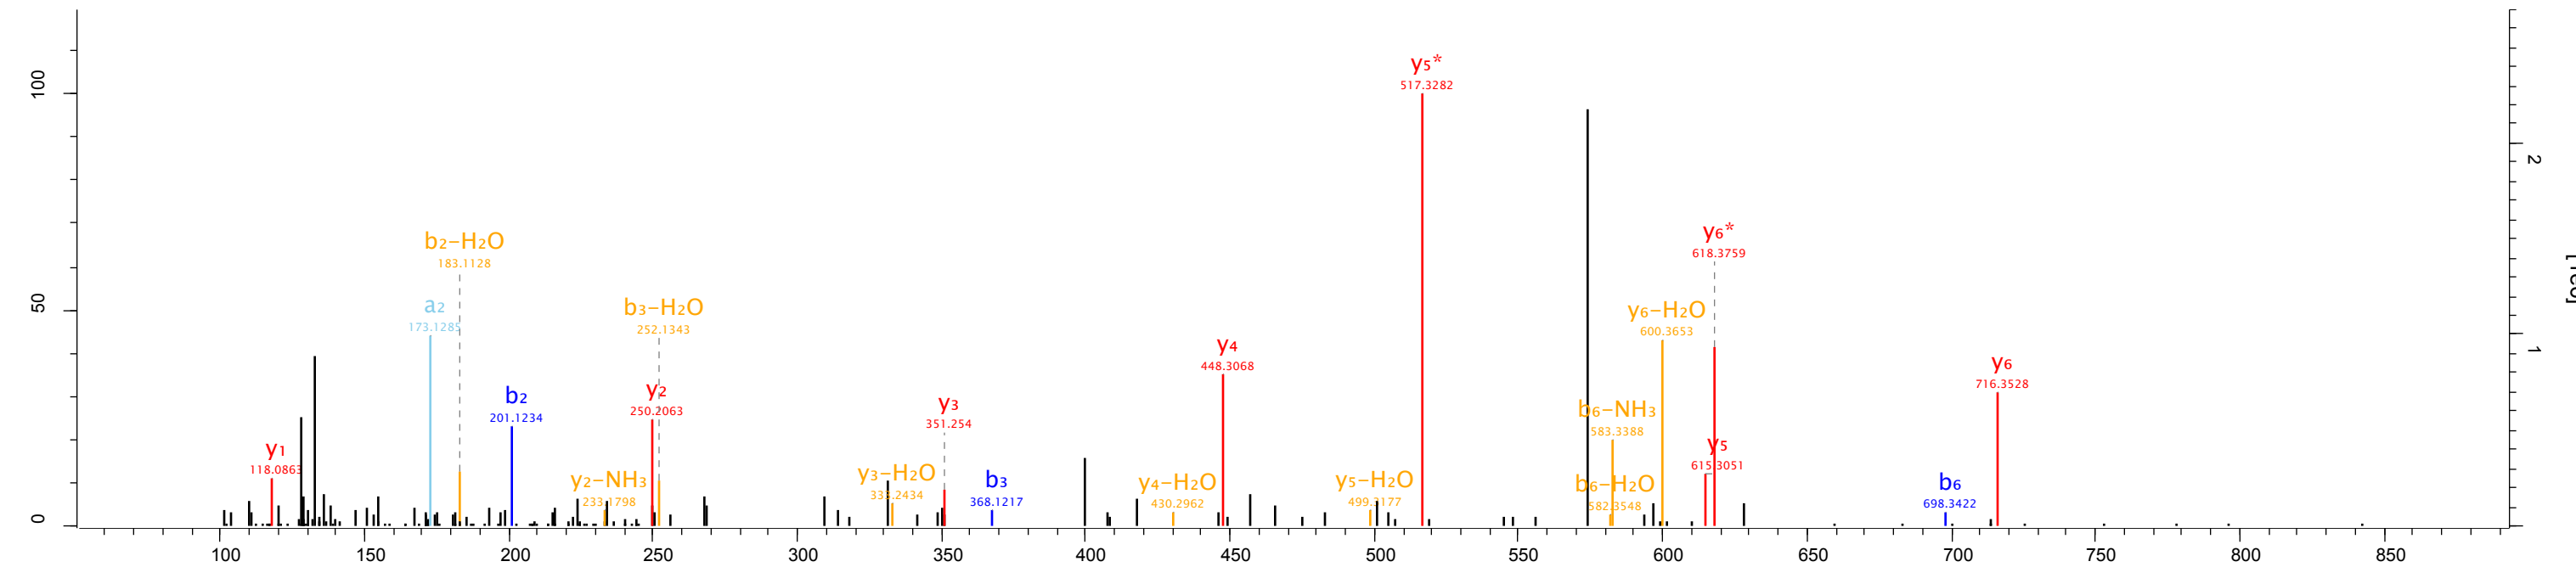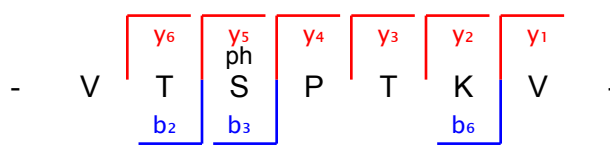

Raw file 20150814\_A375SR\_Phospho\_BR2\_09 Scan 5333 Method FTMS; HCD Score 66.02 m/z 514.27 Gene names BPTF

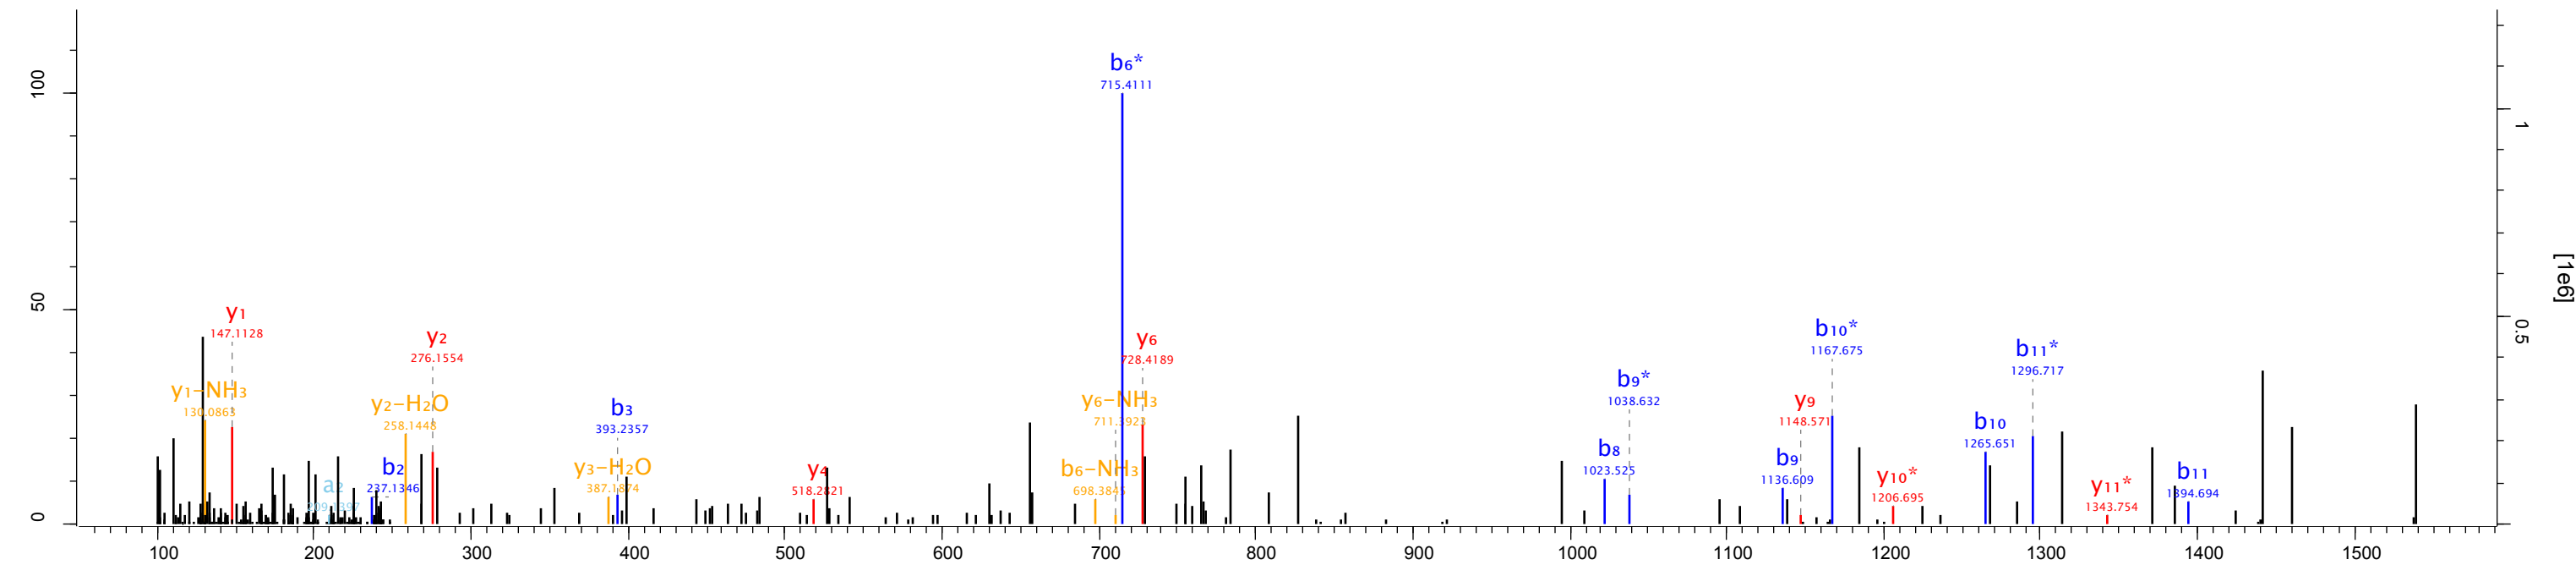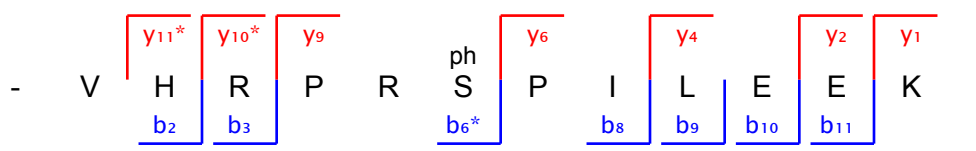

Raw file: 20150814\_A375SR\_Phospho\_BR2\_09  
 Scan: 6123 Method: FTMS; HCD Score: 68.26 m/z: 612.78 Gene names: NOL8

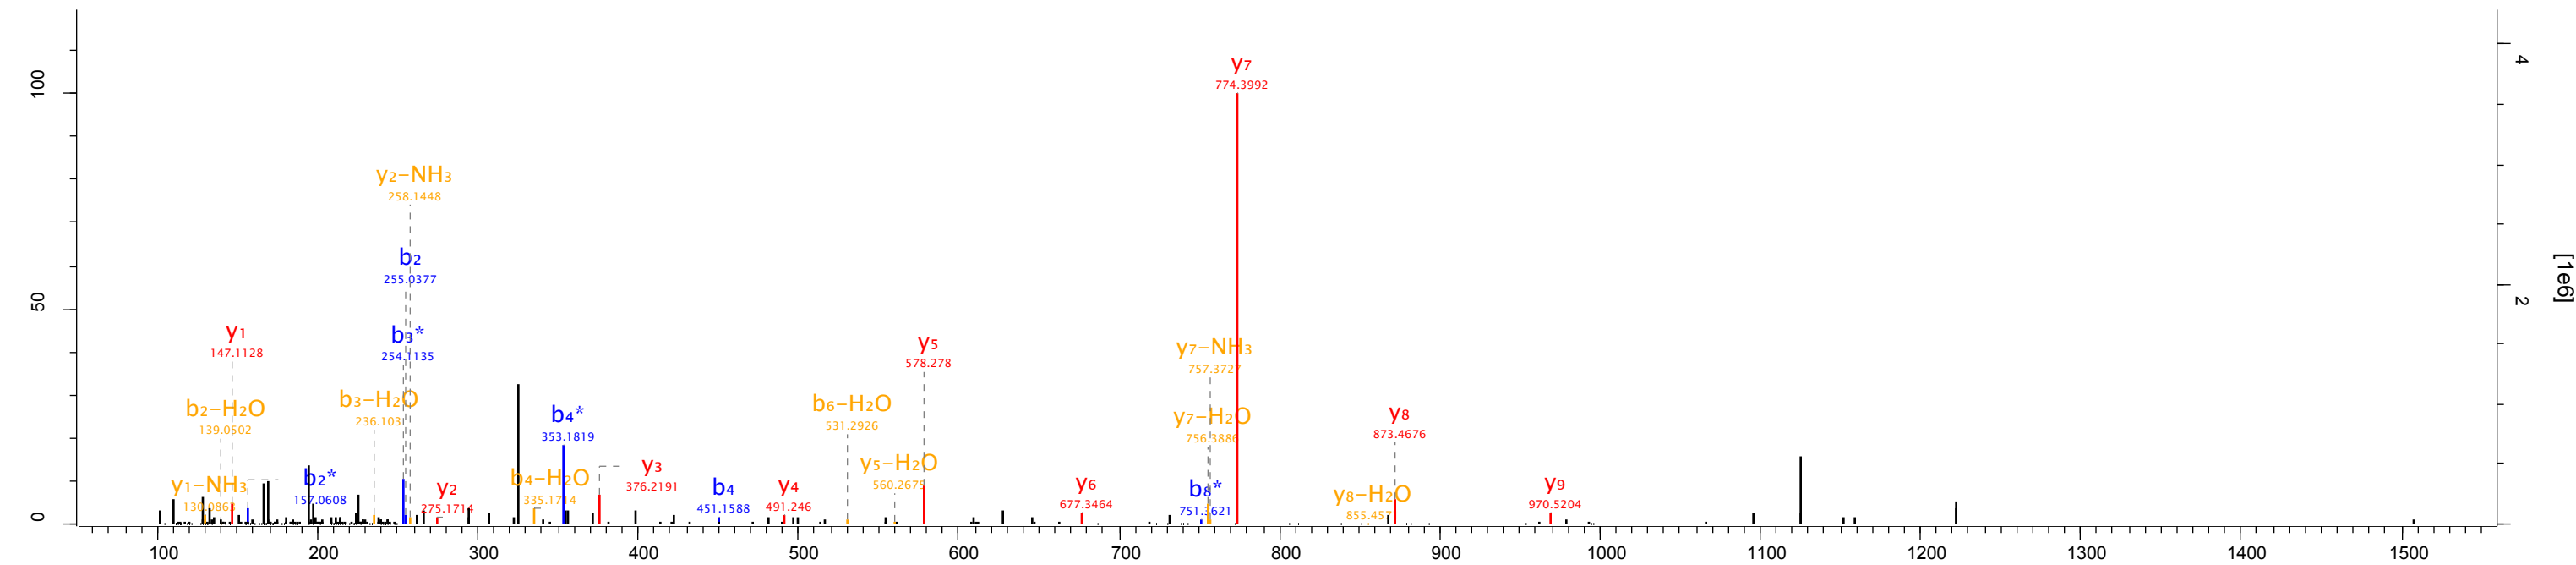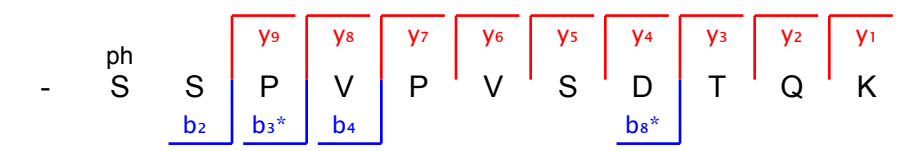

Raw file 20150814\_A375SR\_Phospho\_BR2\_09 Scan 6203 Method FTMS; HCD Score 98.94 m/z 617.73 Gene names HNRNPK

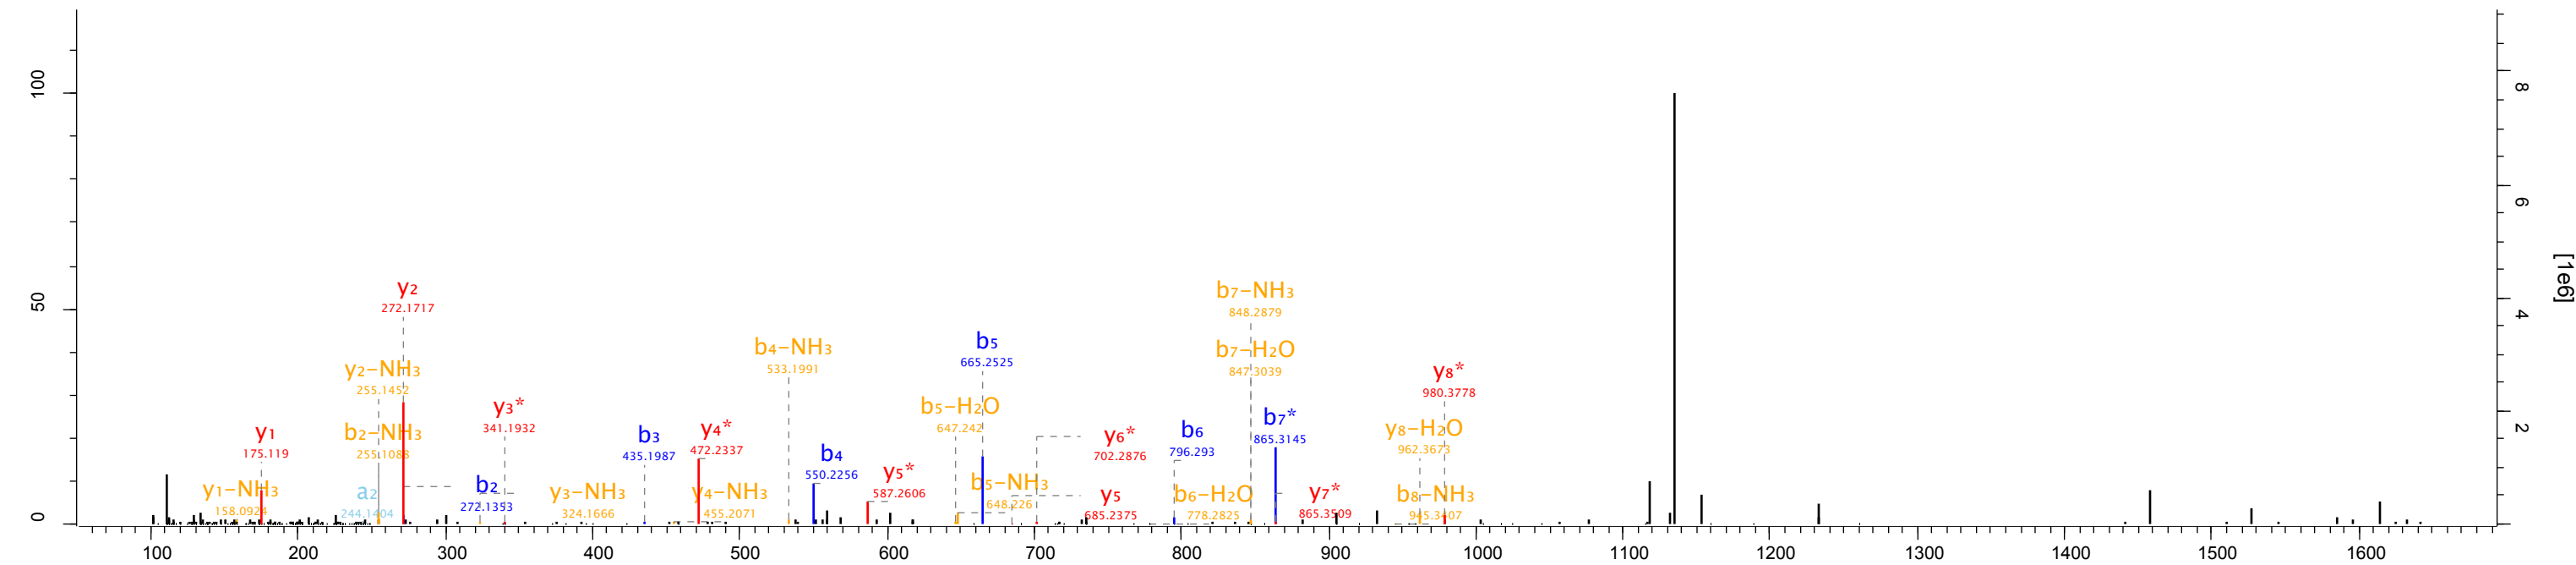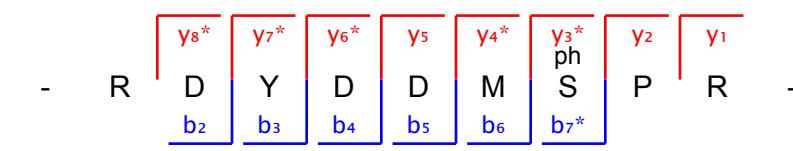

Raw file: 20150814\_A375SR\_Phospho\_BR2\_09  
 Scan: 6213 Method: FTMS; HCD Score: 158.93 m/z: 653.77 Gene names: SORBS2

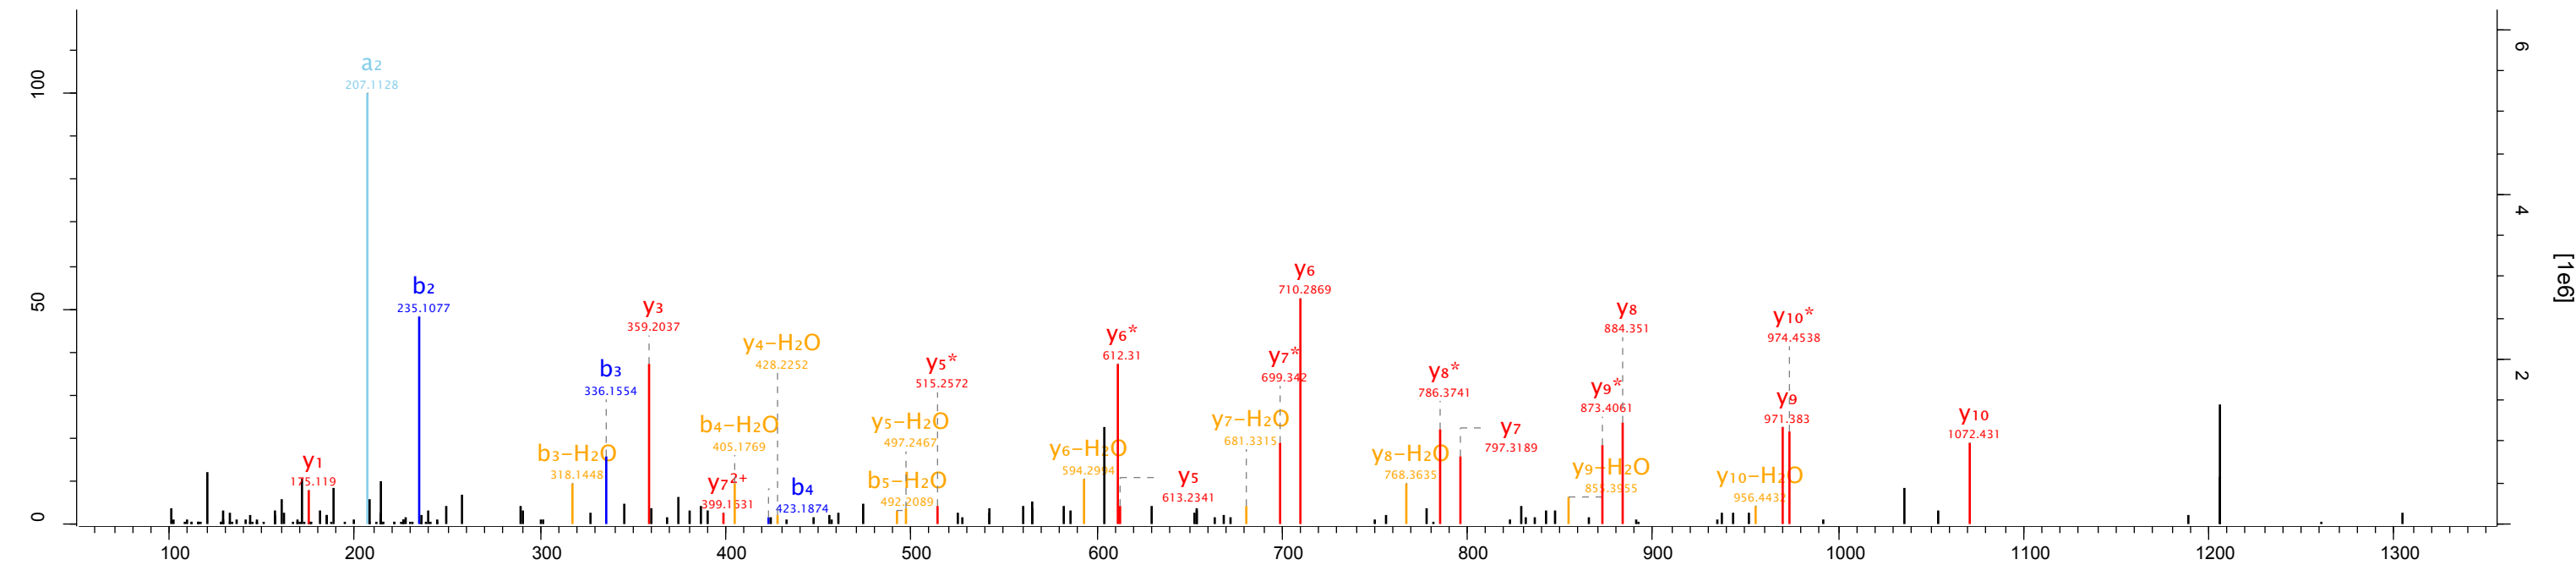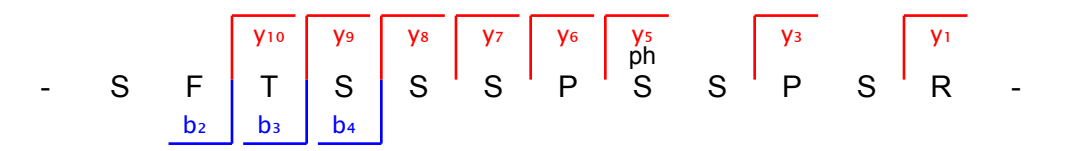

Raw file: 20150814\_A375SR\_Phospho\_BR2\_09  
 Scan: 6563 Method: FTMS; HCD Score: 132.59 m/z: 582.3 Gene names: MARK2

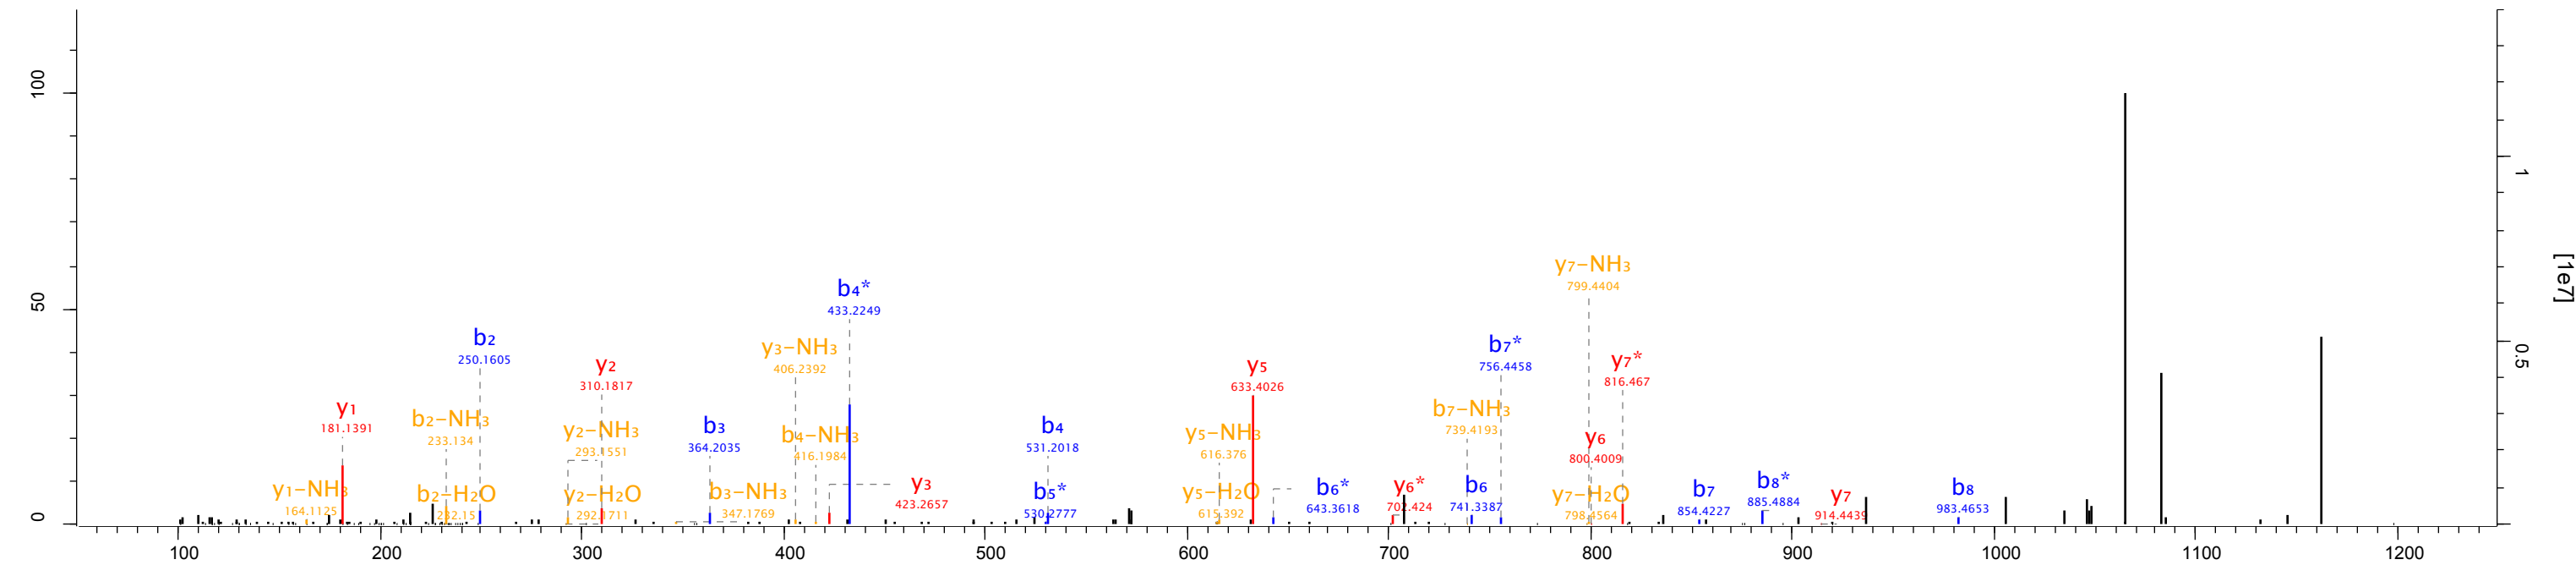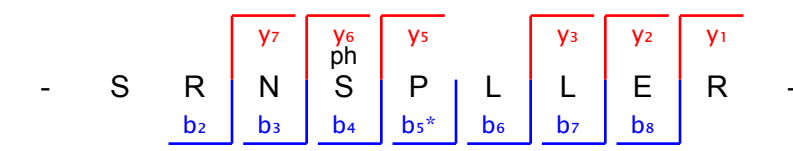

Raw file: 20150814\_A375SR\_Phospho\_BR2\_09  
 Scan: 7573 Method: FTMS; HCD Score: 297.7 m/z: 848.88 Gene names: SMARCC2

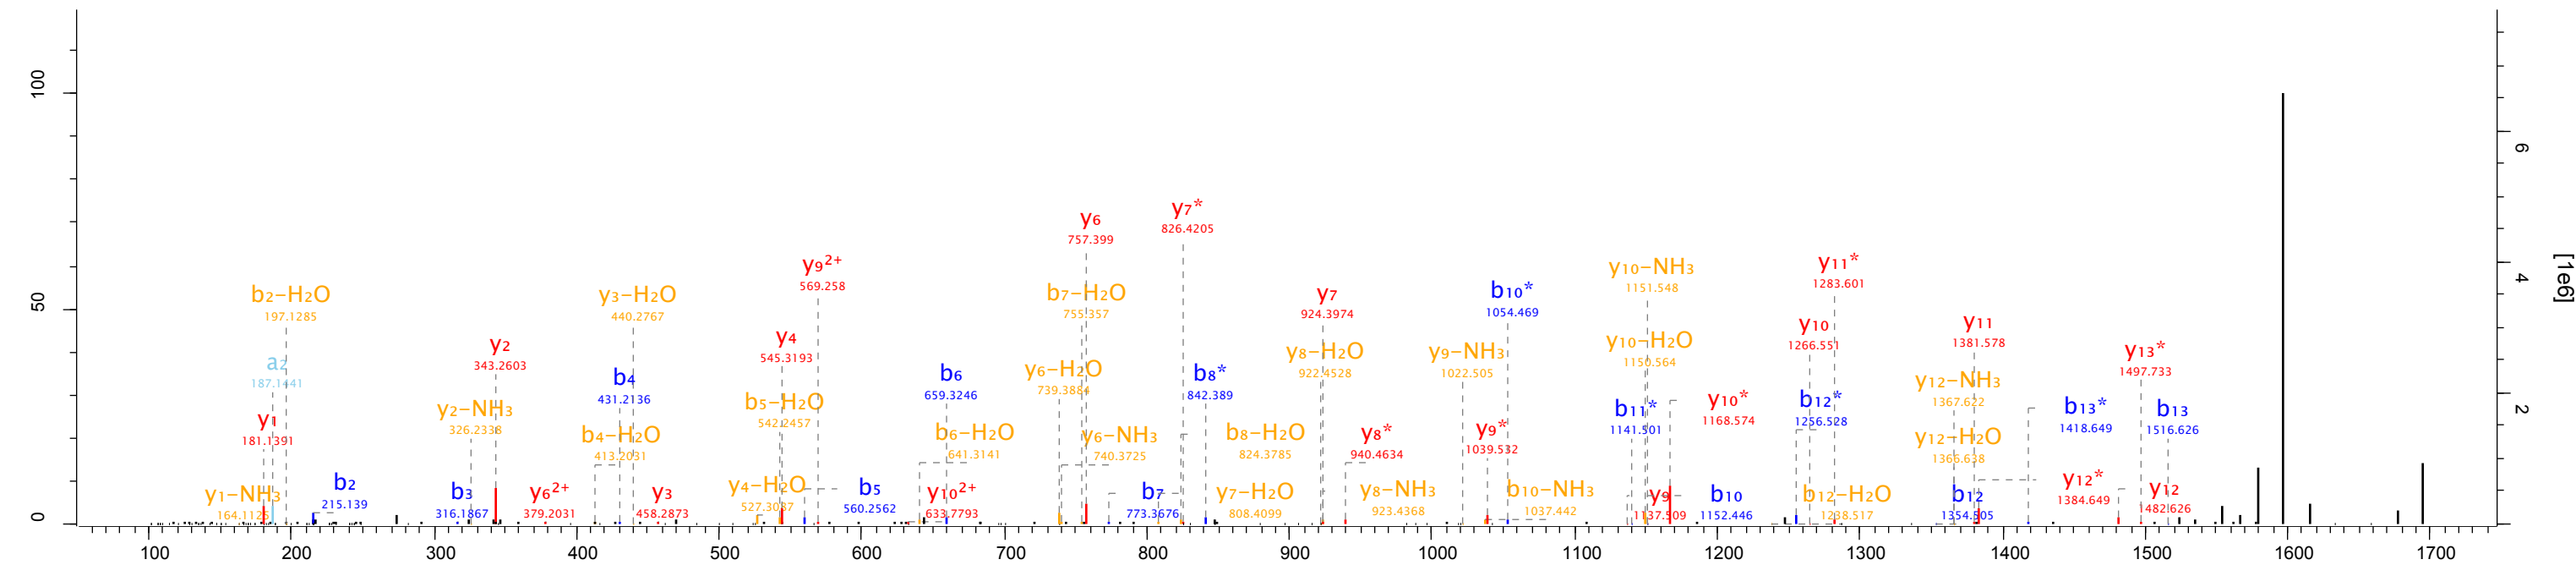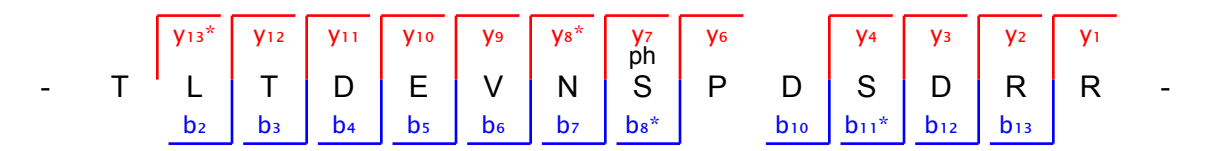



Raw file: 20150814\_A375SR\_Phospho\_BR2\_09  
 Scan: 7653 Method: FTMS; HCD Score: 52.09 m/z: 578.94 Gene names: TSC22D4

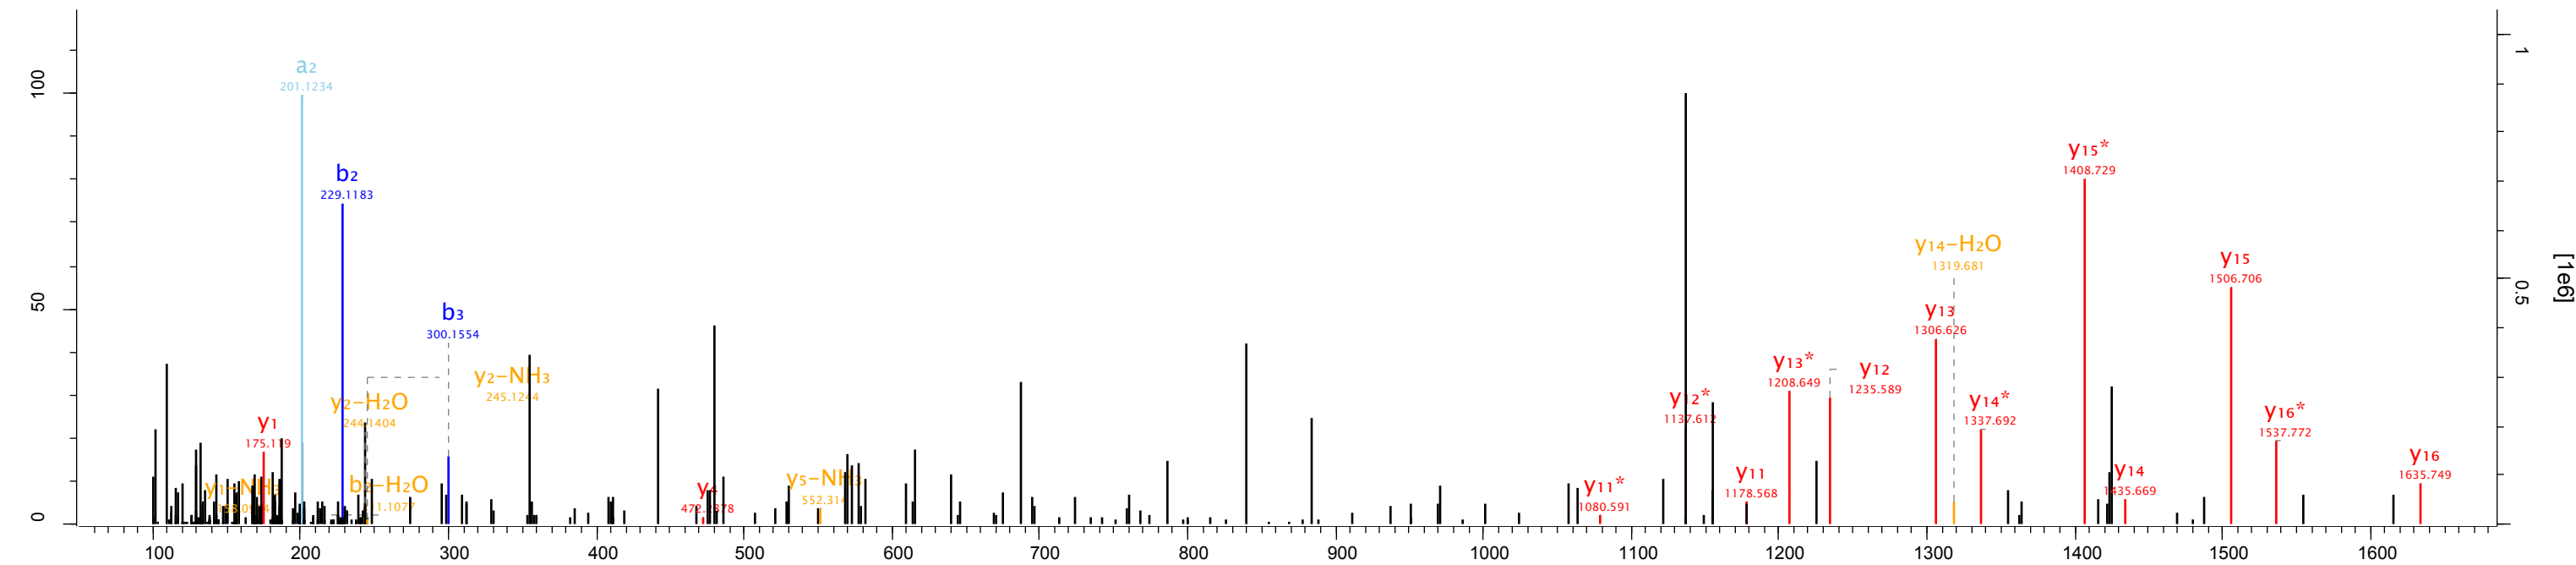

- V E A E A G G S G A R T P P L S R -

Fragmentation mapping:  
 - b2: E A  
 - b3: A E  
 - y1: G G  
 - y4: P P  
 - y11: G G  
 - y12: A G  
 - y13: A  
 - y14: E  
 - y15: A  
 - y16: E

Raw file 20150814\_A375SR\_Phospho\_BR2\_09 Scan 8593 Method FTMS; HCD Score 130.47 m/z 717.85 Gene names DIDO1

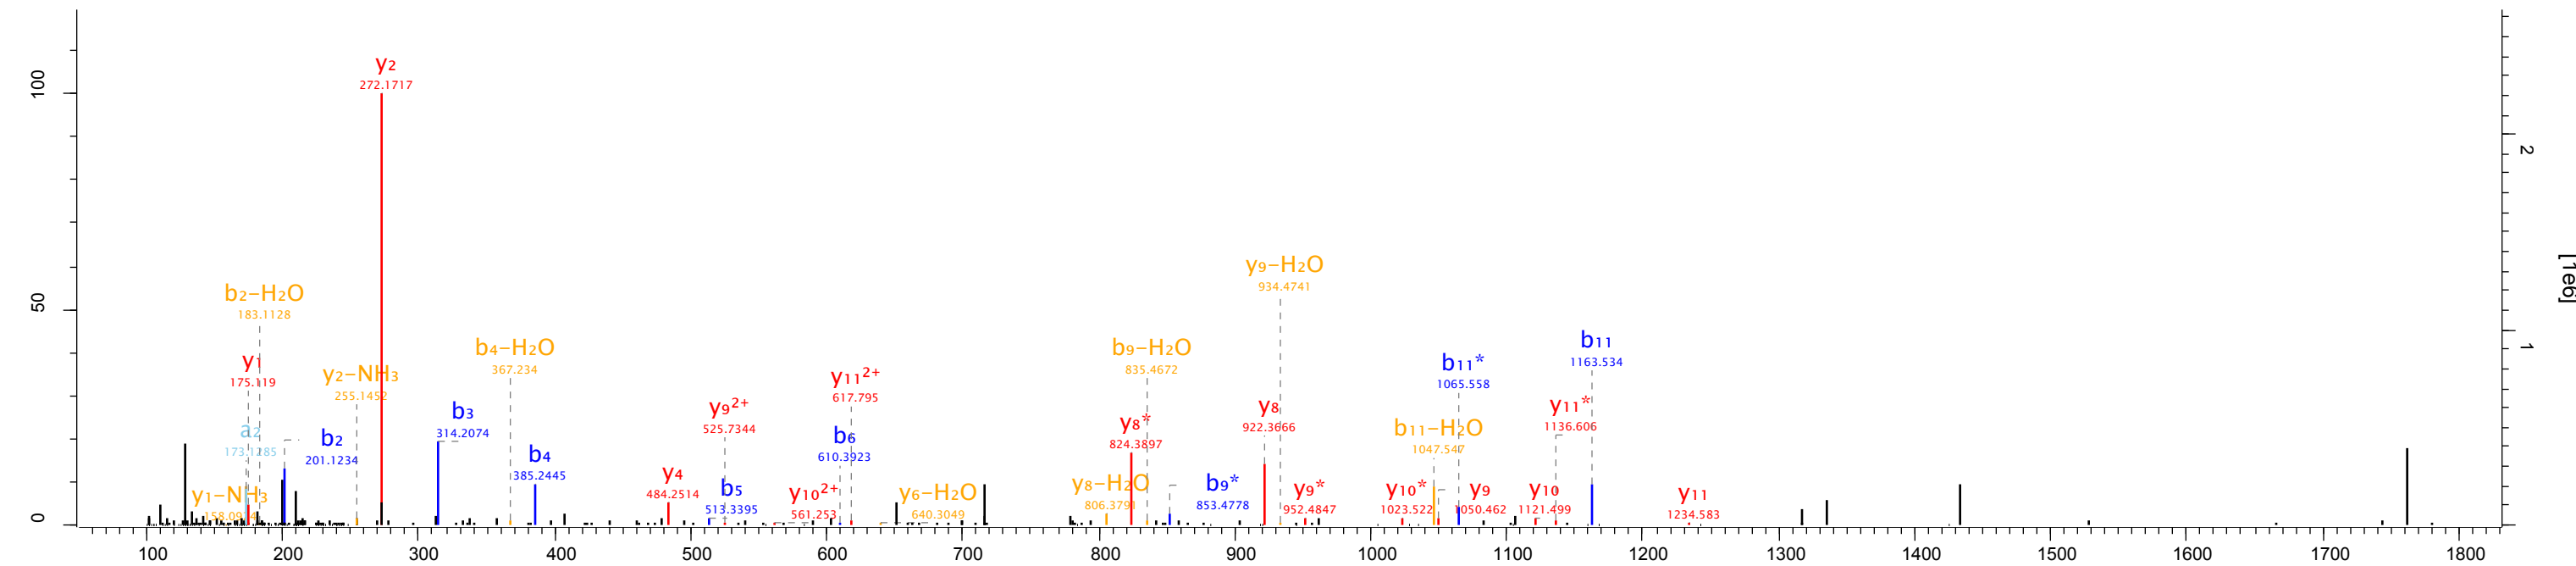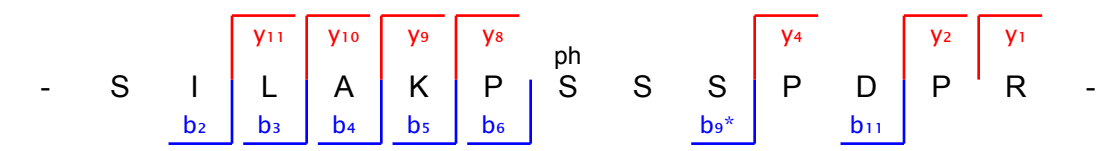

Raw file: 20150814\_A375SR\_Phospho\_BR2\_09  
 Scan: 9463 Method: FTMS; HCD Score: 107.82 m/z: 697.88 Gene names: RPUSD2

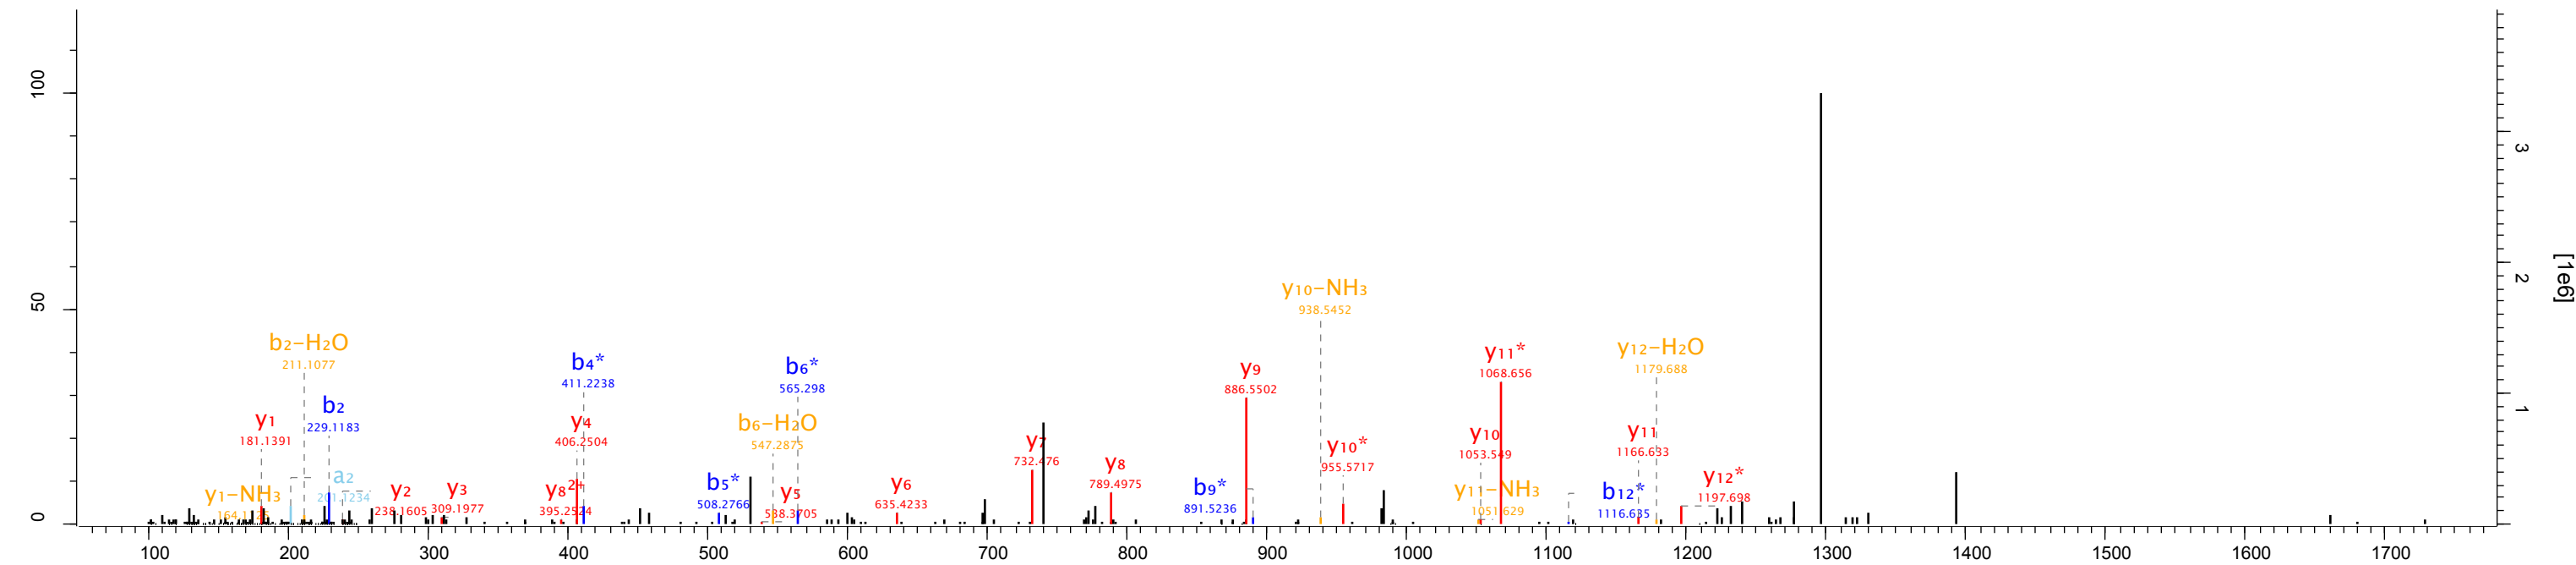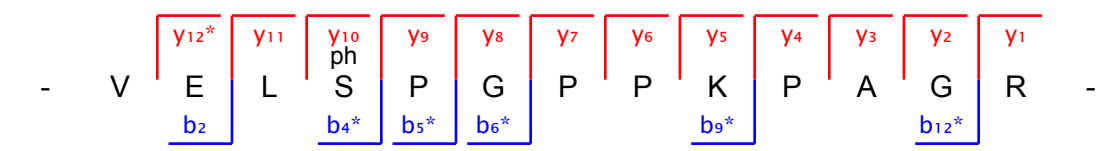

Raw file: 20150814\_A375SR\_Phospho\_BR2\_02  
 Scan: 10344 Method: FTMS; HCD Score: 65.51 m/z: 985.13 Gene names: ZFP91

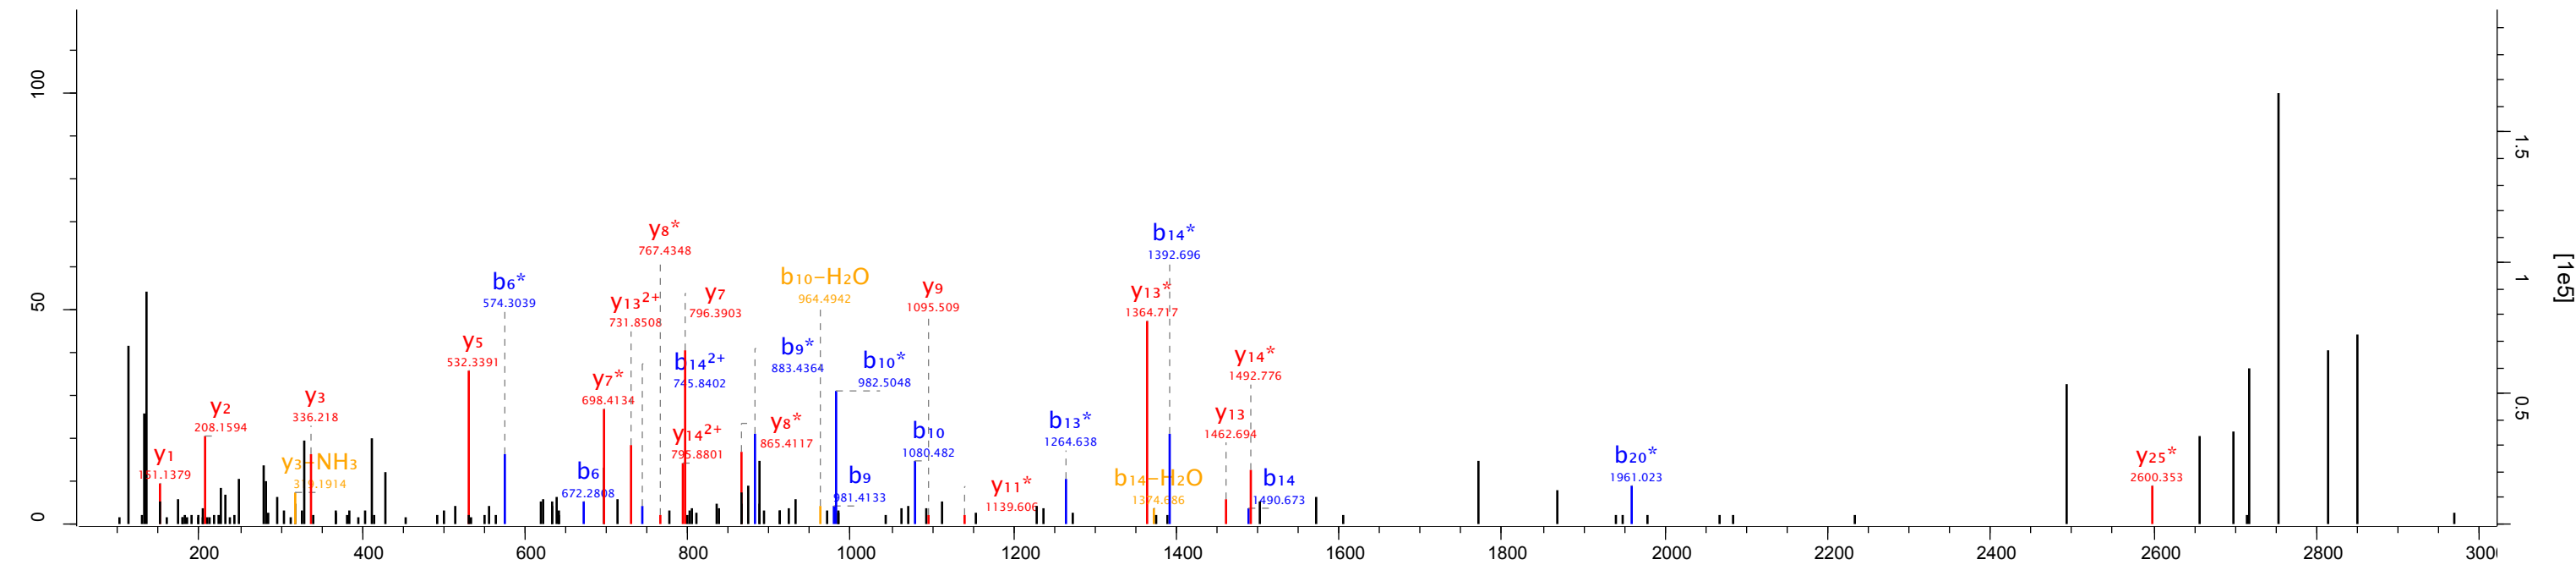

Sequence: - S S P S A R P P D V P G Q Q P Q A A K S P S P V Q G K -

Fragmentation mapping (b-ions in blue, y-ions in red):

- b6: R
- b9: D, V
- b10: V
- b13\*: Q
- b14: Q
- y14\*: Q
- y13: P
- y11\*: A
- y9: A
- y8\*: S
- y7: P
- y5: P
- y3: Q
- y2: G
- y1: K
- y25\*: P

Raw file: 20150814\_A375SR\_Phospho\_BR2\_02  
 Scan: 10704 Method: FTMS; HCD Score: 90.91 m/z: 938.82 Gene names: LEO1

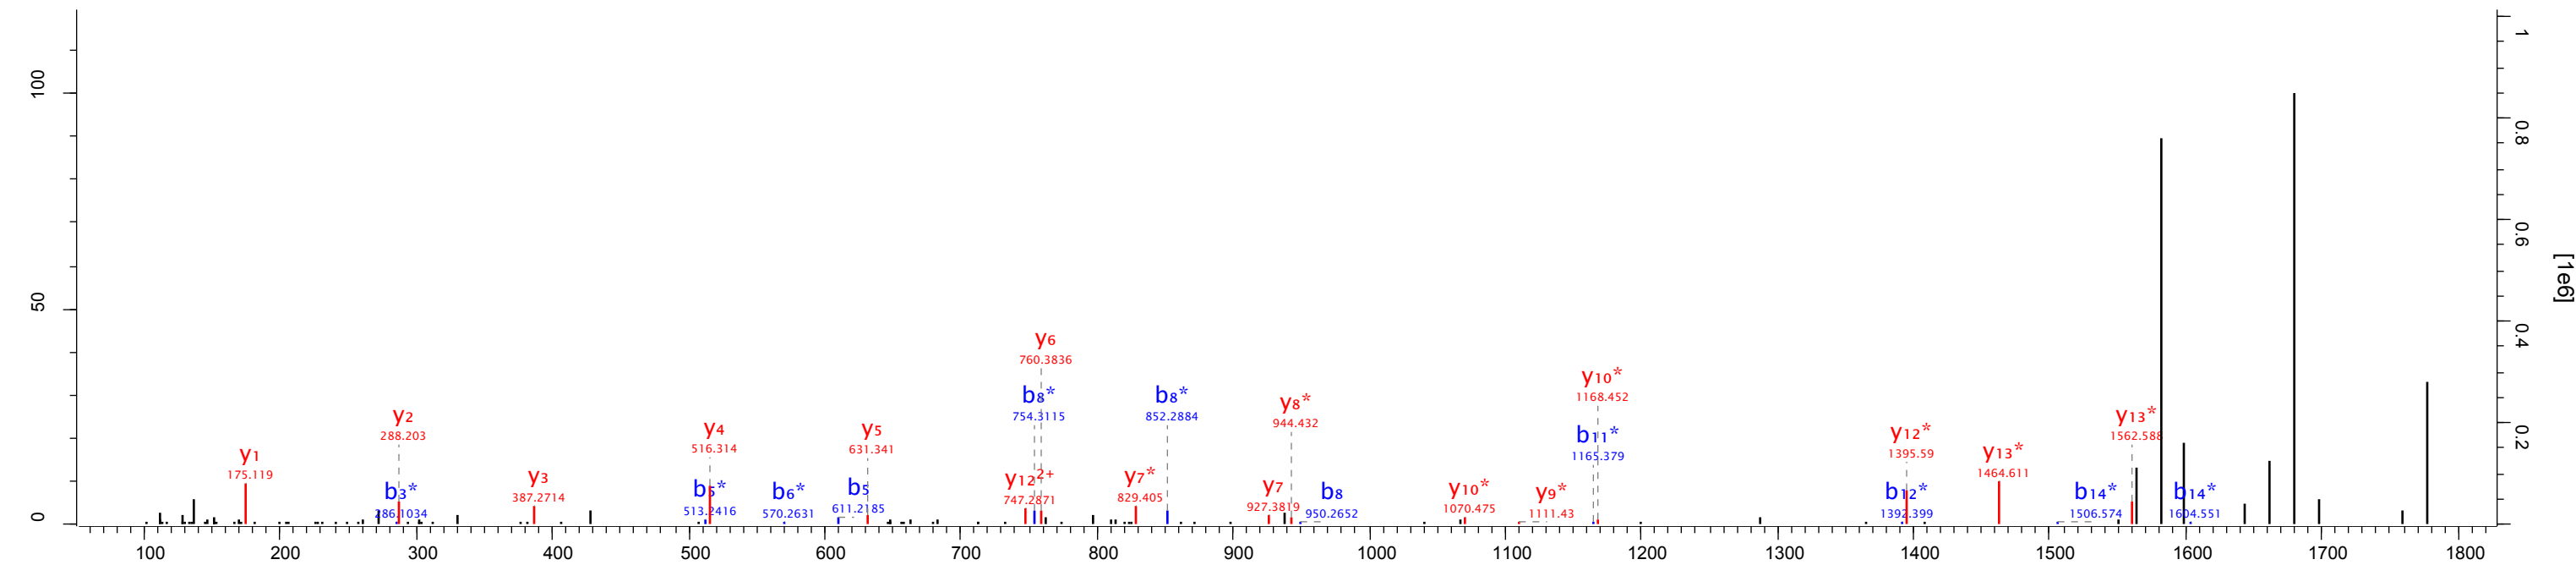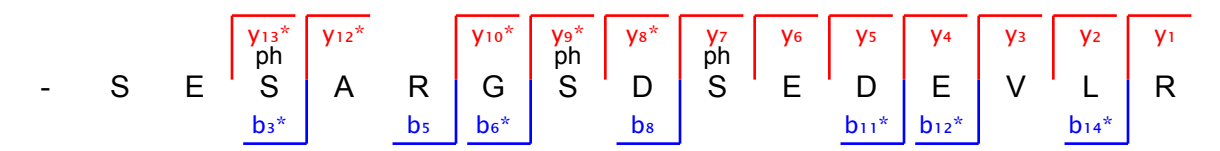

Raw file: 20150814\_A375SR\_Phospho\_BR2\_02  
 Scan: 10774 Method: FTMS; HCD Score: 65.92 m/z: 871.83 Gene names: FRMD6

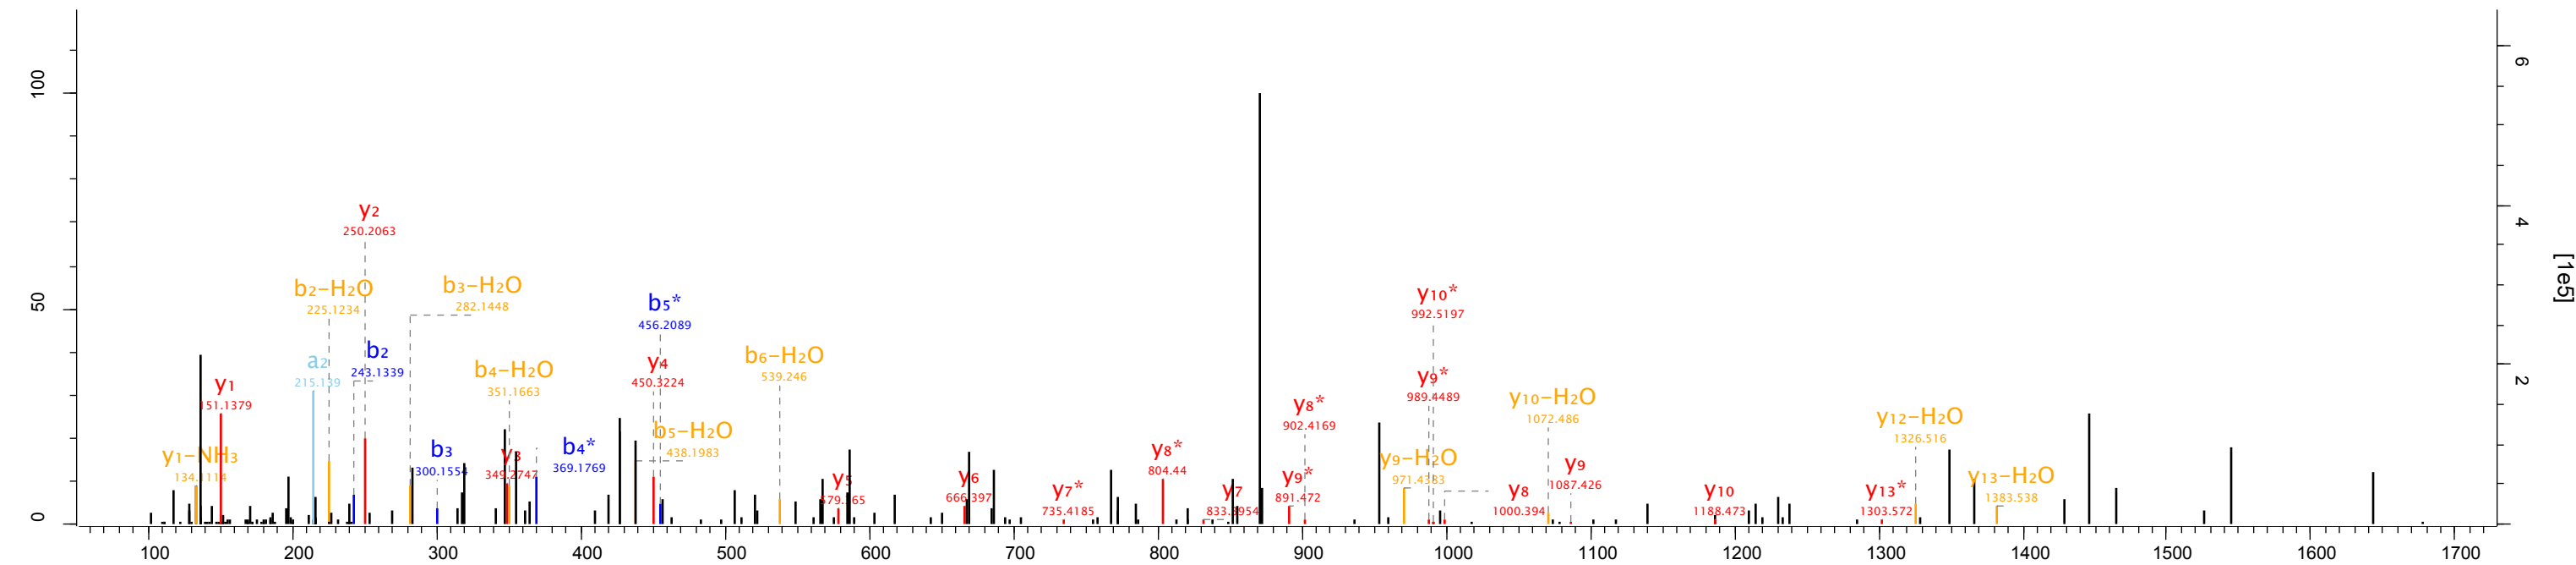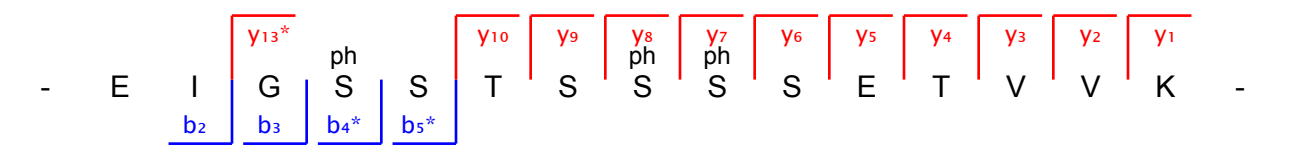

Raw file 20150814\_A375SR\_Phospho\_BR2\_02 Scan 11154 Method FTMS; HCD Score 50.83 m/z 622.26 Gene names AMOTL2

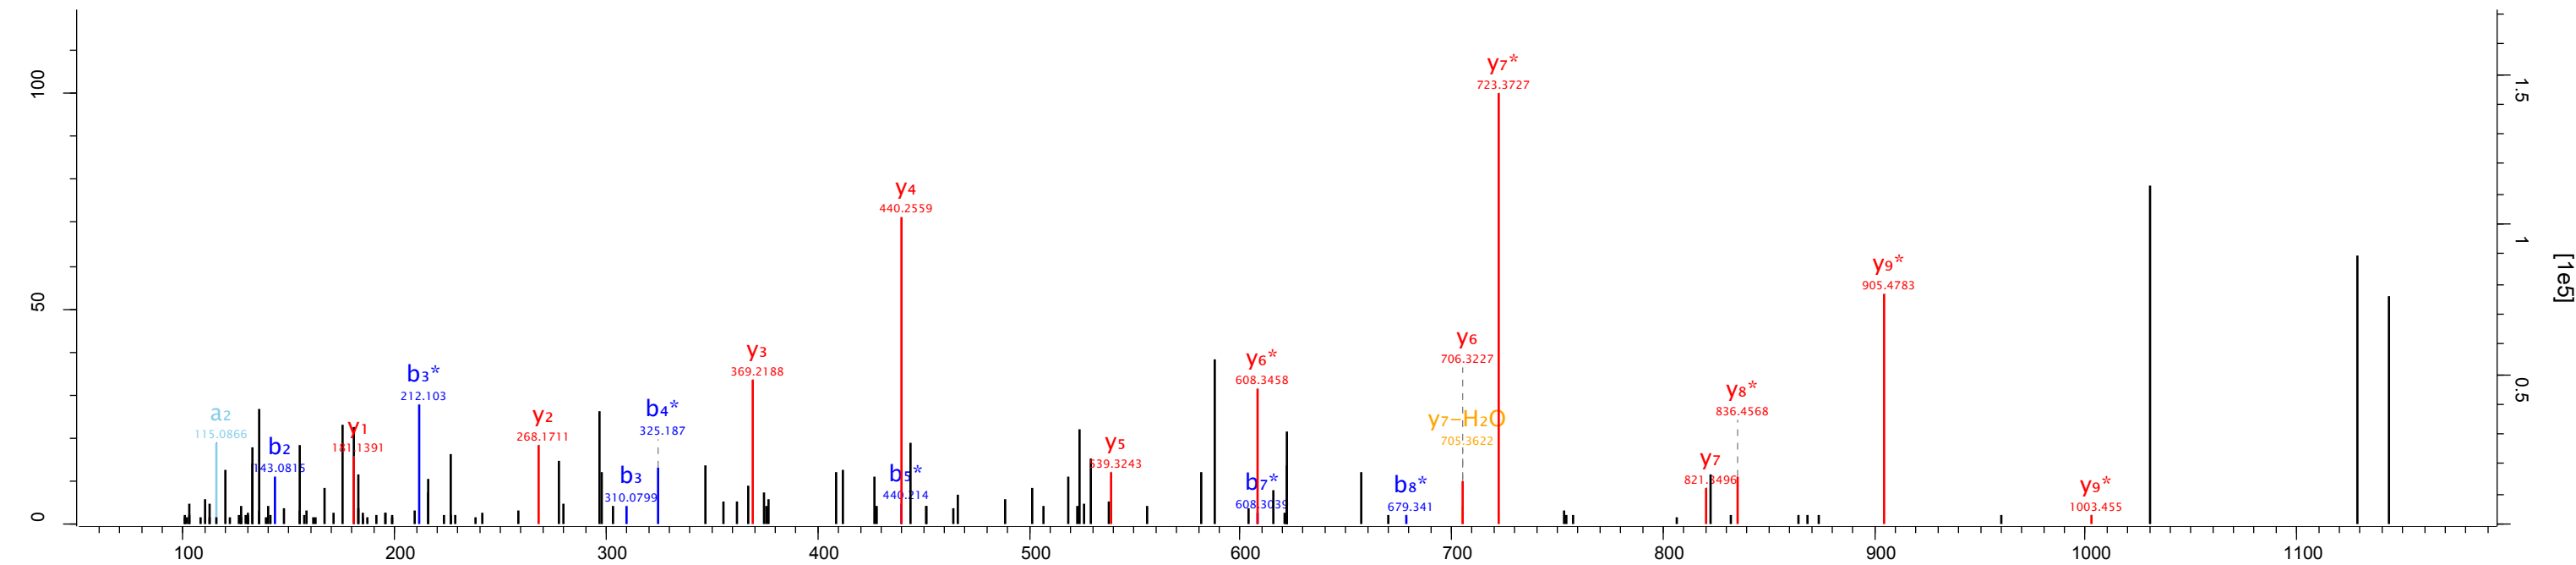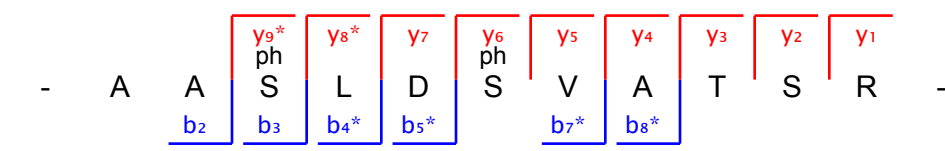

Raw file: 20150814\_A375SR\_Phospho\_BR2\_02  
 Scan: 11384 Method: FTMS; HCD Score: 76.57 m/z: 899.79 Gene names: TBC1D2

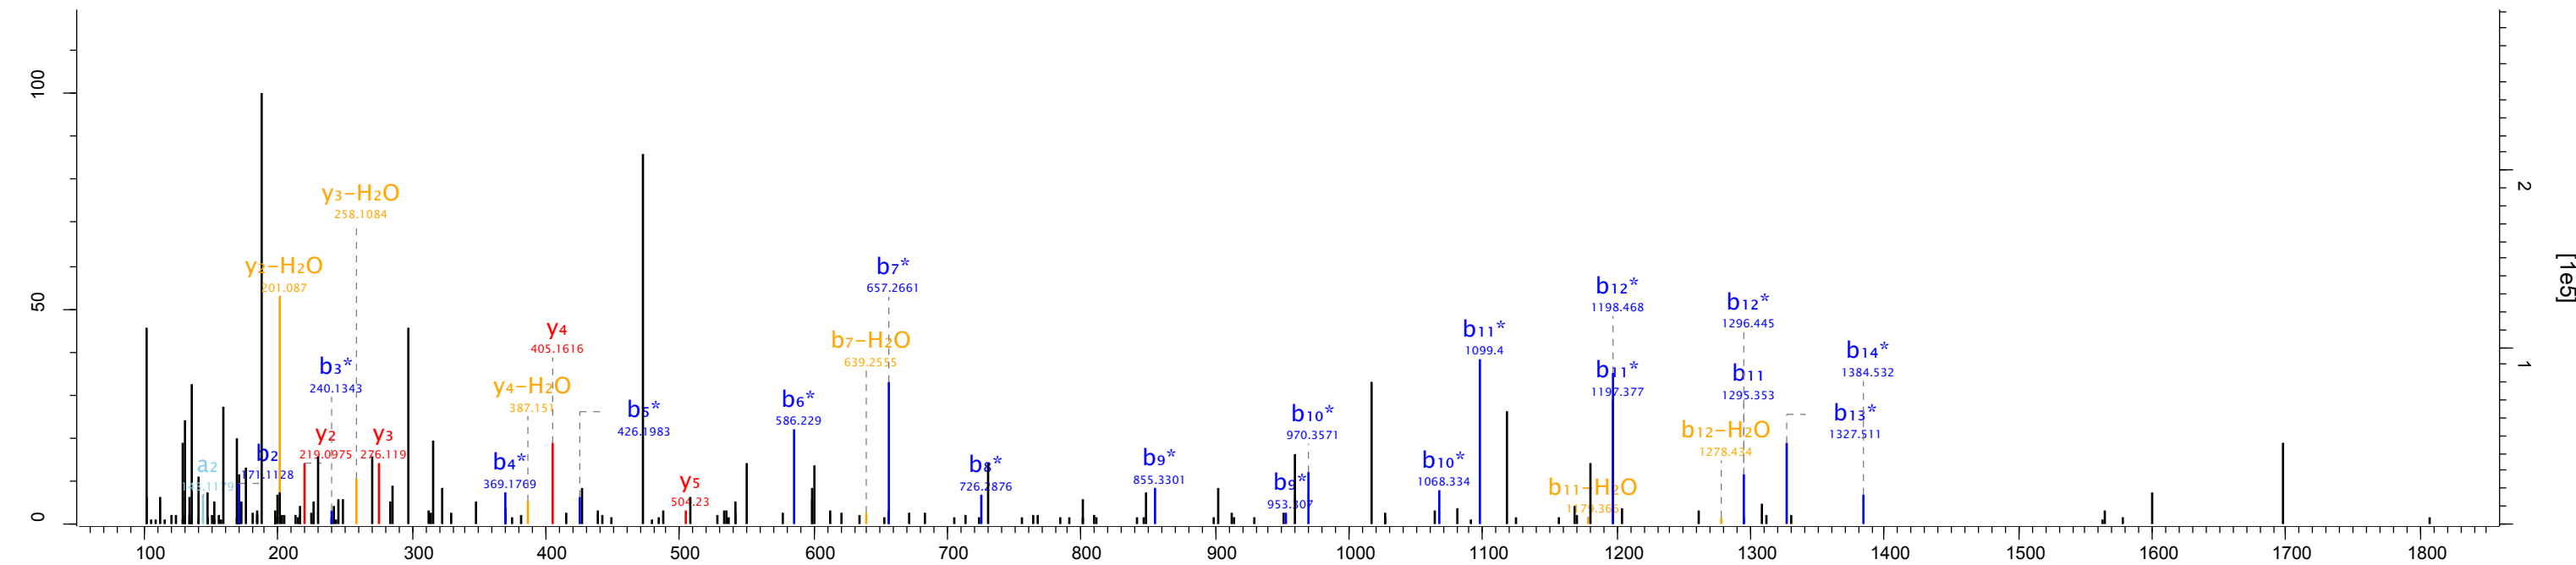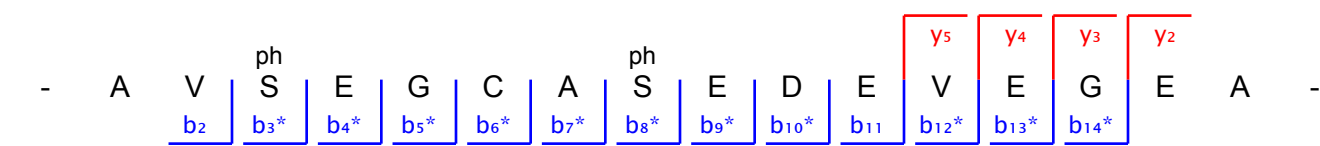



Raw file 20150814\_A375SR\_Phospho\_BR2\_02 Scan 12114 Method FTMS; HCD Score 88.63 m/z 790.33 Gene names MKI67

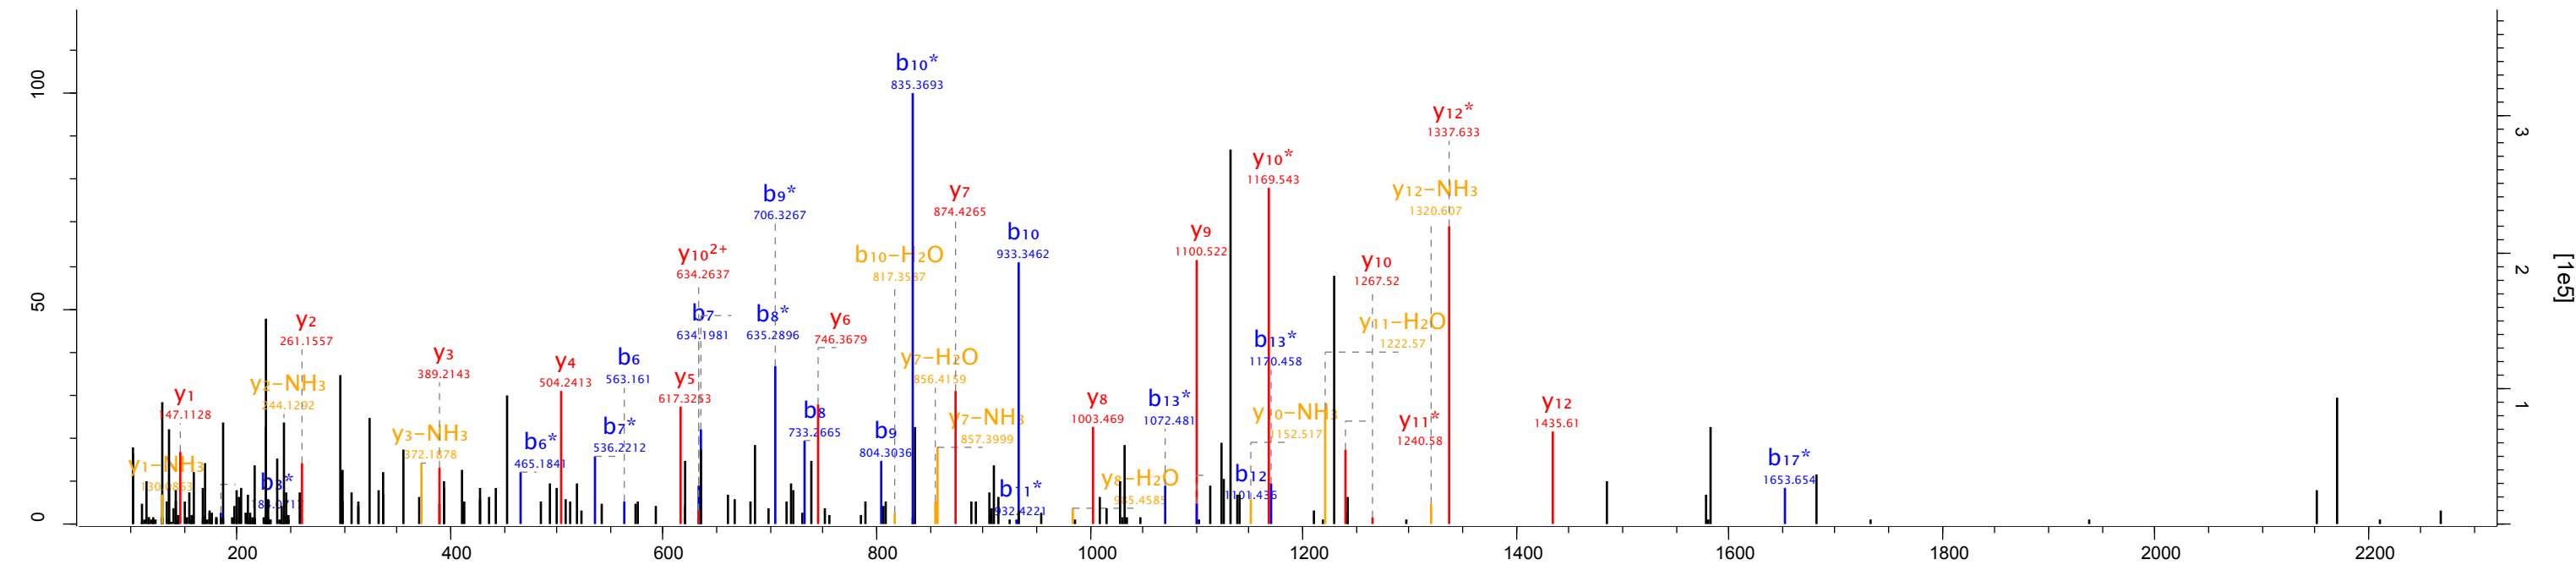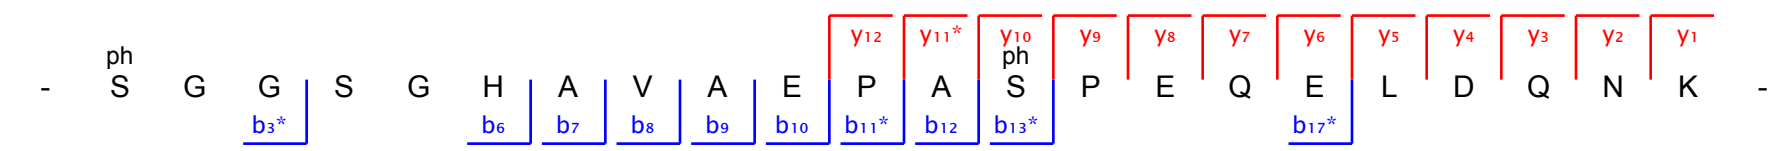

Raw file: 20150814\_A375SR\_Phospho\_BR2\_02  
 Scan: 13484 Method: FTMS; HCD Score: 71.41 m/z: 911.72 Gene names: RAPGEF2

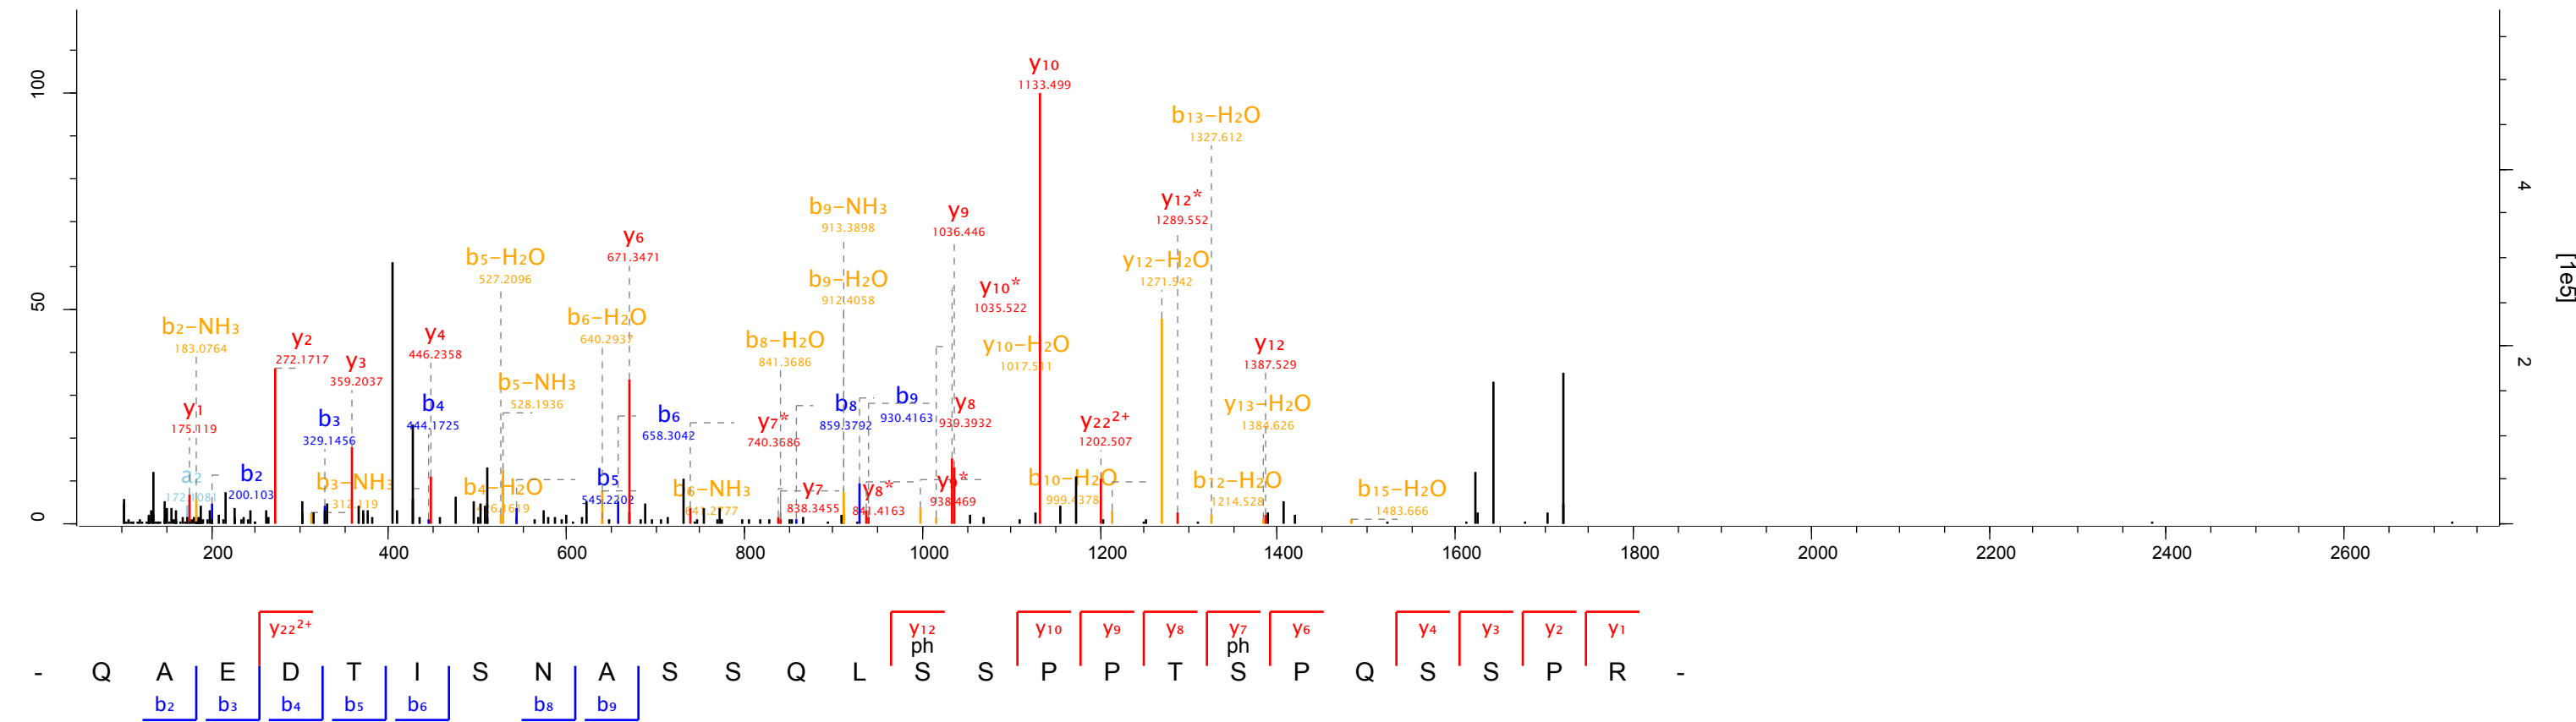

Raw file 20150814\_A375SR\_Phospho\_BR2\_02 Scan 13844 Method FTMS; HCD Score 76.59 m/z 675.26 Gene names KLC2

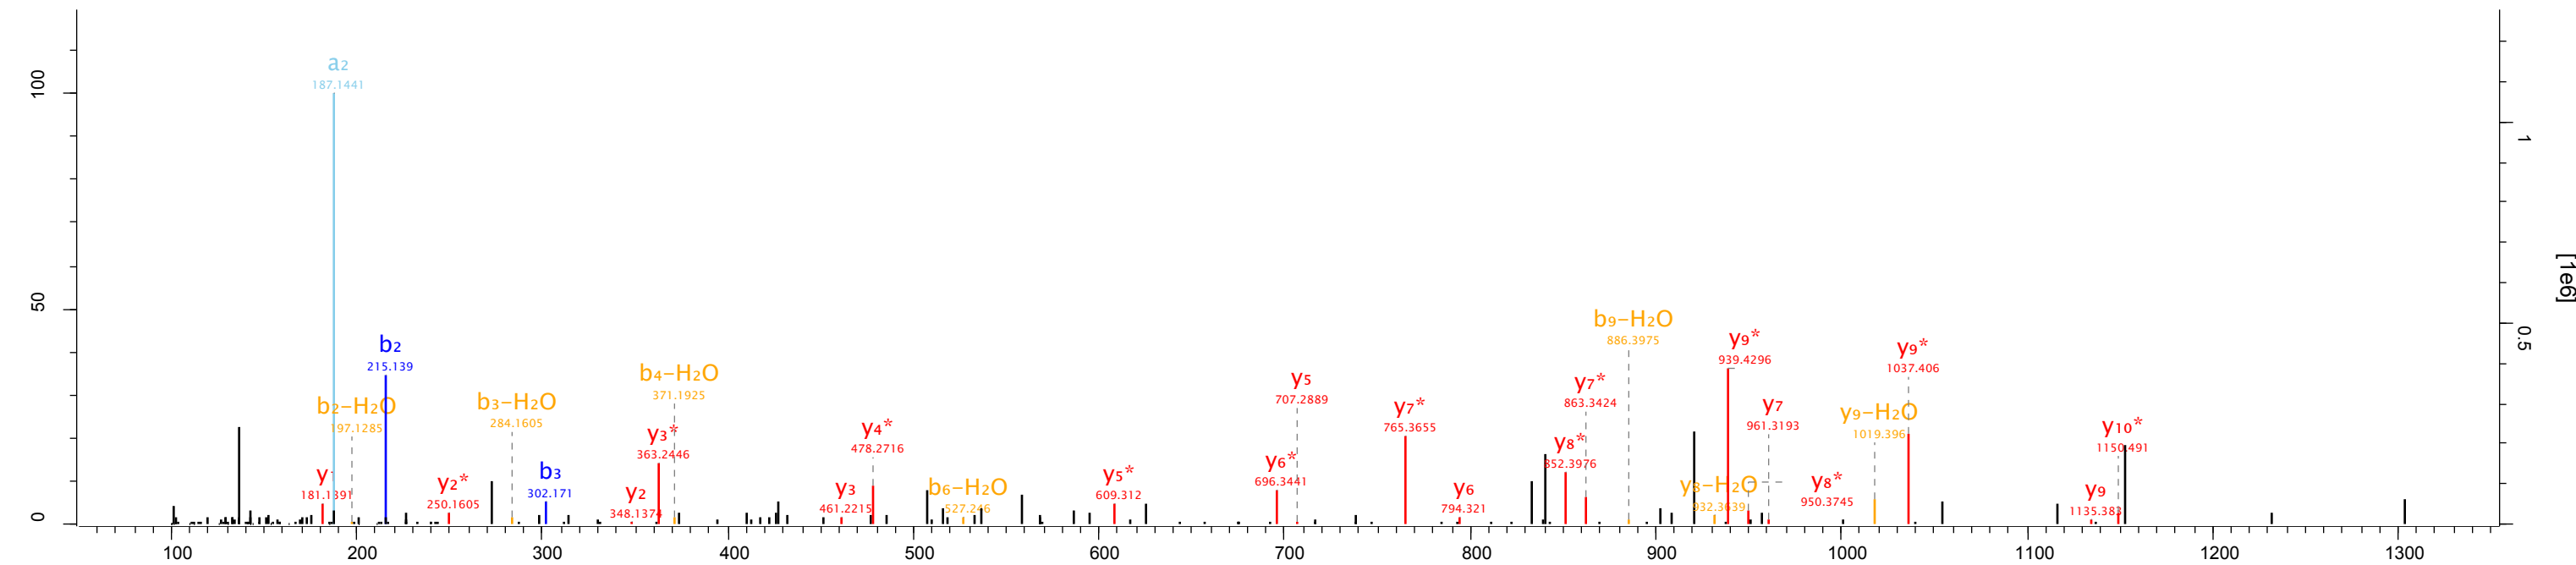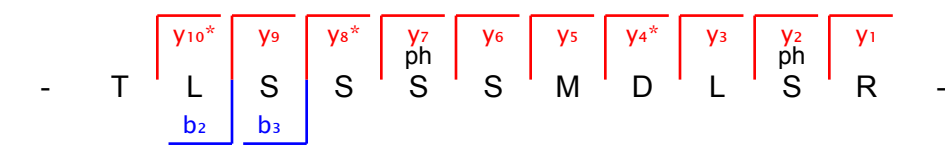

Raw file 20150814\_A375SR\_Phospho\_BR2\_02 Scan 13994 Method FTMS; HCD Score 190.24 m/z 790.77 Gene names DDX20

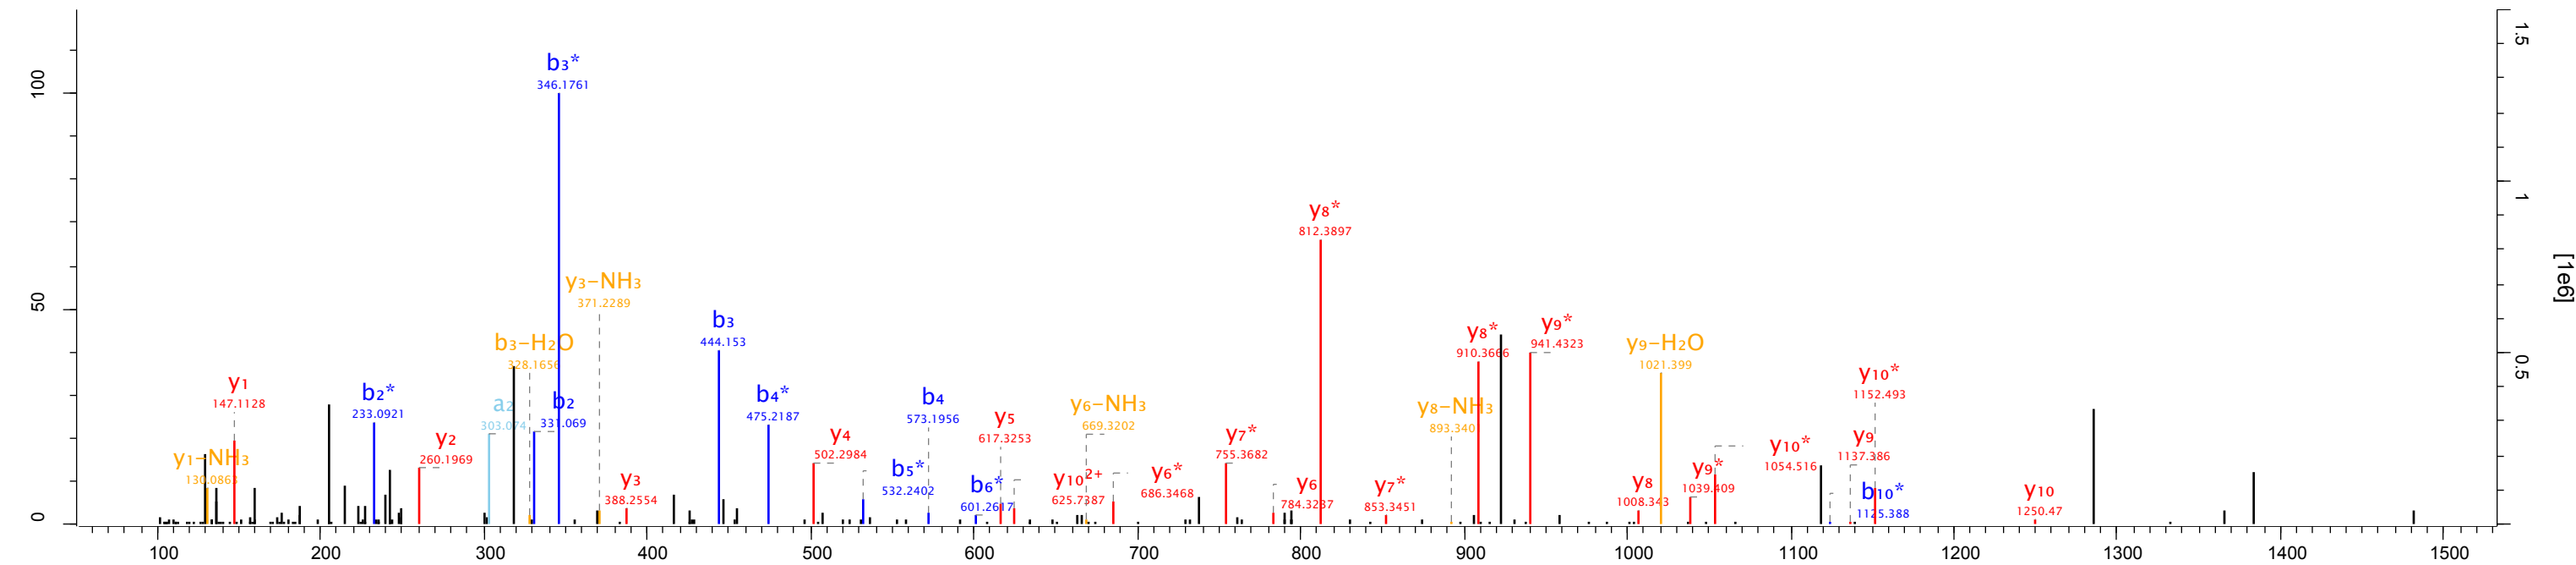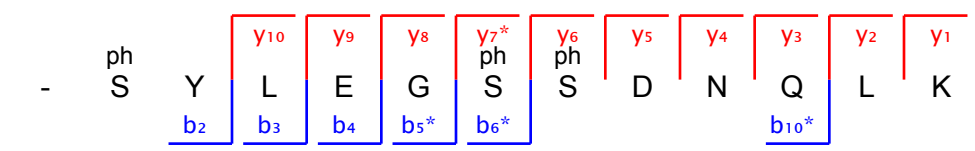

Raw file 20150814\_A375SR\_Phospho\_BR2\_02 Scan 14004 Method FTMS; HCD Score 101.48 m/z 946.89 Gene names SHROOM2

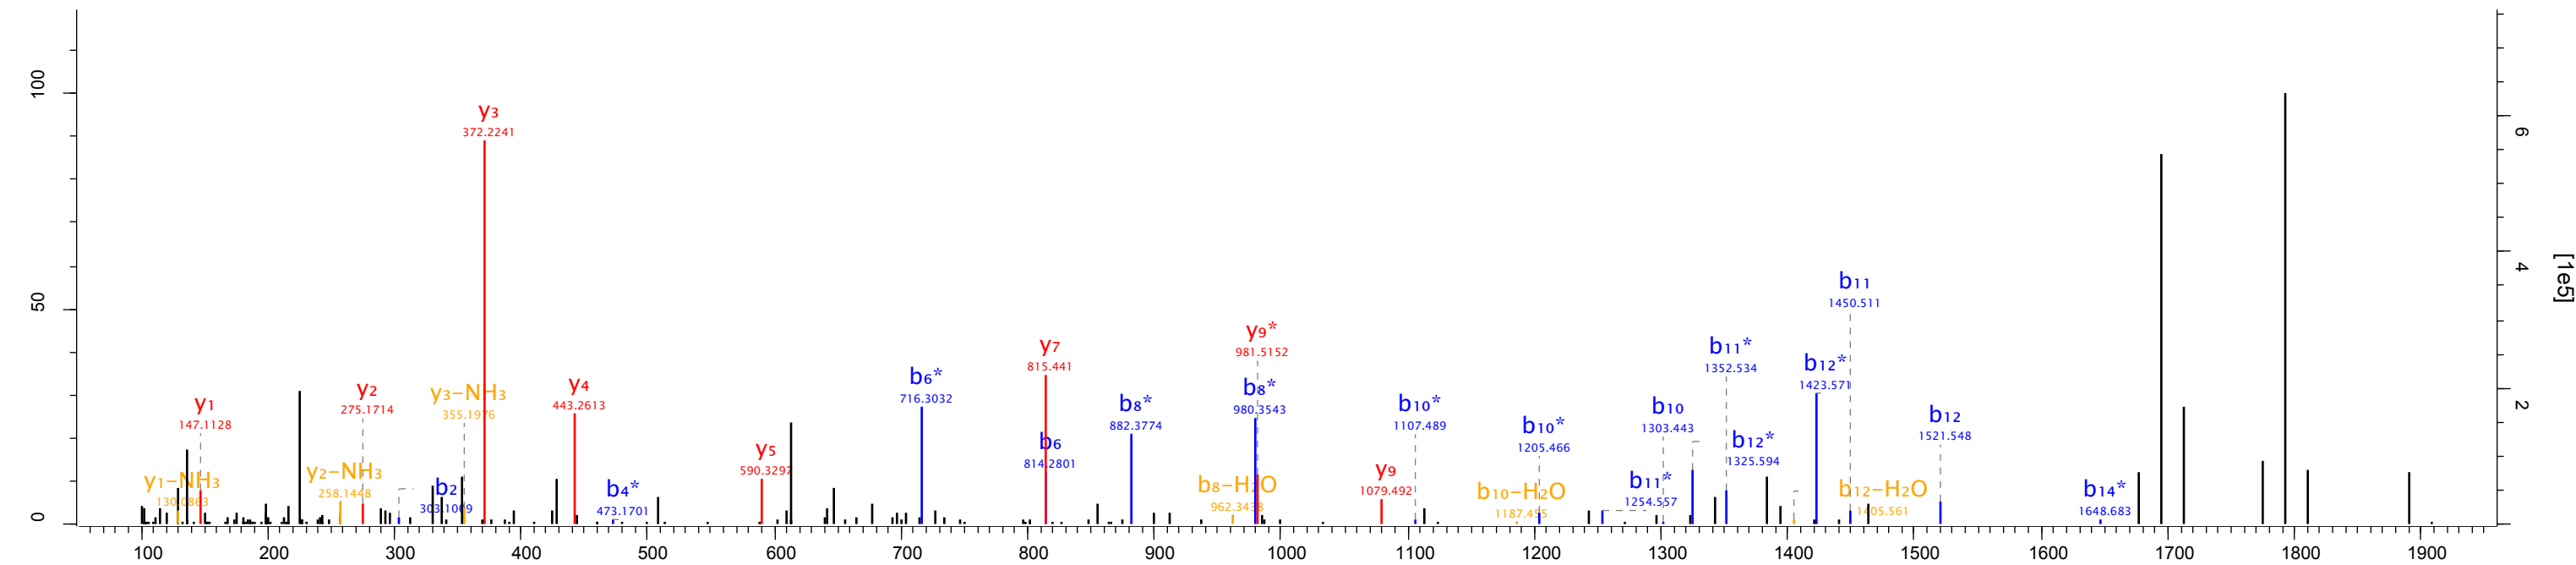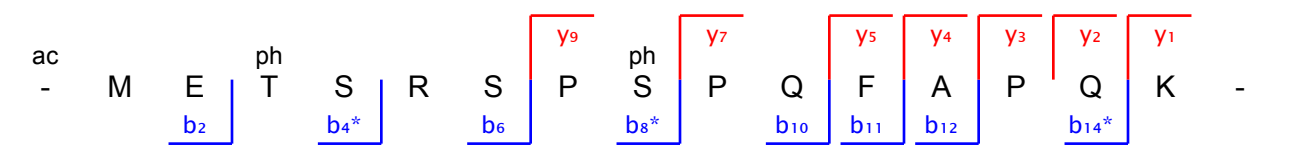

Raw file: 20150814\_A375SR\_Phospho\_BR2\_02  
 Scan: 14094  
 Method: FTMS; HCD  
 Score: 111.54  
 m/z: 779.78  
 Gene names: OSTM1

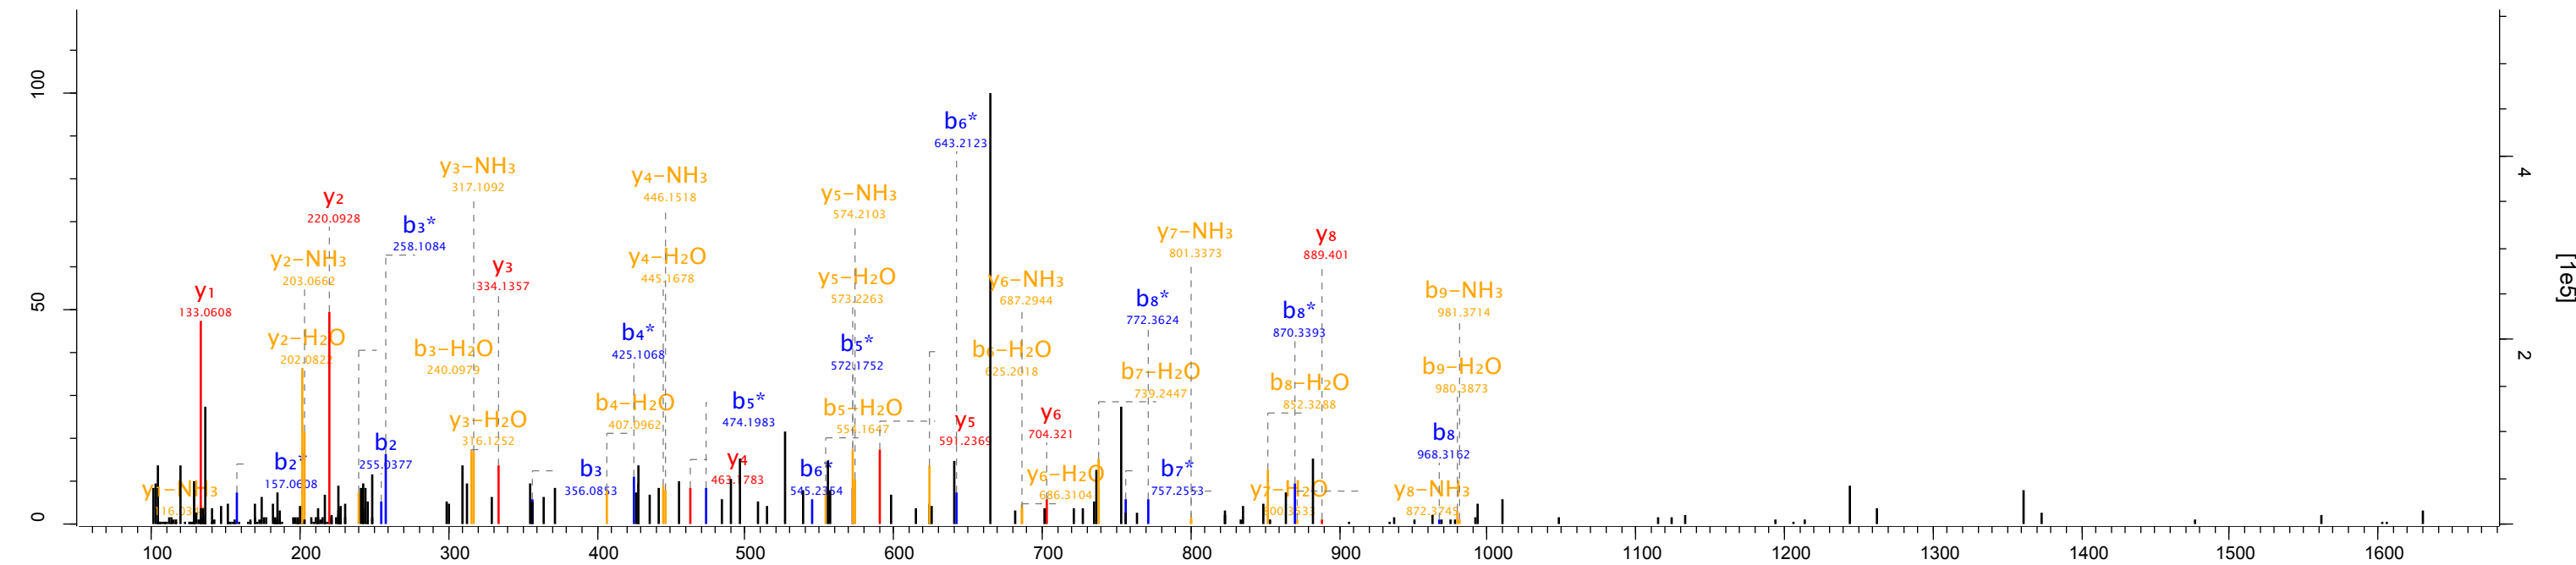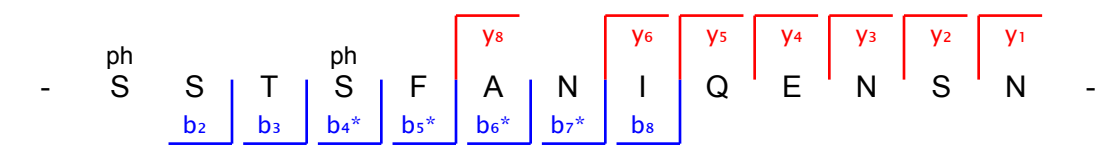

Raw file: 20150814\_A375SR\_Phospho\_BR2\_02  
 Scan: 14114 Method: FTMS; HCD Score: 107.25 m/z: 987.4 Gene names: AKAP12

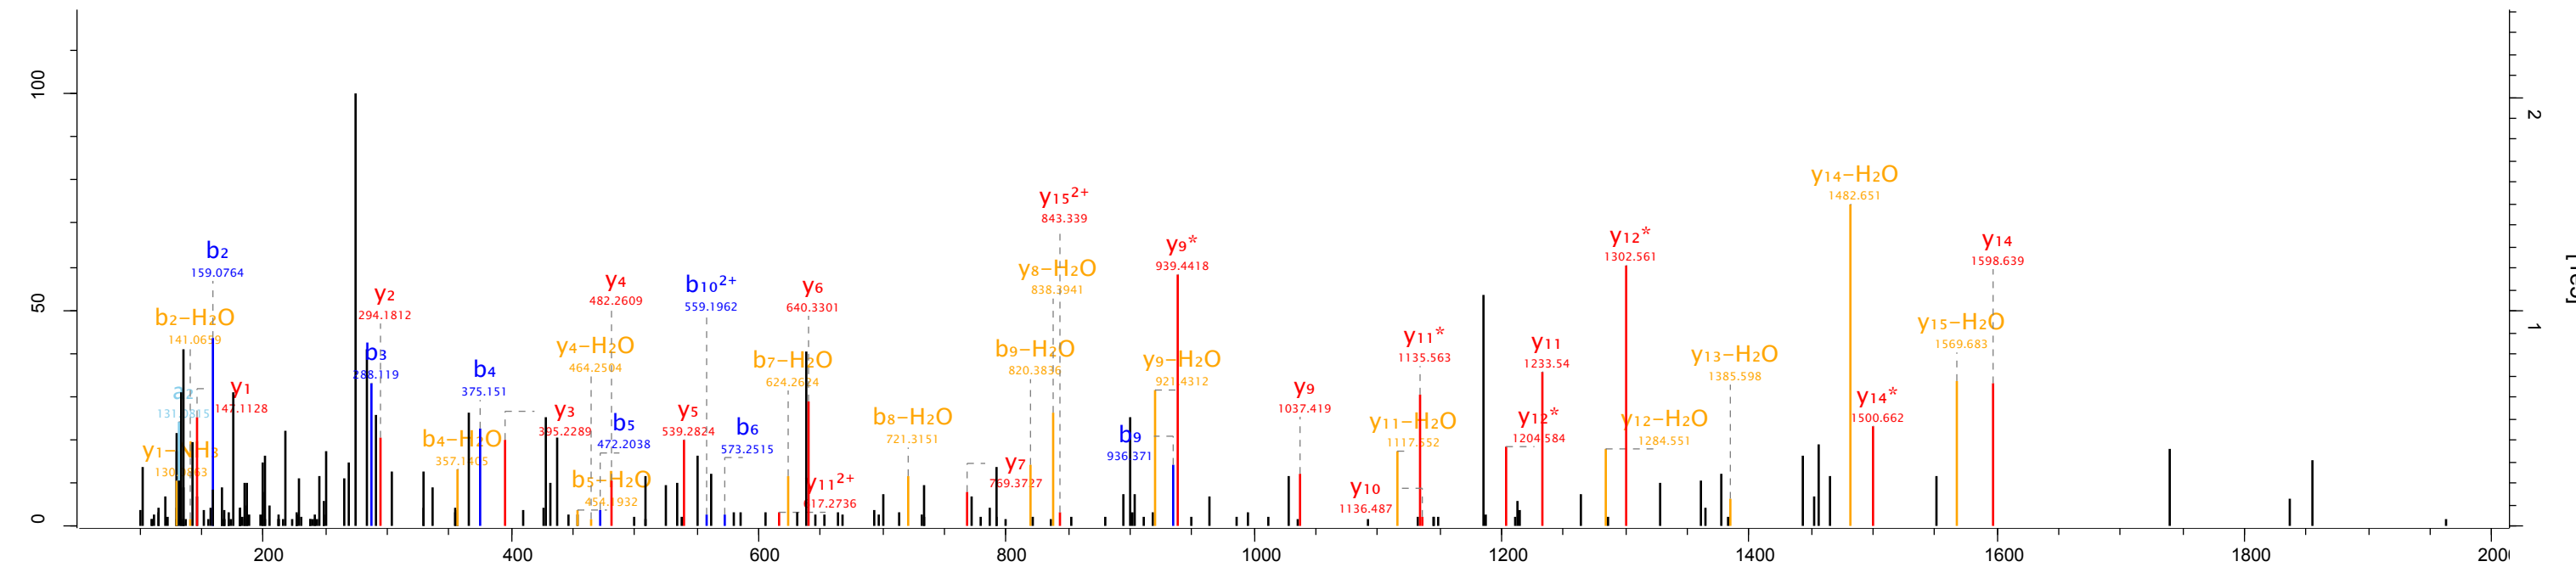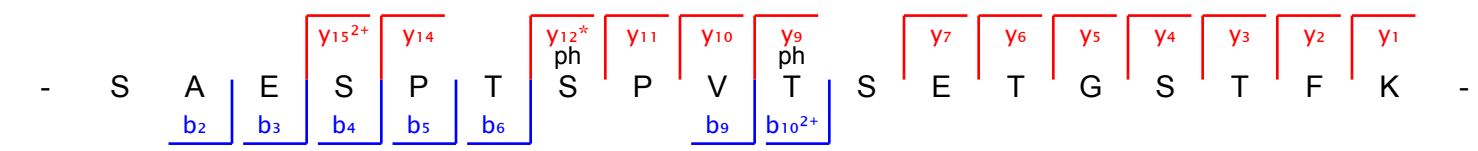

Raw file: 20150814\_A375SR\_Phospho\_BR2\_02  
 Scan: 14884 Method: FTMS; HCD Score: 121.95 m/z: 714.75 Gene names: UBN1

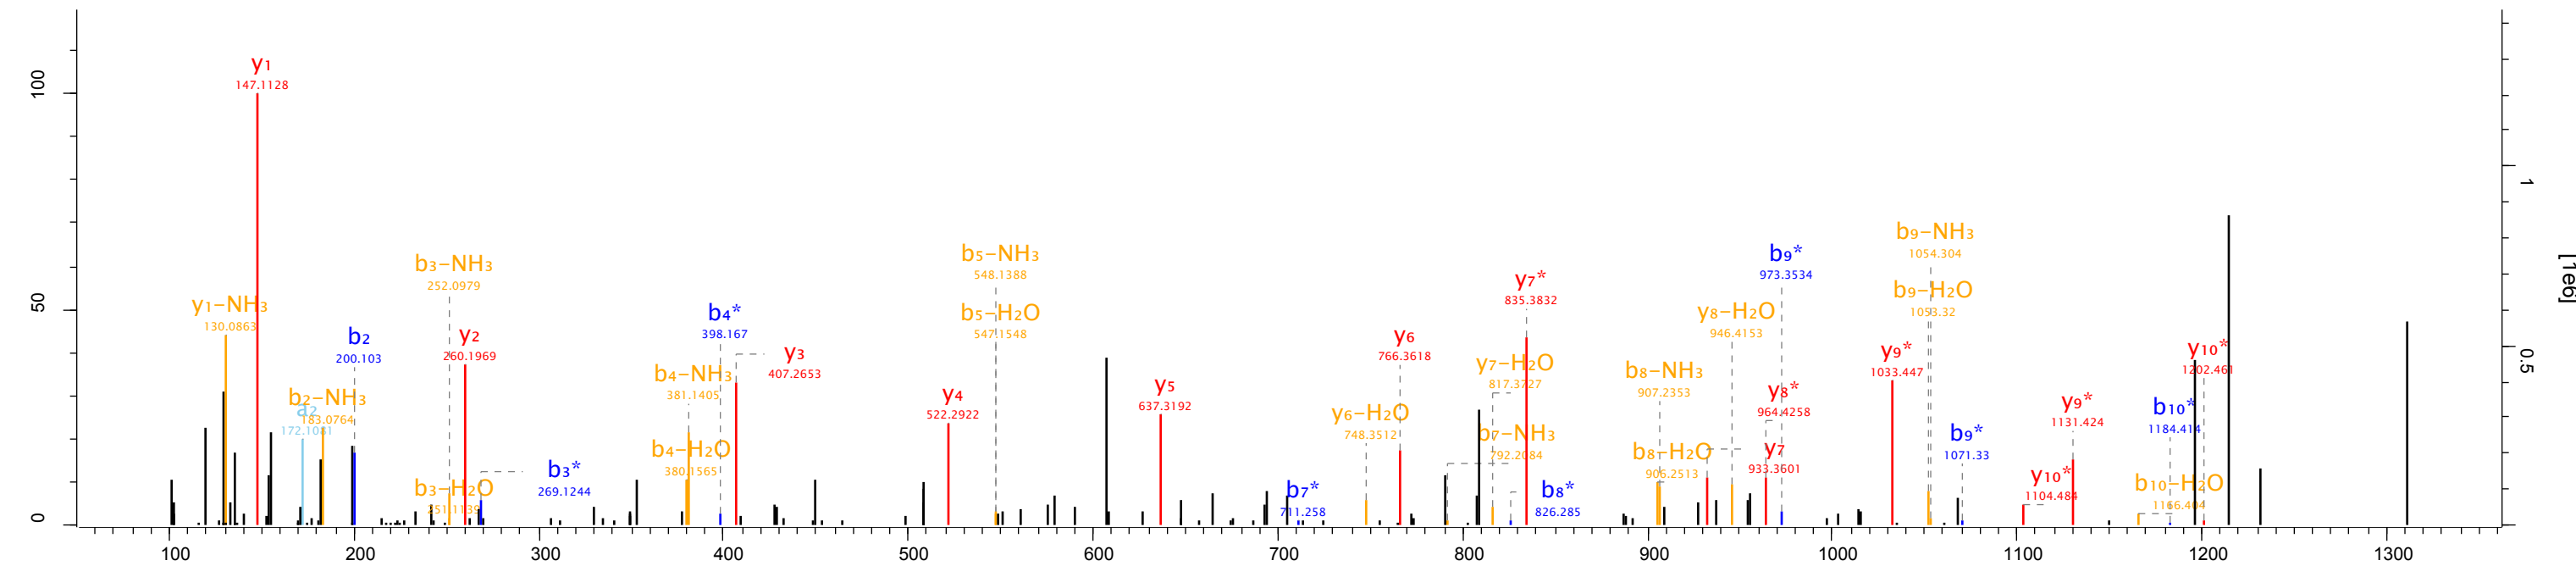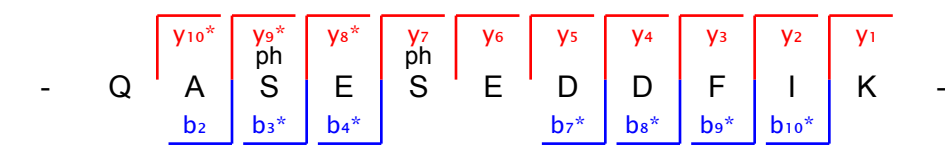



Raw file: 20150814\_A375SR\_Phospho\_BR2\_02  
 Scan: 15124 Method: FTMS; HCD Score: 162.21 m/z: 1257.98 Gene names: POLR2A

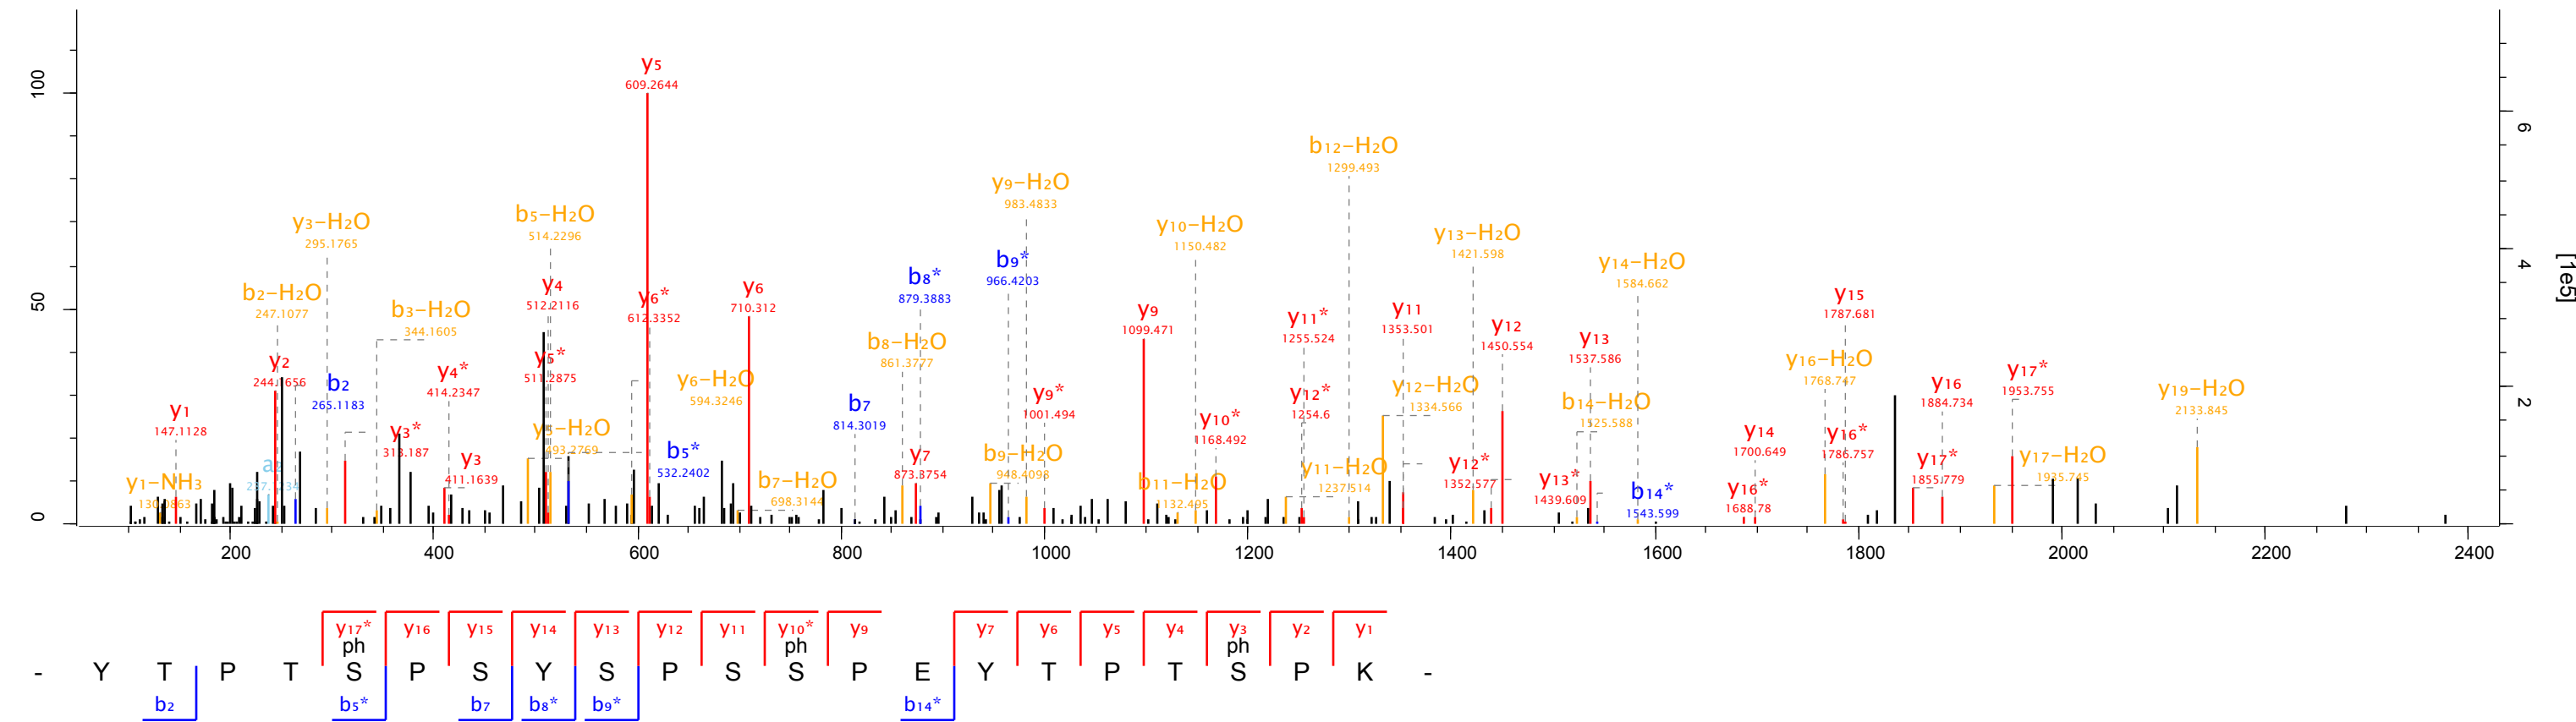

Raw file 20150814\_A375SR\_Phospho\_BR2\_02 Scan 15844 Method FTMS; HCD Score 189.49 m/z 1024.91 Gene names PPFIBP1

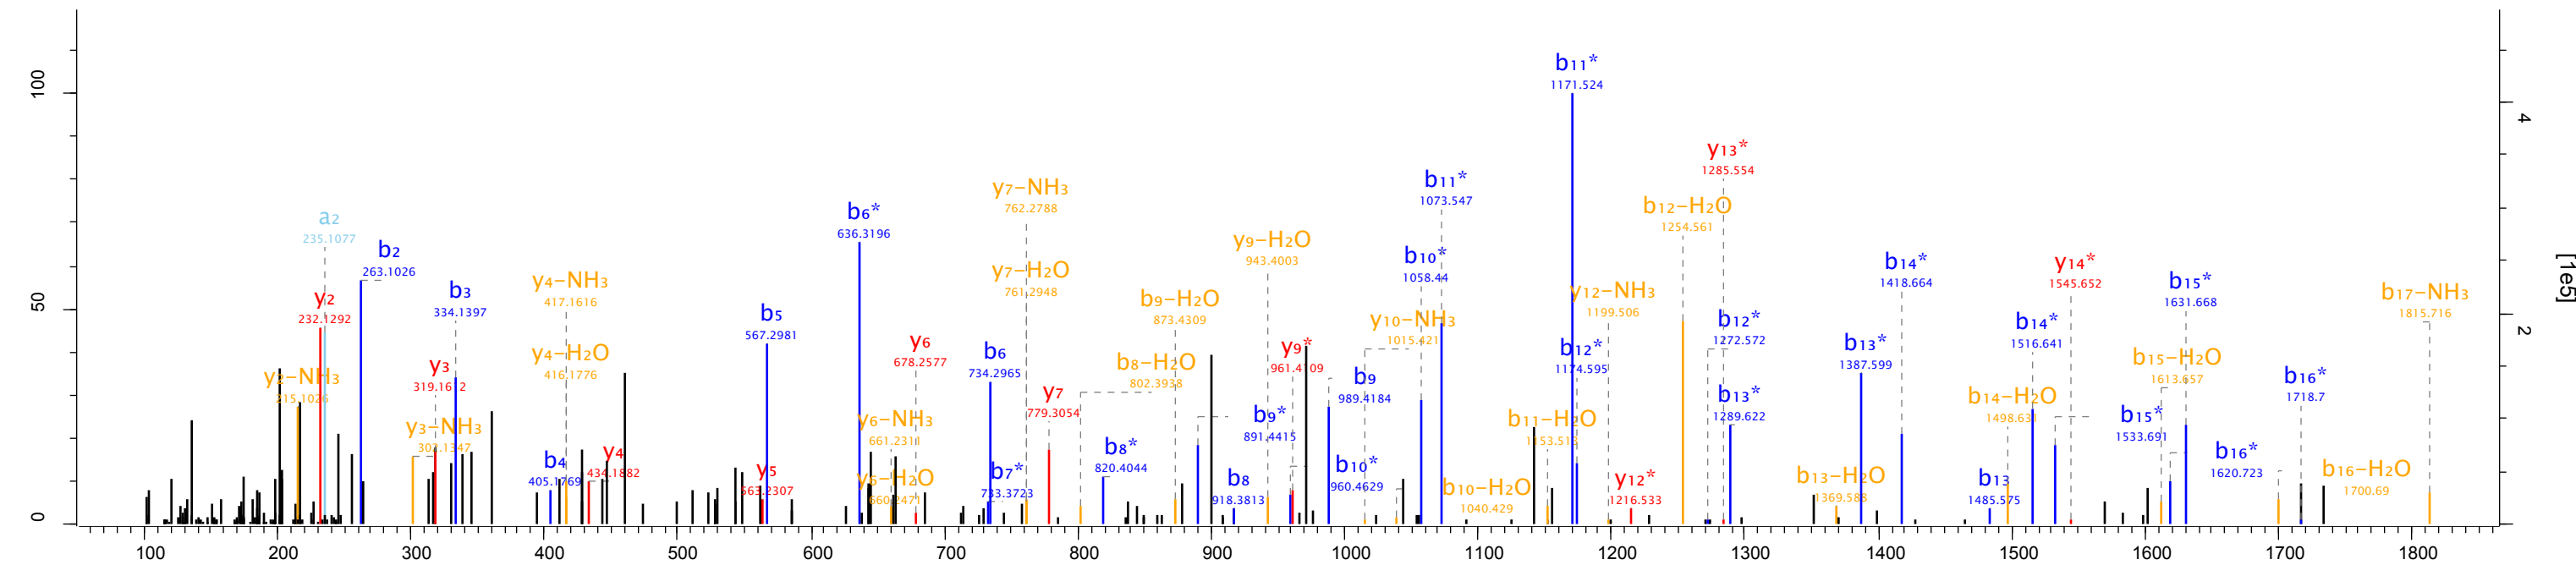

- D F A A R S P S A S I T D E D S N V -

Fragmentation mapping (b and y ions) is shown below the sequence:

- b<sub>2</sub> (F), b<sub>3</sub> (A), b<sub>4</sub> (A), b<sub>5</sub> (R), b<sub>6</sub> (S), b<sub>7</sub>\* (P), b<sub>8</sub> (S), b<sub>9</sub> (A), b<sub>10</sub>\* (S), b<sub>11</sub>\* (I), b<sub>12</sub>\* (T), b<sub>13</sub> (D), b<sub>14</sub>\* (E), b<sub>15</sub>\* (D), b<sub>16</sub>\* (S)
- y<sub>2</sub> (N), y<sub>3</sub> (S), y<sub>4</sub> (D), y<sub>5</sub> (E), y<sub>6</sub> (D), y<sub>7</sub> (T), y<sub>9</sub>\* (S), y<sub>12</sub>\* (S), y<sub>13</sub>\* (S), y<sub>14</sub>\* (R)

Raw file  
 20150814\_A375SR\_Phospho\_BR2\_02  
 Scan 15954 Method FTMS; HCD Score 102.65 m/z 683.32 Gene names TANC2

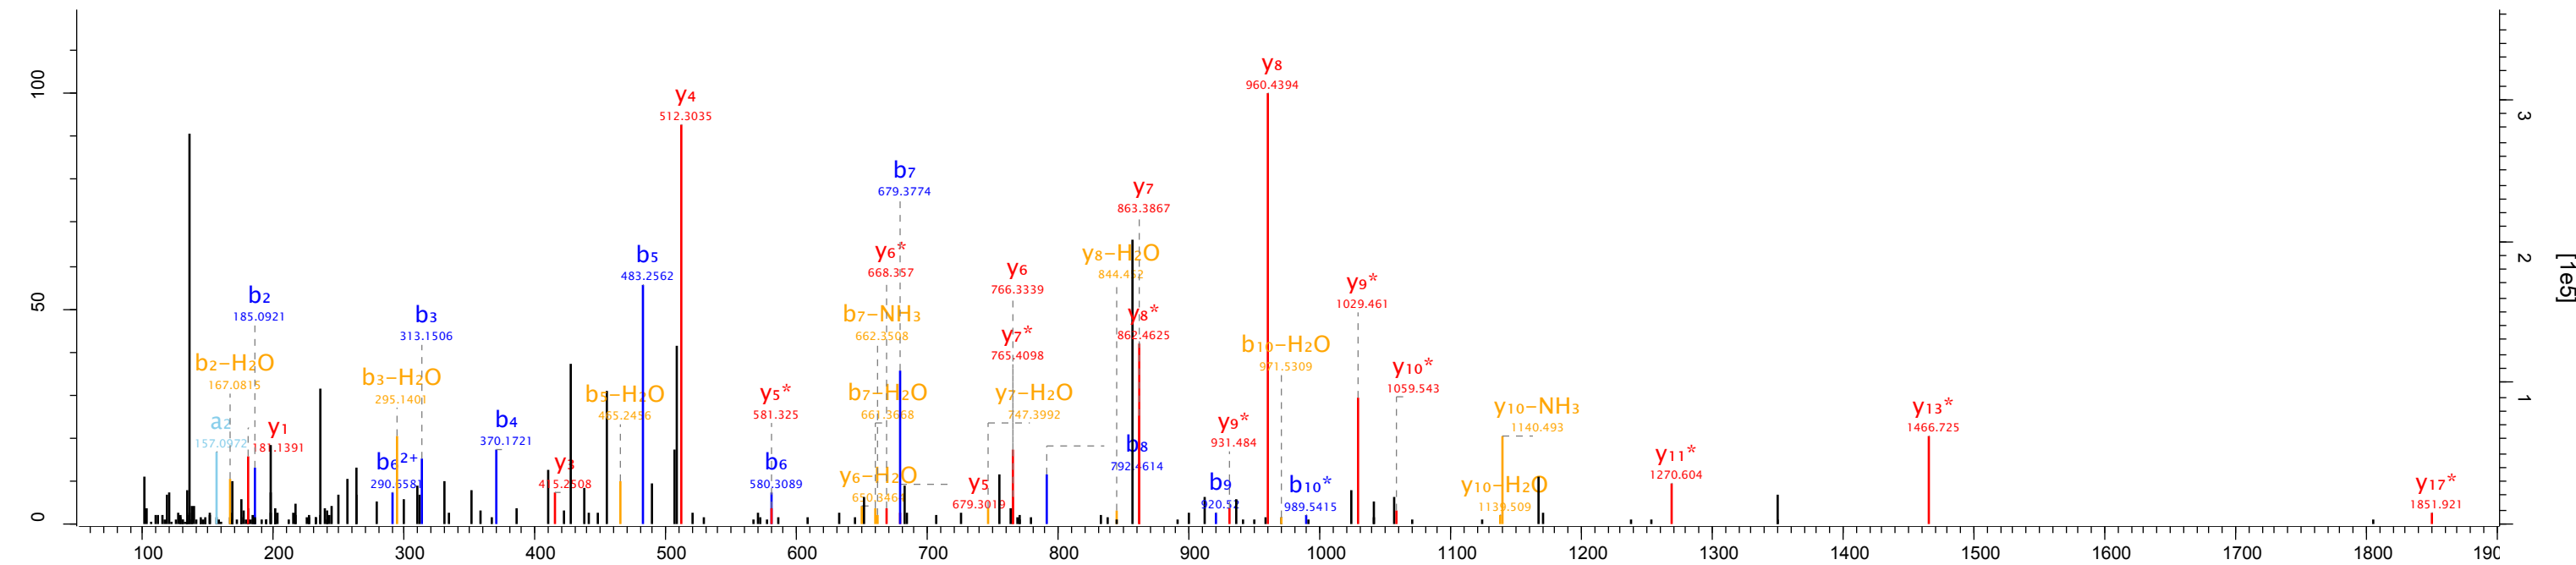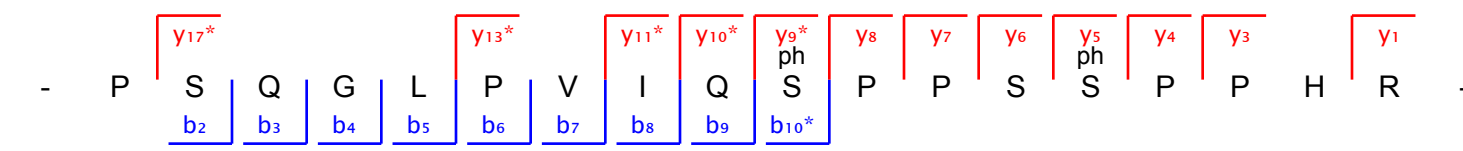

Raw file 20150814\_A375SR\_Phospho\_BR2\_02 Scan 16034 Method FTMS; HCD Score 61.16 m/z 852.86 Gene names RAB34

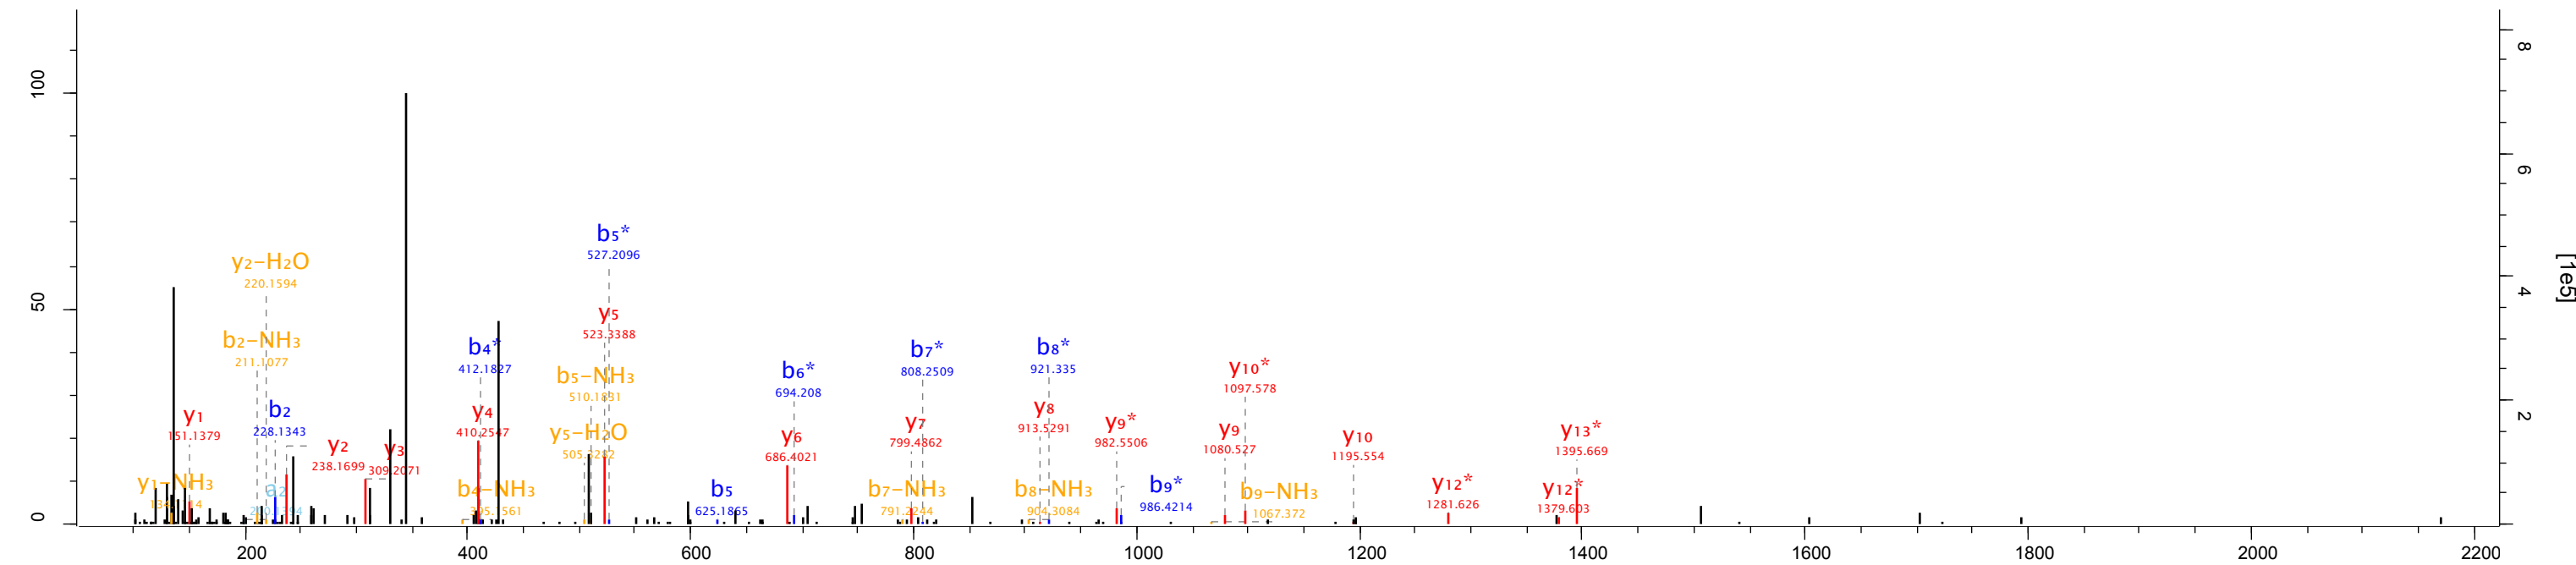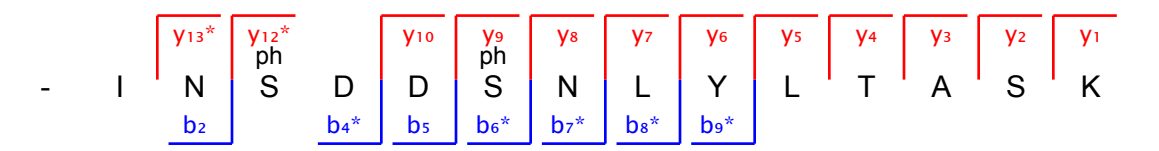

Raw file 20150814\_A375SR\_Phospho\_BR2\_02 Scan 16334 Method FTMS; HCD Score 46.95 m/z 944.37 Gene names FAM169A

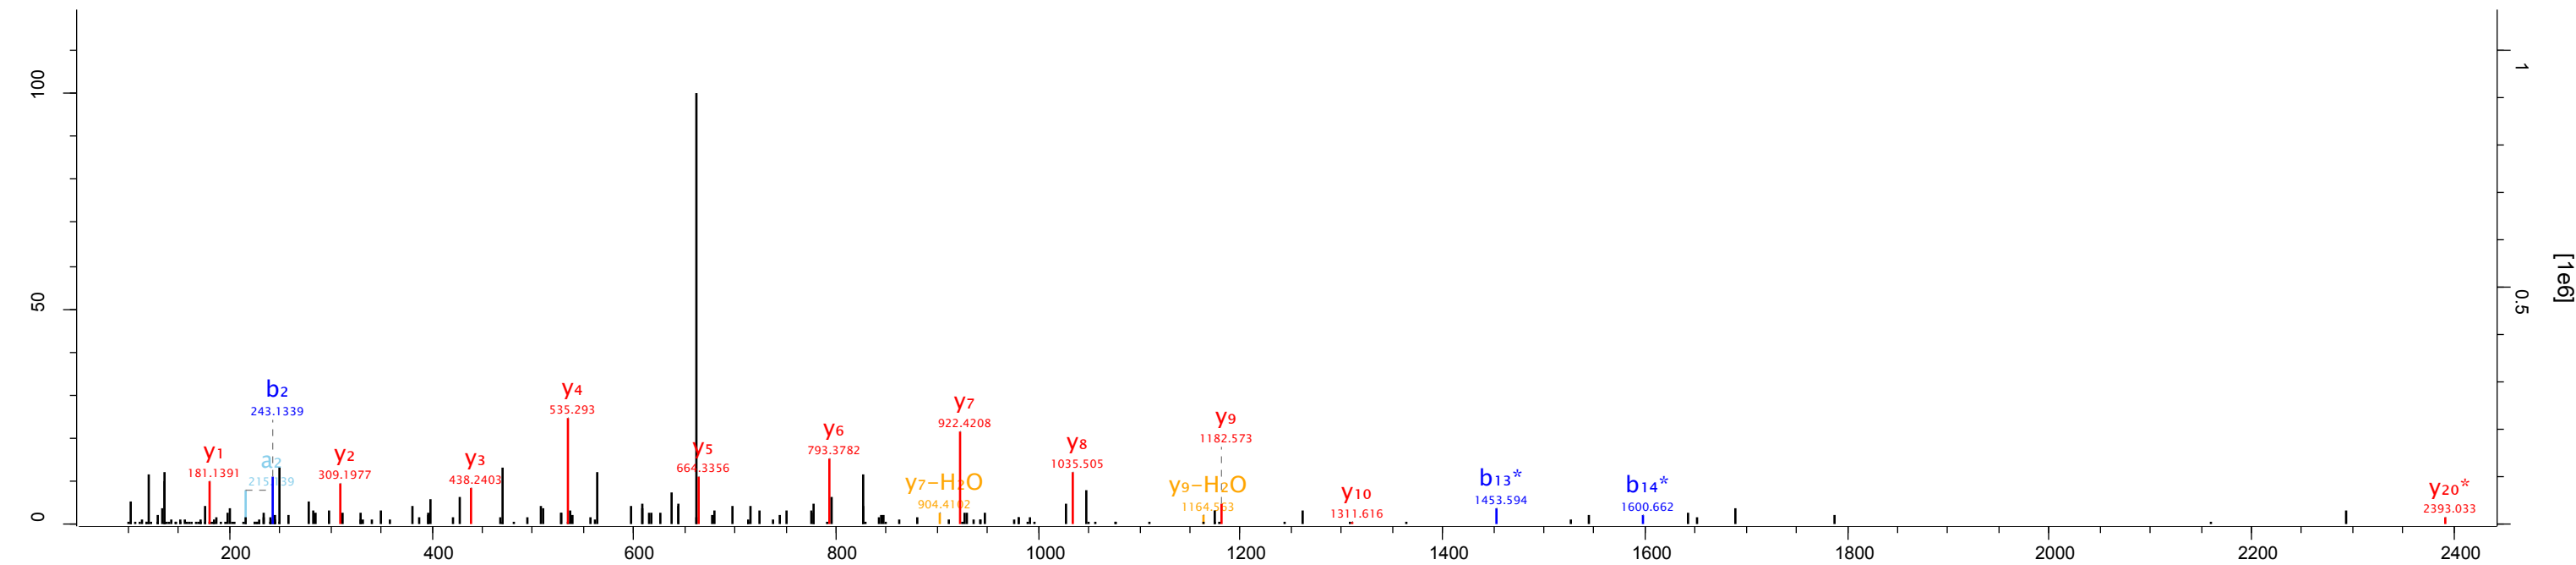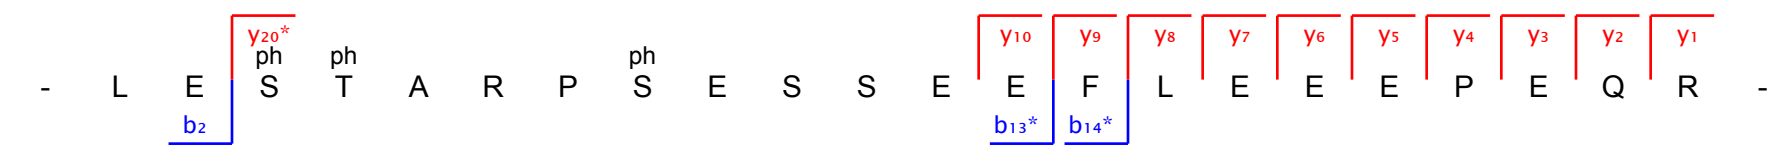

Raw file Scan Method Score m/z Gene names

20150814\_A375SR\_Phospho\_BR2\_02 16474 FTMS; HCD 56.69 1106.97 EPRS

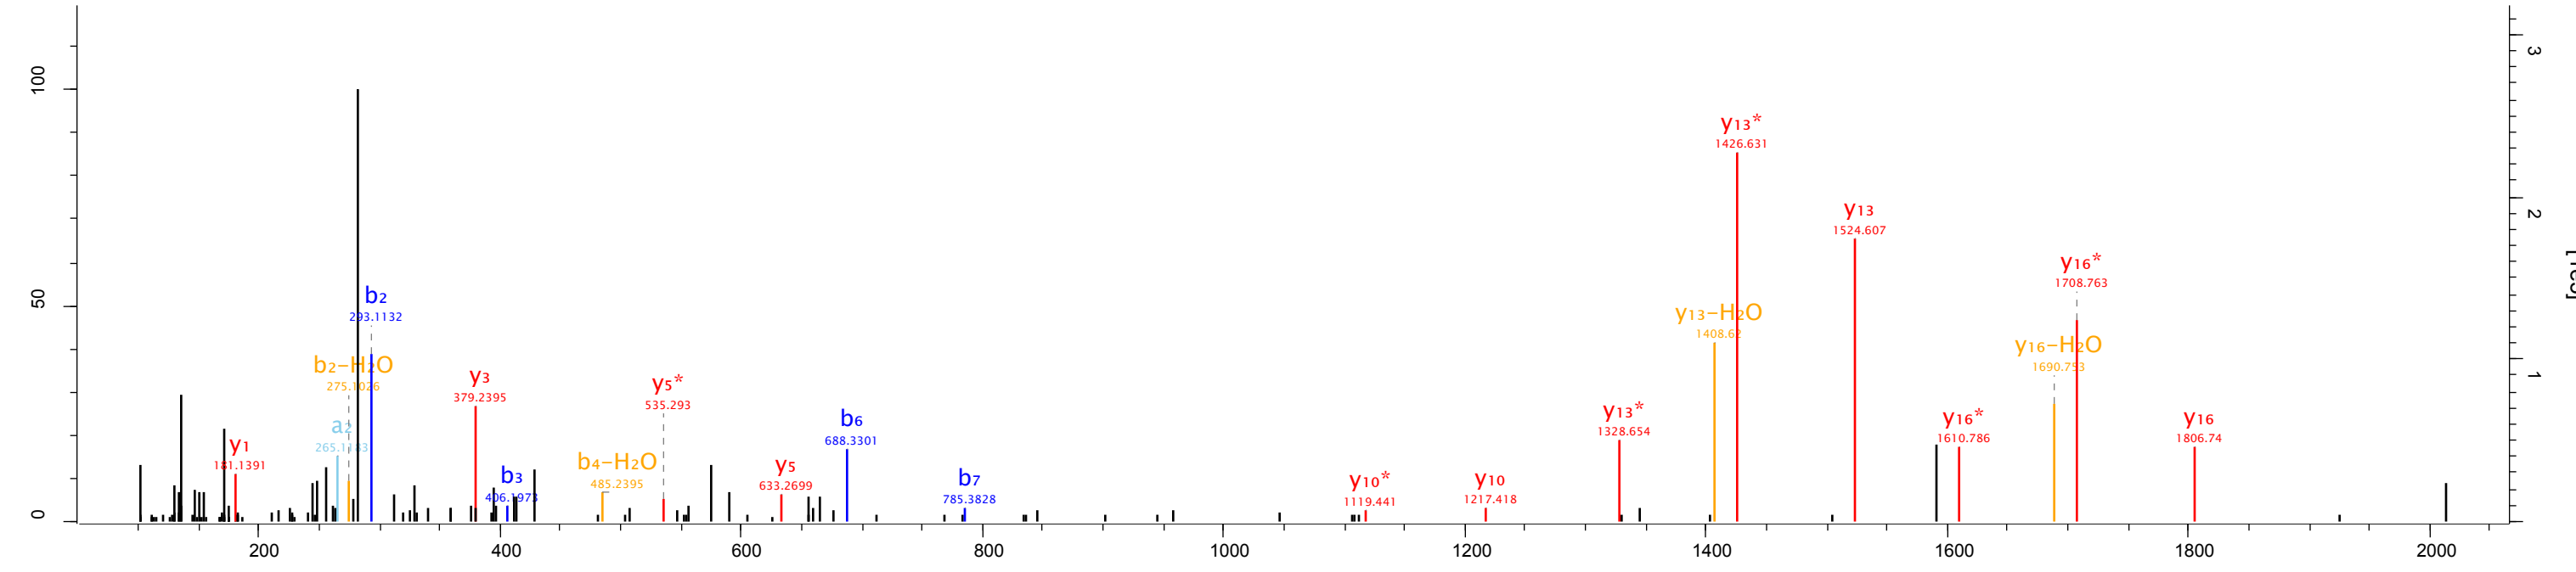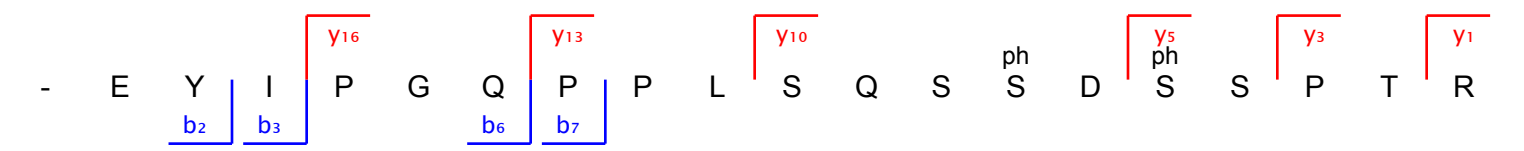

Raw file 20150814\_A375SR\_Phospho\_BR2\_02 Scan 16564 Method FTMS; HCD Score 73.69 m/z 738.32 Gene names VPS13B

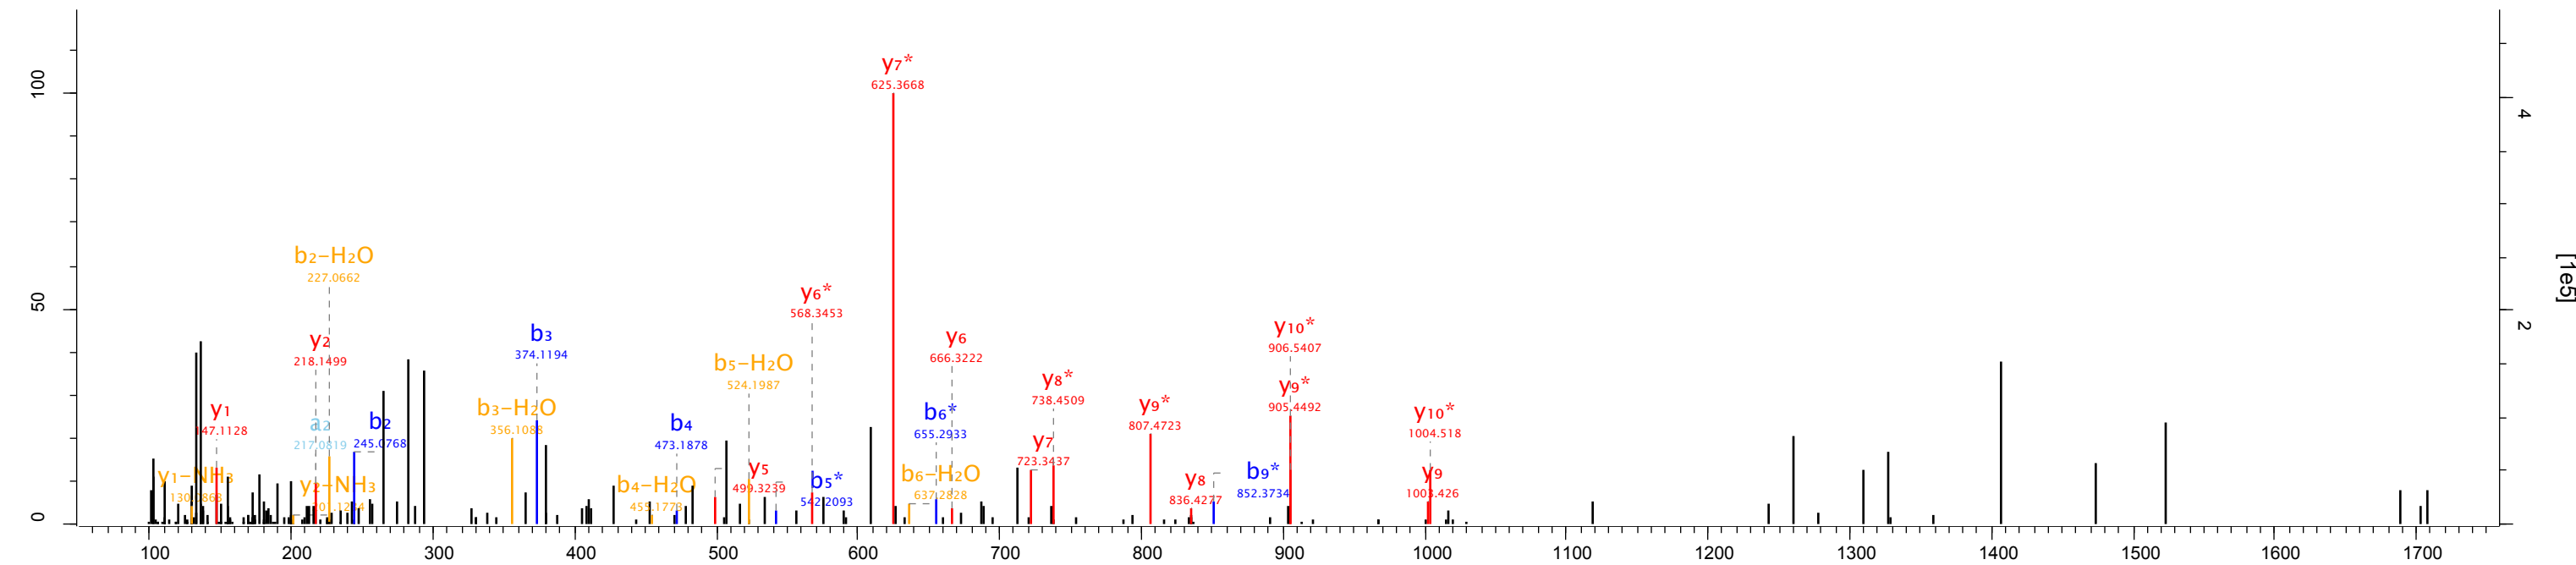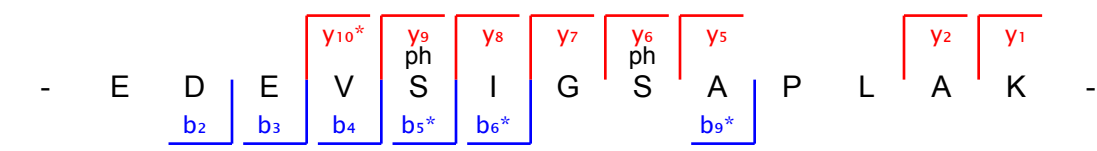

Raw file 20150814\_A375SR\_Phospho\_BR2\_02 Scan 17774 Method FTMS; HCD Score 86.47 m/z 989.41 Gene names SCRIB

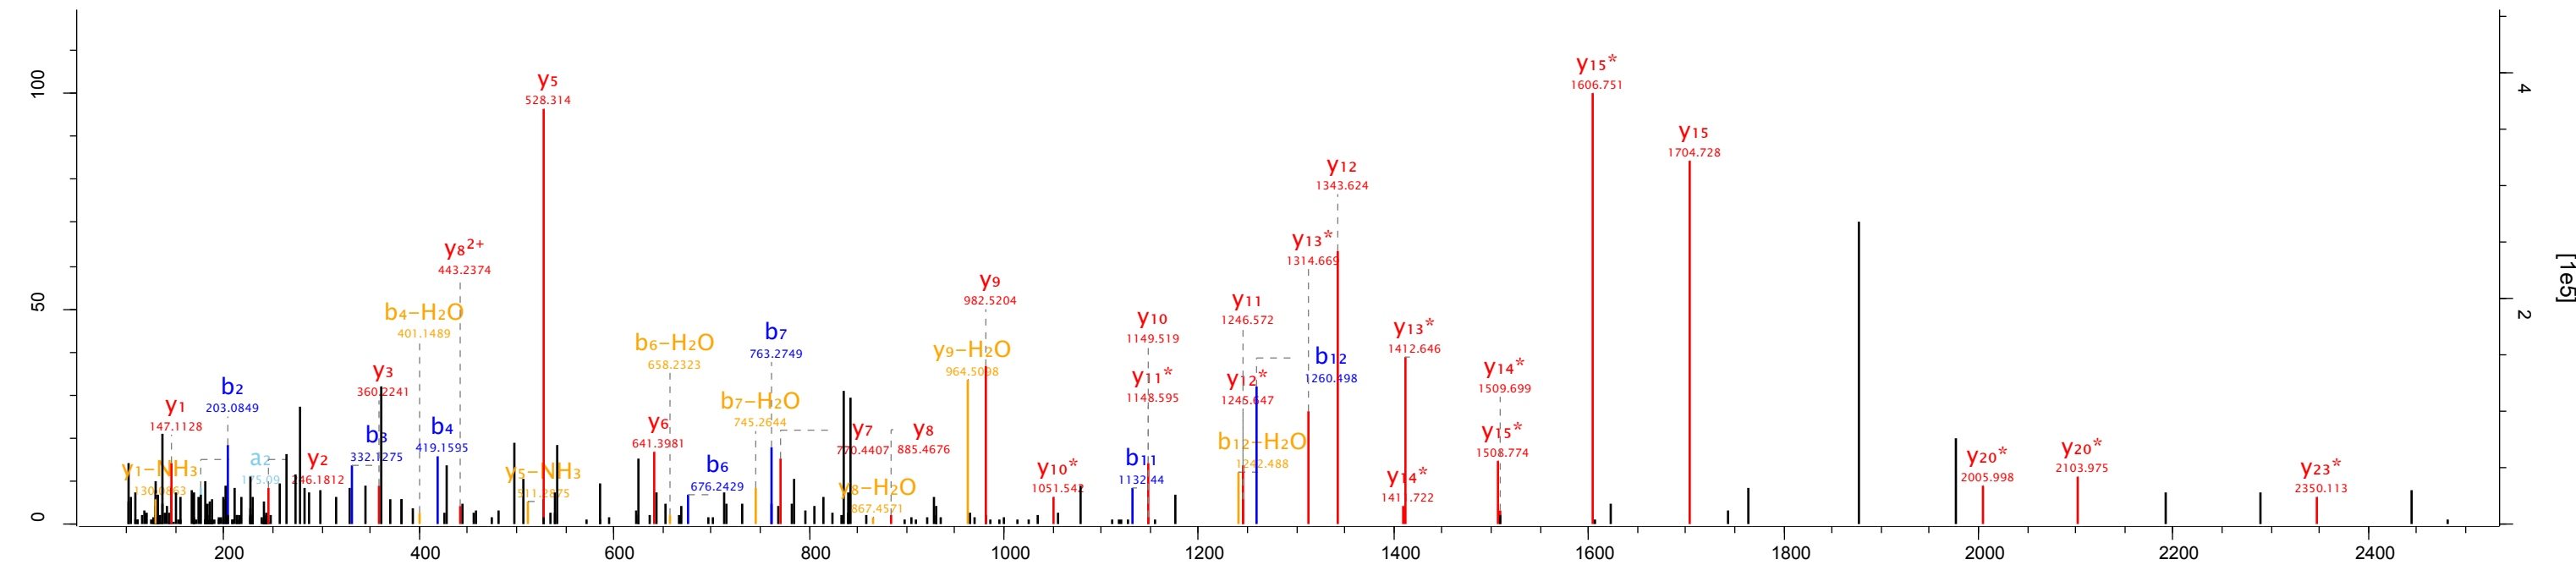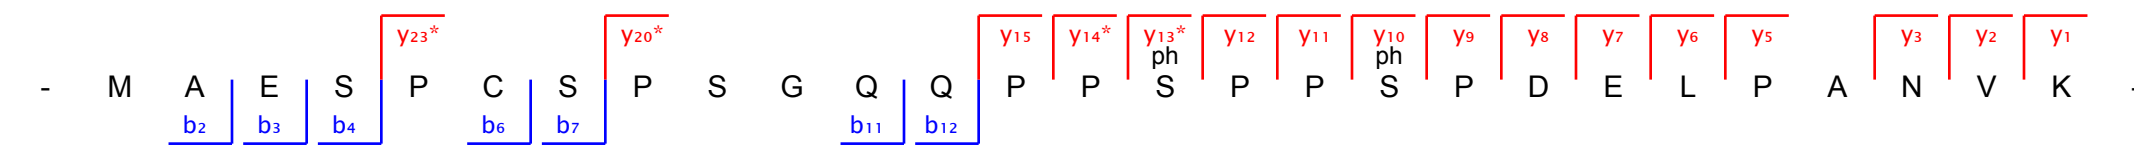



Raw file 20150814\_A375SR\_Phospho\_BR2\_02 Scan 17884 Method FTMS; HCD Score 160.12 m/z 1030.94 Gene names IGF2BP2

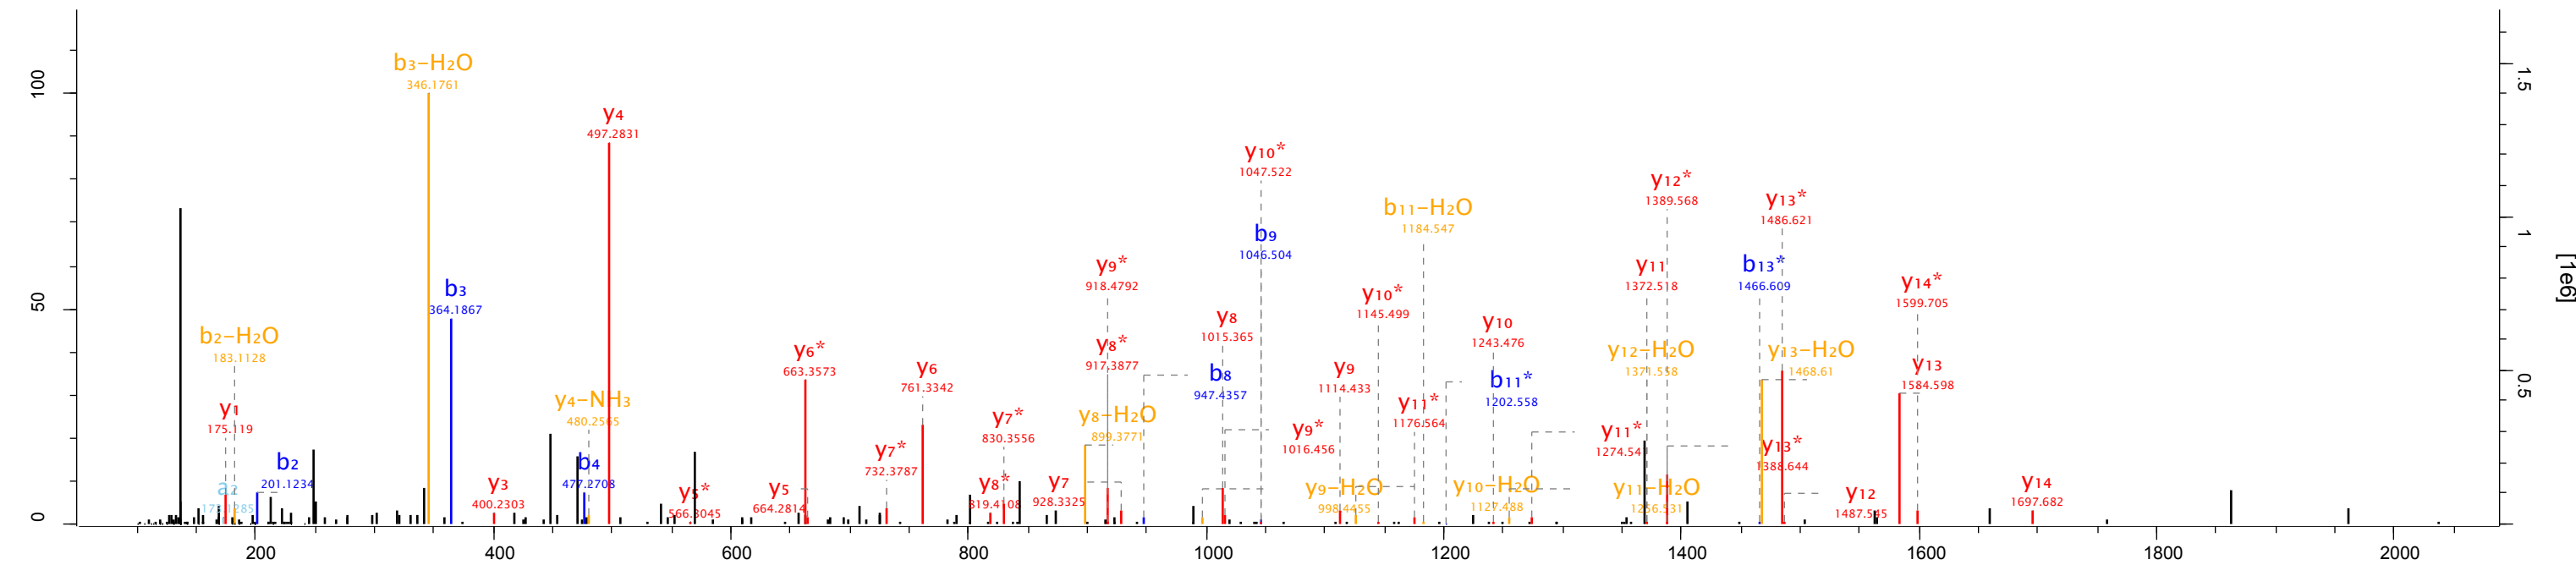

- I S Y I P D E E V S P S P P Q R -

b<sub>2</sub>
b<sub>3</sub>
b<sub>4</sub>
y<sub>14</sub>
y<sub>13</sub>
y<sub>12</sub>
y<sub>11</sub>
y<sub>10</sub>
y<sub>9</sub>
y<sub>8</sub>
y<sub>7</sub>
y<sub>6</sub>
y<sub>5</sub>
y<sub>4</sub>
y<sub>3</sub>
y<sub>1</sub>

b<sub>8</sub>
b<sub>9</sub>
b<sub>11</sub>\*
b<sub>13</sub>\*

Raw file: 20150814\_A375SR\_Phospho\_BR2\_02  
 Scan: 18904  
 Method: FTMS; HCD  
 Score: 162.61  
 m/z: 1072.4  
 Gene names: MAP1B

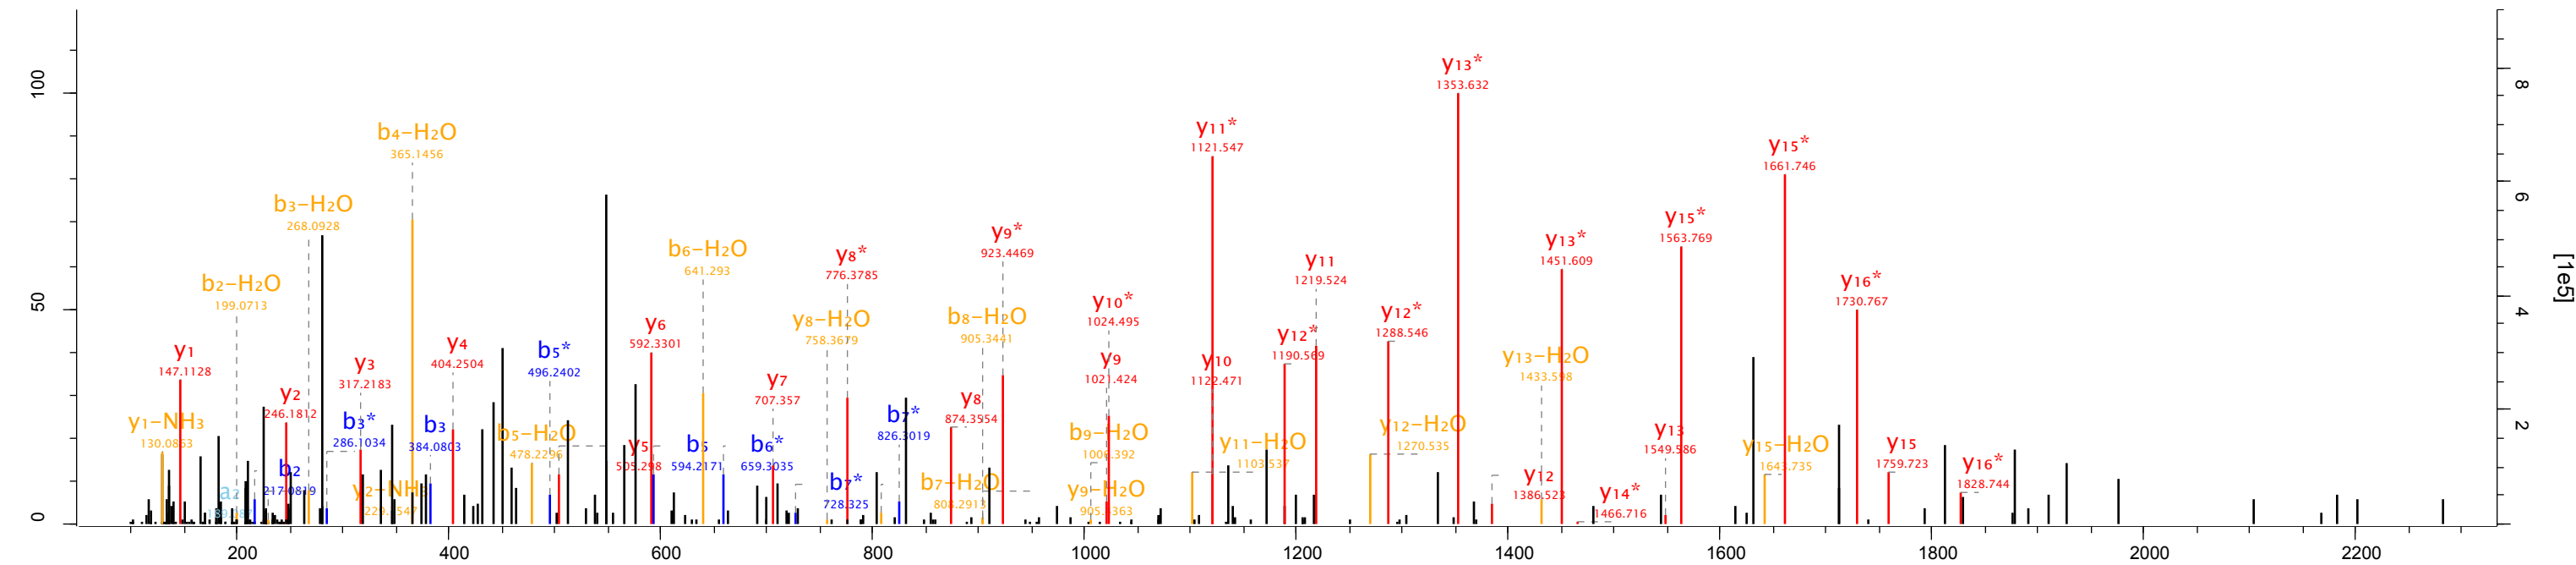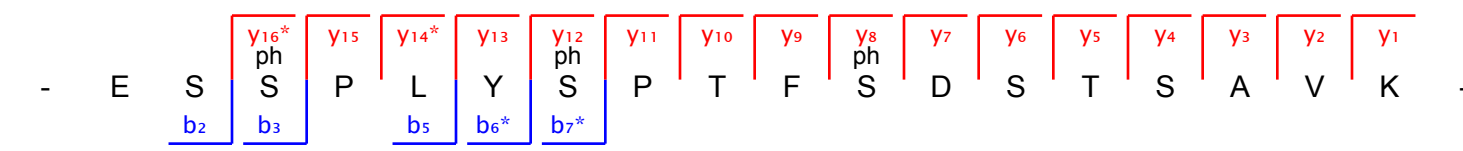

Raw file: 20150814\_A375SR\_Phospho\_BR2\_02  
 Scan: 19314 Method: FTMS; HCD Score: 47.62 m/z: 1150.15 Gene names: SMARCA2

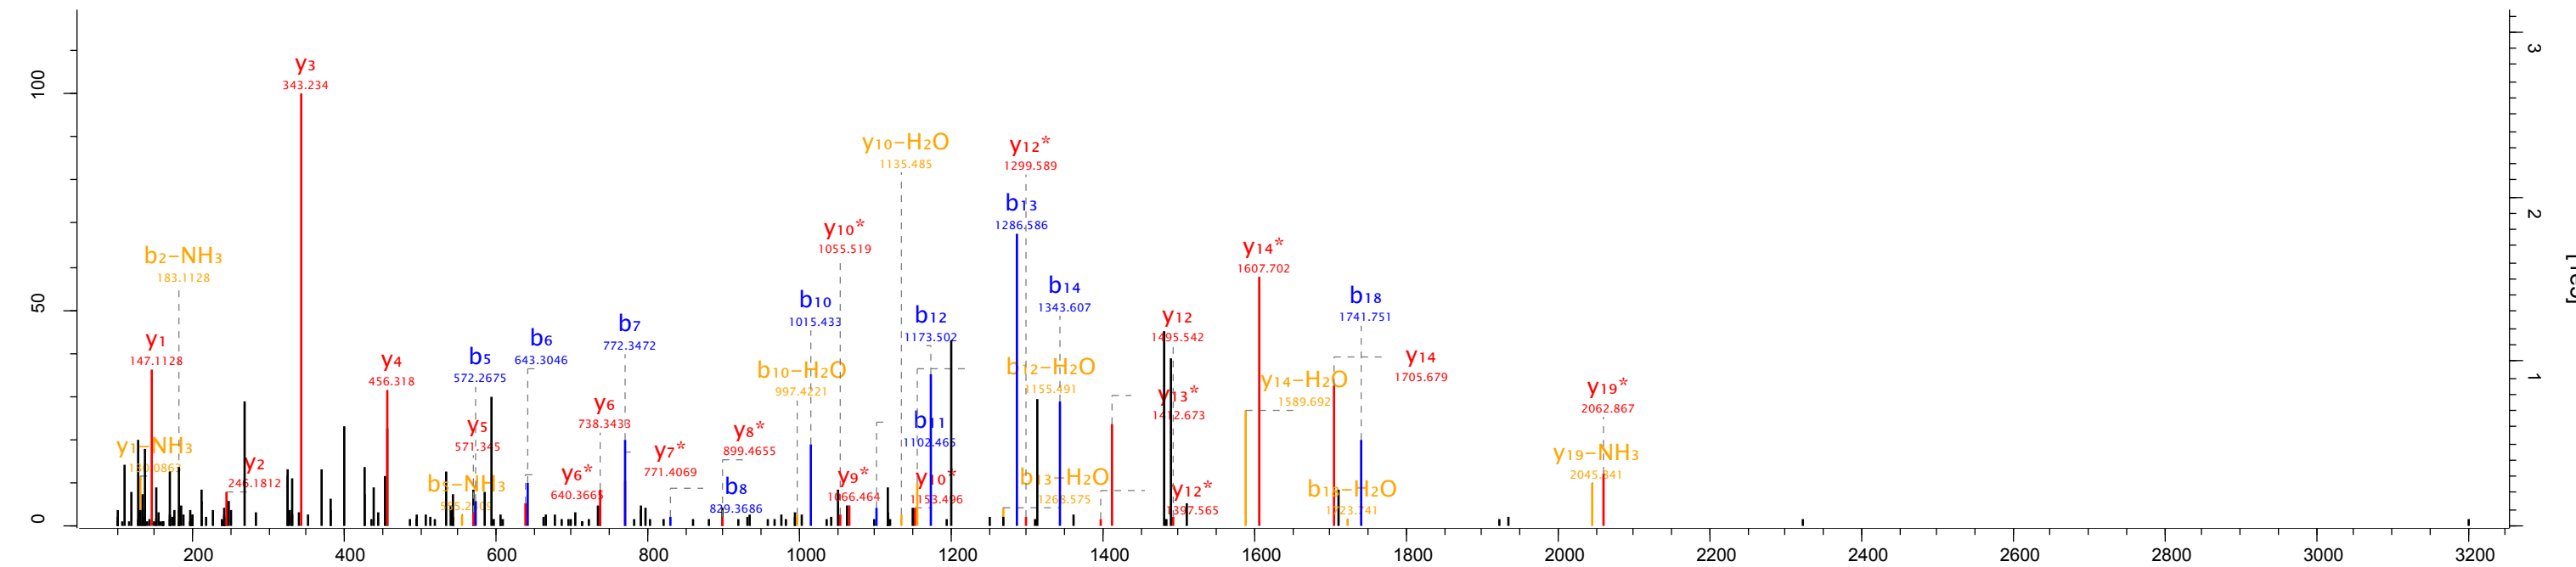

Protein sequence: - K A E E N A E G G E S A L G P D G E P I D E S S Q M S D L P V K -

Fragmentation sites (b and y ions) are indicated by brackets below the sequence:

- b<sub>5</sub>** (under N)
- b<sub>6</sub>** (under A)
- b<sub>7</sub>** (under E)
- b<sub>8</sub>** (under G)
- b<sub>10</sub>** (under E)
- b<sub>11</sub>** (under S)
- b<sub>12</sub>** (under A)
- b<sub>13</sub>** (under L)
- b<sub>14</sub>** (under G)
- b<sub>18</sub>** (under E)
- y<sub>19</sub>\*** (above G)
- y<sub>14</sub>** (above P)
- y<sub>13</sub>\*** (above I)
- y<sub>12</sub>** (above D)
- y<sub>10</sub>\*** (above S)
- y<sub>9</sub>\*** (above S)
- y<sub>8</sub>\*** (above Q)
- y<sub>7</sub>\*** (above M)
- y<sub>6</sub>** (above S)
- y<sub>5</sub>** (above D)
- y<sub>4</sub>** (above L)
- y<sub>3</sub>** (above P)
- y<sub>2</sub>** (above V)
- y<sub>1</sub>** (above K)

Raw file: 20150814\_A375SR\_Phospho\_BR2\_02  
 Scan: 19874 Method: FTMS; HCD Score: 176.38 m/z: 1134.97 Gene names: NCAPD2

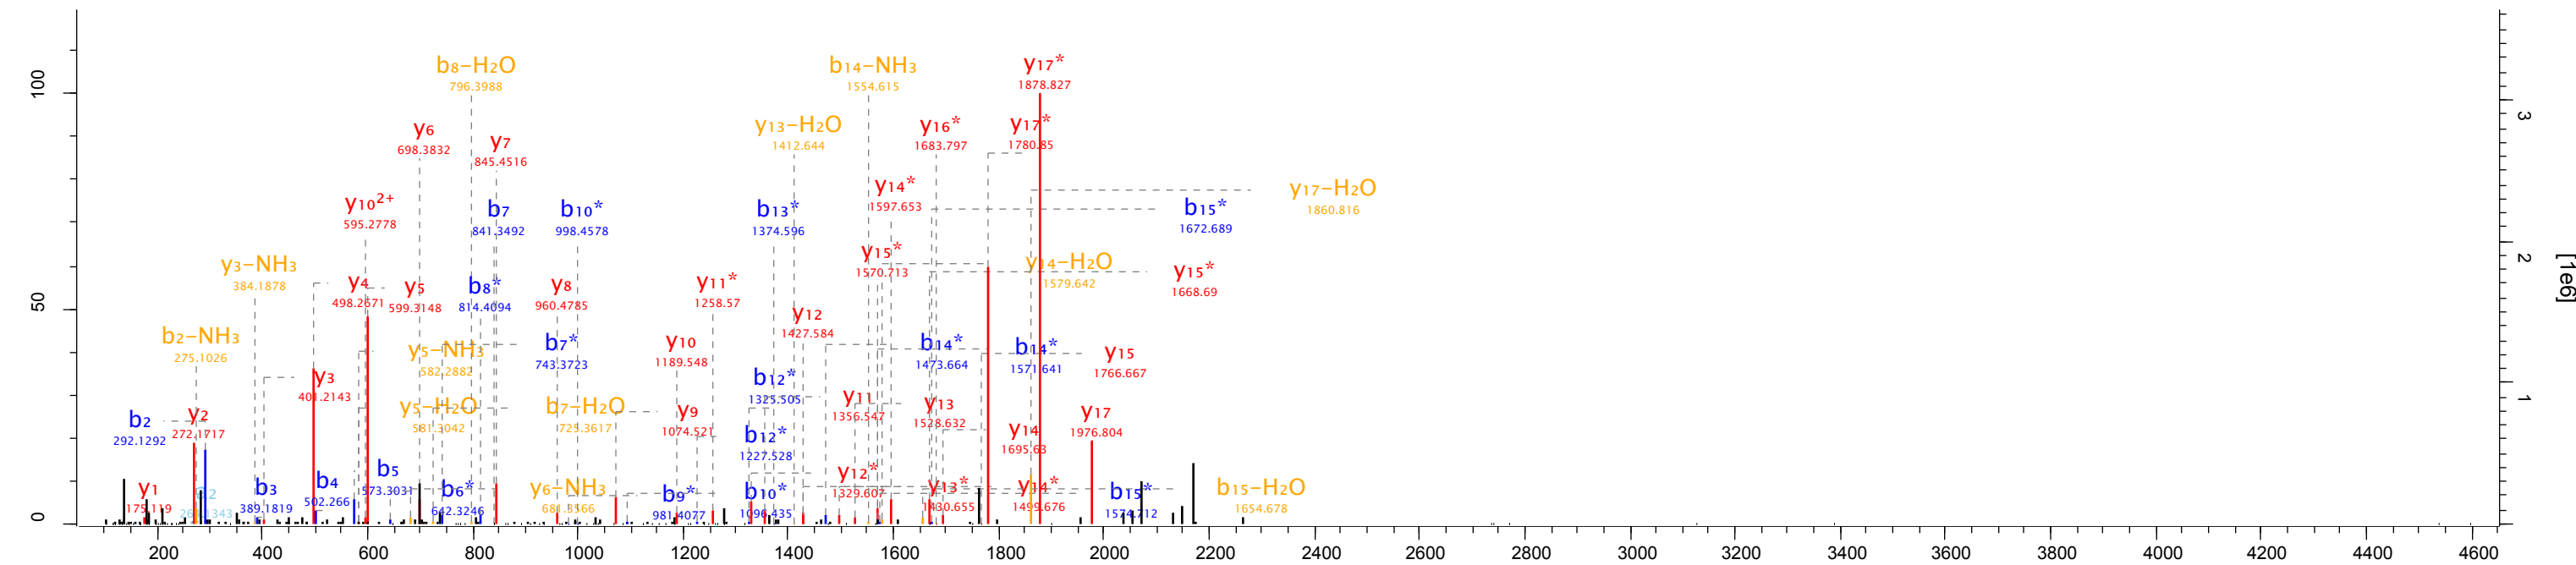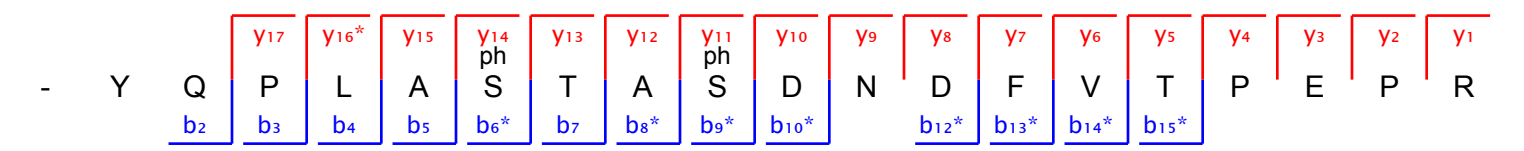

Raw file: 20150814\_A375SR\_Phospho\_BR2\_02  
 Scan: 2004 Method: FTMS; HCD Score: 95.66 m/z: 525.21 Gene names: SRRM2

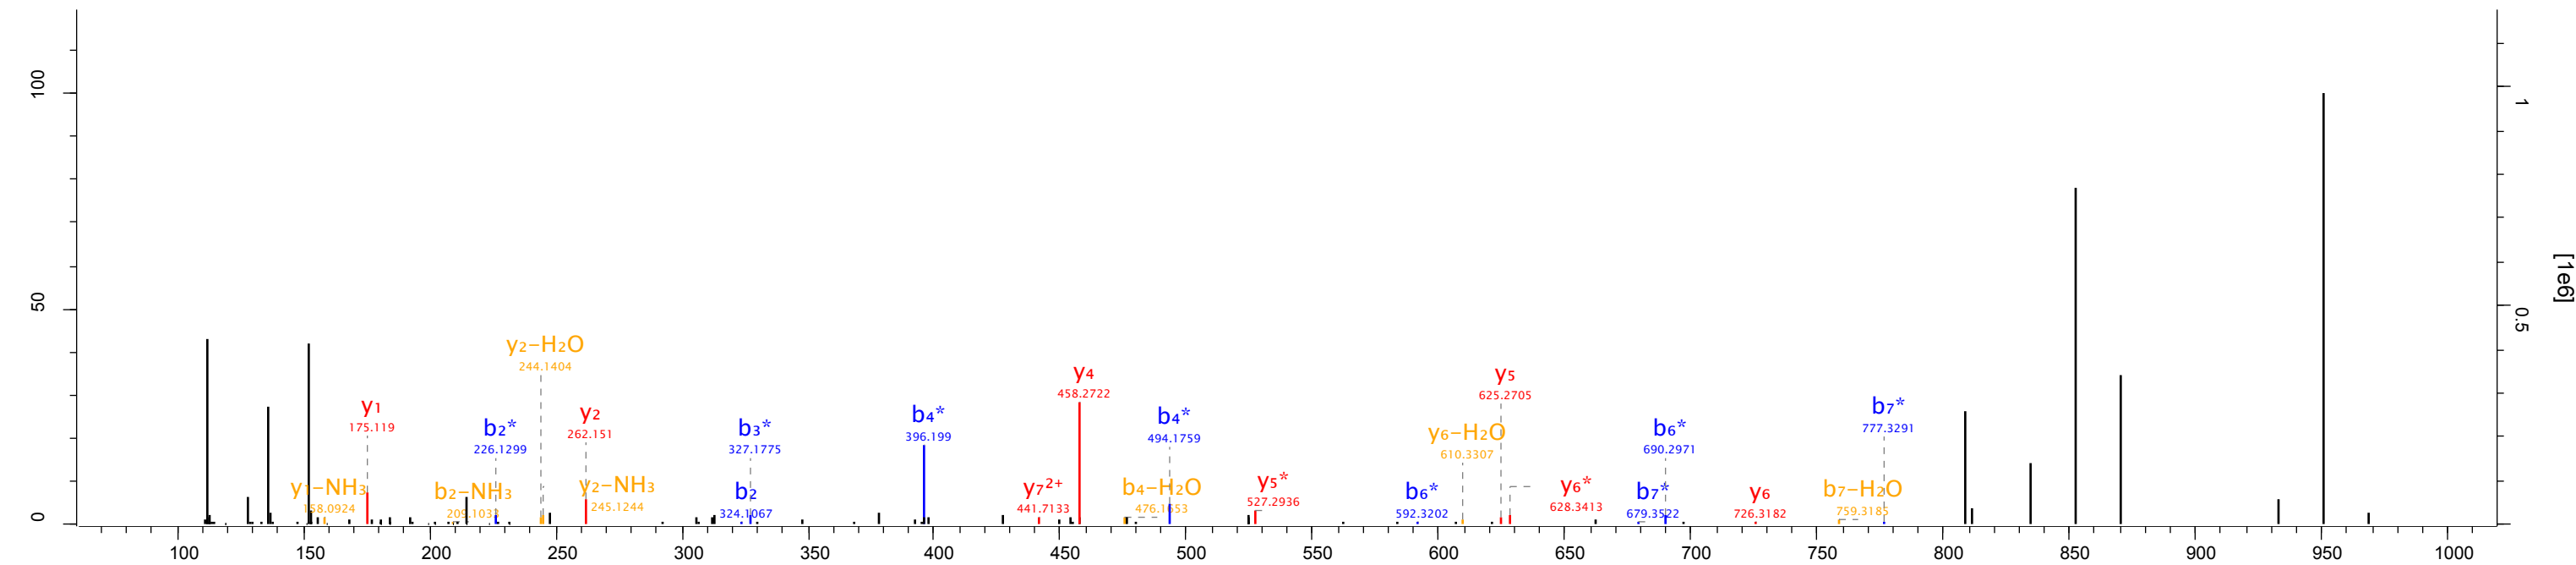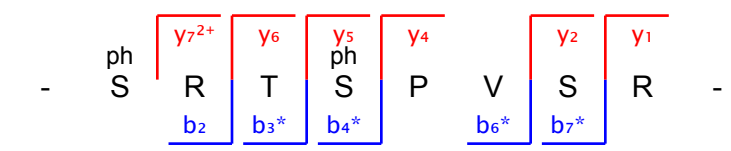

Raw file 20150814\_A375SR\_Phospho\_BR2\_02 Scan 22574 Method FTMS; HCD Score 95.55 m/z 924.46 Gene names YAP1

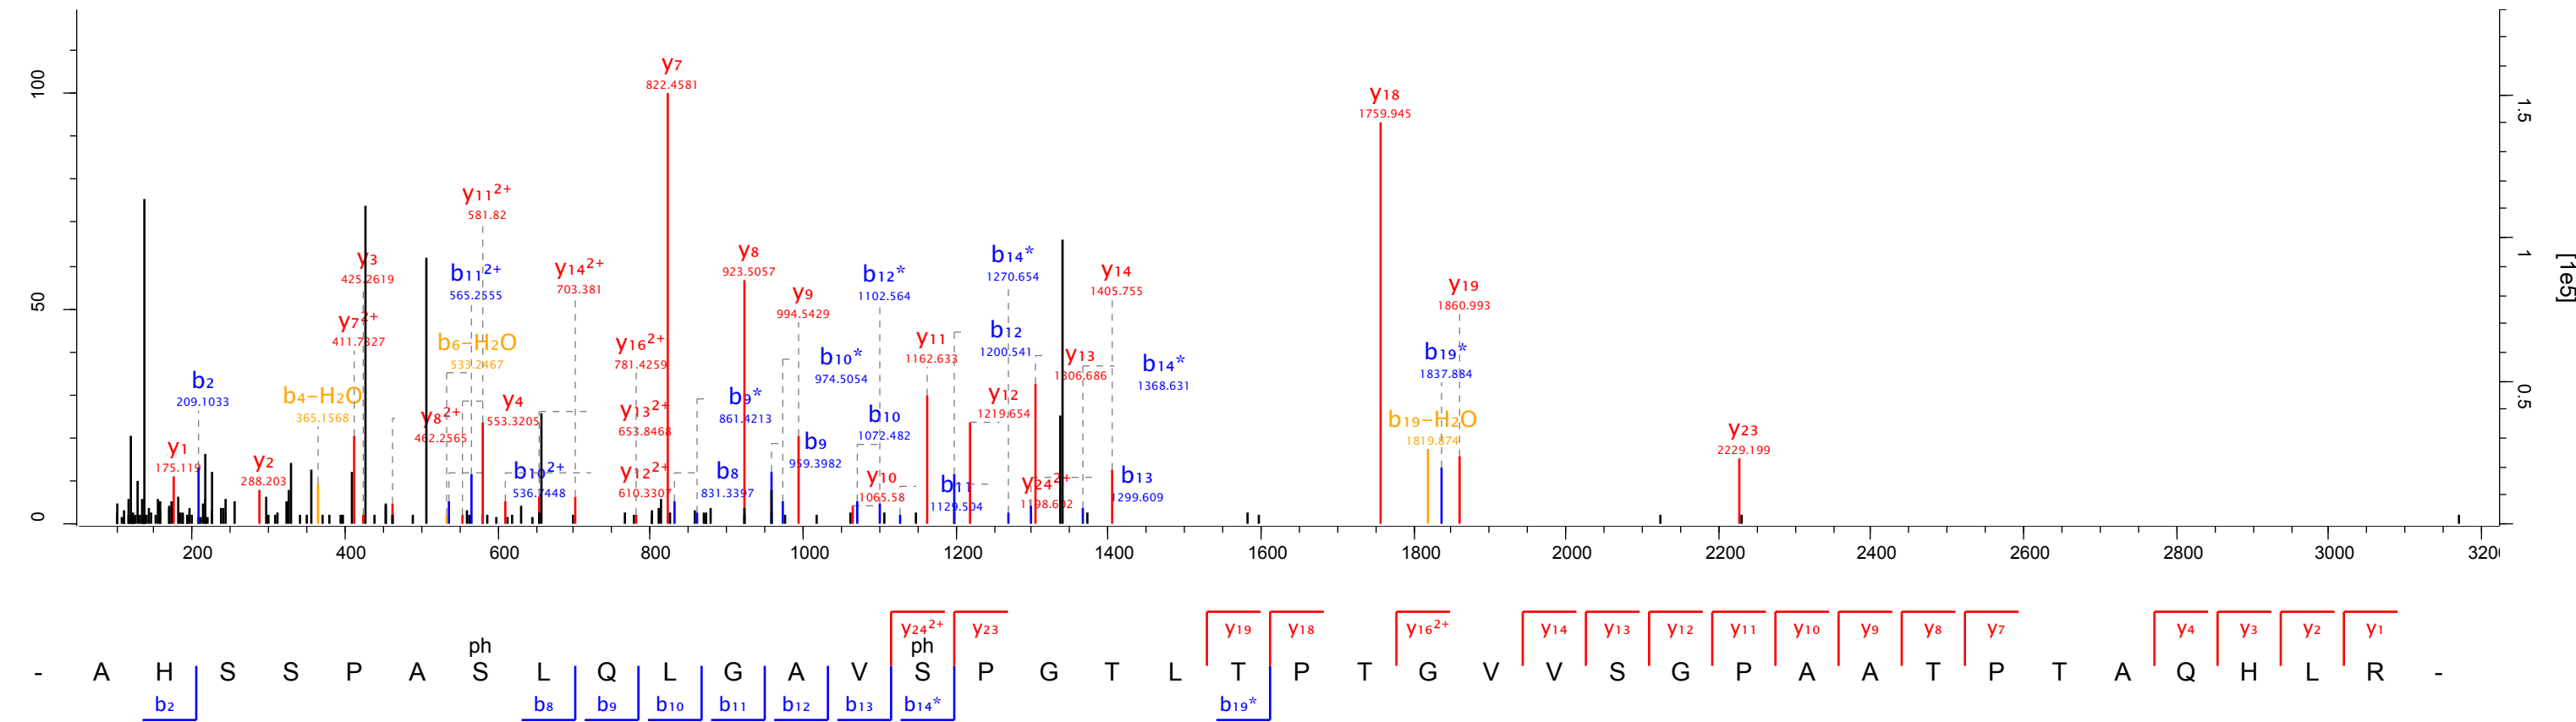

Raw file 20150814\_A375SR\_Phospho\_BR2\_02 Scan 23404 Method FTMS; HCD Score 164.46 m/z 918.07 Gene names CCNL1

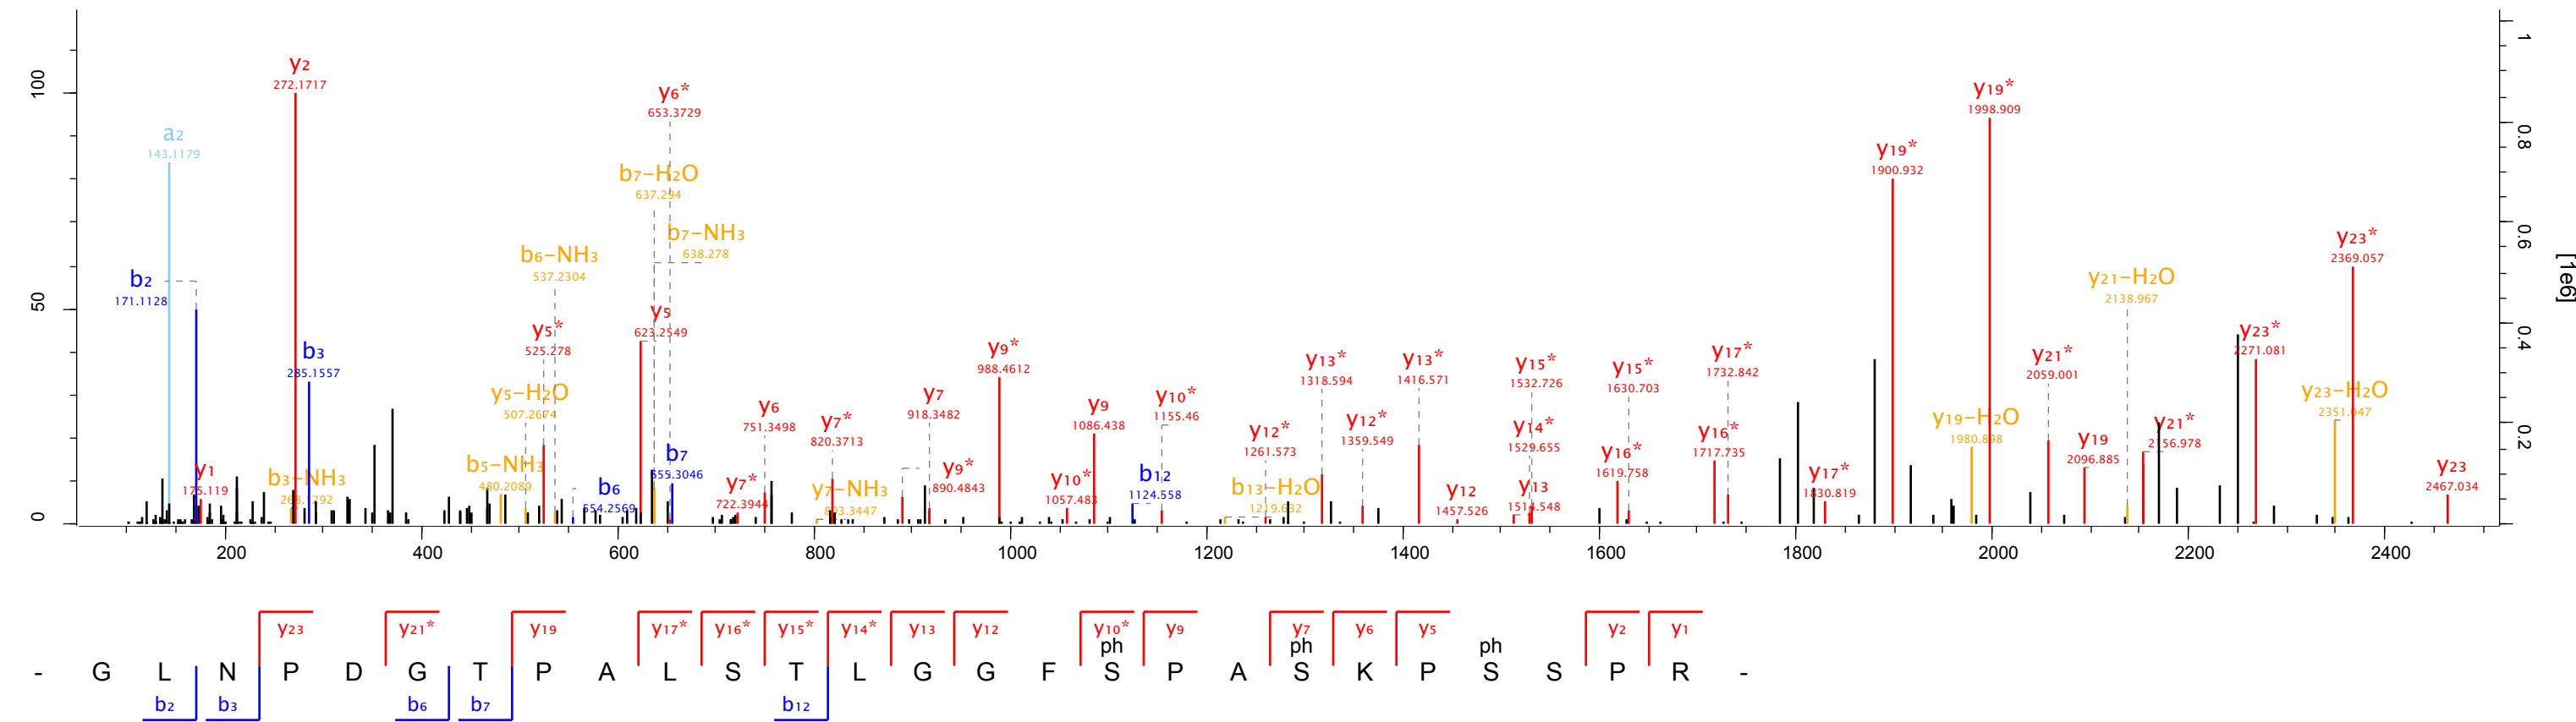

Raw file: 20150814\_A375SR\_Phospho\_BR2\_02  
 Scan: 4104 Method: FTMS; HCD Score: 158.42 m/z: 714.77 Gene names: SPAG9

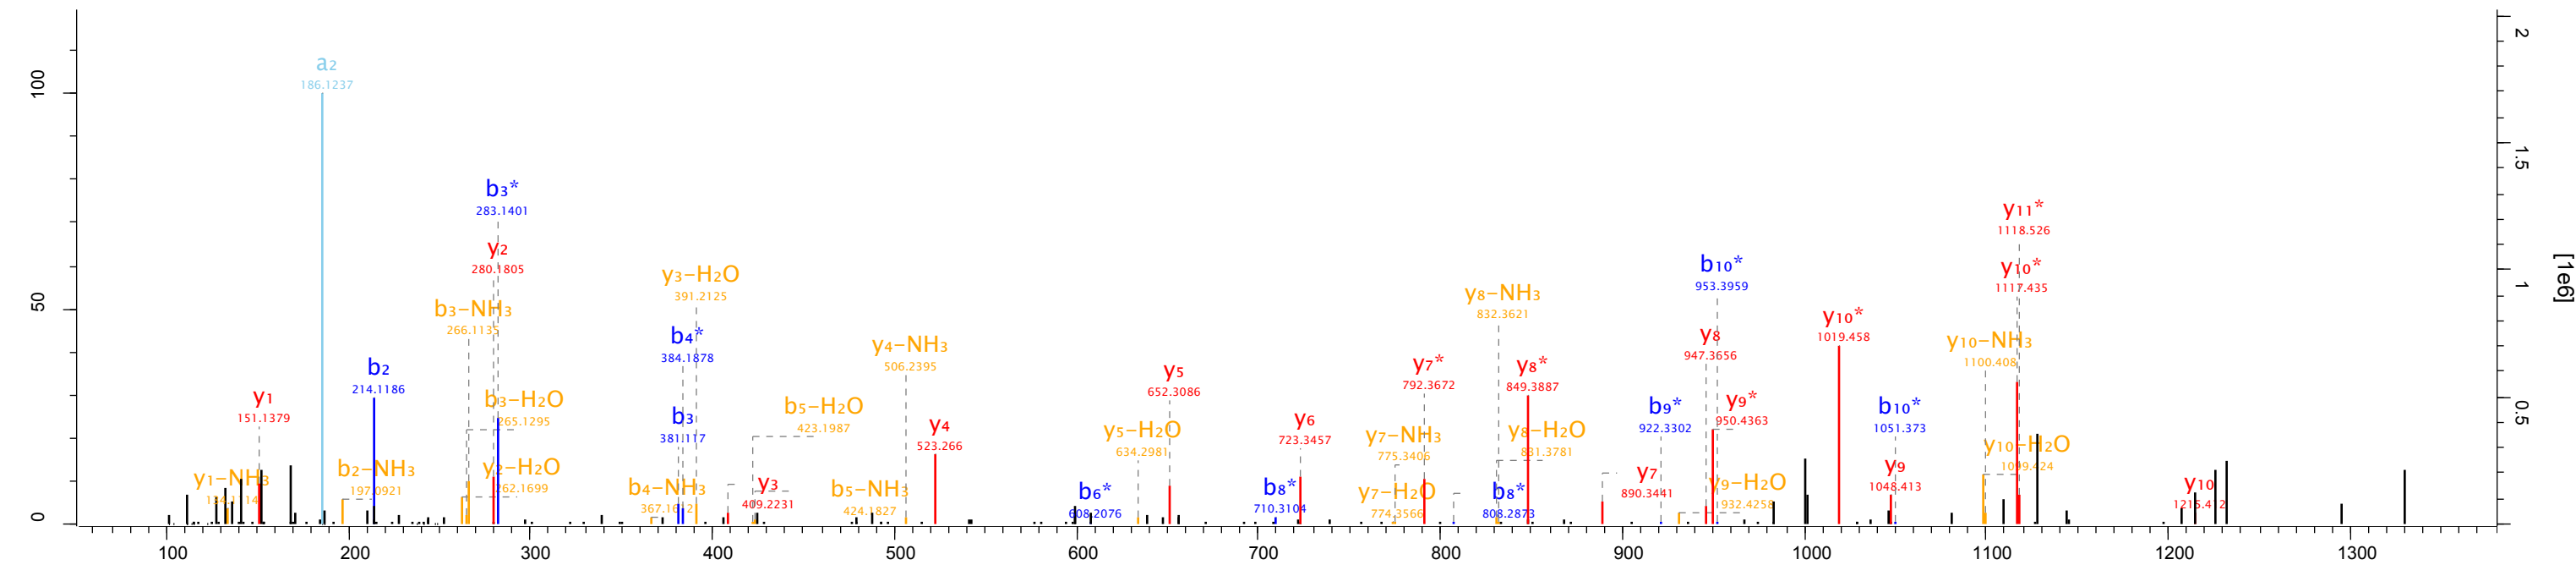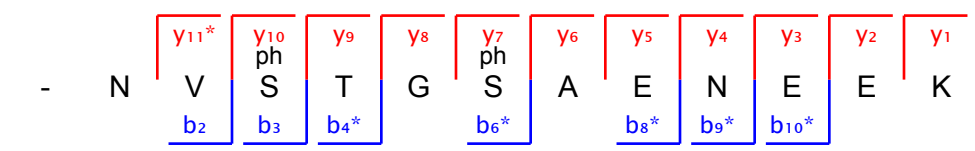



Raw file 20150814\_A375SR\_Phospho\_BR2\_02 Scan 4284 Method FTMS; HCD Score 95.9 m/z 709.75 Gene names MADD

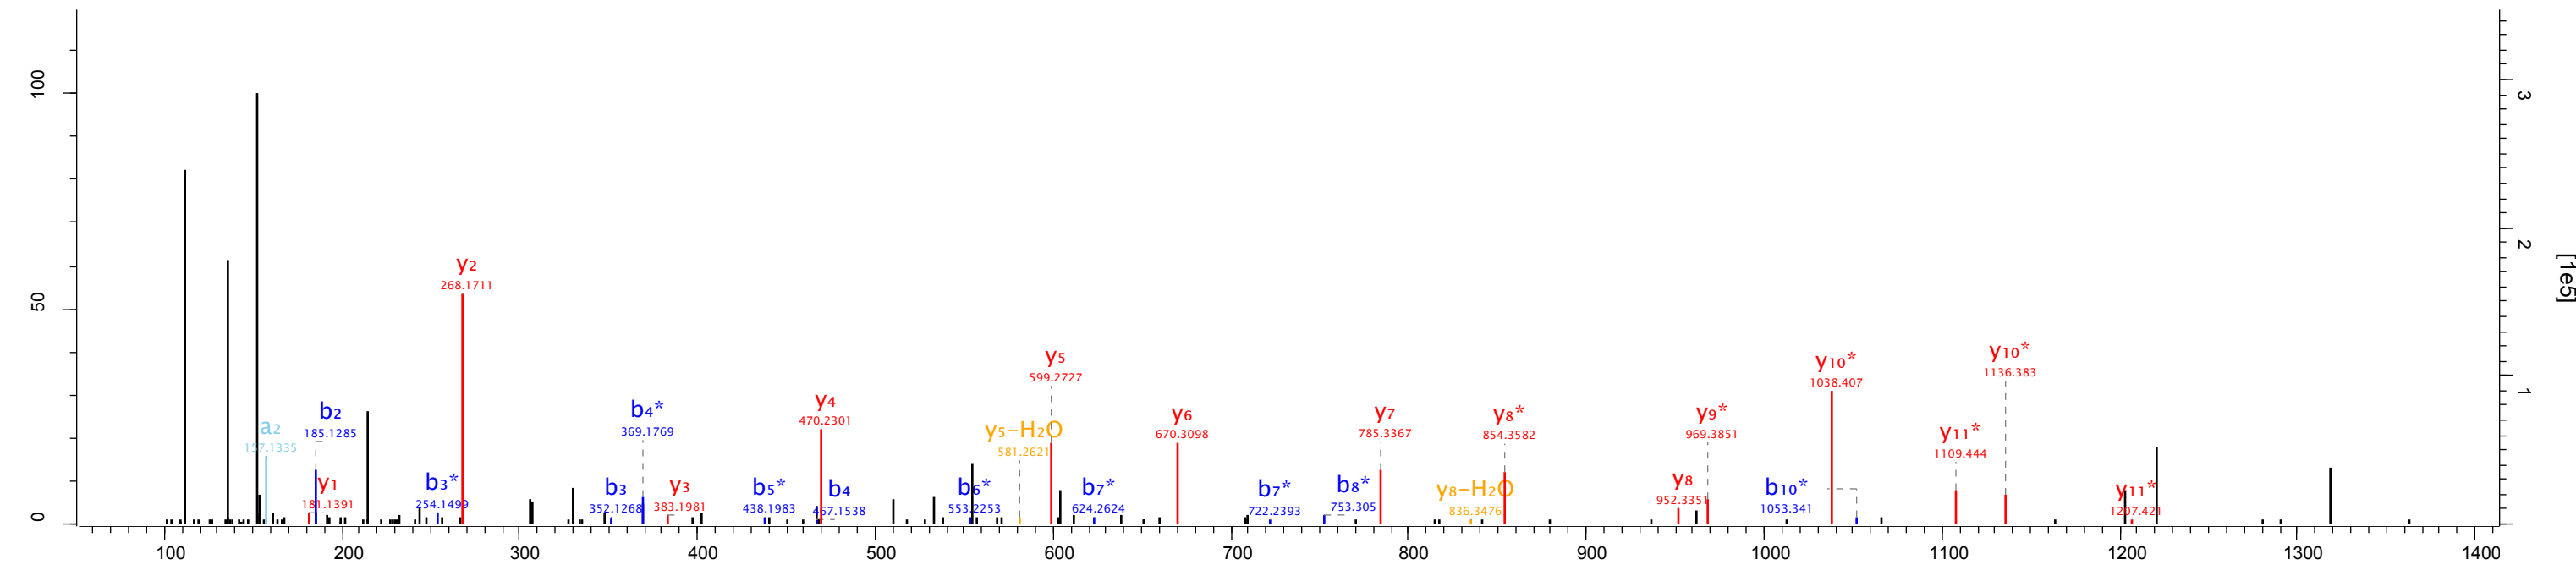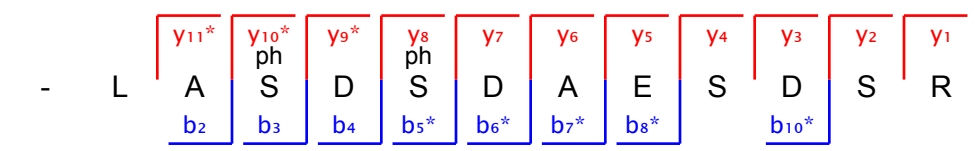

Raw file 20150814\_A375SR\_Phospho\_BR2\_02 Scan 4974 Method FTMS; HCD Score 142.23 m/z 690.26 Gene names ADD2

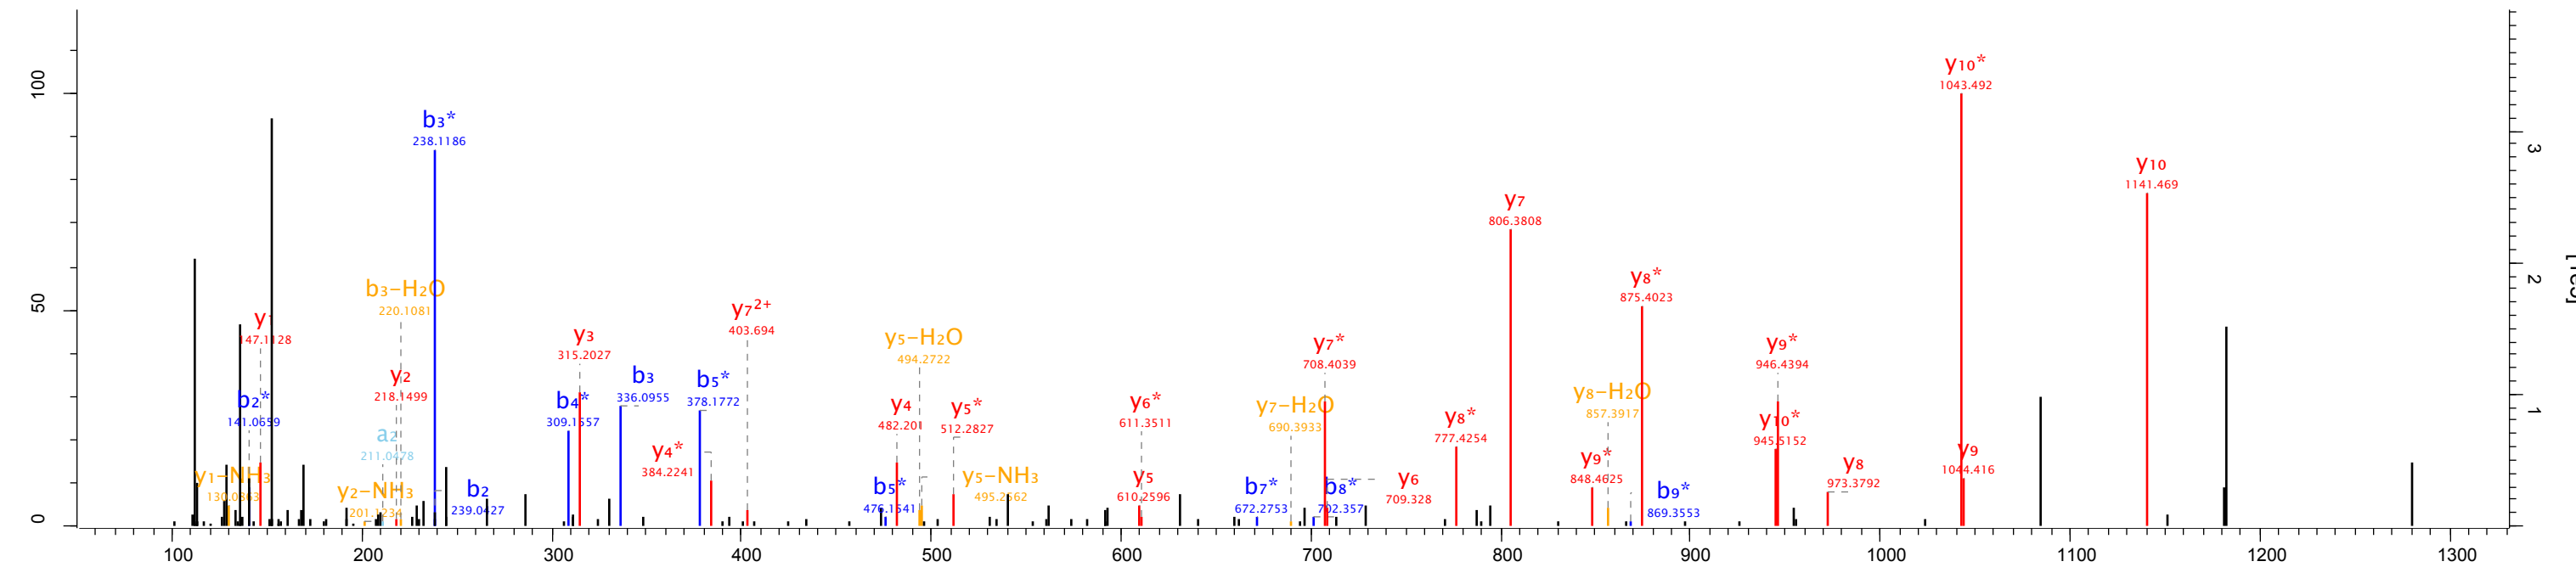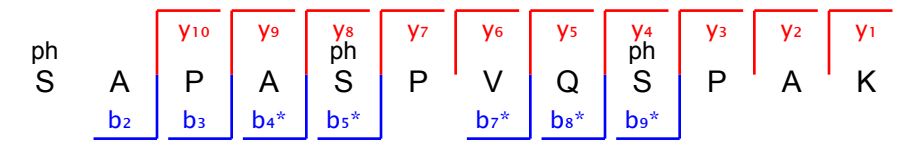

Raw file: 20150814\_A375SR\_Phospho\_BR2\_02  
 Scan: 5214 Method: FTMS; HCD Score: 80.96 m/z: 576.74 Gene names: GOLGA4

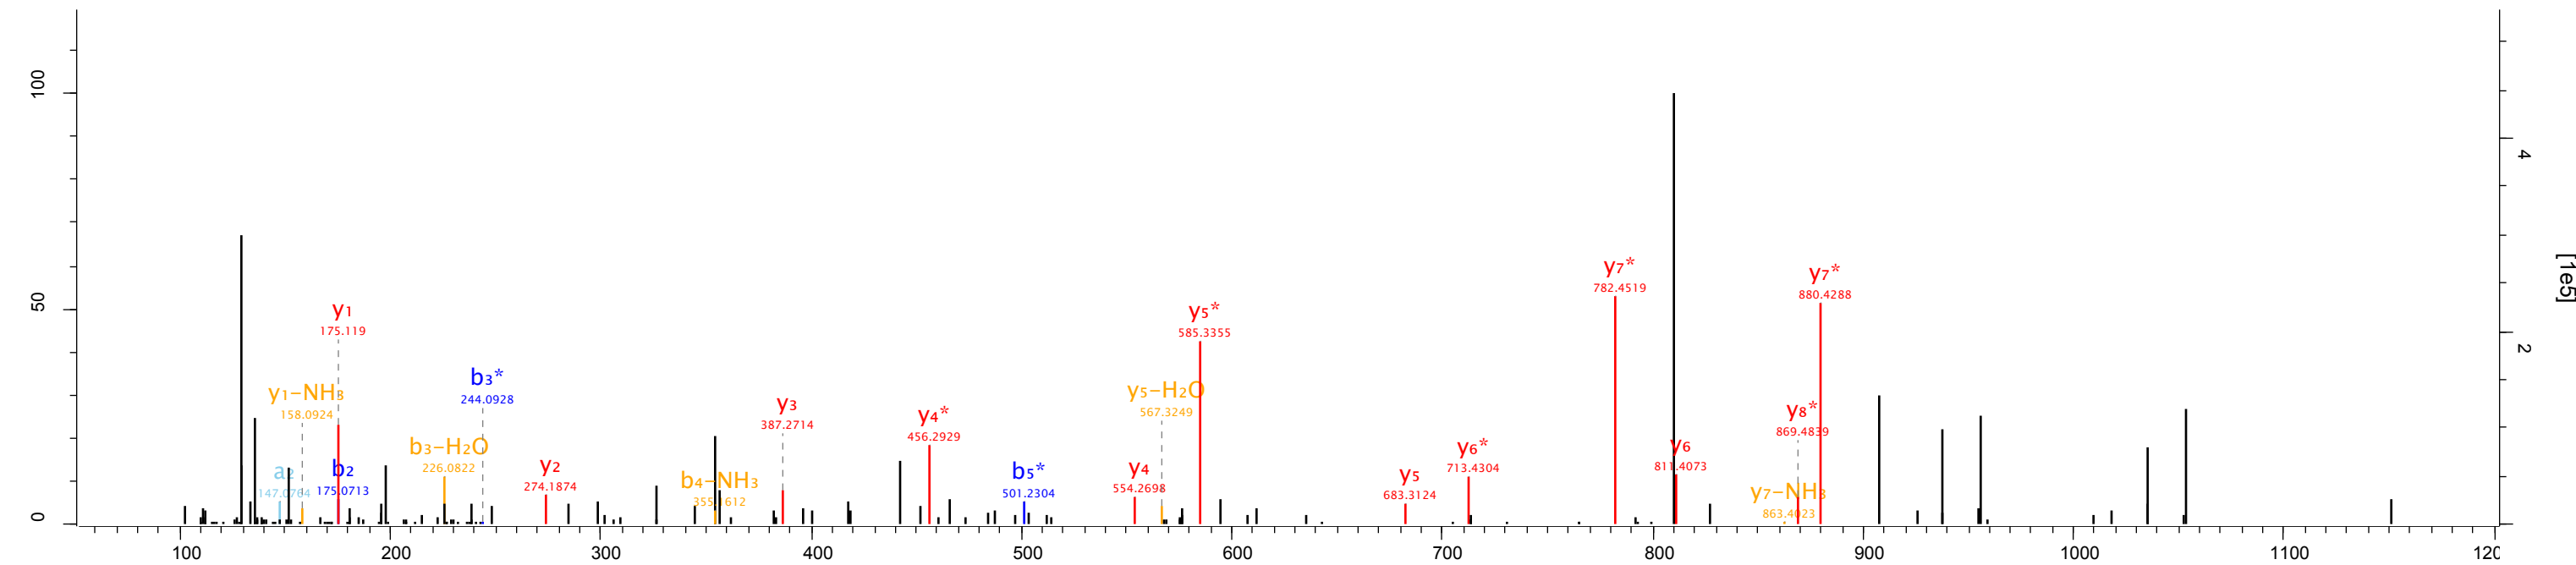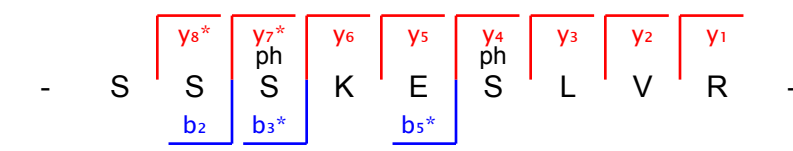

Raw file 20150814\_A375SR\_Phospho\_BR2\_02 Scan 5474 Method FTMS; HCD Score 73.35 m/z 618.19 Gene names ATRX

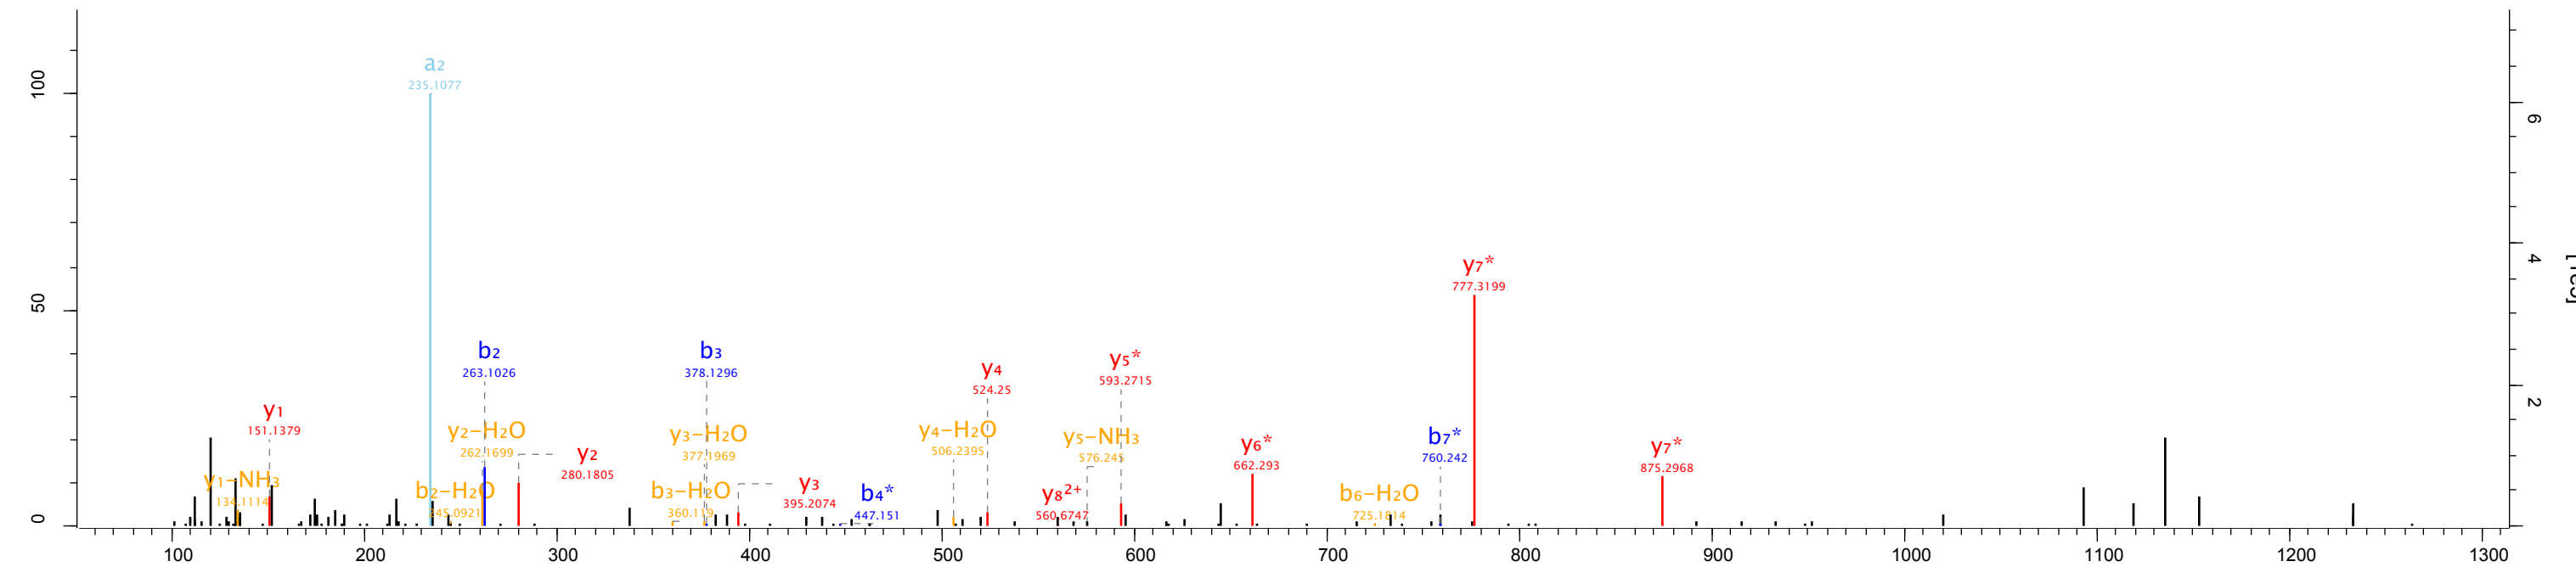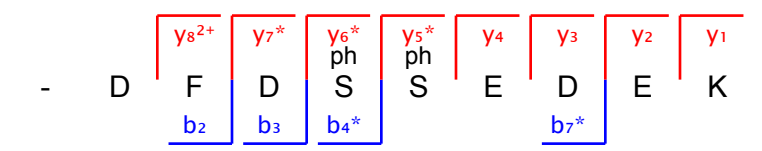

Raw file: 20150814\_A375SR\_Phospho\_BR2\_02  
 Scan: 6404 Method: FTMS; HCD Score: 81.55 m/z: 905.38 Gene names: SYTL5

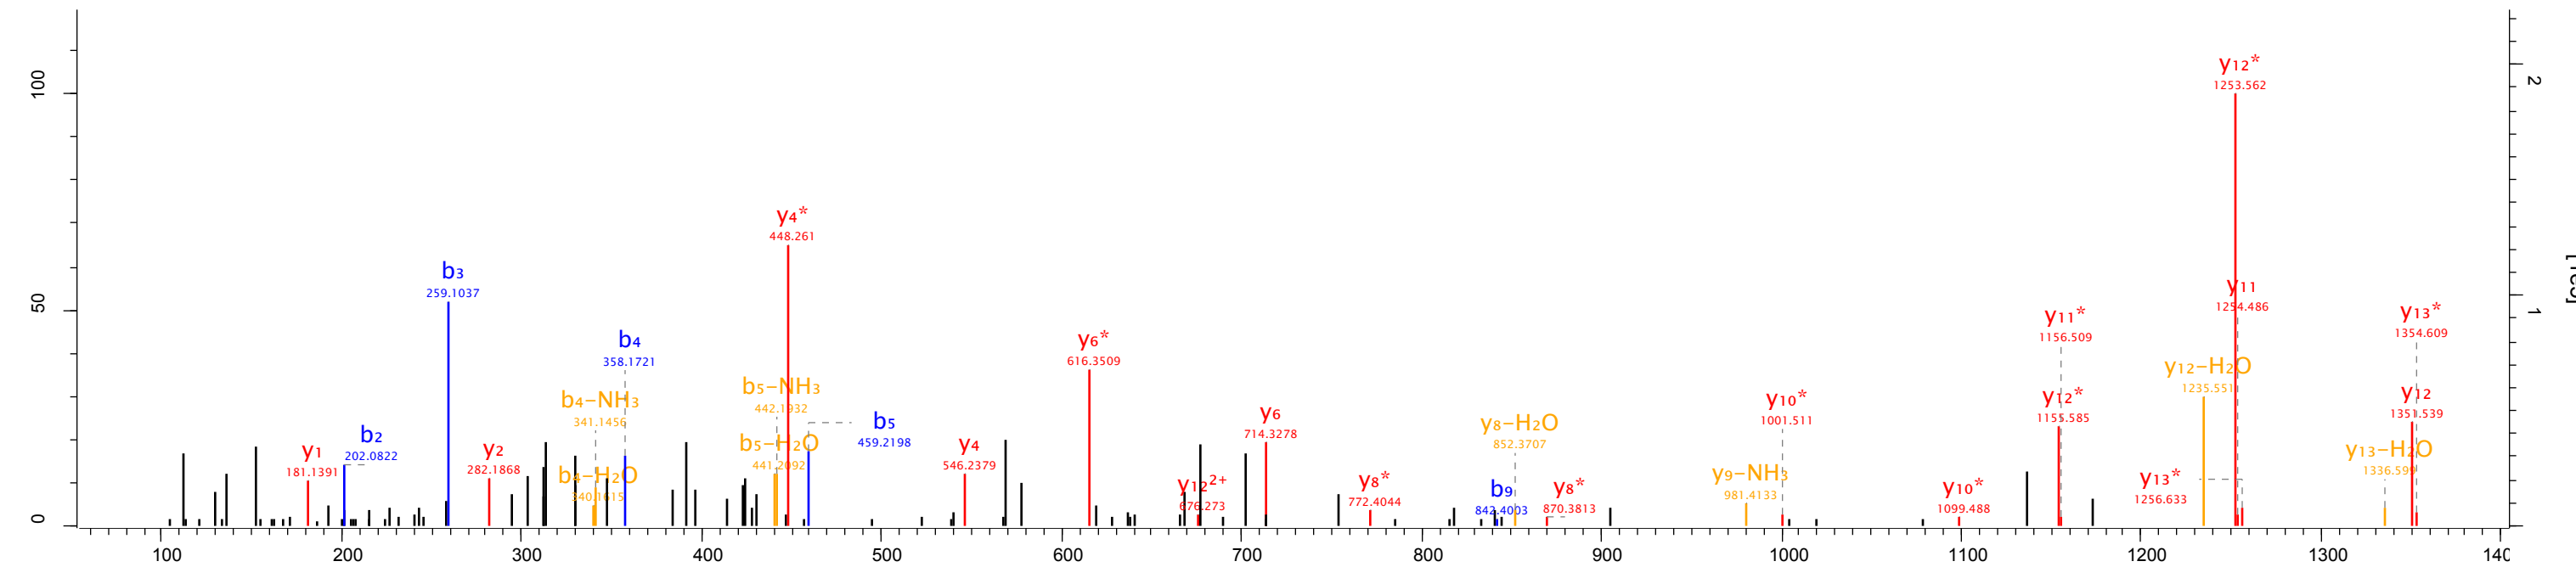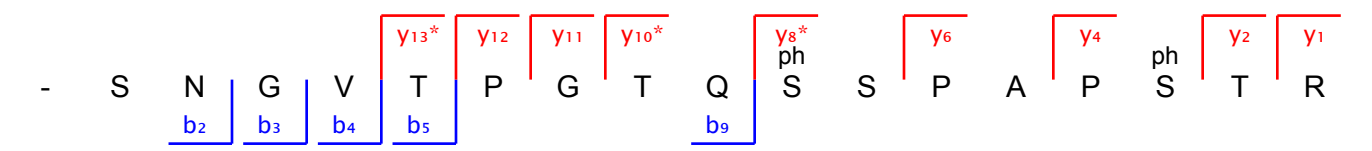

Raw file 20150814\_A375SR\_Phospho\_BR2\_02 Scan 6554 Method FTMS; HCD Score 99.99 m/z 803.98 Gene names RERE

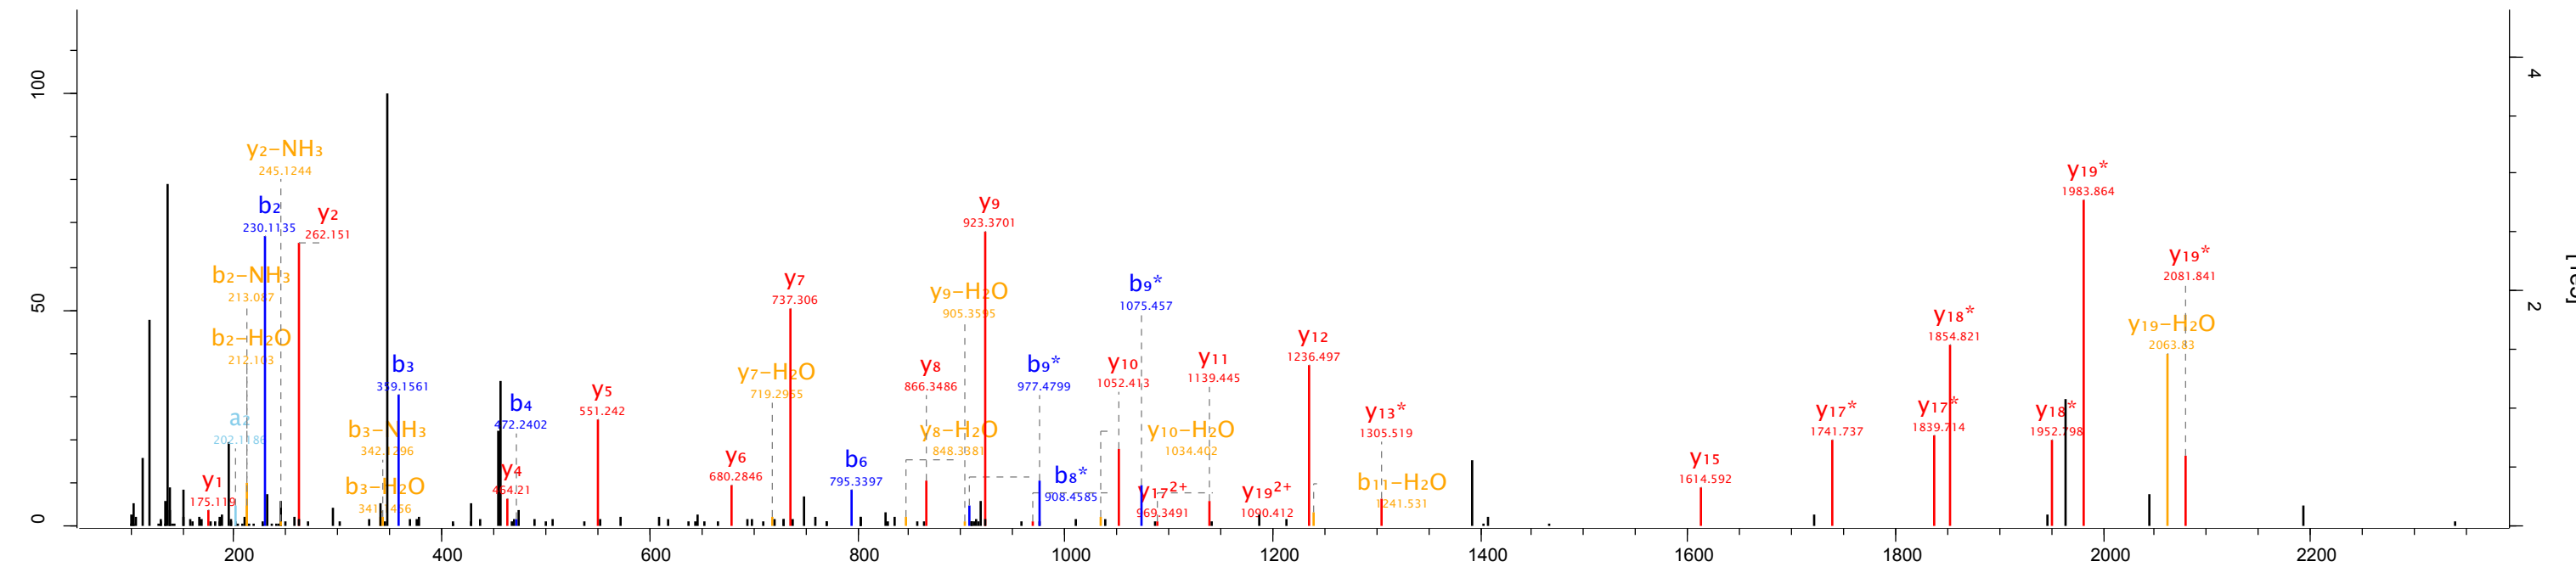

- T Q E I ph S R P N S P S E G E G E S S D S R -

Fragmentation mapping (b and y ions) is shown below the sequence:

- Q (b<sub>2</sub>)
- E (b<sub>3</sub>)
- I (b<sub>4</sub>)
- ph (y<sub>17</sub>\*)
- S (b<sub>6</sub>)
- R (y<sub>15</sub>)
- P (b<sub>8</sub>\*)
- N (b<sub>9</sub>\*)
- S (y<sub>13</sub>\*)
- P (y<sub>12</sub>)
- S (y<sub>11</sub>)
- E (y<sub>10</sub>)
- G (y<sub>9</sub>)
- E (y<sub>8</sub>)
- G (y<sub>7</sub>)
- E (y<sub>6</sub>)
- S (y<sub>5</sub>)
- S (y<sub>4</sub>)
- D (y<sub>2</sub>)
- S (y<sub>1</sub>)

Raw file: 20150814\_A375SR\_Phospho\_BR2\_02  
 Scan: 6754 Method: FTMS; HCD Score: 134.91 m/z: 723.96 Gene names: SFSWAP

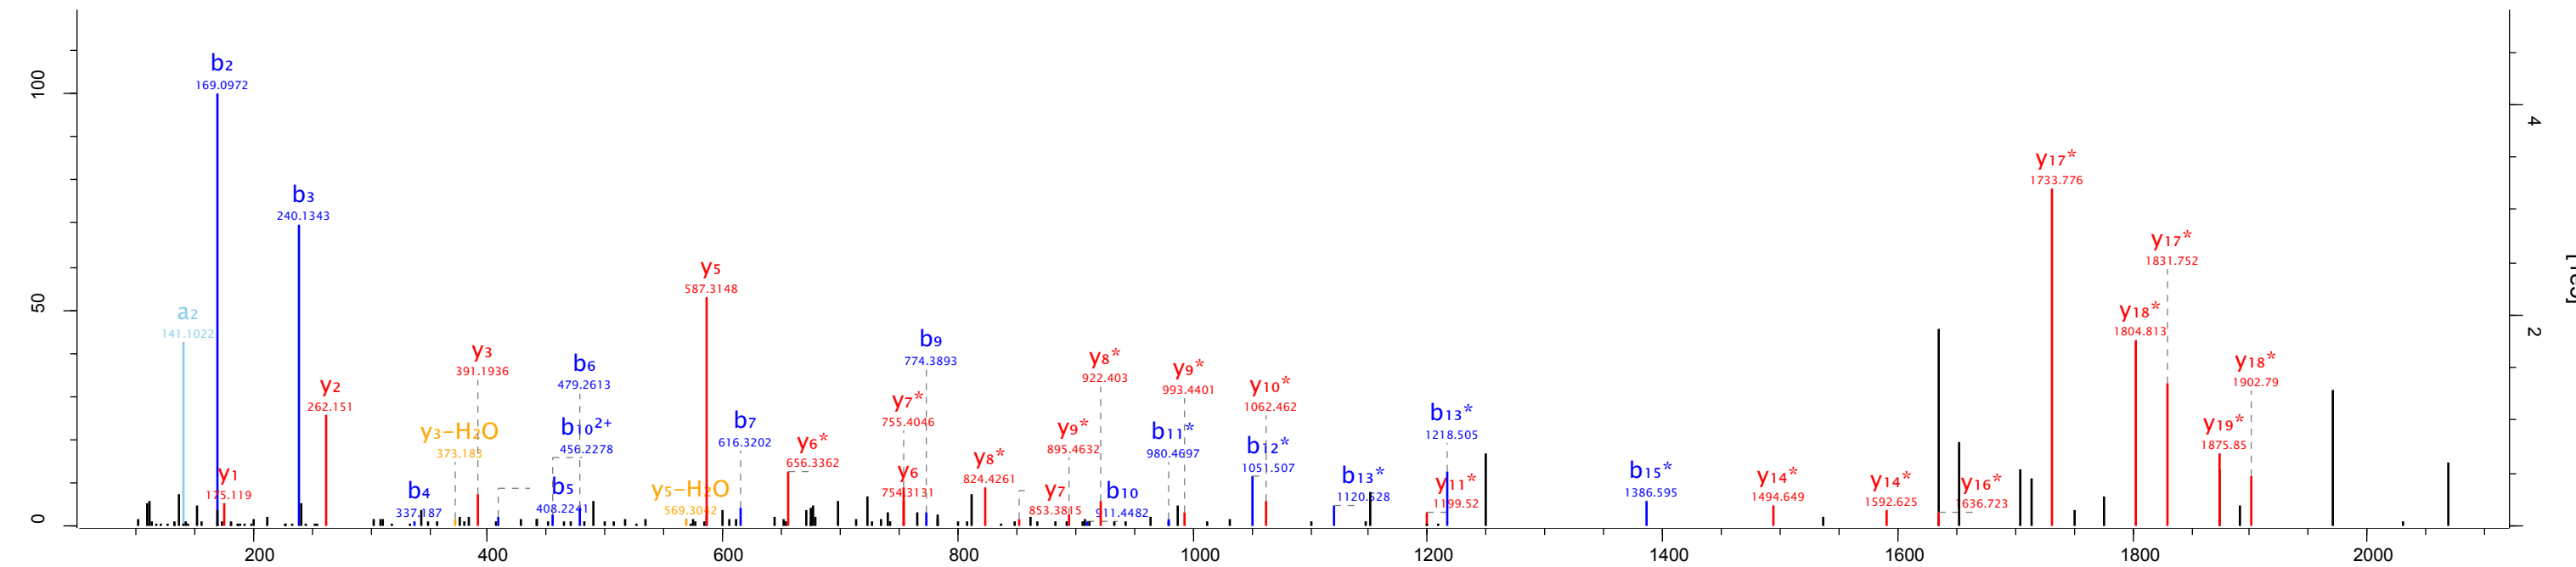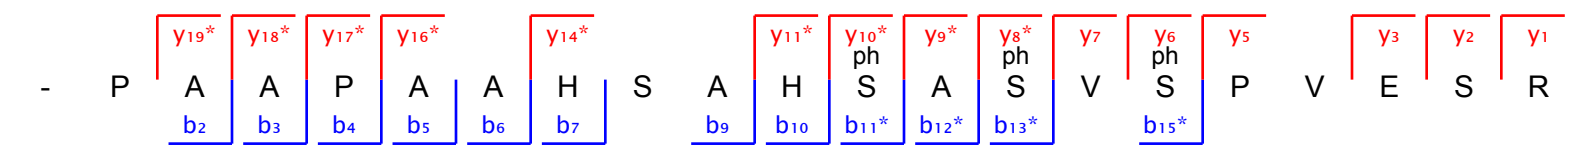

Raw file: 20150814\_A375SR\_Phospho\_BR2\_02  
 Scan: 7244 Method: FTMS; HCD Score: 158.35 m/z: 694.26 Gene names: SRRM2

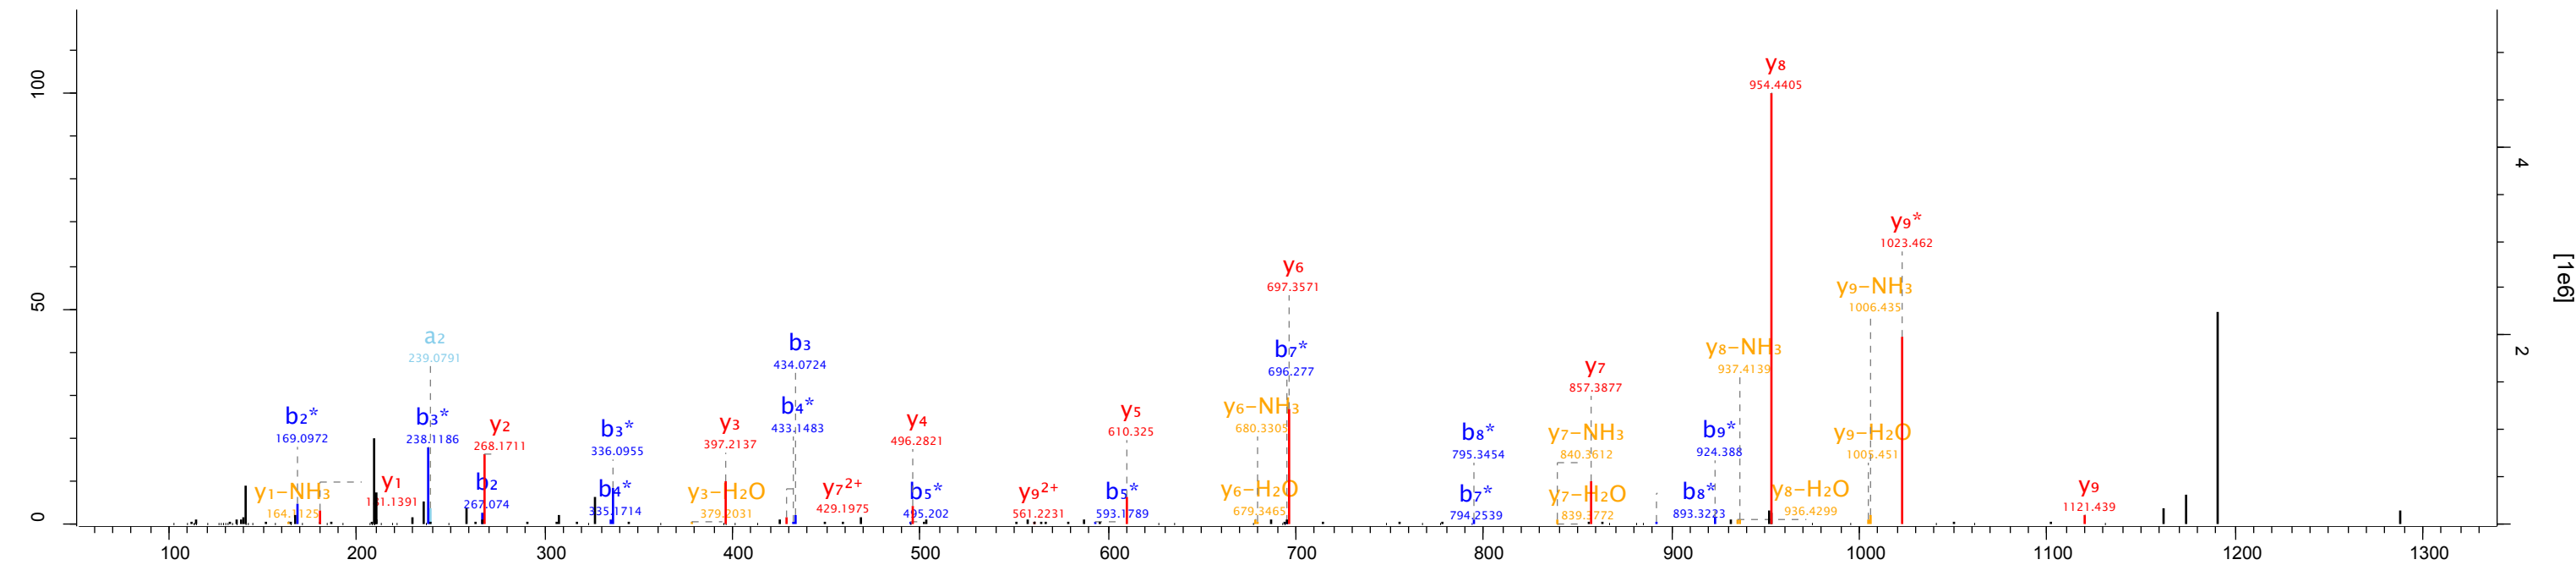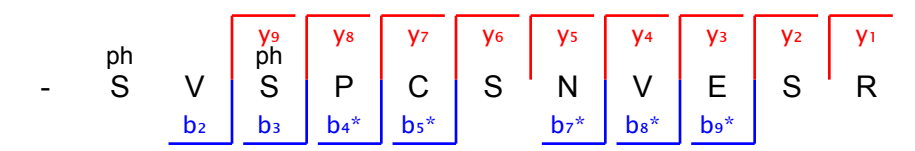



Raw file: 20150814\_A375SR\_Phospho\_BR2\_02  
 Scan: 7834 Method: FTMS; HCD Score: 118.52 m/z: 759.3 Gene names: CEP170

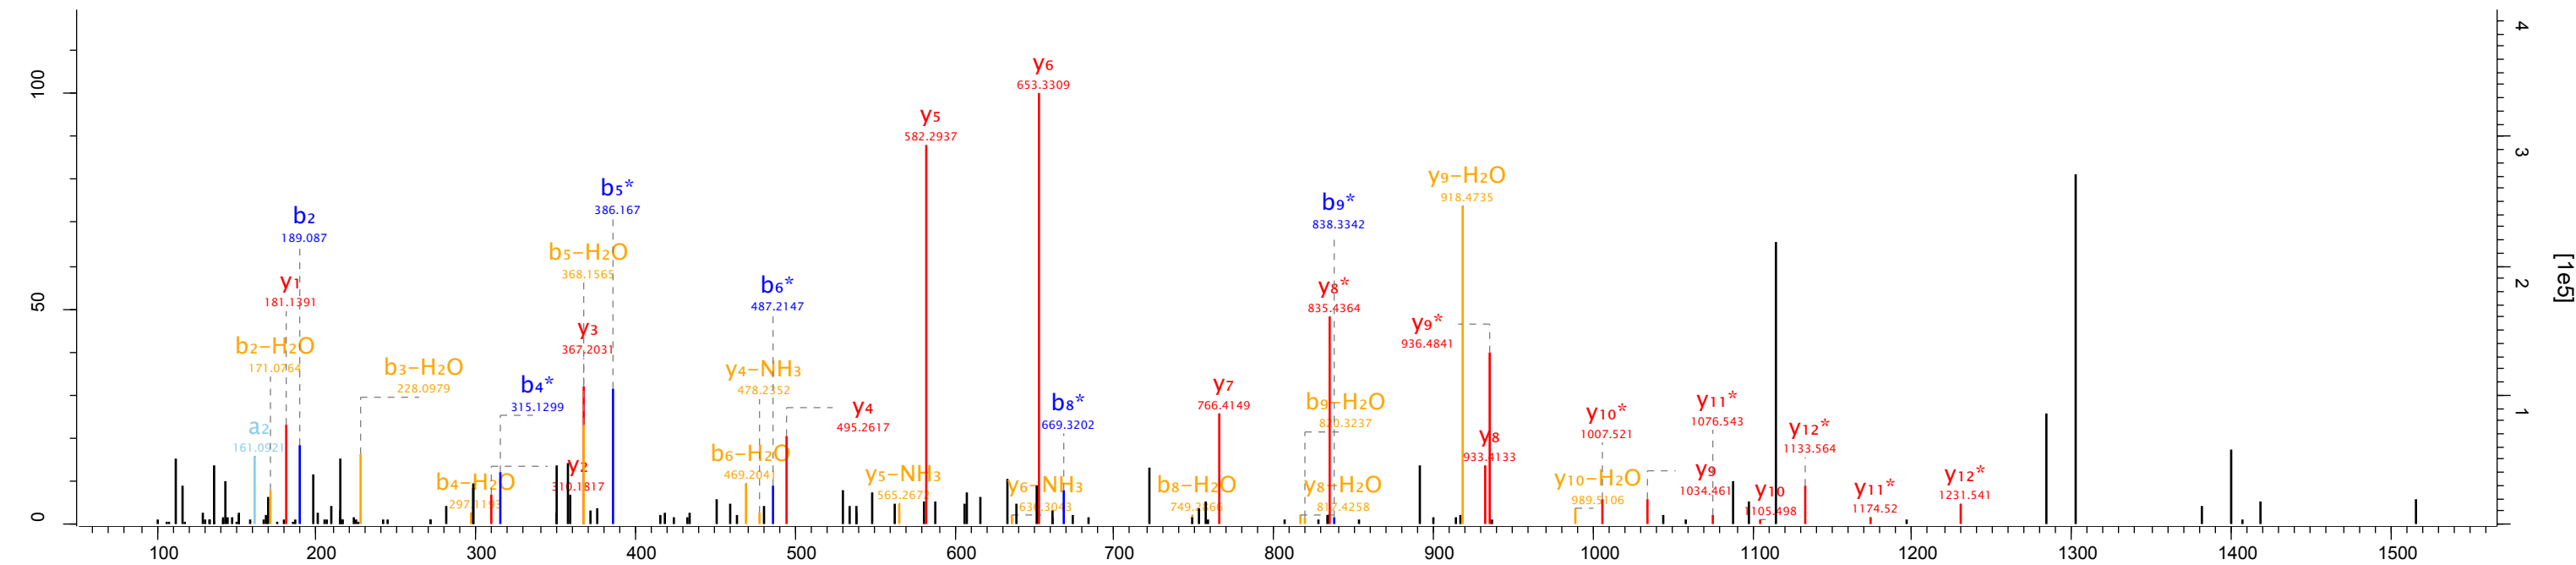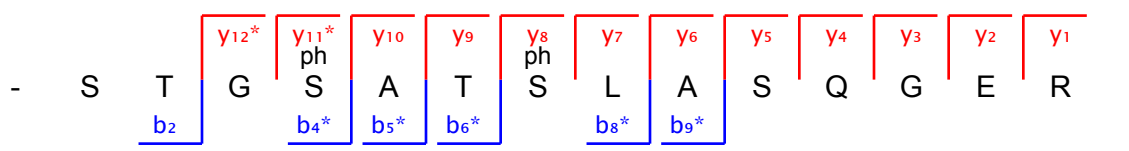

Raw file: 20150814\_A375SR\_Phospho\_BR2\_02  
 Scan: 9124 Method: FTMS; HCD Score: 141.69 m/z: 948.84 Gene names: STK11IP

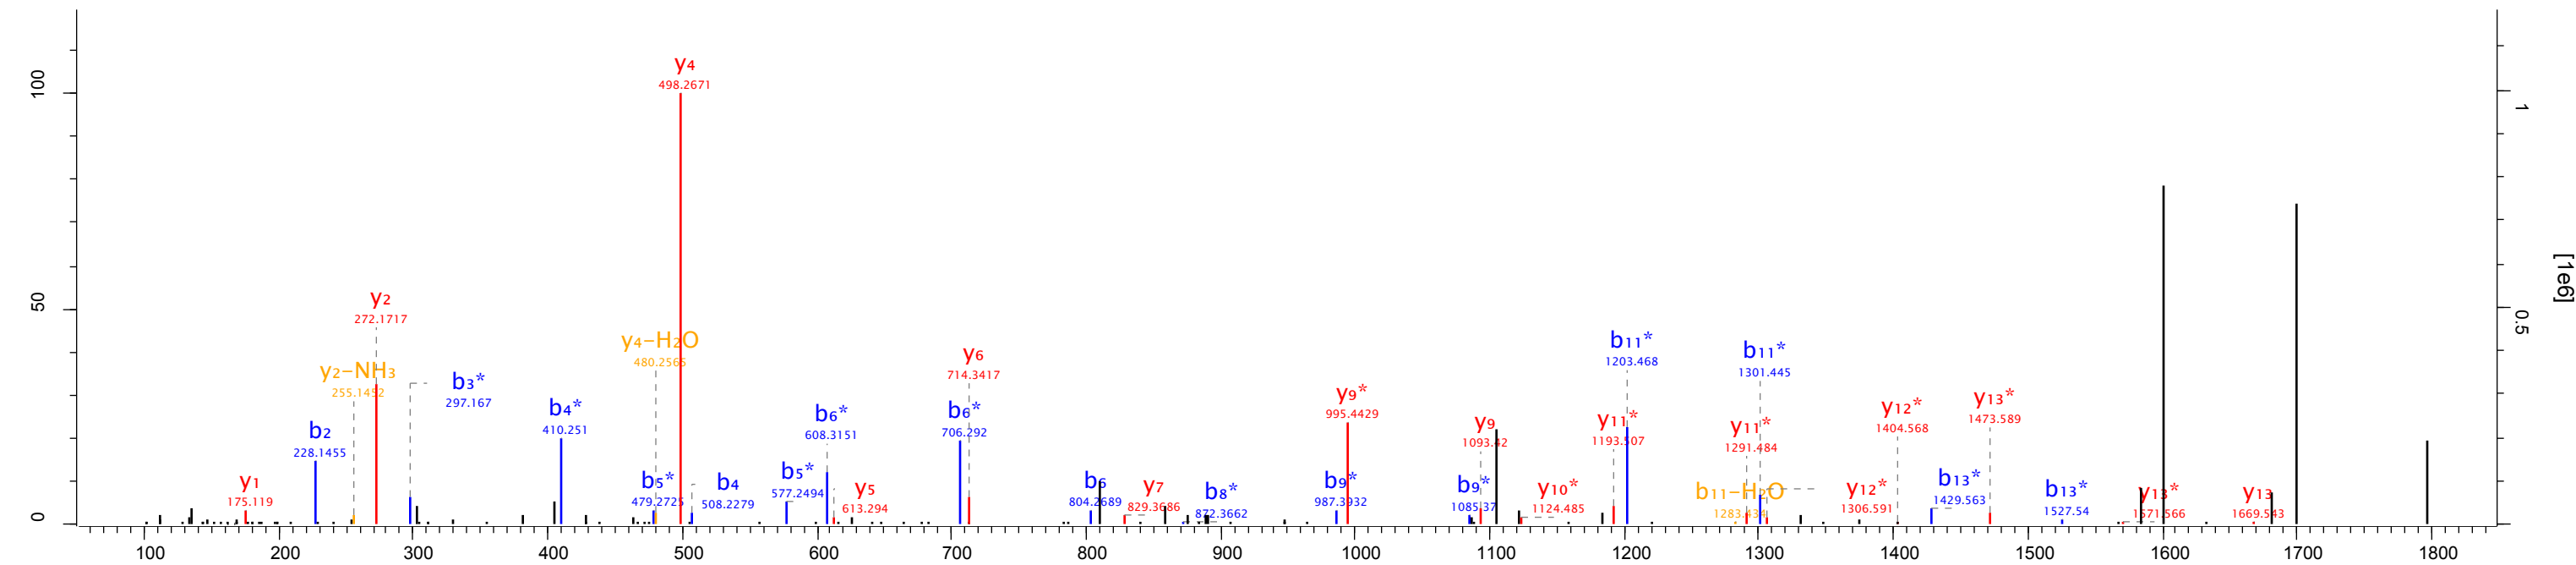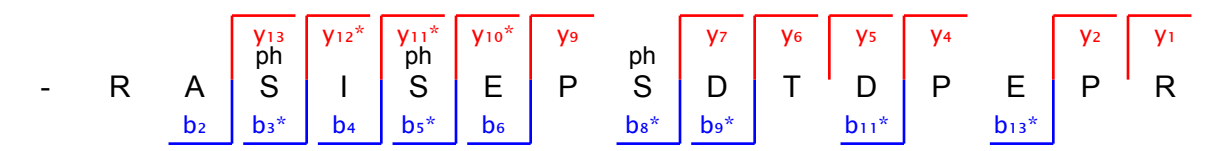

Raw file: 20150814\_A375SR\_Phospho\_BR2\_02  
 Scan: 9324 Method: FTMS; HCD Score: 144.27 m/z: 775.75 Gene names: PRRC2B

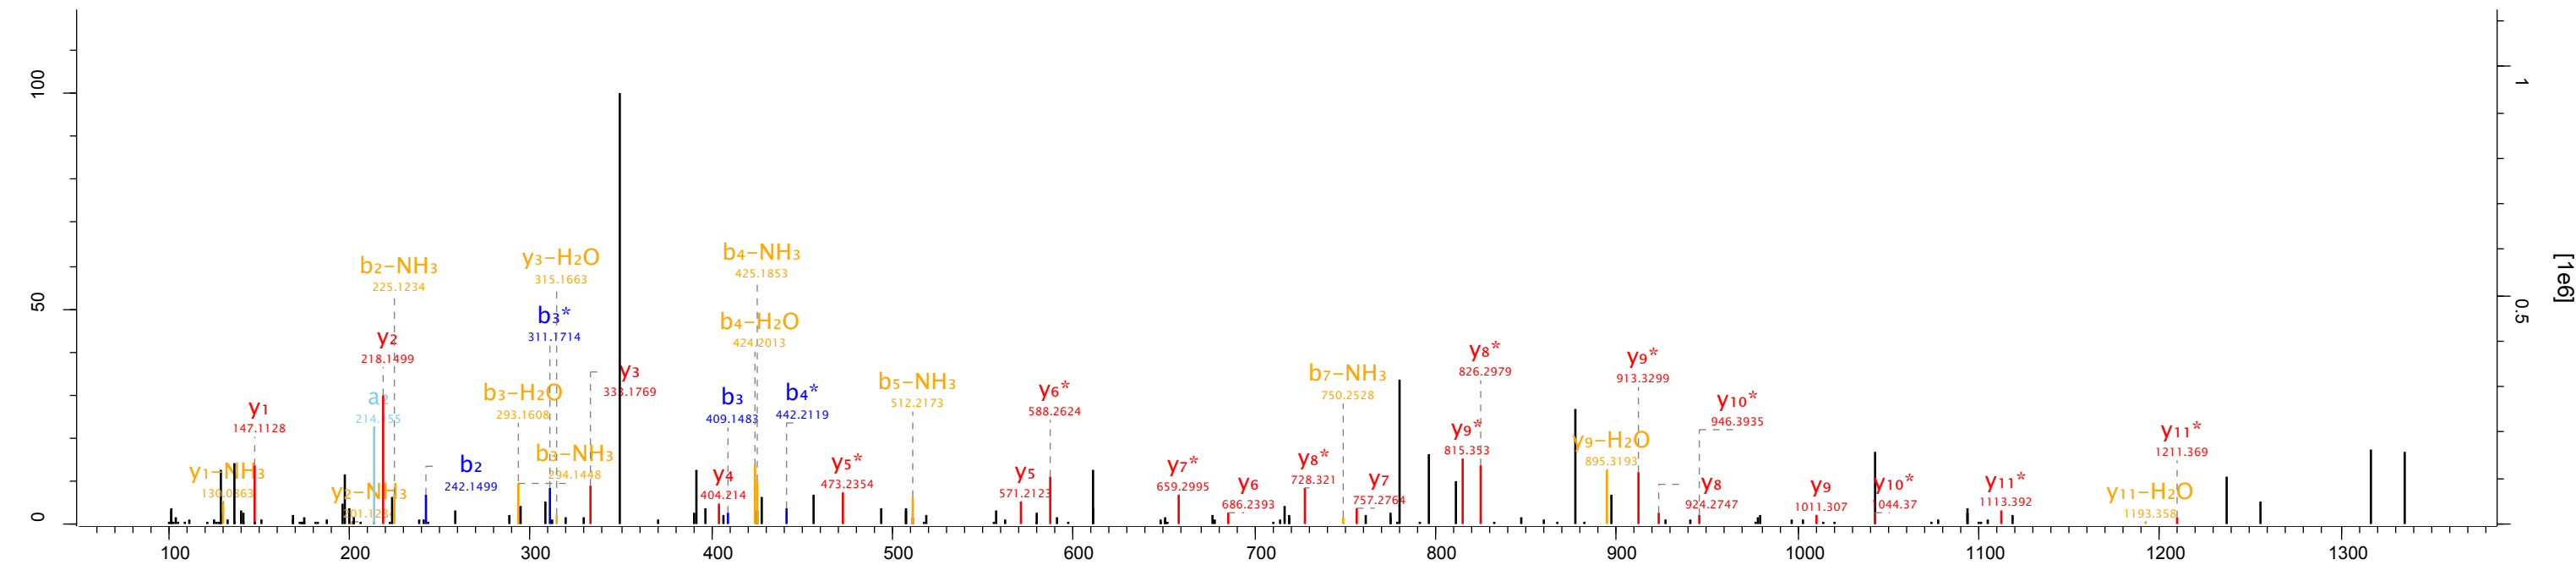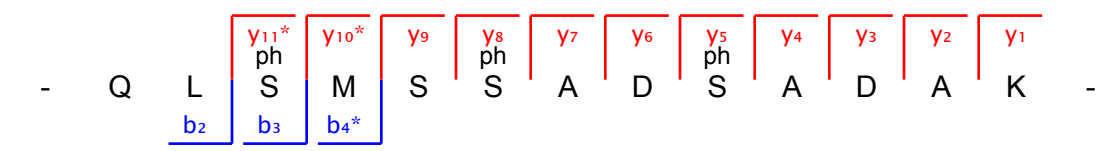

Raw file 20150814\_A375SR\_Phospho\_BR2\_02 Scan 9984 Method FTMS; HCD Score 77.44 m/z 909.84 Gene names MYO9B

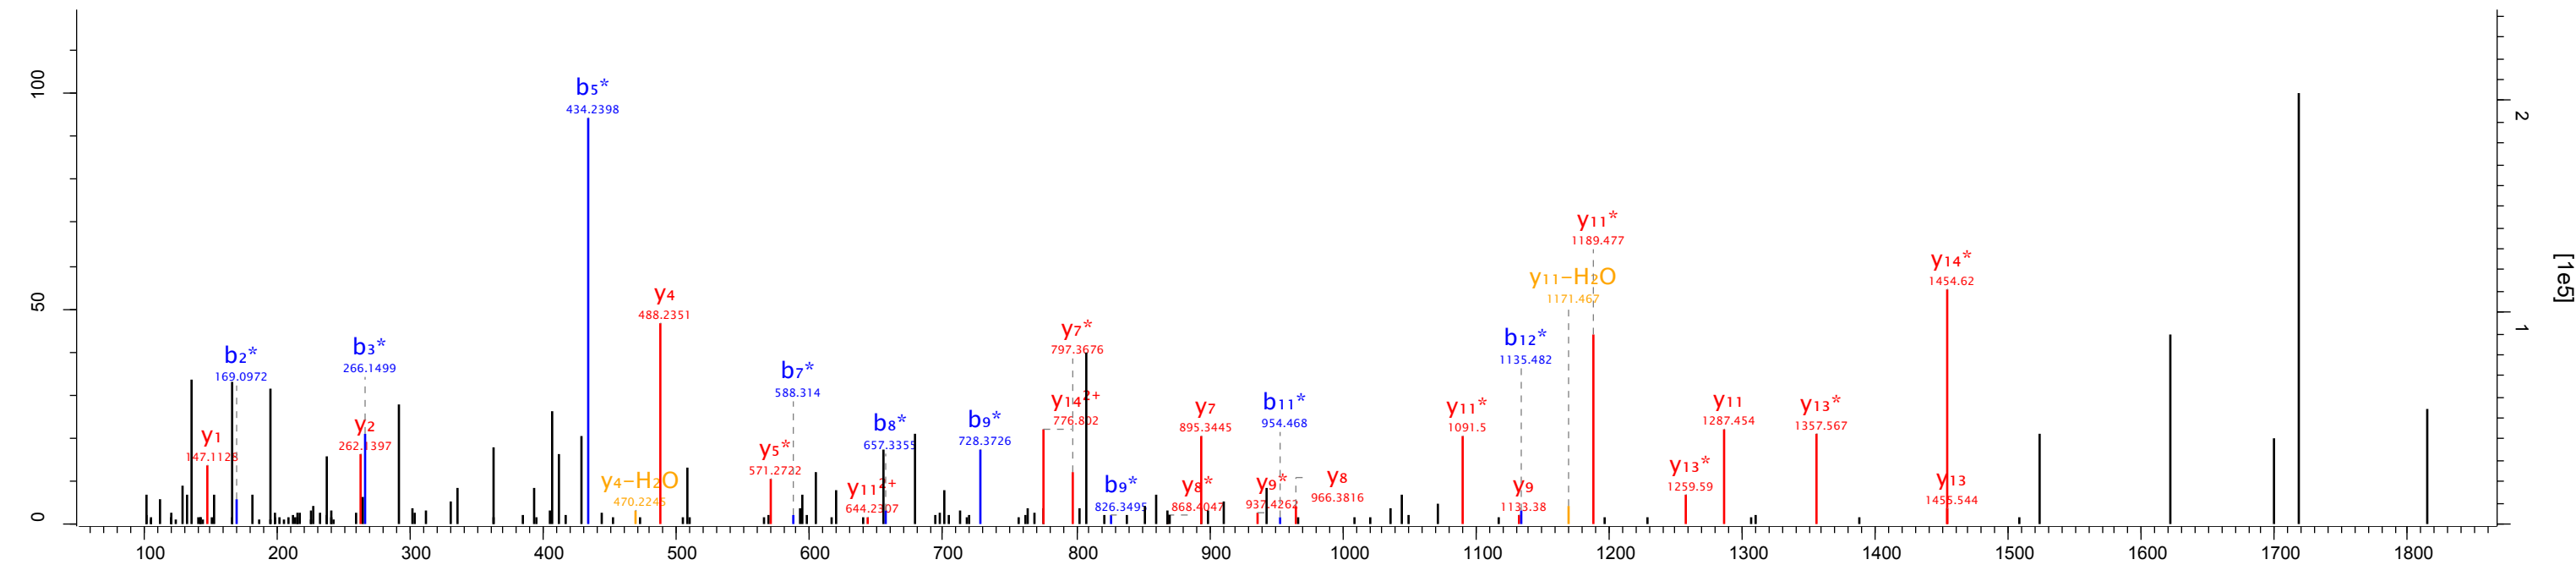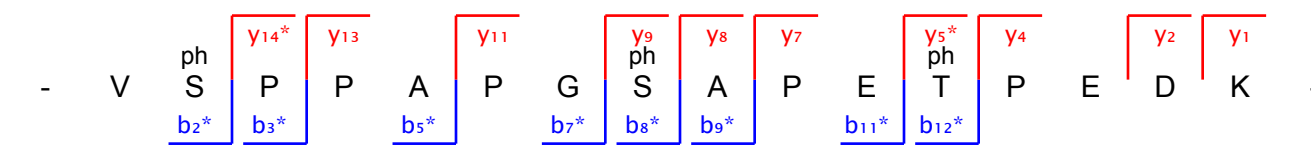

Raw file: 20150814\_A375SR\_Phospho\_BR2\_03  
 Scan: 10014 Method: FTMS; HCD Score: 189.91 m/z: 674.81 Gene names: HUWE1

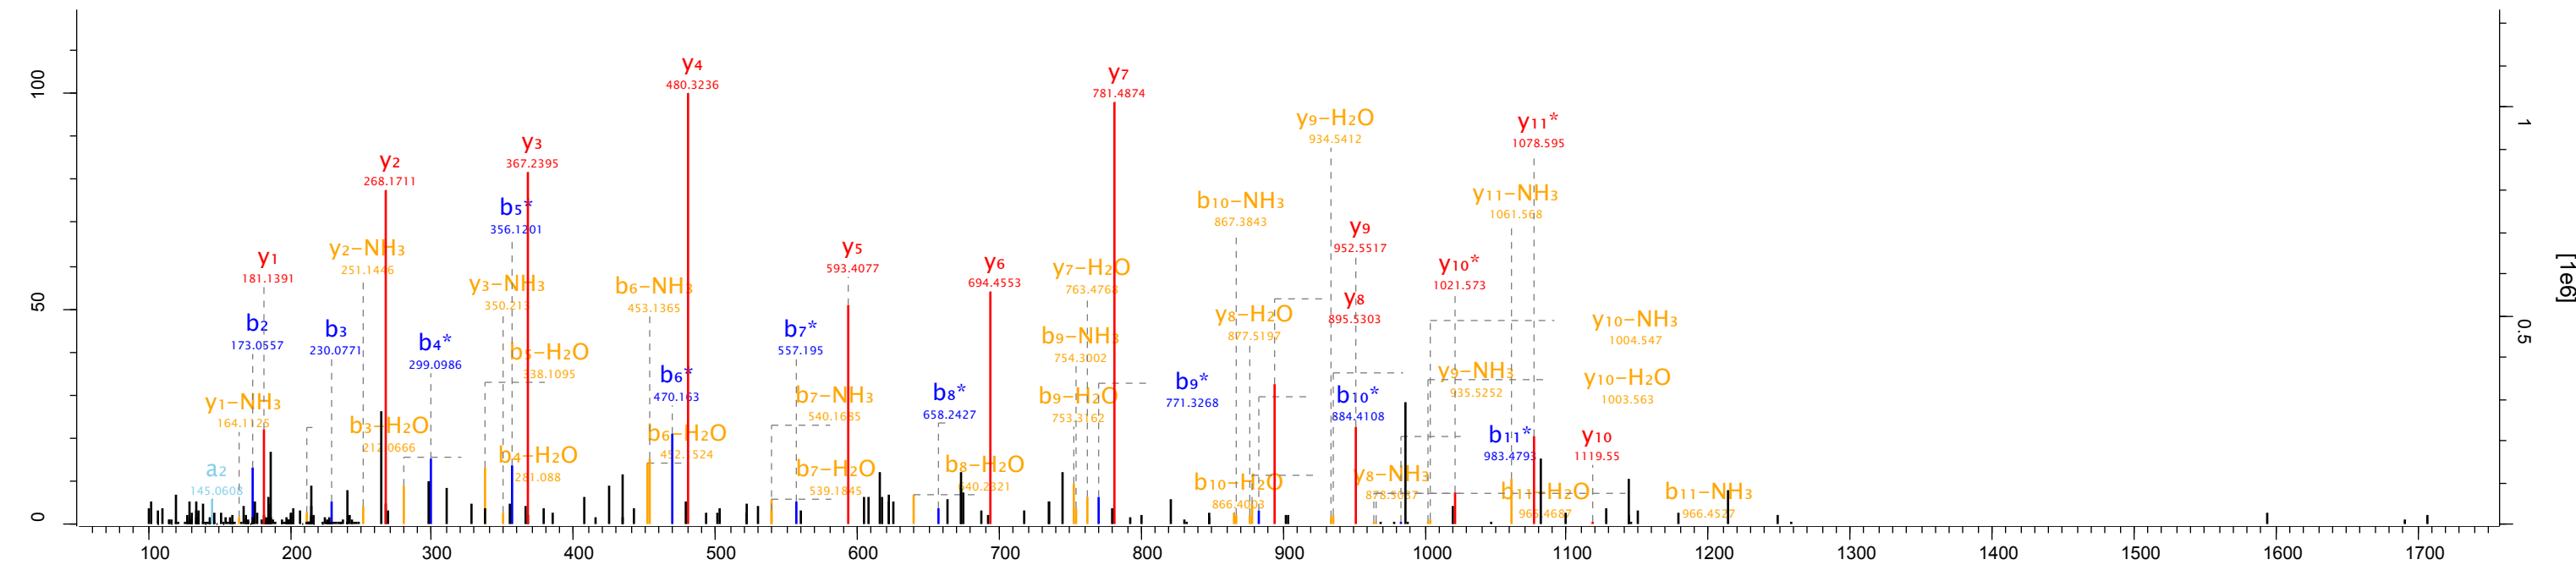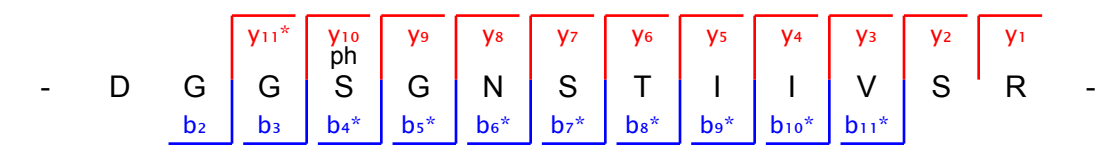

Raw file 20150814\_A375SR\_Phospho\_BR2\_03 Scan 10094 Method FTMS; HCD Score 318.25 m/z 1311.08 Gene names ZC3HC1

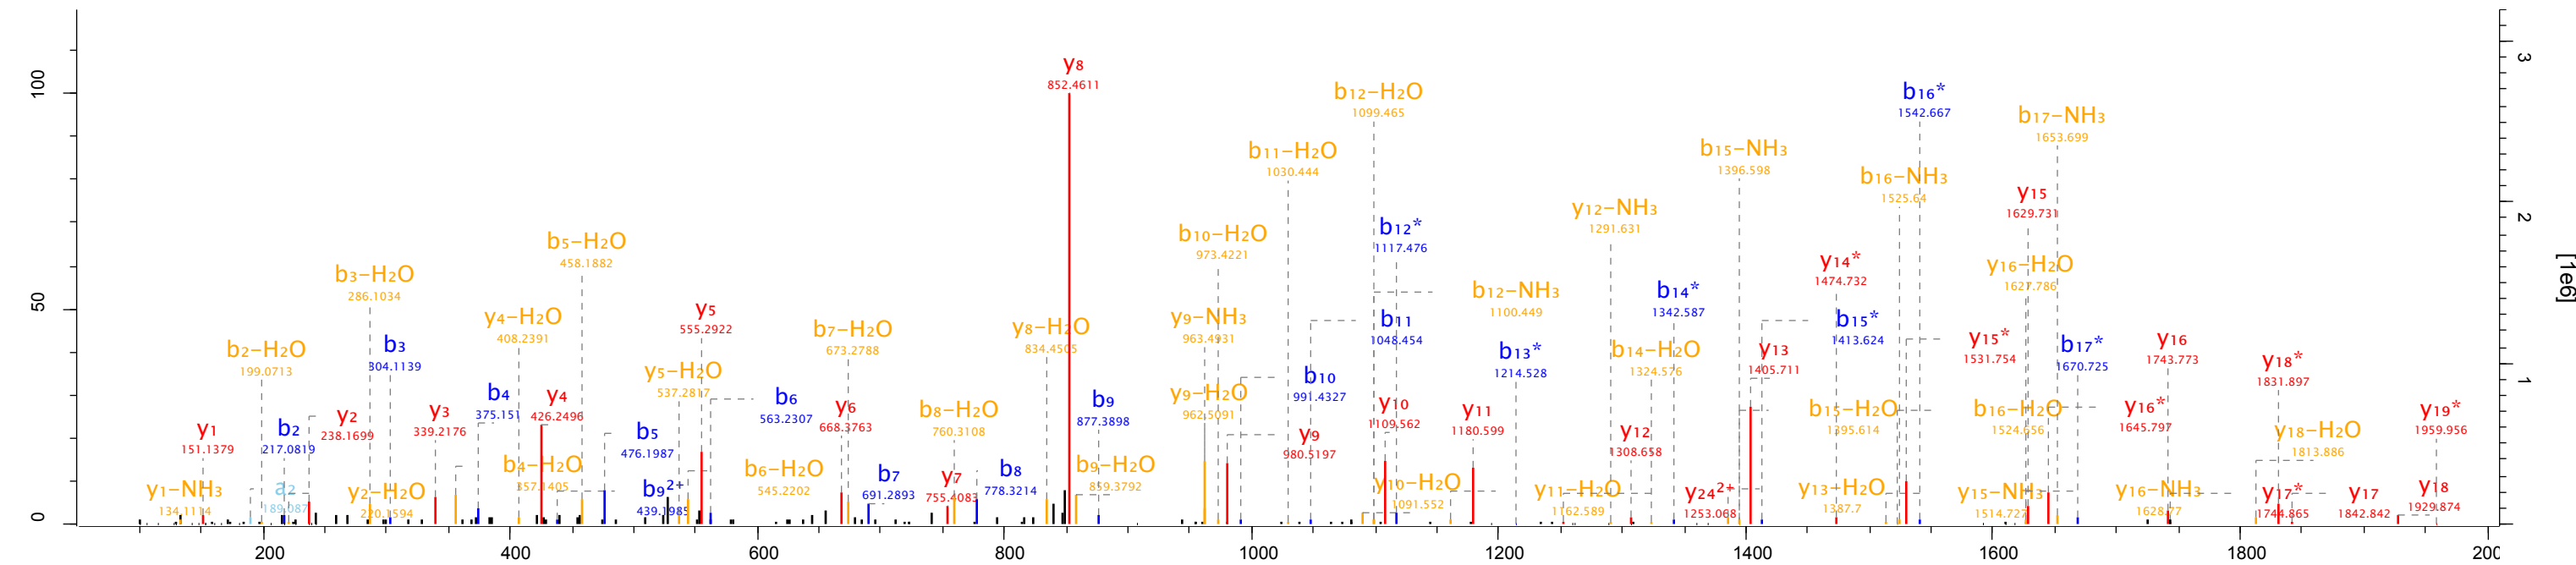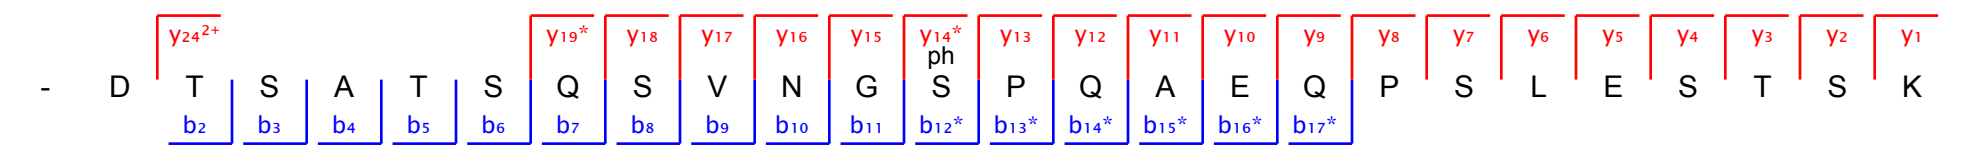

Raw file 20150814\_A375SR\_Phospho\_BR2\_03 Scan 10114 Method FTMS; HCD Score 151.39 m/z 695.8 Gene names PTRF

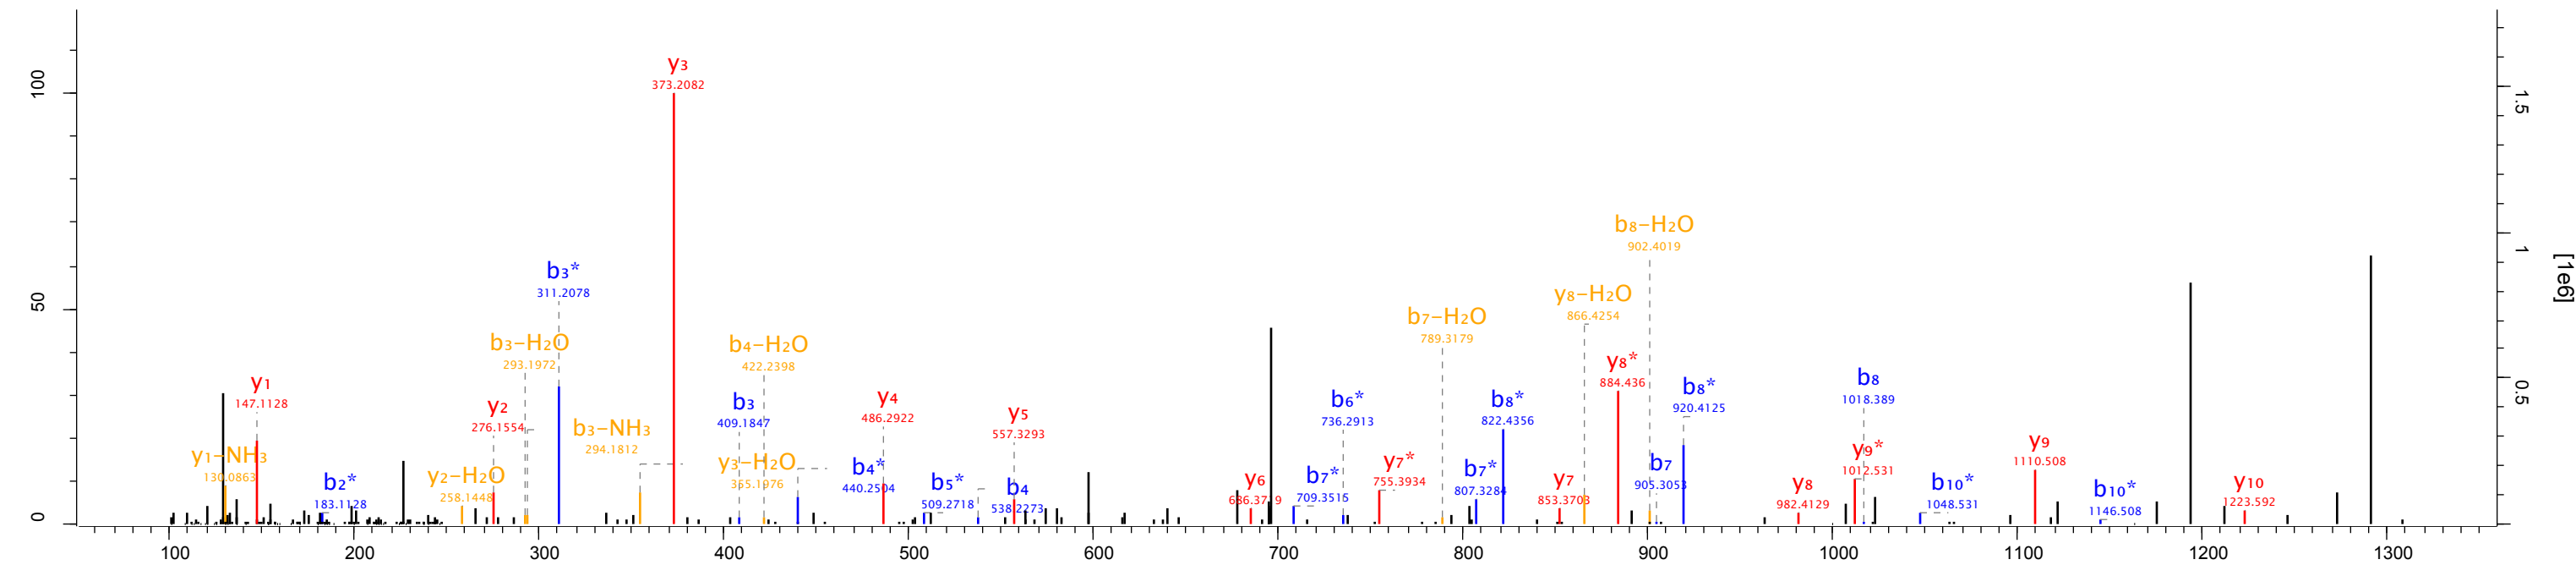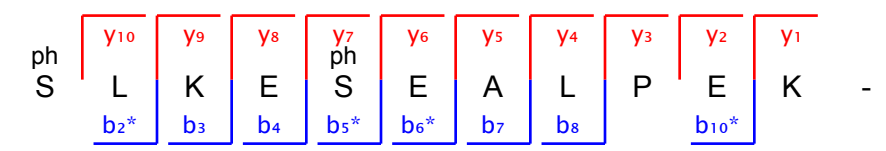

Raw file 20150814\_A375SR\_Phospho\_BR2\_03 Scan 10164 Method FTMS; HCD Score 184.2 m/z 1217.48 Gene names PLCG1

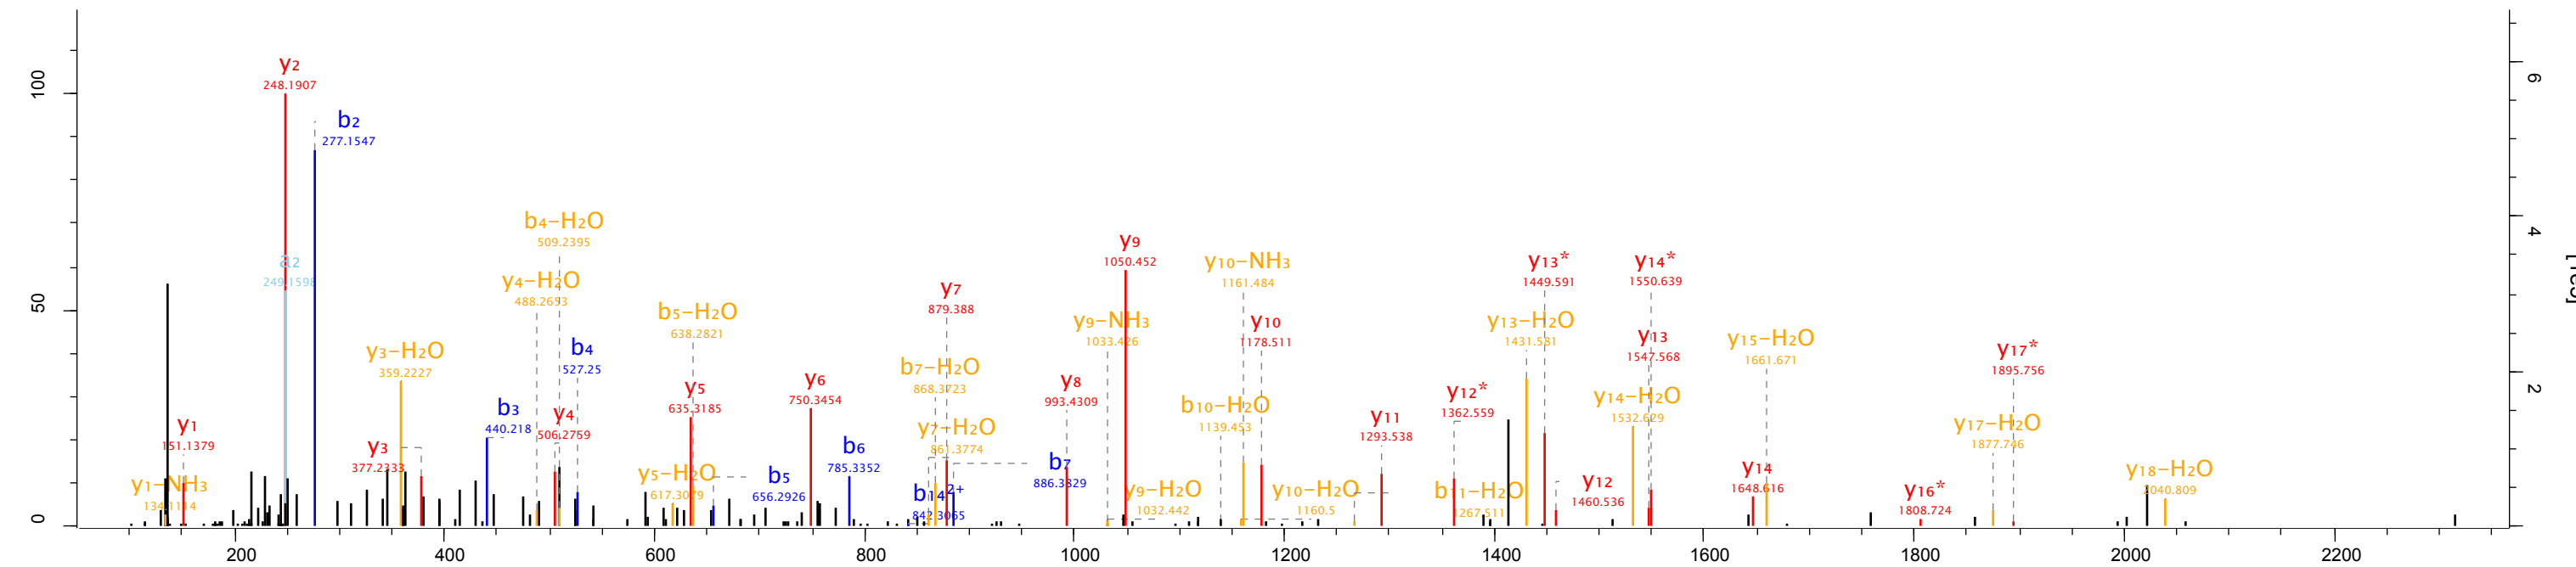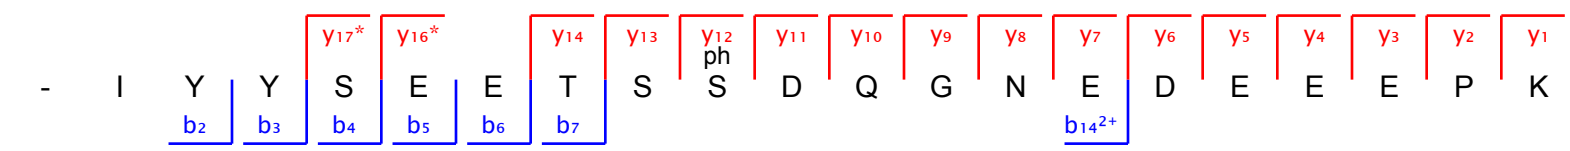



Raw file: 20150814\_A375SR\_Phospho\_BR2\_03  
 Scan: 10324 Method: FTMS; HCD Score: 114.9 m/z: 1023.94 Gene names: DYNC1LI1

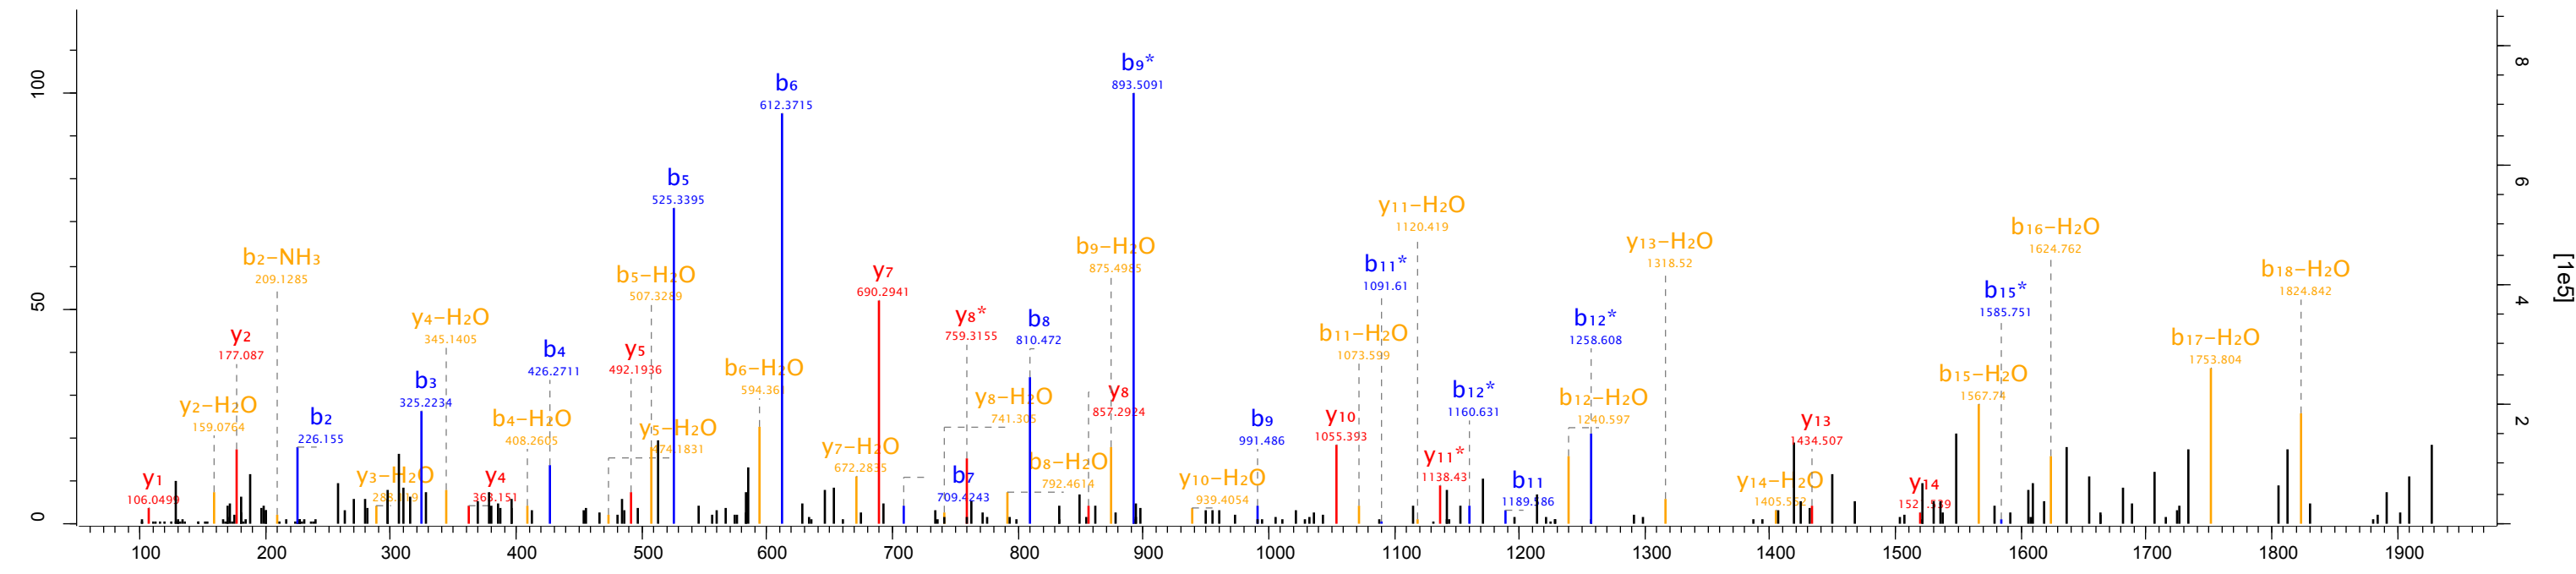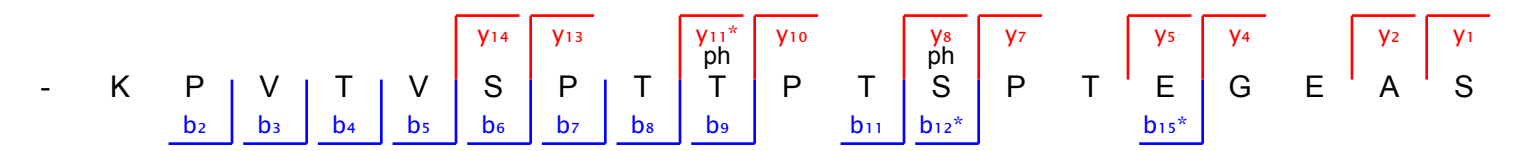

Raw file 20150814\_A375SR\_Phospho\_BR2\_03 Scan 10394 Method FTMS; HCD Score 259.14 m/z 910.35 Gene names PHIP

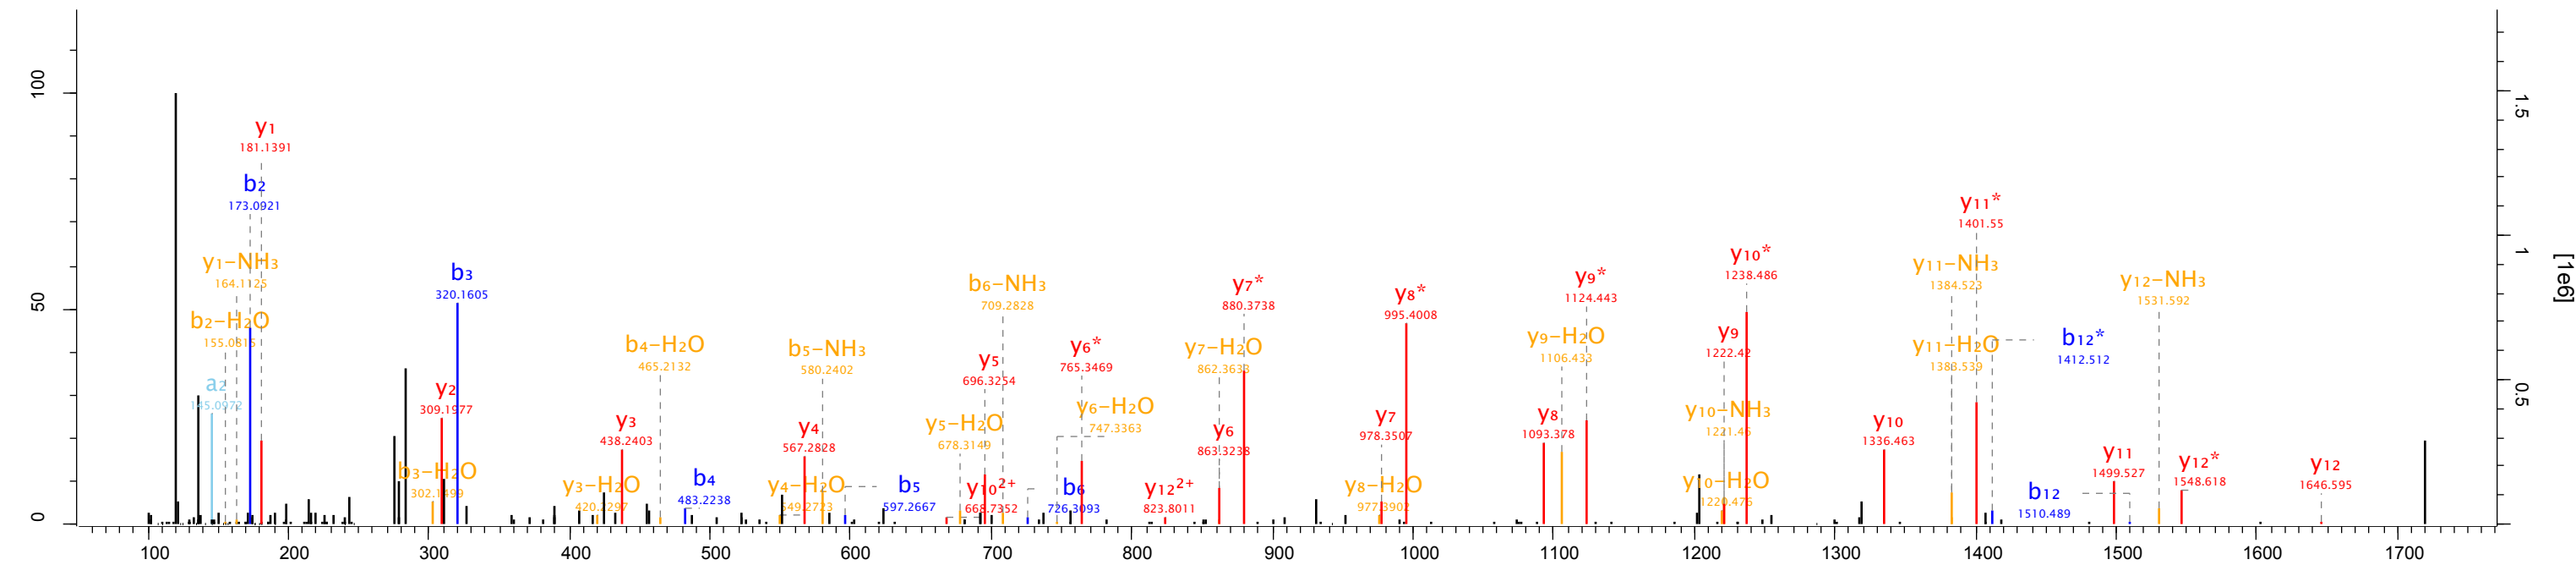

- T A F Y N E D D S E E E Q R -  
 b2 b3 b4 b5 b6 b12

Raw file: 20150814\_A375SR\_Phospho\_BR2\_03  
 Scan: 10844 Method: FTMS; HCD Score: 150.31 m/z: 916.05 Gene names: PLEC

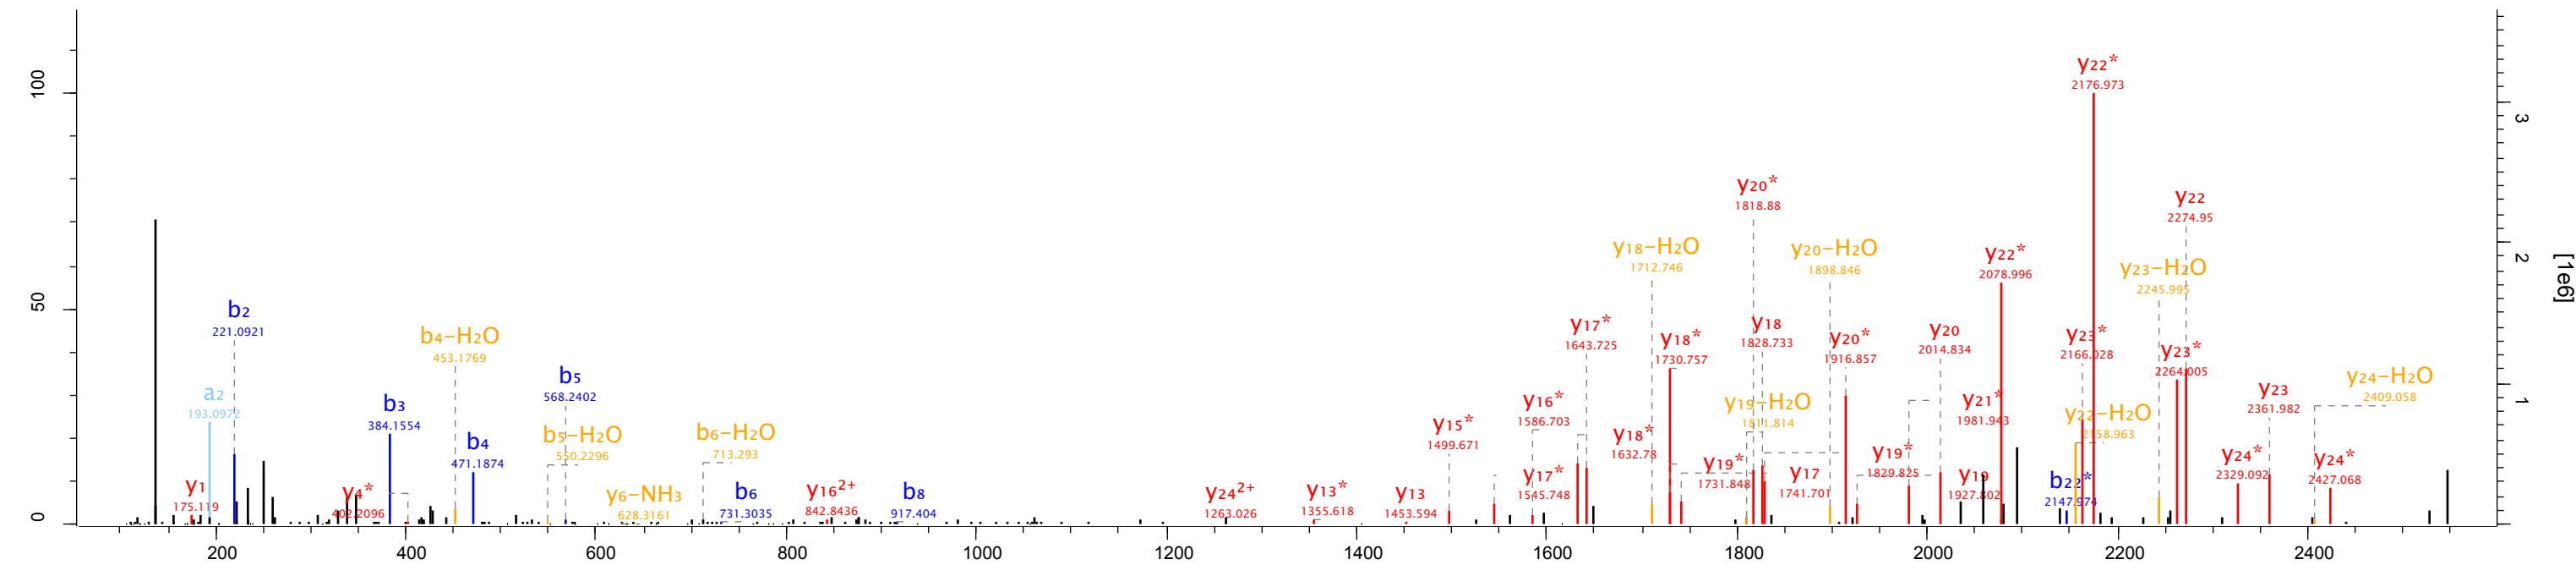

- G Y Y S P Y S V S G S G S T A G S R T G S R T G S R -

Annotations below the sequence:

- Blue boxes: b<sub>2</sub> (under Y), b<sub>3</sub> (under Y), b<sub>4</sub> (under S), b<sub>5</sub> (under P), b<sub>6</sub> (under Y), b<sub>8</sub> (under V)
- Red boxes: y<sub>24</sub>\* (under Y), y<sub>23</sub> (under S), y<sub>22</sub> (under P), y<sub>21</sub>\* (under Y), y<sub>20</sub> (under S), y<sub>19</sub> (under V), y<sub>18</sub> (under S), y<sub>17</sub> (under G), y<sub>16</sub>\* (under S), y<sub>15</sub>\* (under G), y<sub>13</sub> (under T), y<sub>4</sub>\* (under T)
- Blue box: b<sub>22</sub>\* (under R)

Raw file: 20150814\_A375SR\_Phospho\_BR2\_03  
 Scan: 11114 Method: FTMS; HCD Score: 111.6 m/z: 985.93 Gene names: PLEKHG2

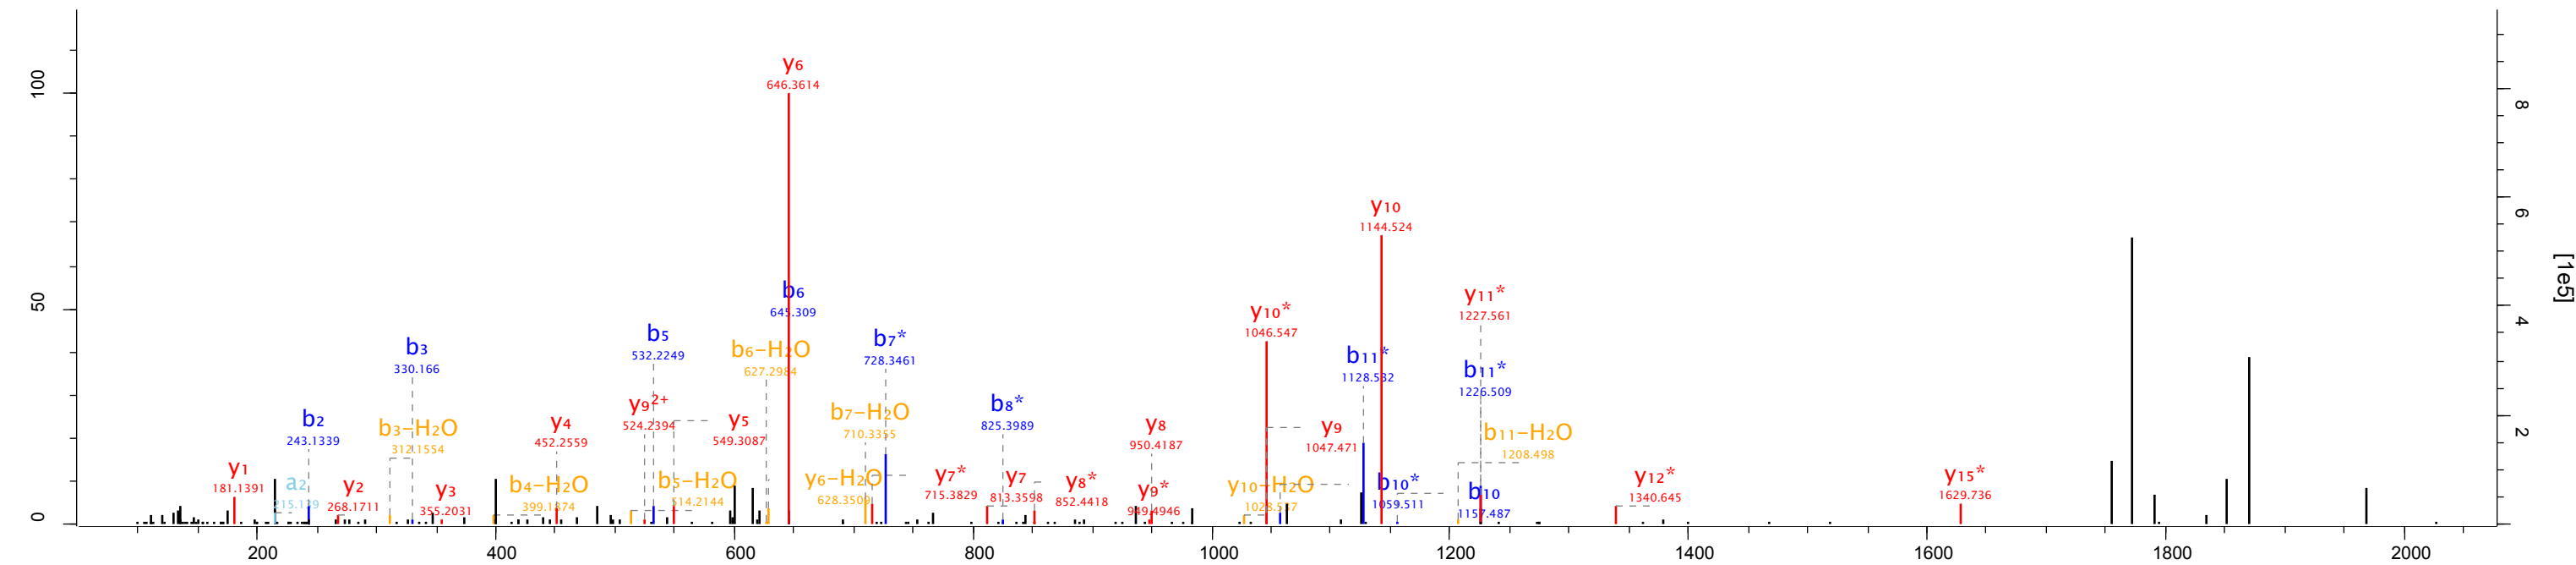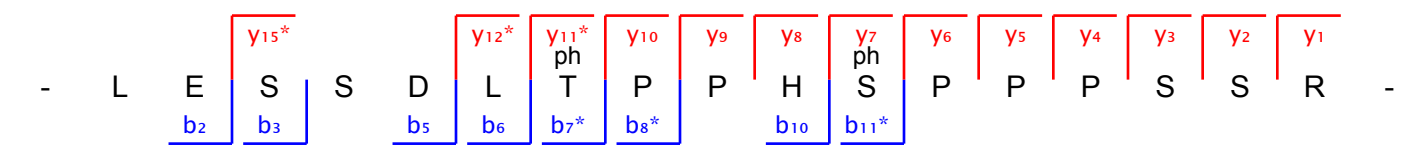

Raw file 20150814\_A375SR\_Phospho\_BR2\_03 Scan 11414 Method FTMS; HCD Score 312.62 m/z 1040.44 Gene names PRKAA1

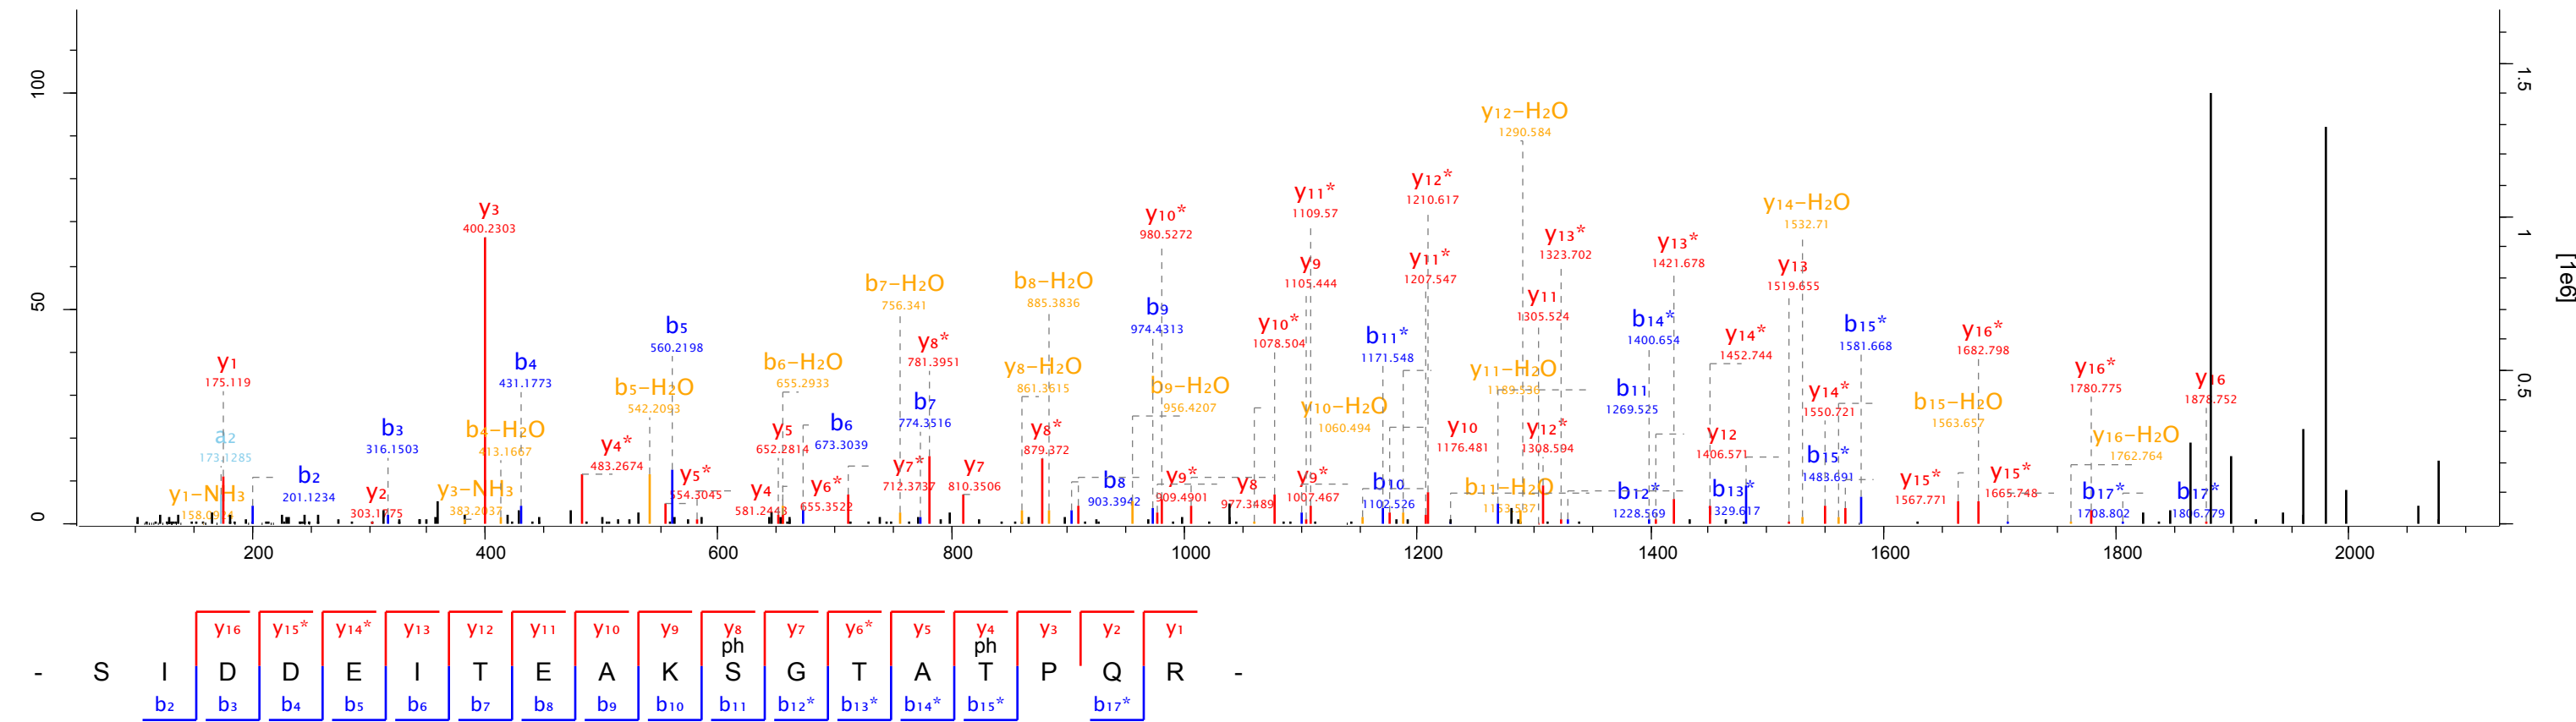

Raw file: 20150814\_A375SR\_Phospho\_BR2\_03  
 Scan: 11494 Method: FTMS; HCD Score: 83.6 m/z: 978.35 Gene names: CXXC1

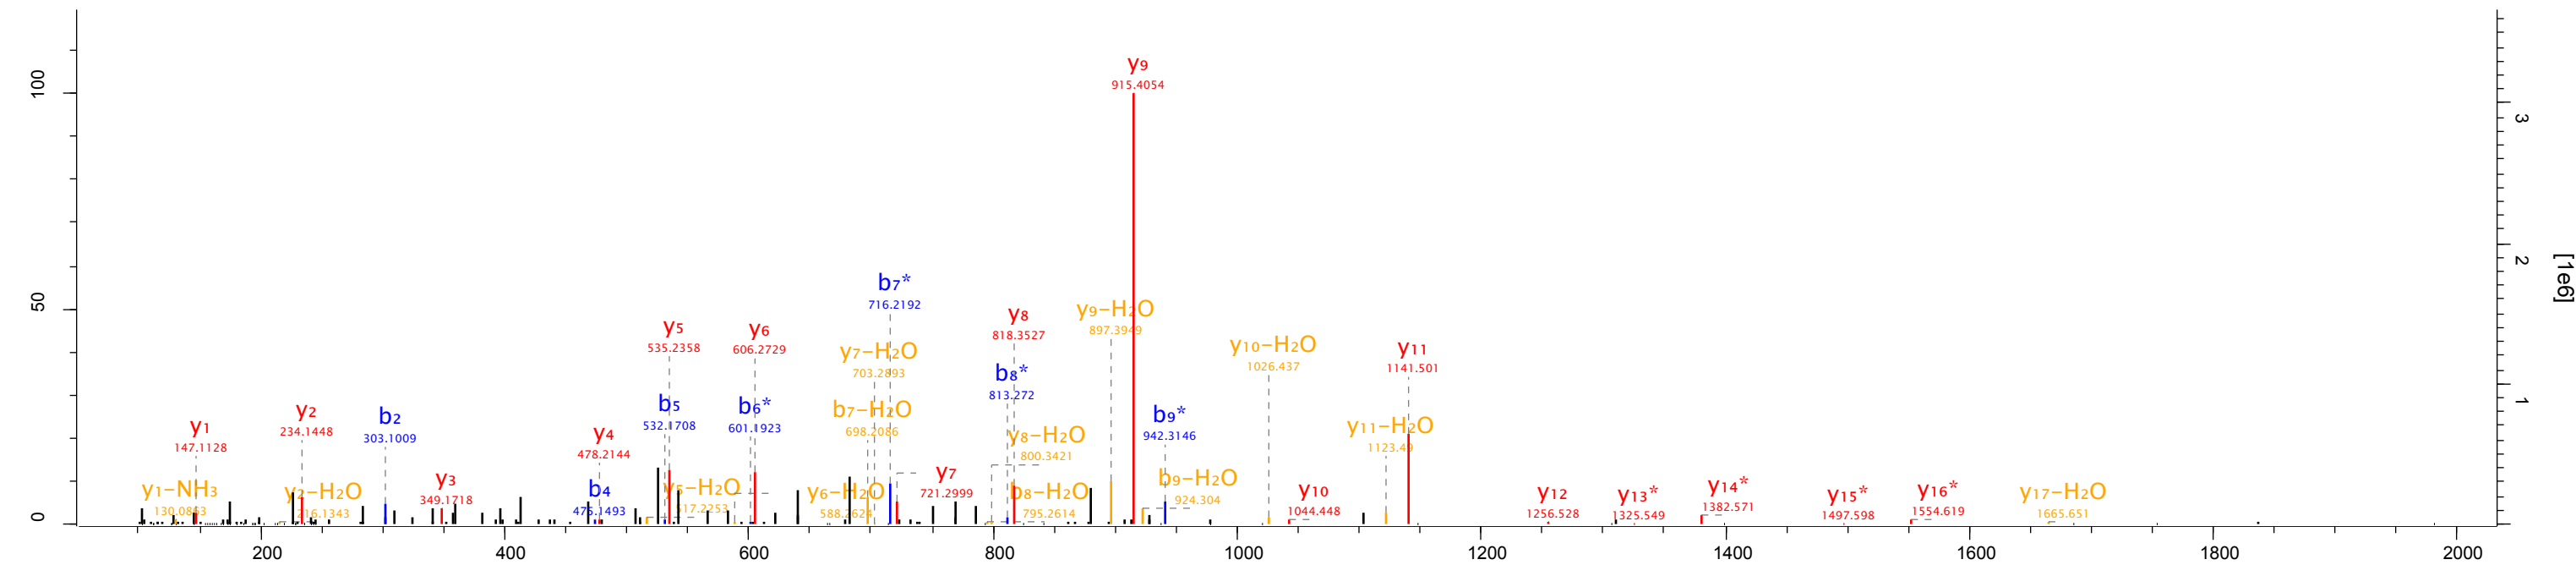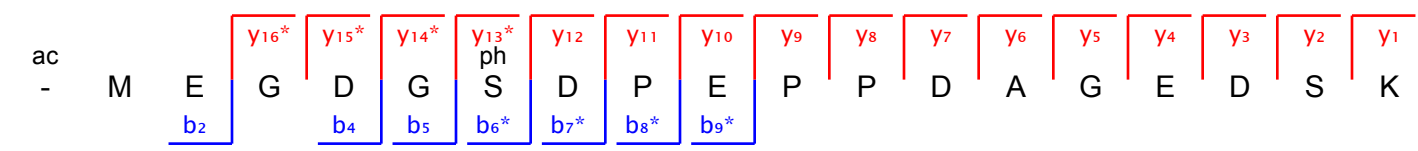

Raw file 20150814\_A375SR\_Phospho\_BR2\_03 Scan 11694 Method FTMS; HCD Score 71.59 m/z 521.26

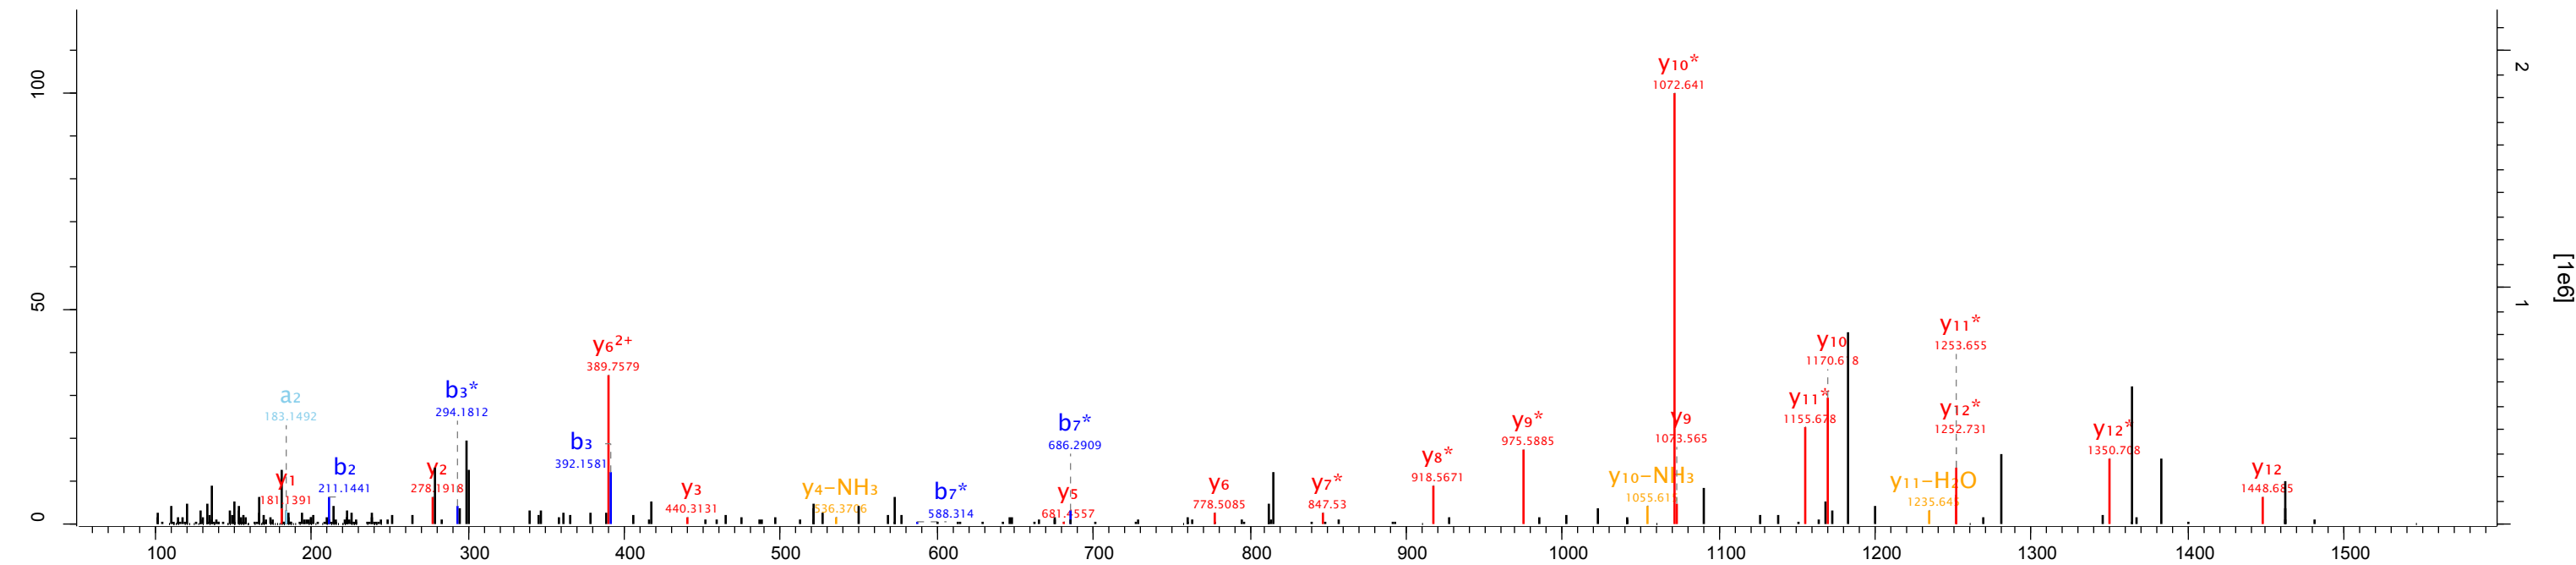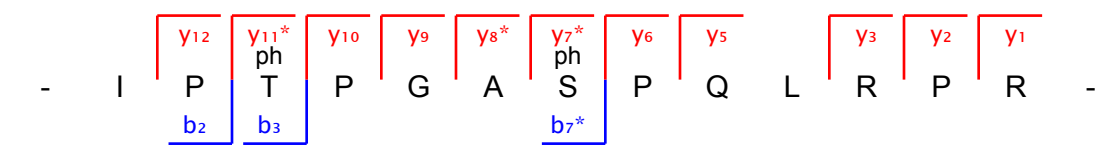

Raw file: 20150814\_A375SR\_Phospho\_BR2\_03  
 Scan: 11724 Method: FTMS; HCD Score: 43.96 m/z: 1117.1 Gene names: SF3A1

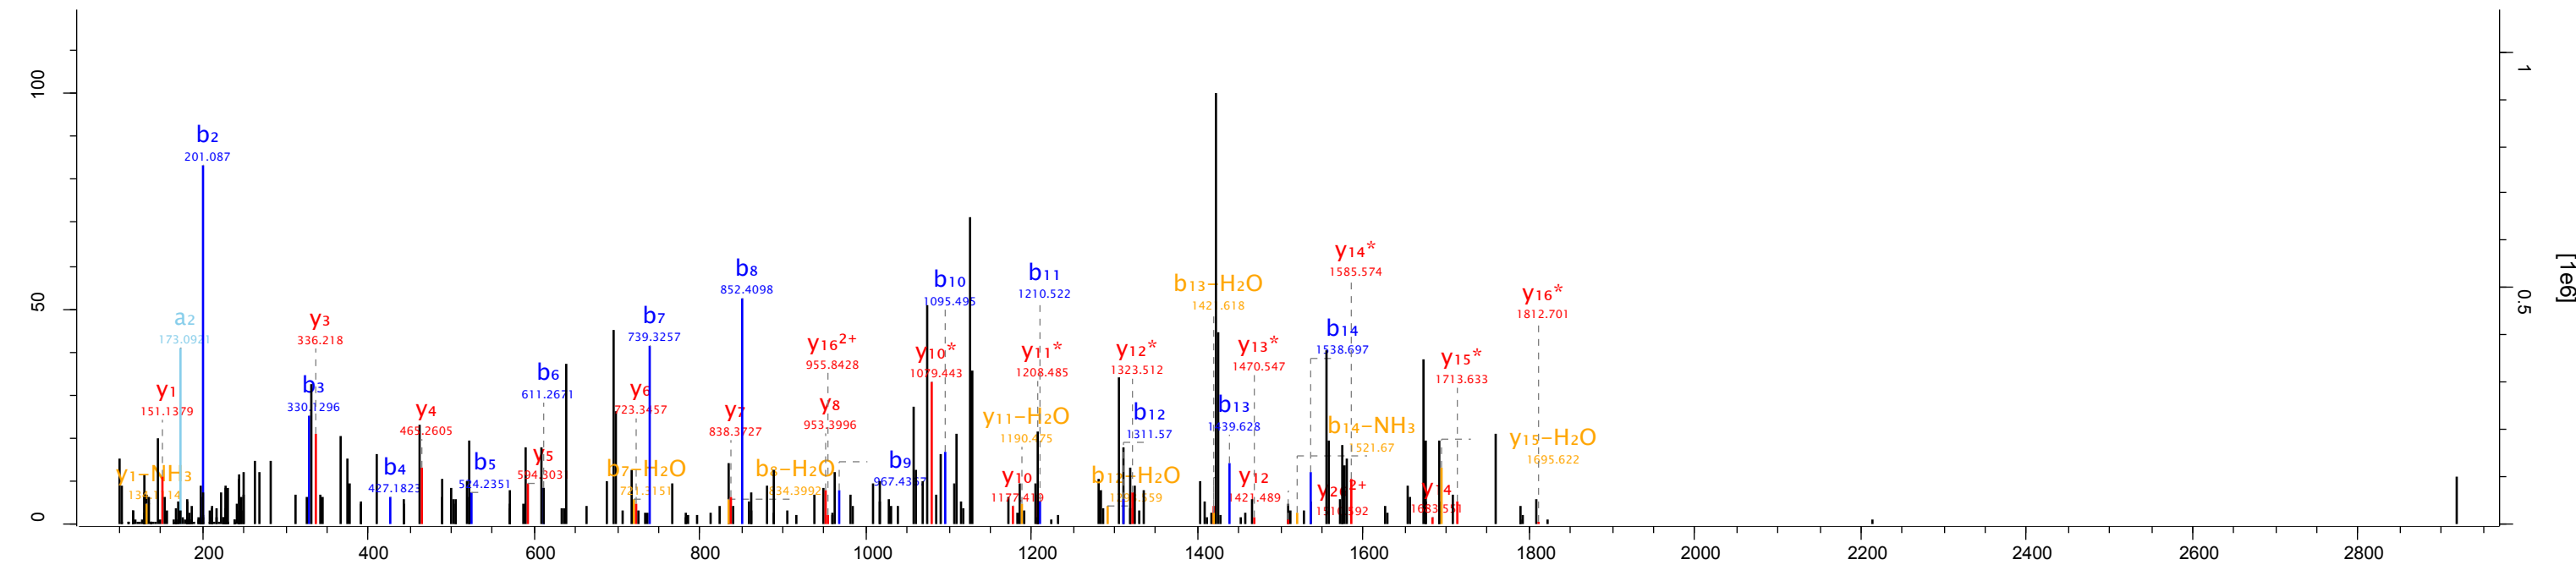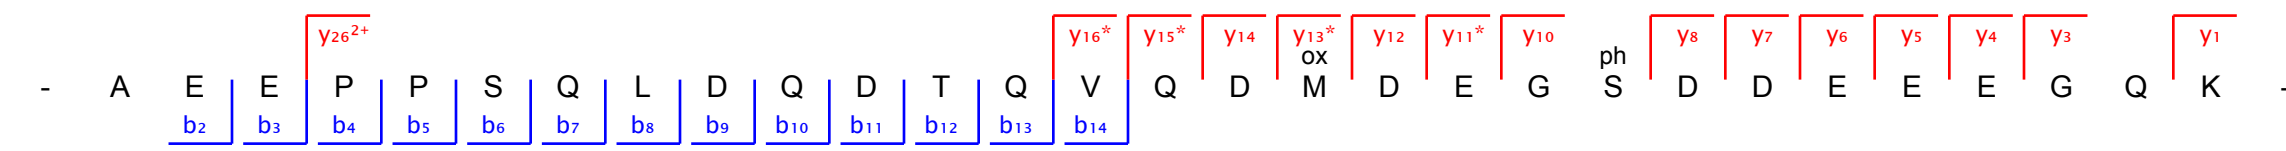



Raw file 20150814\_A375SR\_Phospho\_BR2\_03 Scan 11814 Method FTMS; HCD Score 168.42 m/z 775.84 Gene names PTMA

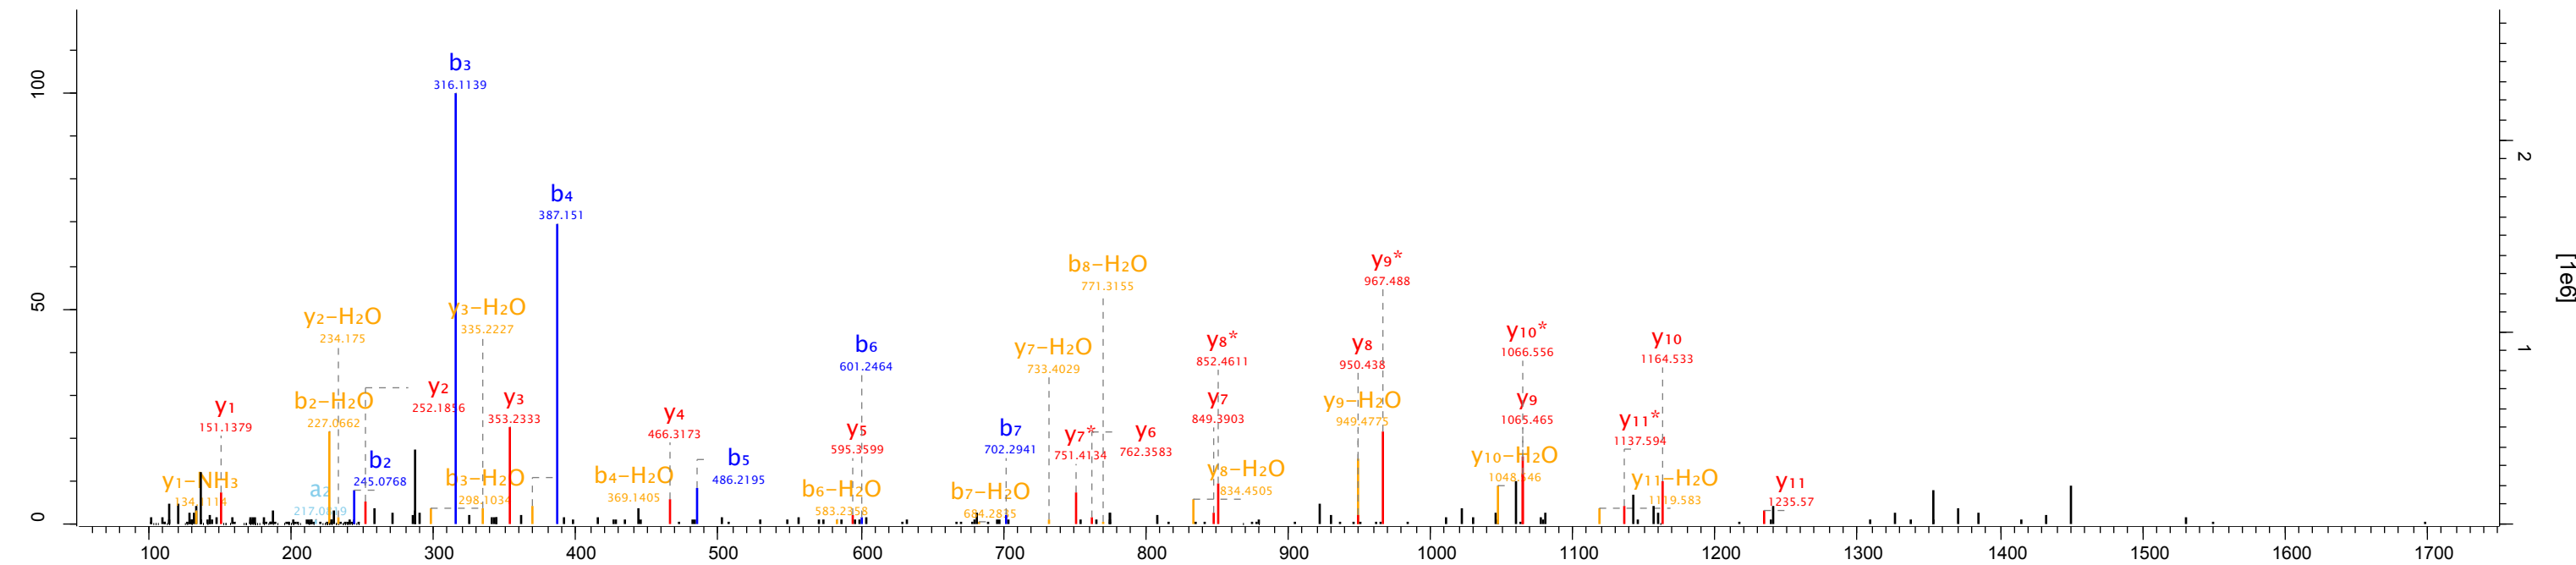

ac - S D A A V D T S S E I T T K -

b2 b3 b4 b5 b6 b7 y11 y10 y9 y8 y7 y6 ph y5 y4 y3 y2 y1

Raw file: 20150814\_A375SR\_Phospho\_BR2\_03  
 Scan: 11954 Method: FTMS; HCD Score: 84.61 m/z: 609.77 Gene names: CTIF

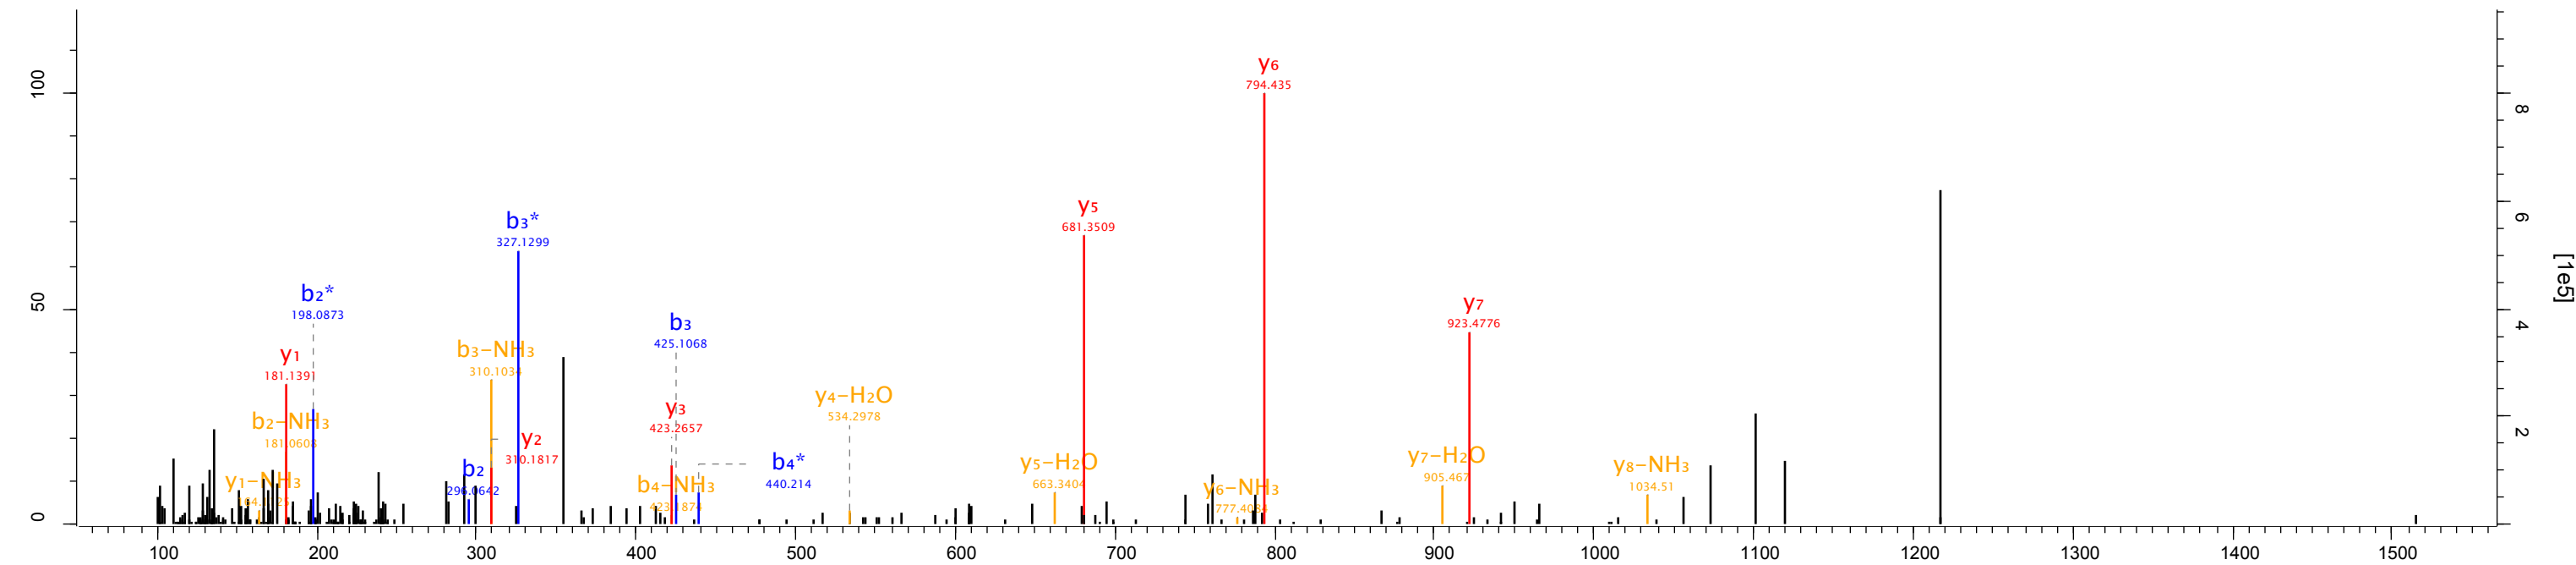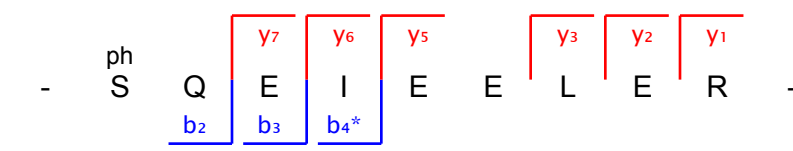

Raw file 20150814\_A375SR\_Phospho\_BR2\_03 Scan 12364 Method FTMS; HCD Score 173.19 m/z 760.83 Gene names AMOTL1

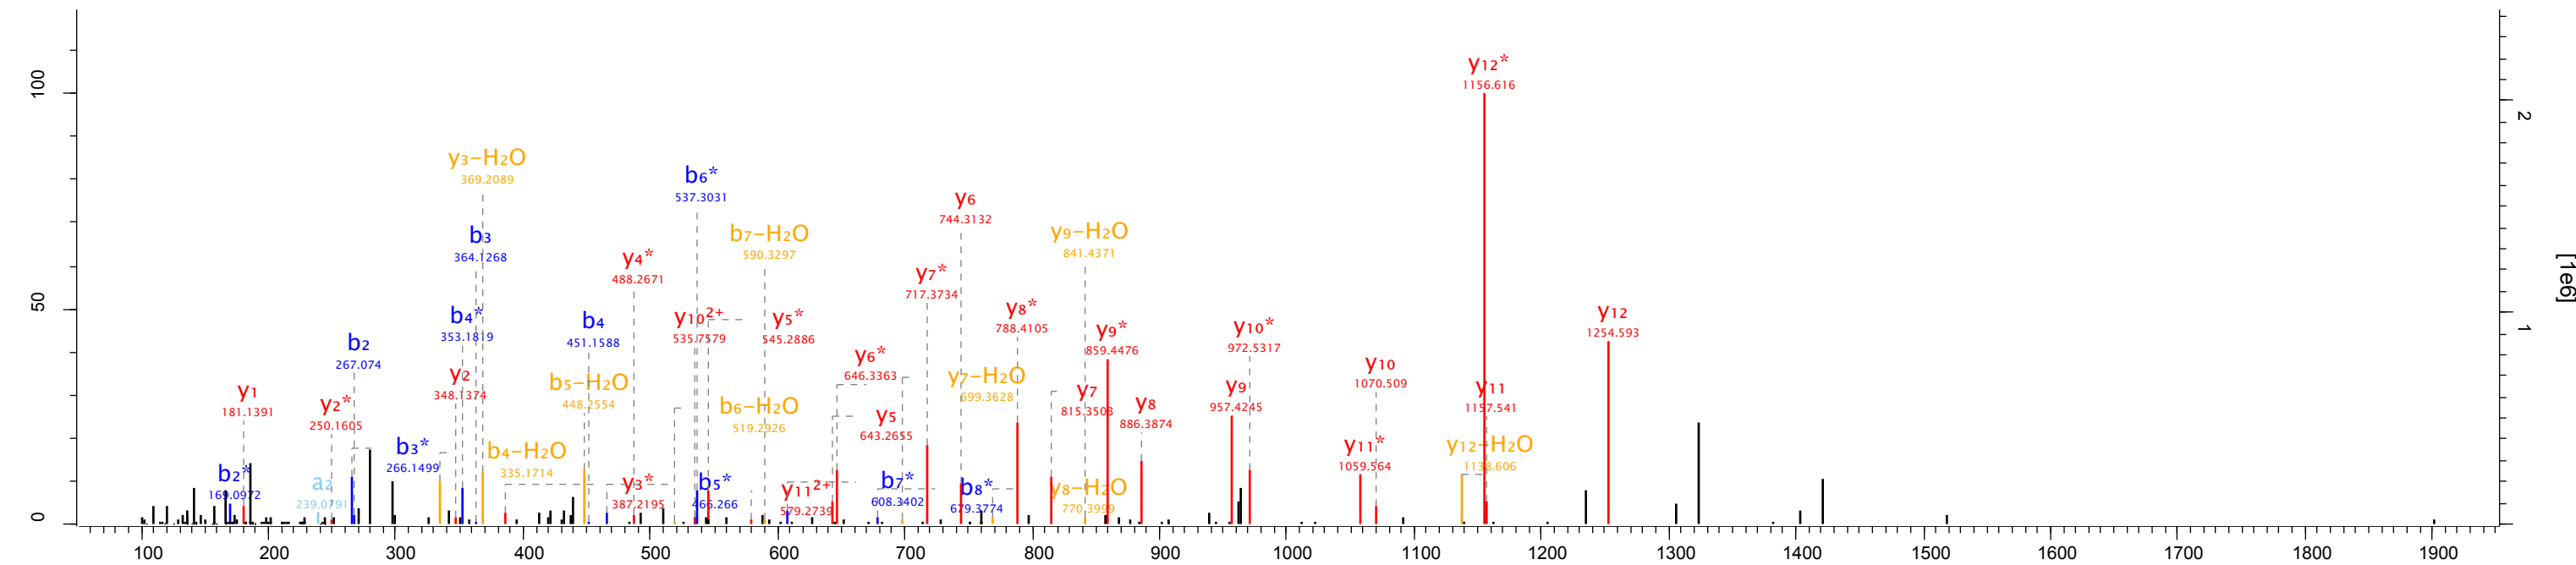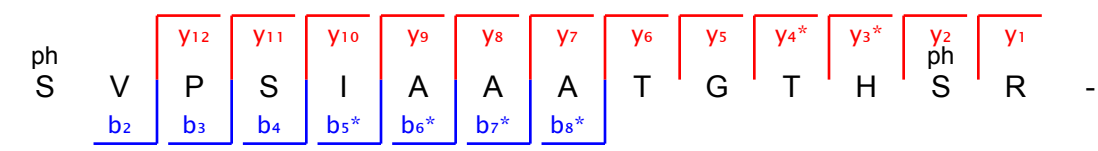

Raw file 20150814\_A375SR\_Phospho\_BR2\_03 Scan 12614 Method FTMS; HCD Score 119.08 m/z 743.35 Gene names ARHGAP39

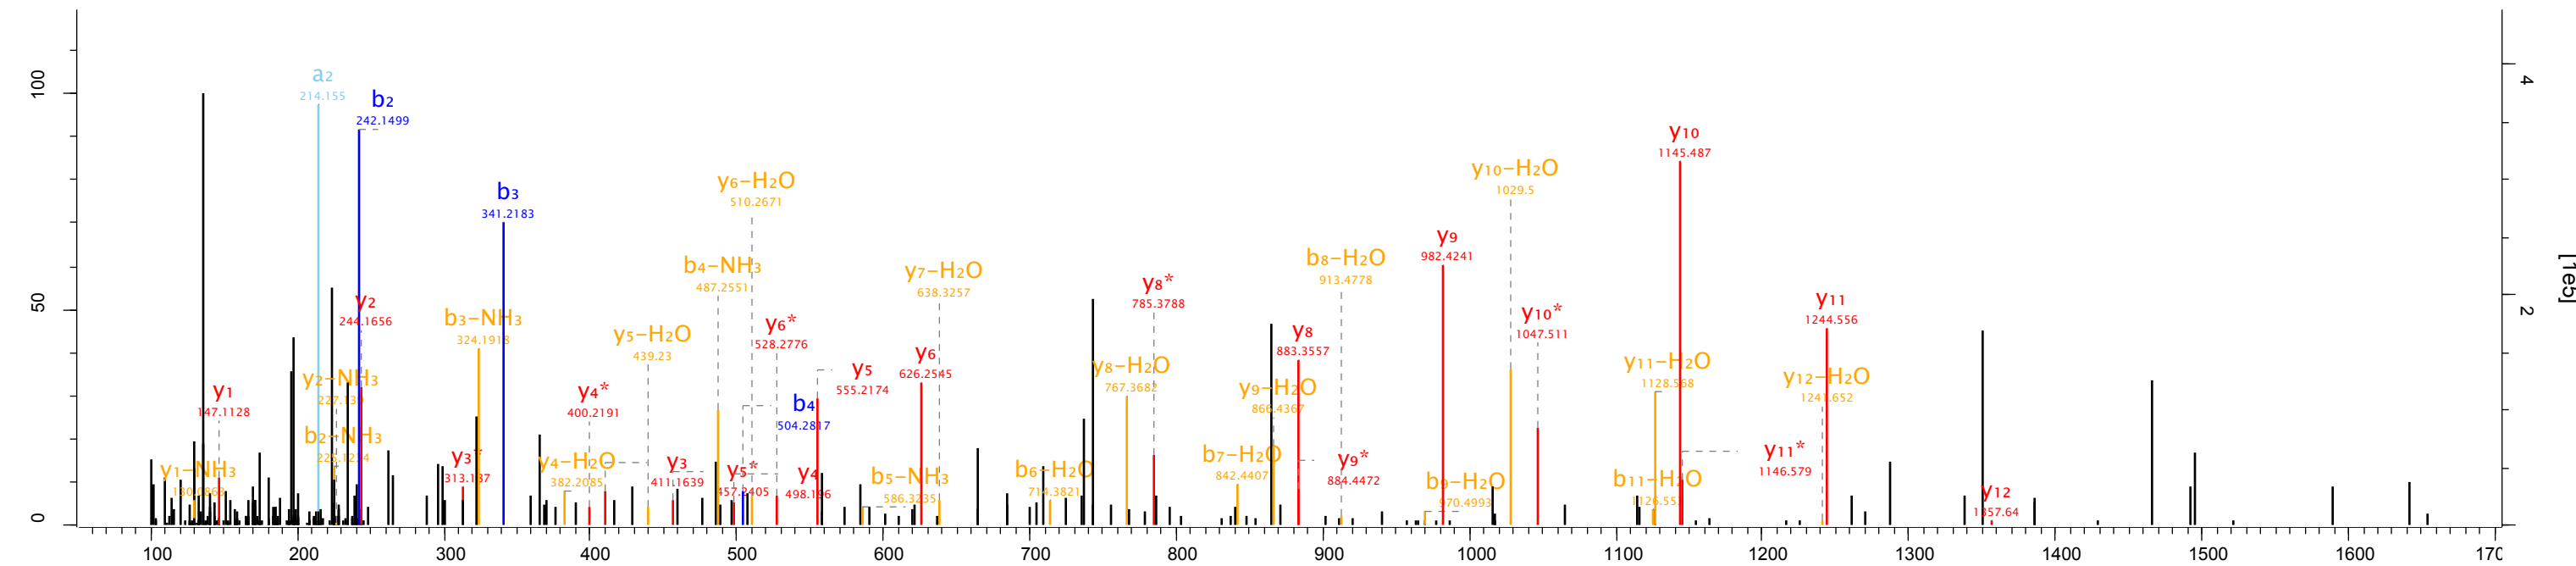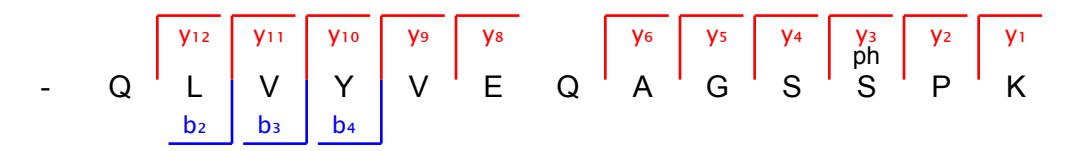

Raw file 20150814\_A375SR\_Phospho\_BR2\_03 Scan 13154 Method FTMS; HCD Score 89.43 m/z 634.82 Gene names ANXA1

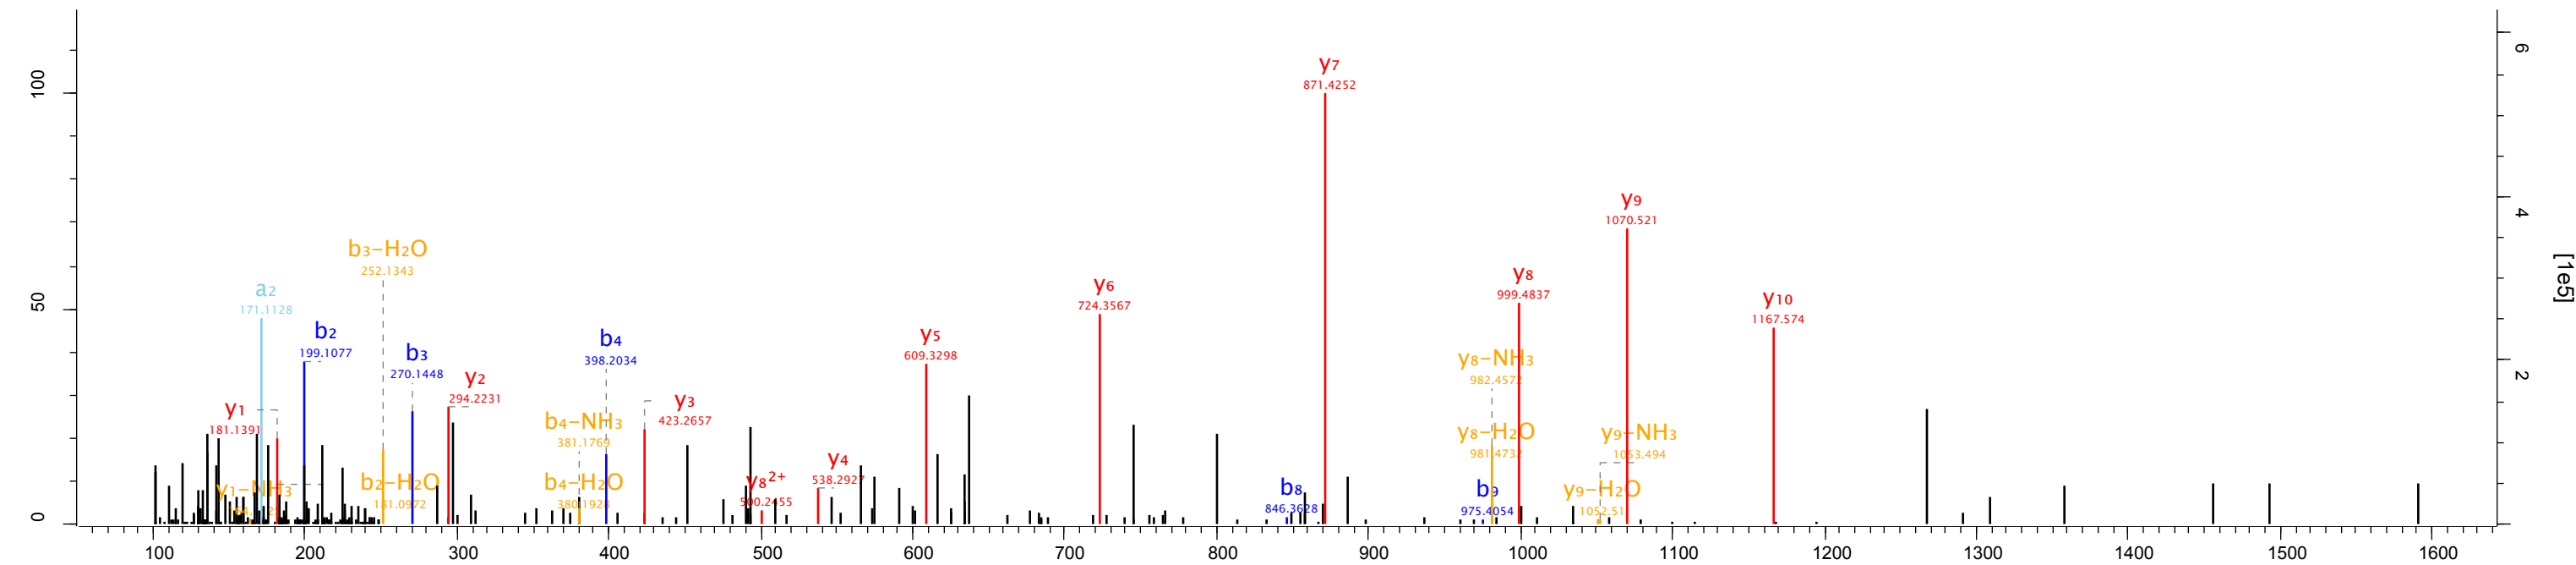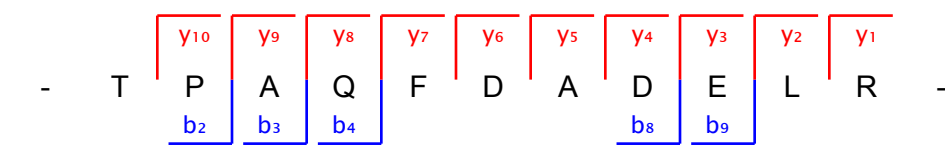

Raw file: 20150814\_A375SR\_Phospho\_BR2\_03  
 Scan: 13234 Method: FTMS; HCD Score: 246.44 m/z: 1206.01 Gene names: SCAF11

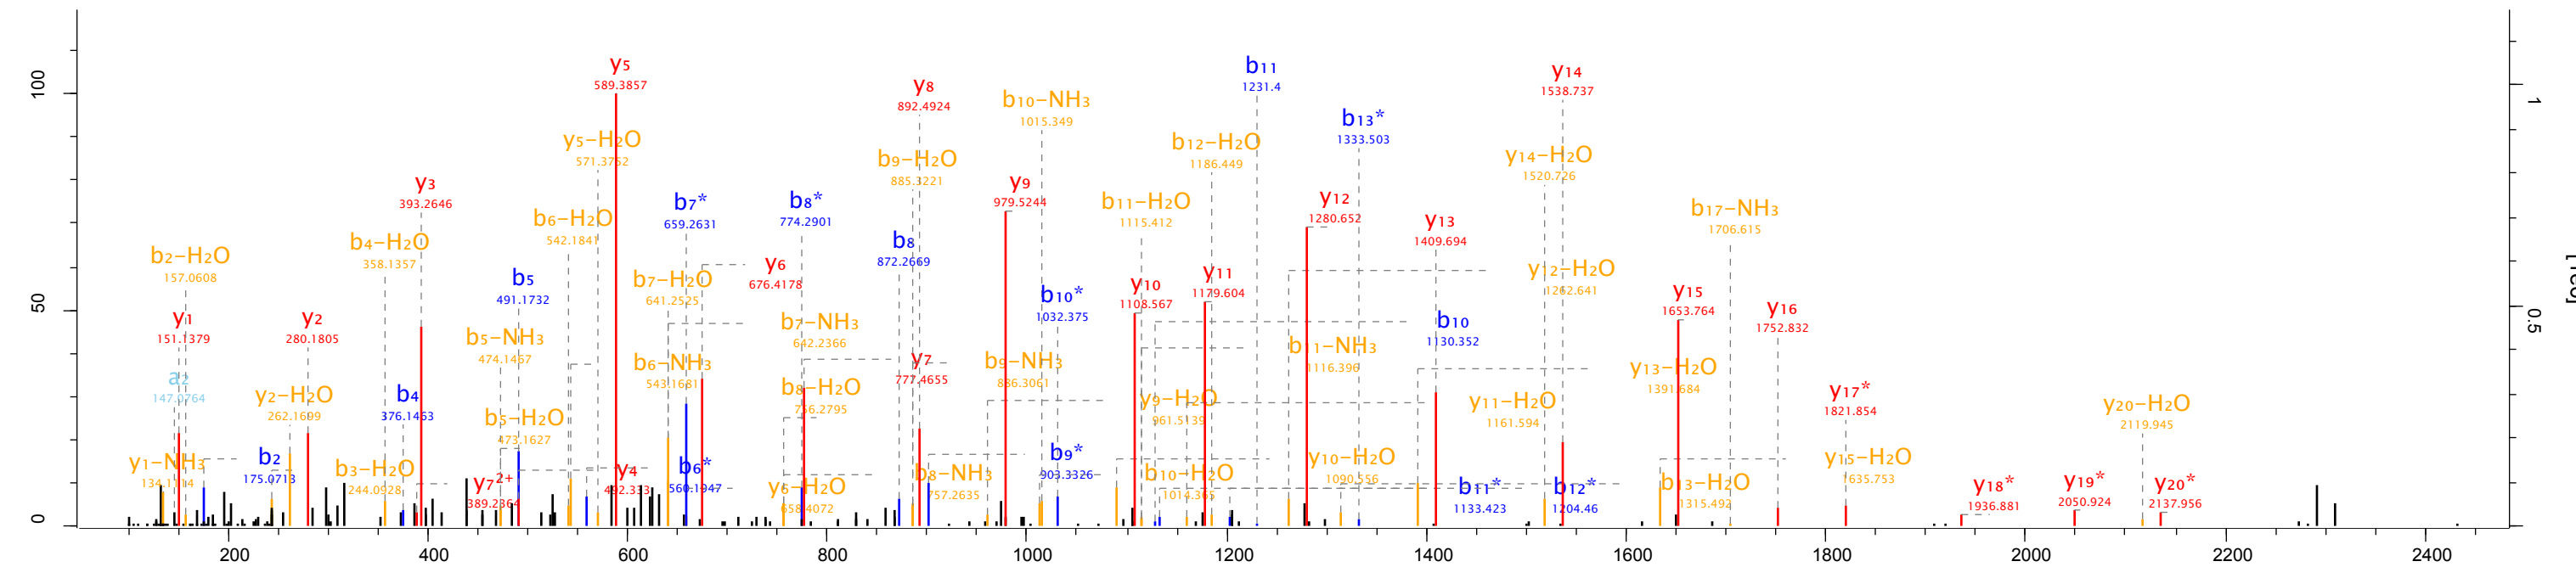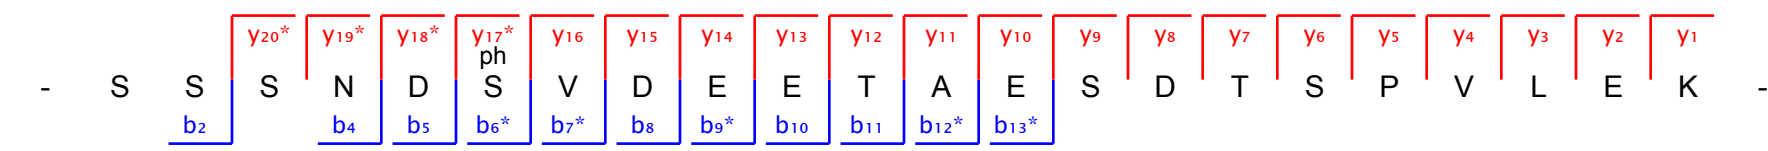

Raw file 20150814\_A375SR\_Phospho\_BR2\_03 Scan 13254 Method FTMS; HCD Score 230.17 m/z 1123.82 Gene names HUWE1

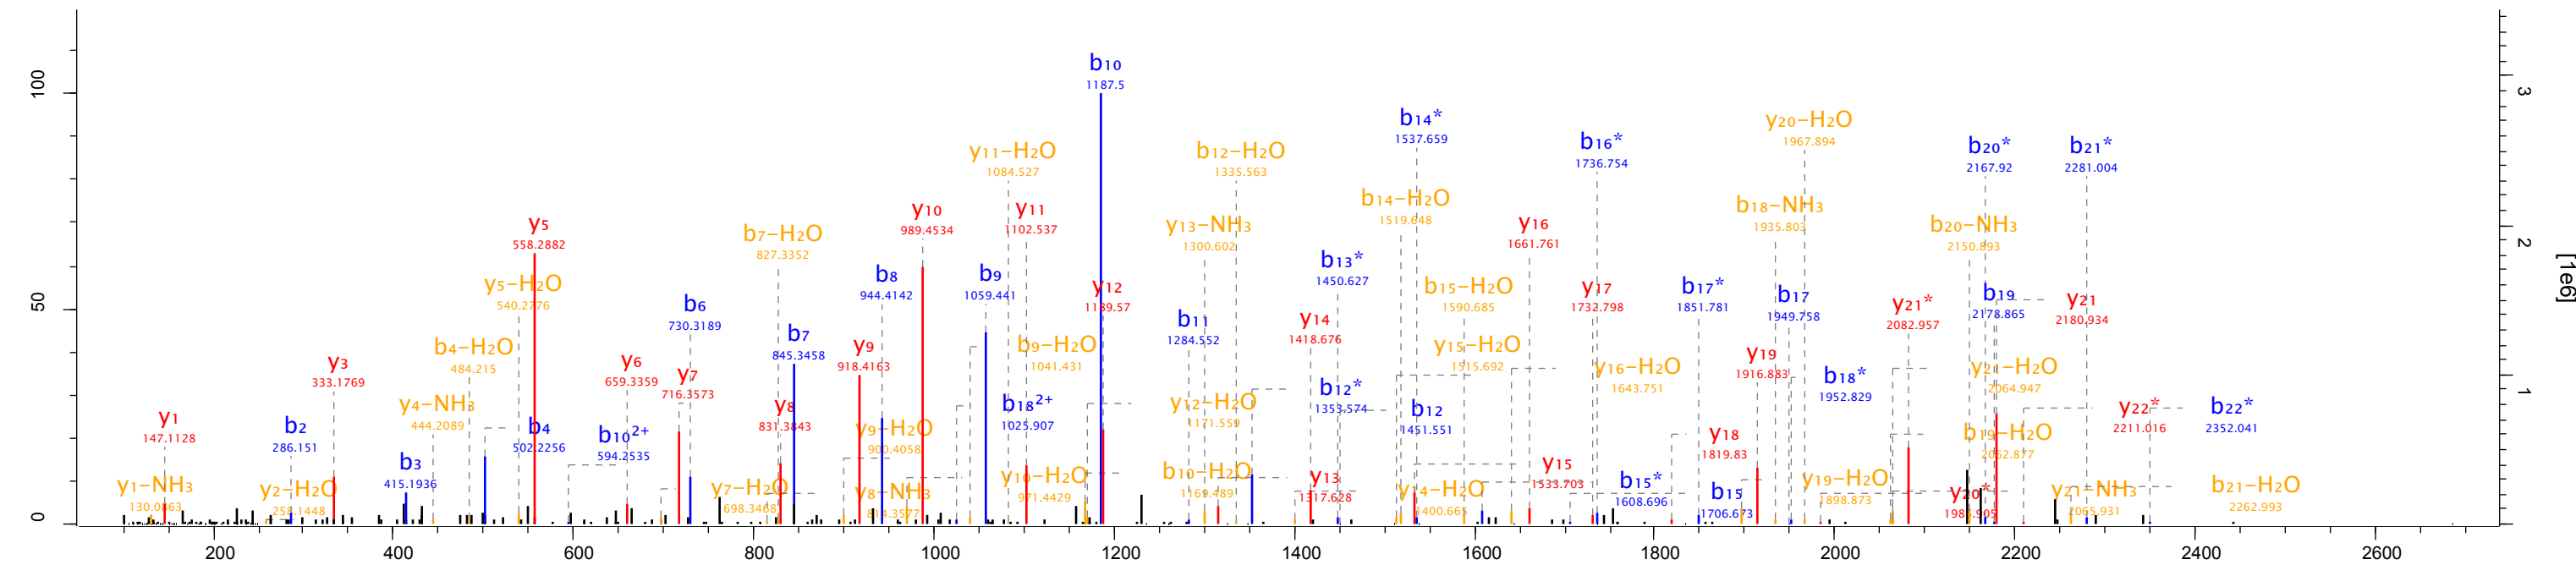

- R E E S P M D V D Q P S P S A Q D T Q S I A S D G T P Q G E K -

b<sub>2</sub>
b<sub>3</sub>
b<sub>4</sub>
b<sub>6</sub>
b<sub>7</sub>
b<sub>8</sub>
b<sub>9</sub>
b<sub>10</sub>
b<sub>11</sub>
b<sub>12</sub>
b<sub>13</sub>\*
b<sub>14</sub>\*
b<sub>15</sub>
b<sub>16</sub>\*
b<sub>17</sub>
b<sub>18</sub>\*
b<sub>19</sub>
b<sub>20</sub>\*
b<sub>21</sub>\*
b<sub>22</sub>\*

Raw file 20150814\_A375SR\_Phospho\_BR2\_03 Scan 13274 Method FTMS; HCD Score 302.71 m/z 727.67 Gene names SF3B1

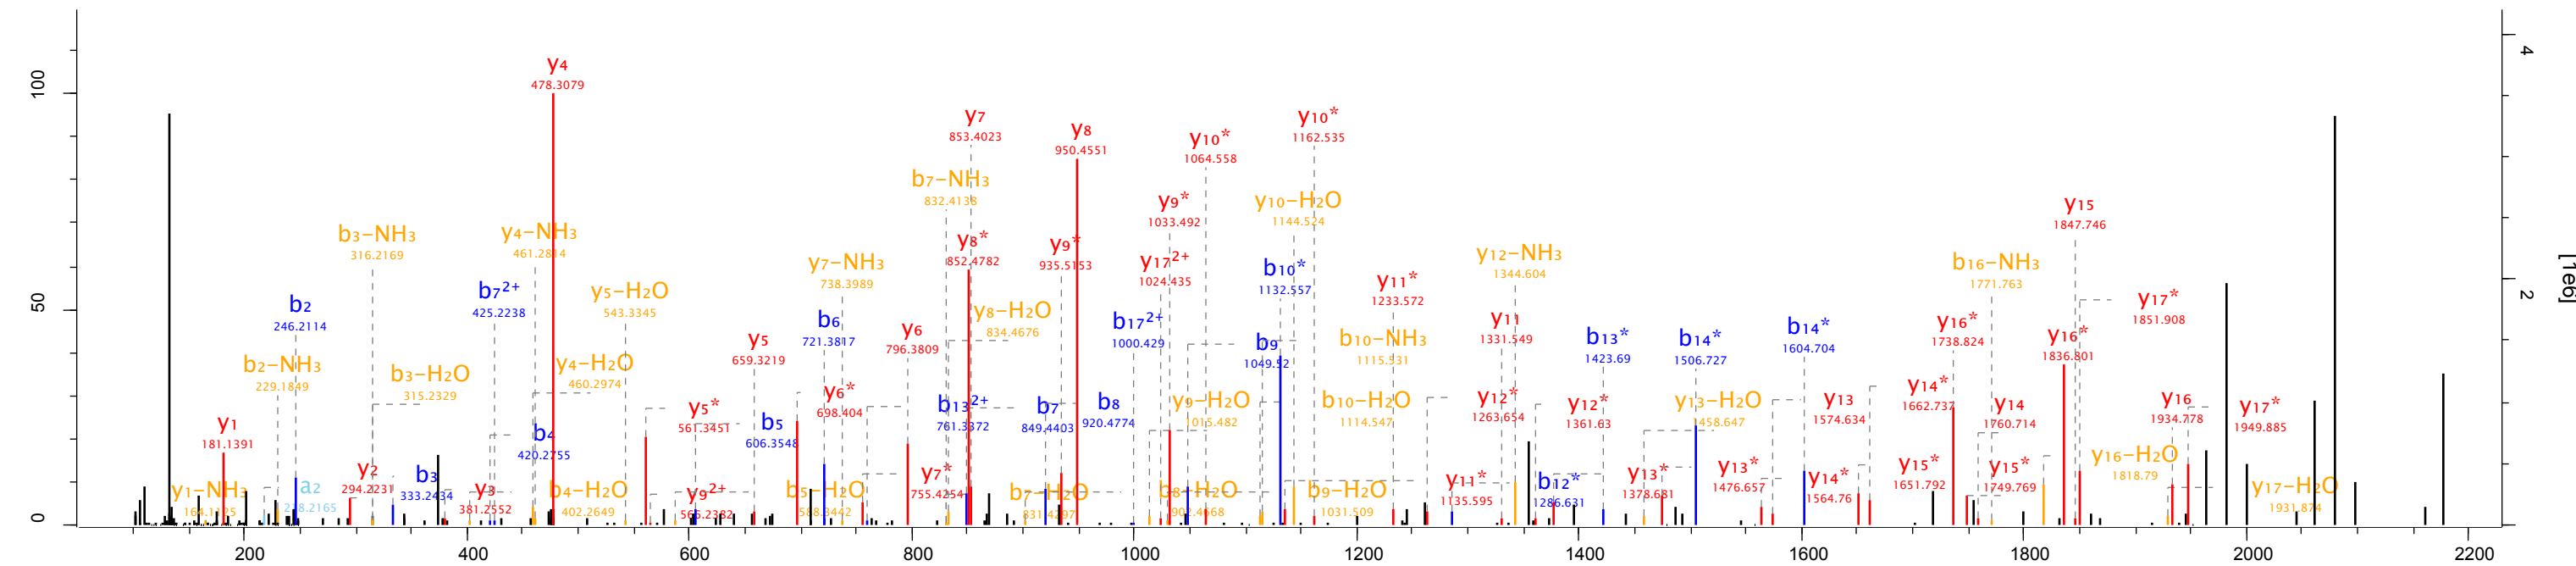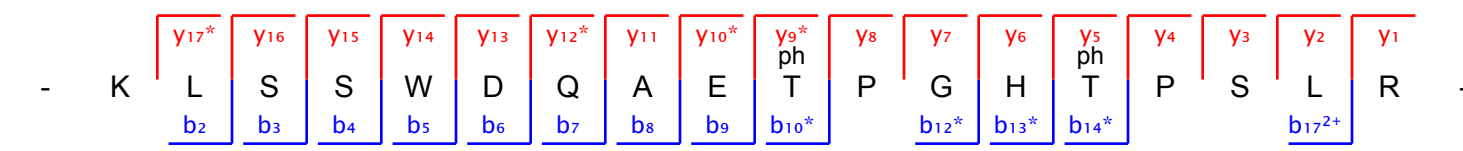



Raw file 20150814\_A375SR\_Phospho\_BR2\_03 Scan 13294 Method FTMS; HCD Score 100.02 m/z 784.39 Gene names SCRIB

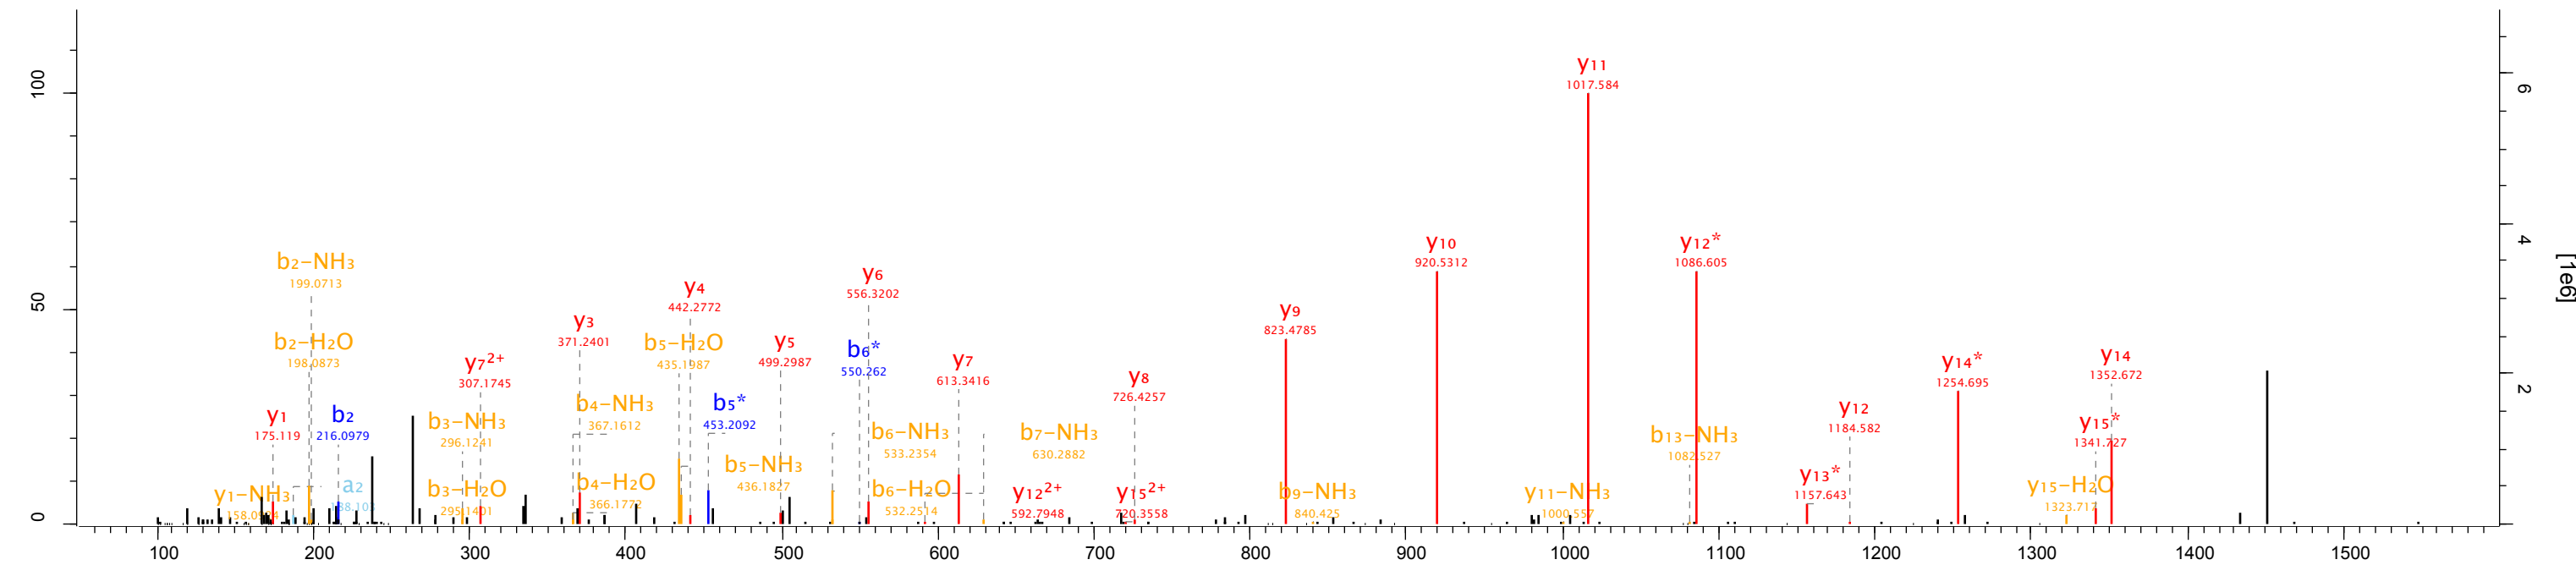

- Q S P A S P P P L G G G A P V R -

b<sub>2</sub>
b<sub>5</sub>\*
b<sub>6</sub>\*

Raw file: 20150814\_A375SR\_Phospho\_BR2\_03  
 Scan: 13434 Method: FTMS; HCD Score: 106.35 m/z: 682.33 Gene names: BCAR3

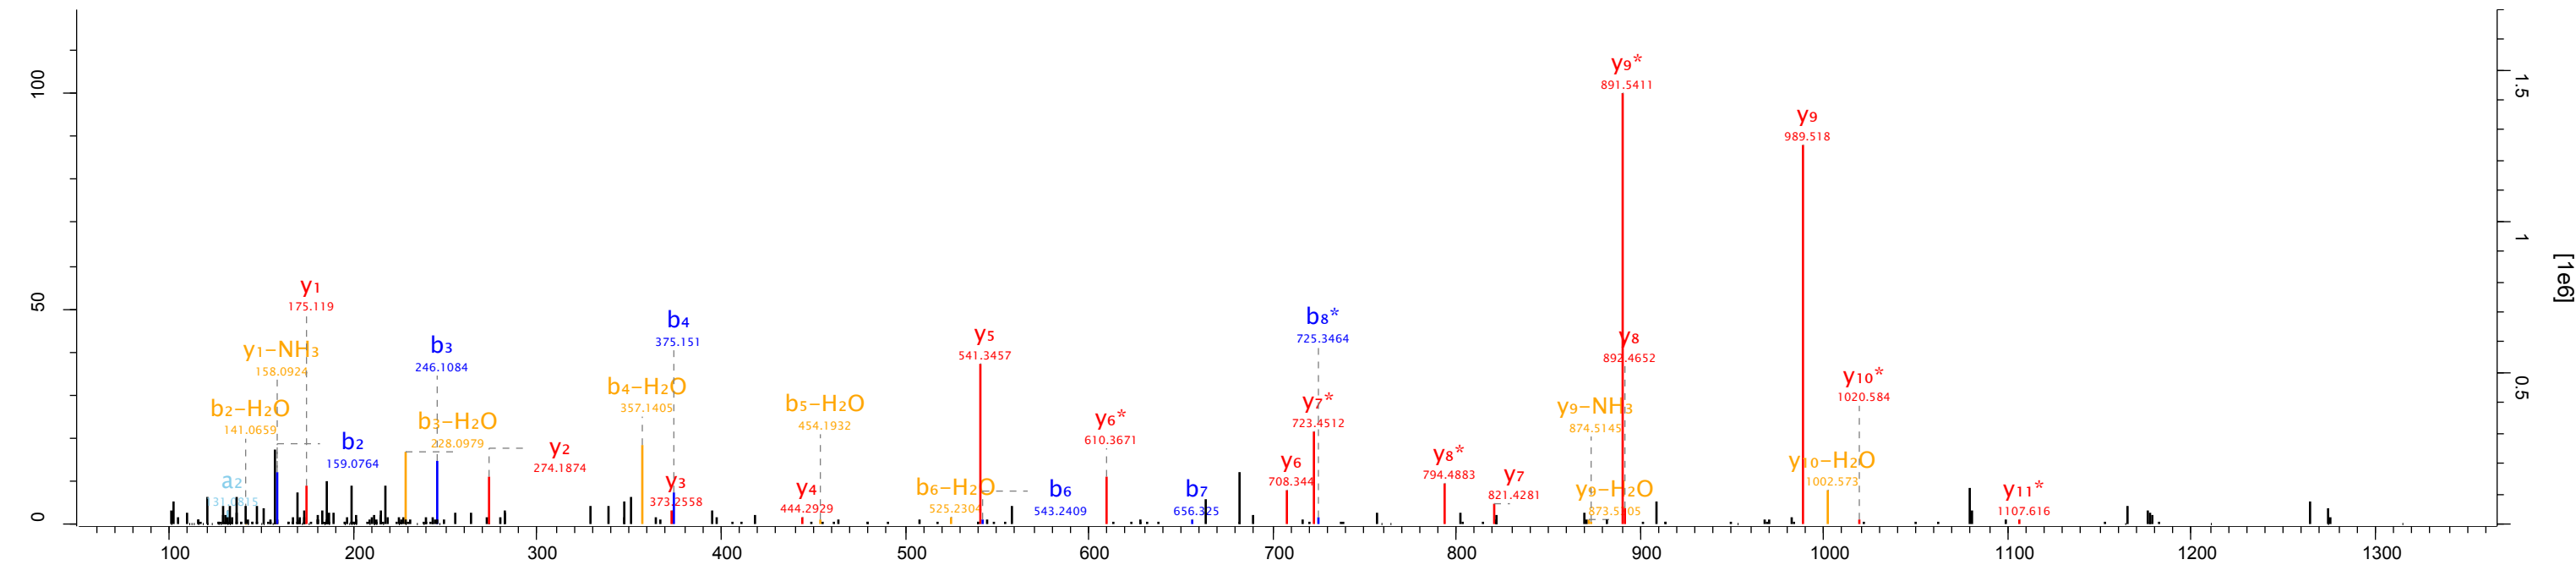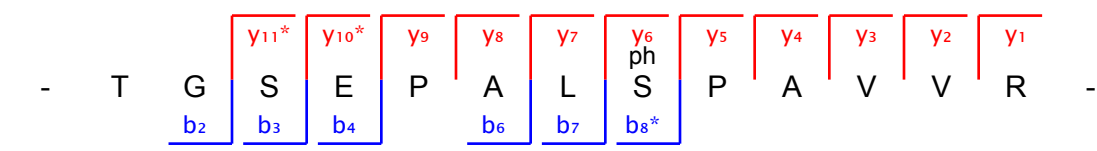

Raw file: 20150814\_A375SR\_Phospho\_BR2\_03  
 Scan: 13444 Method: FTMS; HCD Score: 98.42 m/z: 620.27 Gene names: SOS1

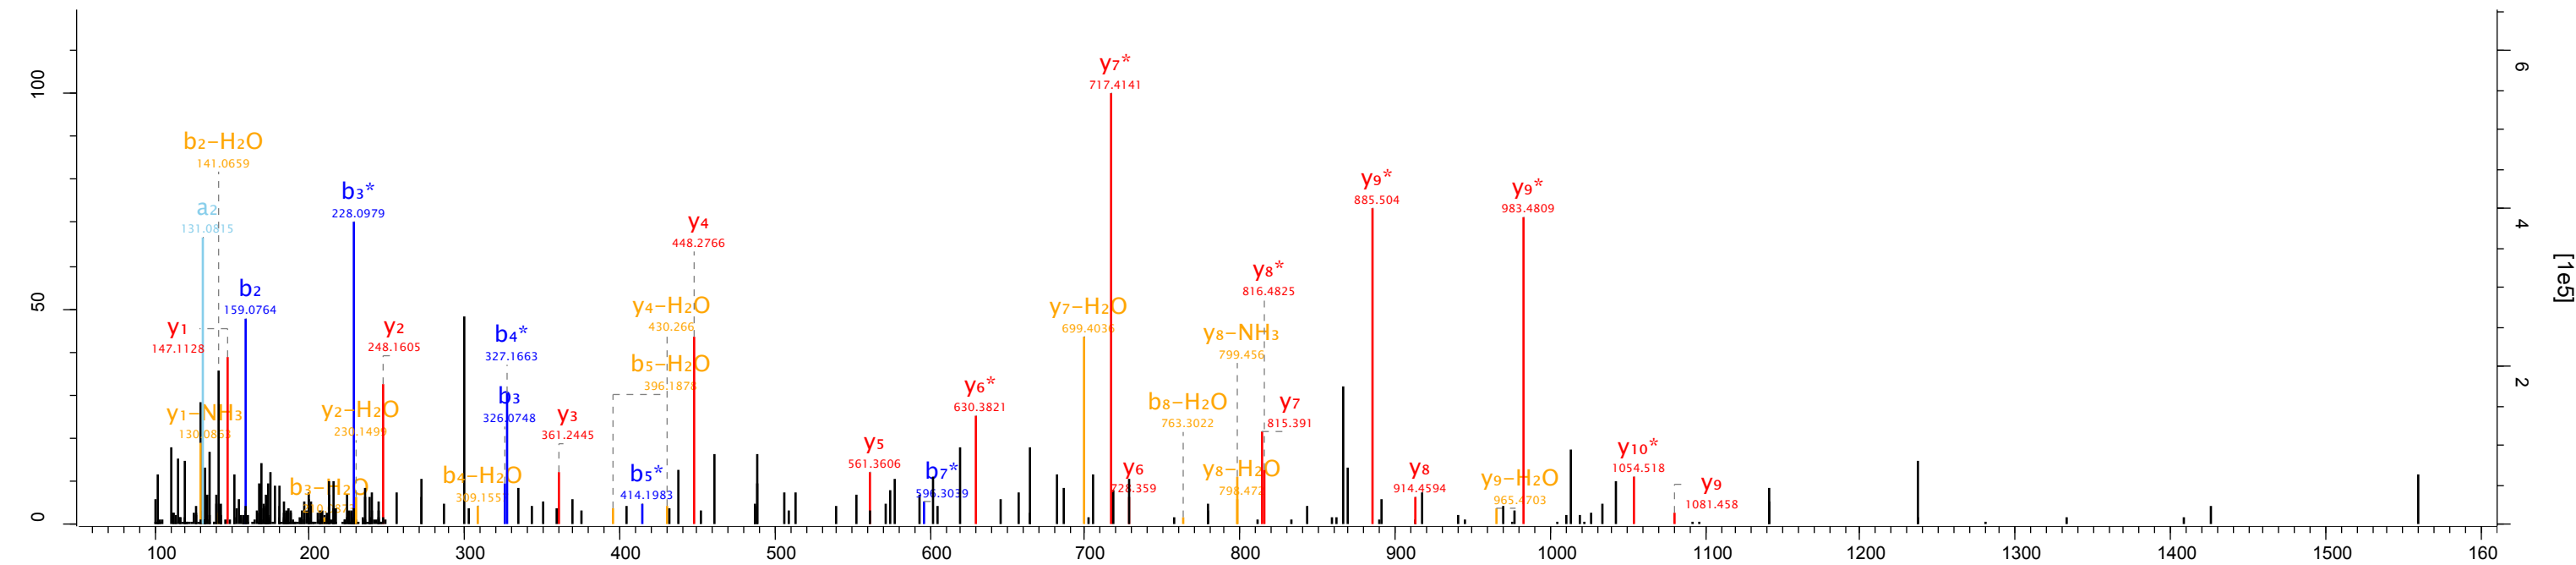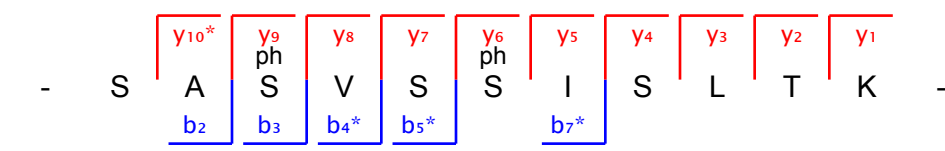

Raw file: 20150814\_A375SR\_Phospho\_BR2\_03  
 Scan: 13484 Method: FTMS; HCD Score: 89.68 m/z: 755.98 Gene names: ARHGEF11

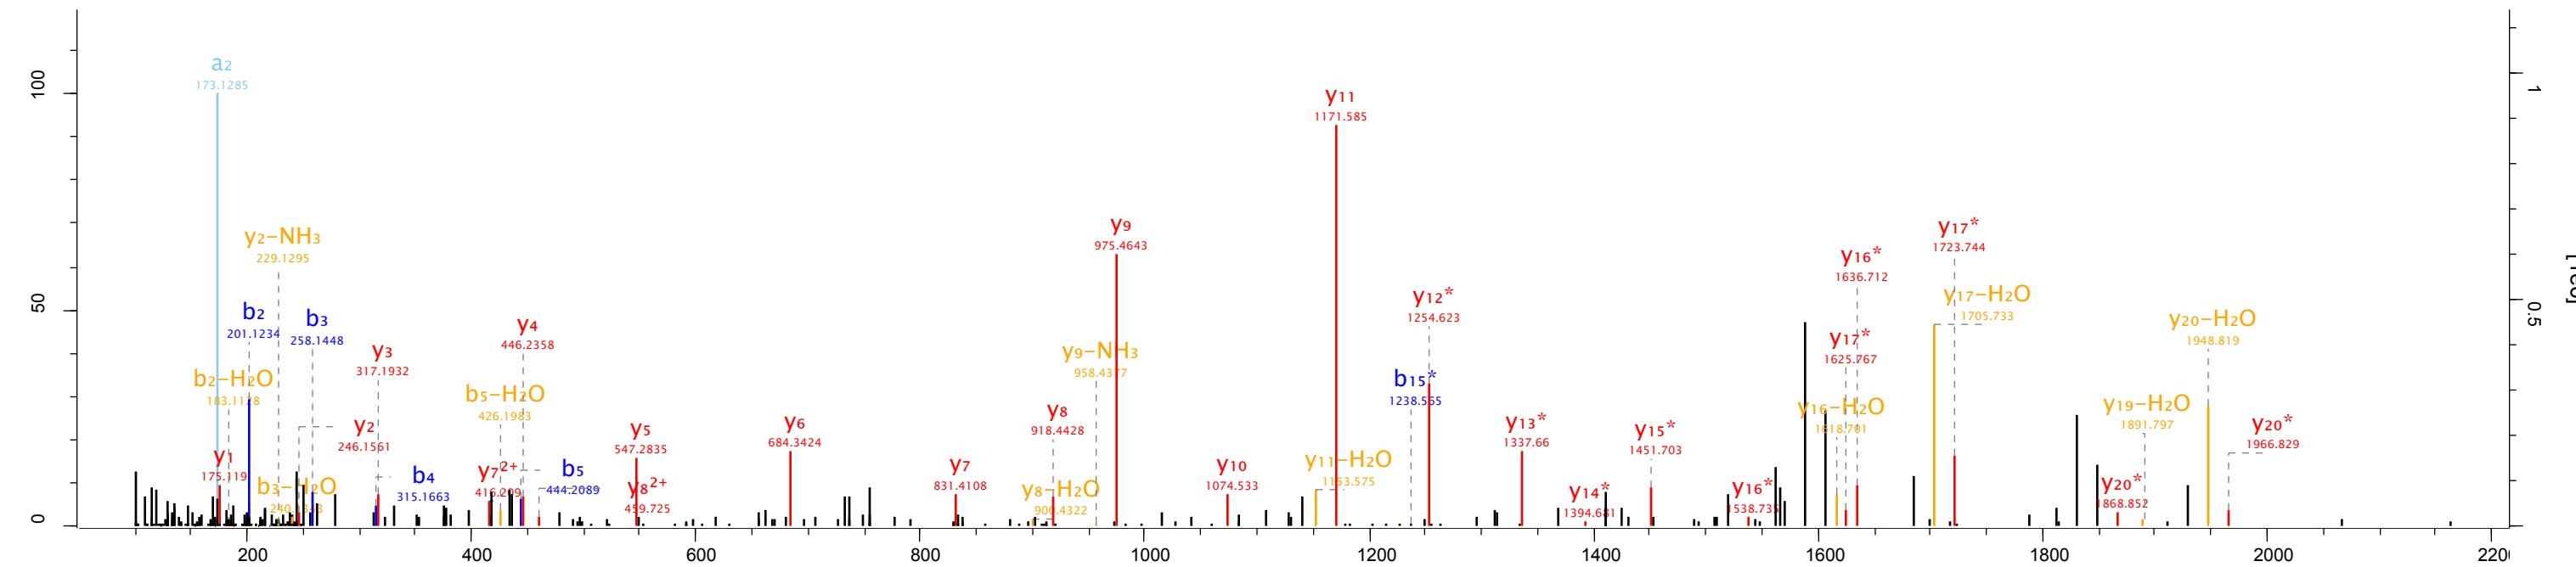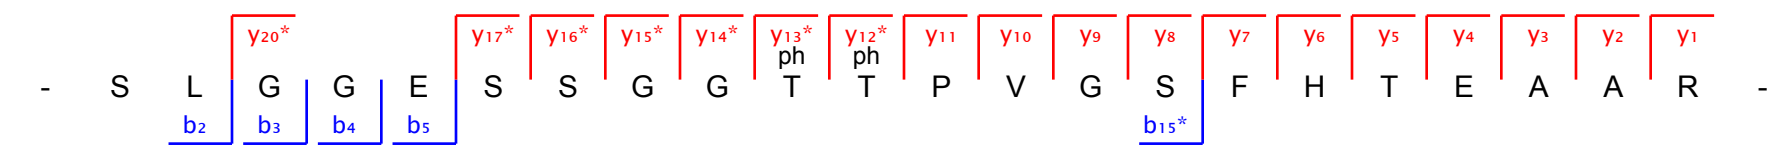

Raw file: 20150814\_A375SR\_Phospho\_BR2\_03  
 Scan: 13604 Method: FTMS; HCD Score: 180.52 m/z: 962.44 Gene names: AMOTL2

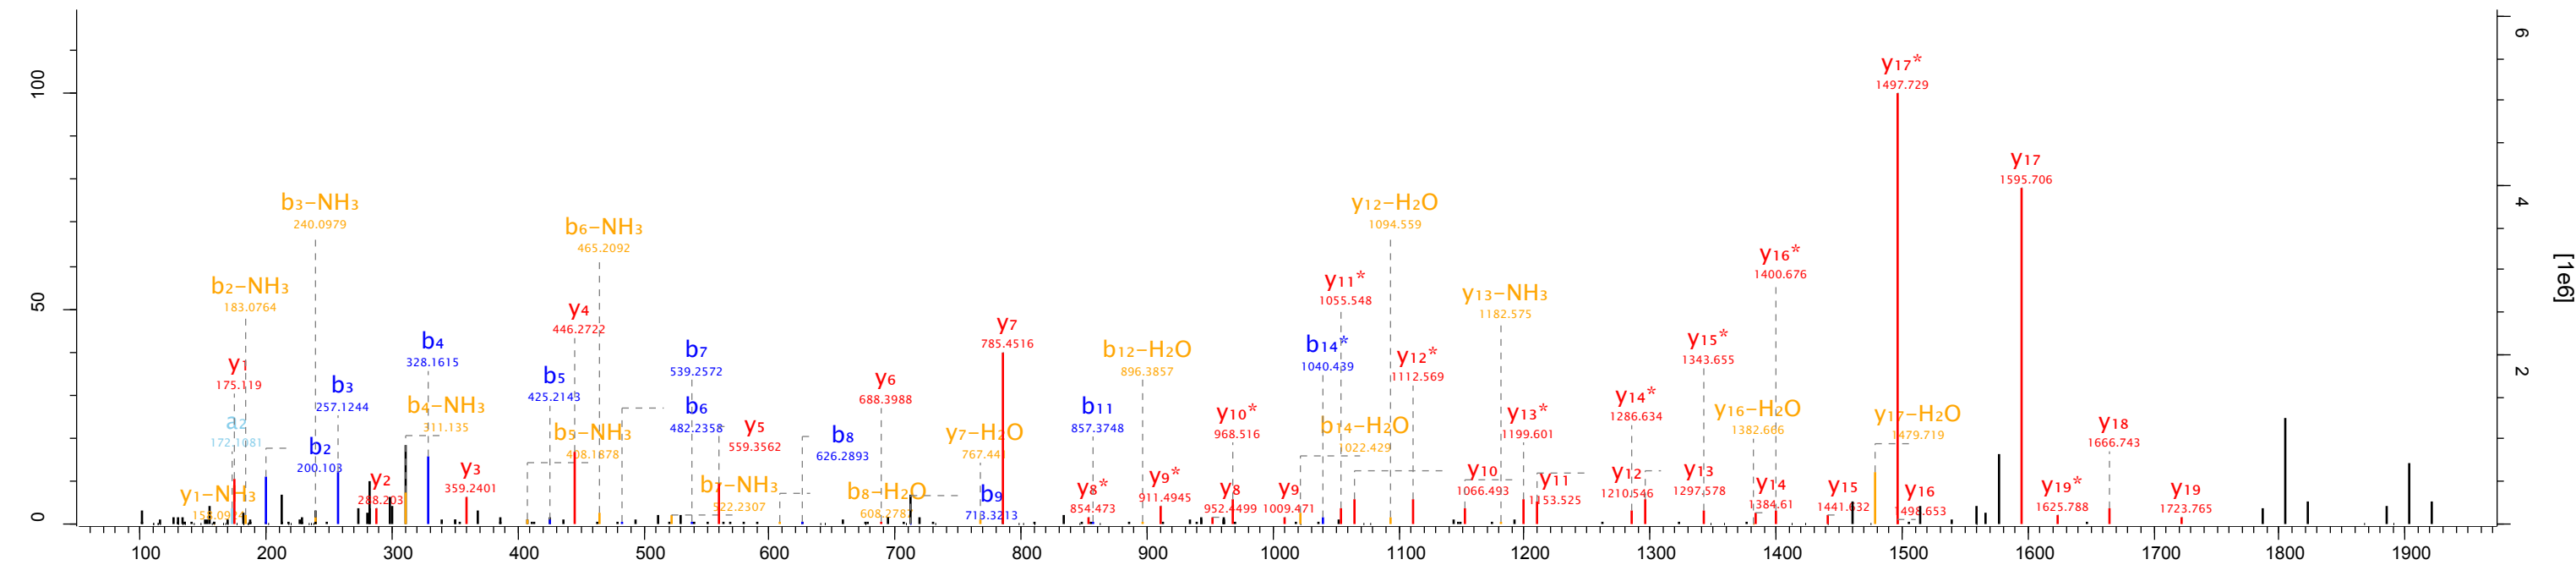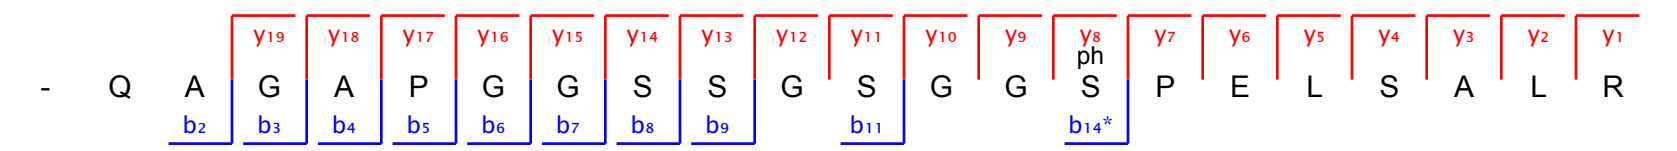

Raw file 20150814\_A375SR\_Phospho\_BR2\_03 Scan 14474 Method FTMS; HCD Score 145.65 m/z 835.37 Gene names TOX4

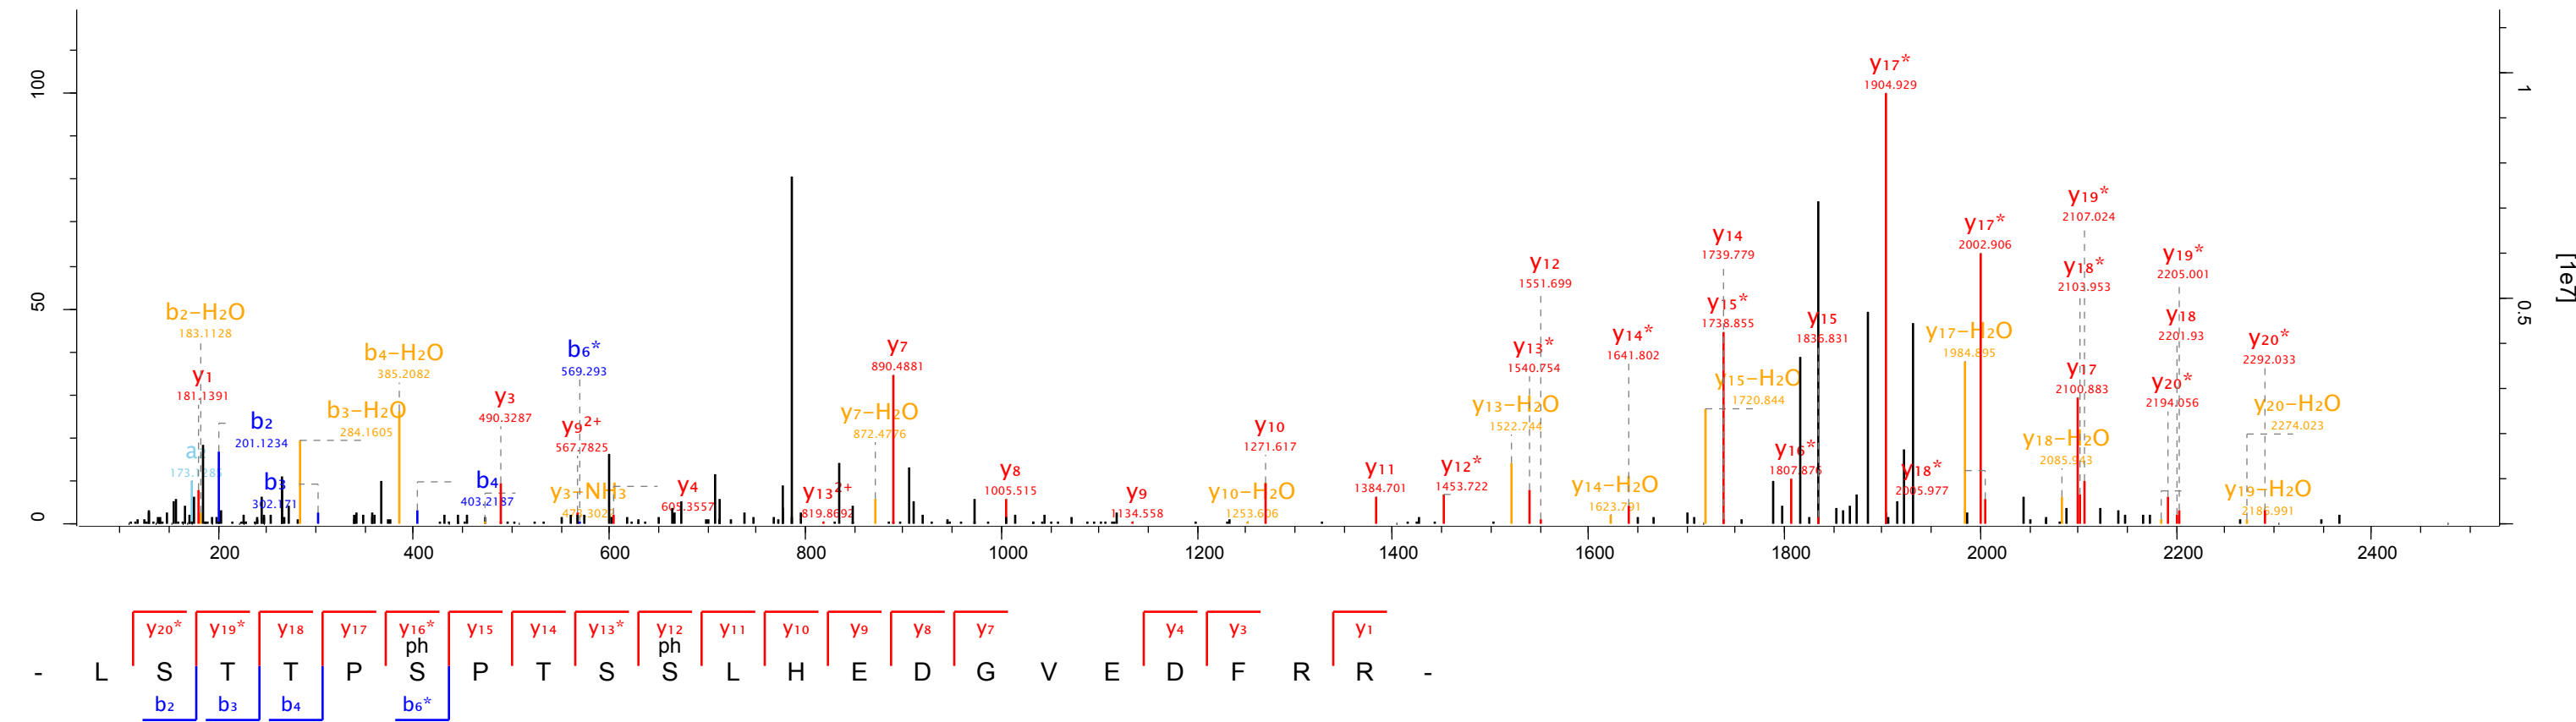

Raw file 20150814\_A375SR\_Phospho\_BR2\_03 Scan 14514 Method FTMS; HCD Score 188.55 m/z 1217.99 Gene names POLR2A

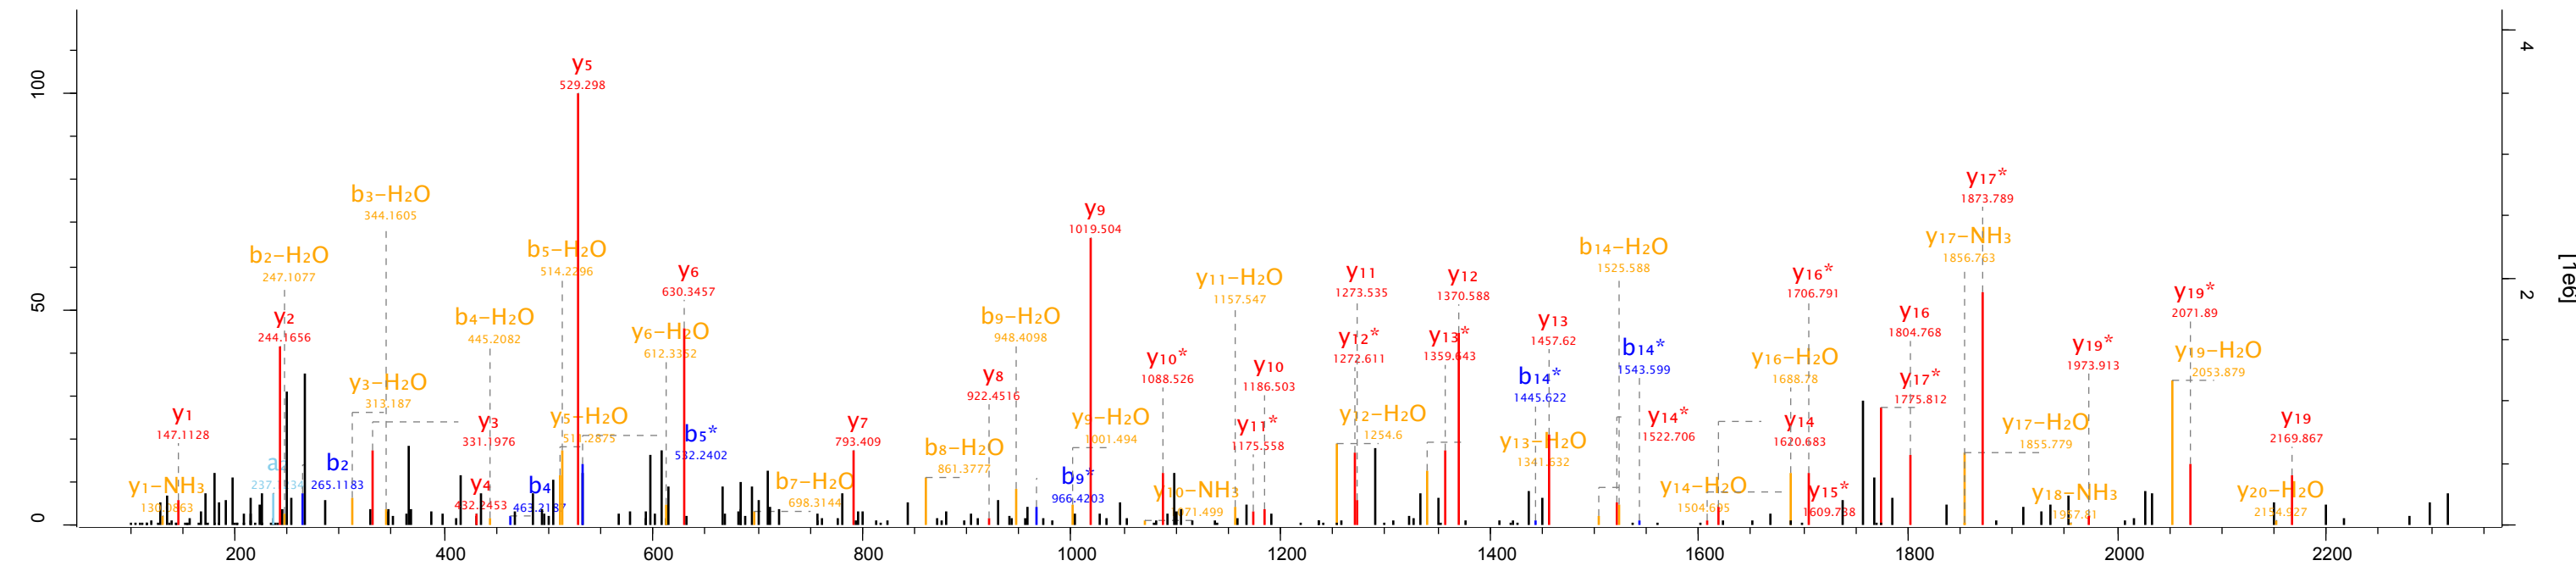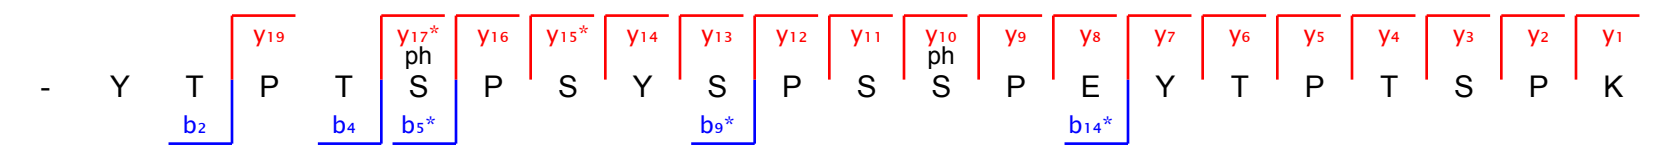

Raw file: 20150814\_A375SR\_Phospho\_BR2\_03  
 Scan: 14524 Method: FTMS; HCD Score: 193.6 m/z: 1175.47 Gene names: DOCK7

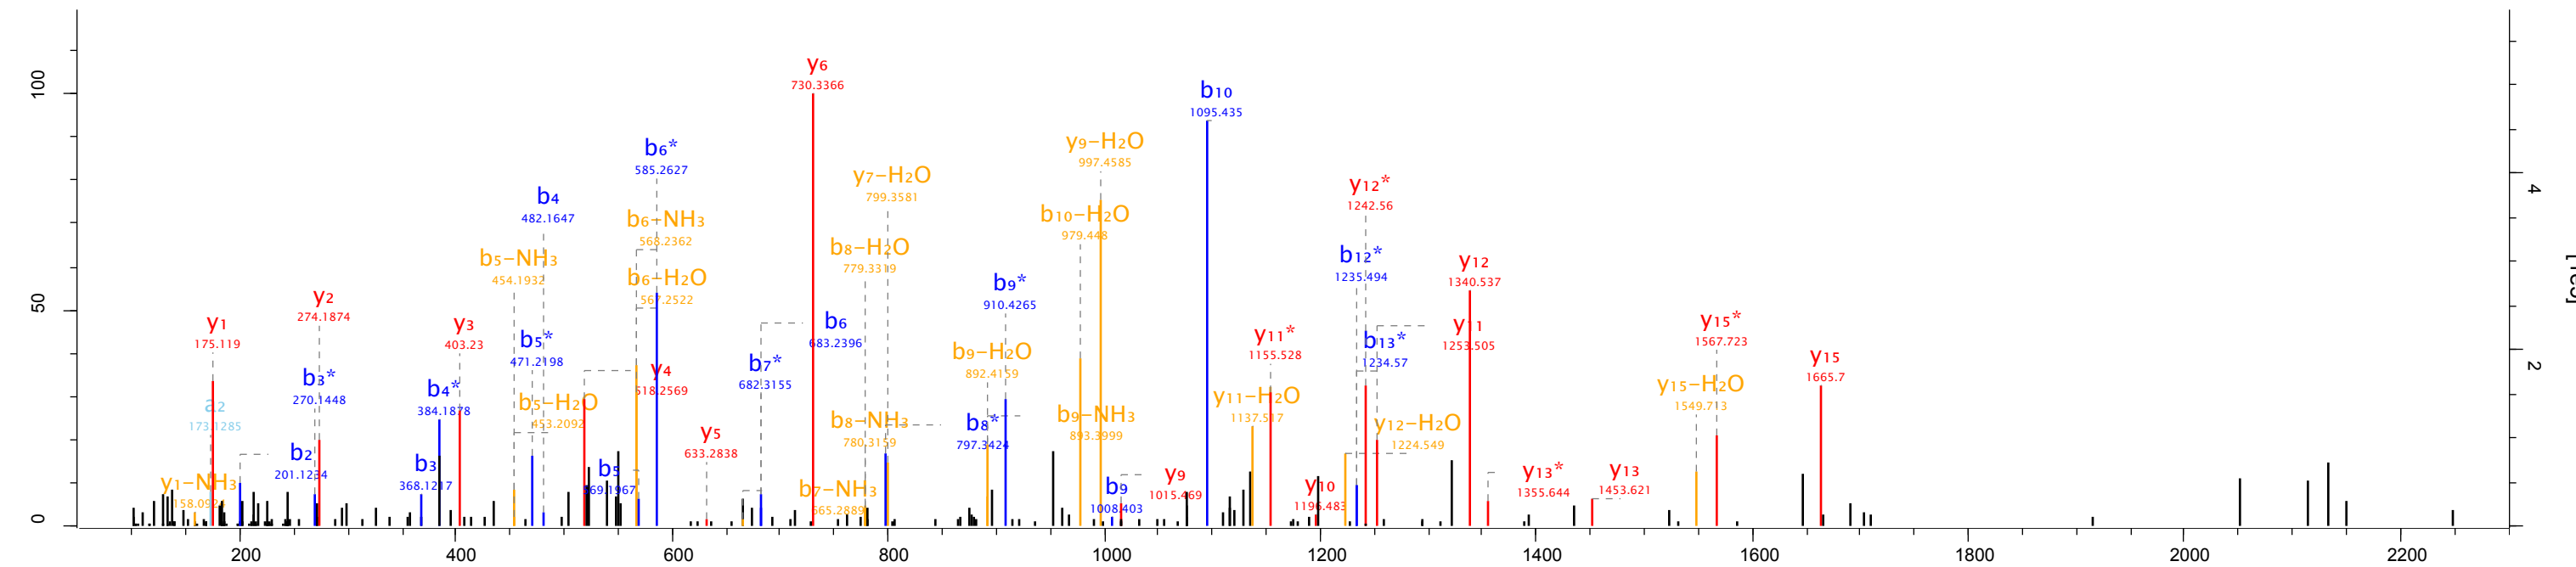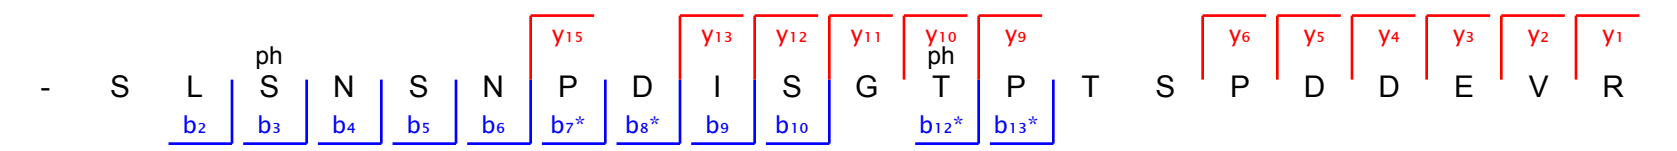



Raw file 20150814\_A375SR\_Phospho\_BR2\_03 Scan 14714 Method FTMS; HCD Score 100.31 m/z 598.31 Gene names EPRS

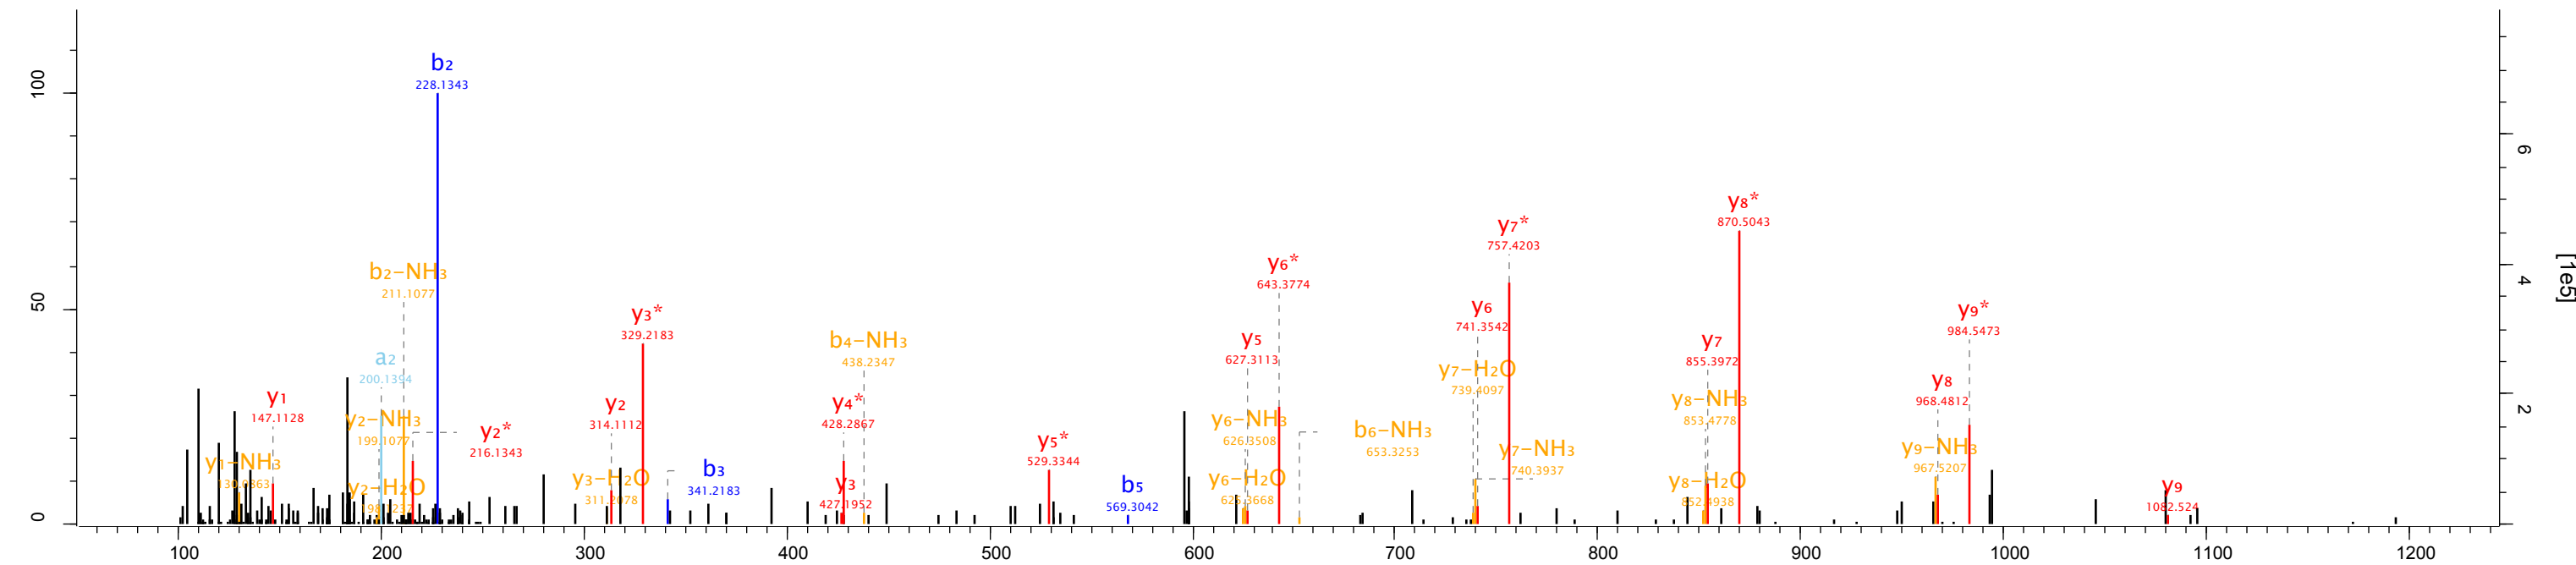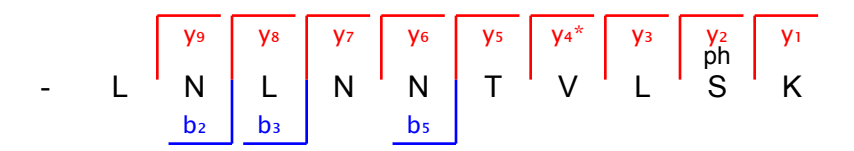

Raw file  
 20150814\_A375SR\_Phospho\_BR2\_03  
 Scan 14734 Method FTMS; HCD Score 191.74 m/z 1162.09 Gene names CHAMP1

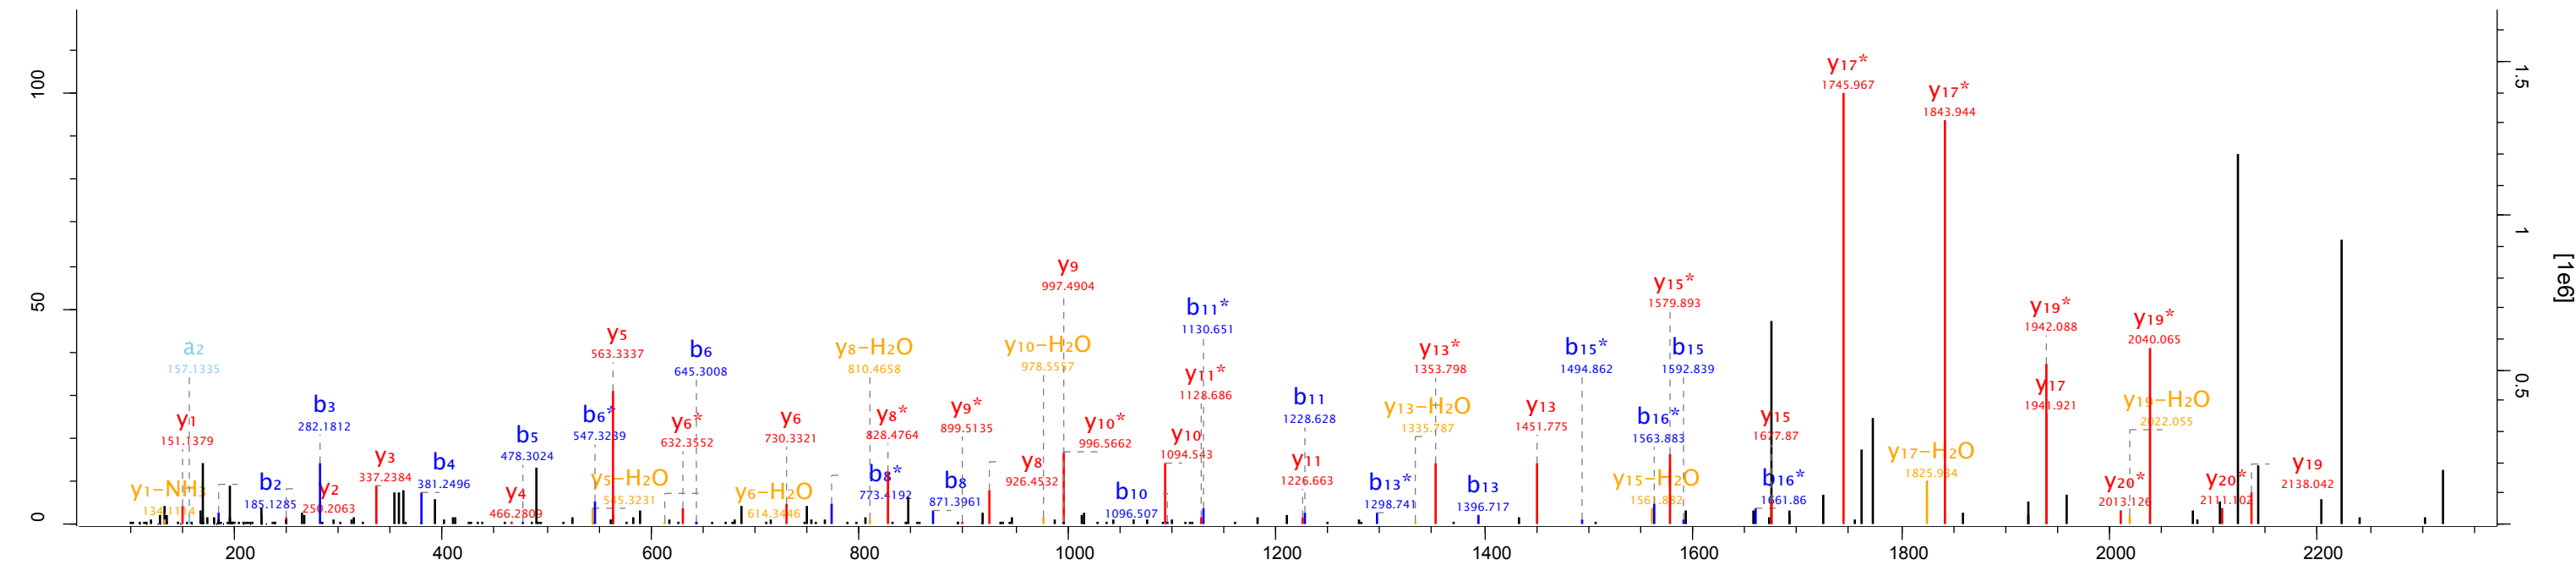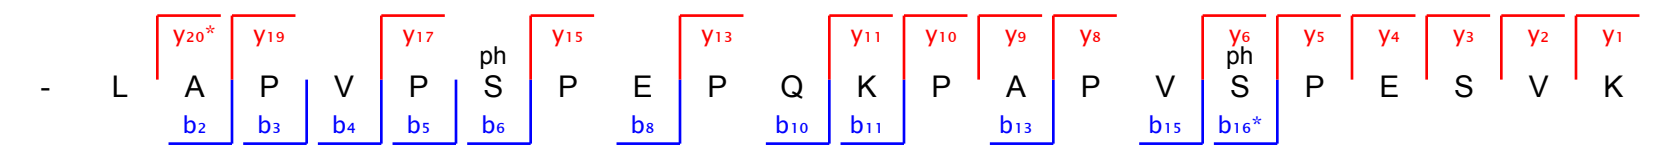

Raw file: 20150814\_A375SR\_Phospho\_BR2\_03  
 Scan: 14924 Method: FTMS; HCD Score: 104.6 m/z: 749.32 Gene names: ZMYM4

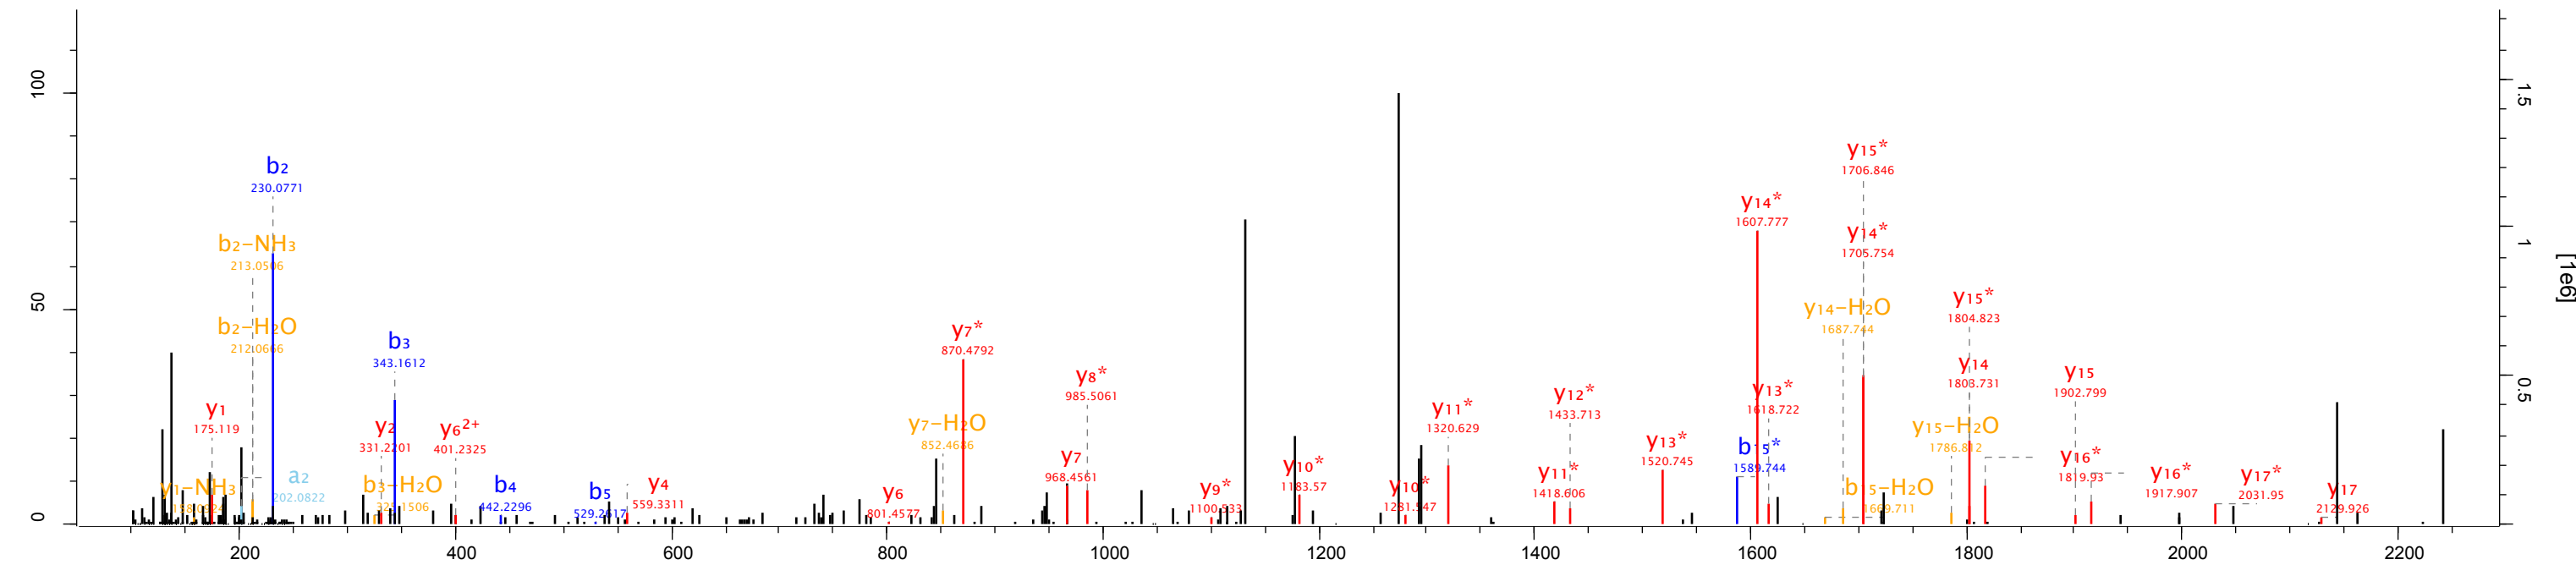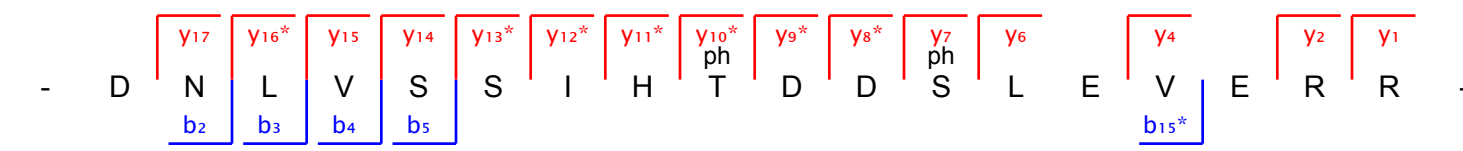

Raw file 20150814\_A375SR\_Phospho\_BR2\_03 Scan 15014 Method FTMS; HCD Score 115.96 m/z 708.32 Gene names ARID1A

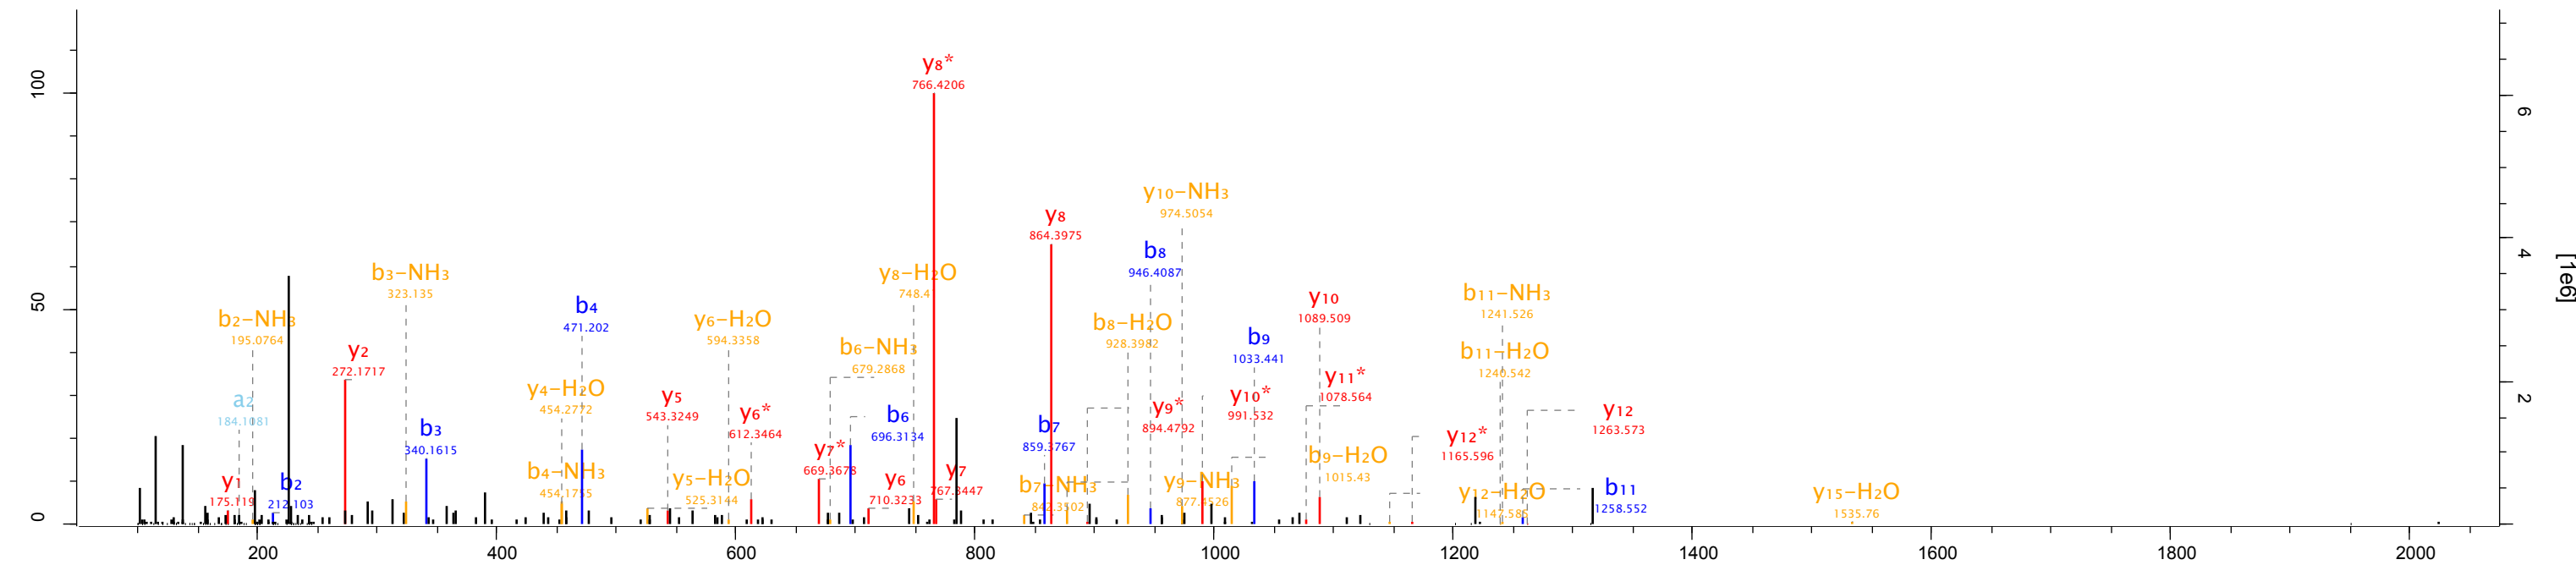

- N P Q M P Q Y S S P Q P G S A L S P R -

Fragmentation sites are indicated by brackets below the sequence:

- Blue brackets: b2 (P-Q), b3 (Q-M), b4 (M-P), b6 (Q-Y), b7 (Y-S), b8 (S-S), b9 (S-P), b11 (Q-P)
- Red brackets: y12 (S), y11\* (S), y10 (P), y9\* (Q), y8 (P), y7 (G), y6-ph (S), y5 (A), y2 (P), y1 (R)

Raw file Scan Method Score m/z Gene names  
 20150814\_A375SR\_Phospho\_BR2\_03 15044 FTMS; HCD 157.42 726.31 GPR56

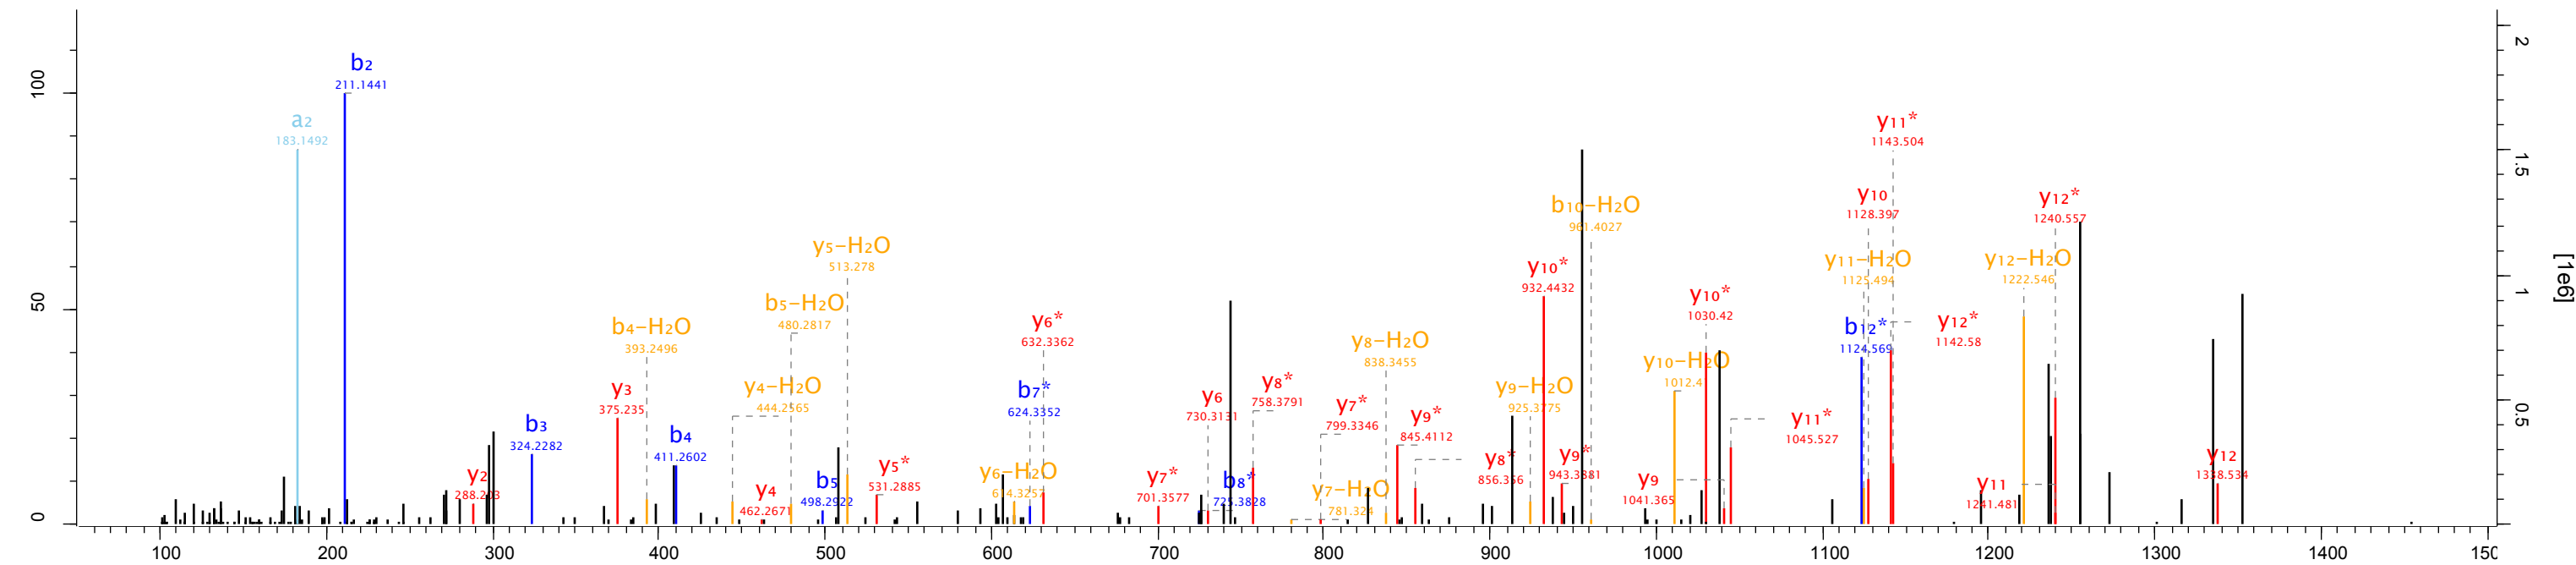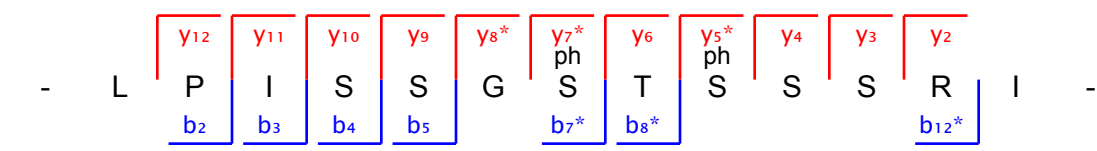

Raw file Scan Method Score m/z Gene names  
 20150814\_A375SR\_Phospho\_BR2\_03 15124 FTMS; HCD 403.83 1253.04 ZC3H4

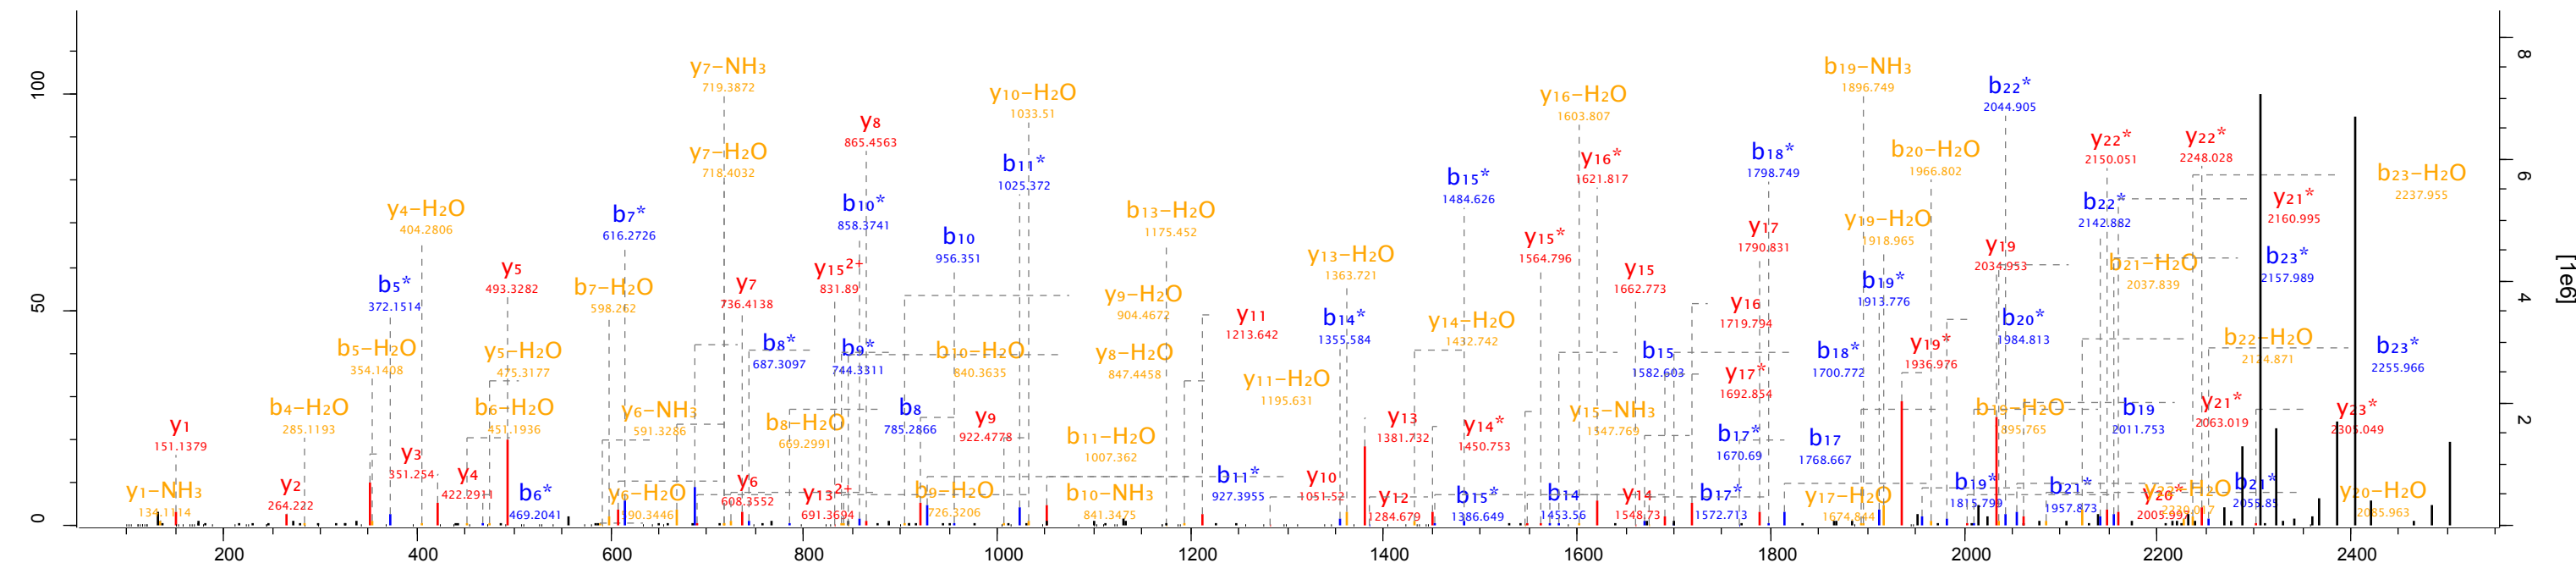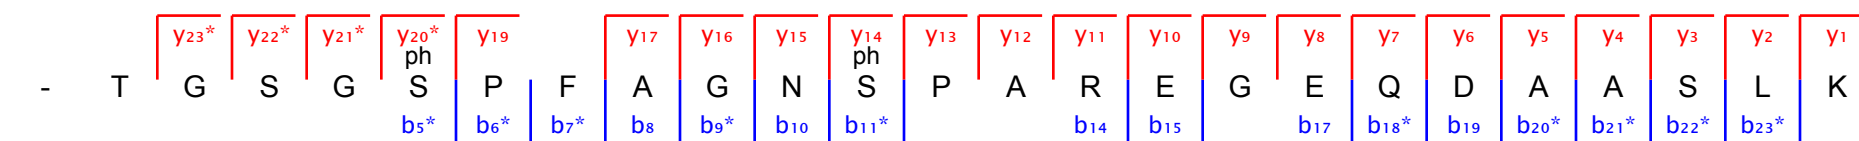

Raw file 20150814\_A375SR\_Phospho\_BR2\_03 Scan 15214 Method FTMS; HCD Score 60.53 m/z 647.04 Gene names ARFGEF2

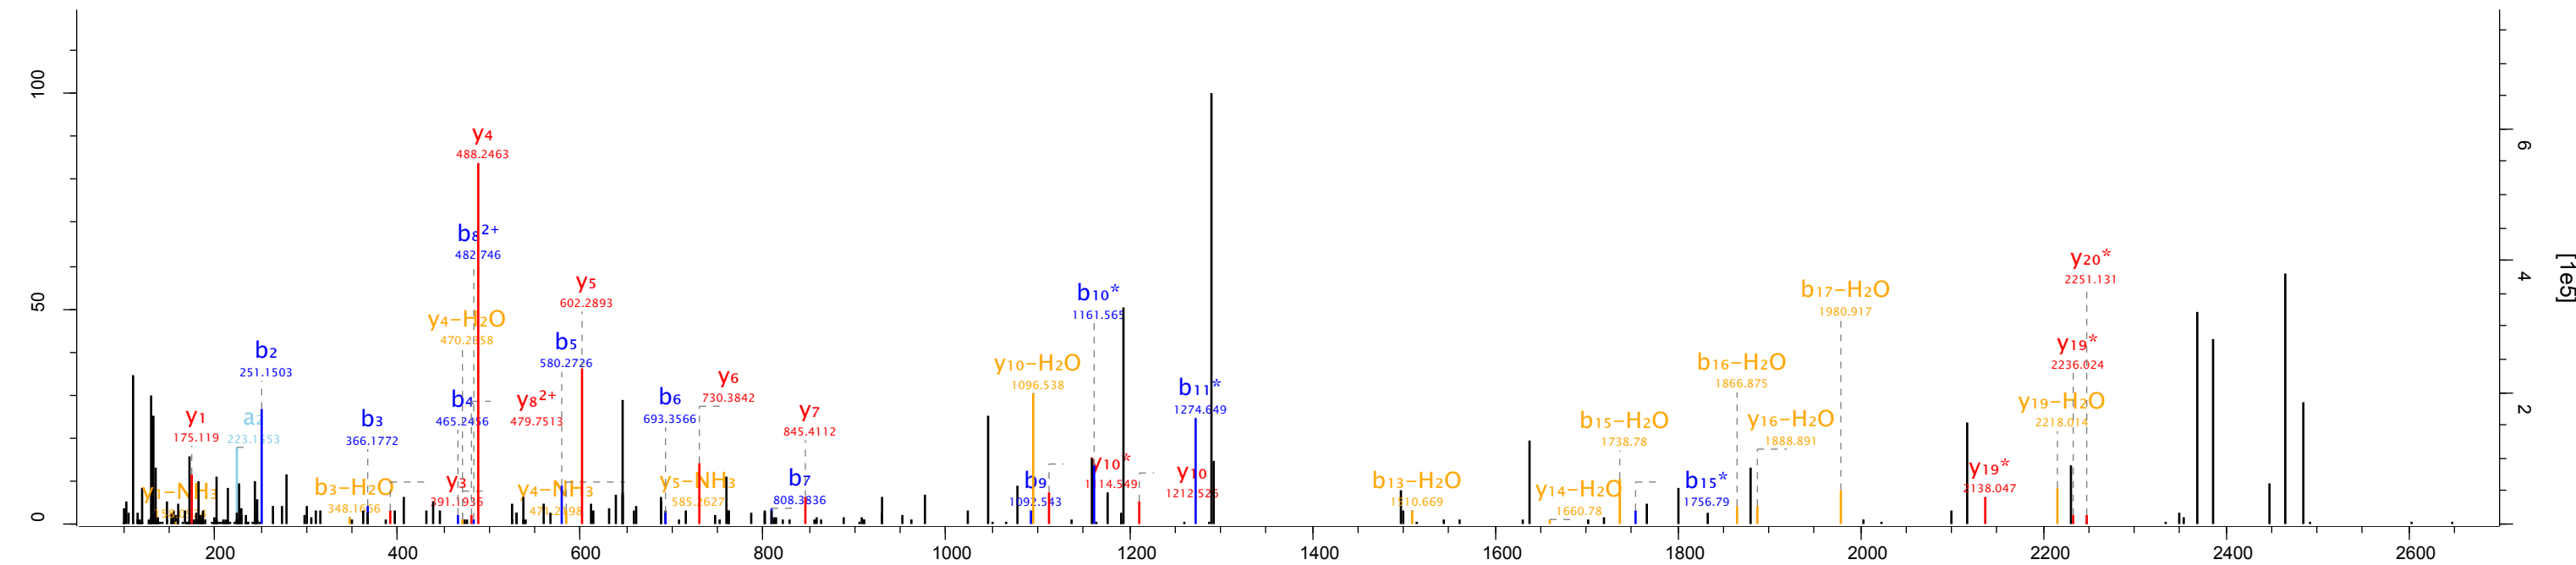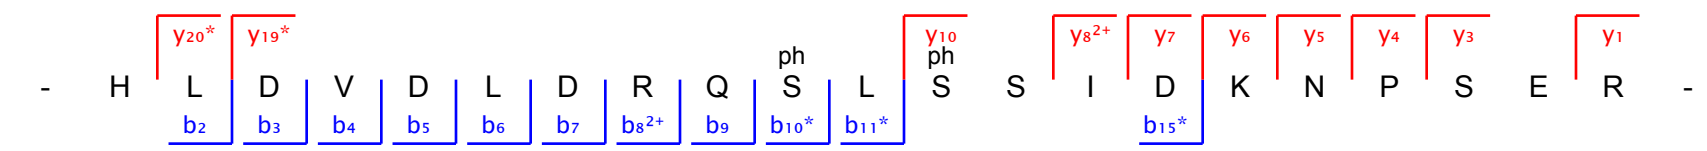

Raw file 20150814\_A375SR\_Phospho\_BR2\_03 Scan 15414 Method FTMS; HCD Score 162.26 m/z 650.3 Gene names TFDP2

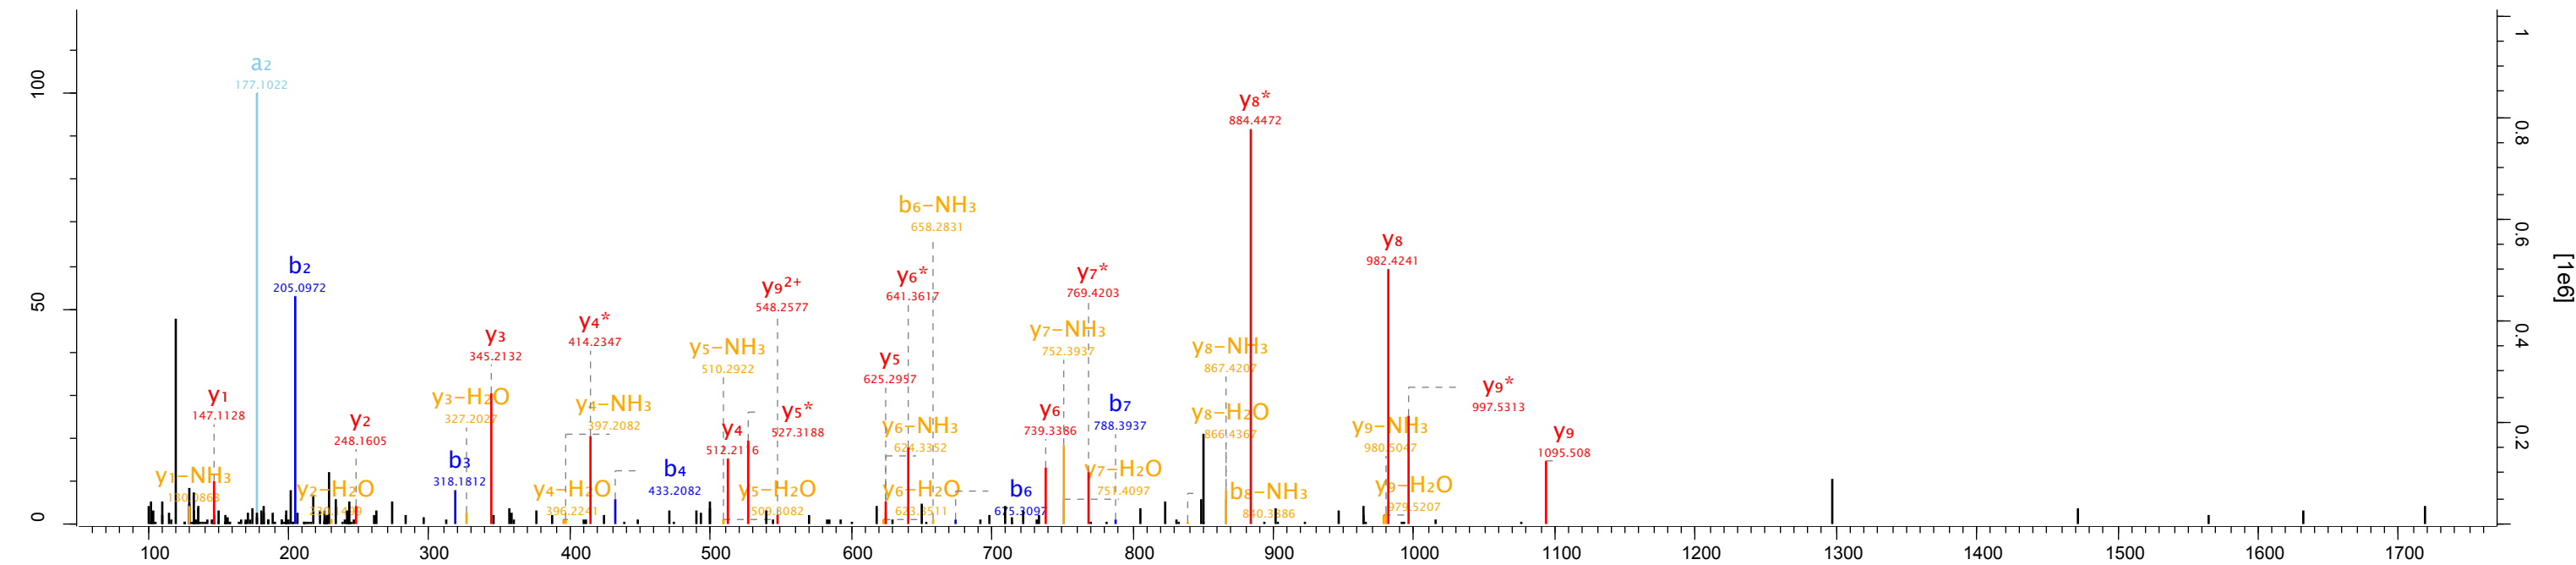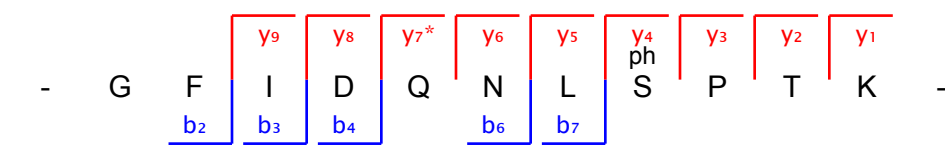



Raw file 20150814\_A375SR\_Phospho\_BR2\_03 Scan 15444 Method FTMS; HCD Score 78.12 m/z 976.39 Gene names ZFC3H1

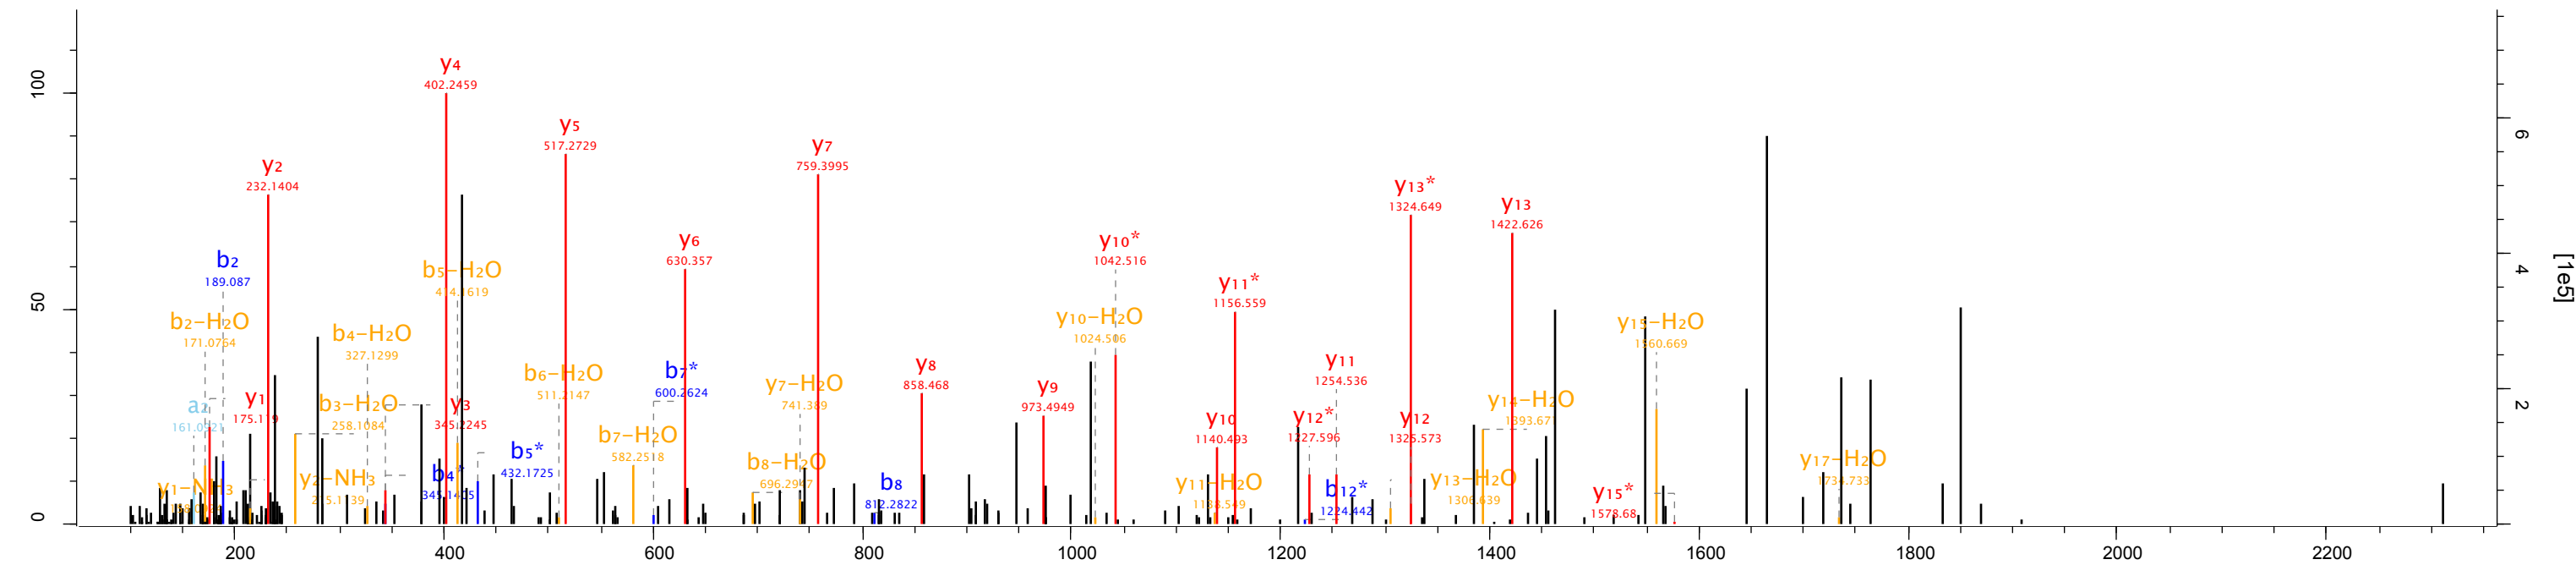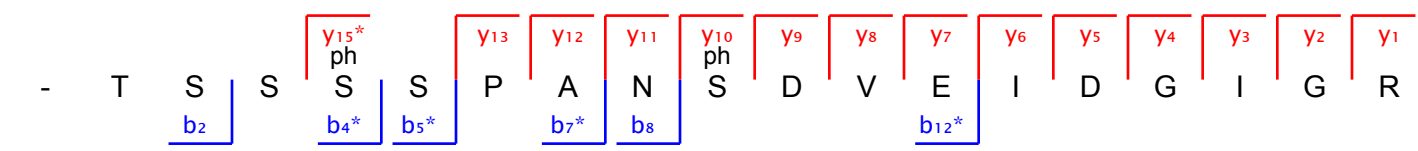

Raw file: 20150814\_A375SR\_Phospho\_BR2\_03  
 Scan: 15474 Method: FTMS; HCD Score: 73.88 m/z: 630.31 Gene names: MYO18A

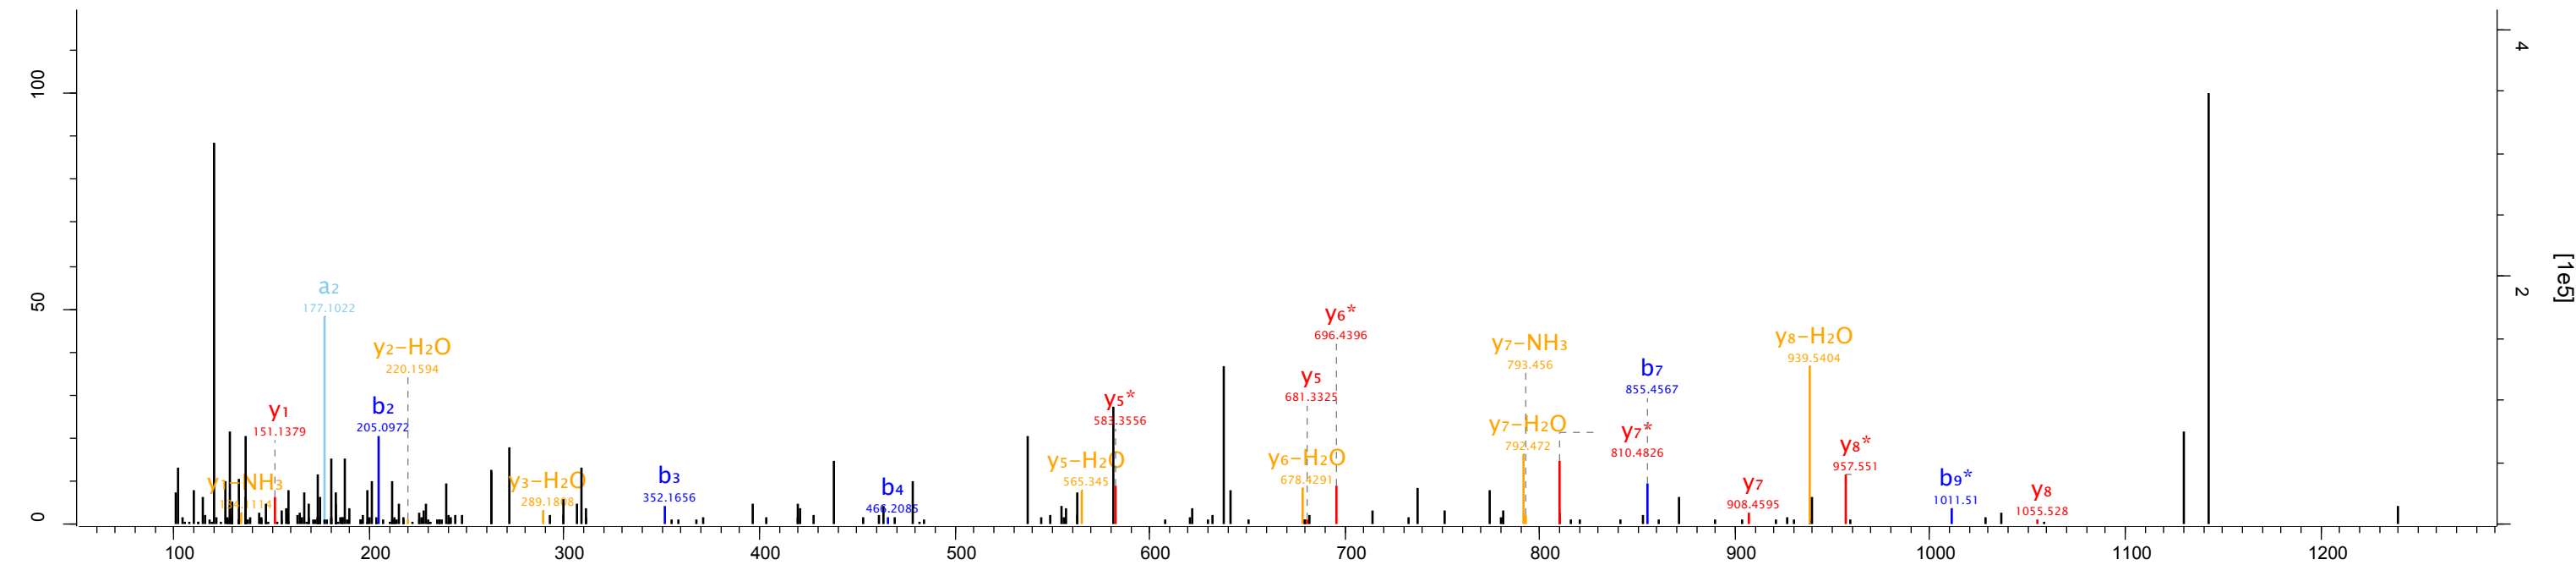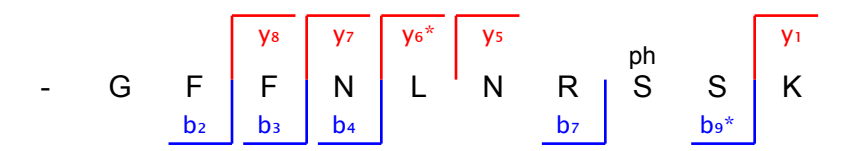

Raw file: 20150814\_A375SR\_Phospho\_BR2\_03  
 Scan: 15654 Method: FTMS; HCD Score: 145.34 m/z: 1186.88 Gene names: RBMS2

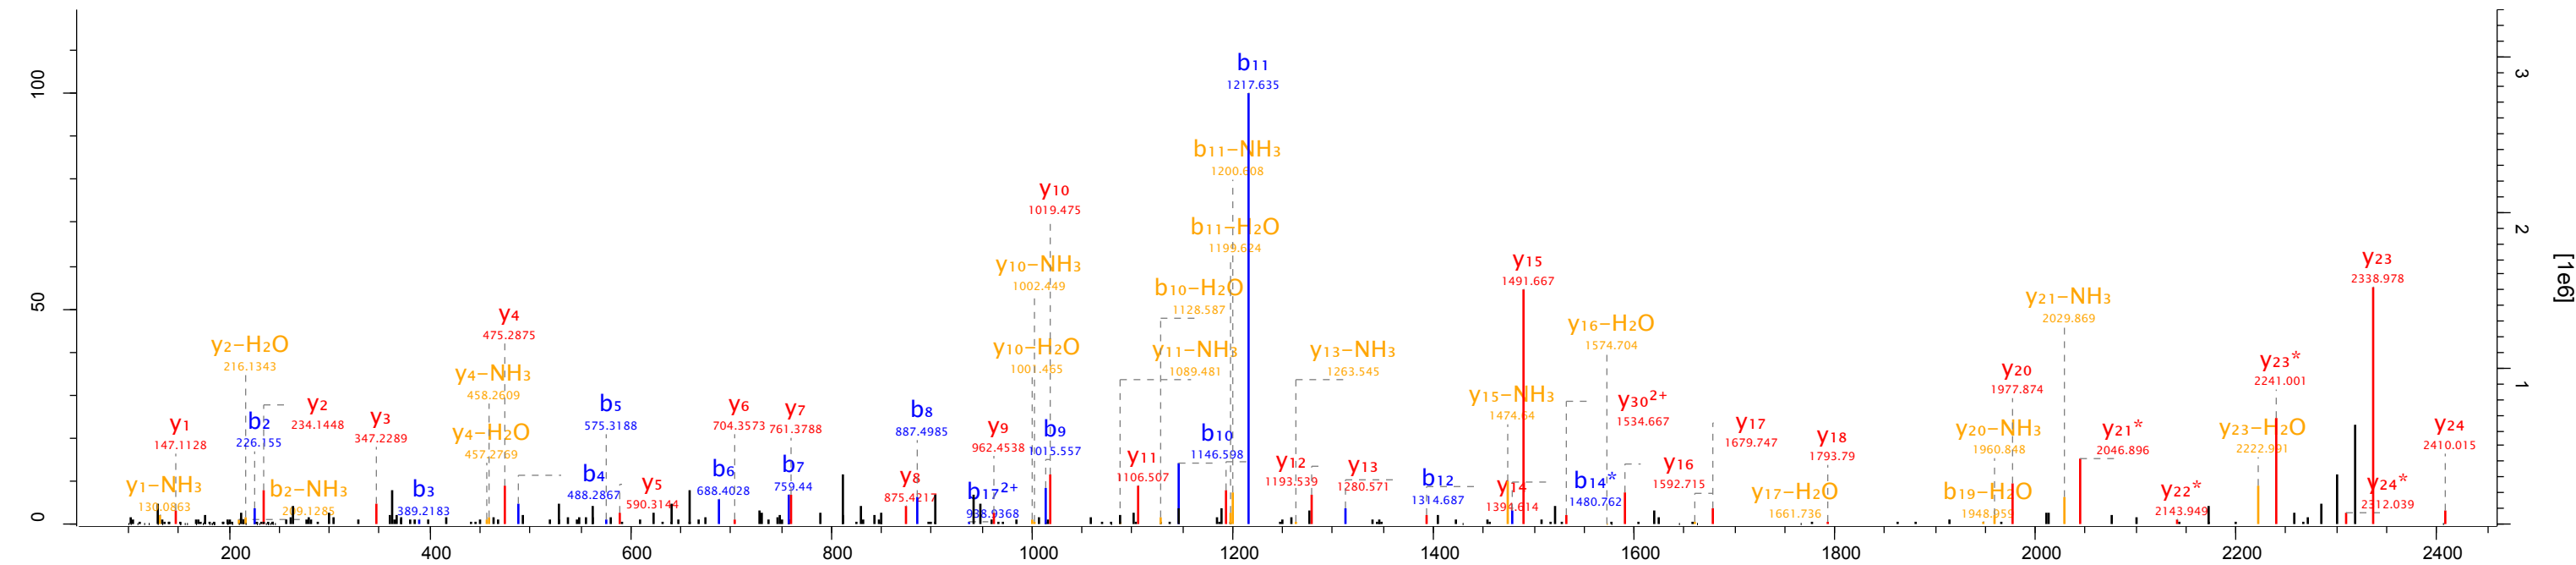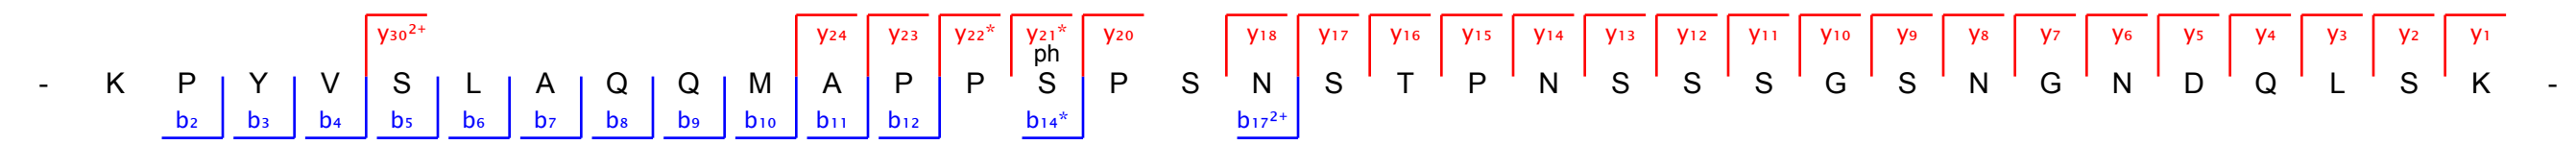

Raw file: 20150814\_A375SR\_Phospho\_BR2\_03  
 Scan: 15724 Method: FTMS; HCD Score: 263.59 m/z: 1184.98 Gene names: NOP58

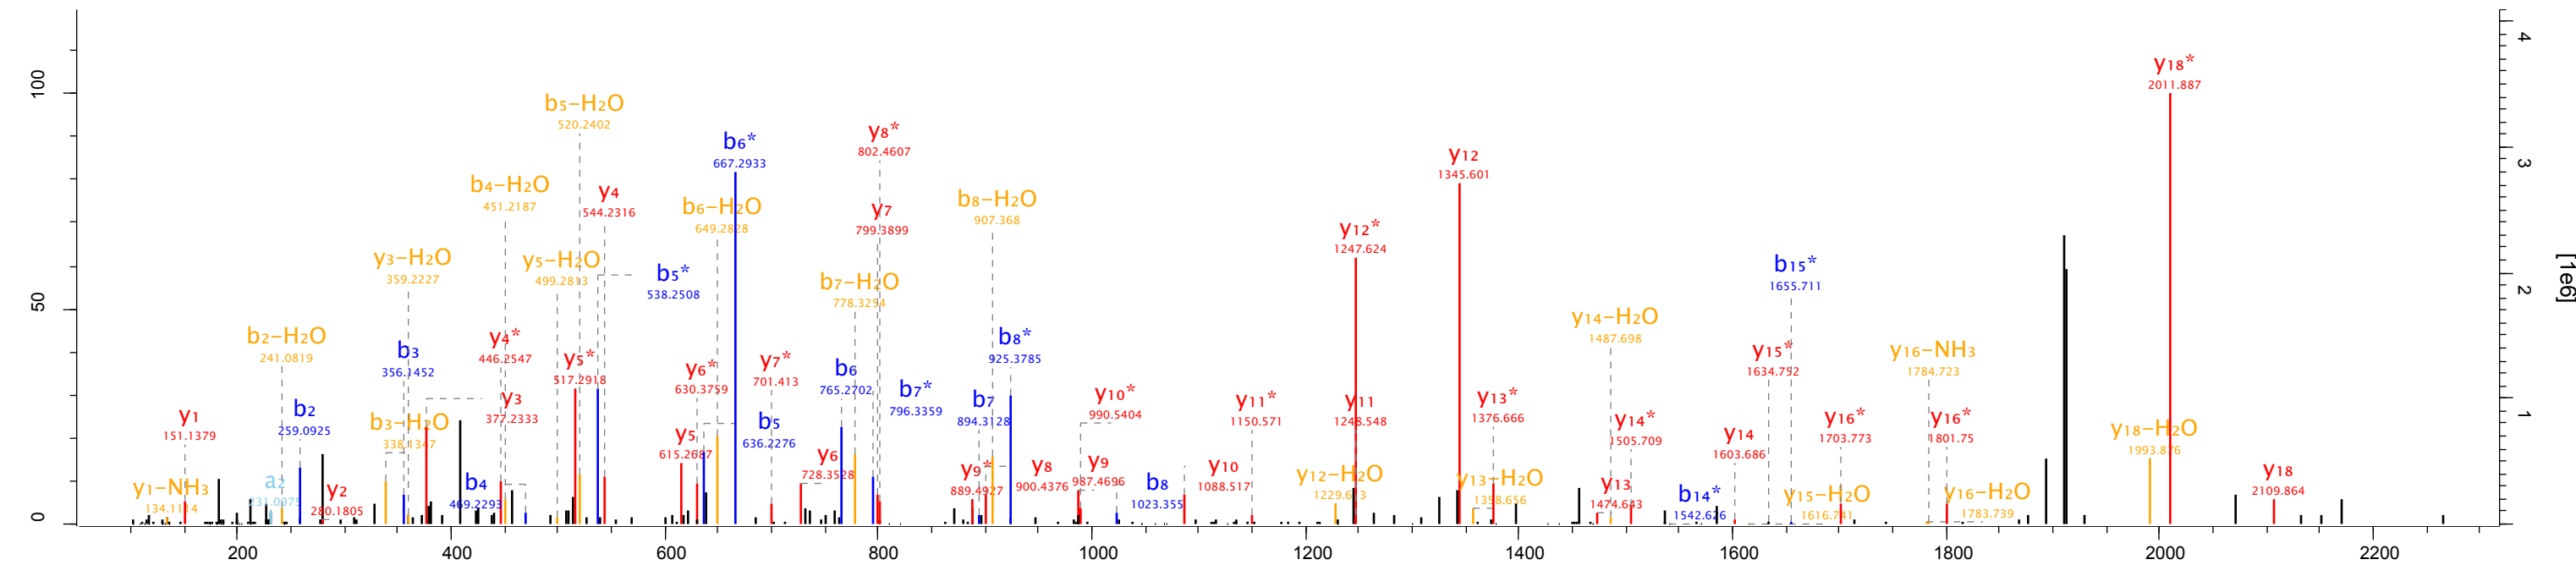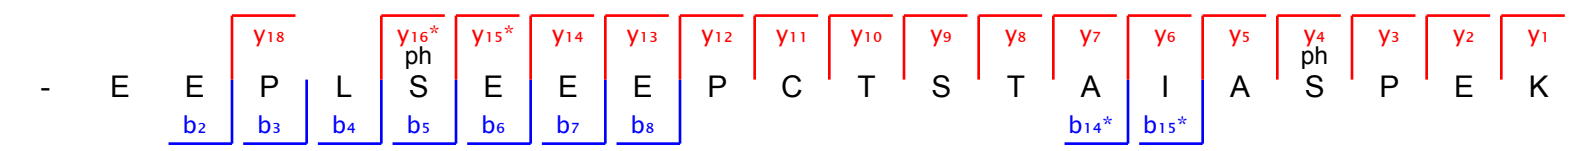

Raw file: 20150814\_A375SR\_Phospho\_BR2\_03  
 Scan: 16004 Method: FTMS; HCD Score: 133.28 m/z: 697.8 Gene names: PLEKHA4

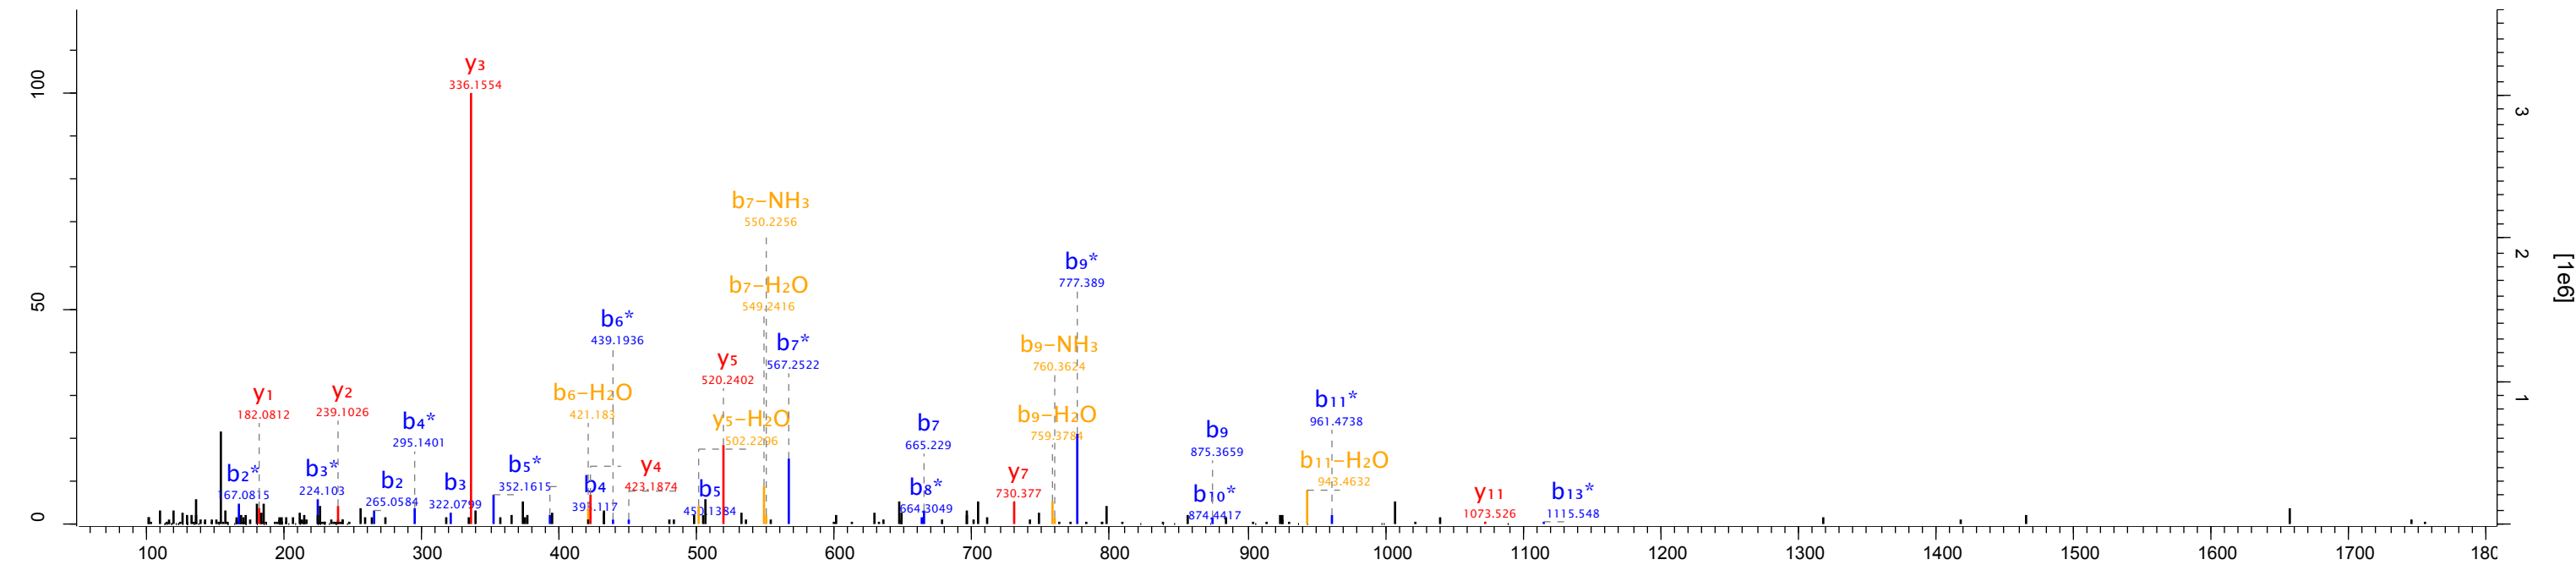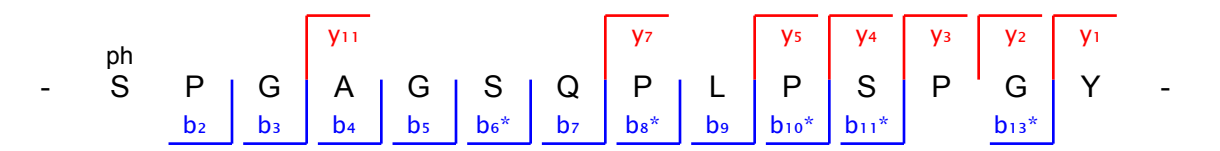

Raw file 20150814\_A375SR\_Phospho\_BR2\_03 Scan 16164 Method FTMS; HCD Score 198.55 m/z 740.7 Gene names CARHSP1

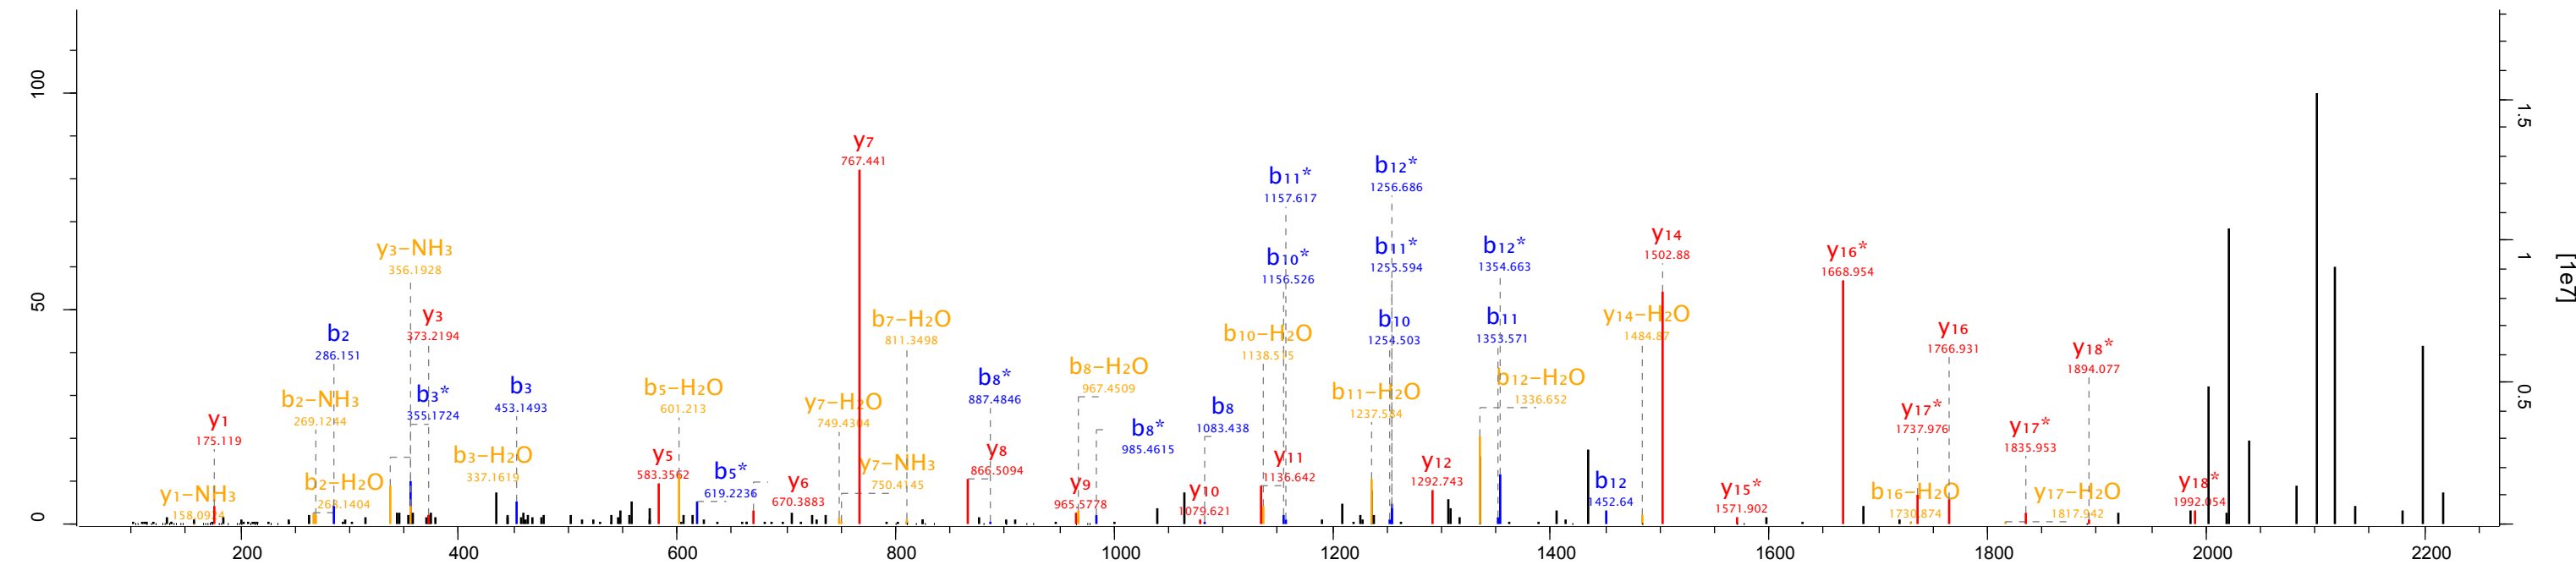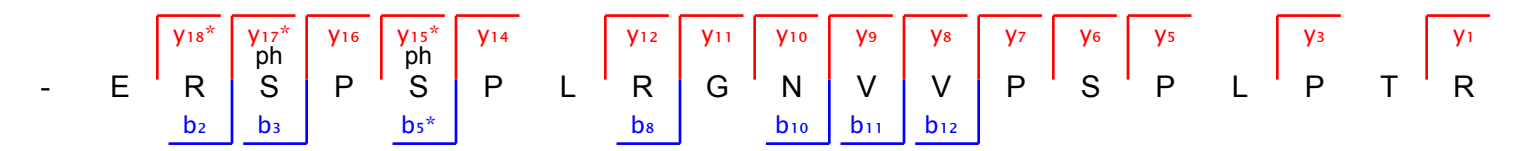

Raw file: 20150814\_A375SR\_Phospho\_BR2\_03  
 Scan: 16314 Method: FTMS; HCD Score: 63.27 m/z: 1012.41 Gene names: PWP1

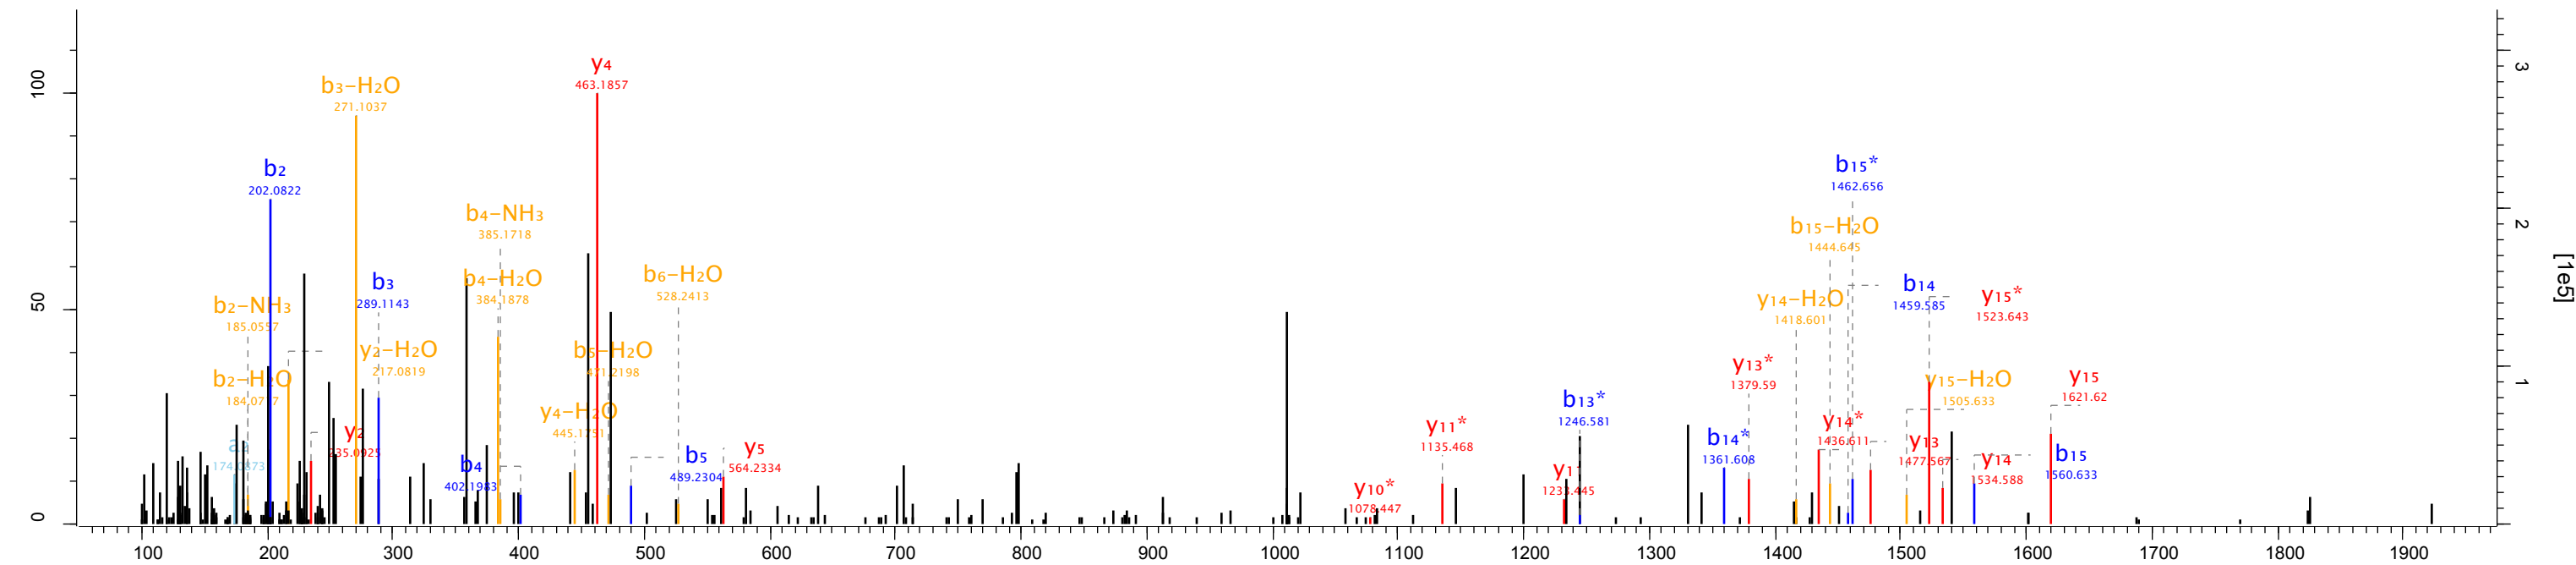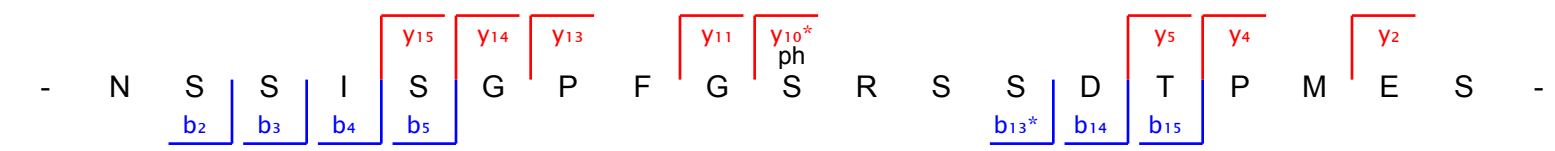

Raw file: 20150814\_A375SR\_Phospho\_BR2\_03  
 Scan: 16404 Method: FTMS; HCD Score: 129.88 m/z: 532.22 Gene names: REEP4

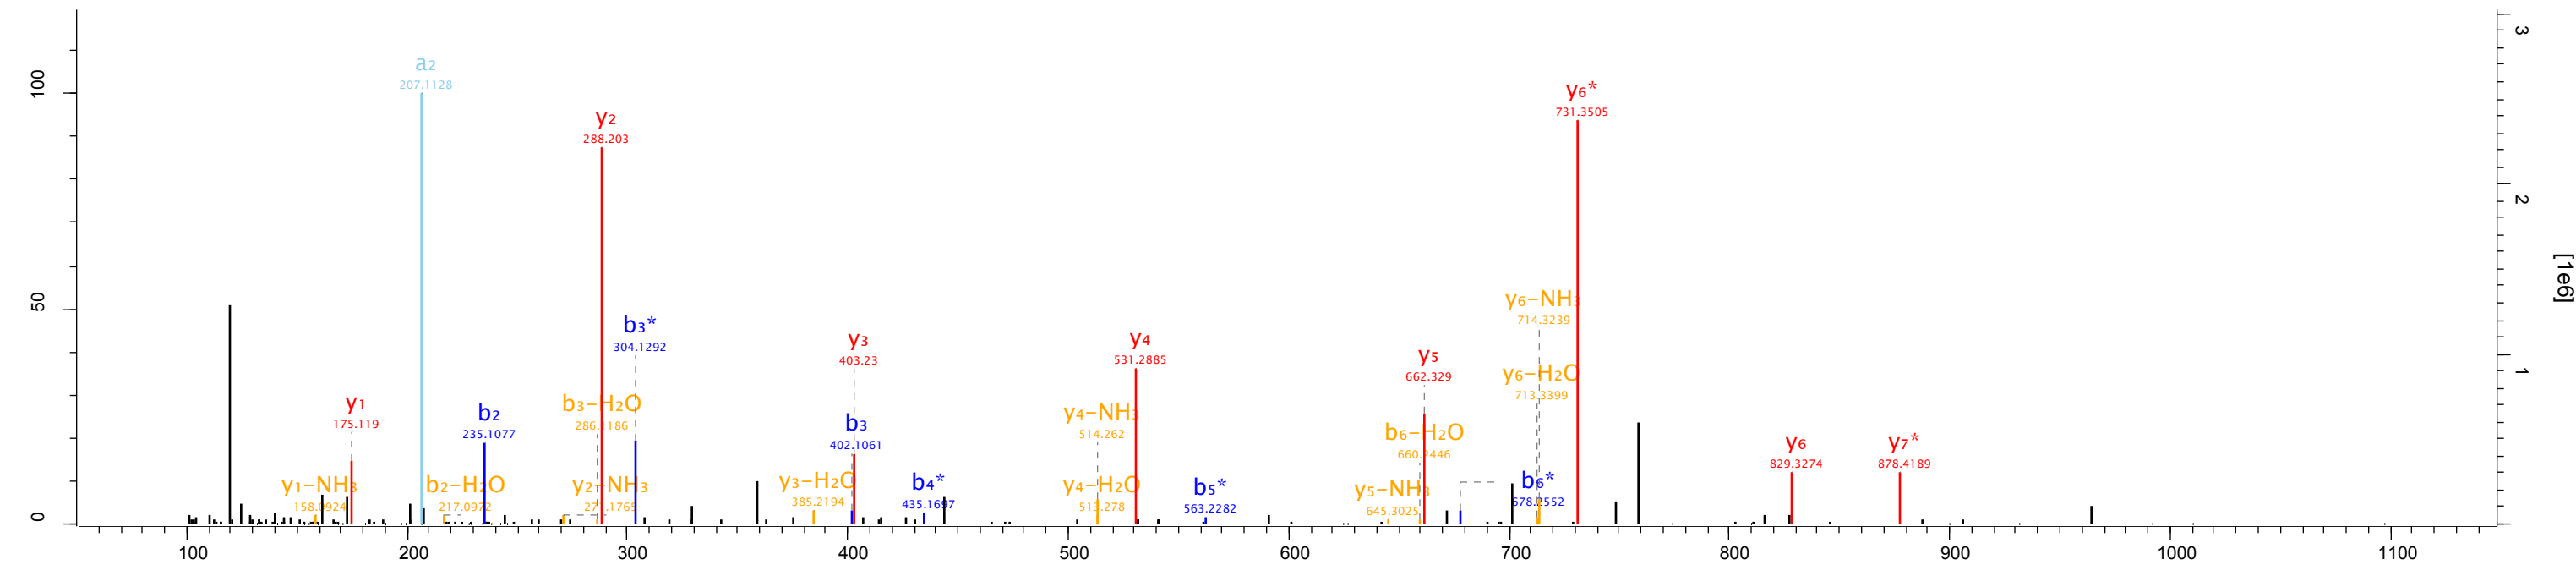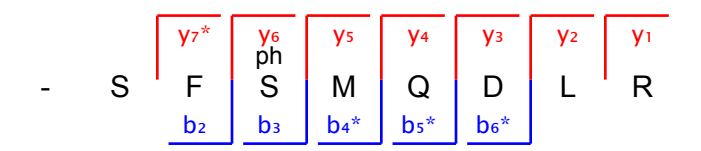



Raw file: 20150814\_A375SR\_Phospho\_BR2\_03  
 Scan: 16474 Method: FTMS; HCD Score: 128.08 m/z: 935.09 Gene names: SRRM2

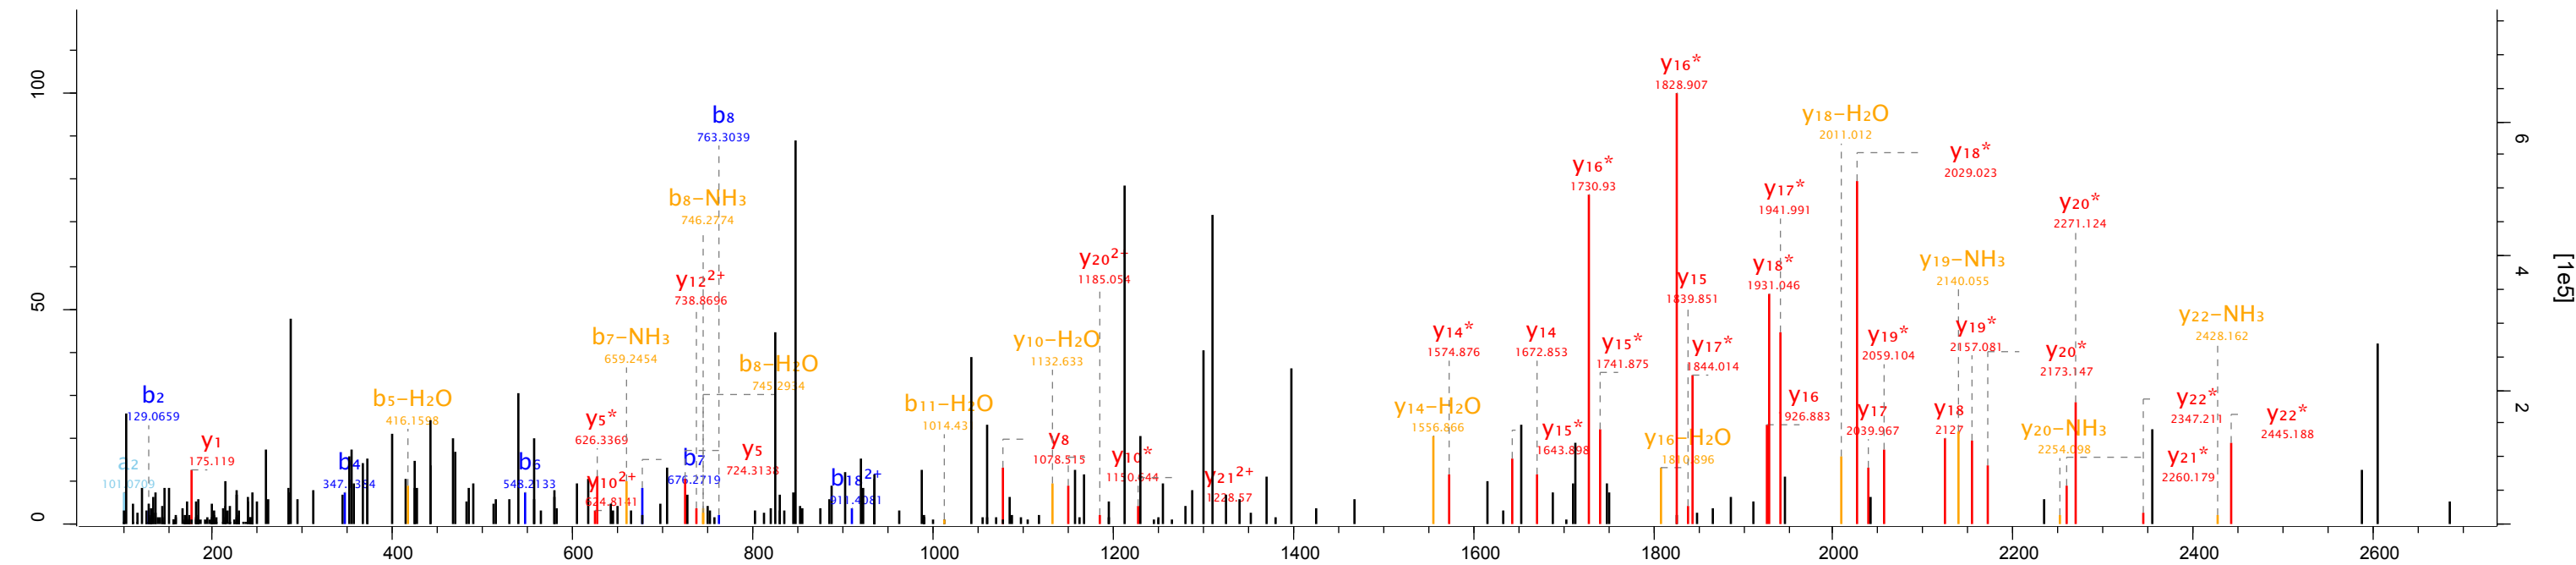

- A G M S S N Q S I S S P V L D A V P R T P S R E R -

Fragmentation labels (b and y ions) are shown below the sequence:

- b<sub>2</sub> (under G)
- b<sub>4</sub> (under S)
- b<sub>6</sub> (under N)
- b<sub>7</sub> (under Q)
- b<sub>8</sub> (under S)
- b<sub>18</sub><sup>2+</sup> (under P)
- y<sub>1</sub> (under R)
- y<sub>5</sub> (under P)
- y<sub>8</sub> (under P)
- y<sub>10</sub><sup>\*</sup> (under A)
- y<sub>12</sub><sup>2+</sup> (under L)
- y<sub>14</sub> (under P)
- y<sub>15</sub> (under S)
- y<sub>16</sub> (under S)
- y<sub>17</sub> (under I)
- y<sub>18</sub> (under S)
- y<sub>19</sub><sup>\*</sup> (under Q)
- y<sub>20</sub><sup>\*</sup> (under N)
- y<sub>21</sub><sup>\*</sup> (under S)
- y<sub>22</sub><sup>\*</sup> (under S)

Raw file: 20150814\_A375SR\_Phospho\_BR2\_03  
 Scan: 16694 Method: FTMS; HCD Score: 91.36 m/z: 679.33 Gene names: GTF2I

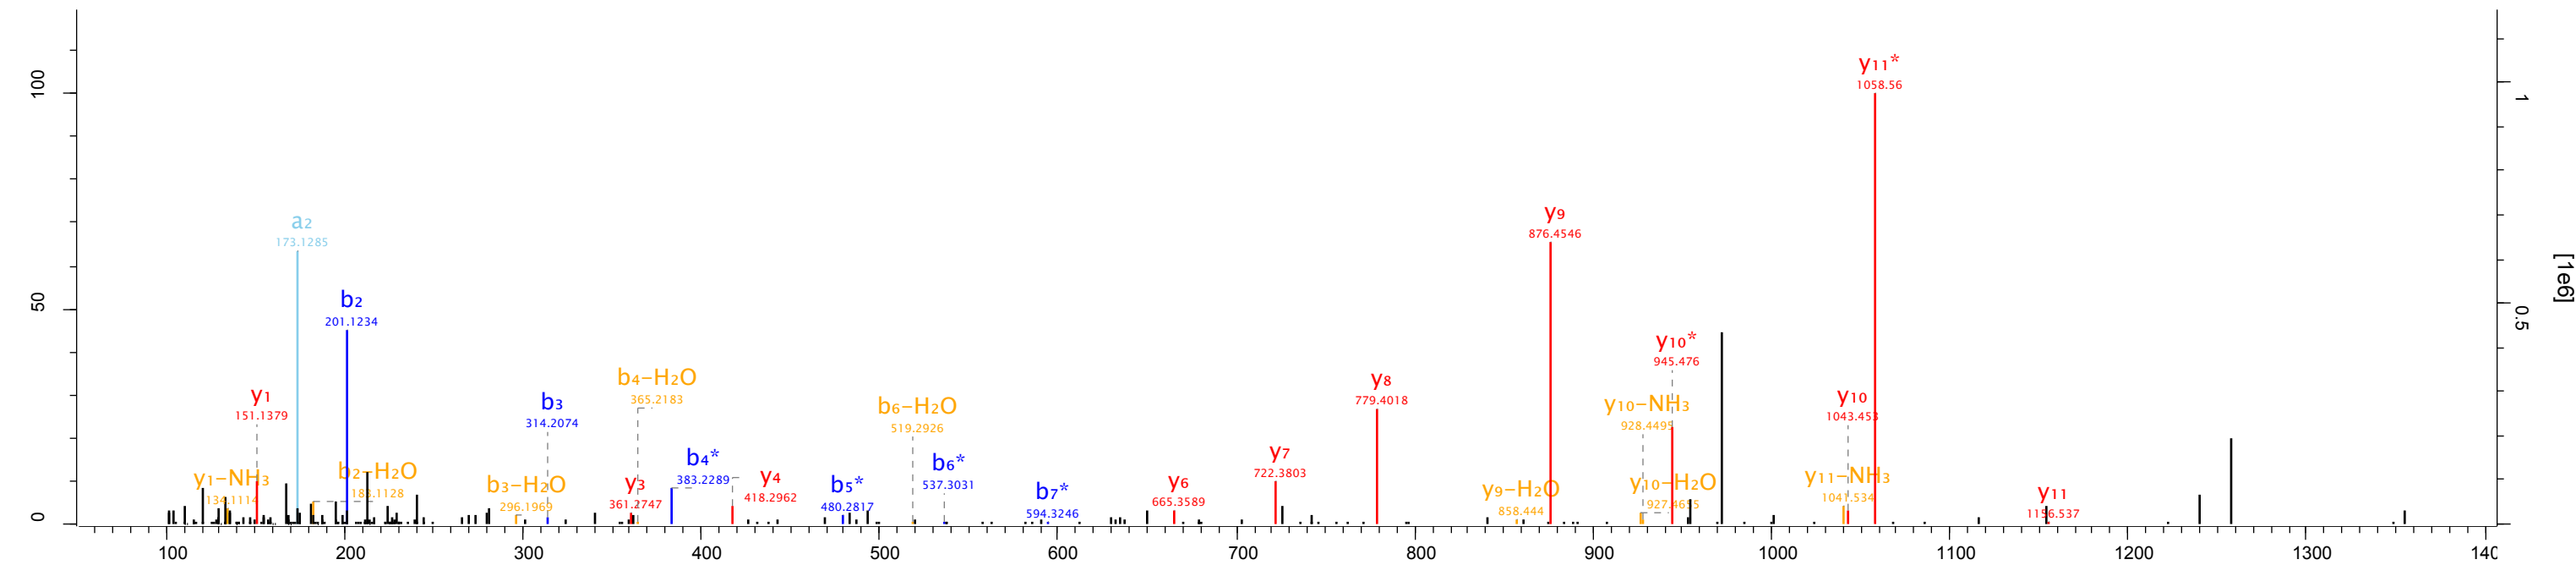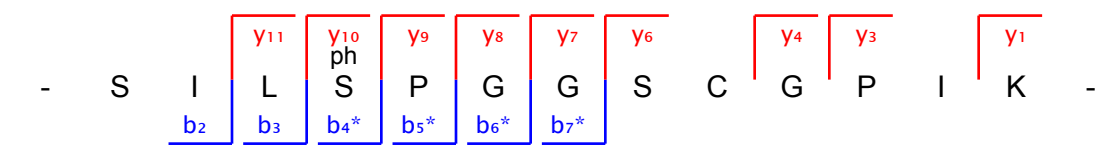

Raw file 20150814\_A375SR\_Phospho\_BR2\_03 Scan 16804 Method FTMS; HCD Score 114.63 m/z 695.28 Gene names ZNF106

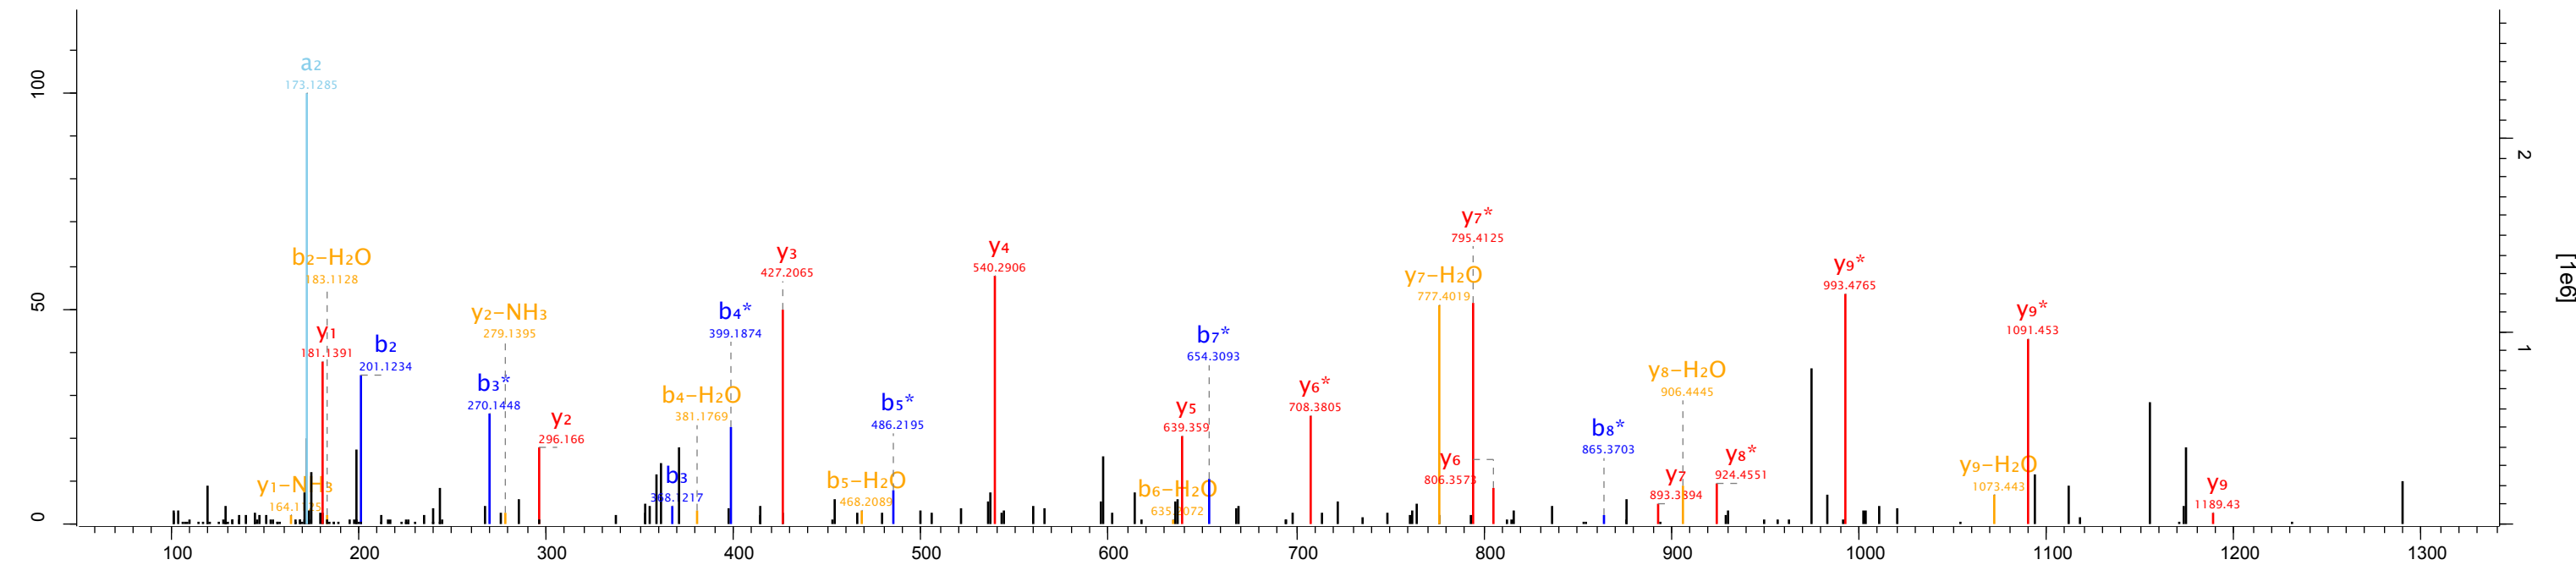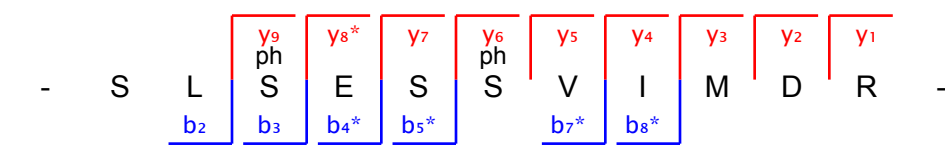

Raw file 20150814\_A375SR\_Phospho\_BR2\_03 Scan 16834 Method FTMS; HCD Score 142.48 m/z 870.9 Gene names CHAF1A

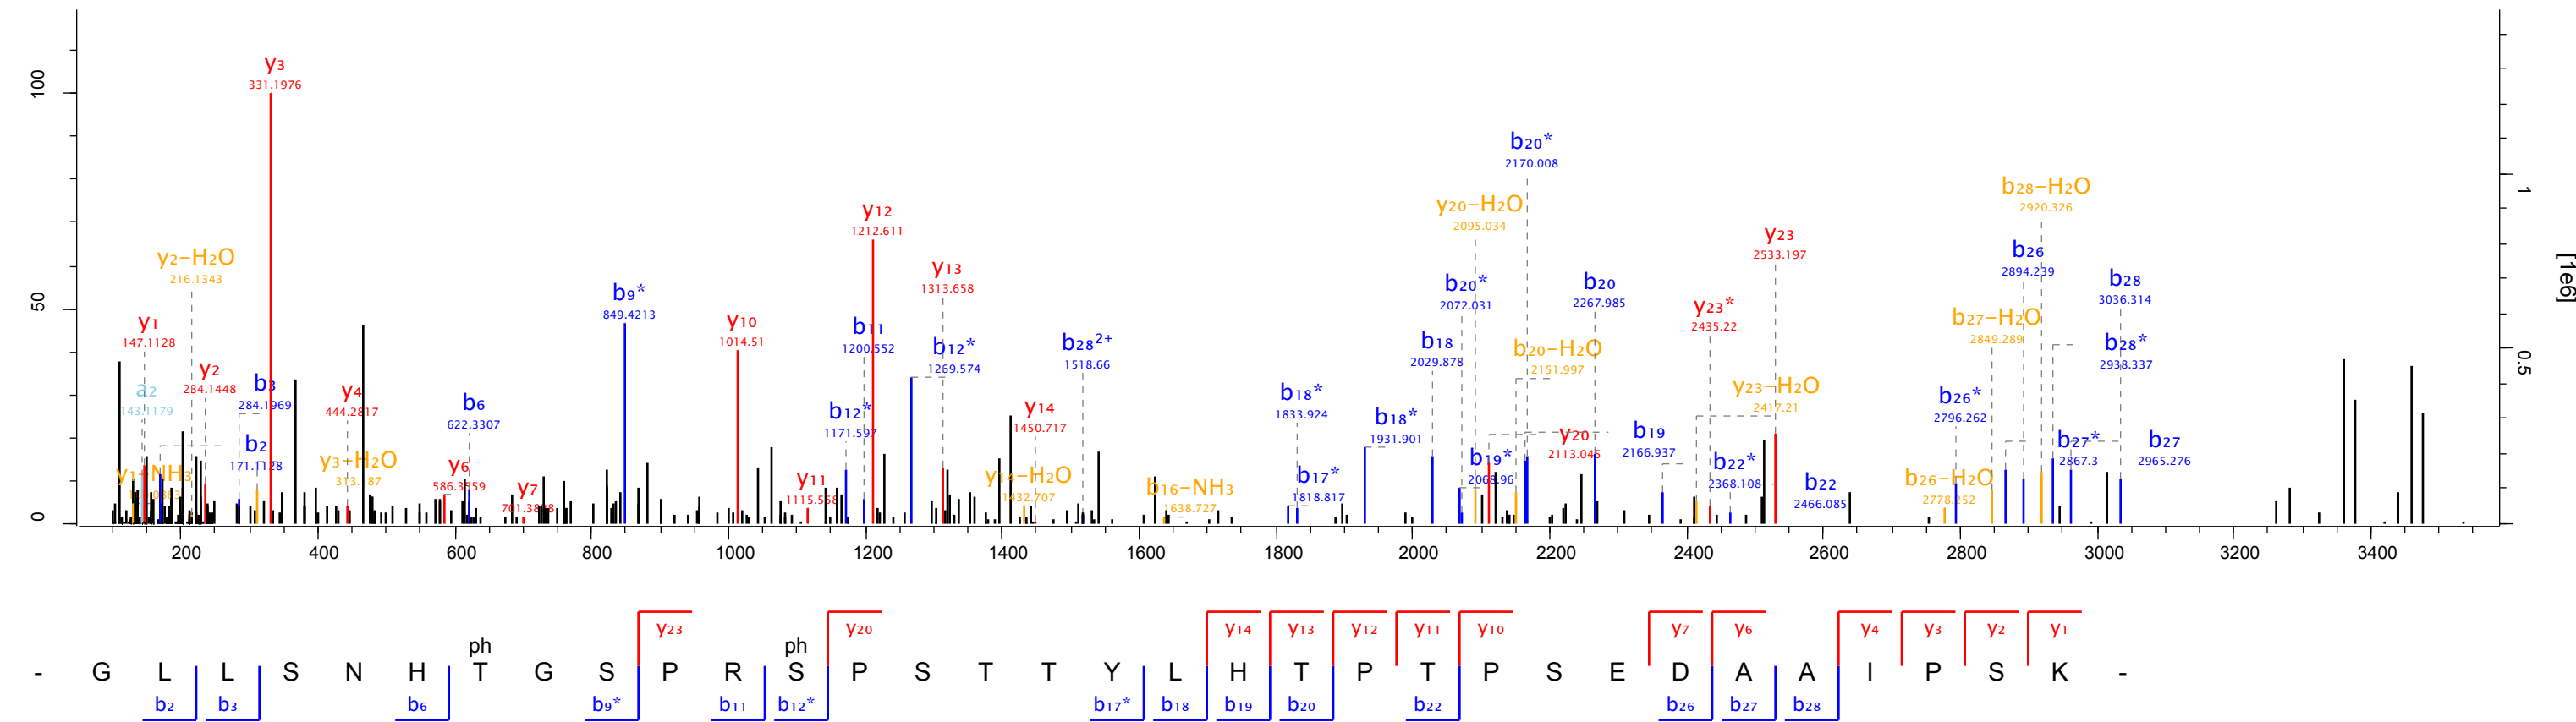

Raw file: 20150814\_A375SR\_Phospho\_BR2\_03  
 Scan: 16884 Method: FTMS; HCD Score: 208.72 m/z: 984.91 Gene names: MAPK6

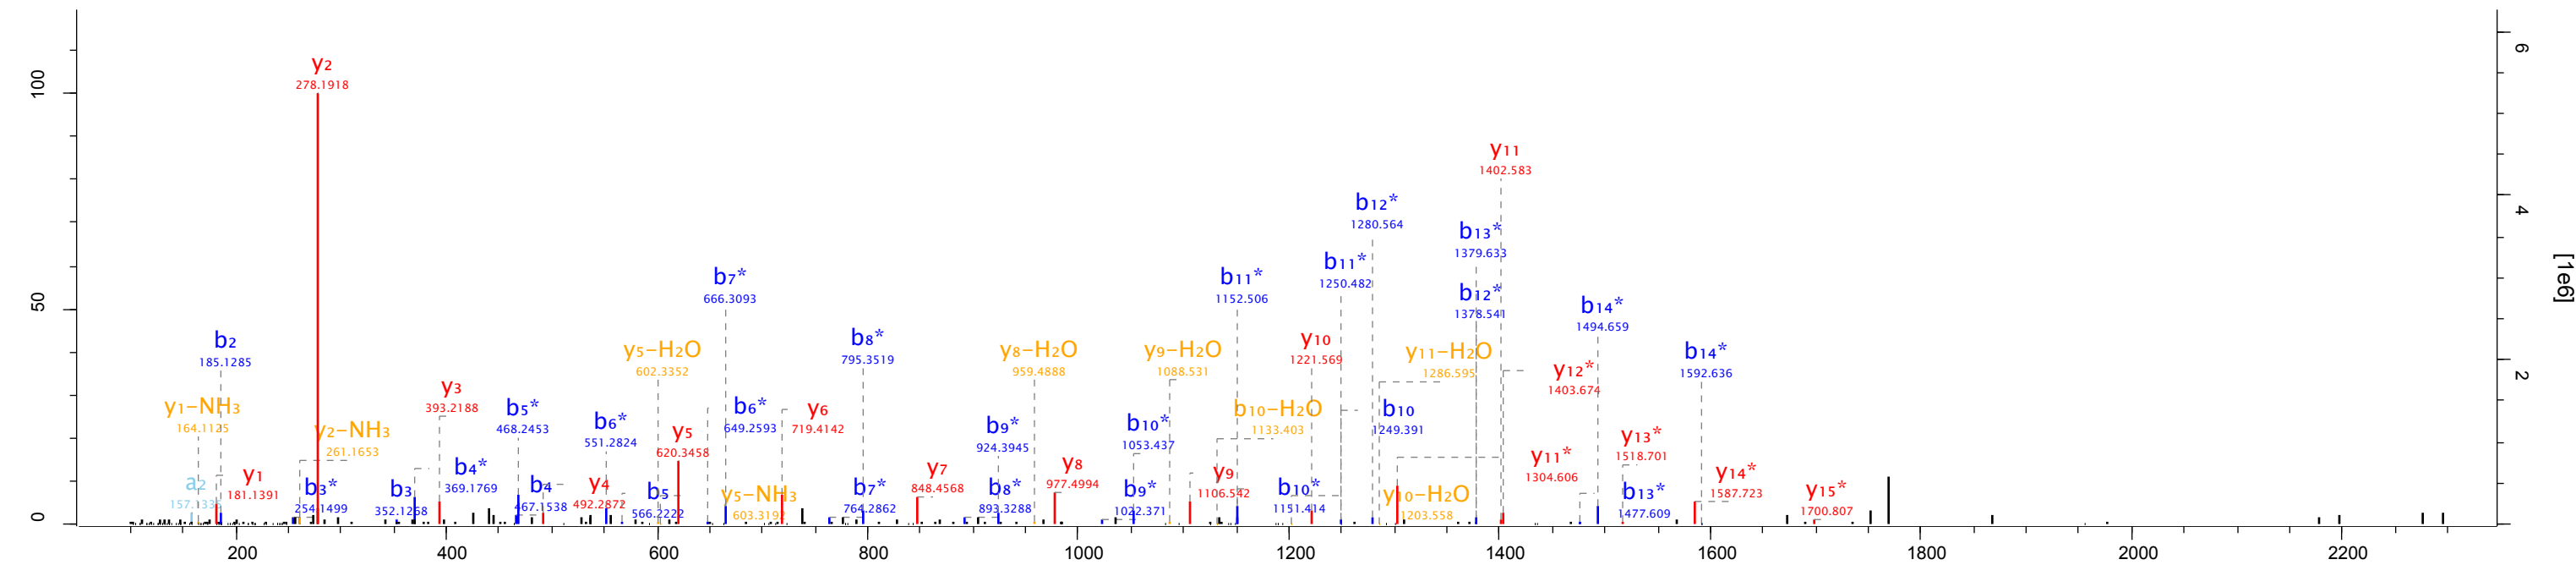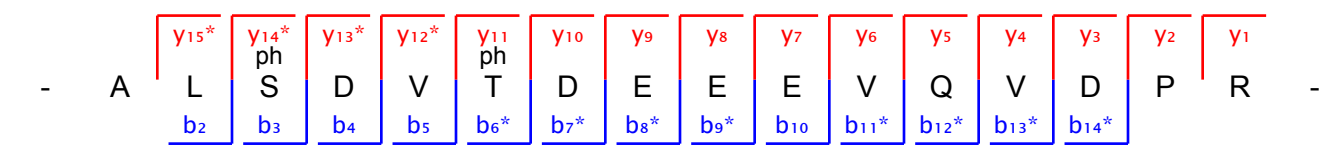

Raw file 20150814\_A375SR\_Phospho\_BR2\_03 Scan 16934 Method FTMS; HCD Score 238.64 m/z 1058.78 Gene names CEP170

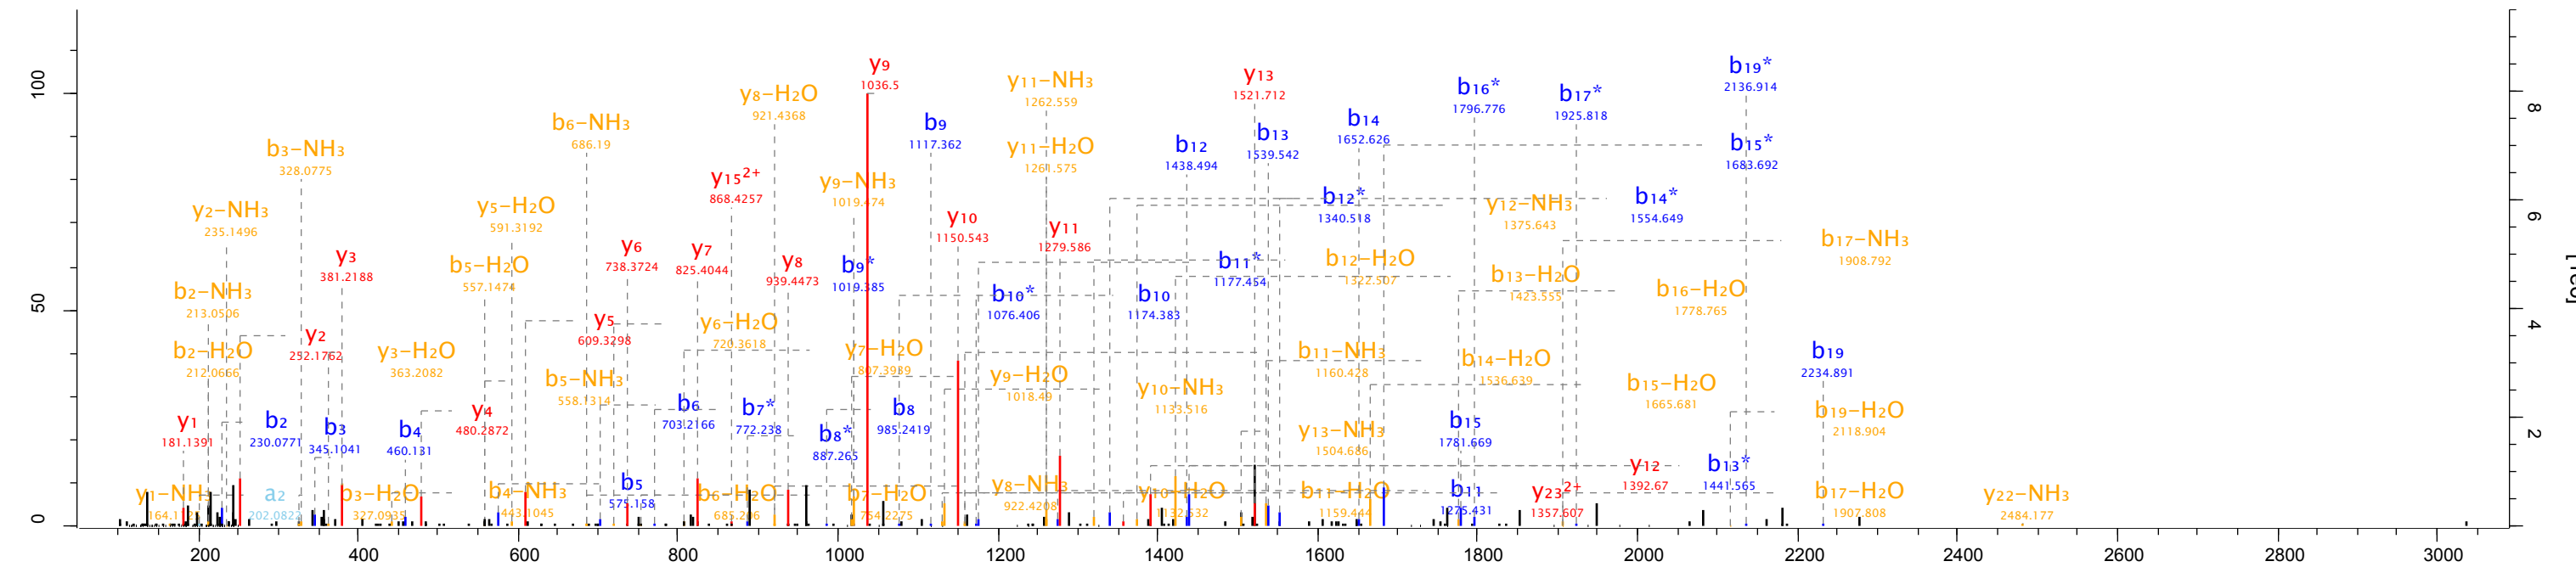

- D N D D **y<sub>23</sub><sup>2+</sup>** D Q S ph D K G T Y **y<sub>15</sub><sup>2+</sup>** T I **y<sub>13</sub>** **y<sub>12</sub>** **y<sub>11</sub>** **y<sub>10</sub>** **y<sub>9</sub>** **y<sub>8</sub>** **y<sub>7</sub>** **y<sub>6</sub>** **y<sub>5</sub>** **y<sub>4</sub>** **y<sub>3</sub>** **y<sub>2</sub>** **y<sub>1</sub>** -  
**b<sub>2</sub>** **b<sub>3</sub>** **b<sub>4</sub>** **b<sub>5</sub>** **b<sub>6</sub>** **b<sub>7</sub><sup>\*</sup>** **b<sub>8</sub>** **b<sub>9</sub>** **b<sub>10</sub>** **b<sub>11</sub>** **b<sub>12</sub>** **b<sub>13</sub>** **b<sub>14</sub>** **b<sub>15</sub>** **b<sub>16</sub><sup>\*</sup>** **b<sub>17</sub><sup>\*</sup>** **b<sub>19</sub>**

Raw file Scan Method Score m/z Gene names  
 20150814\_A375SR\_Phospho\_BR2\_03 17014 FTMS; HCD 213.16 909.42 SPAG9

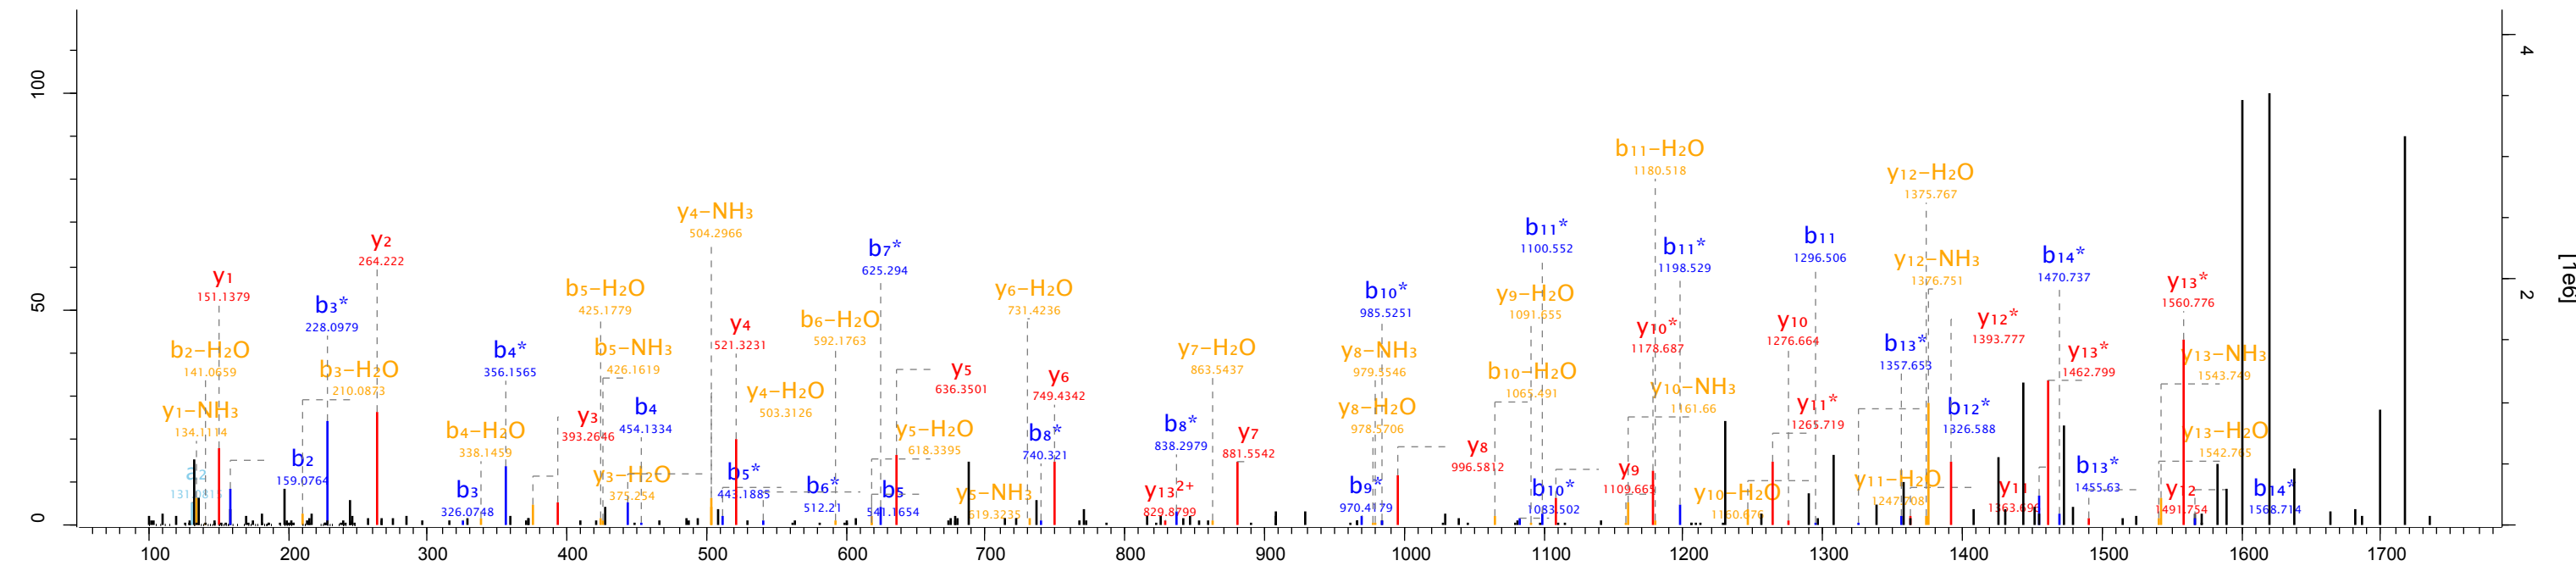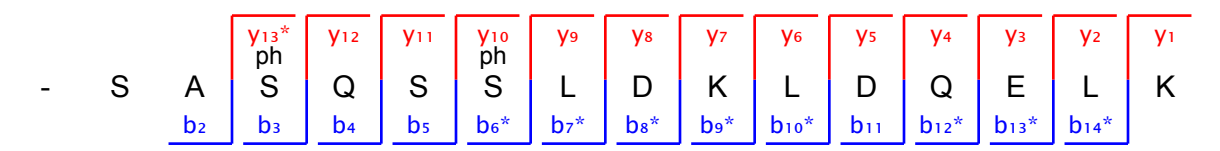

Raw file: 20150814\_A375SR\_Phospho\_BR2\_03  
 Scan: 17034 Method: FTMS; HCD Score: 90.69 m/z: 620.24 Gene names: ULK1

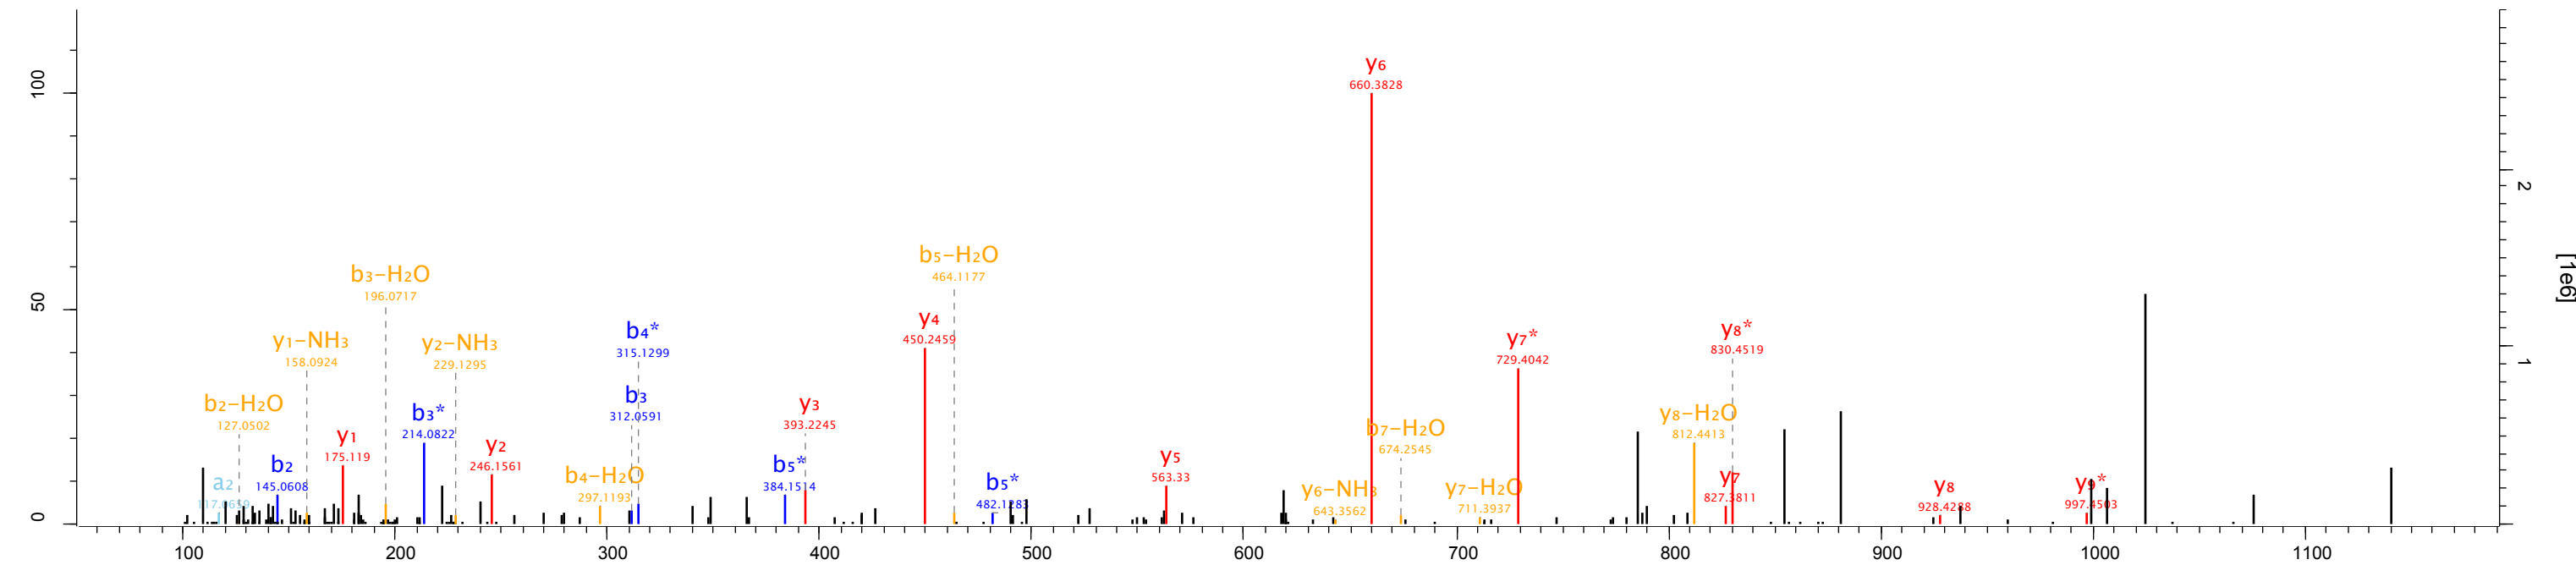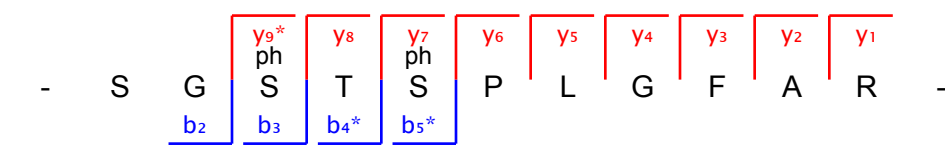



Raw file: 20150814\_A375SR\_Phospho\_BR2\_03  
 Scan: 17284 Method: FTMS; HCD Score: 161.59 m/z: 794.37 Gene names: NAB2

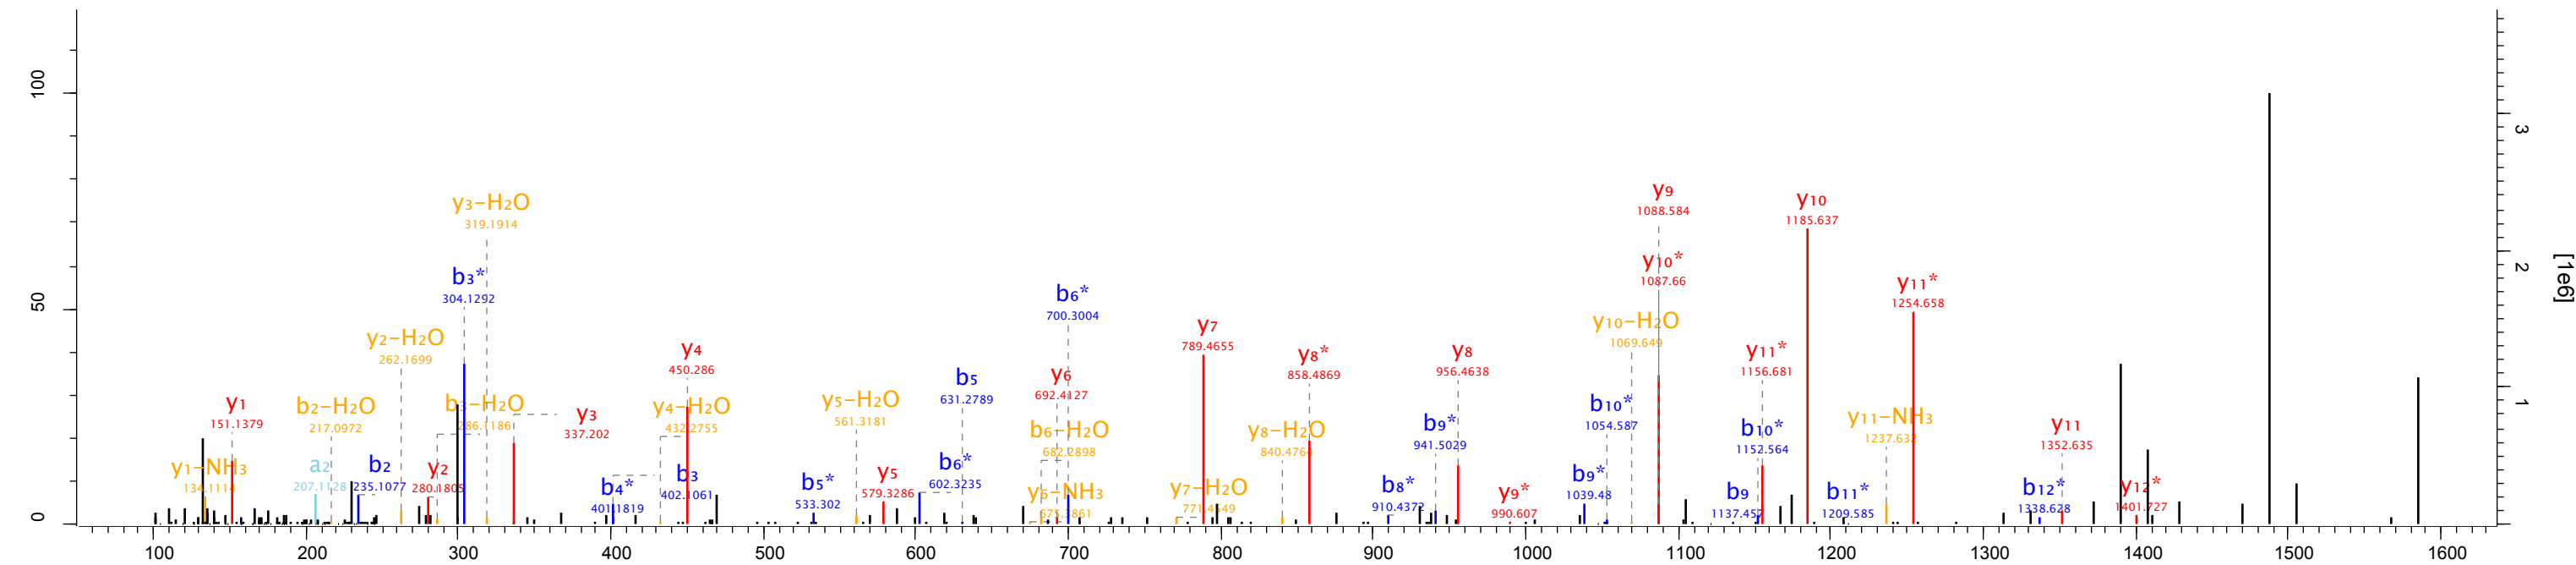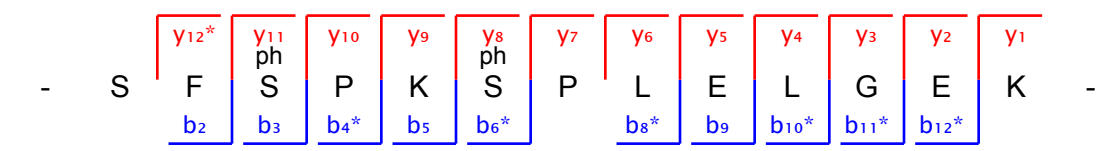

Raw file: 20150814\_A375SR\_Phospho\_BR2\_03  
 Scan: 17474 Method: FTMS; HCD Score: 79.66 m/z: 768.7 Gene names: RANBP2;RGPD3

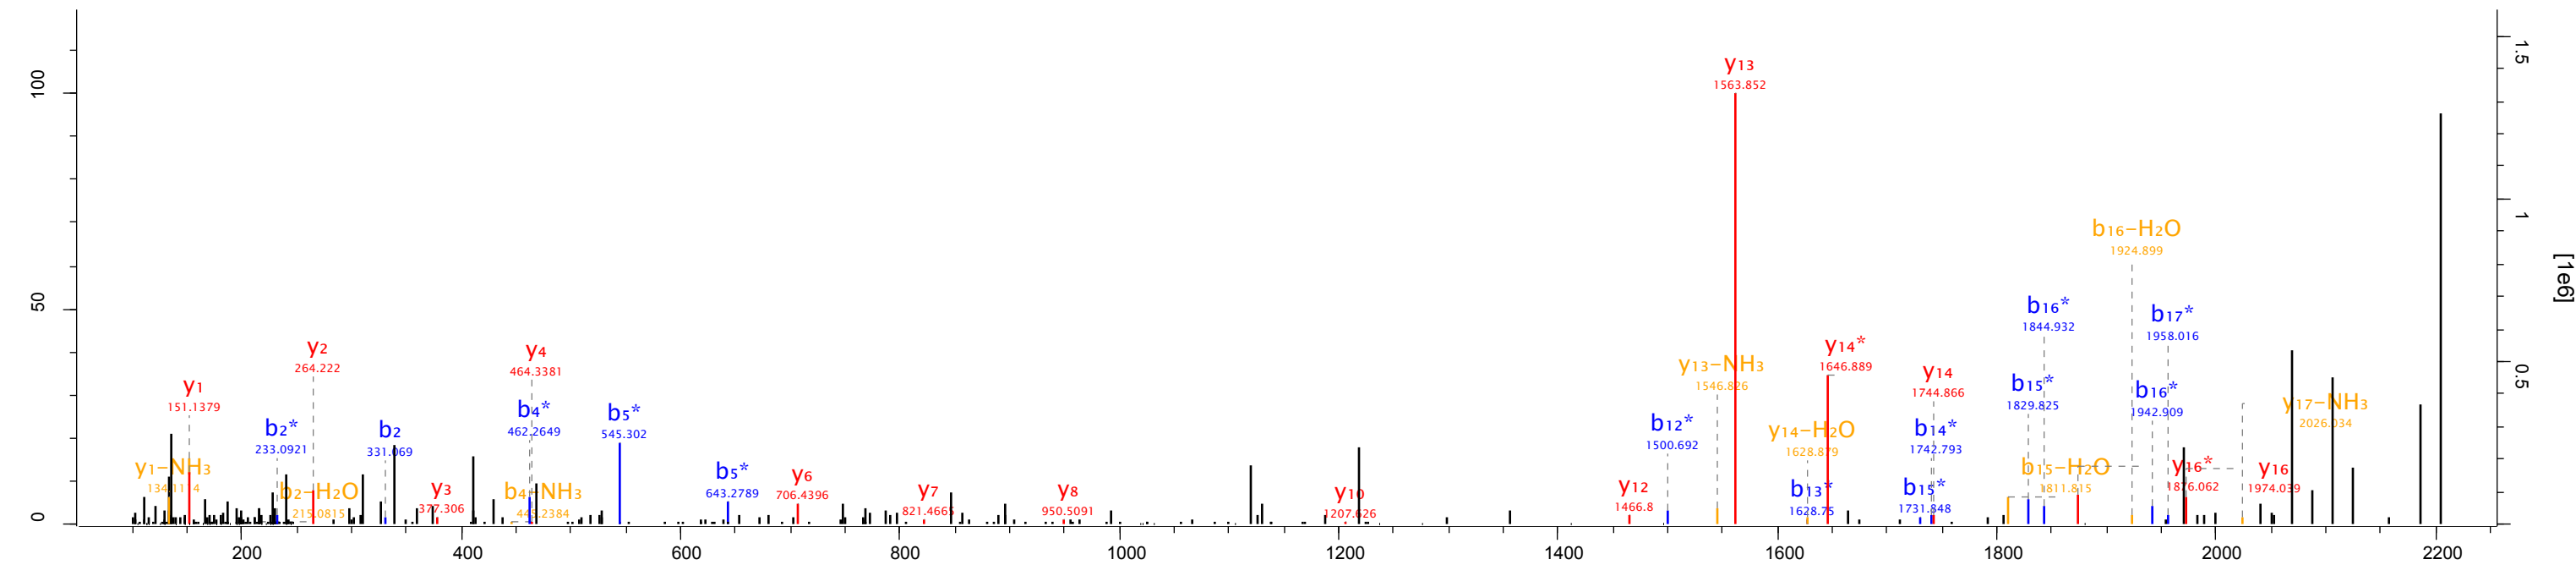

Peptide sequence: - Y ph S P K ph T P P R W A E D Q N S L L K -

Fragmentation sites are indicated by boxes below the sequence:

- Red boxes (y ions): y16 (P), y14 (ph T), y13 (P), y12 (P), y10 (W), y8 (E), y7 (D), y6 (Q), y4 (S), y3 (L), y2 (L), y1 (K).
- Blue boxes (b ions): b2 (ph S), b4\* (K), b5\* (ph T), b12\* (D), b13\* (Q), b14\* (N), b15\* (S), b16\* (L), b17\* (L).

Raw file 20150814\_A375SR\_Phospho\_BR2\_03 Scan 17634 Method FTMS; HCD Score 193.19 m/z 823.34 Gene names MELK

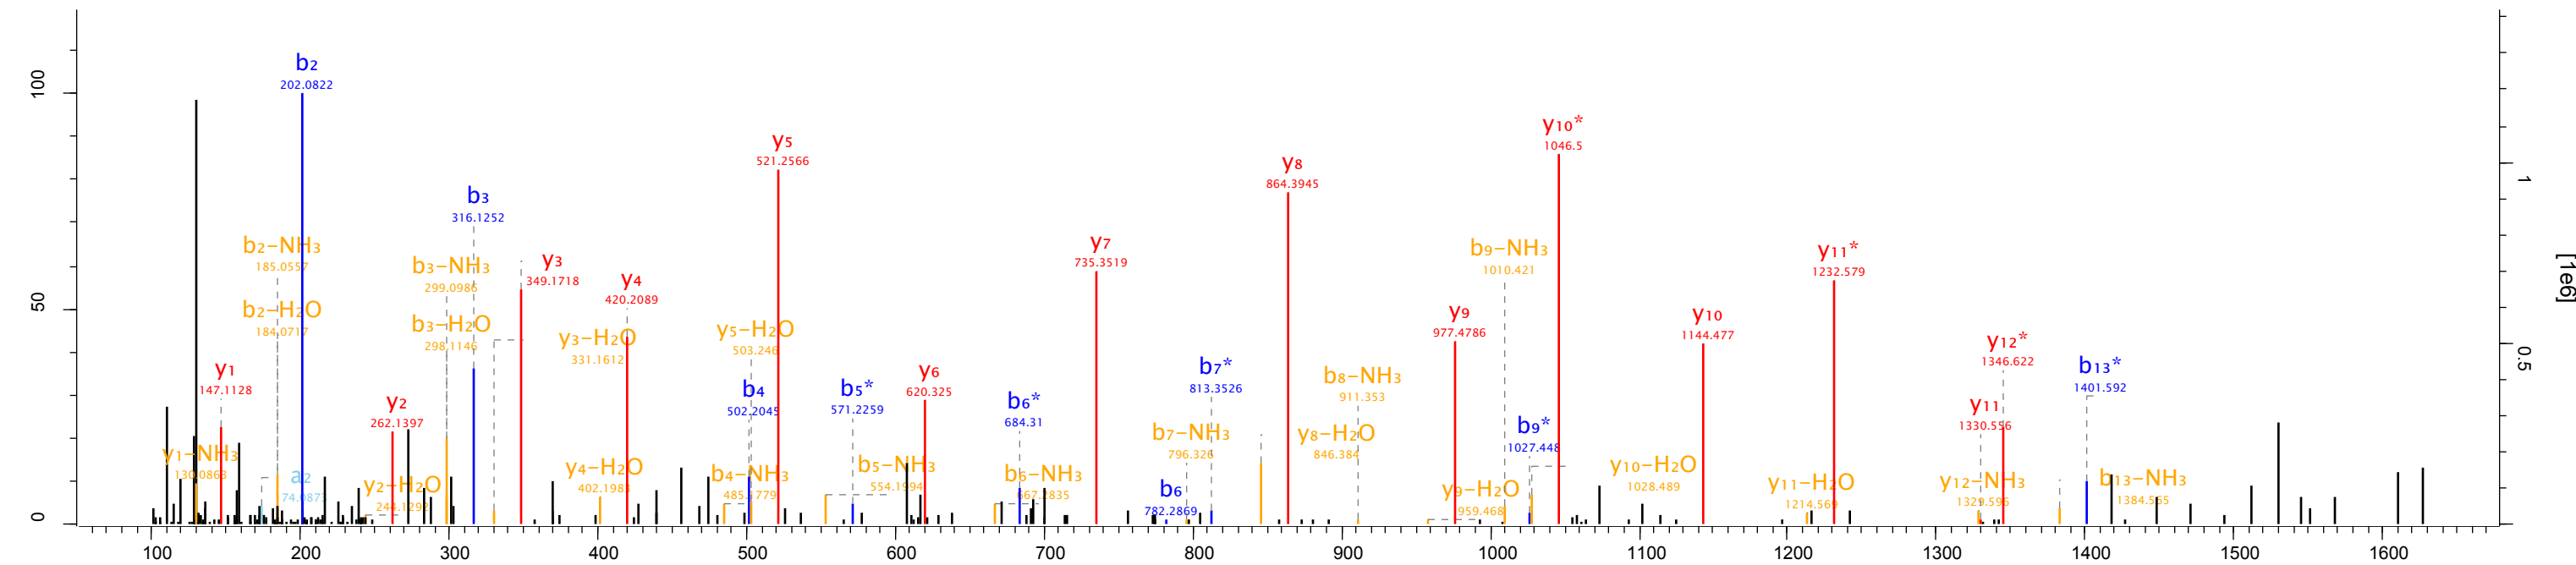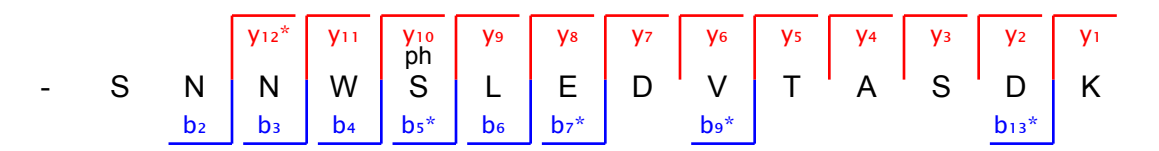

Raw file: 20150814\_A375SR\_Phospho\_BR2\_03  
 Scan: 17704 Method: FTMS; HCD Score: 282.77 m/z: 1023.45 Gene names: DLC1

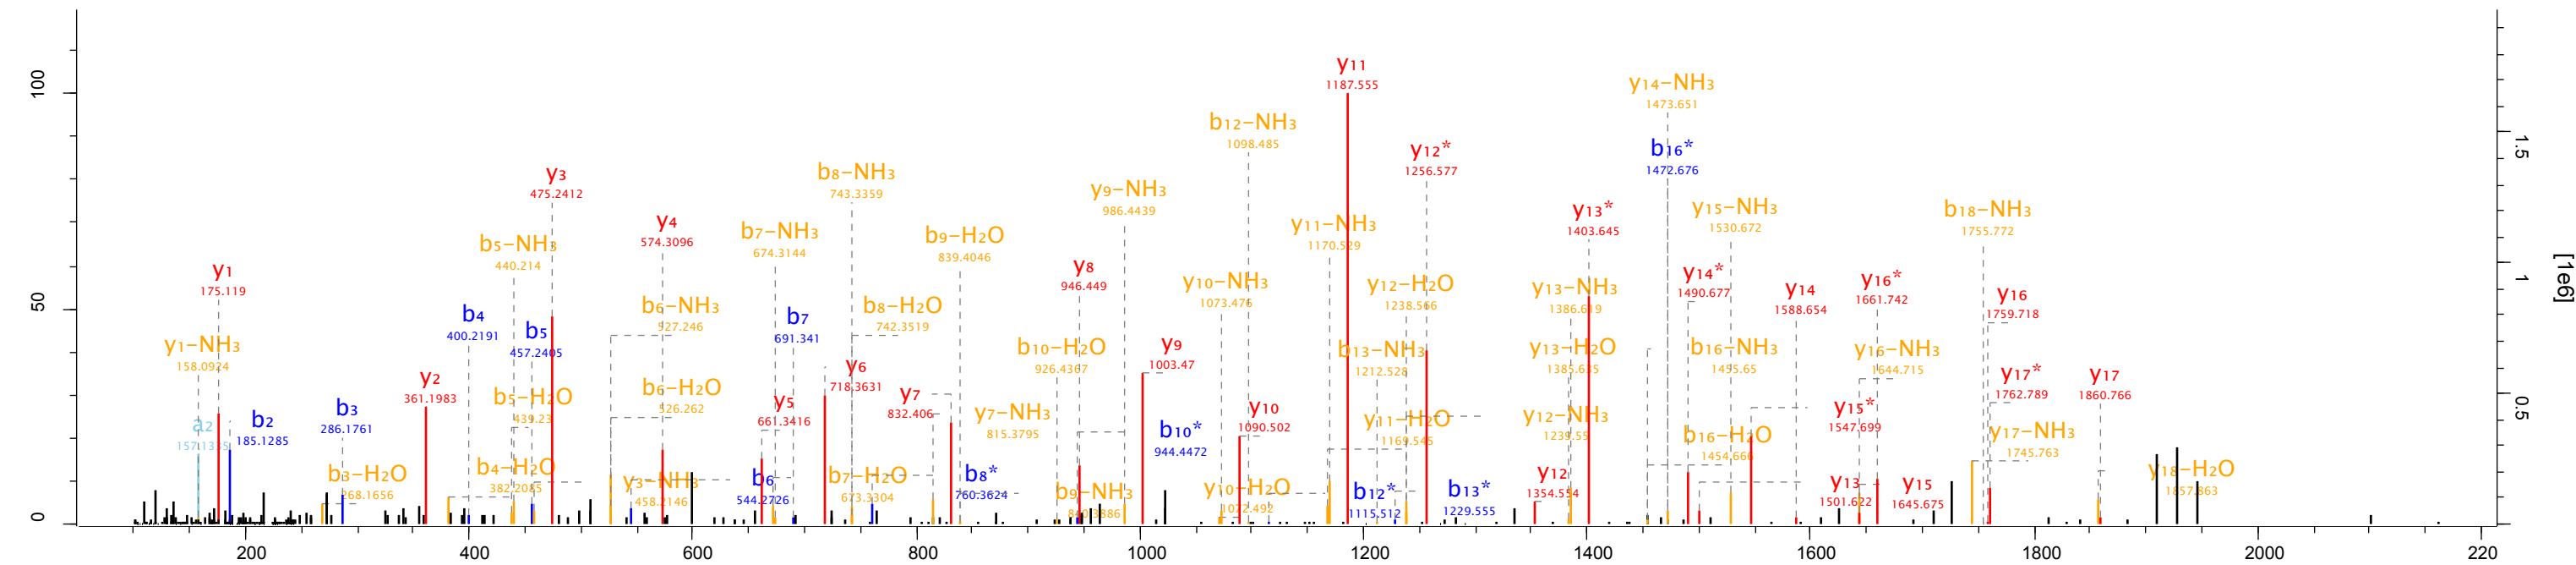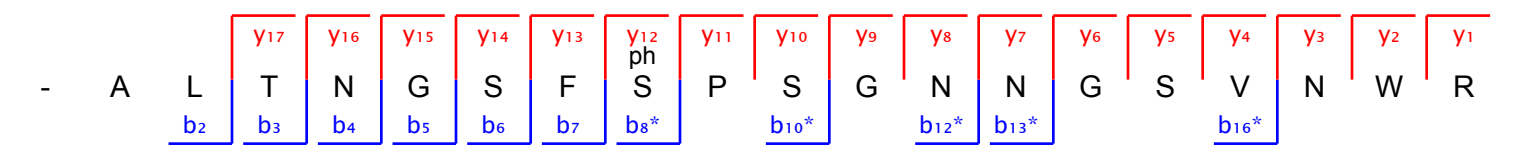

Raw file  
 20150814\_A375SR\_Phospho\_BR2\_03  
 Scan 18114 Method FTMS; HCD Score 172.2 m/z 1029 Gene names ERRF11

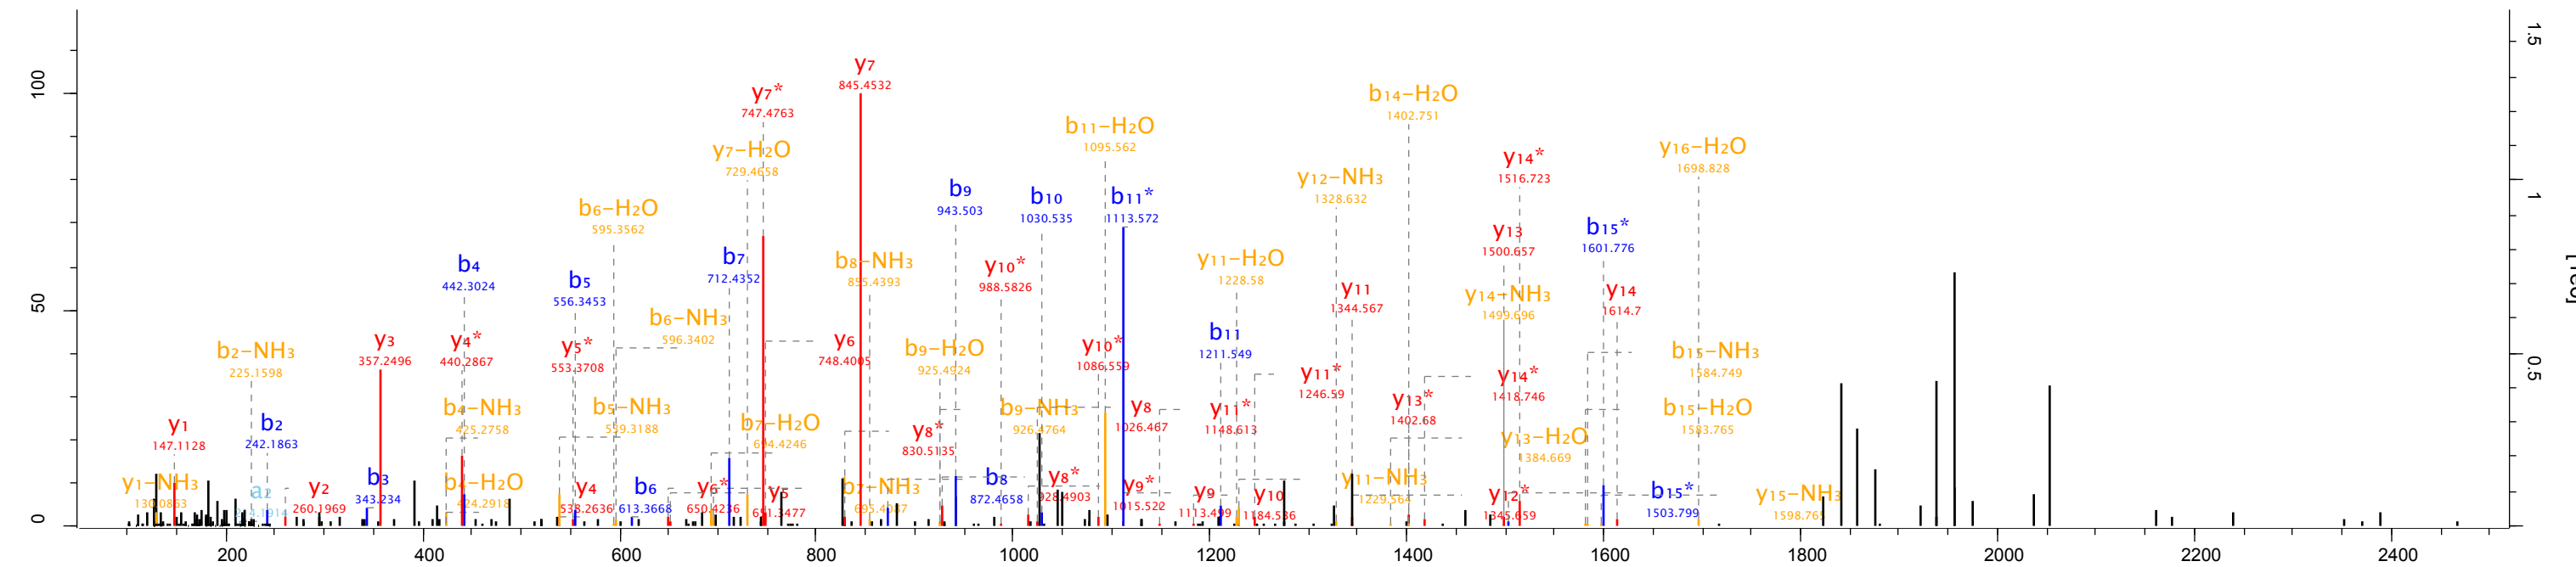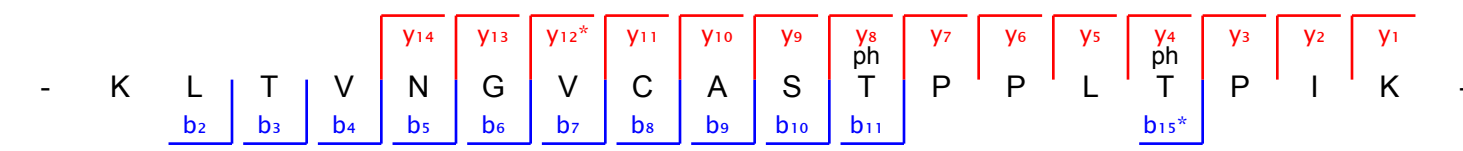

Raw file 20150814\_A375SR\_Phospho\_BR2\_03 Scan 18384 Method FTMS; HCD Score 128.75 m/z 830.36 Gene names MISP

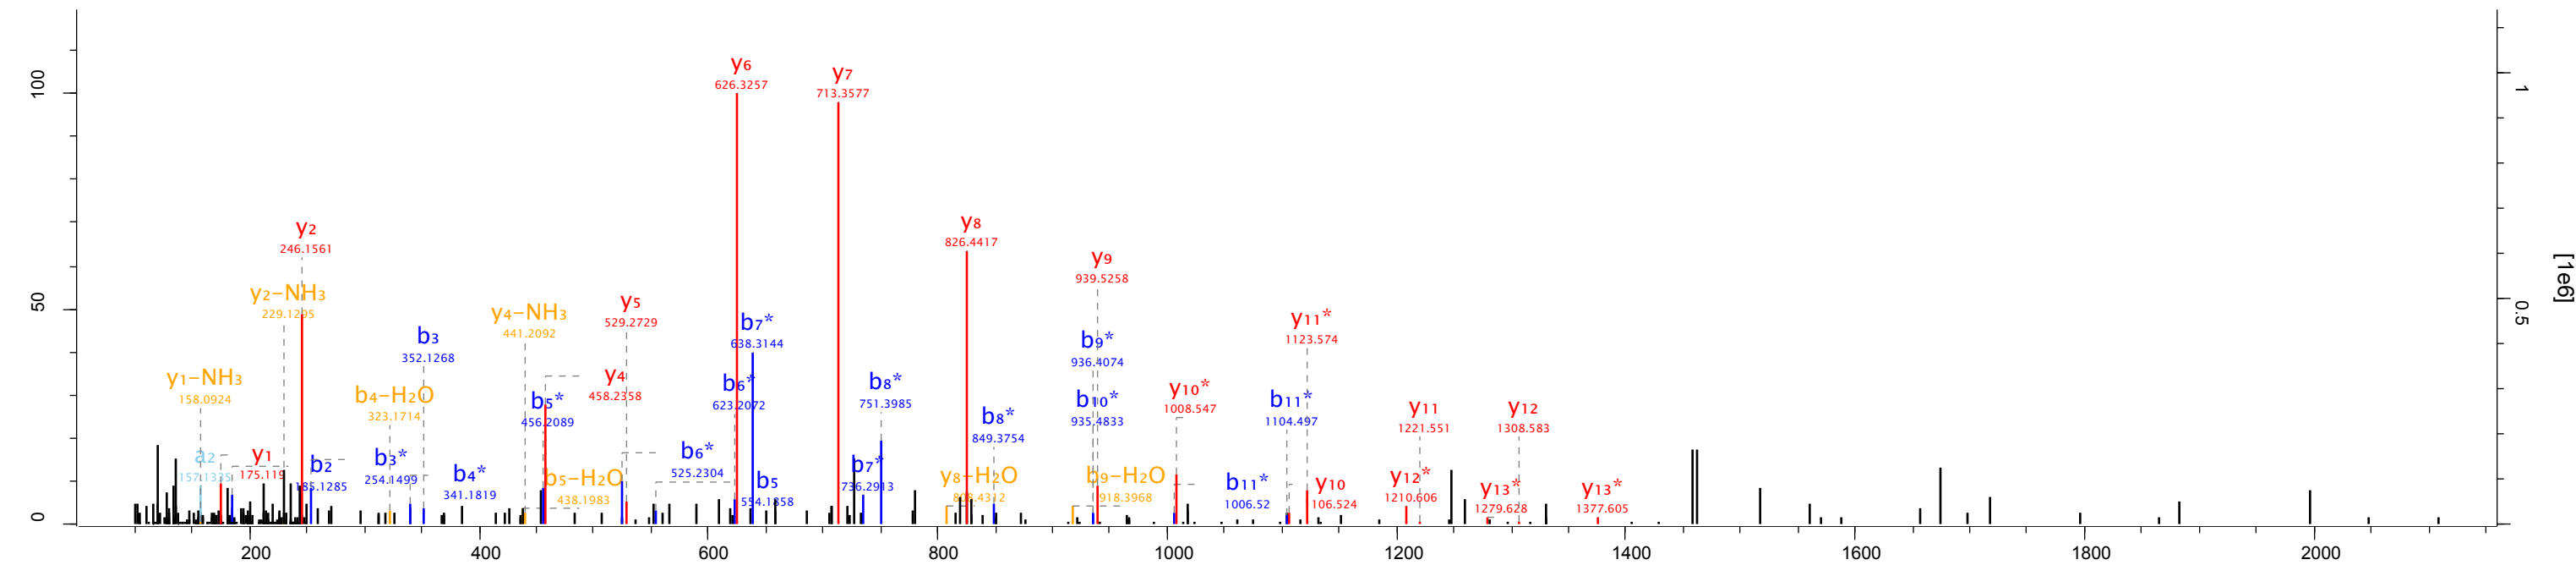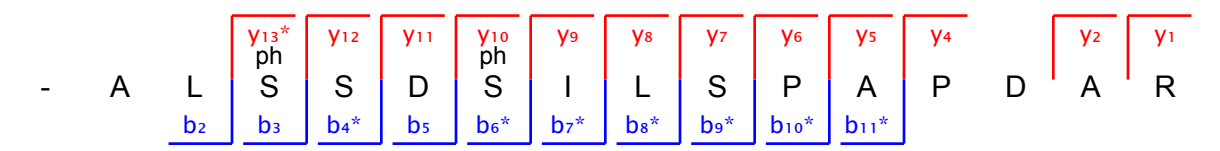

Raw file: 20150814\_A375SR\_Phospho\_BR2\_03  
 Scan: 18604 Method: FTMS; HCD Score: 162.81 m/z: 962.93 Gene names: ADAR

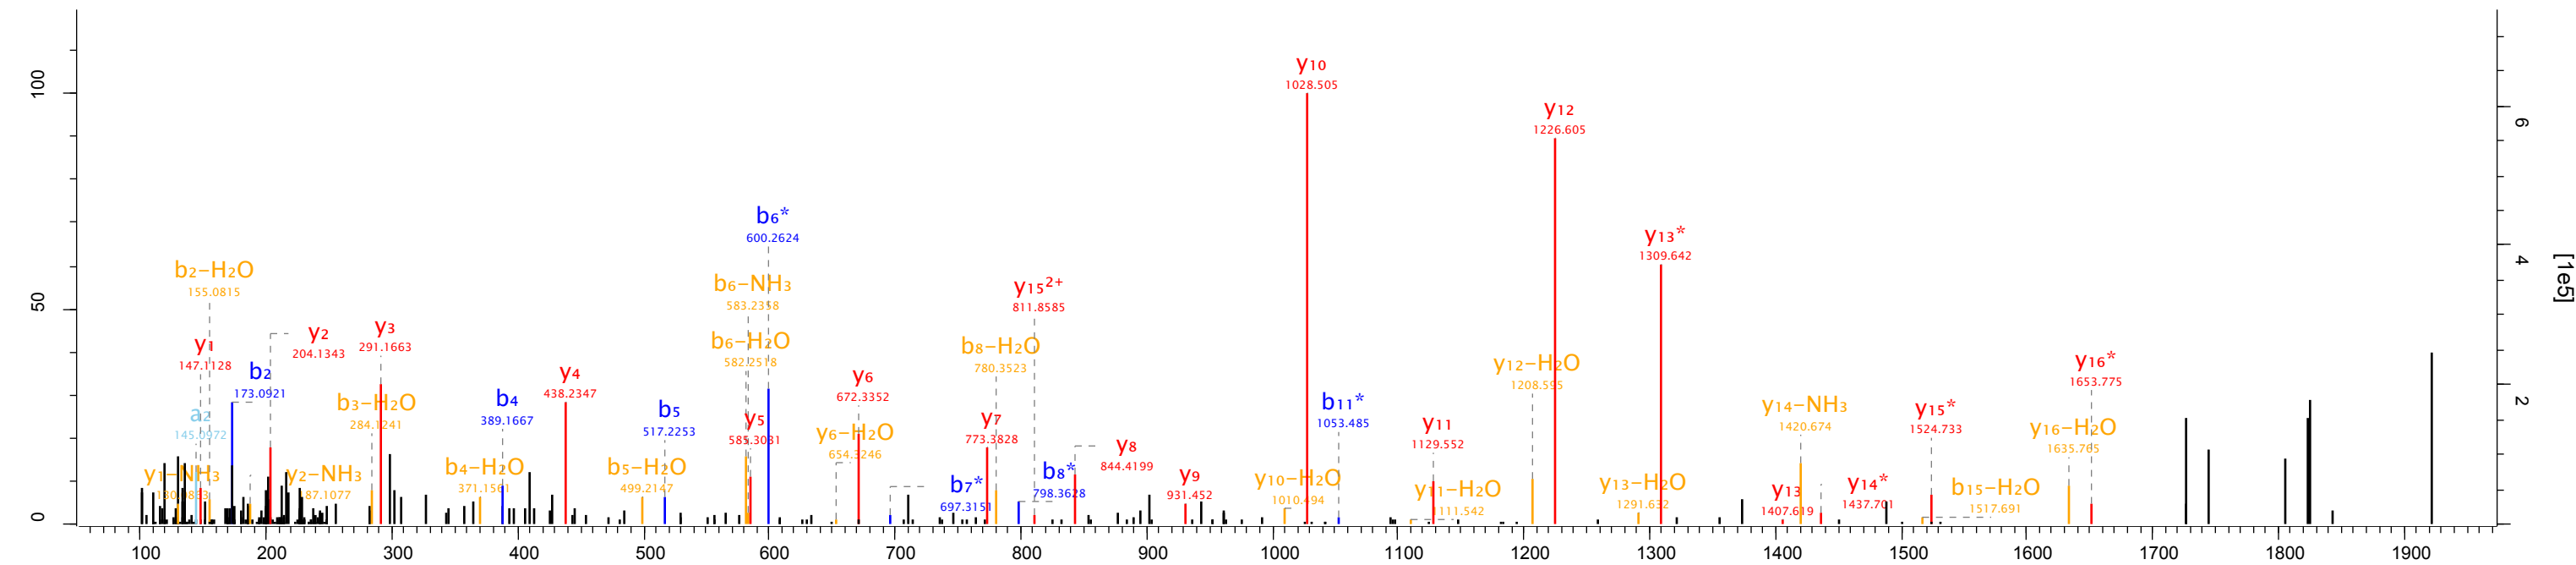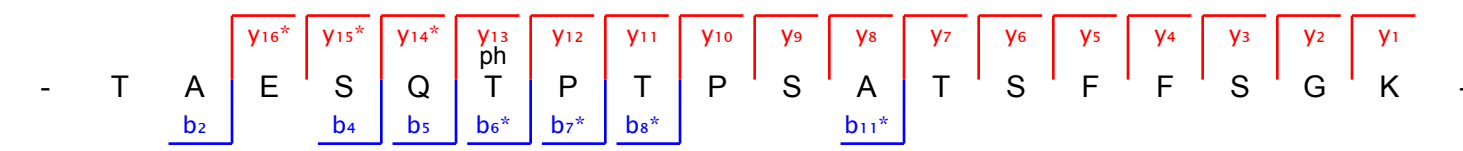

Raw file 20150814\_A375SR\_Phospho\_BR2\_03 Scan 18664 Method FTMS; HCD Score 68.59 m/z 693.94 Gene names LMO7

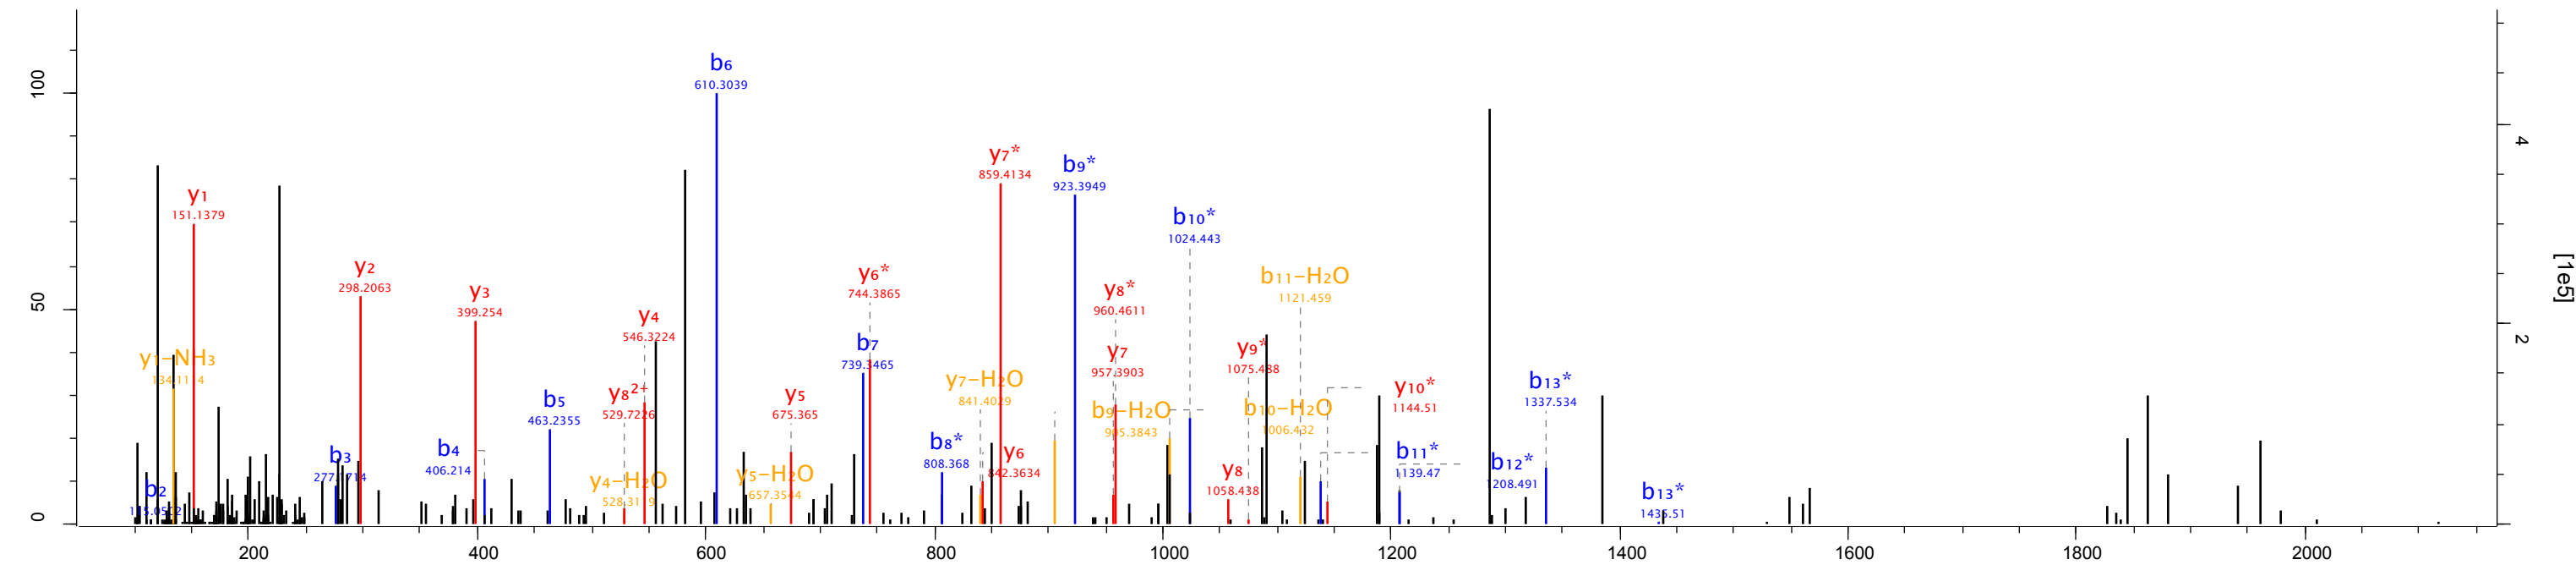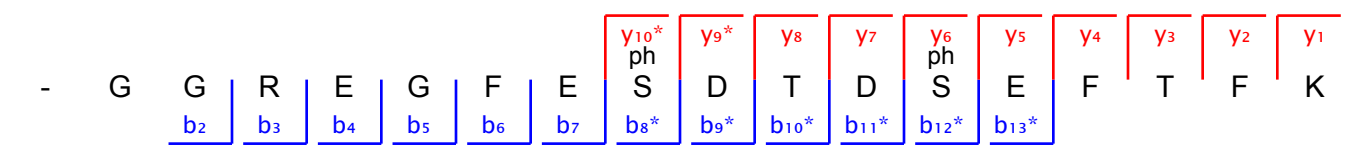



Raw file 20150814\_A375SR\_Phospho\_BR2\_03 Scan 18944 Method FTMS; HCD Score 269.43 m/z 898.1 Gene names AGFG1

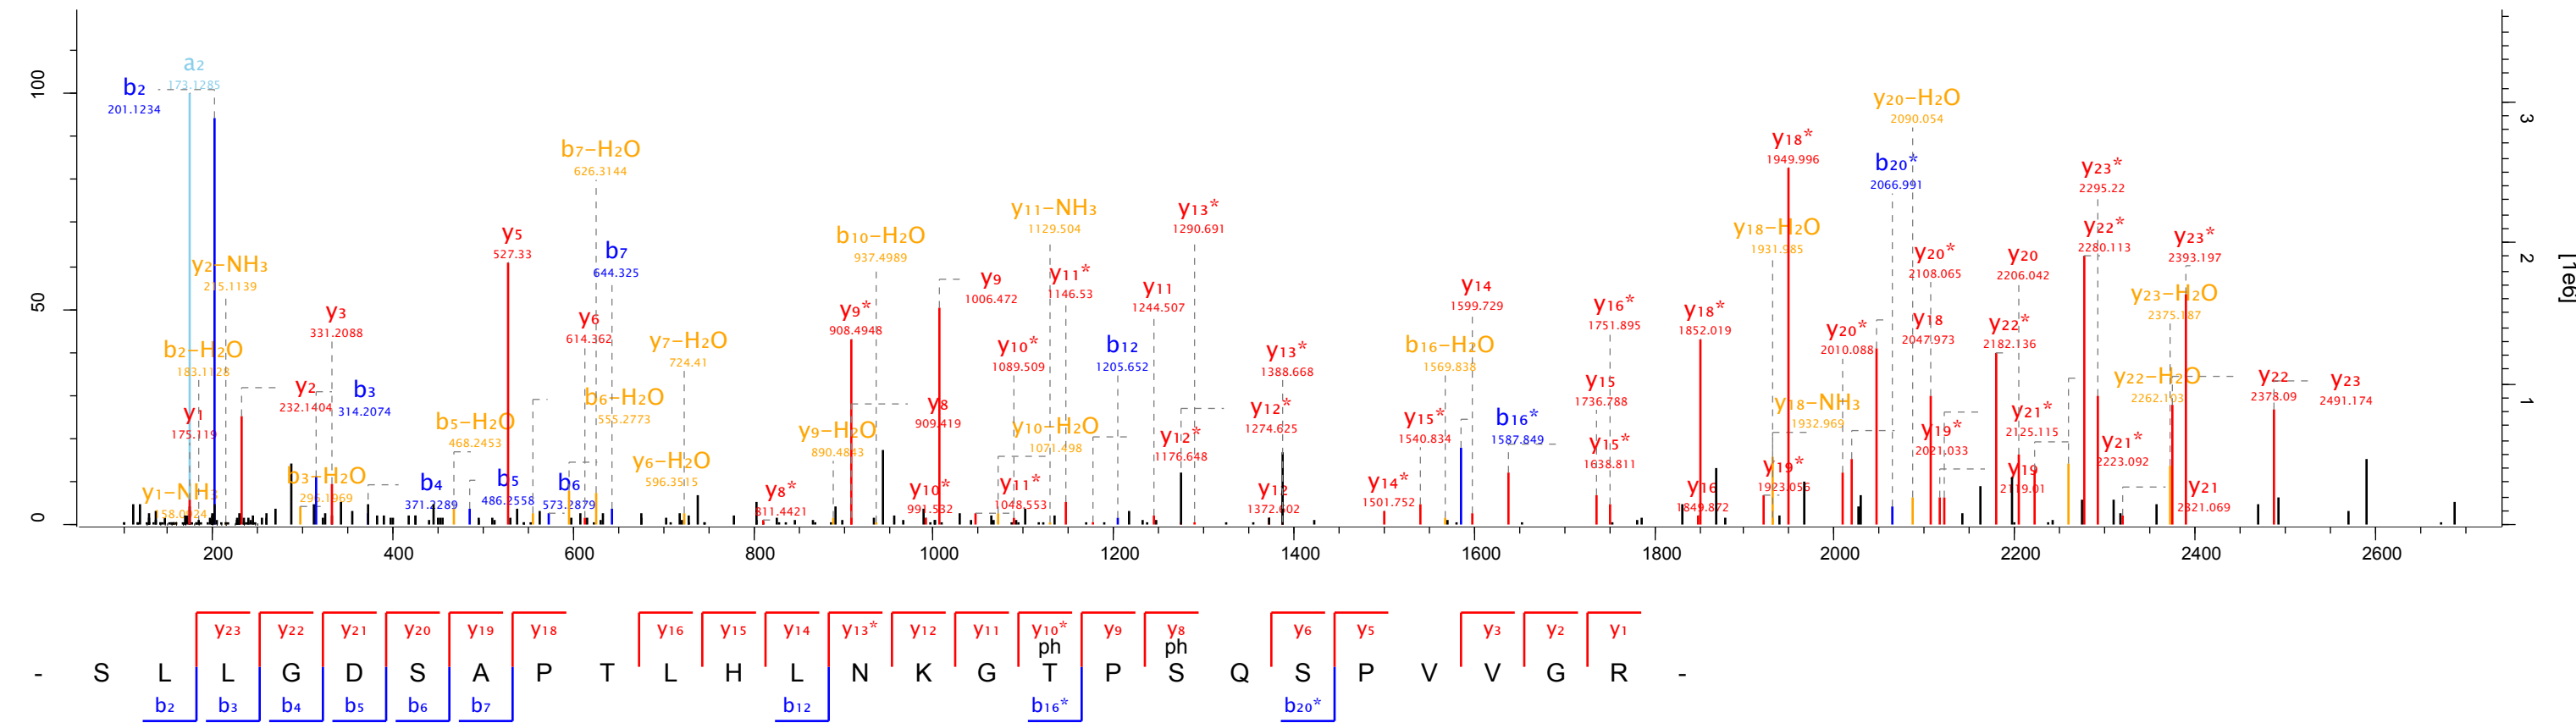

Raw file  
20150814\_A375SR\_Phospho\_BR2\_03

Scan 19574 Method FTMS; HCD Score 184.96 m/z 992.36 Gene names FADD

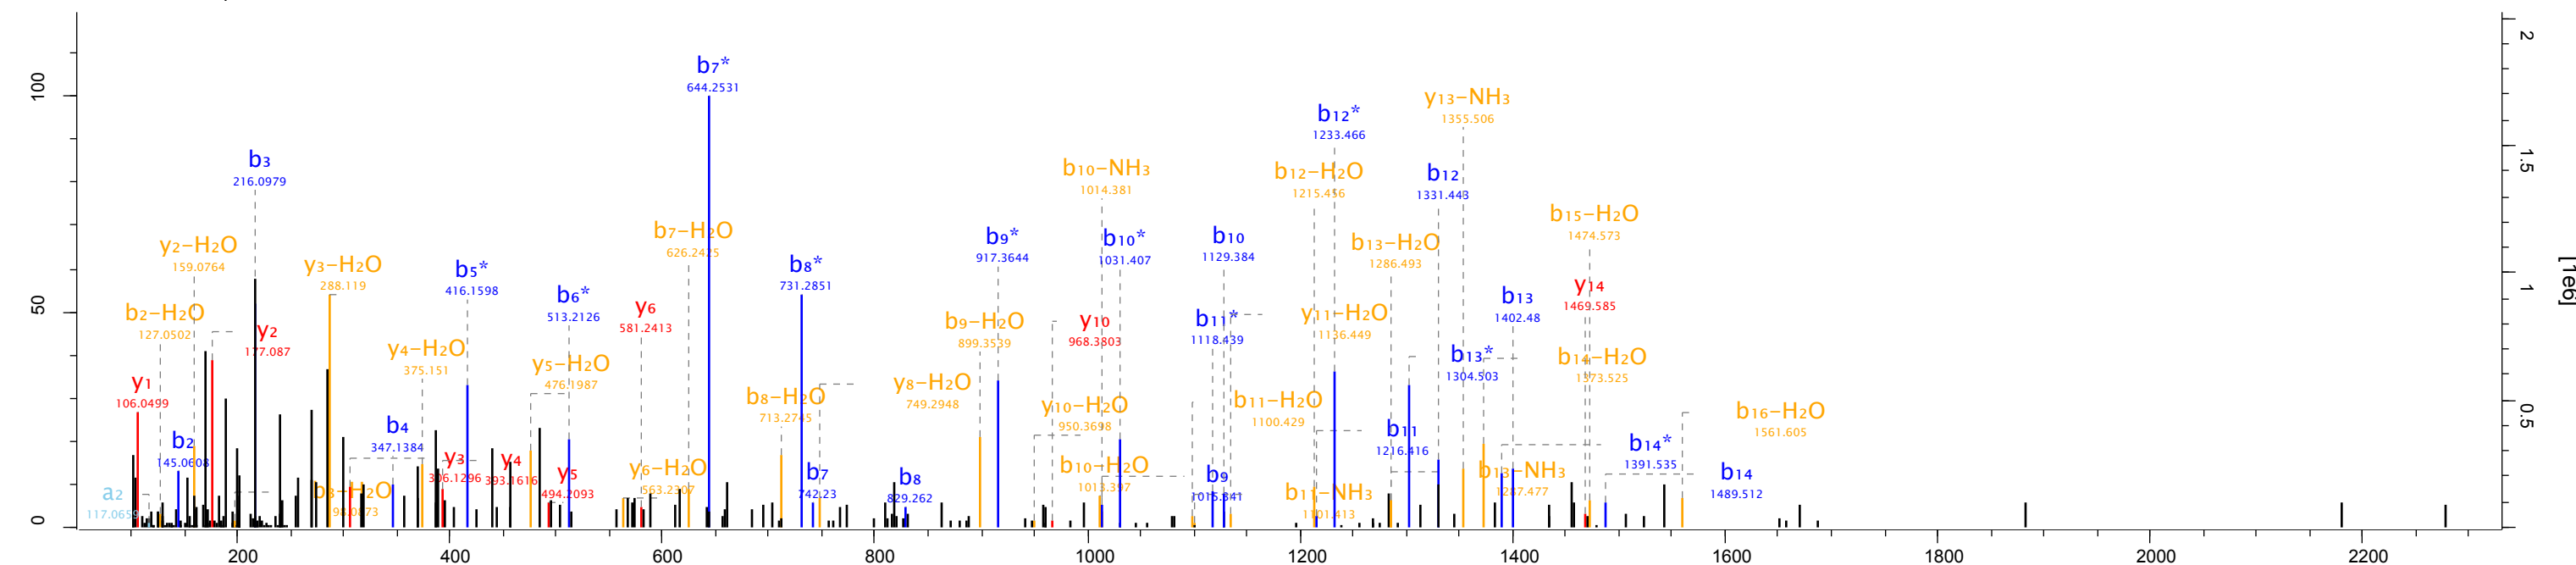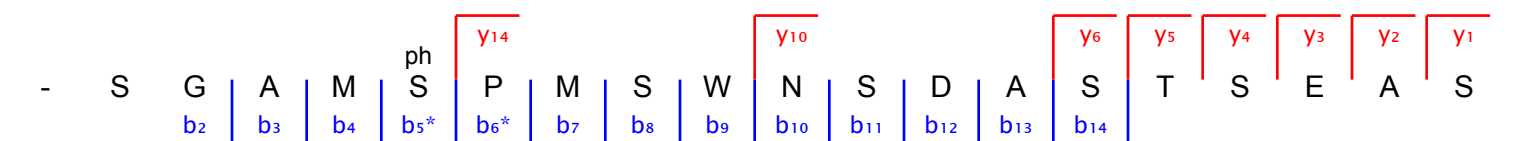

Raw file 20150814\_A375SR\_Phospho\_BR2\_03 Scan 19624 Method FTMS; HCD Score 118.42 m/z 730.79 Gene names CAMSAP2

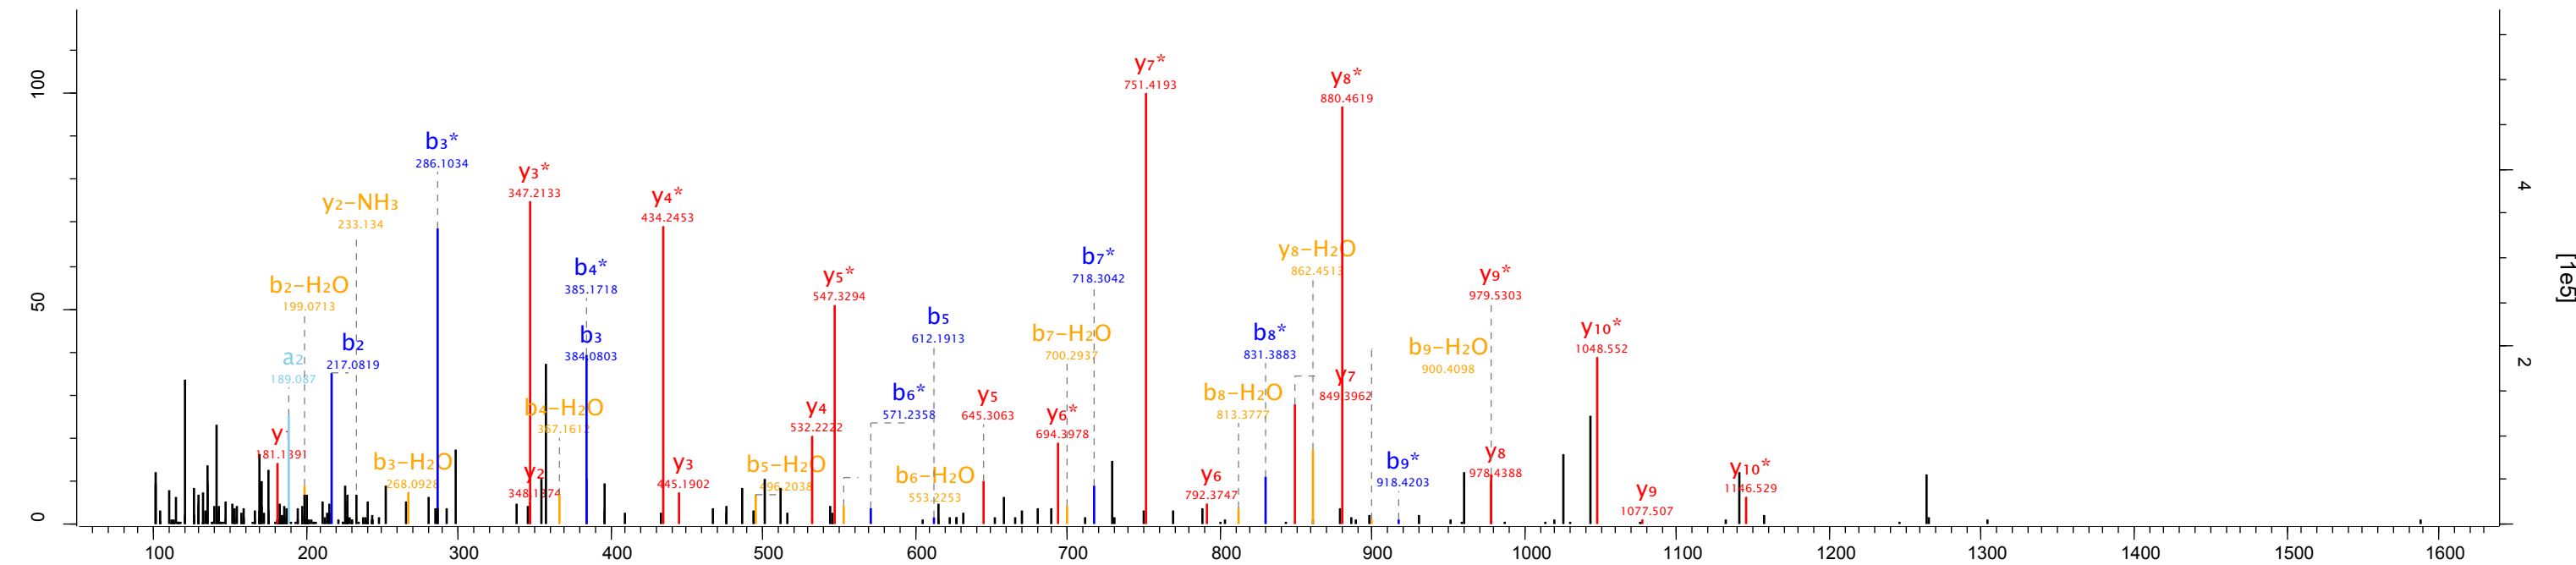

- S E Y<sub>10</sub>\* Y<sub>9</sub> Y<sub>8</sub> Y<sub>7</sub> Y<sub>6</sub> Y<sub>5</sub> Y<sub>4</sub> Y<sub>3</sub> Y<sub>2</sub> Y<sub>1</sub> -  
 b<sub>2</sub> b<sub>3</sub> b<sub>4</sub>\* b<sub>5</sub> b<sub>6</sub>\* b<sub>7</sub>\* b<sub>8</sub>\* b<sub>9</sub>\* P S R -

Raw file: 20150814\_A375SR\_Phospho\_BR2\_03  
 Scan: 19634 Method: FTMS; HCD Score: 65.47 m/z: 707.27 Gene names: FAM175A

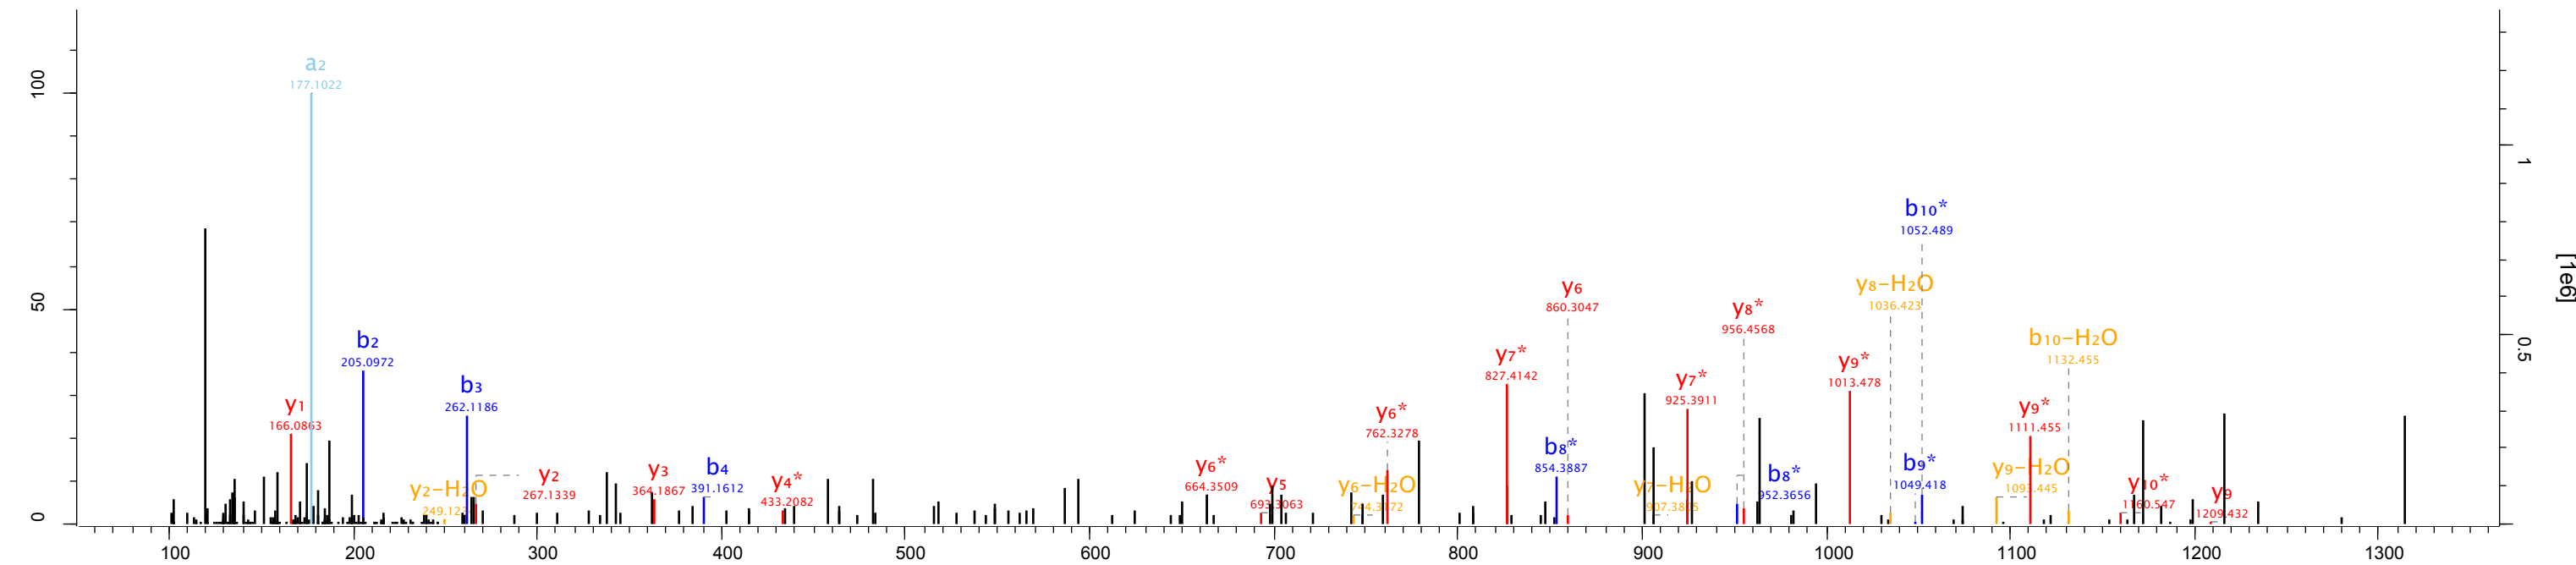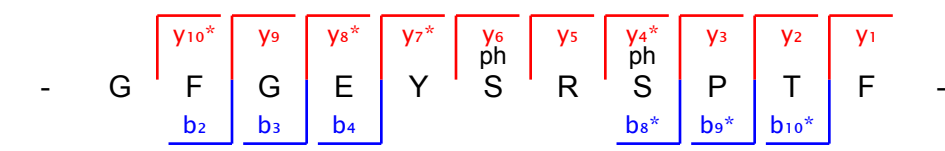

Raw file Scan Method Score m/z Gene names  
 20150814\_A375SR\_Phospho\_BR2\_03 19774 FTMS; HCD 101.6 866.41 C2CD5

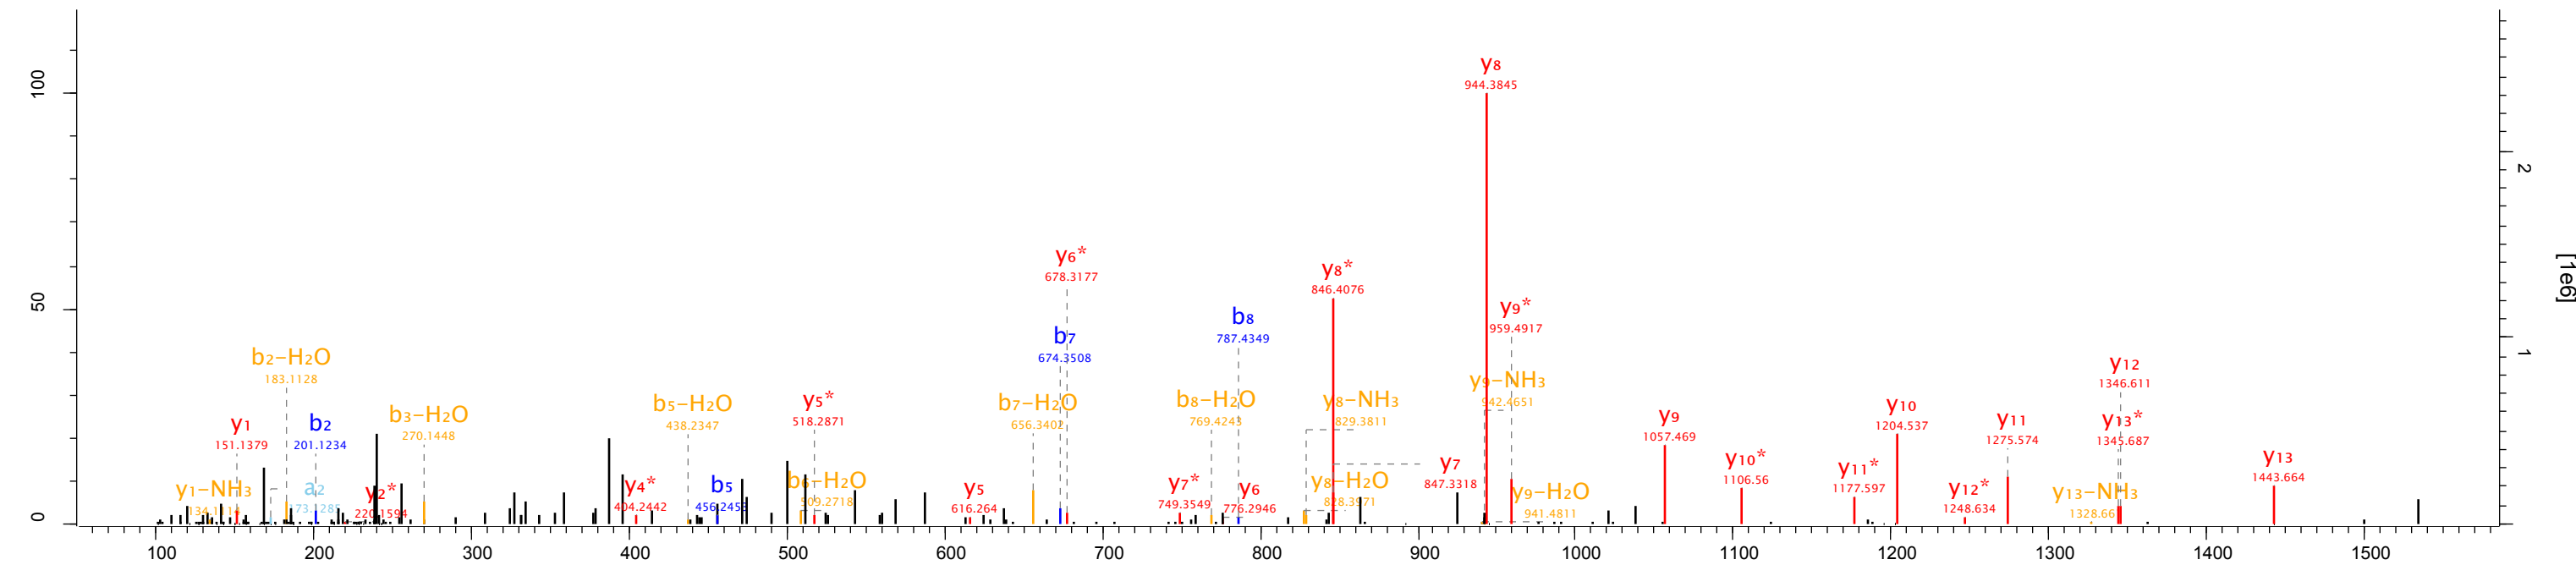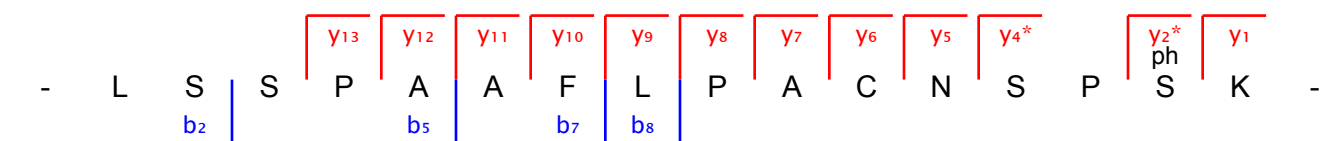

Raw file: 20150814\_A375SR\_Phospho\_BR2\_03  
 Scan: 2004 Method: FTMS; HCD Score: 98.1 m/z: 398.17 Gene names: SRSF3

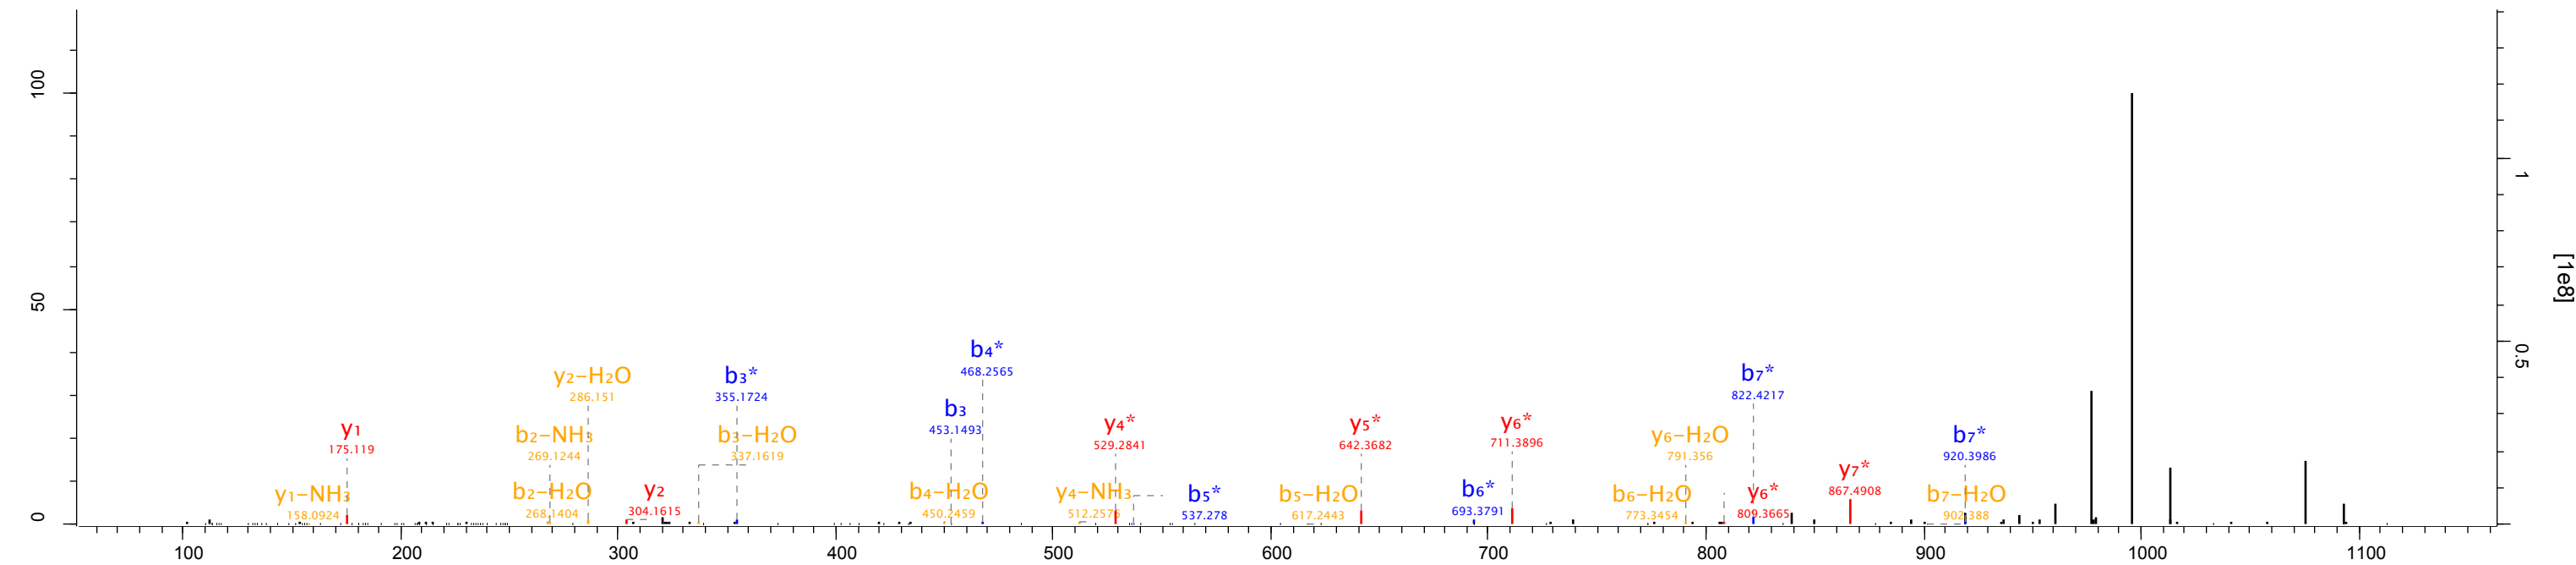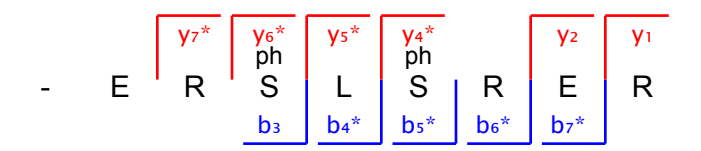

Raw file 20150814\_A375SR\_Phospho\_BR2\_03 Scan 20104 Method FTMS; HCD Score 102.17 m/z 840.09 Gene names GAPVD1

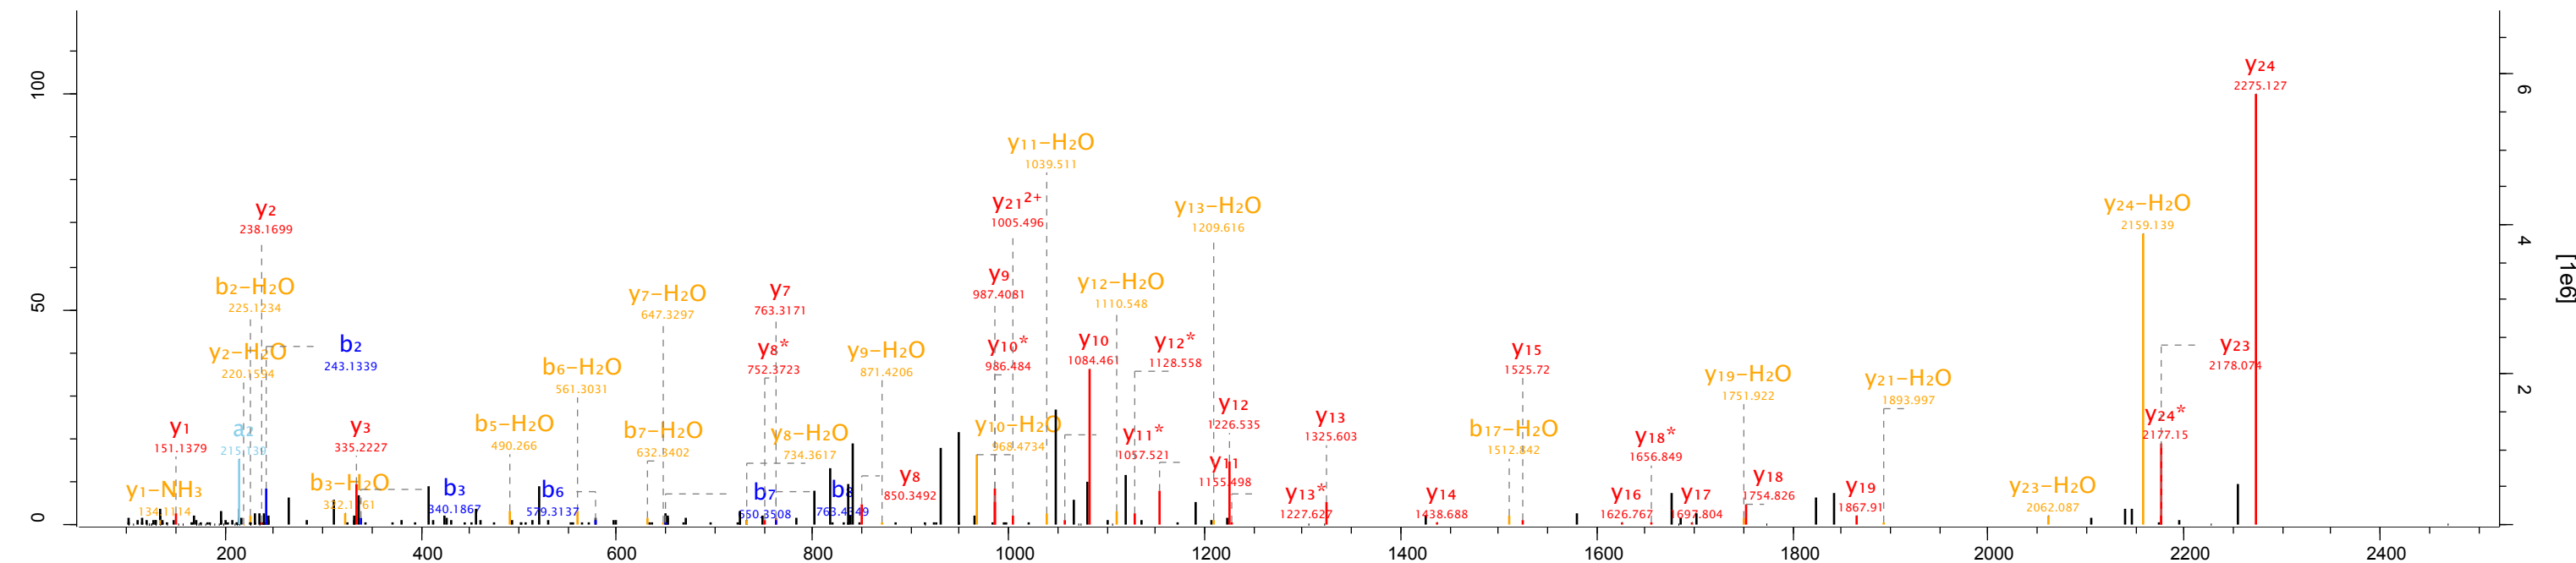

- E L P P A A A I G A T S L V A A P H S S S S S P S K -

Fragmentation sites are indicated by brackets below the sequence:

- Blue brackets: b2 (L), b3 (P), b6 (A), b7 (A), b8 (I)
- Red brackets: y24 (P), y23 (P), y21<sup>2+</sup> (A), y19 (I), y18 (G), y17 (A), y16 (T), y15 (S), y14 (L), y13 (V), y12 (A), y11 (A), y10 (P), y9 (H), y8 (S), y7<sup>ph</sup> (S), y3 (P), y2 (S), y1 (K)

Raw file: 20150814\_A375SR\_Phospho\_BR2\_03  
 Scan: 20194 Method: FTMS; HCD Score: 354.06 m/z: 1323.52 Gene names: CLNS1A

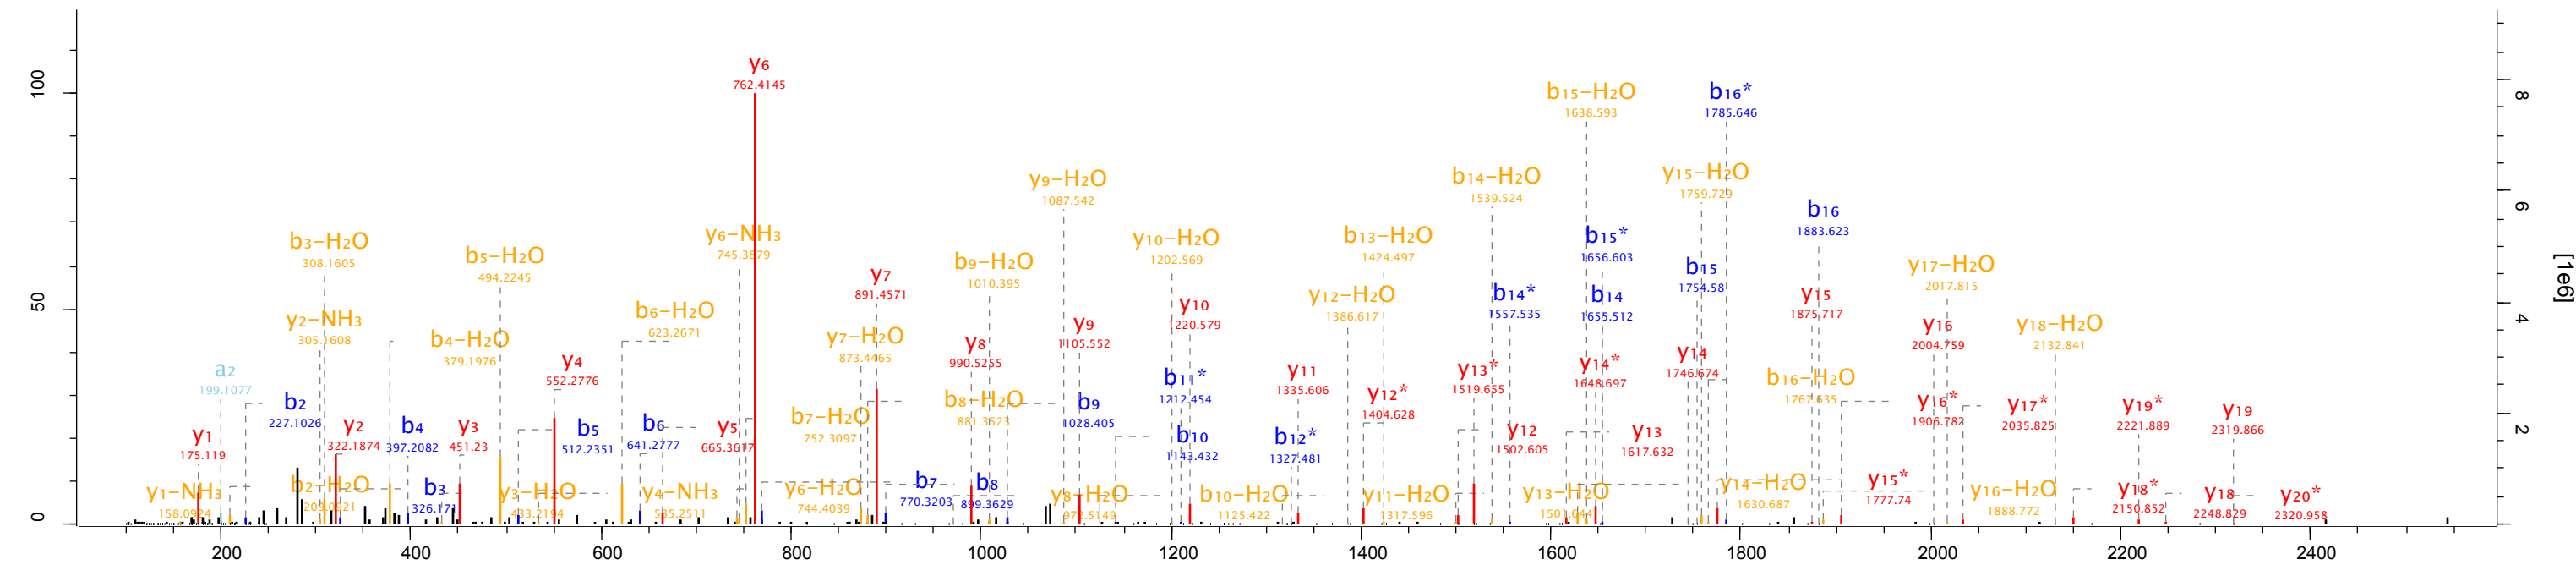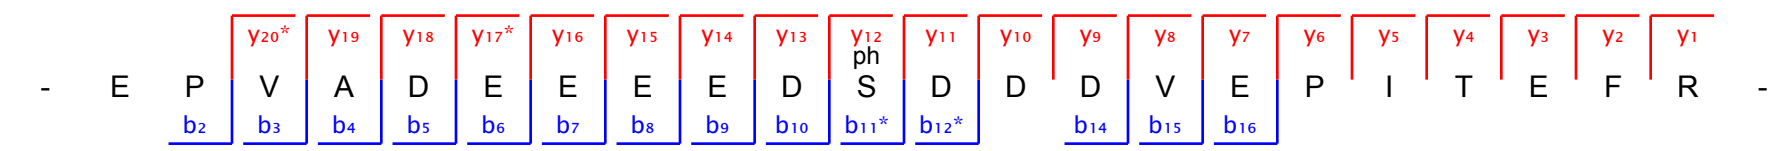



Raw file 20150814\_A375SR\_Phospho\_BR2\_03 Scan 20514 Method FTMS; HCD Score 133.15 m/z 1084.47 Gene names PSEN1

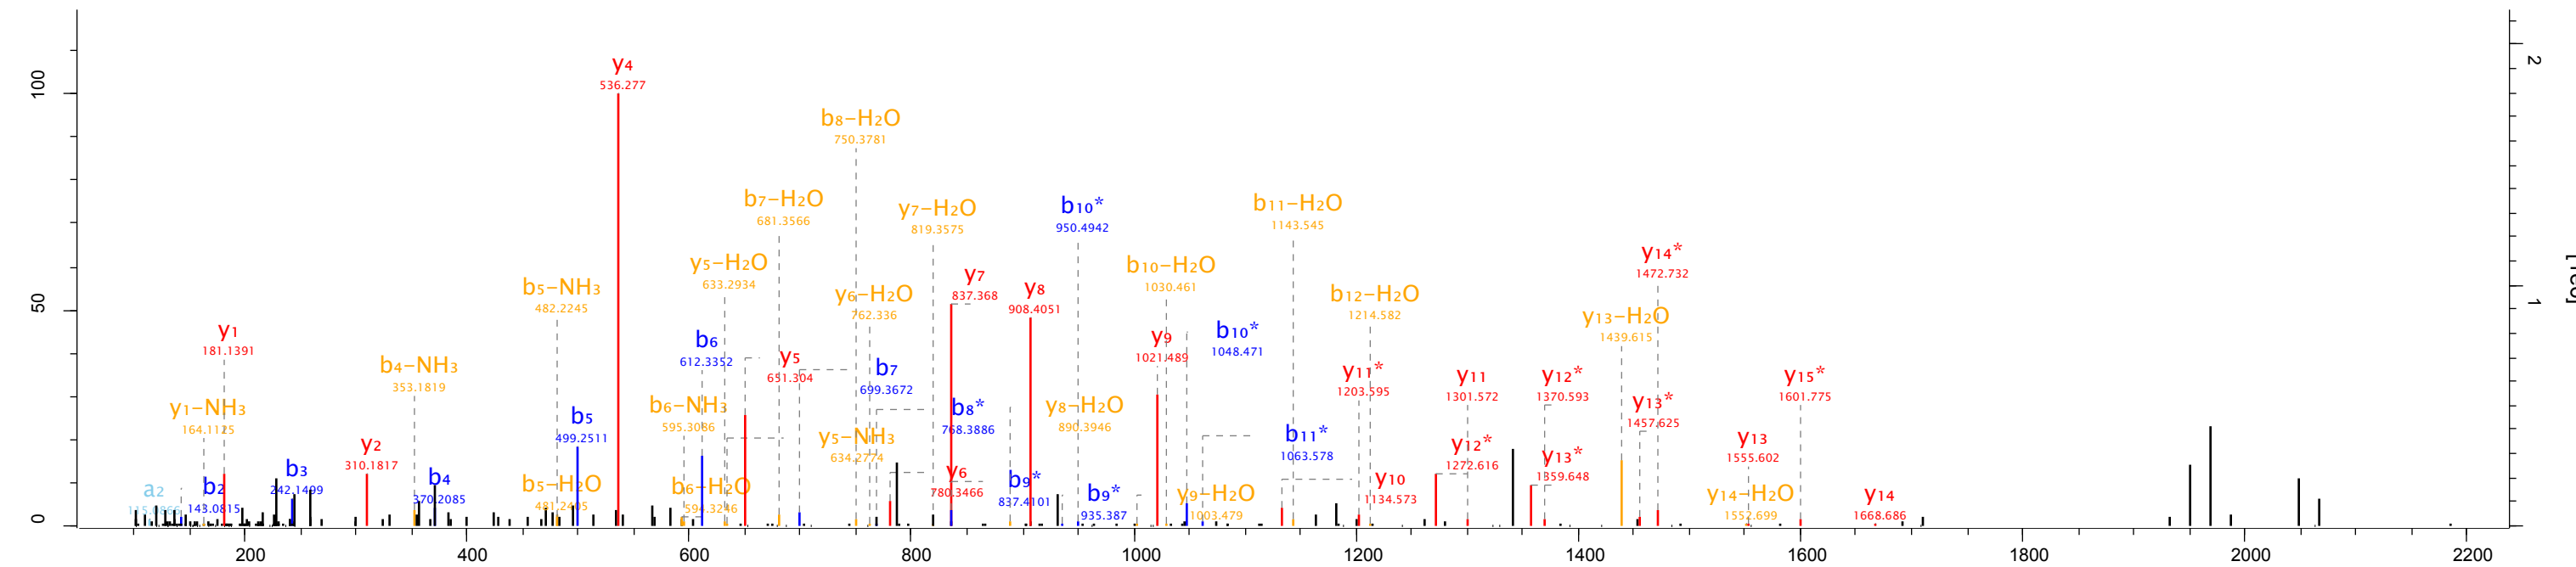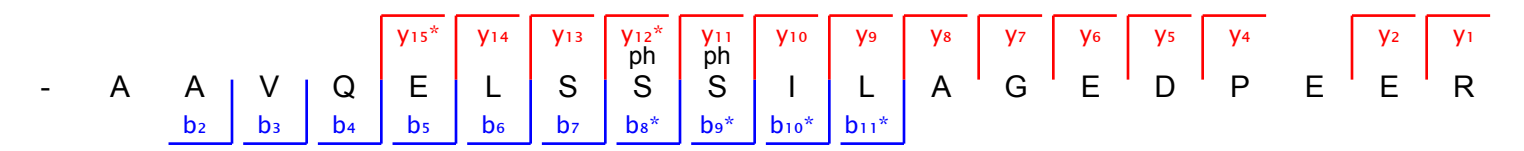

Raw file  
20150814\_A375SR\_Phospho\_BR2\_03

Scan 20594 Method FTMS; HCD Score 337.68 m/z 1288.01 Gene names CTNNA1

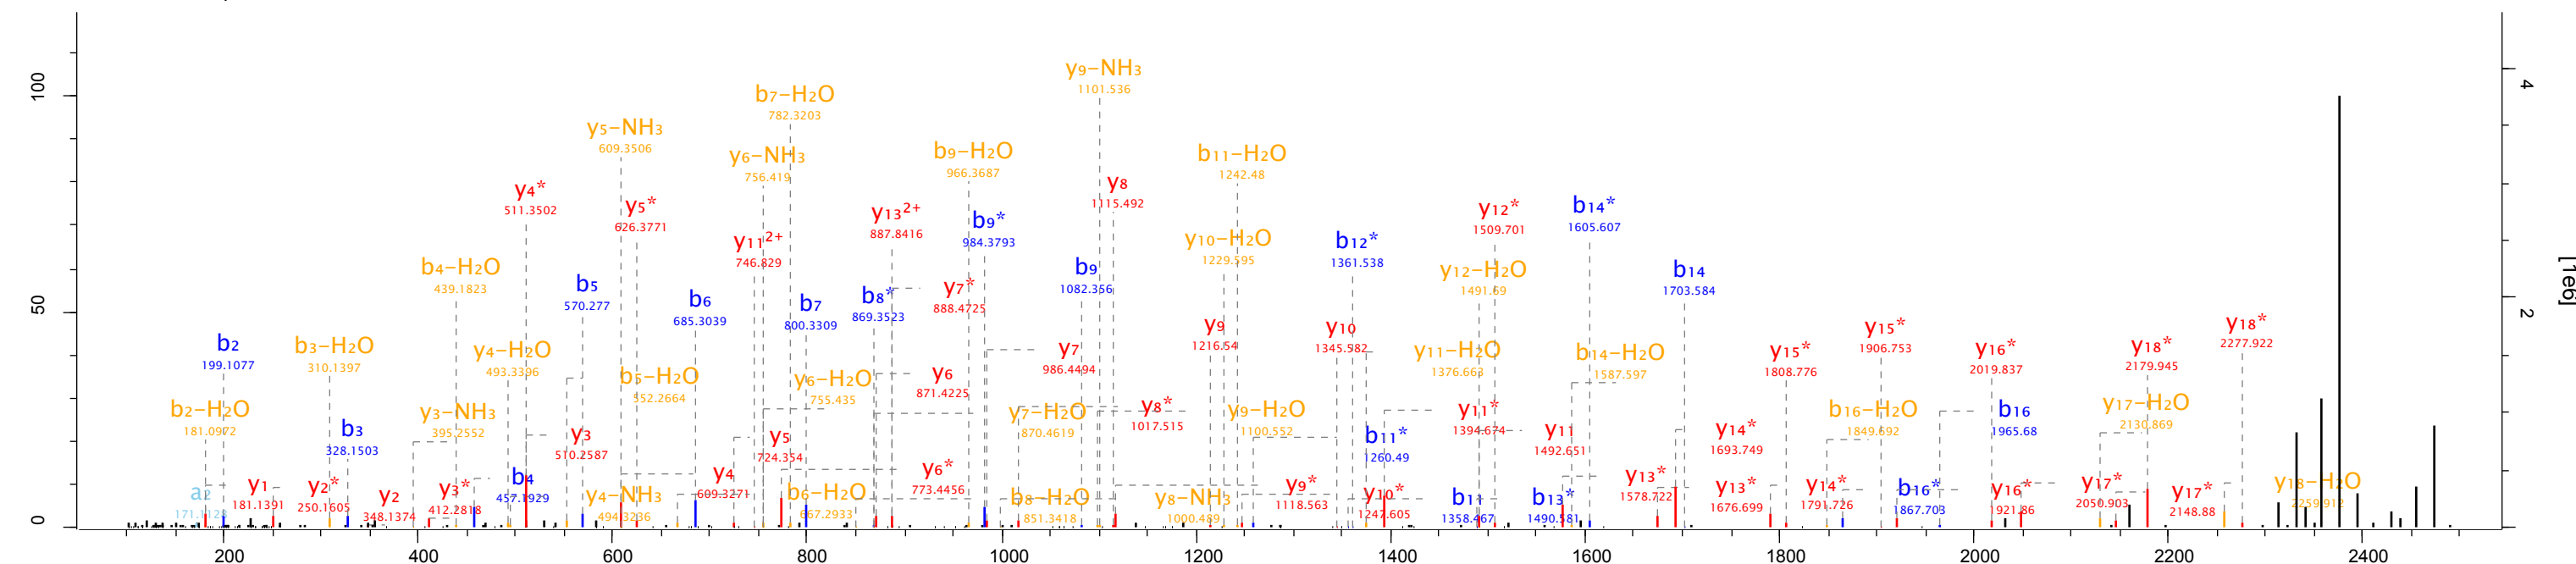

- T P E E L D D S D F E T E D F D V R S R -  
b<sub>2</sub> b<sub>3</sub> b<sub>4</sub> b<sub>5</sub> b<sub>6</sub> b<sub>7</sub> b<sub>8</sub><sup>\*</sup> b<sub>9</sub> b<sub>11</sub> b<sub>12</sub><sup>\*</sup> b<sub>13</sub><sup>\*</sup> b<sub>14</sub> b<sub>16</sub>  
y<sub>18</sub><sup>\*</sup> y<sub>17</sub><sup>\*</sup> y<sub>16</sub><sup>\*</sup> y<sub>15</sub><sup>\*</sup> y<sub>14</sub><sup>\*</sup> y<sub>13</sub><sup>\*</sup> ph y<sub>12</sub><sup>\*</sup> y<sub>11</sub> y<sub>10</sub> y<sub>9</sub> y<sub>8</sub> y<sub>7</sub> y<sub>6</sub> y<sub>5</sub> y<sub>4</sub> y<sub>3</sub> y<sub>2</sub> ph y<sub>1</sub>

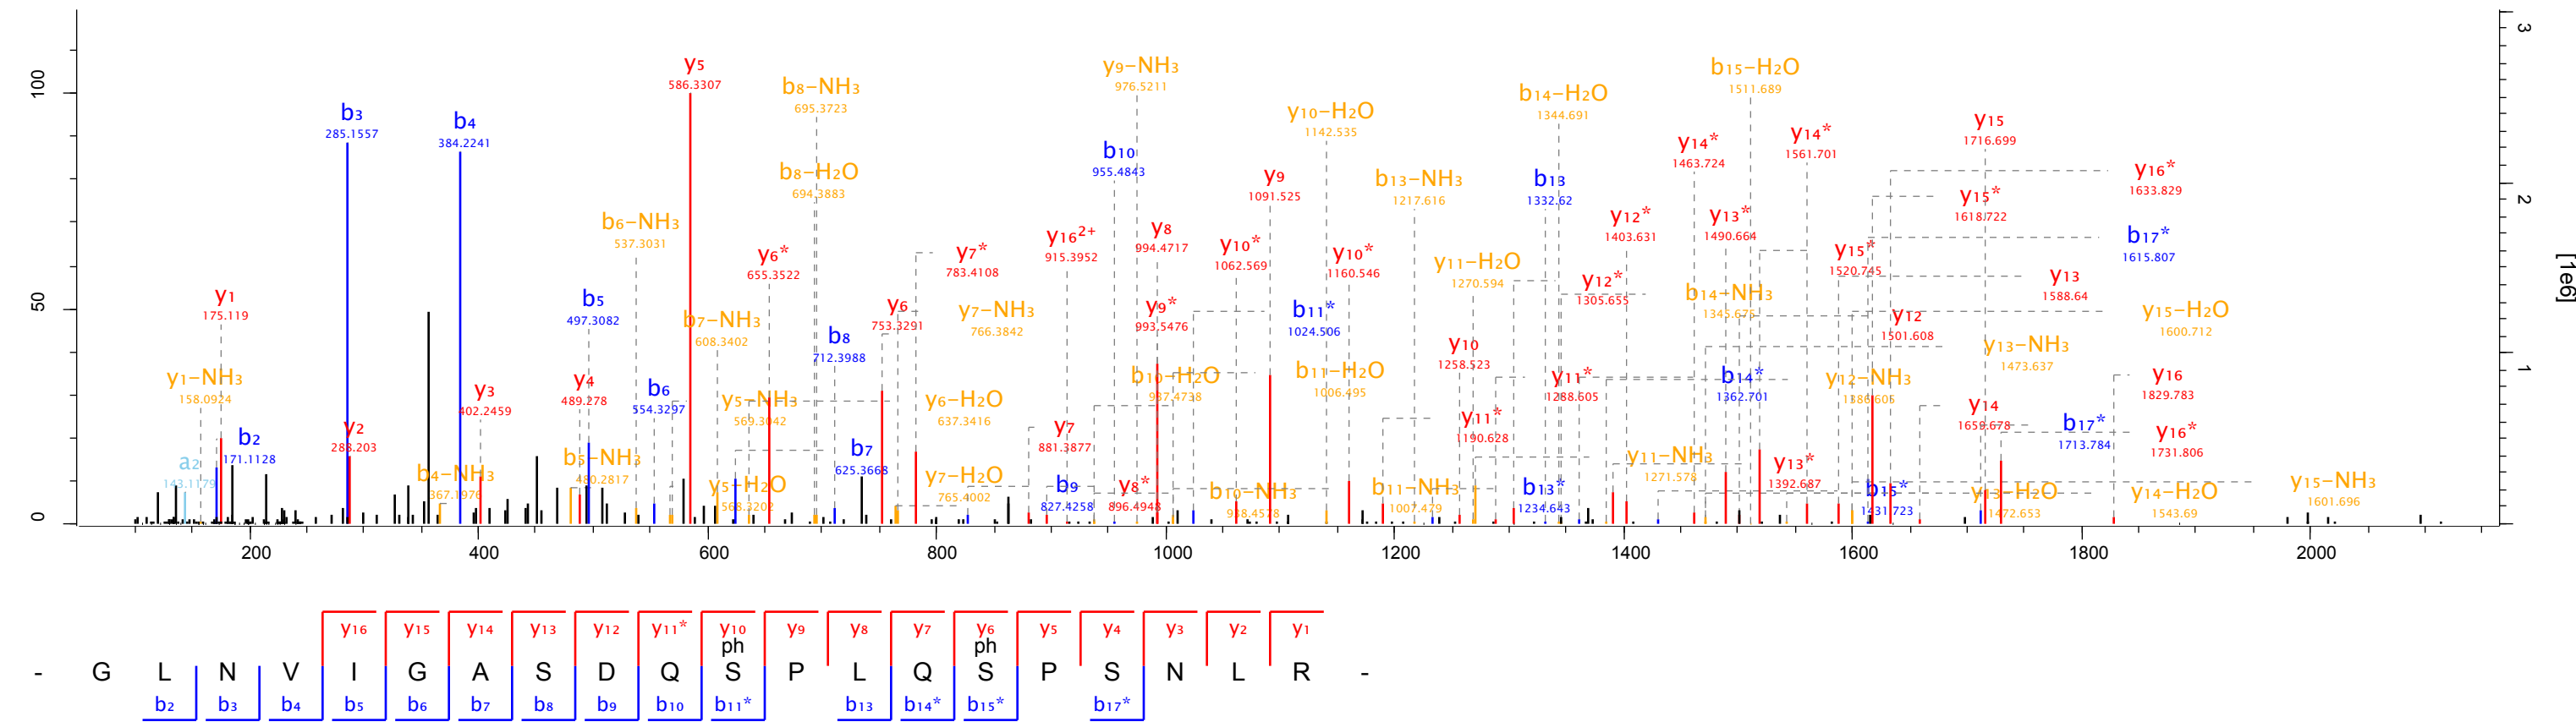

Raw file: 20150814\_A375SR\_Phospho\_BR2\_03  
 Scan: 20844 Method: FTMS; HCD Score: 61.74 m/z: 962.71 Gene names: MCM3

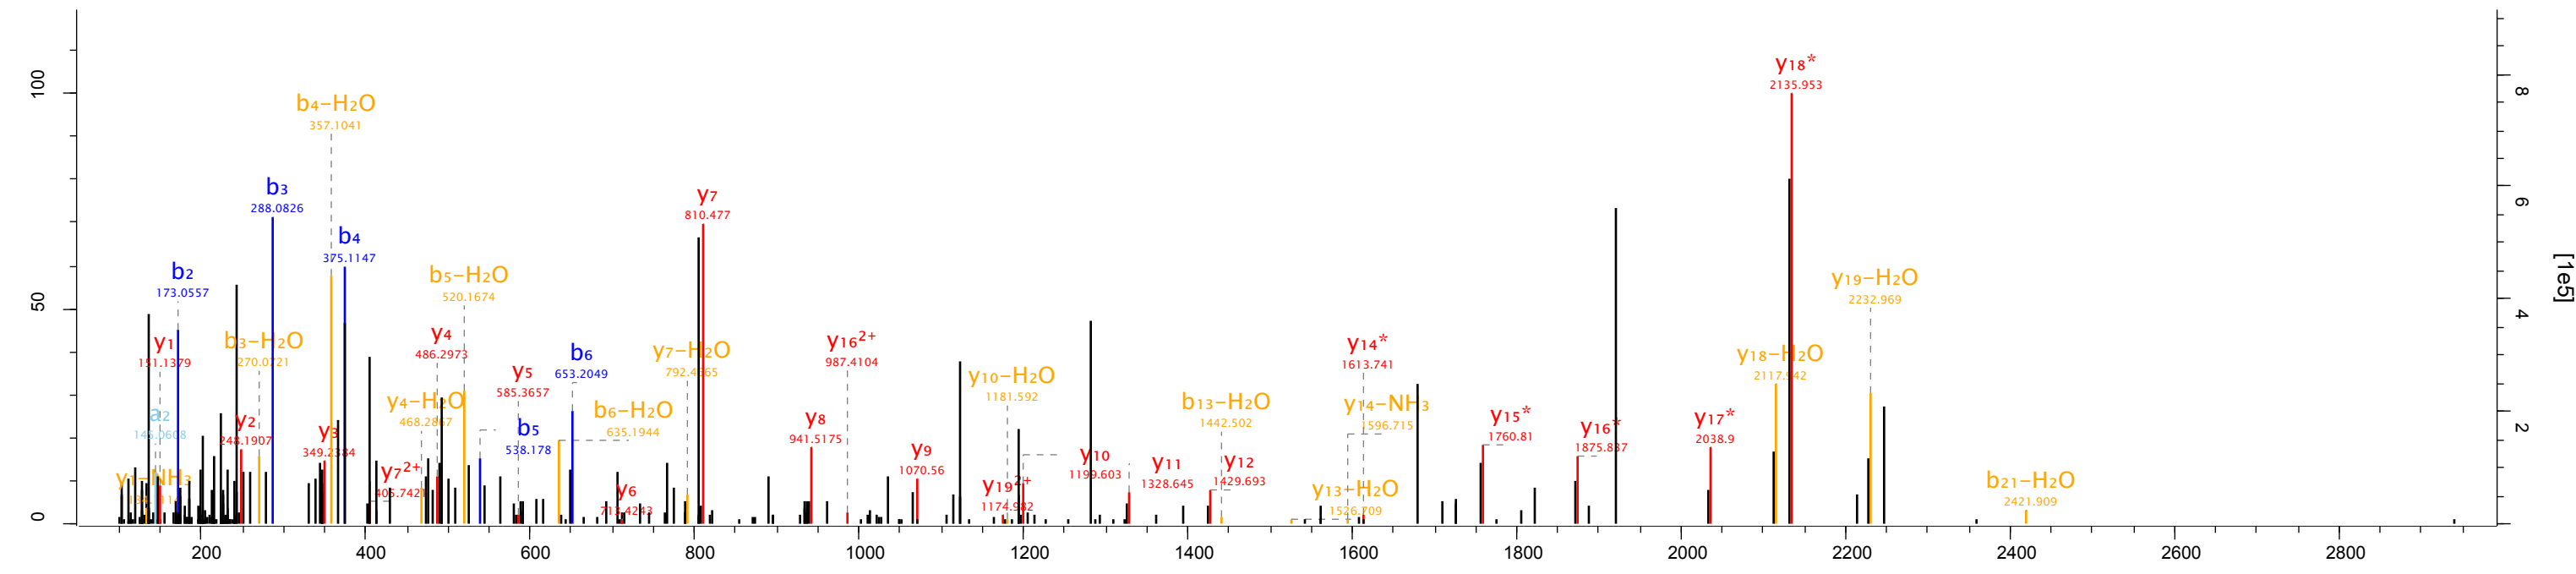

Sequence: - D G D S Y D P Y D F S D T E E E M P Q V H T P K -

Fragmentation sites (b and y ions) are indicated by brackets below the sequence:

- b2: G
- b3: D
- b4: S
- b5: Y
- b6: D
- y1: K
- y2: P
- y3: T
- y4: H
- y5: V
- y6: Q
- y7: P
- y8: M
- y9: E
- y10: E
- y11: E
- y12: T
- y14\*: S
- y15\*: F
- y16\*: D
- y17\*: Y
- y18\*: P
- y19-2+: D

Raw file Scan Method Score m/z Gene names  
 20150814\_A375SR\_Phospho\_BR2\_03 21114 FTMS; HCD 211.16 940.49 CREBBP

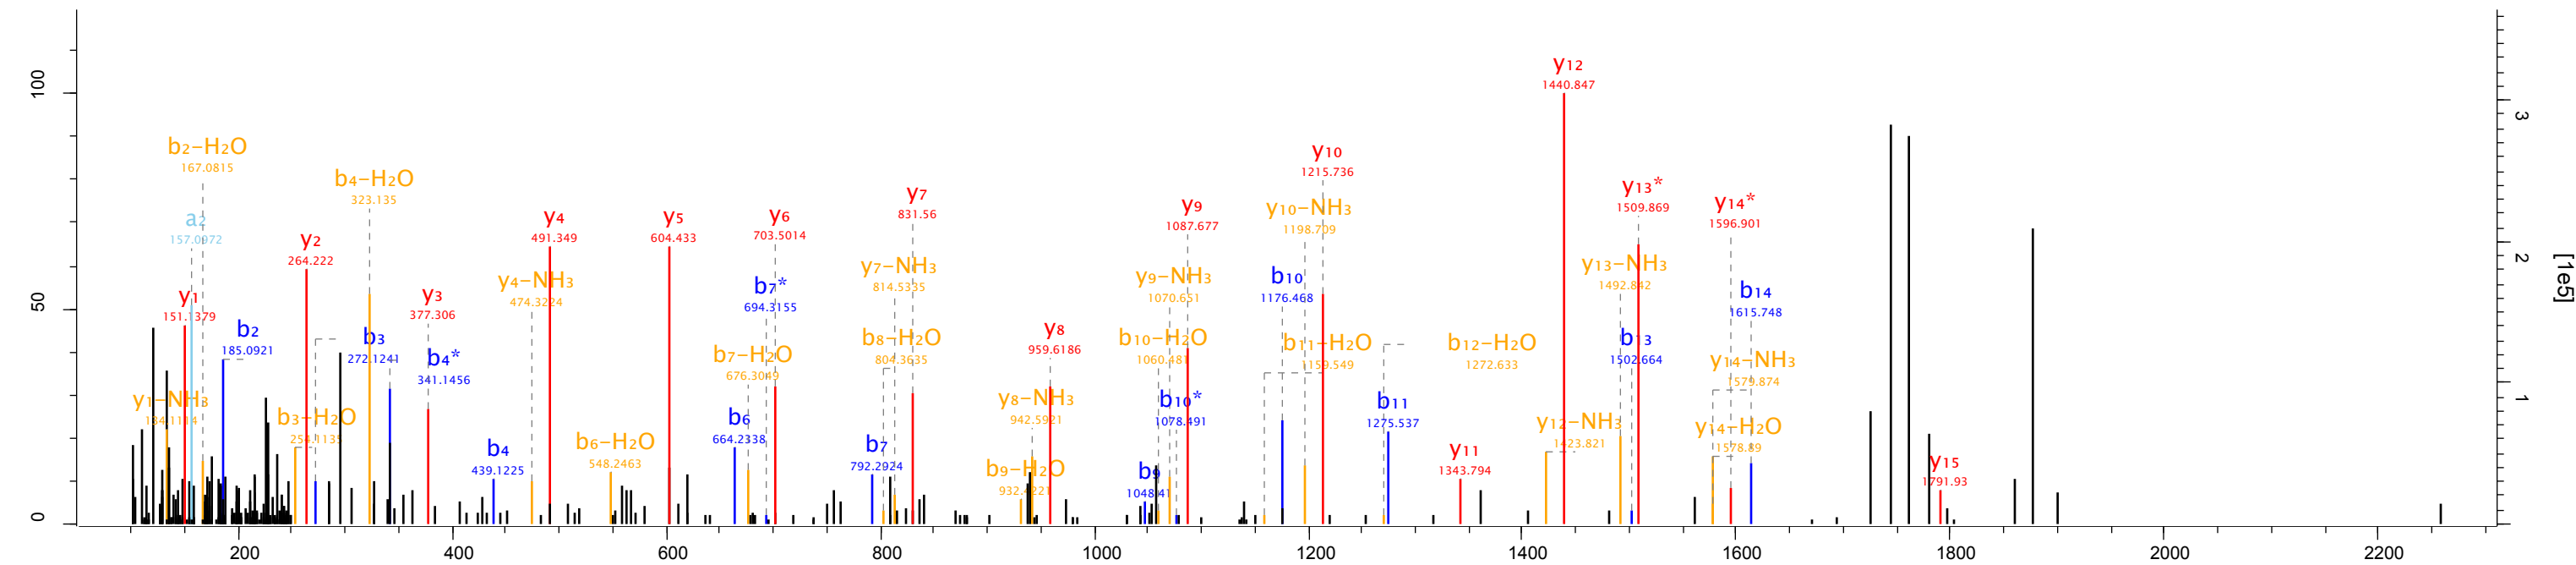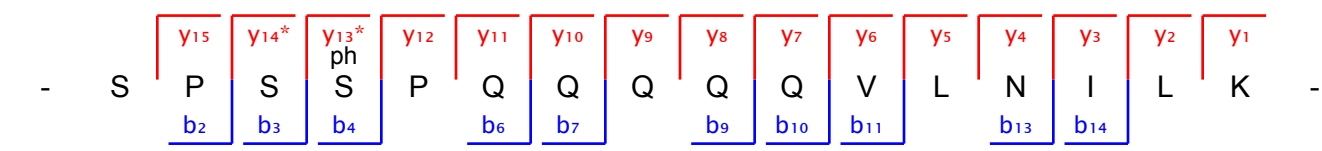

Raw file 20150814\_A375SR\_Phospho\_BR2\_03 Scan 21804 Method FTMS; HCD Score 115.05 m/z 917.43 Gene names DDHD1

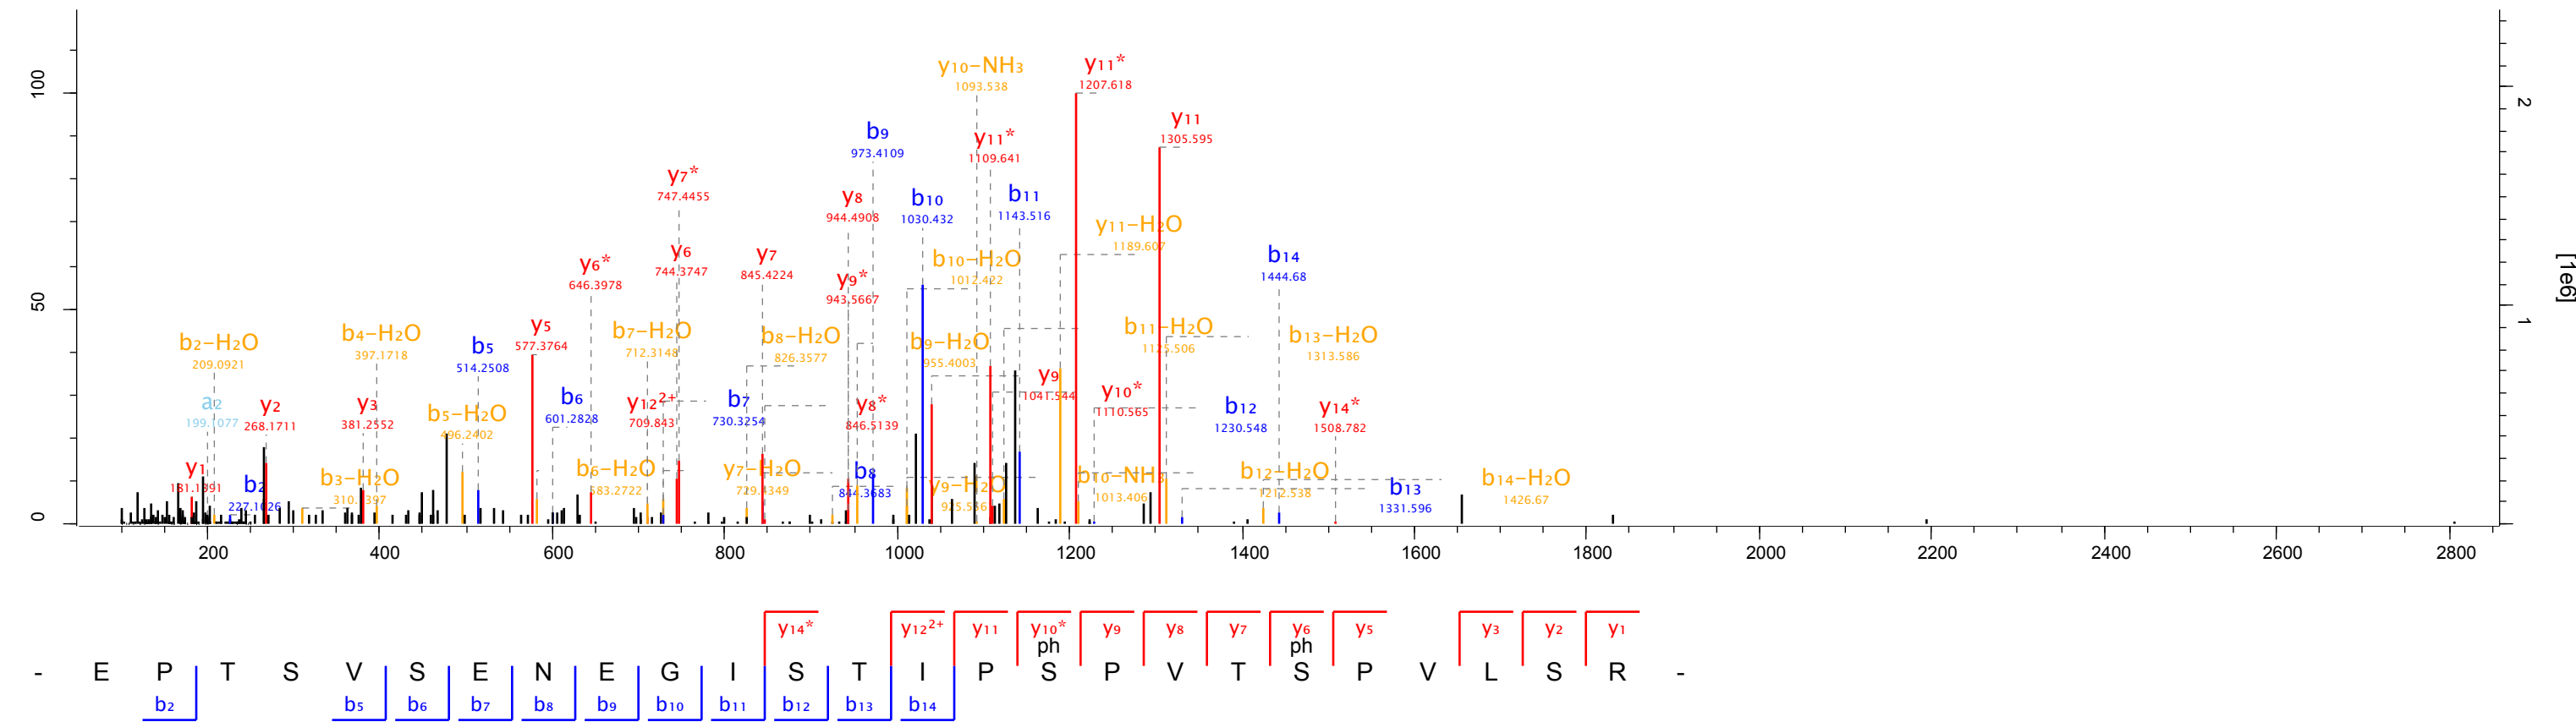

Raw file: 20150814\_A375SR\_Phospho\_BR2\_03  
 Scan: 2194 Method: FTMS; HCD Score: 72.52 m/z: 632.81 Gene names: VRK3

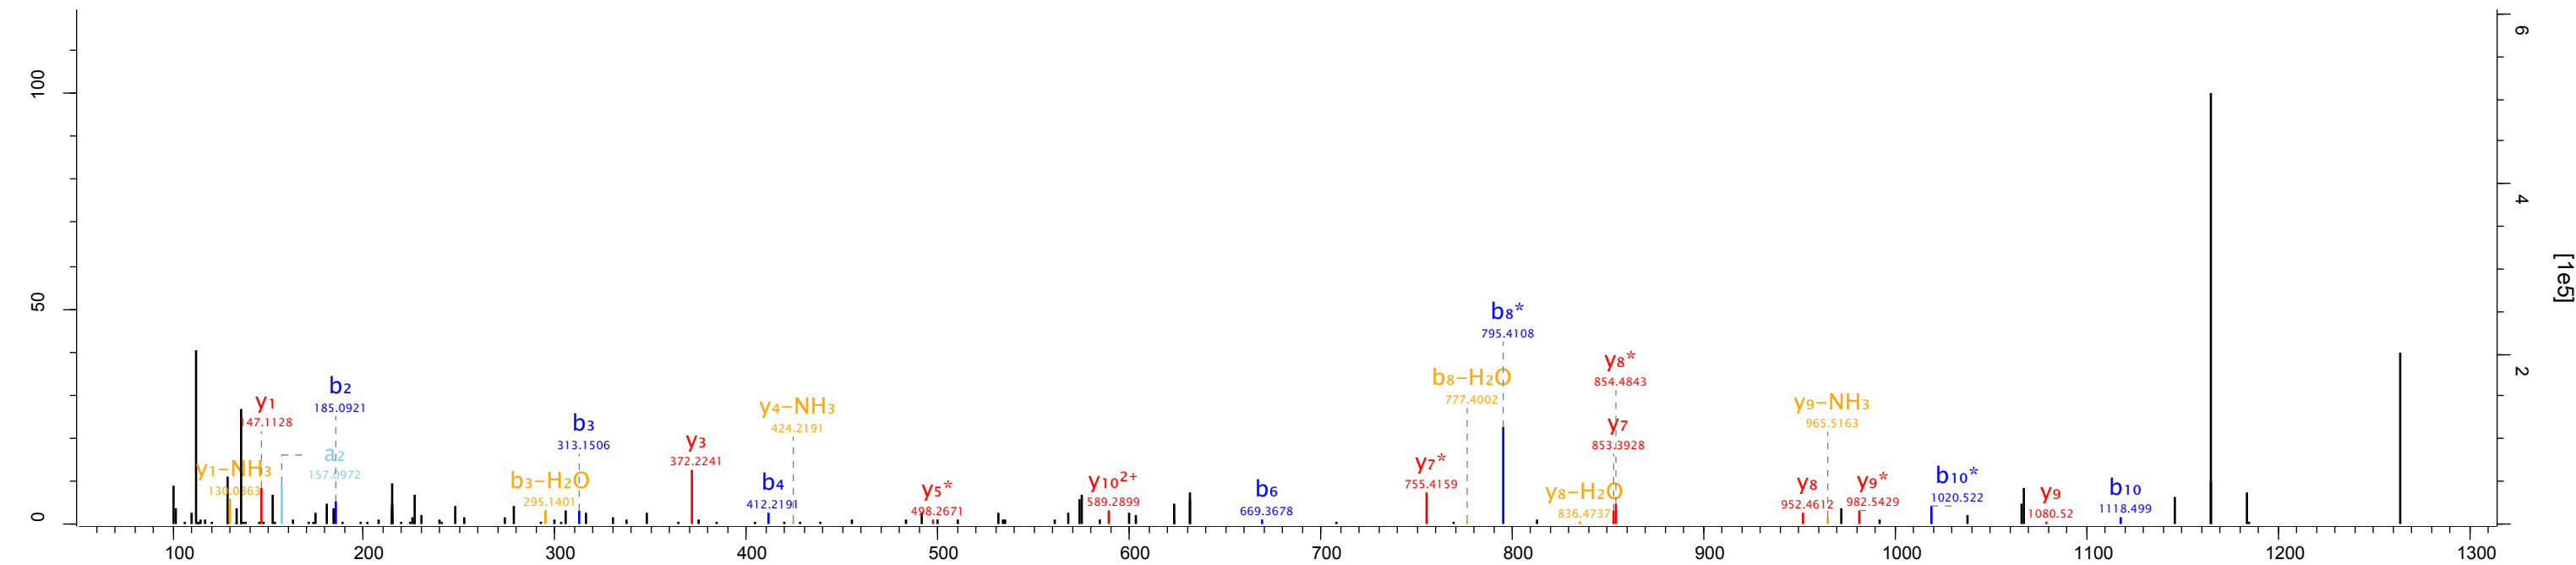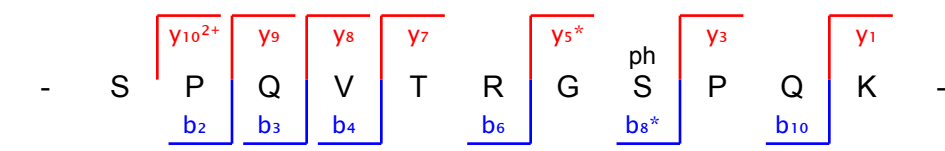

Raw file Scan Method Score m/z Gene names  
 20150814\_A375SR\_Phospho\_BR2\_03 22204 FTMS; HCD 231.44 975.45 EPHA2

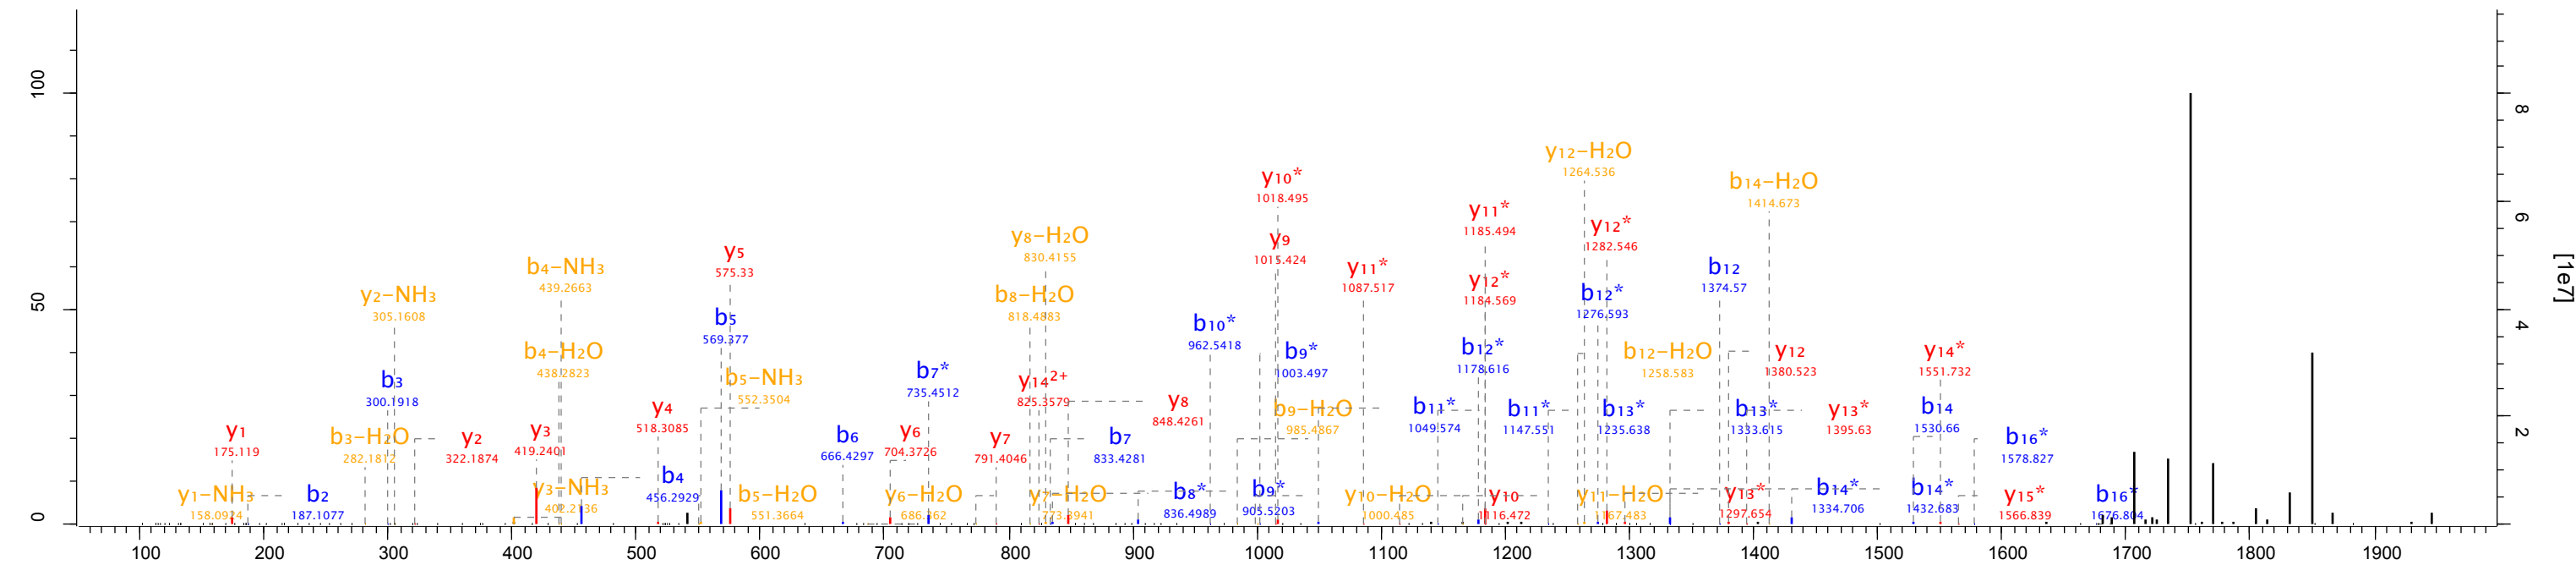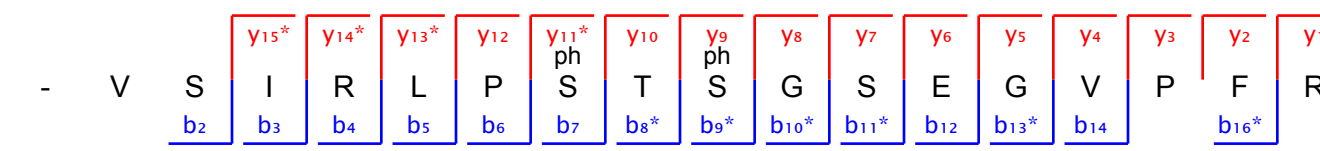



Raw file: 20150814\_A375SR\_Phospho\_BR2\_03  
 Scan: 22264 Method: FTMS; HCD Score: 277.38 m/z: 1201.99 Gene names: SOX10

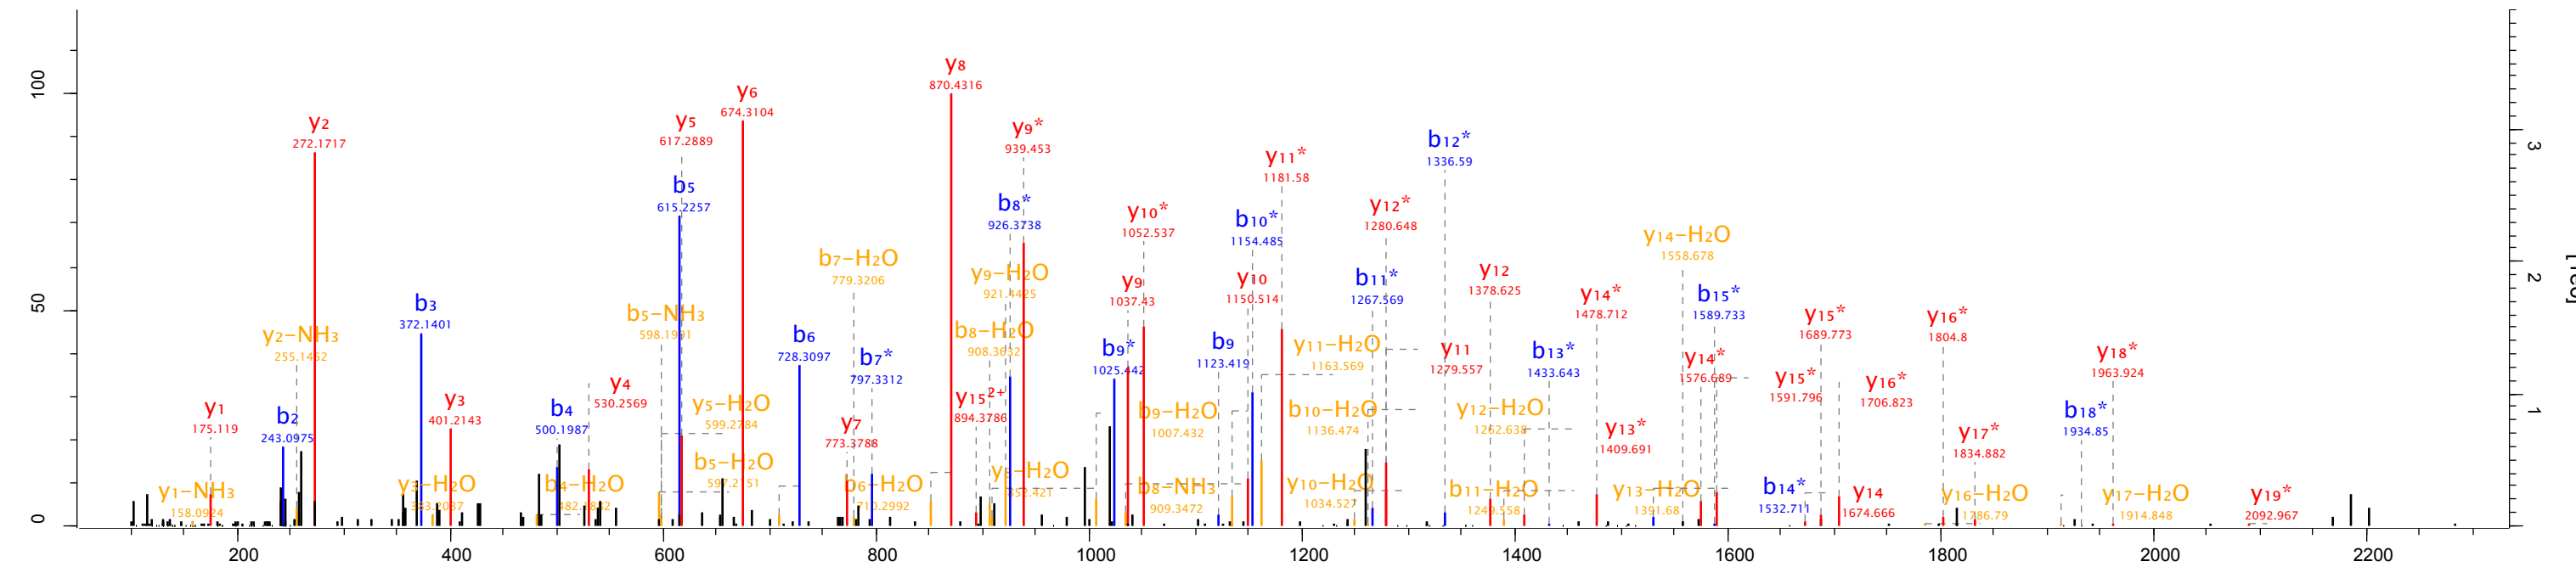

ac - A E E Q D L S E V E L S P V G S E E P R -

y19\*
y18\*
y17\*
y16\*
y15\*
y14
ph
y13\*
y12
y11
y10
y9
ph
y8
y7
y6
y5
y4
y3
y2
y1

b2
b3
b4
b5
b6
b7\*
b8\*
b9
b10\*
b11\*
b12\*
b13\*
b14\*
b15\*
b18\*

Raw file: 20150814\_A375SR\_Phospho\_BR2\_03  
 Scan: 22914 Method: FTMS; HCD Score: 61.52 m/z: 1024.42 Gene names: NFIB

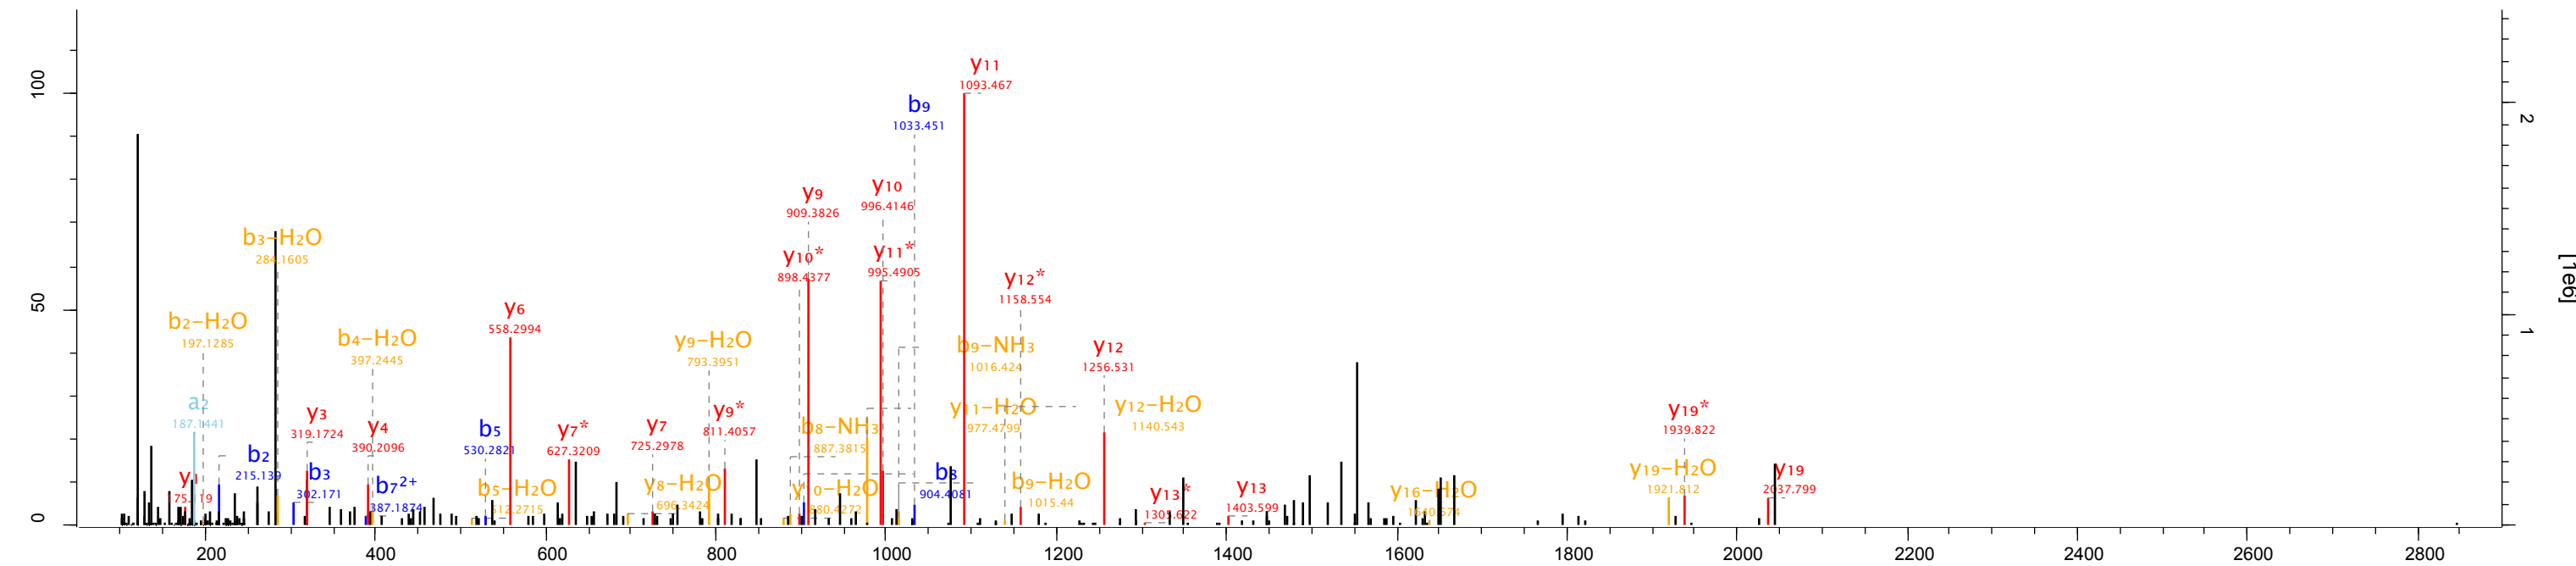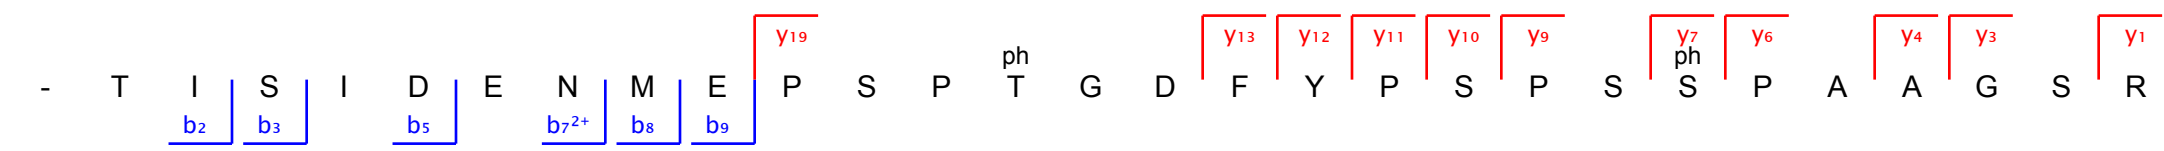

Raw file 20150814\_A375SR\_Phospho\_BR2\_03 Scan 23214 Method FTMS; HCD Score 167.97 m/z 1210.99 Gene names GTPBP1

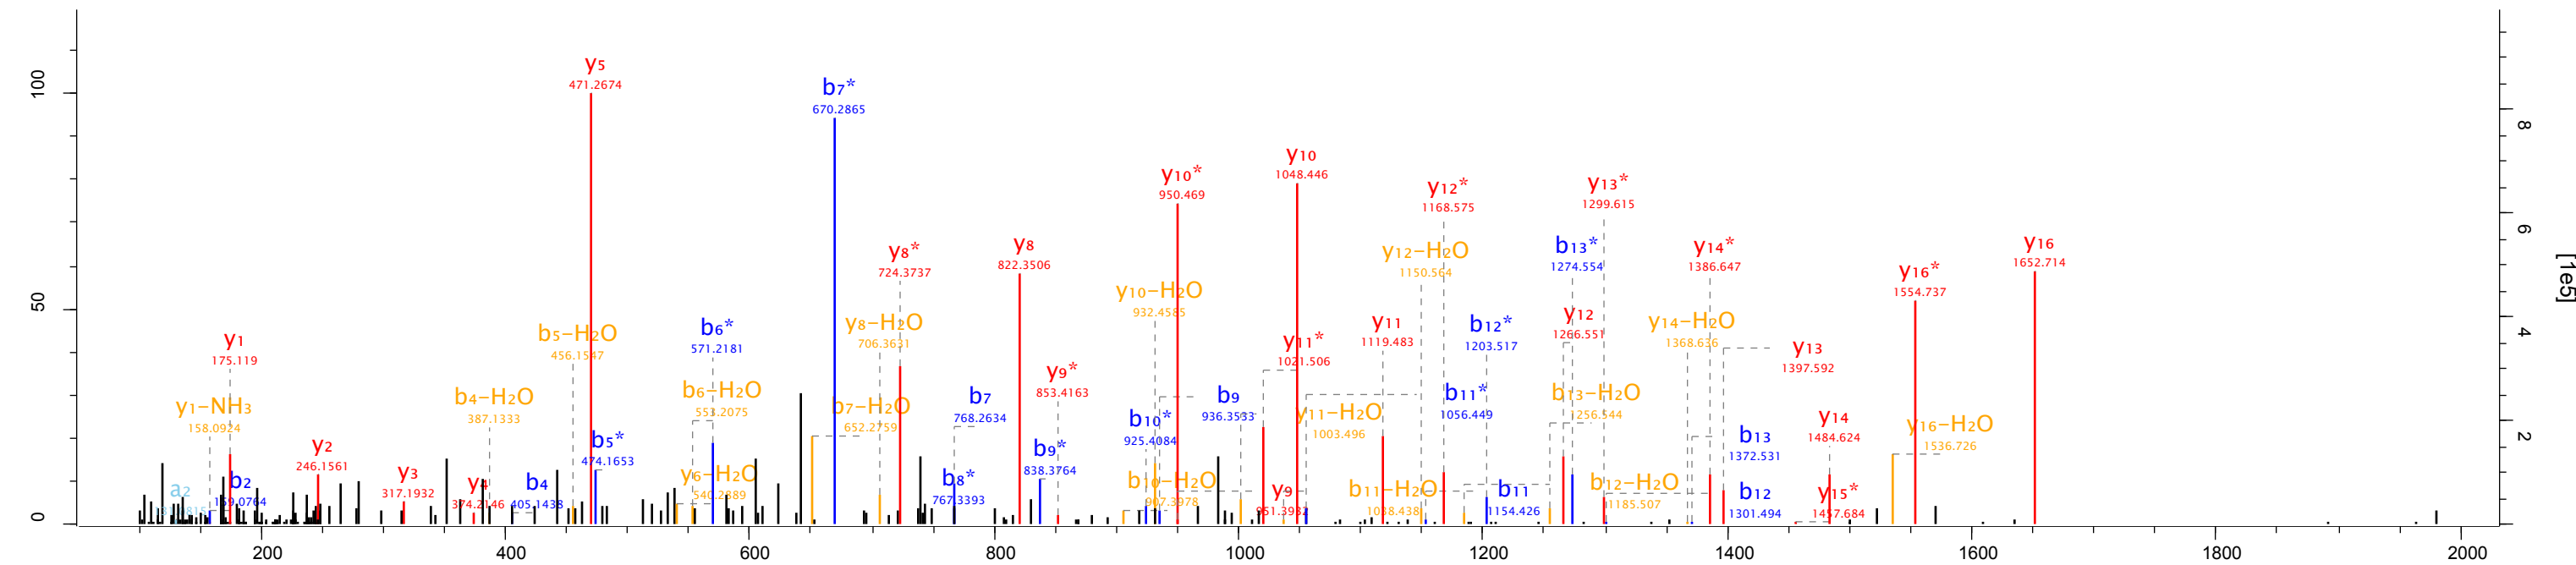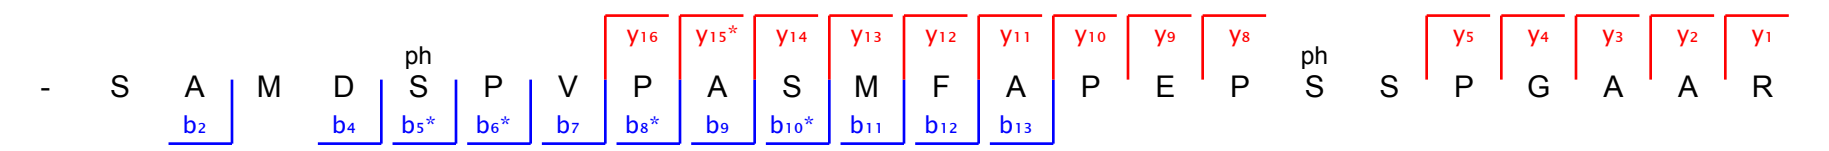

Raw file: 20150814\_A375SR\_Phospho\_BR2\_03  
 Scan: 23314 Method: FTMS; HCD Score: 227.37 m/z: 1113.85 Gene names: SIPA1L2

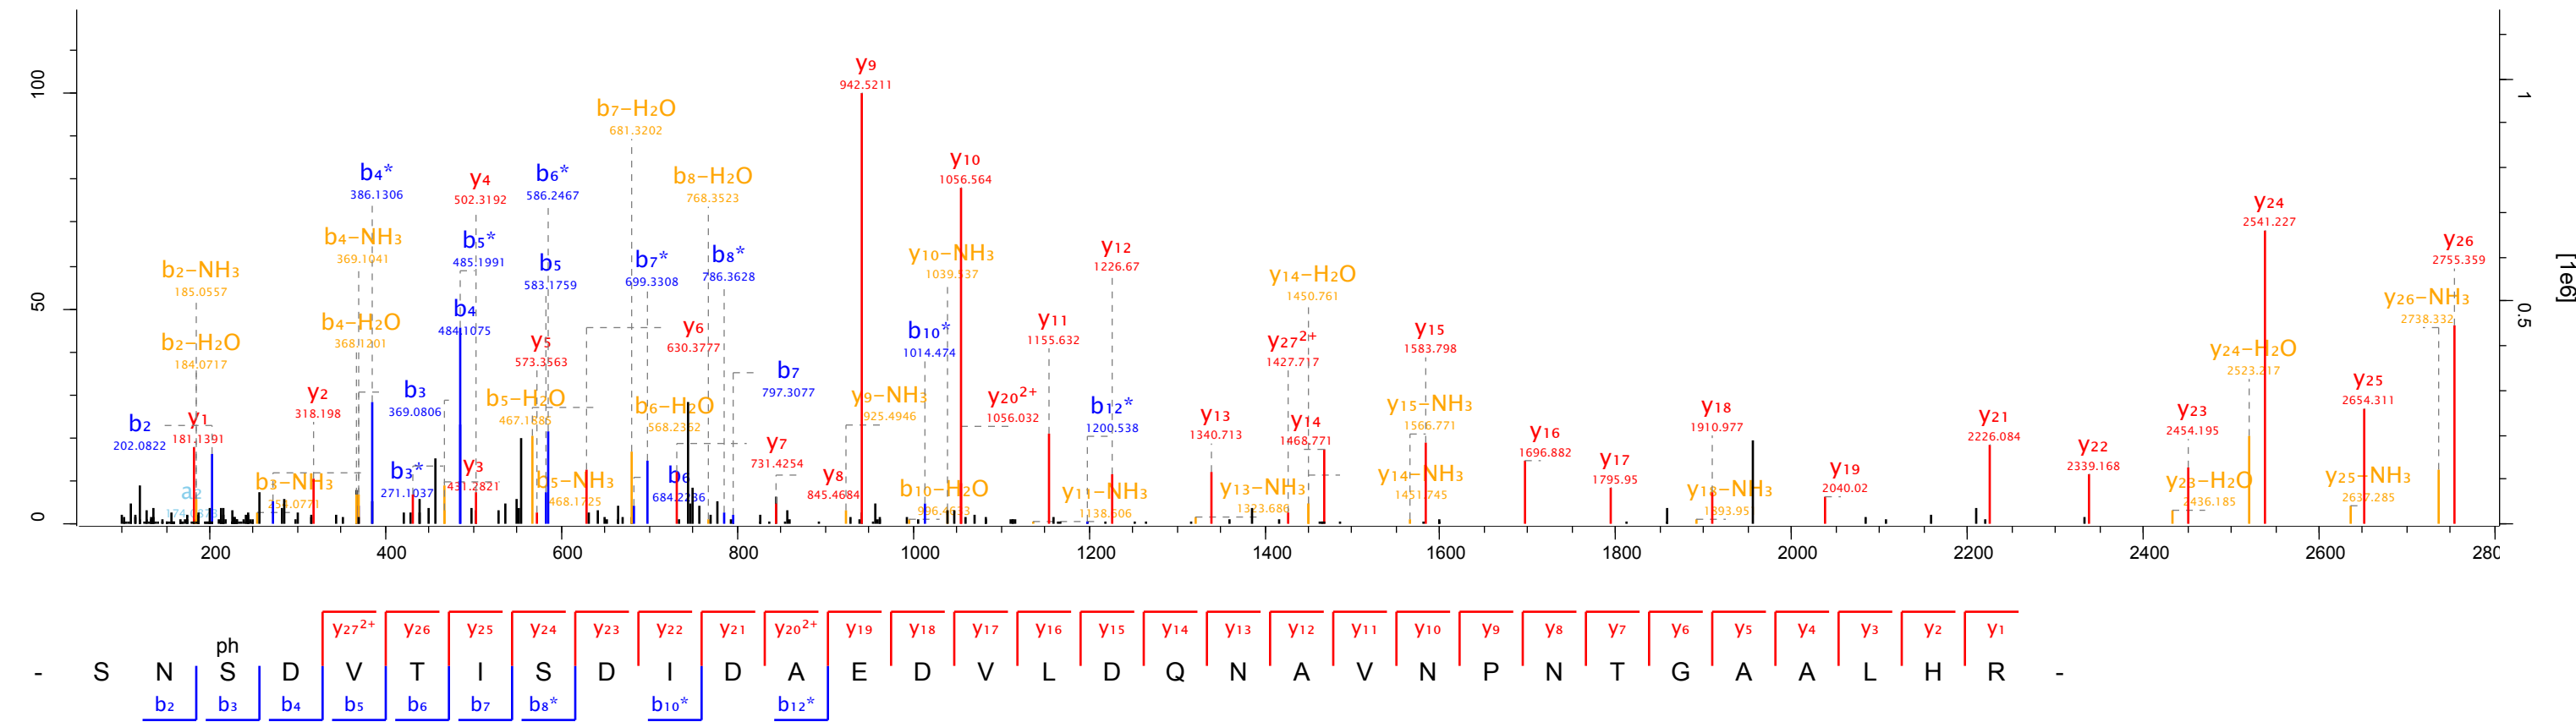

Raw file  
20150814\_A375SR\_Phospho\_BR2\_03

Scan 23364 Method FTMS; HCD Score 168.75 m/z 1000.24 Gene names EIF4EBP1

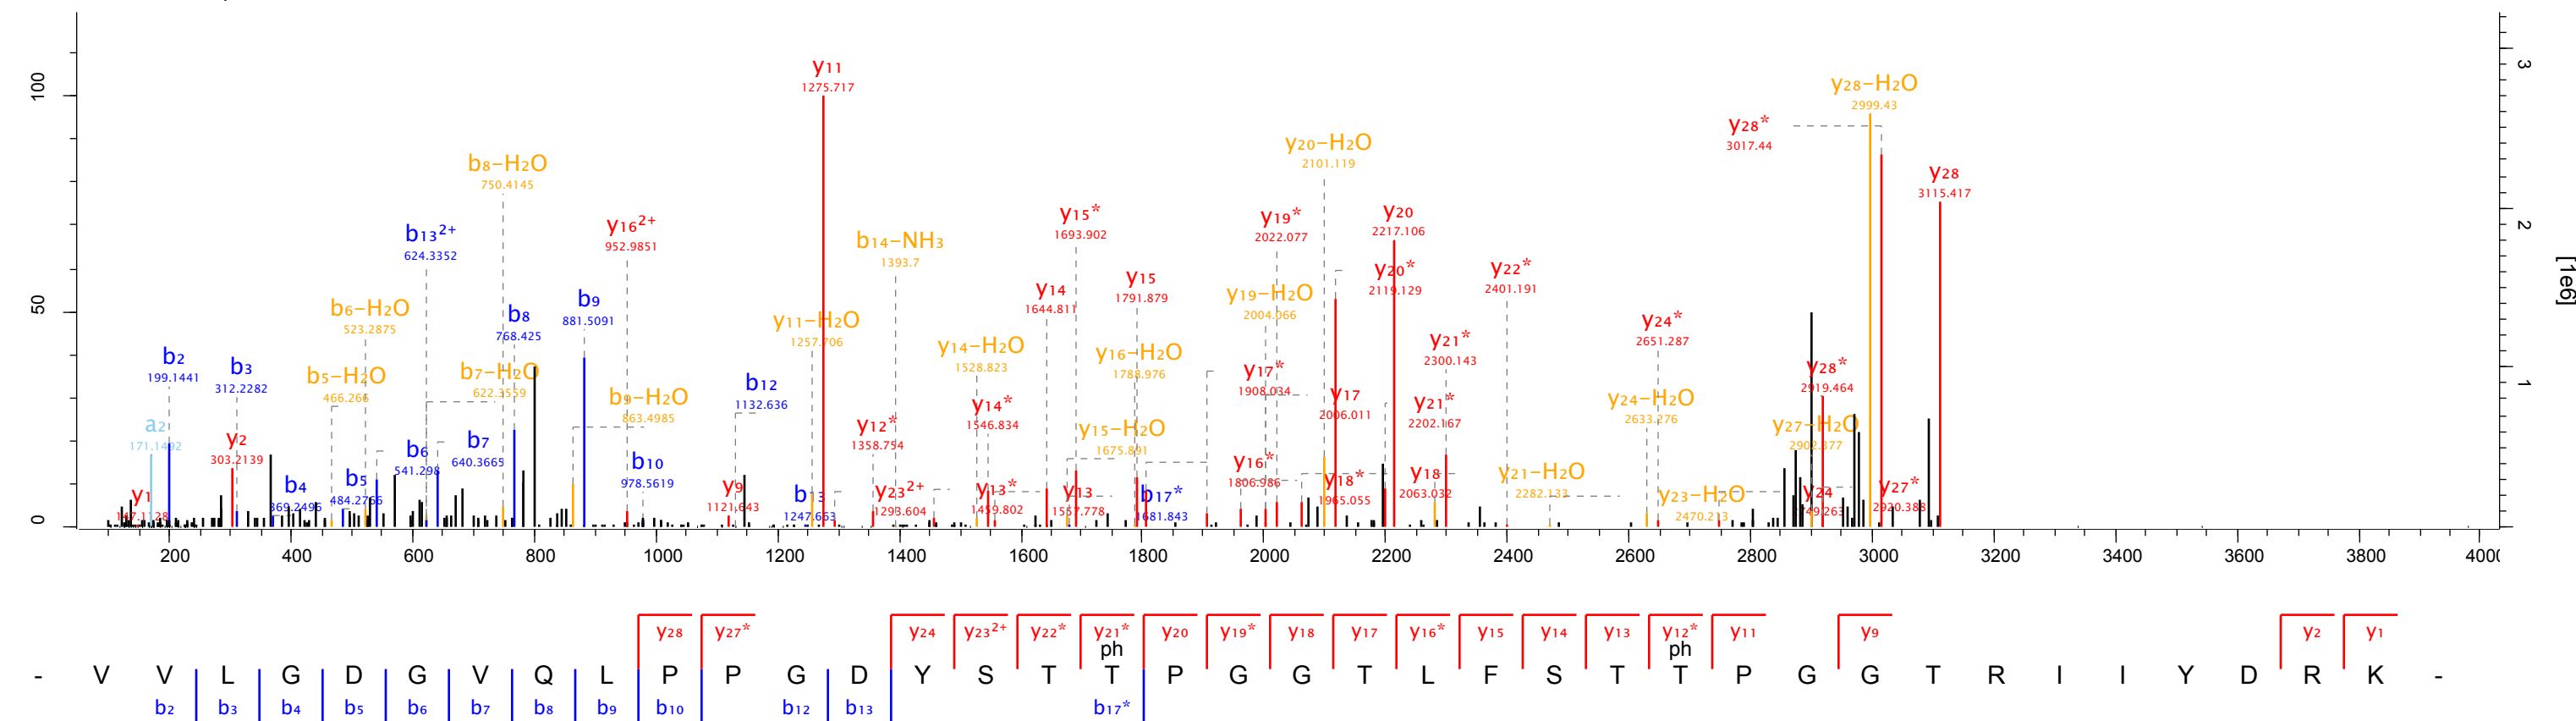

Raw file: 20150814\_A375SR\_Phospho\_BR2\_03  
 Scan: 23374 Method: FTMS; HCD Score: 78.67 m/z: 728.87 Gene names: SON

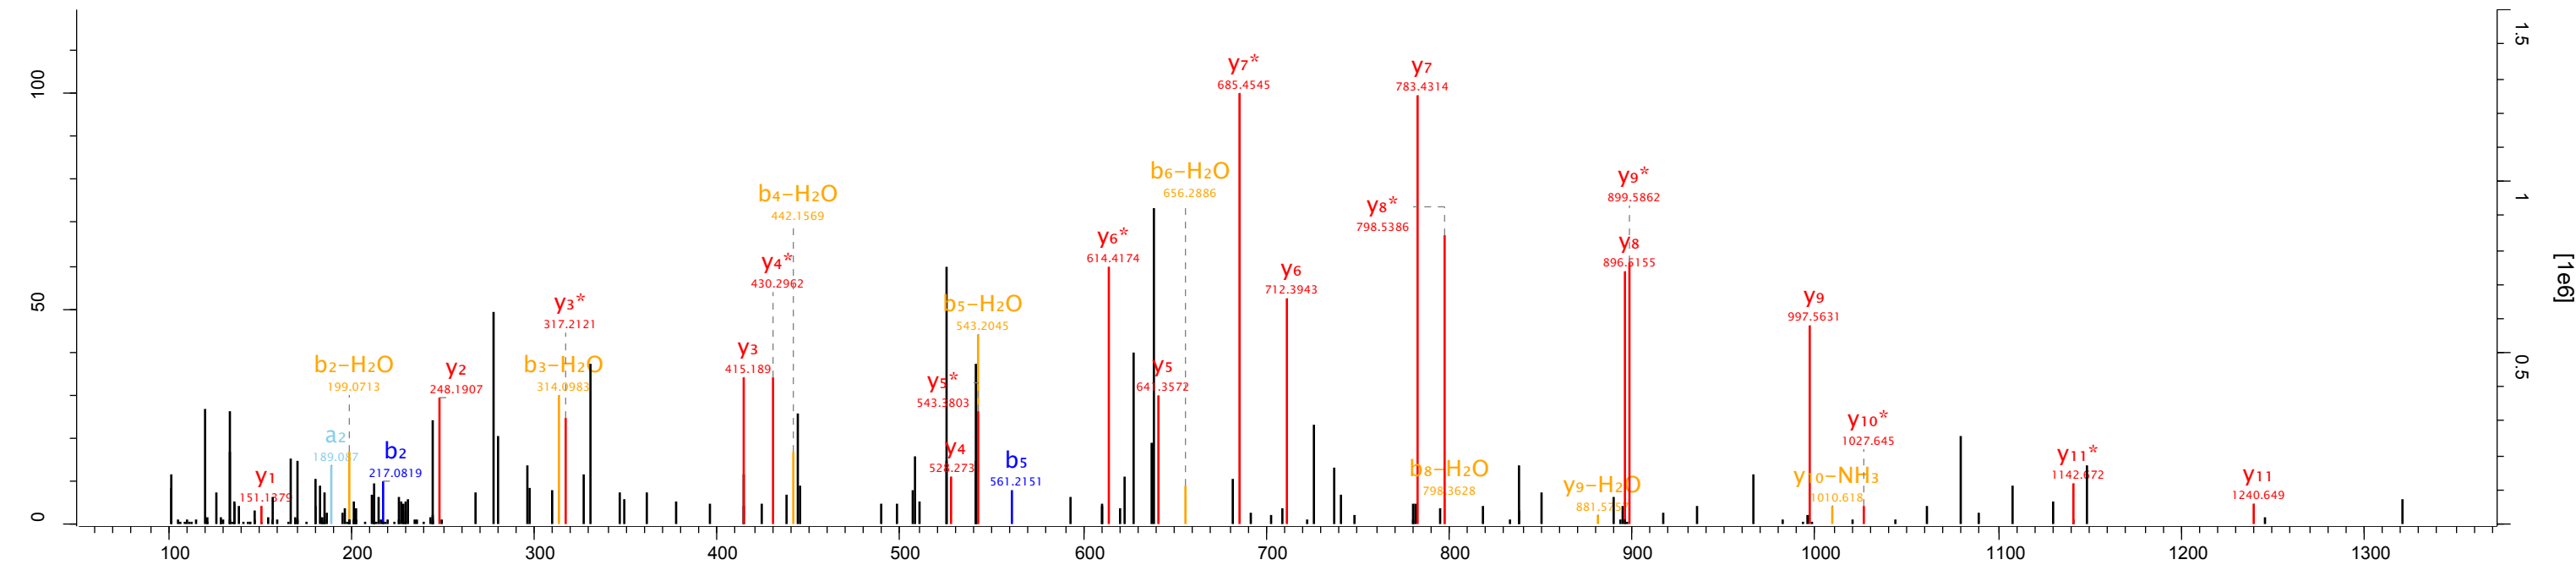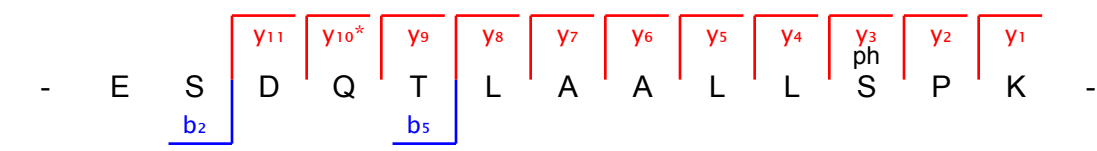

Raw file Scan Method Score m/z Gene names  
 20150814\_A375SR\_Phospho\_BR2\_03 24004 FTMS; HCD 212.66 925.43 UBE2O

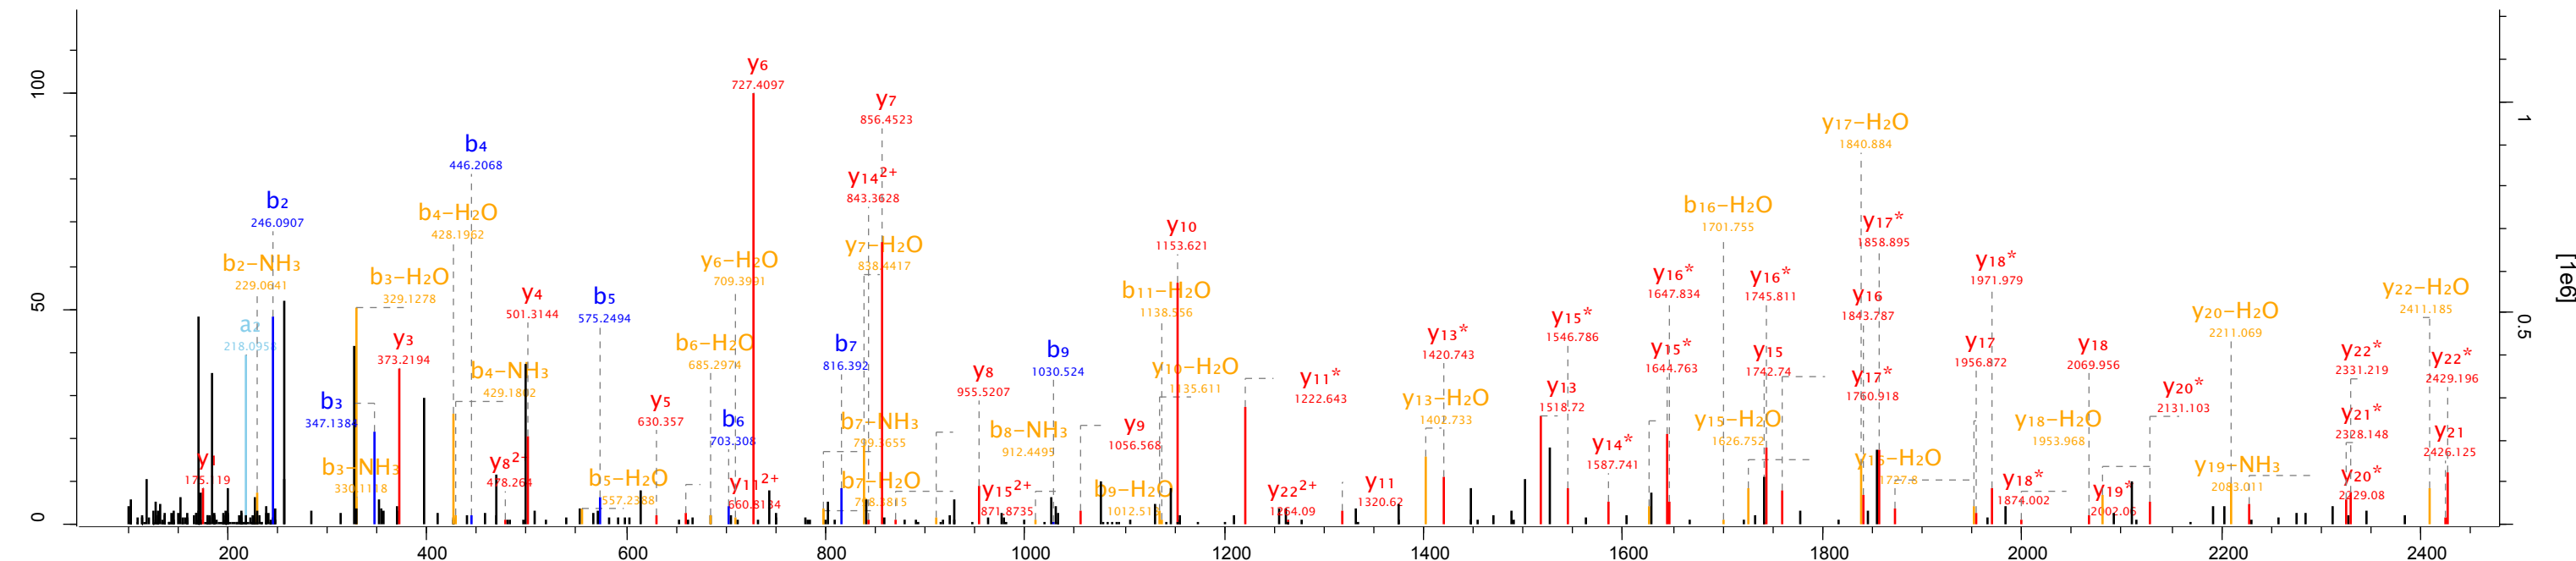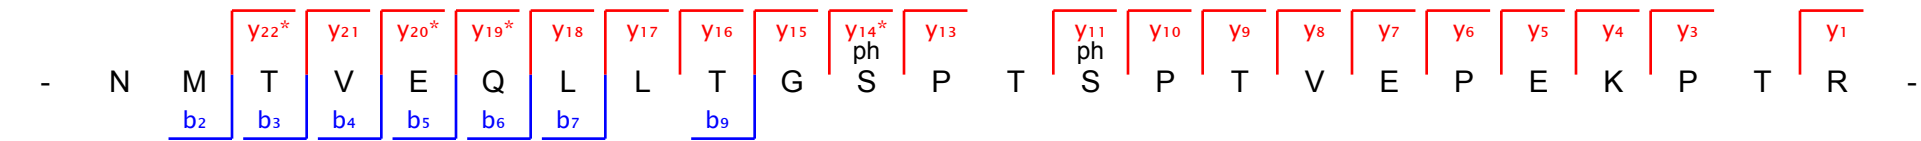

Raw file 20150814\_A375SR\_Phospho\_BR2\_03 Scan 24214 Method FTMS; HCD Score 158.52 m/z 879.37 Gene names NUP153

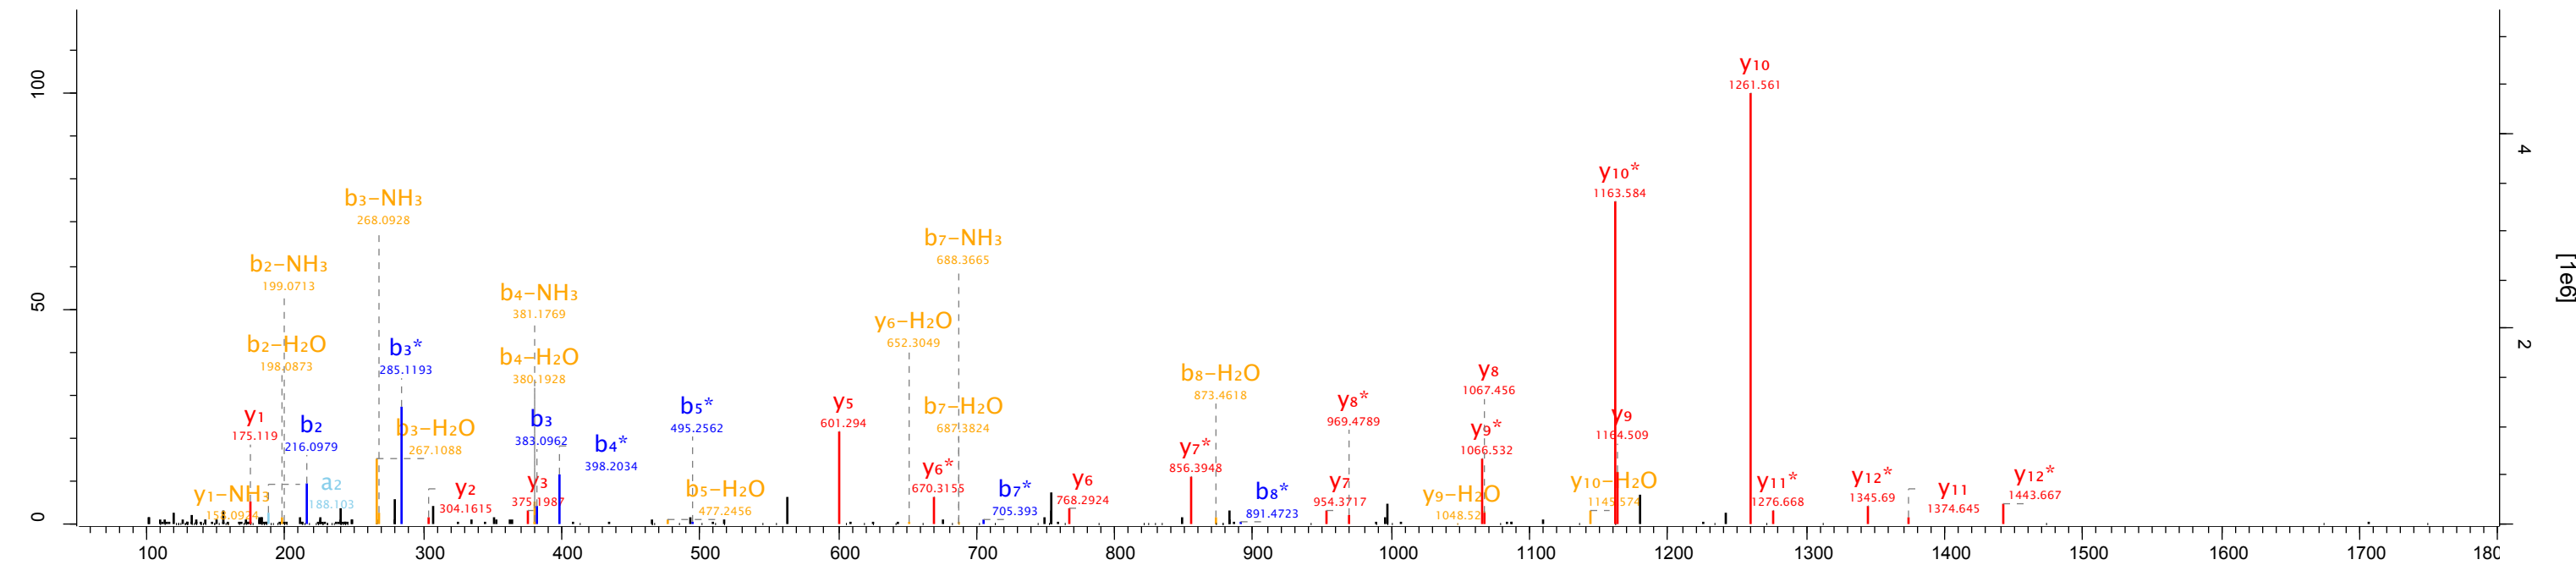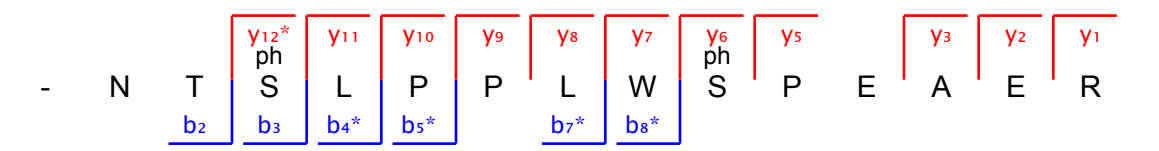



Raw file: 20150814\_A375SR\_Phospho\_BR2\_03  
 Scan: 24324 Method: FTMS; HCD Score: 59.57 m/z: 890.74 Gene names: TLK1

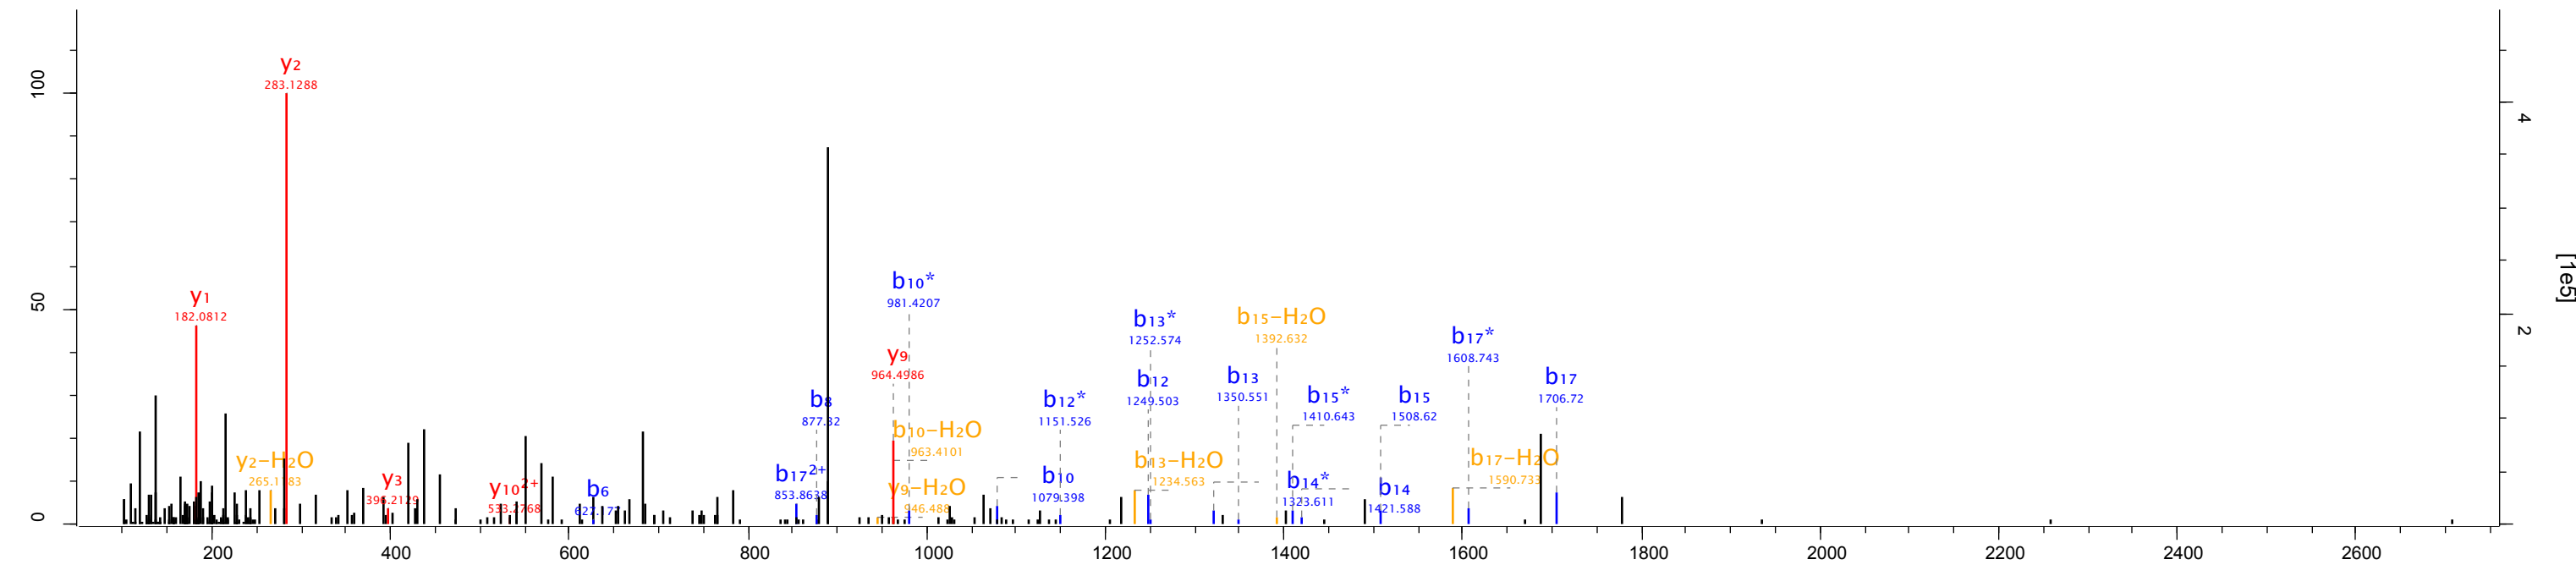

Sequence: - S N S S G N L H M A G L T A S P T P P S S S I I T Y -

Fragmentation sites (b ions): b<sub>6</sub>, b<sub>8</sub>, b<sub>10</sub>, b<sub>12</sub>, b<sub>13</sub>, b<sub>14</sub>, b<sub>15</sub>, b<sub>17</sub>

Fragmentation sites (y ions): y<sub>10</sub><sup>2+</sup>, y<sub>9</sub>, y<sub>3</sub>, y<sub>2</sub>, y<sub>1</sub>

Raw file 20150814\_A375SR\_Phospho\_BR2\_03 Scan 24364 Method FTMS; HCD Score 120.44 m/z 961.16 Gene names B4GALT1

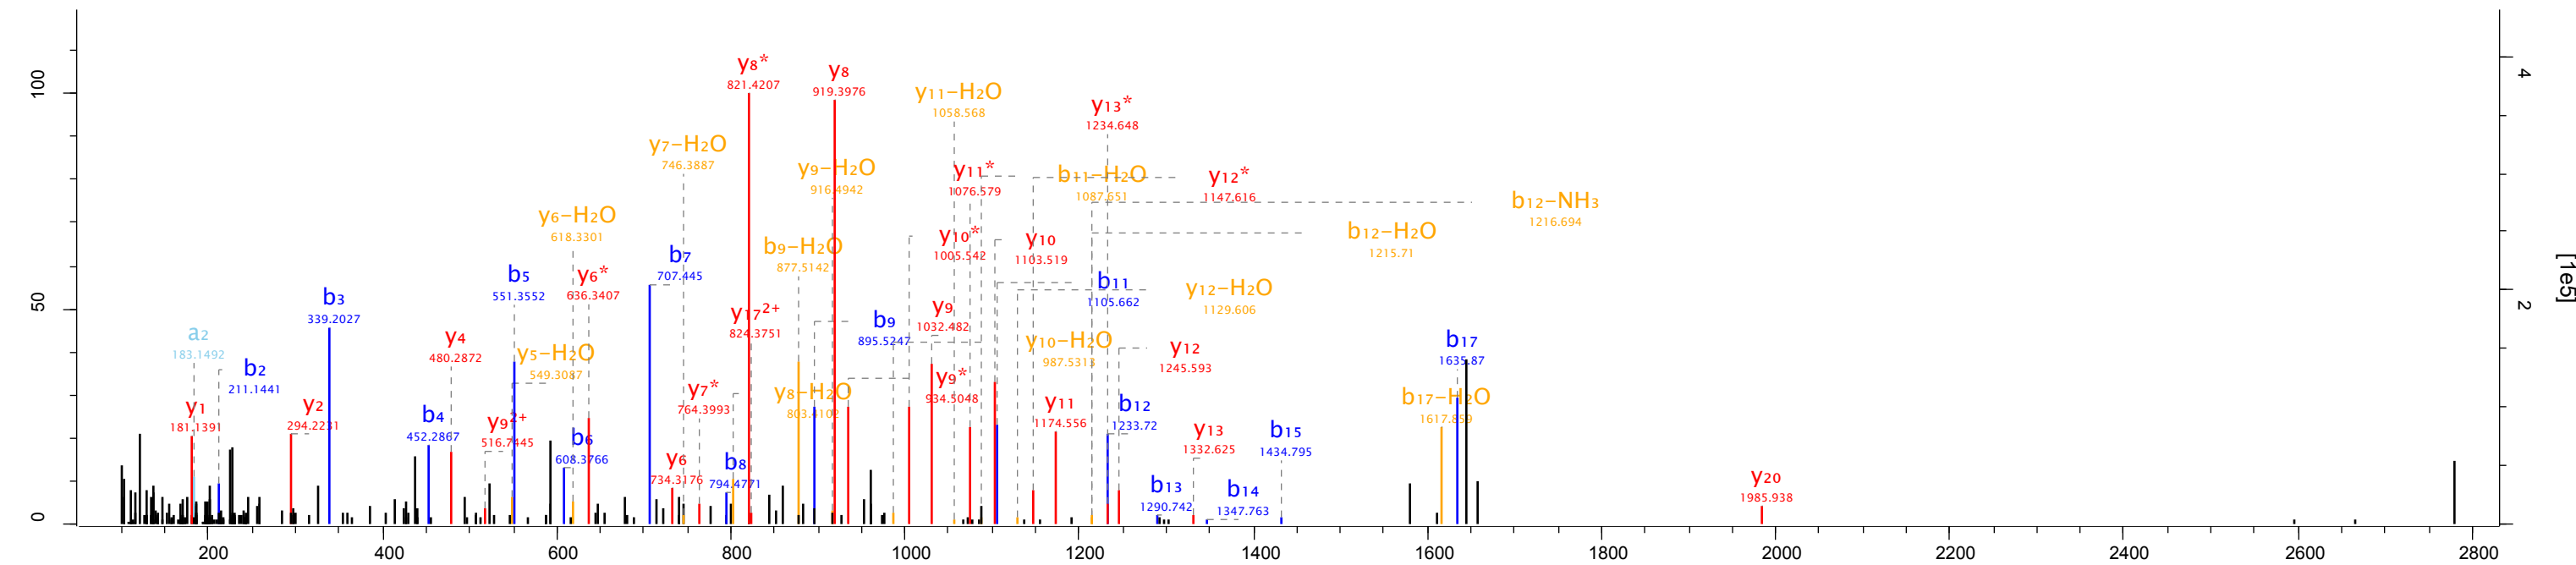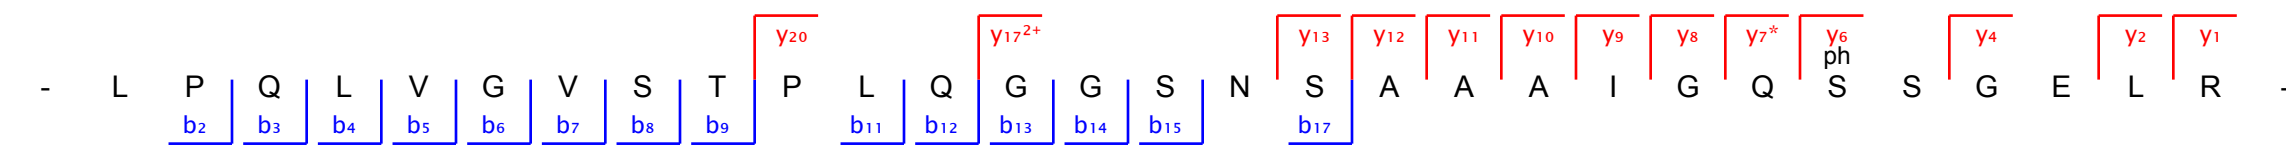

Raw file: 20150814\_A375SR\_Phospho\_BR2\_03  
 Scan: 24454 Method: FTMS; HCD Score: 365.11 m/z: 1360.59 Gene names: KNOP1

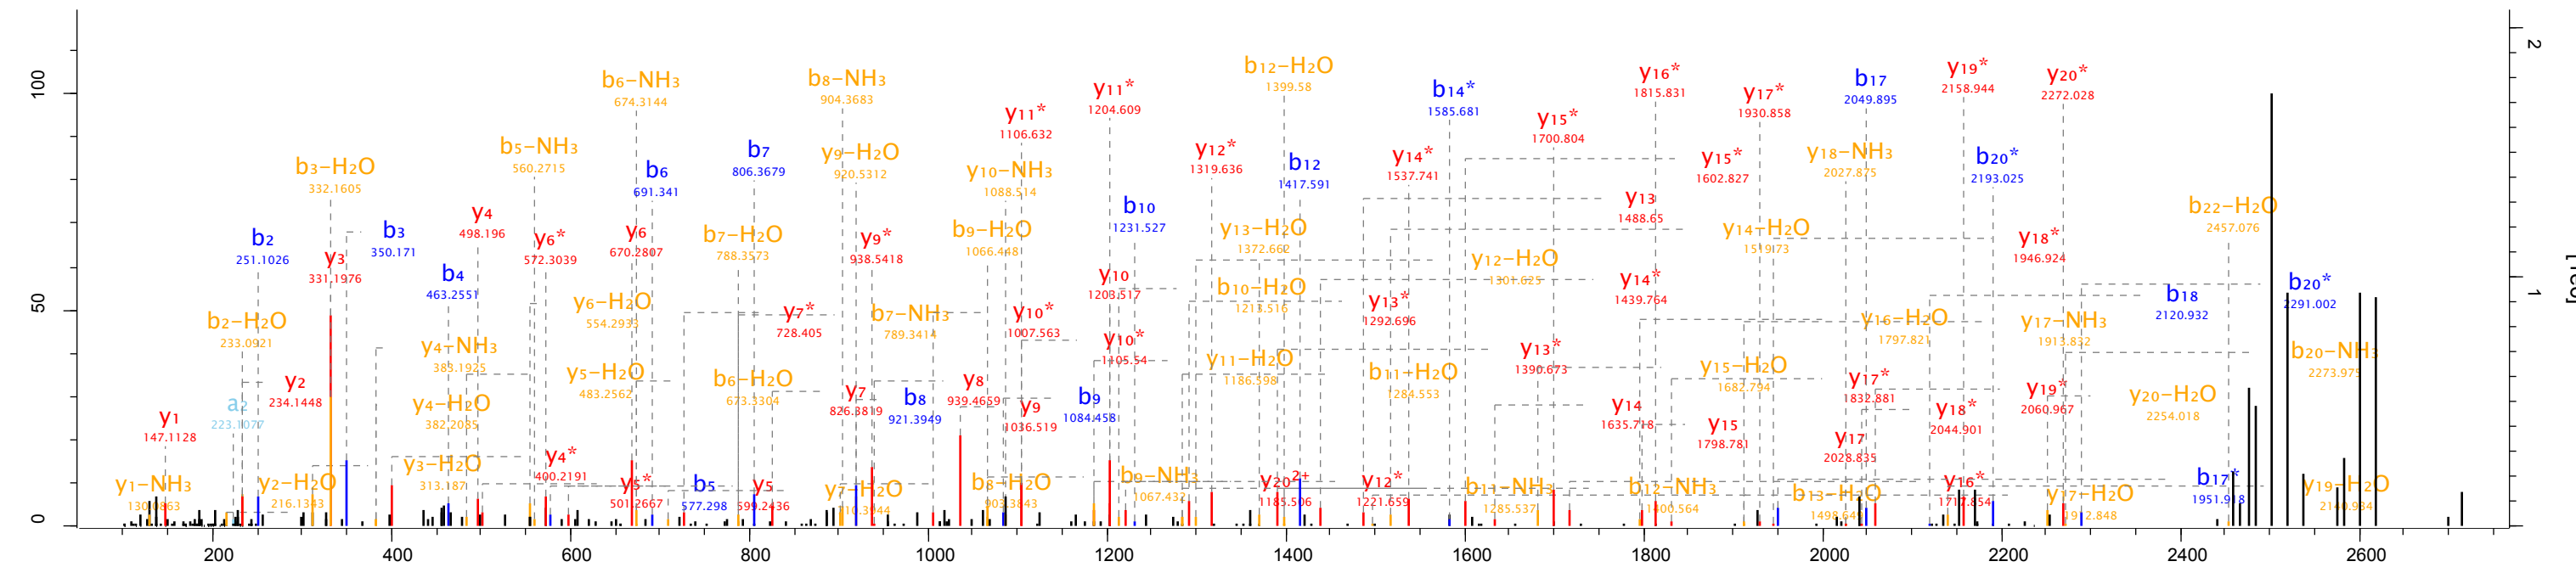

Protein sequence: Y S V L N N D D Y F A D V S P L R A T S P S K -

Fragmentation mapping (b-ions in blue, y-ions in red):

- b<sub>2</sub> (S), b<sub>3</sub> (V), b<sub>4</sub> (L), b<sub>5</sub> (N), b<sub>6</sub> (N), b<sub>7</sub> (D), b<sub>8</sub> (D), b<sub>9</sub> (Y), b<sub>10</sub> (F), b<sub>12</sub> (D), b<sub>14</sub>\* (S), b<sub>17</sub> (R), b<sub>18</sub> (A), b<sub>20</sub>\* (S)
- y<sub>1</sub> (K), y<sub>2</sub> (S), y<sub>3</sub> (P), y<sub>4</sub> (S), y<sub>5</sub> (T), y<sub>6</sub> (A), y<sub>7</sub> (R), y<sub>8</sub> (L), y<sub>9</sub> (P), y<sub>10</sub> (S), y<sub>11</sub>\* (V), y<sub>12</sub>\* (D), y<sub>13</sub> (A), y<sub>14</sub> (F), y<sub>15</sub> (Y), y<sub>16</sub>\* (D), y<sub>17</sub> (D), y<sub>18</sub>\* (N), y<sub>19</sub>\* (N), y<sub>20</sub>\* (L)

Raw file  
20150814\_A375SR\_Phospho\_BR2\_03

Scan 24504 Method FTMS; HCD Score 93.91 m/z 799.05 Gene names TRIM56

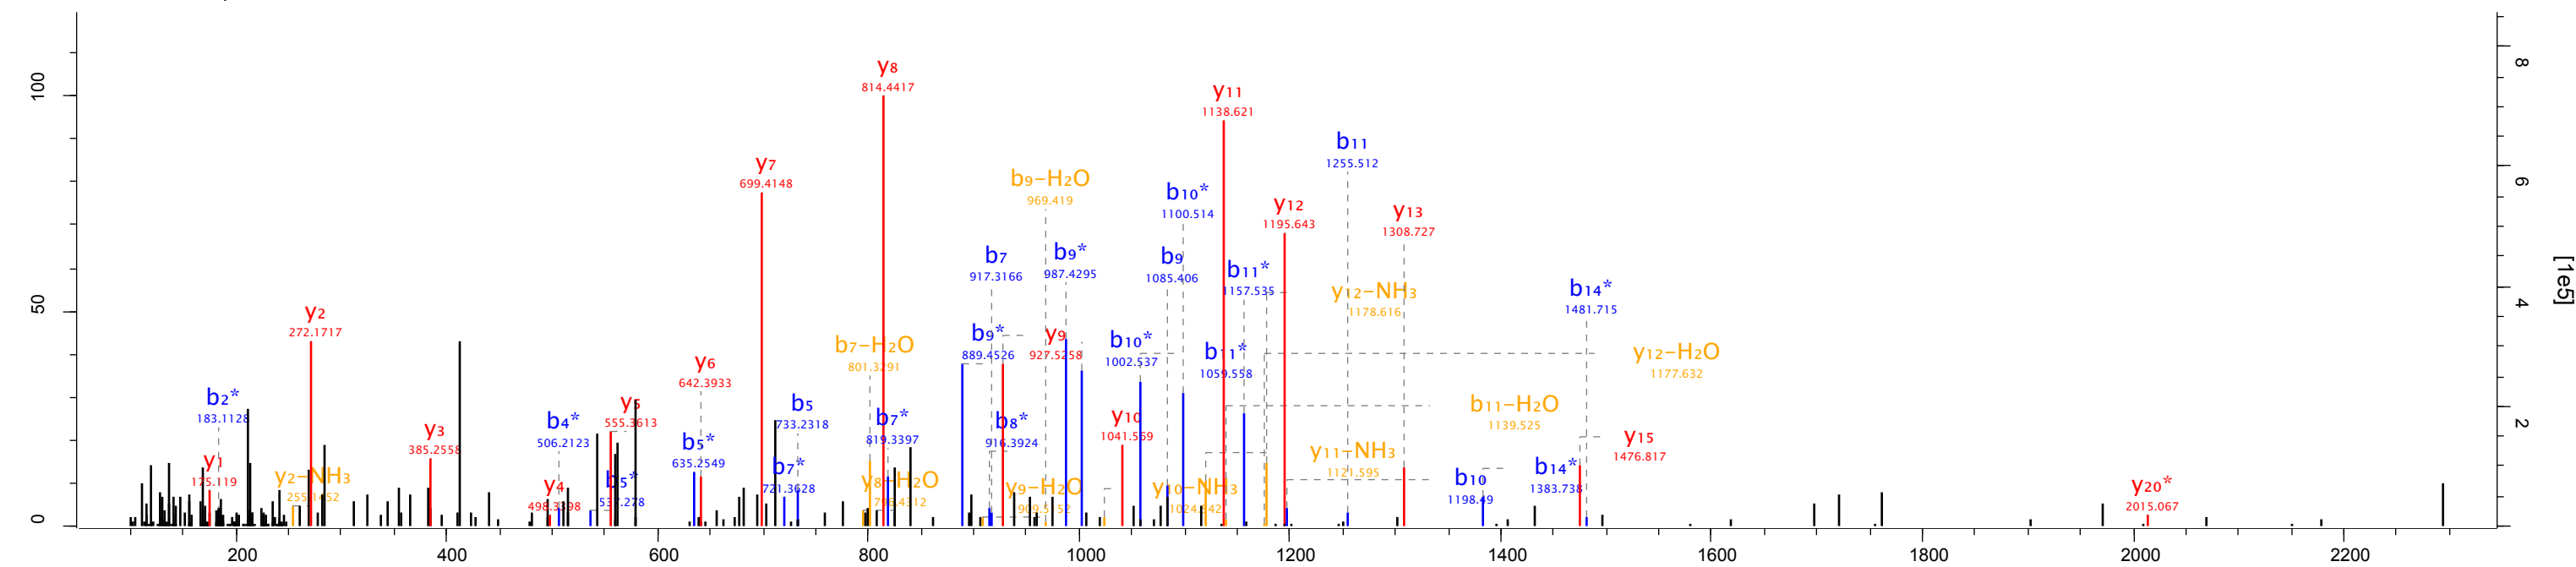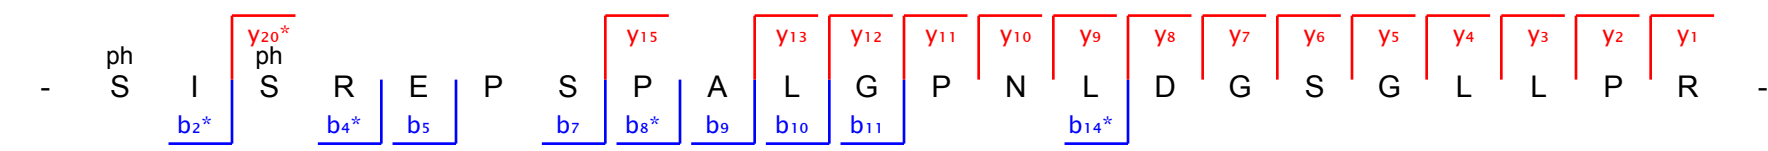

Raw file 20150814\_A375SR\_Phospho\_BR2\_03 Scan 25124 Method FTMS; HCD Score 127.76 m/z 995.43 Gene names OTUB1

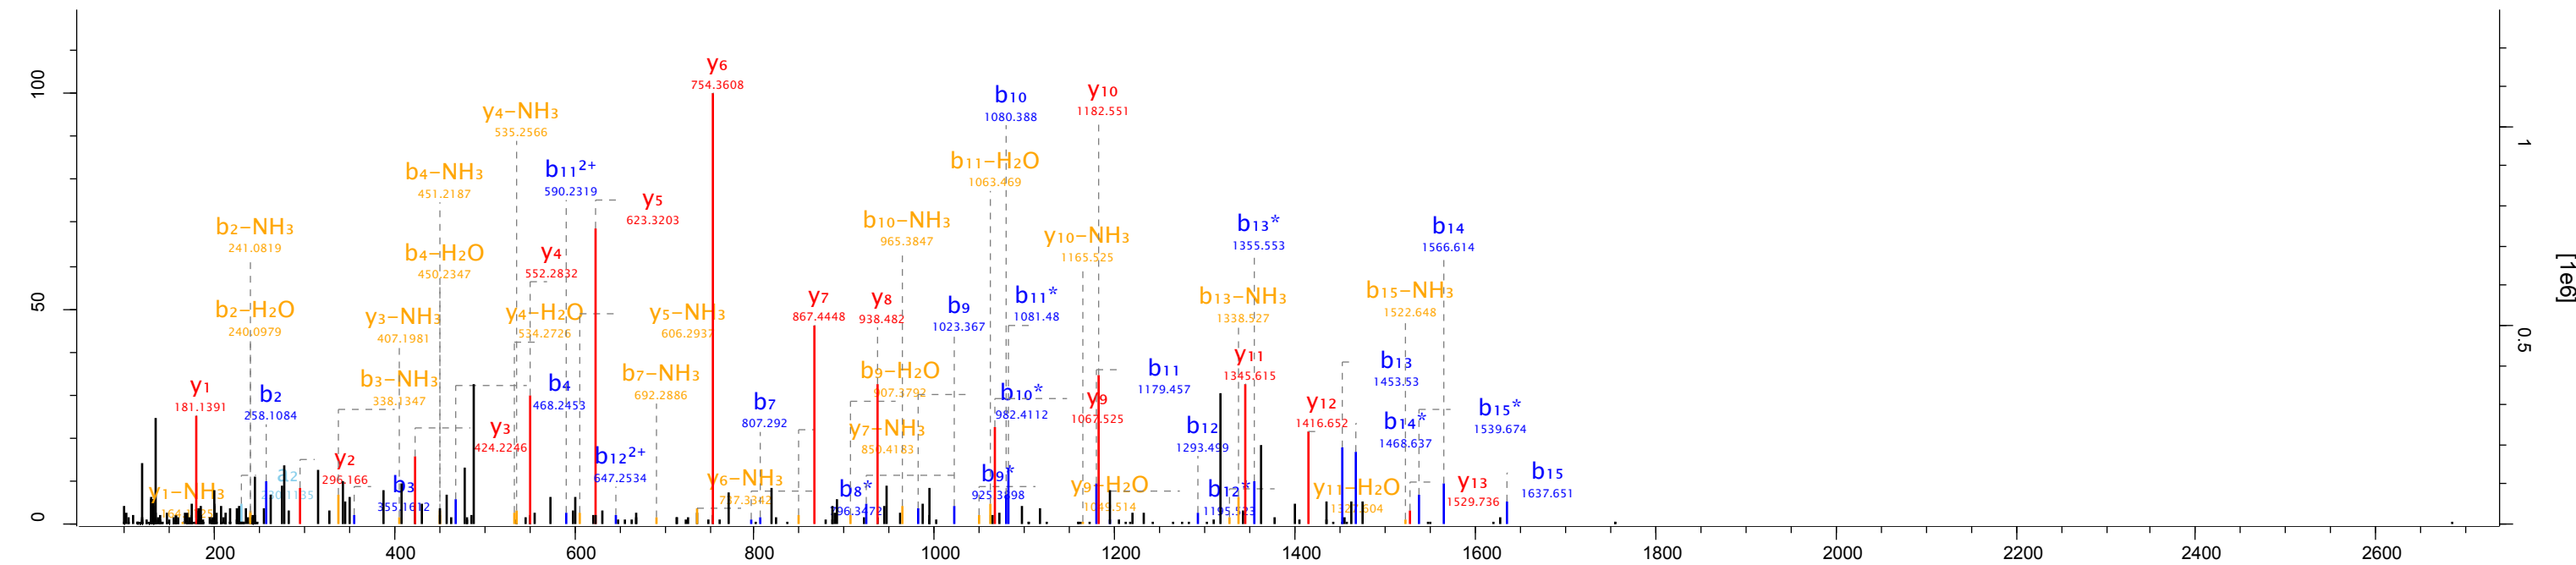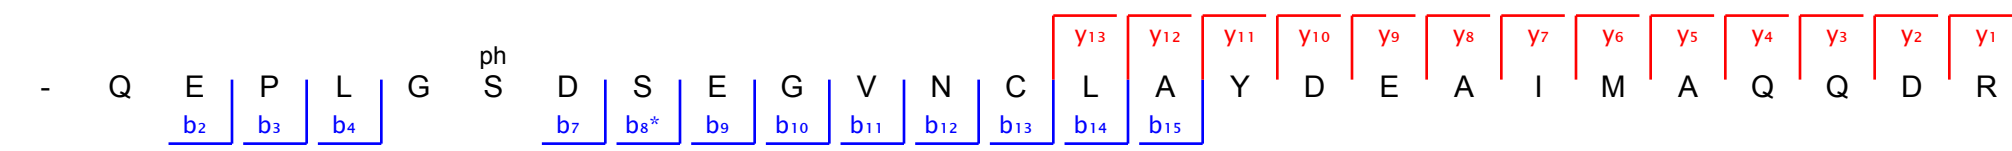

Raw file: 20150814\_A375SR\_Phospho\_BR2\_03  
 Scan: 26034 Method: FTMS; HCD Score: 106.18 m/z: 861.38 Gene names: FAM21C;FAM21D;FAM21A

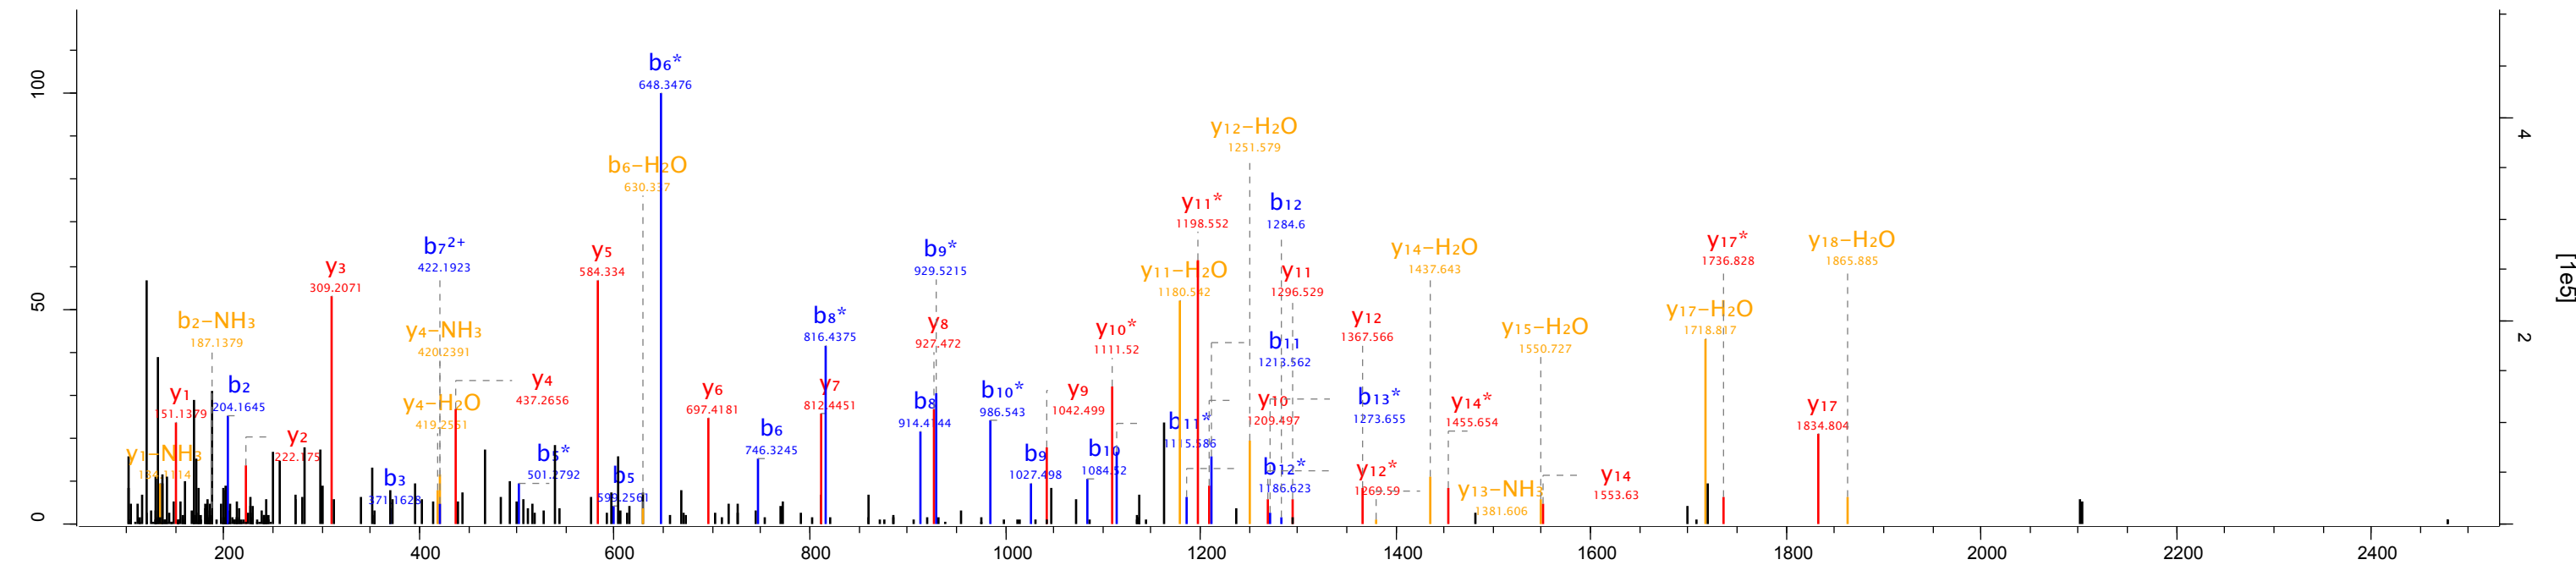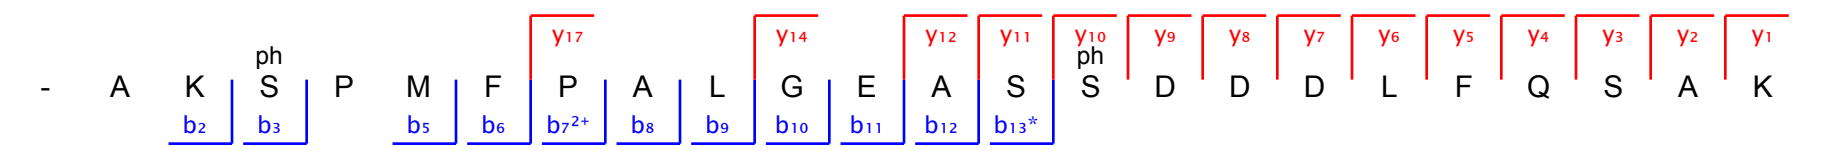

Raw file Scan Method Score m/z Gene names  
 20150814\_A375SR\_Phospho\_BR2\_03 26044 FTMS; HCD 186.91 1045.68 MYO5A

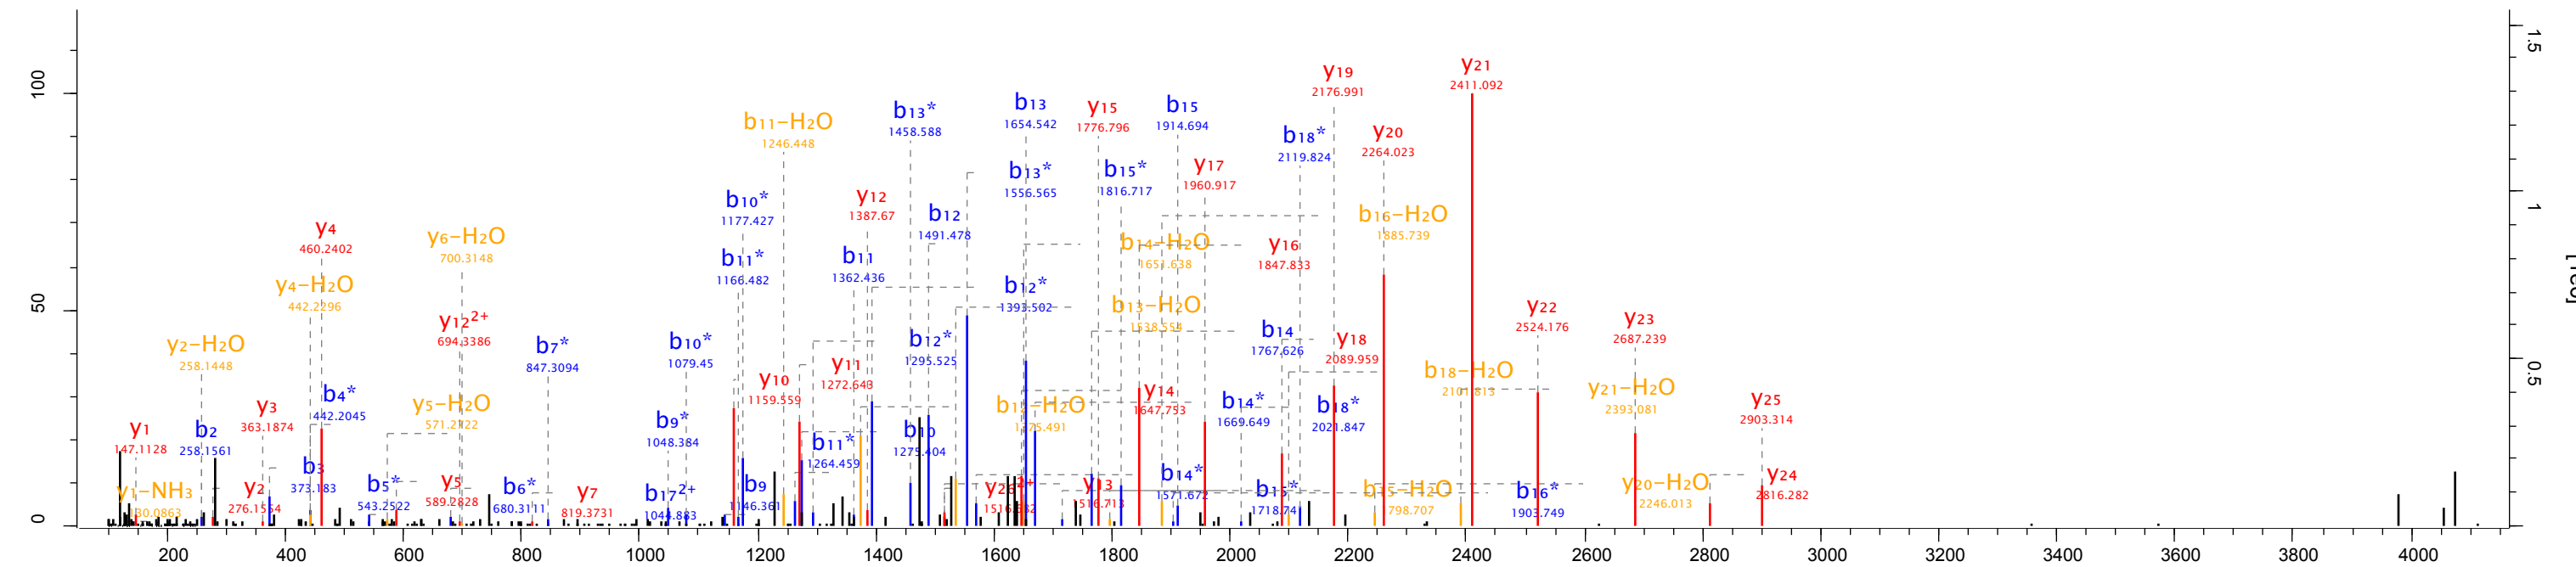

- R T D S T H S S N E S E Y I F S S E I A E M E D I P S R T E E P S E K -

Fragmentation mapping below the sequence:

- ph (b<sub>2</sub>, b<sub>3</sub>, b<sub>4</sub><sup>\*</sup>, b<sub>5</sub><sup>\*</sup>, b<sub>6</sub><sup>\*</sup>, b<sub>7</sub><sup>\*</sup>)
- ph (b<sub>9</sub>, b<sub>10</sub>, b<sub>11</sub>, b<sub>12</sub>, b<sub>13</sub>, b<sub>14</sub>, b<sub>15</sub>, b<sub>16</sub><sup>\*</sup>, b<sub>17</sub><sup>2+</sup>, b<sub>18</sub><sup>\*</sup>)
- y<sub>26</sub><sup>2+</sup>, y<sub>25</sub>, y<sub>24</sub>, y<sub>23</sub>, y<sub>22</sub>, y<sub>21</sub>, y<sub>20</sub>, y<sub>19</sub>, y<sub>18</sub>, y<sub>17</sub>, y<sub>16</sub>, y<sub>15</sub>, y<sub>14</sub>, y<sub>13</sub>, y<sub>12</sub>, y<sub>11</sub>, y<sub>10</sub>, y<sub>7</sub>, y<sub>5</sub>, y<sub>4</sub>, y<sub>3</sub>, y<sub>2</sub>, y<sub>1</sub>

Raw file  
20150814\_A375SR\_Phospho\_BR2\_03

Scan 26214 Method FTMS; HCD Score 129.8 m/z 1236.54 Gene names VPS51

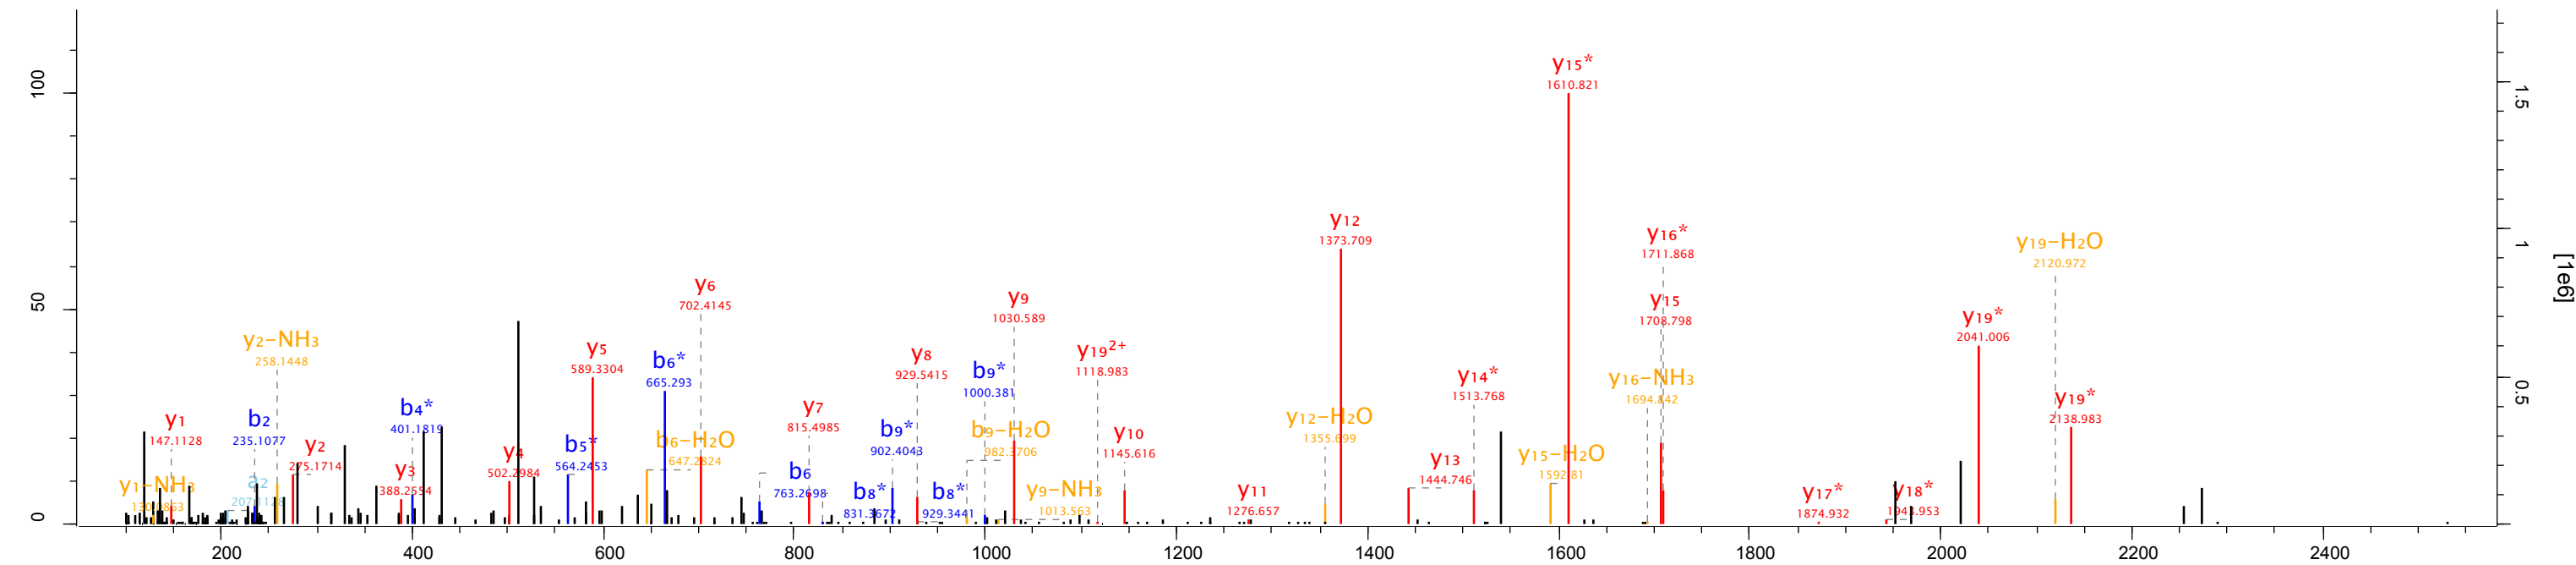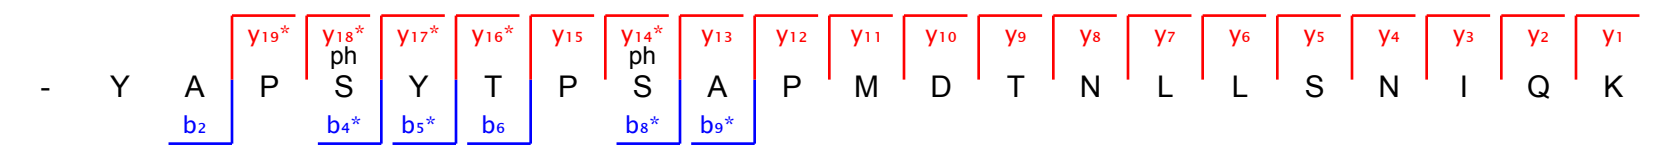



Raw file 20150814\_A375SR\_Phospho\_BR2\_03 Scan 26684 Method FTMS; HCD Score 114.06 m/z 848.91 Gene names ANKS6

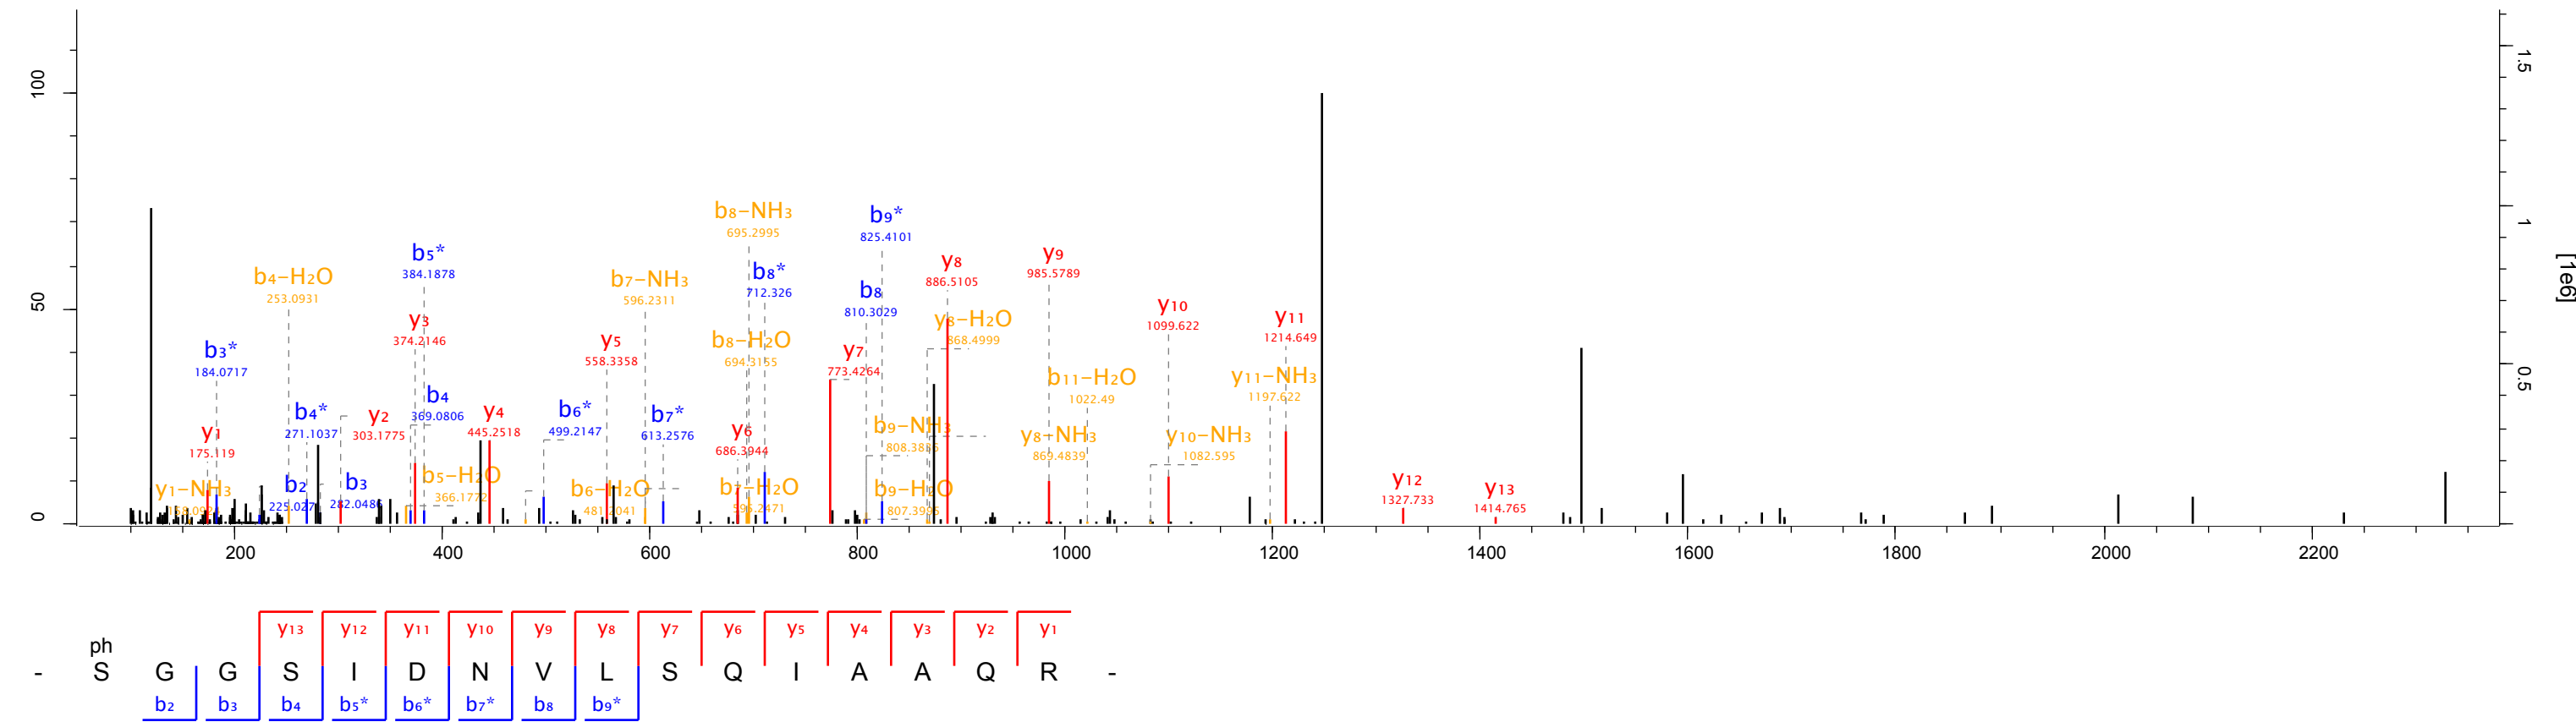

Raw file: 20150814\_A375SR\_Phospho\_BR2\_03  
 Scan: 27394 Method: FTMS; HCD Score: 113.31 m/z: 937.91 Gene names: TNKS1BP1

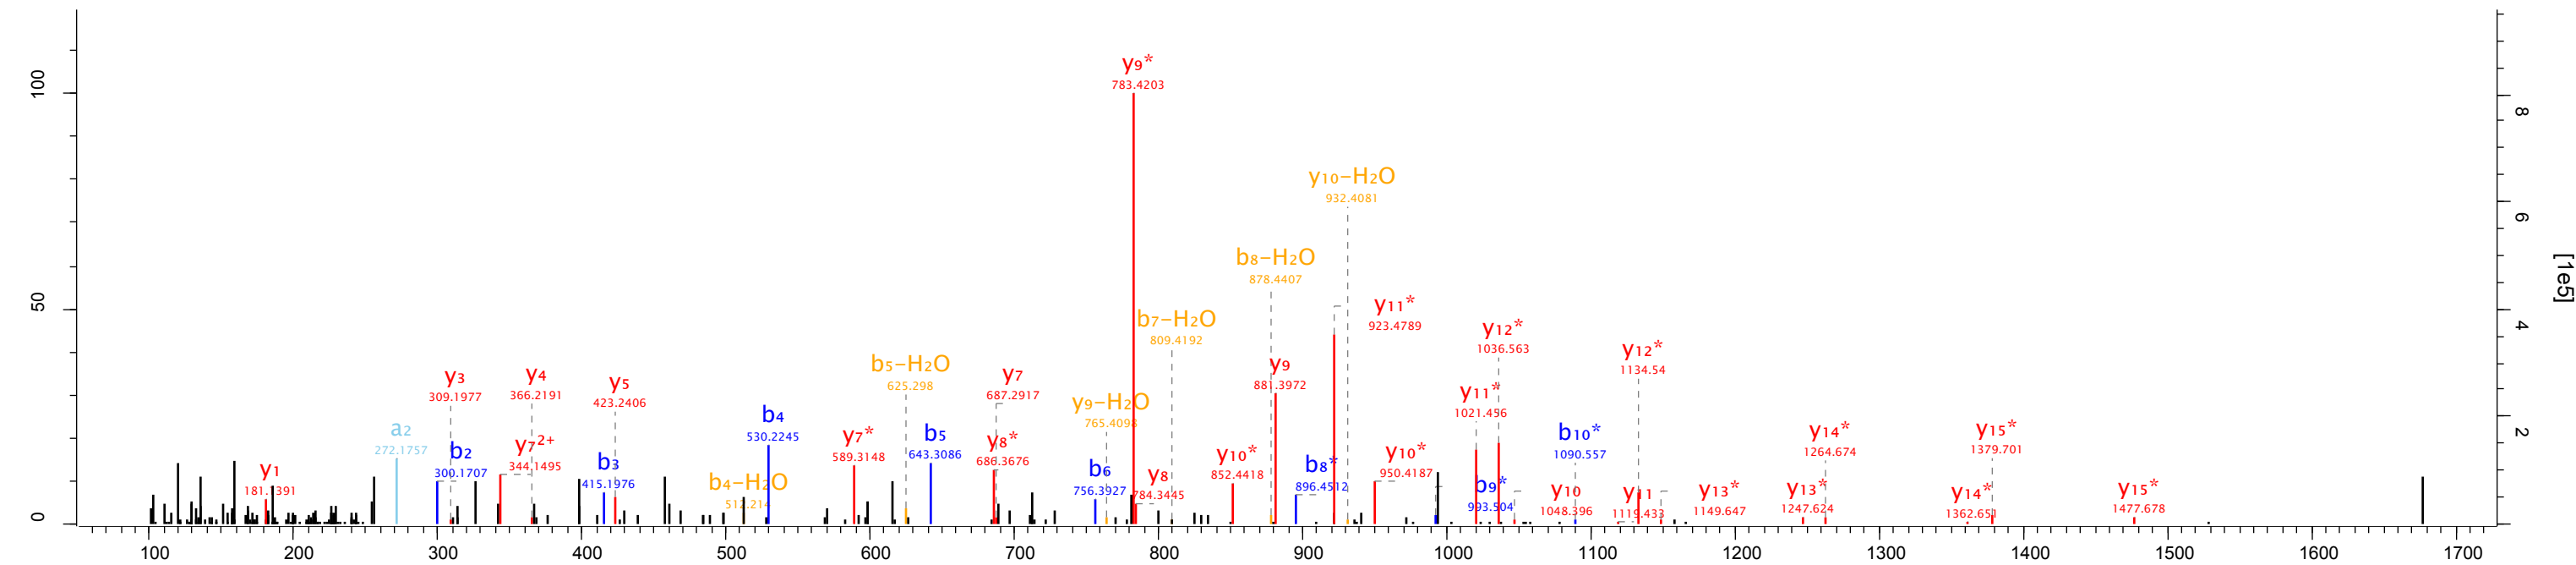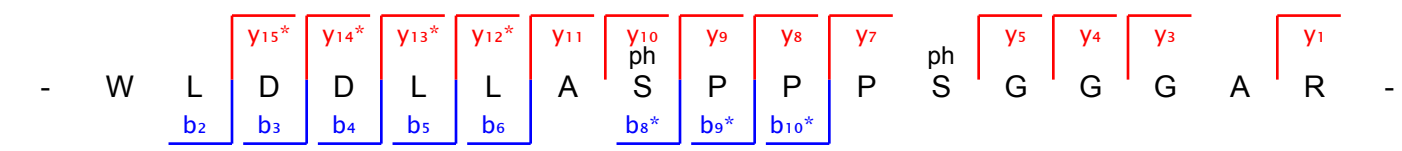

Raw file Scan Method Score m/z Gene names  
 20150814\_A375SR\_Phospho\_BR2\_03 27754 FTMS; HCD 107.43 831.39 NUMA1

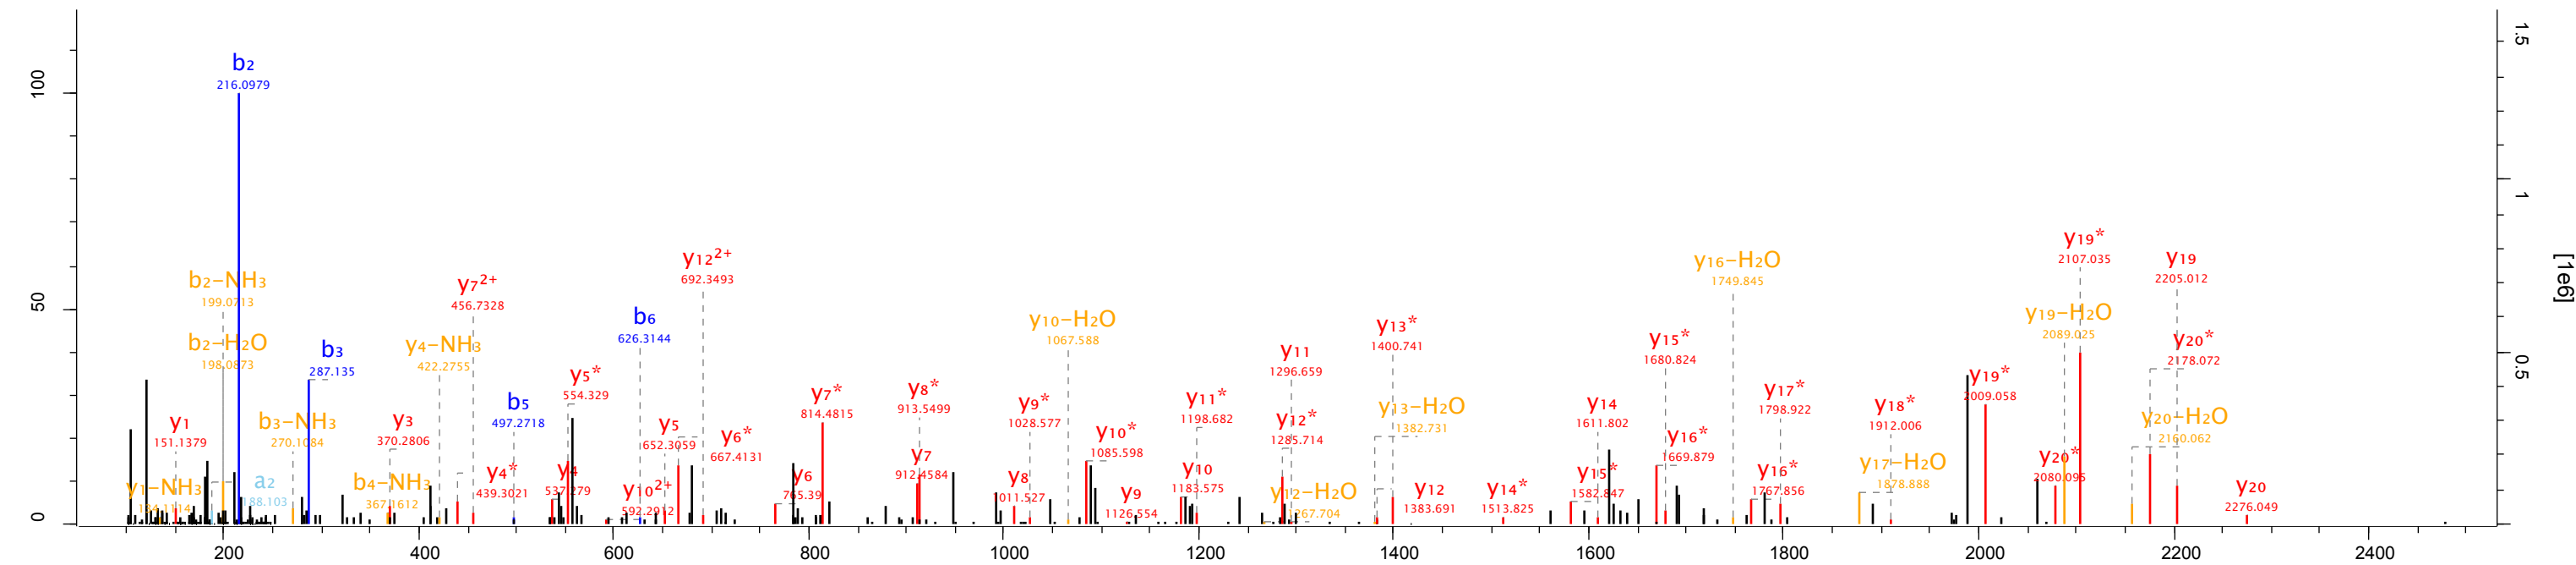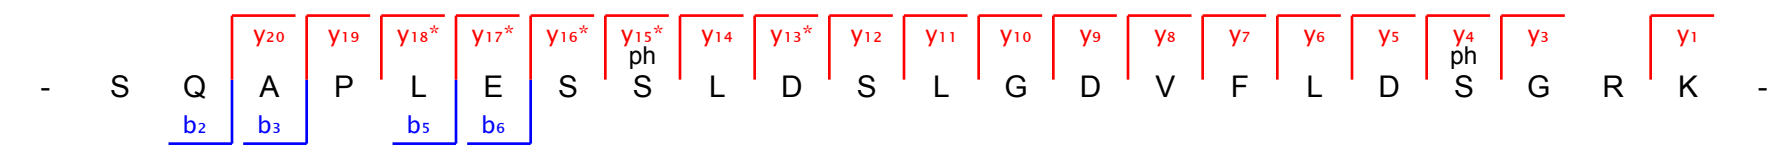

Raw file: 20150814\_A375SR\_Phospho\_BR2\_03  
 Scan: 28214 Method: FTMS; HCD Score: 76.03 m/z: 981.12 Gene names: TCF20

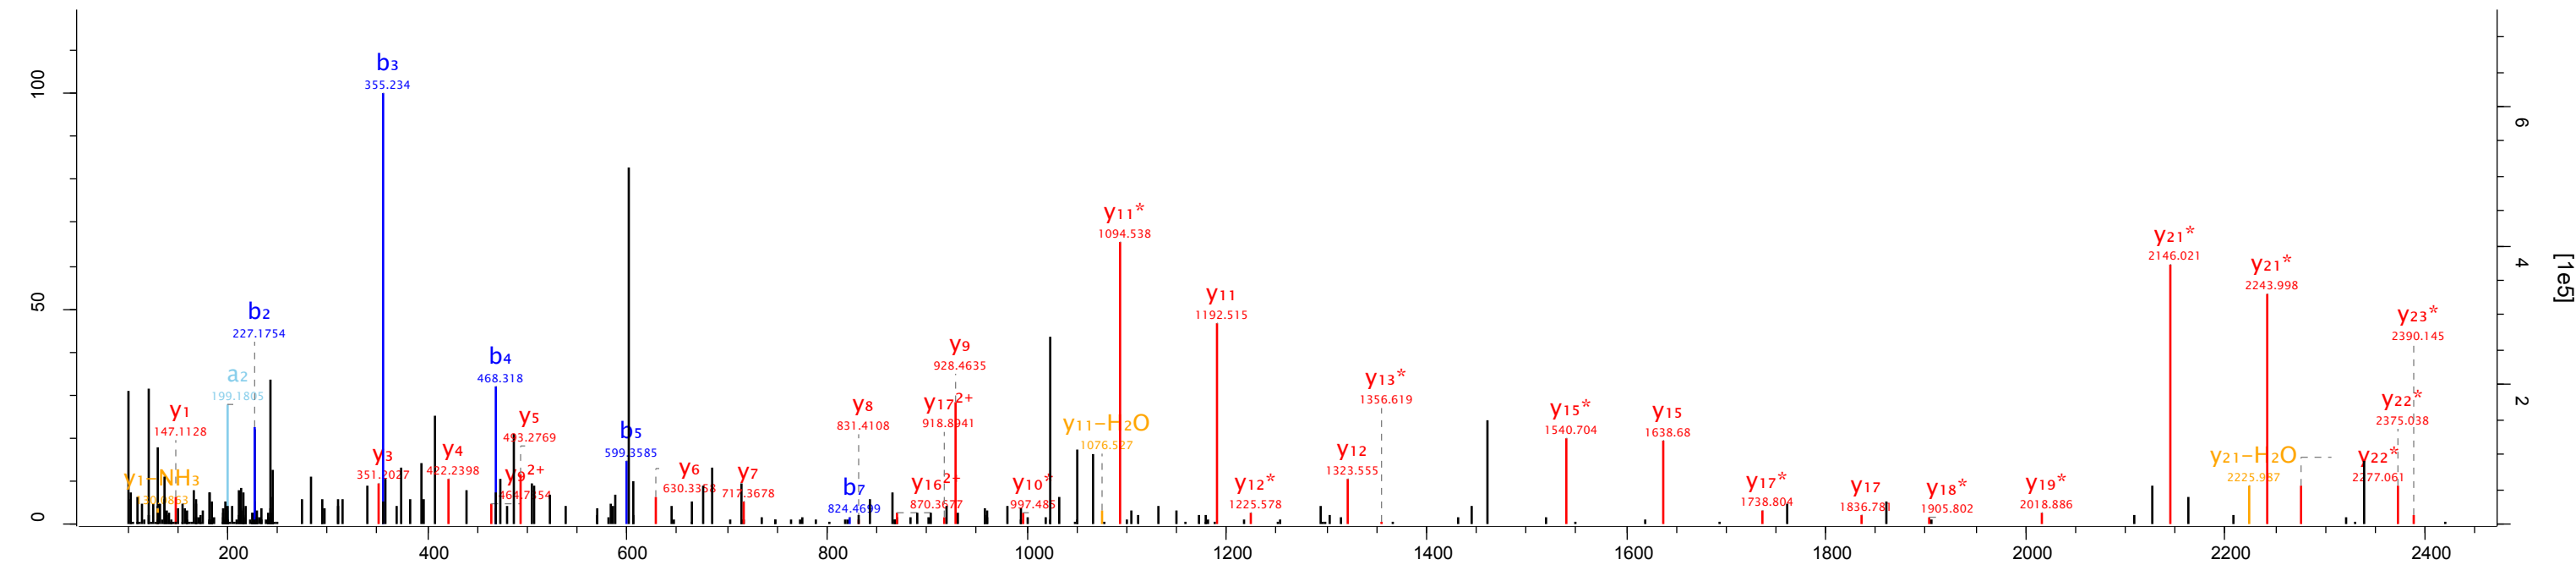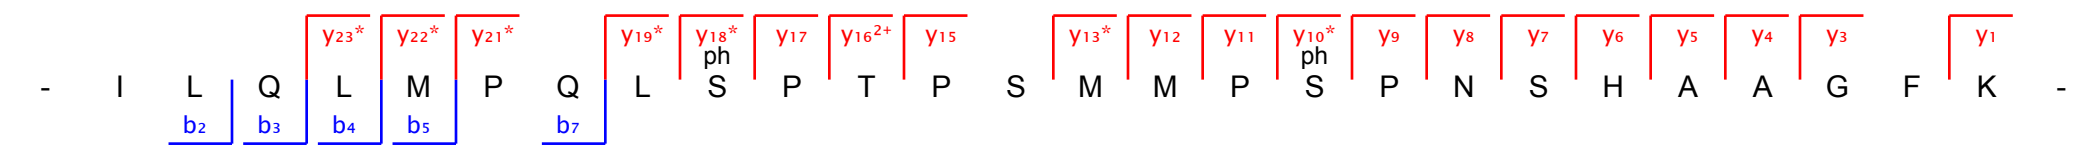

Raw file  
 20150814\_A375SR\_Phospho\_BR2\_03  
 Scan 28274 Method FTMS; HCD Score 148.53 m/z 749.67 Gene names CLSPN

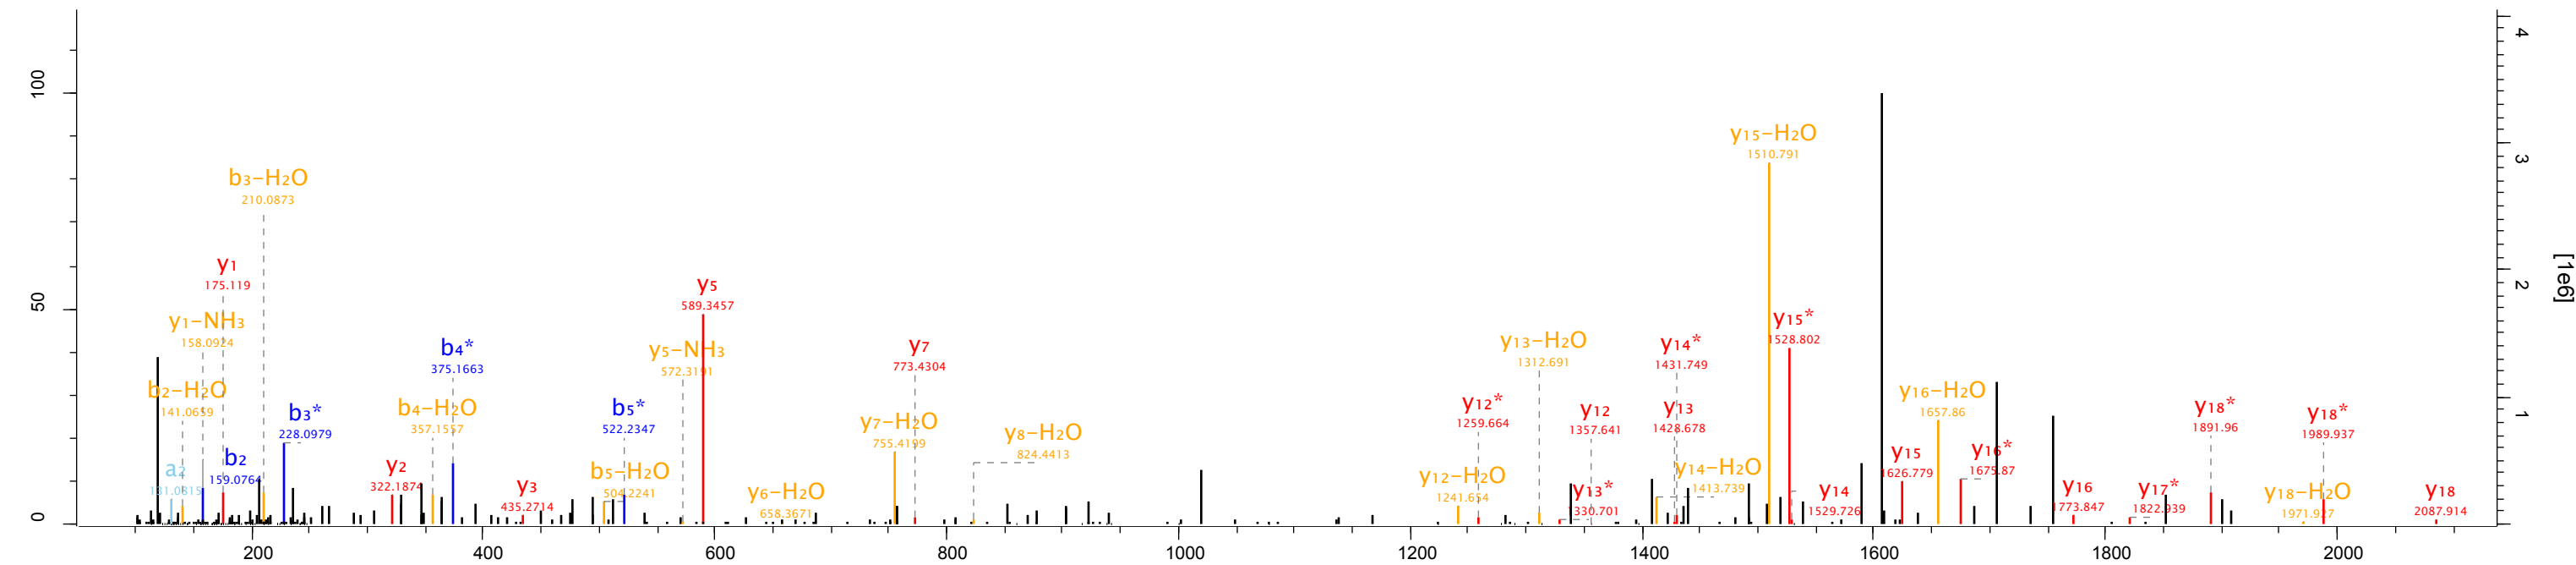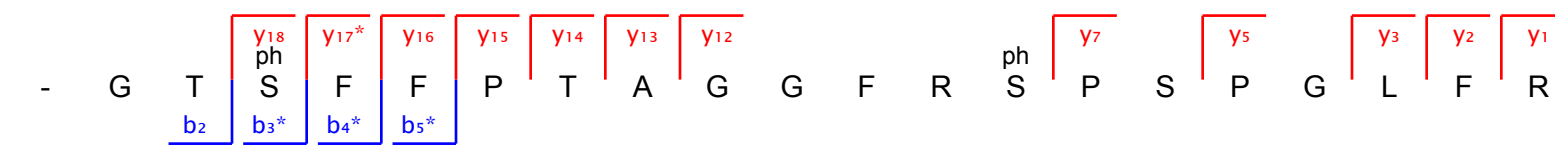

Raw file  
20150814\_A375SR\_Phospho\_BR2\_03

Scan 28364 Method FTMS; HCD Score 198.35 m/z 685.32 Gene names LARPI

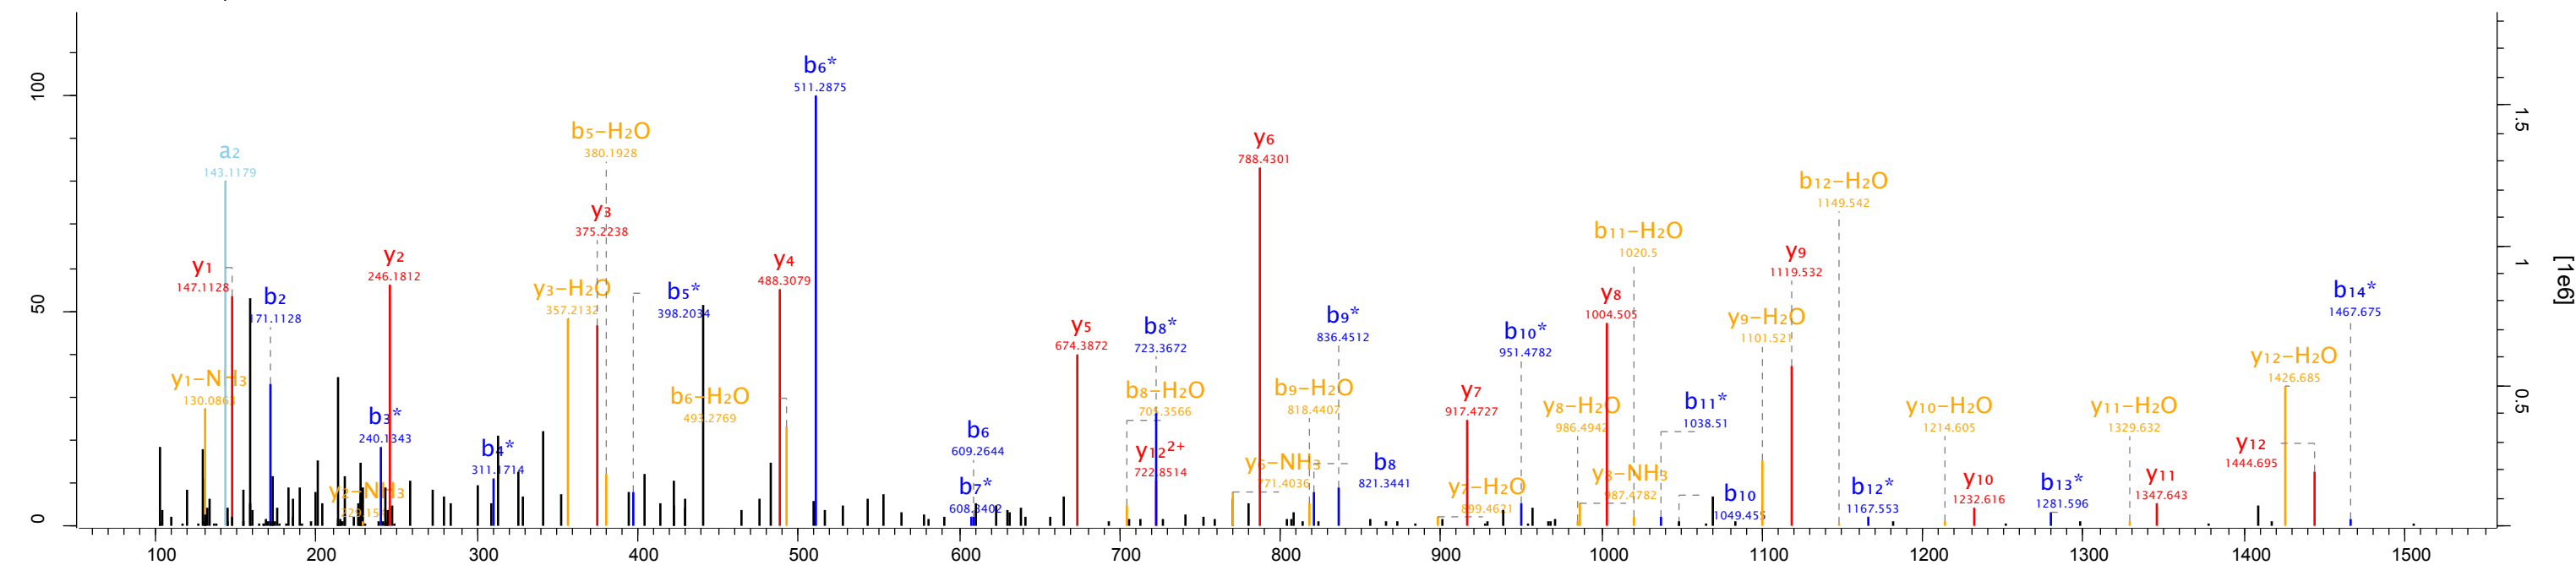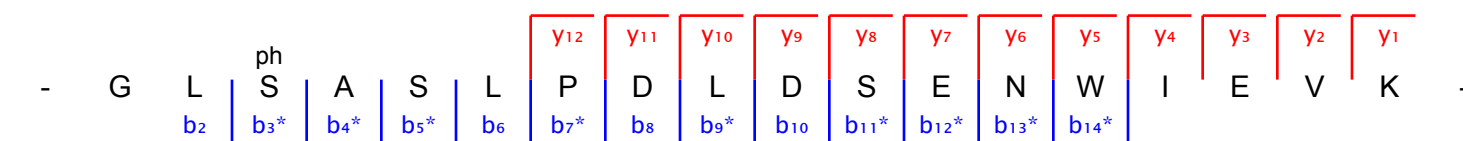

Raw file: 20150814\_A375SR\_Phospho\_BR2\_03  
 Scan: 28374 Method: FTMS; HCD Score: 97.2 m/z: 1447.06 Gene names: ZFP36L2

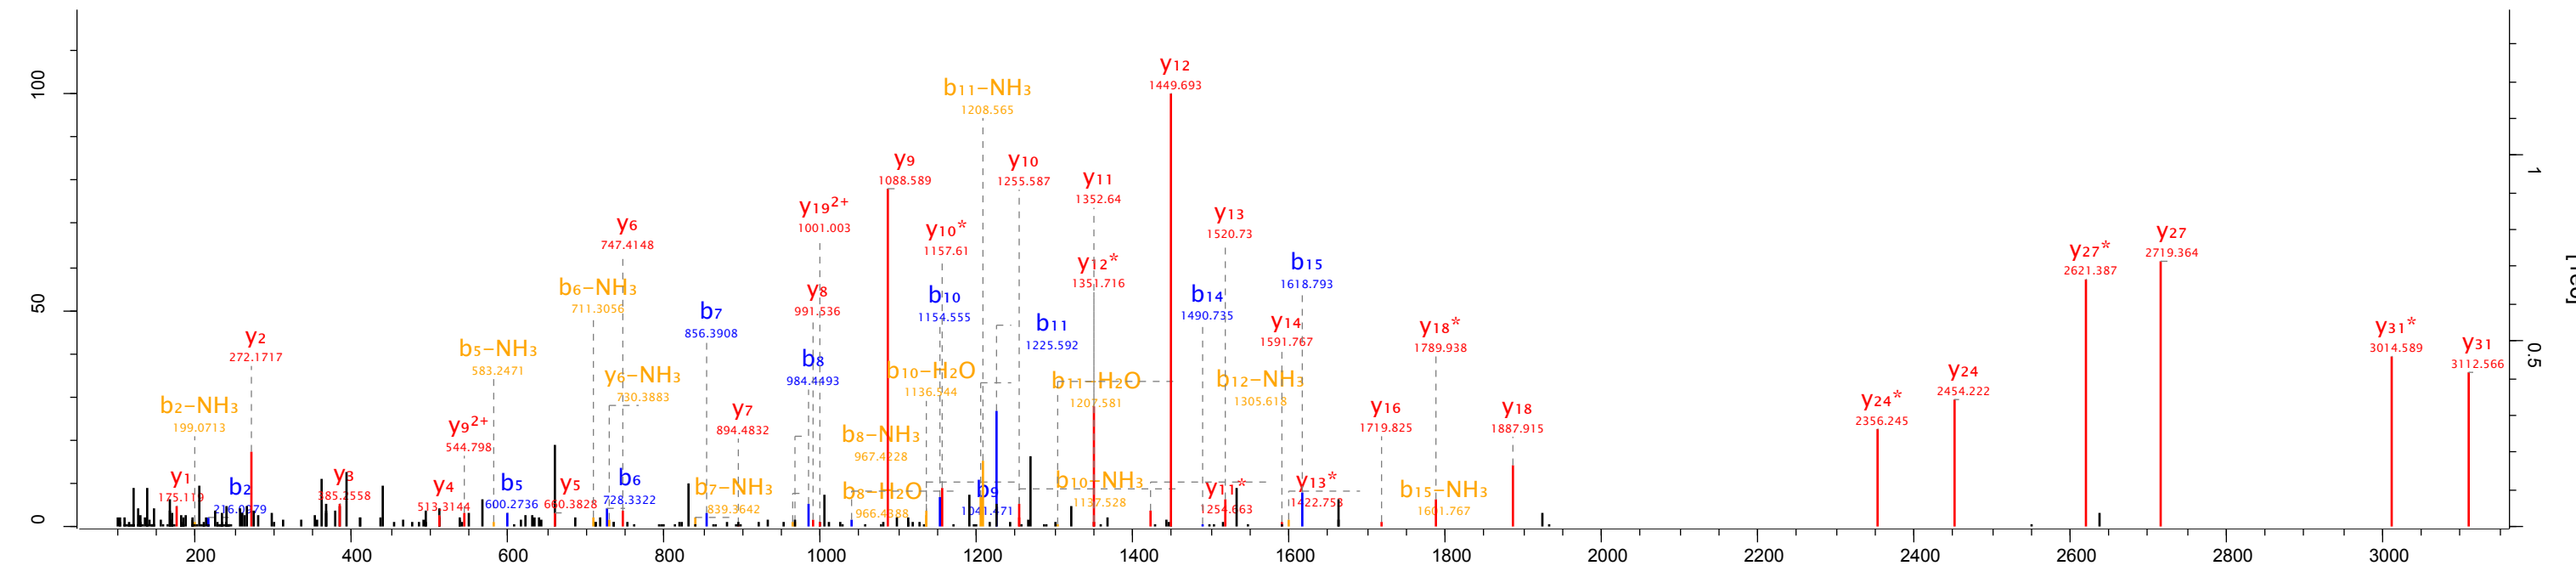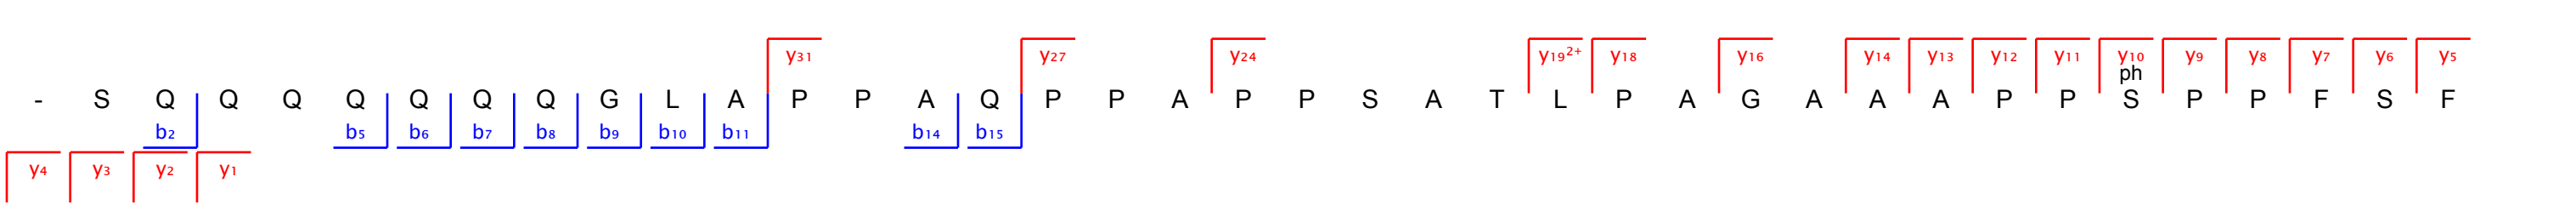

Raw file  
 20150814\_A375SR\_Phospho\_BR2\_03  
 Scan 28524 Method FTMS; HCD Score 169.68 m/z 1032.96 Gene names MCRS1

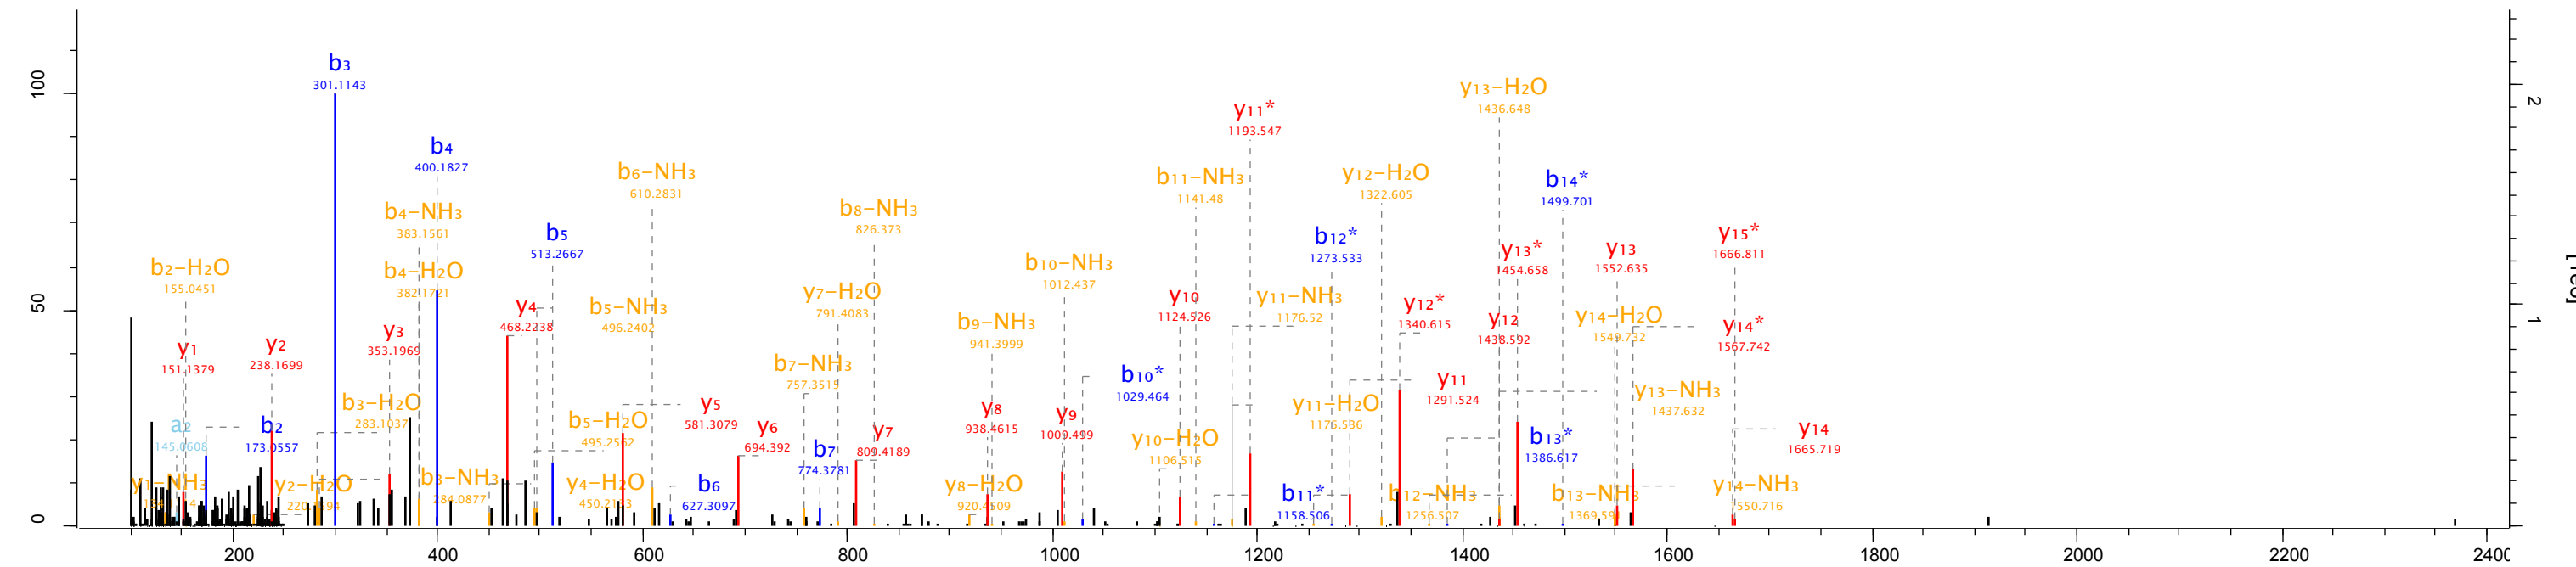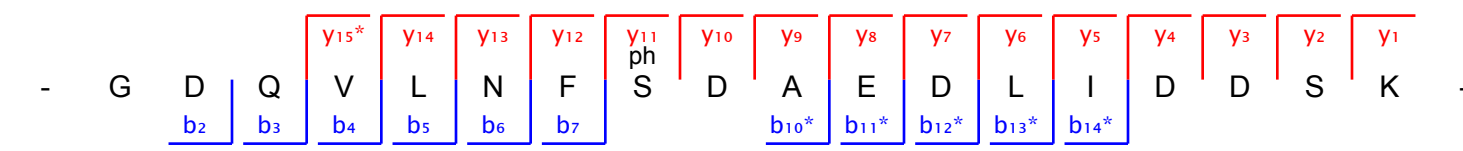



Raw file: 20150814\_A375SR\_Phospho\_BR2\_03  
 Scan: 3234 Method: FTMS; HCD Score: 62.23 m/z: 522.7 Gene names: APTX

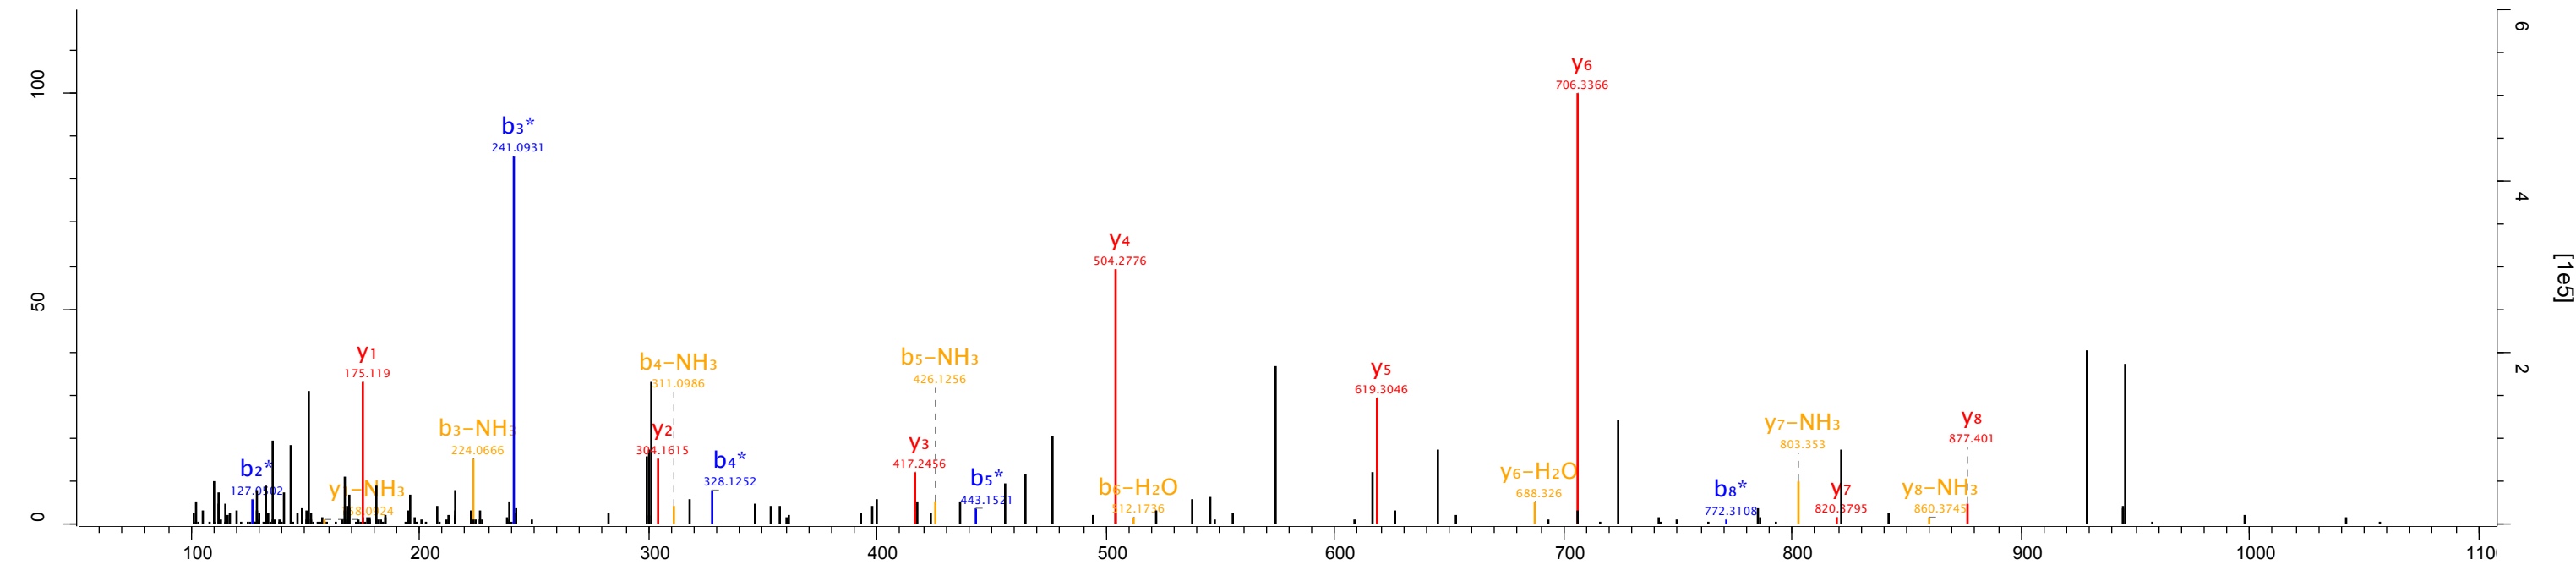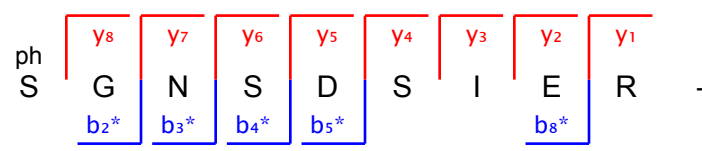

Raw file: 20150814\_A375SR\_Phospho\_BR2\_03  
 Scan: 4254 Method: FTMS; HCD Score: 102.09 m/z: 648.79 Gene names: PPAP2B

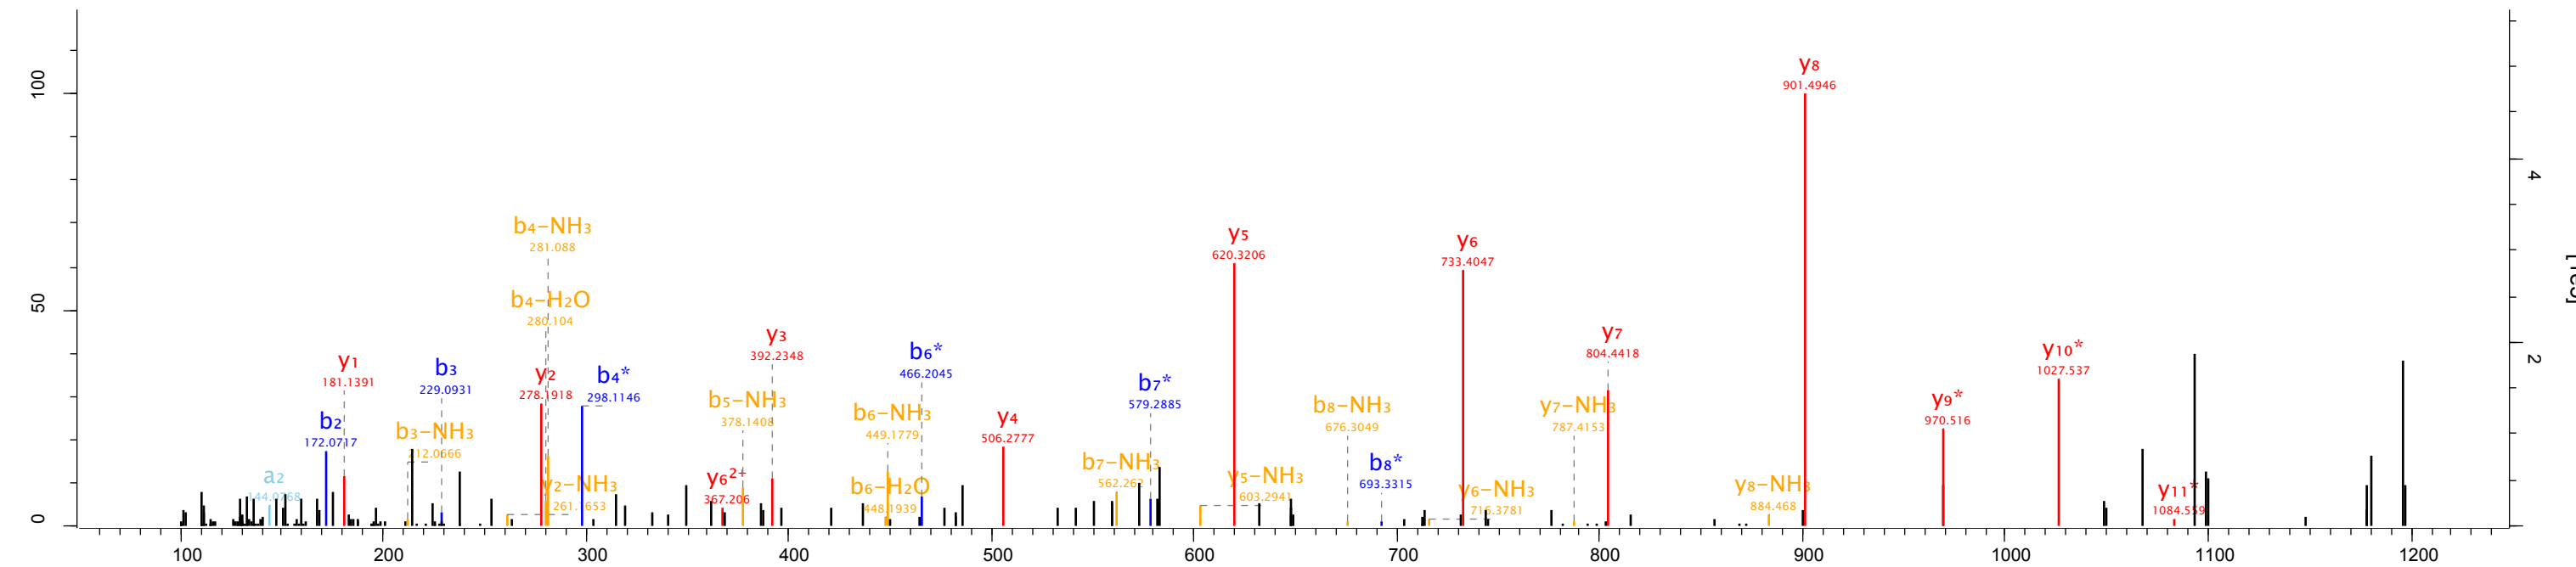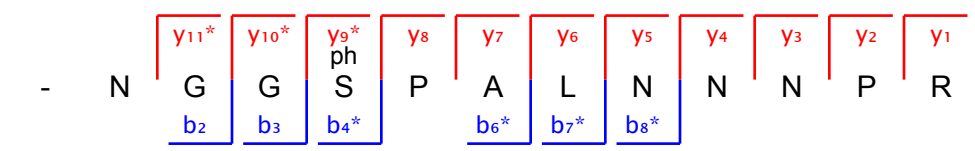

Raw file: 20150814\_A375SR\_Phospho\_BR2\_03  
 Scan: 5244 Method: FTMS; HCD Score: 68.52 m/z: 463.21 Gene names: CSNK1D

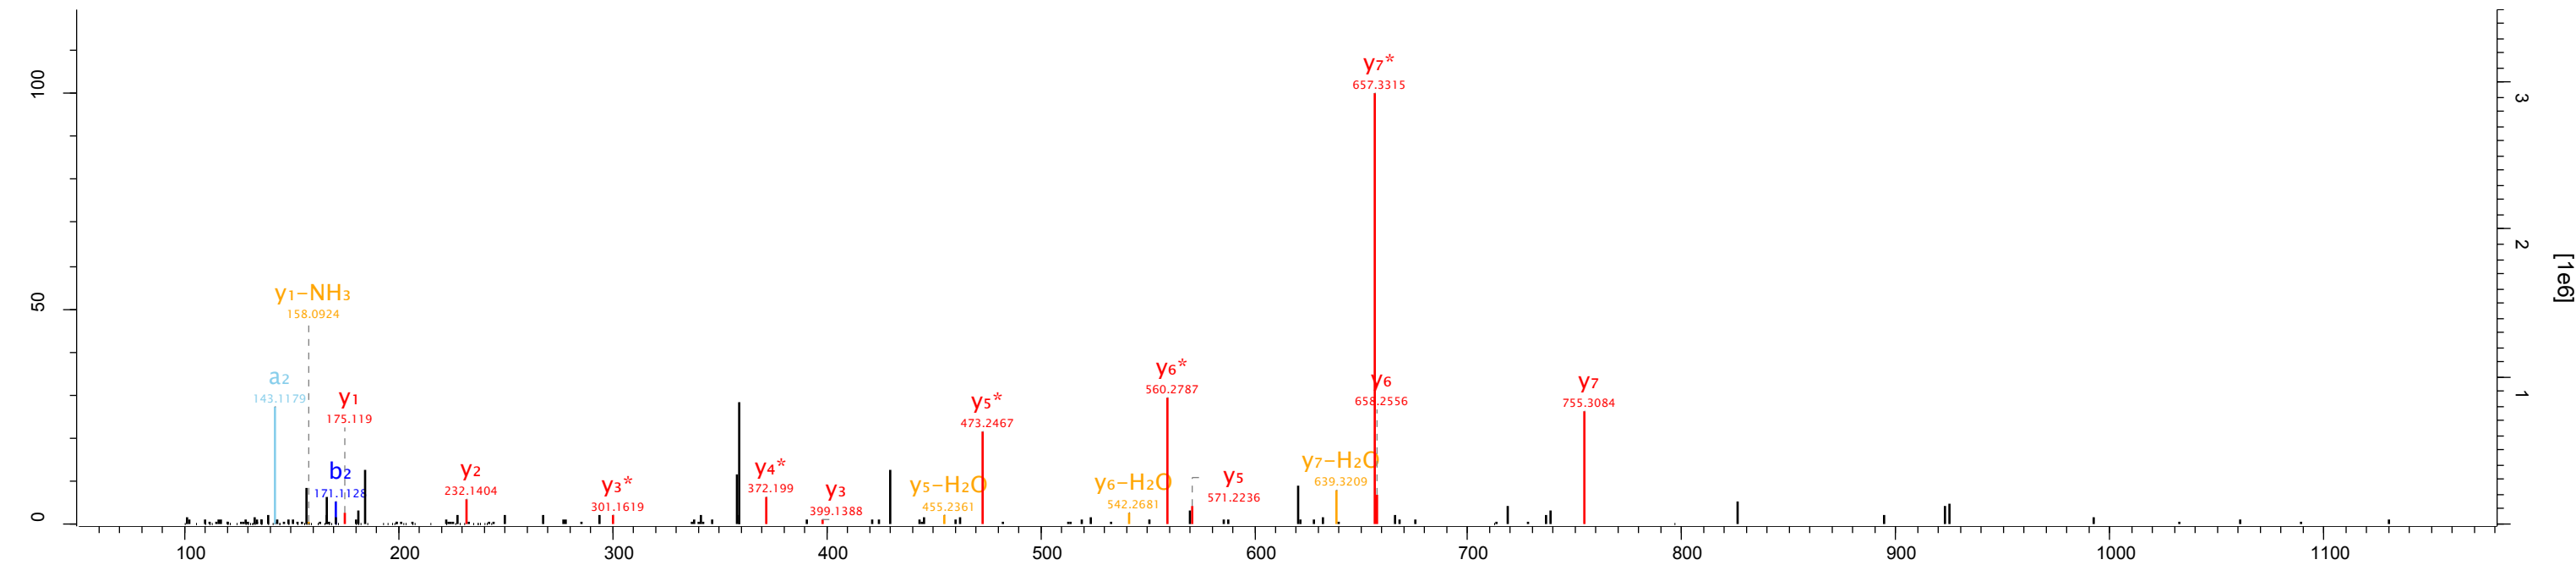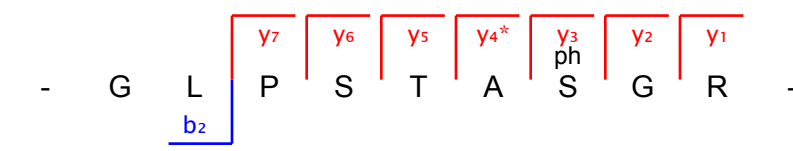

Raw file: 20150814\_A375SR\_Phospho\_BR2\_03  
 Scan: 5314 Method: FTMS; HCD Score: 98.25 m/z: 479.22 Gene names: RHBDF2

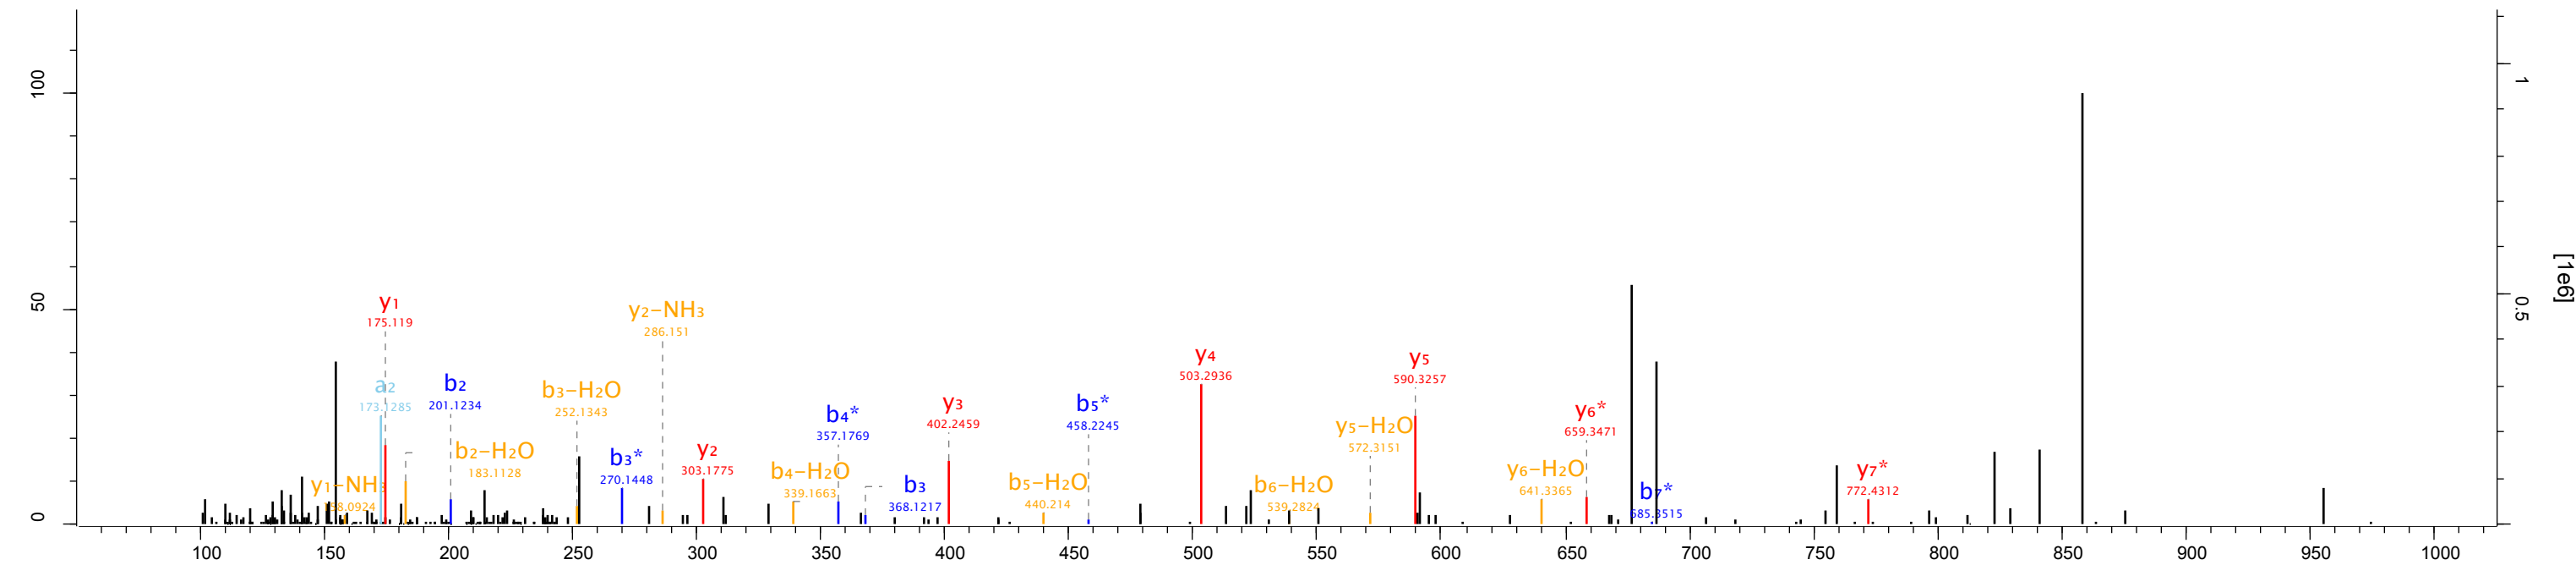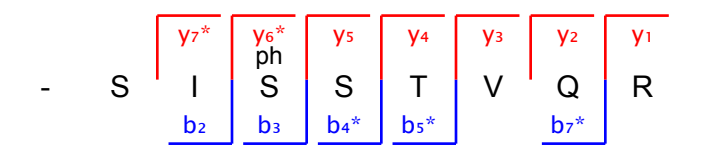

Raw file: 20150814\_A375SR\_Phospho\_BR2\_03  
 Scan: 7074 Method: FTMS; HCD Score: 96.56 m/z: 863.35 Gene names: NFRKB

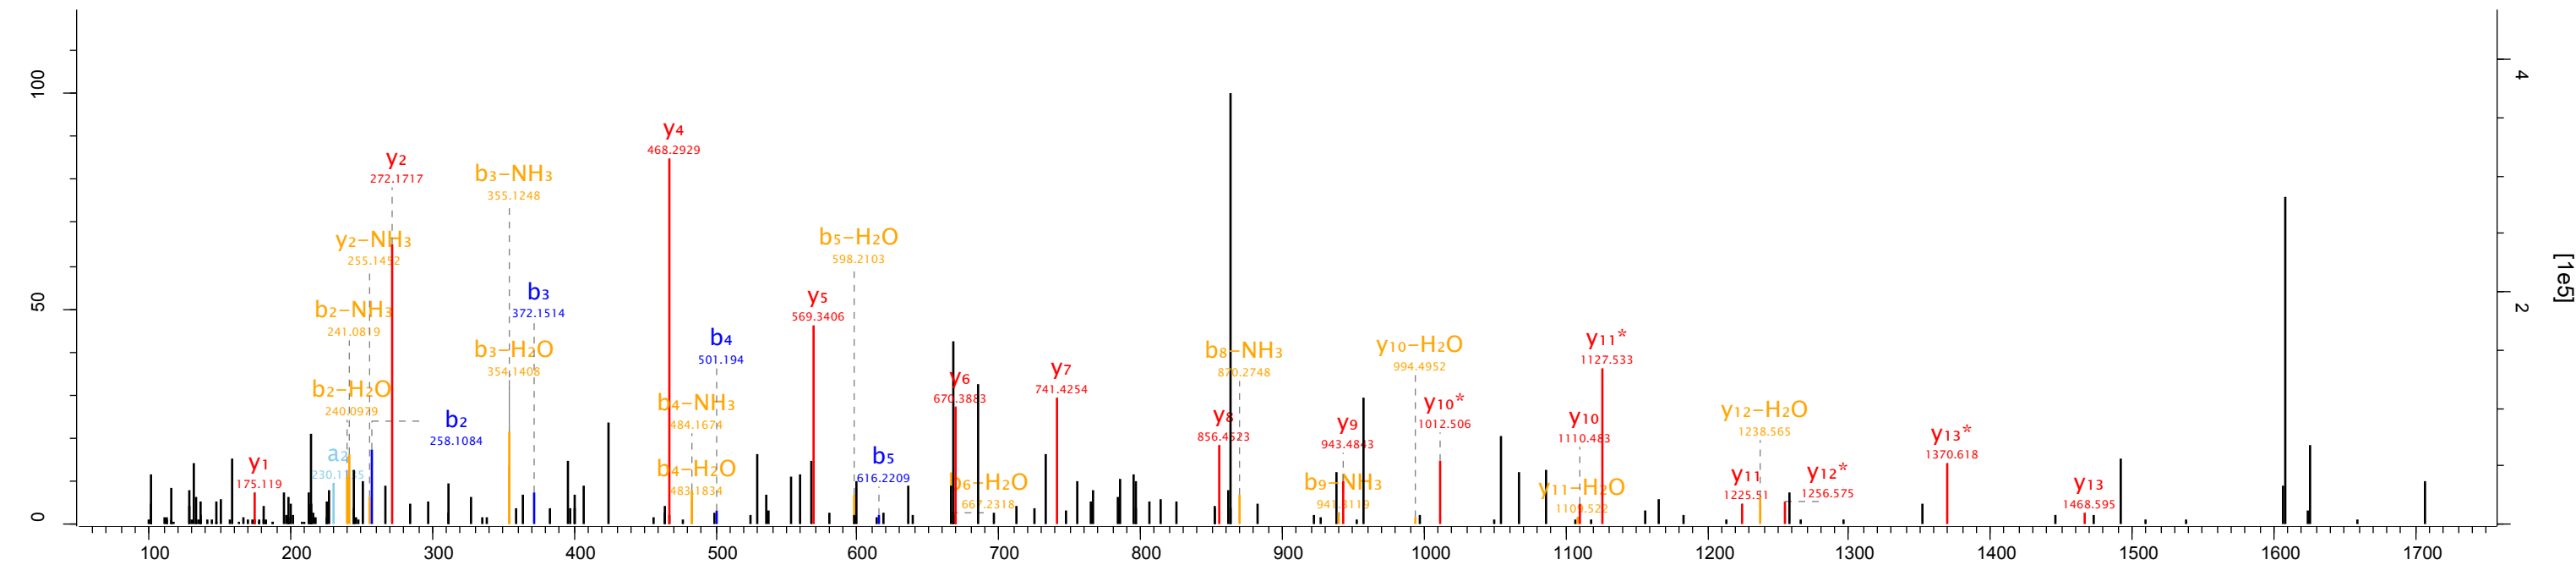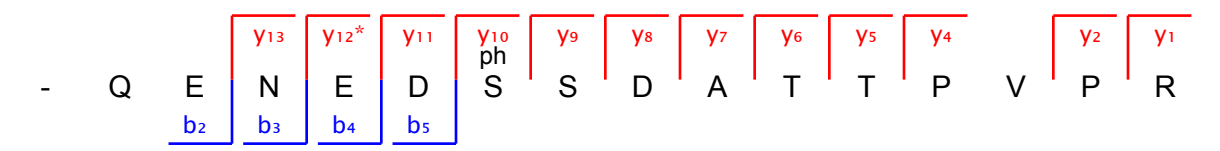

Raw file: 20150814\_A375SR\_Phospho\_BR2\_03  
 Scan: 7334 Method: FTMS; HCD Score: 131.64 m/z: 982.92 Gene names: GTF3C1

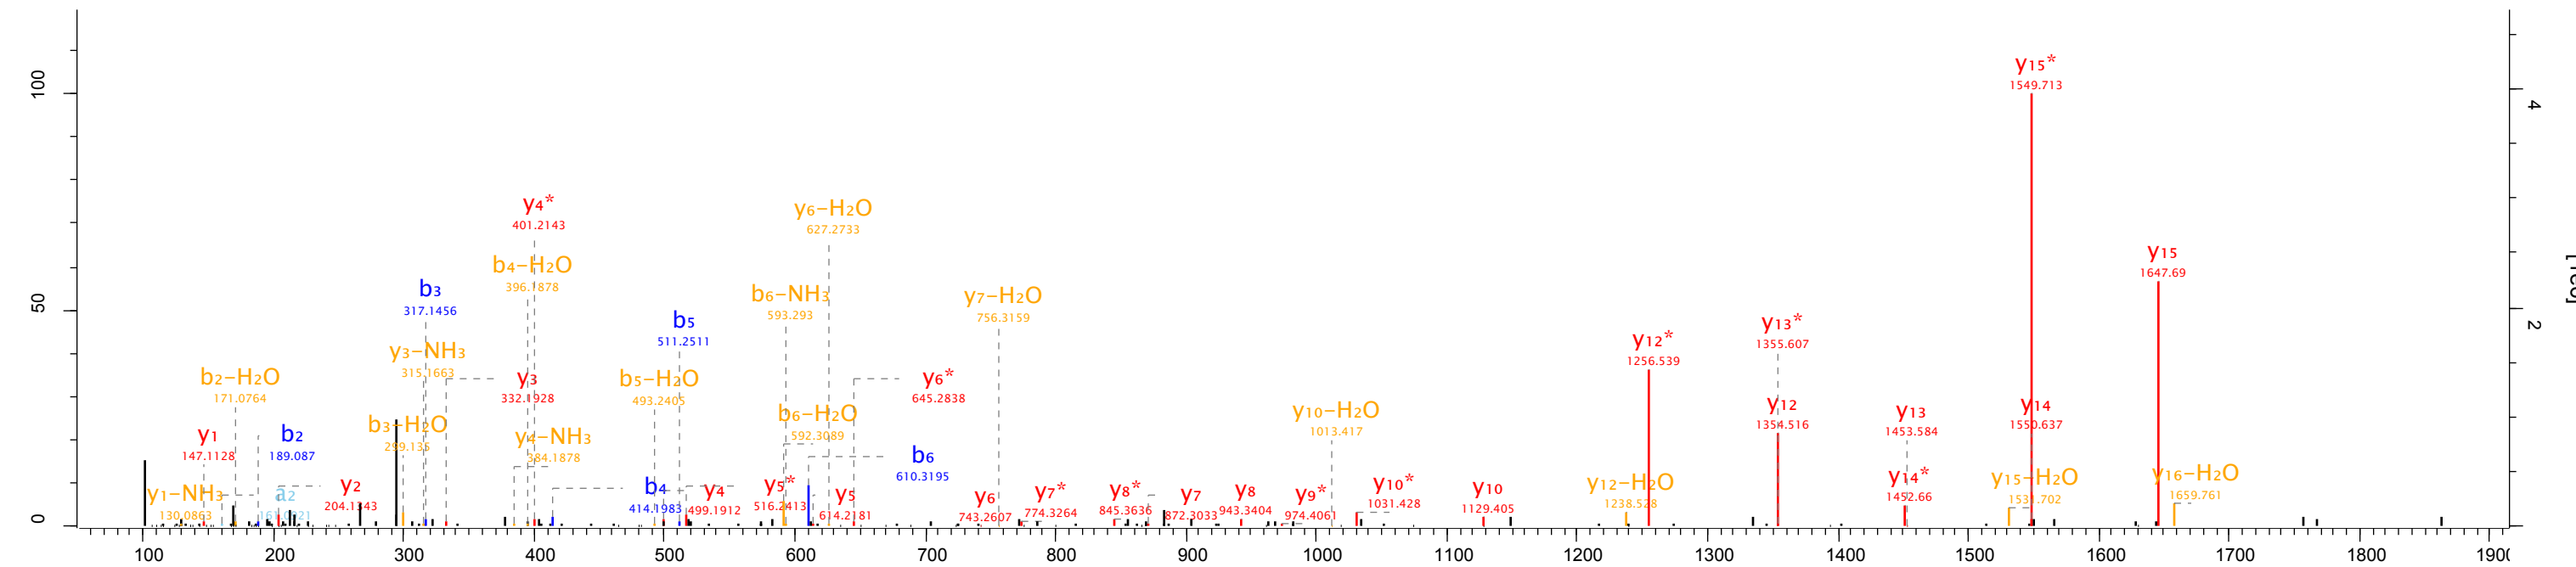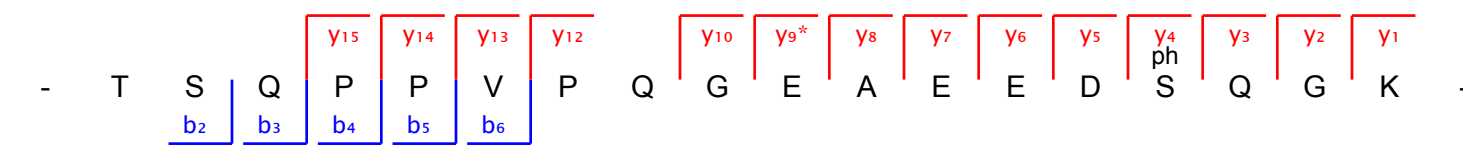

Raw file Scan Method Score m/z Gene names

20150814\_A375SR\_Phospho\_BR2\_03 7874 FTMS; HCD 164.88 633.27 ANKS1A

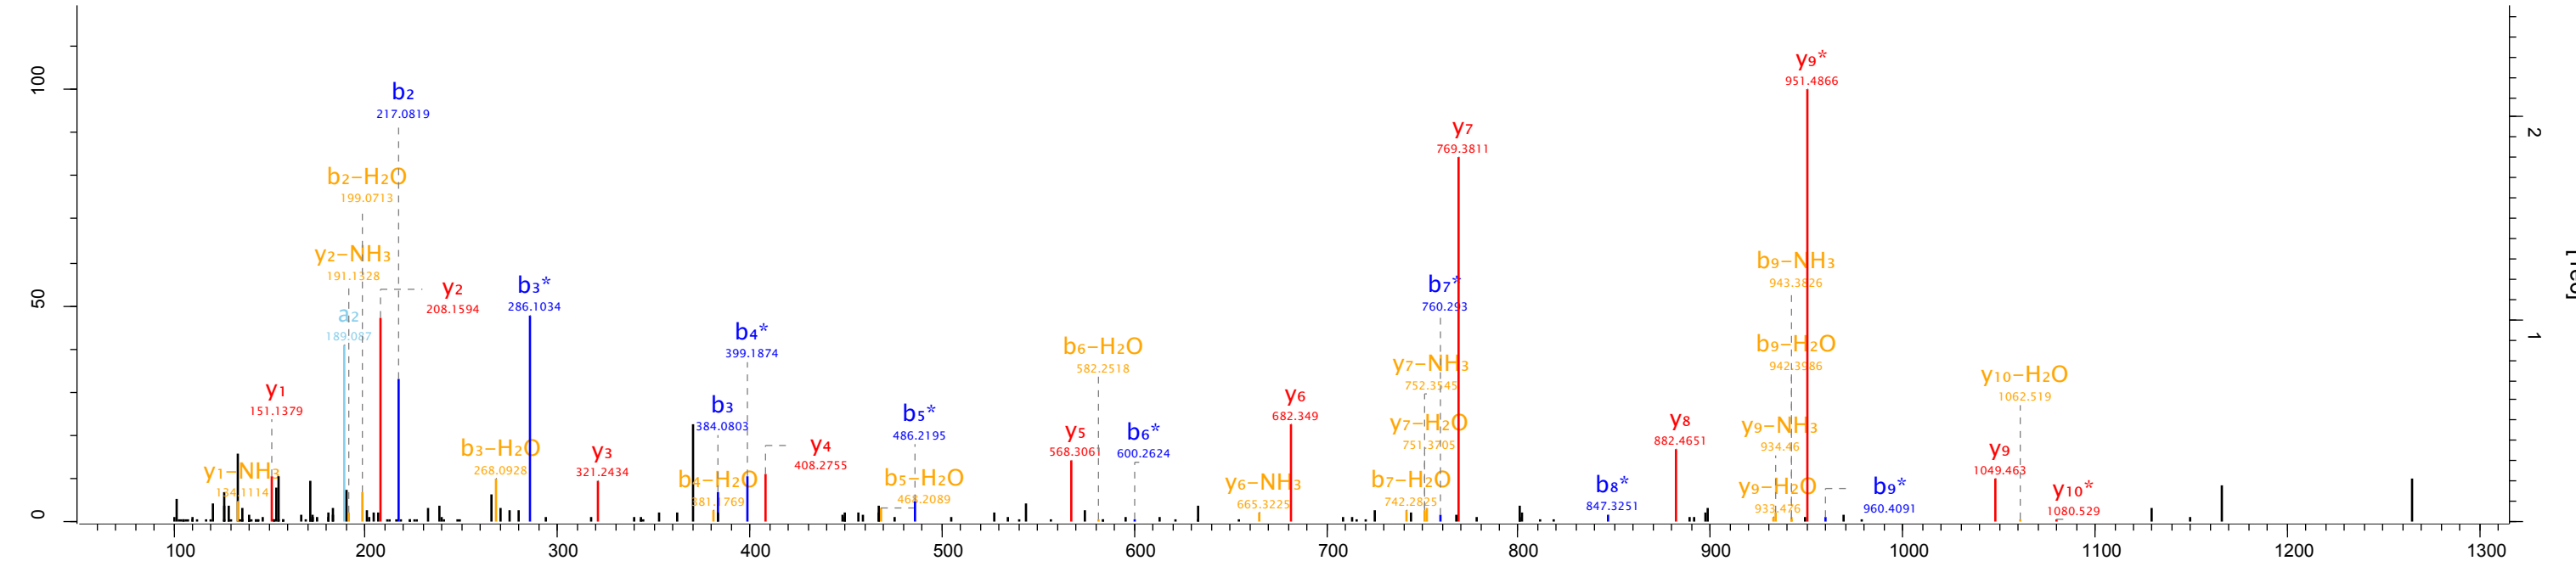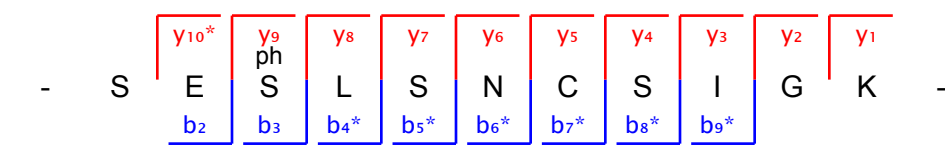

Raw file: 20150814\_A375SR\_Phospho\_BR2\_03  
 Scan: 8294 Method: FTMS; HCD Score: 87.39 m/z: 652.27 Gene names: TRAPPC12

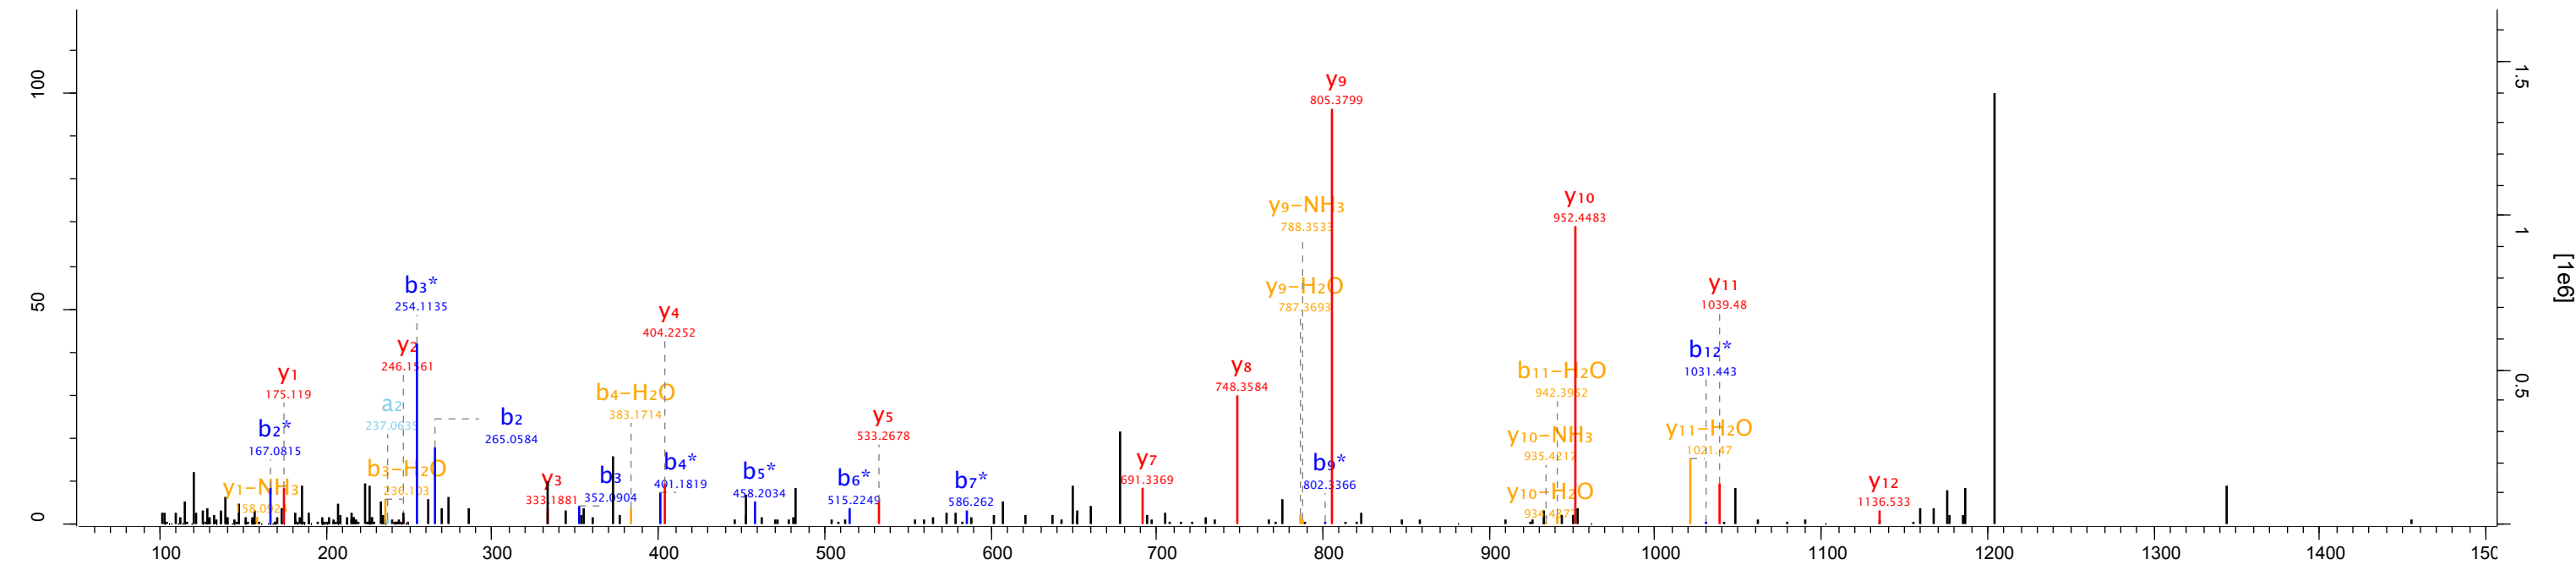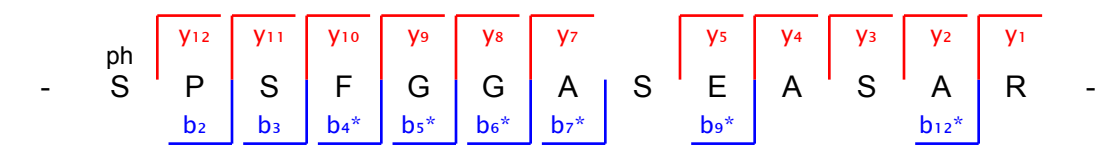





Raw file: 20150814\_A375SR\_Phospho\_BR2\_03  
 Scan: 9014 Method: FTMS; HCD Score: 81.02 m/z: 833.85 Gene names: VIM

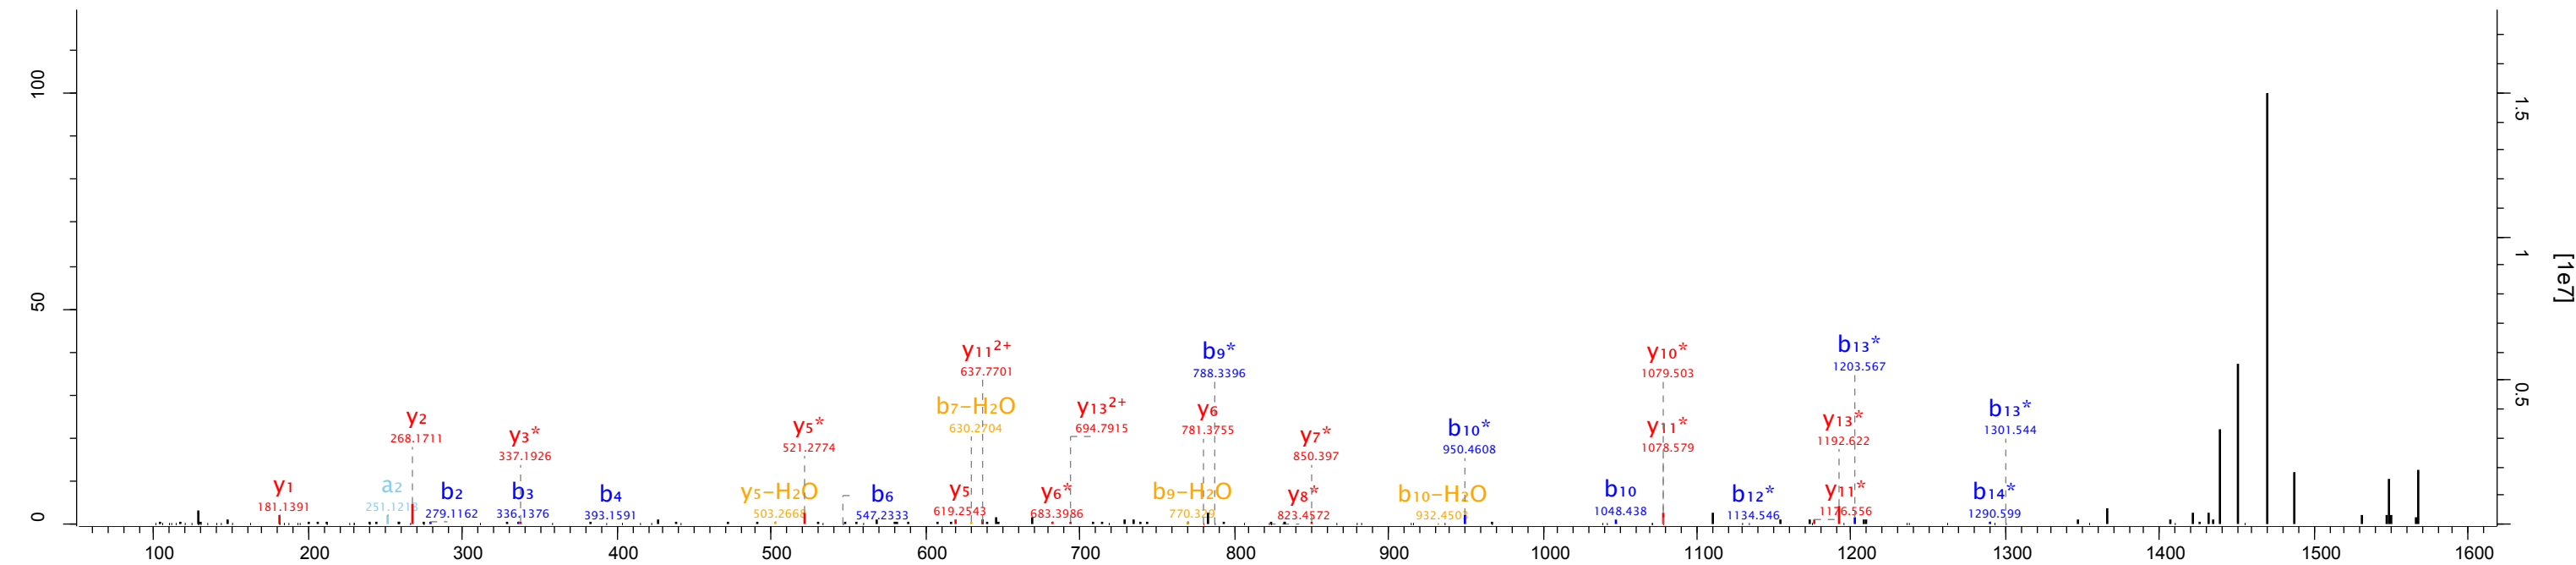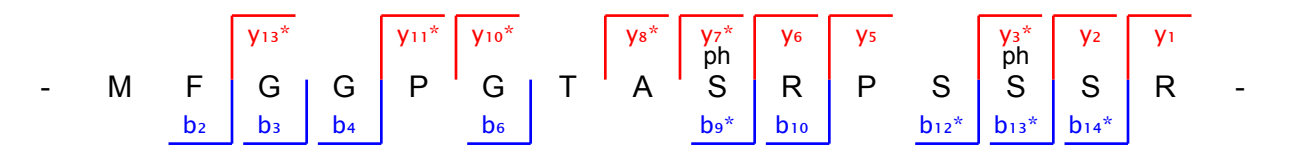

Raw file: 20150814\_A375SR\_Phospho\_BR2\_03  
 Scan: 9154 Method: FTMS; HCD Score: 43.96 m/z: 722.68 Gene names: BAP1

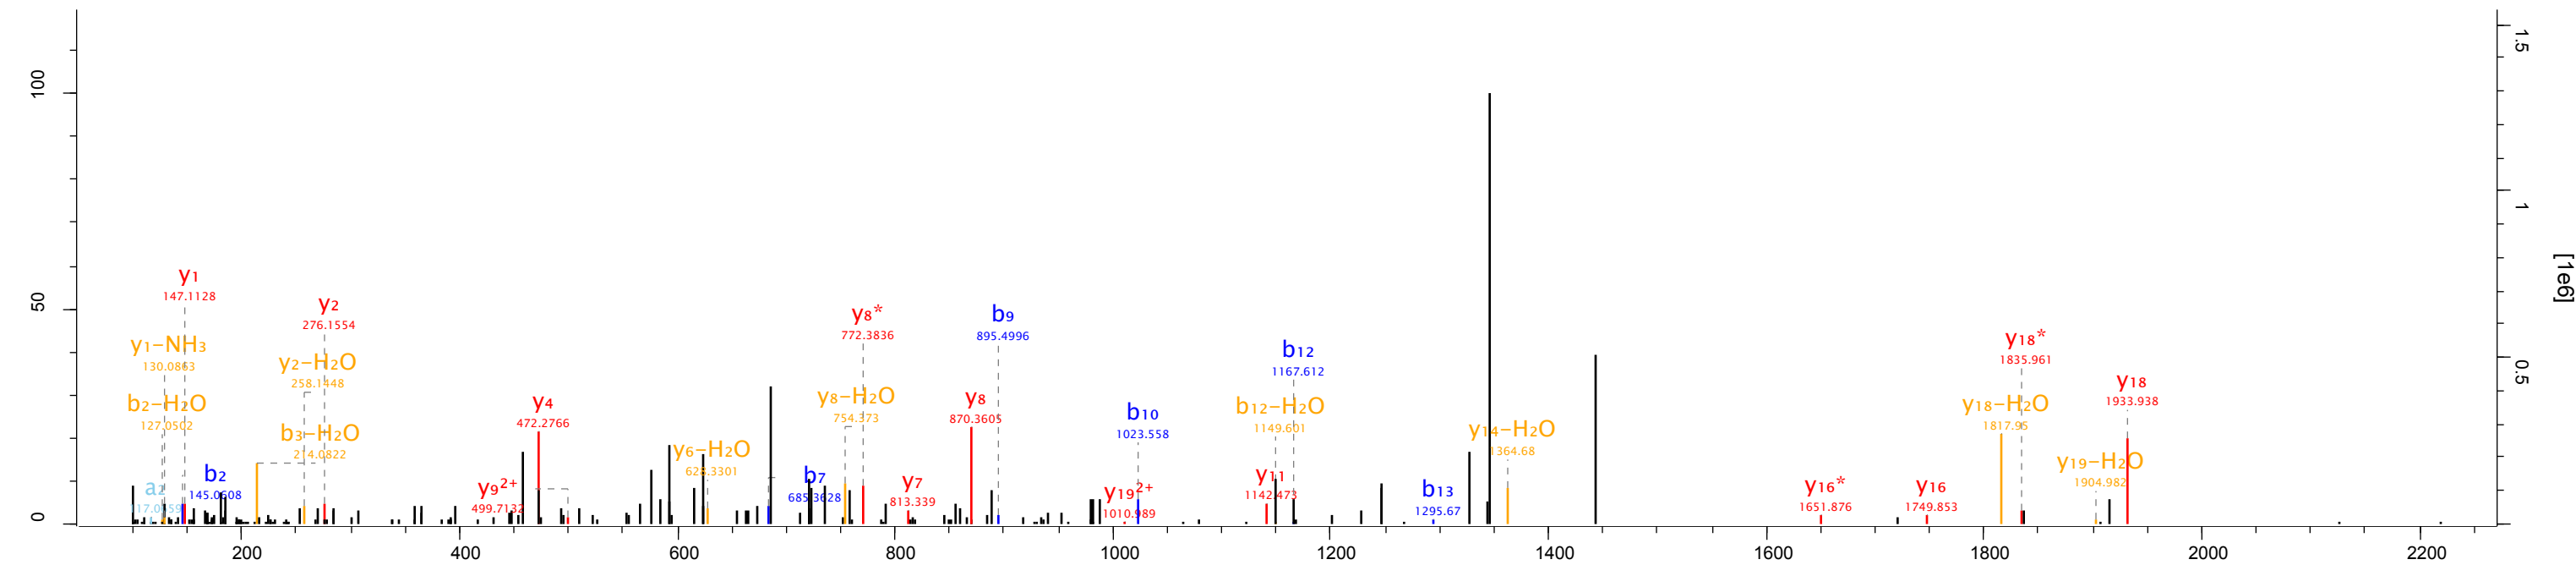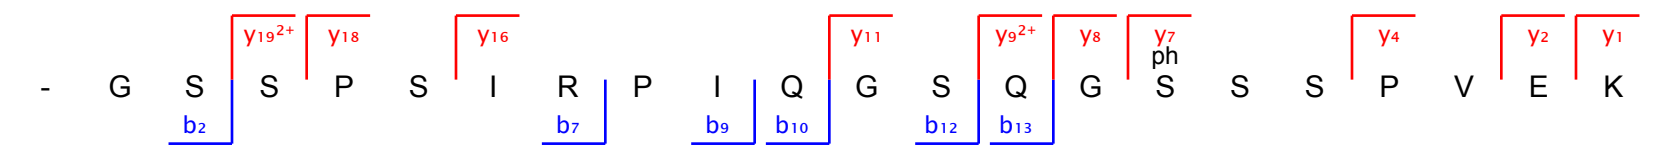

Raw file: 20150814\_A375SR\_Phospho\_BR2\_03  
 Scan: 9324 Method: FTMS; HCD Score: 303.76 m/z: 892.36 Gene names: PEX1

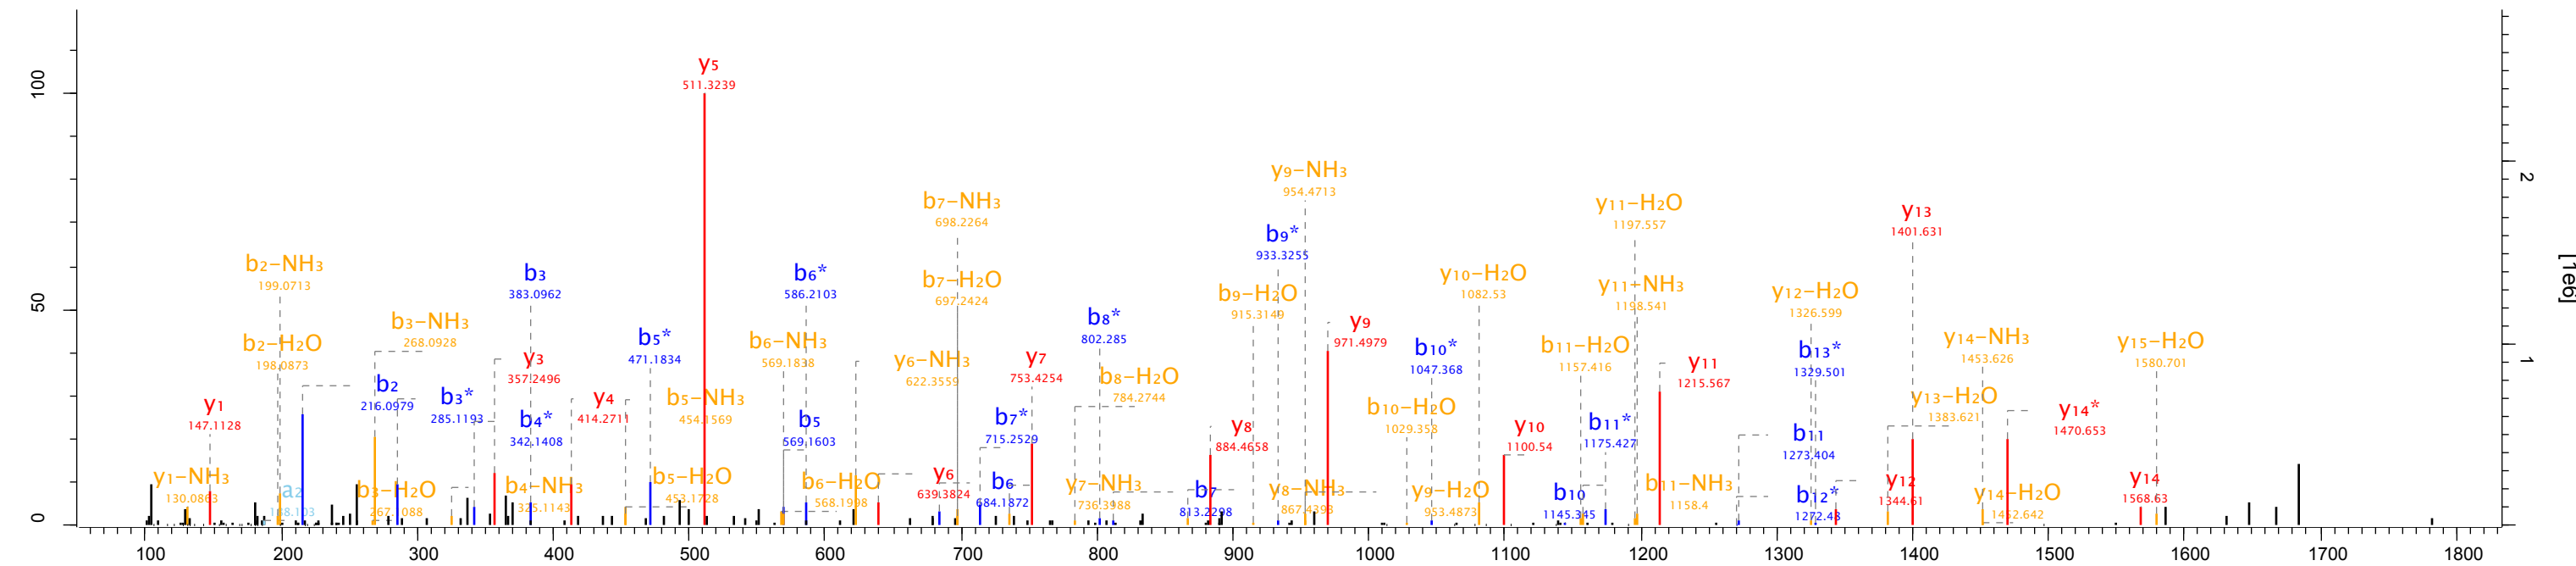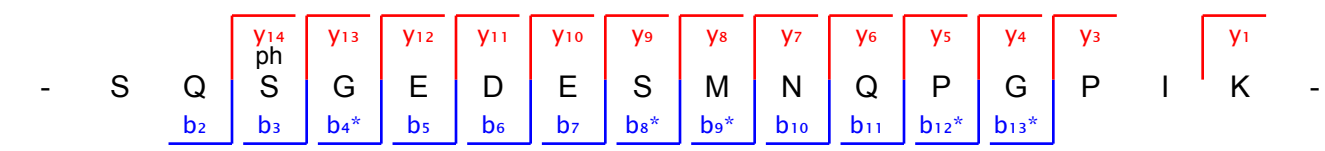

Raw file: 20150814\_A375SR\_Phospho\_BR2\_03  
 Scan: 9434 Method: FTMS; HCD Score: 190.35 m/z: 930.92 Gene names: CASC3

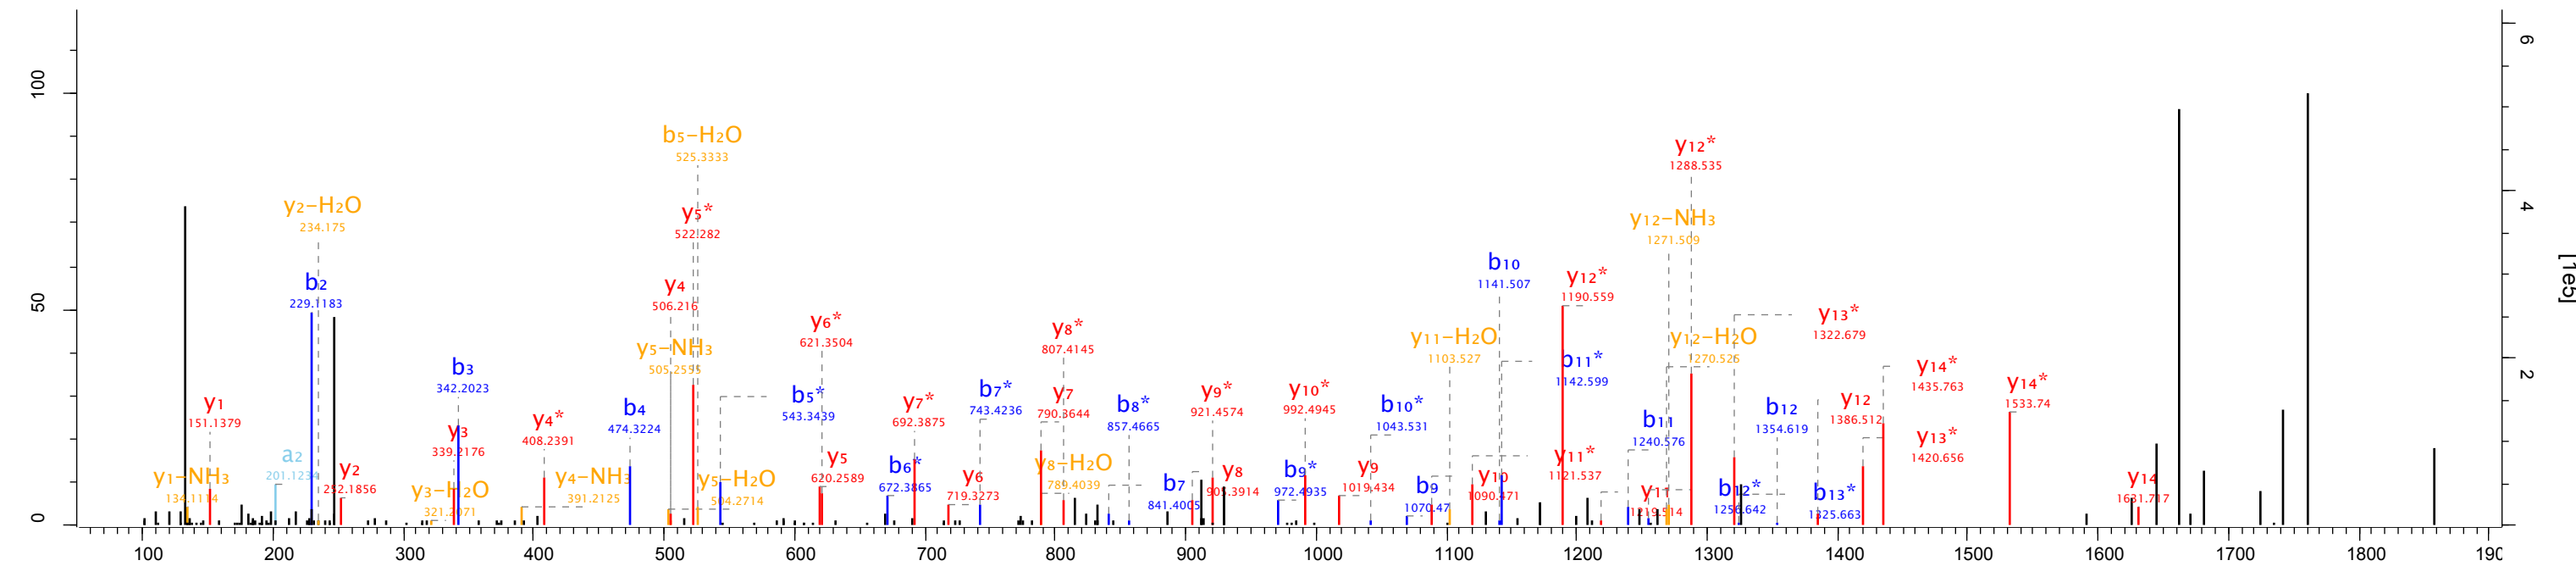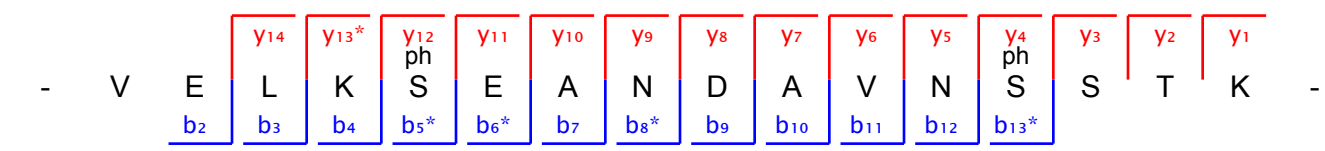

Raw file: 20150814\_A375SR\_Phospho\_BR2\_03  
 Scan: 9484 Method: FTMS; HCD Score: 107.35 m/z: 620.74 Gene names: PRRC2C

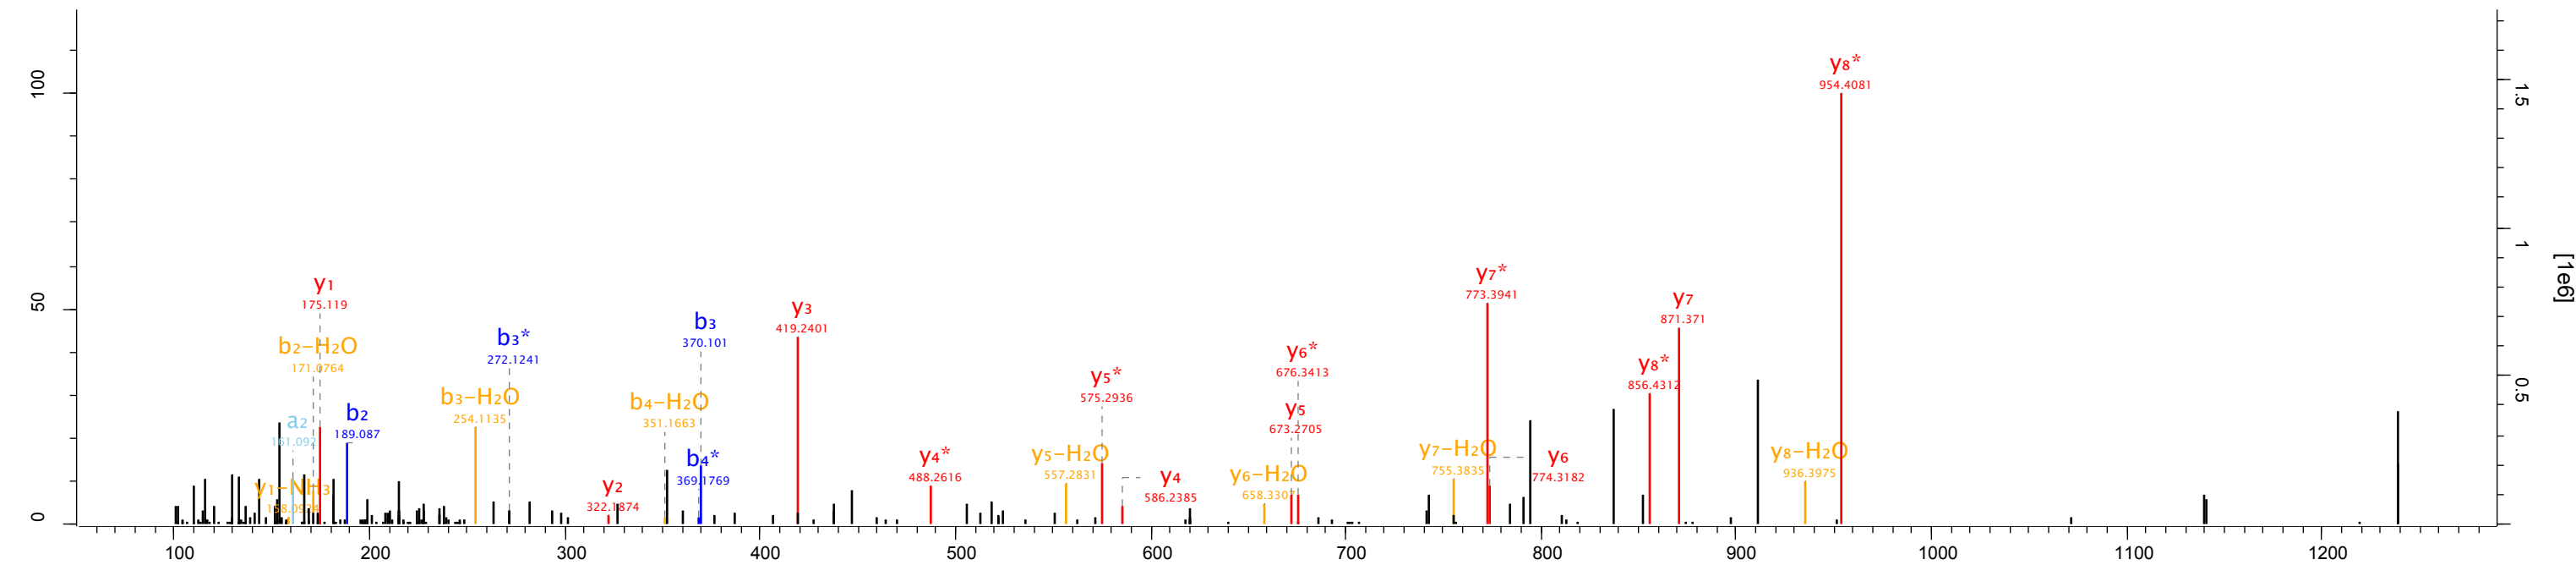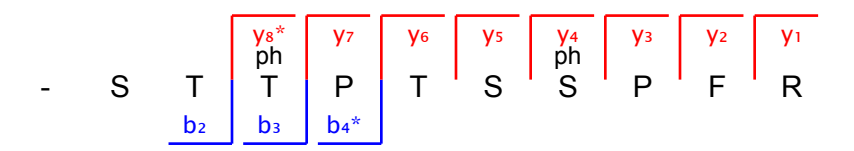

Raw file: 20150814\_A375SR\_Phospho\_BR2\_03  
 Scan: 9754 Method: FTMS; HCD Score: 137.04 m/z: 1111.43 Gene names: ILF3

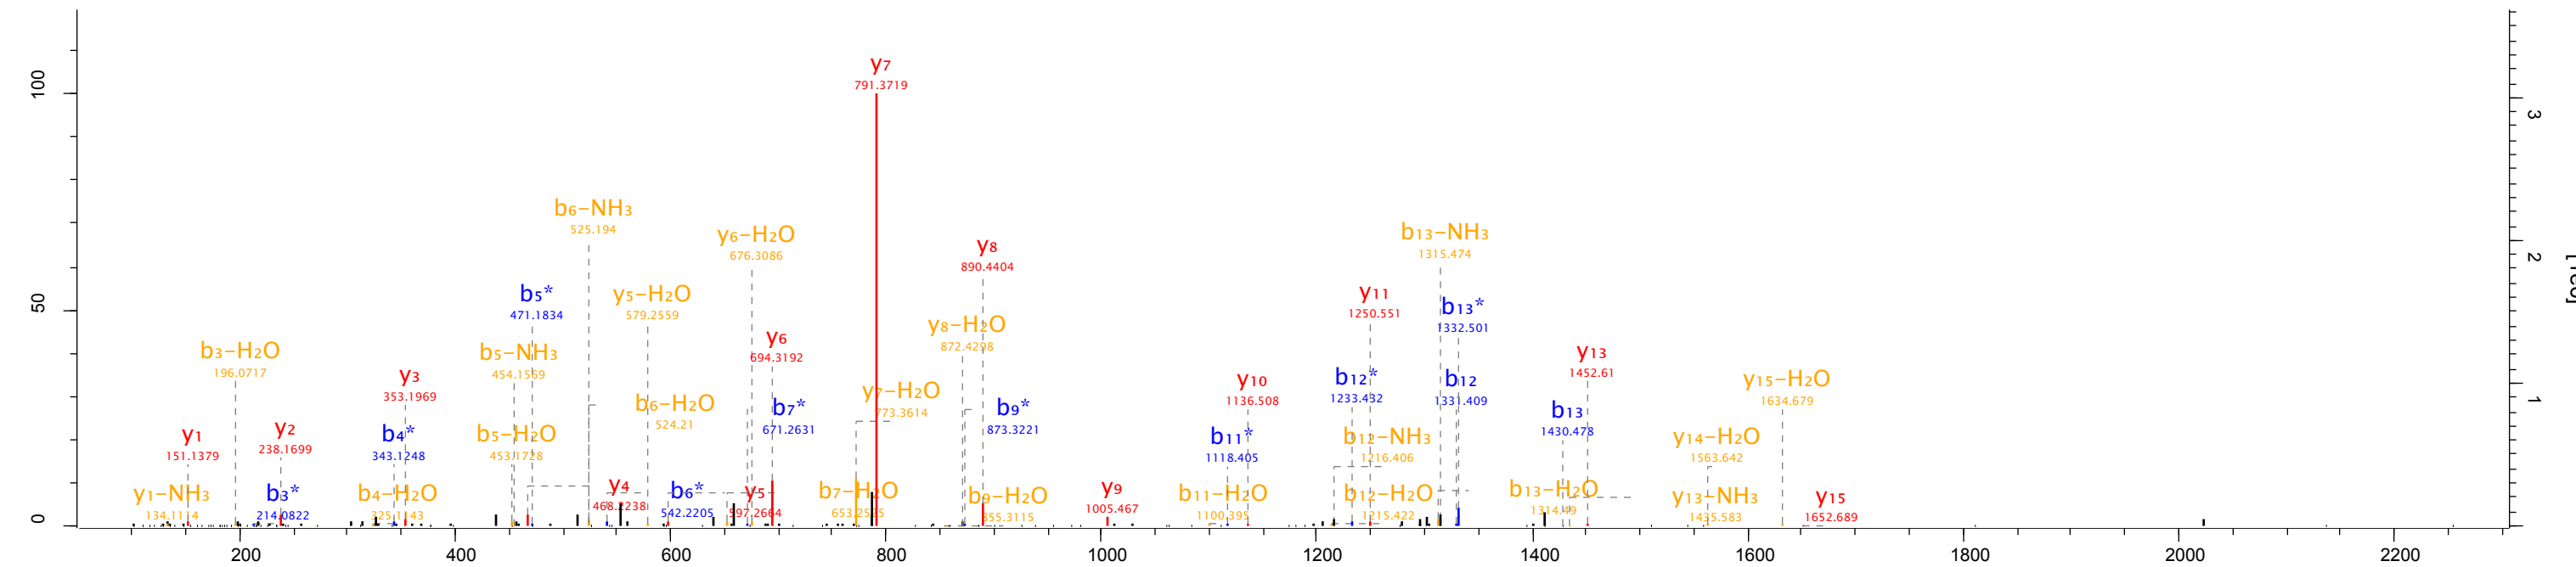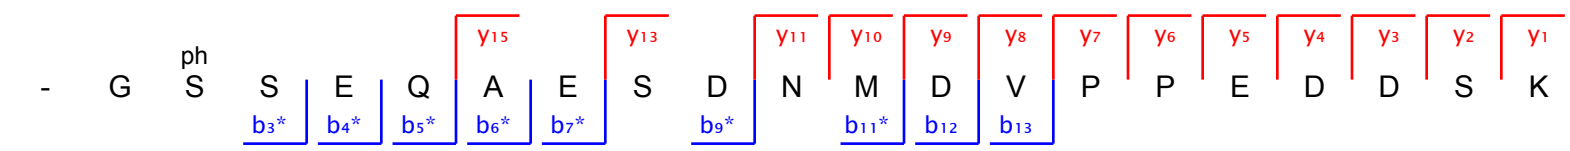

Raw file 20150814\_A375SR\_Phospho\_BR2\_04 Scan 10734 Method FTMS; HCD Score 107.73 m/z 753.36 Gene names TLK2

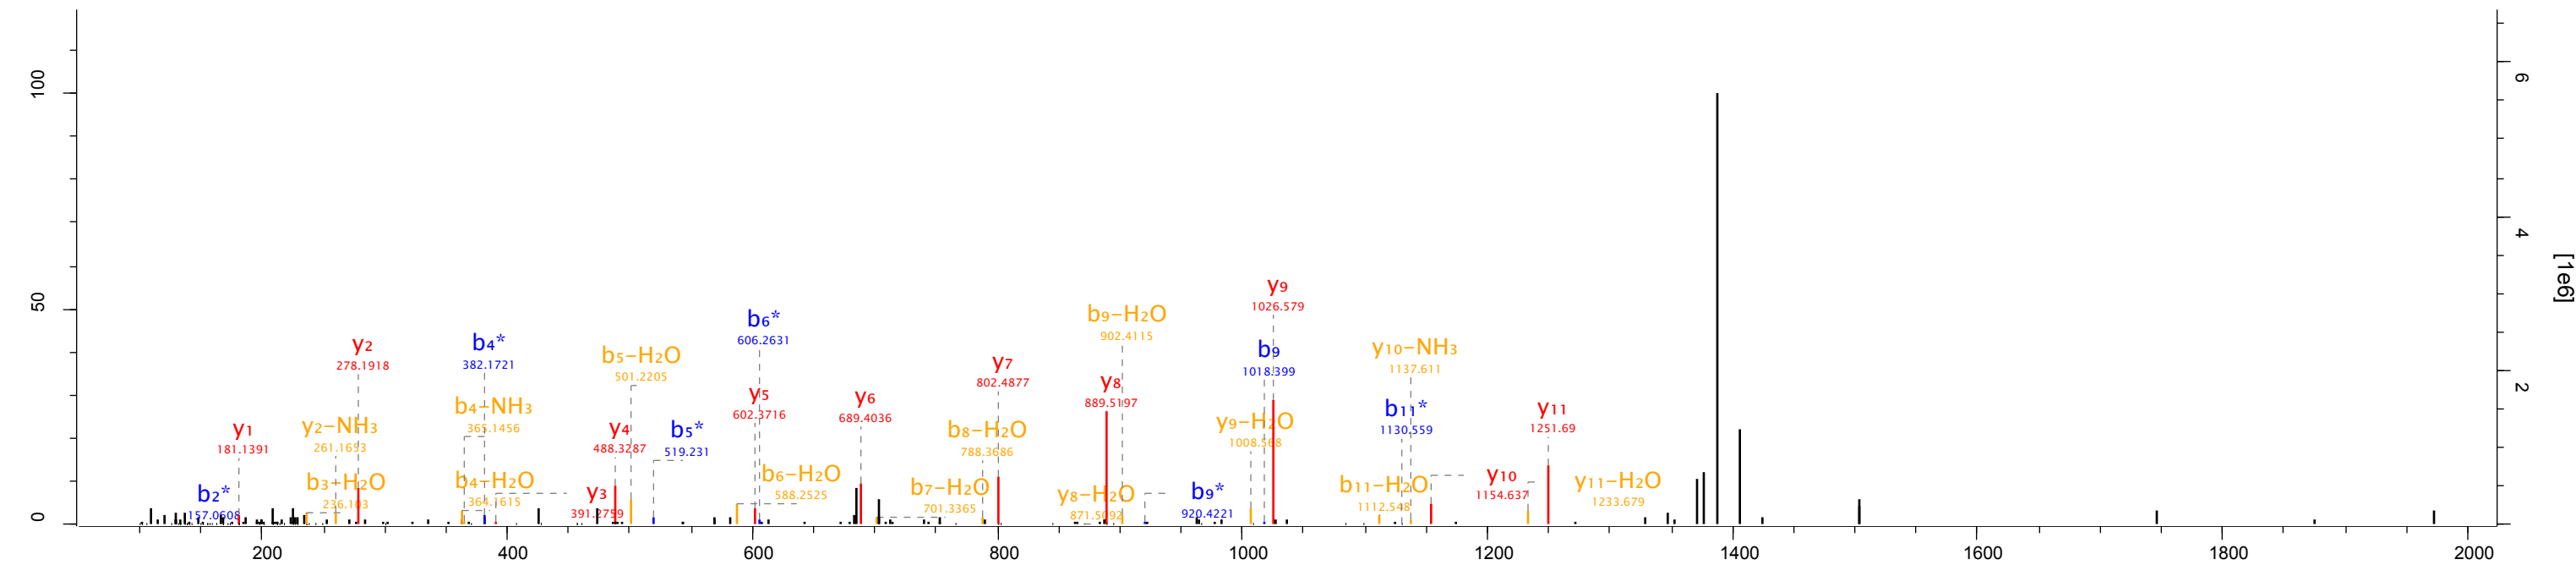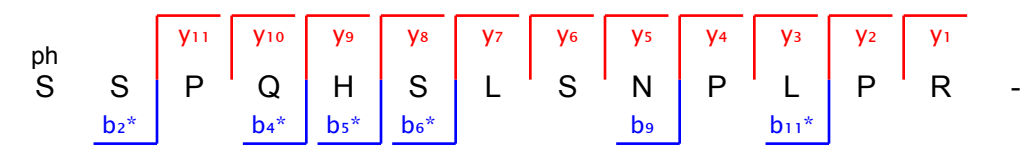



Raw file 20150814\_A375SR\_Phospho\_BR2\_04 Scan 11064 Method FTMS; HCD Score 158.92 m/z 792.38 Gene names SH3PXD2A

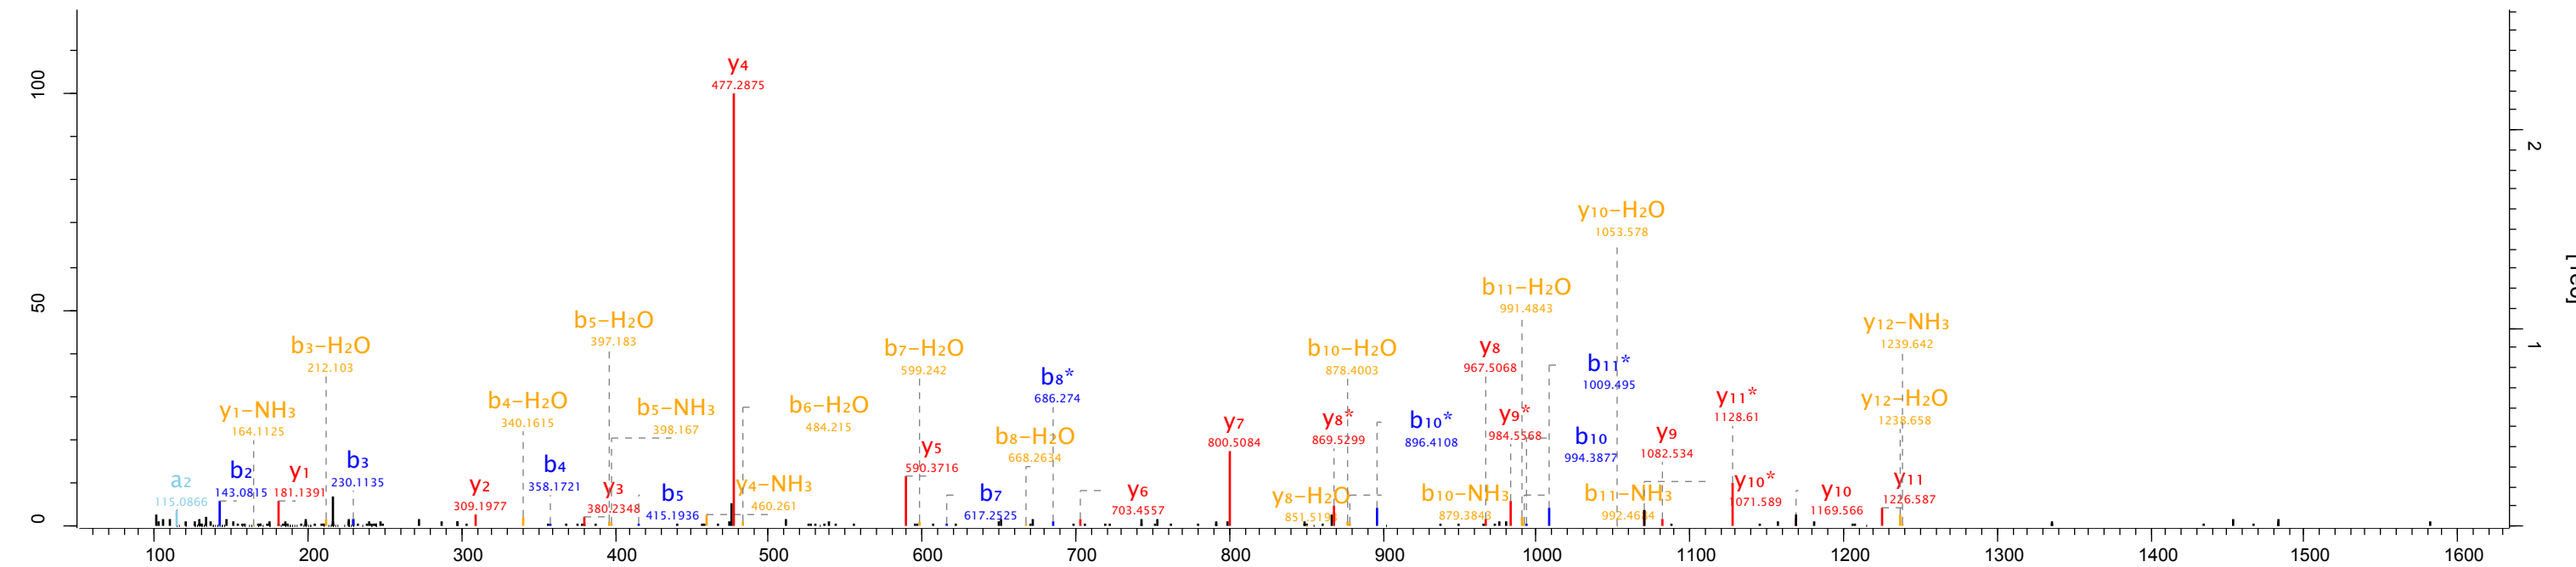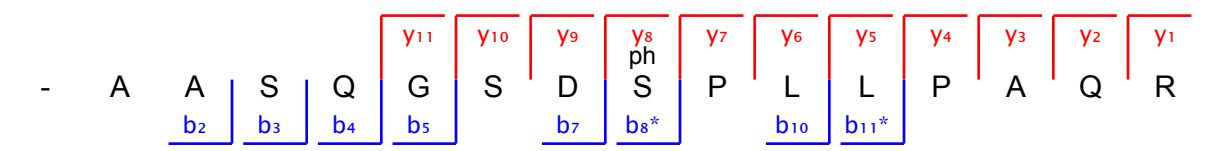

Raw file: 20150814\_A375SR\_Phospho\_BR2\_04  
 Scan: 11194 Method: FTMS; HCD Score: 112.85 m/z: 730.31 Gene names: PBRM1

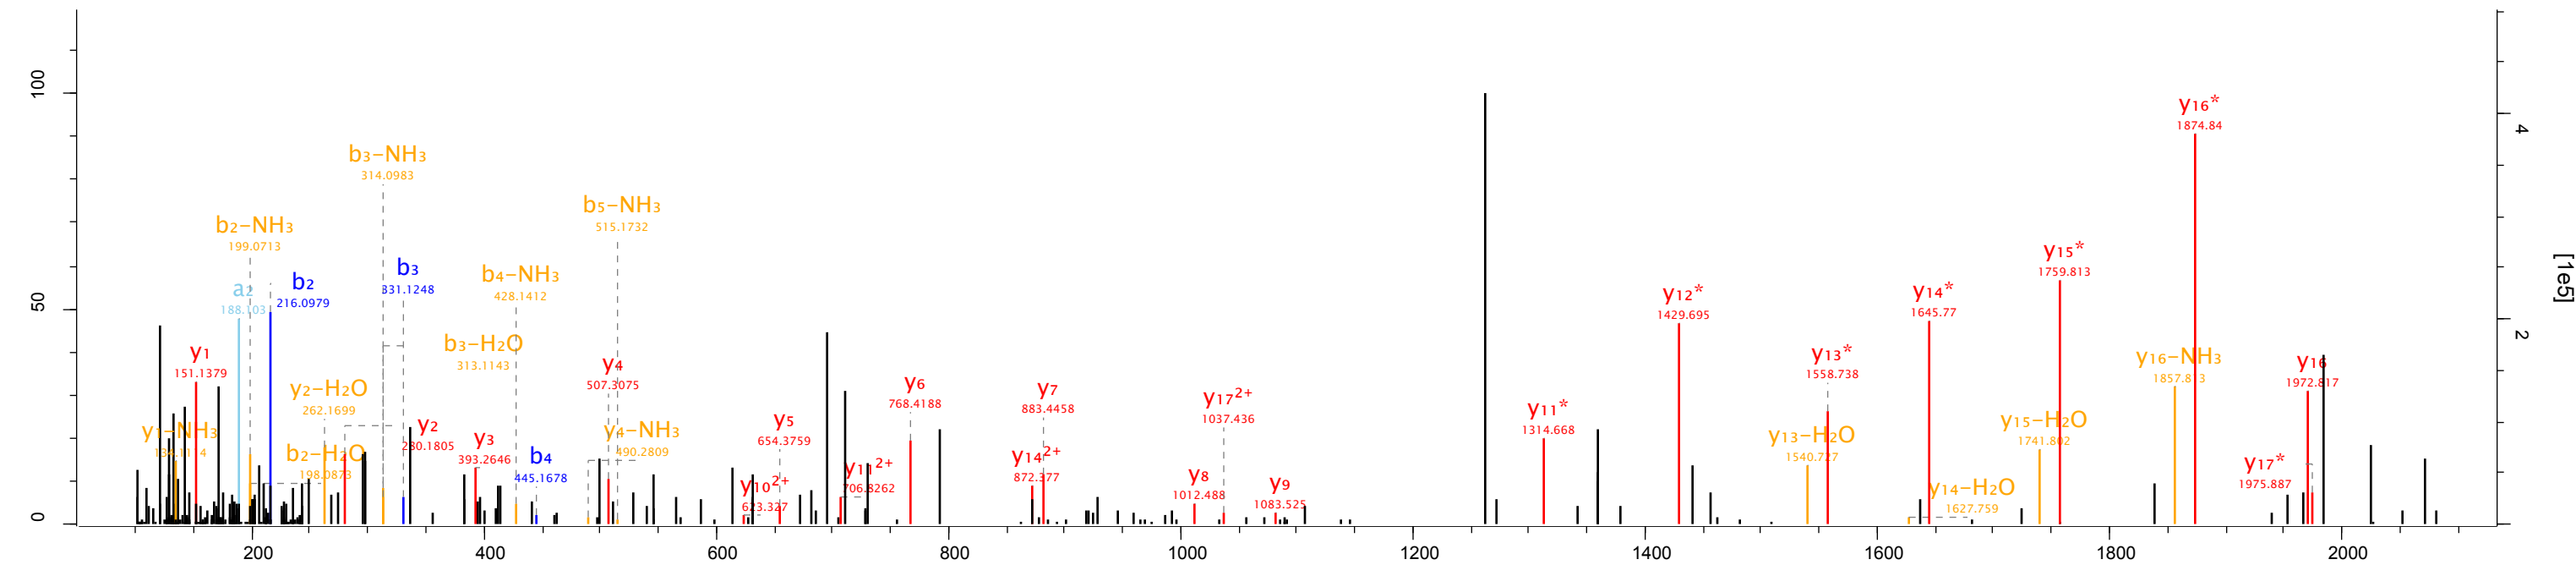

- N T D N S E D S R A E D N F N L E K -

Fragmentation sites (b and y ions) are indicated by boxes below the sequence:

- Red boxes: y17\* (T), y16 (D), y15\* (N), y14\* (S), y13\* (E), y12\* (D), y11\* (S), y10<sup>2+</sup> (R), y9 (A), y8 (E), y7 (D), y6 (N), y5 (F), y4 (N), y3 (L), y2 (E), y1 (K)
- Blue boxes: b2 (T), b3 (D), b4 (N)

Raw file: 20150814\_A375SR\_Phospho\_BR2\_04  
 Scan: 11244 Method: FTMS; HCD Score: 219.99 m/z: 749.83 Gene names: ZNF609

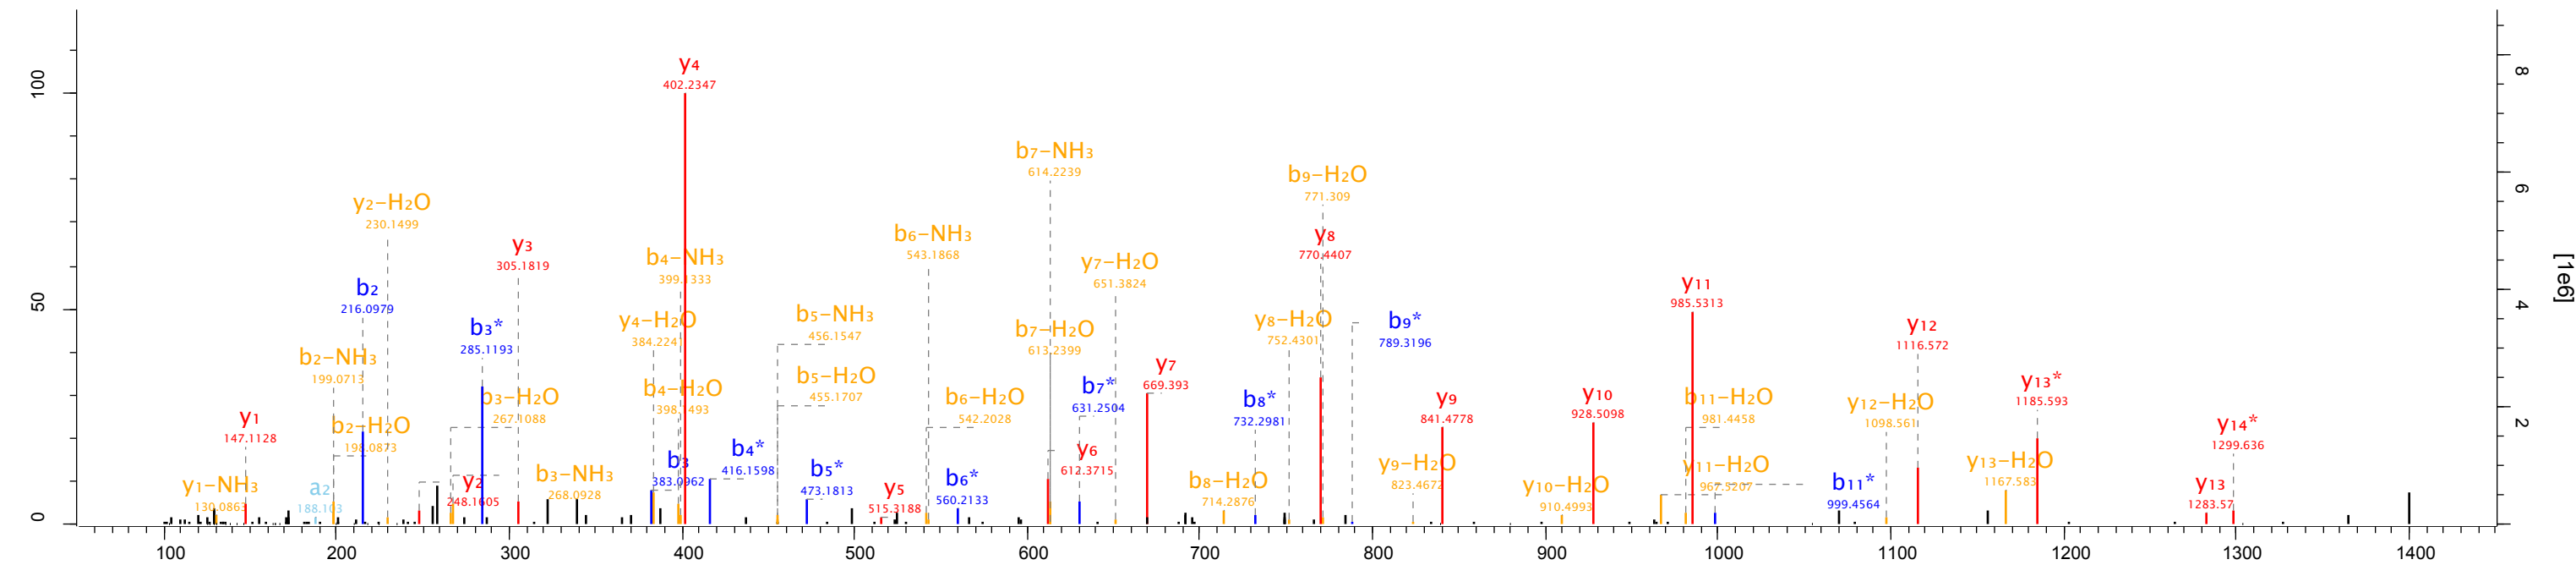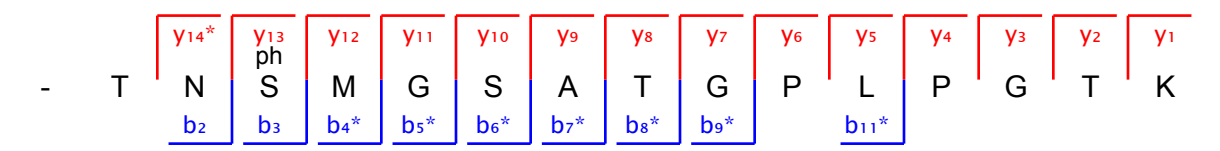

Raw file: 20150814\_A375SR\_Phospho\_BR2\_04  
 Scan: 11364 Method: FTMS; HCD Score: 171.2 m/z: 565.24 Gene names: MECP2

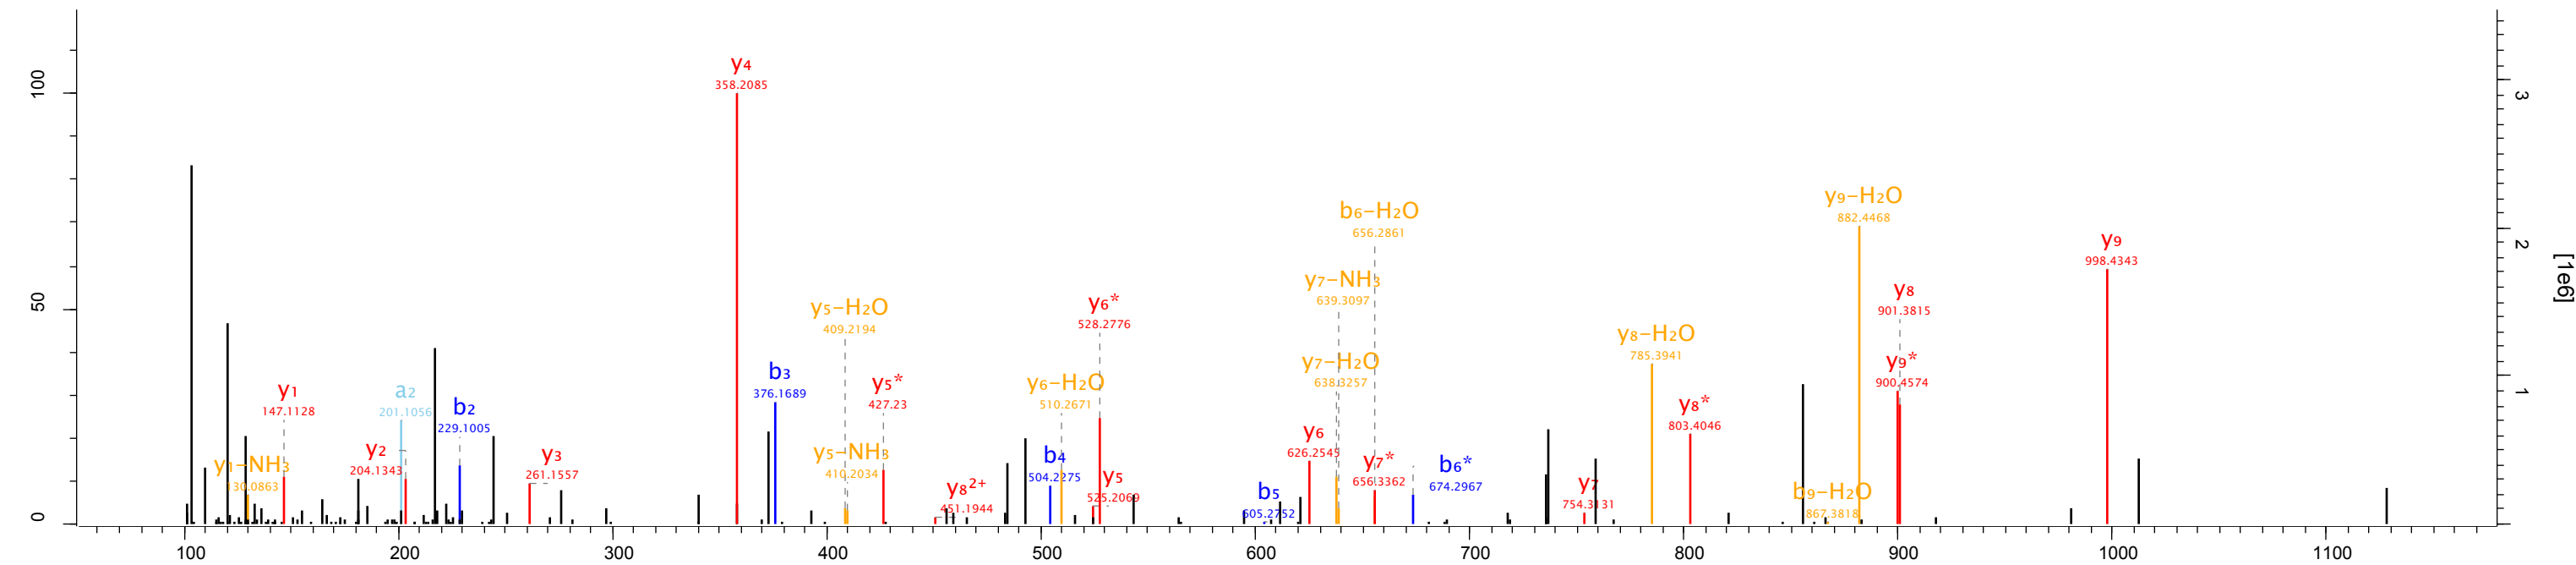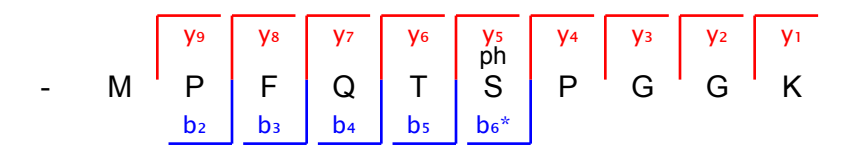

Raw file: 20150814\_A375SR\_Phospho\_BR2\_04  
 Scan: 11734 Method: FTMS; HCD Score: 64.84 m/z: 534.23 Gene names: TNKS1BP1

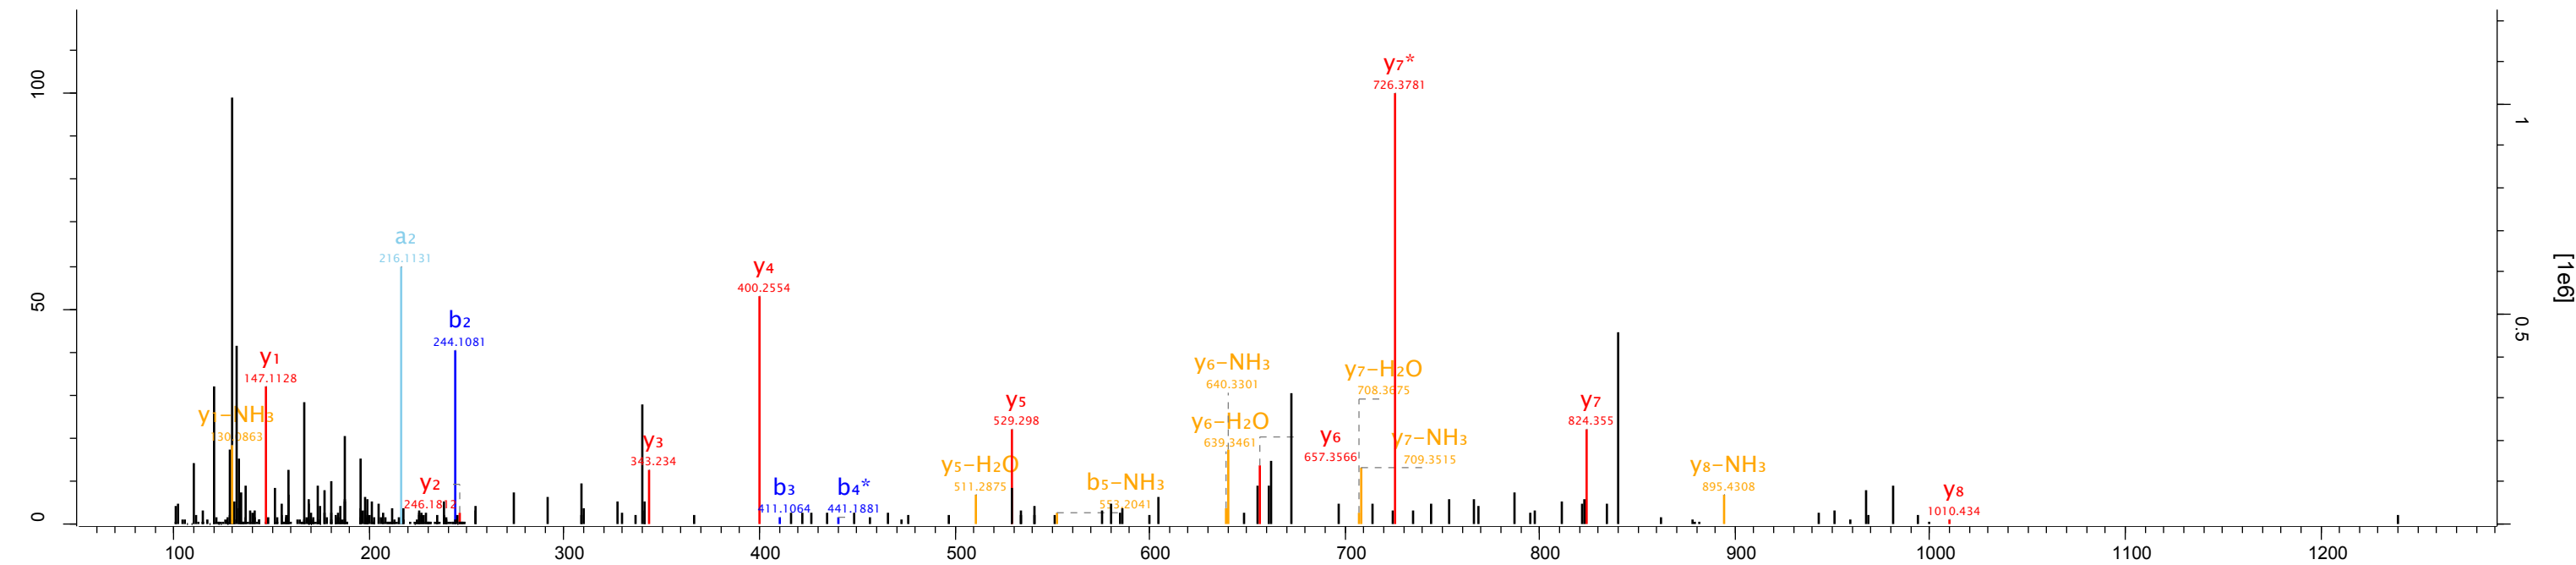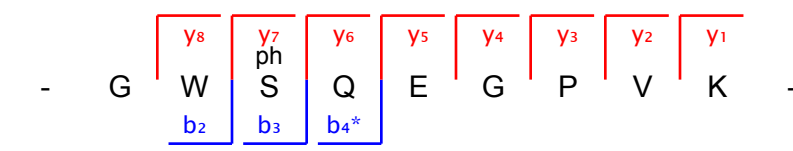

Raw file 20150814\_A375SR\_Phospho\_BR2\_04 Scan 11874 Method FTMS; HCD Score 142.1 m/z 614.81 Gene names NOP2

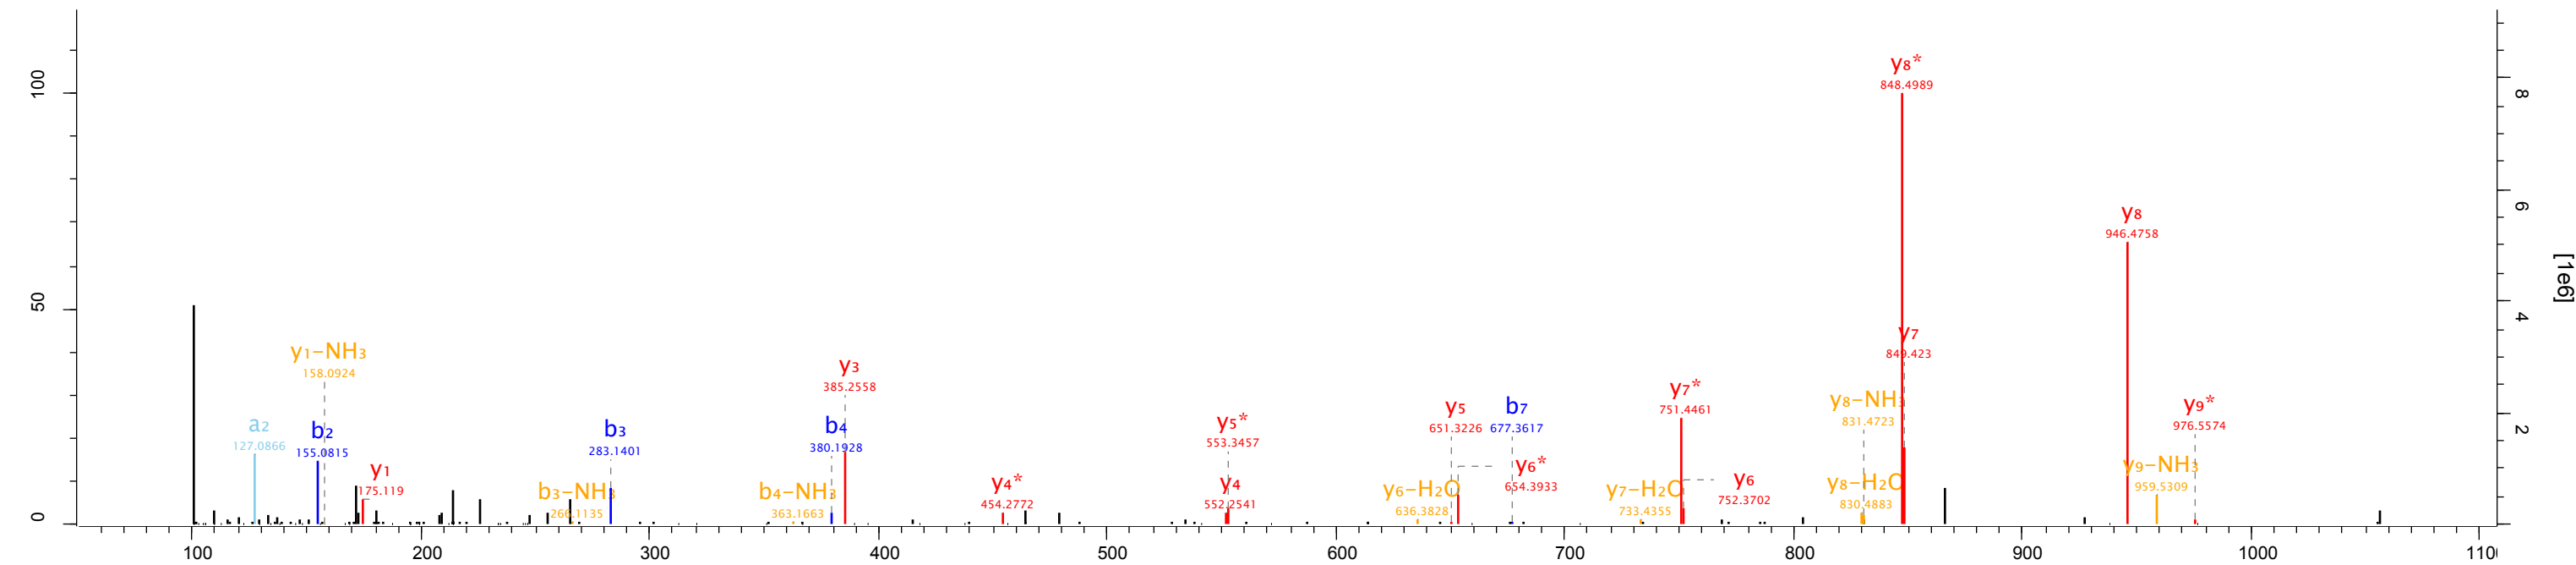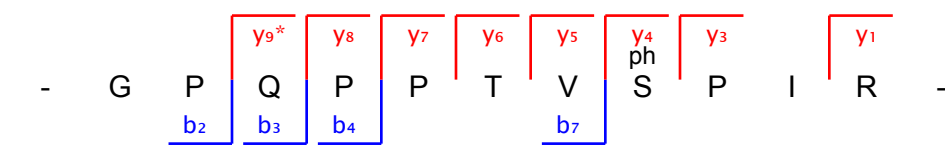

Raw file: 20150814\_A375SR\_Phospho\_BR2\_04  
 Scan: 12014  
 Method: FTMS; HCD  
 Score: 108.35  
 m/z: 659.3  
 Gene names: MAPK14

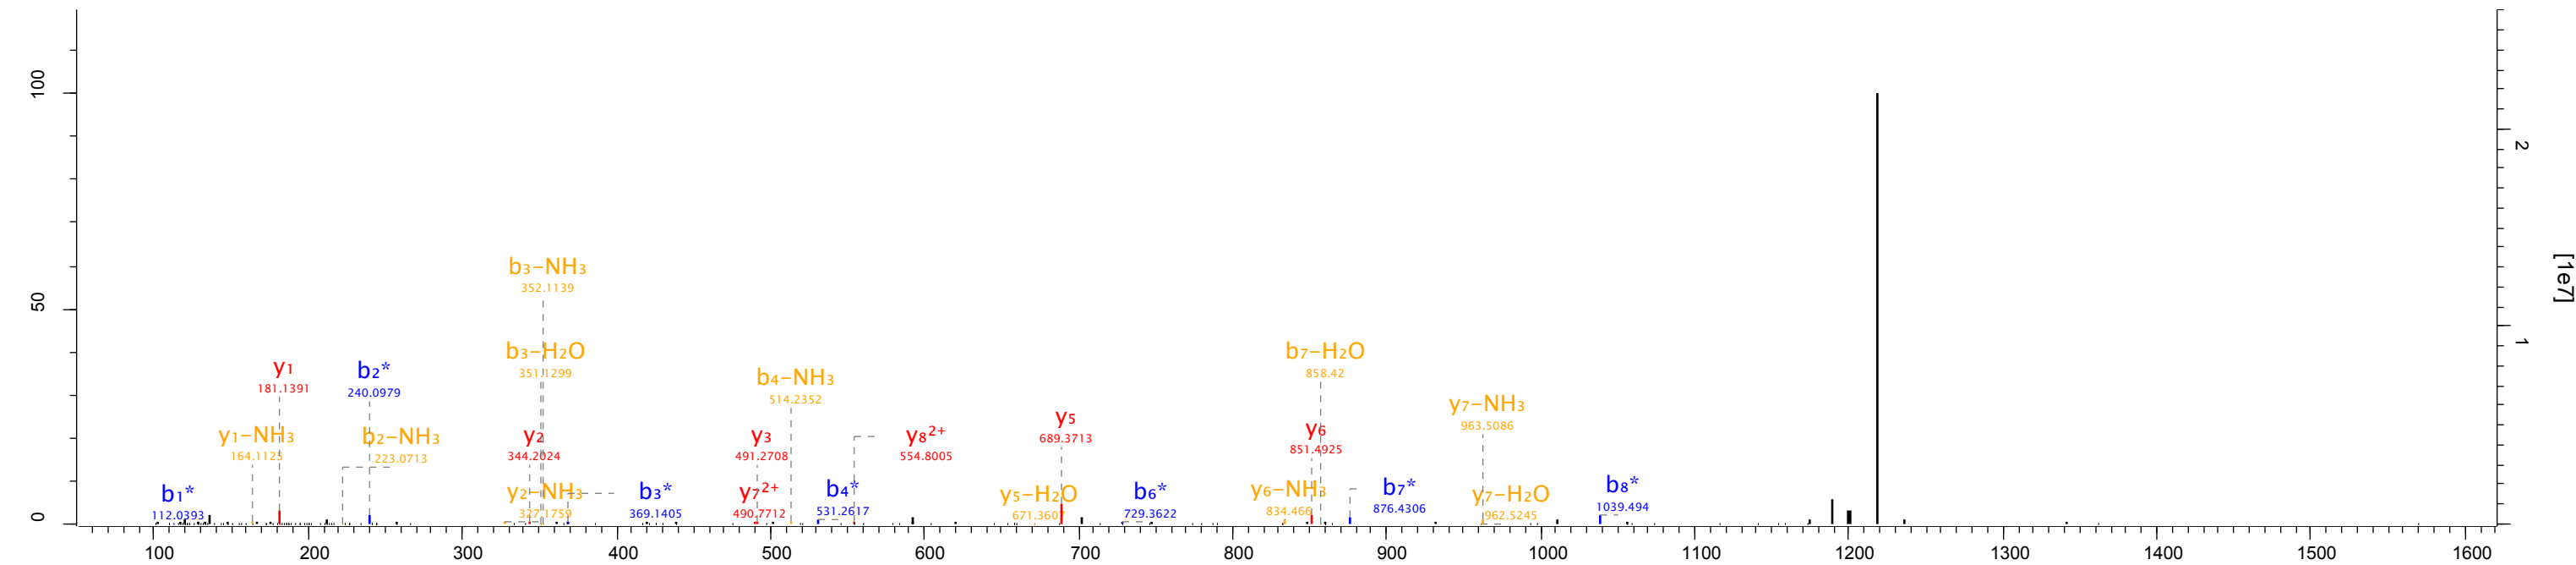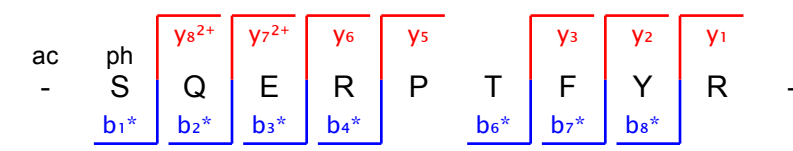

Raw file: 20150814\_A375SR\_Phospho\_BR2\_04  
 Scan: 12034 Method: FTMS; HCD Score: 185.28 m/z: 780.29 Gene names: MAP9

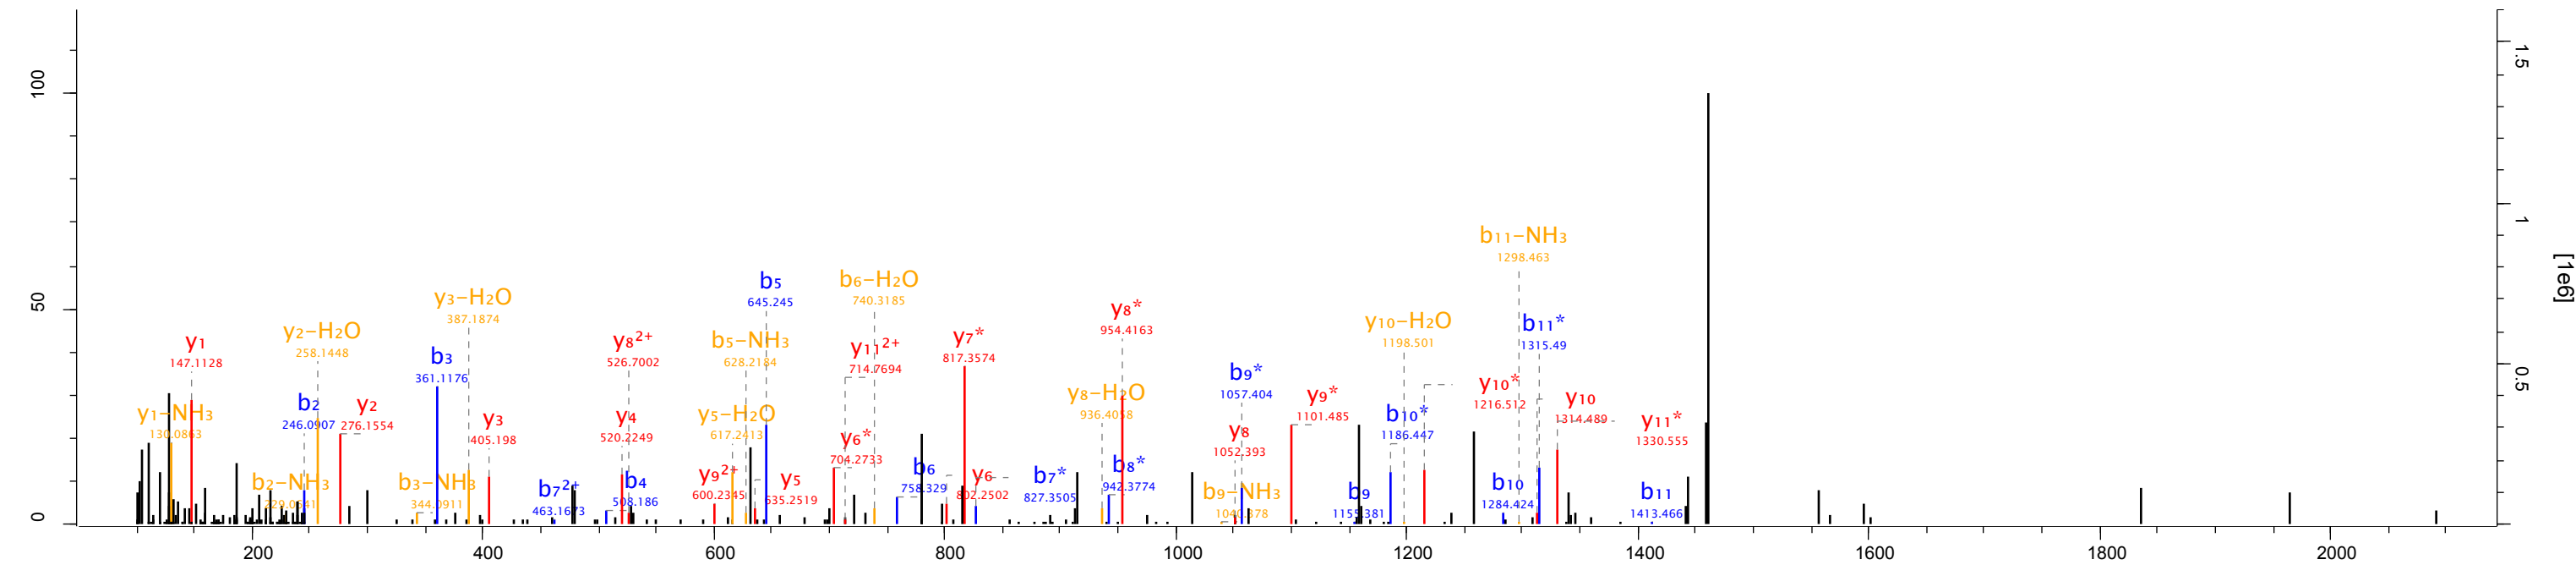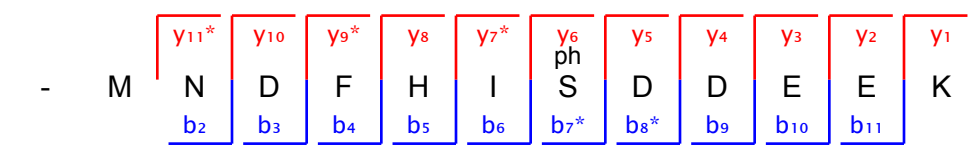



Raw file: 20150814\_A375SR\_Phospho\_BR2\_04  
 Scan: 12194 Method: FTMS; HCD Score: 290.35 m/z: 1074.44 Gene names: RPRD2

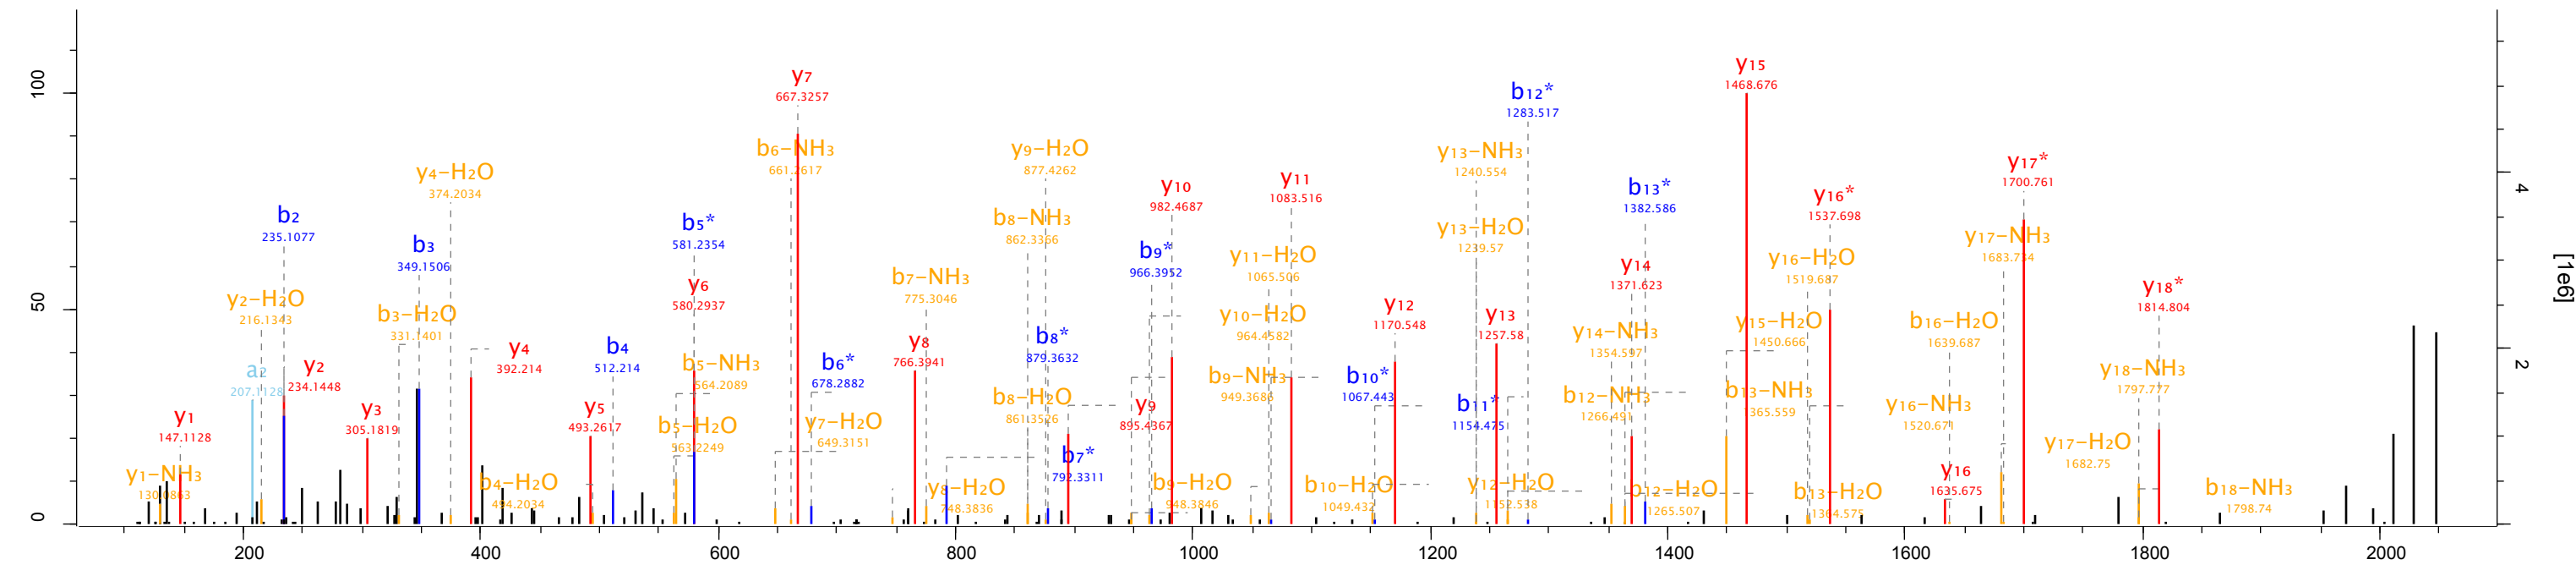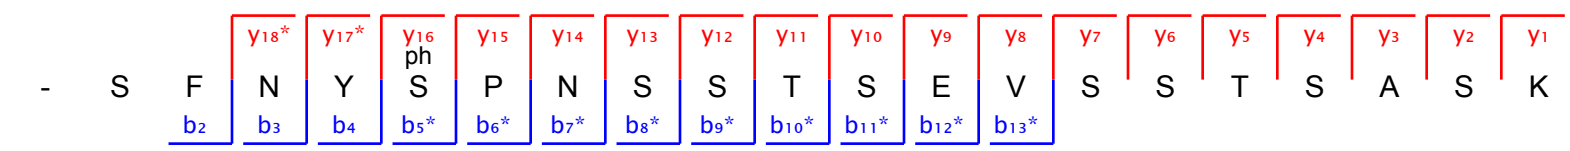

Raw file: 20150814\_A375SR\_Phospho\_BR2\_04  
 Scan: 12524 Method: FTMS; HCD Score: 233.5 m/z: 985.93 Gene names: GLE1

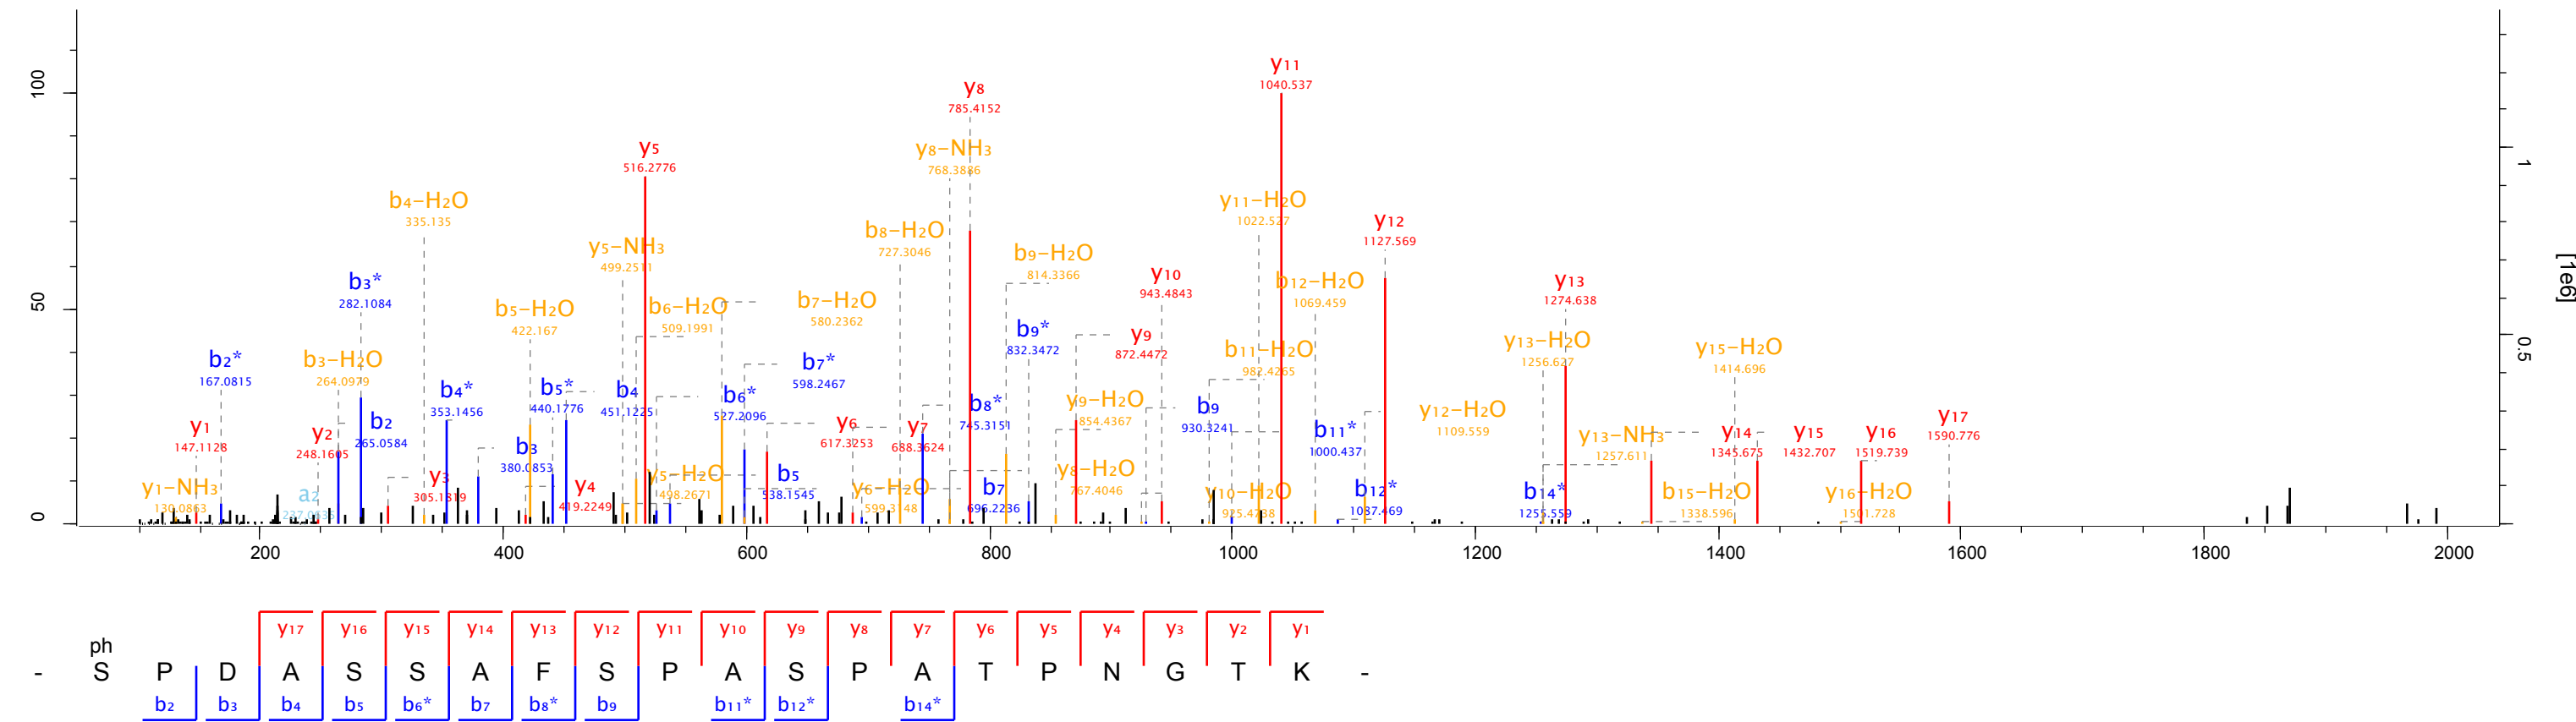

Raw file: 20150814\_A375SR\_Phospho\_BR2\_04  
 Scan: 12624 Method: FTMS; HCD Score: 213.7 m/z: 1041 Gene names: HDAC7

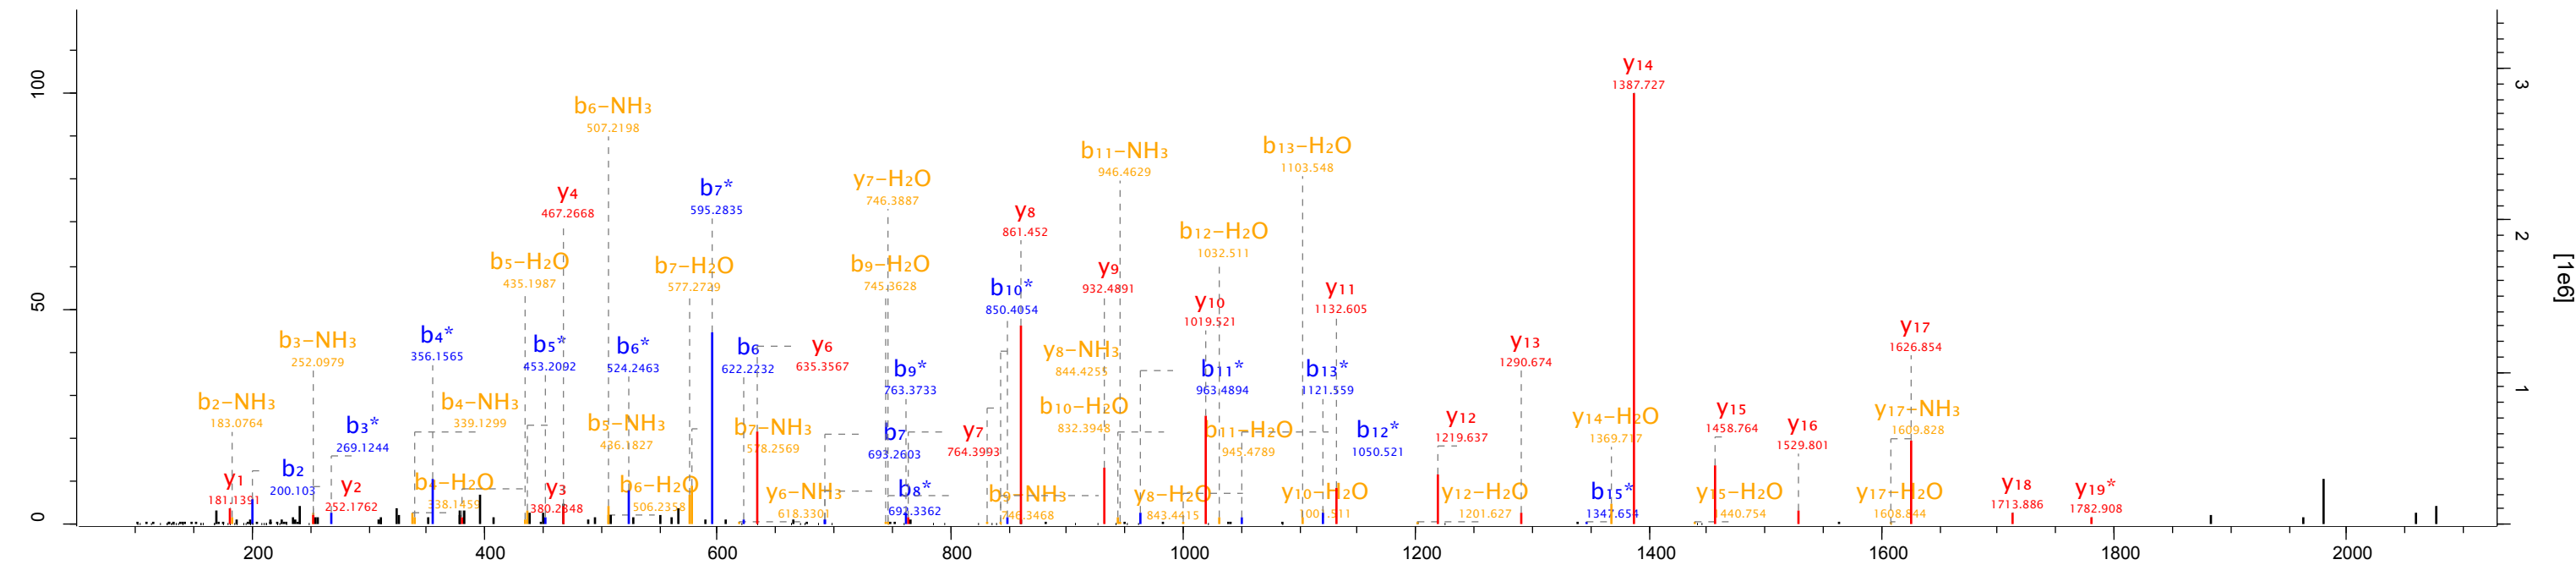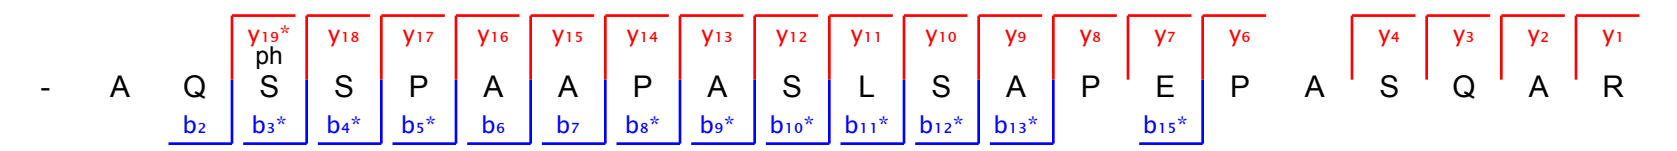

Raw file 20150814\_A375SR\_Phospho\_BR2\_04 Scan 12674 Method FTMS; HCD Score 103.53 m/z 745.96 Gene names KPNA4

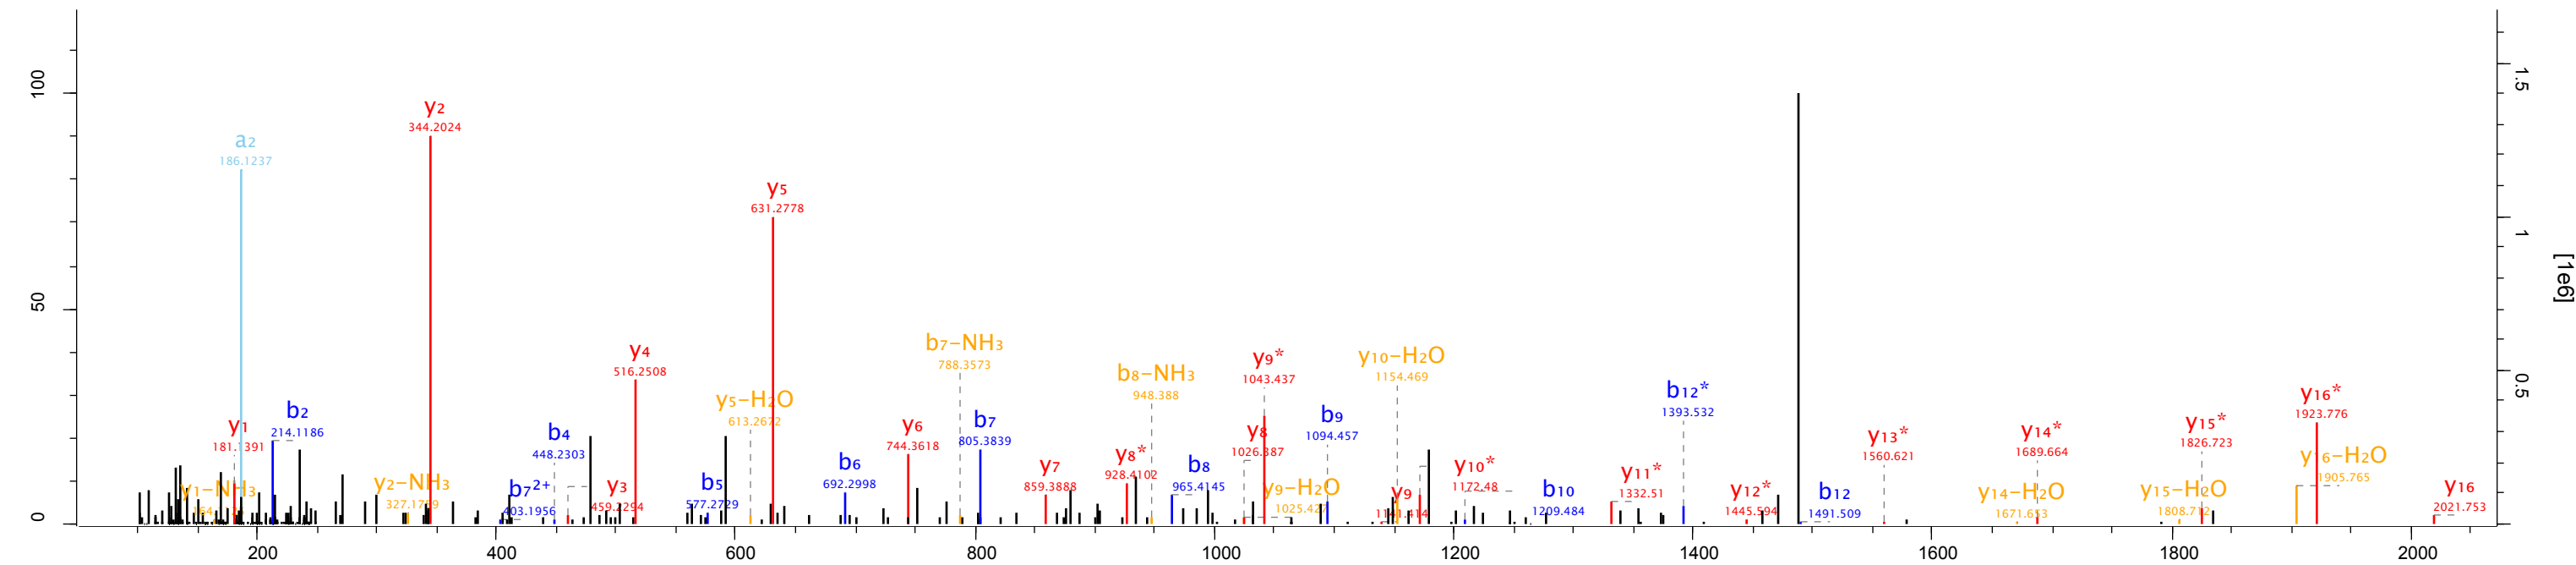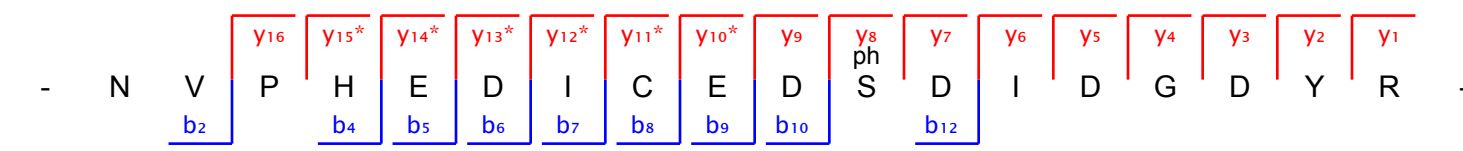

Raw file: 20150814\_A375SR\_Phospho\_BR2\_04  
 Scan: 13594 Method: FTMS; HCD Score: 174.04 m/z: 759.84 Gene names: RUNX1

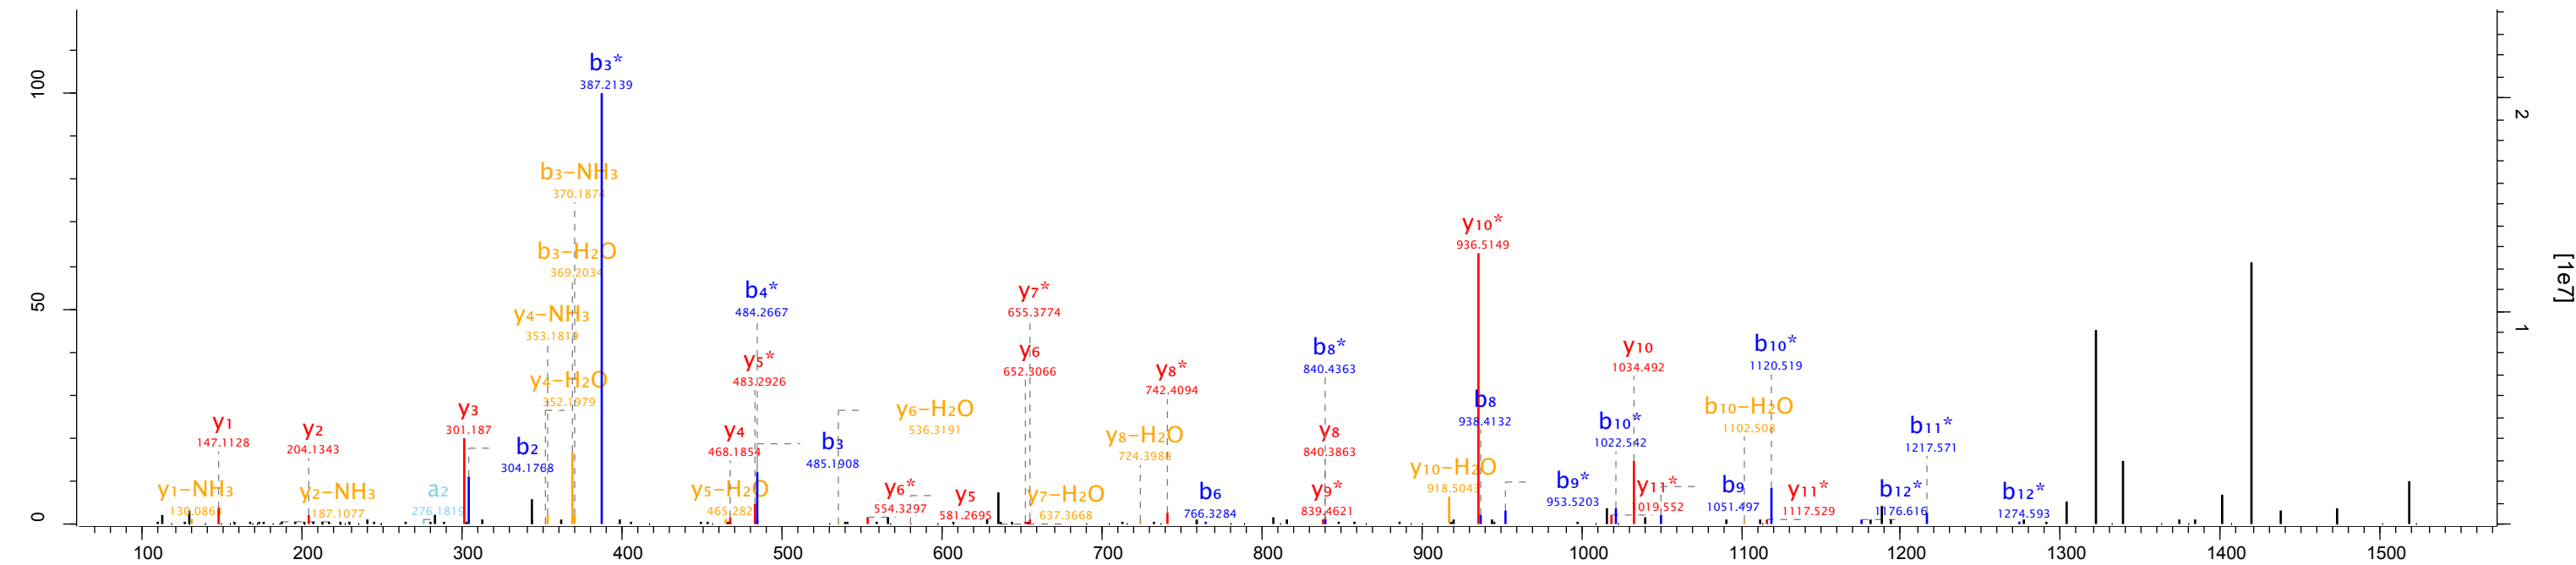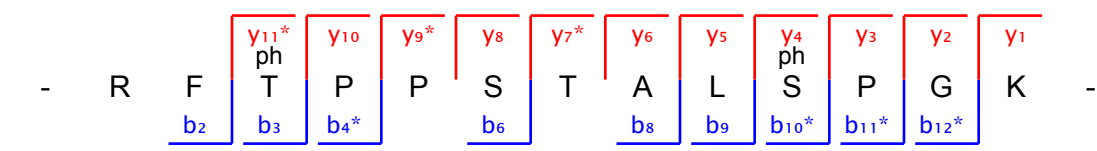

Raw file 20150814\_A375SR\_Phospho\_BR2\_04 Scan 13954 Method FTMS; HCD Score 70.12 m/z 637.76 Gene names SLAIN2

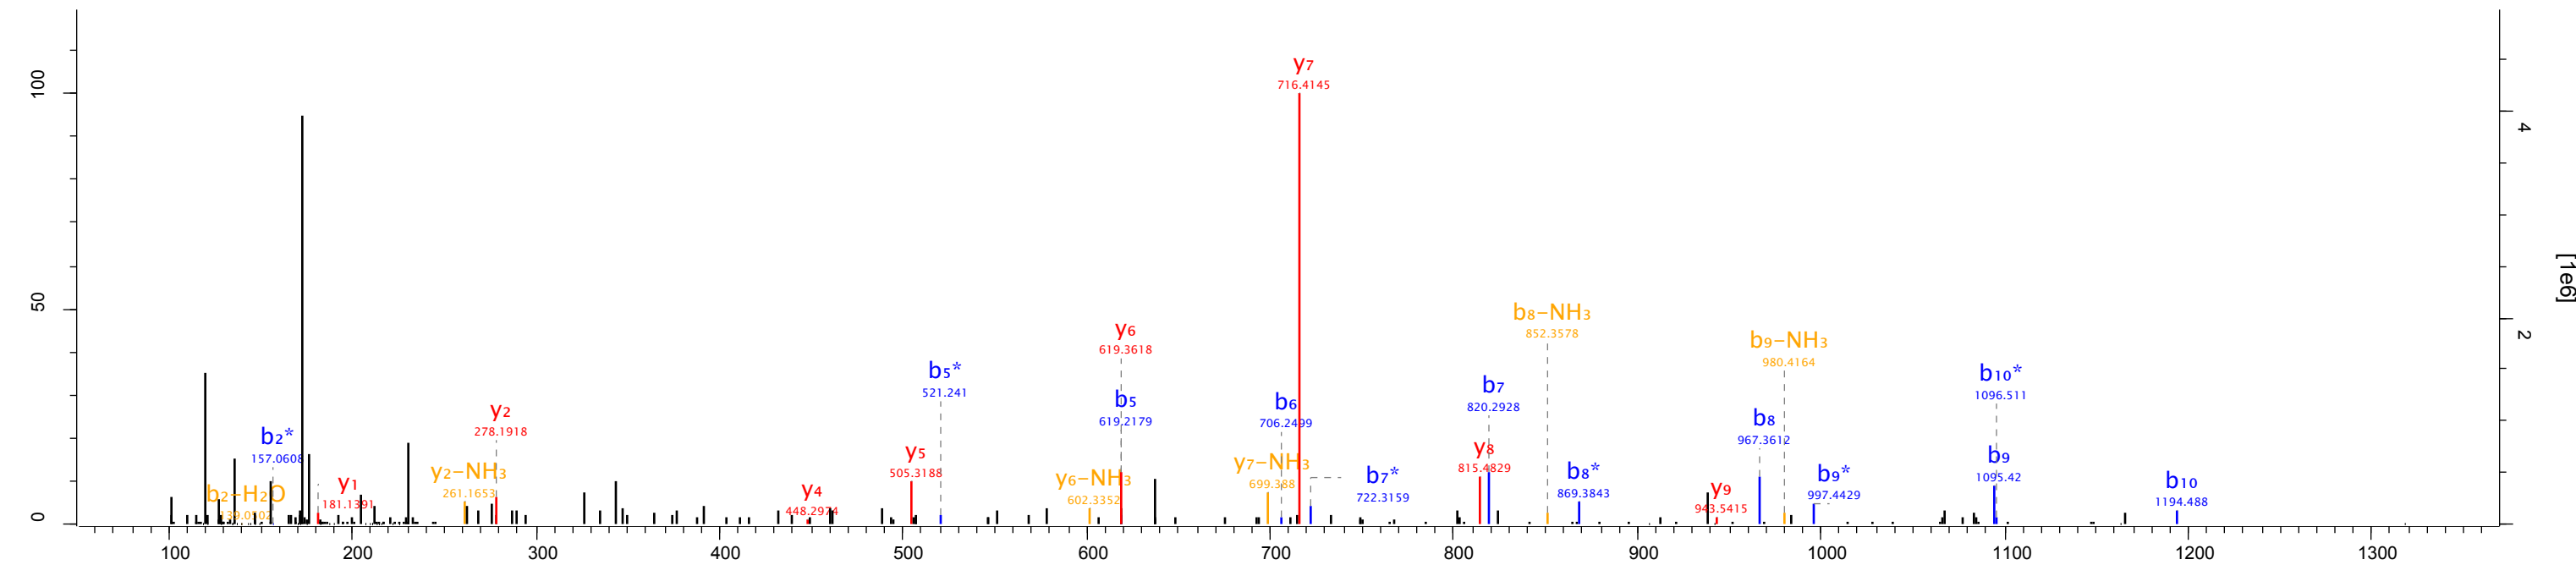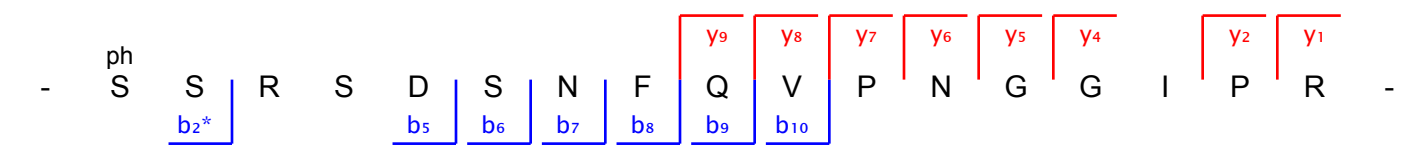

Raw file 20150814\_A375SR\_Phospho\_BR2\_04 Scan 14214 Method FTMS; HCD Score 244.73 m/z 899.42 Gene names TERF2IP

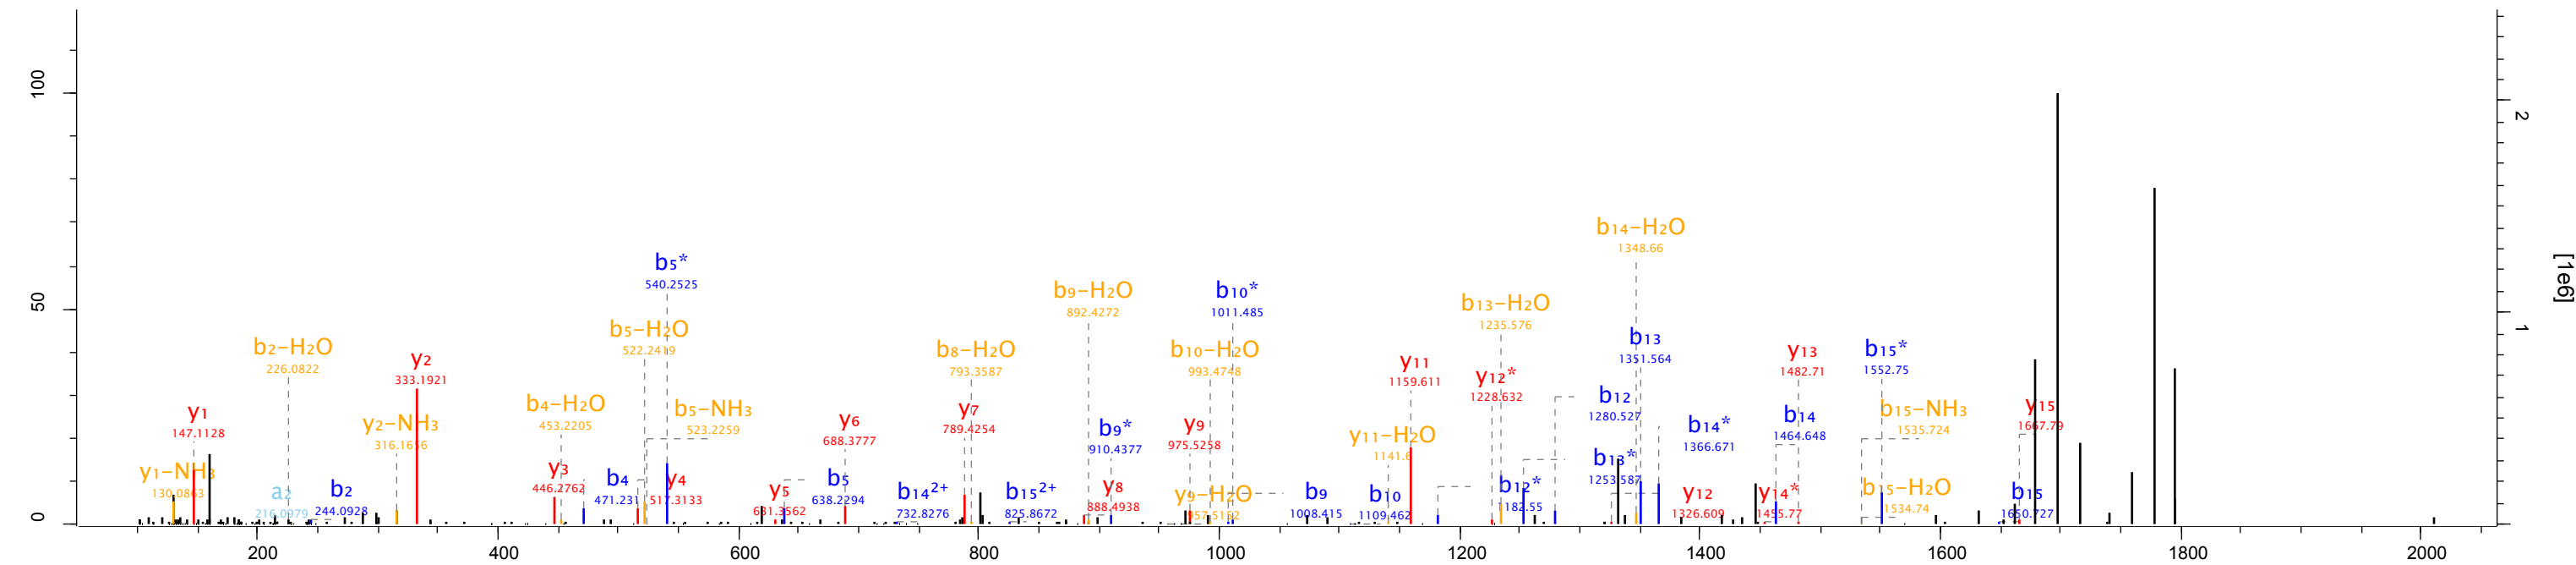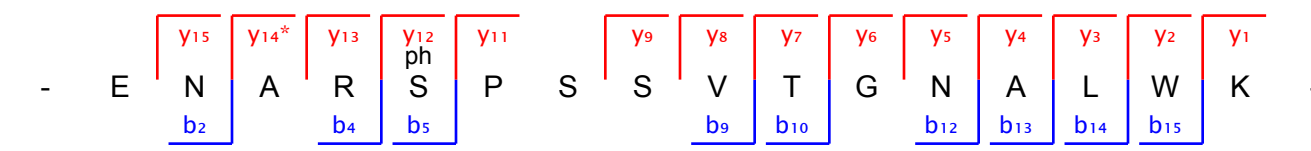

Raw file 20150814\_A375SR\_Phospho\_BR2\_04 Scan 14264 Method FTMS; HCD Score 308.1 m/z 850.97 Gene names TCOF1

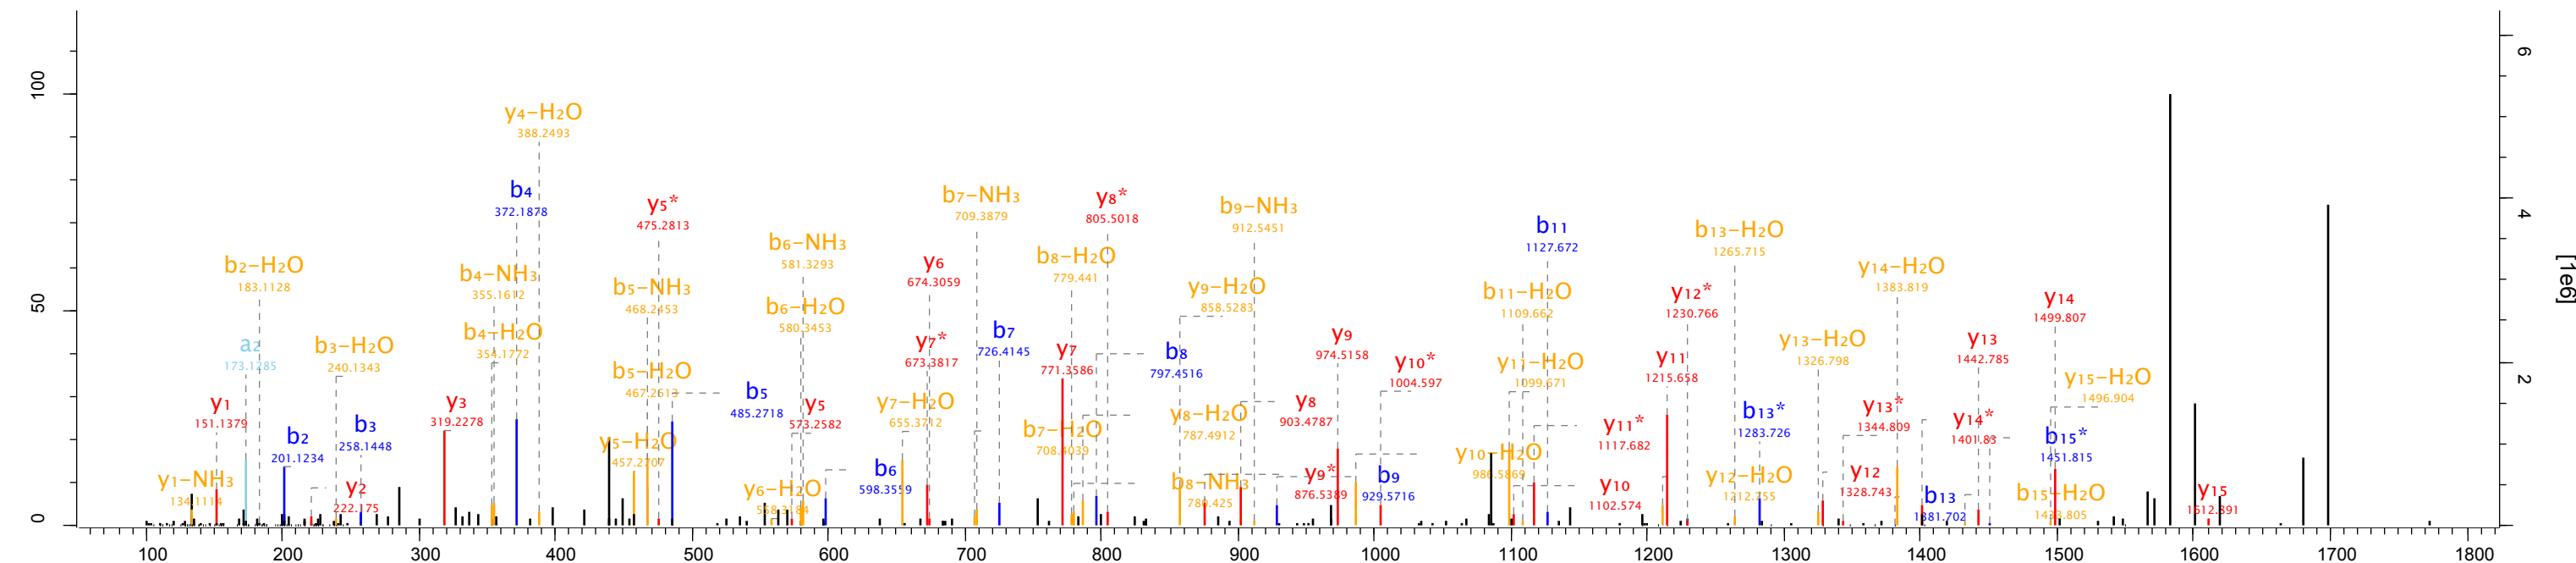

- S L G N I L Q A K P T S S P A K -

Fragmentation mapping (b-ions in blue, y-ions in red):

- b<sub>2</sub> (L), b<sub>3</sub> (G), b<sub>4</sub> (N), b<sub>5</sub> (I), b<sub>6</sub> (L), b<sub>7</sub> (Q), b<sub>8</sub> (A), b<sub>9</sub> (K), b<sub>11</sub> (P), b<sub>13</sub> (S), b<sub>15</sub>\* (A)
- y<sub>1</sub> (K), y<sub>2</sub> (A), y<sub>3</sub> (S), y<sub>6</sub> (T), y<sub>7</sub> (P), y<sub>8</sub> (K), y<sub>9</sub> (A), y<sub>10</sub> (Q), y<sub>11</sub> (L), y<sub>12</sub> (I), y<sub>13</sub> (N), y<sub>14</sub> (G), y<sub>15</sub> (L)



Raw file: 20150814\_A375SR\_Phospho\_BR2\_04  
 Scan: 14474 Method: FTMS; HCD Score: 49.65 m/z: 539.25 Gene names: TAF2

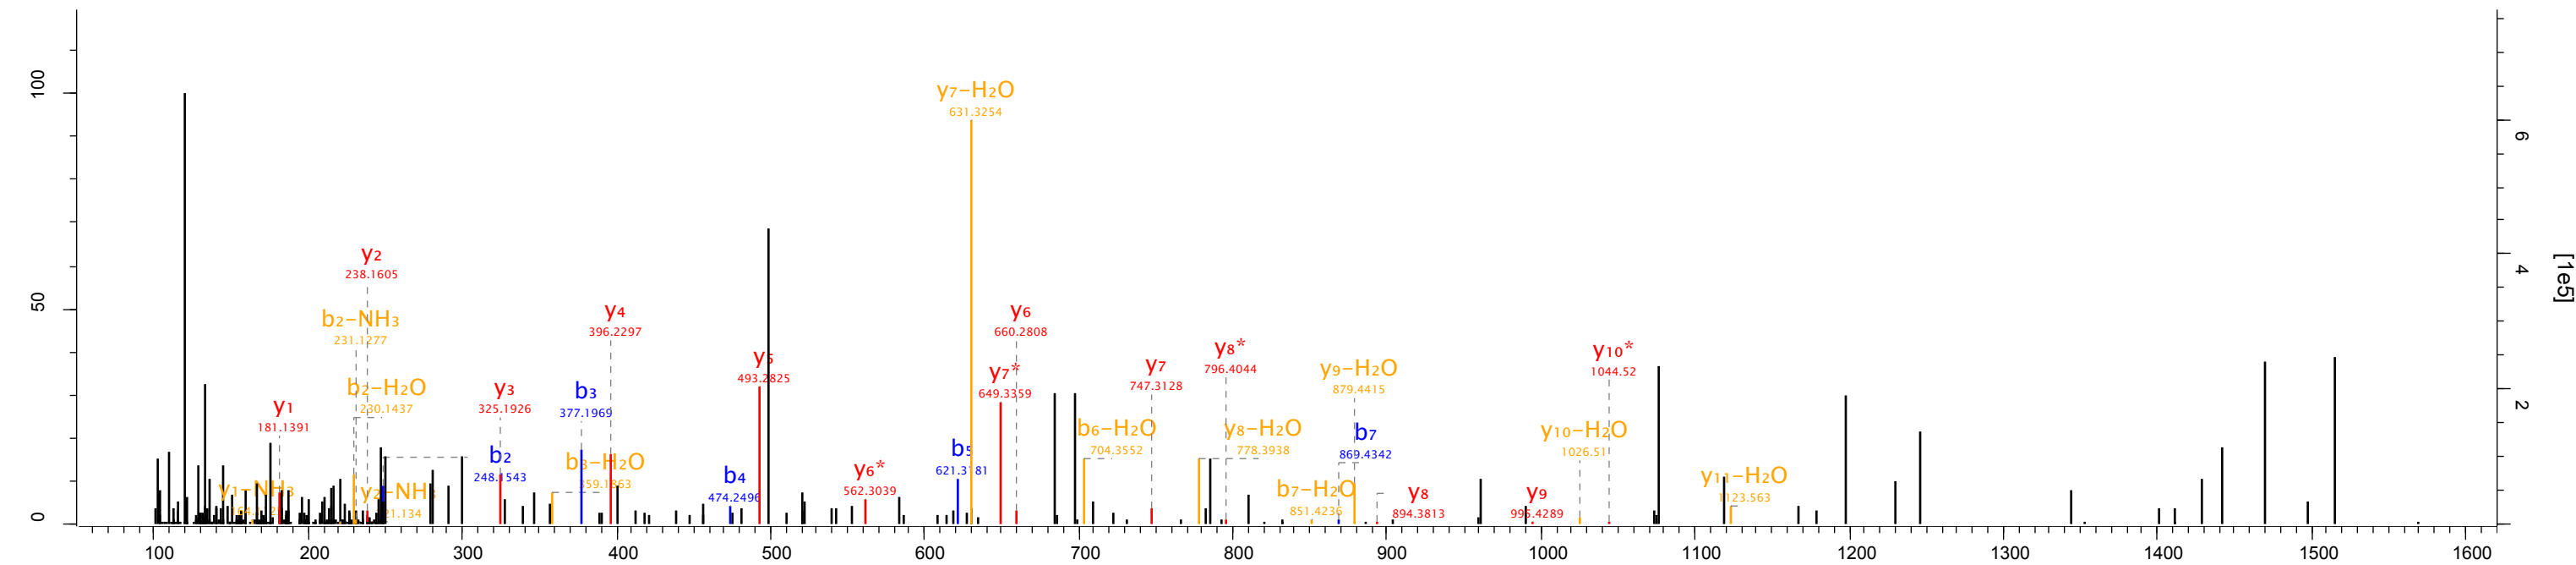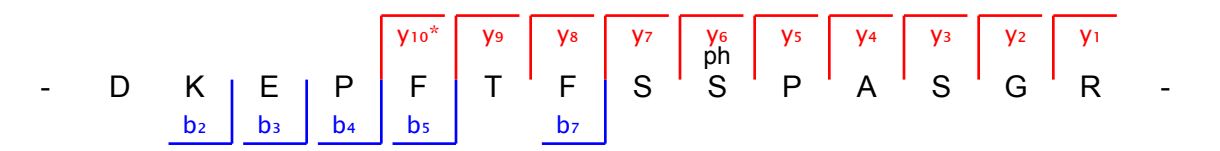

Raw file 20150814\_A375SR\_Phospho\_BR2\_04 Scan 14544 Method FTMS; HCD Score 69.36 m/z 720.97 Gene names DENND4A

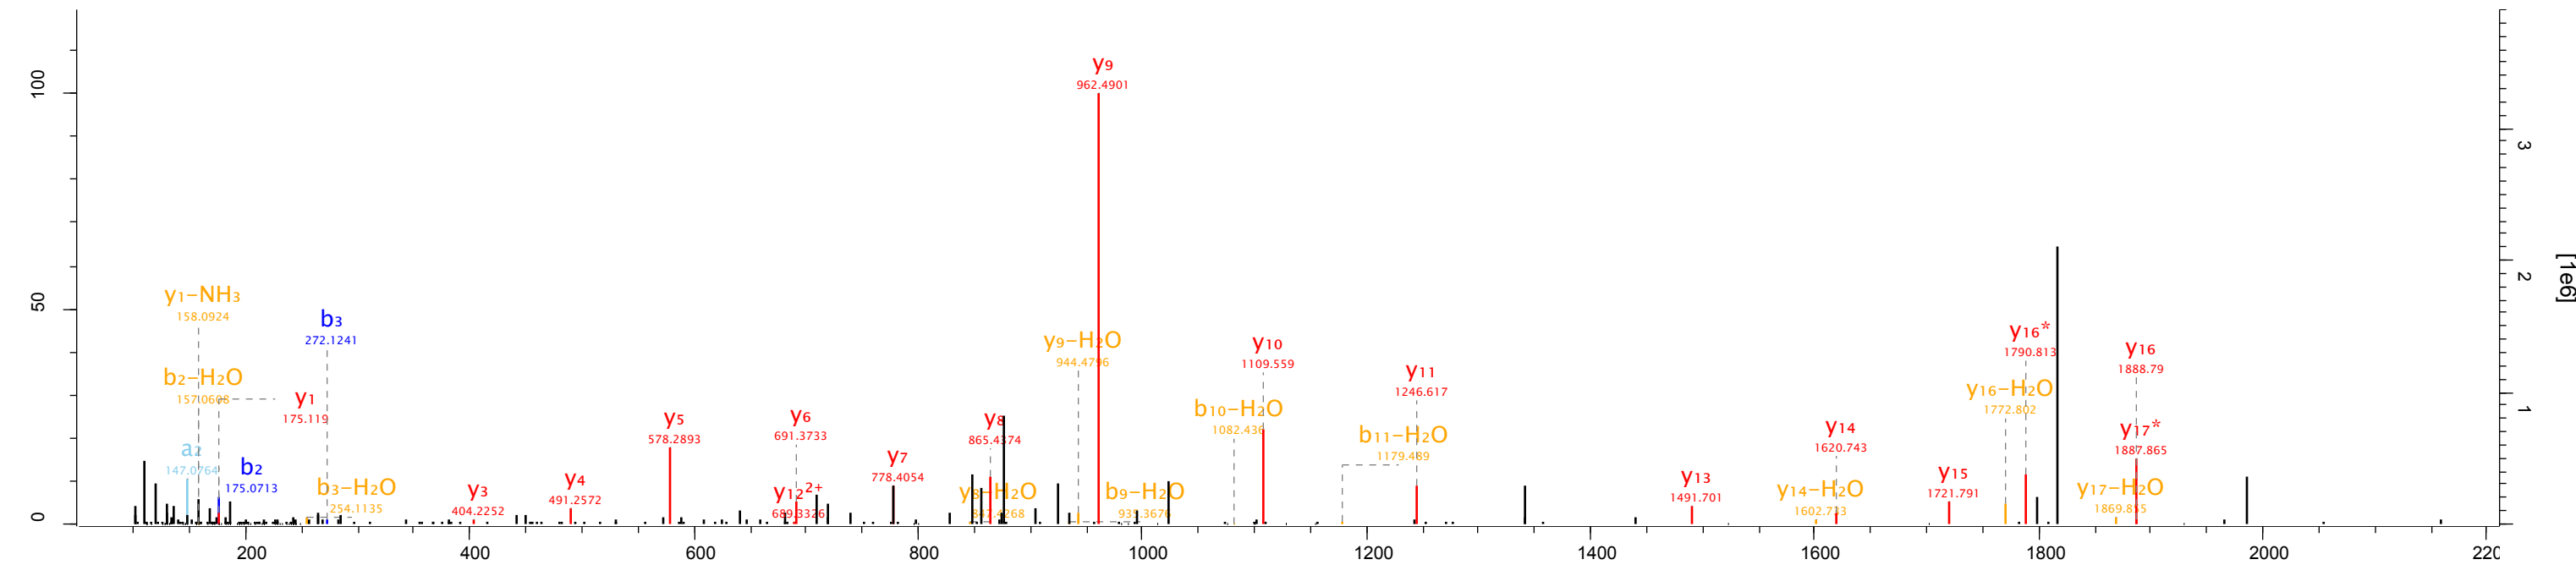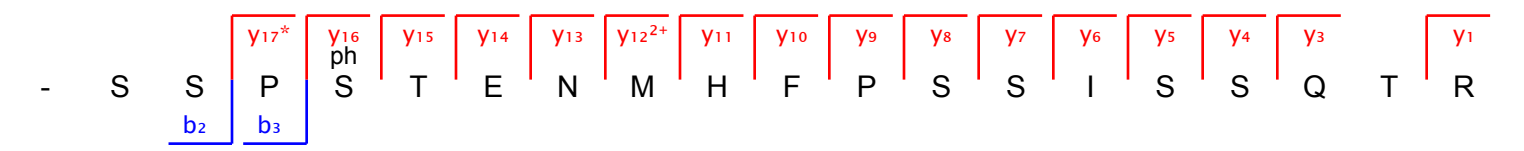

Raw file 20150814\_A375SR\_Phospho\_BR2\_04 Scan 14674 Method FTMS; HCD Score 151.22 m/z 495.73 Gene names EIF3S3;EIF3H

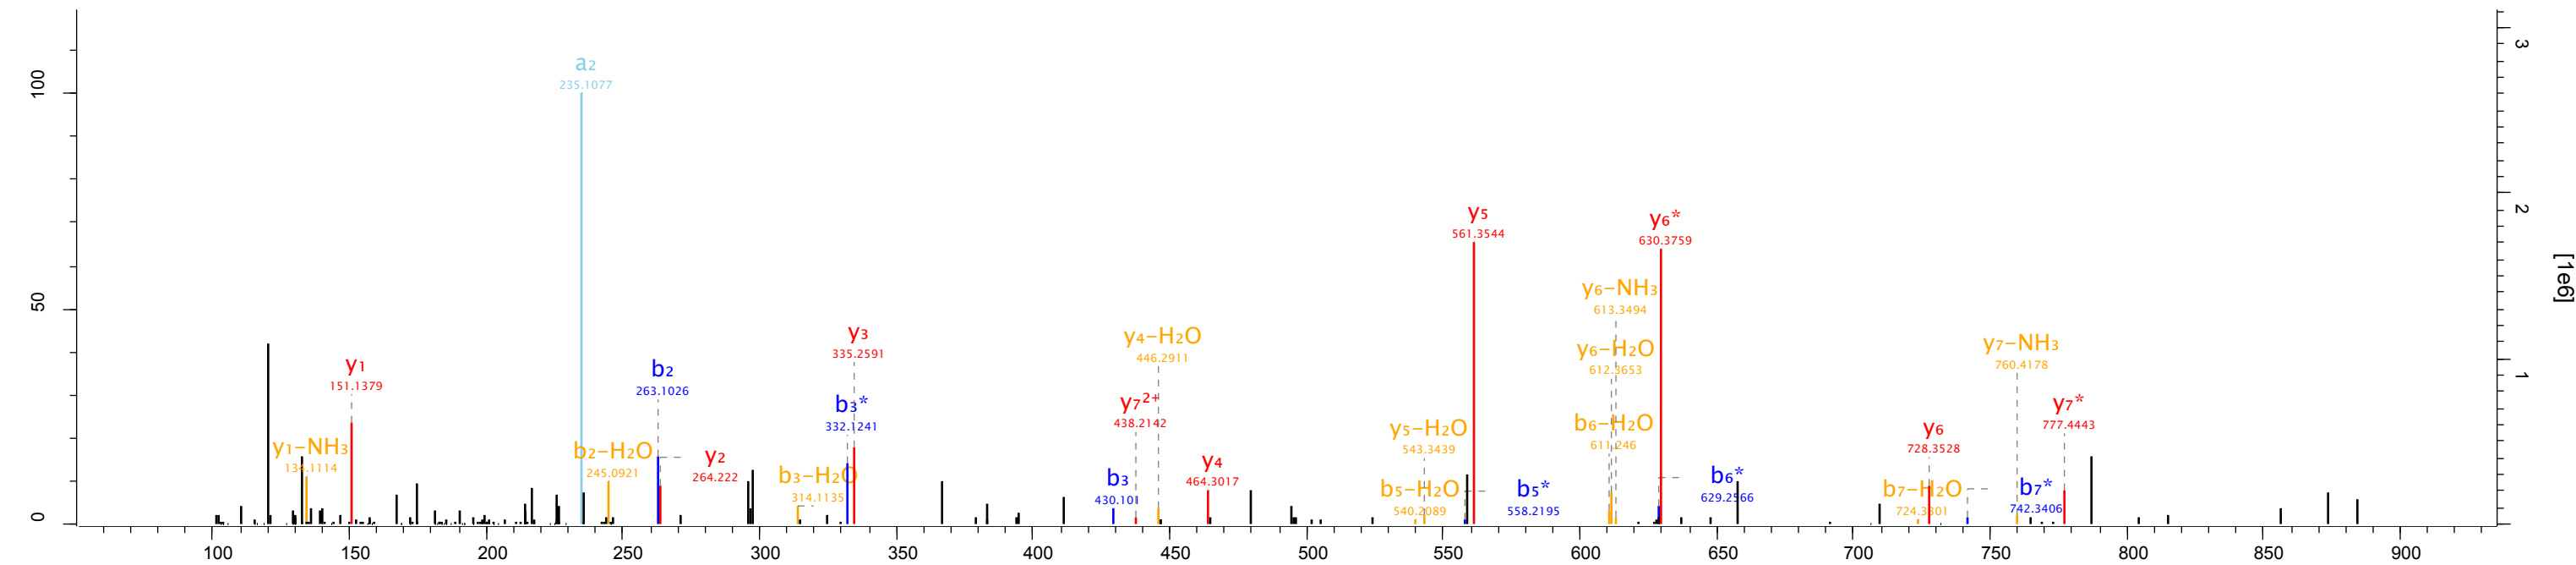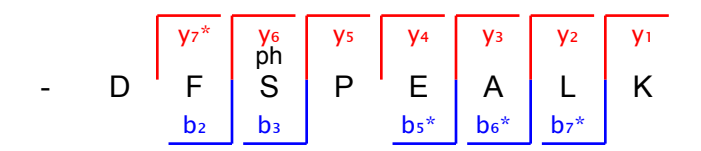

Raw file: 20150814\_A375SR\_Phospho\_BR2\_04  
 Scan: 14794 Method: FTMS; HCD Score: 101.92 m/z: 662.97 Gene names: PCM1

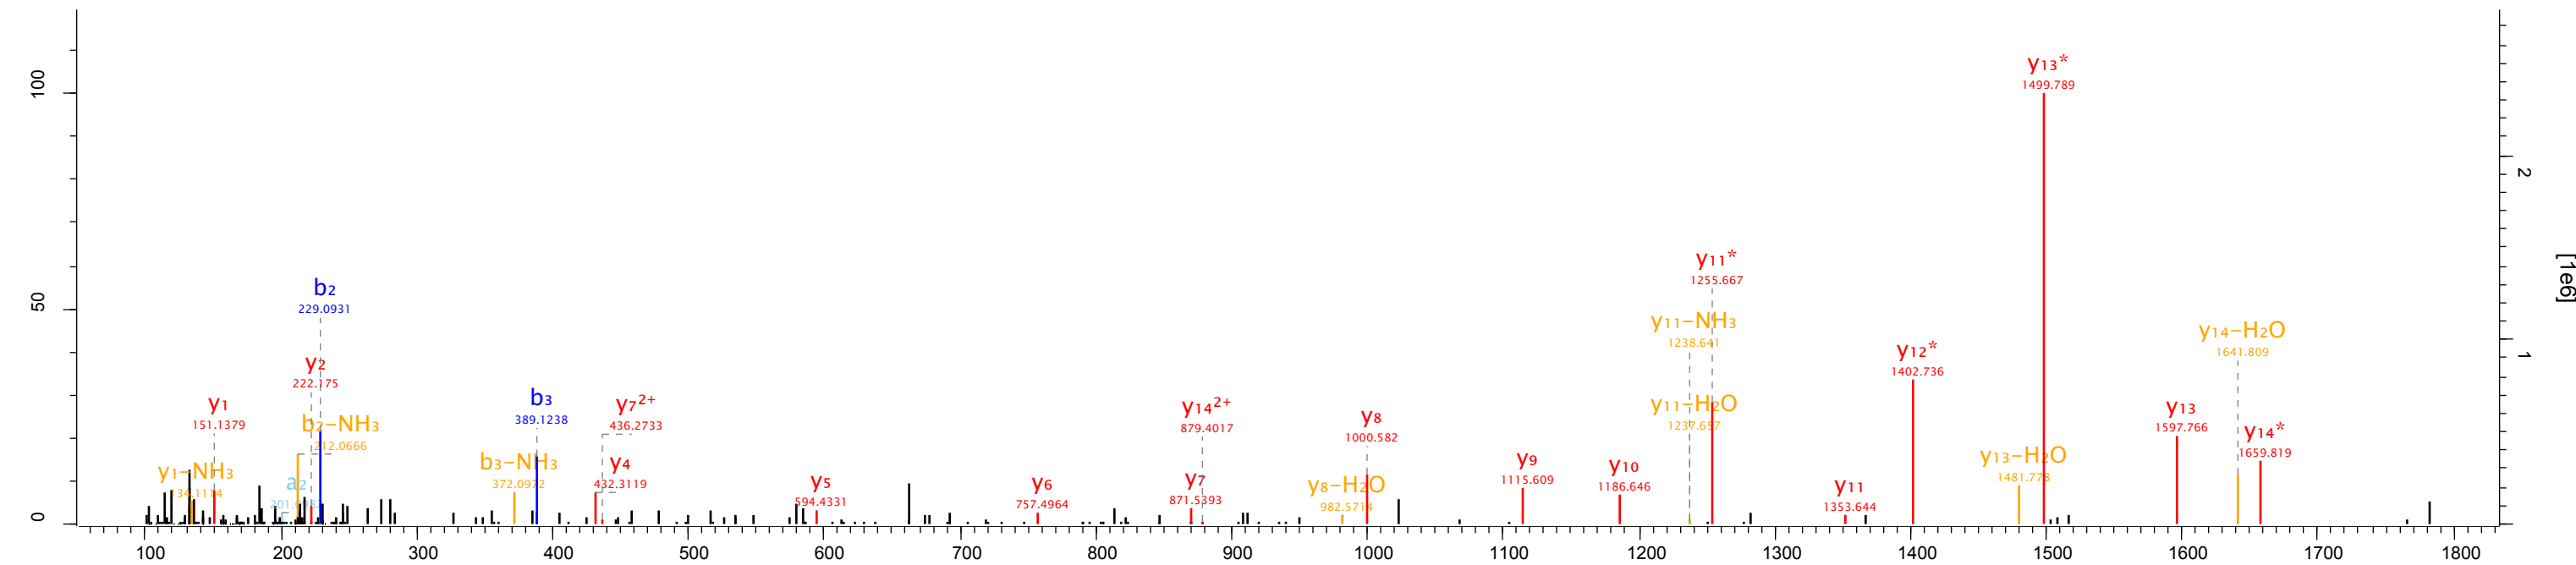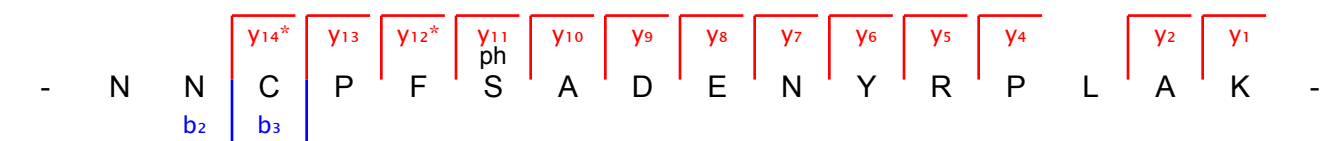

Raw file Scan Method Score m/z Gene names  
 20150814\_A375SR\_Phospho\_BR2\_04 14934 FTMS; HCD 170.11 991.93 MYO18A

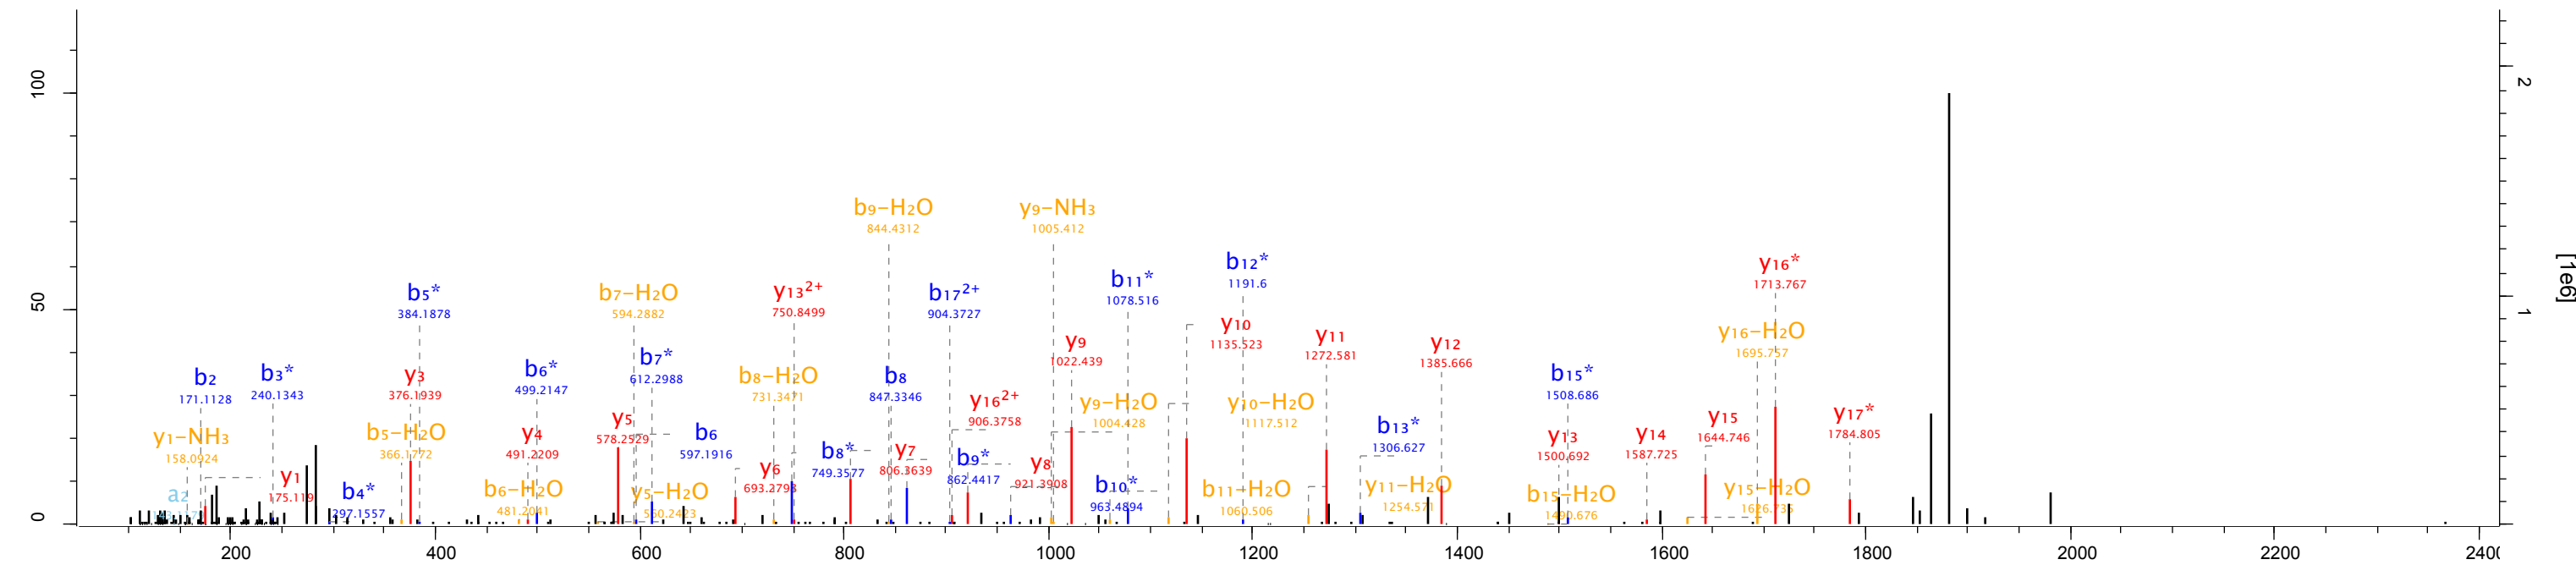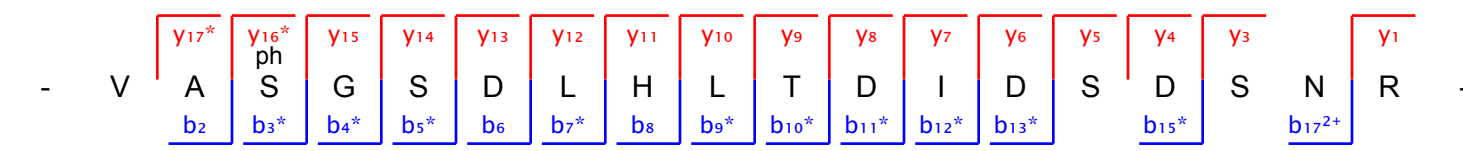

Raw file 20150814\_A375SR\_Phospho\_BR2\_04 Scan 15024 Method FTMS; HCD Score 47.62 m/z 561.58 Gene names ATP2B1

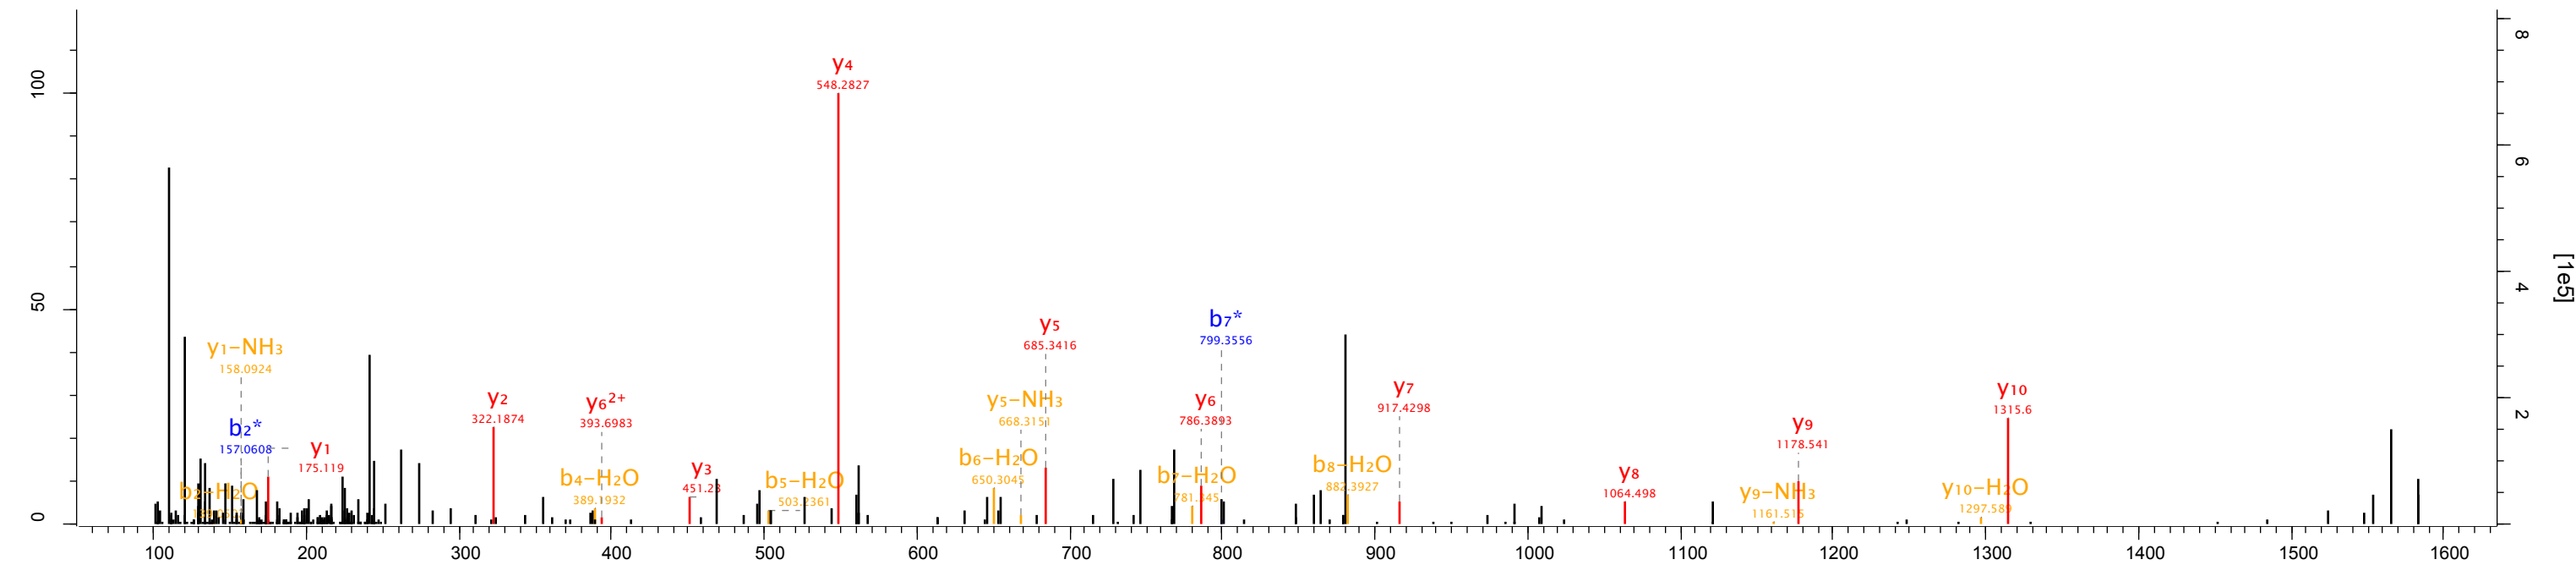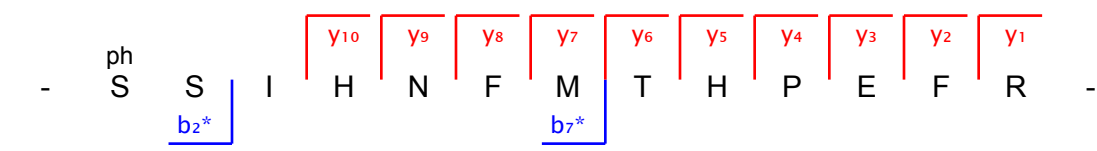

Raw file 20150814\_A375SR\_Phospho\_BR2\_04 Scan 15054 Method FTMS; HCD Score 96.38 m/z 718.03 Gene names YWHAQ

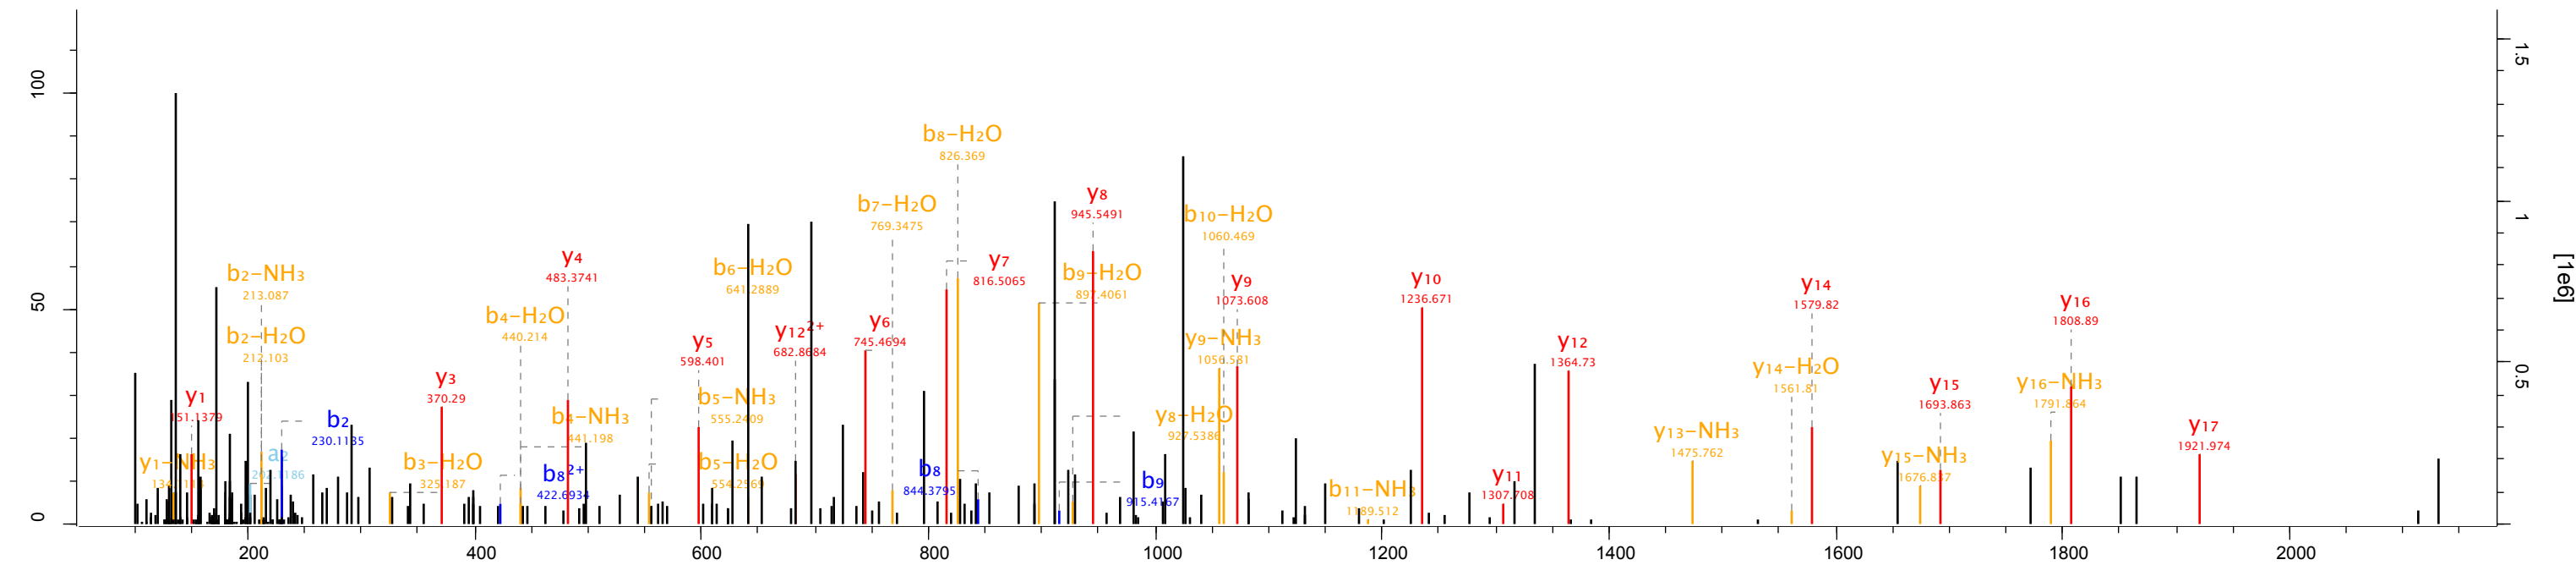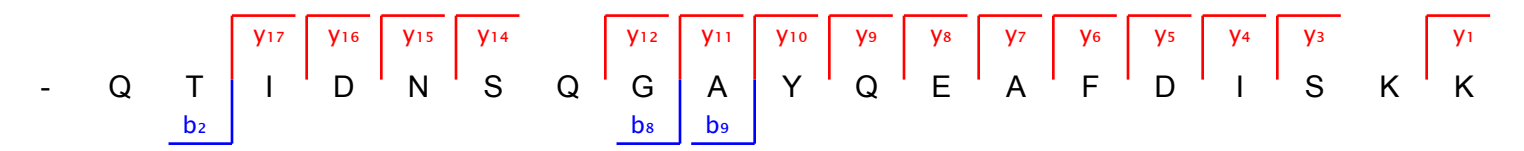

Raw file 20150814\_A375SR\_Phospho\_BR2\_04 Scan 15134 Method FTMS; HCD Score 122.3 m/z 891.92 Gene names LUZP1

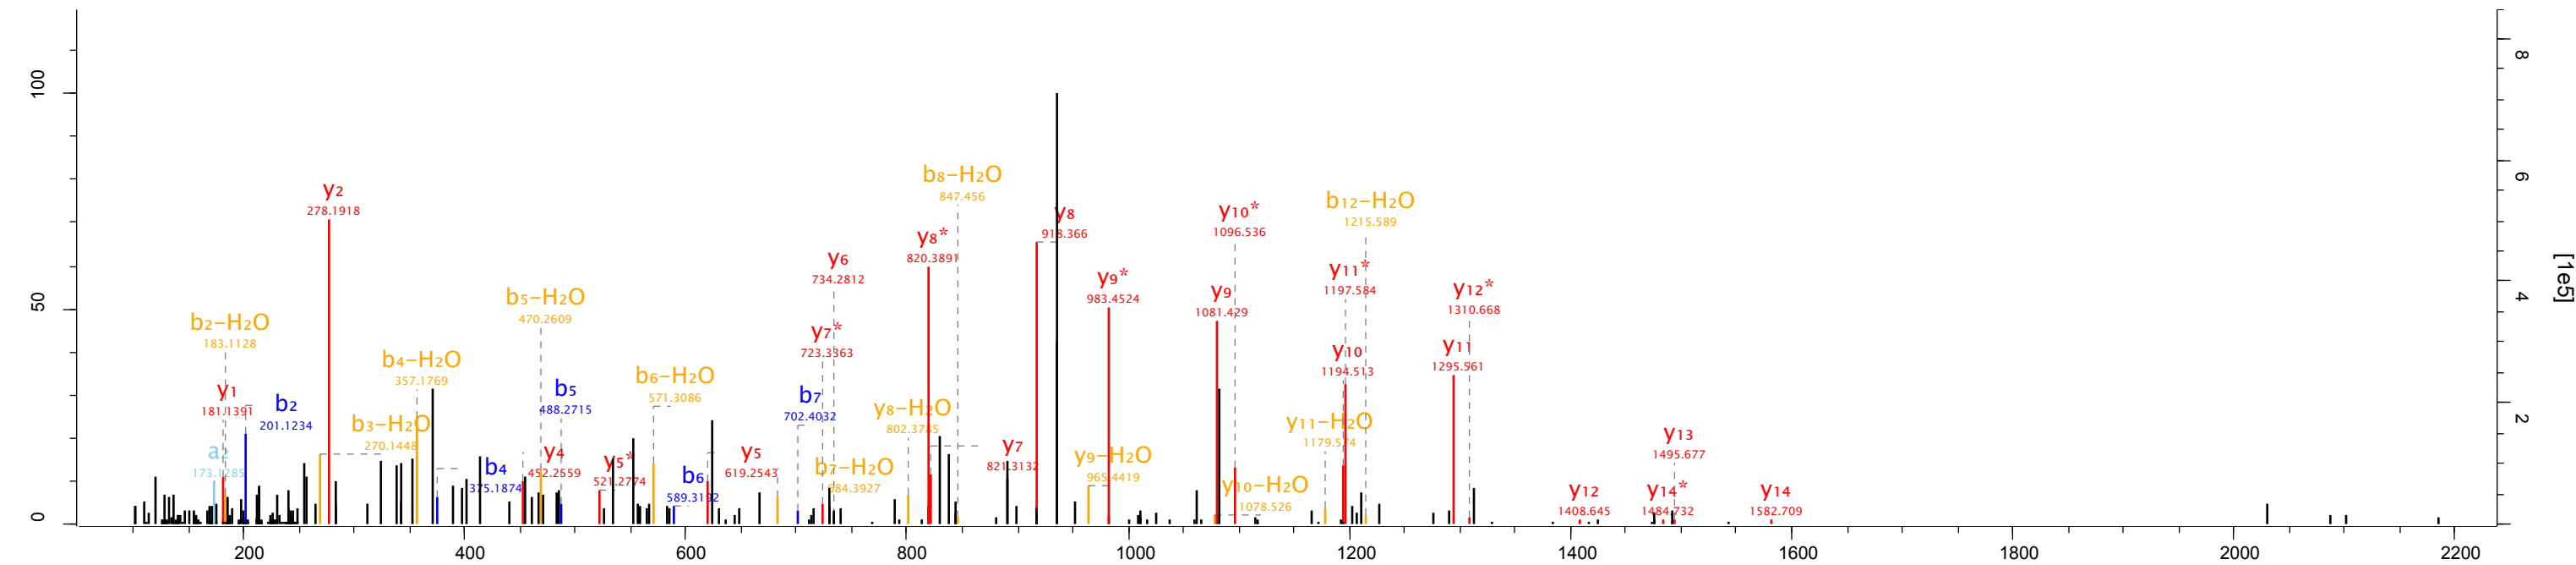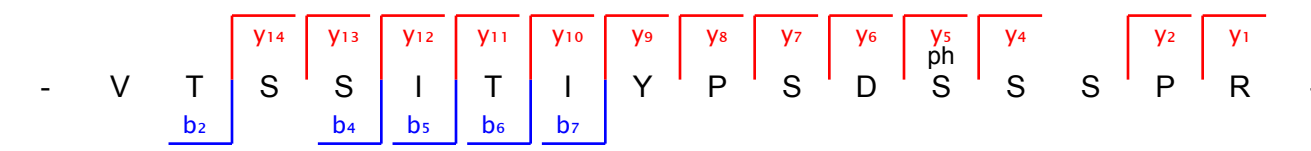



Raw file: 20150814\_A375SR\_Phospho\_BR2\_04  
 Scan: 15294 Method: FTMS; HCD Score: 69.47 m/z: 716.34 Gene names: RPS6KA1

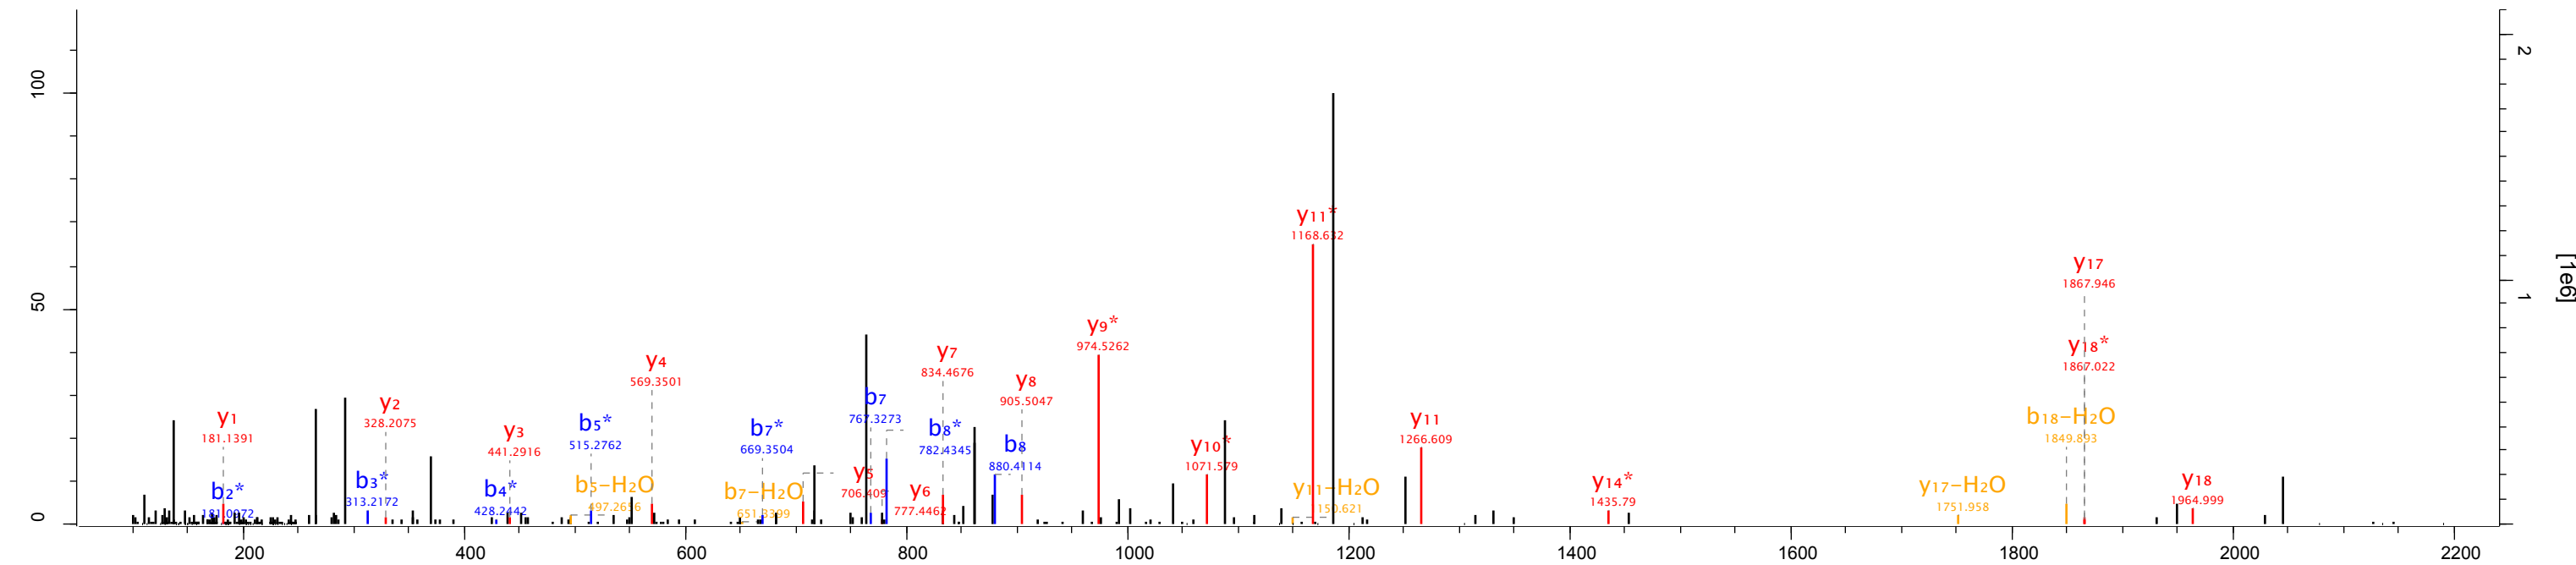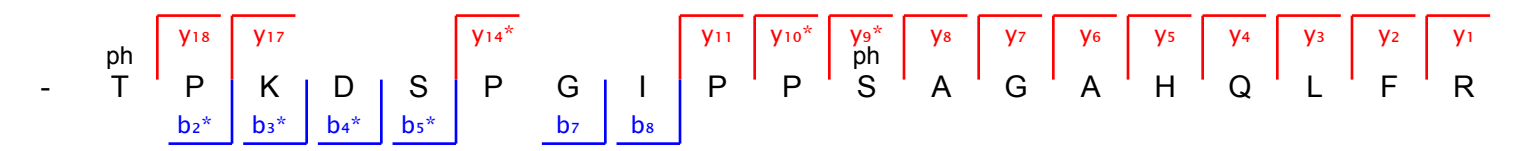

Raw file: 20150814\_A375SR\_Phospho\_BR2\_04  
 Scan: 15314 Method: FTMS; HCD Score: 241.84 m/z: 1129.5 Gene names: PRRC2B

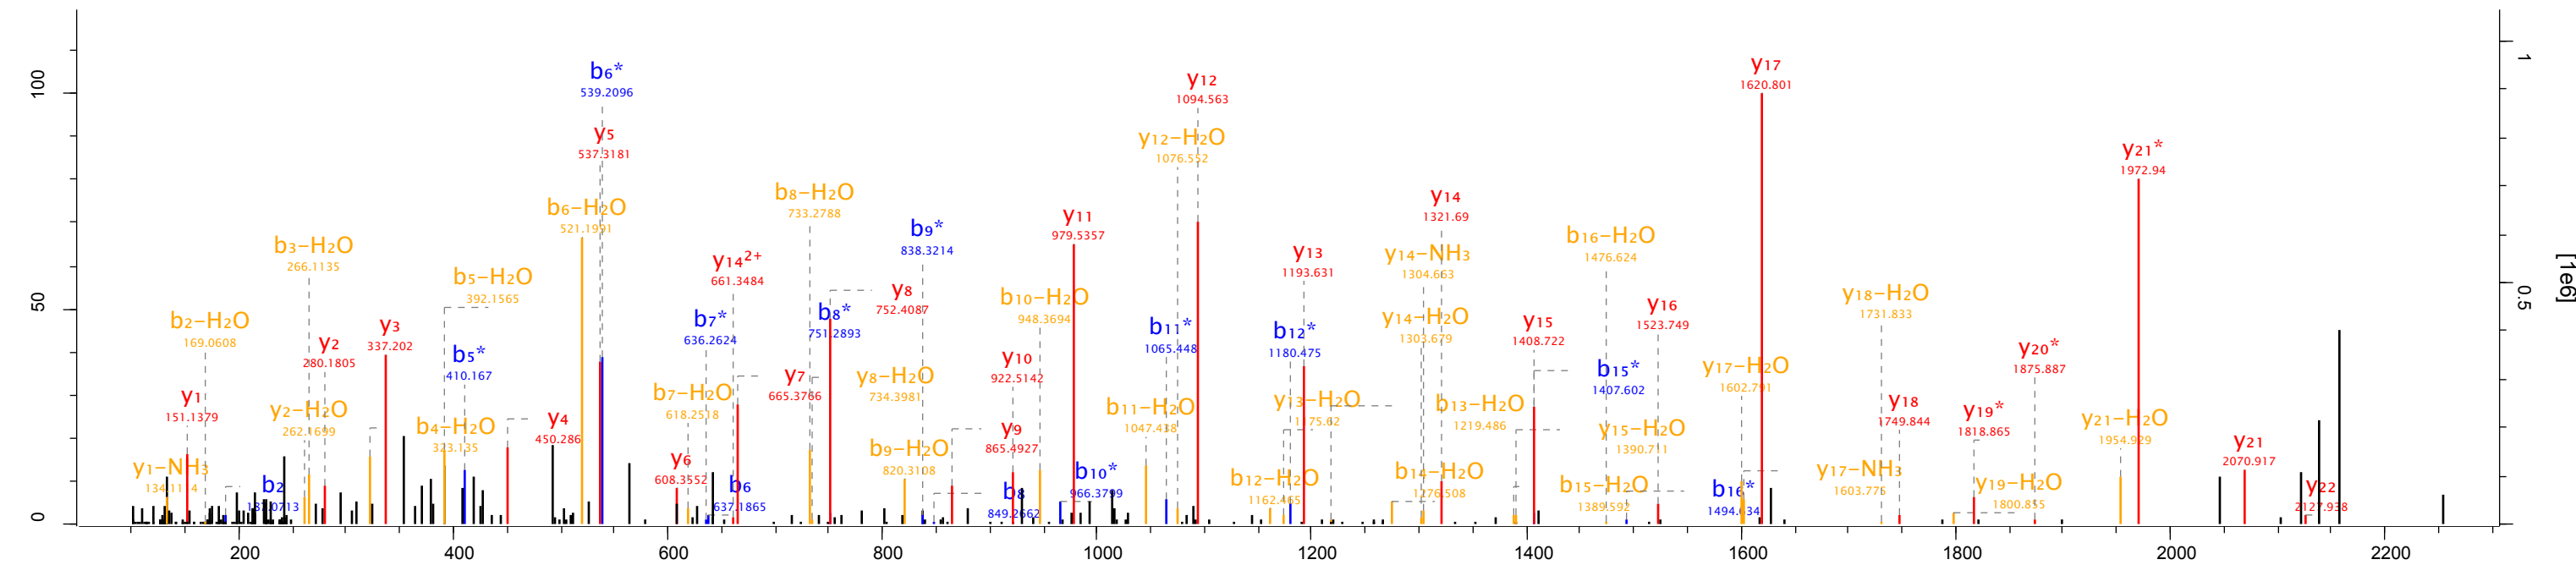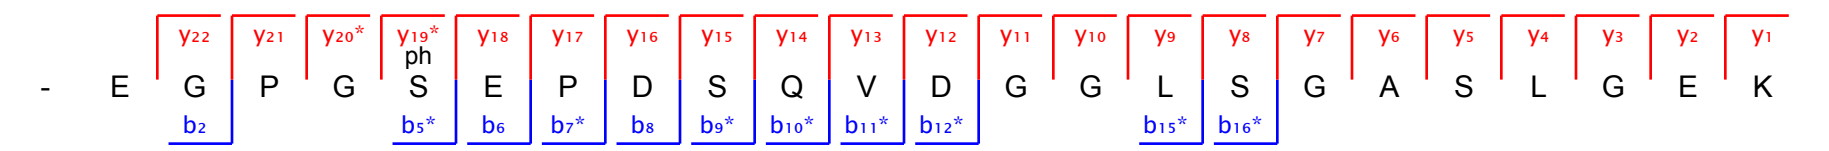

Raw file 20150814\_A375SR\_Phospho\_BR2\_04 Scan 15494 Method FTMS; HCD Score 121.2 m/z 843.06 Gene names SPHK2

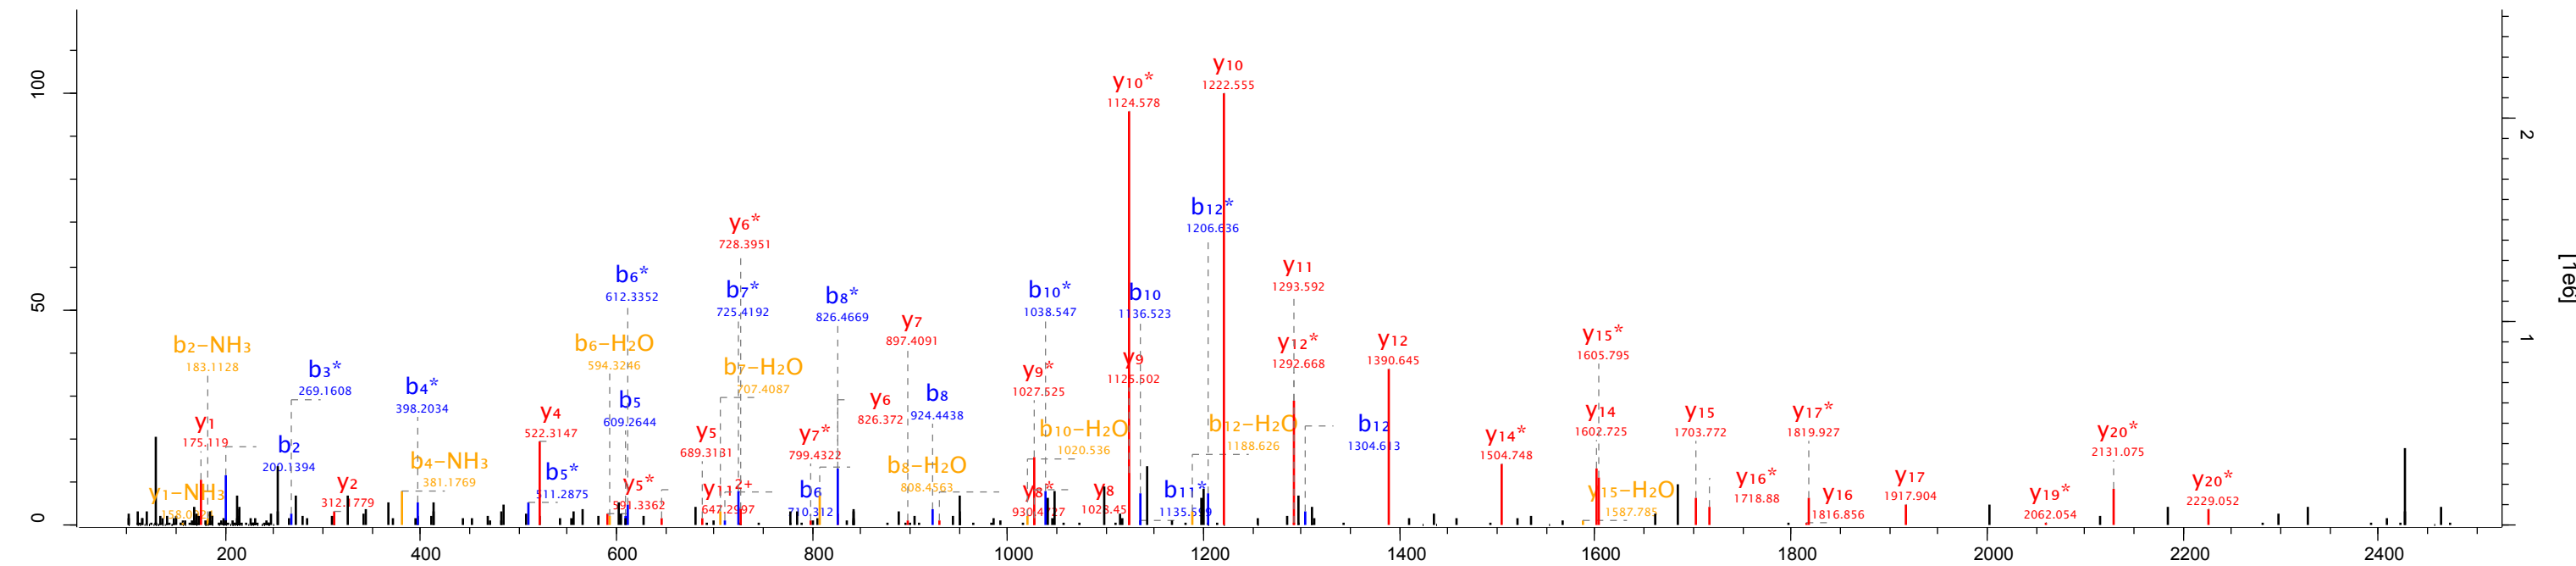

- A K S E L T L T P D P A P P M A H S P L H R -

b<sub>2</sub>
b<sub>3</sub><sup>\*</sup>
b<sub>4</sub><sup>\*</sup>
b<sub>5</sub>
b<sub>6</sub>
b<sub>7</sub><sup>\*</sup>
b<sub>8</sub>
b<sub>10</sub>
b<sub>11</sub><sup>\*</sup>
b<sub>12</sub>
y<sub>14</sub>
y<sub>15</sub>
y<sub>16</sub>
y<sub>17</sub>
y<sub>19</sub><sup>\*</sup>
y<sub>20</sub><sup>\*</sup>
y<sub>1</sub>
y<sub>2</sub>
y<sub>4</sub>
y<sub>5</sub>
y<sub>6</sub>
y<sub>7</sub>
y<sub>8</sub>
y<sub>9</sub>
y<sub>10</sub>
y<sub>11</sub>
y<sub>12</sub>

Raw file 20150814\_A375SR\_Phospho\_BR2\_04 Scan 15584 Method FTMS; HCD Score 83.06 m/z 688.35 Gene names EIF4G1

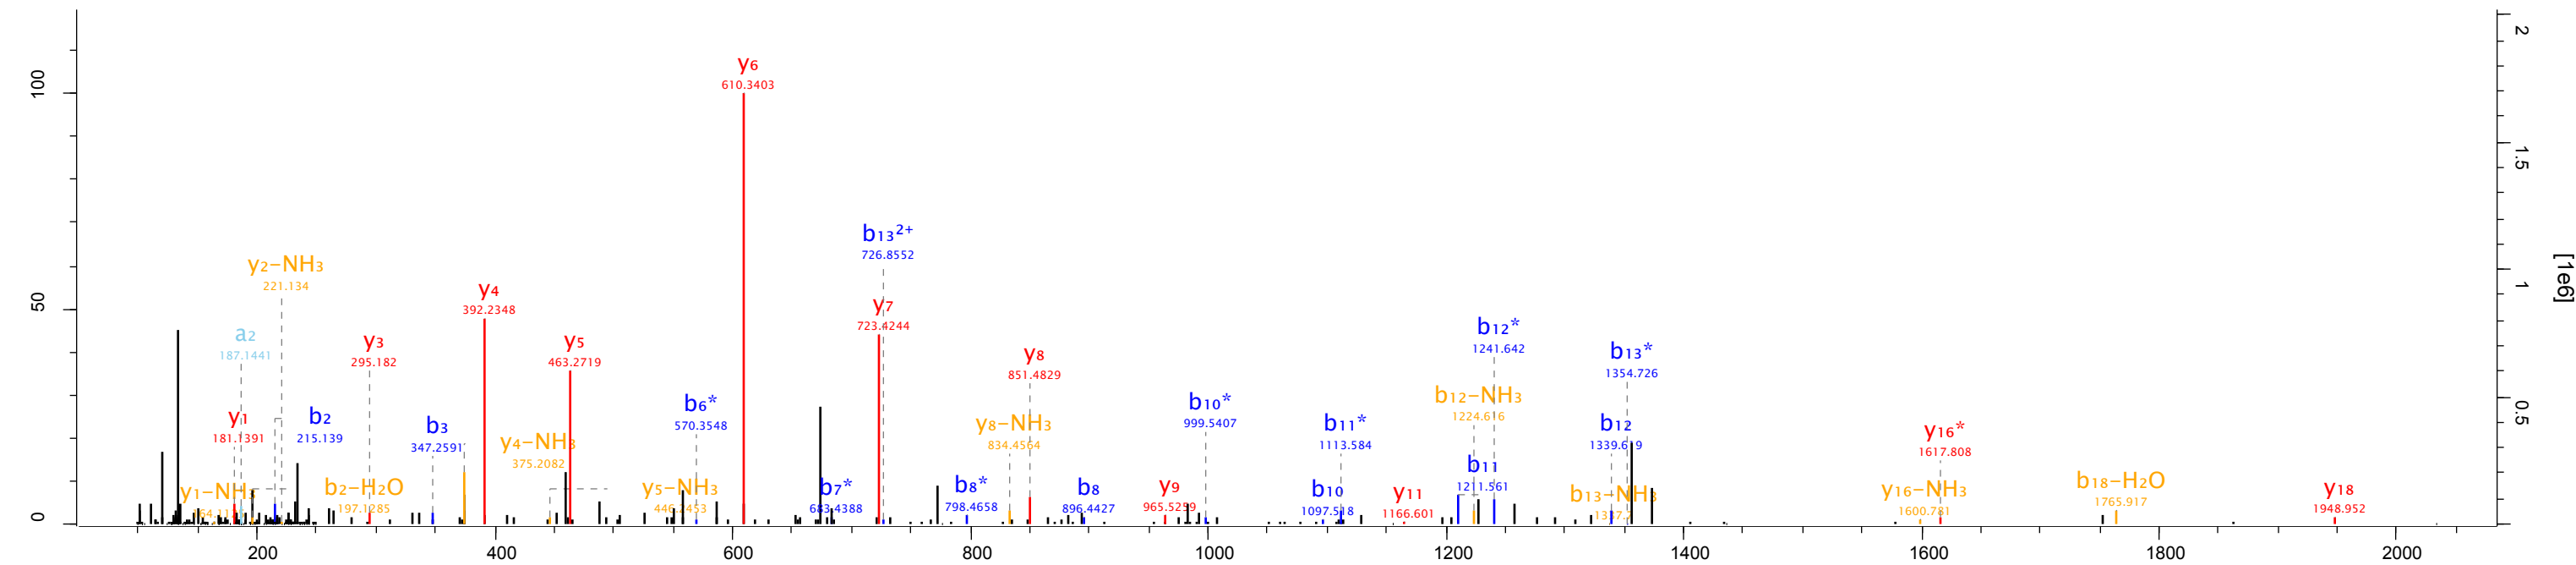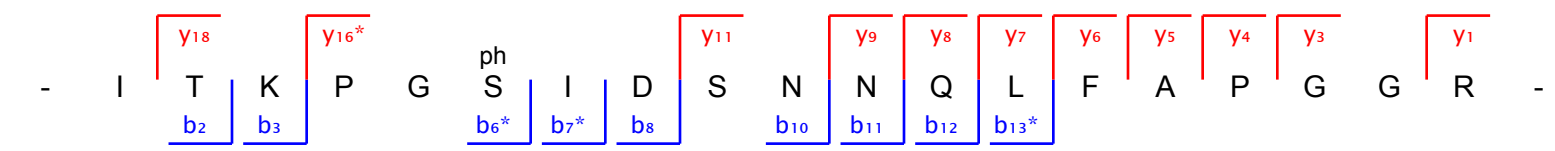

Raw file: 20150814\_A375SR\_Phospho\_BR2\_04  
 Scan: 15734 Method: FTMS; HCD Score: 165.06 m/z: 869.94 Gene names: KIAA0430

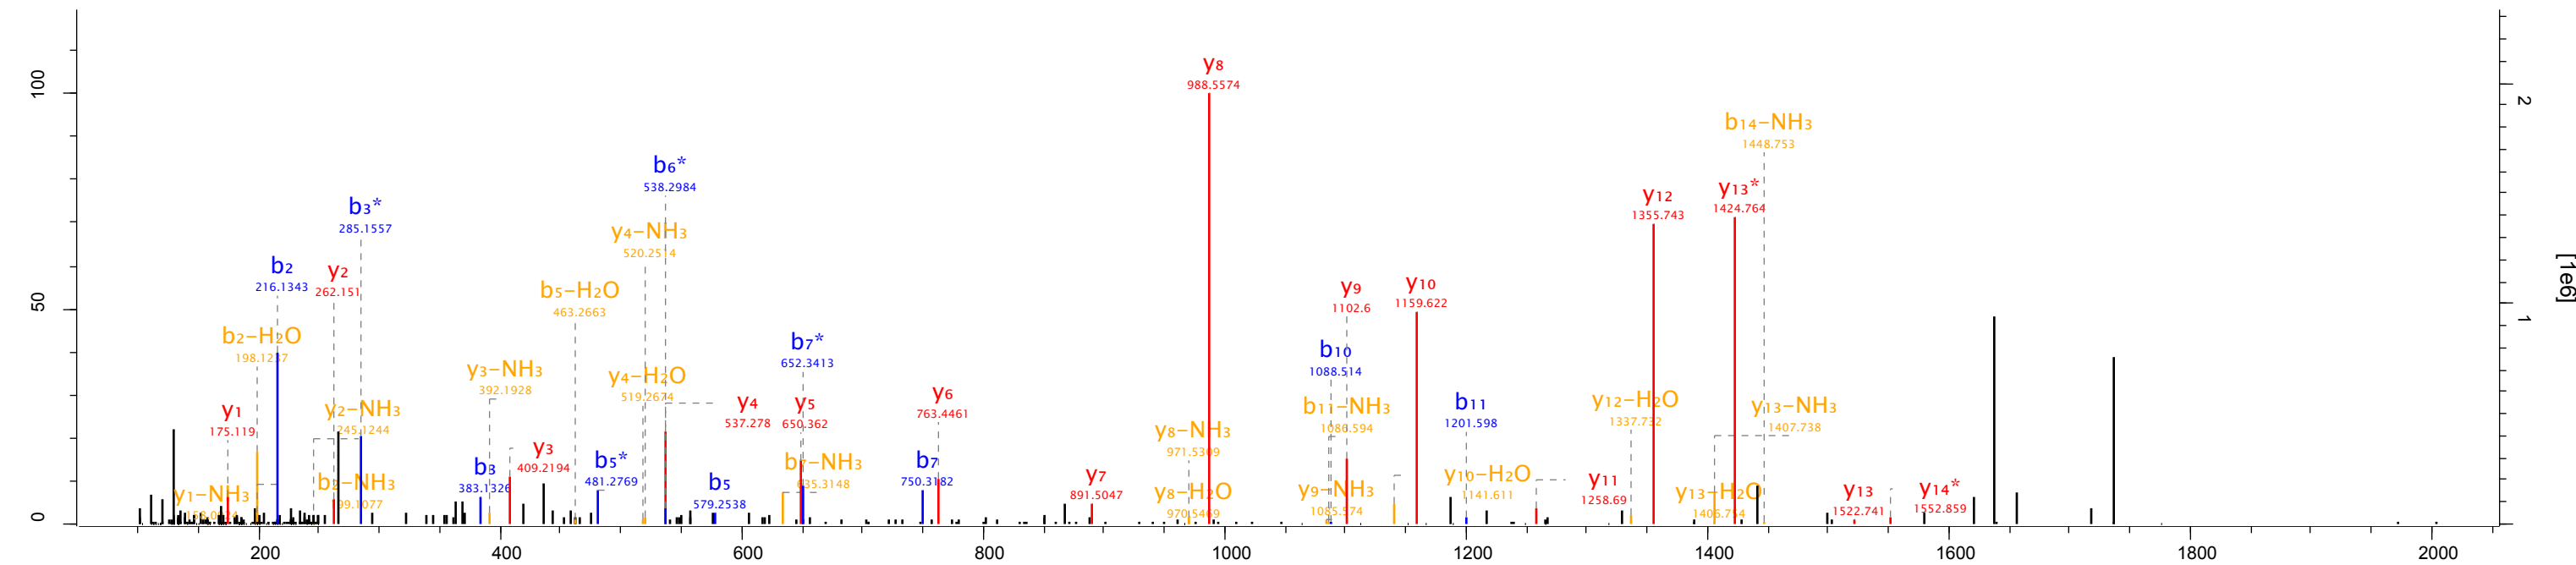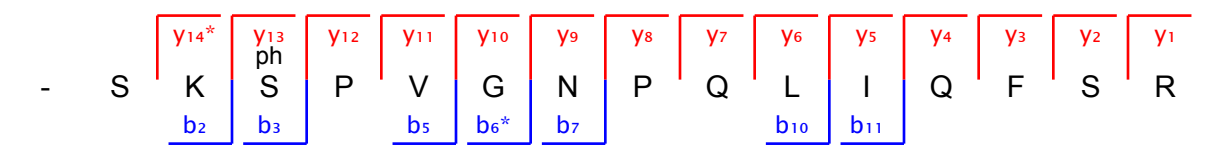

Raw file 20150814\_A375SR\_Phospho\_BR2\_04 Scan 15874 Method FTMS; HCD Score 142.71 m/z 842.16 Gene names DDI2

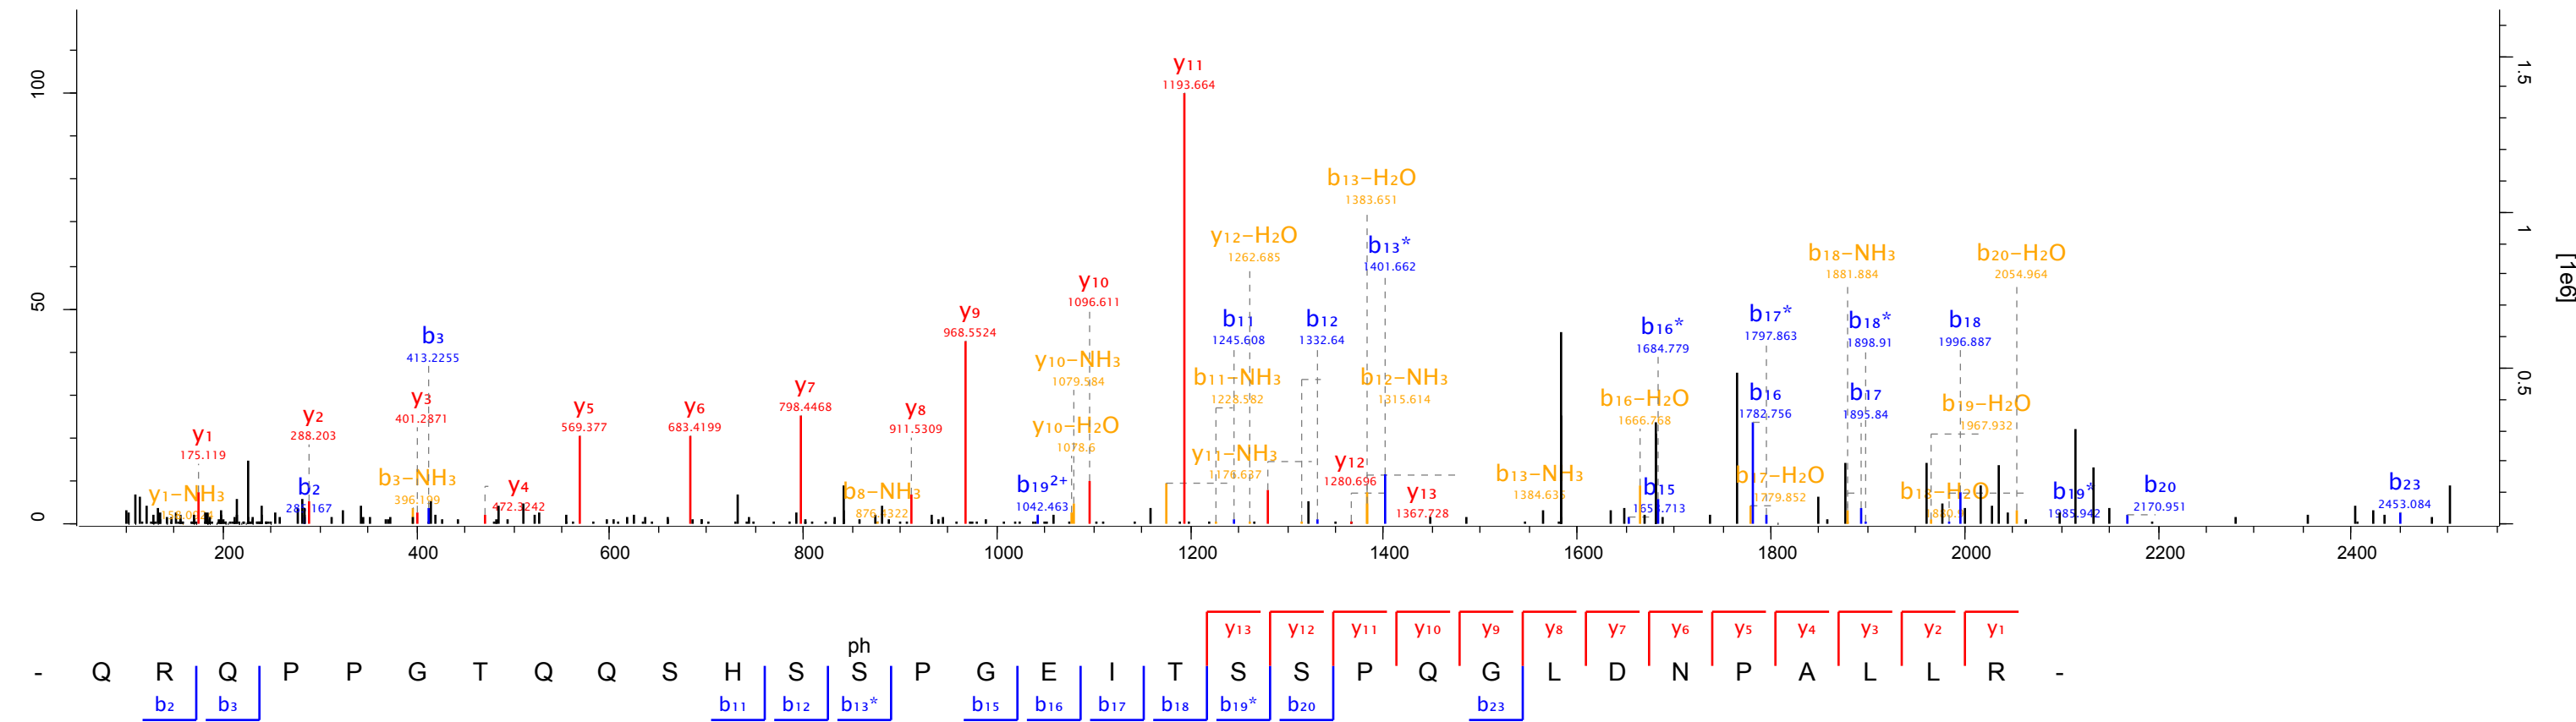

Raw file: 20150814\_A375SR\_Phospho\_BR2\_04  
 Scan: 15884 Method: FTMS; HCD Score: 126.83 m/z: 646.77 Gene names: ZNF318

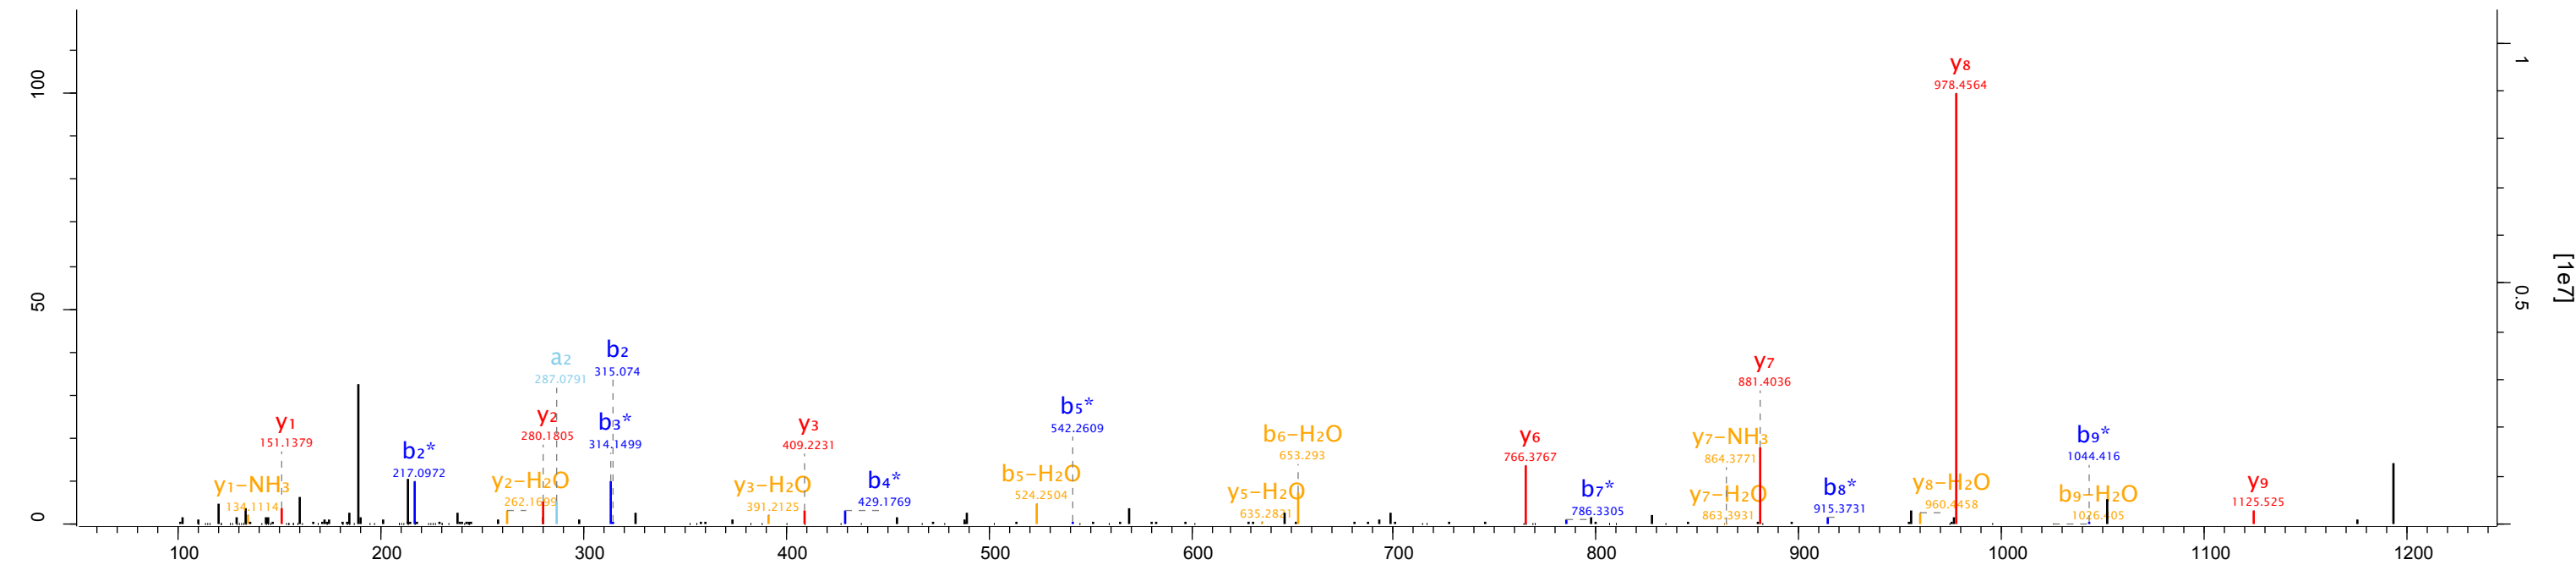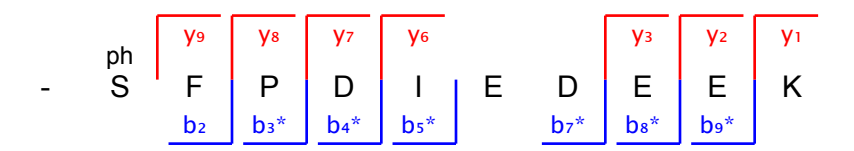

Raw file: 20150814\_A375SR\_Phospho\_BR2\_04  
 Scan: 15924 Method: FTMS; HCD Score: 160.88 m/z: 577.77 Gene names: STMN2;STMN1

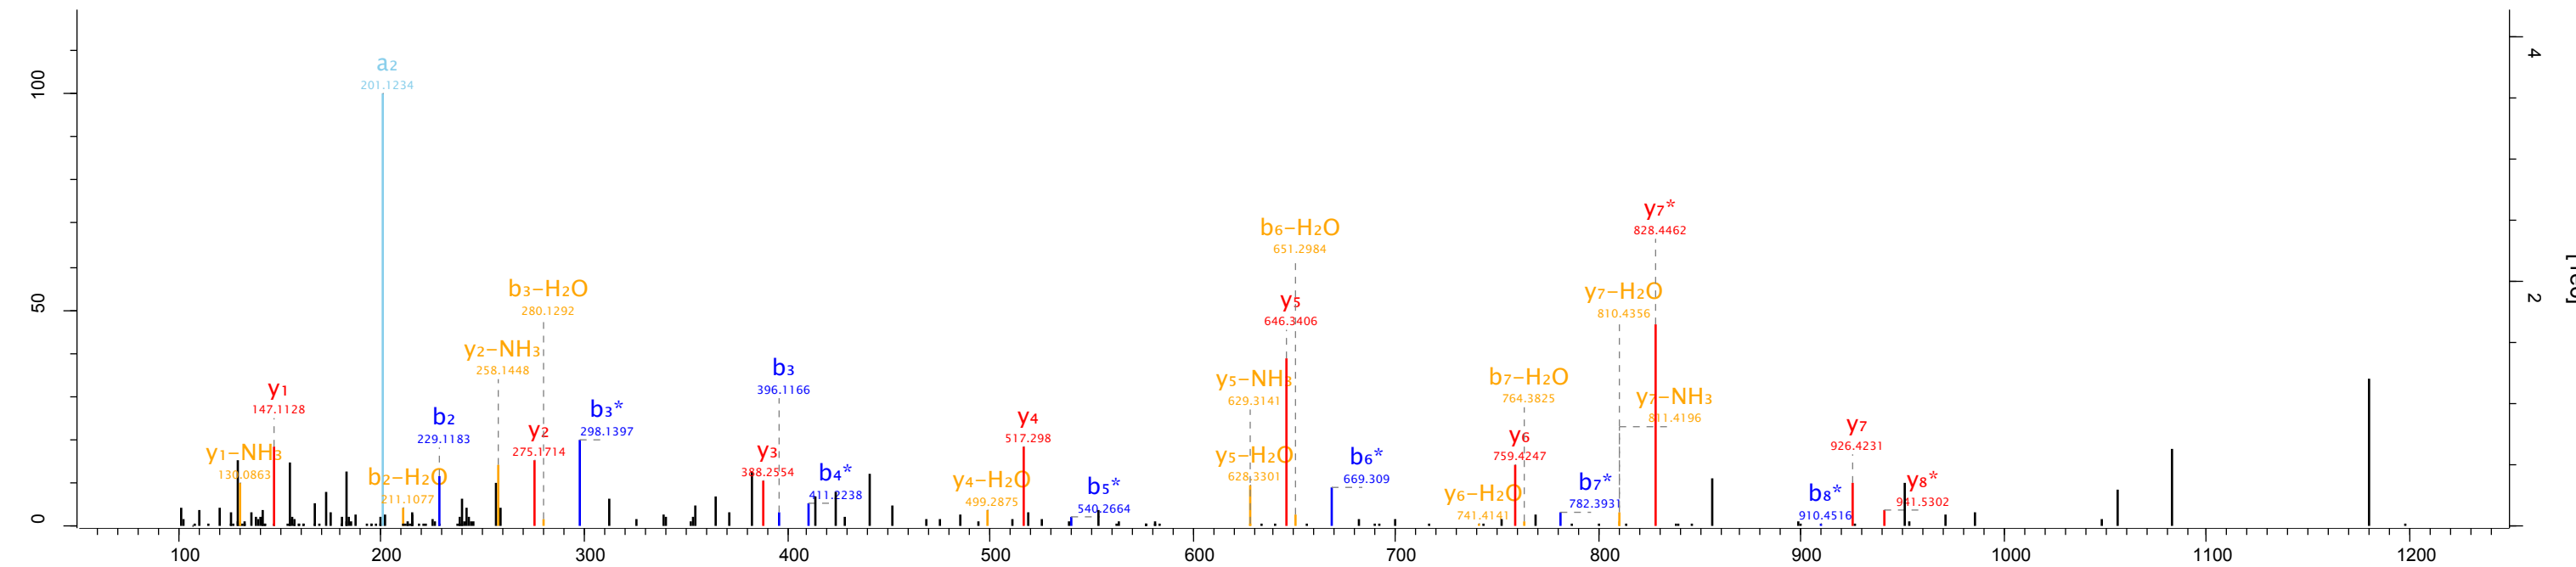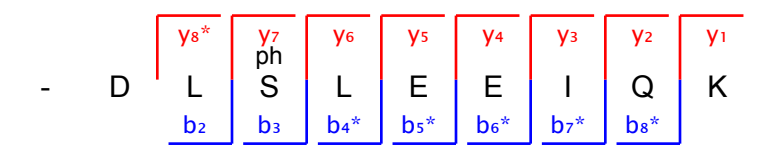



Raw file Scan Method Score m/z Gene names  
 20150814\_A375SR\_Phospho\_BR2\_04 16044 FTMS; HCD 310.49 1086.48 BCAR3

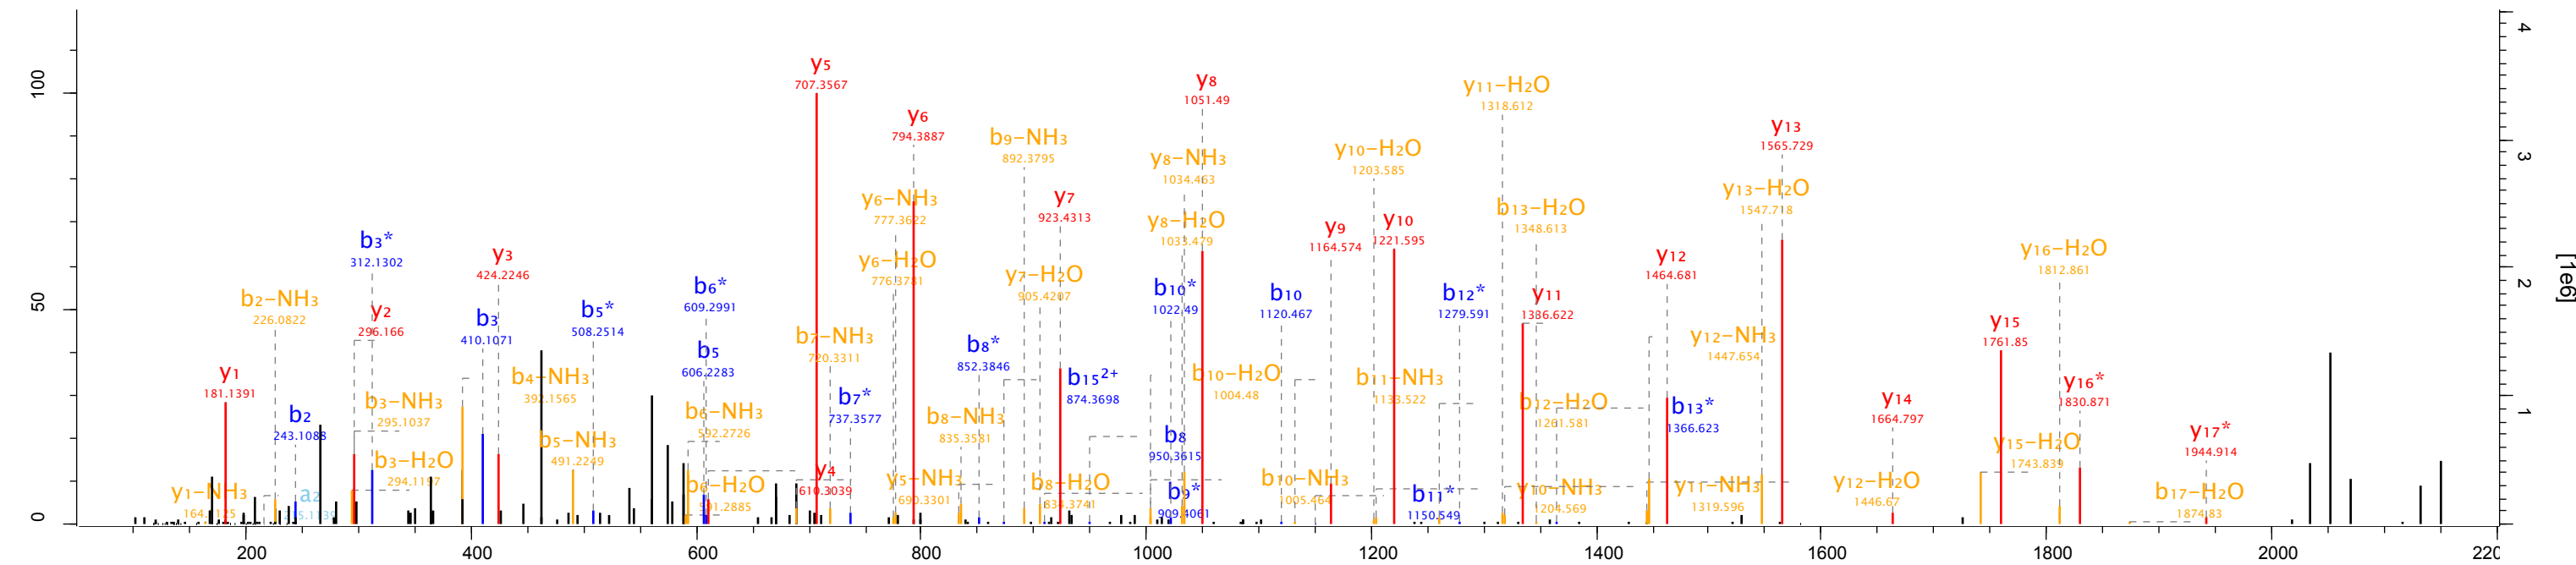

- Q N S P V T Q D G I Q E S P W Q D R -

y17\*
y16\*  
ph
y15
y14
y13
y12
y11
y10
y9
y8
y7
y6
y5
y4
y3
y2
y1

b2
b3
b5
b6\*
b7\*
b8
b9\*
b10
b11\*
b12\*
b13\*
b15<sup>2+</sup>

Raw file 20150814\_A375SR\_Phospho\_BR2\_04 Scan 1634 Method FTMS; HCD Score 79.65 m/z 704.8 Gene names TGFBRAP1

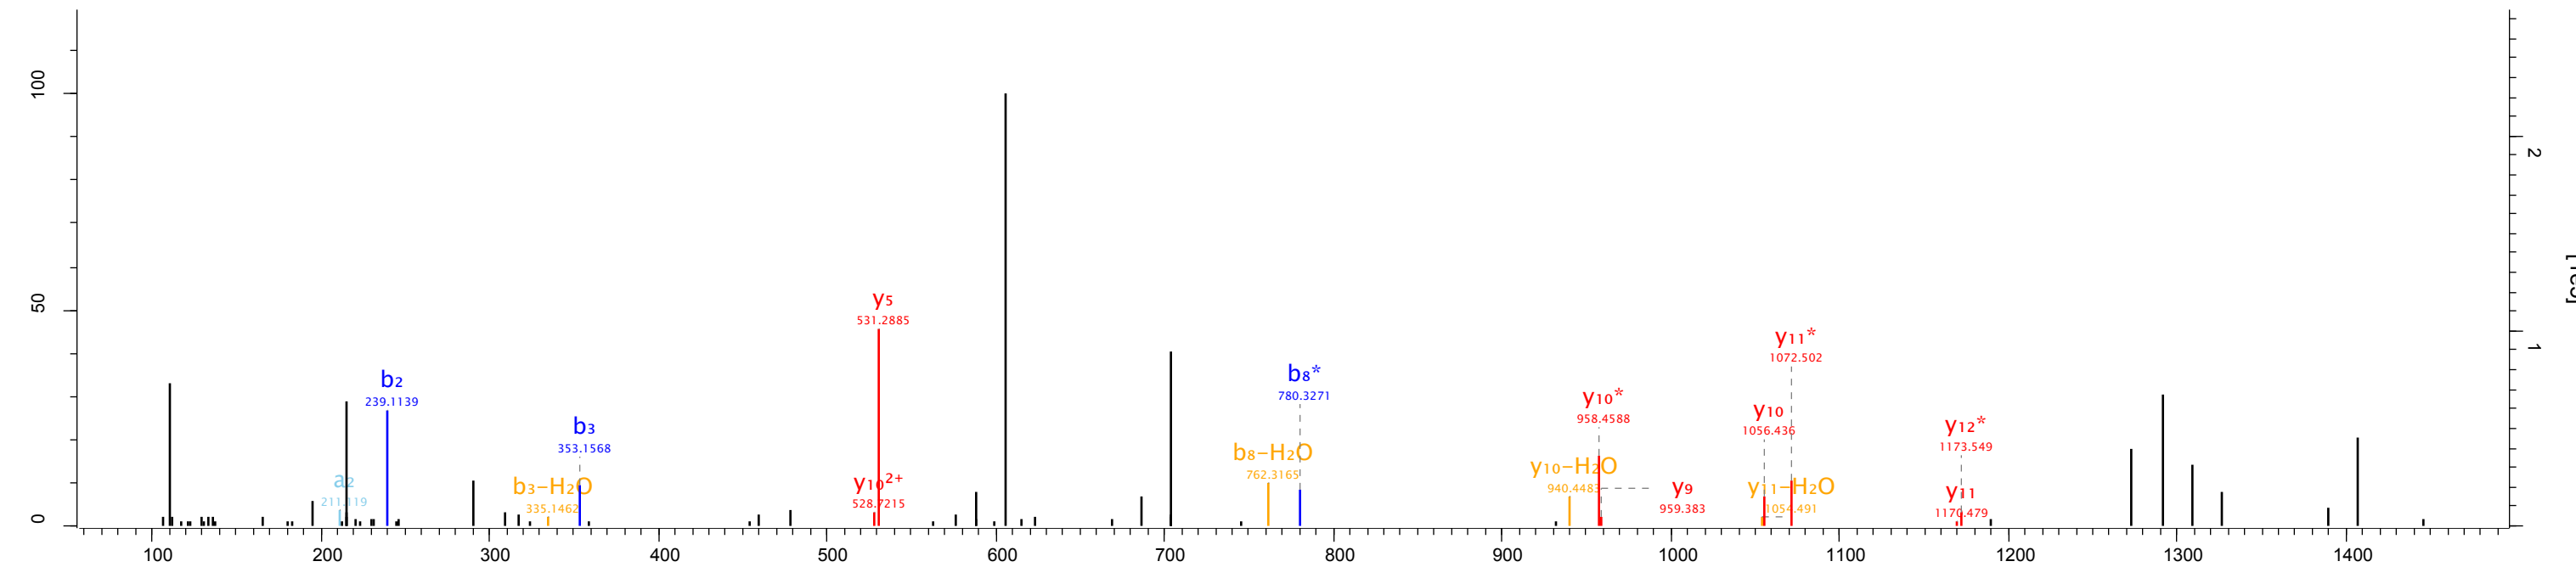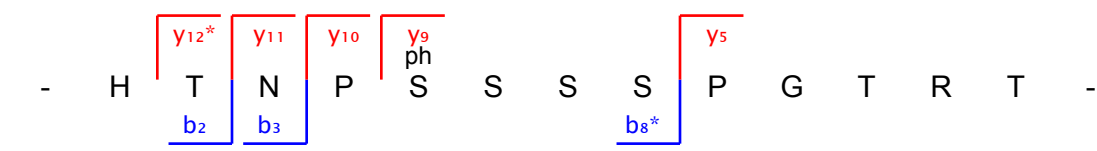

Raw file: 20150814\_A375SR\_Phospho\_BR2\_04  
 Scan: 16374 Method: FTMS; HCD Score: 79.59 m/z: 959.42 Gene names: SAMD4A

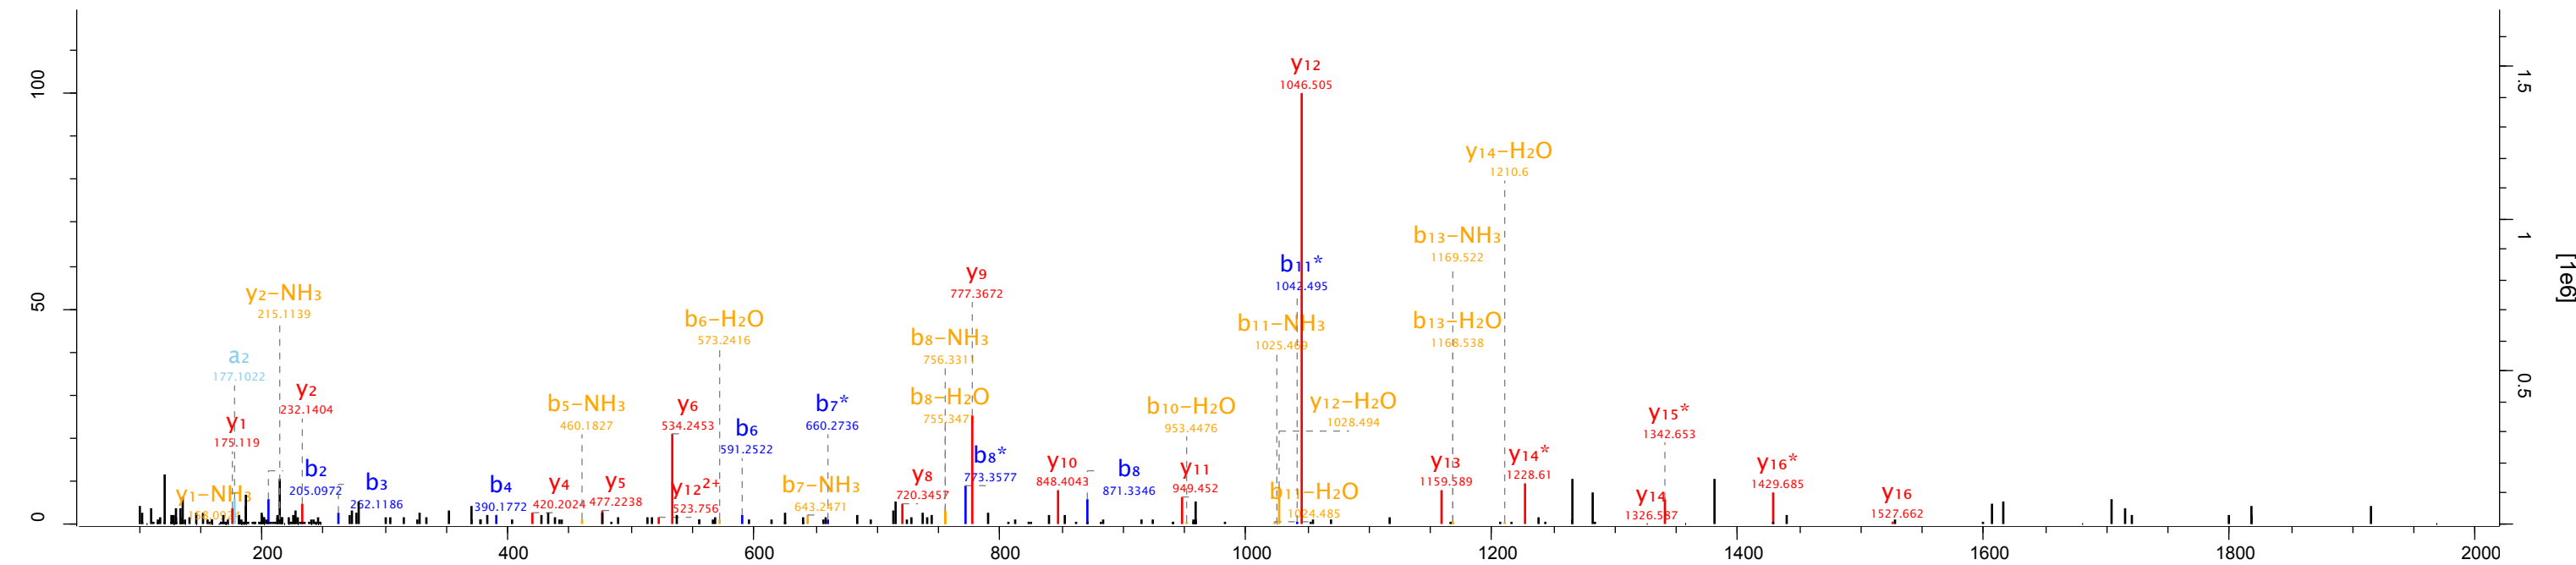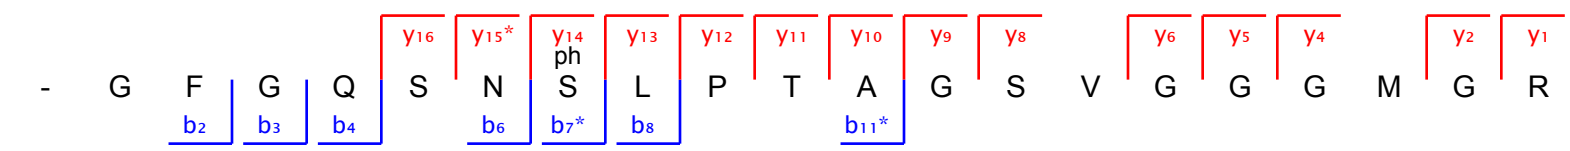

Raw file: 20150814\_A375SR\_Phospho\_BR2\_04  
 Scan: 16444 Method: FTMS; HCD Score: 345.28 m/z: 1031.46 Gene names: USP8

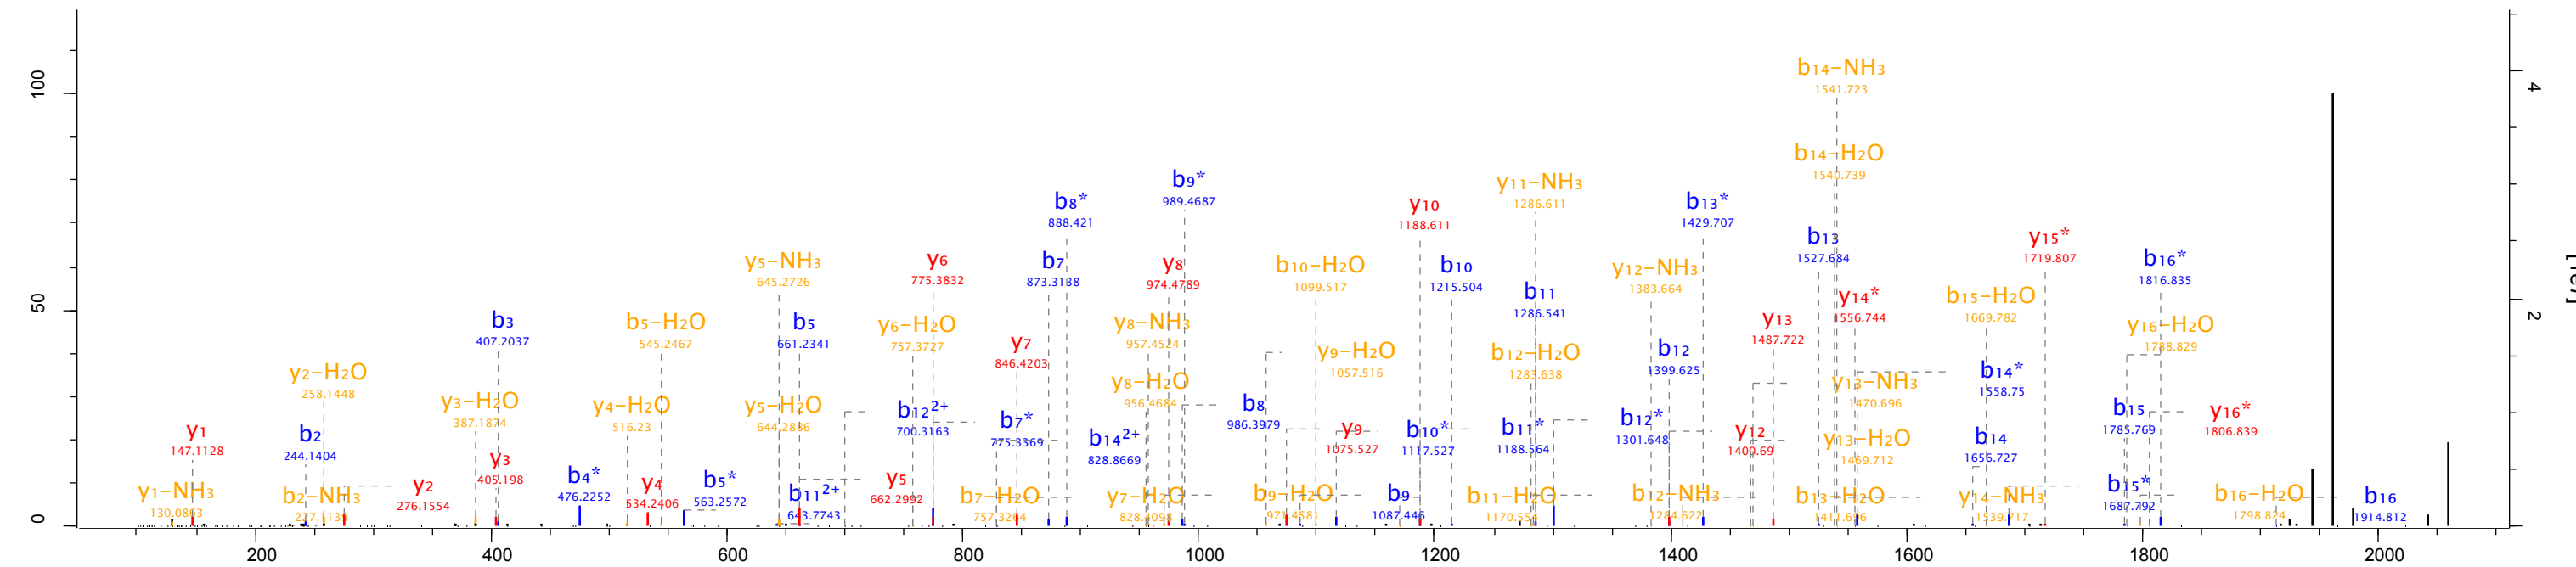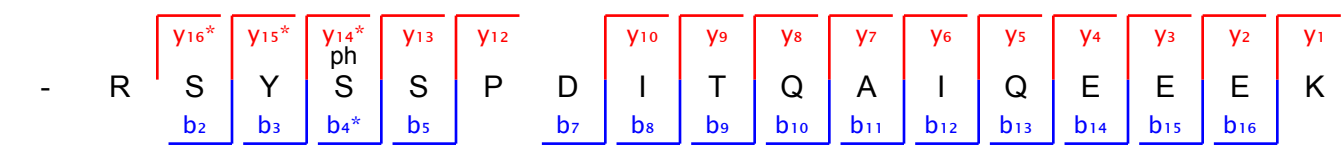

Raw file 20150814\_A375SR\_Phospho\_BR2\_04 Scan 16494 Method FTMS; HCD Score 132.78 m/z 895.43 Gene names ZYX

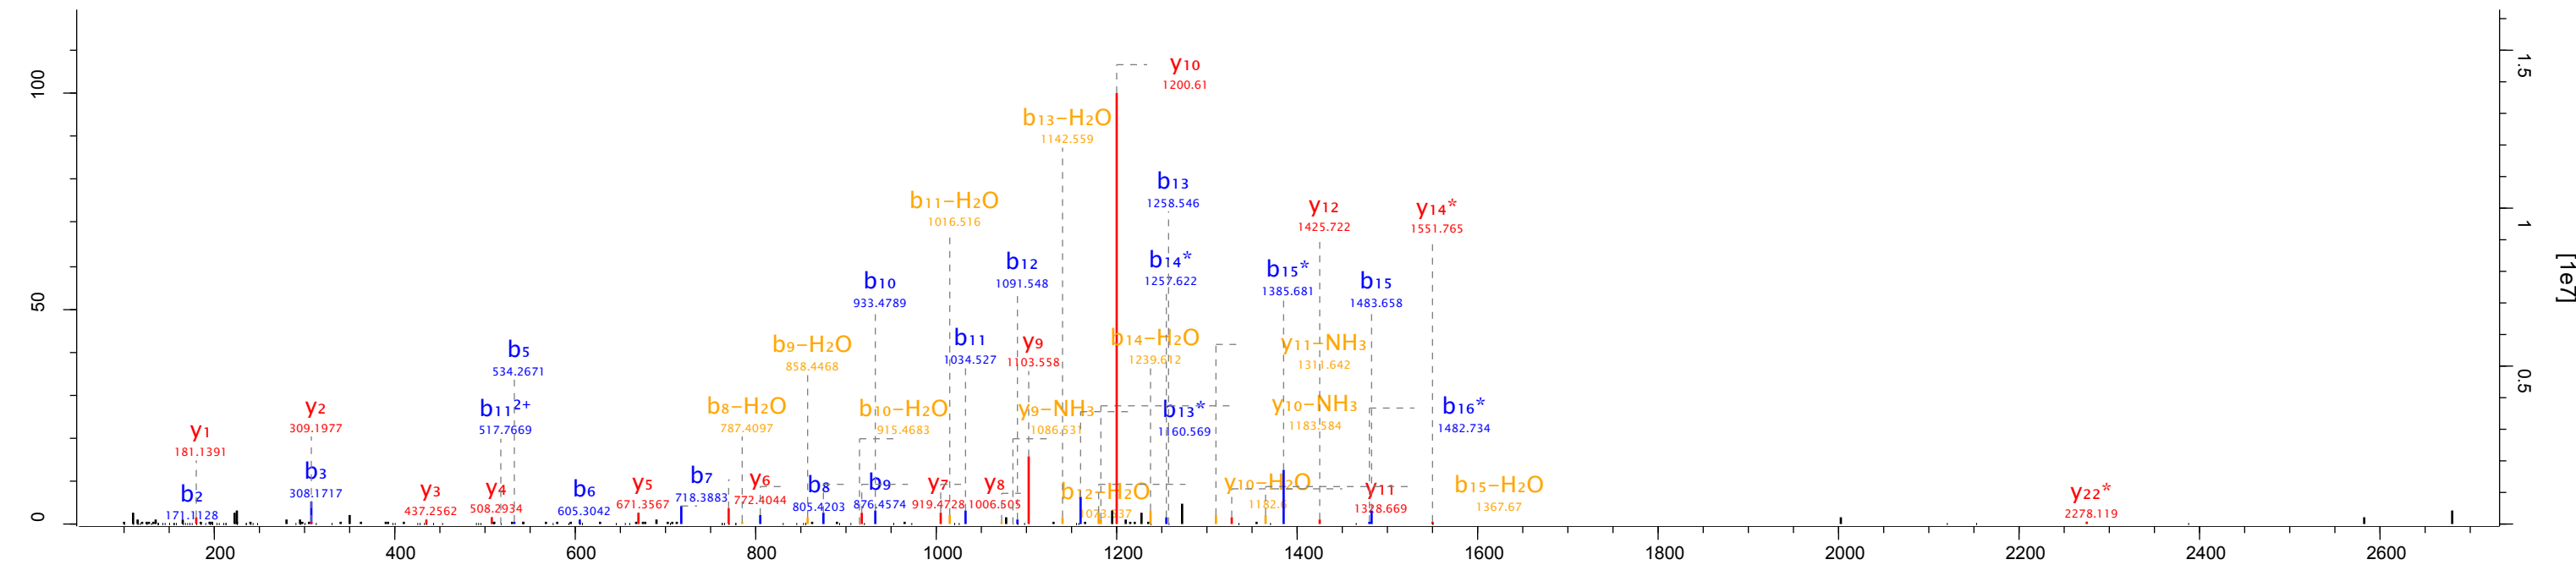

- L G H P E A L S A G T G S P Q P P S F T Y A Q Q R -

b<sub>2</sub>
b<sub>3</sub>
b<sub>5</sub>
b<sub>6</sub>
b<sub>7</sub>
b<sub>8</sub>
b<sub>9</sub>
b<sub>10</sub>
b<sub>11</sub>
b<sub>12</sub>
b<sub>13</sub>
b<sub>14</sub>\*
b<sub>15</sub>
b<sub>16</sub>\*
y<sub>14</sub>\*
y<sub>12</sub>
y<sub>11</sub>
y<sub>10</sub>
y<sub>9</sub>
y<sub>8</sub>
y<sub>7</sub>
y<sub>6</sub>
y<sub>5</sub>
y<sub>4</sub>
y<sub>3</sub>
y<sub>2</sub>
y<sub>1</sub>
y<sub>22</sub>\*

Raw file: 20150814\_A375SR\_Phospho\_BR2\_04  
 Scan: 16634 Method: FTMS; HCD Score: 86.36 m/z: 942.08 Gene names: TNRC18

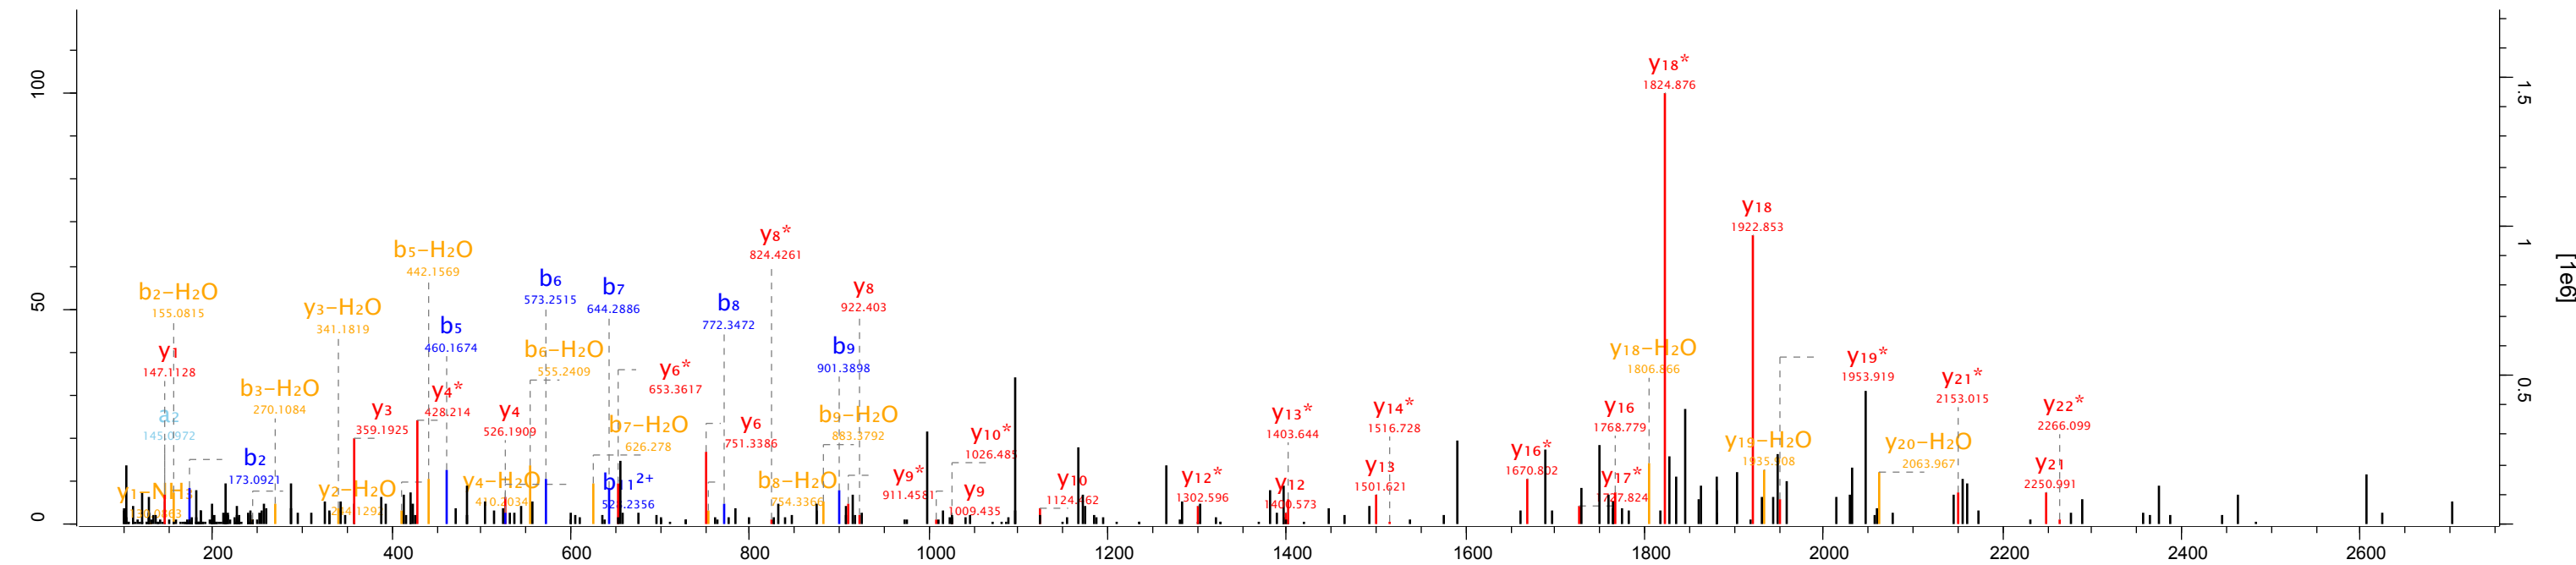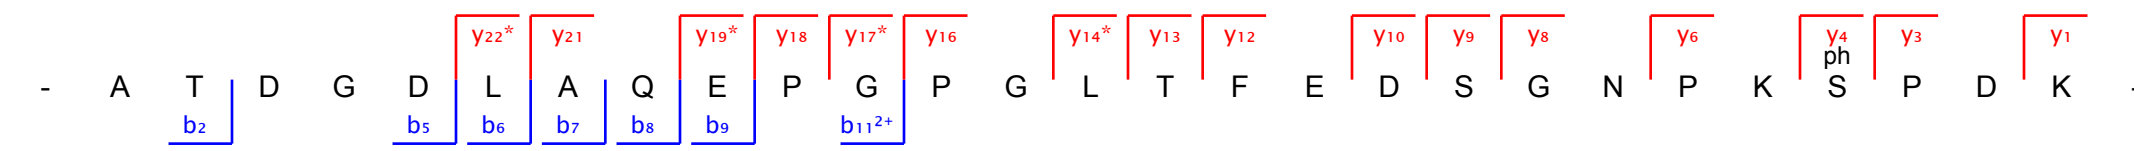

Raw file: 20150814\_A375SR\_Phospho\_BR2\_04  
 Scan: 1664 Method: FTMS; HCD Score: 48.62 m/z: 764.8 Gene names: HLCS

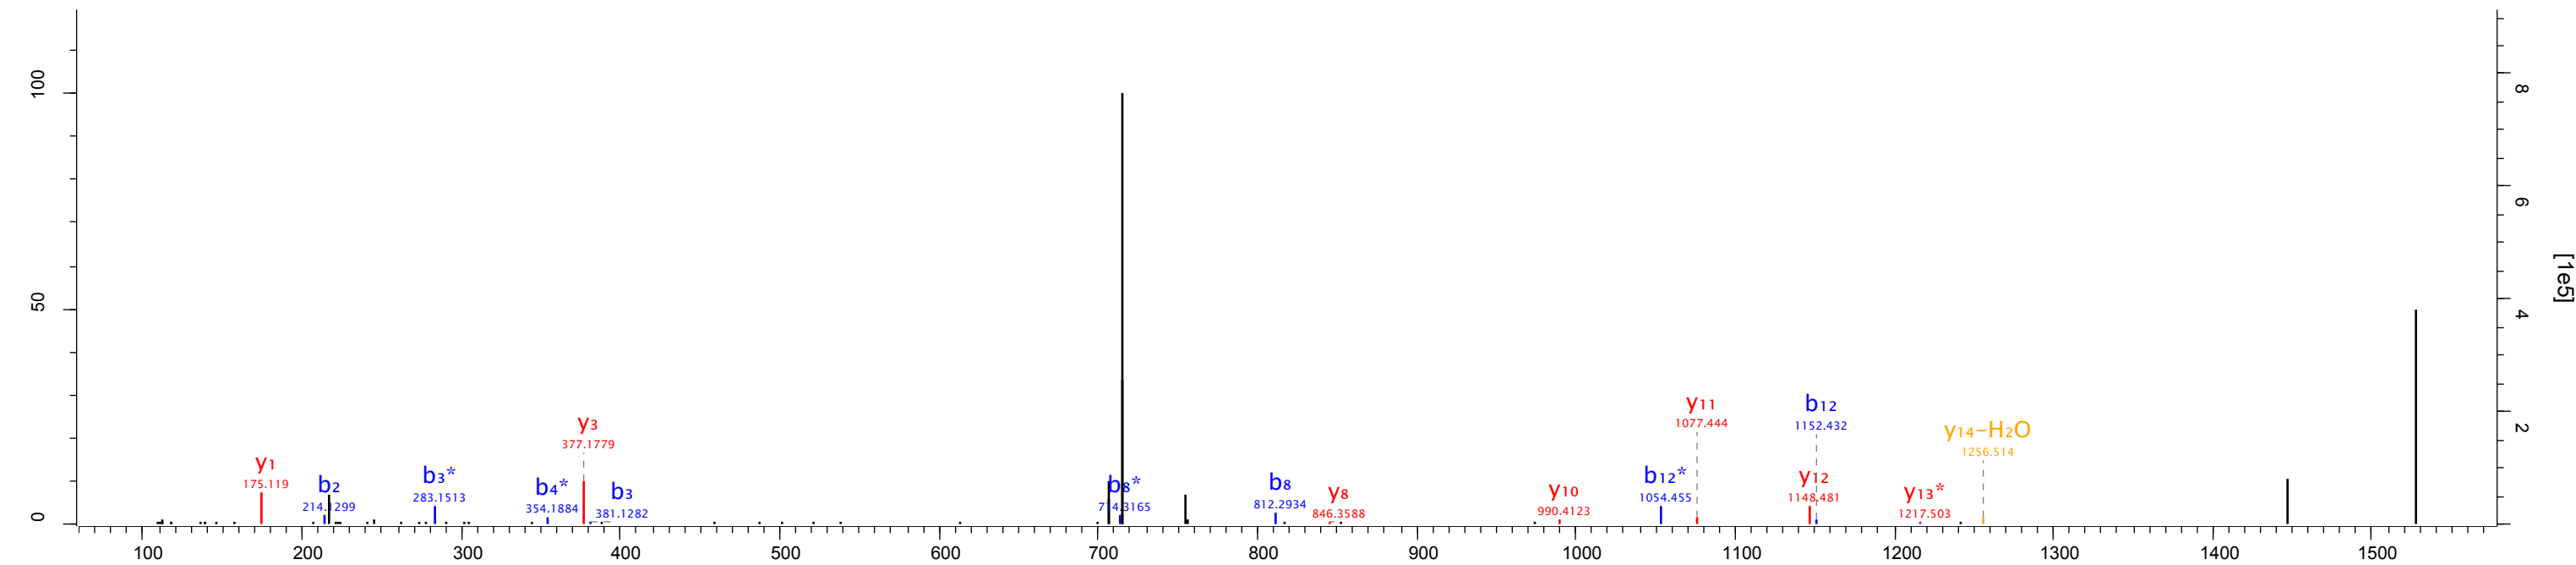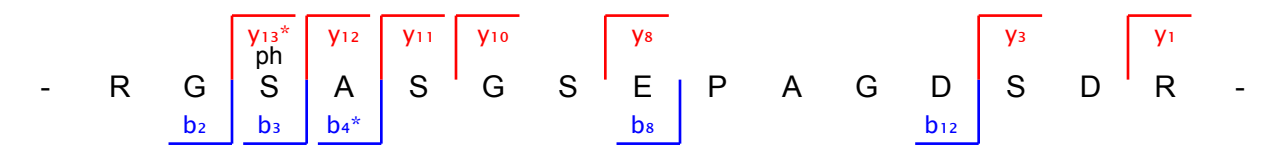

Raw file: 20150814\_A375SR\_Phospho\_BR2\_04  
 Scan: 16874 Method: FTMS; HCD Score: 75.05 m/z: 972.41 Gene names: DNPH1

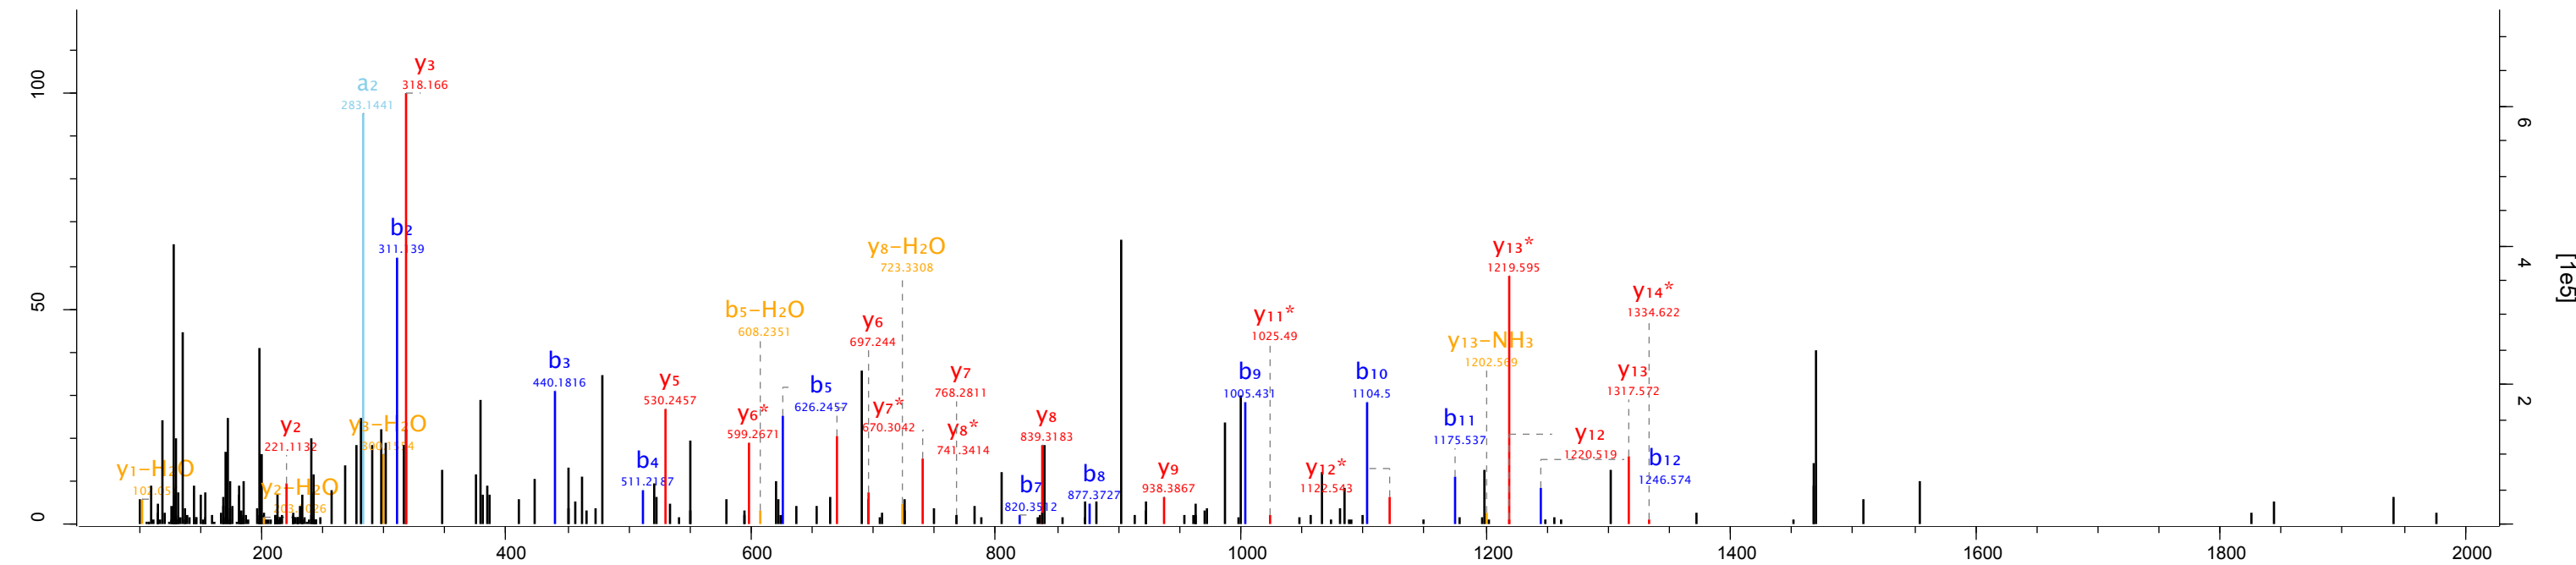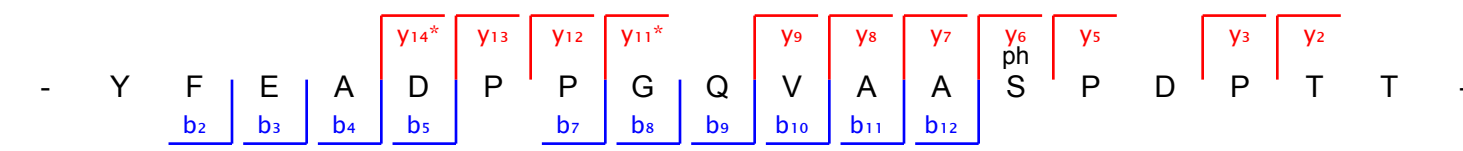



Raw file 20150814\_A375SR\_Phospho\_BR2\_04 Scan 17064 Method FTMS; HCD Score 180.2 m/z 1203.6 Gene names LARP1

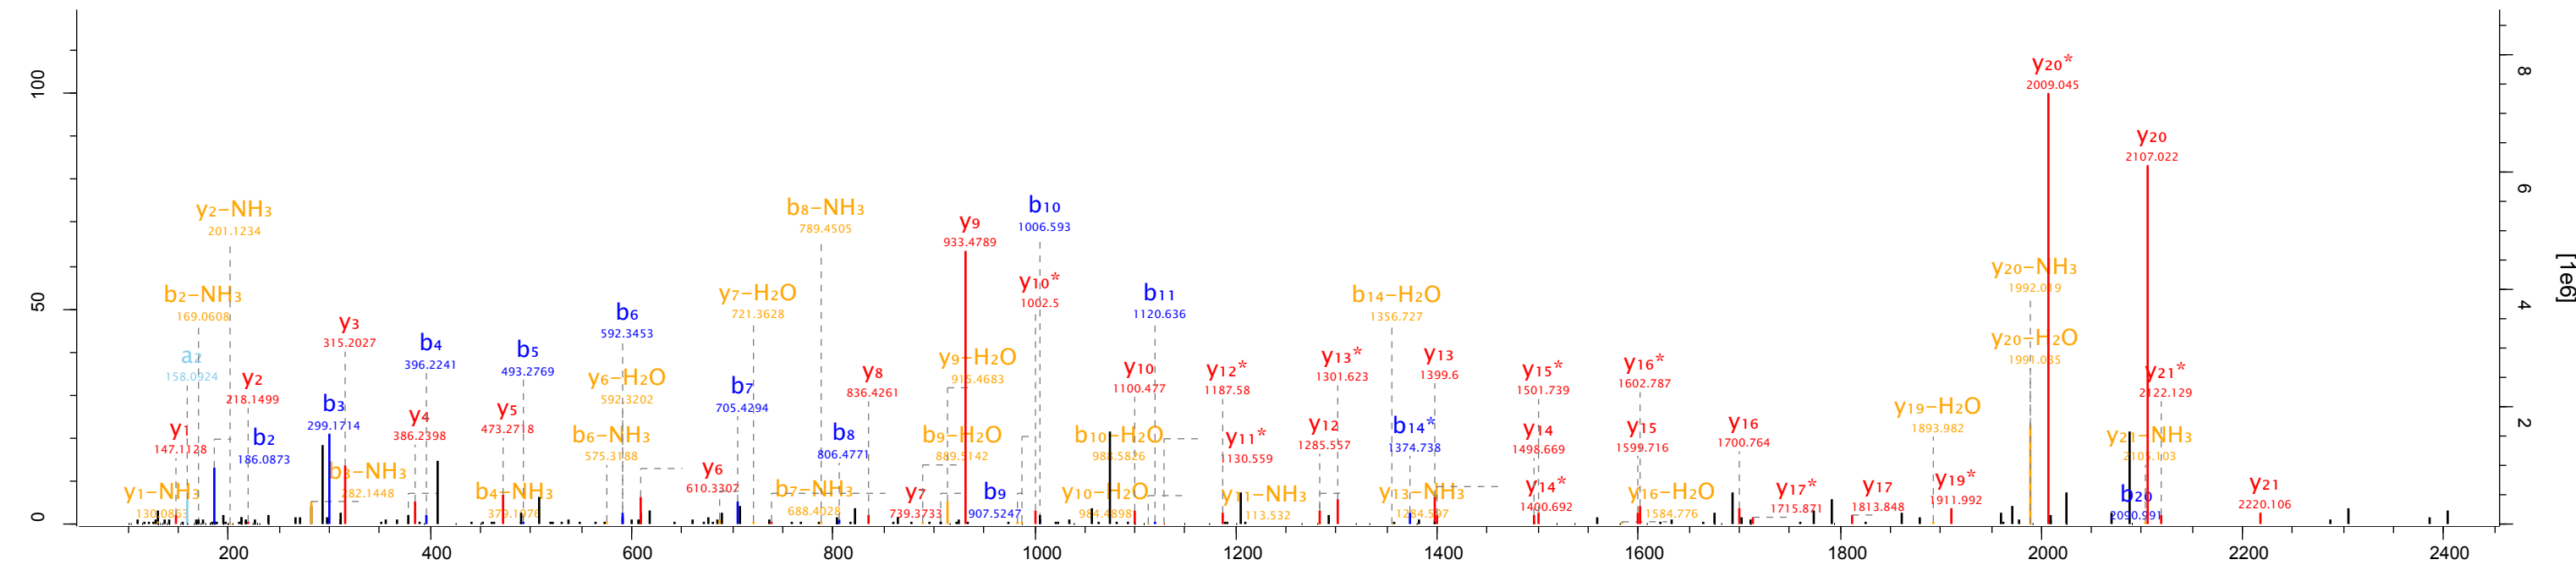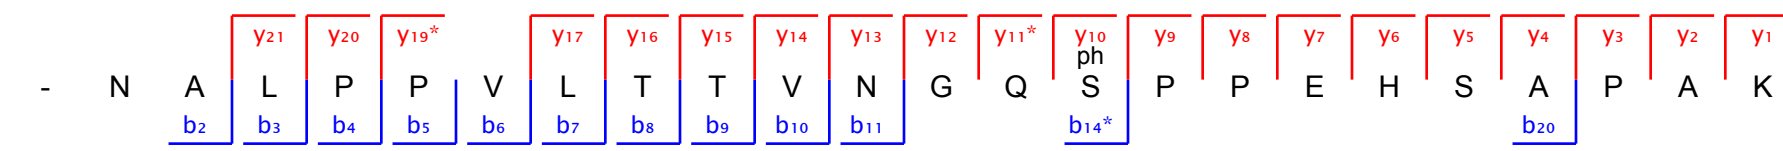

Raw file

20150814\_A375SR\_Phospho\_BR2\_04

Scan 17214 Method FTMS; HCD Score 93.86 m/z 652.3 Gene names UBN1

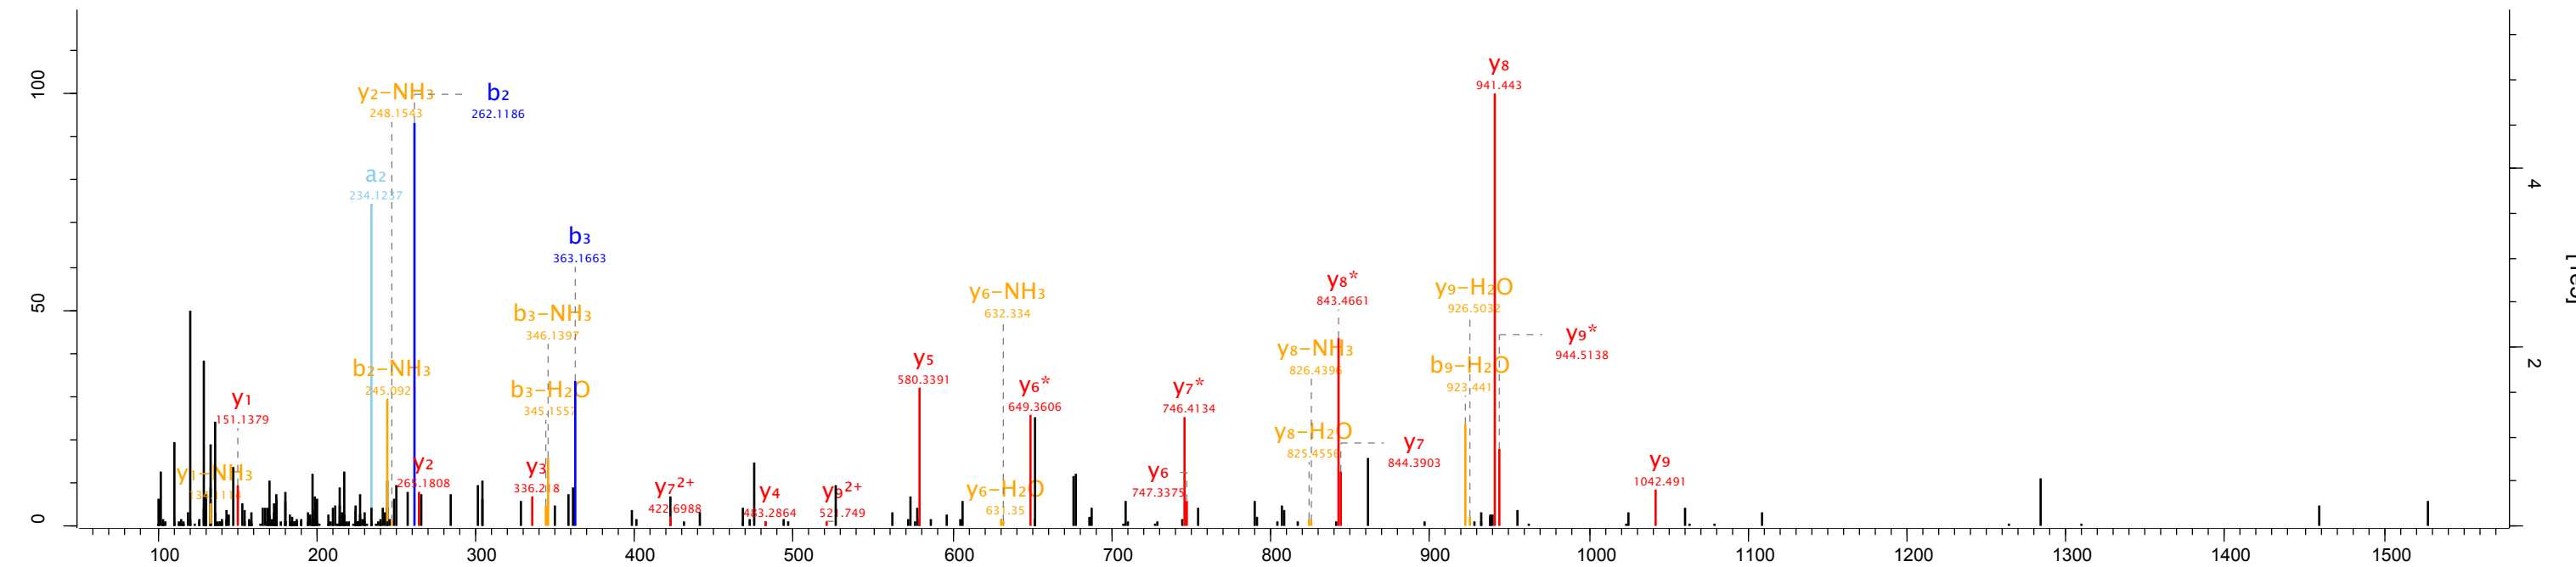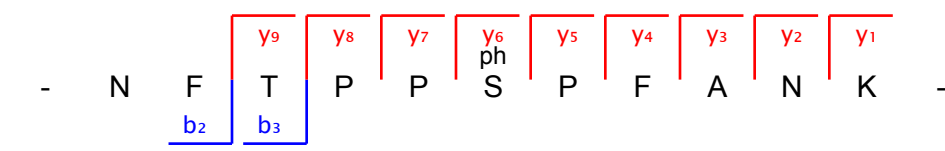

Raw file 20150814\_A375SR\_Phospho\_BR2\_04 Scan 17304 Method FTMS; HCD Score 225.39 m/z 755.37 Gene names EIF3E

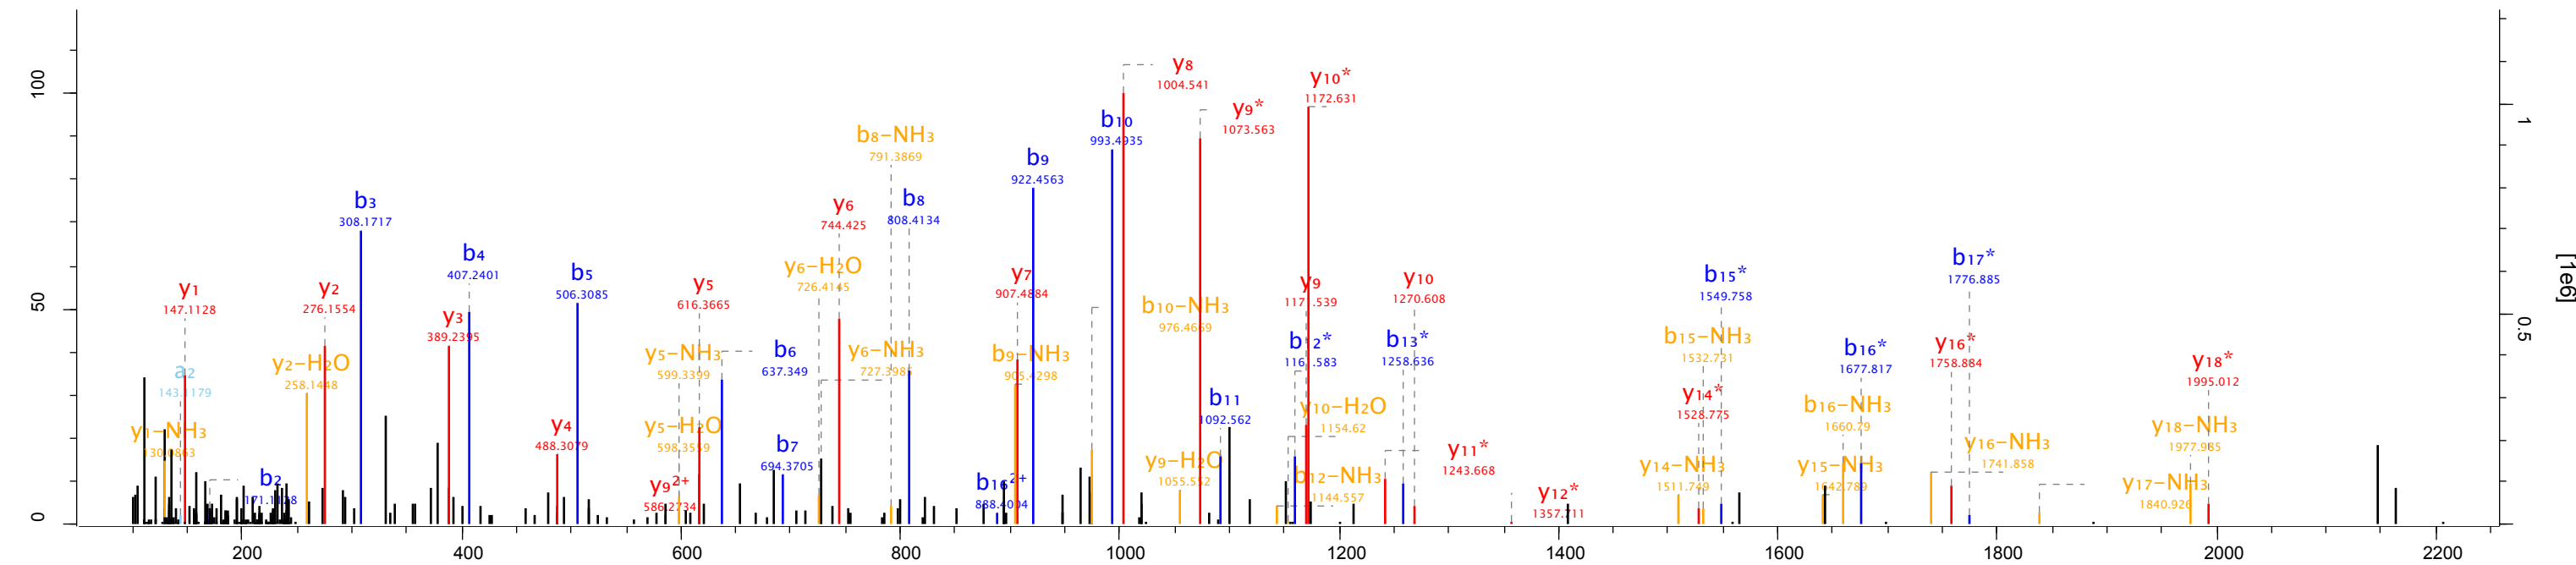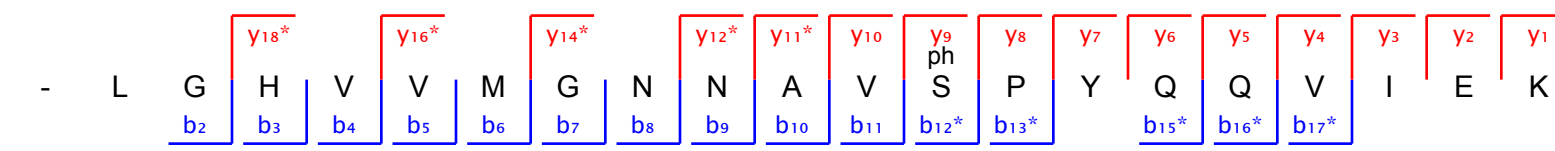

Raw file: 20150814\_A375SR\_Phospho\_BR2\_04  
 Scan: 17454 Method: FTMS; HCD Score: 79.47 m/z: 790.83 Gene names: FAM21C;FAM21A

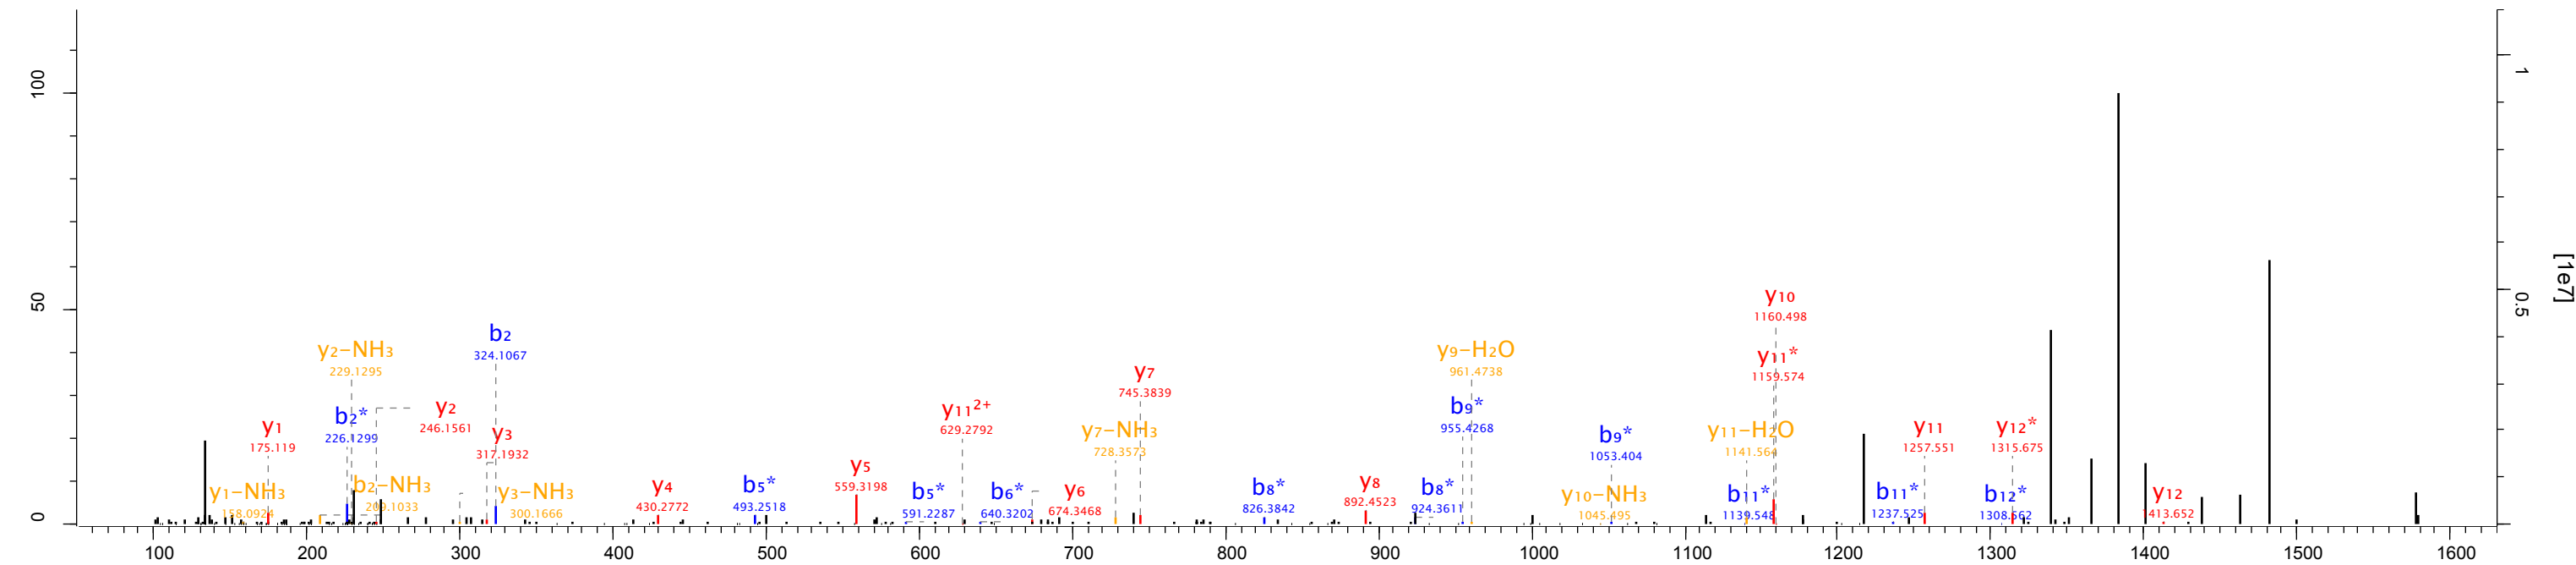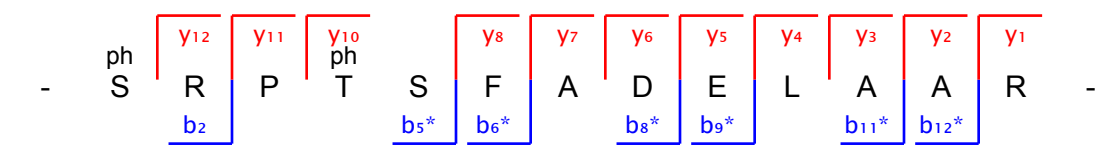

Raw file 20150814\_A375SR\_Phospho\_BR2\_04 Scan 17634 Method FTMS; HCD Score 154.52 m/z 795.86 Gene names PPFIBP1

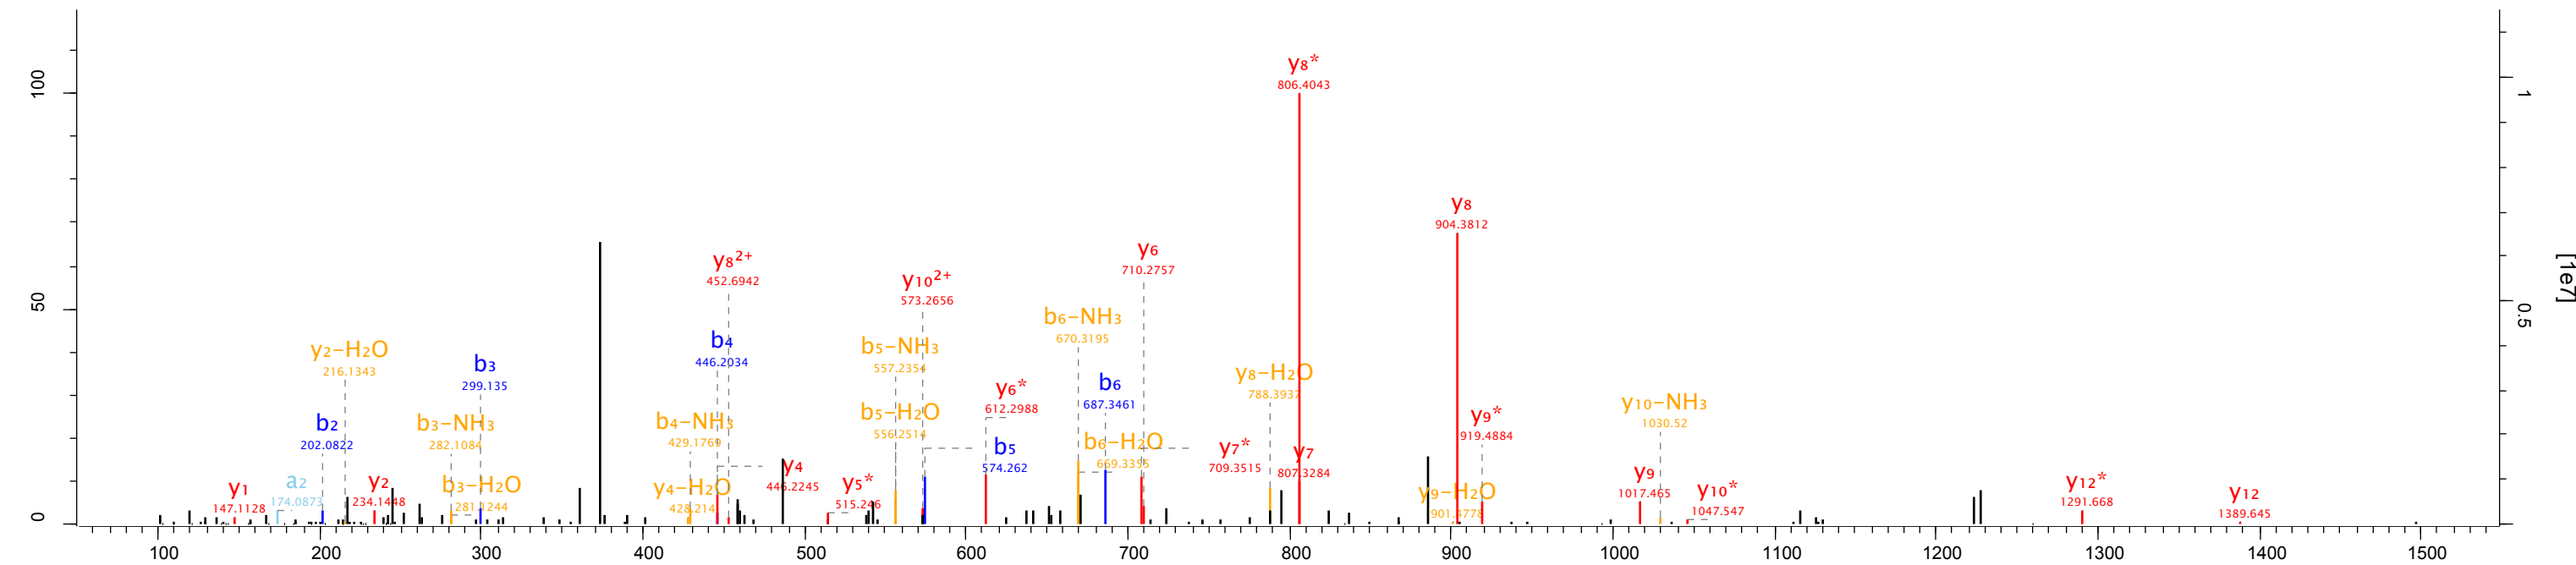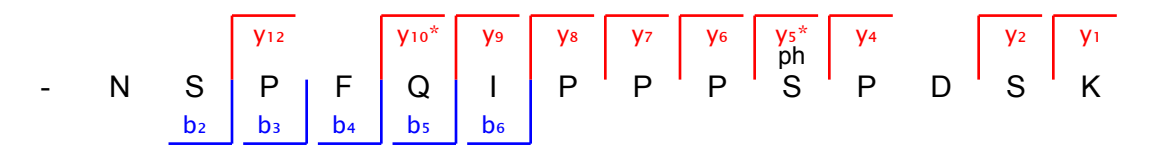

Raw file: 20150814\_A375SR\_Phospho\_BR2\_04  
 Scan: 17834 Method: FTMS; HCD Score: 111.05 m/z: 956.95 Gene names: RYK

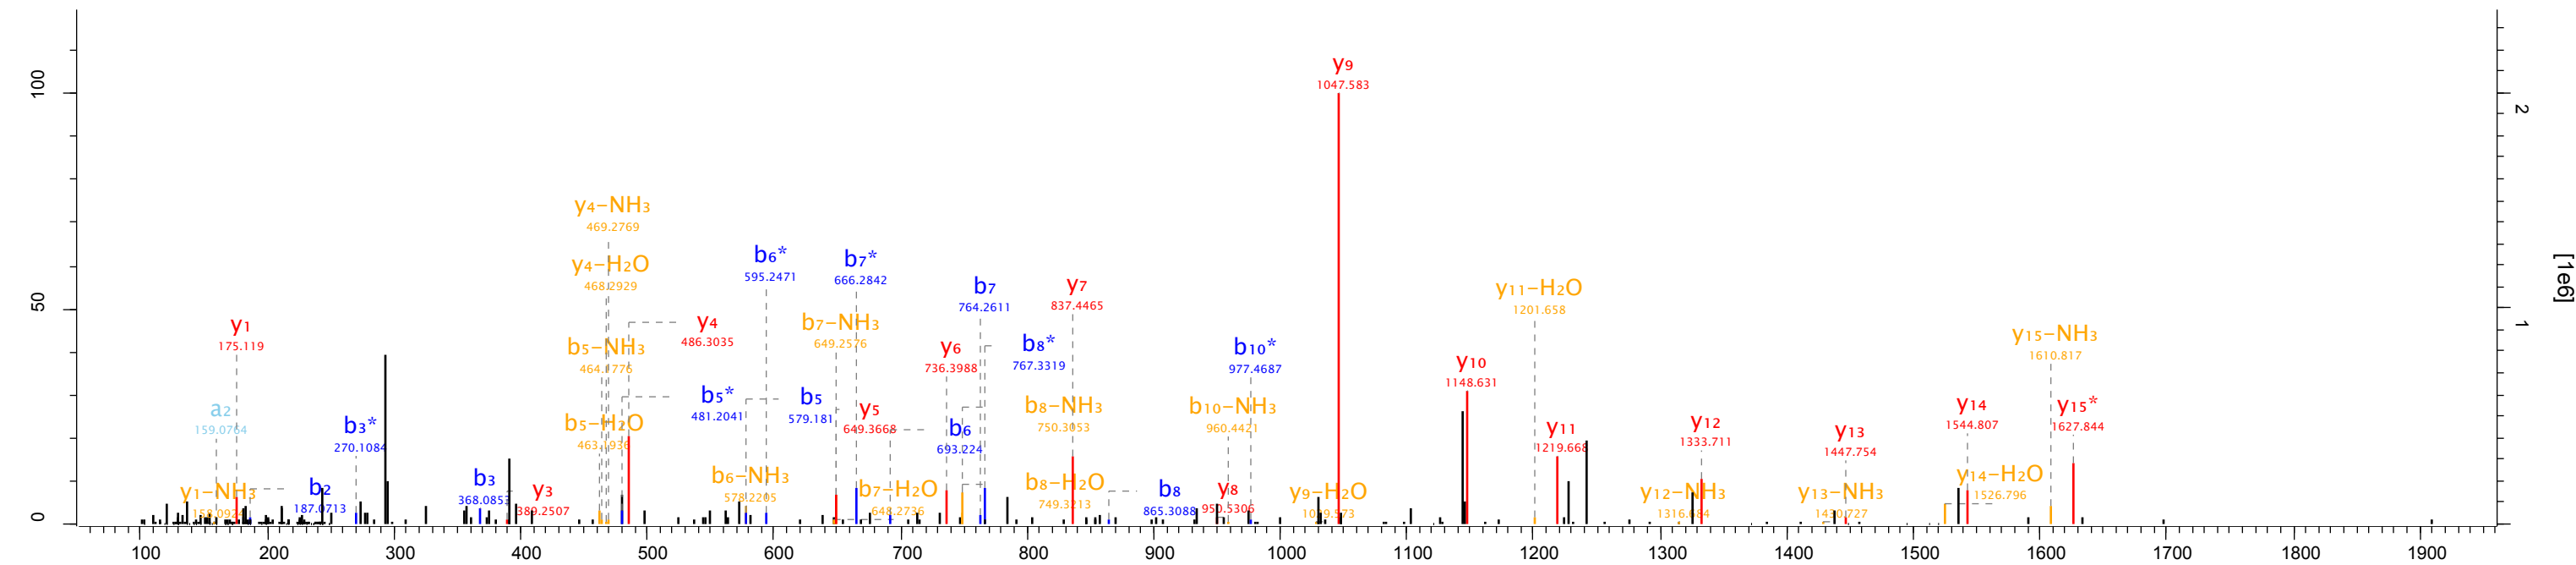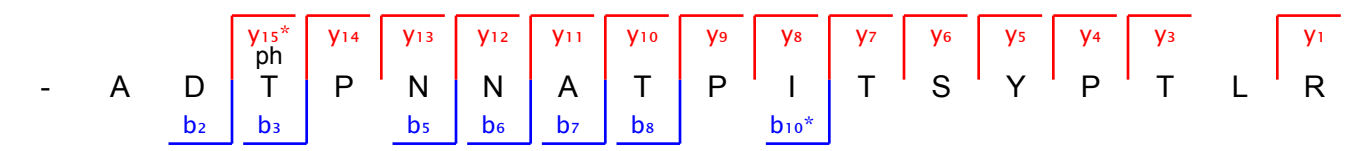

Raw file: 20150814\_A375SR\_Phospho\_BR2\_04  
 Scan: 18334 Method: FTMS; HCD Score: 263.75 m/z: 895.94 Gene names: STK24

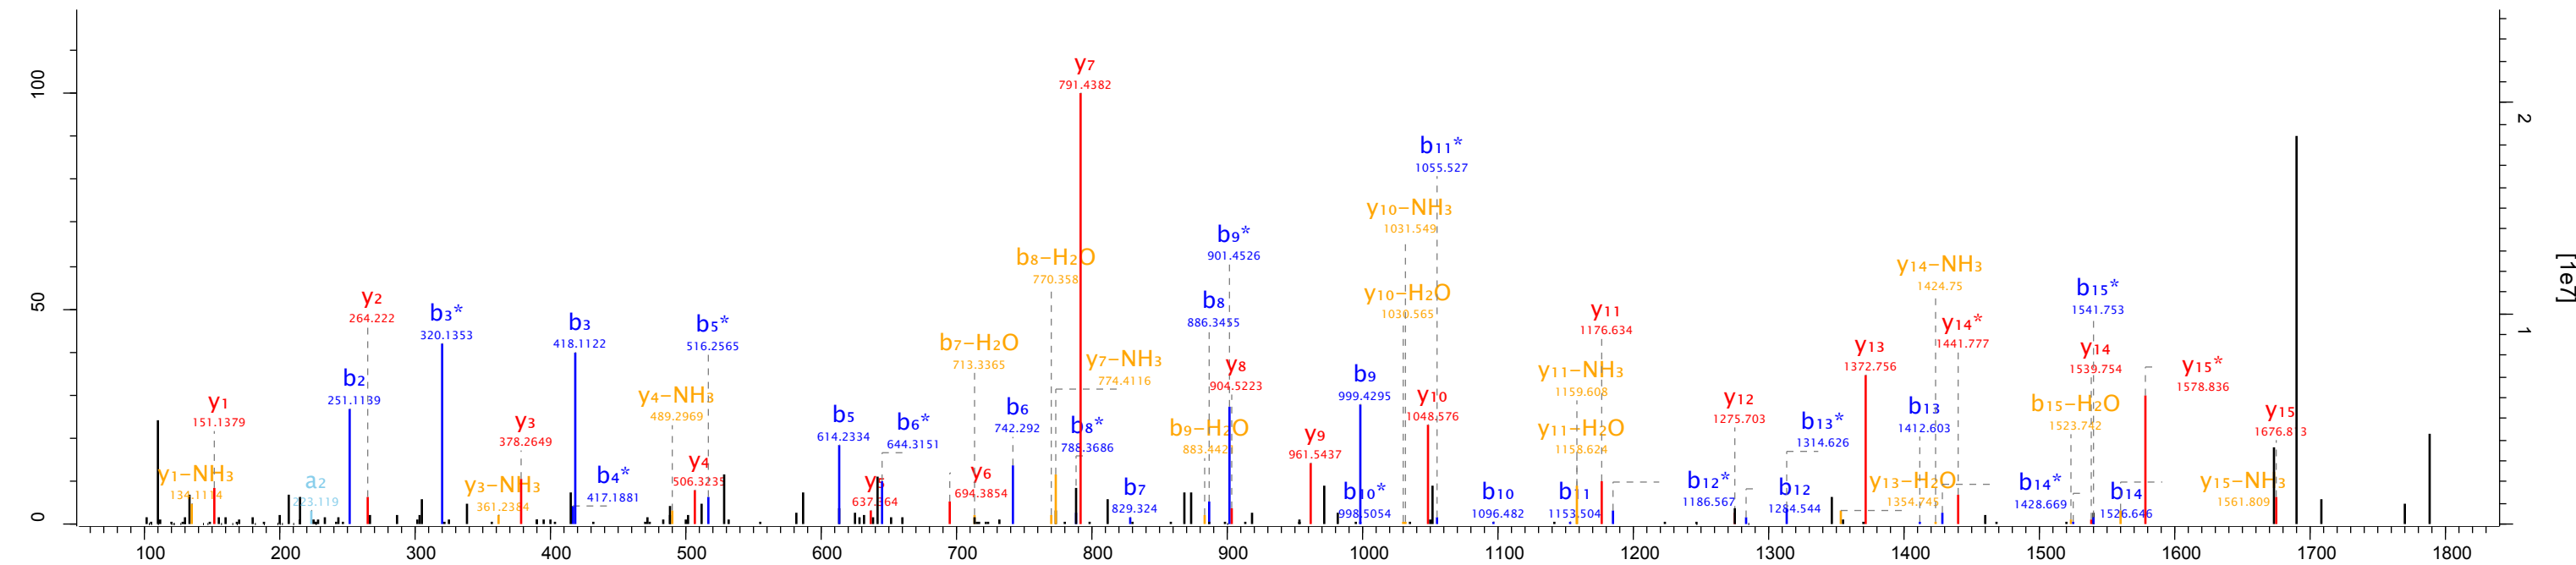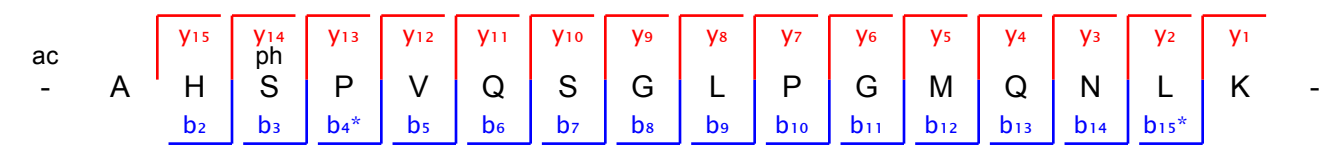

Raw file: 20150814\_A375SR\_Phospho\_BR2\_04  
 Scan: 19594 Method: FTMS; HCD Score: 203.13 m/z: 919.41 Gene names: ATP2B1

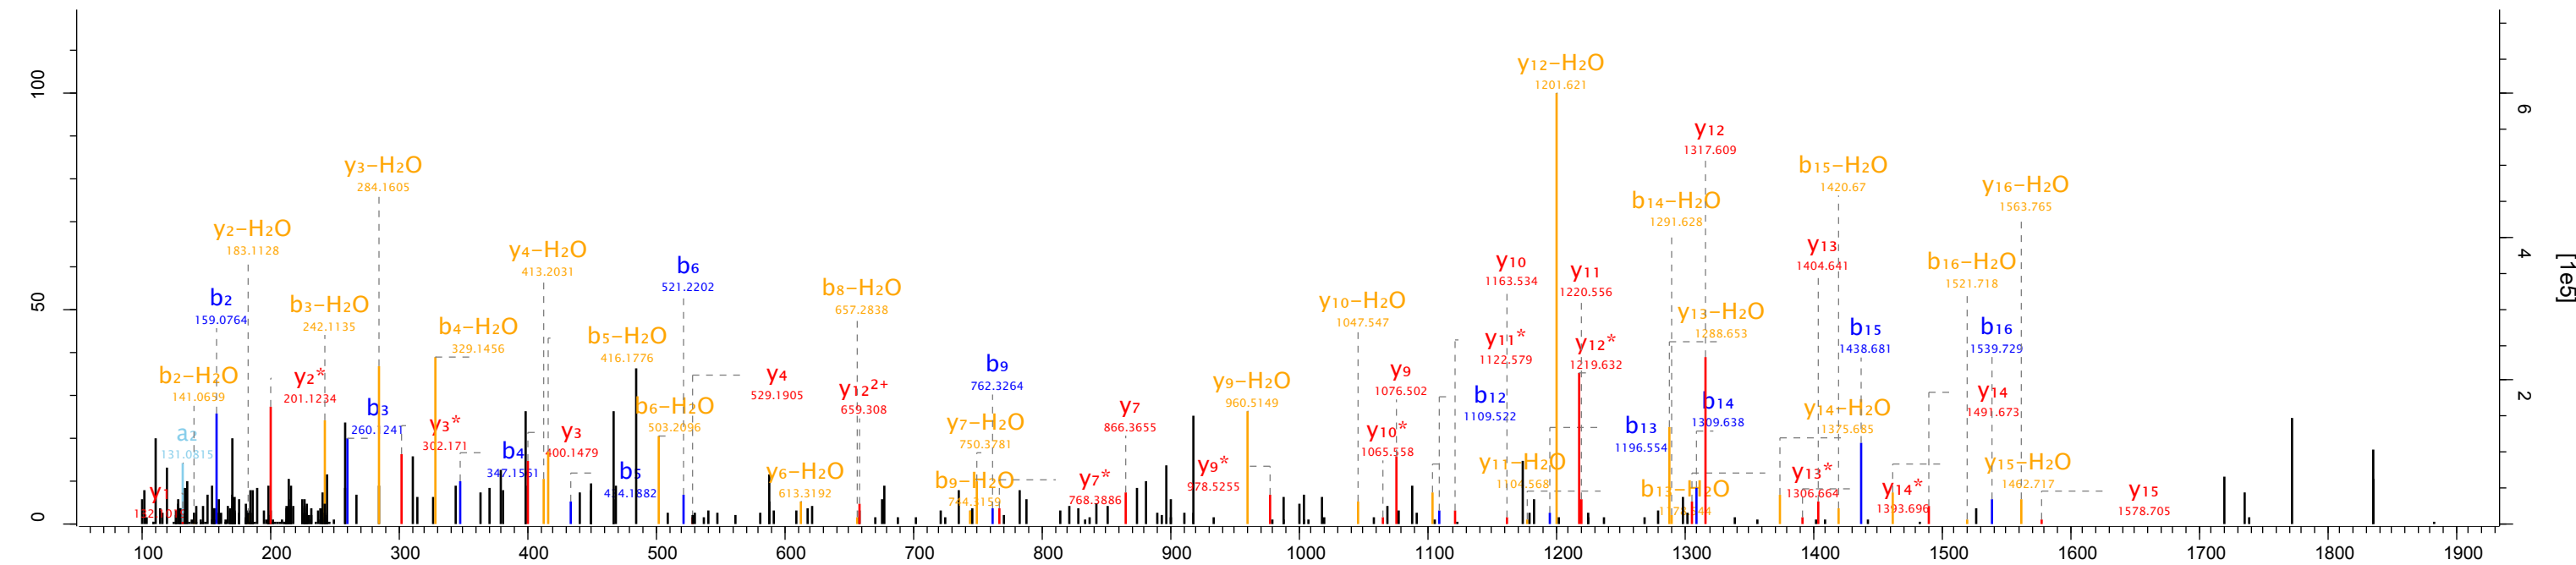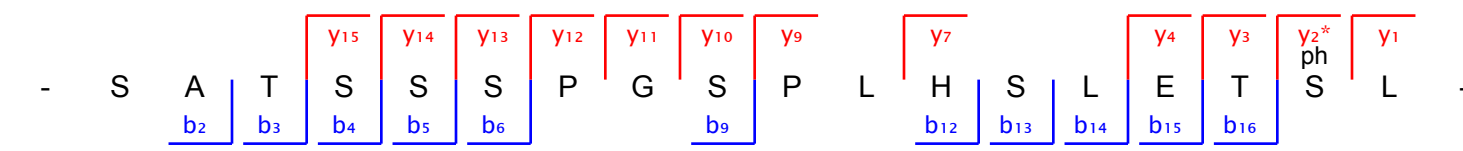



Raw file Scan Method Score m/z Gene names  
 20150814\_A375SR\_Phospho\_BR2\_04 19734 FTMS; HCD 187.21 850.71 SF3B1

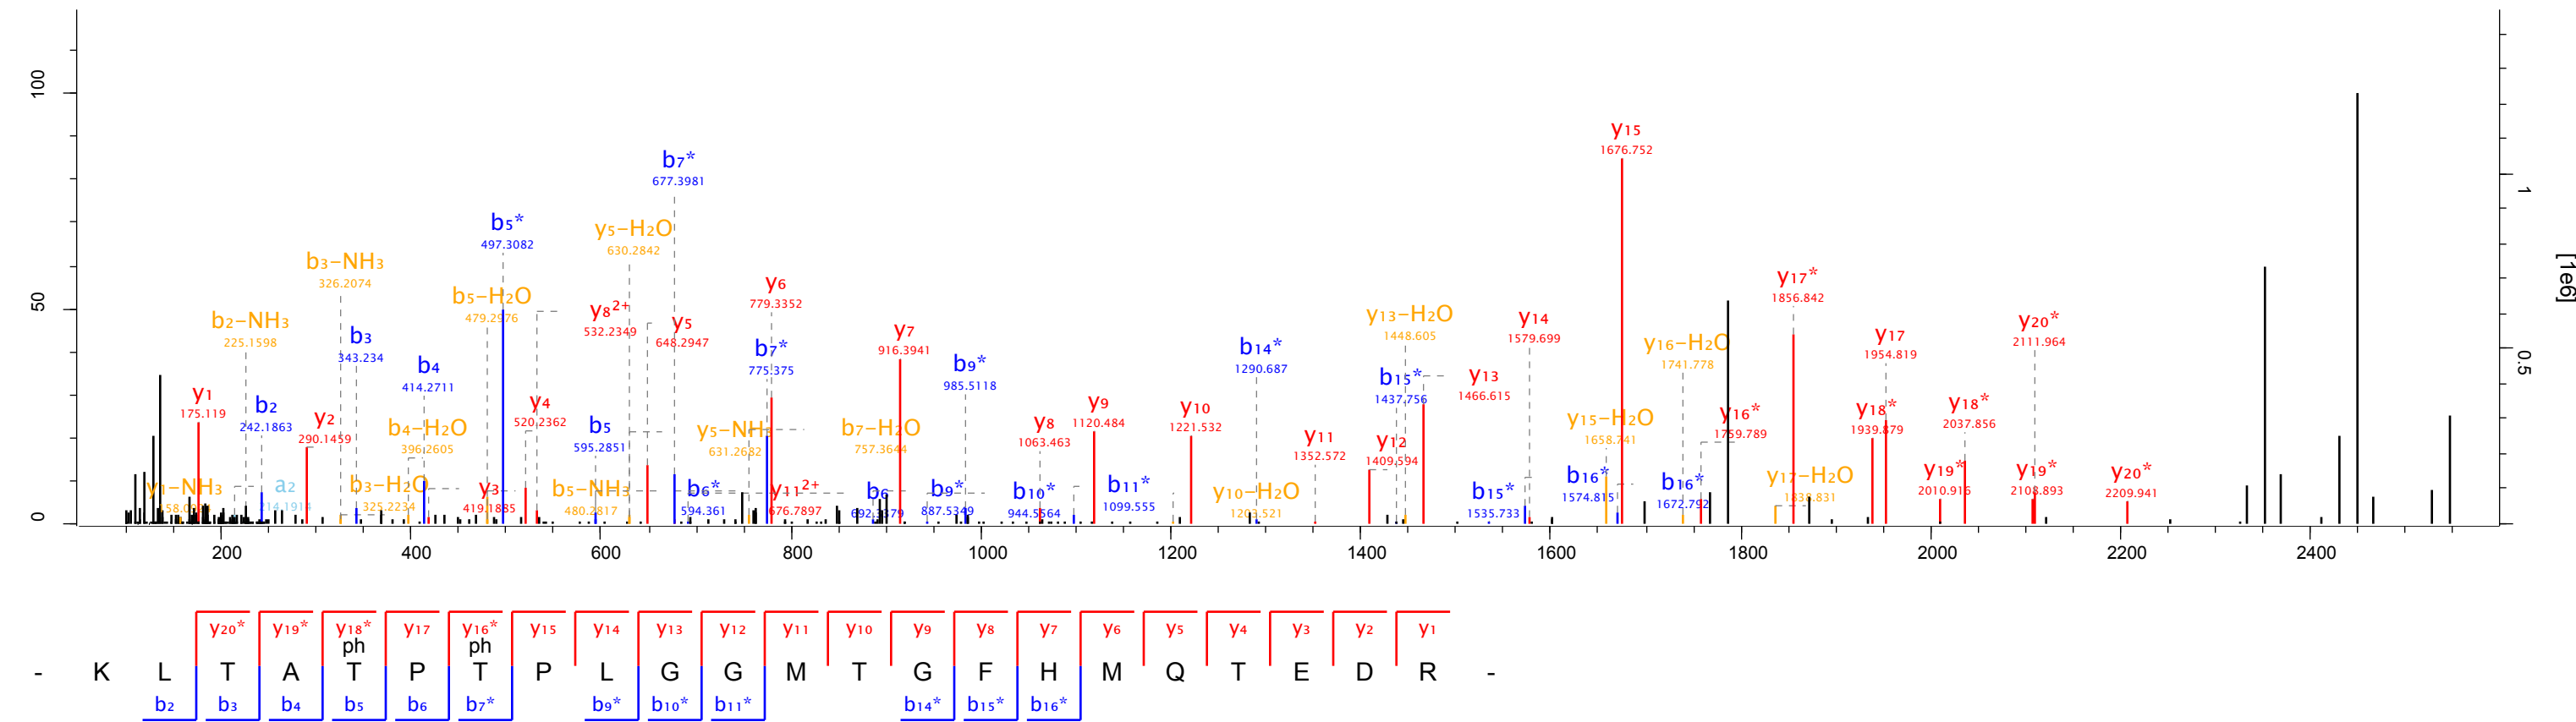

Raw file: 20150814\_A375SR\_Phospho\_BR2\_04  
 Scan: 20014 Method: FTMS; HCD Score: 205.29 m/z: 881.77 Gene names: MAP1S

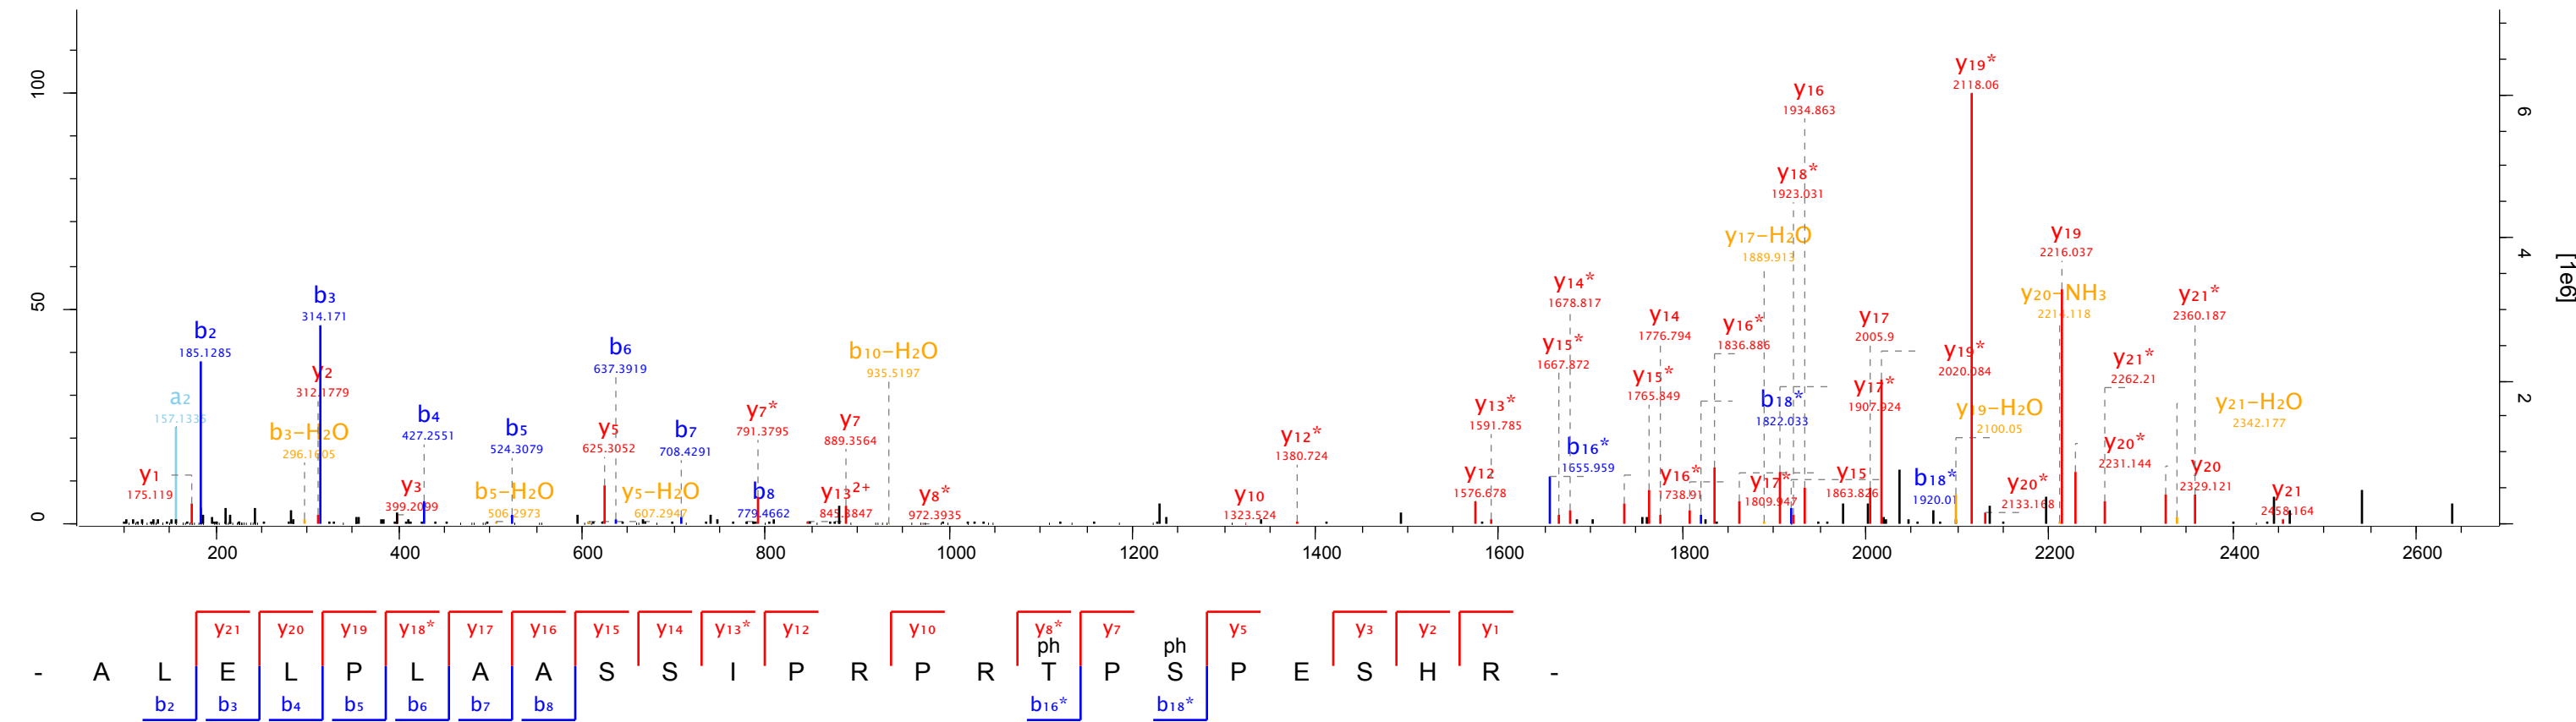

Raw file: 20150814\_A375SR\_Phospho\_BR2\_04  
 Scan: 20114 Method: FTMS; HCD Score: 141.78 m/z: 838.41 Gene names: GAPVD1

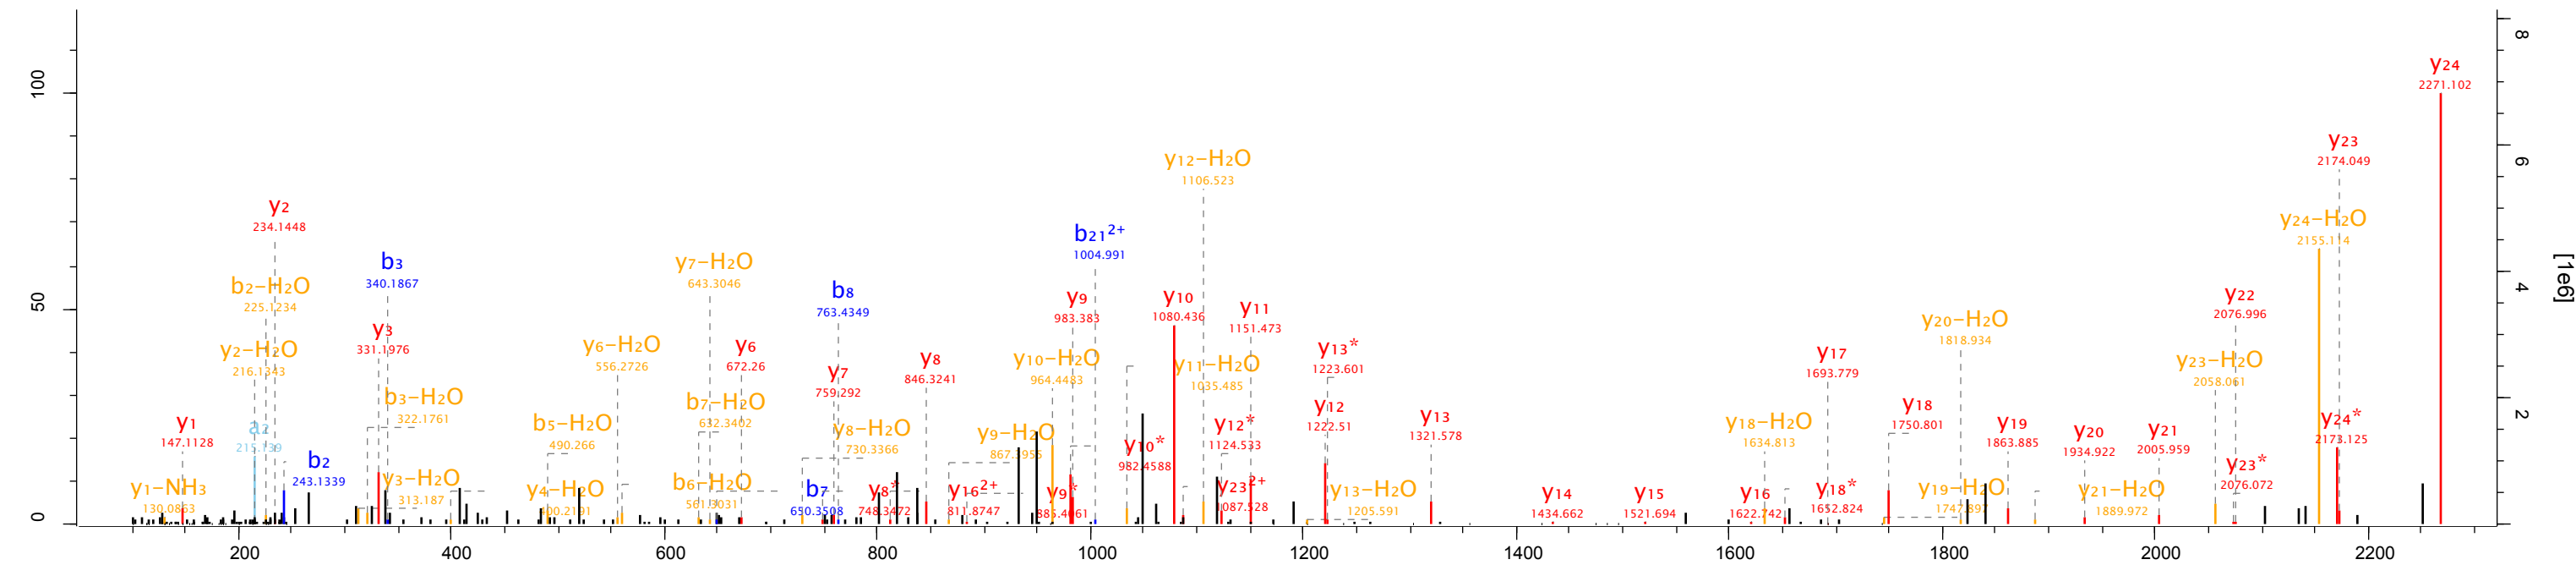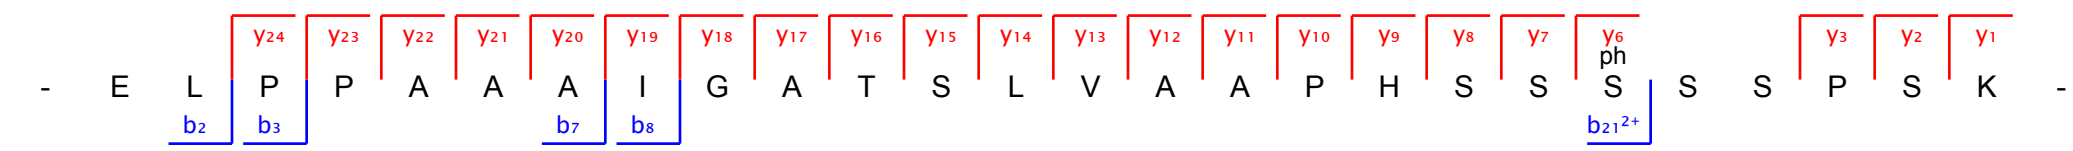

Raw file: 20150814\_A375SR\_Phospho\_BR2\_04  
 Scan: 20284 Method: FTMS; HCD Score: 170.95 m/z: 626.3 Gene names: RNF123

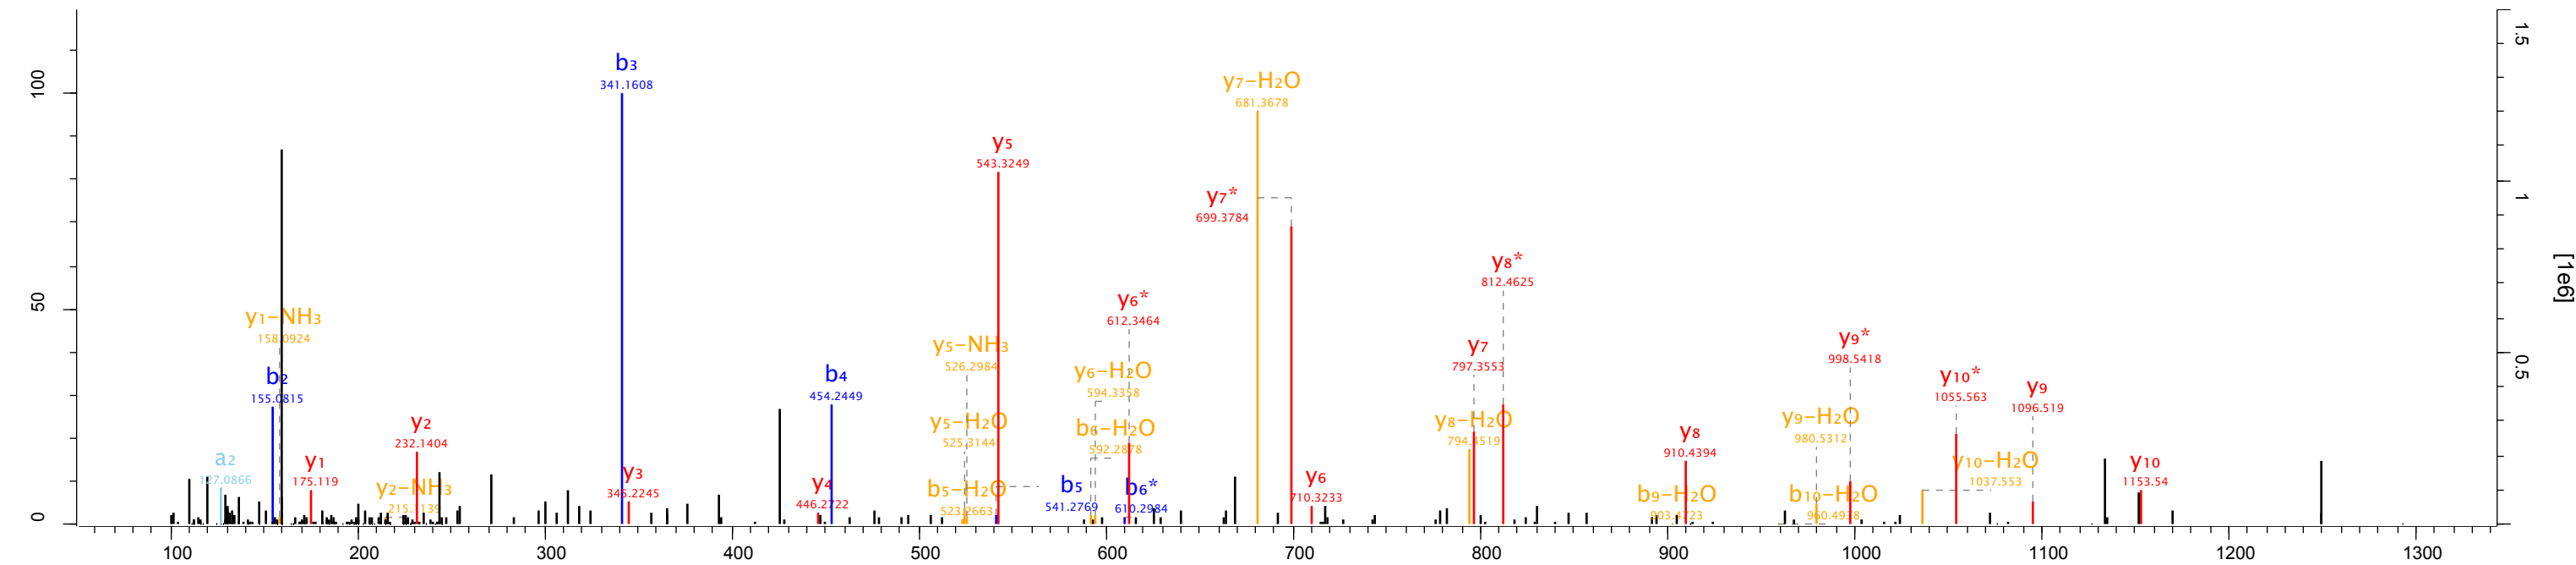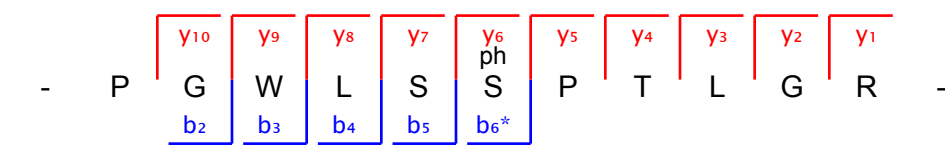

Raw file: 20150814\_A375SR\_Phospho\_BR2\_04  
 Scan: 20304 Method: FTMS; HCD Score: 157.91 m/z: 813.82 Gene names: ATP11B

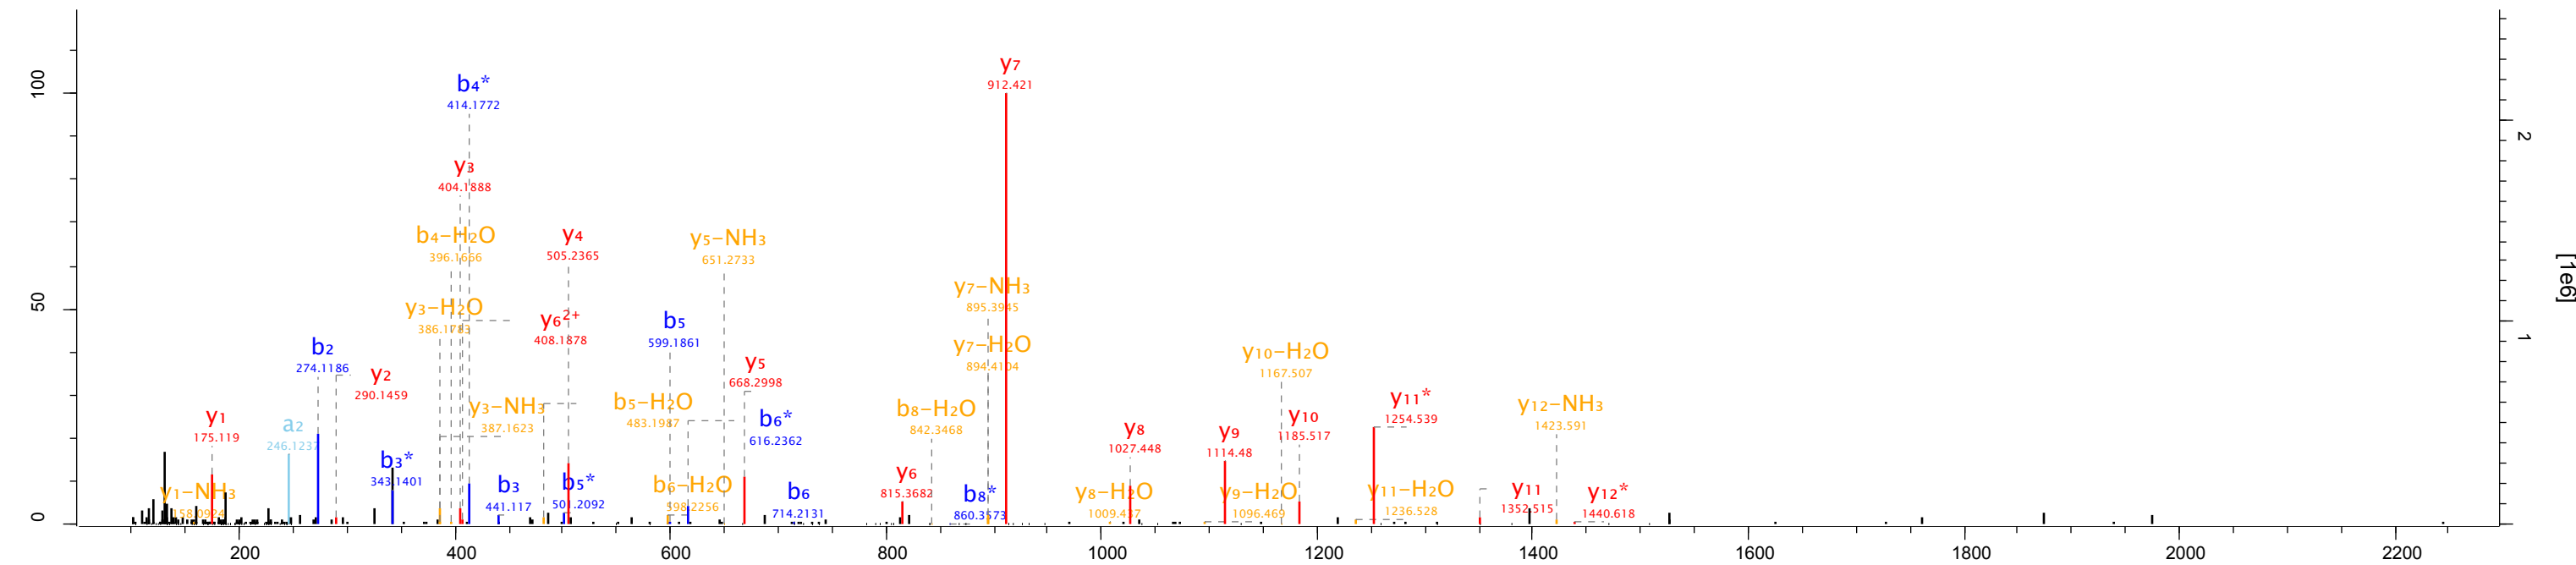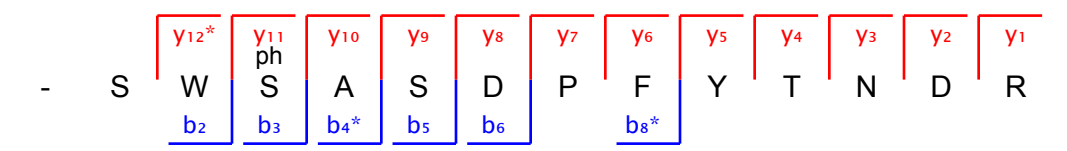

Raw file  
20150814\_A375SR\_Phospho\_BR2\_04

Scan 21084 Method FTMS; HCD Score 290.61 m/z 954.46 Gene names RB1

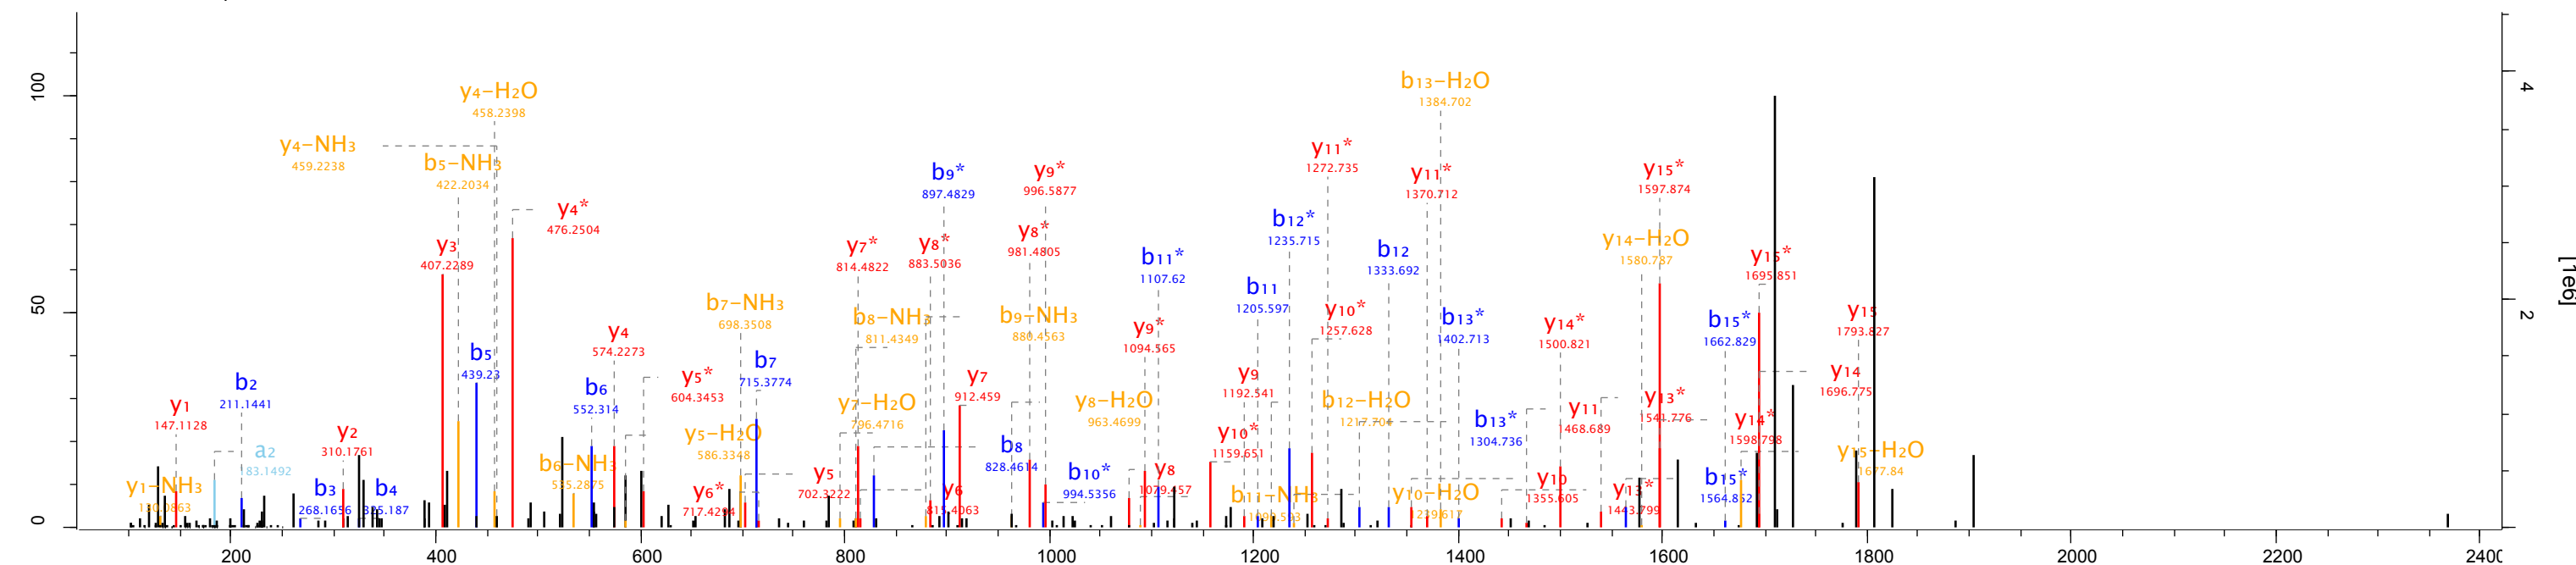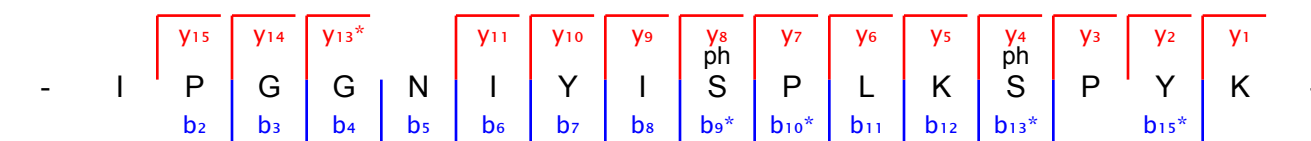

Raw file 21144 FTMS; HCD 173.37 940.49 CREBBP

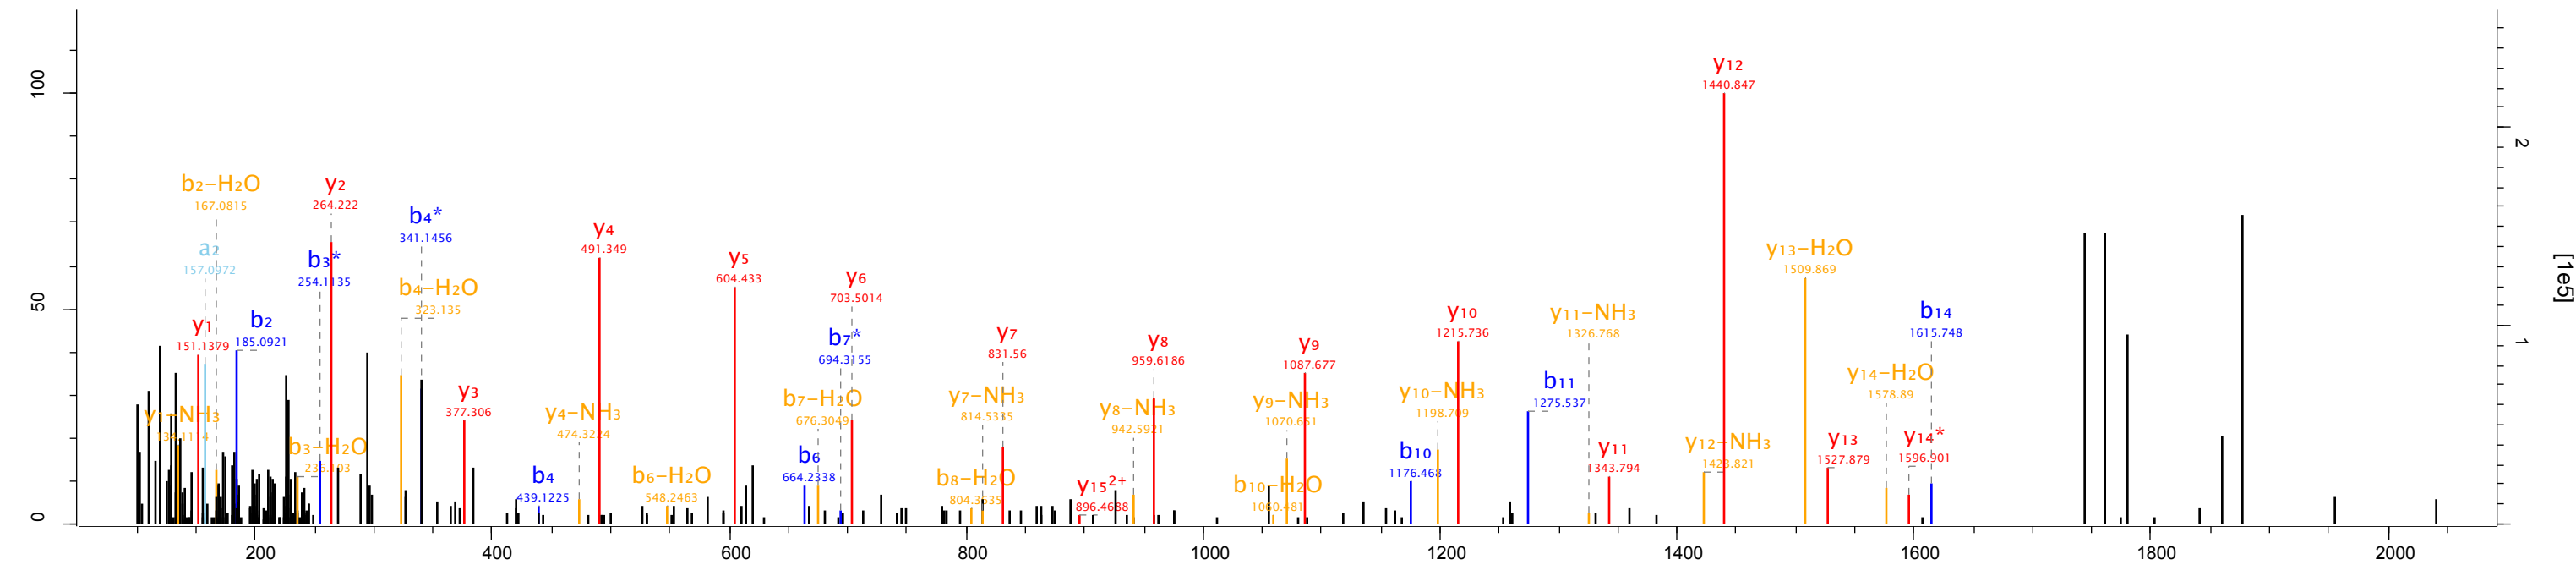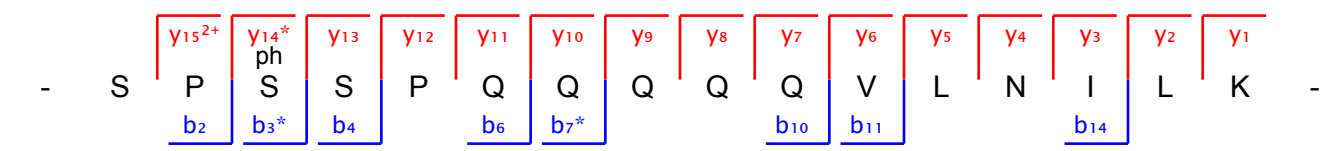

Raw file: 20150814\_A375SR\_Phospho\_BR2\_04  
 Scan: 21194 Method: FTMS; HCD Score: 184 m/z: 749.85 Gene names: TRIP11

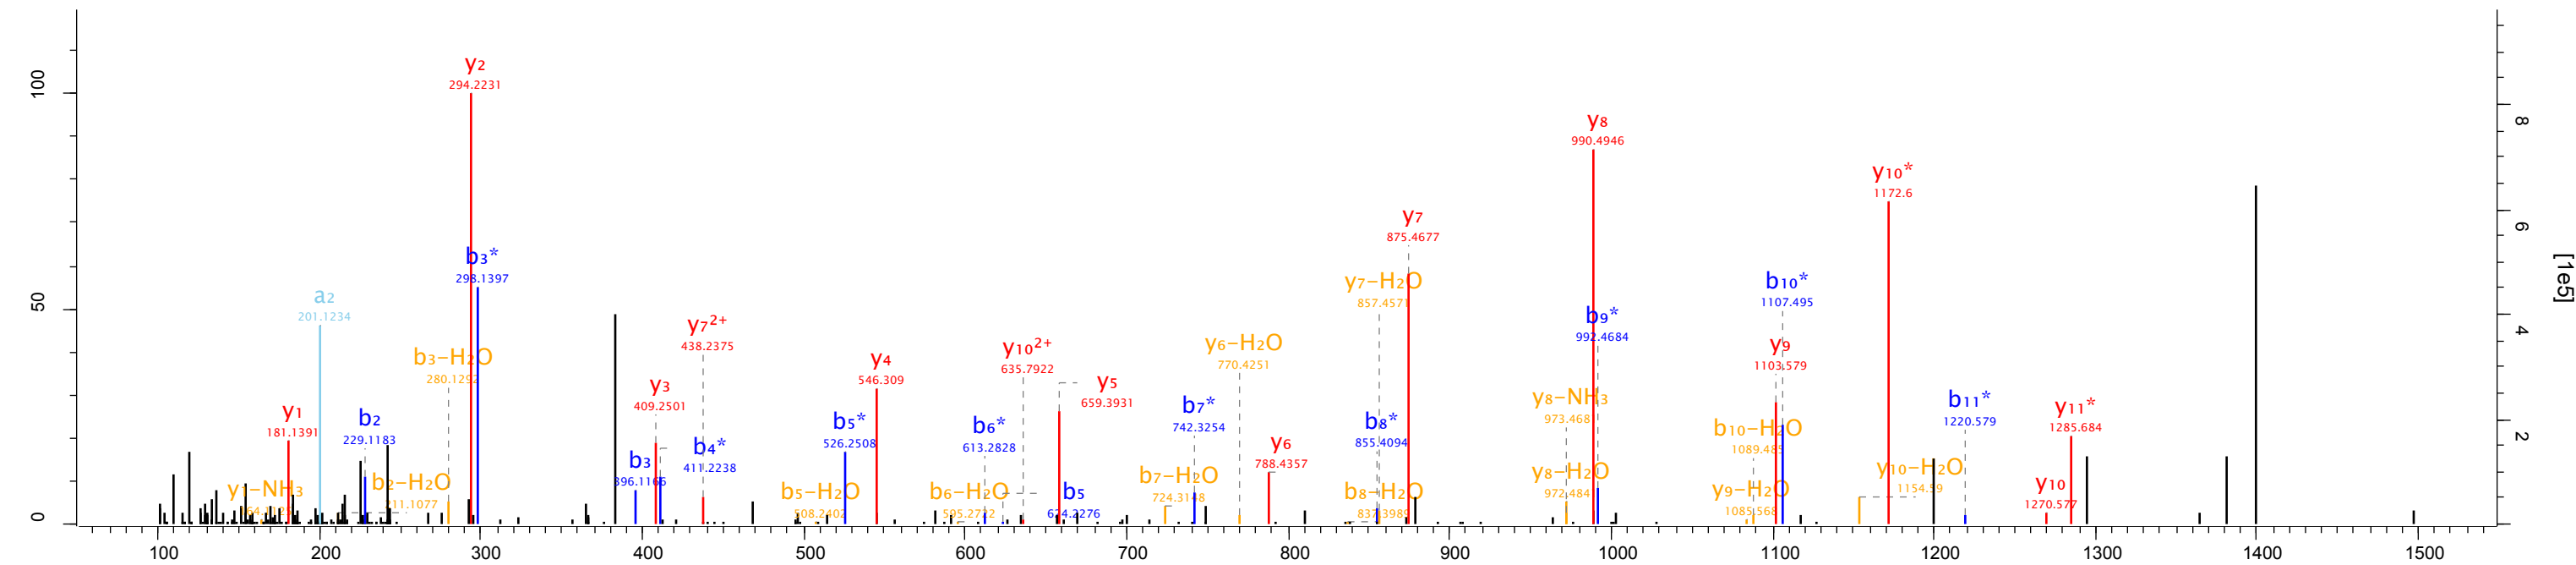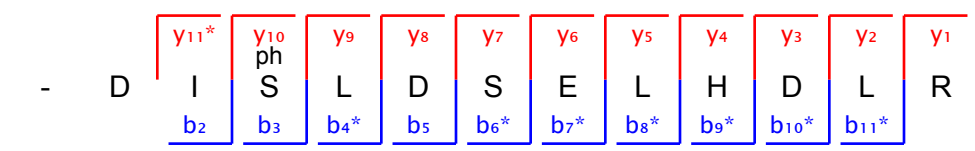



Raw file 20150814\_A375SR\_Phospho\_BR2\_04 Scan 21224 Method FTMS; HCD Score 45.14 m/z 911.42 Gene names PKN1

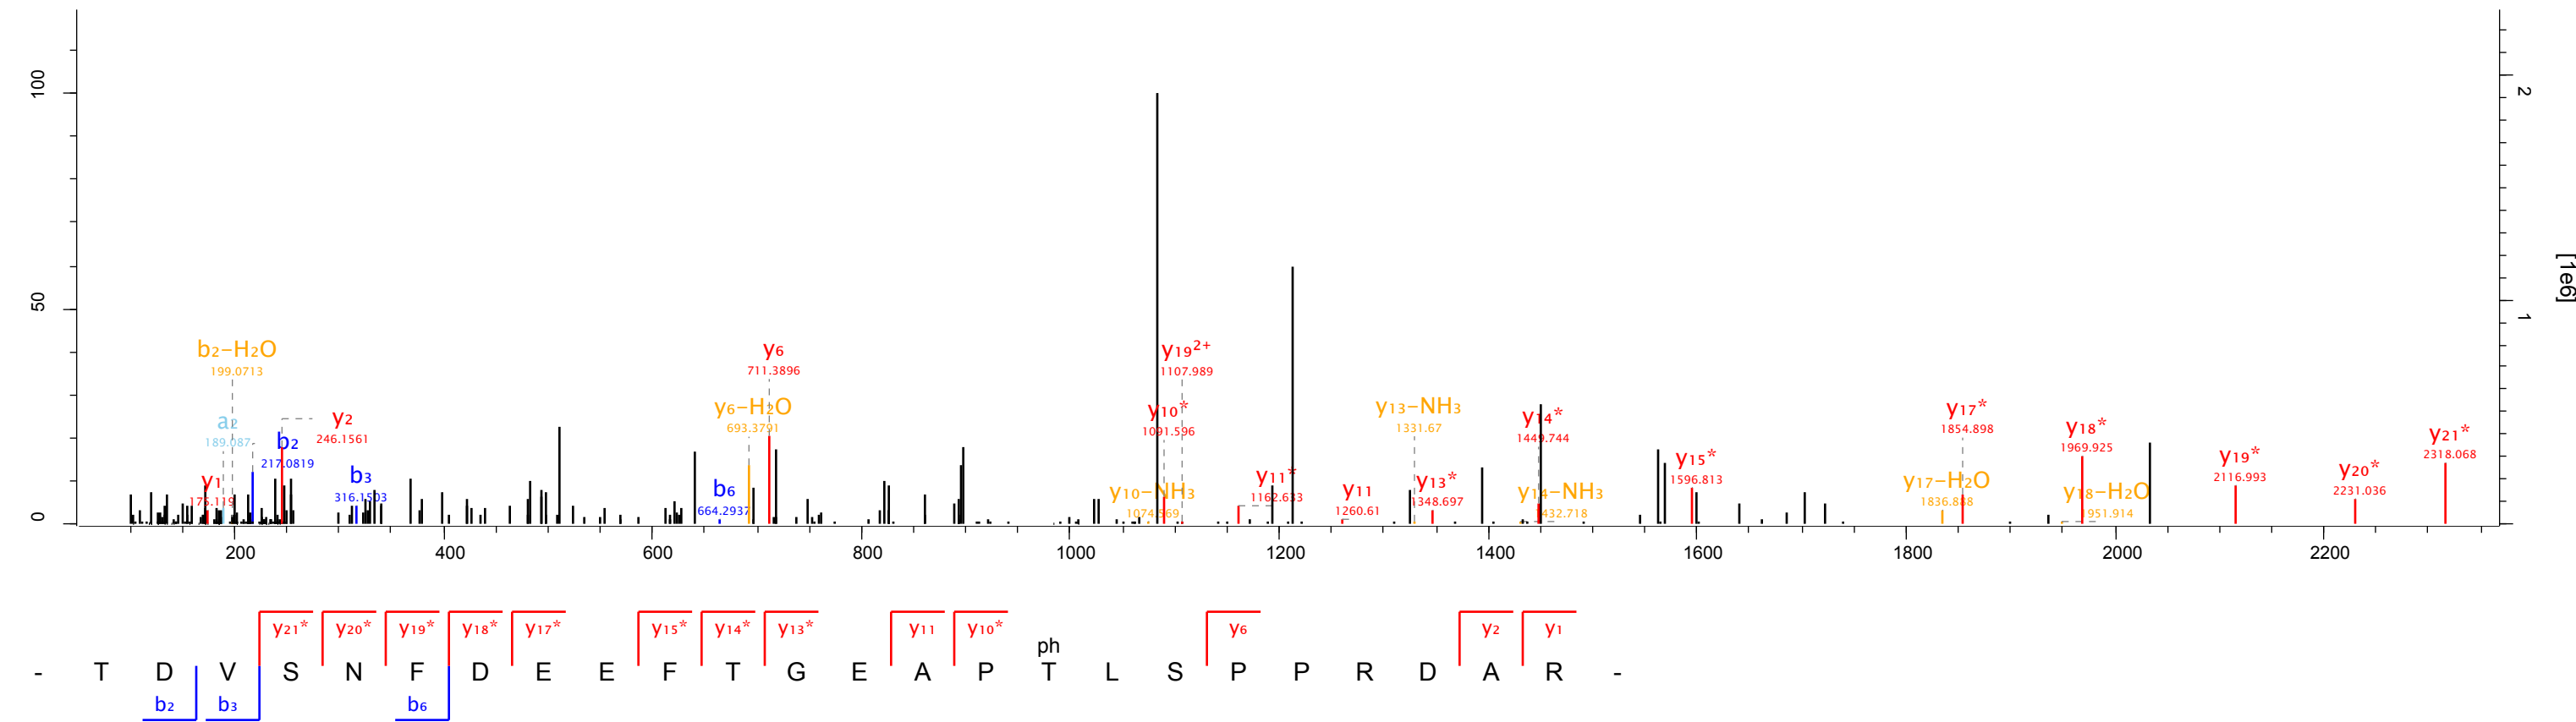

Raw file 20150814\_A375SR\_Phospho\_BR2\_04 Scan 21464 Method FTMS; HCD Score 144.17 m/z 847.37 Gene names IQSEC1

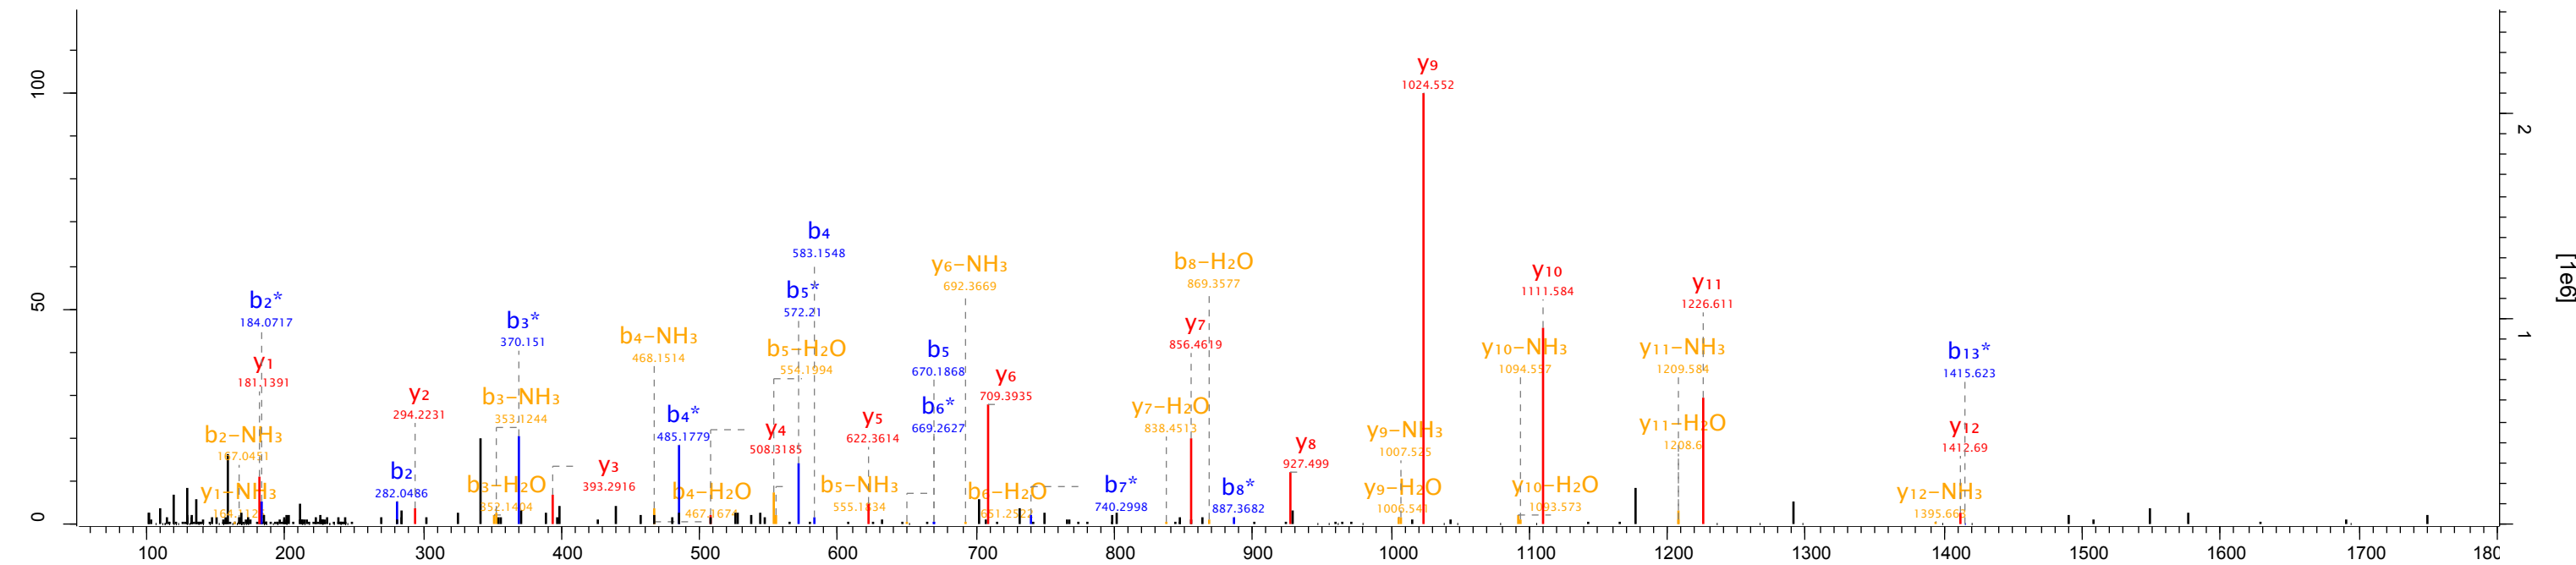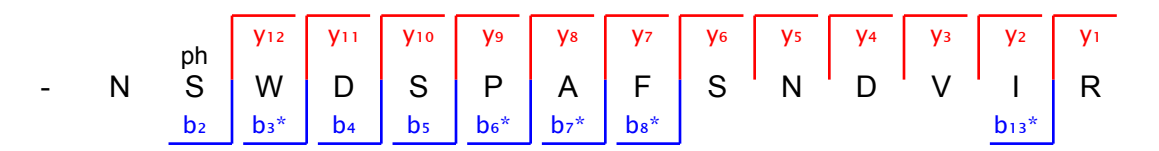

Raw file: 20150814\_A375SR\_Phospho\_BR2\_04  
 Scan: 2154 Method: FTMS; HCD Score: 119.62 m/z: 662.8 Gene names: EXOSC5

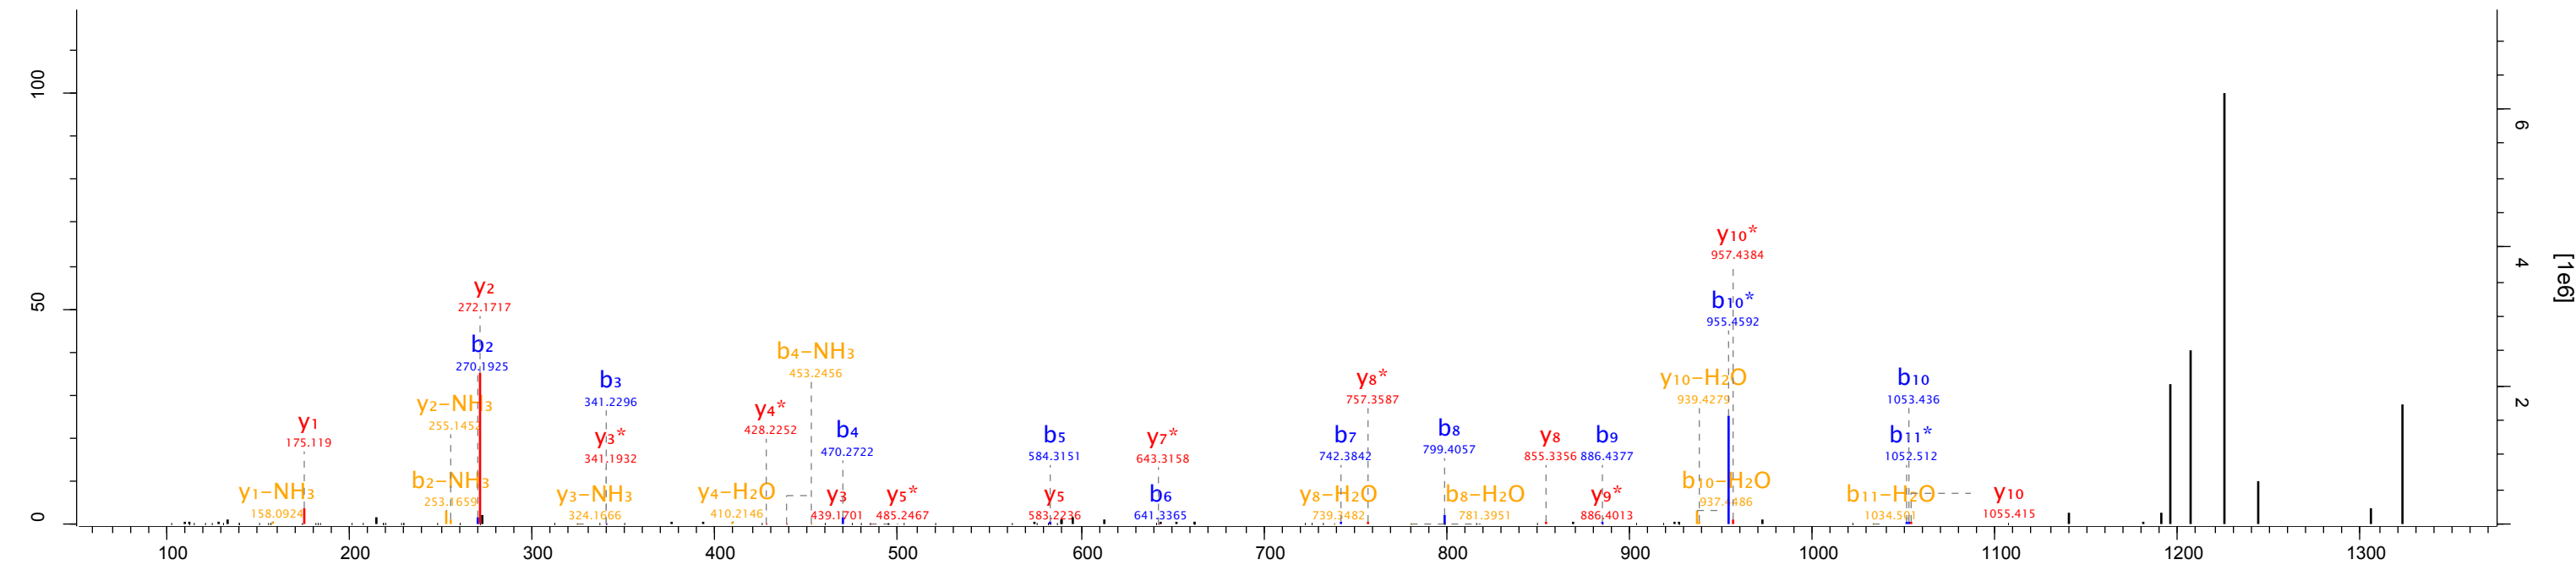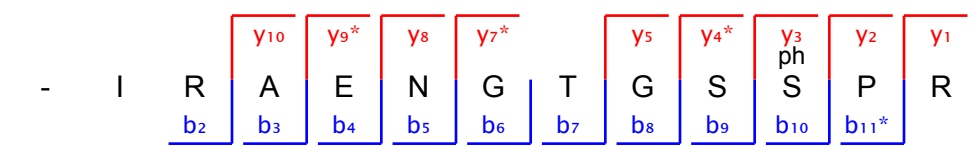

Raw file Scan Method Score m/z Gene names

20150814\_A375SR\_Phospho\_BR2\_04 21644 FTMS; HCD 306.35 1117.87 IMUP

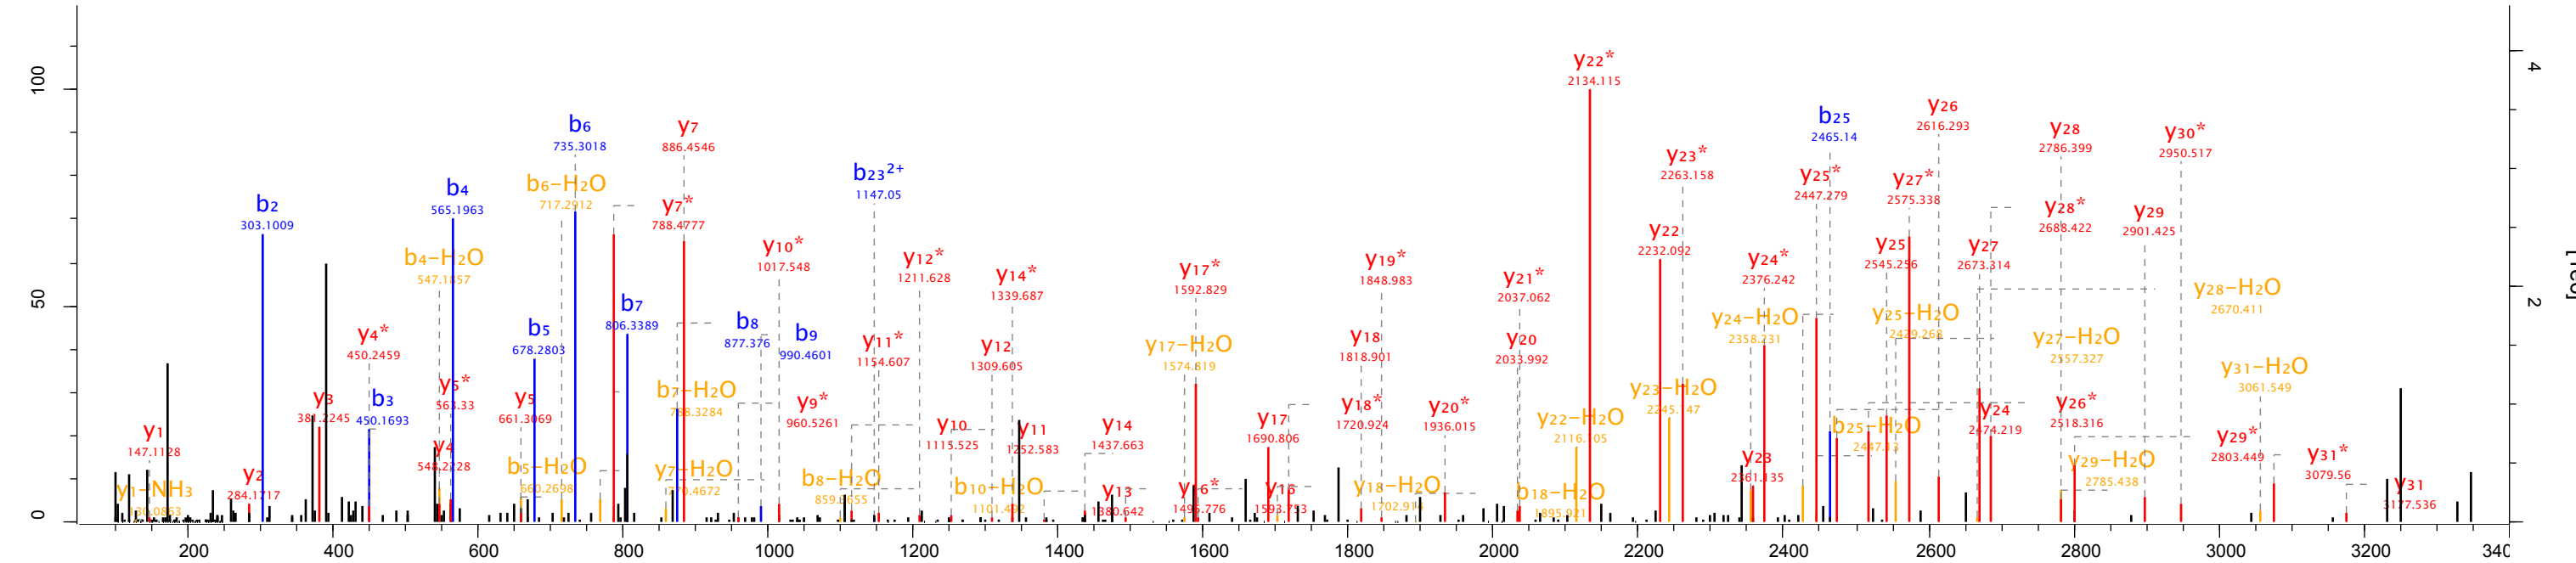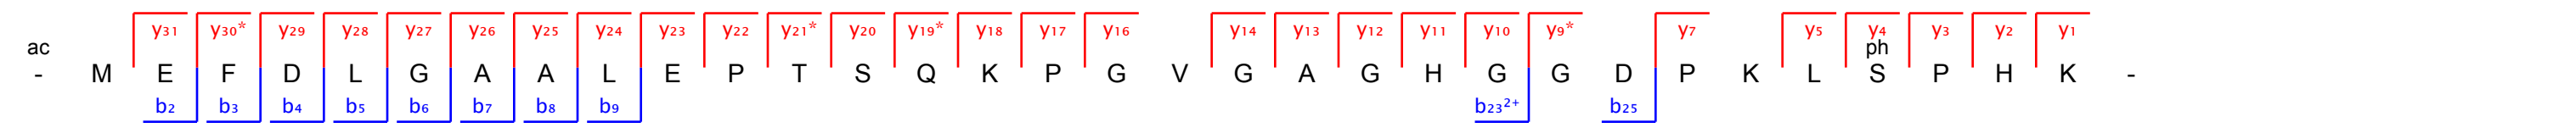

Raw file: 20150814\_A375SR\_Phospho\_BR2\_04  
 Scan: 22274 Method: FTMS; HCD Score: 419.31 m/z: 1189.08 Gene names: LSM14A

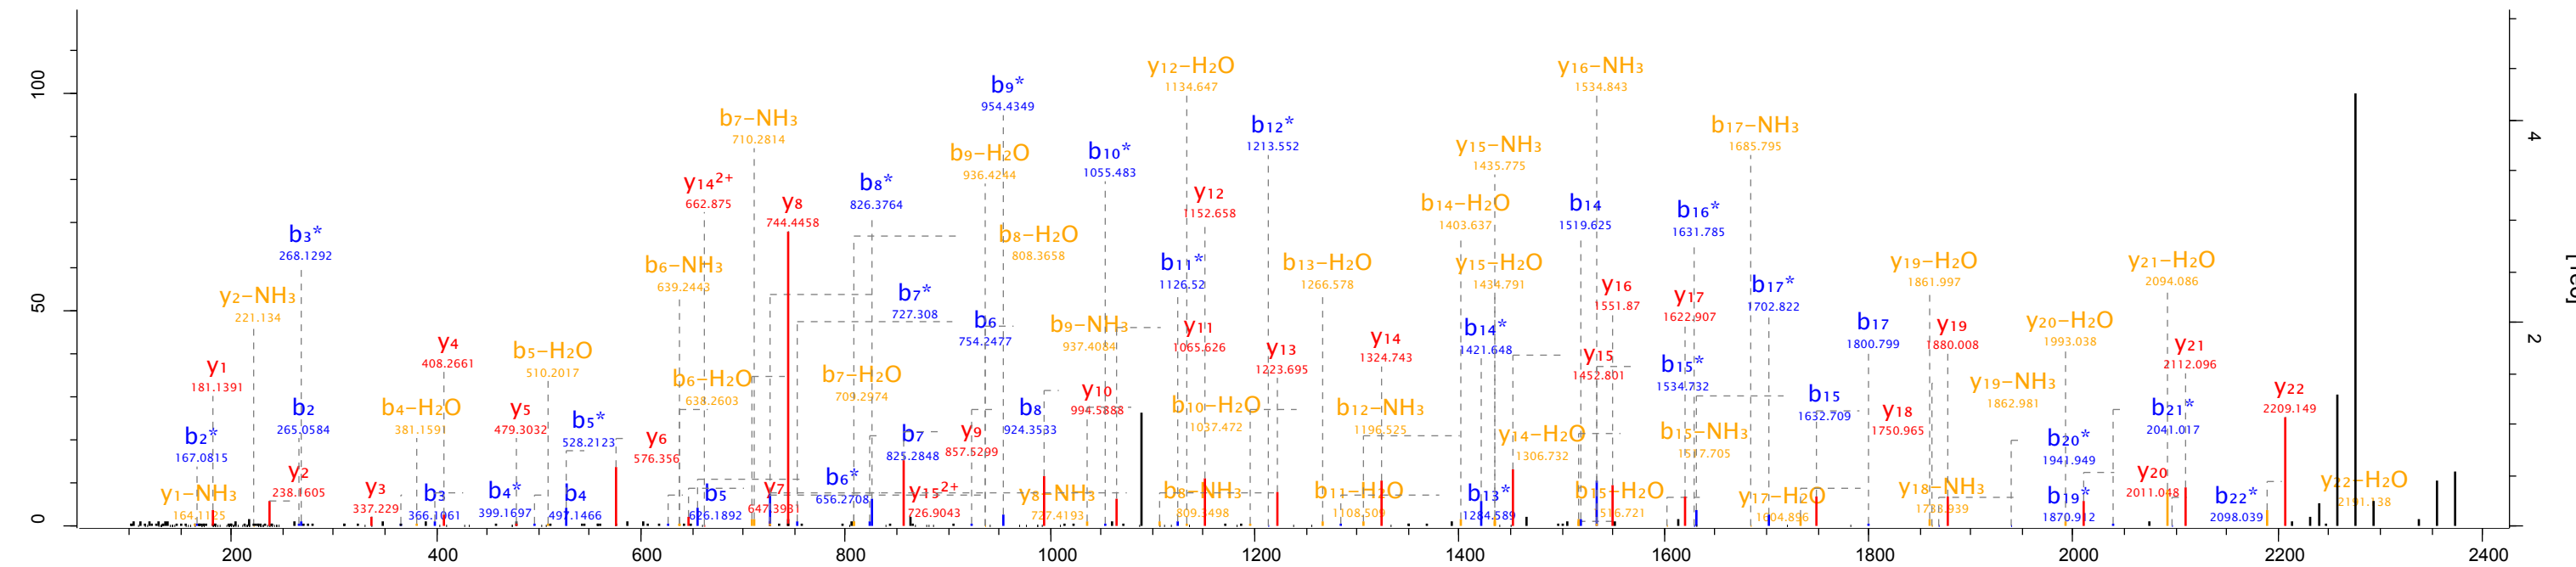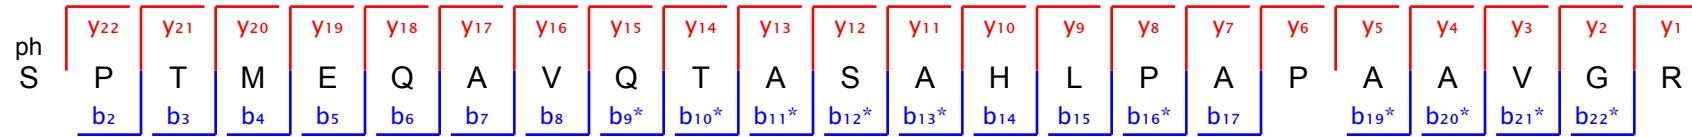

Raw file 20150814\_A375SR\_Phospho\_BR2\_04 Scan 2234 Method FTMS; HCD Score 71.08 m/z 491.22 Gene names MED1

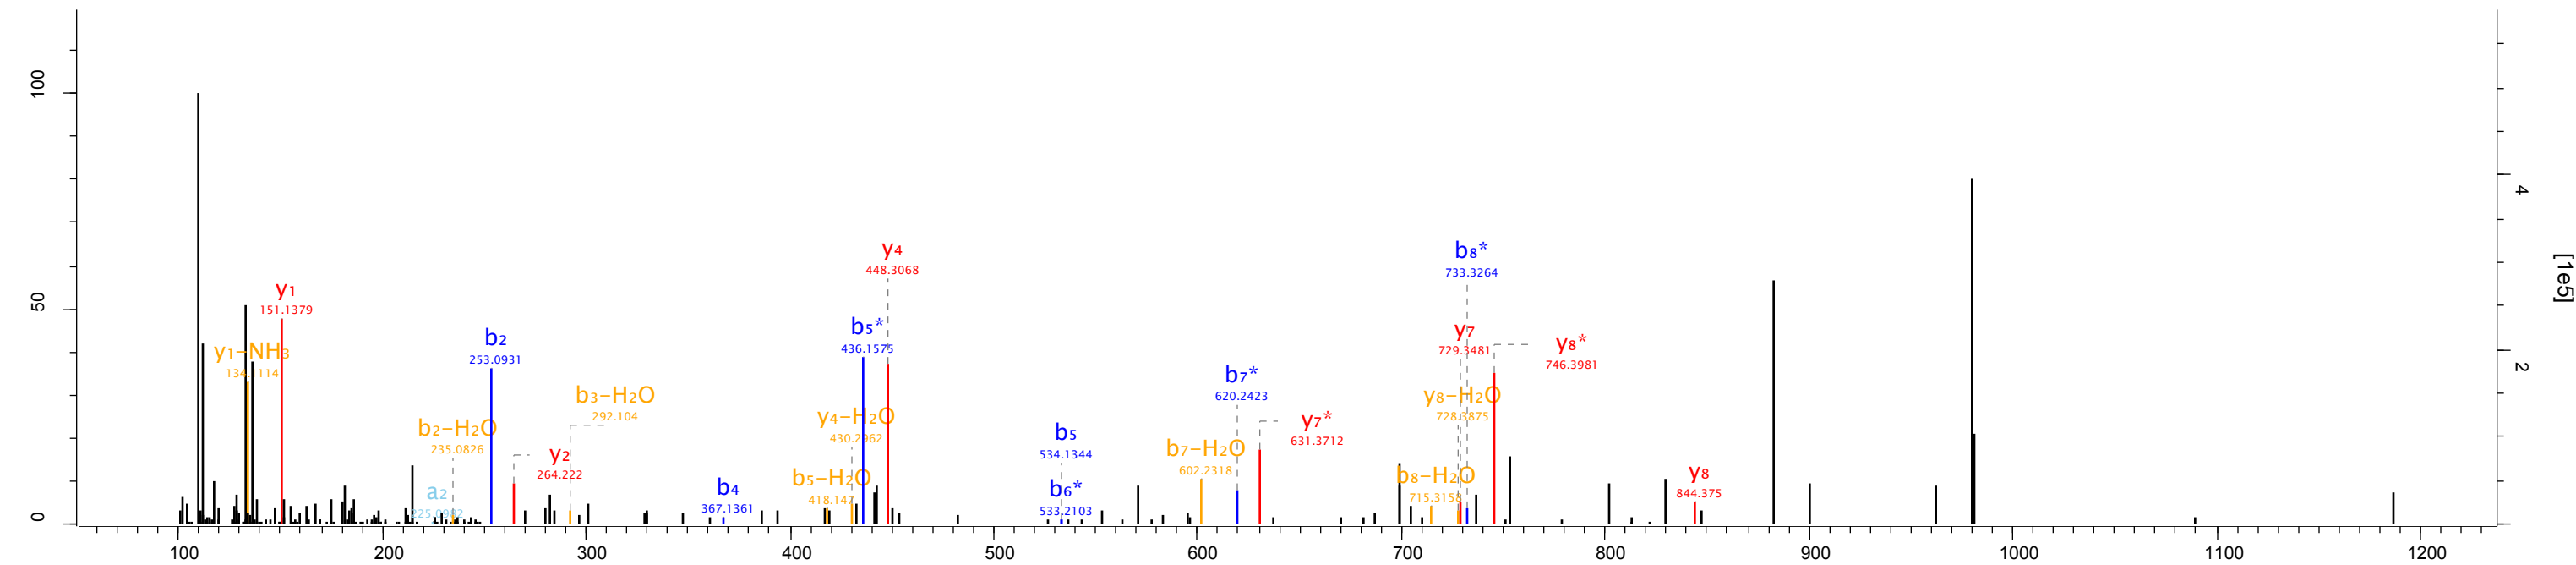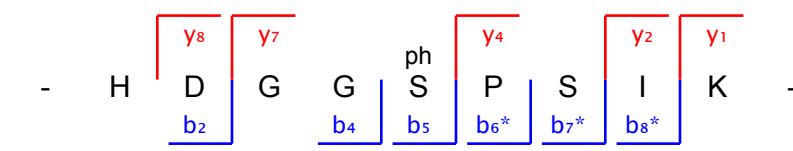

Raw file  
20150814\_A375SR\_Phospho\_BR2\_04

Scan 22704 Method FTMS; HCD Score 144.43 m/z 970.41 Gene names RAB11FIP2

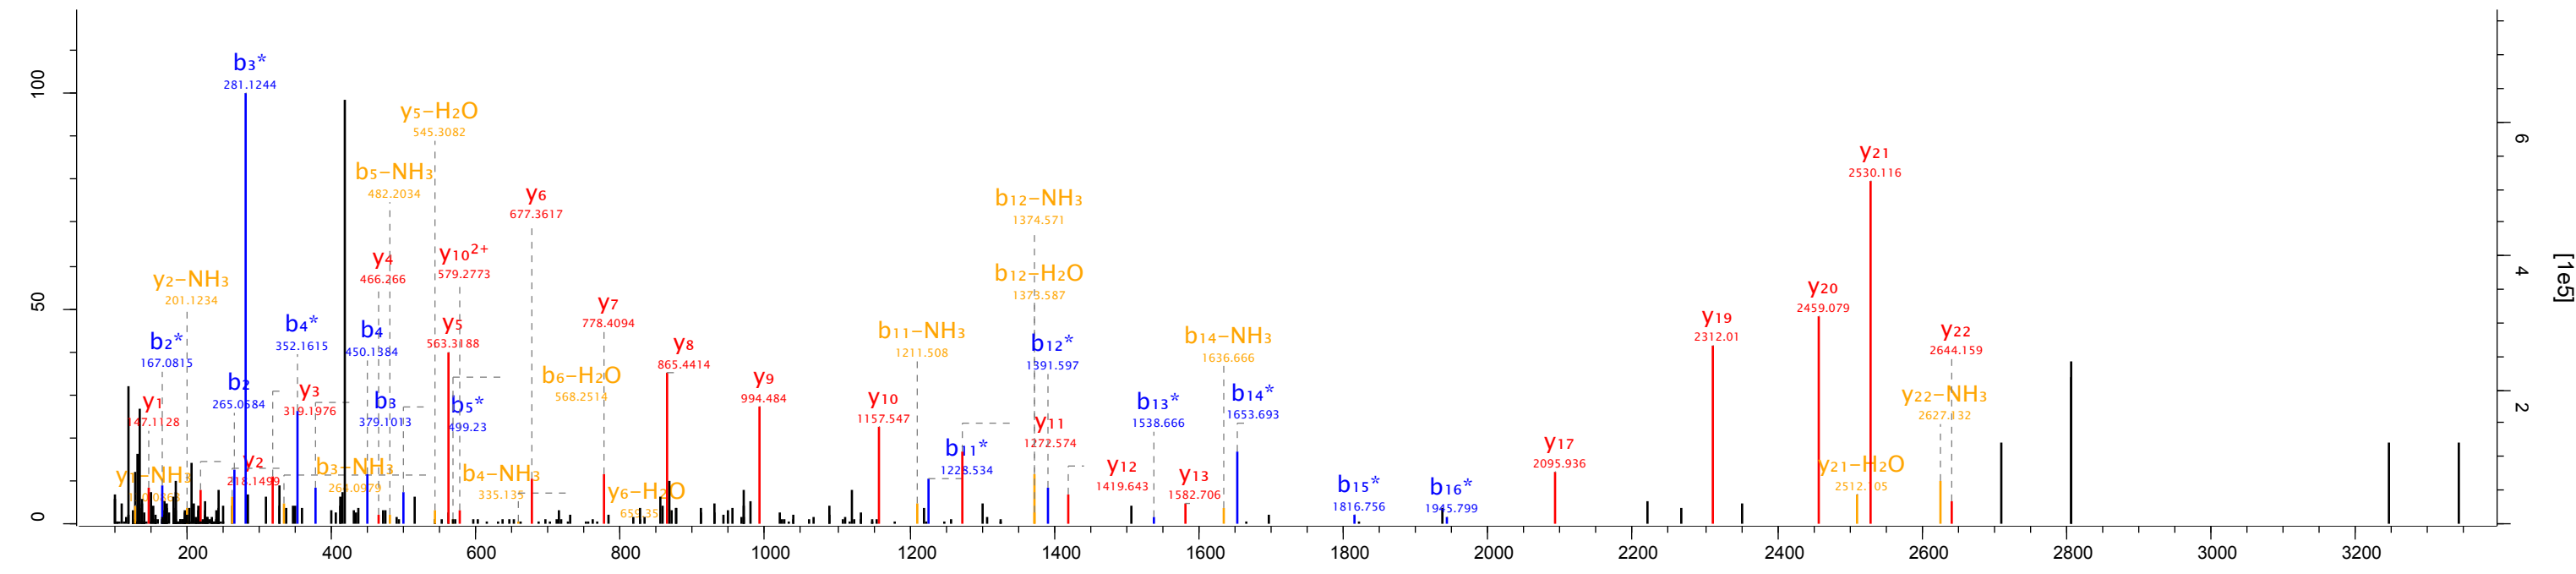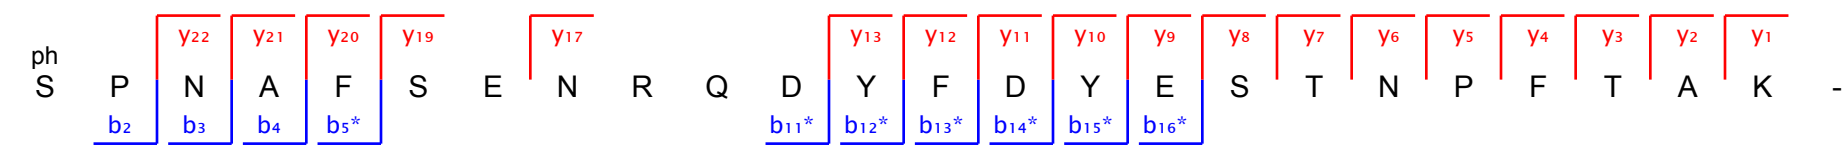

Raw file 20150814\_A375SR\_Phospho\_BR2\_04 Scan 22914 Method FTMS; HCD Score 132.95 m/z 721.8 Gene names SLC1A1

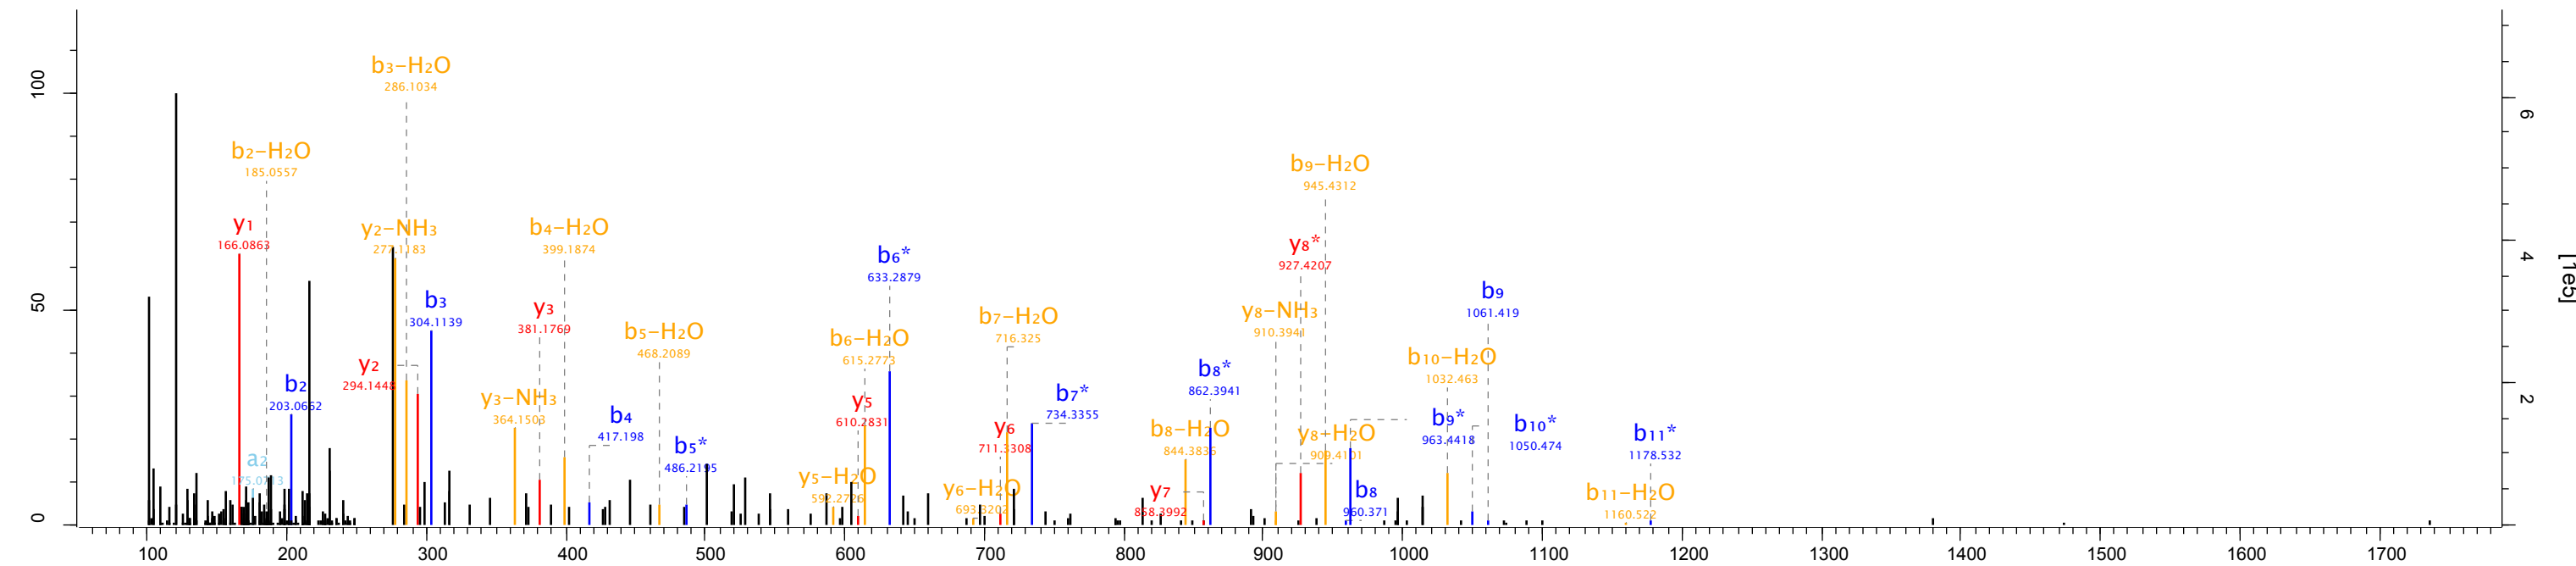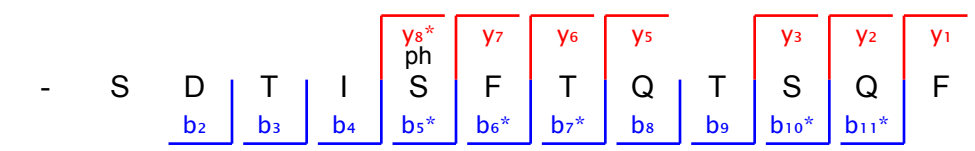



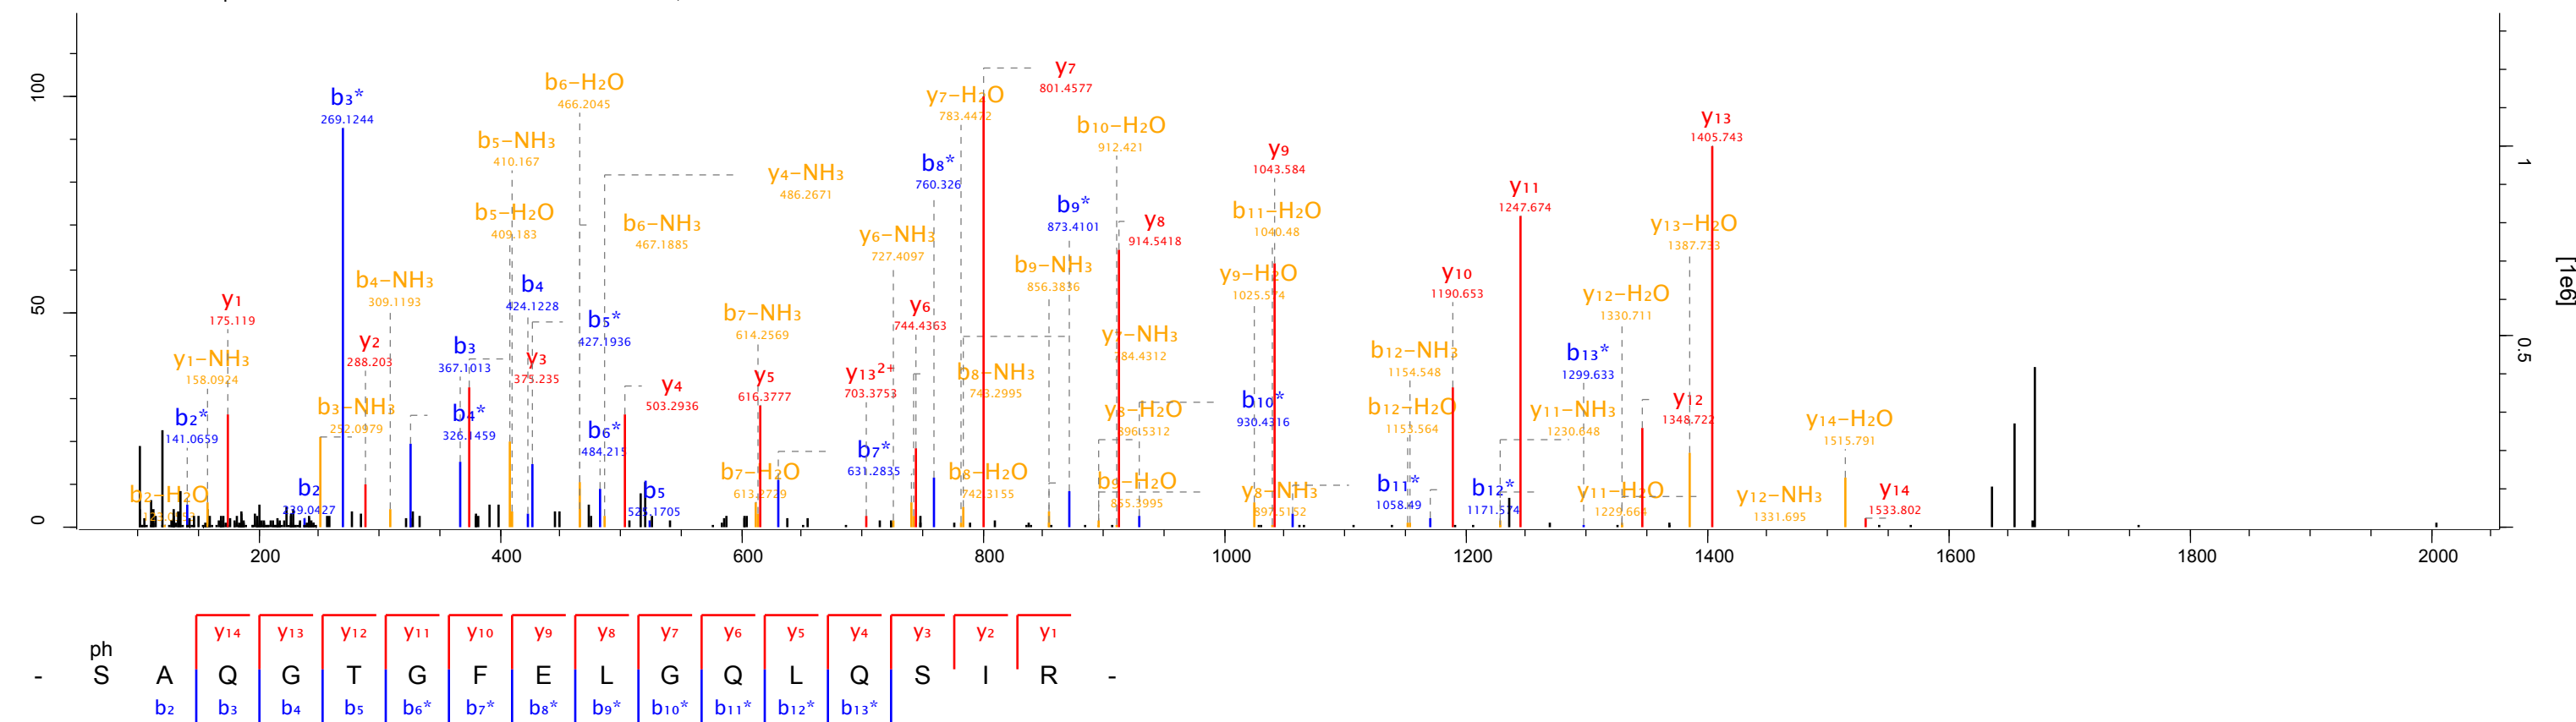

Raw file 20150814\_A375SR\_Phospho\_BR2\_04 Scan 23104 Method FTMS; HCD Score 147.24 m/z 981.46 Gene names ATXN7L3B

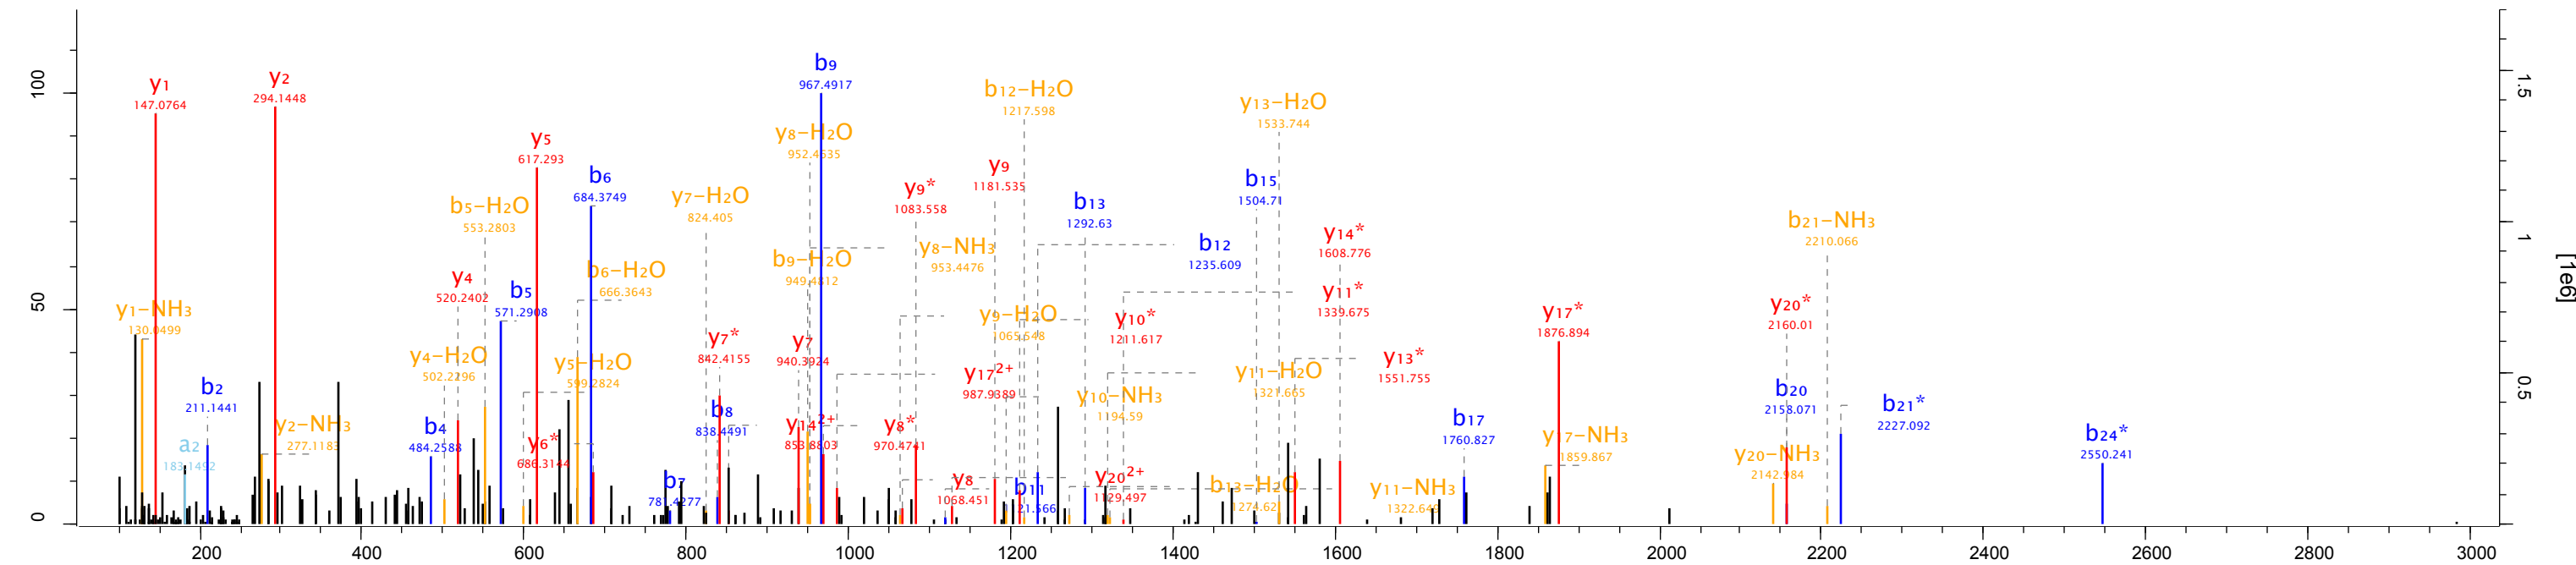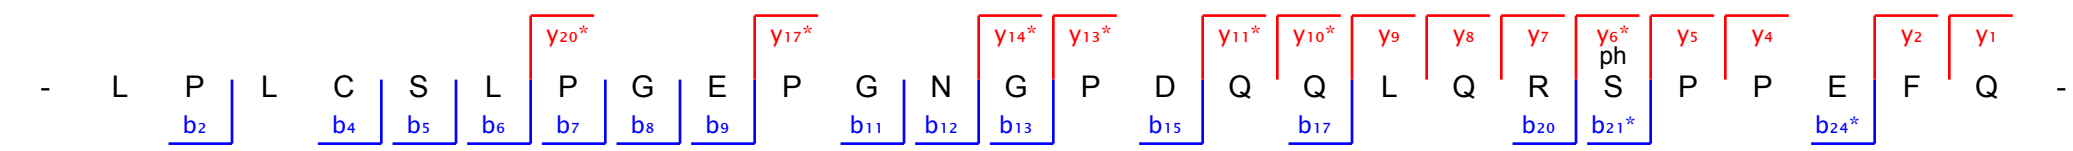

Raw file 20150814\_A375SR\_Phospho\_BR2\_04 Scan 23514 Method FTMS; HCD Score 106.3 m/z 1050.8 Gene names SCRIB

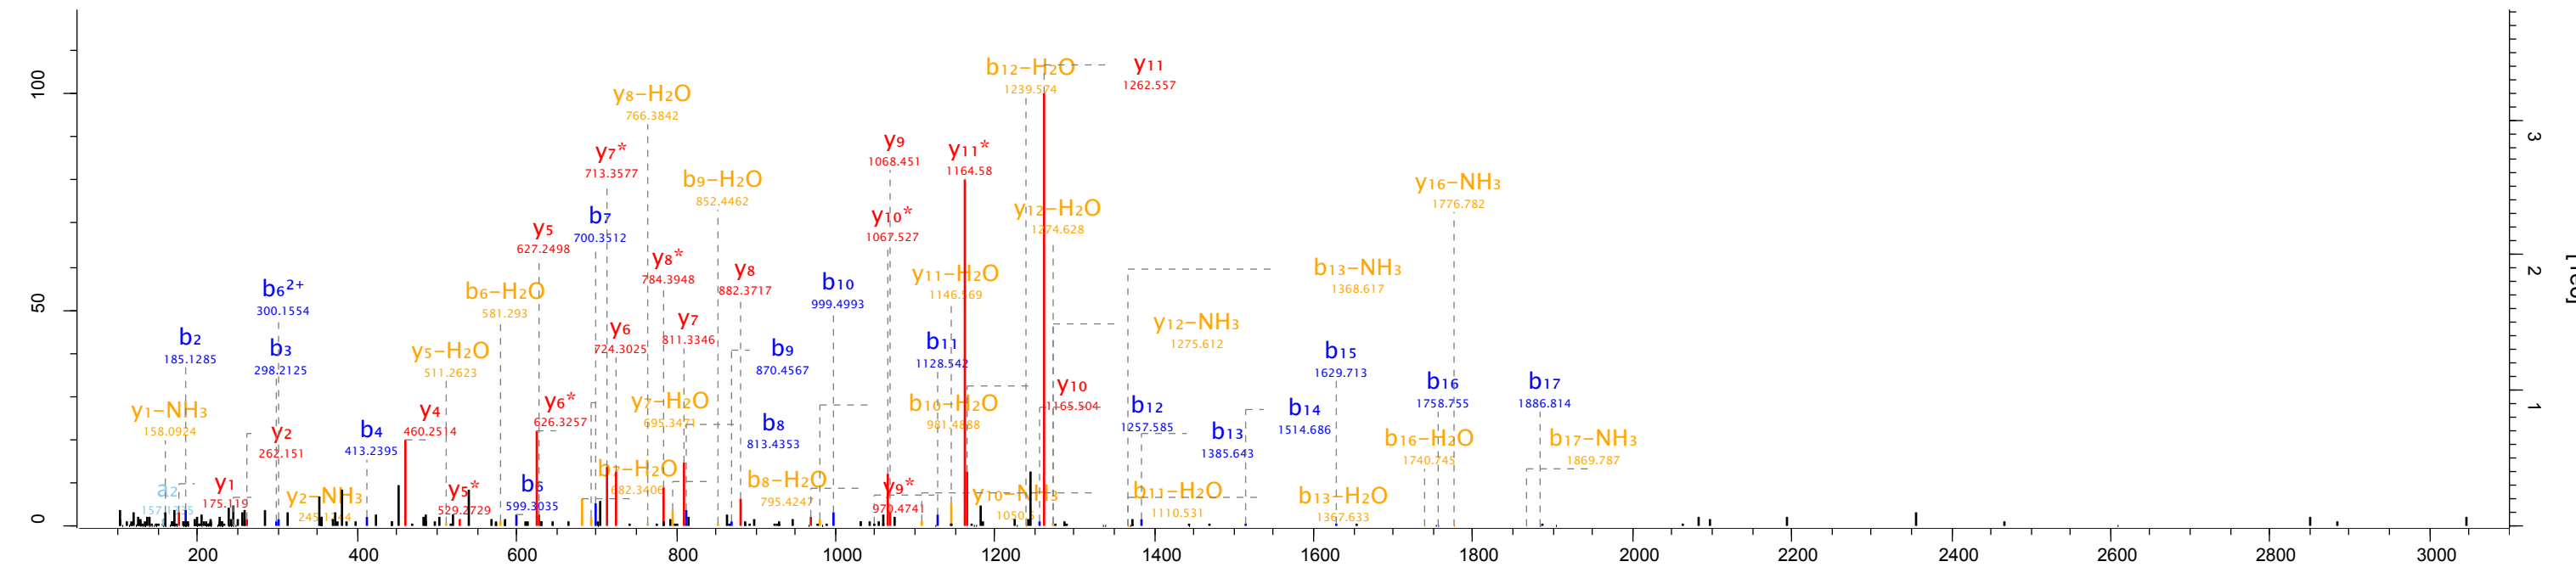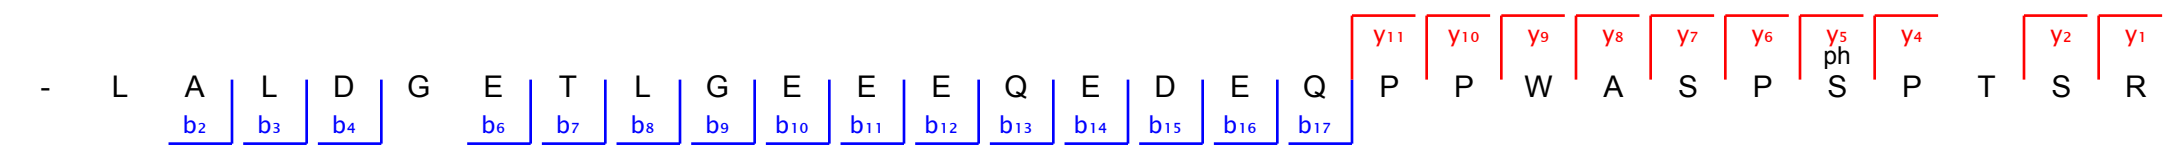

Raw file: 20150814\_A375SR\_Phospho\_BR2\_04  
 Scan: 23824 Method: FTMS; HCD Score: 151.23 m/z: 1352.58 Gene names: DDX42

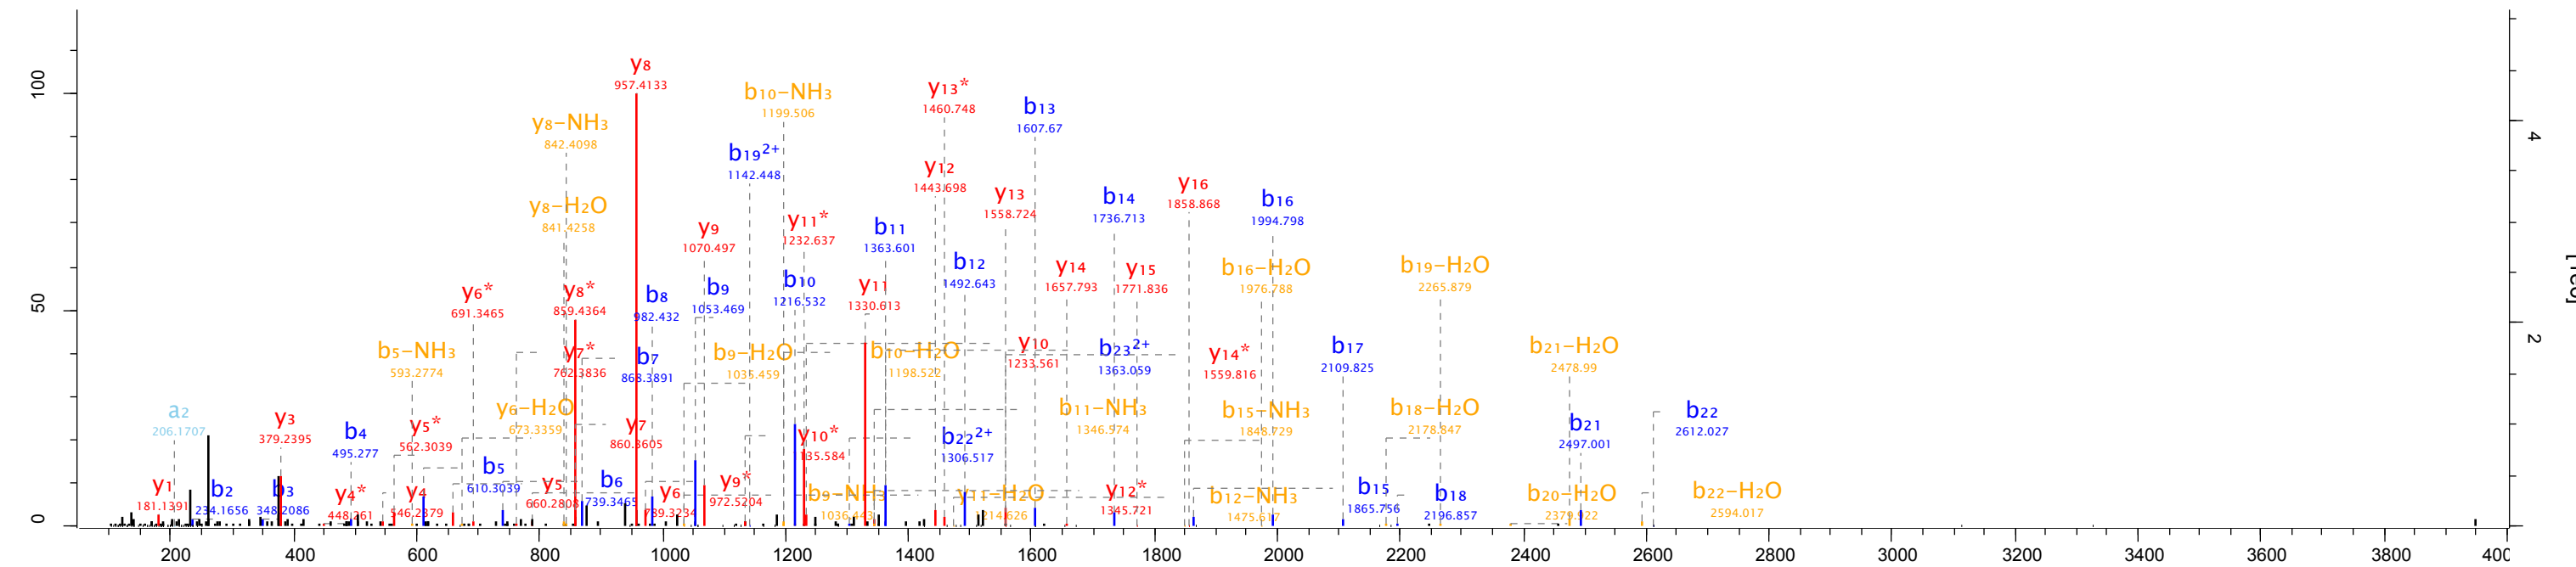

Sequence: R A N F D E E N A Y F E D E E E D S S N V D L P Y I P A E N S P T R -

Fragmentation mapping (b and y ions):

- b2: A
- b3: AN
- b4: ANF
- b5: ANFD
- b6: ANFDE
- b7: ANFDEE
- b8: ANFDEEN
- b9: ANFDEENA
- b10: ANFDEENAY
- b11: ANFDEENAYF
- b12: ANFDEENAYFE
- b13: ANFDEENAYFED
- b14: ANFDEENAYFED E
- b15: ANFDEENAYFED E E
- b16: ANFDEENAYFED E E E
- b17: ANFDEENAYFED E E E D
- b18: ANFDEENAYFED E E E D S
- b19<sup>2+</sup>: ANFDEENAYFED E E E D S S
- b21: ANFDEENAYFED E E E D S S N V
- b22: ANFDEENAYFED E E E D S S N V D
- b23<sup>2+</sup>: ANFDEENAYFED E E E D S S N V D L

Raw file 20150814\_A375SR\_Phospho\_BR2\_04 Scan 23874 Method FTMS; HCD Score 46.52 m/z 1120.51 Gene names PPIP5K2

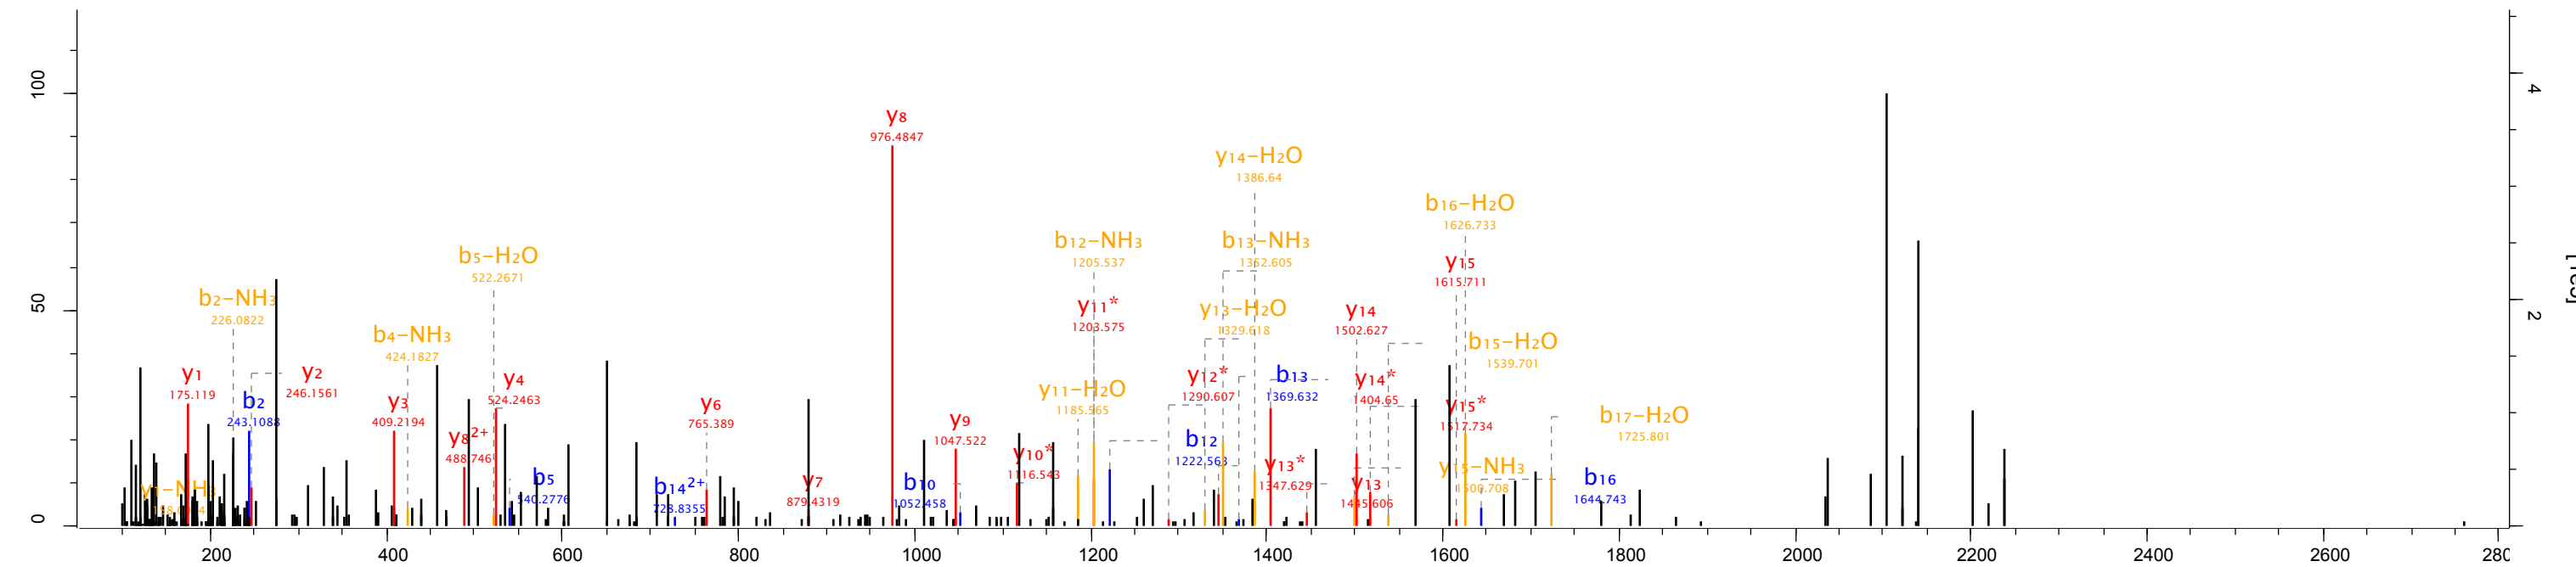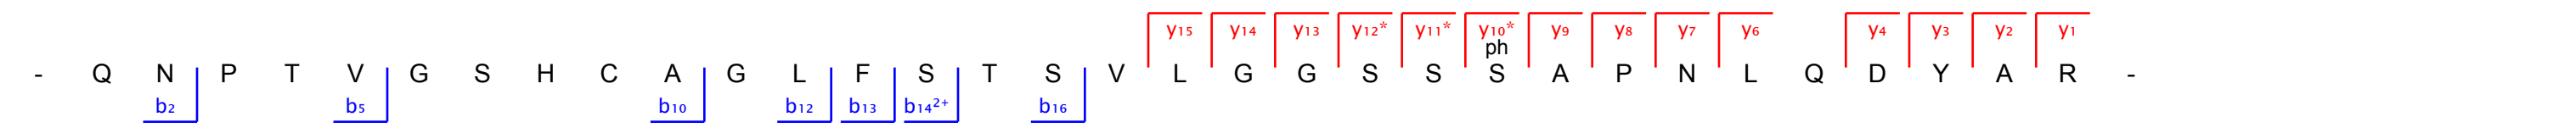

Raw file 20150814\_A375SR\_Phospho\_BR2\_04 Scan 23924 Method FTMS; HCD Score 168.69 m/z 810.82 Gene names SRSF9

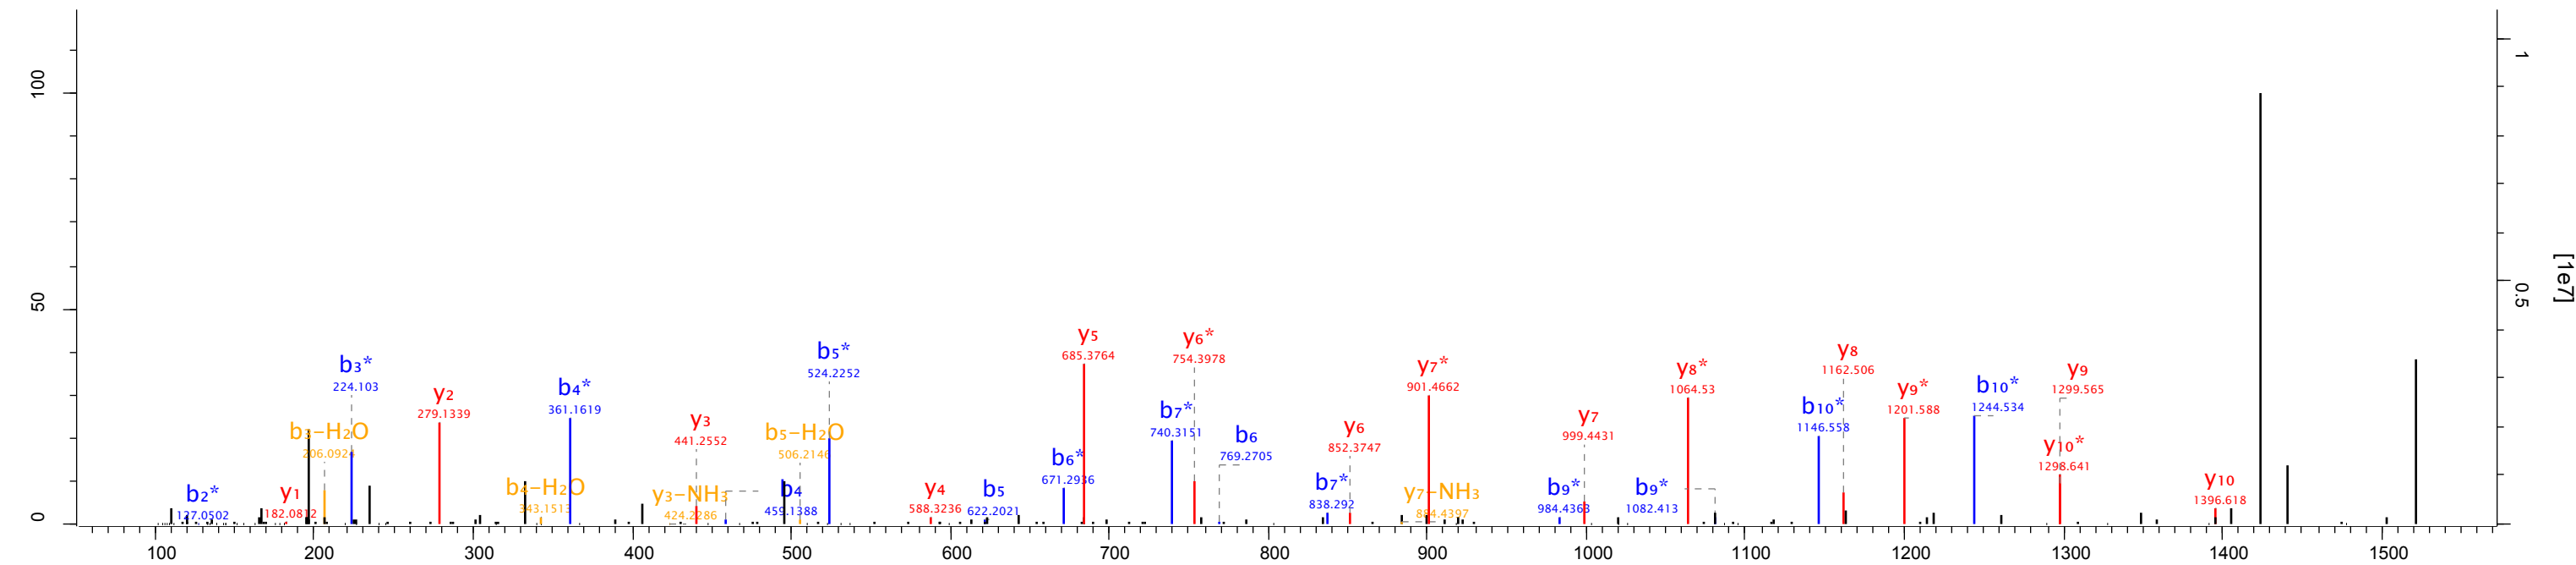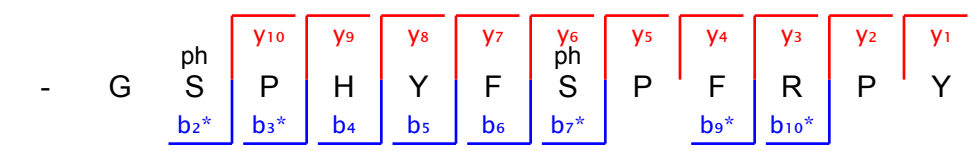

Raw file: 20150814\_A375SR\_Phospho\_BR2\_04  
 Scan: 2404 Method: FTMS; HCD Score: 115.1 m/z: 648.3

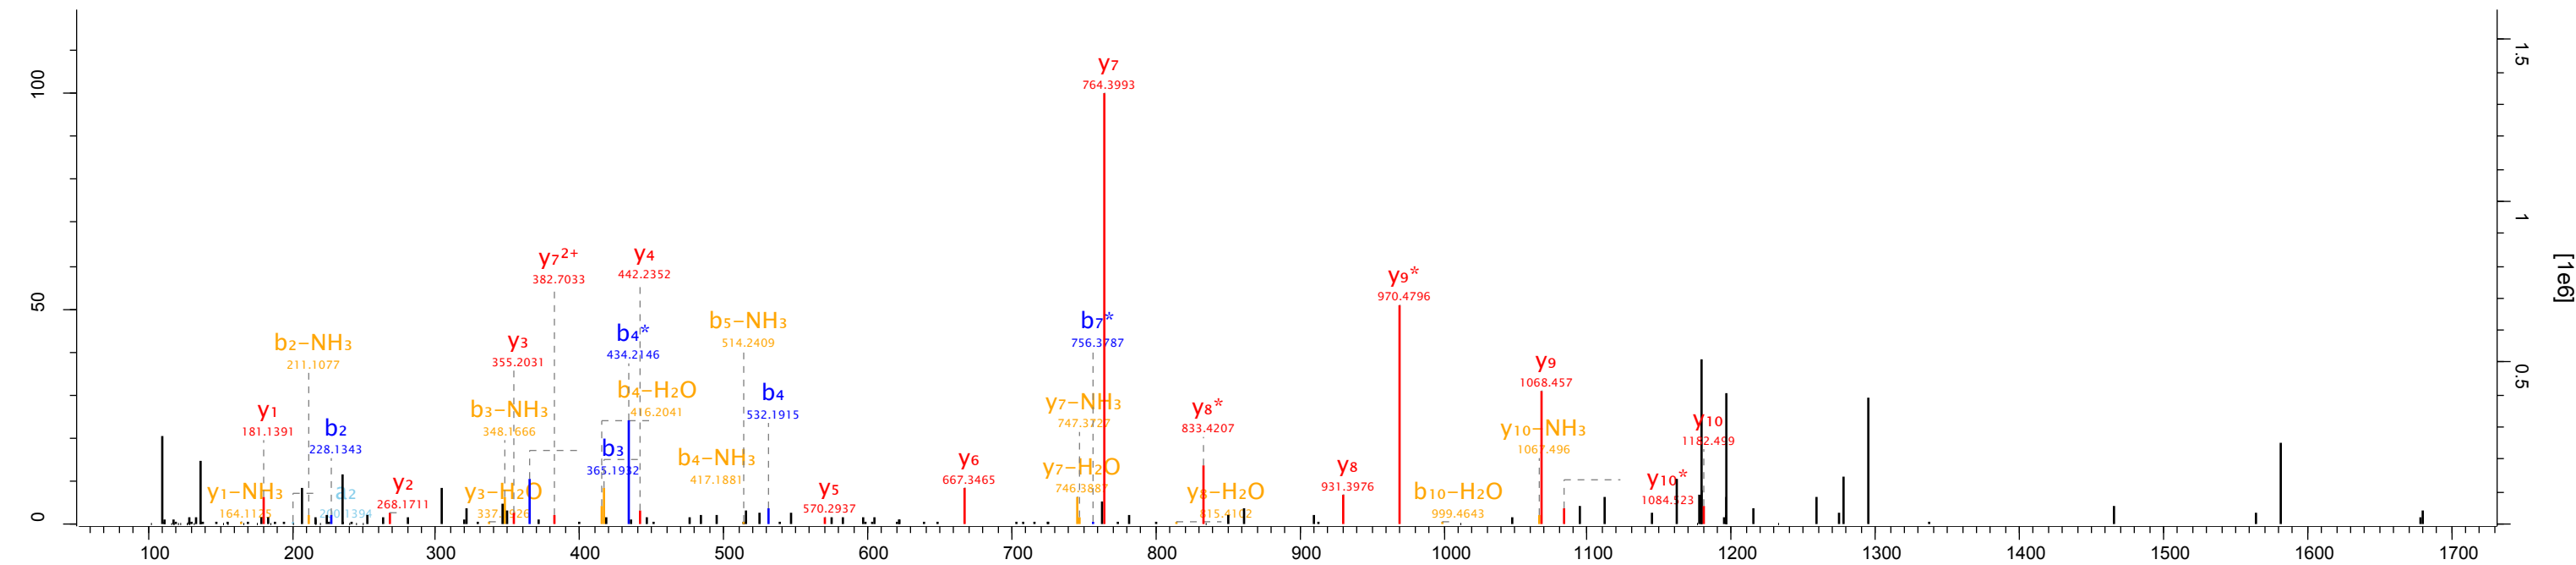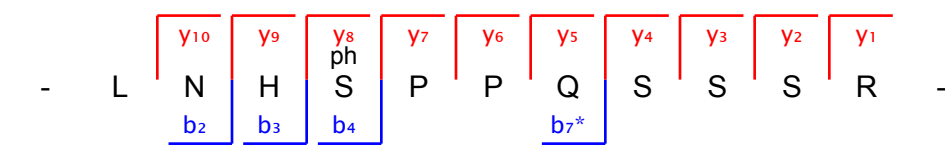

Raw file  
20150814\_A375SR\_Phospho\_BR2\_04

Scan 24124 Method FTMS; HCD Score 189.09 m/z 769.68 Gene names CENPF

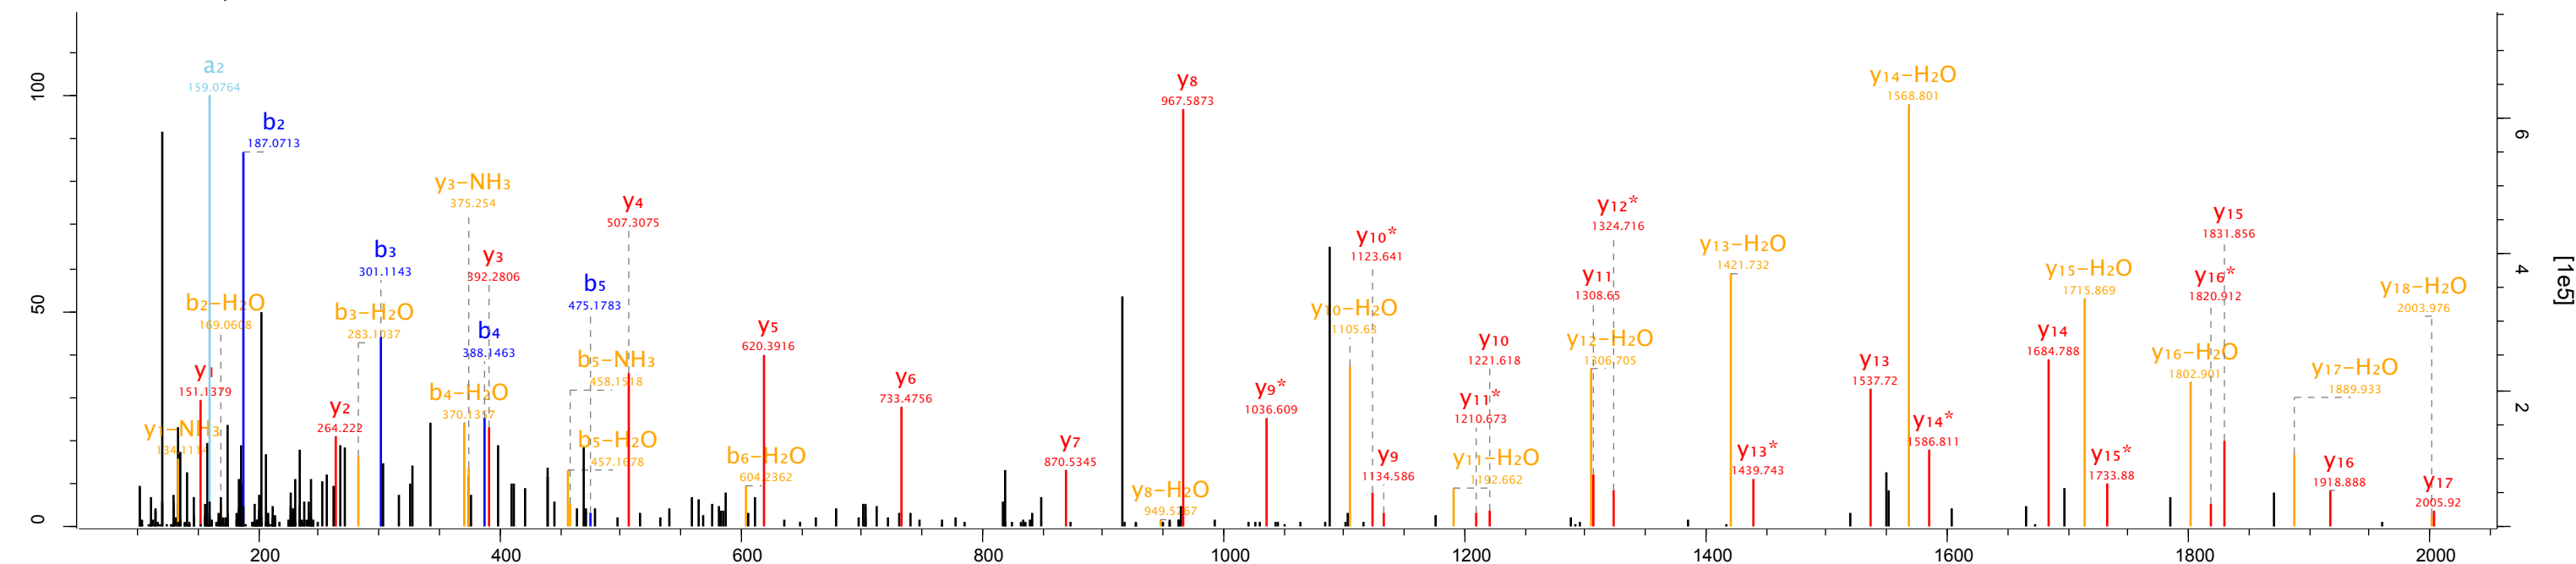

- D A N S S F F D N S S ph S P H L L D Q L K -

Fragmentation mapping below the spectrum shows the sequence of amino acids: D, A, N, S, S, F, F, D, N, S, S, ph, S, P, H, L, L, D, Q, L, K. The b-ions (b2 to b5) are highlighted in blue, and the y-ions (y1 to y17) are highlighted in red. The y-ions are labeled with their corresponding amino acid residues: y17 (K), y16 (L), y15 (Q), y14 (D), y13 (L), y12\* (L), y11 (D), y10 (S), y9 (S), y8 (ph), y7 (S), y6 (P), y5 (H), y4 (L), y3 (L), y2 (D), y1 (A).



Raw file: 20150814\_A375SR\_Phospho\_BR2\_04  
 Scan: 24134 FTMS; HCD  
 Score: 257.53 m/z: 931.39  
 Gene names: SRSF6

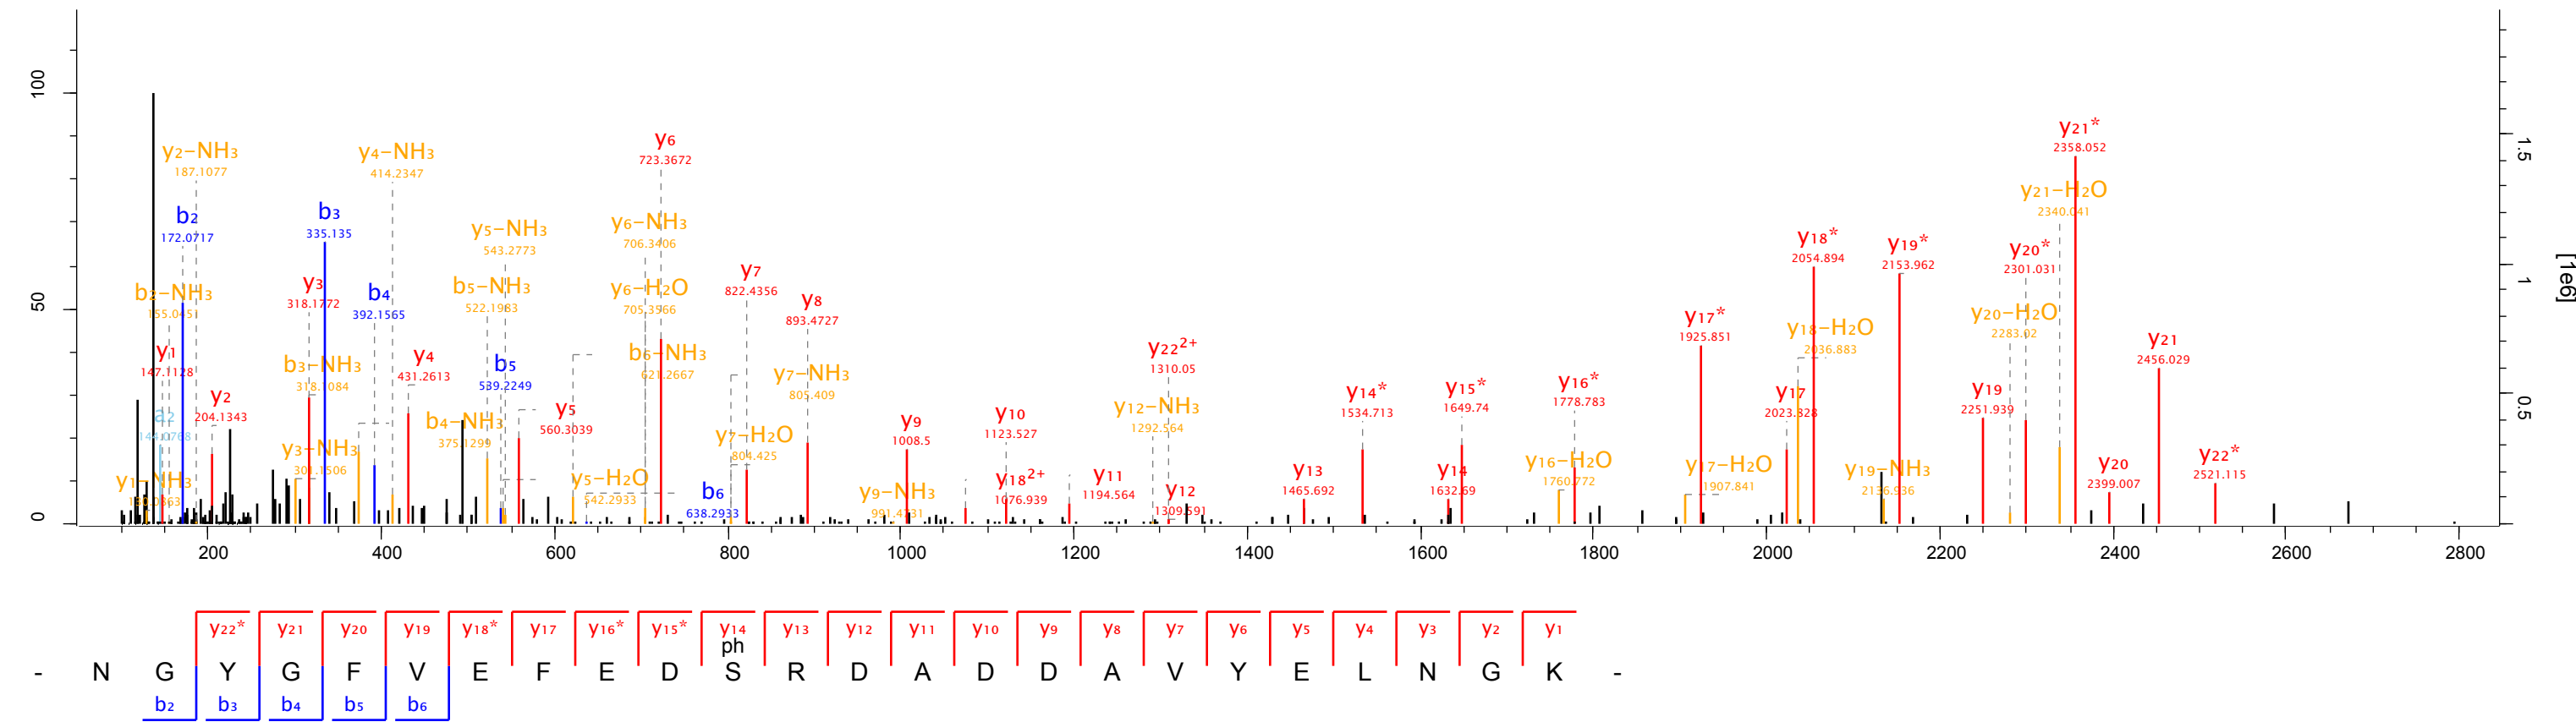

Raw file: 20150814\_A375SR\_Phospho\_BR2\_04  
 Scan: 2414 Method: FTMS; HCD Score: 178.01 m/z: 719.32 Gene names: PHC3

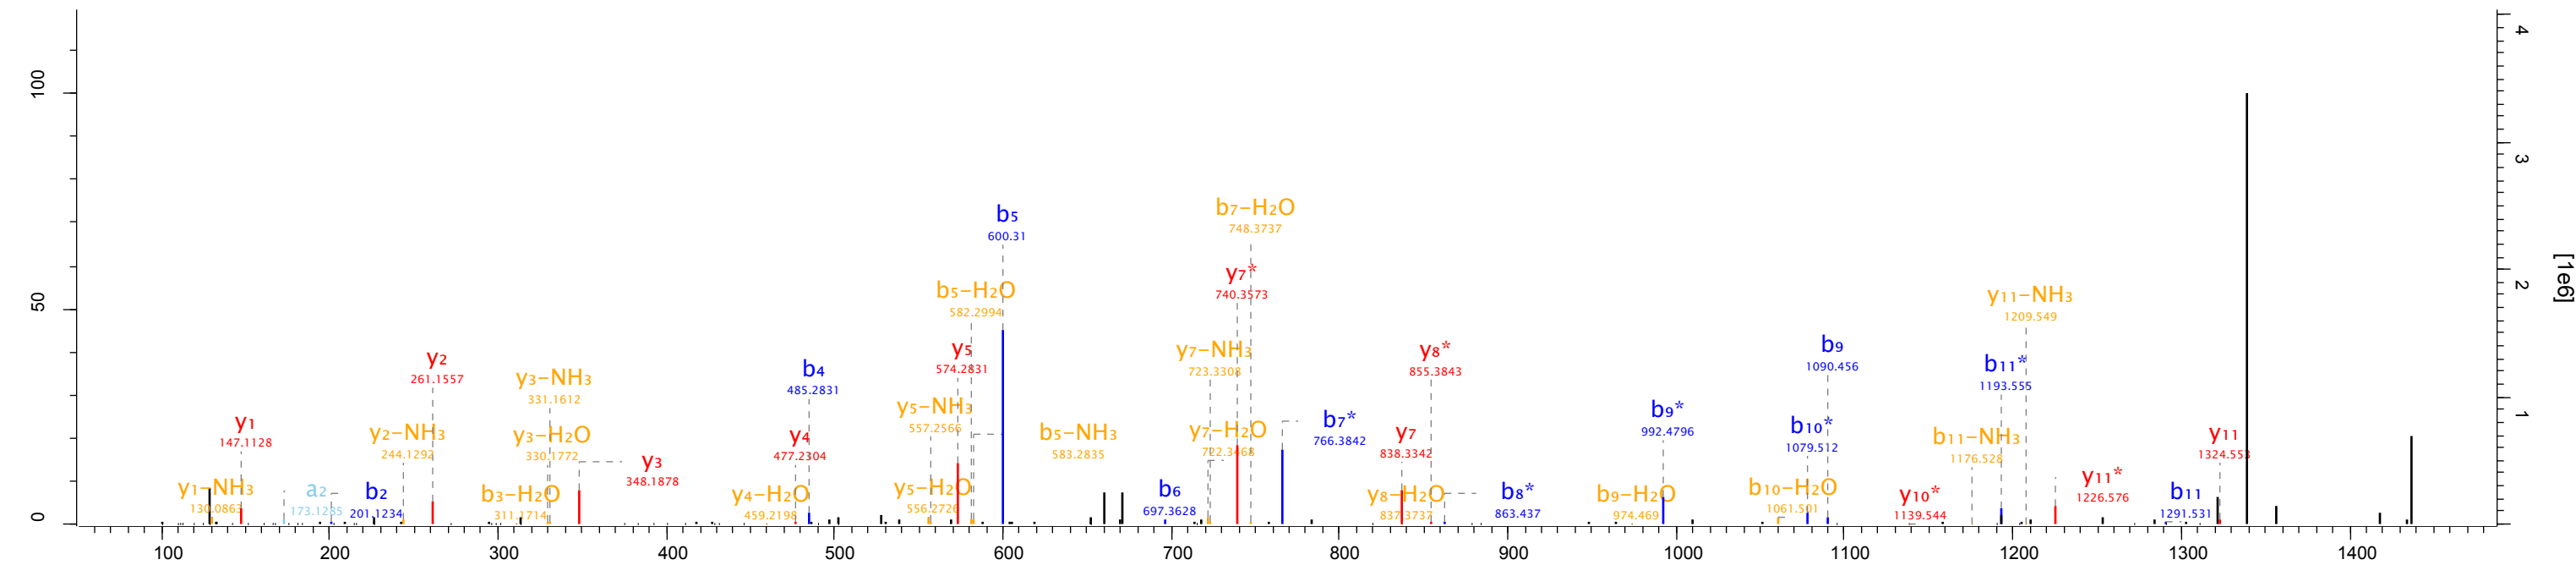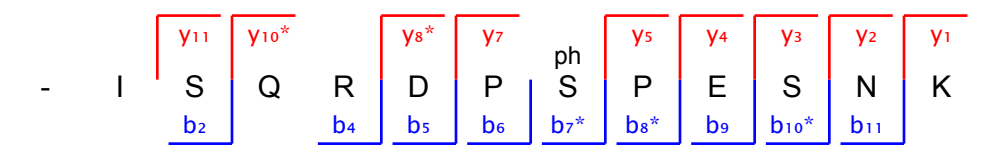

Raw file: 20150814\_A375SR\_Phospho\_BR2\_04  
 Scan: 2444 Method: FTMS; HCD Score: 199.7 m/z: 837.37 Gene names: WNK4

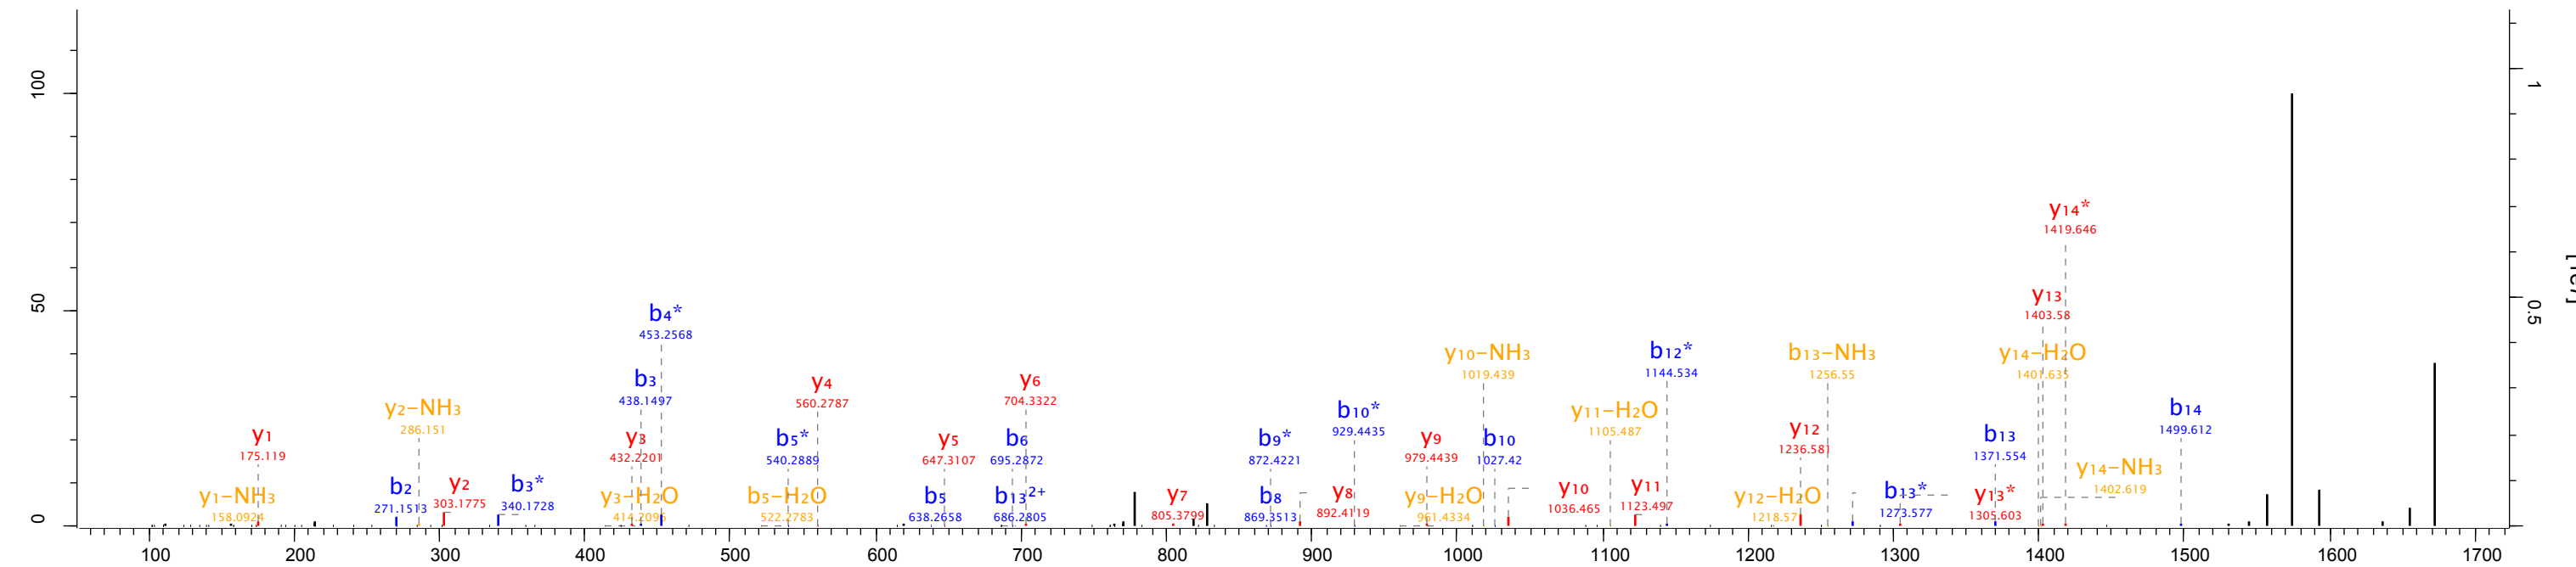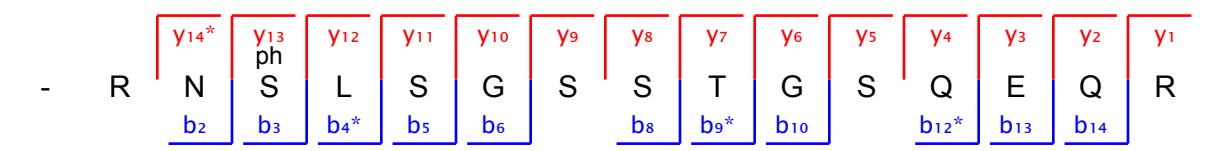

Raw file Scan Method Score m/z Gene names  
 20150814\_A375SR\_Phospho\_BR2\_04 24594 FTMS; HCD 201.96 848.18 FASN

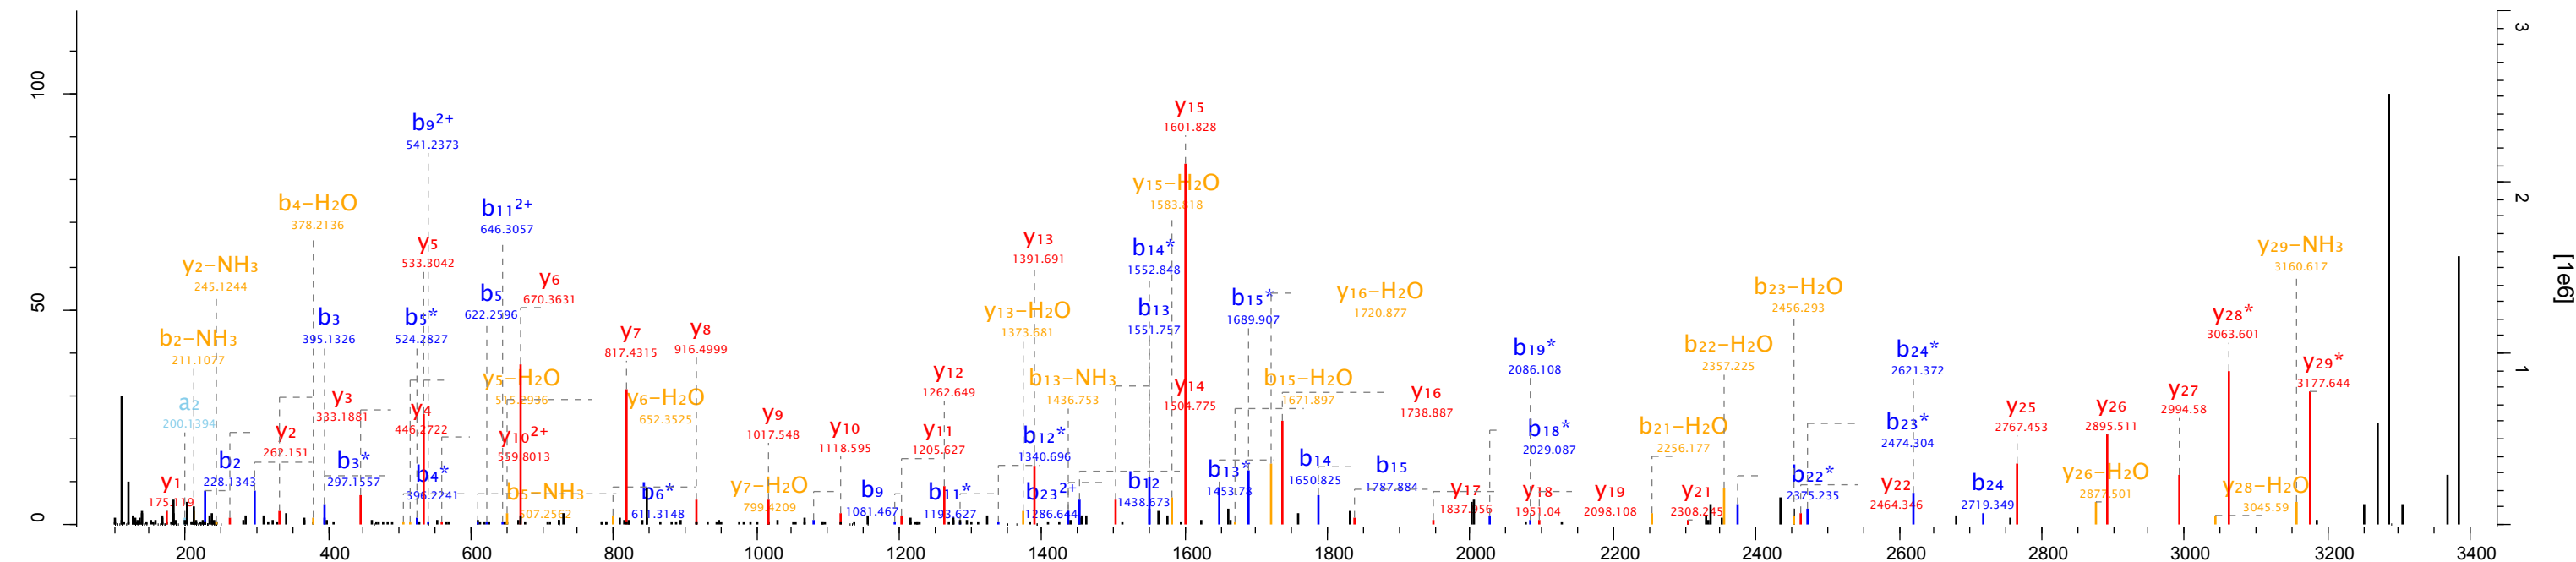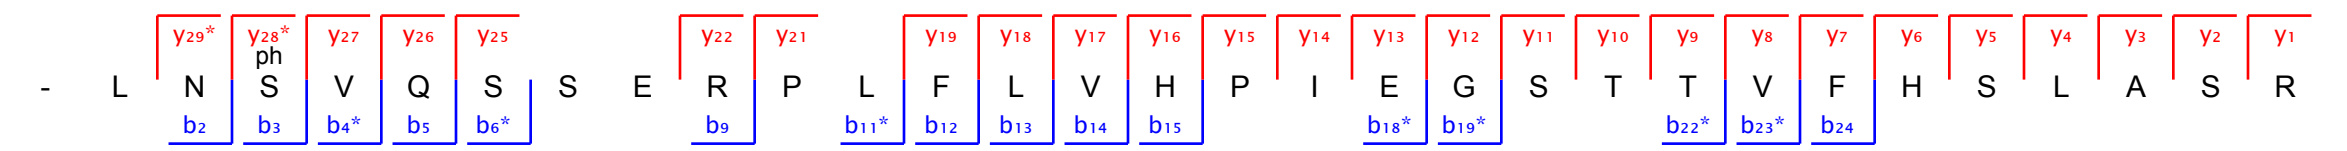

Raw file 20150814\_A375SR\_Phospho\_BR2\_04 Scan 24884 Method FTMS; HCD Score 101.59 m/z 1196.55 Gene names SIK3

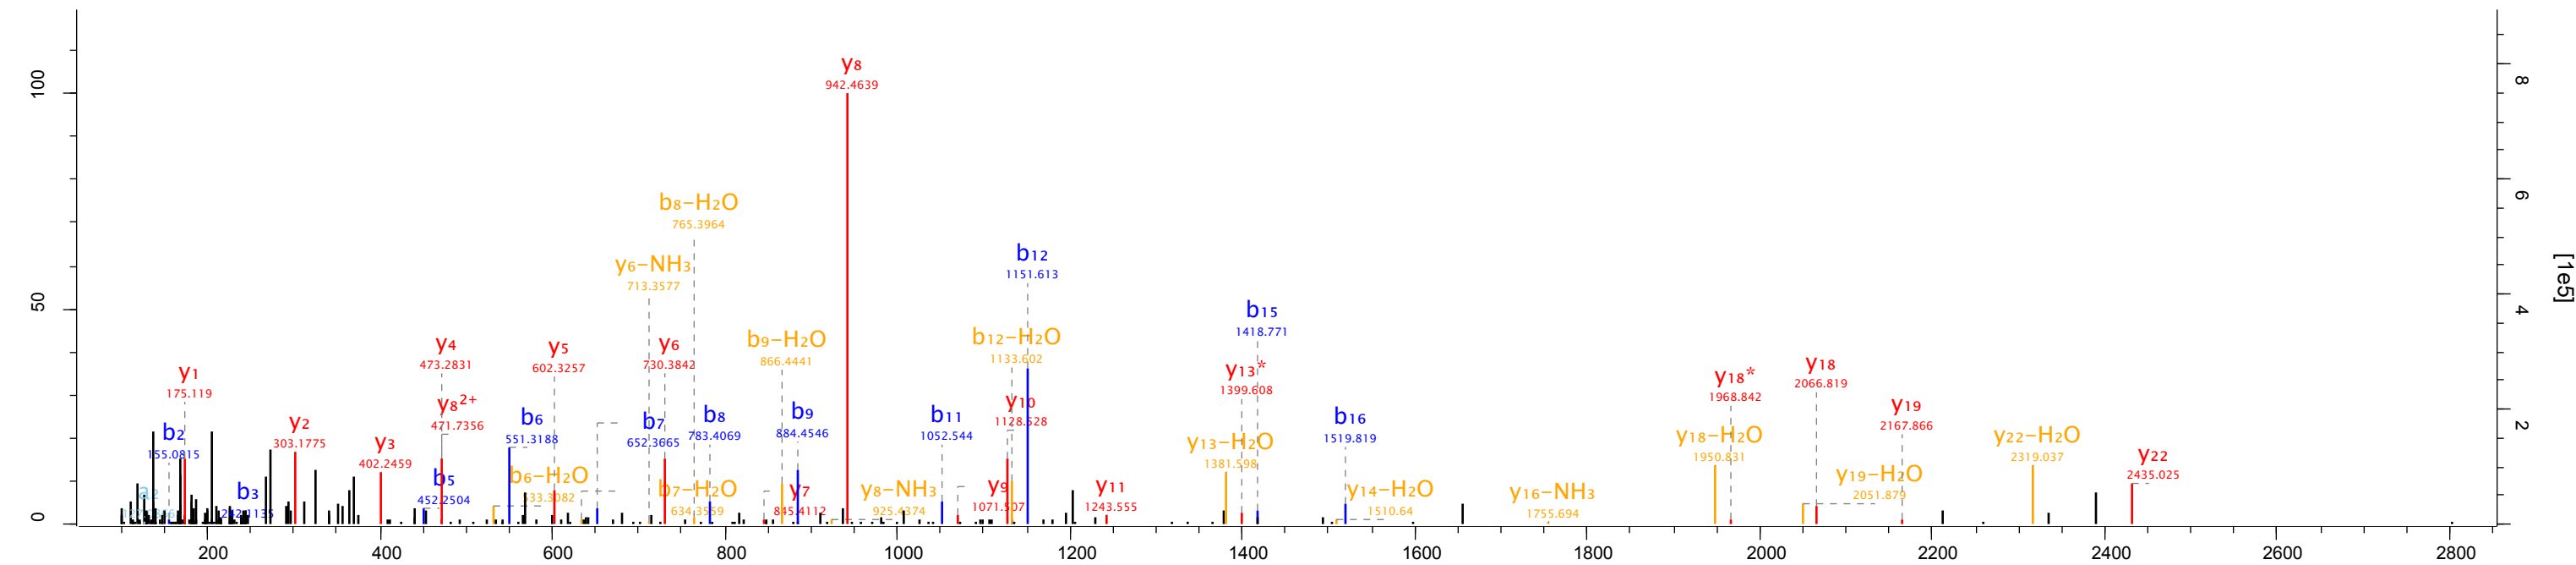

- G P S P L V T M T P A V P A V T P V D E E S S D G E P D Q E A V Q R -

b<sub>2</sub>
b<sub>3</sub>
b<sub>5</sub>
b<sub>6</sub>
b<sub>7</sub>
b<sub>8</sub>
b<sub>9</sub>
b<sub>11</sub>
b<sub>12</sub>
b<sub>15</sub>
b<sub>16</sub>
y<sub>19</sub>
y<sub>18</sub>
y<sub>13</sub>\*
y<sub>11</sub>
y<sub>10</sub>
y<sub>9</sub>
y<sub>8</sub>
y<sub>7</sub>
y<sub>6</sub>
y<sub>5</sub>
y<sub>4</sub>
y<sub>3</sub>
y<sub>2</sub>
y<sub>1</sub>

Raw file: 20150814\_A375SR\_Phospho\_BR2\_04  
 Scan: 25004 Method: FTMS; HCD Score: 99.91 m/z: 1174.57 Gene names: NEXN

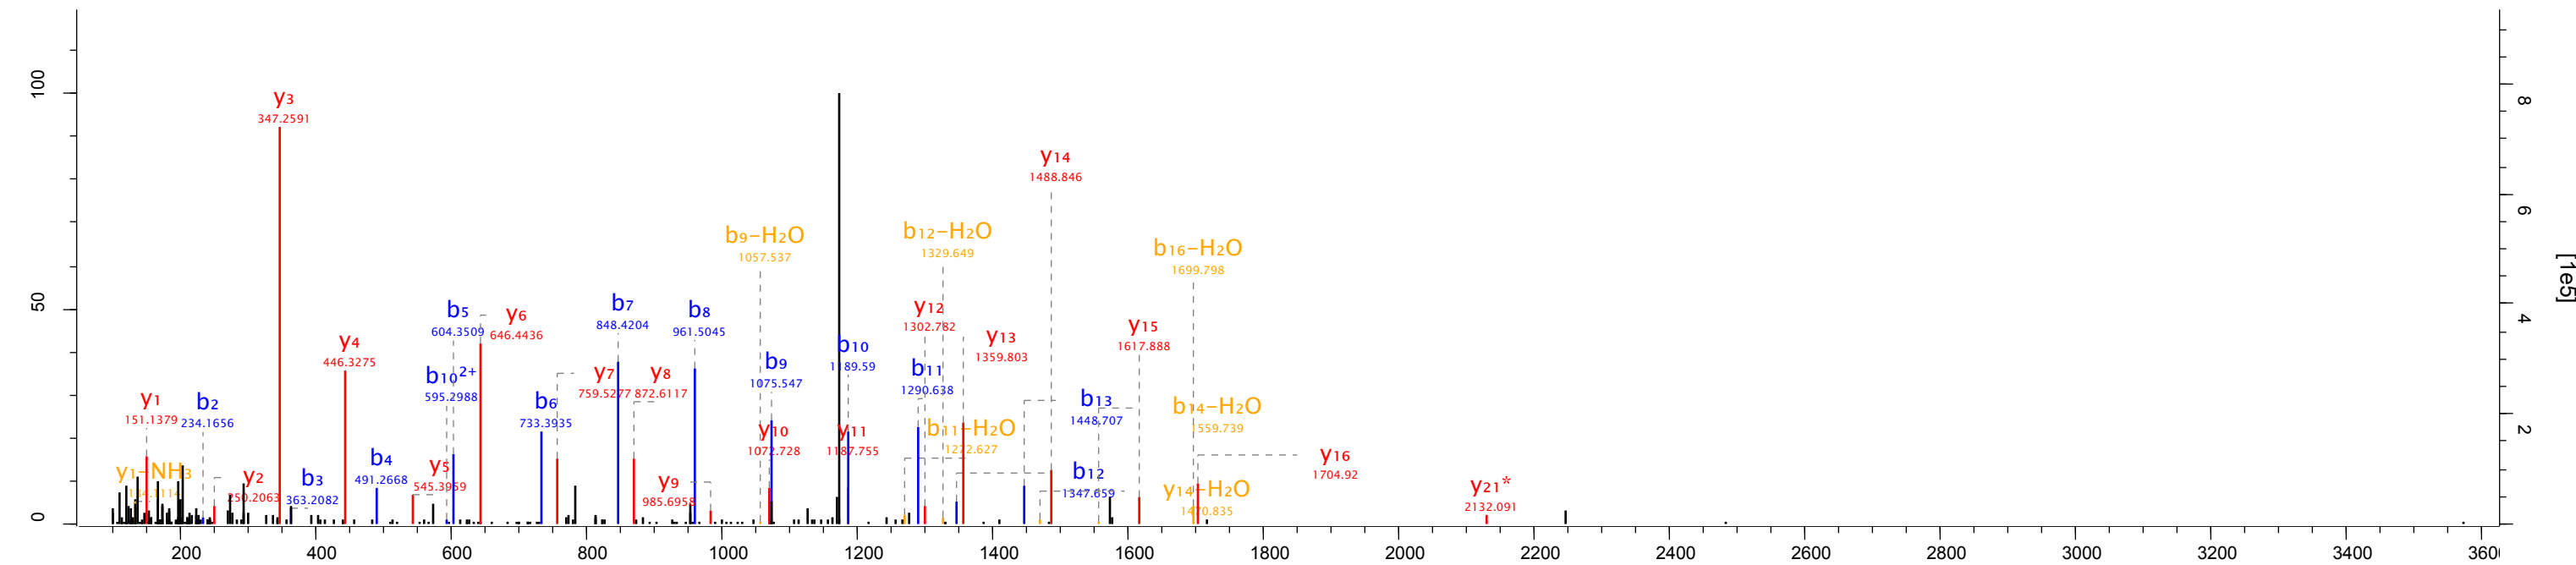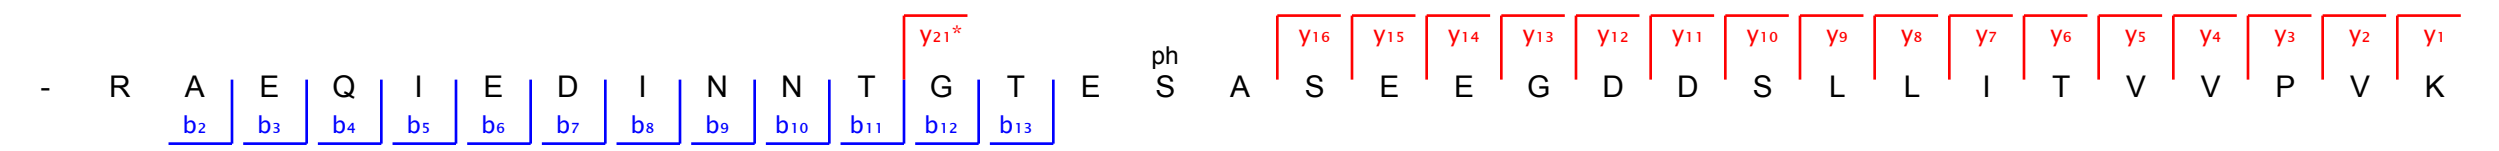

Raw file 20150814\_A375SR\_Phospho\_BR2\_04 Scan 25124 Method FTMS; HCD Score 323.2 m/z 1564.21 Gene names LIMA1;TRMT1

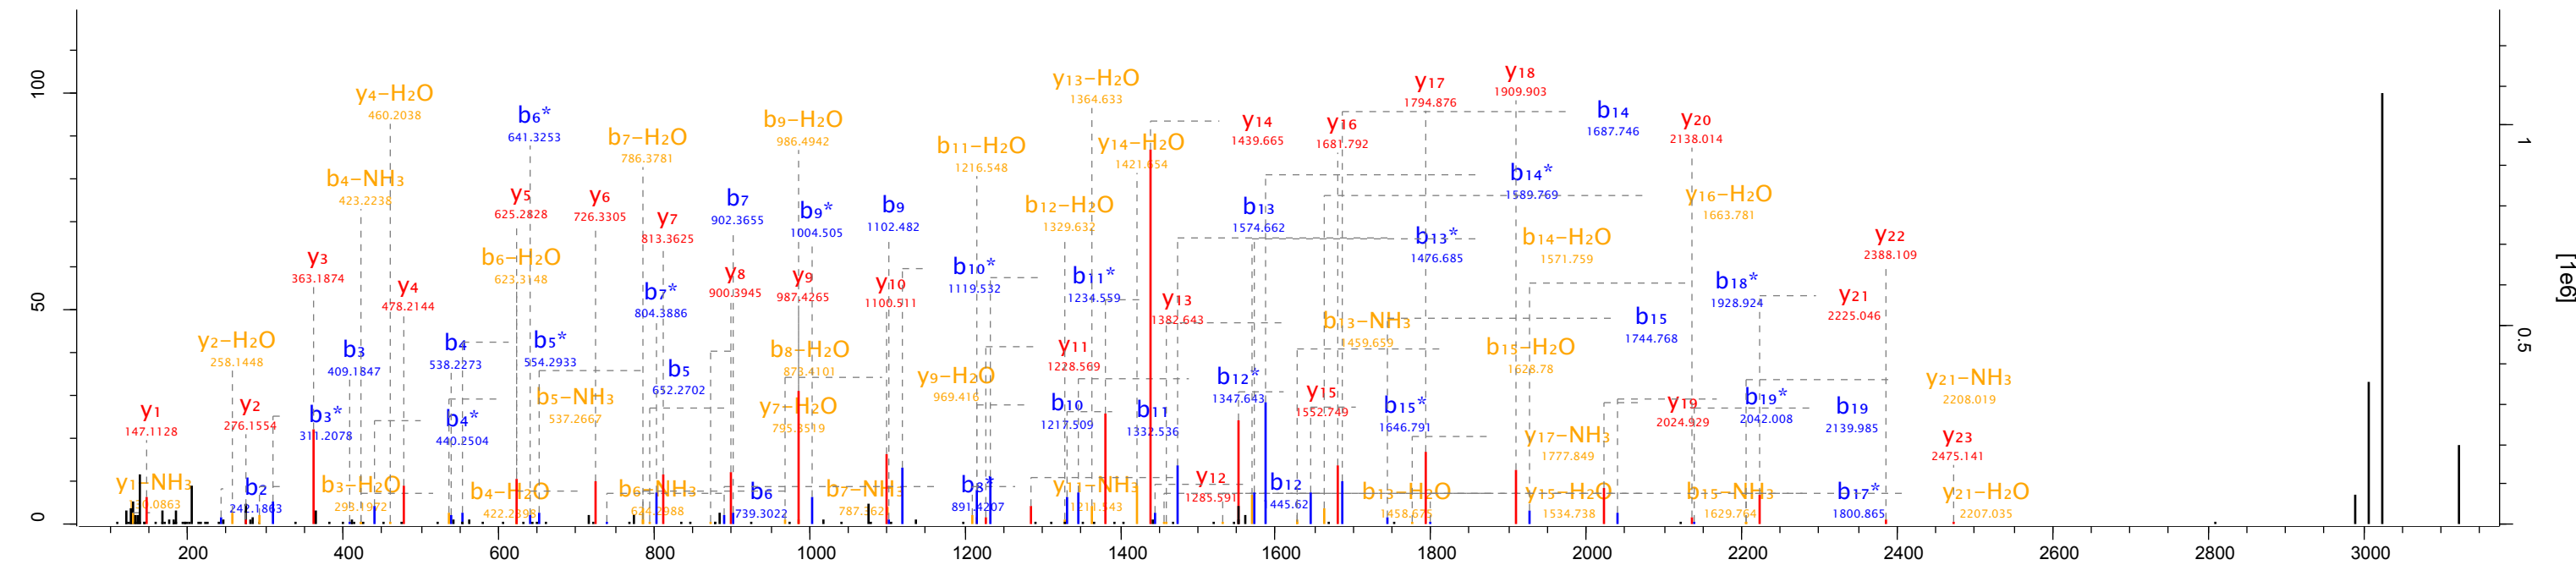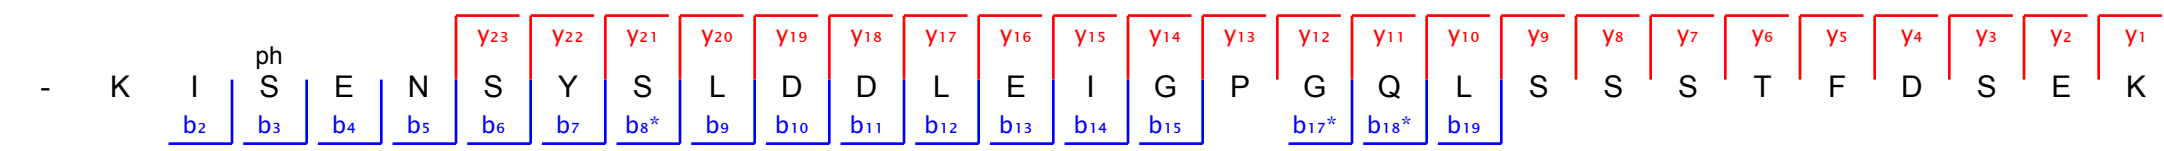

Raw file: 20150814\_A375SR\_Phospho\_BR2\_04  
 Scan: 25154 Method: FTMS; HCD Score: 52.91 m/z: 860.08 Gene names: ZMYM2

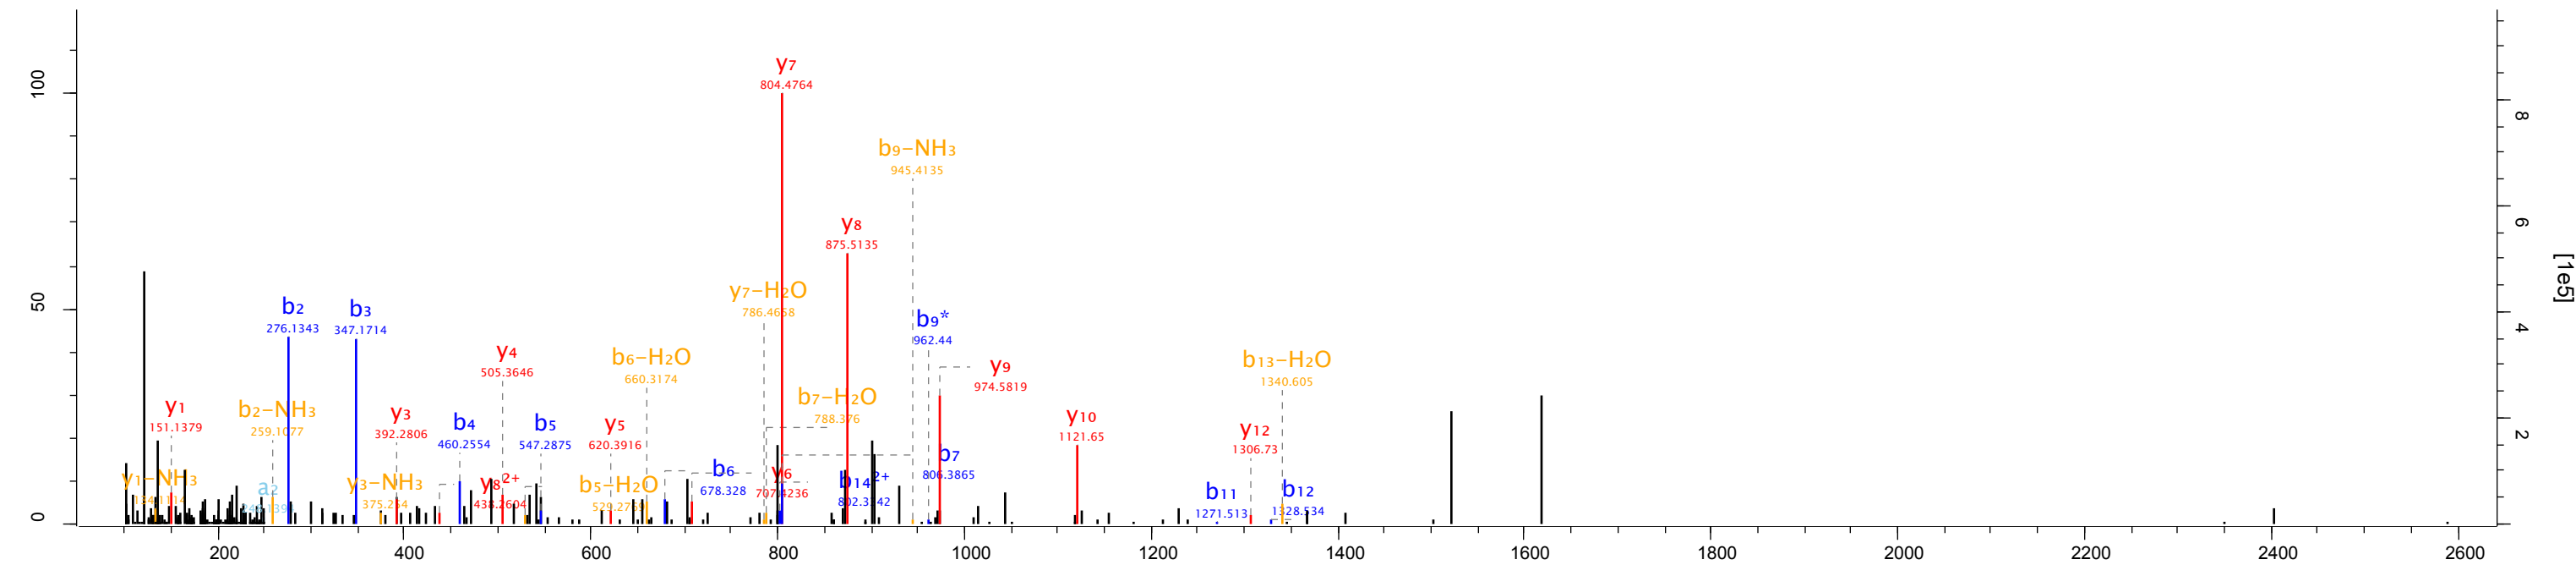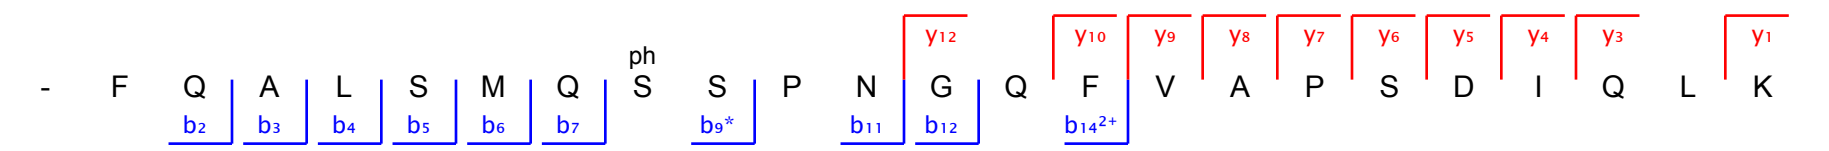



Raw file 20150814\_A375SR\_Phospho\_BR2\_04 Scan 25184 Method FTMS; HCD Score 84.03 m/z 995.09 Gene names OTUB1

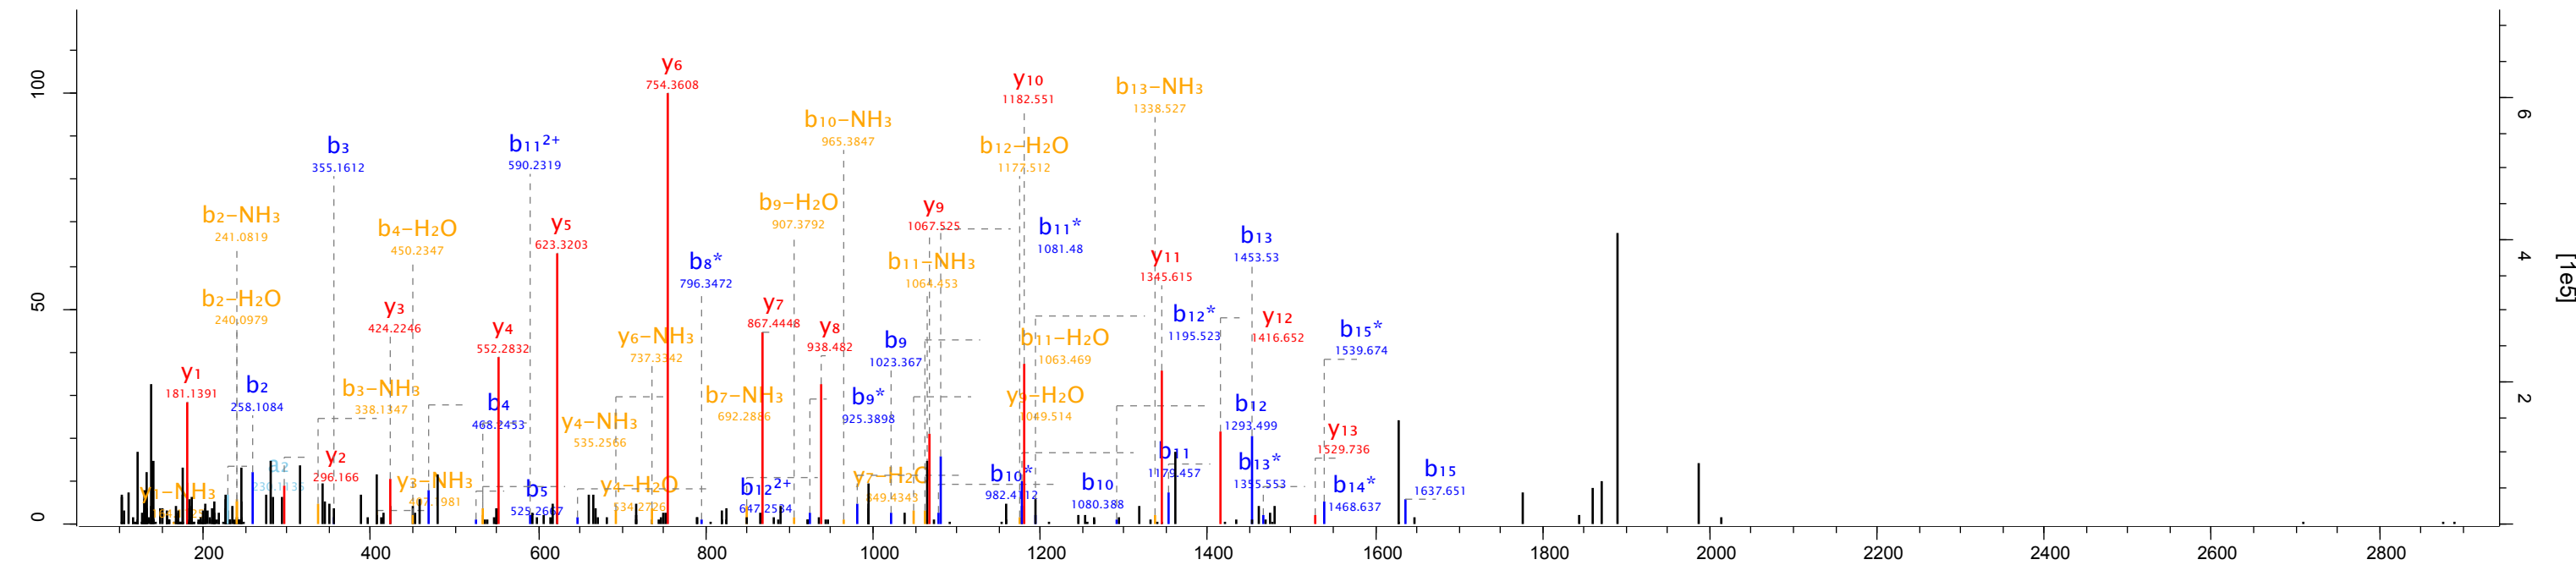

- Q E P L G S D S E G V N C L A Y D E A I M A Q Q D R -

b<sub>2</sub>
b<sub>3</sub>
b<sub>4</sub>
b<sub>5</sub>
ph
S
D
b<sub>8</sub><sup>\*</sup>
b<sub>9</sub>
b<sub>10</sub>
b<sub>11</sub>
b<sub>12</sub>
b<sub>13</sub>
b<sub>14</sub><sup>\*</sup>
b<sub>15</sub>
y<sub>13</sub>
y<sub>12</sub>
y<sub>11</sub>
y<sub>10</sub>
y<sub>9</sub>
y<sub>8</sub>
y<sub>7</sub>
y<sub>6</sub>
y<sub>5</sub>
y<sub>4</sub>
y<sub>3</sub>
y<sub>2</sub>
y<sub>1</sub>

Raw file: 20150814\_A375SR\_Phospho\_BR2\_04  
 Scan: 25314 Method: FTMS; HCD Score: 49.81 m/z: 1096.19 Gene names: RAD54L2

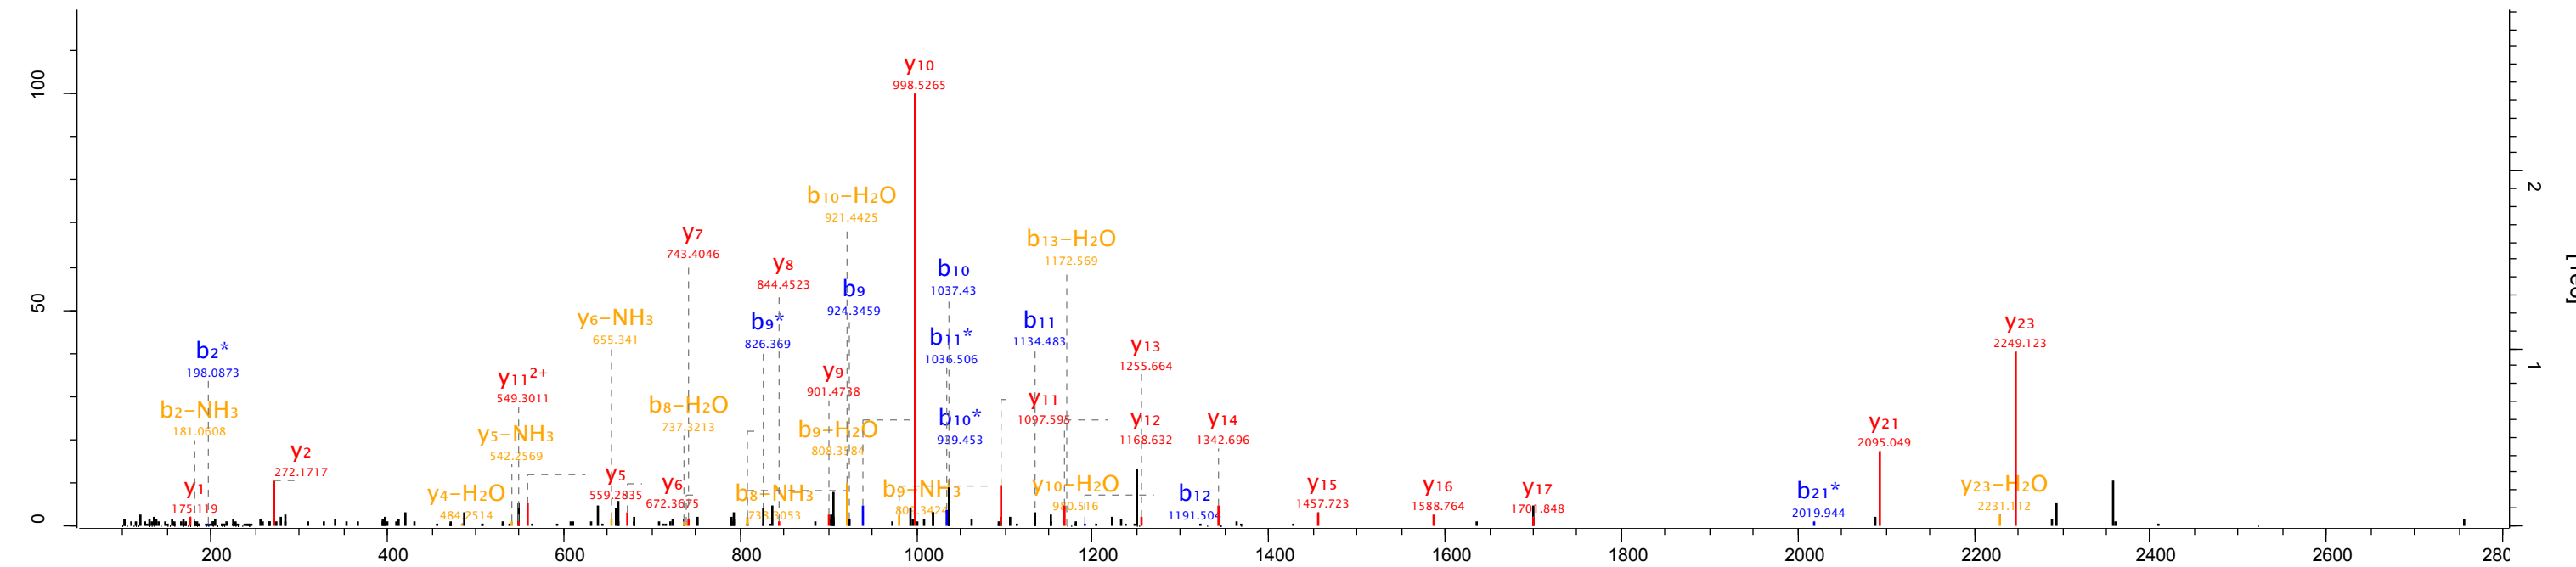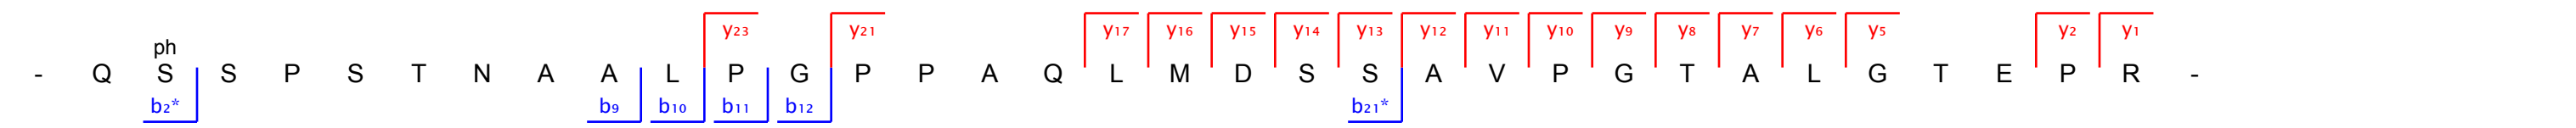

Raw file: 20150814\_A375SR\_Phospho\_BR2\_04  
 Scan: 25624 Method: FTMS; HCD Score: 189.99 m/z: 985.96 Gene names: NFATC2IP

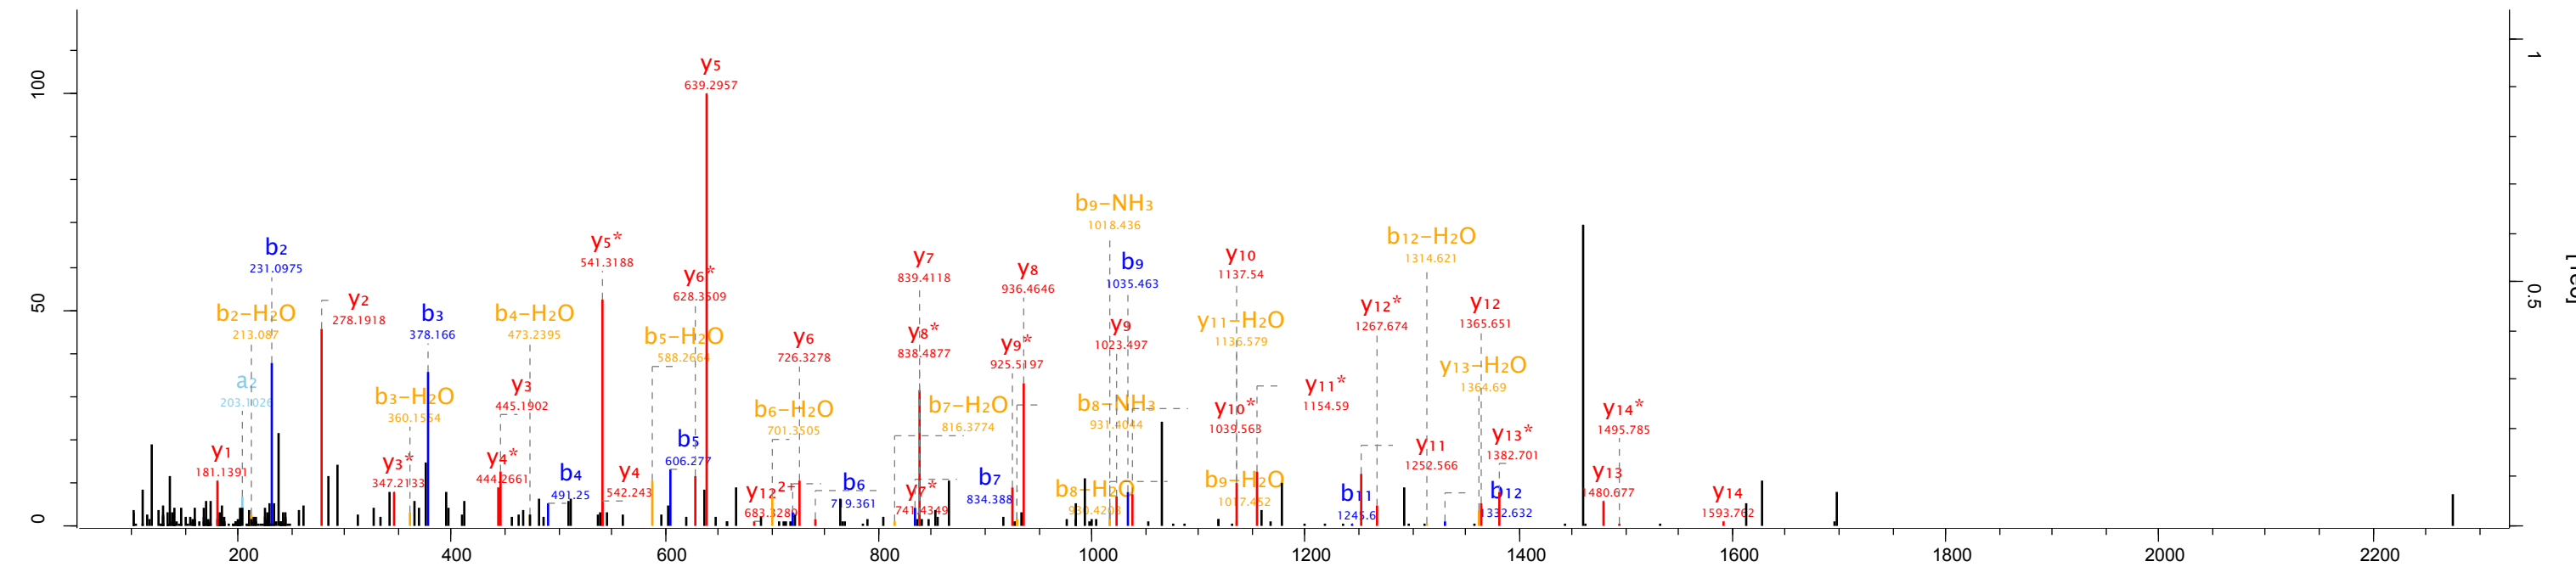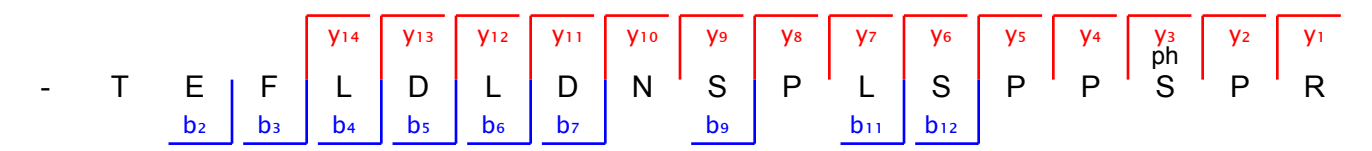

Raw file: 20150814\_A375SR\_Phospho\_BR2\_04  
 Scan: 25944 Method: FTMS; HCD Score: 129.89 m/z: 1290.62 Gene names: EIF4EBP1

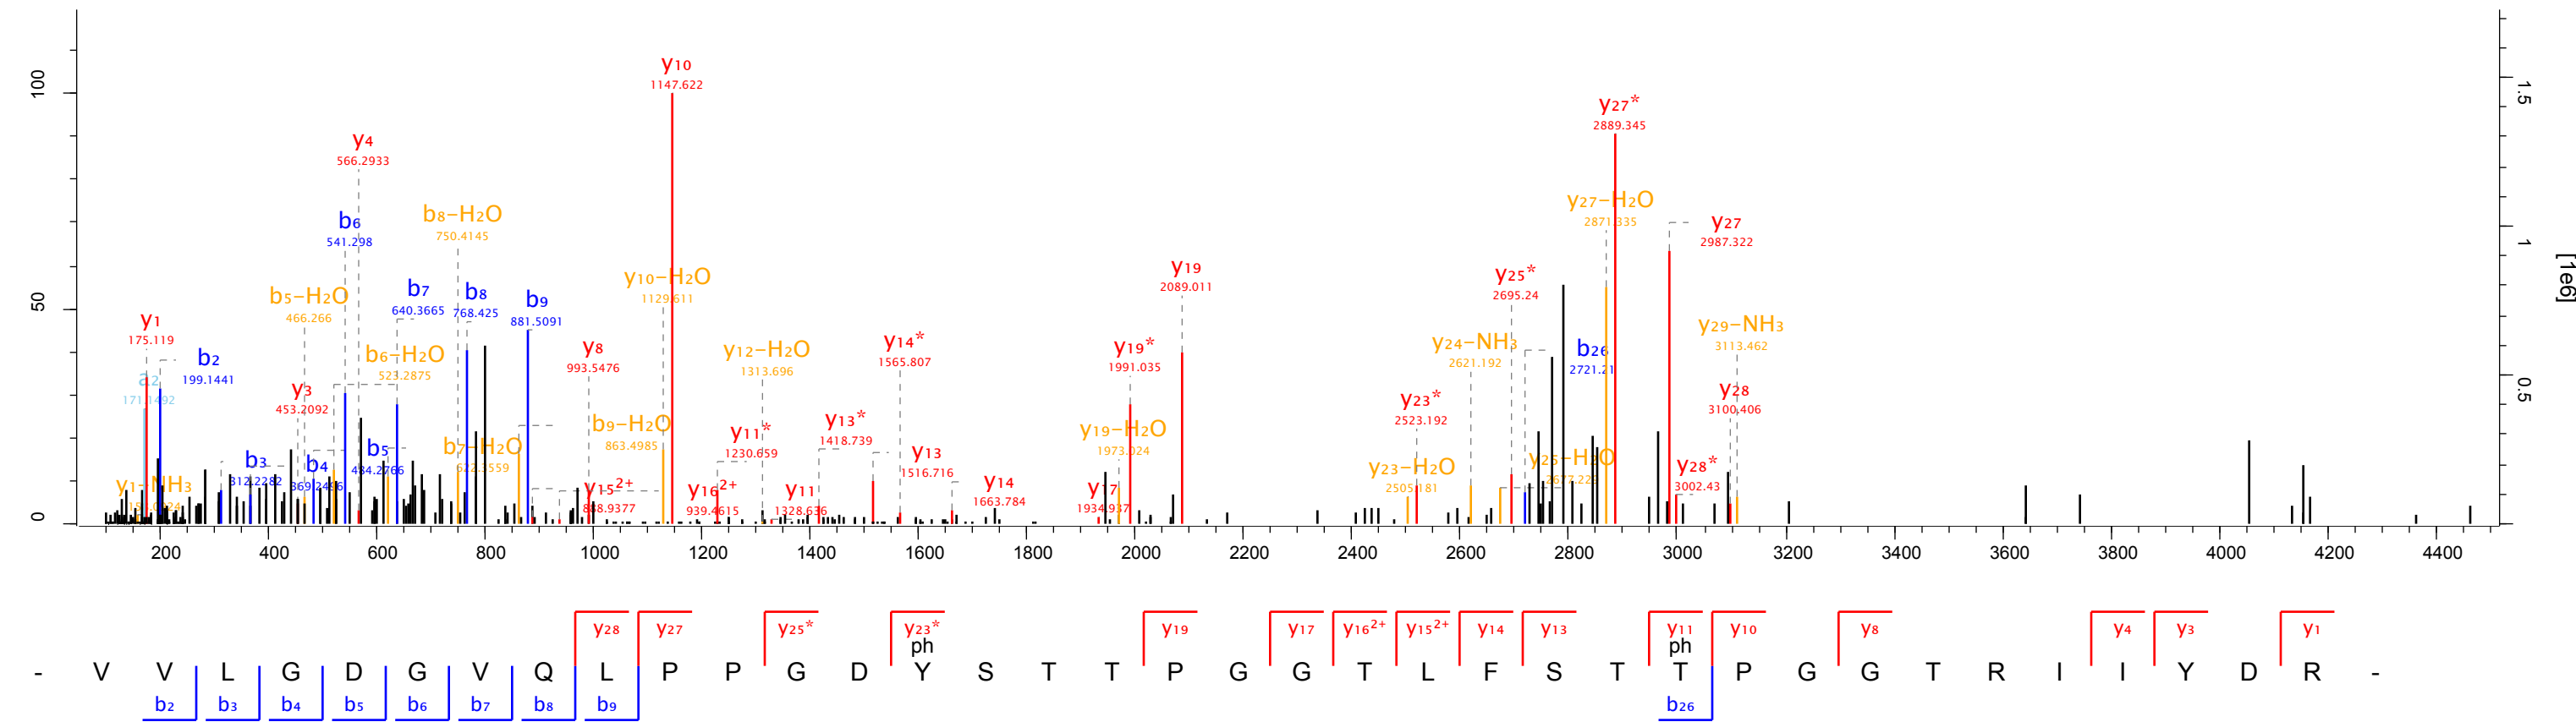

Raw file 20150814\_A375SR\_Phospho\_BR2\_04 Scan 25954 Method FTMS; HCD Score 107.34 m/z 728.27 Gene names TOP2A

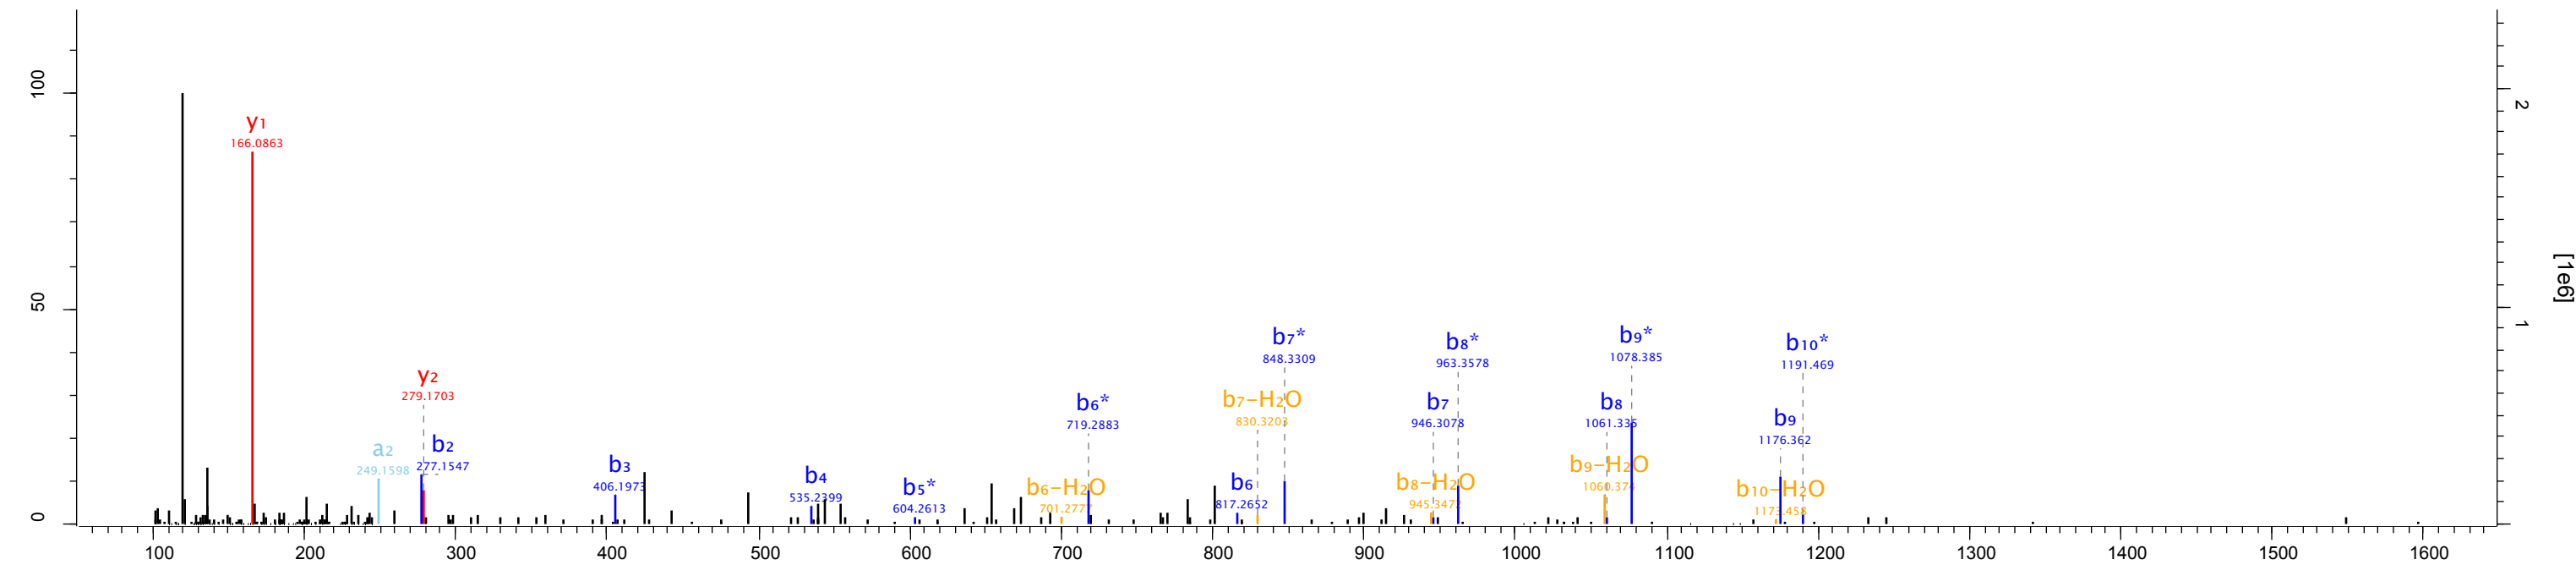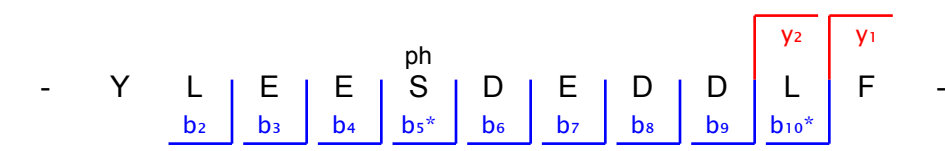

Raw file: 20150814\_A375SR\_Phospho\_BR2\_04  
 Scan: 25974 Method: FTMS; HCD Score: 205.65 m/z: 692.36 Gene names: OFD1

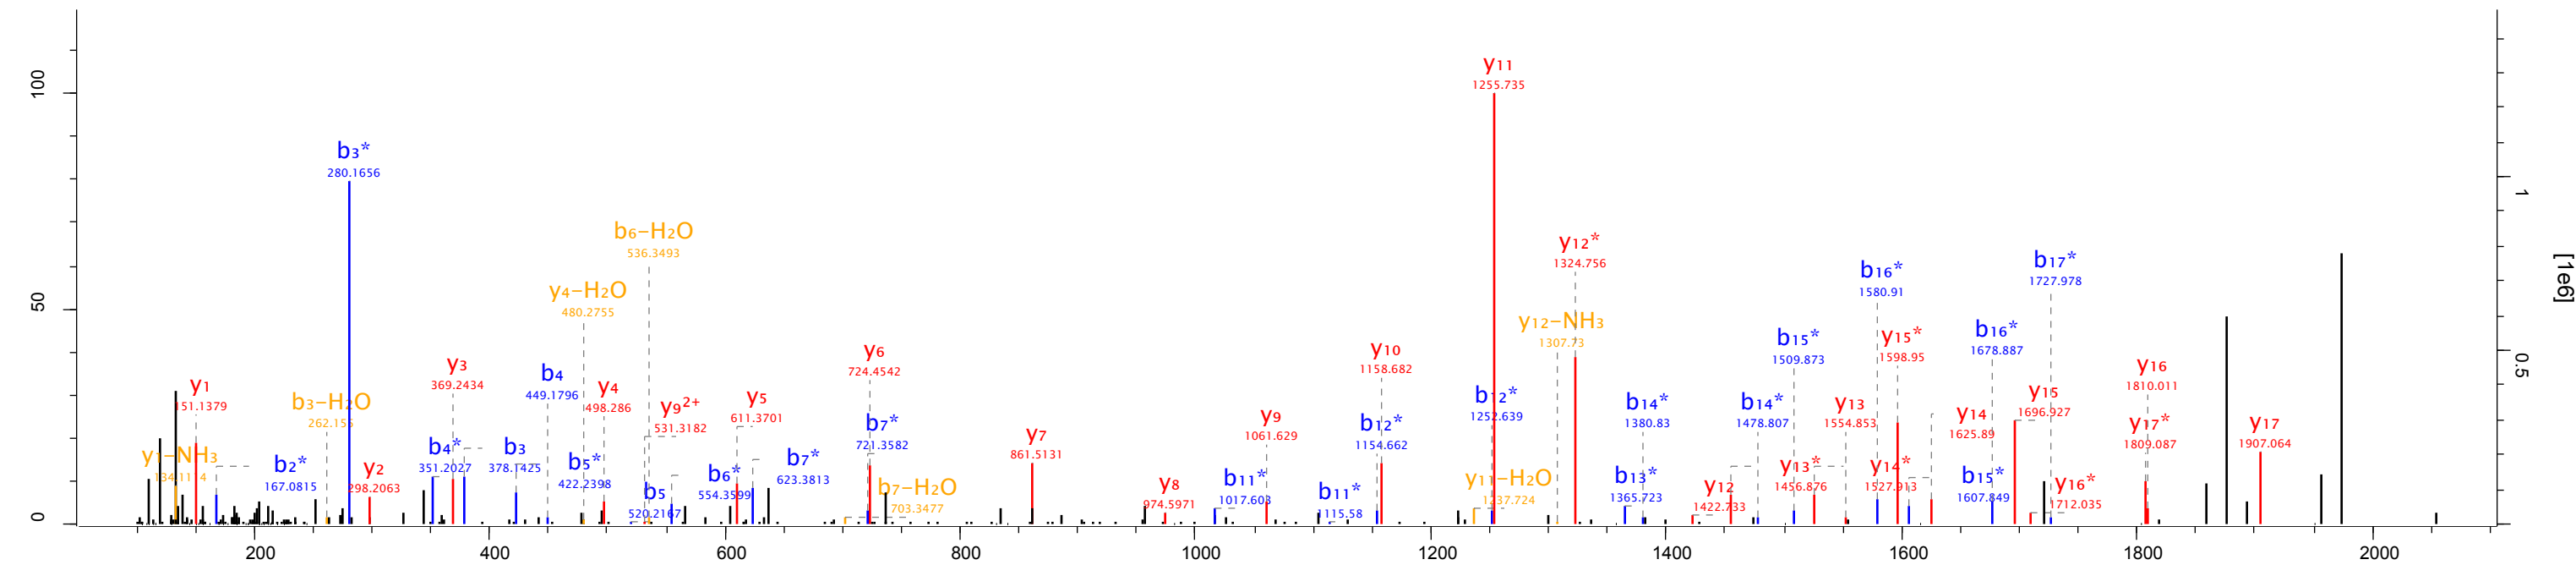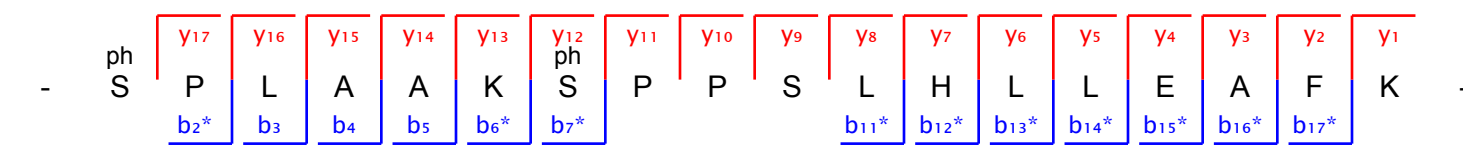

Raw file: 20150814\_A375SR\_Phospho\_BR2\_04  
 Scan: 26024 Method: FTMS; HCD Score: 101.77 m/z: 1101.25 Gene names: ARHGEF11

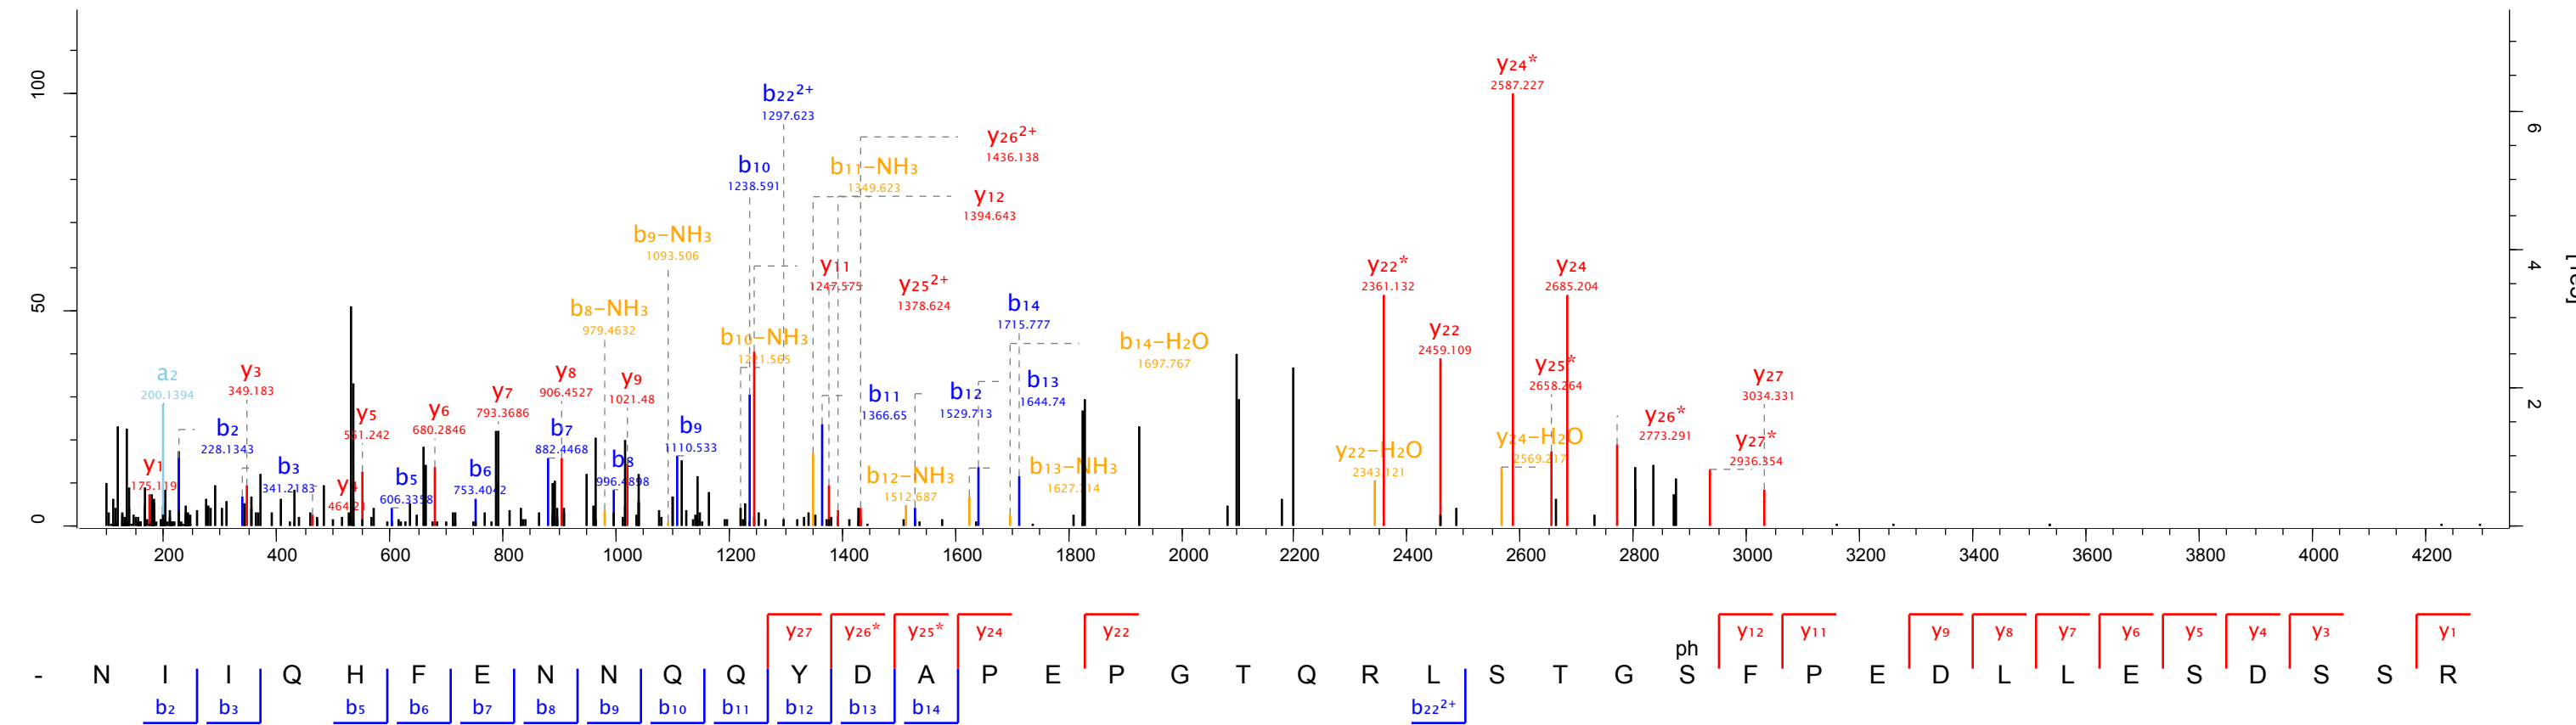

Raw file  
20150814\_A375SR\_Phospho\_BR2\_04

Scan 26714 Method FTMS; HCD Score 151.35 m/z 975.45 Gene names EIF2S2

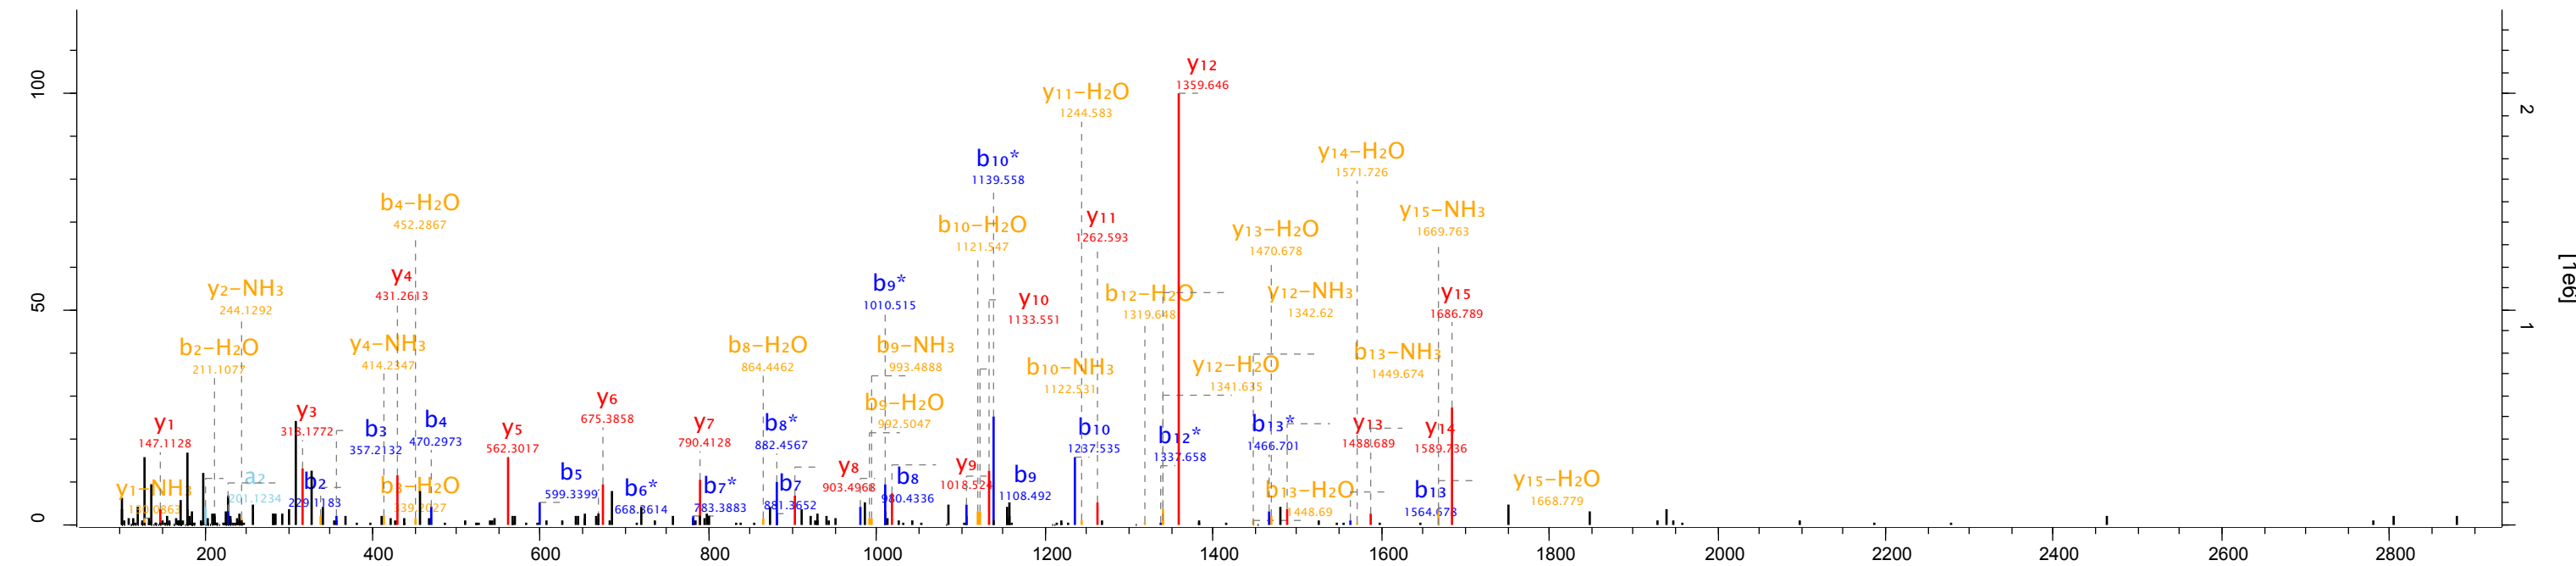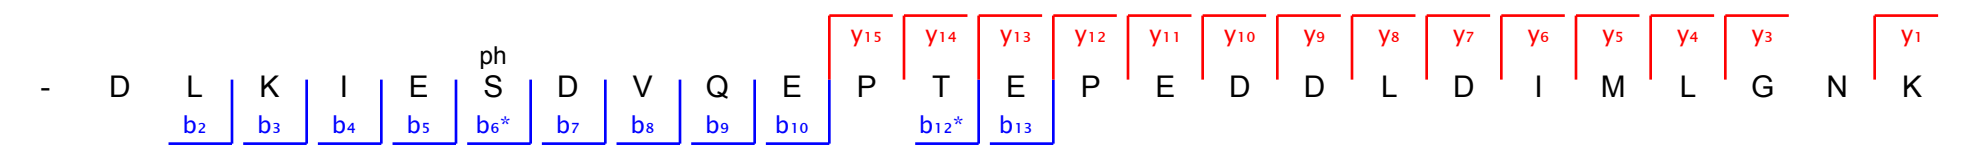



Raw file 20150814\_A375SR\_Phospho\_BR2\_04 Scan 2674 Method FTMS; HCD Score 127.53 m/z 774.66 Gene names RNASEH1

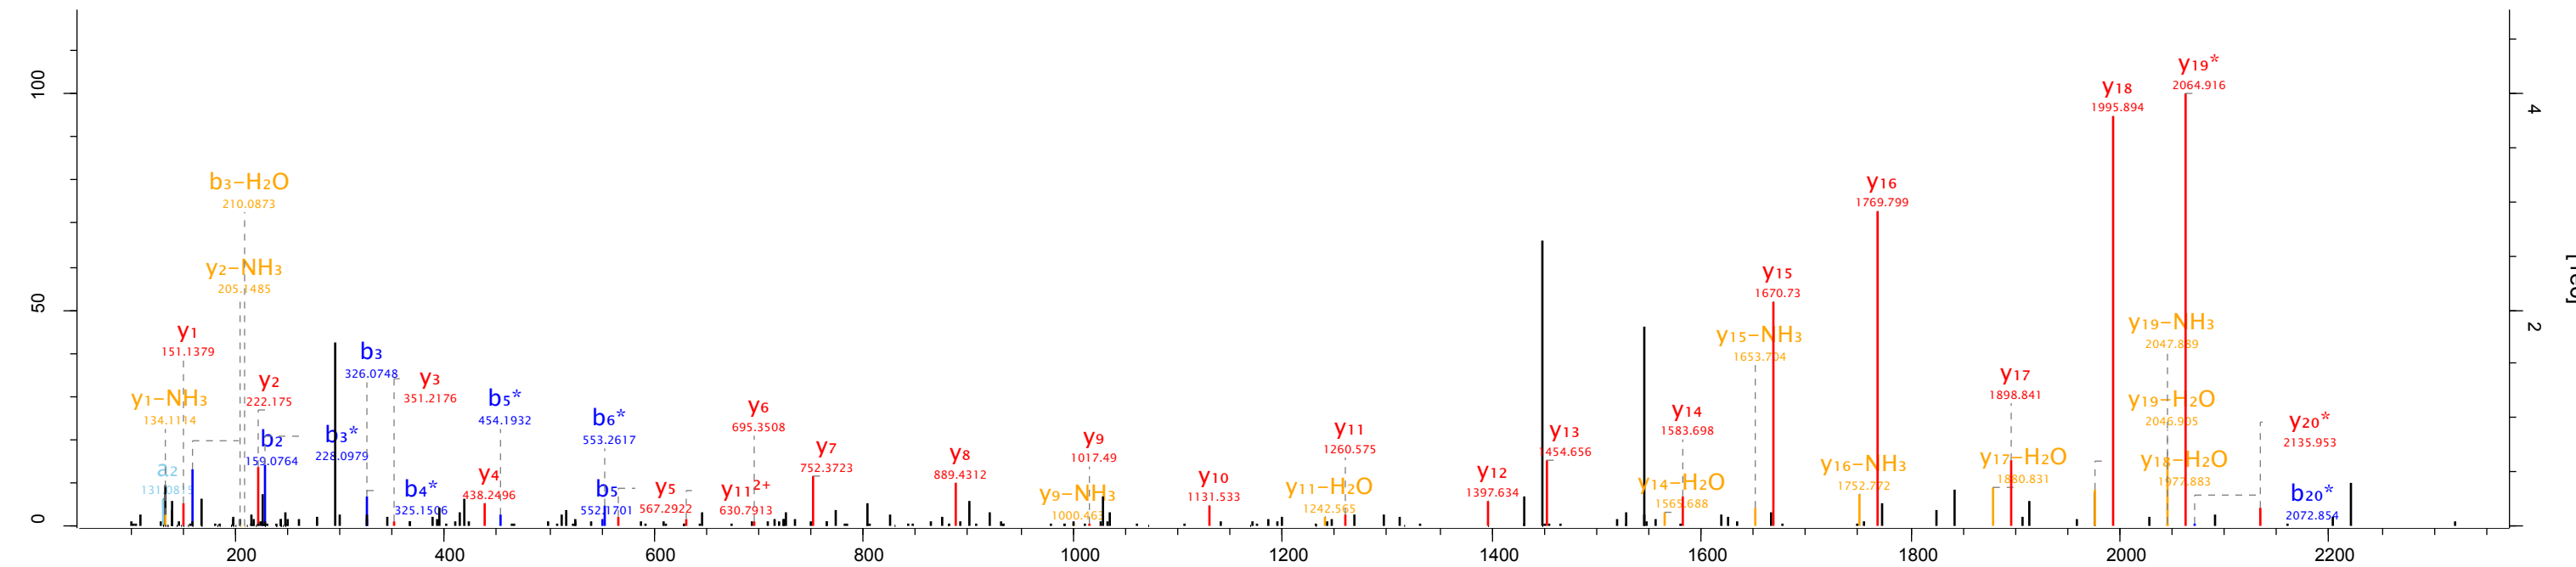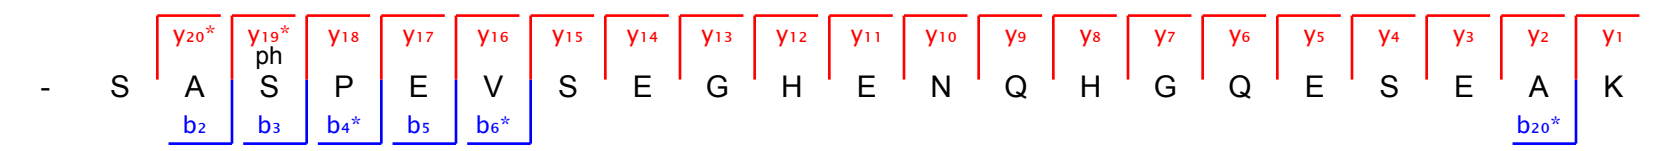

Raw file: 20150814\_A375SR\_Phospho\_BR2\_04  
 Scan: 26784 Method: FTMS; HCD Score: 94.64 m/z: 1252.88 Gene names: EIF4ENIF1

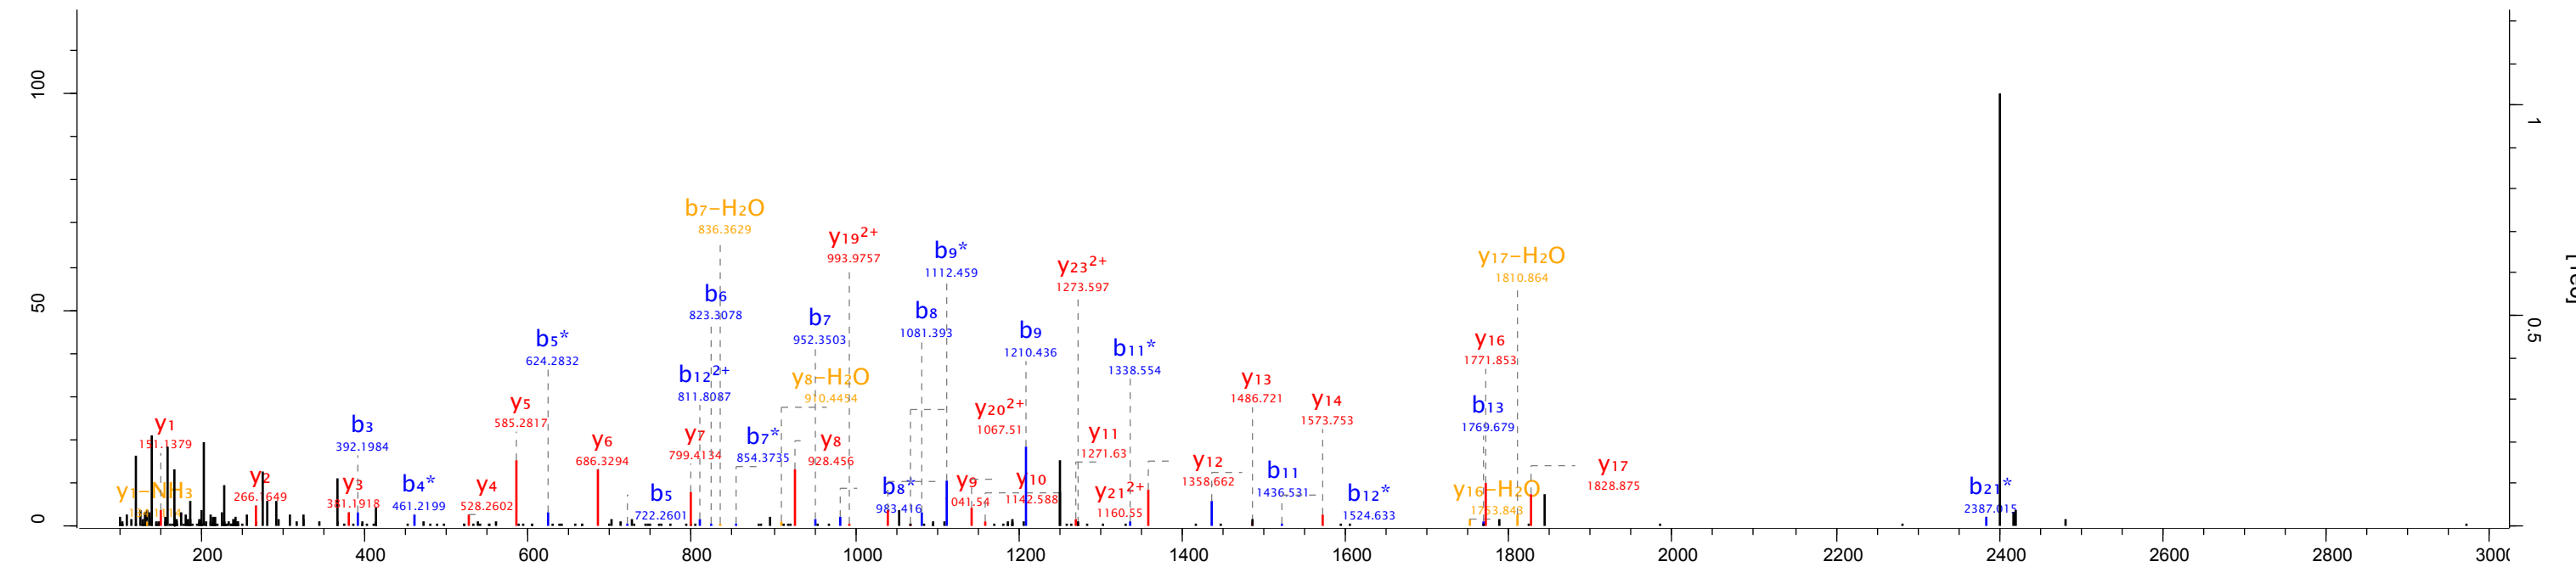

- R N D S Y T E E E P E W F S A G P T S Q S E T I E L T G F D D K -

ph  
 b<sub>3</sub> b<sub>4</sub>\* b<sub>5</sub> b<sub>6</sub> b<sub>7</sub> b<sub>8</sub> b<sub>9</sub> y<sub>23</sub><sup>2+</sup> y<sub>21</sub><sup>2+</sup> y<sub>20</sub><sup>2+</sup> y<sub>19</sub><sup>2+</sup> y<sub>17</sub> y<sub>16</sub> y<sub>14</sub> y<sub>13</sub> y<sub>12</sub> y<sub>11</sub> y<sub>10</sub> y<sub>9</sub> y<sub>8</sub> y<sub>7</sub> y<sub>6</sub> y<sub>5</sub> y<sub>4</sub> y<sub>3</sub> y<sub>2</sub> y<sub>1</sub>  
 b<sub>11</sub> b<sub>12</sub>\* b<sub>13</sub> b<sub>21</sub>\*

Raw file: 20150814\_A375SR\_Phospho\_BR2\_04  
 Scan: 27034 Method: FTMS; HCD Score: 216.53 m/z: 716.66 Gene names: MAGEC2

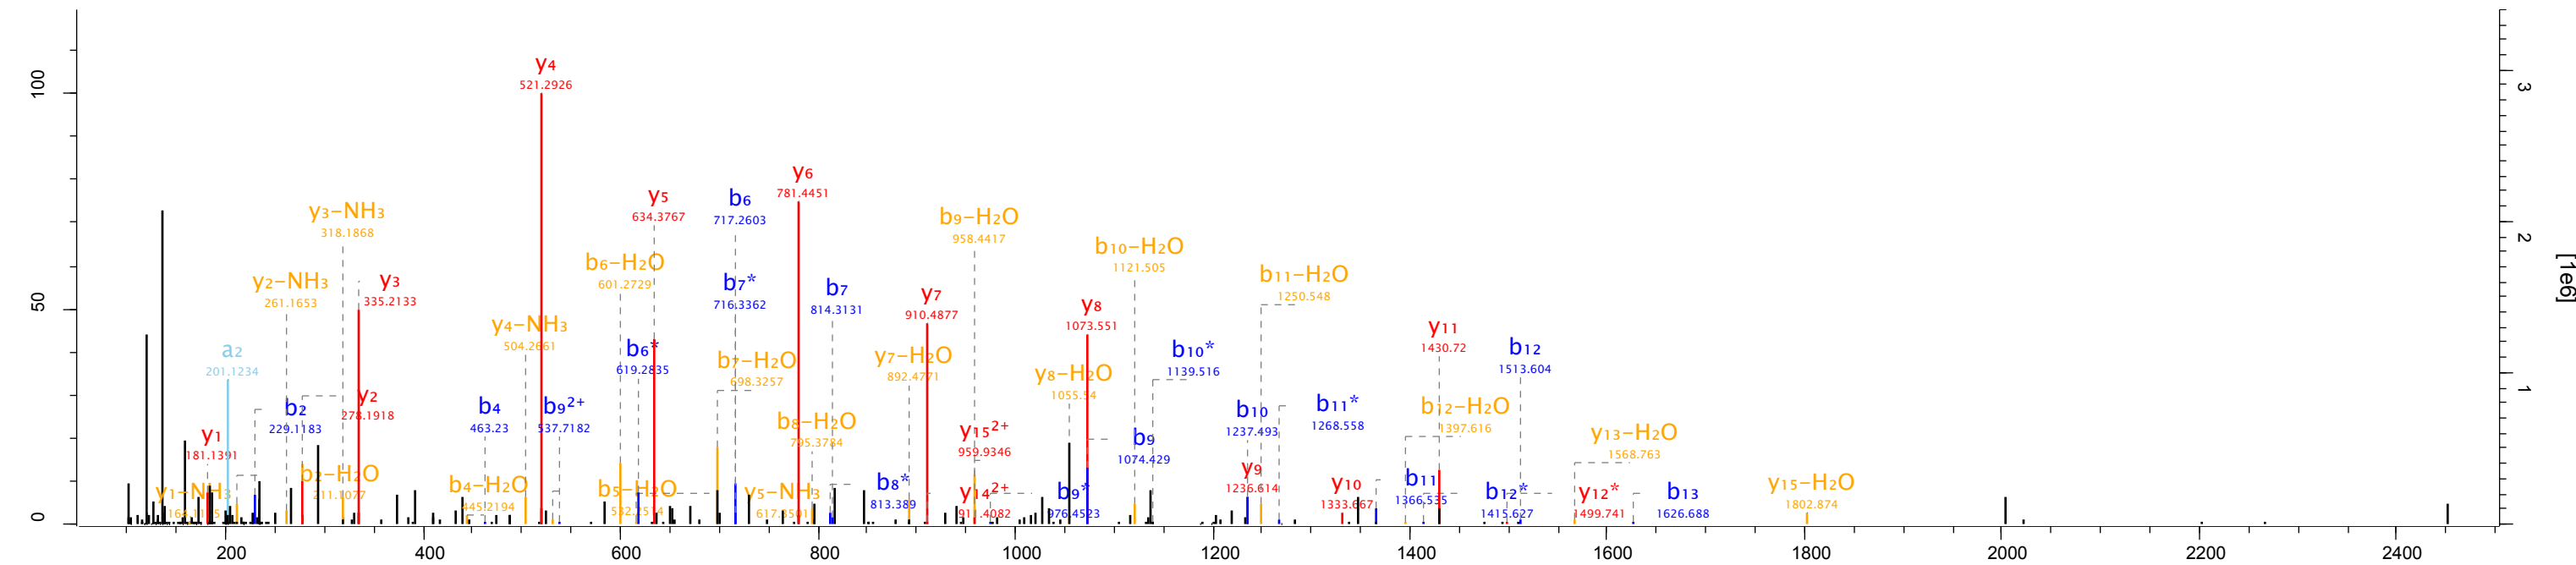

Peptide sequence: - E V P H S P P Y Y E F L W G P R -

Fragmentation sites are indicated by boxes below the sequence:

- Red boxes (y ions): y15<sup>2+</sup>, y14<sup>2+</sup>, y12\*<sub>ph</sub>, y11, y10, y9, y8, y7, y6, y5, y4, y3, y2, y1
- Blue boxes (b ions): b2, b4, b6, b7, b8\*, b9, b10, b11, b12, b13

Raw file: 20150814\_A375SR\_Phospho\_BR2\_04  
 Scan: 2704 Method: FTMS; HCD Score: 258.87 m/z: 865.85 Gene names: SET

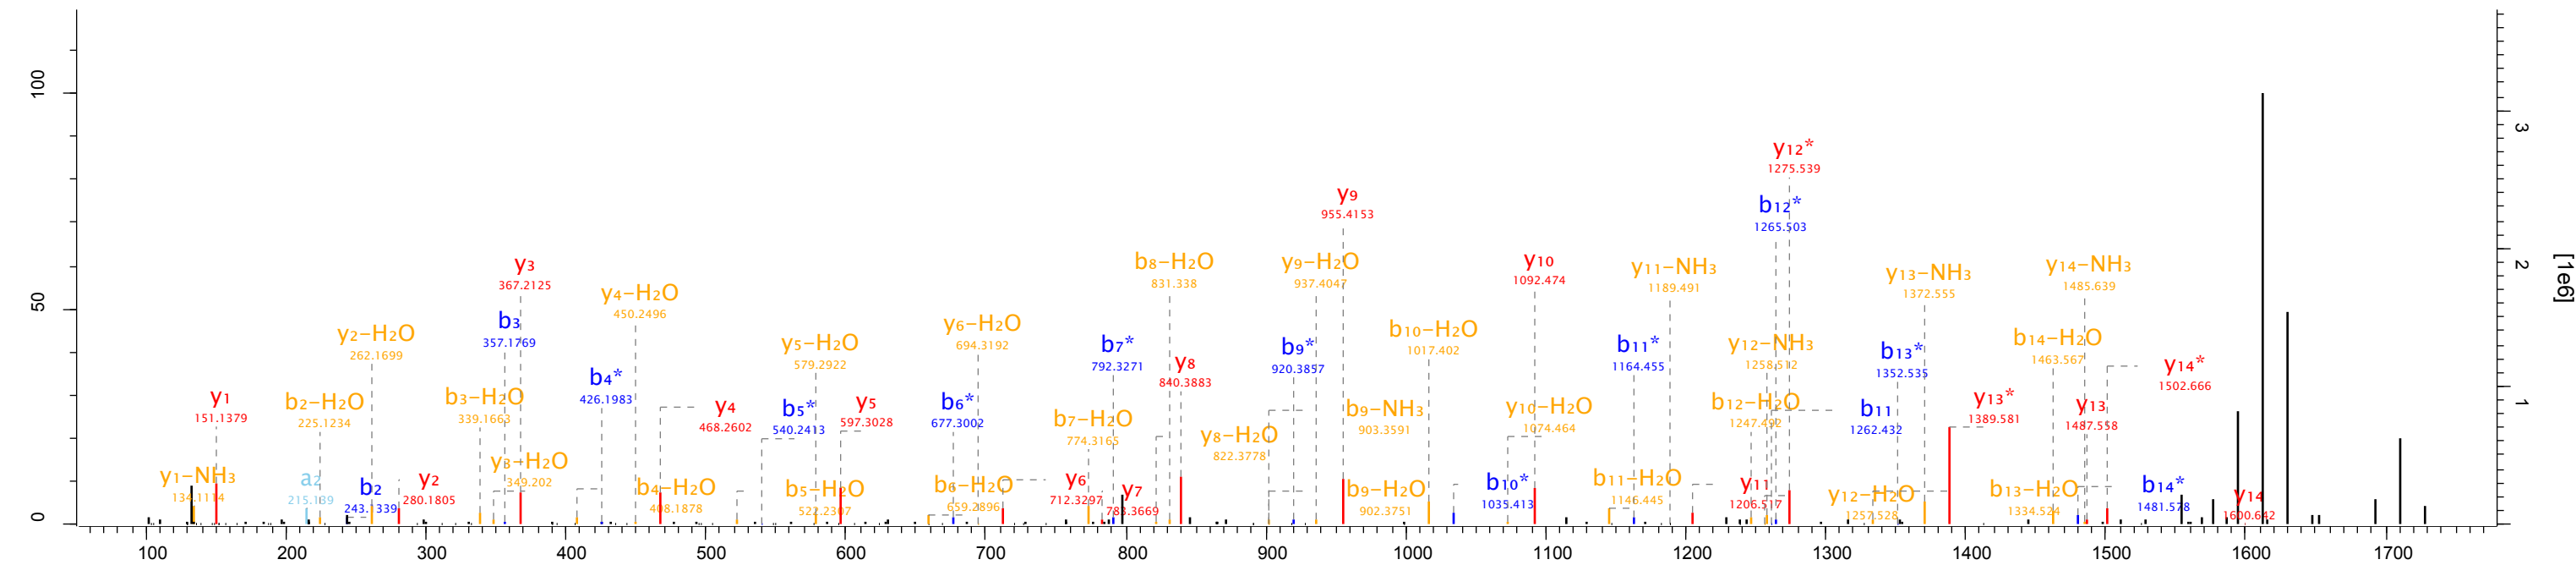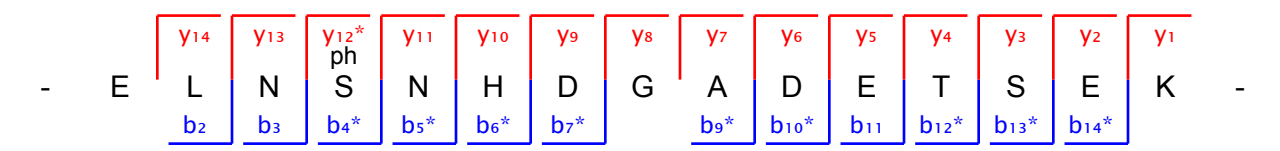

Raw file: 20150814\_A375SR\_Phospho\_BR2\_04  
 Scan: 27954 Method: FTMS; HCD Score: 108.95 m/z: 1089.86 Gene names: PRRC2A

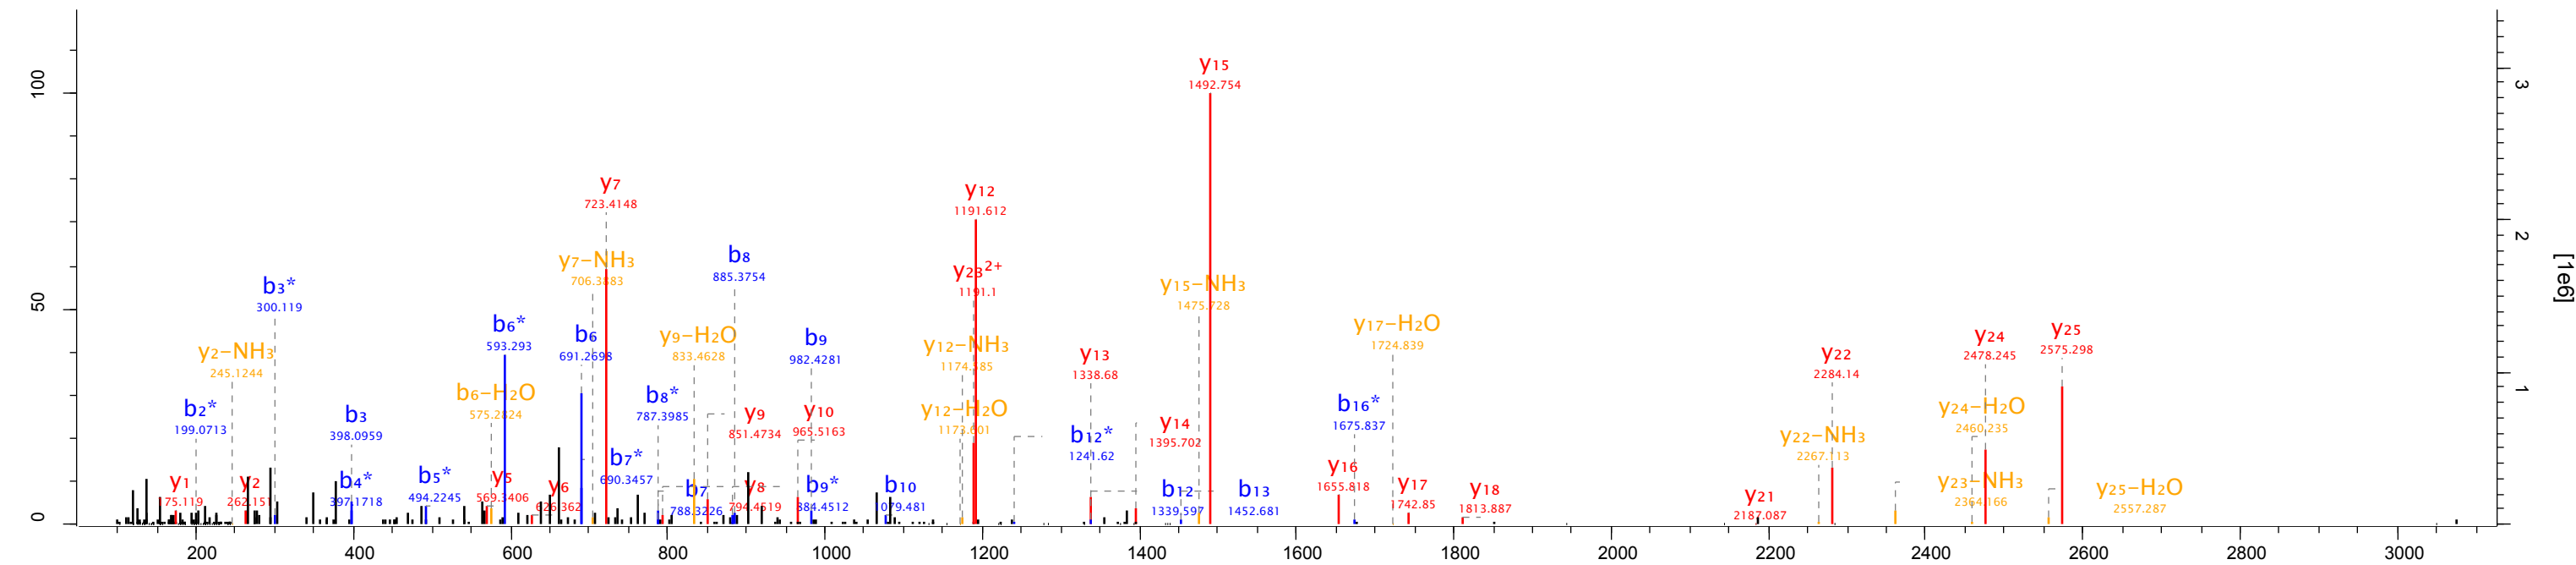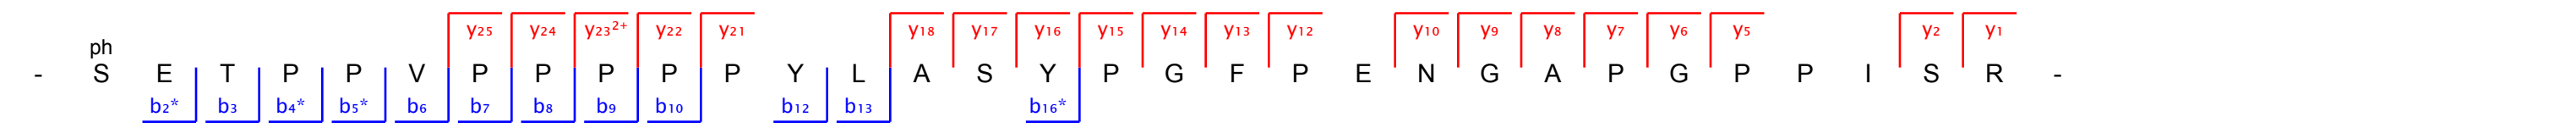

Raw file  
20150814\_A375SR\_Phospho\_BR2\_04

Scan Method Score m/z Gene names  
28064 FTMS; HCD 153.55 1024.8 RAVR1

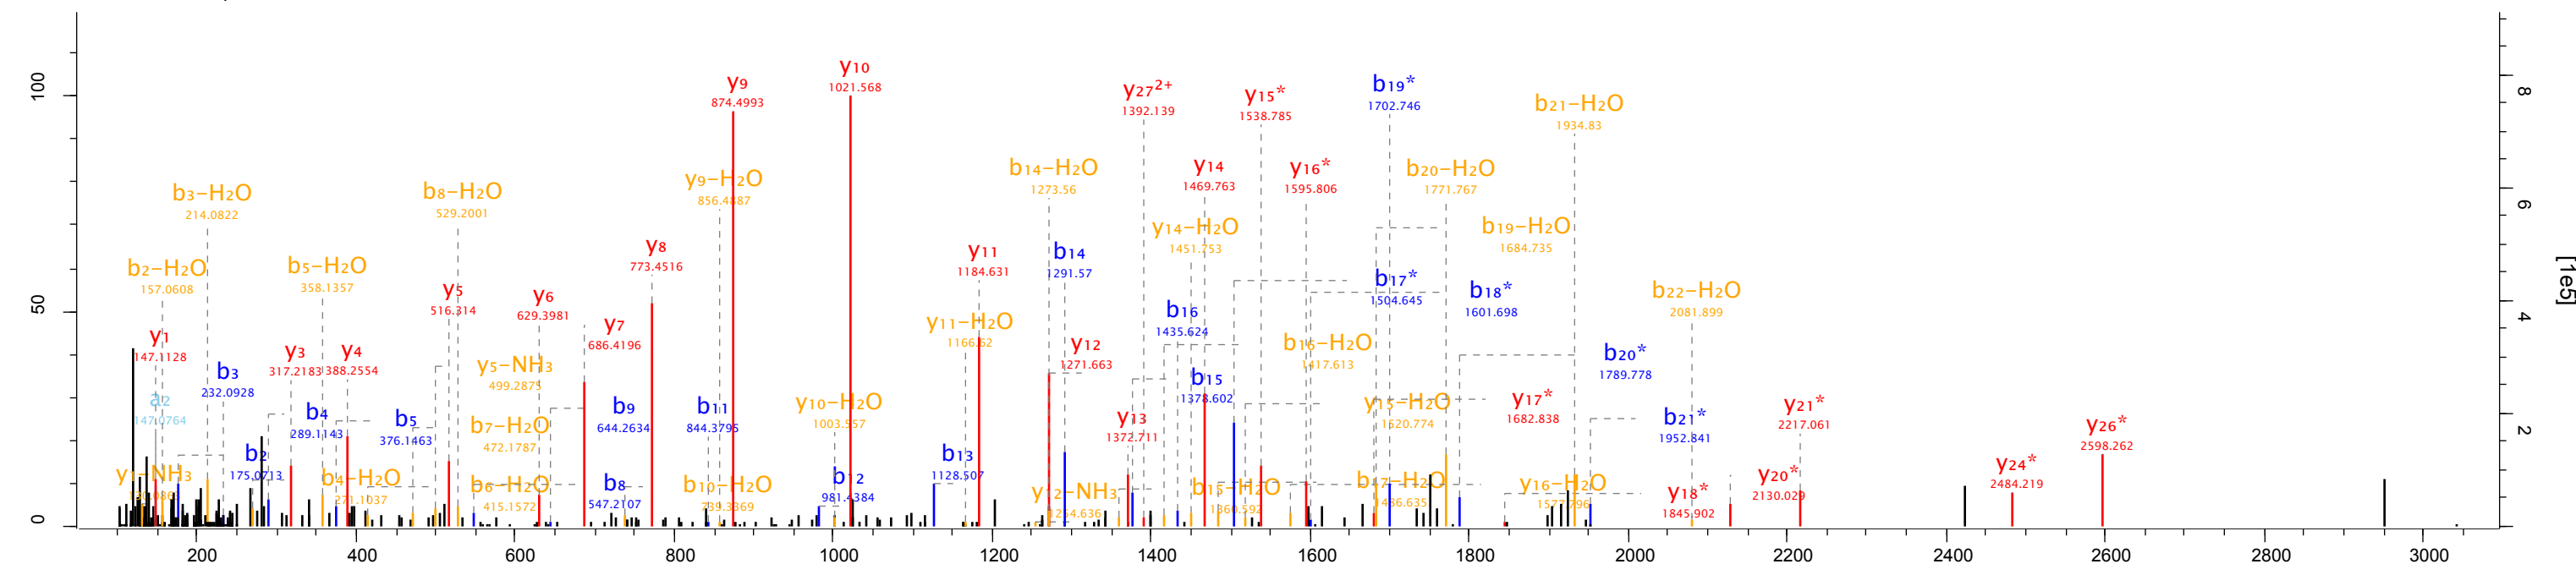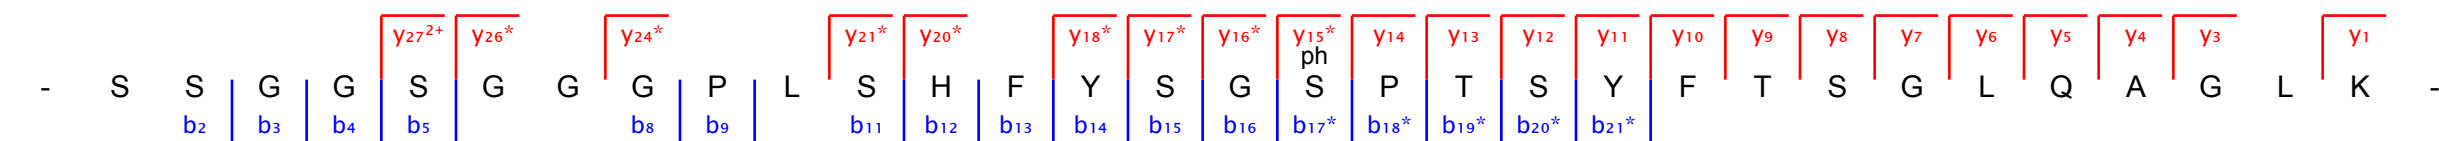

Raw file: 20150814\_A375SR\_Phospho\_BR2\_04  
 Scan: 2824 Method: FTMS; HCD Score: 84.05 m/z: 459.71 Gene names: ACTR10

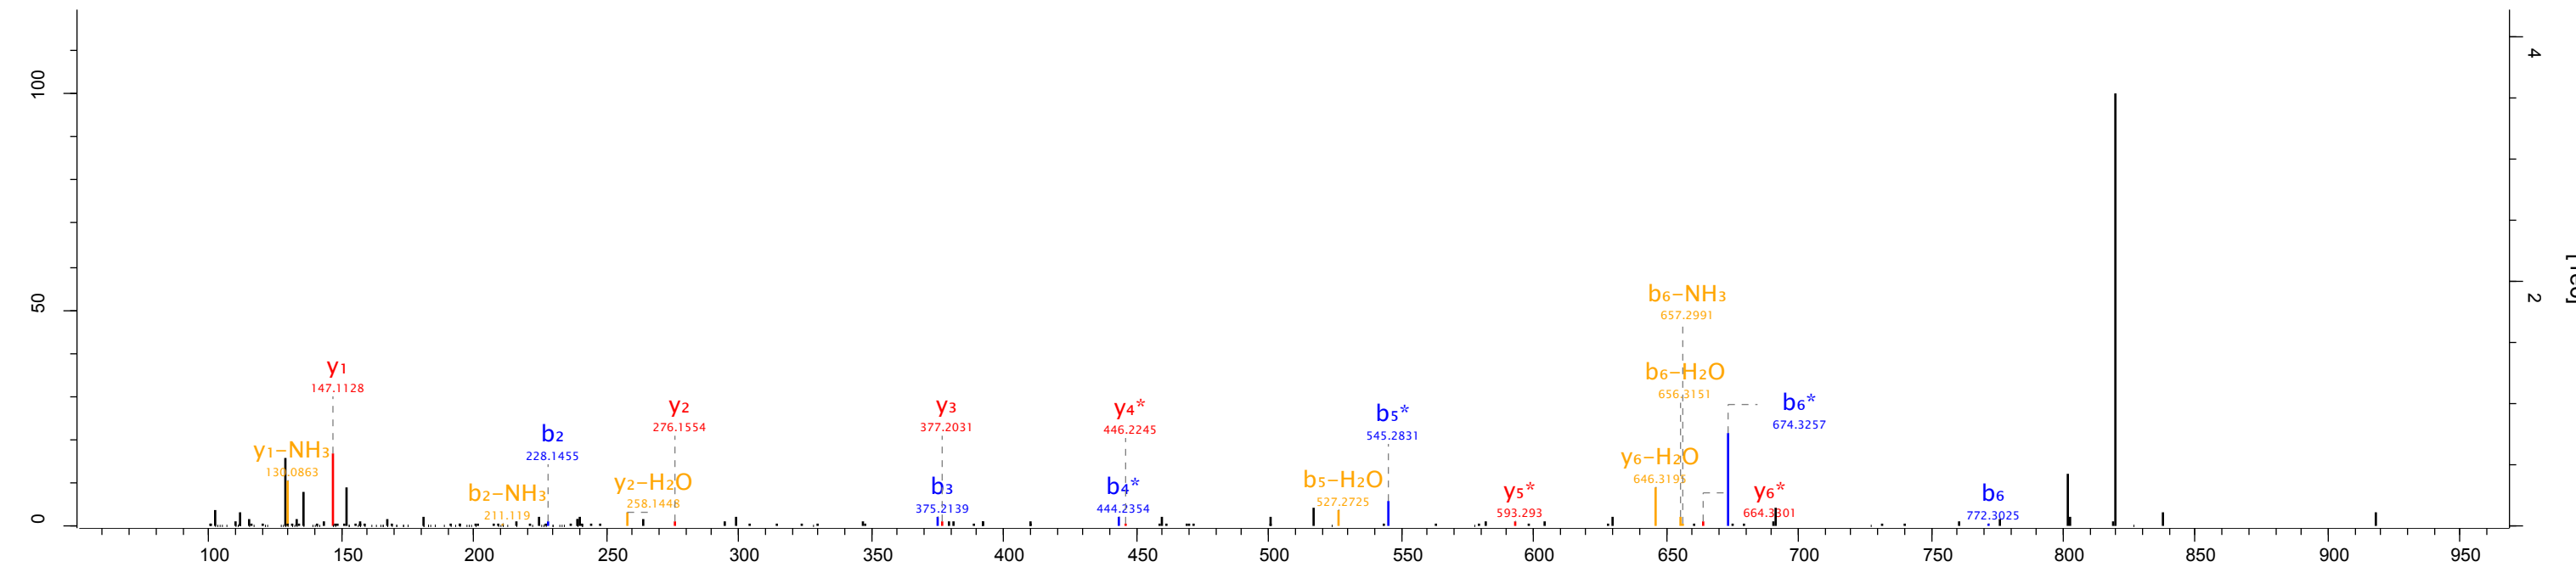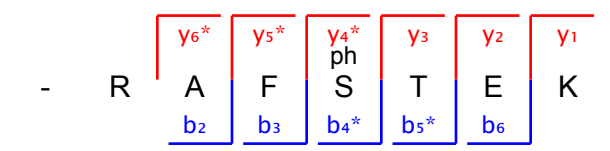

Raw file  
20150814\_A375SR\_Phospho\_BR2\_04

Scan 28324 Method FTMS; HCD Score 95.2 m/z 917.43 Gene names ELMSAN1

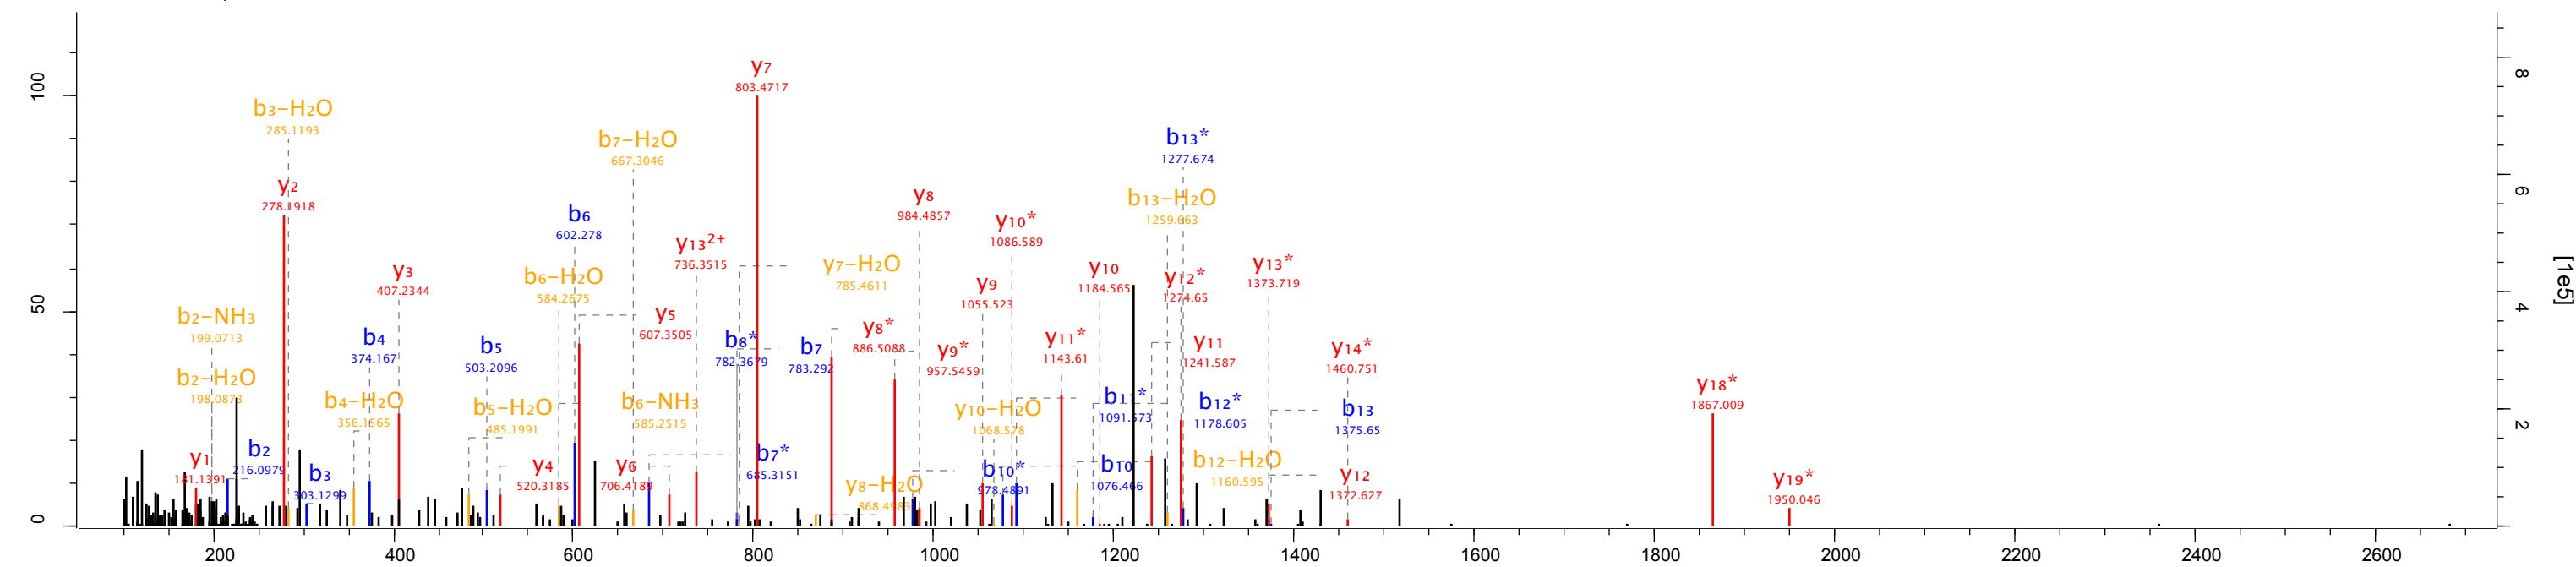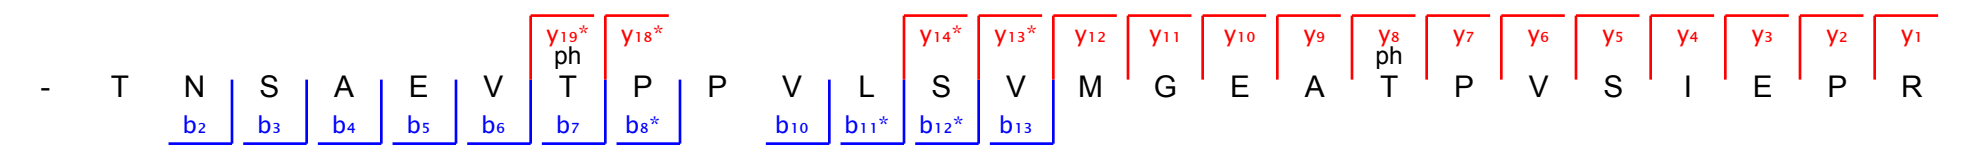



Raw file: 20150814\_A375SR\_Phospho\_BR2\_04  
 Scan: 28334 Method: FTMS; HCD Score: 123.22 m/z: 1114.08 Gene names: RB1

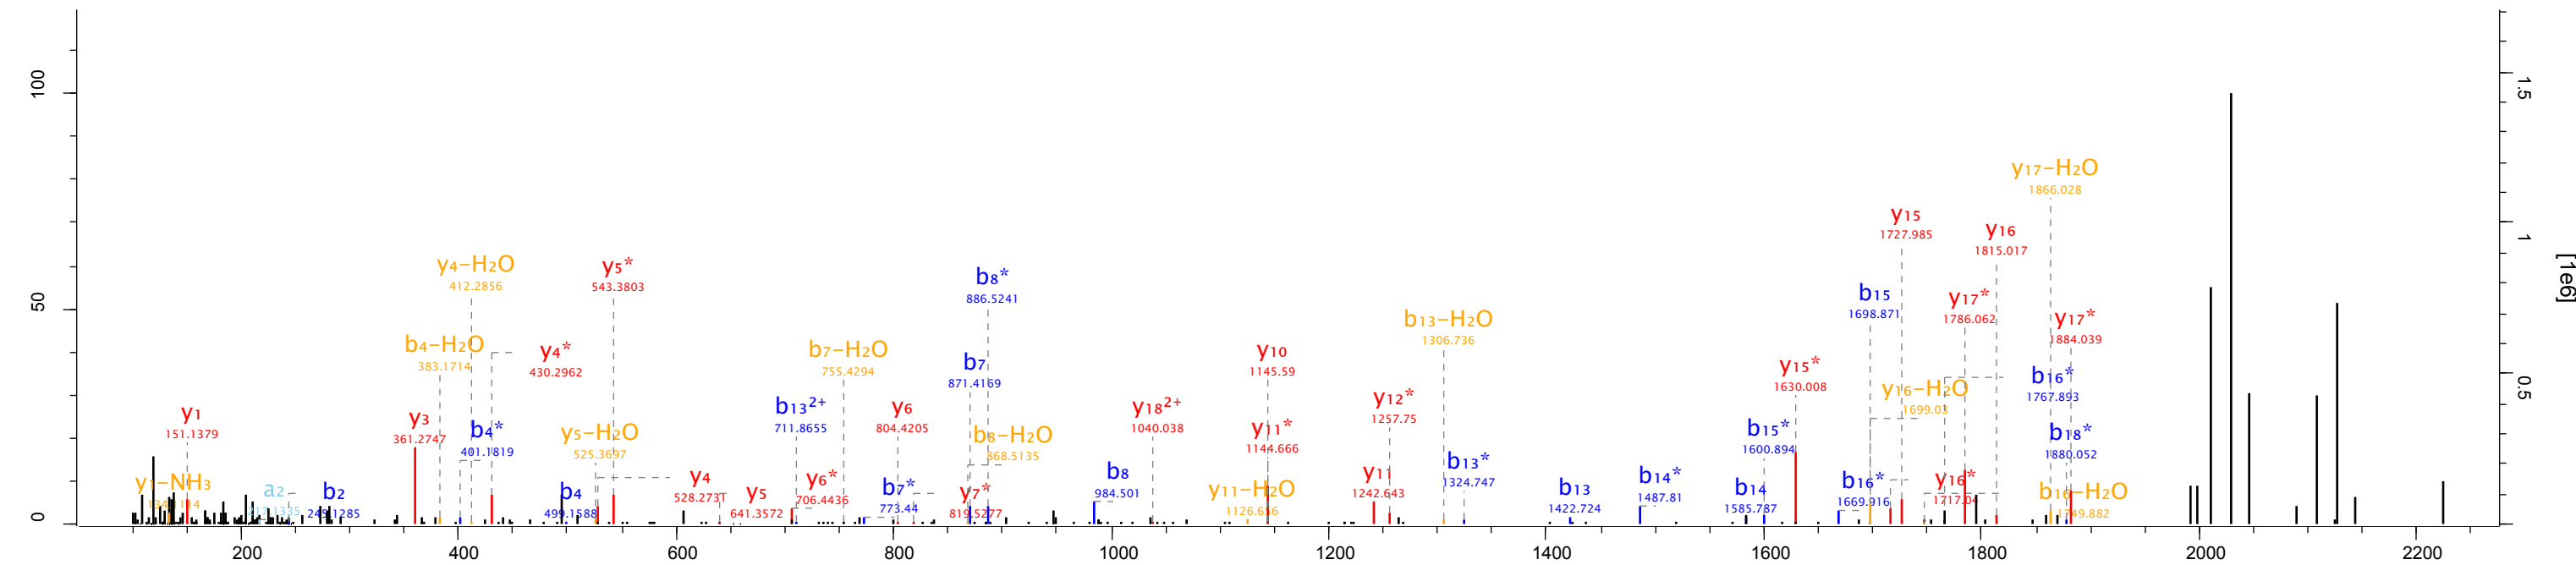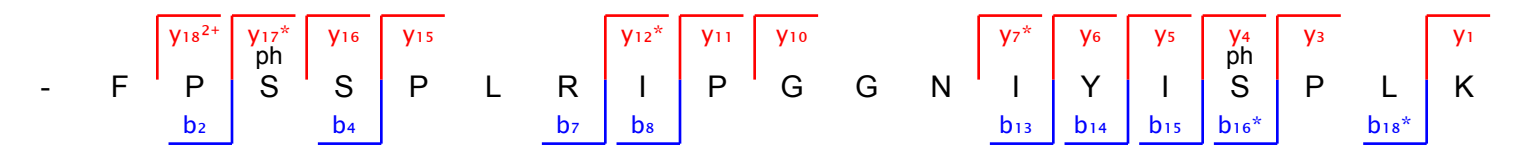

Raw file: 20150814\_A375SR\_Phospho\_BR2\_04  
 Scan: 28424 Method: FTMS; HCD Score: 46.8 m/z: 1273.53 Gene names: RPA2

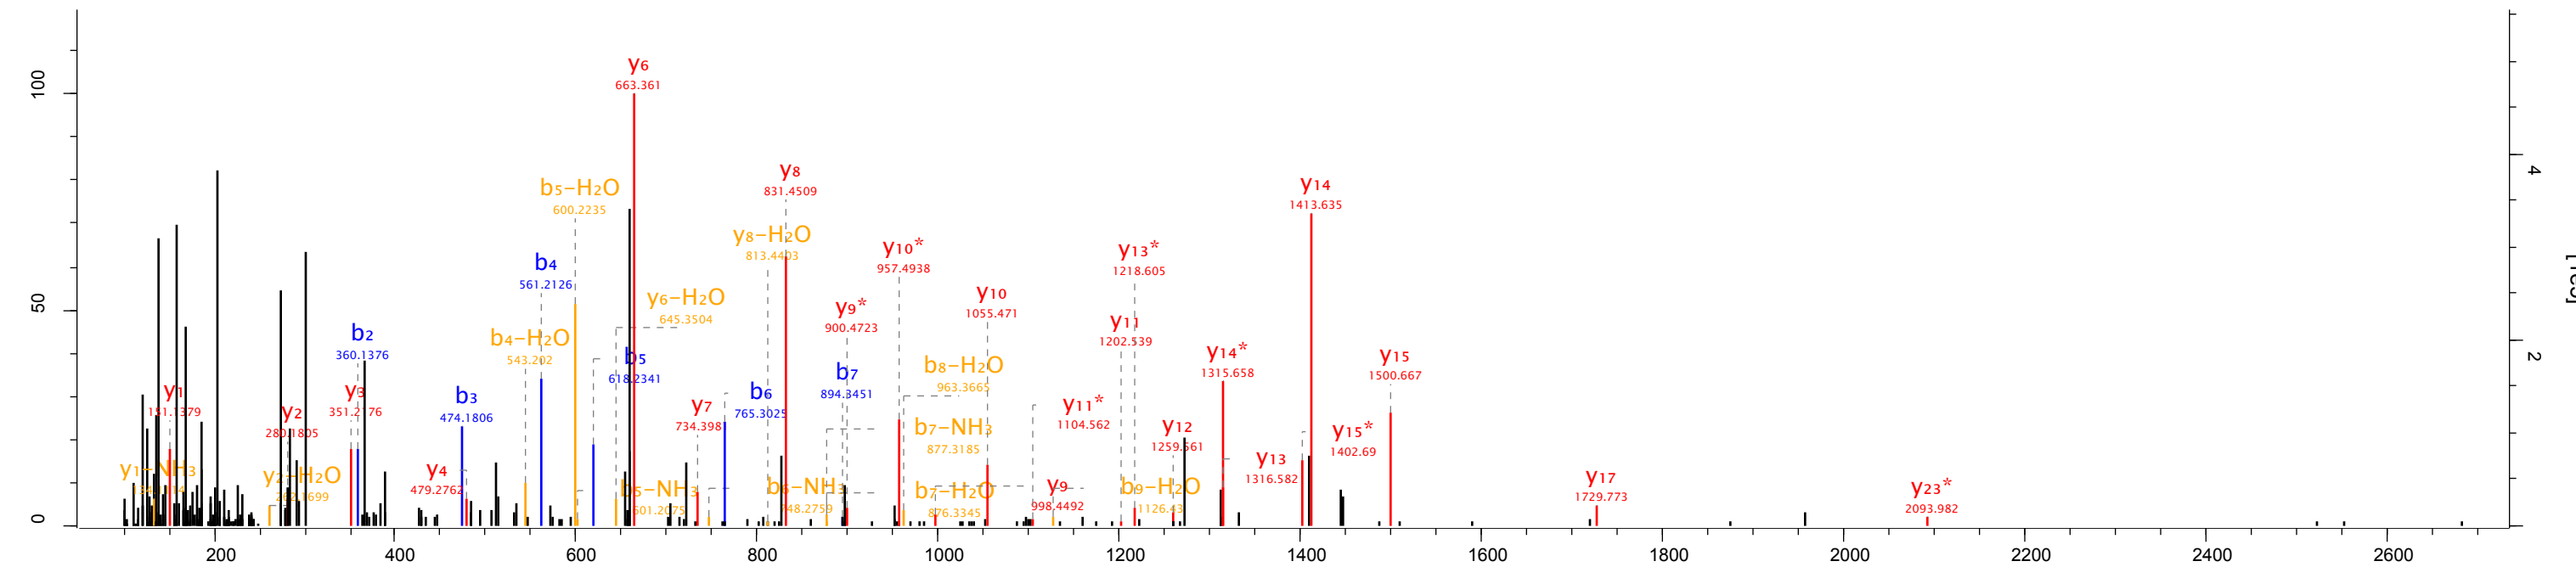

ac - M W N S G F E S Y G S S Y G G A G G Y T Q S P G G F G S P A P S Q A E K -

Fragmentation sites are indicated by brackets below the amino acid sequence:

- W, N, S, G, F, E: b2, b3, b4, b5, b6, b7
- G, G, A, G, G, Y, T, Q, S, P, G, G, F, G, S, P, A, P, S, Q, A, E, K: y1, y2, y3, y4, y6, y7, y8, y9, y10, y11, y12, y13, y14, y15, y17, y23\*

Raw file 20150814\_A375SR\_Phospho\_BR2\_04 Scan 28694 Method FTMS; HCD Score 204.53 m/z 727.7 Gene names BRD8

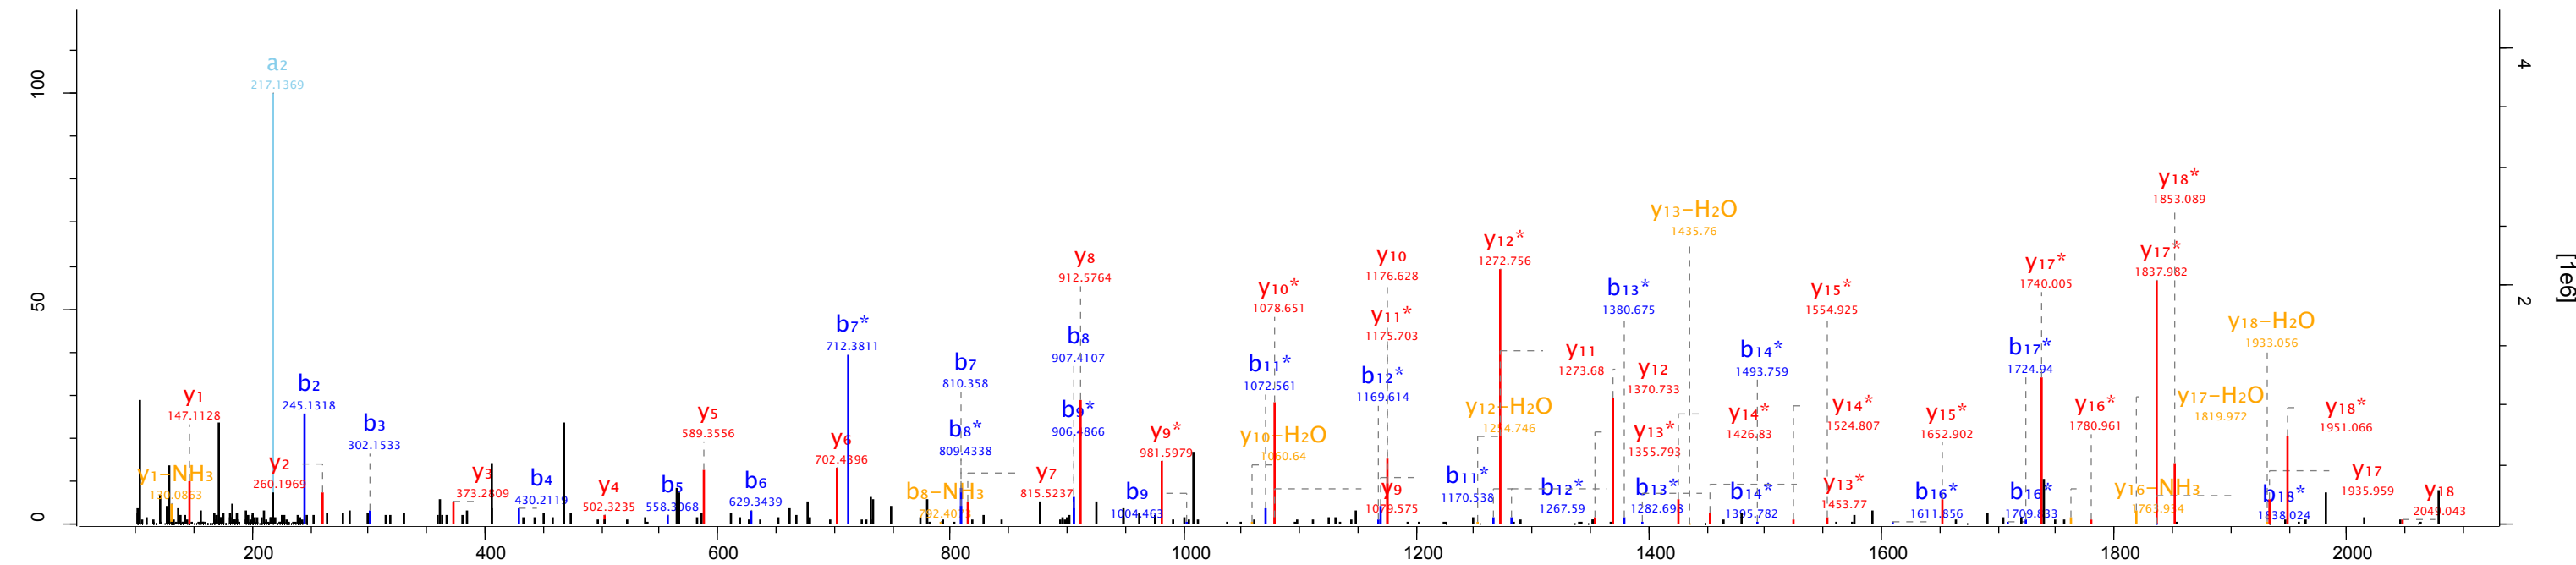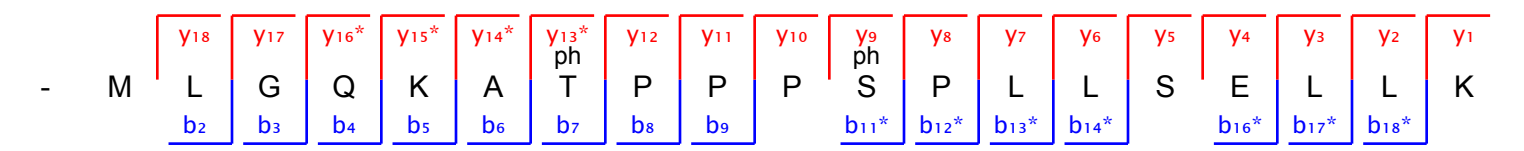

Raw file: 20150814\_A375SR\_Phospho\_BR2\_04  
 Scan: 29114 Method: FTMS; HCD Score: 212.17 m/z: 893.86 Gene names: ATG4B

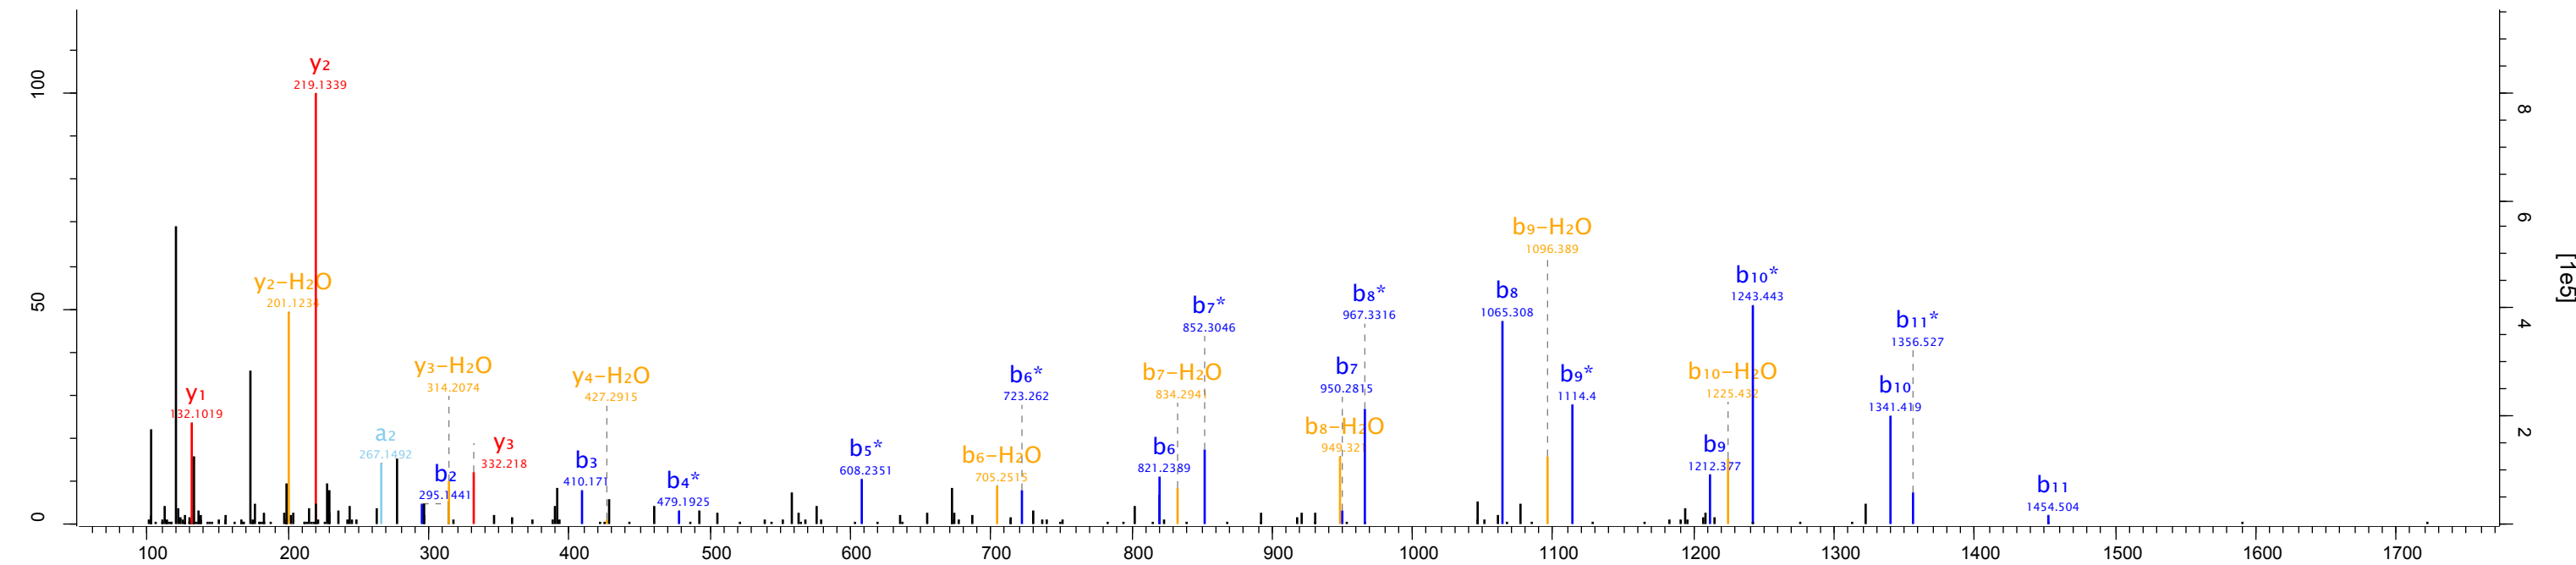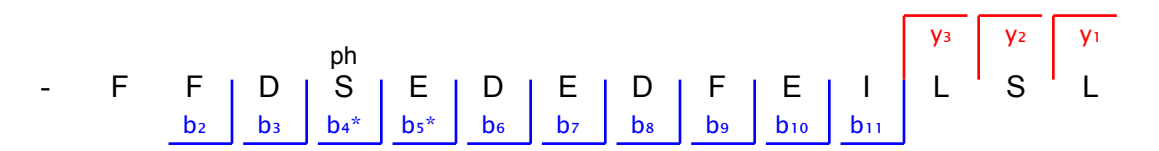

Raw file 20150814\_A375SR\_Phospho\_BR2\_04 Scan 2954 Method FTMS; HCD Score 138.56 m/z 735.33 Gene names UHRF1BP1L

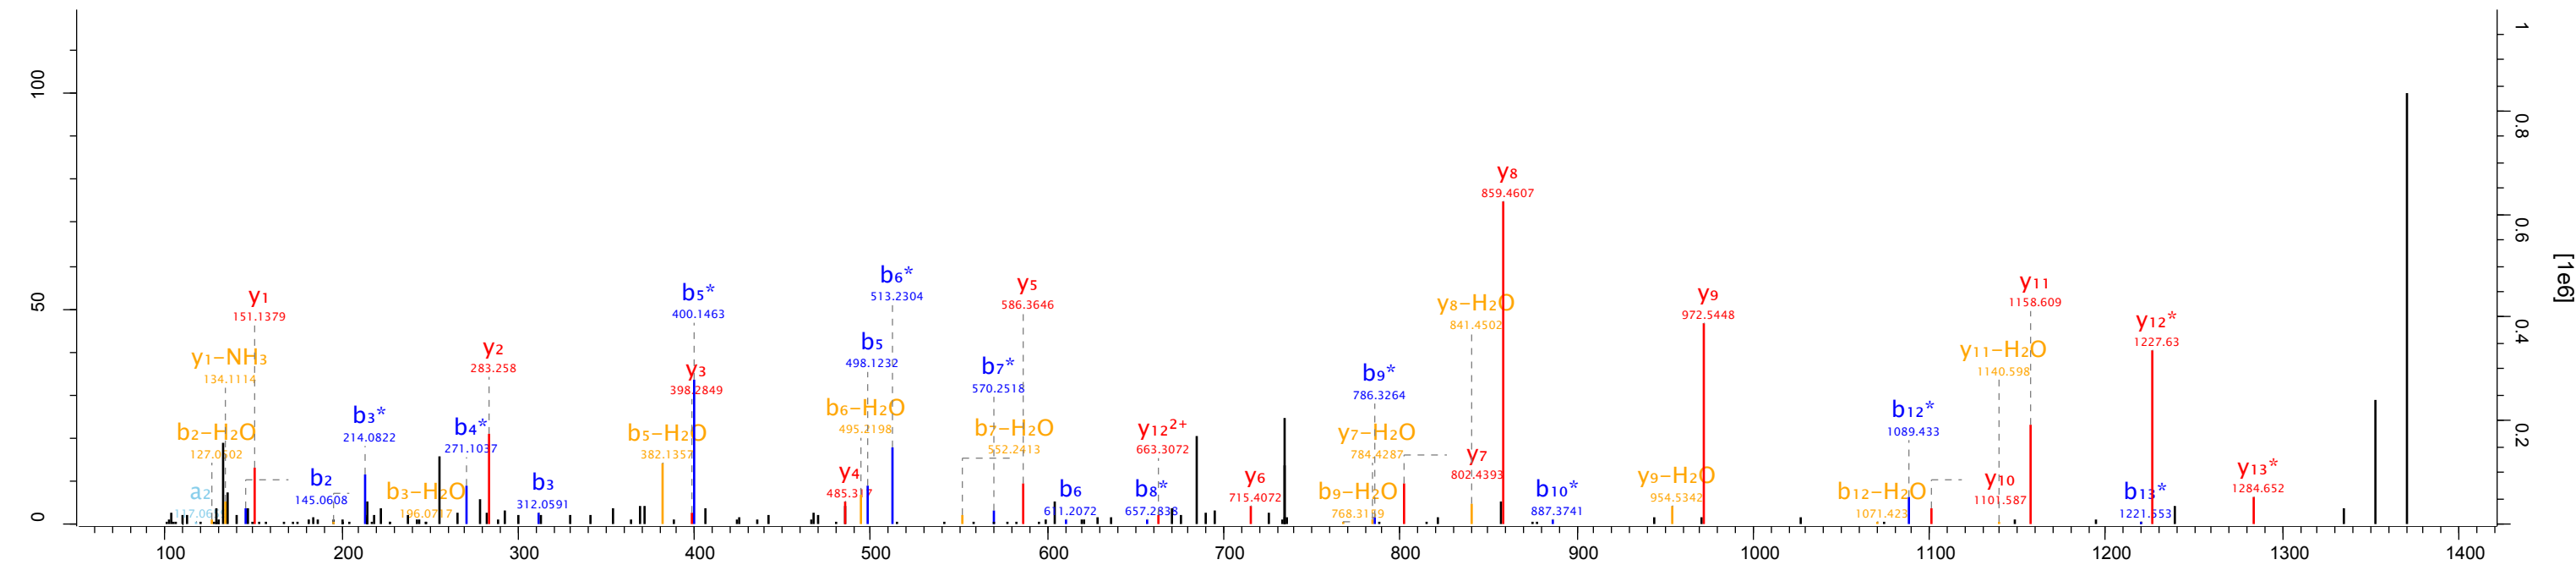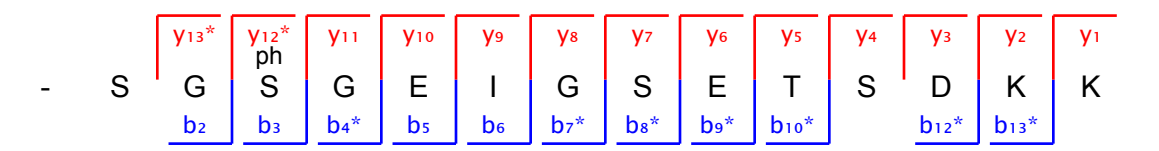

Raw file 20150814\_A375SR\_Phospho\_BR2\_04 Scan 3384 Method FTMS; HCD Score 59.59 m/z 601.27 Gene names SF1

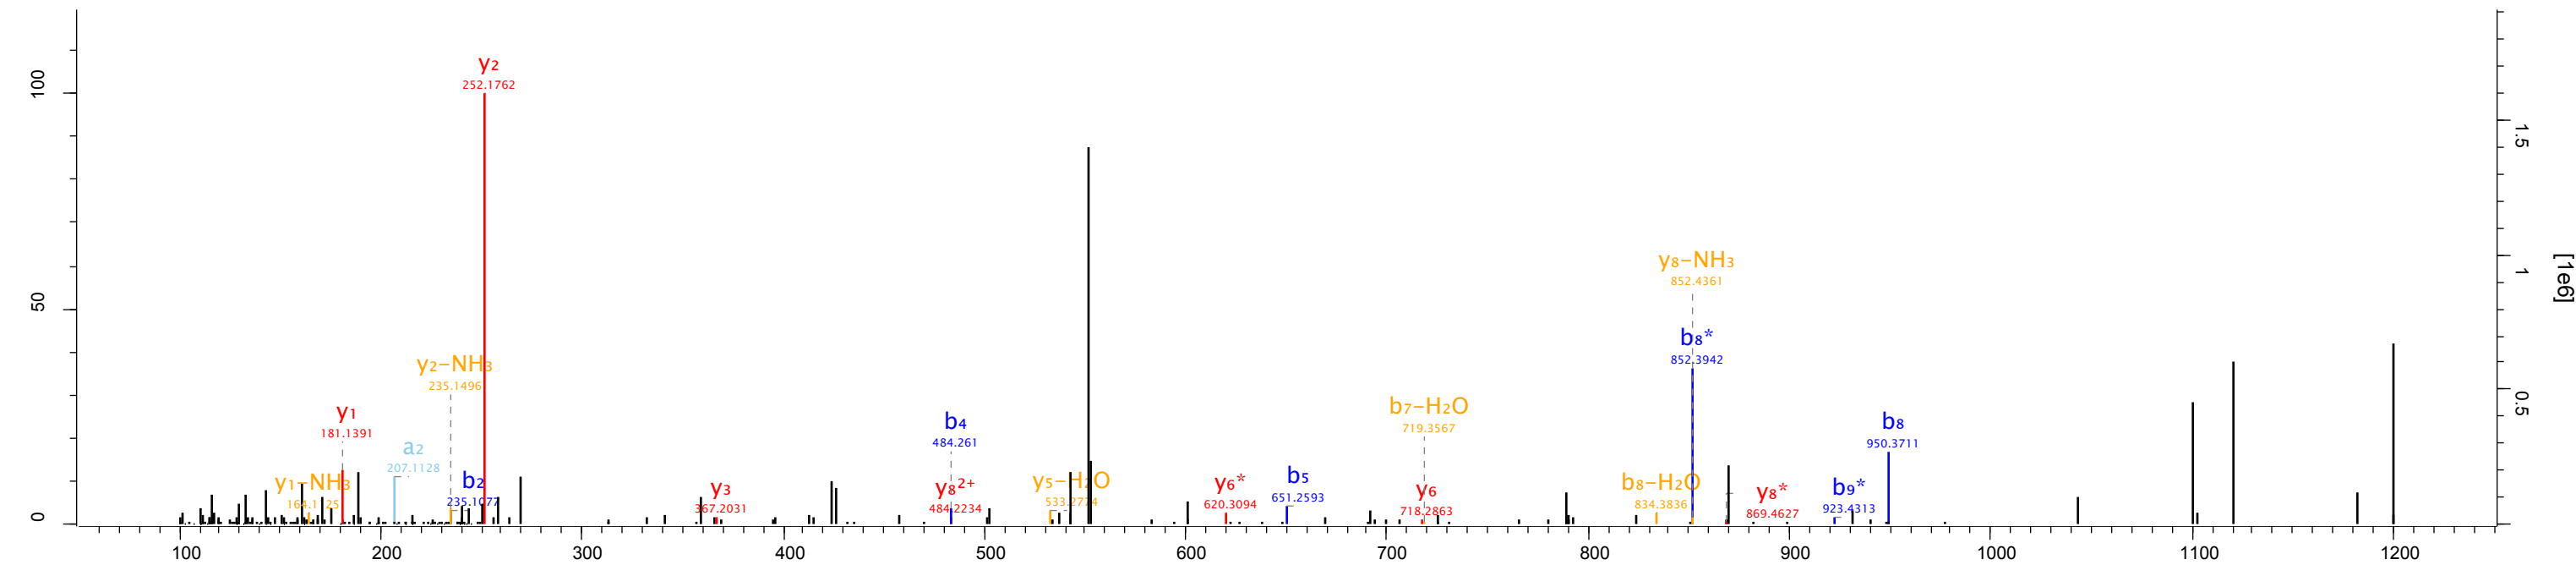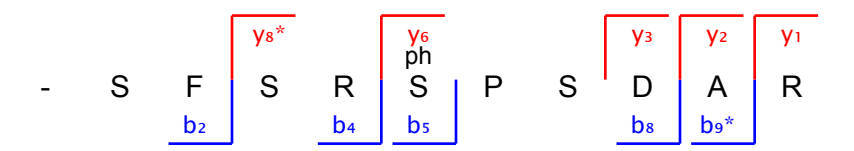

Raw file: 20150814\_A375SR\_Phospho\_BR2\_04  
 Scan: 3644 Method: FTMS; HCD Score: 115 m/z: 519.25 Gene names: SORBS3

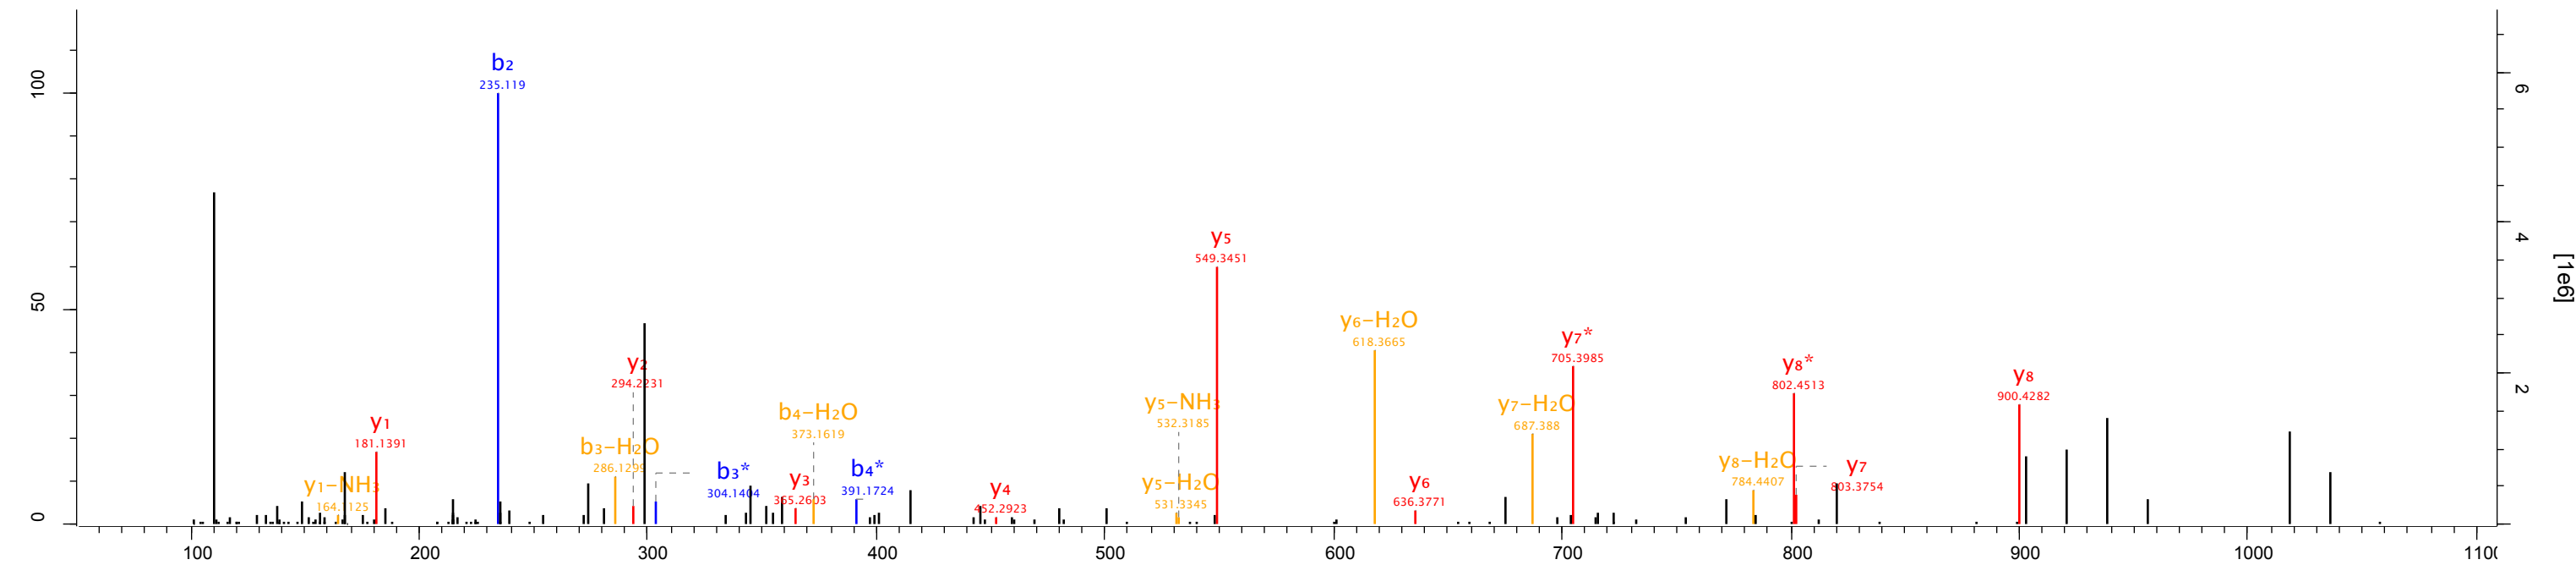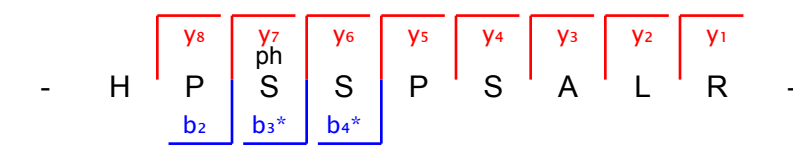

Raw file: 20150814\_A375SR\_Phospho\_BR2\_04  
 Scan: 3684 Method: FTMS; HCD Score: 145.86 m/z: 615.77 Gene names: RBM8A

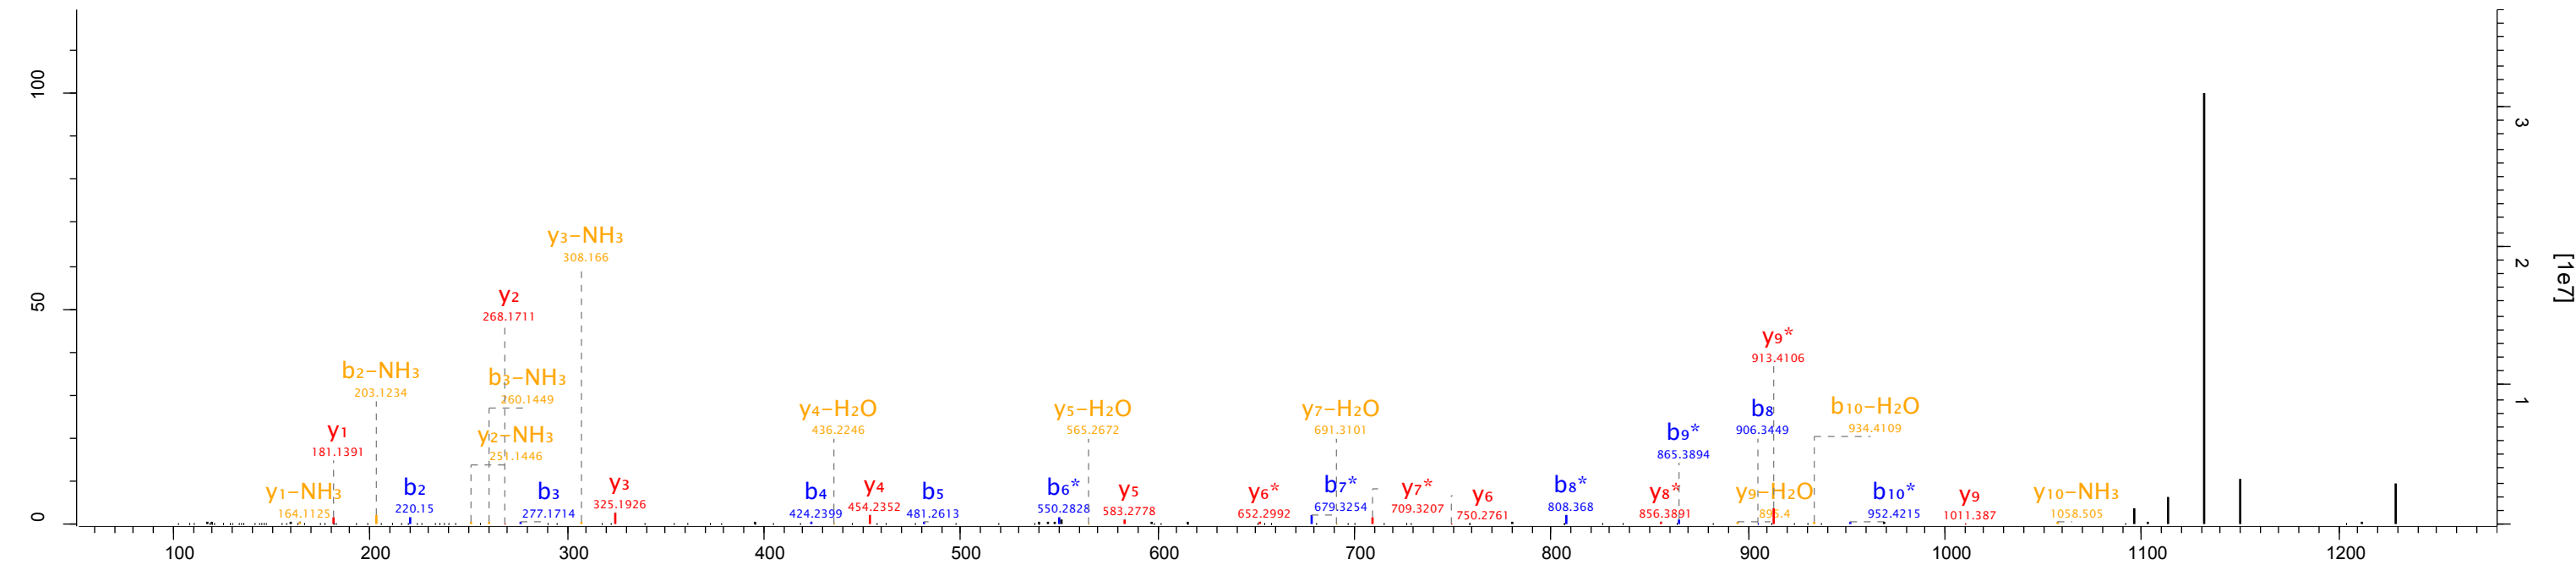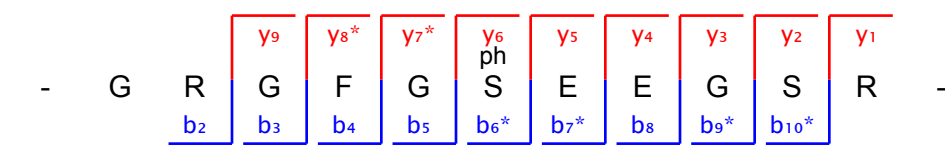



Raw file: 20150814\_A375SR\_Phospho\_BR2\_04  
 Scan: 3784 Method: FTMS; HCD Score: 208.66 m/z: 647.28 Gene names: XRN2

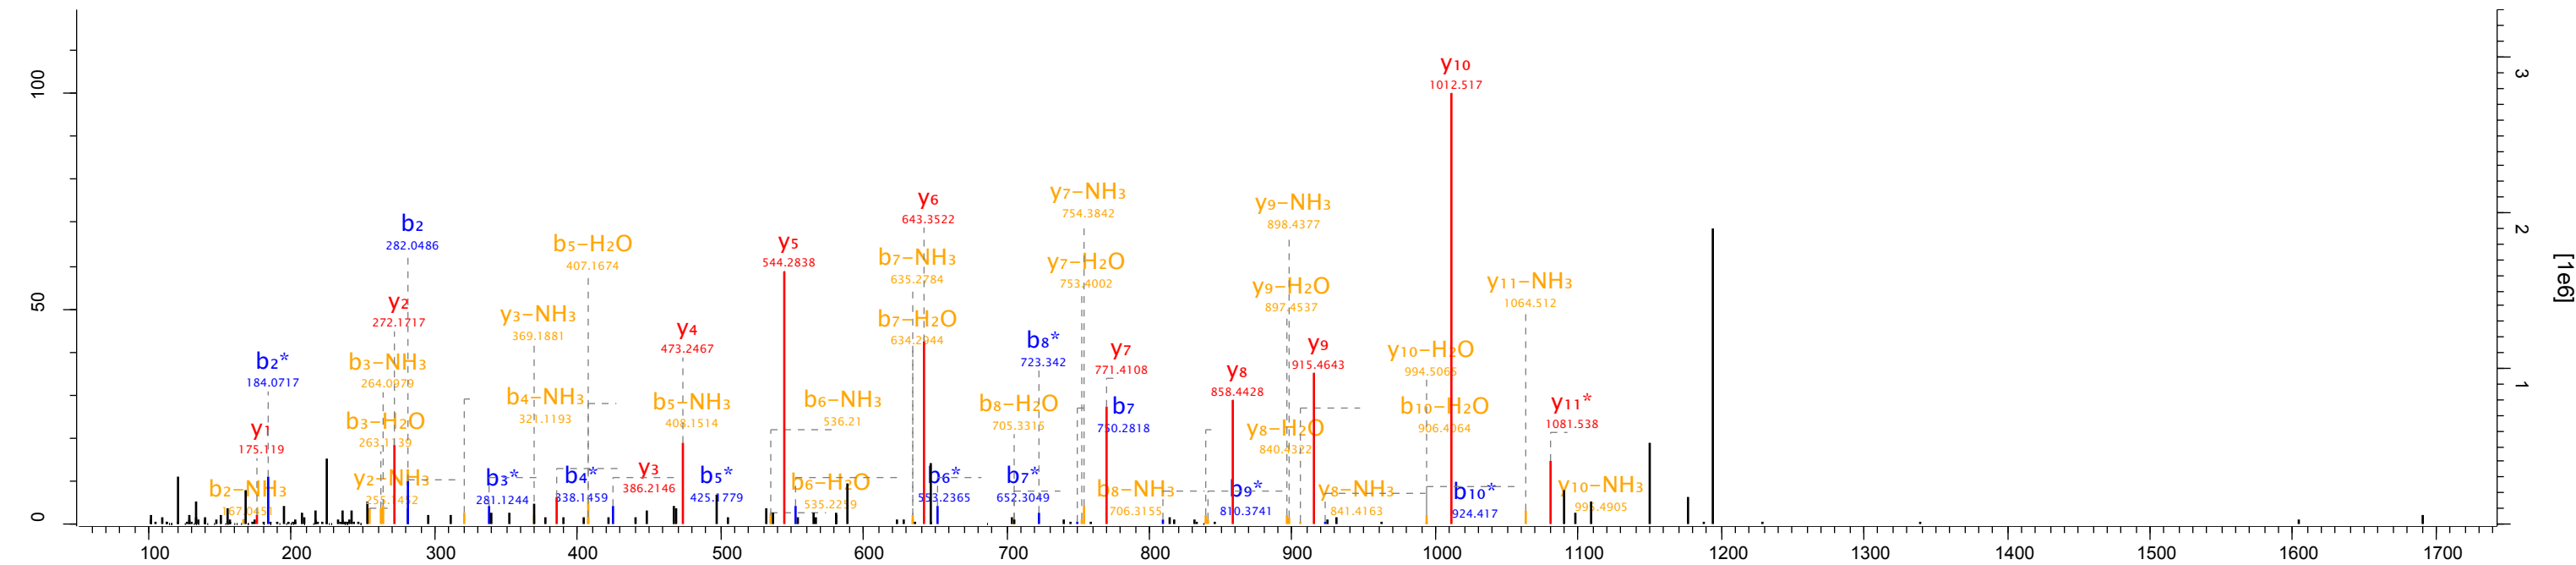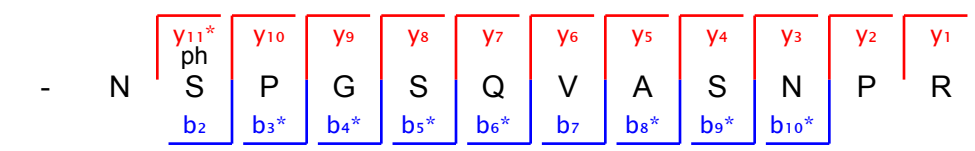

Raw file: 20150814\_A375SR\_Phospho\_BR2\_04  
 Scan: 4224 Method: FTMS; HCD Score: 128.08 m/z: 469.26 Gene names: TMPO

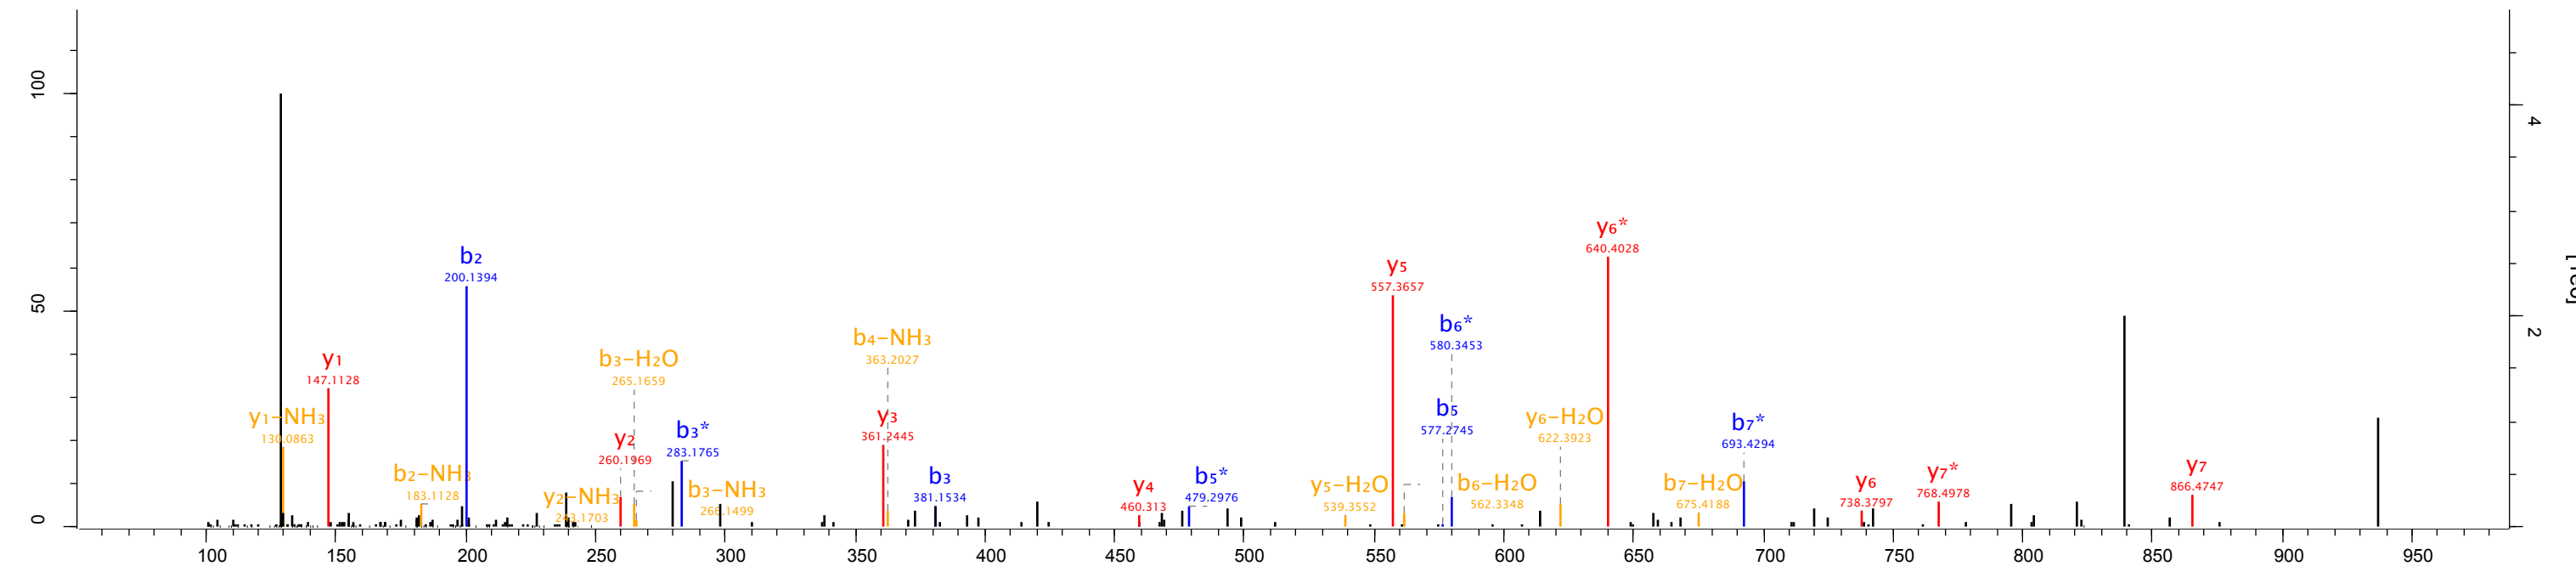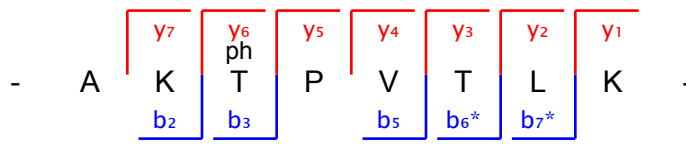

Raw file: 20150814\_A375SR\_Phospho\_BR2\_04  
 Scan: 4684  
 Method: FTMS; HCD  
 Score: 178.1  
 m/z: 849.88  
 Gene names: YBX3

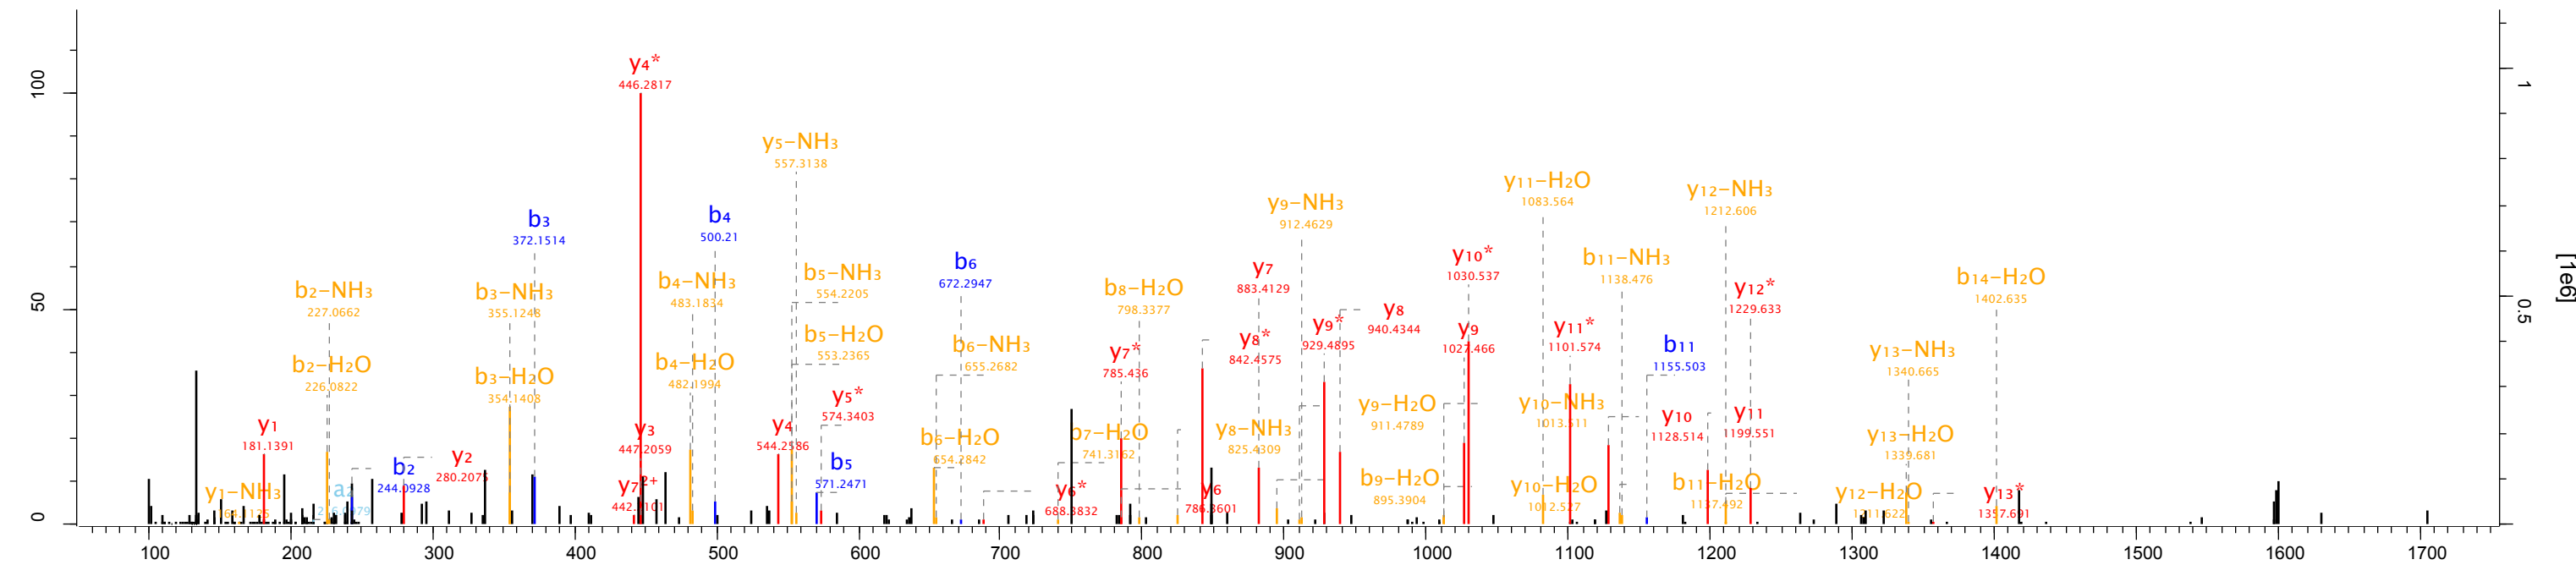

- E N Q Q A T S G P N Q P S V R -  
 (b2) (b3) (b4) (b5) (b6) (b11)  
 (y13\*) (y12\*) (y11) (y10) (y9) (y8) (y7) (y6) (y5\*) (y4) (y3) (y2) (y1)  
 (ph)

Raw file: 20150814\_A375SR\_Phospho\_BR2\_04  
 Scan: 6124 Method: FTMS; HCD Score: 99.28 m/z: 594.75 Gene names: ATXN2L

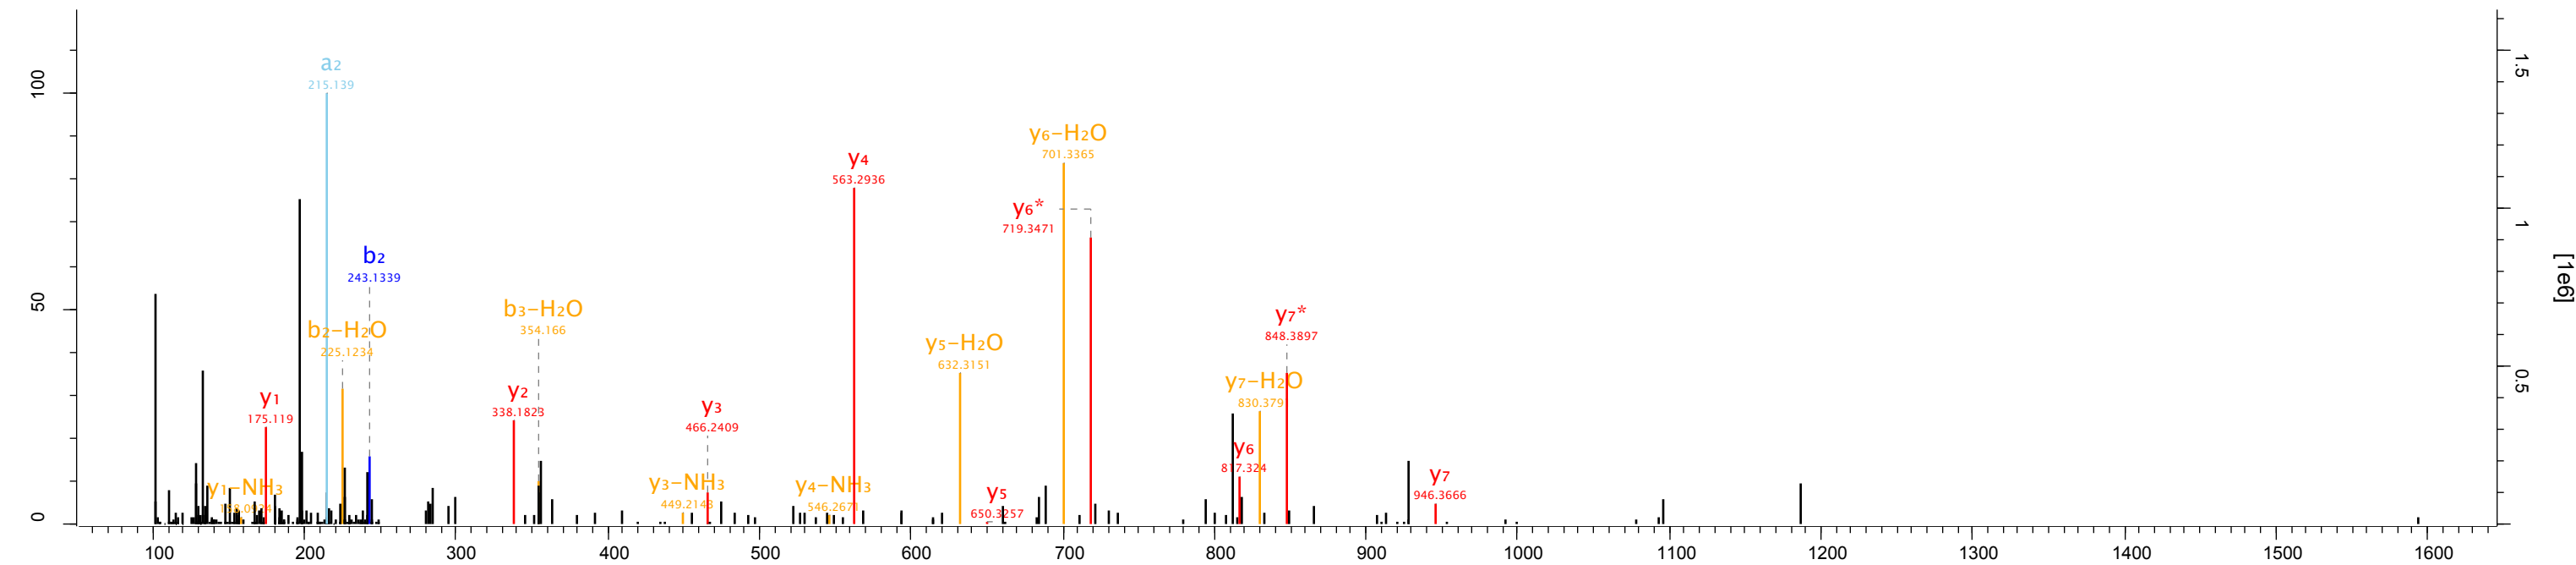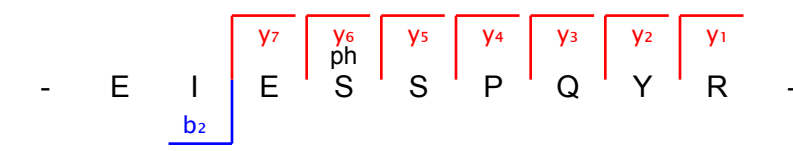

Raw file Scan Method Score m/z Gene names

20150814\_A375SR\_Phospho\_BR2\_04 6704 FTMS; HCD 129.87 557.26 HN1

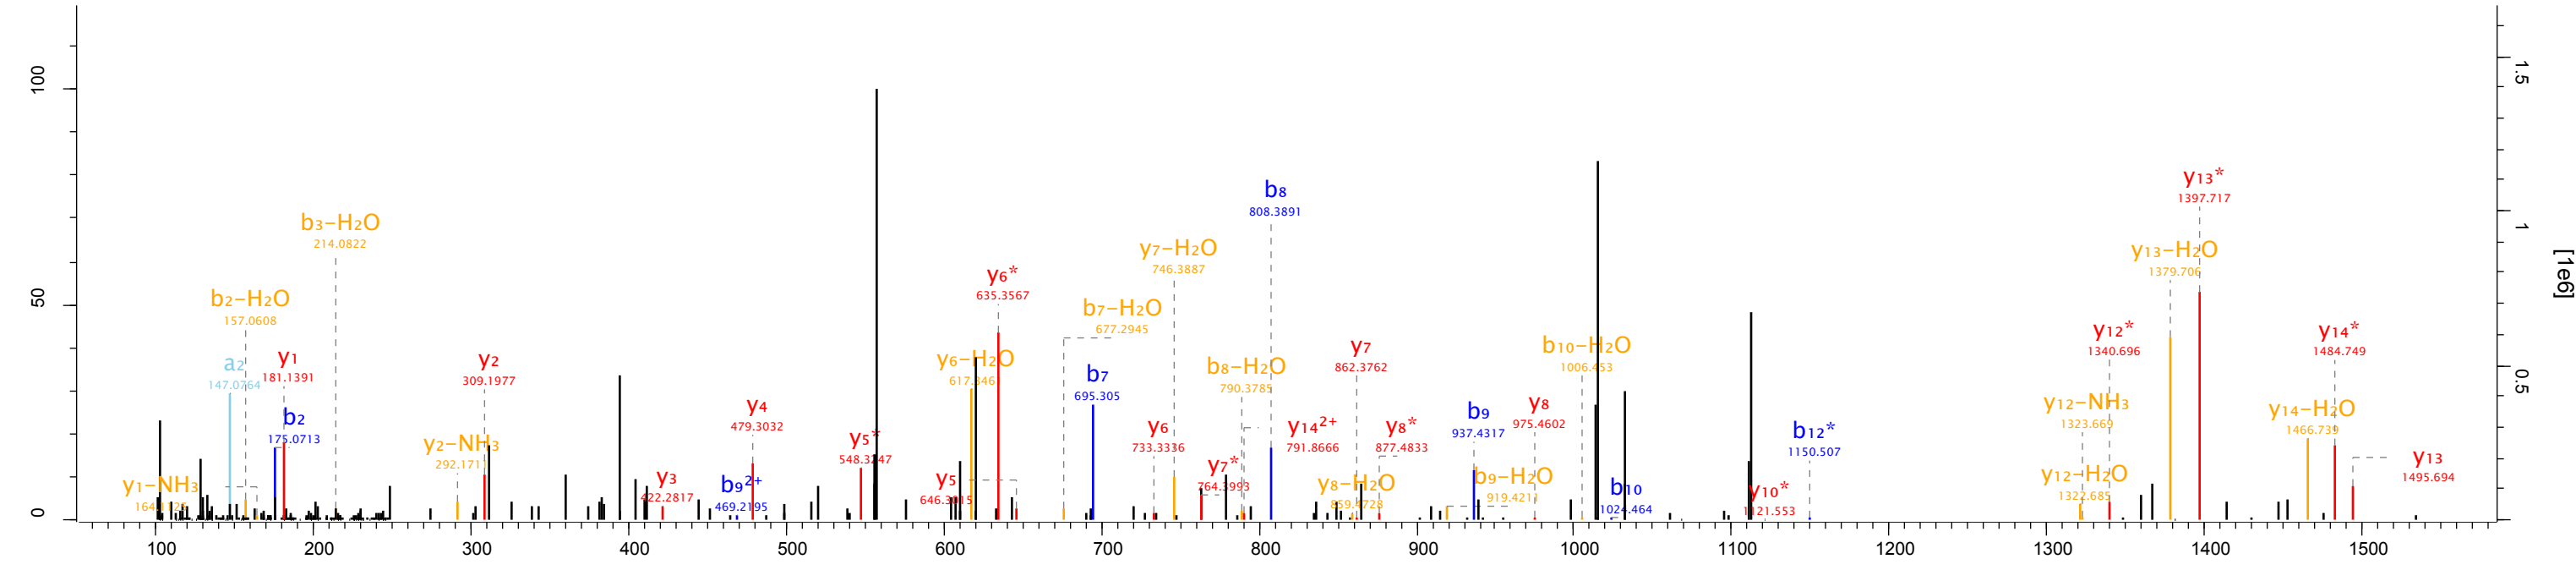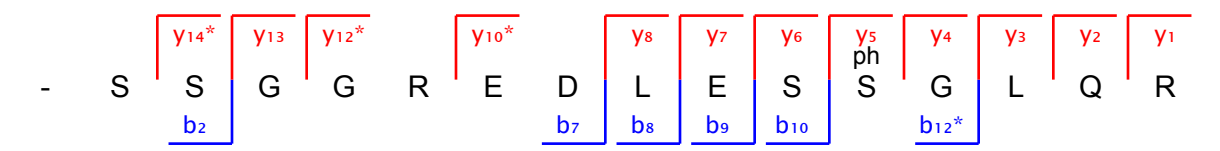

Raw file: 20150814\_A375SR\_Phospho\_BR2\_04  
 Scan: 7124 Method: FTMS; HCD Score: 143.98 m/z: 640.79 Gene names: PARD3

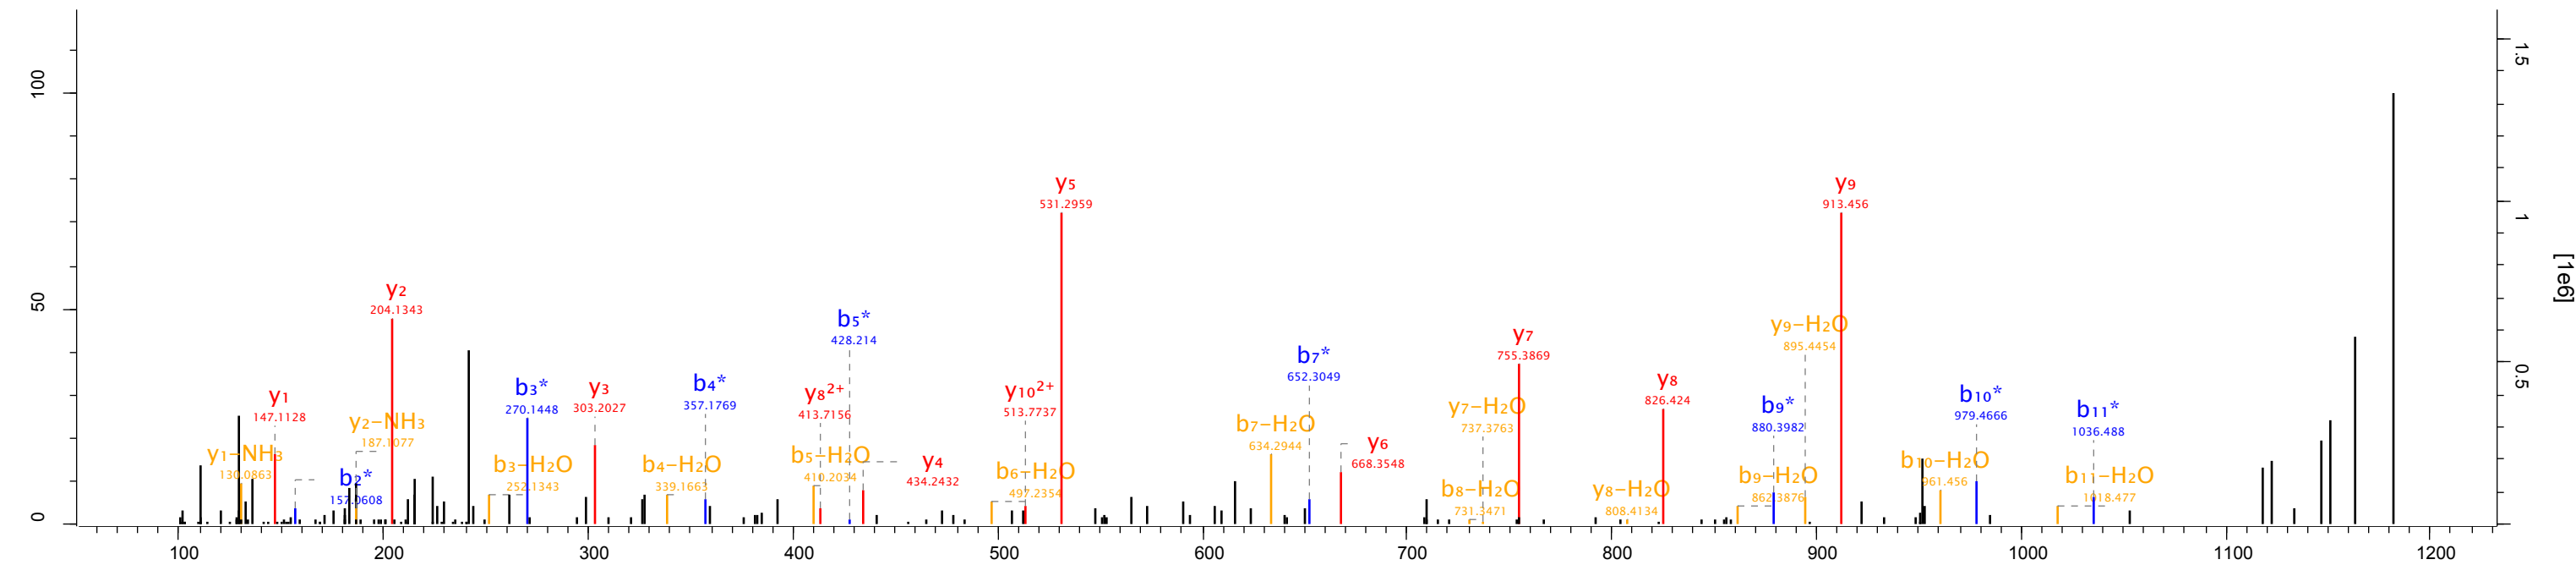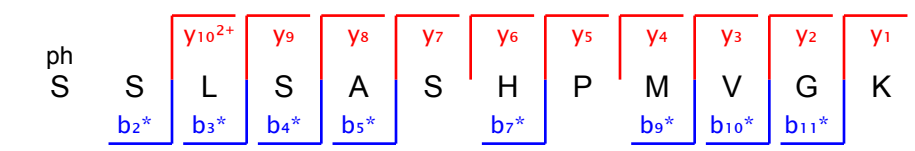

Raw file: 20150814\_A375SR\_Phospho\_BR2\_04  
 Scan: 7494 Method: FTMS; HCD Score: 168.43 m/z: 785.36 Gene names: NME1

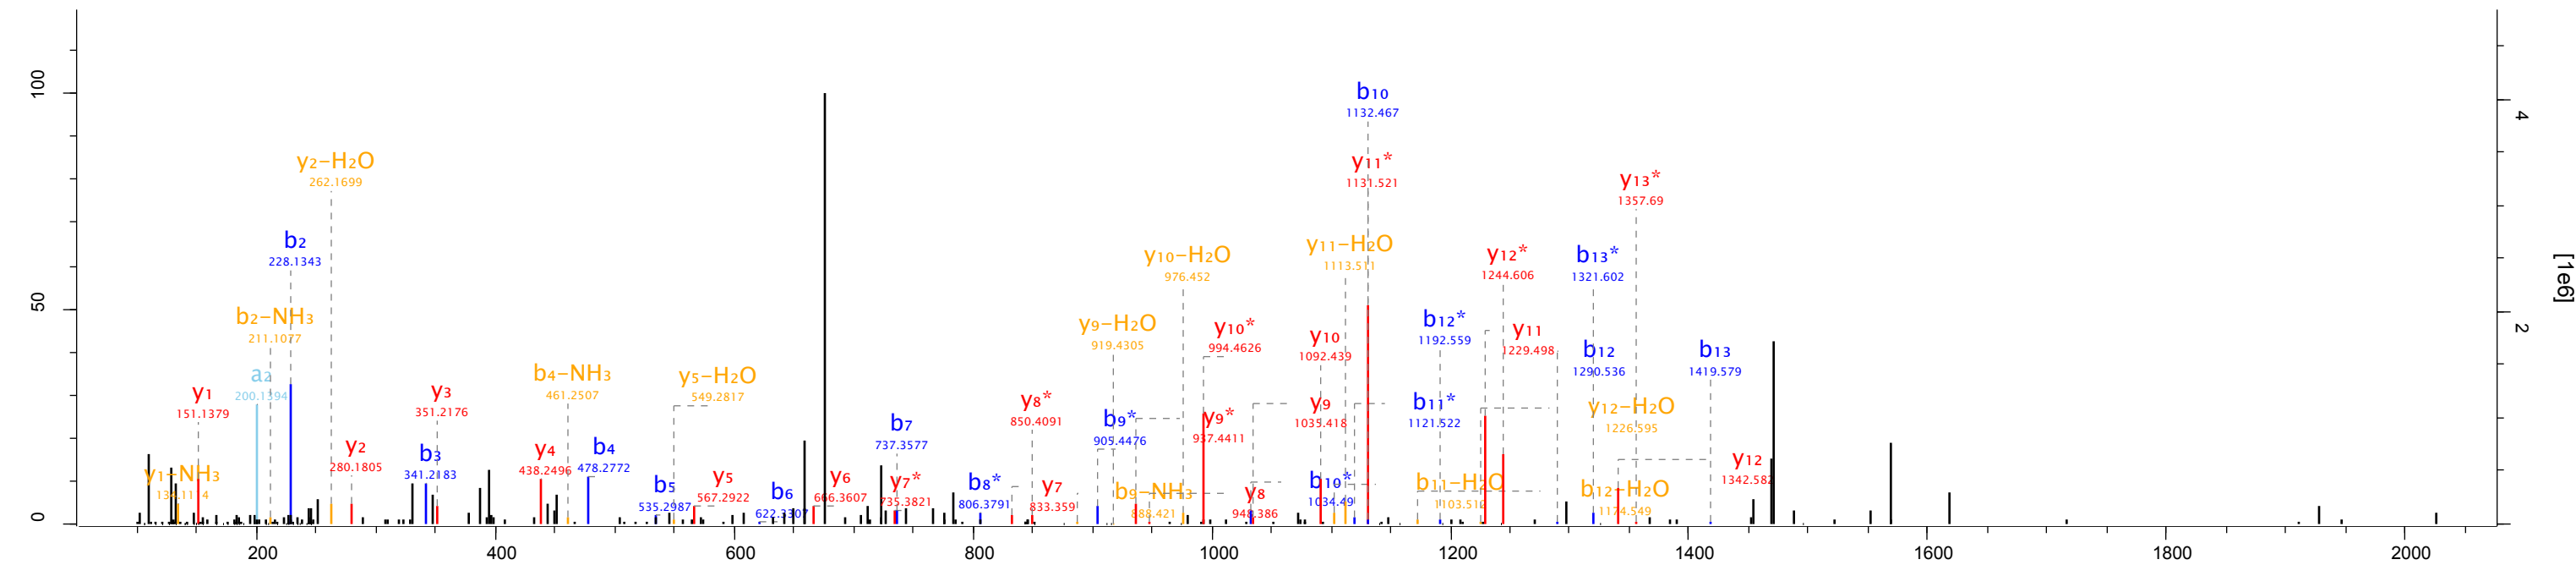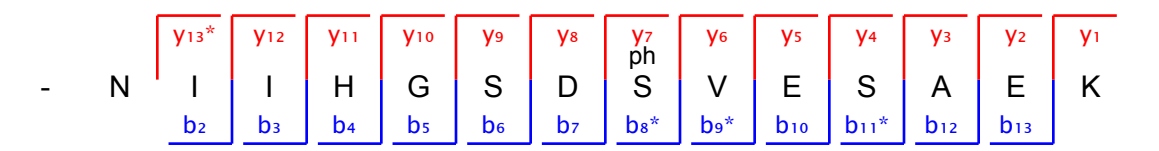

Raw file 20150814\_A375SR\_Phospho\_BR2\_04 Scan 7594 Method FTMS; HCD Score 198.85 m/z 718.8 Gene names SFPQ

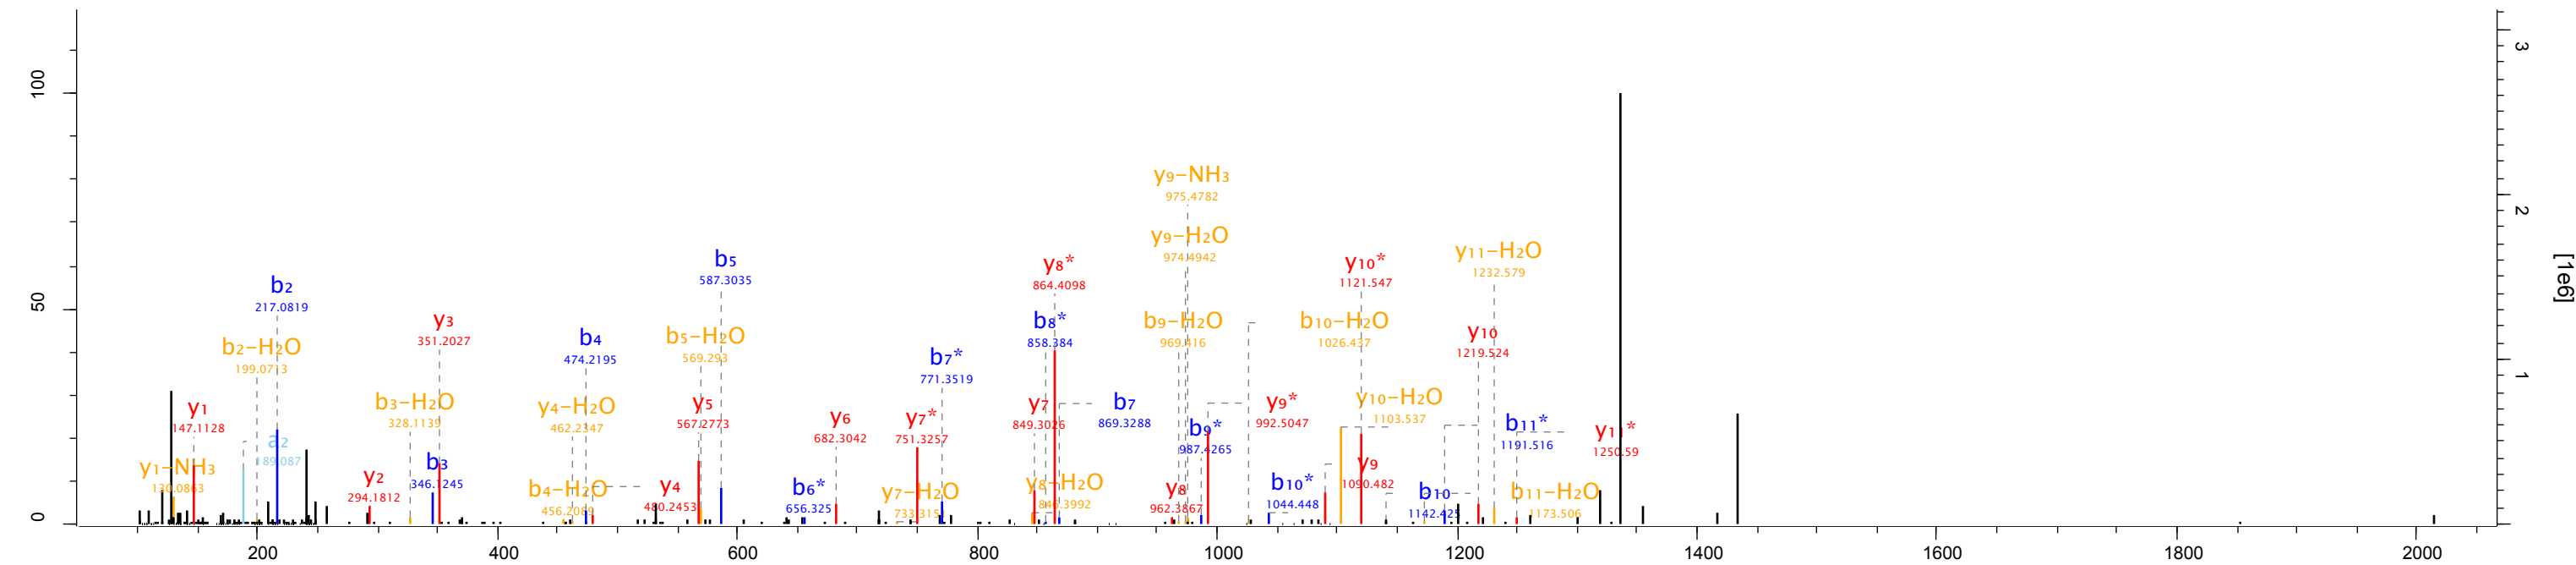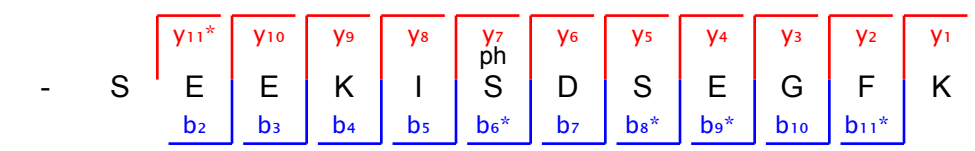



Raw file: 20150814\_A375SR\_Phospho\_BR2\_04  
 Scan: 7854 Method: FTMS; HCD Score: 195.6 m/z: 788.85 Gene names: ALDOA

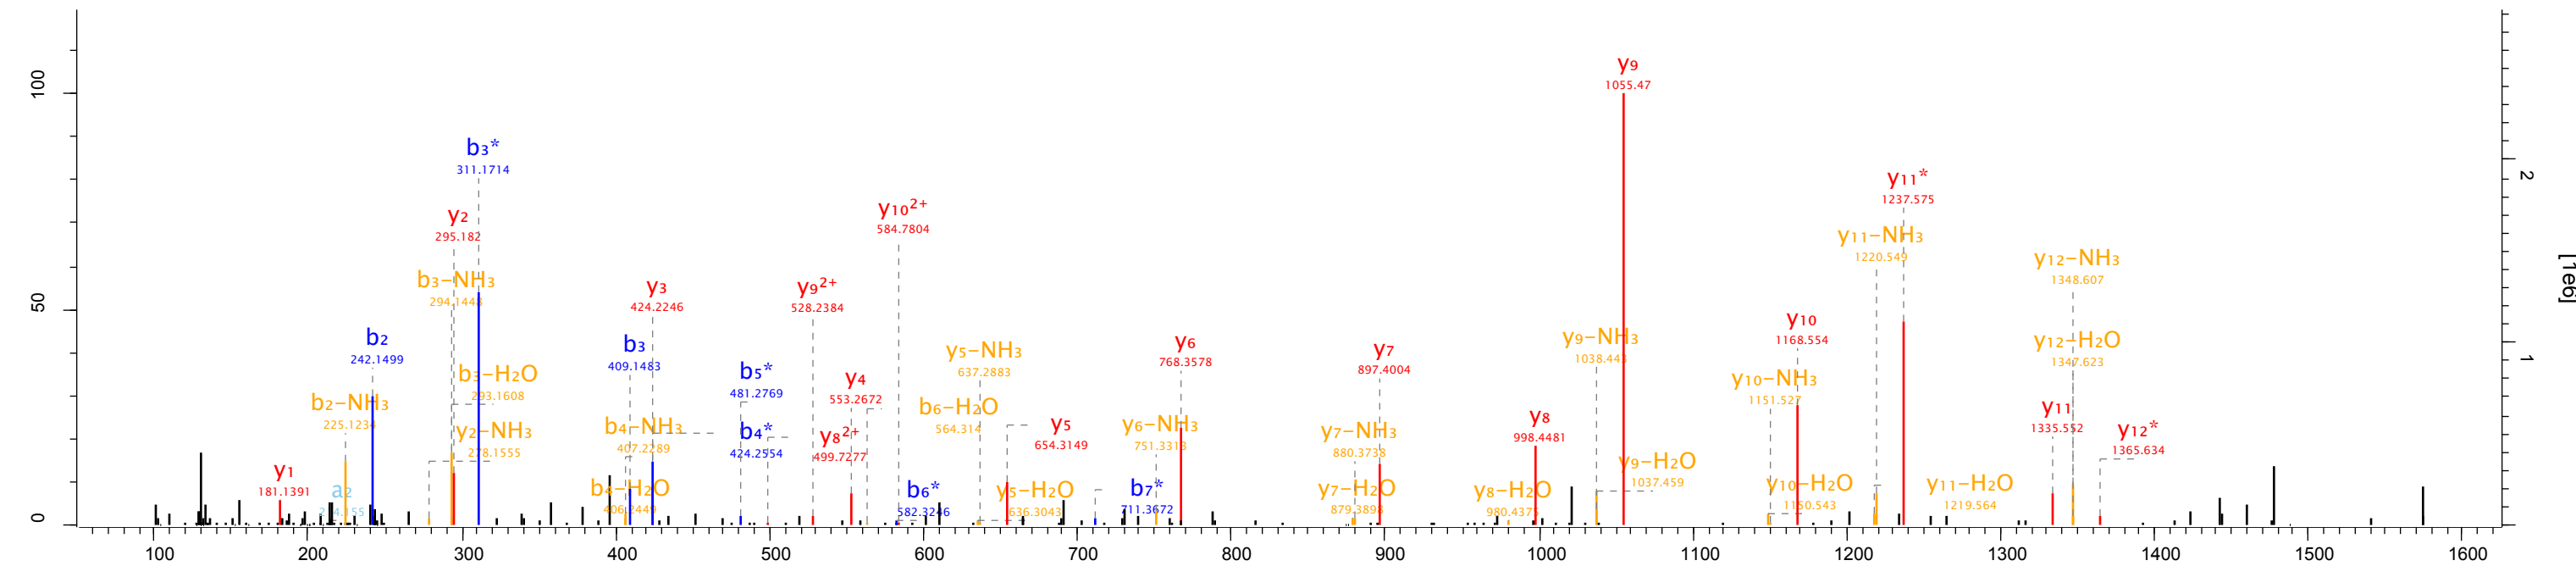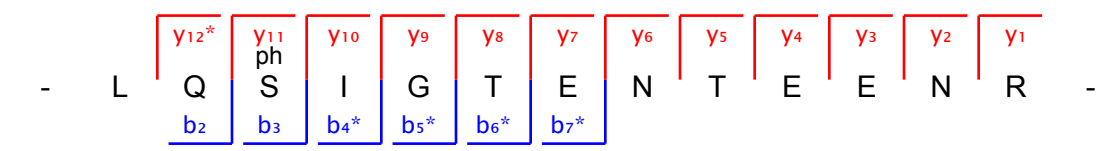

Raw file: 20150814\_A375SR\_Phospho\_BR2\_04  
 Scan: 7874 Method: FTMS; HCD Score: 103.67 m/z: 715.33 Gene names: PRRC2A

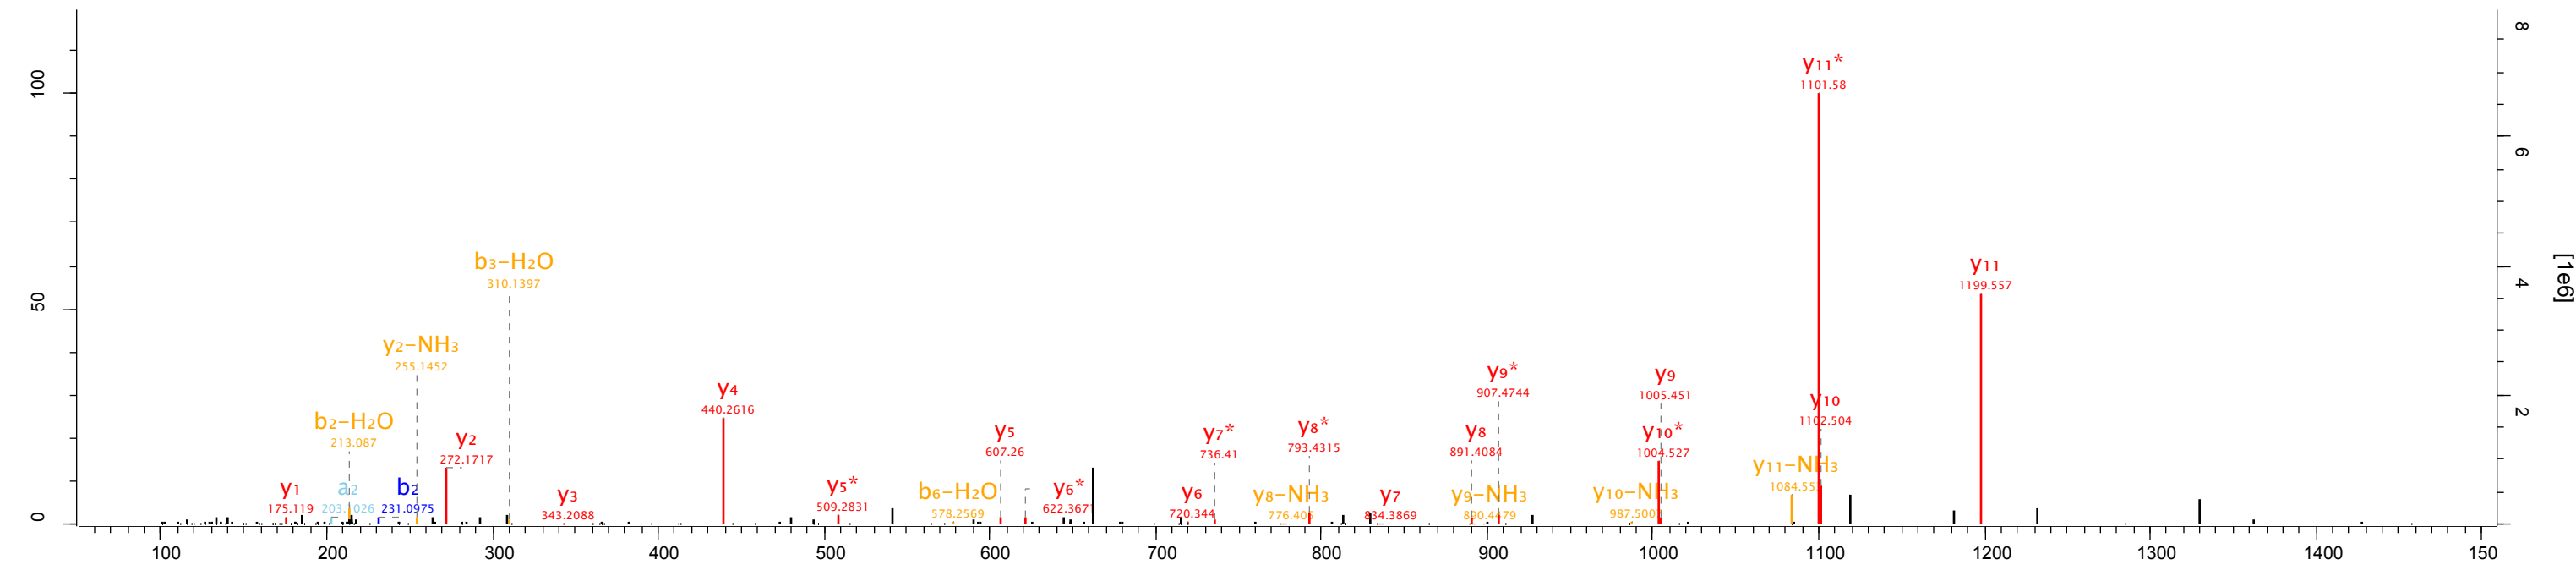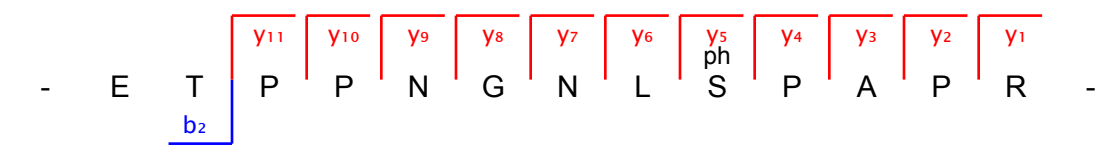

Raw file 20150814\_A375SR\_Phospho\_BR2\_04 Scan 8414 Method FTMS; HCD Score 276.8 m/z 885.88 Gene names HNRNPH1;HNRNPH2

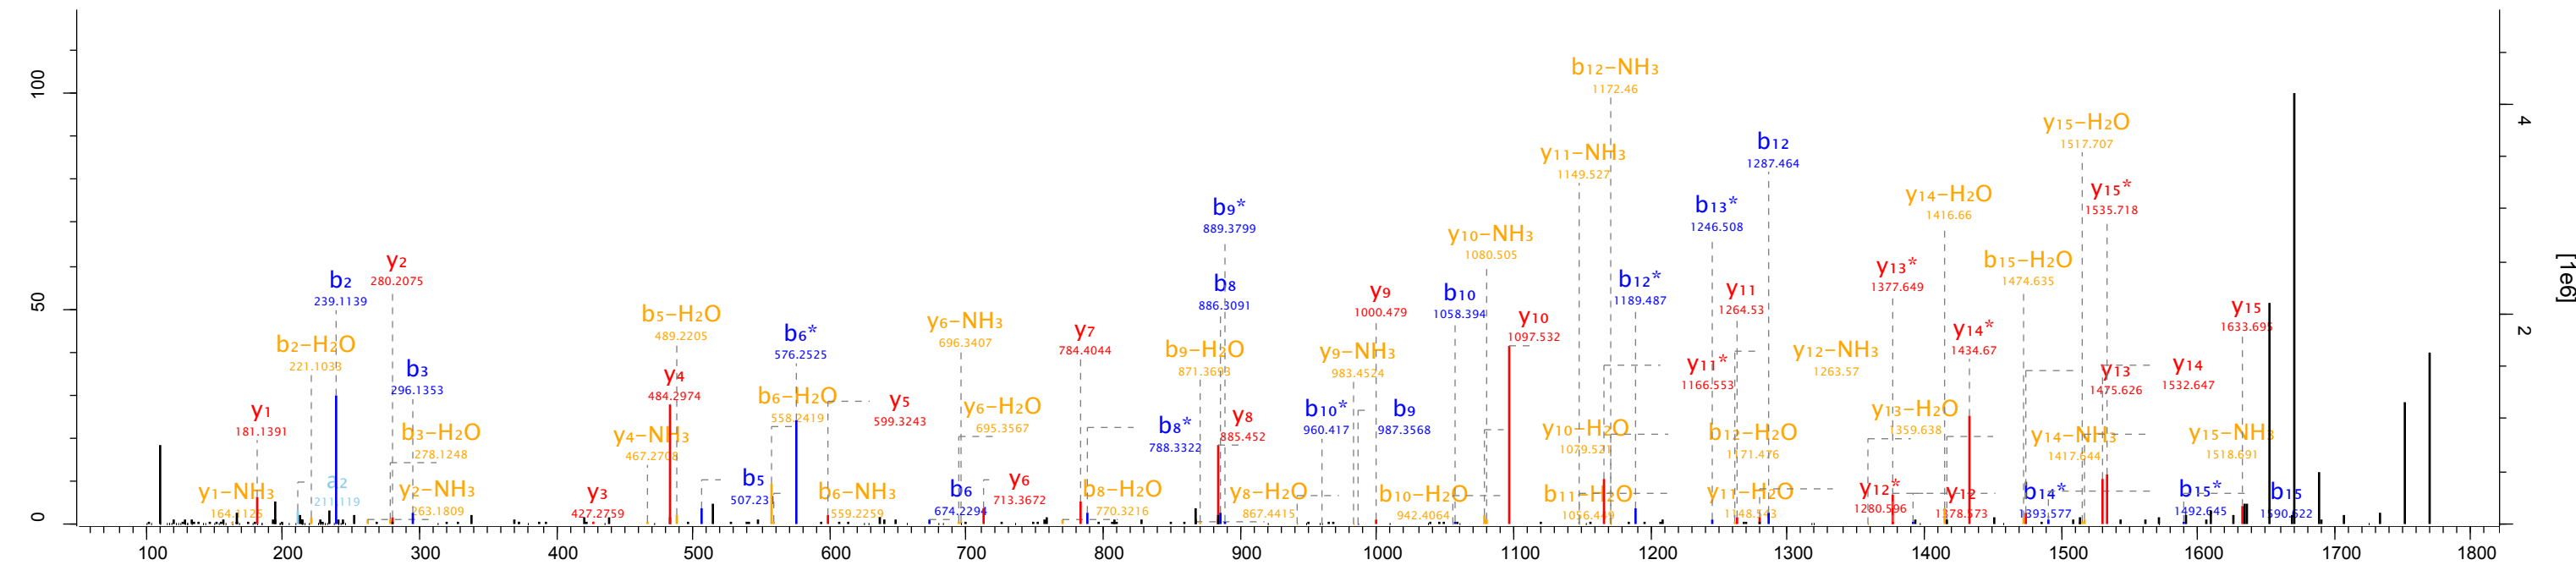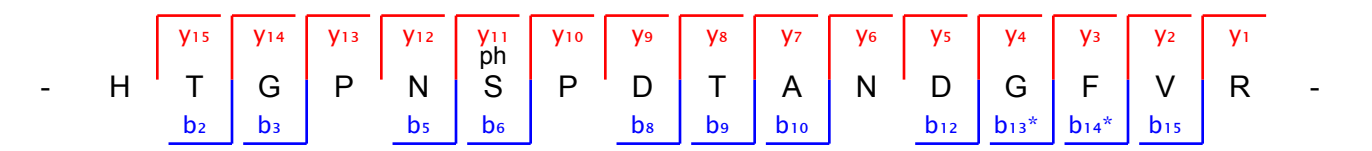

Raw file 20150814\_A375SR\_Phospho\_BR2\_04 Scan 8704 Method FTMS; HCD Score 98.58 m/z 437.19 Gene names KLC2

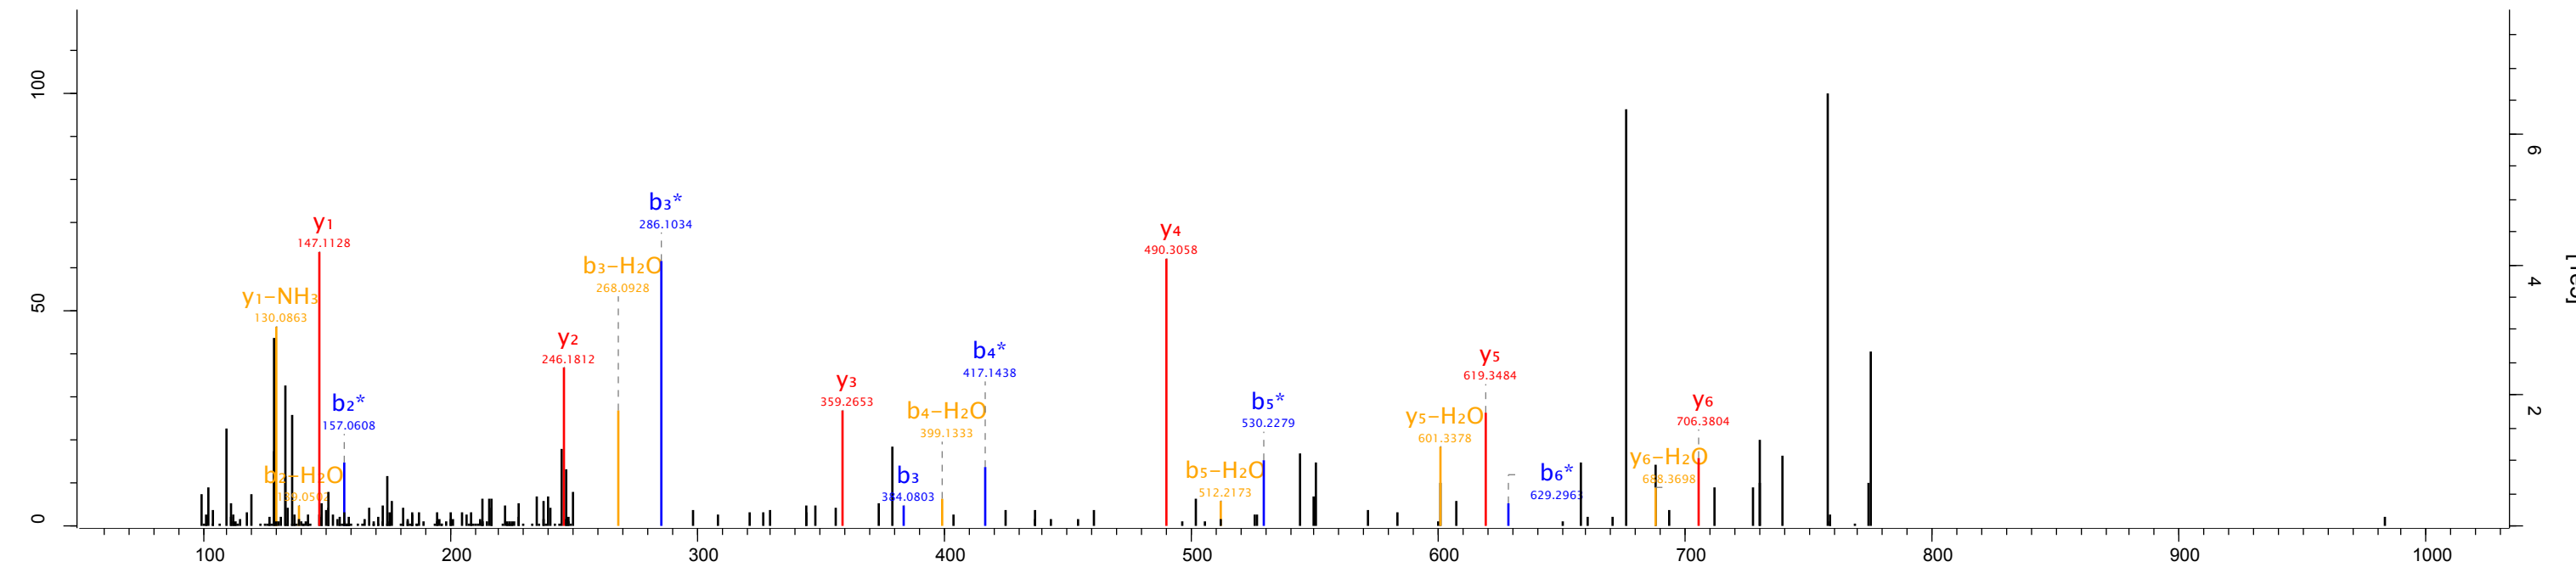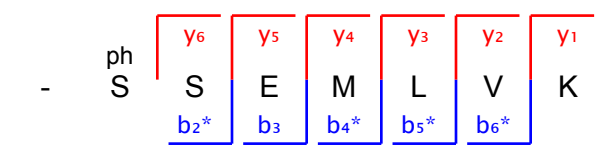

Raw file: 20150814\_A375SR\_Phospho\_BR2\_04  
 Scan: 8714 Method: FTMS; HCD Score: 100.18 m/z: 700.32 Gene names: MISP

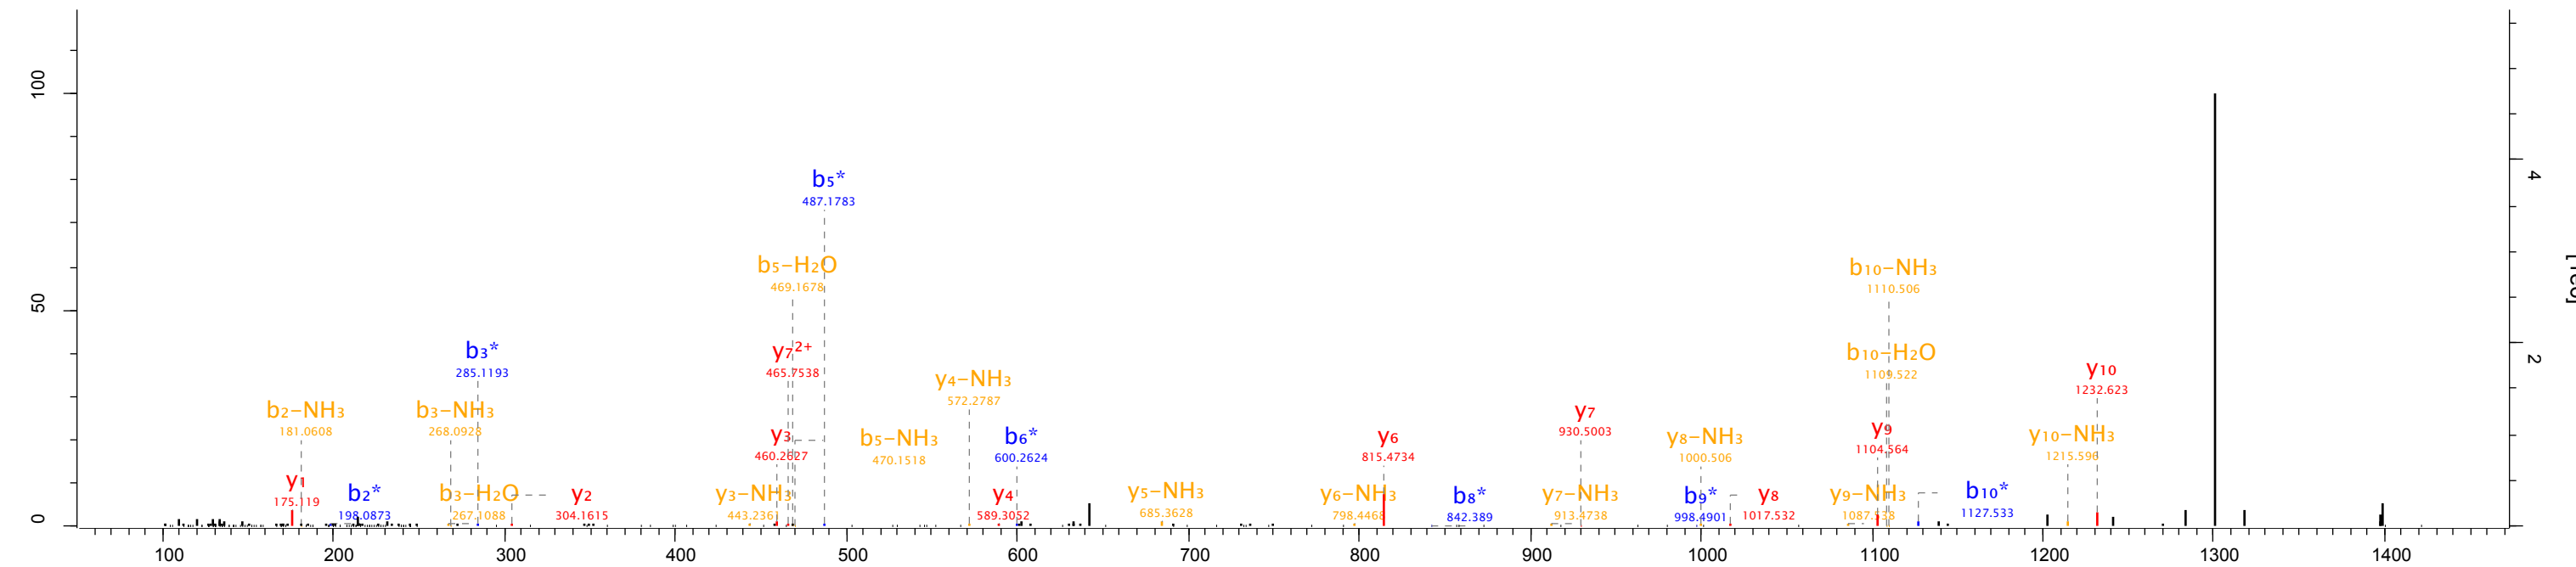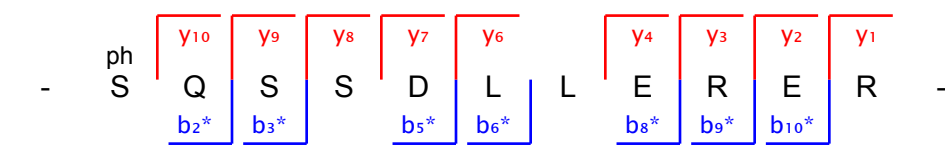

Raw file: 20150814\_A375SR\_Phospho\_BR2\_04  
 Scan: 8834 Method: FTMS; HCD Score: 85.28 m/z: 727.33 Gene names: TWF1

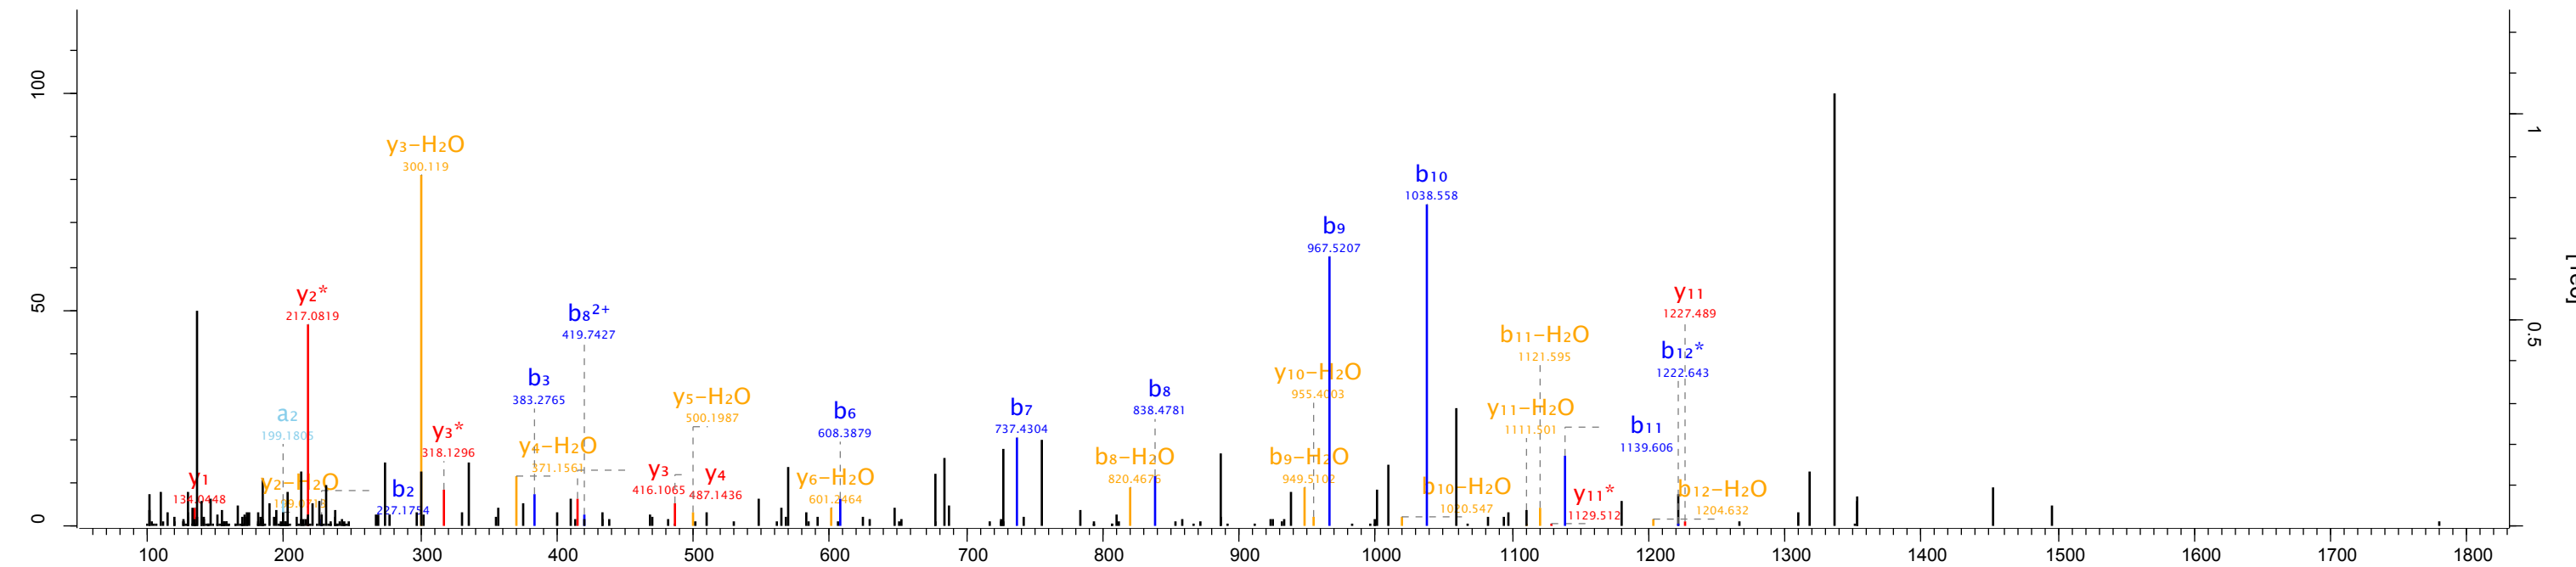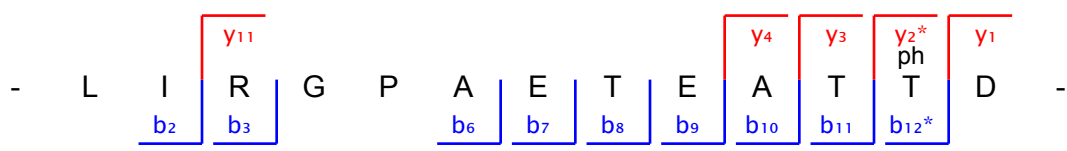

Raw file: 20150814\_A375SR\_Phospho\_BR2\_04  
 Scan: 8894 Method: FTMS; HCD Score: 127.66 m/z: 753.33 Gene names: GOSR1

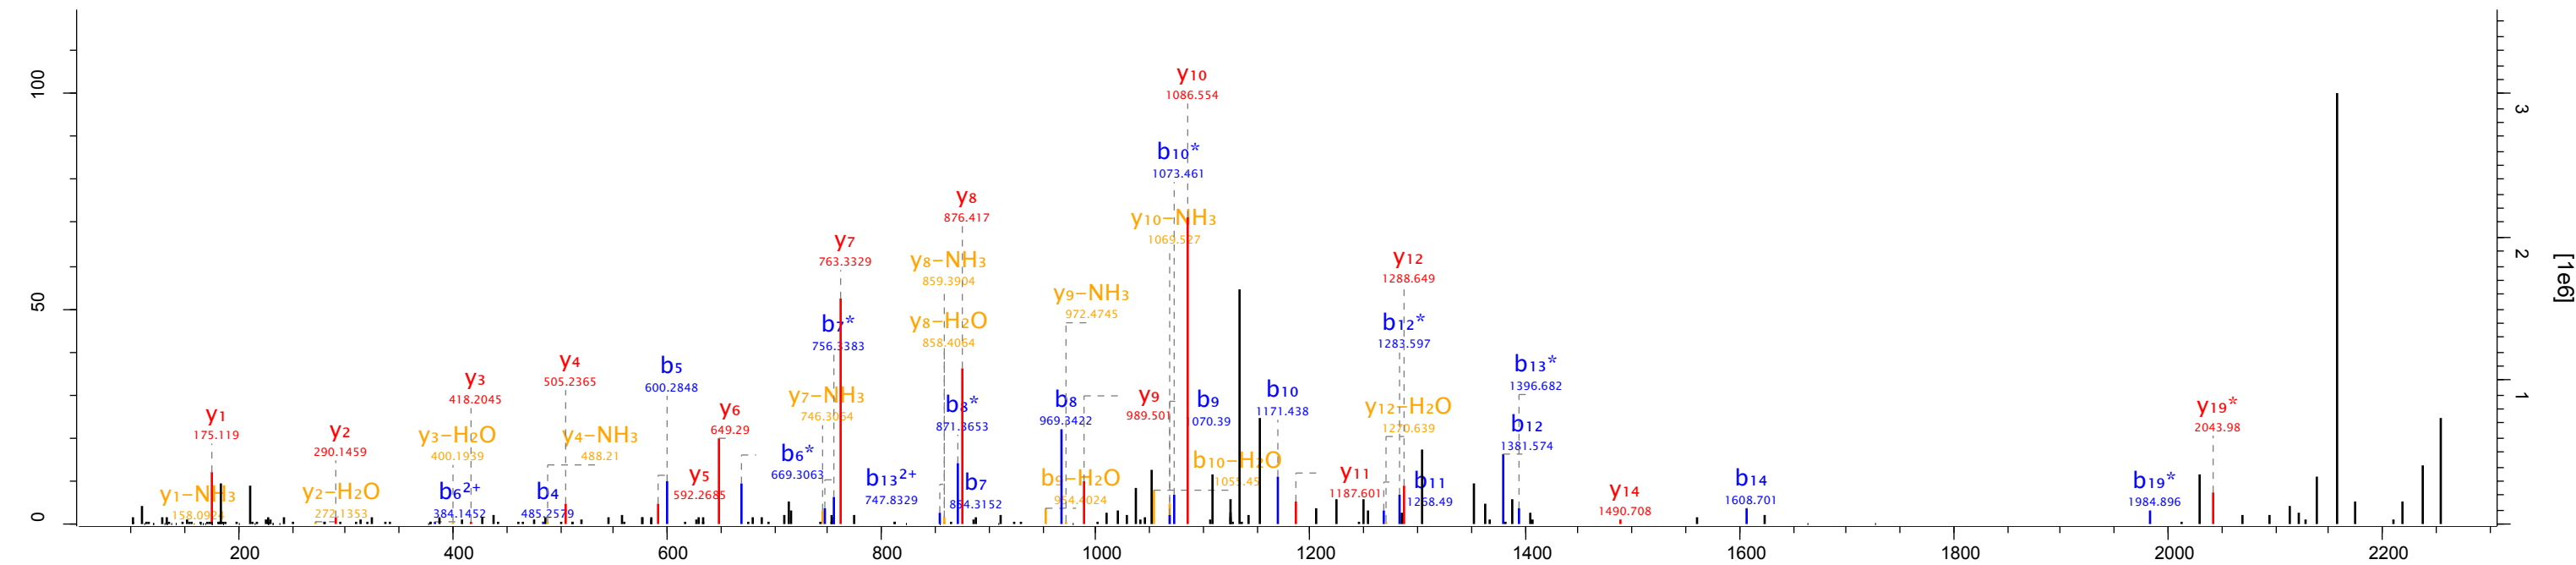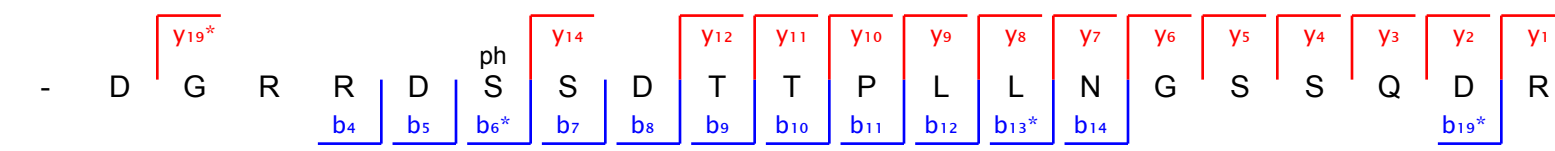

Raw file: 20150814\_A375SR\_Phospho\_BR2\_04  
 Scan: 8964 Method: FTMS; HCD Score: 129.54 m/z: 624.78 Gene names: ZAK

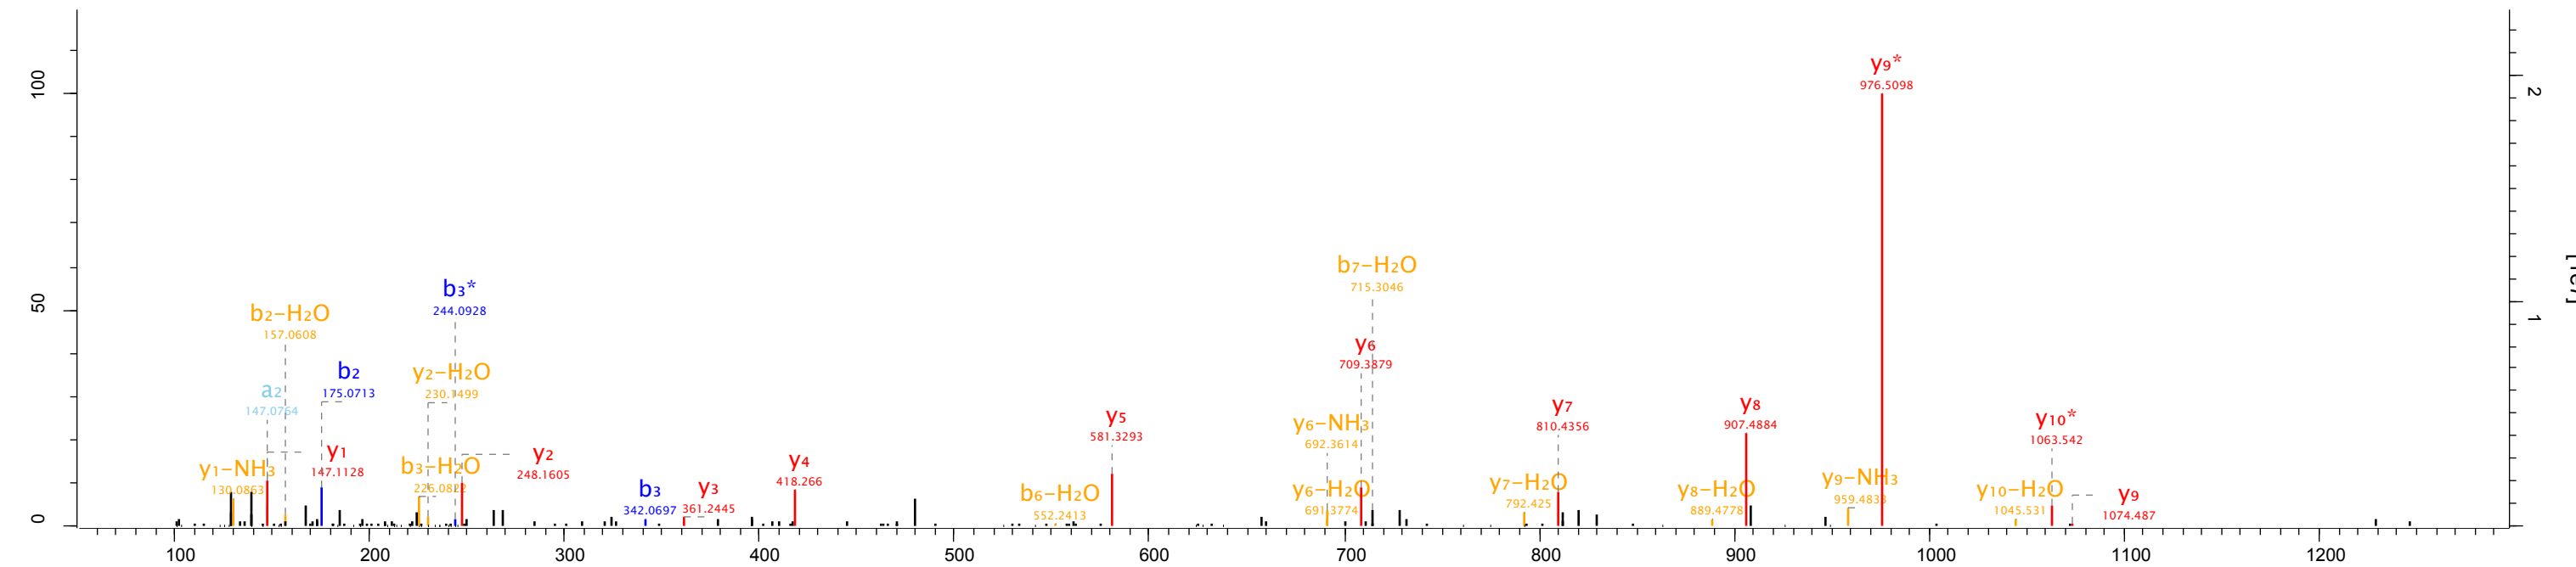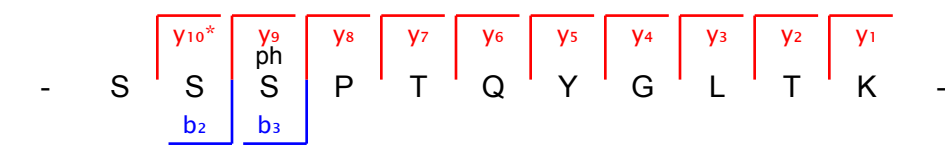



Raw file 20150814\_A375SR\_Phospho\_BR2\_04 Scan 9814 Method FTMS; HCD Score 64.52 m/z 802.38 Gene names PANK2

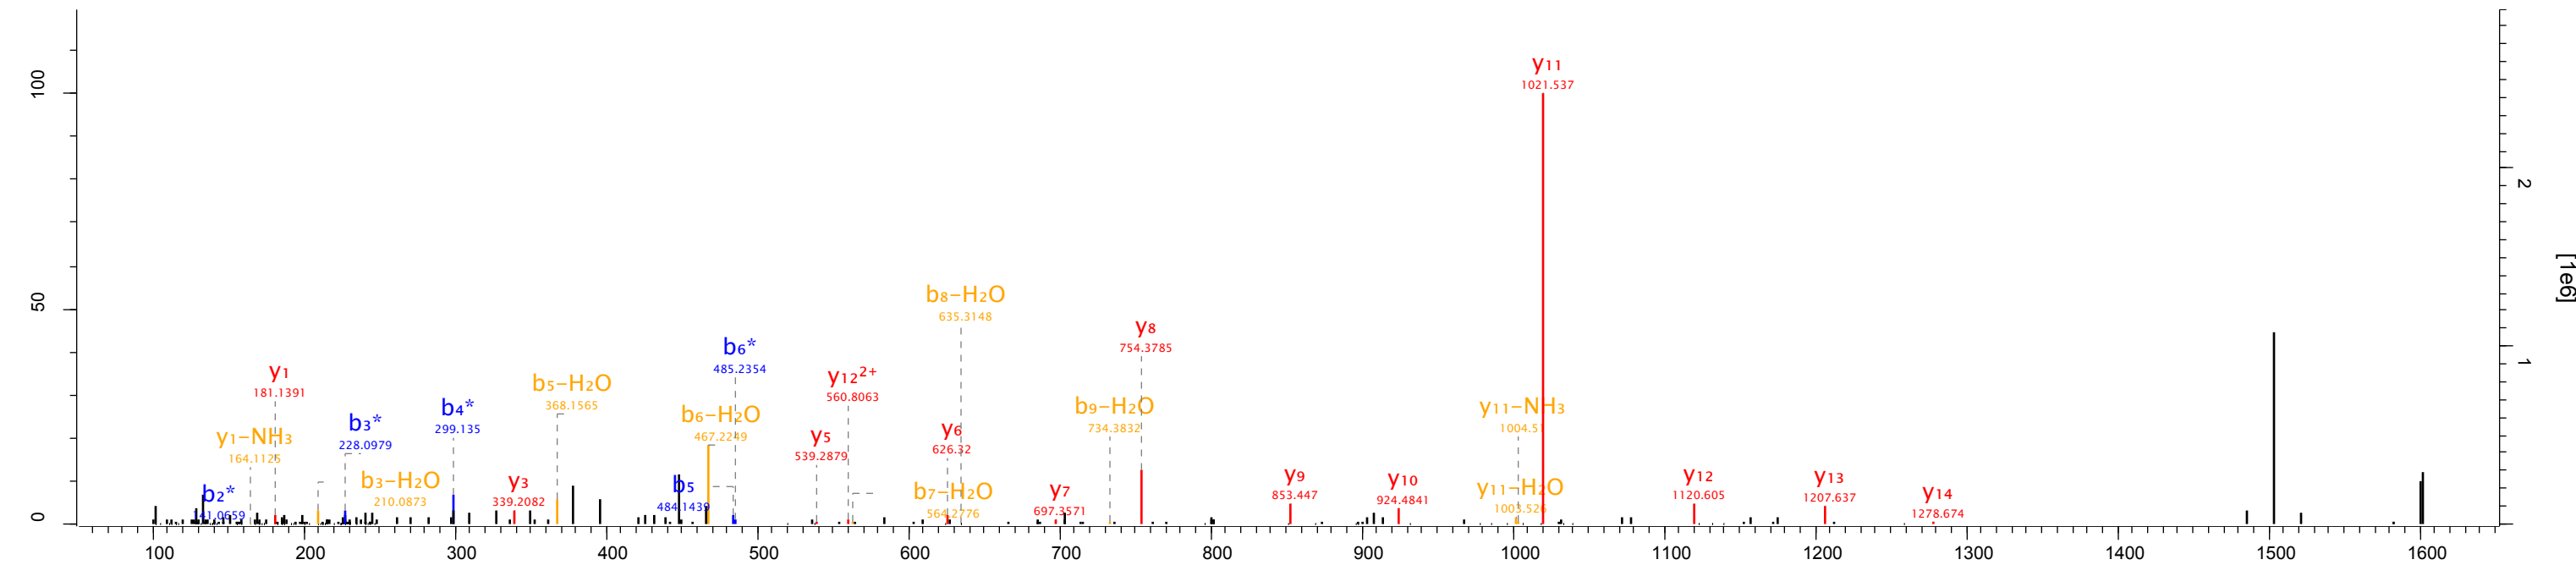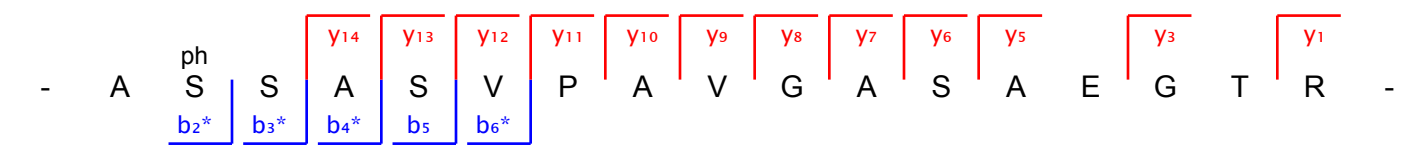

Raw file 20150814\_A375SR\_Phospho\_BR2\_04 Scan 9864 Method FTMS; HCD Score 111.4 m/z 959.87 Gene names PA2G4

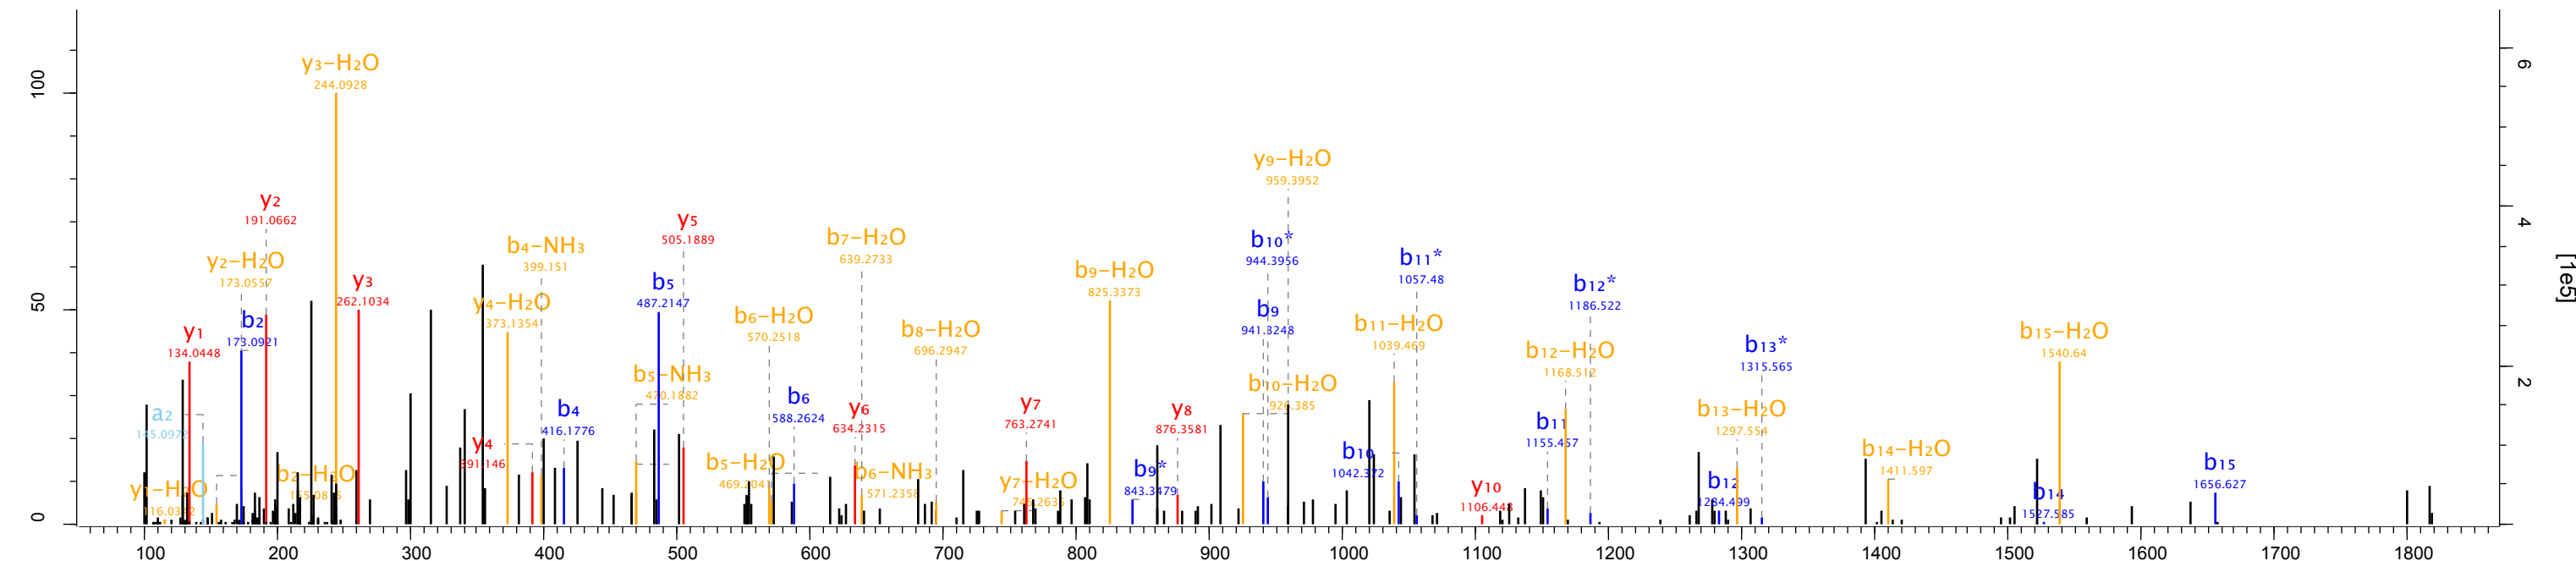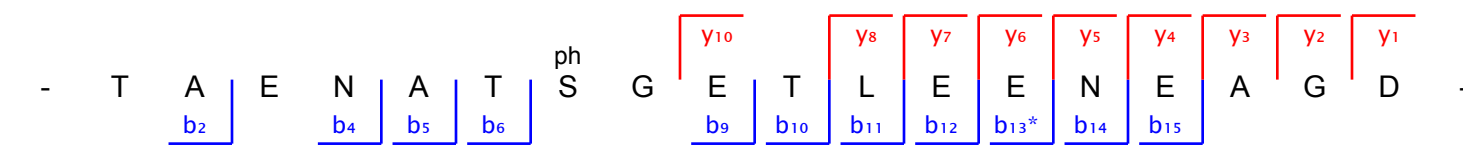

Raw file Scan Method Score m/z Gene names  
 20150814\_A375SR\_Phospho\_BR2\_05 10324 FTMS; HCD 93.65 652.76 SIPA1L3

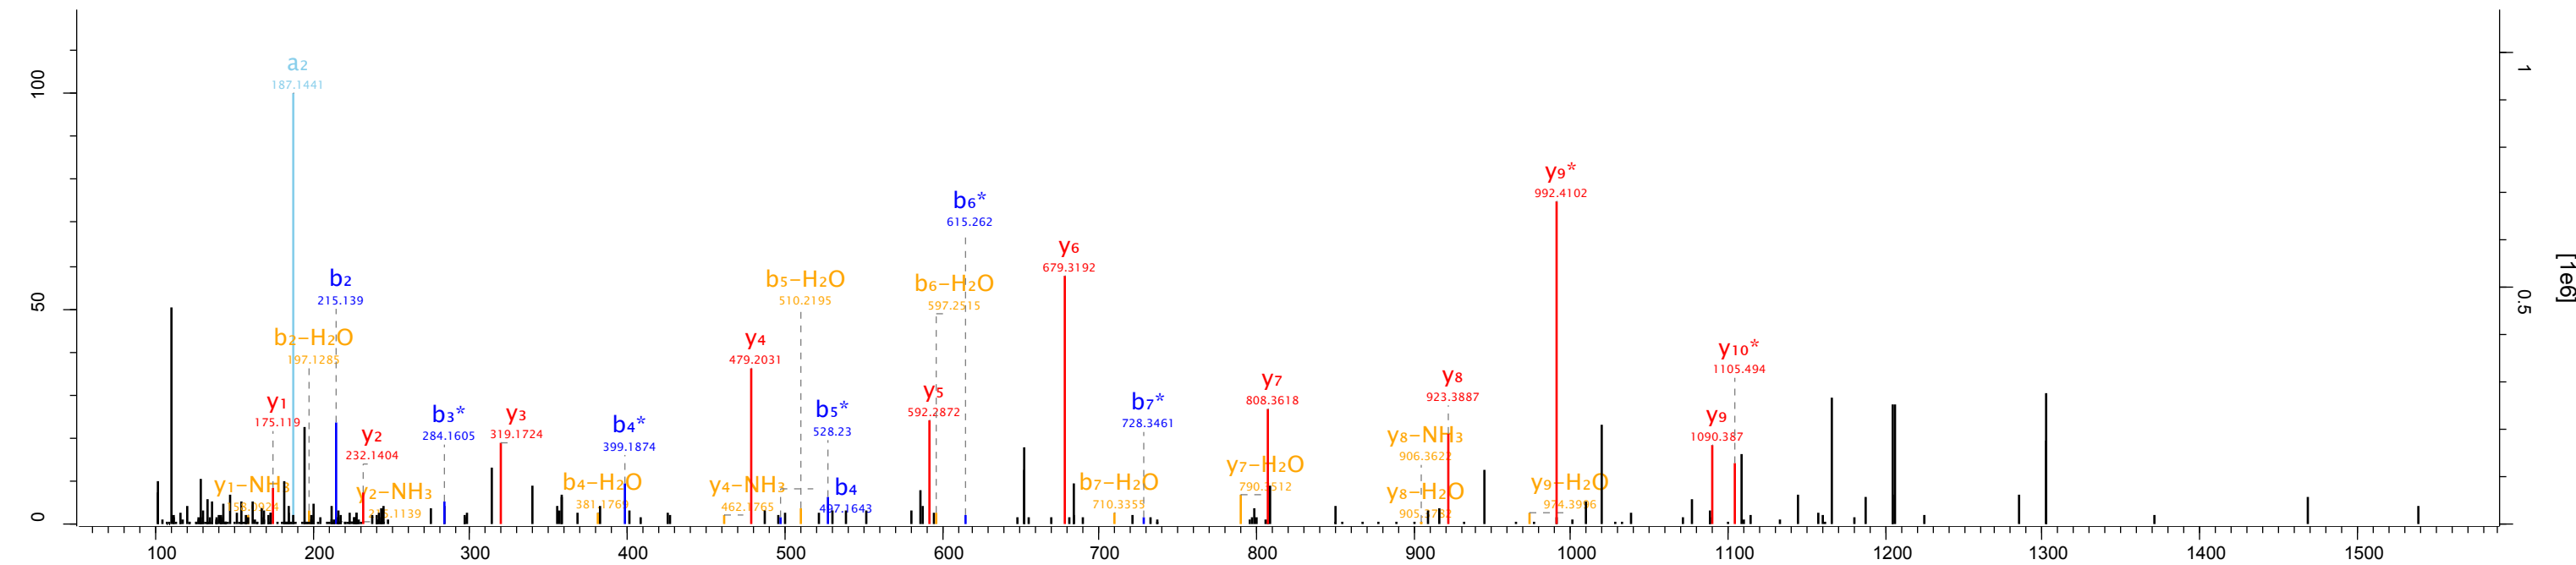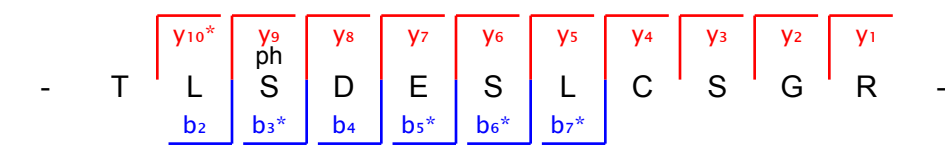

Raw file: 20150814\_A375SR\_Phospho\_BR2\_05  
 Scan: 10714 Method: FTMS; HCD Score: 86.55 m/z: 642.8 Gene names: EPB41L2

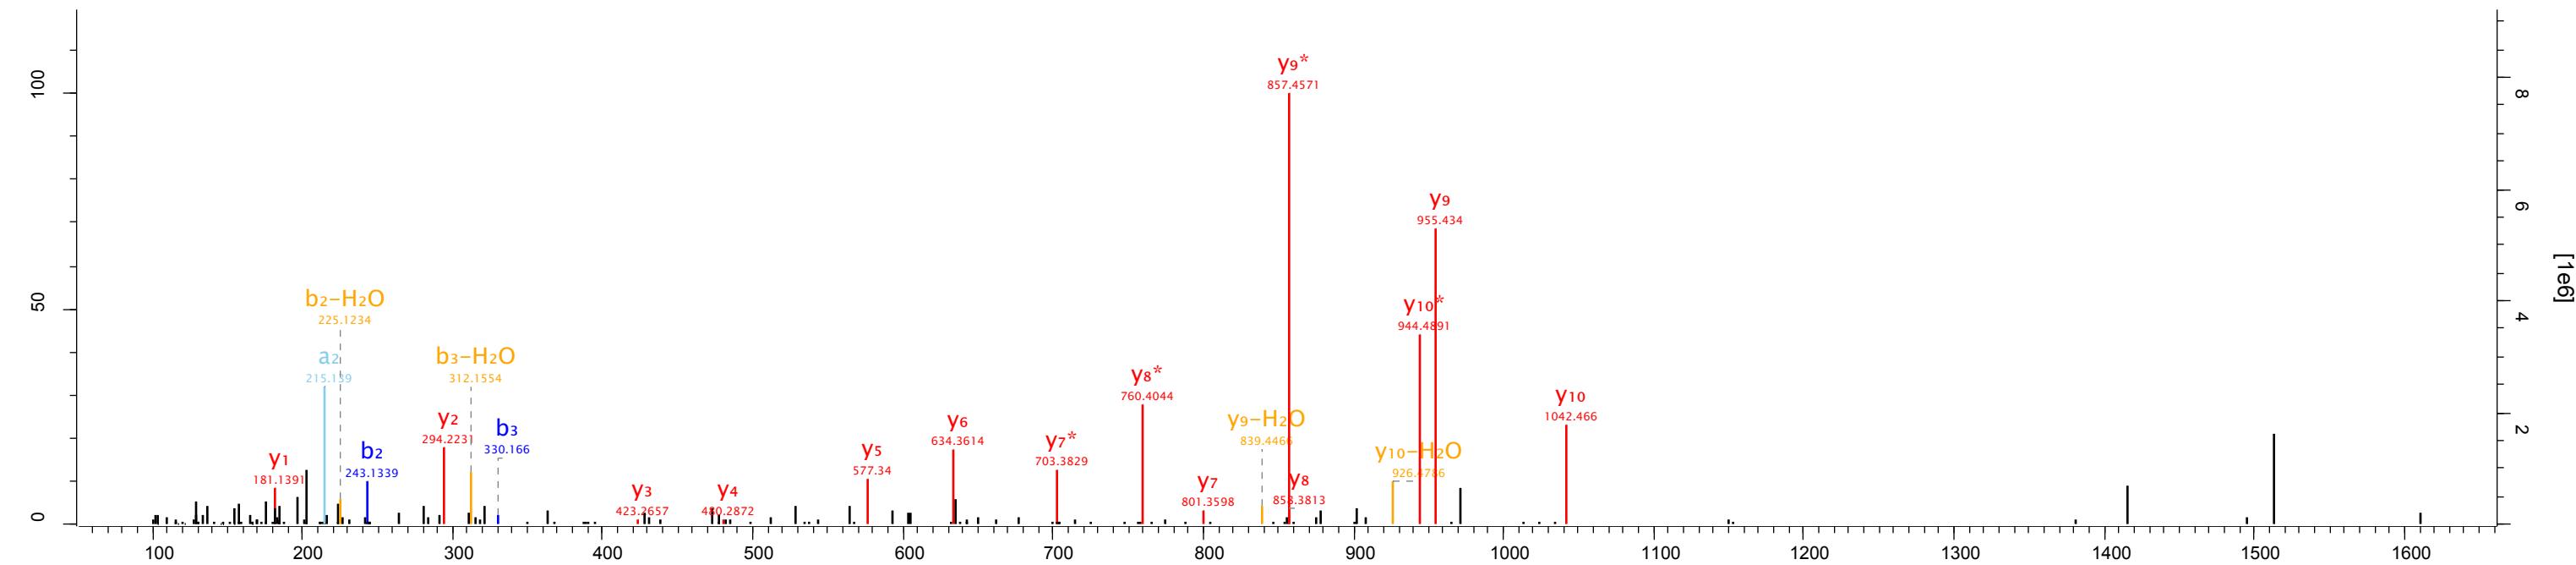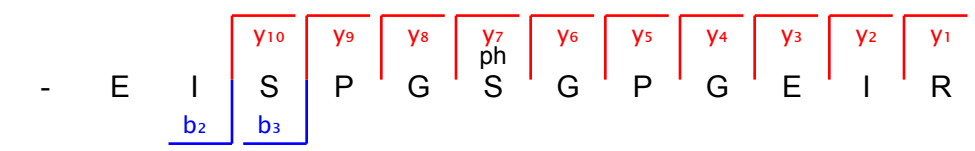

Raw file 20150814\_A375SR\_Phospho\_BR2\_05 Scan 10944 Method FTMS; HCD Score 273.78 m/z 877.37 Gene names FOXJ3

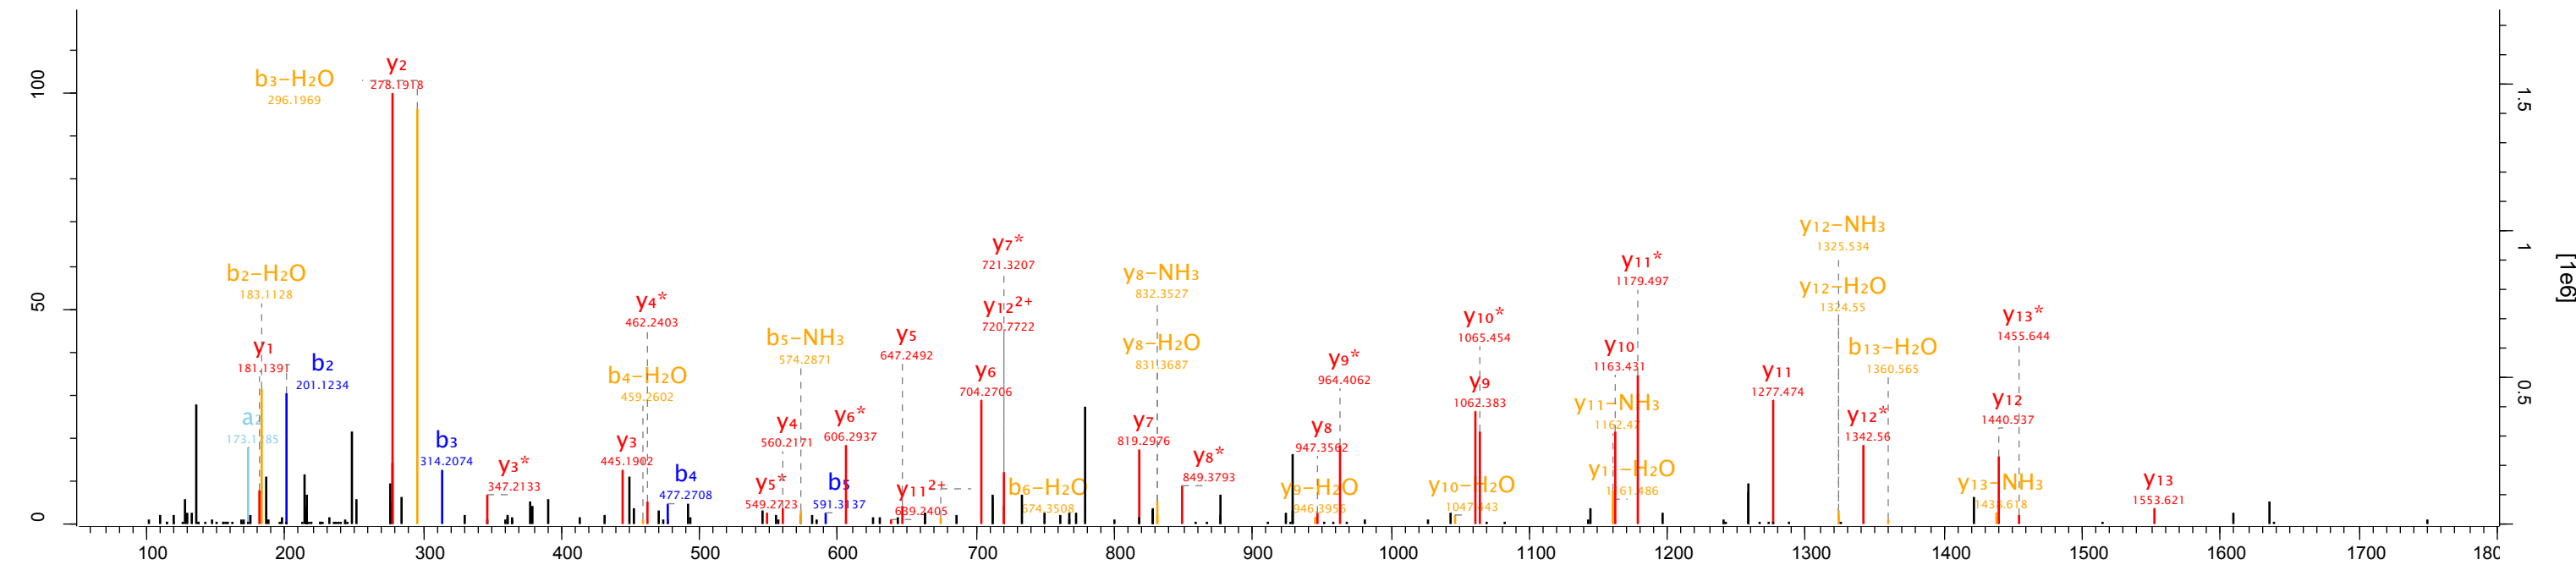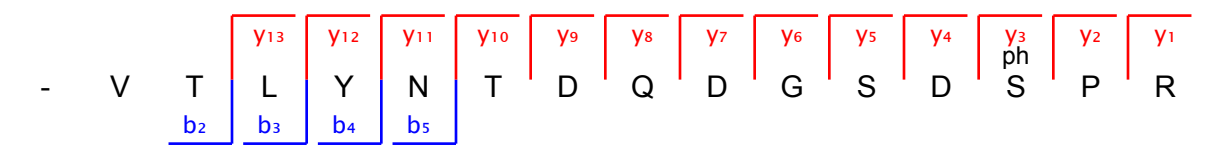

Raw file Scan Method Score m/z Gene names  
 20150814\_A375SR\_Phospho\_BR2\_05 10994 FTMS; HCD 235.69 710.85 WAPAL

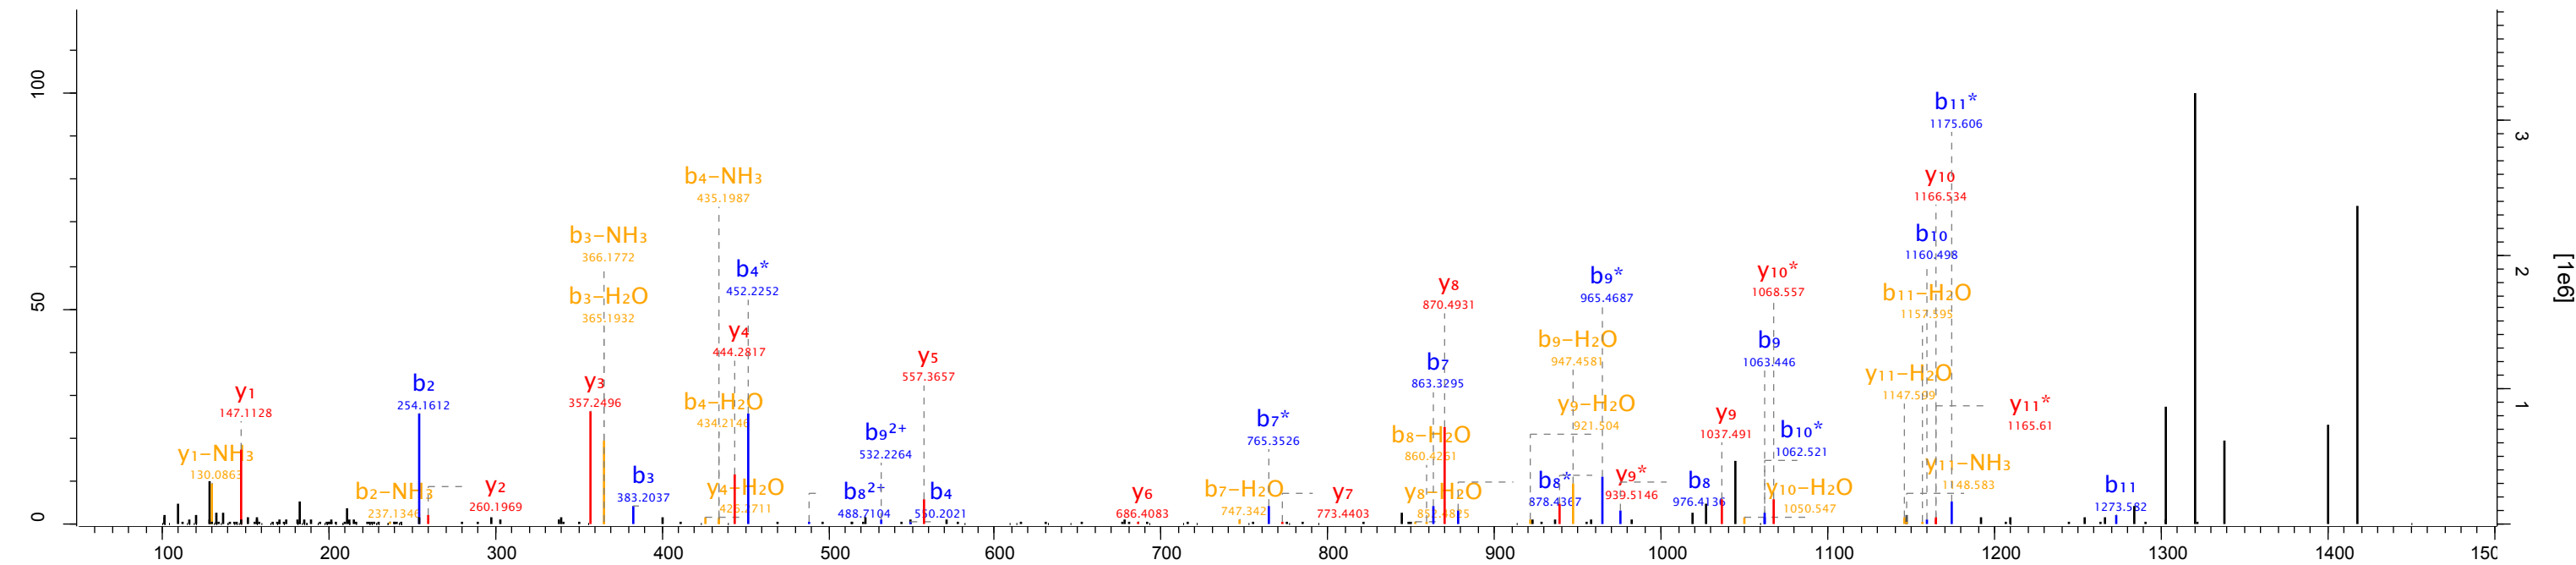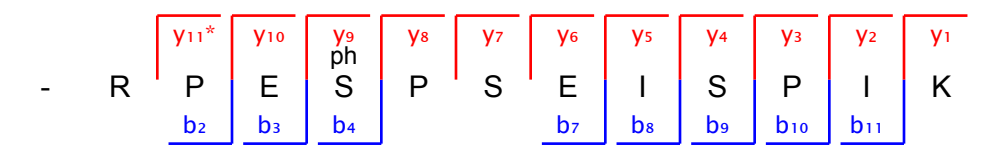

Raw file 20150814\_A375SR\_Phospho\_BR2\_05 Scan 11034 Method FTMS; HCD Score 171.26 m/z 660.27 Gene names CARHSP1

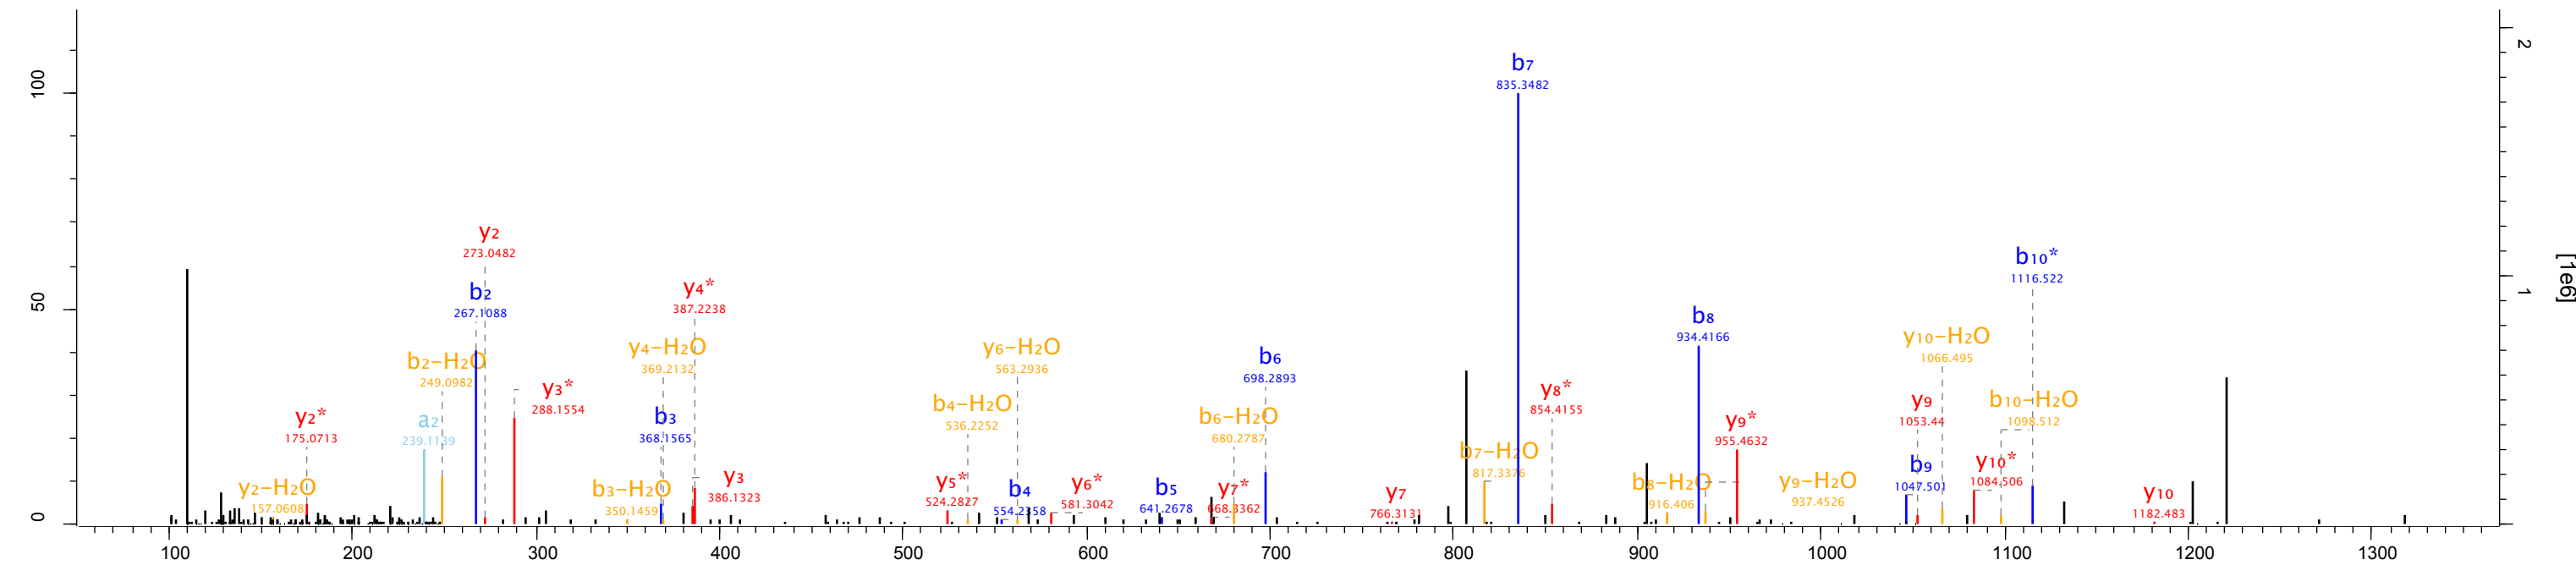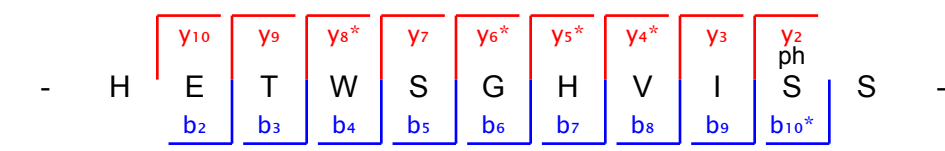

Raw file: 20150814\_A375SR\_Phospho\_BR2\_05  
 Scan: 11104 Method: FTMS; HCD Score: 124.43 m/z: 560.78

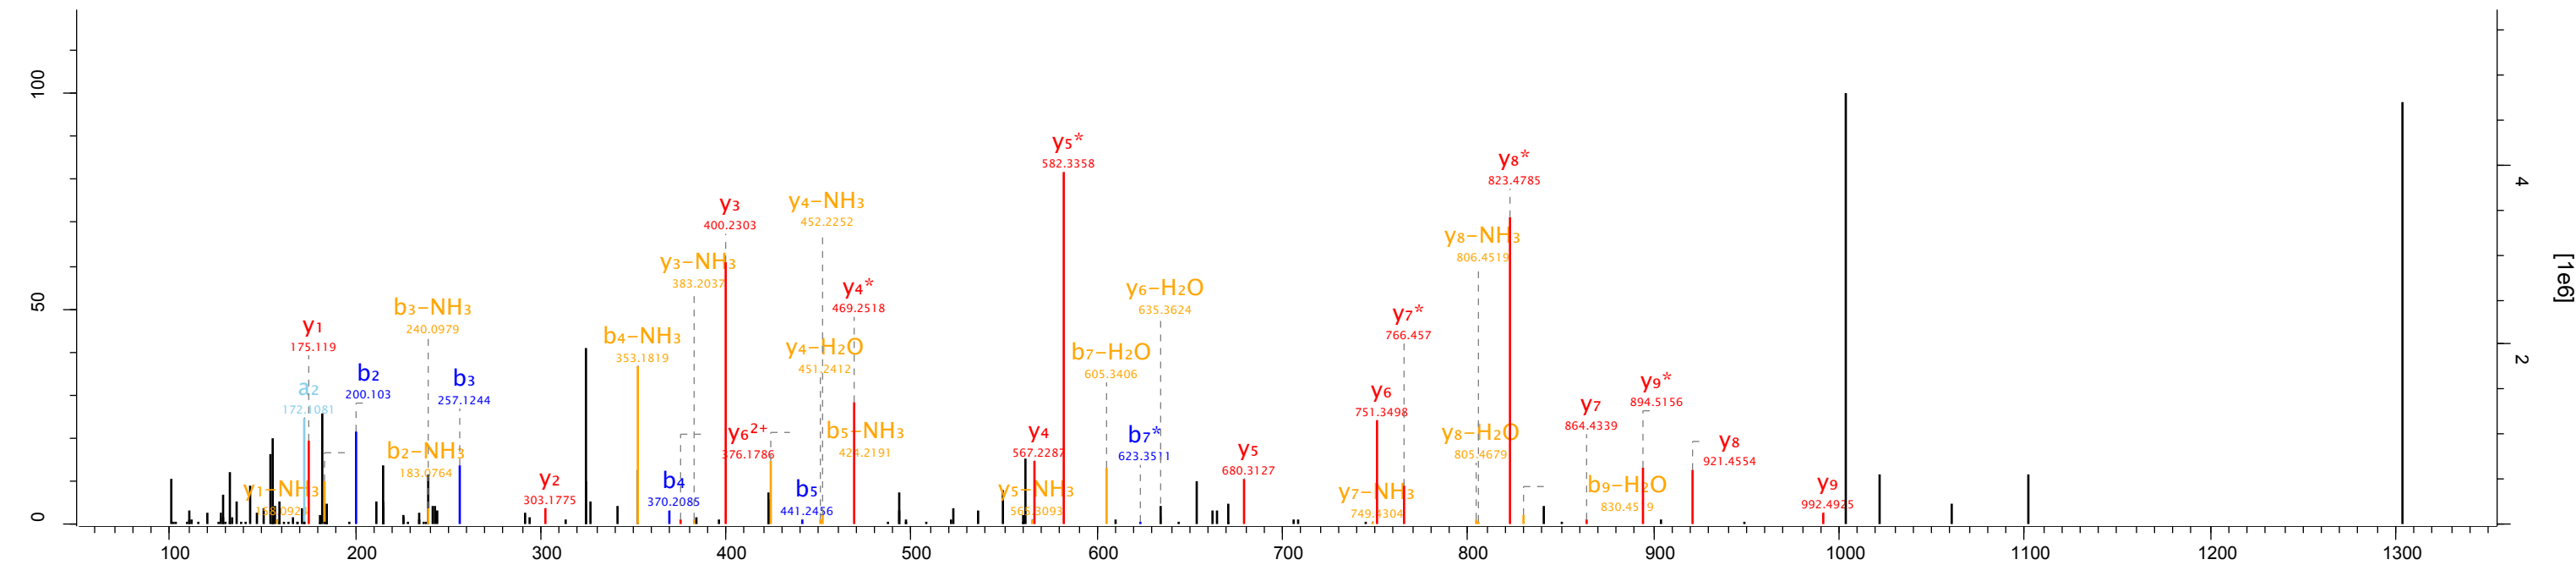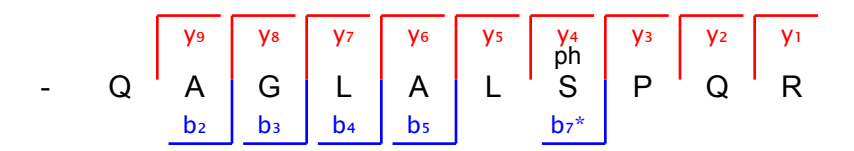



Raw file: 20150814\_A375SR\_Phospho\_BR2\_05  
 Scan: 11314 Method: FTMS; HCD Score: 171.21 m/z: 657.31 Gene names: IFT43

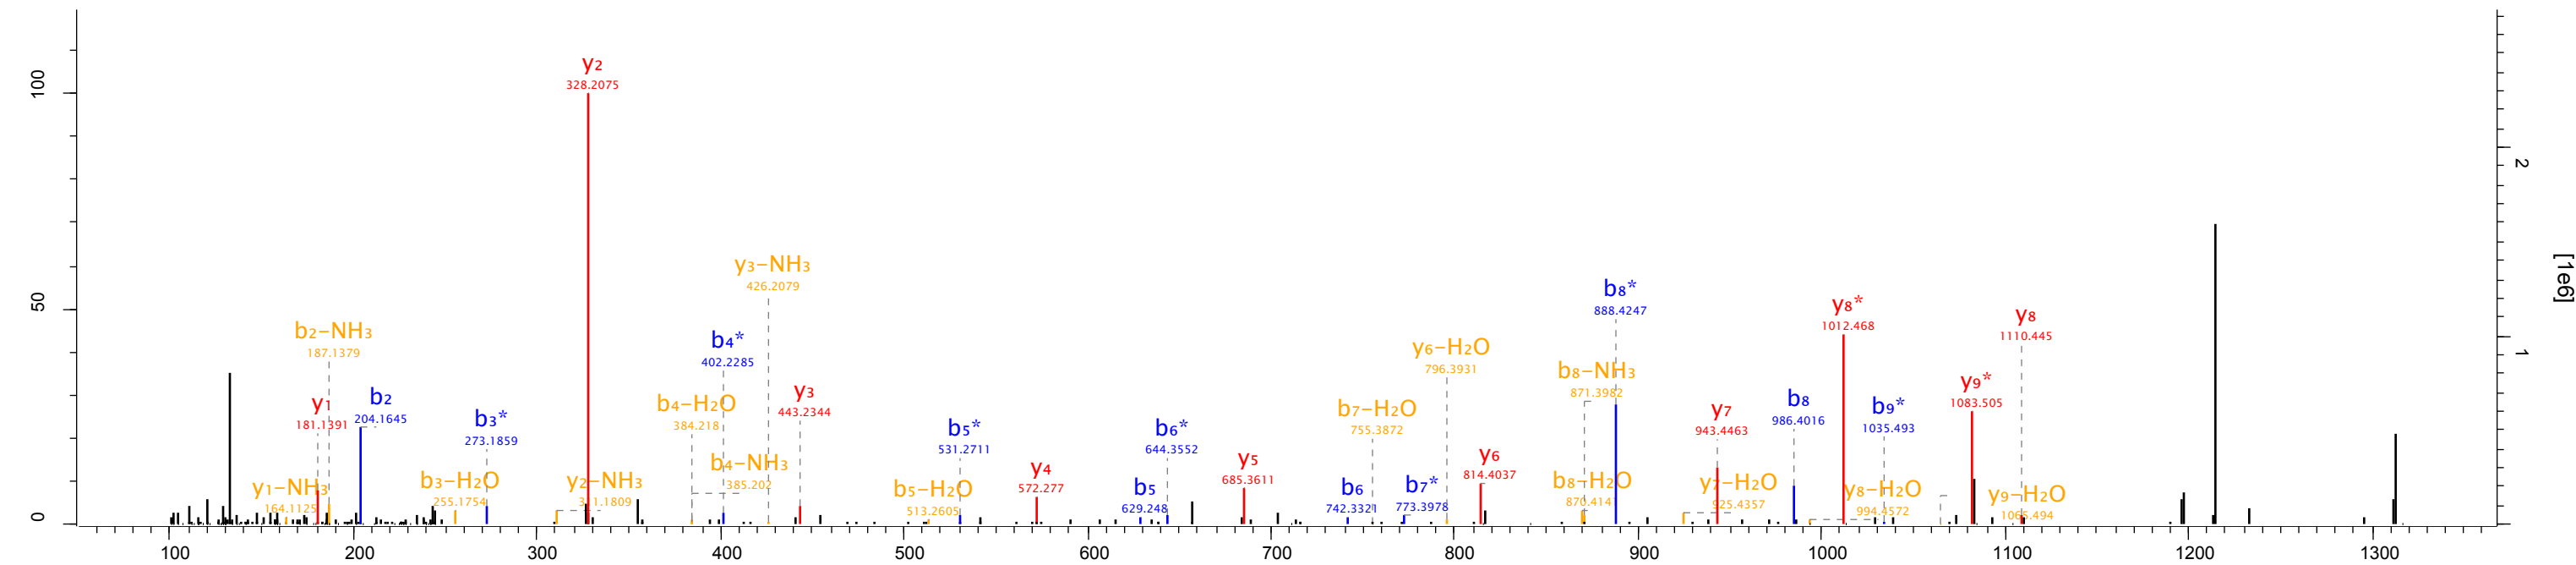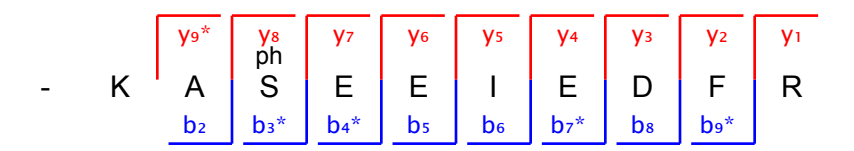

Raw file: 20150814\_A375SR\_Phospho\_BR2\_05  
 Scan: 11374 Method: FTMS; HCD Score: 62.85 m/z: 639.64 Gene names: SRRM2

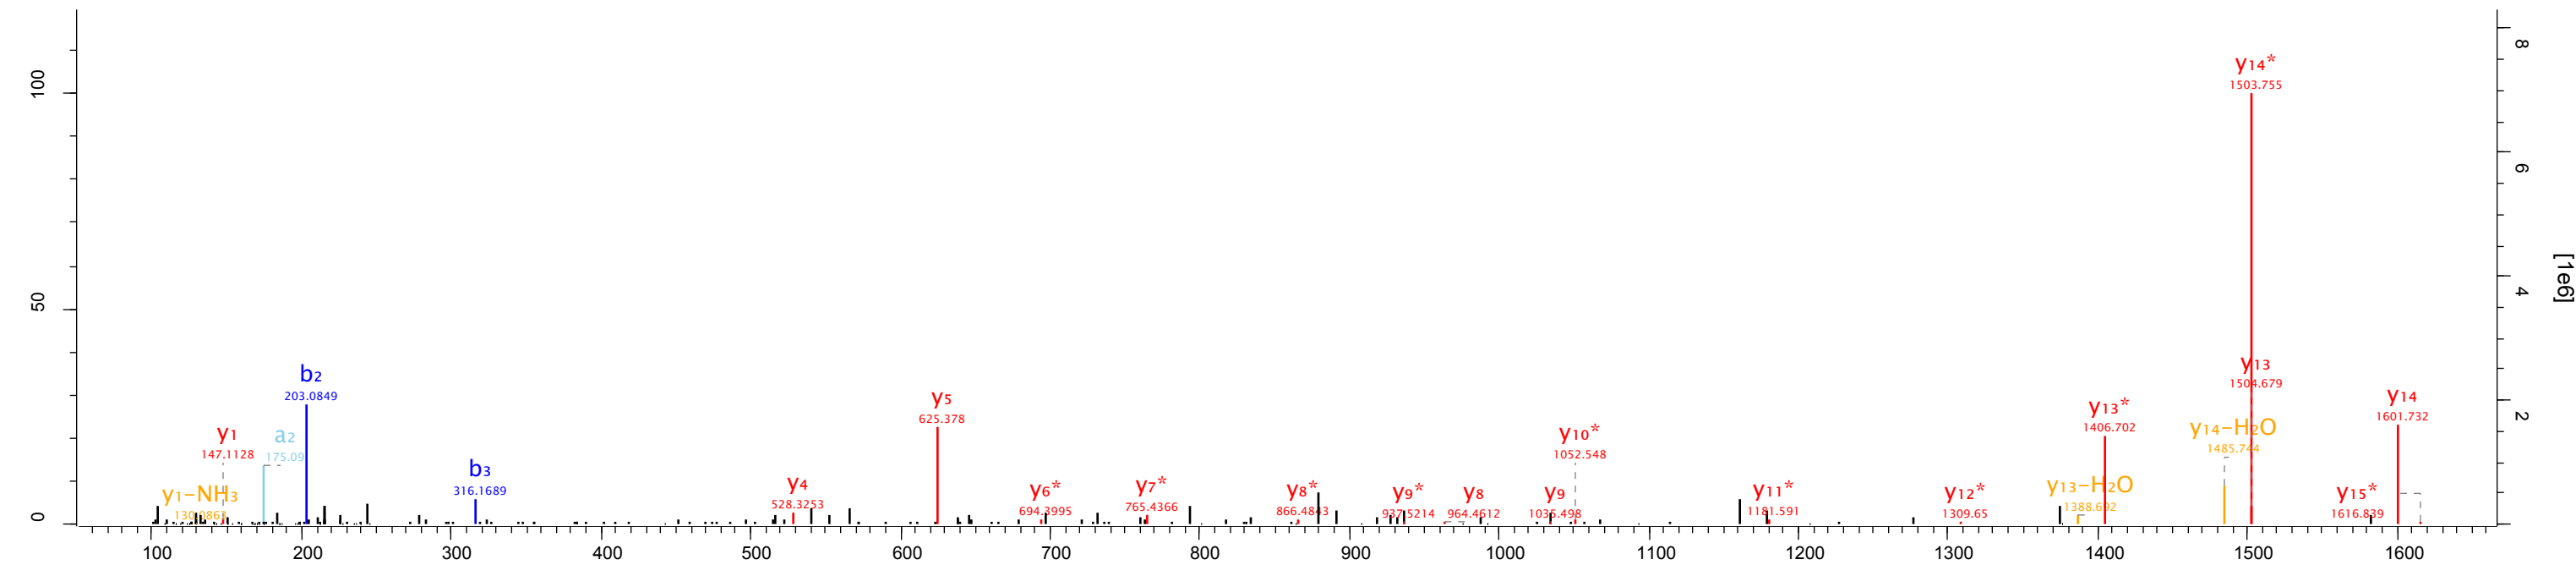

- M A L P P Q E D A T A S P P R Q K -

Fragmentation sites (bracketed above): y15\* (L), y14 (P), y13 (P), y12\* (Q), y11\* (E), y10\* (D), y9 (A), y8 (T), y7\* (A), y6\* (S), y5 (P), y4 (P), y1 (K)

Peptide backbone (bracketed below): b2 (A-L), b3 (L-P)

Raw file: 20150814\_A375SR\_Phospho\_BR2\_05  
 Scan: 11844 Method: FTMS; HCD Score: 213.23 m/z: 904.91 Gene names: RRP15

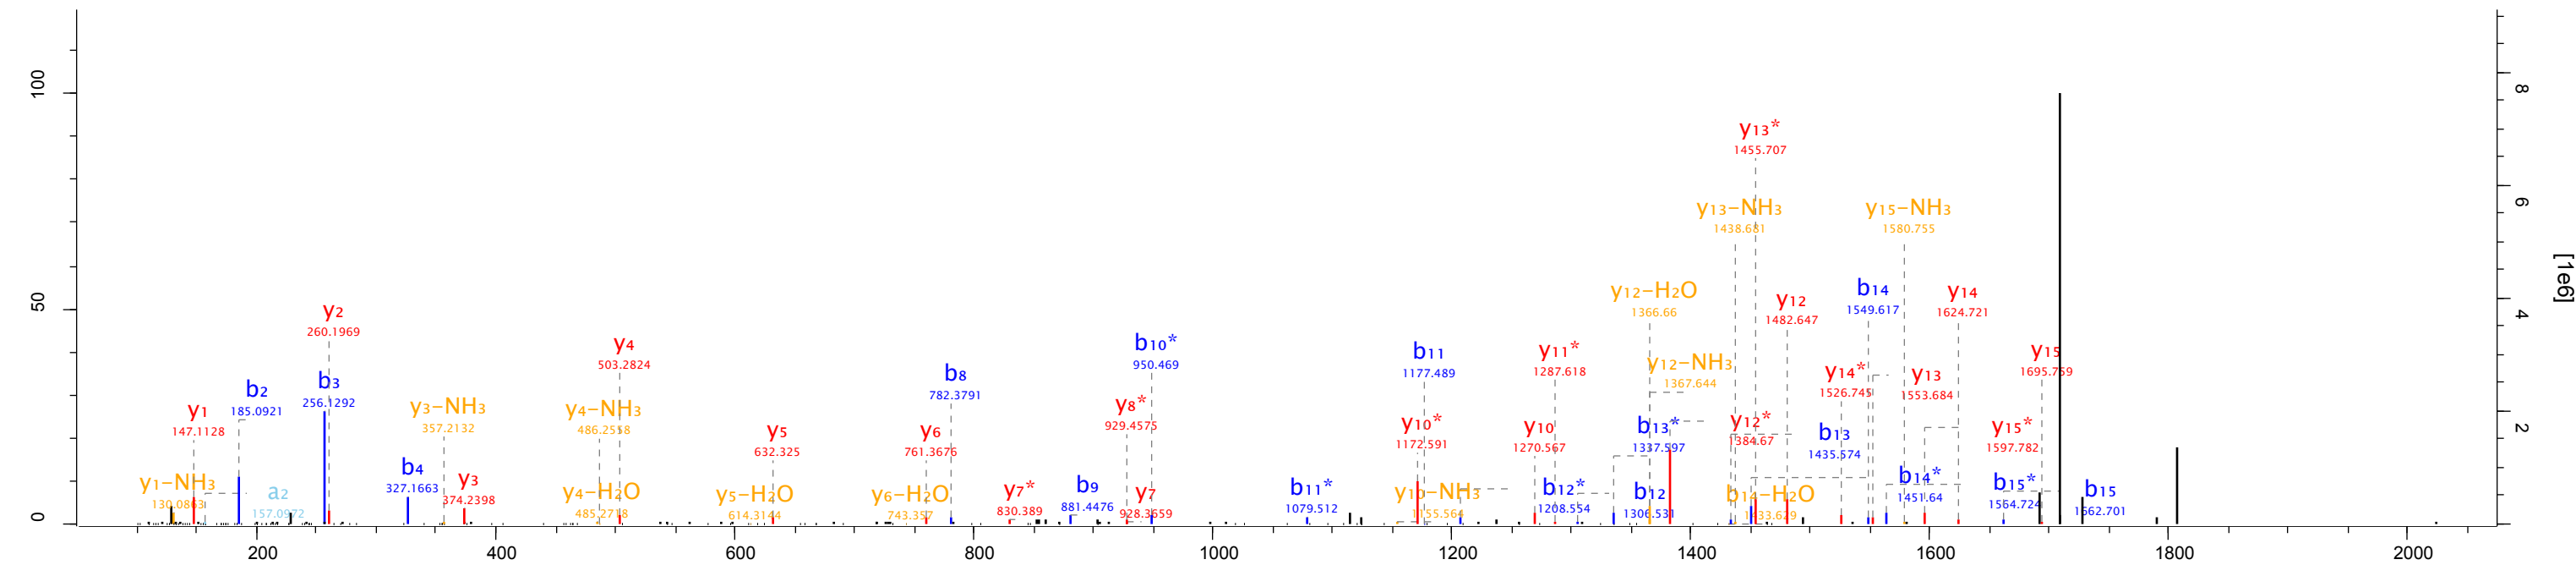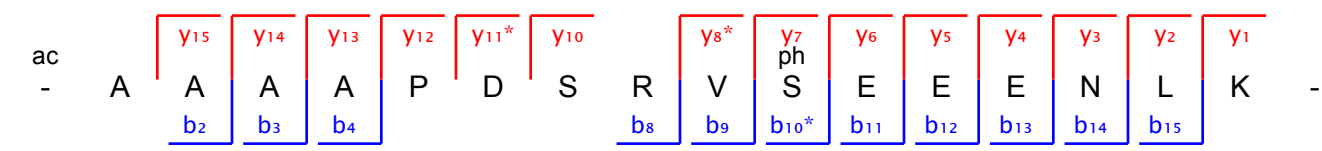

Raw file: 20150814\_A375SR\_Phospho\_BR2\_05  
 Scan: 12124 Method: FTMS; HCD Score: 136.68 m/z: 714.33 Gene names: BAT3;BAG6

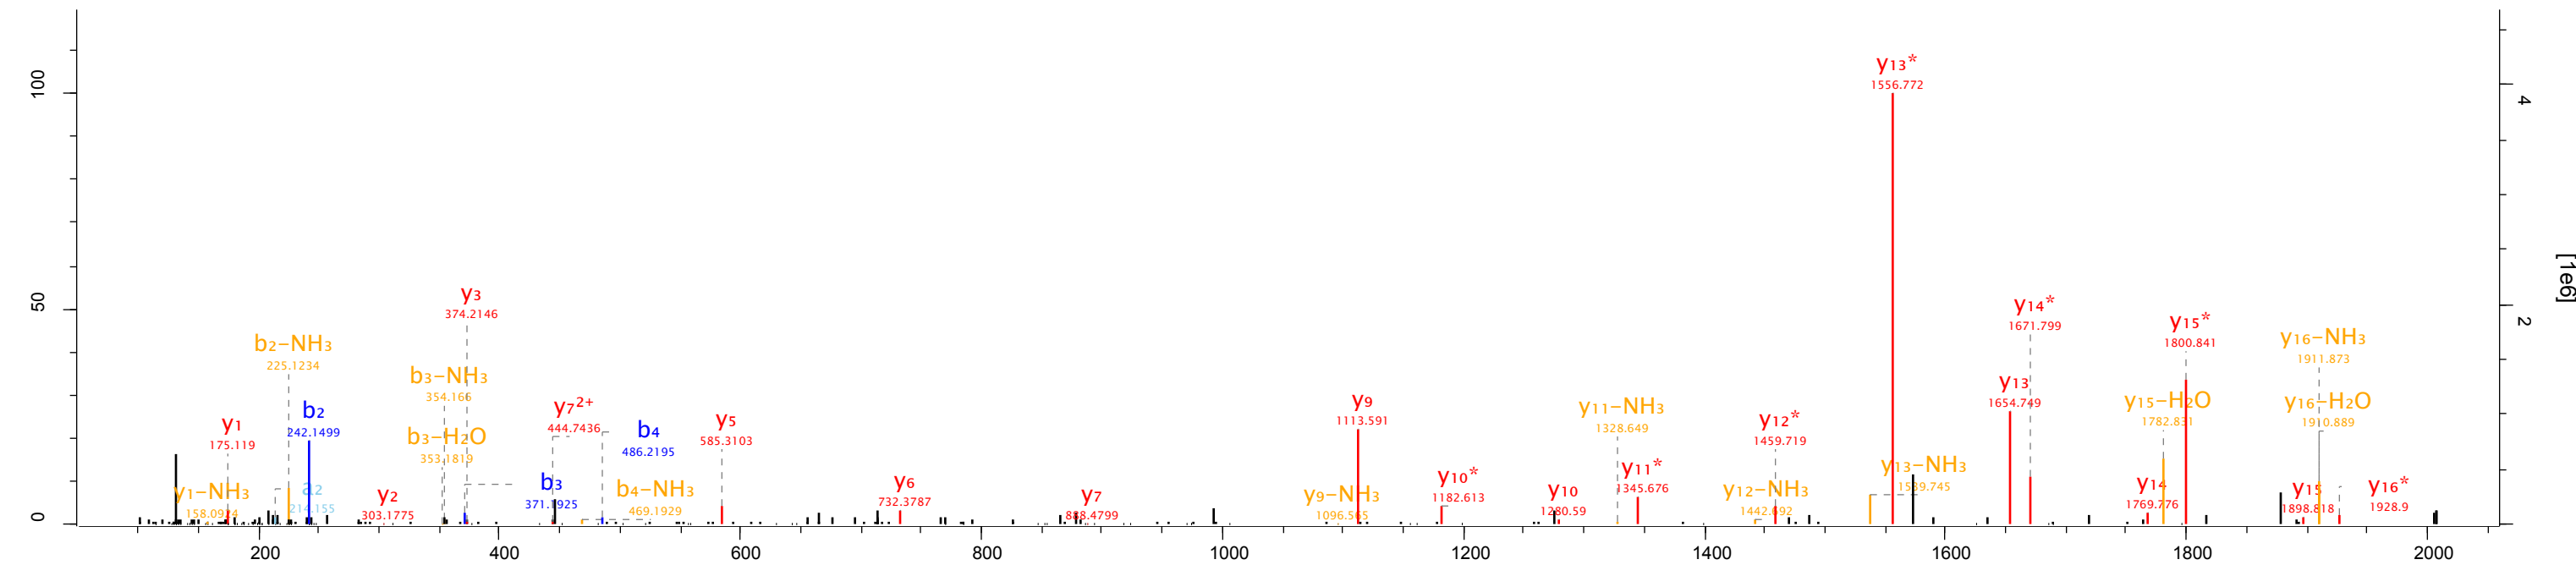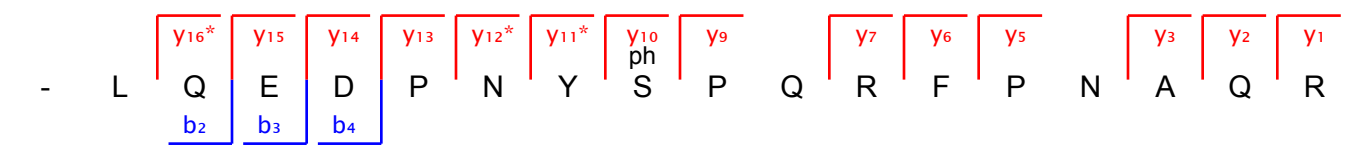

Raw file Scan Method Score m/z Gene names  
 20150814\_A375SR\_Phospho\_BR2\_05 12224 FTMS; HCD 302.61 1000.38 ASAP2

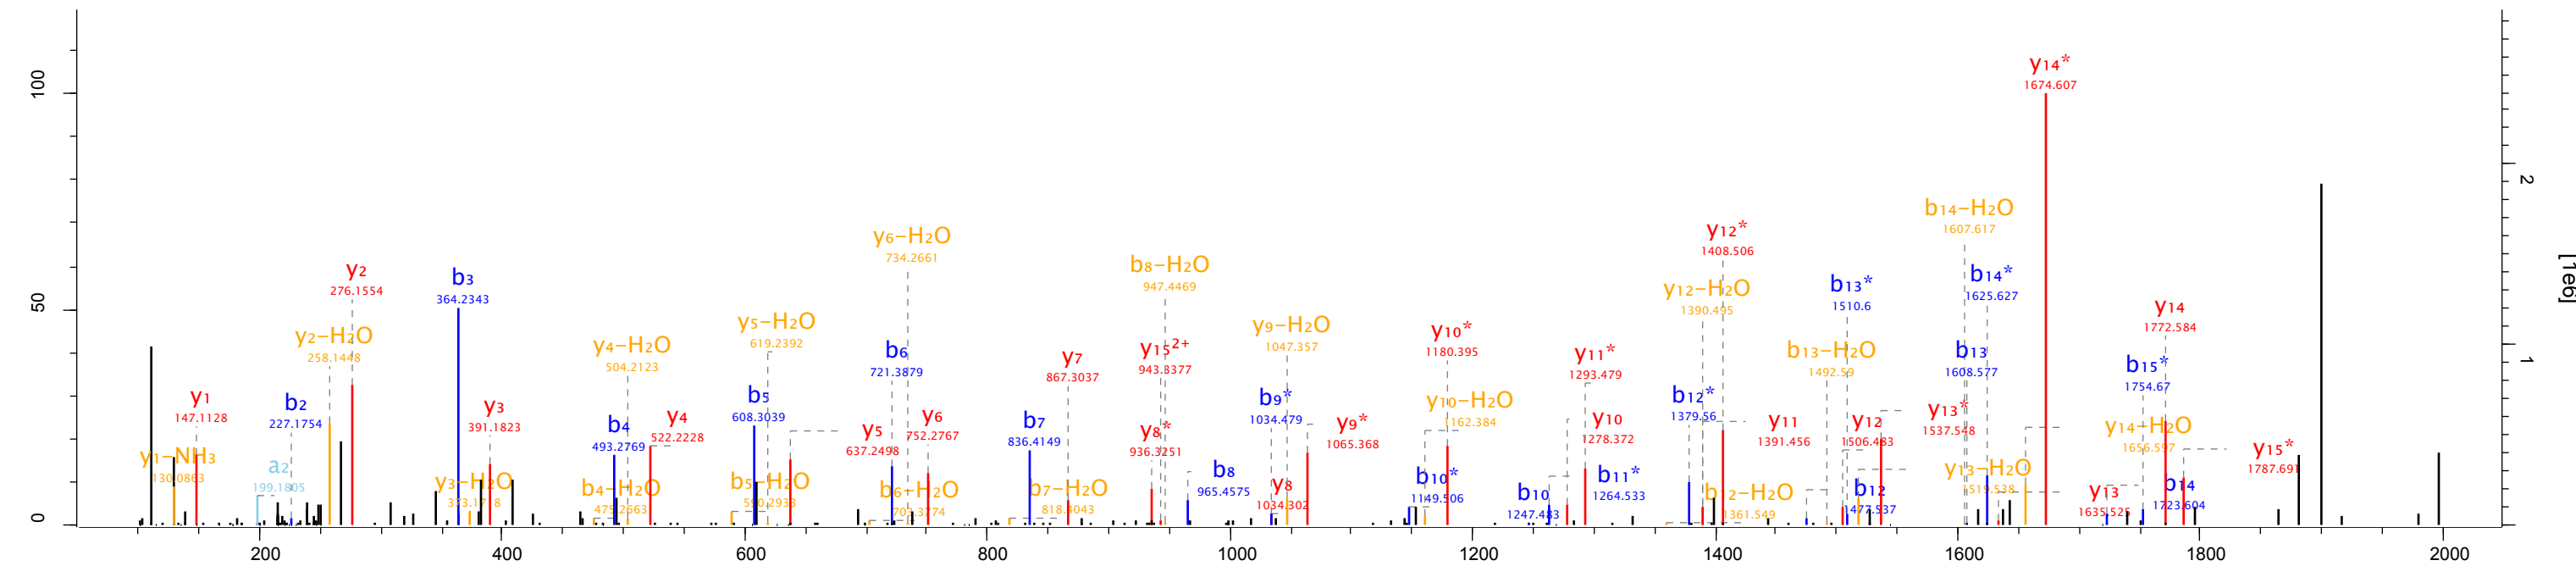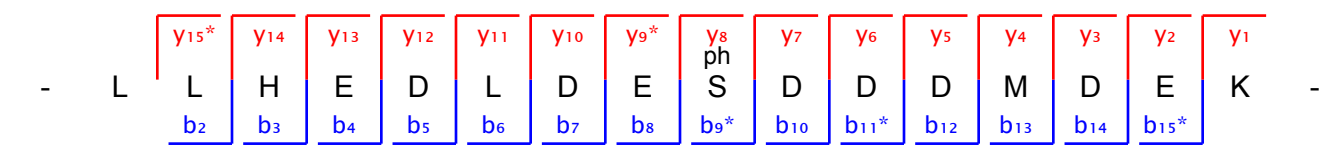

Raw file: 20150814\_A375SR\_Phospho\_BR2\_05  
 Scan: 12494 Method: FTMS; HCD Score: 182.49 m/z: 882.86 Gene names: UPF2

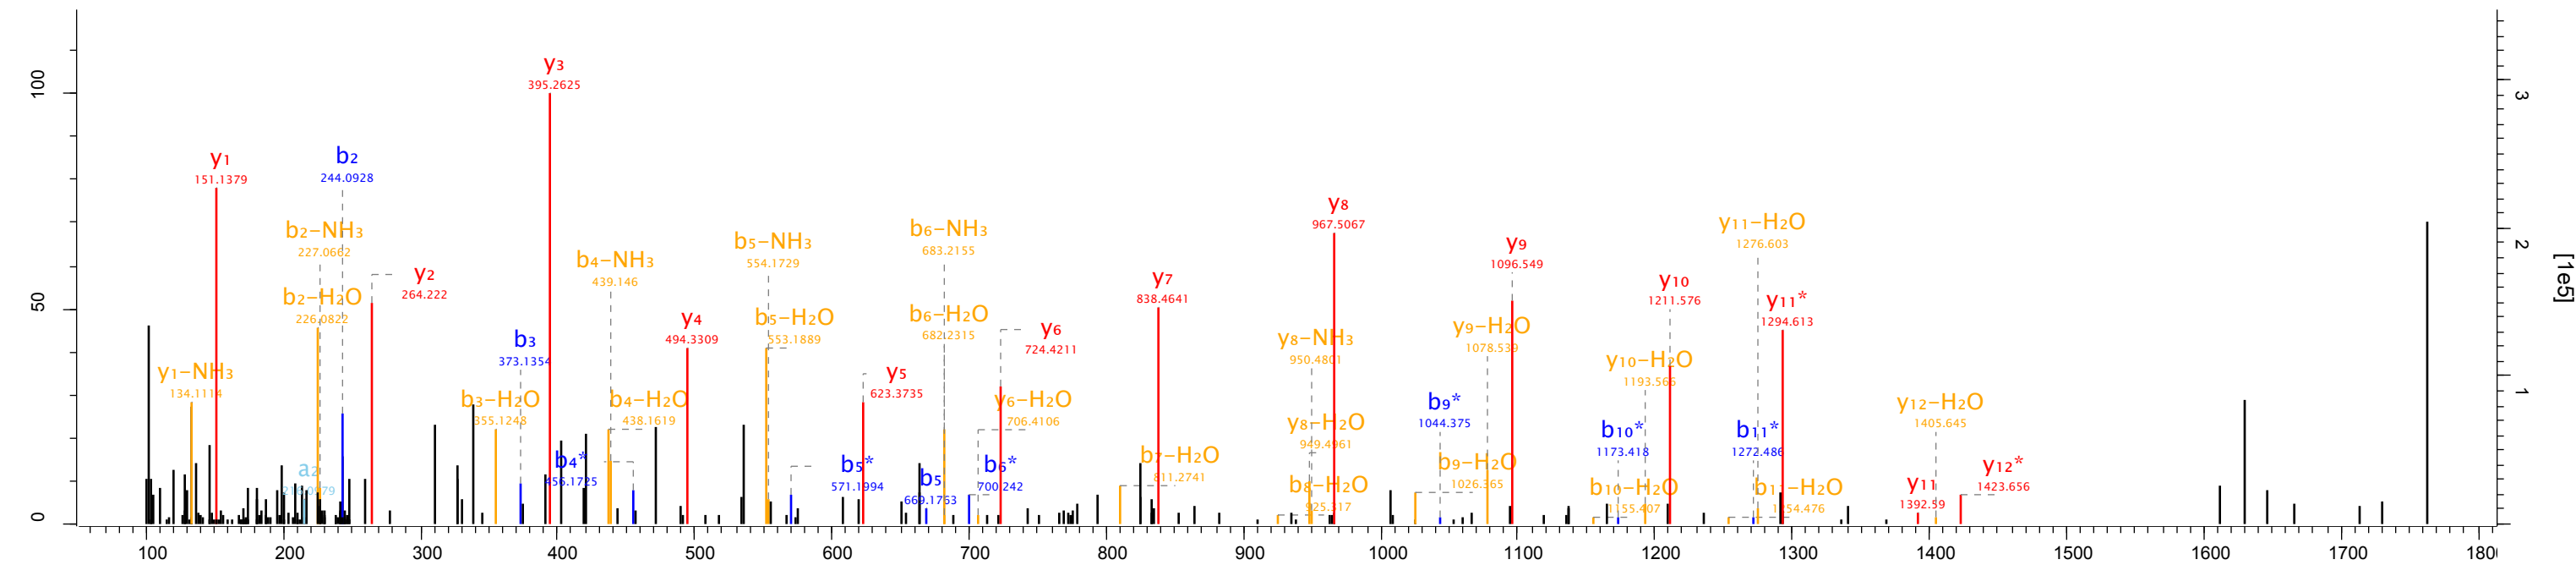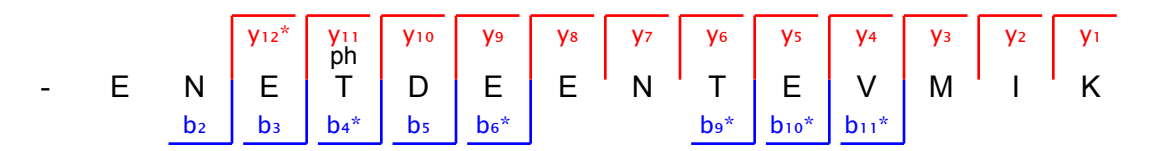

Raw file 20150814\_A375SR\_Phospho\_BR2\_05 Scan 12724 Method FTMS; HCD Score 107.11 m/z 506.72 Gene names CRYBG3

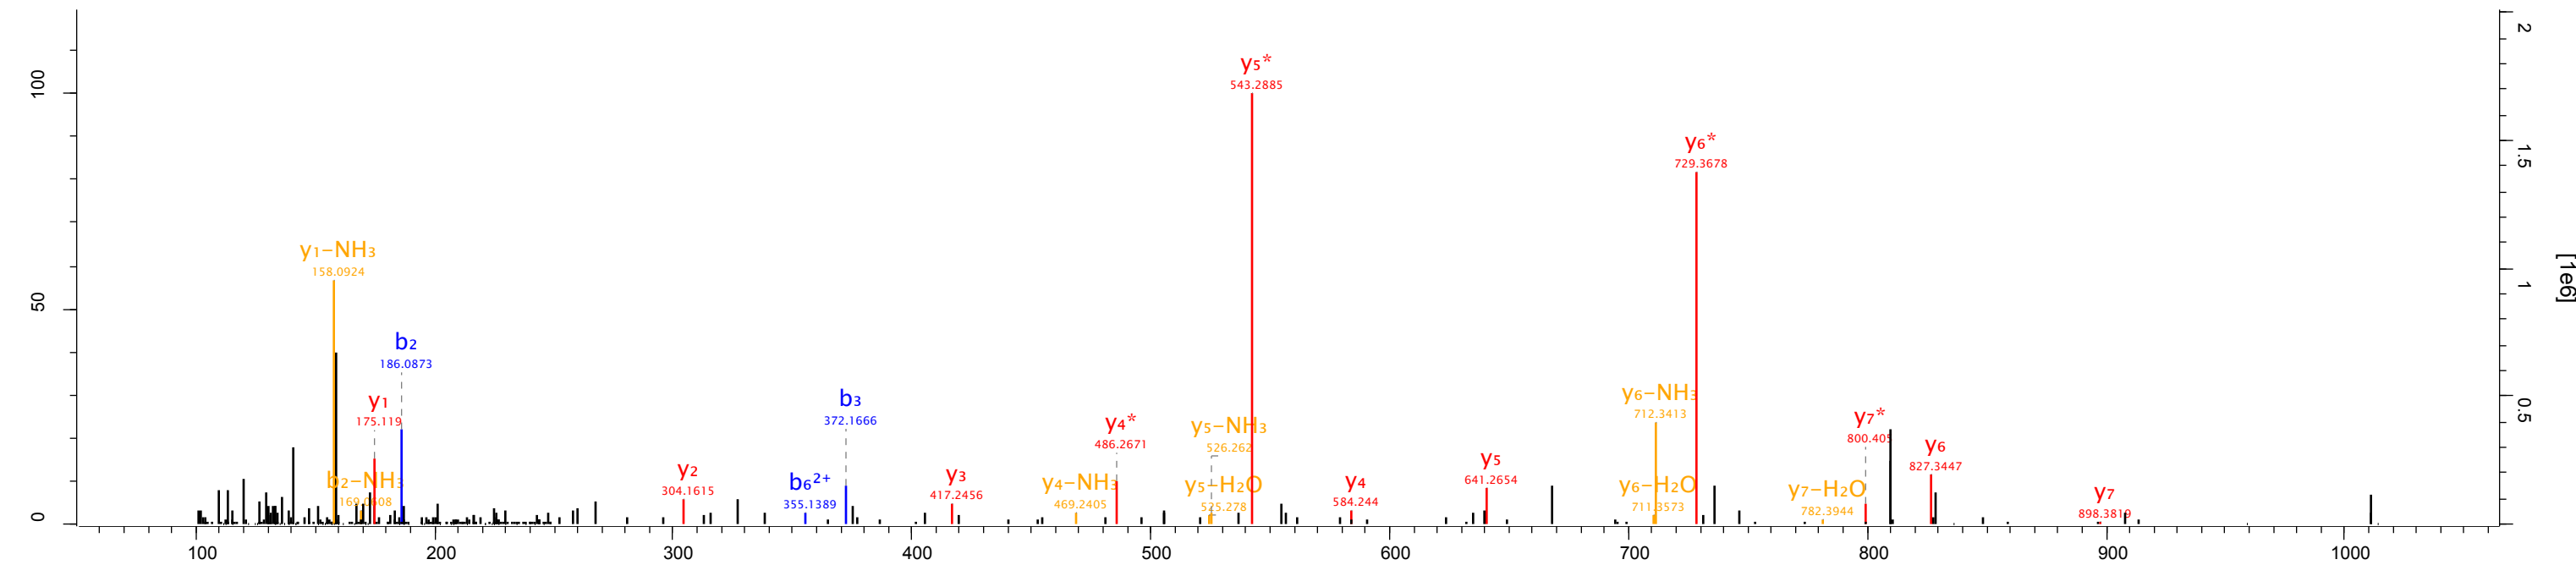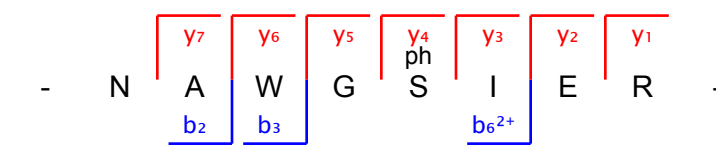

Raw file: 20150814\_A375SR\_Phospho\_BR2\_05  
 Scan: 13094  
 Method: FTMS; HCD  
 Score: 174.44  
 m/z: 669.33  
 Gene names: EIF3A

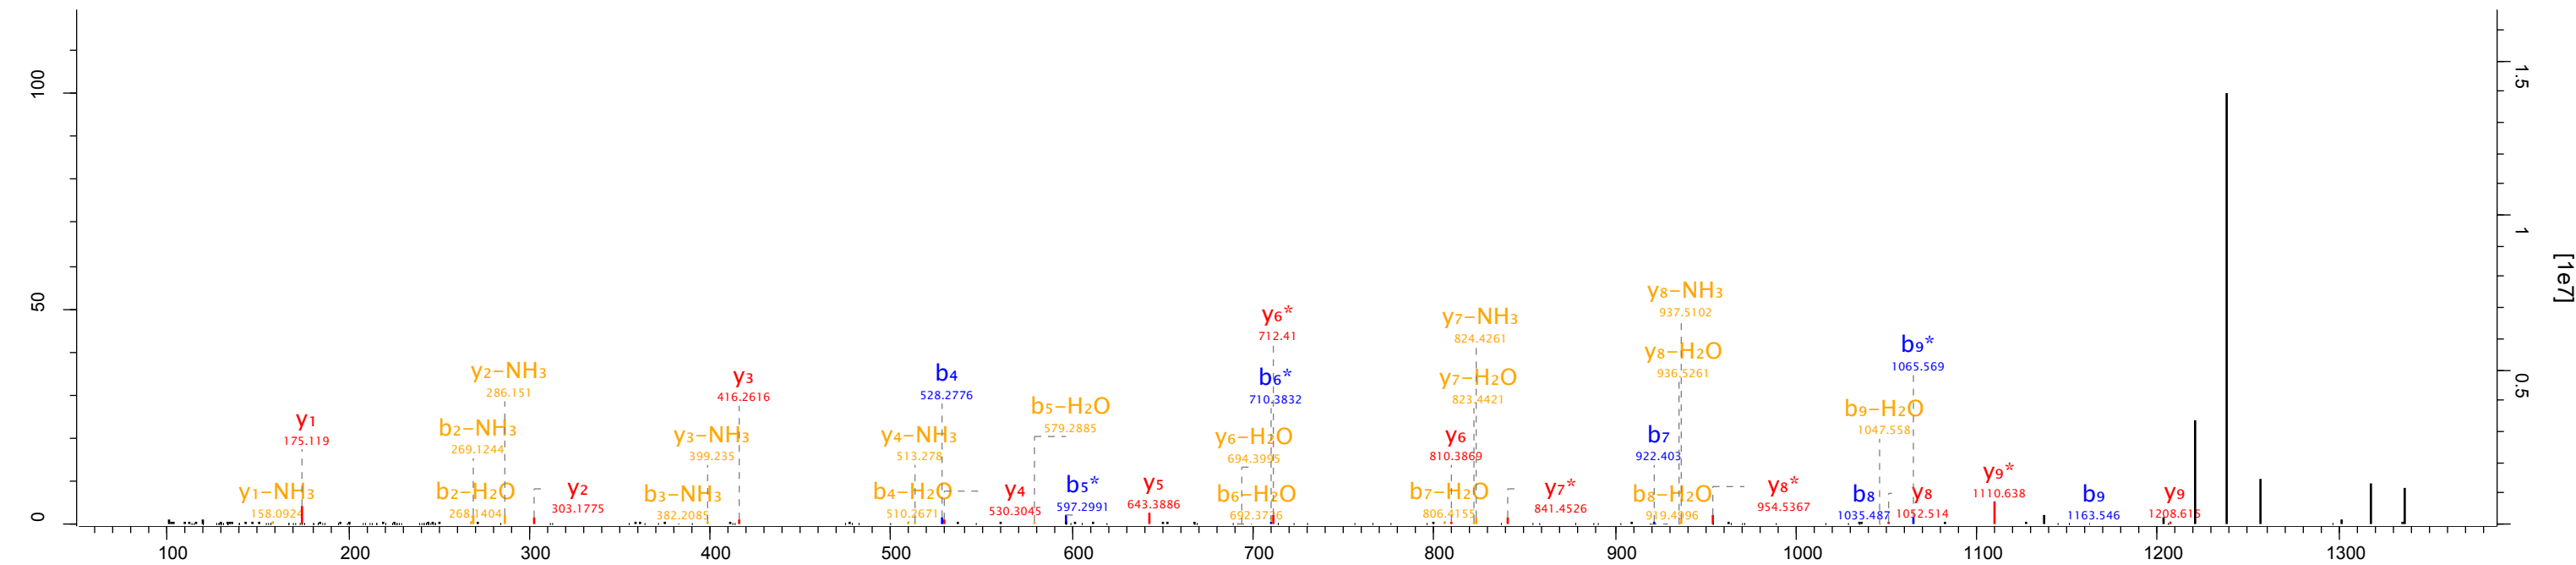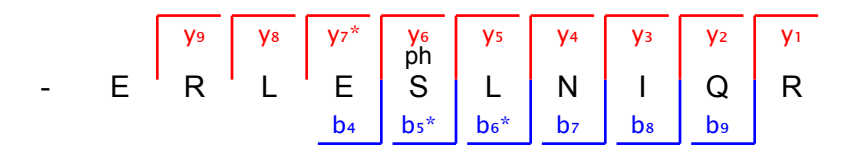



Raw file 20150814\_A375SR\_Phospho\_BR2\_05 Scan 13244 Method FTMS; HCD Score 149.2 m/z 824.36 Gene names BCL9

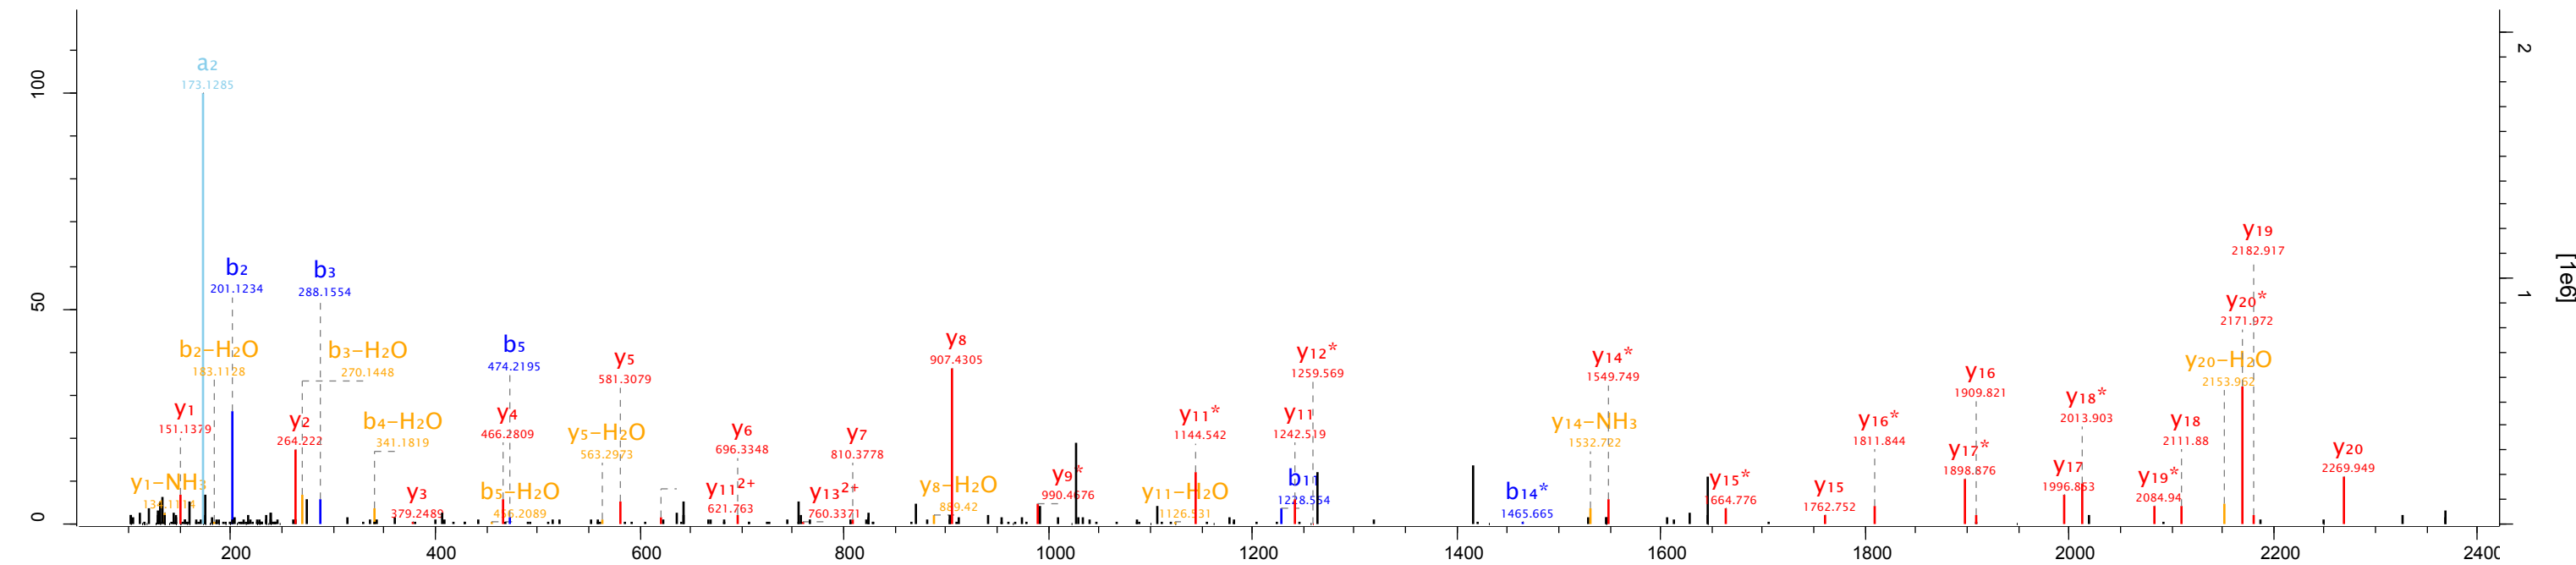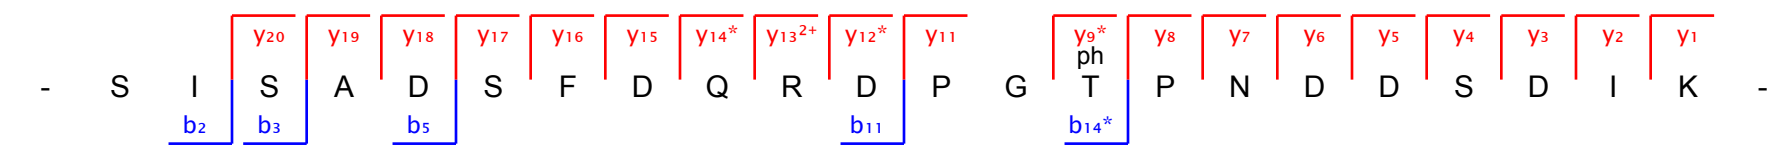

Raw file 20150814\_A375SR\_Phospho\_BR2\_05 Scan 13324 Method FTMS; HCD Score 120.23 m/z 639.76 Gene names RBM7

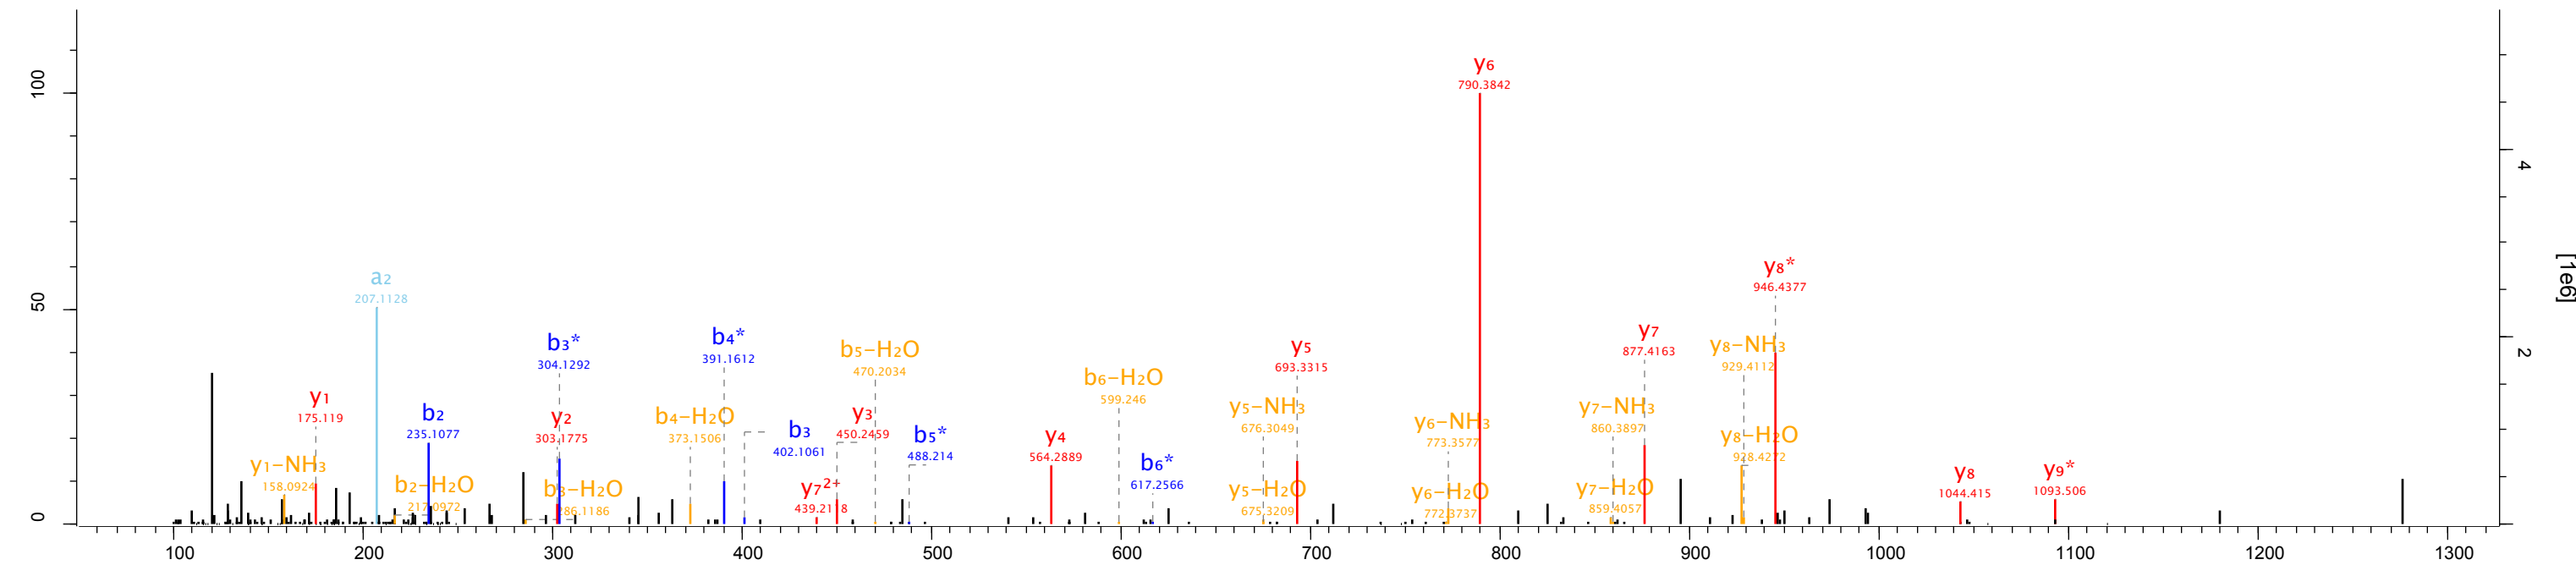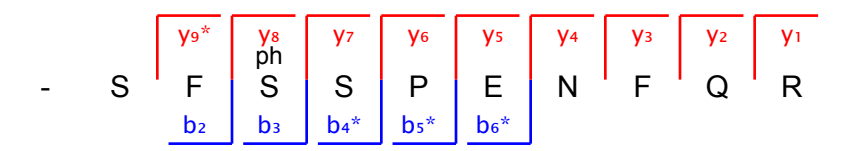

Raw file  
 20150814\_A375SR\_Phospho\_BR2\_05  
 Scan 13514 Method FTMS; HCD Score 207.69 m/z 660.59 Gene names HMGA1

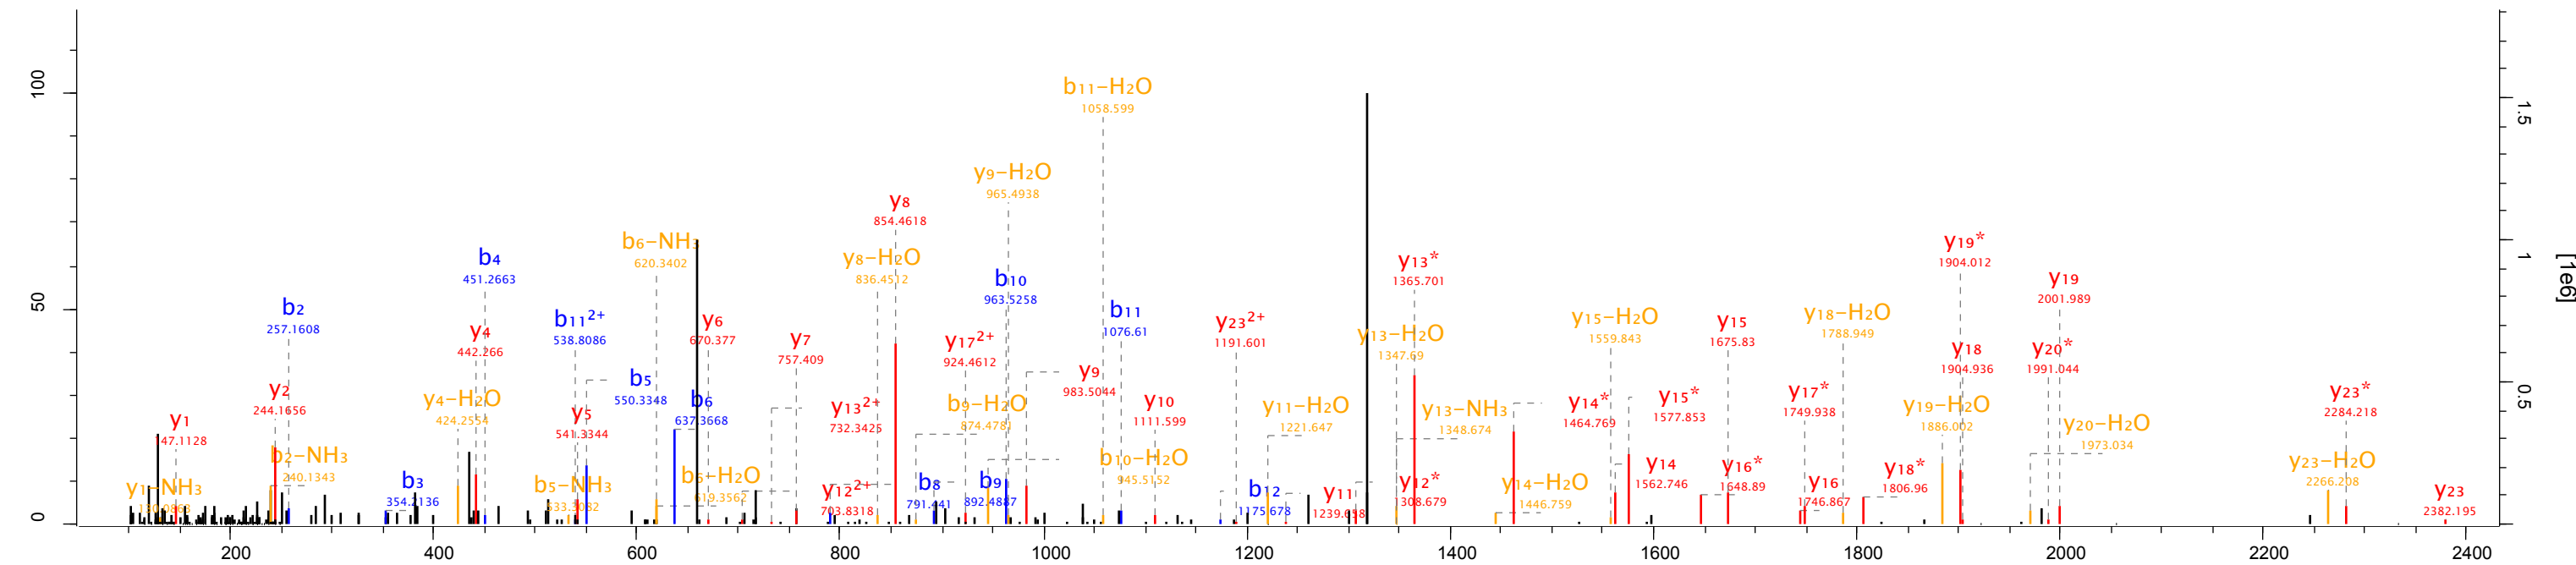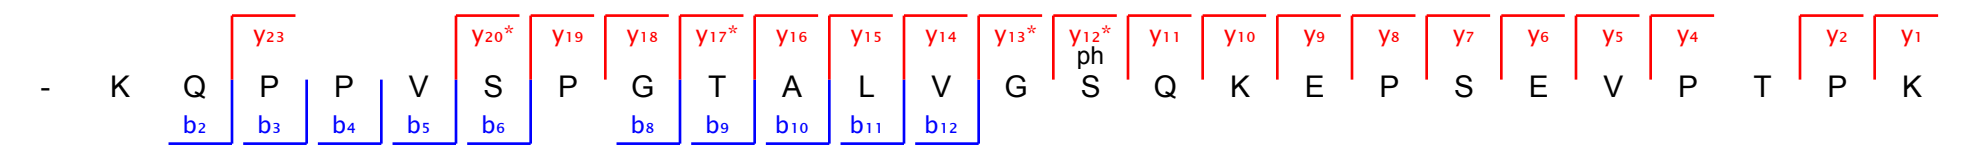

Raw file: 20150814\_A375SR\_Phospho\_BR2\_05  
 Scan: 13654 Method: FTMS; HCD Score: 196.64 m/z: 919.78 Gene names: ZNF800

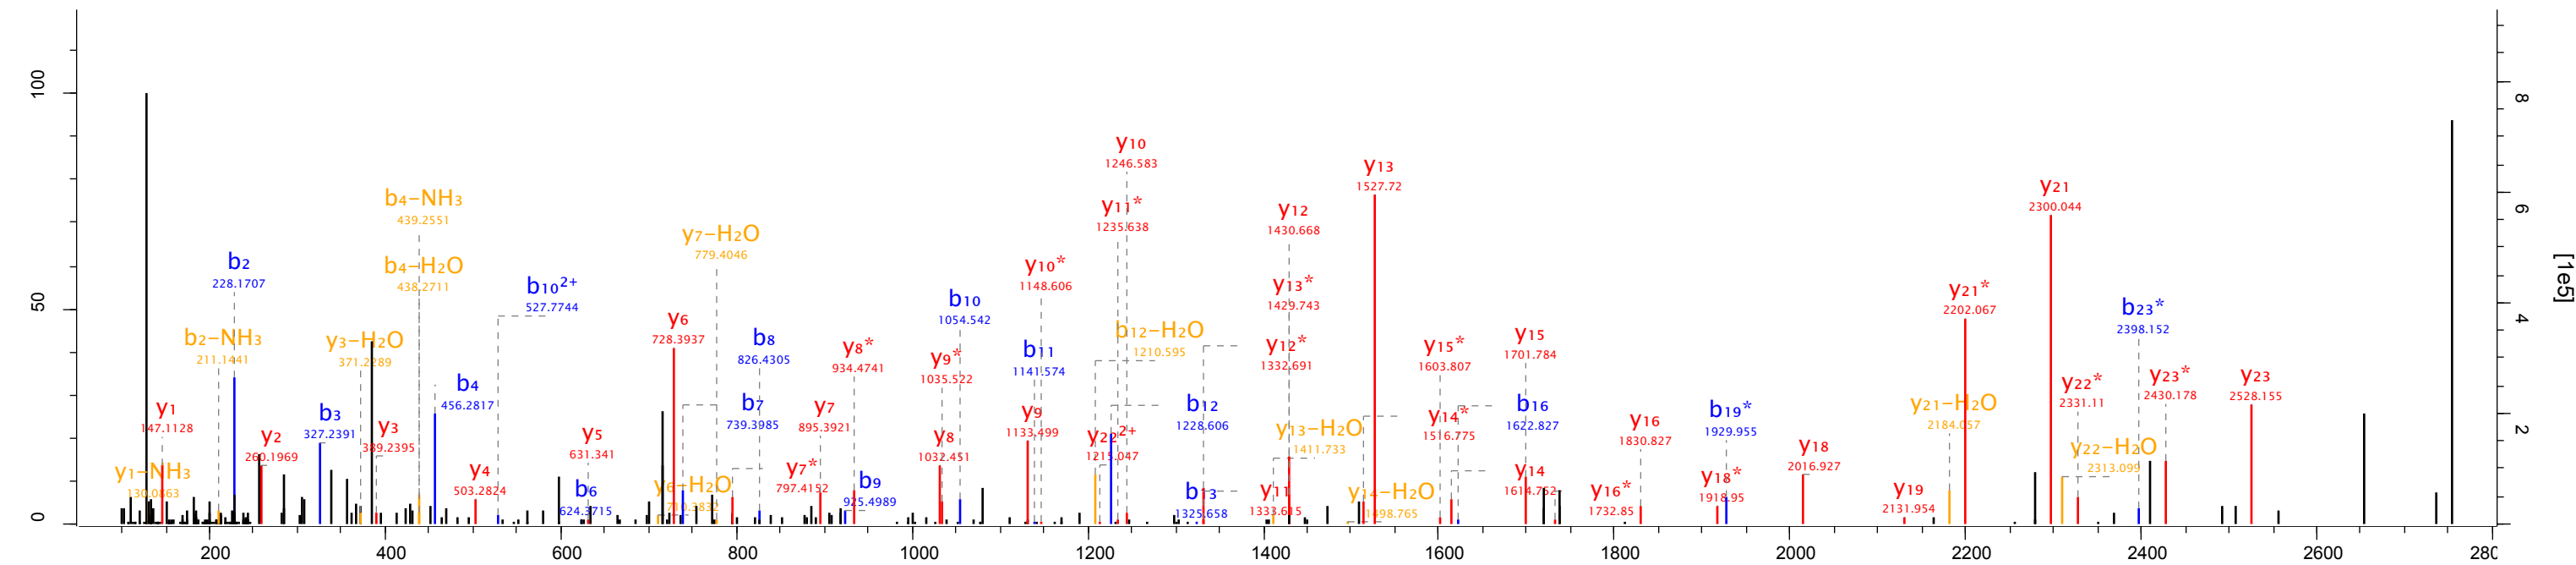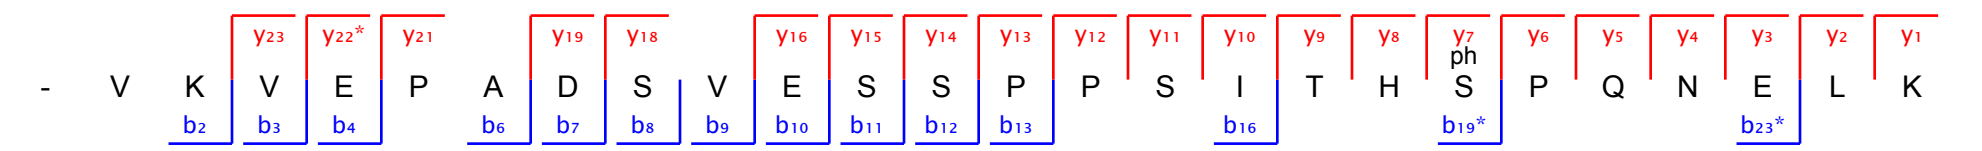

Raw file 20150814\_A375SR\_Phospho\_BR2\_05 Scan 13664 Method FTMS; HCD Score 159.18 m/z 740.82 Gene names ALKBH5

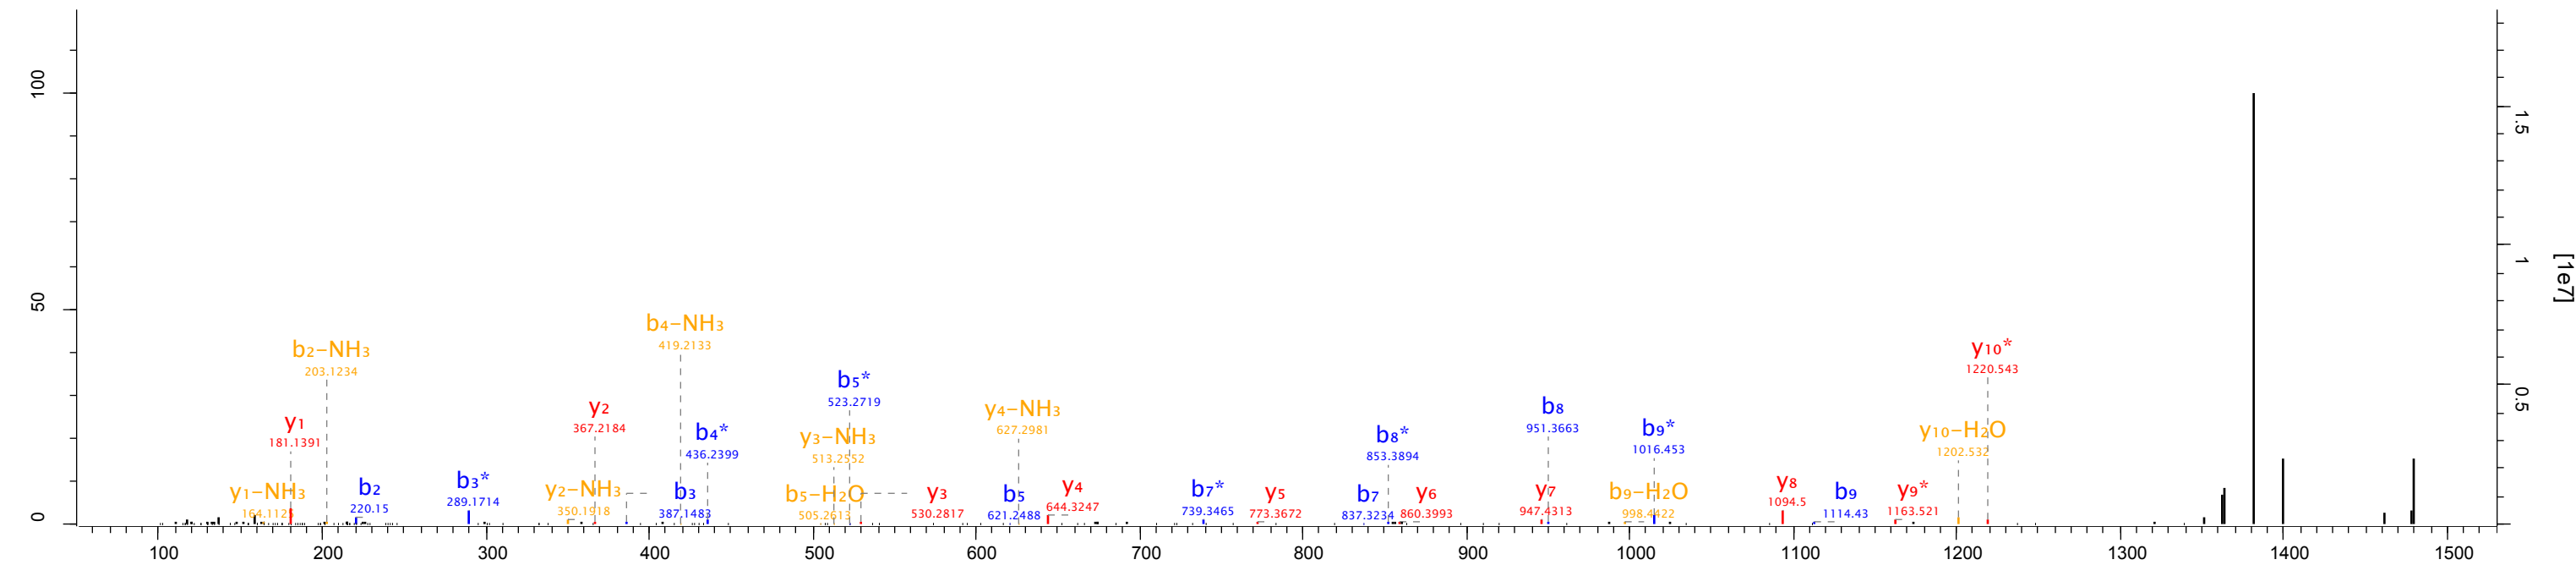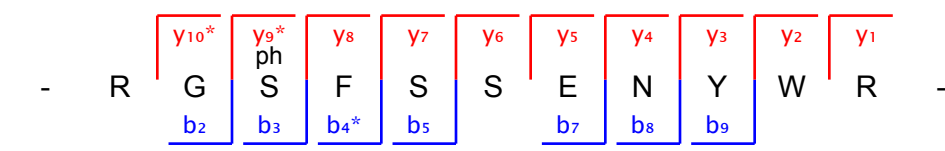

Raw file 20150814\_A375SR\_Phospho\_BR2\_05 Scan 14684 Method FTMS; HCD Score 122.5 m/z 872.86 Gene names TBC1D5

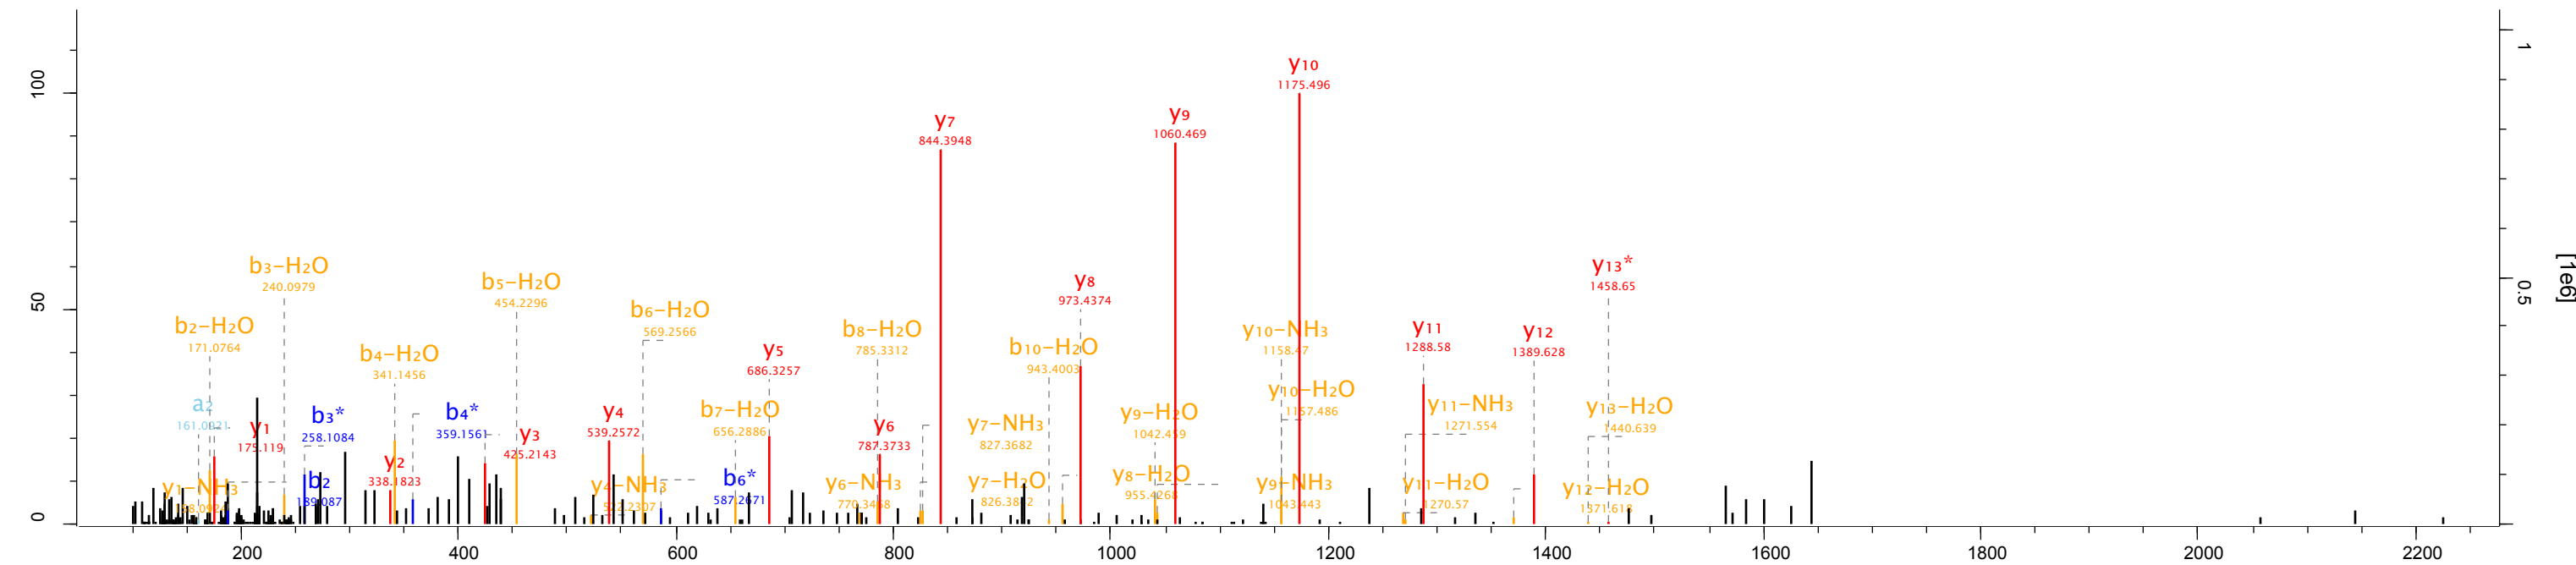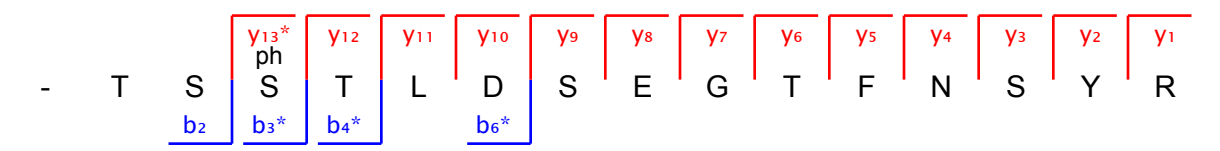

Raw file: 20150814\_A375SR\_Phospho\_BR2\_05  
 Scan: 14764 Method: FTMS; HCD Score: 49.27 m/z: 720.97 Gene names: DENND4A

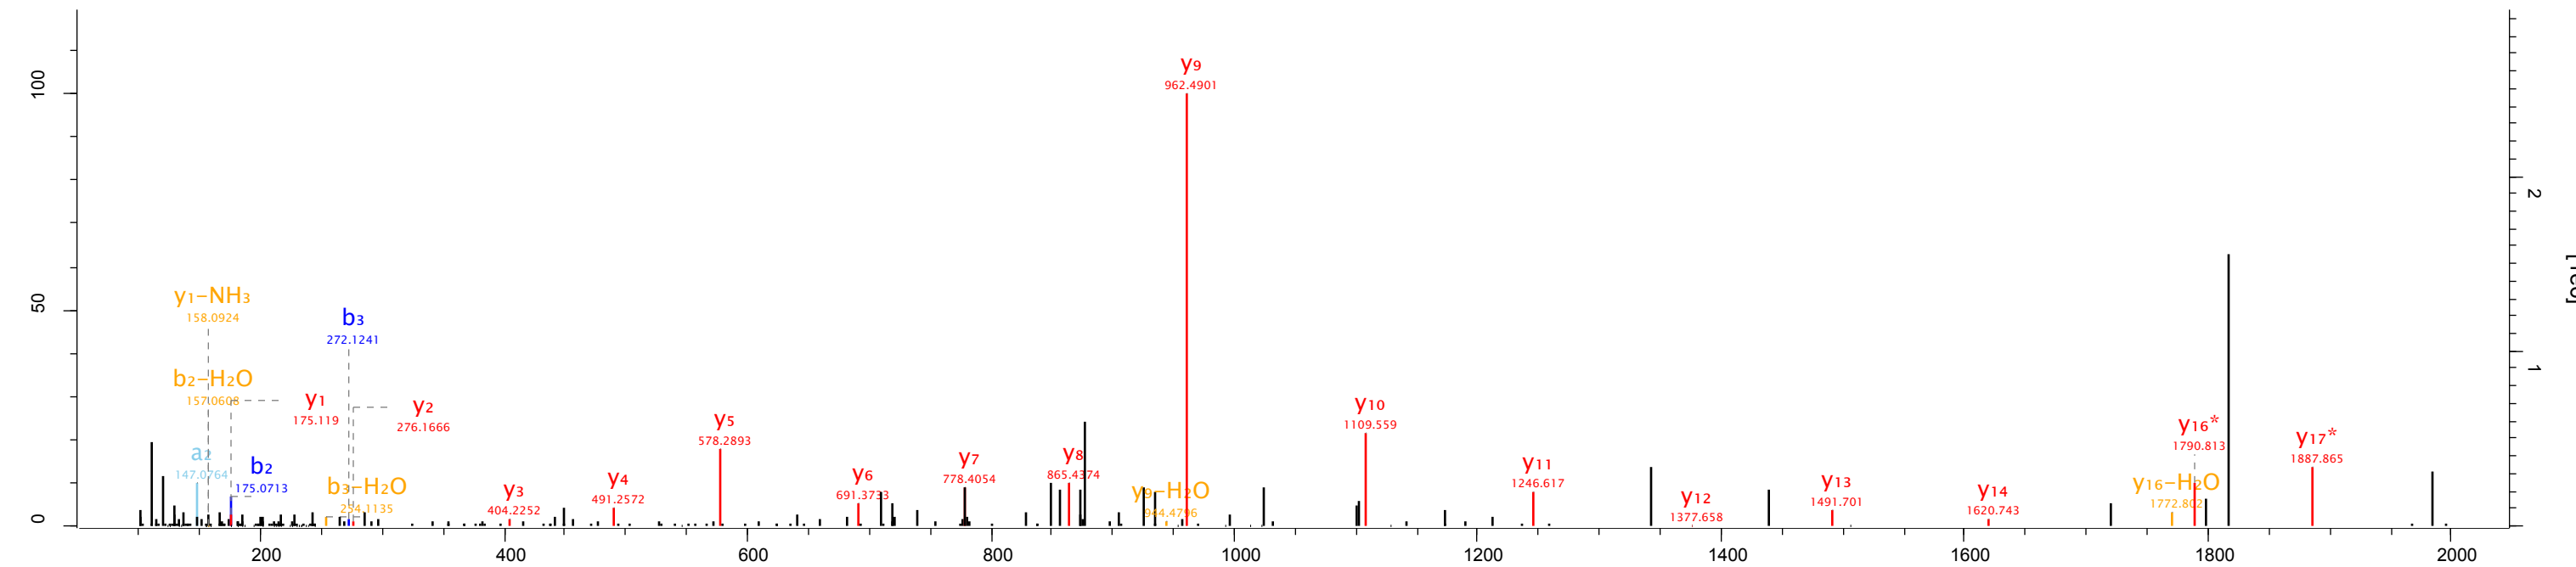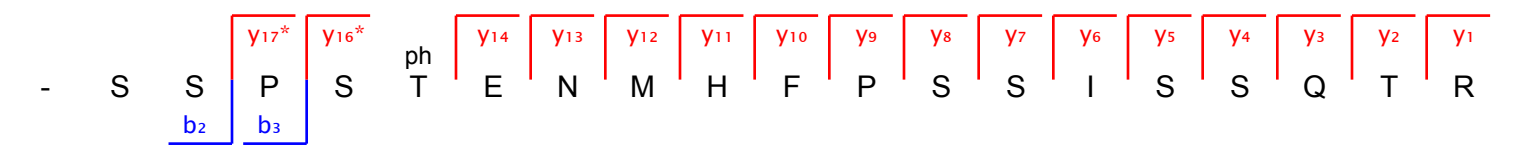

Raw file 20150814\_A375SR\_Phospho\_BR2\_05 Scan 14814 Method FTMS; HCD Score 74.99 m/z 612.3 Gene names STARD3NL

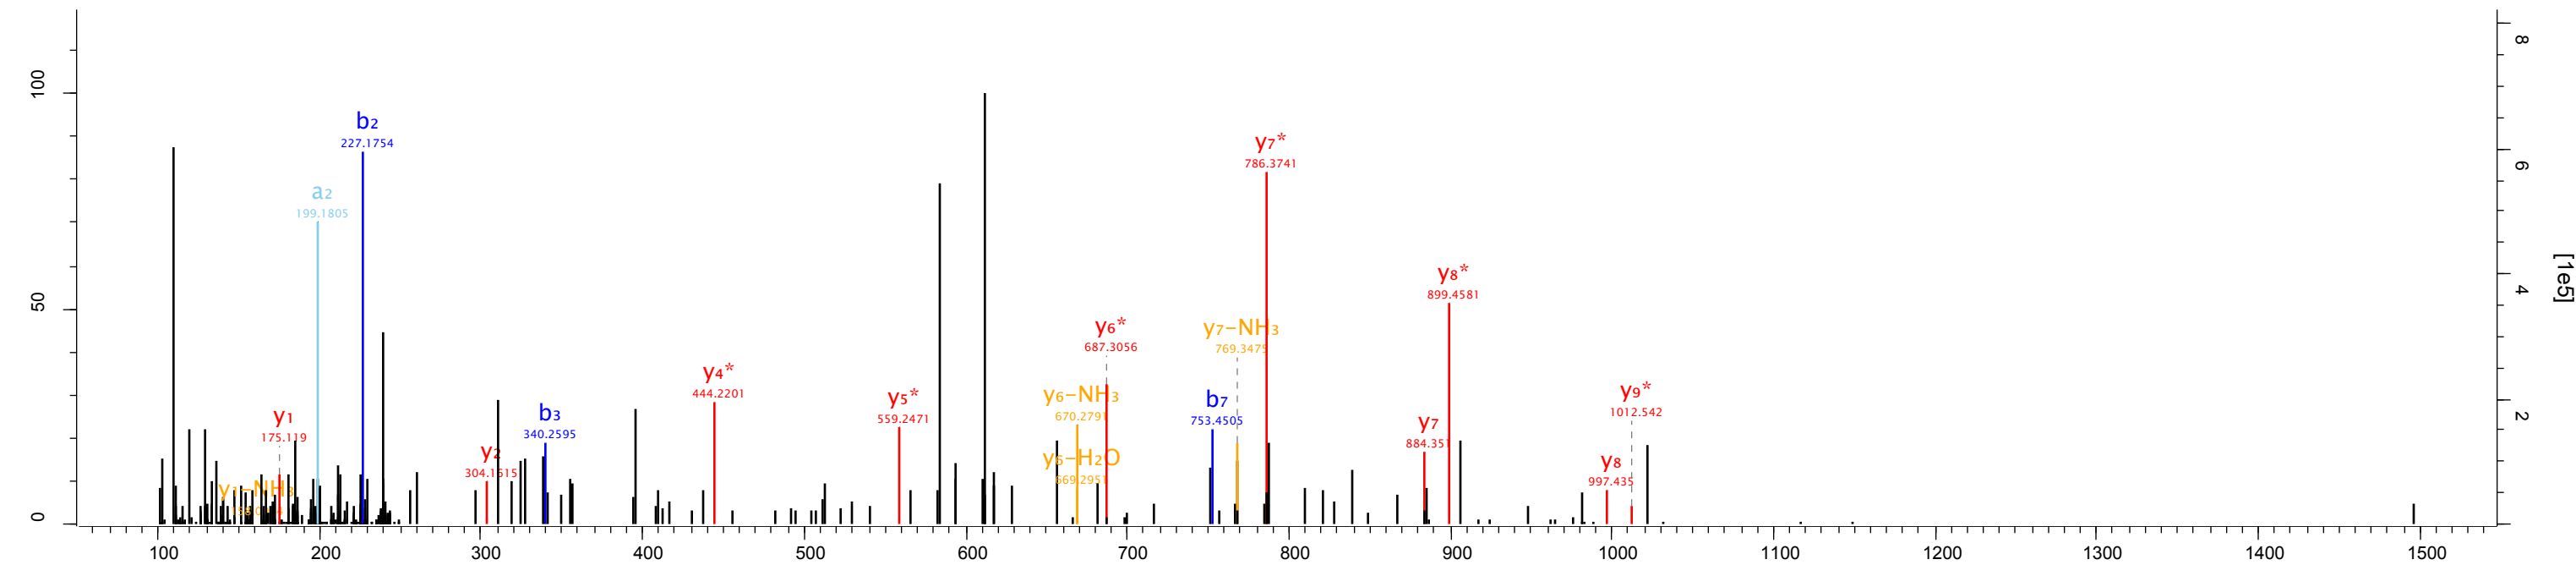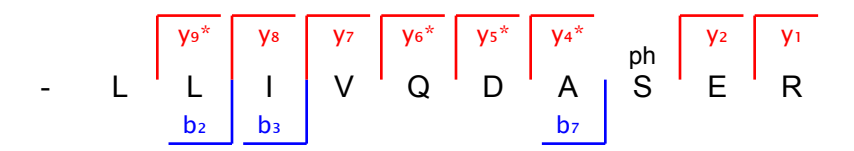



Raw file 20150814\_A375SR\_Phospho\_BR2\_05 Scan 15504 Method FTMS; HCD Score 100.07 m/z 819.84 Gene names CNKSR3

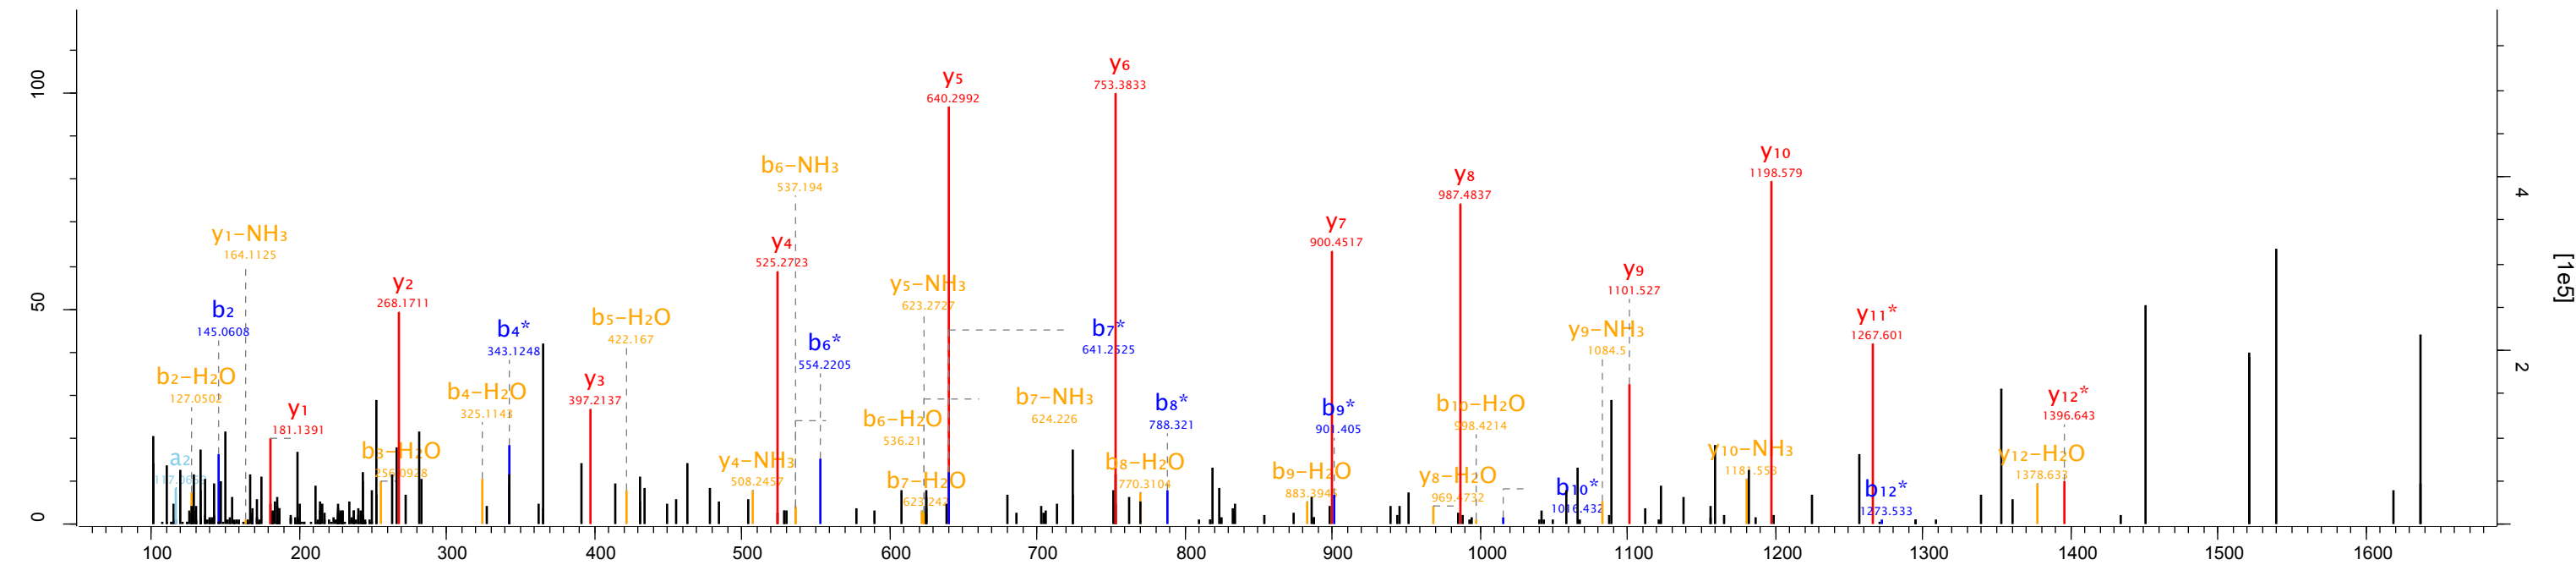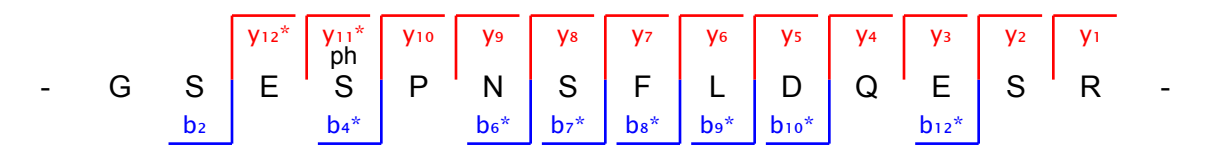

Raw file: 20150814\_A375SR\_Phospho\_BR2\_05  
 Scan: 15544 Method: FTMS; HCD Score: 183 m/z: 596.29 Gene names: PRRC2C

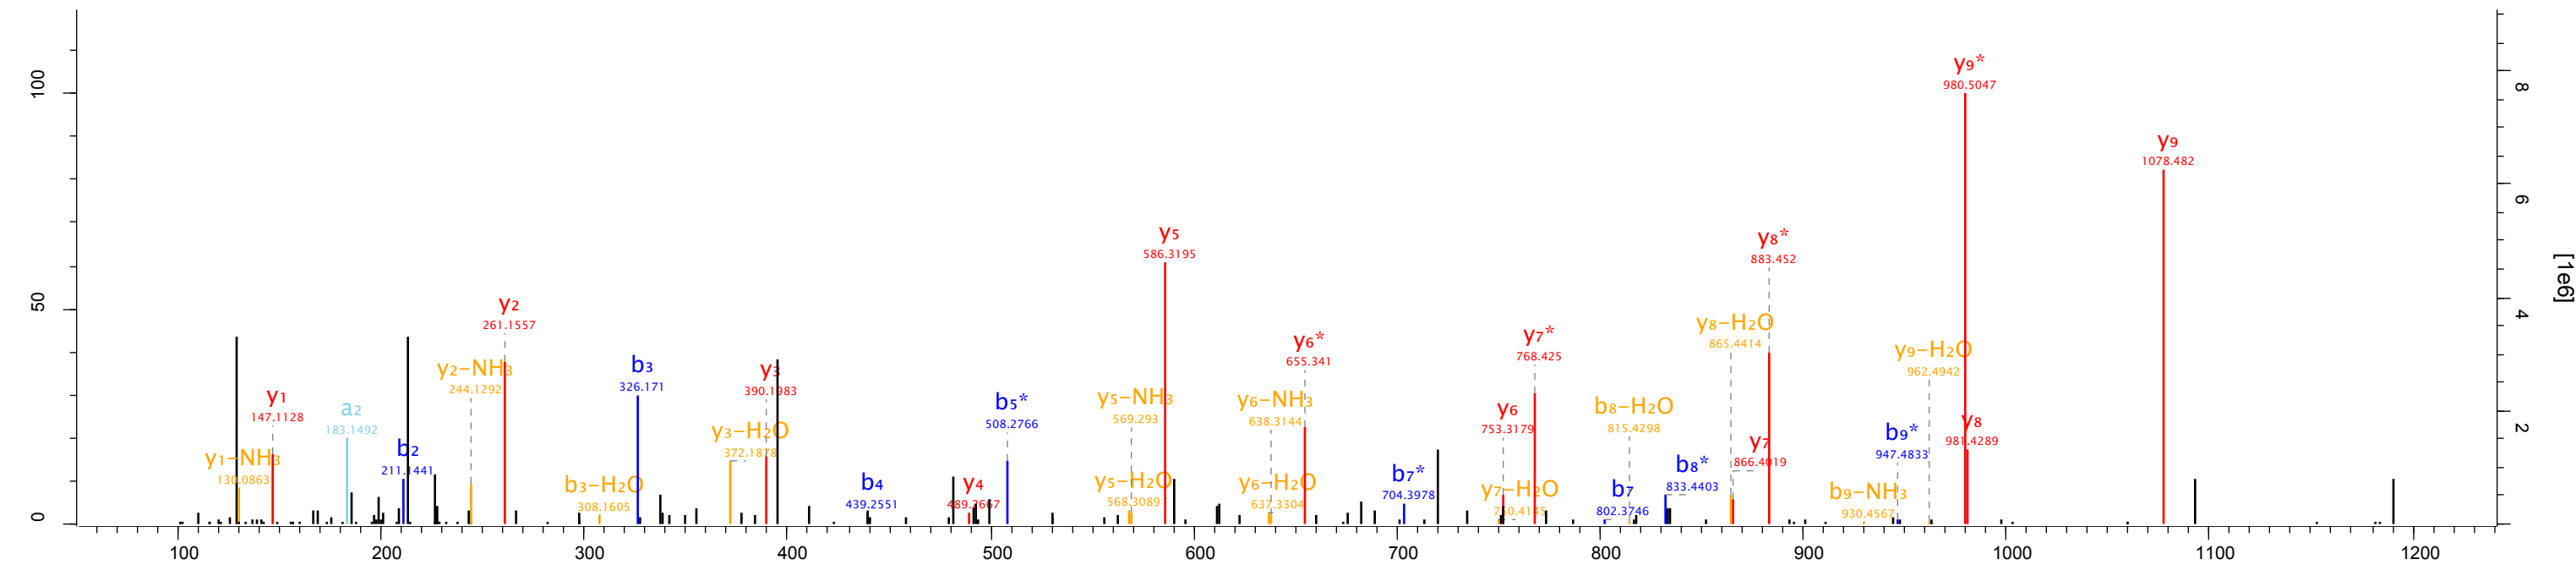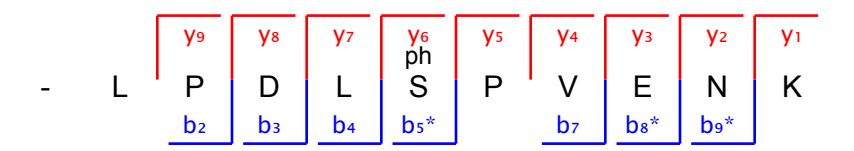

Raw file 20150814\_A375SR\_Phospho\_BR2\_05 Scan 15694 Method FTMS; HCD Score 126.02 m/z 822.86 Gene names FRYL

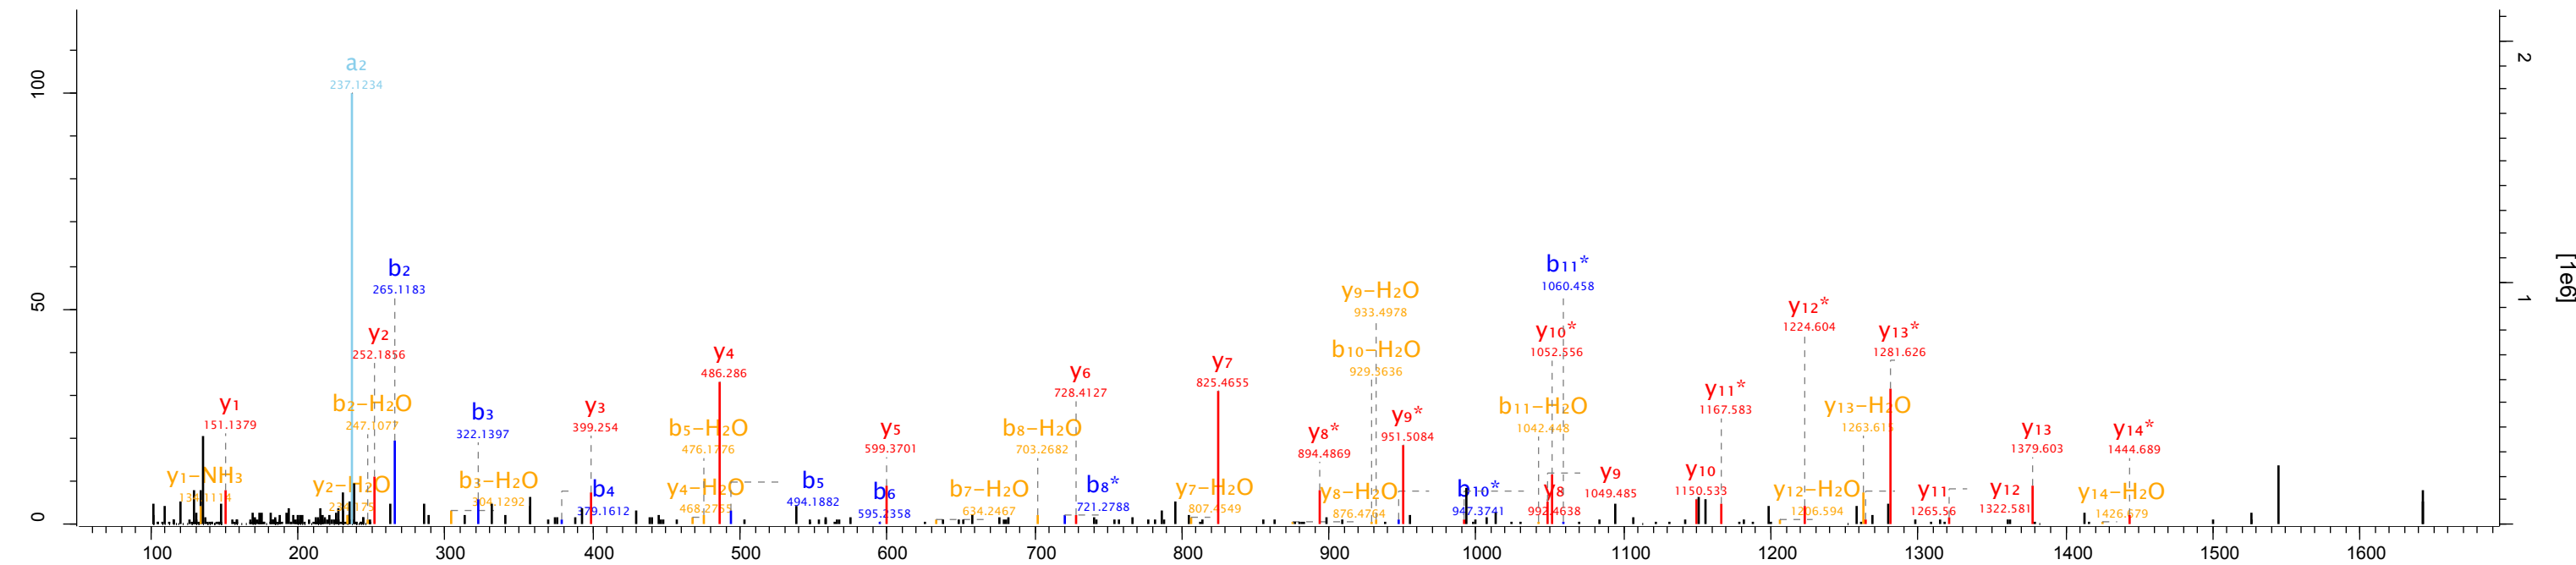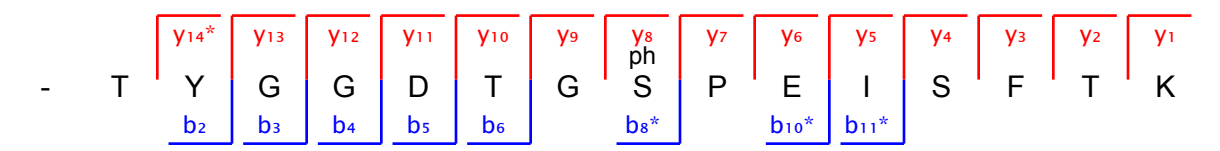

Raw file 20150814\_A375SR\_Phospho\_BR2\_05 Scan 16024 Method FTMS; HCD Score 112.3 m/z 545.71 Gene names SHROOM1

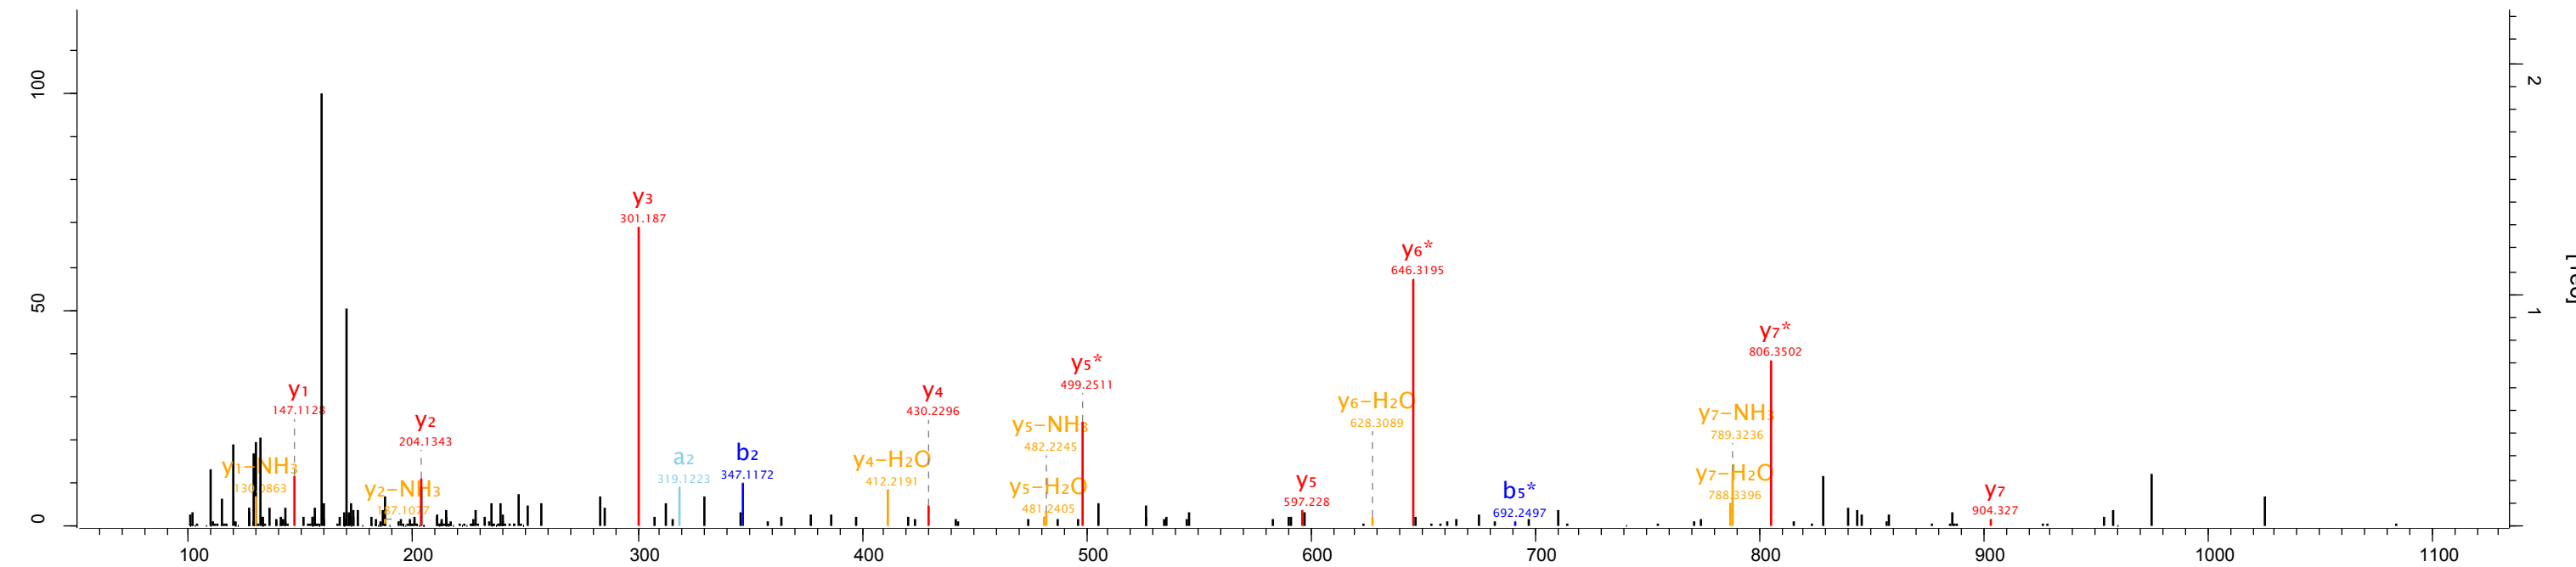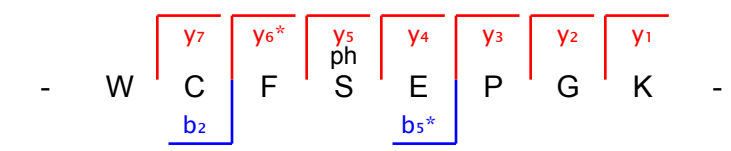

Raw file: 20150814\_A375SR\_Phospho\_BR2\_05  
 Scan: 16104 Method: FTMS; HCD Score: 262.63 m/z: 889.36 Gene names: STRN

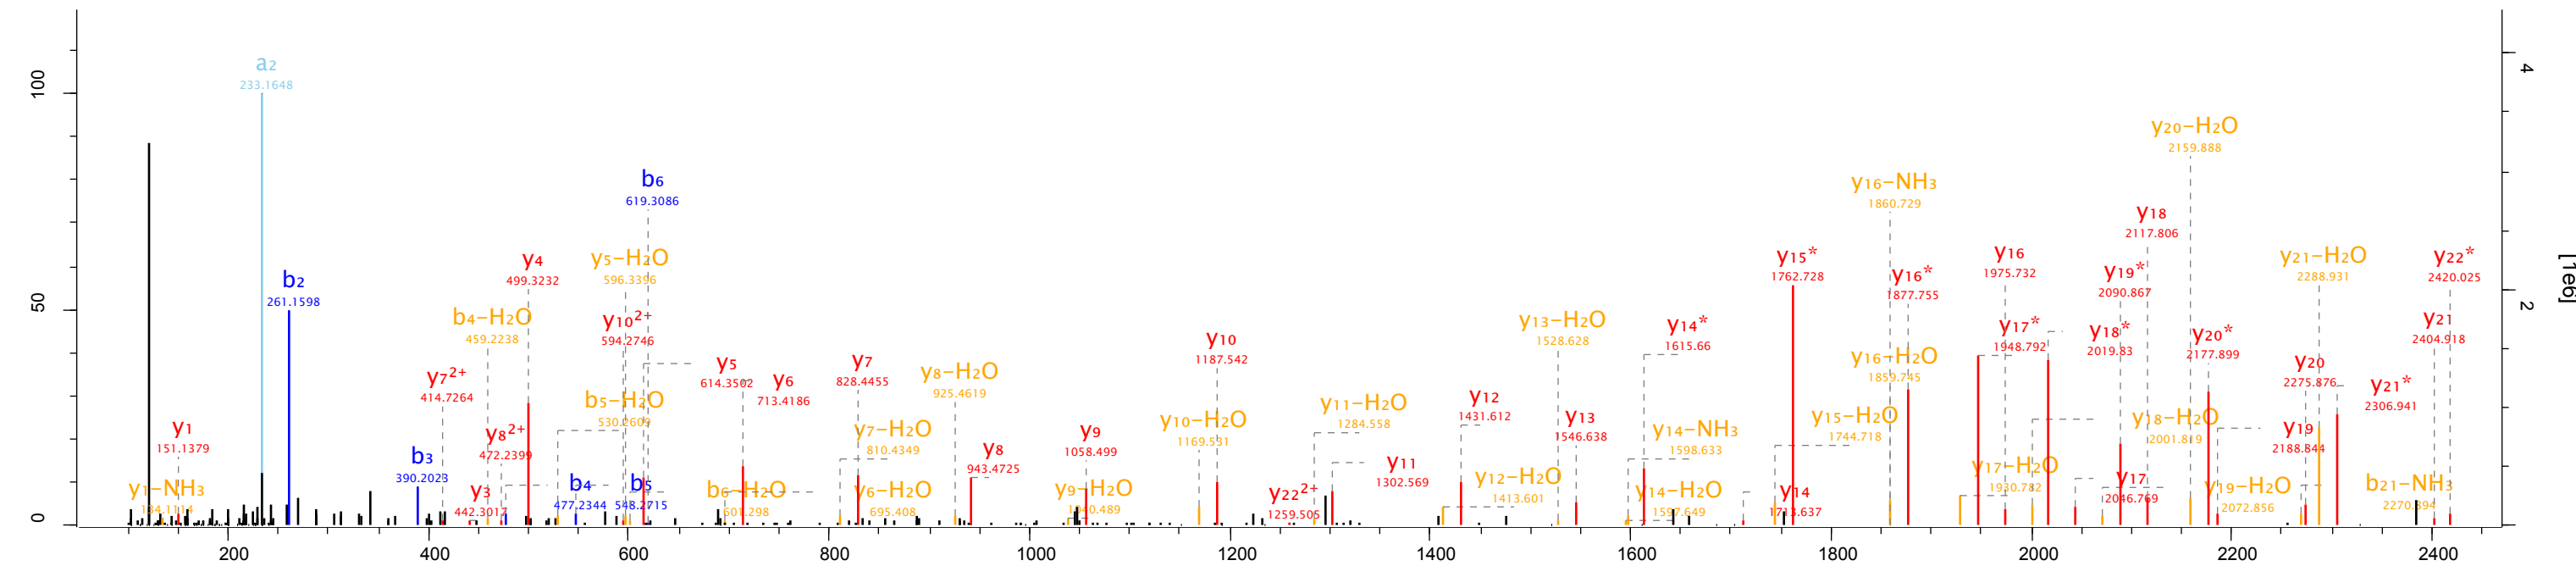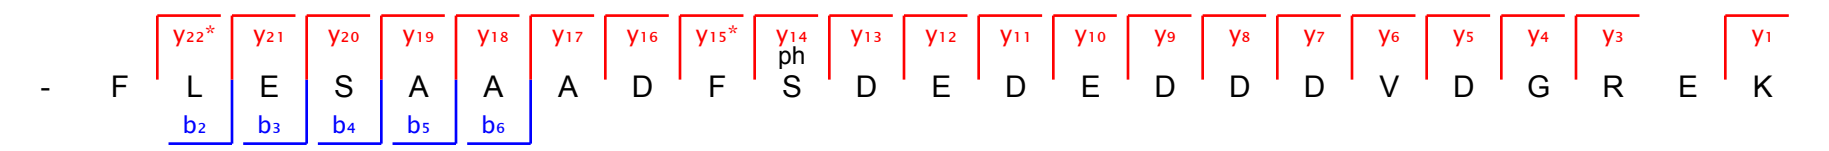

Raw file 20150814\_A375SR\_Phospho\_BR2\_05 Scan 16244 Method FTMS; HCD Score 202.61 m/z 984.02 Gene names POU2F1

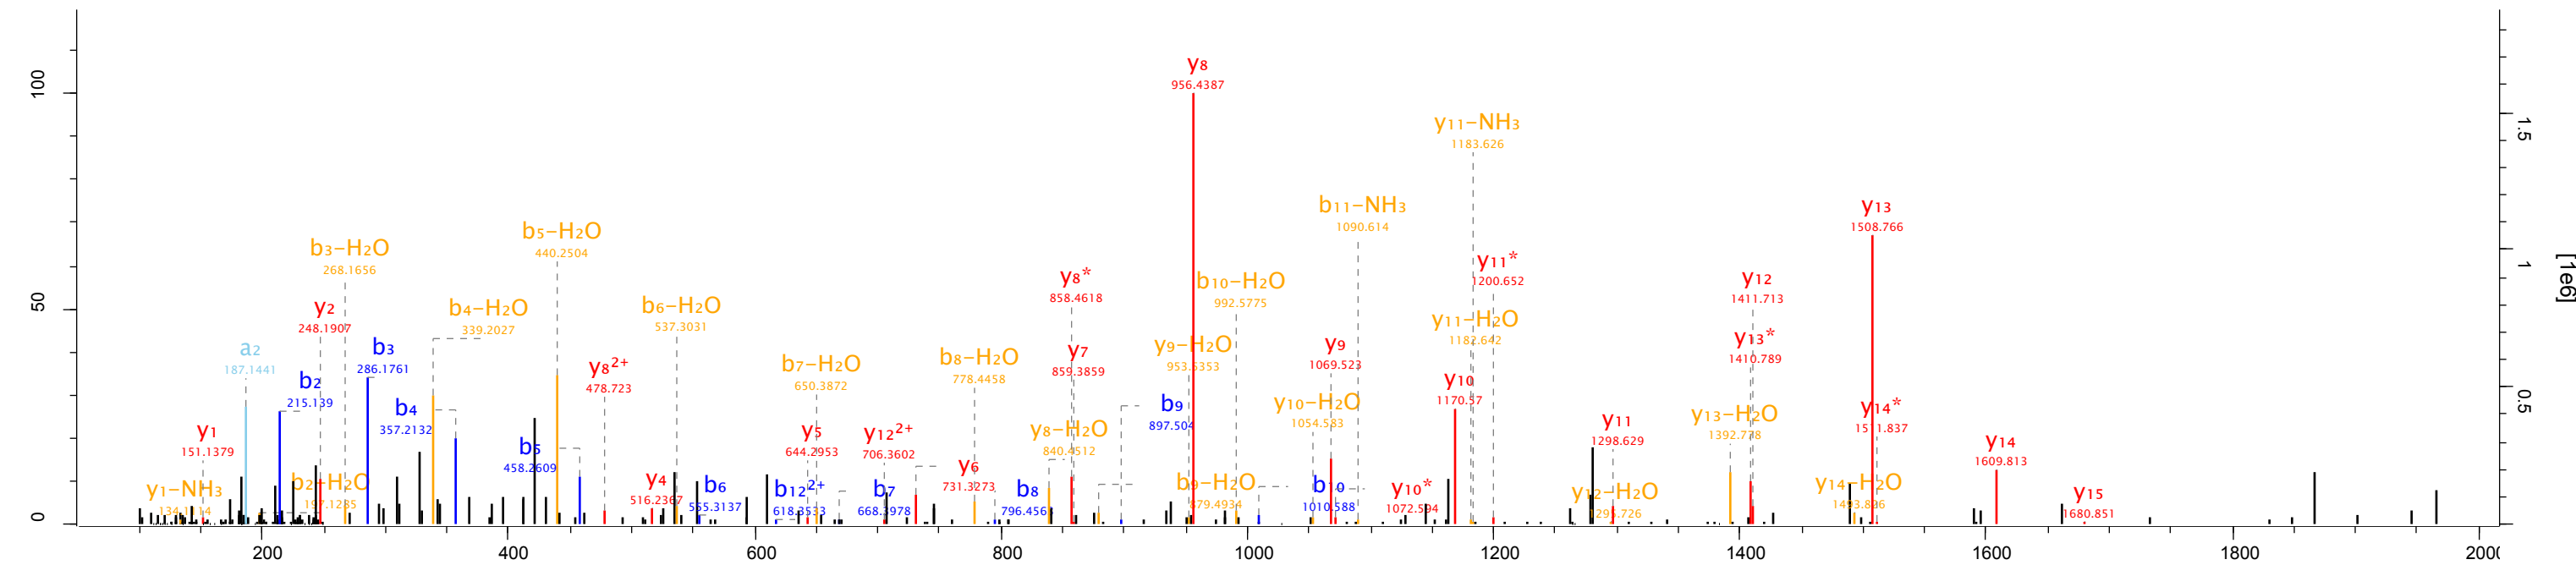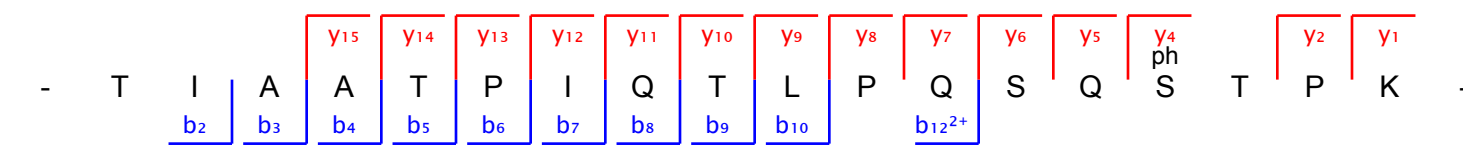

Raw file Scan Method Score m/z Gene names  
 20150814\_A375SR\_Phospho\_BR2\_05 16604 FTMS; HCD 254.54 817.38 MIS18BP1

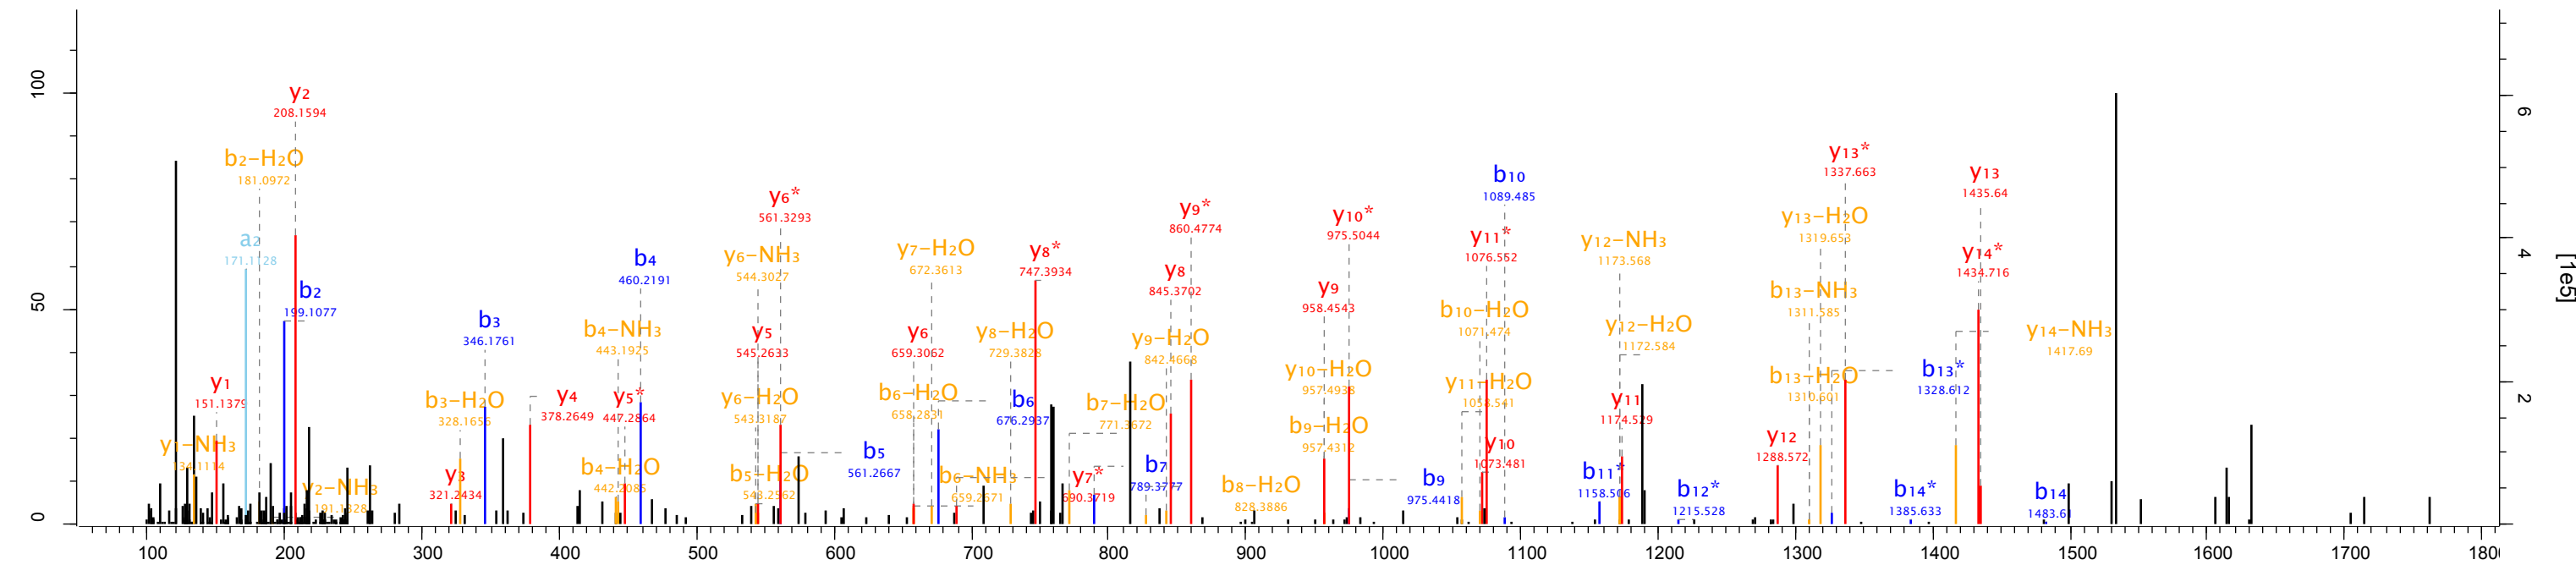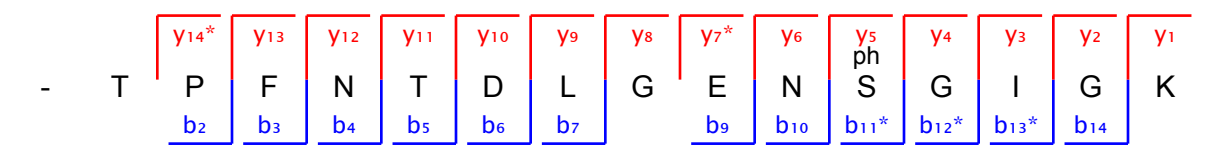

Raw file: 20150814\_A375SR\_Phospho\_BR2\_05  
 Scan: 16694 Method: FTMS; HCD Score: 114.31 m/z: 635.29 Gene names: SLC9A1

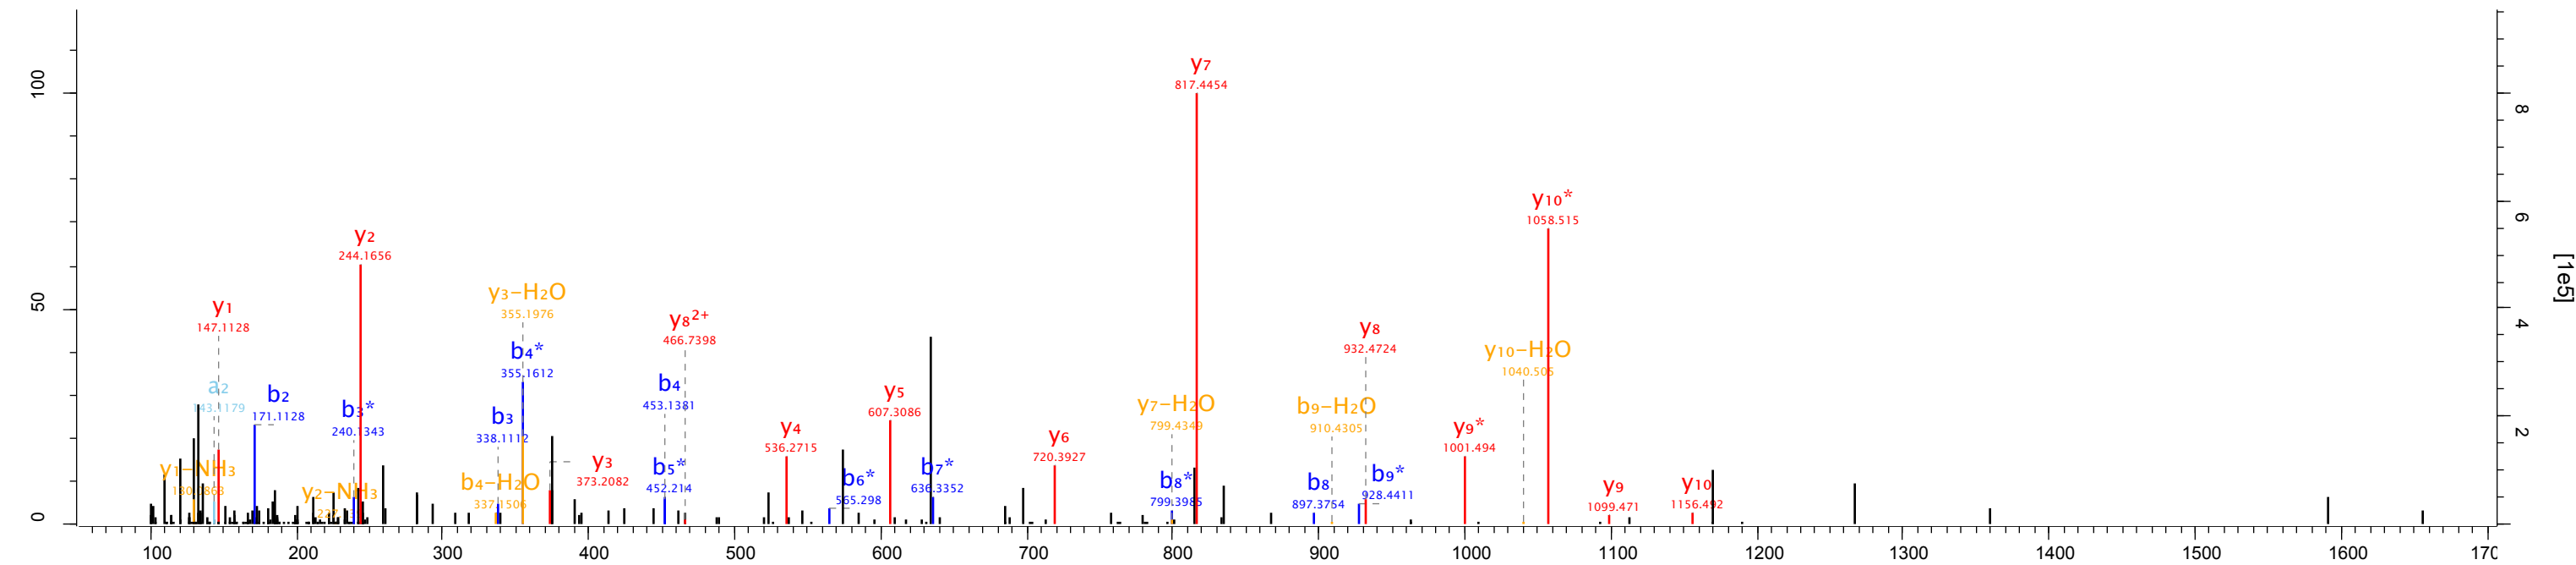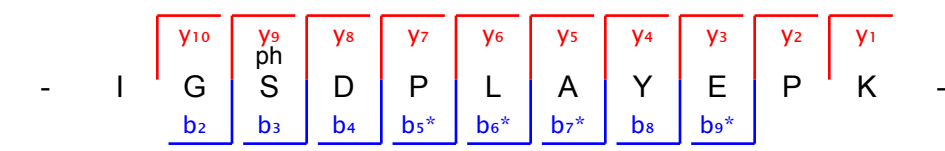



Raw file: 20150814\_A375SR\_Phospho\_BR2\_05  
 Scan: 16724 Method: FTMS; HCD Score: 145.04 m/z: 826.37 Gene names: INCENP

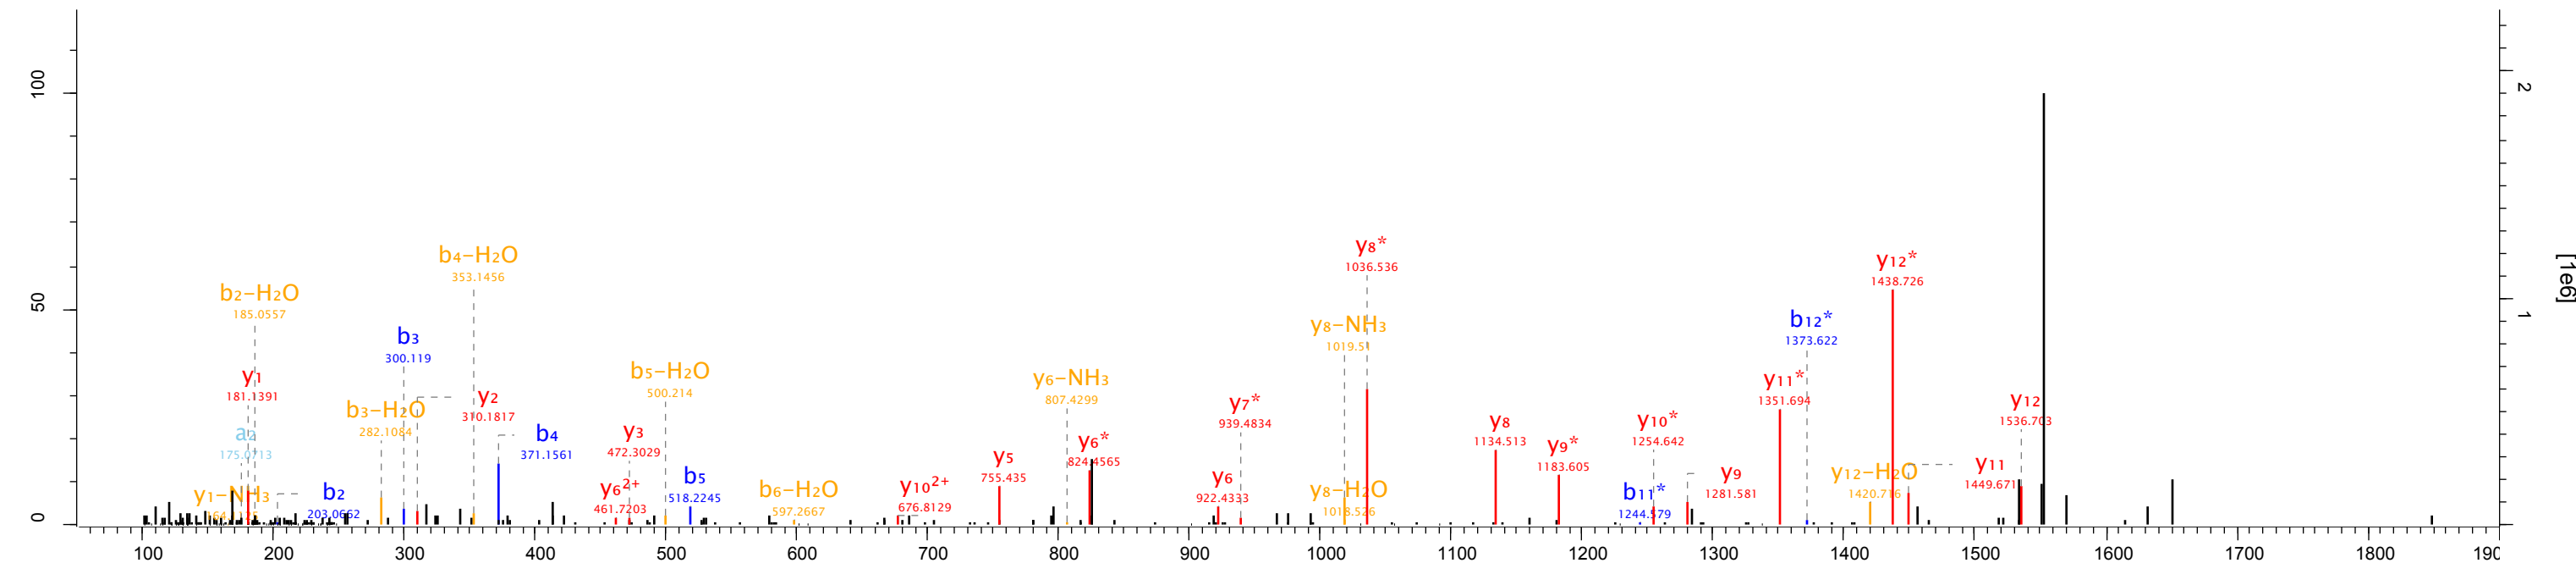

- D S P A F P D S P W R E R -  
 b<sub>2</sub> b<sub>3</sub> b<sub>4</sub> b<sub>5</sub> b<sub>11</sub><sup>\*</sup> b<sub>12</sub><sup>\*</sup>

Raw file 20150814\_A375SR\_Phospho\_BR2\_05 Scan 16764 Method FTMS; HCD Score 202.52 m/z 938.92 Gene names SETD2

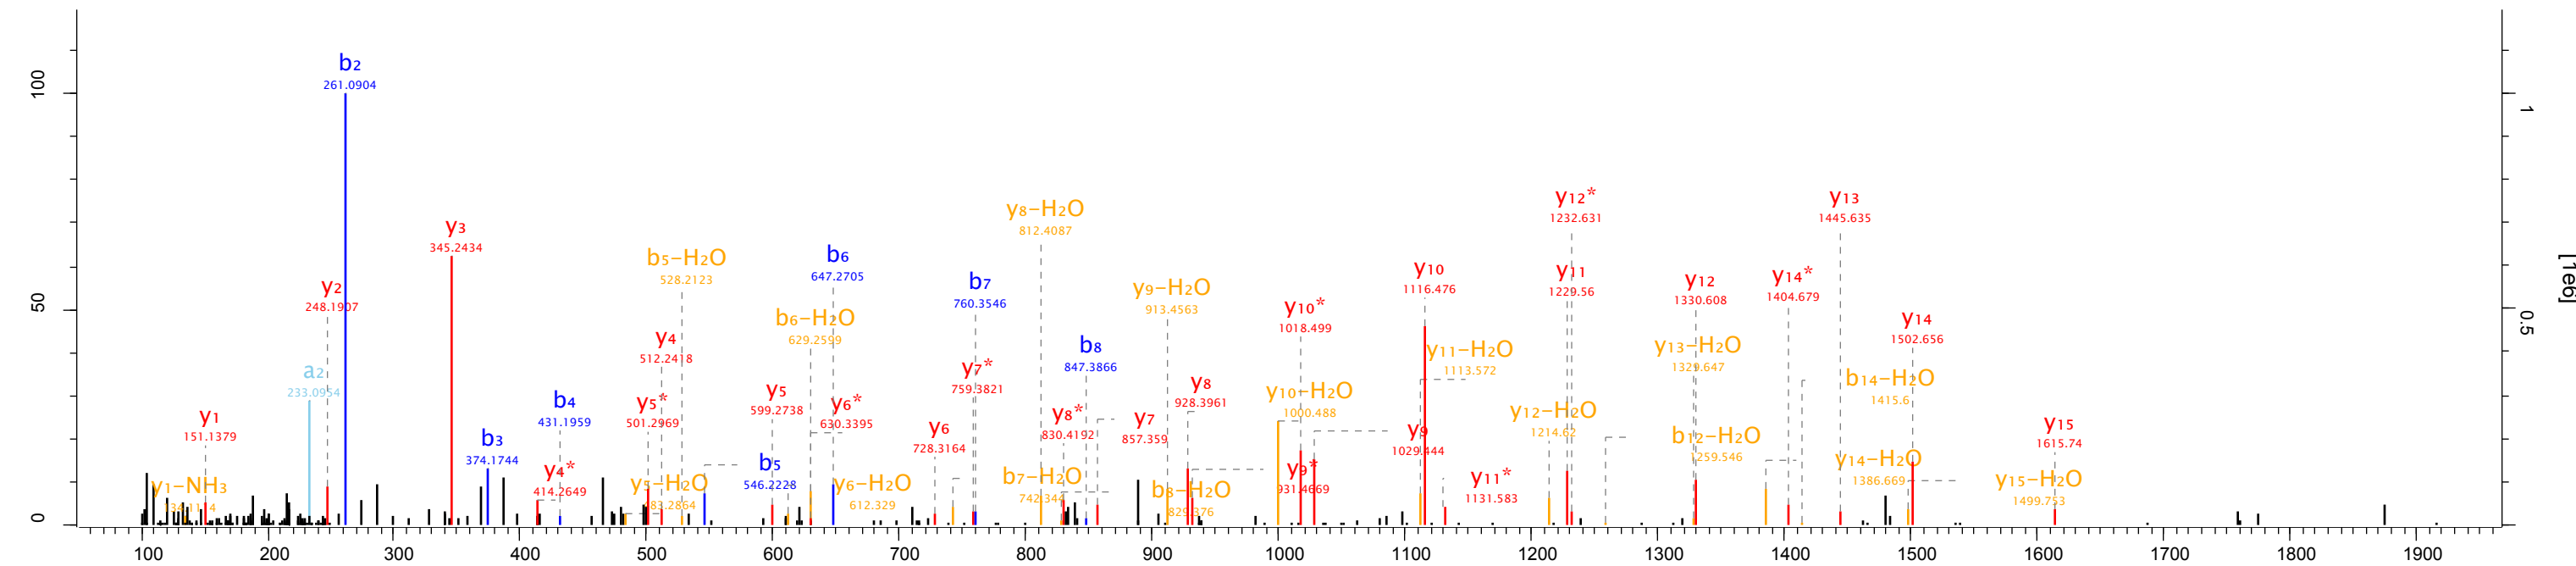

- M E I G D T L S T A E E S S P P K -

b<sub>2</sub>
b<sub>3</sub>
b<sub>4</sub>
b<sub>5</sub>
b<sub>6</sub>
b<sub>7</sub>
b<sub>8</sub>
y<sub>15</sub>
y<sub>14</sub>
y<sub>13</sub>
y<sub>12</sub>
y<sub>11</sub>
y<sub>10</sub>
y<sub>9</sub>
y<sub>8</sub>
y<sub>7</sub>
y<sub>6</sub>
y<sub>5</sub>
y<sub>4</sub>
y<sub>3</sub>
y<sub>2</sub>
y<sub>1</sub>

Raw file 20150814\_A375SR\_Phospho\_BR2\_05 Scan 17004 Method FTMS; HCD Score 153.19 m/z 967.01 Gene names RHPN2;RHPN2P1

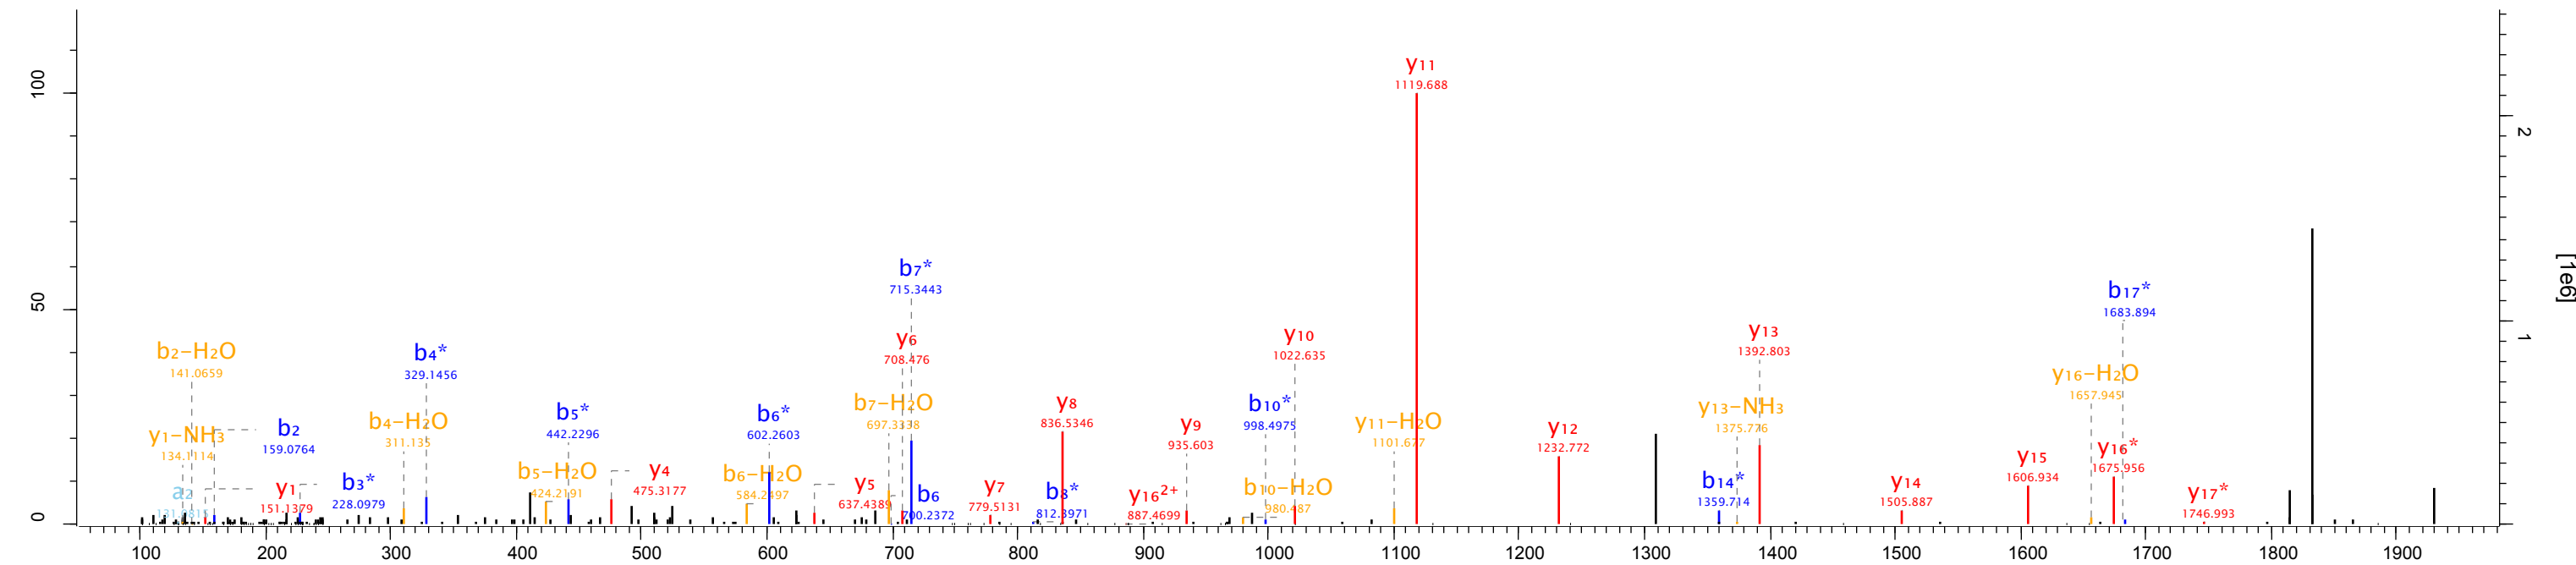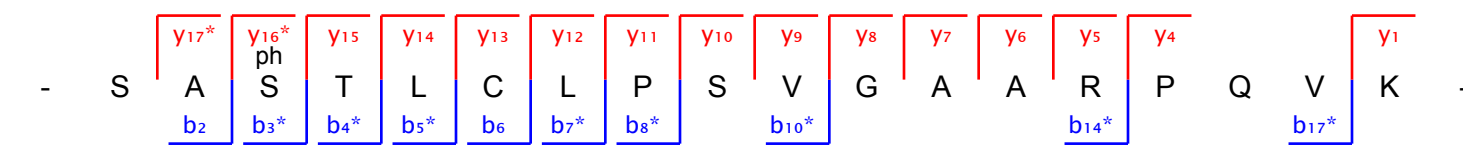

Raw file: 20150814\_A375SR\_Phospho\_BR2\_05  
 Scan: 17434 Method: FTMS; HCD Score: 199.75 m/z: 835.39 Gene names: SKA3

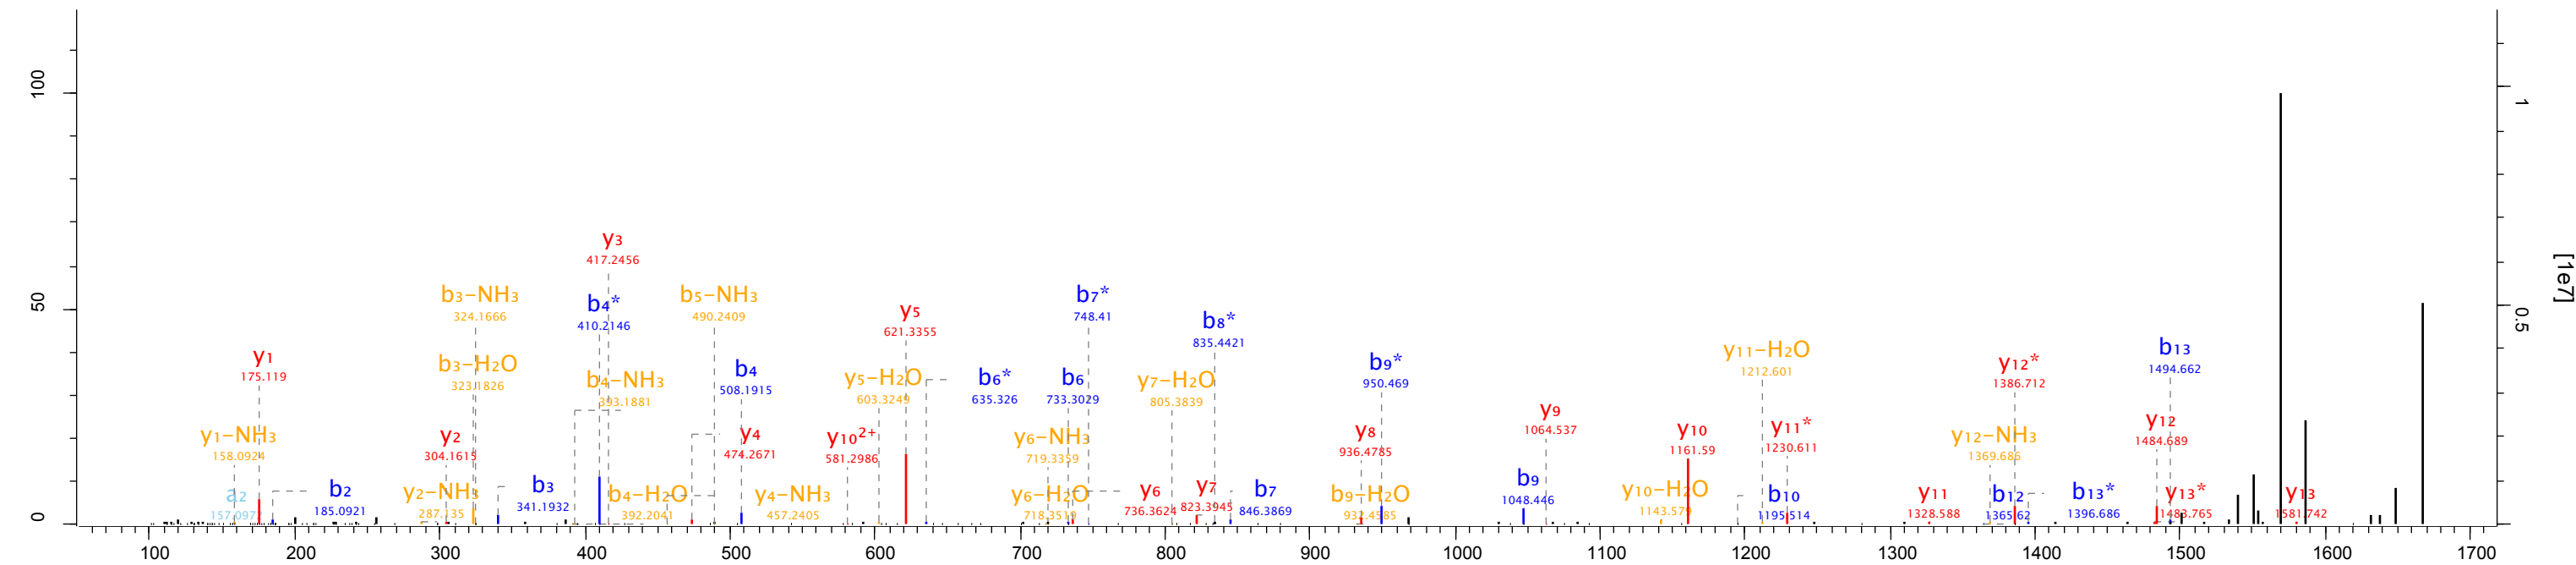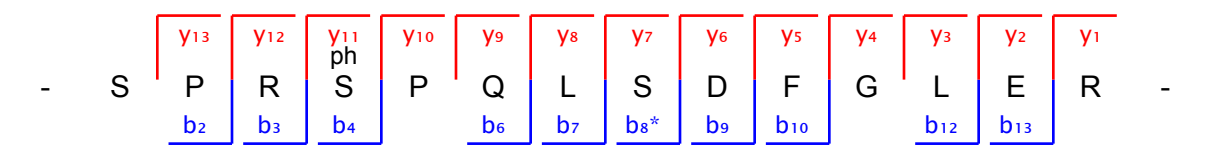

Raw file 20150814\_A375SR\_Phospho\_BR2\_05 Scan 17474 Method FTMS; HCD Score 93.55 m/z 829.39 Gene names IRF2BP2

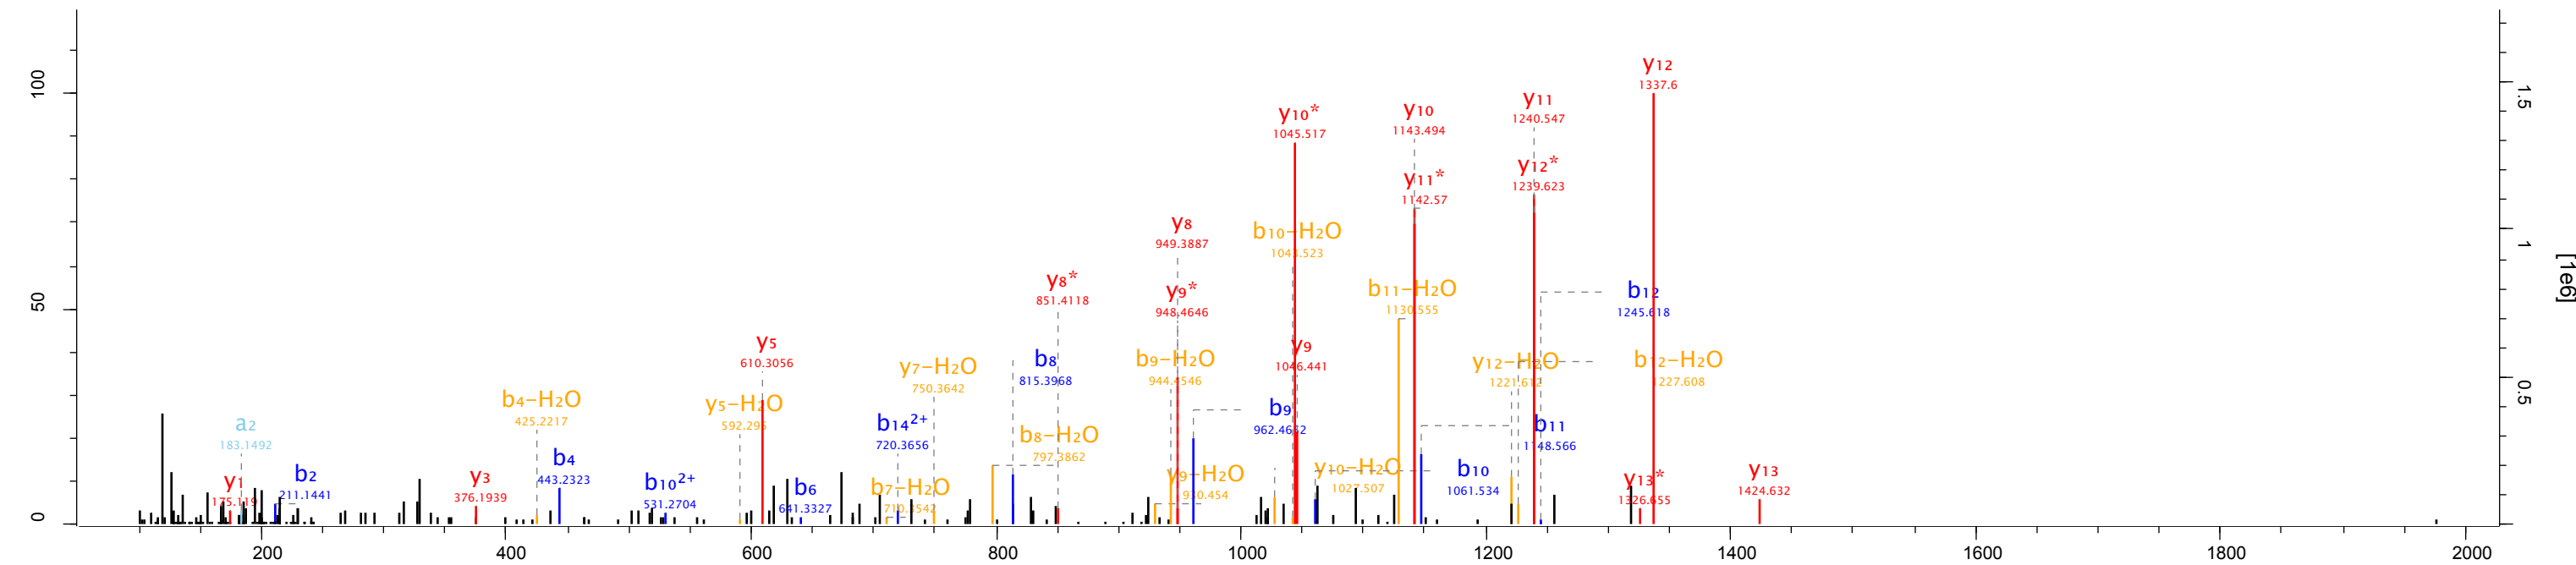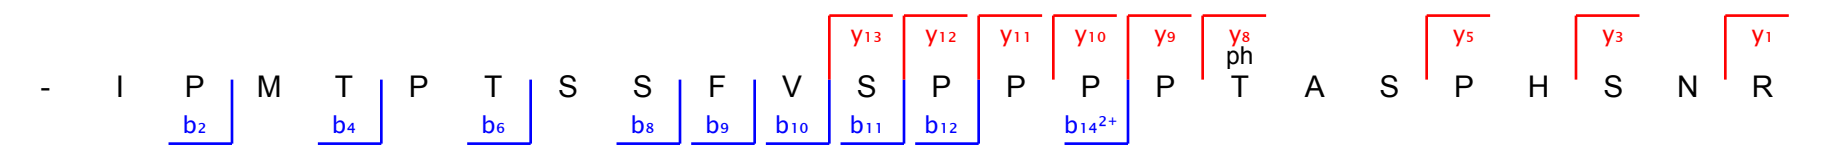

Raw file 20150814\_A375SR\_Phospho\_BR2\_05 Scan 17564 Method FTMS; HCD Score 110.9 m/z 608.31 Gene names TFG

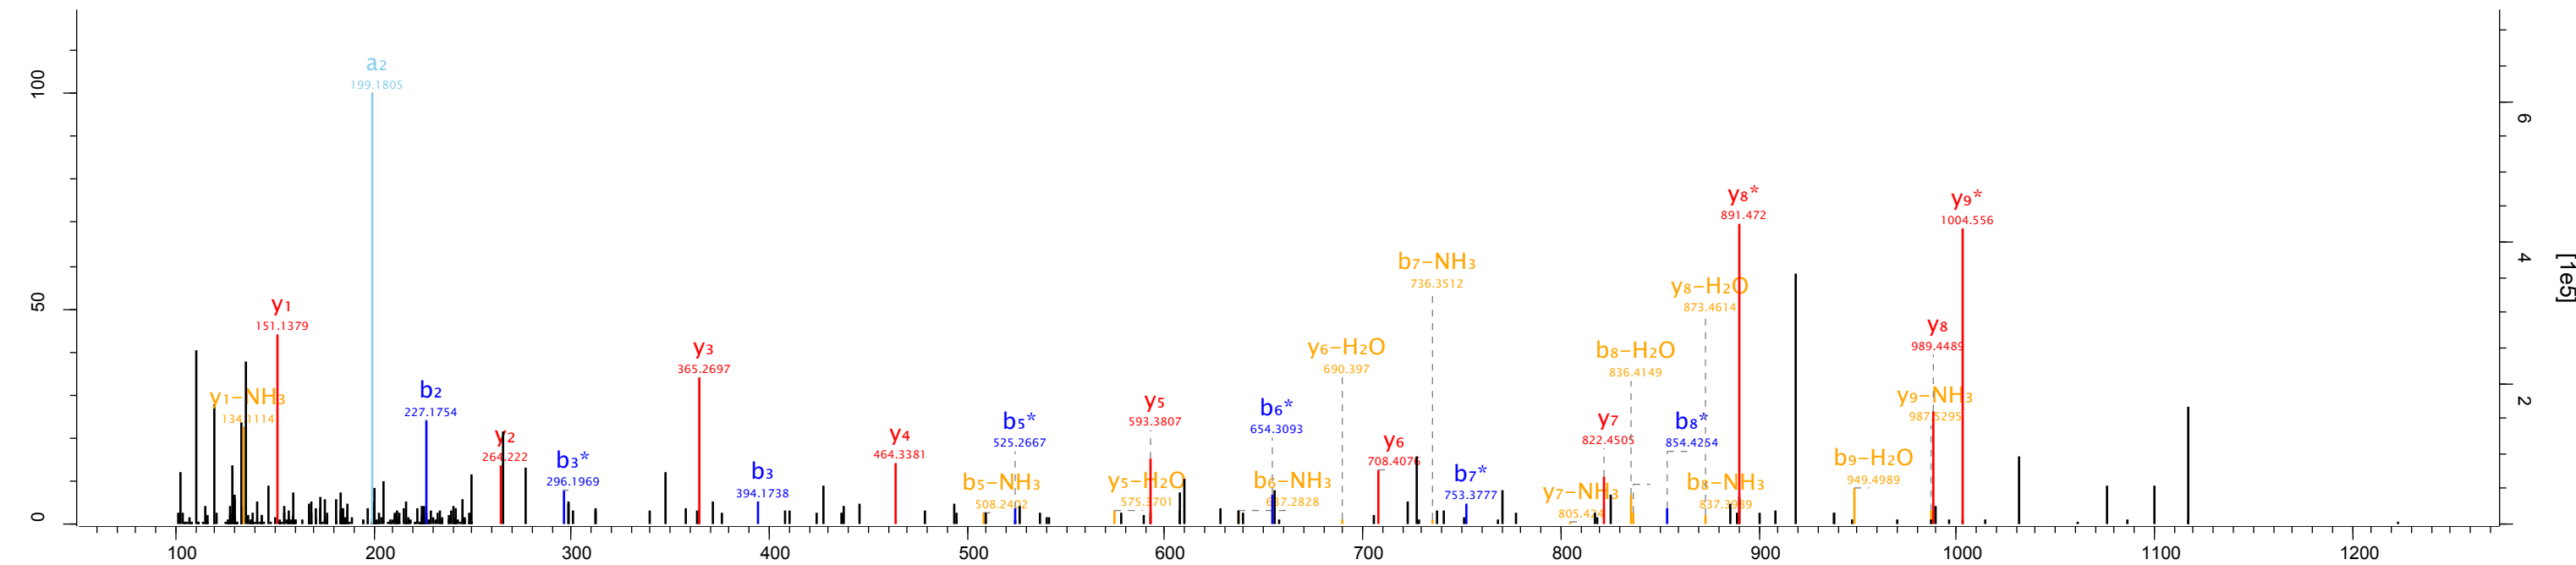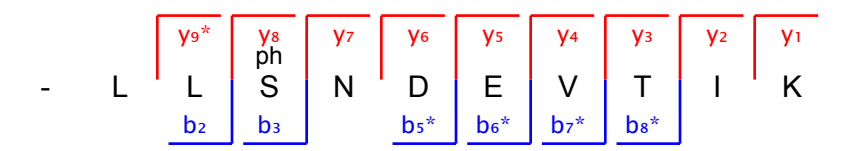

Raw file: 20150814\_A375SR\_Phospho\_BR2\_05  
 Scan: 17624 Method: FTMS; HCD Score: 202.62 m/z: 1020.97 Gene names: NF1

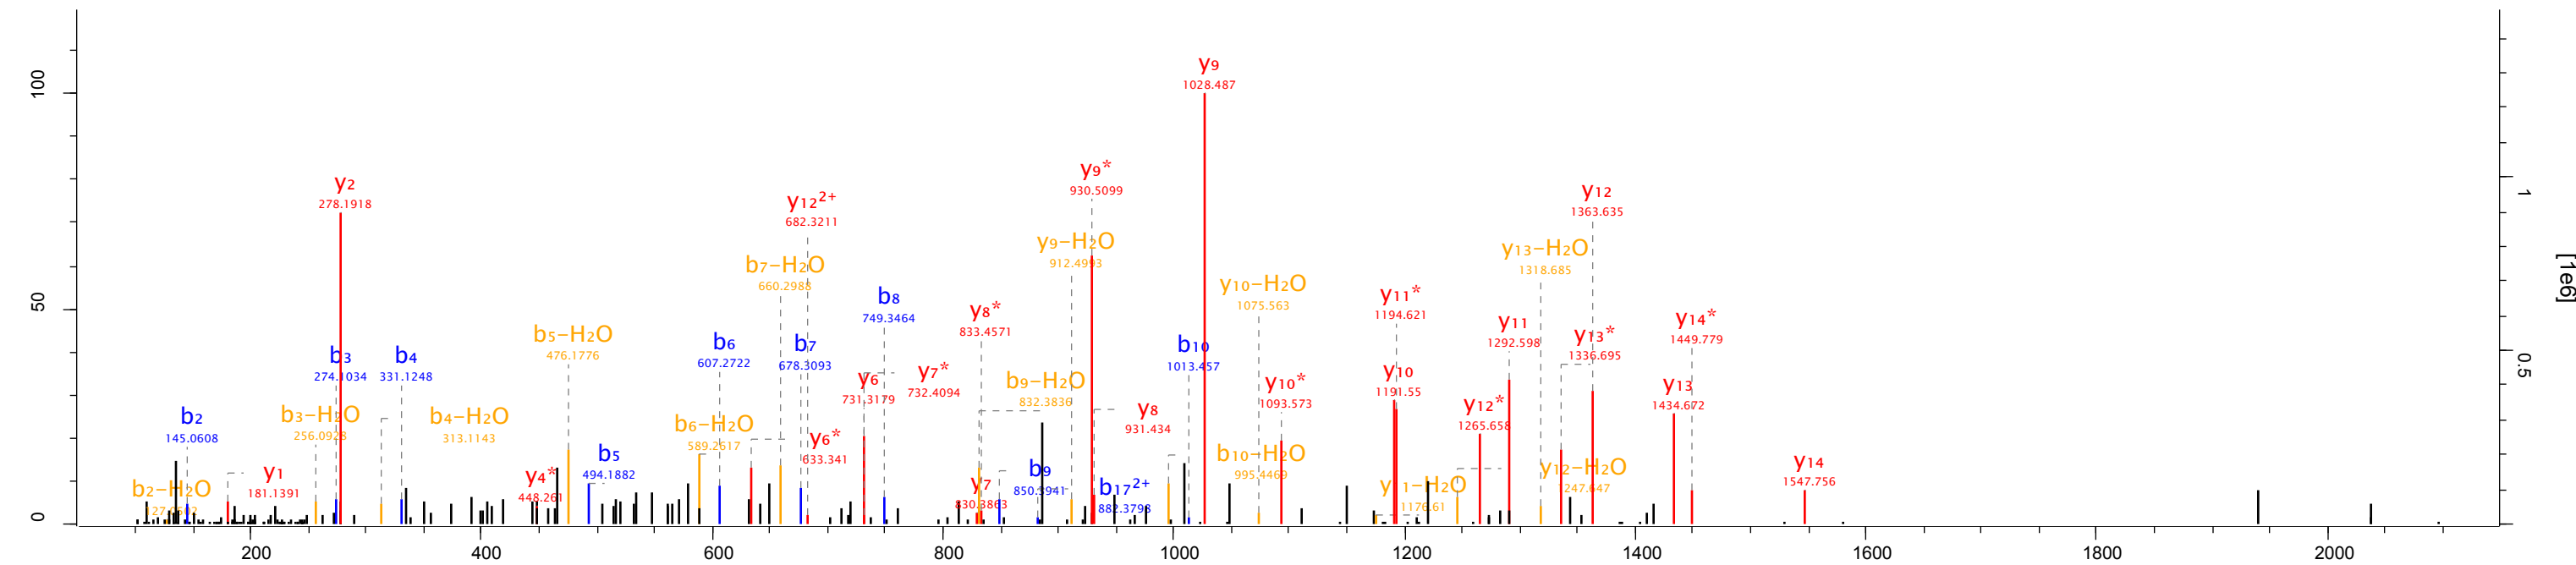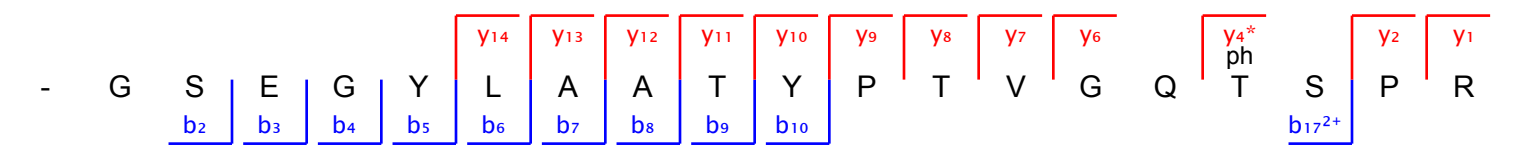

Raw file 20150814\_A375SR\_Phospho\_BR2\_05 Scan 17924 Method FTMS; HCD Score 190.19 m/z 974.92 Gene names LUC7L2

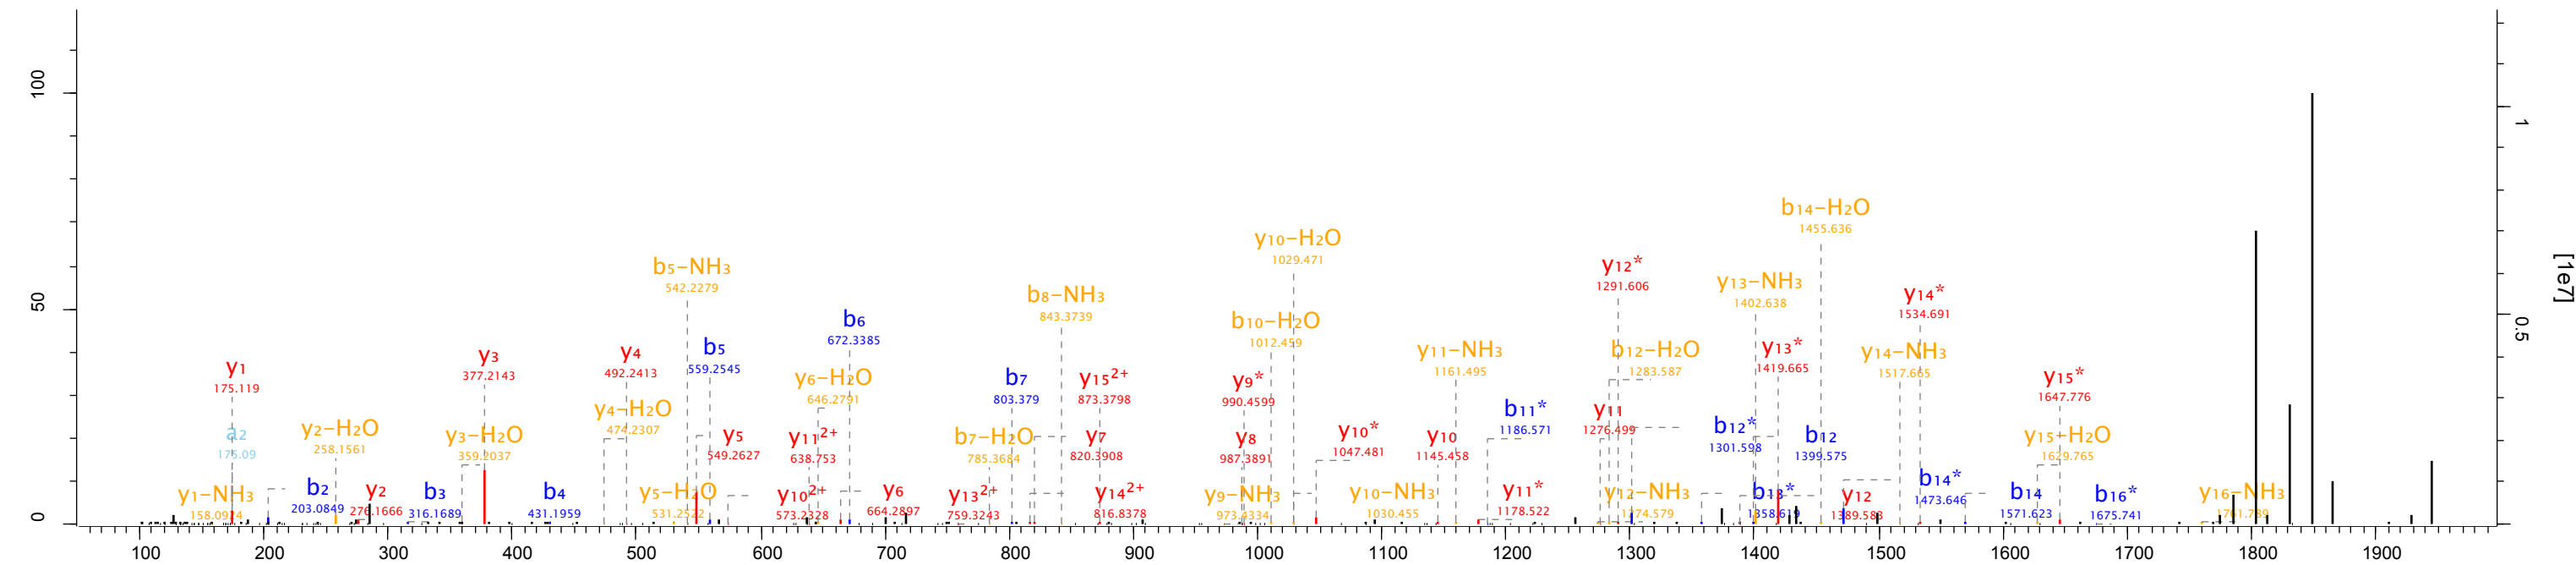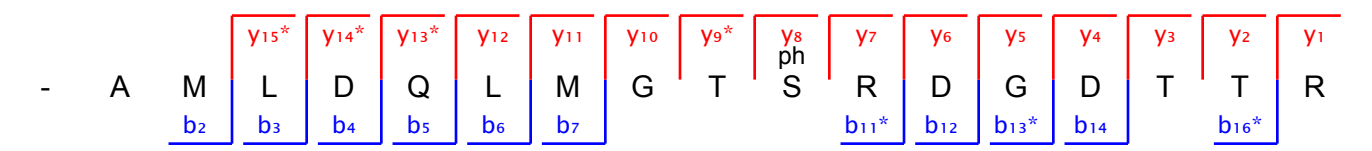



Raw file: 20150814\_A375SR\_Phospho\_BR2\_05  
 Scan: 17994 Method: FTMS; HCD Score: 245.6 m/z: 860.82 Gene names: PTPN14

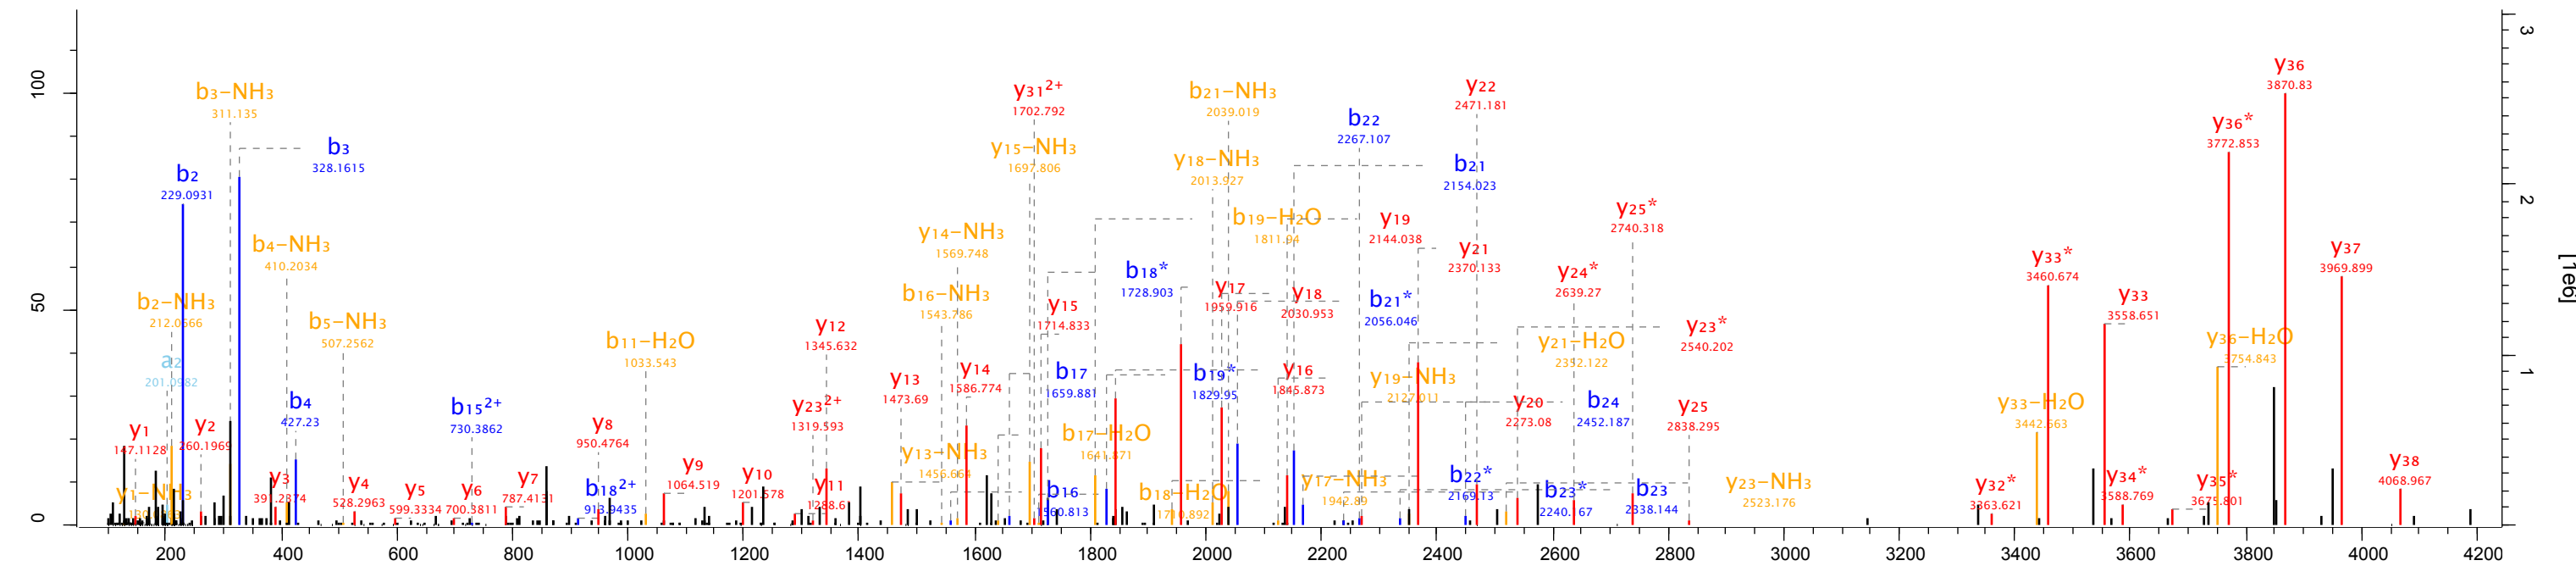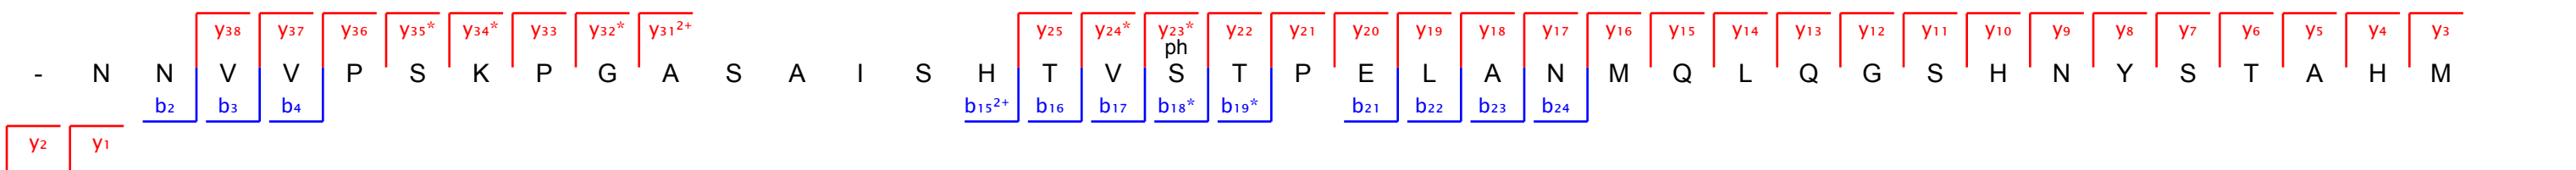

Raw file: 20150814\_A375SR\_Phospho\_BR2\_05  
 Scan: 18354 Method: FTMS; HCD Score: 170.42 m/z: 815.35 Gene names: SPRED2

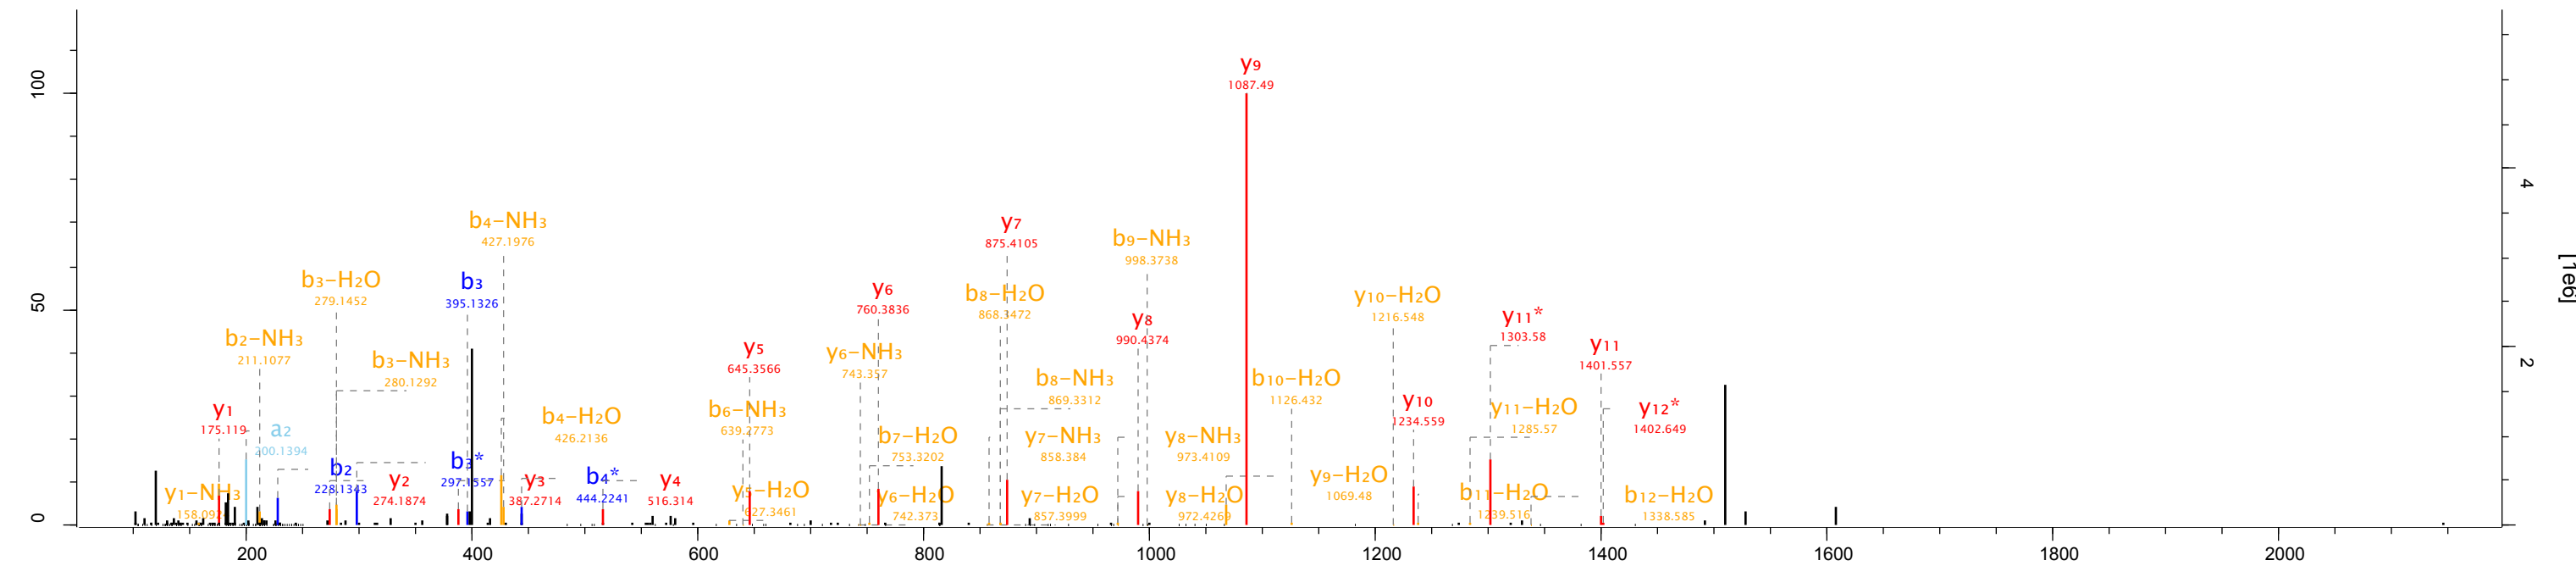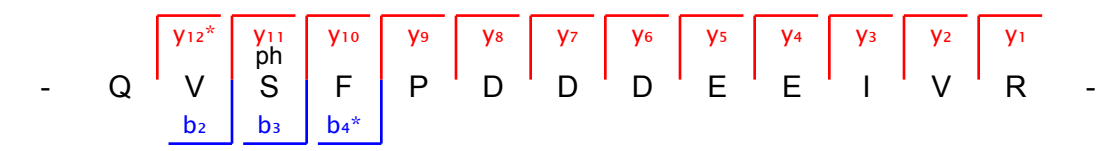

Raw file: 20150814\_A375SR\_Phospho\_BR2\_05  
 Scan: 18464 Method: FTMS; HCD Score: 107.74 m/z: 728.8 Gene names: NELFE

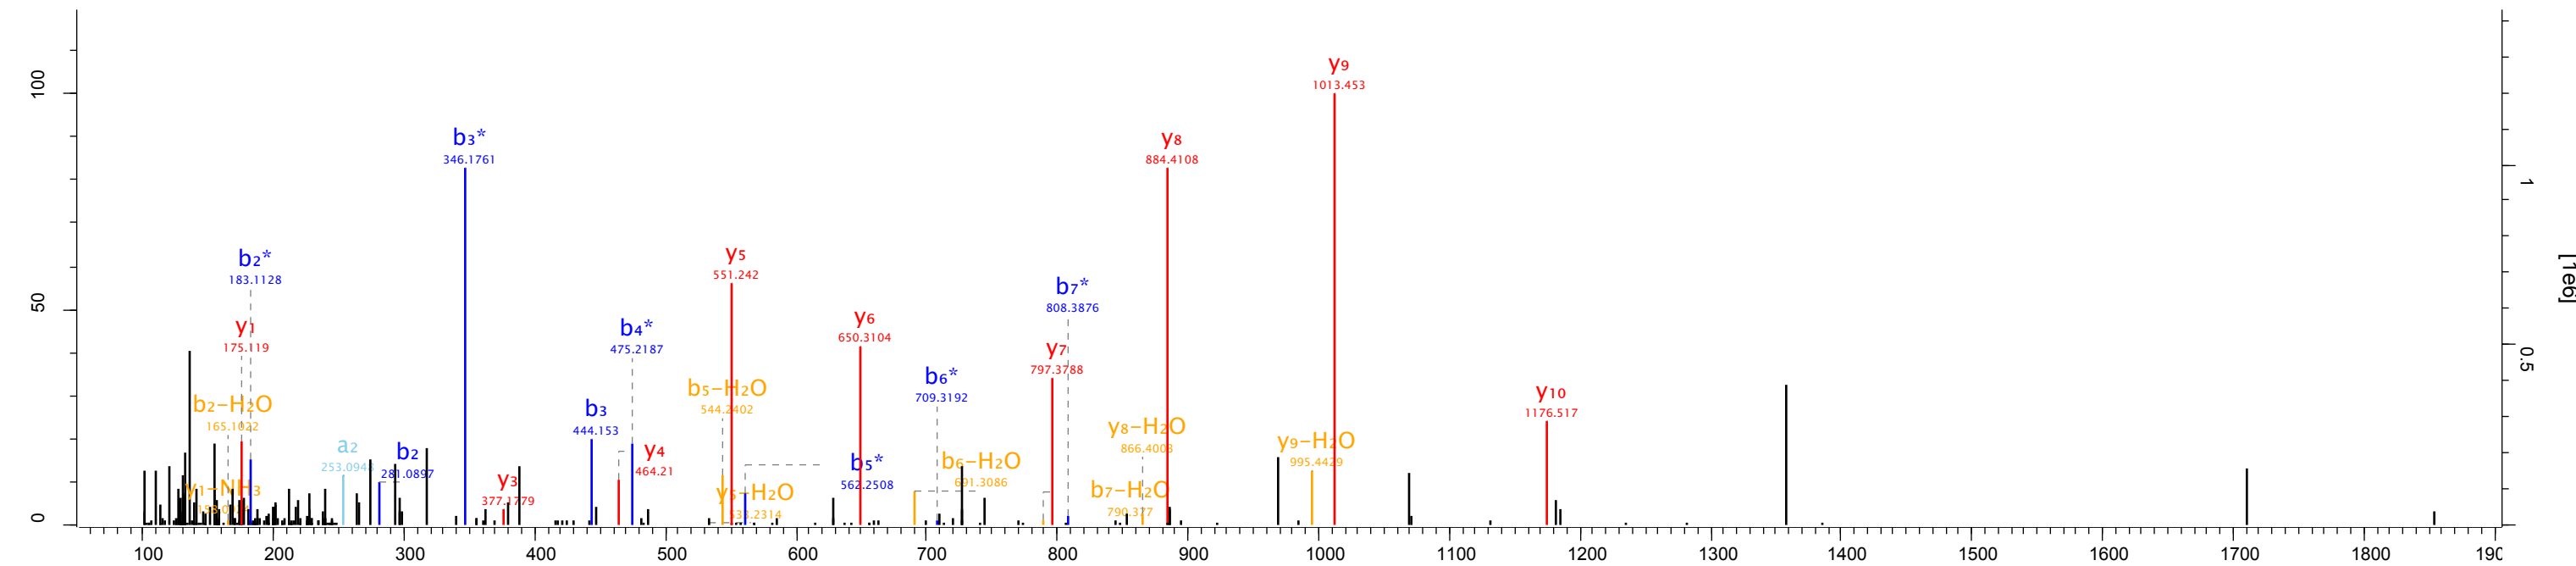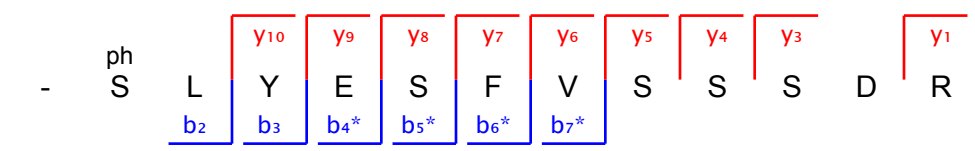

Raw file  
 20150814\_A375SR\_Phospho\_BR2\_05  
 Scan 18484 Method FTMS; HCD Score 124.98 m/z 1056.11 Gene names RAPGEF6

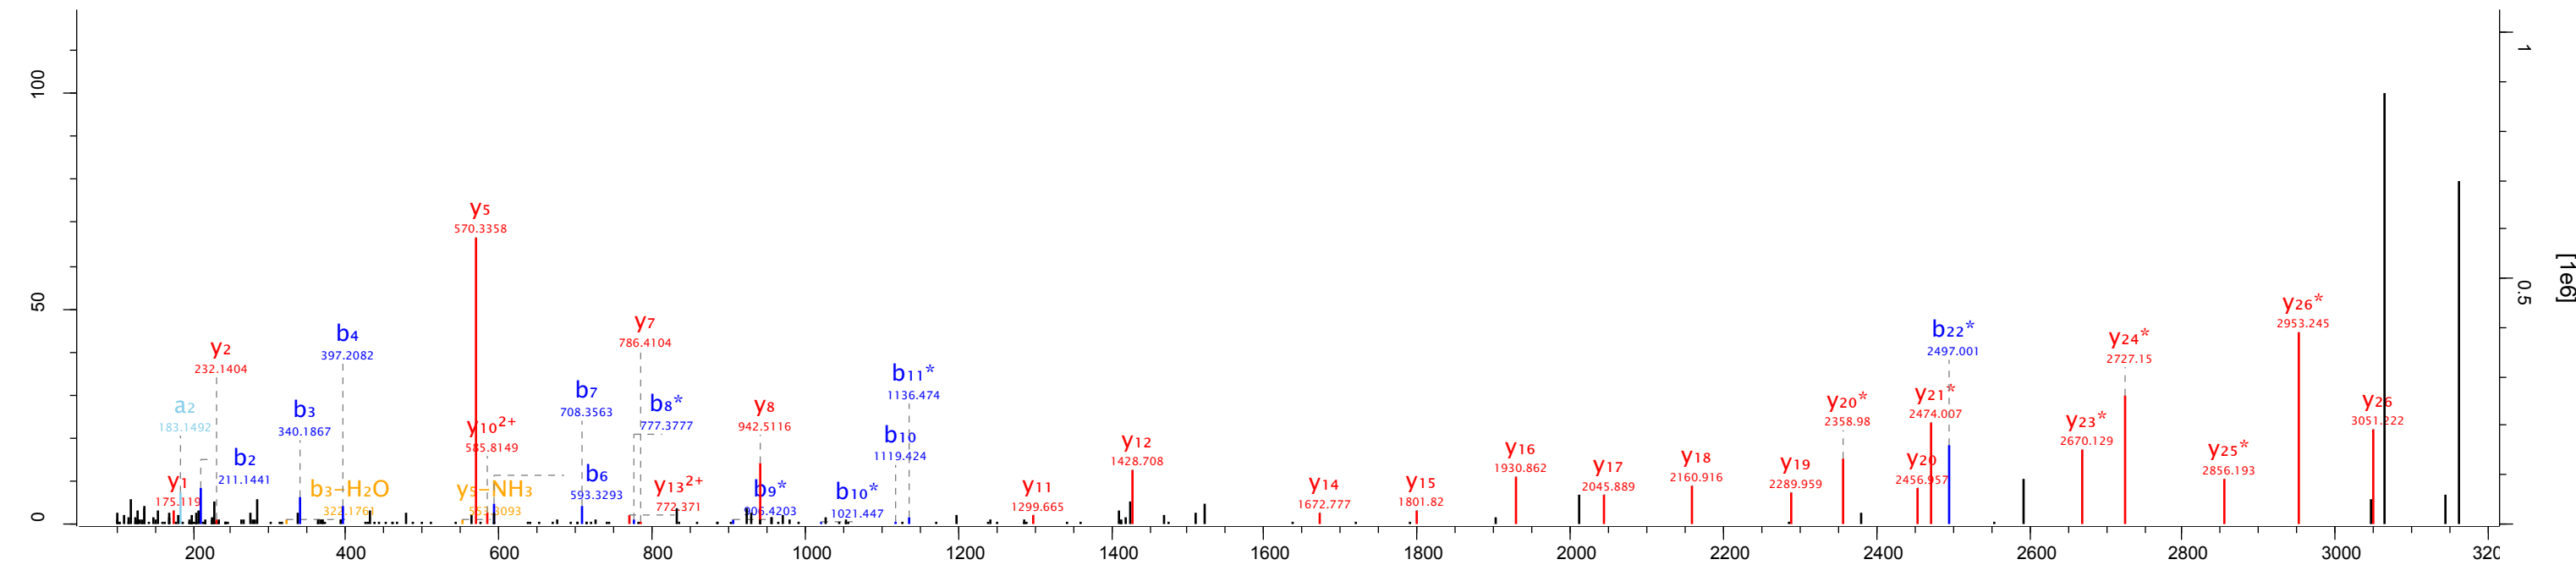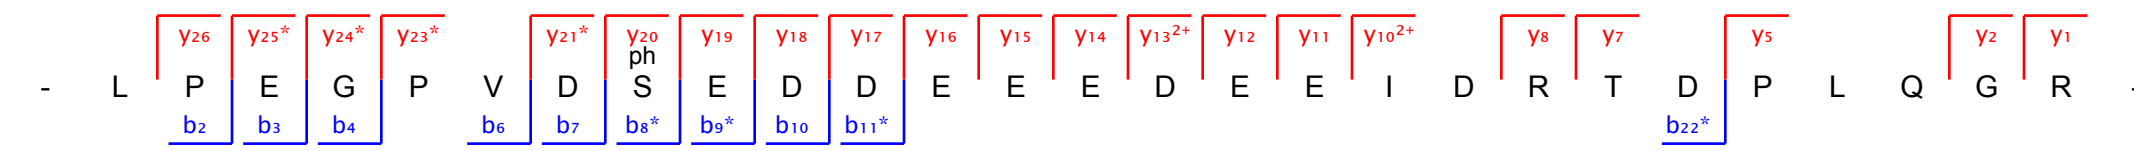

Raw file 20150814\_A375SR\_Phospho\_BR2\_05 Scan 18534 Method FTMS; HCD Score 57.05 m/z 839.41 Gene names TRIM47

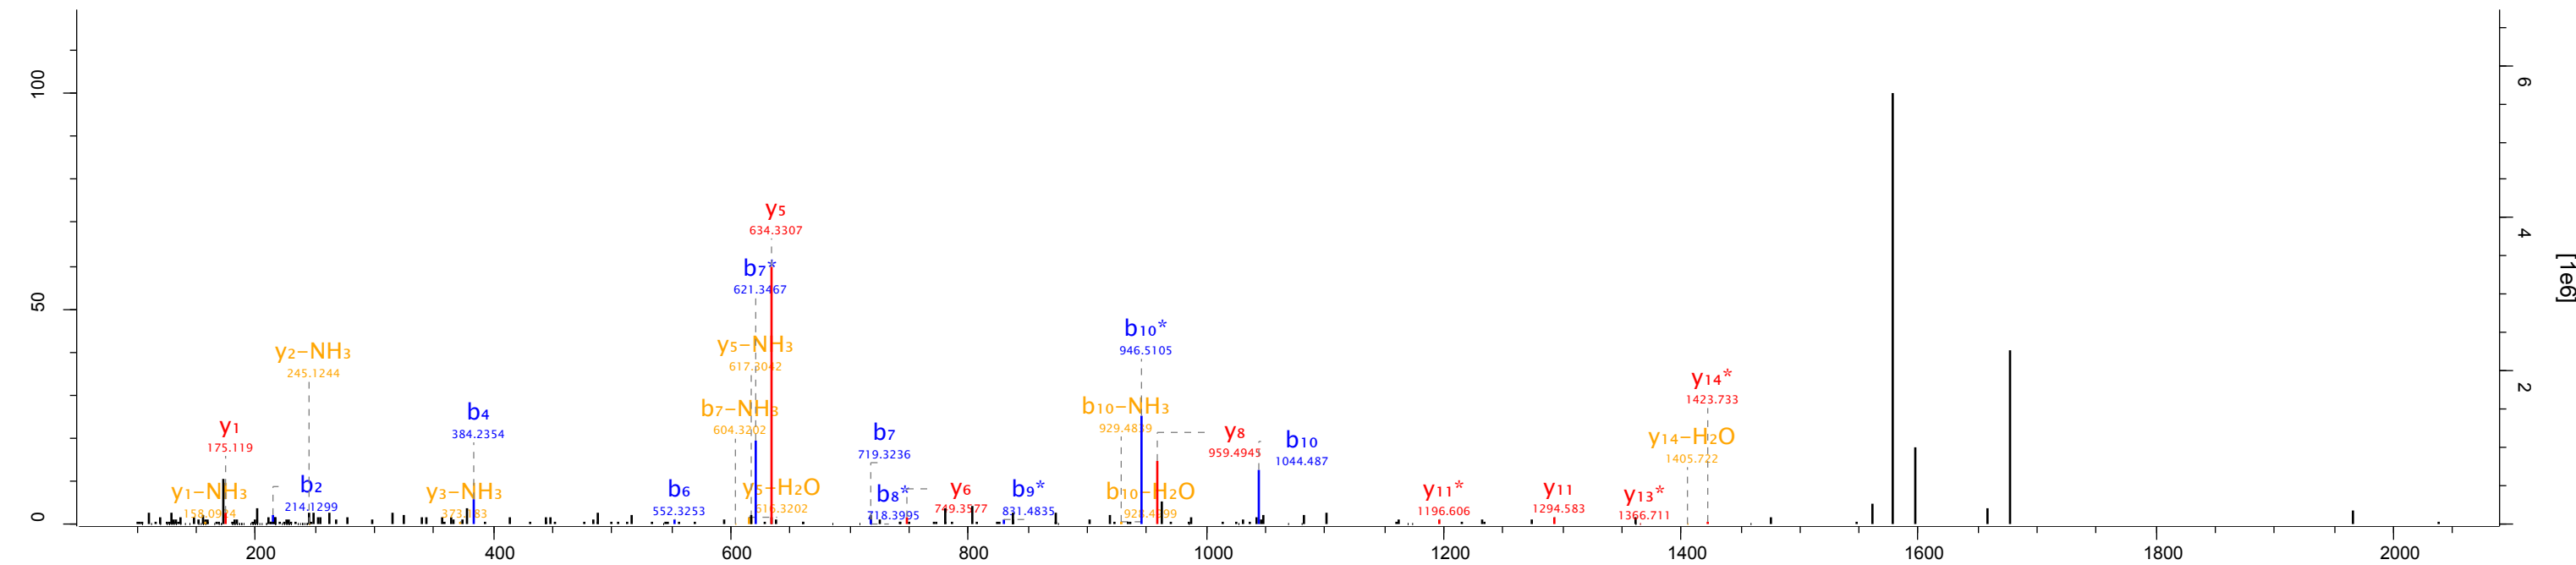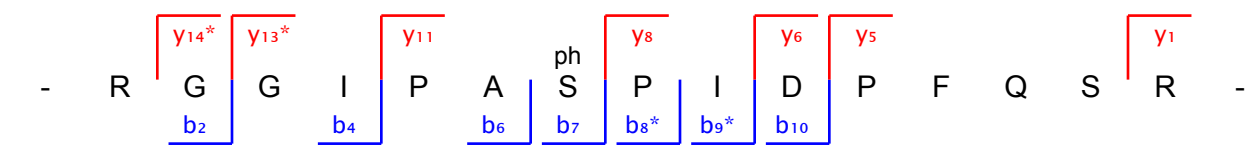

Raw file: 20150814\_A375SR\_Phospho\_BR2\_05  
 Scan: 1884 Method: FTMS; HCD Score: 110.31 m/z: 513.73 Gene names: SRSF5

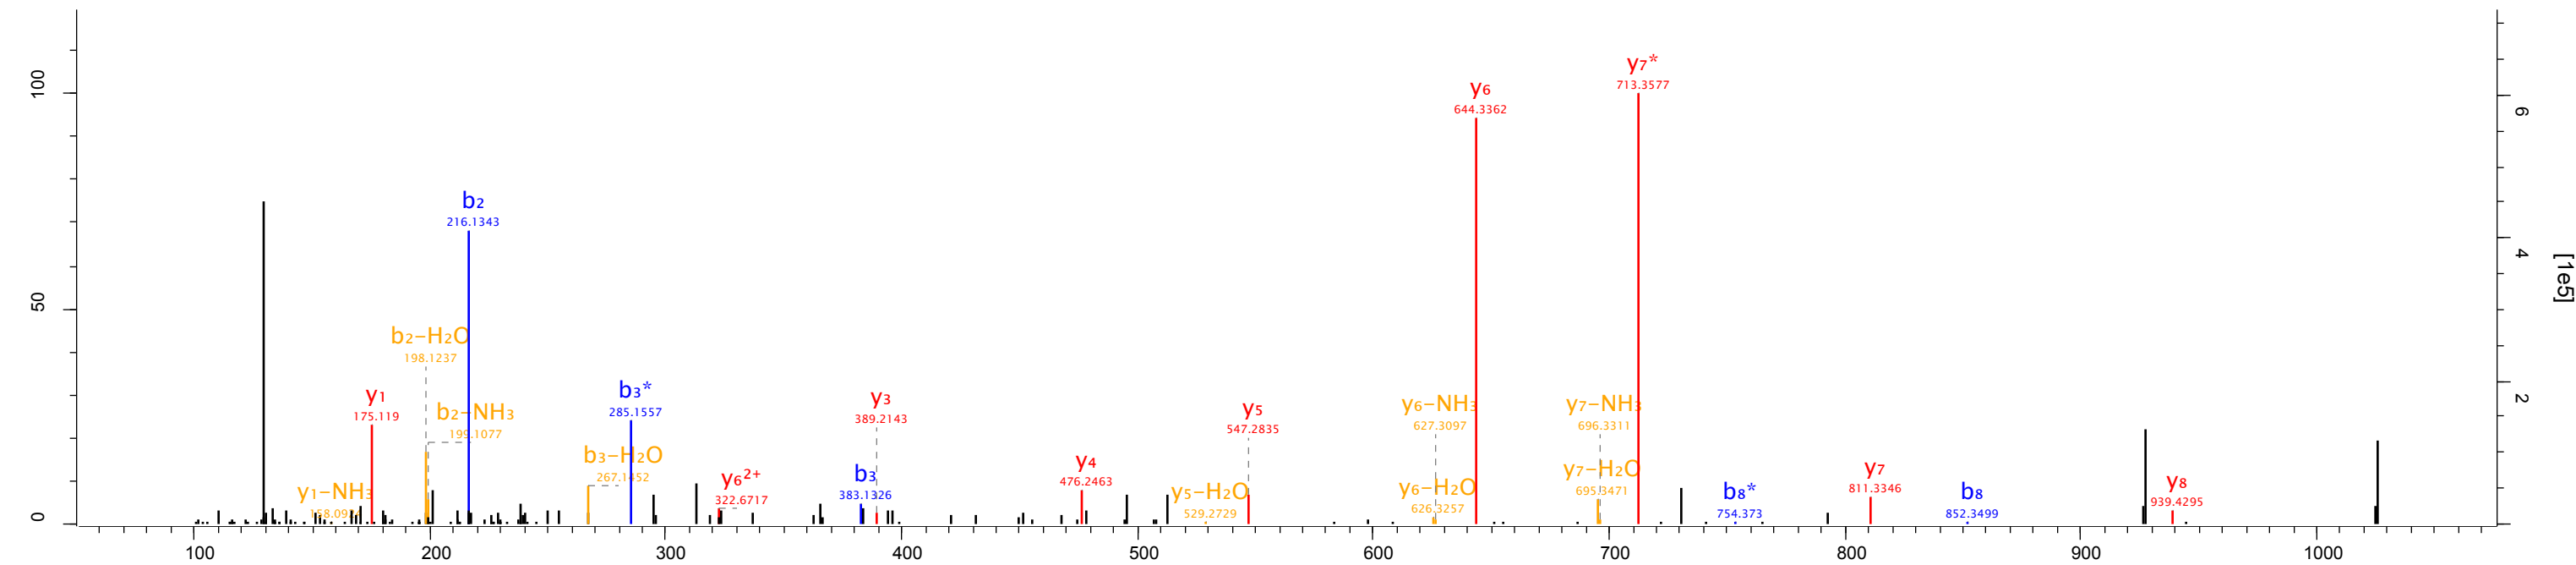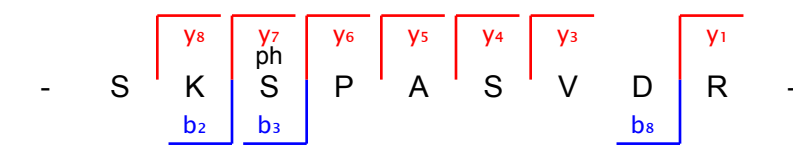

Raw file  
 20150814\_A375SR\_Phospho\_BR2\_05  
 Scan 18964 Method FTMS; HCD Score 91.06 m/z 725.87 Gene names UBA1

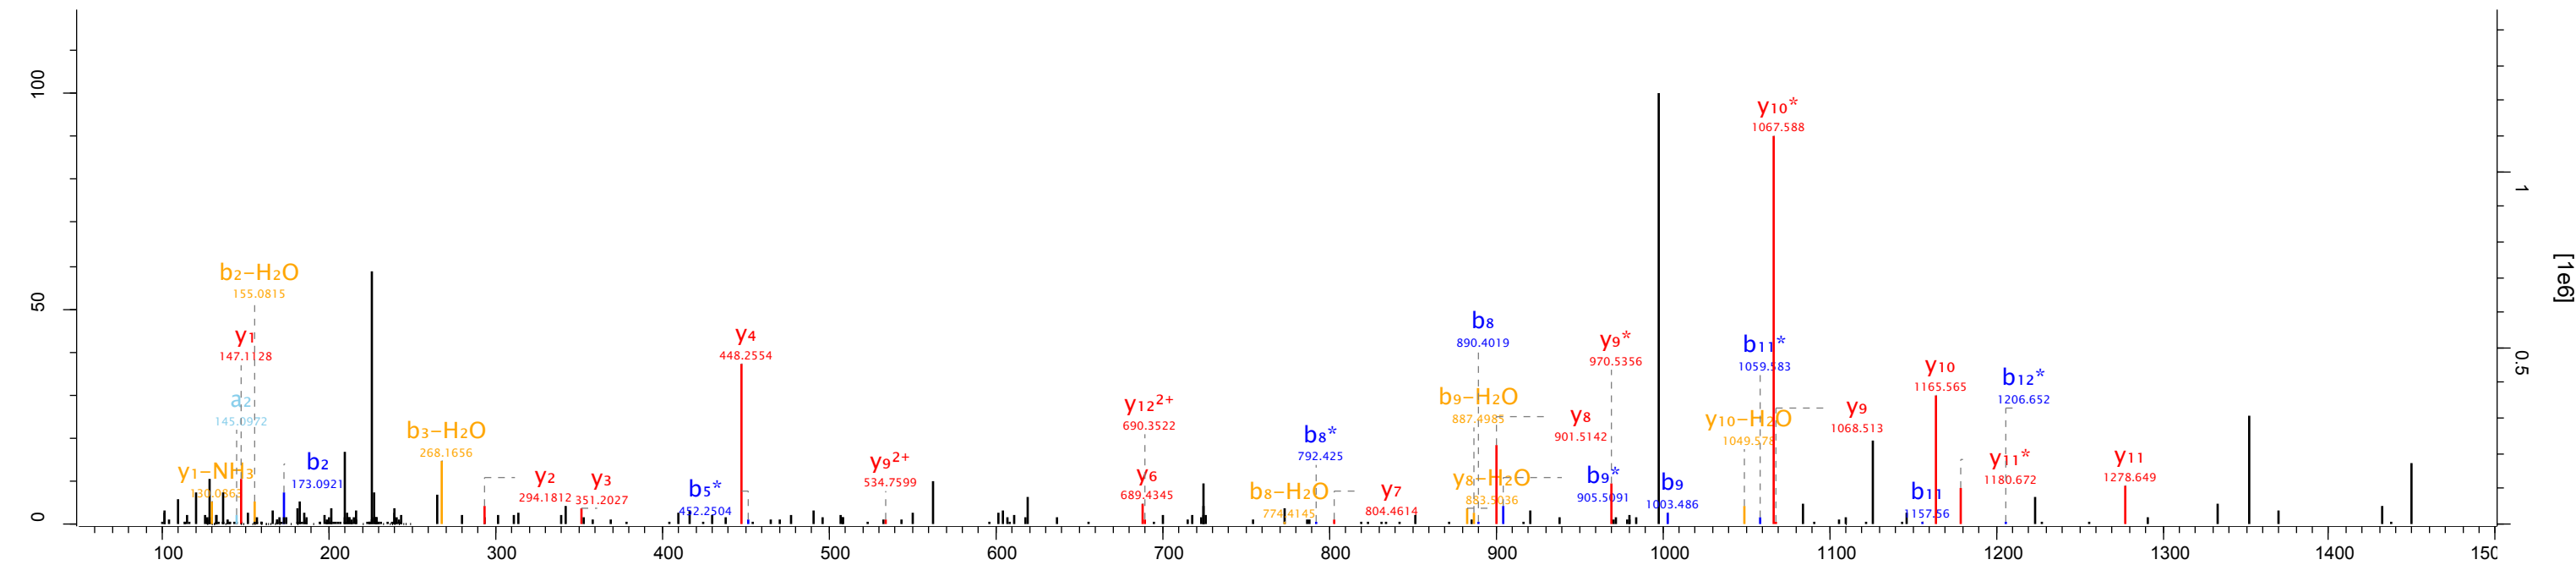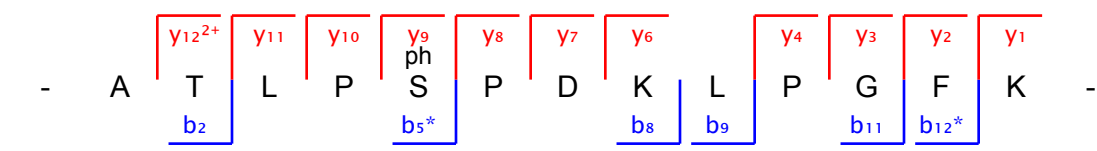

Raw file: 20150814\_A375SR\_Phospho\_BR2\_05  
 Scan: 19024 Method: FTMS; HCD Score: 177.85 m/z: 977.73 Gene names: EIF4EBP1

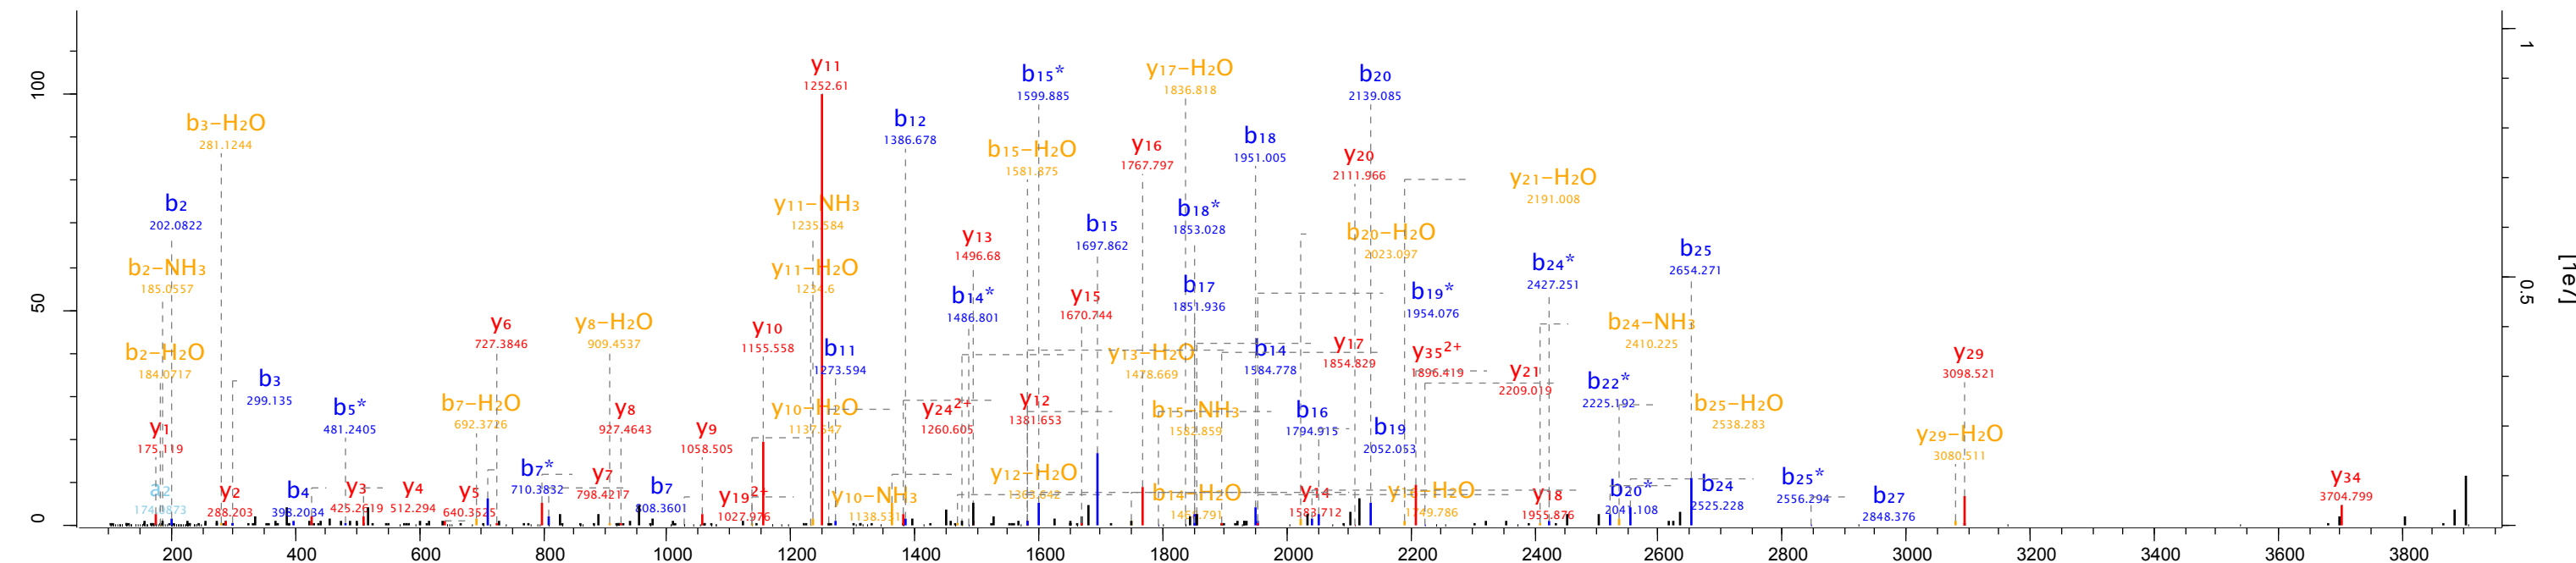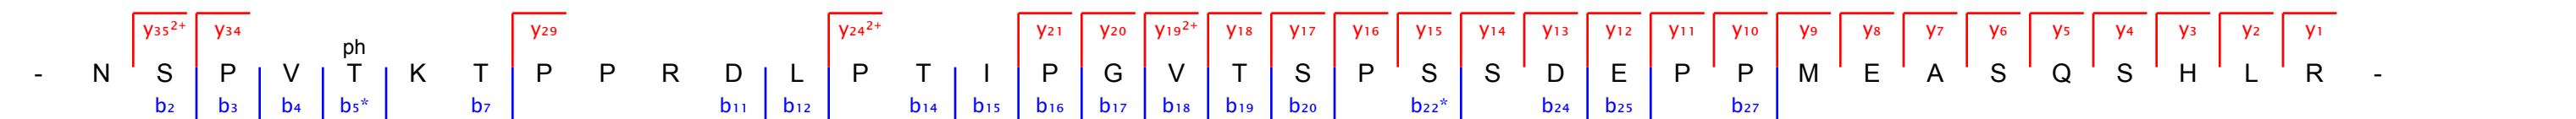



Raw file 20150814\_A375SR\_Phospho\_BR2\_05 Scan 19504 Method FTMS; HCD Score 105.04 m/z 880.75 Gene names TPRN

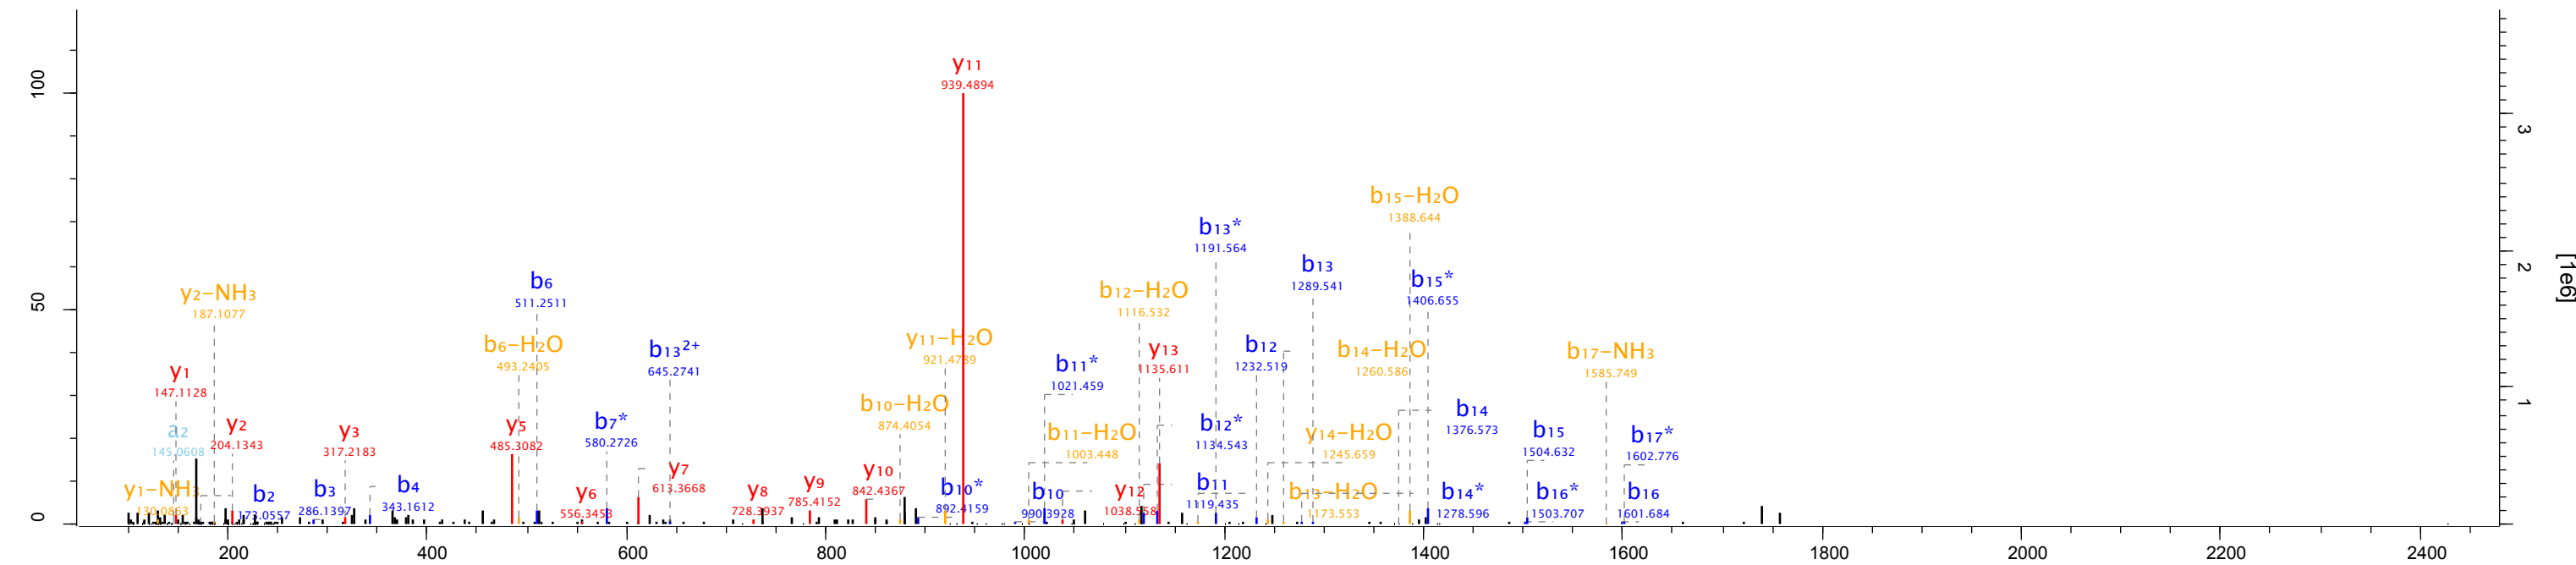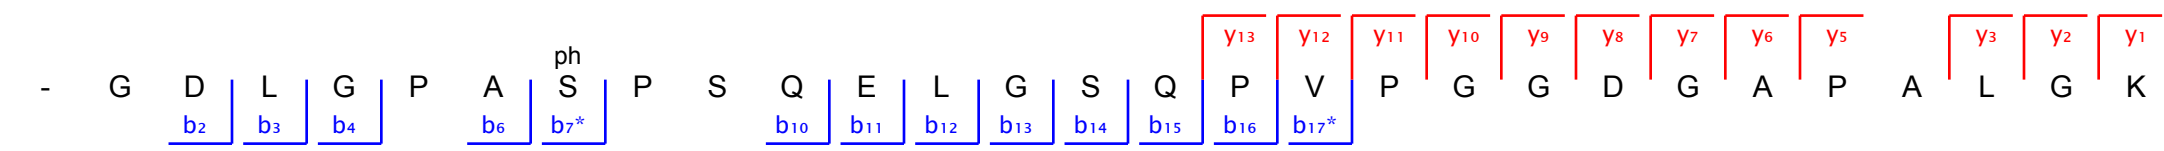

Raw file: 20150814\_A375SR\_Phospho\_BR2\_05  
 Scan: 19584 Method: FTMS; HCD Score: 200.4 m/z: 792.39 Gene names: INPP5F

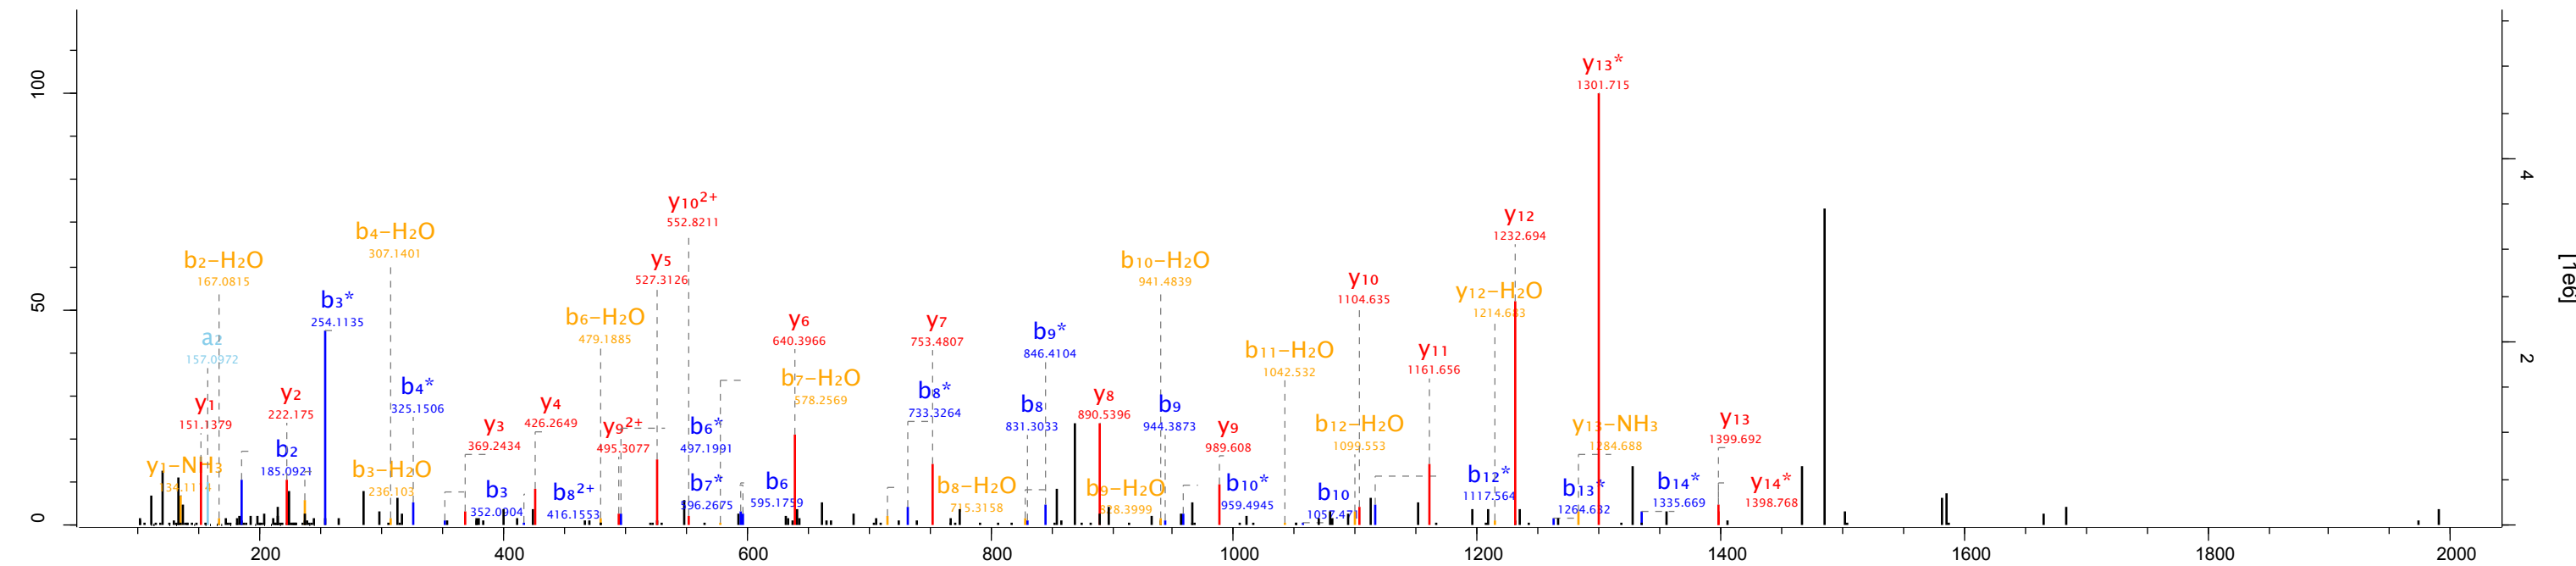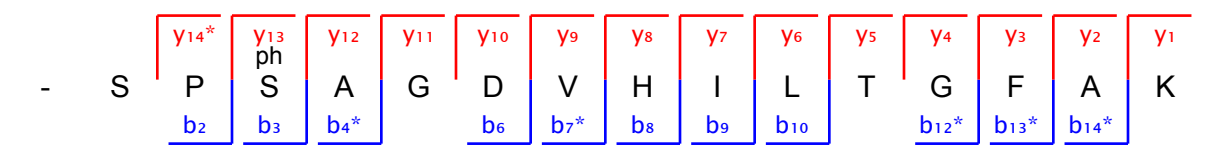

Raw file  
20150814\_A375SR\_Phospho\_BR2\_05

Scan 19654 Method FTMS; HCD Score 168.96 m/z 1029.46 Gene names MAP1B

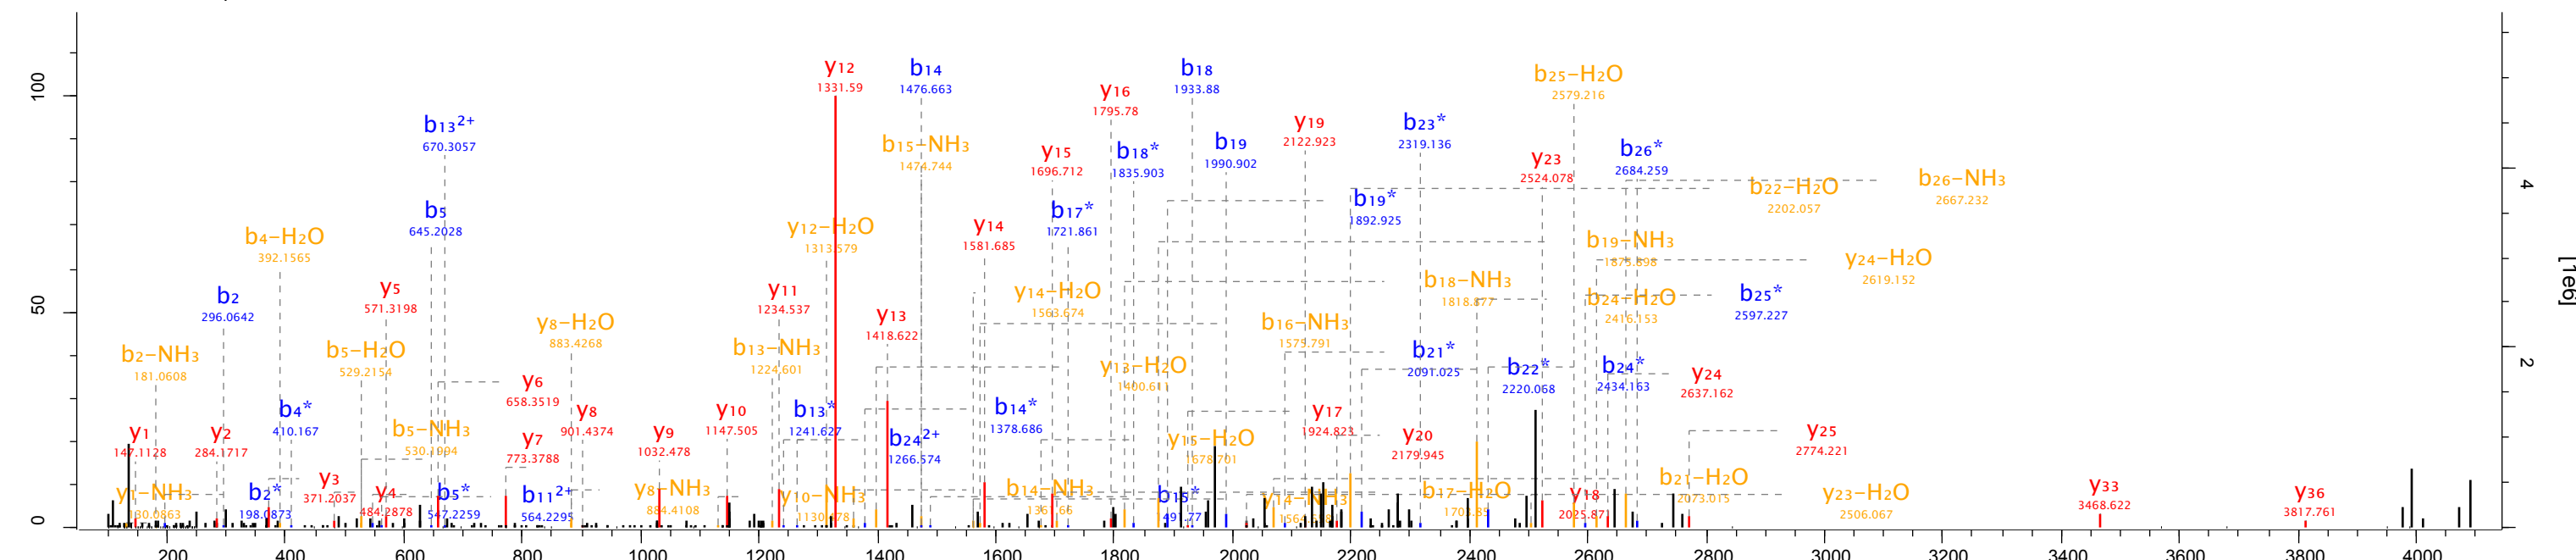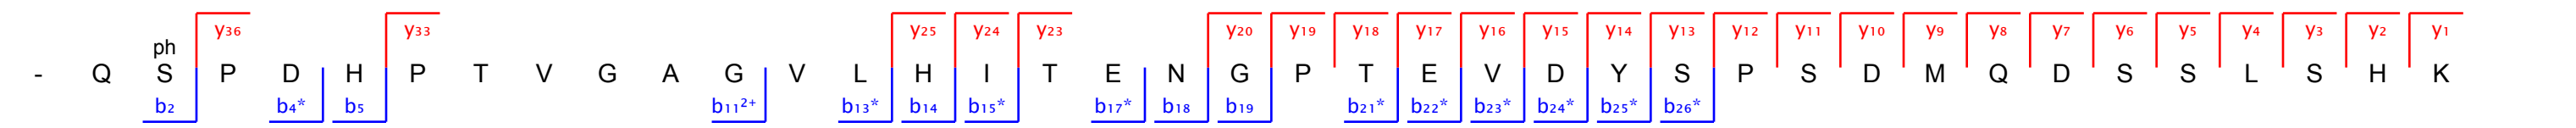

Raw file 20150814\_A375SR\_Phospho\_BR2\_05 Scan 19774 Method FTMS; HCD Score 186.17 m/z 833.89 Gene names SEC22B

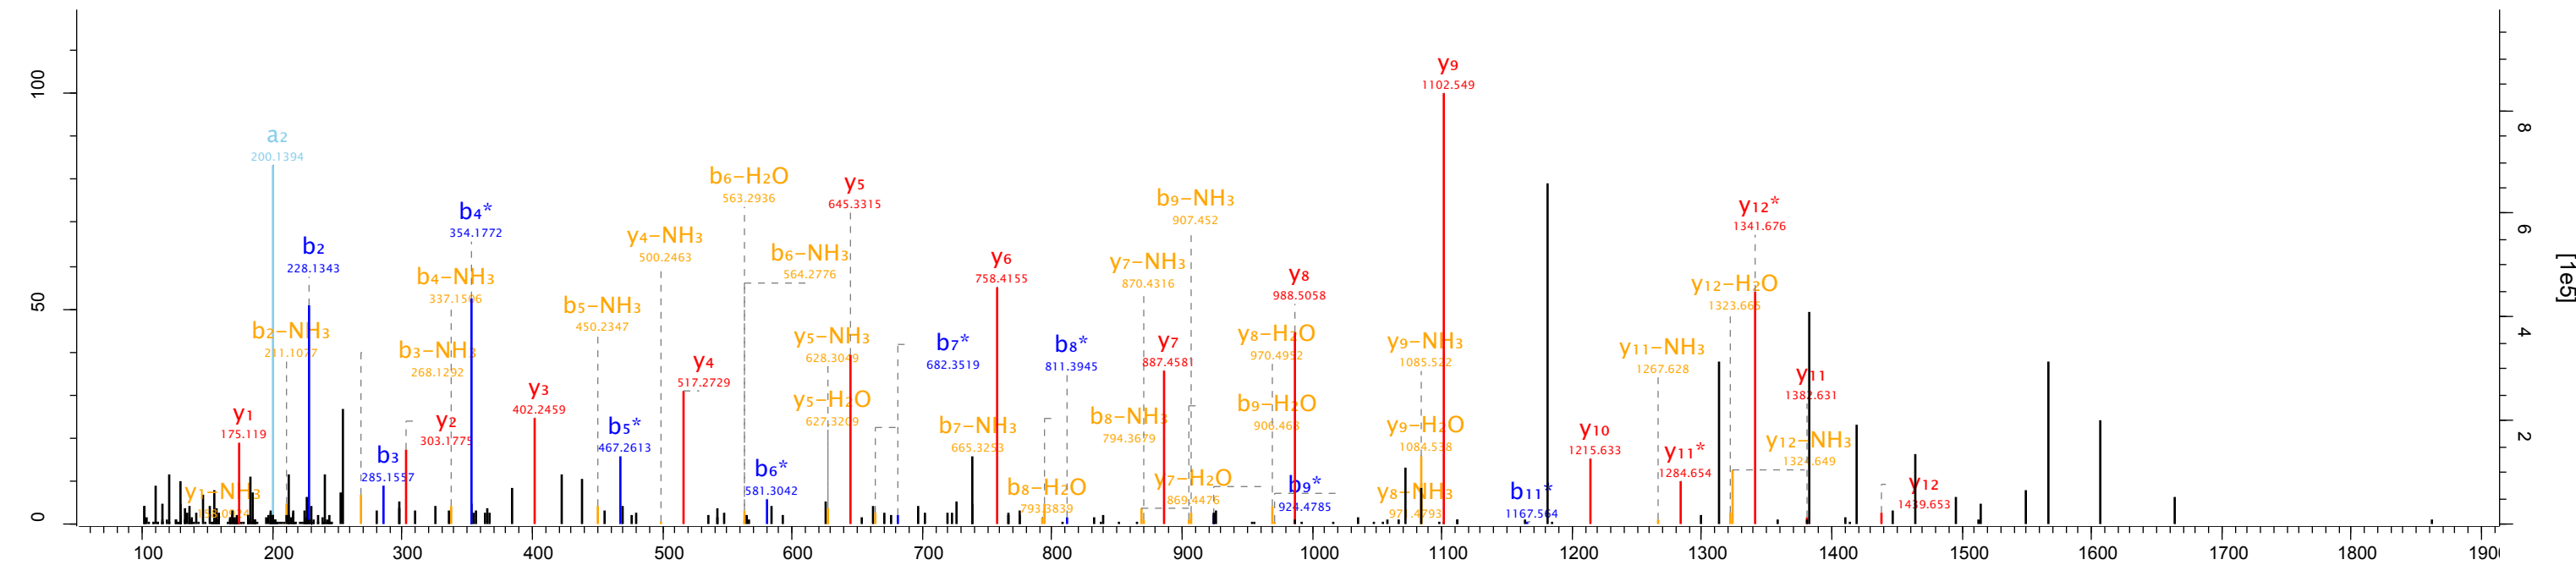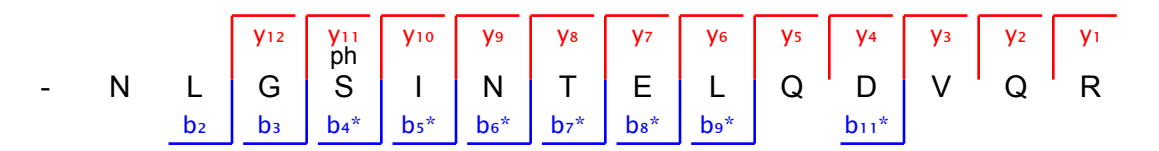

Raw file: 20150814\_A375SR\_Phospho\_BR2\_05  
 Scan: 1994 Method: FTMS; HCD Score: 79.2 m/z: 438.24 Gene names: PMS2;PMS2CL

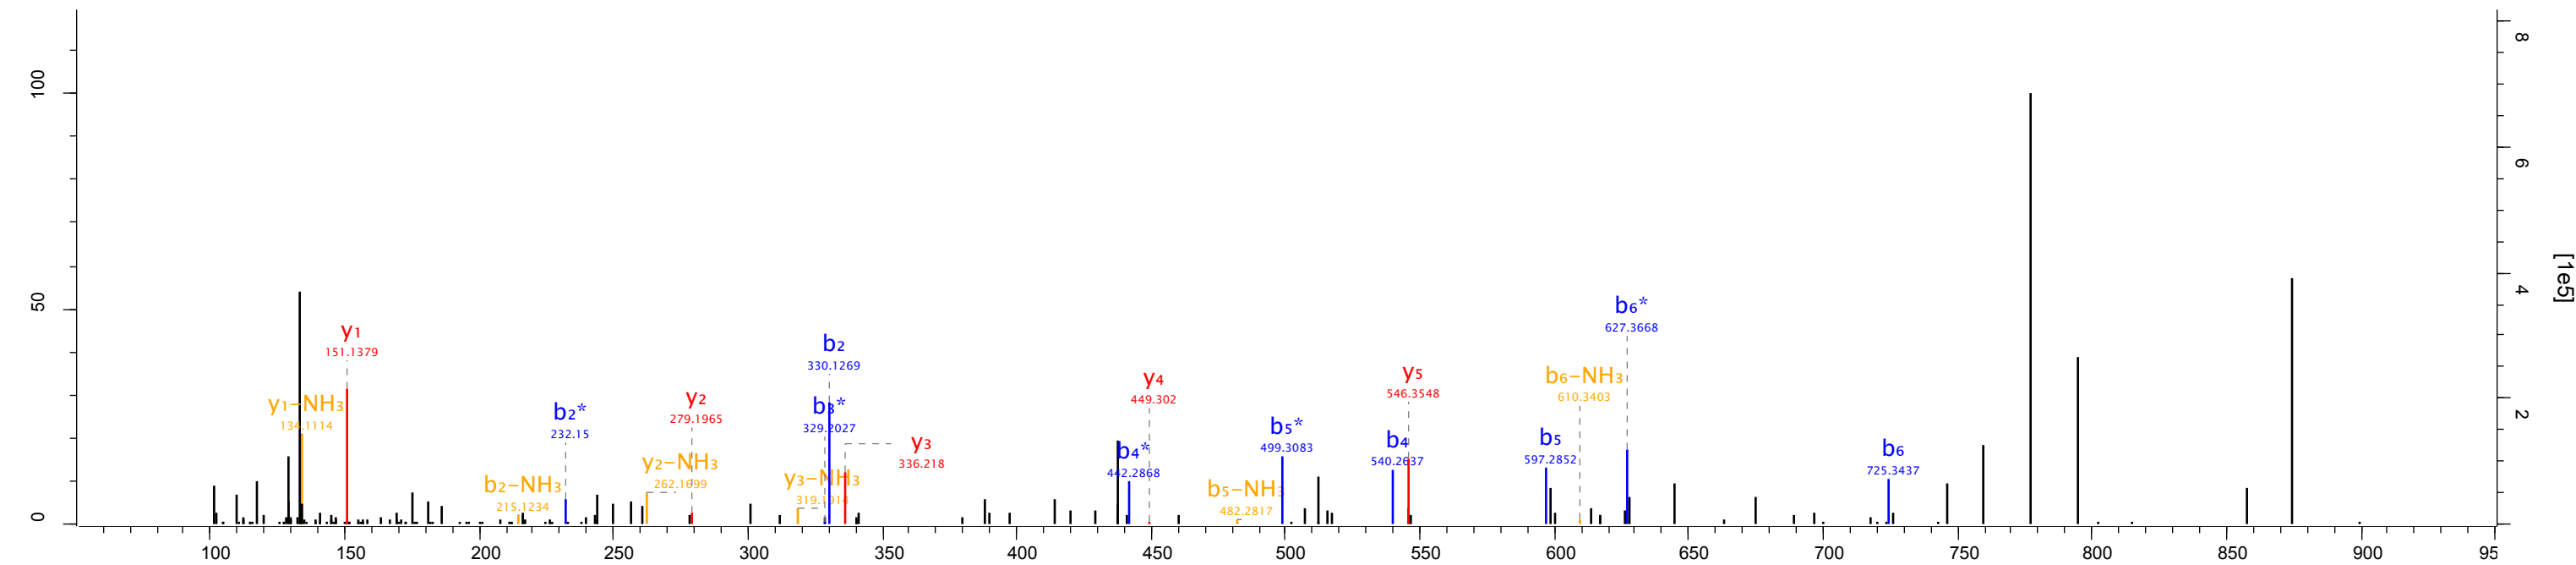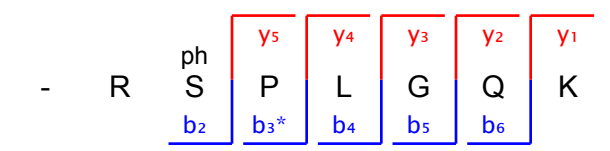

Raw file Scan Method Score m/z Gene names  
 20150814\_A375SR\_Phospho\_BR2\_05 20534 FTMS; HCD 45.94 808 M6PR

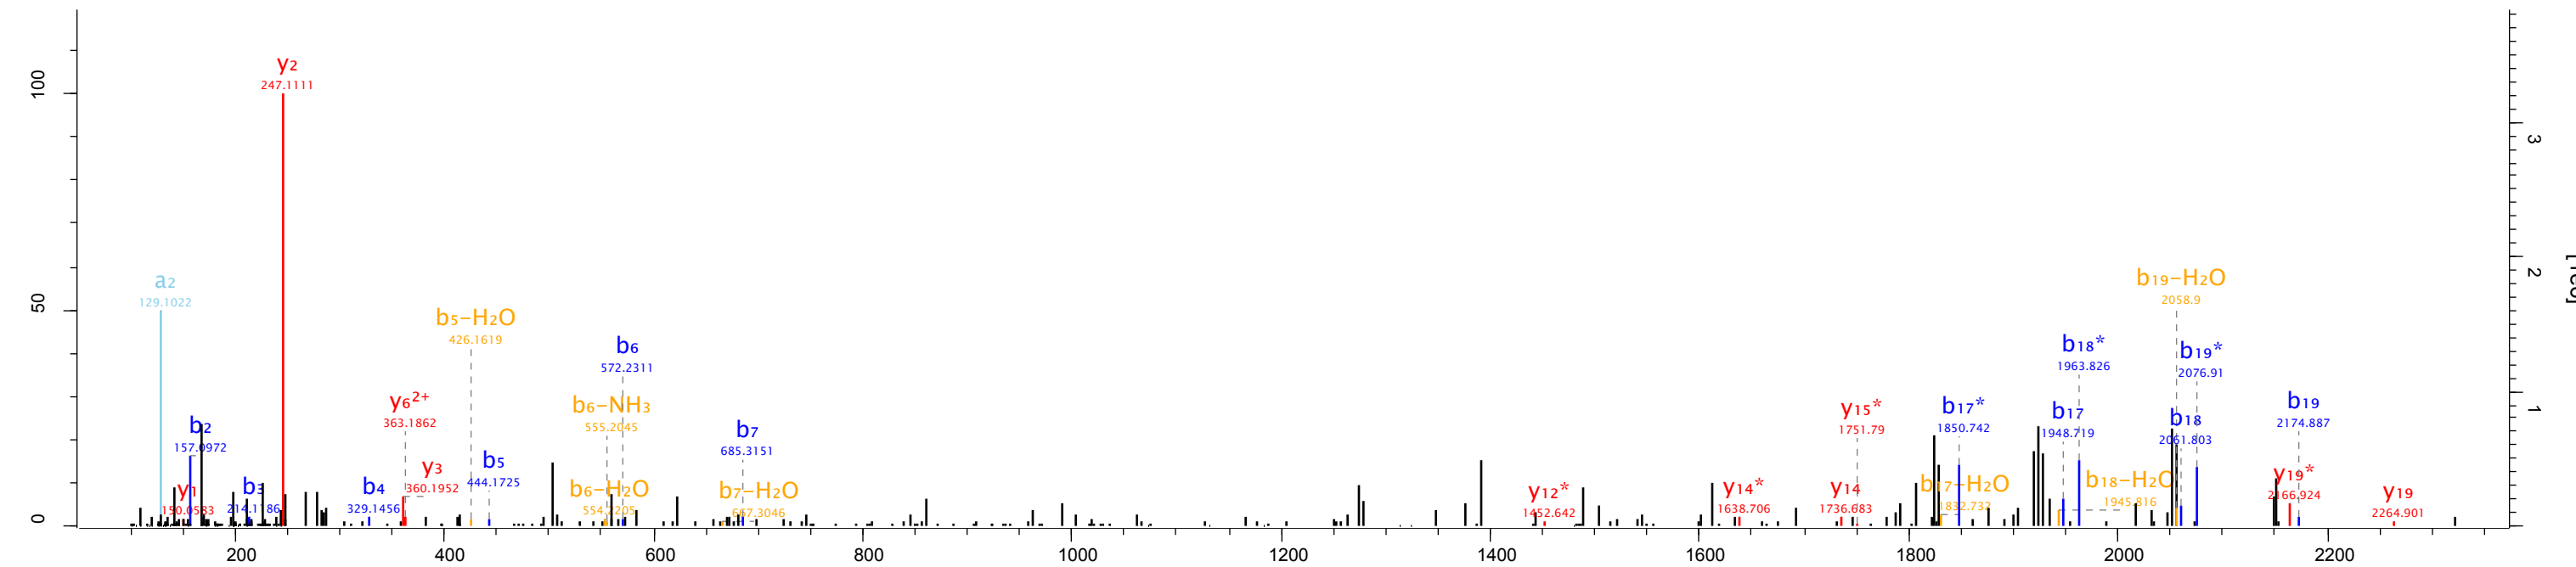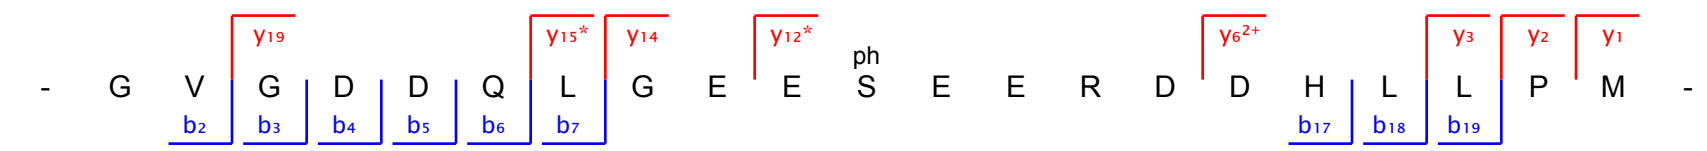

Raw file 20150814\_A375SR\_Phospho\_BR2\_05 Scan 20774 Method FTMS; HCD Score 90.97 m/z 796.39 Gene names RPS8

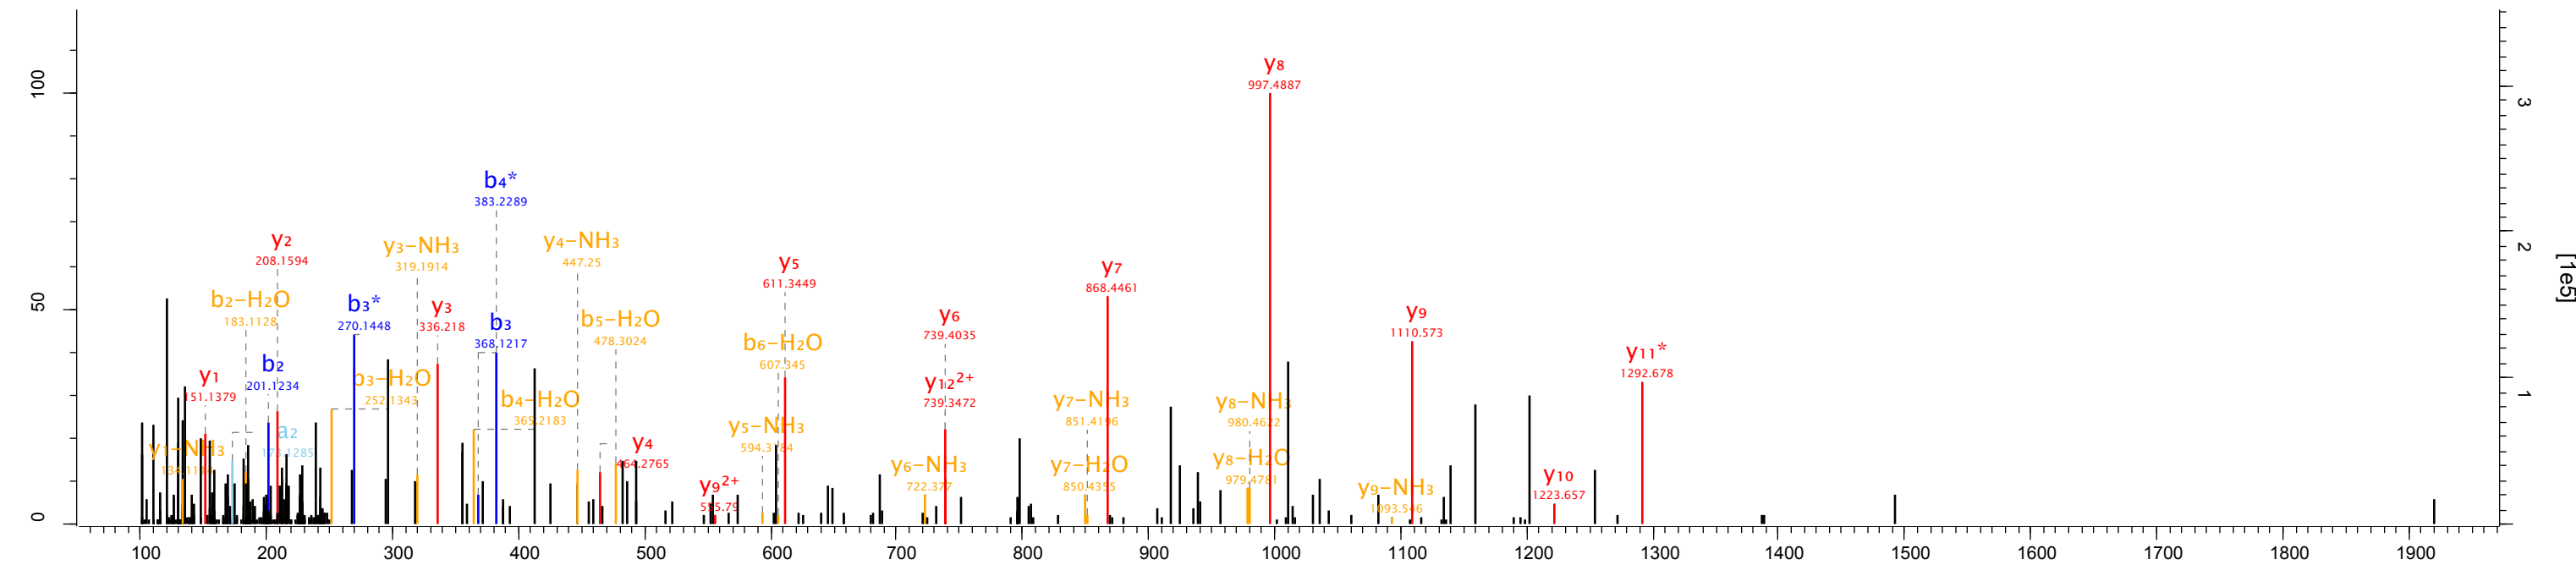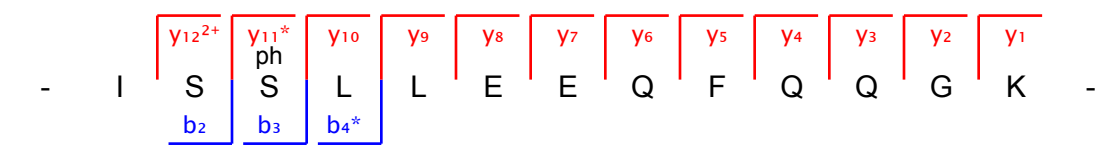

Raw file: 20150814\_A375SR\_Phospho\_BR2\_05  
 Scan: 20964 Method: FTMS; HCD Score: 132.84 m/z: 853.9 Gene names: HAUS6

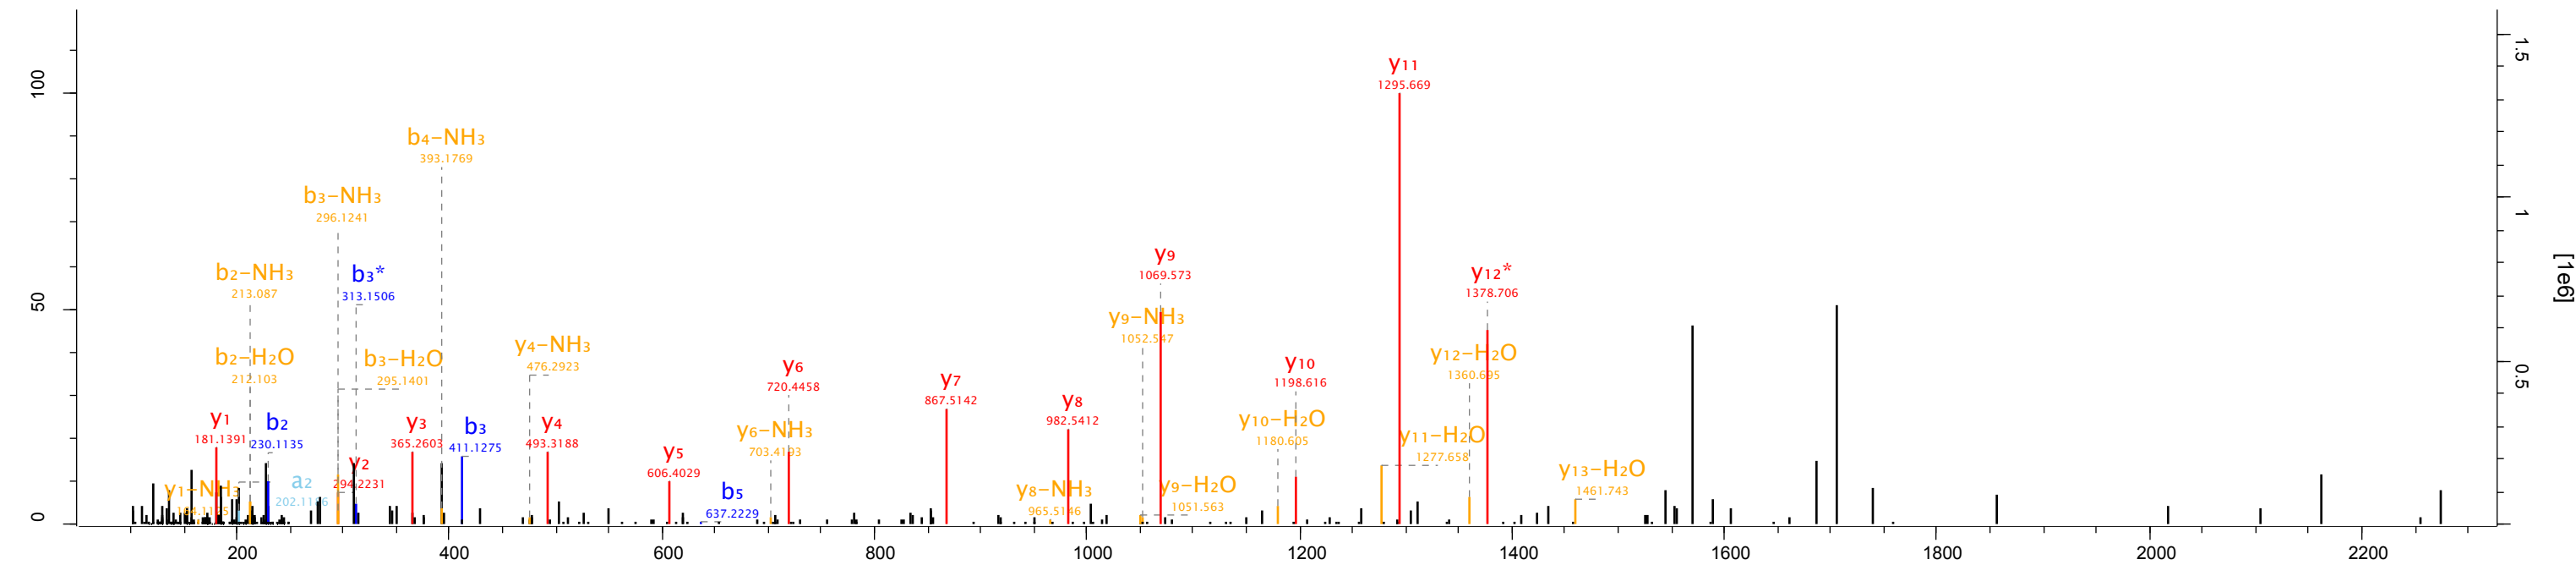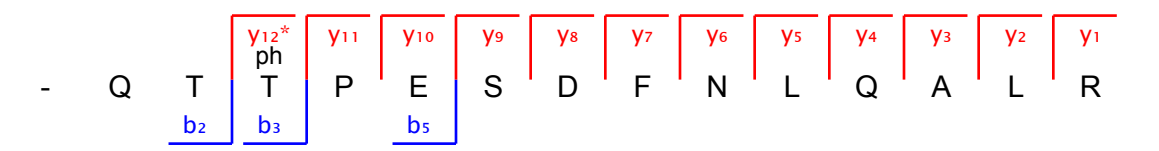



Raw file: 20150814\_A375SR\_Phospho\_BR2\_05  
 Scan: 20974 Method: FTMS; HCD Score: 58.09 m/z: 613.62 Gene names: MAST2

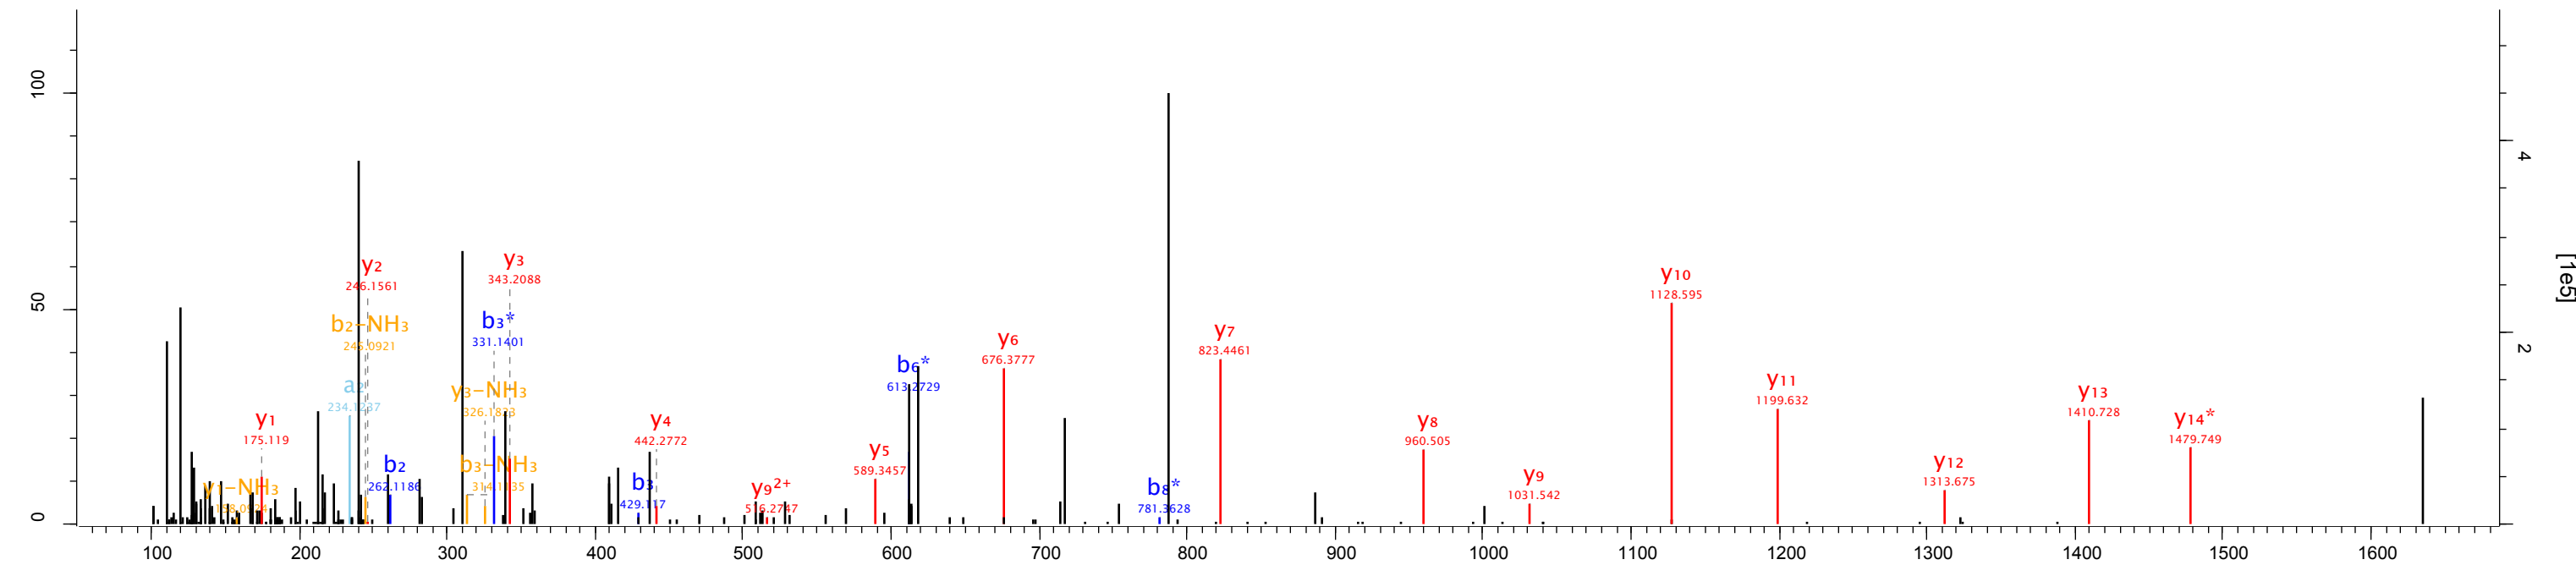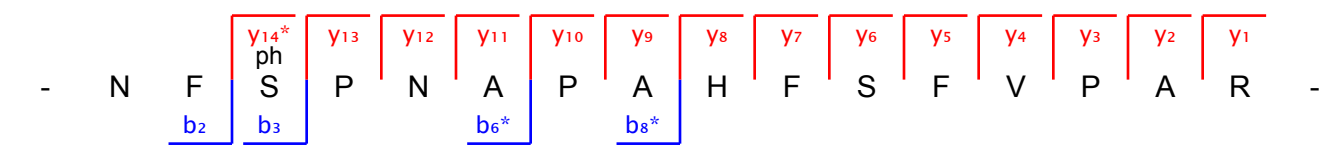

Raw file: 20150814\_A375SR\_Phospho\_BR2\_05  
 Scan: 21084 Method: FTMS; HCD Score: 133.74 m/z: 1035.01 Gene names: C9orf142

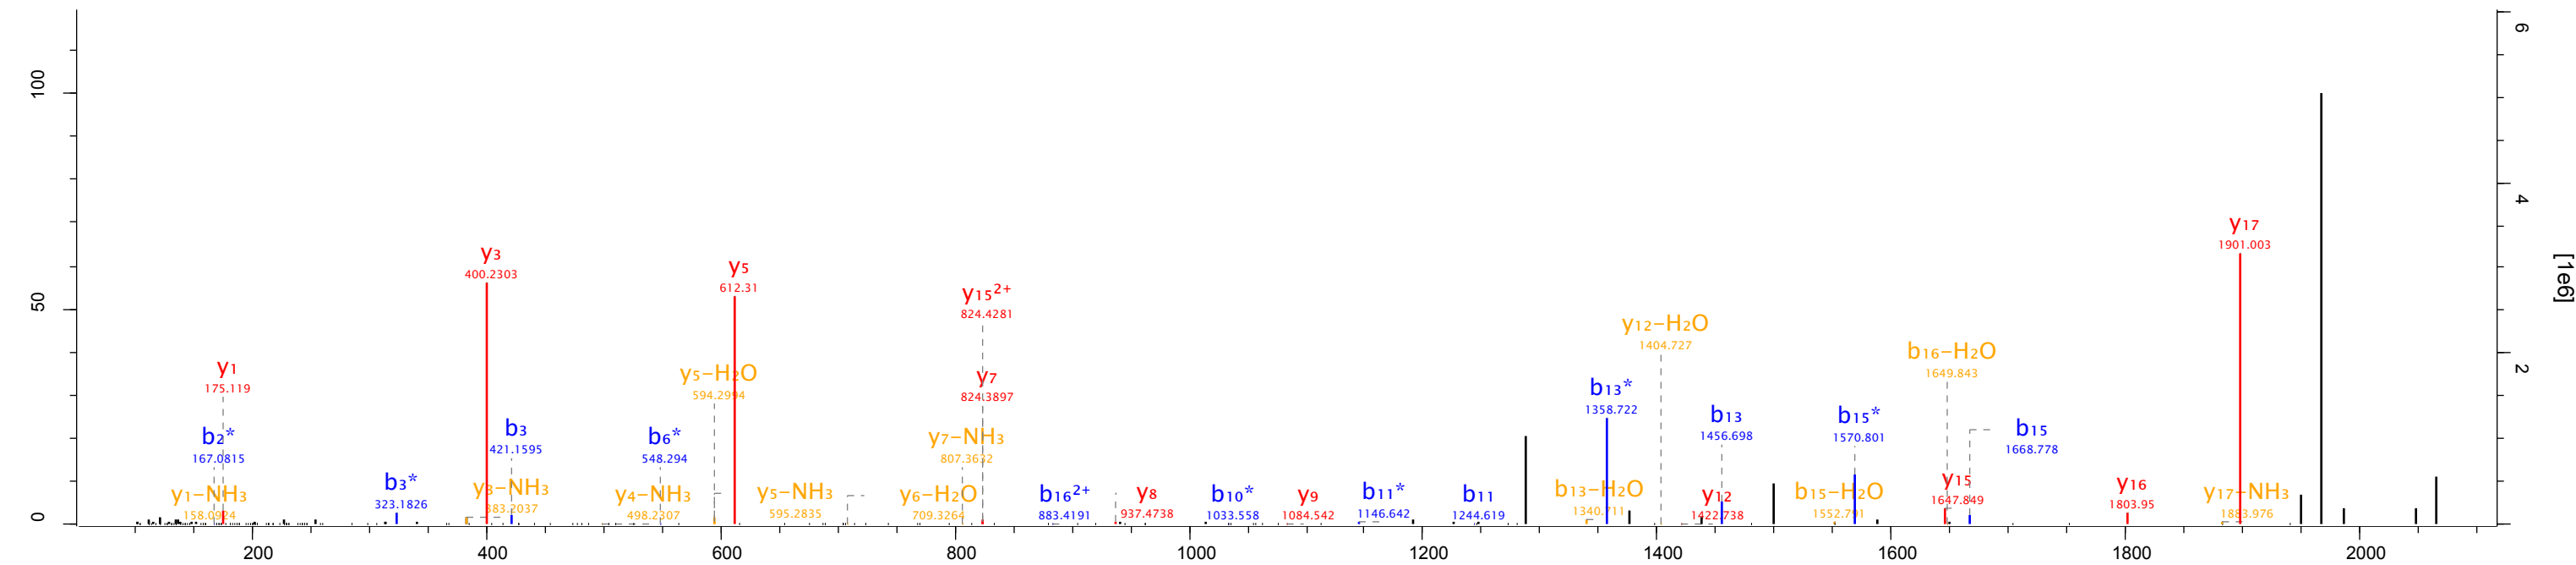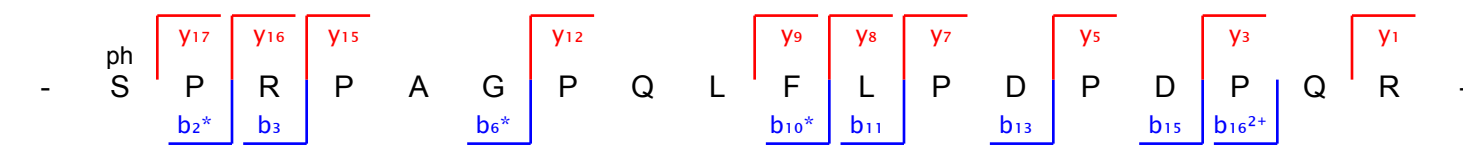

Raw file: 20150814\_A375SR\_Phospho\_BR2\_05  
 Scan: 21154 Method: FTMS; HCD Score: 156.24 m/z: 631.83 Gene names: PTTG1;PTTG2

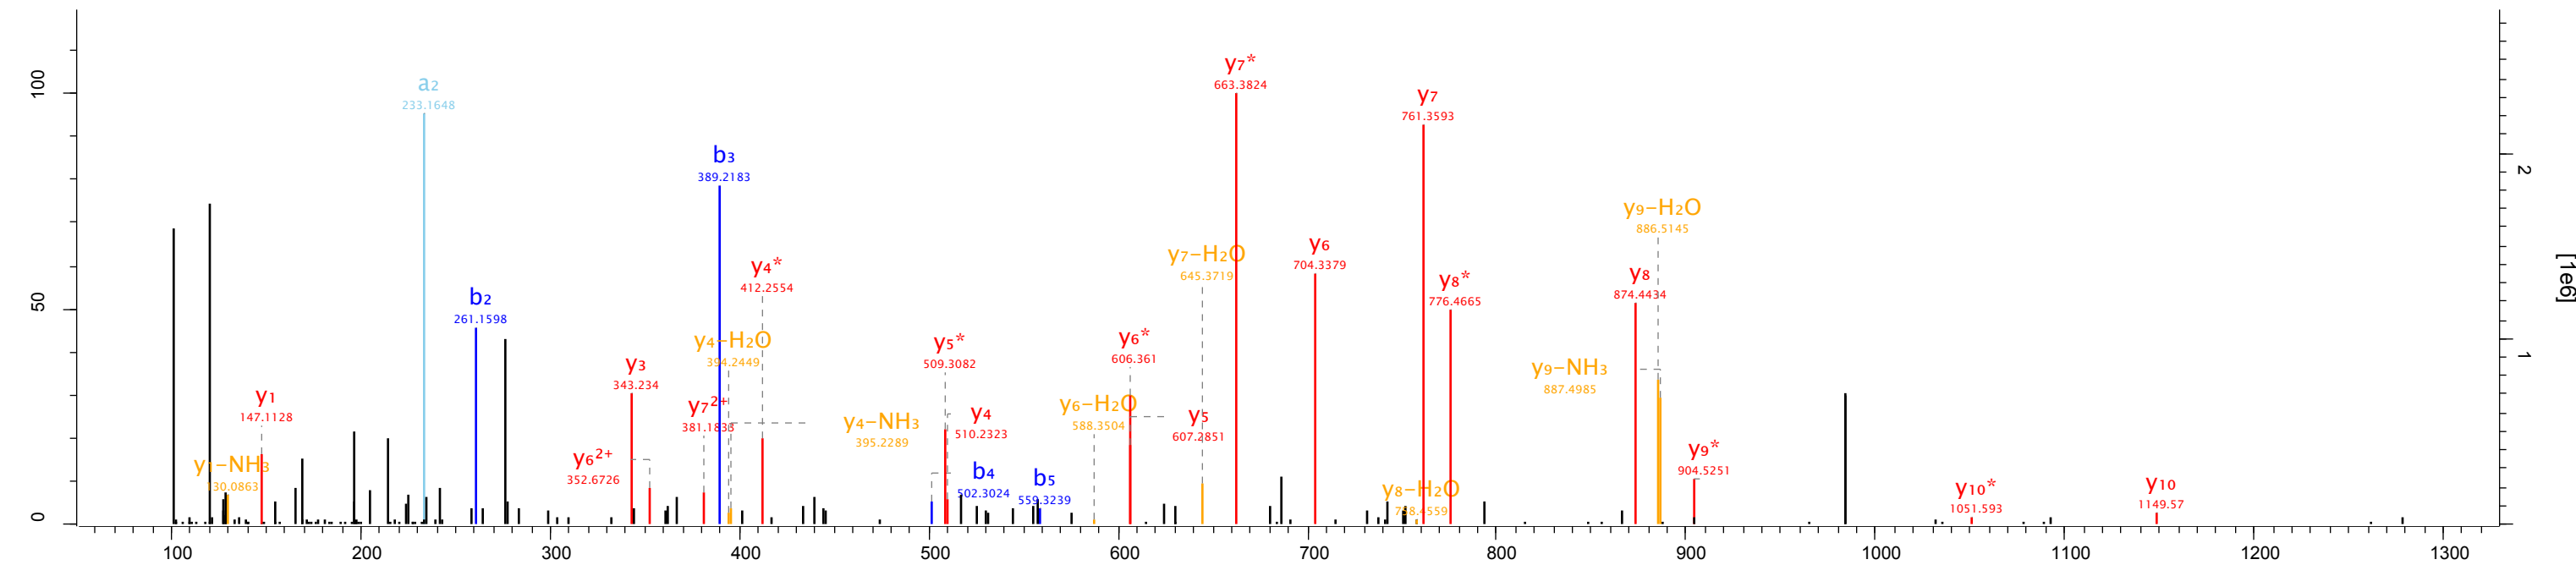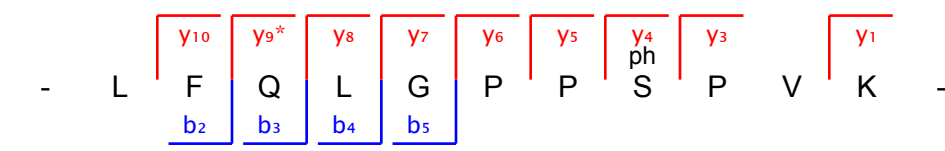

Raw file: 20150814\_A375SR\_Phospho\_BR2\_05  
 Scan: 21314 Method: FTMS; HCD Score: 143.83 m/z: 779.88 Gene names: AHNAK

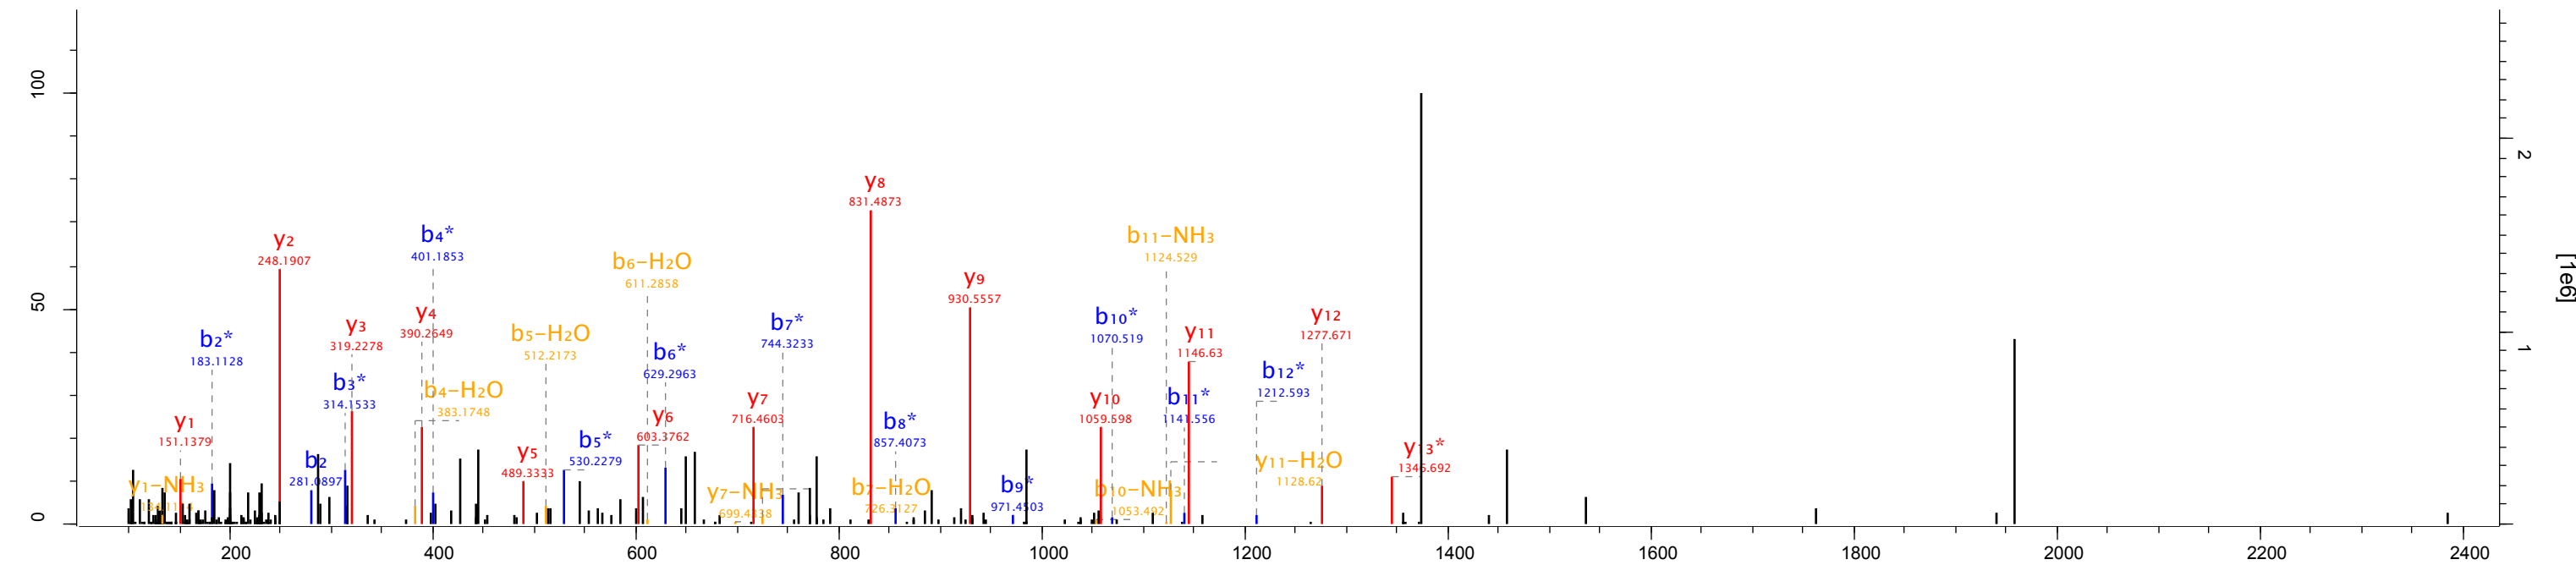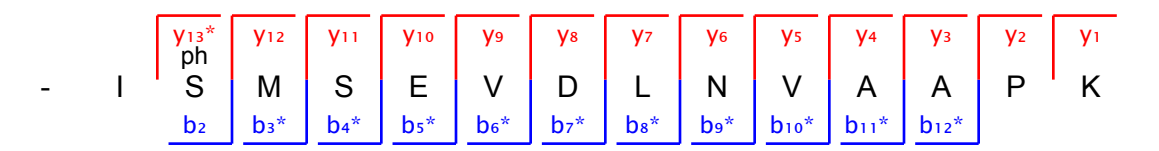

Raw file 20150814\_A375SR\_Phospho\_BR2\_05 Scan 21364 Method FTMS; HCD Score 50.86 m/z 965.48 Gene names TRIM24

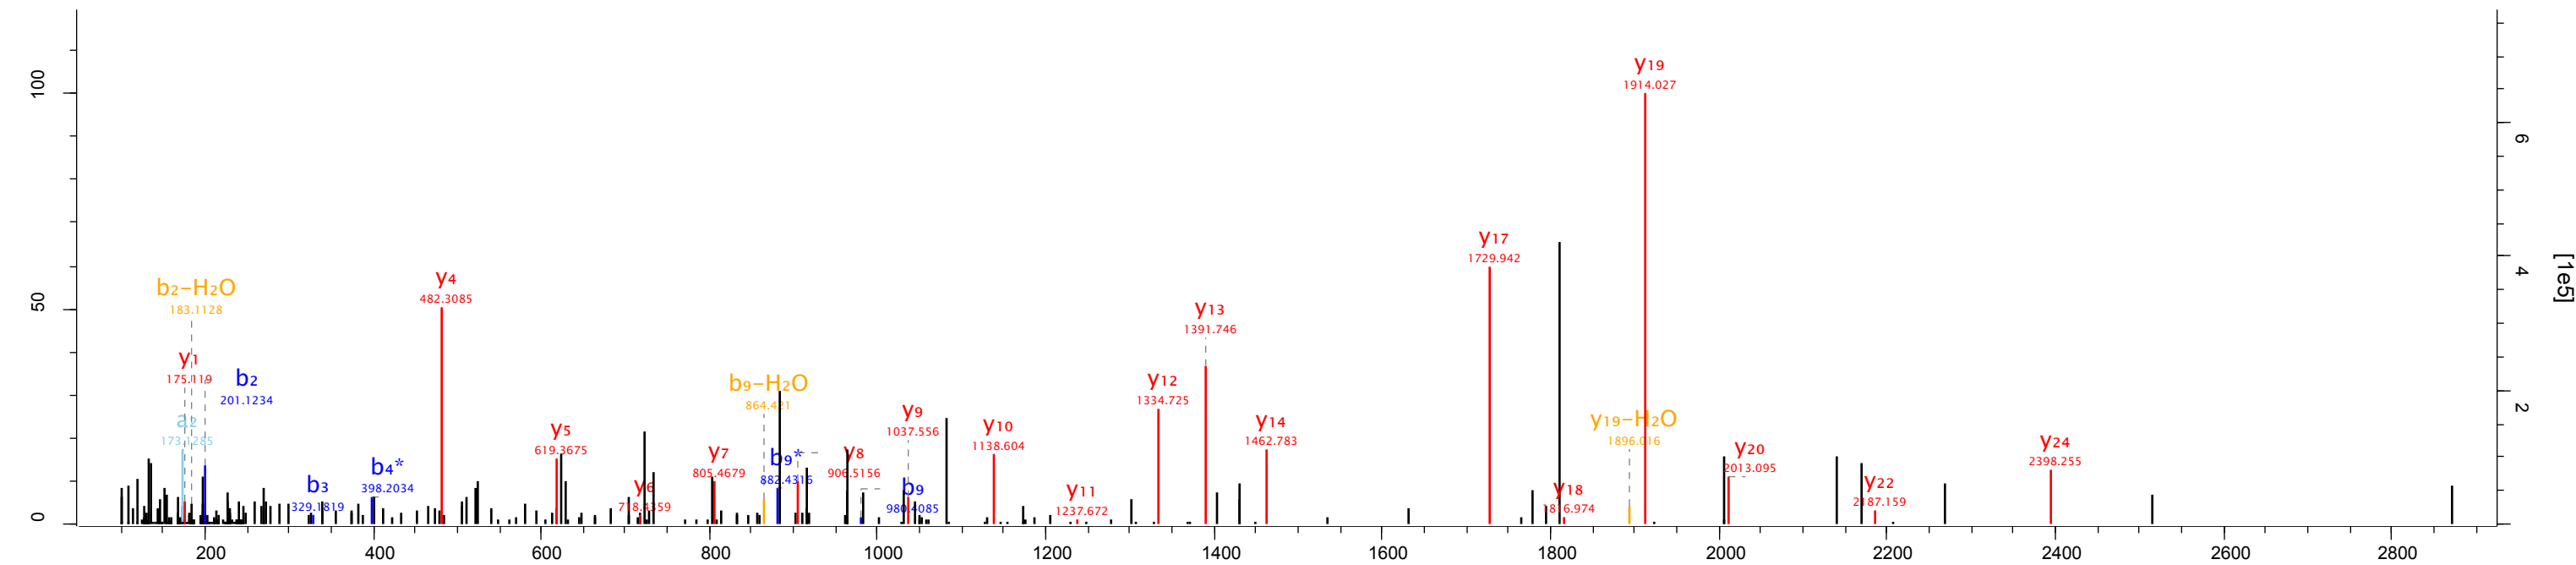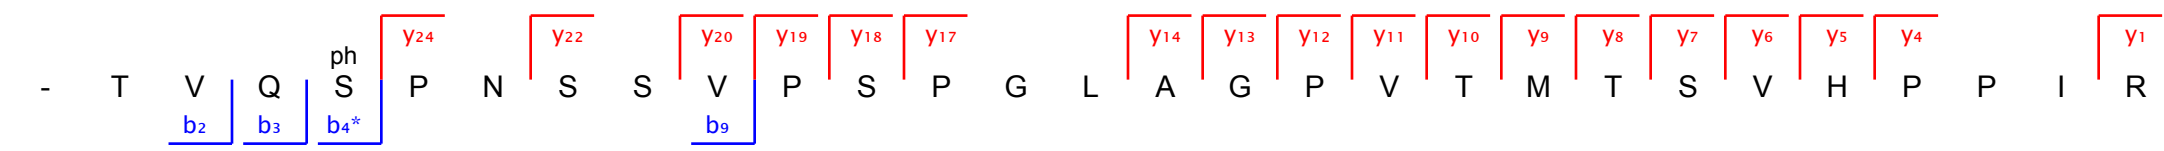

Raw file 20150814\_A375SR\_Phospho\_BR2\_05 Scan 21494 Method FTMS; HCD Score 126.91 m/z 897.93 Gene names PPP1R13L

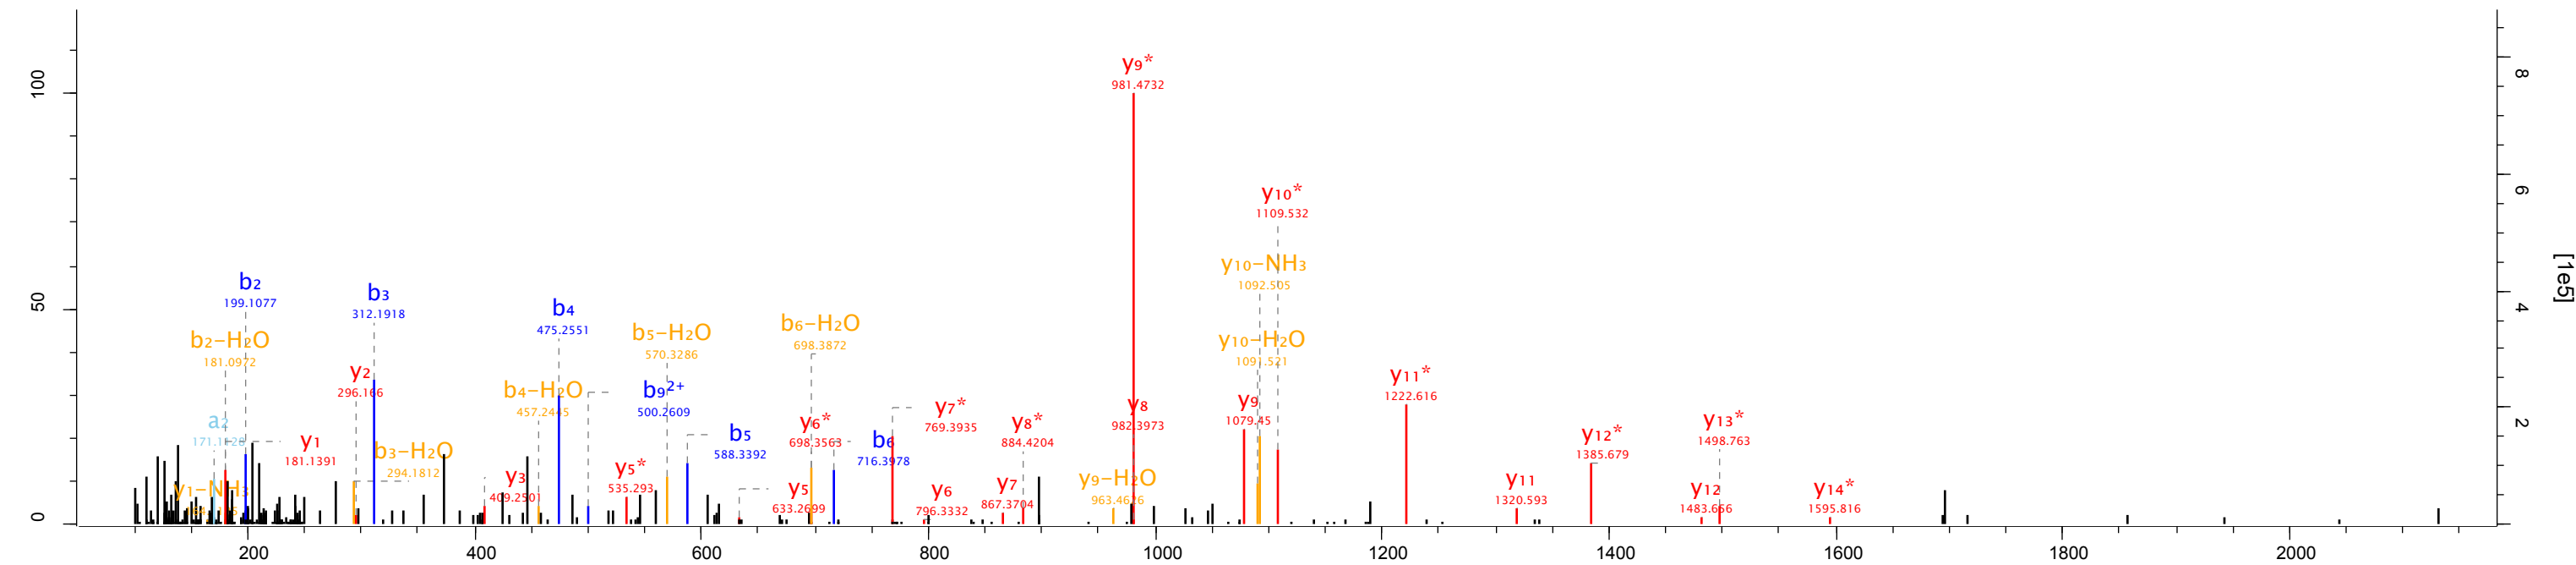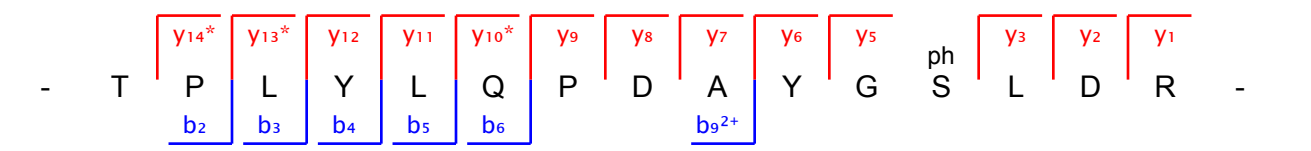

Raw file 20150814\_A375SR\_Phospho\_BR2\_05 Scan 21614 Method FTMS; HCD Score 140.76 m/z 1215.9 Gene names TRIM28

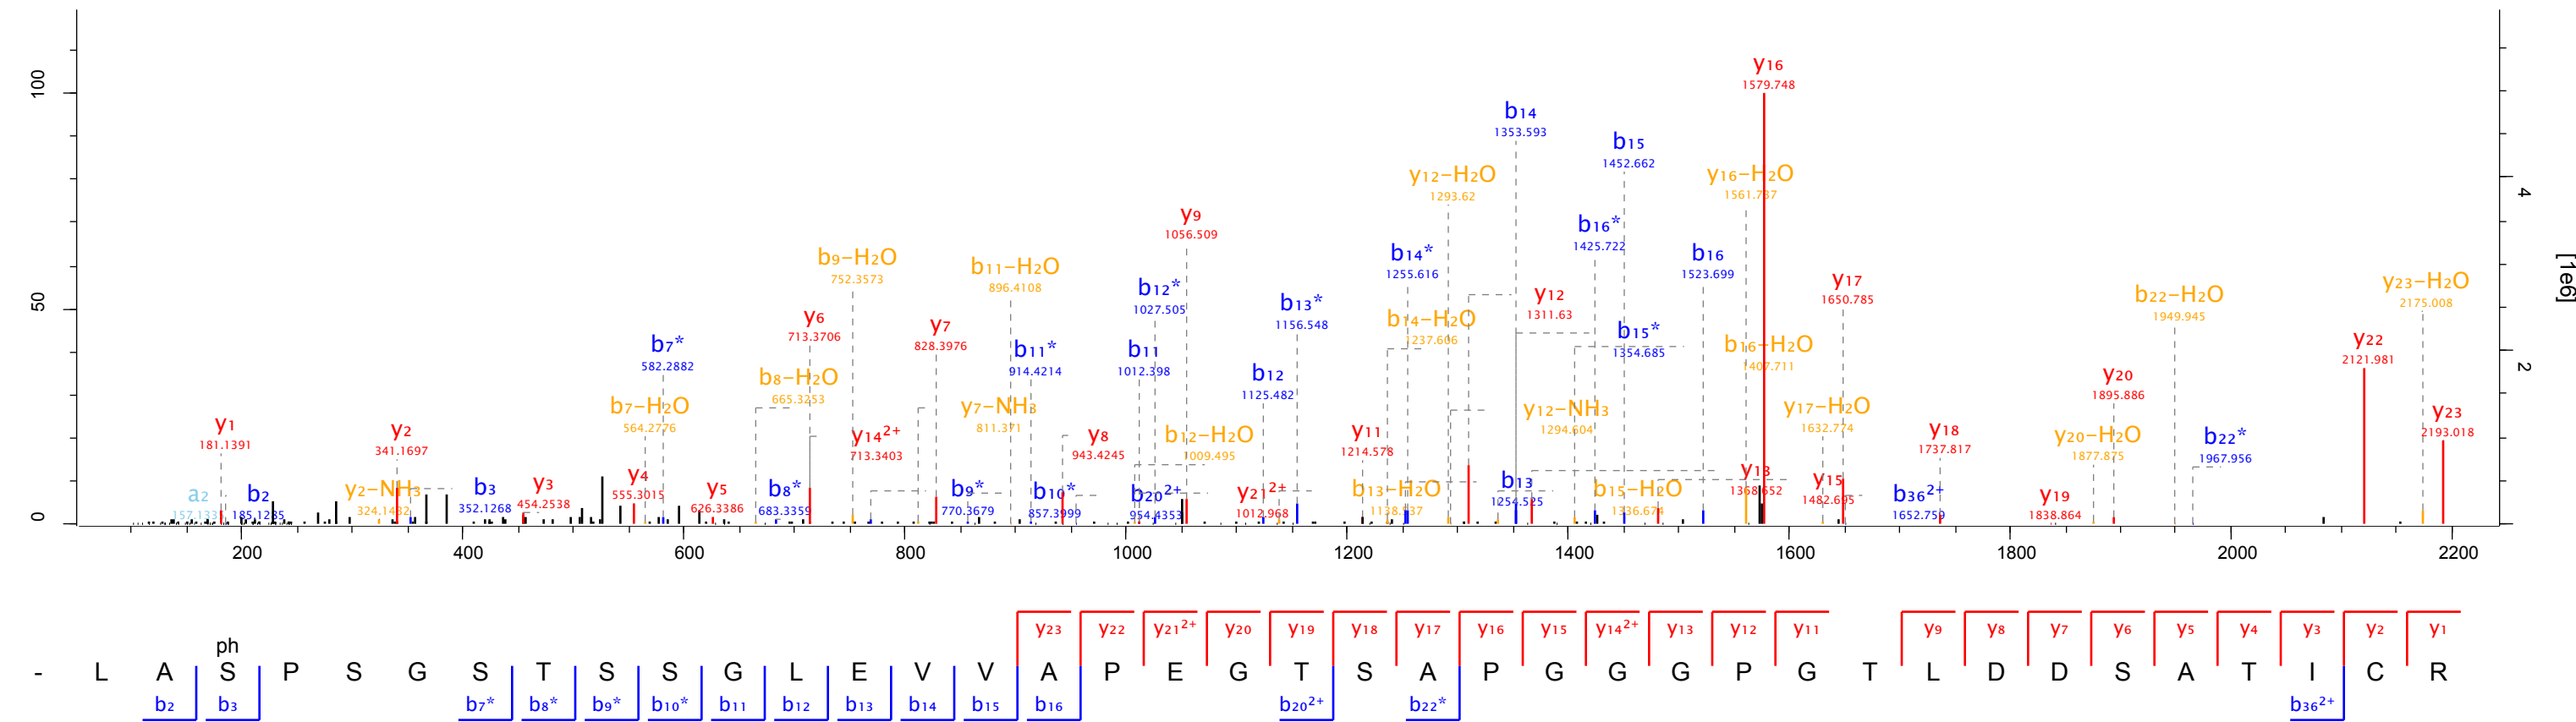

Raw file 20150814\_A375SR\_Phospho\_BR2\_05 Scan 21774 Method FTMS; HCD Score 121.48 m/z 1000.94 Gene names FAM21C;FAM21A

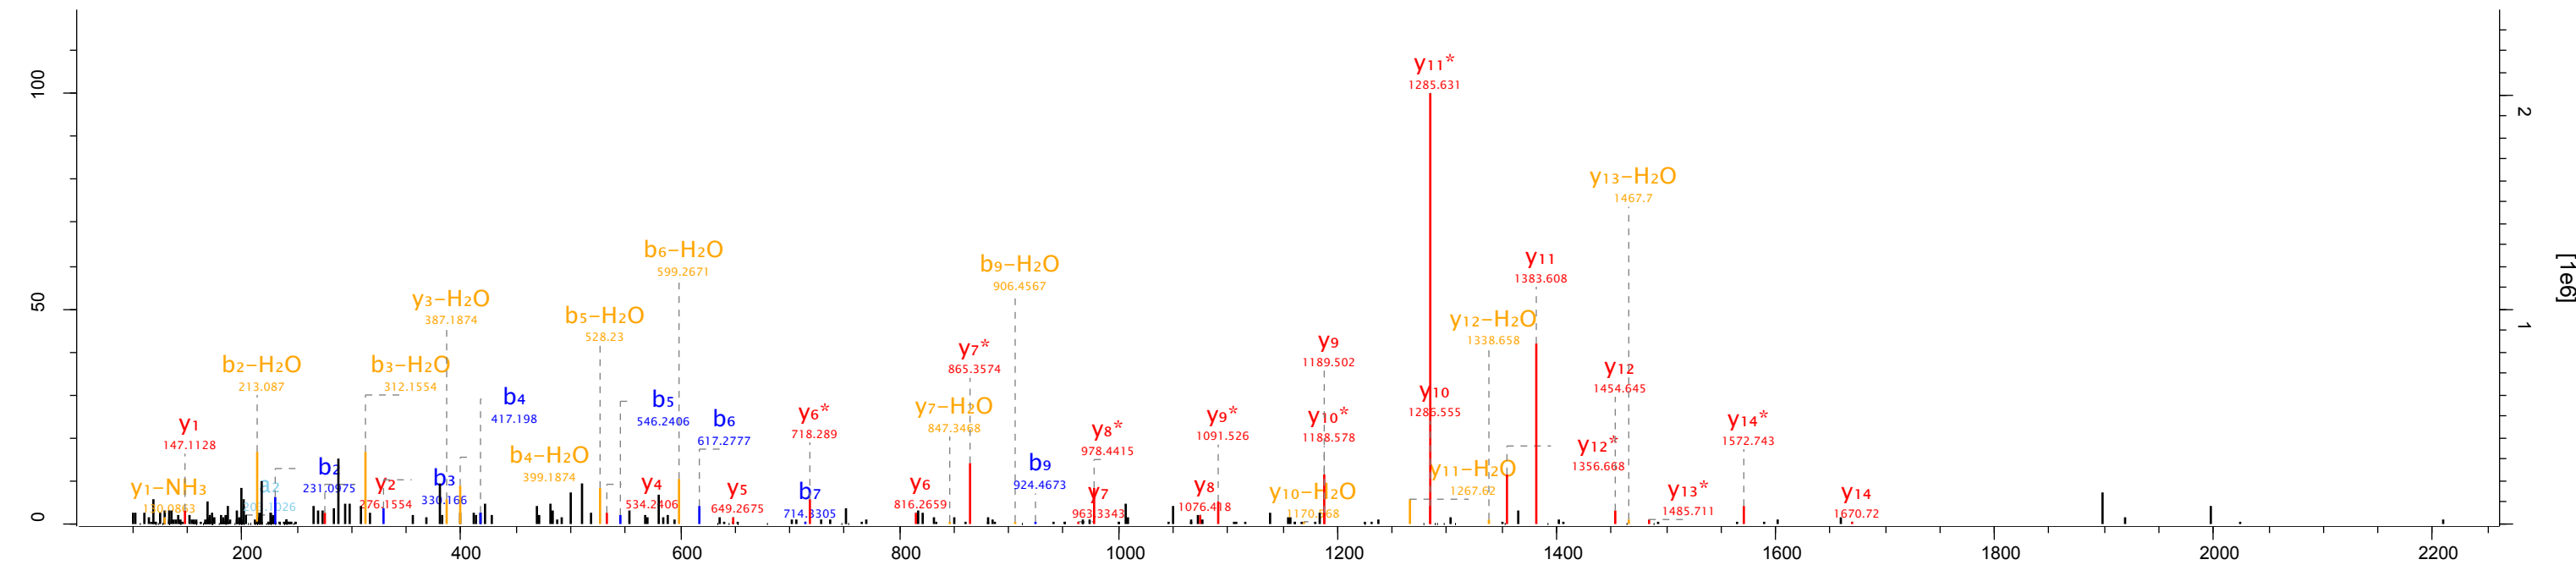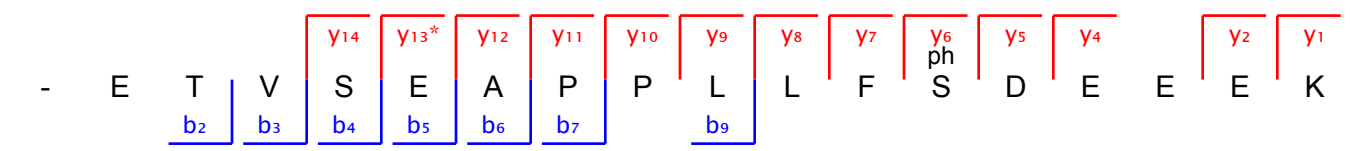



Raw file: 20150814\_A375SR\_Phospho\_BR2\_05  
 Scan: 21854 Method: FTMS; HCD Score: 98 m/z: 907.42 Gene names: SPIN1

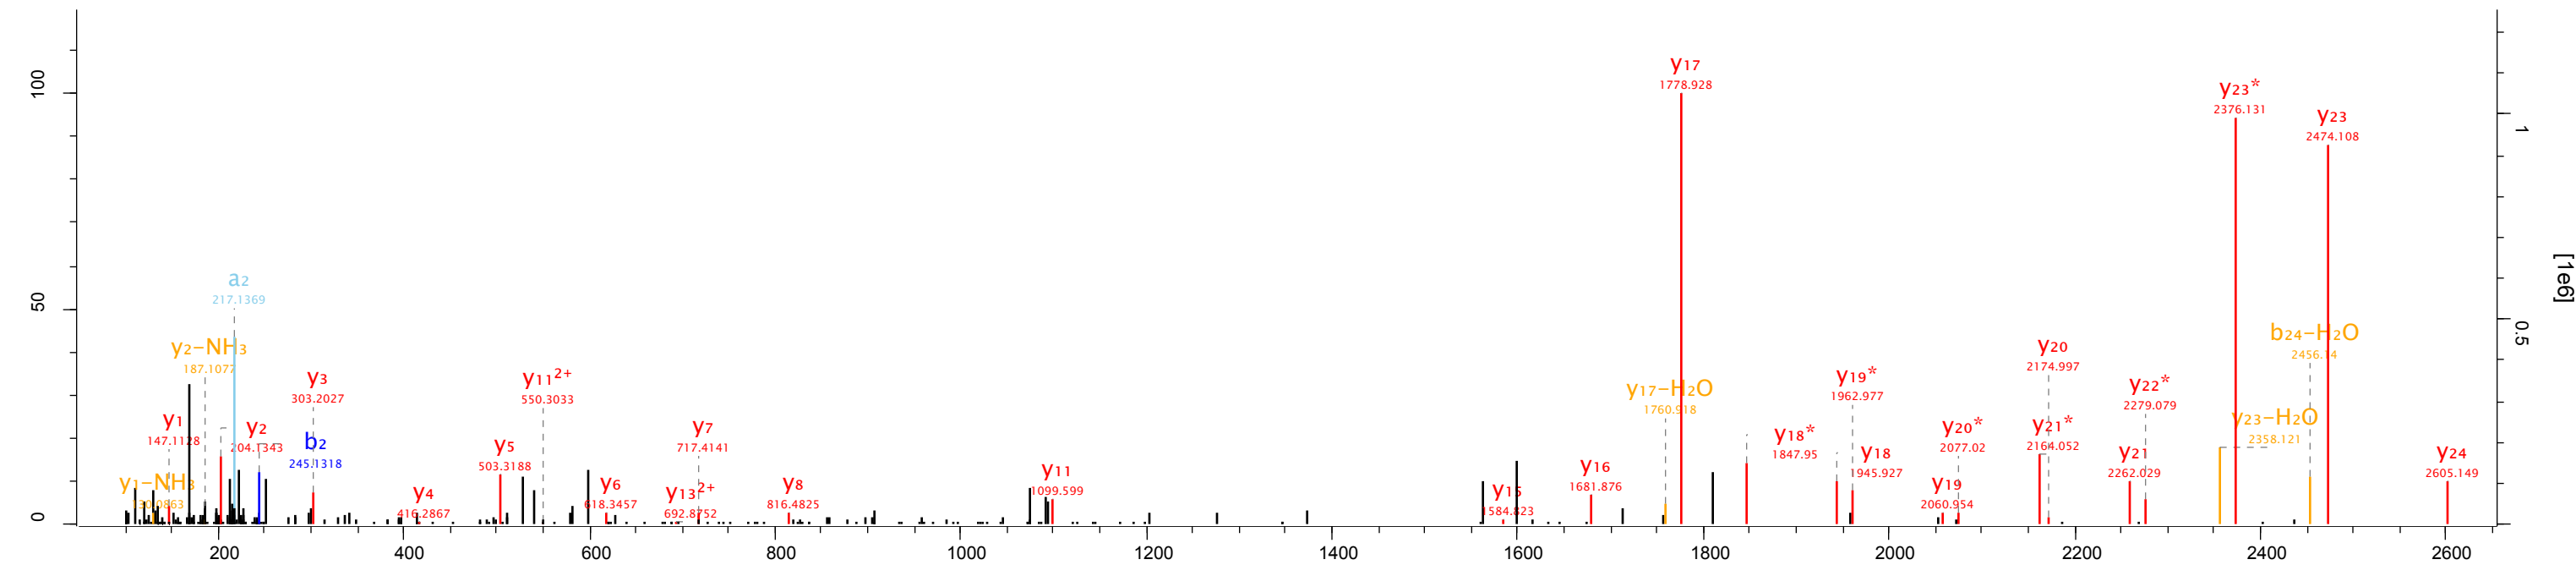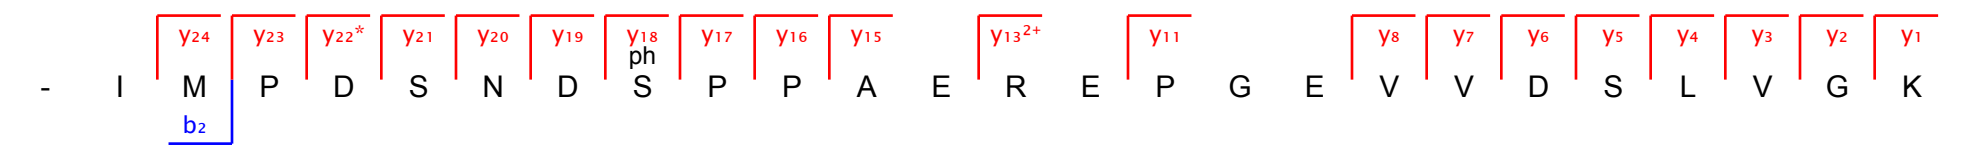

Raw file 20150814\_A375SR\_Phospho\_BR2\_05 Scan 22074 Method FTMS; HCD Score 348.62 m/z 1000.45 Gene names USP16

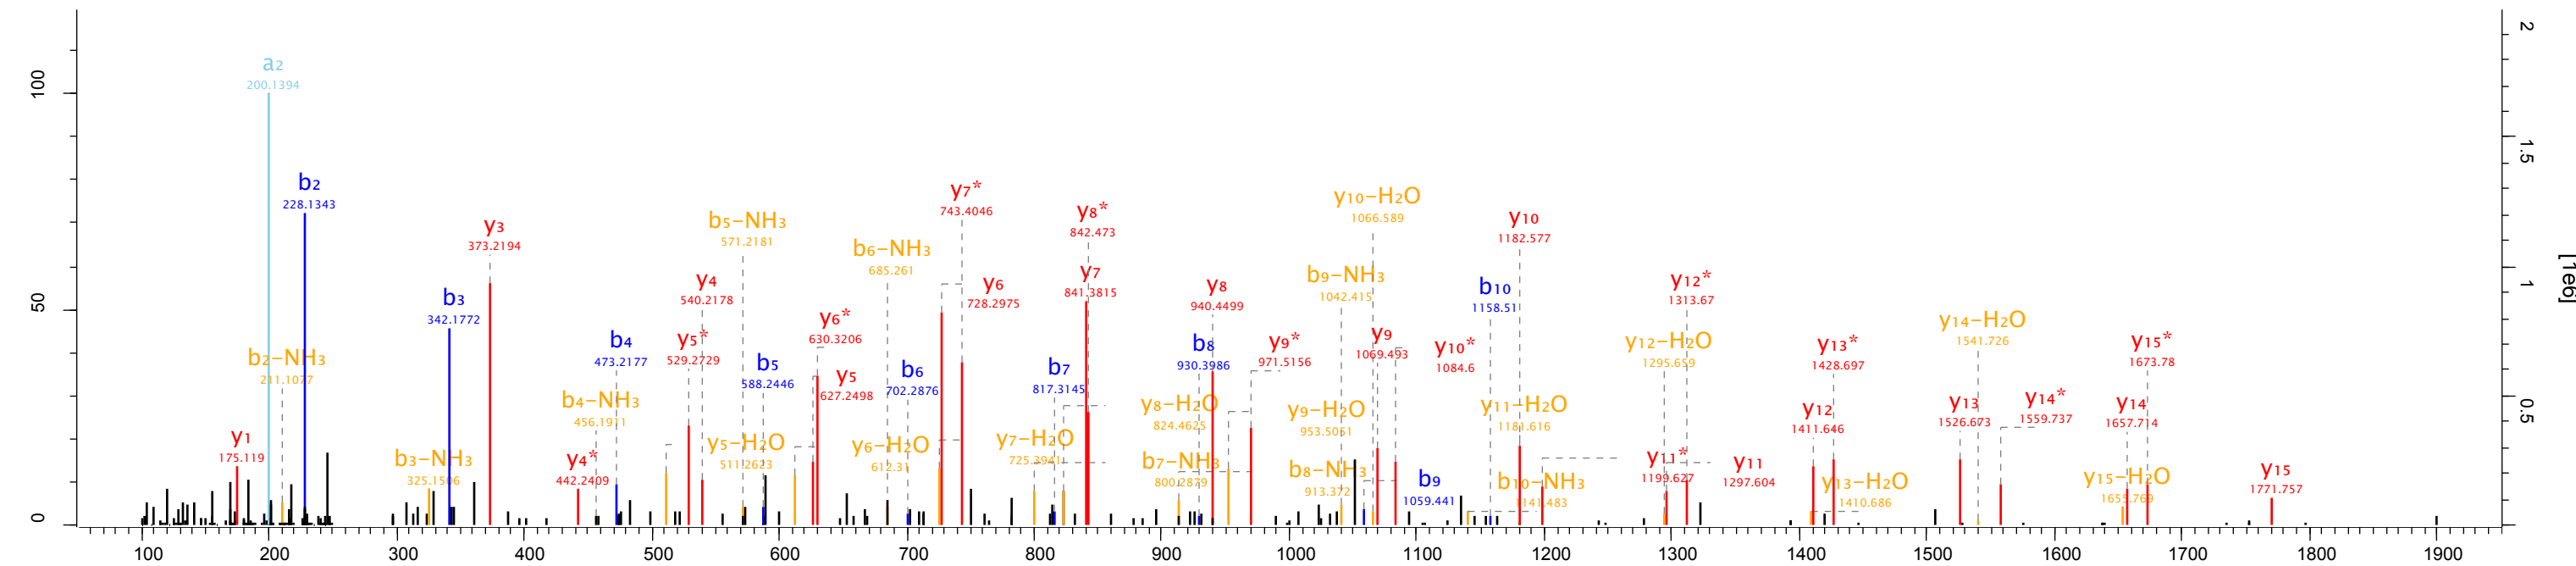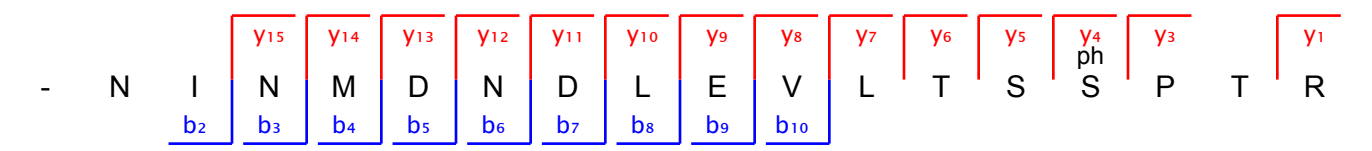

Raw file: 20150814\_A375SR\_Phospho\_BR2\_05  
 Scan: 22114 Method: FTMS; HCD Score: 232.49 m/z: 1058.03 Gene names: EGFR

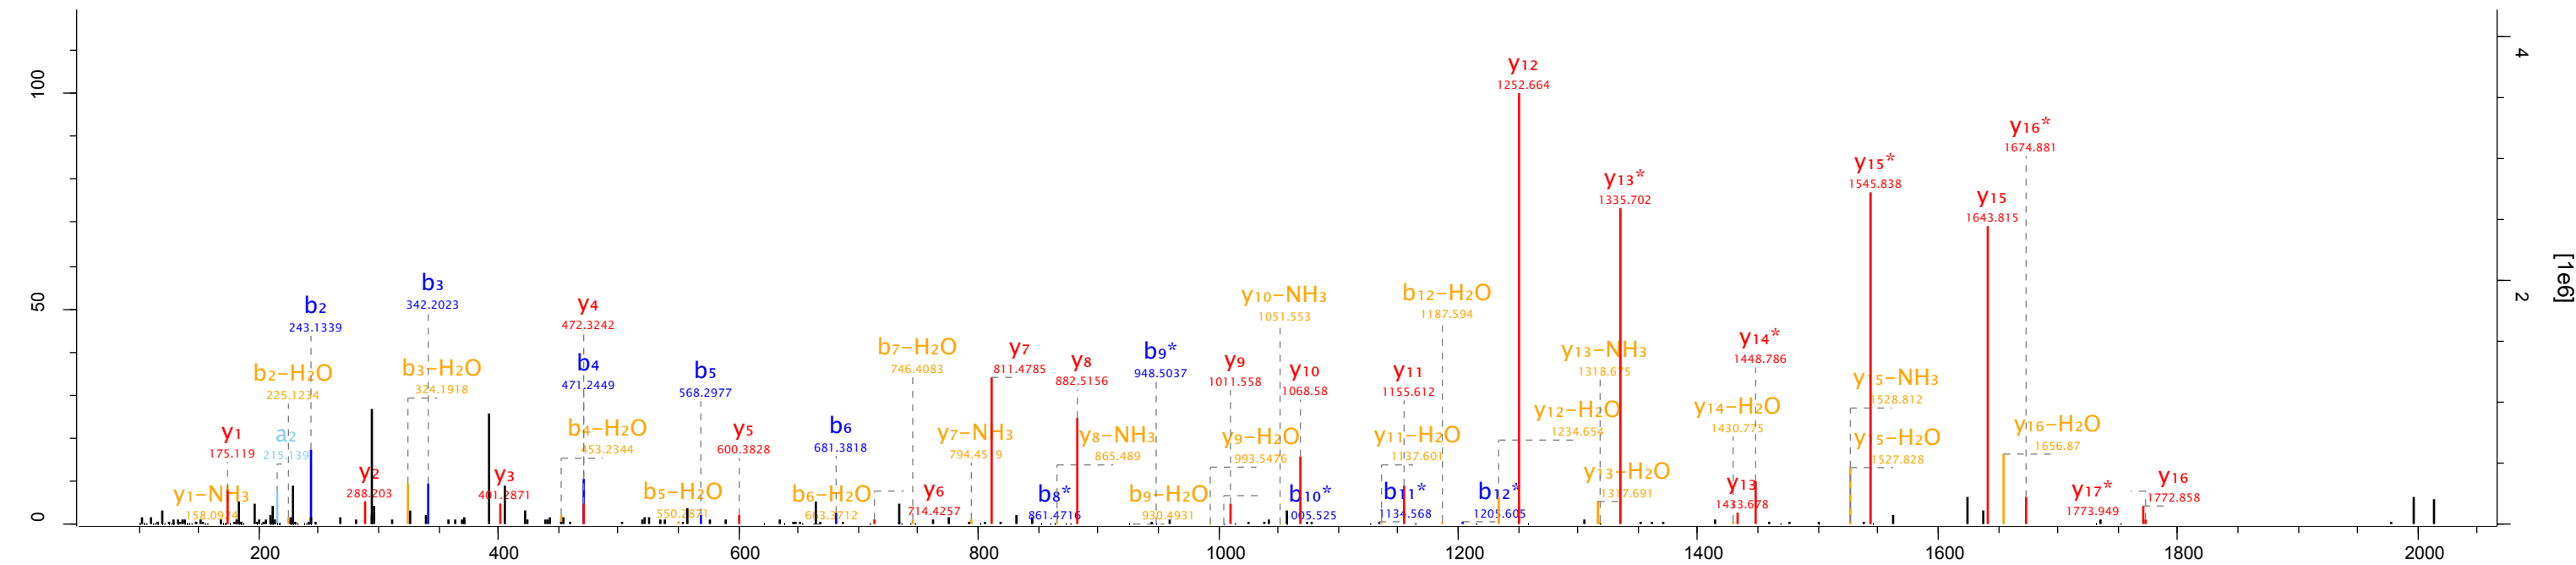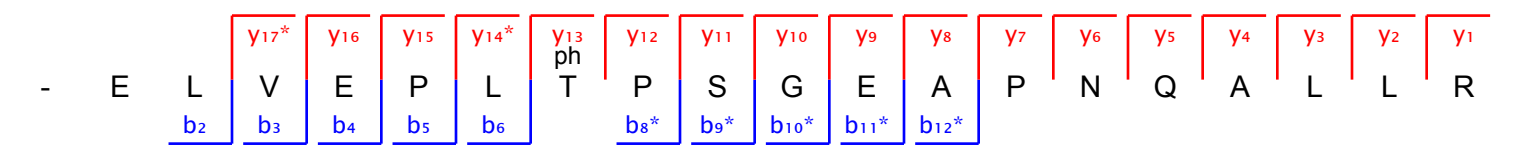

Raw file 20150814\_A375SR\_Phospho\_BR2\_05 Scan 22144 Method FTMS; HCD Score 75.61 m/z 601.99 Gene names SIK3

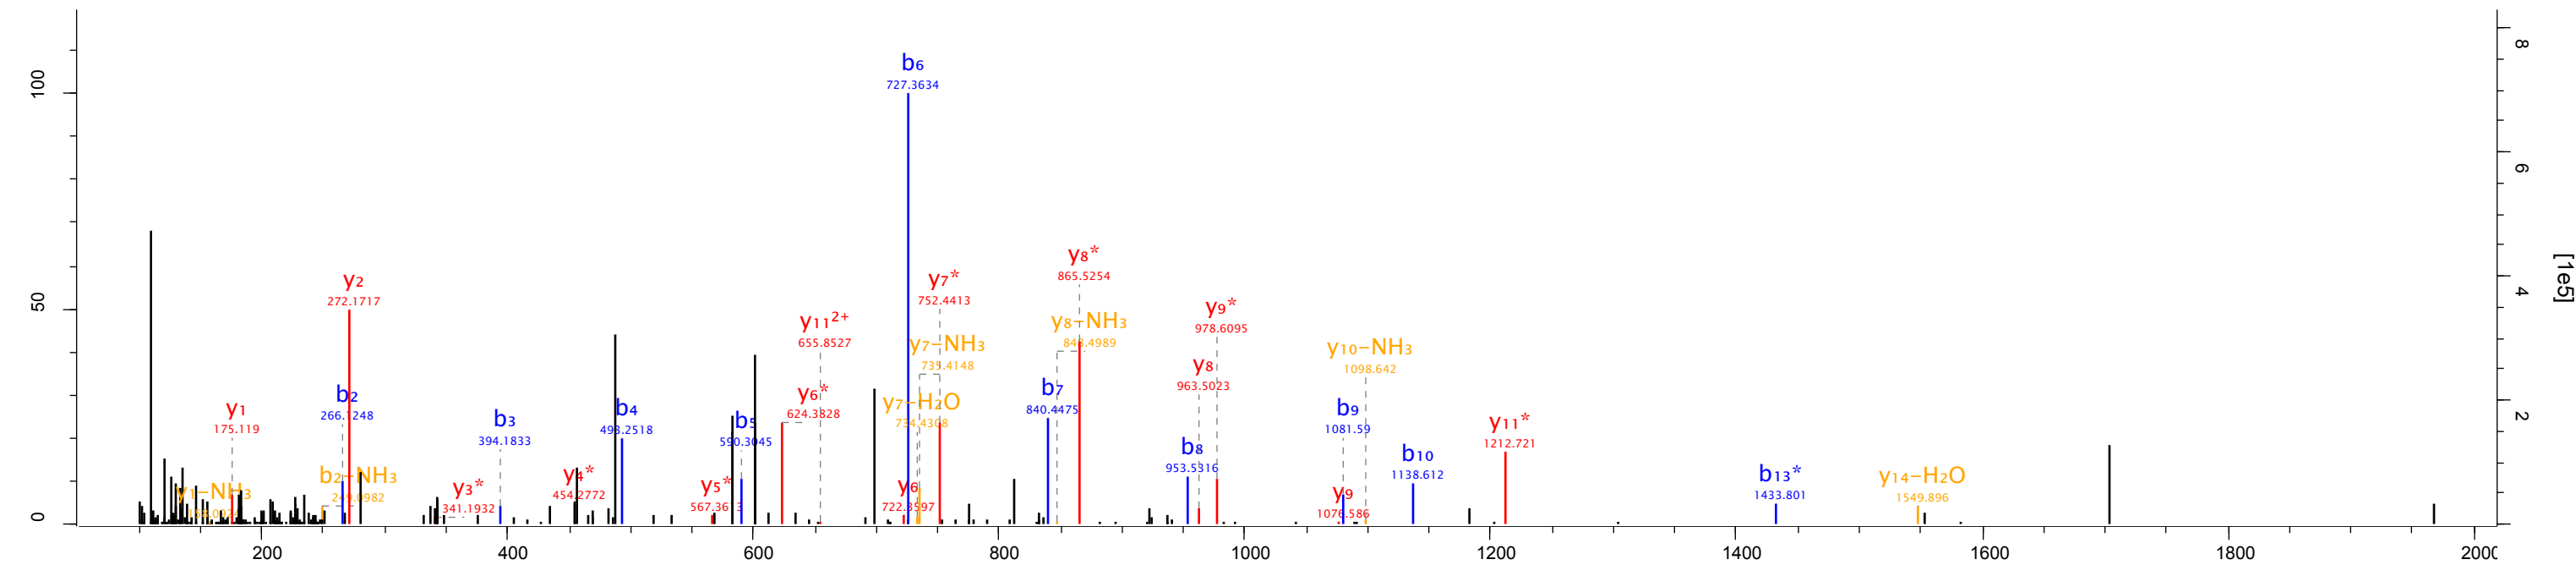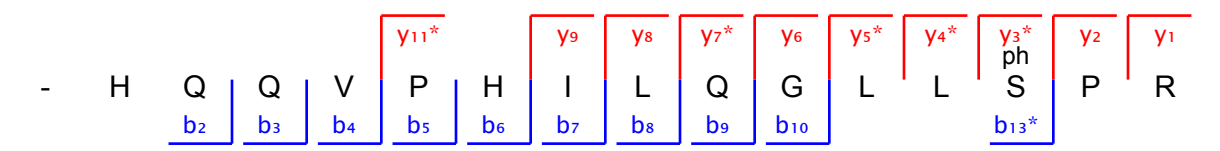

Raw file 20150814\_A375SR\_Phospho\_BR2\_05 Scan 22474 Method FTMS; HCD Score 148.08 m/z 1211.23 Gene names LIN37

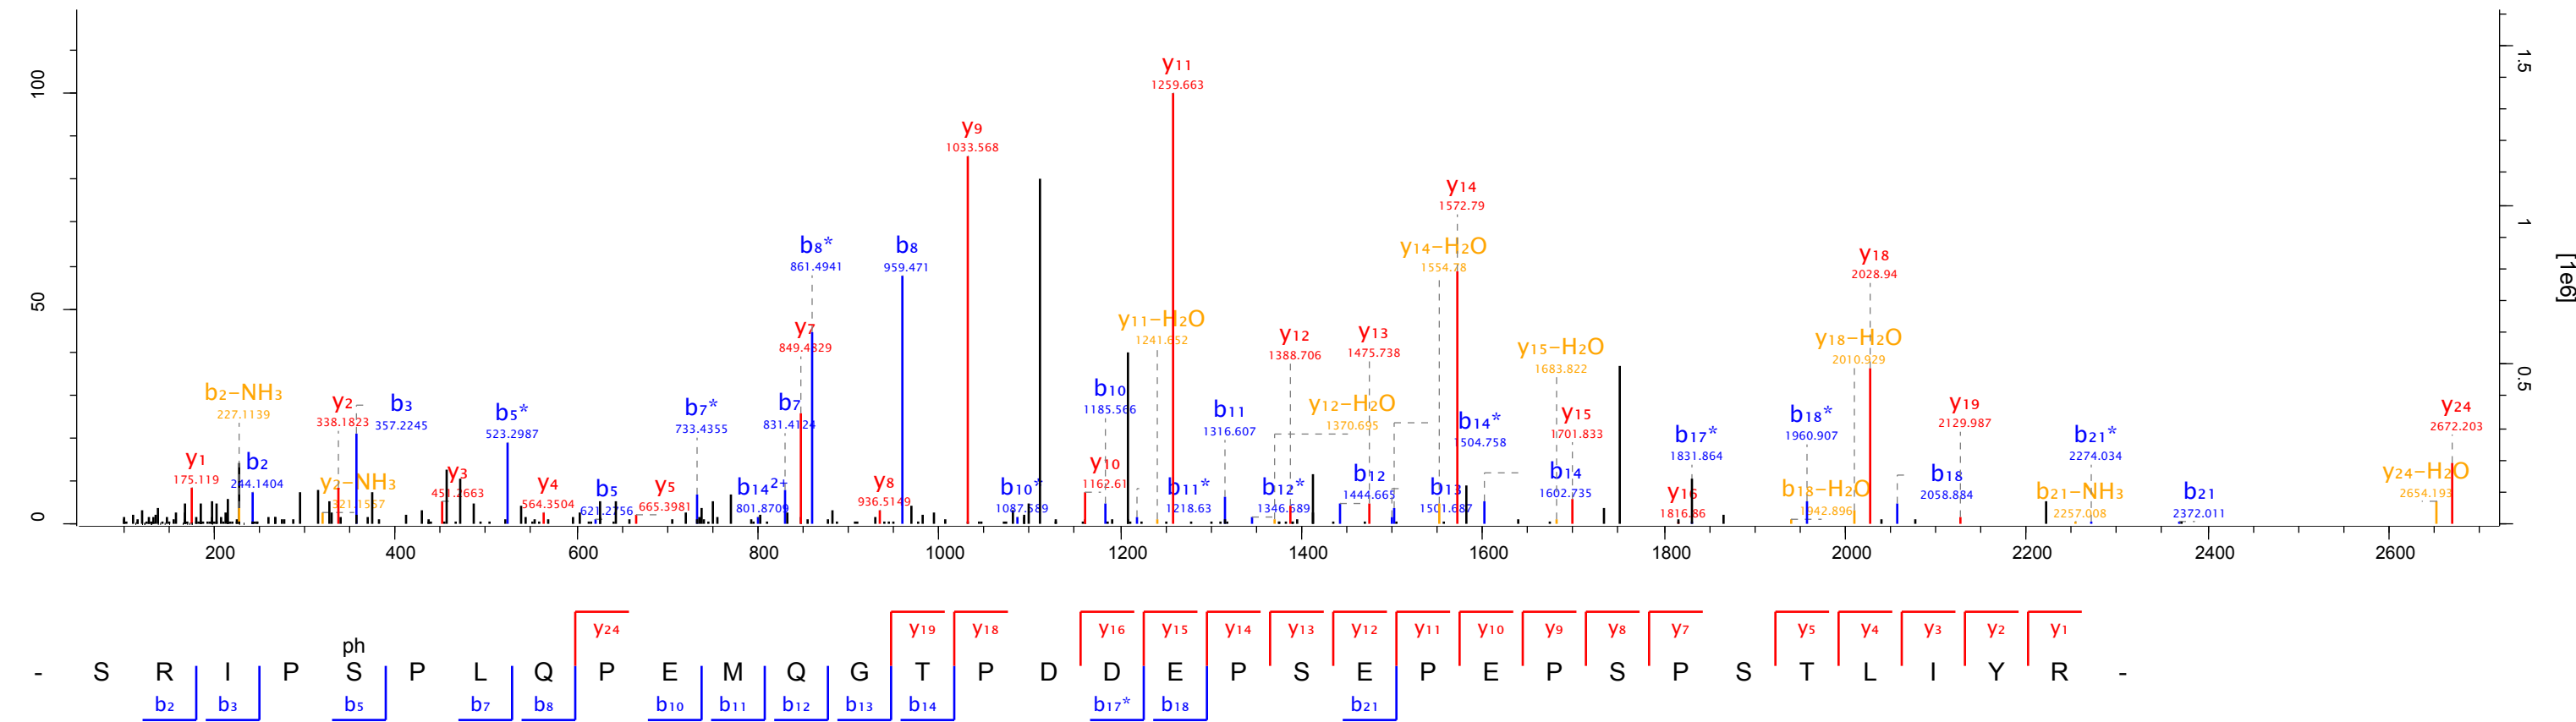

Raw file 20150814\_A375SR\_Phospho\_BR2\_05 Scan 22724 Method FTMS; HCD Score 103.16 m/z 684.86 Gene names RHPN2;RHPN2P1

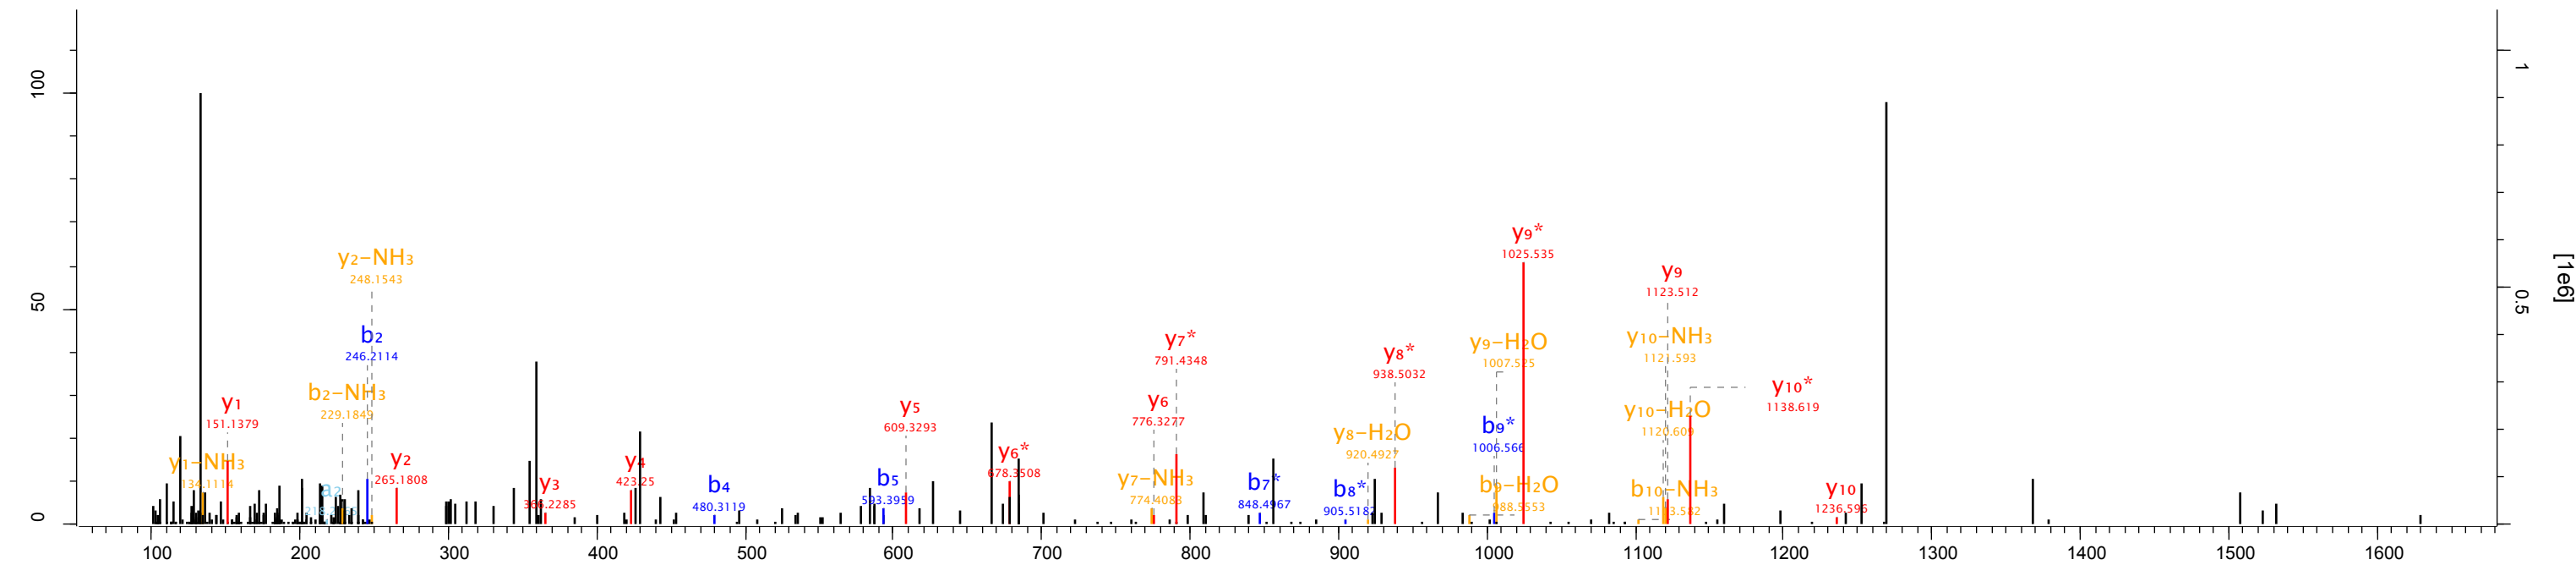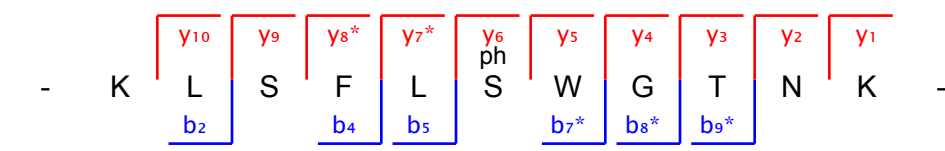

Raw file 20150814\_A375SR\_Phospho\_BR2\_05 Scan 22764 Method FTMS; HCD Score 121.36 m/z 888.92 Gene names TNKS1BP1

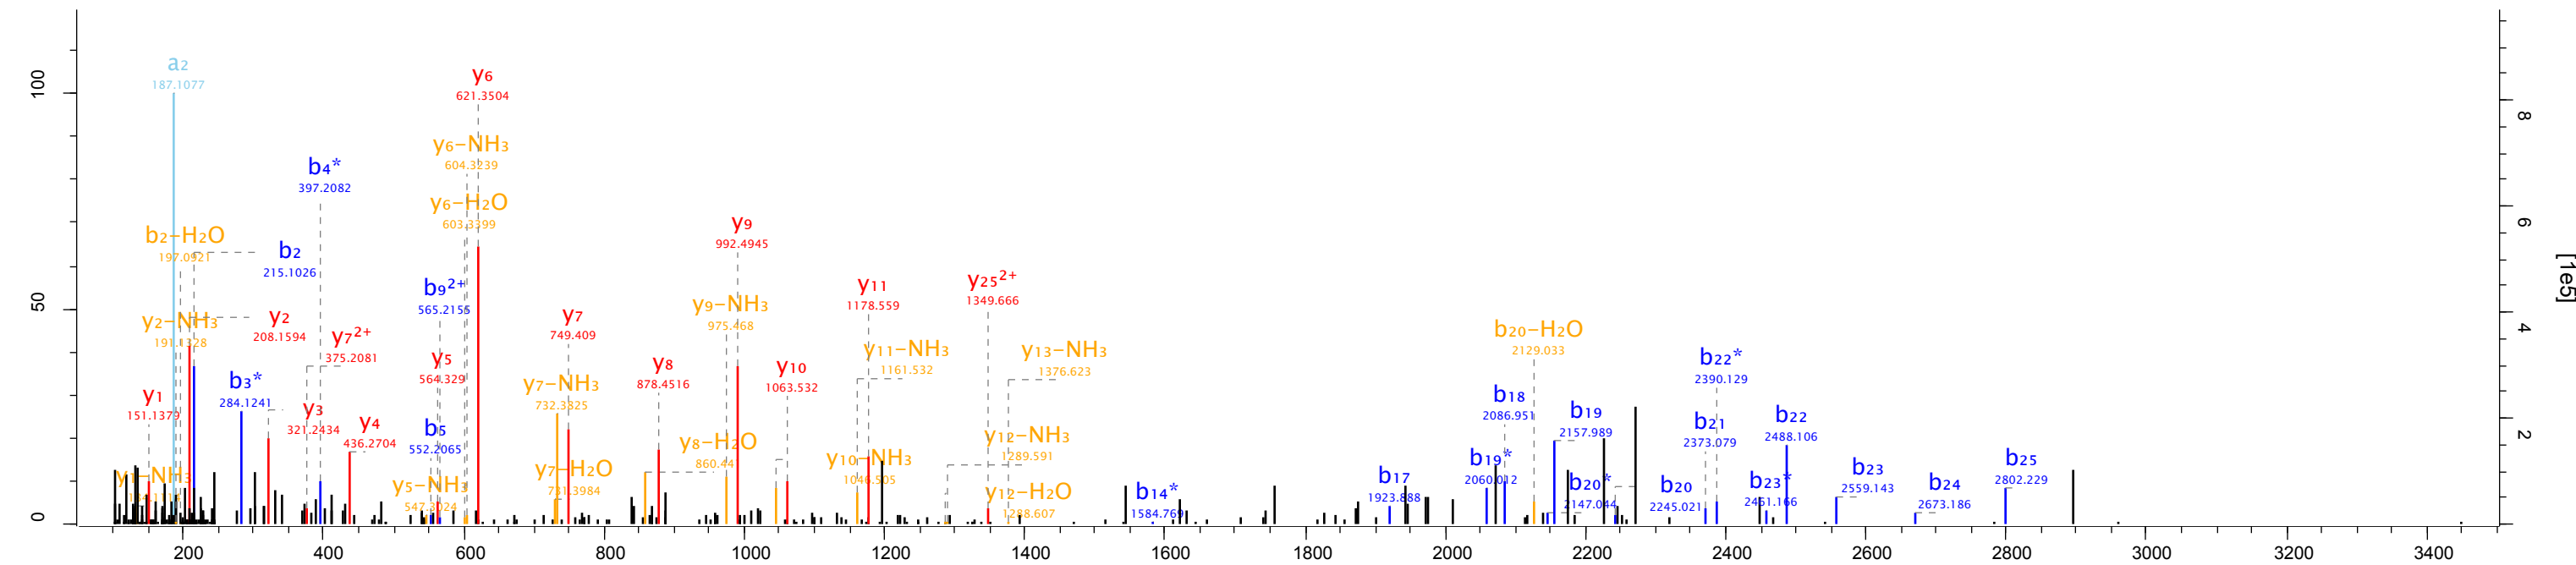

- D V S L G D W E F G K R D S L G A Y A S Q D A N E Q G Q D L G K -

b<sub>2</sub>
b<sub>3</sub><sup>\*</sup>
b<sub>4</sub><sup>\*</sup>
b<sub>5</sub>
b<sub>9</sub><sup>2+</sup>
b<sub>14</sub><sup>\*</sup>
b<sub>17</sub>
b<sub>18</sub>
b<sub>19</sub>
b<sub>20</sub>
b<sub>21</sub>
b<sub>22</sub>
b<sub>23</sub>
b<sub>24</sub>
b<sub>25</sub>
y<sub>11</sub>
y<sub>10</sub>
y<sub>9</sub>
y<sub>8</sub>
y<sub>7</sub>
y<sub>6</sub>
y<sub>5</sub>
y<sub>4</sub>
y<sub>3</sub>
y<sub>2</sub>
y<sub>1</sub>

Raw file 20150814\_A375SR\_Phospho\_BR2\_05 Scan 22924 Method FTMS; HCD Score 169.18 m/z 924.46 Gene names LMO7

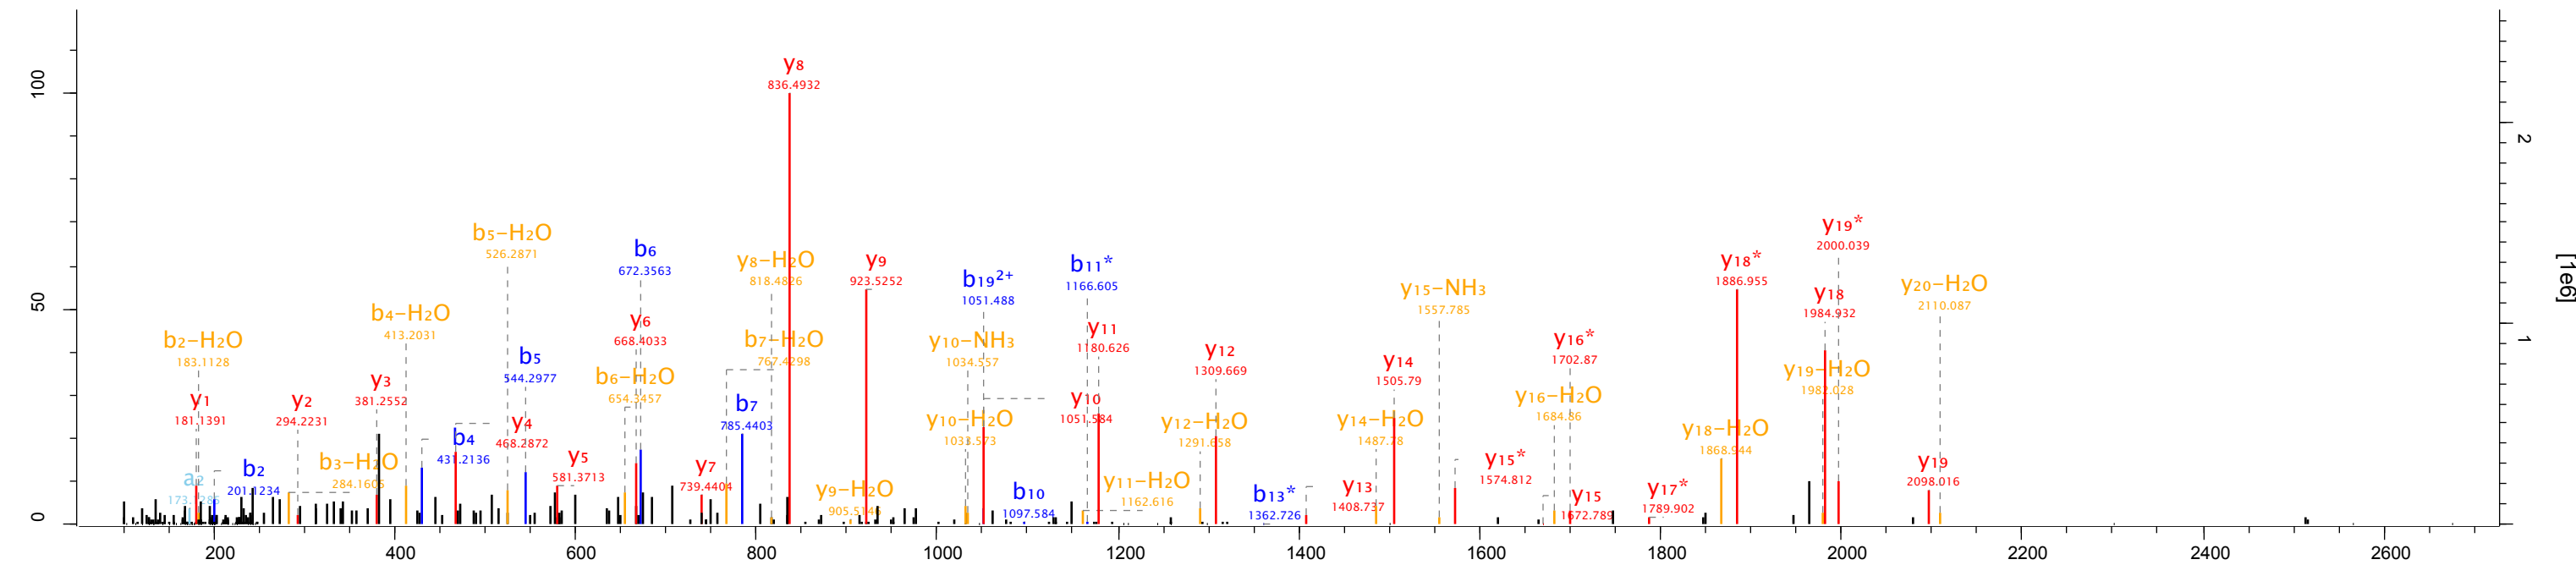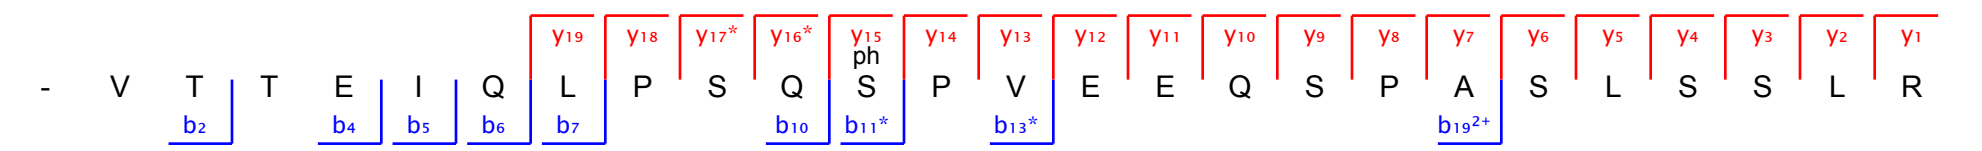



Raw file: 20150814\_A375SR\_Phospho\_BR2\_05  
 Scan: 23264 Method: FTMS; HCD Score: 122.92 m/z: 1325.57 Gene names: UTP3

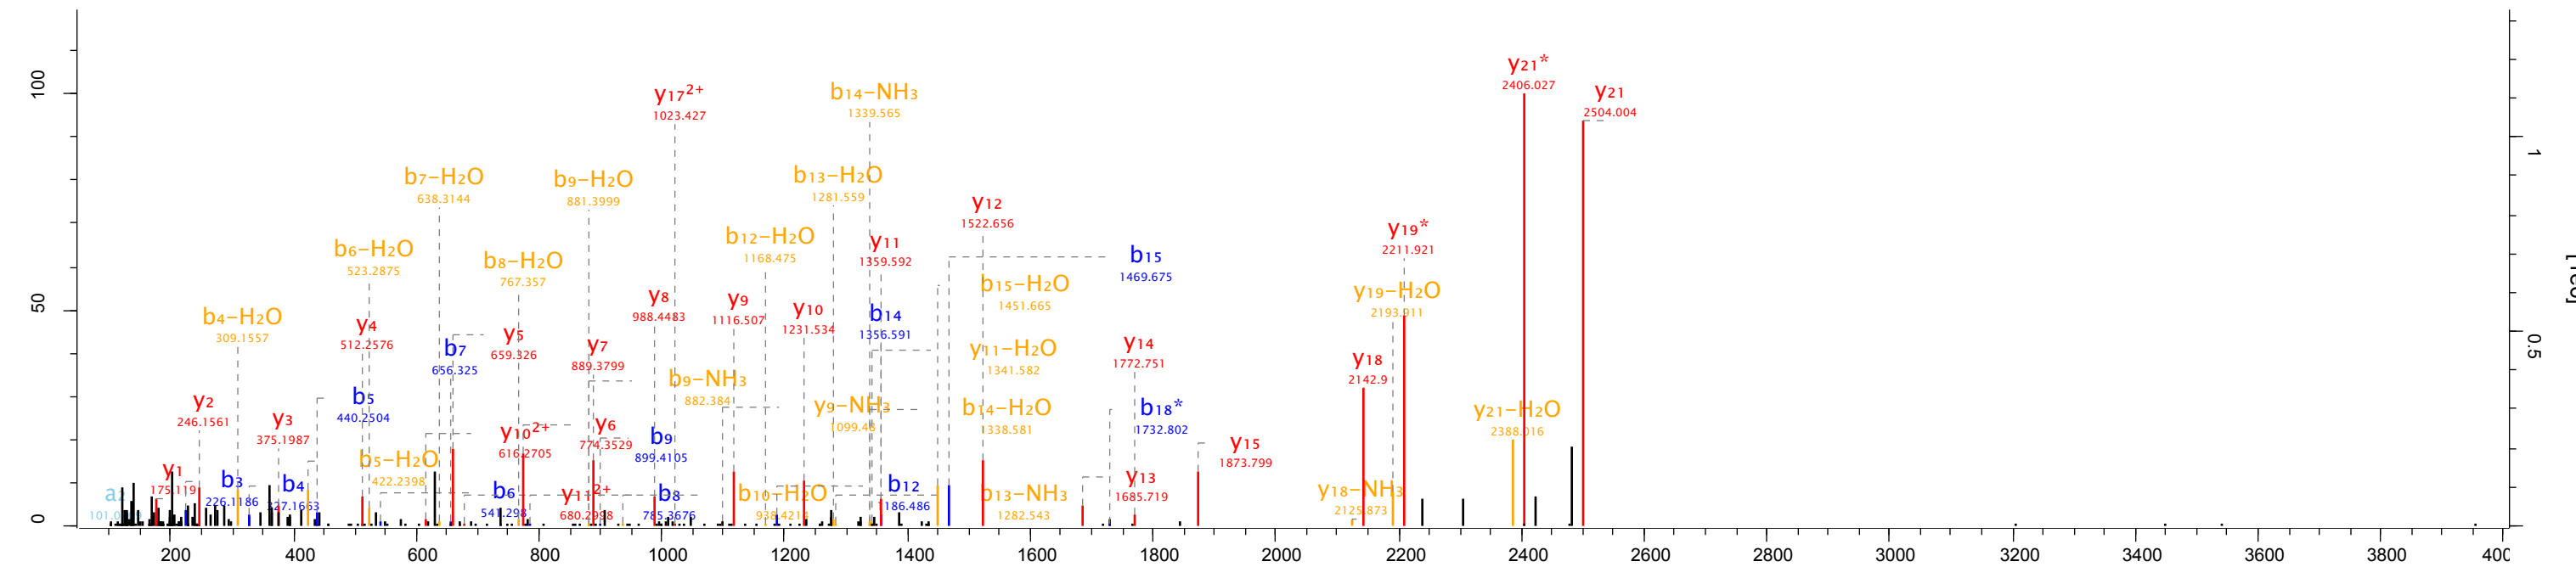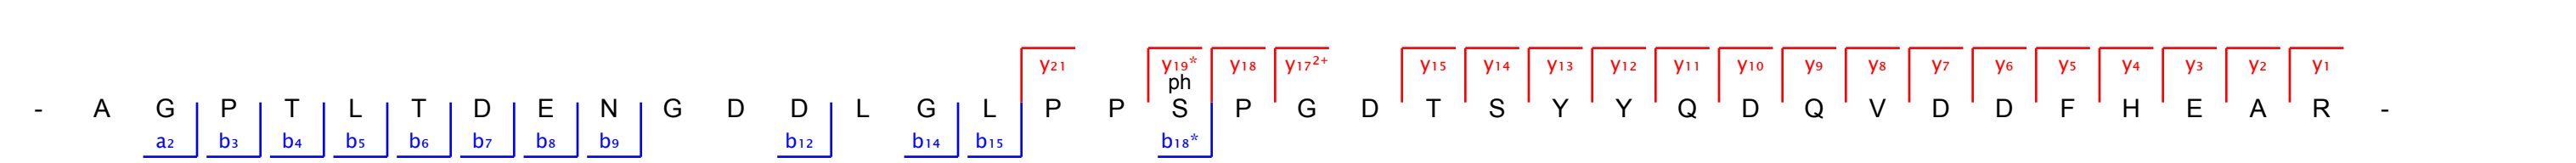

Raw file 20150814\_A375SR\_Phospho\_BR2\_05 Scan 23304 Method FTMS; HCD Score 274.85 m/z 1177.09 Gene names BAIAP2;CCDC43

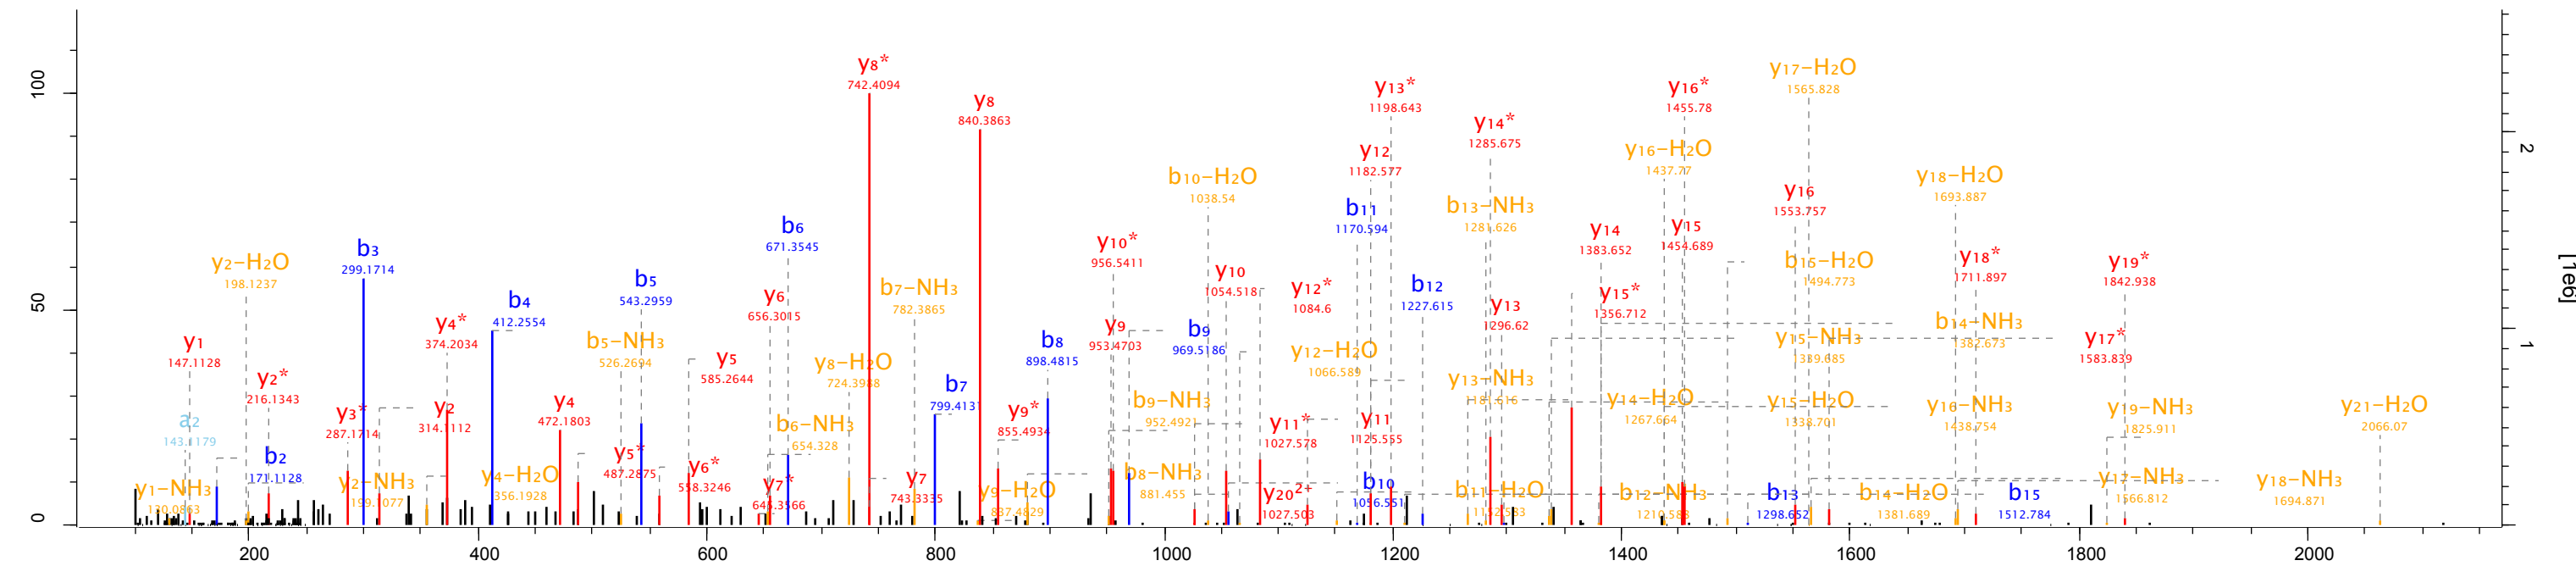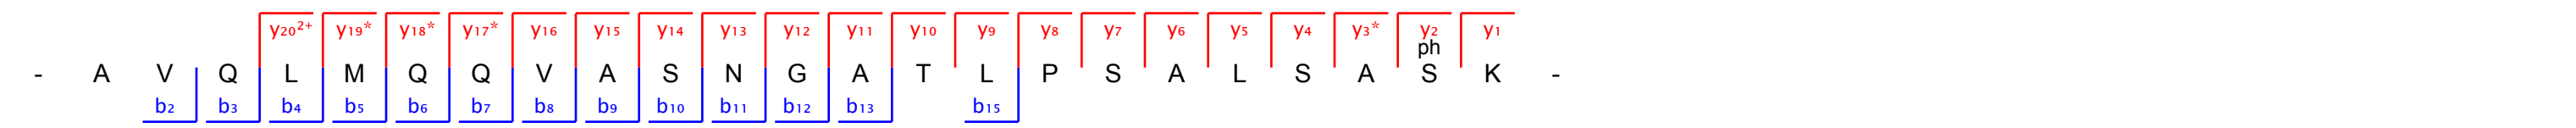

Raw file: 20150814\_A375SR\_Phospho\_BR2\_05  
 Scan: 23564 Method: FTMS; HCD Score: 300.97 m/z: 1091.05 Gene names: MPDZ

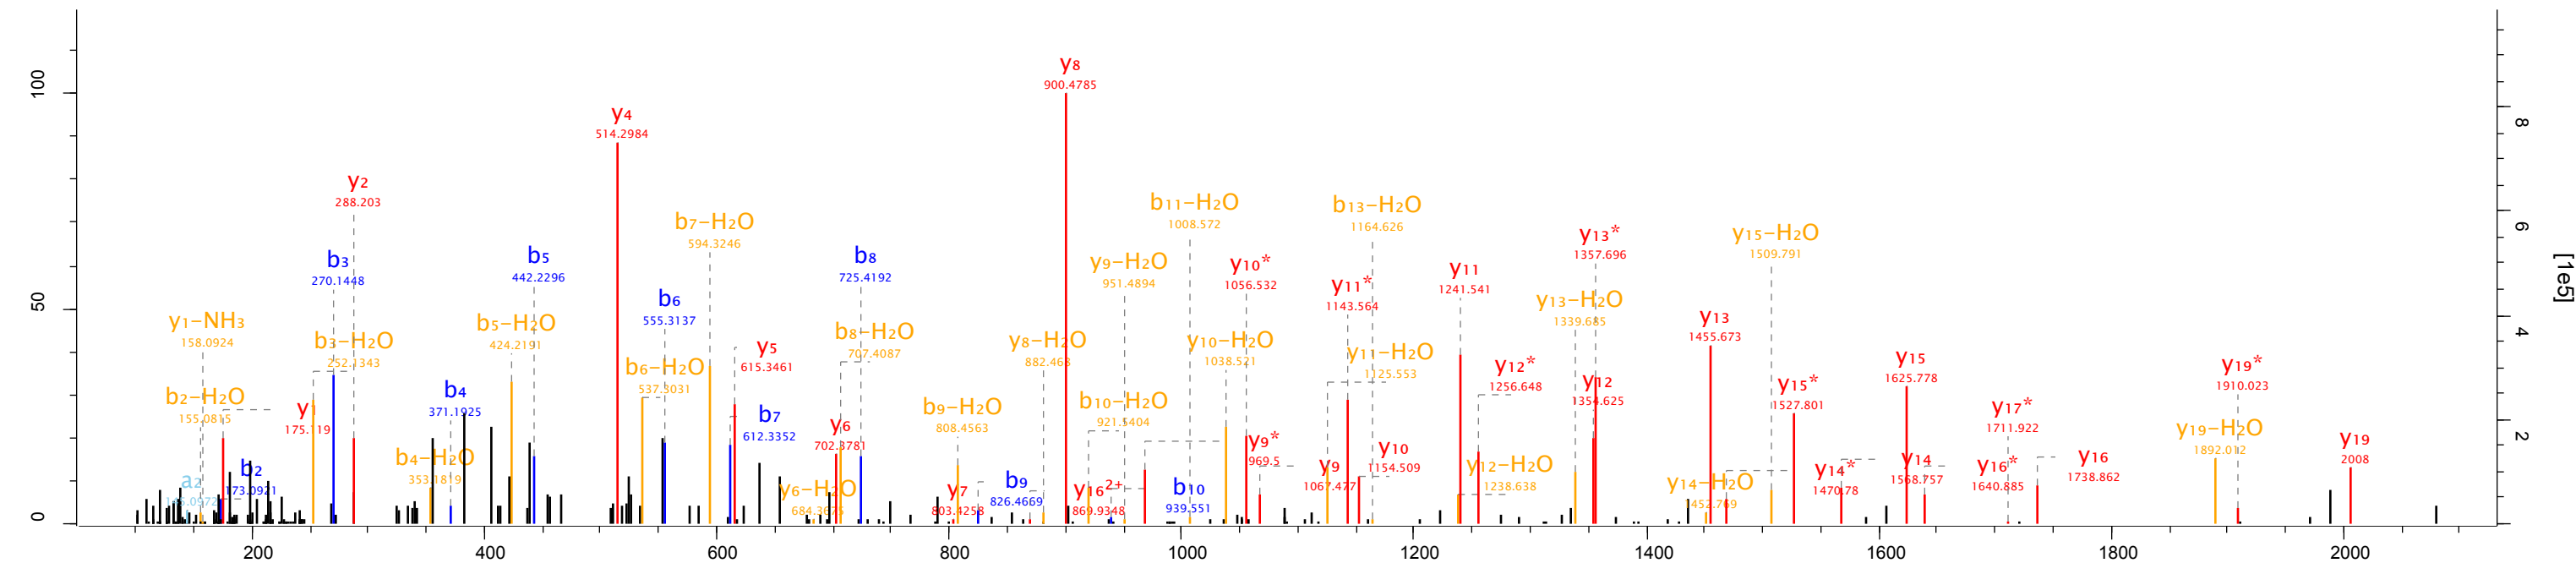

- T A P T A L G I T L S S p h S P T S T P E L R -

Fragmentation mapping (b and y ions) is shown below the sequence:

- b ions (blue boxes):** b<sub>2</sub> (A), b<sub>3</sub> (P), b<sub>4</sub> (T), b<sub>5</sub> (A), b<sub>6</sub> (L), b<sub>7</sub> (G), b<sub>8</sub> (I), b<sub>9</sub> (T), b<sub>10</sub> (L)
- y ions (red boxes):** y<sub>1</sub> (R), y<sub>2</sub> (E), y<sub>4</sub> (P), y<sub>5</sub> (T), y<sub>6</sub> (S), y<sub>7</sub> (T), y<sub>8</sub> (P), y<sub>9</sub> (S), y<sub>10</sub> (S), y<sub>11</sub> (S), y<sub>12</sub> (L), y<sub>13</sub> (T), y<sub>14</sub> (I), y<sub>15</sub> (G), y<sub>16</sub> (L), y<sub>17</sub>\* (A), y<sub>19</sub> (A)

Raw file: 20150814\_A375SR\_Phospho\_BR2\_05  
 Scan: 23754 Method: FTMS; HCD Score: 259.58 m/z: 1122.52 Gene names: NONO

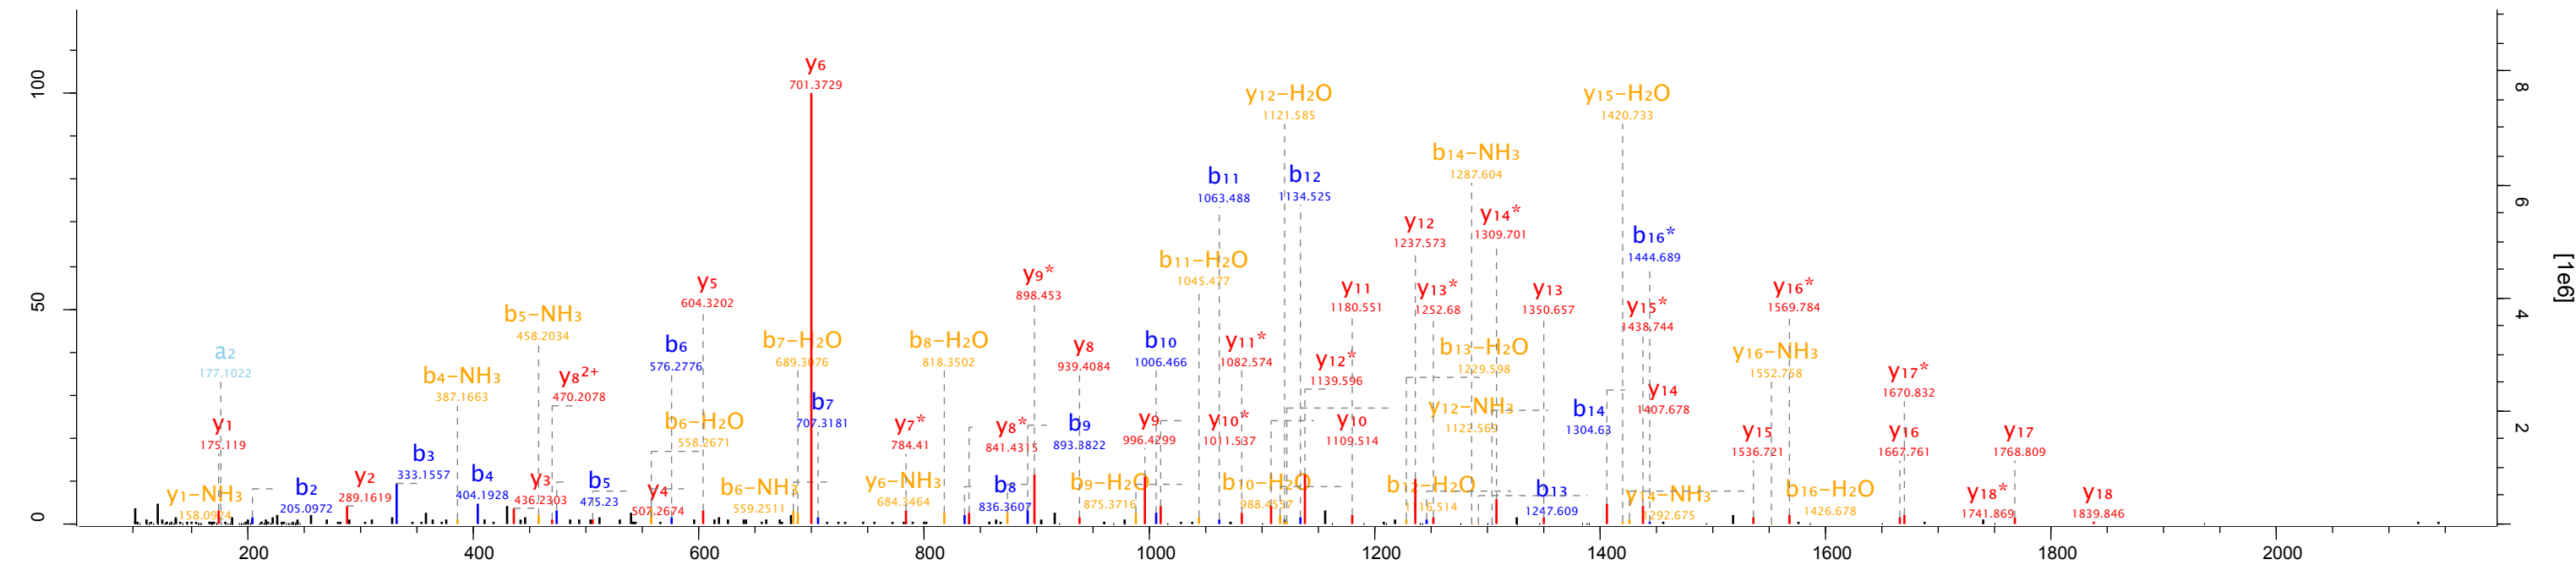

Sequence: F G Q A A T M E G I G A I G G T P P A F N R -

Fragmentation sites (b ions): b2, b3, b4, b5, b6, b7, b8, b9, b10, b11, b12, b13, b14, b16\*

Fragmentation sites (y ions): y1, y2, y3, y4, y5, y6, y7\*, y8, y9, y10, y11, y12, y13, y14, y15, y16, y17, y18

Raw file 20150814\_A375SR\_Phospho\_BR2\_05 Scan 23794 Method FTMS; HCD Score 283.72 m/z 1049.01 Gene names TRIOBP

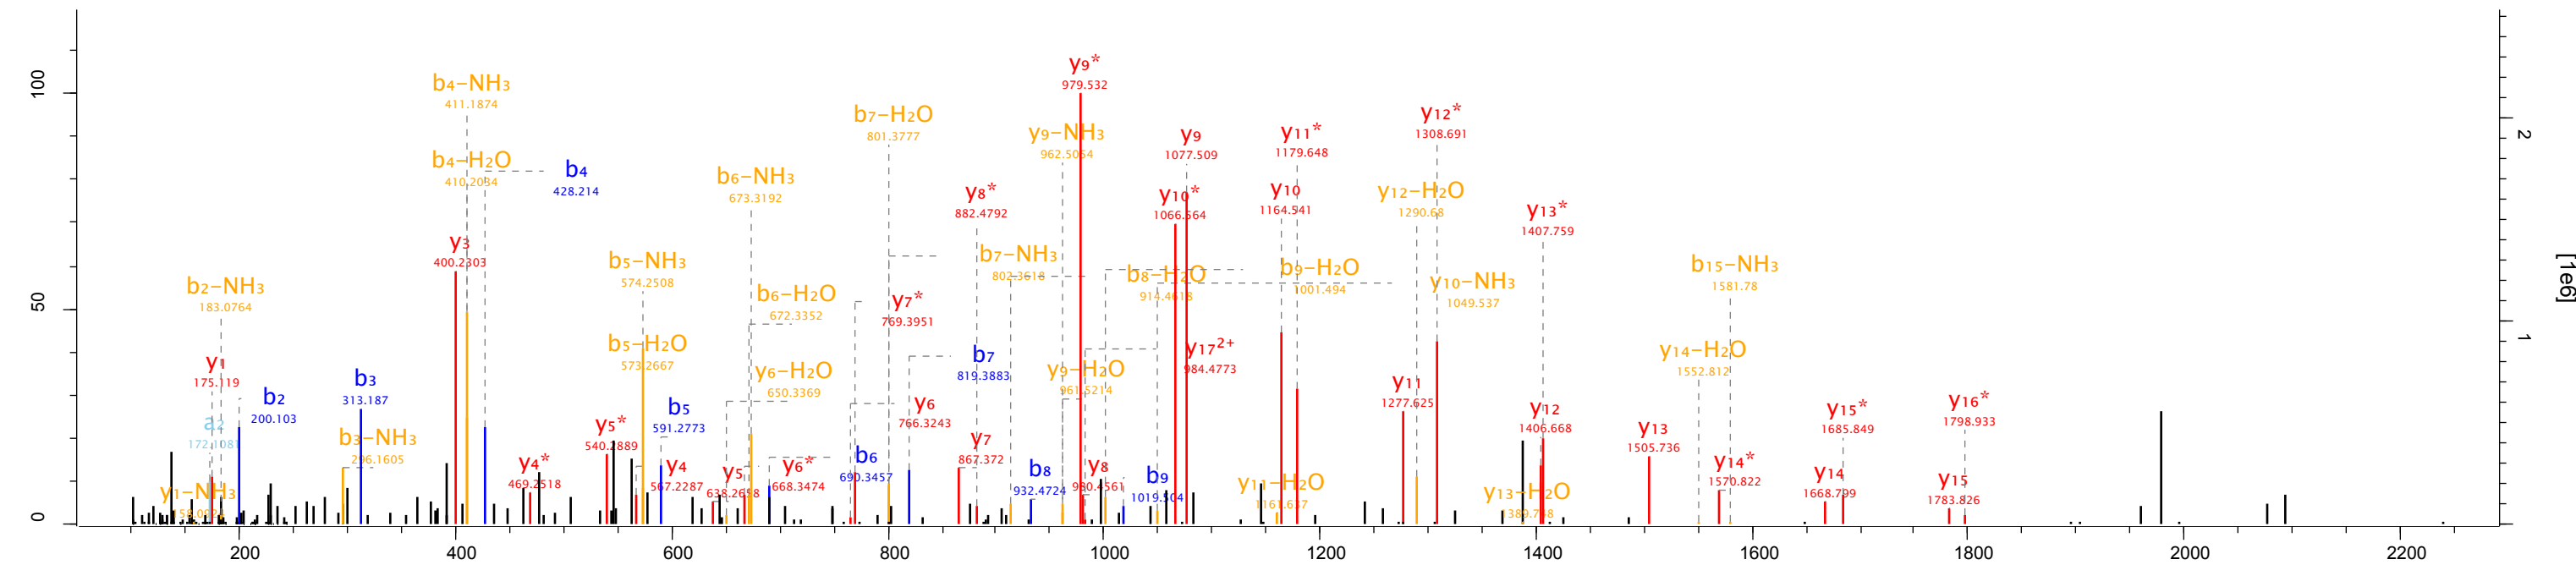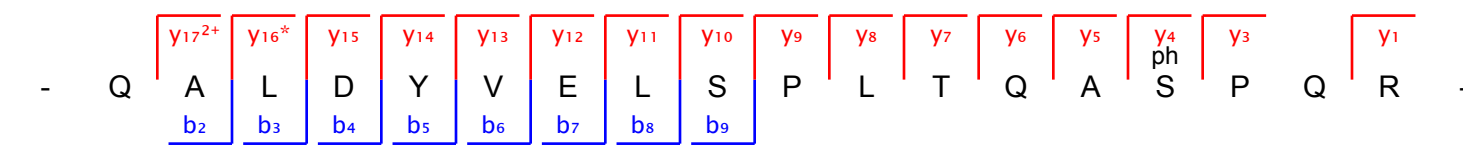

Raw file: 20150814\_A375SR\_Phospho\_BR2\_05  
 Scan: 23944 Method: FTMS; HCD Score: 194.03 m/z: 1244.08 Gene names: TP53BP1

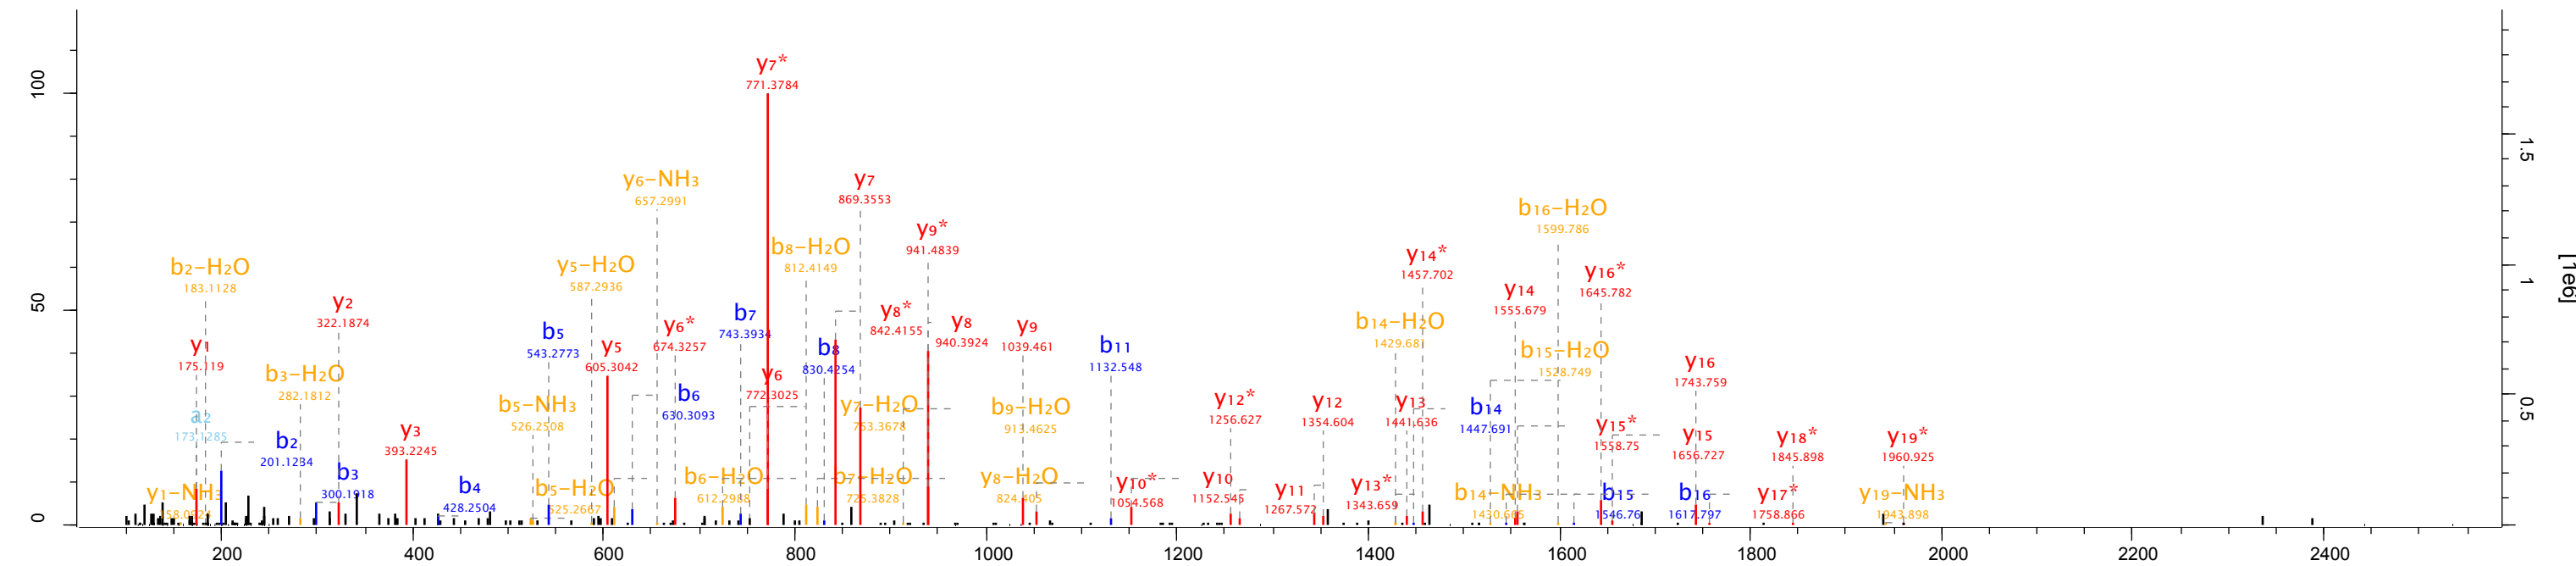

- S L V Q D S L S T N S S D L V A P S P D A F R -

b<sub>2</sub>
b<sub>3</sub>
b<sub>4</sub>
b<sub>5</sub>
b<sub>6</sub>
b<sub>7</sub>
b<sub>8</sub>
b<sub>11</sub>
b<sub>14</sub>
b<sub>15</sub>
b<sub>16</sub>

y<sub>19</sub>\*
y<sub>18</sub>\*
y<sub>17</sub>\*
y<sub>16</sub>
y<sub>15</sub>
y<sub>14</sub>
y<sub>13</sub>
y<sub>12</sub>
y<sub>11</sub>
y<sub>10</sub>
y<sub>9</sub>
y<sub>8</sub>
y<sub>7</sub>
y<sub>6</sub><sup>ph</sup>
y<sub>5</sub>
y<sub>3</sub>
y<sub>2</sub>
y<sub>1</sub>

Raw file 20150814\_A375SR\_Phospho\_BR2\_05 Scan 24474 Method FTMS; HCD Score 196.8 m/z 753.37 Gene names SH3BP4

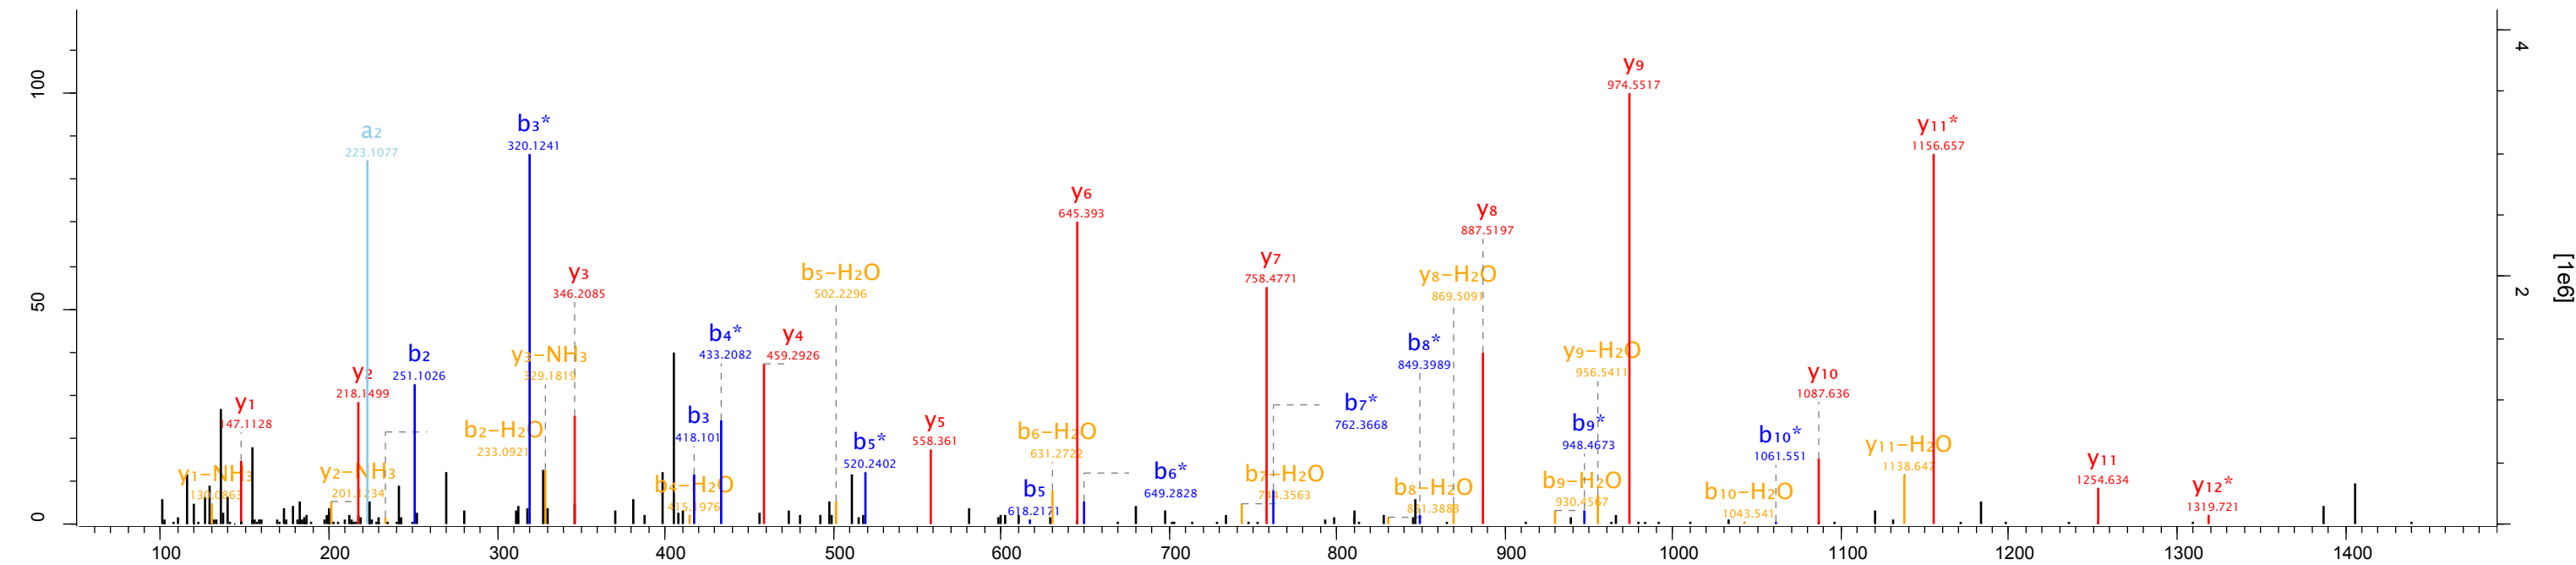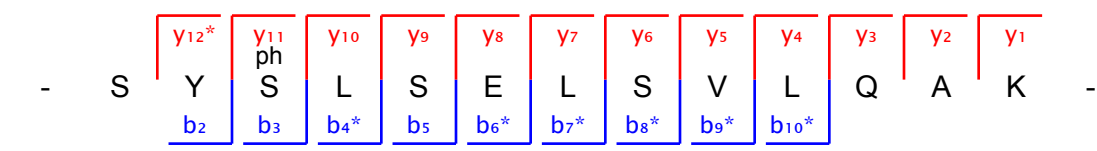

Raw file

20150814\_A375SR\_Phospho\_BR2\_05

| Scan  | Method    | Score | m/z     | Gene names |
|-------|-----------|-------|---------|------------|
| 24794 | FTMS; HCD | 60.28 | 1270.24 | ARAF       |

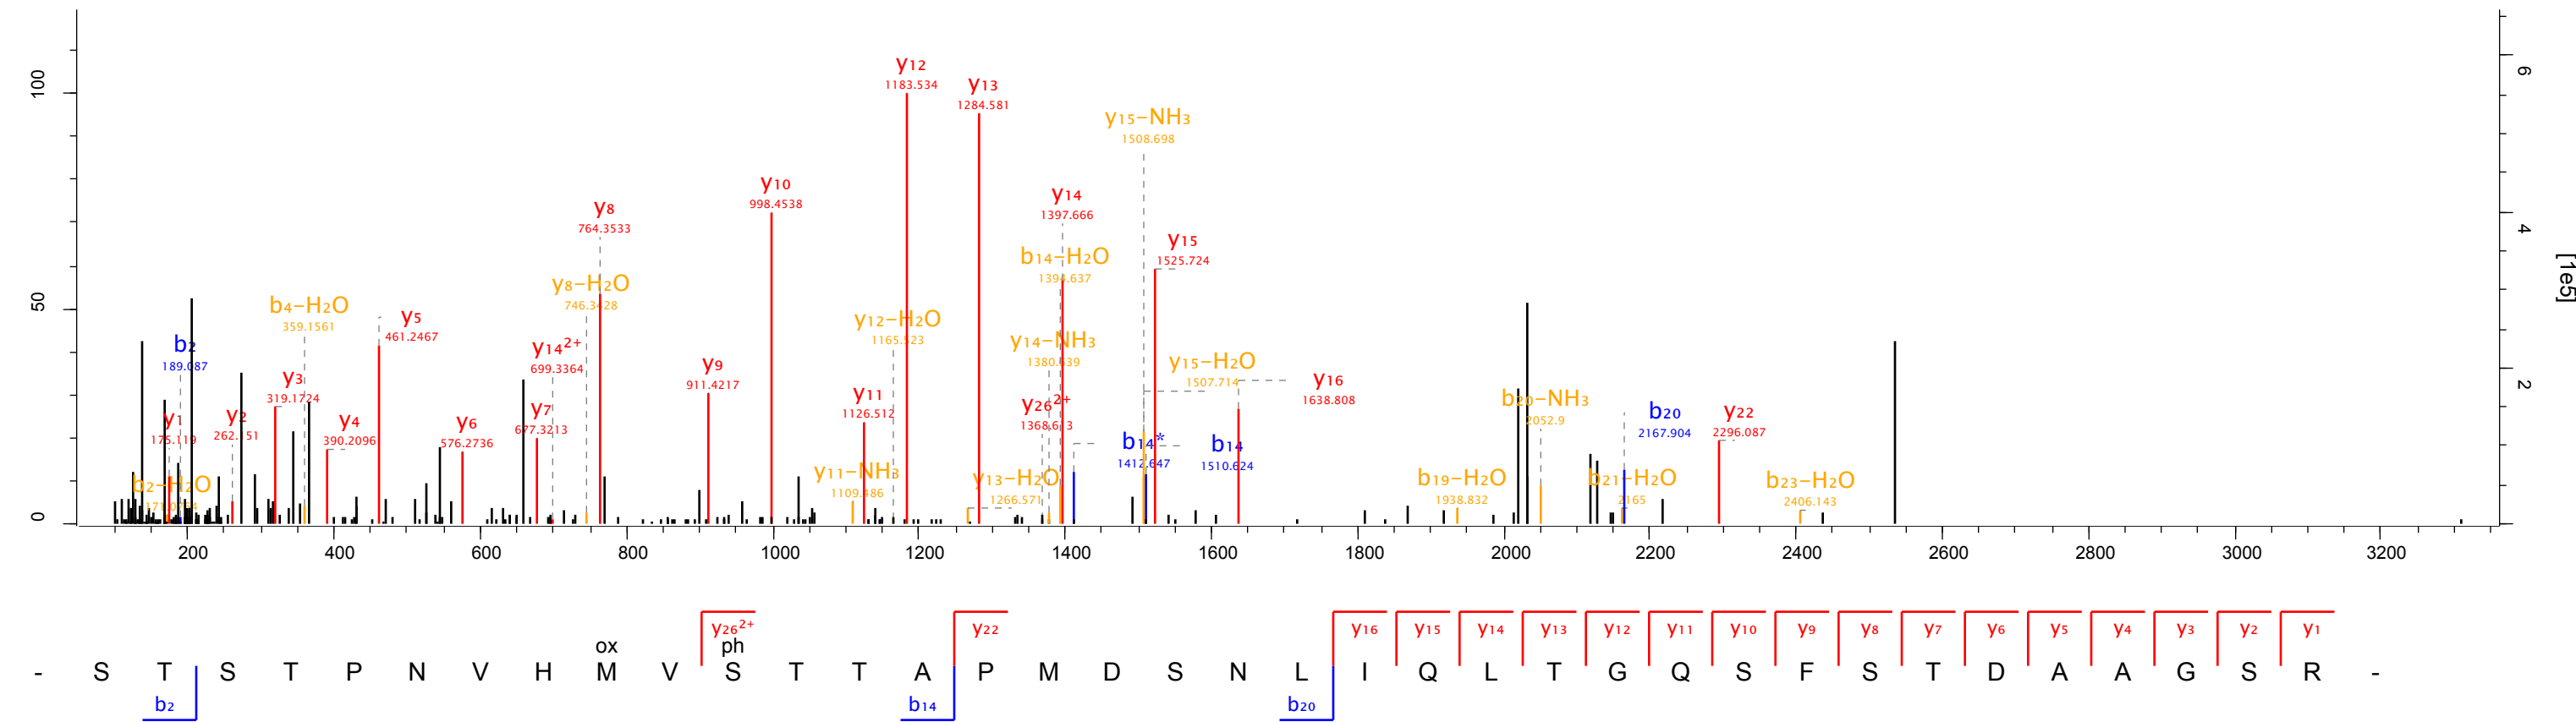



Raw file: 20150814\_A375SR\_Phospho\_BR2\_05  
 Scan: 25234 Method: FTMS; HCD Score: 161.96 m/z: 894.92 Gene names: TNKS1BP1

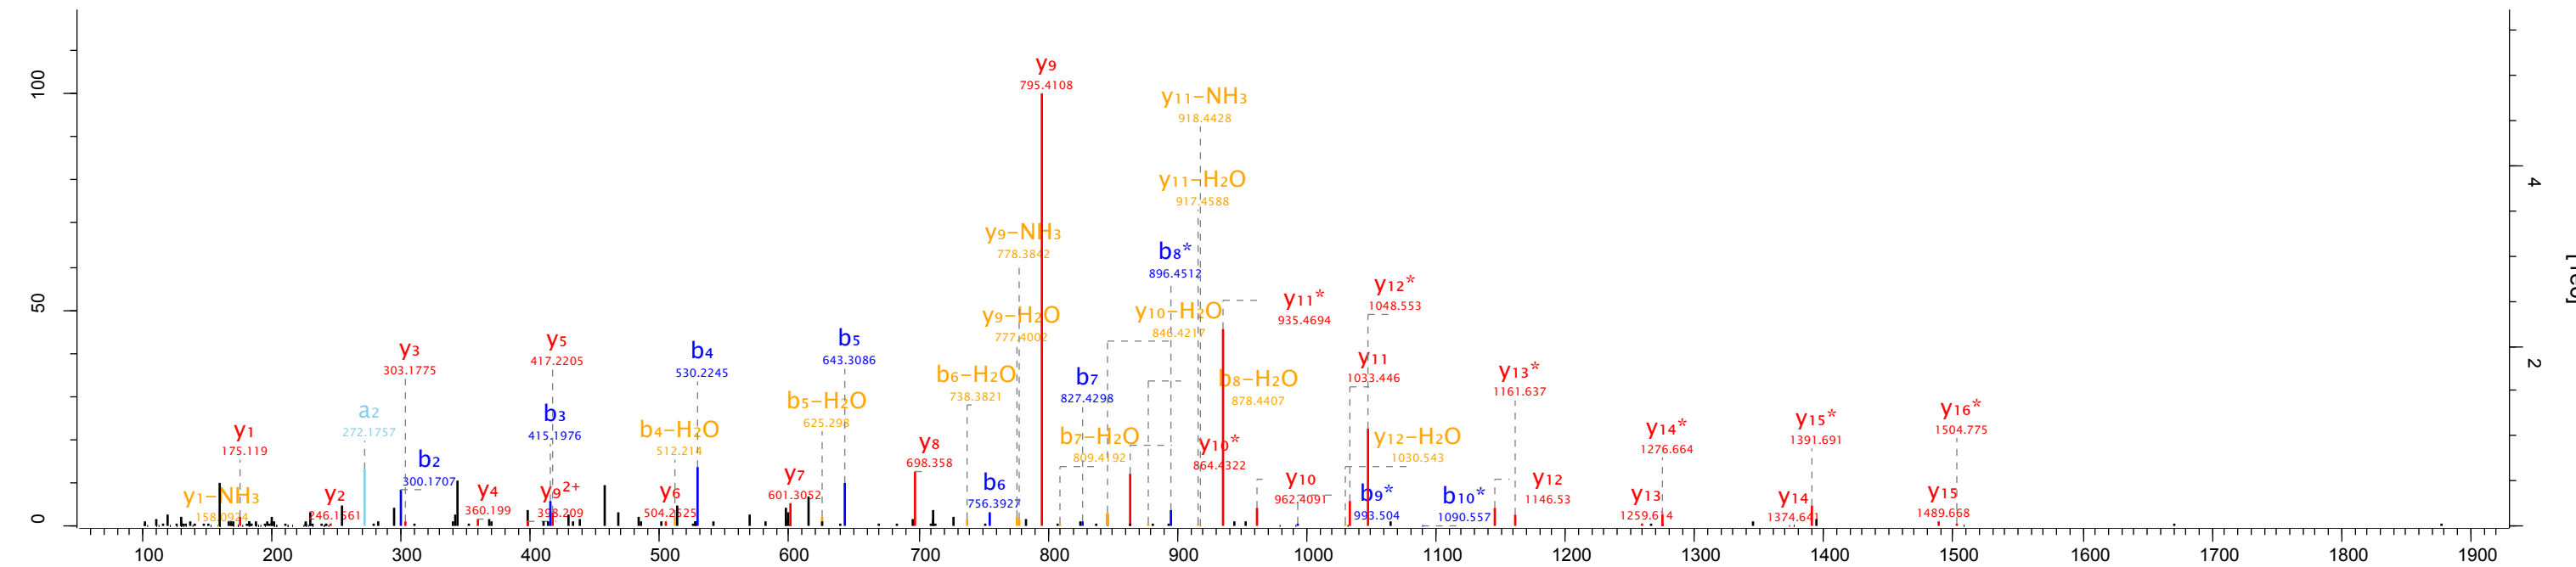

W L D D L L A S P P P S G G G A R -

y16\*
y15
y14
y13
y12
y11
y10  
ph
y9
y8
y7
y6
y5
y4
y3
y2
y1

b2
b3
b4
b5
b6
b7
b8\*
b9\*
b10\*

Raw file: 20150814\_A375SR\_Phospho\_BR2\_05  
 Scan: 25914 Method: FTMS; HCD Score: 57.1 m/z: 1263.57 Gene names: GIGYF1

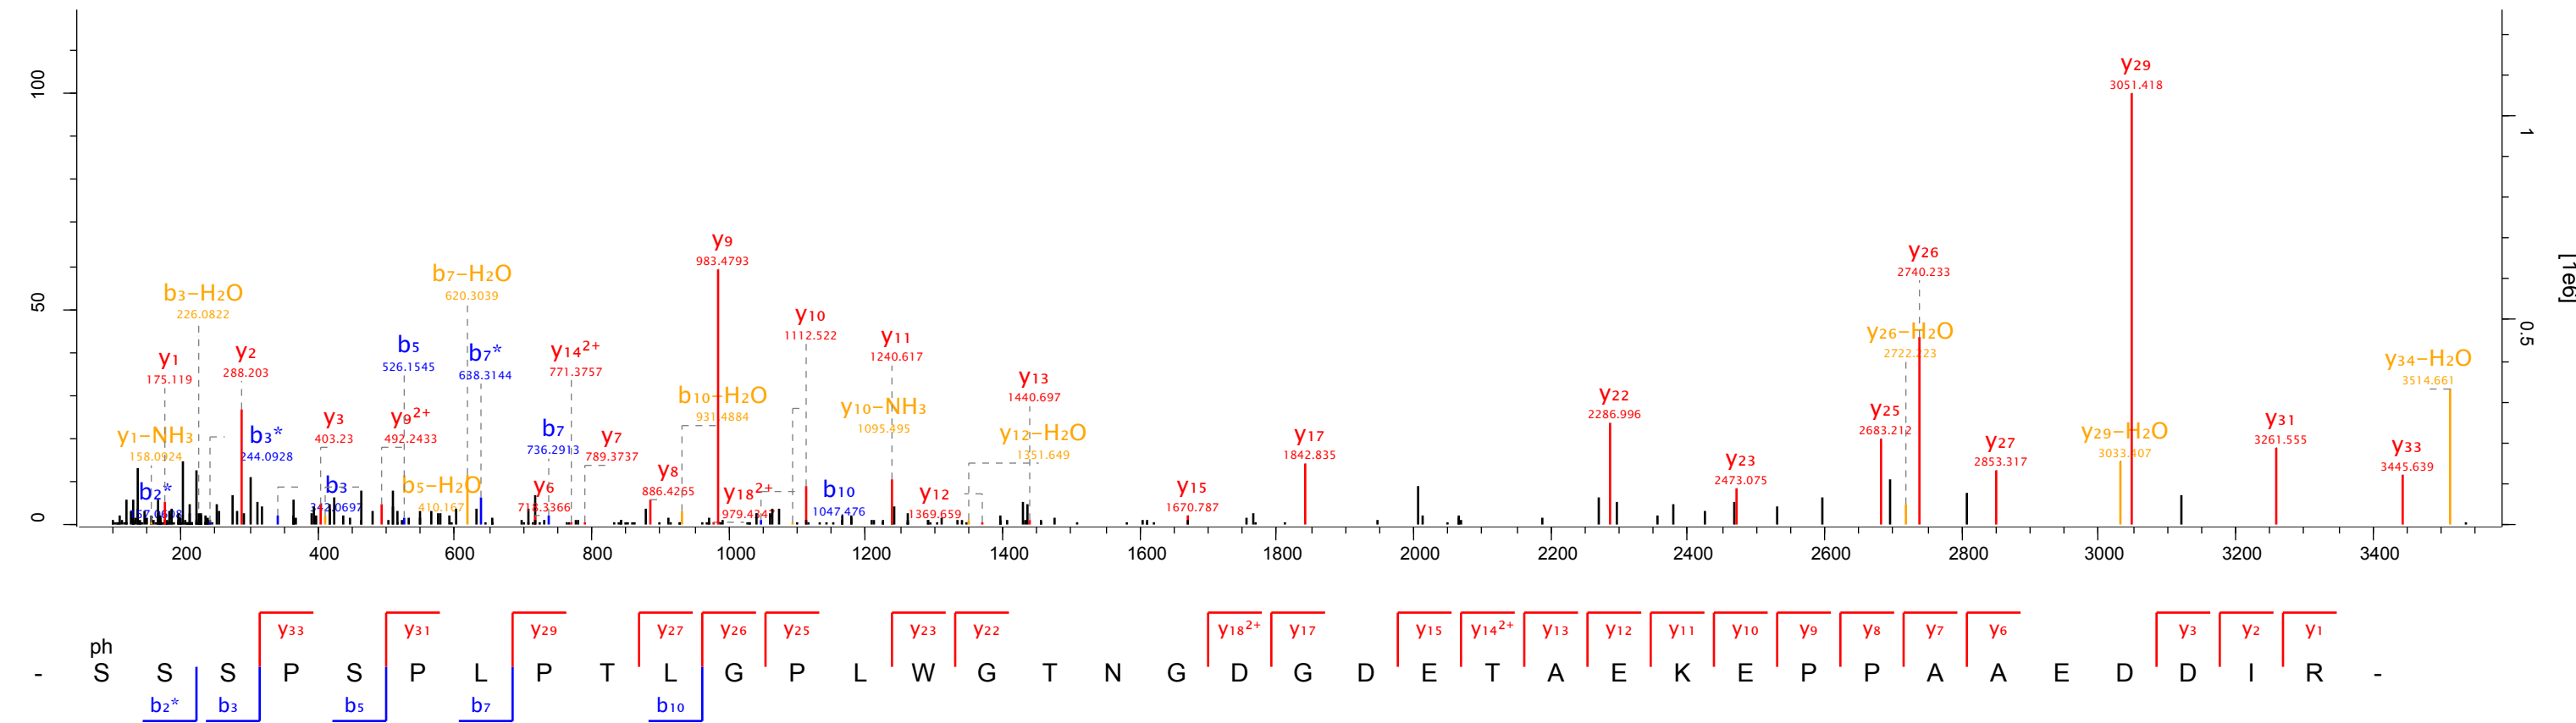

Raw file 20150814\_A375SR\_Phospho\_BR2\_05 Scan 26614 Method FTMS; HCD Score 102.5 m/z 795.38 Gene names LARS

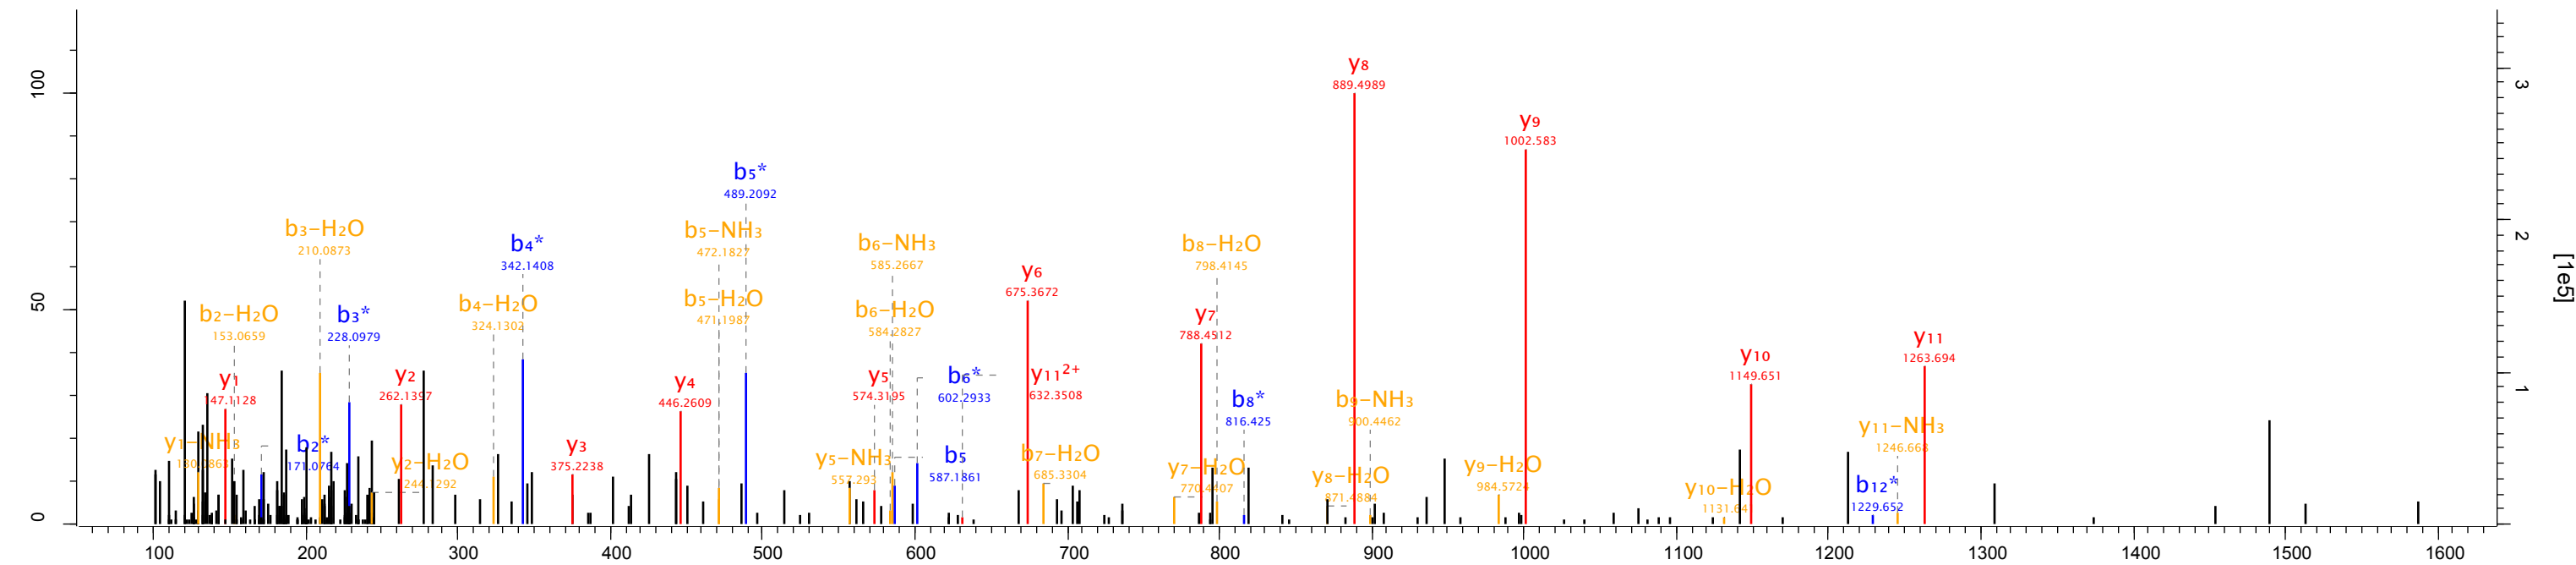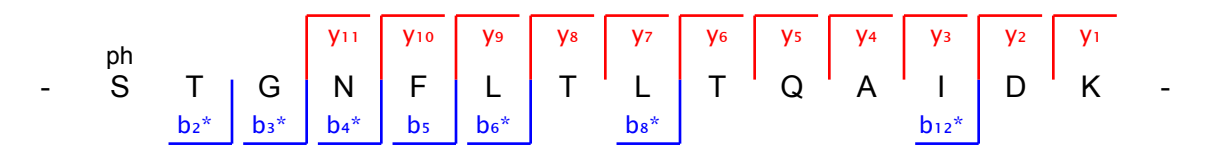

Raw file: 20150814\_A375SR\_Phospho\_BR2\_05  
 Scan: 27494 Method: FTMS; HCD Score: 49.48 m/z: 614.83 Gene names: PHACTR4

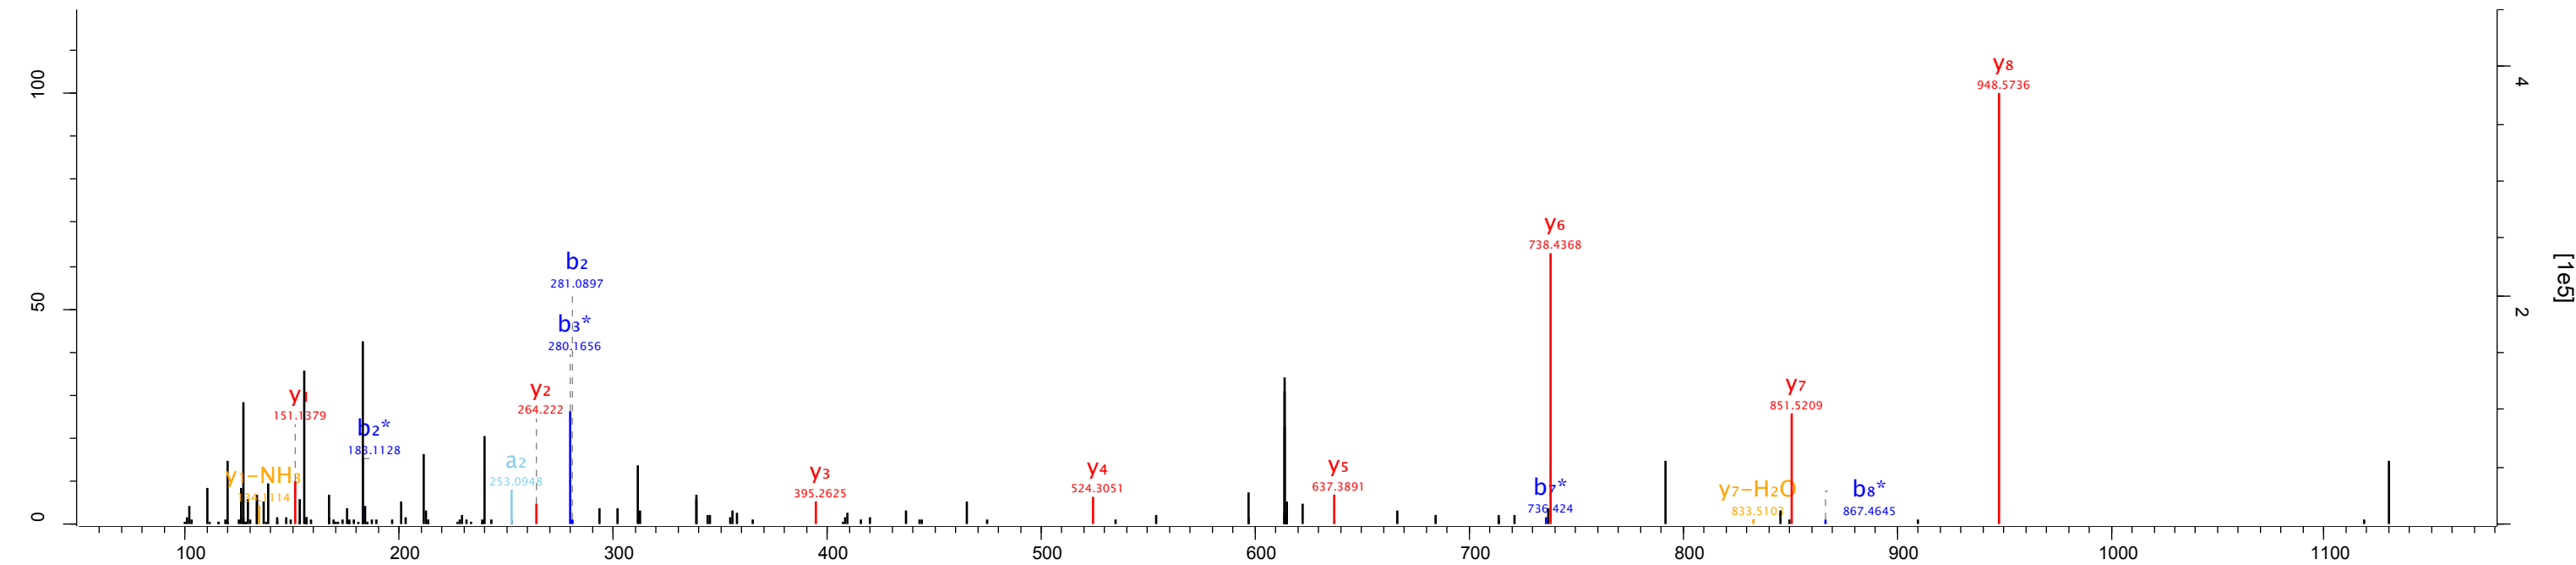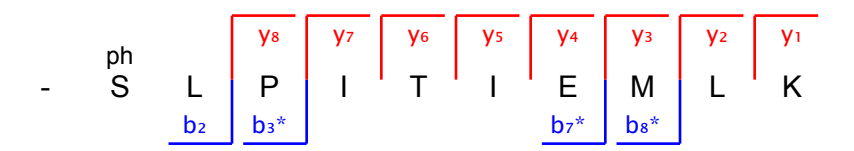

Raw file  
20150814\_A375SR\_Phospho\_BR2\_05

Scan 27644 Method FTMS; HCD Score 94.72 m/z 697.7 Gene names NFKB1

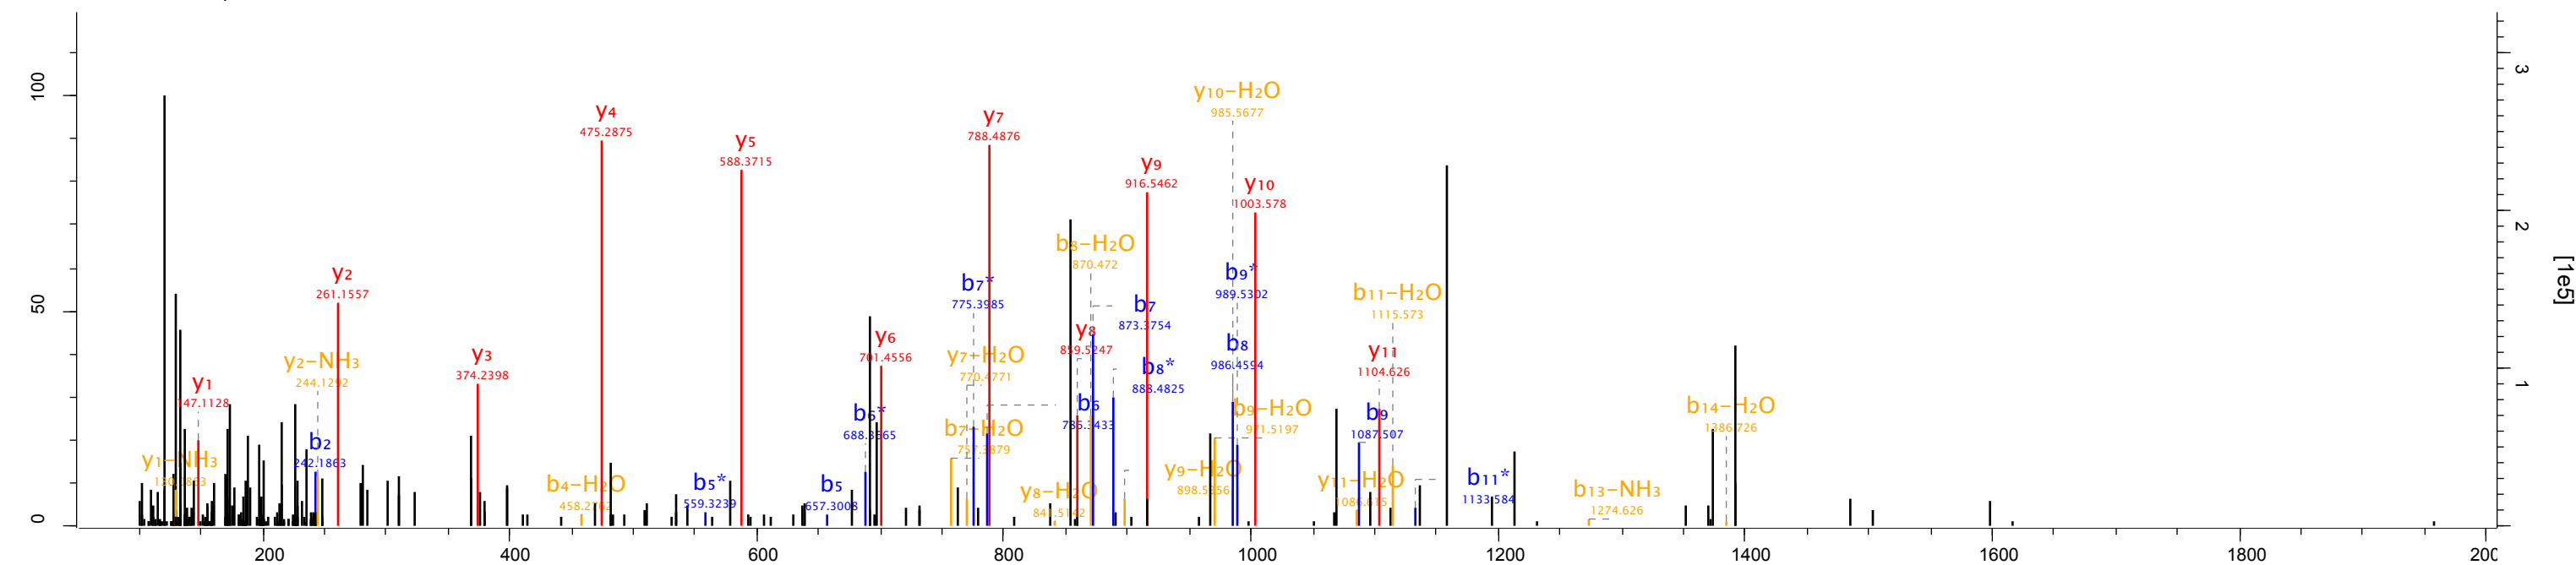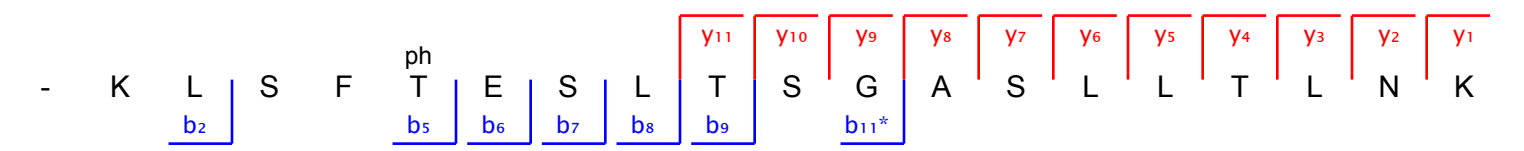

Raw file 20150814\_A375SR\_Phospho\_BR2\_05 Scan 28164 Method FTMS; HCD Score 217.86 m/z 790.32 Gene names CAST

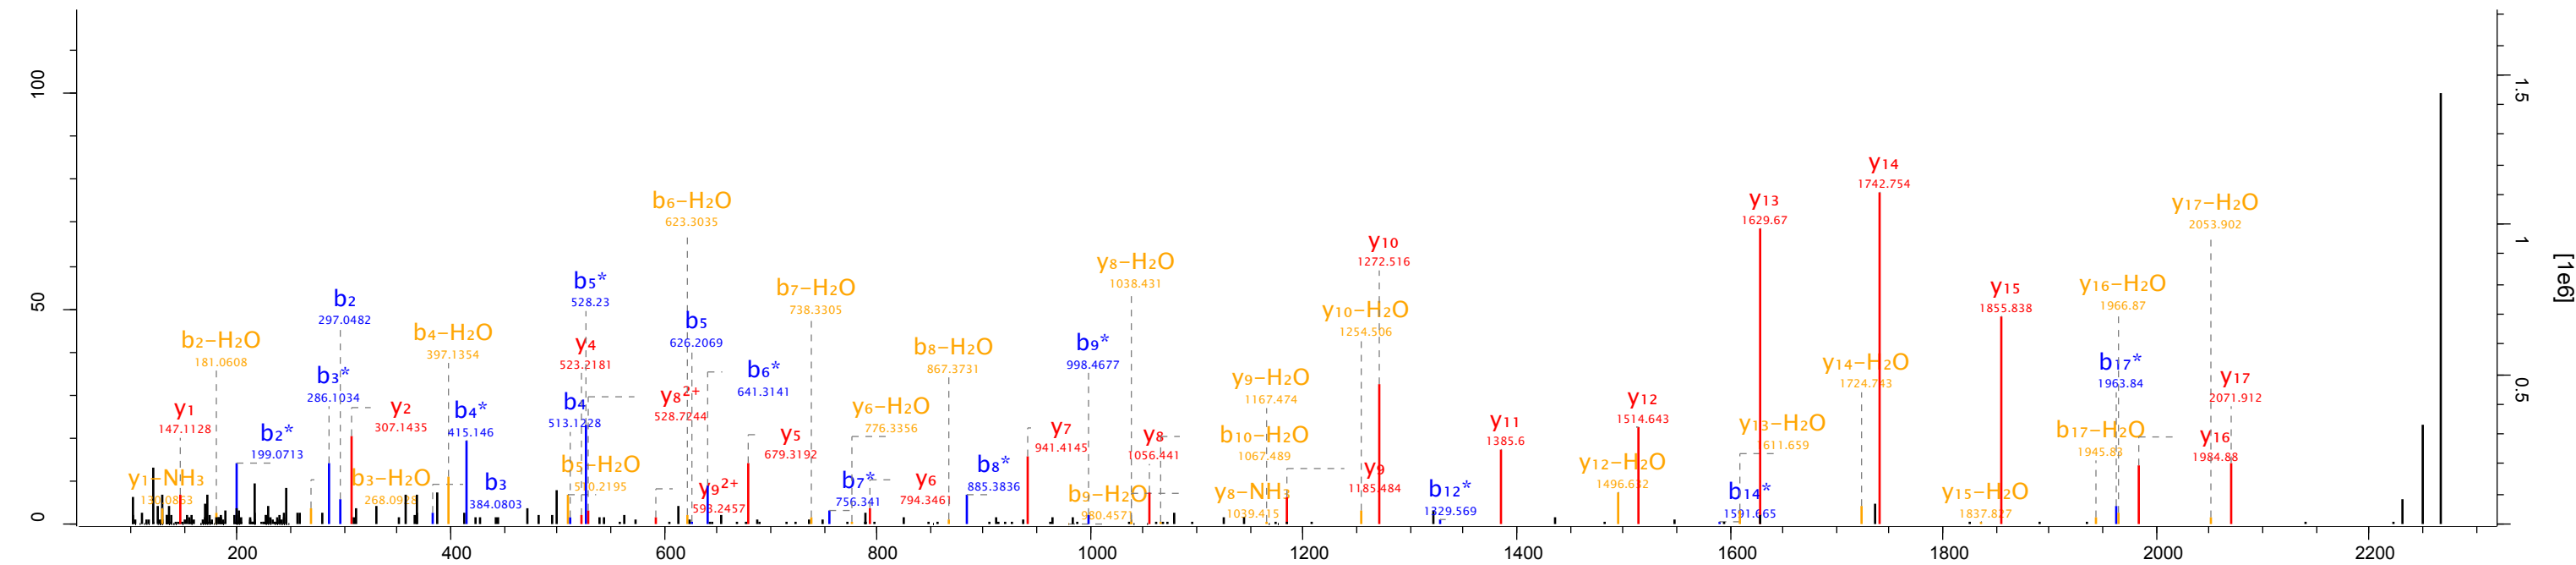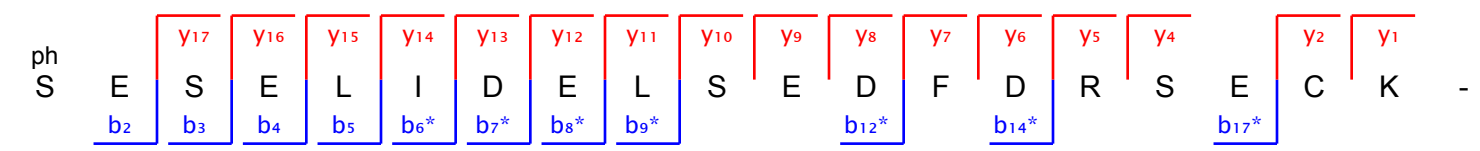

Raw file 20150814\_A375SR\_Phospho\_BR2\_05 Scan 28944 Method FTMS; HCD Score 98.63 m/z 1011.15 Gene names TRIM28

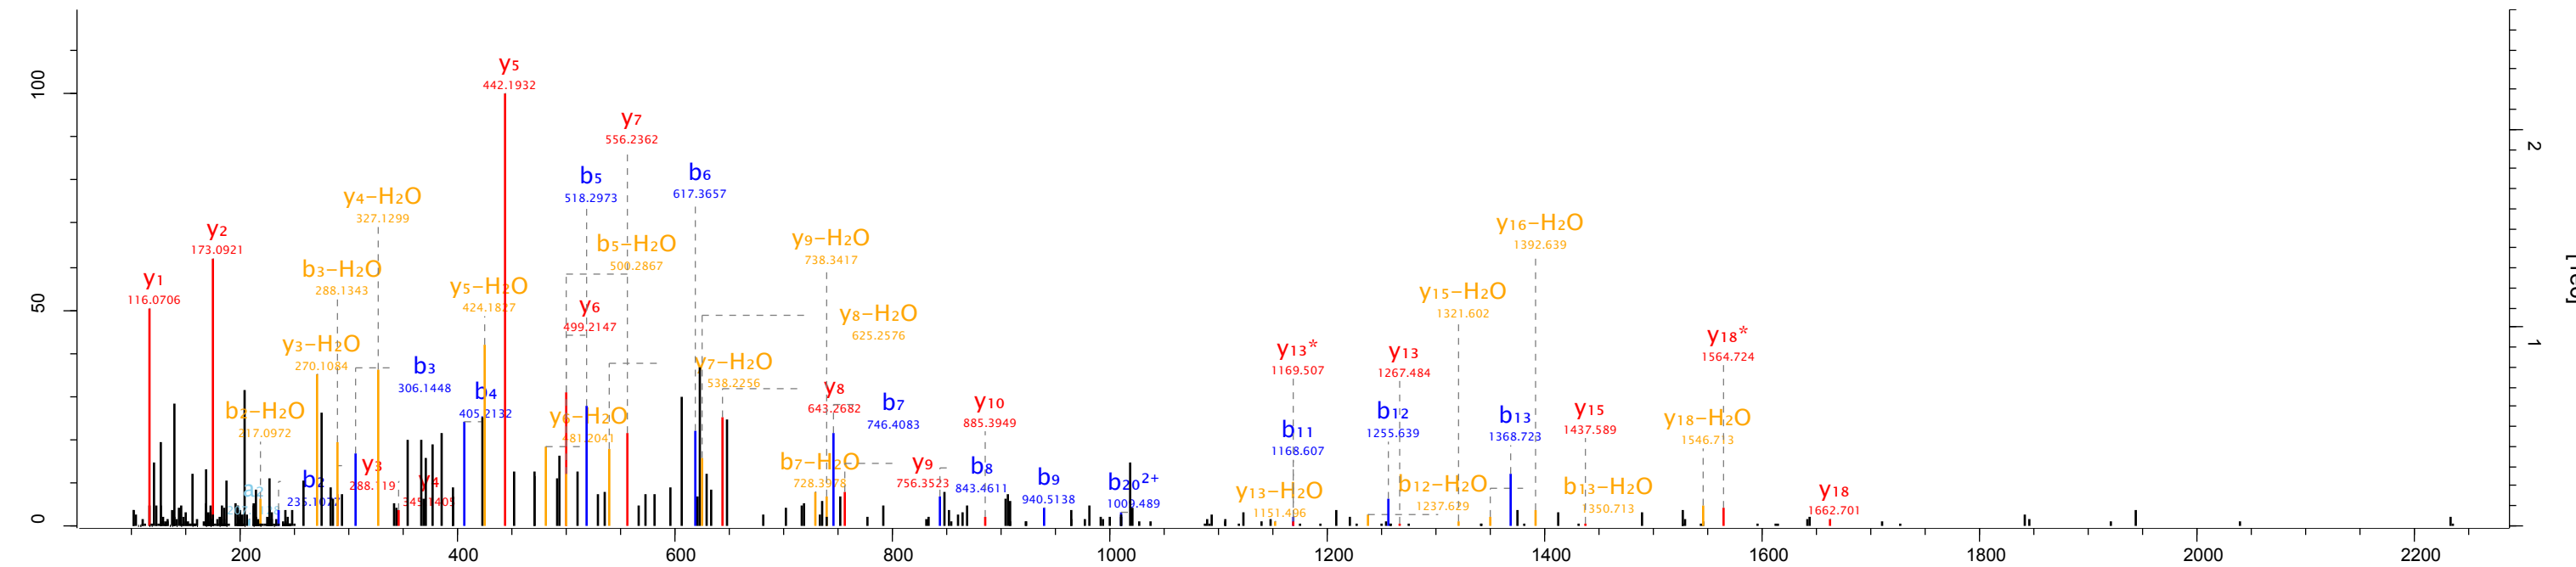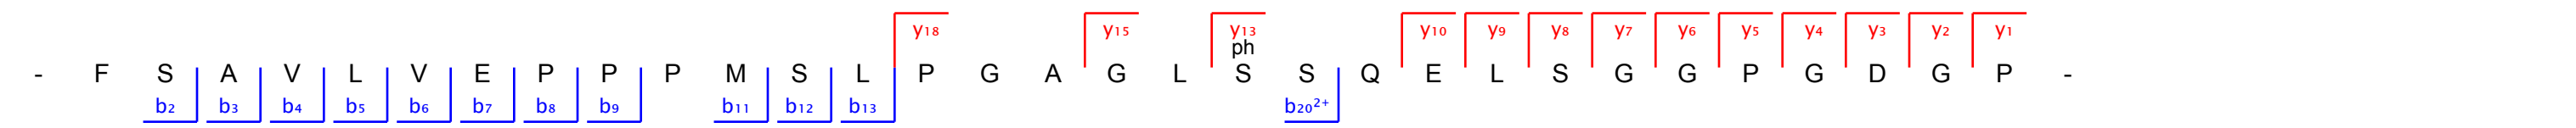

Raw file: 20150814\_A375SR\_Phospho\_BR2\_05  
 Scan: 3764 Method: FTMS; HCD Score: 66.02 m/z: 425.86 Gene names: MBD3

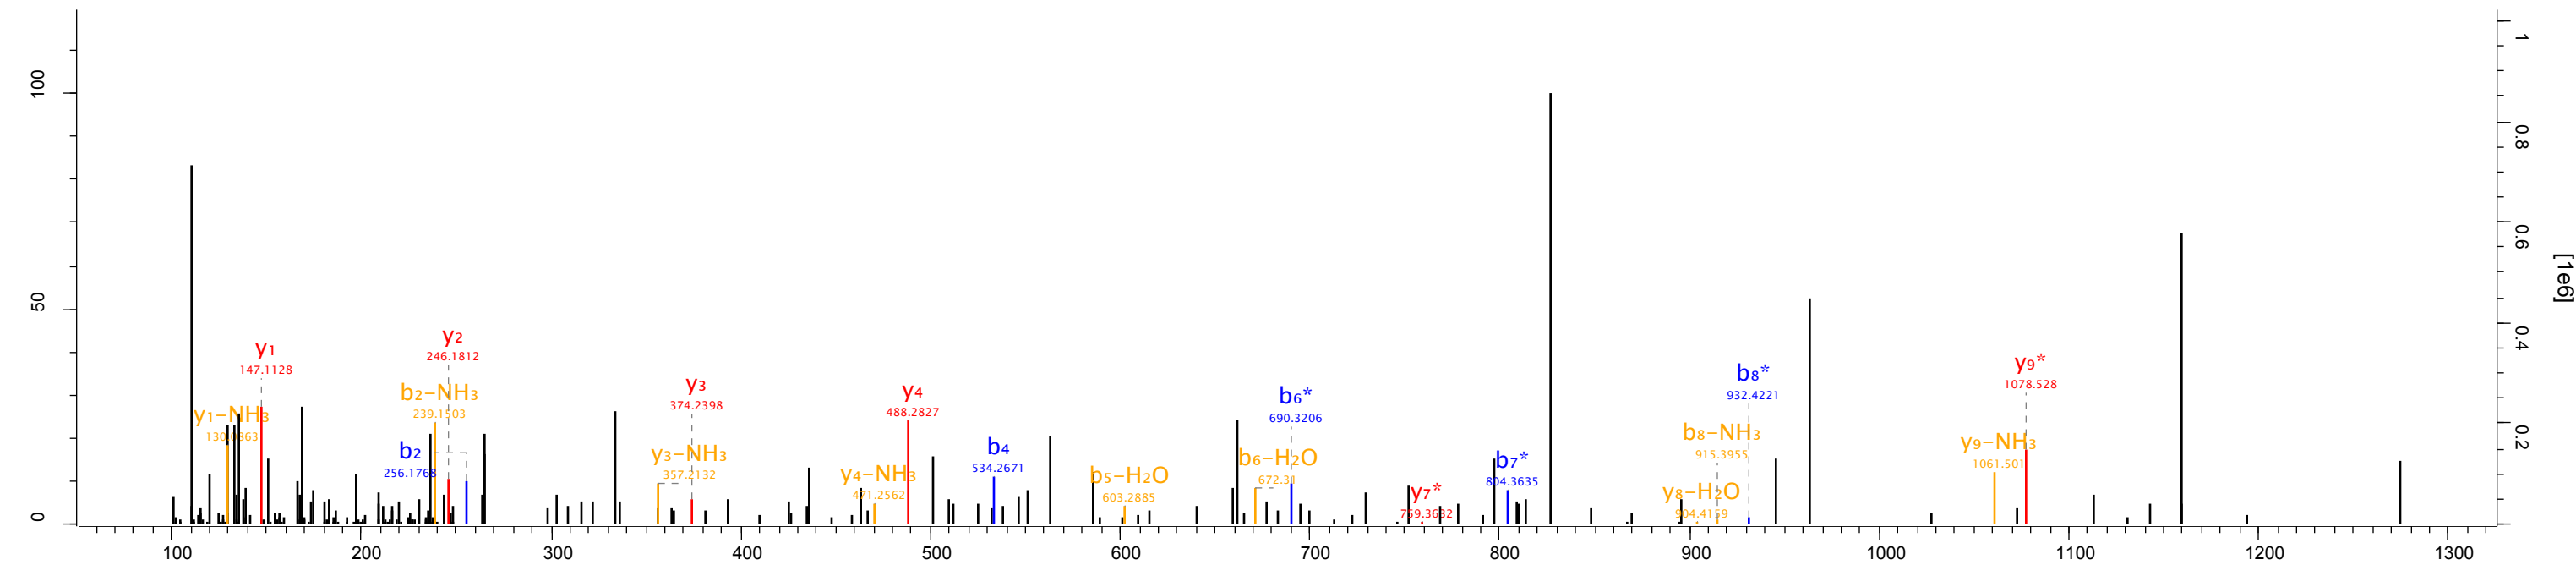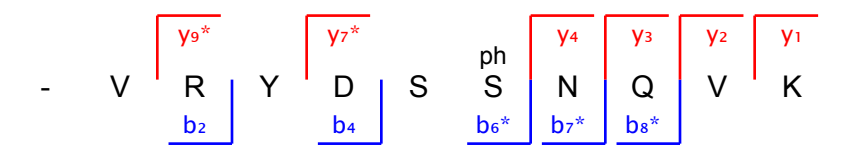



Raw file 20150814\_A375SR\_Phospho\_BR2\_05 Scan 4294 Method FTMS; HCD Score 210.39 m/z 658.84 Gene names ZNF316

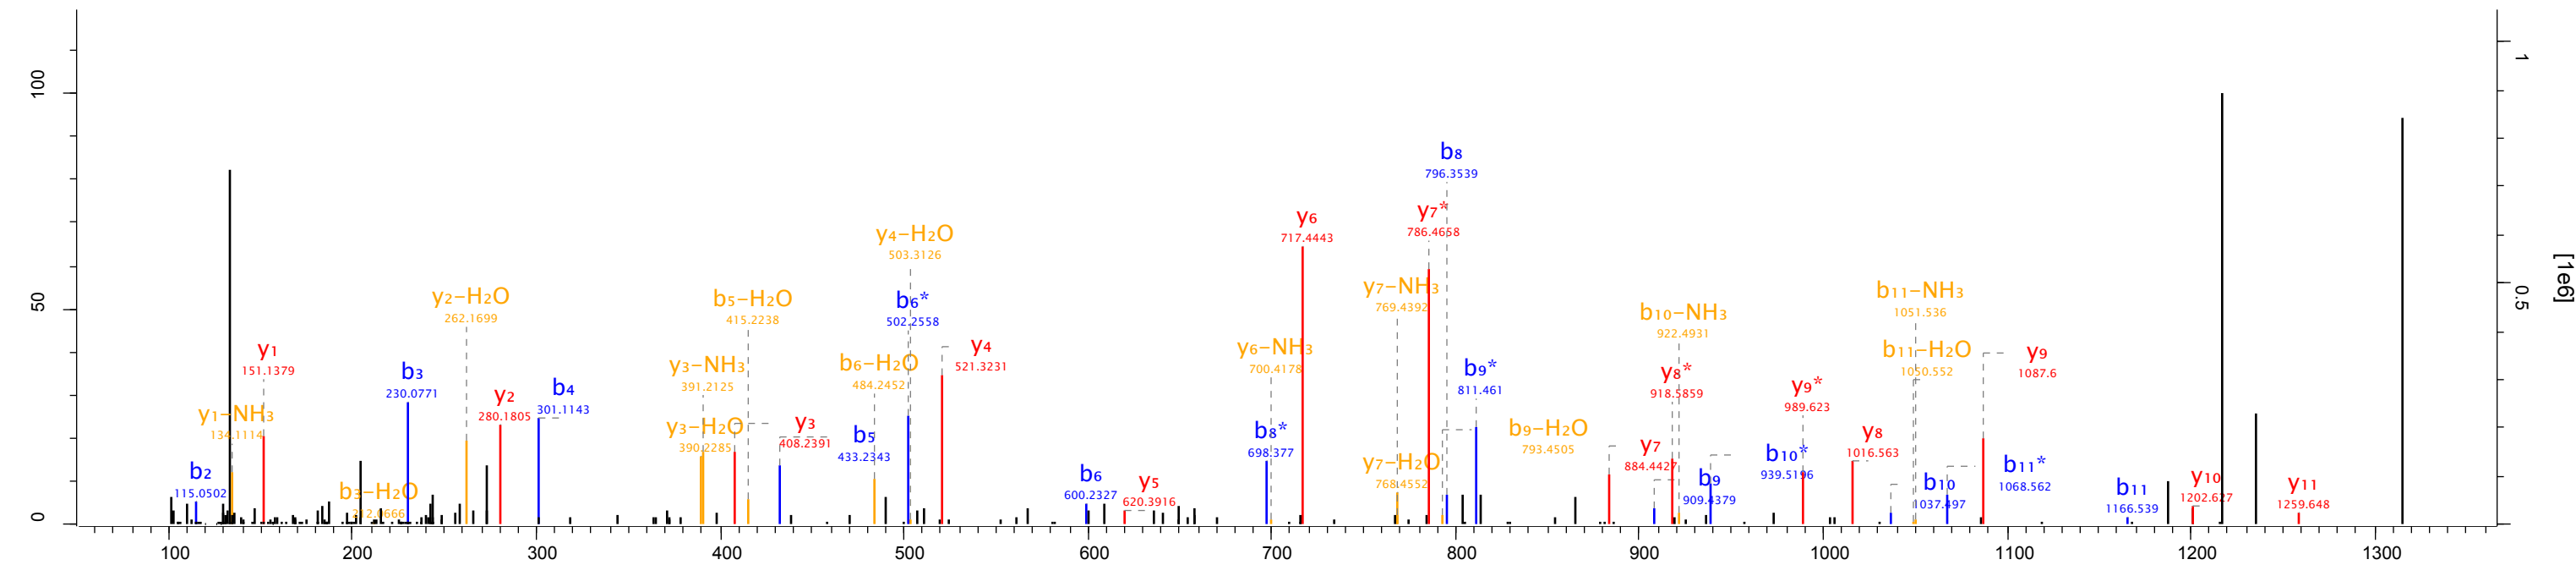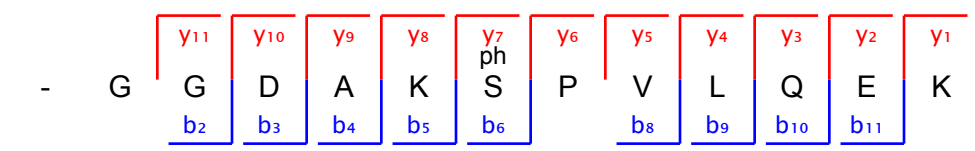

Raw file: 20150814\_A375SR\_Phospho\_BR2\_05  
 Scan: 4304 Method: FTMS; HCD Score: 140.63 m/z: 510.23 Gene names: OTUD4

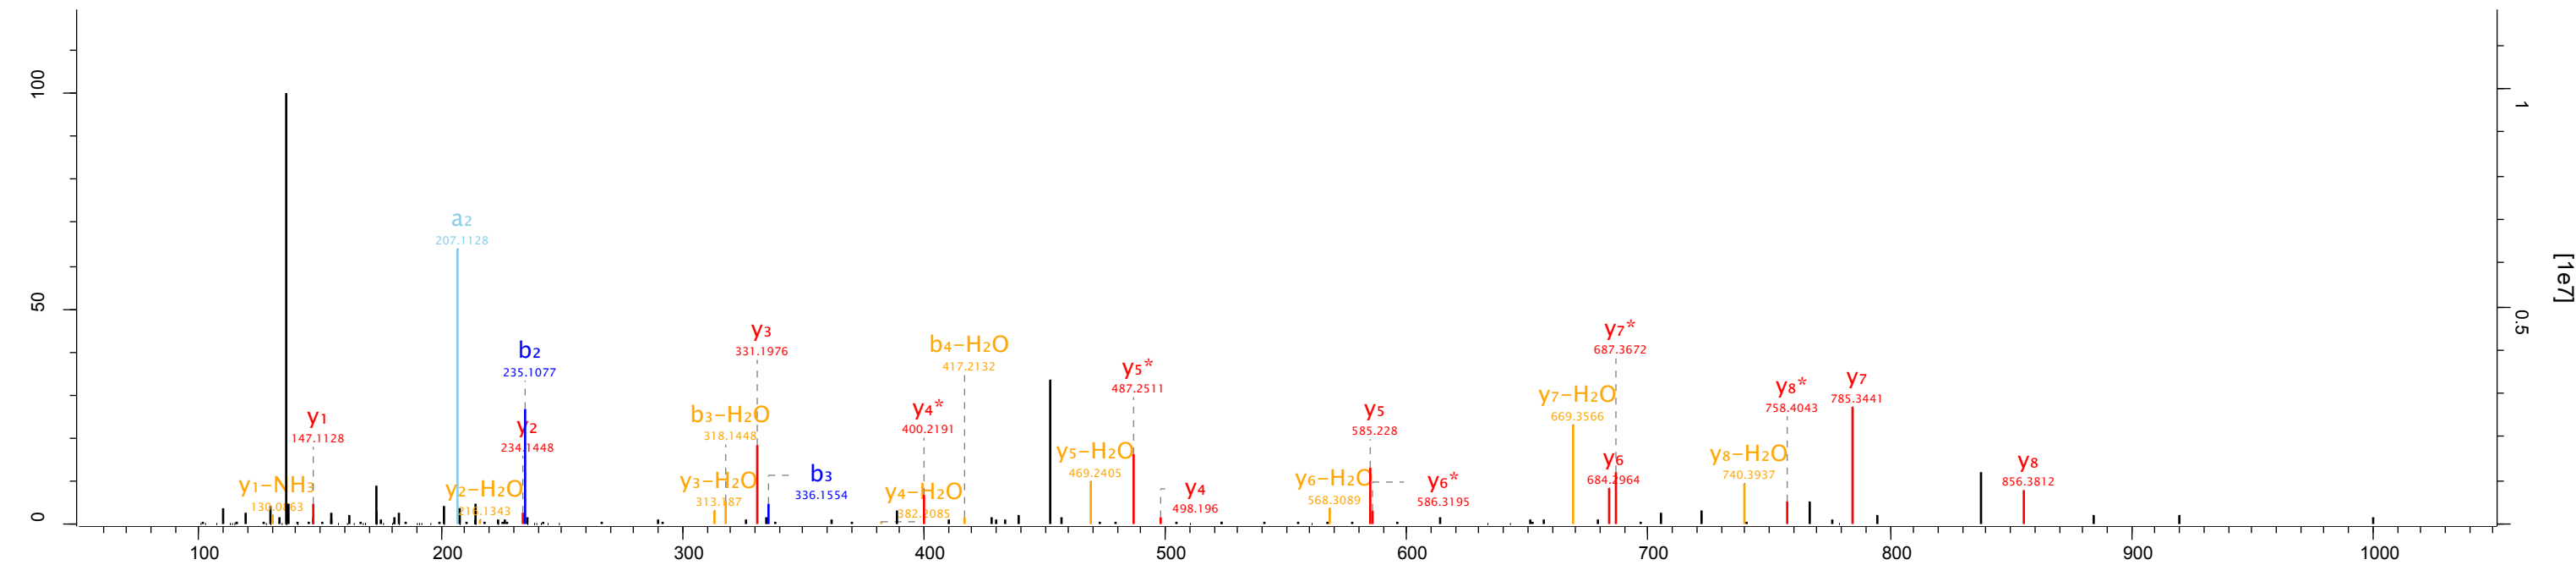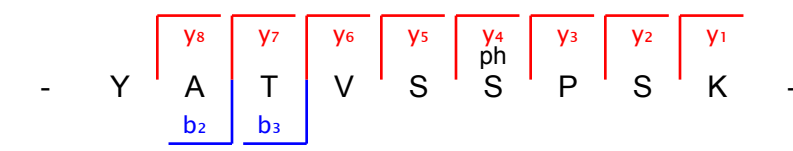

Raw file

Scan

Method

Score

m/z

Gene names

20150814\_A375SR\_Phospho\_BR2\_05

4544

FTMS; HCD

129.29

627.3

HIST1H2BC;HIST1H2BH;HIST2H2BF;HIST1H2BL;HIST1H2BA;HIST2H2BE;HIST3H2BB;HIST1H2BK;H2BFS;HIST1H2BN;HIST1H2BD;HIST1H2BM

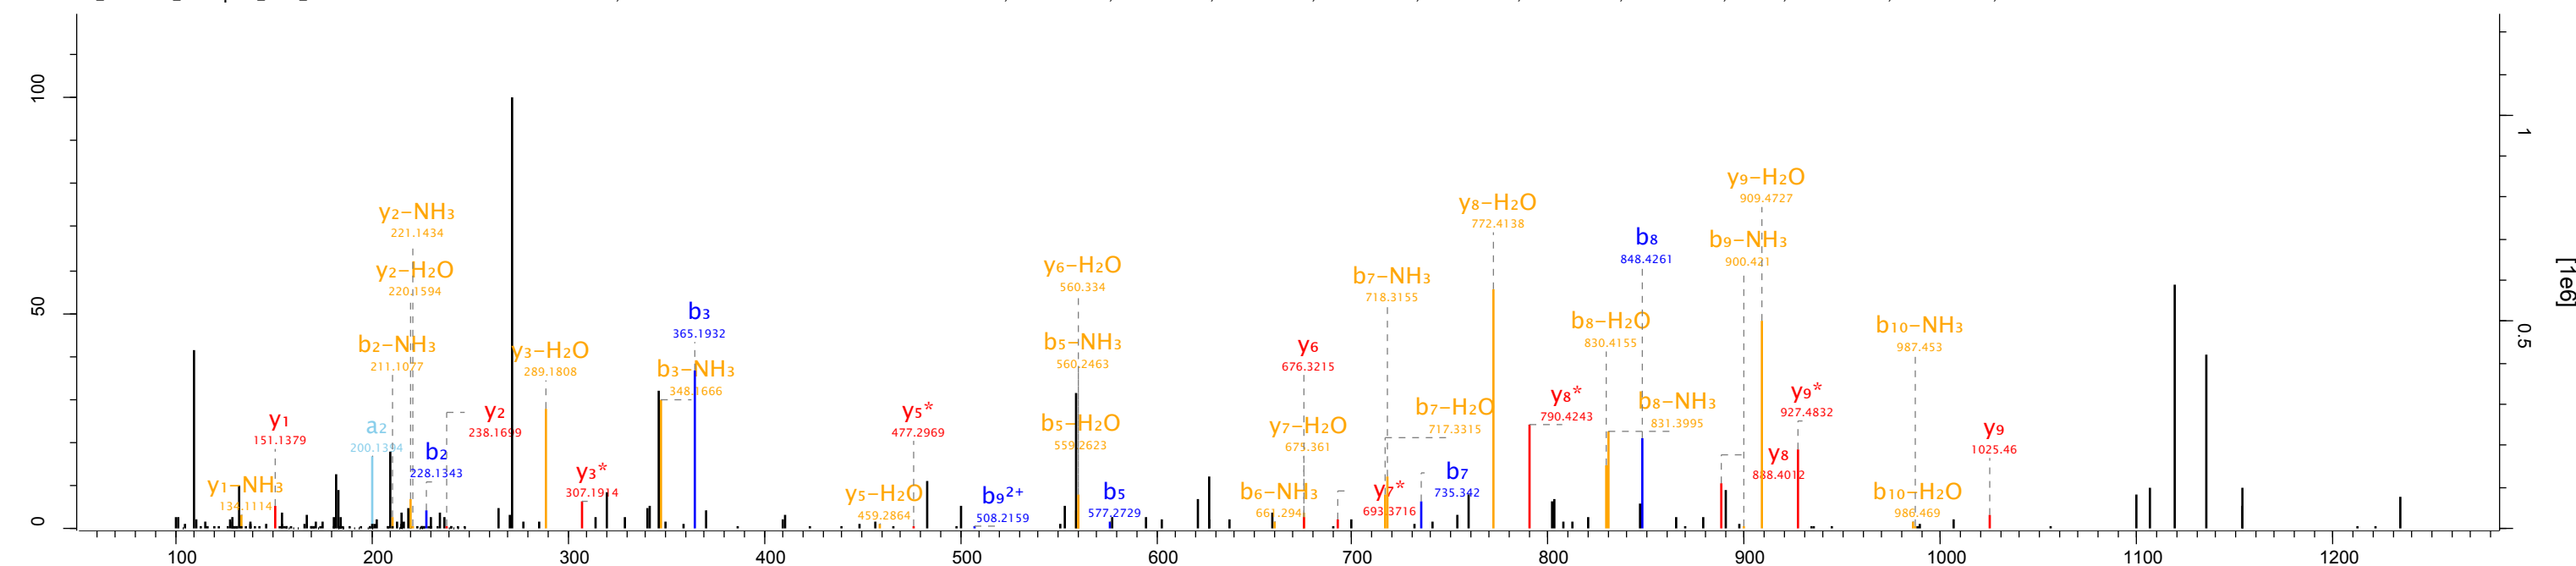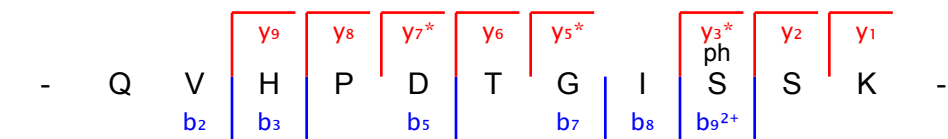

Raw file: 20150814\_A375SR\_Phospho\_BR2\_05  
 Scan: 4844 Method: FTMS; HCD Score: 141.08 m/z: 455.23 Gene names: SPEN

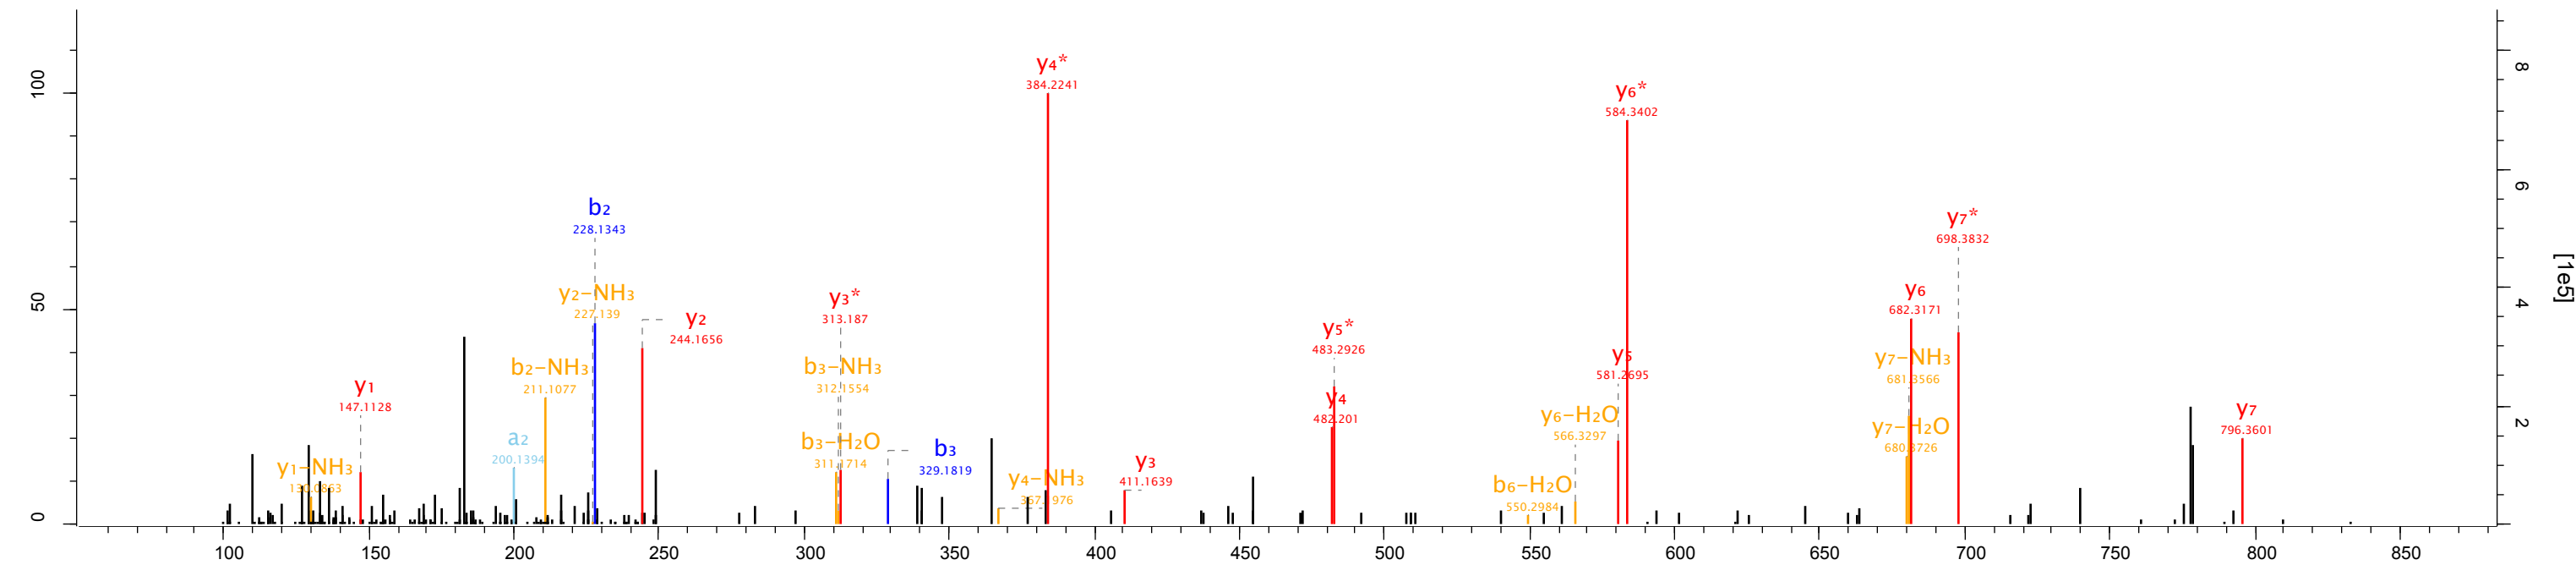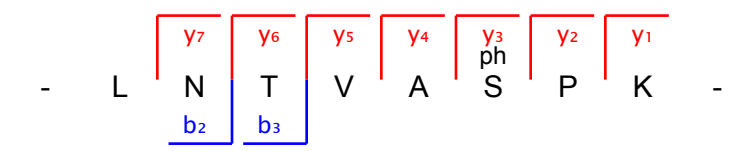

Raw file: 20150814\_A375SR\_Phospho\_BR2\_05  
 Scan: 4934 Method: FTMS; HCD Score: 54.81 m/z: 504.56 Gene names: SF3B1

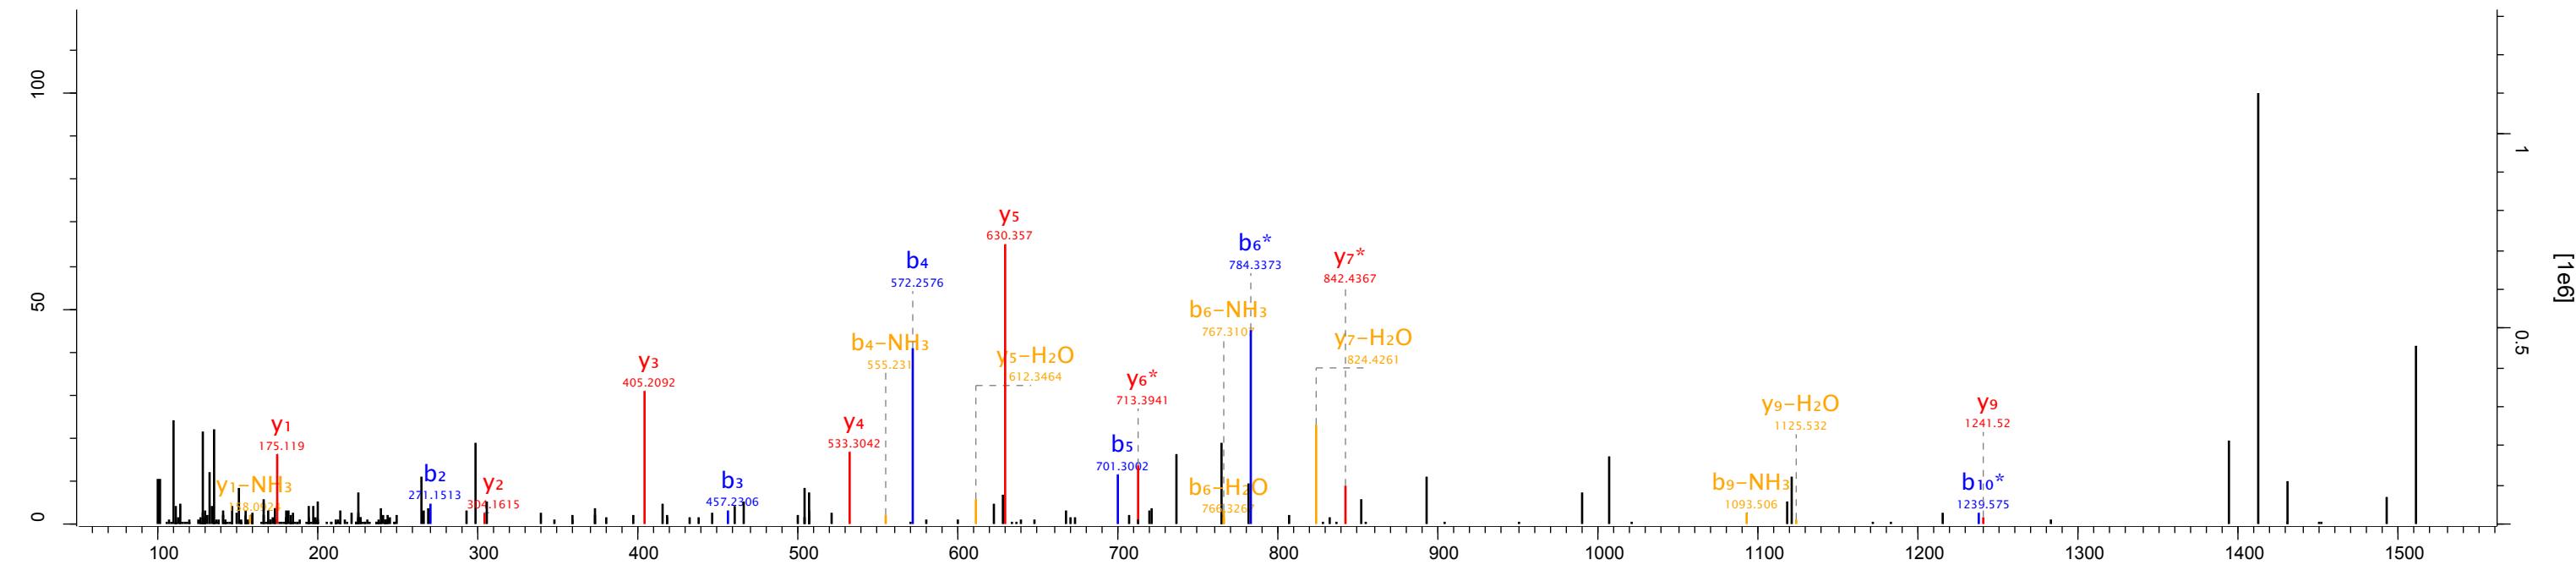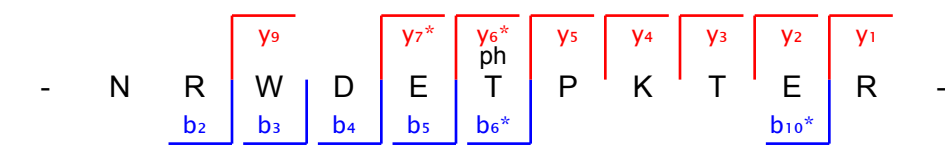

Raw file Scan Method Score m/z Gene names

20150814\_A375SR\_Phospho\_BR2\_05 5454 FTMS; HCD 198.85 652.31 SRRM1

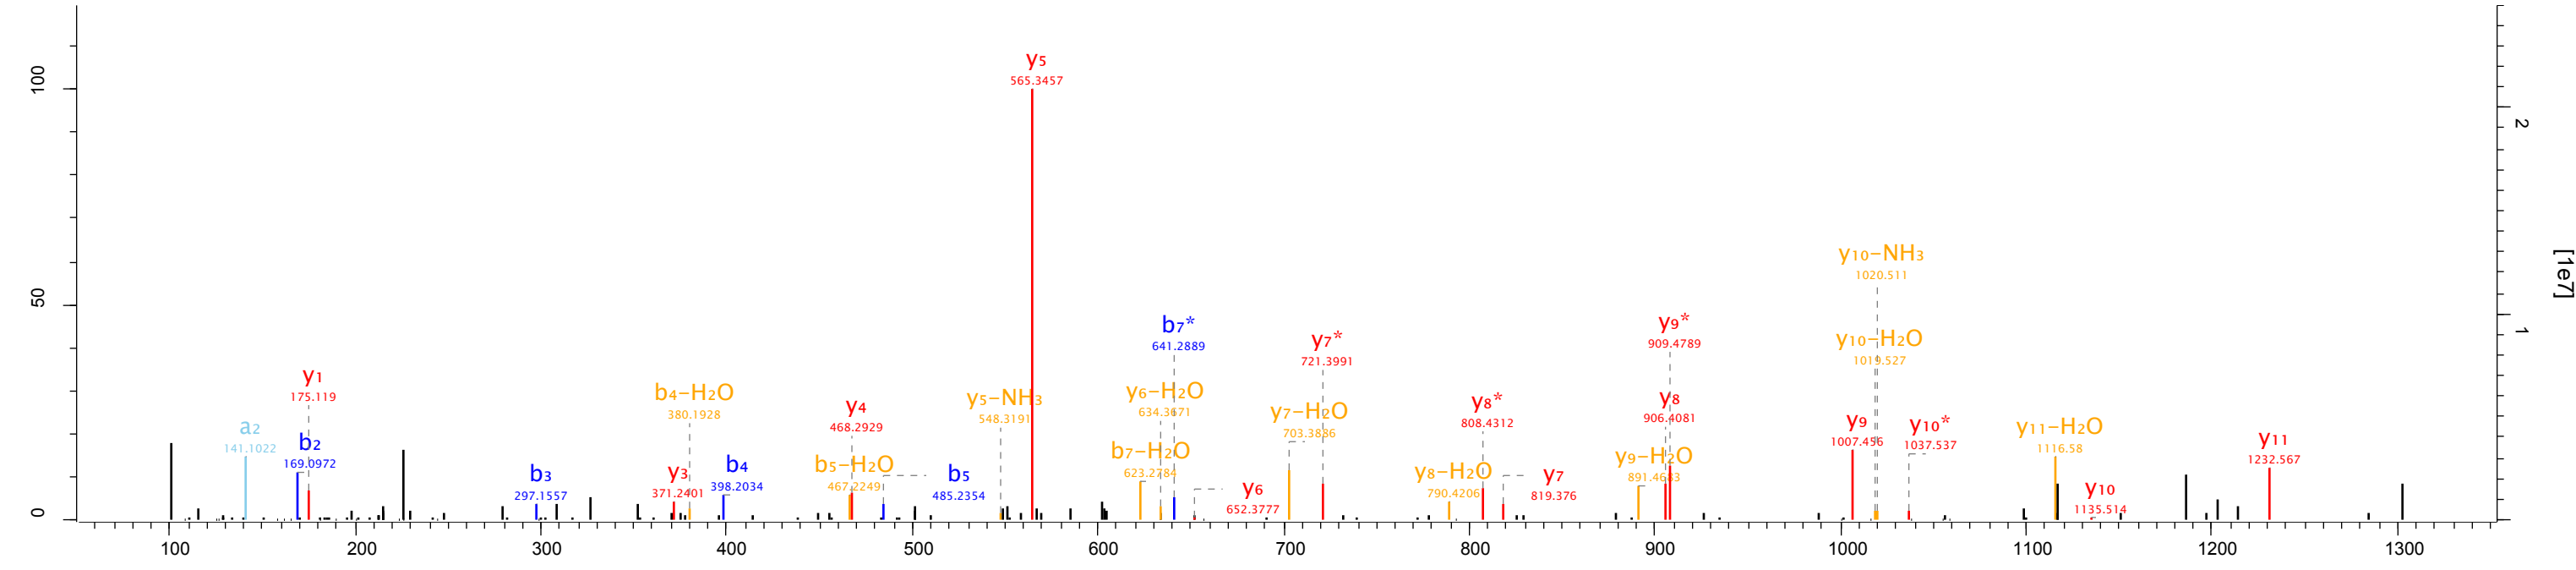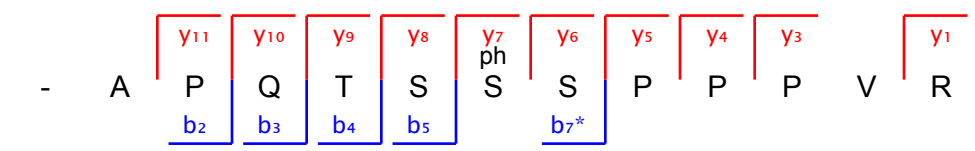

Raw file: 20150814\_A375SR\_Phospho\_BR2\_05  
 Scan: 5734 Method: FTMS; HCD Score: 166.46 m/z: 760.82 Gene names: MTMR1

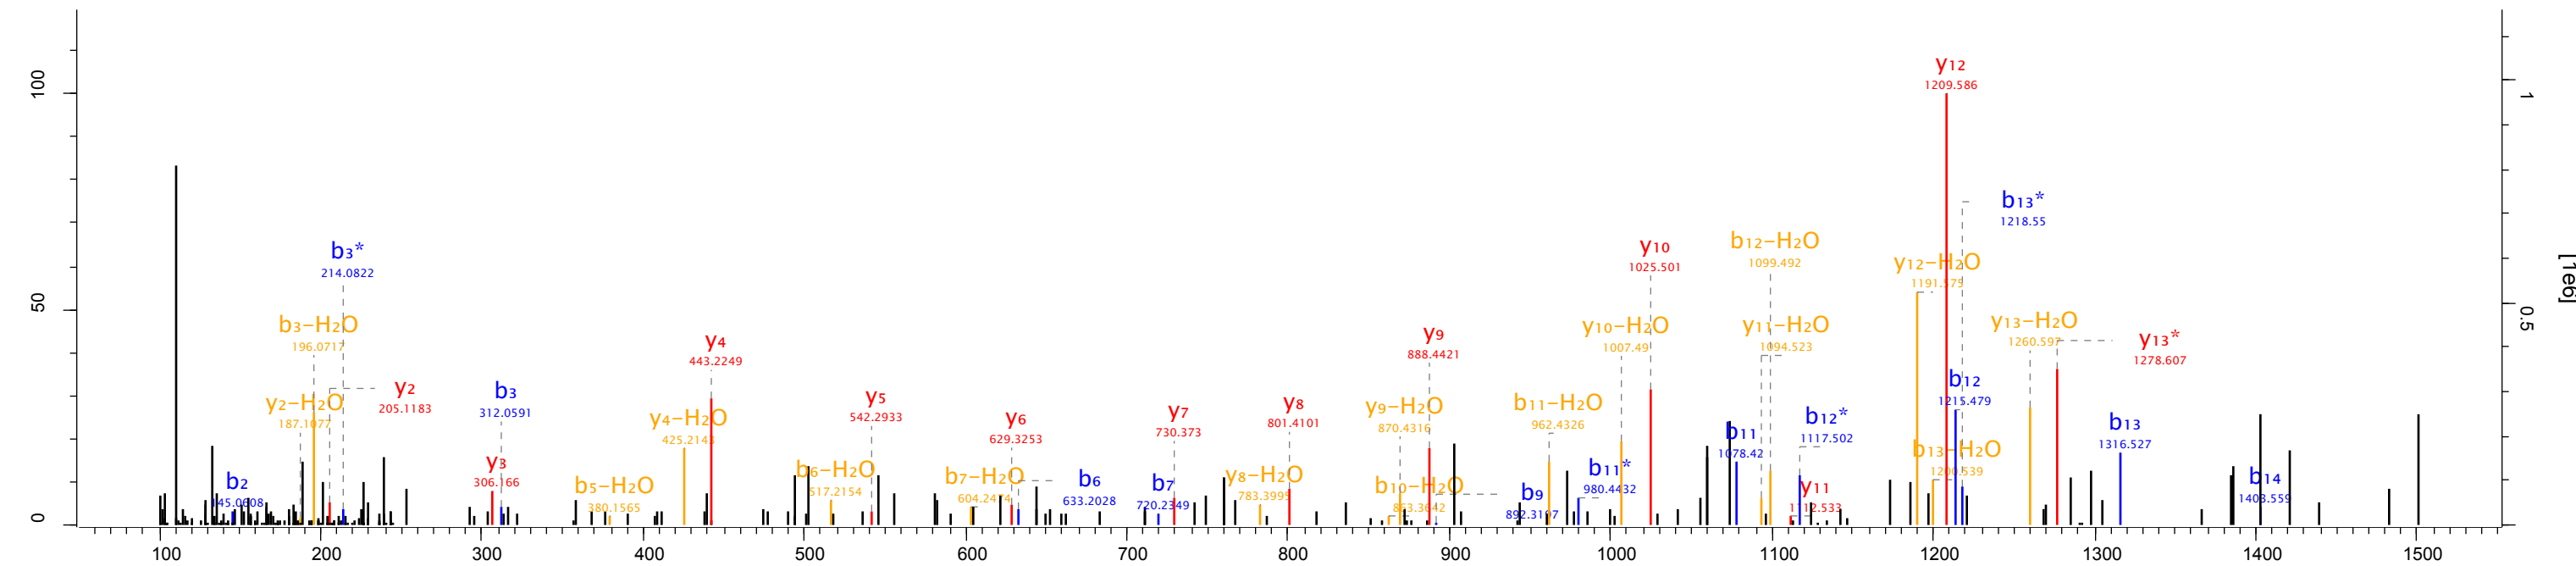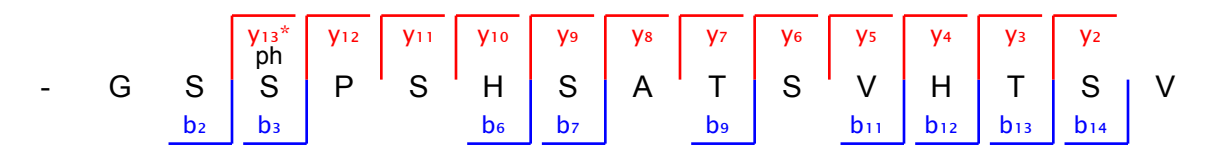

Raw file: 20150814\_A375SR\_Phospho\_BR2\_05  
 Scan: 6114 Method: FTMS; HCD Score: 319.23 m/z: 1072.46 Gene names: OGFR

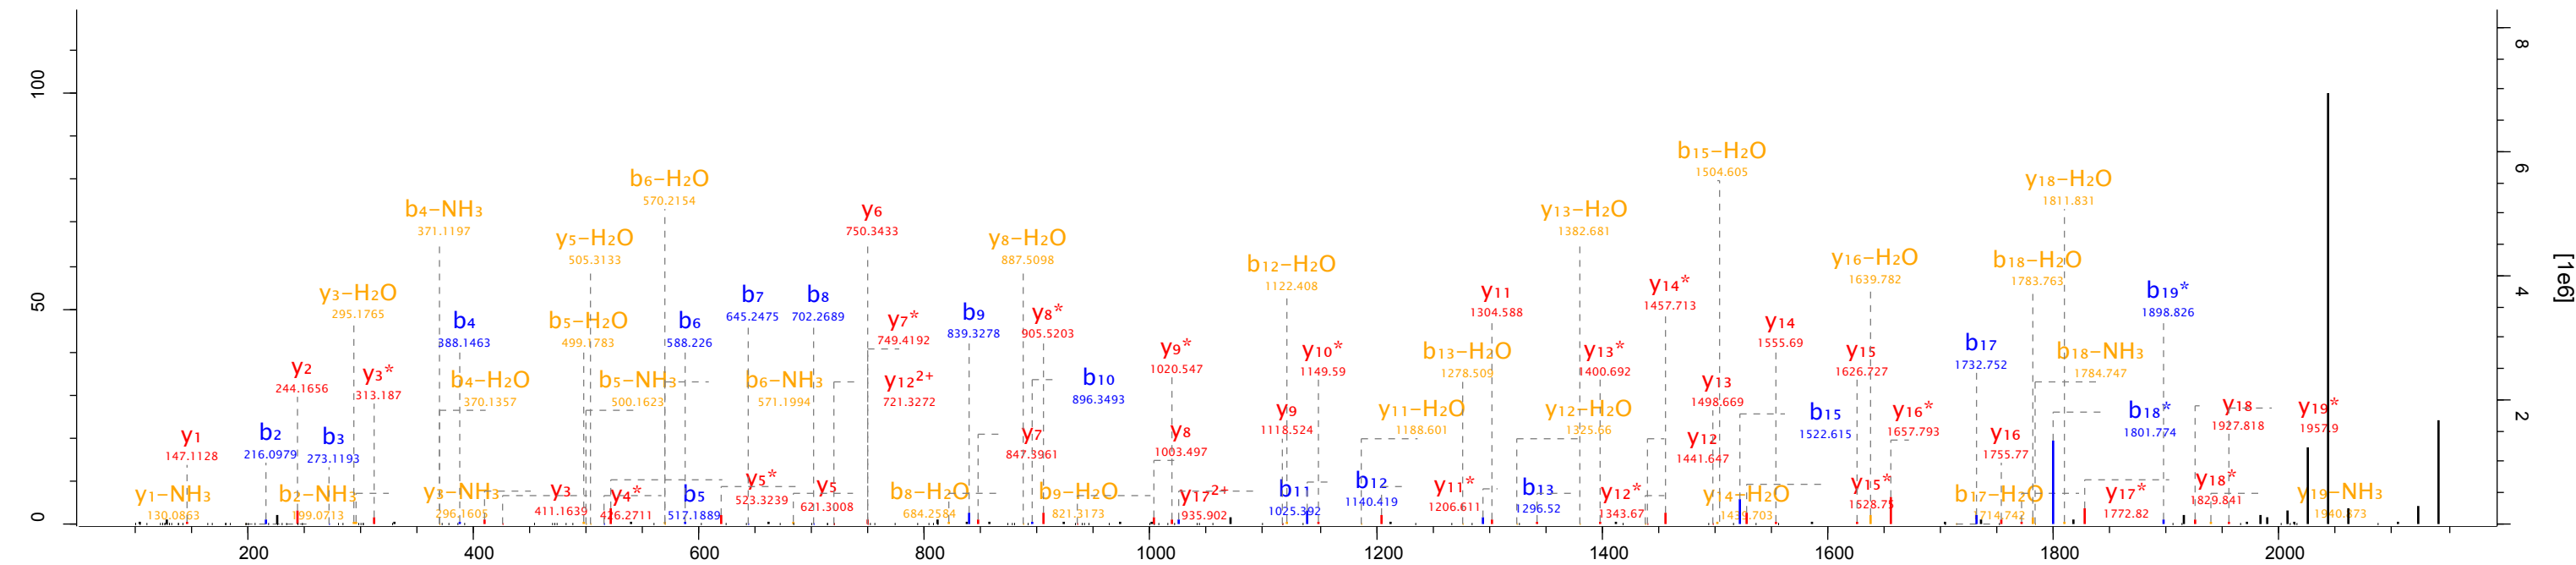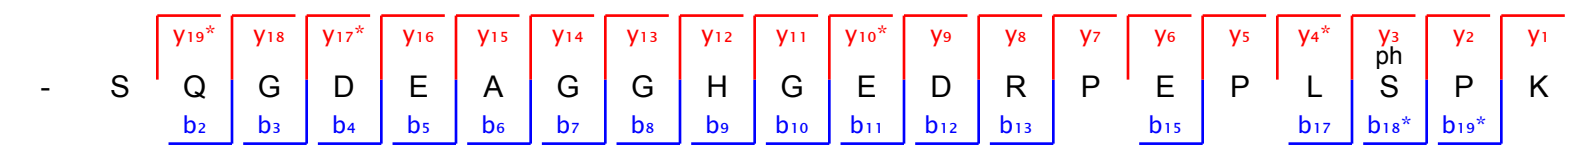



Raw file Scan Method Score m/z Gene names

20150814\_A375SR\_Phospho\_BR2\_05 6294 FTMS; HCD 139.55 765.35 TMSB10

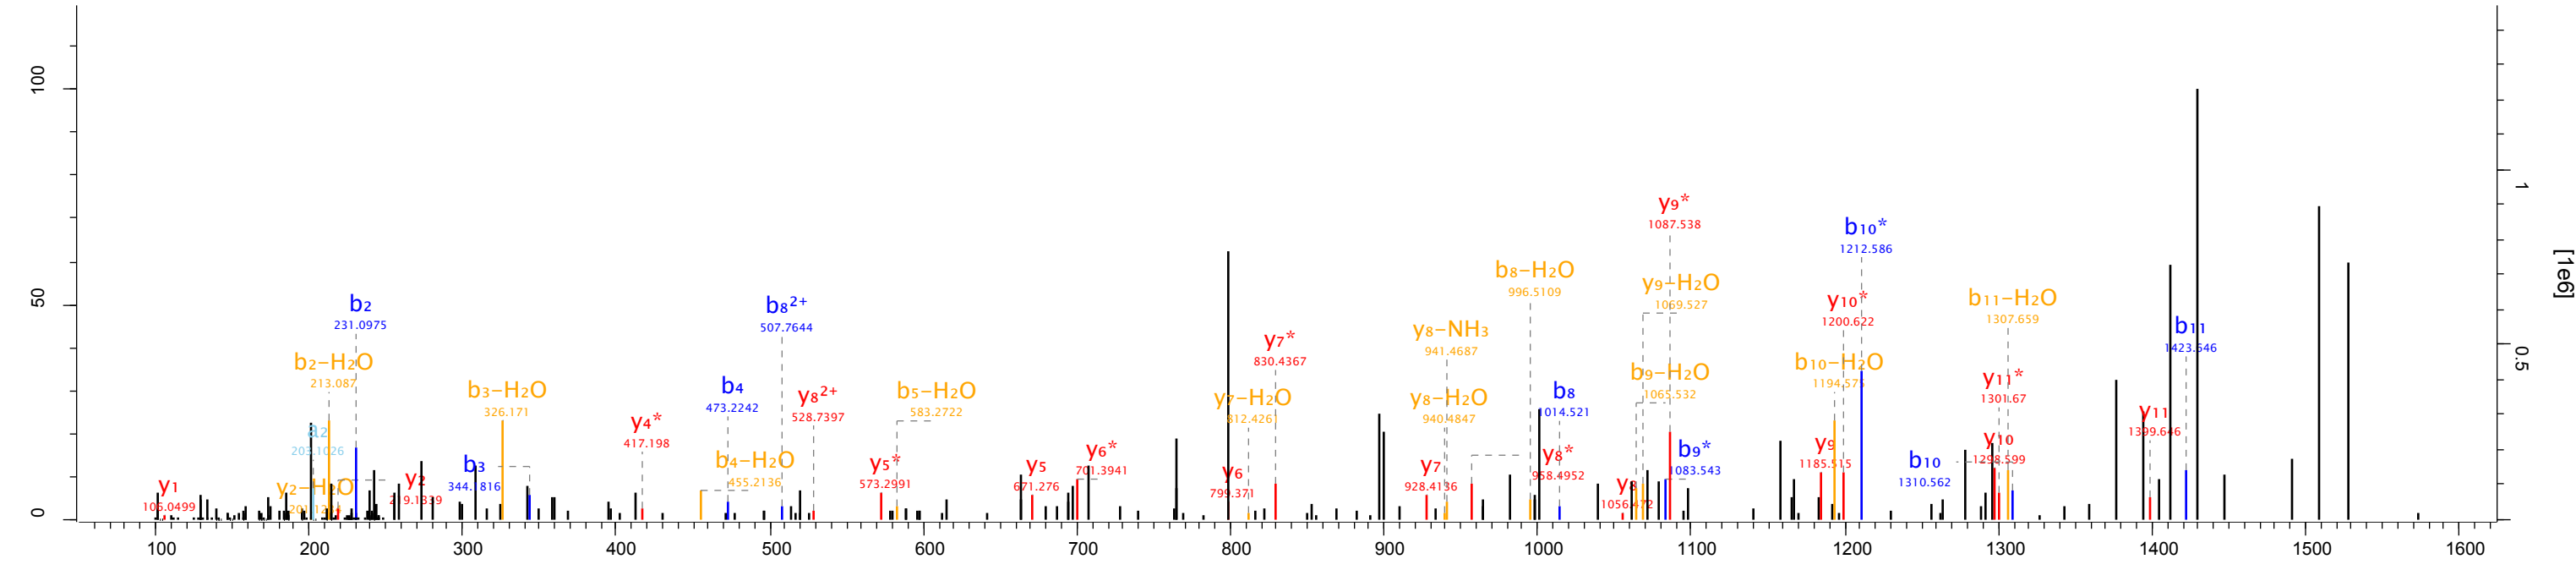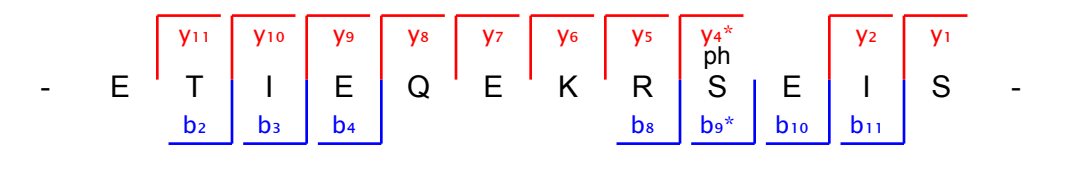

Raw file: 20150814\_A375SR\_Phospho\_BR2\_05  
 Scan: 6604 Method: FTMS; HCD Score: 190.28 m/z: 671.81 Gene names: ANAPC1

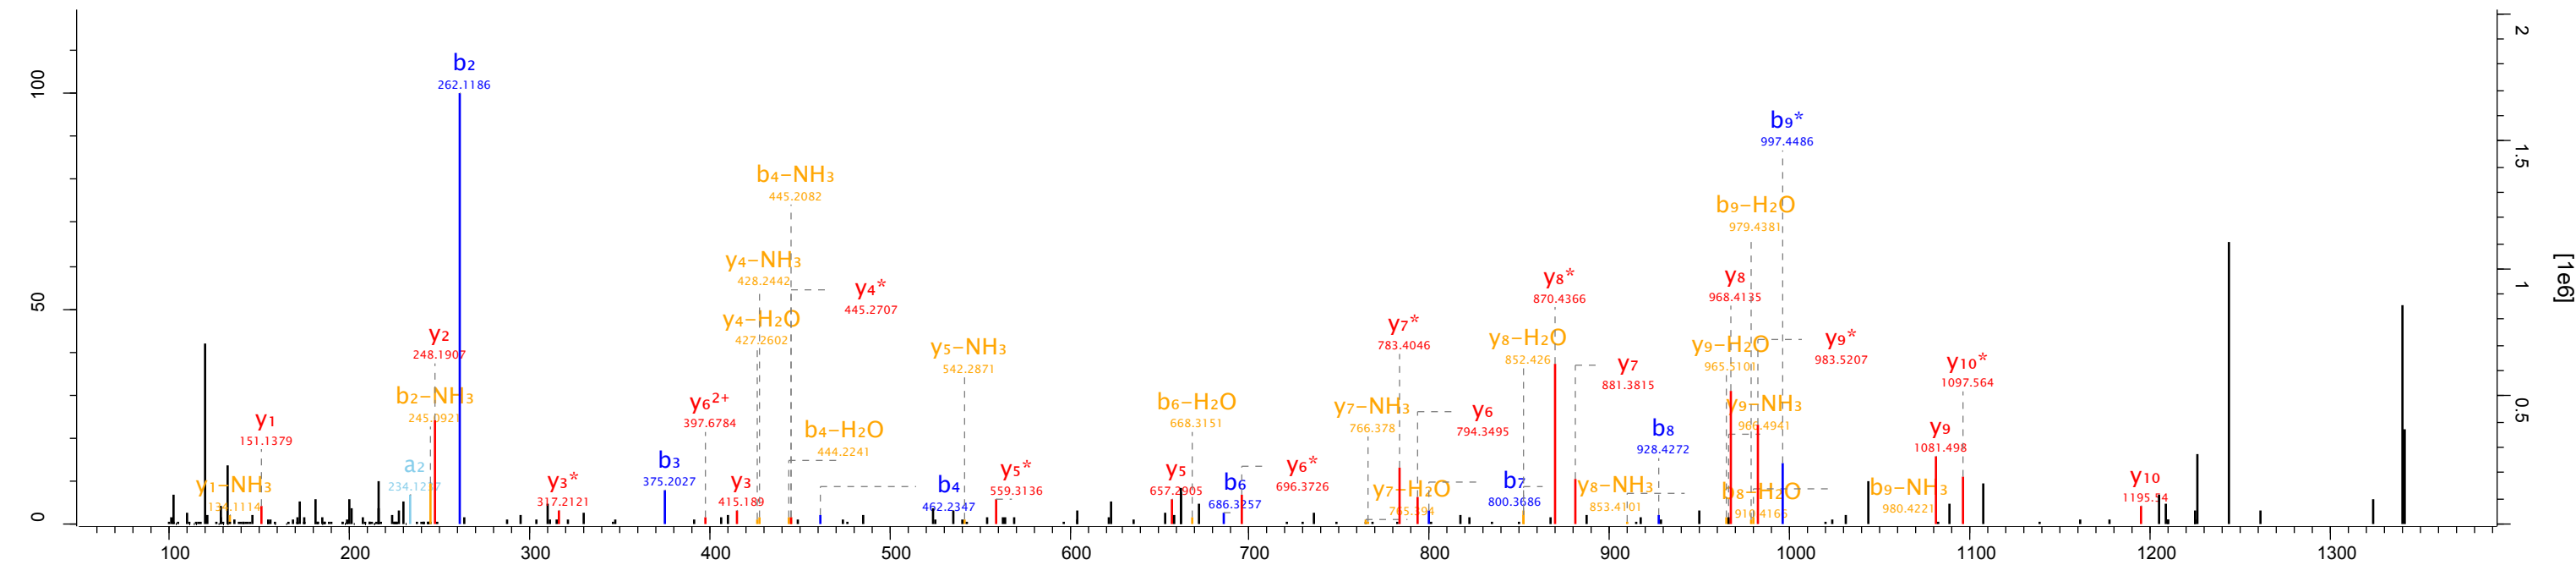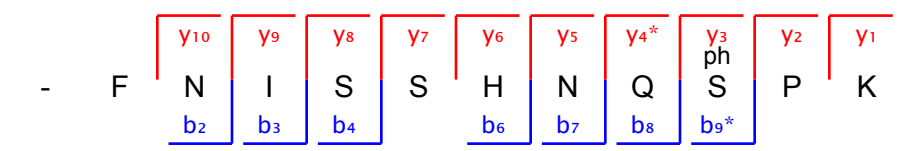

Raw file 20150814\_A375SR\_Phospho\_BR2\_05 Scan 7014 Method FTMS; HCD Score 84.16 m/z 981.47 Gene names EFHD2

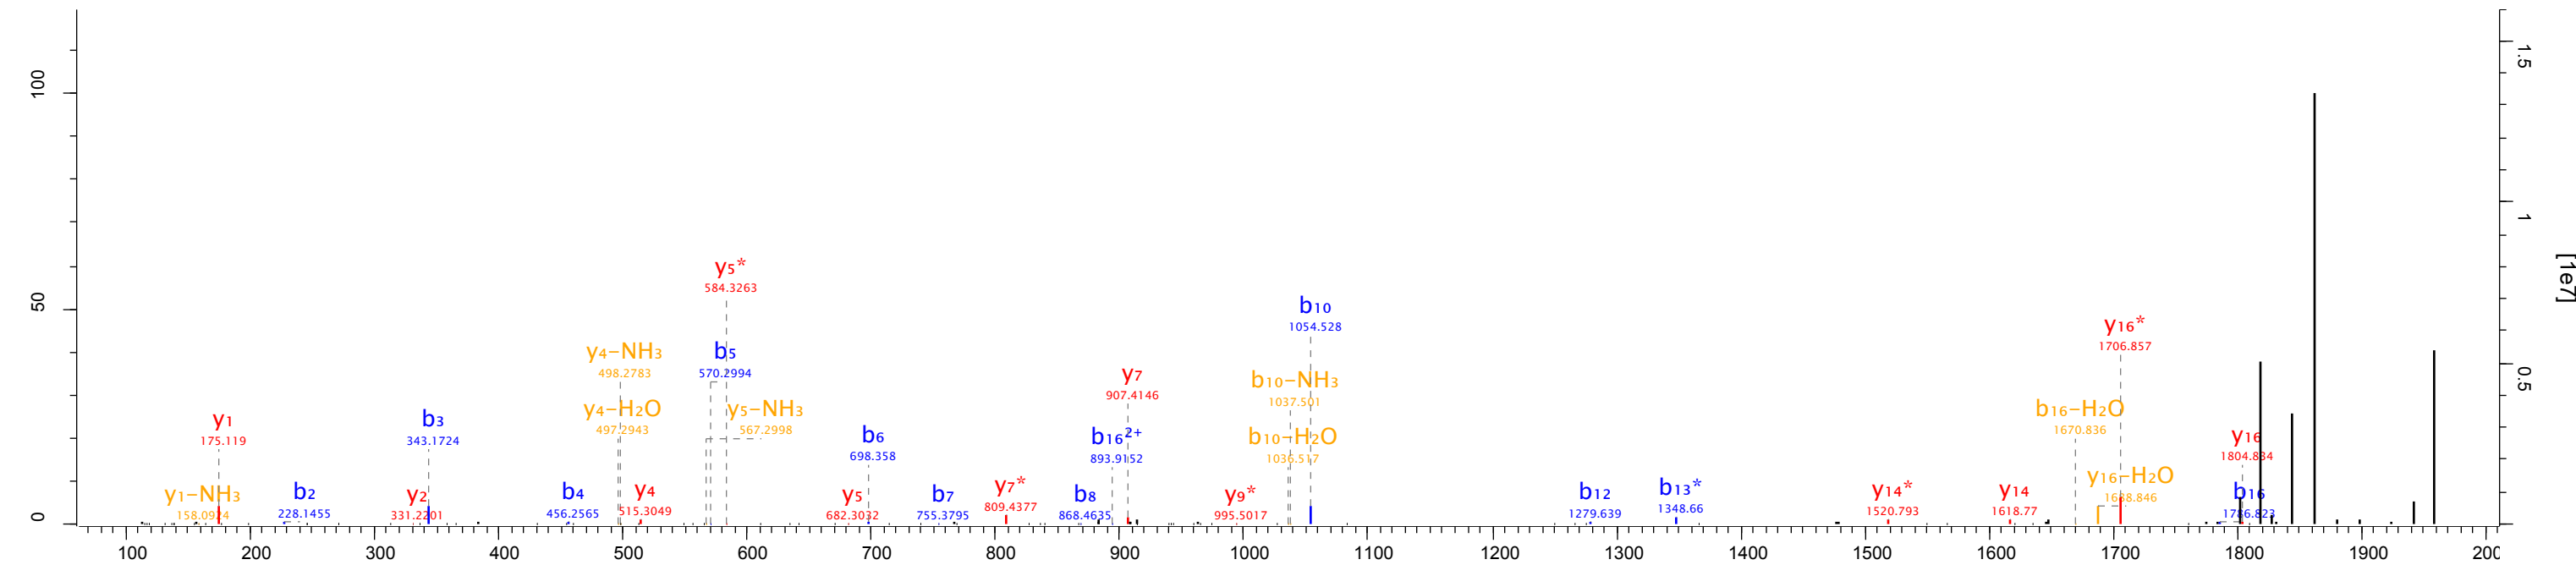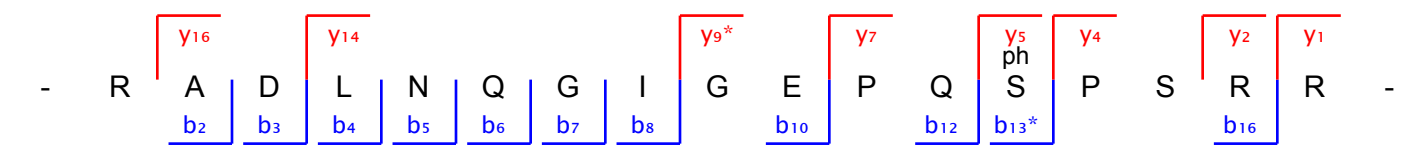

Raw file: 20150814\_A375SR\_Phospho\_BR2\_05  
 Scan: 7104 Method: FTMS; HCD Score: 206.81 m/z: 738.33 Gene names: EIF4A3

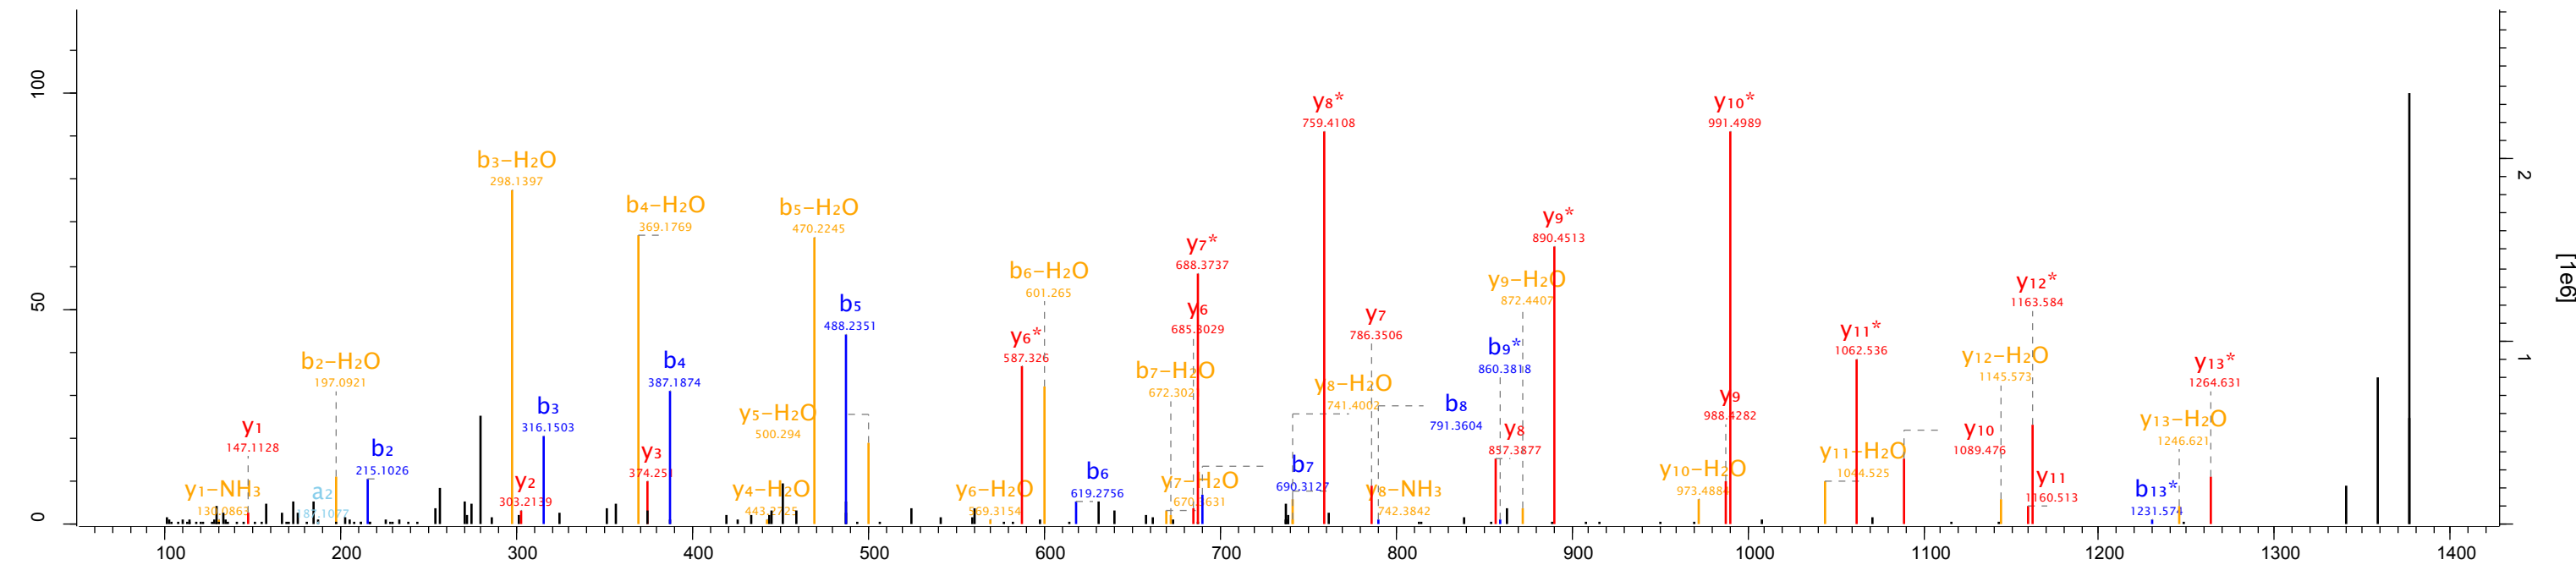

ac - A T T A T M A T S G S A R K -

Fragmentation mapping (b and y ions):

- Red boxes (y ions): y13\* (T), y12\* (T), y11 (A), y10 (T), y9 (M), y8 (A), y7 (T), y6 (S)
- Blue boxes (b ions): b2 (T), b3 (T), b4 (A), b5 (T), b6 (M), b7 (A), b8 (T), b9\* (S), b13\* (S)

Raw file 20150814\_A375SR\_Phospho\_BR2\_05 Scan 7124 Method FTMS; HCD Score 64.24 m/z 681.29 Gene names PRRC2A

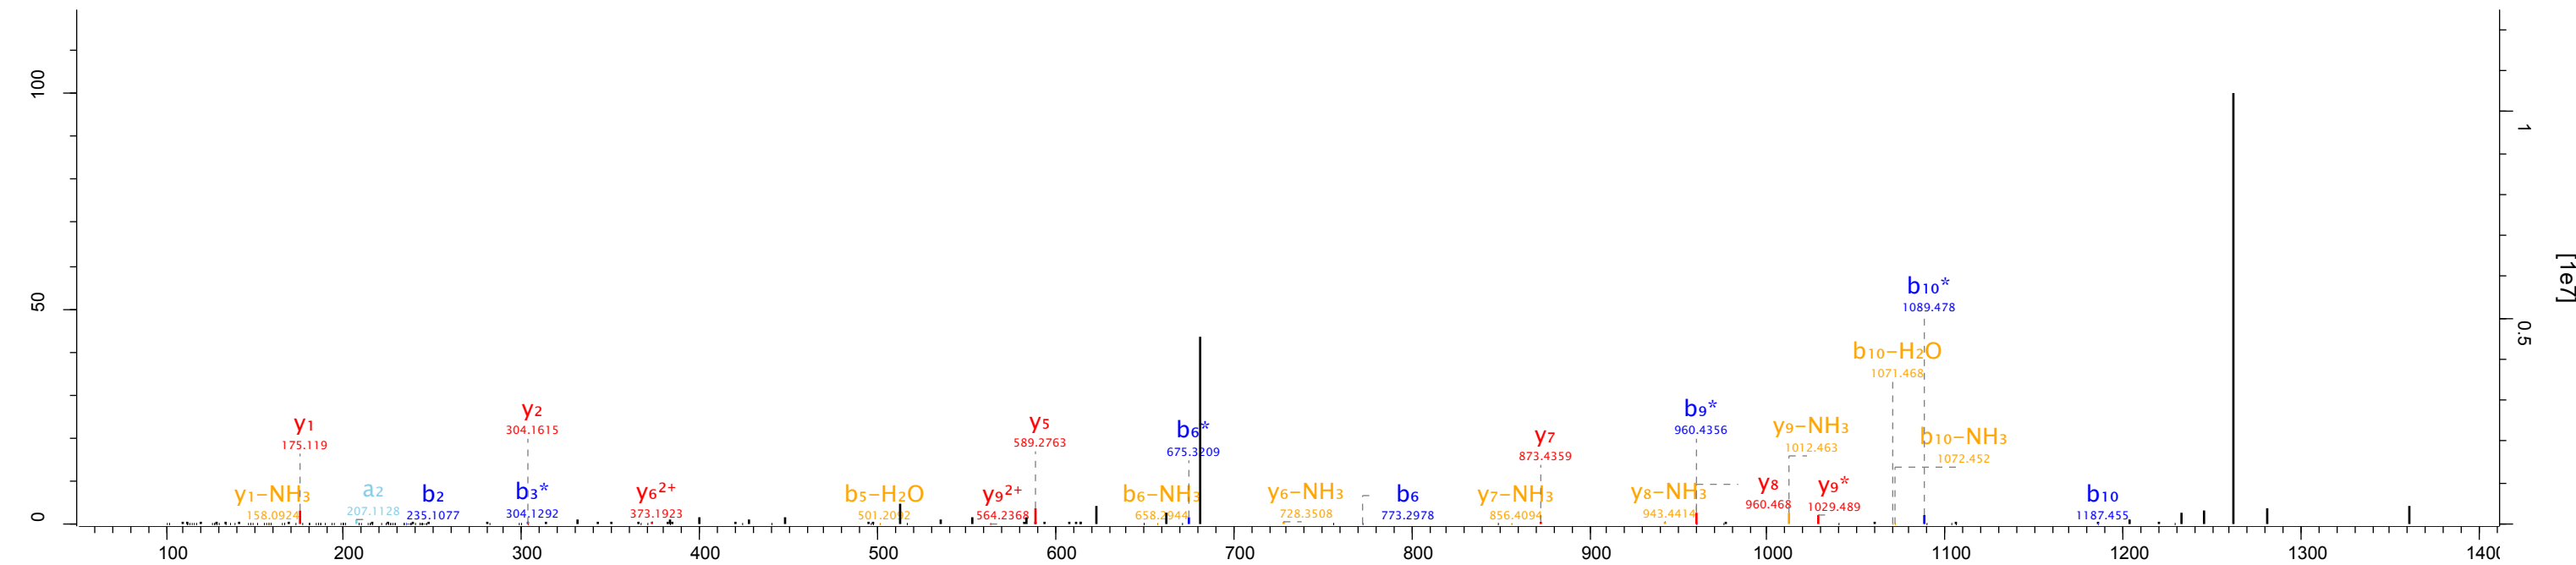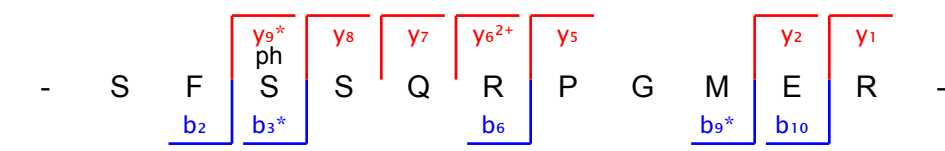

Raw file: 20150814\_A375SR\_Phospho\_BR2\_05  
 Scan: 7244 Method: FTMS; HCD Score: 187.37 m/z: 677.3 Gene names: EME1

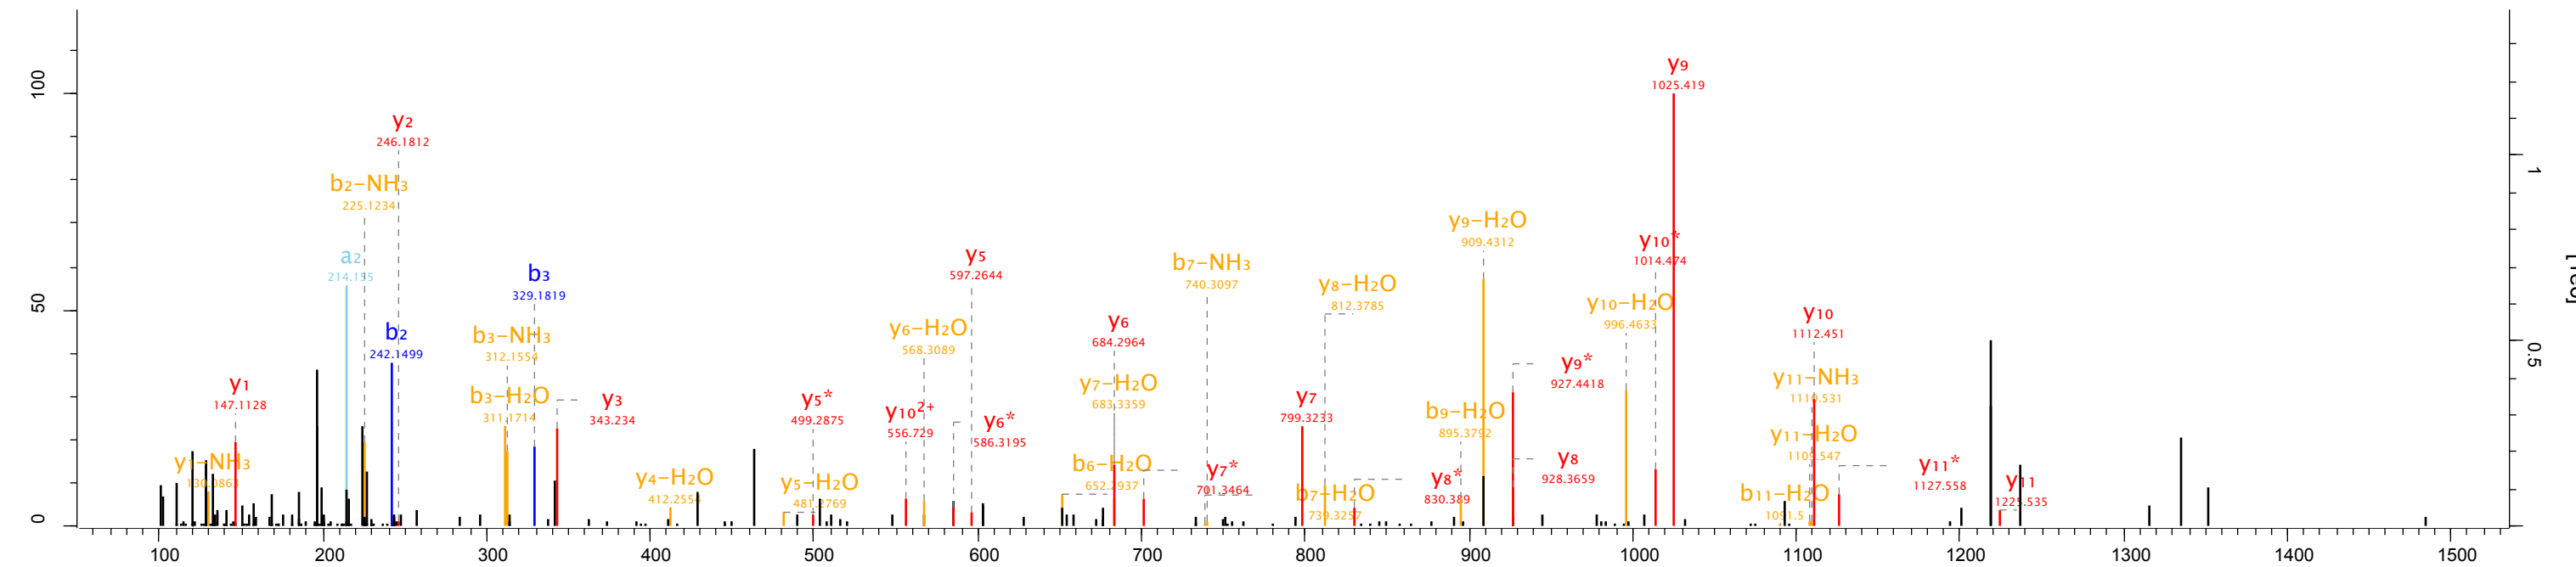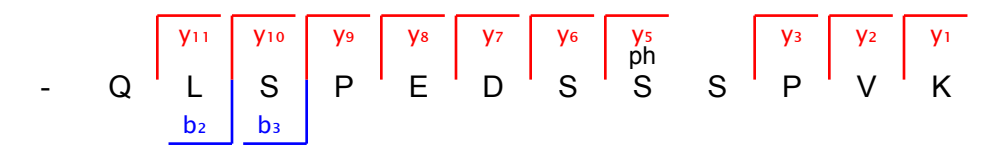

Raw file: 20150814\_A375SR\_Phospho\_BR2\_05  
 Scan: 7264 Method: FTMS; HCD Score: 145.28 m/z: 537.26 Gene names: UBR4

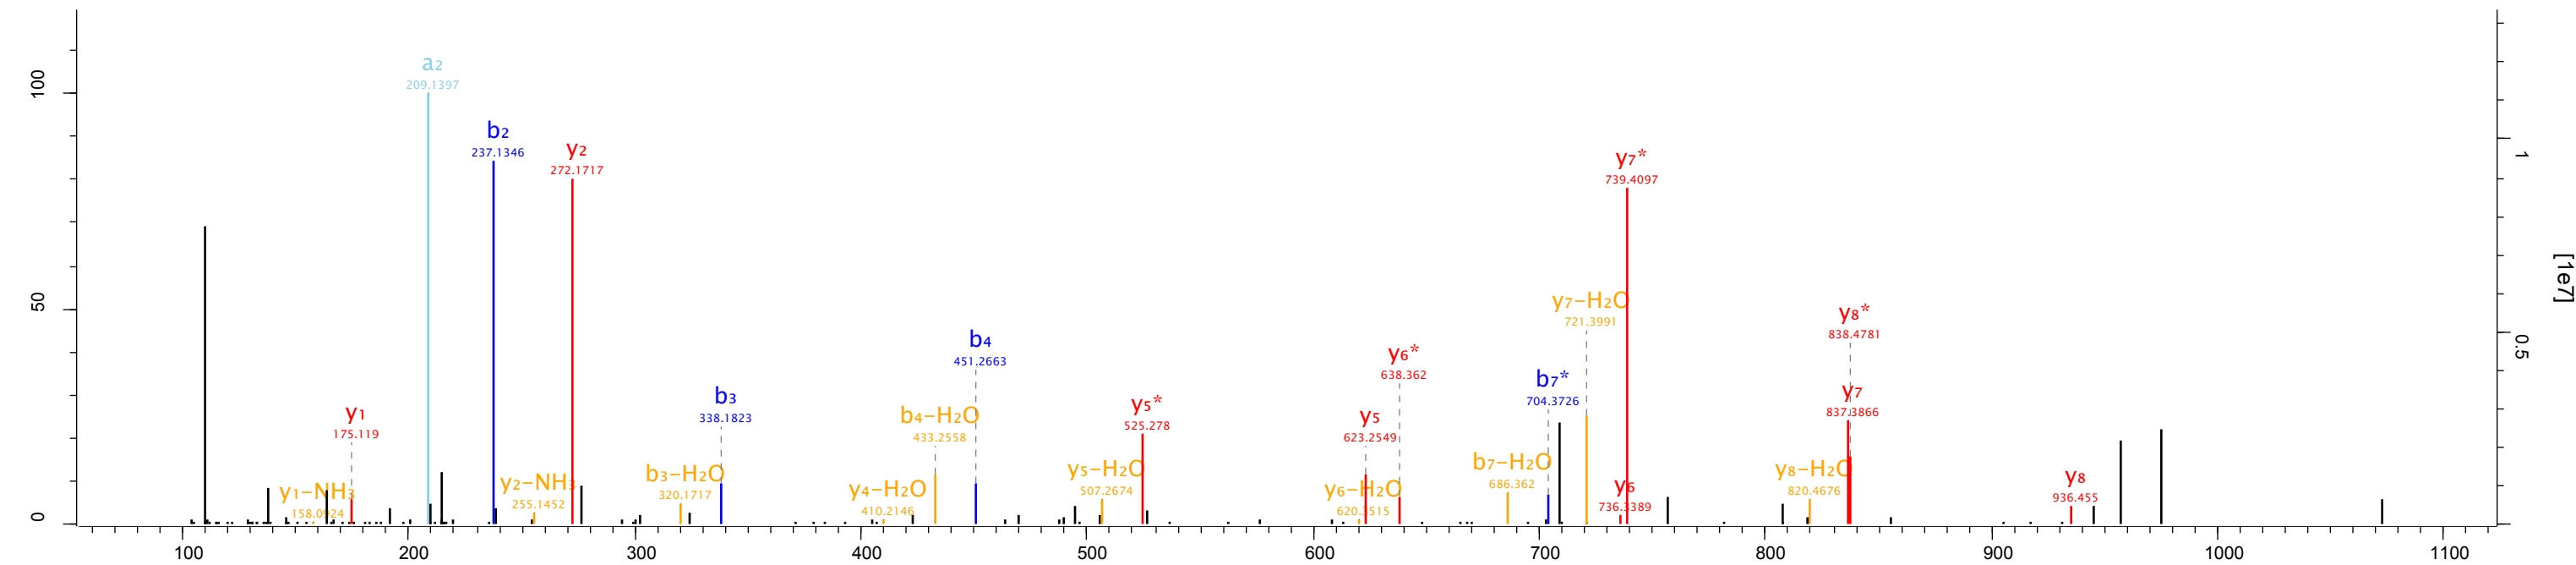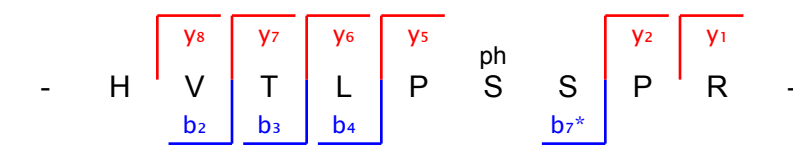

Raw file: 20150814\_A375SR\_Phospho\_BR2\_05  
 Scan: 7354 Method: FTMS; HCD Score: 82.52 m/z: 602.27 Gene names: DFFA

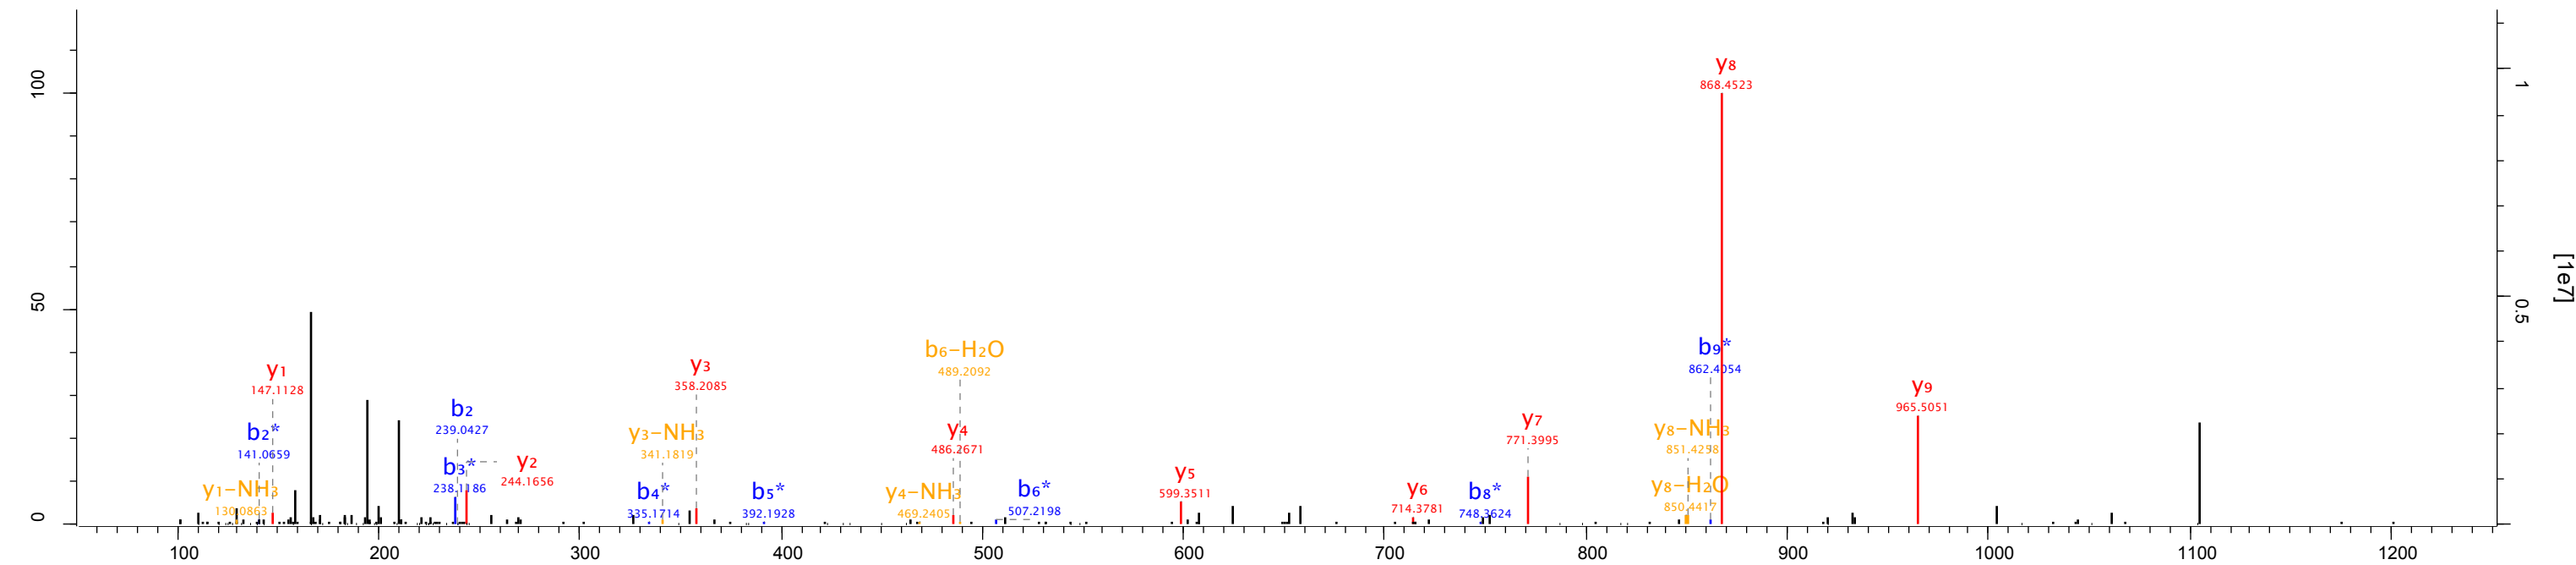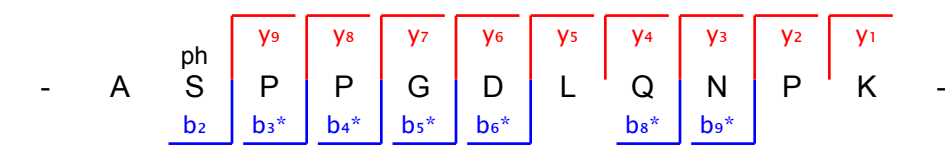



Raw file: 20150814\_A375SR\_Phospho\_BR2\_05  
 Scan: 7414 Method: FTMS; HCD Score: 85.74 m/z: 466.18 Gene names: RBM12B

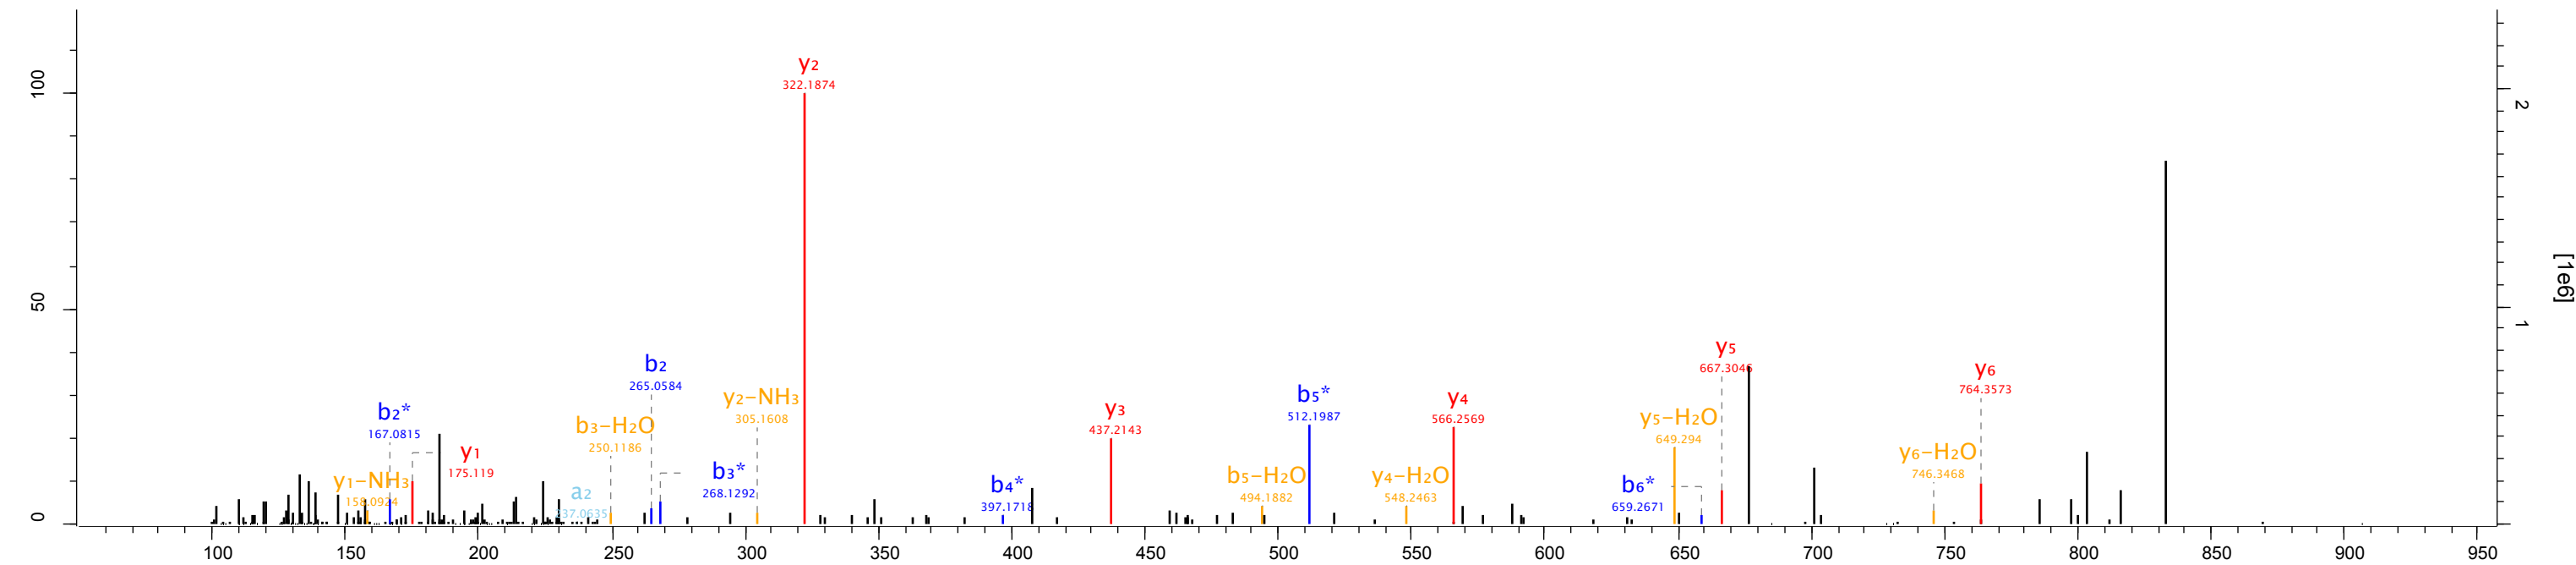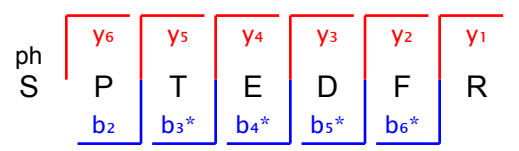

Raw file: 20150814\_A375SR\_Phospho\_BR2\_05  
 Scan: 7934 Method: FTMS; HCD Score: 106.97 m/z: 563.78 Gene names: SCYL2

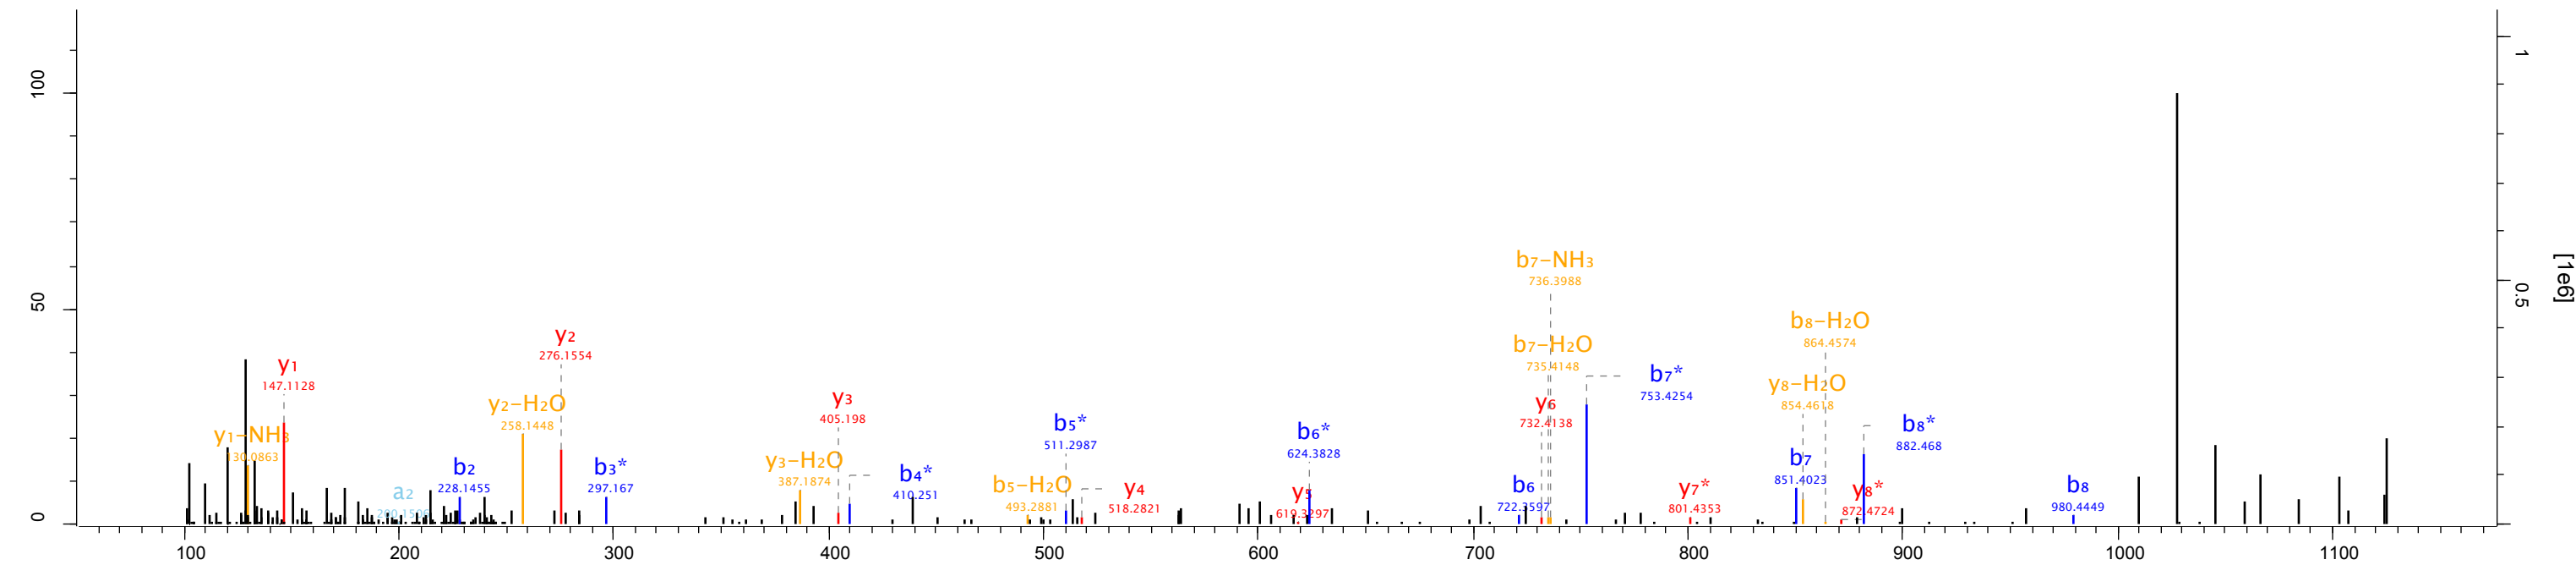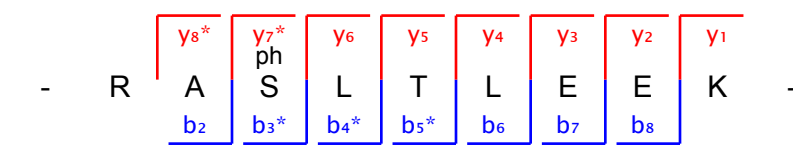

Raw file: 20150814\_A375SR\_Phospho\_BR2\_05  
 Scan: 7954 Method: FTMS; HCD Score: 198.51 m/z: 936.38 Gene names: DHX16

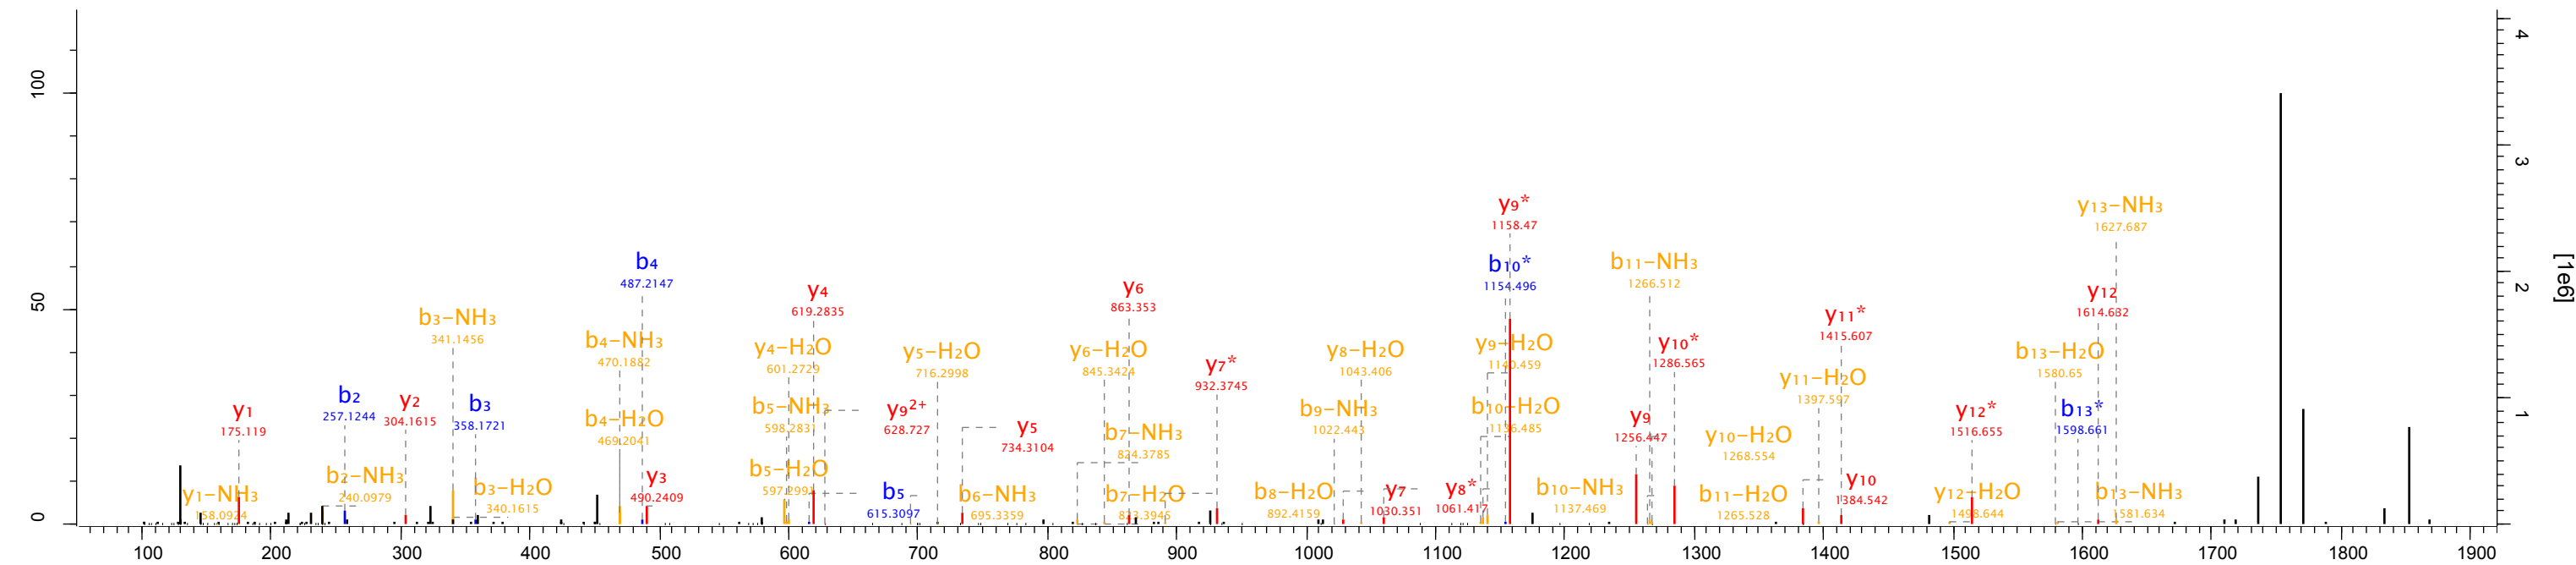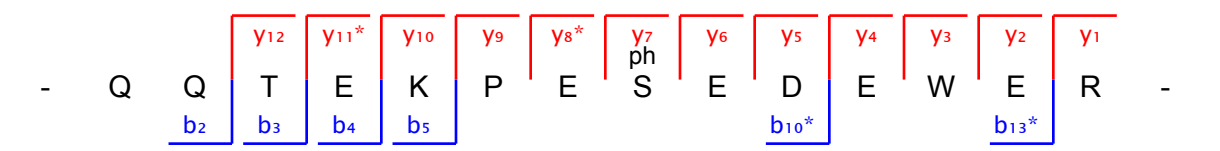

Raw file 20150814\_A375SR\_Phospho\_BR2\_05 Scan 8094 Method FTMS; HCD Score 47.51 m/z 656.28 Gene names NCOA2

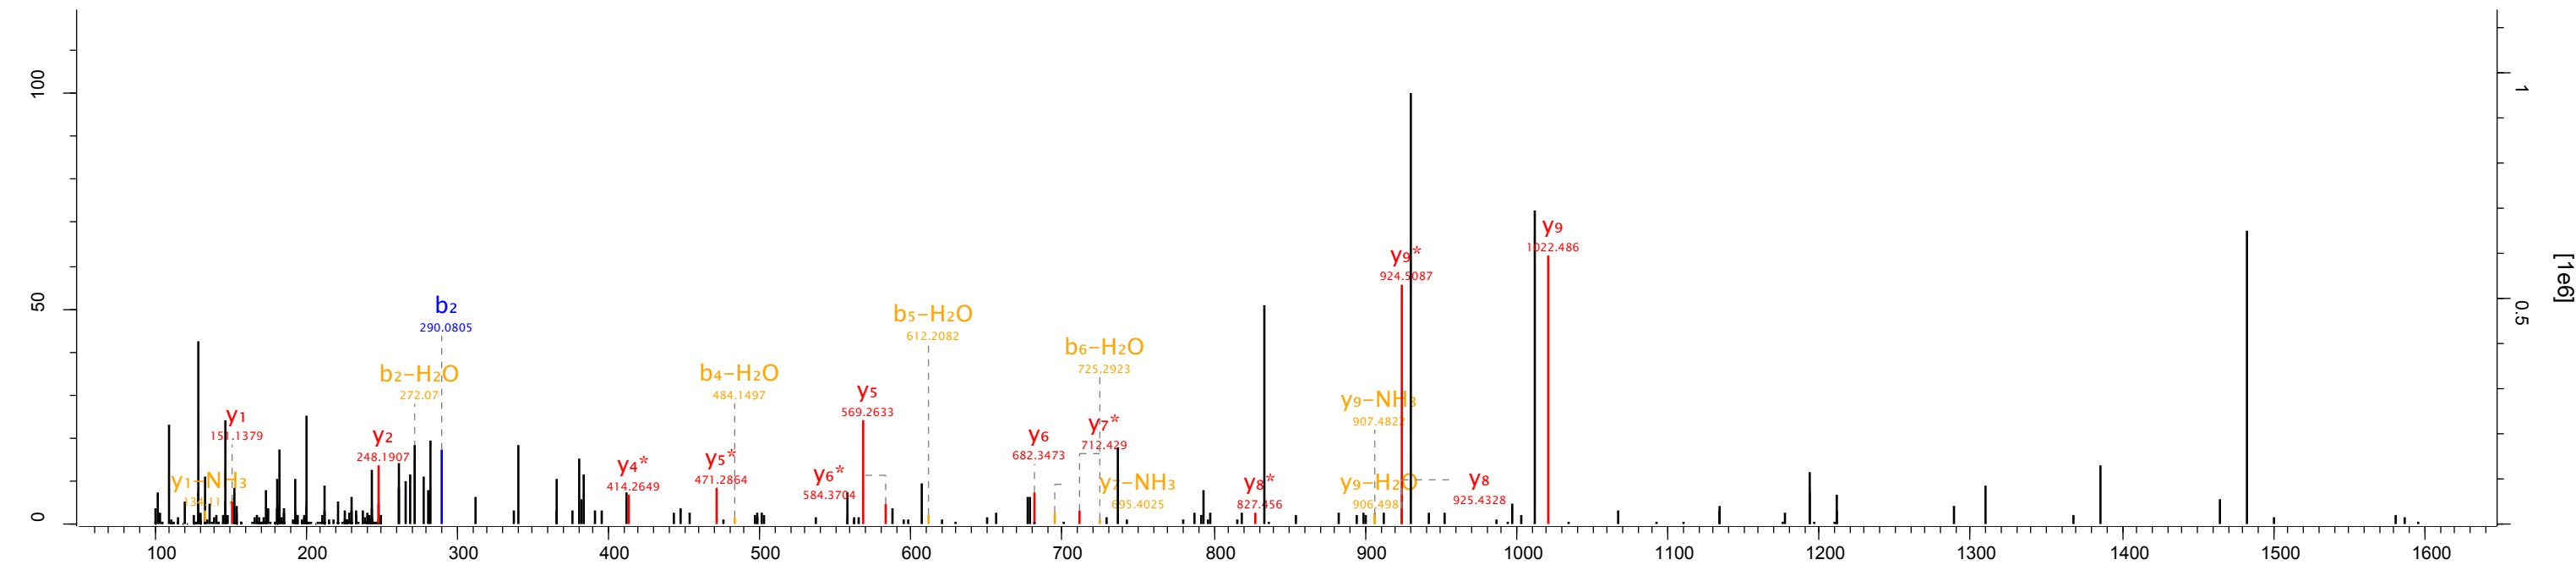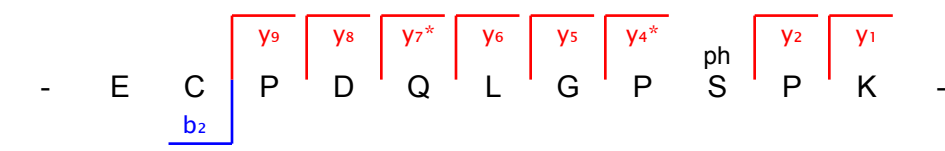

Raw file: 20150814\_A375SR\_Phospho\_BR2\_05  
 Scan: 9554 Method: FTMS; HCD Score: 136.46 m/z: 869.85 Gene names: EIF2B1

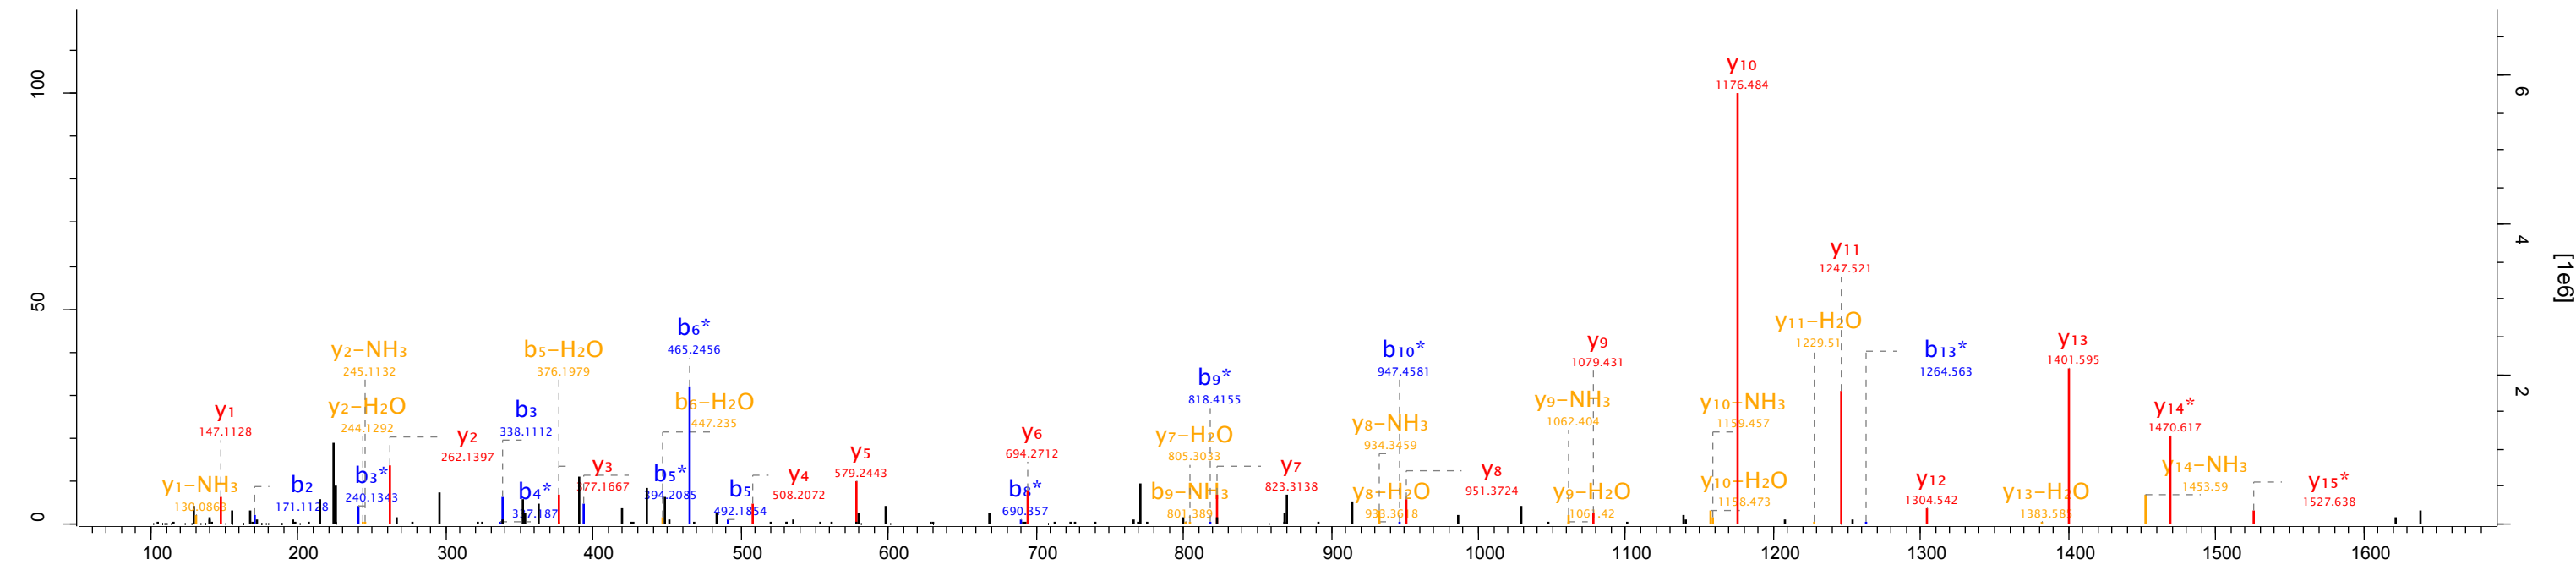

Protein sequence: L G S P G A P Q Q E D A M D D K -

Fragmentation sites (b and y ions) are indicated by boxes below the sequence:

- Red boxes (y ions): y15\* (G), y14\* (S), y13 (P), y12 (G), y11 (A), y10 (P), y9 (Q), y8 (Q), y7 (E), y6 (D), y5 (A), y4 (M), y3 (D), y2 (D), y1 (K).
- Blue boxes (b ions): b2 (G), b3 (S), b4\* (P), b5 (G), b6\* (A), b8\* (Q), b9\* (Q), b10\* (E), b13\* (M).

Raw file 20150814\_A375SR\_Phospho\_BR2\_06 Scan 10064 Method FTMS; HCD Score 117.65 m/z 556.6 Gene names STK17A

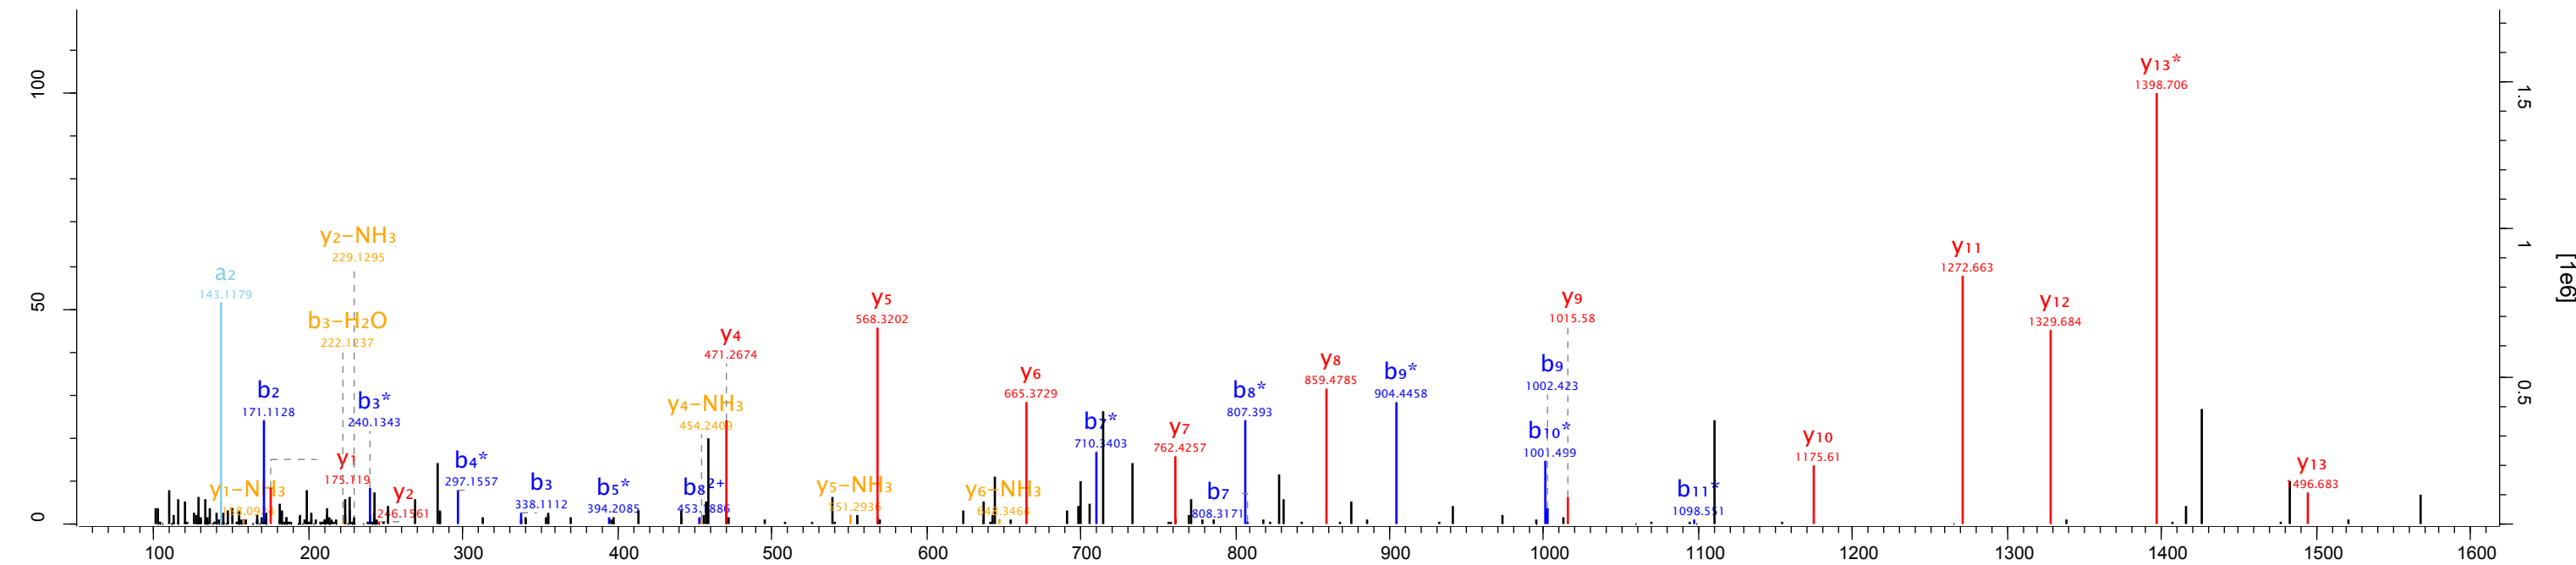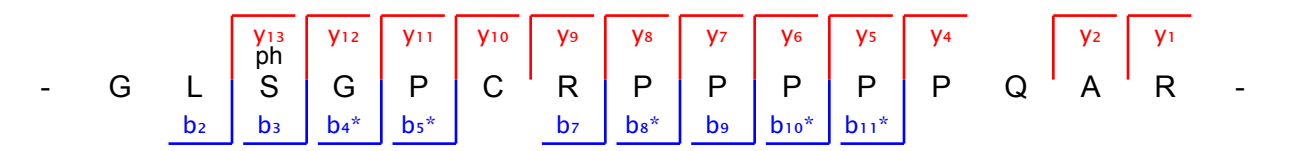

Raw file: 20150814\_A375SR\_Phospho\_BR2\_06  
 Scan: 10144 Method: FTMS; HCD Score: 108.72 m/z: 903.76 Gene names: RPRD2

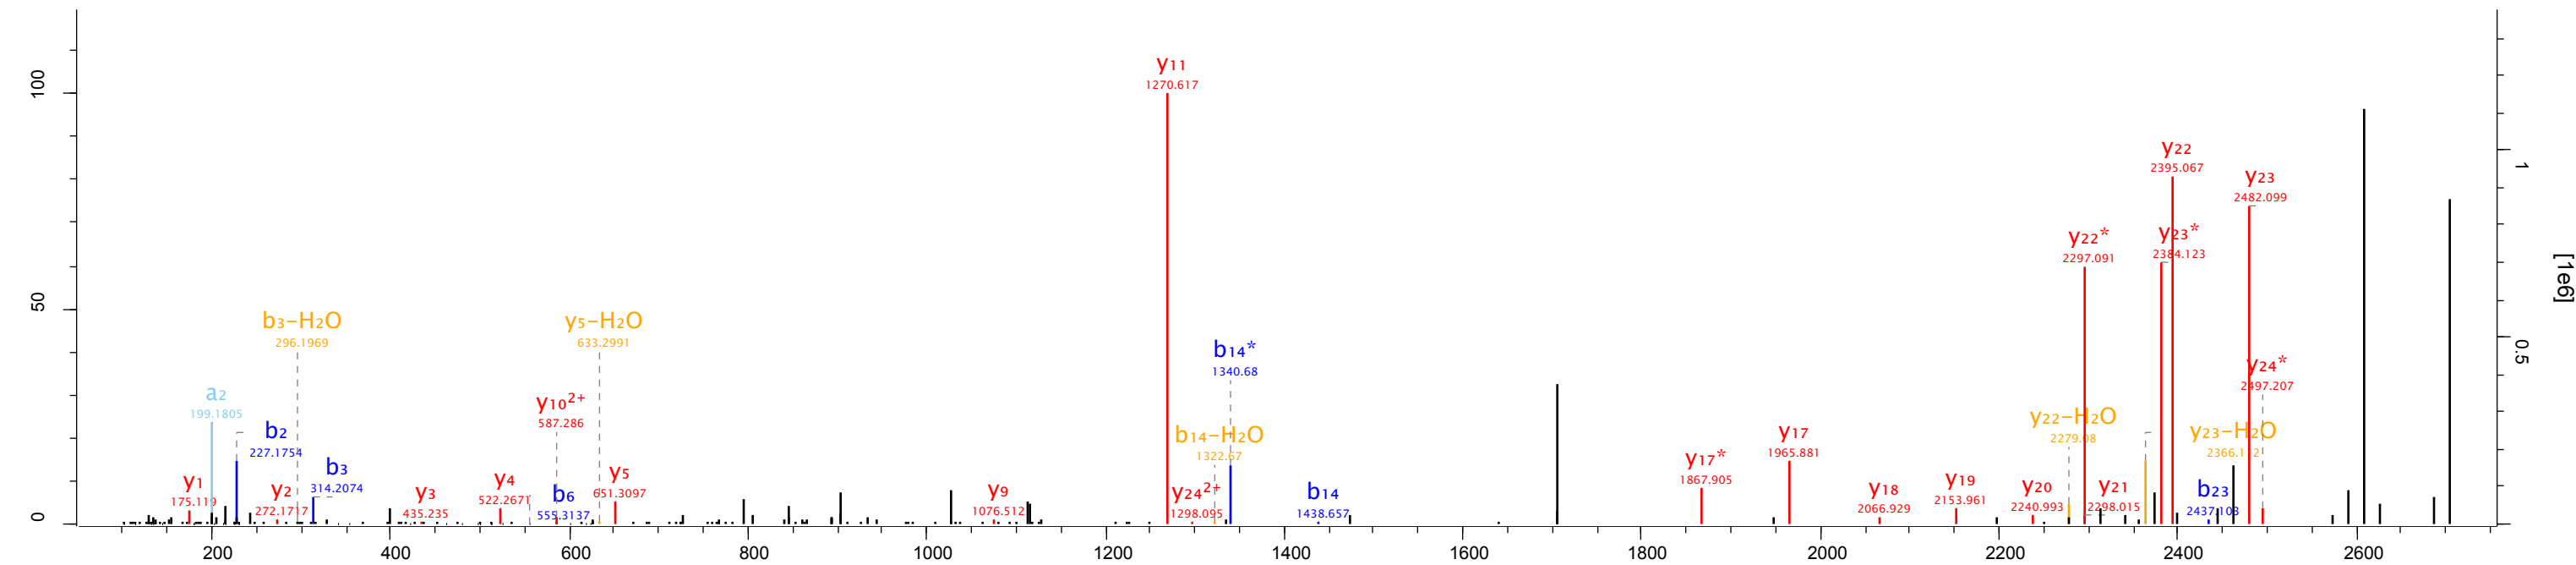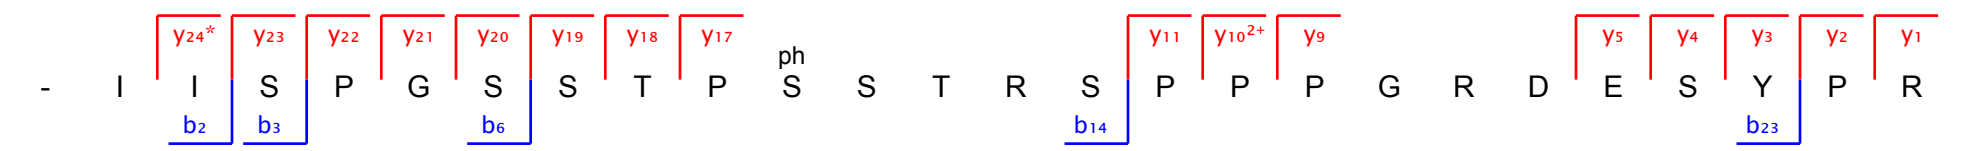

Raw file: 20150814\_A375SR\_Phospho\_BR2\_06  
 Scan: 10534 Method: FTMS; HCD Score: 99.08 m/z: 670.99 Gene names: CEP131

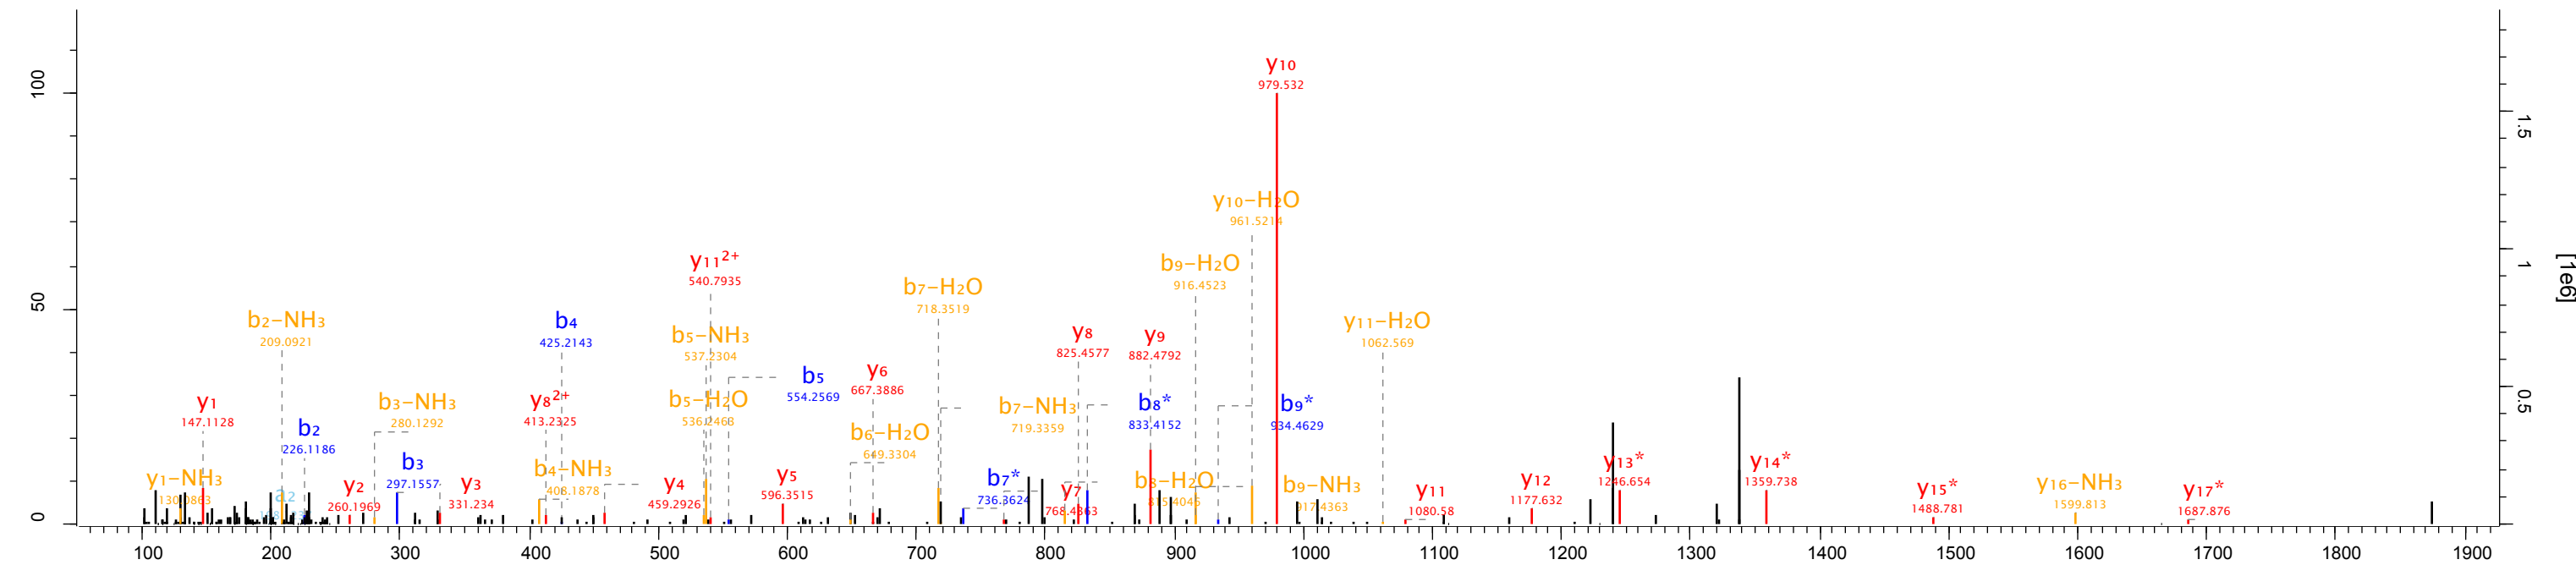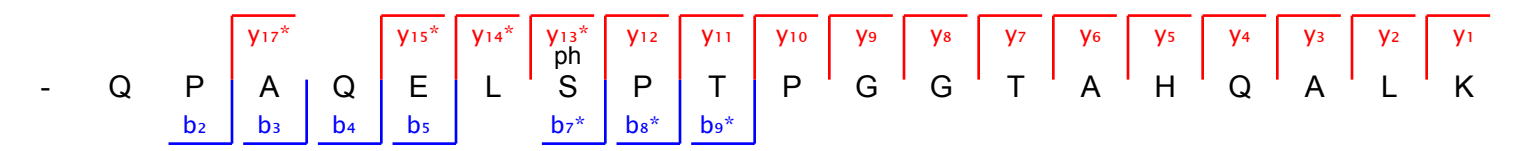



Raw file 20150814\_A375SR\_Phospho\_BR2\_06 Scan 10764 Method FTMS; HCD Score 81.57 m/z 608.75 Gene names ZDHHC5

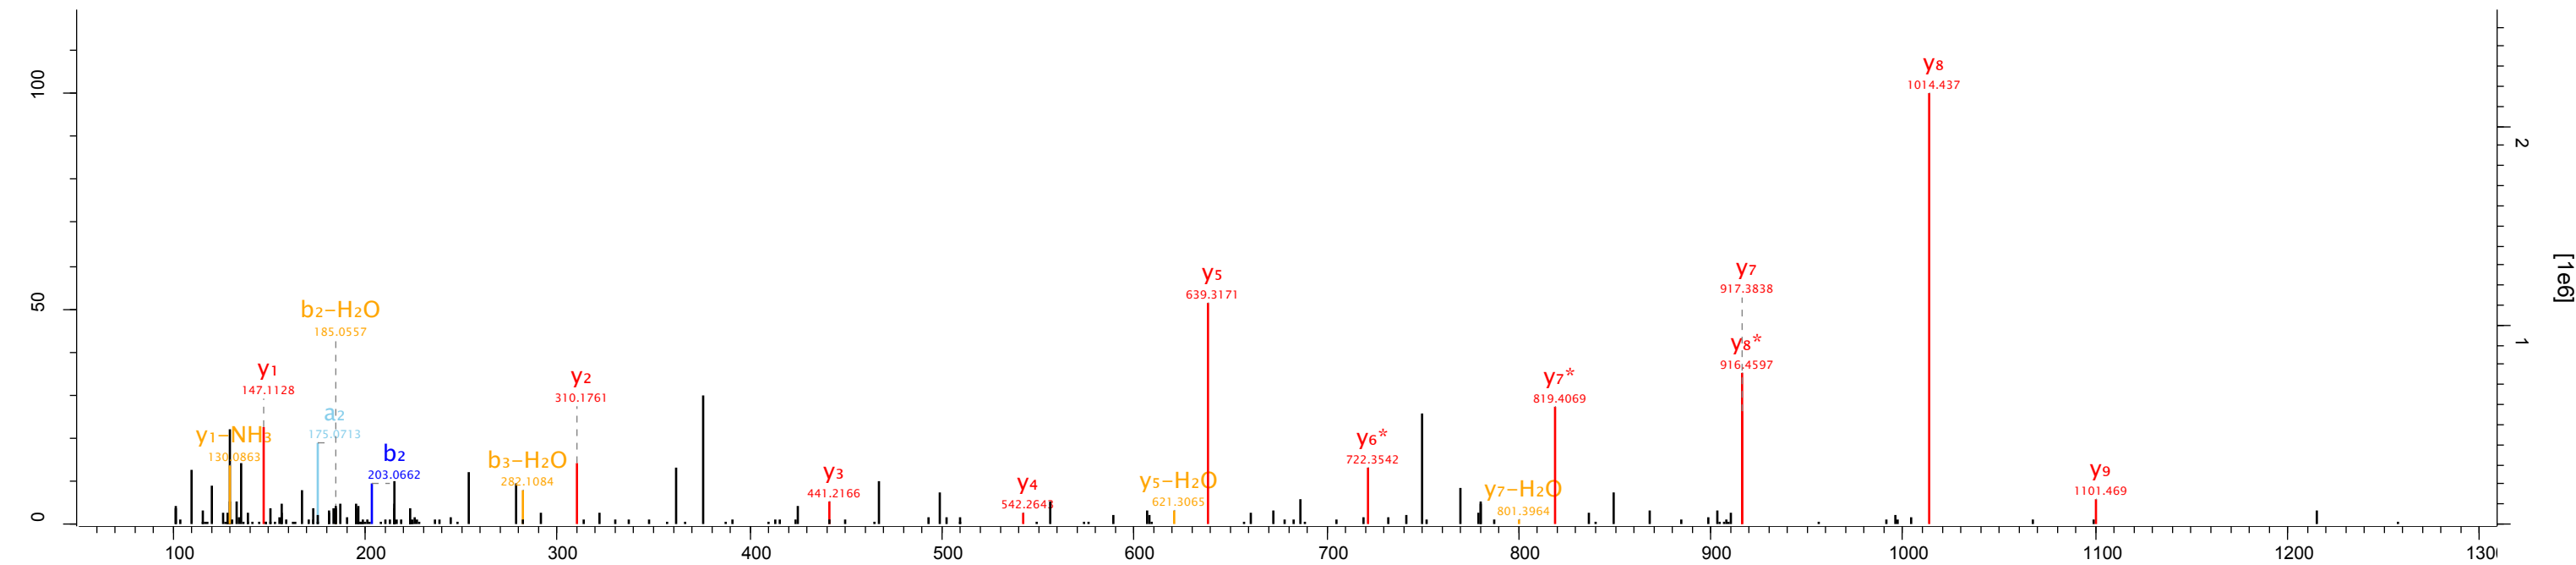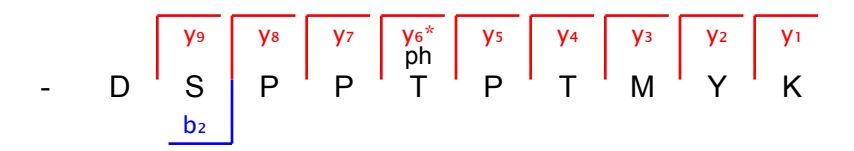

Raw file 20150814\_A375SR\_Phospho\_BR2\_06 Scan 10884 Method FTMS; HCD Score 107.51 m/z 718.33 Gene names NDRG2

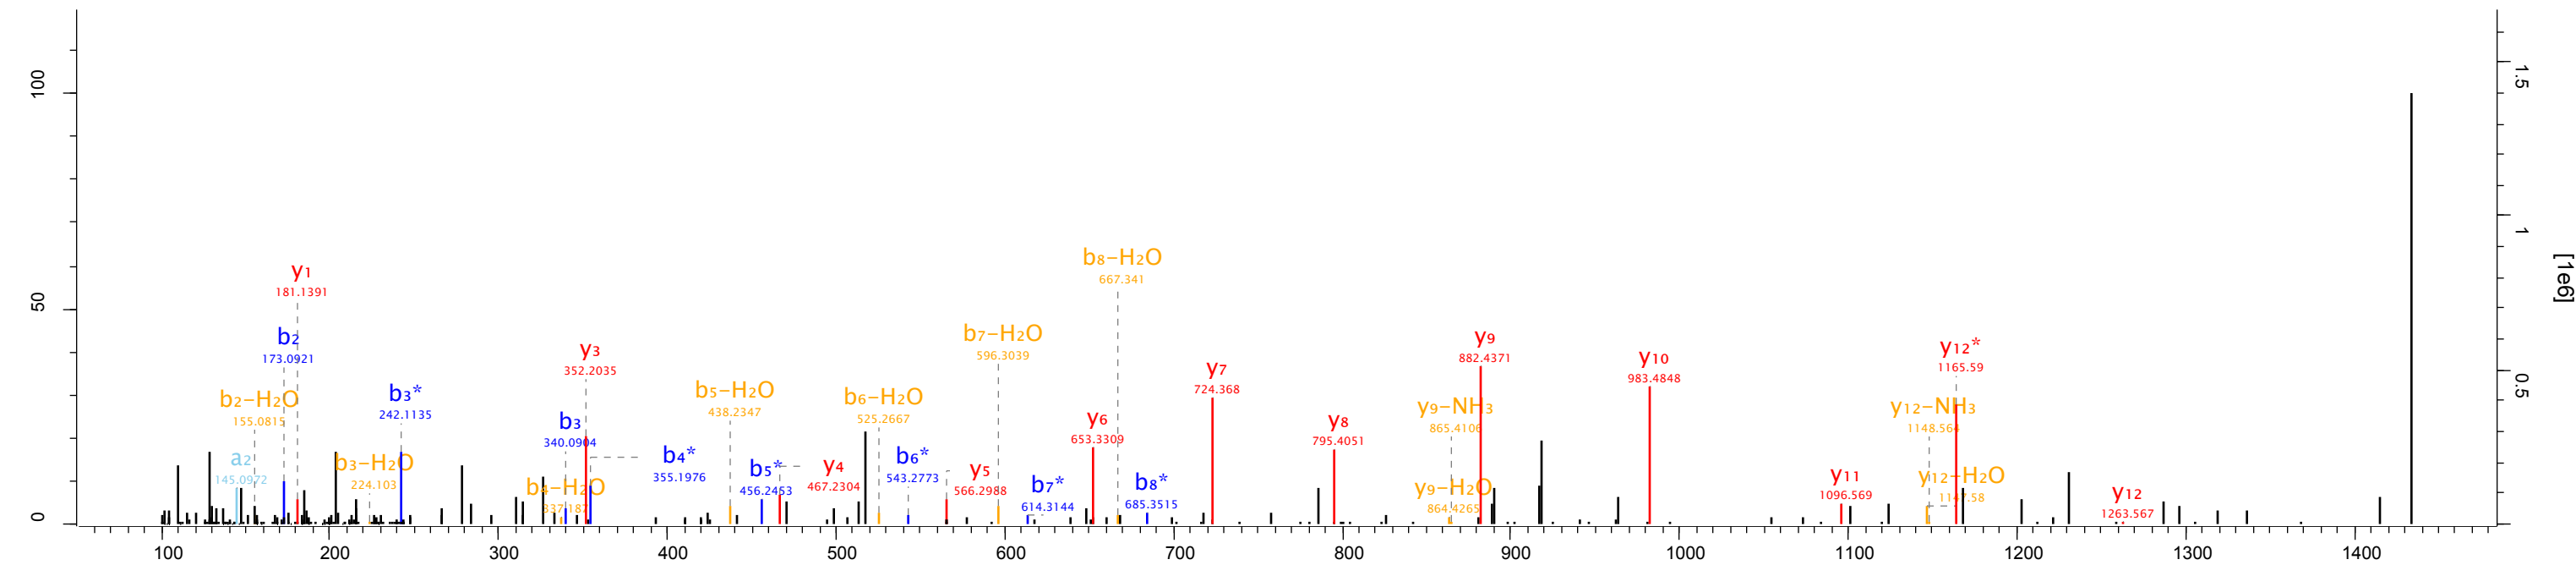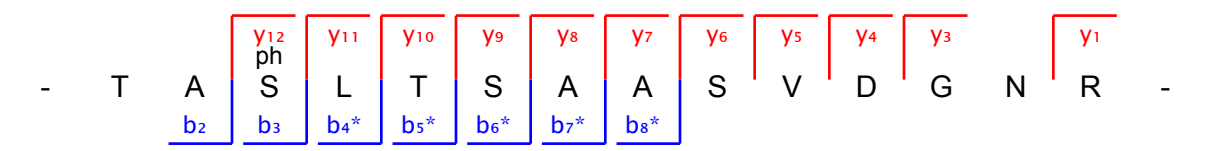

Raw file: 20150814\_A375SR\_Phospho\_BR2\_06  
 Scan: 10904 Method: FTMS; HCD Score: 104.53 m/z: 535.73 Gene names: BCAR3

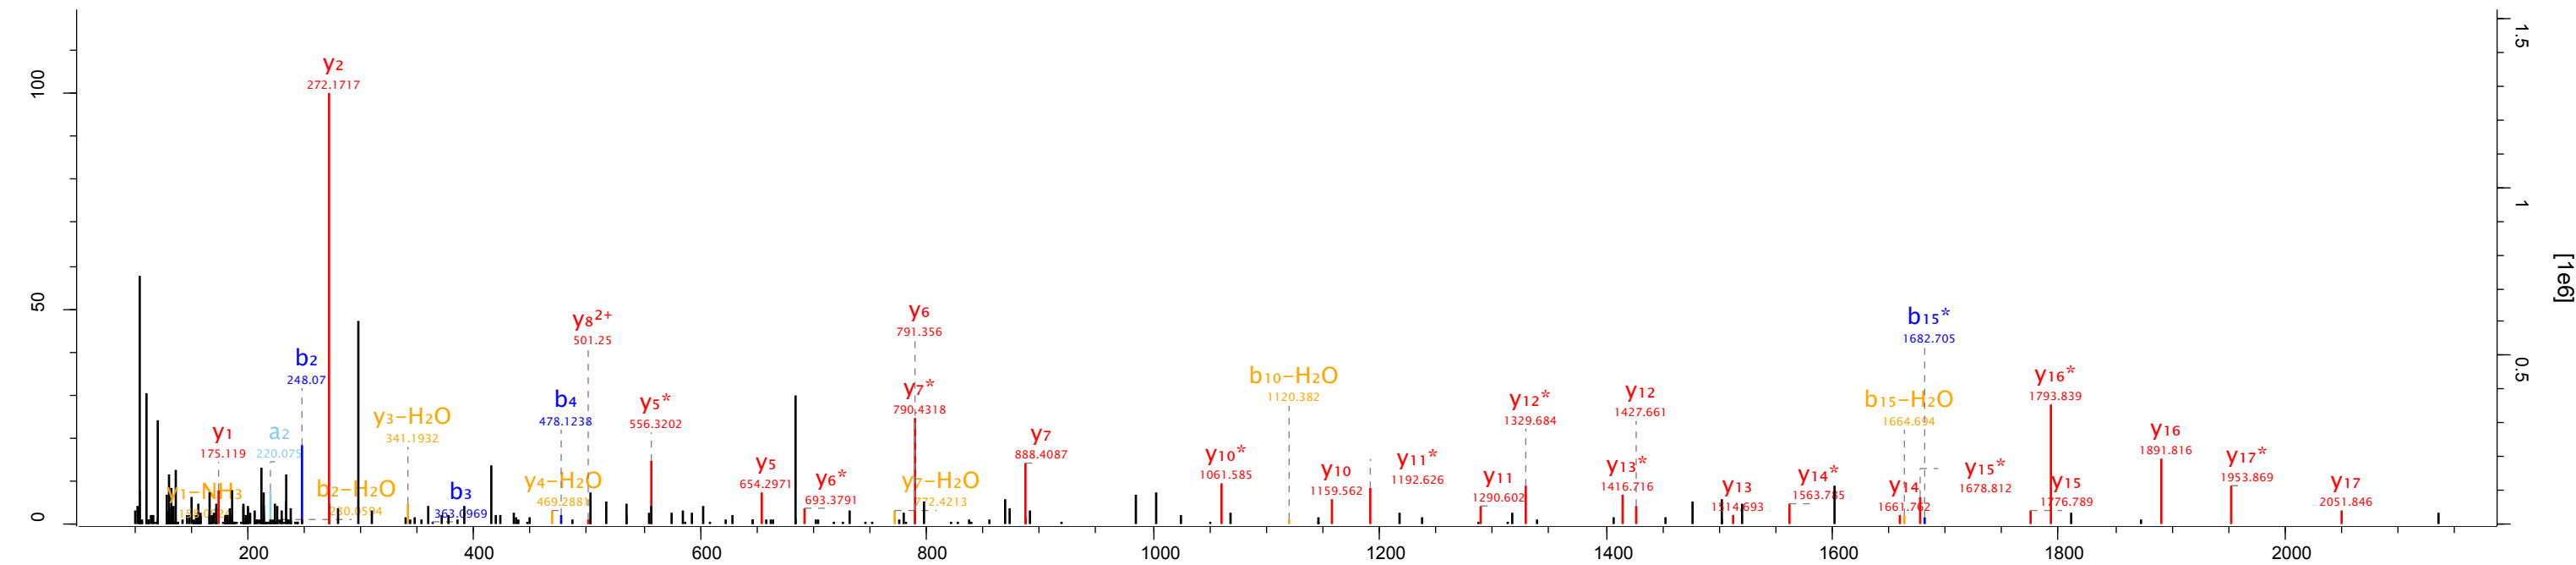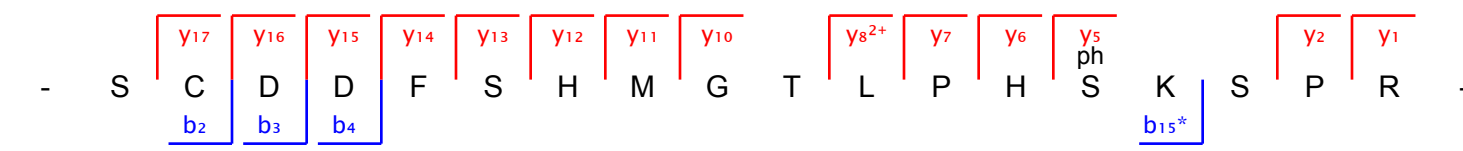



Raw file: 20150814\_A375SR\_Phospho\_BR2\_06  
 Scan: 11424 Method: FTMS; HCD Score: 107.78 m/z: 639.97 Gene names: SRRM2

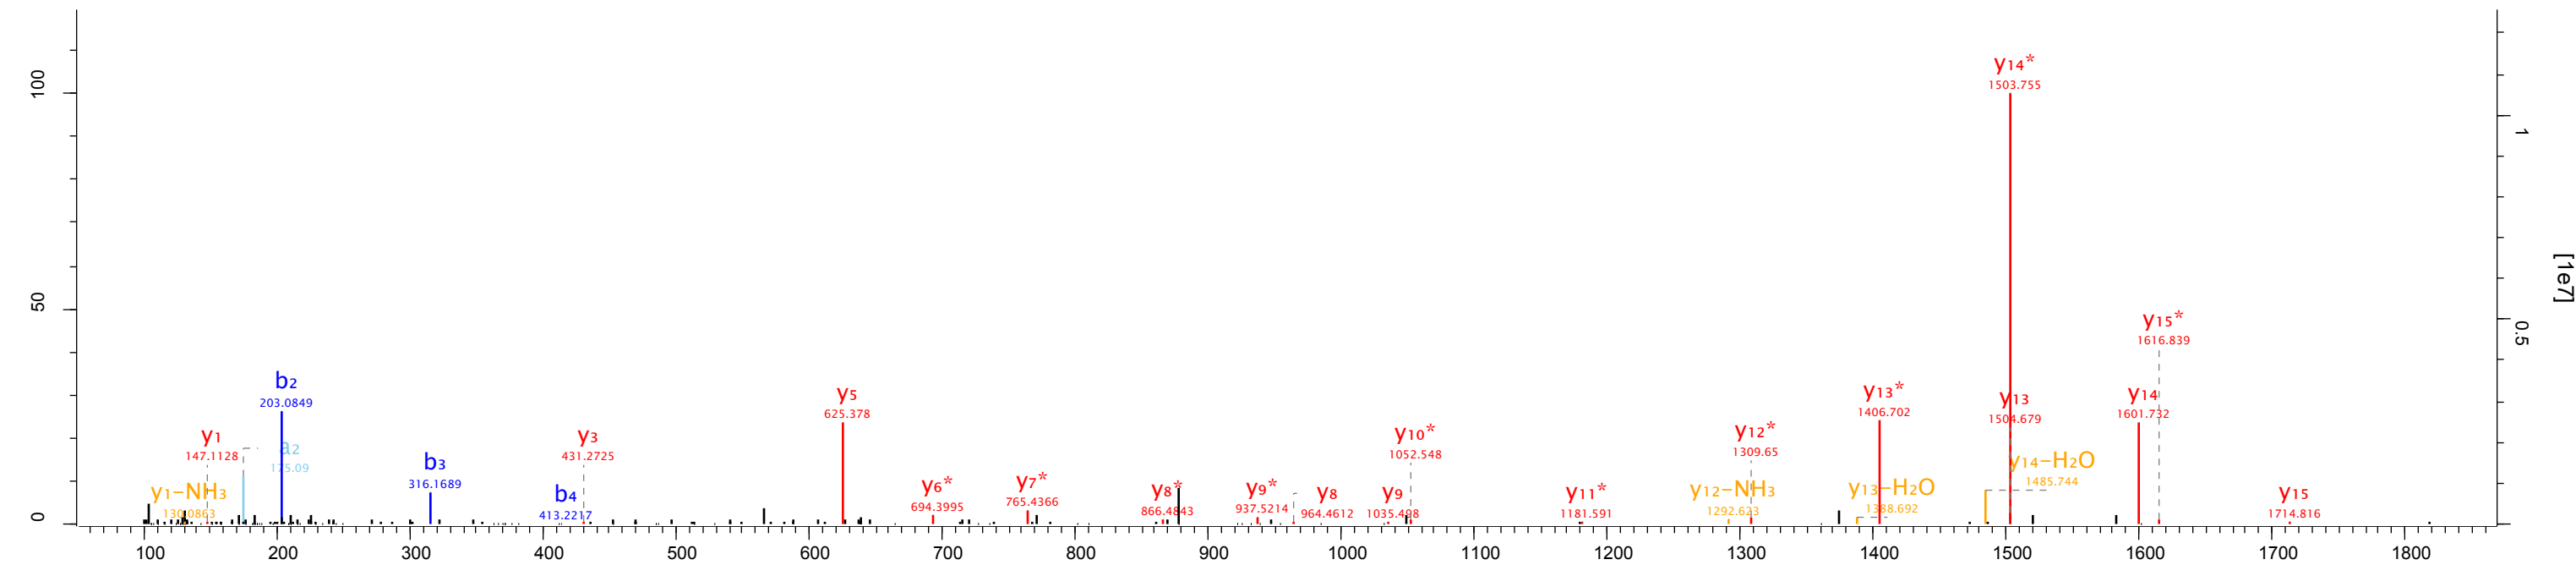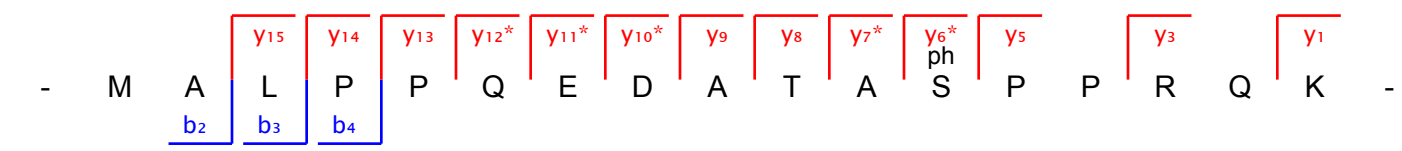

Raw file: 20150814\_A375SR\_Phospho\_BR2\_06  
 Scan: 11674 Method: FTMS; HCD Score: 151.7 m/z: 533.76 Gene names: PDCD4

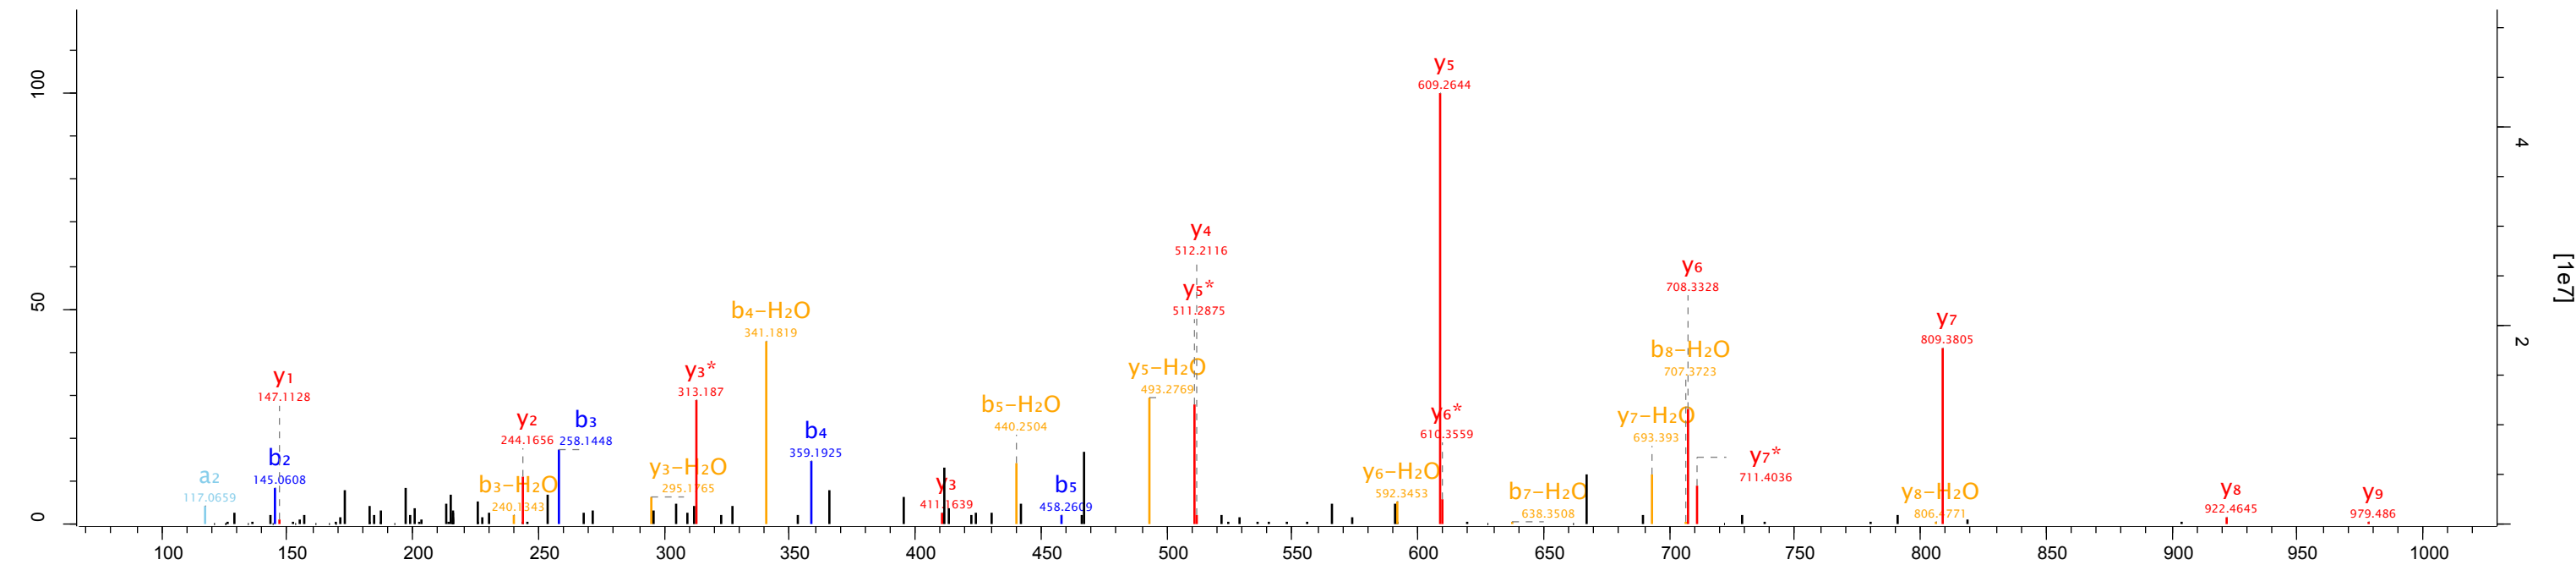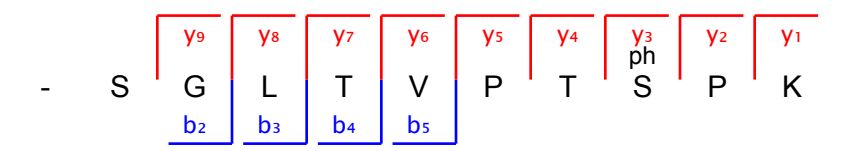

Raw file 20150814\_A375SR\_Phospho\_BR2\_06 Scan 11884 Method FTMS; HCD Score 130.49 m/z 900.37 Gene names BAT3;BAG6

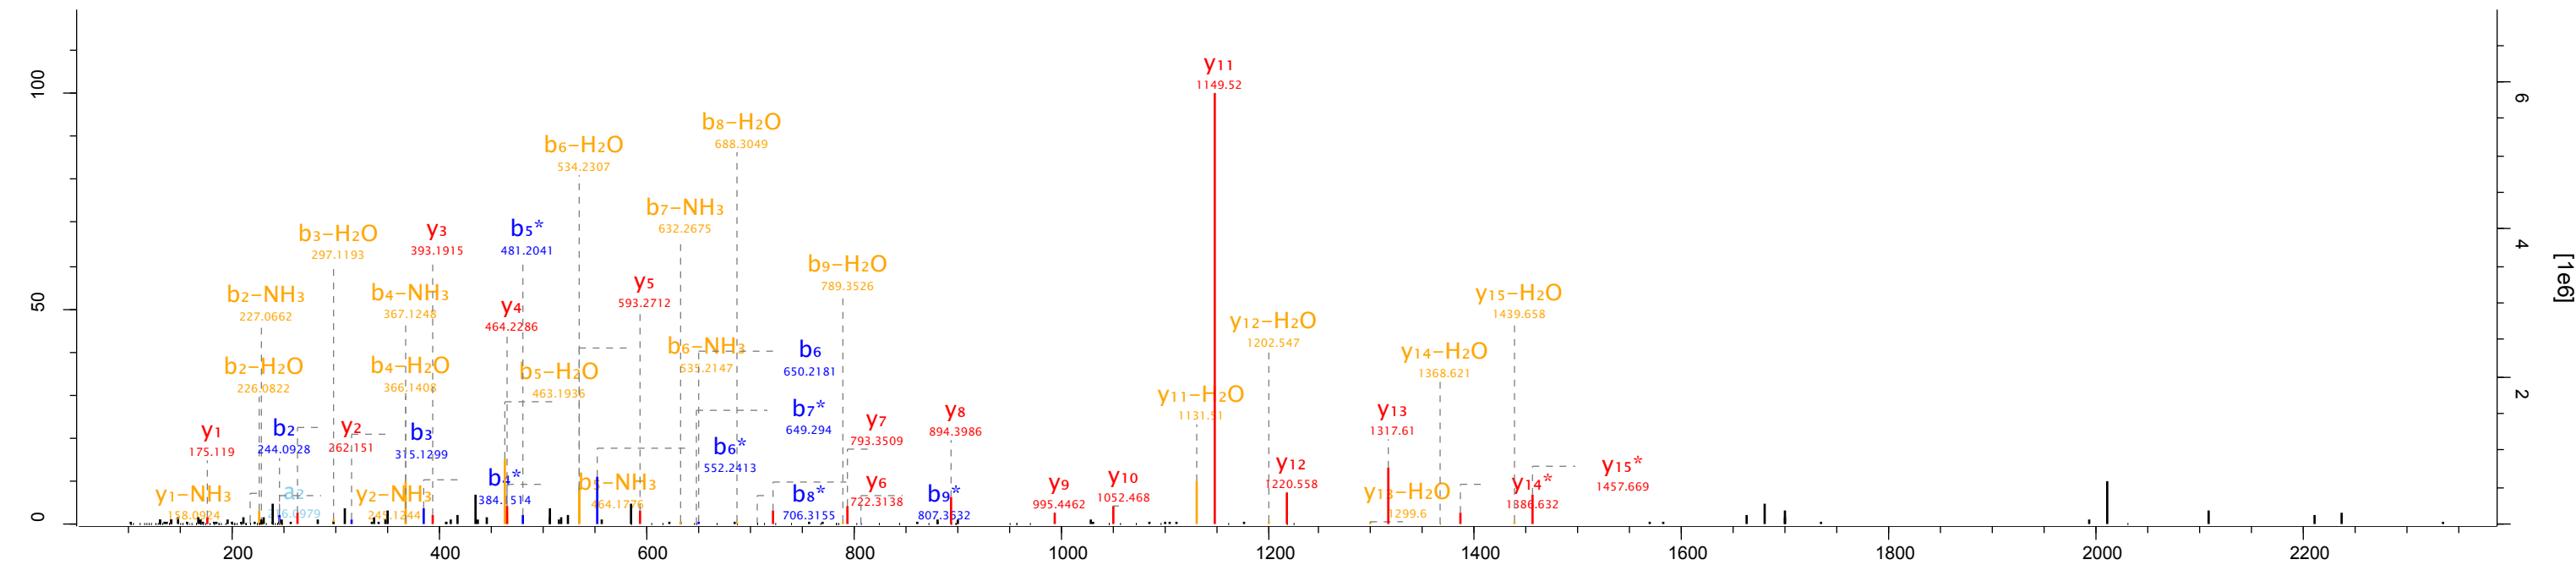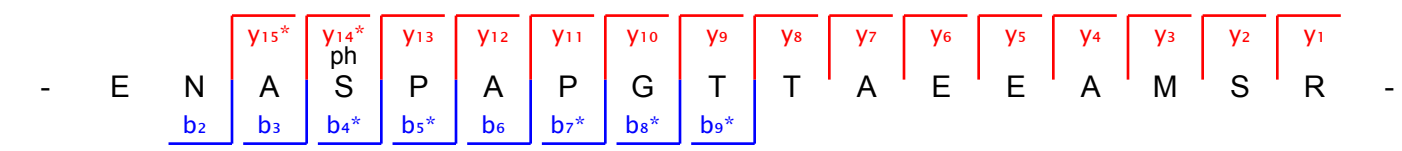

Raw file: 20150814\_A375SR\_Phospho\_BR2\_06  
 Scan: 12174 Method: FTMS; HCD Score: 65.9 m/z: 671.85 Gene names: CHAMP1

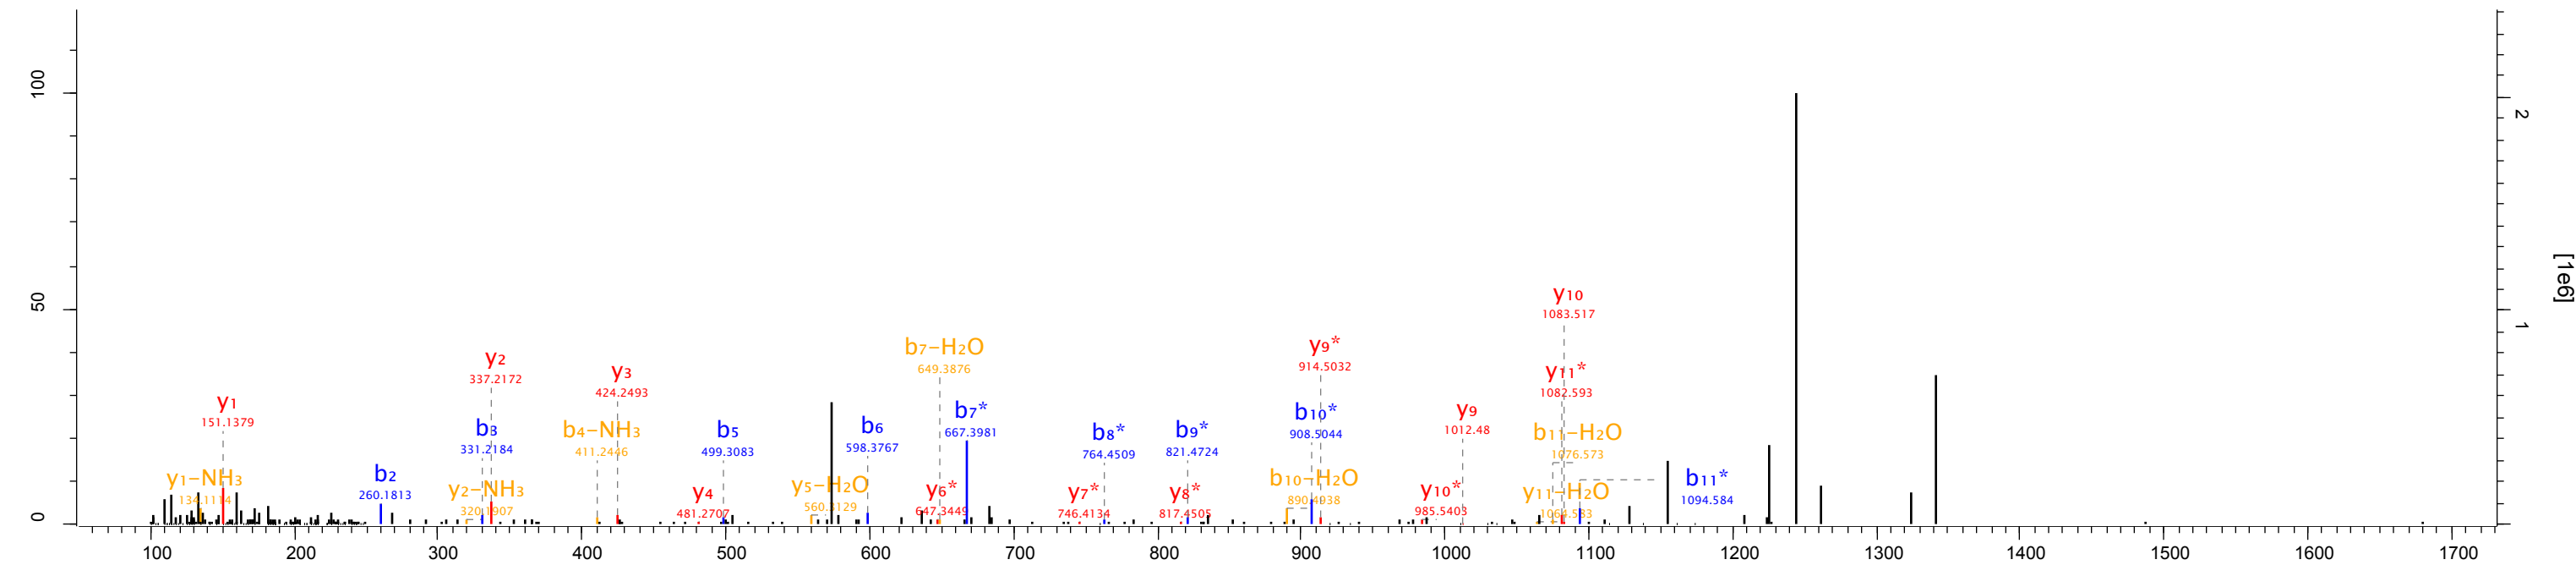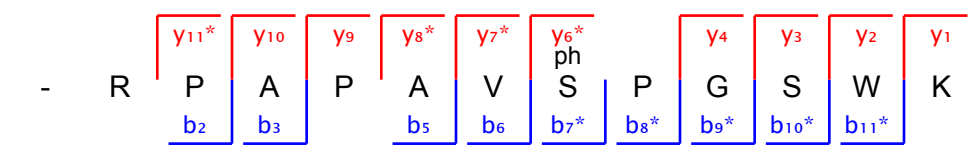



Raw file: 20150814\_A375SR\_Phospho\_BR2\_06  
 Scan: 13034 Method: FTMS; HCD Score: 241.36 m/z: 1048.96 Gene names: AKAP12

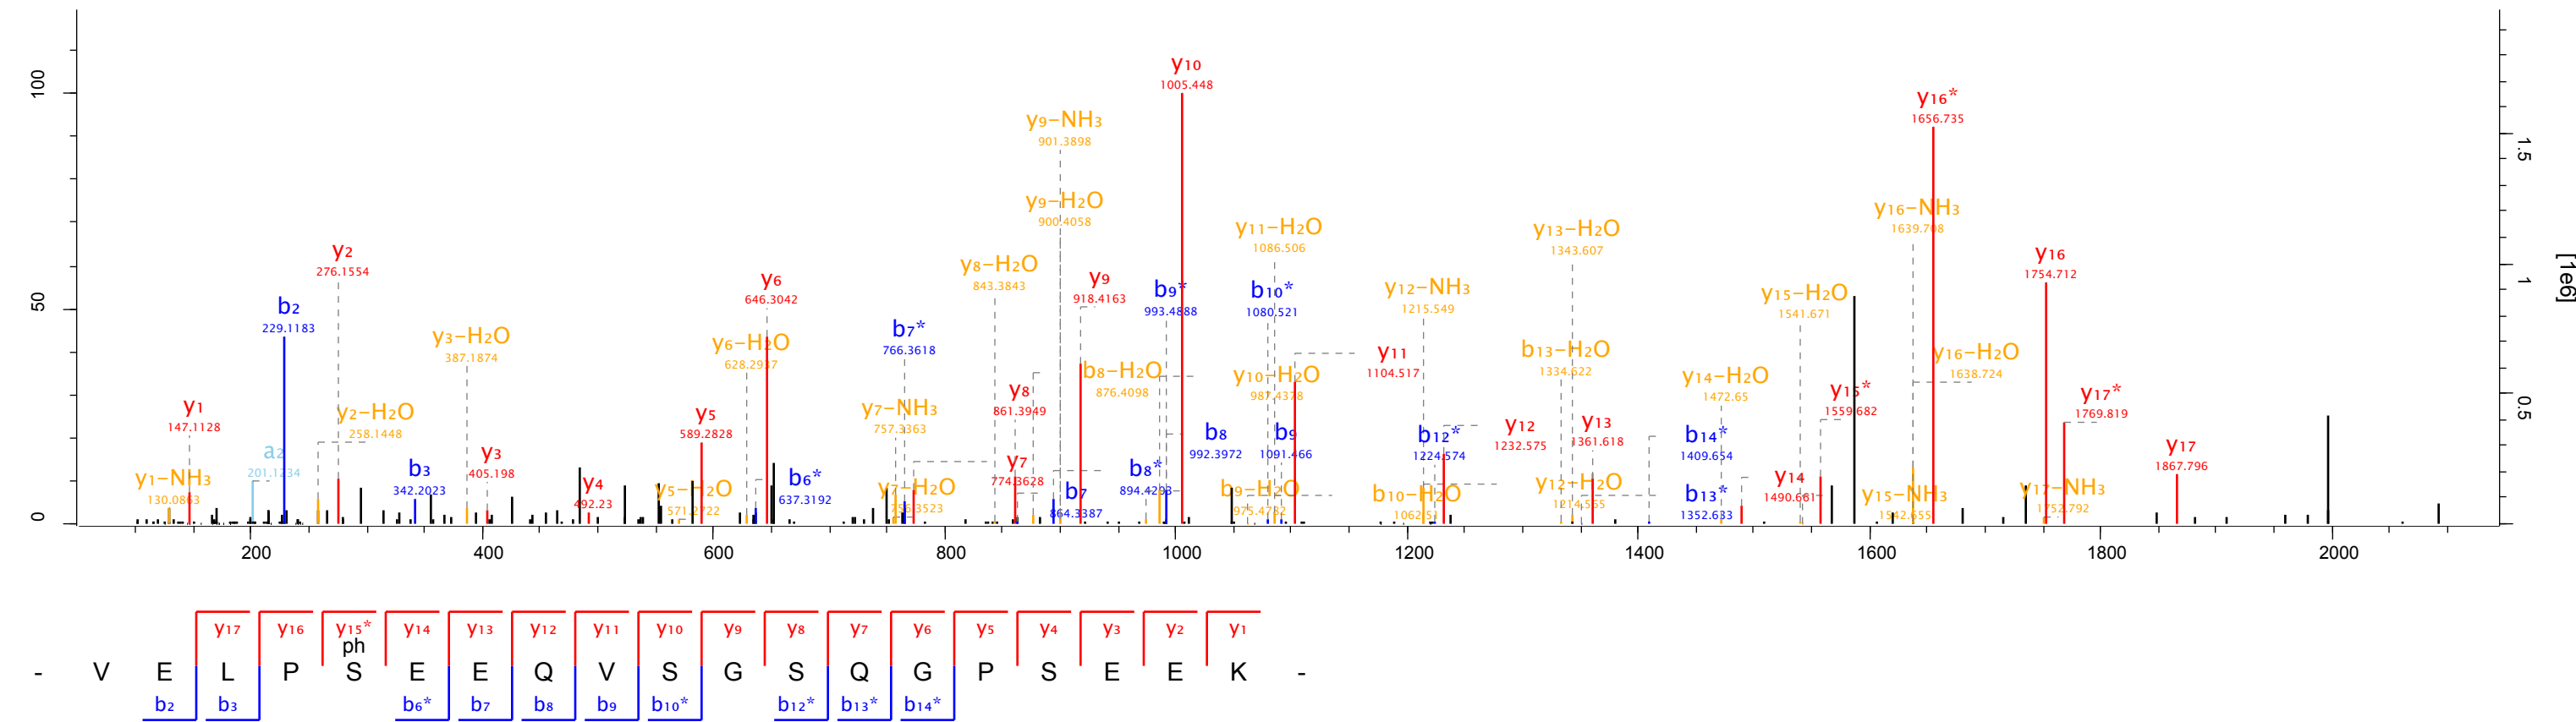

Raw file: 20150814\_A375SR\_Phospho\_BR2\_06  
 Scan: 13204 Method: FTMS; HCD Score: 48.89 m/z: 577.76 Gene names: PPIA1

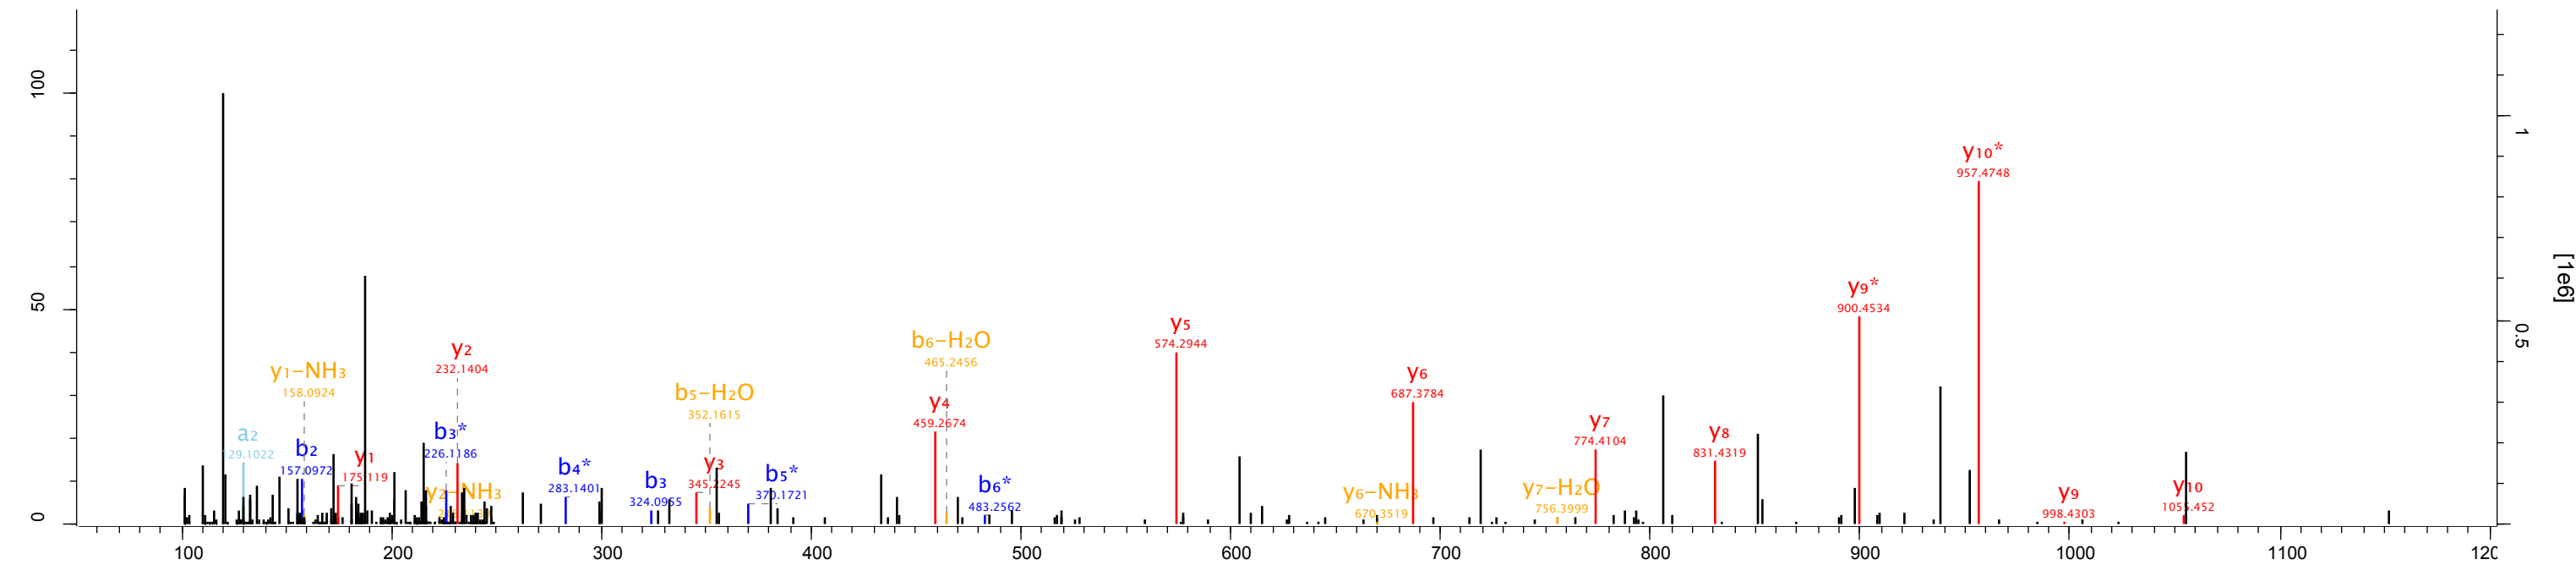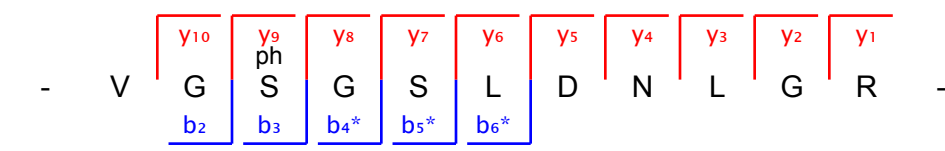

Raw file: 20150814\_A375SR\_Phospho\_BR2\_06  
 Scan: 13374 Method: FTMS; HCD Score: 67.65 m/z: 619.78 Gene names: ARHGEF11

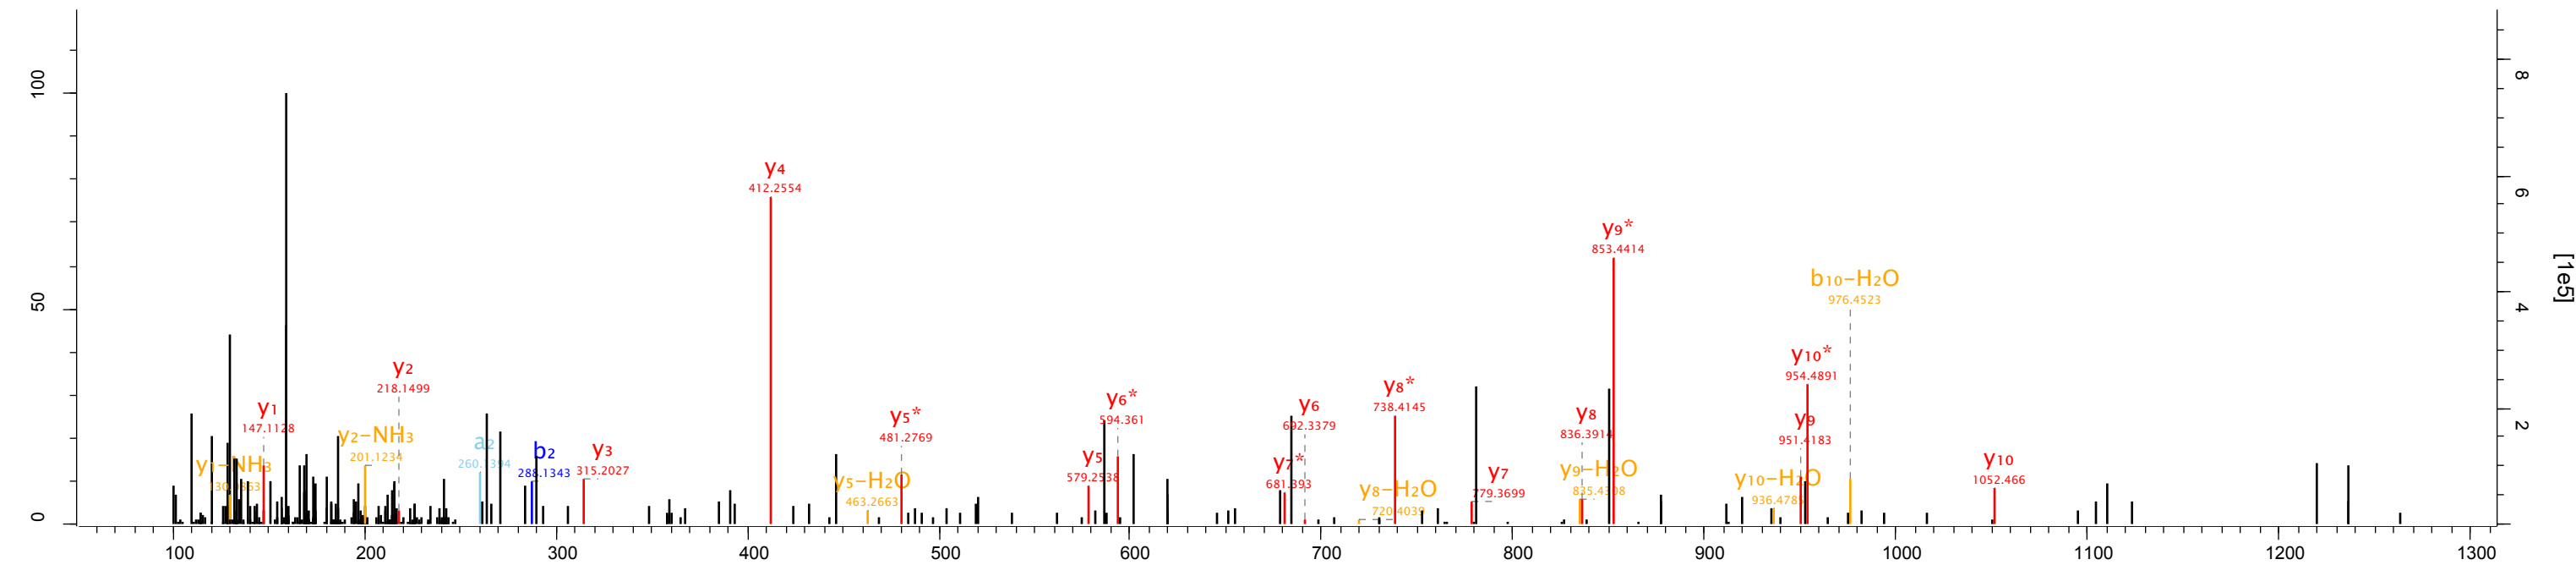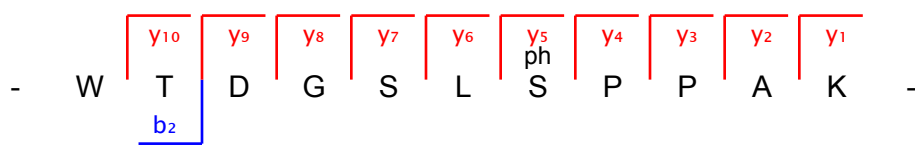

Raw file: 20150814\_A375SR\_Phospho\_BR2\_06  
 Scan: 13664 Method: FTMS; HCD Score: 197.1 m/z: 737.38 Gene names: DNM1L

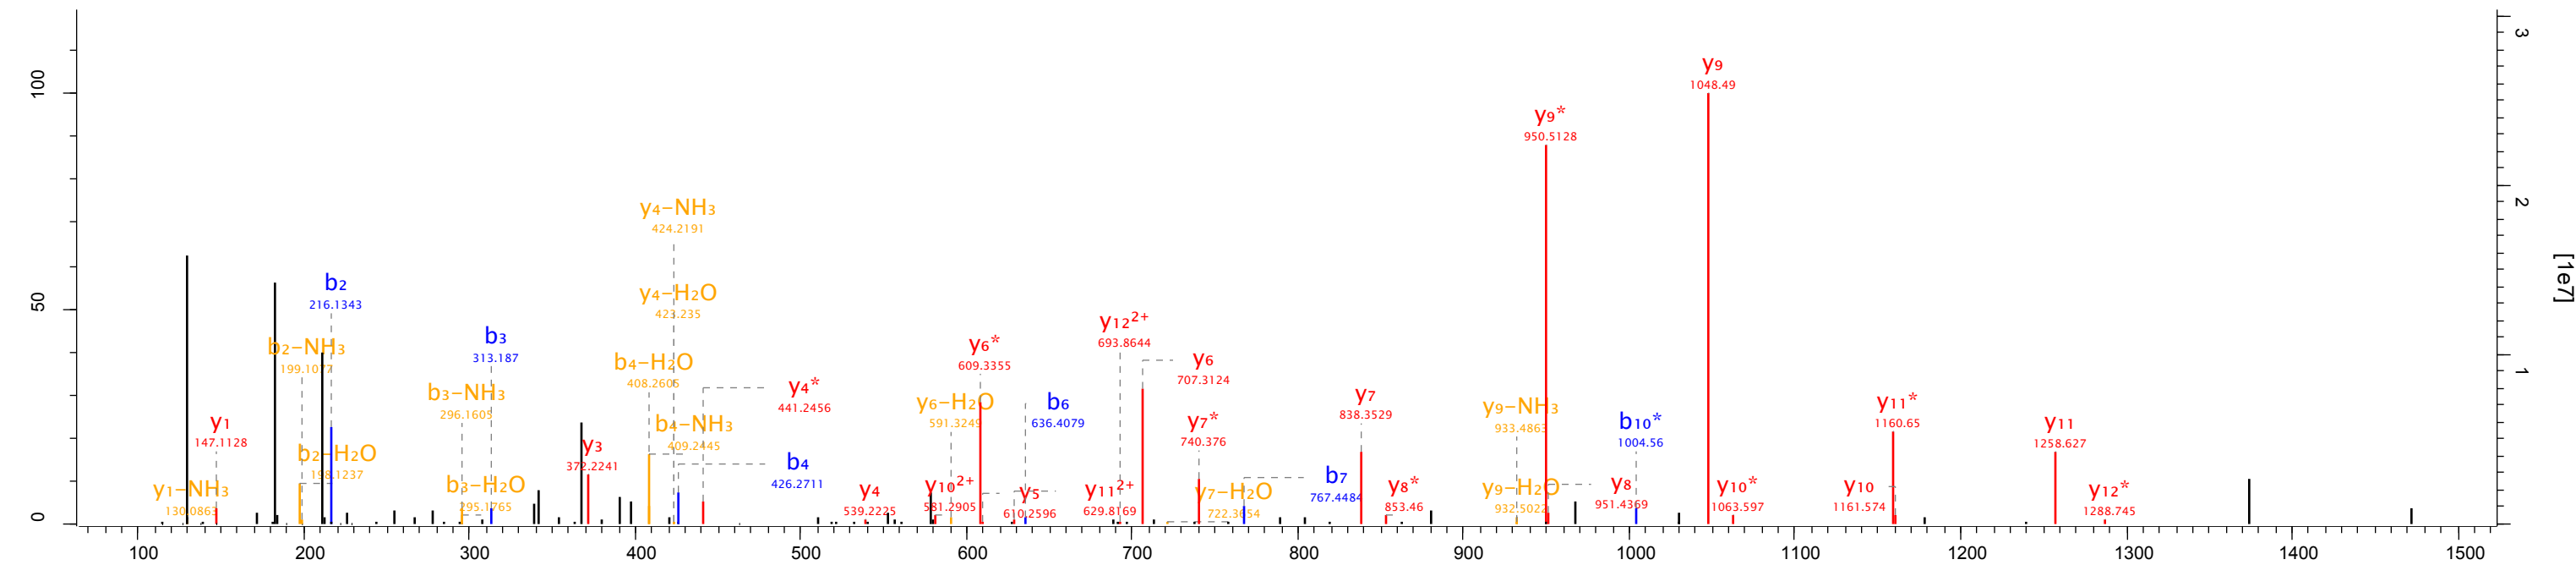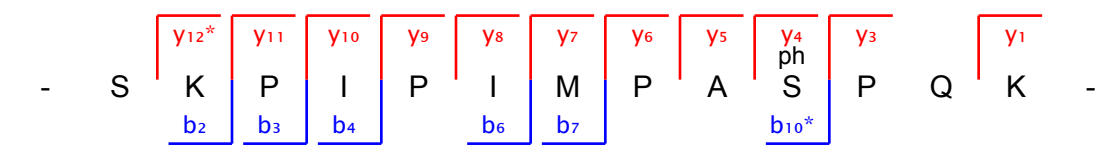

Raw file: 20150814\_A375SR\_Phospho\_BR2\_06  
 Scan: 13894 Method: FTMS; HCD Score: 316.27 m/z: 848.93 Gene names: PI4KB

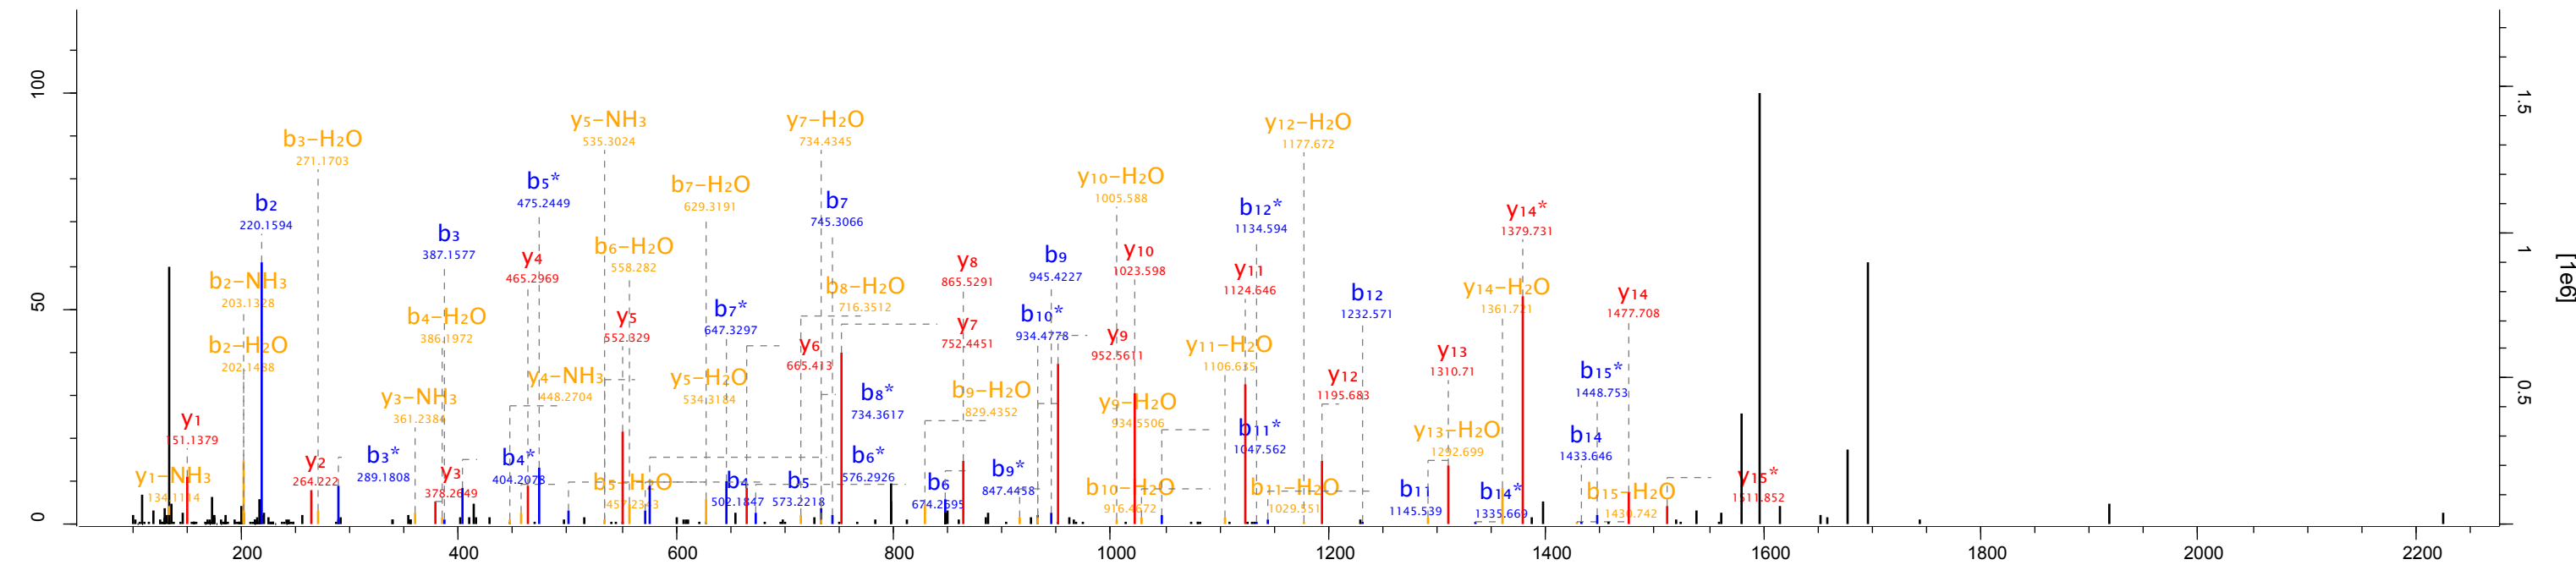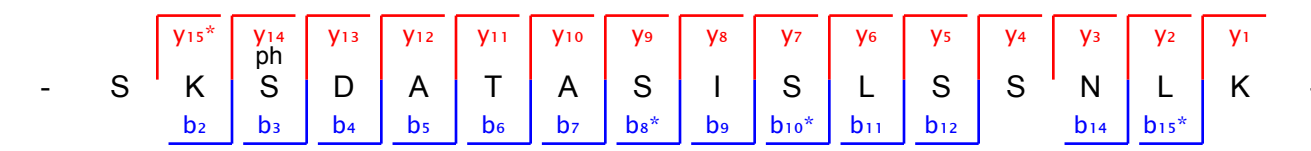

Raw file: 20150814\_A375SR\_Phospho\_BR2\_06  
 Scan: 14014 Method: FTMS; HCD Score: 305.56 m/z: 1004.47 Gene names: BAIAP2L1

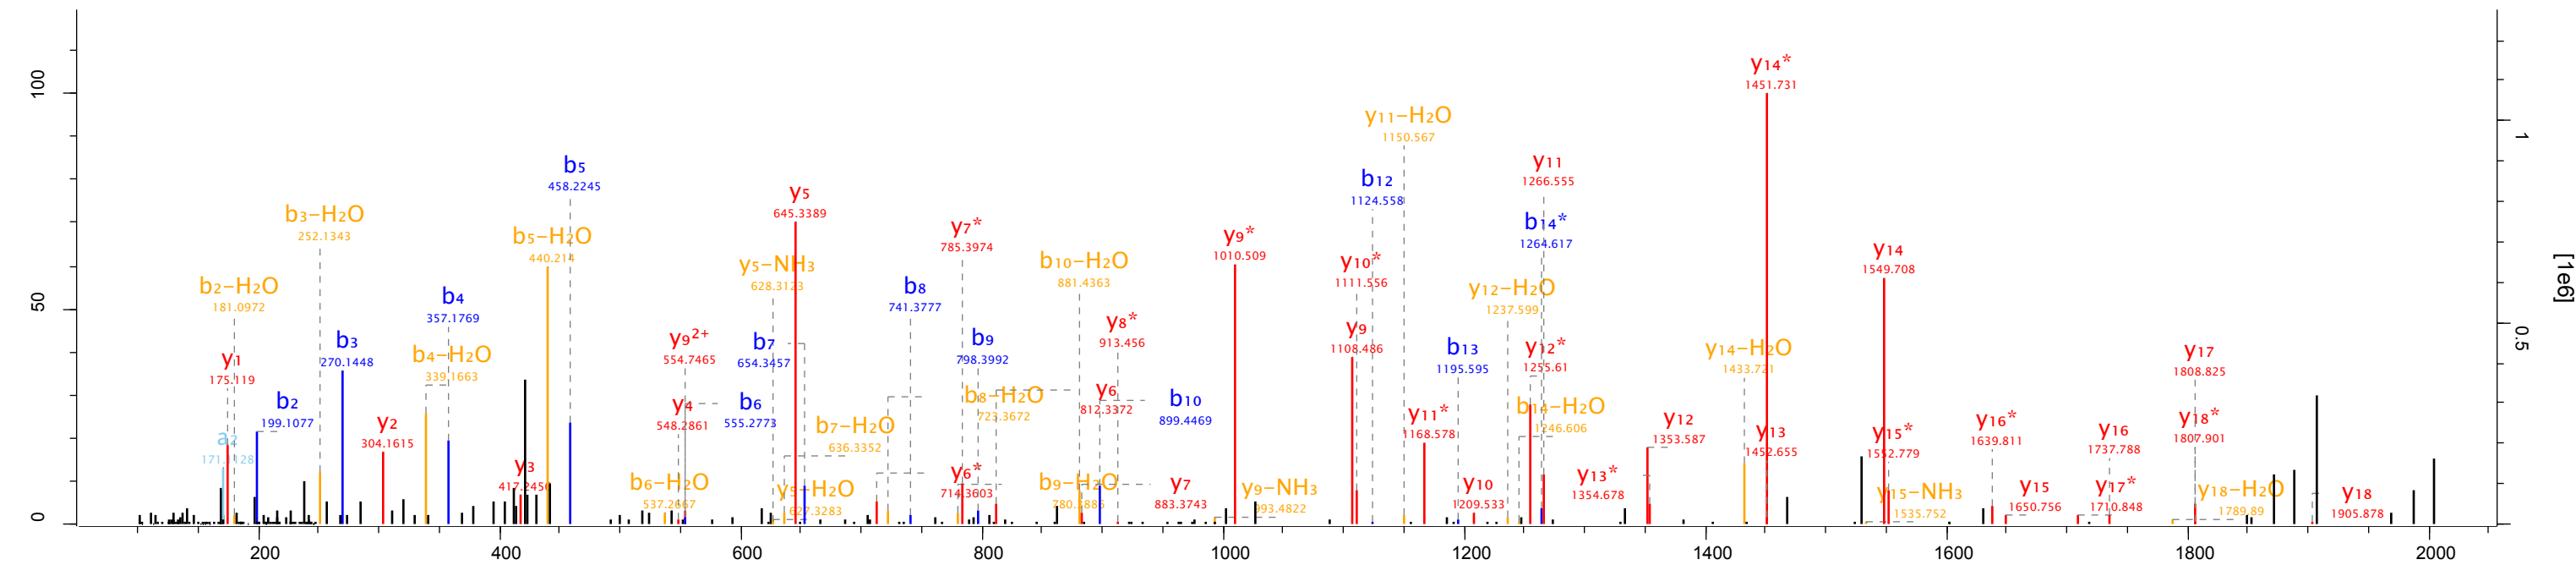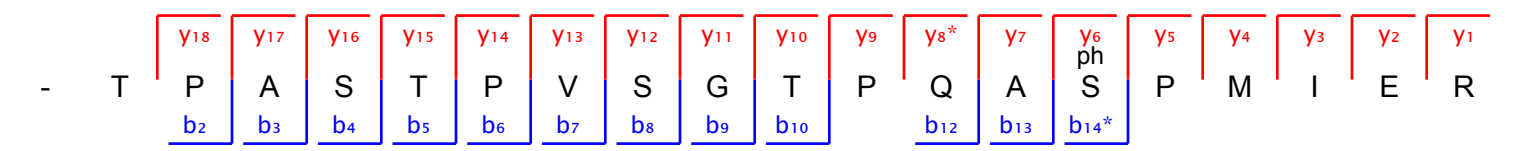

Raw file: 20150814\_A375SR\_Phospho\_BR2\_06  
 Scan: 14224 Method: FTMS; HCD Score: 74.81 m/z: 895.79 Gene names: SORBS2

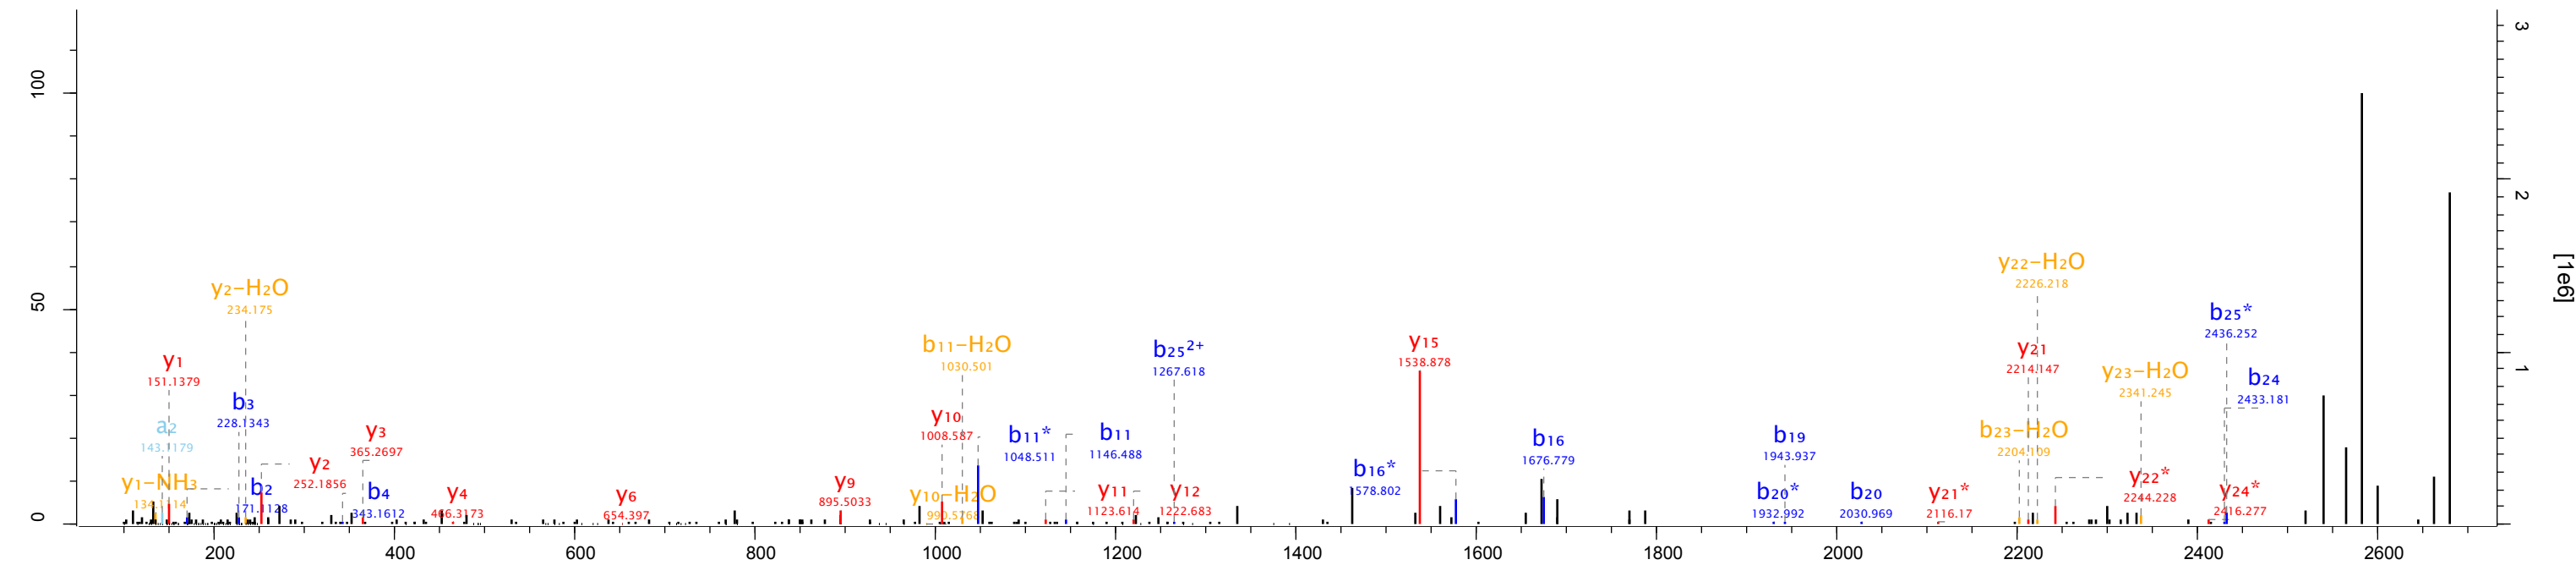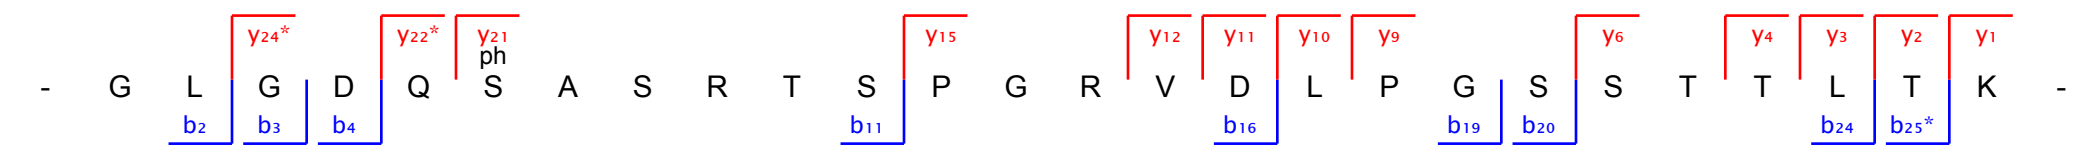

Raw file: 20150814\_A375SR\_Phospho\_BR2\_06  
 Scan: 14284 Method: FTMS; HCD Score: 153.25 m/z: 897.4 Gene names: ZC3H13

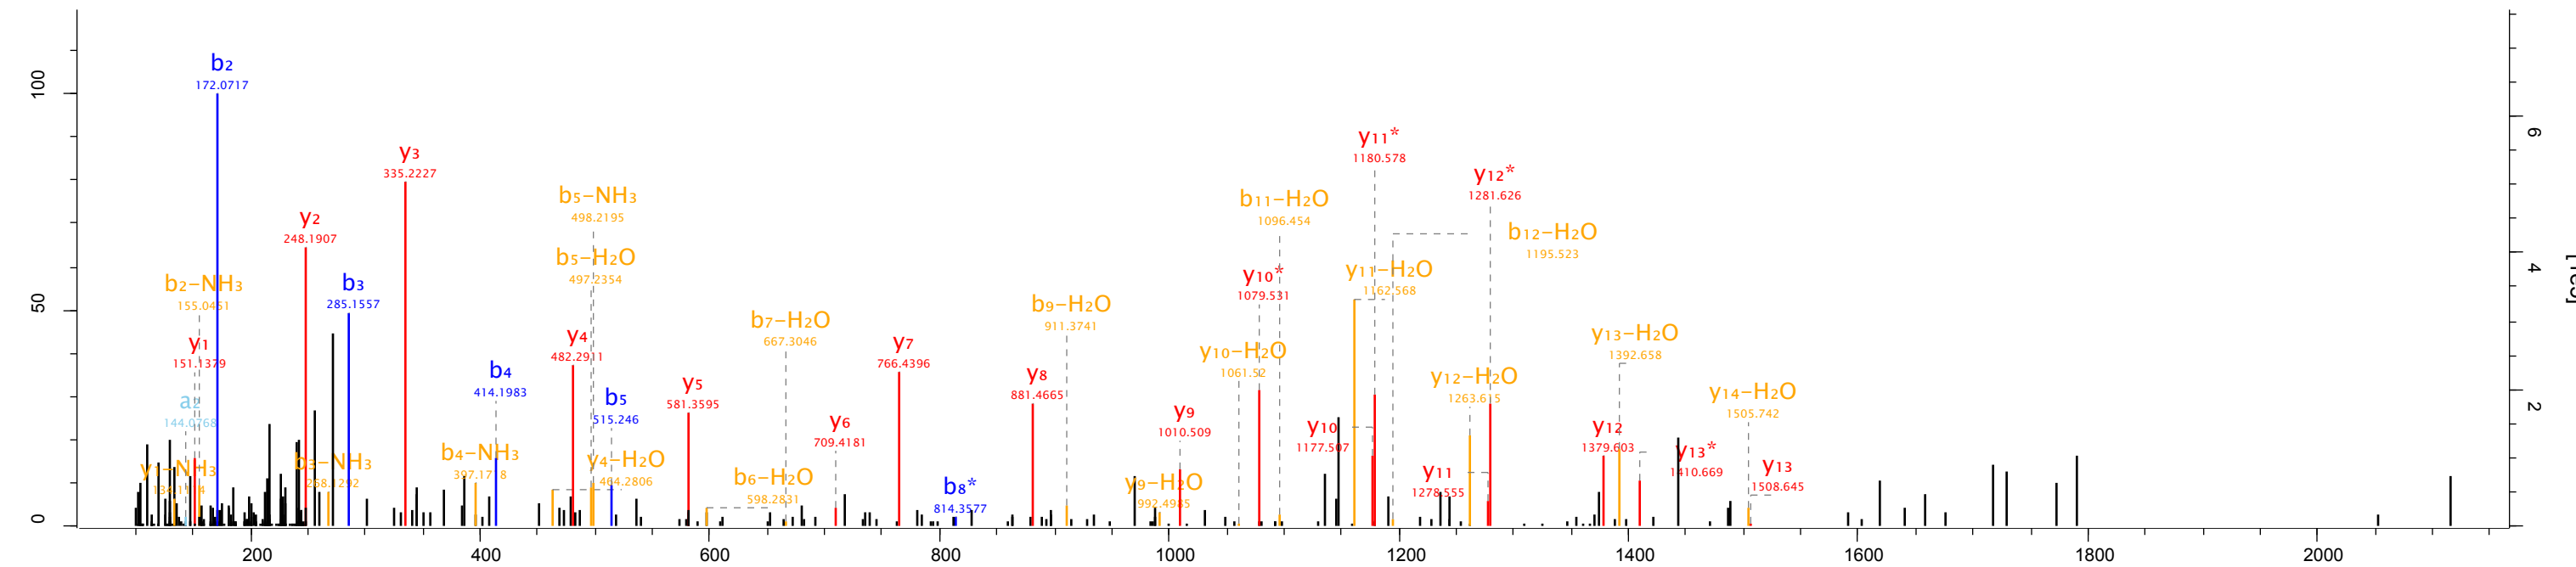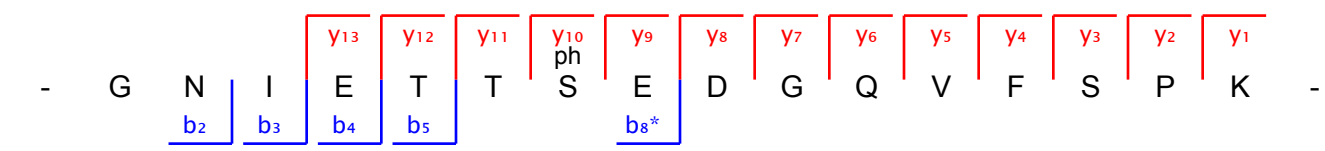



Raw file Scan Method Score m/z Gene names  
 20150814\_A375SR\_Phospho\_BR2\_06 14444 FTMS; HCD 385.94 1085.5 PGM3

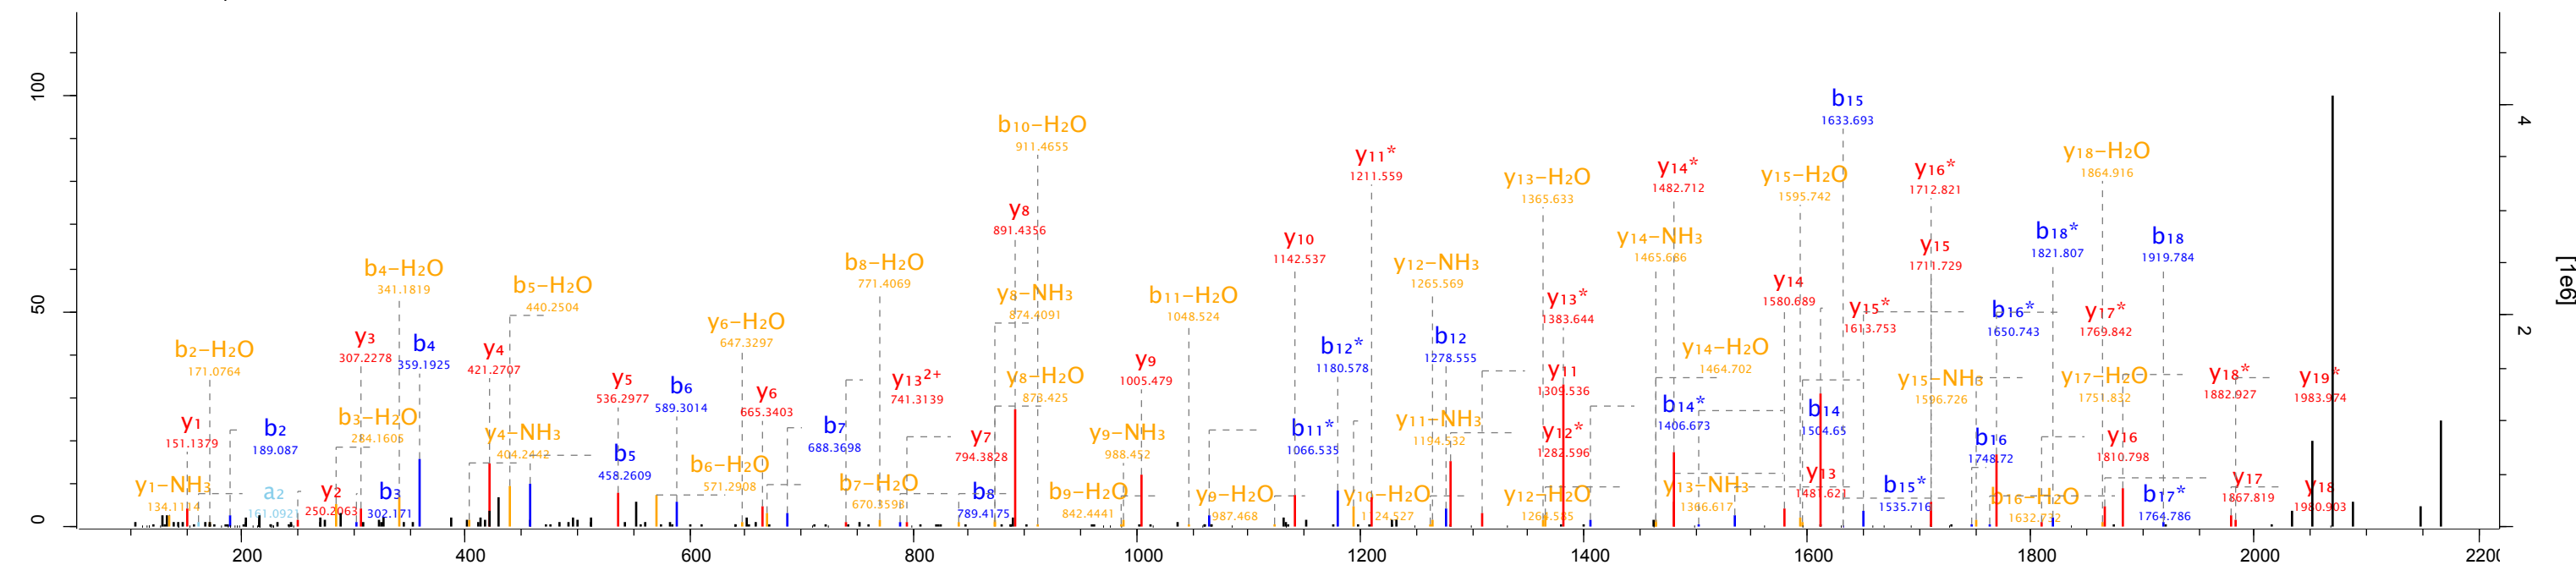

- S T I G V M V T A S H N P E E D N G V K -

y19\*
y18
y17
y16
y15
y14
y13
y12\*
y11<sup>ph</sup>
y10
y9
y8
y7
y6
y5
y4
y3
y2
y1

b2
b3
b4
b5
b6
b7
b8
b11\*
b12
b14
b15
b16
b17\*
b18

Raw file 20150814\_A375SR\_Phospho\_BR2\_06 Scan 14504 Method FTMS; HCD Score 62.44 m/z 801.36 Gene names SHROOM2

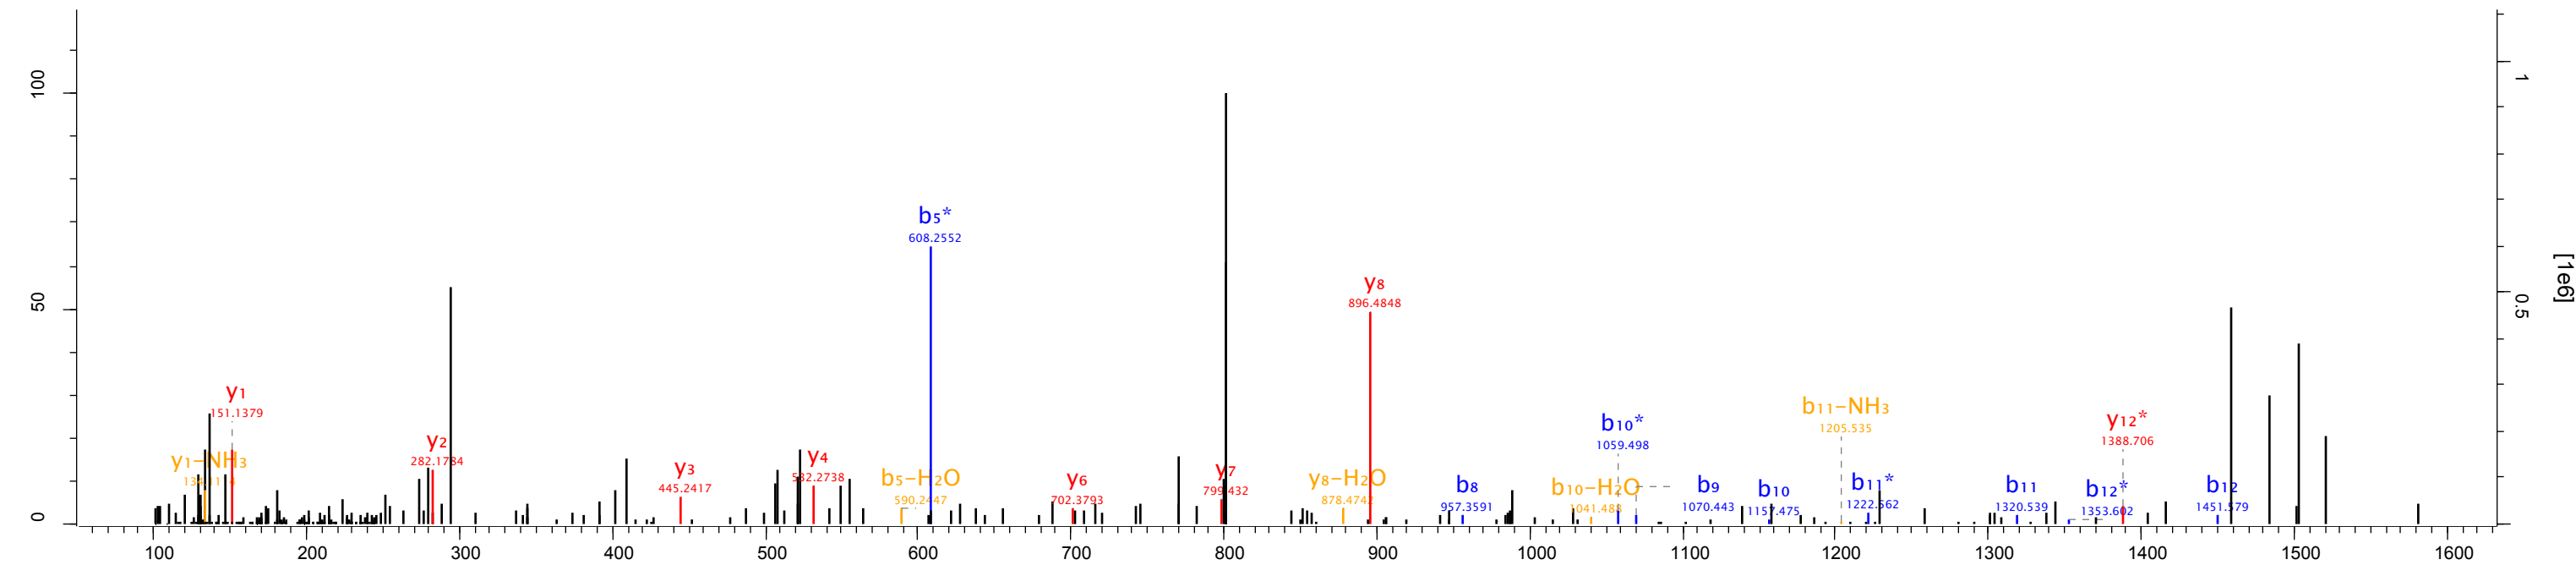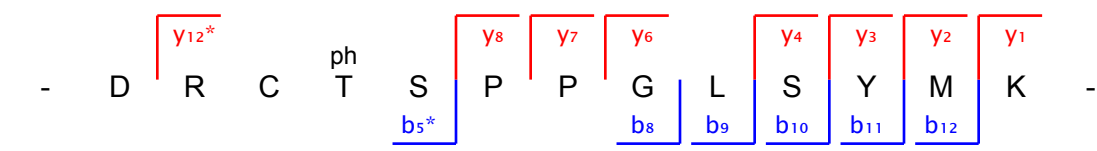

Raw file  
20150814\_A375SR\_Phospho\_BR2\_06

Scan 15144 Method FTMS; HCD Score 109.83 m/z 682.3 Gene names KIF23

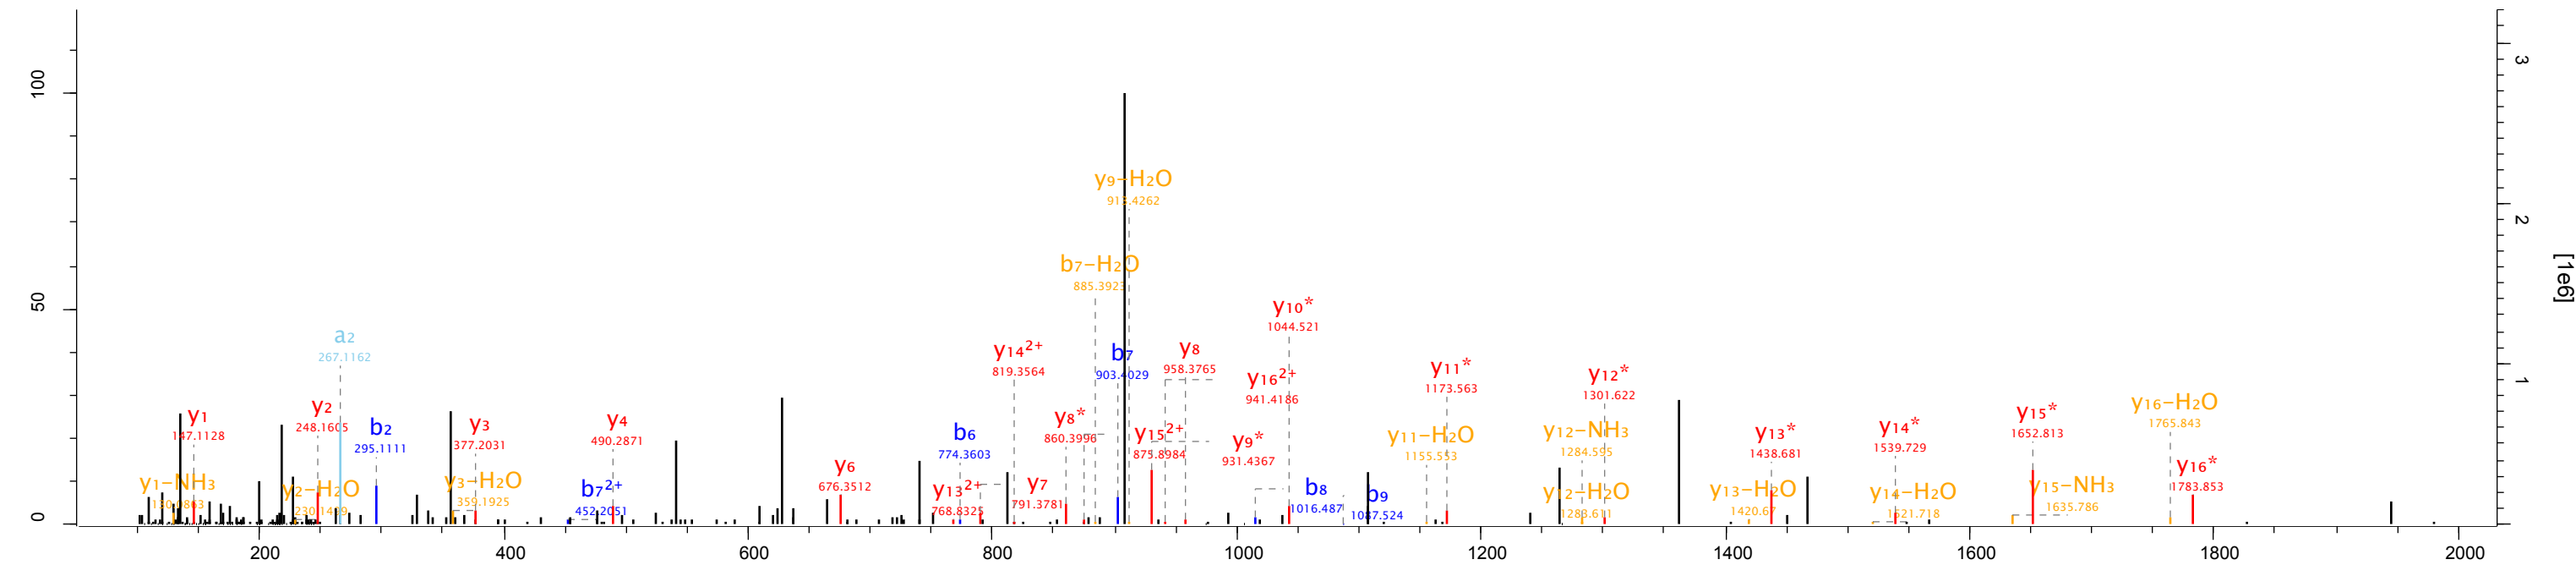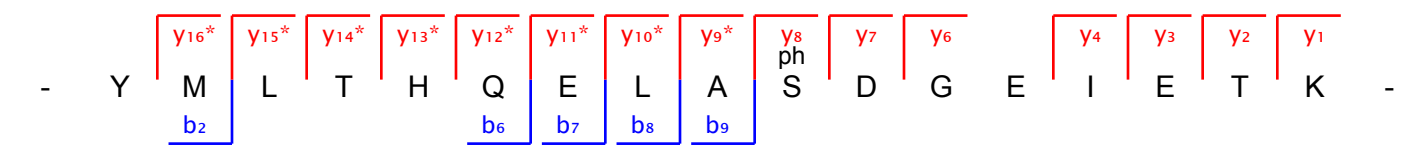

Raw file: 20150814\_A375SR\_Phospho\_BR2\_06  
 Scan: 15974 Method: FTMS; HCD Score: 67.33 m/z: 691.81 Gene names: SPIRE2

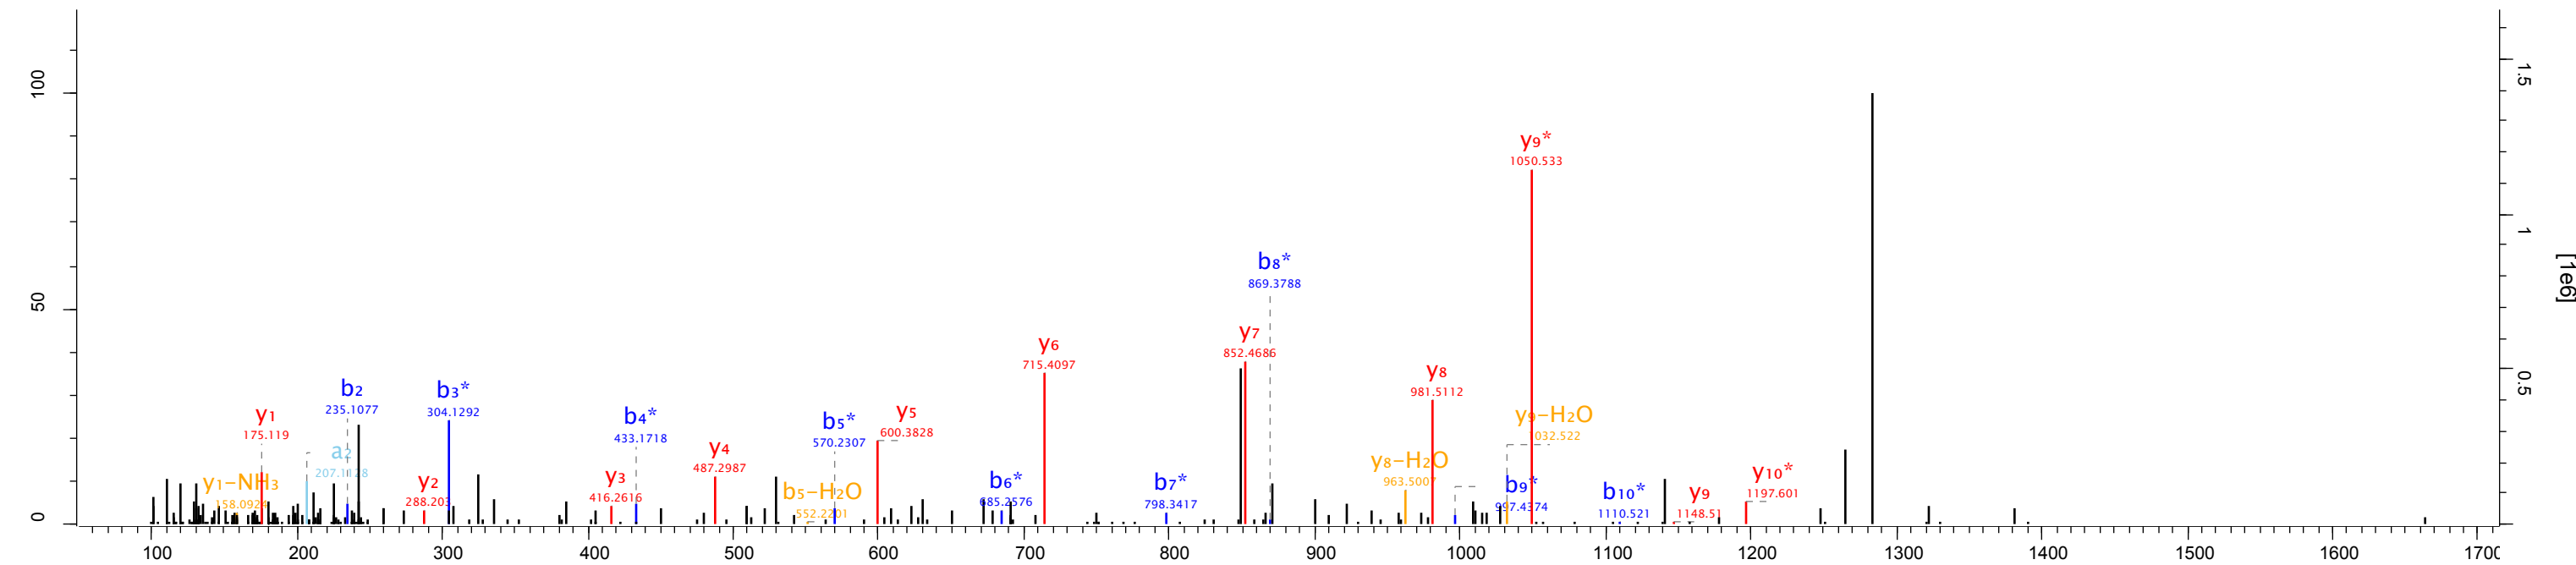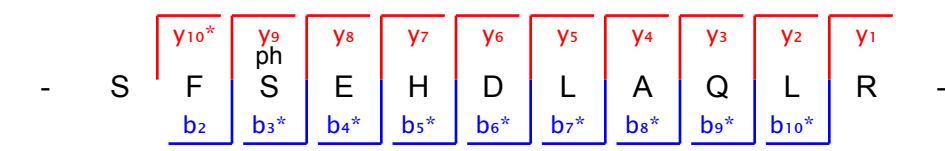

Raw file Scan Method Score m/z Gene names  
 20150814\_A375SR\_Phospho\_BR2\_06 16084 FTMS; HCD 193.16 1041.16 PHLDA2

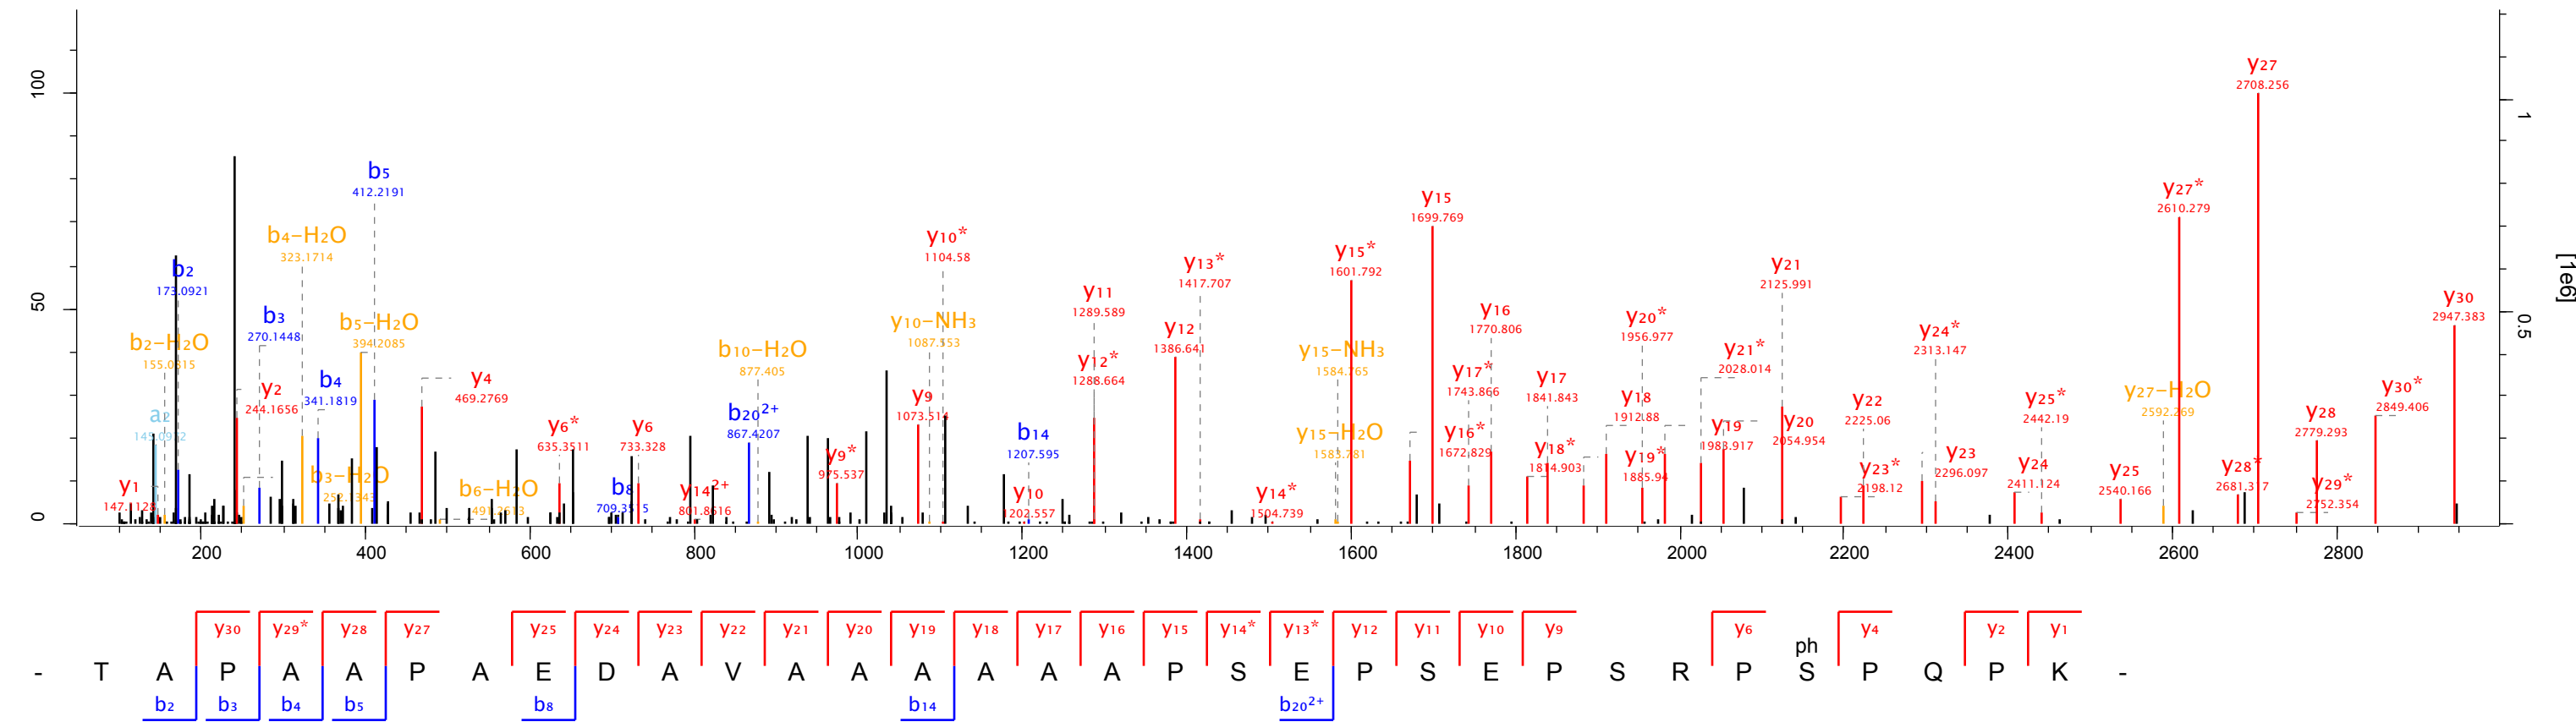

Raw file 20150814\_A375SR\_Phospho\_BR2\_06 Scan 16294 Method FTMS; HCD Score 63.71 m/z 743.87 Gene names TNRC18

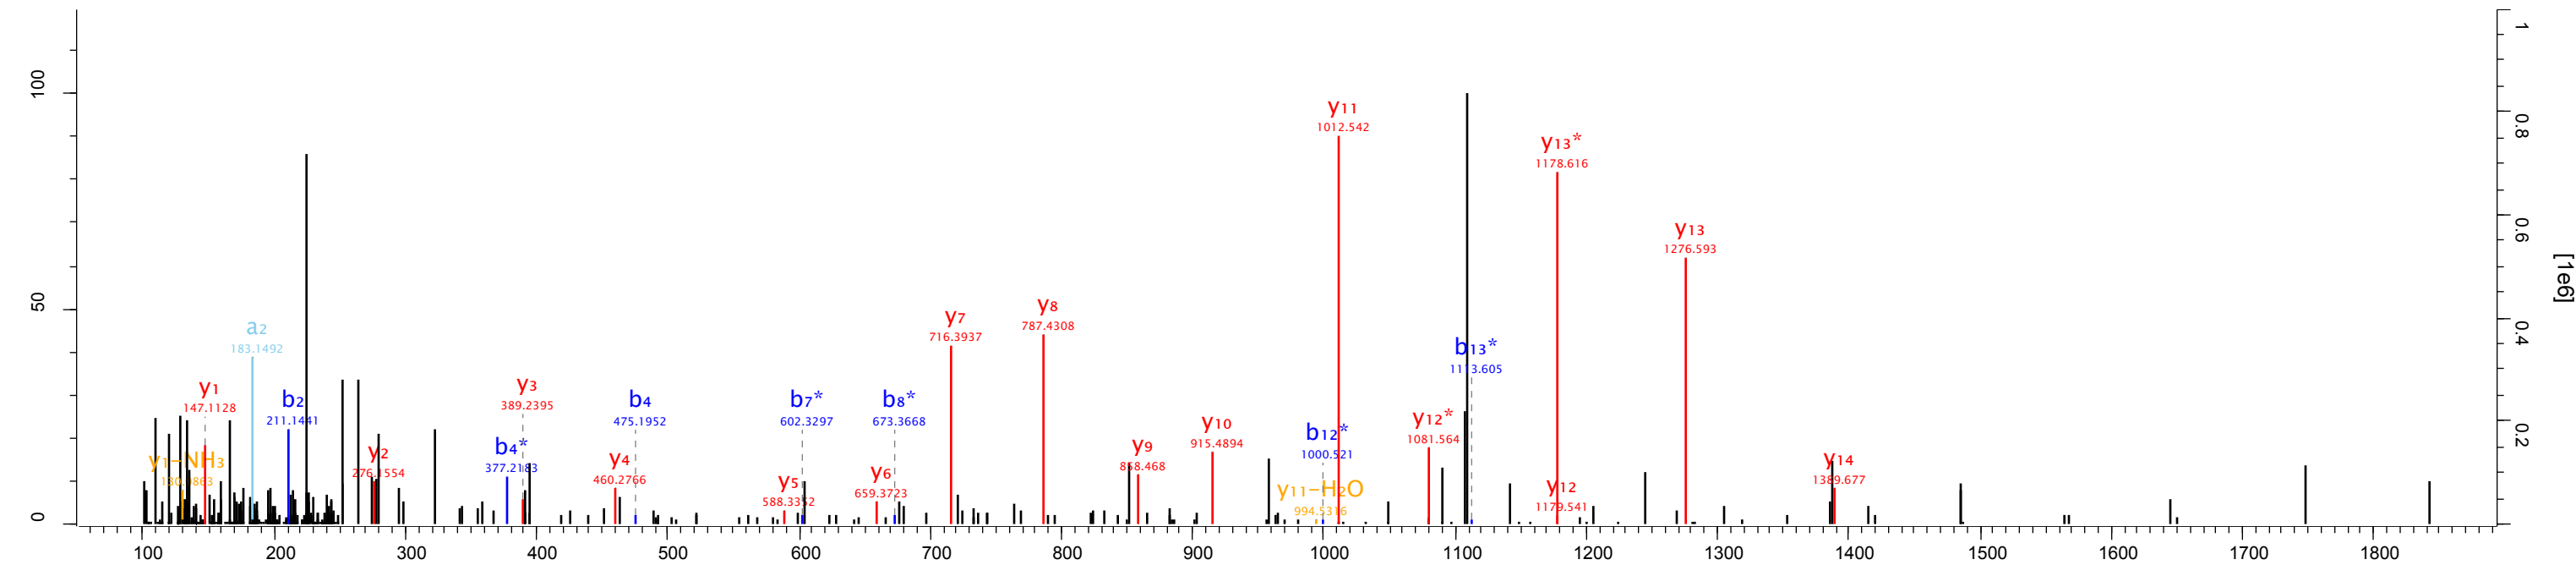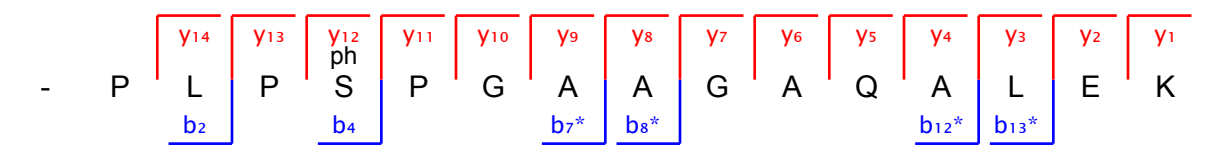

Raw file: 20150814\_A375SR\_Phospho\_BR2\_06  
 Scan: 16534 Method: FTMS; HCD Score: 130.69 m/z: 607.3 Gene names: PLEKHA5

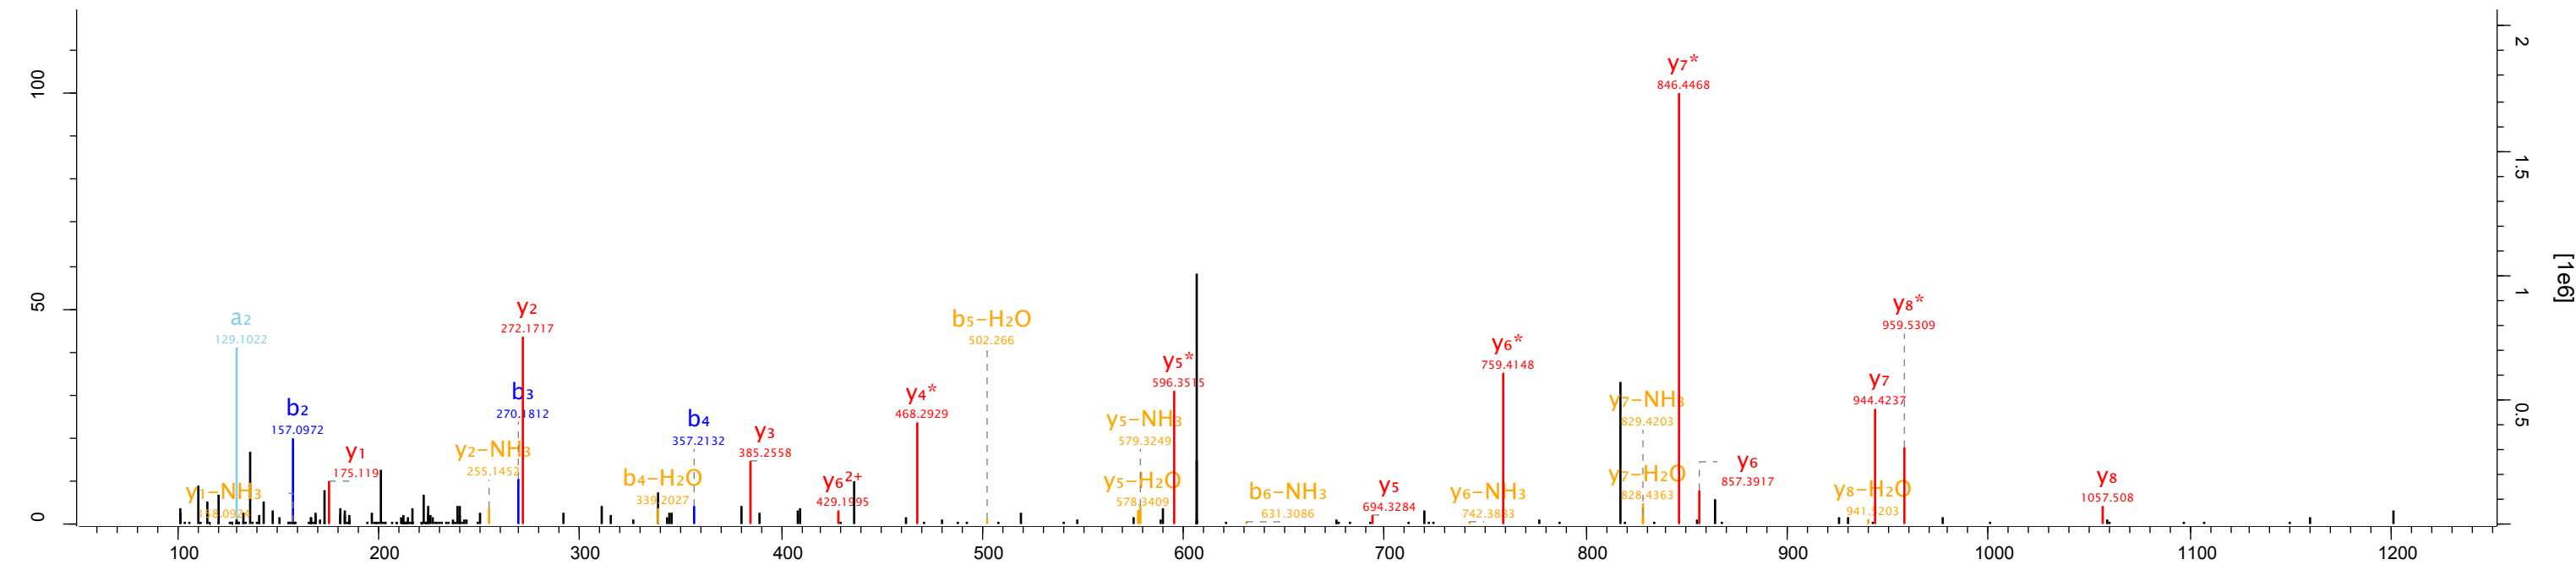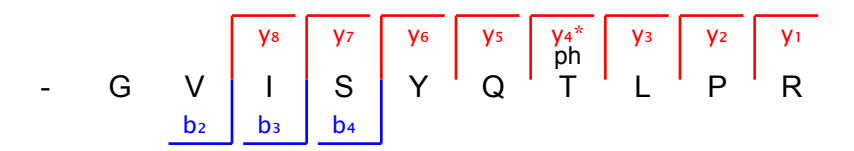

Raw file: 20150814\_A375SR\_Phospho\_BR2\_06  
 Scan: 16684 Method: FTMS; HCD Score: 130.02 m/z: 809.37 Gene names: PRKD3

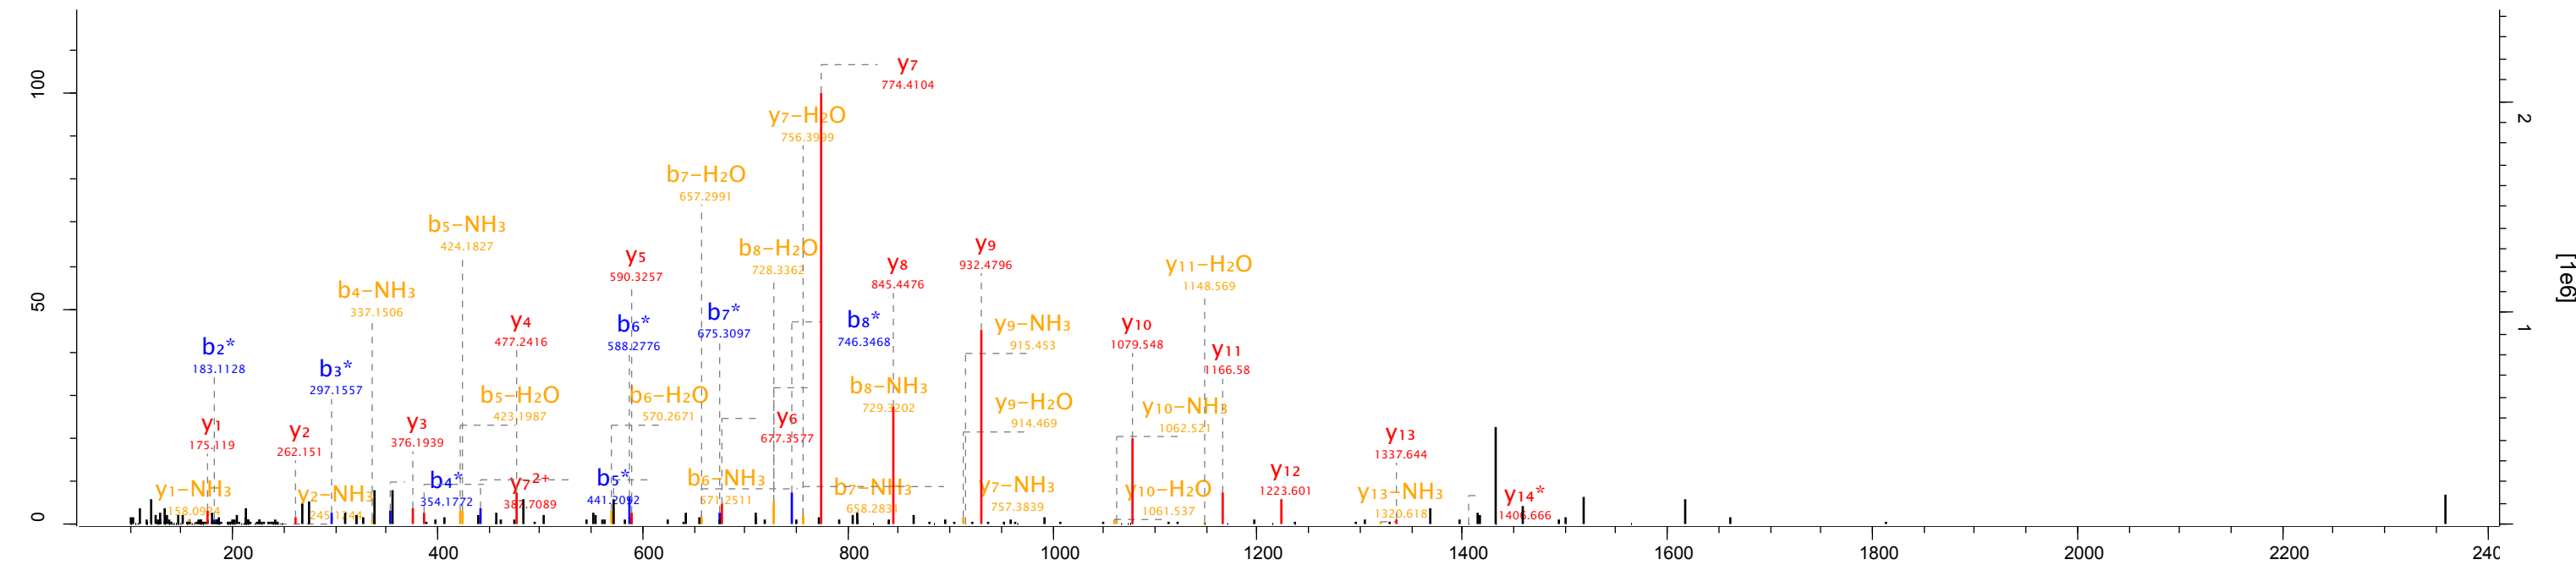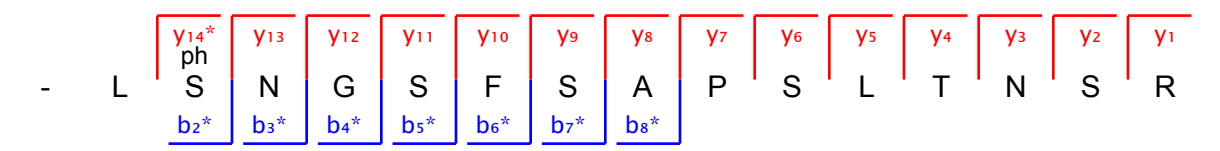



Raw file 20150814\_A375SR\_Phospho\_BR2\_06 Scan 16924 Method FTMS; HCD Score 194.12 m/z 604.27 Gene names ZMYND8

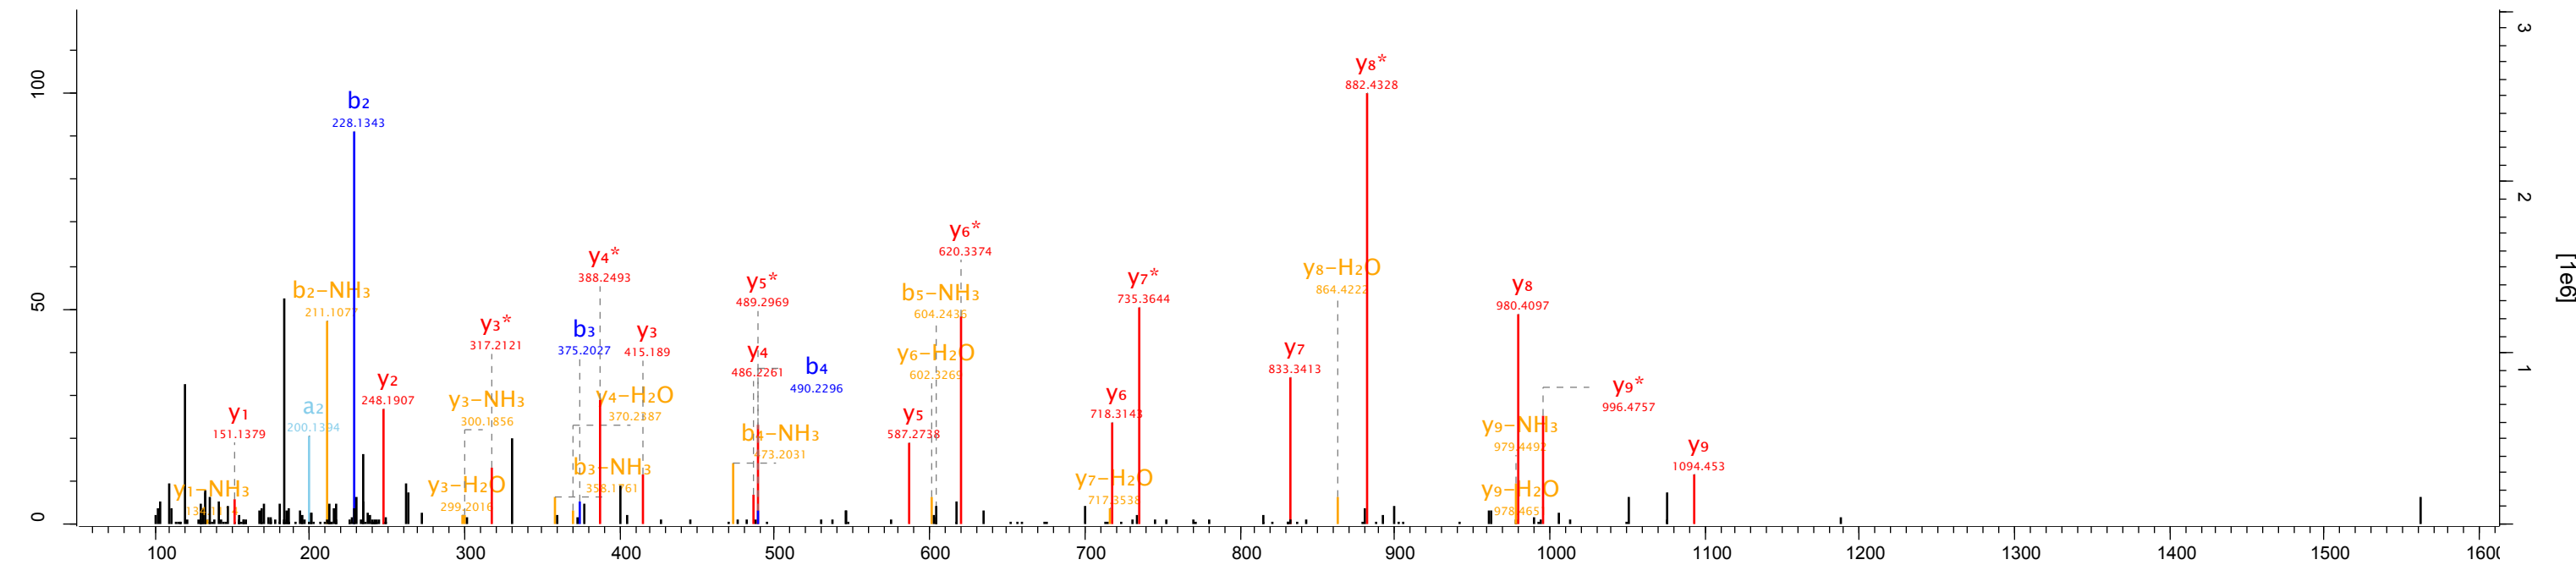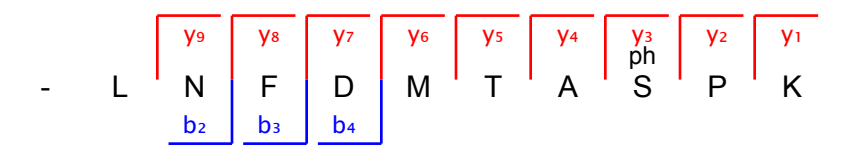

Raw file 20150814\_A375SR\_Phospho\_BR2\_06 Scan 17064 Method FTMS; HCD Score 90.56 m/z 665.33 Gene names NAV1

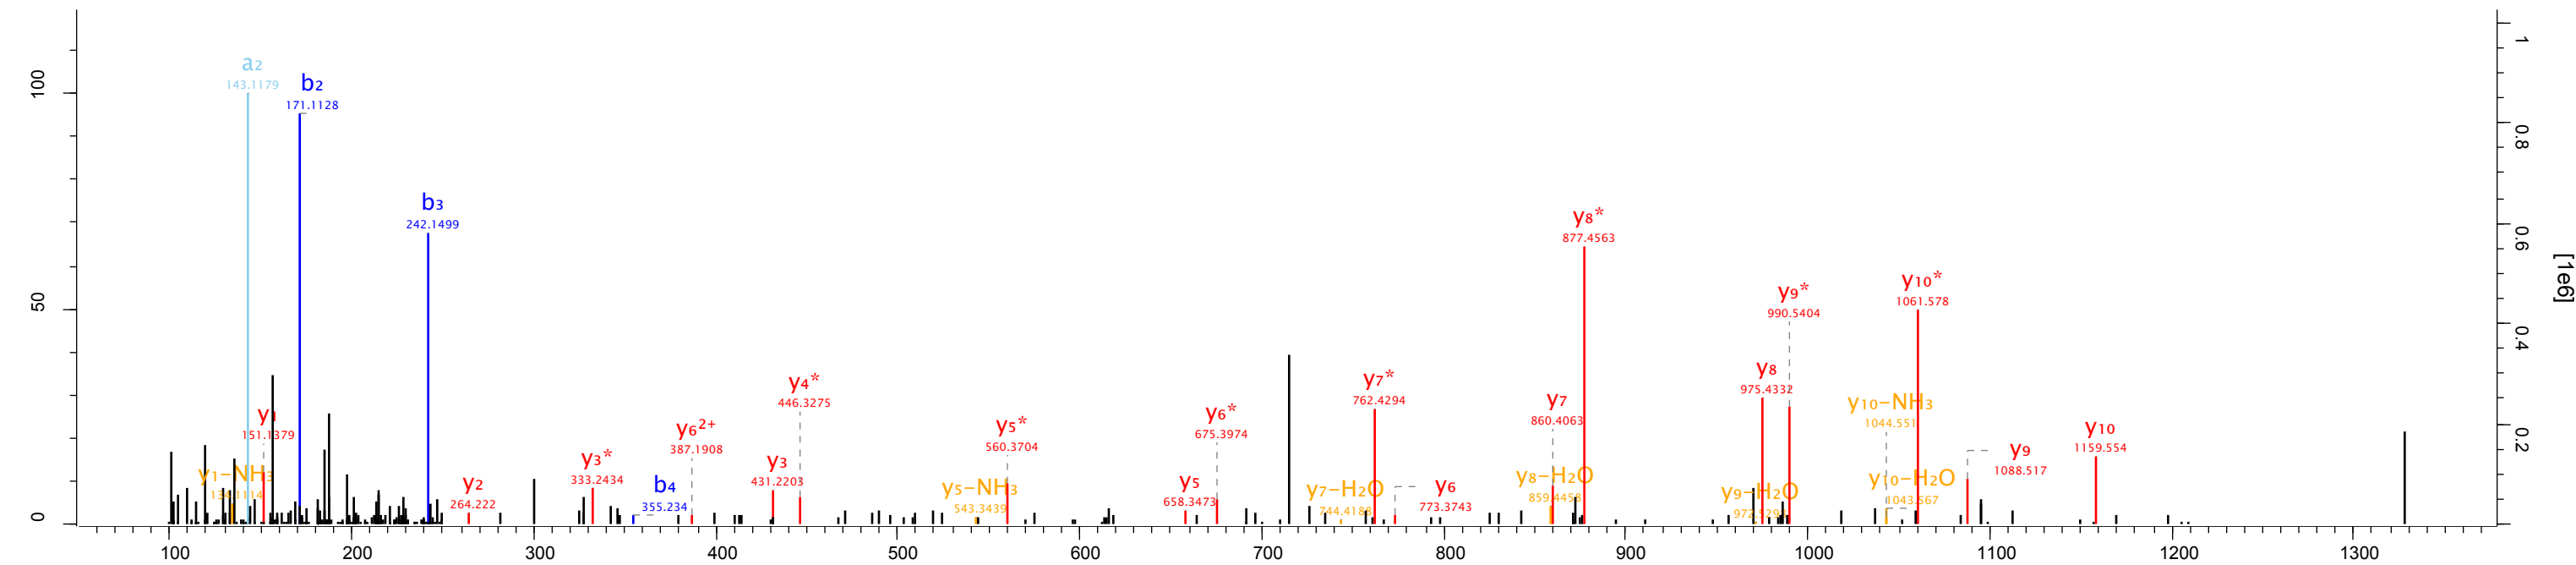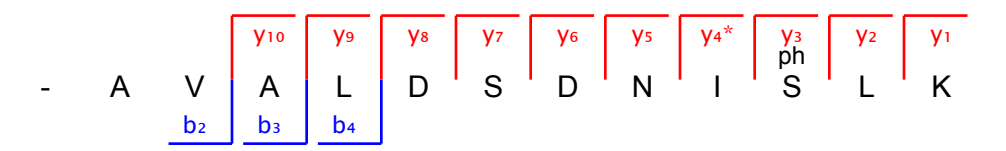

Raw file  
20150814\_A375SR\_Phospho\_BR2\_06

Scan 17454 Method FTMS; HCD Score 259.71 m/z 792.01 Gene names SP110

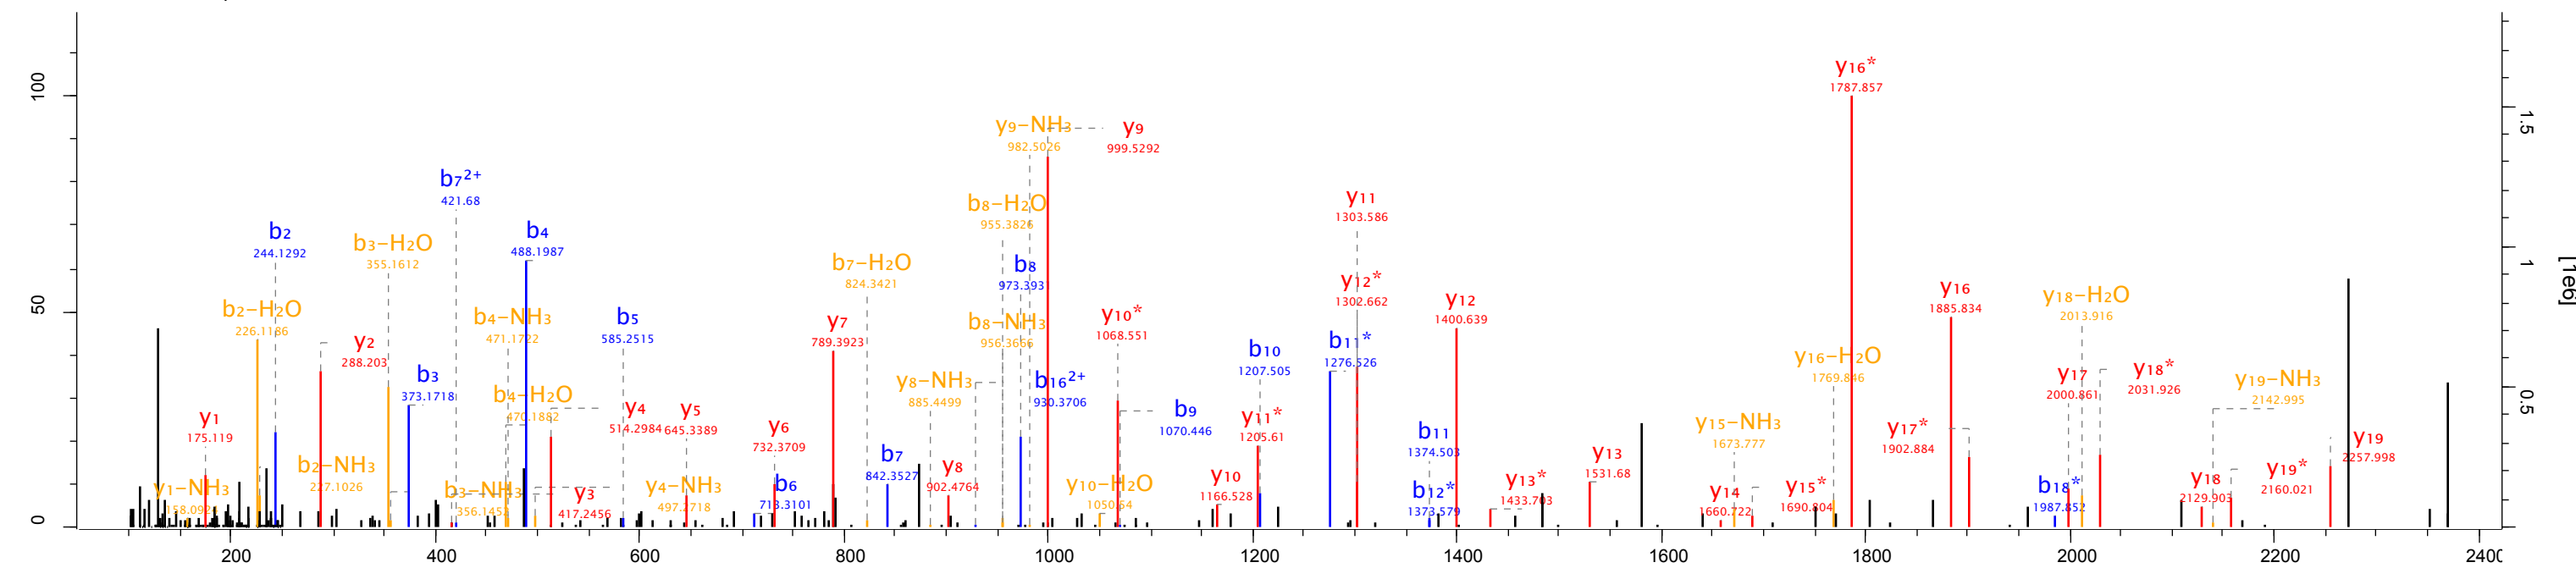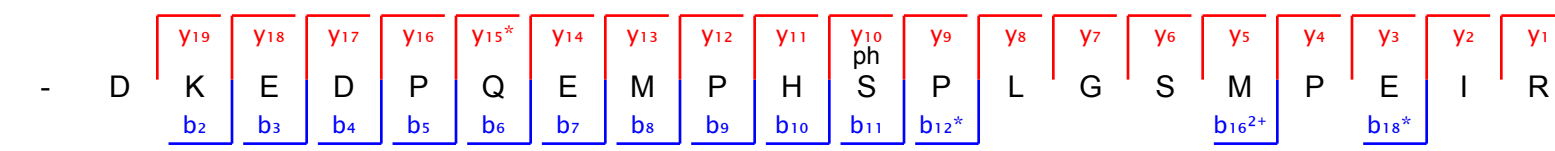

Raw file: 20150814\_A375SR\_Phospho\_BR2\_06  
 Scan: 18064 Method: FTMS; HCD Score: 199.61 m/z: 864.9 Gene names: URGCP;URGCP-MRPS24

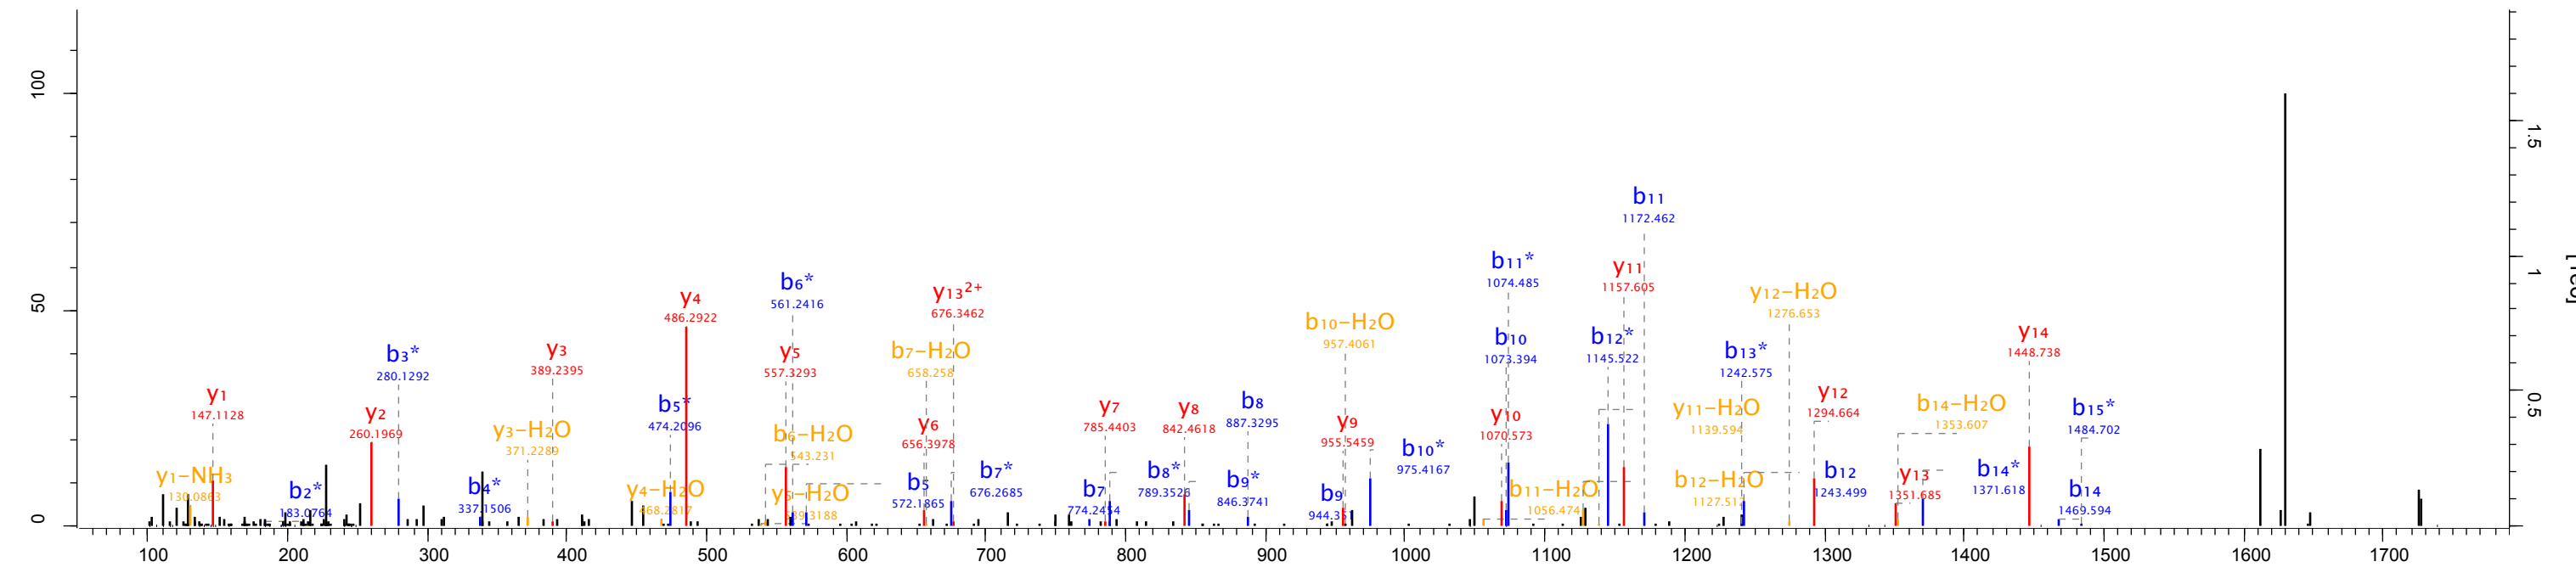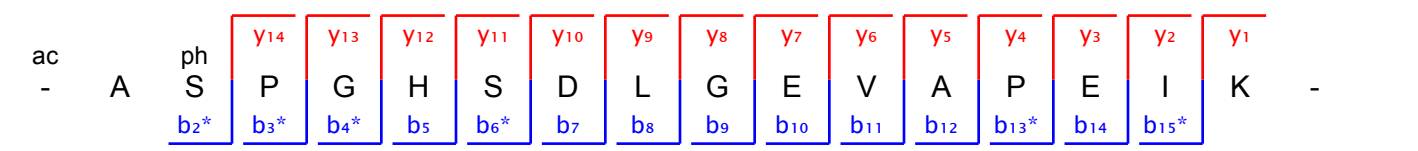

Raw file 20150814\_A375SR\_Phospho\_BR2\_06 Scan 19024 Method FTMS; HCD Score 149.71 m/z 999.43 Gene names EPHB2

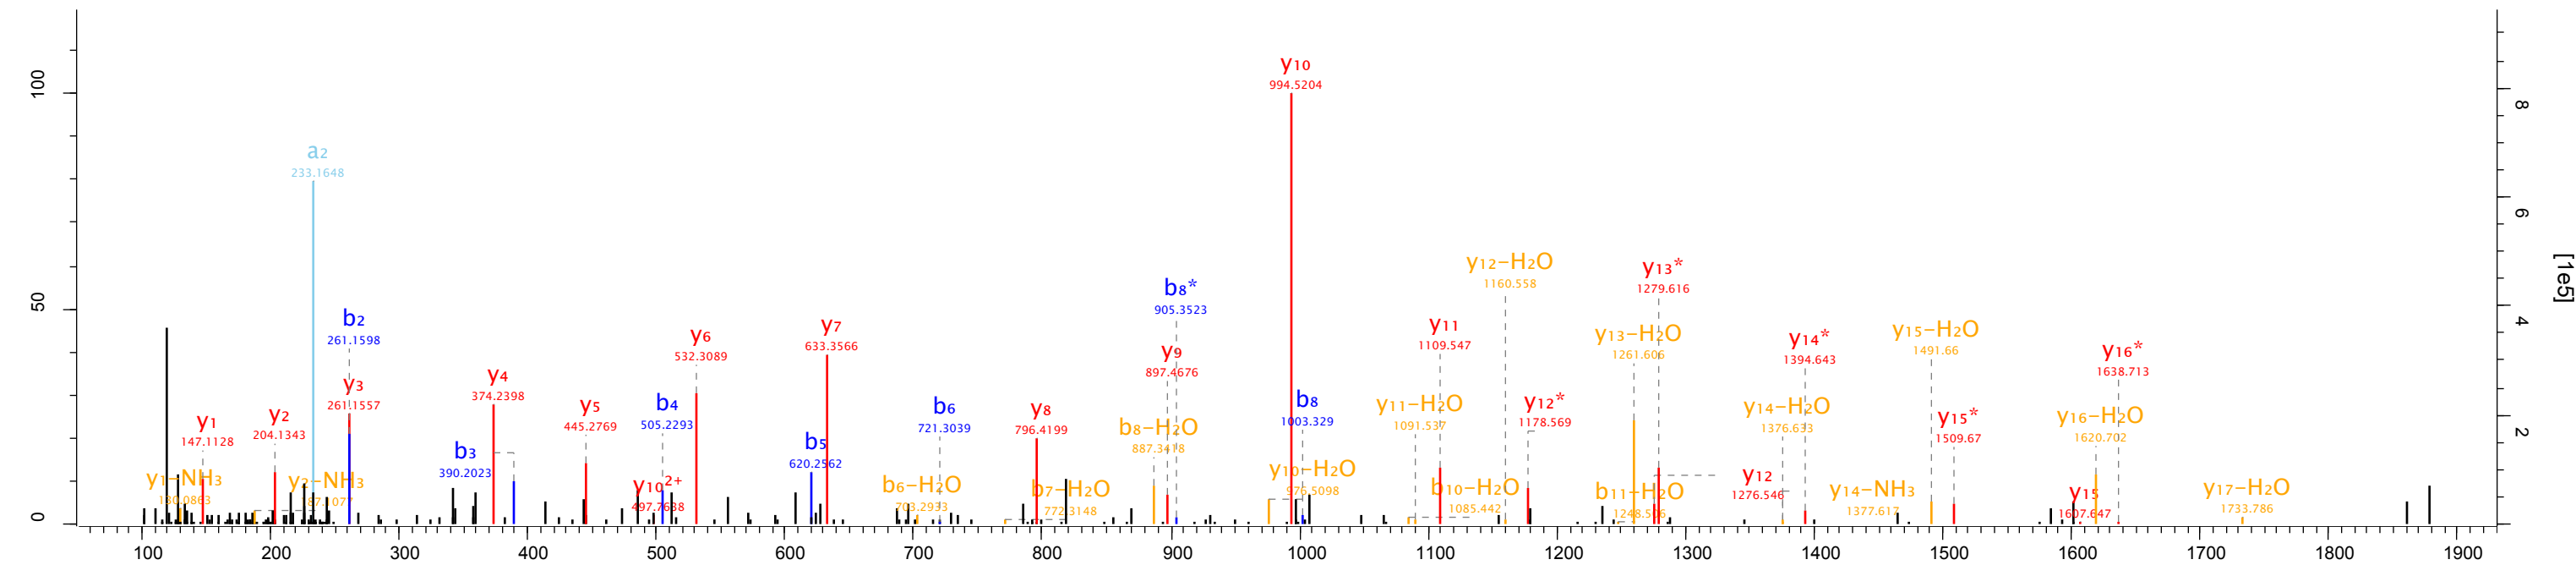

- F L E D D T S D P T Y T S A L G G K -

Fragmentation scheme showing b and y ions for the peptide sequence: F L E D D T S D P T Y T S A L G G K. The b ions are labeled b2 through b8, and the y ions are labeled y1 through y16\*.

Raw file 20150814\_A375SR\_Phospho\_BR2\_06 Scan 19724 Method FTMS; HCD Score 117.29 m/z 641.96 Gene names NCOA3

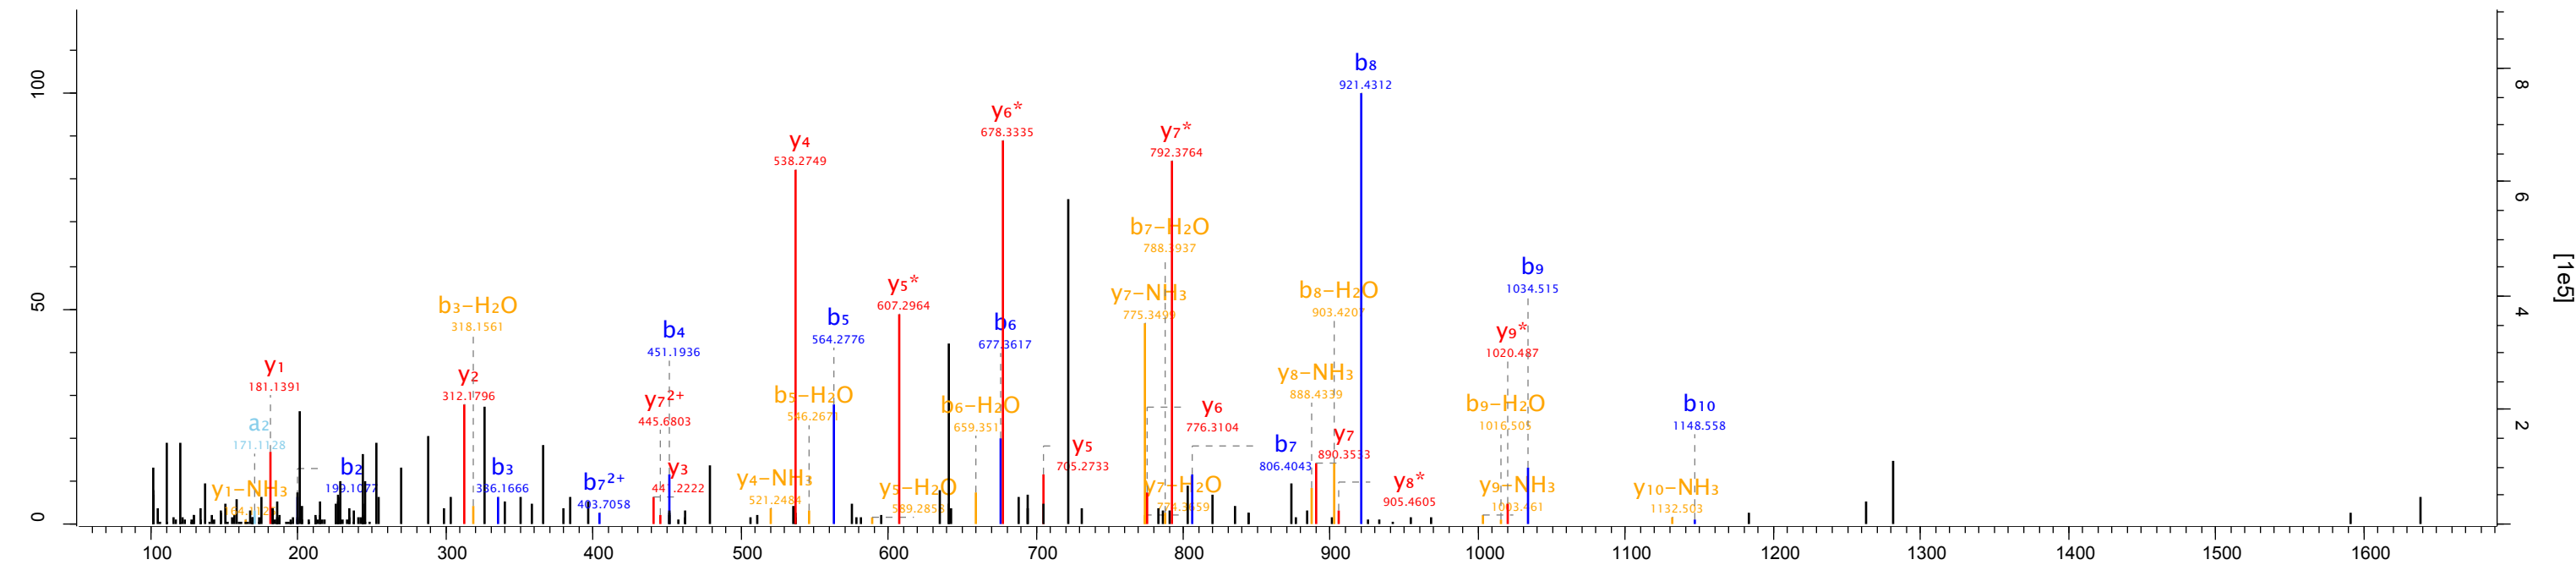

- T P H D I L E D I N A S P E M R -

b<sub>2</sub>
b<sub>3</sub>
b<sub>4</sub>
b<sub>5</sub>
b<sub>6</sub>
b<sub>7</sub>
b<sub>8</sub>
b<sub>9</sub>
b<sub>10</sub>
y<sub>9</sub>\*
y<sub>8</sub>\*
y<sub>7</sub>
y<sub>6</sub>
y<sub>5</sub>
y<sub>4</sub>
y<sub>3</sub>
y<sub>2</sub>
y<sub>1</sub>

Raw file 20150814\_A375SR\_Phospho\_BR2\_06 Scan 19804 Method FTMS; HCD Score 211.17 m/z 976.45 Gene names SKAP2

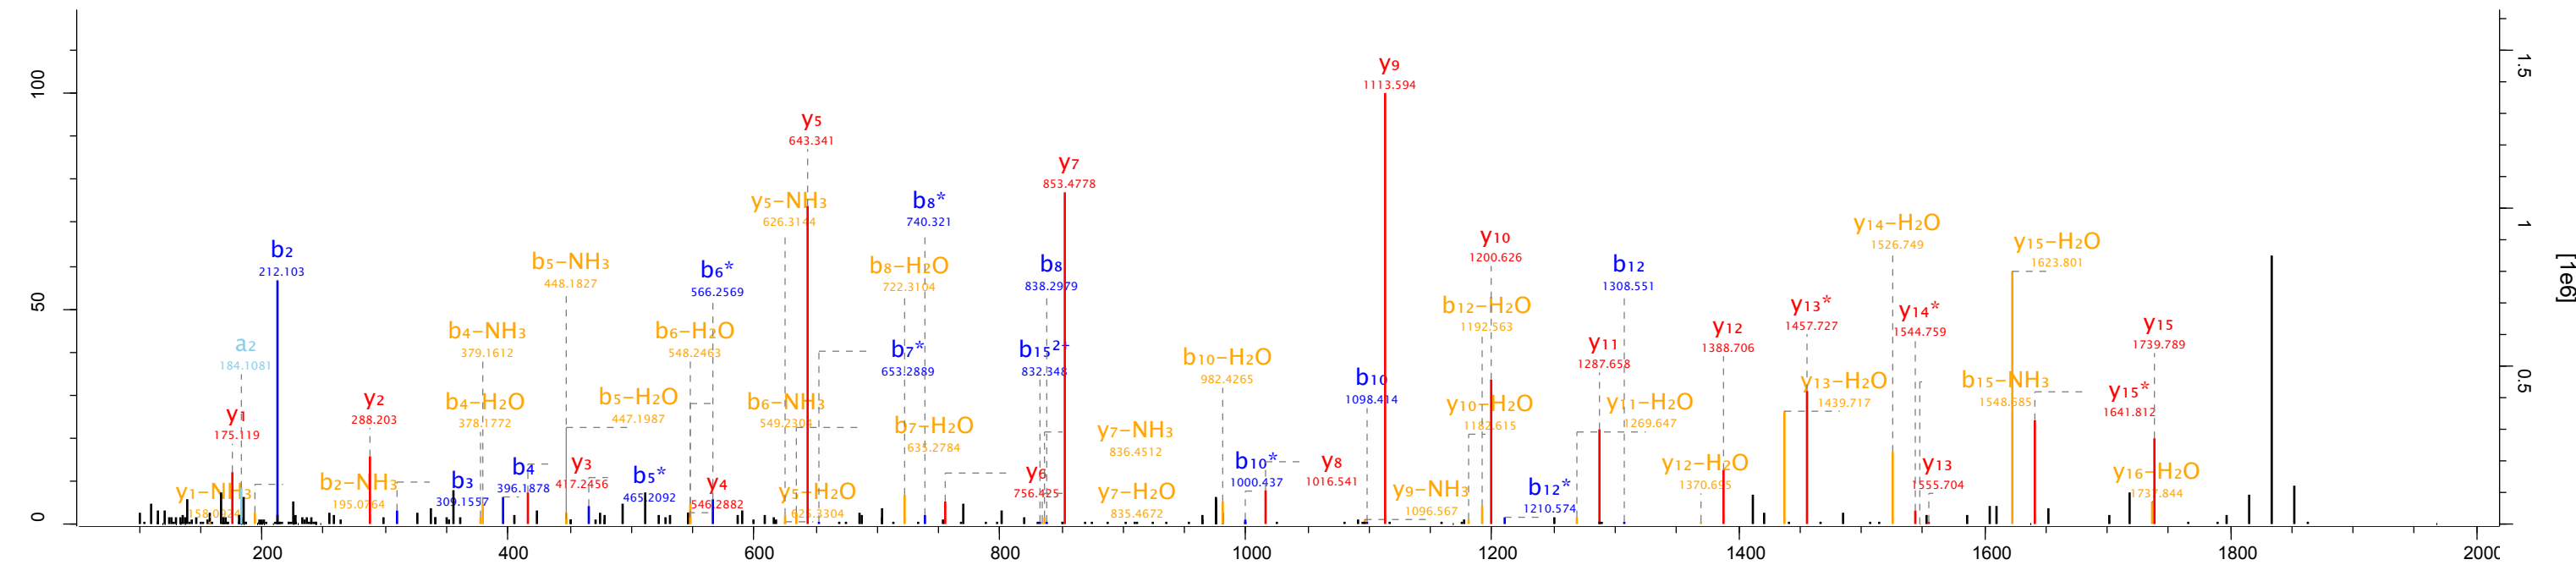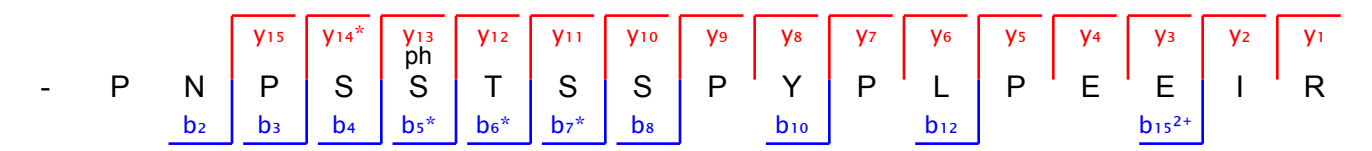

Raw file: 20150814\_A375SR\_Phospho\_BR2\_06  
 Scan: 19964 Method: FTMS; HCD Score: 183.28 m/z: 659.3 Gene names: BAIAP2L1

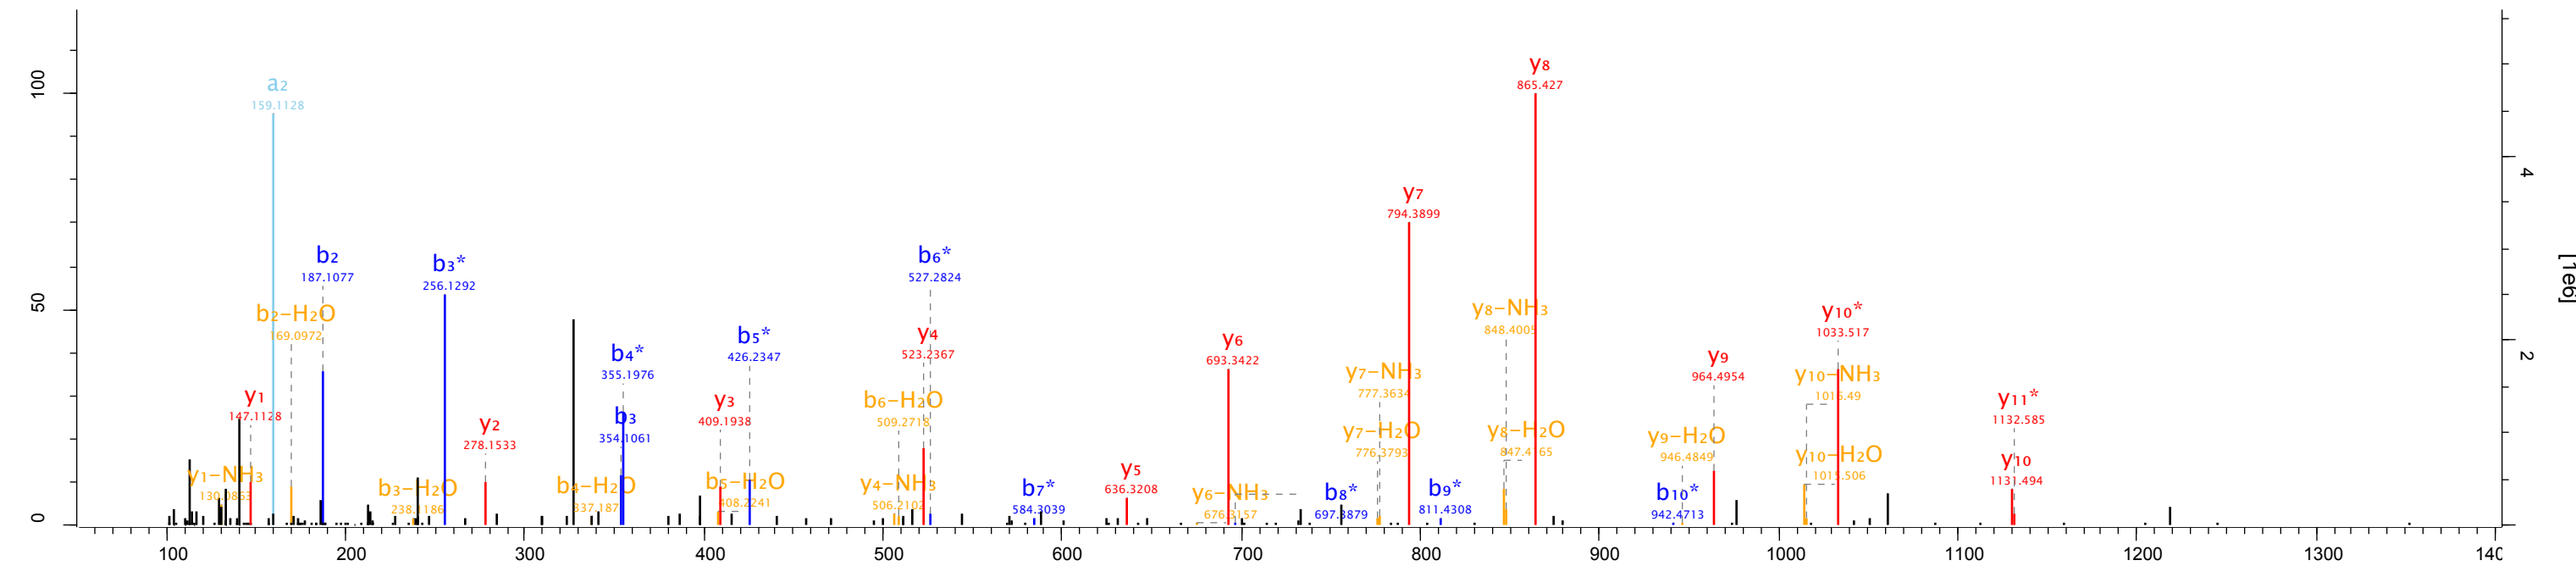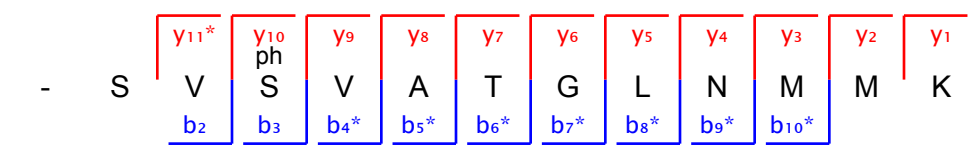



Raw file 20150814\_A375SR\_Phospho\_BR2\_06 Scan 20204 Method FTMS; HCD Score 244.98 m/z 946.46 Gene names AHNAK

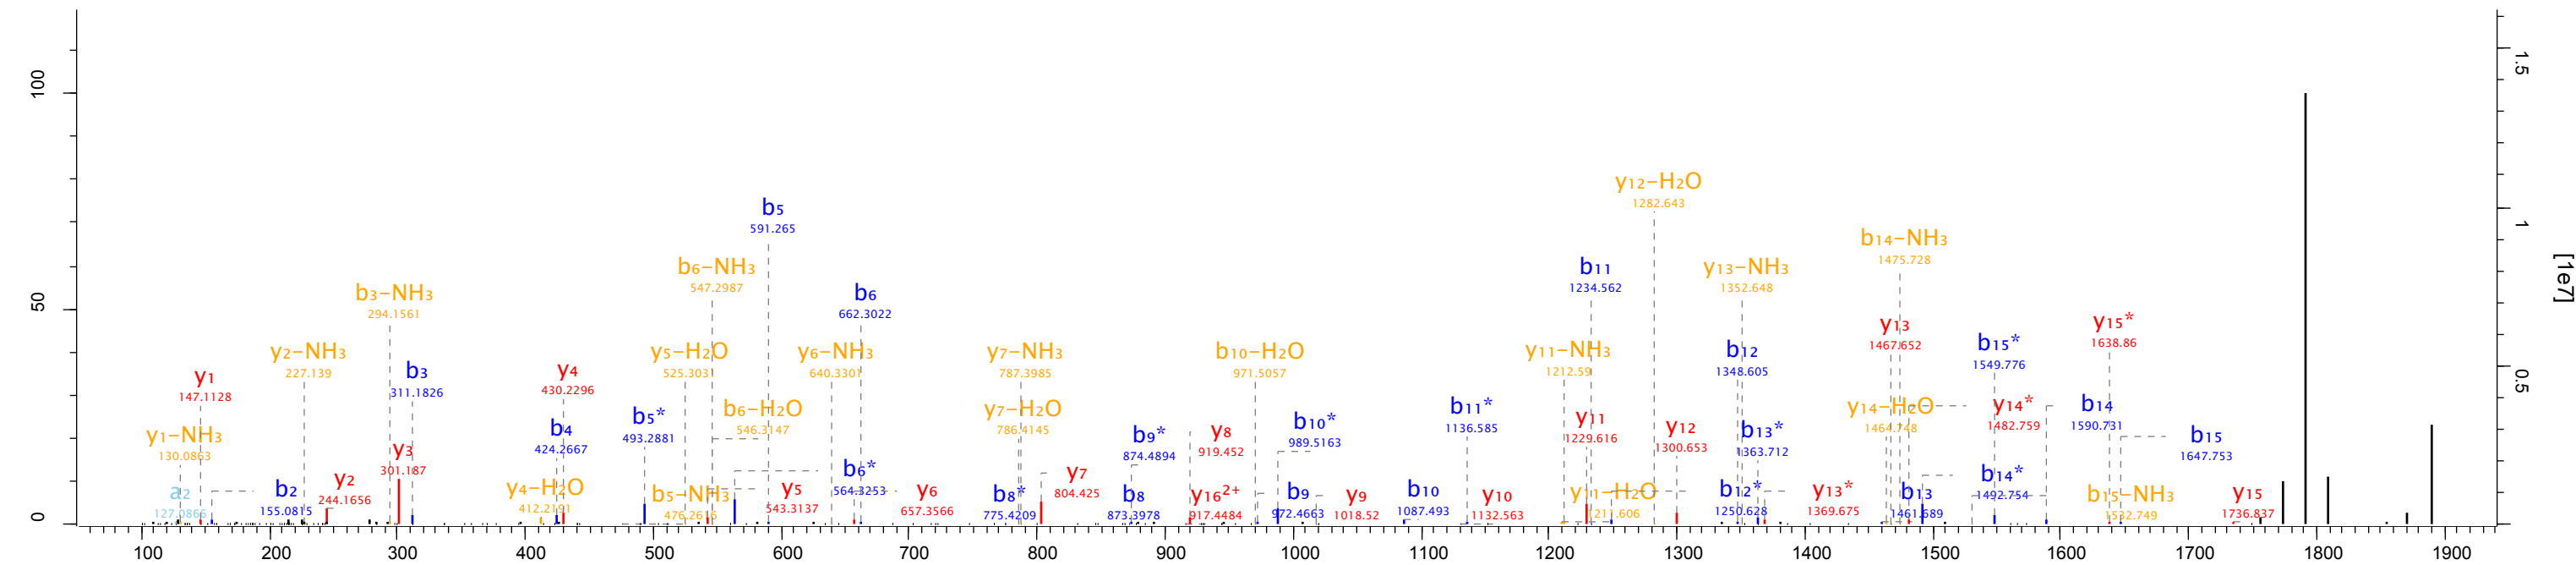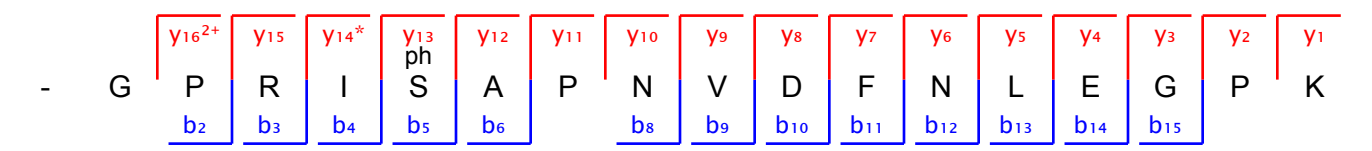

Raw file  
 20150814\_A375SR\_Phospho\_BR2\_06  
 Scan 20464 Method FTMS; HCD Score 113.28 m/z 776.89 Gene names OSBPL3

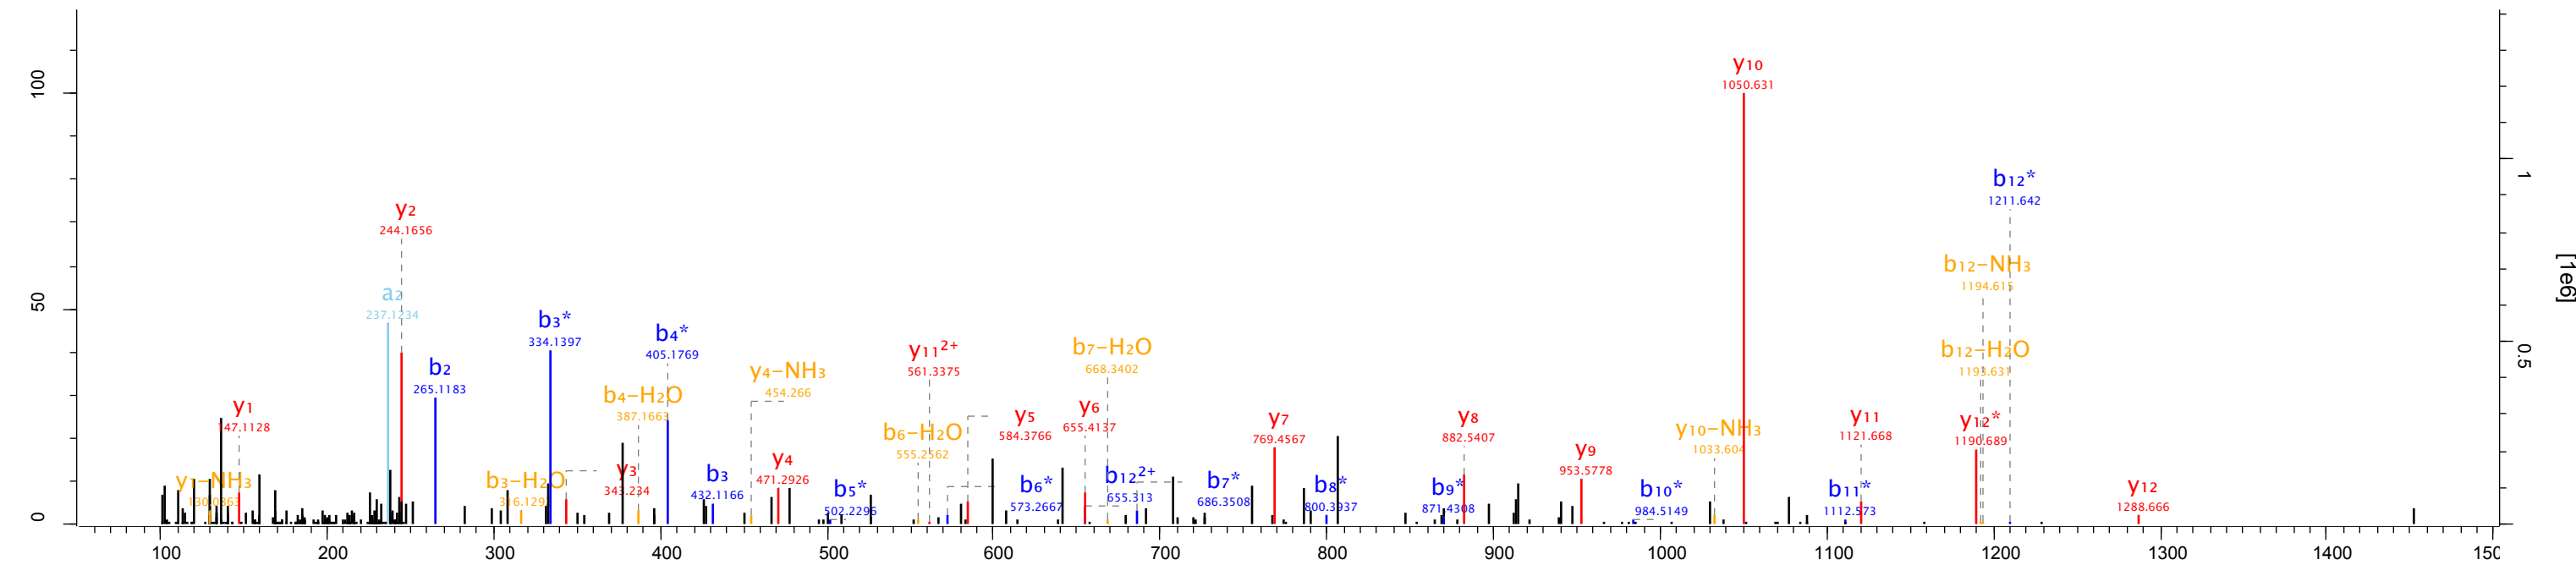

- T Y y<sub>12</sub> ph y<sub>11</sub> y<sub>10</sub> y<sub>9</sub> y<sub>8</sub> y<sub>7</sub> y<sub>6</sub> y<sub>5</sub> y<sub>4</sub> y<sub>3</sub> y<sub>2</sub> y<sub>1</sub> -

b<sub>2</sub> b<sub>3</sub> b<sub>4</sub>\* b<sub>5</sub>\* b<sub>6</sub>\* b<sub>7</sub>\* b<sub>8</sub>\* b<sub>9</sub>\* b<sub>10</sub>\* b<sub>11</sub>\* b<sub>12</sub>\* P K -

Raw file Scan Method Score m/z Gene names  
 20150814\_A375SR\_Phospho\_BR2\_06 20814 FTMS; HCD 300.27 1115.56 EBAG9

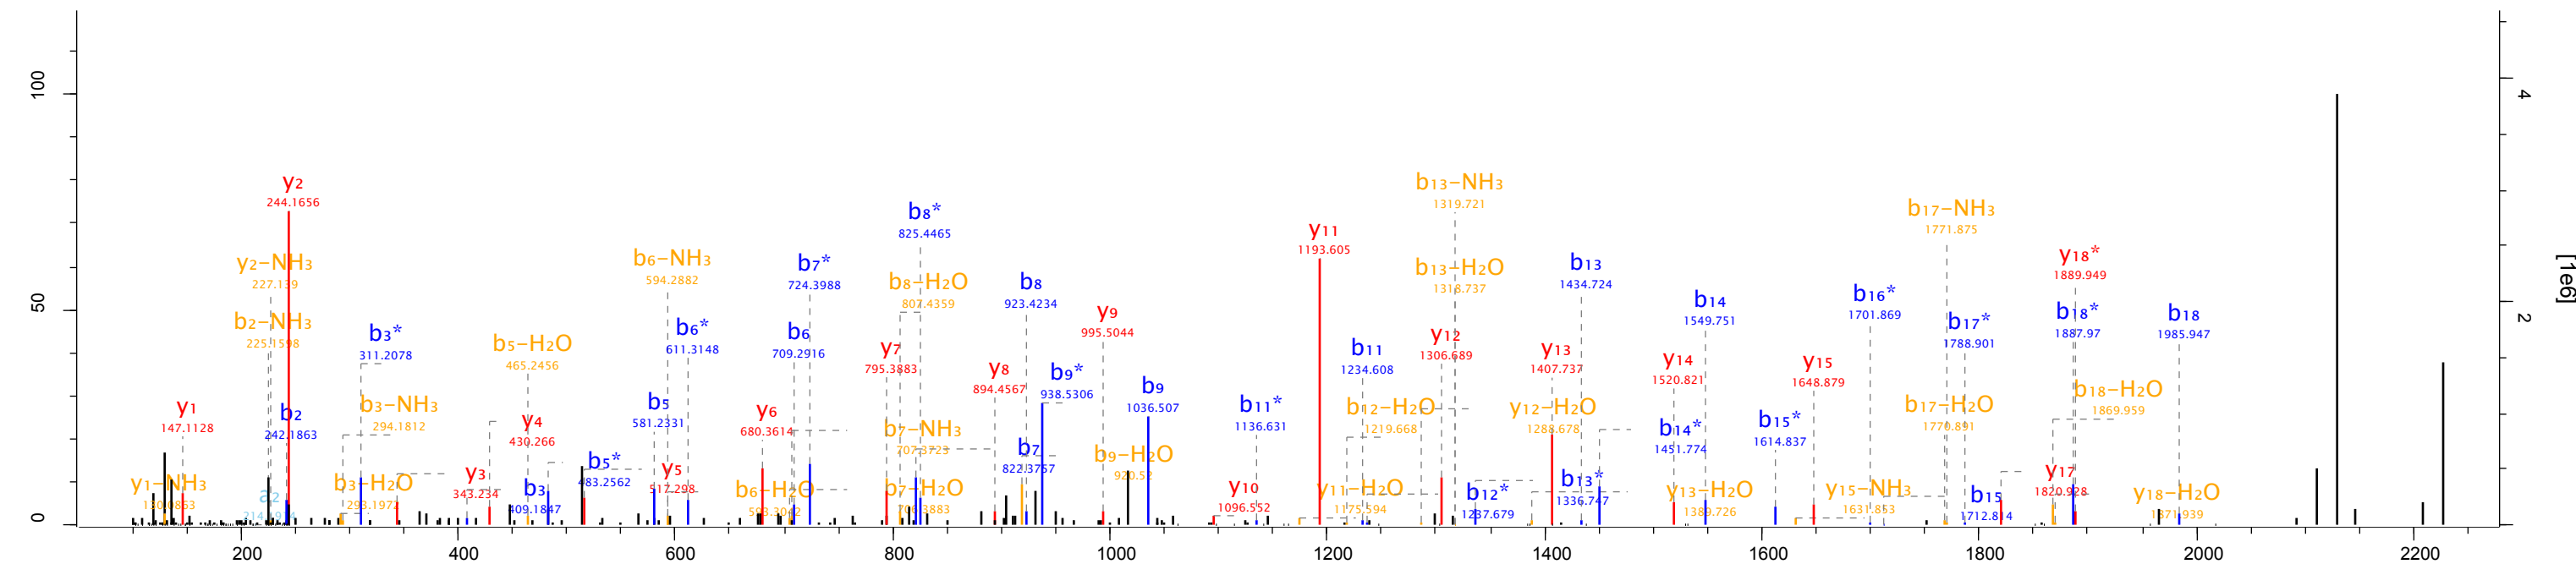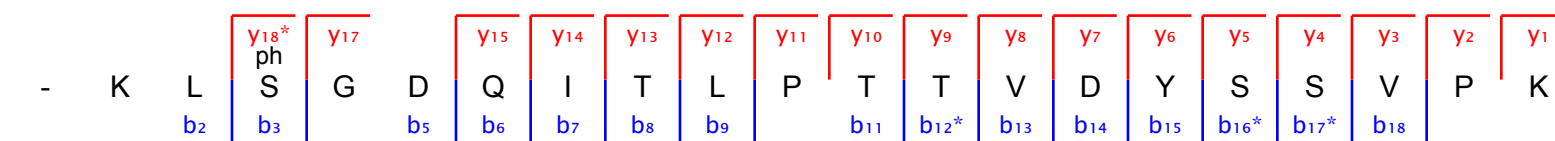

Raw file: 20150814\_A375SR\_Phospho\_BR2\_06  
 Scan: 22224 Method: FTMS; HCD Score: 113.65 m/z: 1009.95 Gene names: ZC3HAV1

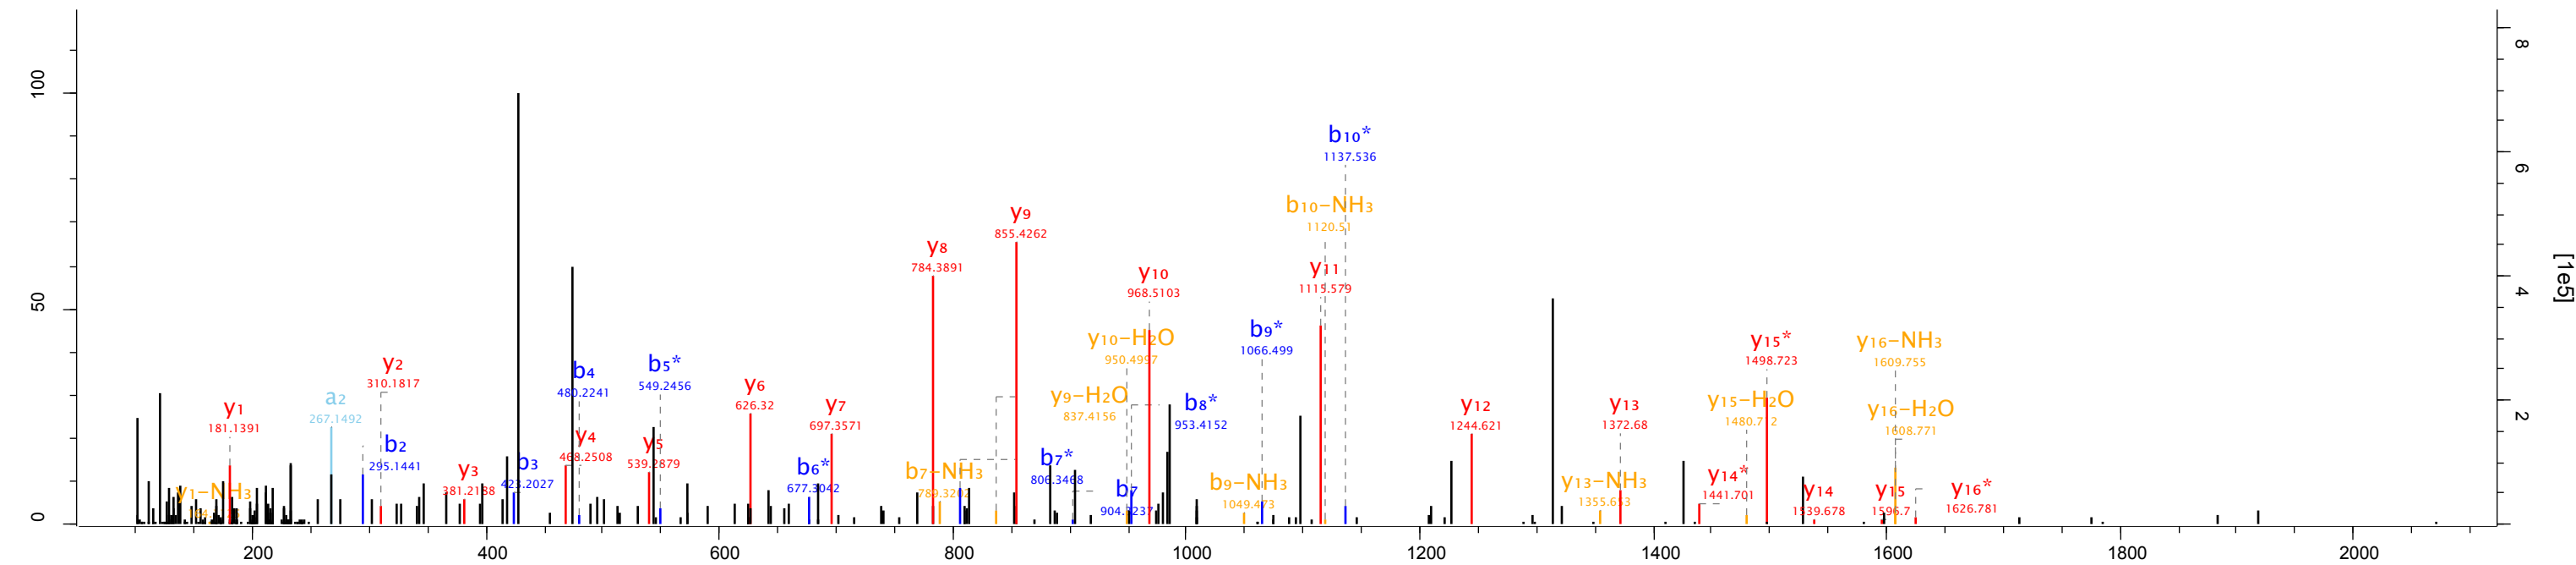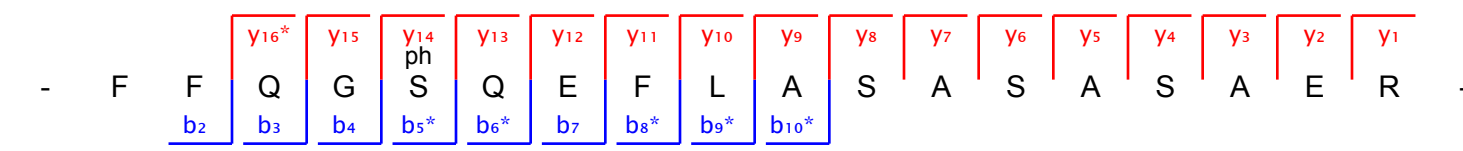

Raw file: 20150814\_A375SR\_Phospho\_BR2\_06  
 Scan: 22504 Method: FTMS; HCD Score: 117.04 m/z: 1207.59 Gene names: FAM129A

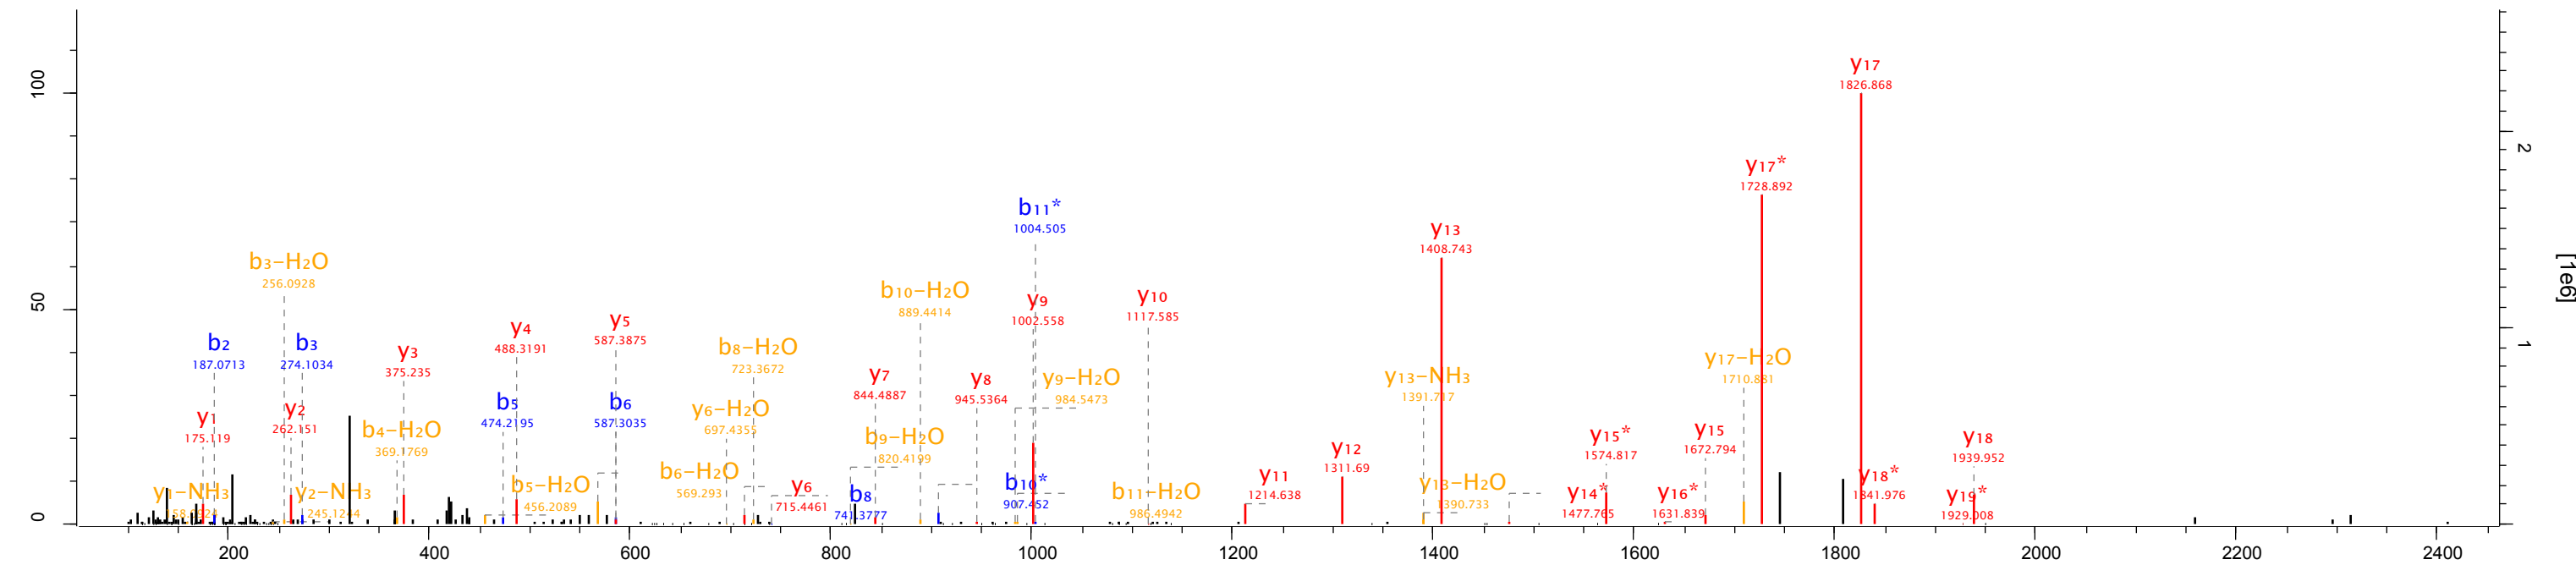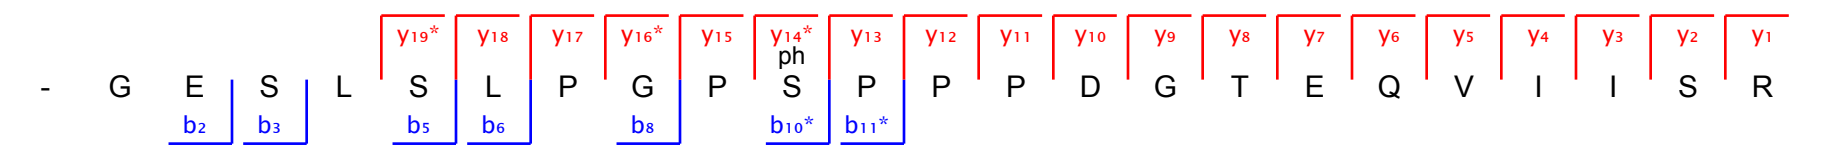

Raw file: 20150814\_A375SR\_Phospho\_BR2\_06  
 Scan: 22804 Method: FTMS; HCD Score: 208.06 m/z: 1032.96 Gene names: IRS2

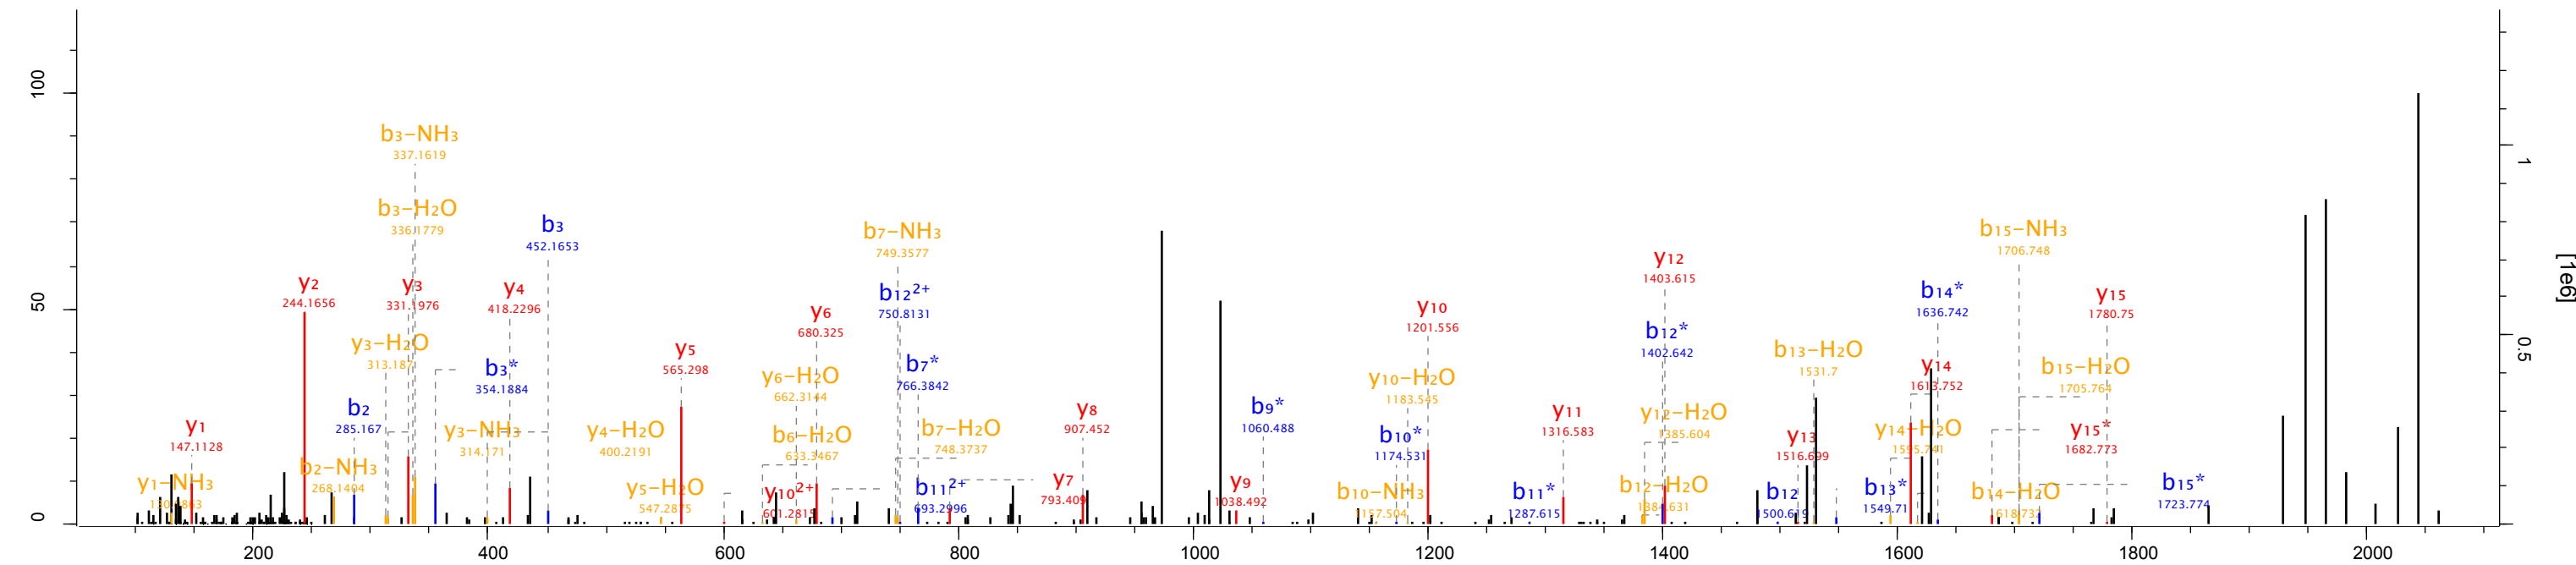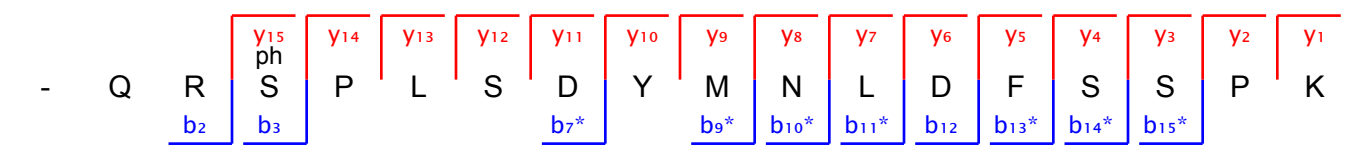

Raw file: 20150814\_A375SR\_Phospho\_BR2\_06  
 Scan: 22854 Method: FTMS; HCD Score: 82.24 m/z: 1128.49 Gene names: NFATC2IP

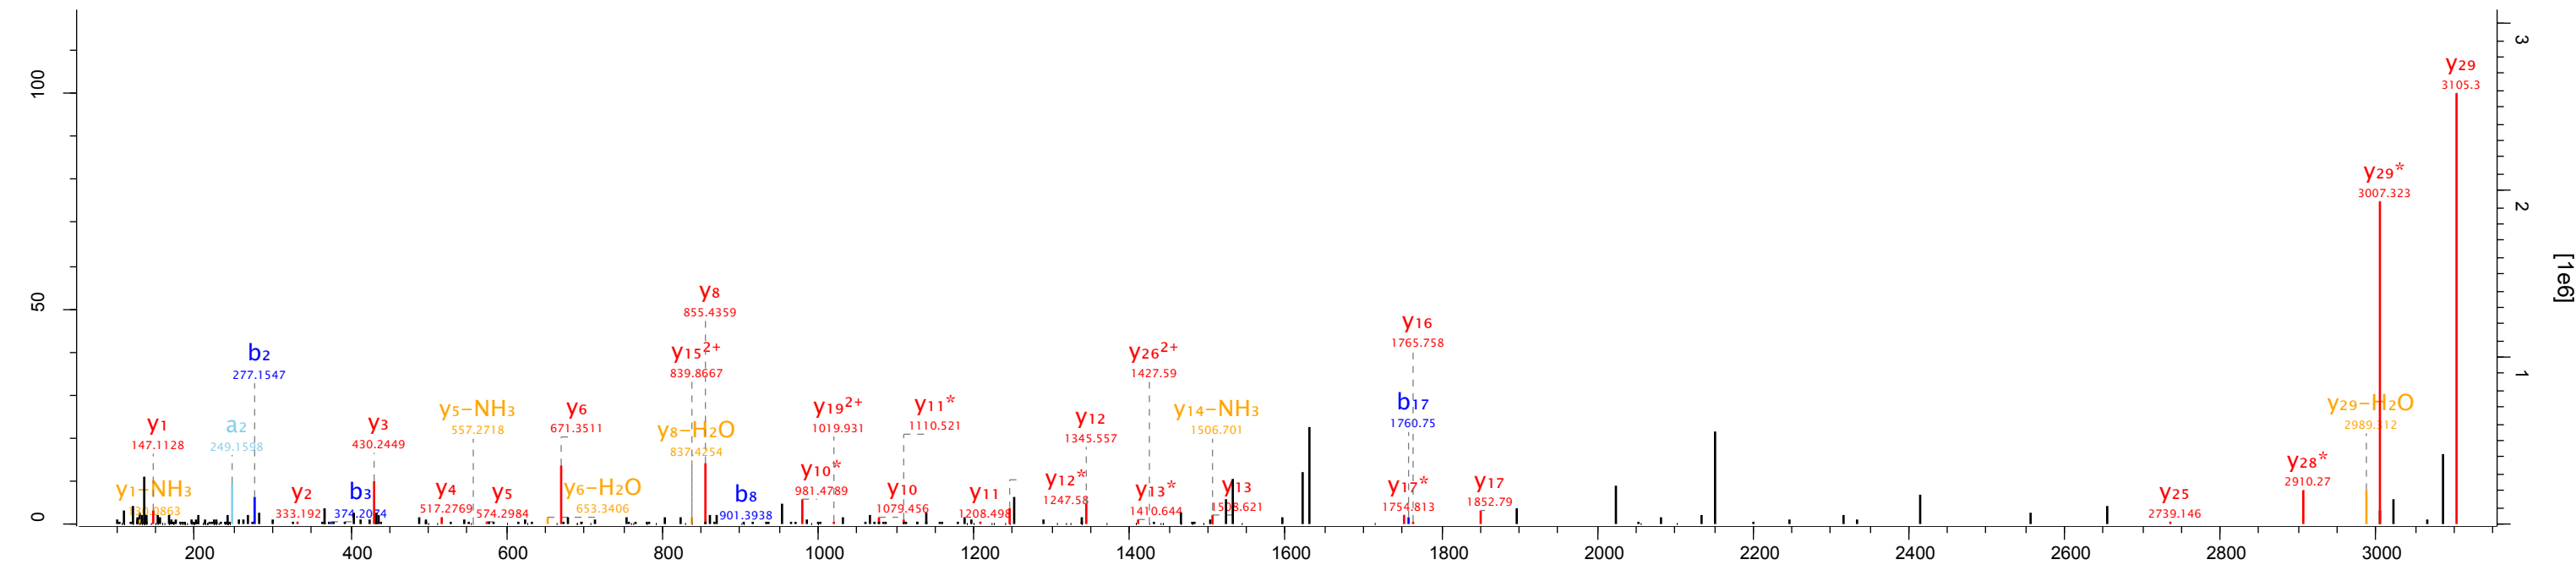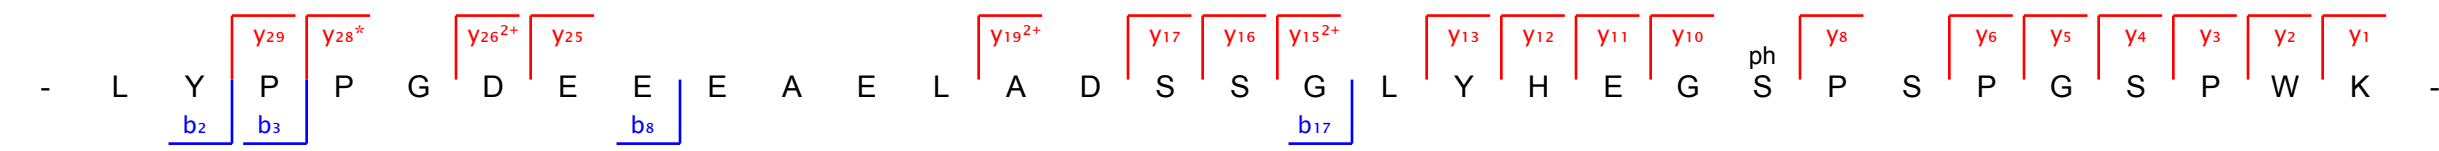

Raw file  
20150814\_A375SR\_Phospho\_BR2\_06

Scan 23104 Method FTMS; HCD Score 164.64 m/z 870.38 Gene names EXOC1

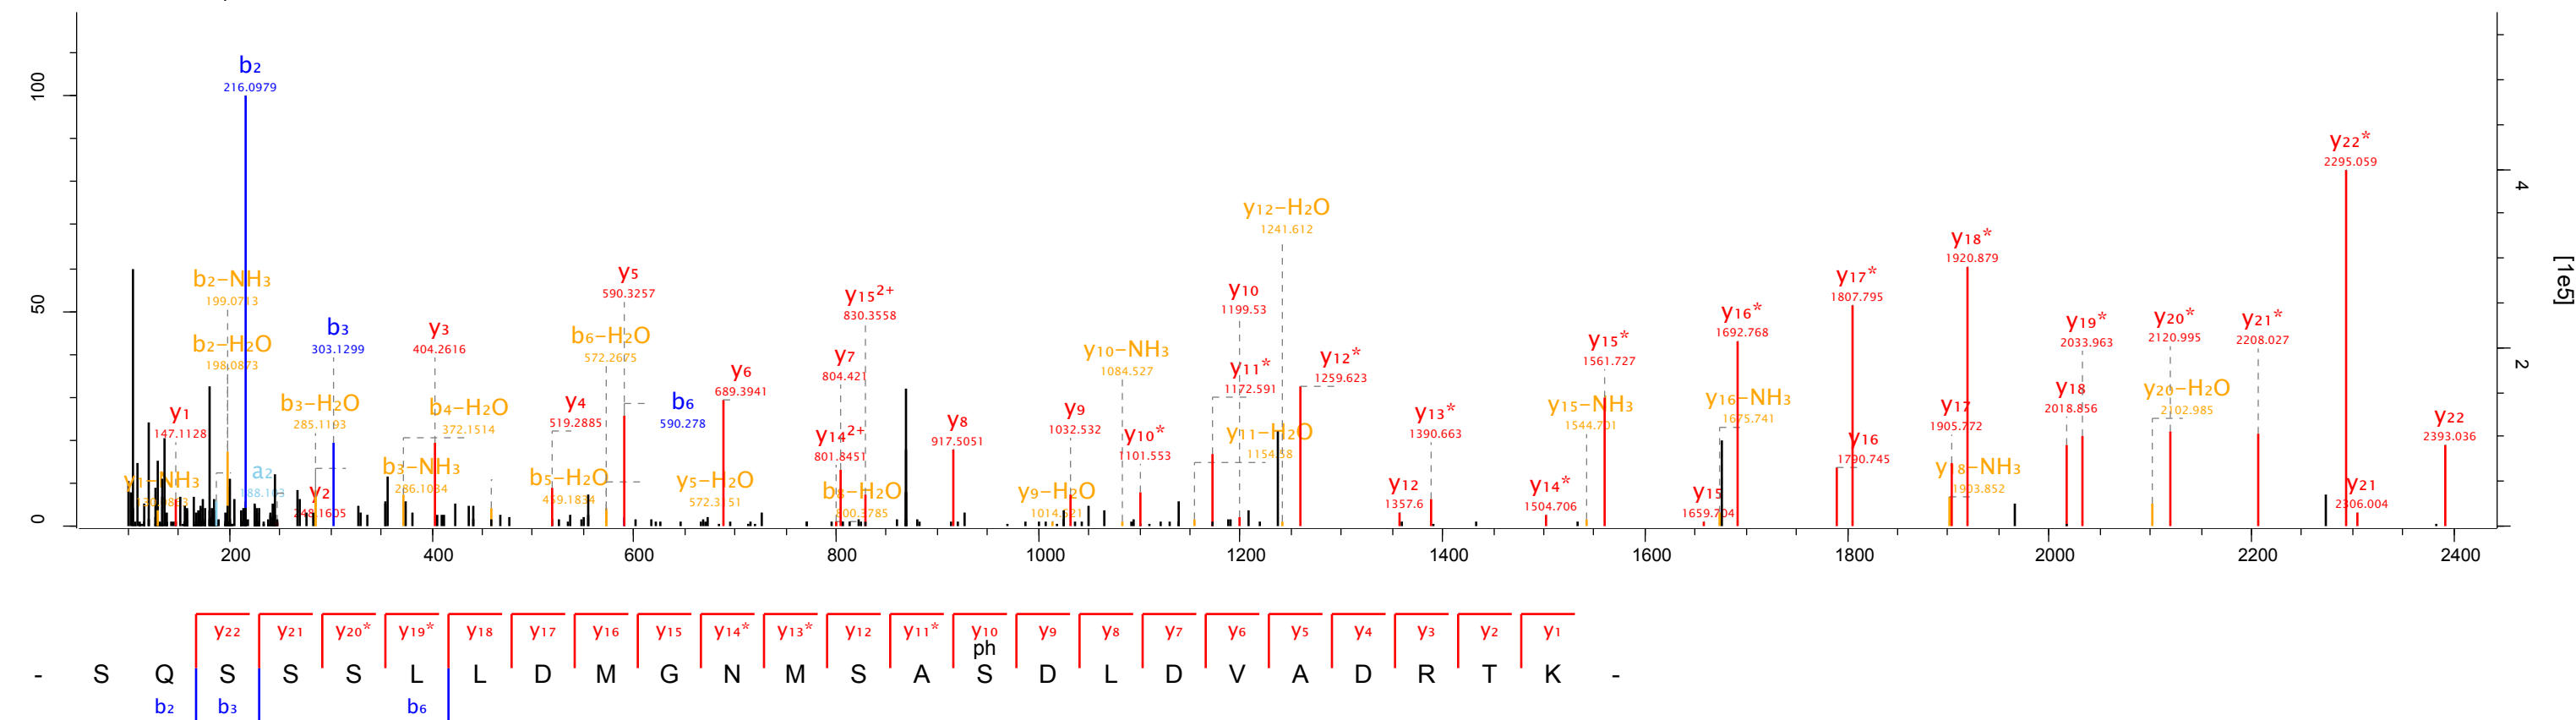



Raw file: 20150814\_A375SR\_Phospho\_BR2\_06  
 Scan: 23494 Method: FTMS; HCD Score: 80.73 m/z: 791.05 Gene names: N4BP2

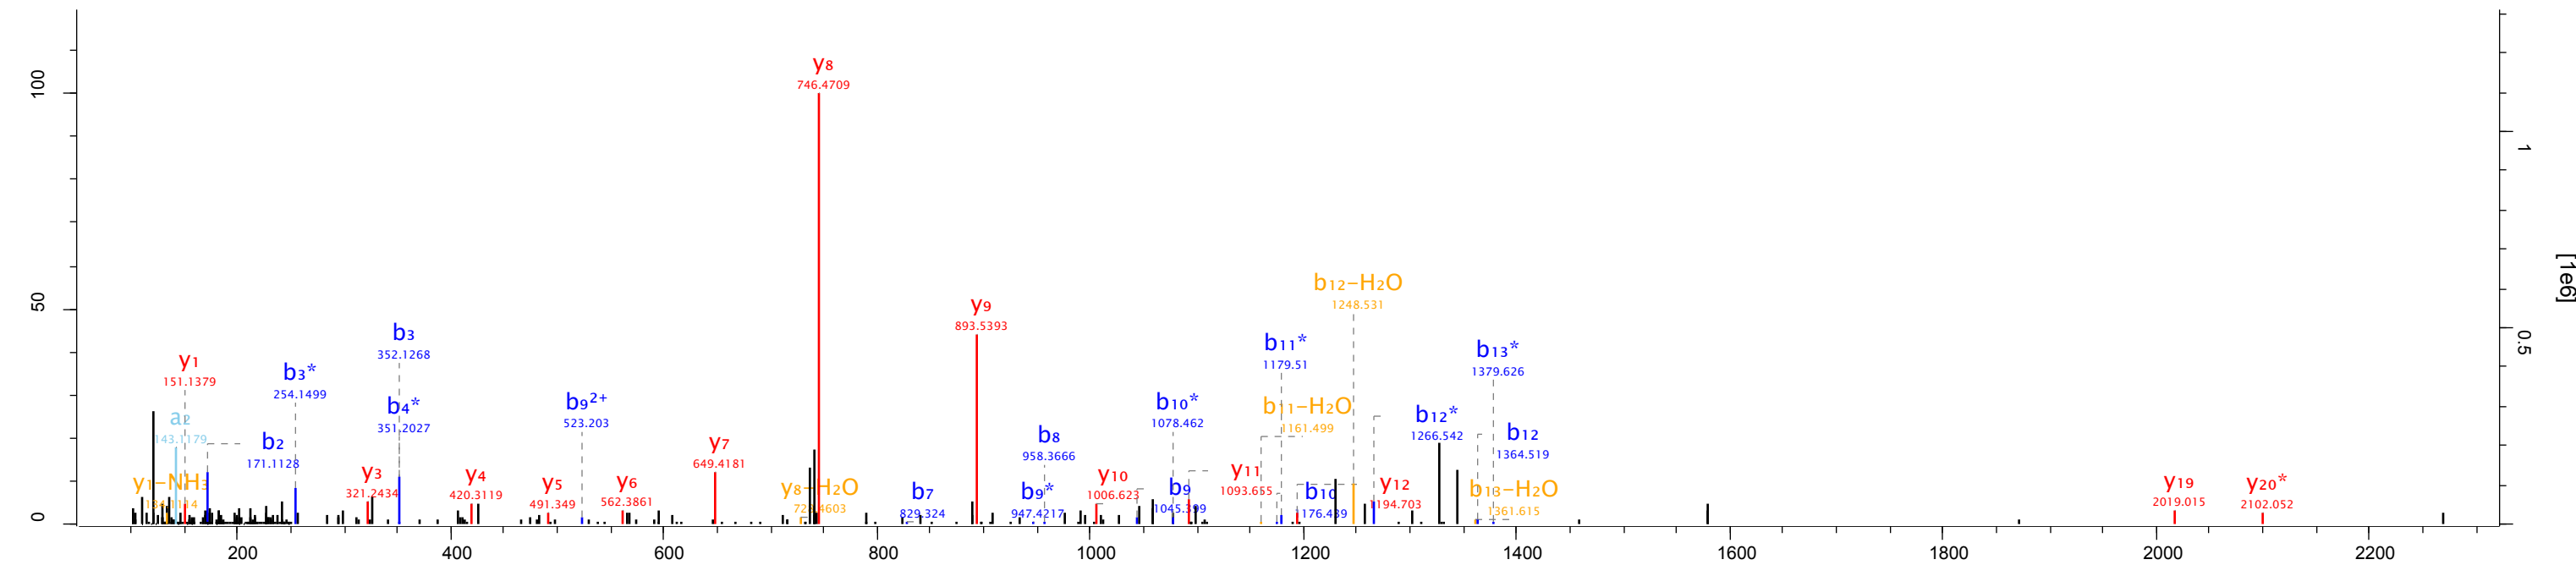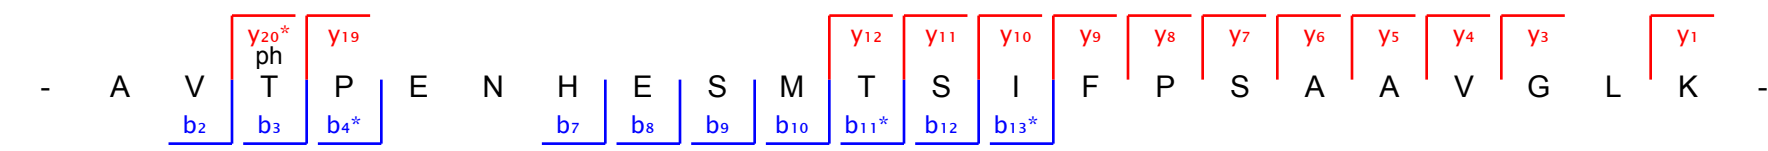

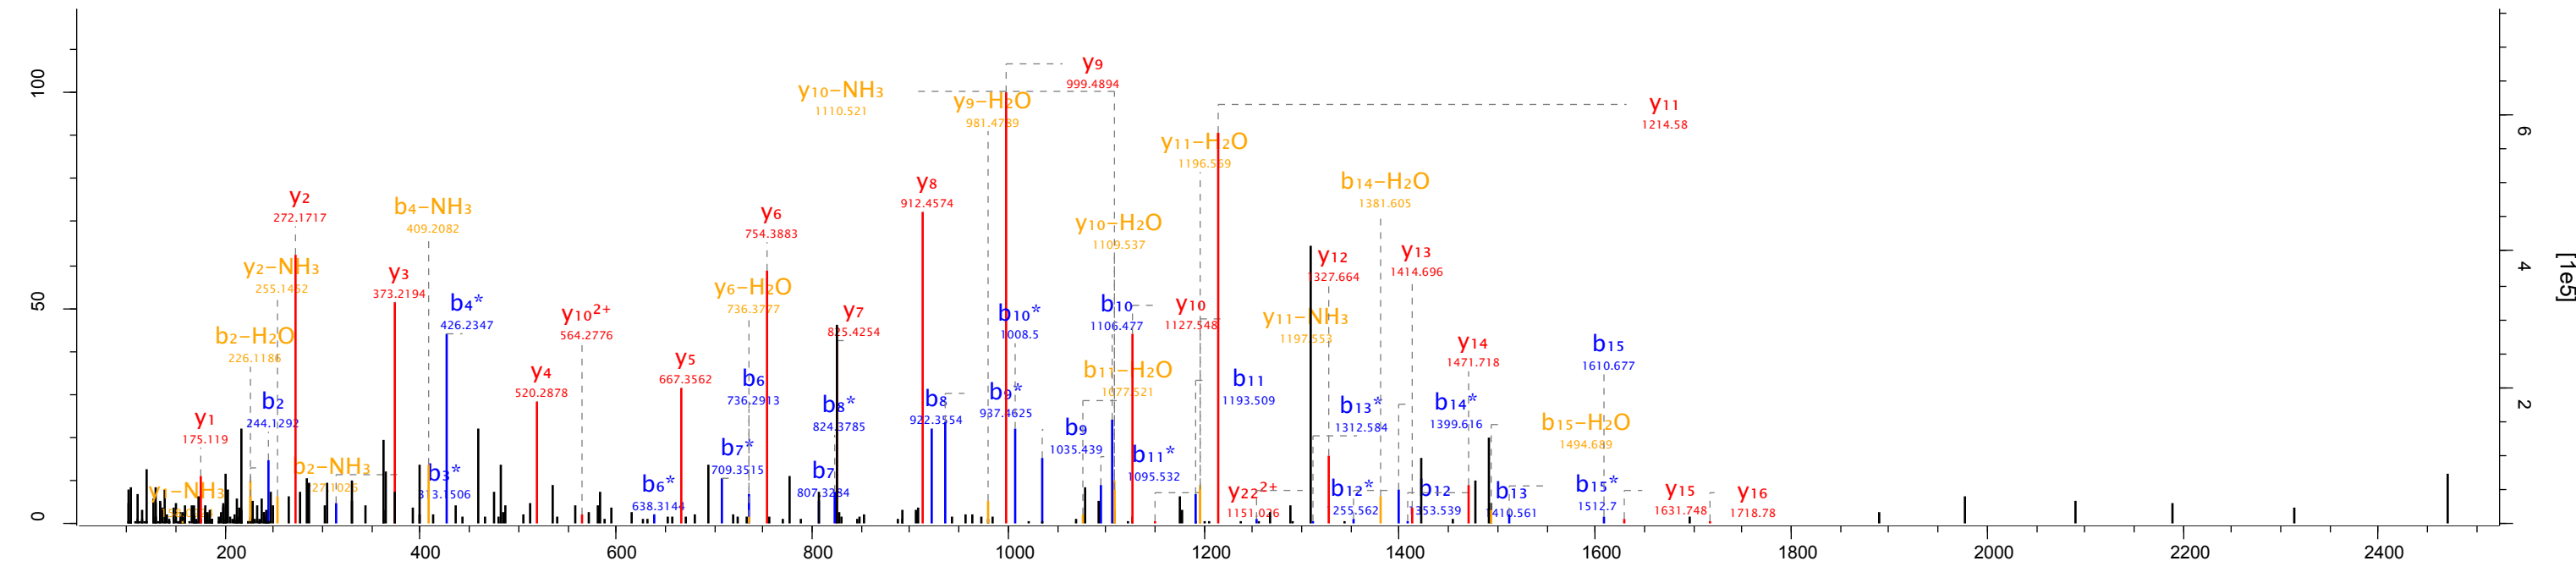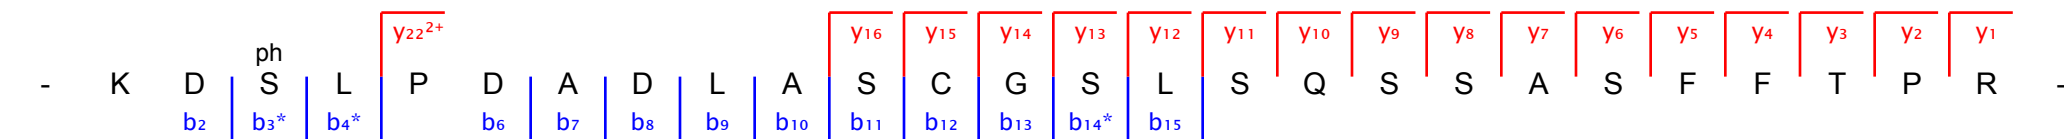

Raw file 20150814\_A375SR\_Phospho\_BR2\_06 Scan 23974 Method FTMS; HCD Score 70.58 m/z 898.81 Gene names DENND2A

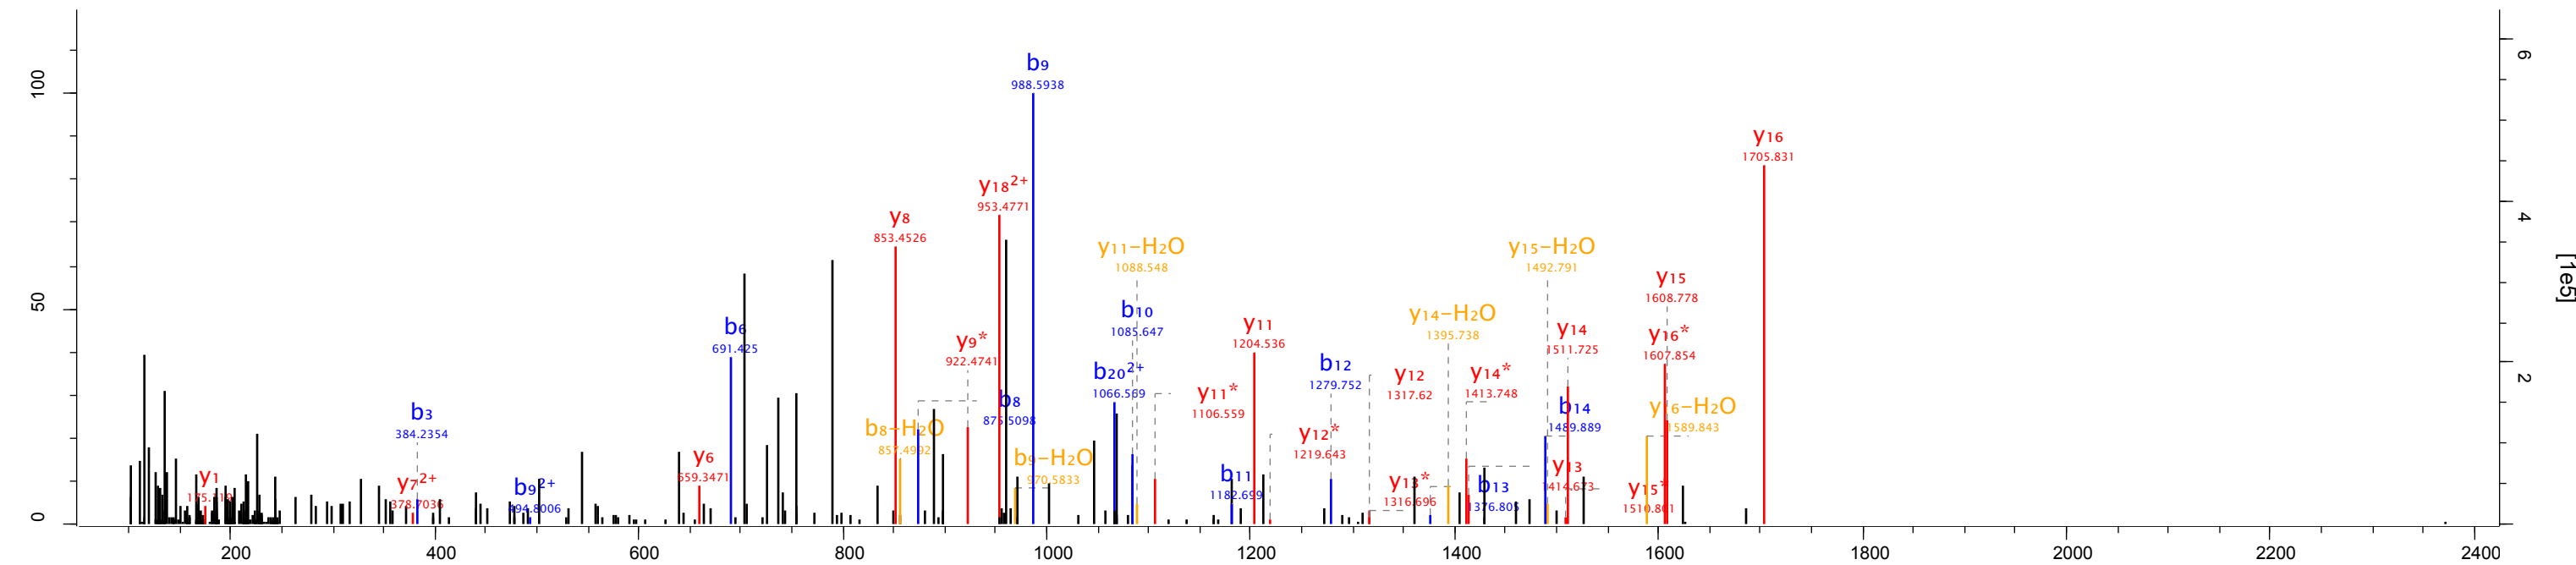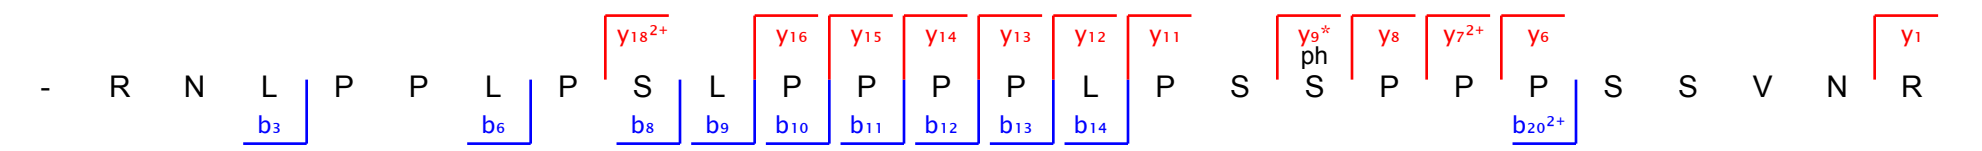

Raw file  
 20150814\_A375SR\_Phospho\_BR2\_06  
 Scan 24344 Method FTMS; HCD Score 92.09 m/z 850.06 Gene names FLNA

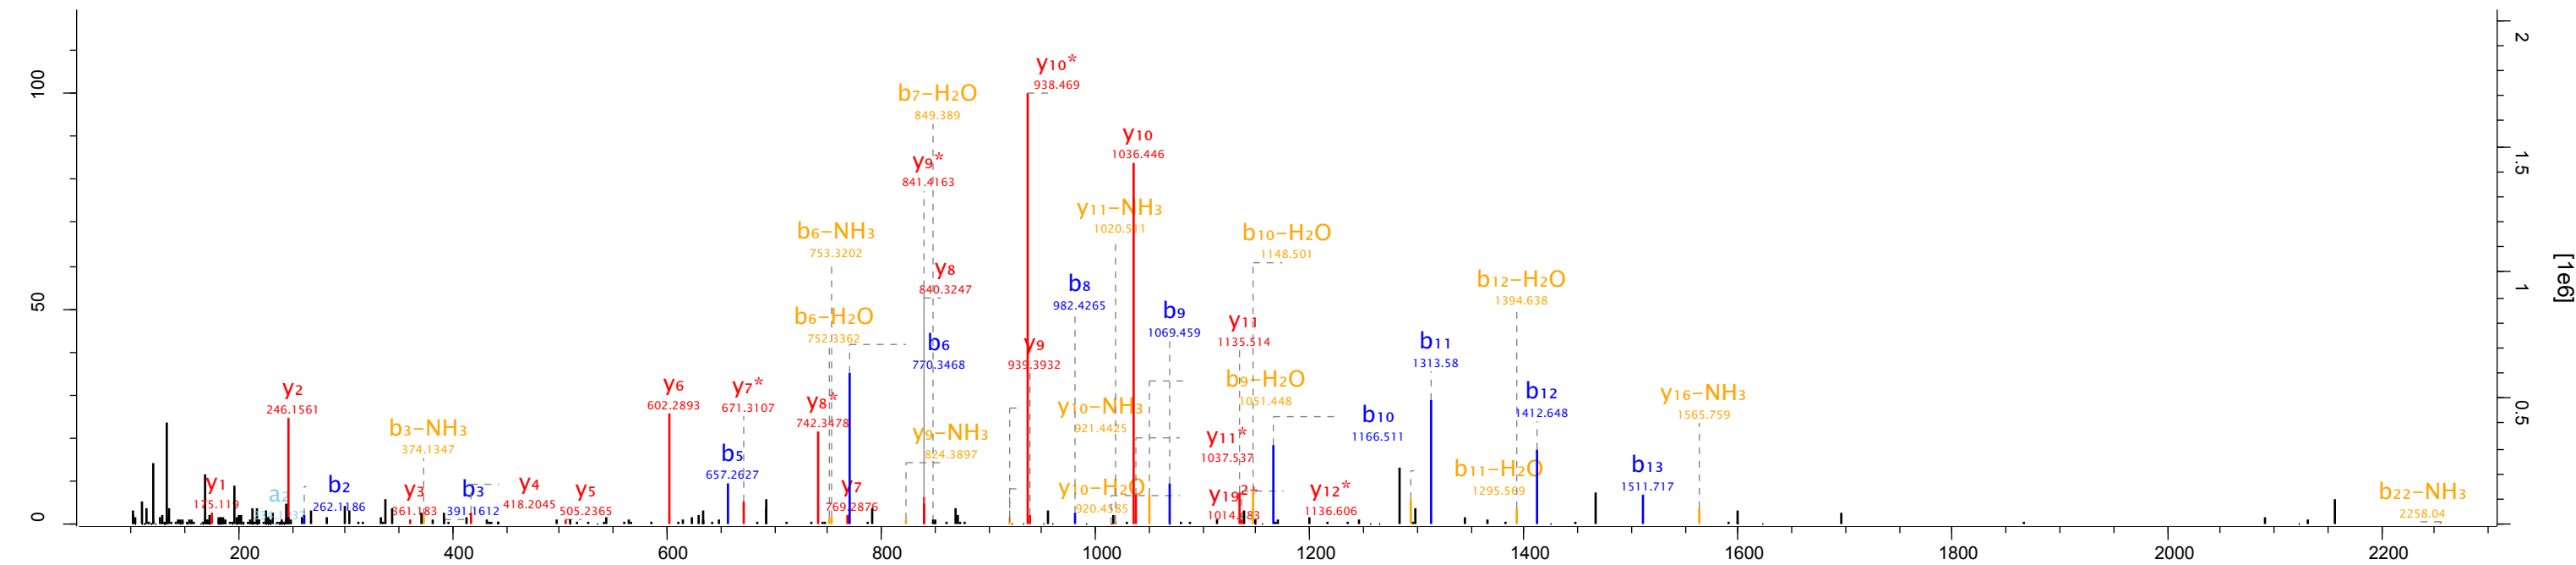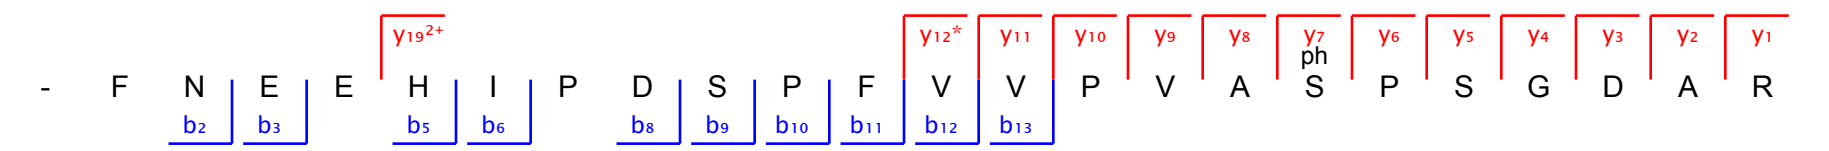

Raw file: 20150814\_A375SR\_Phospho\_BR2\_06  
 Scan: 24404 Method: FTMS; HCD Score: 203.53 m/z: 811.87 Gene names: TJAP1

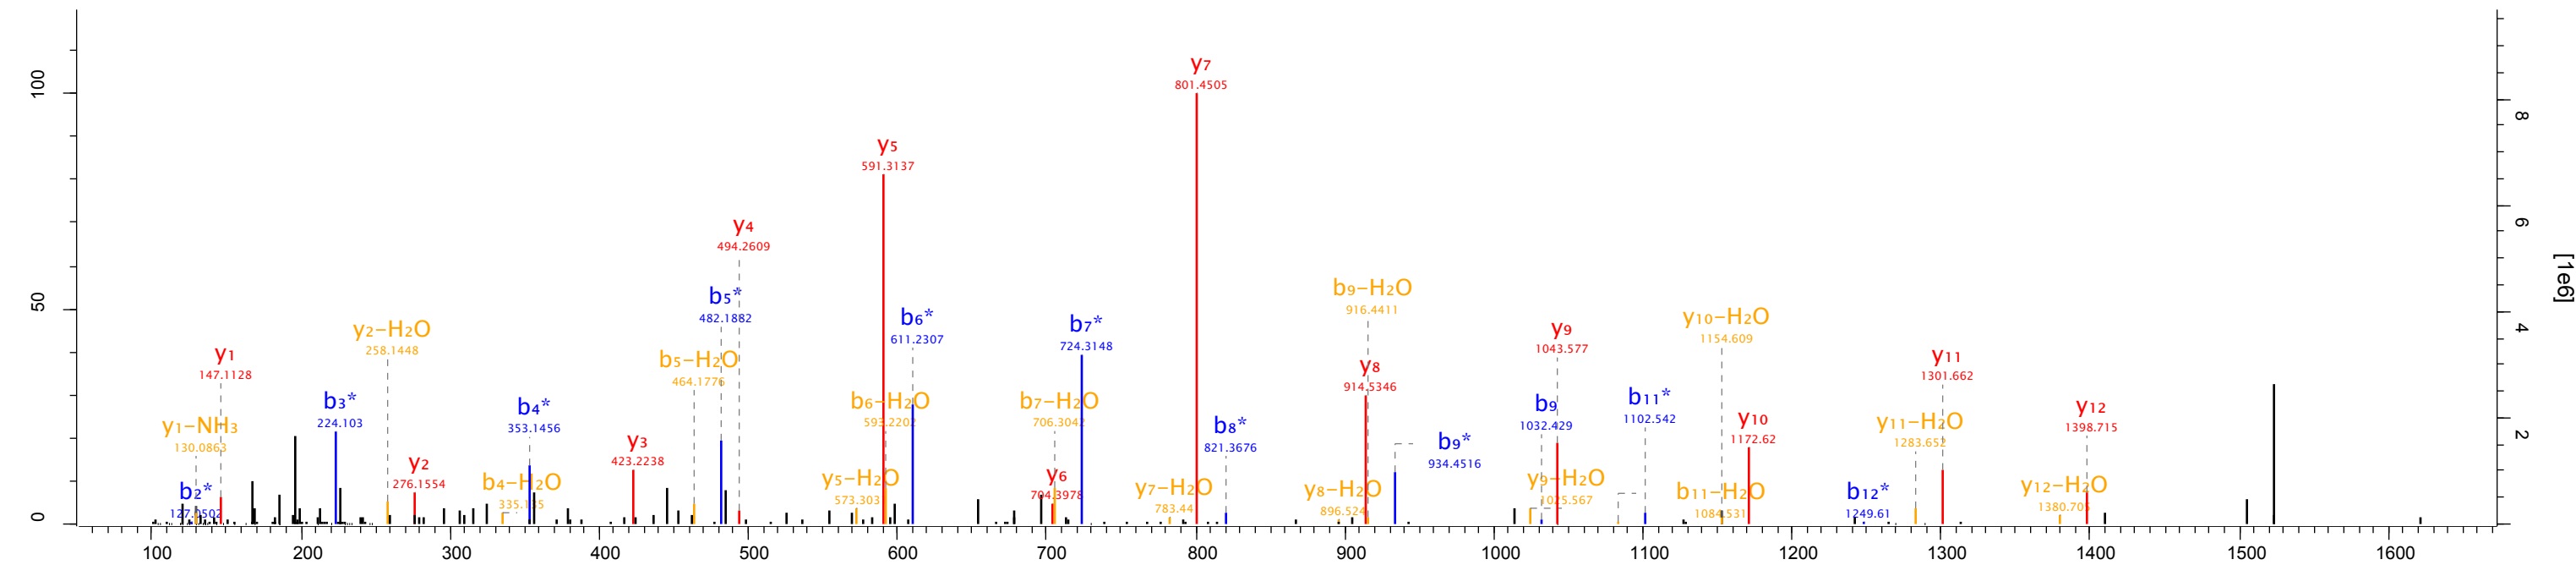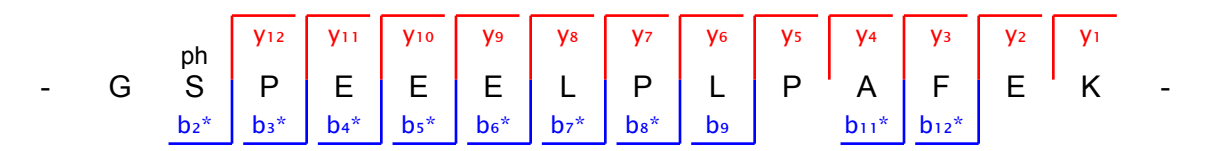

Raw file: 20150814\_A375SR\_Phospho\_BR2\_06  
 Scan: 25094 Method: FTMS; HCD Score: 105.32 m/z: 734.33

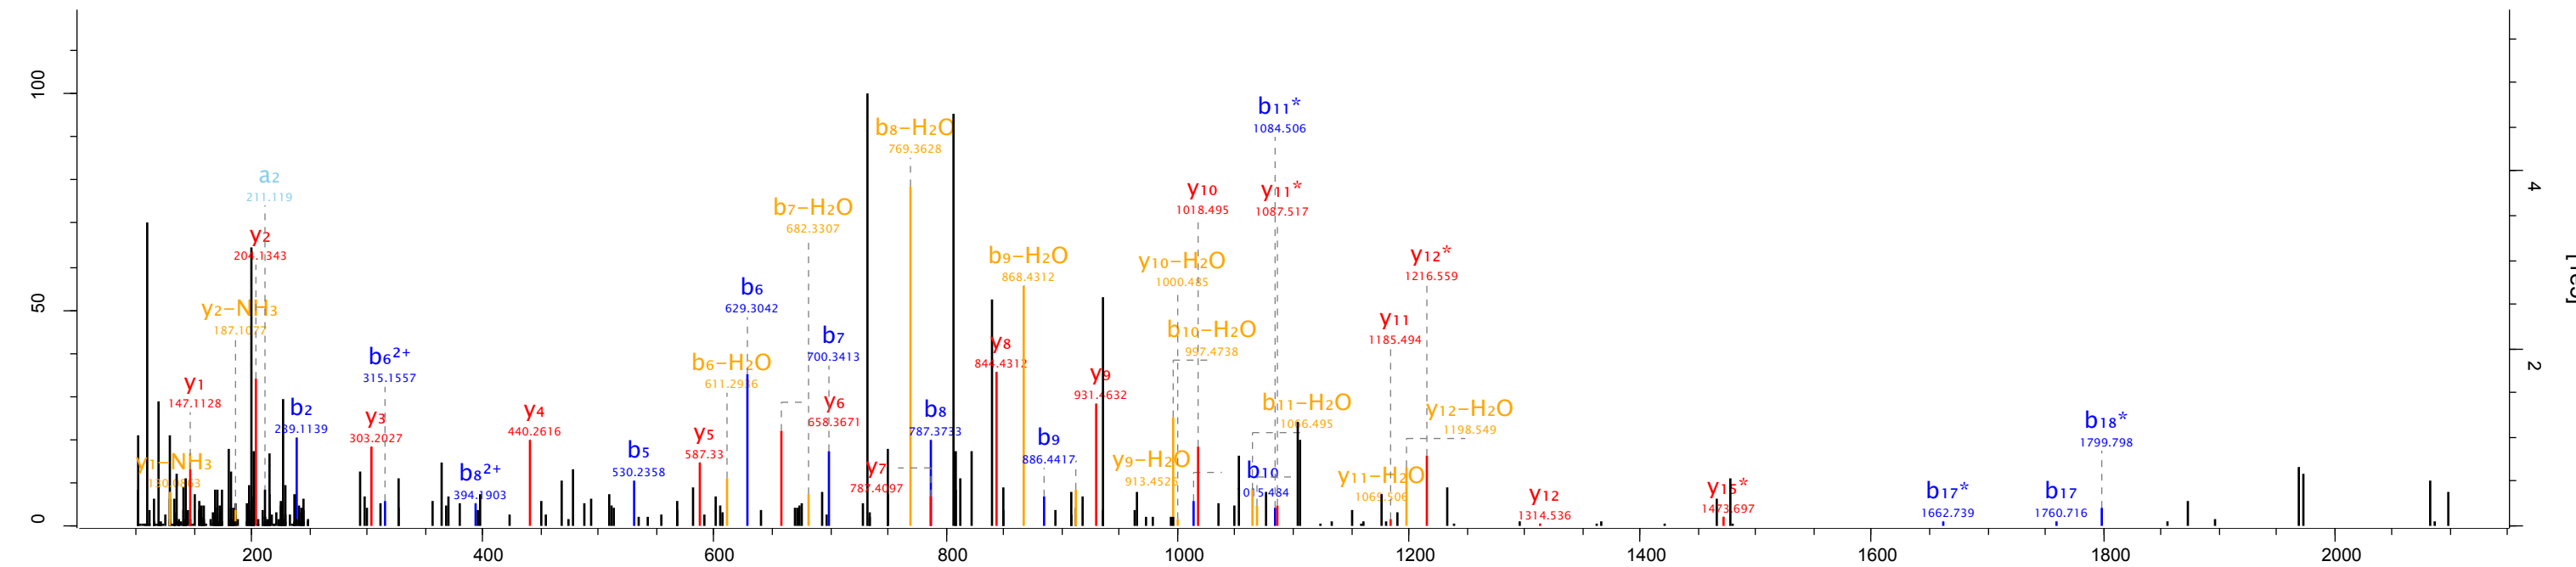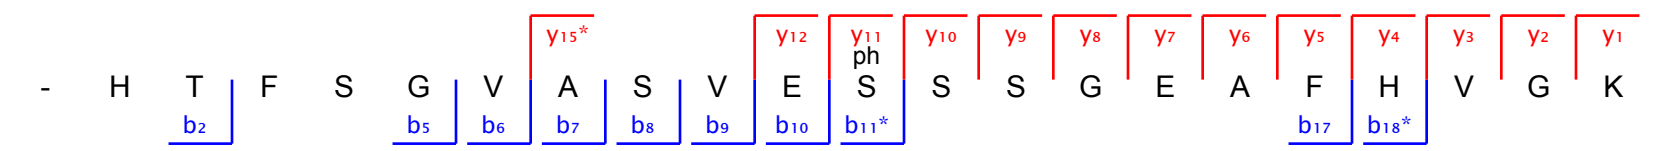

Raw file: 20150814\_A375SR\_Phospho\_BR2\_06  
 Scan: 25524 Method: FTMS; HCD Score: 148.66 m/z: 882.41 Gene names: WEE1

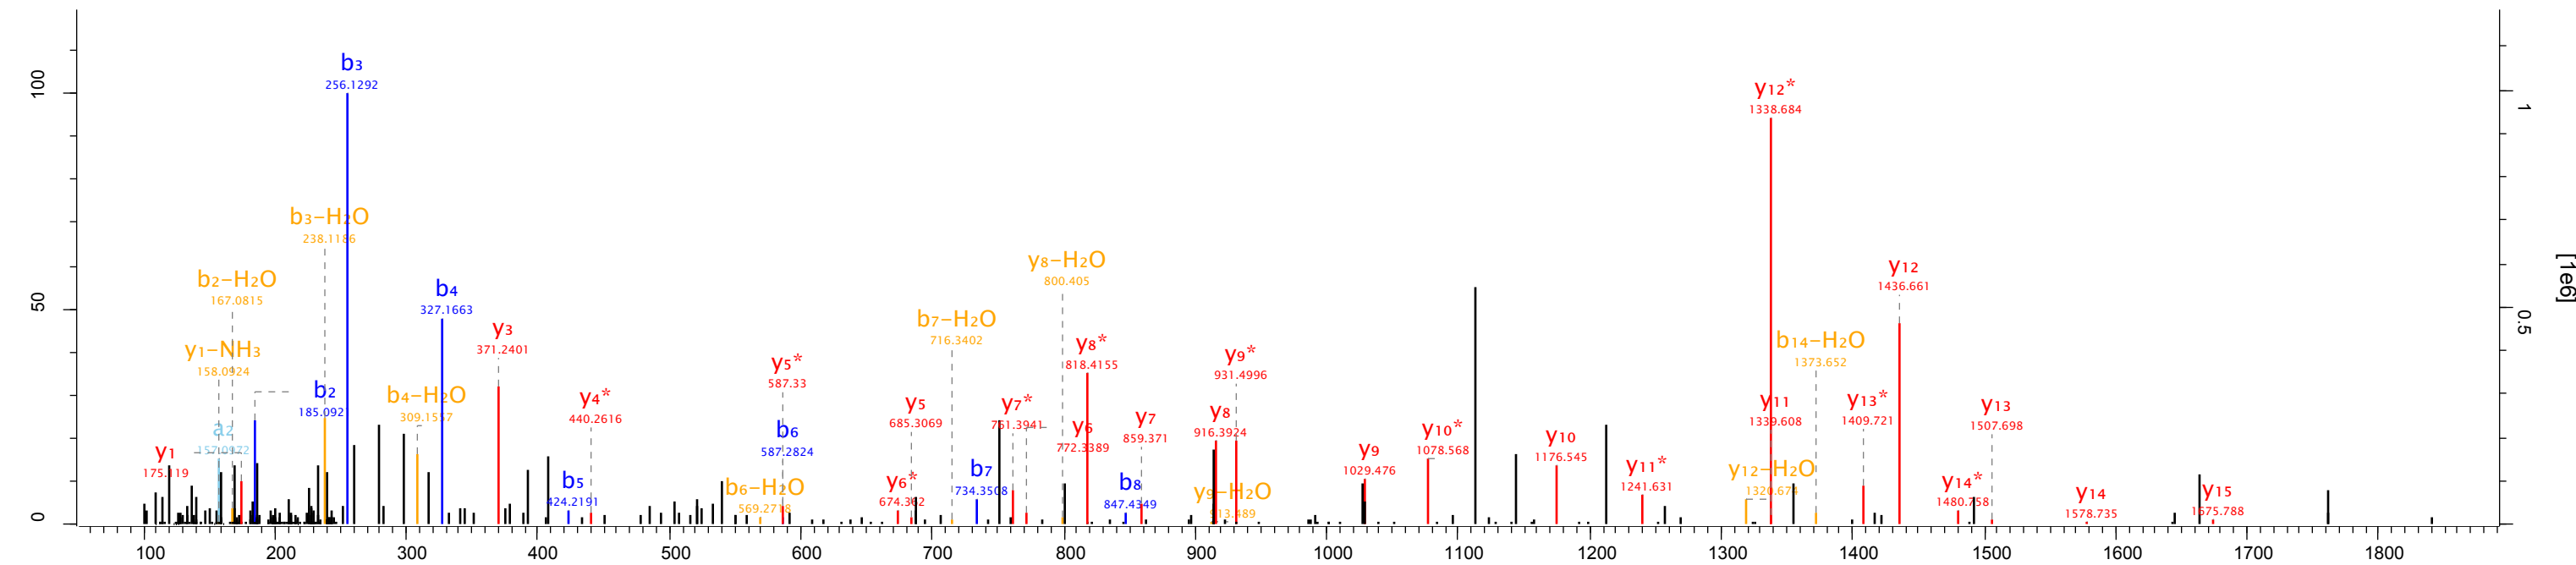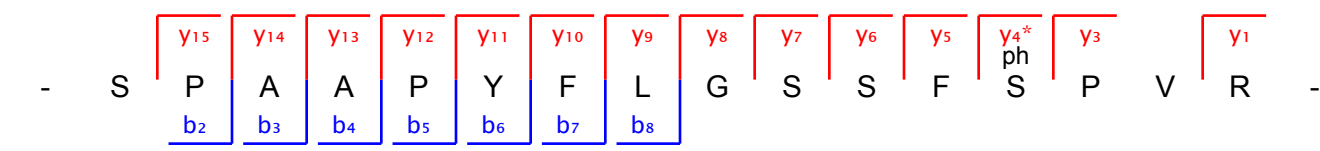

Raw file: 20150814\_A375SR\_Phospho\_BR2\_06  
 Scan: 27314 Method: FTMS; HCD Score: 208.13 m/z: 716.66 Gene names: MAGEC2

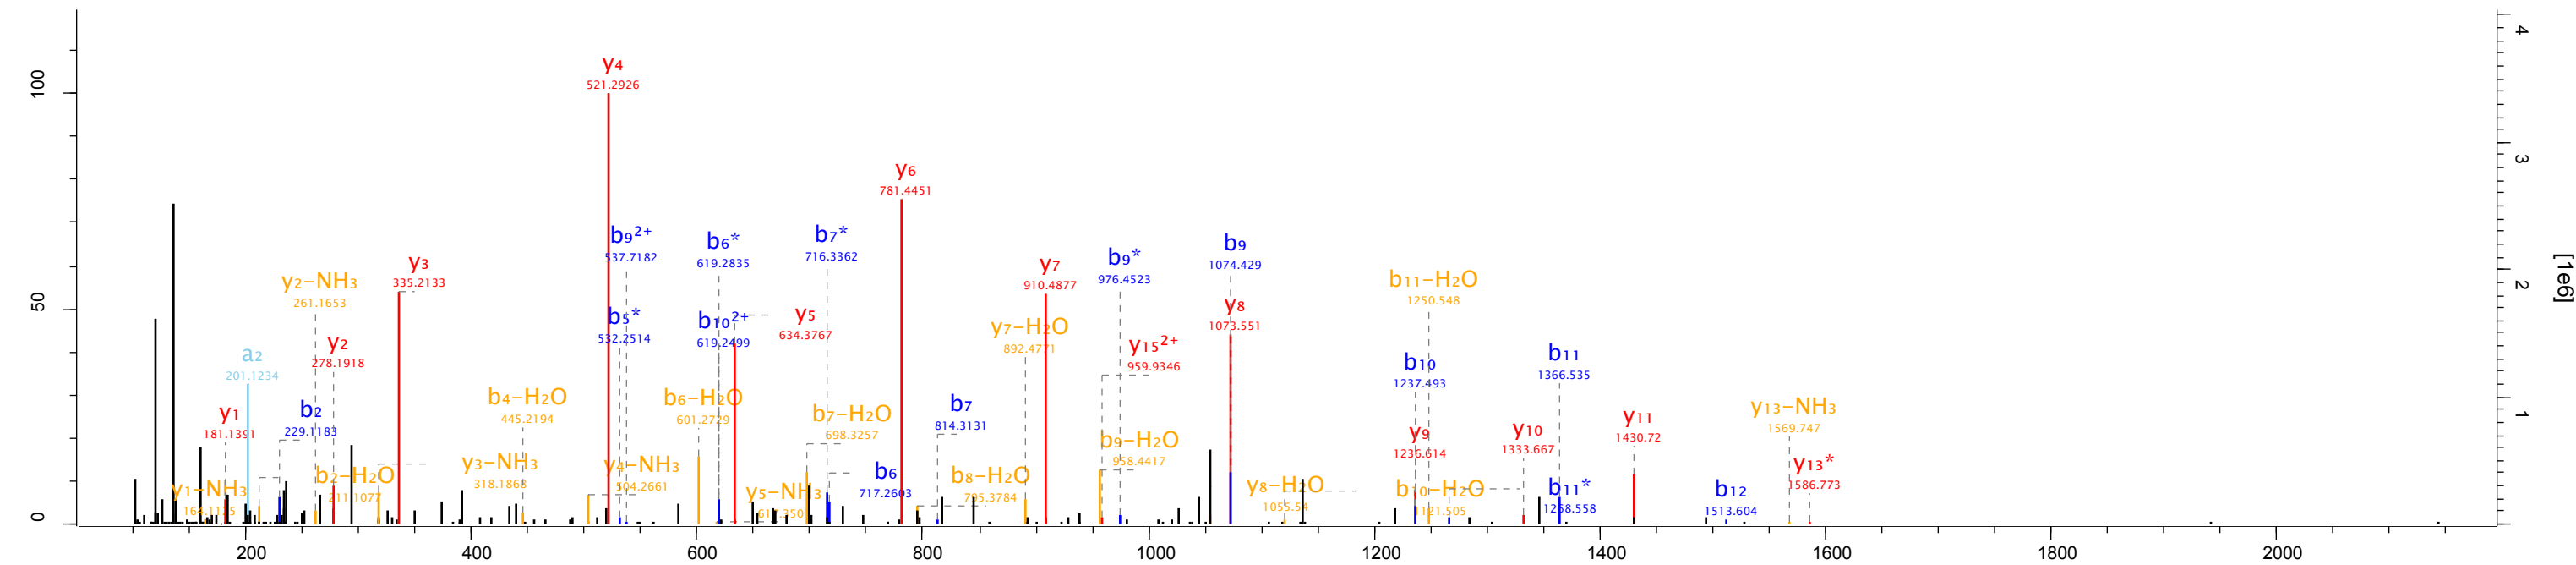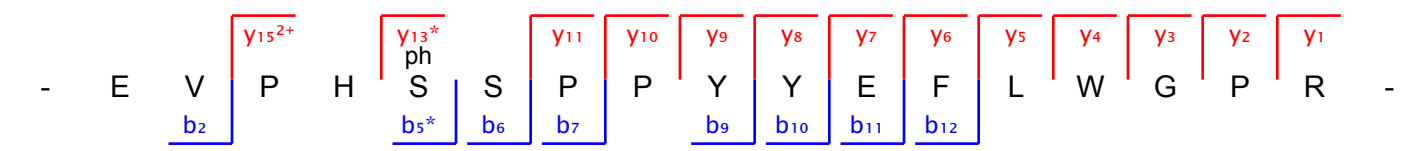





Raw file: 20150814\_A375SR\_Phospho\_BR2\_06  
 Scan: 27474 Method: FTMS; HCD Score: 90.39 m/z: 752.86 Gene names: RPRD2

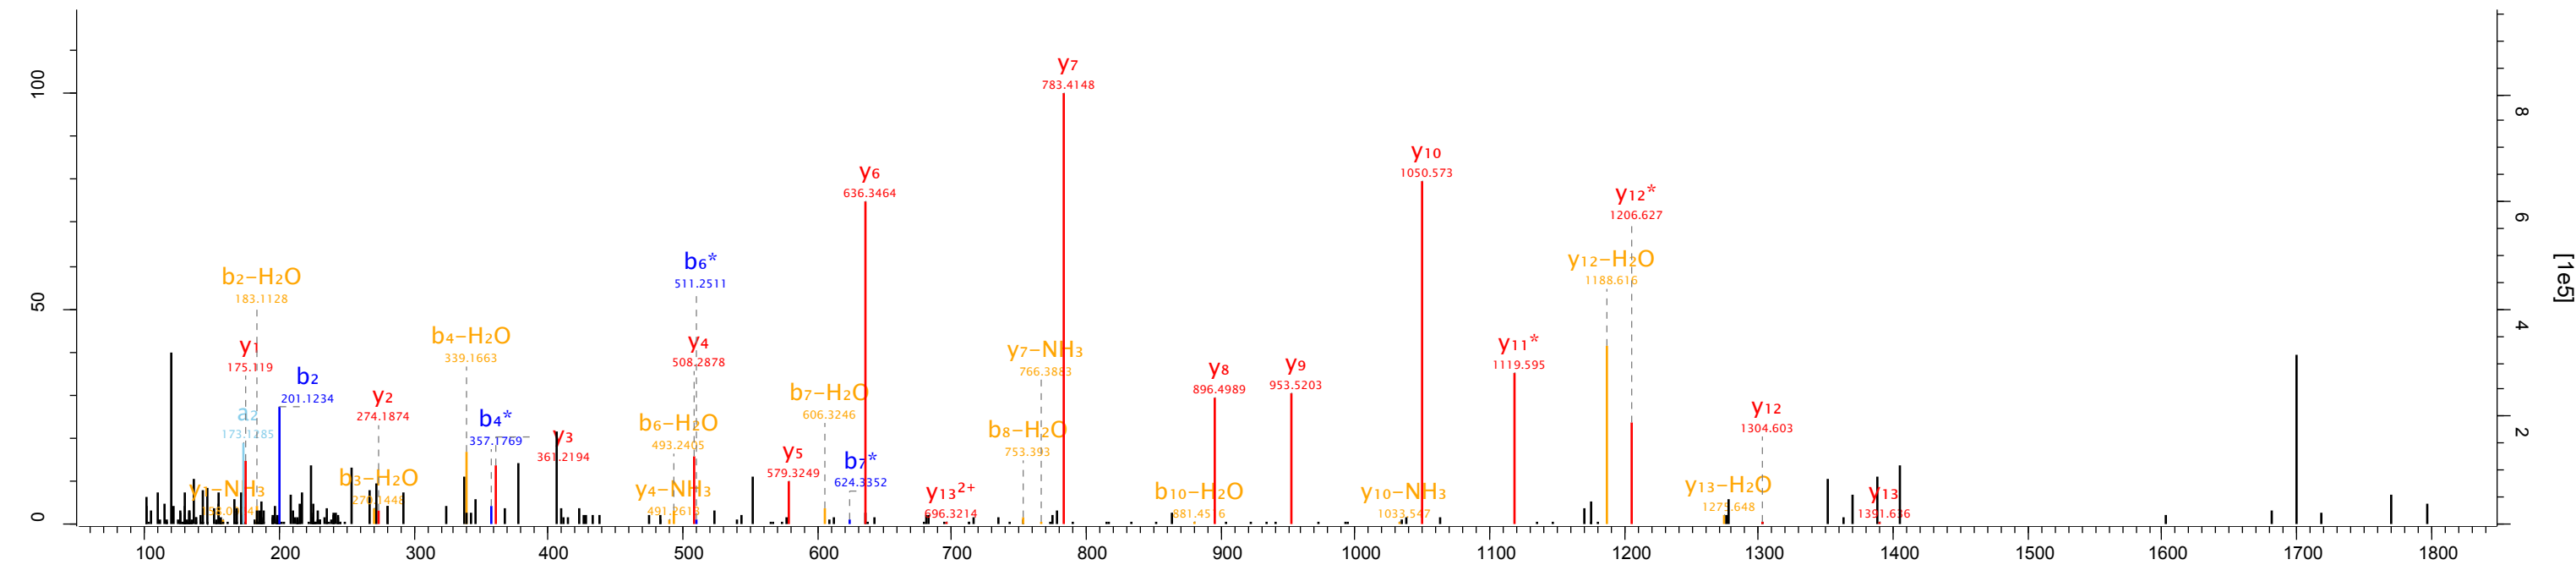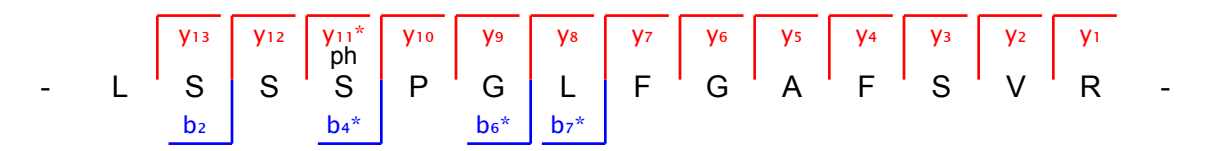

Raw file 20150814\_A375SR\_Phospho\_BR2\_06 Scan 28464 Method FTMS; HCD Score 241.66 m/z 736.88 Gene names FAM91A1

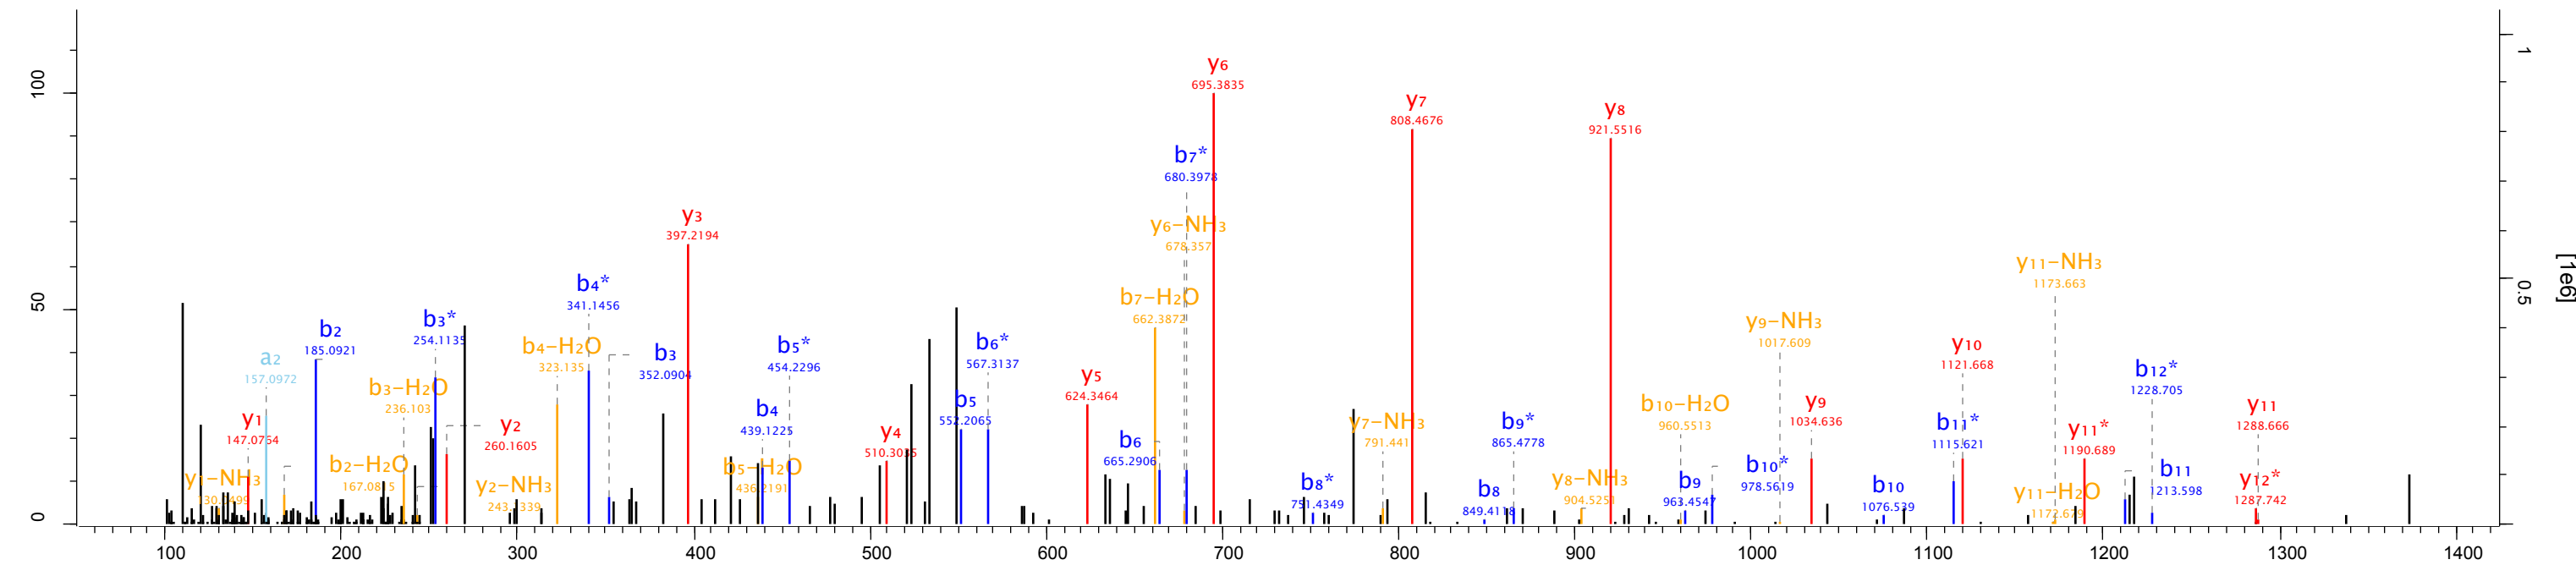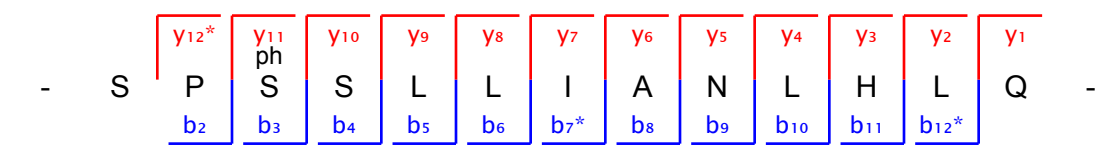

Raw file: 20150814\_A375SR\_Phospho\_BR2\_06  
 Scan: 28494 Method: FTMS; HCD Score: 54.81 m/z: 491.59 Gene names: FAM91A1

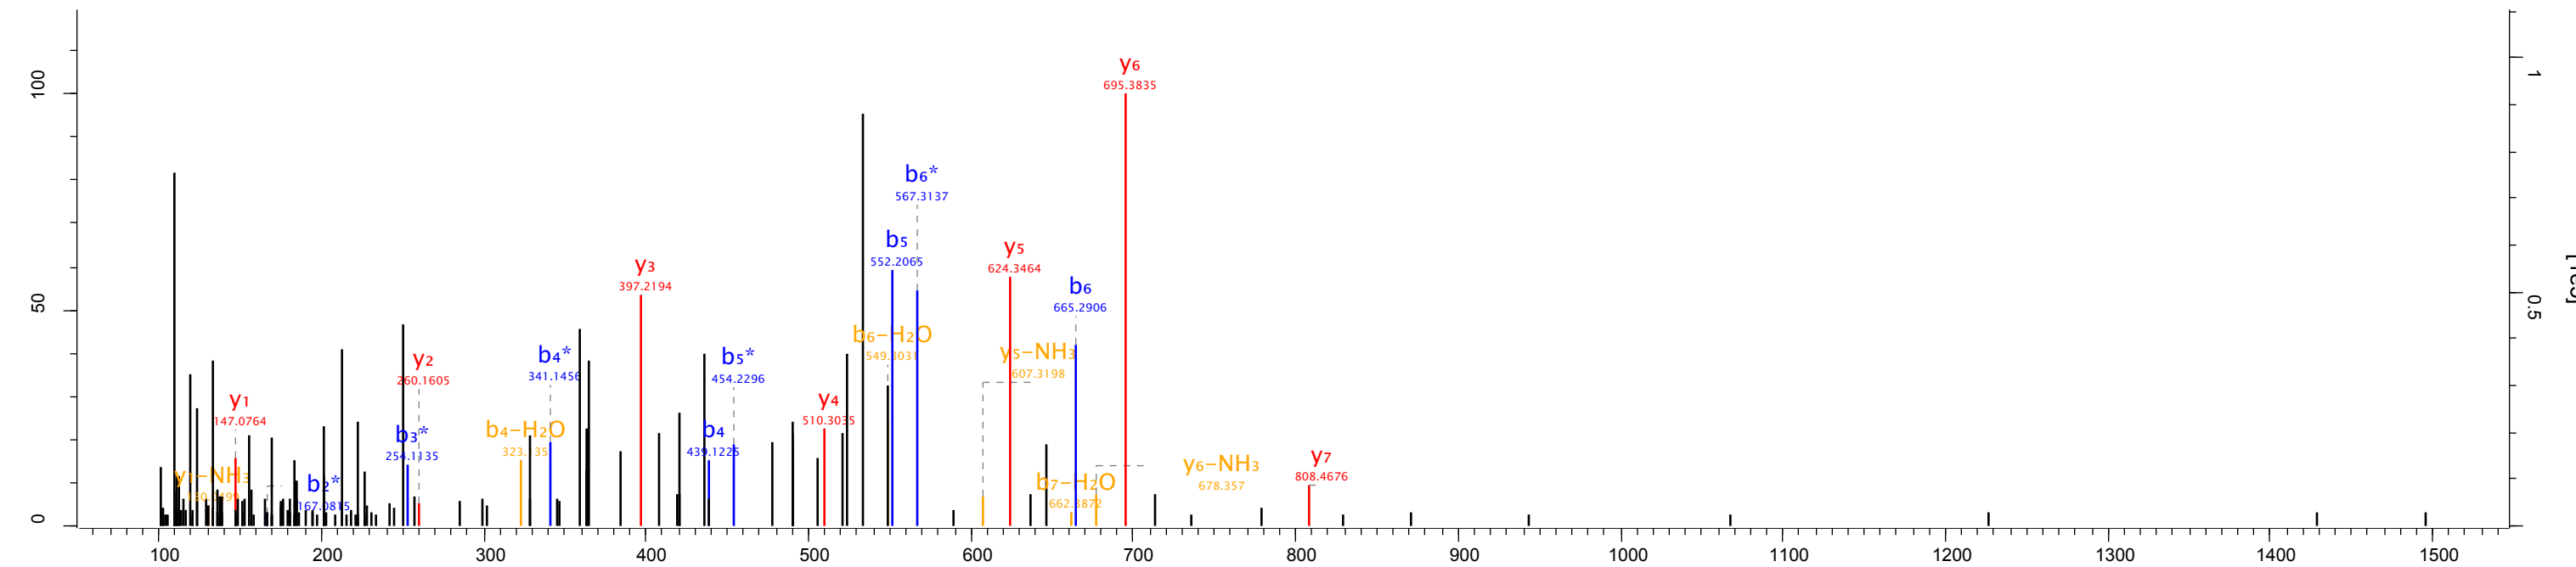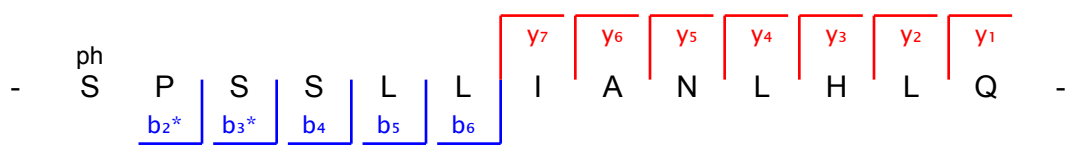

Raw file 20150814\_A375SR\_Phospho\_BR2\_06 Scan 28774 Method FTMS; HCD Score 47.1 m/z 759.38 Gene names RFX7

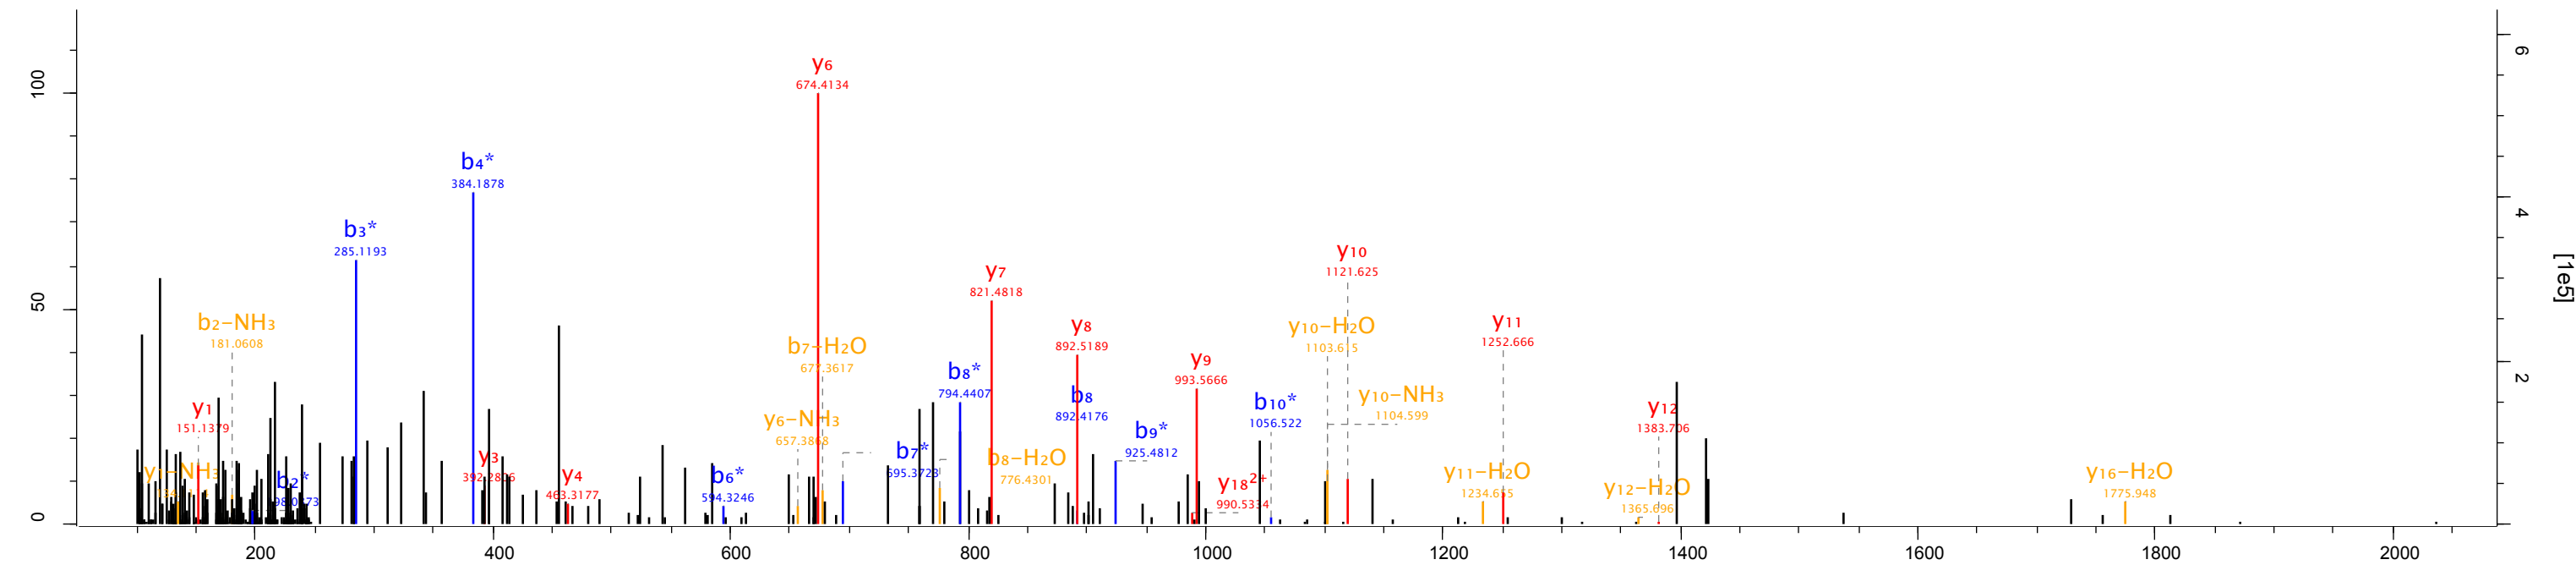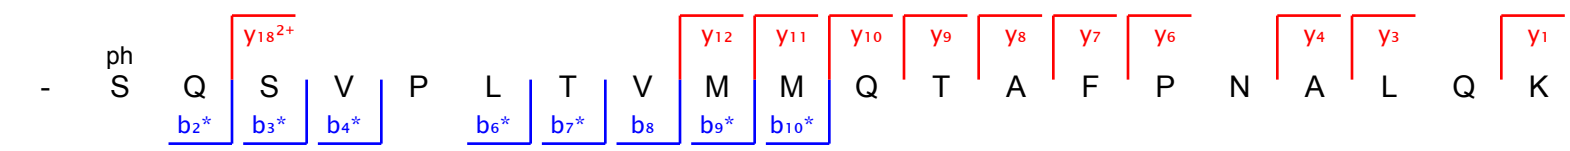

Raw file Scan Method Score m/z Gene names

20150814\_A375SR\_Phospho\_BR2\_06 4254 FTMS; HCD 118.52 605.77 MSL3

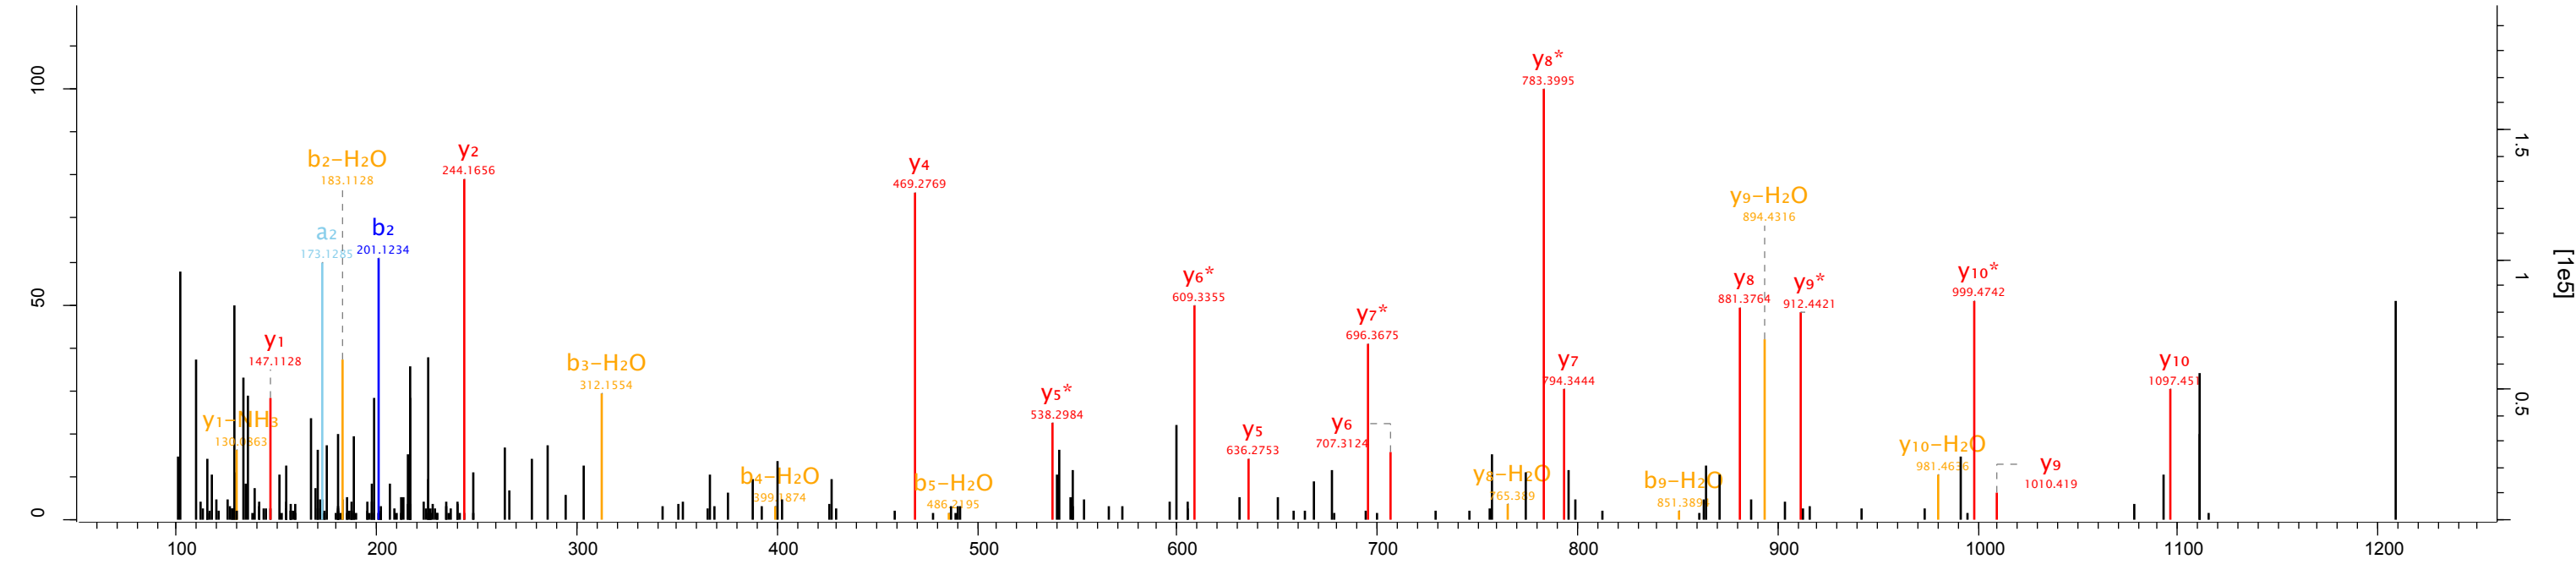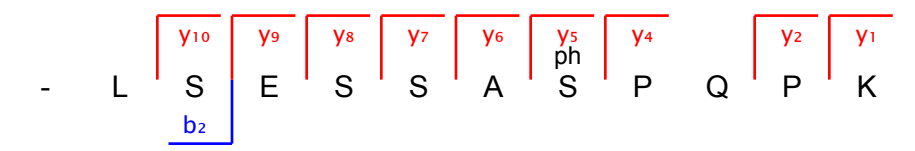

Raw file: 20150814\_A375SR\_Phospho\_BR2\_06  
 Scan: 4994 Method: FTMS; HCD Score: 125.72 m/z: 515.25 Gene names: PRKCD

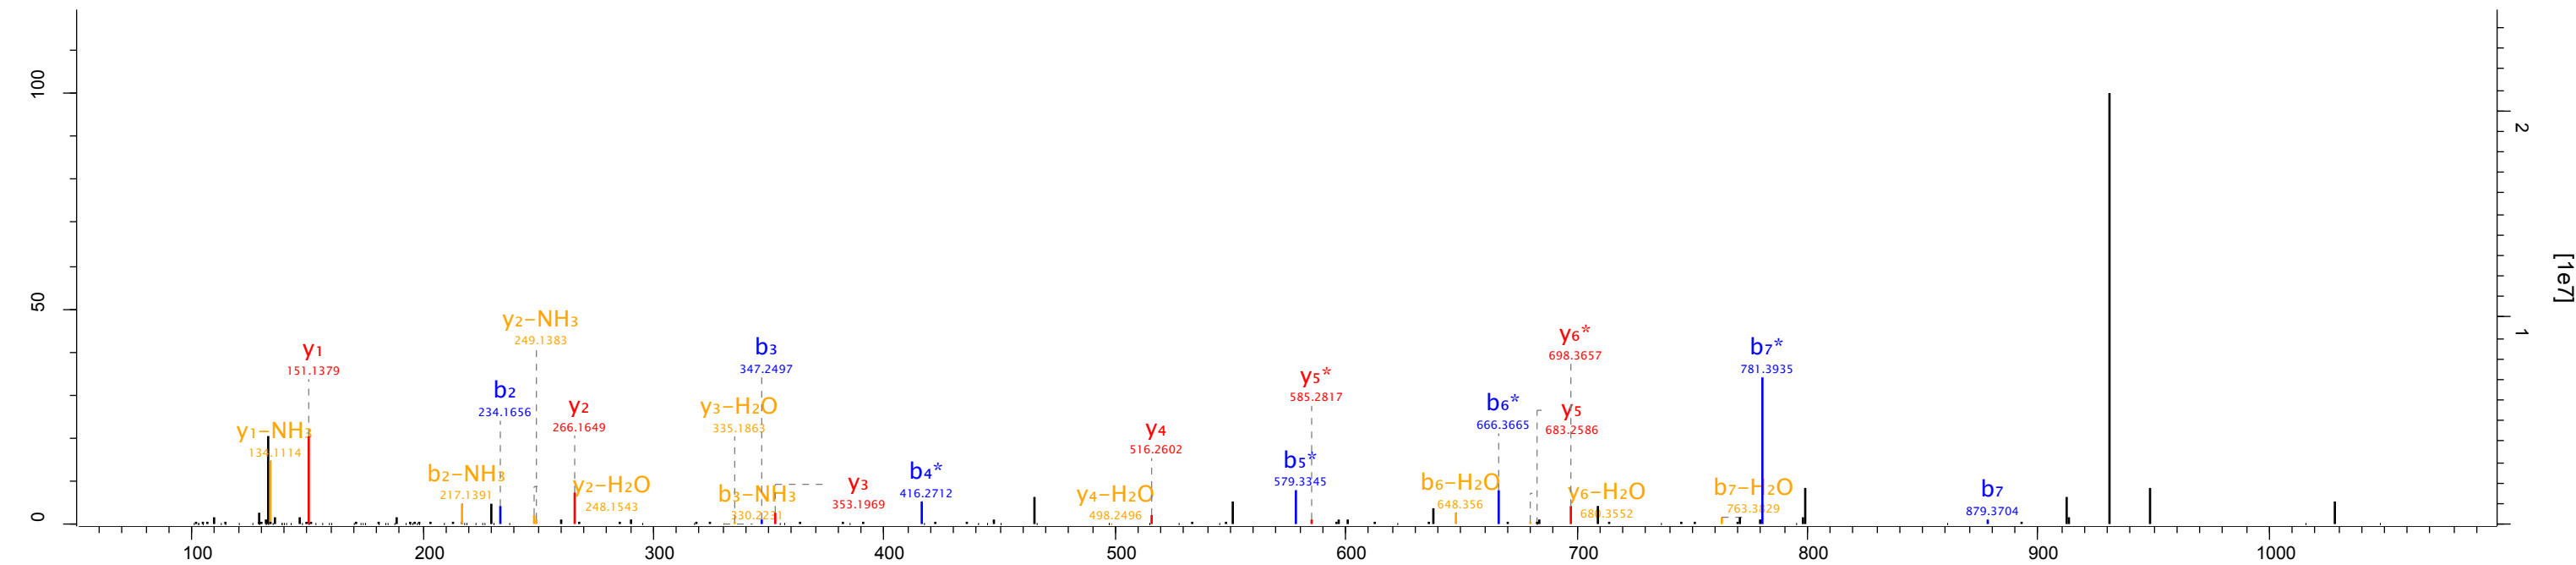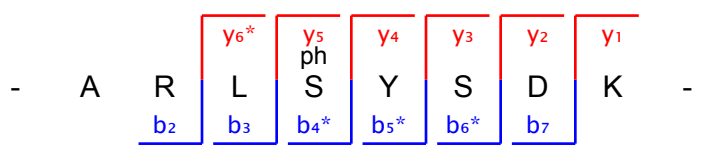

Raw file 20150814\_A375SR\_Phospho\_BR2\_06 Scan 5054 Method FTMS; HCD Score 79.49 m/z 511.57 Gene names FARP1

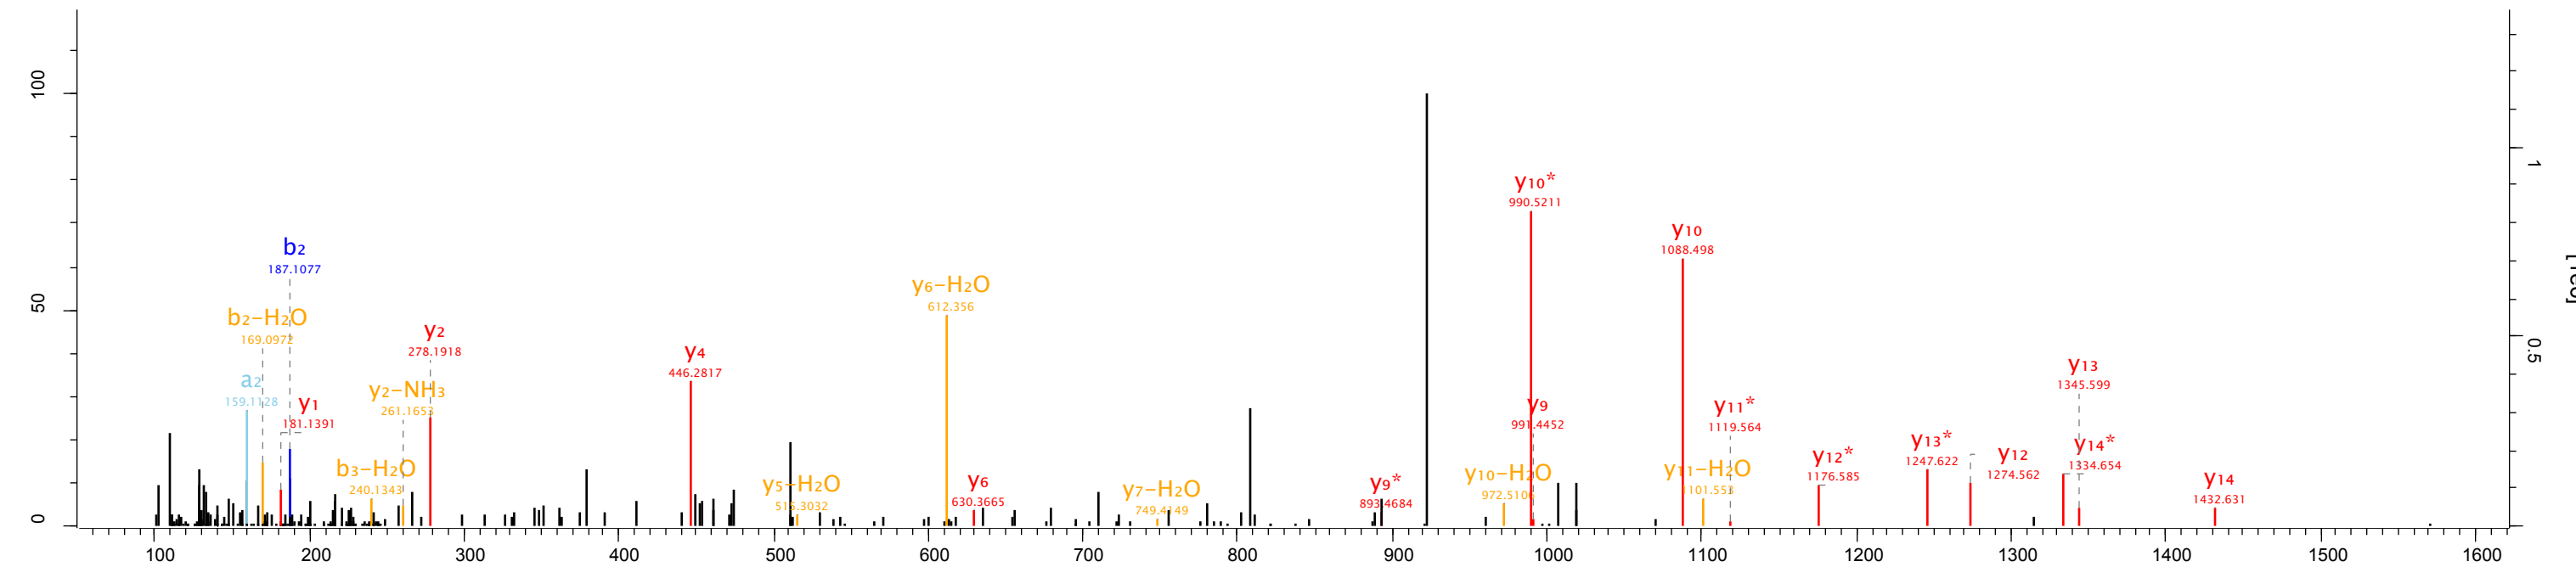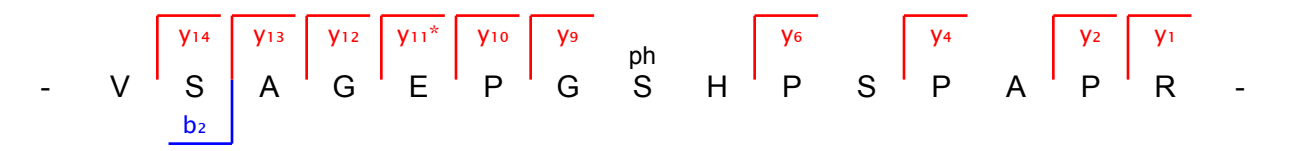



Raw file: 20150814\_A375SR\_Phospho\_BR2\_06  
 Scan: 5344 Method: FTMS; HCD Score: 108.38 m/z: 626.74 Gene names: KIF1B;KIF1Bbeta

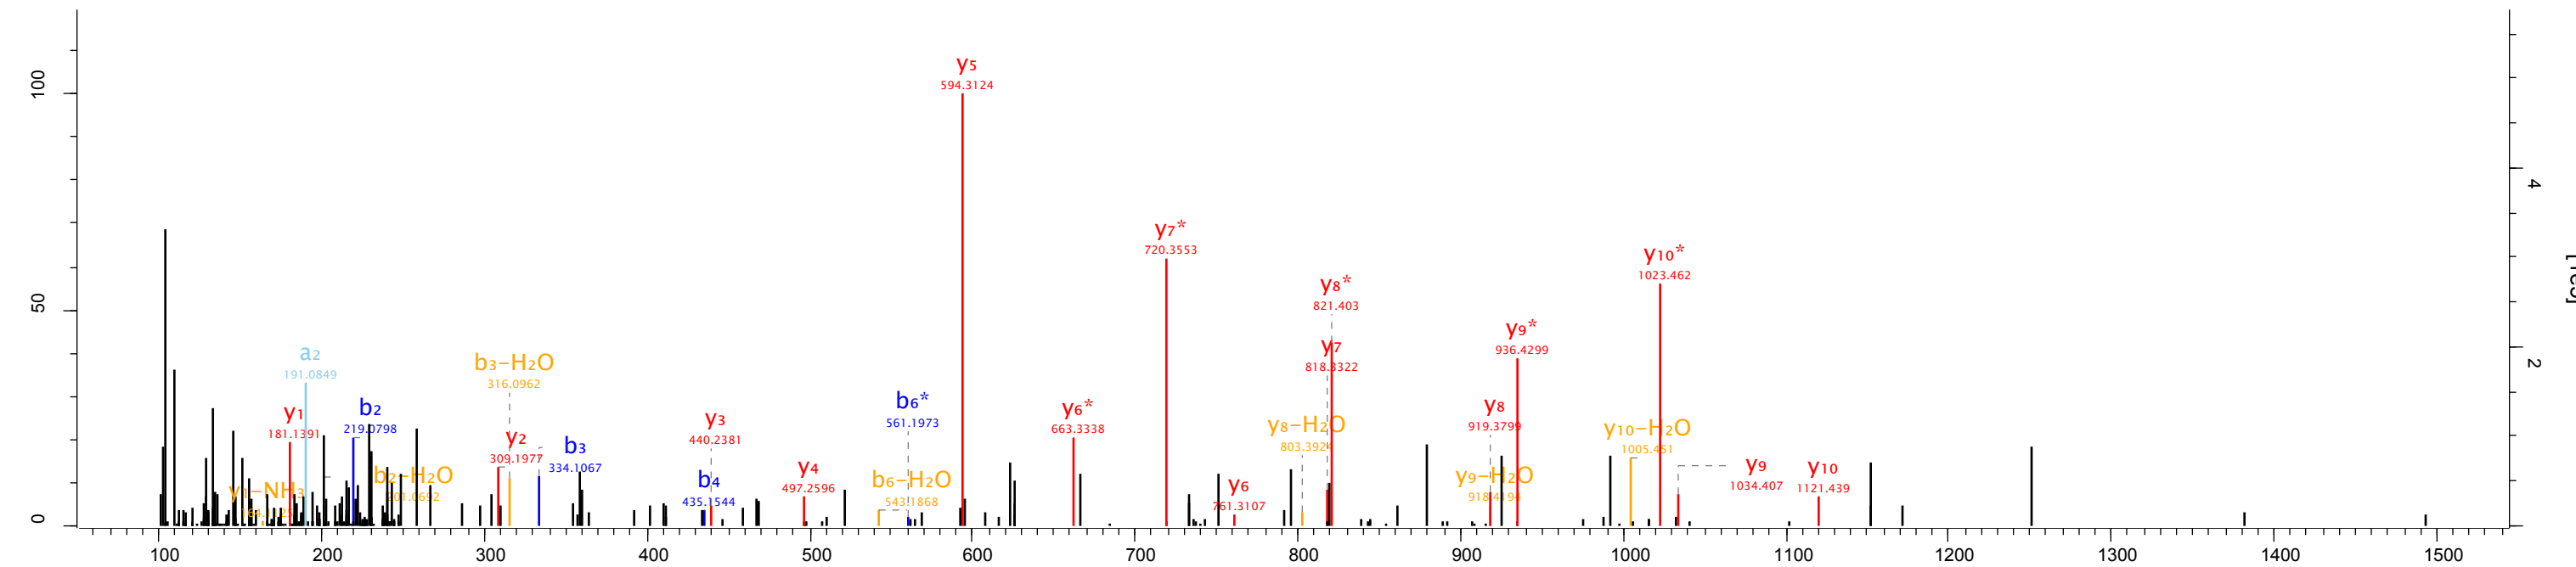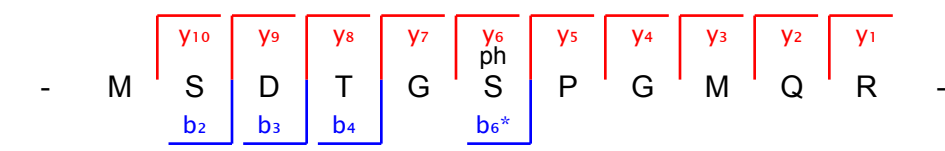

Raw file: 20150814\_A375SR\_Phospho\_BR2\_06  
 Scan: 6454 Method: FTMS; HCD Score: 119.27 m/z: 483.26 Gene names: PEA15

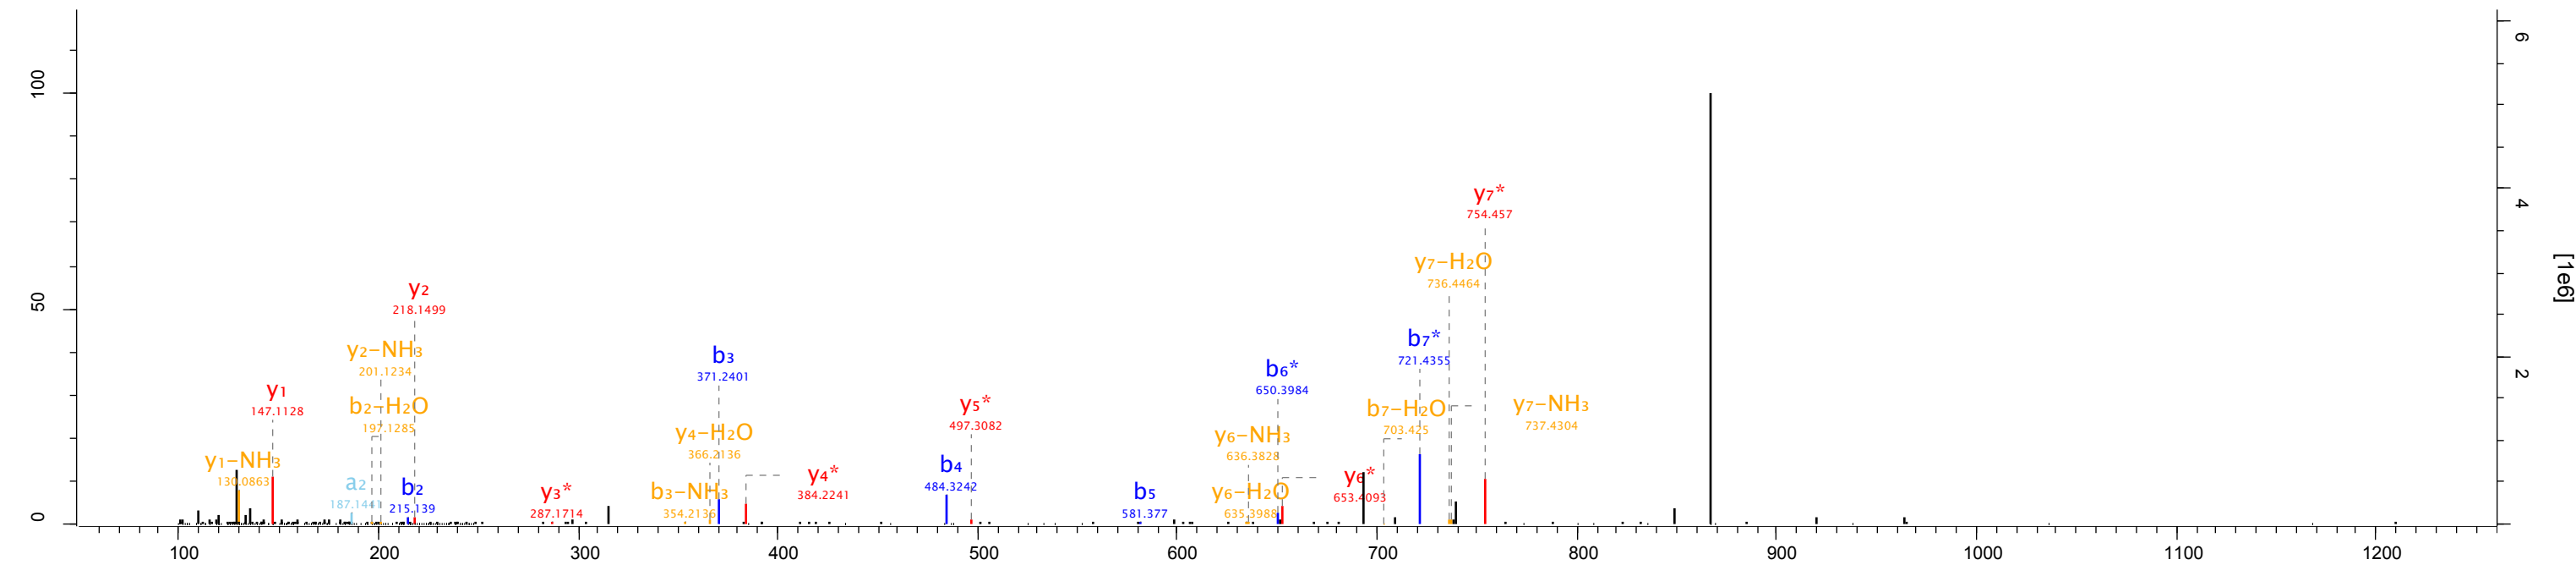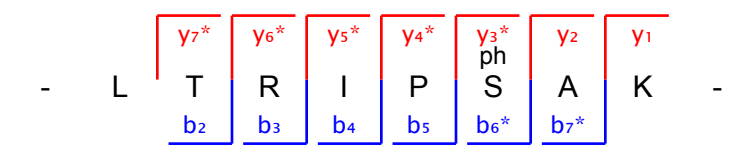

Raw file: 20150814\_A375SR\_Phospho\_BR2\_06  
 Scan: 7304 Method: FTMS; HCD Score: 246.52 m/z: 684.82 Gene names: SLC4A7

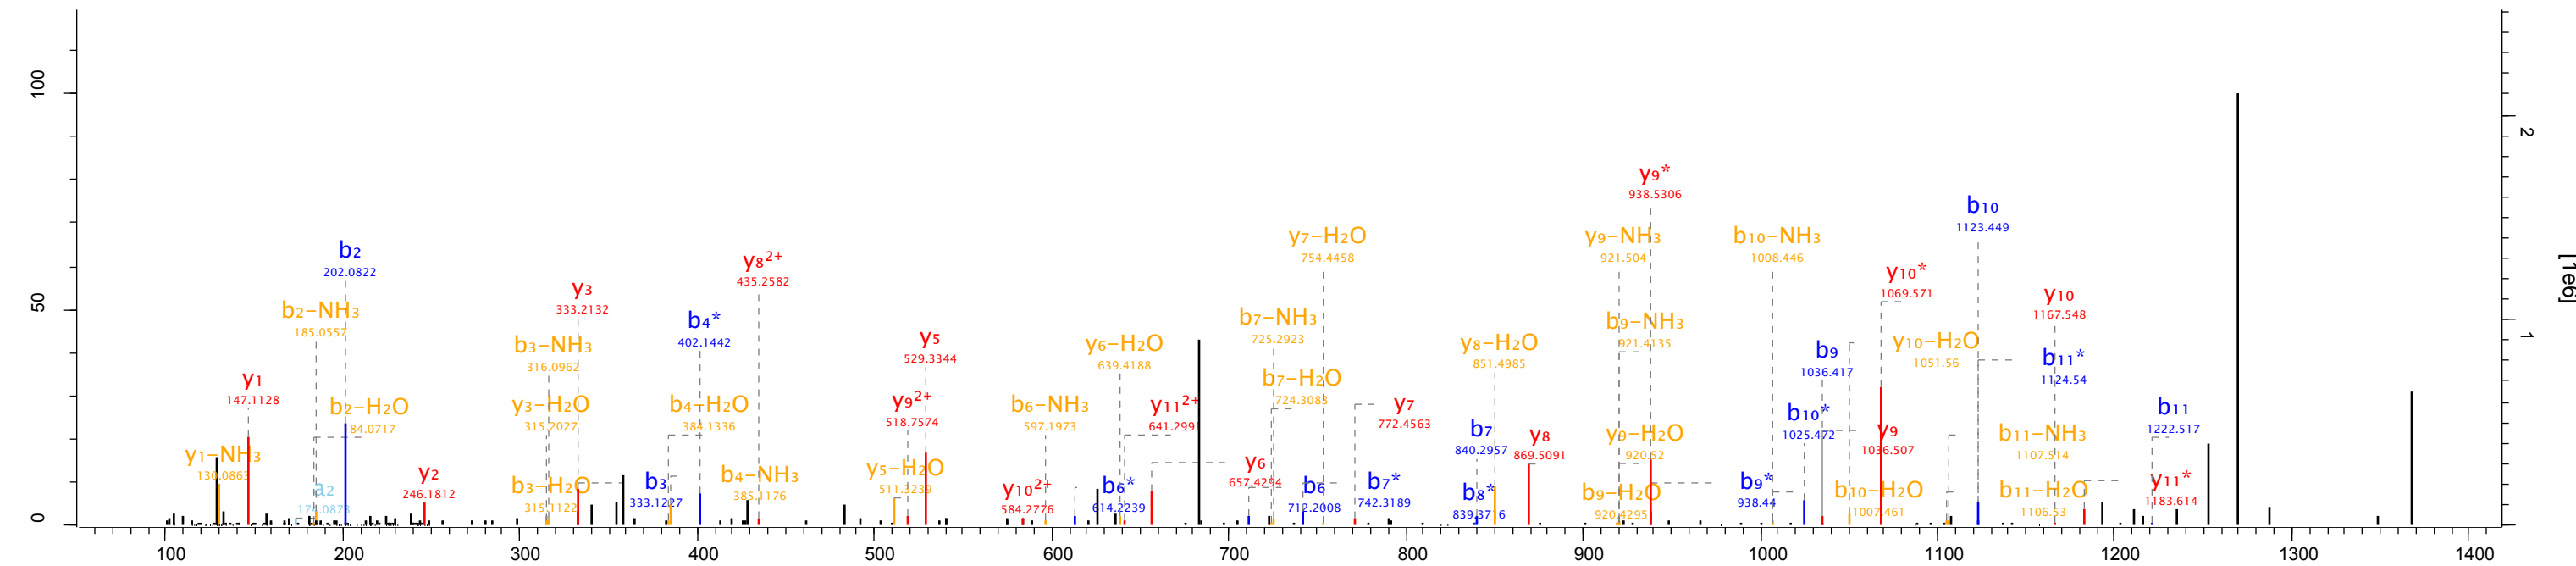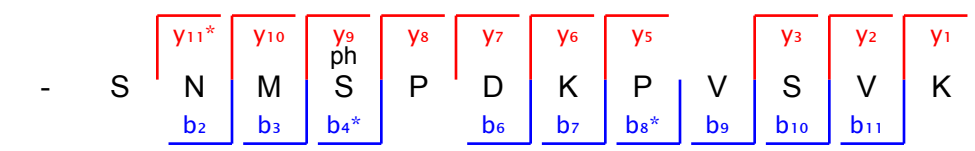

Raw file: 20150814\_A375SR\_Phospho\_BR2\_06  
 Scan: 7454 Method: FTMS; HCD Score: 145.88 m/z: 649.63 Gene names: MED26

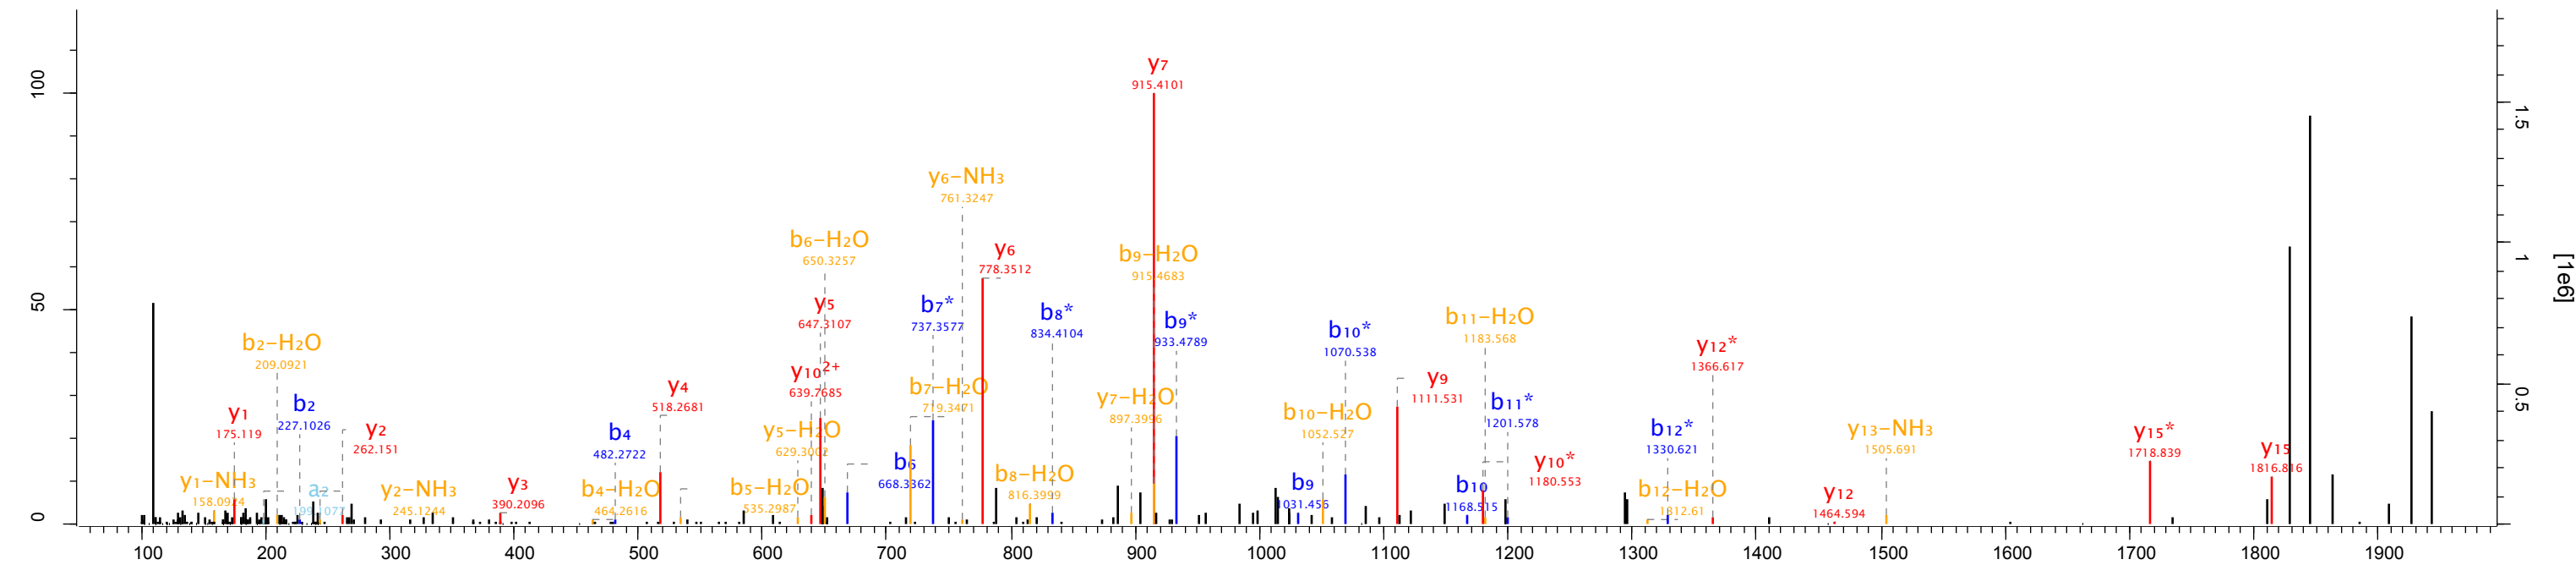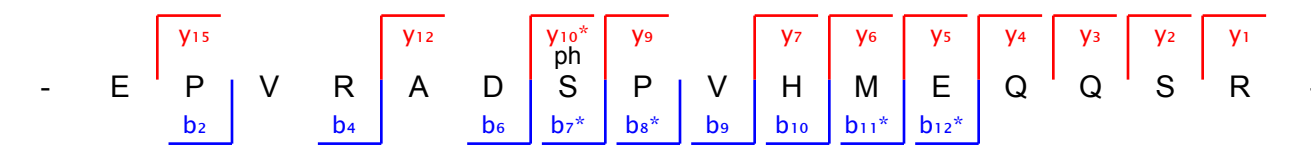

Raw file: 20150814\_A375SR\_Phospho\_BR2\_06  
 Scan: 8454 Method: FTMS; HCD Score: 215.48 m/z: 726.32 Gene names: PPFIA1

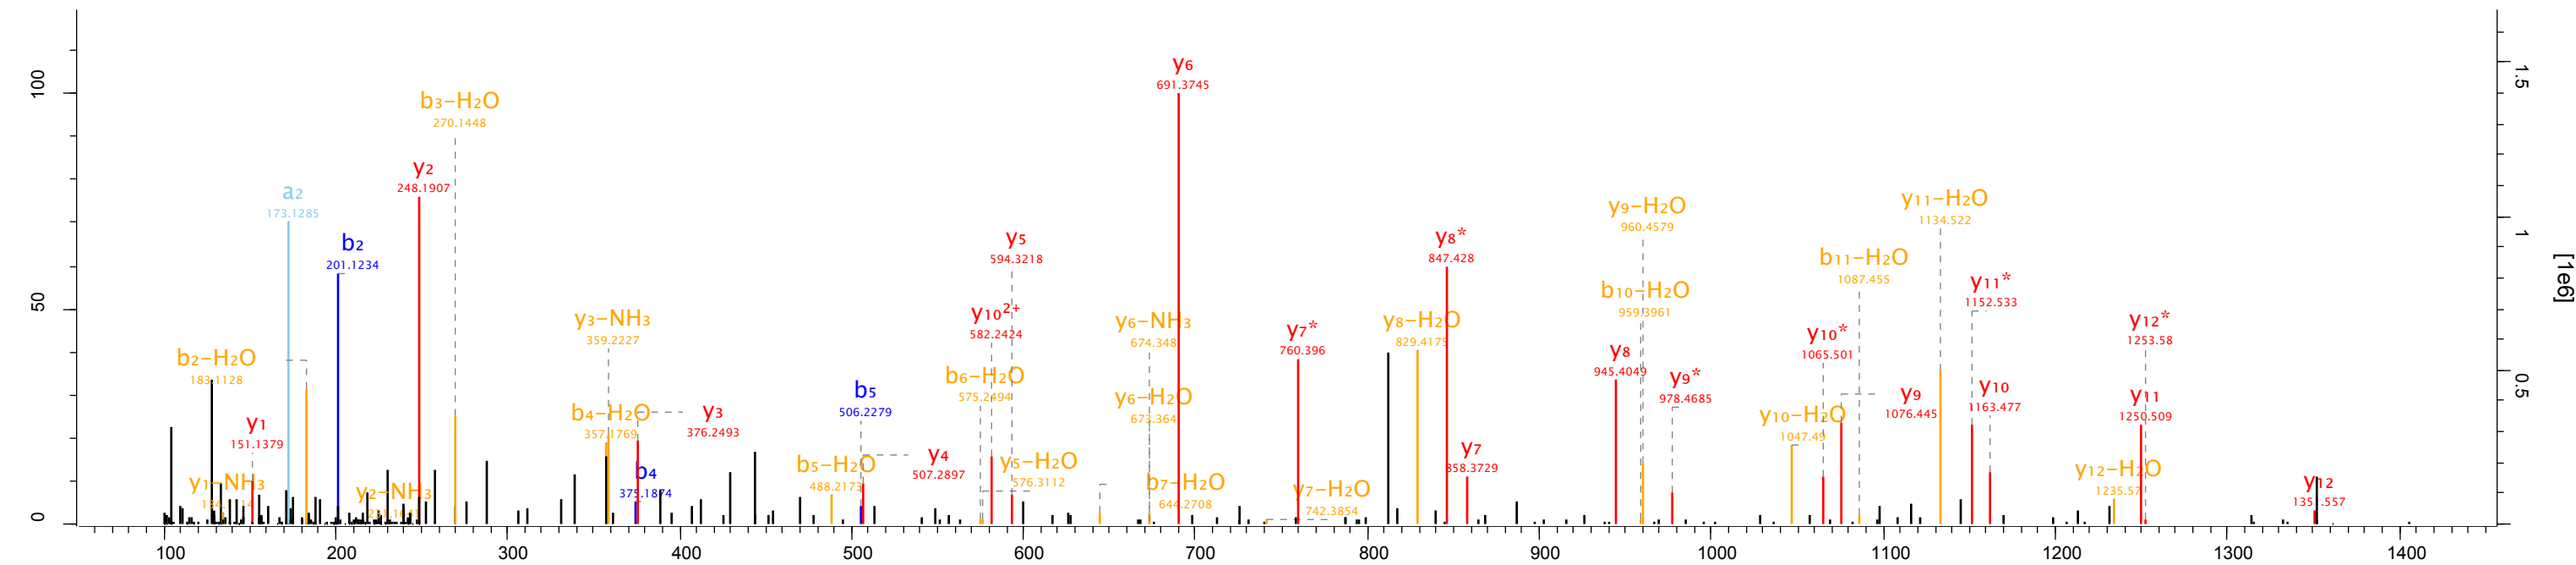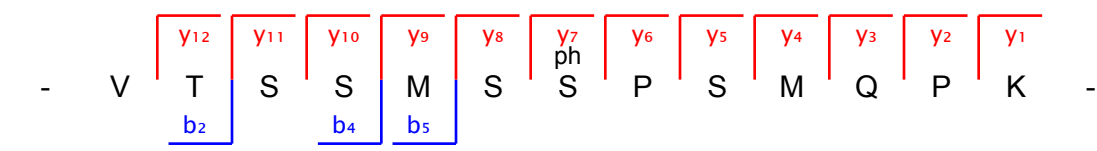

Raw file: 20150814\_A375SR\_Phospho\_BR2\_06  
 Scan: 8944 Method: FTMS; HCD Score: 134.02 m/z: 891.94 Gene names: ABI1

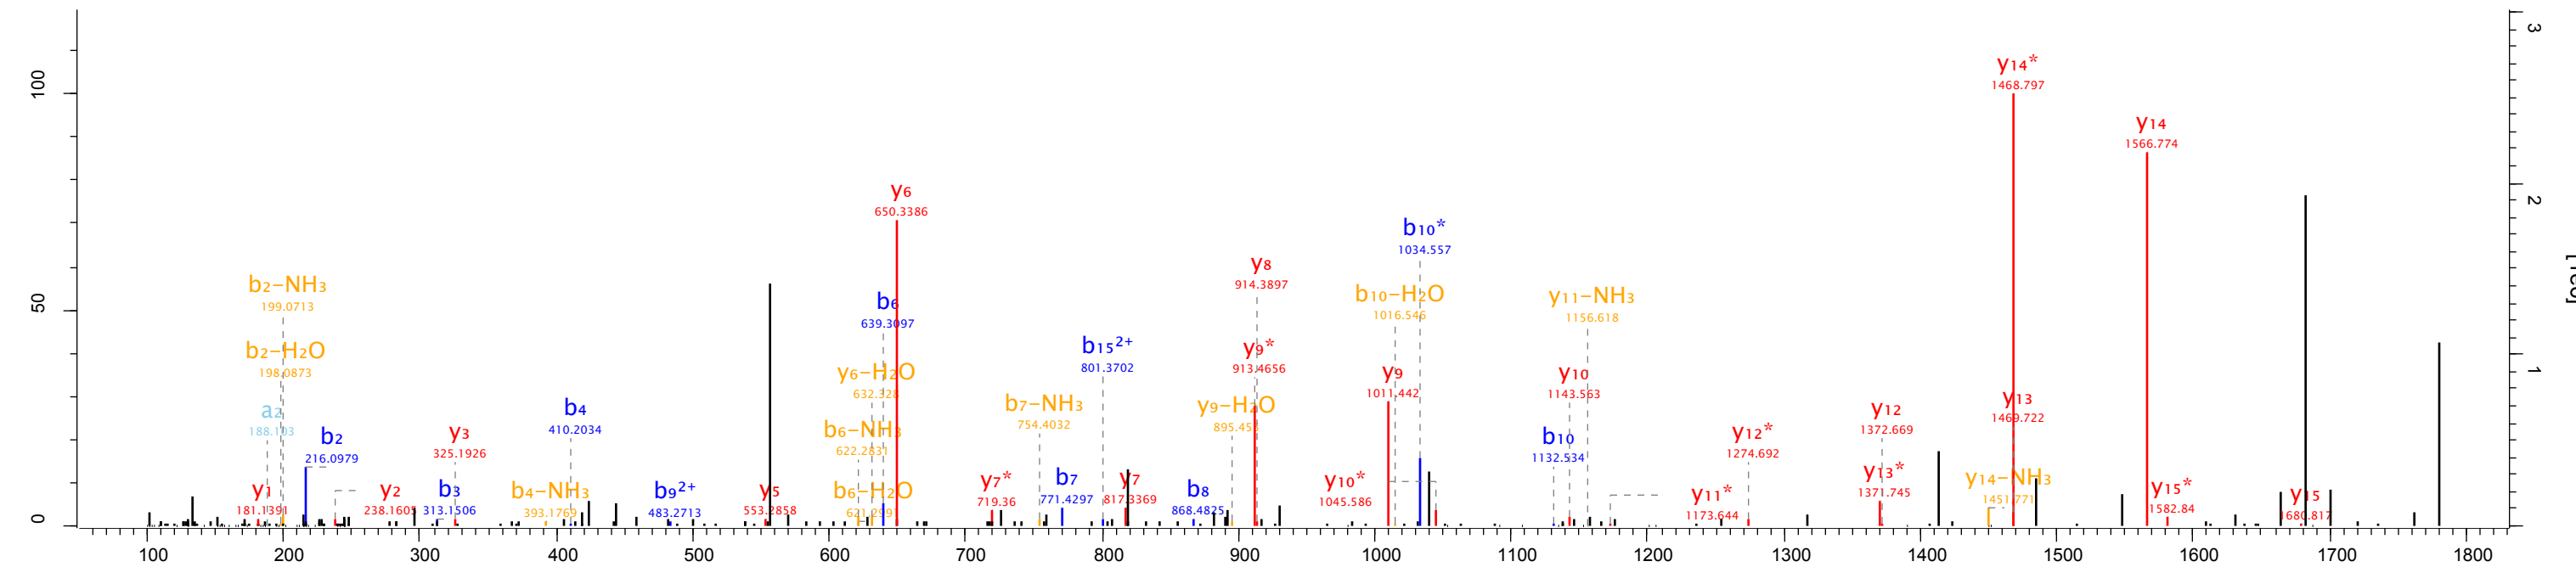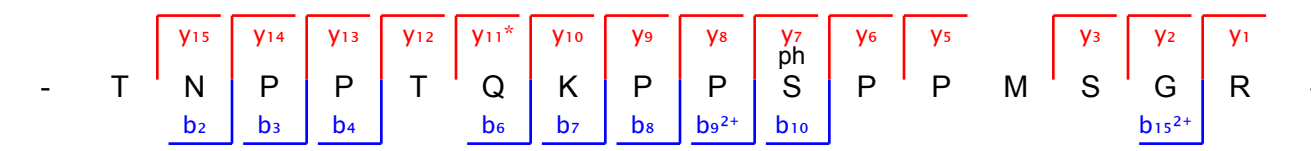



Raw file: 20150814\_A375SR\_Phospho\_BR2\_06  
 Scan: 9574 Method: FTMS; HCD Score: 116.43 m/z: 858.37 Gene names: AHDC1

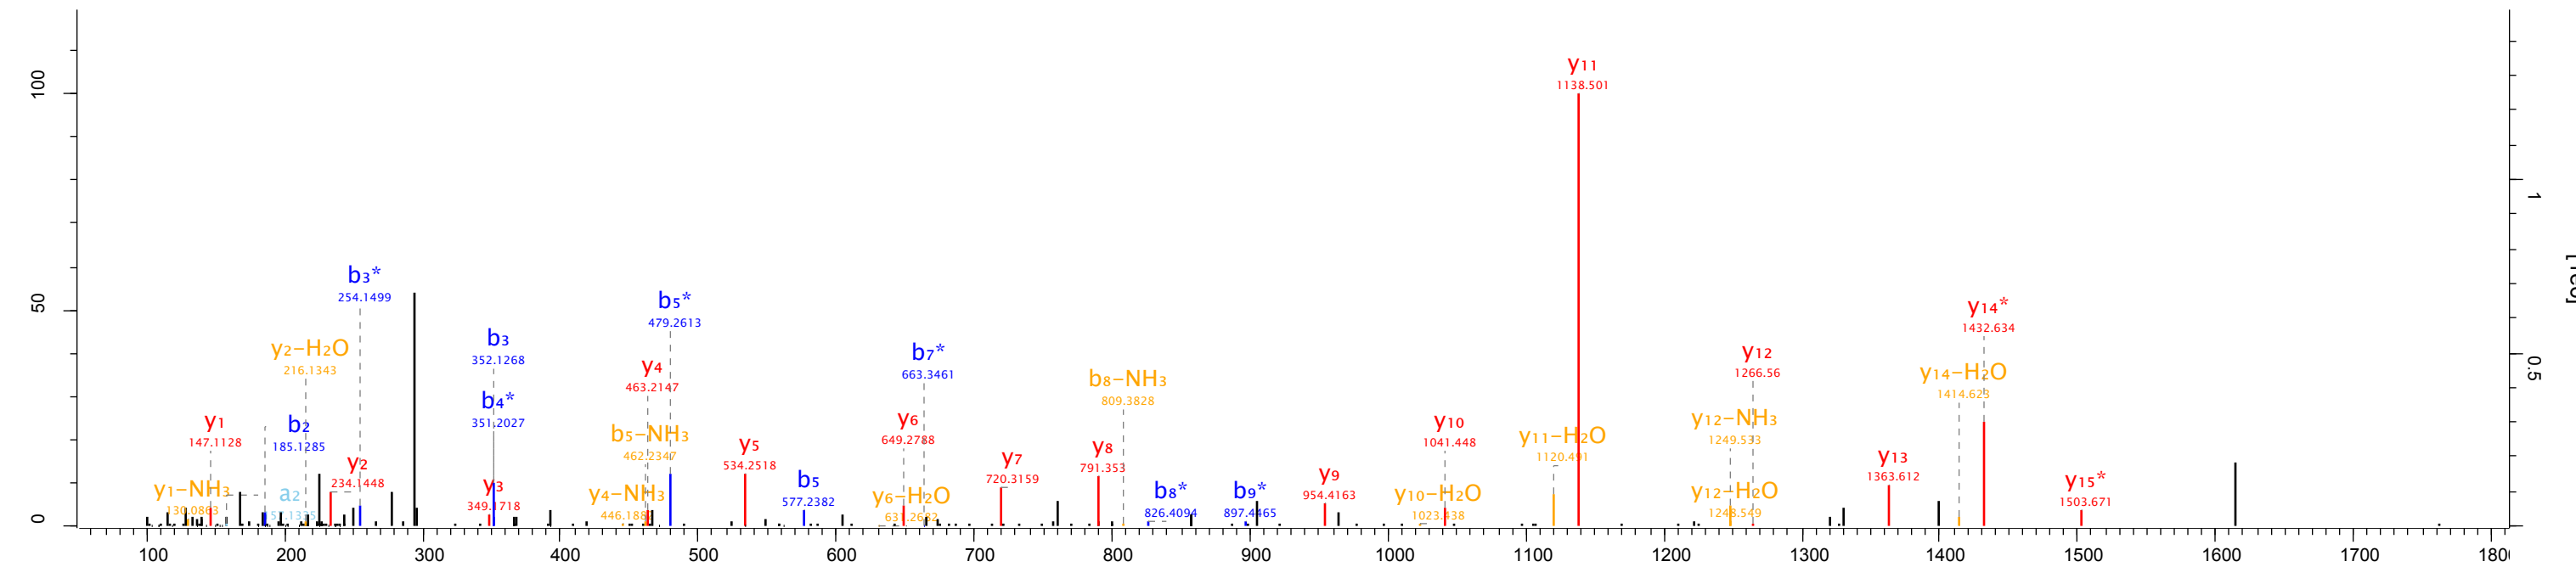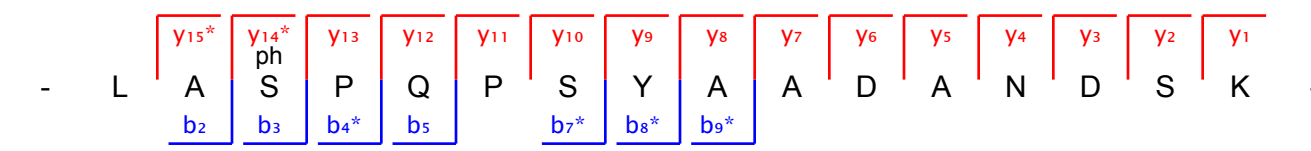



Raw file 20150814\_A375SR\_Phospho\_BR2\_06 Scan 9894 Method FTMS; HCD Score 70.89 m/z 641.32 Gene names STIM2

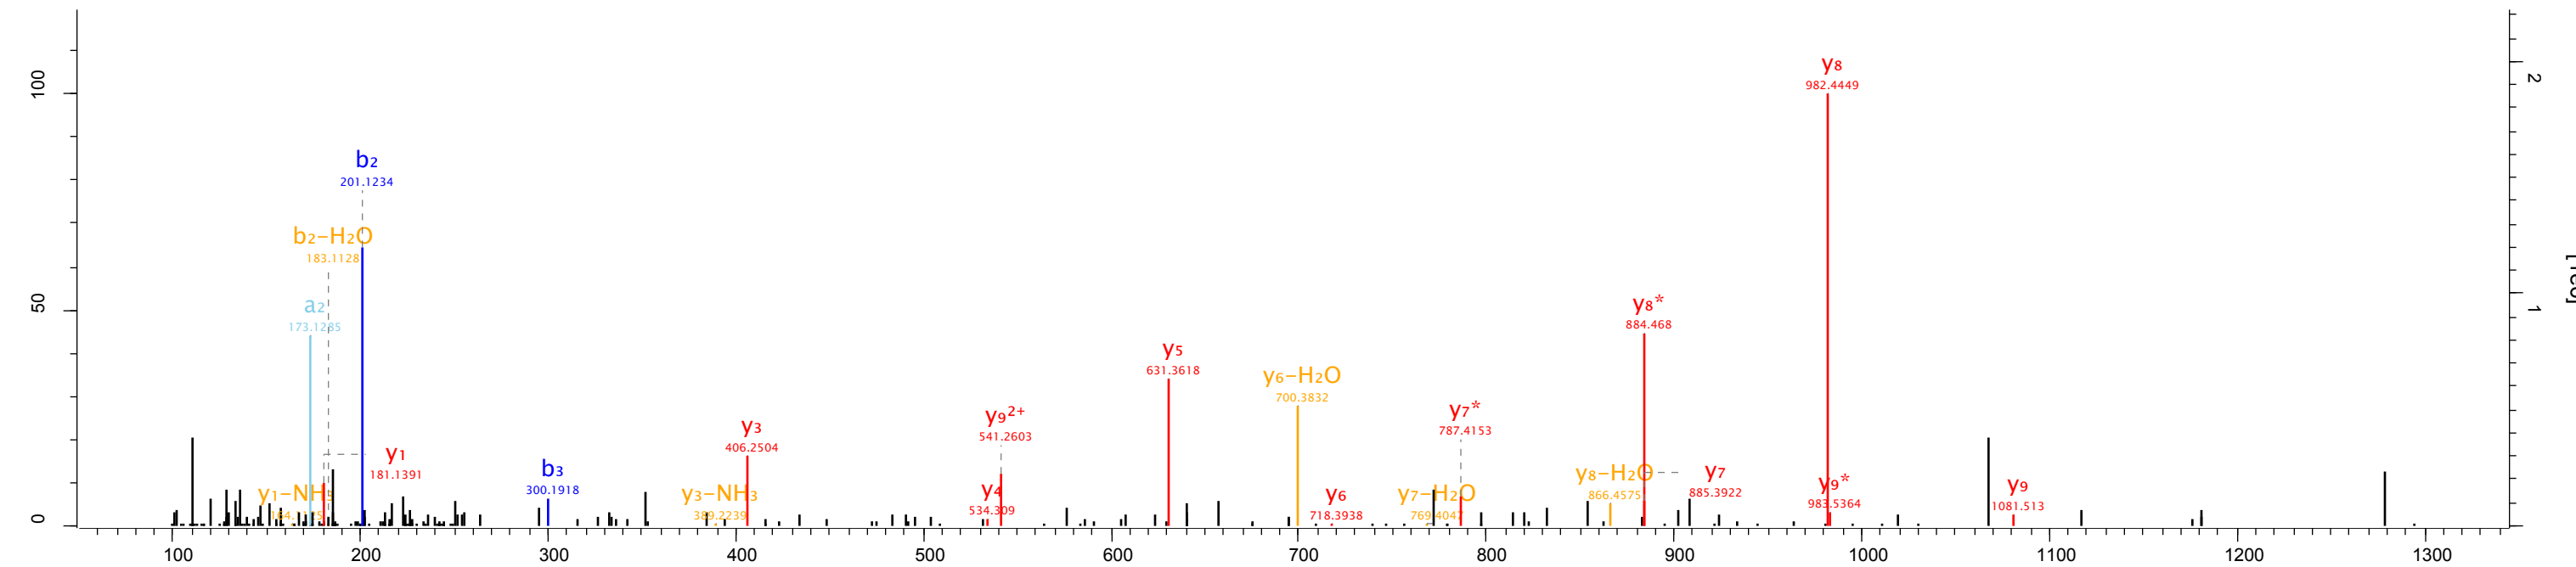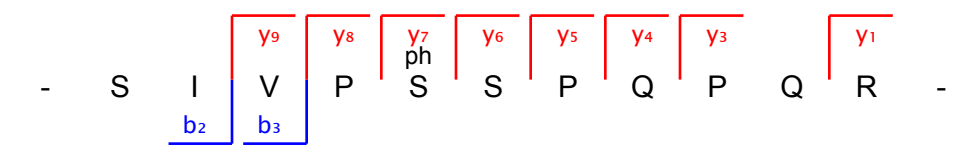

Raw file: 20150814\_A375SR\_Phospho\_BR2\_07  
 Scan: 10234 Method: FTMS; HCD Score: 179.9 m/z: 711.85 Gene names: RRP1B

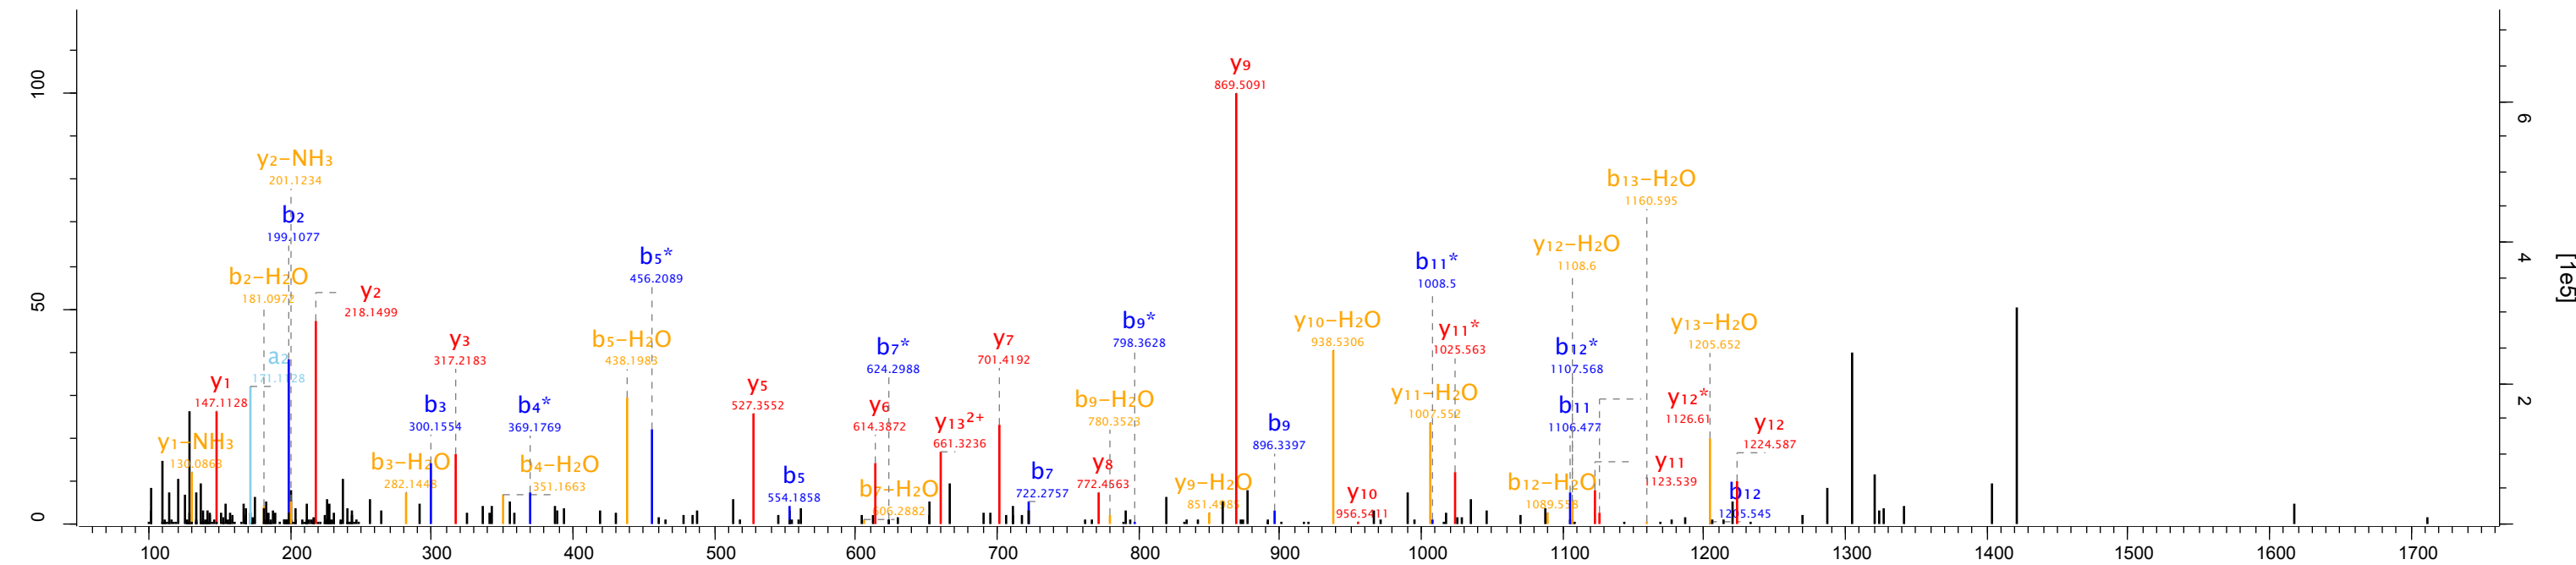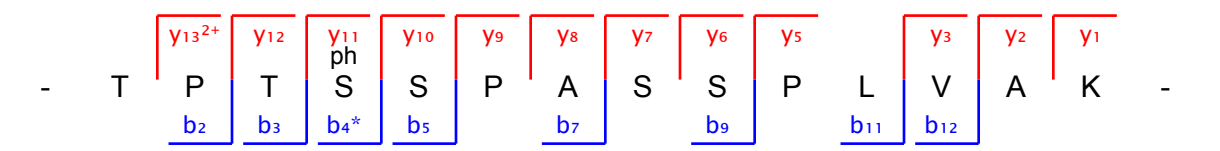

Raw file Scan Method Score m/z Gene names  
 20150814\_A375SR\_Phospho\_BR2\_07 10784 FTMS; HCD 90.56 693.86 PHF3

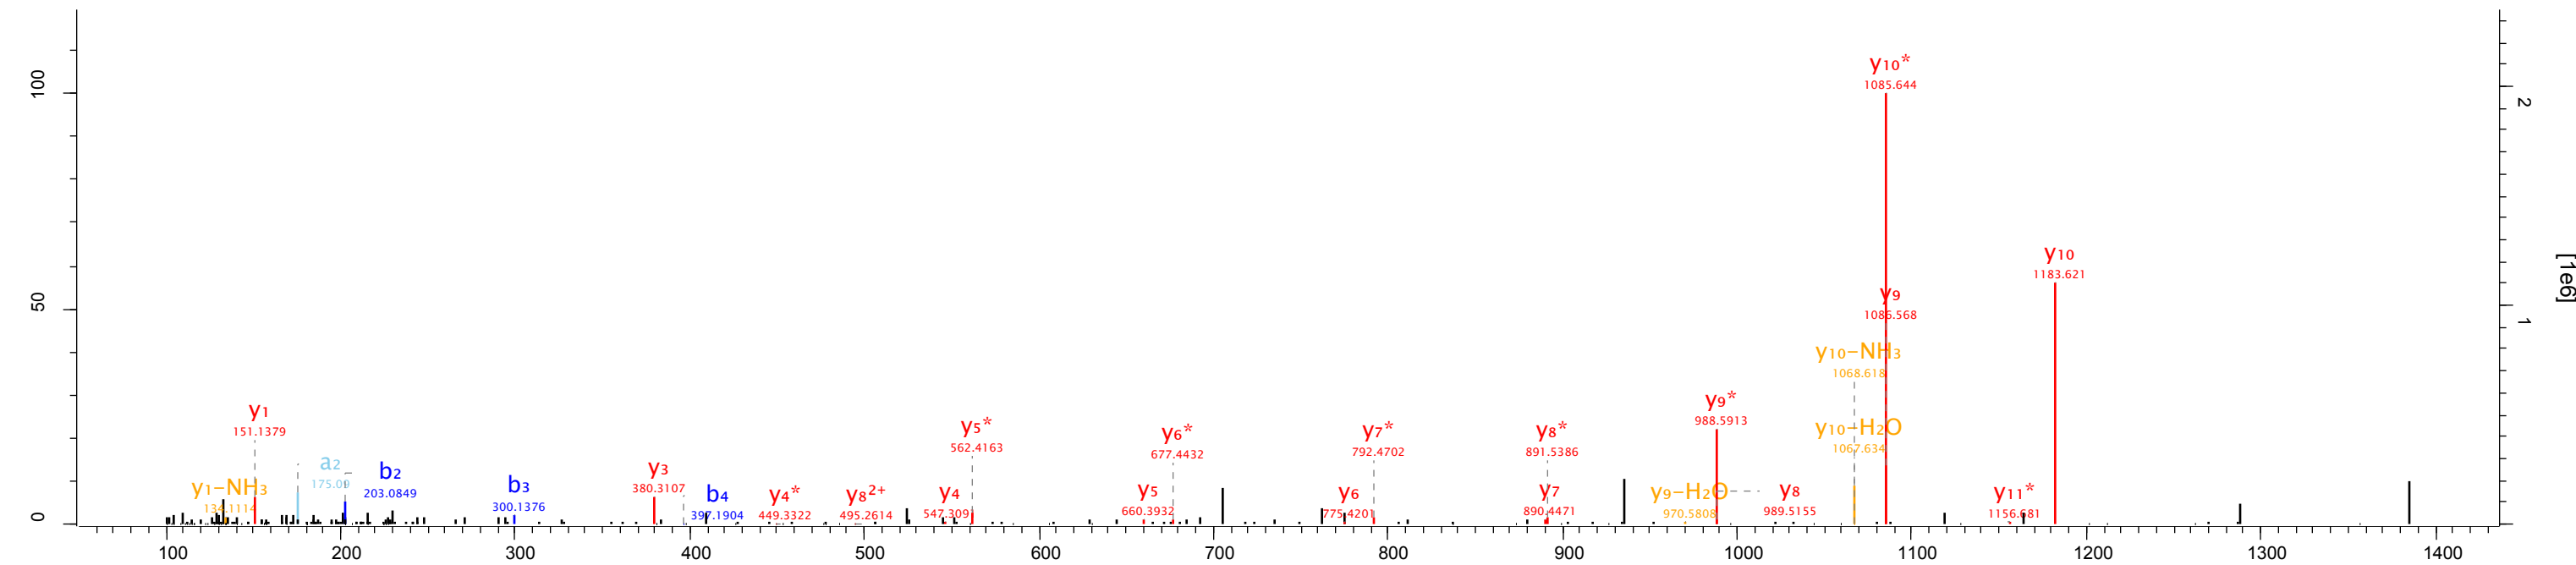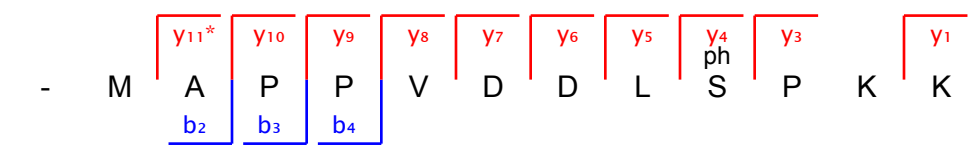

Raw file  
20150814\_A375SR\_Phospho\_BR2\_07

Scan 11074 Method FTMS; HCD Score 99.99 m/z 692.59 Gene names FAM195B

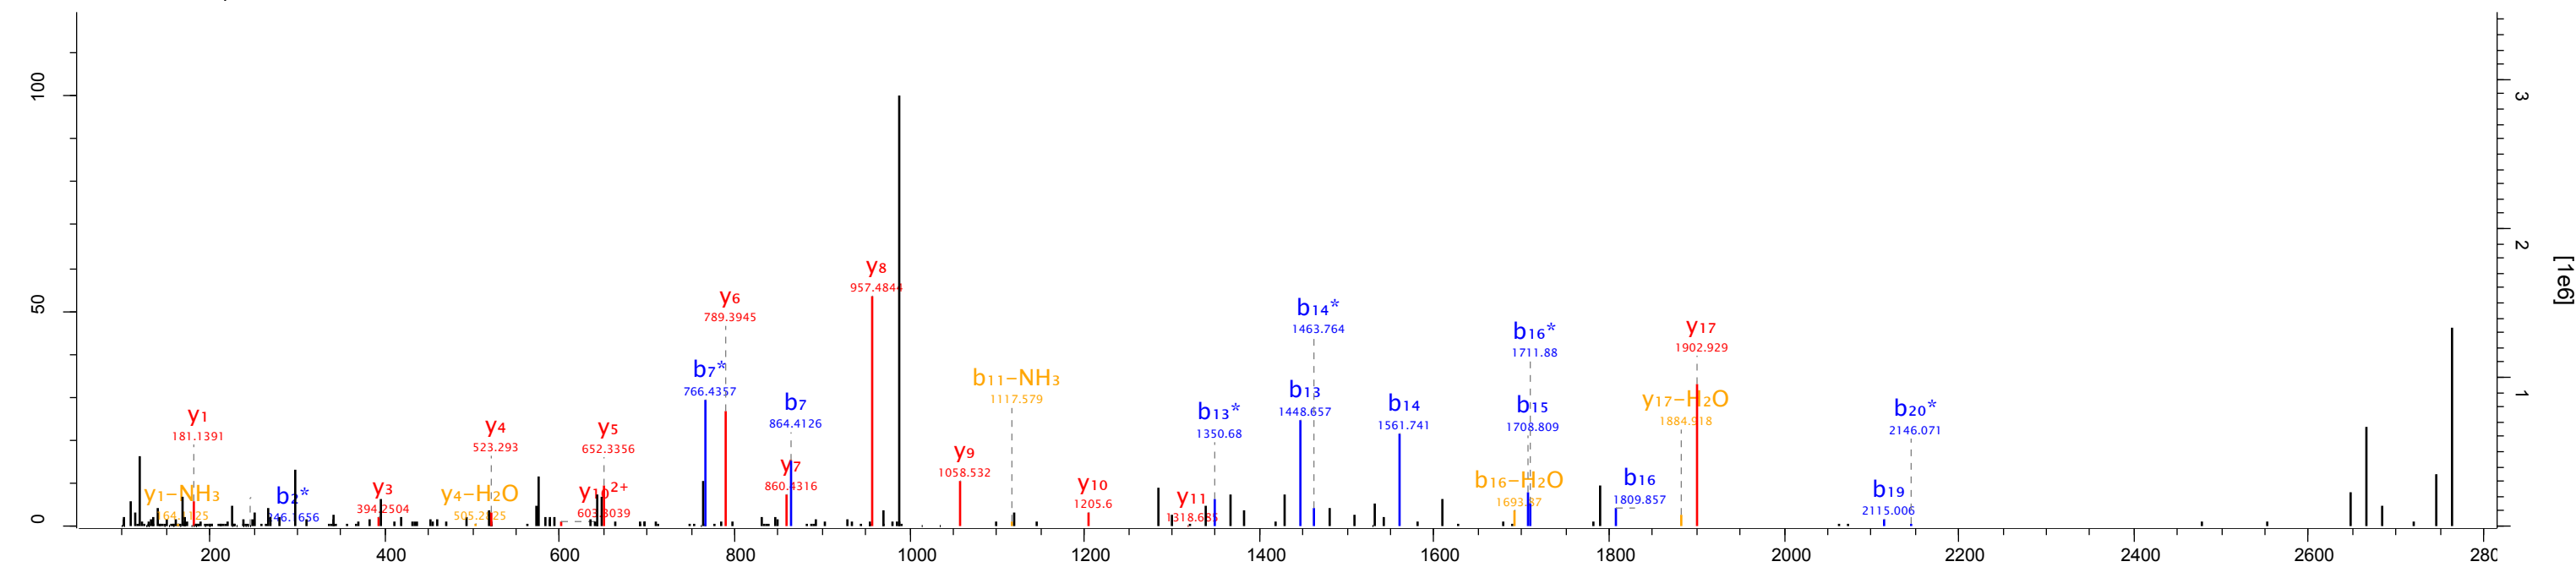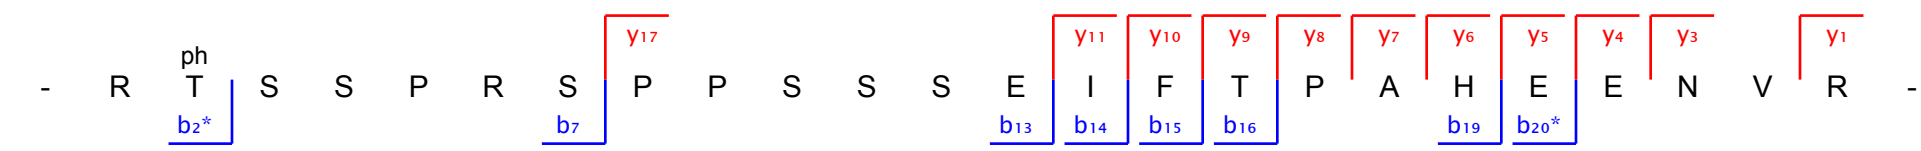

Raw file: 20150814\_A375SR\_Phospho\_BR2\_07  
 Scan: 11394 Method: FTMS; HCD Score: 111.4 m/z: 816.01 Gene names: SON

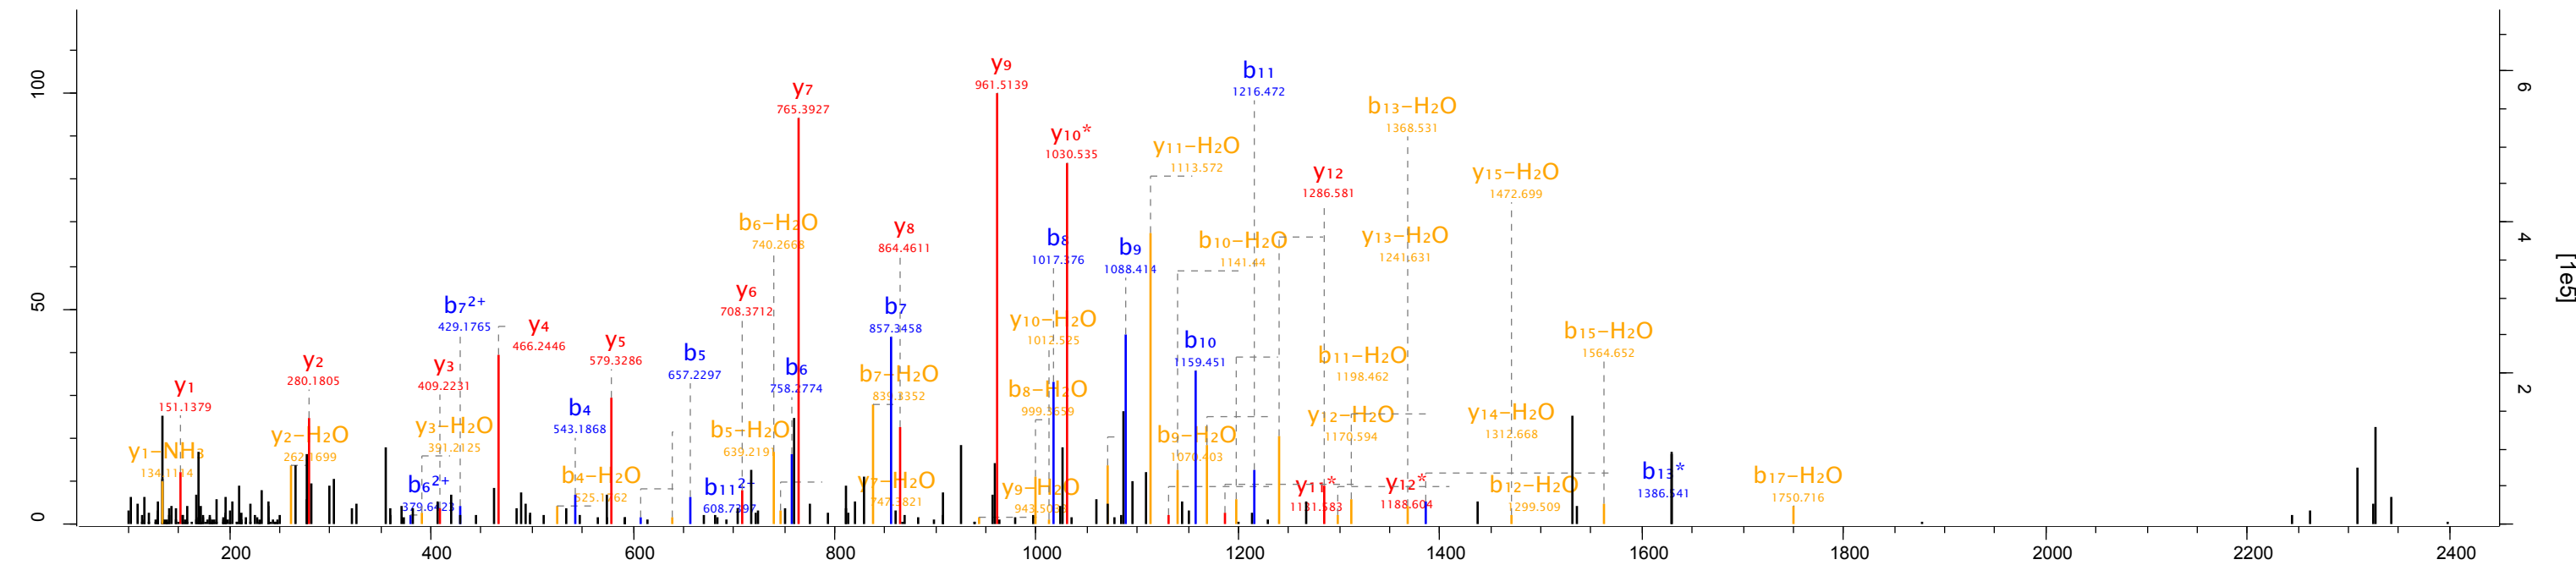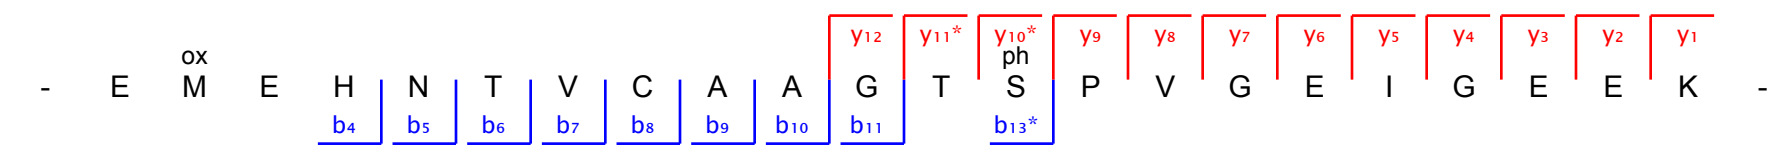

Raw file: 20150814\_A375SR\_Phospho\_BR2\_07  
 Scan: 11594 Method: FTMS; HCD Score: 263.95 m/z: 902.91 Gene names: RAB3GAP1

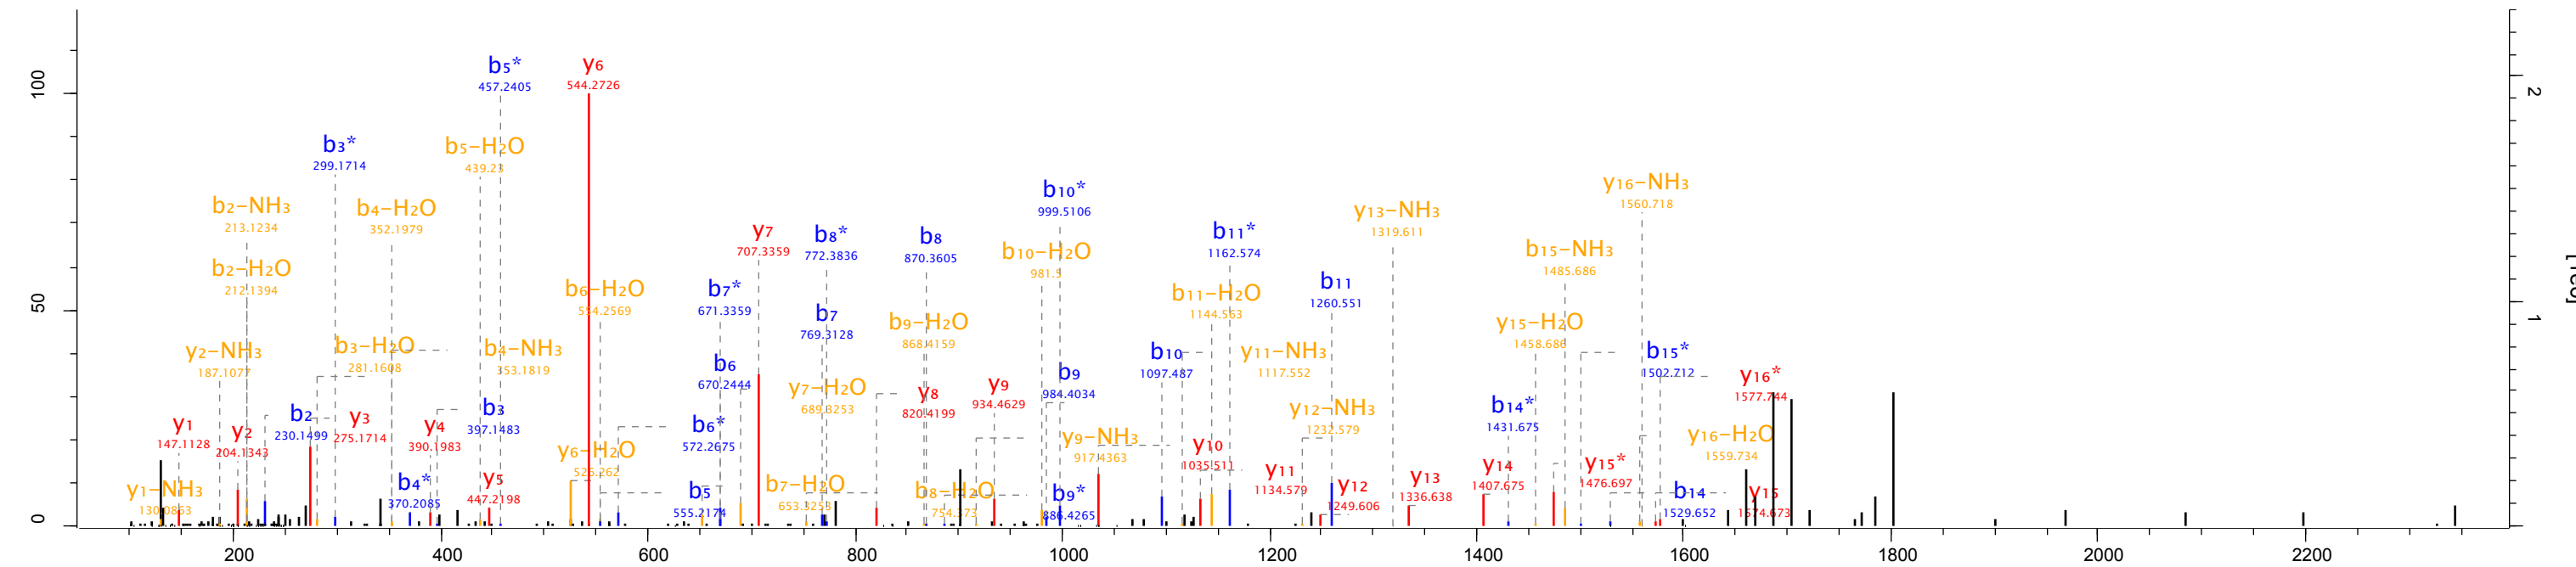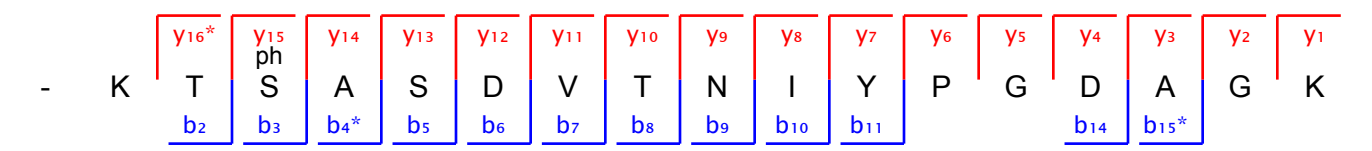

Raw file  
 20150814\_A375SR\_Phospho\_BR2\_07  
 Scan 12274 Method FTMS; HCD Score 87.67 m/z 641.84 Gene names ZNF687

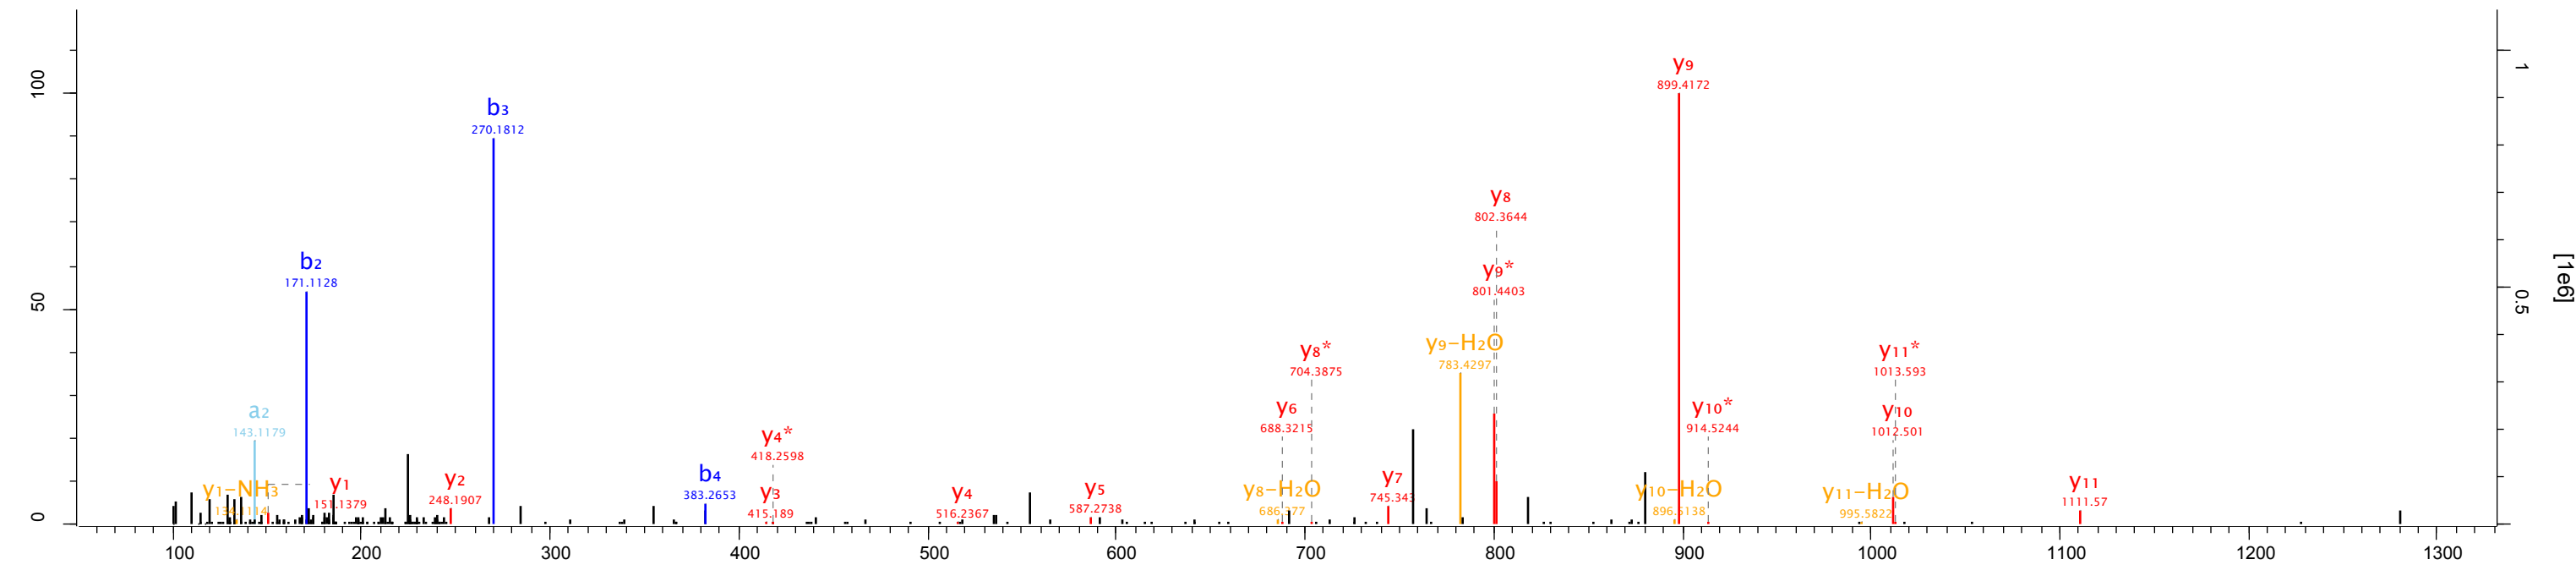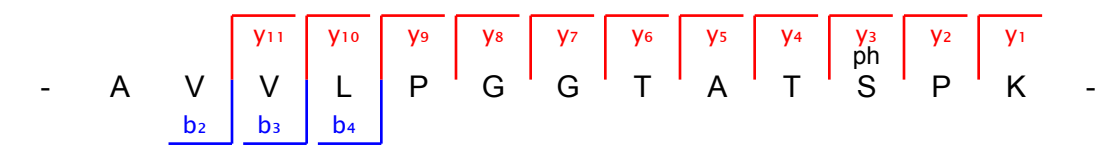

Raw file: 20150814\_A375SR\_Phospho\_BR2\_07  
 Scan: 12554 Method: FTMS; HCD Score: 155.88 m/z: 532.8 Gene names: MAGED2

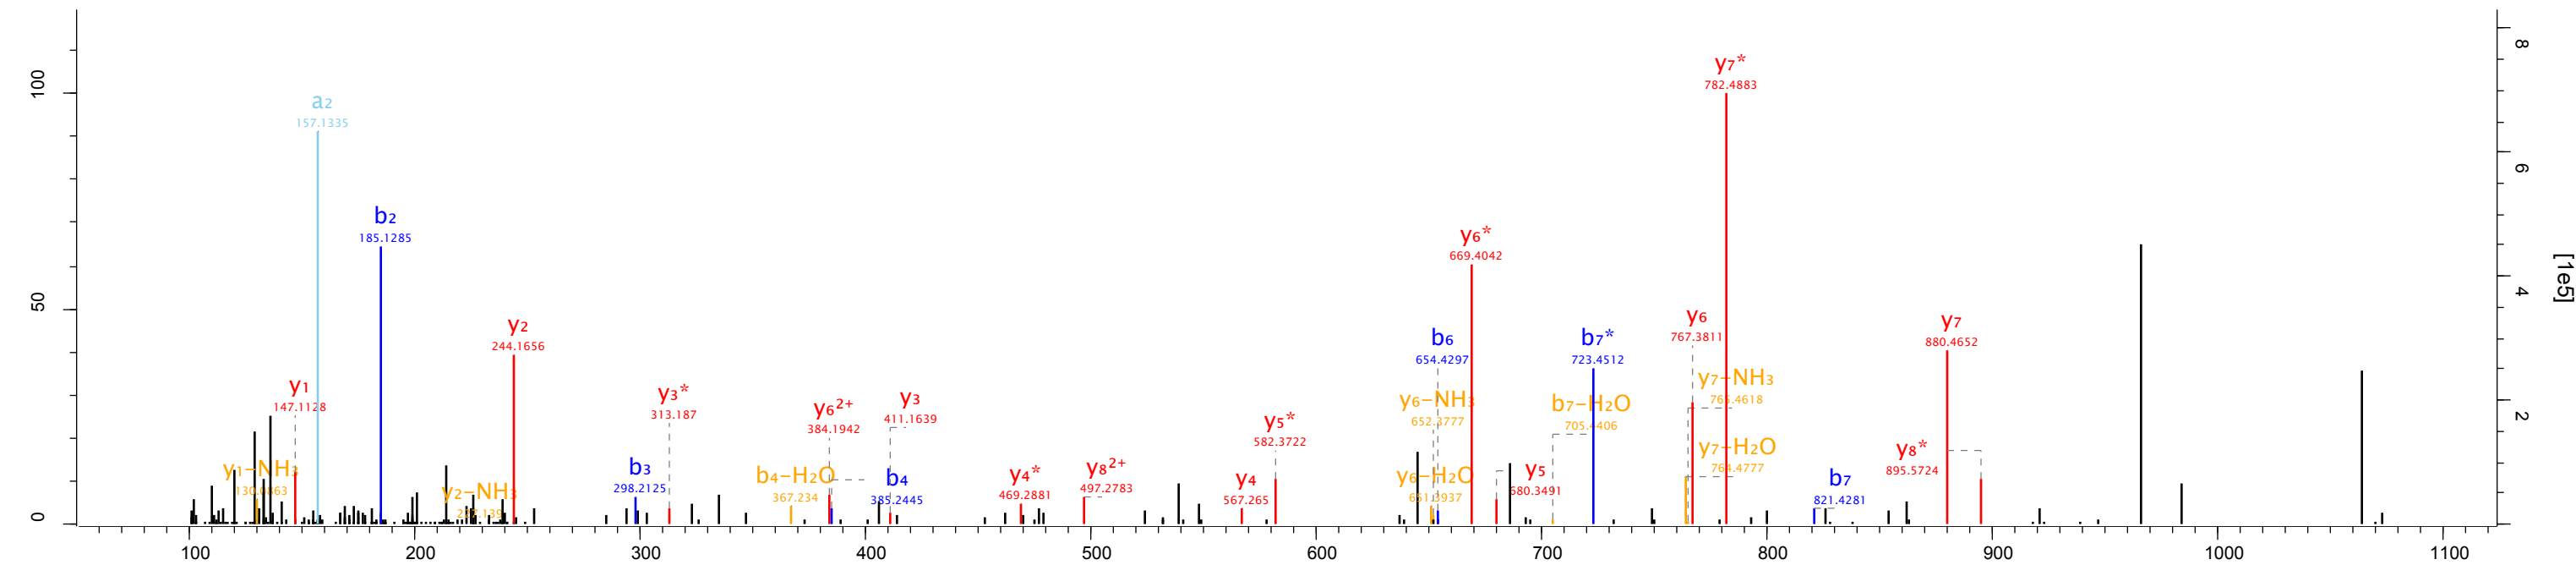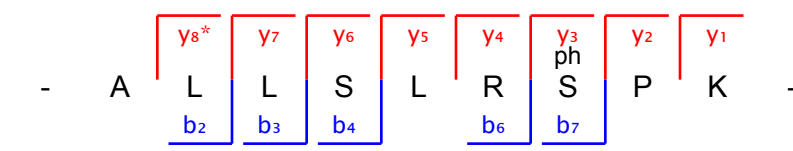



Raw file 20150814\_A375SR\_Phospho\_BR2\_07 Scan 15664 Method FTMS; HCD Score 147.67 m/z 1032.73 Gene names PDXDC1

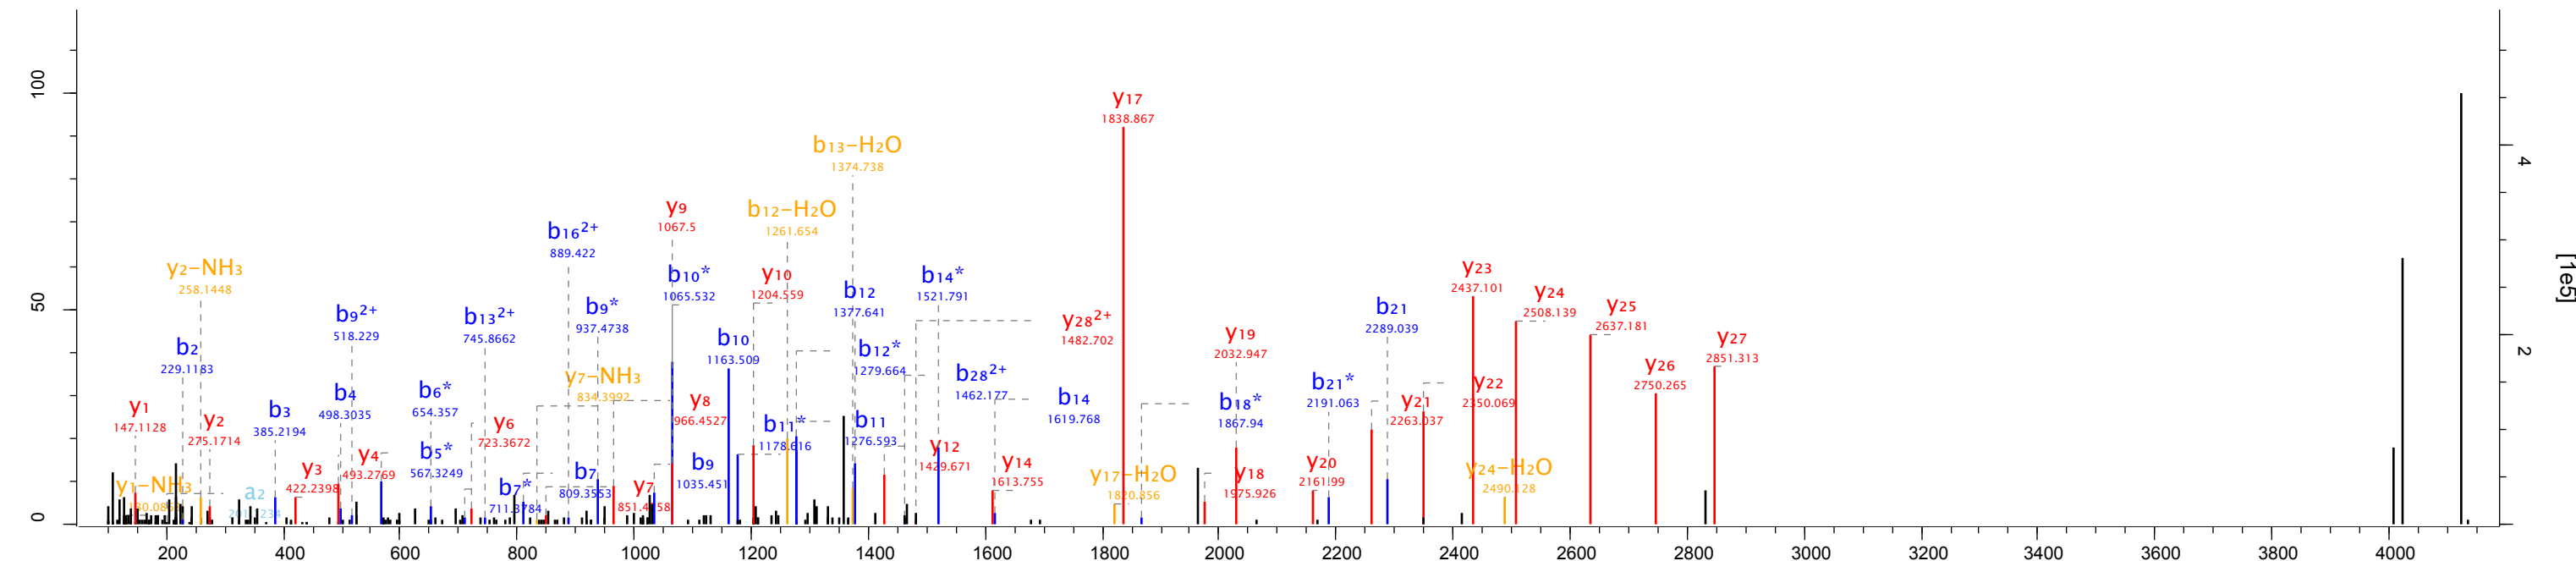

- V E R L S S G P E Q I T L E A S S T E G H P G A P S P Q H T D Q T E A F Q K

Fragmentation mapping (b and y ions):

- b<sub>2</sub> (E), b<sub>3</sub> (R), b<sub>4</sub> (L), b<sub>5</sub>\* (S), b<sub>6</sub>\* (S), b<sub>7</sub> (G)
- b<sub>9</sub> (E), b<sub>10</sub> (Q), b<sub>11</sub> (I), b<sub>12</sub> (T), b<sub>13</sub><sup>2+</sup> (L), b<sub>14</sub> (E)
- b<sub>16</sub><sup>2+</sup> (S), b<sub>18</sub>\* (S), b<sub>21</sub> (H)
- b<sub>28</sub><sup>2+</sup> (P)
- y<sub>1</sub> (K), y<sub>2</sub> (Q), y<sub>3</sub> (F), y<sub>4</sub> (A), y<sub>6</sub> (T), y<sub>7</sub> (D), y<sub>8</sub> (T), y<sub>9</sub> (H), y<sub>10</sub> (Q), y<sub>12</sub> (S), y<sub>14</sub> (A), y<sub>17</sub> (P), y<sub>18</sub> (H), y<sub>19</sub> (G), y<sub>20</sub> (E), y<sub>21</sub> (T), y<sub>22</sub> (S), y<sub>23</sub> (S), y<sub>24</sub> (A), y<sub>25</sub> (E), y<sub>26</sub> (L), y<sub>27</sub> (T), y<sub>28</sub><sup>2+</sup> (I)

Raw file 20150814\_A375SR\_Phospho\_BR2\_07 Scan 16624 Method FTMS; HCD Score 189.88 m/z 1201.57 Gene names ZBTB21

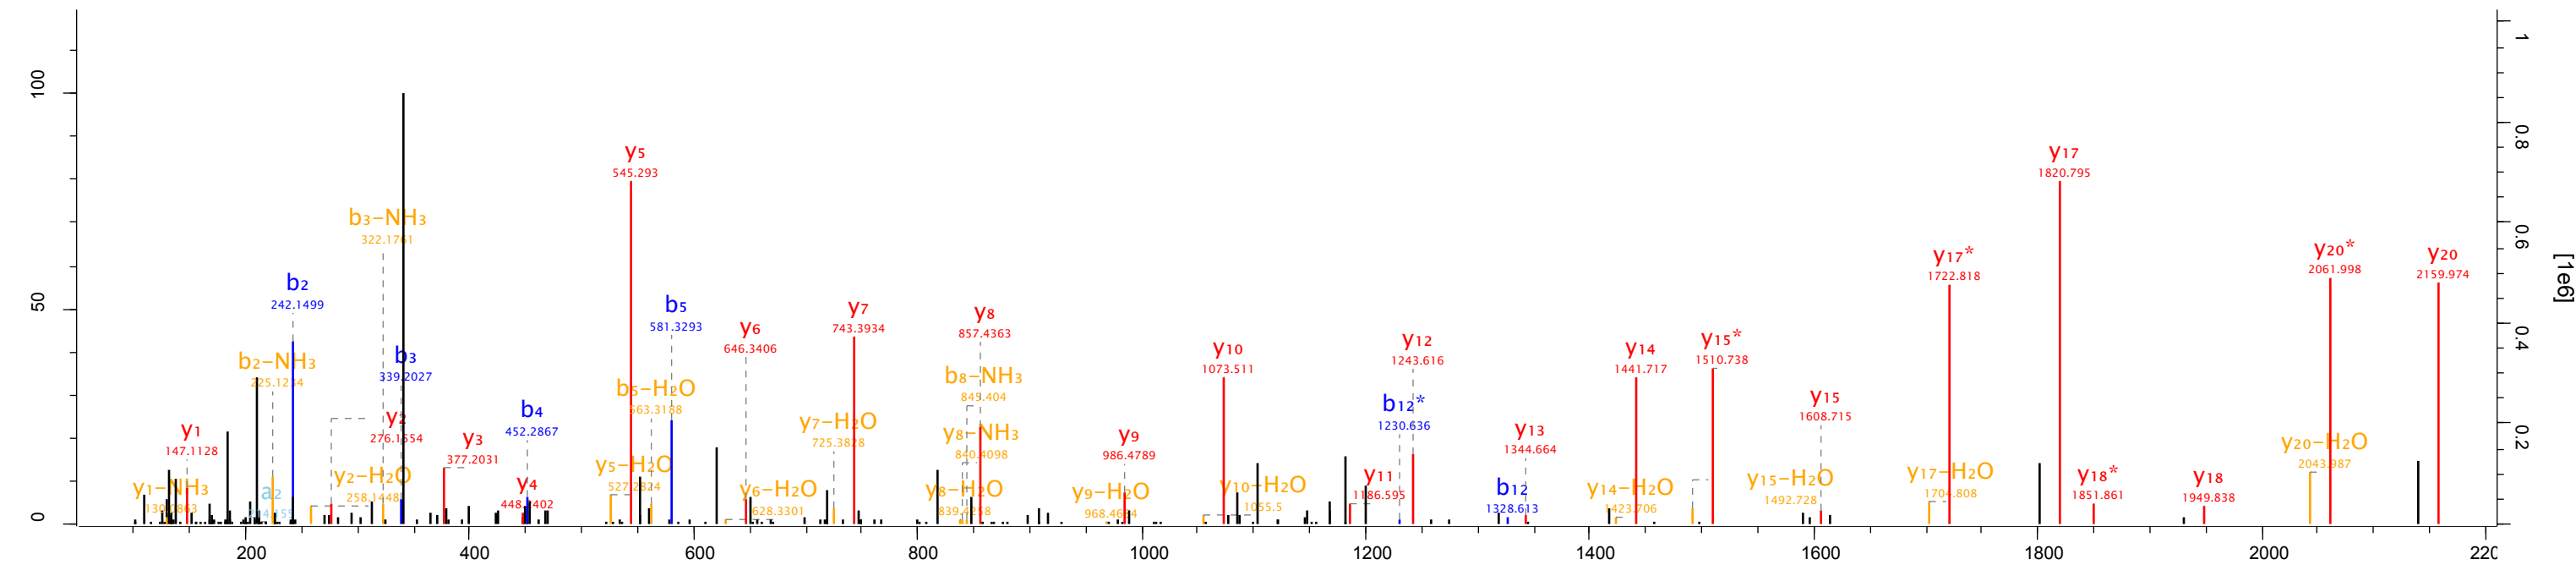

- I Q P L E P D S P T G L S E N P T P A T E K -

Fragmentation mapping (b and y ions) is shown below the sequence:

- Red boxes above the sequence indicate y-ion fragments: y20 (P), y18 (E), y17 (P), y15 (S), y14 (P), y13 (T), y12 (G), y11 (L), y10 (S), y9 (E), y8 (N), y7 (P), y6 (T), y5 (P), y4 (A), y3 (T), y2 (E), y1 (K).
- Blue boxes below the sequence indicate b-ion fragments: b2 (Q), b3 (P), b4 (L), b5 (E), b12 (L).

Raw file 20150814\_A375SR\_Phospho\_BR2\_07 Scan 17084 Method FTMS; HCD Score 115.87 m/z 724.33 Gene names GPBP1

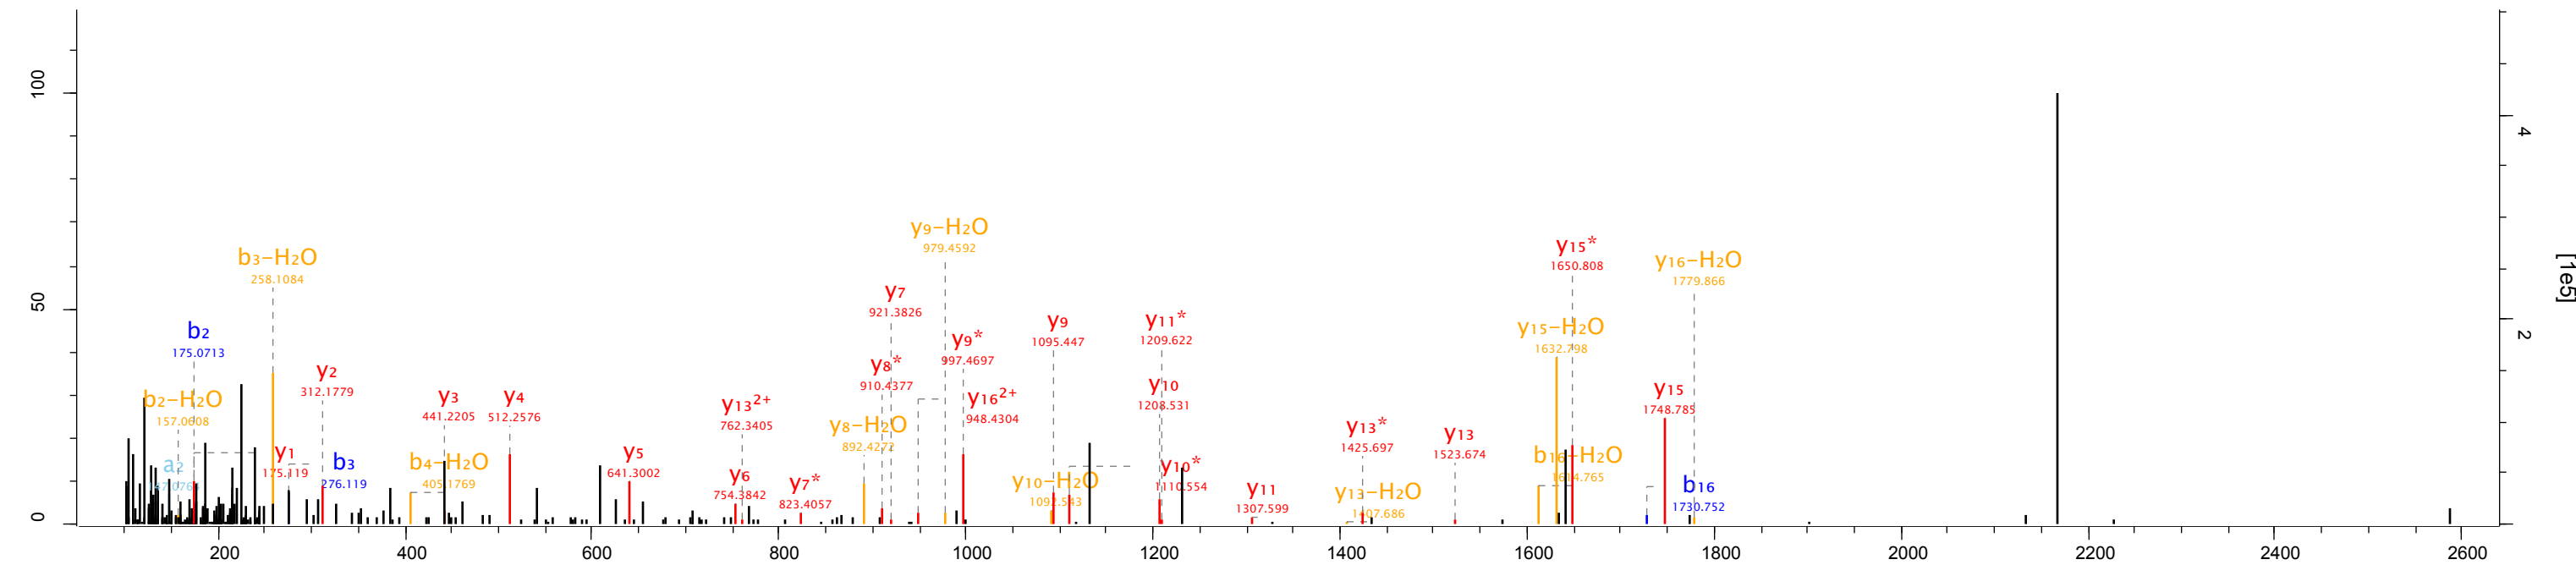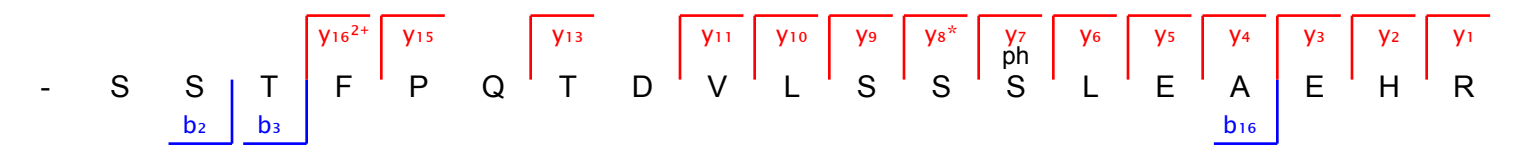

Raw file 20150814\_A375SR\_Phospho\_BR2\_07 Scan 19074 Method FTMS; HCD Score 54.96 m/z 919.12 Gene names HCFC1

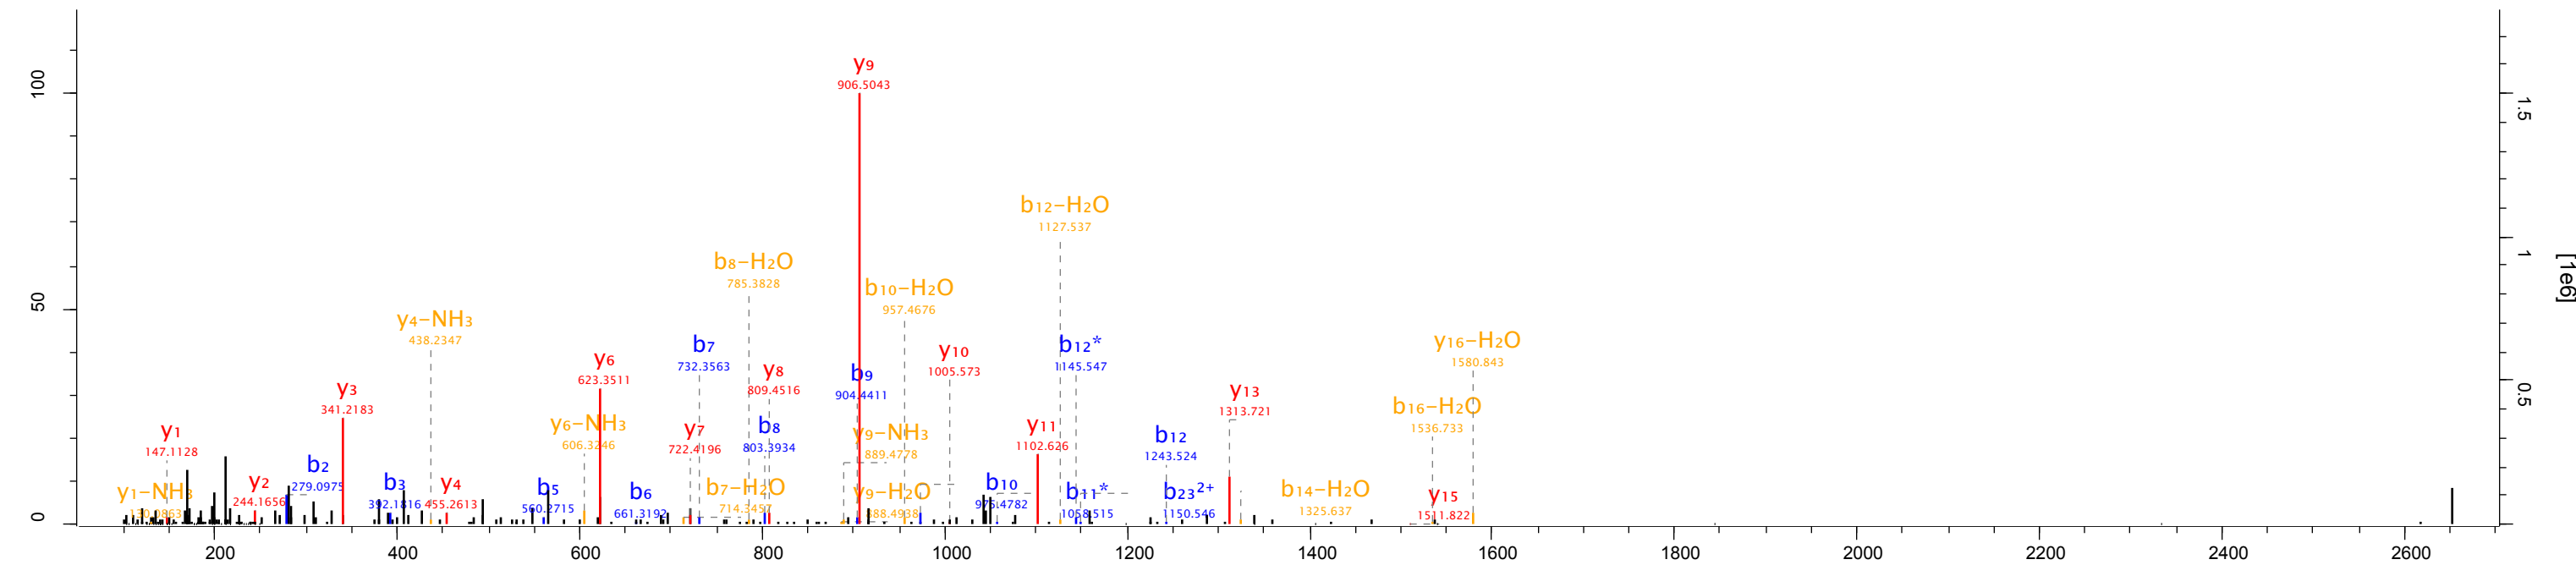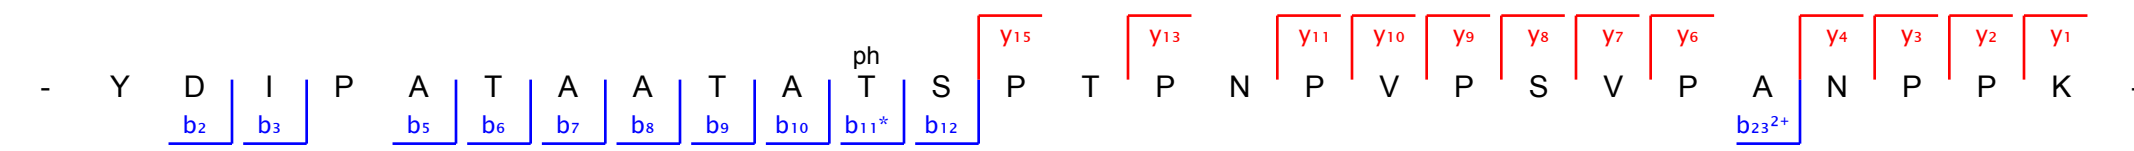

Raw file 20150814\_A375SR\_Phospho\_BR2\_07 Scan 19214 Method FTMS; HCD Score 50.03 m/z 742.68 Gene names C8orf33

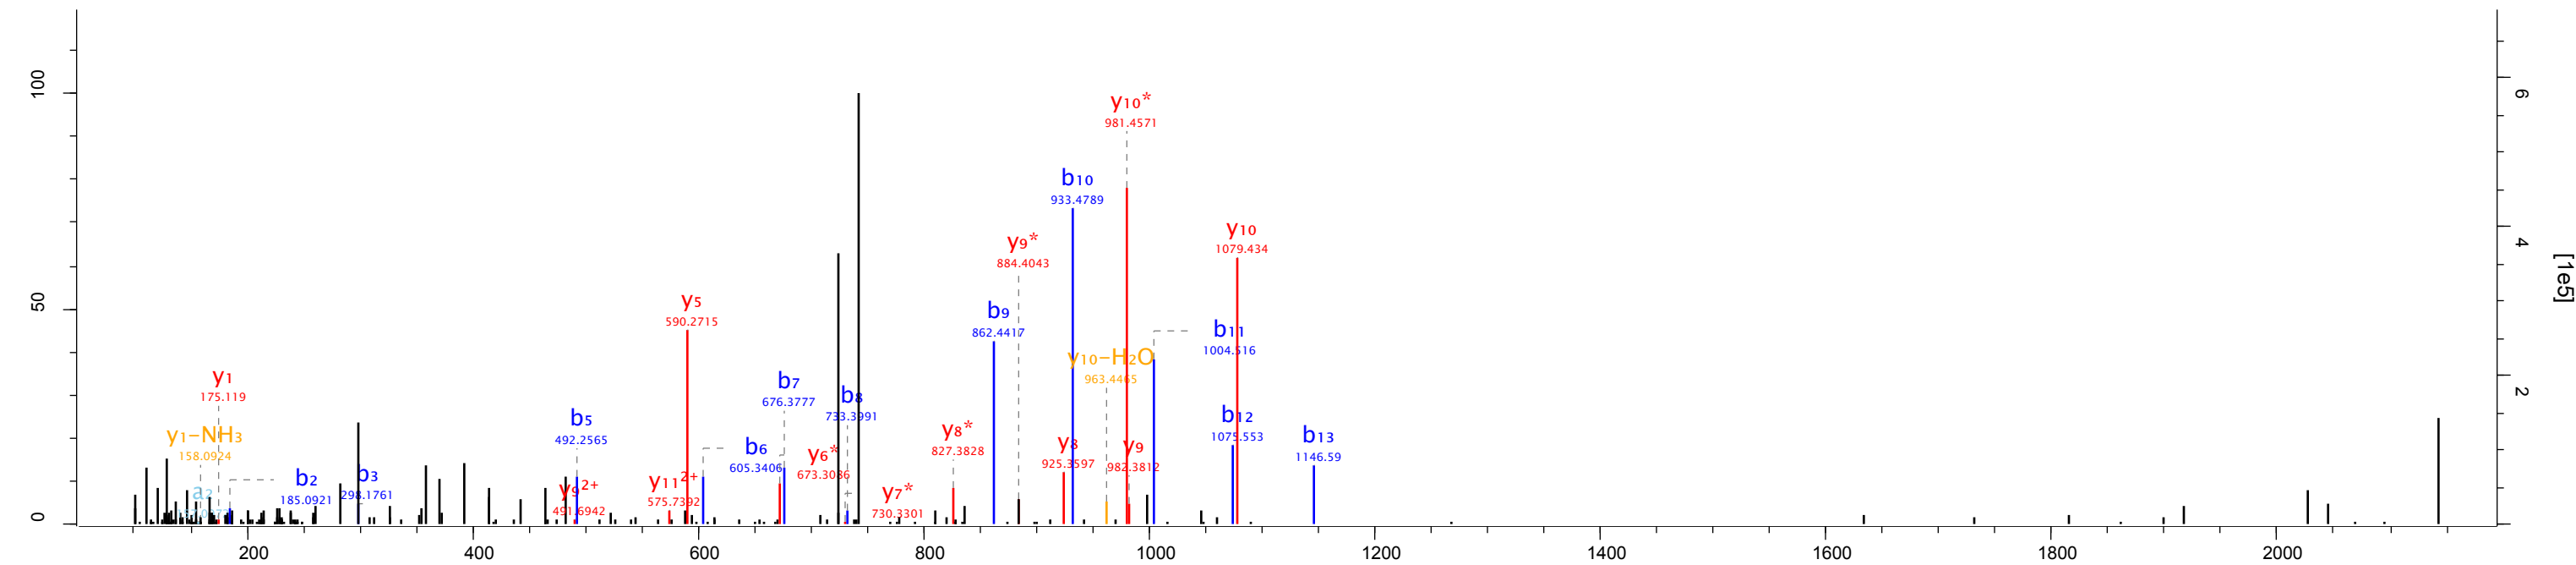

ac - A A L G H L A G E A A A A P G P G T P C A S R -

Fragmentation mapping: b2 (A), b3 (L), b5 (H), b6 (L), b7 (A), b8 (G), b9 (E), b10 (A), b11 (A), b12 (A), b13 (A), y11 2+ (A), y10 (P), y9 (G), y8 (P), y7\* (G), y6\* ph (T), y5 (P), y1 (R).

Raw file  
 20150814\_A375SR\_Phospho\_BR2\_07  
 Scan 19664 Method FTMS; HCD Score 351.89 m/z 1062 Gene names CD3EAP

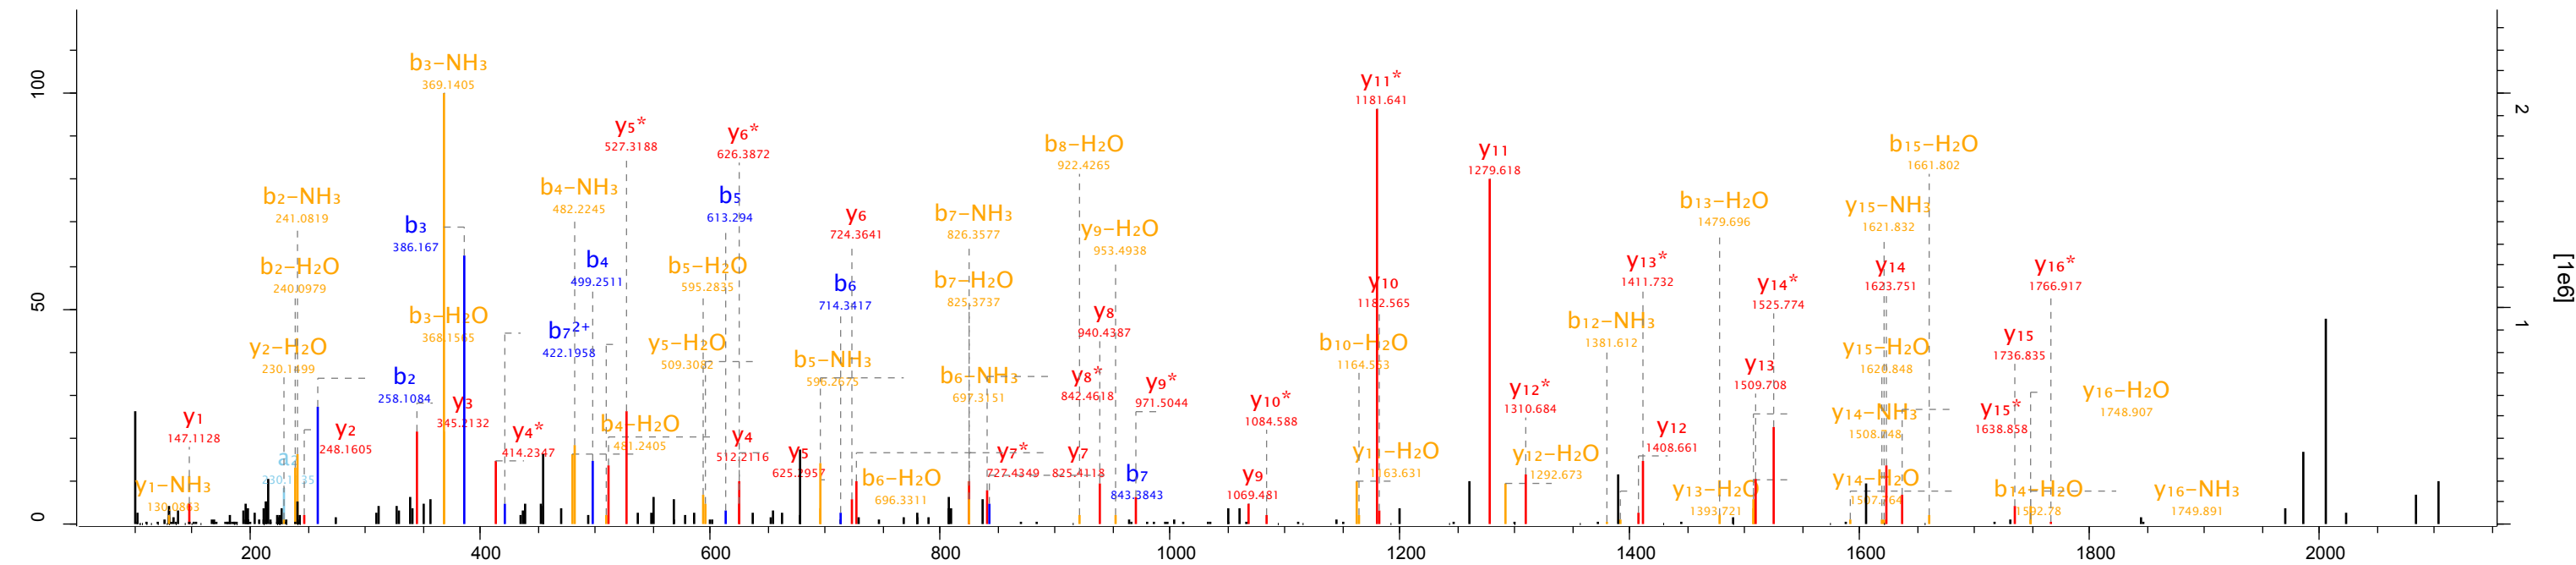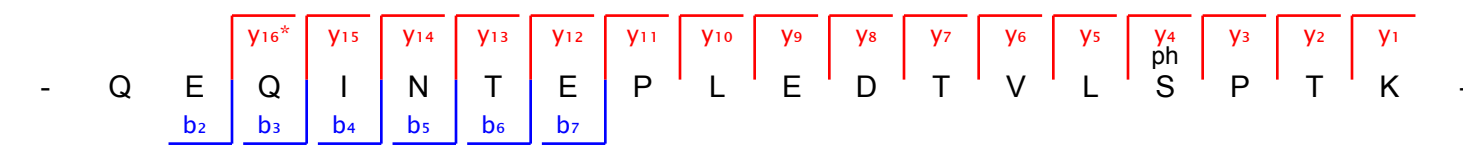

Raw file: 20150814\_A375SR\_Phospho\_BR2\_07  
 Scan: 23104 Method: FTMS; HCD Score: 96.21 m/z: 1041.44 Gene names: PRKAB2

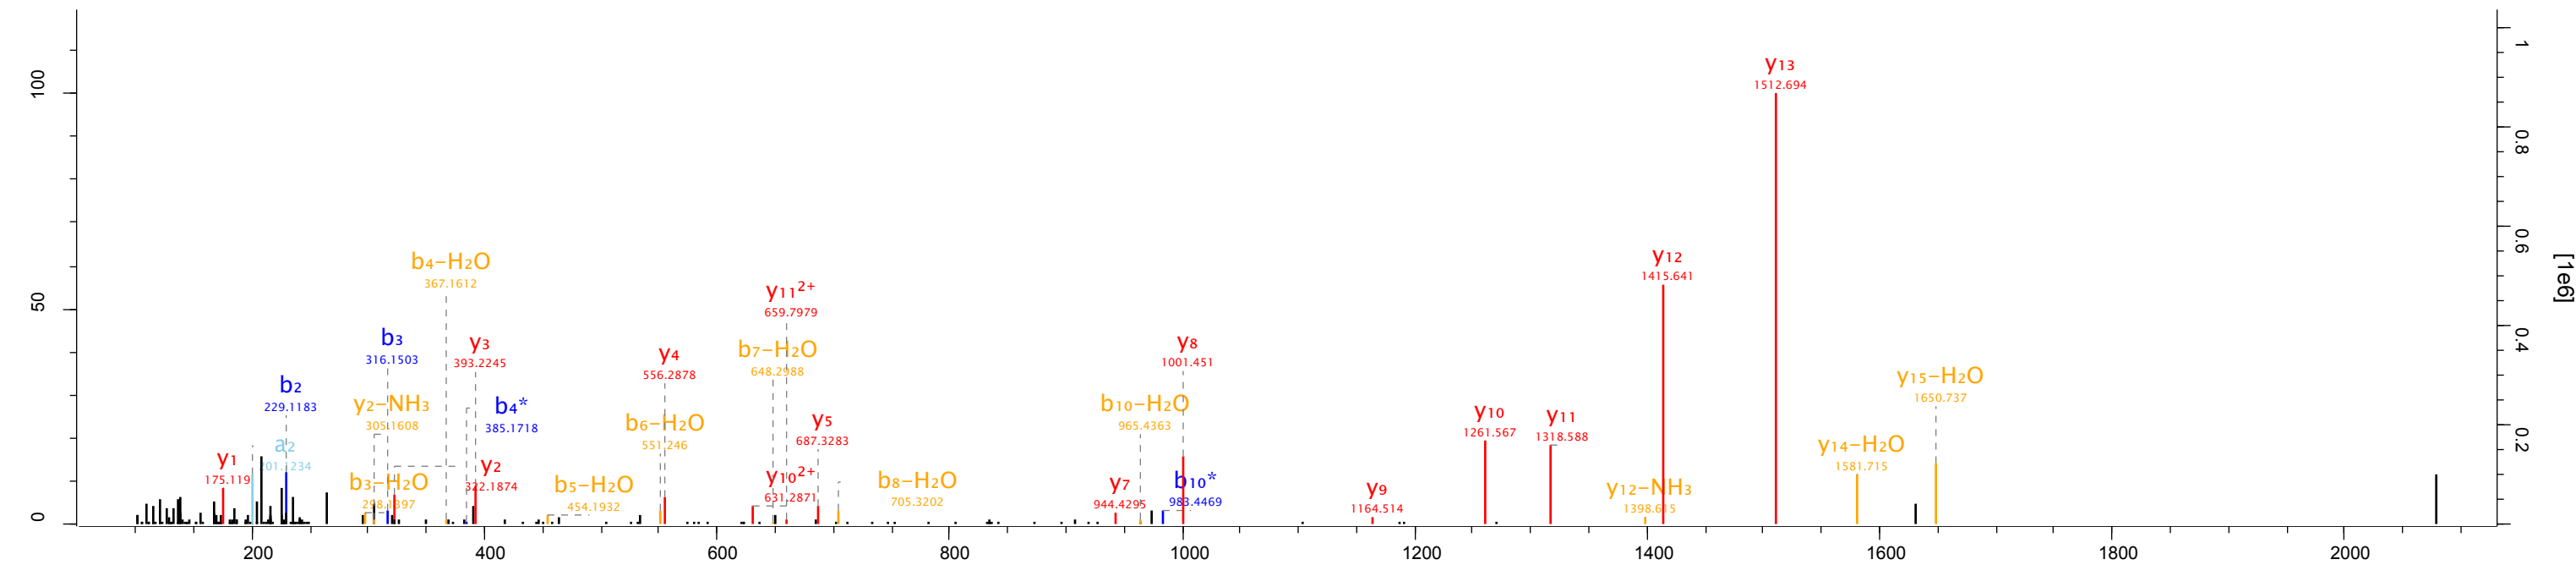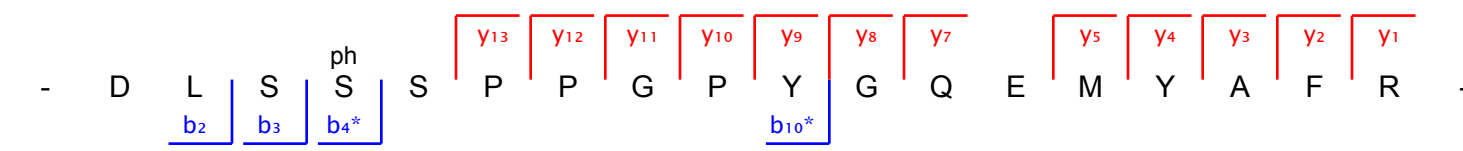

Raw file 20150814\_A375SR\_Phospho\_BR2\_07 Scan 2384 Method FTMS; HCD Score 122.63 m/z 616.3 Gene names SCAF1

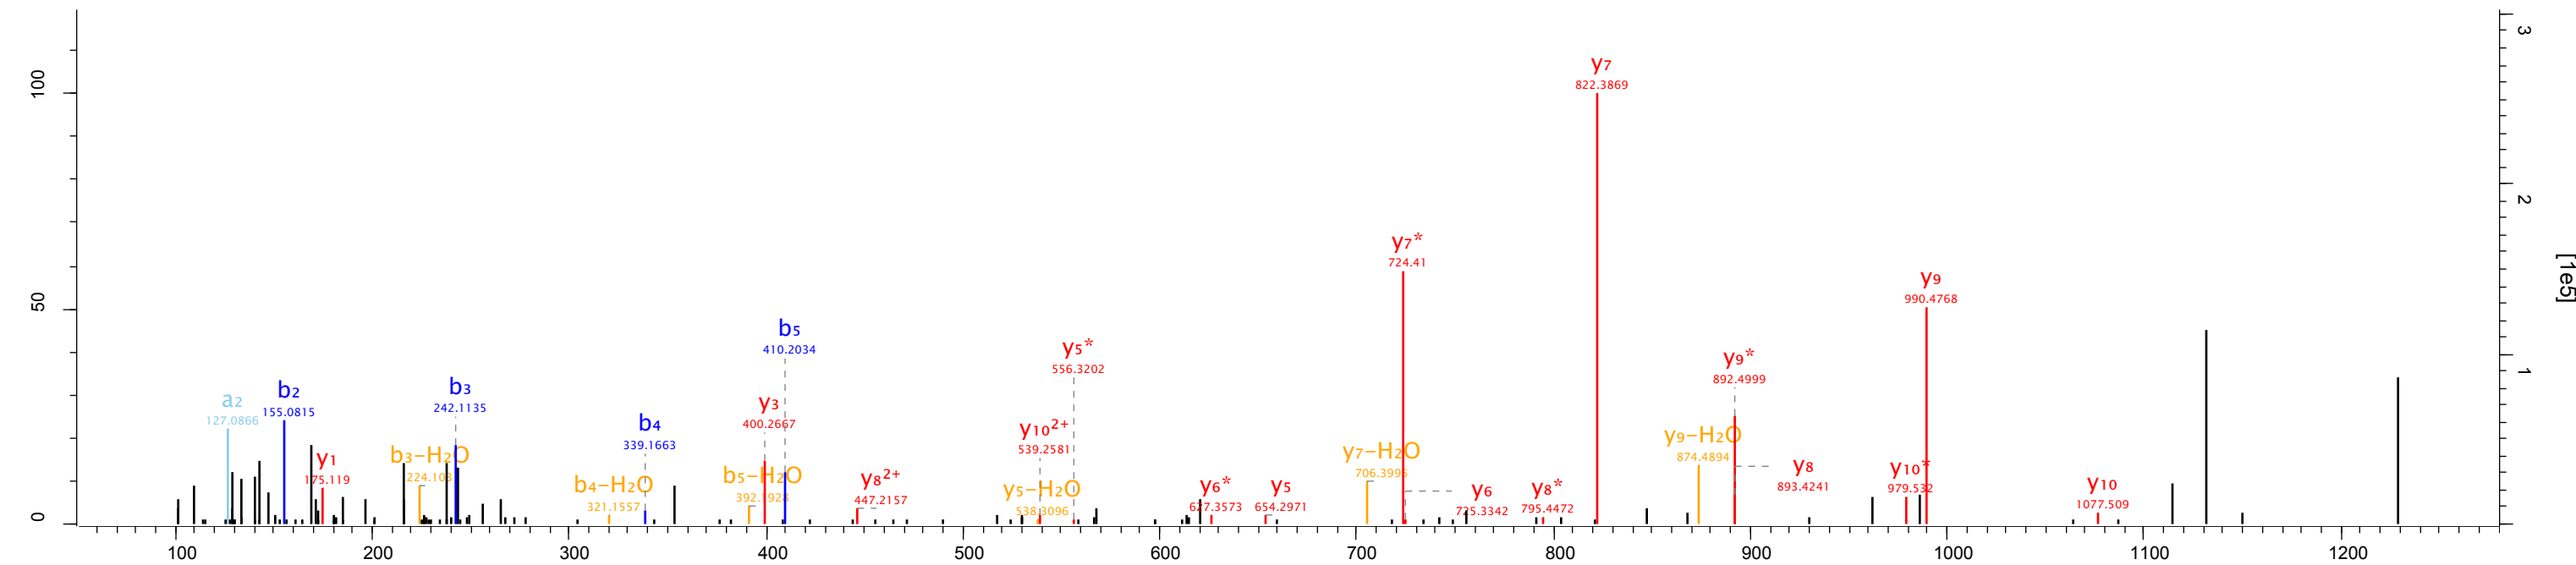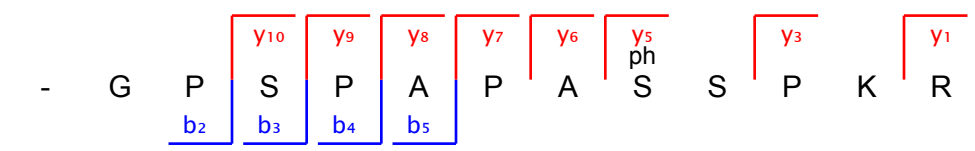



Raw file: 20150814\_A375SR\_Phospho\_BR2\_07  
 Scan: 2404 Method: FTMS; HCD Score: 41.53 m/z: 582.25 Gene names: AFTPH

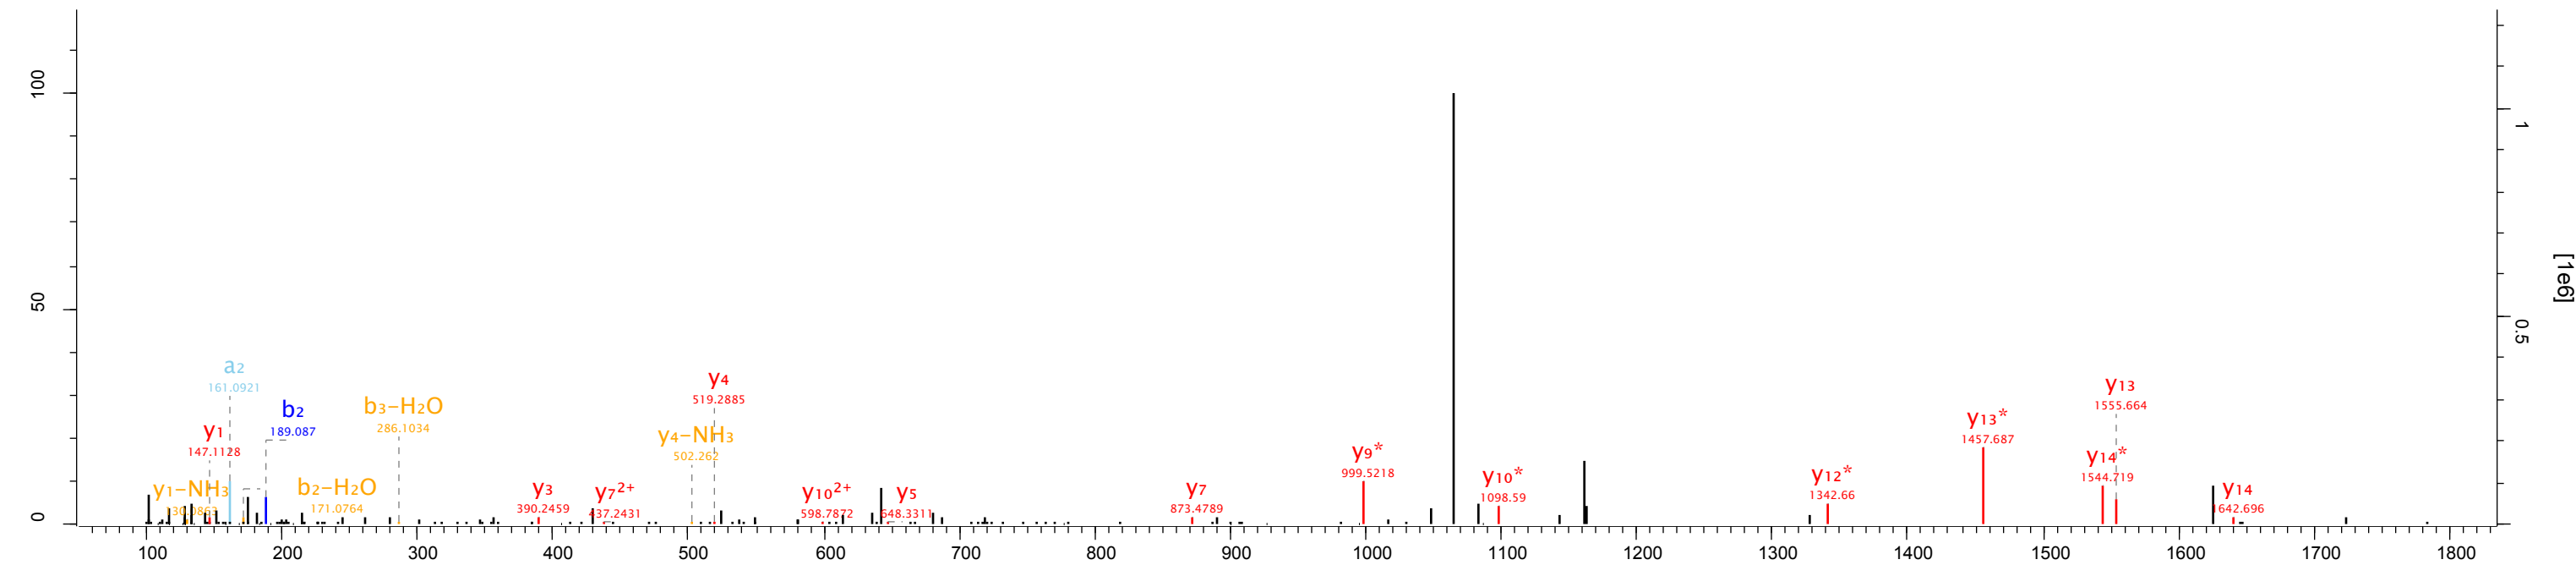

Sequence: - T S D D E V G S P K E E S R K -

Fragmentation mapping (b and y ions):

- b<sub>2</sub> (blue box) covers residues S and D.
- y<sub>1</sub> (red box) covers residue R.
- y<sub>3</sub> (red box) covers residues S and E.
- y<sub>4</sub> (red box) covers residues E and E.
- y<sub>5</sub> (red box) covers residue E.
- y<sub>7</sub> (red box) covers residue P.
- y<sub>9</sub><sup>\*</sup> (red box) covers residue G.
- y<sub>10</sub><sup>\*</sup> (red box) covers residue V.
- y<sub>12</sub><sup>\*</sup> (red box) covers residue D.
- y<sub>13</sub> (red box) covers residue D.
- y<sub>14</sub> (red box) covers residue S.

Raw file: 20150814\_A375SR\_Phospho\_BR2\_07  
 Scan: 24424 Method: FTMS; HCD Score: 91.59 m/z: 1213.23 Gene names: PACS1

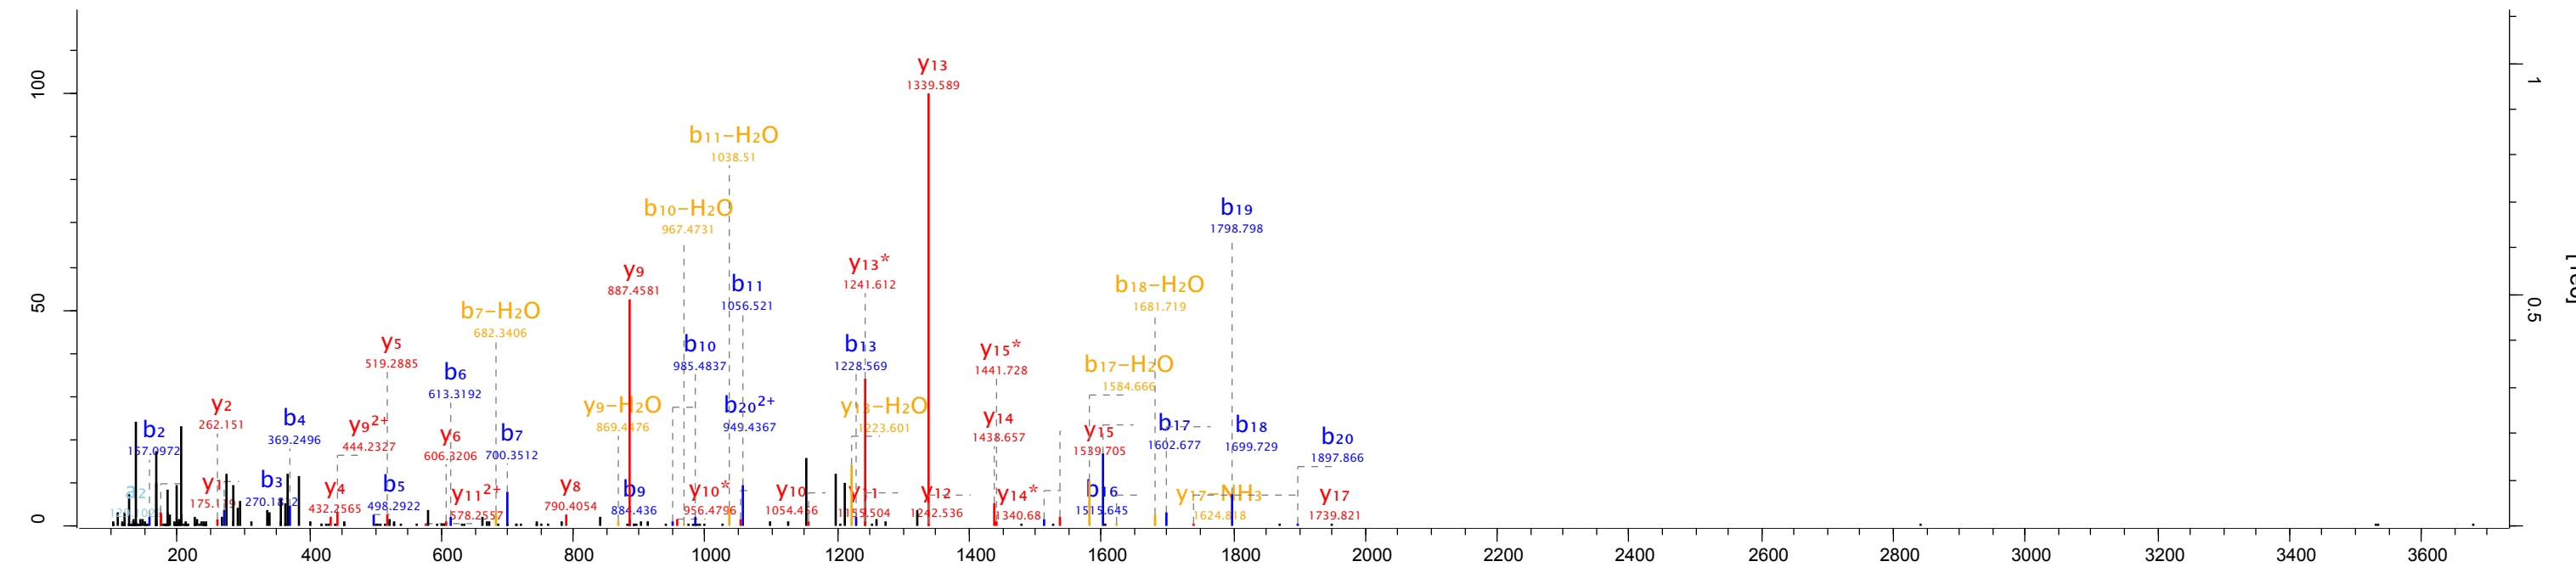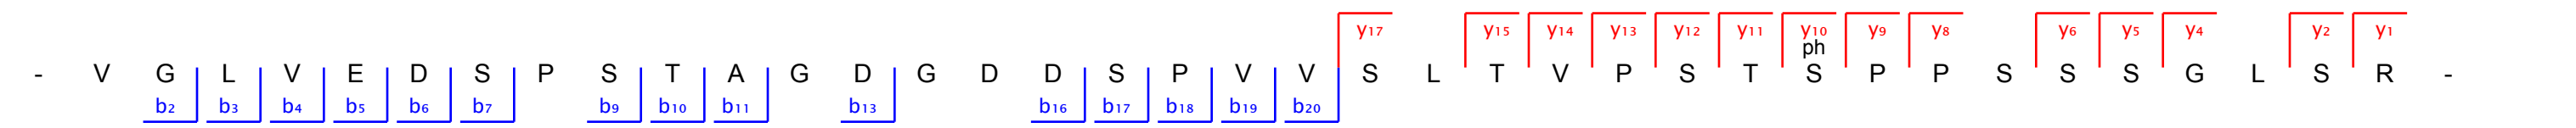

Raw file 20150814\_A375SR\_Phospho\_BR2\_07  
 Scan 2824 Method FTMS; HCD Score 51.77 m/z 866.34 Gene names UBR4

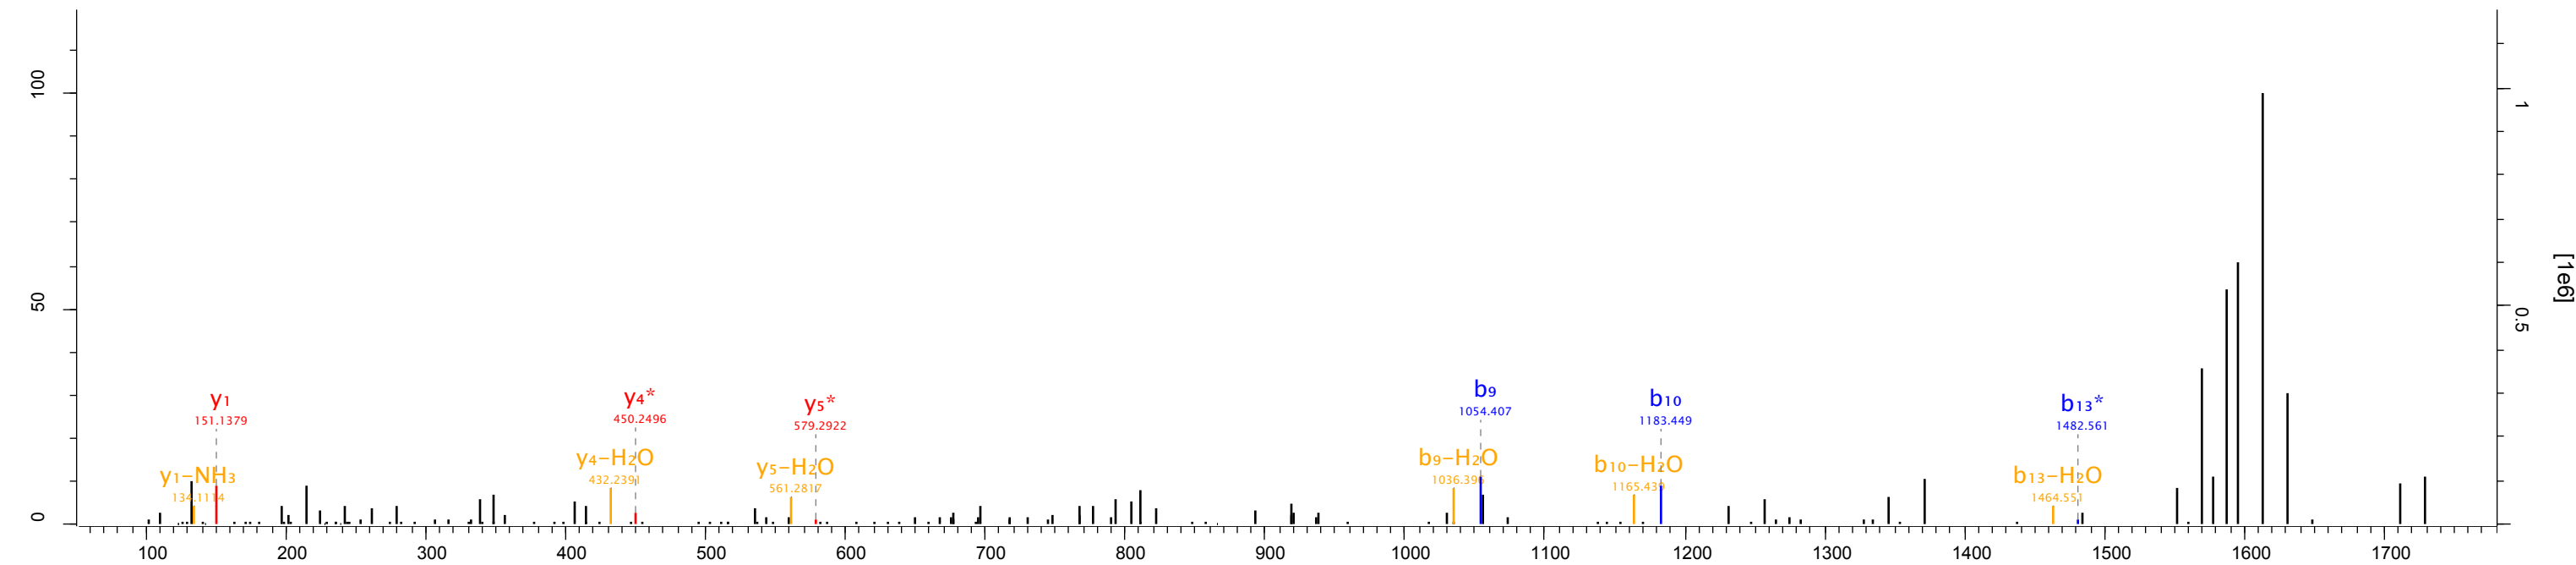

ac - ox M L E D ox M T T G T E S E T K -  
 b9 b10 y5\* y4\* ph b13\* y1

Raw file 20150814\_A375SR\_Phospho\_BR2\_07 Scan 28414 Method FTMS; HCD Score 63.73 m/z 1046.51 Gene names DNM2;MUCL1

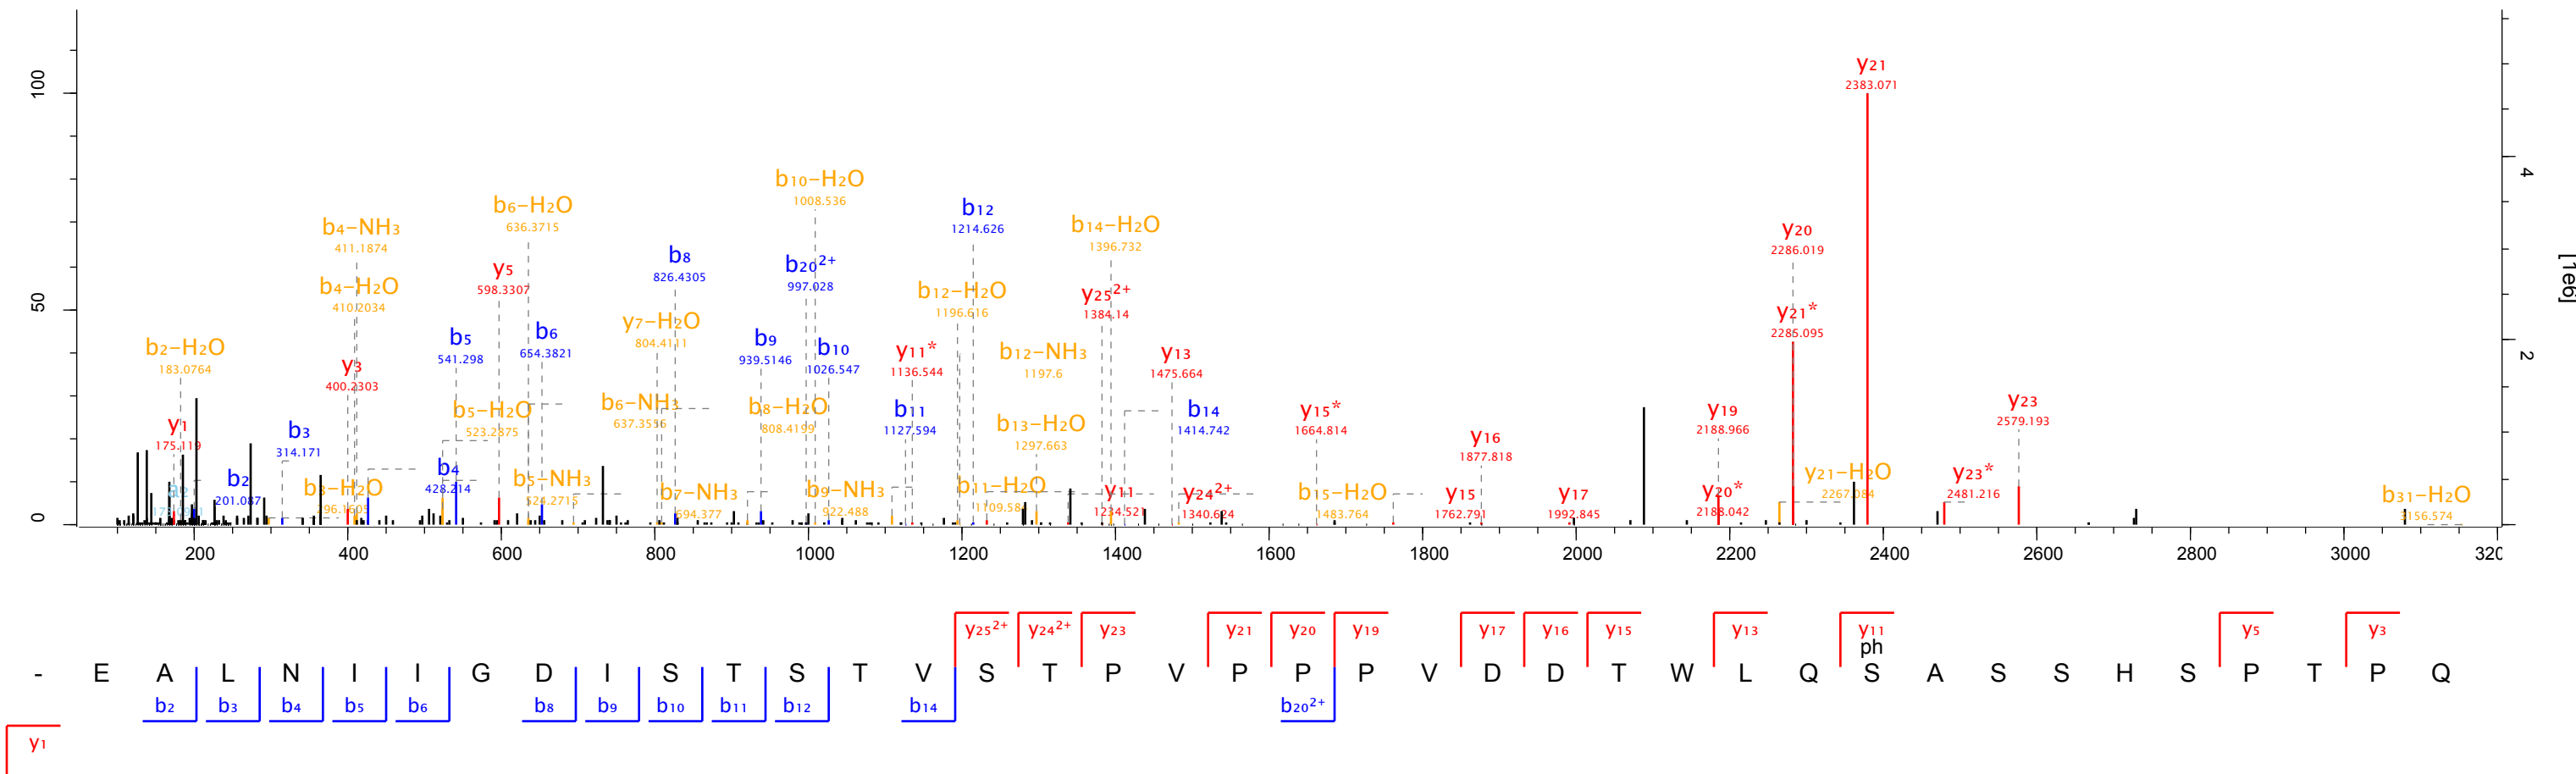

Raw file: 20150814\_A375SR\_Phospho\_BR2\_07  
 Scan: 3674 Method: FTMS; HCD Score: 177.44 m/z: 706.81 Gene names: ATXN1L

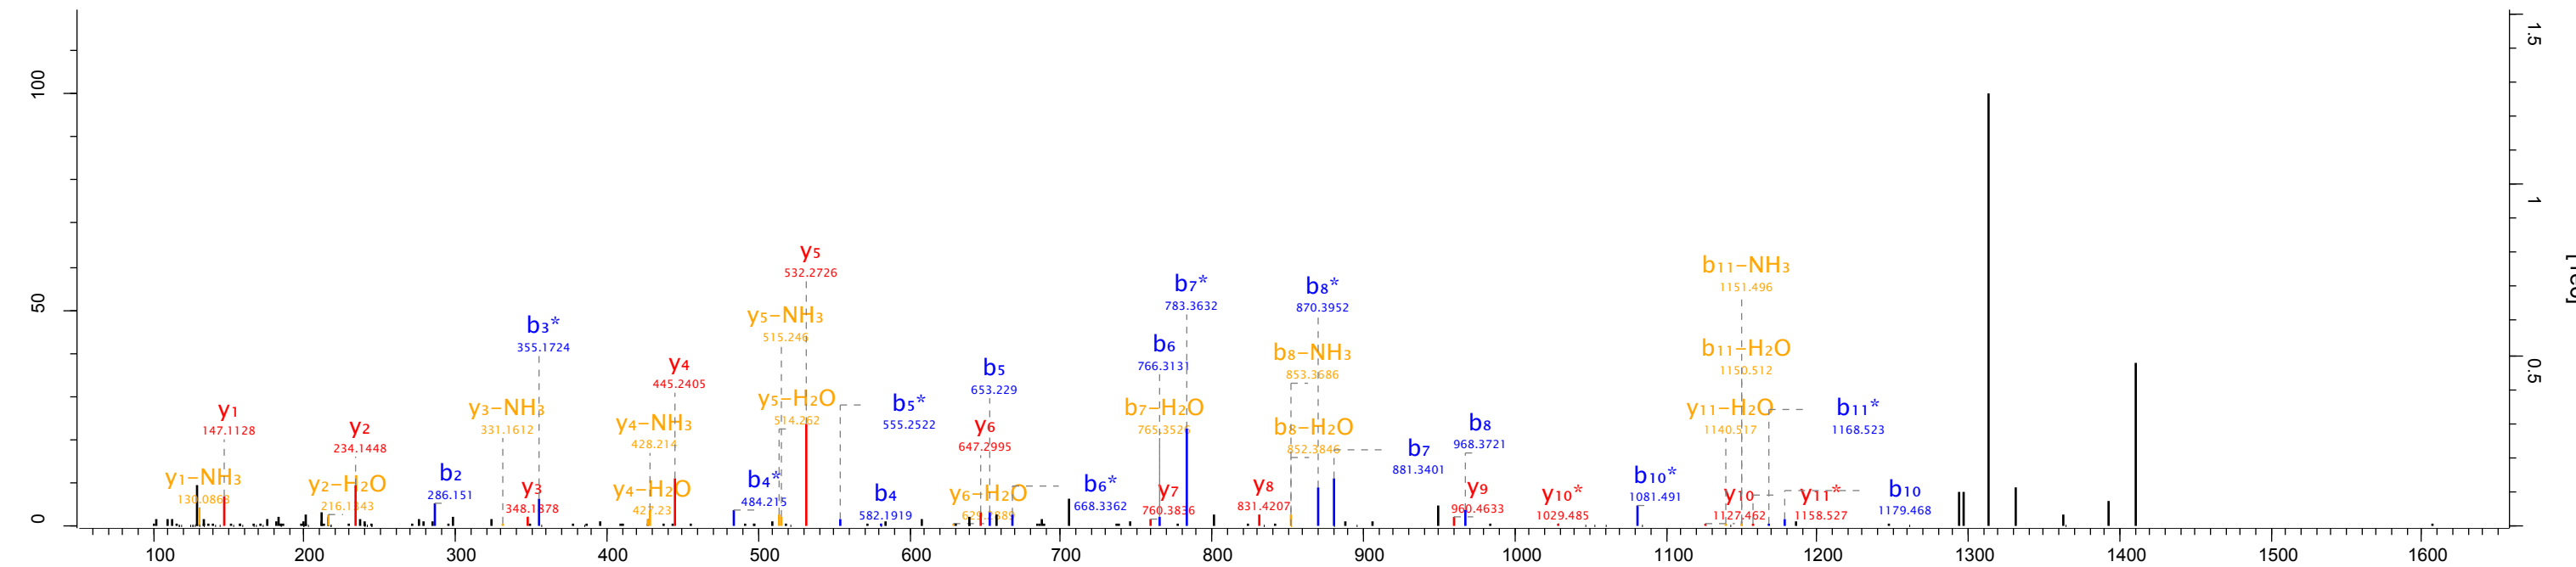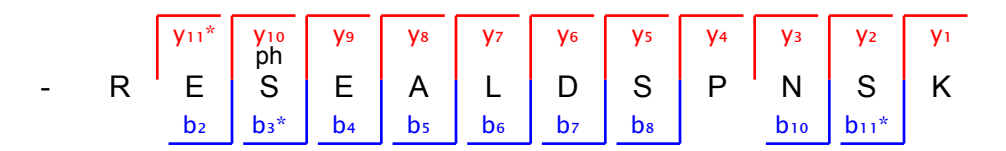

Raw file: 20150814\_A375SR\_Phospho\_BR2\_07  
 Scan: 5424 Method: FTMS; HCD Score: 147.09 m/z: 691.84 Gene names: APC

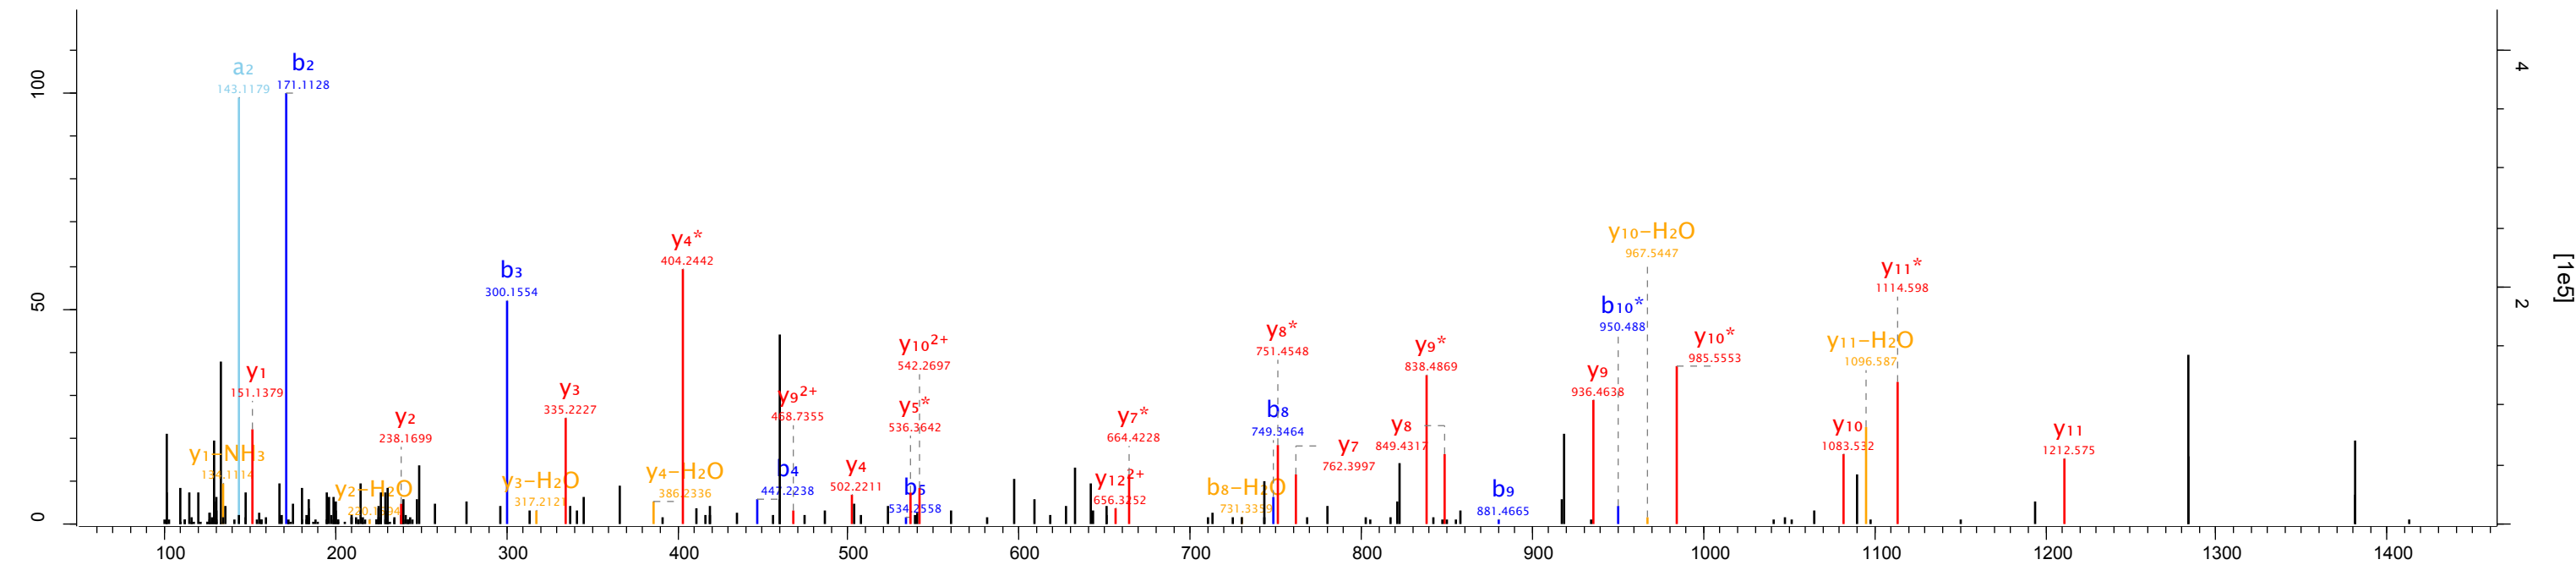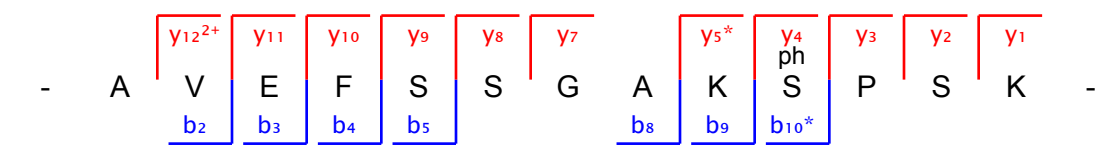

Raw file: 20150814\_A375SR\_Phospho\_BR2\_07  
 Scan: 6274 Method: FTMS; HCD Score: 122.86 m/z: 494.73 Gene names: ENO1

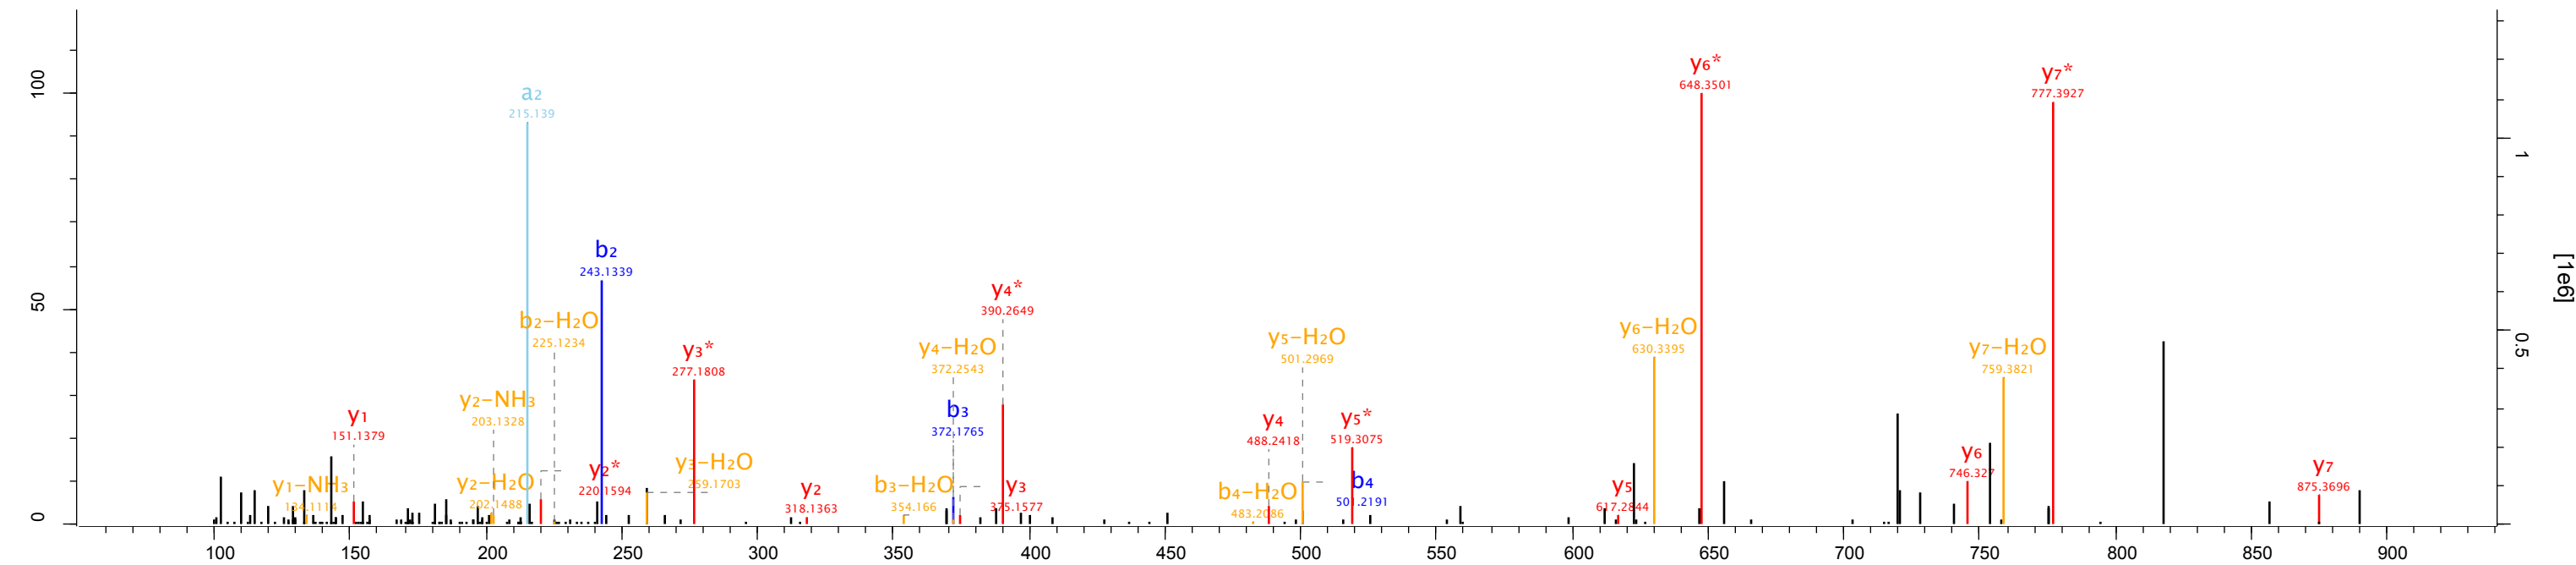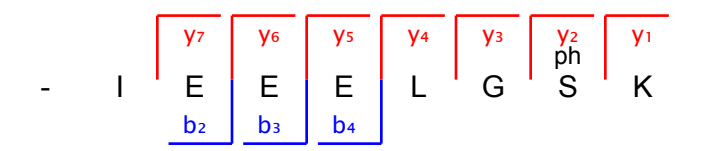

Raw file 20150814\_A375SR\_Phospho\_BR2\_07 Scan 7364 Method FTMS; HCD Score 58.09 m/z 601.29 Gene names AHCTF1

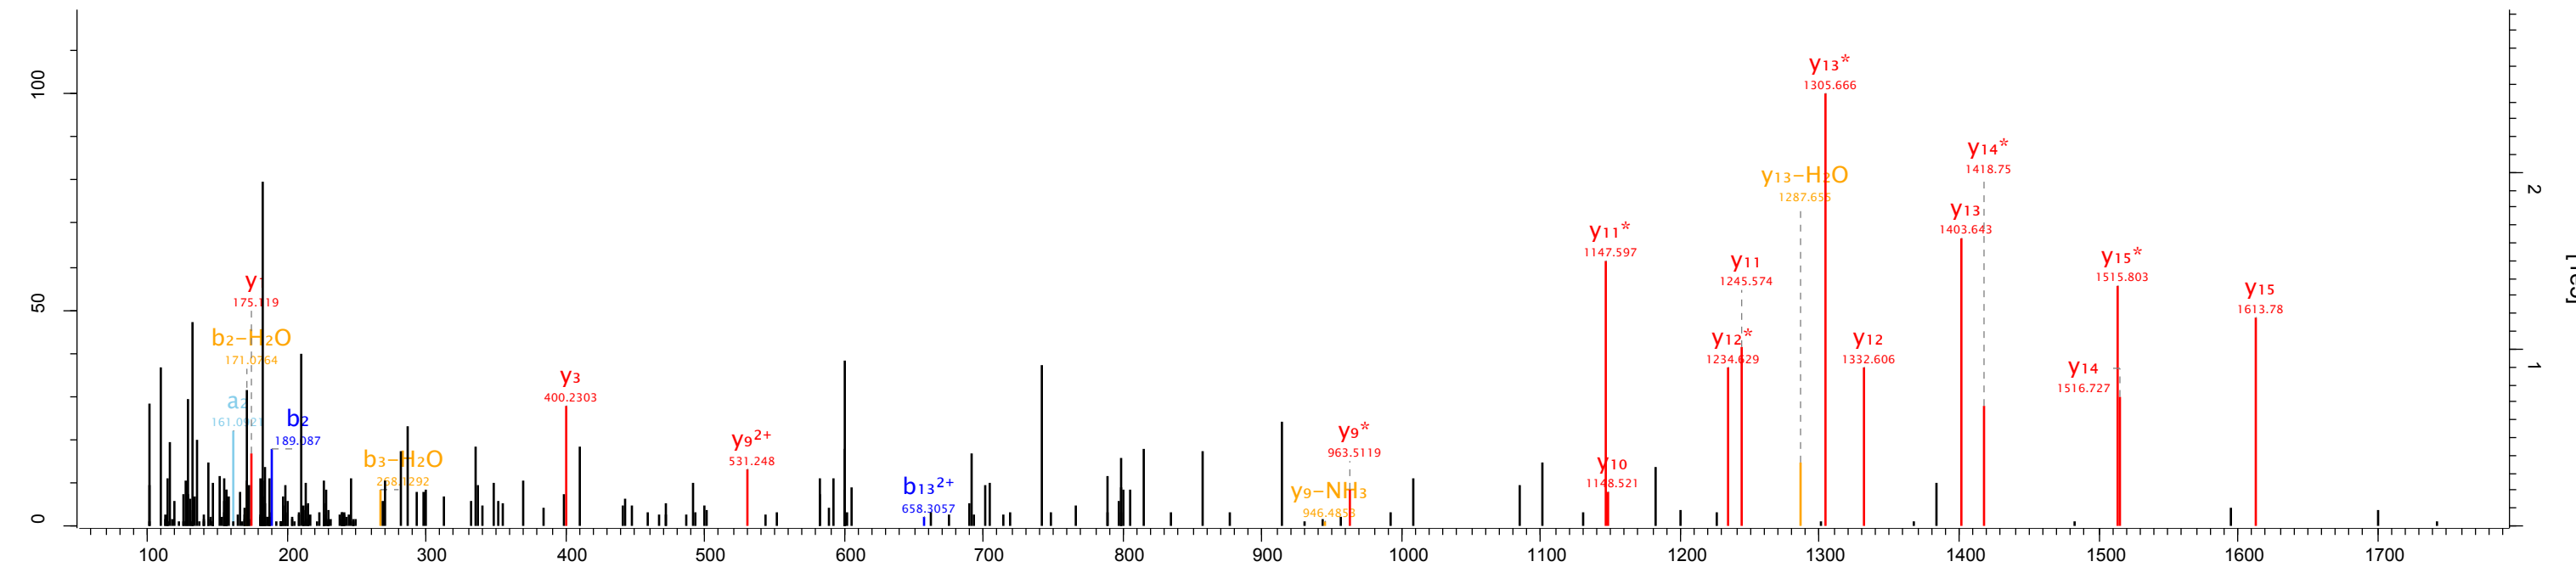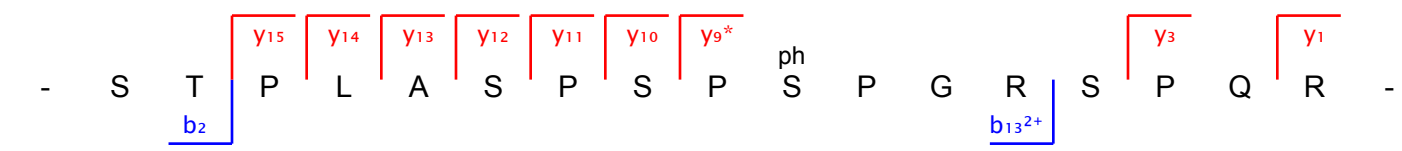



Raw file 20150814\_A375SR\_Phospho\_BR2\_07 Scan 9664 Method FTMS; HCD Score 88.57 m/z 795.39 Gene names PRPF40A

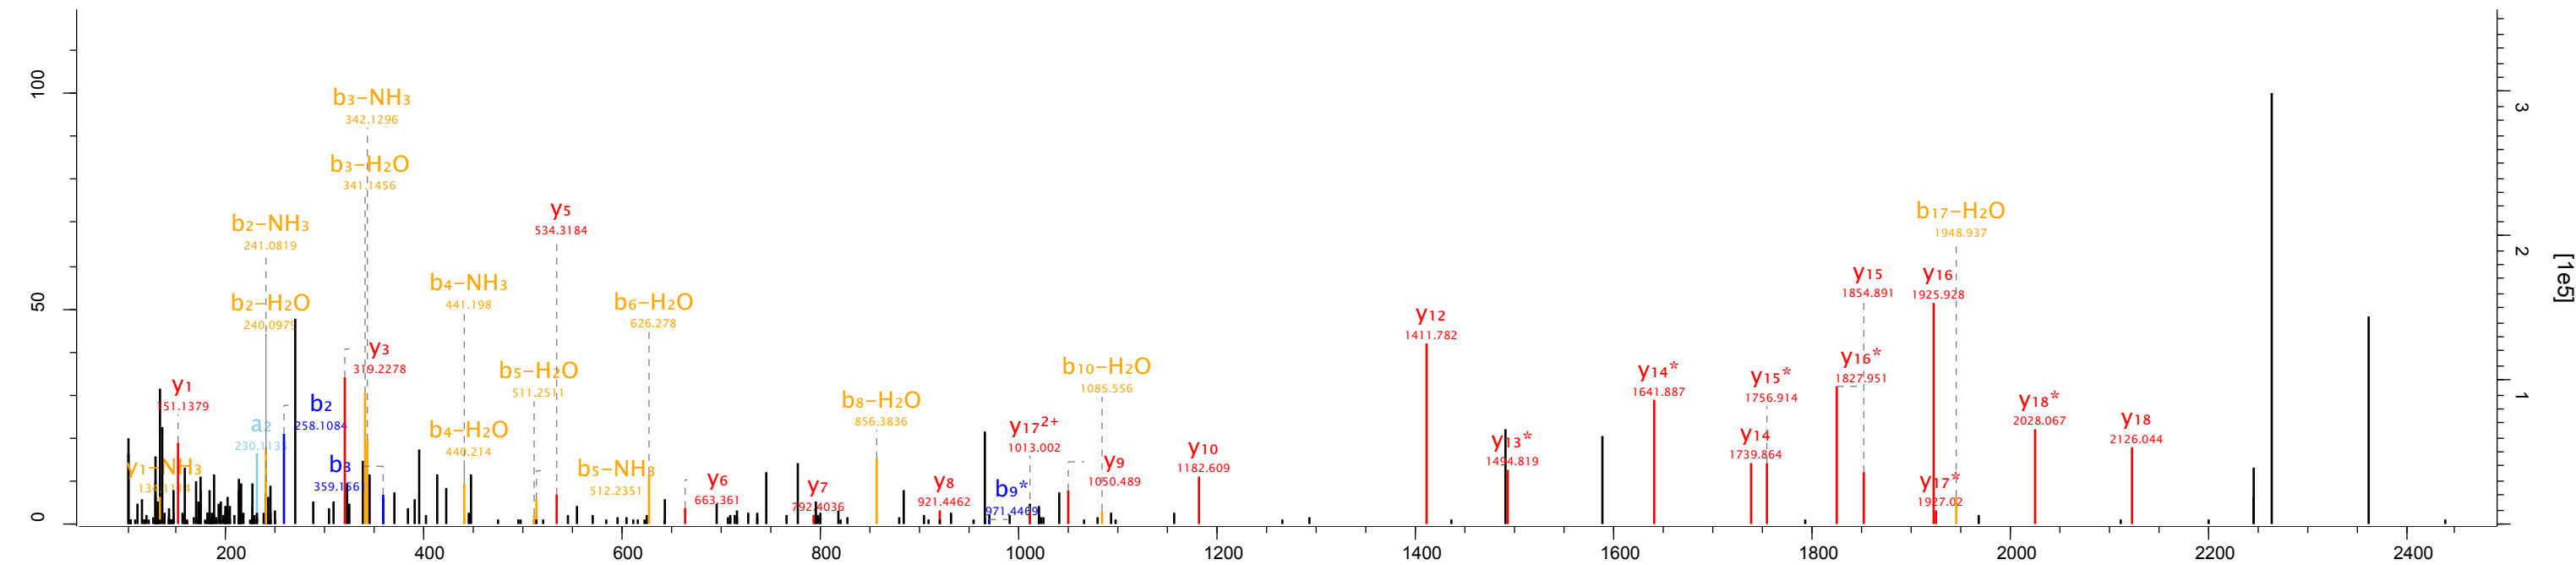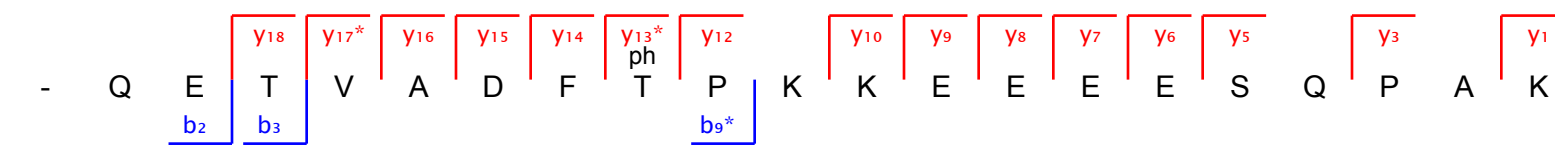

Raw file: 20150814\_A375SR\_Phospho\_BR2\_08  
 Scan: 10374 Method: FTMS; HCD Score: 115.33 m/z: 520.24 Gene names: C1orf226

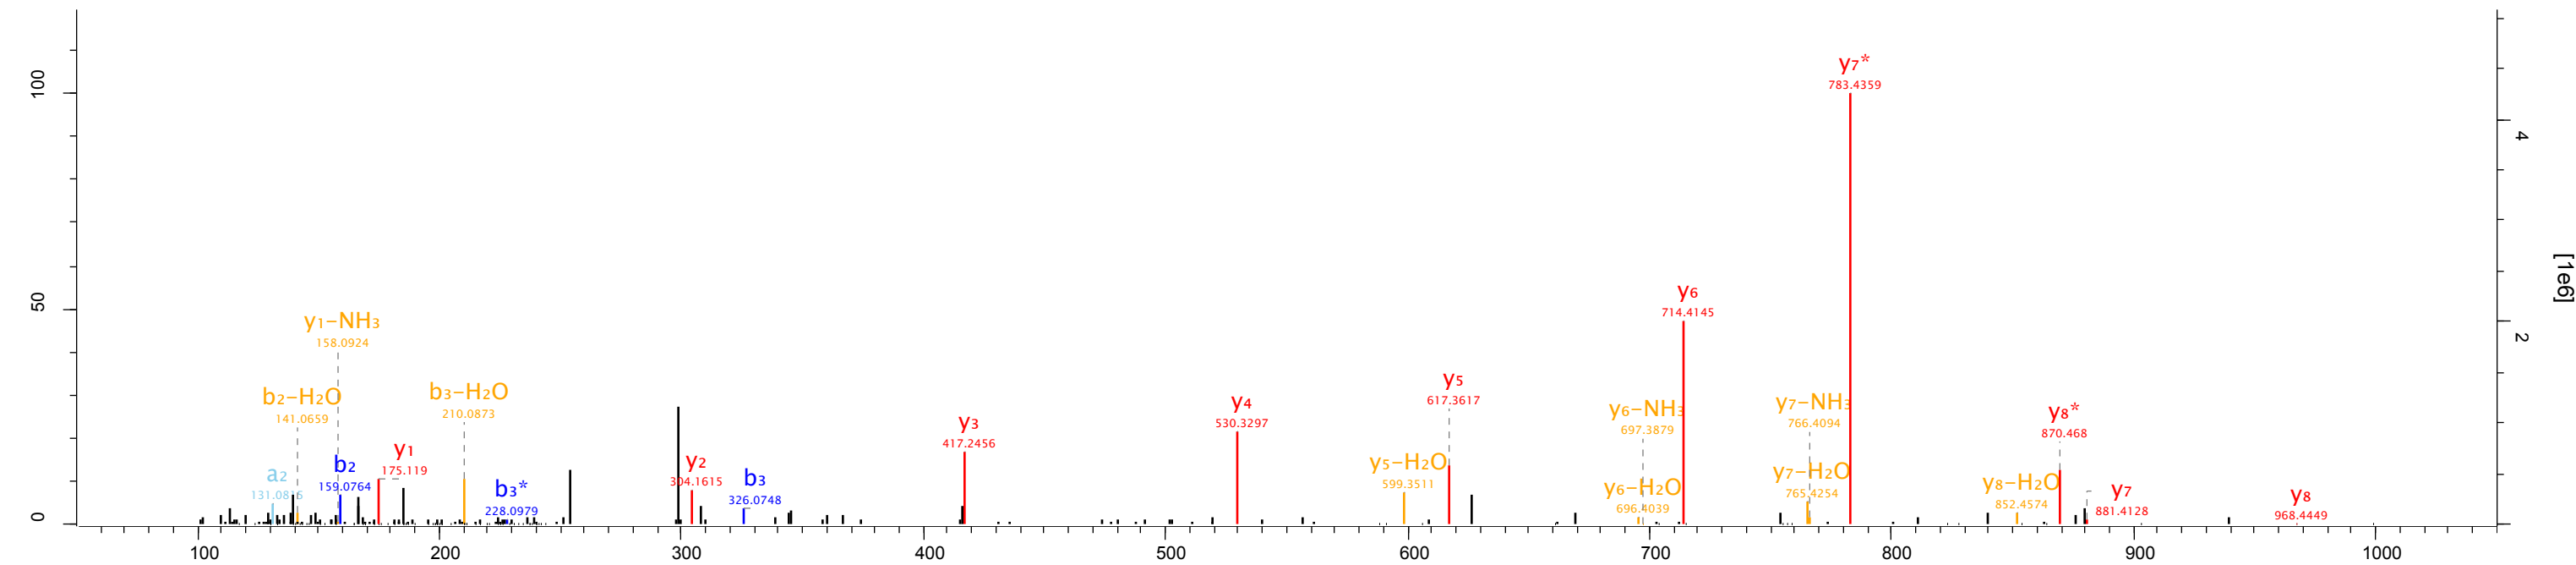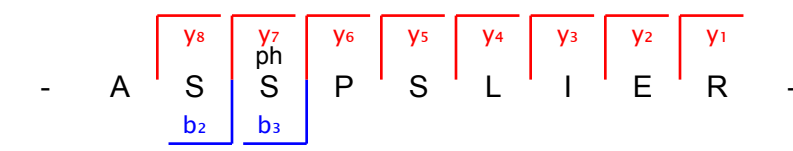

Raw file 20150814\_A375SR\_Phospho\_BR2\_08 Scan 11224 Method FTMS; HCD Score 201.12 m/z 633.28 Gene names UCK1

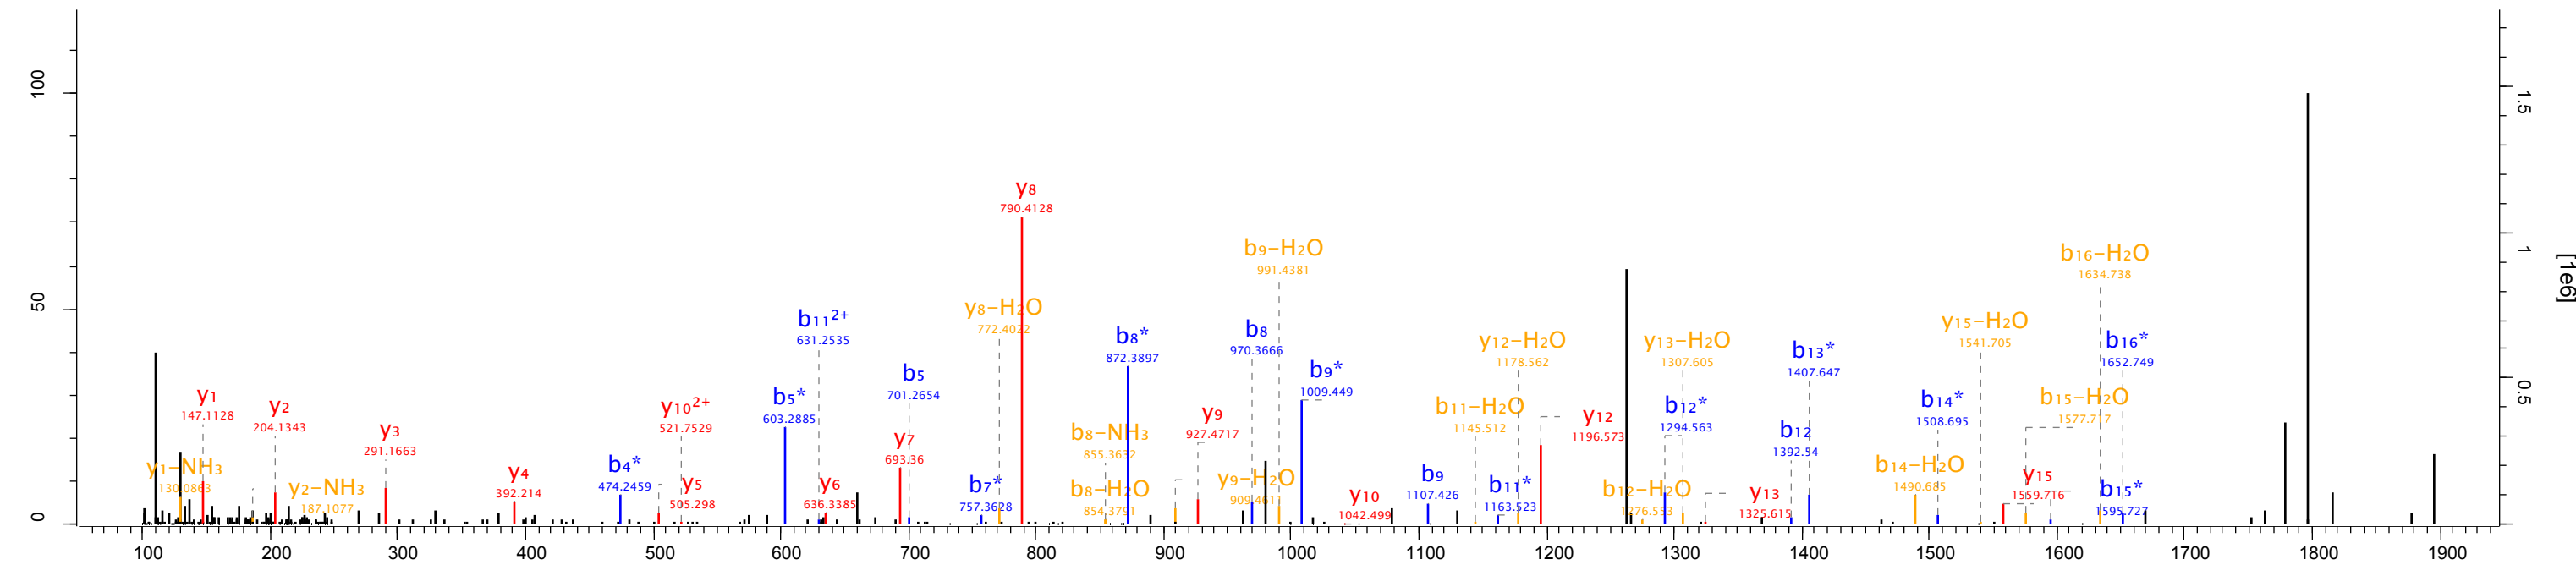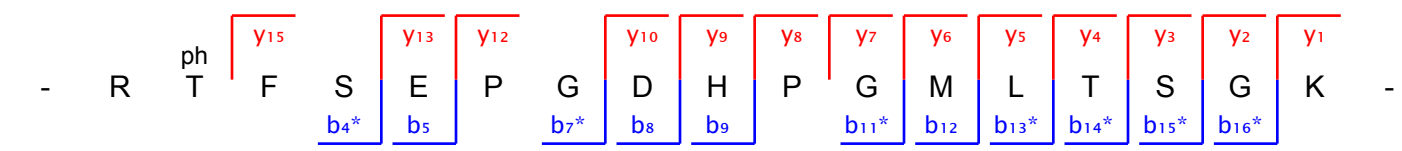

Raw file 20150814\_A375SR\_Phospho\_BR2\_08 Scan 12254 Method FTMS; HCD Score 105.98 m/z 467.74 Gene names PHLDB1

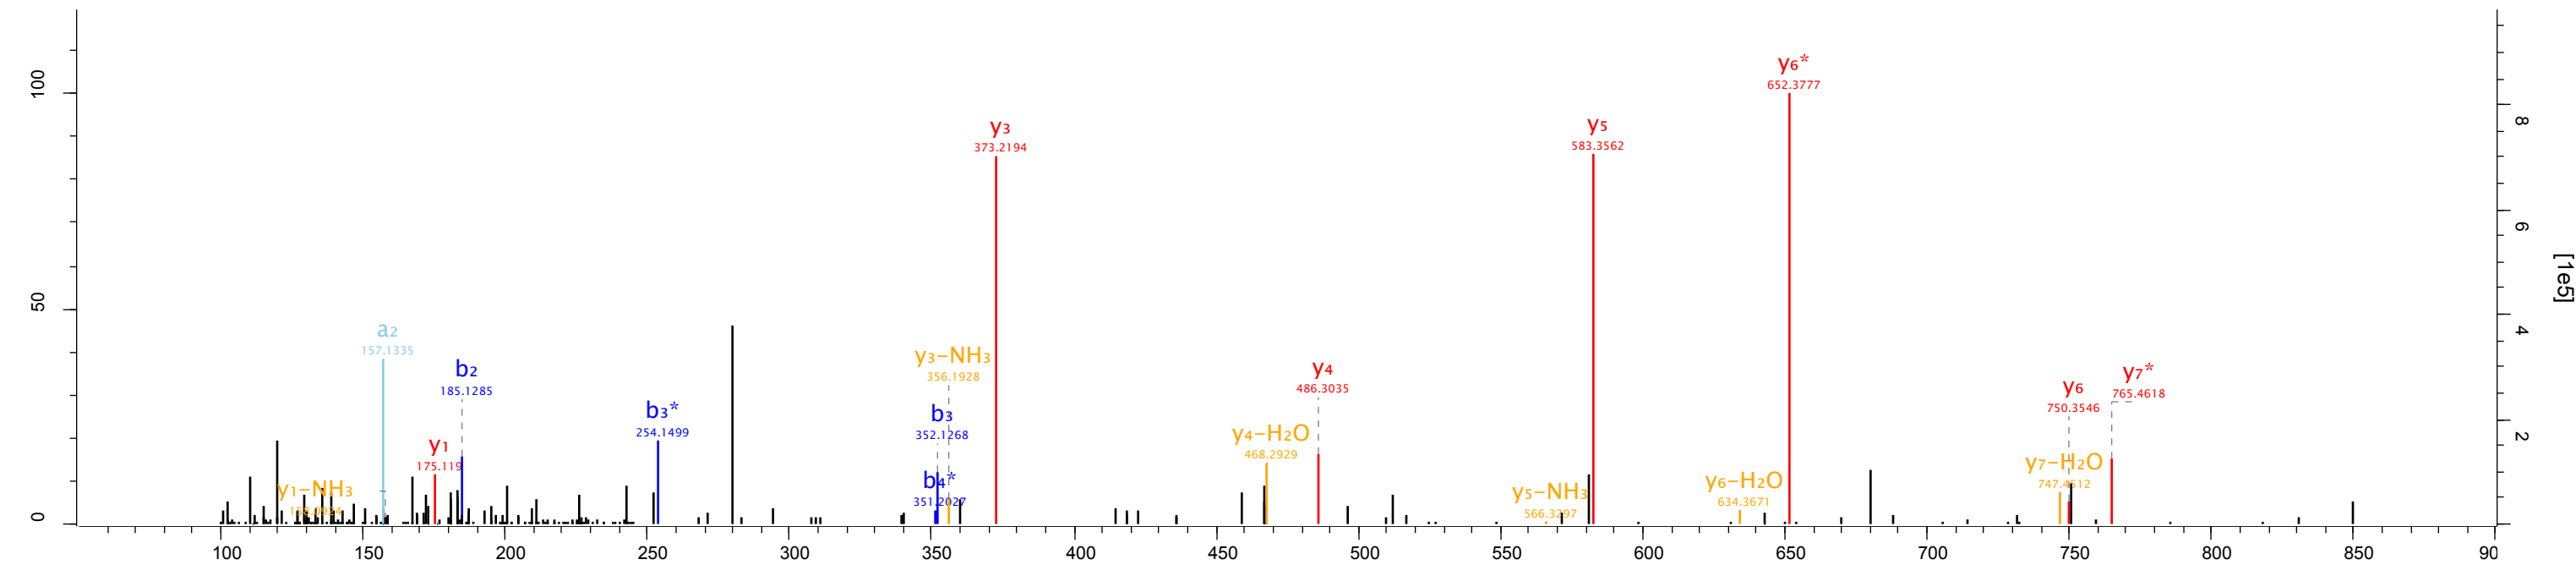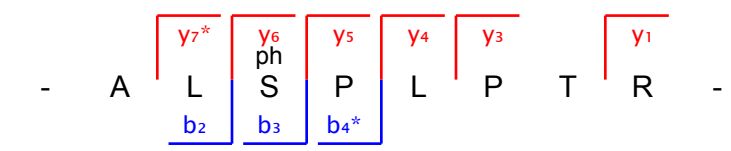

Raw file: 20150814\_A375SR\_Phospho\_BR2\_08  
 Scan: 12294 Method: FTMS; HCD Score: 67.41 m/z: 772.37 Gene names: NBN

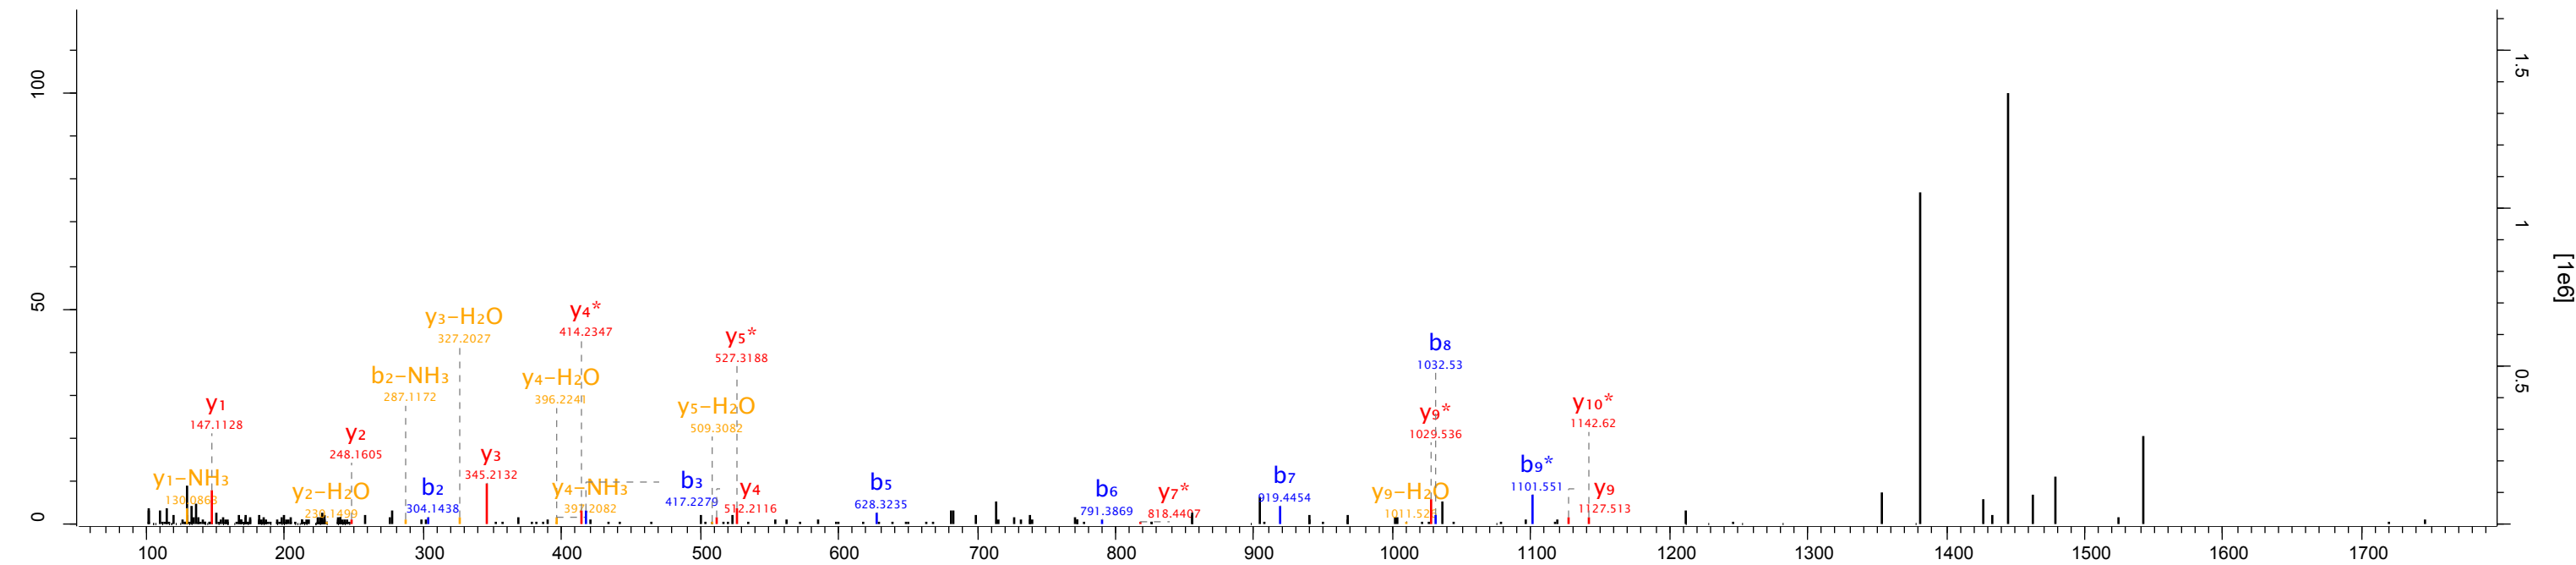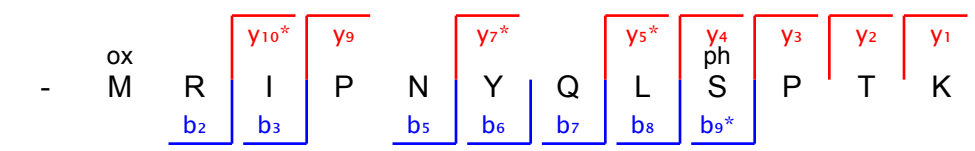

Raw file: 20150814\_A375SR\_Phospho\_BR2\_08  
 Scan: 12424 Method: FTMS; HCD Score: 74.11 m/z: 591.98 Gene names: IQSEC1

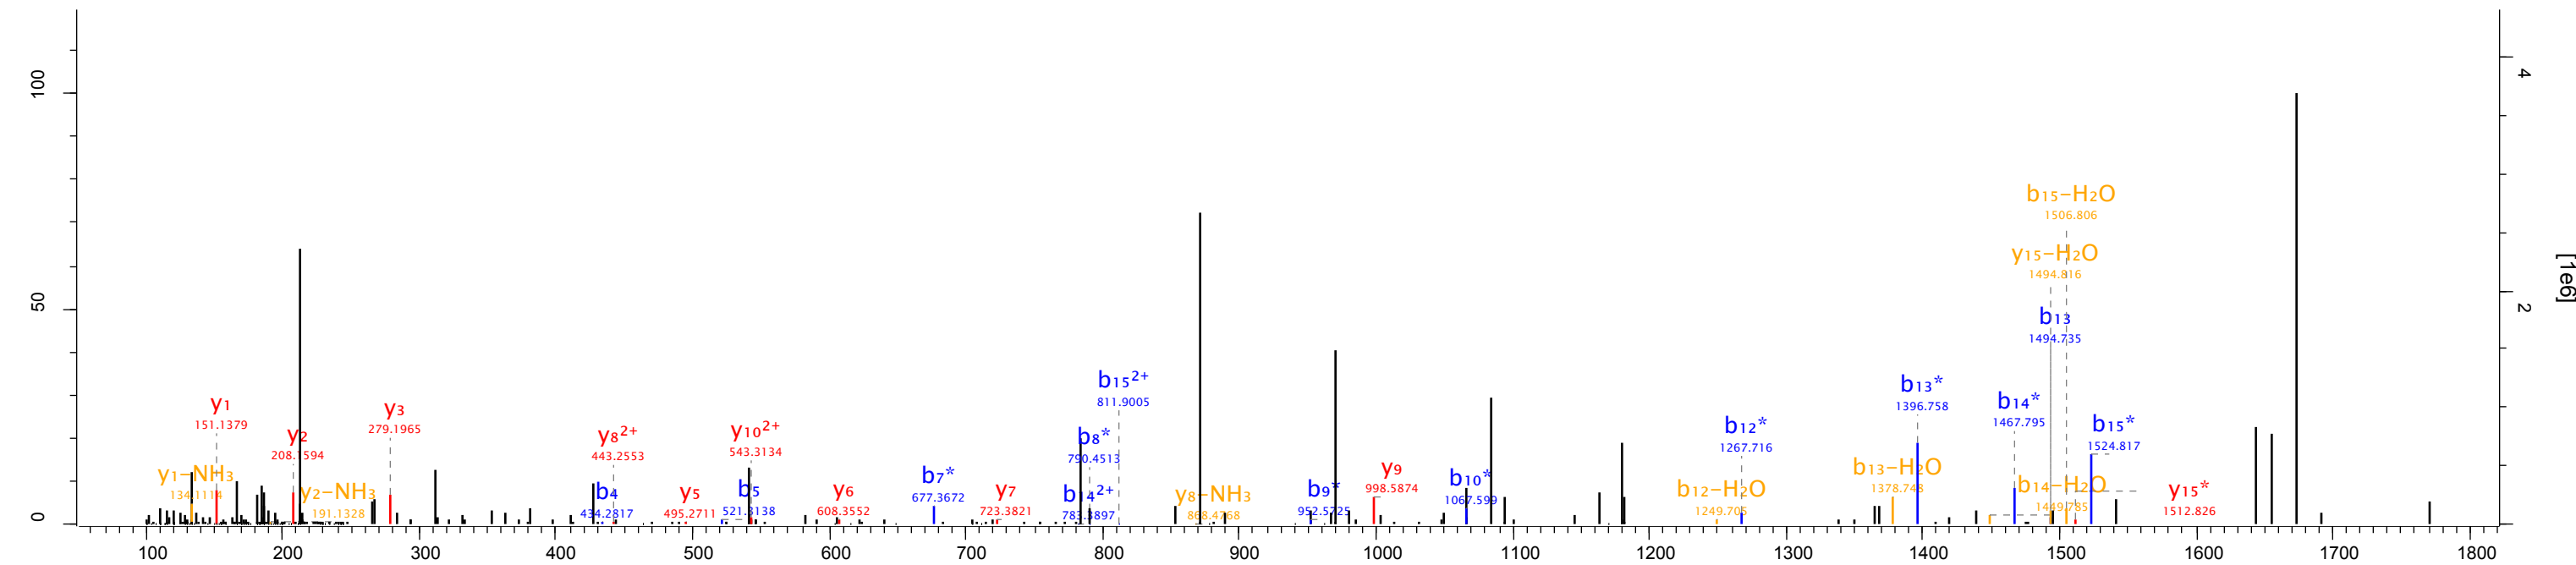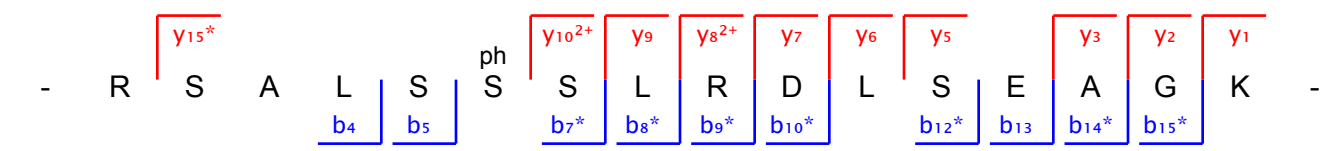

Raw file: 20150814\_A375SR\_Phospho\_BR2\_08  
 Scan: 12504 Method: FTMS; HCD Score: 137.62 m/z: 814.05 Gene names: MDC1

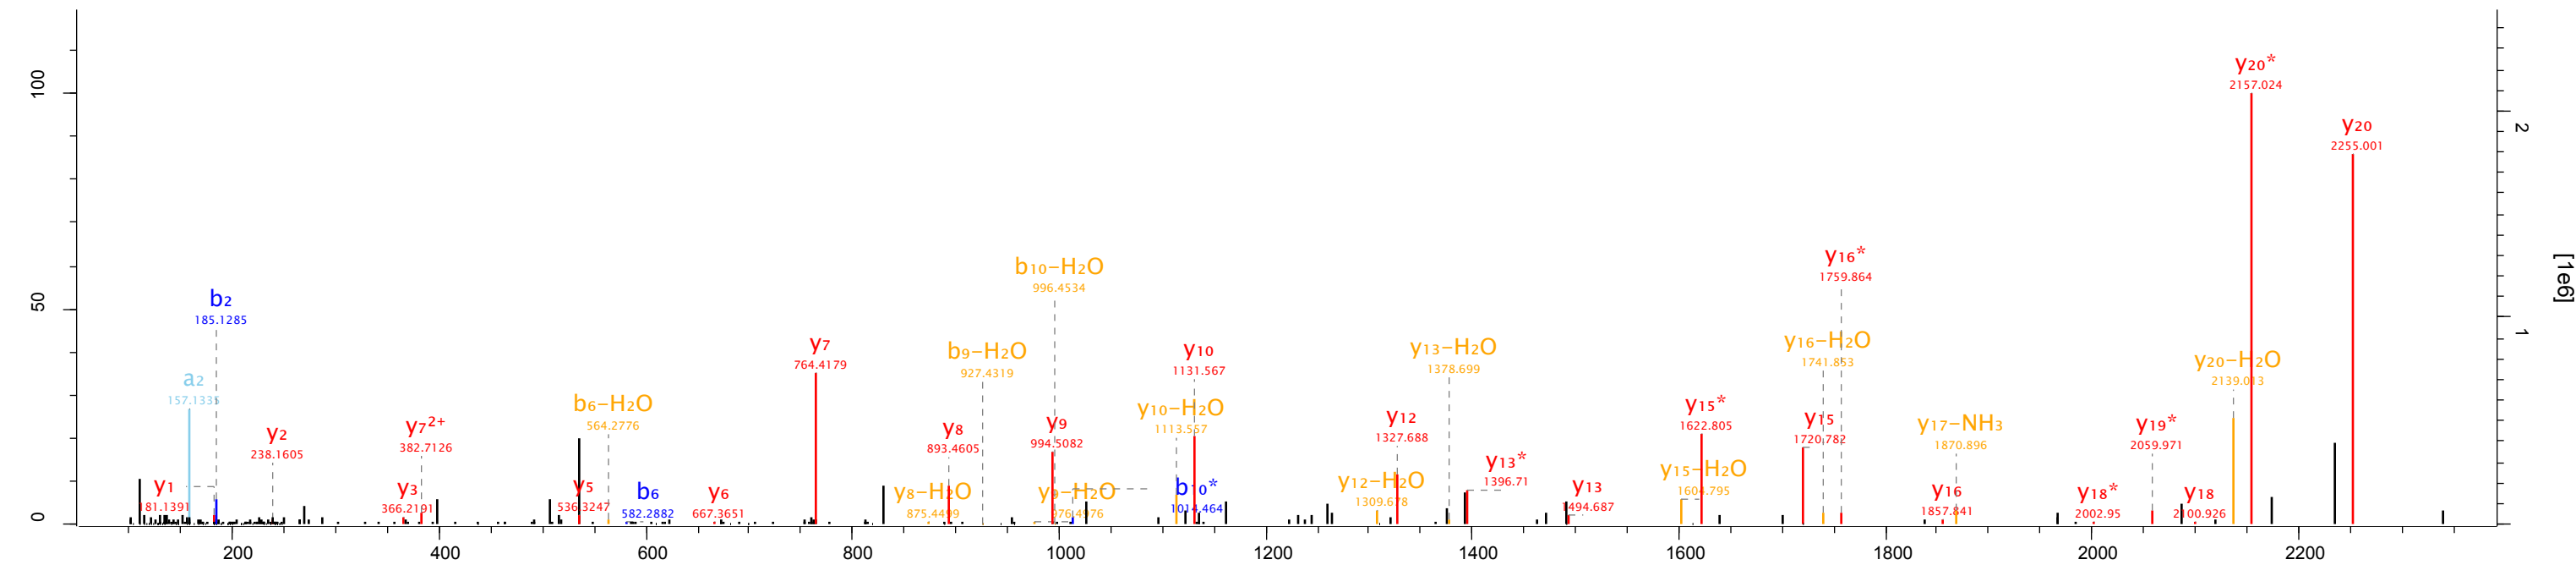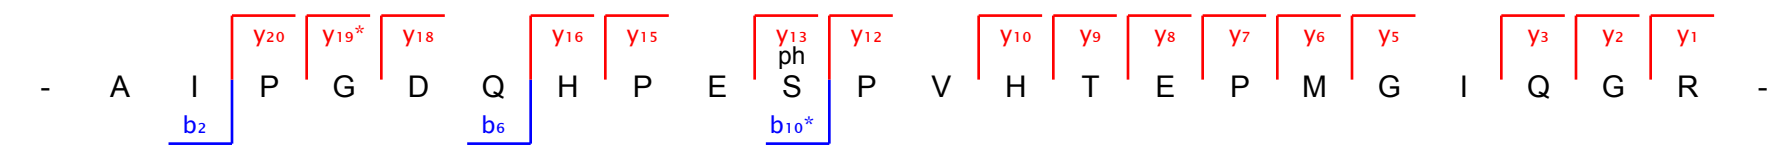

Raw file 20150814\_A375SR\_Phospho\_BR2\_08 Scan 12854 Method FTMS; HCD Score 69.33 m/z 693.32 Gene names ARFGAP1

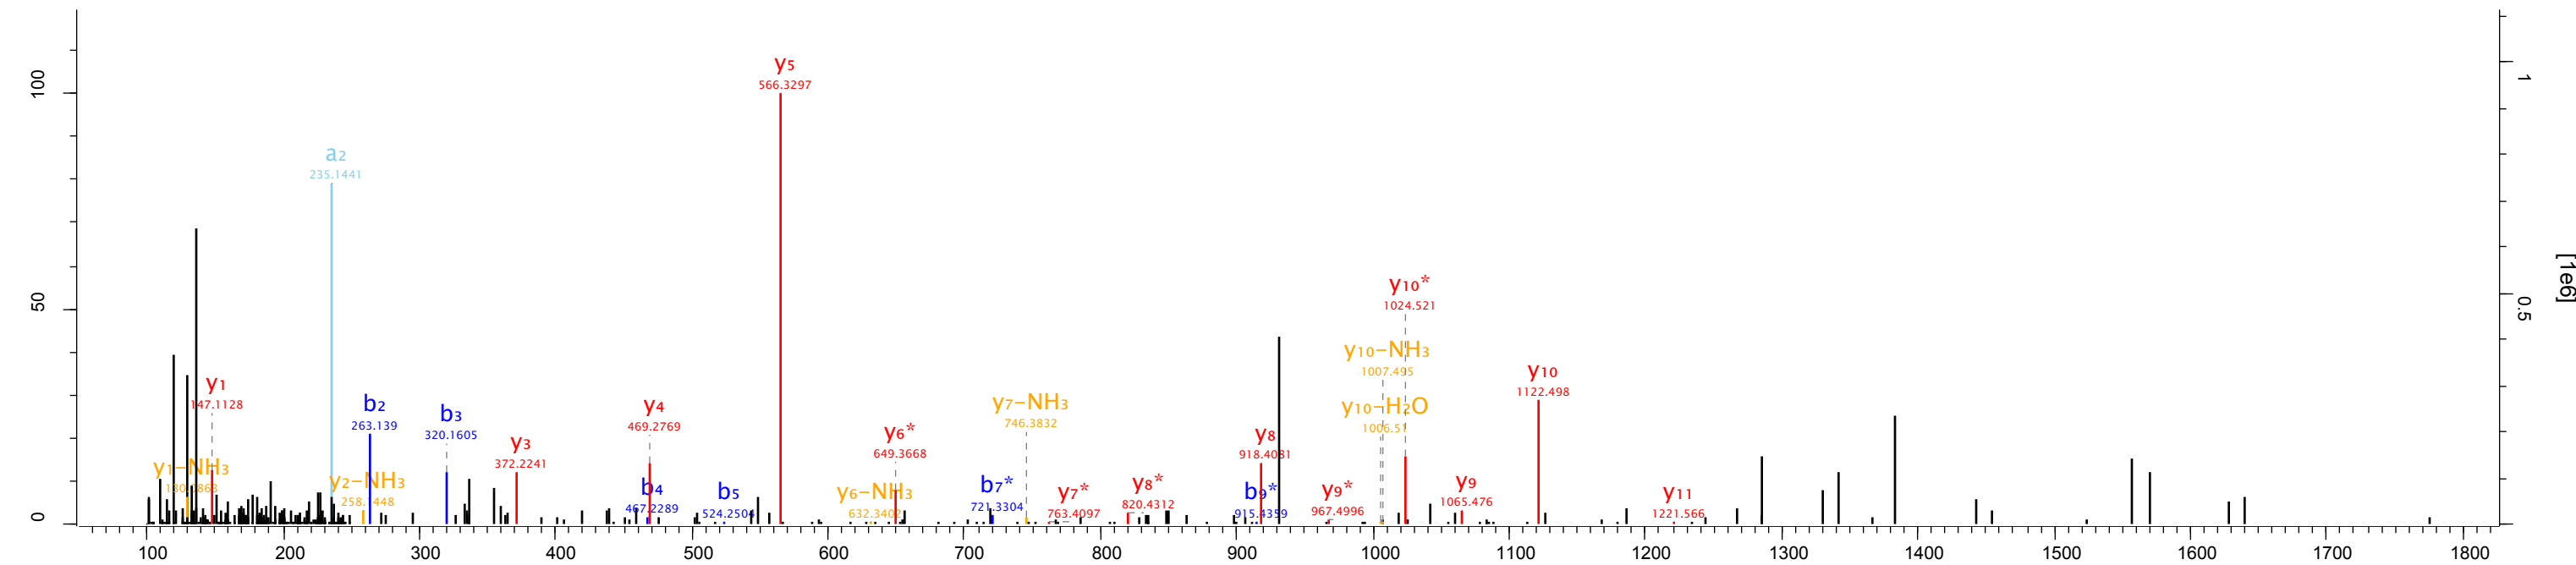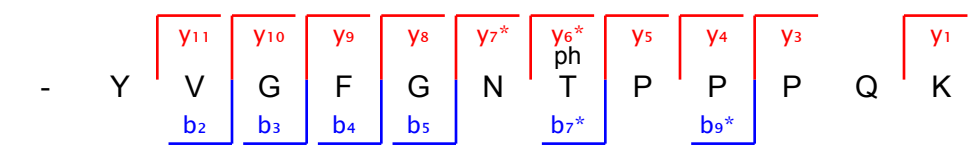



Raw file: 20150814\_A375SR\_Phospho\_BR2\_08  
 Scan: 14824 Method: FTMS; HCD Score: 195.03 m/z: 925.45 Gene names: CHD8

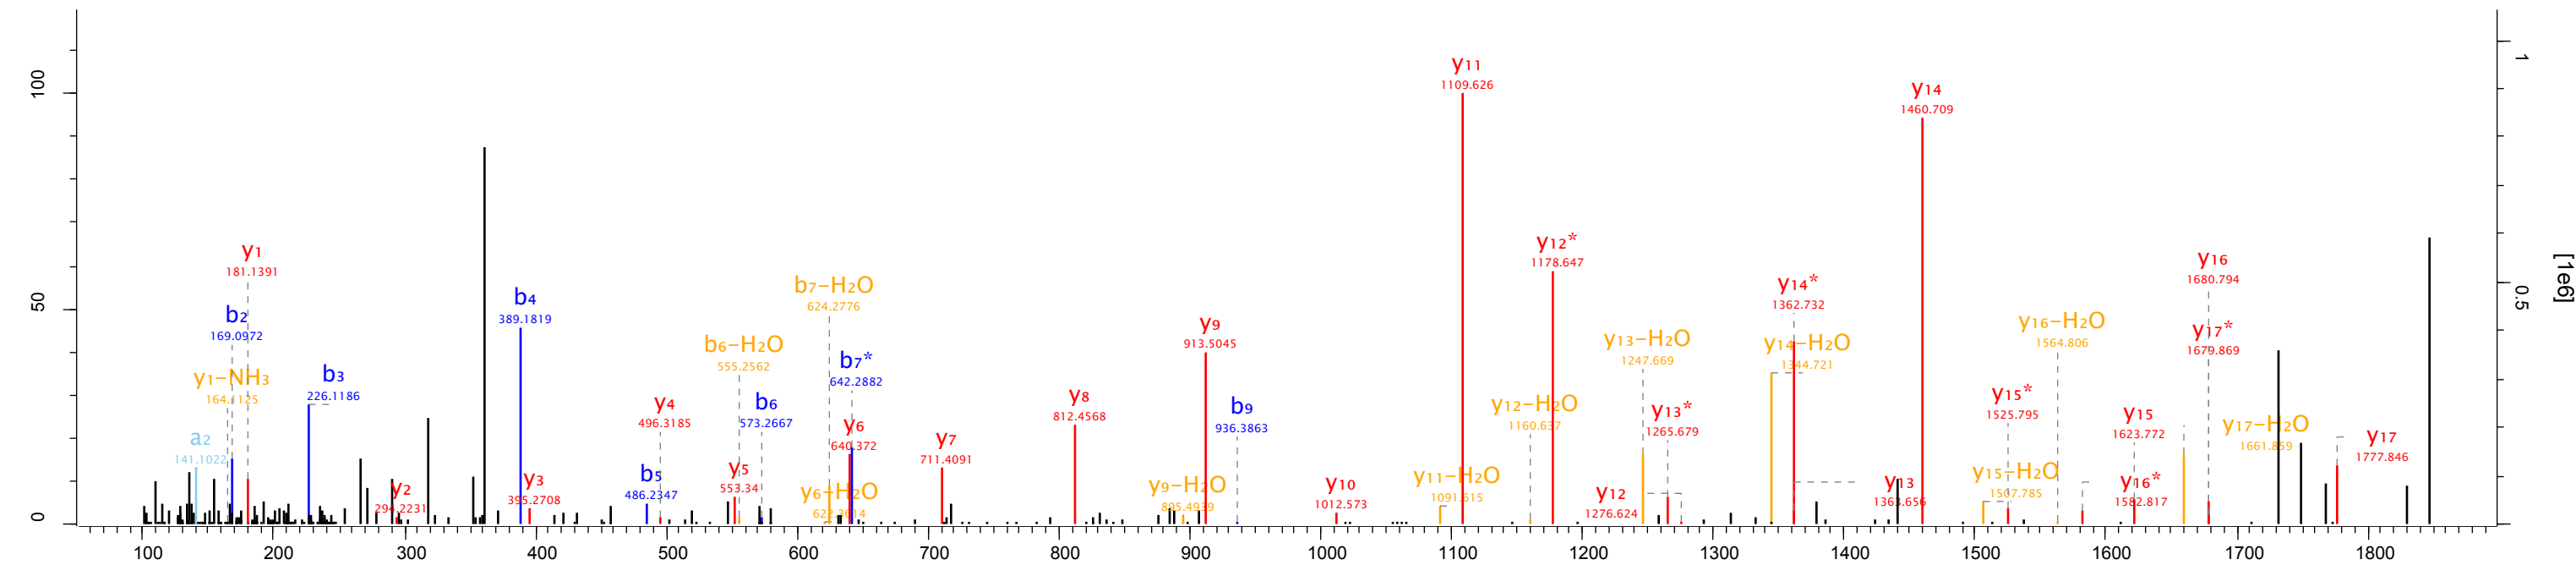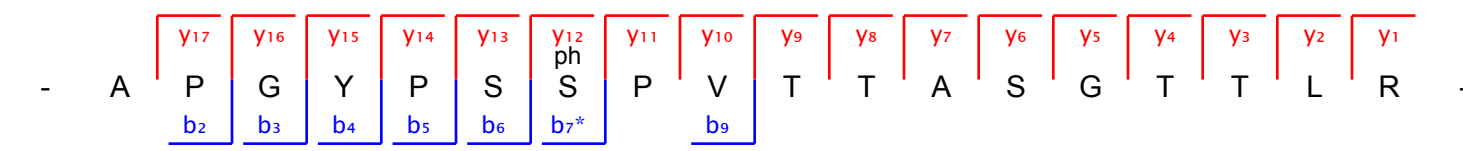

Raw file 20150814\_A375SR\_Phospho\_BR2\_08 Scan 15304 Method FTMS; HCD Score 308.32 m/z 933.97 Gene names PPP1R12A

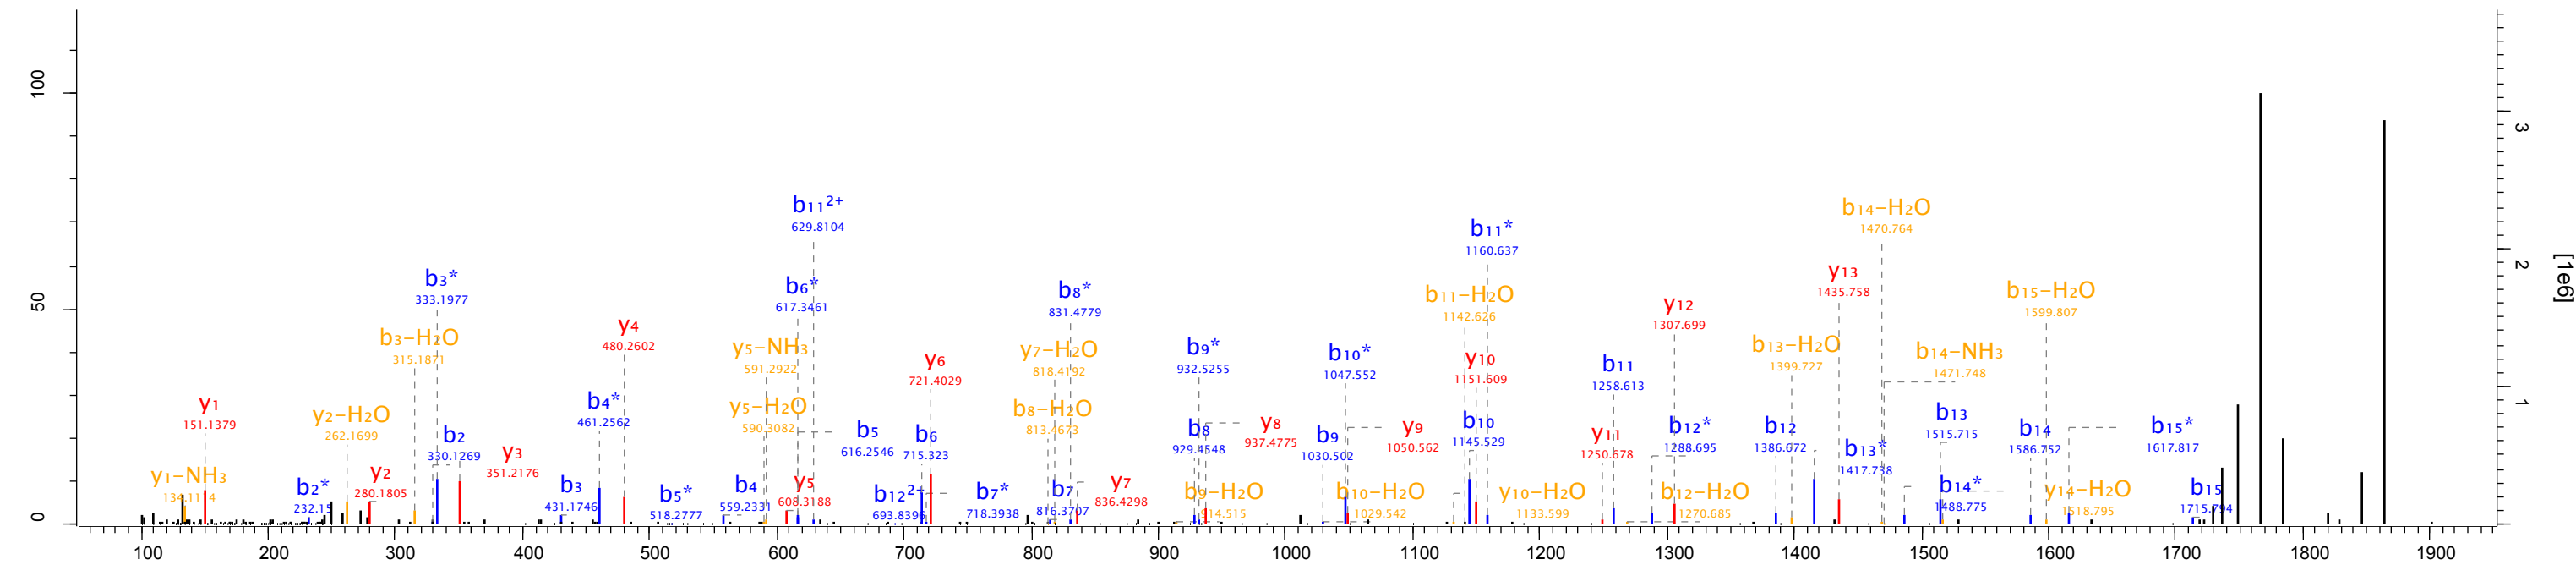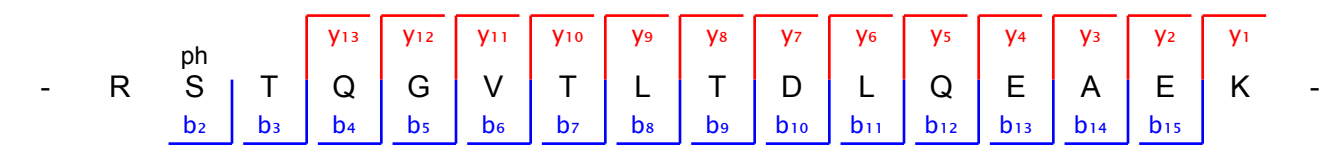

Raw file: 20150814\_A375SR\_Phospho\_BR2\_08  
 Scan: 15384 Method: FTMS; HCD Score: 90.71 m/z: 794.9 Gene names: AKAP2

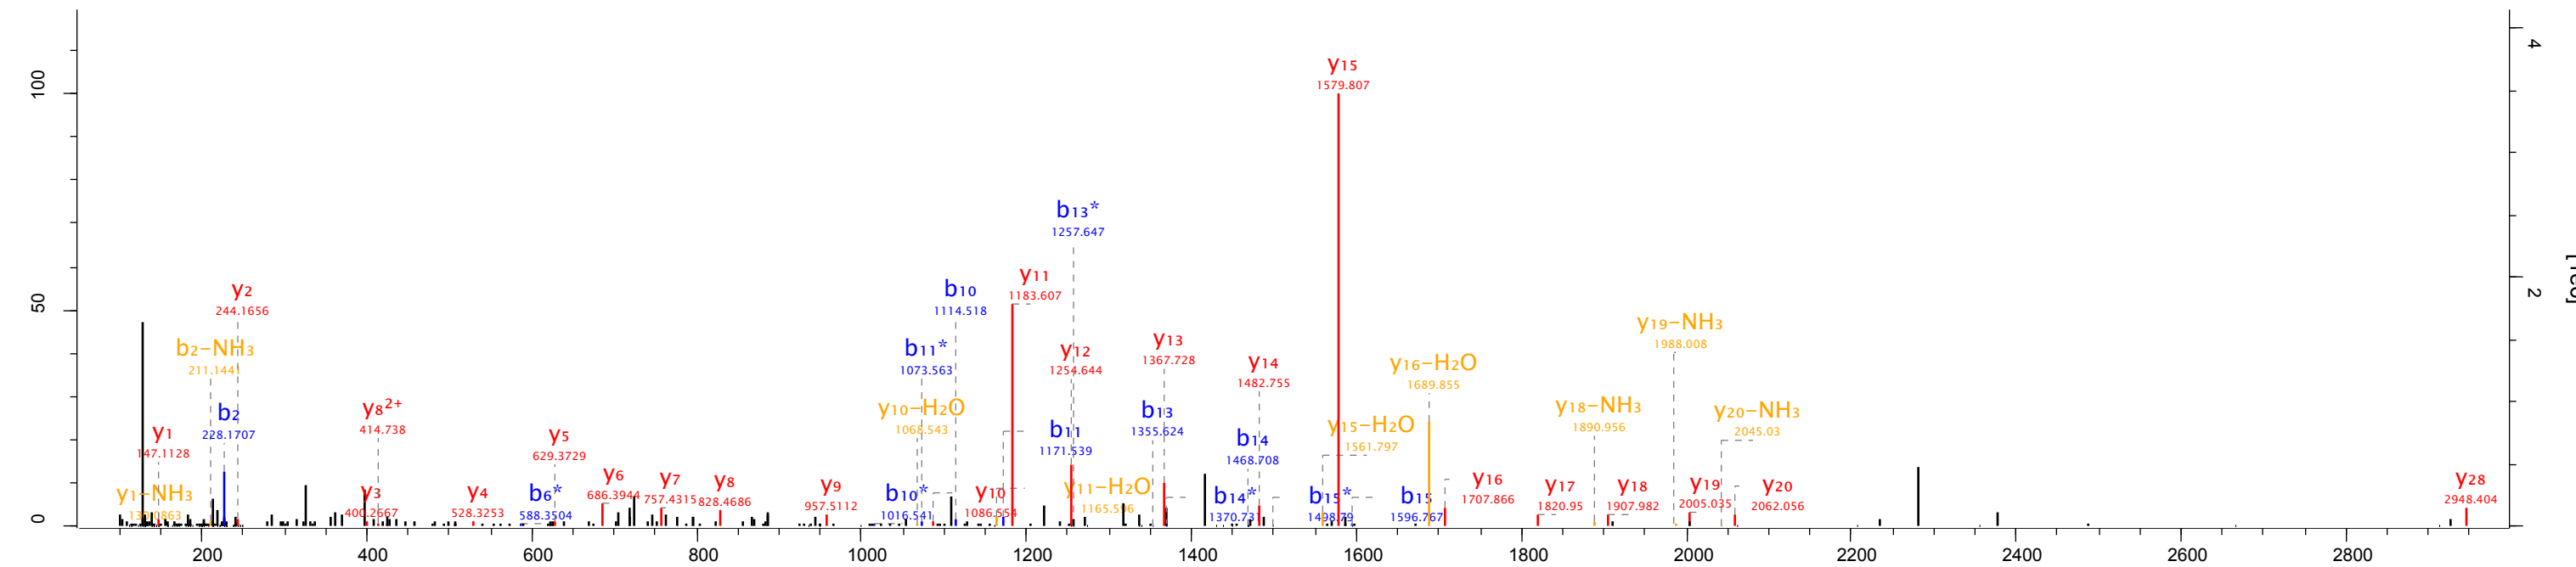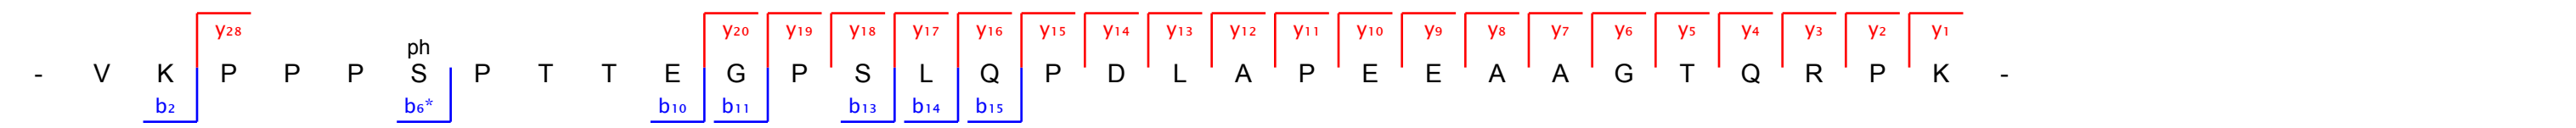

Raw file 20150814\_A375SR\_Phospho\_BR2\_08 Scan 16074 Method FTMS; HCD Score 53.09 m/z 839.43 Gene names MYO9B

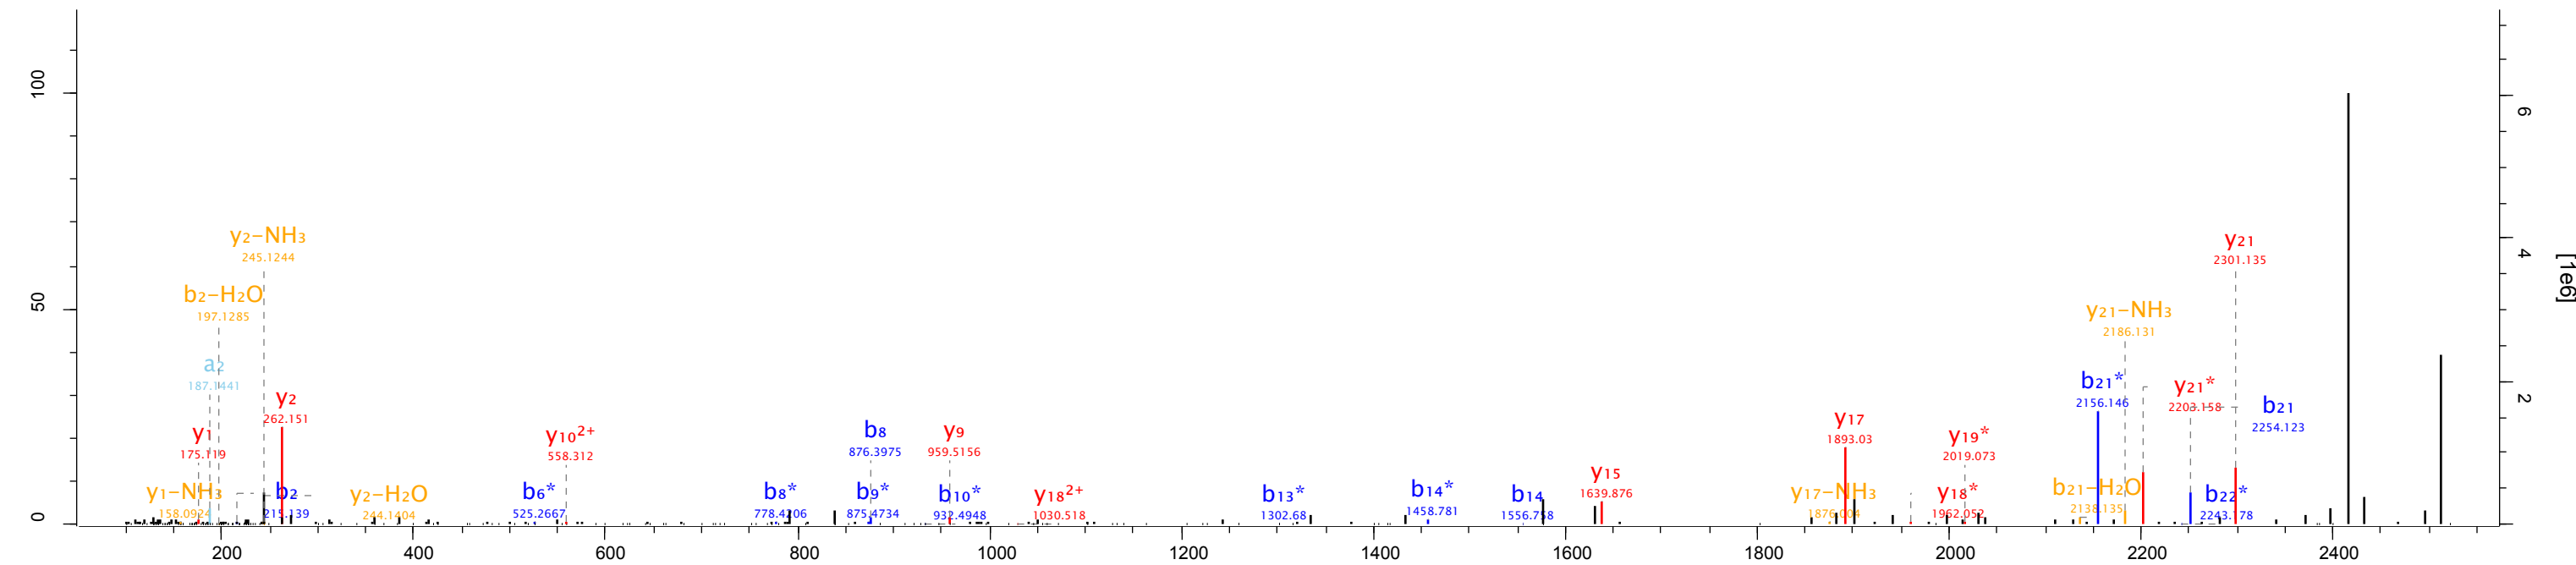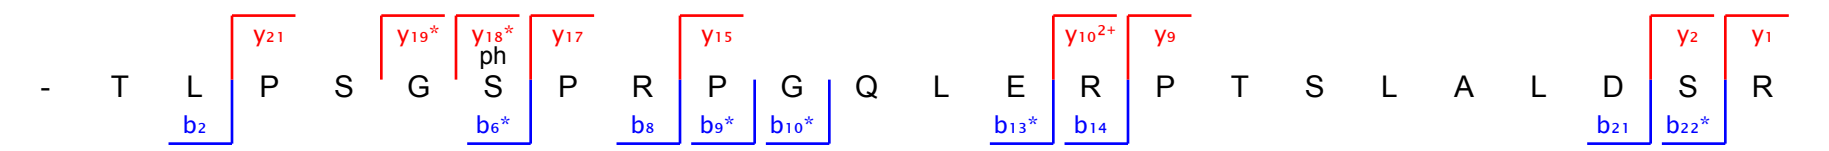

Raw file: 20150814\_A375SR\_Phospho\_BR2\_08  
 Scan: 17064 Method: FTMS; HCD Score: 250.38 m/z: 1034.96 Gene names: TGOLN2

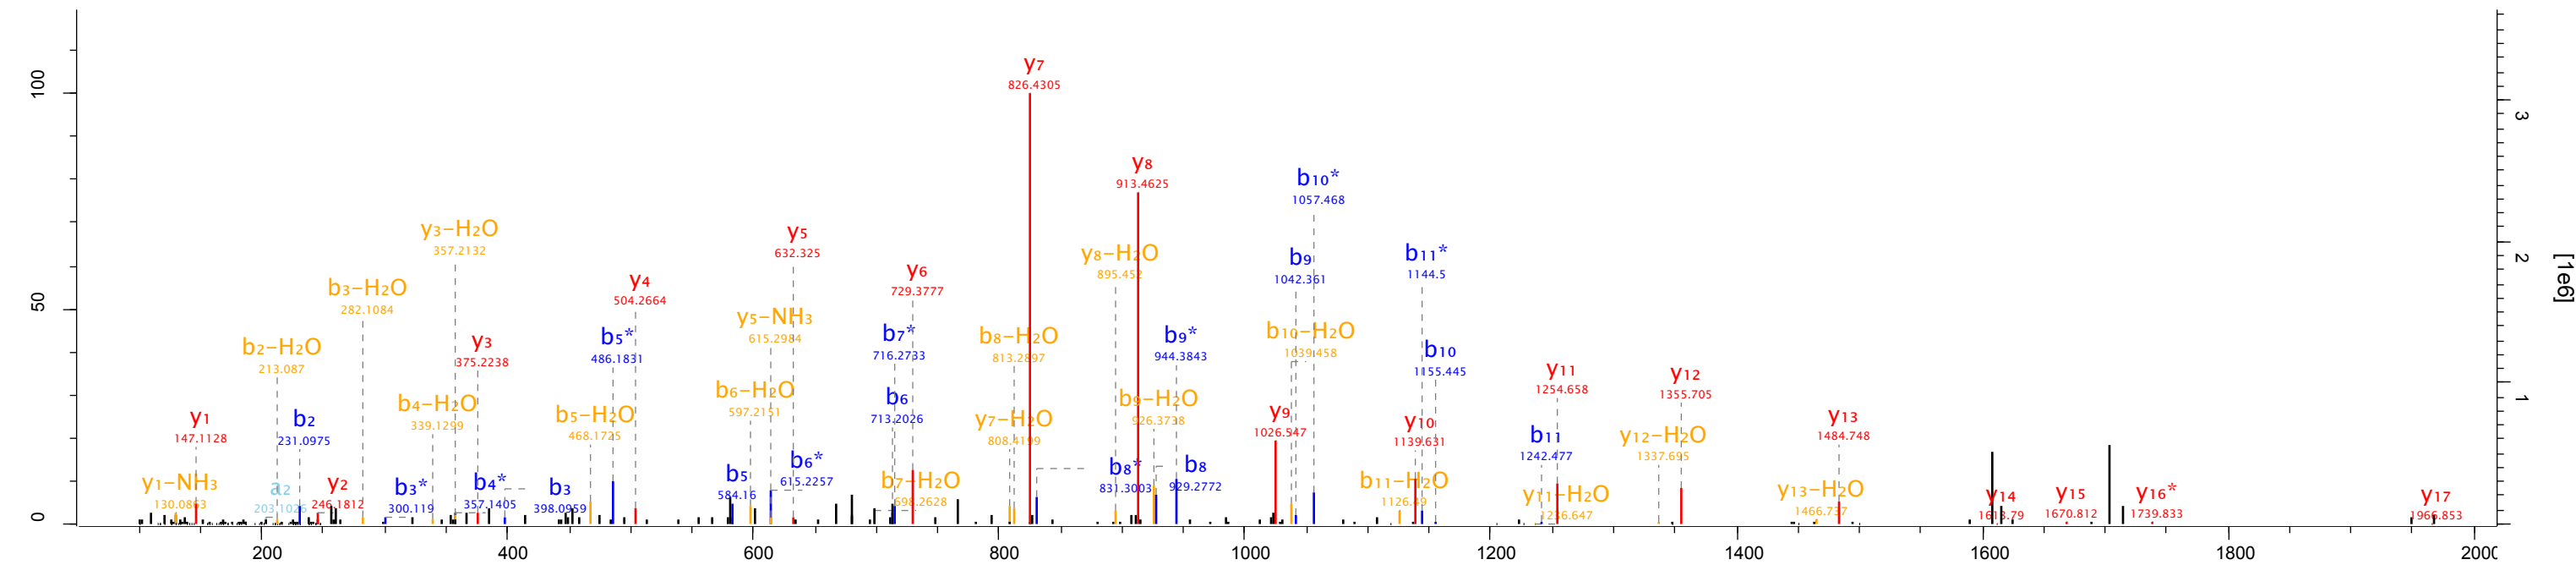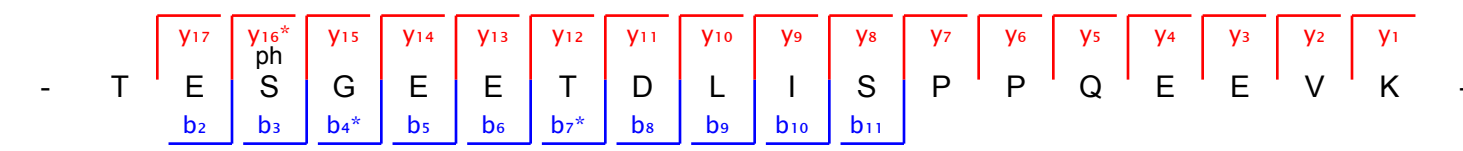

Raw file  
20150814\_A375SR\_Phospho\_BR2\_08

Scan 17384 Method FTMS; HCD Score 119.18 m/z 687.38 Gene names PRR12

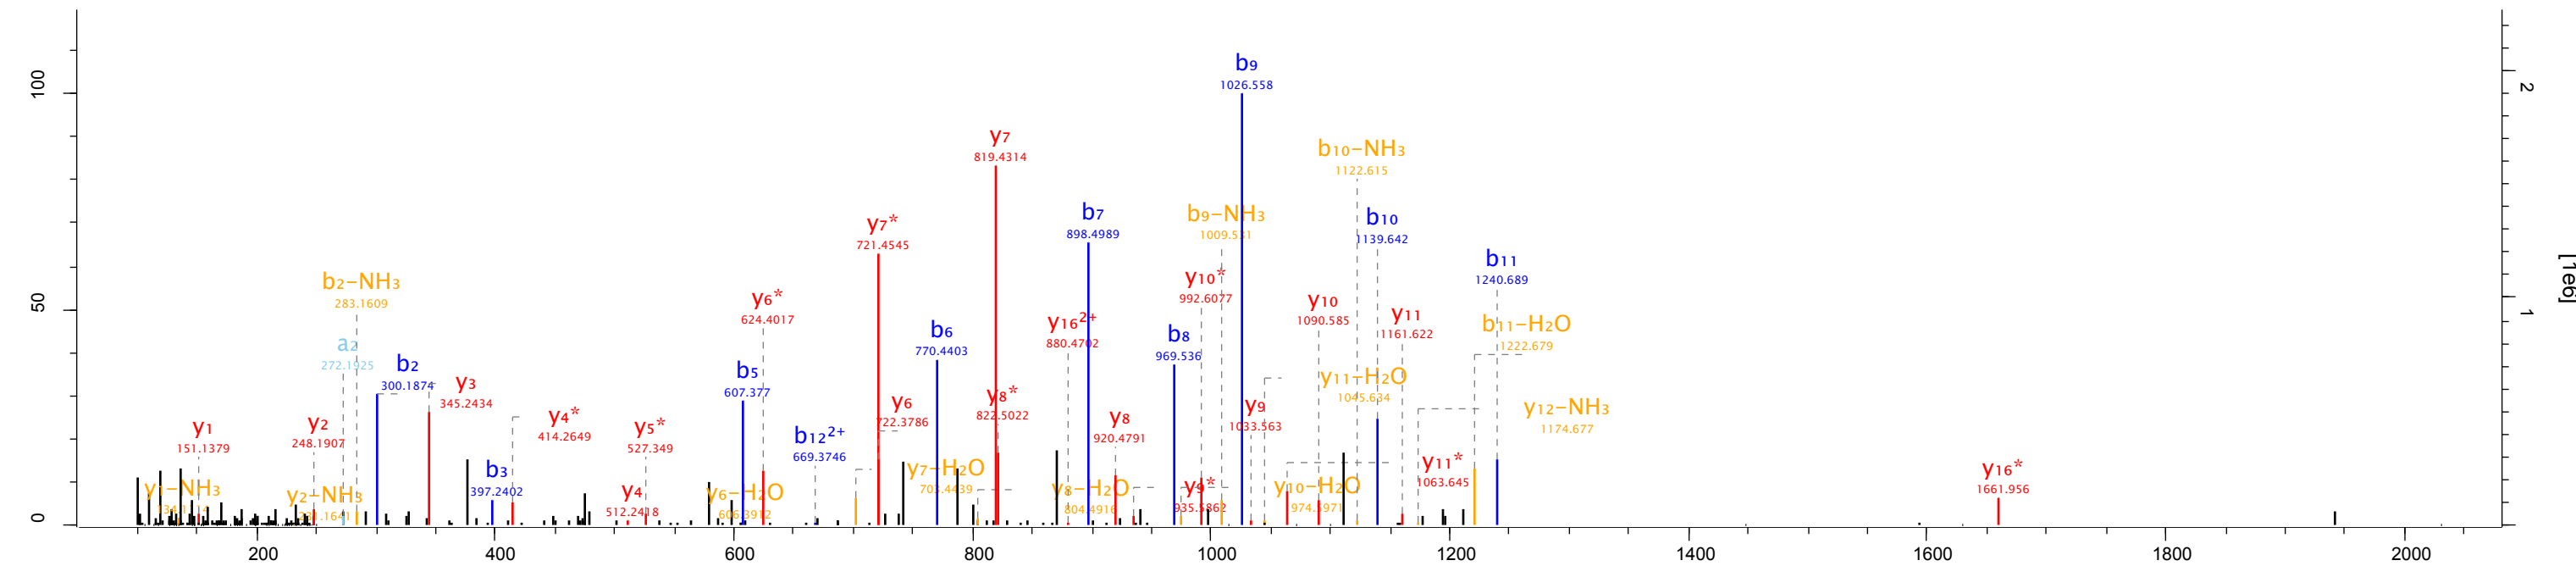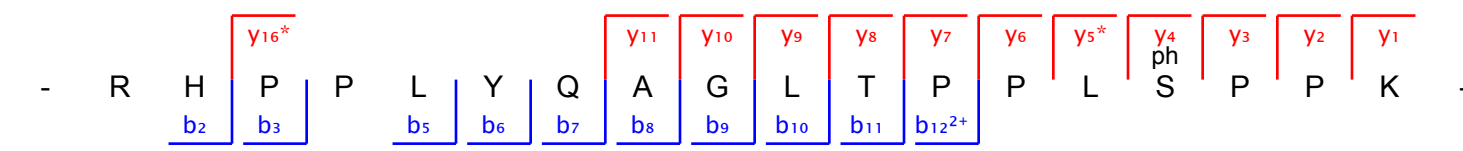

Raw file: 20150814\_A375SR\_Phospho\_BR2\_08  
 Scan: 20064 Method: FTMS; HCD Score: 154.51 m/z: 750.87 Gene names: LUZP1

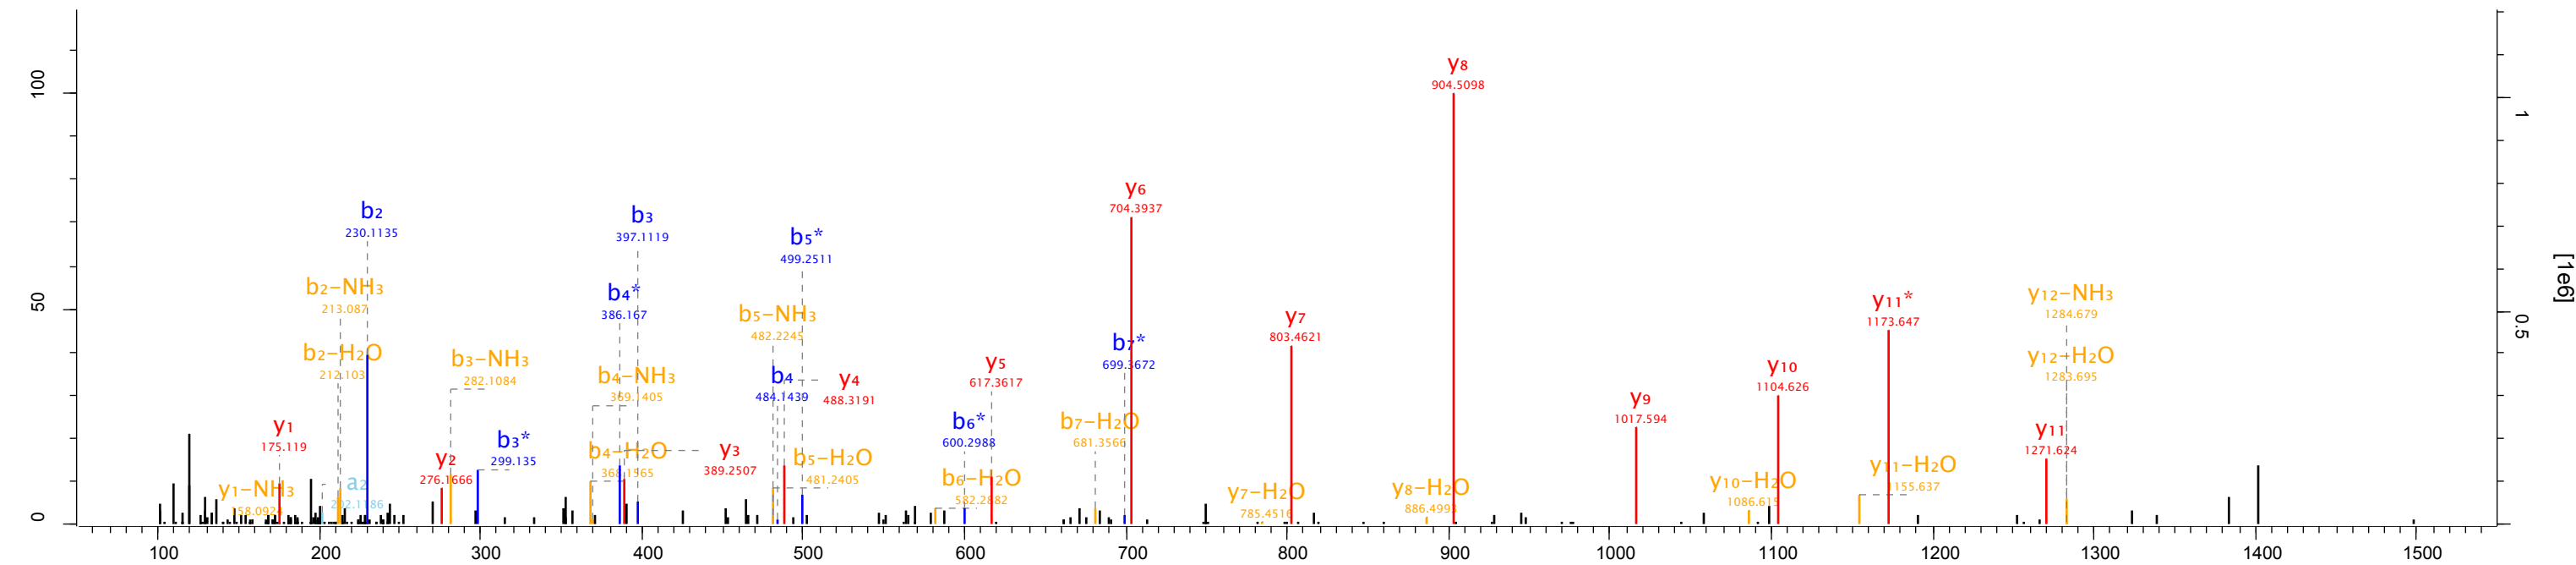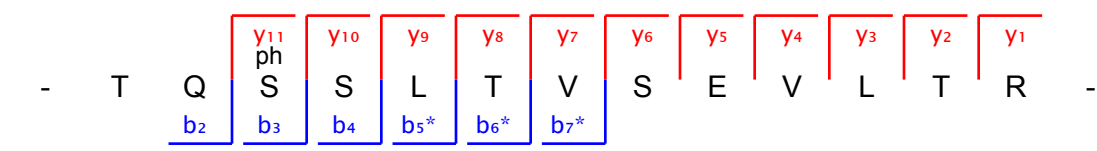

Raw file 20150814\_A375SR\_Phospho\_BR2\_08 Scan 20624 Method FTMS; HCD Score 128.88 m/z 542.27 Gene names YTHDC1

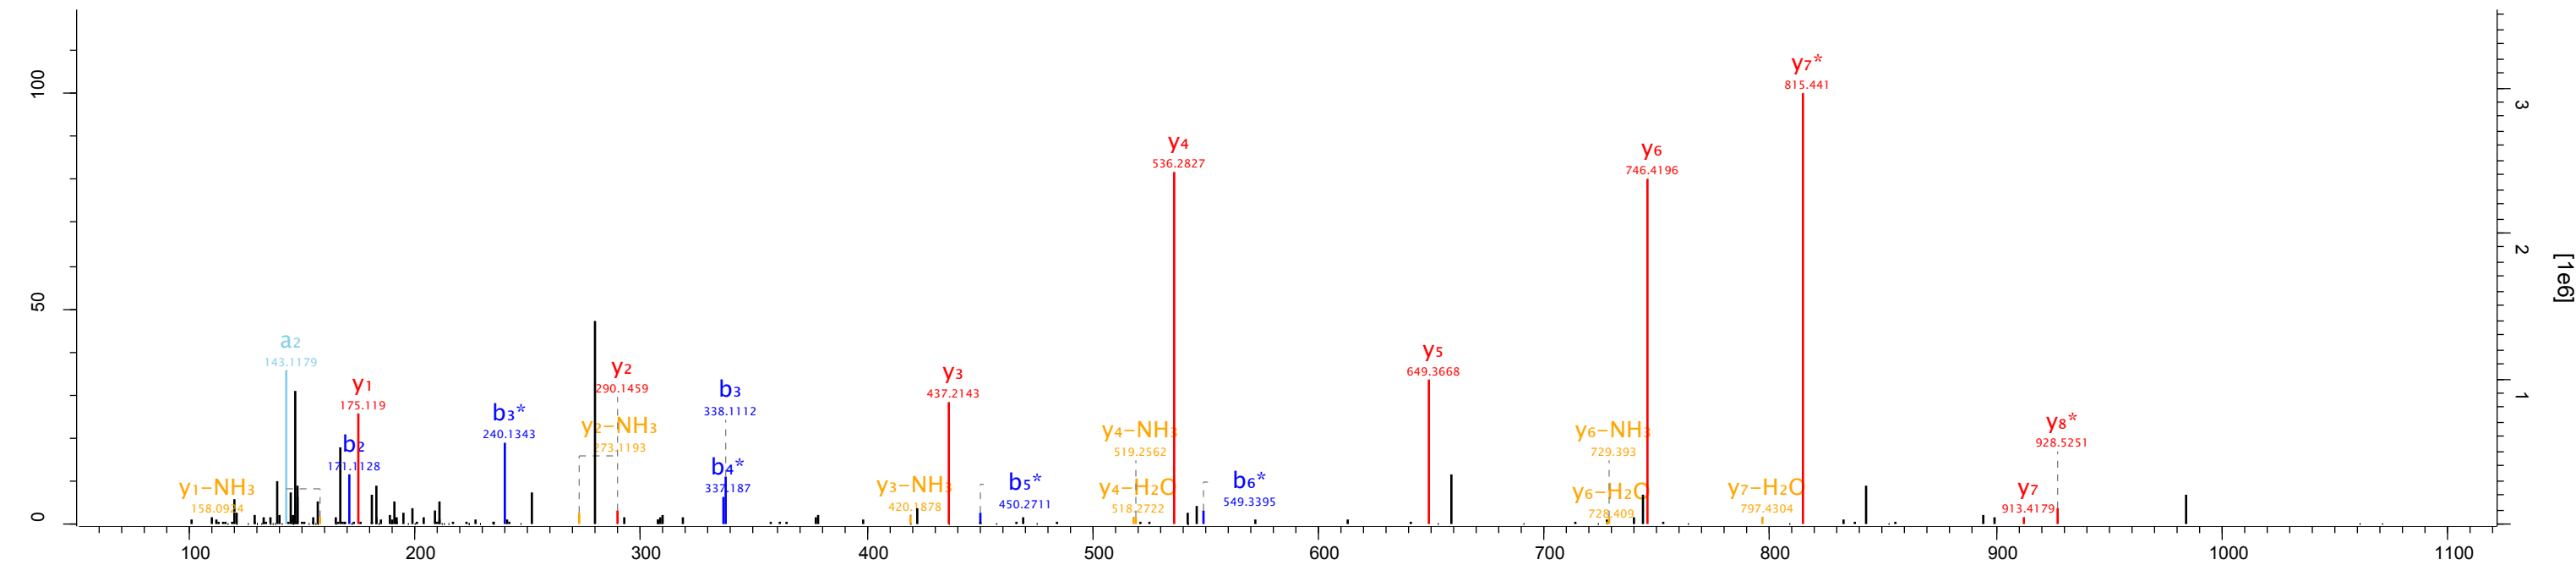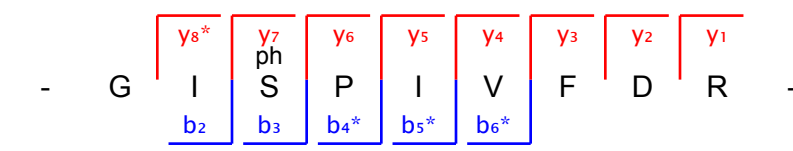



Raw file: 20150814\_A375SR\_Phospho\_BR2\_08  
 Scan: 20834 Method: FTMS; HCD Score: 187.82 m/z: 1166.4 Gene names: U2AF2

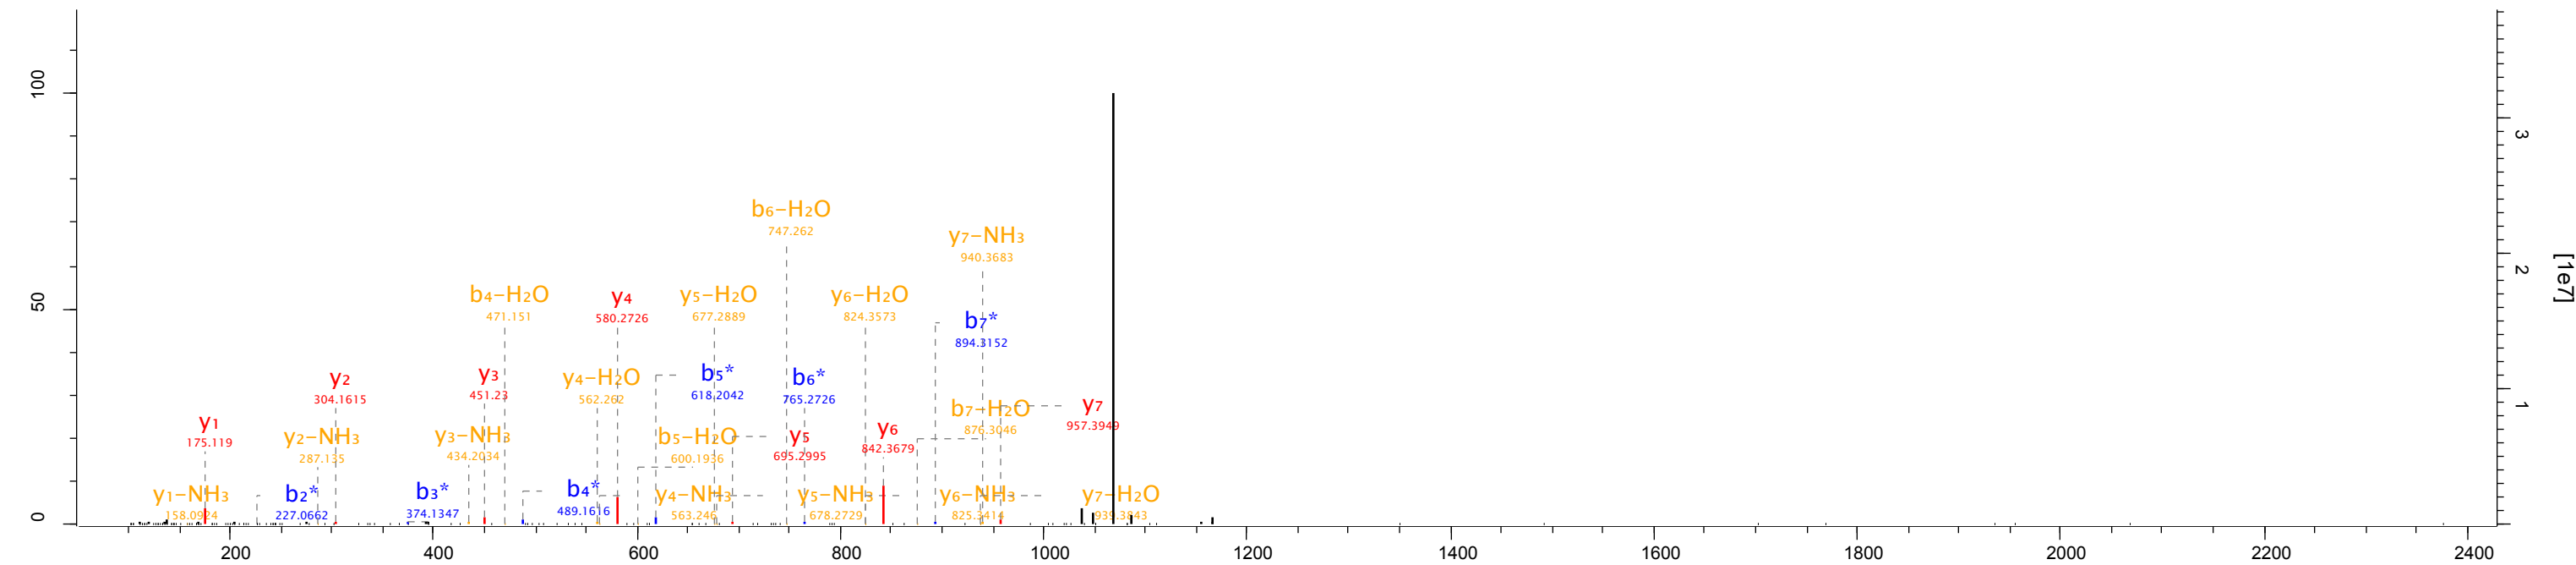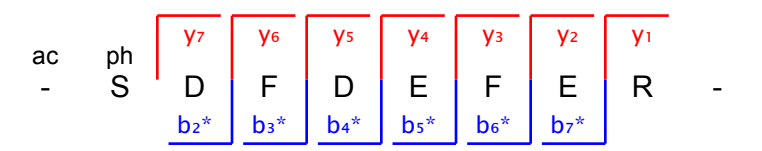

Raw file: 20150814\_A375SR\_Phospho\_BR2\_08  
 Scan: 23594 Method: FTMS; HCD Score: 191.96 m/z: 802.39 Gene names: SH3KBP1

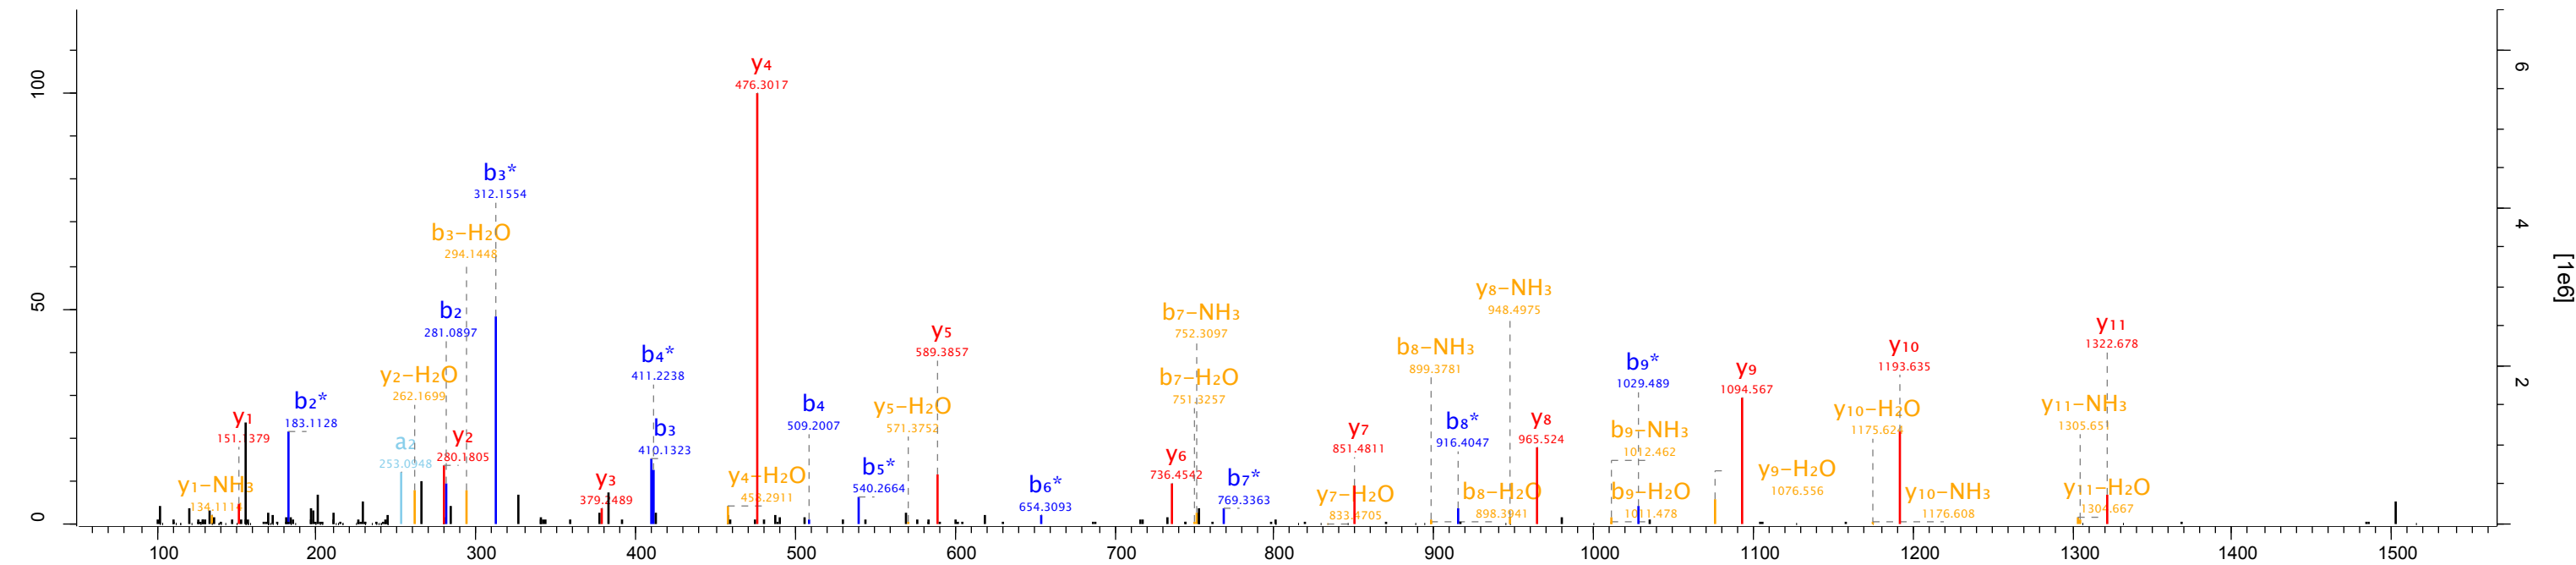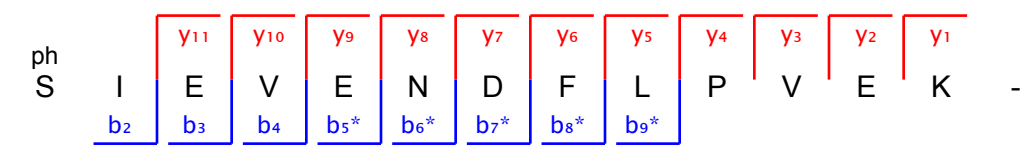

Raw file: 20150814\_A375SR\_Phospho\_BR2\_08  
 Scan: 24664 Method: FTMS; HCD Score: 69.46 m/z: 1106.84 Gene names: CHAMP1

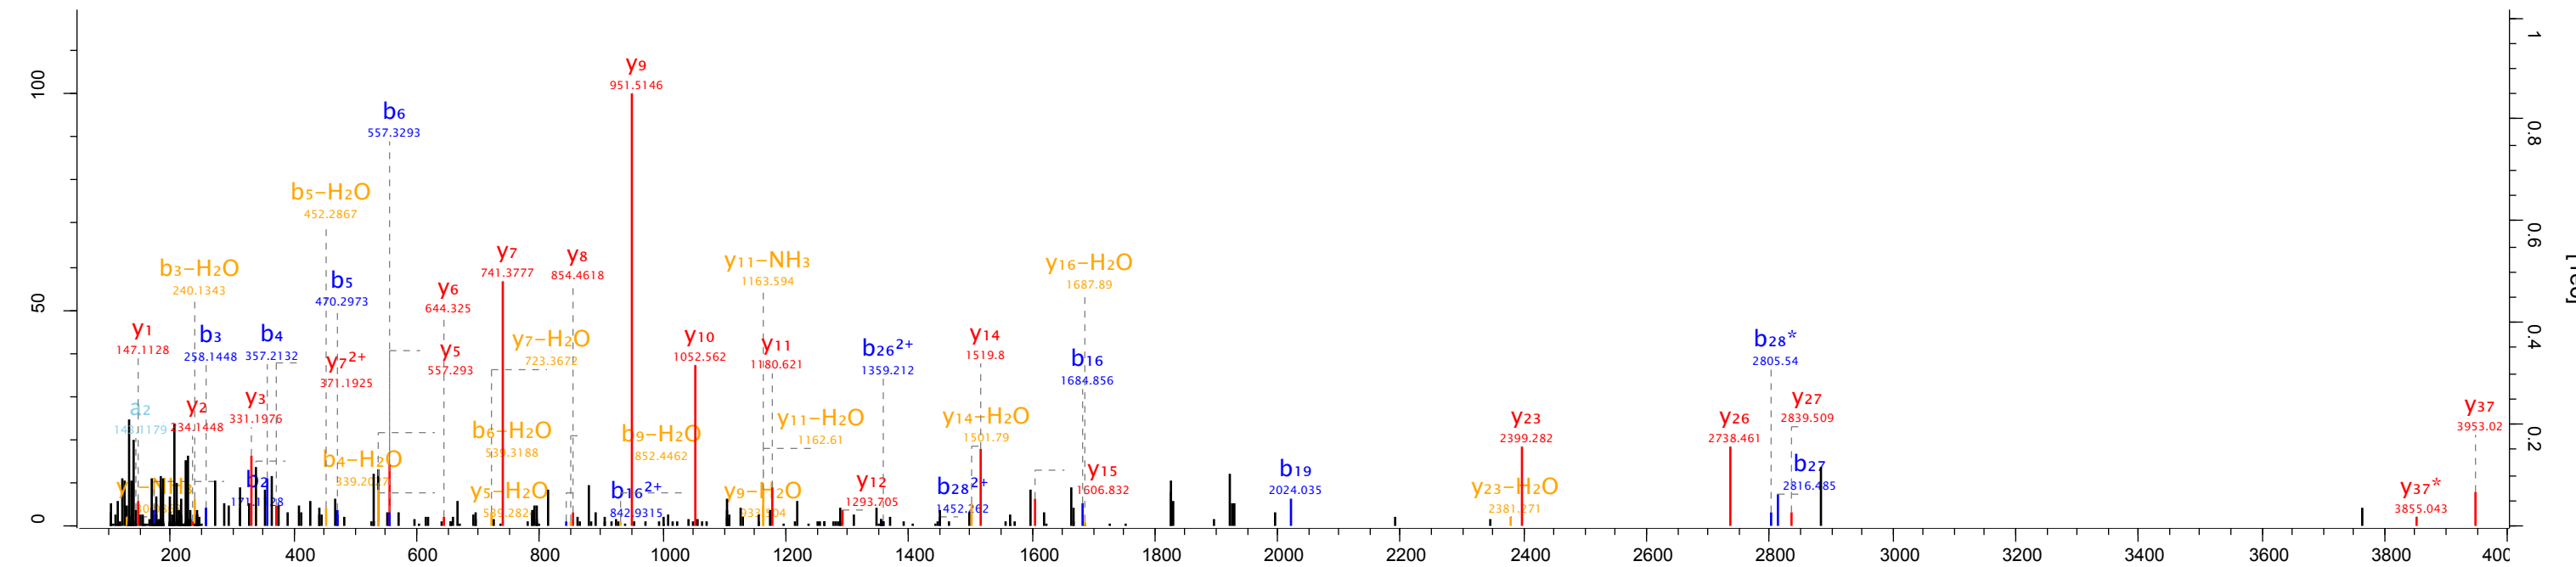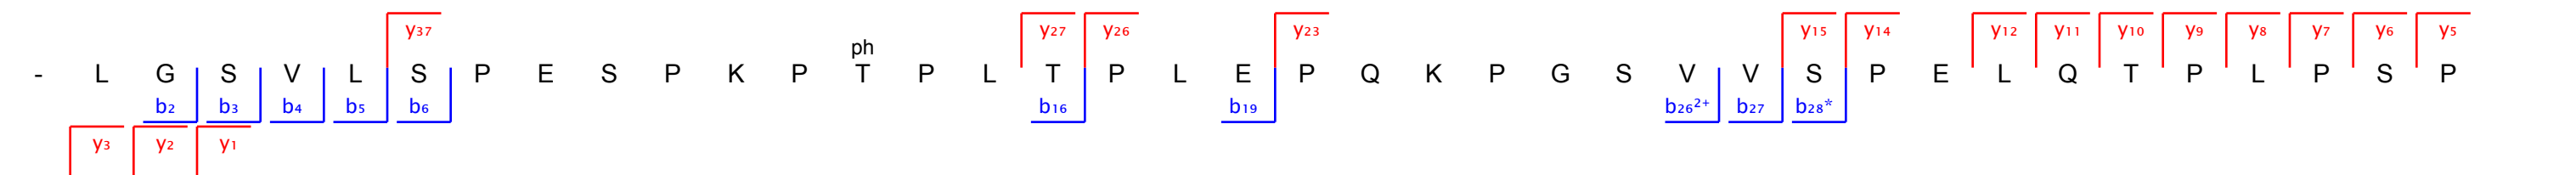

Raw file Scan Method Score m/z Gene names  
 20150814\_A375SR\_Phospho\_BR2\_08 24724 FTMS; HCD 49.48 989.98 NES

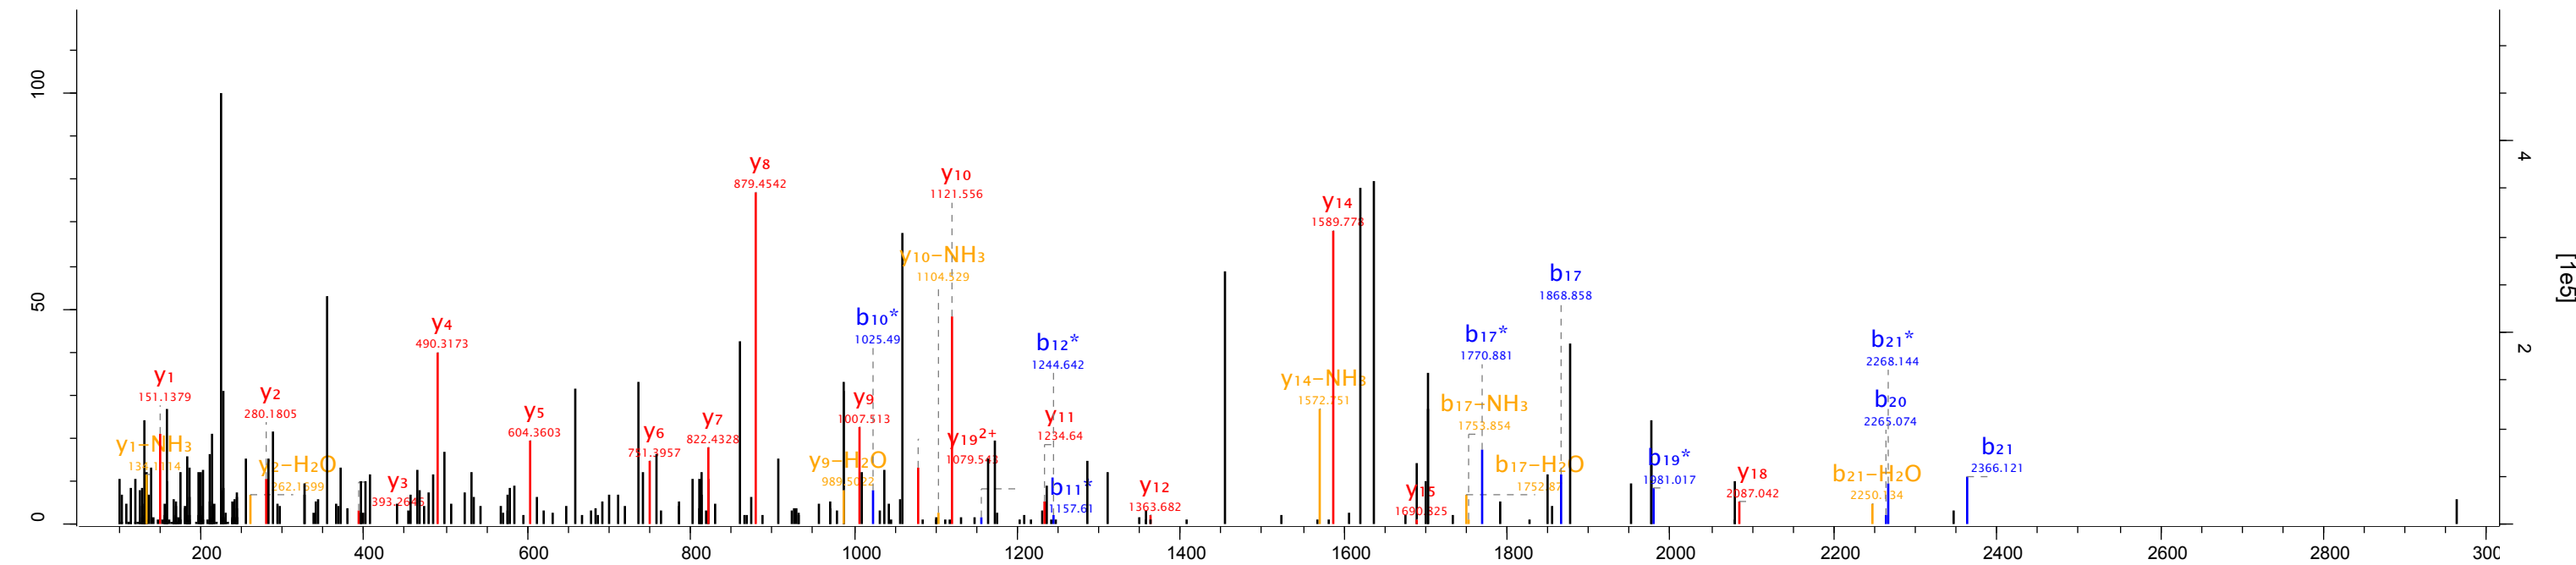

- S A G Q E N L E T L K S P E T Q A P L W T P E E I N Q G A M N P L E K -

ph

b10\* b11\* b12\* b17 b19\* b20 b21 y19<sup>2+</sup> y18 y15 y14 y12 y11 y10 y9 y8 y7 y6 OX y5 y4 y3 y2 y1

Raw file 20150814\_A375SR\_Phospho\_BR2\_08 Scan 24944 Method FTMS; HCD Score 70.7 m/z 718.04 Gene names PDE1C

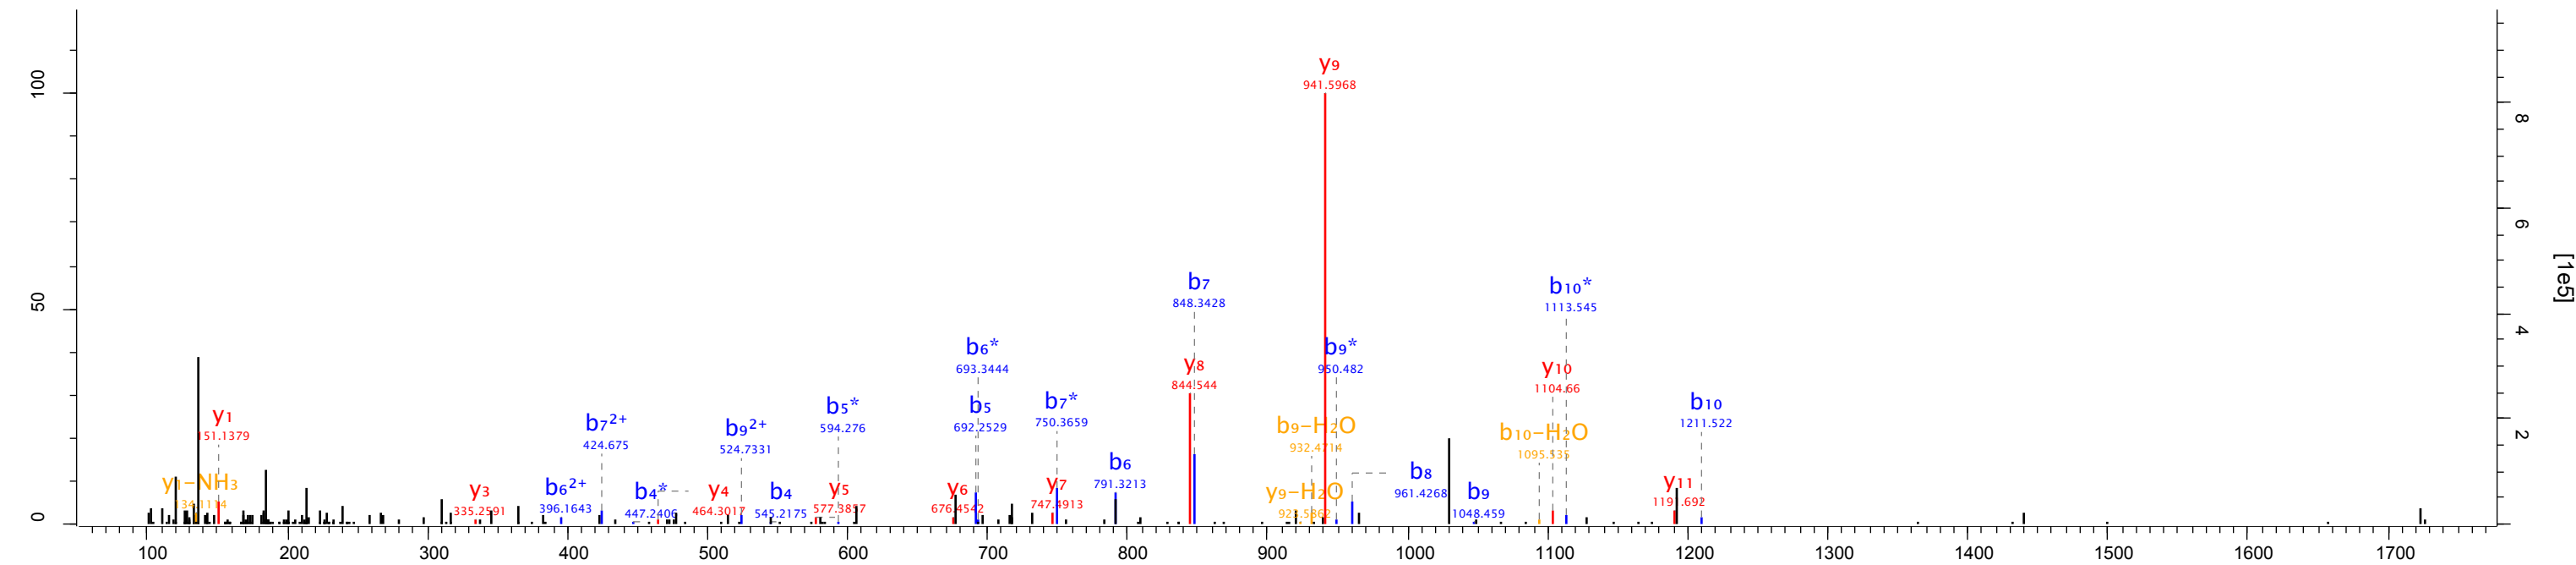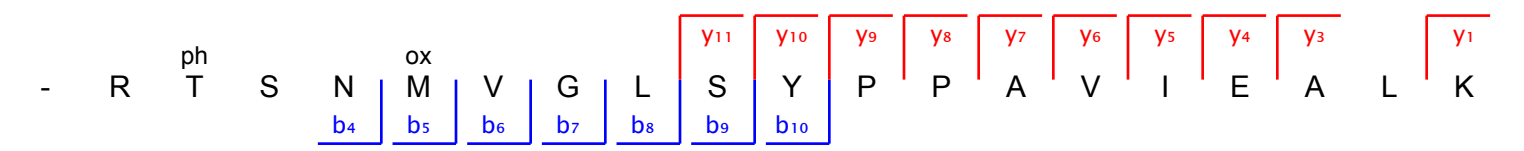

Raw file: 20150814\_A375SR\_Phospho\_BR2\_08  
 Scan: 25434 Method: FTMS; HCD Score: 66.76 m/z: 660.68 Gene names: PHF2

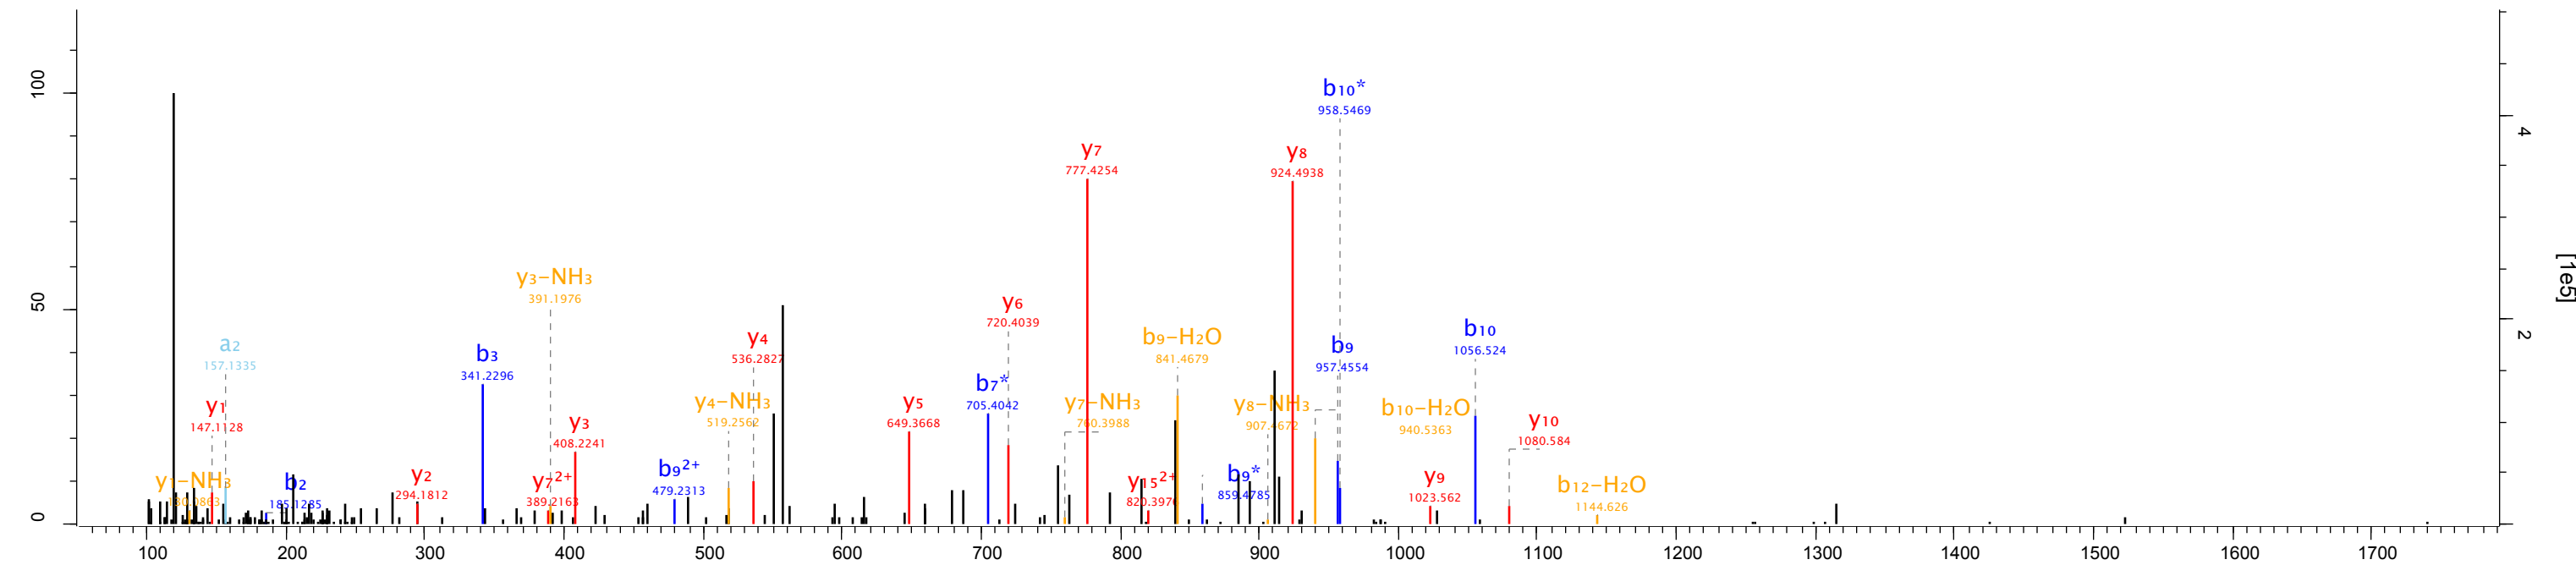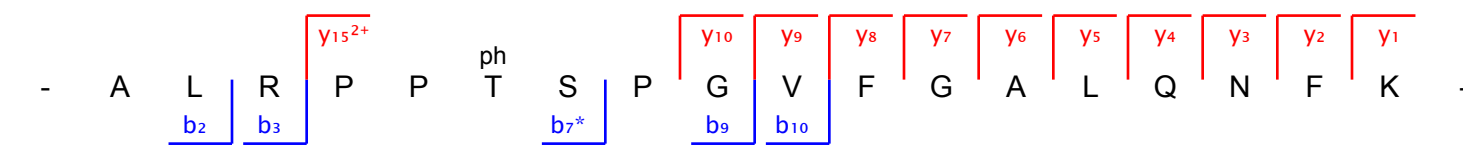

Raw file: 20150814\_A375SR\_Phospho\_BR2\_08  
 Scan: 26104 Method: FTMS; HCD Score: 76.97 m/z: 937.69 Gene names: CNOT4

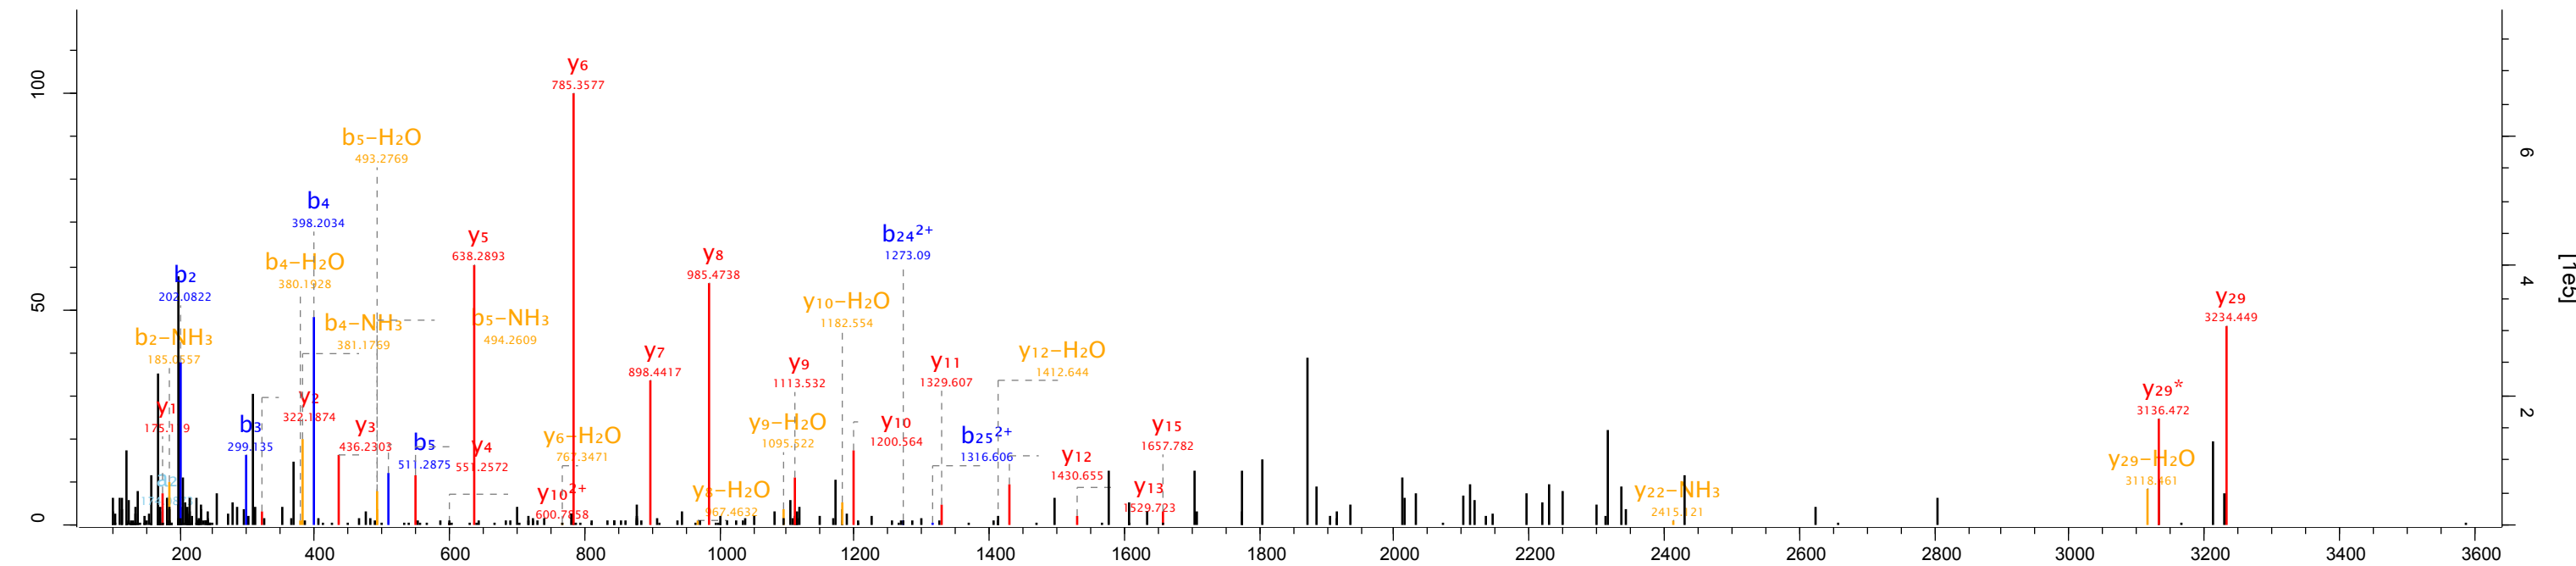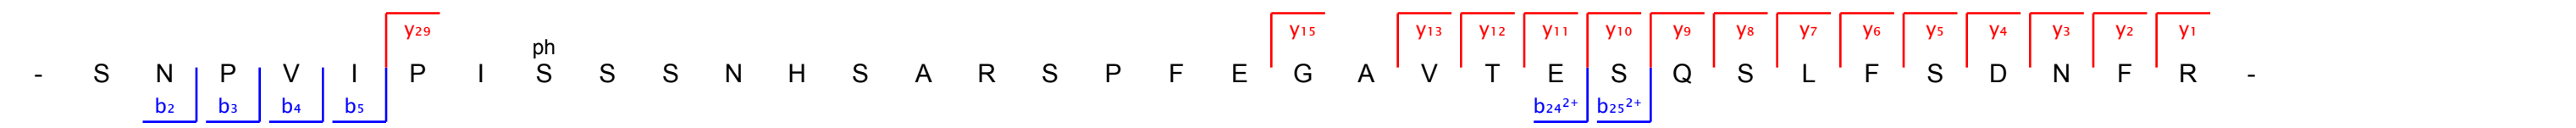

Raw file: 20150814\_A375SR\_Phospho\_BR2\_08  
 Scan: 2654 Method: FTMS; HCD Score: 100.43 m/z: 466.54 Gene names: KLC2

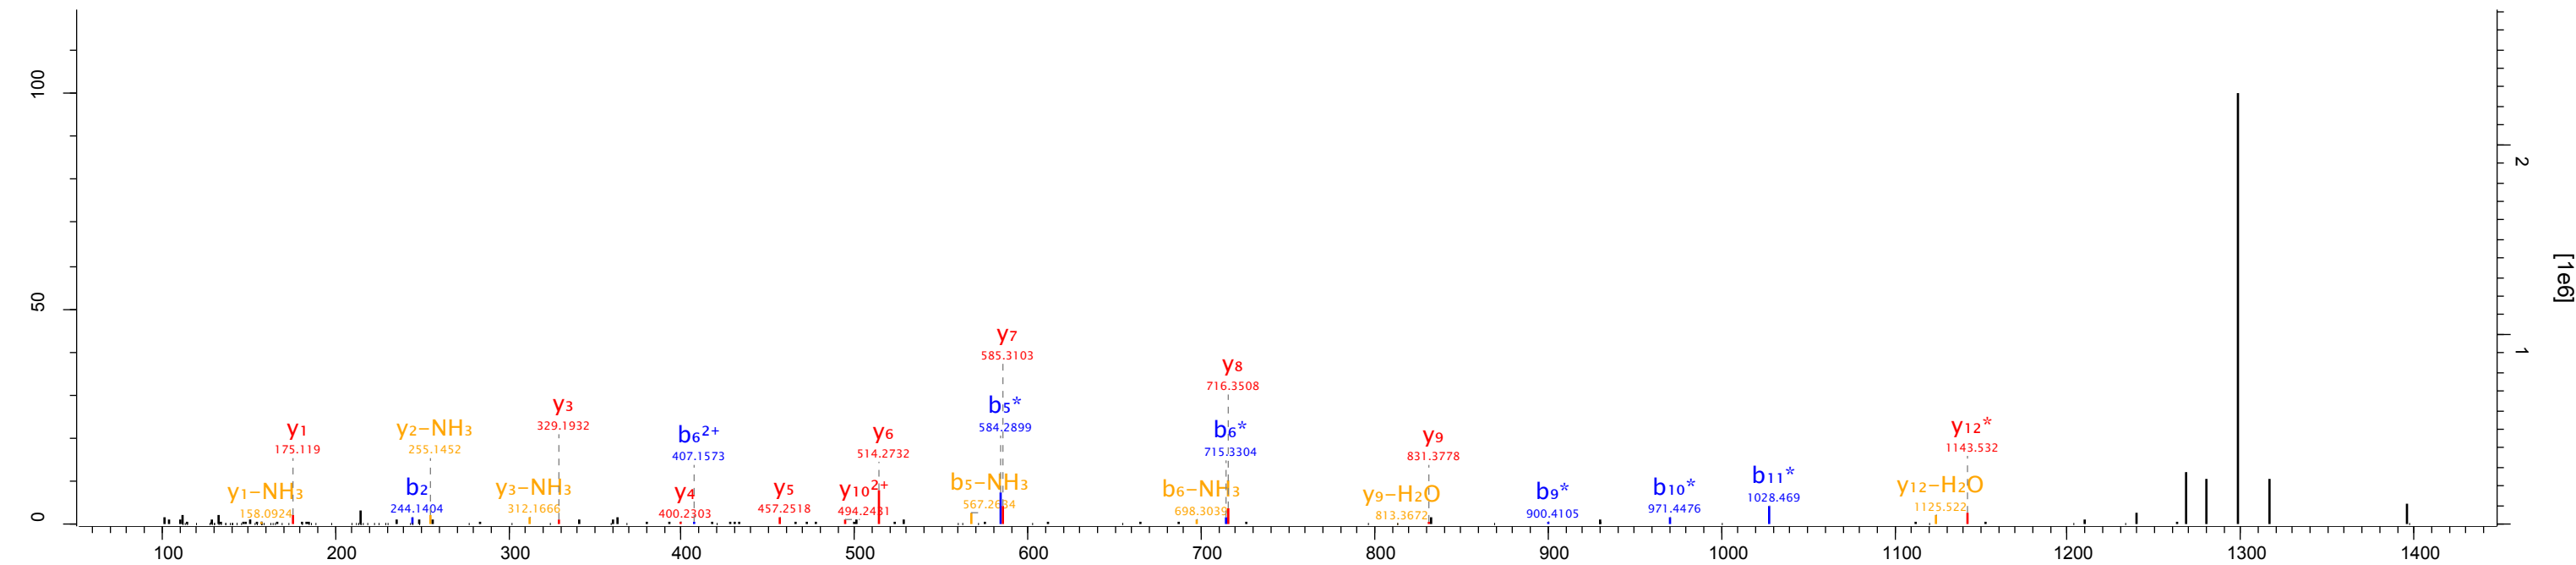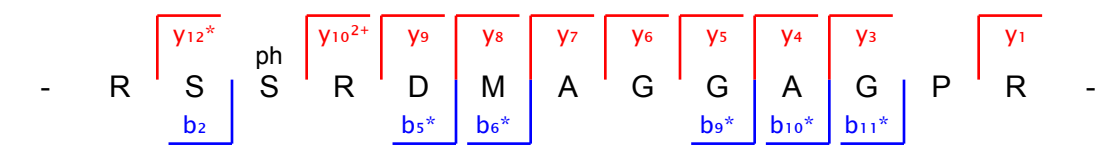



Raw file  
20150814\_A375SR\_Phospho\_BR2\_08

Scan 28624 Method FTMS; HCD Score 187.33 m/z 1133.79 Gene names MAP1B

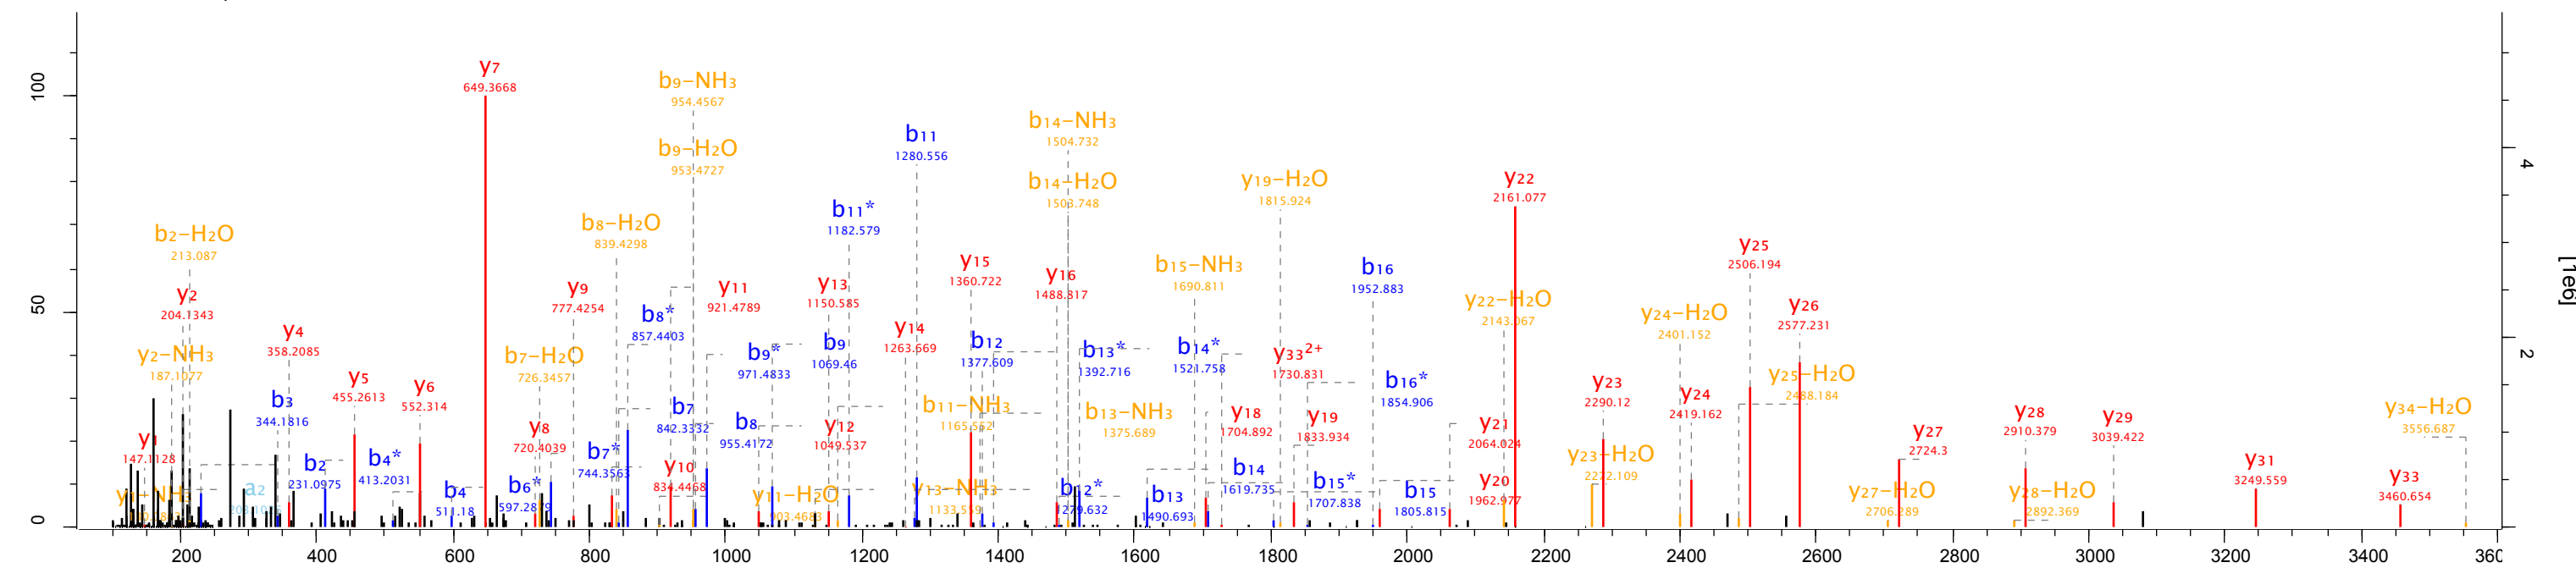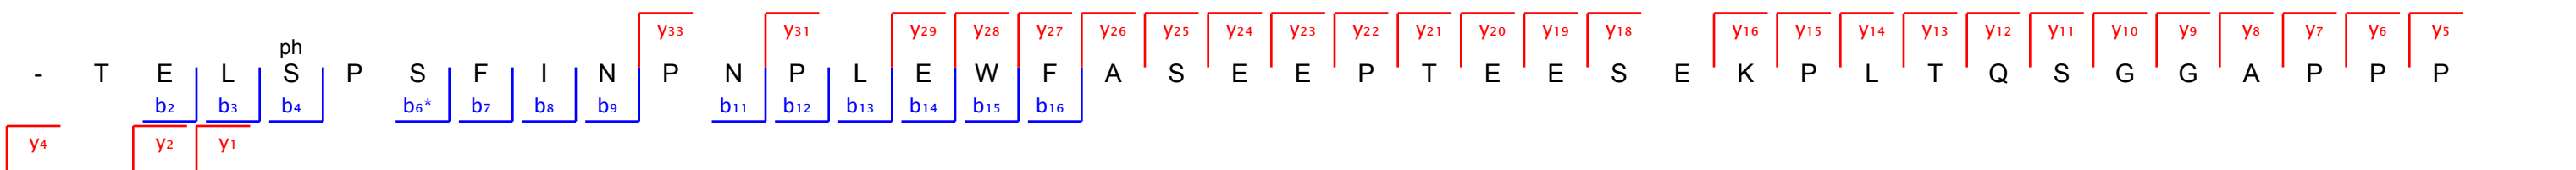

Raw file: 20150814\_A375SR\_Phospho\_BR2\_08  
 Scan: 2944 Method: FTMS; HCD Score: 130.12 m/z: 630.79 Gene names: RTKN

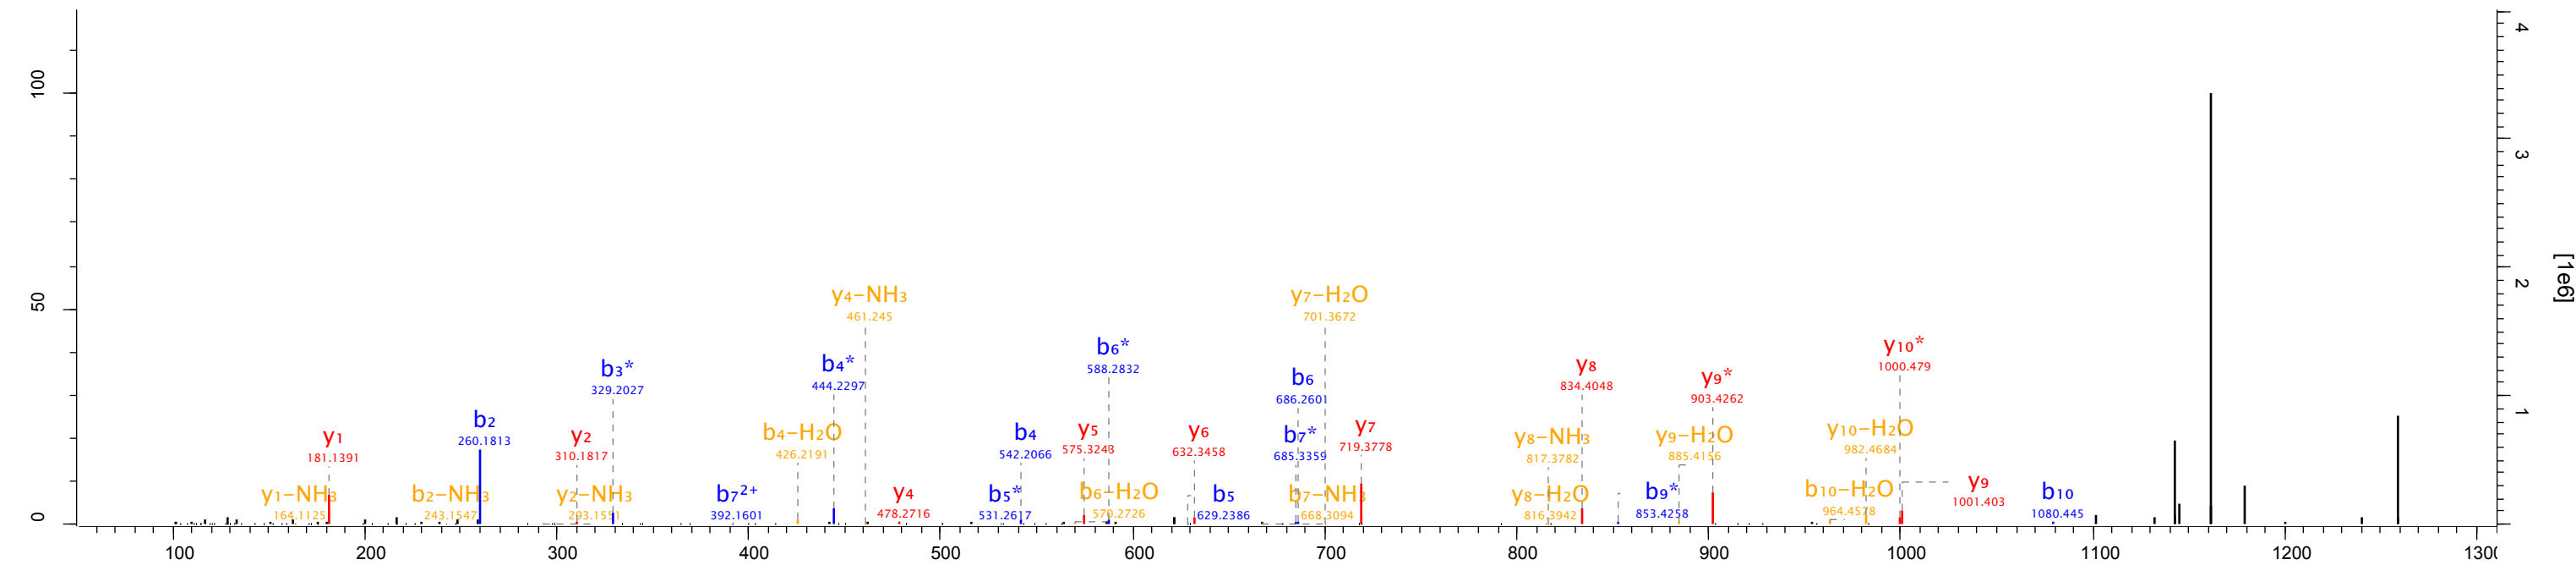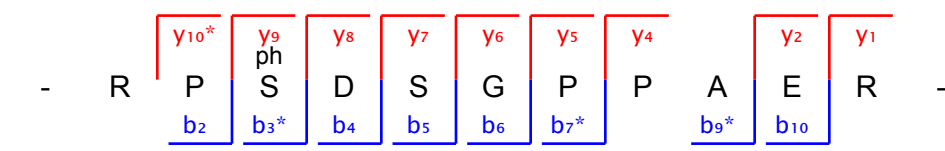

Raw file  
 20150814\_A375SR\_Phospho\_BR2\_08  
 Scan 3384 Method FTMS; HCD Score 131.61 m/z 744.34 Gene names DBR1

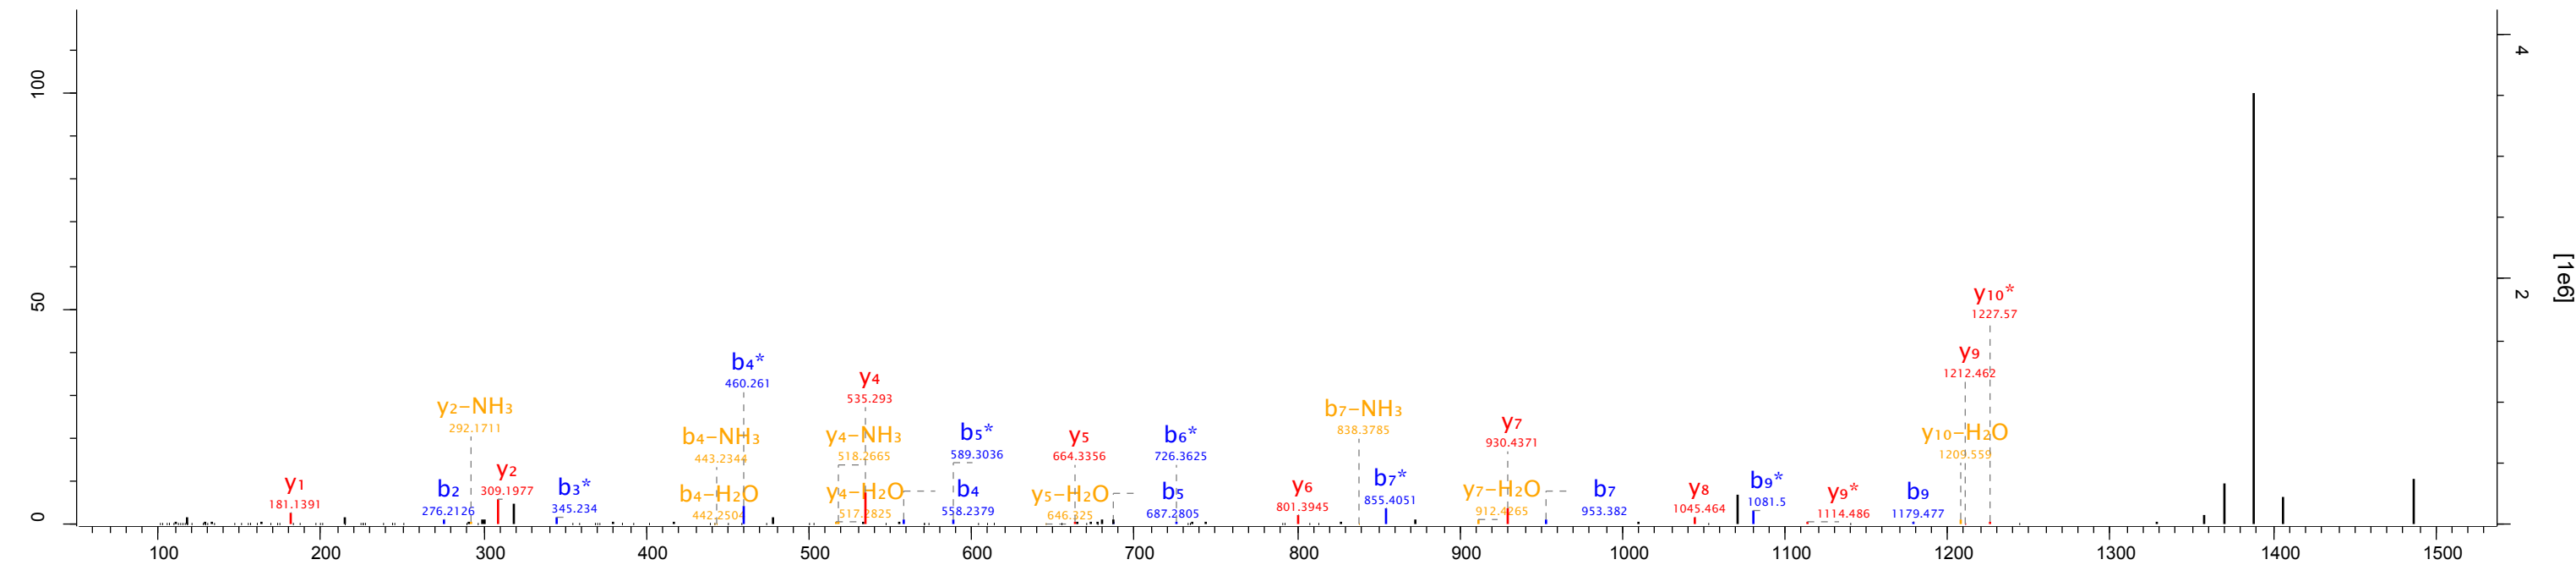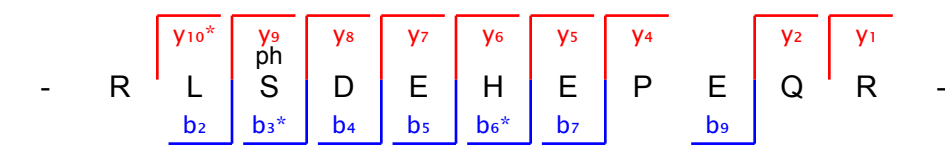

Raw file: 20150814\_A375SR\_Phospho\_BR2\_08  
 Scan: 4234 Method: FTMS; HCD Score: 152.39 m/z: 742.36 Gene names: WWC2

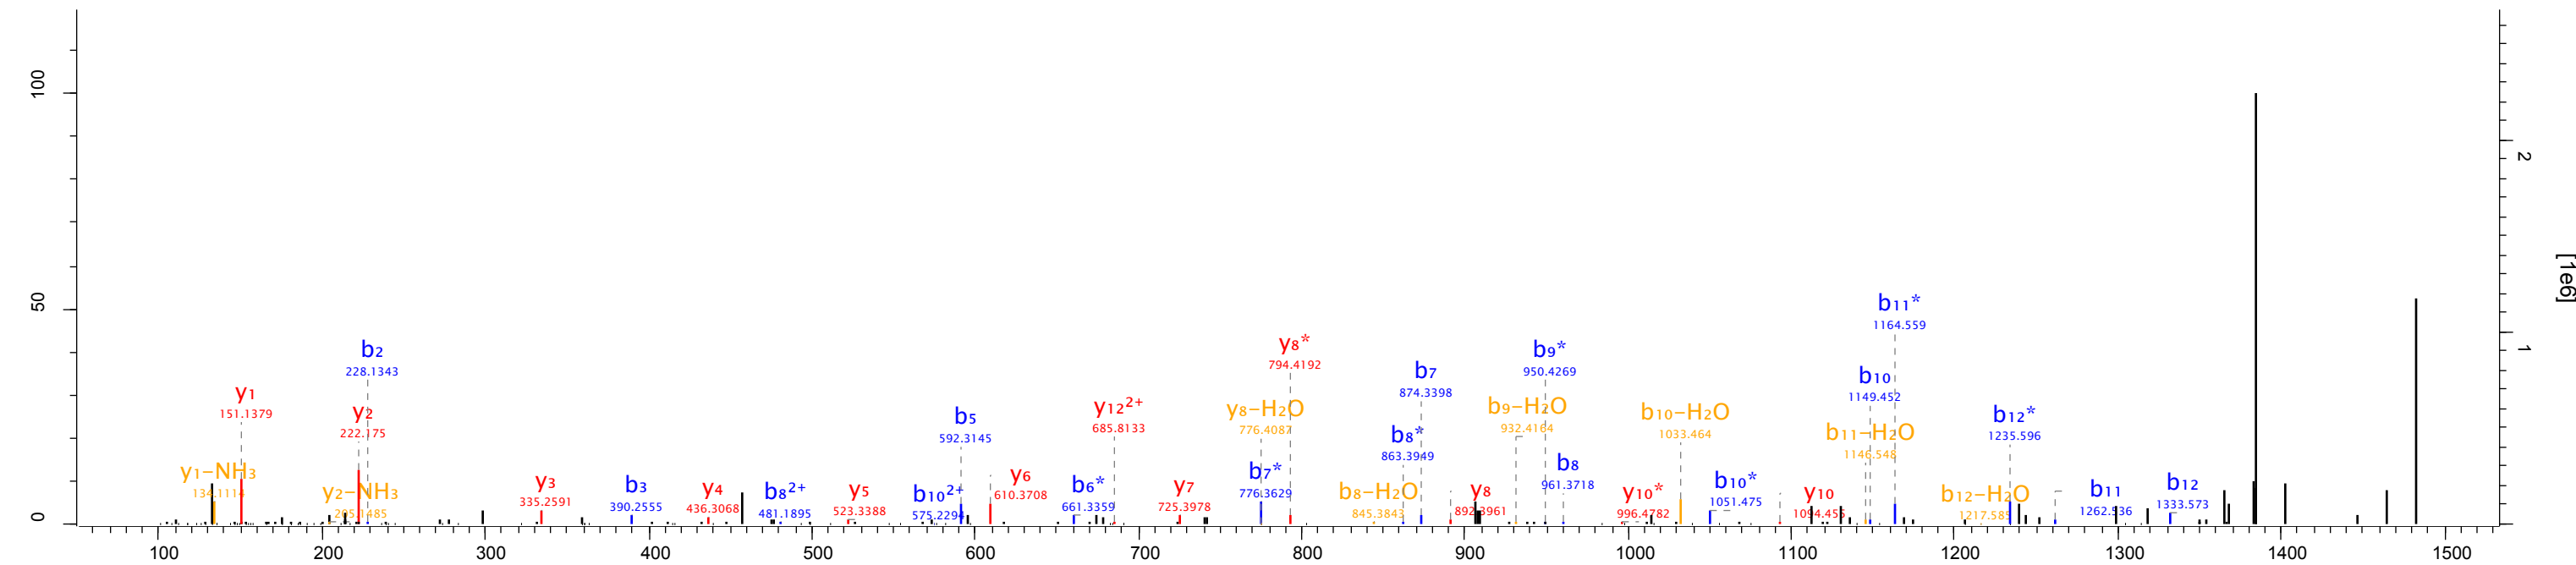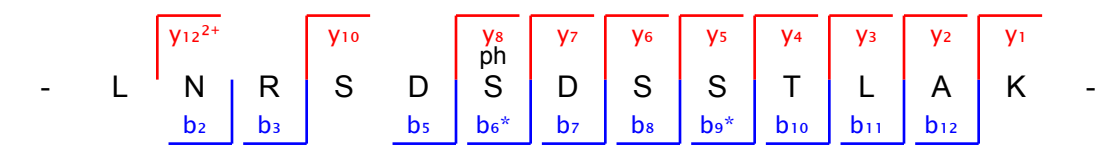

Raw file: 20150814\_A375SR\_Phospho\_BR2\_08  
 Scan: 4584 Method: FTMS; HCD Score: 176.32 m/z: 601.76 Gene names: KIDINS220

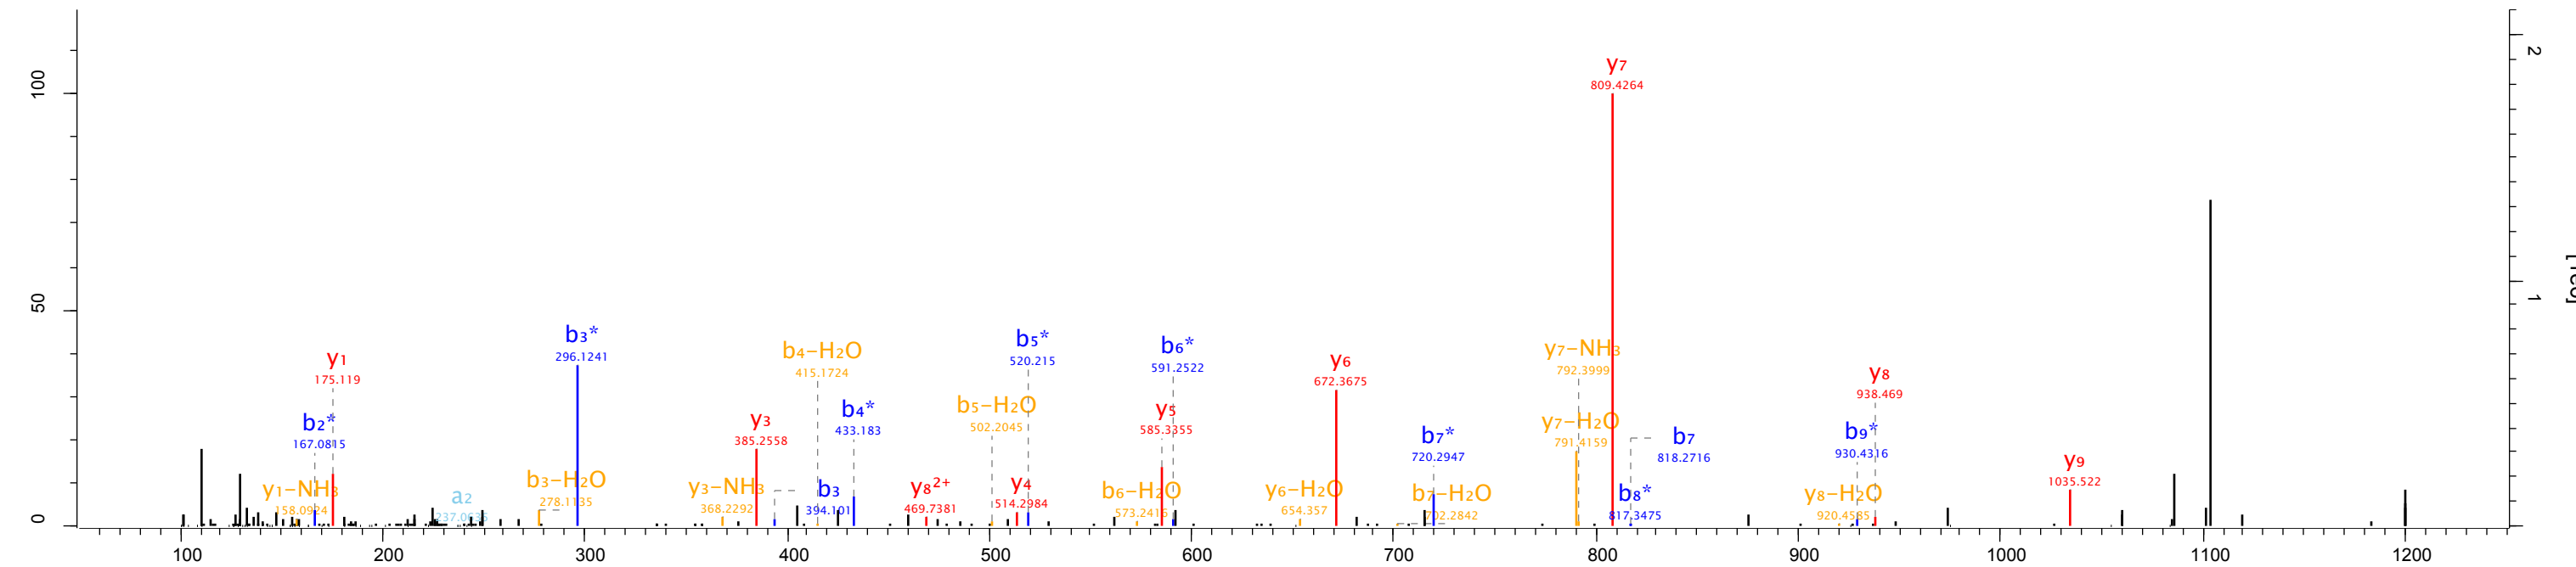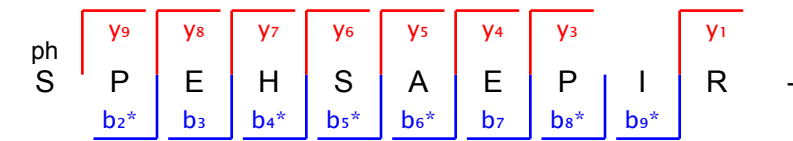

Raw file 20150814\_A375SR\_Phospho\_BR2\_08 Scan 4694 Method FTMS; HCD Score 77.78 m/z 395.53 Gene names FMNL1

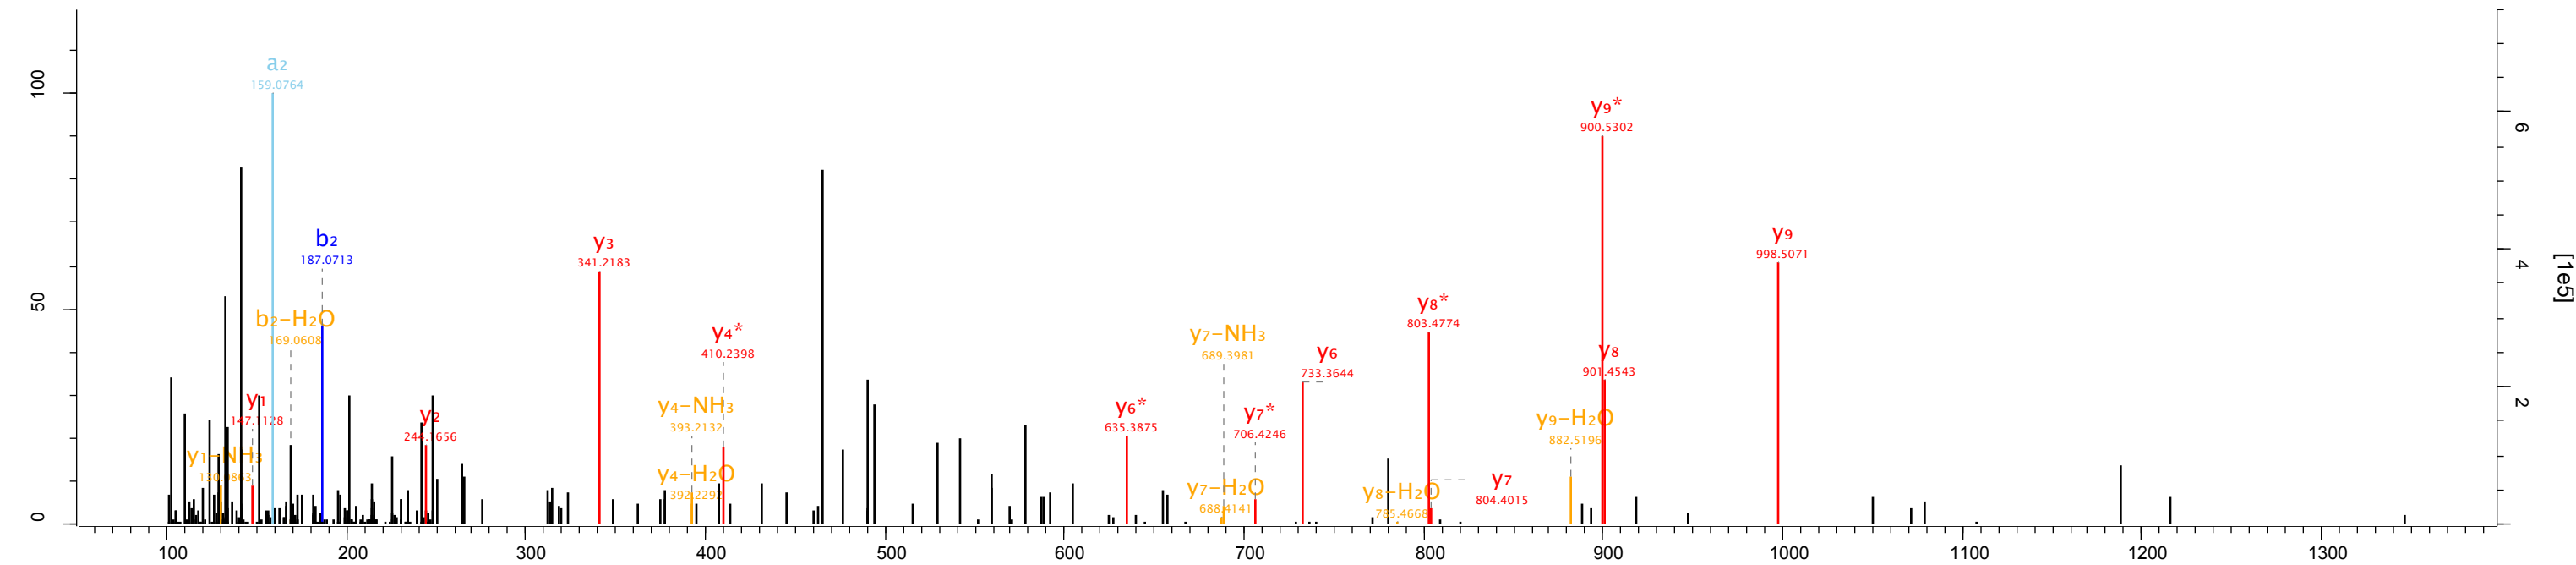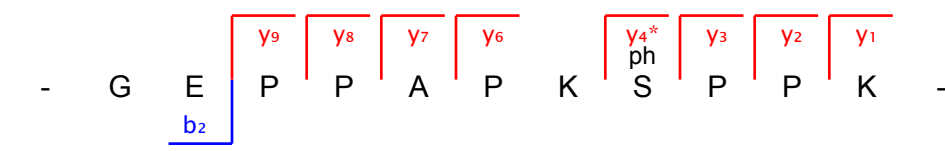

Raw file: 20150814\_A375SR\_Phospho\_BR2\_08  
 Scan: 5294 Method: FTMS; HCD Score: 114.24 m/z: 583.8 Gene names: ARID4A

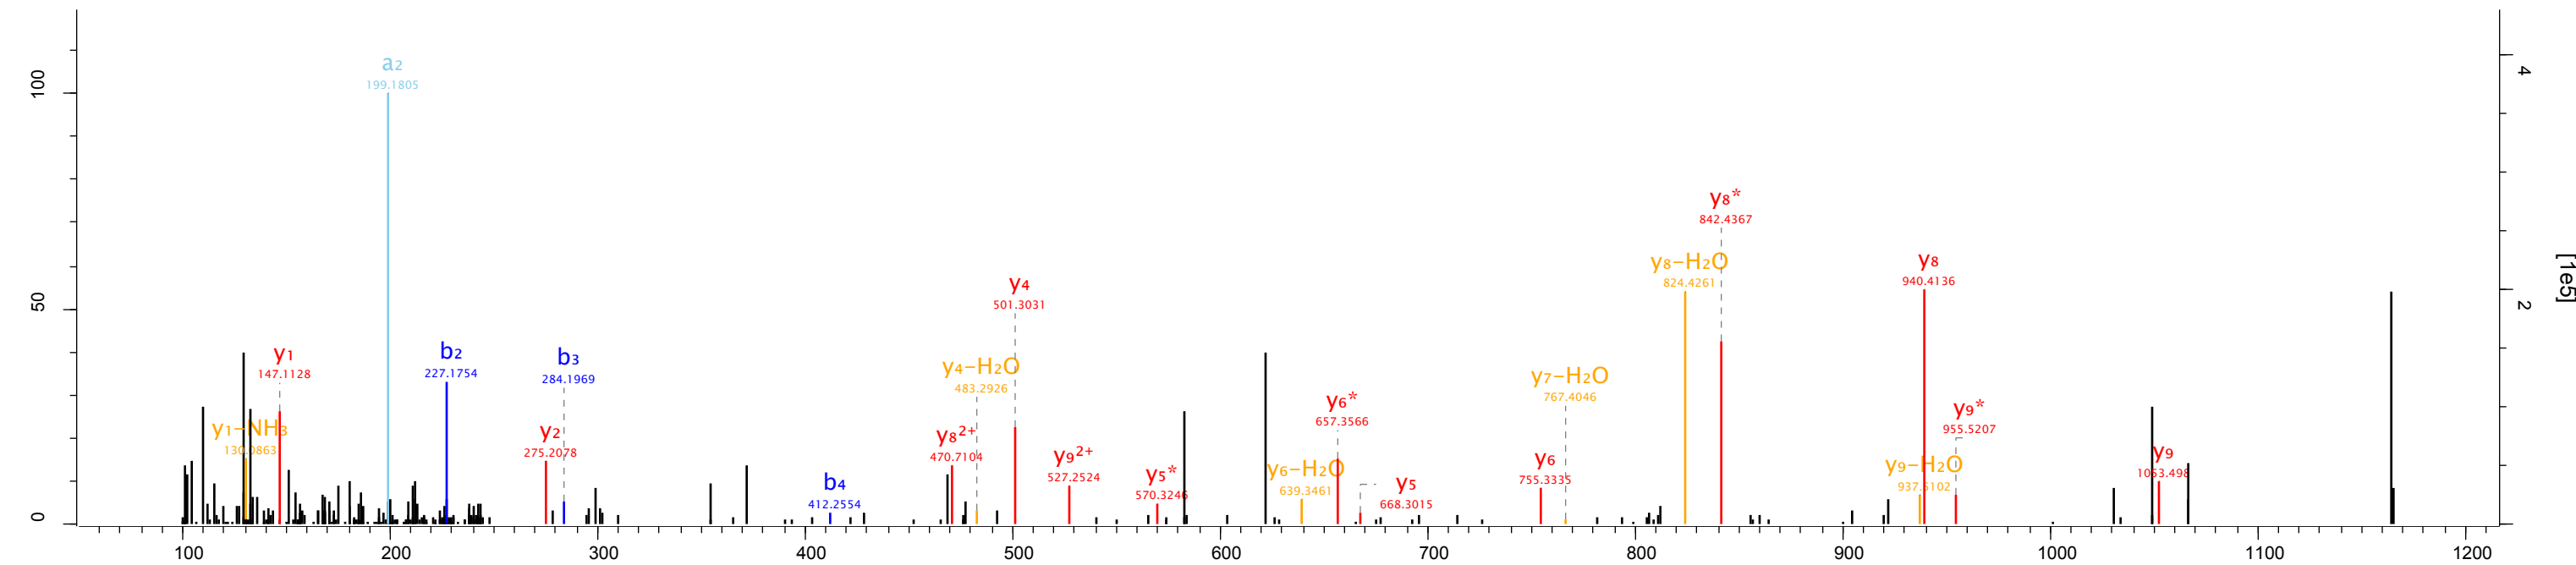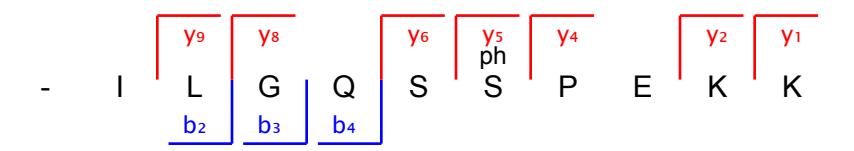

Raw file: 20150814\_A375SR\_Phospho\_BR2\_08  
 Scan: 5474 Method: FTMS; HCD Score: 74.03 m/z: 435.23 Gene names: SEPT9

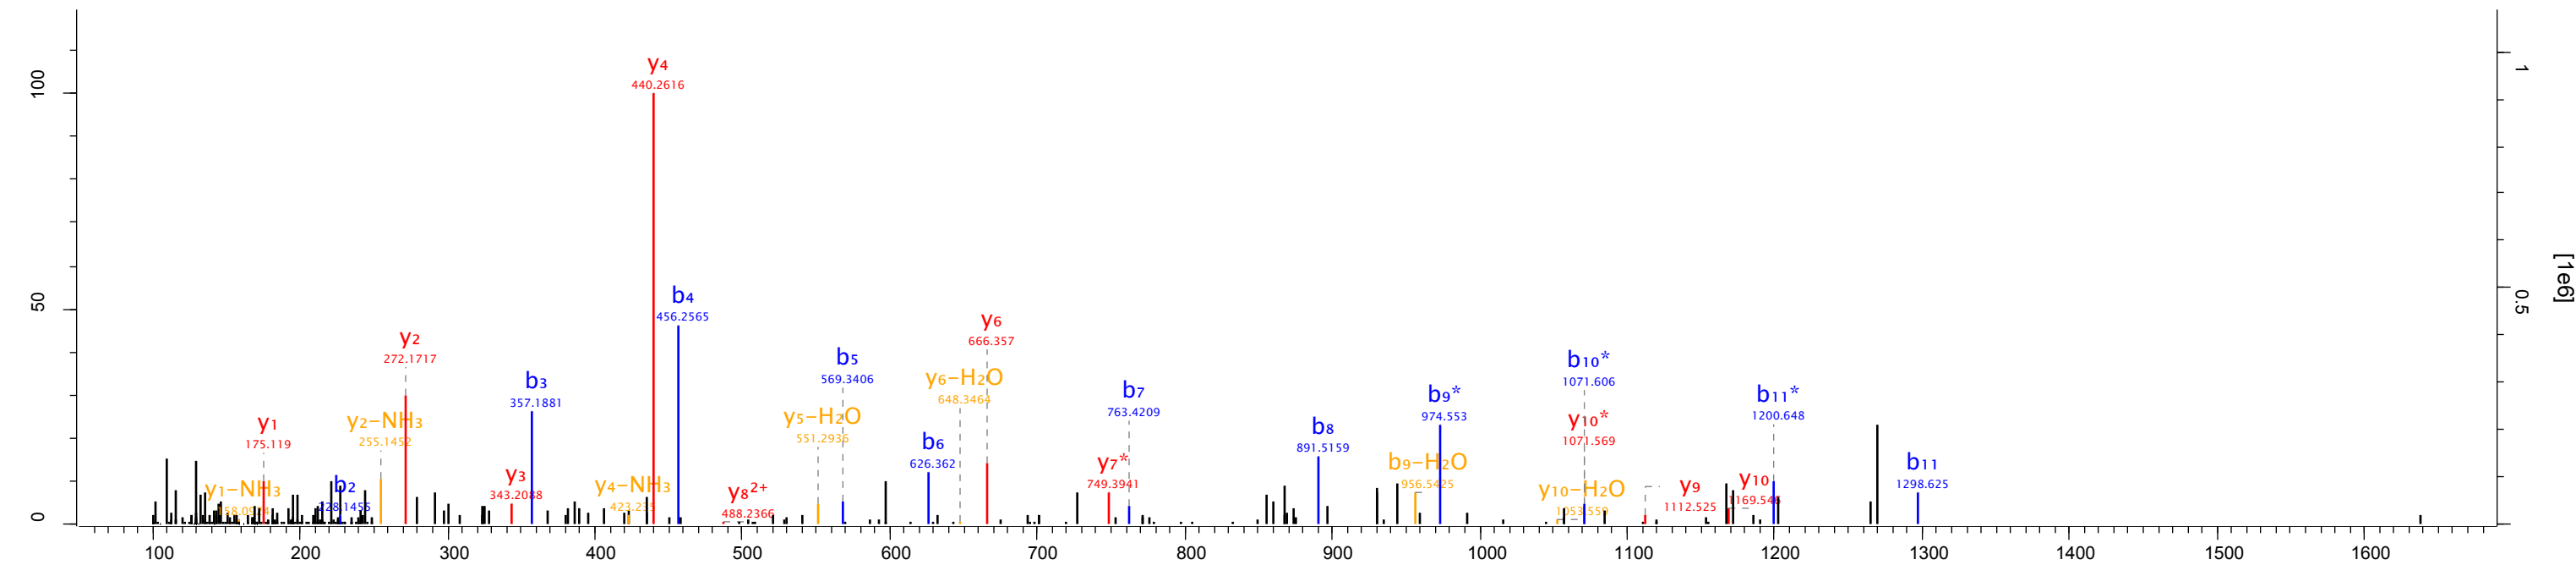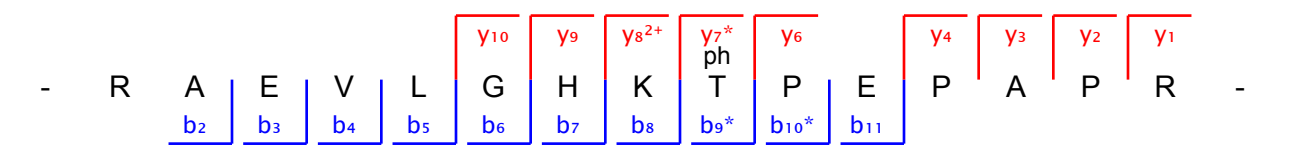



20150814\_A375SR\_Phospho\_BR2\_08 5894 FTMS; HCD 109.99 429.89 RCC1

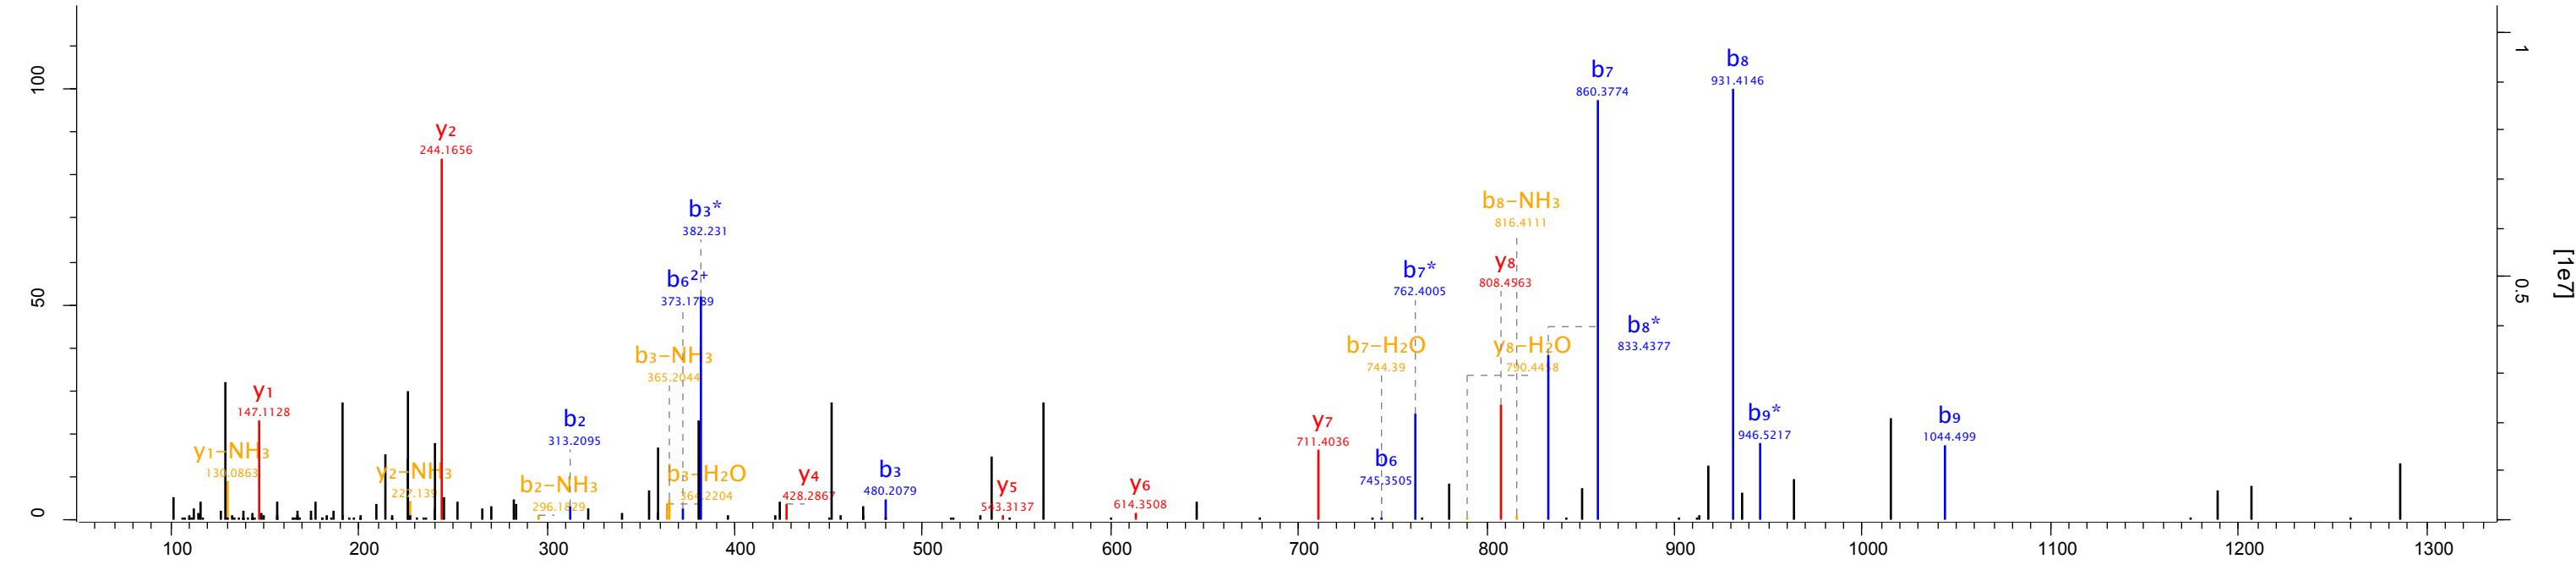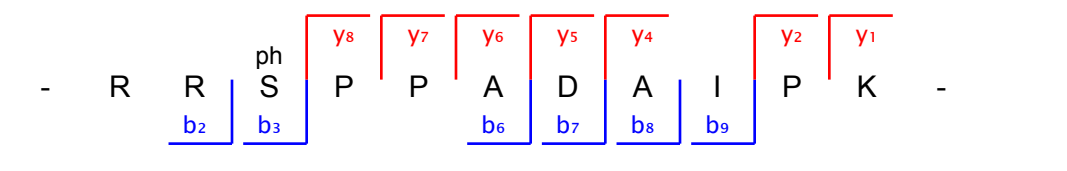

Raw file: 20150814\_A375SR\_Phospho\_BR2\_08  
 Scan: 7294 Method: FTMS; HCD Score: 56.87 m/z: 655.8 Gene names: TCF20

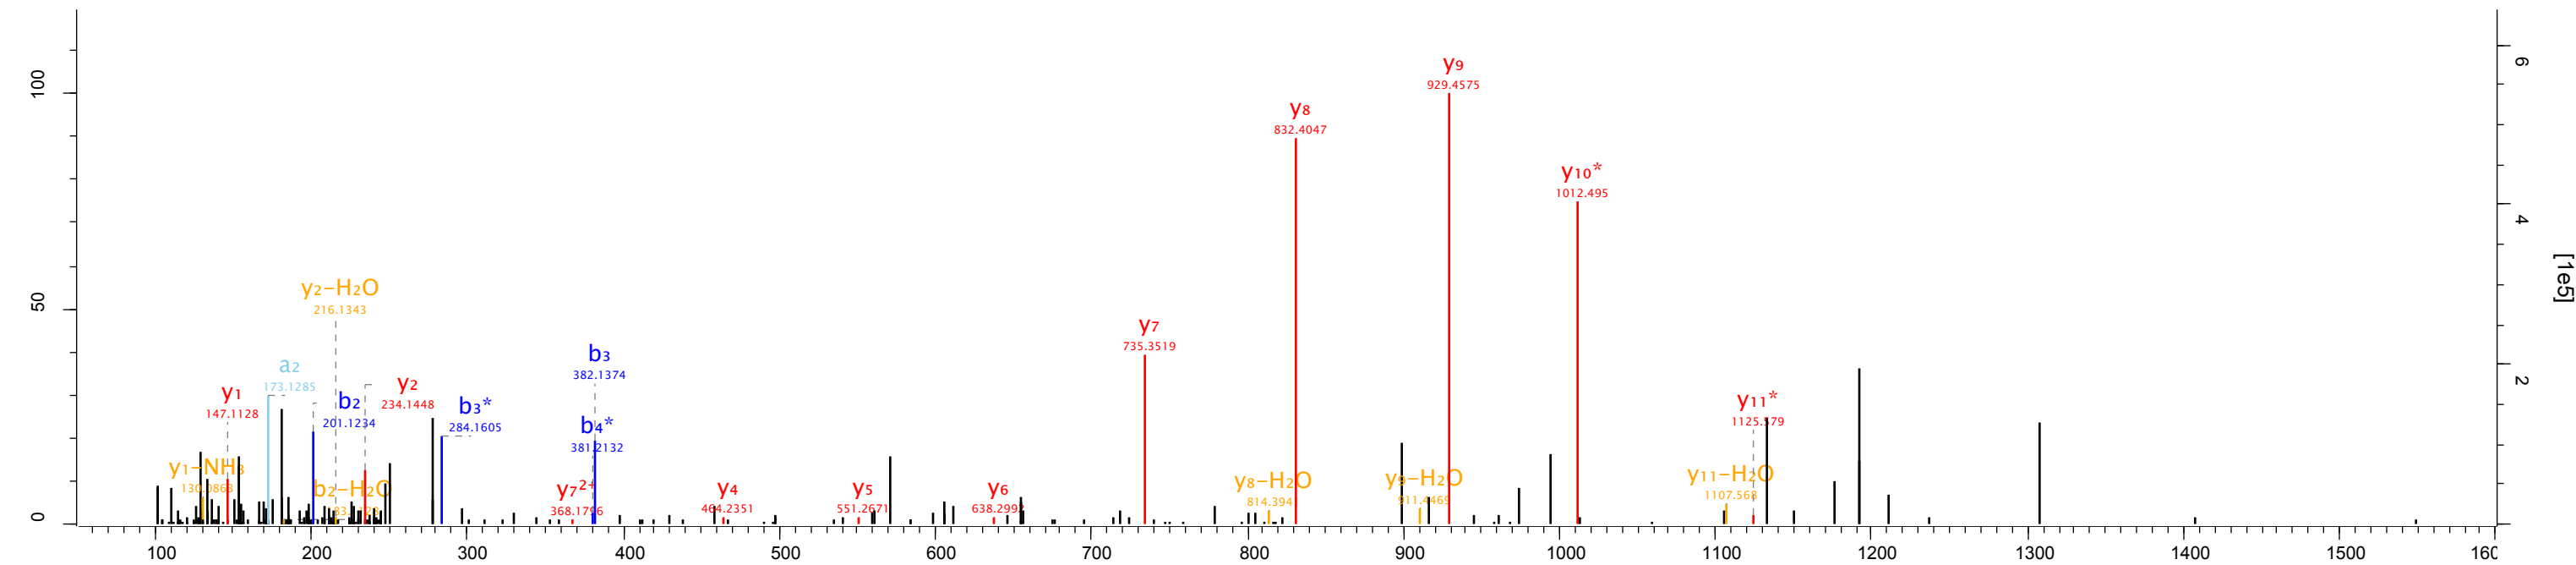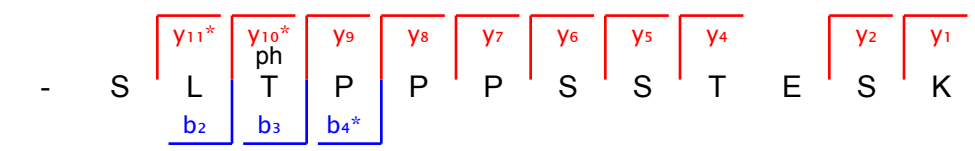

Raw file 20150814\_A375SR\_Phospho\_BR2\_08 Scan 7614 Method FTMS; HCD Score 77.75 m/z 467.89 Gene names SMEK1

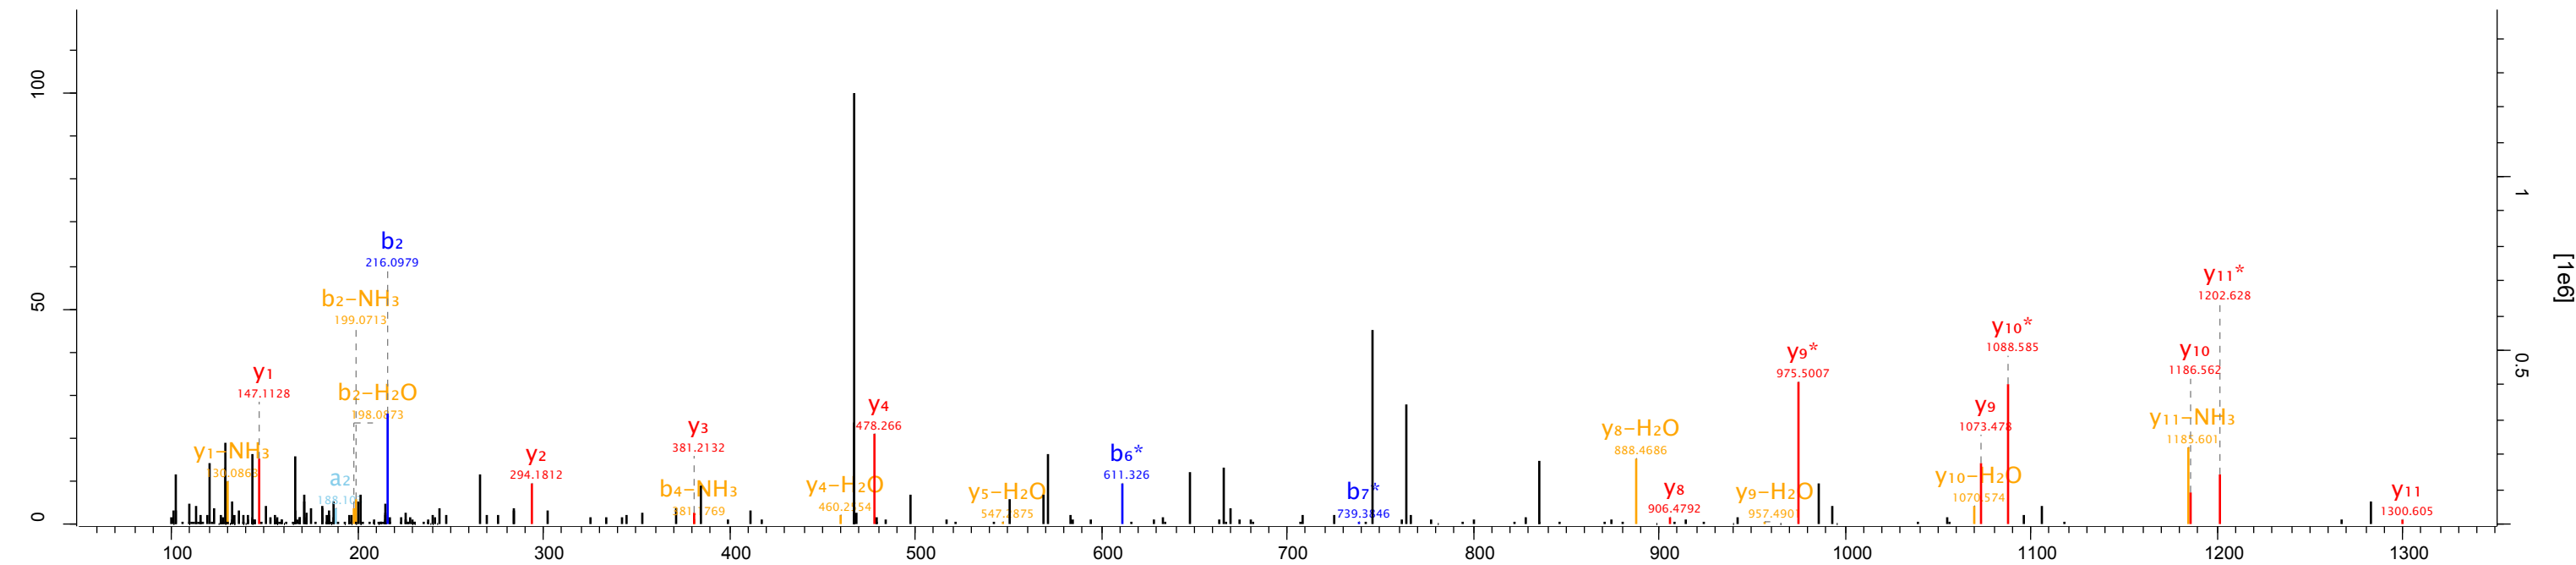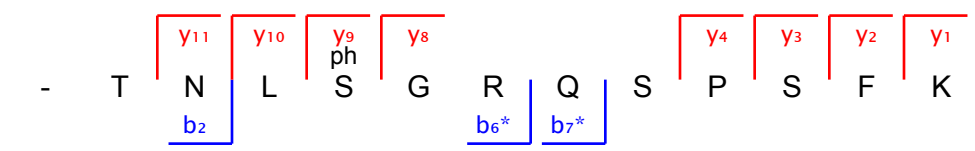

Raw file: 20150814\_A375SR\_Phospho\_BR2\_08  
 Scan: 8894 Method: FTMS; HCD Score: 56.87 m/z: 486.6 Gene names: UCKL1

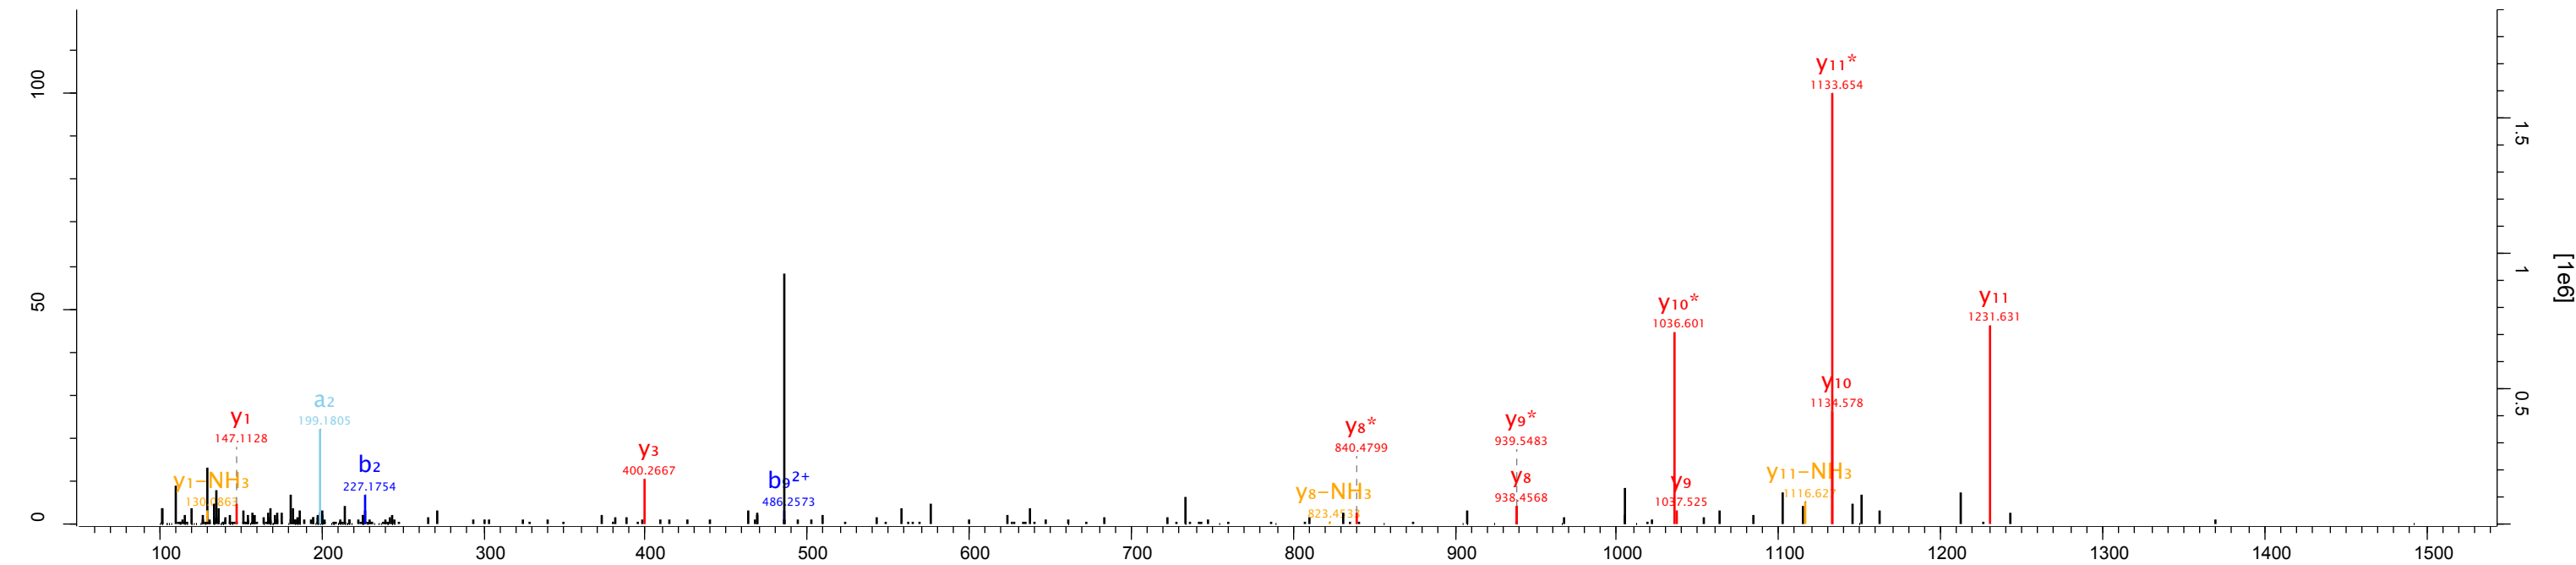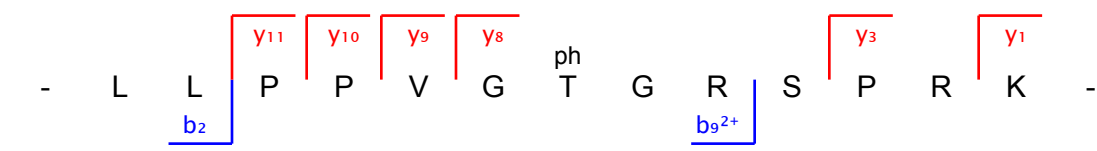

Raw file: 20150814\_A375SR\_Phospho\_BR2\_09  
 Scan: 10234 Method: FTMS; HCD Score: 103.76 m/z: 530.81 Gene names: CDYL

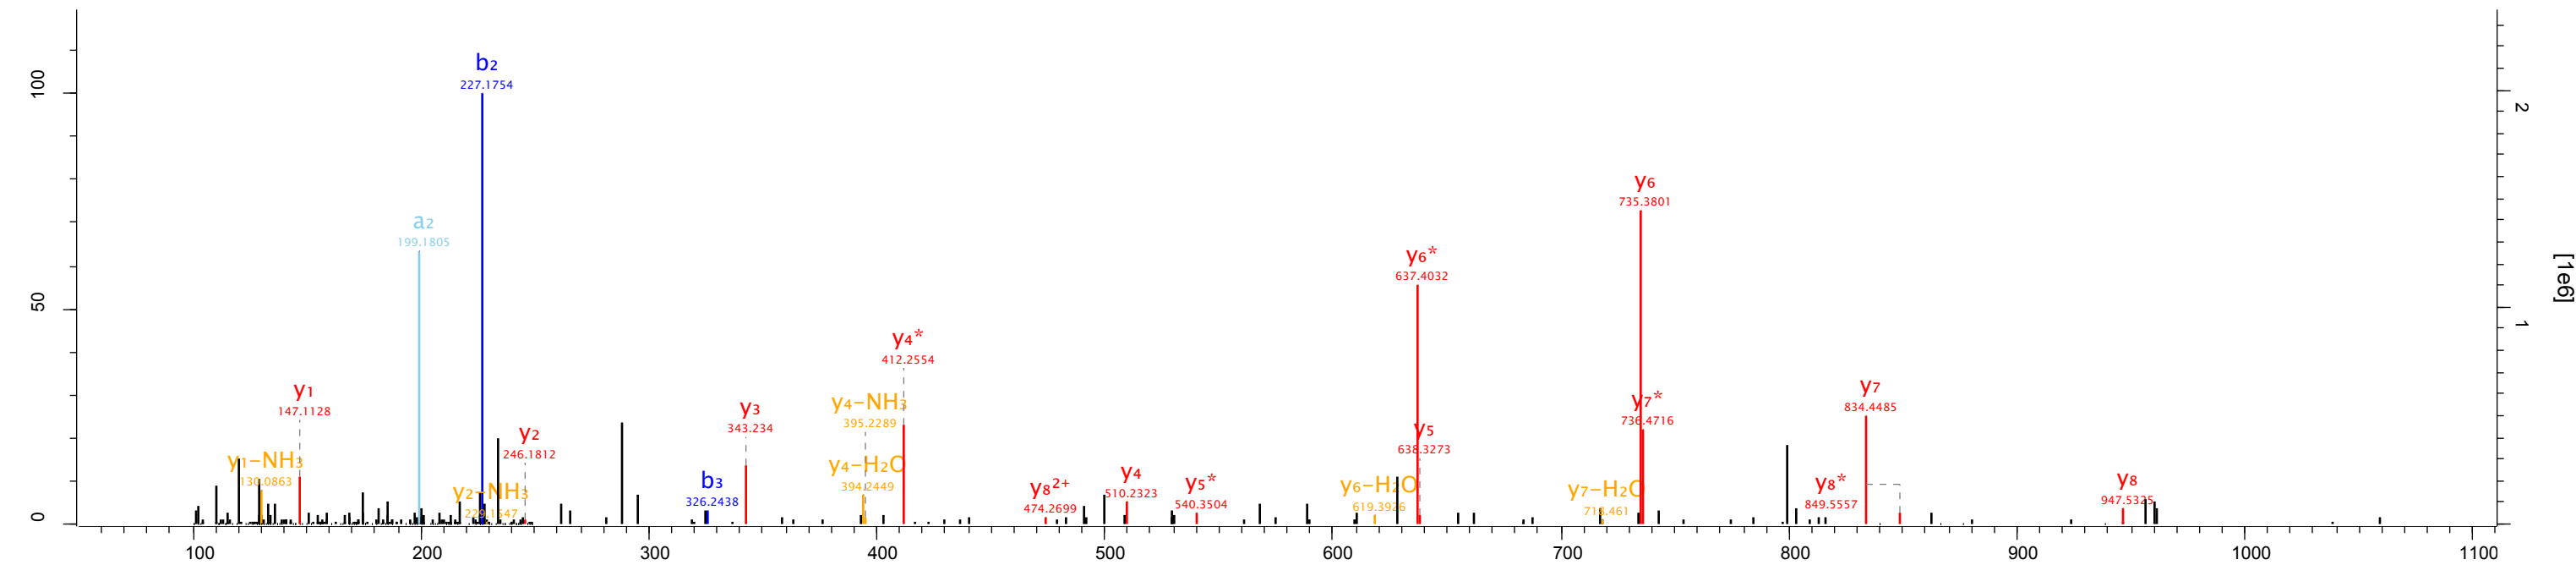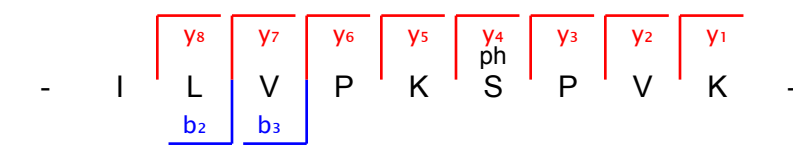

Raw file: 20150814\_A375SR\_Phospho\_BR2\_09  
 Scan: 11294 Method: FTMS; HCD Score: 82.65 m/z: 545.62 Gene names: CDC2L1;CDK11B;CDK11A

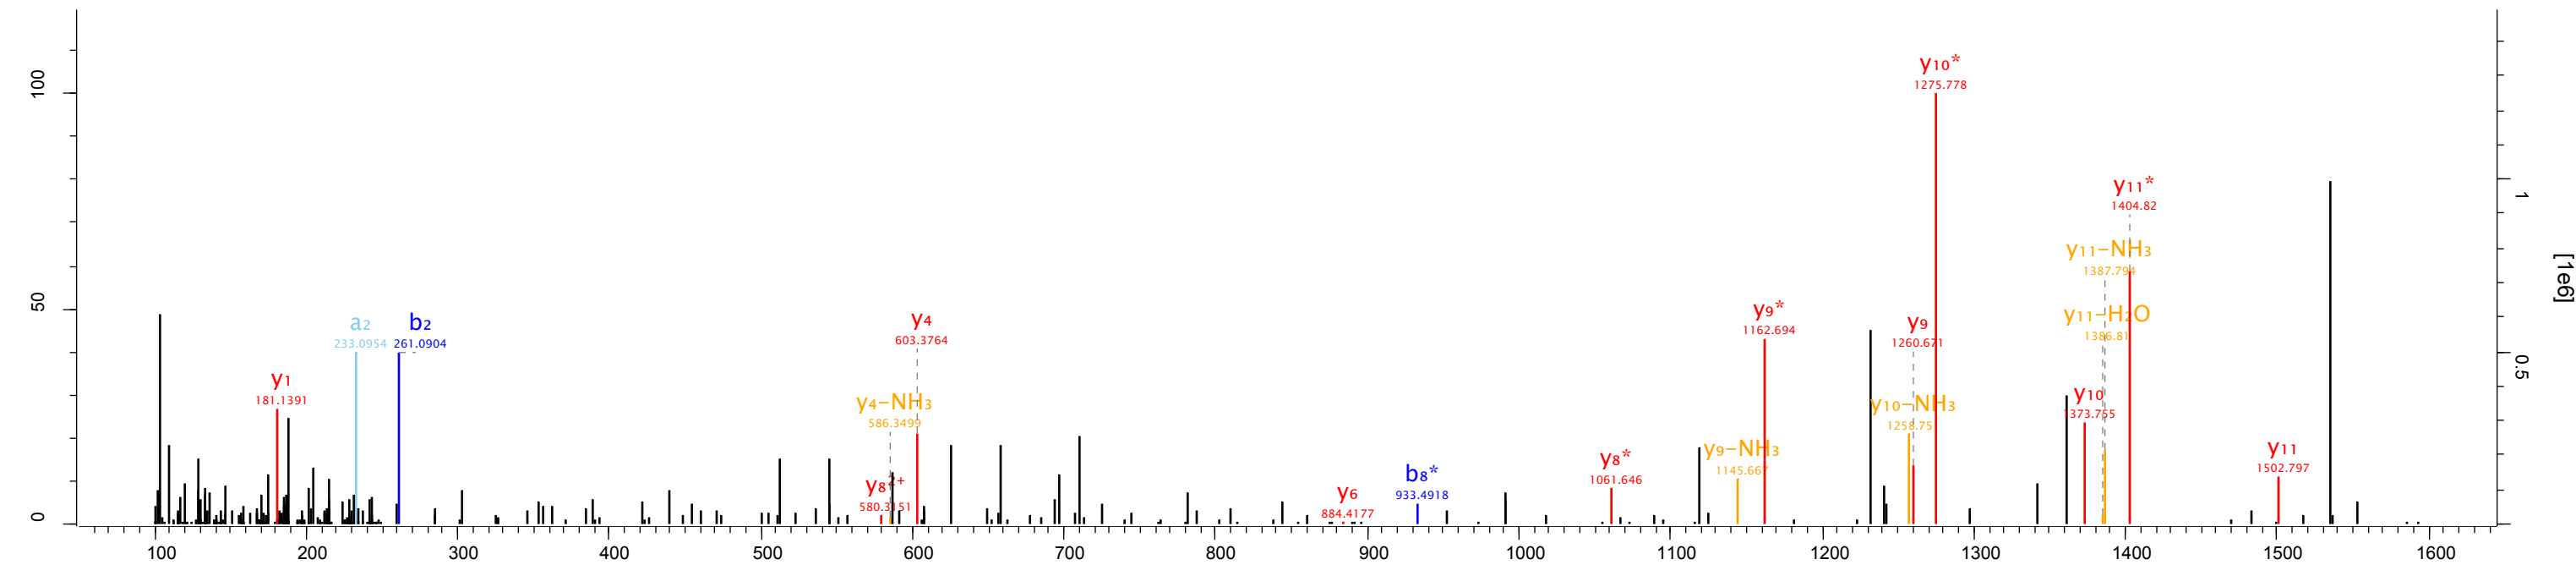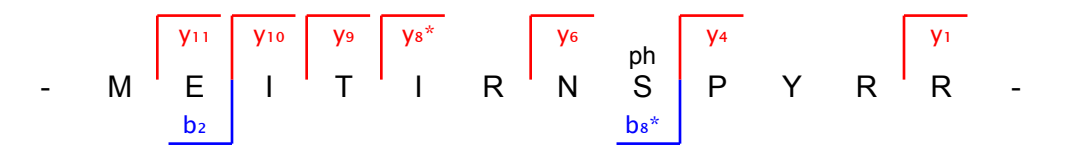

Raw file 20150814\_A375SR\_Phospho\_BR2\_09 Scan 11934 Method FTMS; HCD Score 111.79 m/z 583.31 Gene names FAM193A

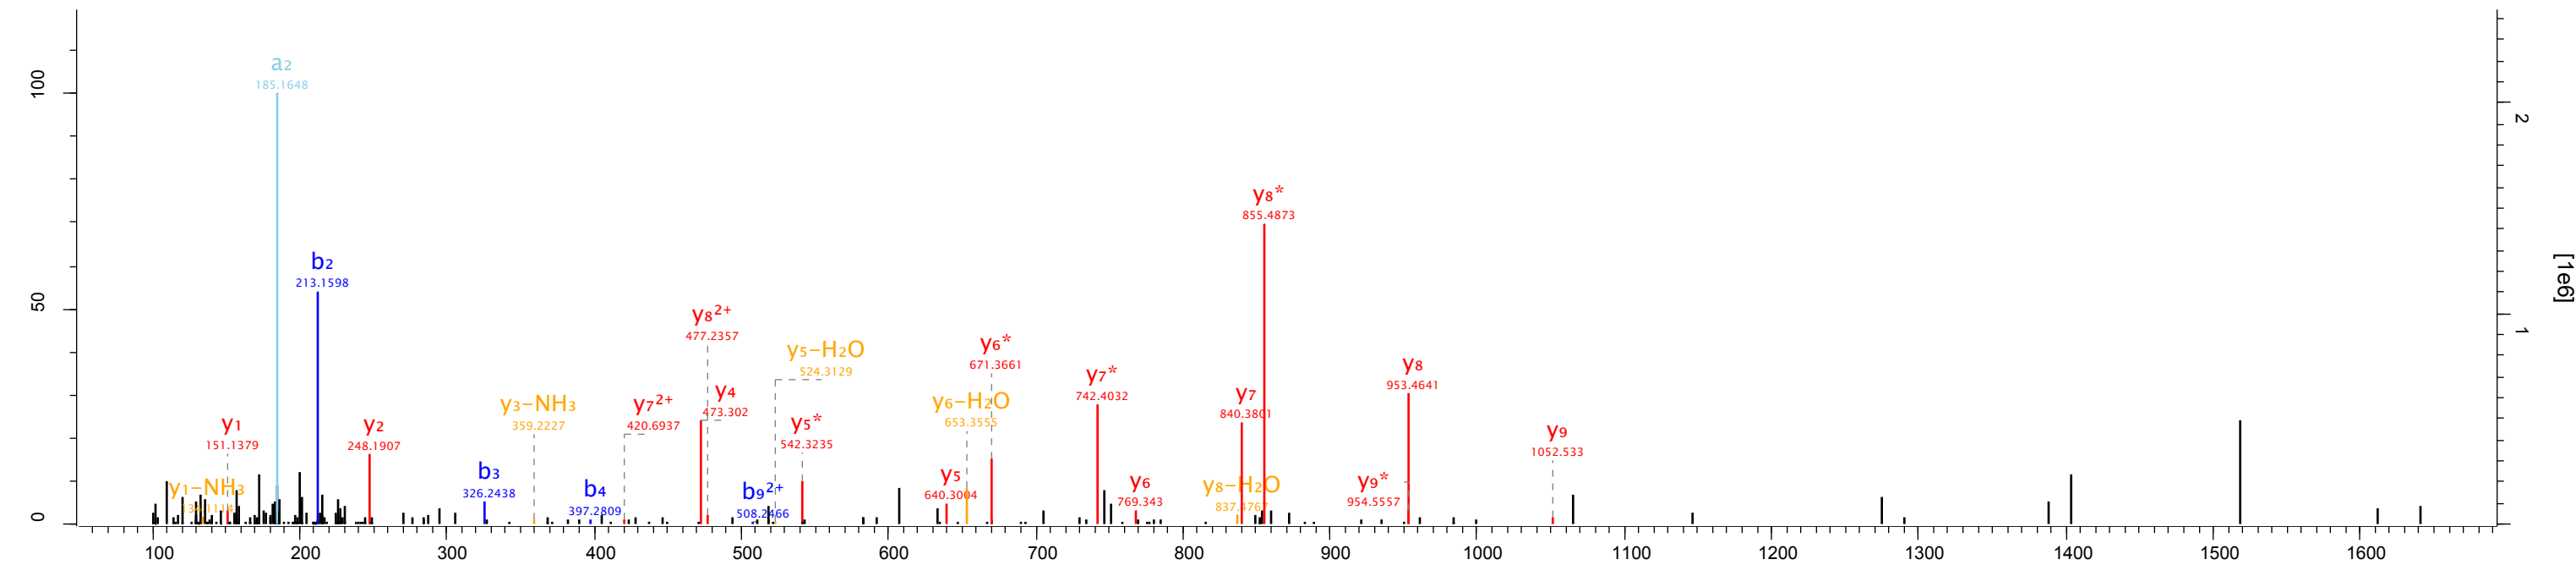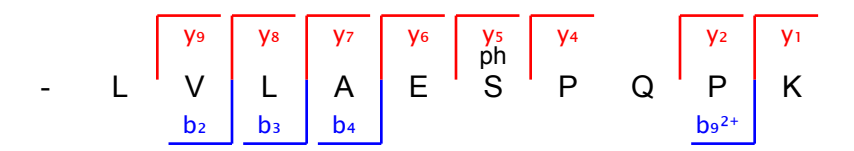

Raw file: 20150814\_A375SR\_Phospho\_BR2\_09  
 Scan: 12034 Method: FTMS; HCD Score: 120.42 m/z: 867.44 Gene names: UNC45A

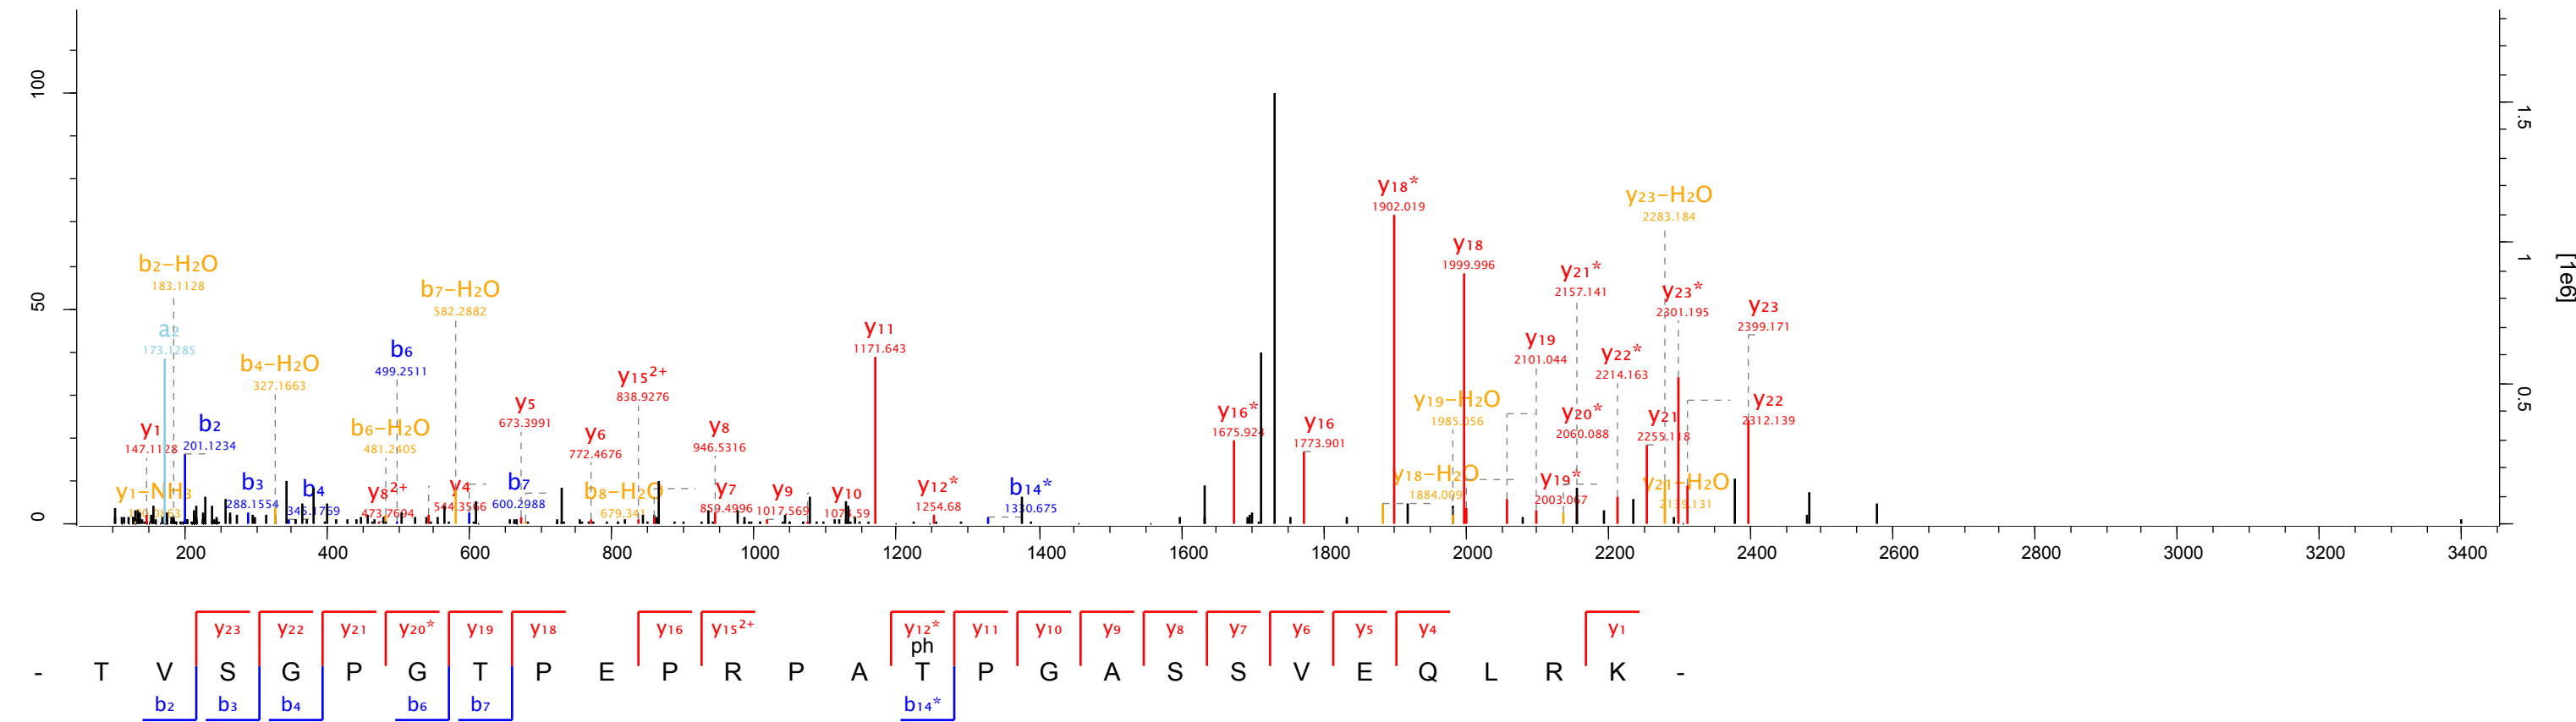



Raw file 20150814\_A375SR\_Phospho\_BR2\_09 Scan 14054 Method FTMS; HCD Score 43.76 m/z 575.8 Gene names CHAMP1

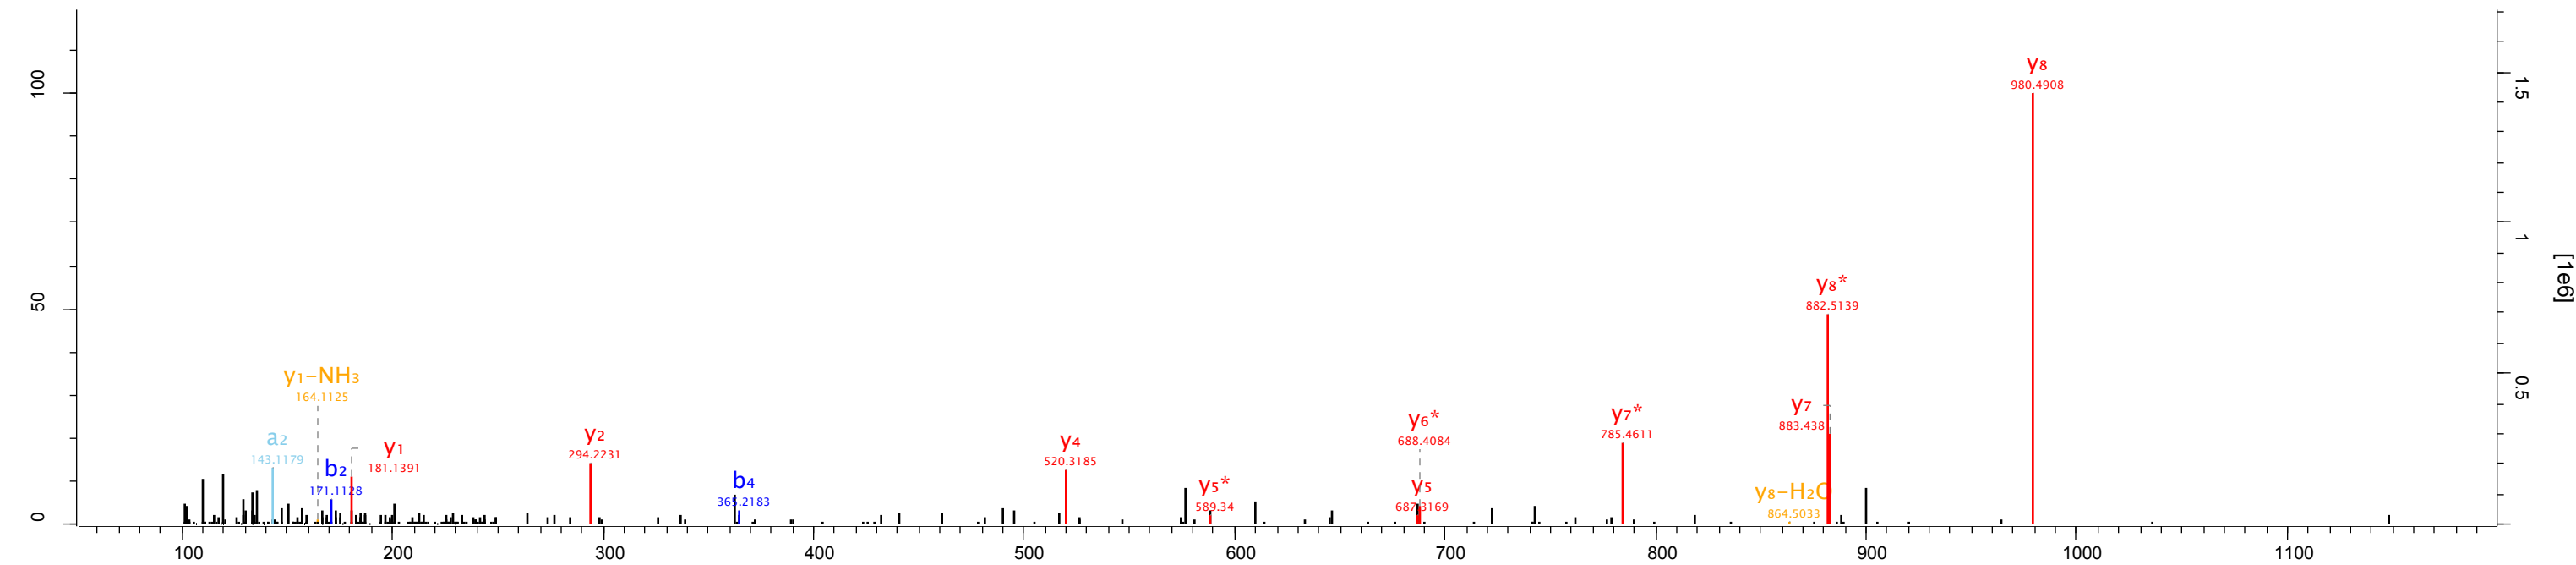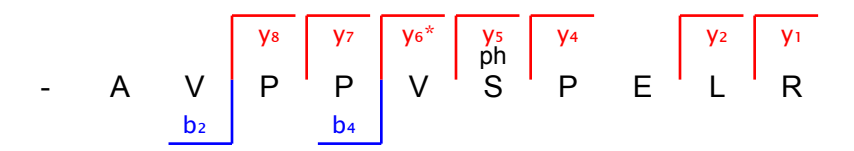

Raw file 20150814\_A375SR\_Phospho\_BR2\_09 Scan 14694 Method FTMS; HCD Score 119.6 m/z 844.34 Gene names MAP1A

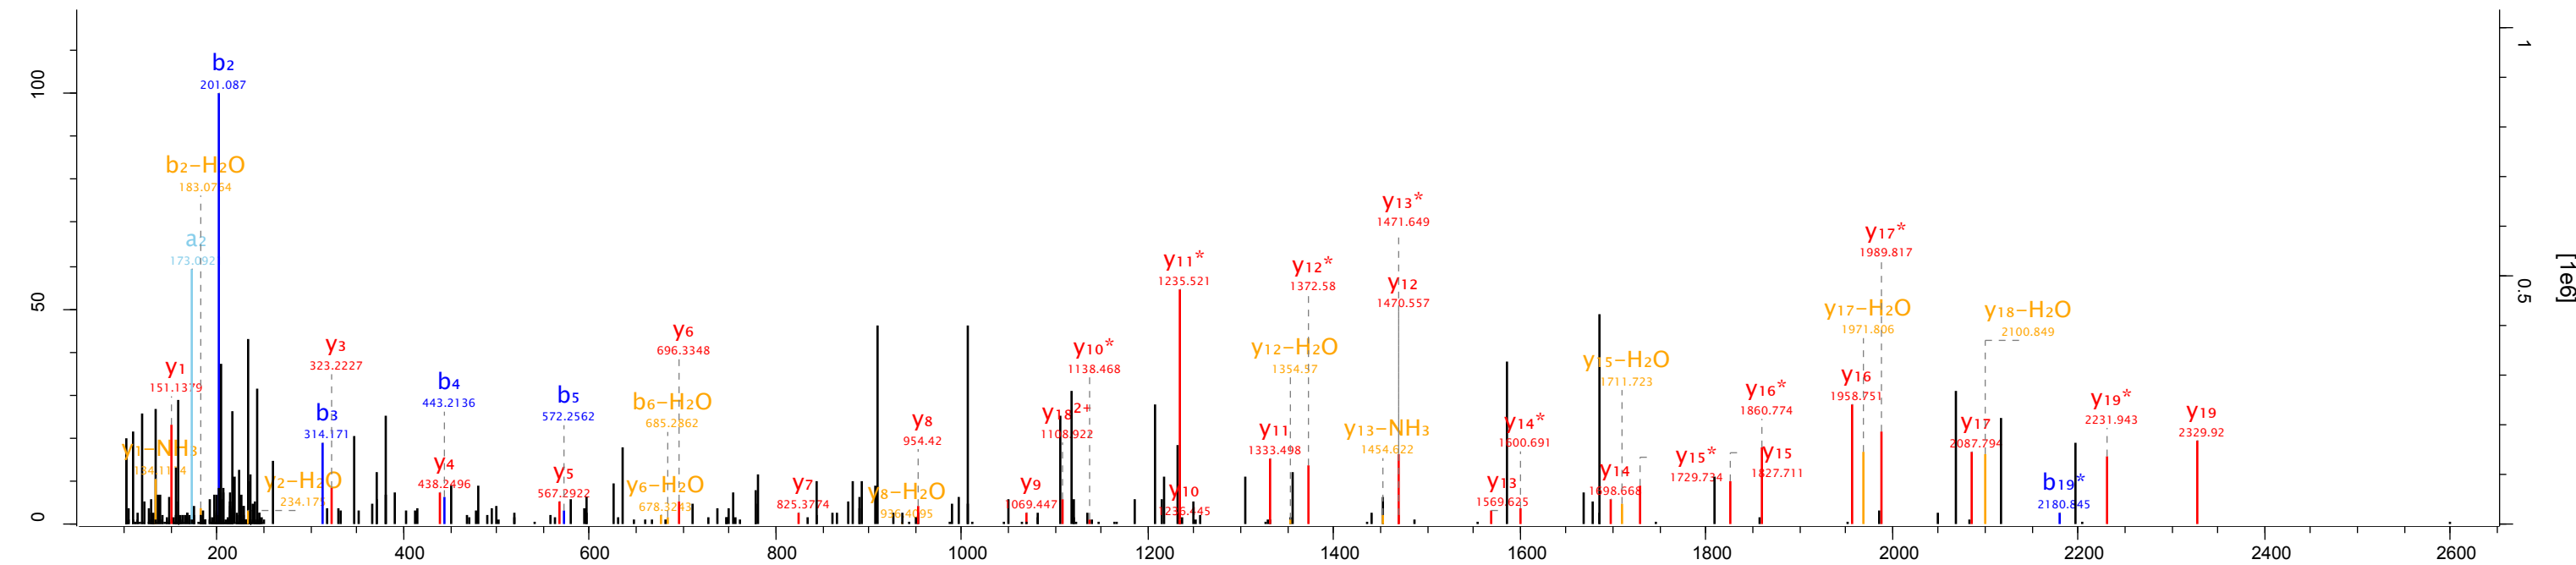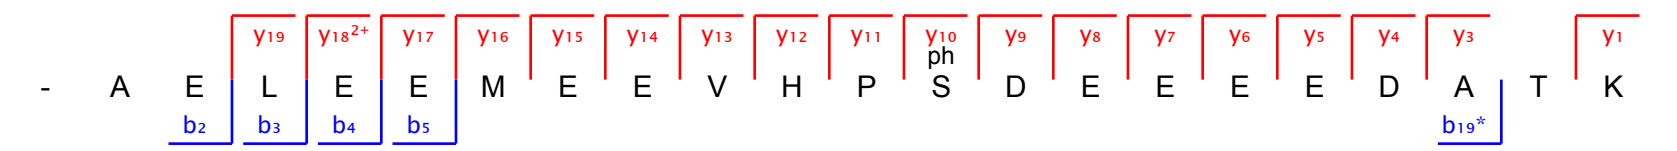

Raw file 20150814\_A375SR\_Phospho\_BR2\_09 Scan 1474 Method FTMS; HCD Score 59.8 m/z 396.53 Gene names MAP1B

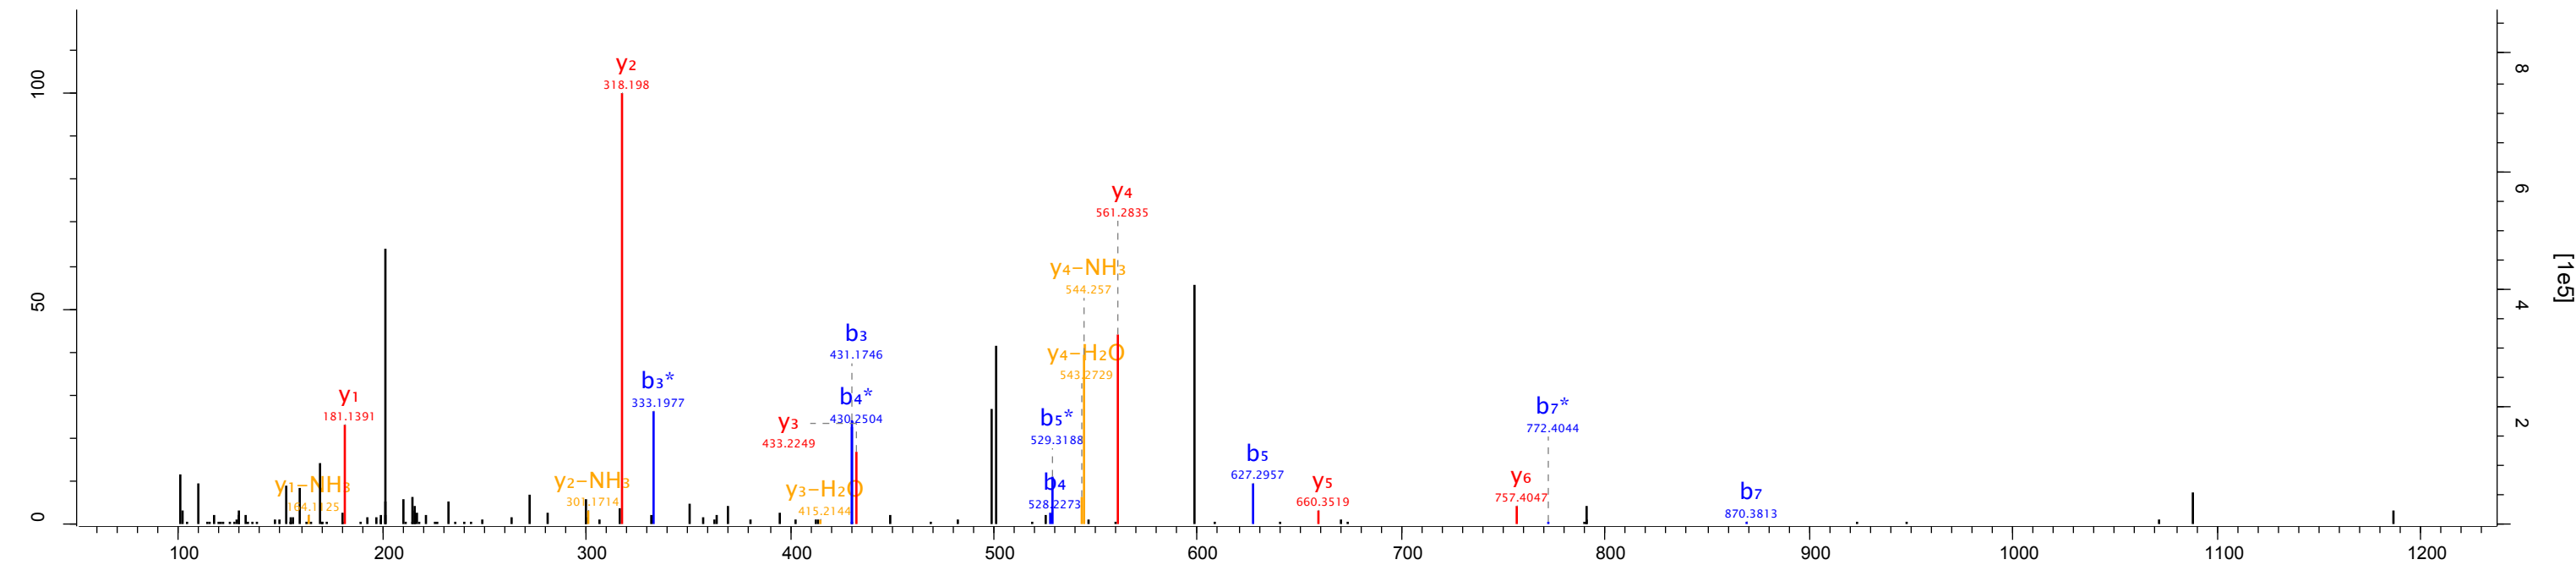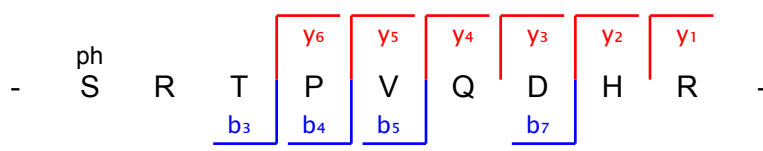

Raw file: 20150814\_A375SR\_Phospho\_BR2\_09  
 Scan: 16214 Method: FTMS; HCD Score: 72.9 m/z: 608.31 Gene names: MARK2

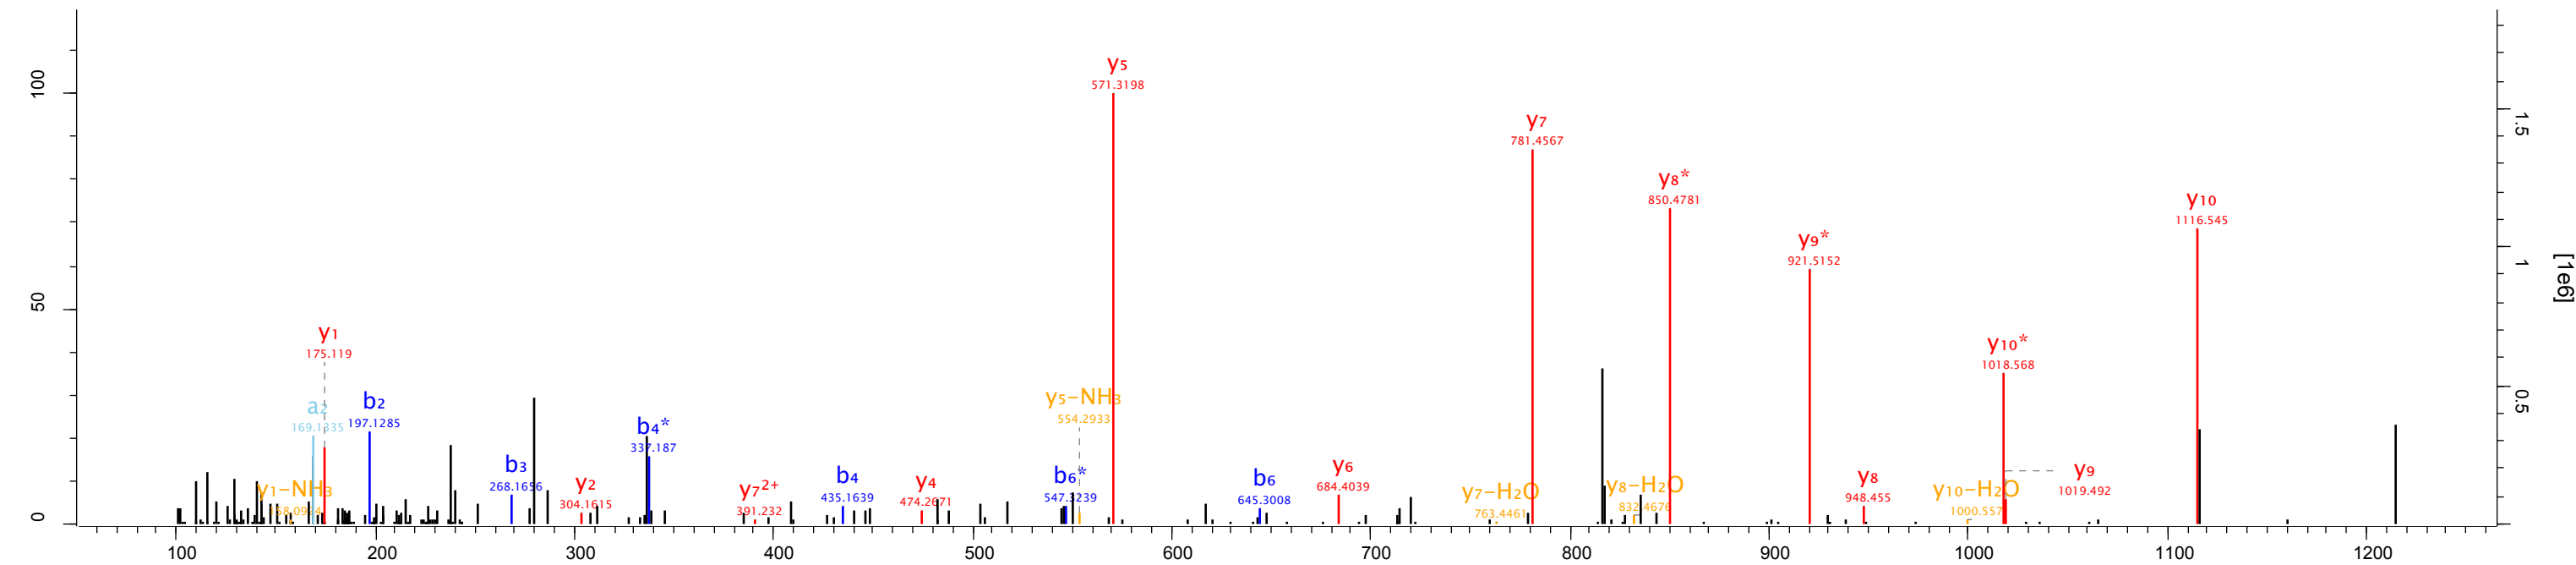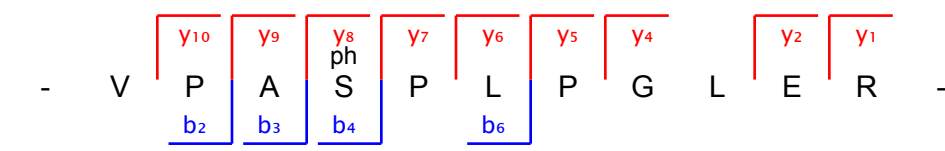

Raw file 20150814\_A375SR\_Phospho\_BR2\_09 Scan 16434 Method FTMS; HCD Score 64.52 m/z 536.61 Gene names MAGI3

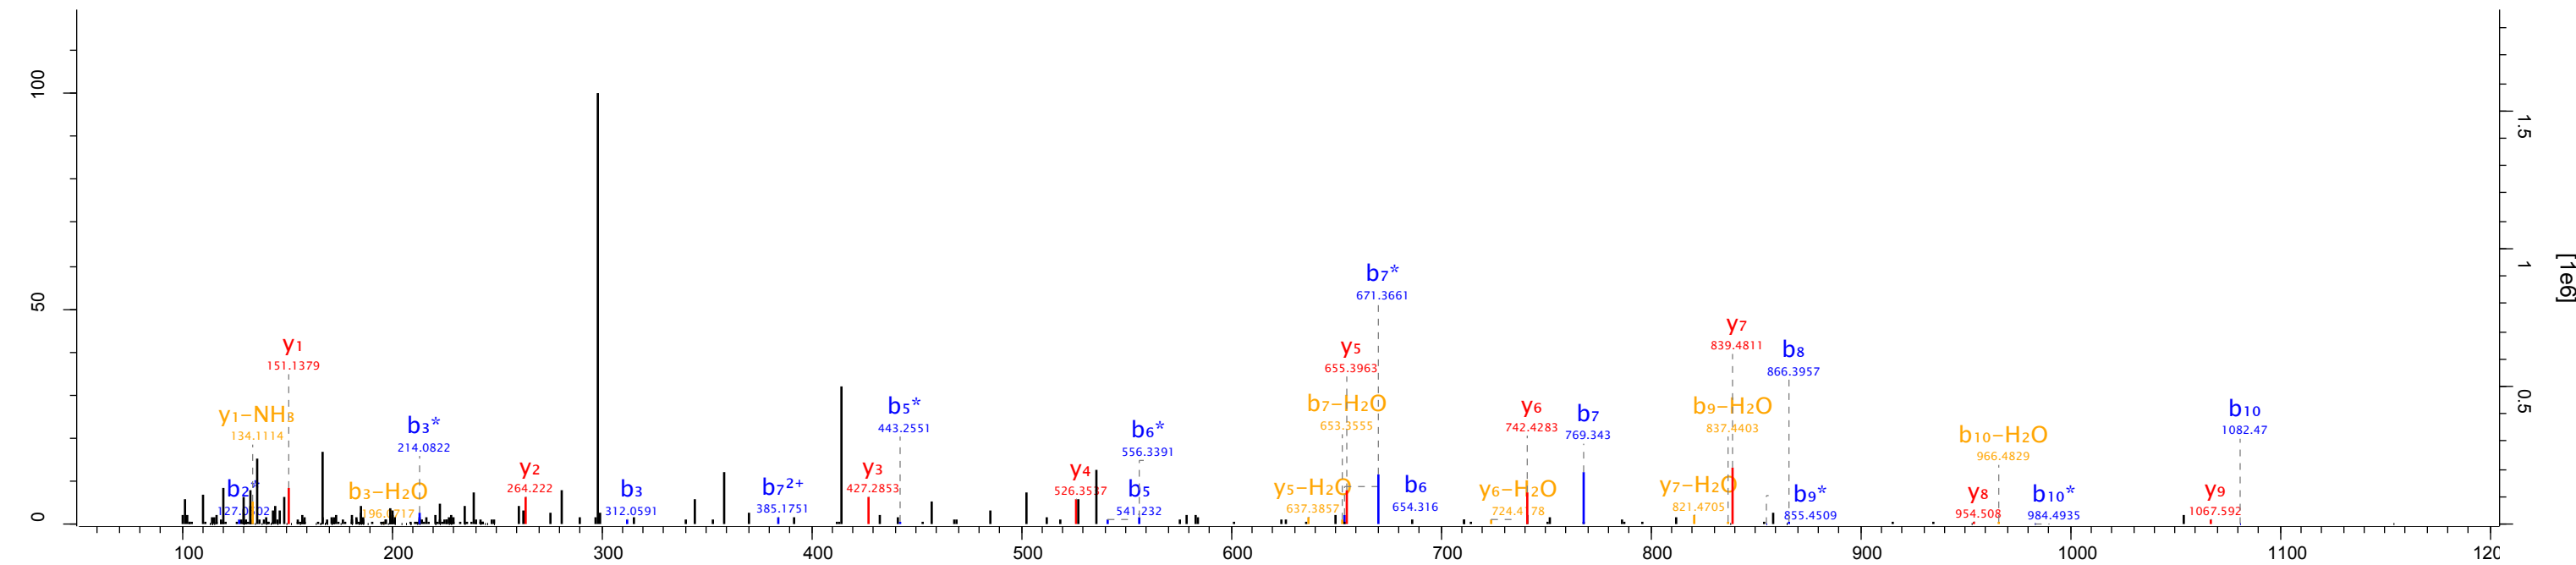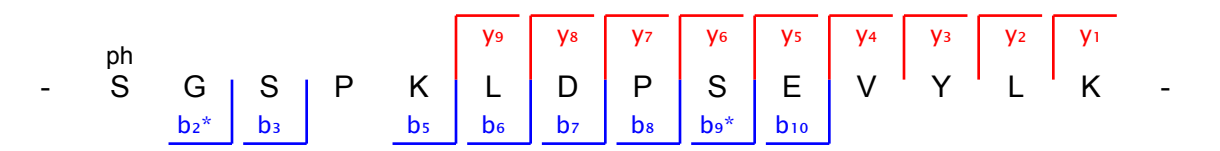

Raw file: 20150814\_A375SR\_Phospho\_BR2\_09  
 Scan: 16524 Method: FTMS; HCD Score: 294.4 m/z: 1005.48 Gene names: ZC3HC1

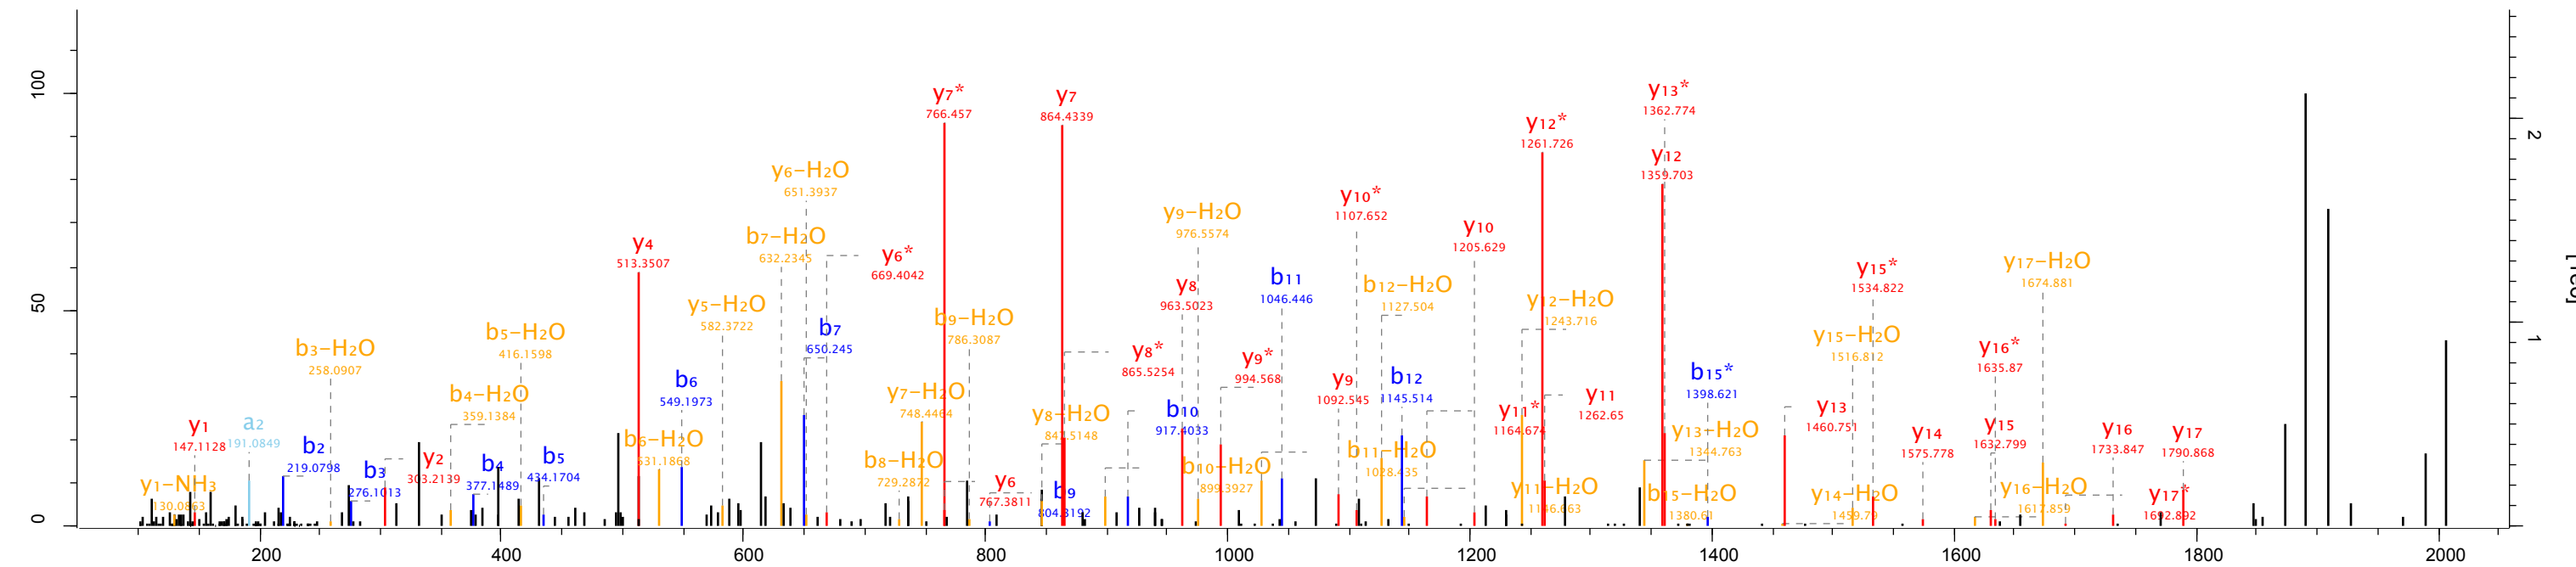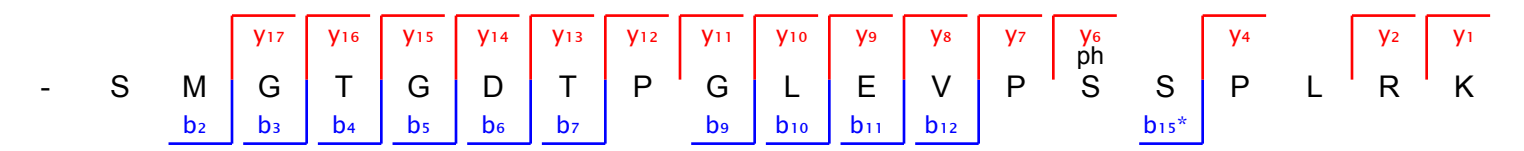

Raw file: 20150814\_A375SR\_Phospho\_BR2\_09  
 Scan: 17014 Method: FTMS; HCD Score: 95.23 m/z: 525.93 Gene names: FAM193A

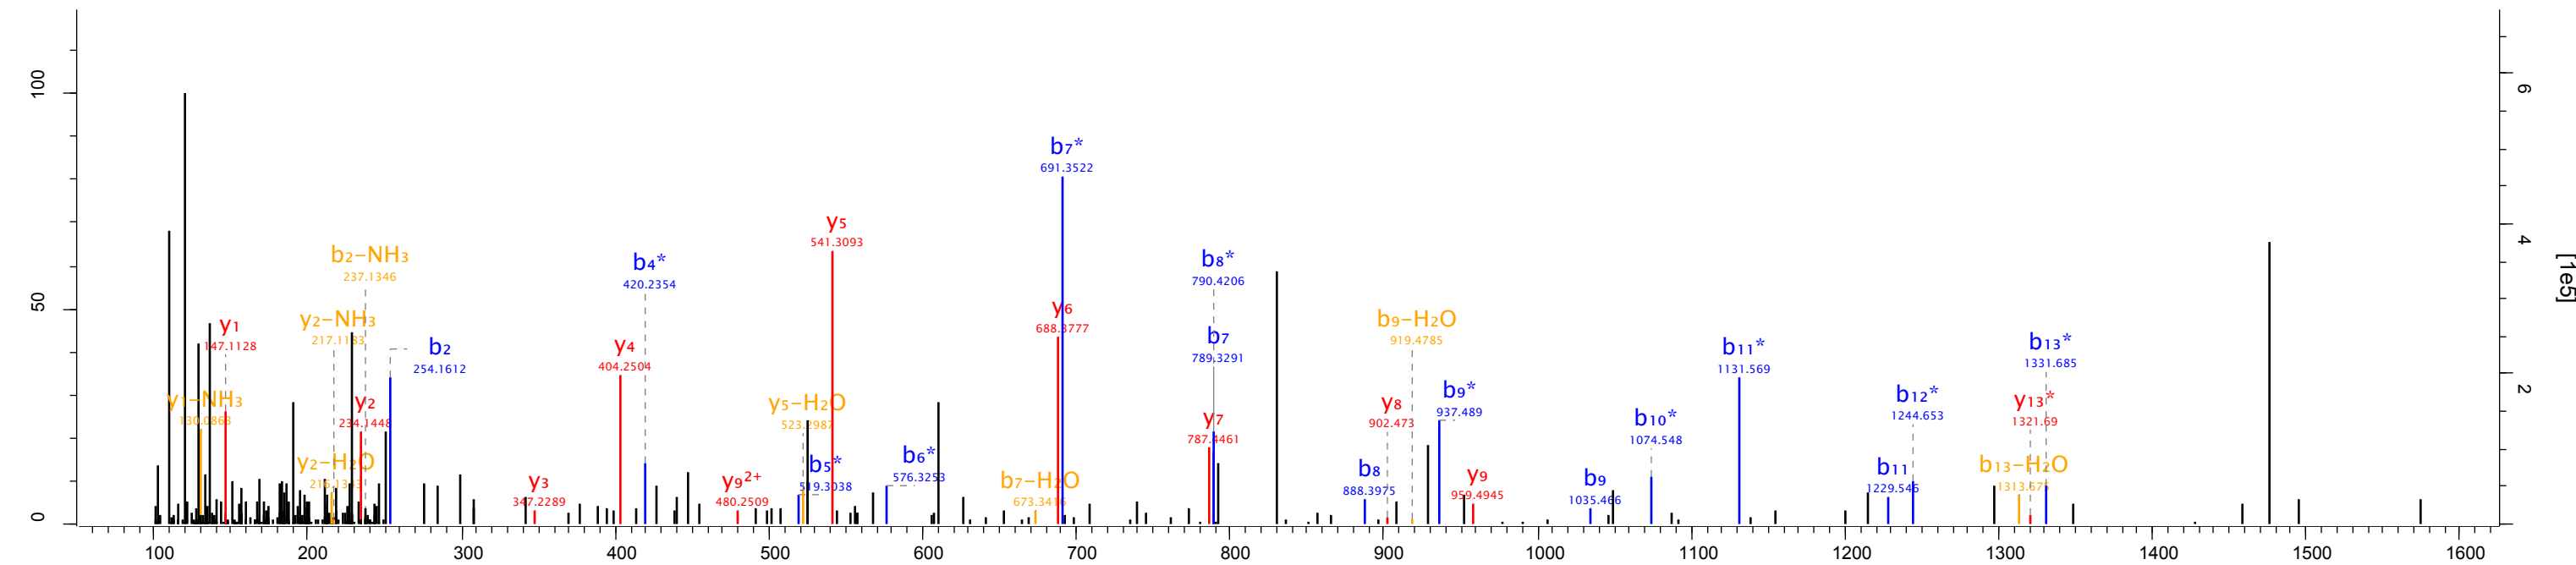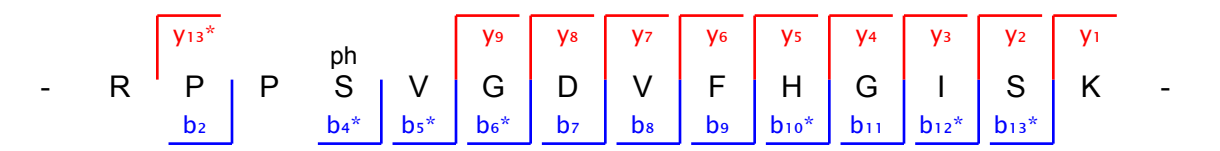

Raw file: 20150814\_A375SR\_Phospho\_BR2\_09  
 Scan: 17774 Method: FTMS; HCD Score: 93.21 m/z: 778.73 Gene names: FAM21C;FAM21D;FAM21A

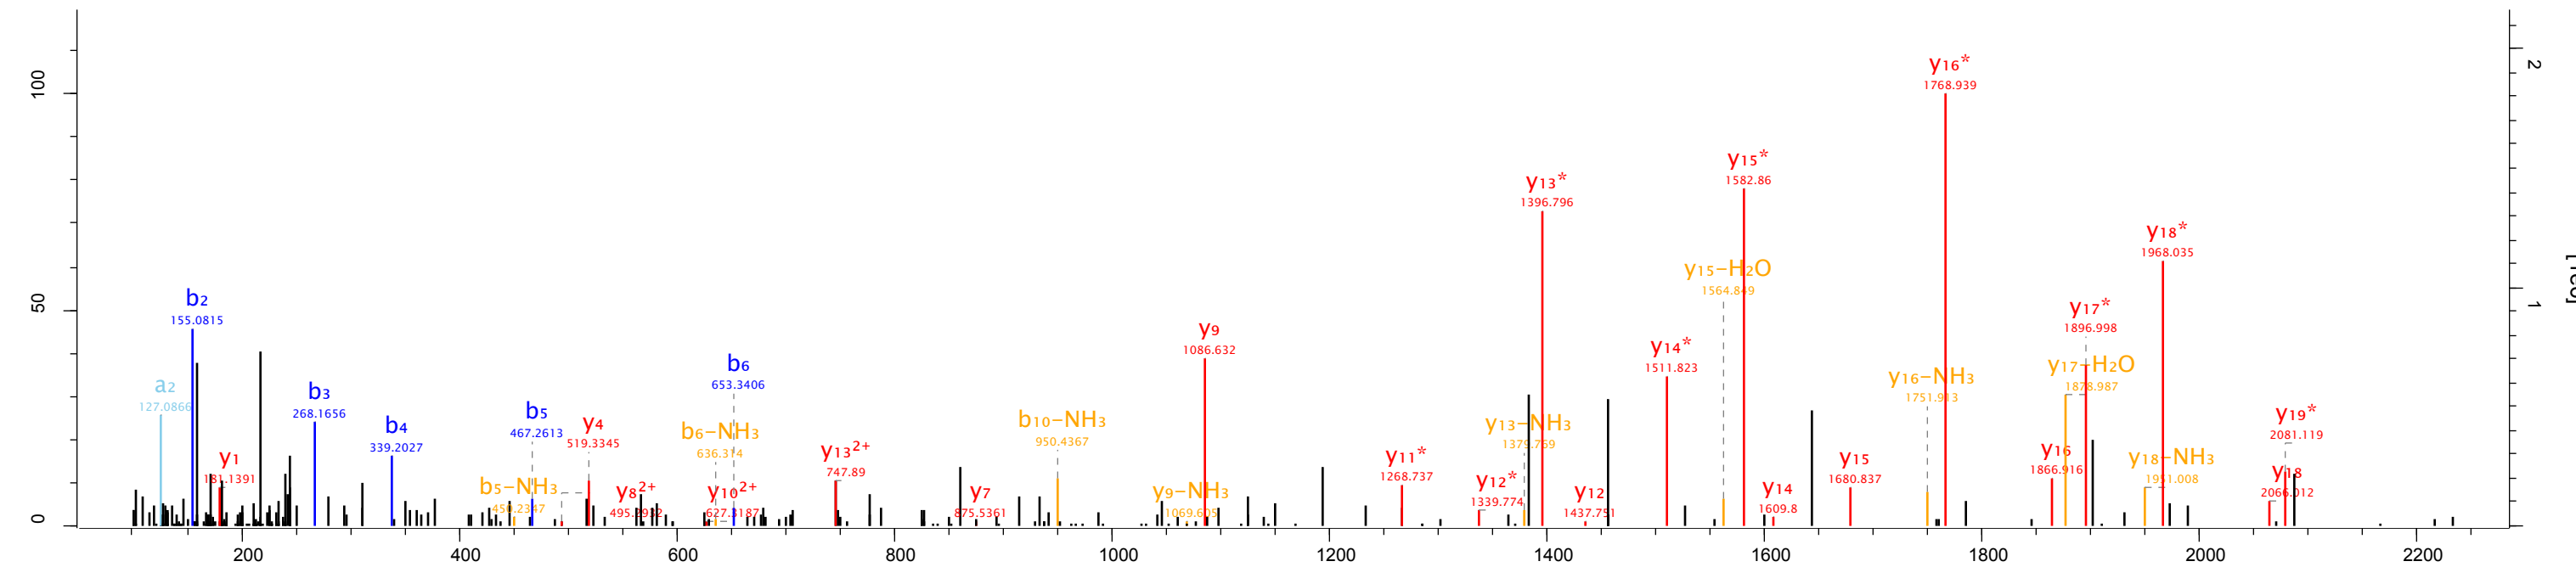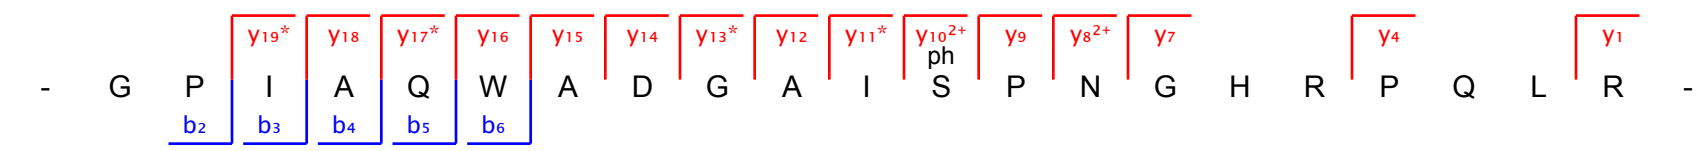



Raw file: 20150814\_A375SR\_Phospho\_BR2\_09  
 Scan: 18034 Method: FTMS; HCD Score: 116.28 m/z: 879.43 Gene names: MPRIP

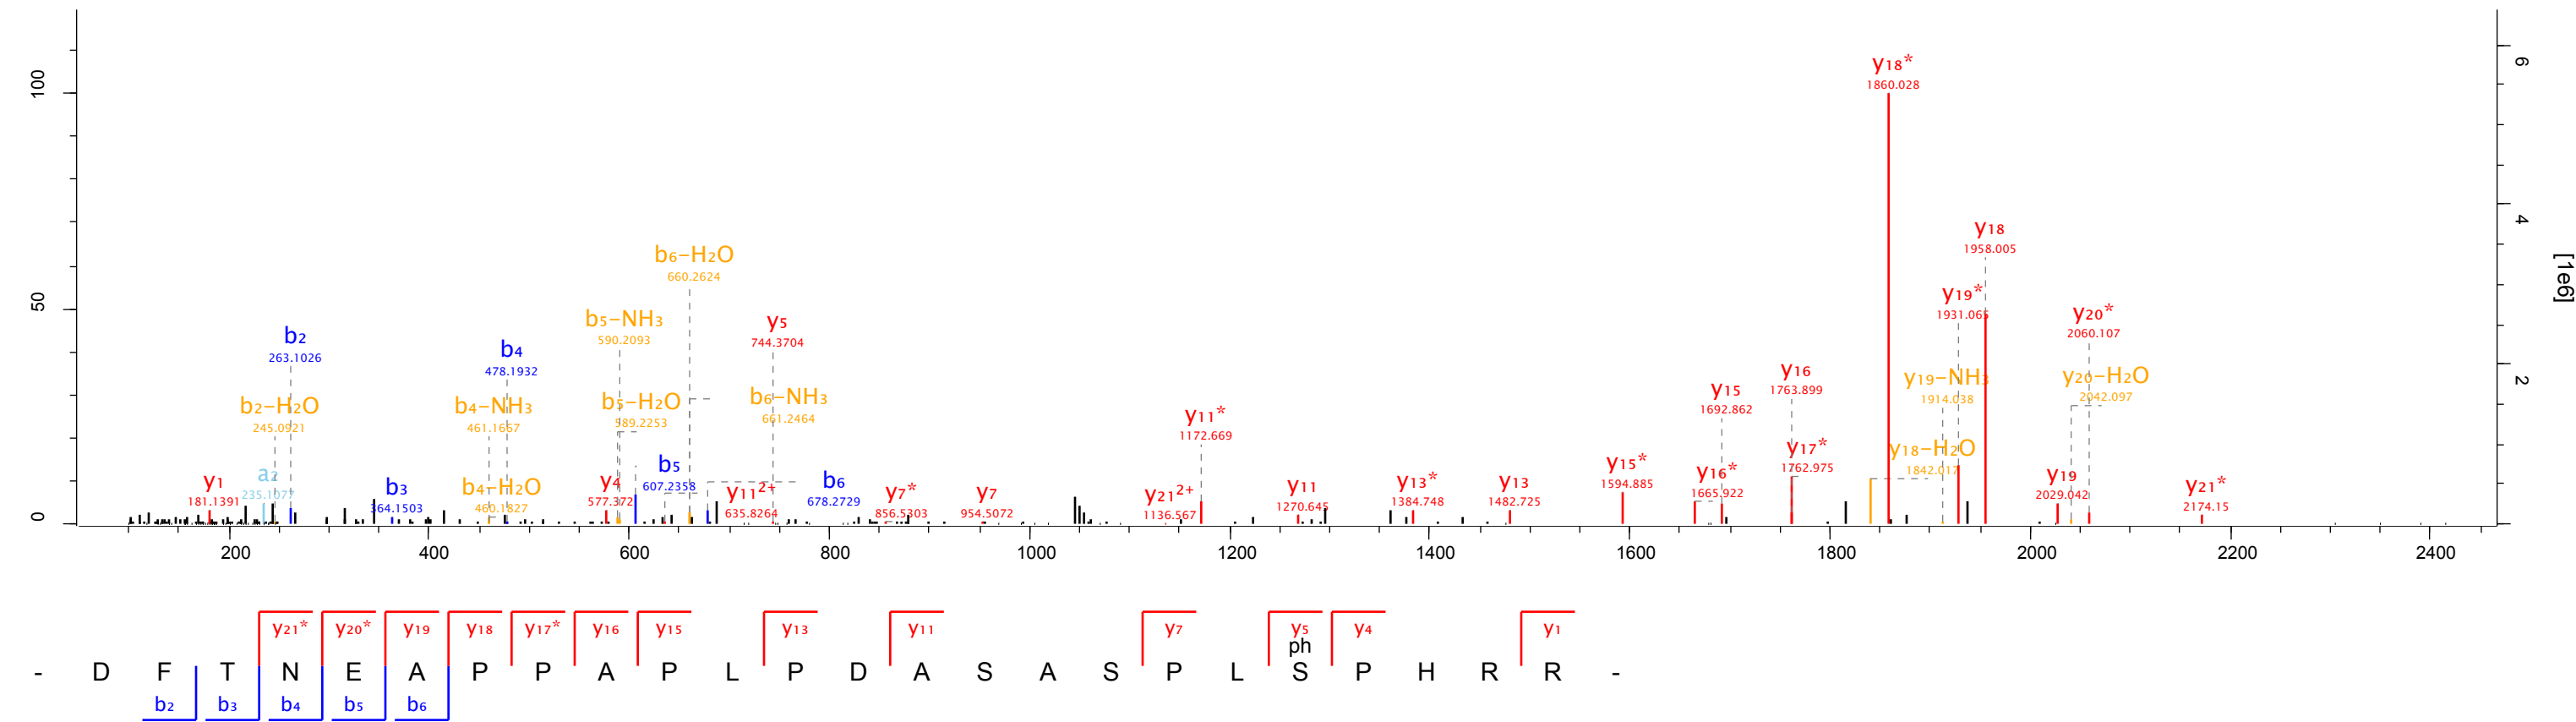

Raw file 20150814\_A375SR\_Phospho\_BR2\_09 Scan 18214 Method FTMS; HCD Score 200.48 m/z 689.88 Gene names NUFIP2

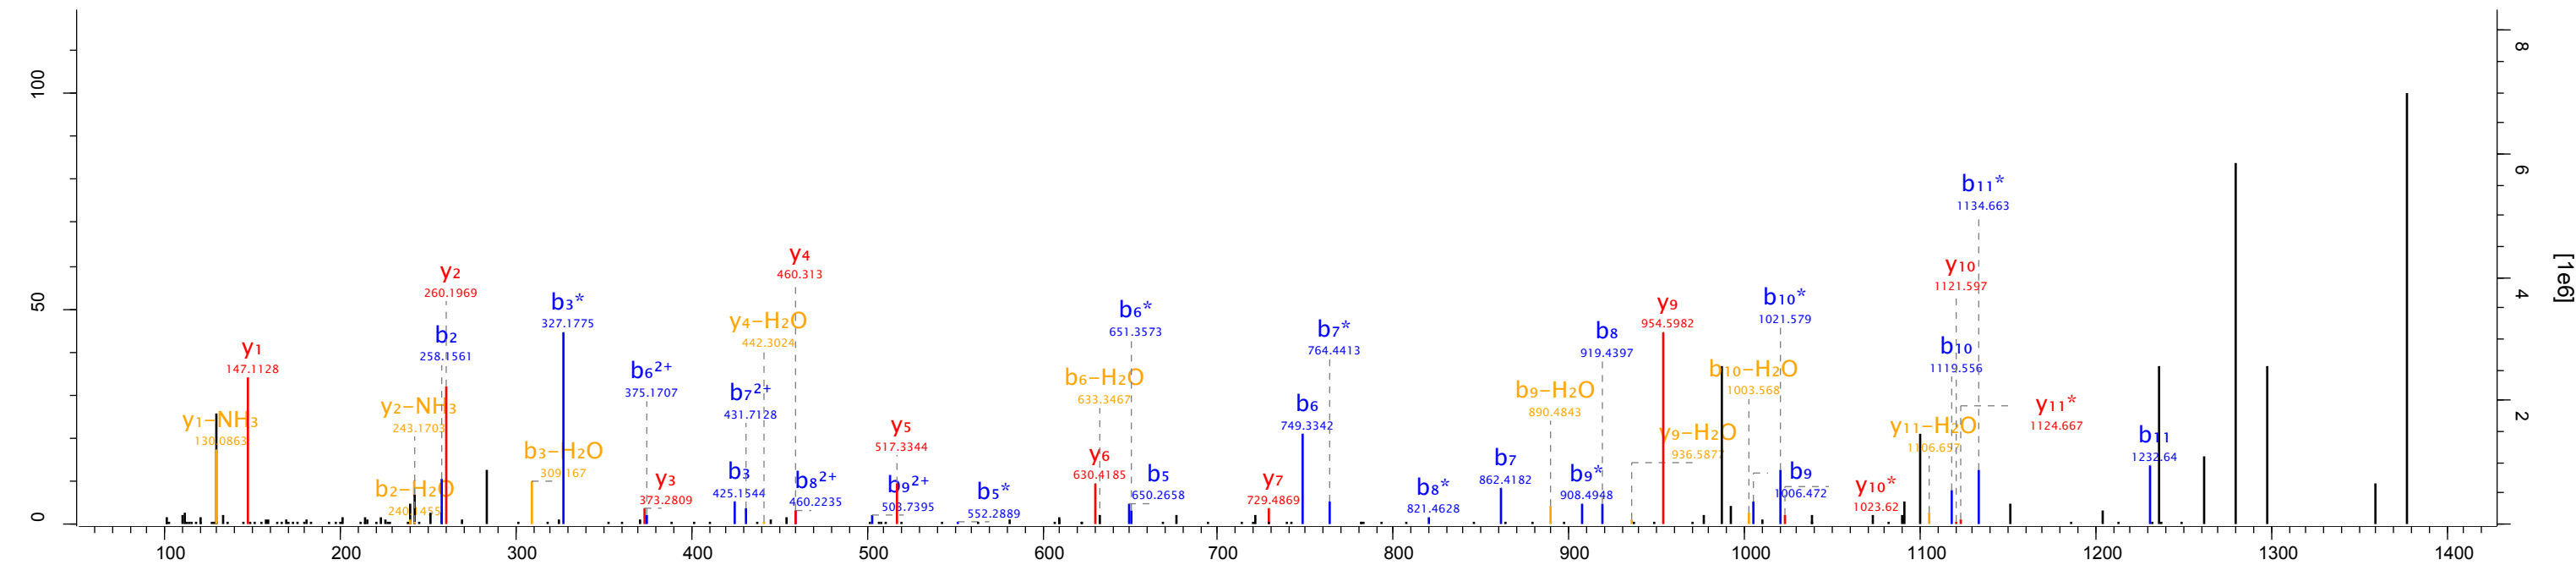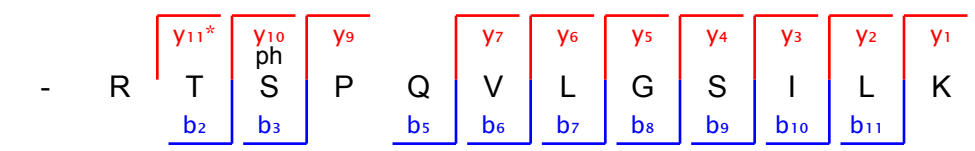

Raw file: 20150814\_A375SR\_Phospho\_BR2\_09  
 Scan: 19554 Method: FTMS; HCD Score: 91.38 m/z: 804.47 Gene names: SP2

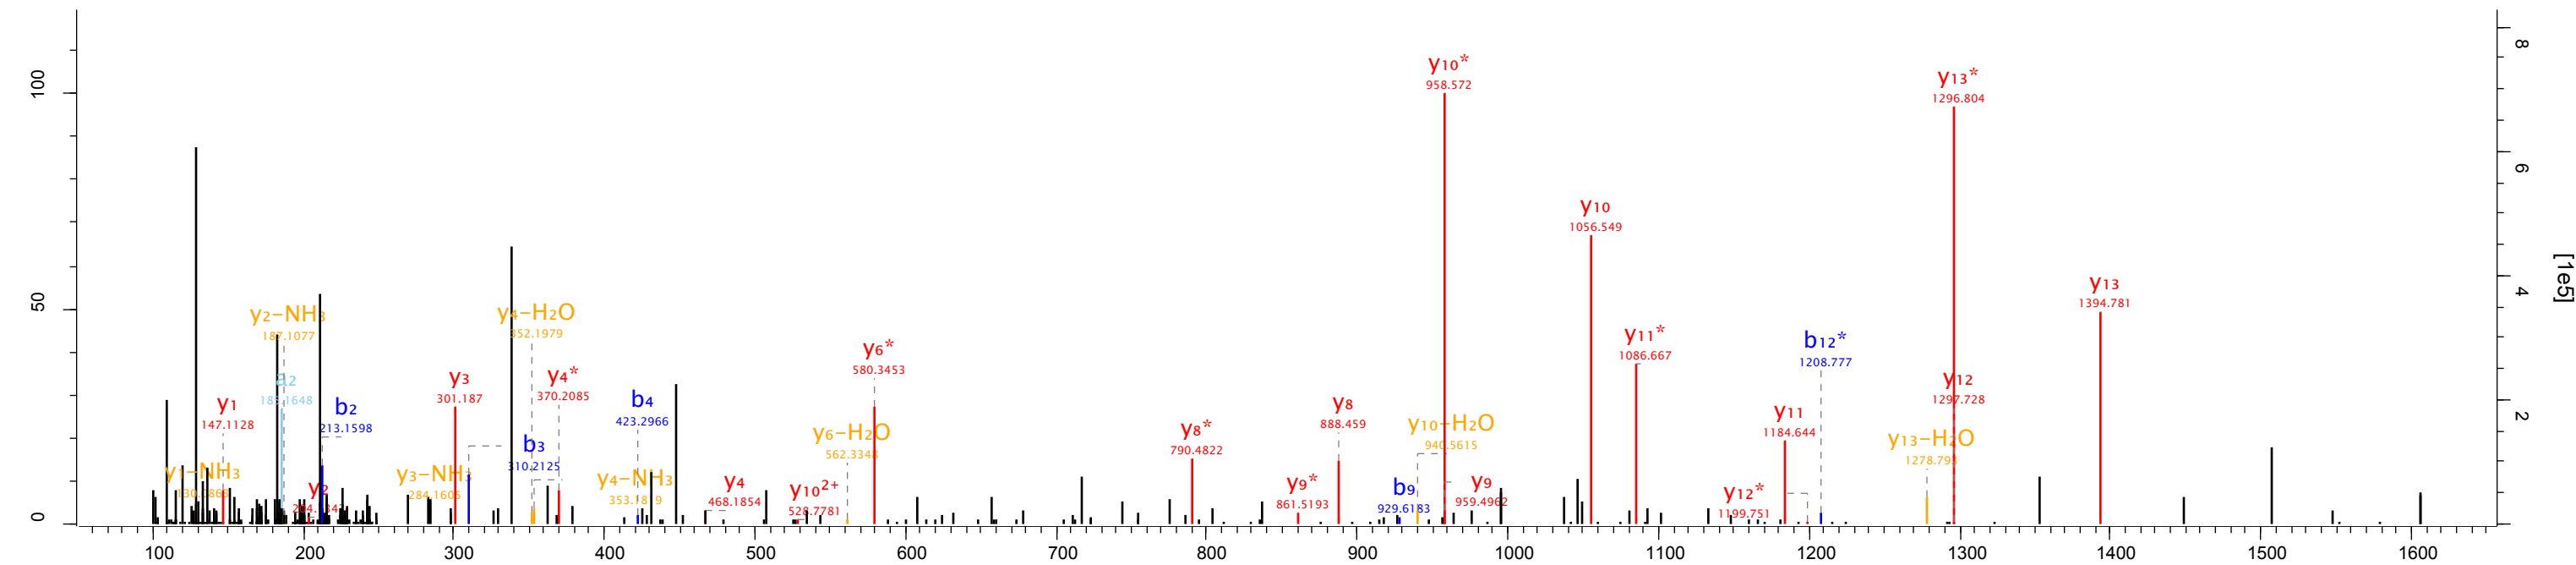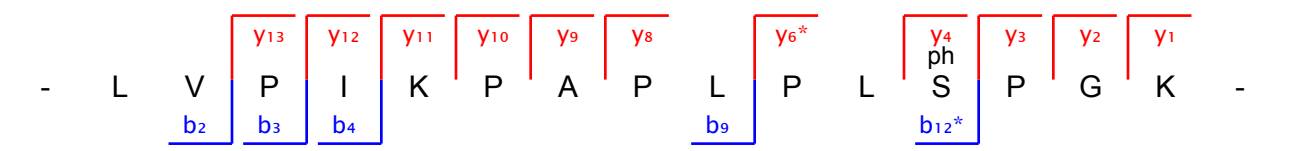

Raw file 20150814\_A375SR\_Phospho\_BR2\_09 Scan 20014 Method FTMS; HCD Score 245.98 m/z 1066.04 Gene names ACIN1

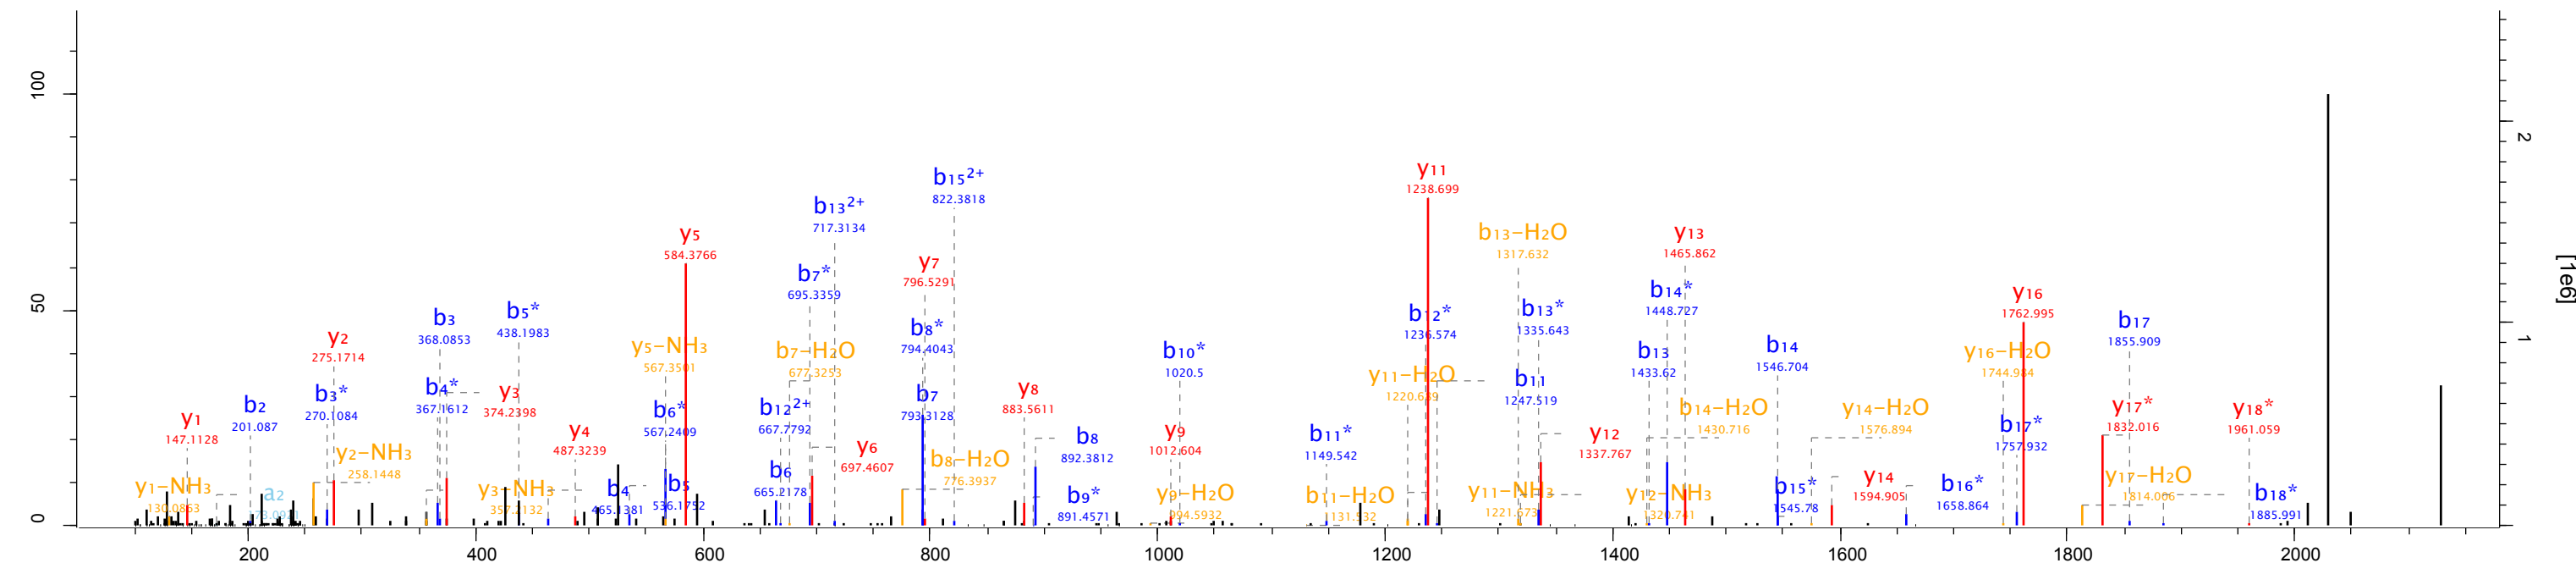

- A E S P A E K V P E E S V L P L V Q K -

y18\*
y17\*  
ph
y16
y14
y13
y12
y11
y9
y8
y7
y6
y5
y4
y3
y2
y1

b2
b3
b4
b5
b6
b7
b8
b9\*
b10\*
b11
b12\*
b13
b14
b15\*
b16\*
b17
b18\*

Raw file: 20150814\_A375SR\_Phospho\_BR2\_09  
 Scan: 20224 Method: FTMS; HCD Score: 71.77 m/z: 1197.56 Gene names: CDYL

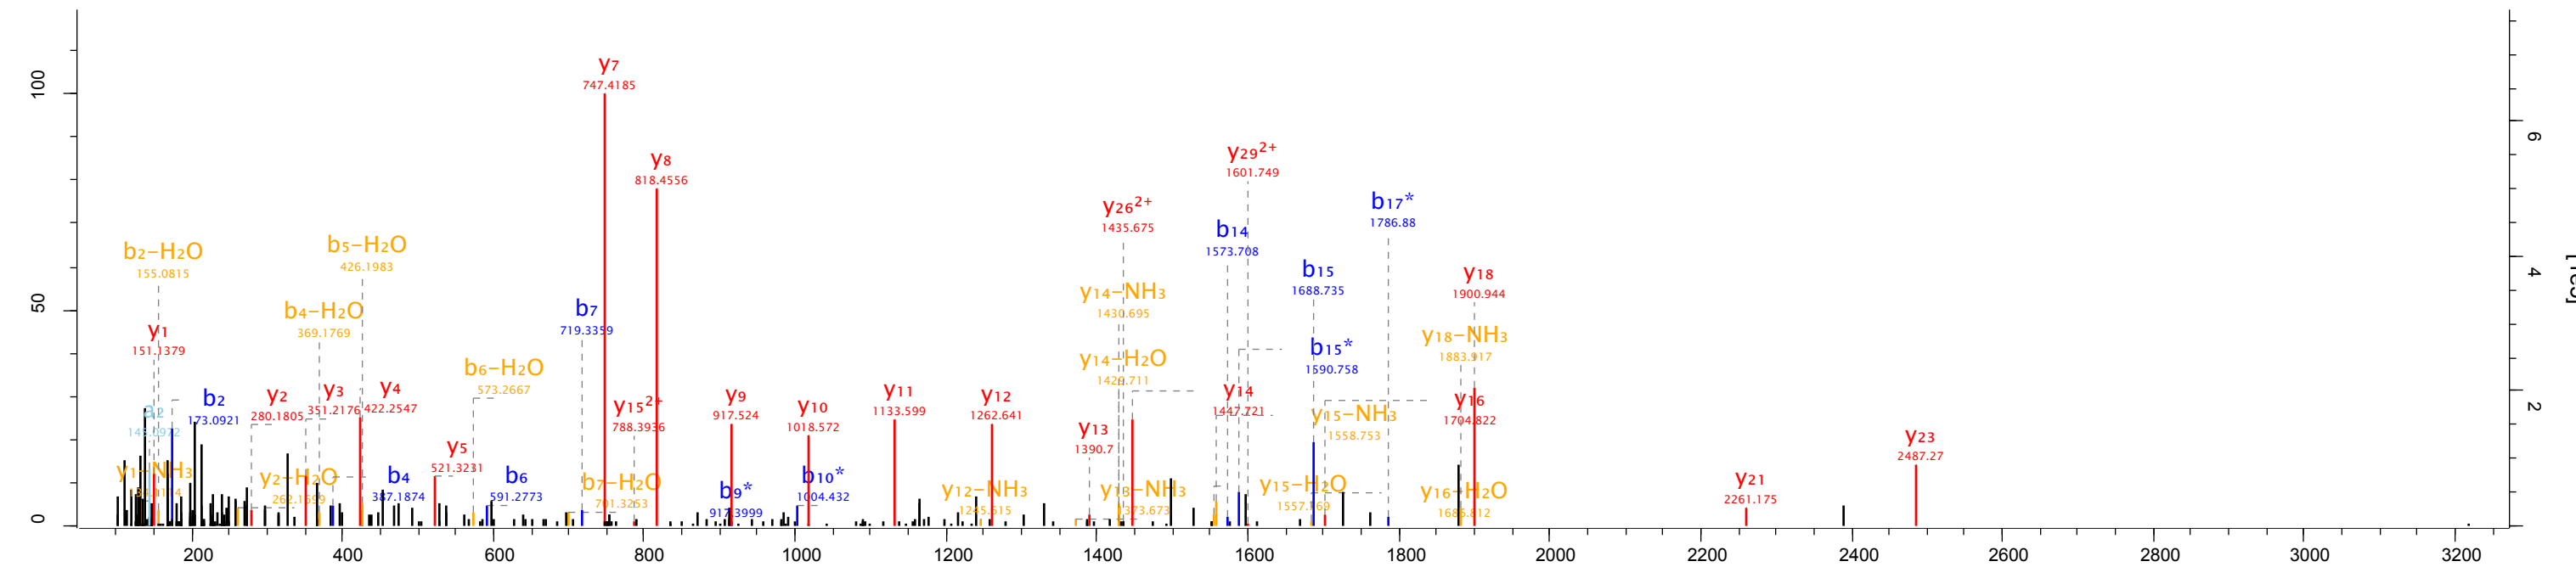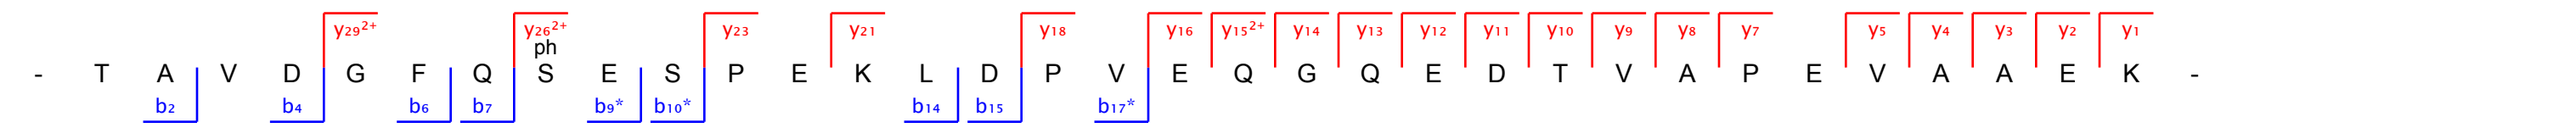

Raw file  
 20150814\_A375SR\_Phospho\_BR2\_09  
 Scan 20684 Method FTMS; HCD Score 137.37 m/z 1140.88 Gene names SCRIB

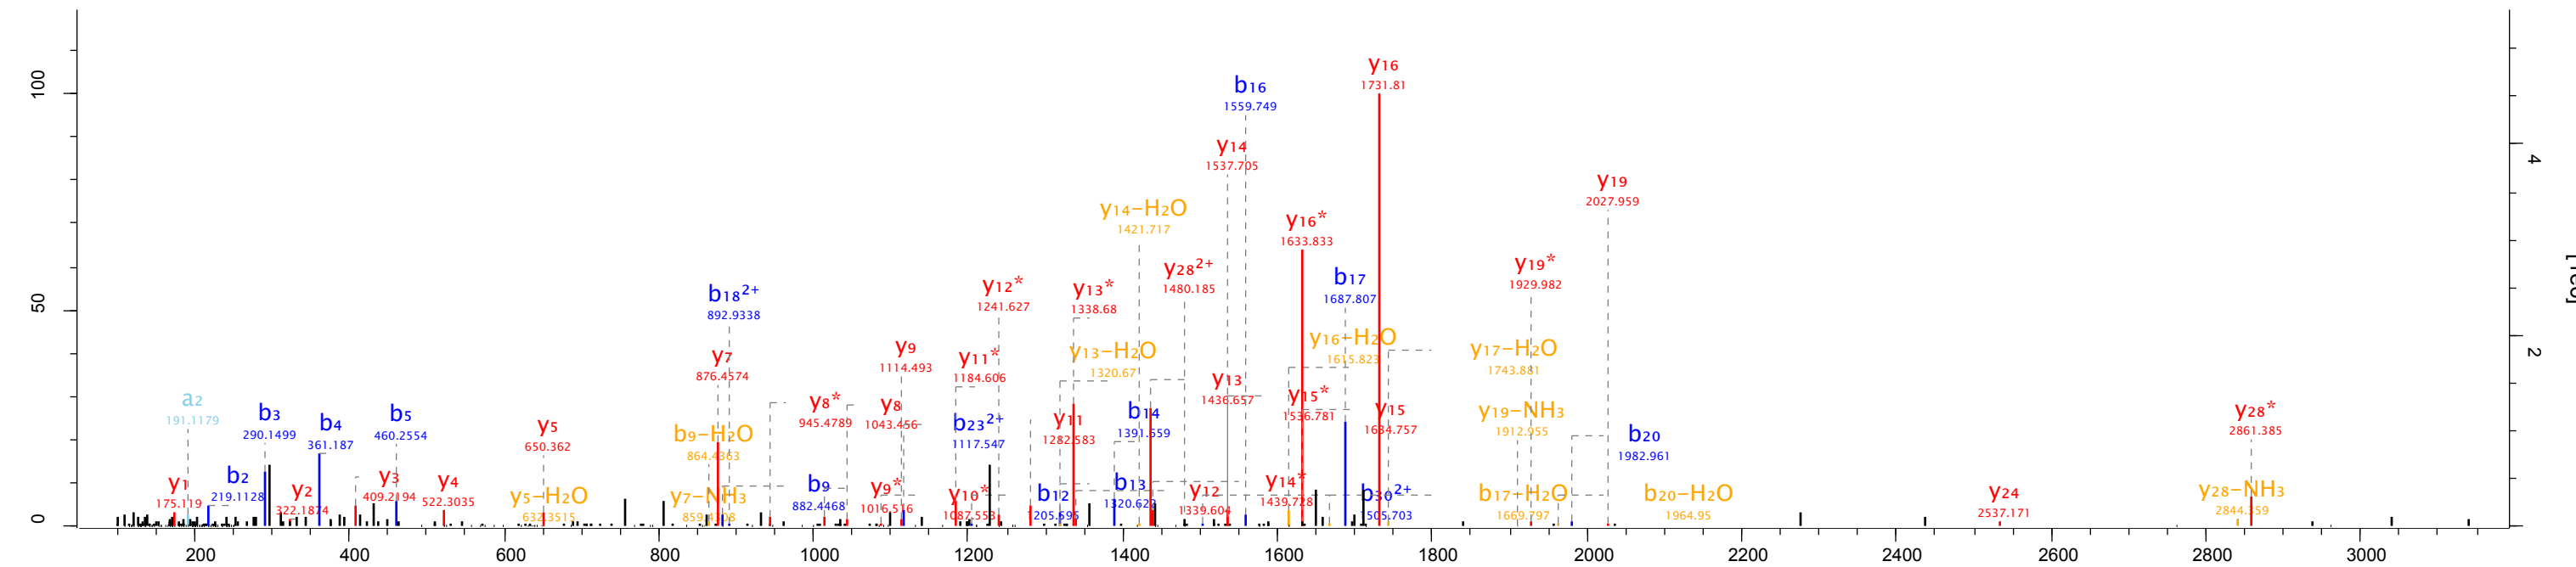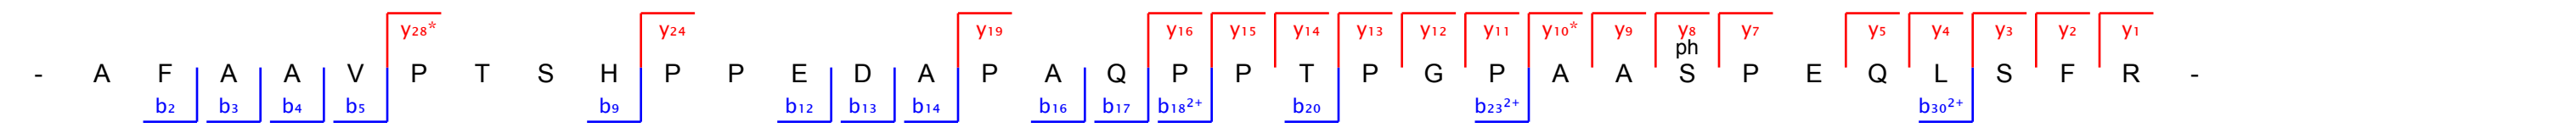

Raw file: 20150814\_A375SR\_Phospho\_BR2\_09  
 Scan: 2084 Method: FTMS; HCD Score: 105.2 m/z: 501.22 Gene names: PNN

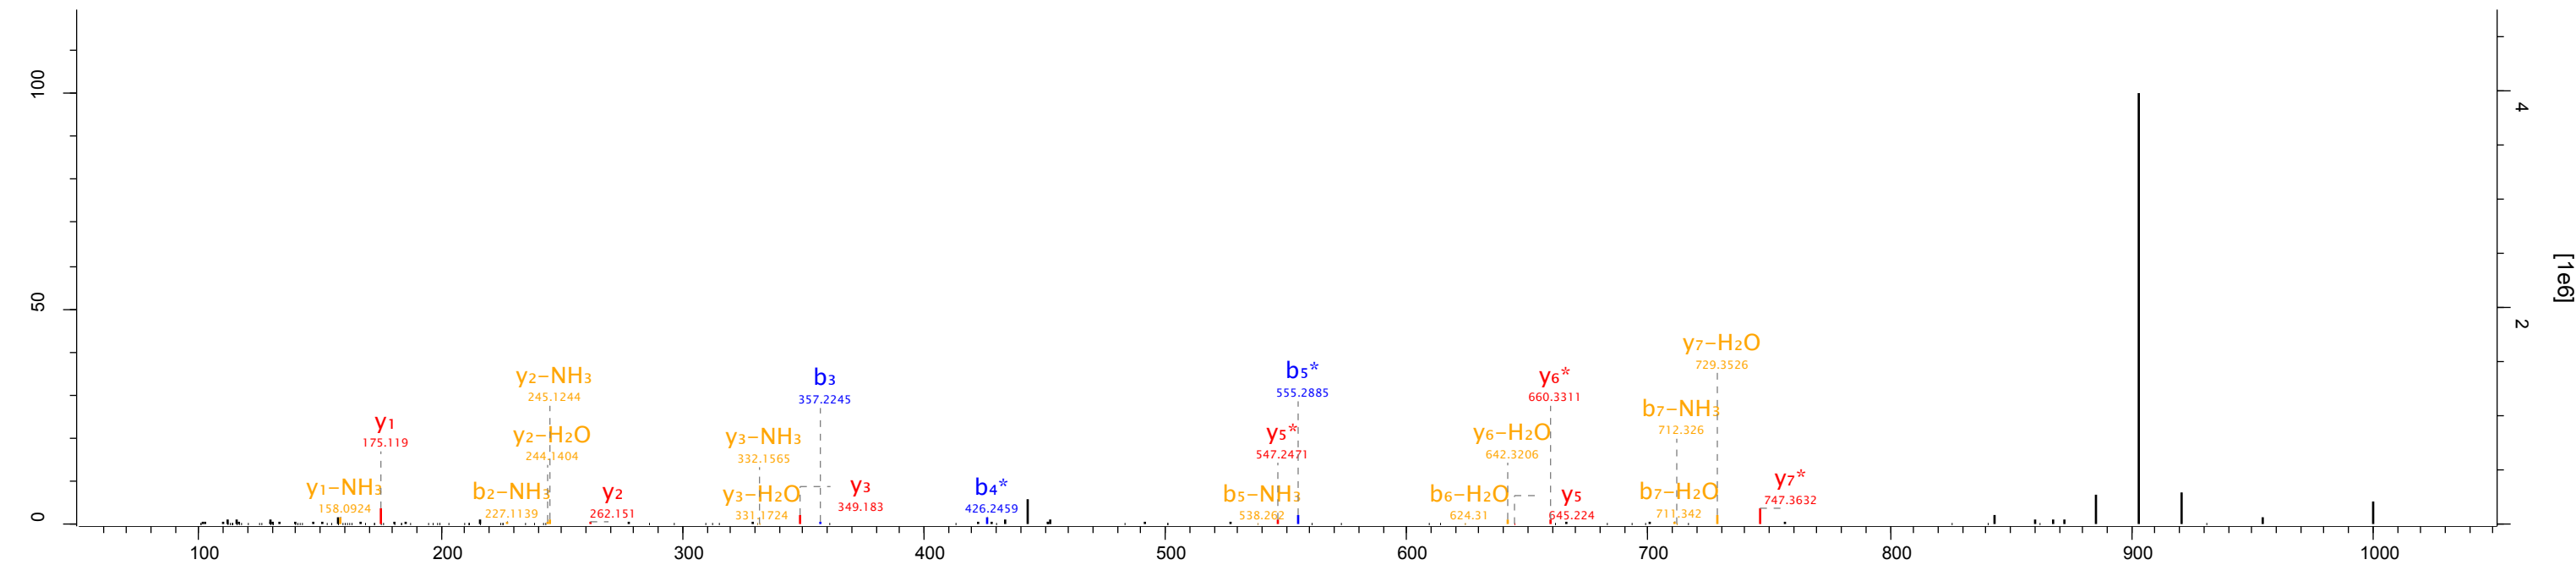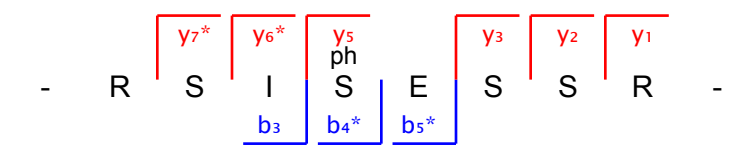

Raw file  
 20150814\_A375SR\_Phospho\_BR2\_09  
 Scan 20984 Method FTMS; HCD Score 180.31 m/z 948.46 Gene names YLPM1

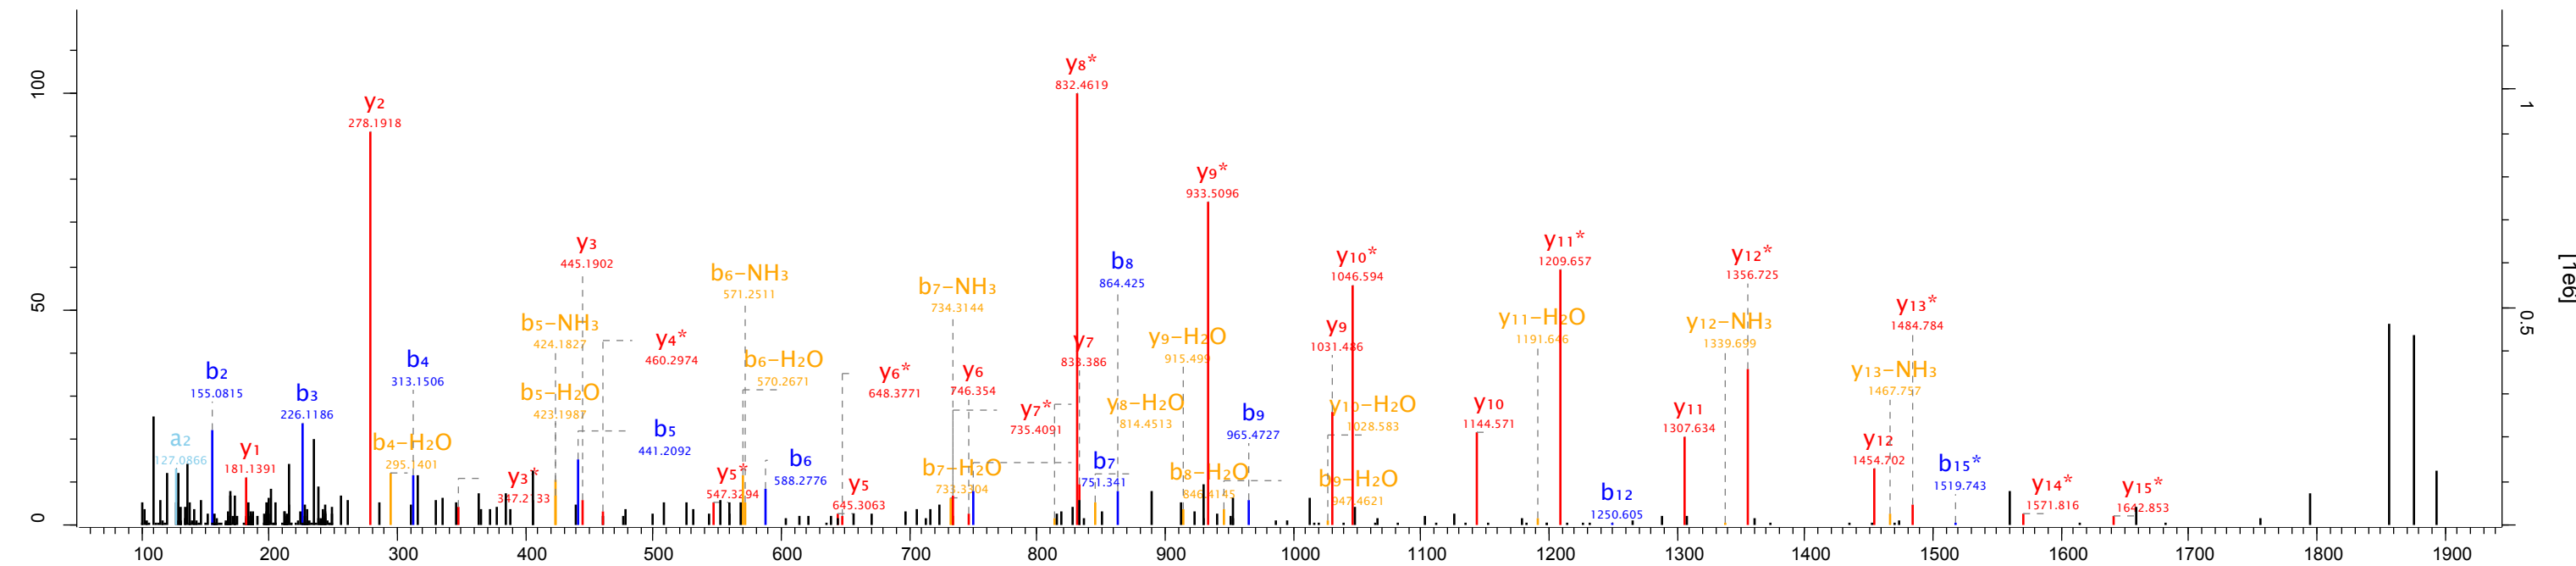

- G P A S Q F Y I T P S T S L S P R -

b<sub>2</sub>
b<sub>3</sub>
b<sub>4</sub>
b<sub>5</sub>
b<sub>6</sub>
b<sub>7</sub>
b<sub>8</sub>
b<sub>9</sub>
b<sub>12</sub>
b<sub>15</sub>\*

y<sub>15</sub>\*
y<sub>14</sub>\*
y<sub>13</sub>\*
y<sub>12</sub>
y<sub>11</sub>
y<sub>10</sub>
y<sub>9</sub>
y<sub>8</sub>\*
y<sub>7</sub>
y<sub>6</sub>
y<sub>5</sub>
y<sub>4</sub>\*
y<sub>3</sub>
y<sub>2</sub>
y<sub>1</sub>



Raw file 20150814\_A375SR\_Phospho\_BR2\_09 Scan 2124 Method FTMS; HCD Score 71.88 m/z 466.25 Gene names PHF3

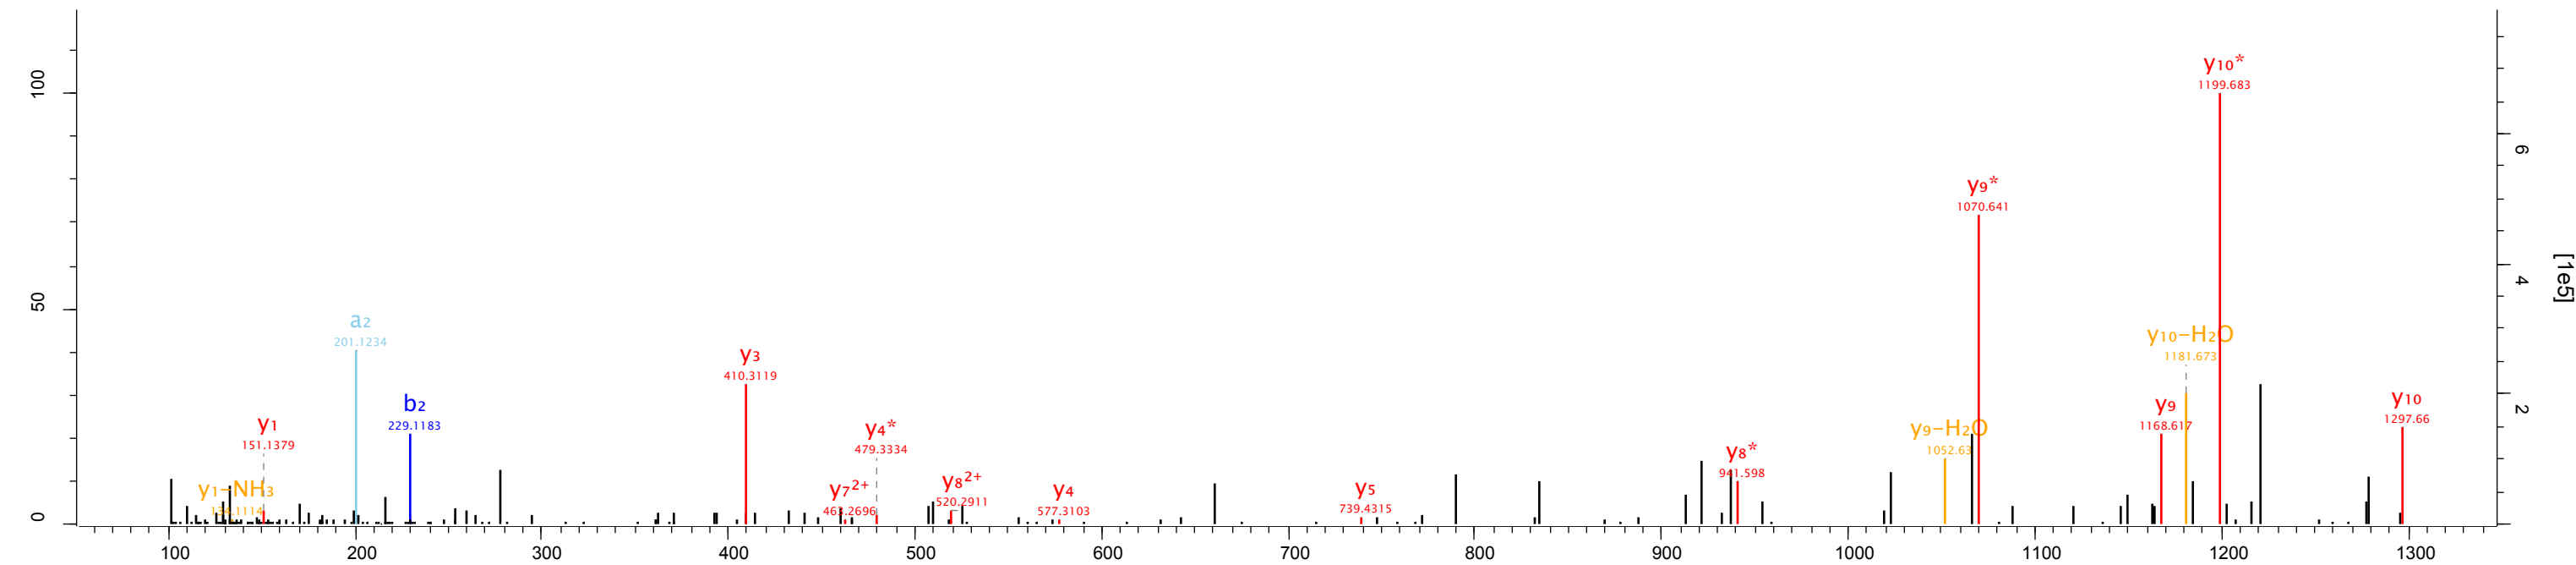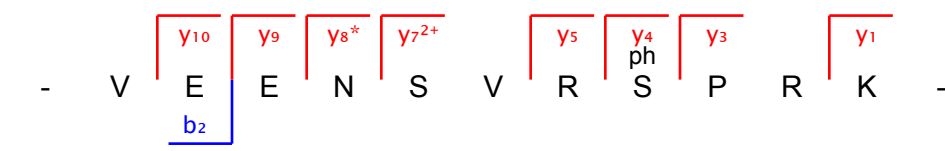

Raw file  
 20150814\_A375SR\_Phospho\_BR2\_09  
 Scan 21964 Method FTMS; HCD Score 158.57 m/z 913.15 Gene names FBXO42

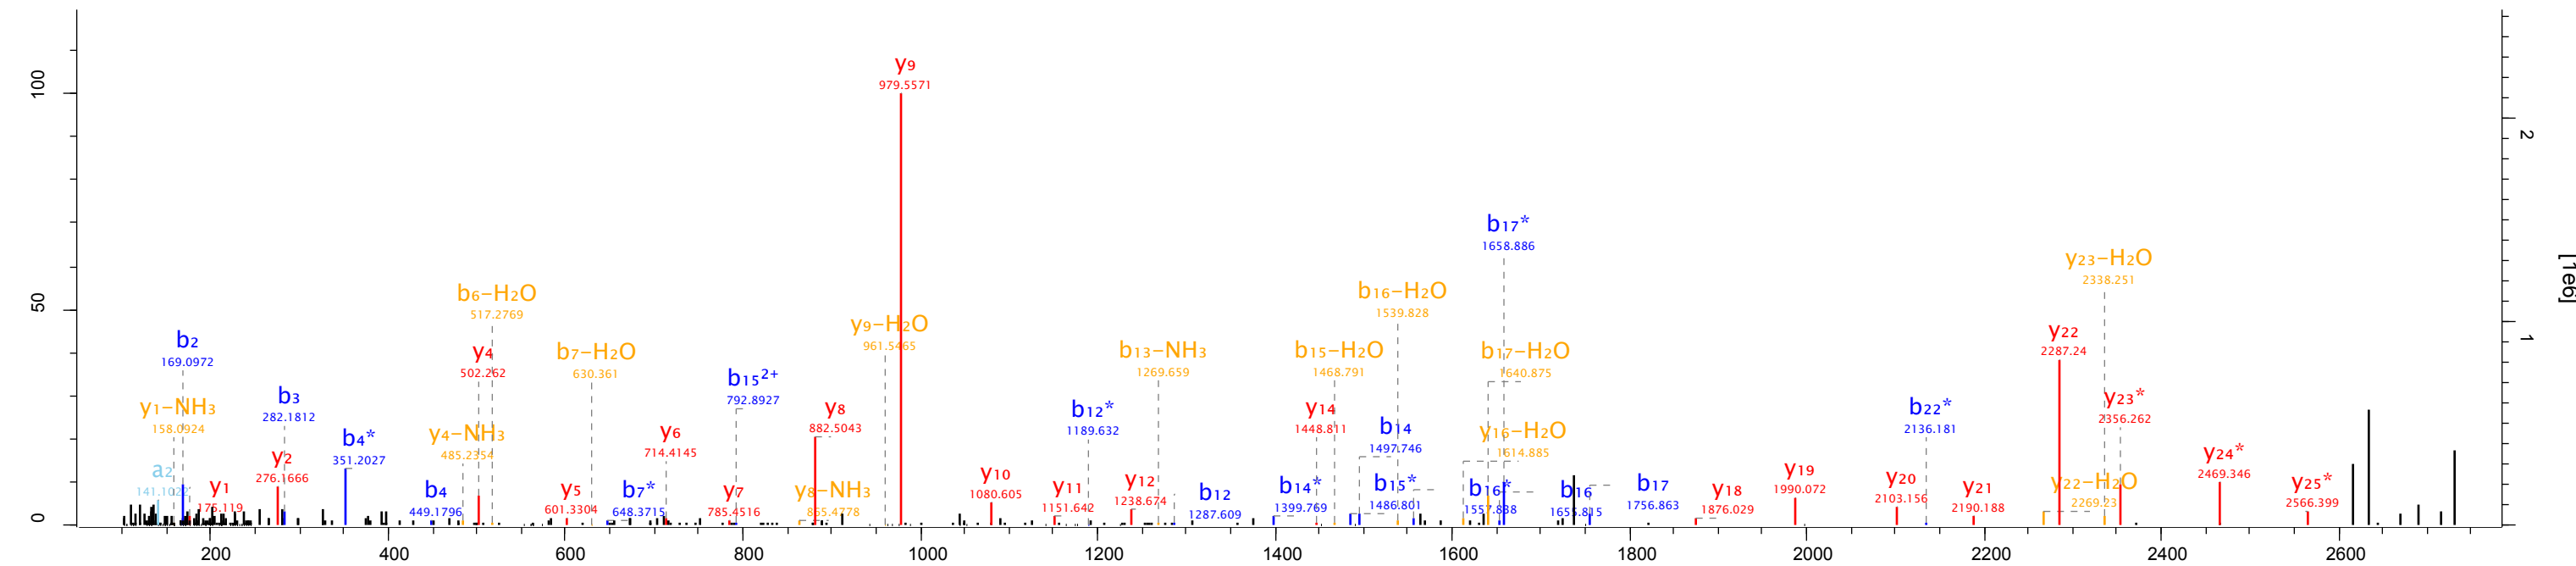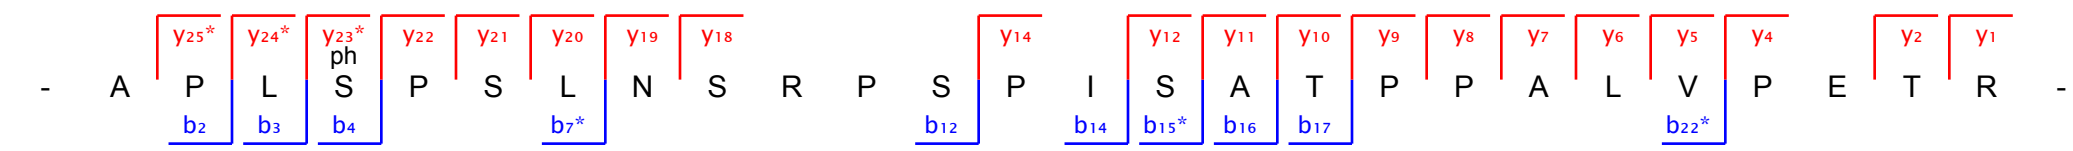

Raw file: 20150814\_A375SR\_Phospho\_BR2\_09  
 Scan: 22644 Method: FTMS; HCD Score: 168.93 m/z: 1043.99 Gene names: AKAP13

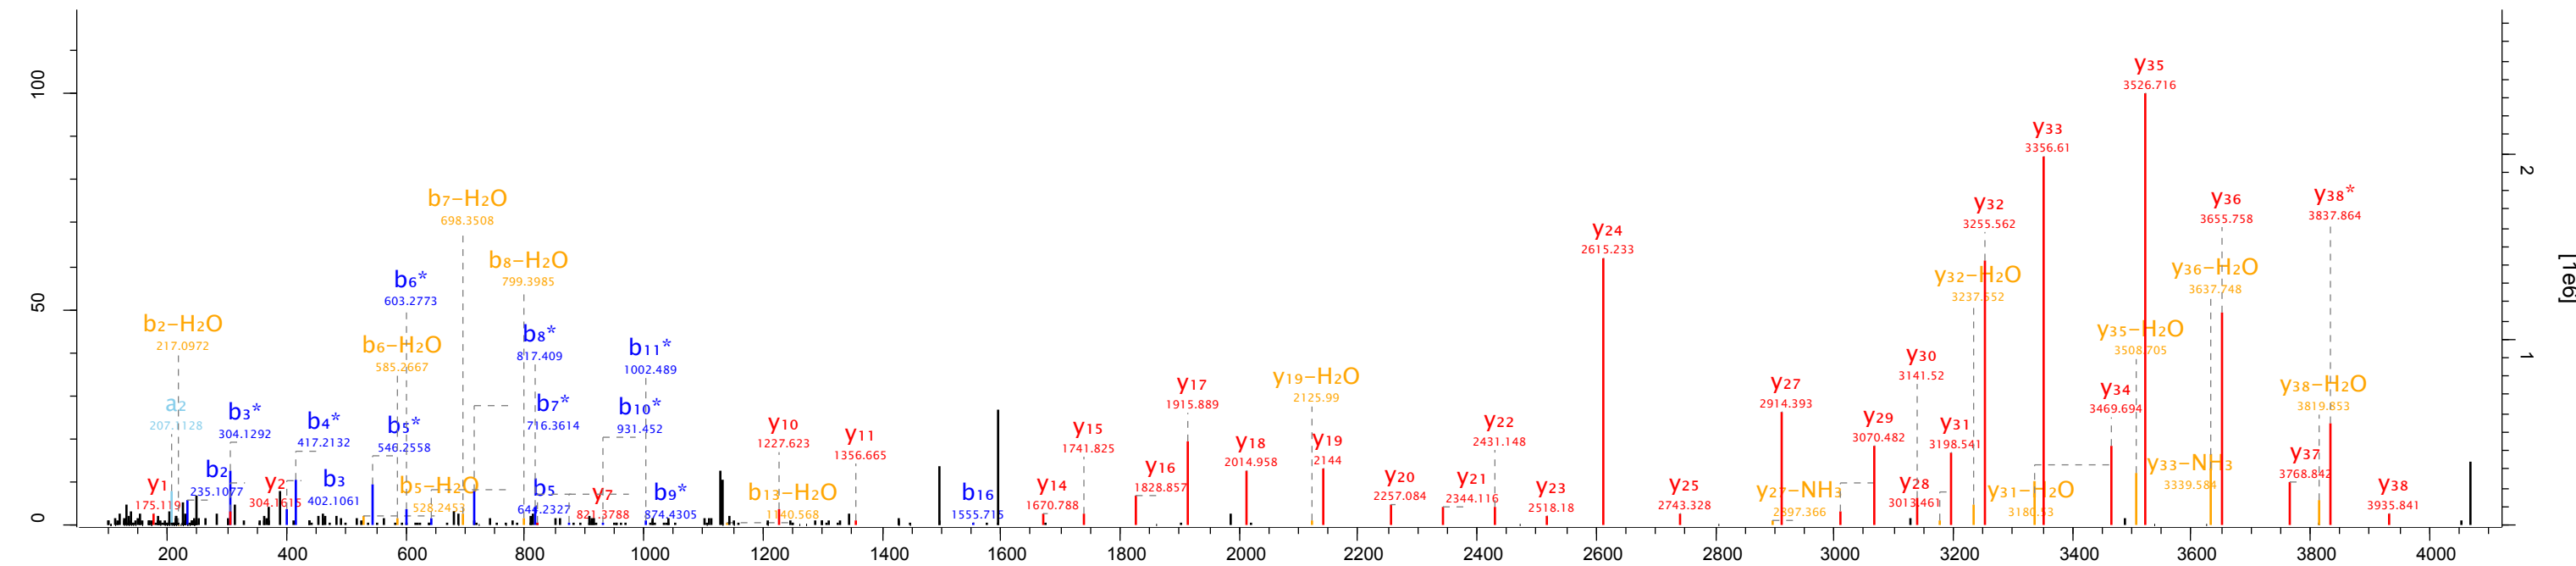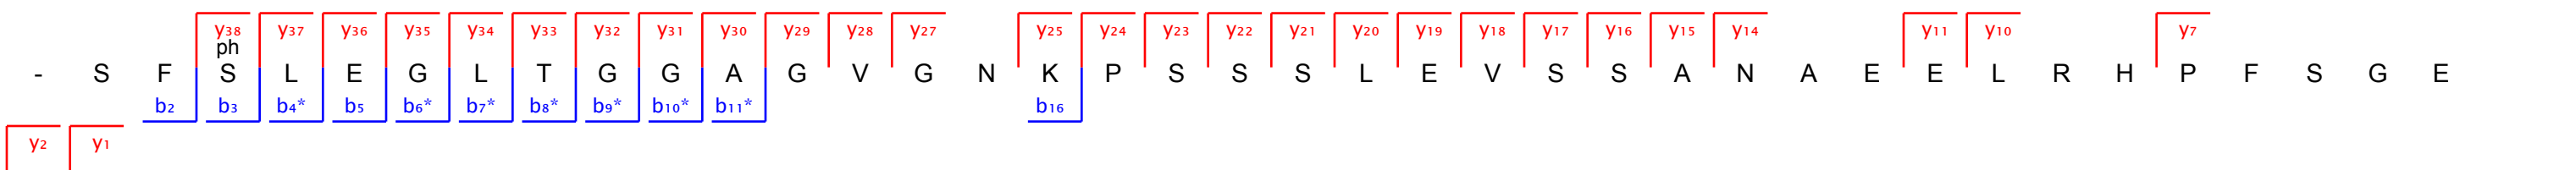

Raw file 20150814\_A375SR\_Phospho\_BR2\_09 Scan 22754 Method FTMS; HCD Score 101.45 m/z 710.06 Gene names POLDIP3;PDIP46

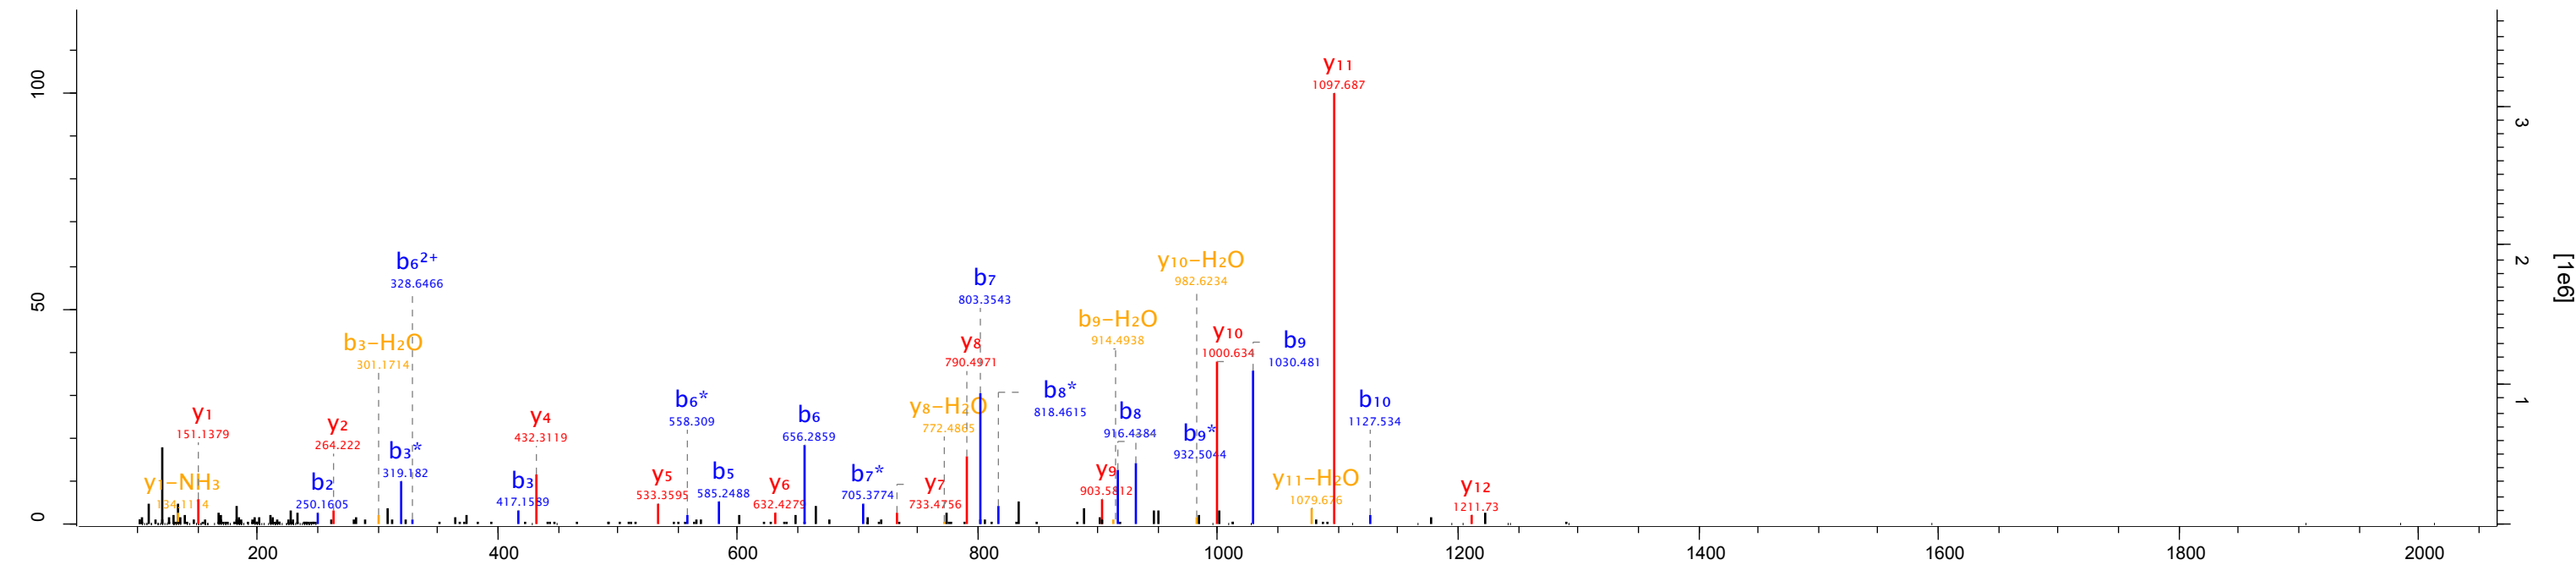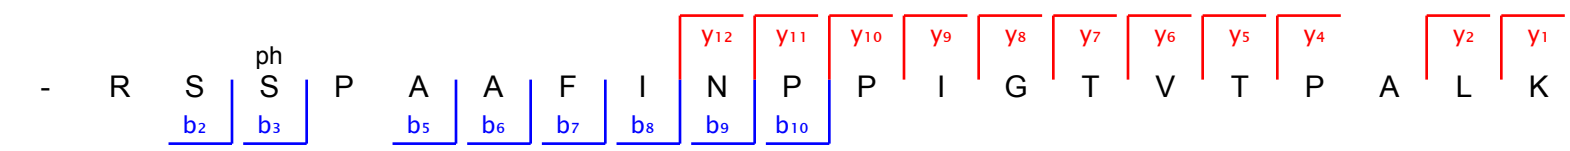

Raw file: 20150814\_A375SR\_Phospho\_BR2\_09  
 Scan: 2314 Method: FTMS; HCD Score: 265.08 m/z: 710.34 Gene names: RSL1D1

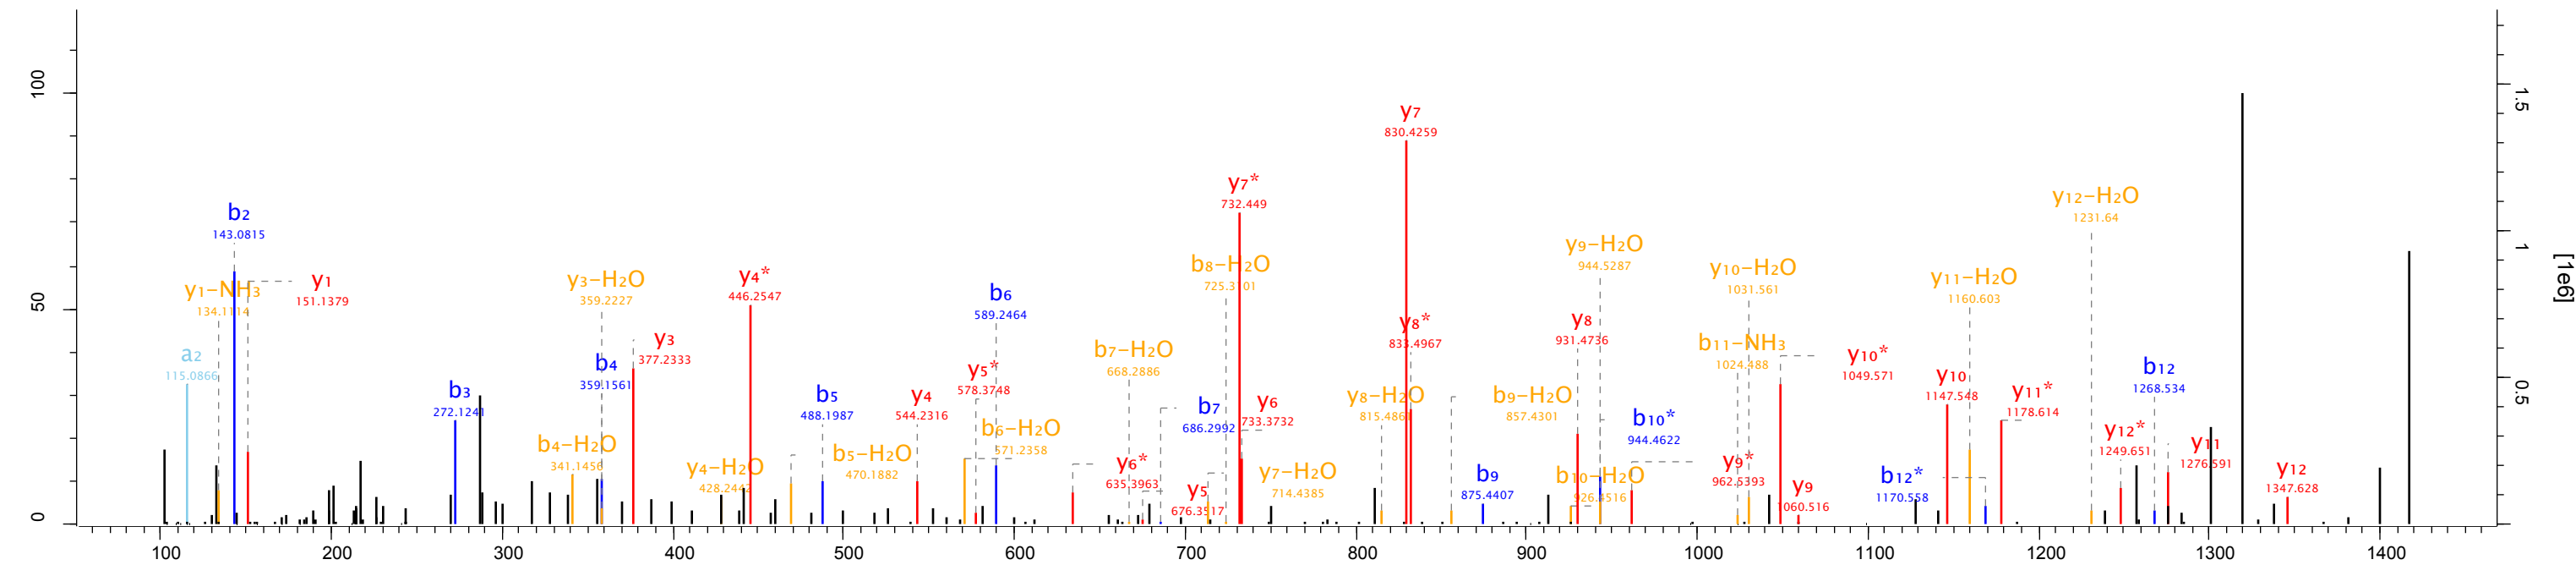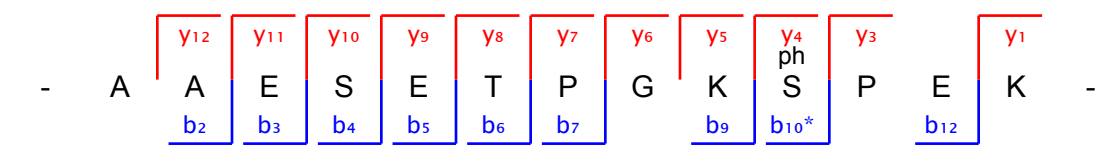

Raw file 20150814\_A375SR\_Phospho\_BR2\_09 Scan 23354 Method FTMS; HCD Score 202.8 m/z 900.94 Gene names ACIN1

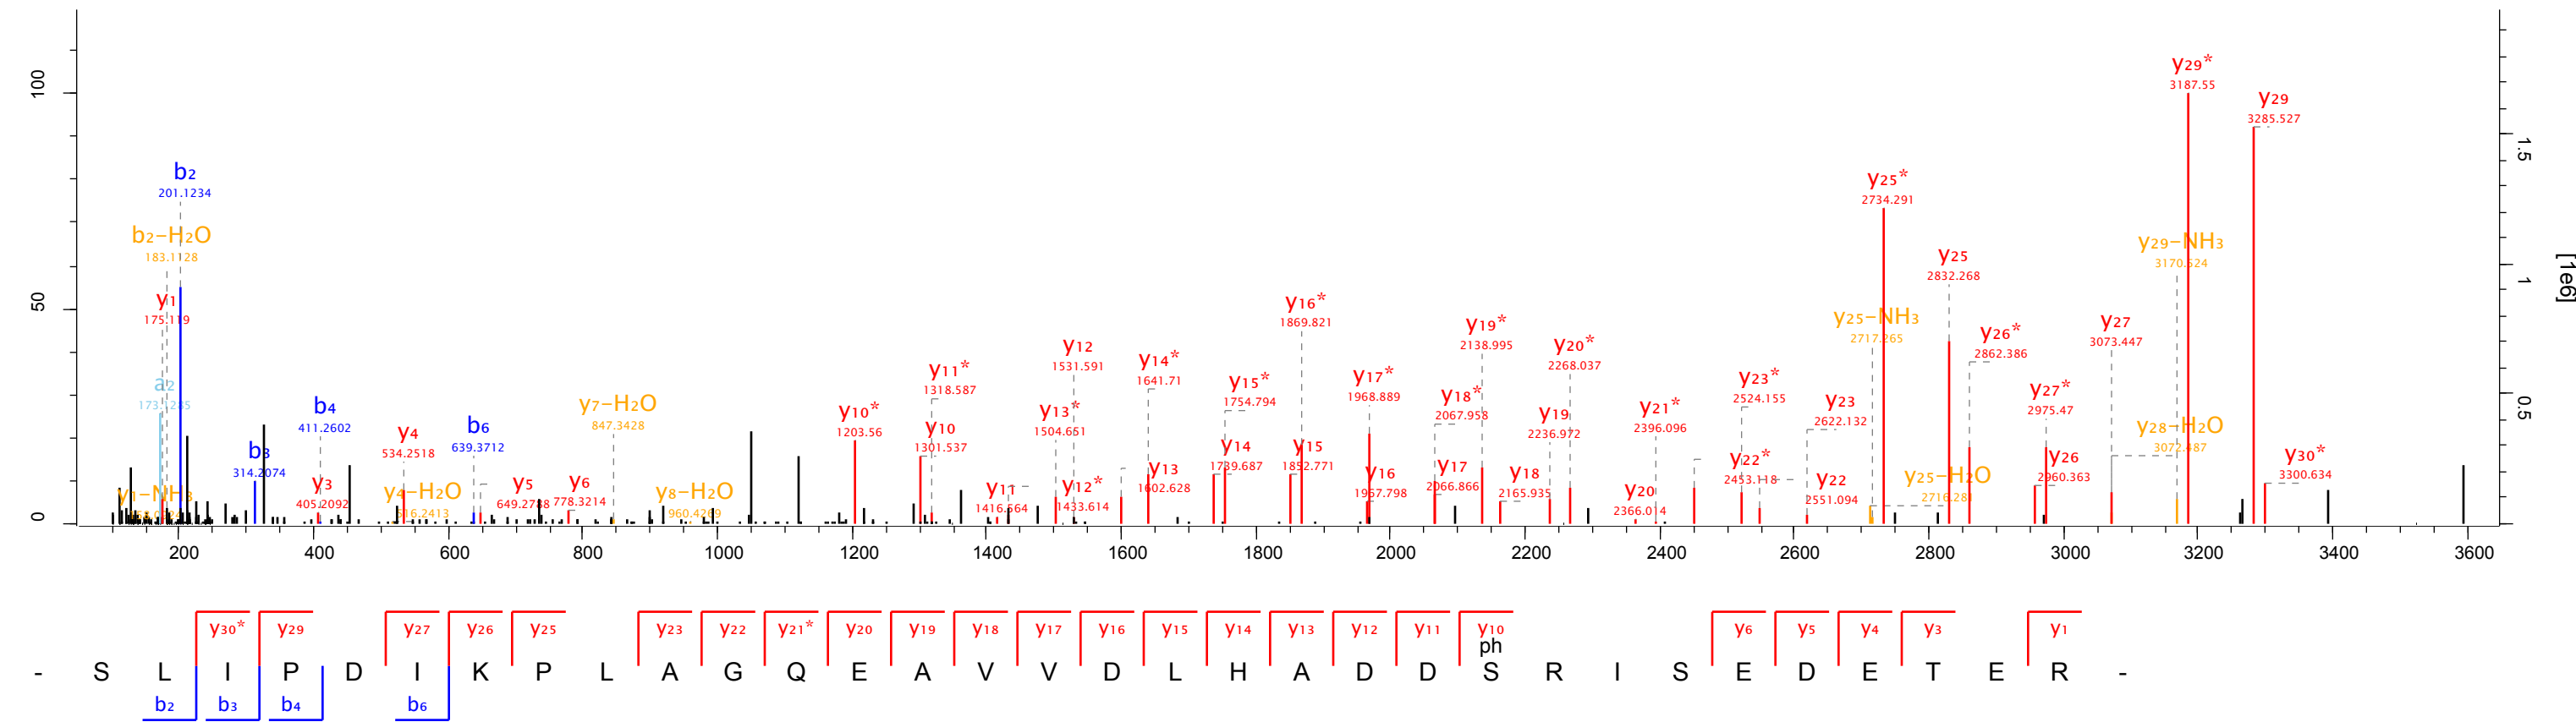

Raw file: 20150814\_A375SR\_Phospho\_BR2\_09  
 Scan: 24414 Method: FTMS; HCD Score: 187.13 m/z: 1040.51 Gene names: CCNL2

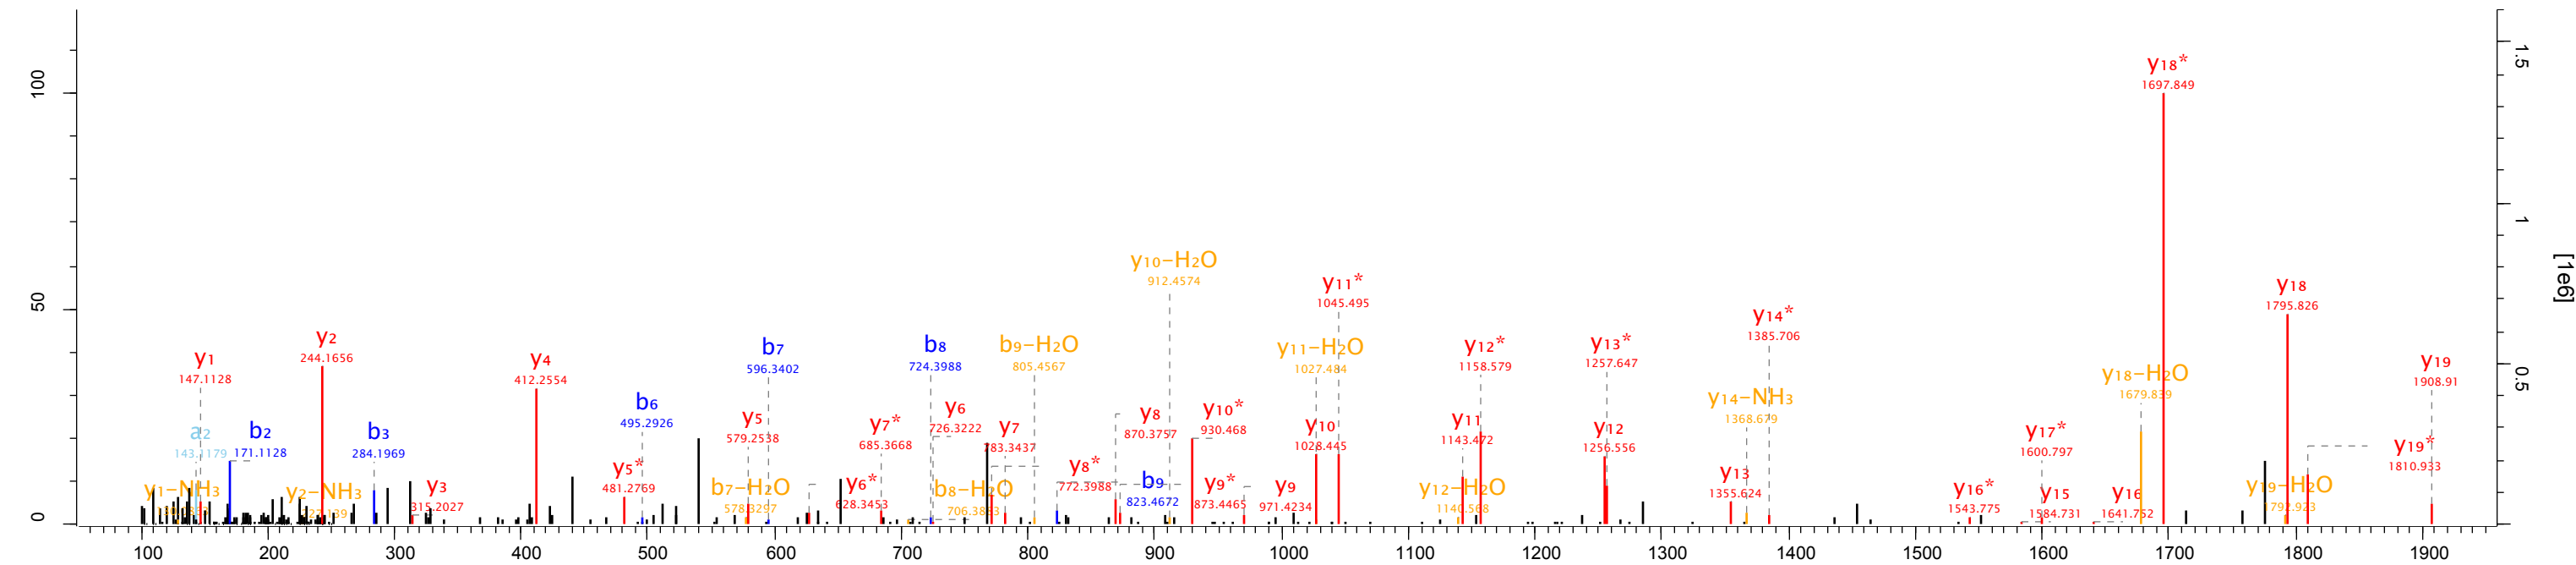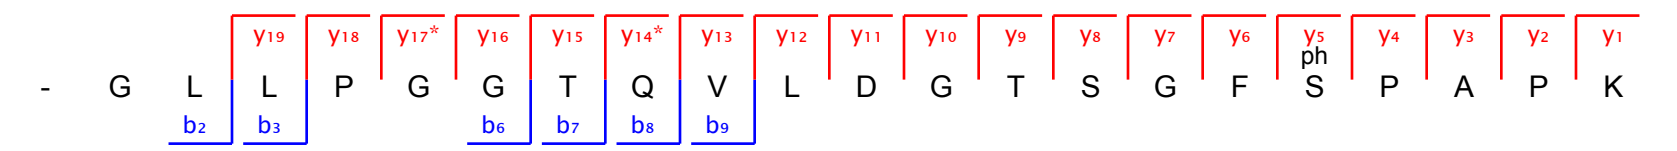

Raw file 20150814\_A375SR\_Phospho\_BR2\_09 Scan 28804 Method FTMS; HCD Score 150.29 m/z 1133.54 Gene names MAP1B

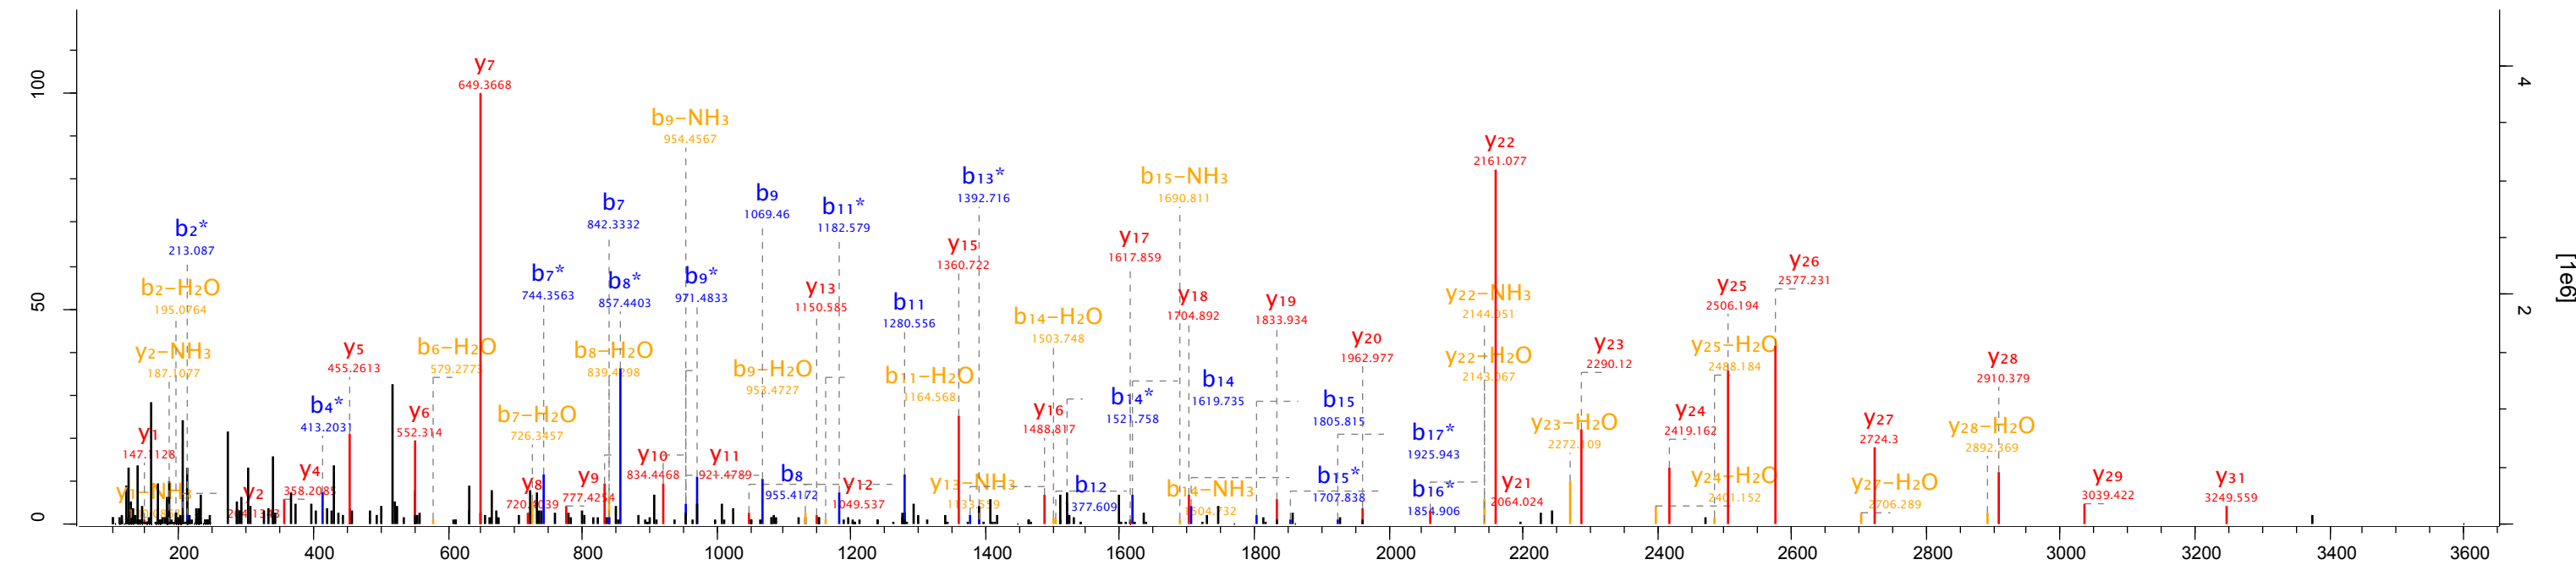

Protein sequence: - P T E L S P S F I N P N P L E W F A S E E P T E E S E K P L T Q S G G A P P P

Fragmentation boxes (b and y ions) are shown below the sequence:

- Red boxes (y ions): y4, y2, y1, y31, y29, y28, y27, y26, y25, y24, y23, y22, y21, y20, y19, y18, y17, y16, y15, y13, y12, y11, y10, y9, y8, y7, y6, y5
- Blue boxes (b ions): b2\*, b4\*, b7, b8, b9, b11, b12, b13\*, b14, b15, b16\*, b17\*



Raw file: 20150814\_A375SR\_Phospho\_BR2\_09  
 Scan: 28914 Method: FTMS; HCD Score: 231.86 m/z: 916.5 Gene names: HCFC1

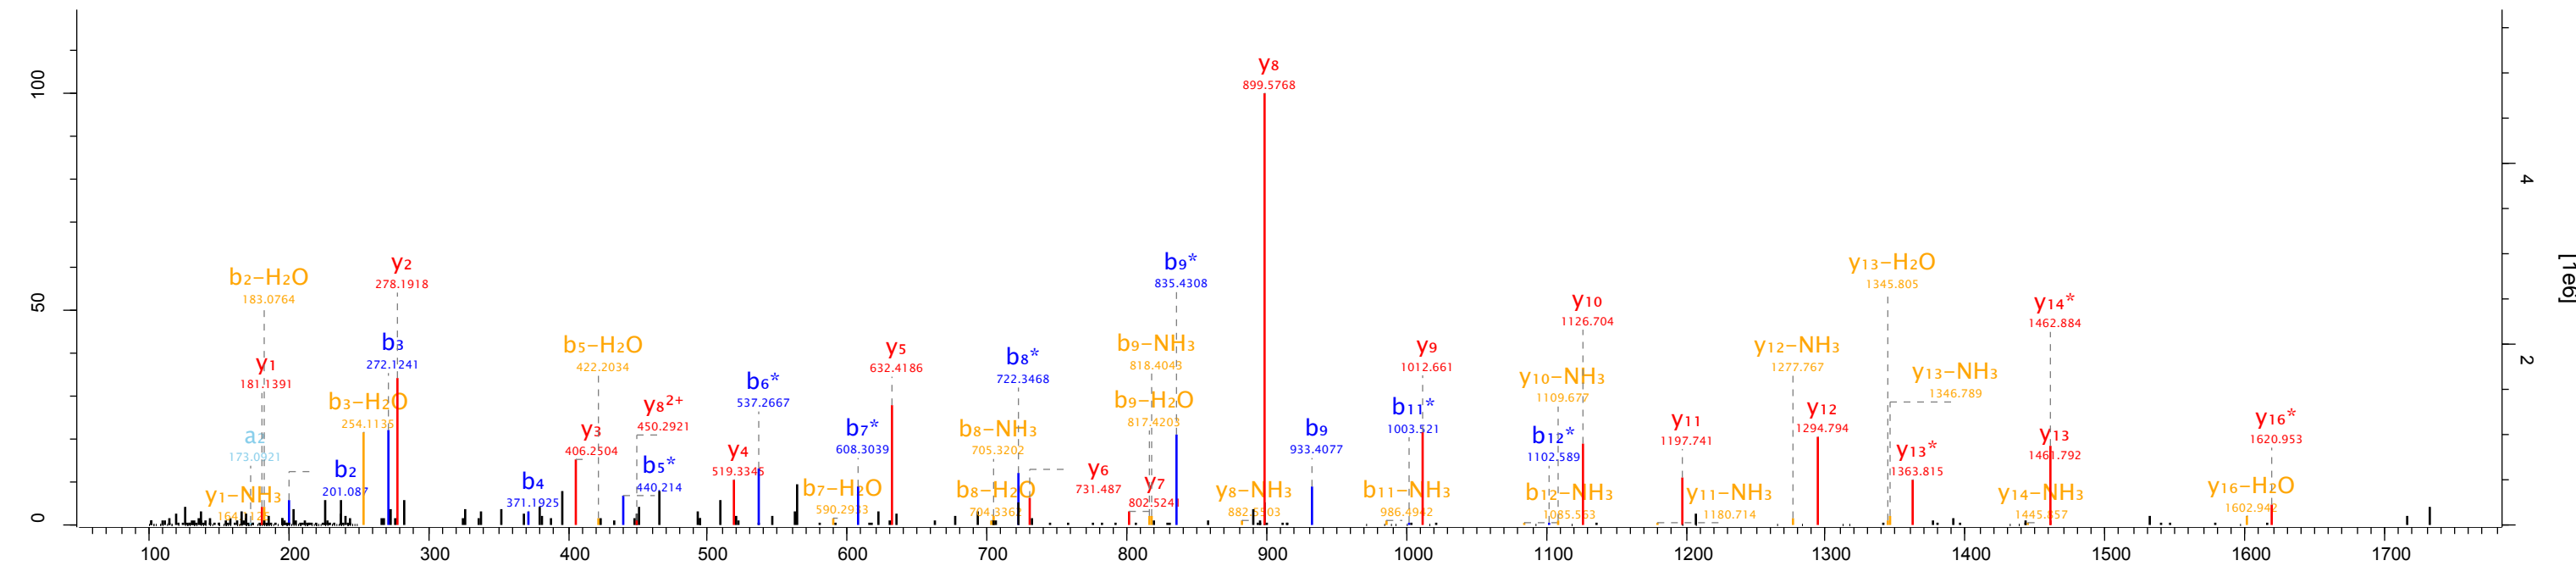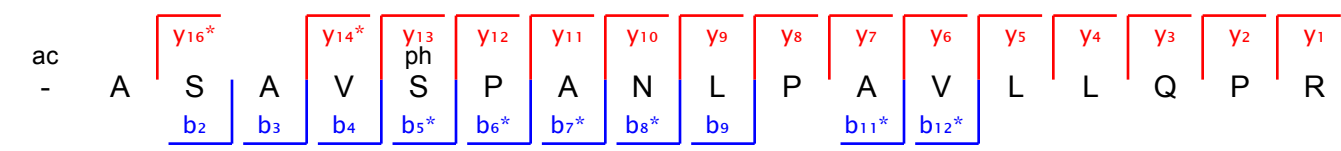

Raw file 20150814\_A375SR\_Phospho\_BR2\_09 Scan 3634 Method FTMS; HCD Score 154.51 m/z 793.4 Gene names MLLT4

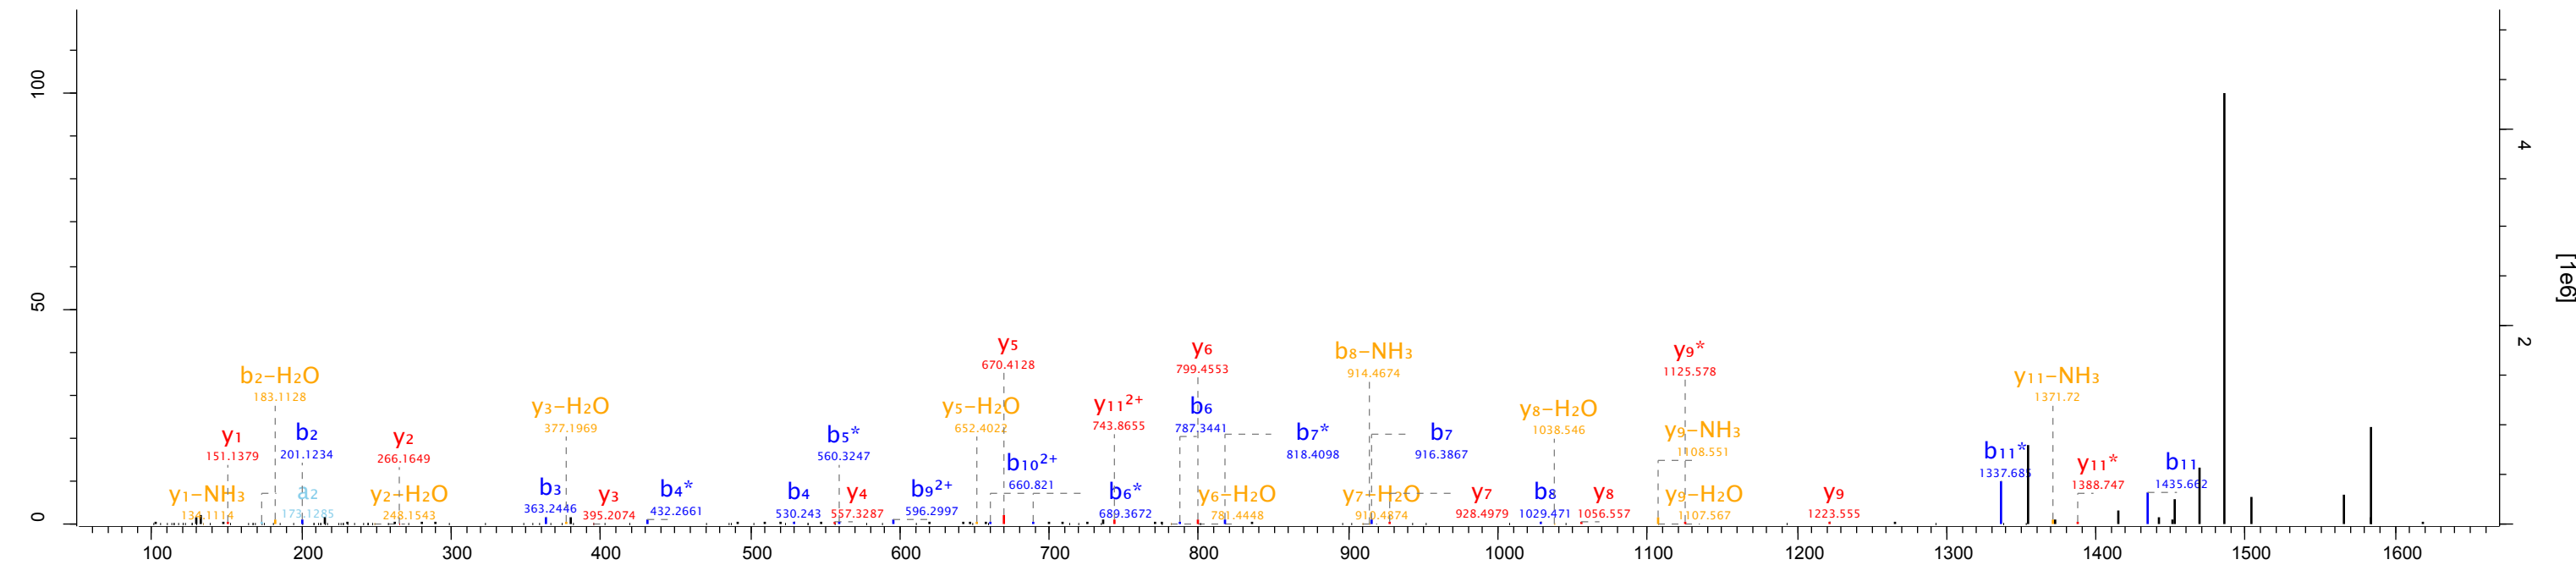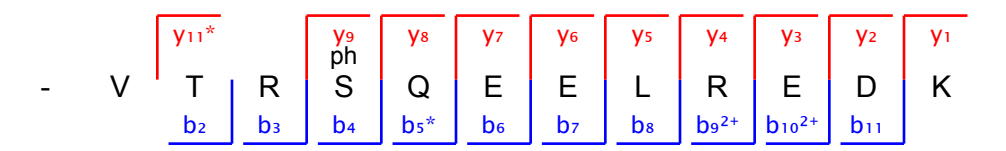

Raw file: 20150814\_A375SR\_Phospho\_BR2\_09  
 Scan: 3874 Method: FTMS; HCD Score: 74.99 m/z: 397.17 Gene names: SF1

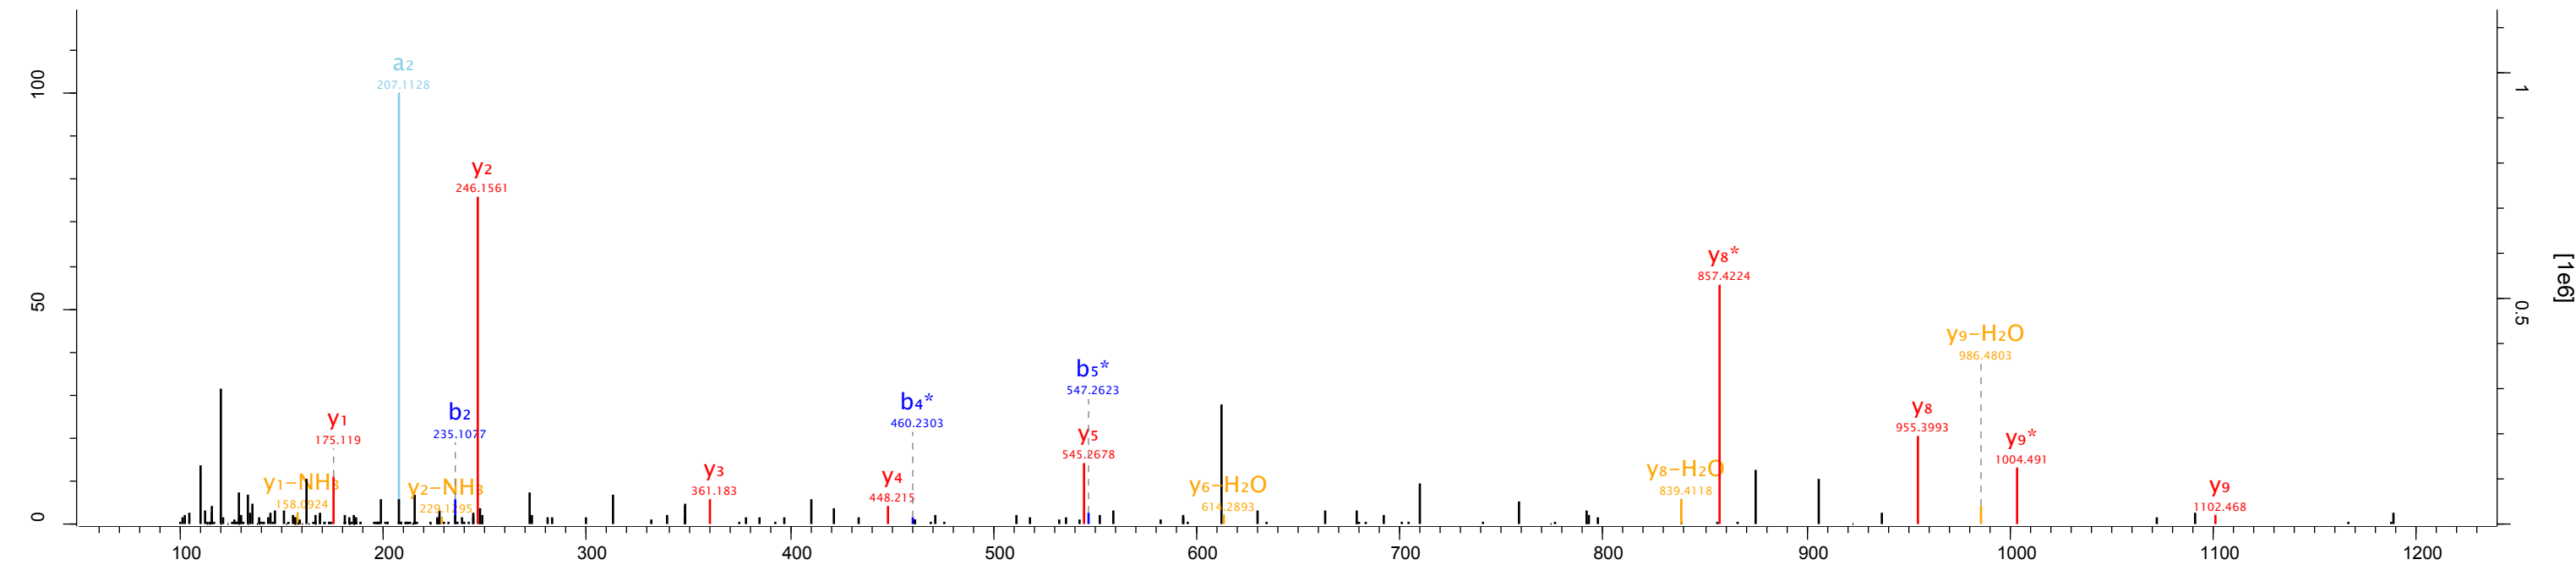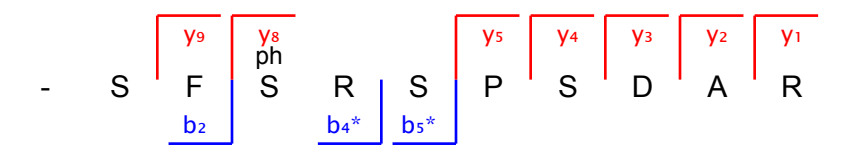

Raw file: 20150814\_A375SR\_Phospho\_BR2\_09  
 Scan: 6714 Method: FTMS; HCD Score: 88.39 m/z: 582.6 Gene names: EIF2AK2

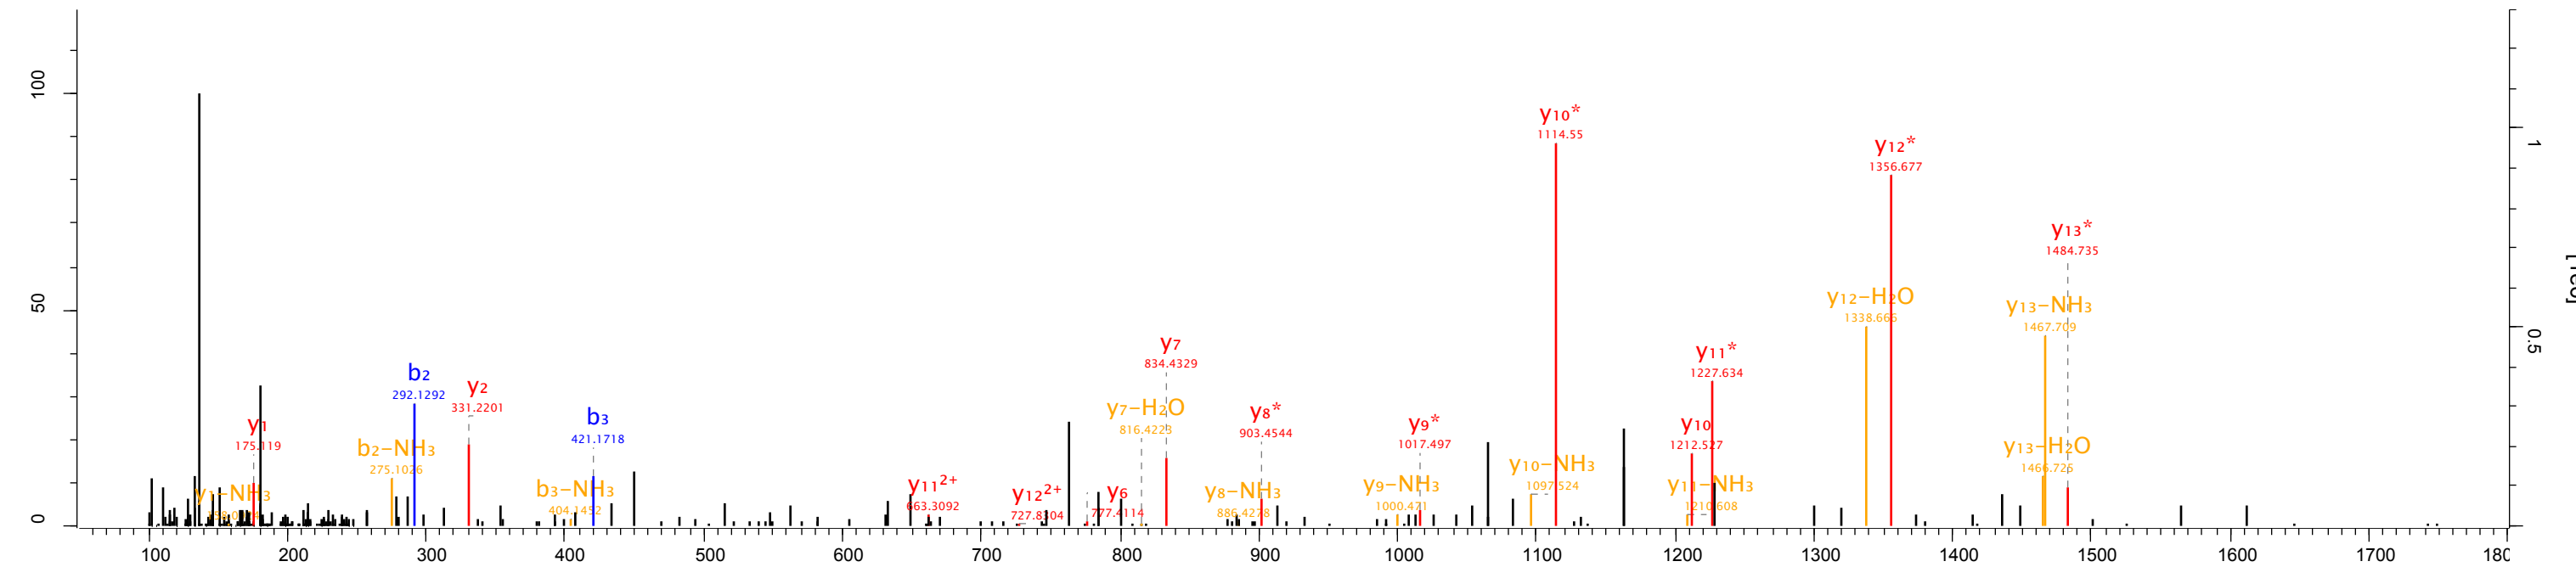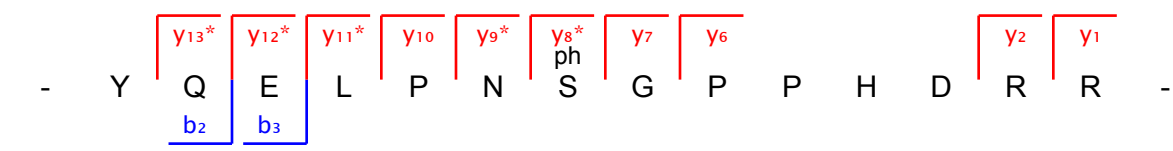

Raw file: 20150814\_A375SR\_Phospho\_BR2\_09  
 Scan: 7274 Method: FTMS; HCD Score: 304.2 m/z: 909.88 Gene names: EXOC4

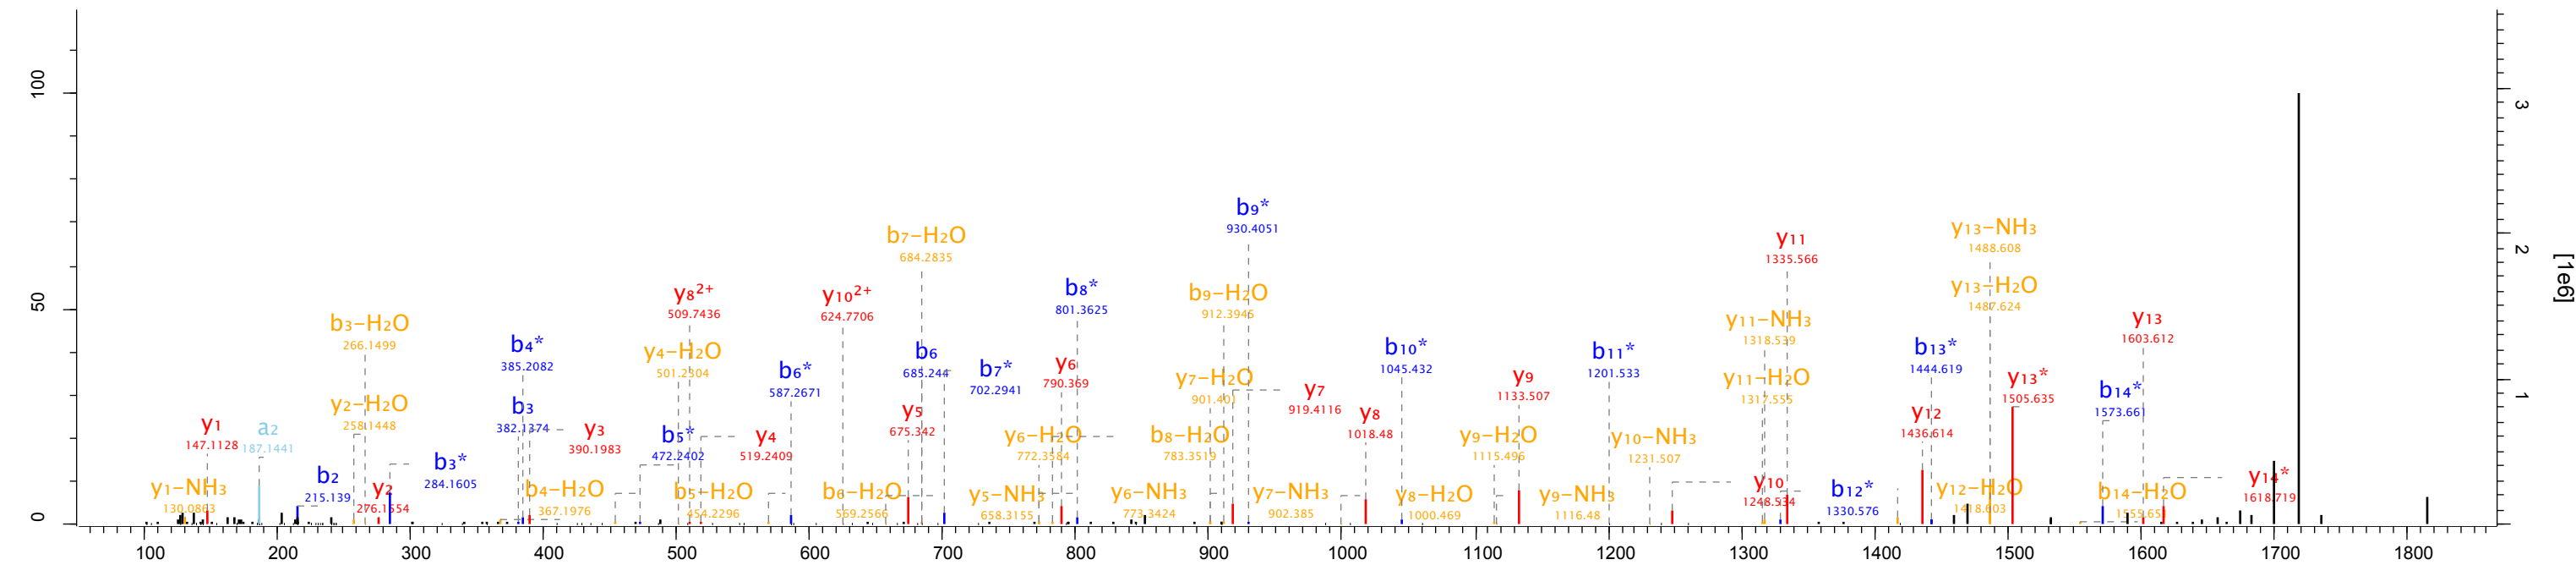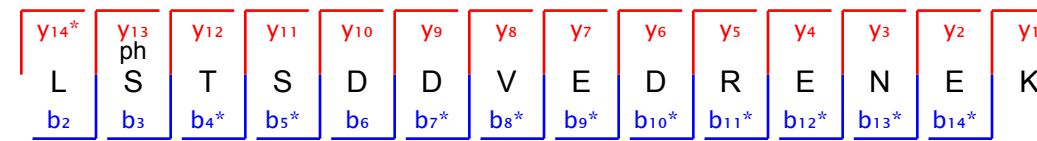

Raw file 20150814\_A375SR\_Phospho\_BR2\_09 Scan 7314 Method FTMS; HCD Score 298.42 m/z 828.4 Gene names CENPC

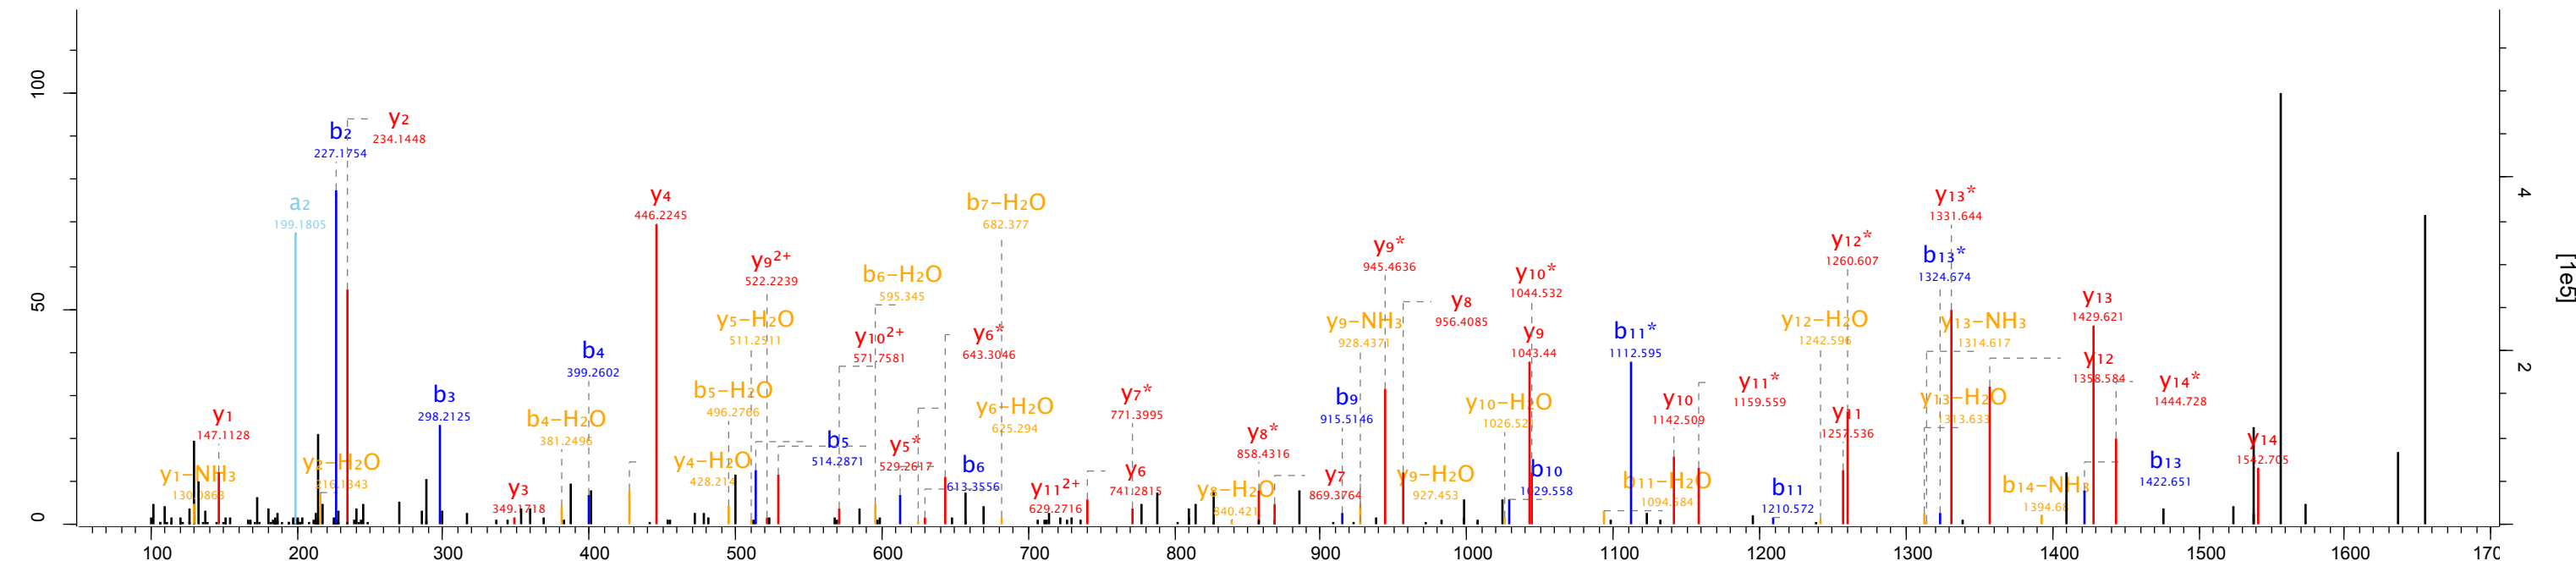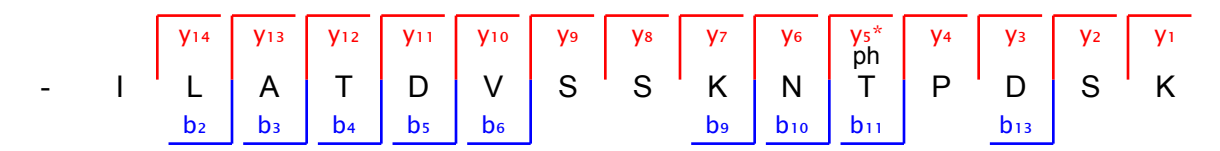

Raw file: 20150814\_A375SR\_Phospho\_BR2\_09  
 Scan: 7844 Method: FTMS; HCD Score: 109.83 m/z: 455.72 Gene names: EP400

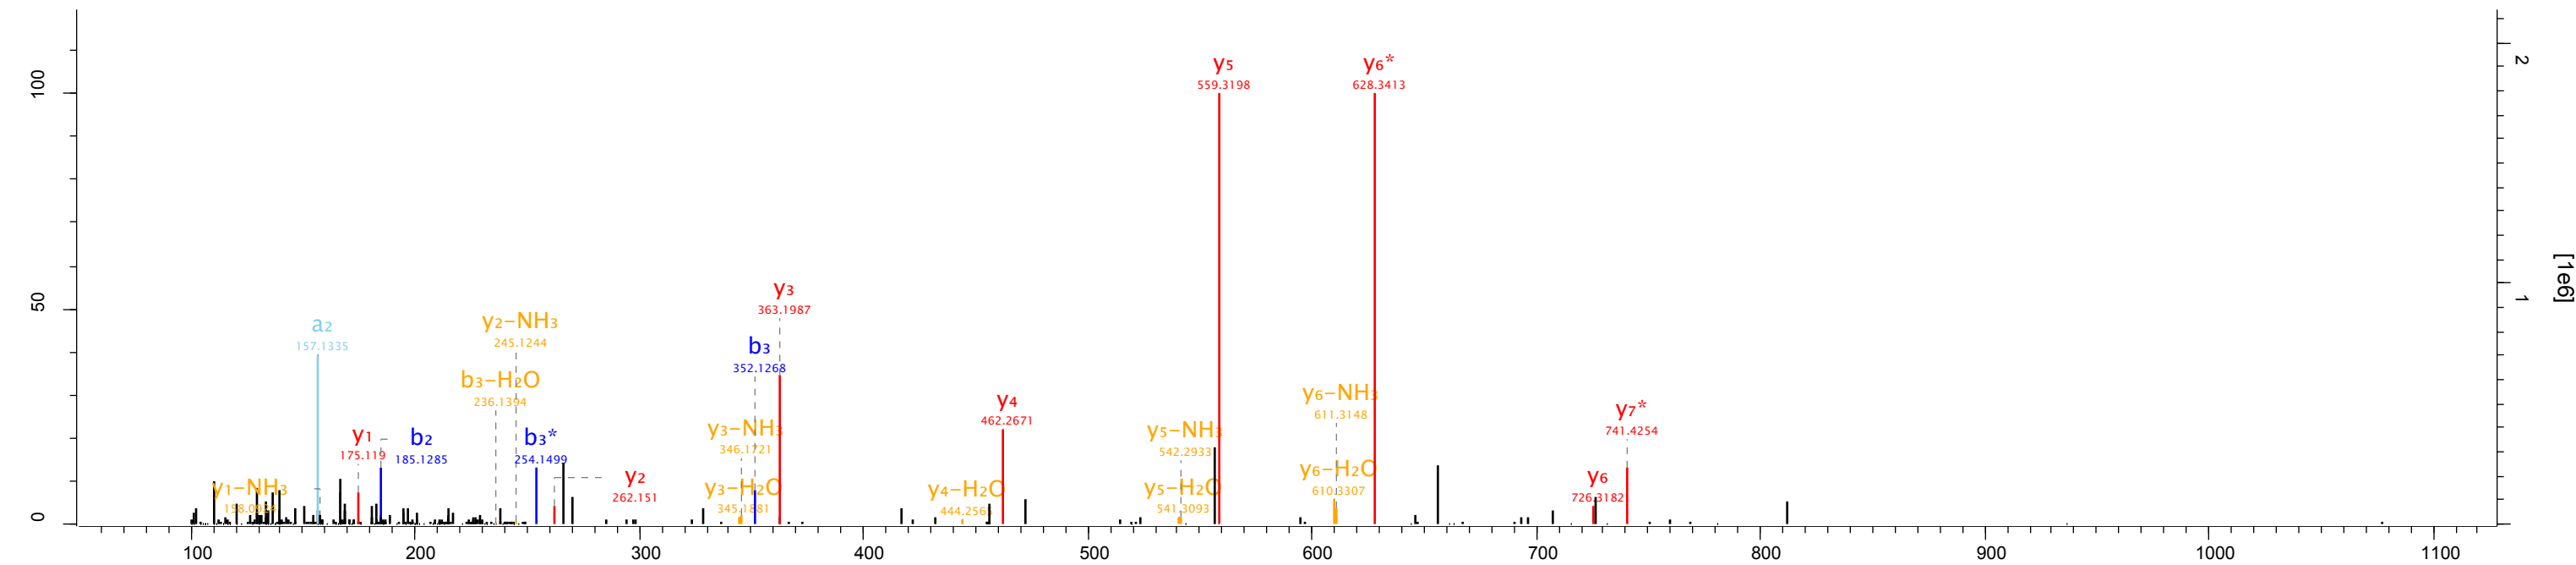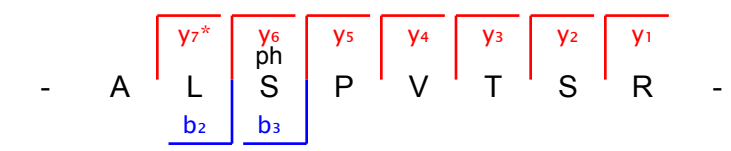

Raw file 20150814\_A375SR\_Phospho\_BR2\_09 Scan 8054 Method FTMS; HCD Score 156.47 m/z 682.01 Gene names ORC6

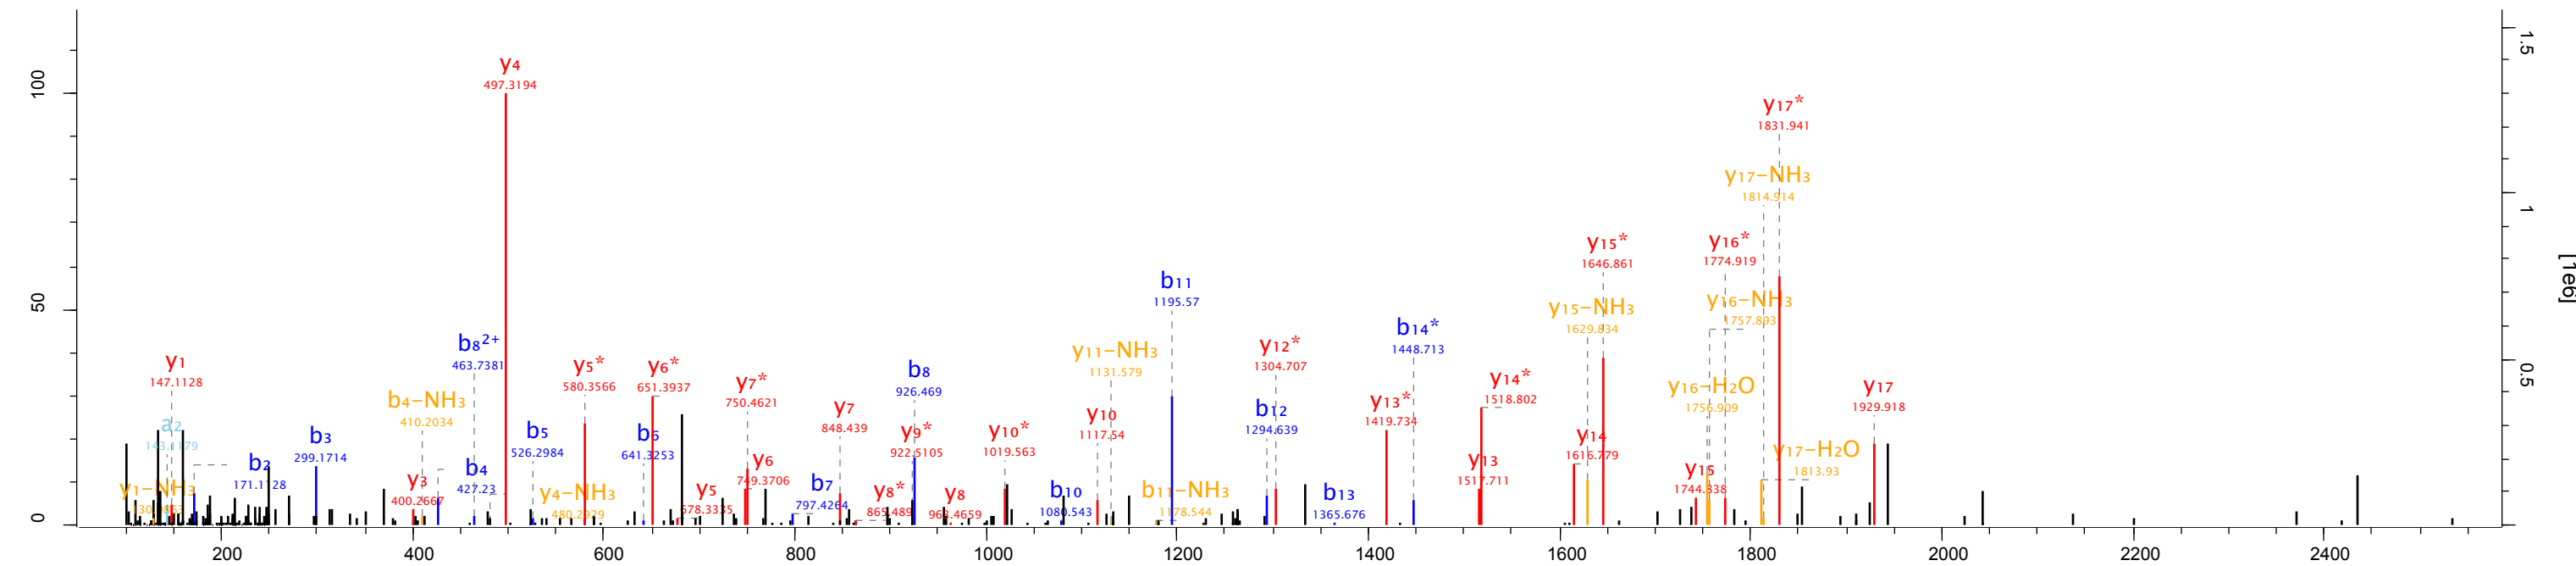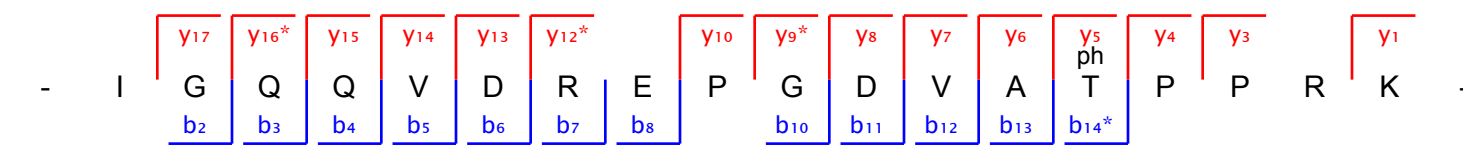



Raw file: 20150814\_A375SR\_Phospho\_BR2\_09  
 Scan: 9594 Method: FTMS; HCD Score: 83.35 m/z: 594.28 Gene names: TCF20

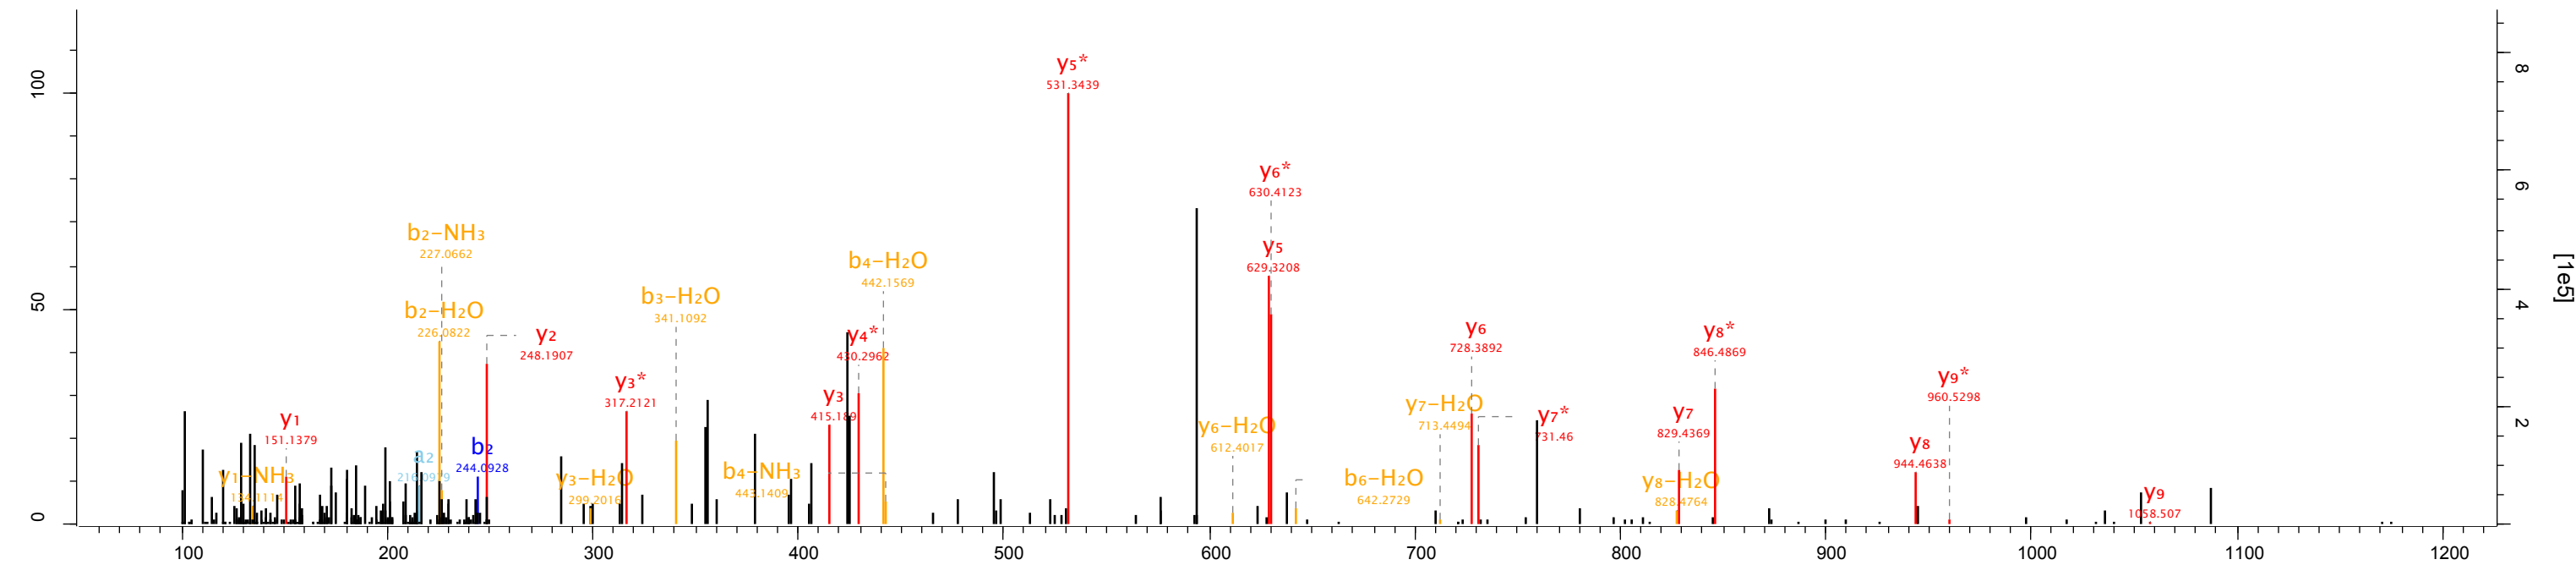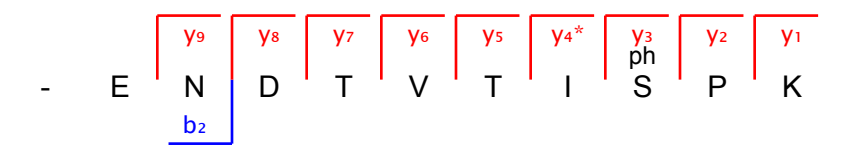

Raw file: 20150814\_A375SR\_Phospho\_BR2\_02  
 Scan: 10035 Method: FTMS; HCD Score: 122.47 m/z: 1036.96 Gene names: SRRM2

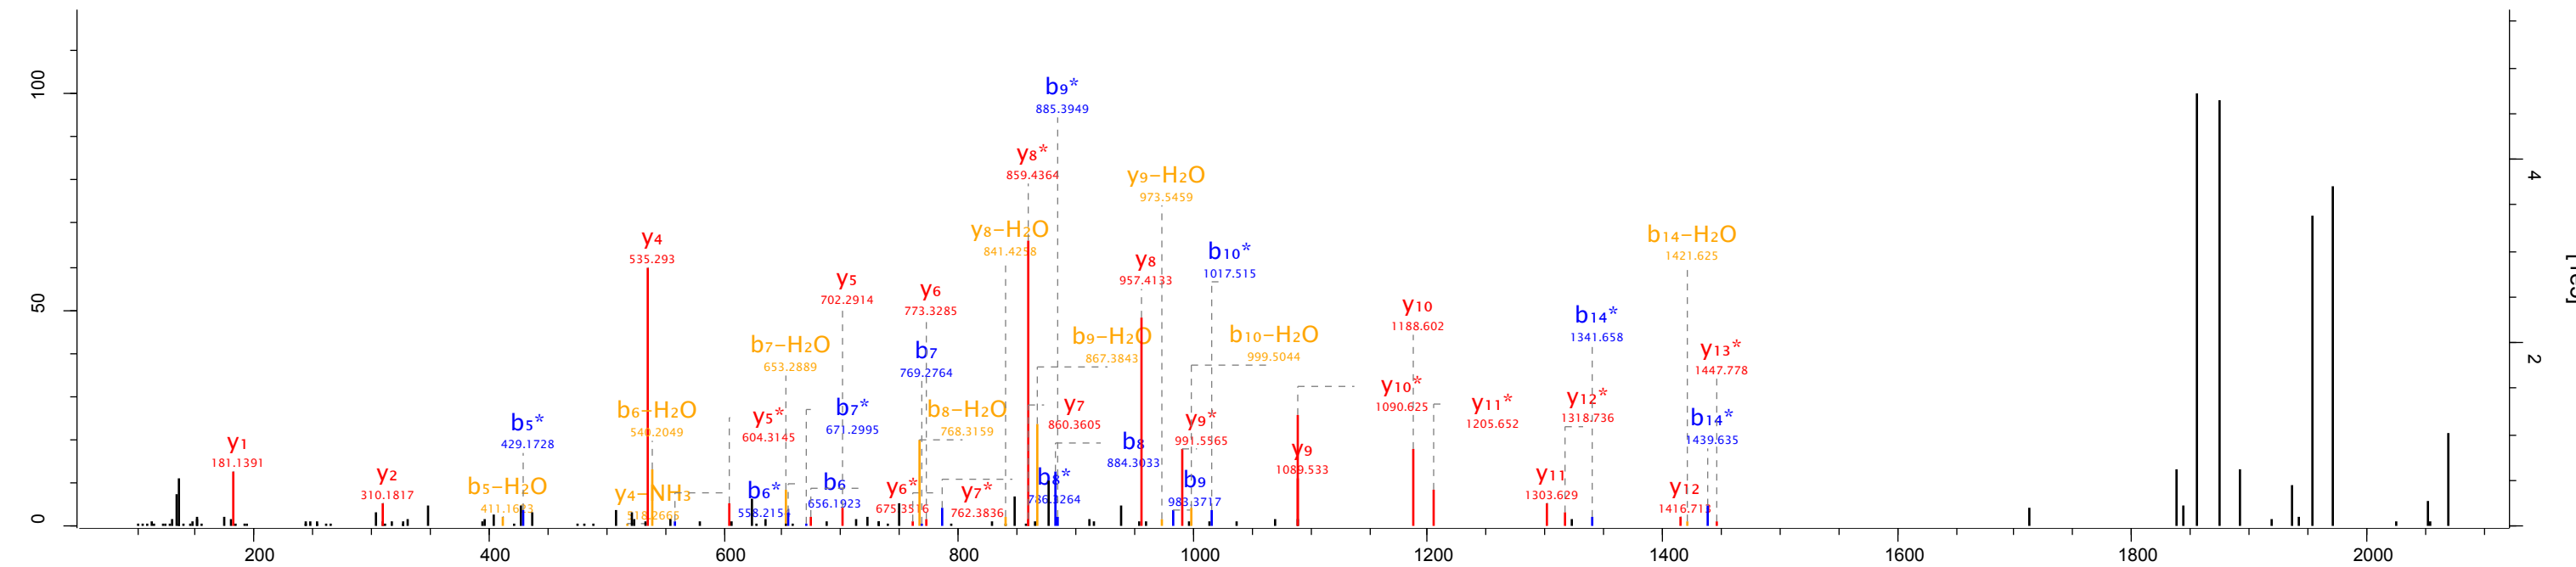

peptide sequence: - S G S S Q E L D V K P S A S P Q E R -

Fragmentation sites (b and y ions):

- Q-E: b5\*, b6, y13\*
- E-L: b7, y12
- L-D: b8, y11
- D-V: b9, y10
- V-K: b10\*, y9
- K-P: y8
- P-S: y7
- S-A: y6
- A-S: b14\*, y5
- S-P: y4
- P-Q: y2
- Q-E: y1

Raw file: 20150814\_A375SR\_Phospho\_BR2\_02  
 Scan: 10885  
 Method: FTMS; HCD  
 Score: 168.3  
 m/z: 936.88  
 Gene names: CBLB

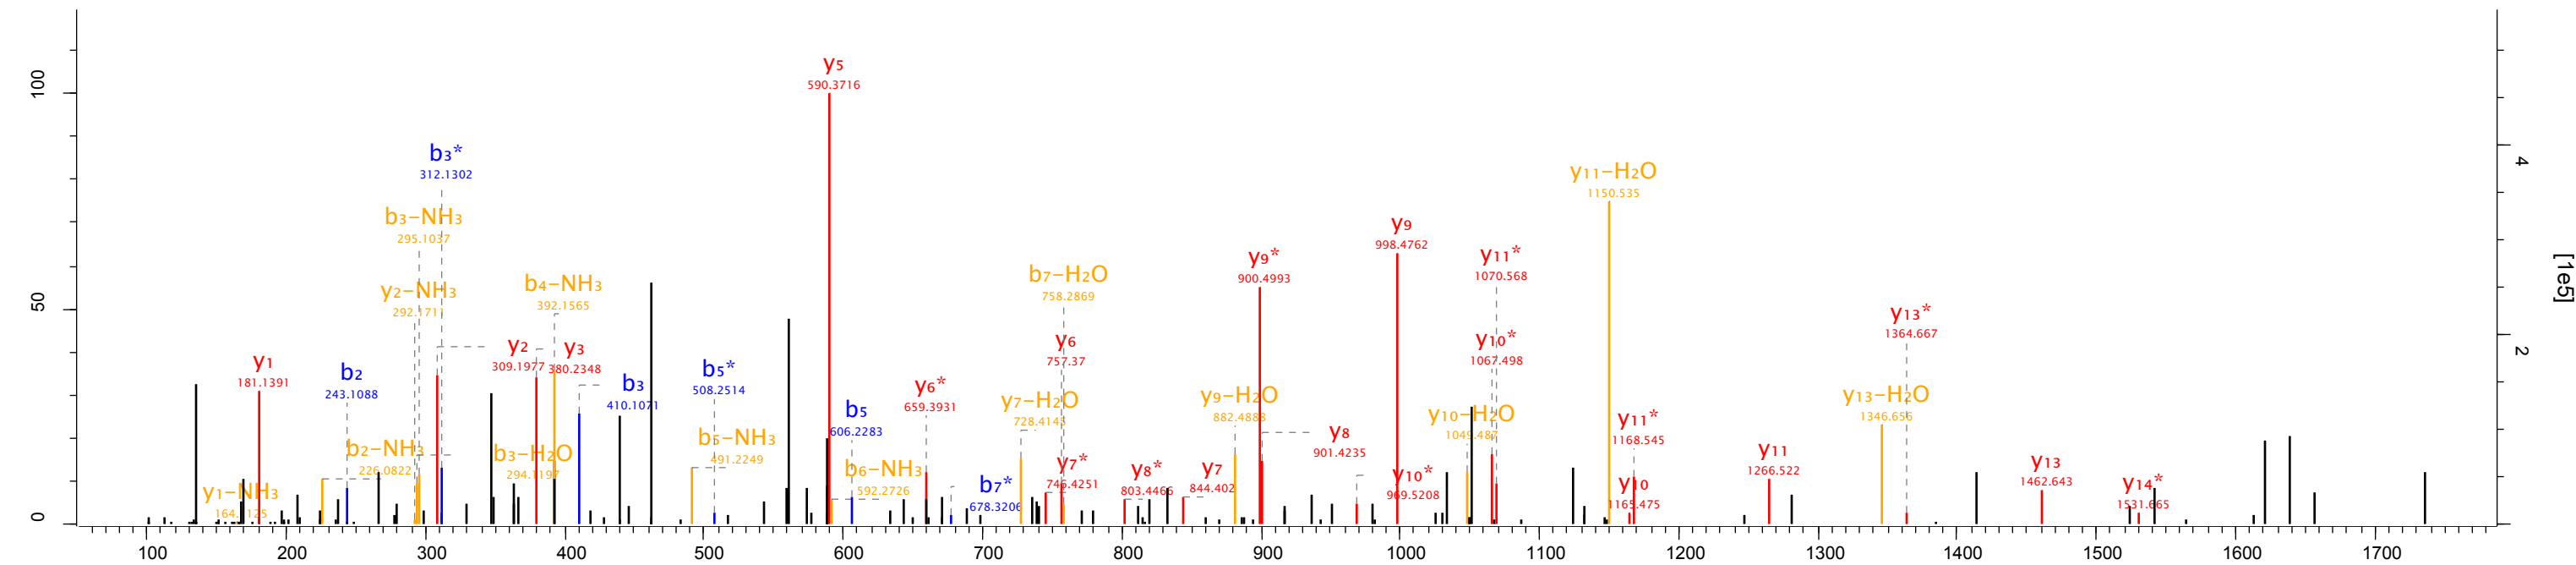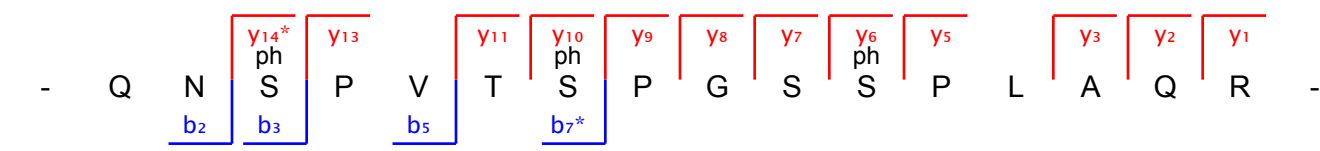

Raw file: 20150814\_A375SR\_Phospho\_BR2\_02  
 Scan: 11005 Method: FTMS; HCD Score: 159.2 m/z: 928.82 Gene names: SRRM2

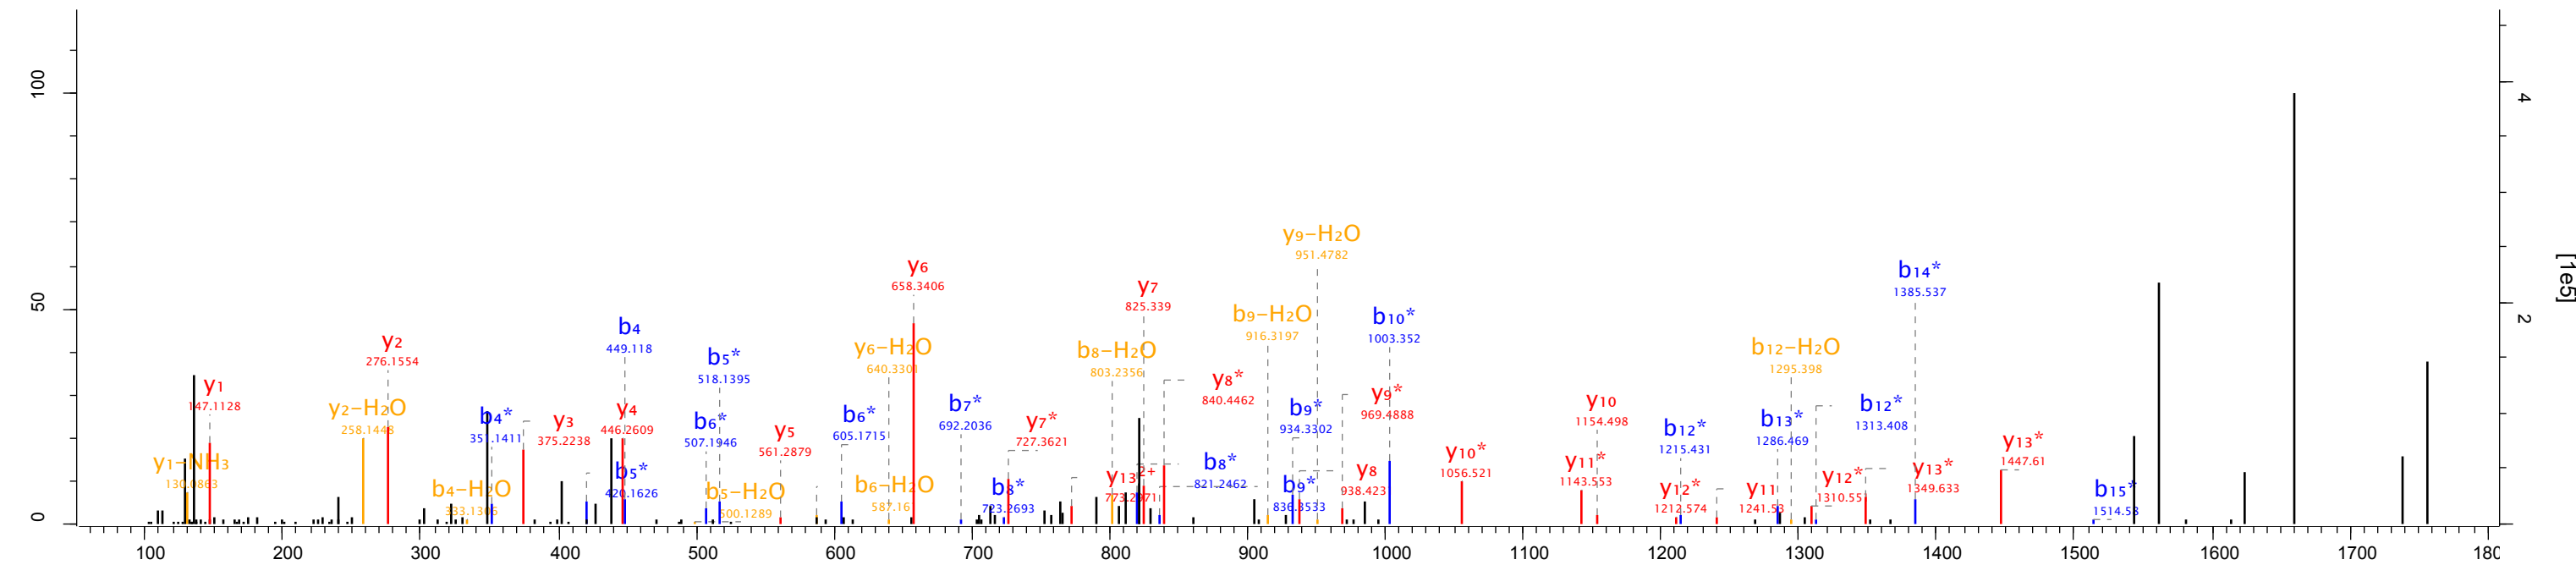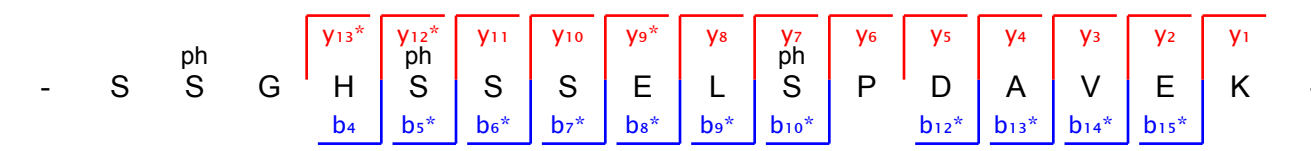

Raw file 20150814\_A375SR\_Phospho\_BR2\_02 Scan 11725 Method FTMS; HCD Score 53.75 m/z 1041.92 Gene names LIMA1;TRMT1

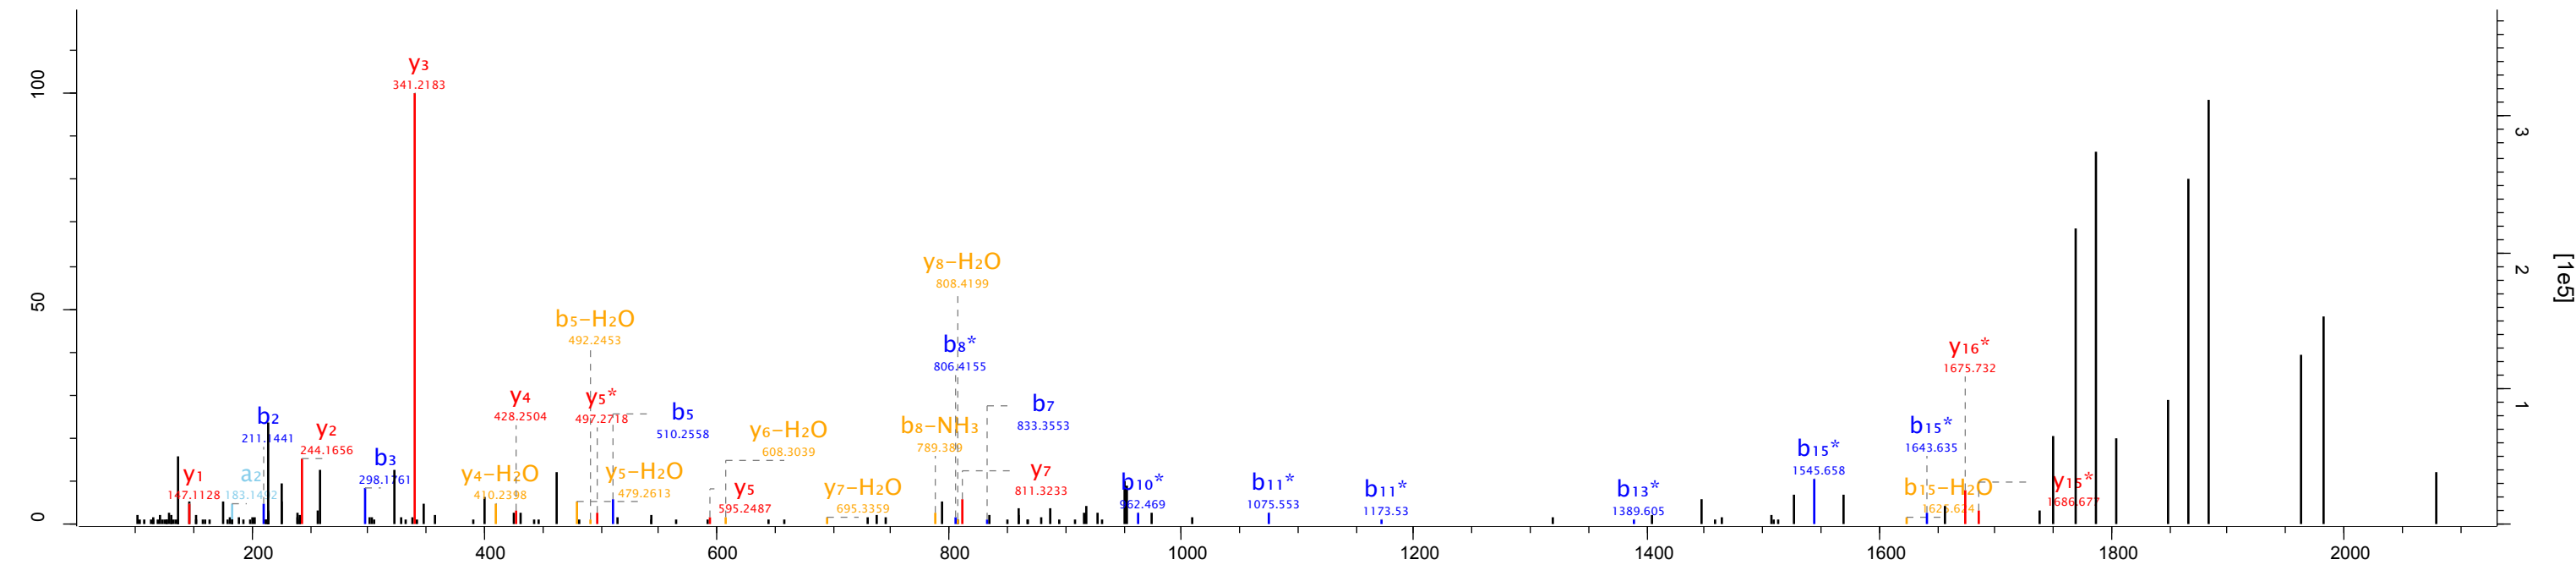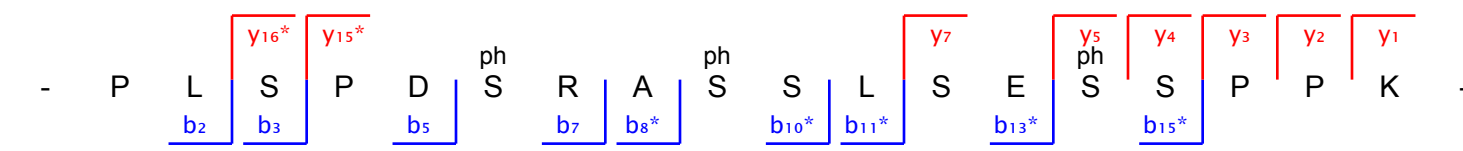

Raw file: 20150814\_A375SR\_Phospho\_BR2\_02  
 Scan: 12135 Method: FTMS; HCD Score: 91.36 m/z: 760.82 Gene names: TRAF7

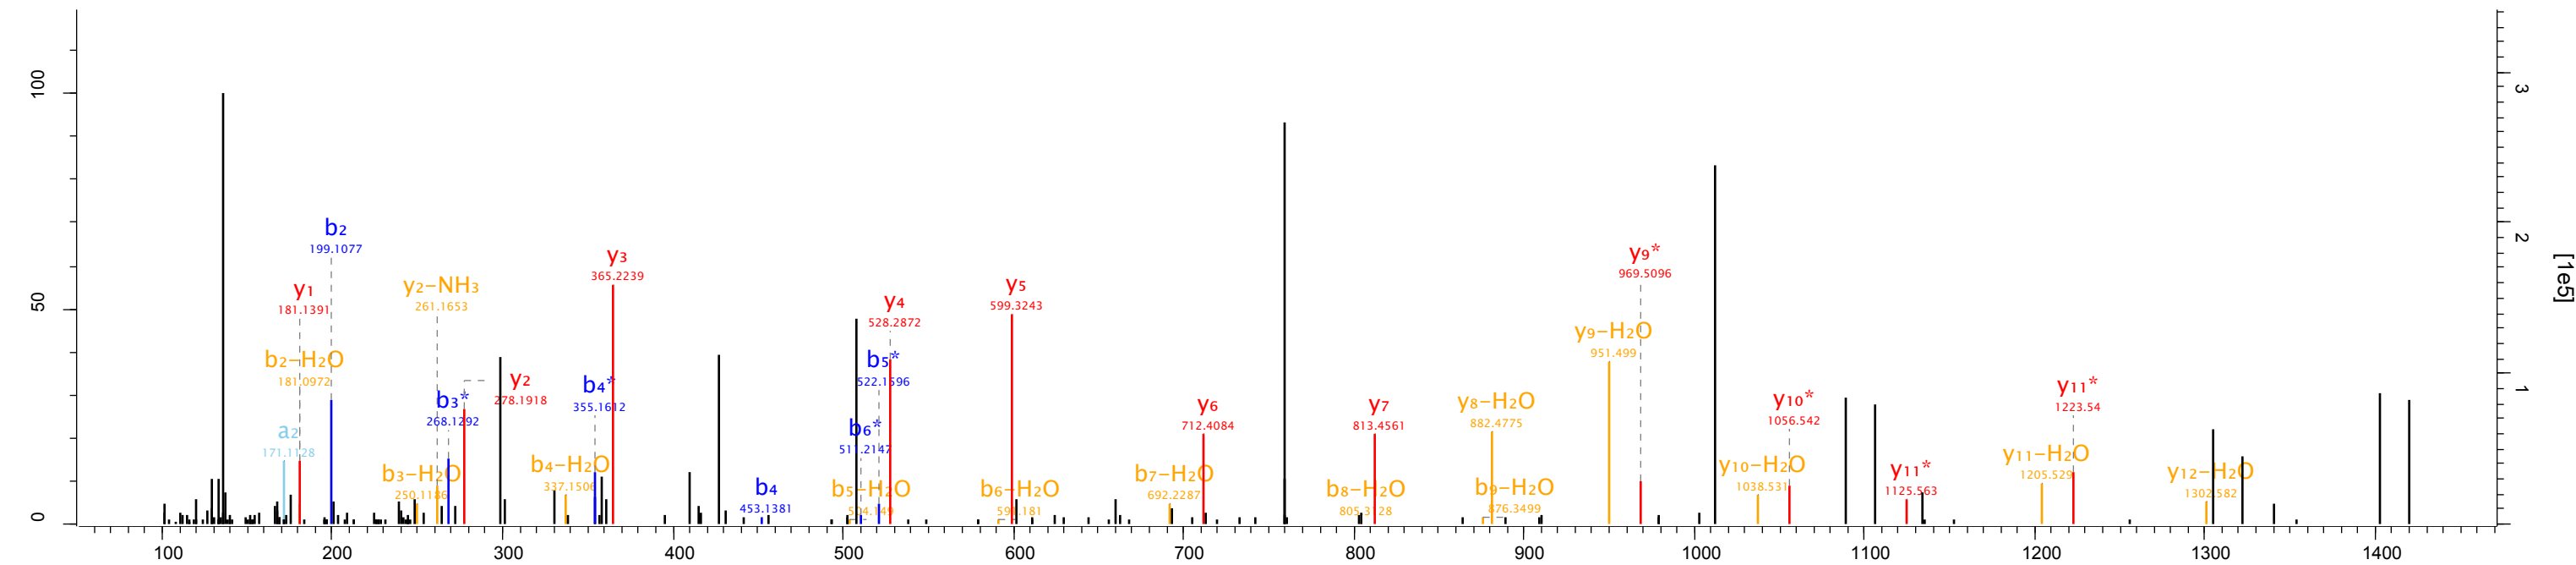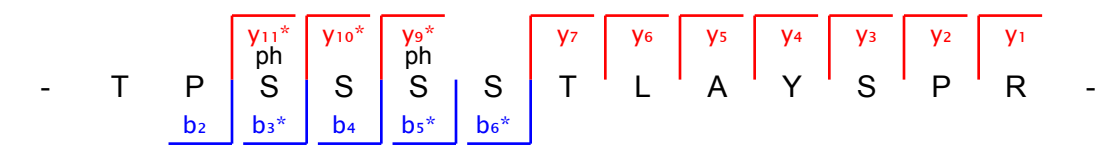

Raw file 20150814\_A375SR\_Phospho\_BR2\_02 Scan 12255 Method FTMS; HCD Score 156.47 m/z 1018.92 Gene names MAP1S

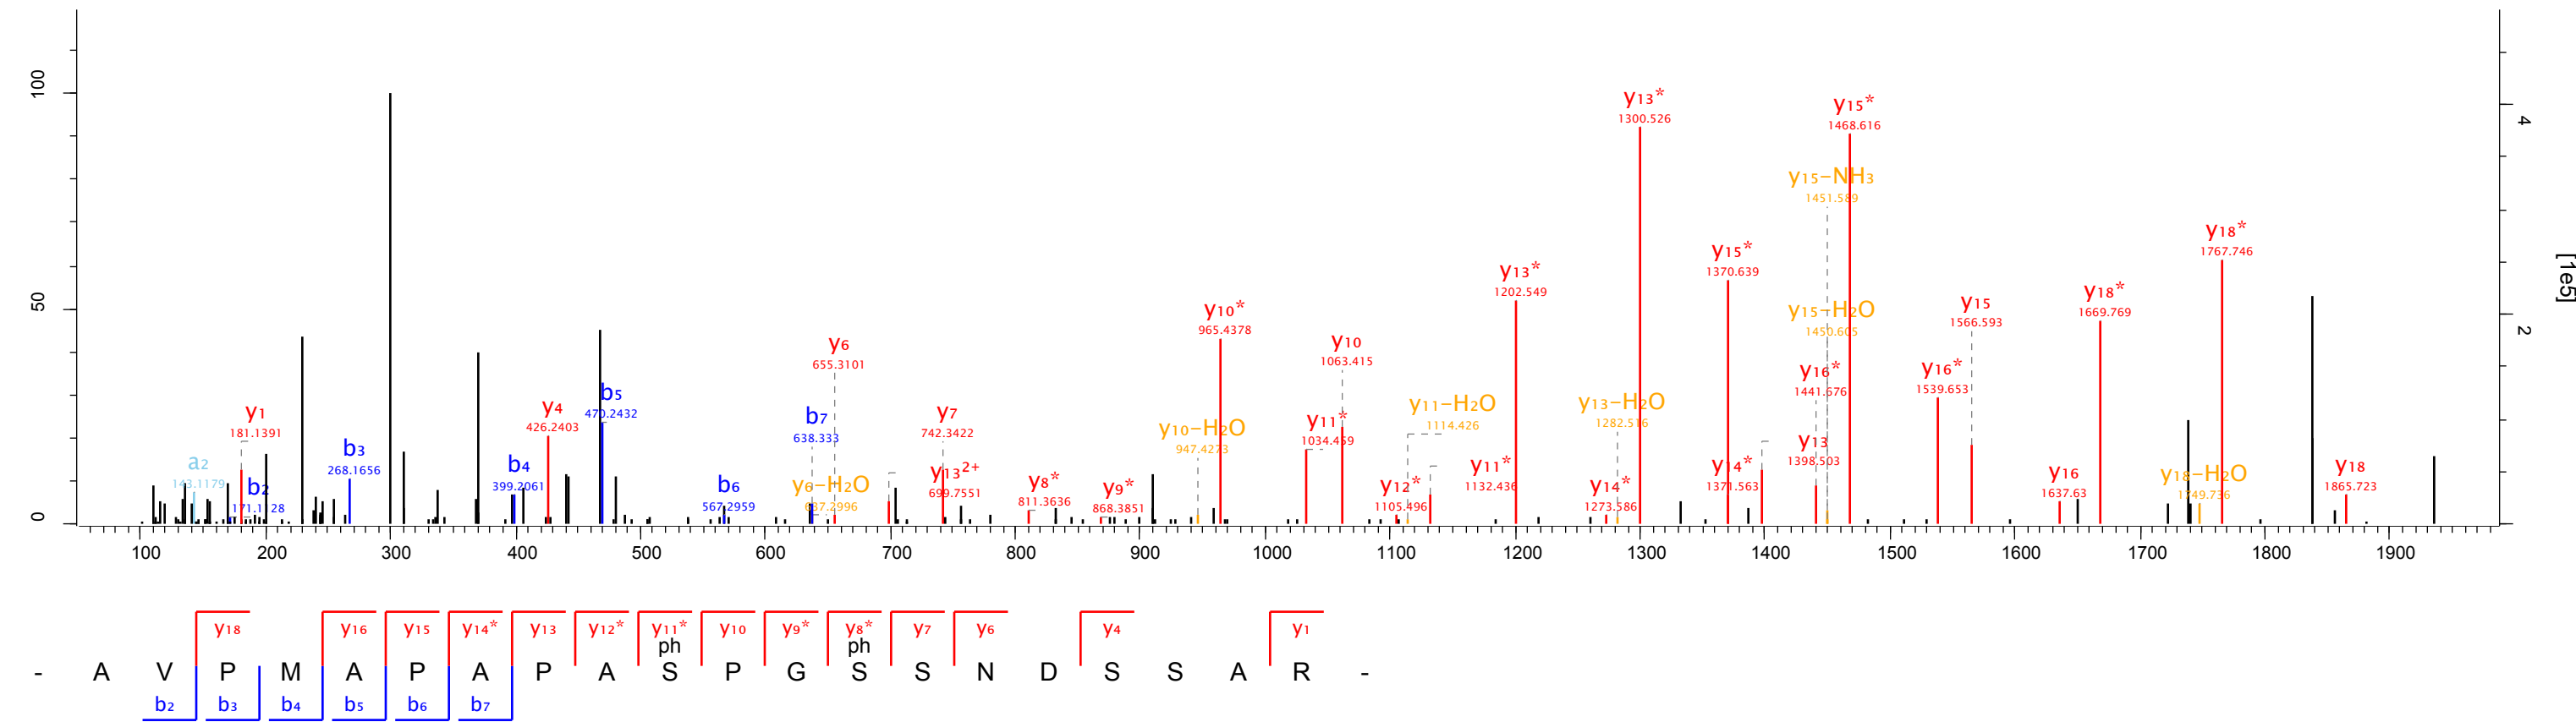

Raw file: 20150814\_A375SR\_Phospho\_BR2\_02  
 Scan: 12945 Method: FTMS; HCD Score: 242.74 m/z: 1270.98 Gene names: TOR1AIP1

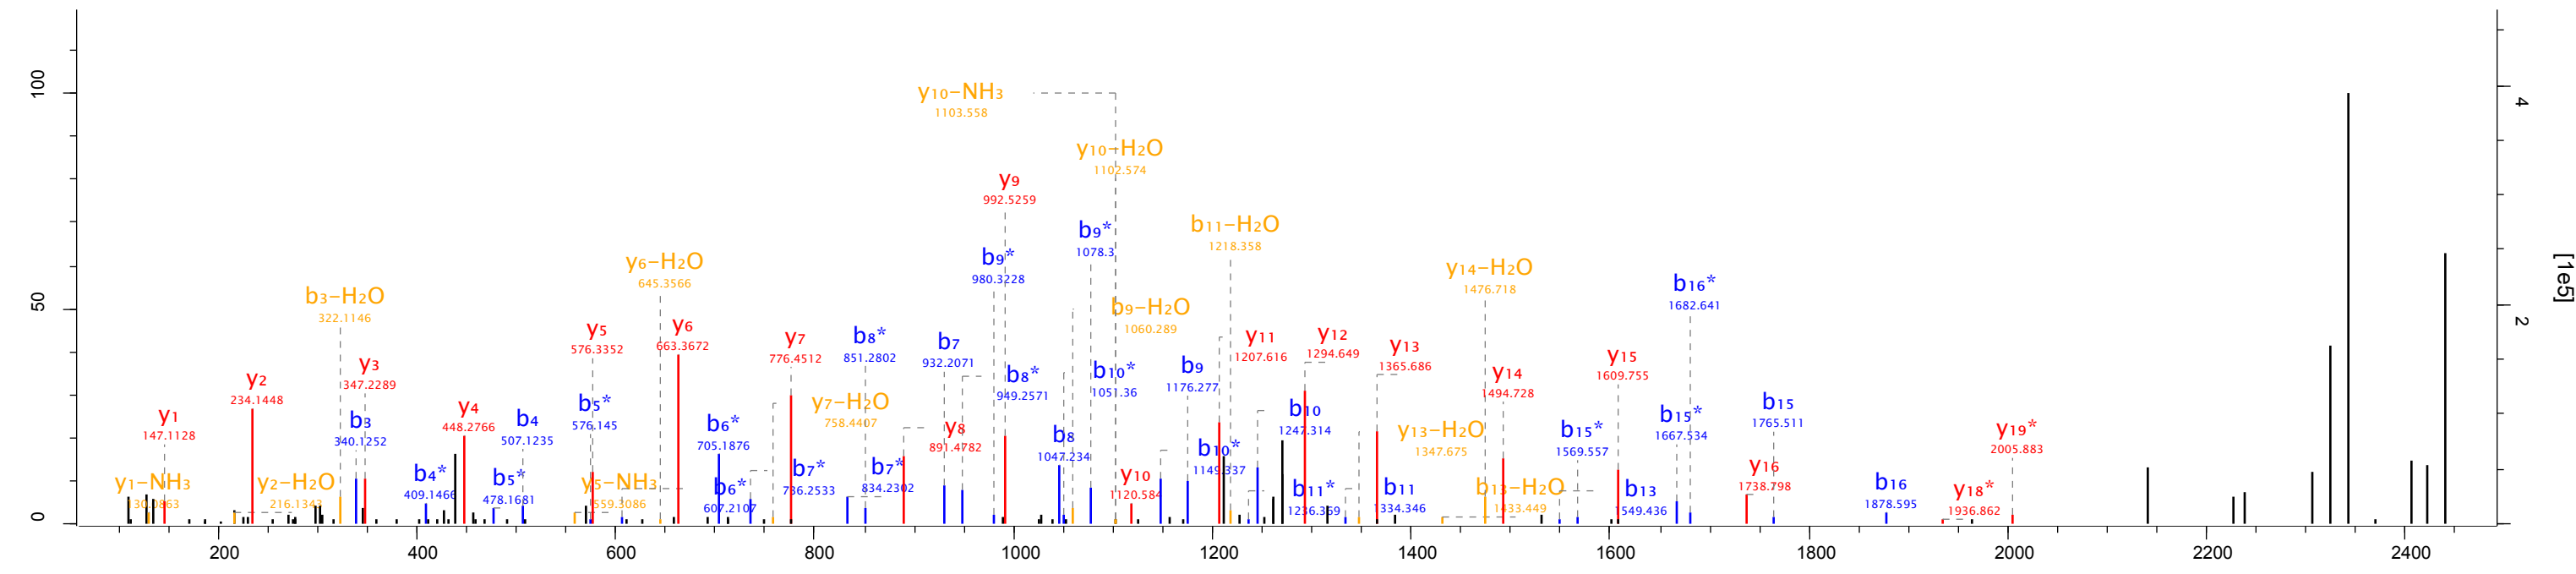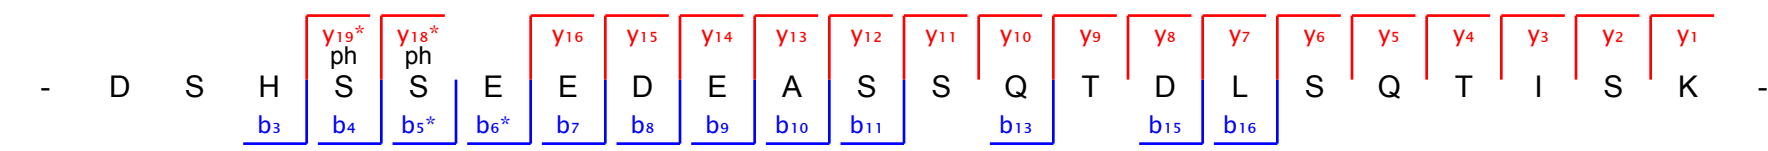



Raw file 20150814\_A375SR\_Phospho\_BR2\_02 Scan 13145 Method FTMS; HCD Score 149.66 m/z 1263.55 Gene names LMNA

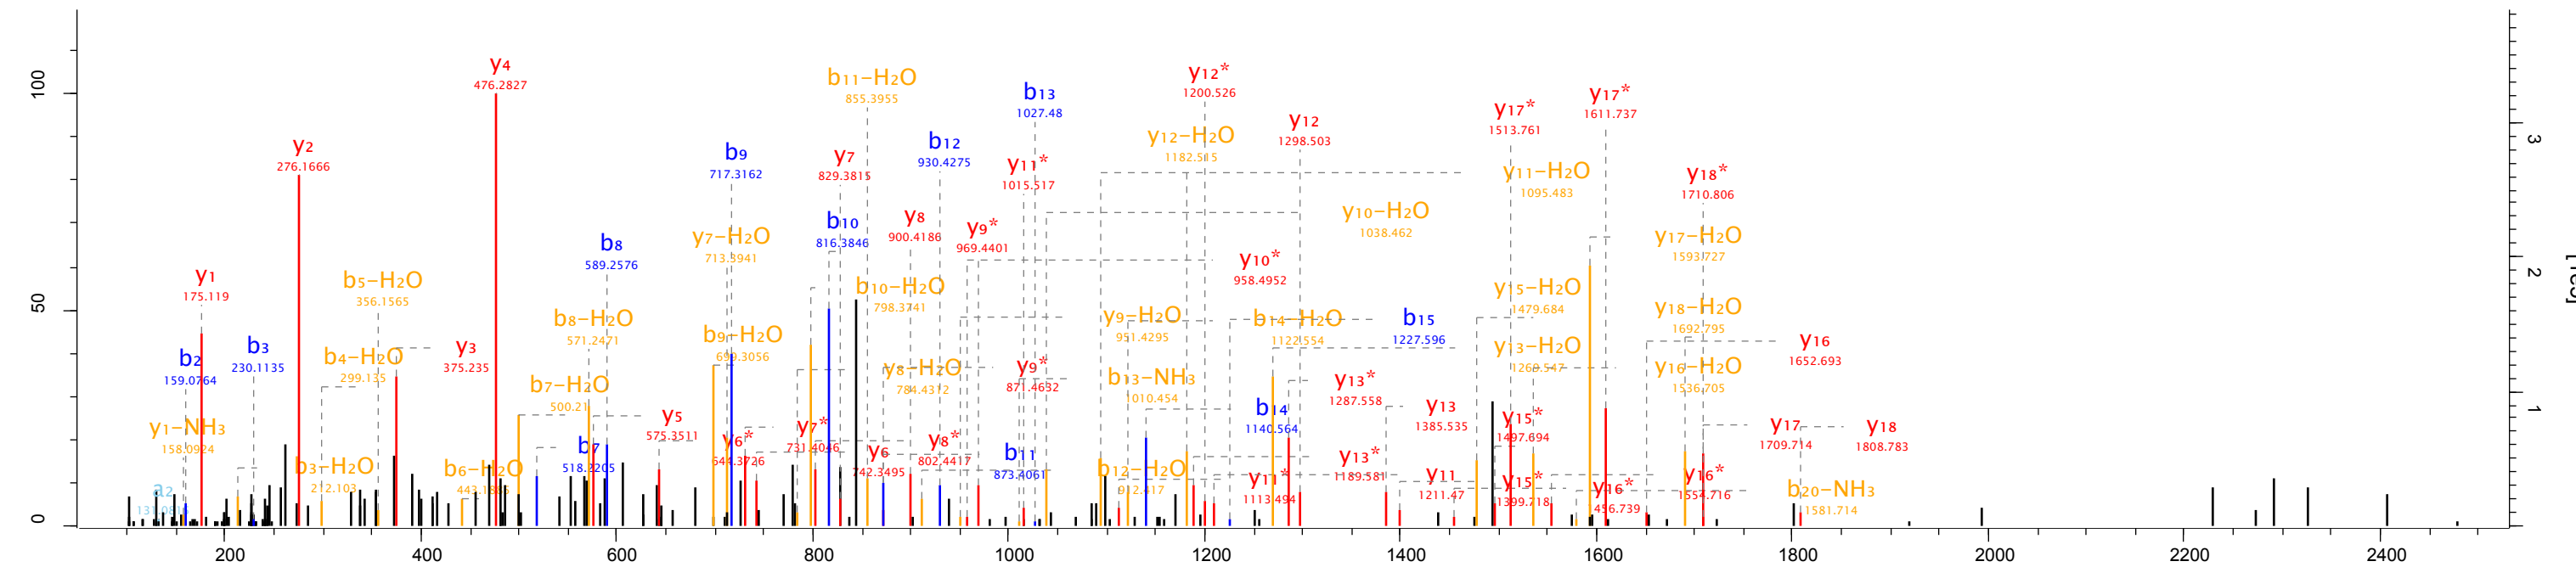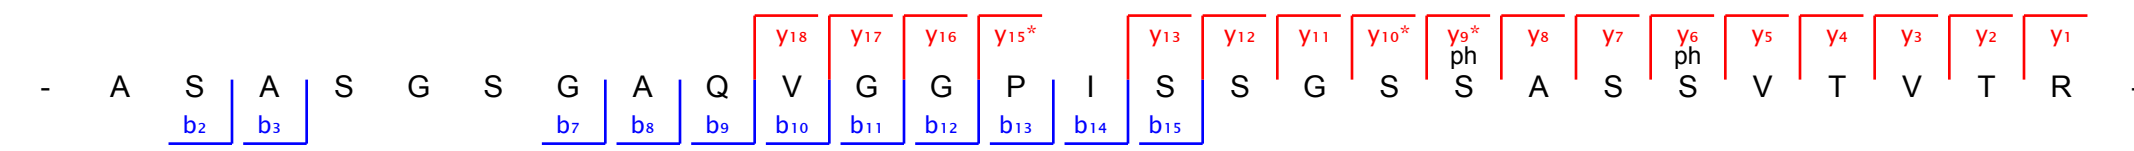

Raw file 20150814\_A375SR\_Phospho\_BR2\_02 Scan 13475 Method FTMS; HCD Score 97.82 m/z 780.79 Gene names SRRM2

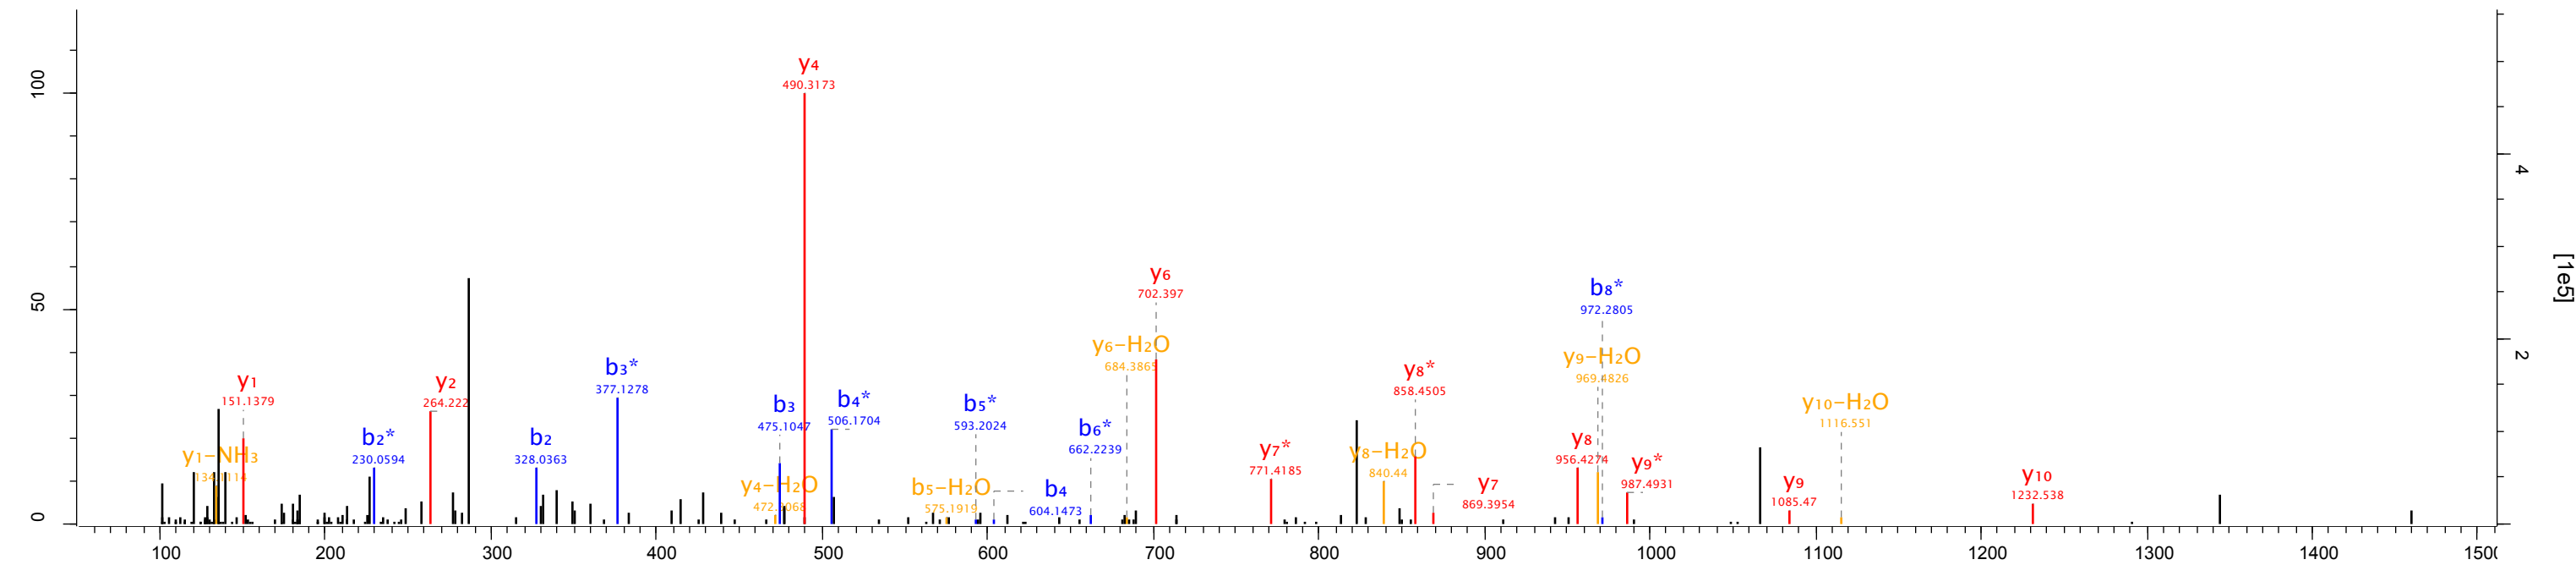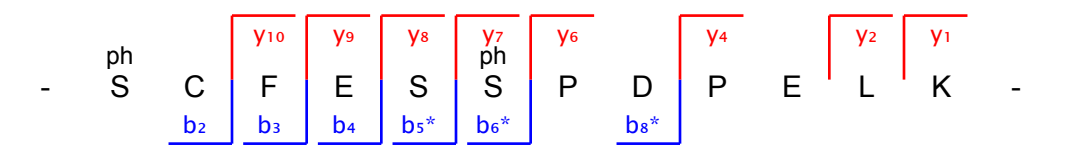

Raw file: 20150814\_A375SR\_Phospho\_BR2\_02  
 Scan: 13985 Method: FTMS; HCD Score: 177.6 m/z: 972.37 Gene names: PLEC

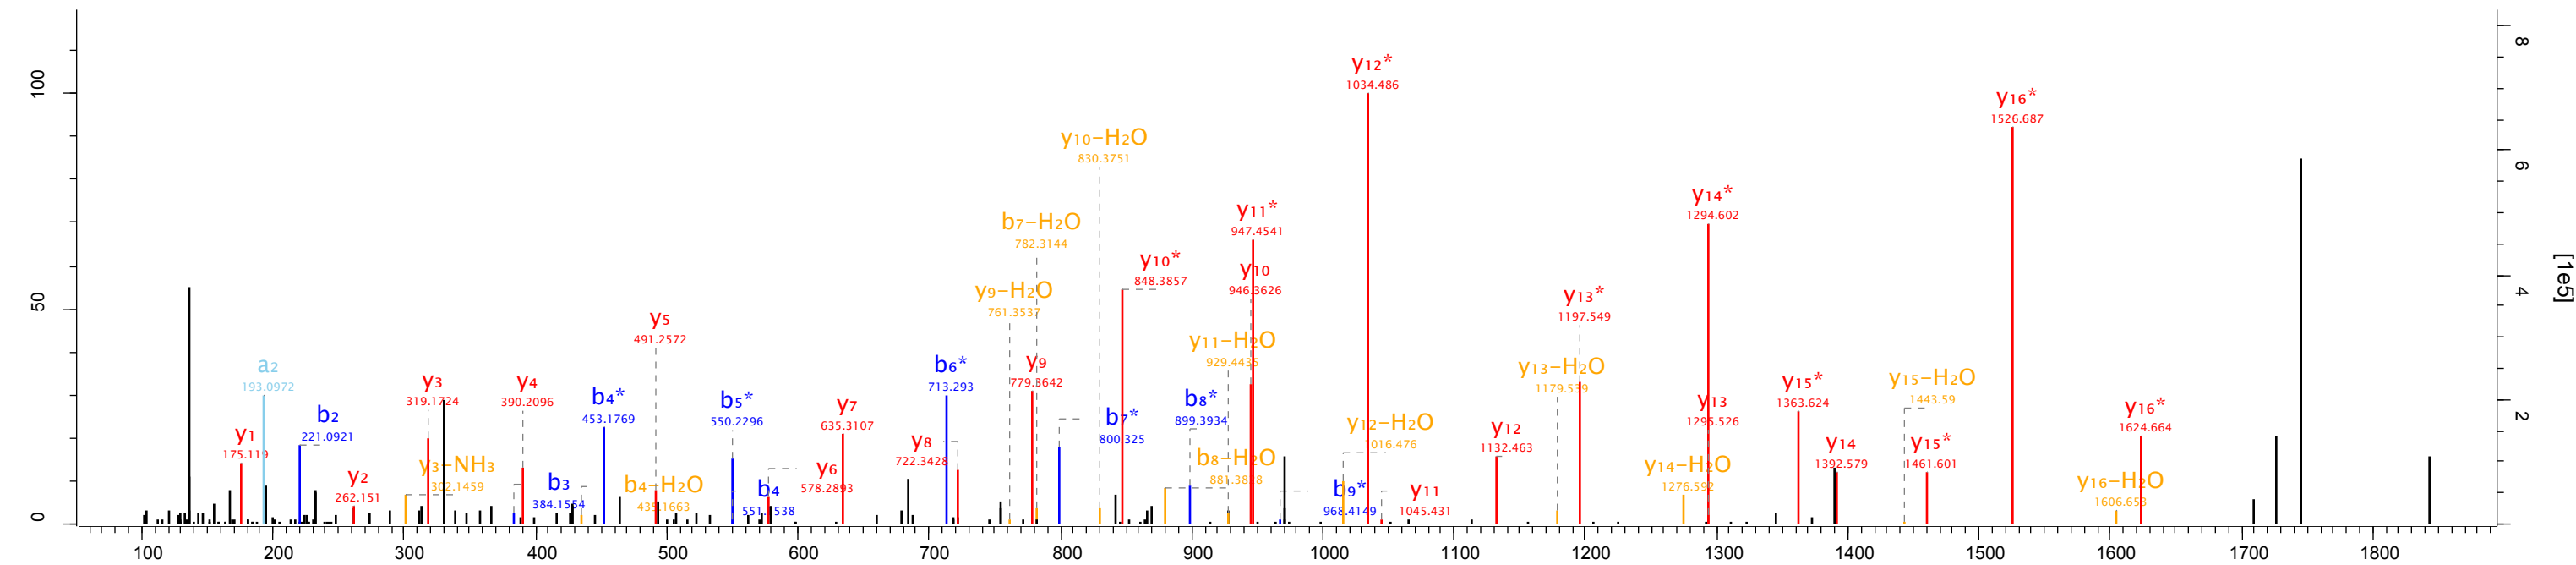

Sequence: - G Y Y Y S Y S V S G S G S T A G S R -

Fragmentation mapping (b-ions in blue, y-ions in red):

| Residue | Fragmentation Type |
|---------|--------------------|
| Y       | b <sub>2</sub>     |
| Y       | b <sub>3</sub>     |
| Y       | b <sub>4</sub>     |
| S       | b <sub>5</sub> *   |
| P       | b <sub>6</sub> *   |
| Y       | b <sub>7</sub> *   |
| S       | b <sub>8</sub> *   |
| V       | b <sub>9</sub> *   |
| S       | y <sub>9</sub>     |
| G       | y <sub>8</sub>     |
| S       | y <sub>7</sub>     |
| G       | y <sub>6</sub>     |
| S       | y <sub>5</sub>     |
| T       | y <sub>4</sub>     |
| A       | y <sub>3</sub>     |
| G       | y <sub>2</sub>     |
| S       | y <sub>1</sub>     |
| R       | -                  |

Raw file 20150814\_A375SR\_Phospho\_BR2\_02 Scan 14345 Method FTMS; HCD Score 179.17 m/z 985.86 Gene names NDRG3

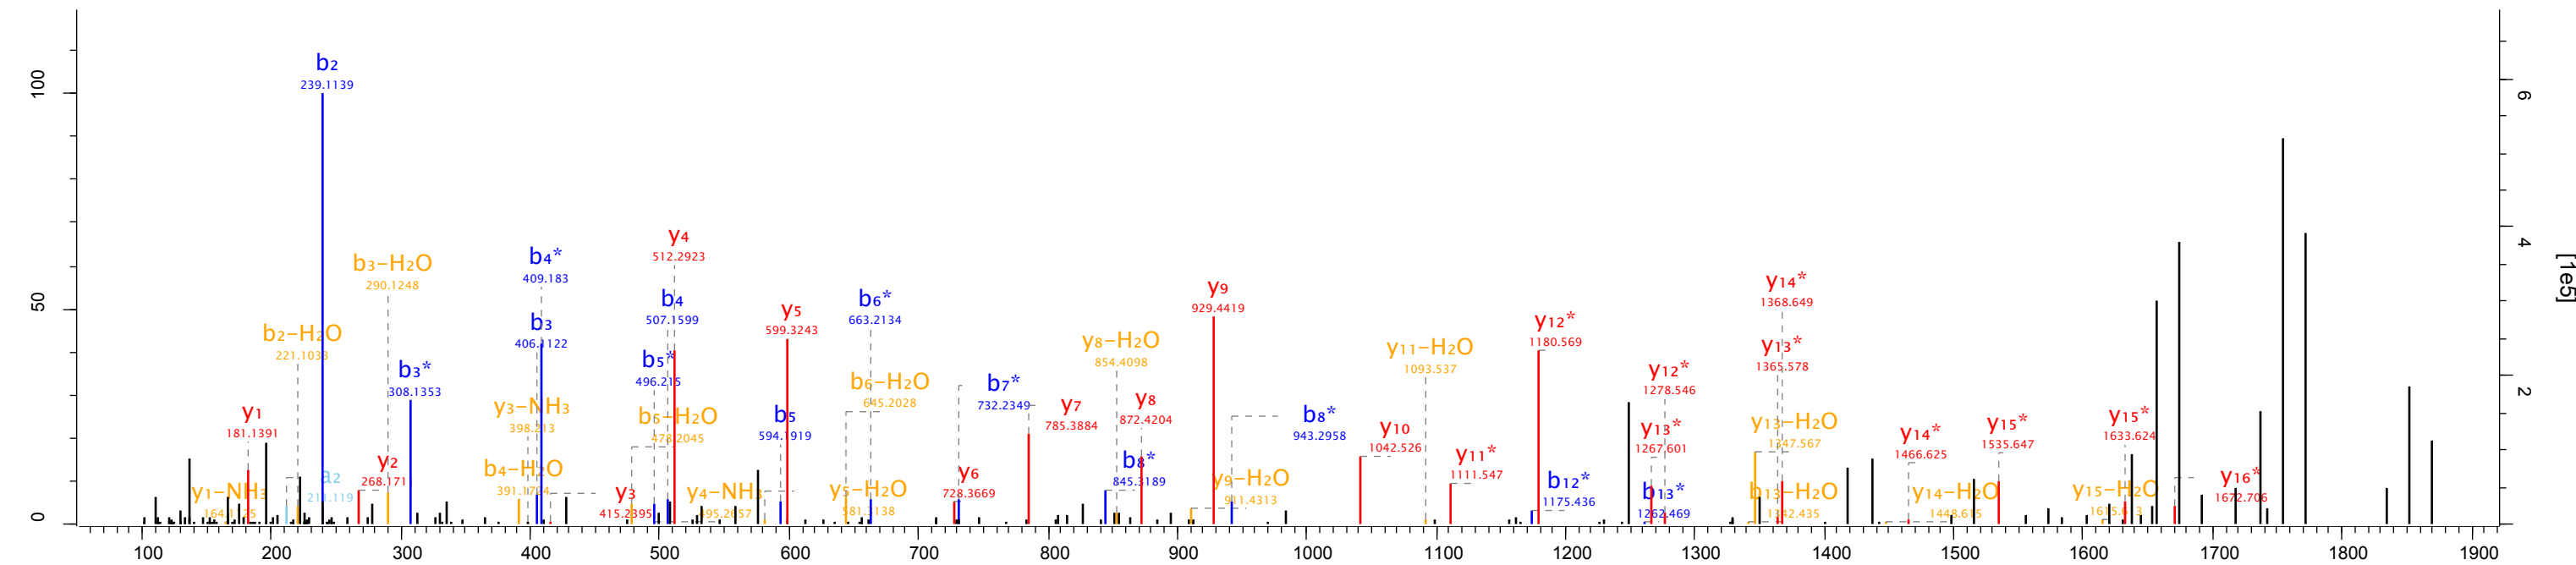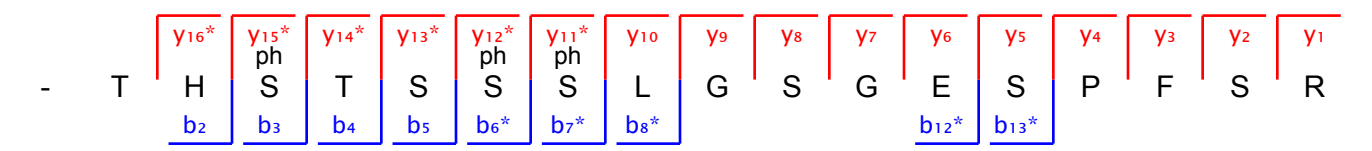

Raw file  
20150814\_A375SR\_Phospho\_BR2\_02

Scan 14415 Method FTMS; HCD Score 74.82 m/z 785.96 Gene names HNRNPA2B1

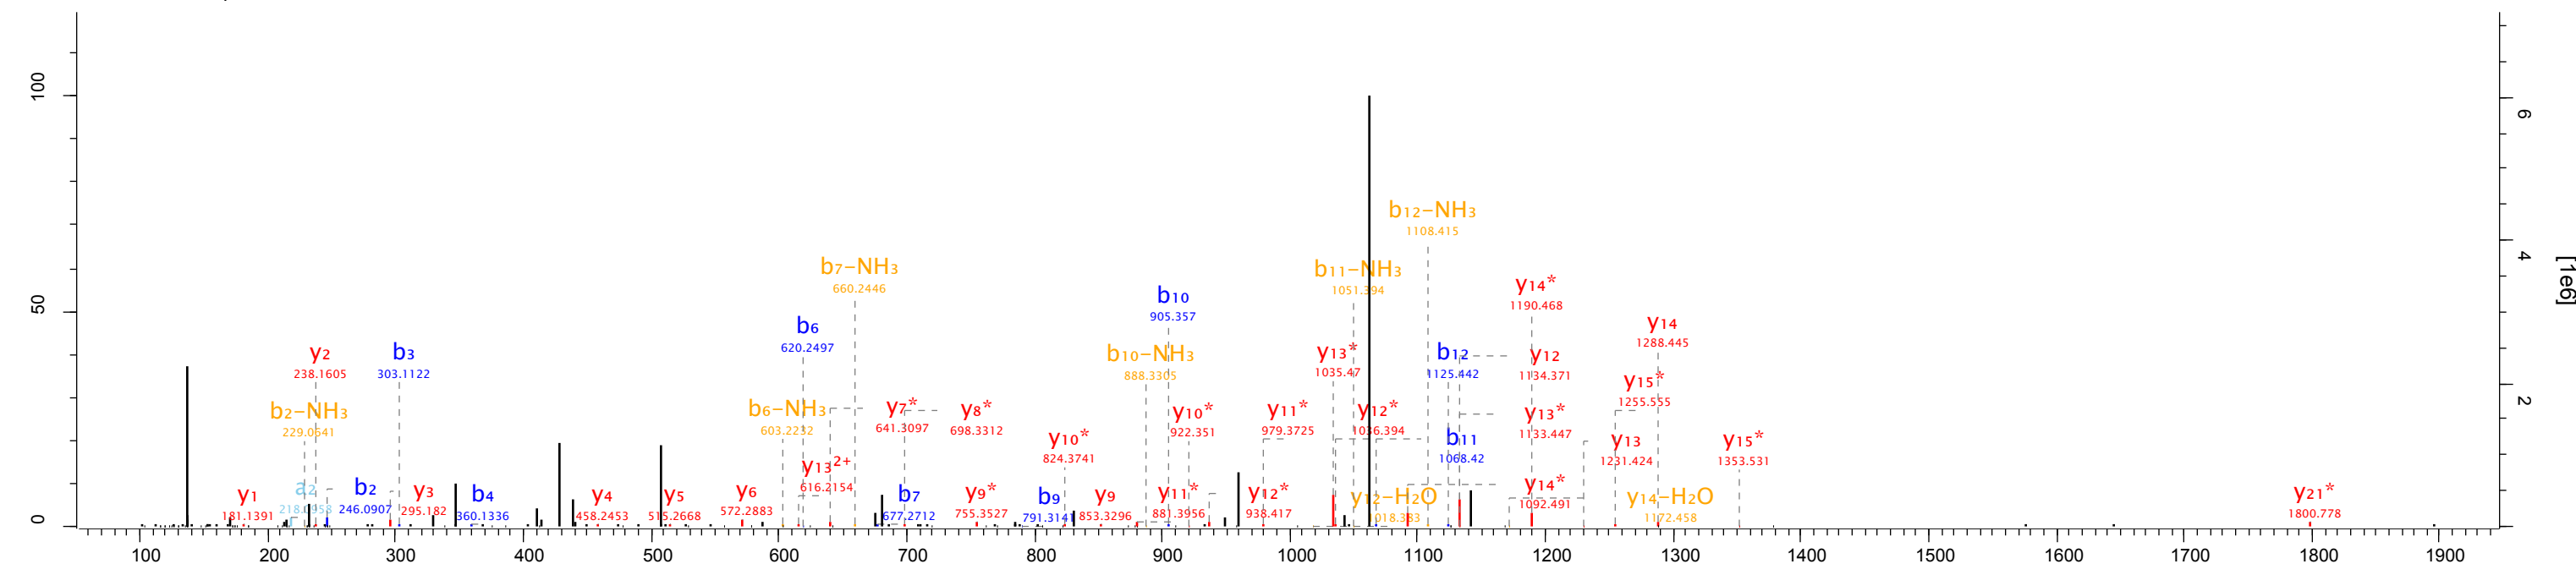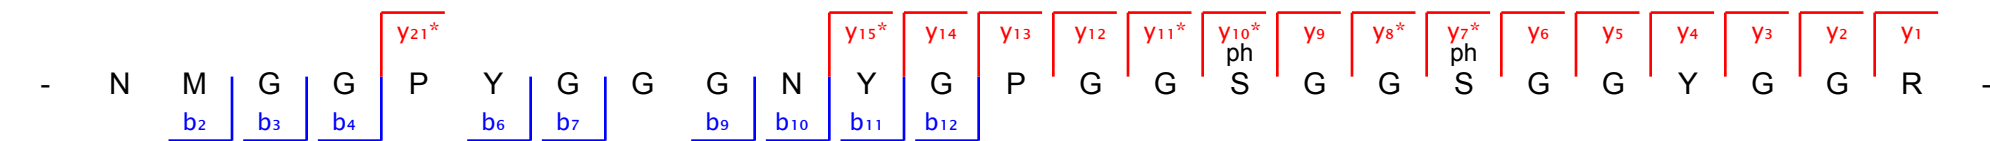

Raw file 20150814\_A375SR\_Phospho\_BR2\_02 Scan 15735 Method FTMS; HCD Score 78.39 m/z 1068.15 Gene names SMEK1

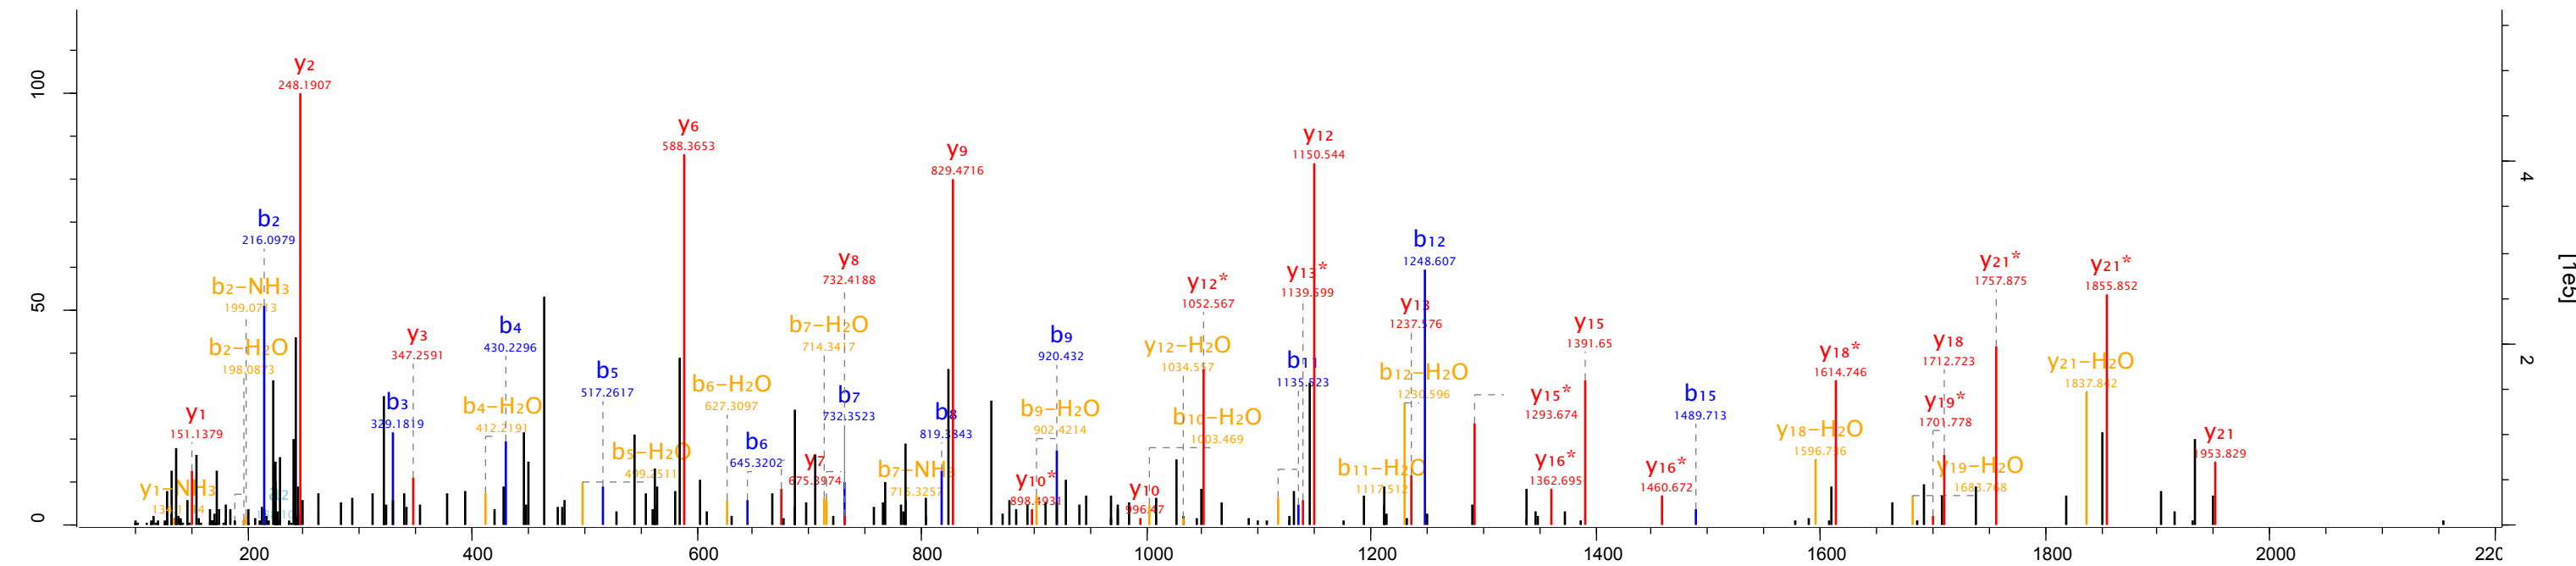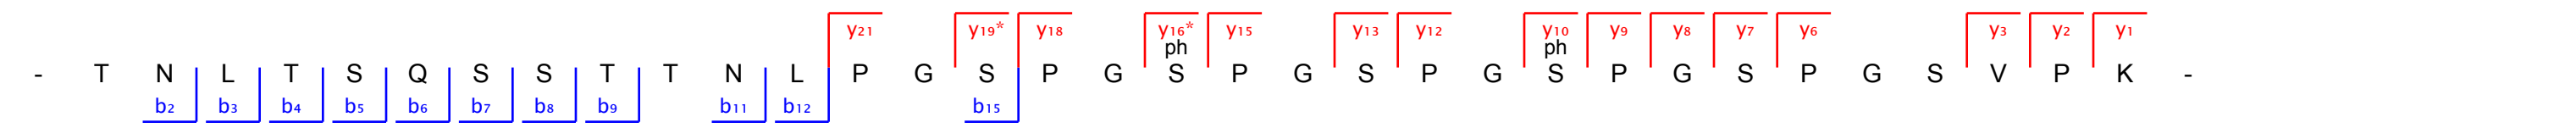

Raw file 20150814\_A375SR\_Phospho\_BR2\_02 Scan 16195 Method FTMS; HCD Score 95.54 m/z 1146.99 Gene names RAI1

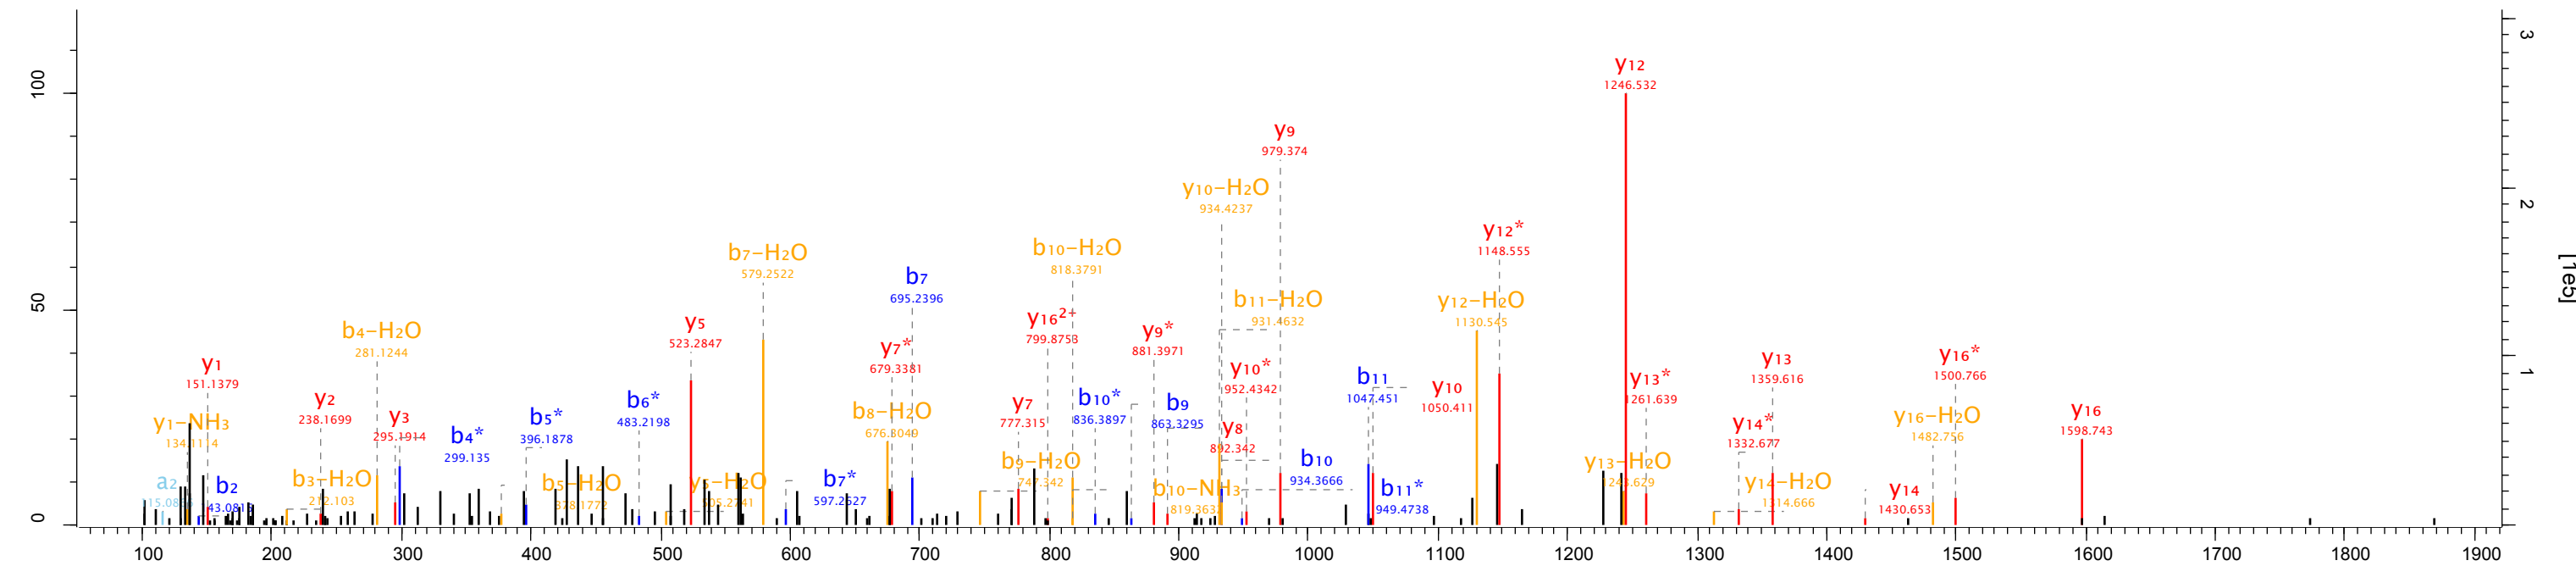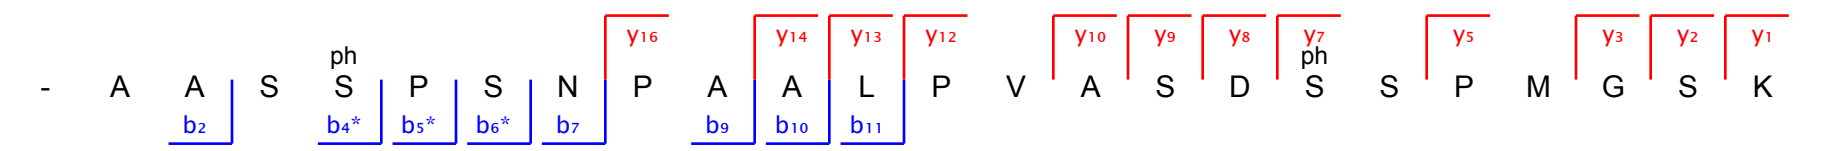

Raw file 20150814\_A375SR\_Phospho\_BR2\_02 Scan 16235 Method FTMS; HCD Score 61.37 m/z 691.81 Gene names MAP3K9

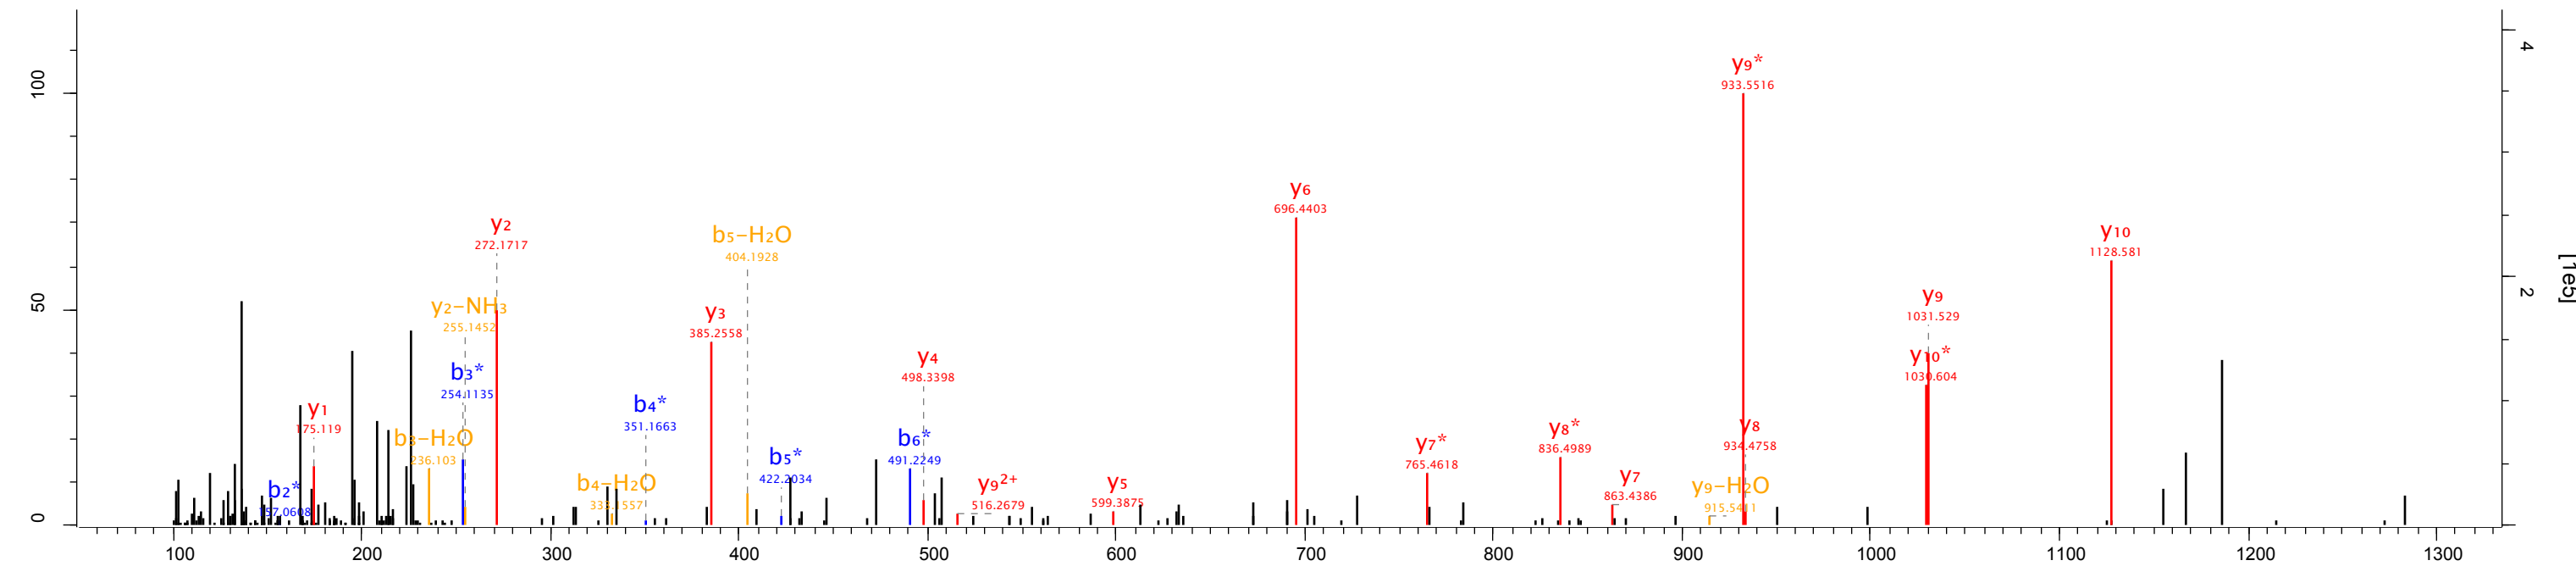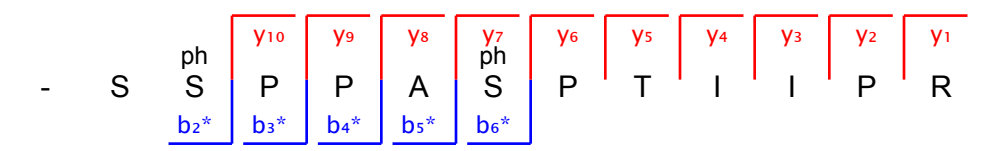



Raw file: 20150814\_A375SR\_Phospho\_BR2\_02  
 Scan: 16425 Method: FTMS; HCD Score: 98.15 m/z: 1074.45 Gene names: RBL2

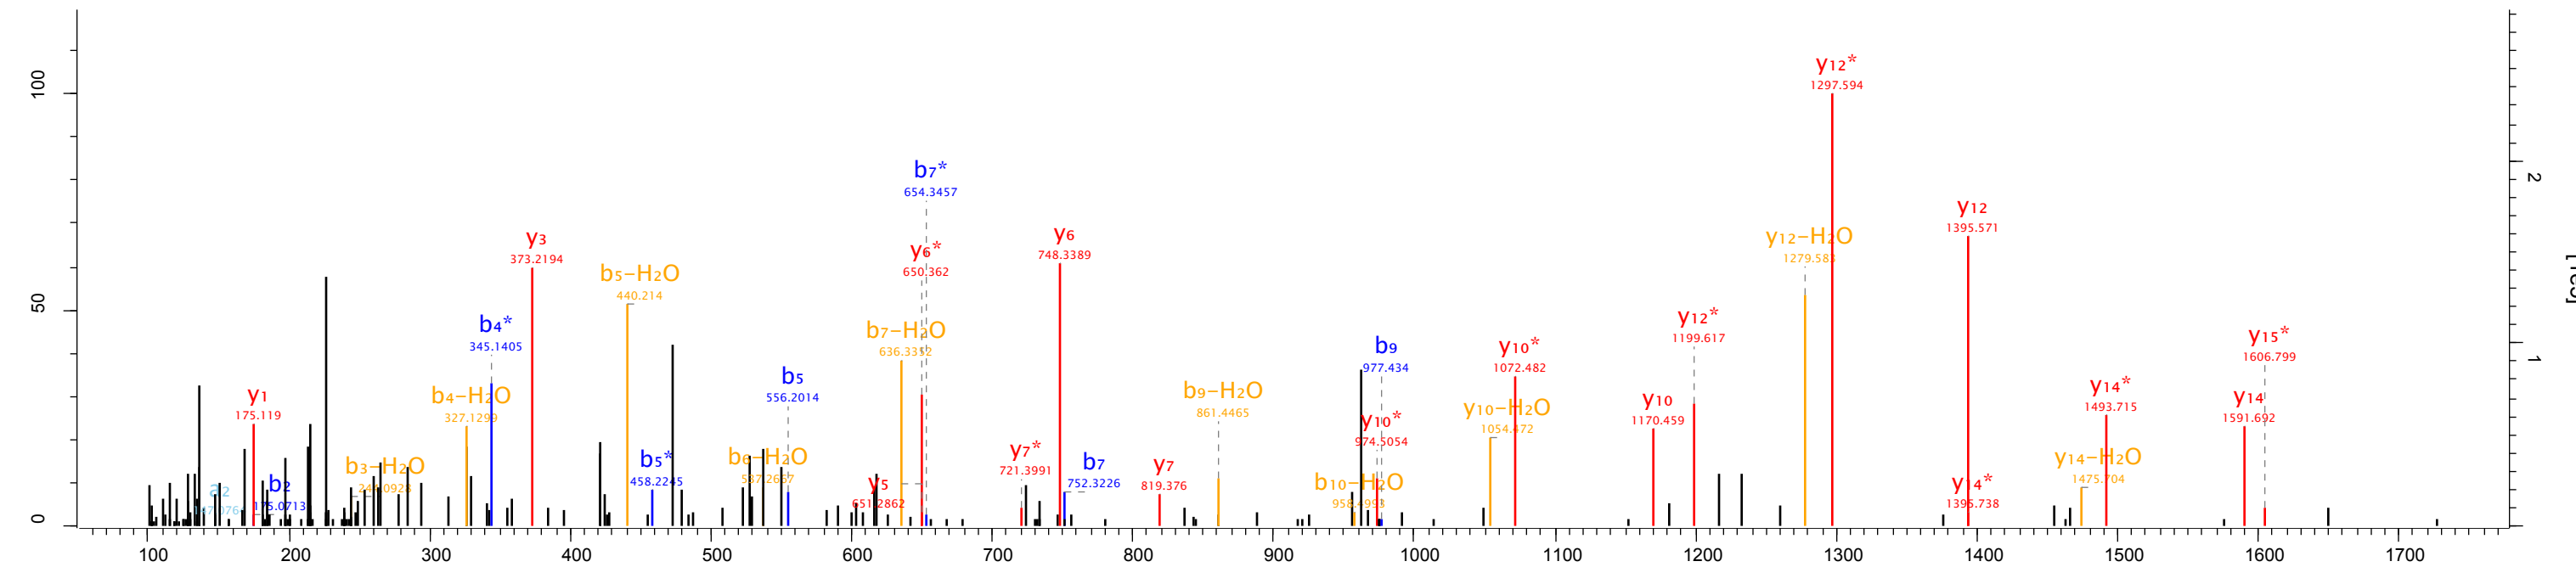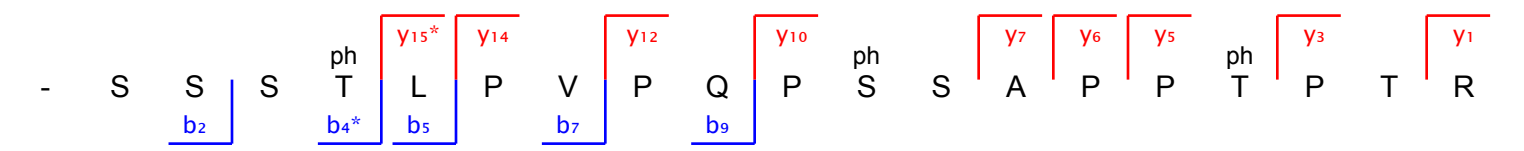

Raw file 20150814\_A375SR\_Phospho\_BR2\_02 Scan 16885 Method FTMS; HCD Score 57.61 m/z 893.77 Gene names TSPYL2

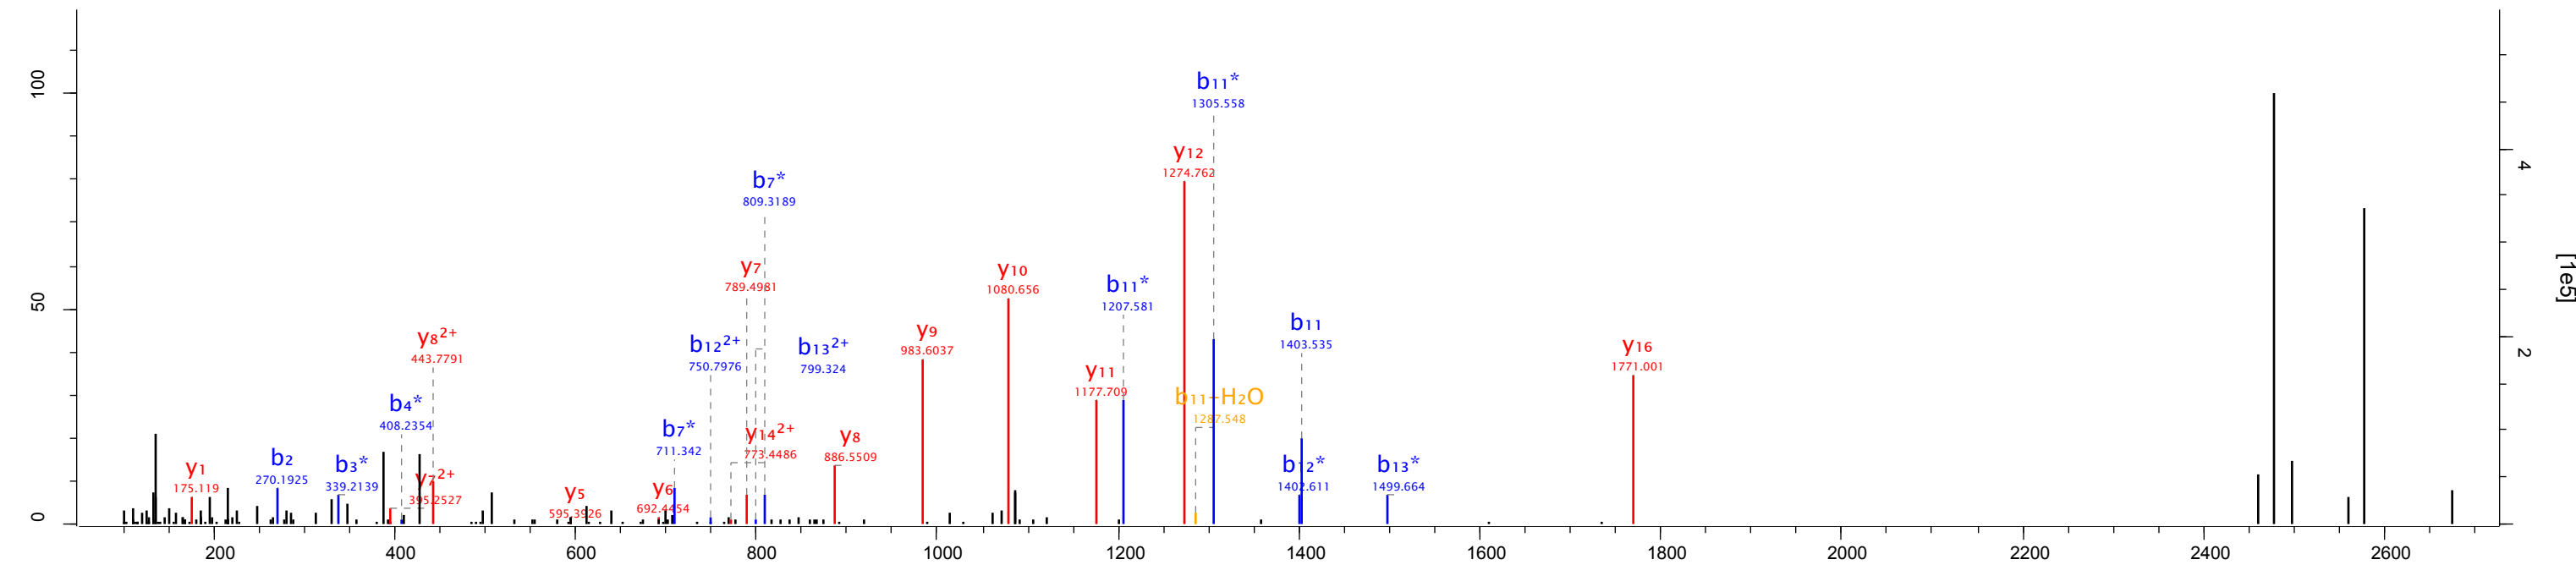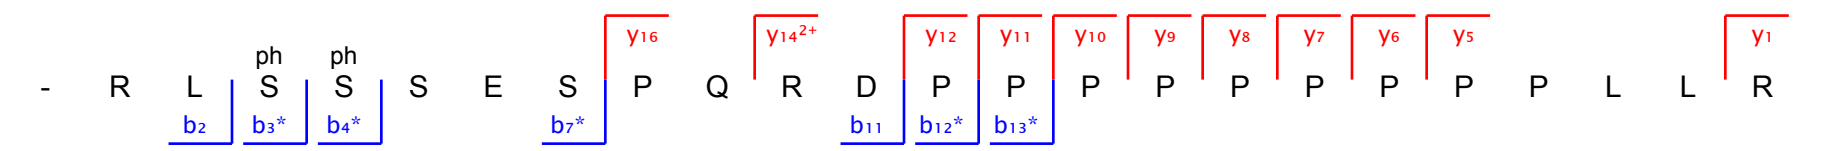

Raw file  
20150814\_A375SR\_Phospho\_BR2\_02

Scan 19415 Method FTMS; HCD Score 85.42 m/z 1061.93 Gene names POM121C

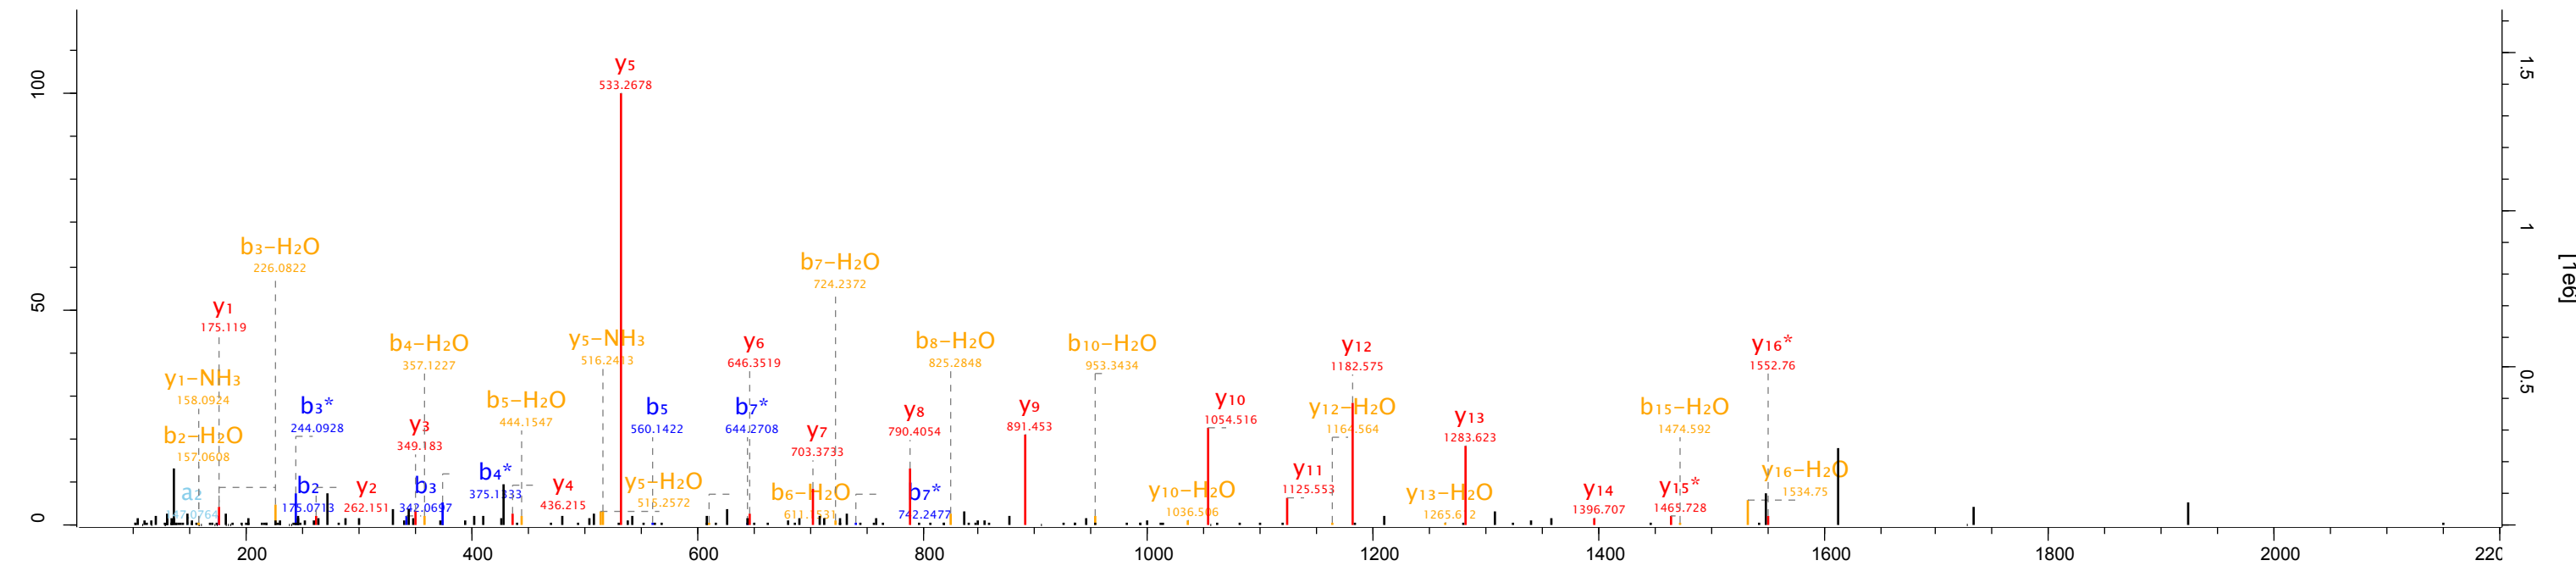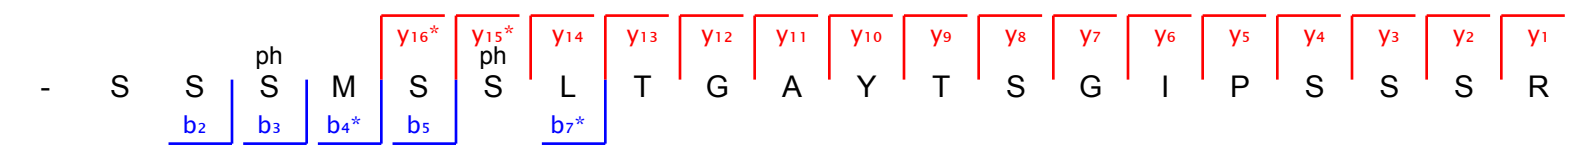

Raw file: 20150814\_A375SR\_Phospho\_BR2\_02  
 Scan: 20325 Method: FTMS; HCD Score: 125.35 m/z: 1018.77 Gene names: GPHN

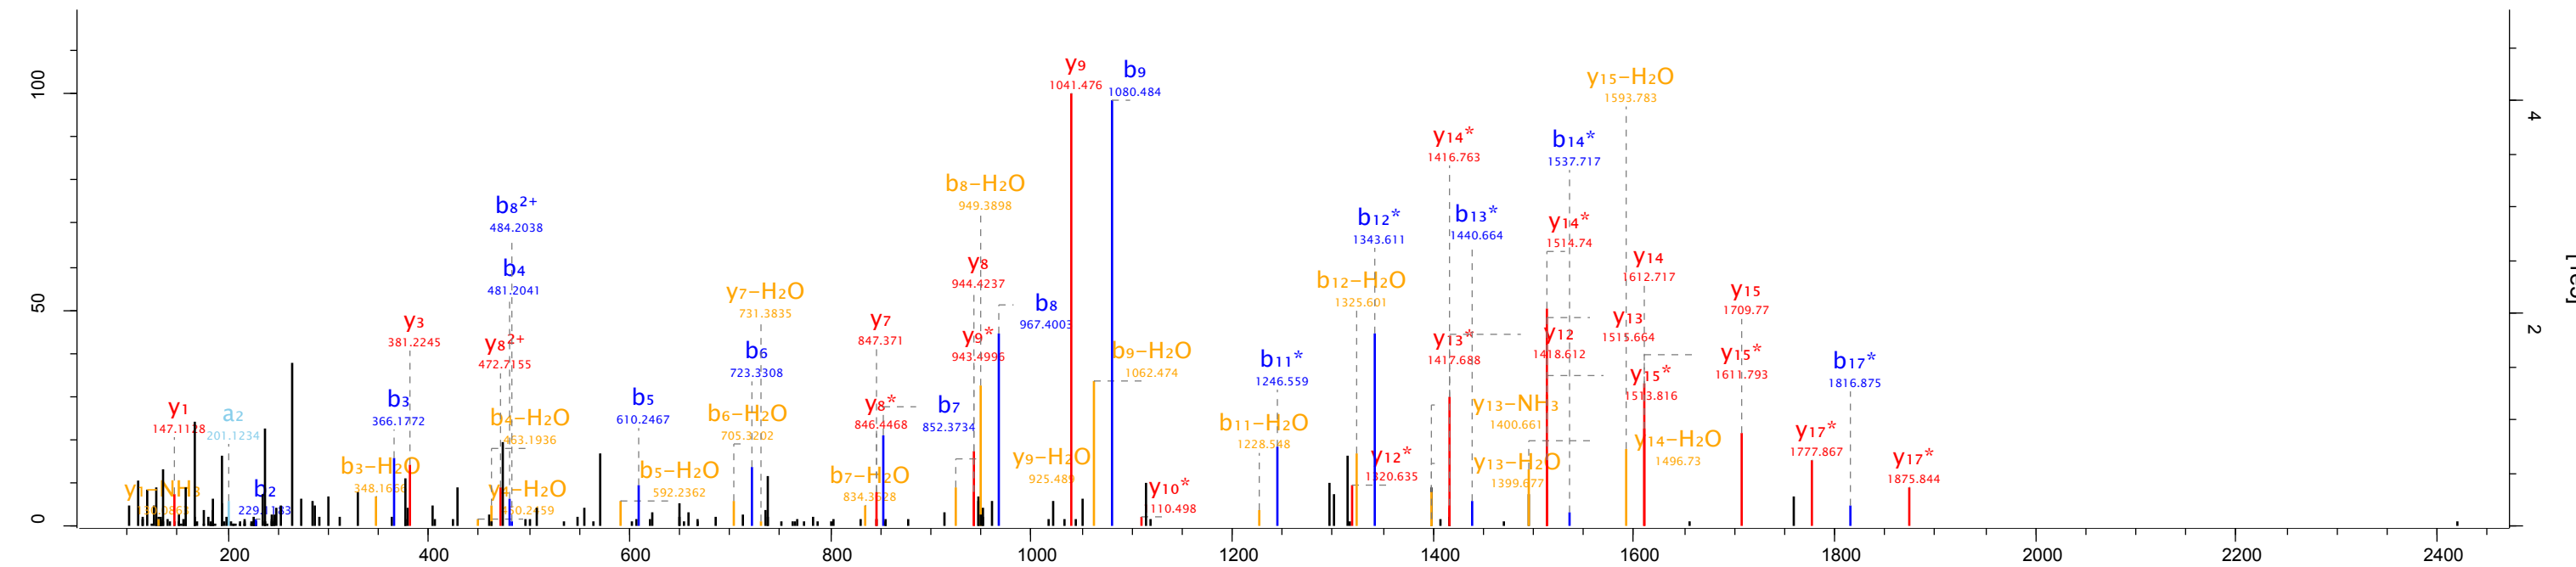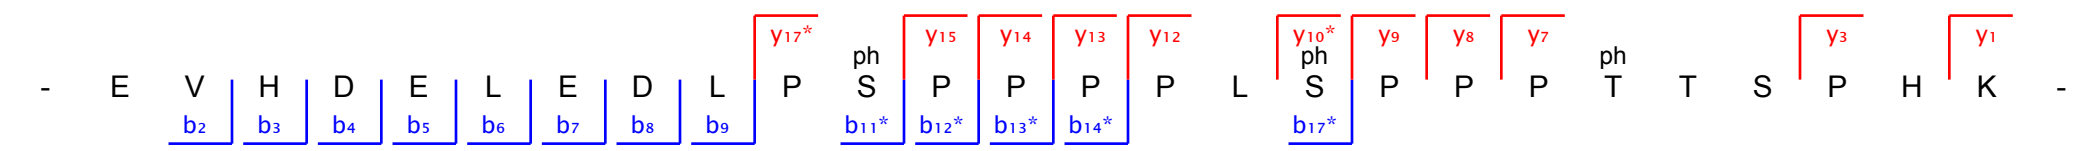

Raw file: 20150814\_A375SR\_Phospho\_BR2\_02  
 Scan: 22145 Method: FTMS; HCD Score: 136.66 m/z: 1111.93 Gene names: KIF21A

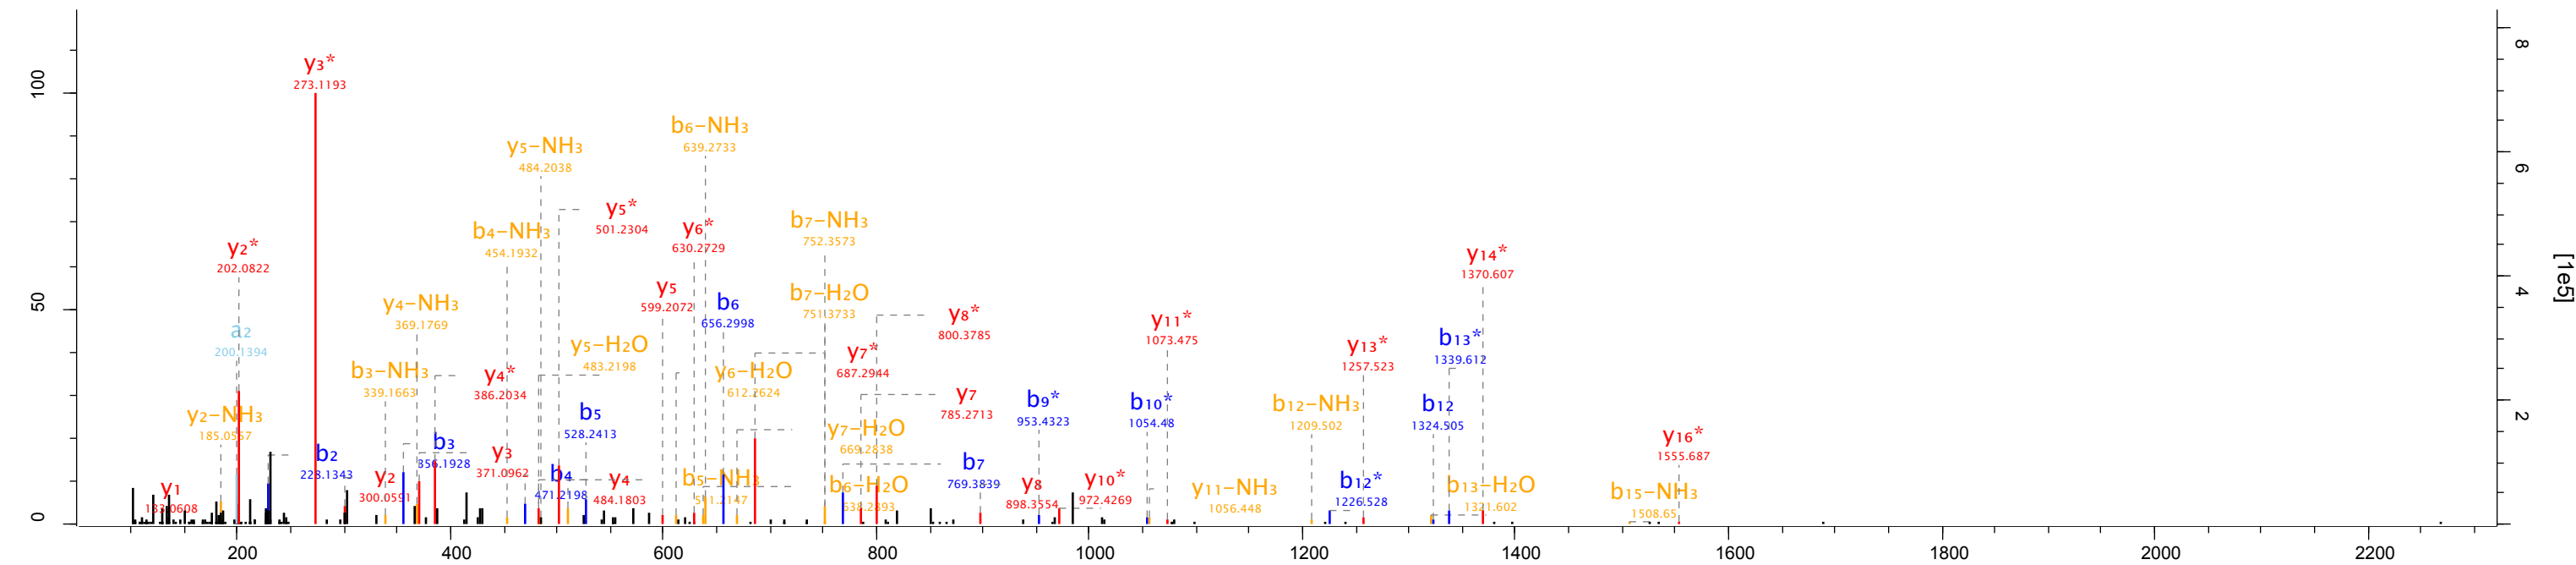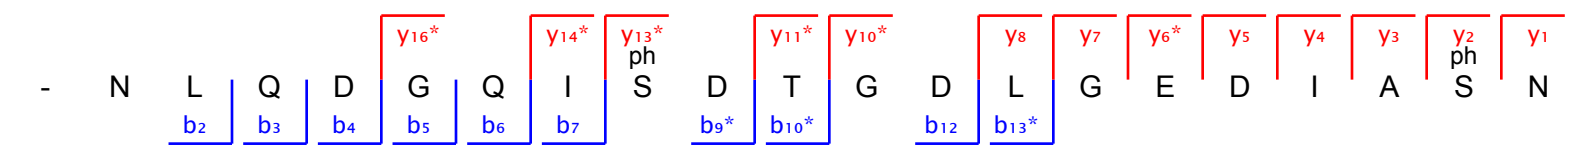

Raw file Scan Method Score m/z Gene names

20150814\_A375SR\_Phospho\_BR2\_02 24115 FTMS; HCD 85.19 907.4 KNOPI

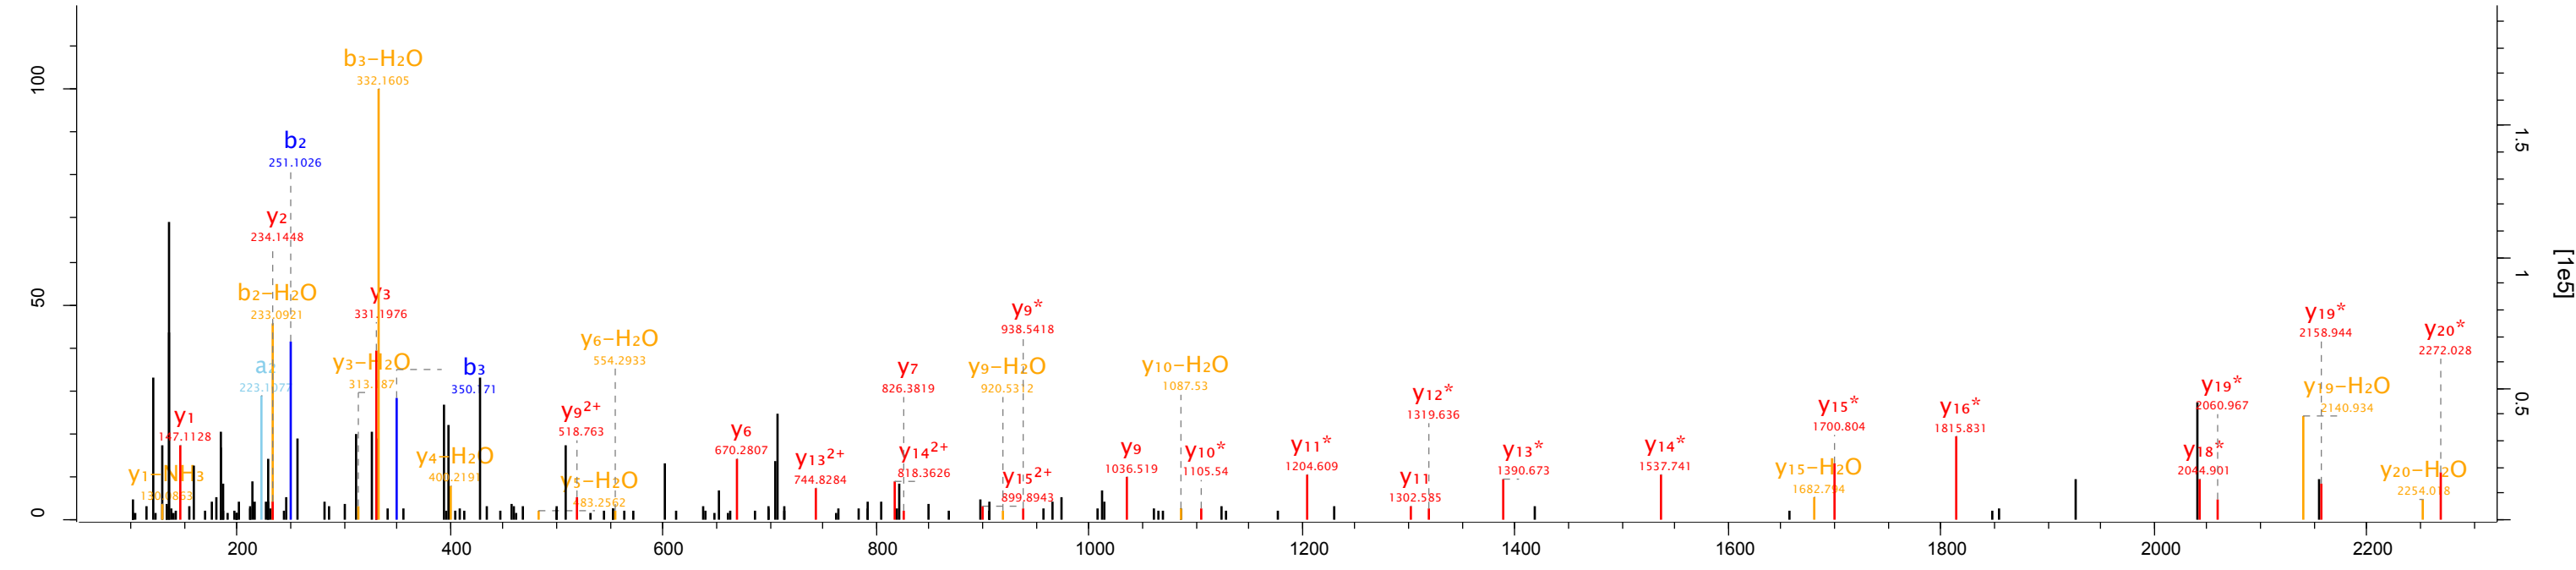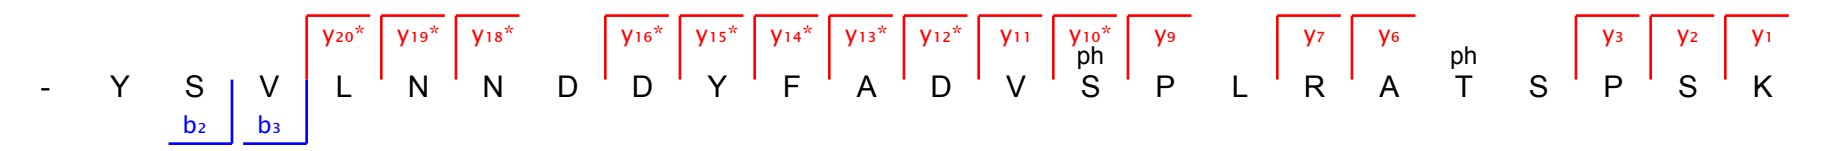

Raw file: 20150814\_A375SR\_Phospho\_BR2\_02  
 Scan: 2845 Method: FTMS; HCD Score: 174.23 m/z: 824.35 Gene names: BAG3

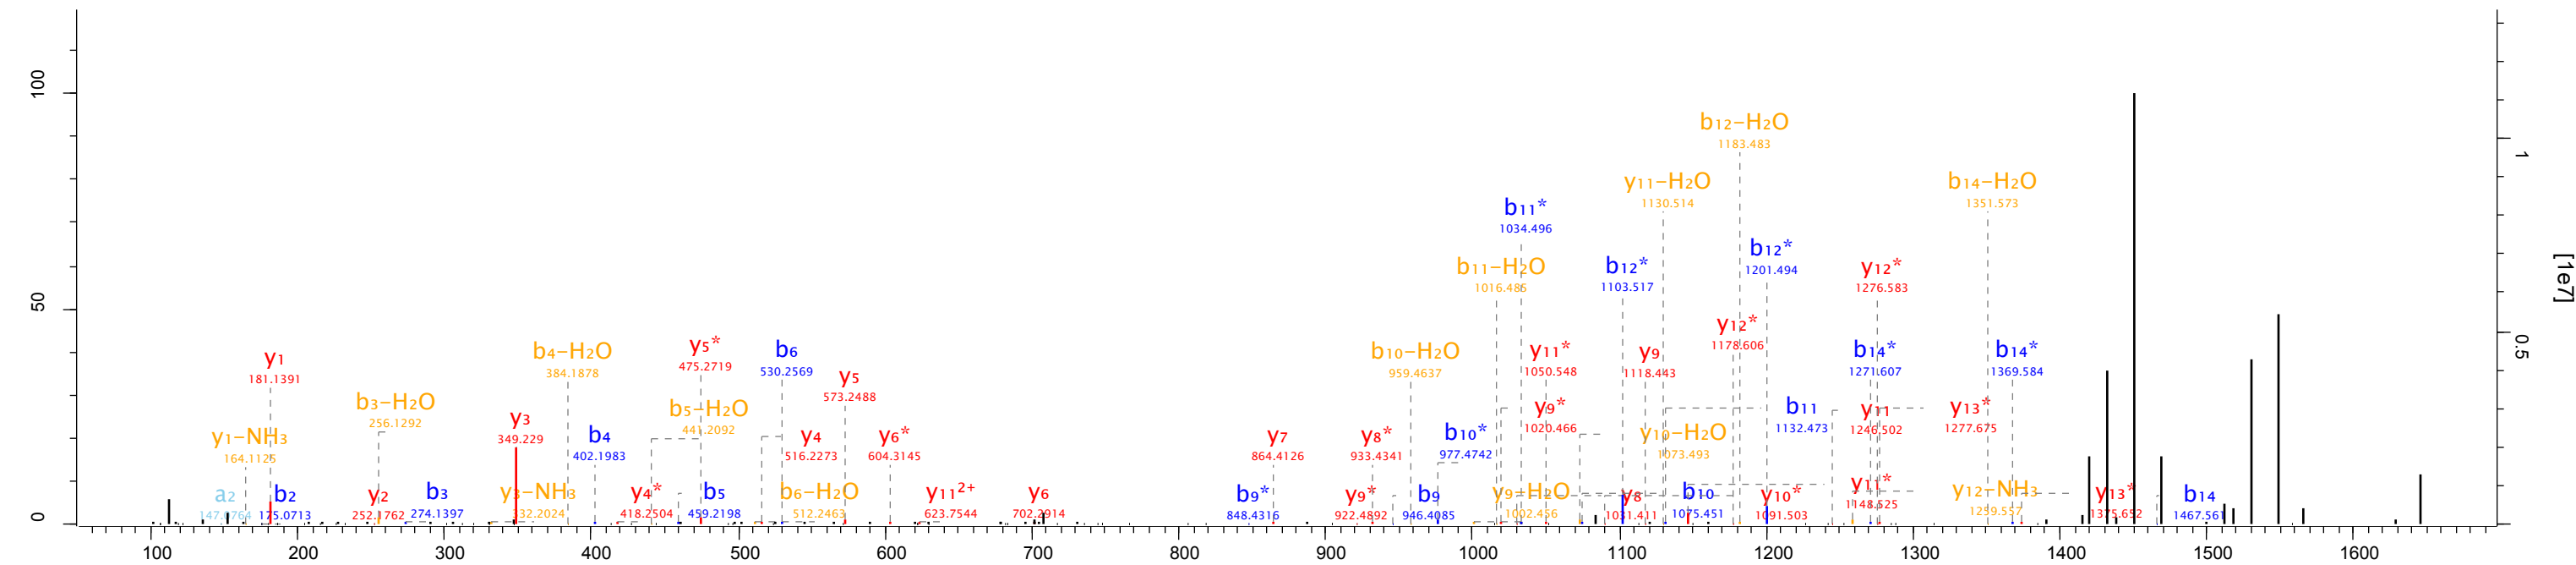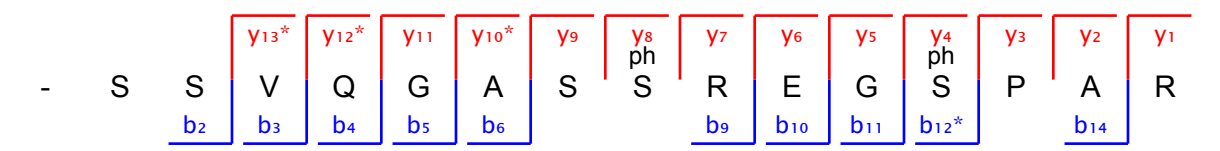

Raw file: 20150814\_A375SR\_Phospho\_BR2\_02  
 Scan: 3745 Method: FTMS; HCD Score: 118.31 m/z: 543.25 Gene names: SRRM2

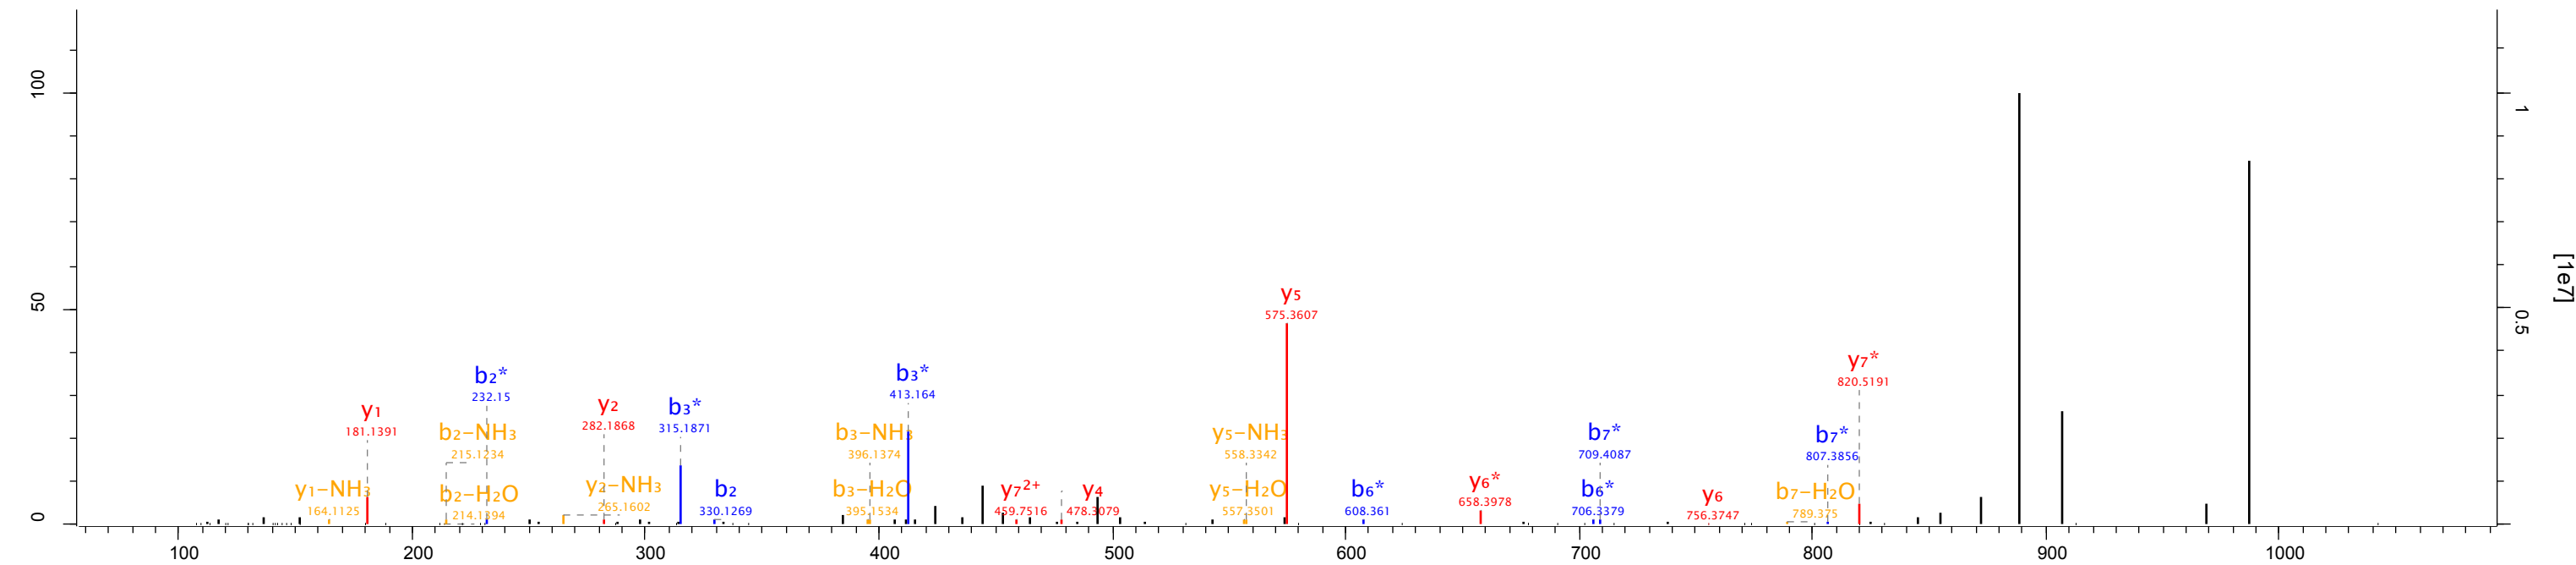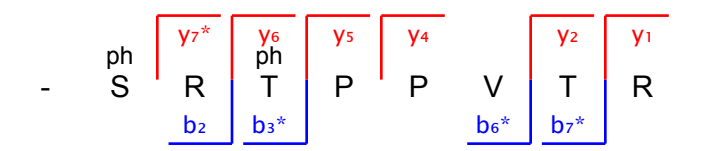



Raw file 20150814\_A375SR\_Phospho\_BR2\_02 Scan 4445 Method FTMS; HCD Score 49.22 m/z 642.23 Gene names PPFIA1;PPFIA4

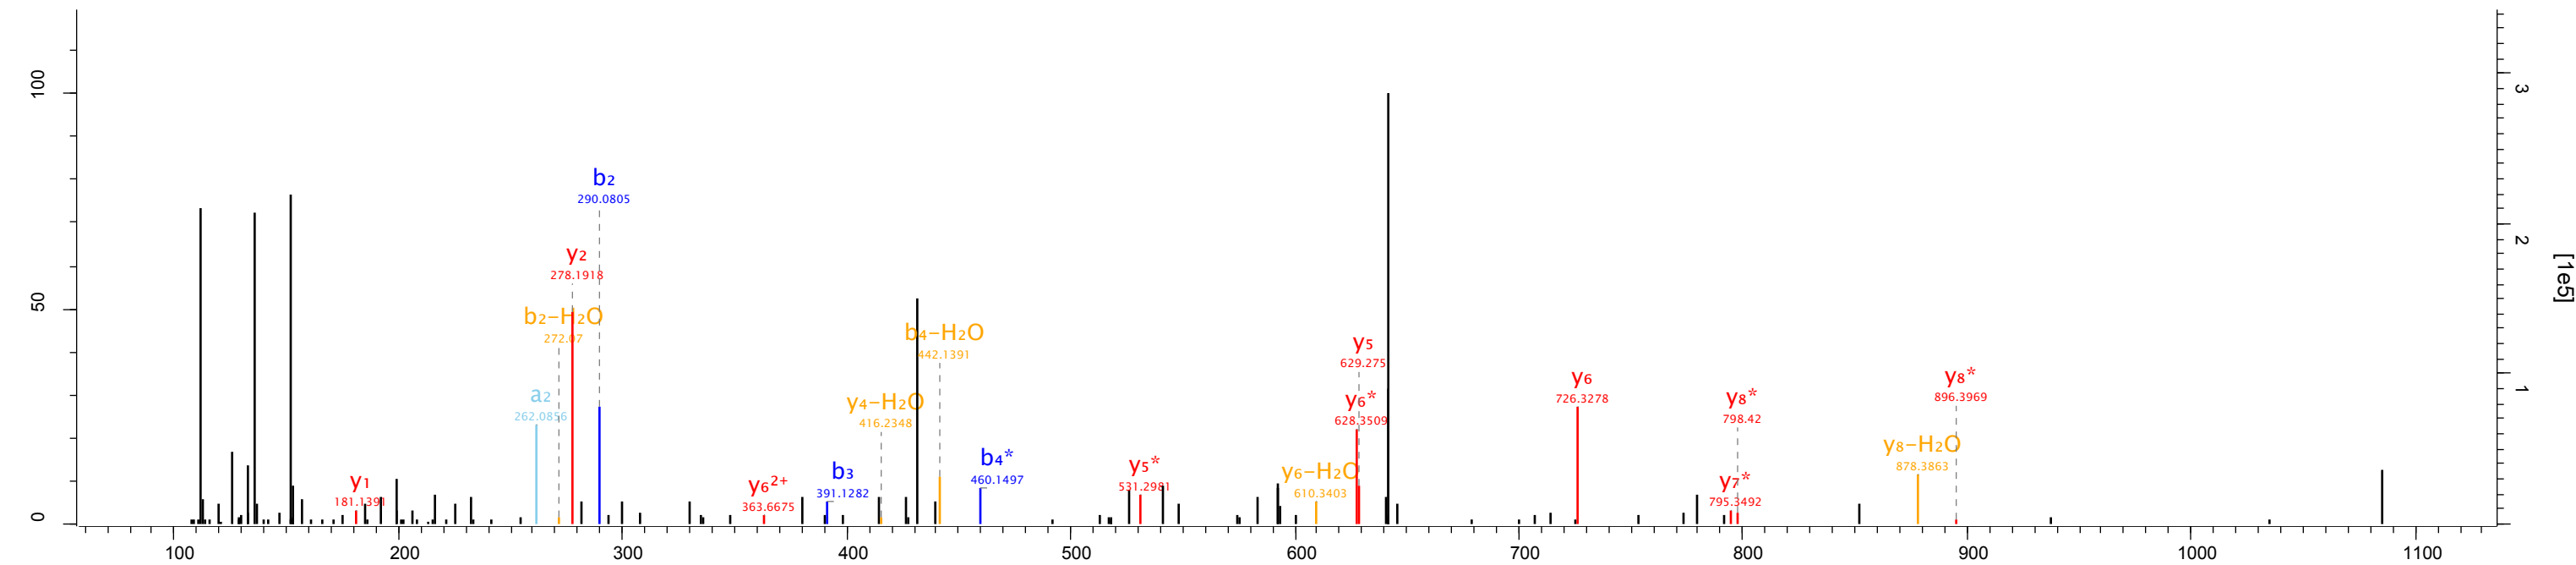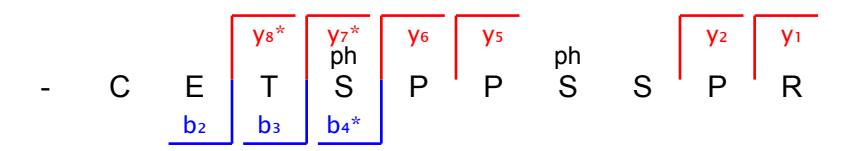

Raw file: 20150814\_A375SR\_Phospho\_BR2\_02  
 Scan: 5285 Method: FTMS; HCD Score: 154.19 m/z: 830.97 Gene names: SAFB

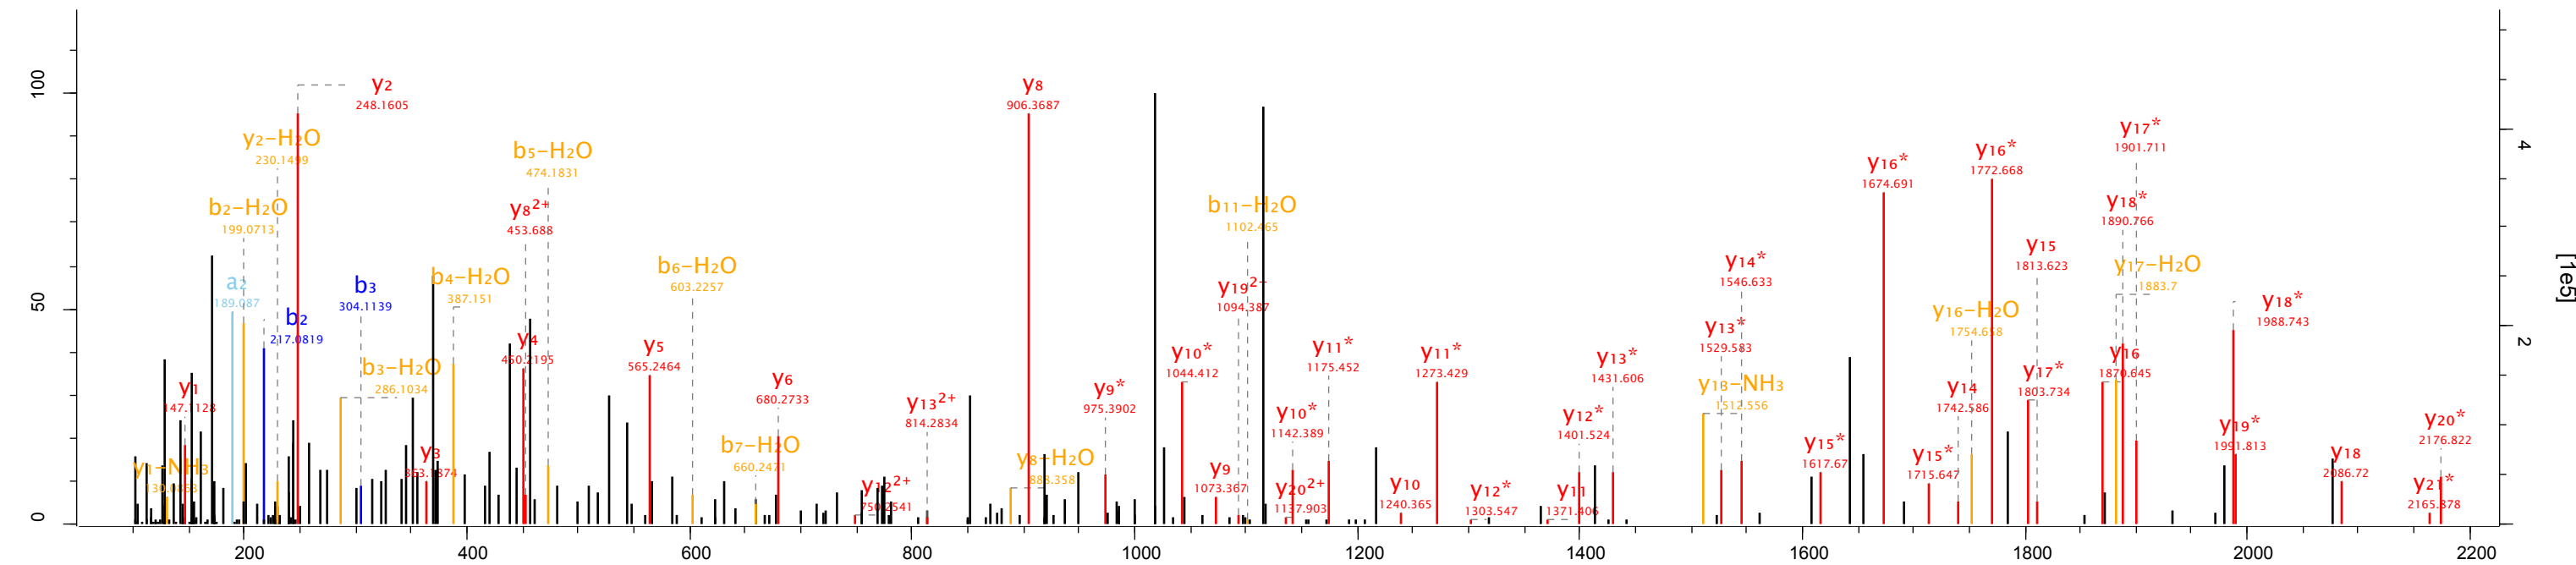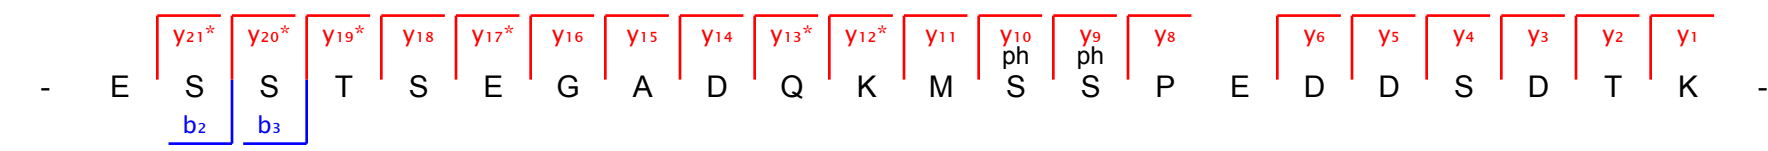

Raw file Scan Method Score m/z Gene names

20150814\_A375SR\_Phospho\_BR2\_02 5485 FTMS; HCD 144.73 753.74 CIC

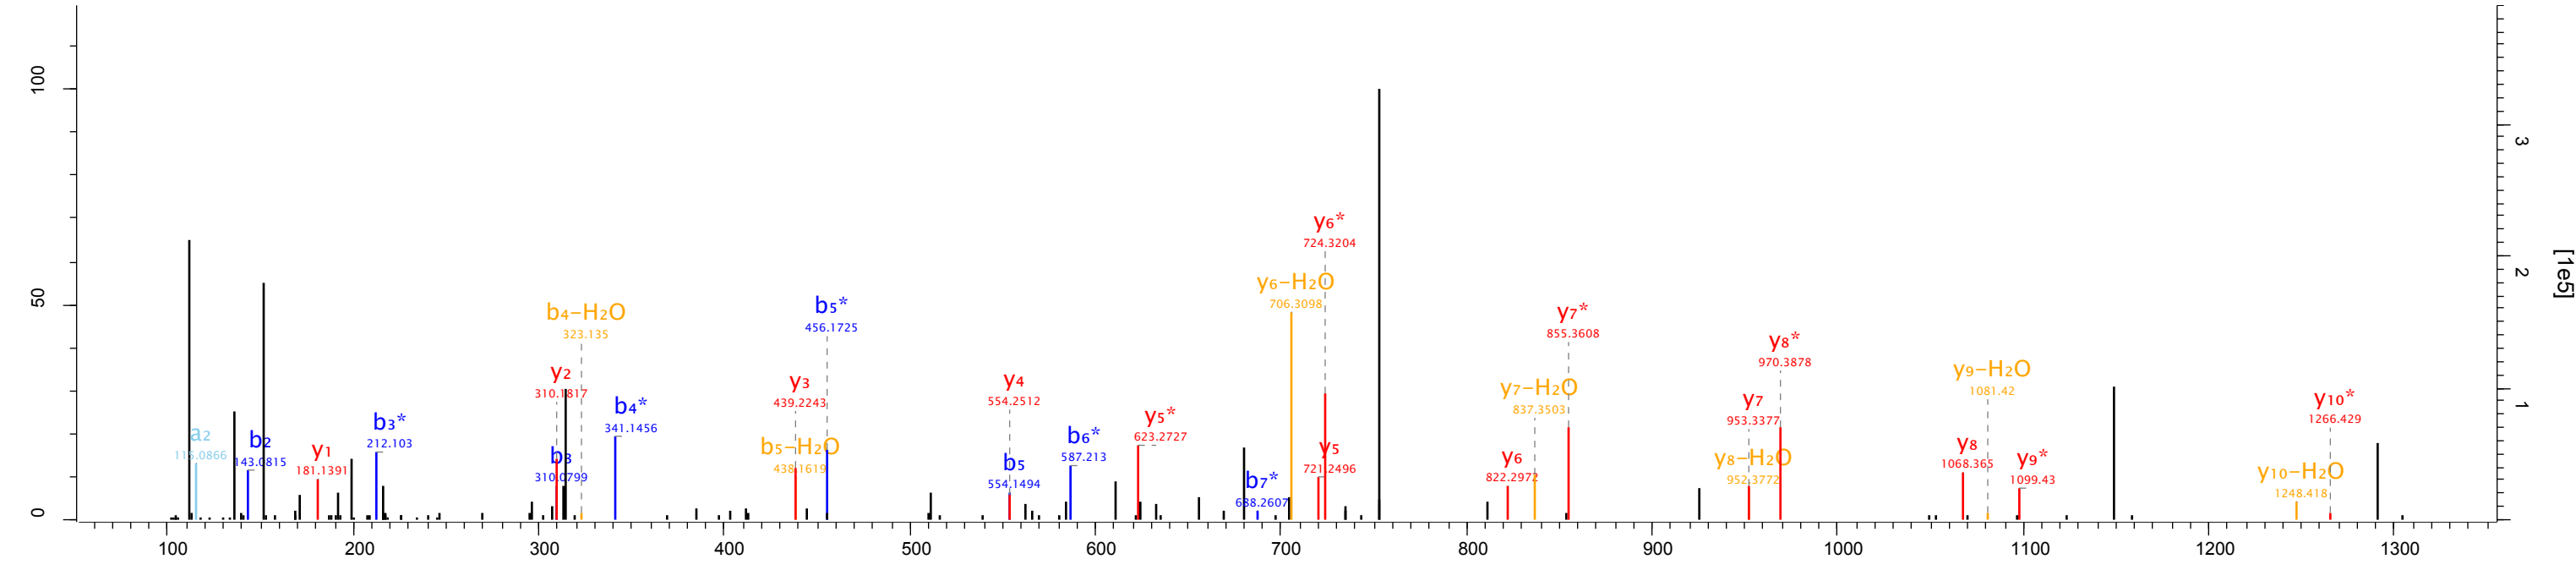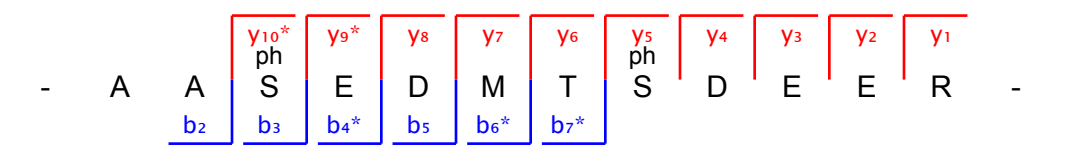

Raw file: 20150814\_A375SR\_Phospho\_BR2\_02  
 Scan: 5545 Method: FTMS; HCD Score: 112.16 m/z: 698.75 Gene names: IWS1

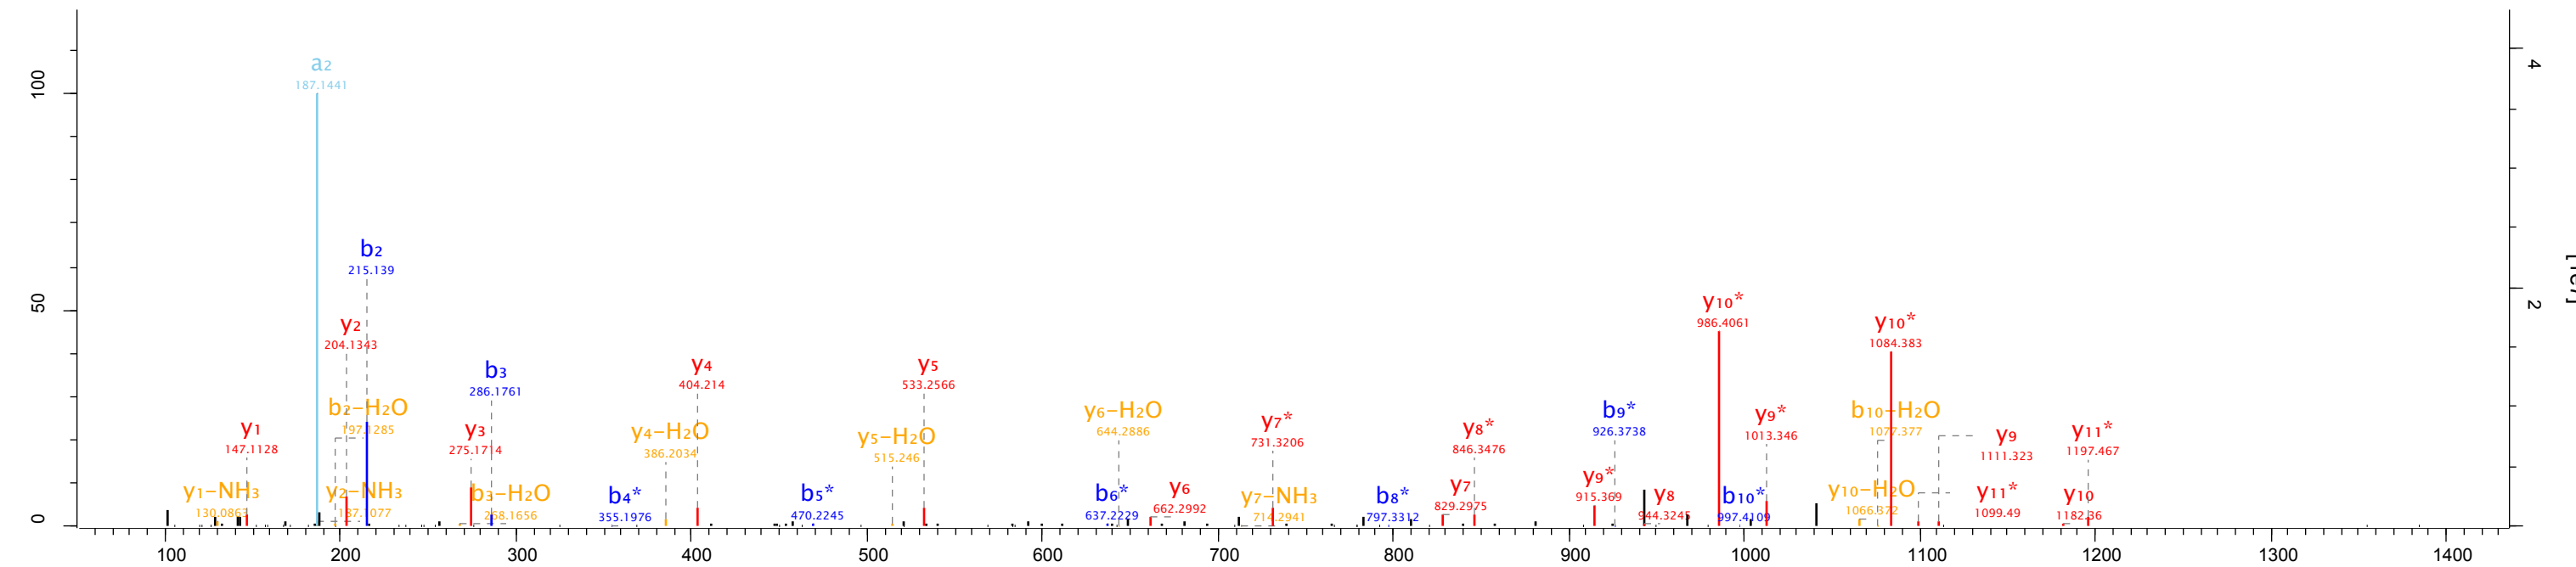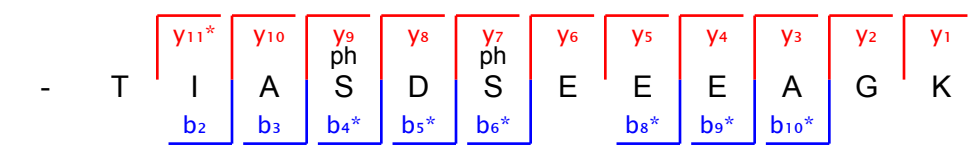

Raw file: 20150814\_A375SR\_Phospho\_BR2\_02  
 Scan: 6325 Method: FTMS; HCD Score: 51.64 m/z: 580.26 Gene names: OTOP3

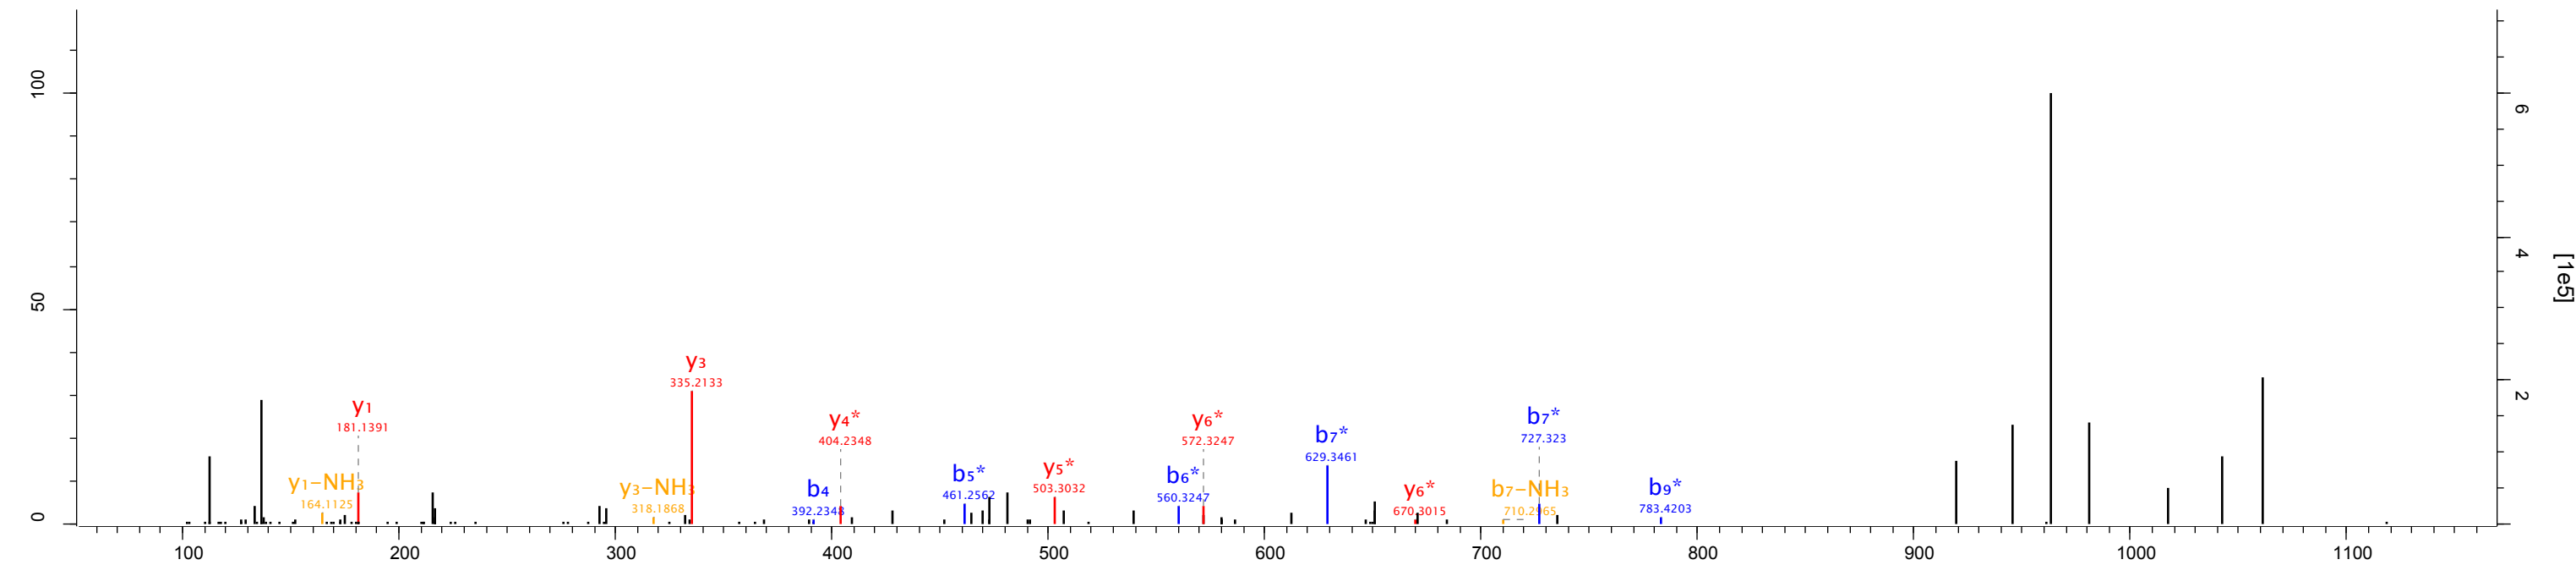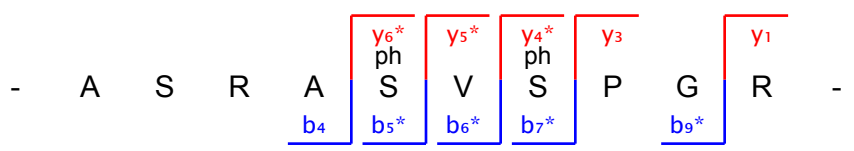

Raw file 20150814\_A375SR\_Phospho\_BR2\_02 Scan 6375 Method FTMS; HCD Score 132.13 m/z 817.4 Gene names FOXH1;XRCC1

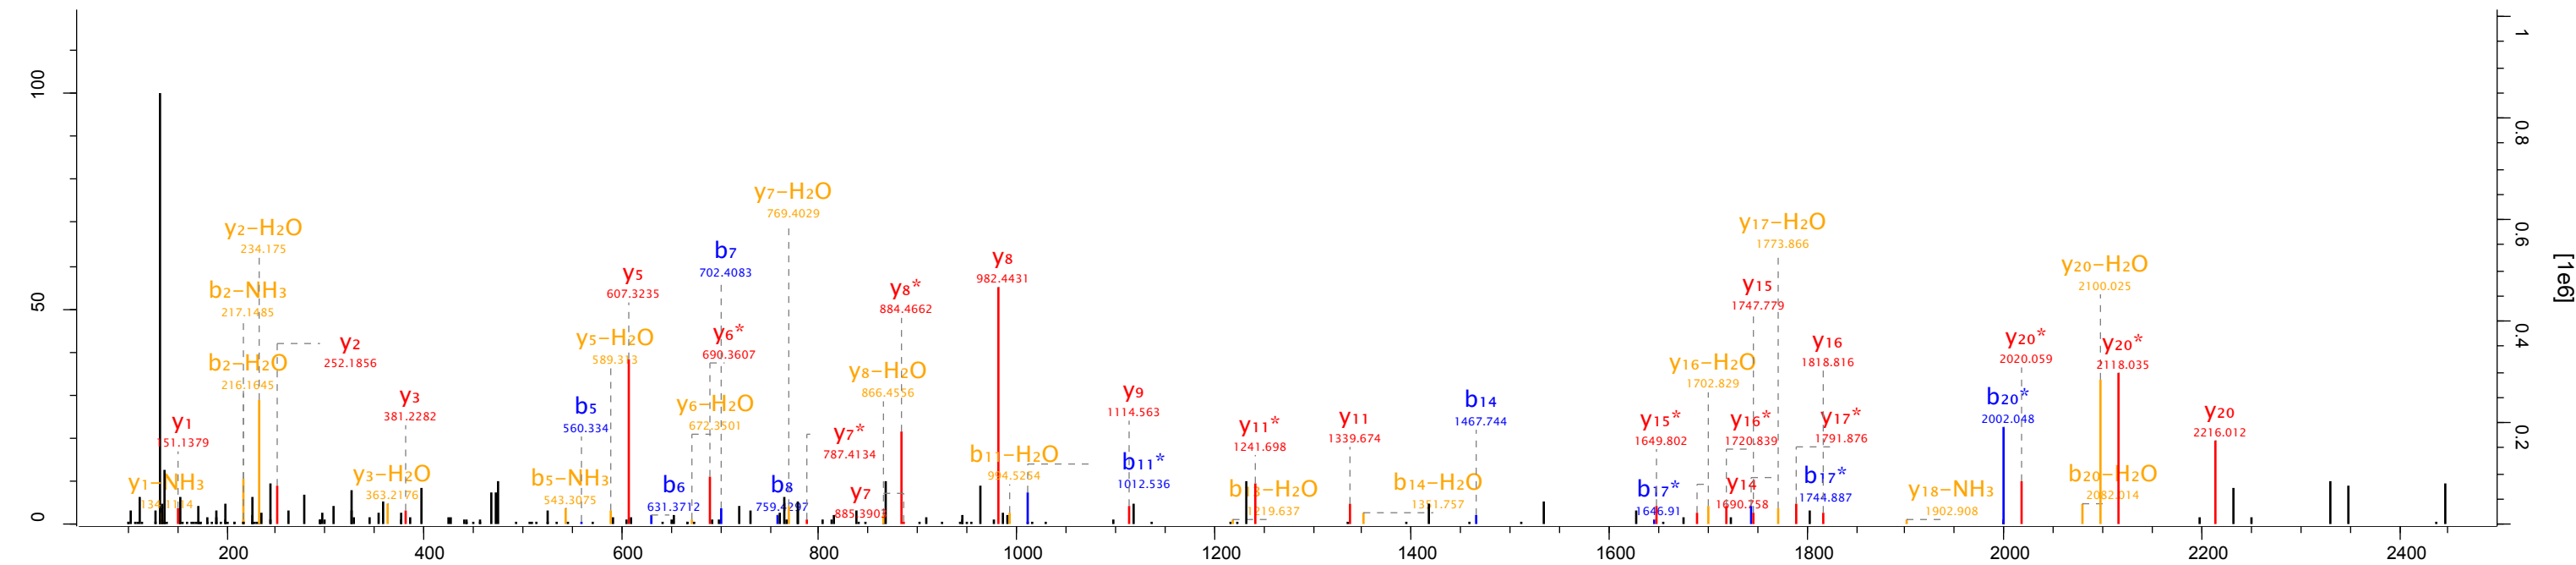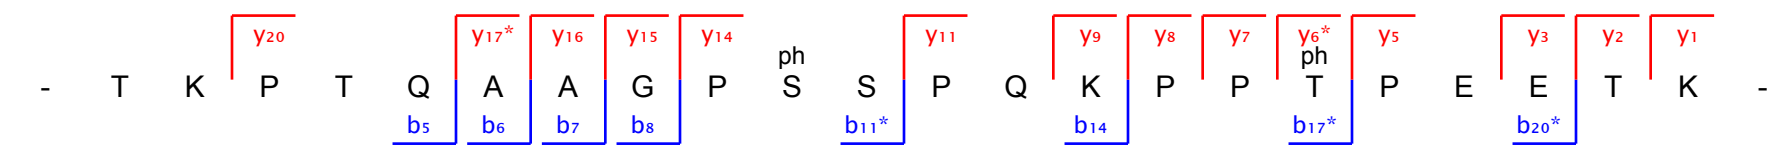

Raw file Scan Method Score m/z Gene names  
 20150814\_A375SR\_Phospho\_BR2\_02 6385 FTMS; HCD 157.73 1029.95 SPTBN1

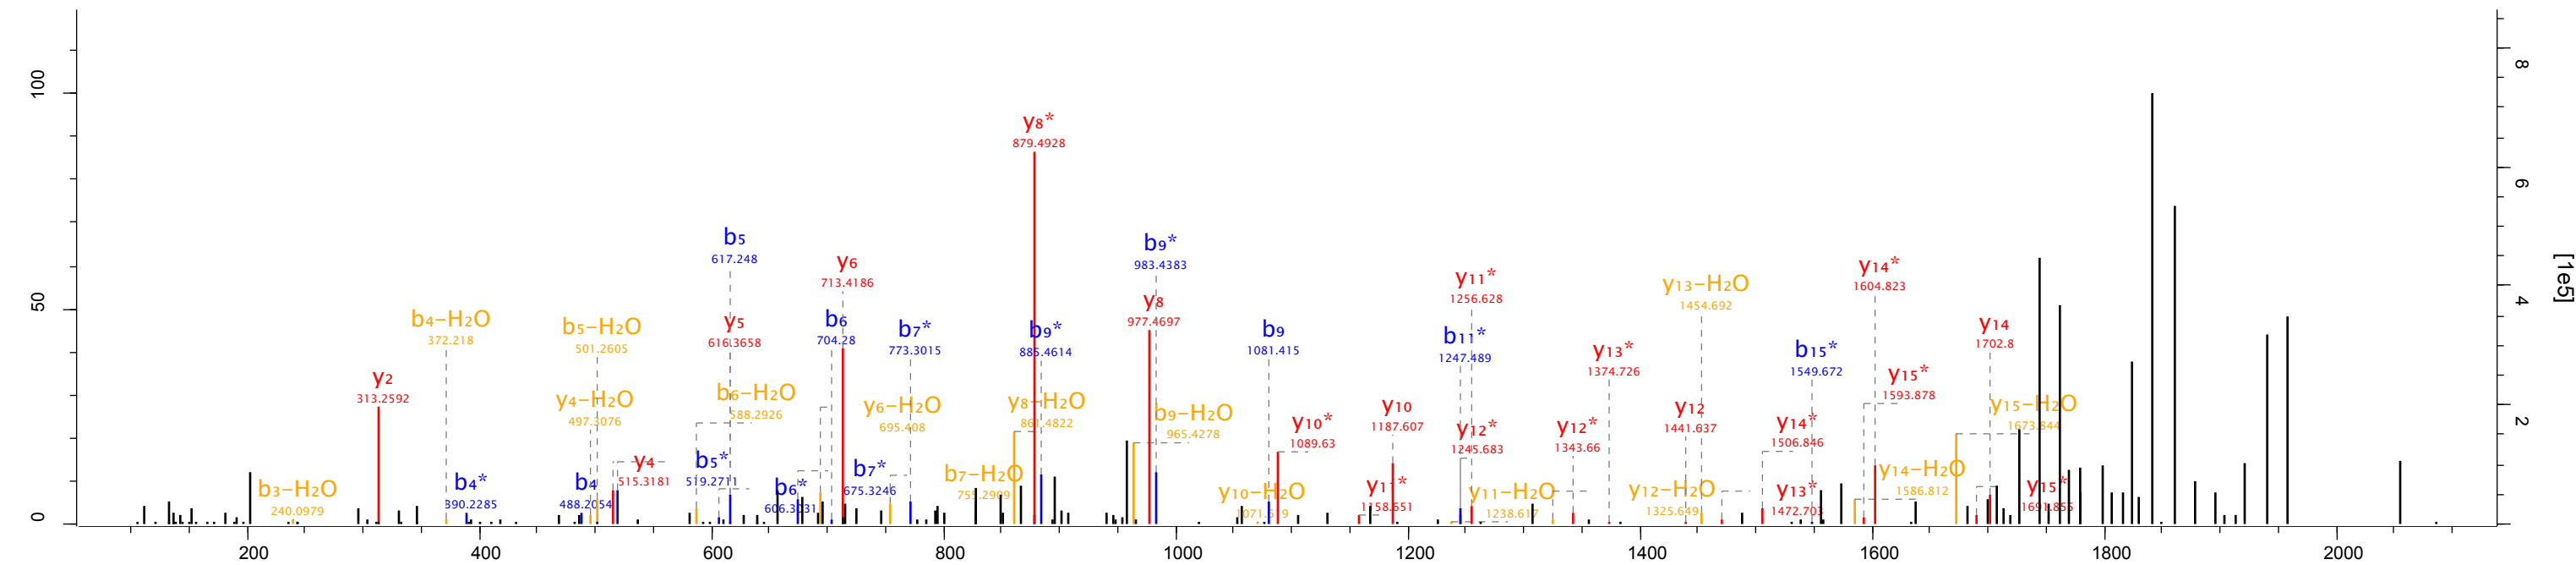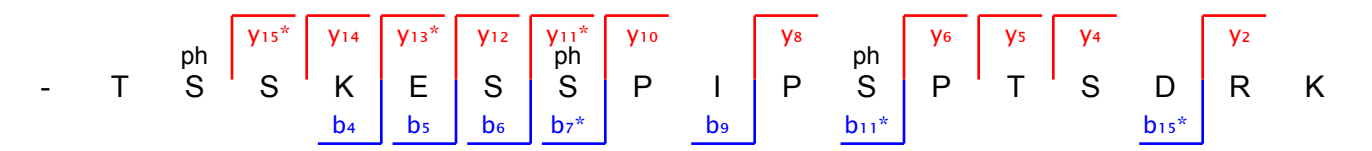

Raw file: 20150814\_A375SR\_Phospho\_BR2\_02  
 Scan: 6495 Method: FTMS; HCD Score: 46.11 m/z: 682.28 Gene names: SPTBN1

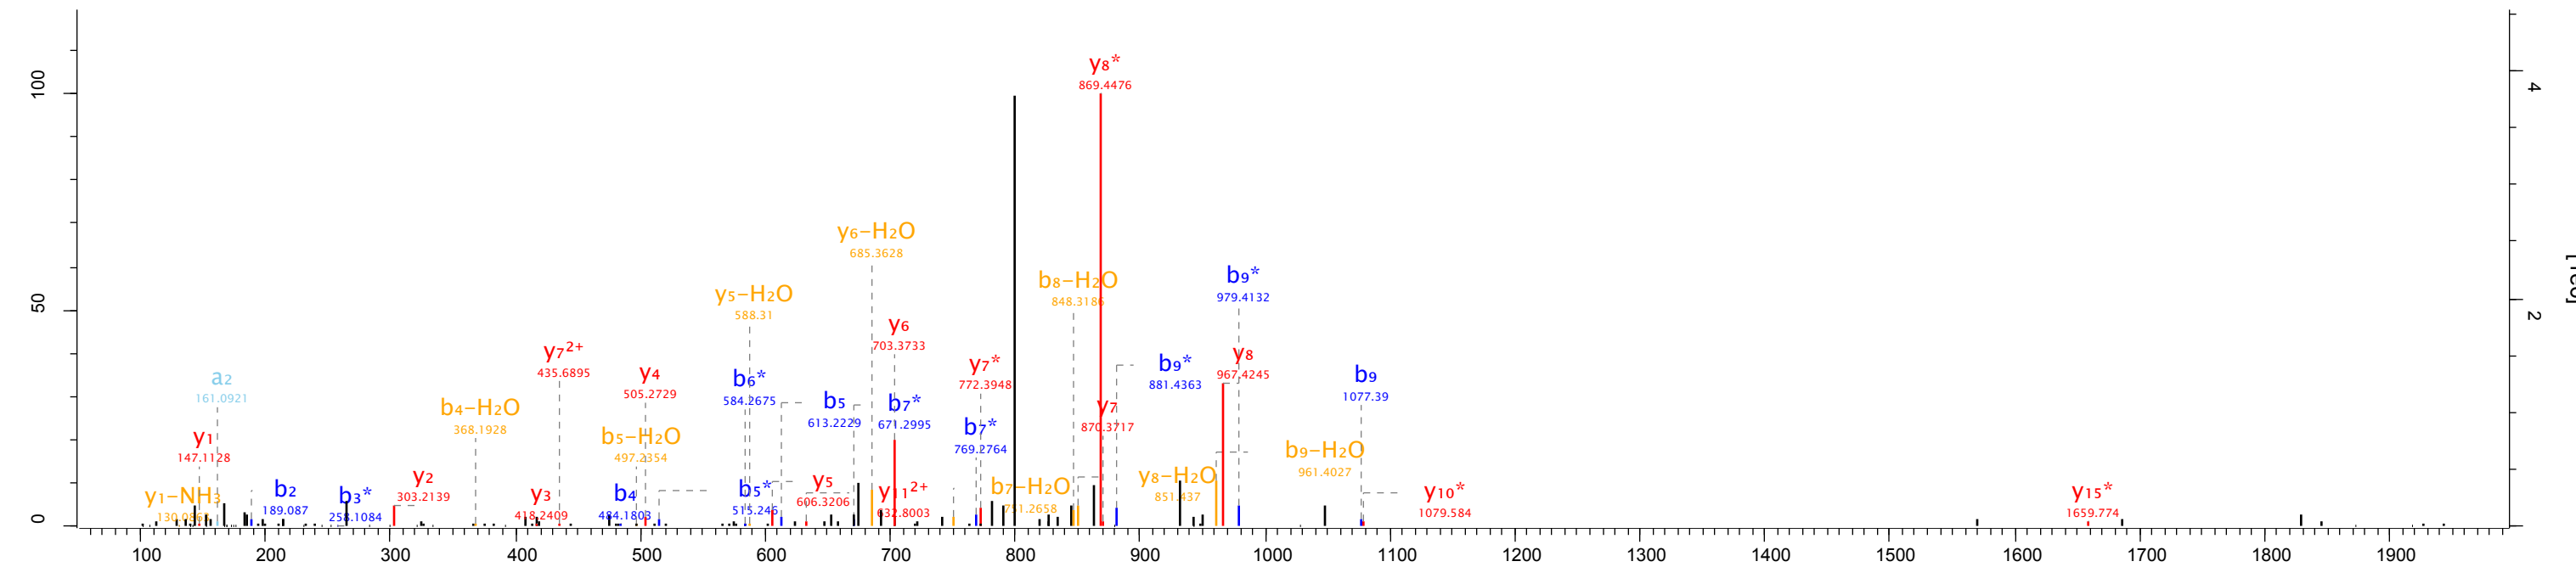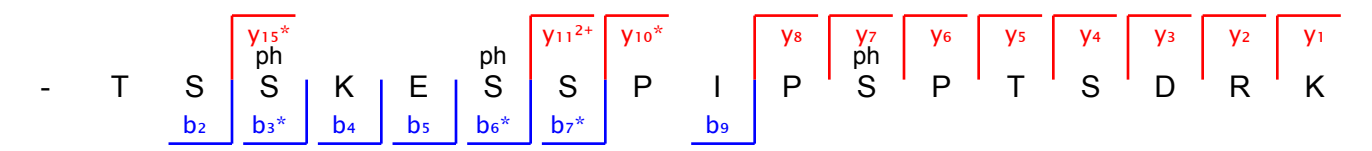



Raw file: 20150814\_A375SR\_Phospho\_BR2\_02  
 Scan: 6545 Method: FTMS; HCD Score: 94.18 m/z: 857.34 Gene names: HMGA1;C2orf81

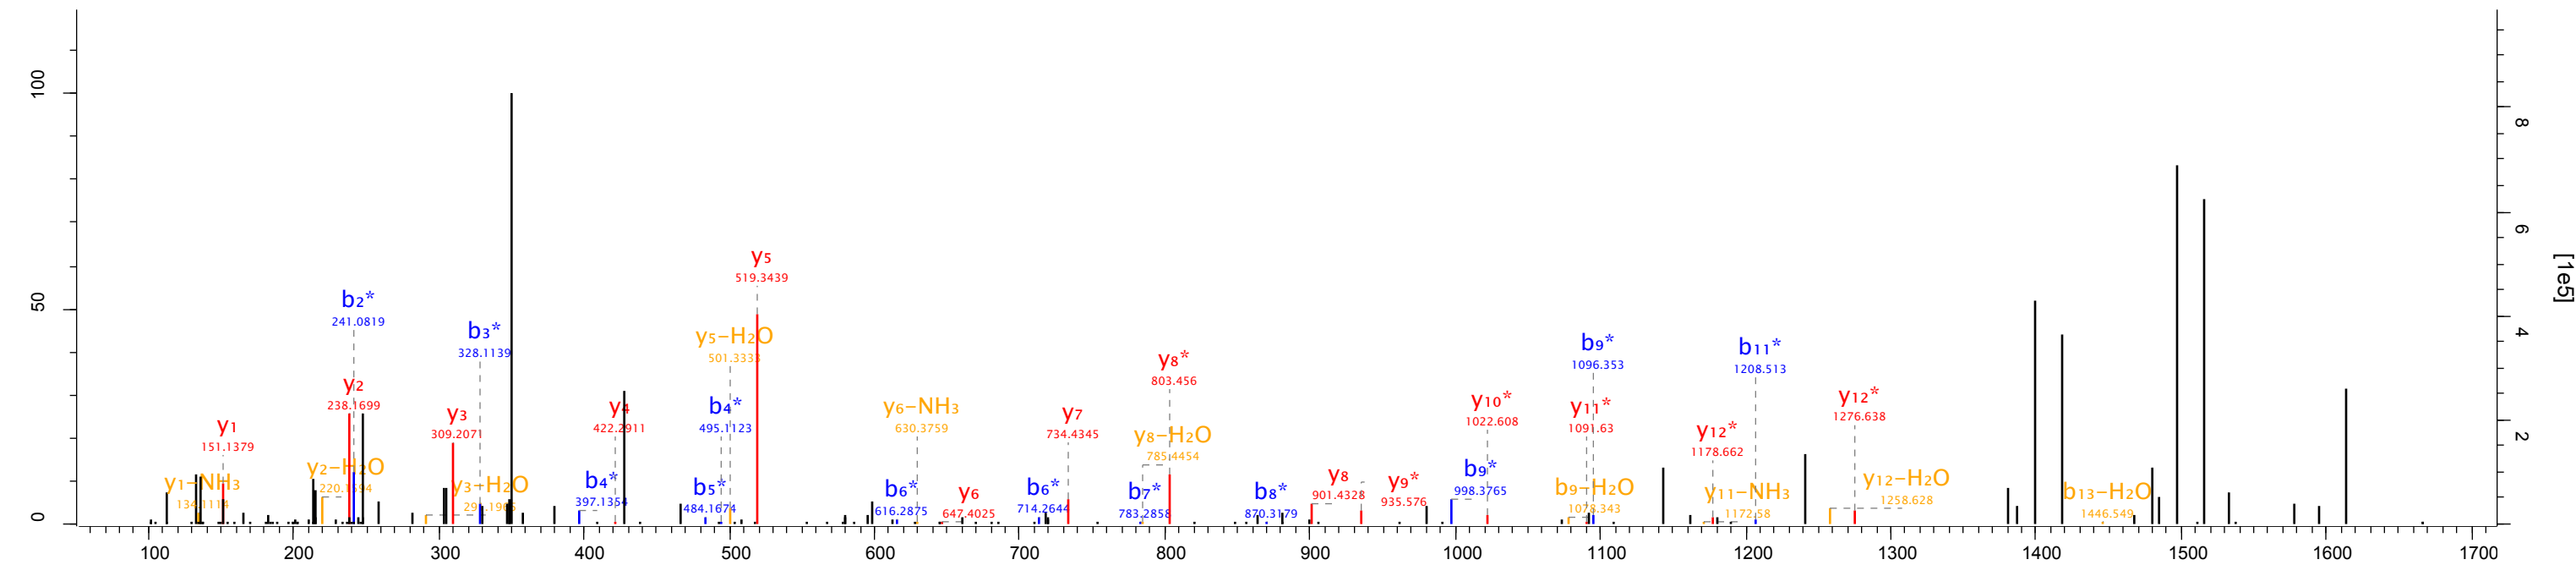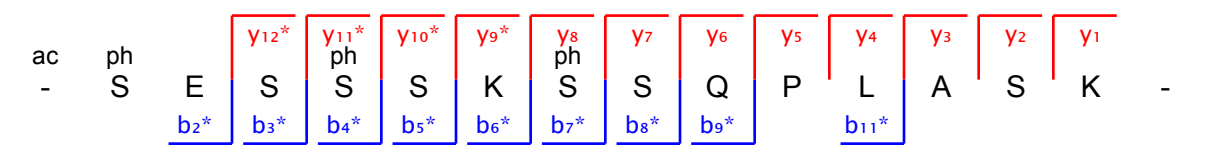

Raw file: 20150814\_A375SR\_Phospho\_BR2\_02  
 Scan: 7025 Method: FTMS; HCD Score: 132.51 m/z: 675.75 Gene names: SMARCAD1

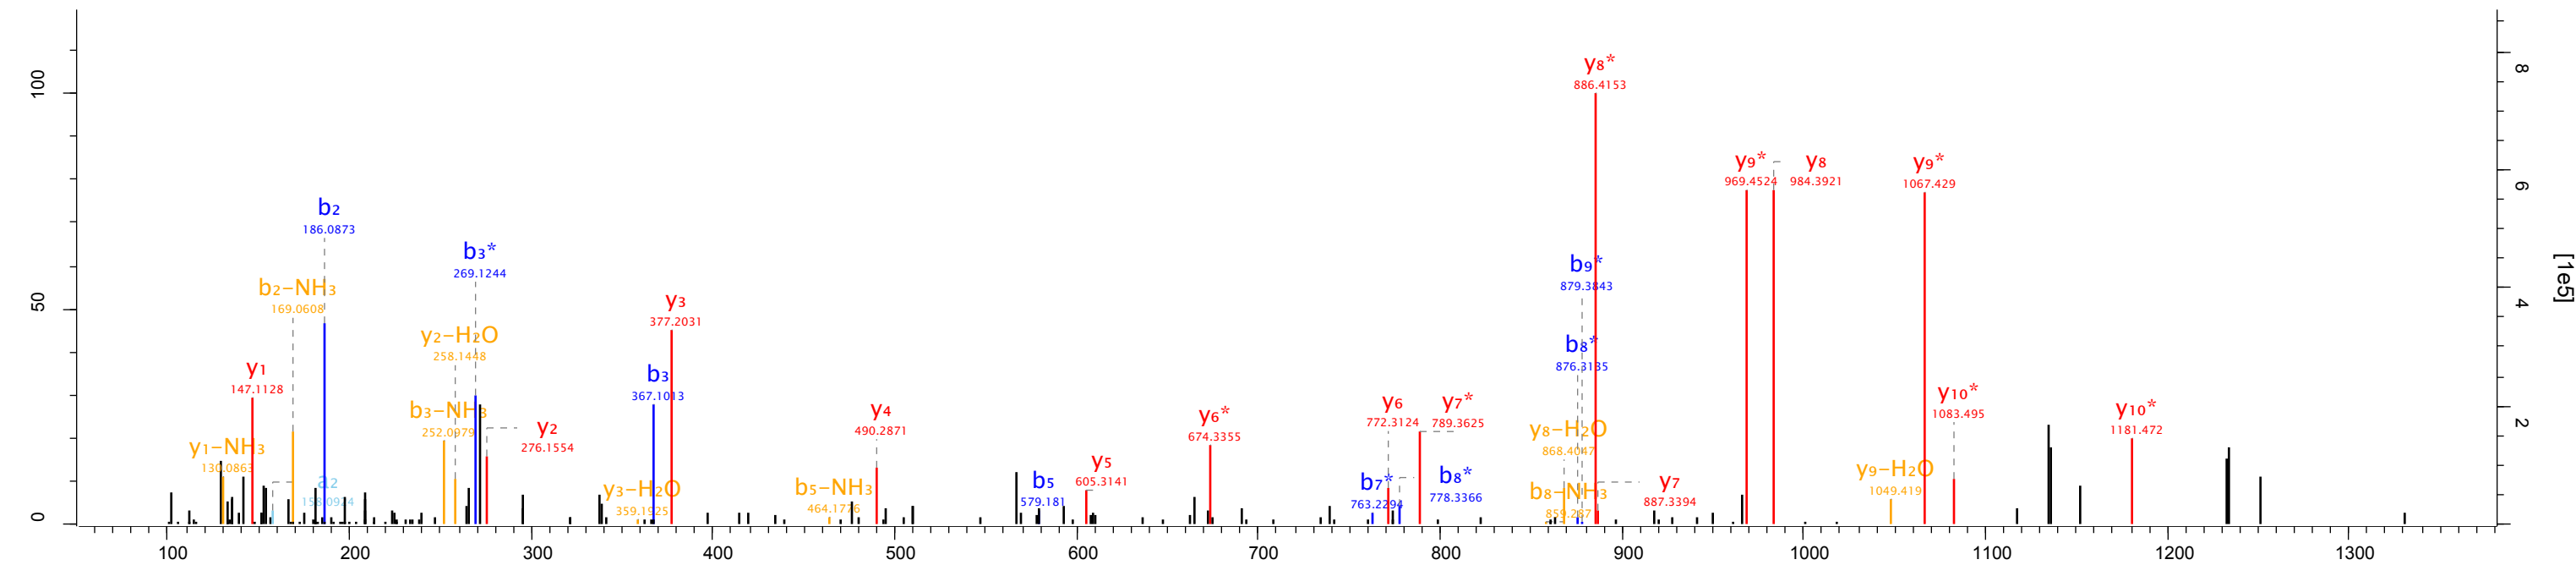

- A N T P D S D I T E K -

b<sub>2</sub>
b<sub>3</sub>
b<sub>5</sub>
b<sub>7</sub>\*
b<sub>8</sub>\*
b<sub>9</sub>\*
y<sub>10</sub>\*
y<sub>9</sub>ph
y<sub>8</sub>
y<sub>7</sub>
y<sub>6</sub>ph
y<sub>5</sub>
y<sub>4</sub>
y<sub>3</sub>
y<sub>2</sub>
y<sub>1</sub>

Raw file: 20150814\_A375SR\_Phospho\_BR2\_02  
 Scan: 7395 Method: FTMS; HCD Score: 51.57 m/z: 570.24 Gene names: PRDM2

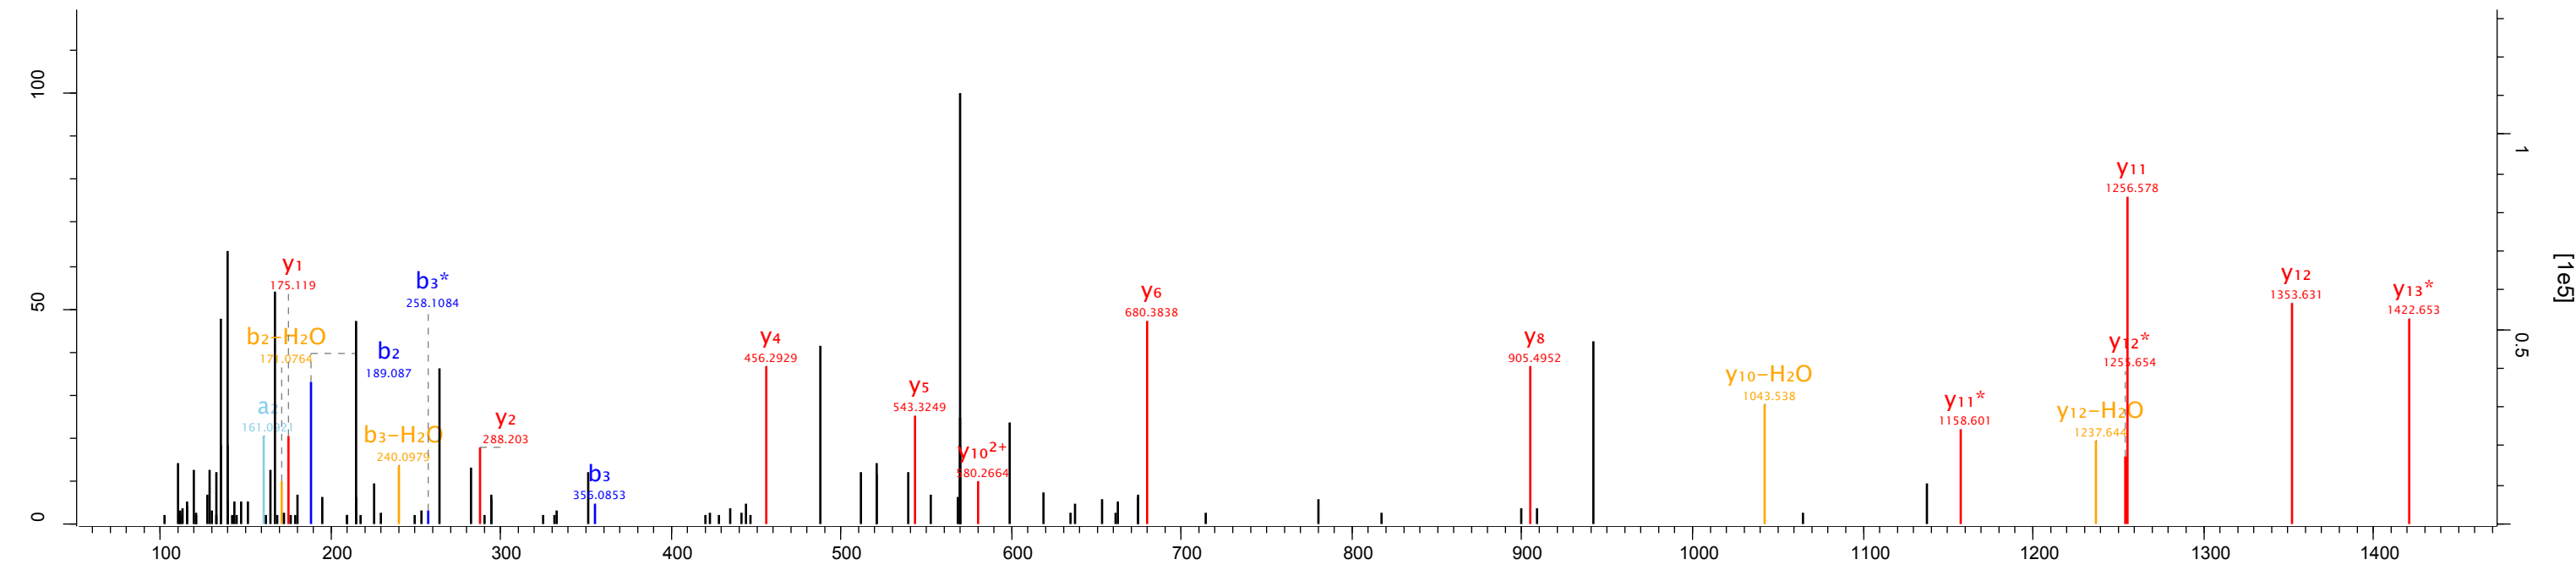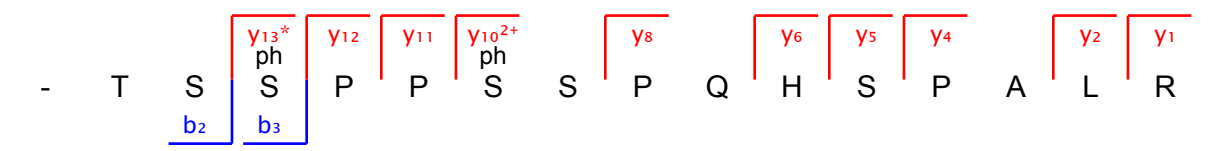

Raw file: 20150814\_A375SR\_Phospho\_BR2\_02  
 Scan: 7445 Method: FTMS; HCD Score: 65.83 m/z: 827.33 Gene names: BTBD9

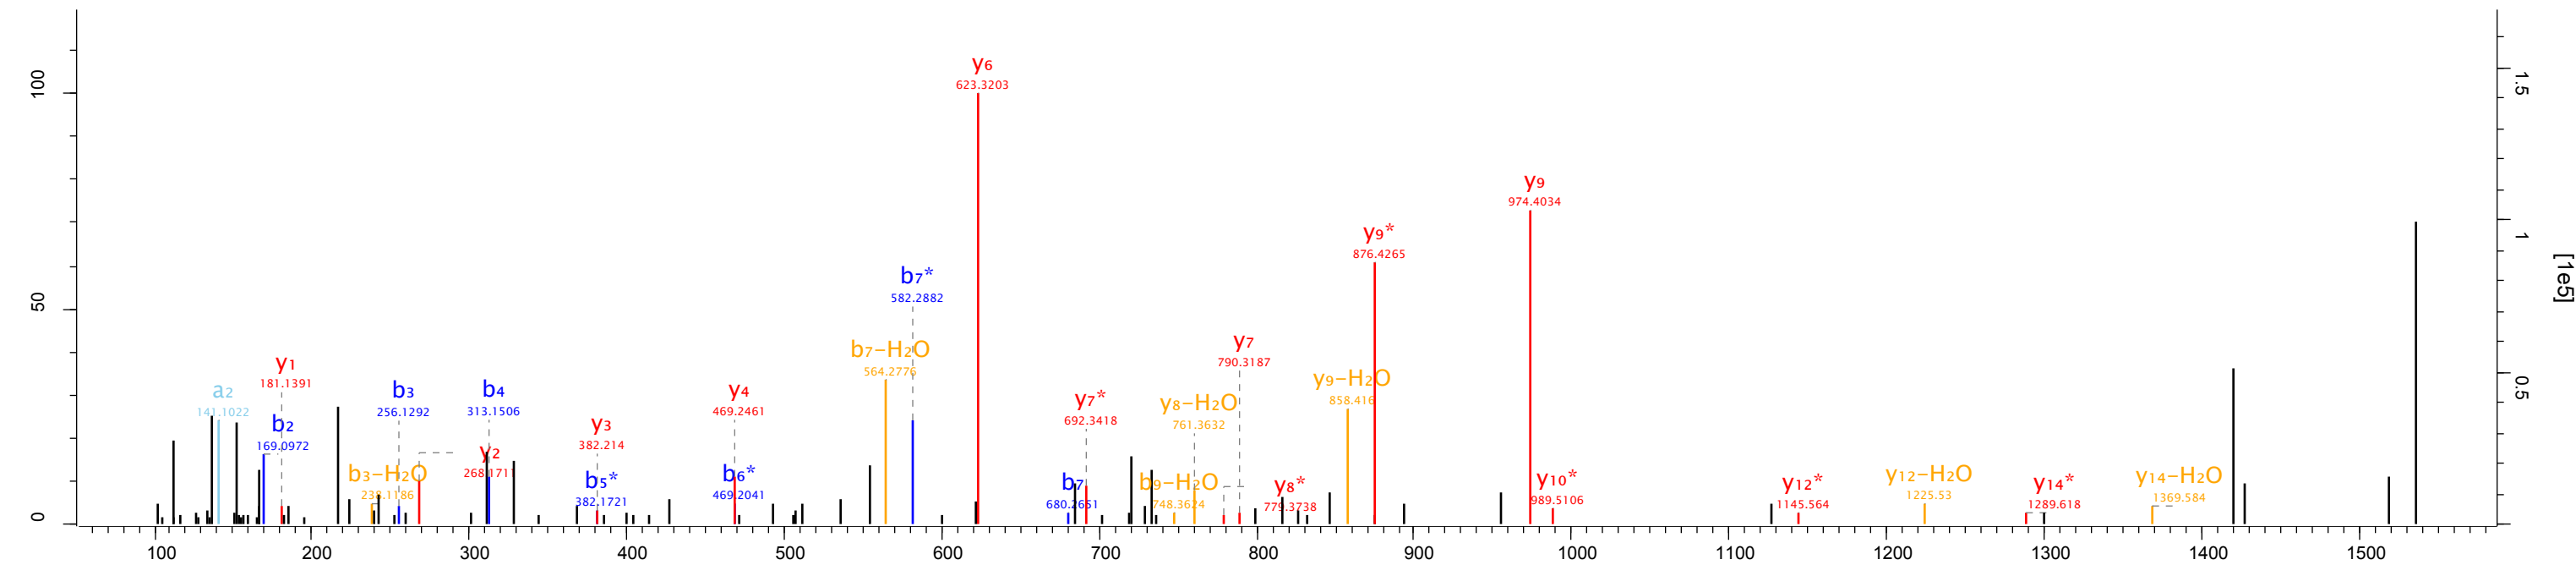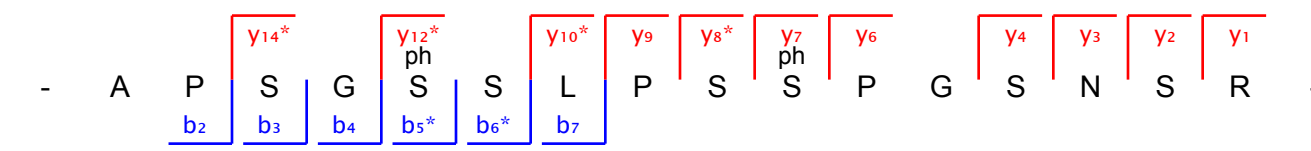

Raw file: 20150814\_A375SR\_Phospho\_BR2\_02  
 Scan: 7685 Method: FTMS; HCD Score: 96.21 m/z: 715.83 Gene names: SRRM2

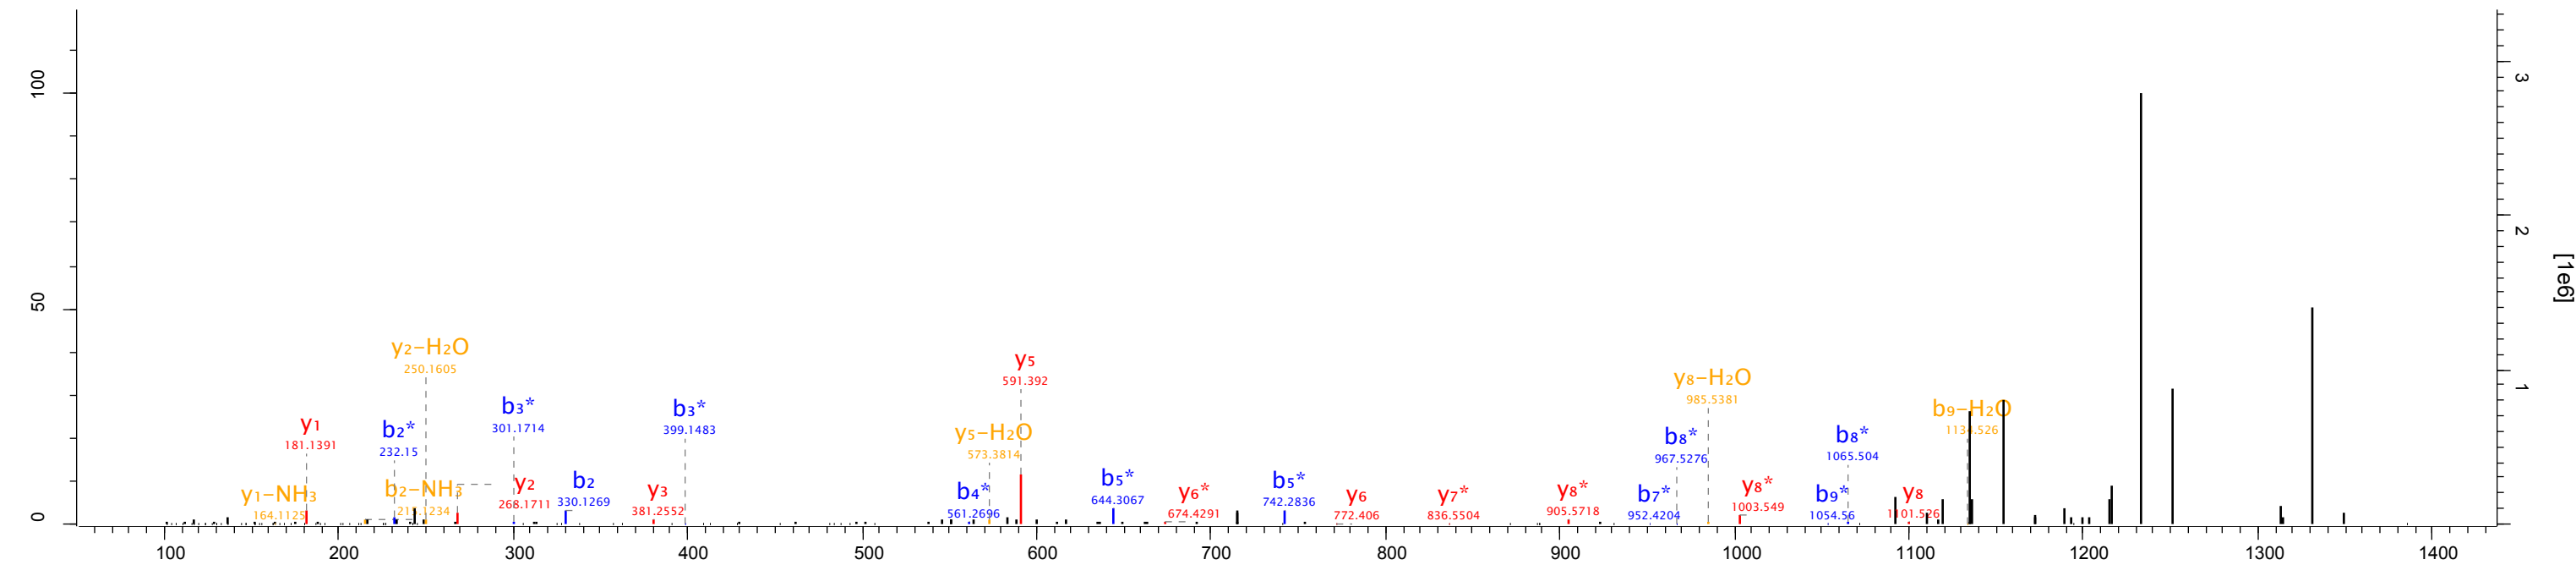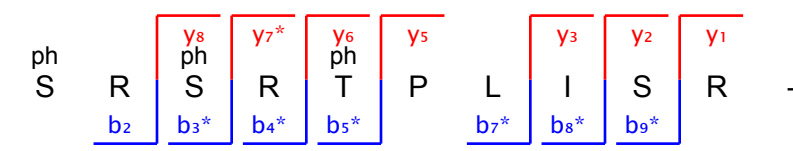

Raw file 20150814\_A375SR\_Phospho\_BR2\_02 Scan 7995 Method FTMS; HCD Score 57.81 m/z 704.98 Gene names PXN

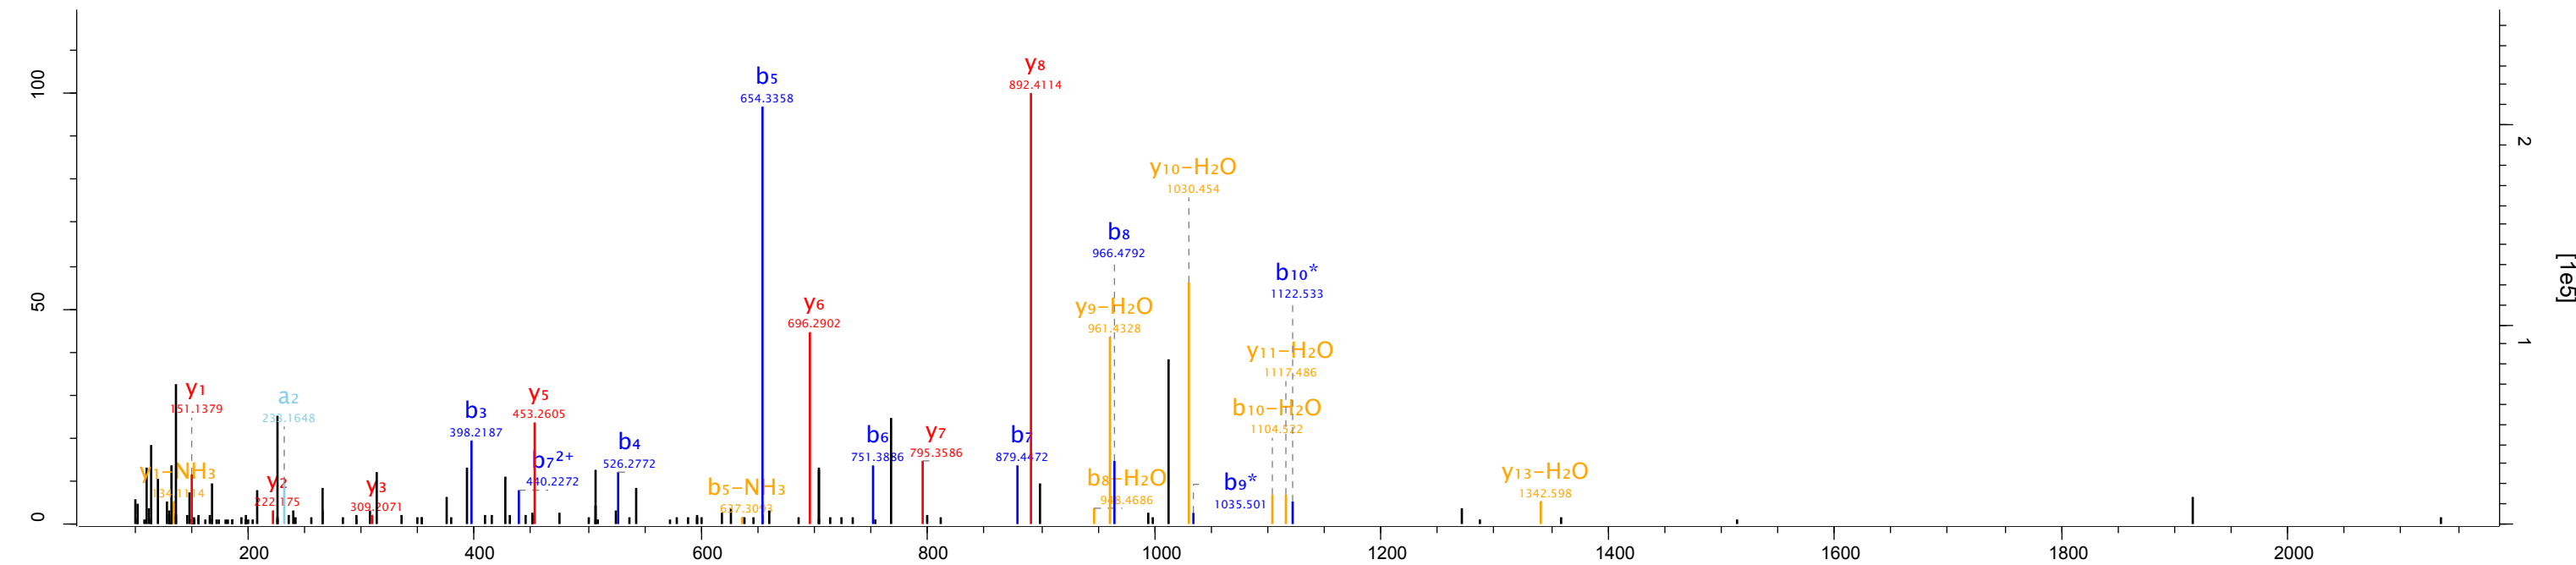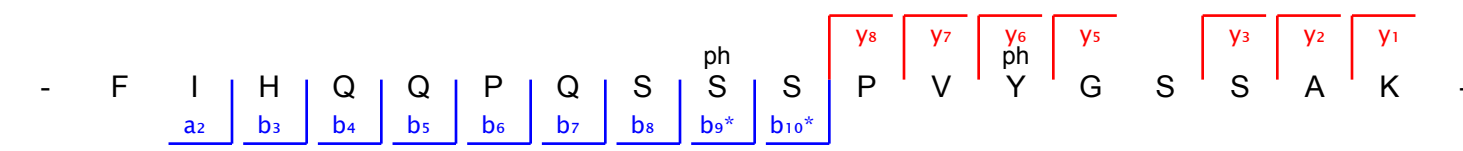

Raw file: 20150814\_A375SR\_Phospho\_BR2\_02  
 Scan: 8135 Method: FTMS; HCD Score: 164.41 m/z: 683.78 Gene names: NFIX

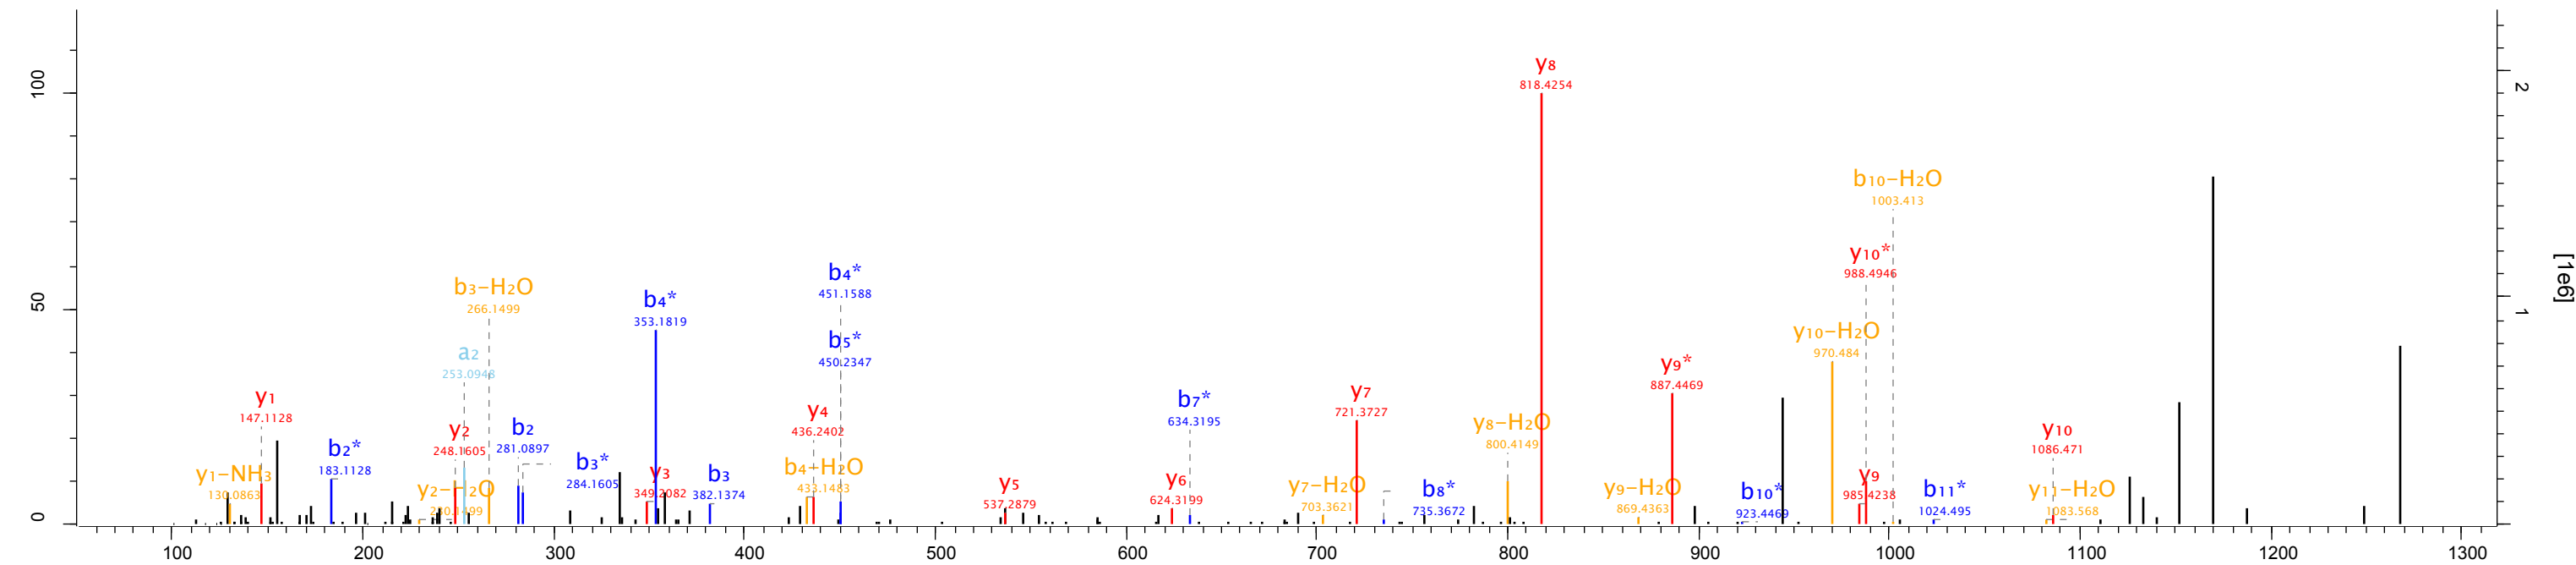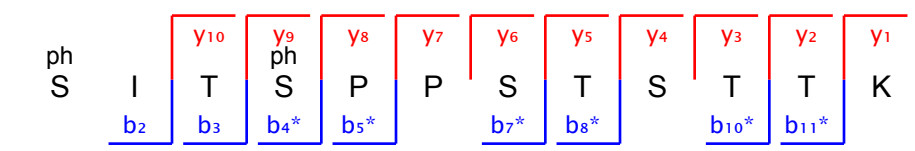

Raw file: 20150814\_A375SR\_Phospho\_BR2\_02  
 Scan: 8375 Method: FTMS; HCD Score: 106.35 m/z: 780.8 Gene names: CNOT2

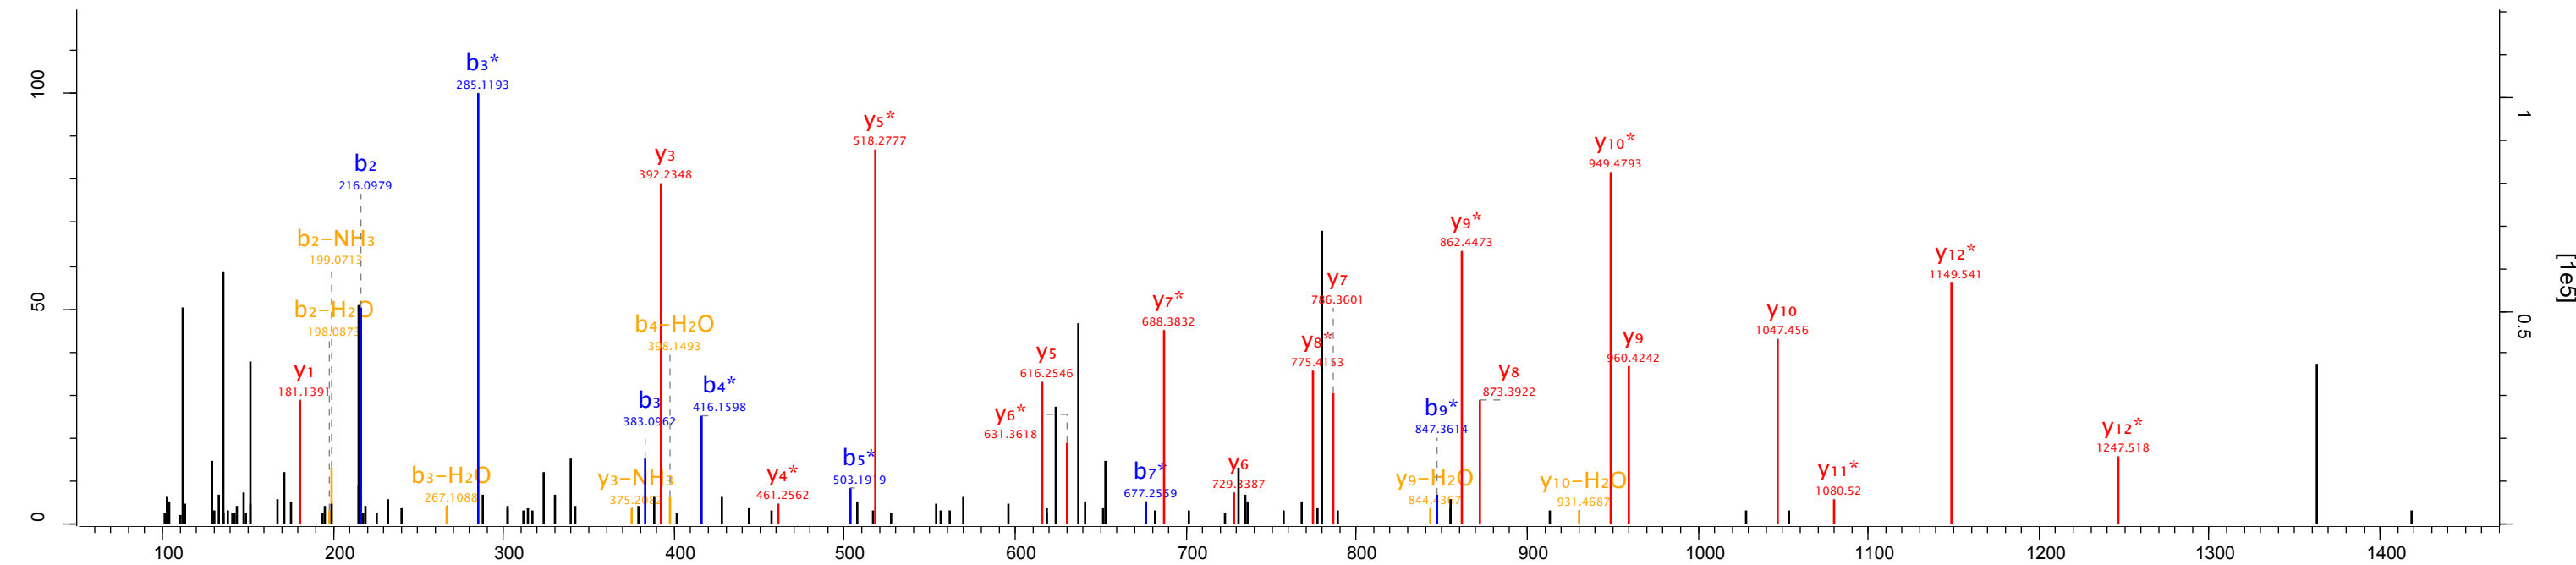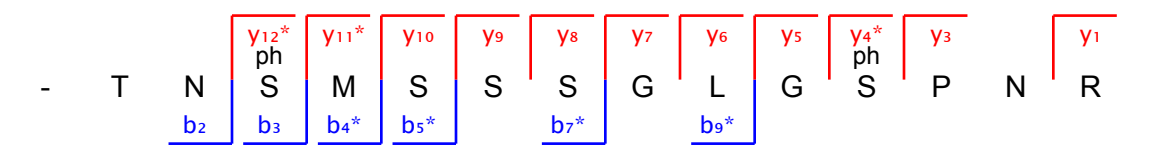



Raw file Scan Method Score m/z Gene names

20150814\_A375SR\_Phospho\_BR2\_02 8705 FTMS; HCD 123.76 658.34 LIG3

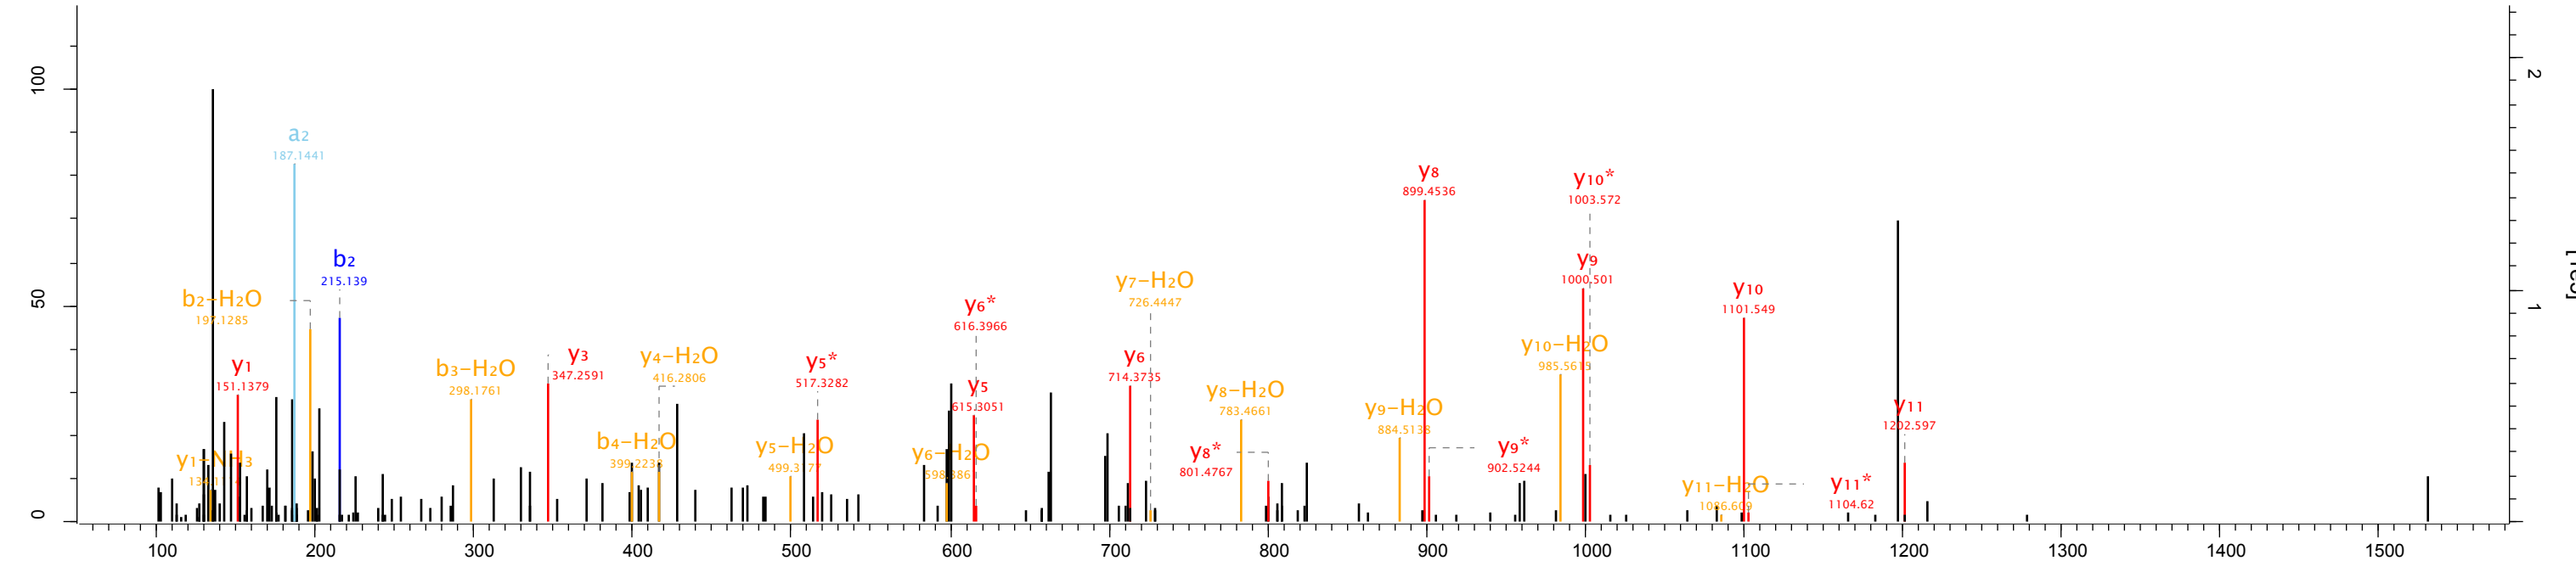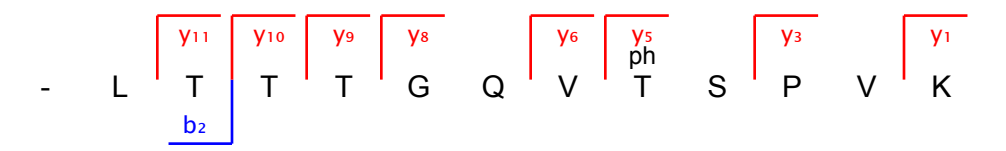

Raw file: 20150814\_A375SR\_Phospho\_BR2\_02  
 Scan: 8995 Method: FTMS; HCD Score: 157.22 m/z: 756.29 Gene names: CEP170

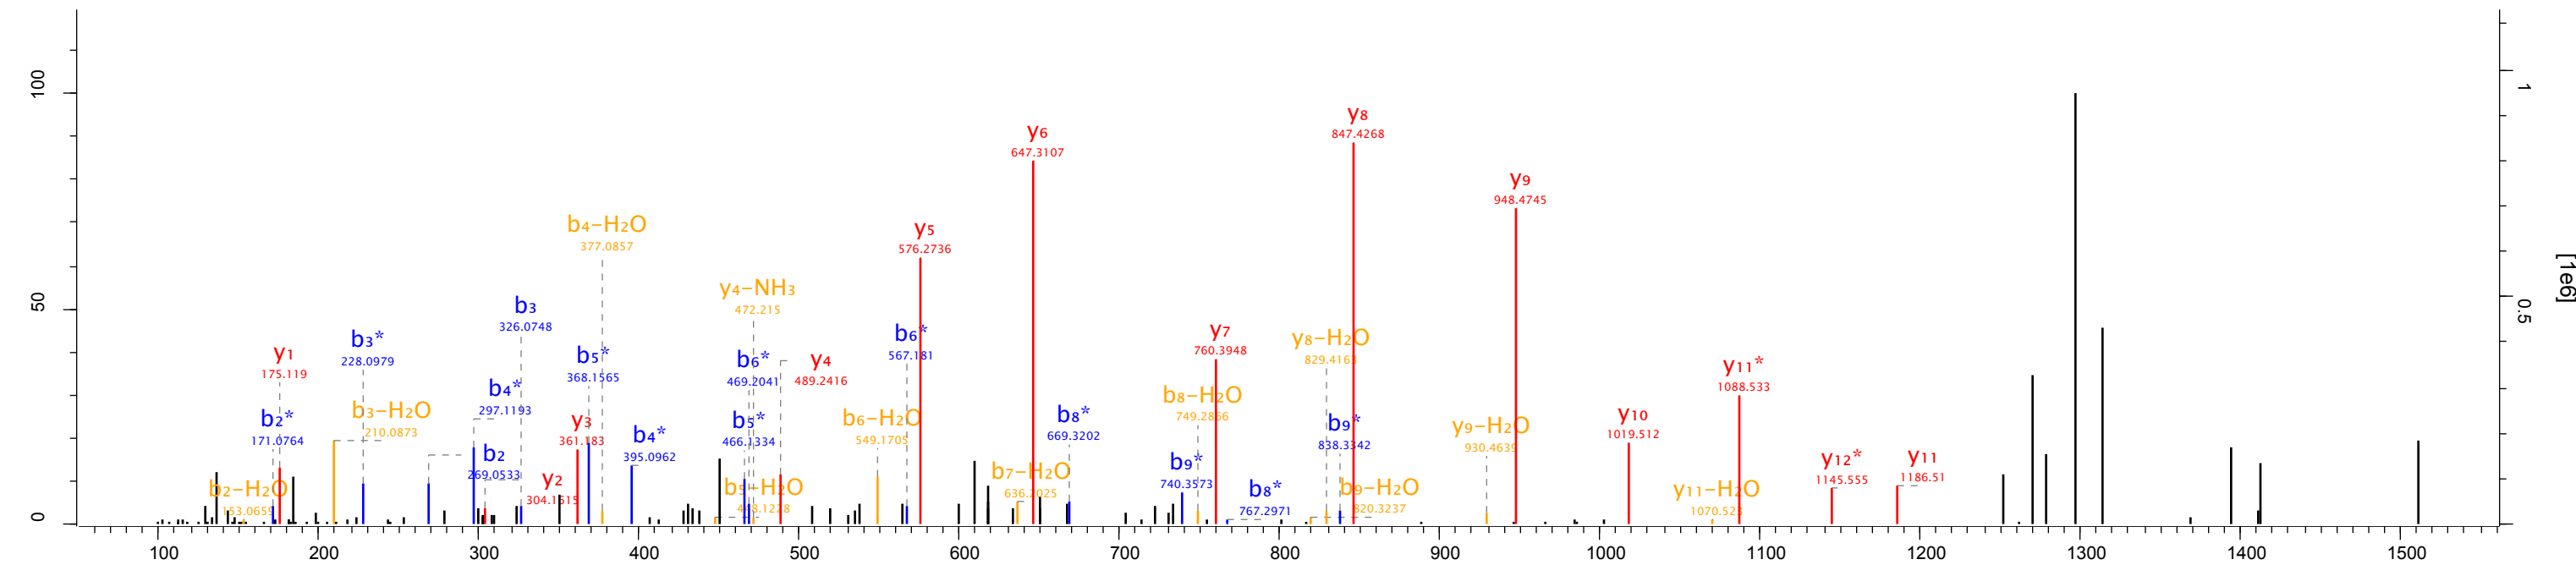

ph S  
 - T G S A T S L A S Q G E R -  
 b<sub>2</sub> b<sub>3</sub> b<sub>4</sub>\* b<sub>5</sub>\* b<sub>6</sub>\* b<sub>8</sub>\* b<sub>9</sub>\*

Raw file: 20150814\_A375SR\_Phospho\_BR2\_02  
 Scan: 9645 Method: FTMS; HCD Score: 100.5 m/z: 804.84 Gene names: PPP1R12A

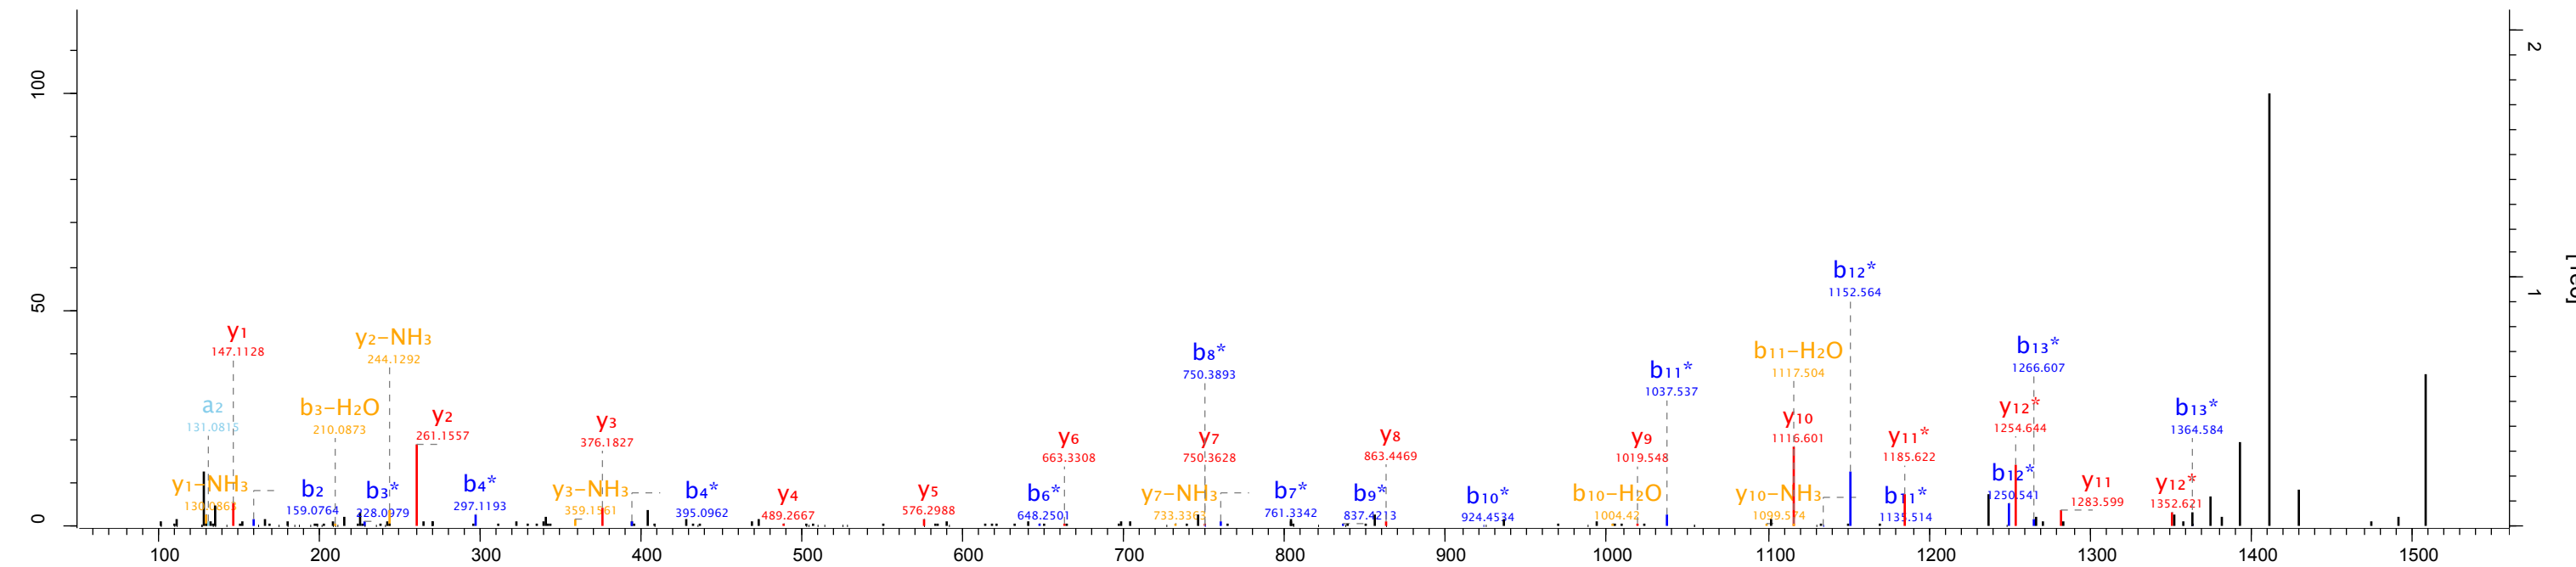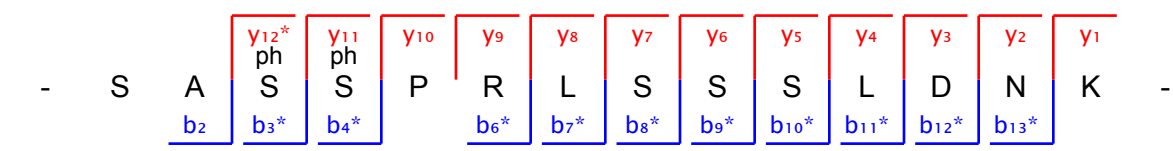

Raw file: 20150814\_A375SR\_Phospho\_BR2\_02  
 Scan: 9995 Method: FTMS; HCD Score: 97.71 m/z: 839.8 Gene names: ZRANB2

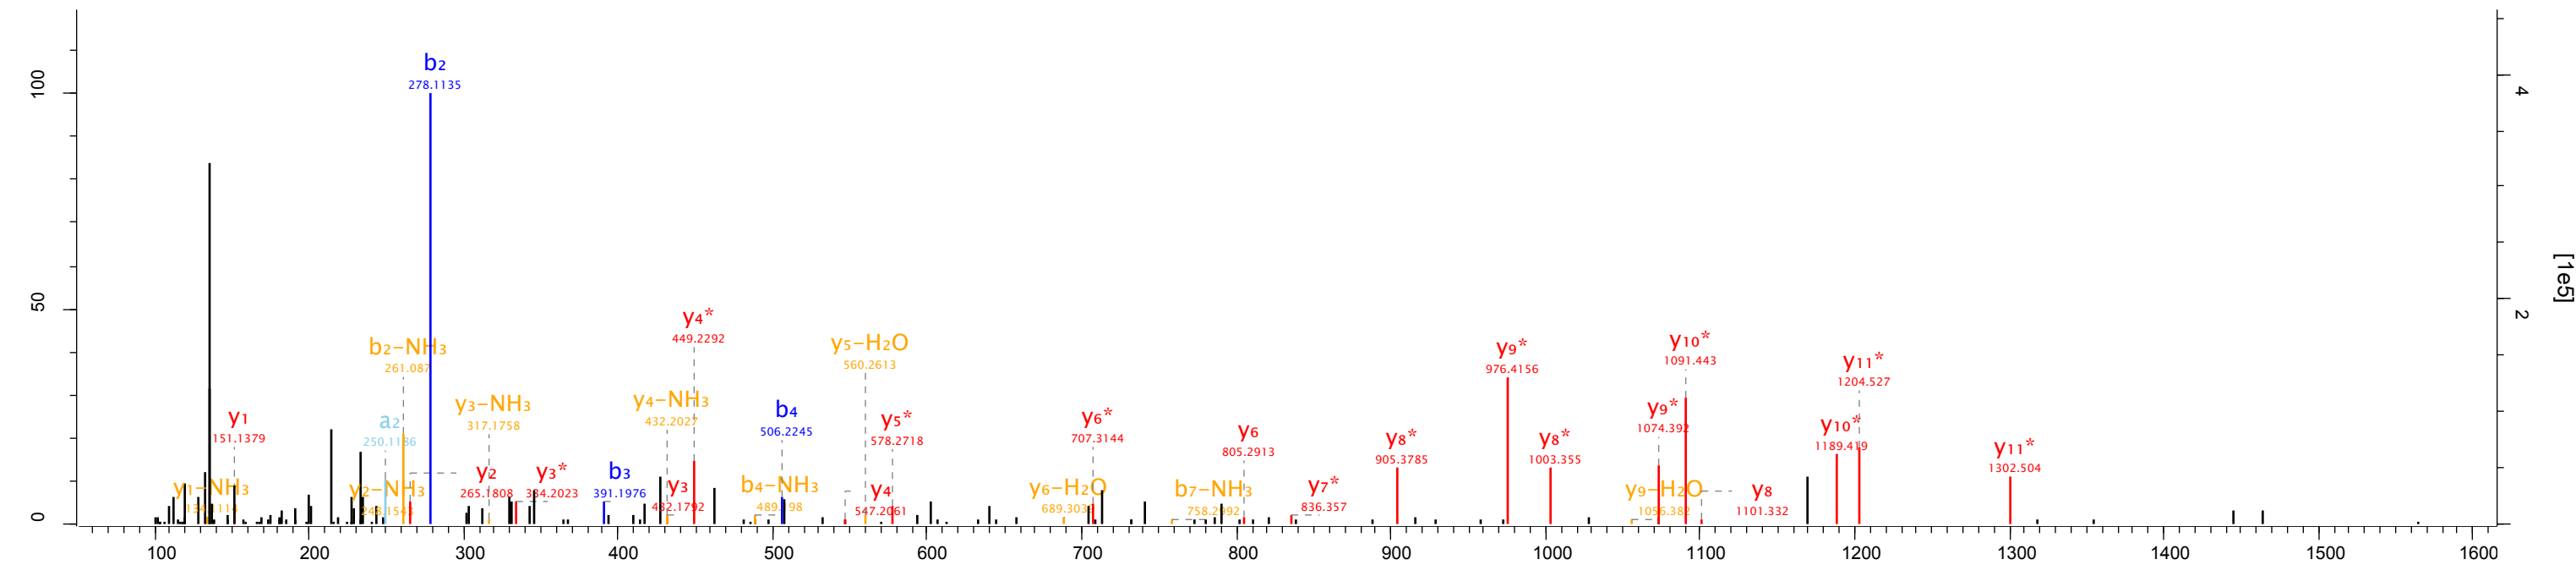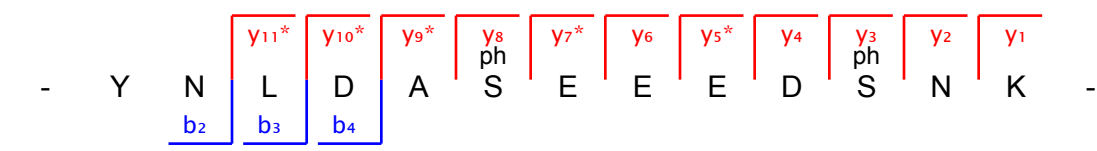

Raw file 20150814\_A375SR\_Phospho\_BR2\_03 Scan 10775 Method FTMS; HCD Score 49.62 m/z 544.25 Gene names PTPN14

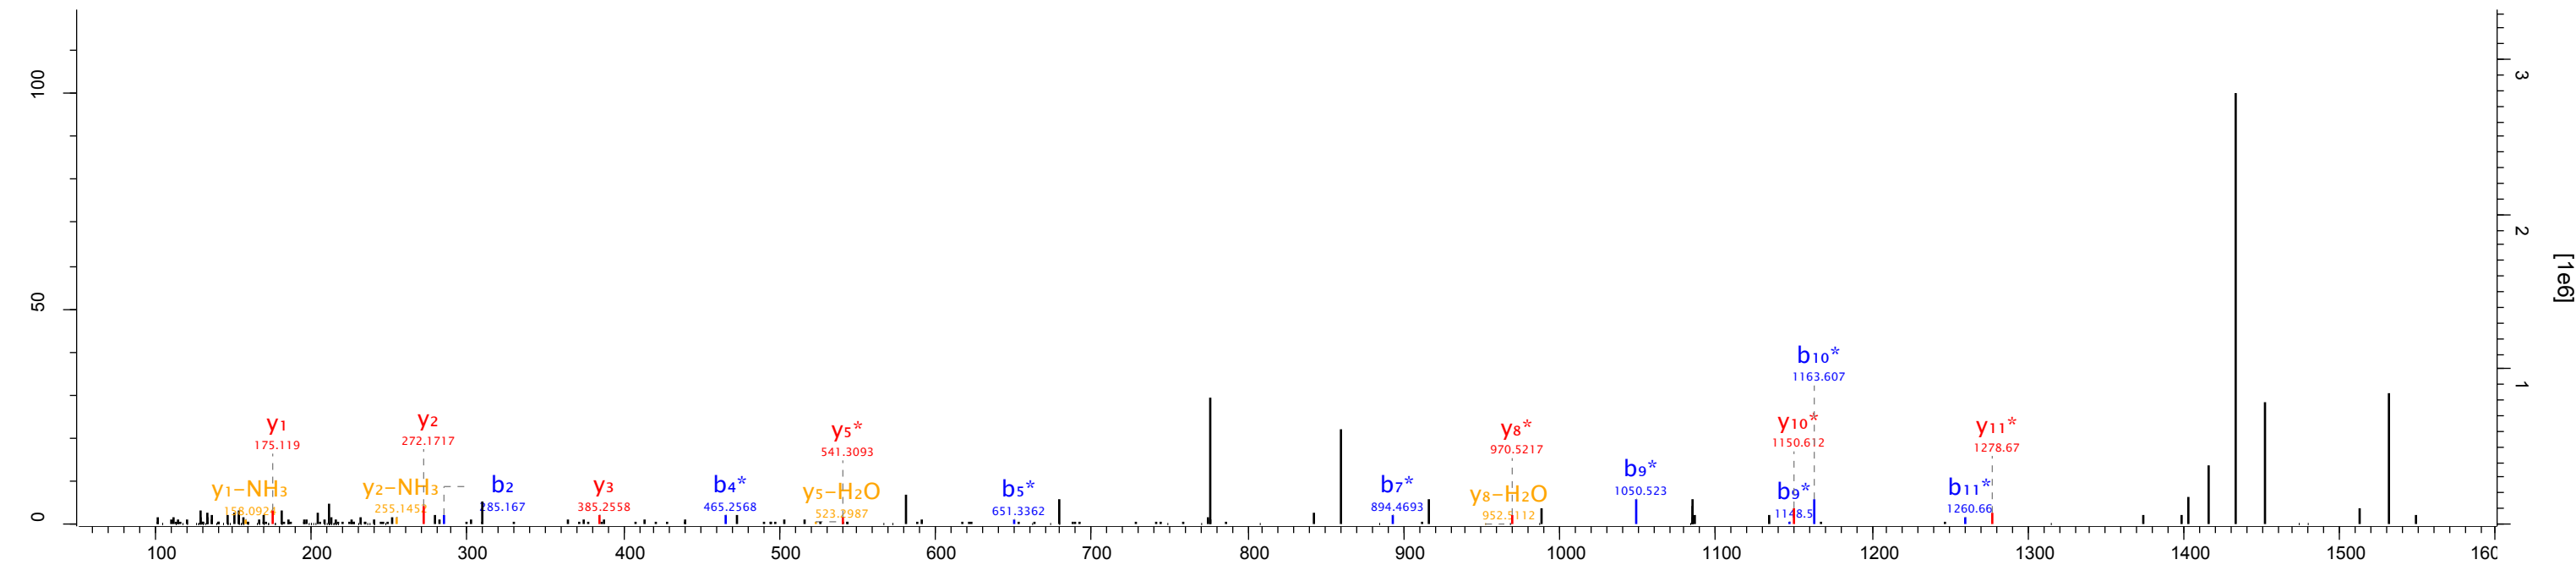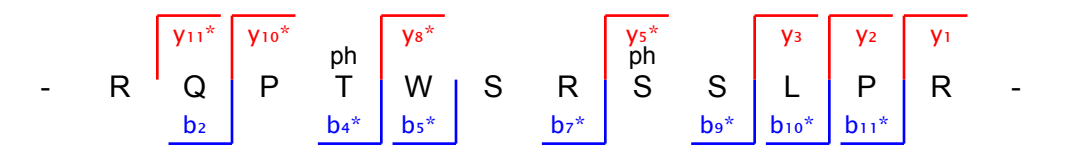

Raw file: 20150814\_A375SR\_Phospho\_BR2\_03  
 Scan: 11065 Method: FTMS; HCD Score: 98 m/z: 543.26 Gene names: ZSCAN5A;ZSCAN5B

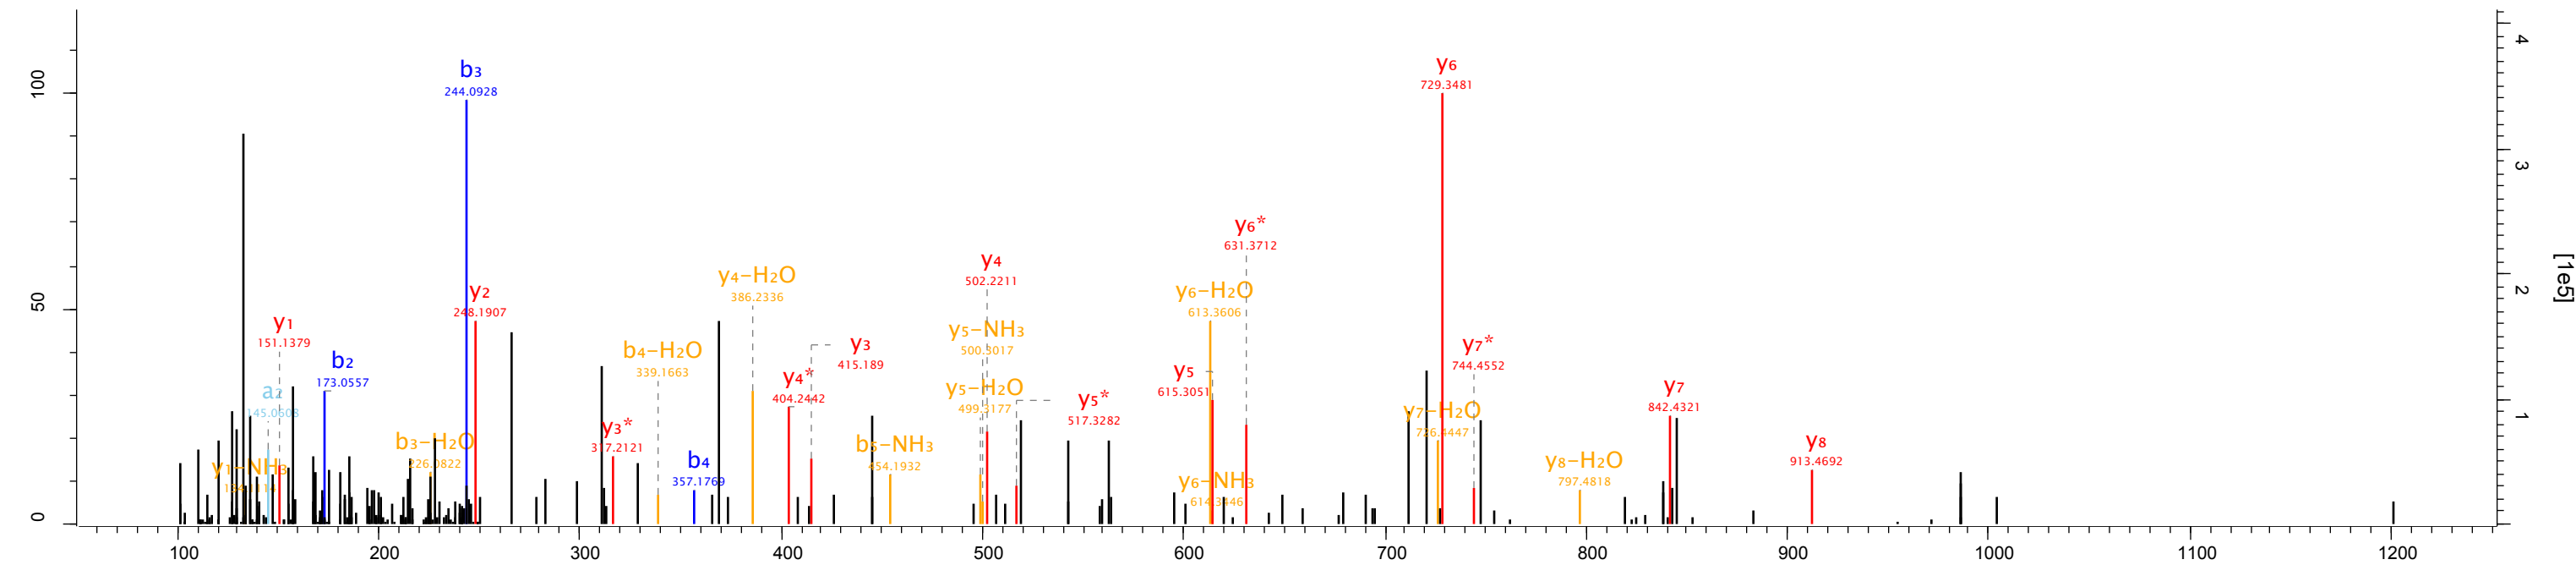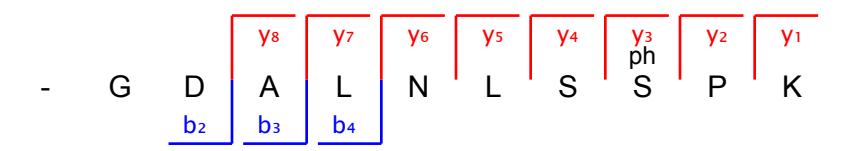

Raw file 20150814\_A375SR\_Phospho\_BR2\_03 Scan 11555 Method FTMS; HCD Score 43.59 m/z 691.32 Gene names CEP85

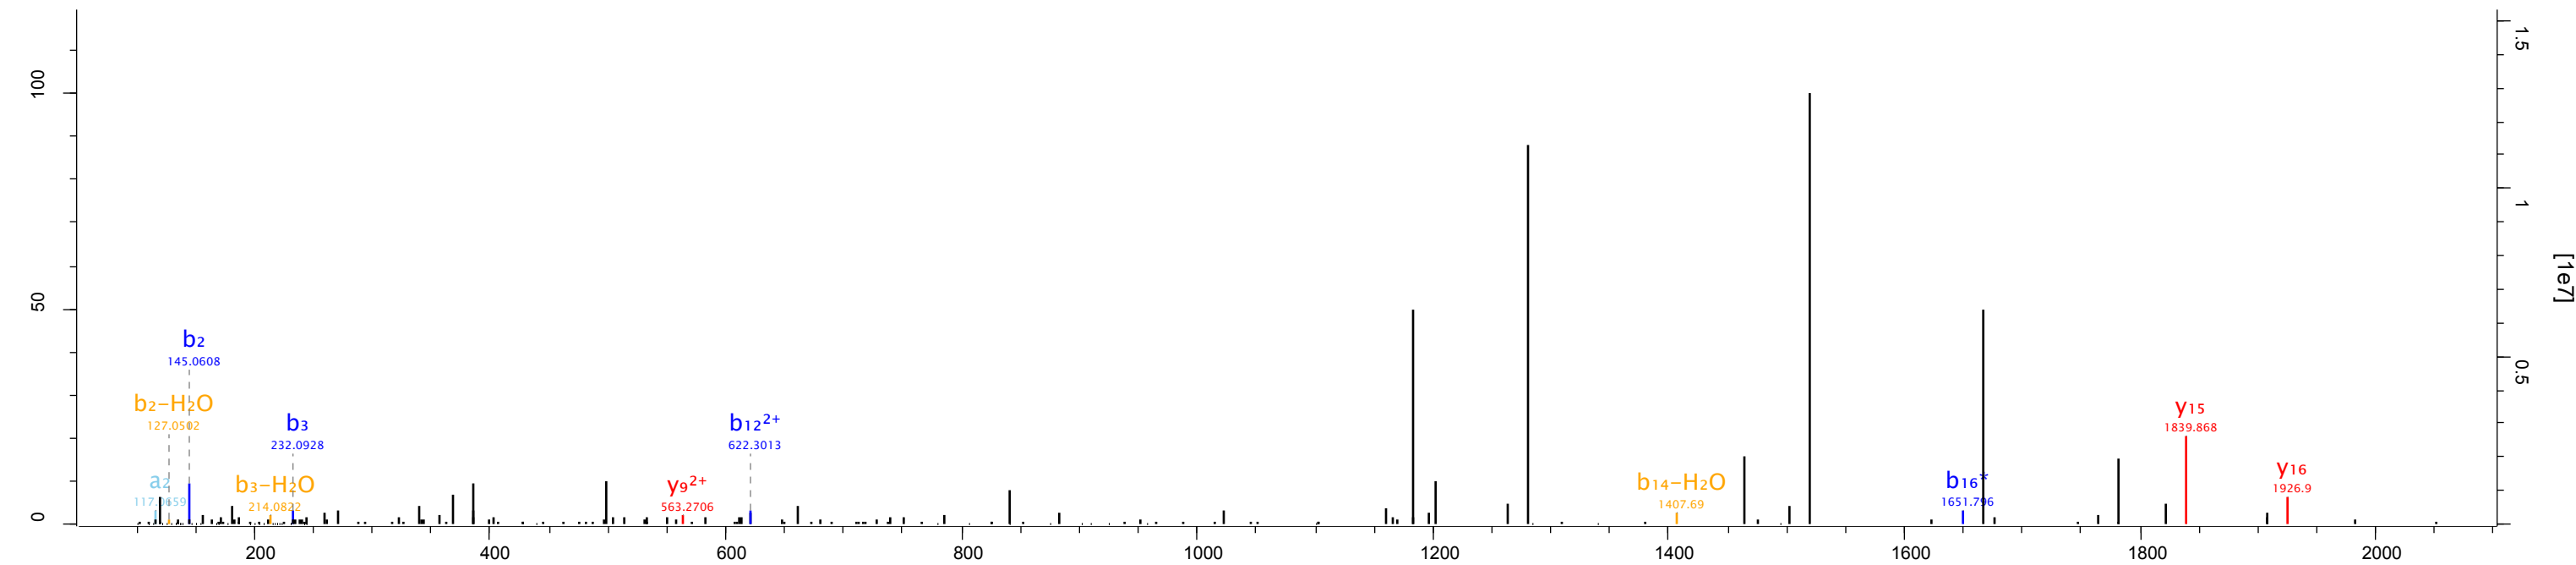

- G S S L G T E W Q T P V I S<sup>ph</sup> E P F R -

Fragmentation sites are indicated by brackets below the sequence:  $b_2$  (under S),  $b_3$  (under SS),  $y_9^{2+}$  (above T),  $b_{12}^{2+}$  (under V), and  $b_{16}^*$  (under P).

Raw file 20150814\_A375SR\_Phospho\_BR2\_03 Scan 11665 Method FTMS; HCD Score 63.45 m/z 928.87 Gene names KDM4A

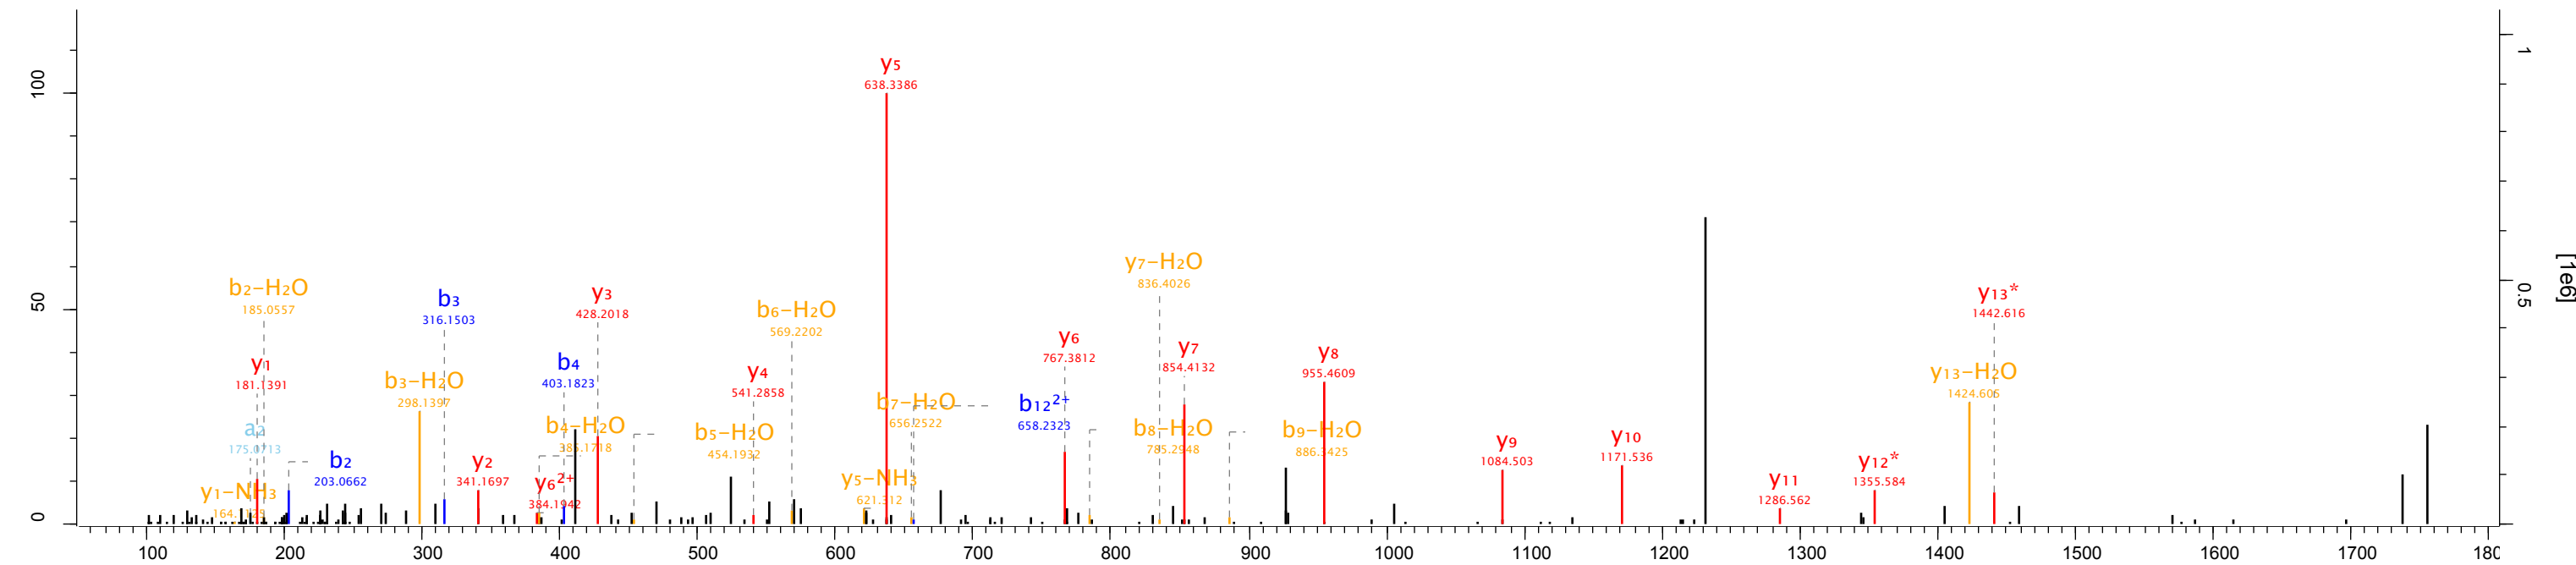

- D S I S y13\* y12\* y11 y10 y9 y8 y7 y6 y5 y4 y3 y2 y1  
 S ph S D S E T S E P L S C R -  
 b2 b3 b4 b12<sup>2+</sup>



Raw file 20150814\_A375SR\_Phospho\_BR2\_03 Scan 11695 Method FTMS; HCD Score 119.53 m/z 541.22 Gene names EIF5

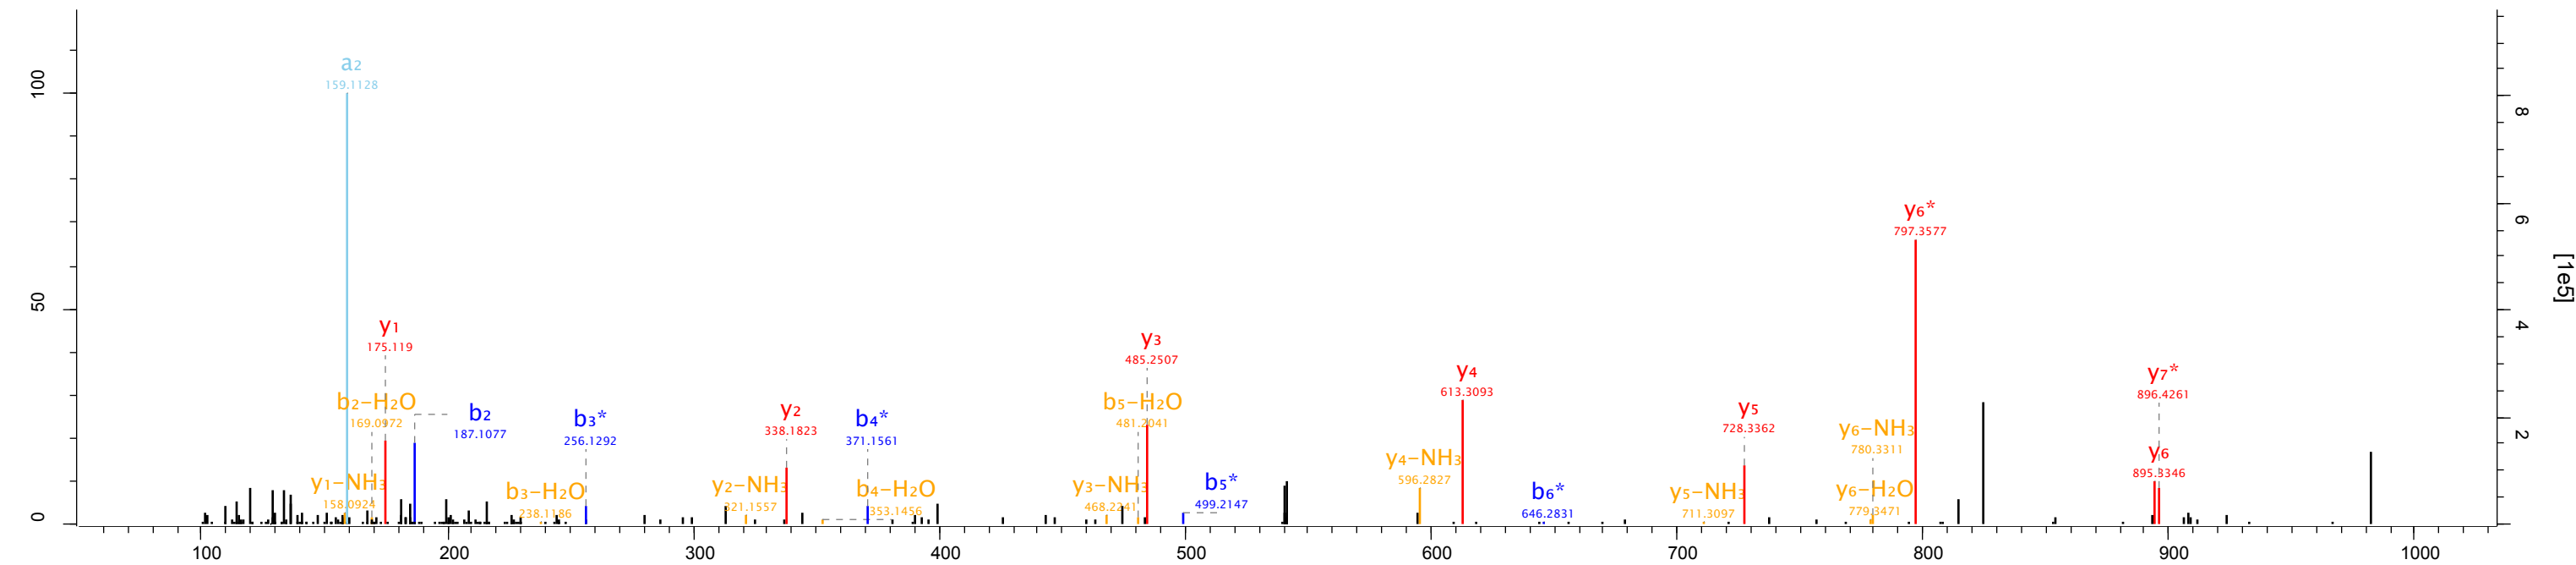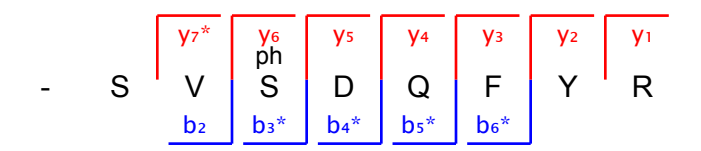

Raw file: 20150814\_A375SR\_Phospho\_BR2\_03  
 Scan: 12055 Method: FTMS; HCD Score: 189.54 m/z: 836.86 Gene names: FOXK1

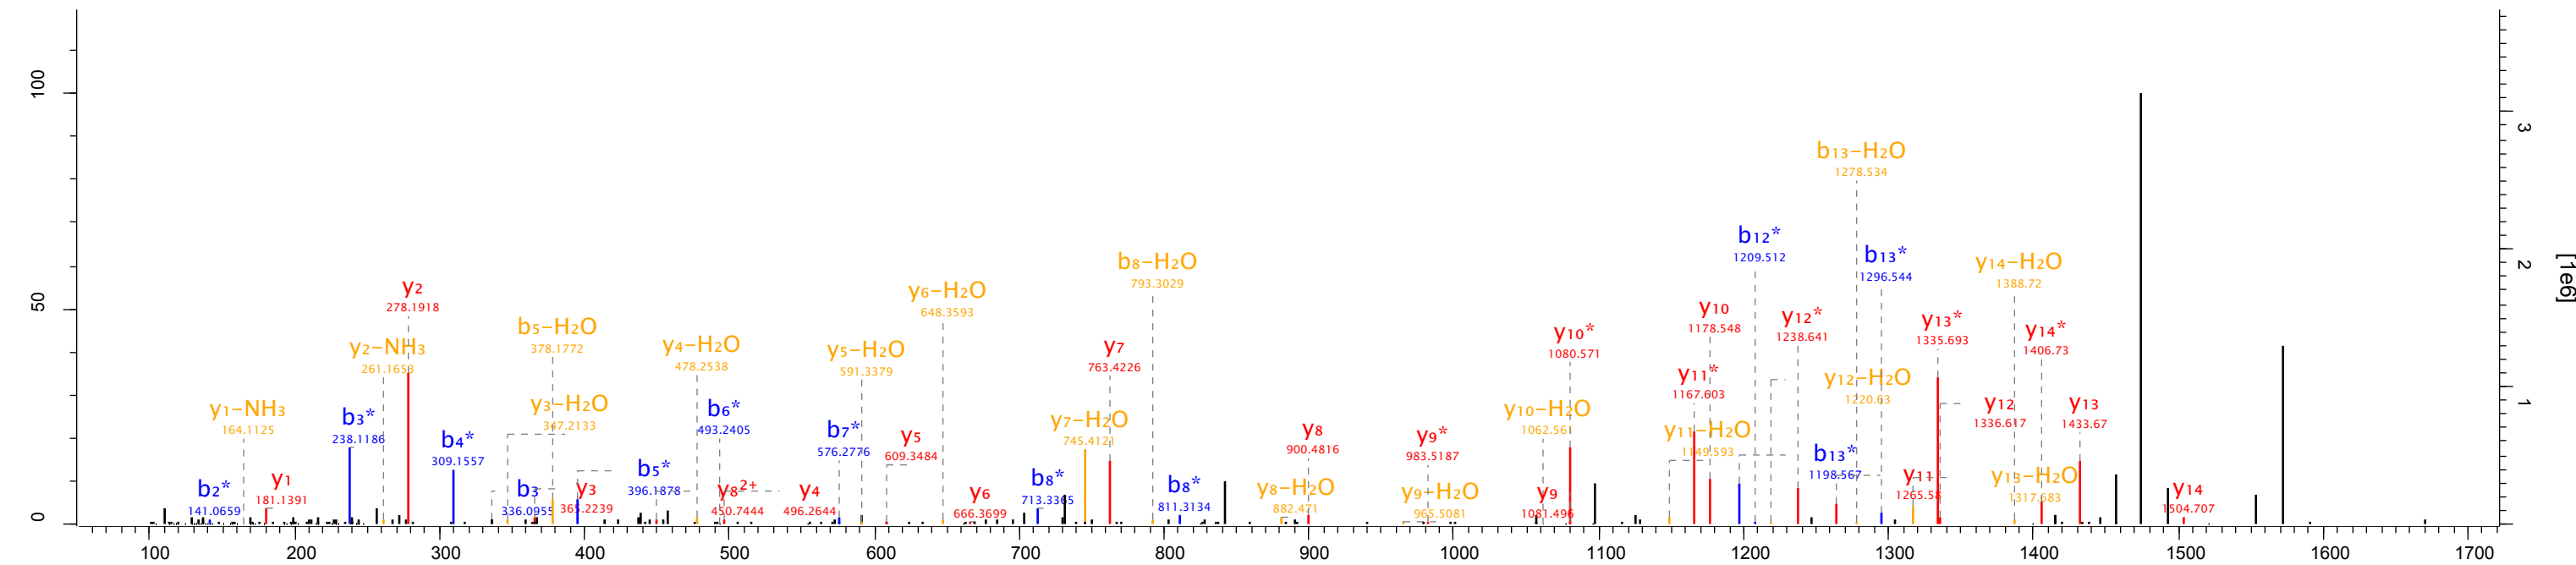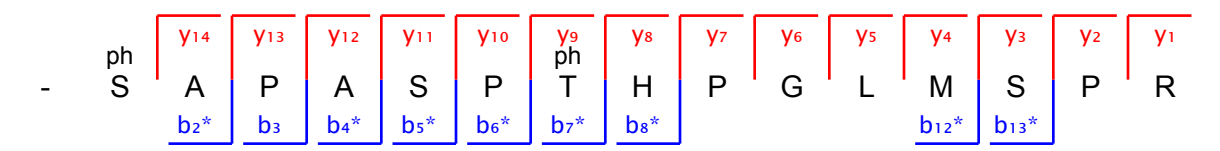

Raw file 20150814\_A375SR\_Phospho\_BR2\_03 Scan 12565 Method FTMS; HCD Score 151.22 m/z 862.35 Gene names PHF12

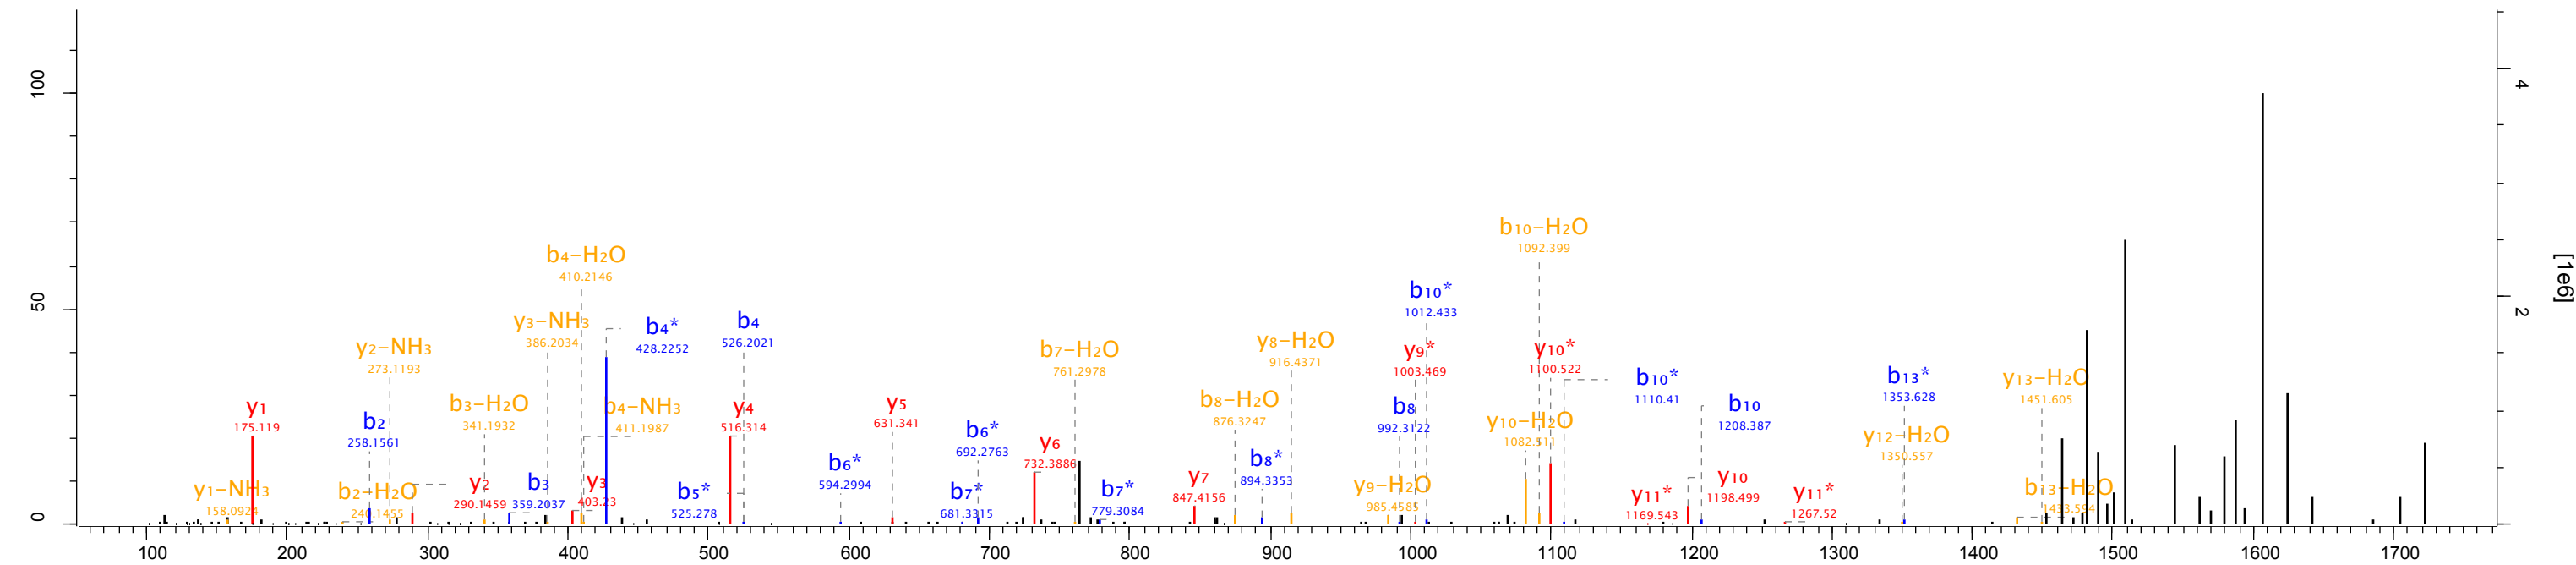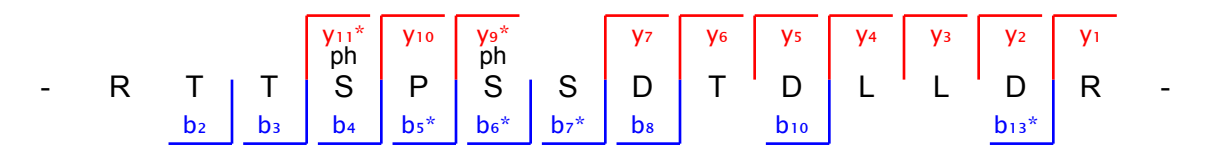

Raw file: 20150814\_A375SR\_Phospho\_BR2\_03  
 Scan: 12785 Method: FTMS; HCD Score: 138.28 m/z: 901.4 Gene names: ZNF106

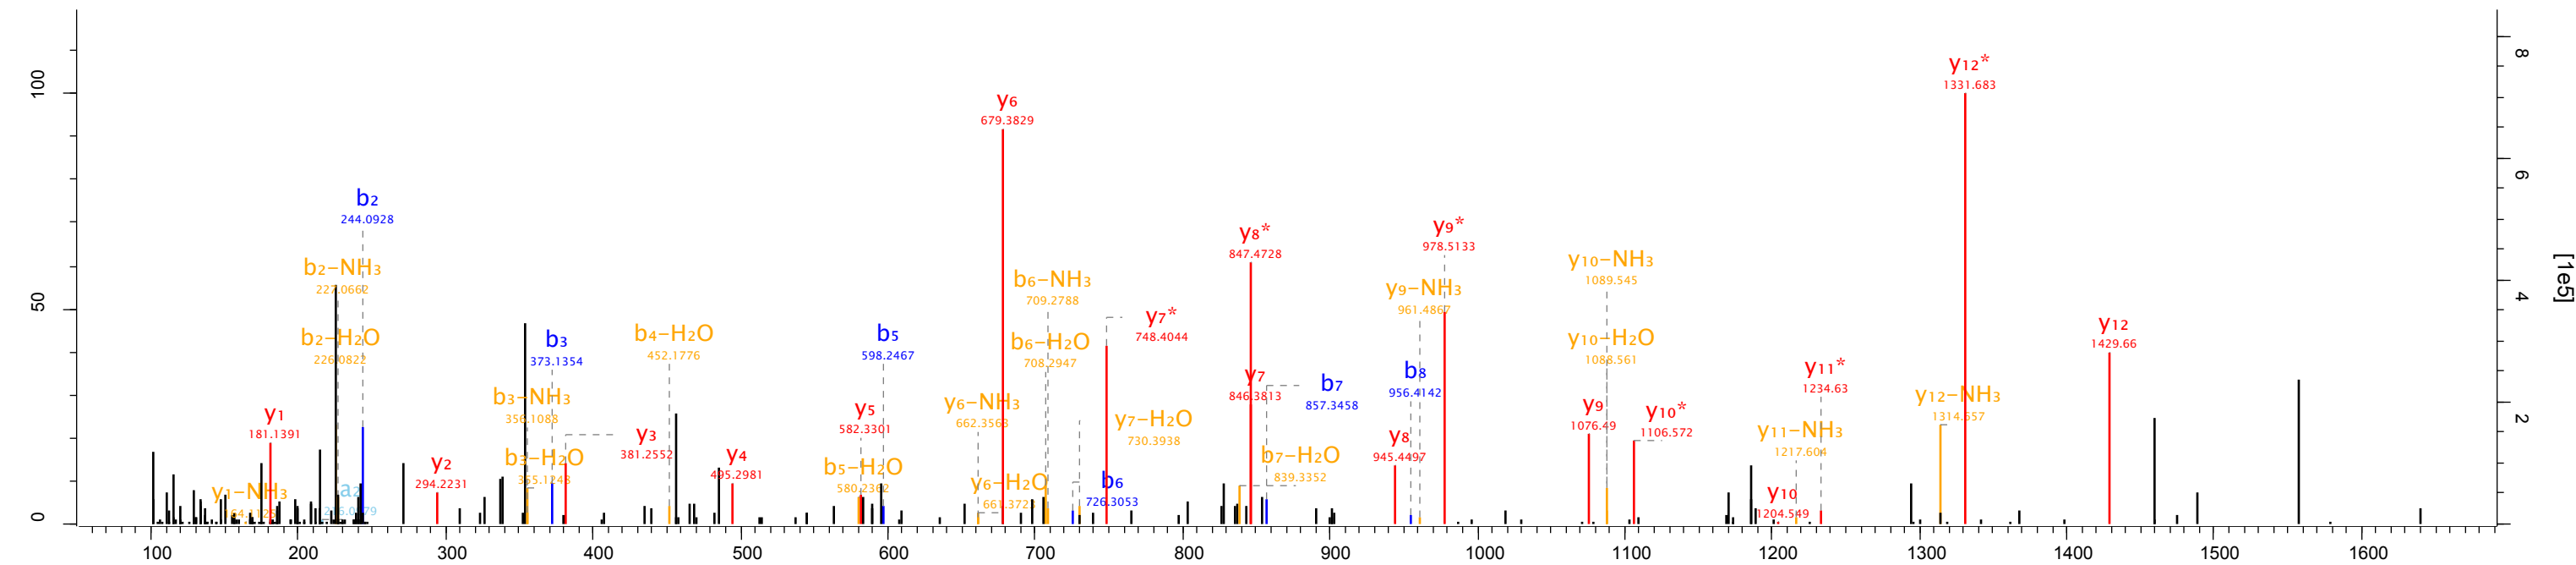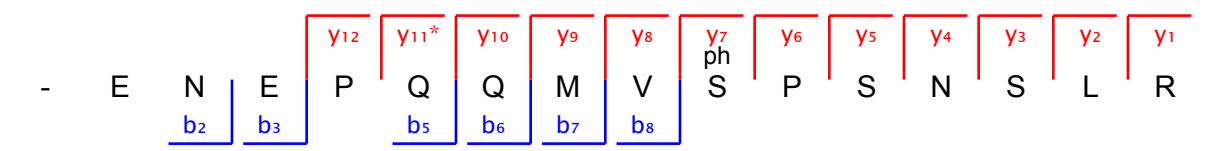

Raw file: 20150814\_A375SR\_Phospho\_BR2\_03  
 Scan: 12955 Method: FTMS; HCD Score: 220.24 m/z: 668.35 Gene names: LIN54

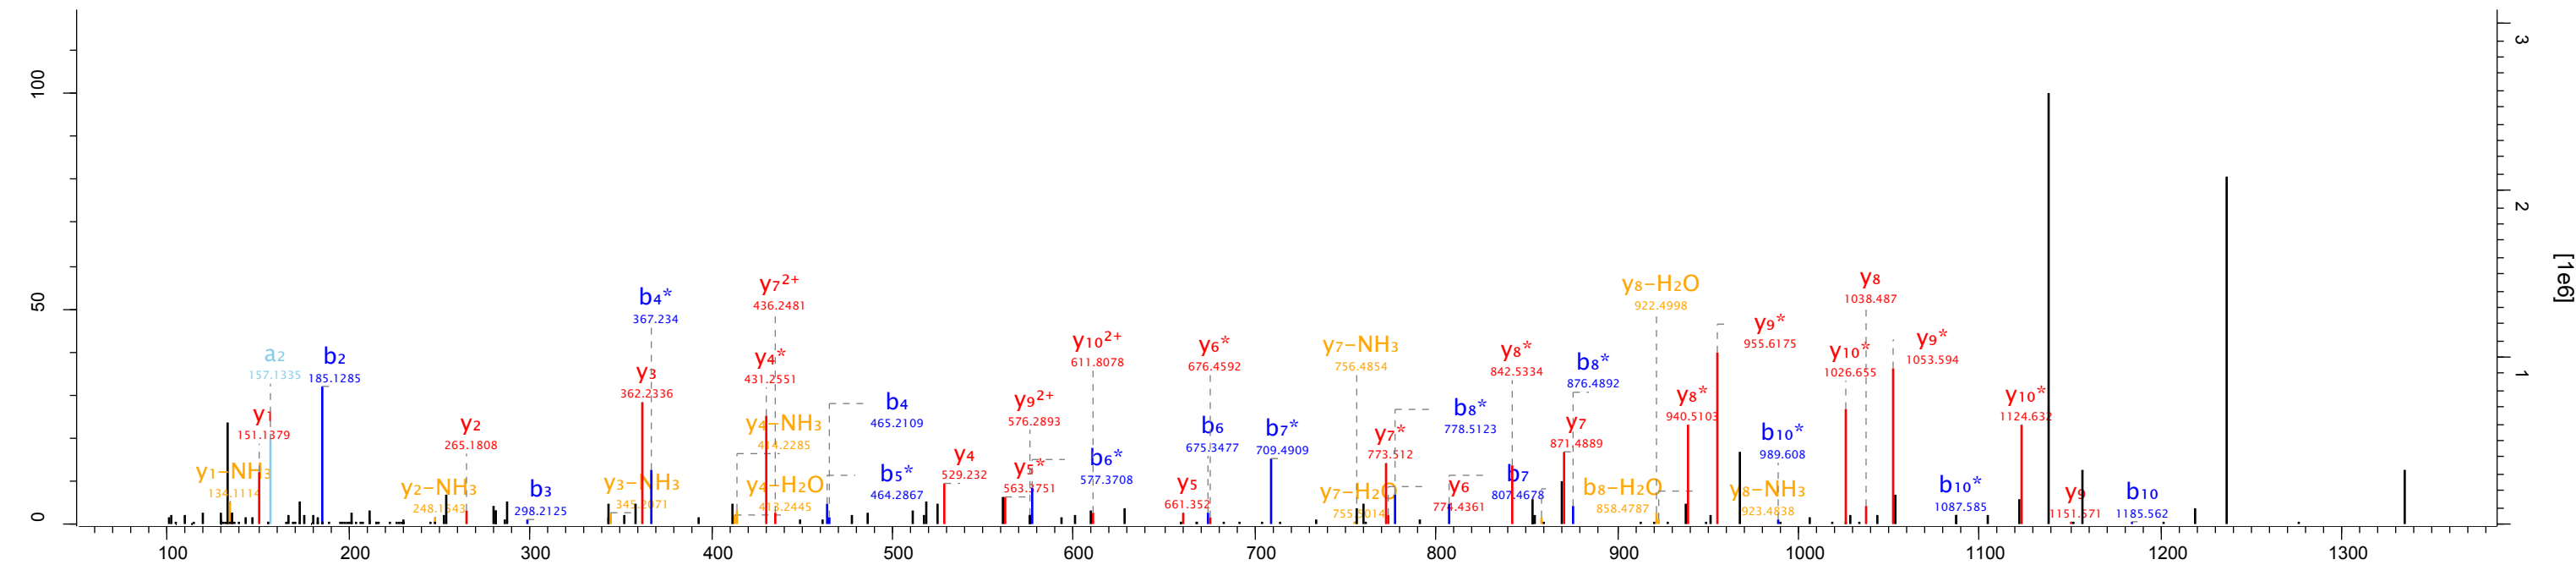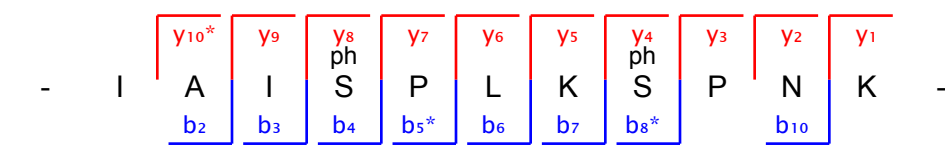

Raw file: 20150814\_A375SR\_Phospho\_BR2\_03  
 Scan: 13055 Method: FTMS; HCD Score: 155.8 m/z: 739.66 Gene names: NAV1

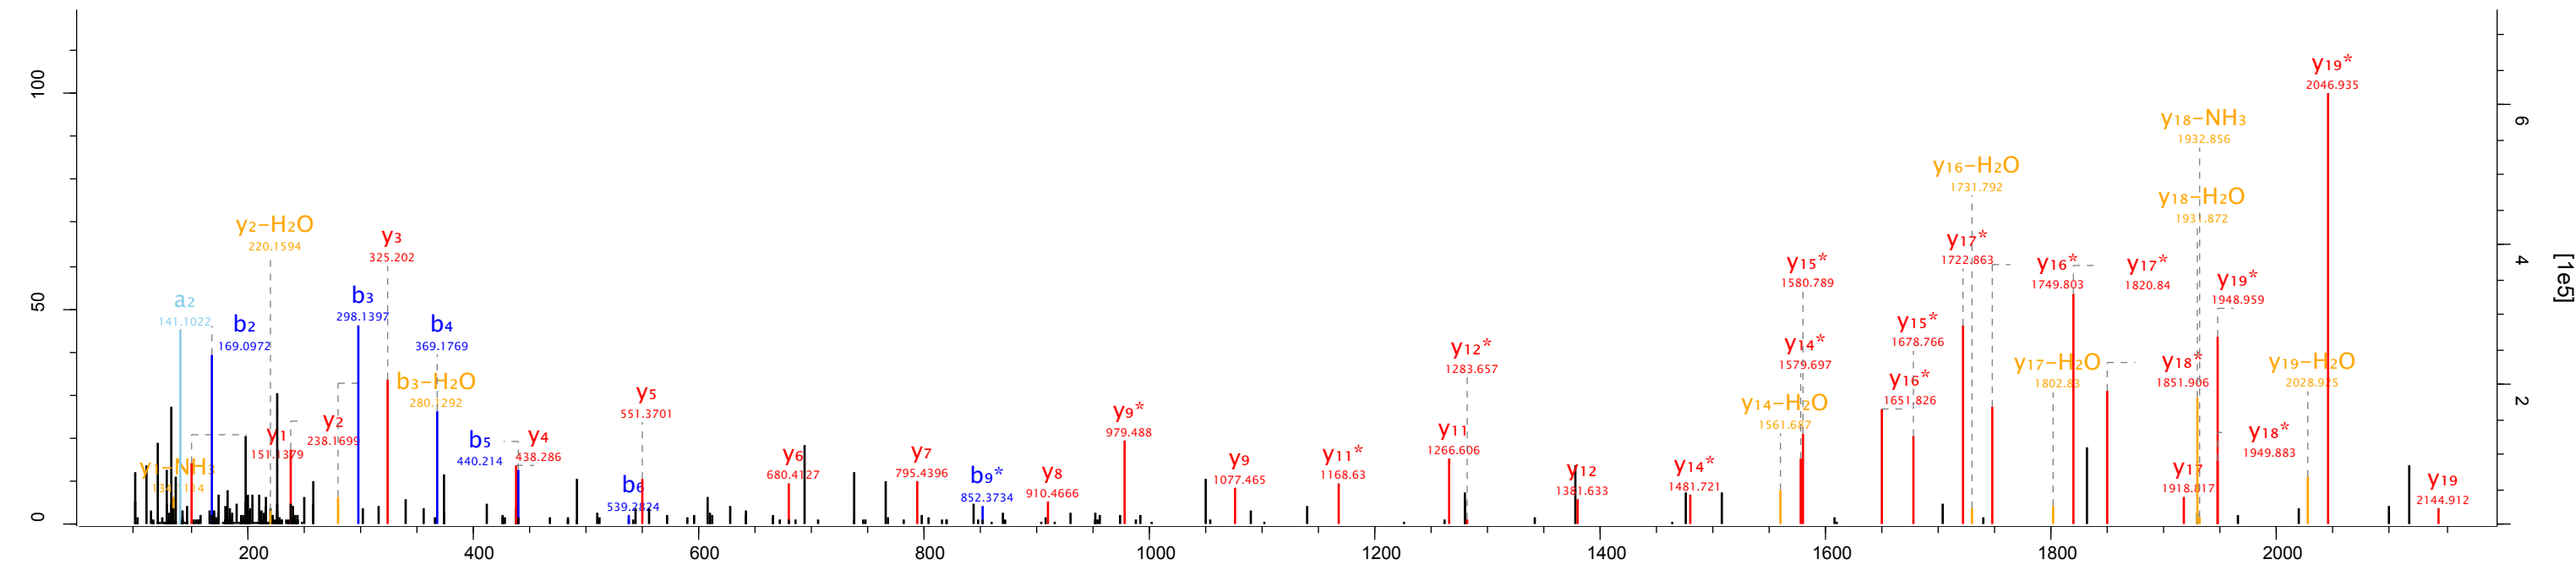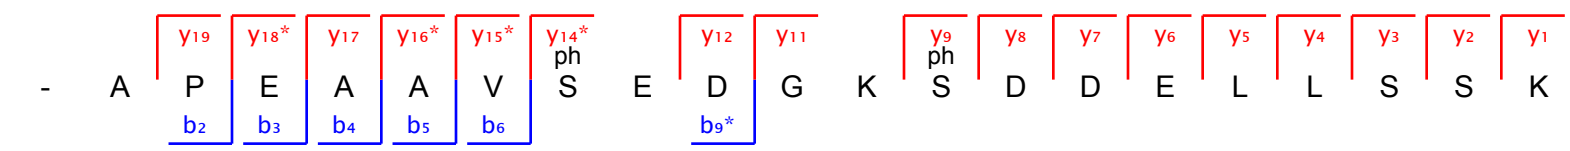

Raw file: 20150814\_A375SR\_Phospho\_BR2\_03  
 Scan: 13125 Method: FTMS; HCD Score: 171.07 m/z: 657.31 Gene names: IRS1

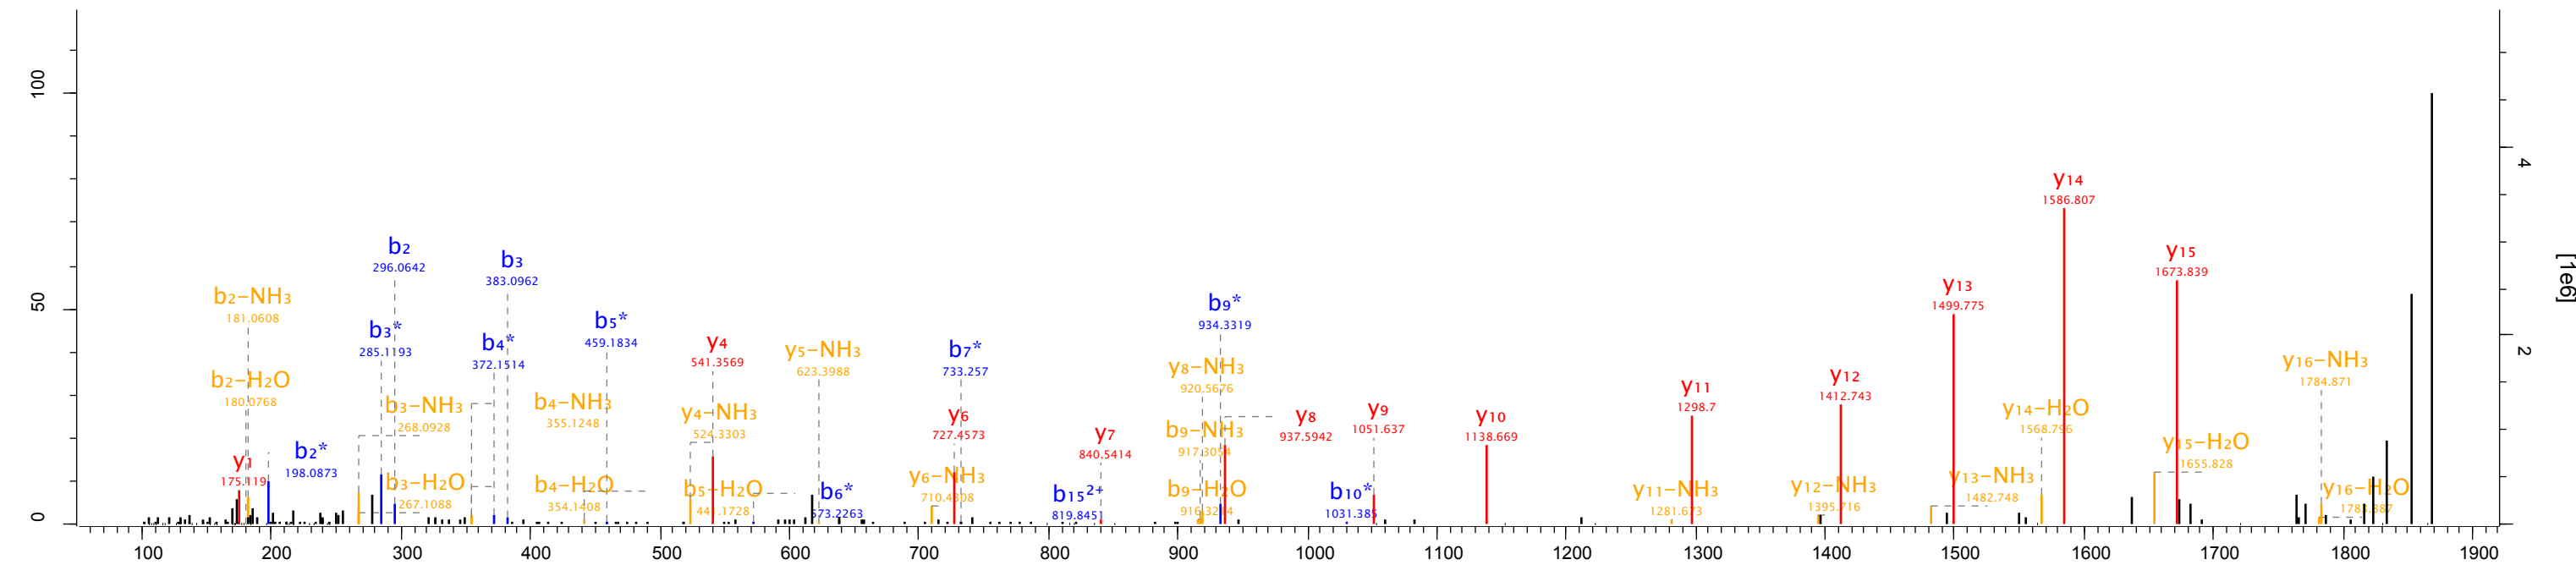

Sequence: Q S S S N C S N P I S V P L R R -  
 Fragmentation: b2, b3, b4\*, b5\*, b6\*, b7\*, b9\*, b10\*, b15<sup>2+</sup>, y1, y4, y6, y7, y8, y9, y10, y11, y12, y13, y14, y15

Raw file: 20150814\_A375SR\_Phospho\_BR2\_03  
 Scan: 13285 Method: FTMS; HCD Score: 171.73 m/z: 650.28 Gene names: LATS1

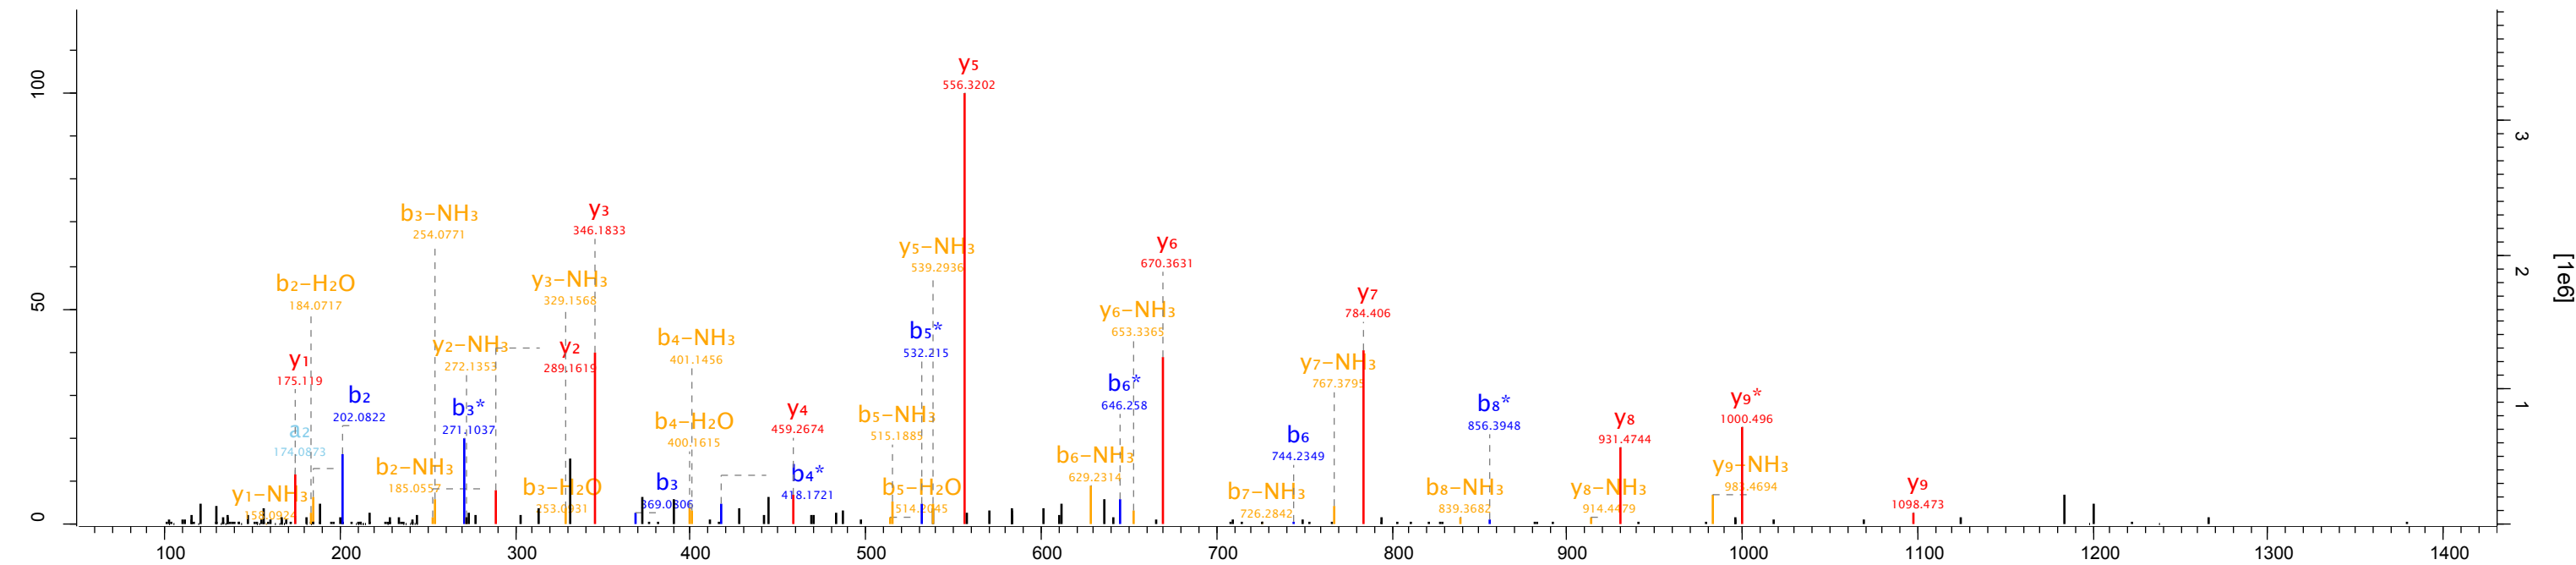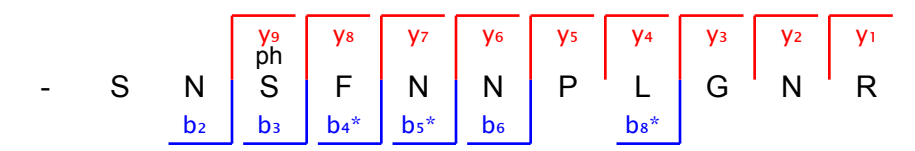



Raw file Scan Method Score m/z Gene names  
 20150814\_A375SR\_Phospho\_BR2\_03 13375 FTMS; HCD 180.09 1082.42 PRRC2A

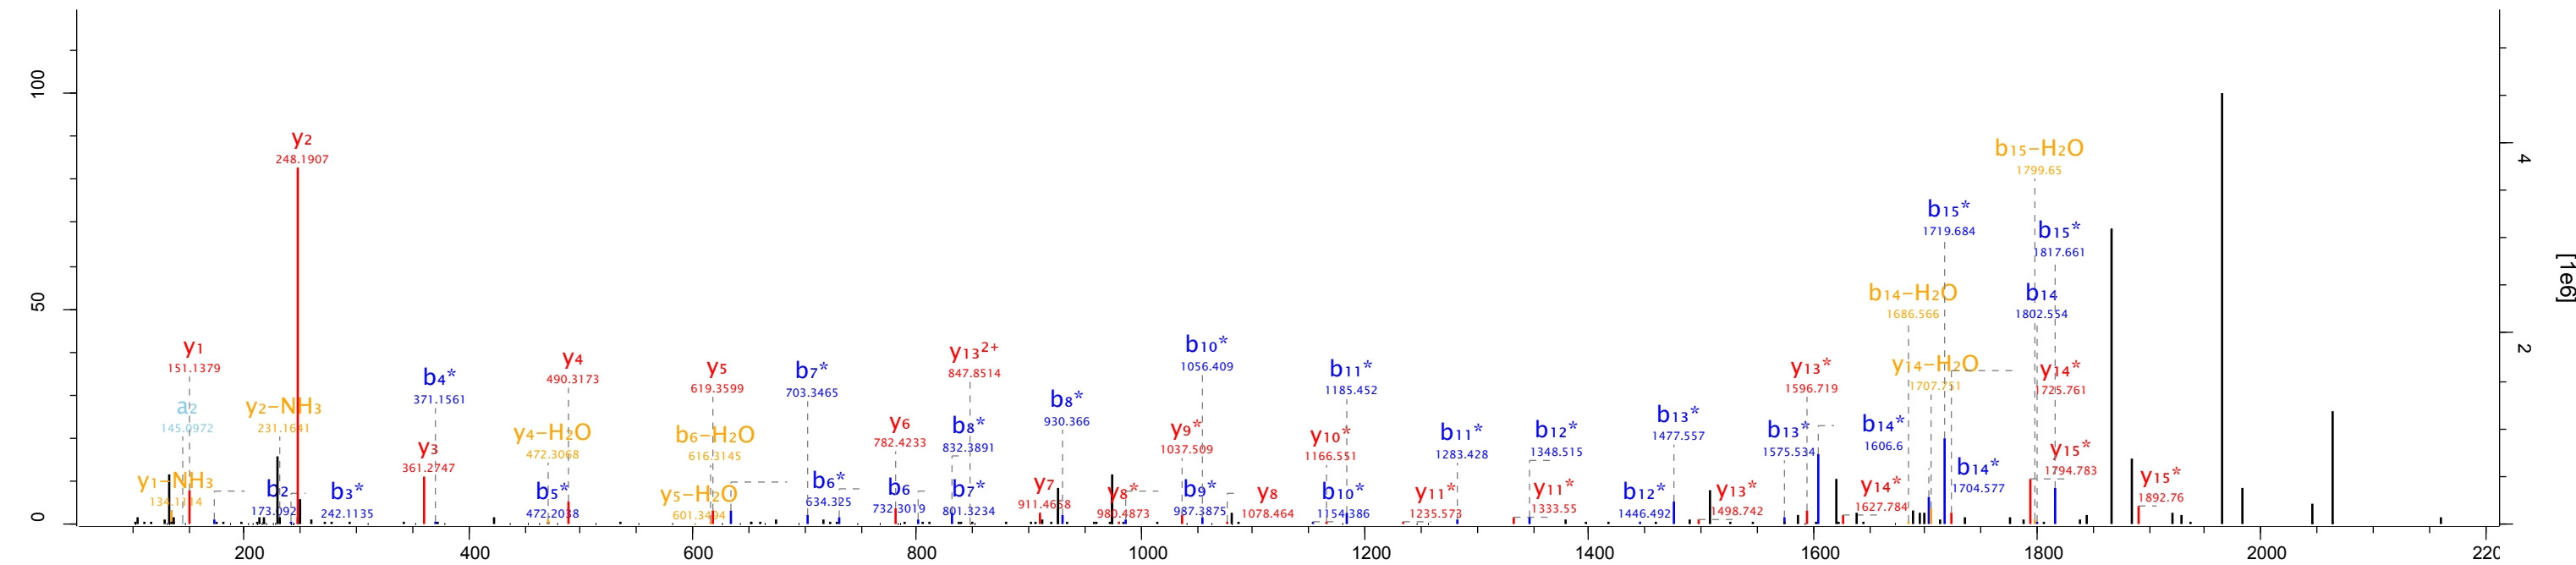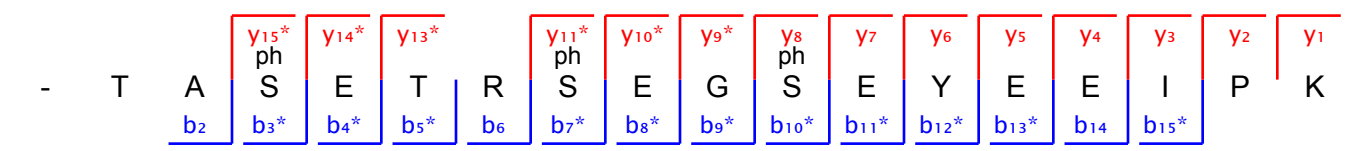

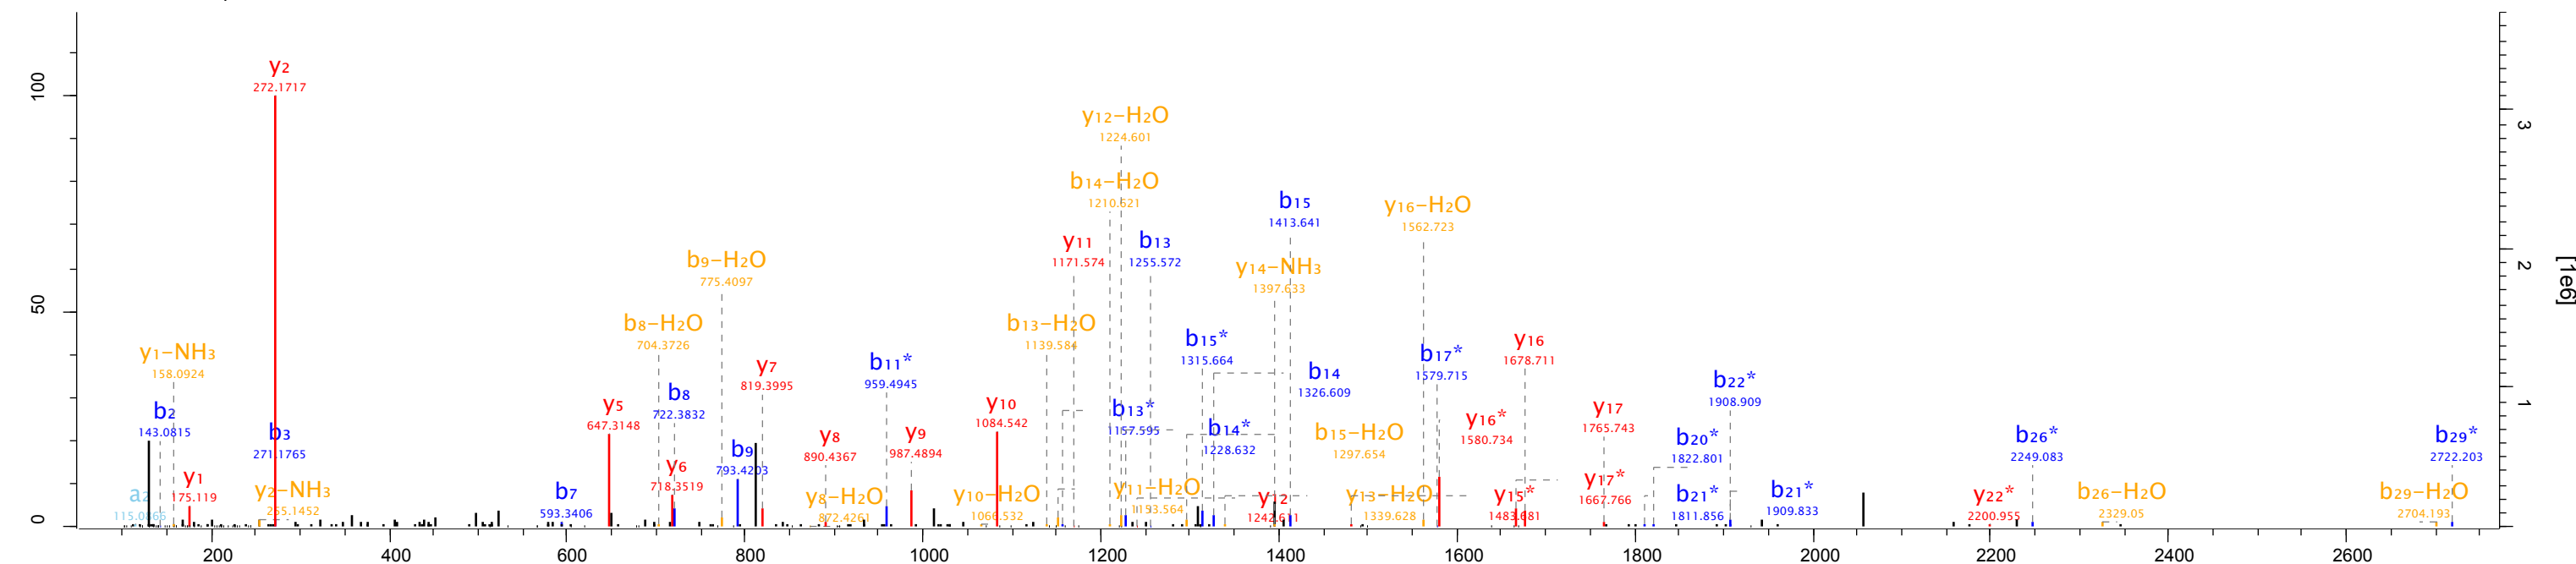

- A A K P G P A E A P S ph P T A S P S ph S G D A S P P A T A P Y D P R -

Fragmentation sites are indicated by brackets below the sequence:

- Blue brackets (b-series): b2 (A), b3 (K), b7 (A), b8 (E), b9 (A), b11\* (S), b13 (T), b14 (A), b15 (S), b17\* (S), b20\* (A), b21\* (S), b22\* (P), b26\* (A), b29\* (D).
- Red brackets (y-series): y22\* (P), y17 (S), y16 (P), y15\* (S), y12 (A), y11 (S), y10 (P), y9 (P), y8 (A), y7 (T), y6 (A), y5 (P), y2 (P), y1 (R).

Raw file  
 20150814\_A375SR\_Phospho\_BR2\_03  
 Scan 13605 Method FTMS; HCD Score 98.23 m/z 706.84 Gene names ALDOA

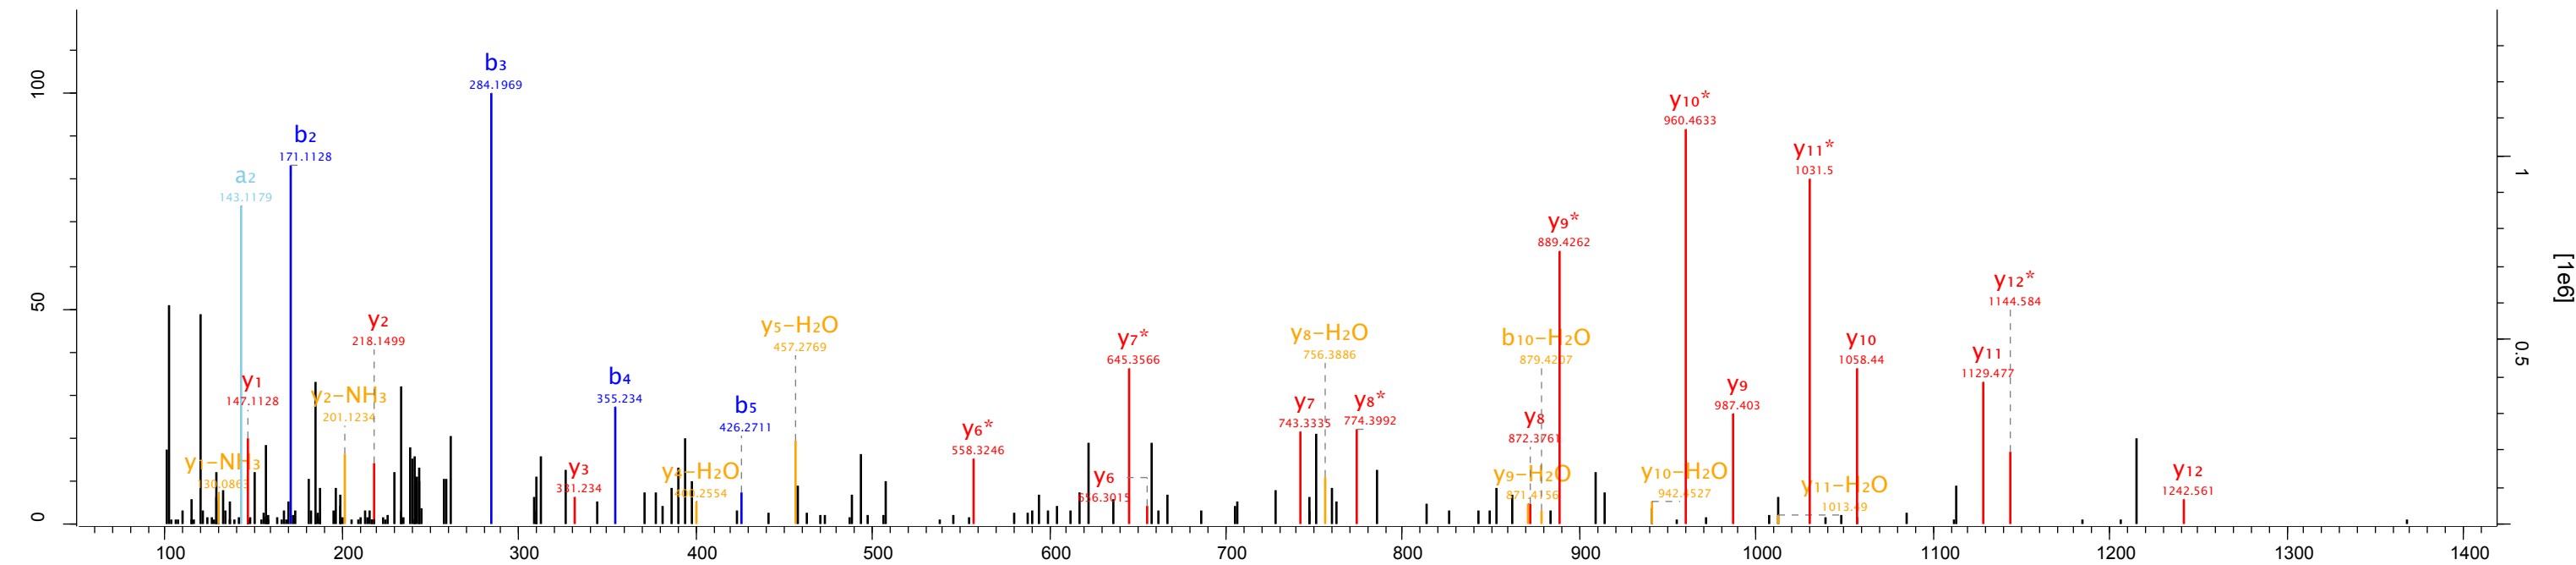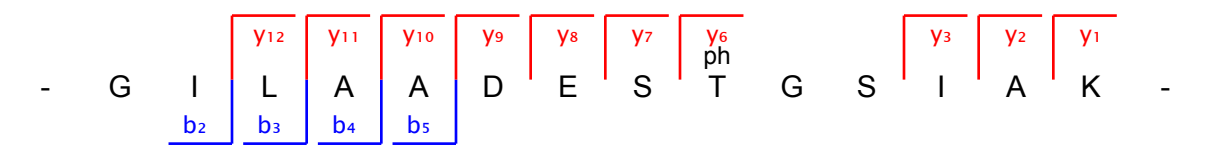

Raw file Scan Method Score m/z Gene names  
 20150814\_A375SR\_Phospho\_BR2\_03 13815 FTMS; HCD 177.74 773.87 LARP1

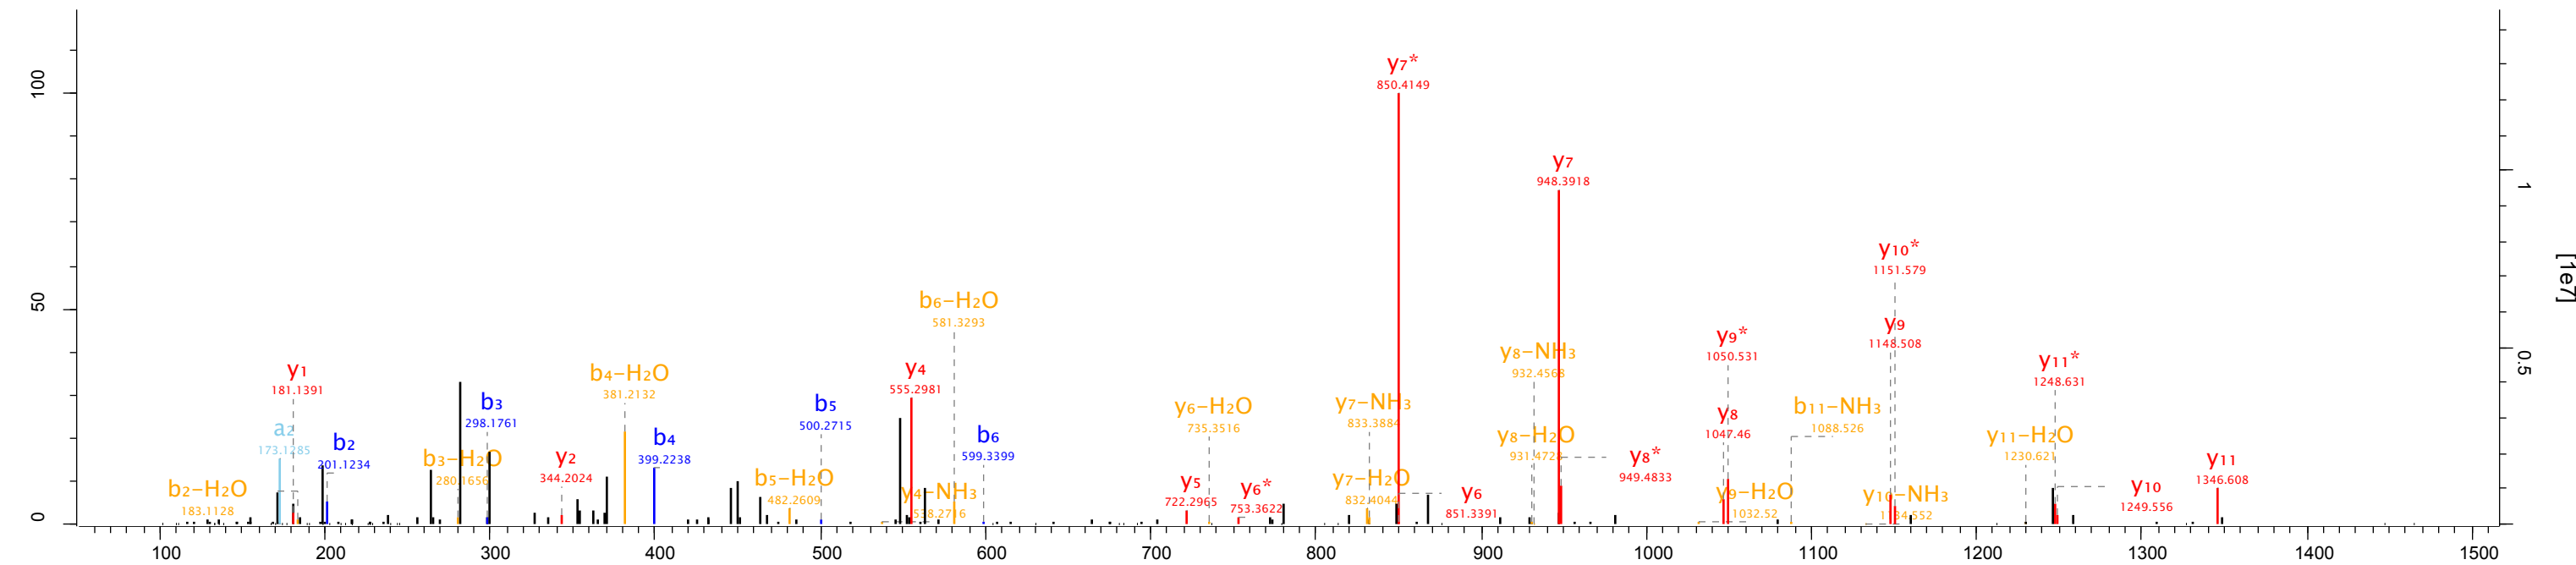

- S L P T T V P E S P N Y R -

b<sub>2</sub>
b<sub>3</sub>
b<sub>4</sub>
b<sub>5</sub>
b<sub>6</sub>
y<sub>11</sub>
y<sub>10</sub>
y<sub>9</sub>
y<sub>8</sub>
y<sub>7</sub>
y<sub>6</sub>
y<sub>5</sub>  
ph
y<sub>4</sub>
y<sub>2</sub>
y<sub>1</sub>

Raw file: 20150814\_A375SR\_Phospho\_BR2\_03  
 Scan: 13845 Method: FTMS; HCD Score: 164.56 m/z: 750.89 Gene names: LRWD1

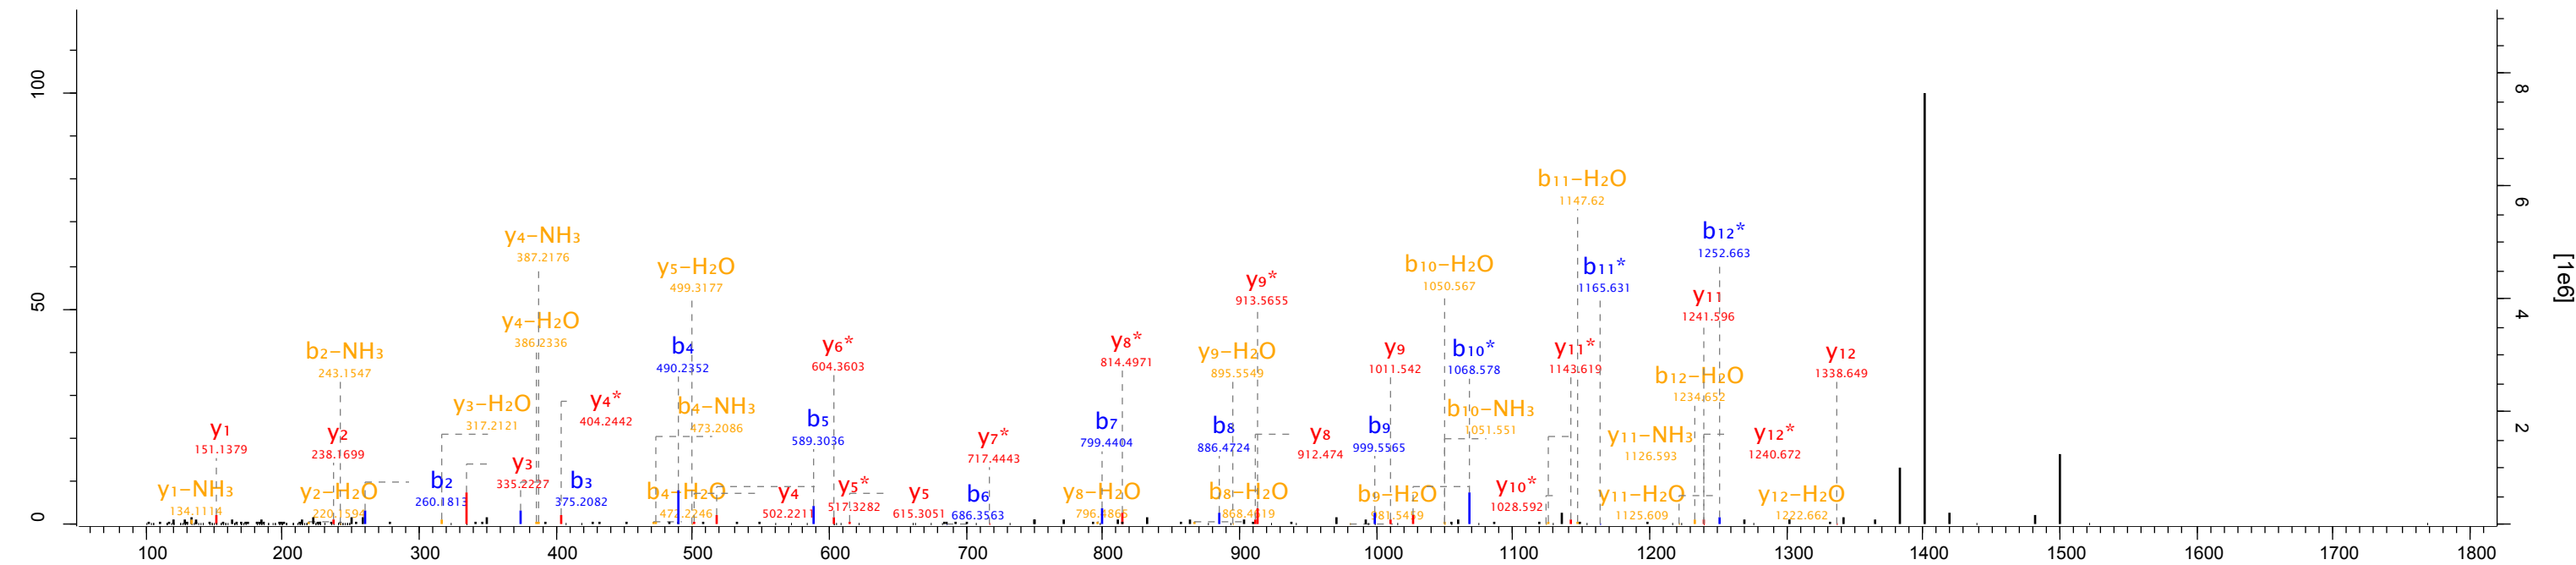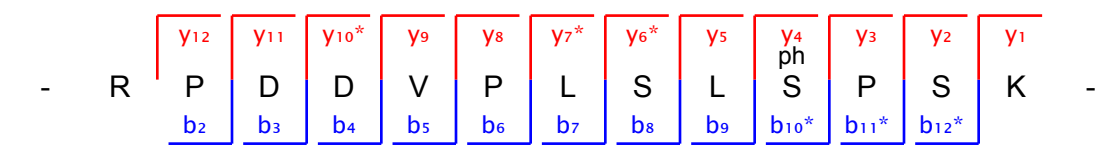

Raw file 20150814\_A375SR\_Phospho\_BR2\_03 Scan 14185 Method FTMS; HCD Score 169.91 m/z 974.88 Gene names PLEC

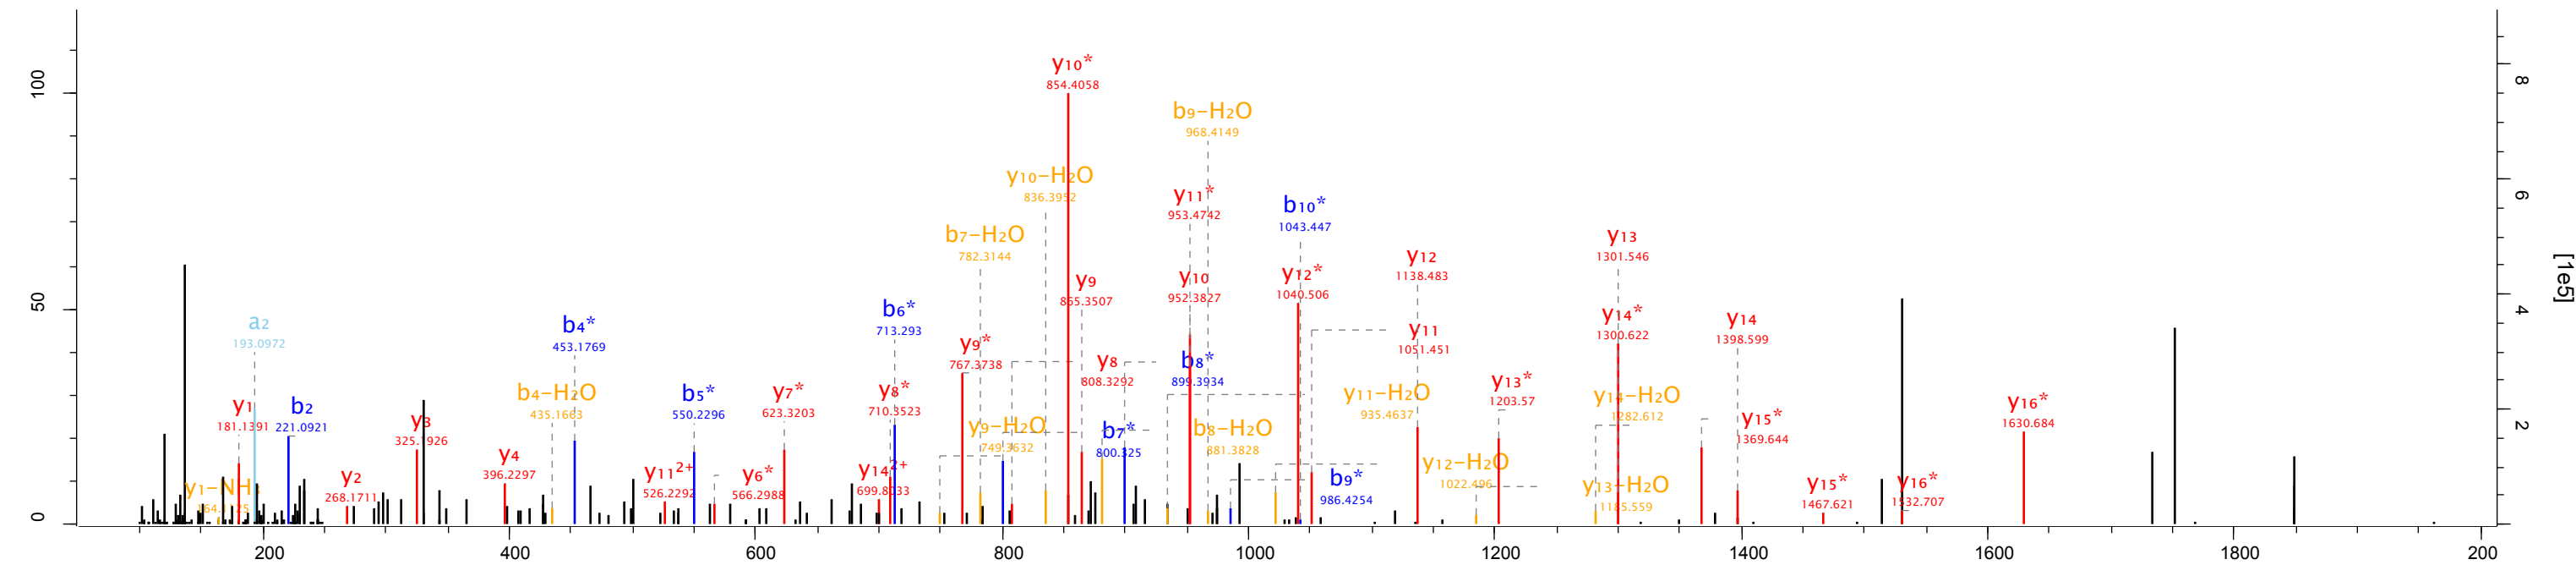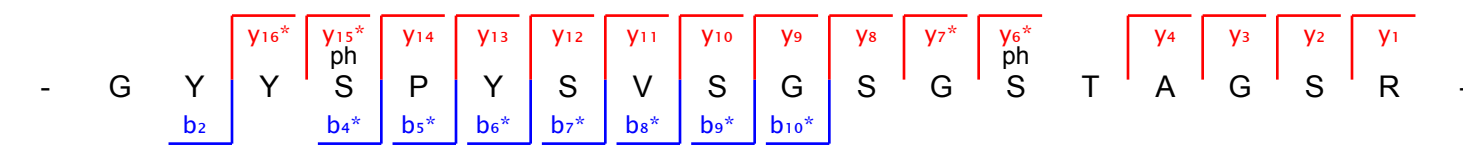

Raw file: 20150814\_A375SR\_Phospho\_BR2\_03  
 Scan: 14235 Method: FTMS; HCD Score: 143.04 m/z: 1045.46 Gene names: VIM

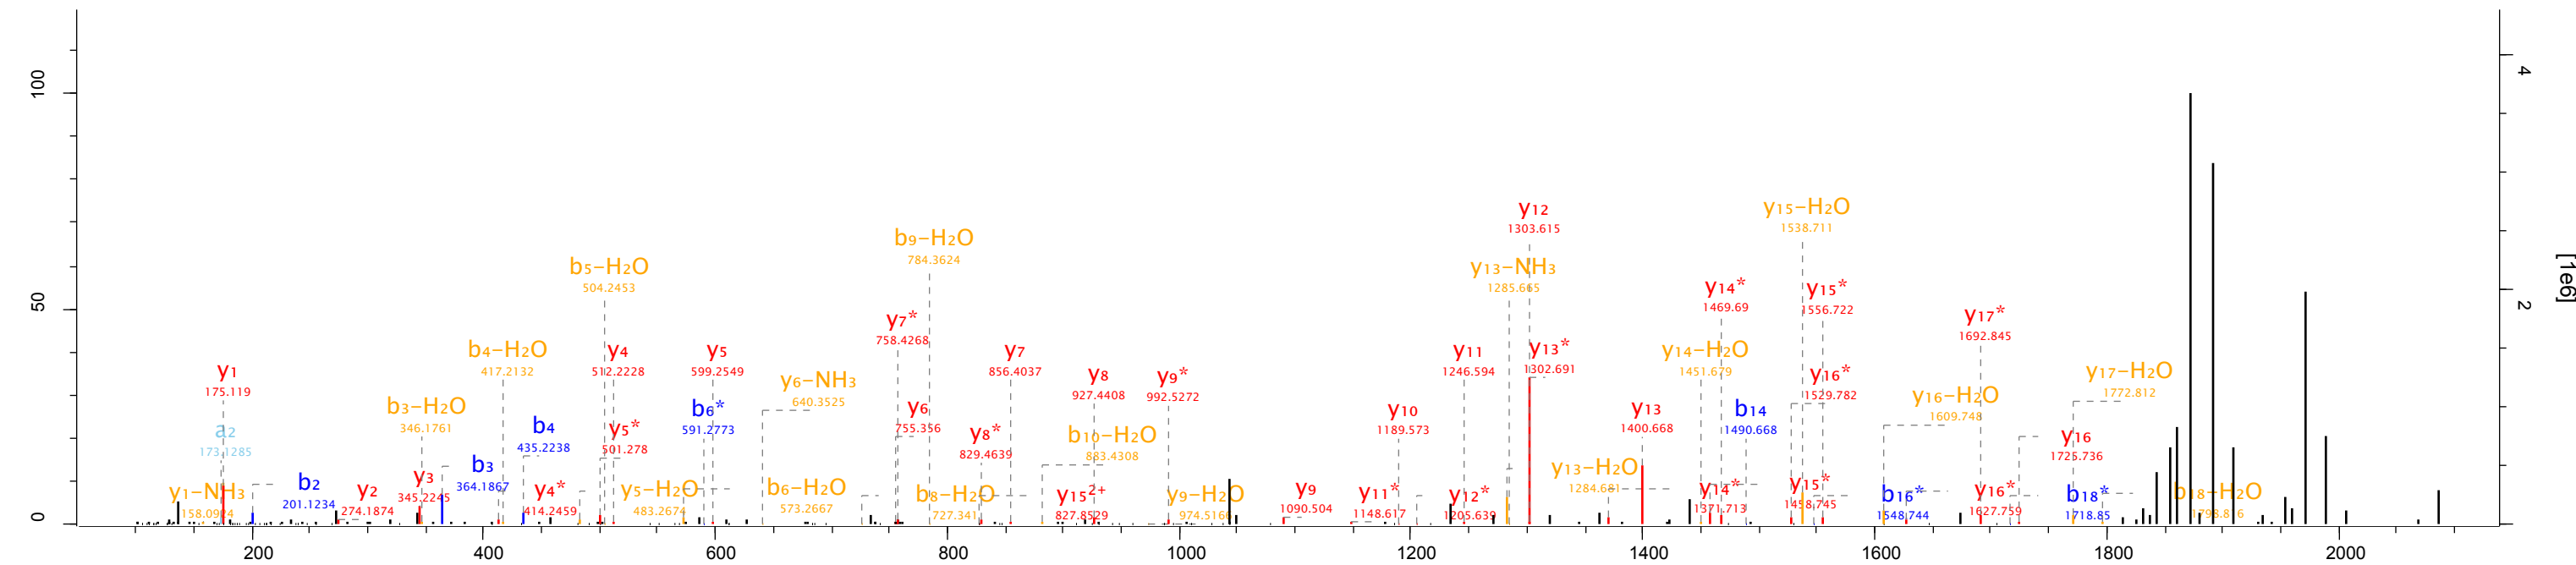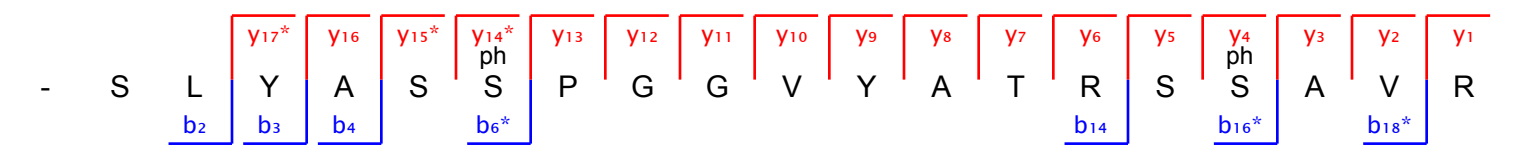

Raw file: 20150814\_A375SR\_Phospho\_BR2\_03  
 Scan: 14895 Method: FTMS; HCD Score: 68.13 m/z: 878.36 Gene names: RYBP

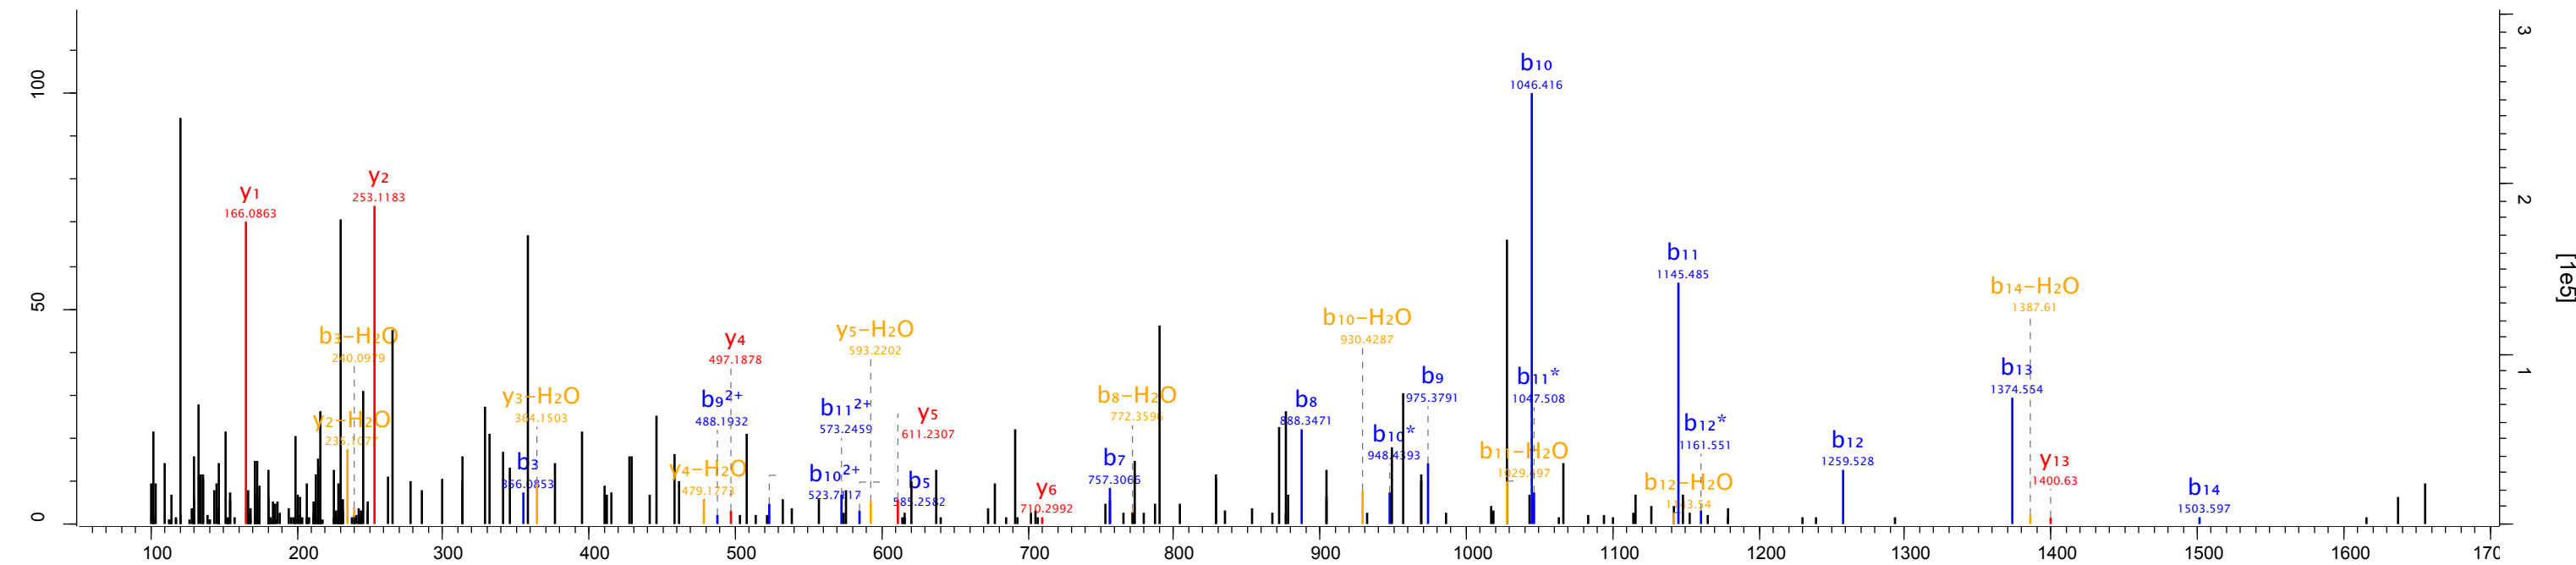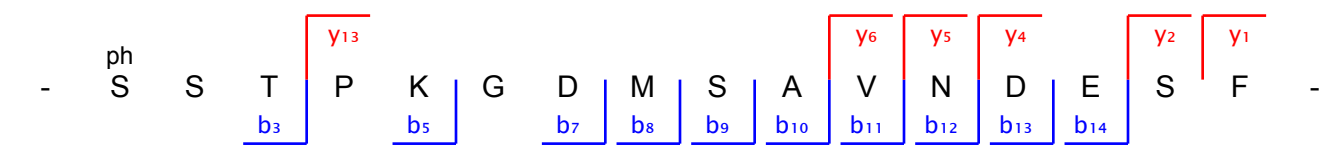



Raw file: 20150814\_A375SR\_Phospho\_BR2\_03  
 Scan: 14975 Method: FTMS; HCD Score: 73.92 m/z: 1095.49 Gene names: GATA6

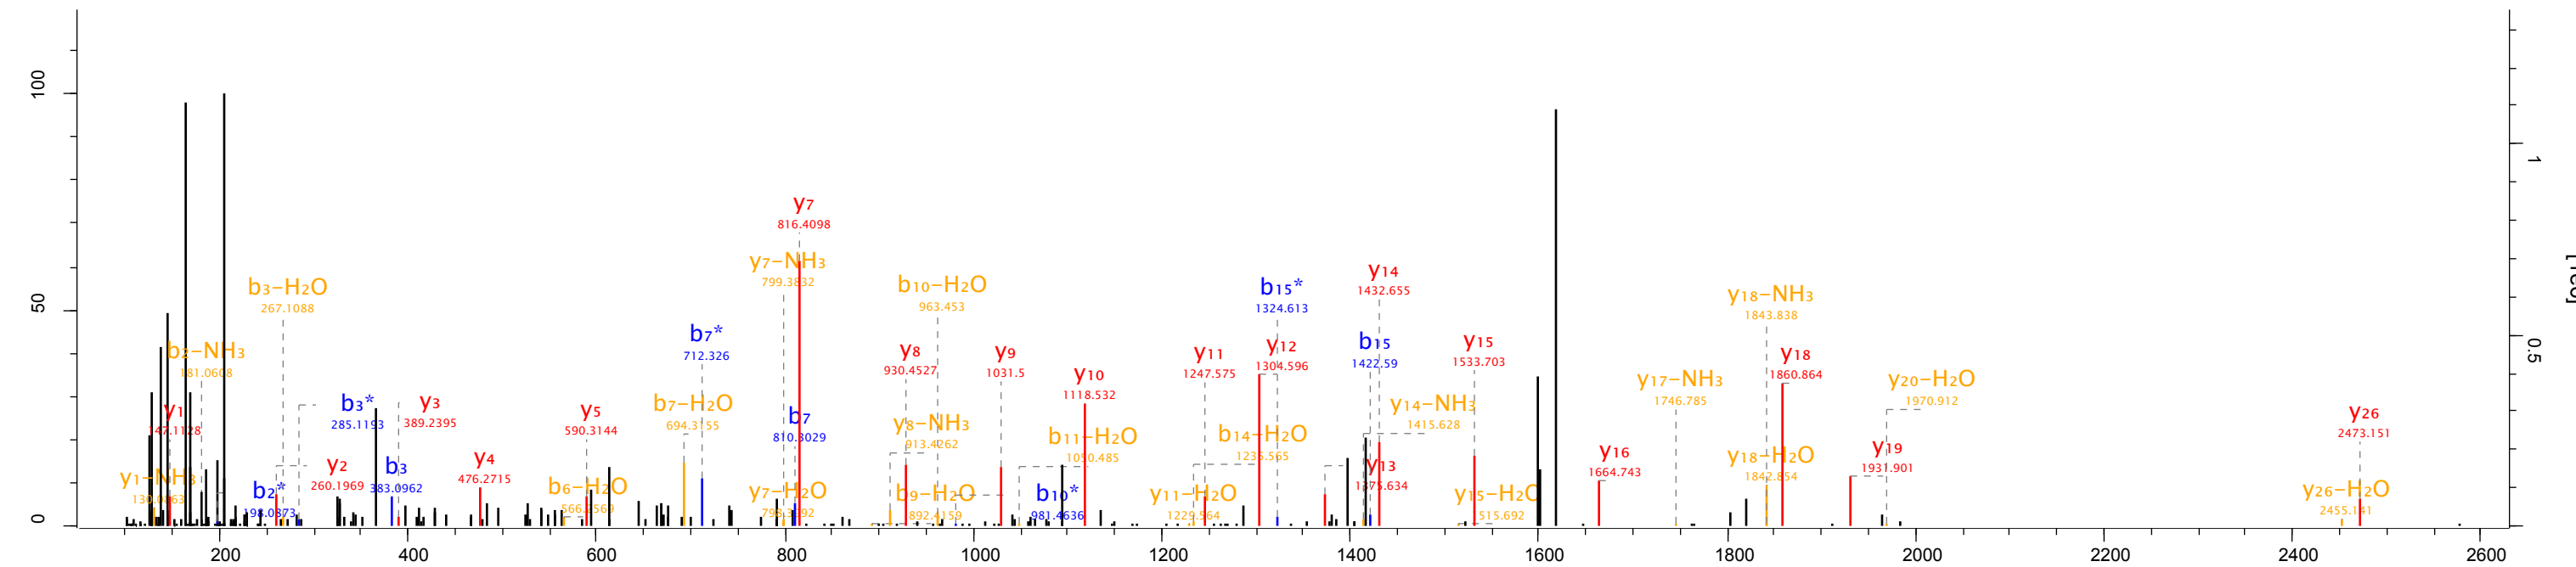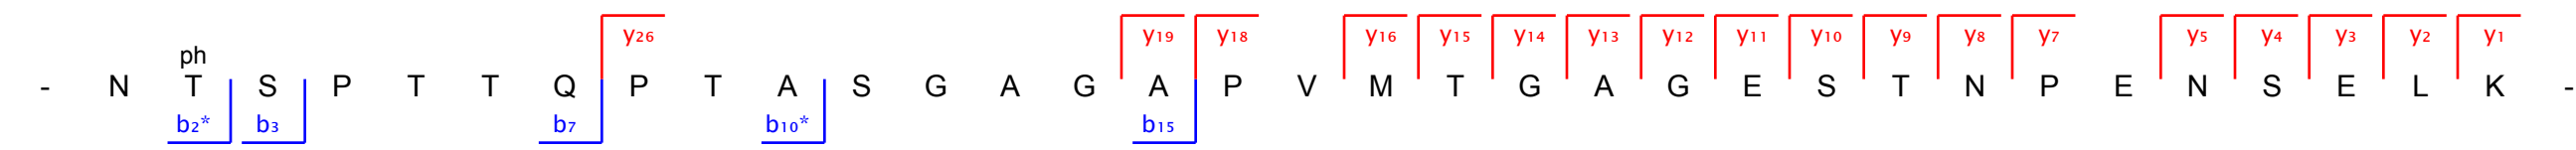

Raw file  
 20150814\_A375SR\_Phospho\_BR2\_03  
 Scan 15015 Method FTMS; HCD Score 180.07 m/z 858.39 Gene names CASKIN2

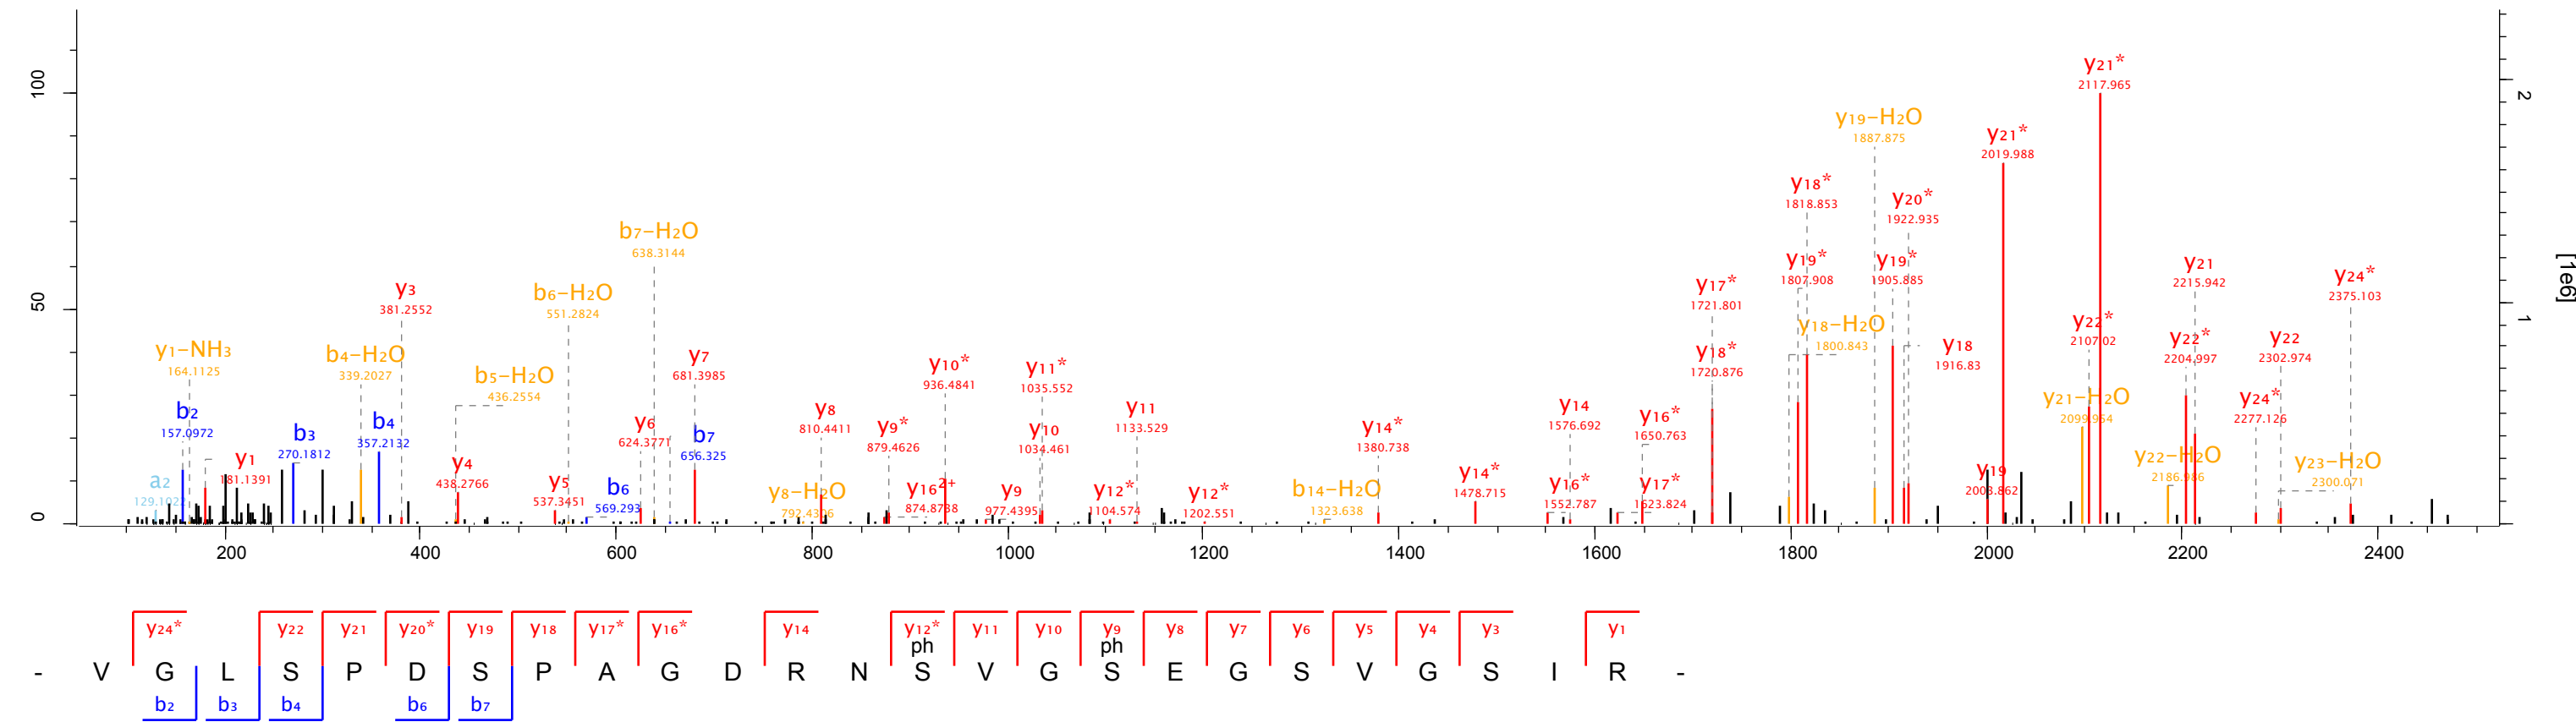

Raw file: 20150814\_A375SR\_Phospho\_BR2\_03  
 Scan: 1505 Method: FTMS; HCD Score: 87.14 m/z: 669.31 Gene names: SRRM2

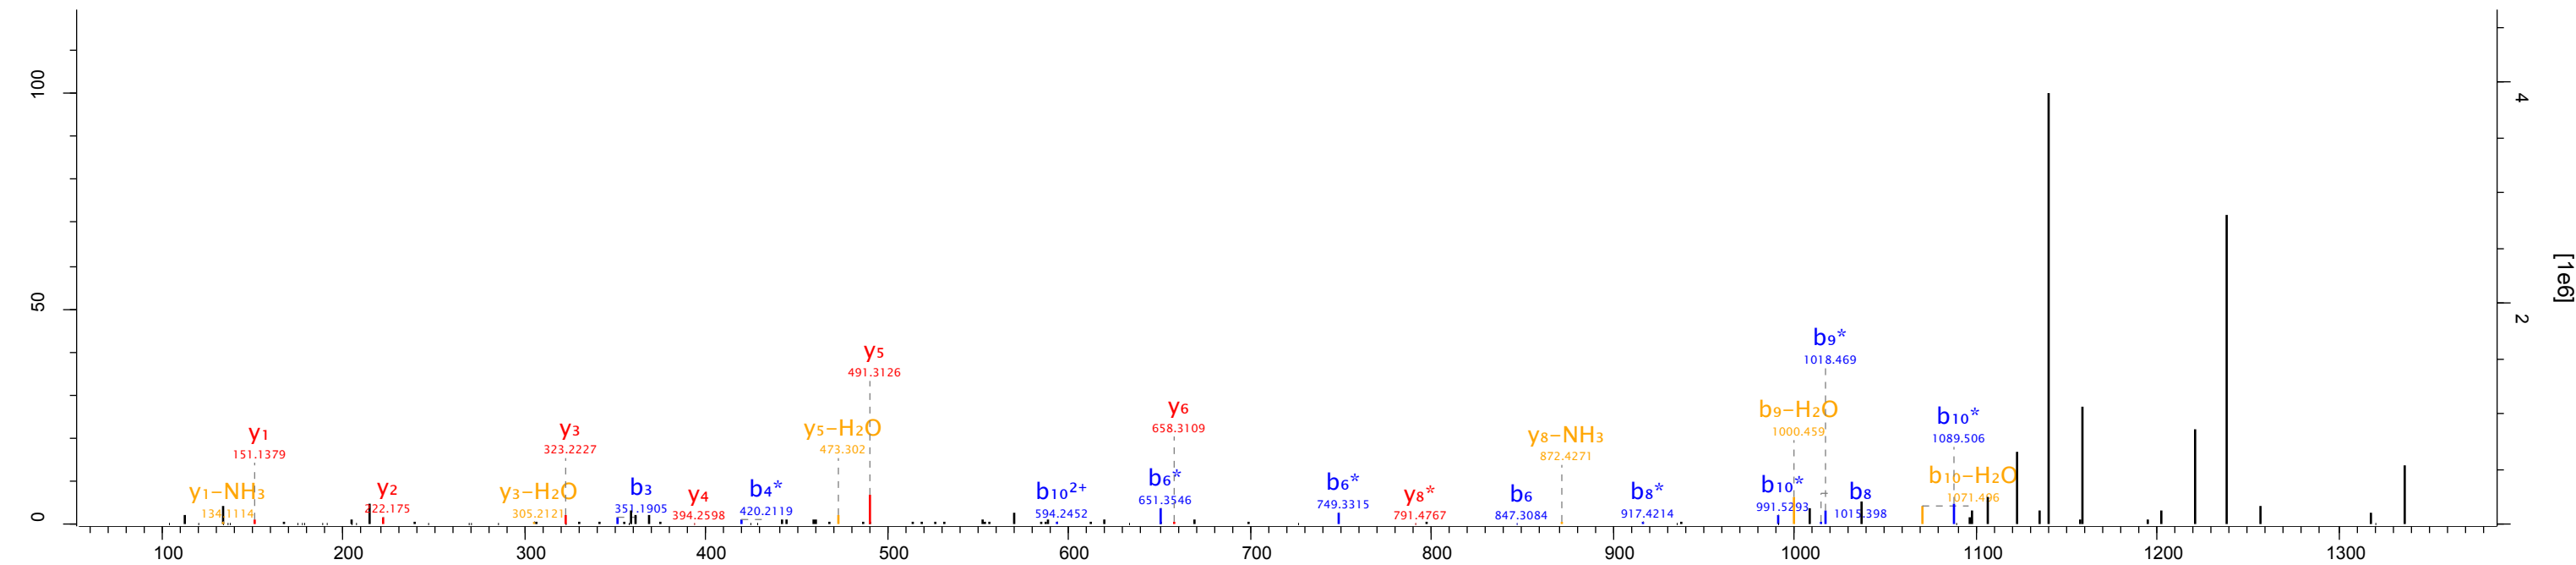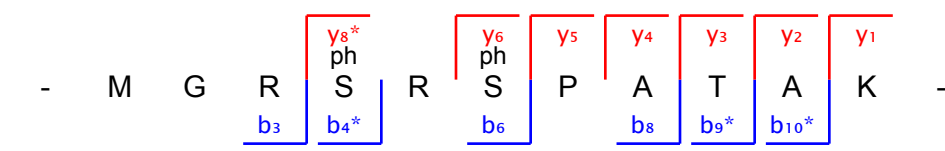

Raw file: 20150814\_A375SR\_Phospho\_BR2\_03  
 Scan: 15245 Method: FTMS; HCD Score: 114.89 m/z: 554.25 Gene names: MAP3K3

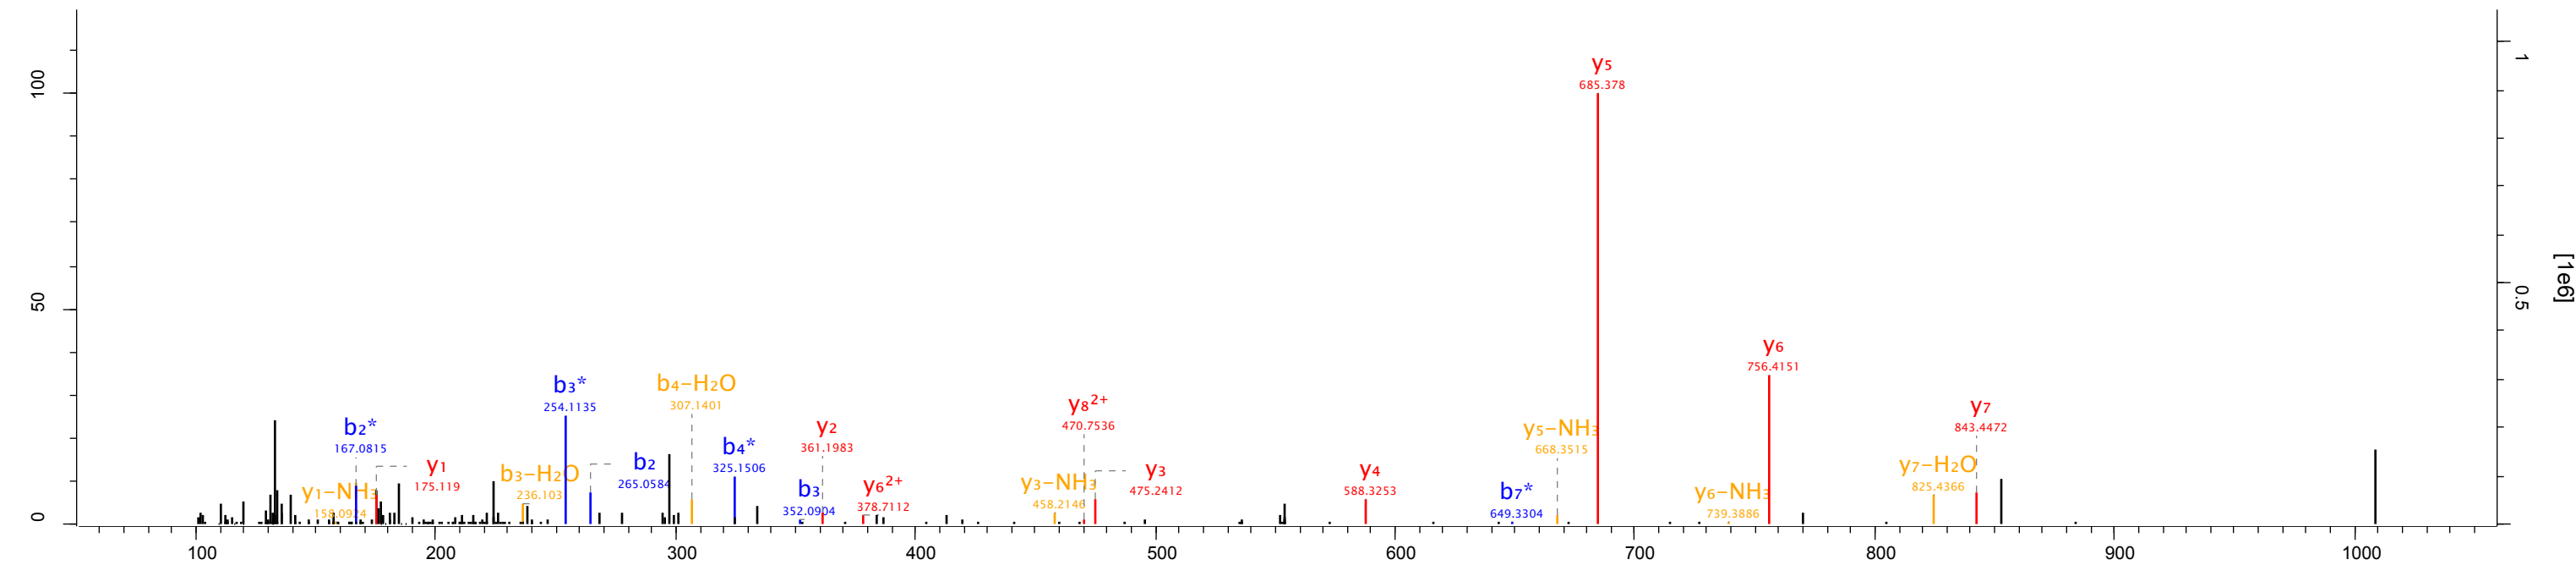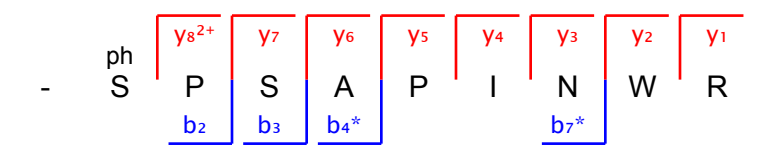

Raw file: 20150814\_A375SR\_Phospho\_BR2\_03  
 Scan: 15355 Method: FTMS; HCD Score: 257.48 m/z: 808.82 Gene names: LMNA

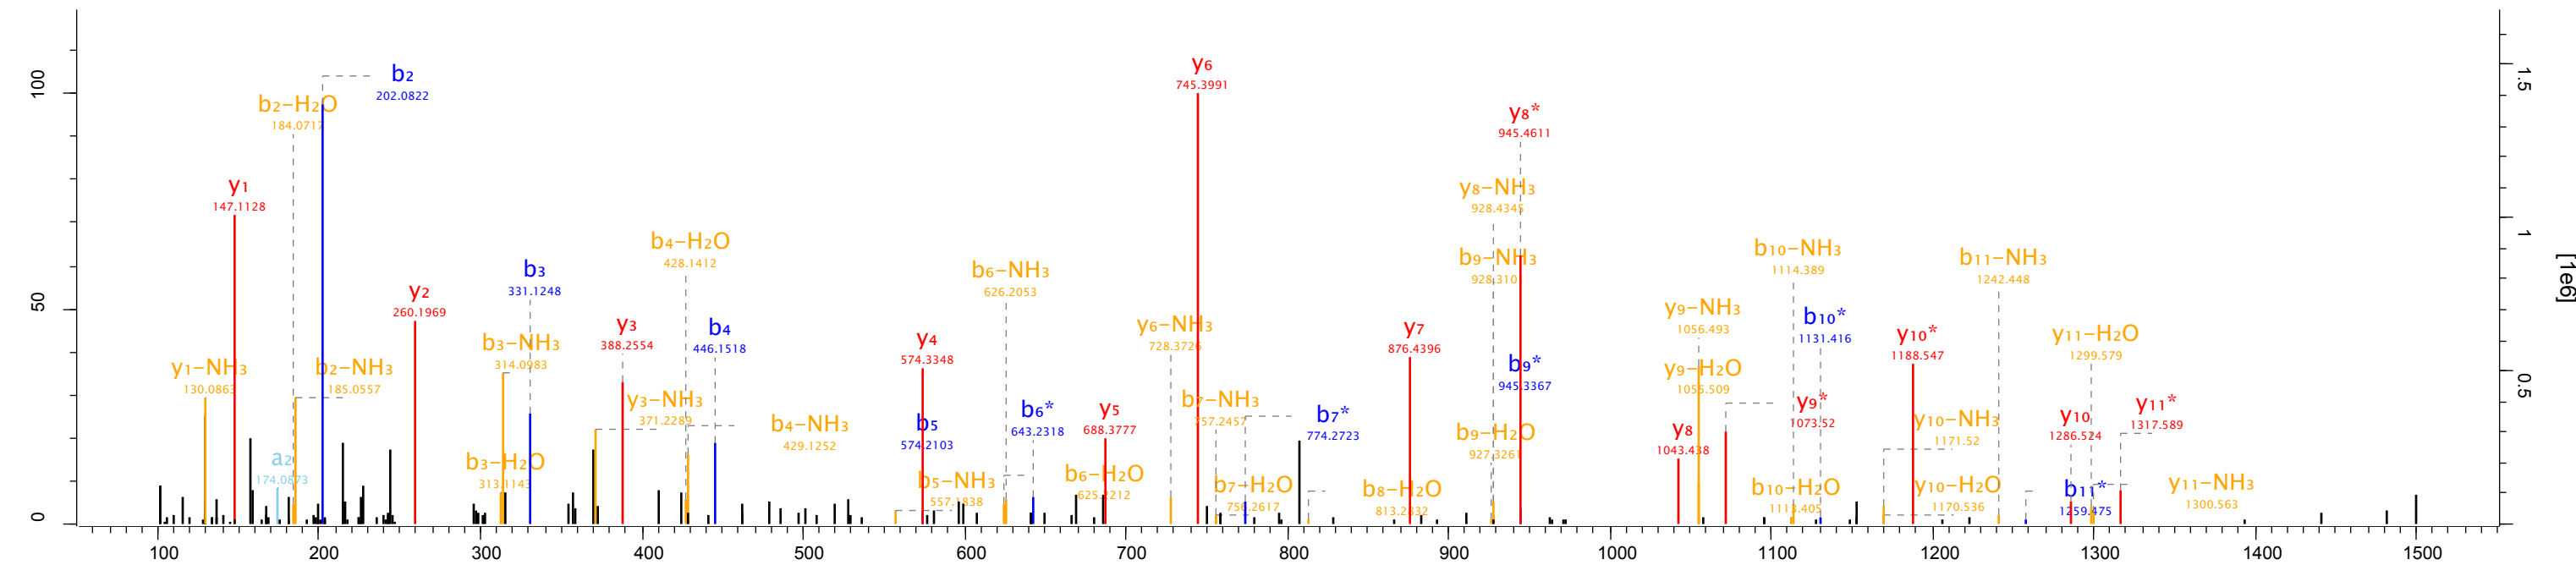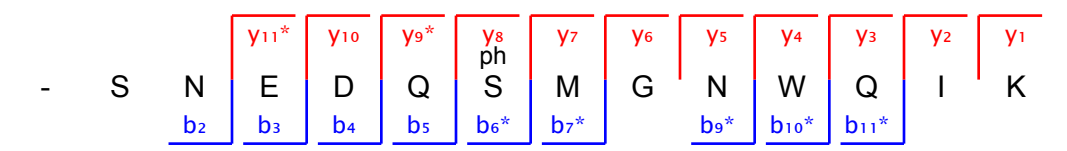

Raw file: 20150814\_A375SR\_Phospho\_BR2\_03  
 Scan: 15445 Method: FTMS; HCD Score: 92.19 m/z: 612.3 Gene names: SLC1A5

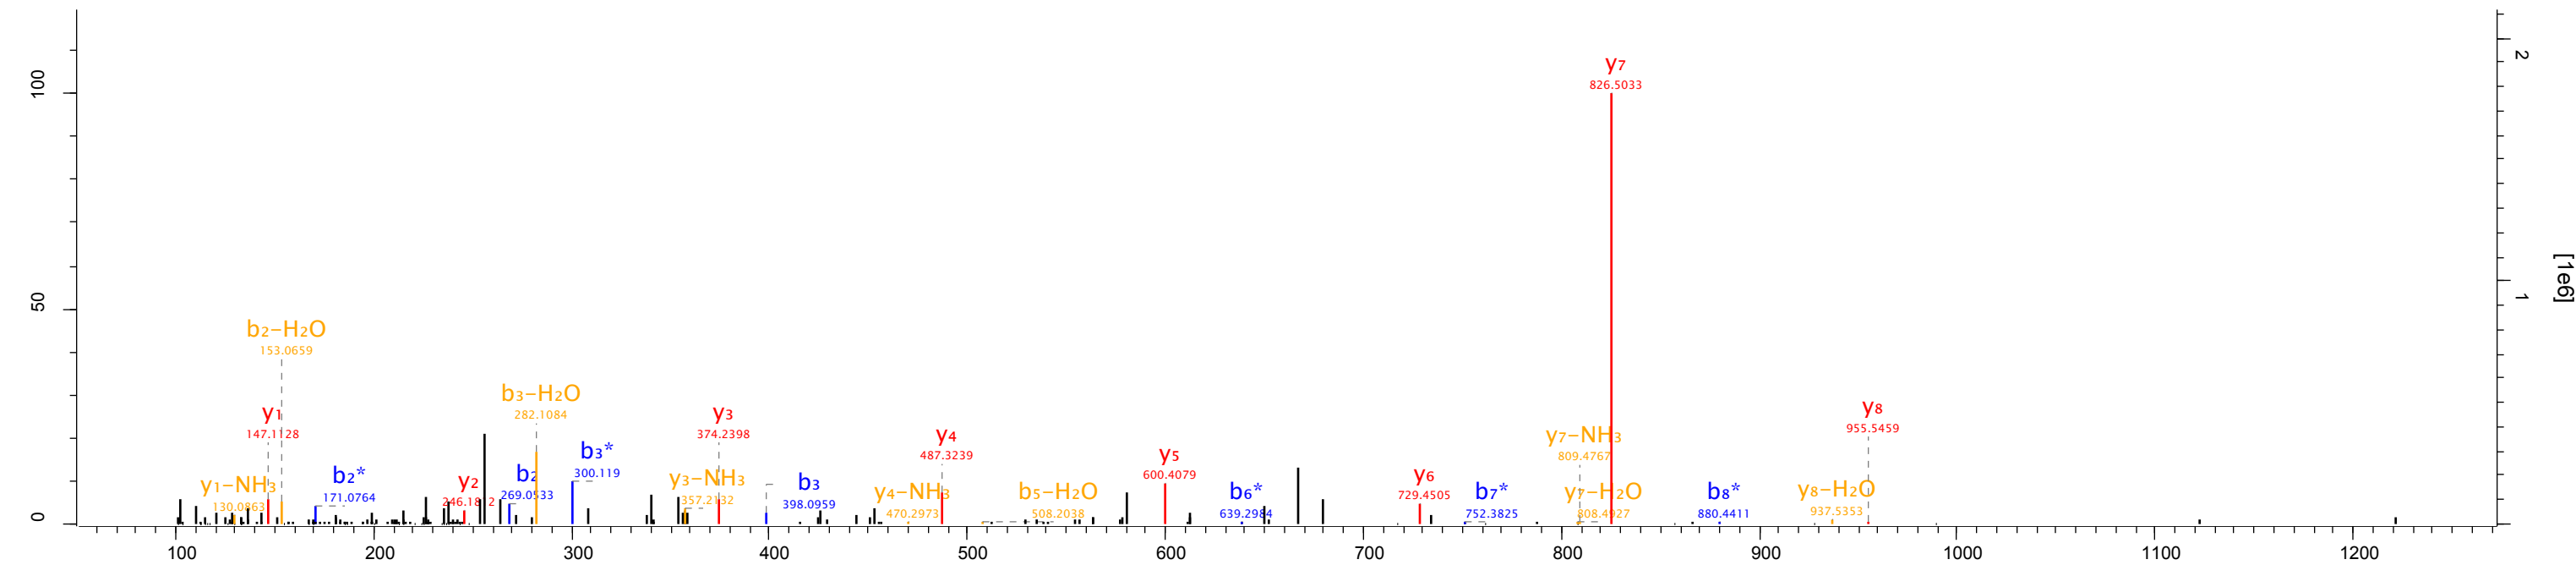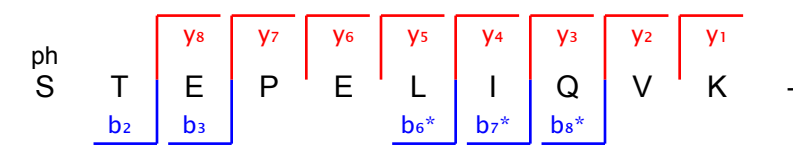

Raw file: 20150814\_A375SR\_Phospho\_BR2\_03  
 Scan: 15495 Method: FTMS; HCD Score: 90.46 m/z: 597.97 Gene names: DBN1

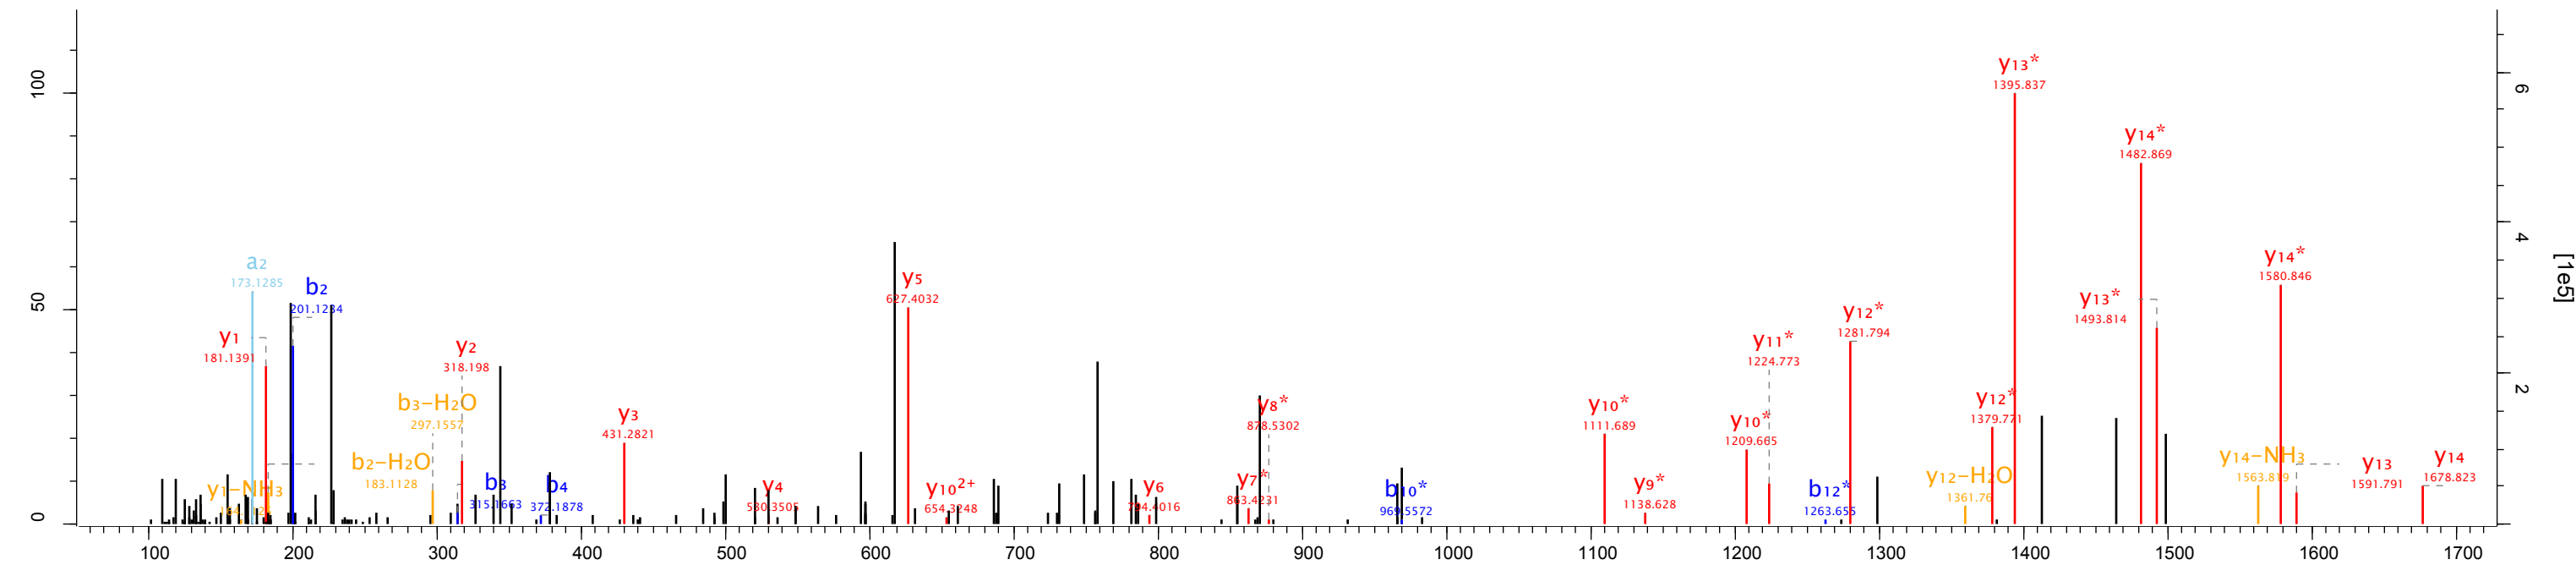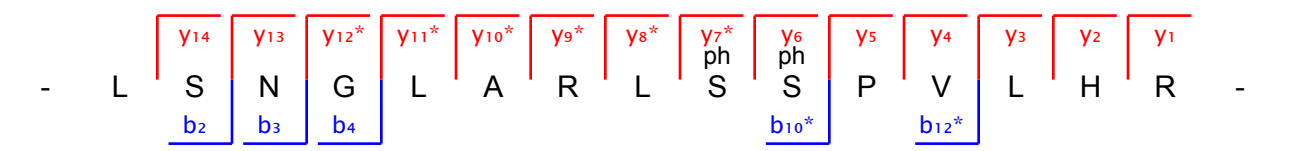

Raw file Scan Method Score m/z Gene names  
 20150814\_A375SR\_Phospho\_BR2\_03 15515 FTMS; HCD 147.33 626.22 RYBP

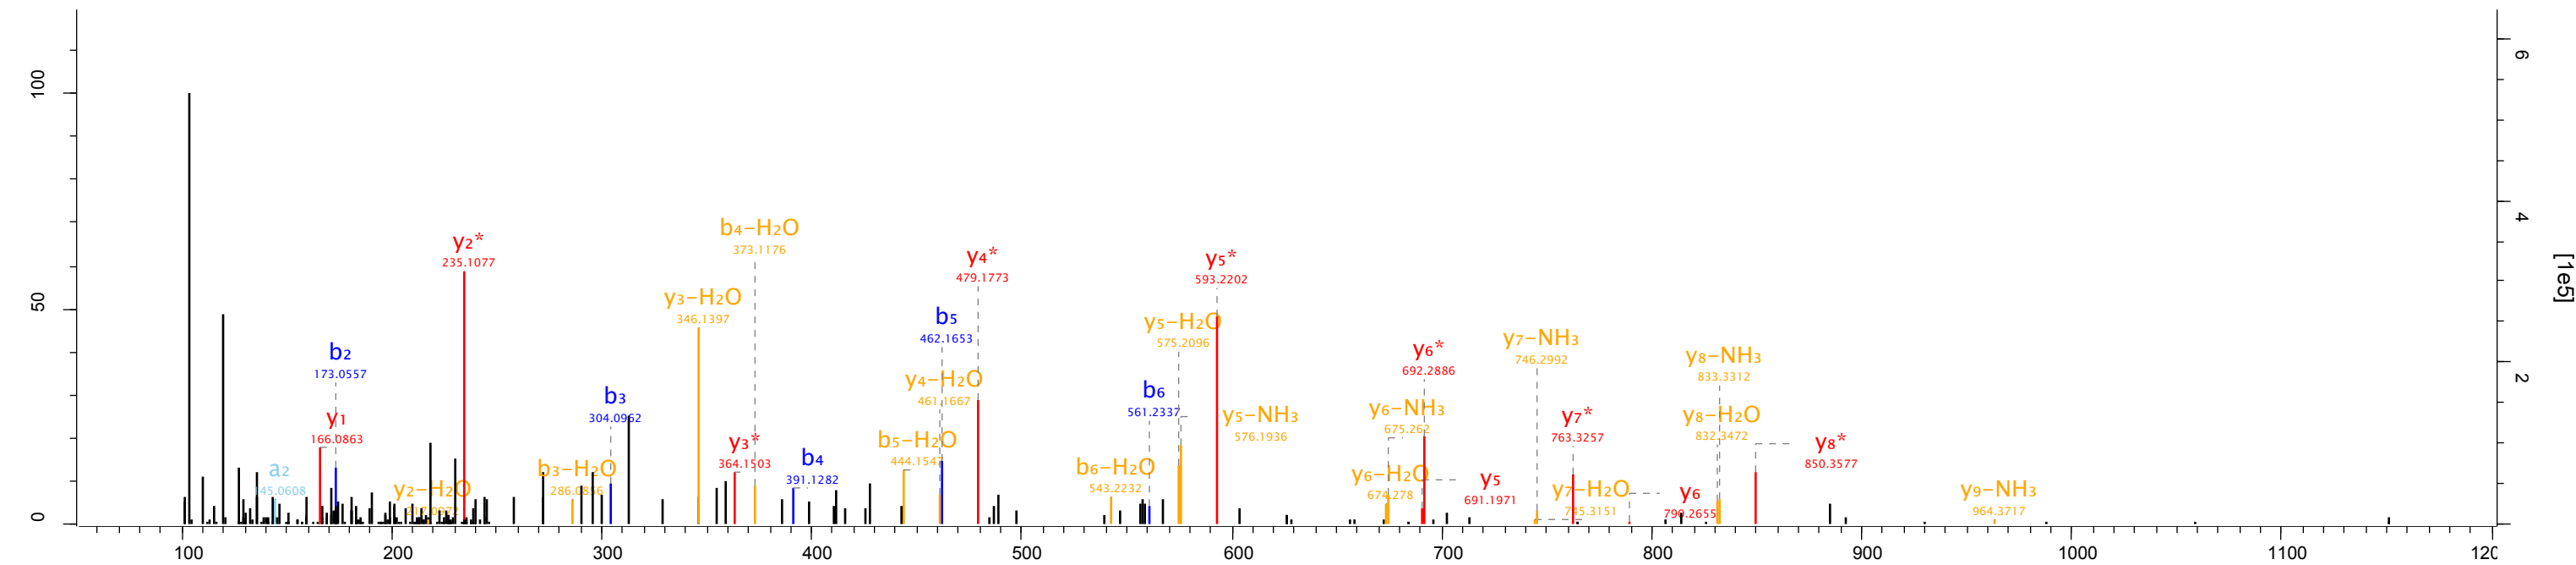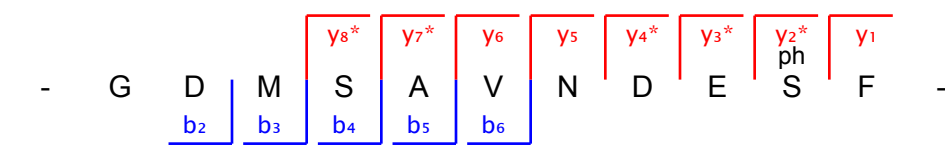



Raw file: 20150814\_A375SR\_Phospho\_BR2\_03  
 Scan: 15835 Method: FTMS; HCD Score: 210.47 m/z: 791.84 Gene names: MAP1B

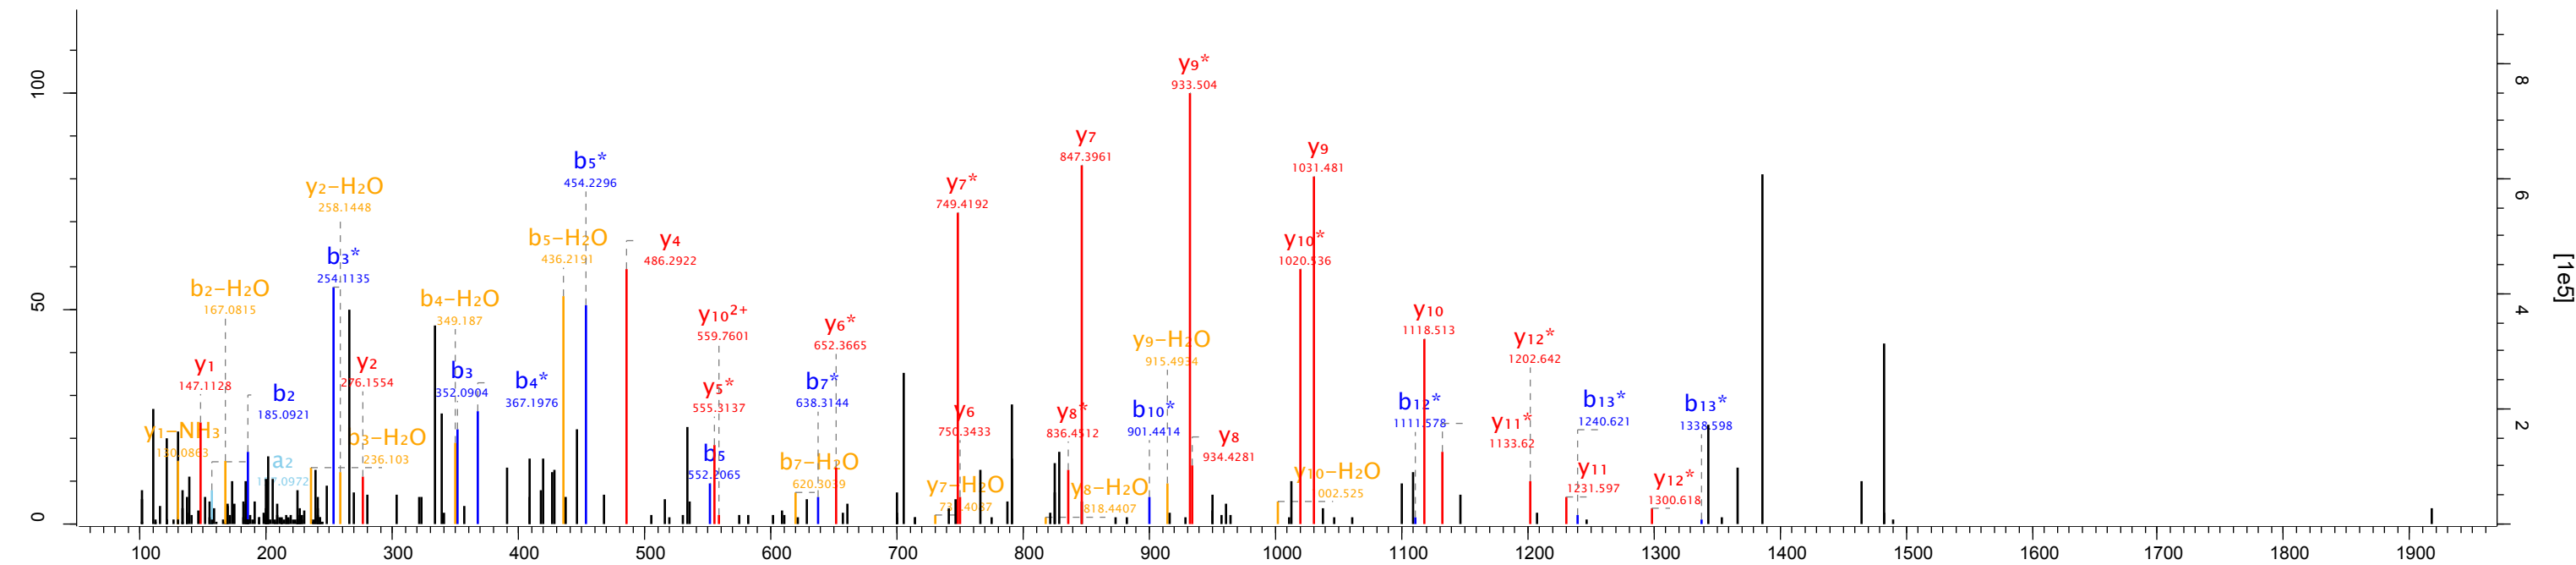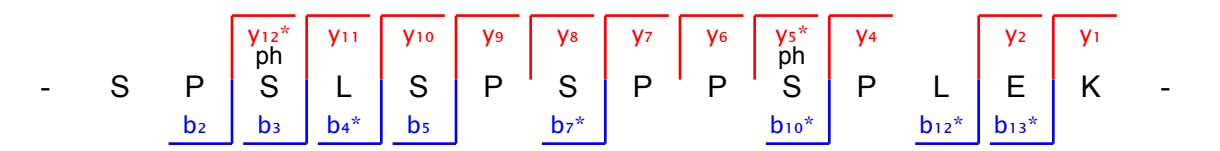

Raw file: 20150814\_A375SR\_Phospho\_BR2\_03  
 Scan: 16065 Method: FTMS; HCD Score: 105.21 m/z: 746.35 Gene names: GEMIN6

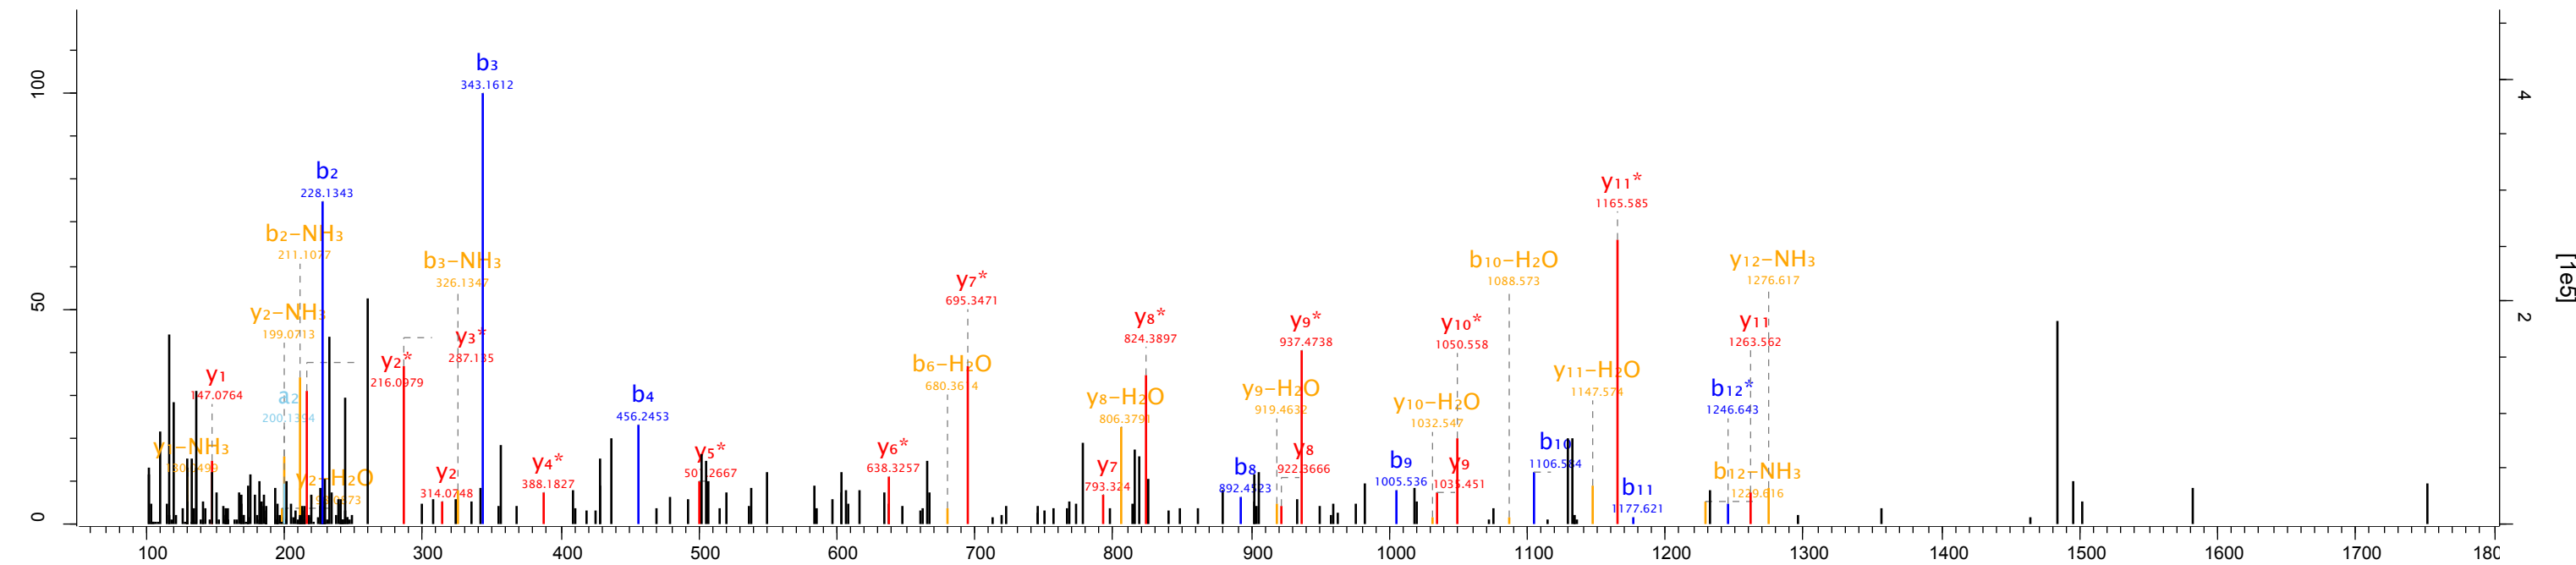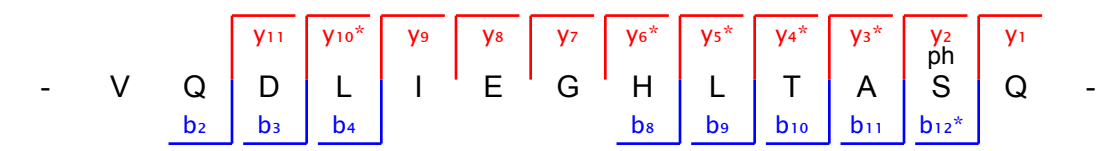

Raw file 20150814\_A375SR\_Phospho\_BR2\_03 Scan 16125 Method FTMS; HCD Score 139 m/z 1187.99 Gene names CCDC88A

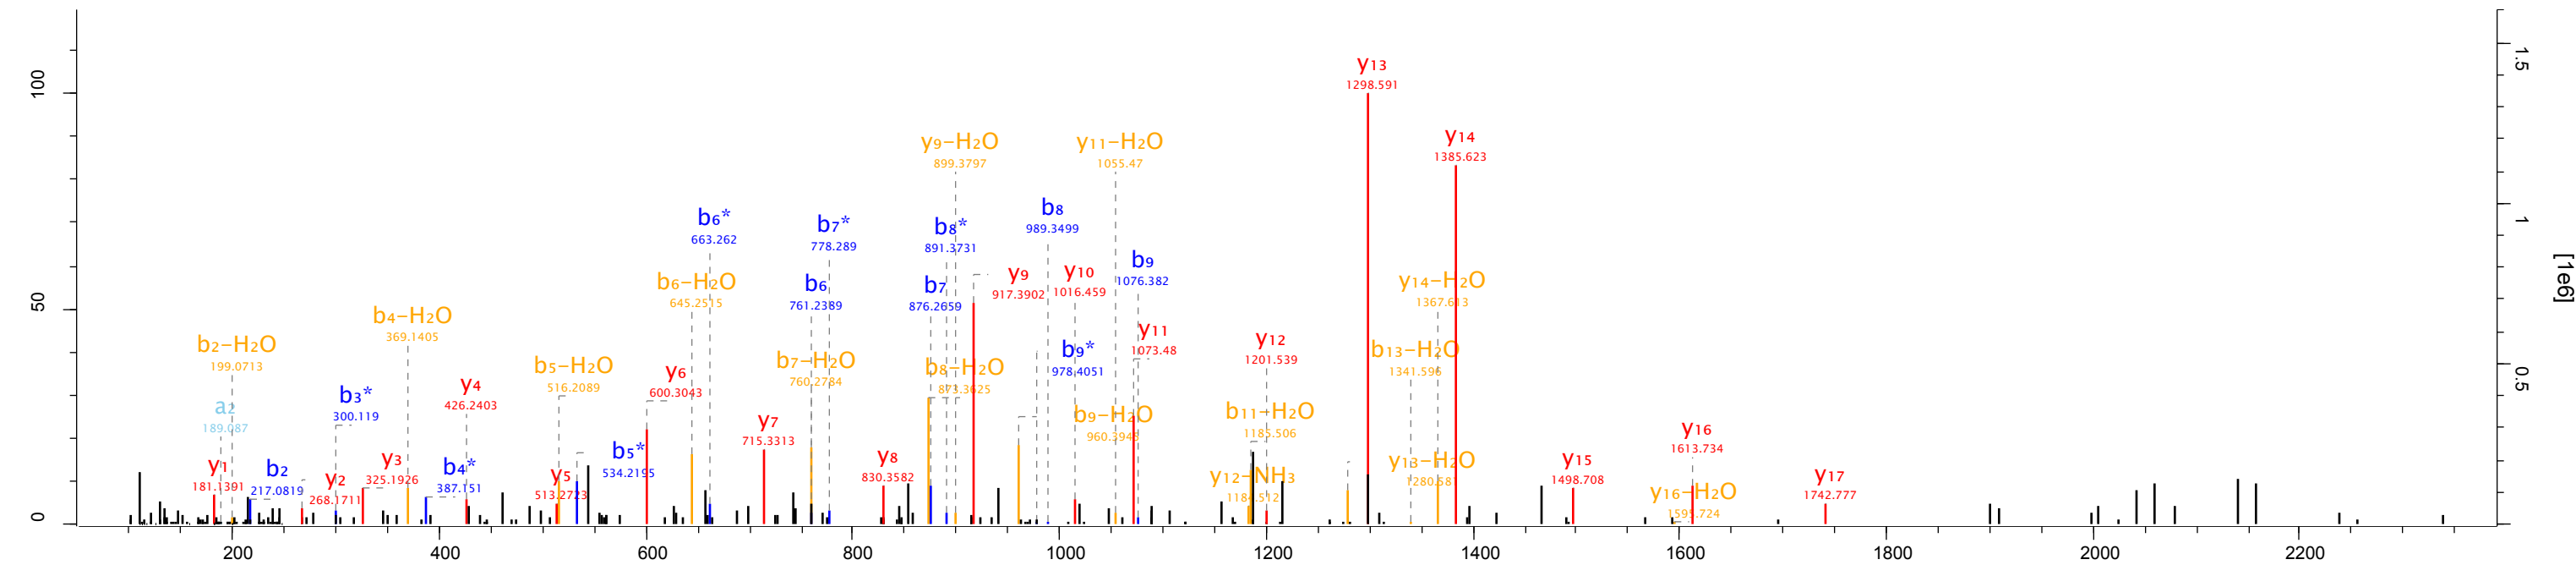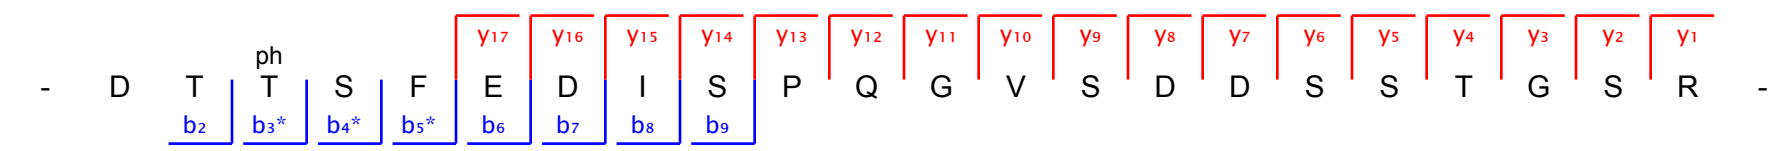

Raw file  
 20150814\_A375SR\_Phospho\_BR2\_03  
 Scan 16545 Method FTMS; HCD Score 189.63 m/z 742.02 Gene names BCL9L

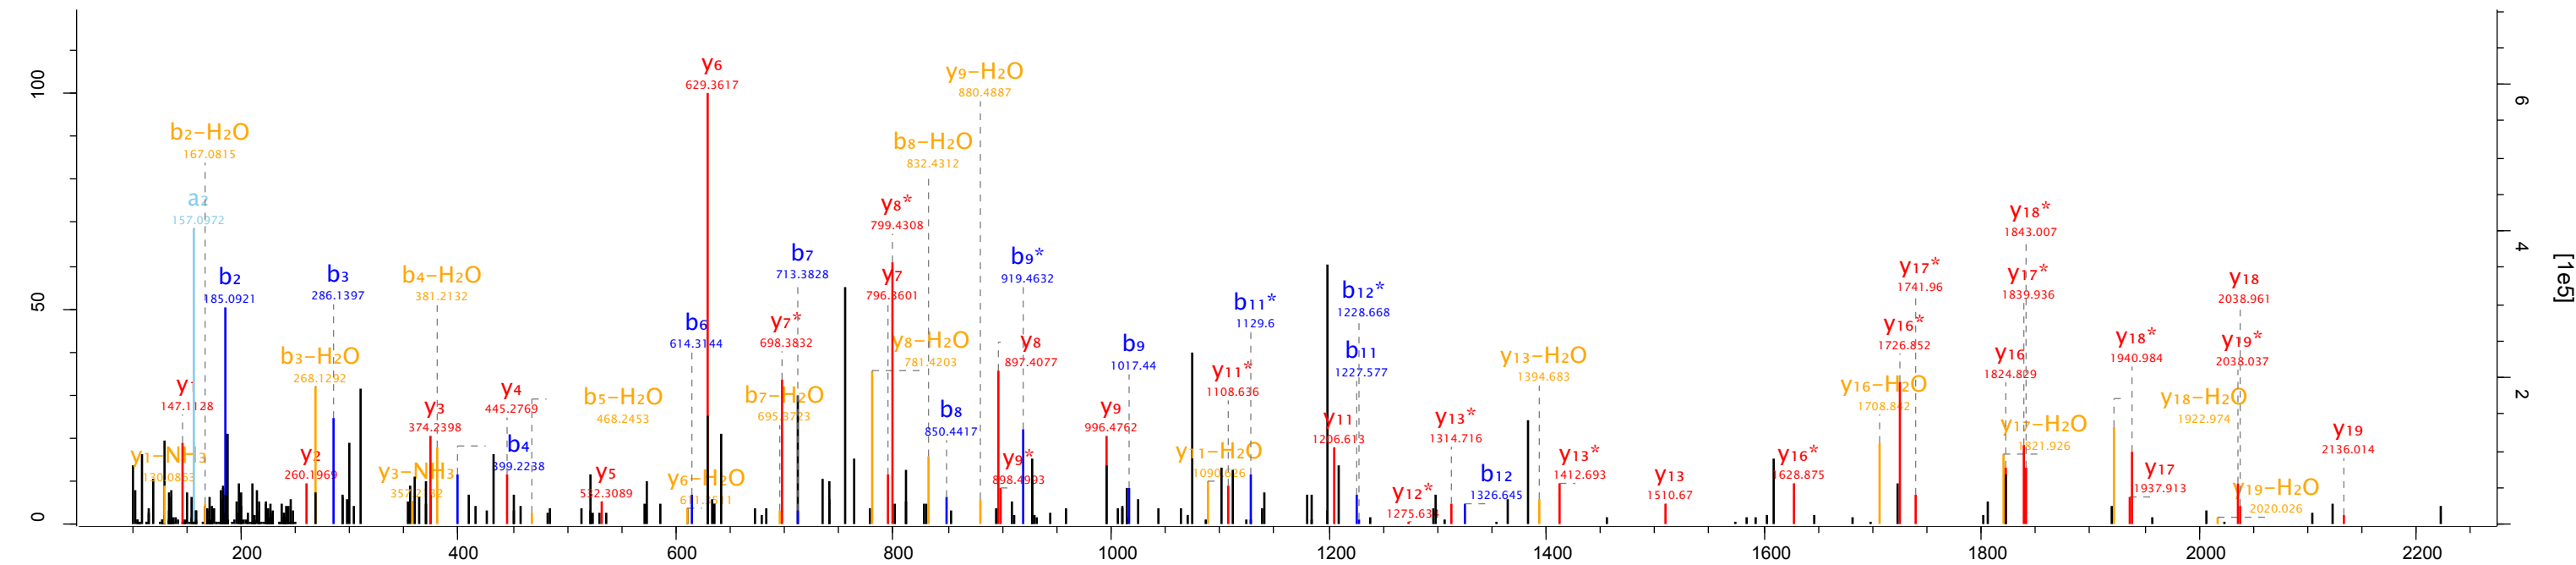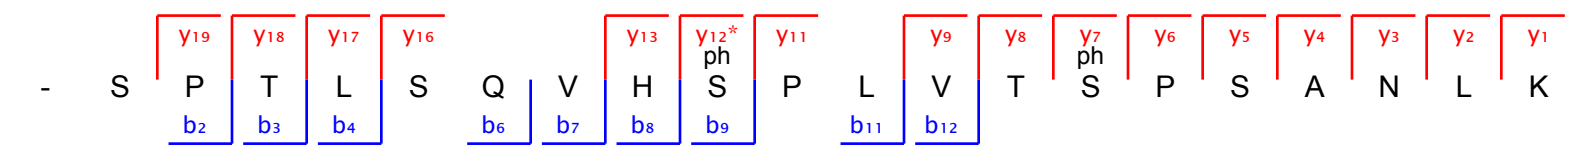

Raw file  
20150814\_A375SR\_Phospho\_BR2\_03

Scan 16615 Method FTMS; HCD Score 114.01 m/z 948.44 Gene names SMTN

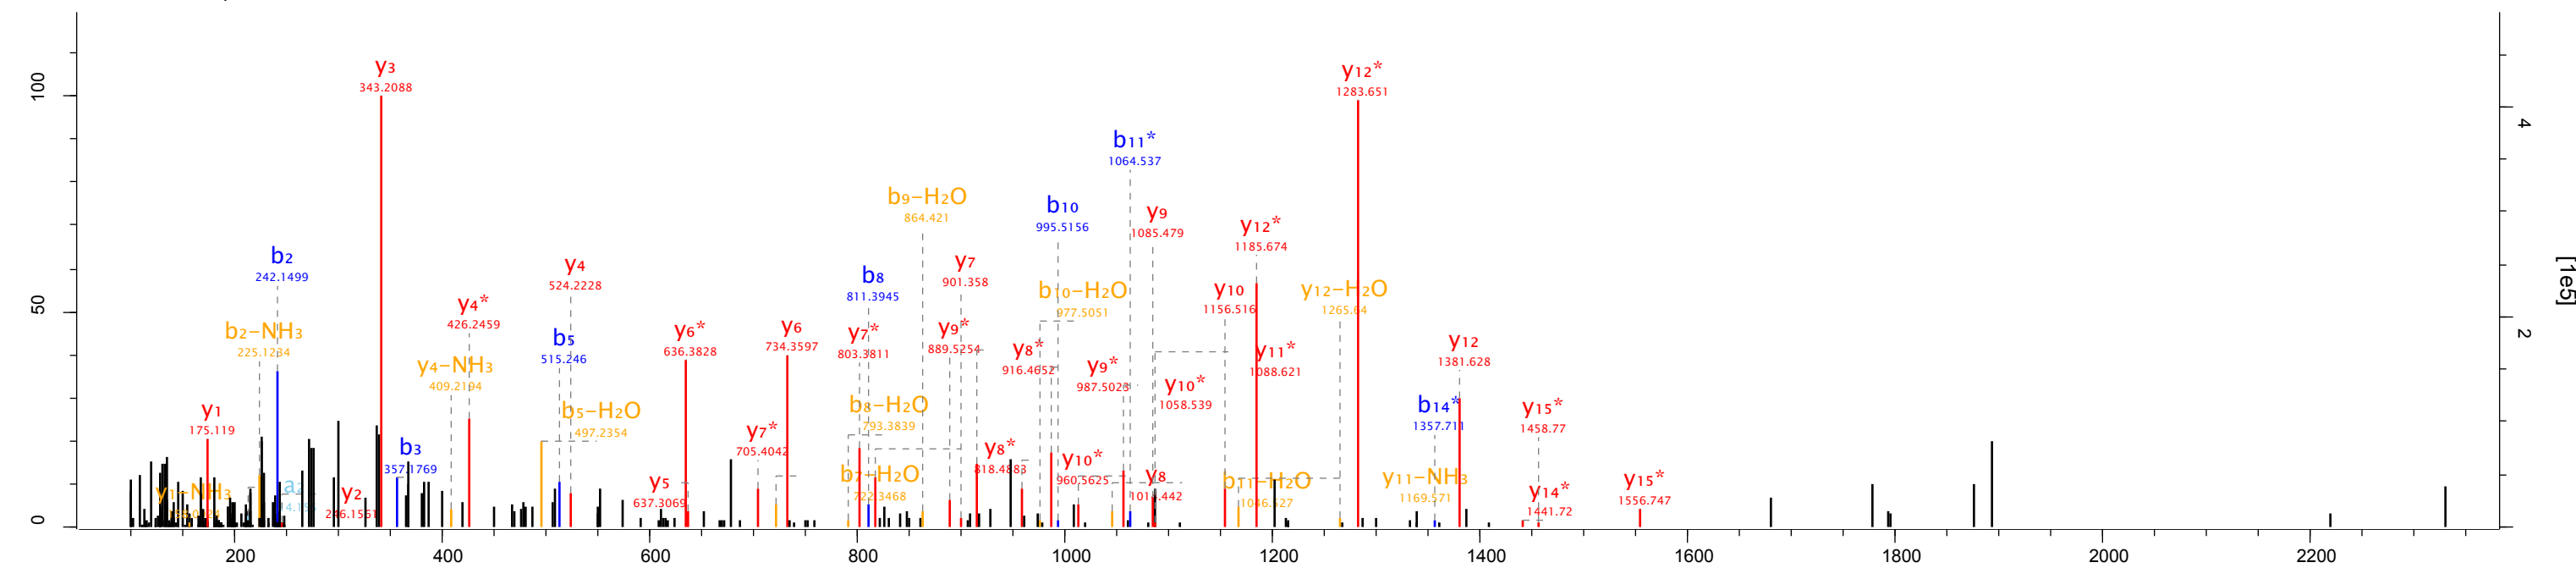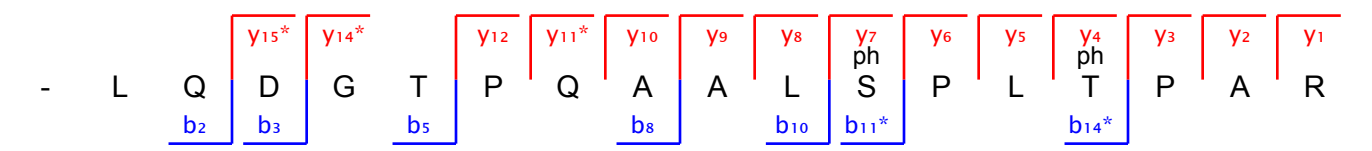

Raw file: 20150814\_A375SR\_Phospho\_BR2\_03  
 Scan: 16945 Method: FTMS; HCD Score: 130.2 m/z: 891.04 Gene names: RALBP1

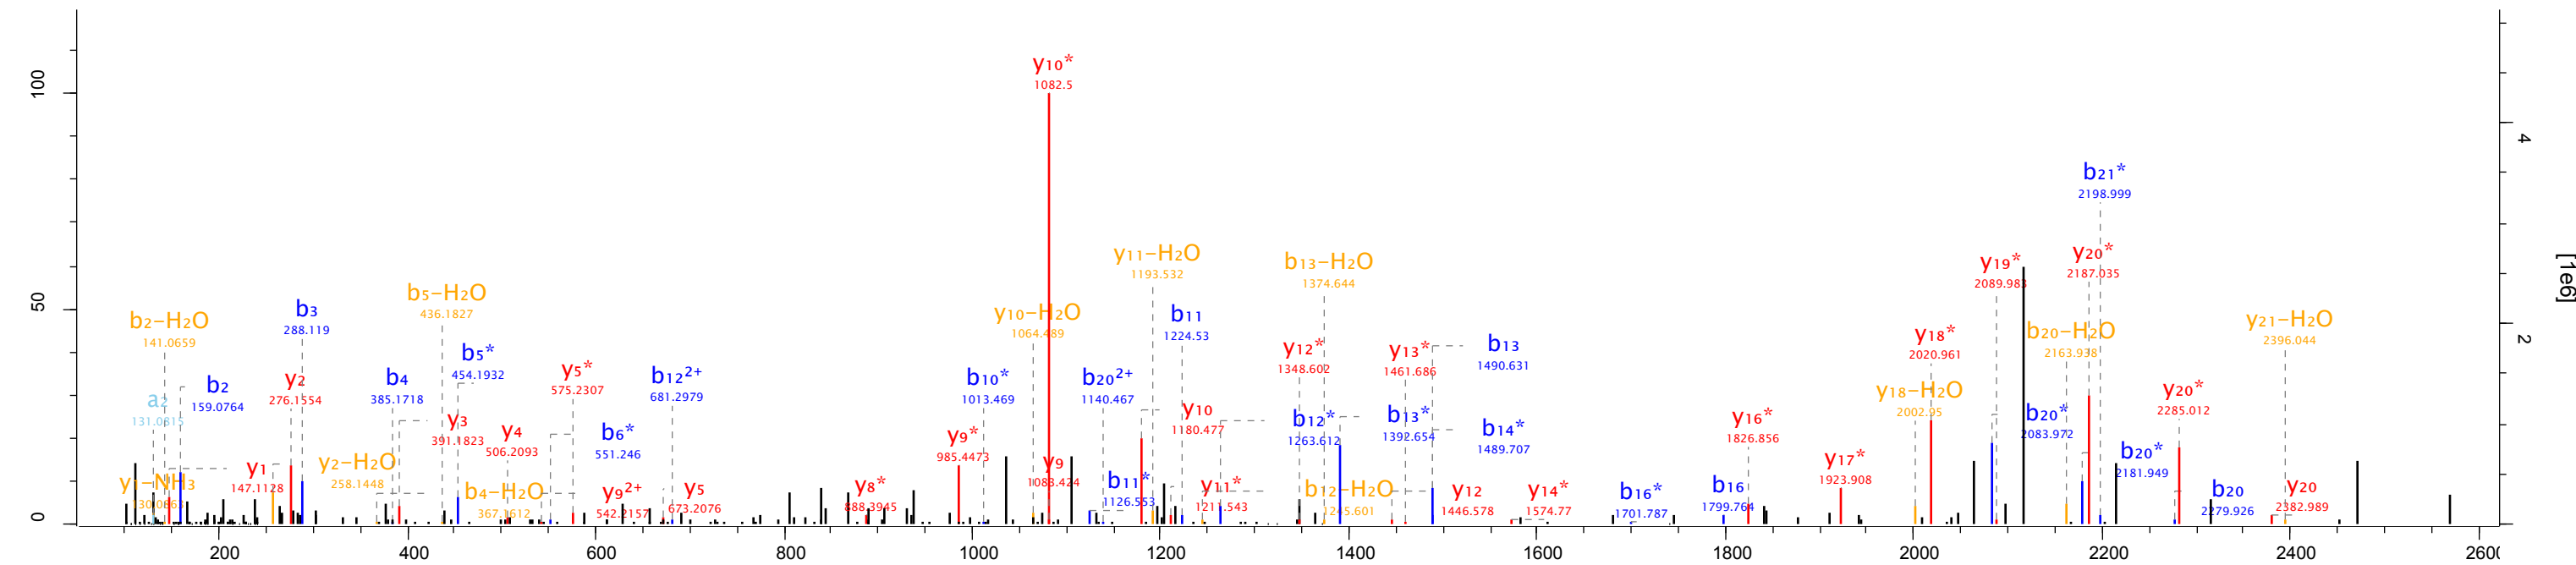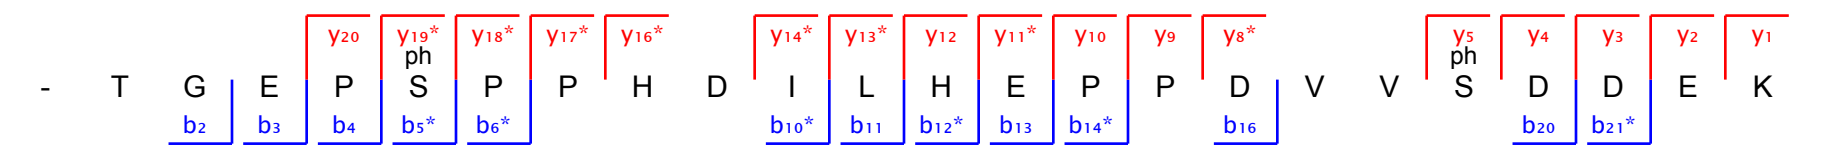

Raw file: 20150814\_A375SR\_Phospho\_BR2\_03  
 Scan: 17025 Method: FTMS; HCD Score: 172.2 m/z: 1042.79 Gene names: MAP1B

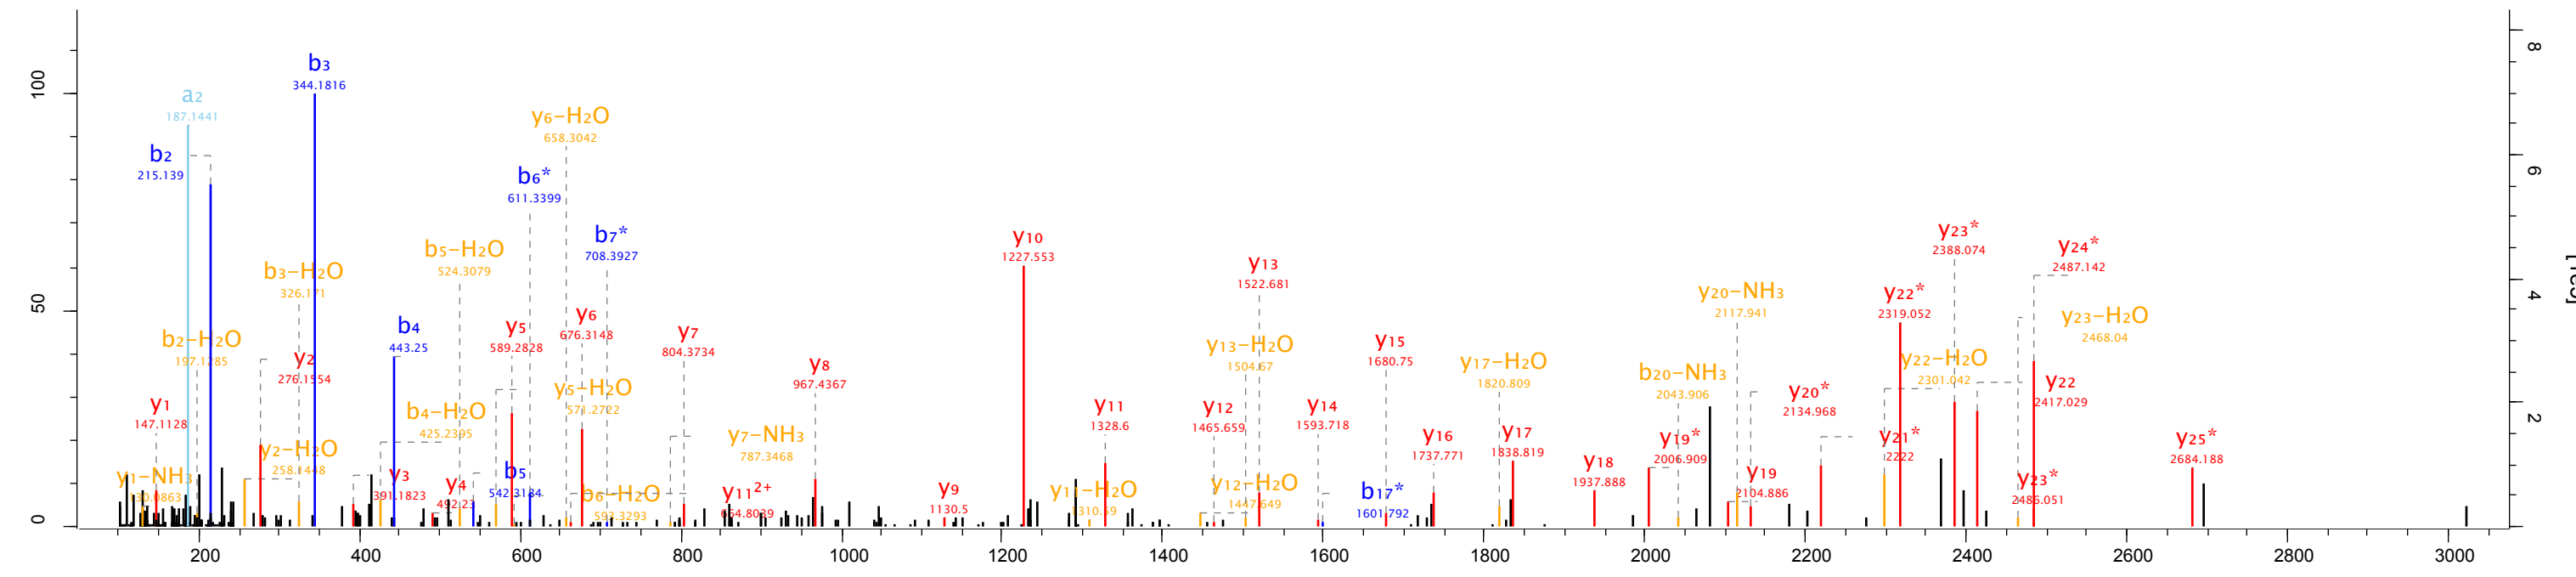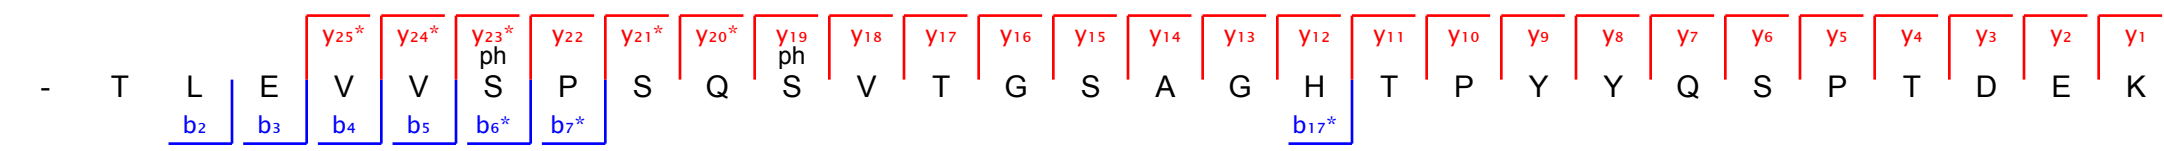

Raw file 20150814\_A375SR\_Phospho\_BR2\_03 Scan 17055 Method FTMS; HCD Score 110.9 m/z 775.35 Gene names ZC3H11A

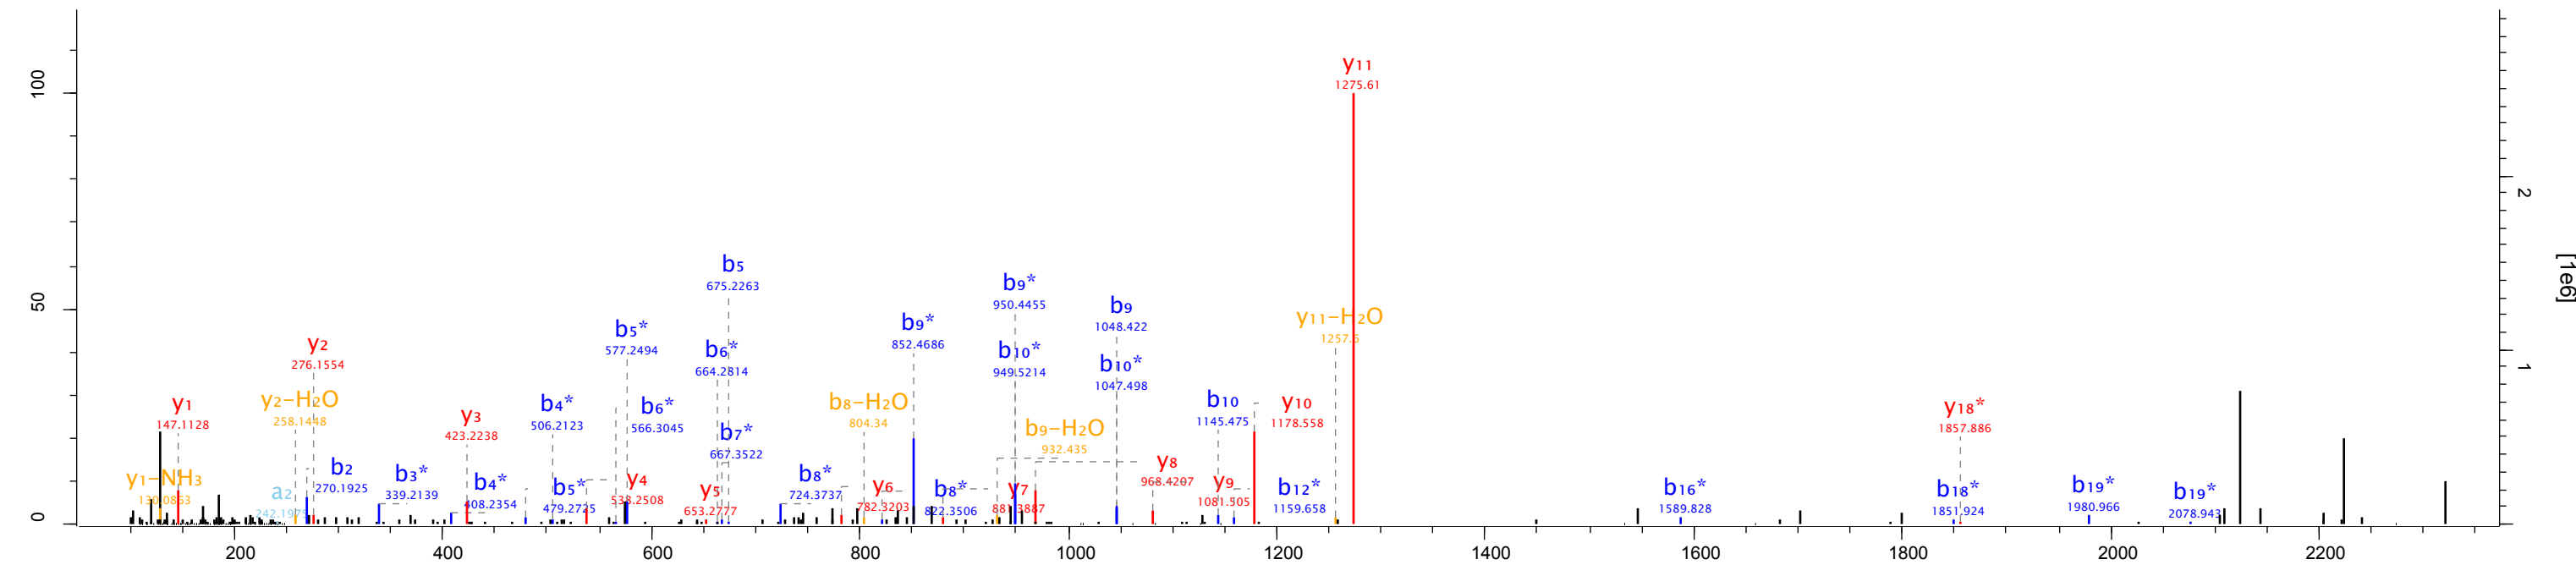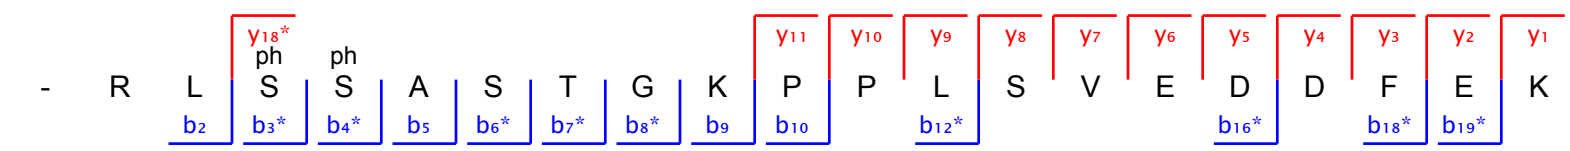



Raw file 20150814\_A375SR\_Phospho\_BR2\_03 Scan 17295 Method FTMS; HCD Score 156.2 m/z 1108.02 Gene names EZH2

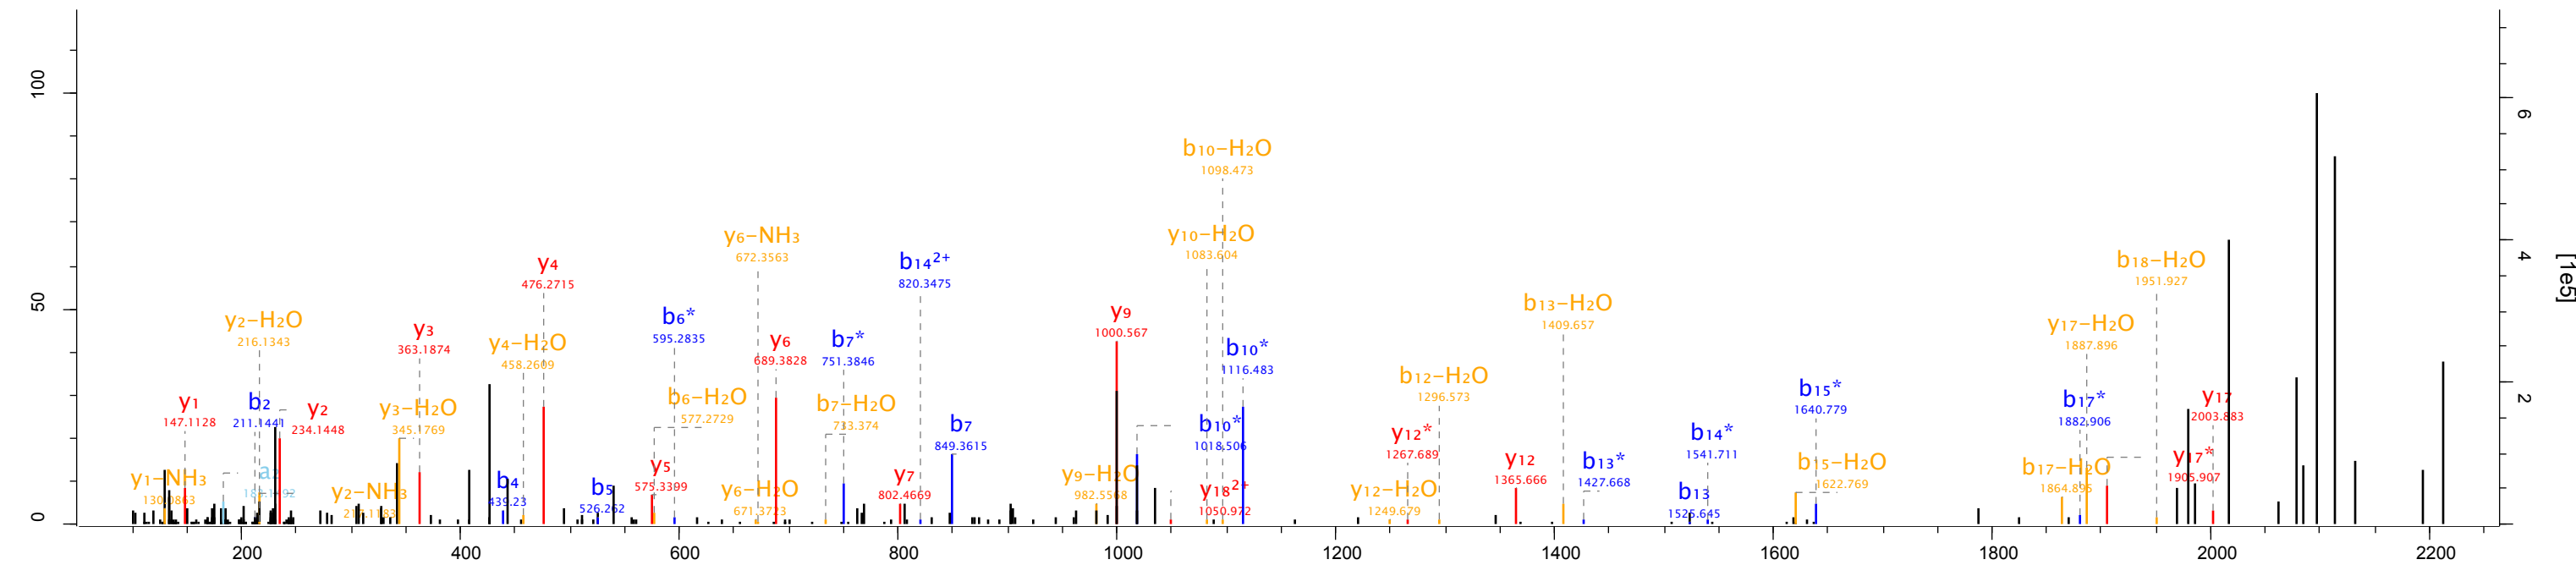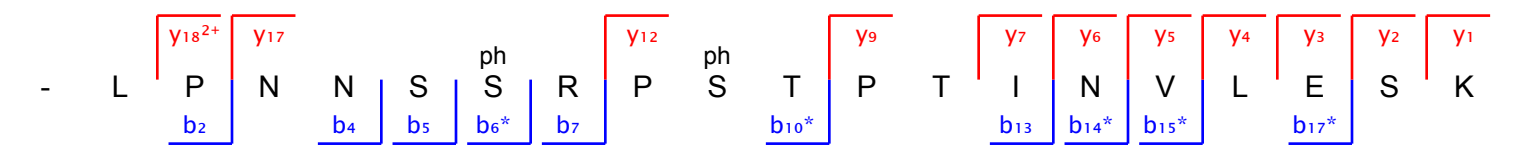

Raw file 20150814\_A375SR\_Phospho\_BR2\_03 Scan 17485 Method FTMS; HCD Score 119.57 m/z 1007.46 Gene names SRRM2

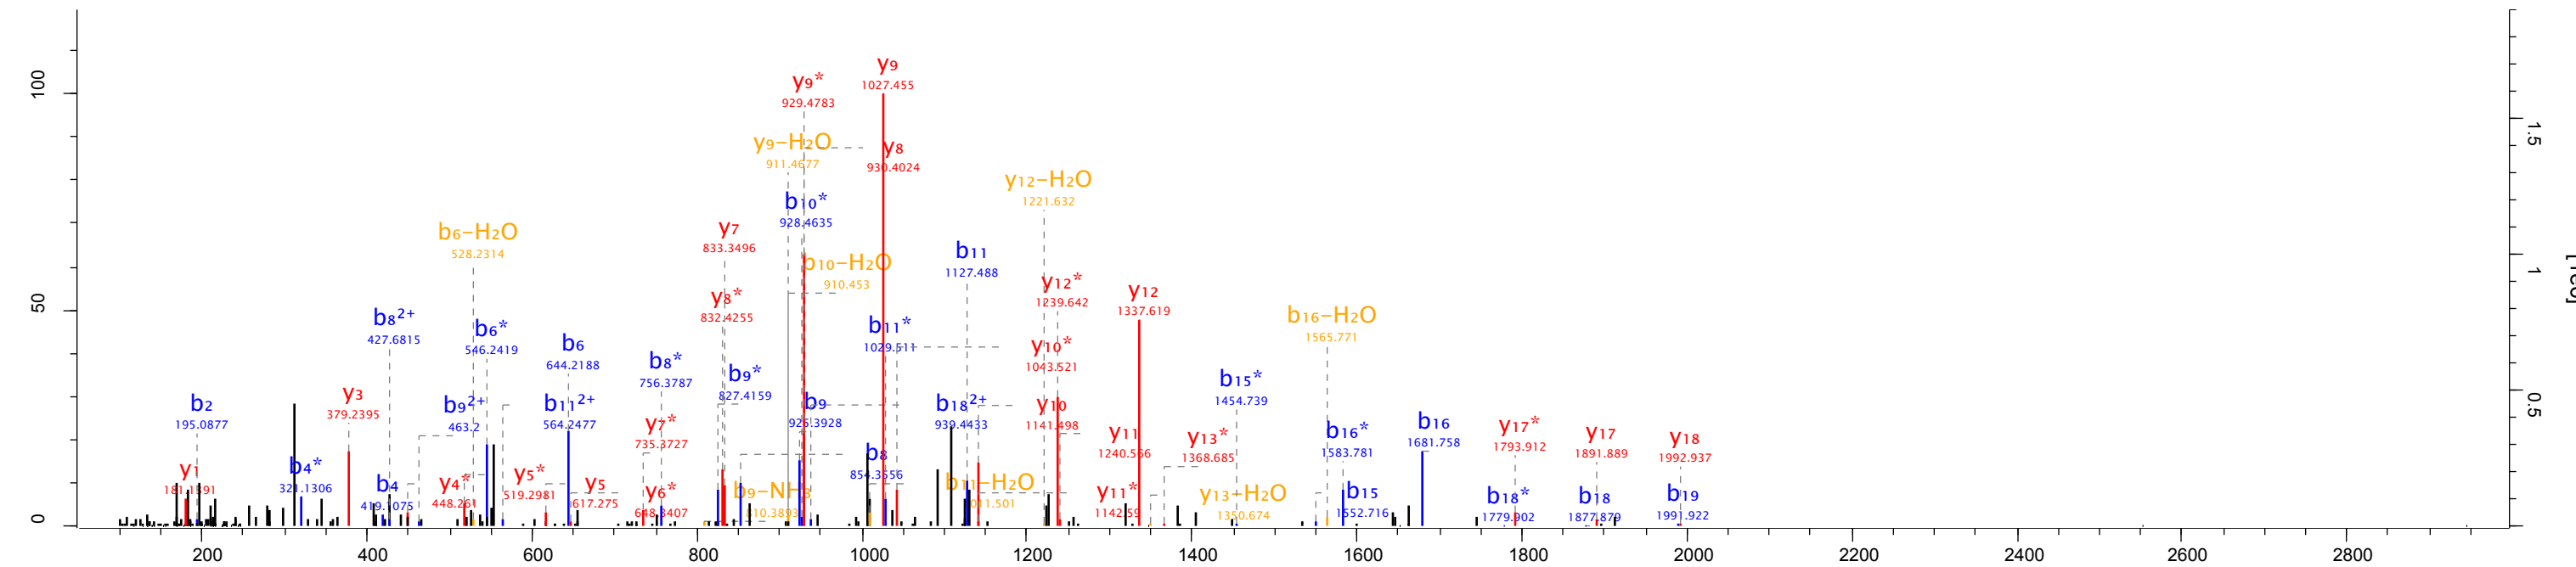

- H G G ph S P Q P L A T T P L S Q E P V N P P S E A S P T R -

b<sub>2</sub>
b<sub>4</sub>
b<sub>6</sub>
b<sub>8</sub>
b<sub>9</sub>
b<sub>10</sub>\*
b<sub>11</sub>
b<sub>15</sub>
b<sub>16</sub>
b<sub>18</sub>
b<sub>19</sub>
y<sub>13</sub>\*
y<sub>12</sub>
y<sub>11</sub>
y<sub>10</sub>
y<sub>9</sub>
y<sub>8</sub>
y<sub>7</sub>
y<sub>6</sub>\*
y<sub>5</sub>
y<sub>4</sub>\*
y<sub>3</sub>
y<sub>18</sub>
y<sub>17</sub>
y<sub>1</sub>

Raw file 20150814\_A375SR\_Phospho\_BR2\_03 Scan 17845 Method FTMS; HCD Score 61.62 m/z 946 Gene names PRPF38A

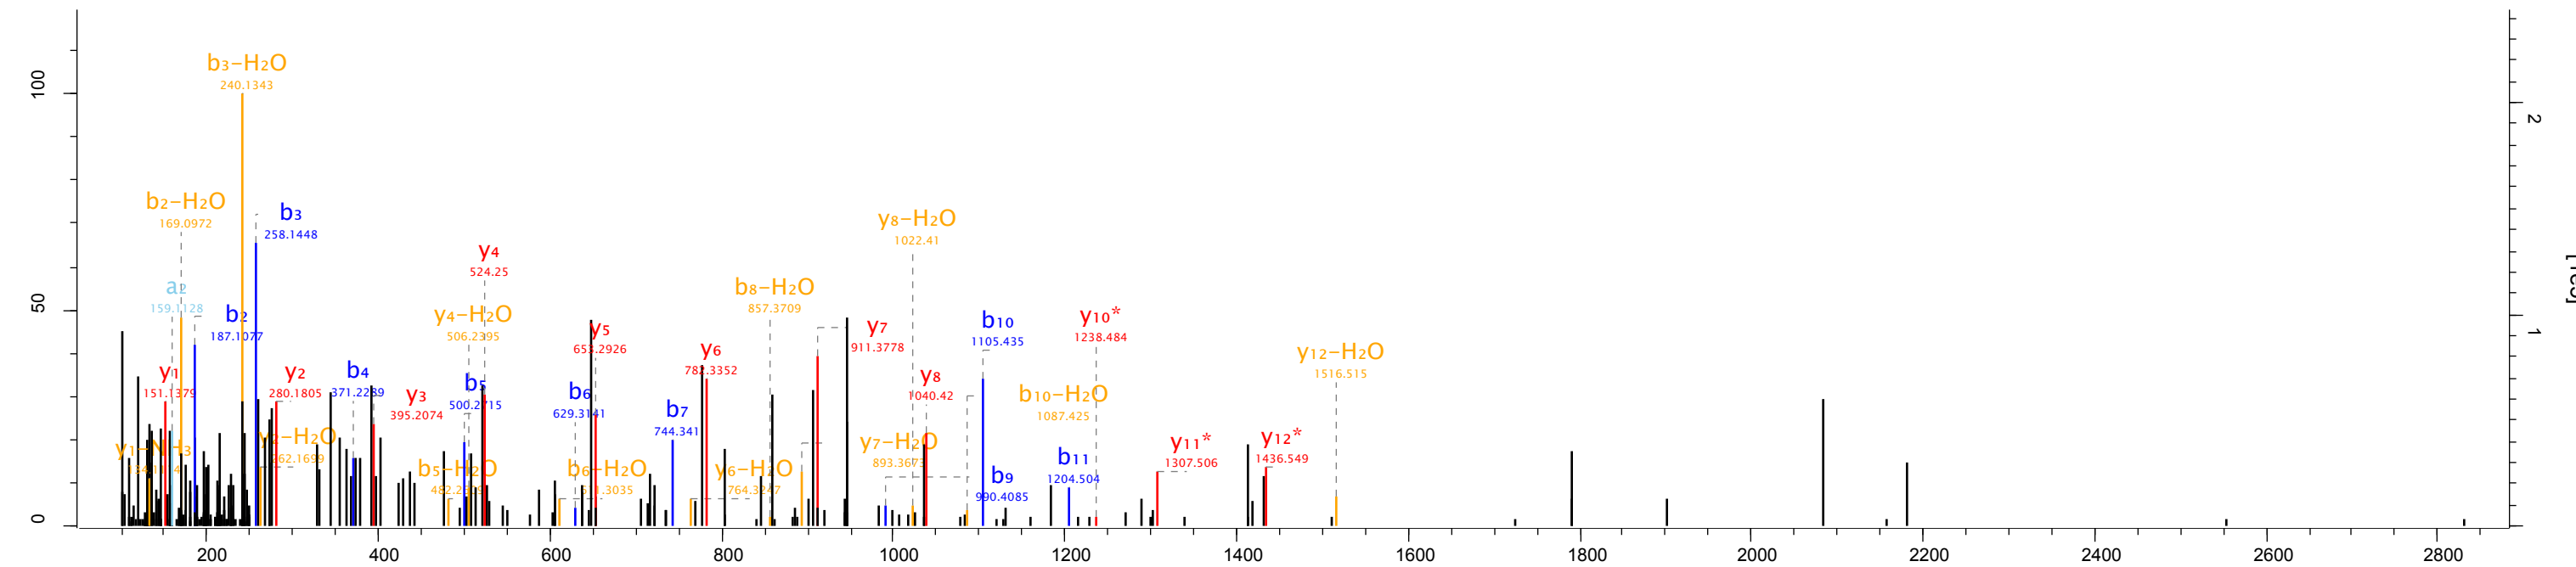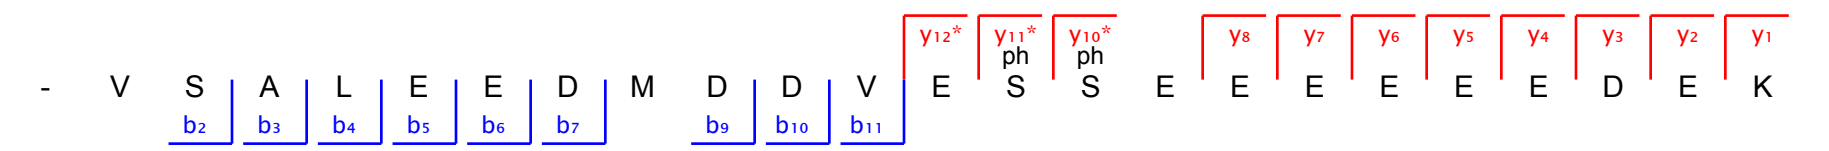

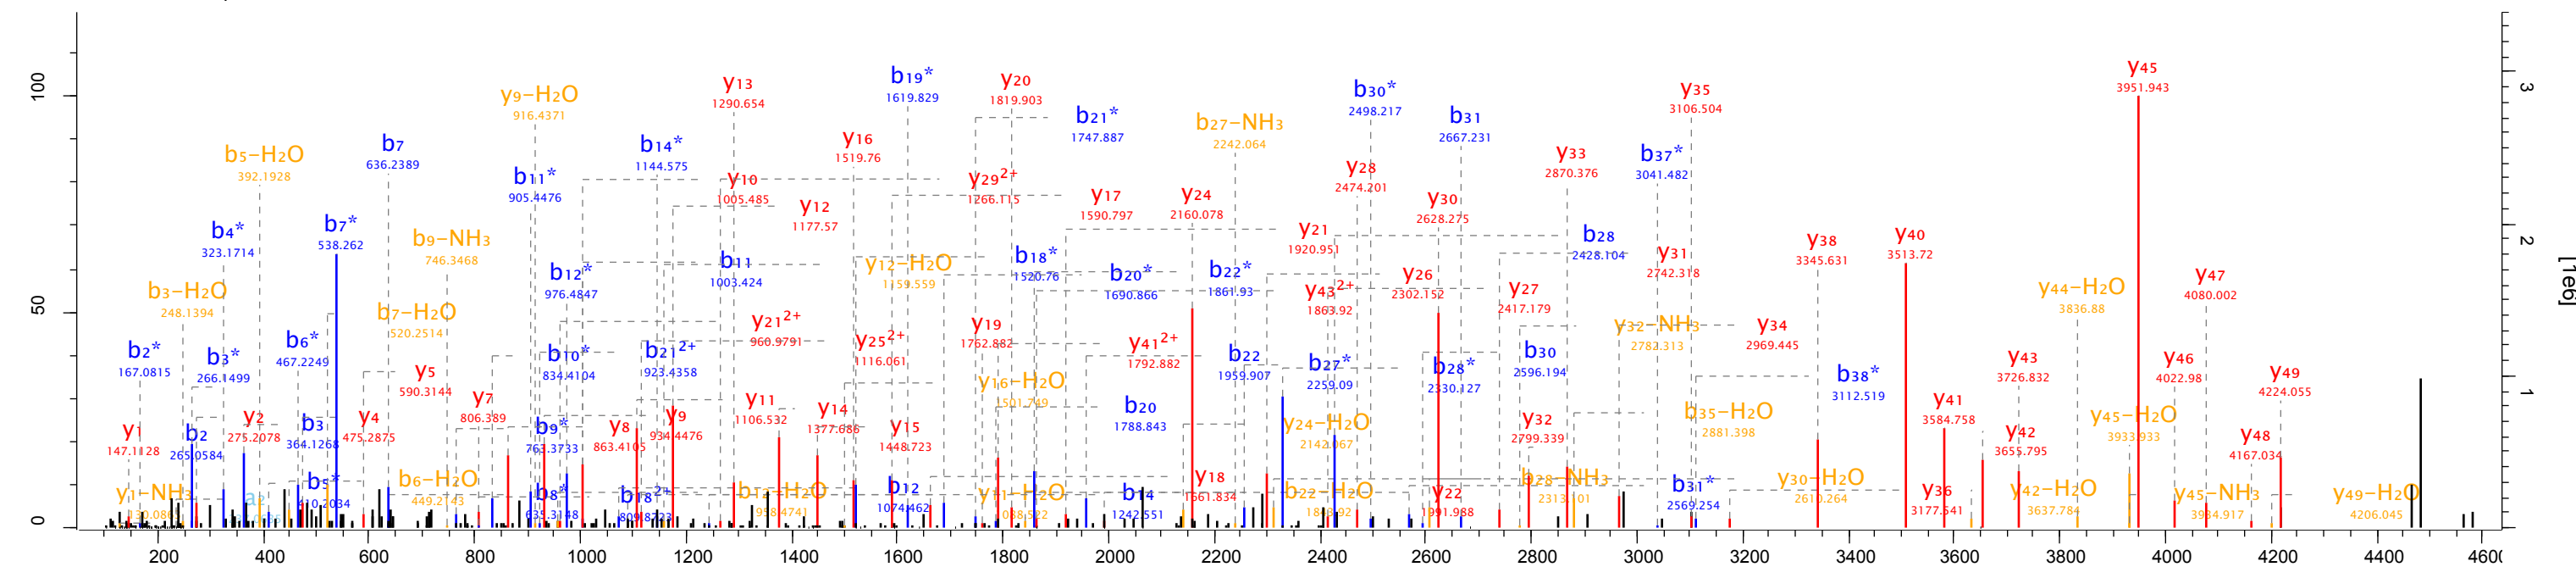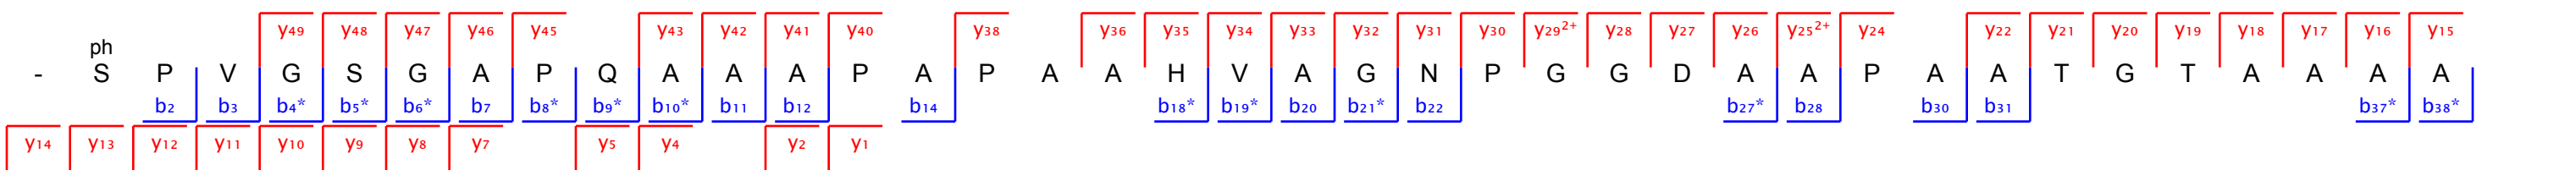

Raw file 20150814\_A375SR\_Phospho\_BR2\_03 Scan 18125 Method FTMS; HCD Score 101.76 m/z 732.79 Gene names SLC6A15

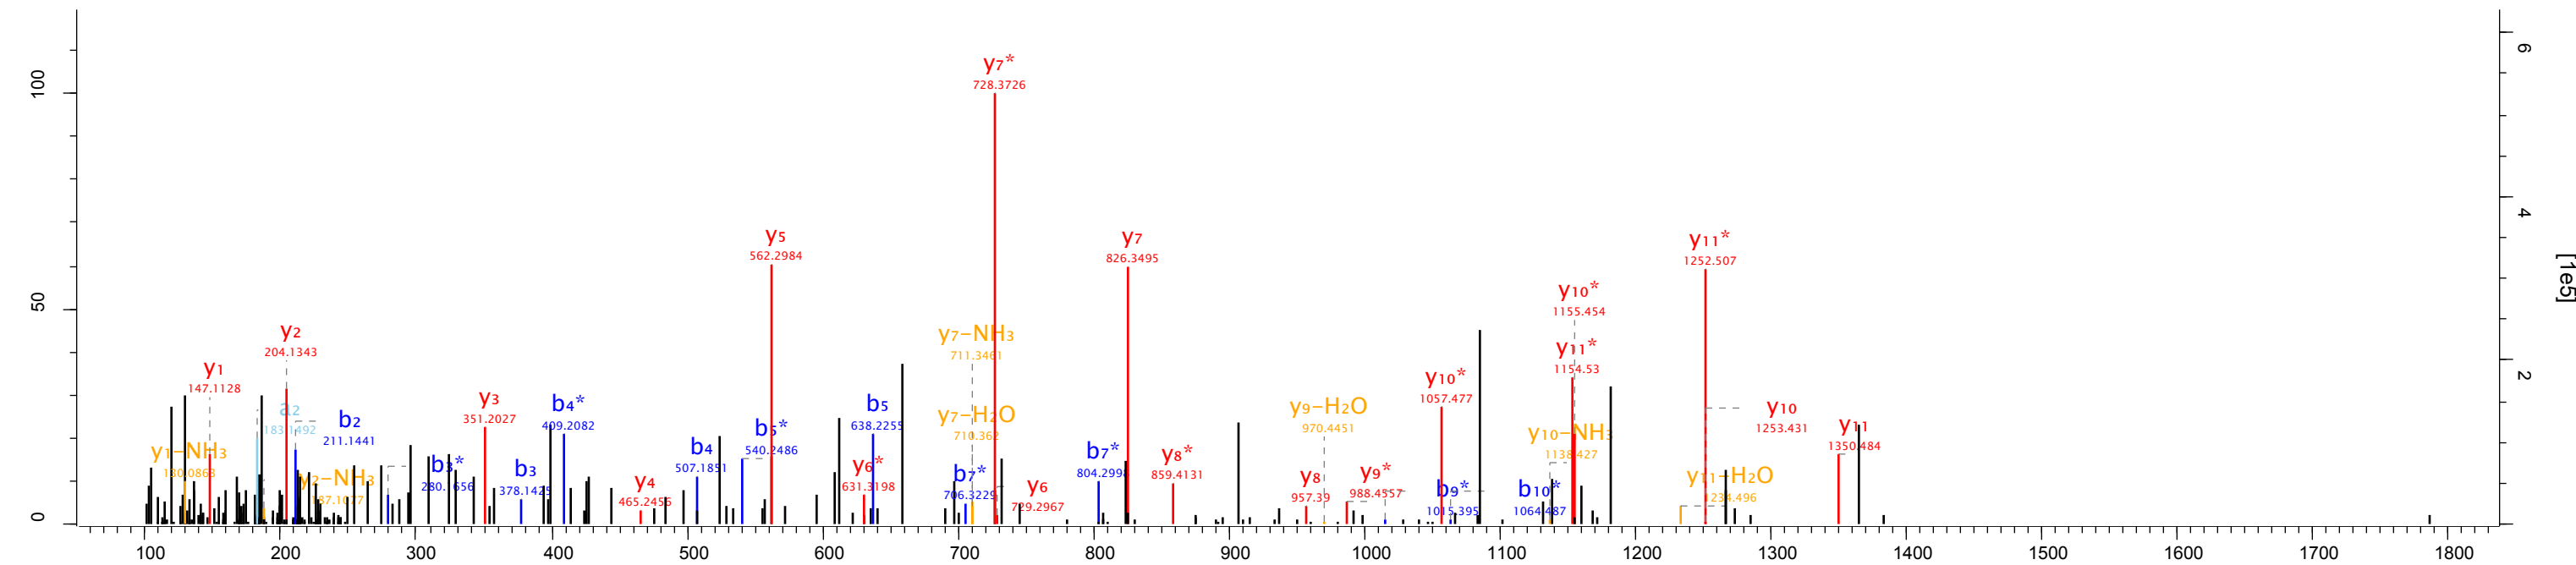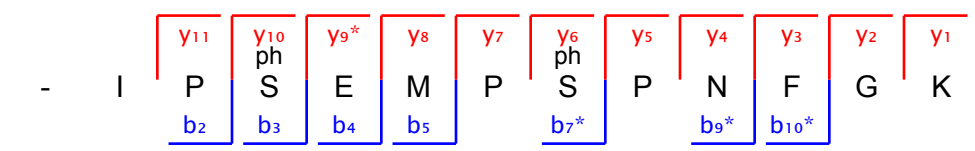

Raw file: 20150814\_A375SR\_Phospho\_BR2\_03  
 Scan: 18905 Method: FTMS; HCD Score: 174.15 m/z: 835.41 Gene names: PSME4

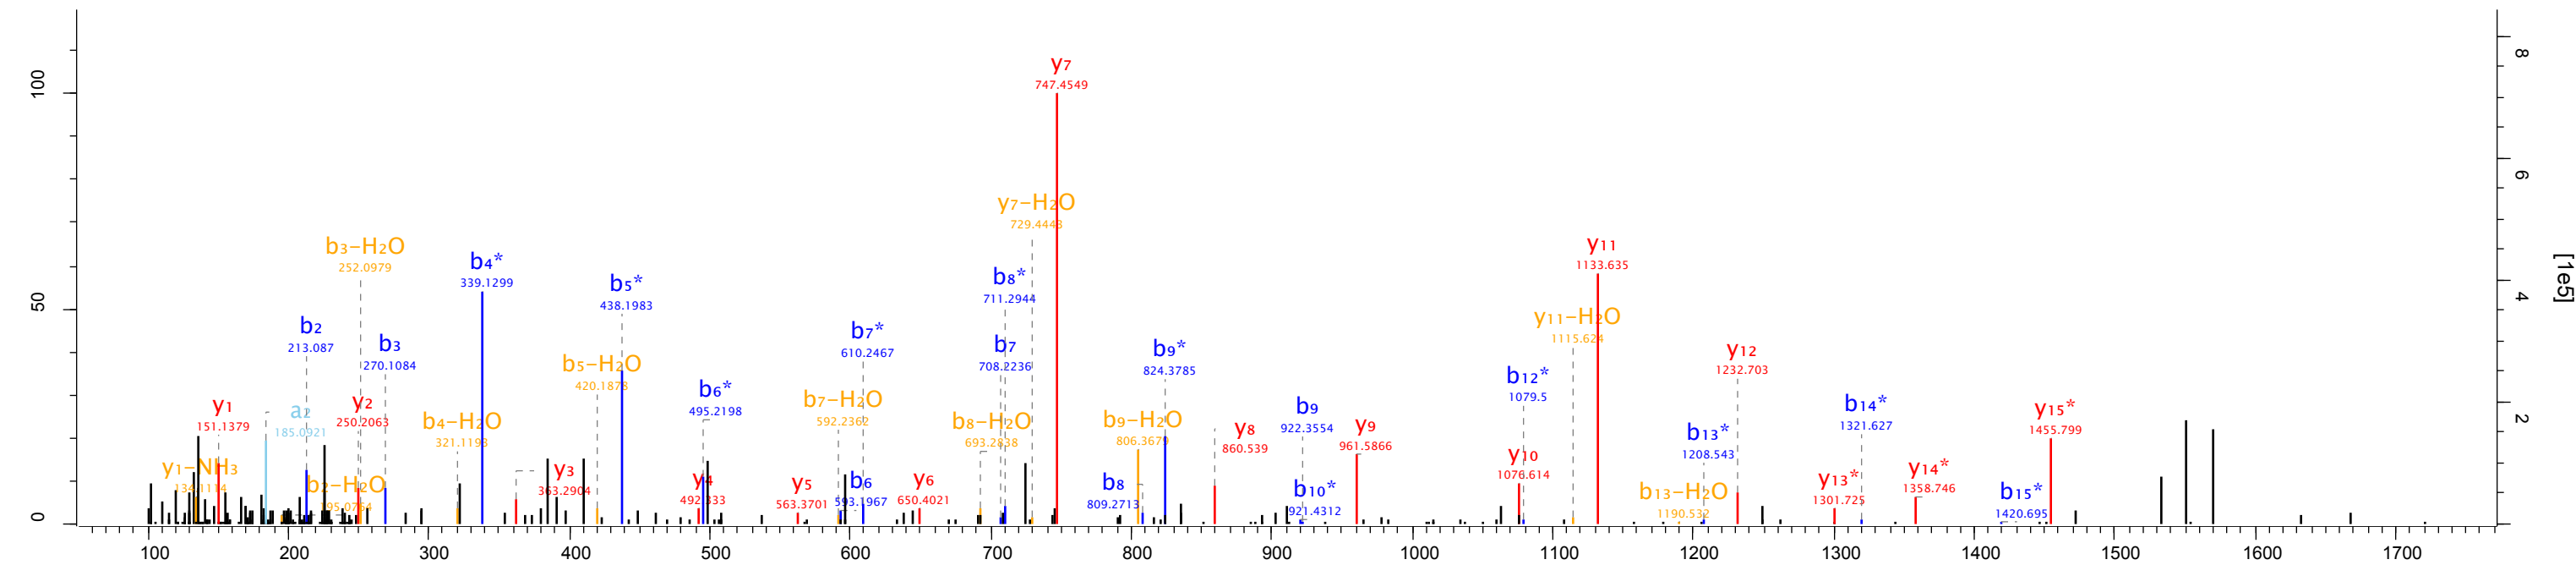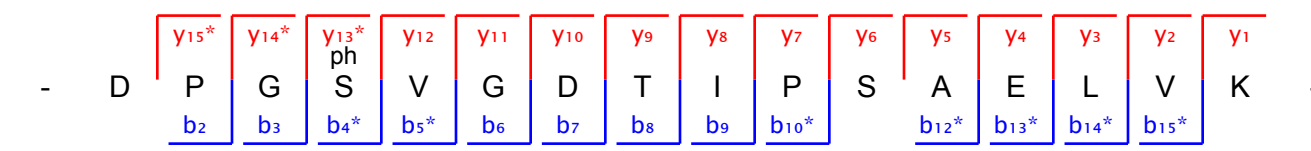

Raw file 20150814\_A375SR\_Phospho\_BR2\_03 Scan 19085 Method FTMS; HCD Score 161.04 m/z 928.94 Gene names RALGPS2

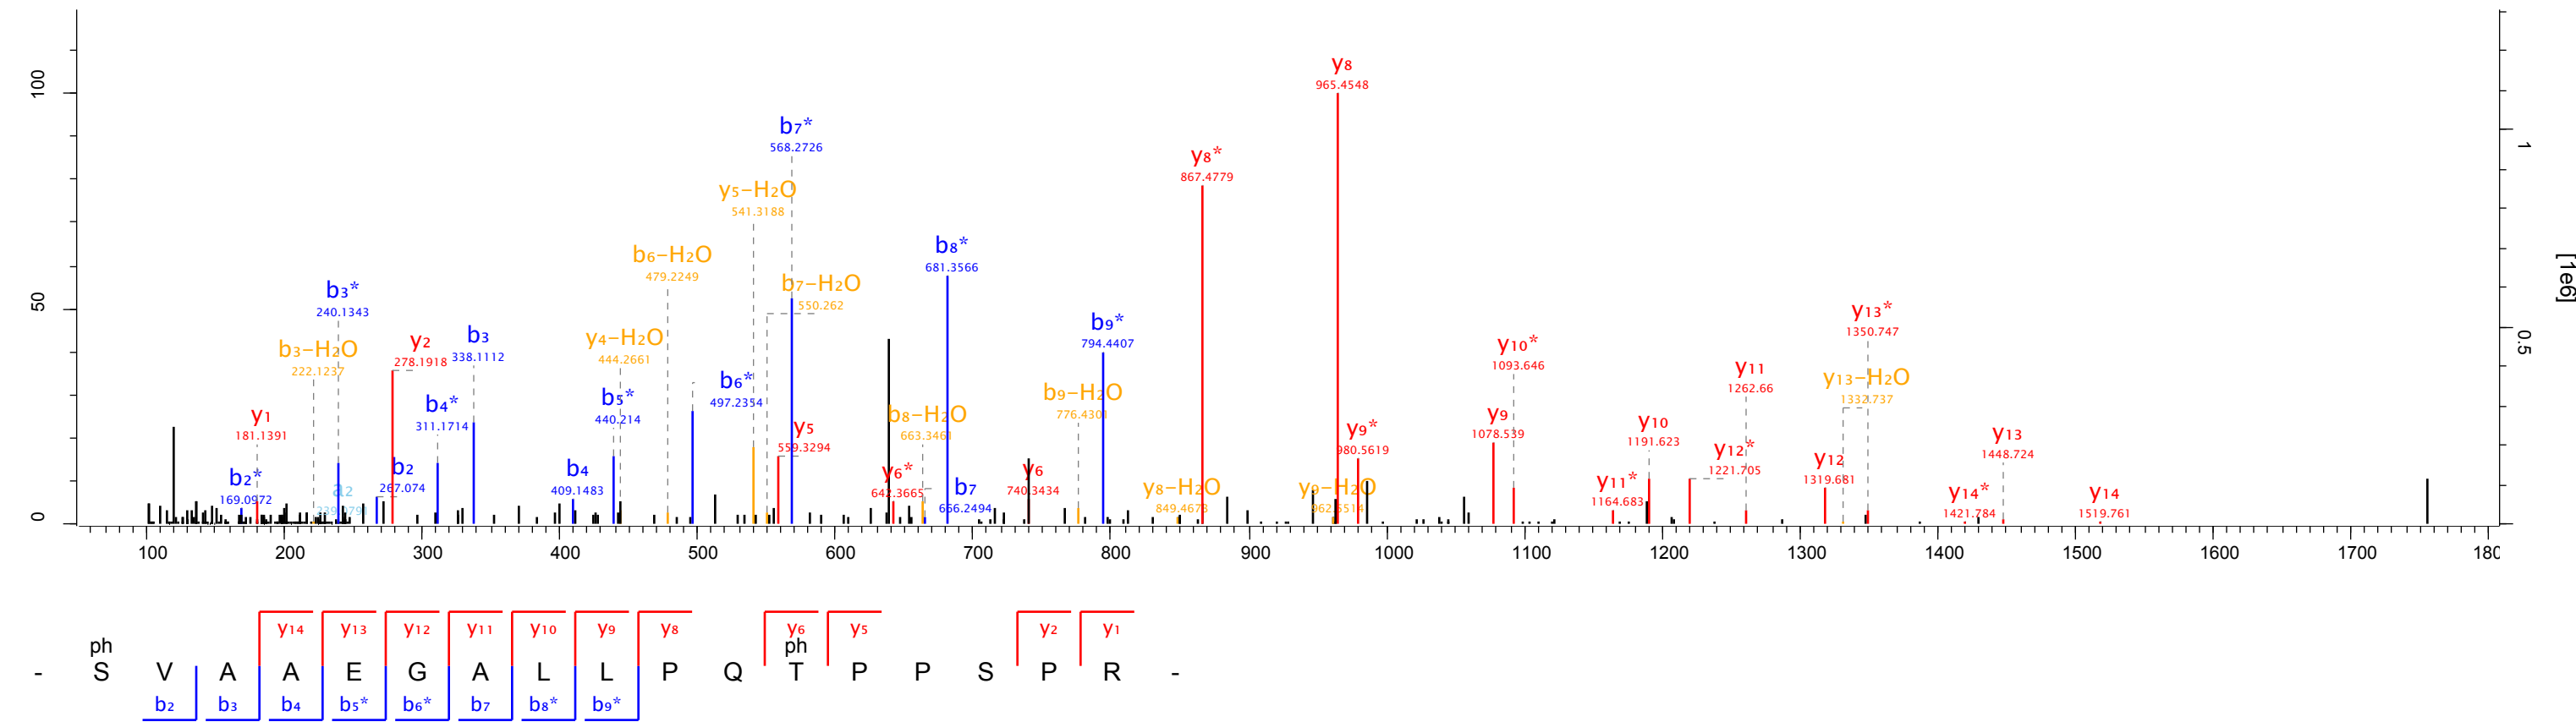

Raw file 20150814\_A375SR\_Phospho\_BR2\_03 Scan 19385 Method FTMS; HCD Score 53.58 m/z 810.41 Gene names KMT2D

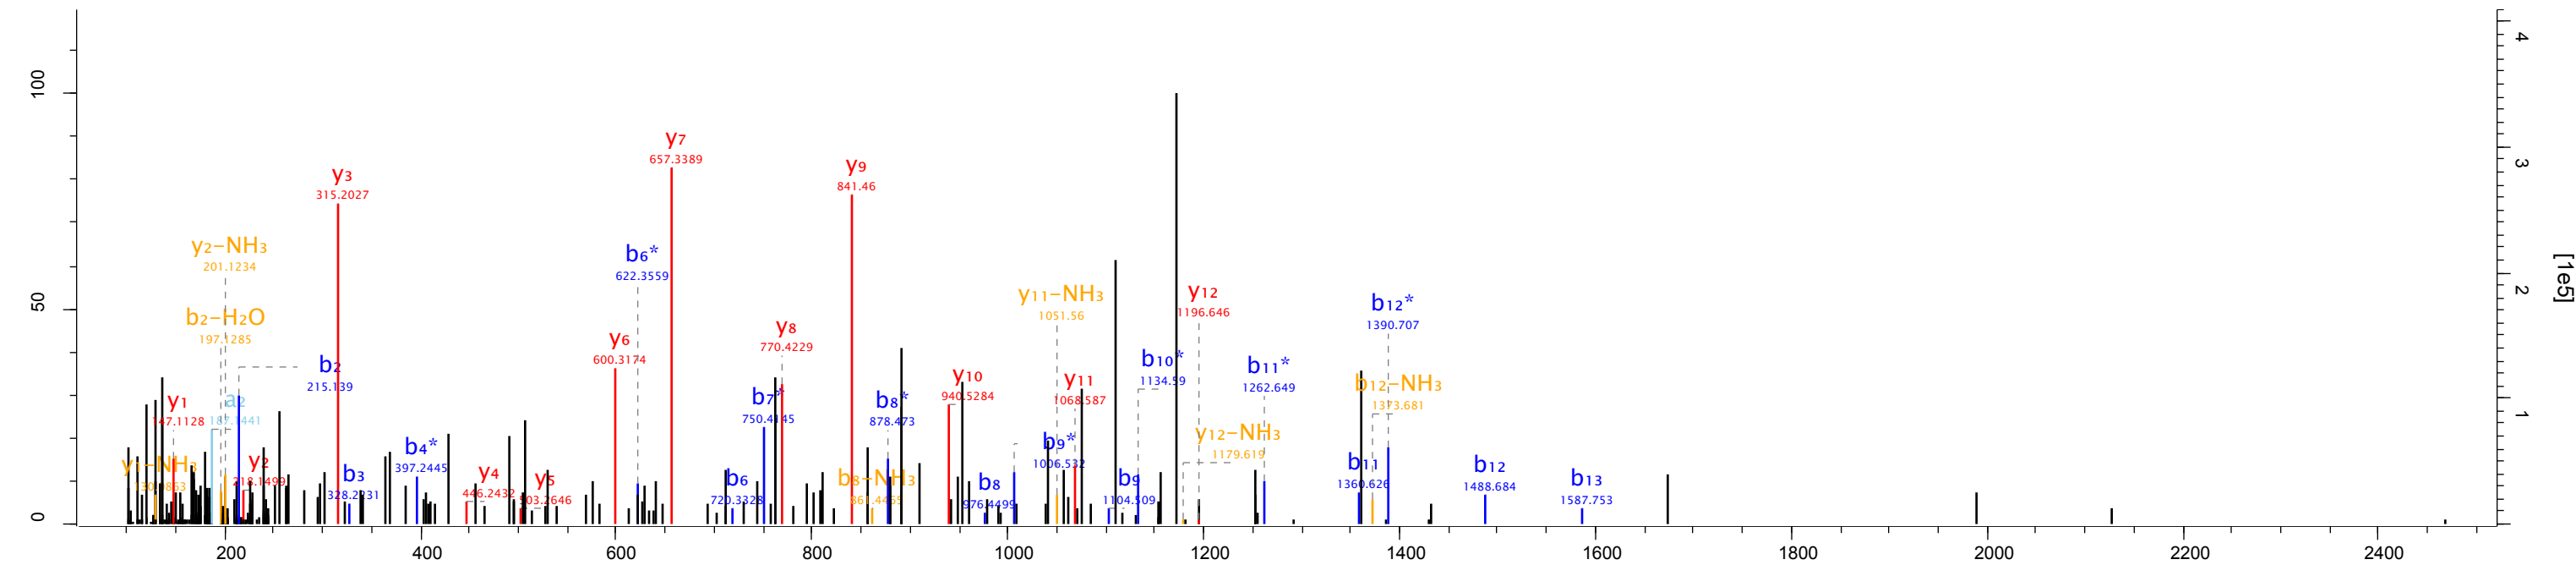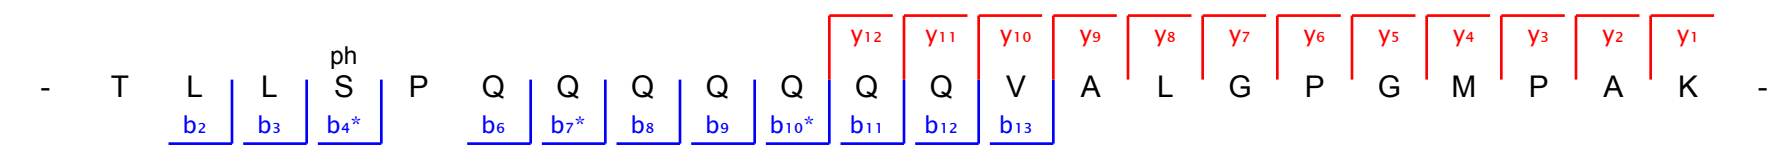



Raw file 20150814\_A375SR\_Phospho\_BR2\_03 Scan 19665 Method FTMS; HCD Score 101.41 m/z 895.42 Gene names NCOA3

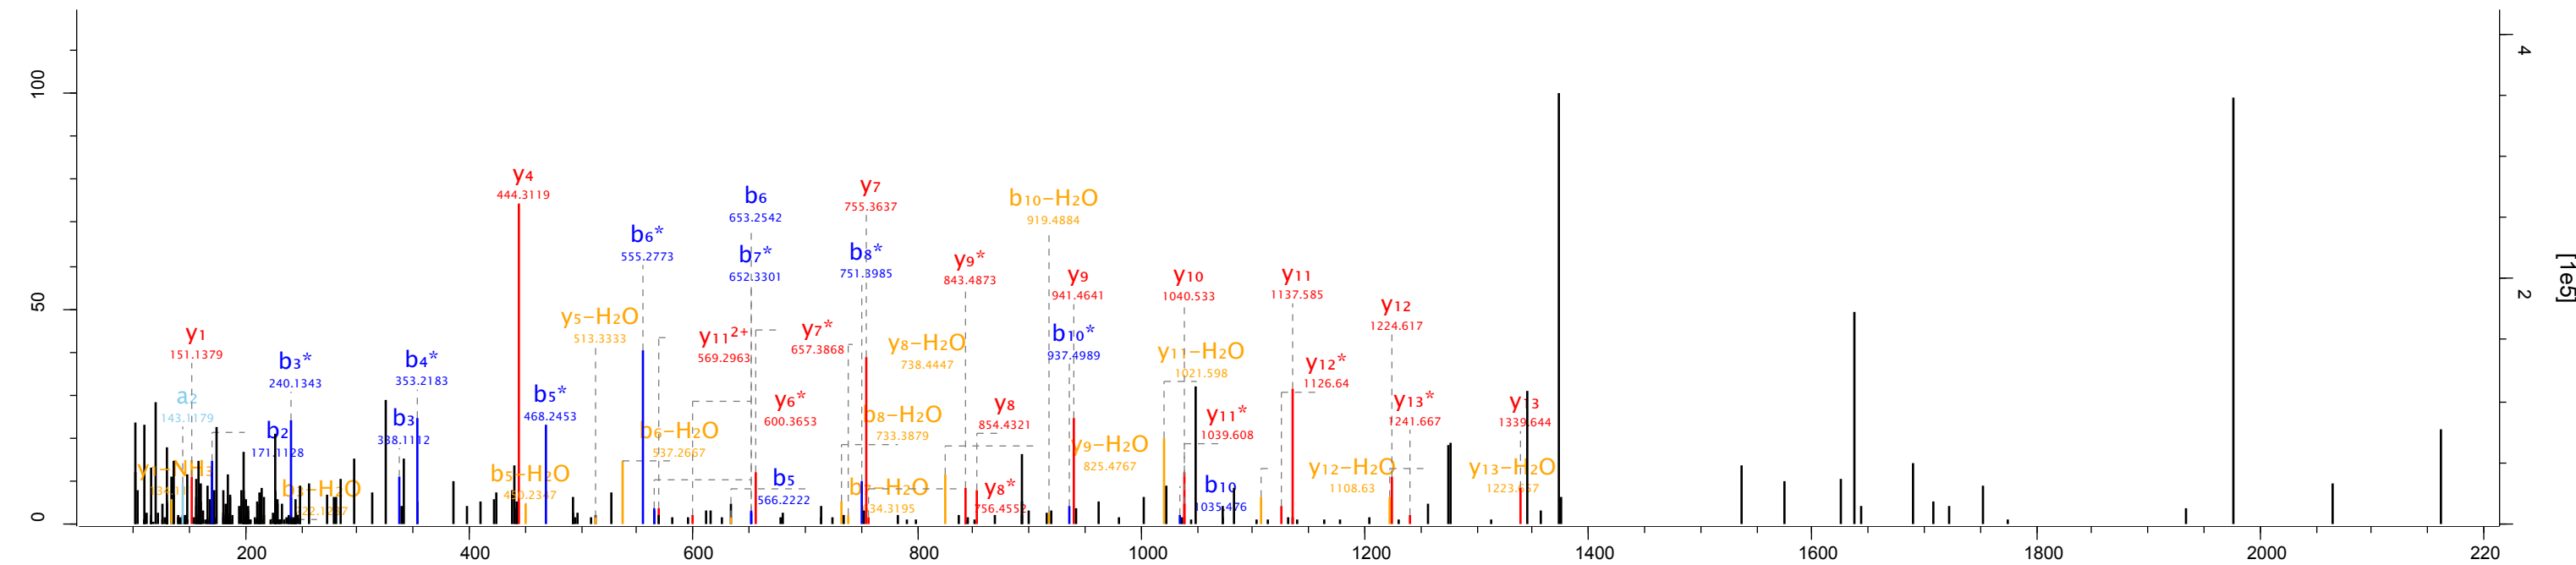

- A V S L D S P V S V G S P P V K -

Fragmentation mapping (b-ions in blue, y-ions in red):

- b<sub>2</sub> (V), b<sub>3</sub> (S), b<sub>4</sub><sup>\*</sup> (L), b<sub>5</sub> (D), b<sub>6</sub> (S), b<sub>7</sub><sup>\*</sup> (P), b<sub>8</sub><sup>\*</sup> (V), b<sub>10</sub> (V)
- y<sub>1</sub> (K), y<sub>4</sub> (P), y<sub>6</sub><sup>\*</sup> (S), y<sub>7</sub> (G), y<sub>8</sub> (V), y<sub>9</sub> (S), y<sub>10</sub> (V), y<sub>11</sub> (P), y<sub>12</sub> (S), y<sub>13</sub> (D)

Raw file: 20150814\_A375SR\_Phospho\_BR2\_03  
 Scan: 19725 Method: FTMS; HCD Score: 92.8 m/z: 909.41 Gene names: KIAA0753

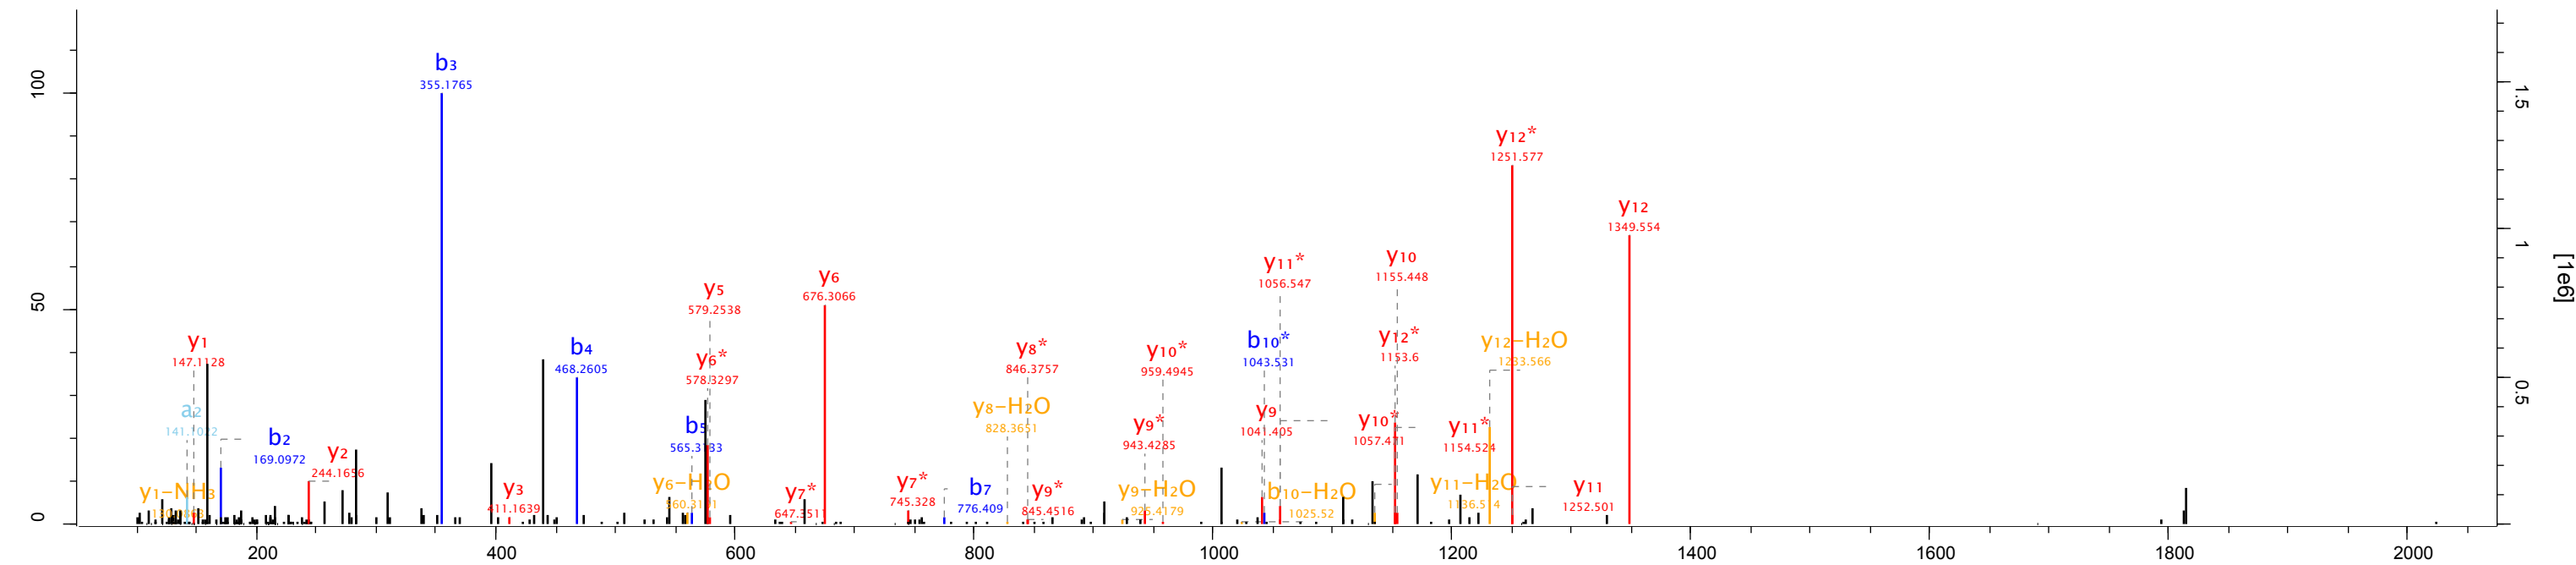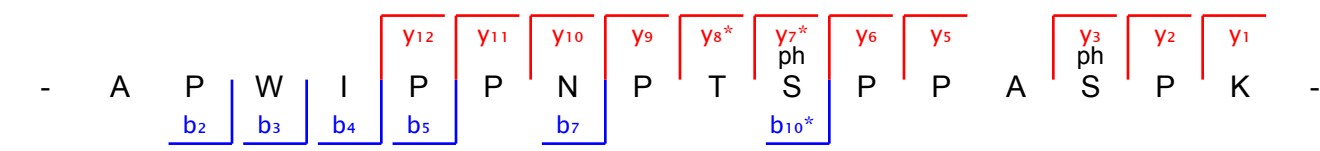

Raw file: 20150814\_A375SR\_Phospho\_BR2\_03  
 Scan: 19845 Method: FTMS; HCD Score: 176.9 m/z: 887.79 Gene names: MAP1S

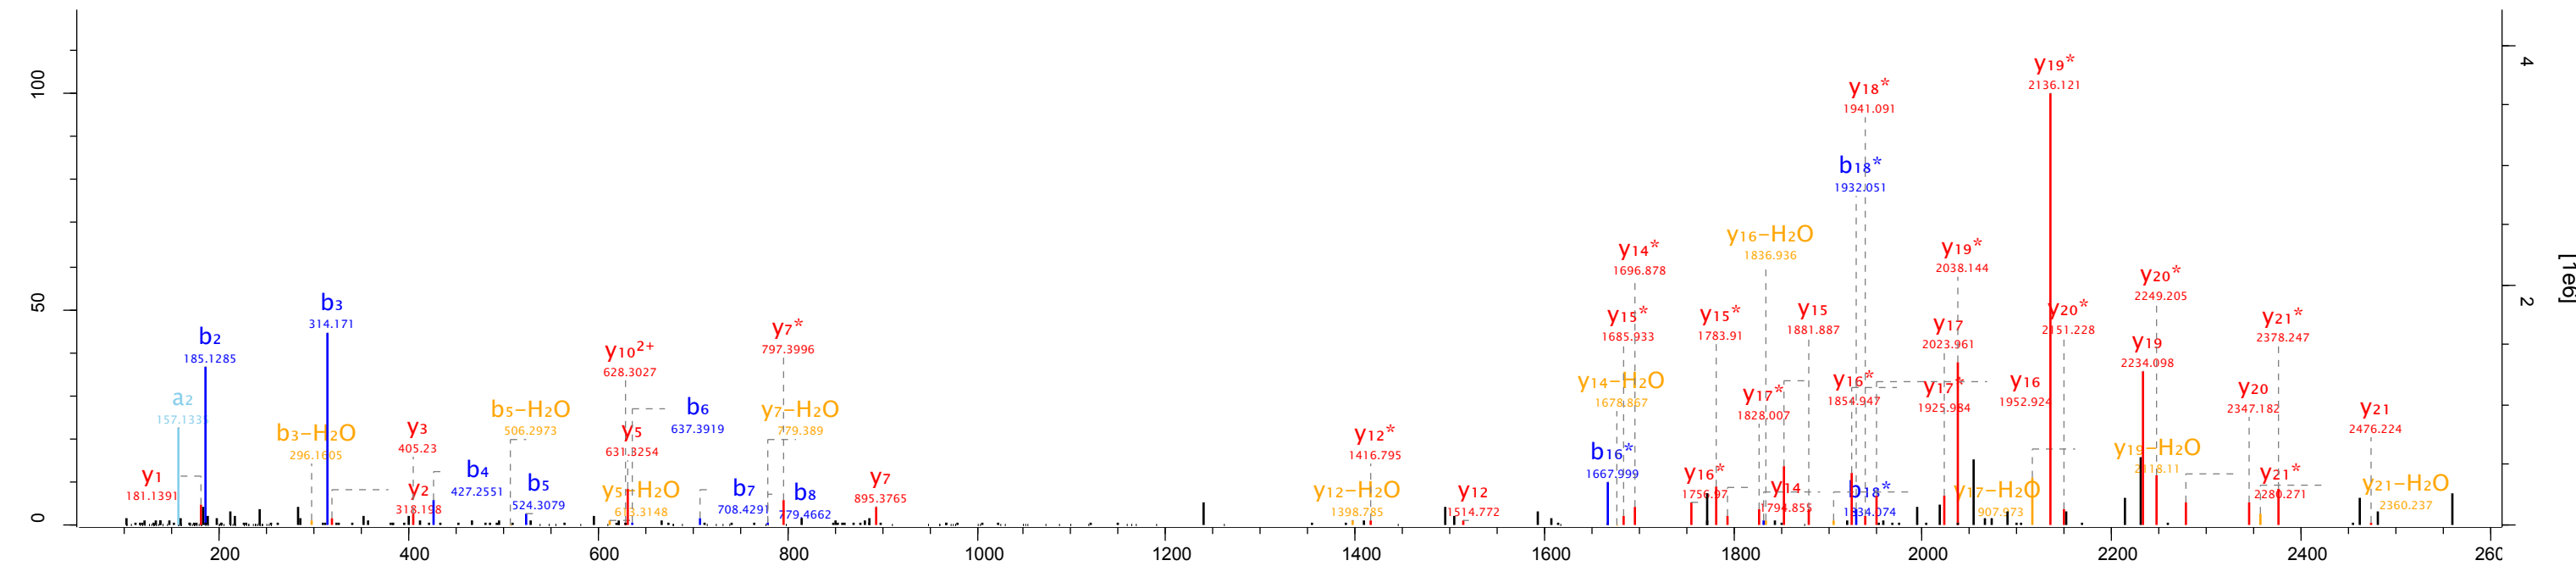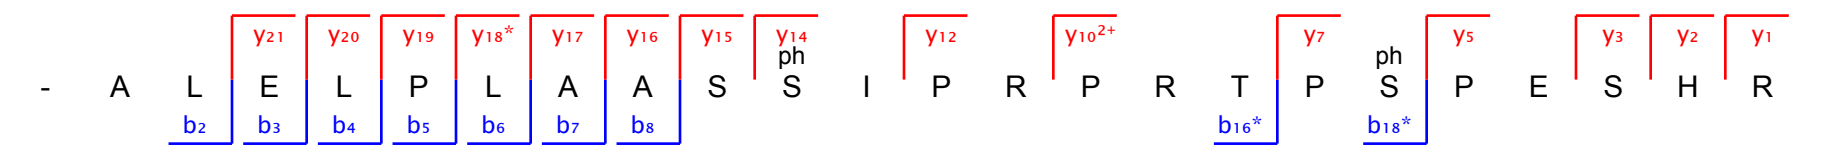

Raw file  
 20150814\_A375SR\_Phospho\_BR2\_03  
 Scan 20045 Method FTMS; HCD Score 112.34 m/z 756.65 Gene names NCAPD2

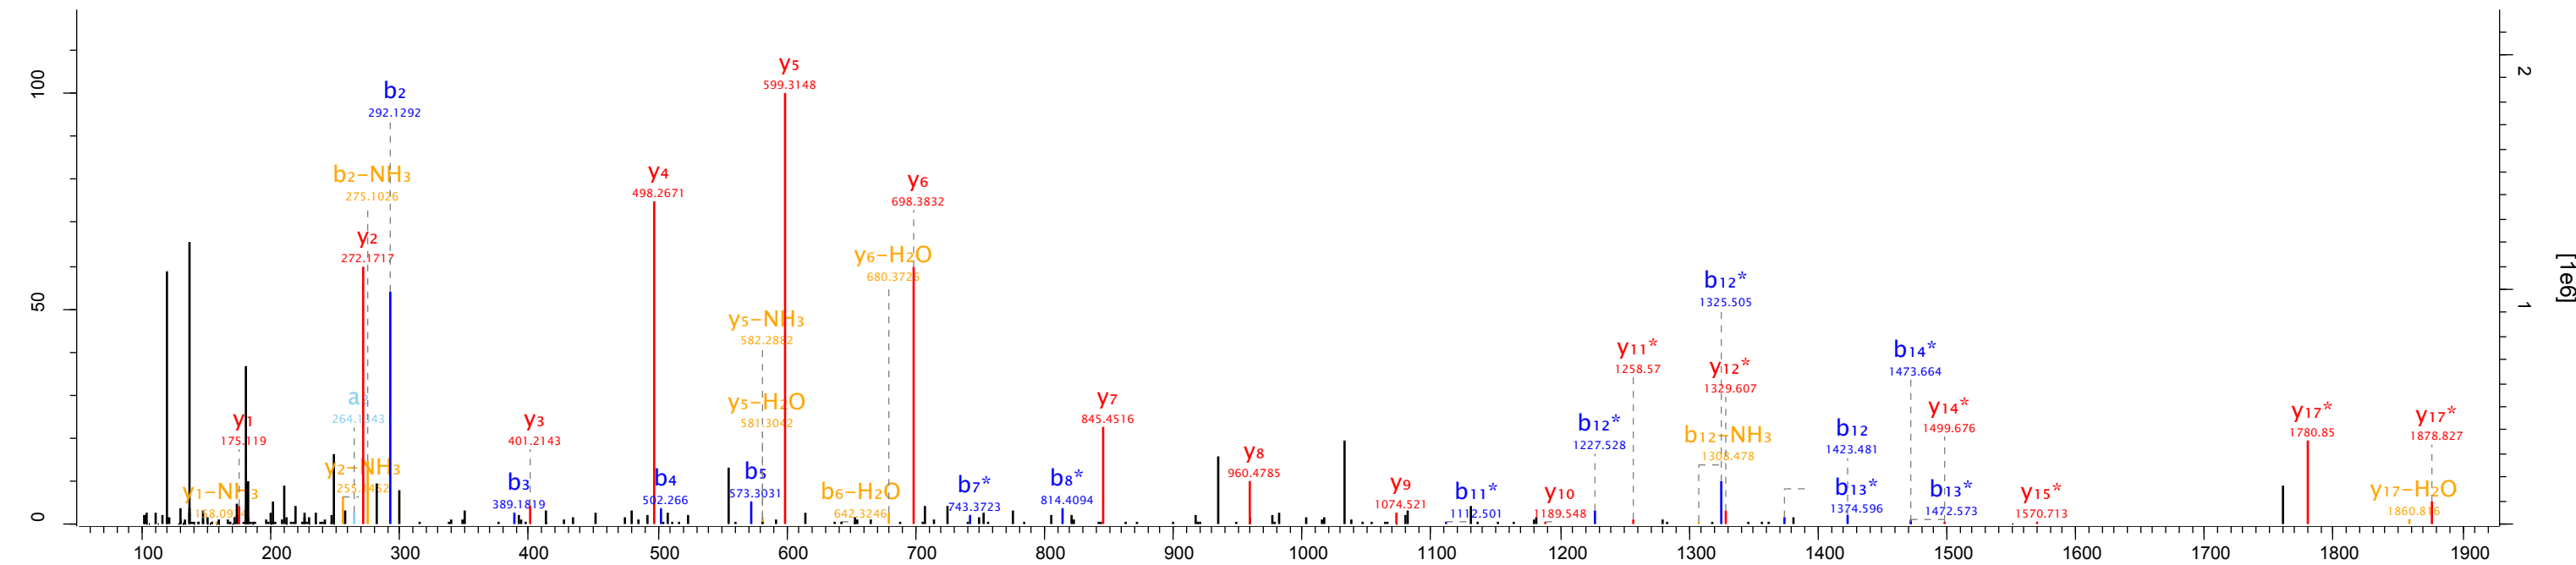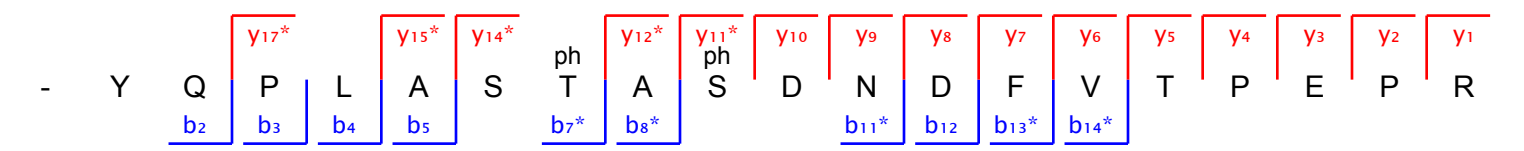

Raw file 20150814\_A375SR\_Phospho\_BR2\_03 Scan 20285 Method FTMS; HCD Score 103.99 m/z 1129.84 Gene names AFAP1

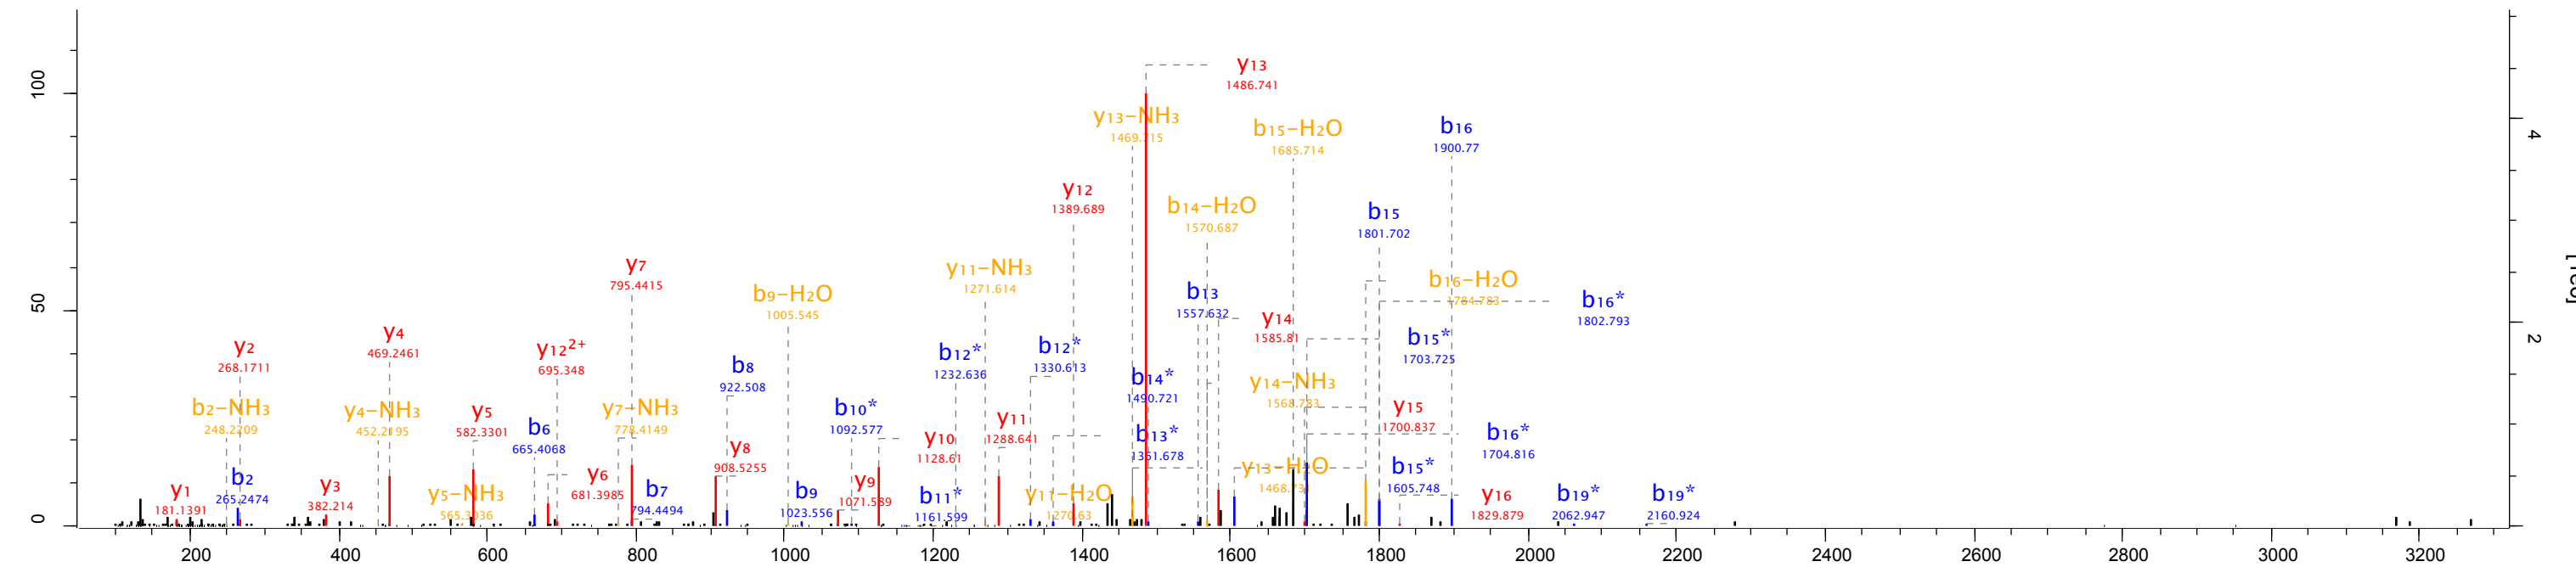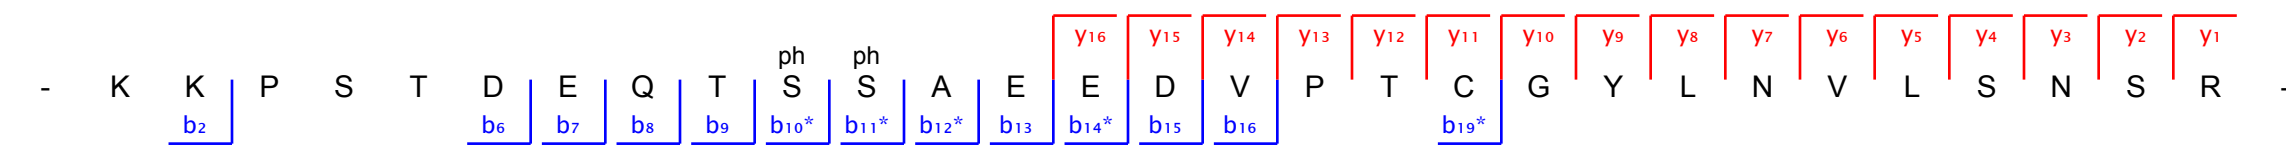

Raw file 20150814\_A375SR\_Phospho\_BR2\_03 Scan 20375 Method FTMS; HCD Score 84.94 m/z 683.32 Gene names NKTR

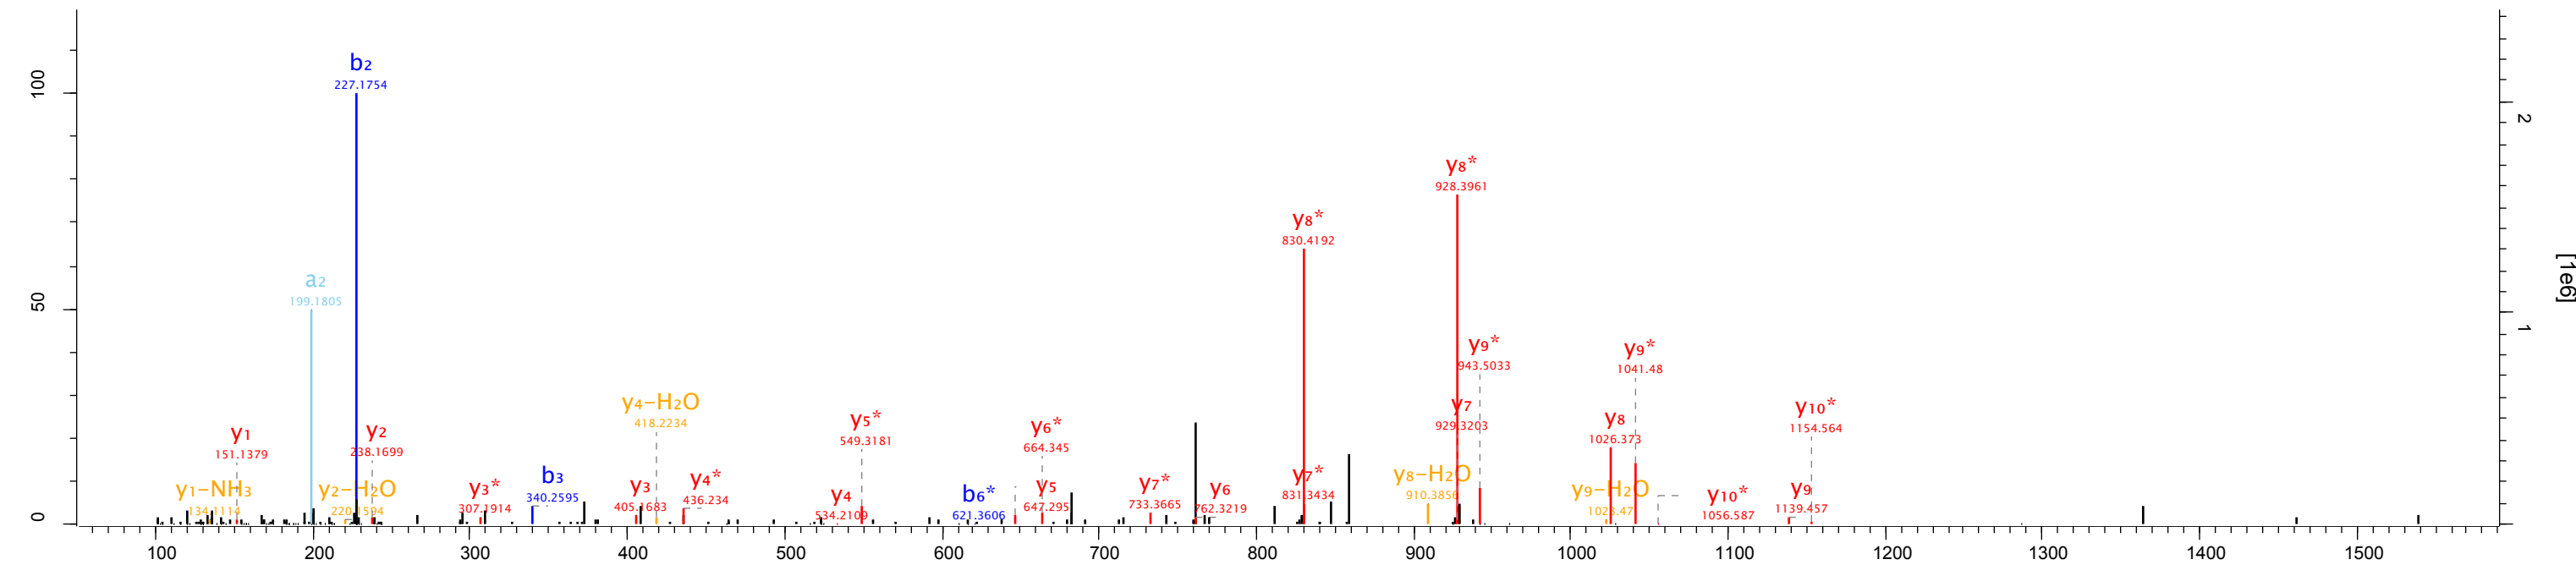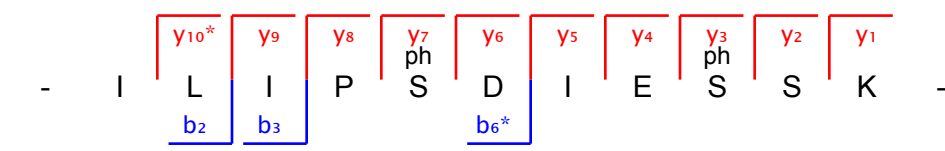

Raw file: 20150814\_A375SR\_Phospho\_BR2\_03  
 Scan: 20765 Method: FTMS; HCD Score: 164.93 m/z: 752.81 Gene names: RB1CC1

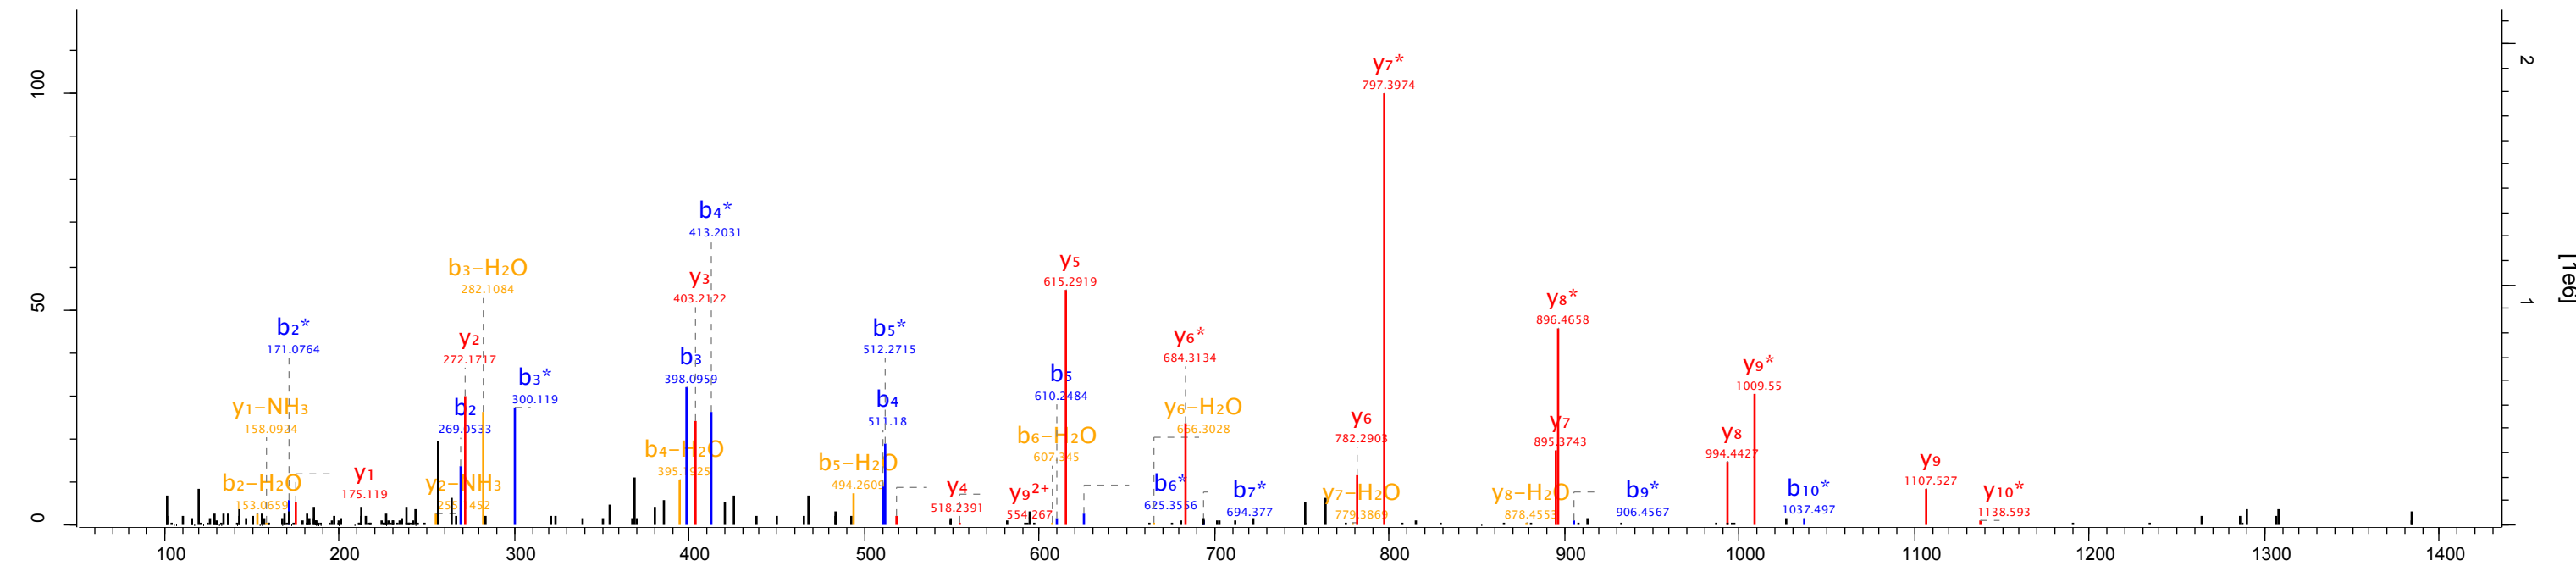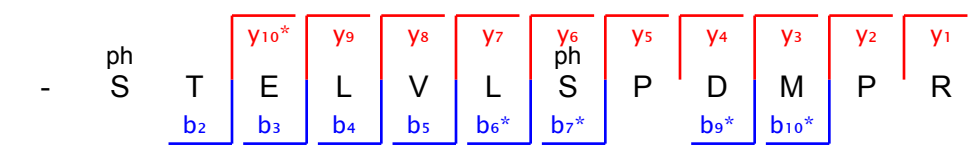

Raw file  
20150814\_A375SR\_Phospho\_BR2\_03

Scan 21265 Method FTMS; HCD Score 290.16 m/z 1138.5 Gene names ARHGEF2

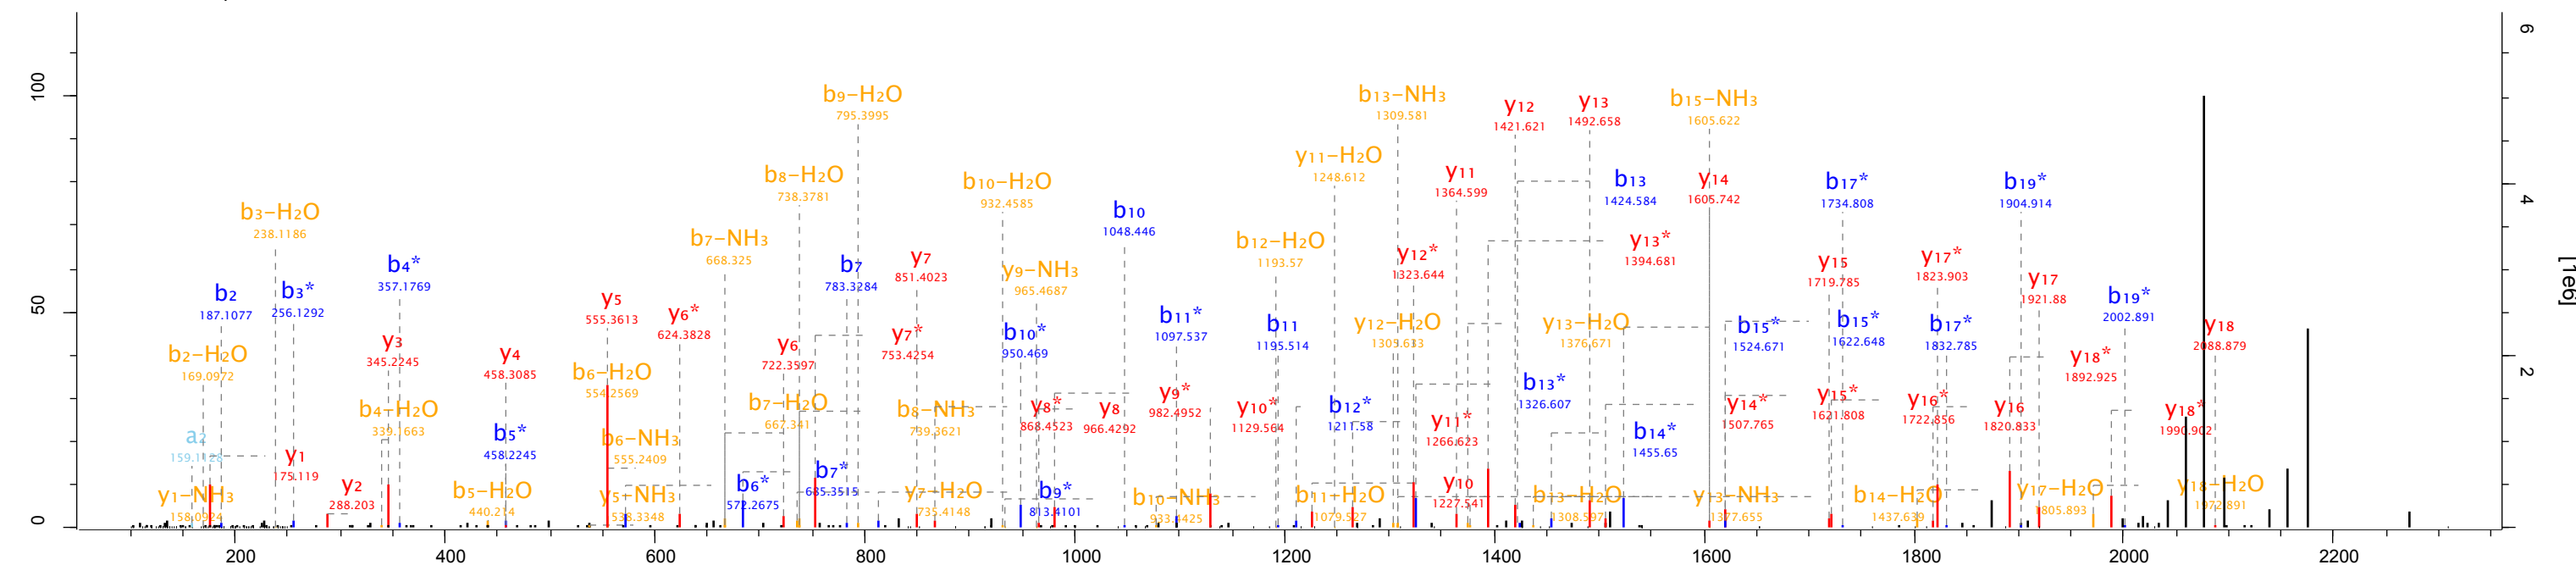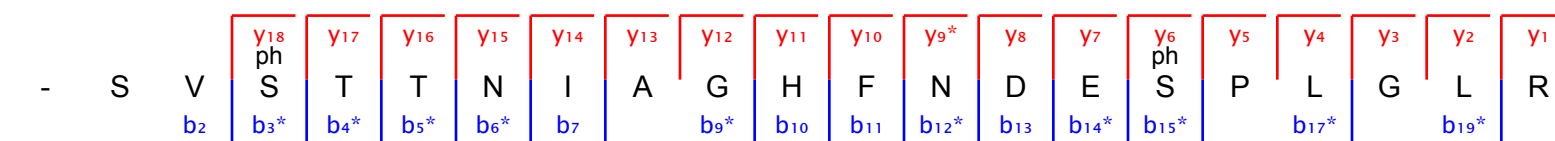



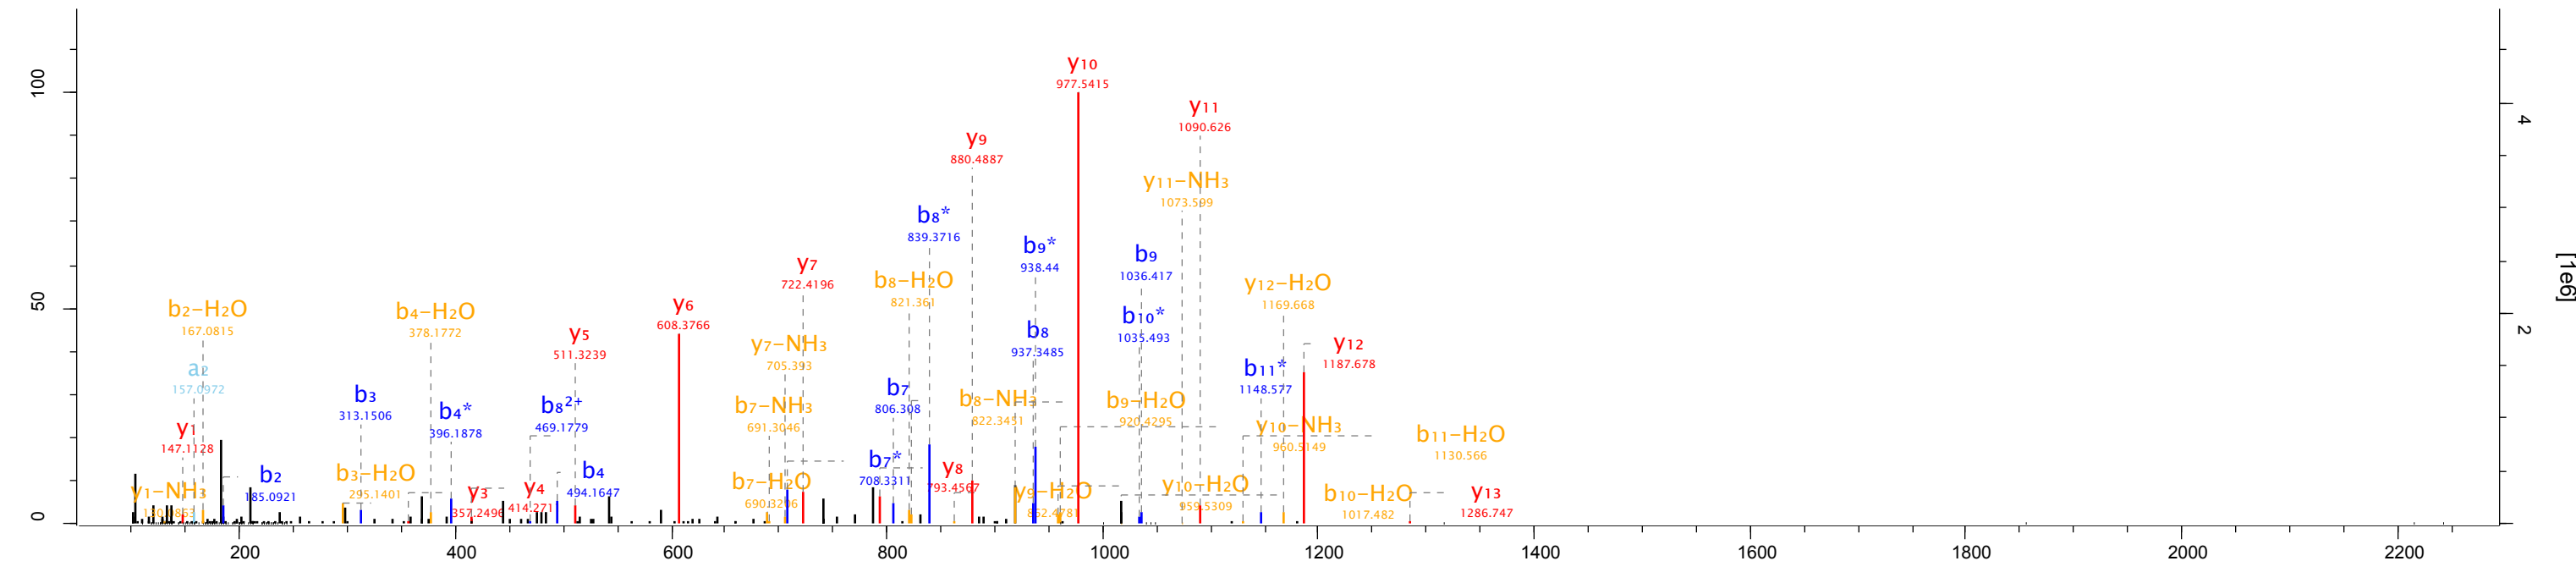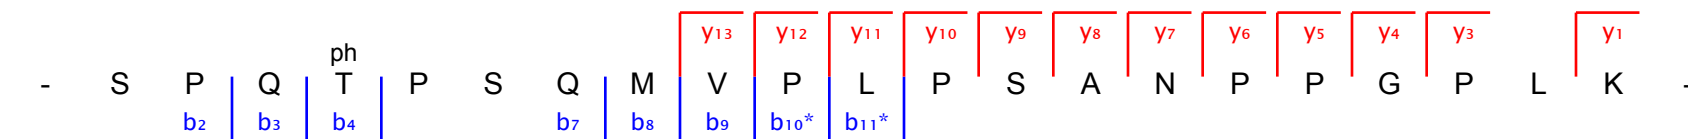

Raw file: 20150814\_A375SR\_Phospho\_BR2\_03  
 Scan: 21905 Method: FTMS; HCD Score: 163.49 m/z: 1201.97 Gene names: USP9X

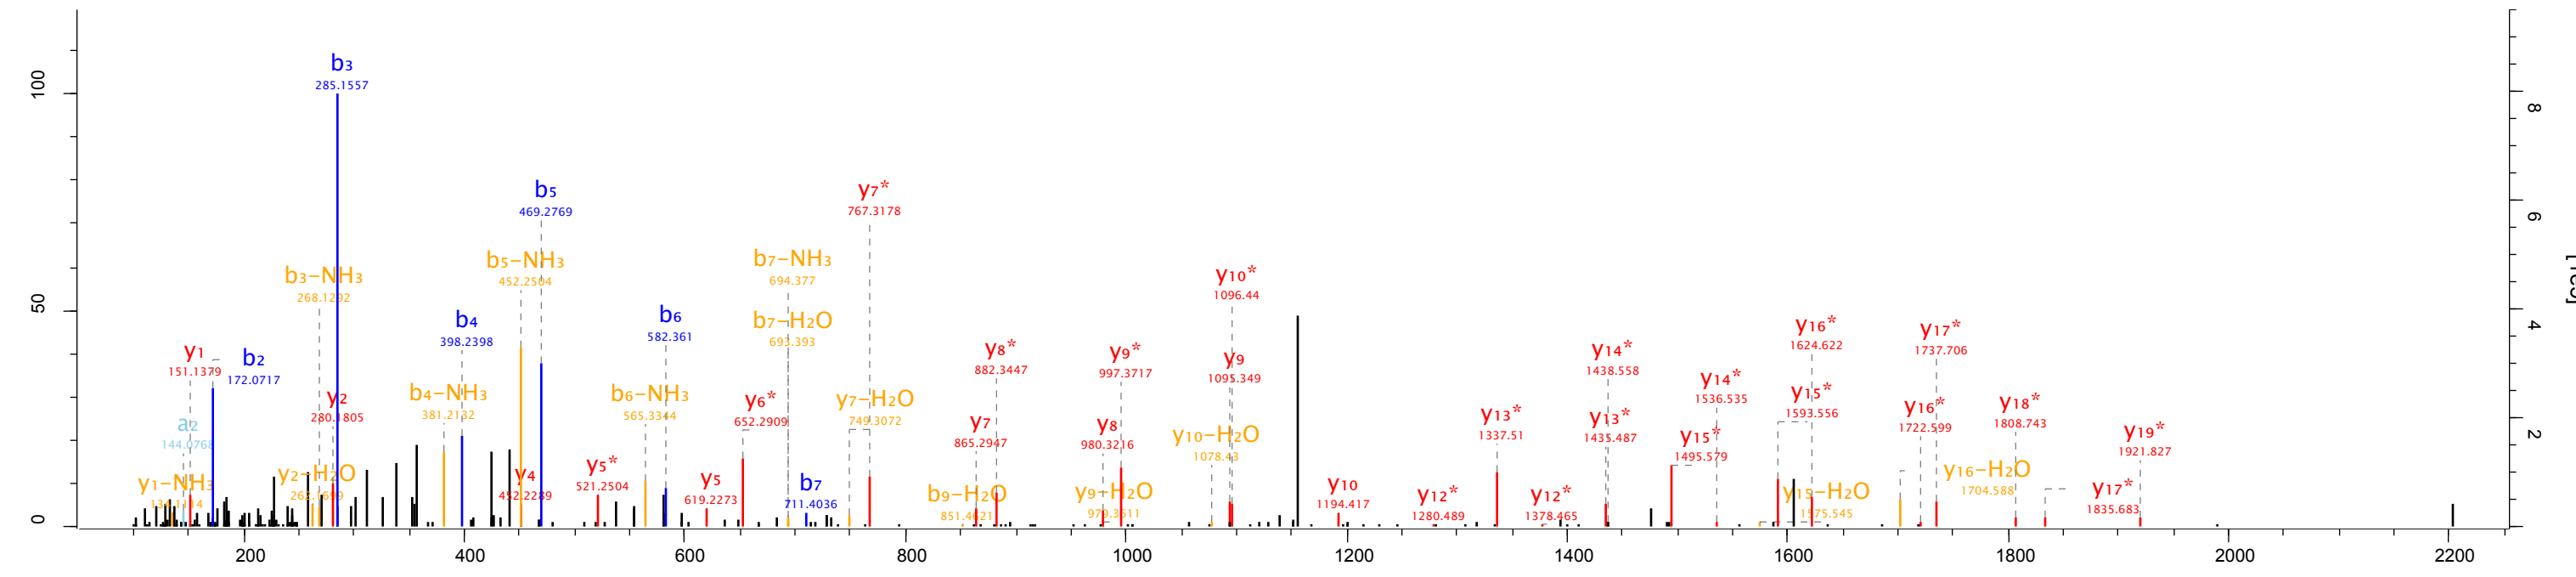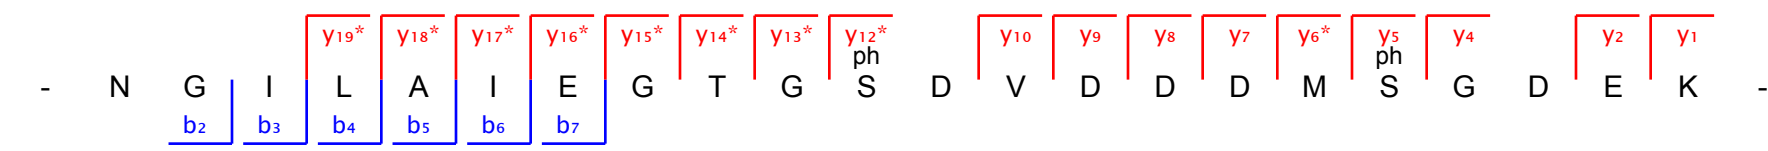

Raw file Scan Method Score m/z Gene names  
 20150814\_A375SR\_Phospho\_BR2\_03 22065 FTMS; HCD 202.35 925.21 YAP1

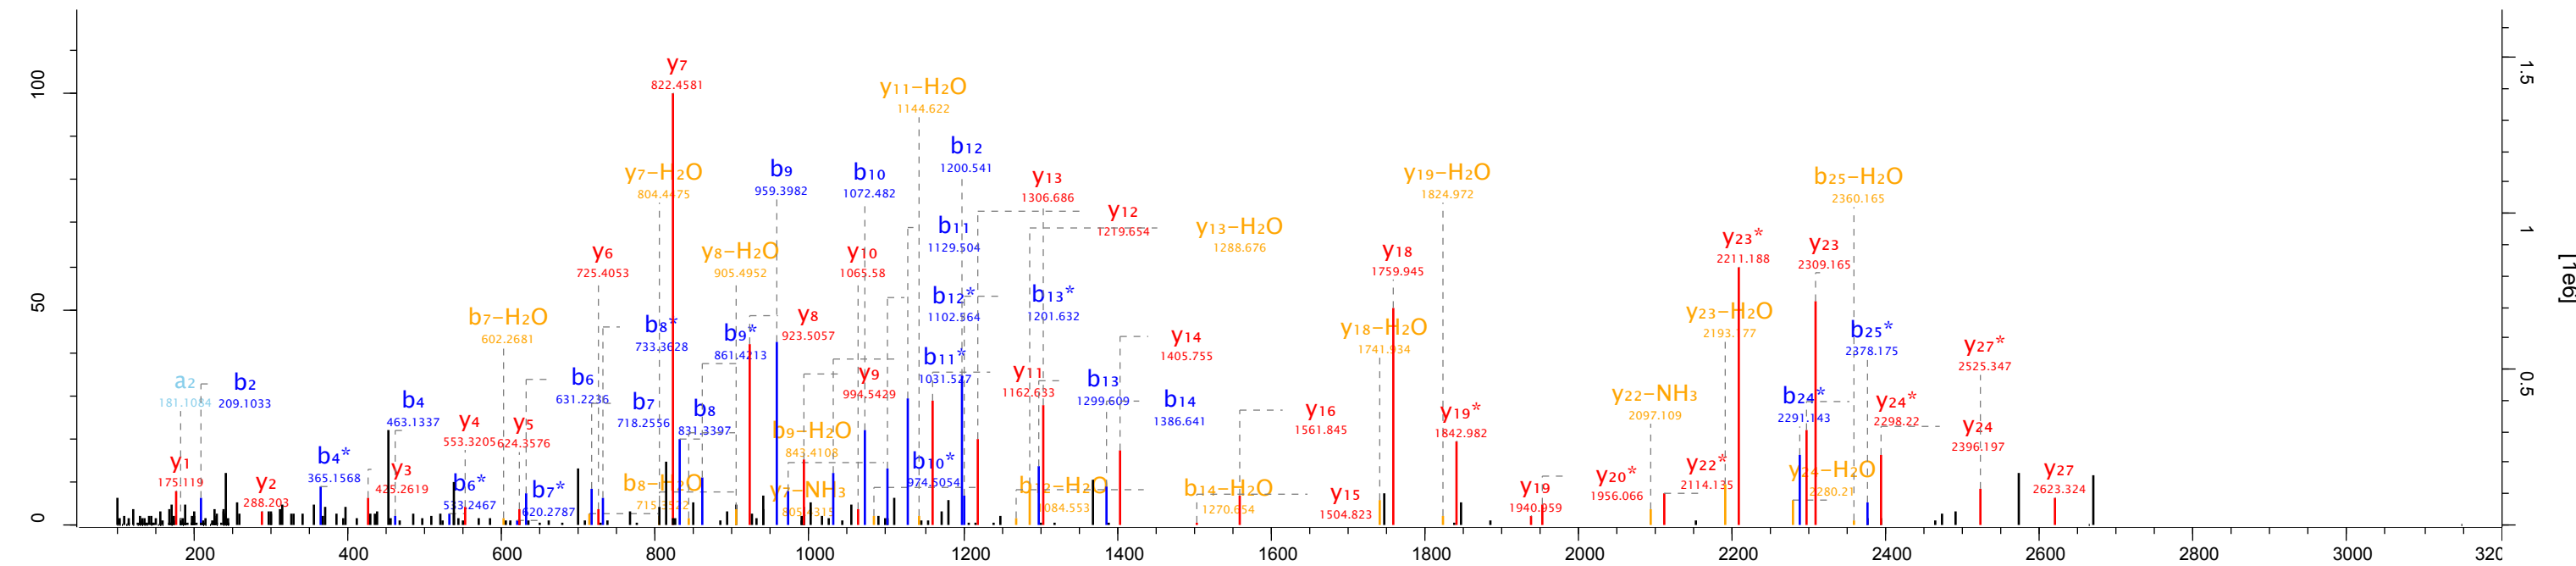

- A H S ph S P A S L Q L G A V S P G T L T P T G V V S G P A A T P T A Q H L R -

b<sub>2</sub>
b<sub>4</sub>\*
b<sub>6</sub>\*
b<sub>7</sub>\*
b<sub>8</sub>\*
b<sub>9</sub>\*
b<sub>10</sub>\*
b<sub>11</sub>\*
b<sub>12</sub>\*
b<sub>13</sub>\*
b<sub>14</sub>\*
b<sub>24</sub>\*
b<sub>25</sub>\*
y<sub>27</sub>
y<sub>24</sub>
y<sub>23</sub>
y<sub>22</sub>\*
y<sub>20</sub>\*
y<sub>19</sub>
y<sub>18</sub>
y<sub>16</sub>
y<sub>15</sub>
y<sub>14</sub>
y<sub>13</sub>
y<sub>12</sub>
y<sub>11</sub>
y<sub>10</sub>
y<sub>9</sub>
y<sub>8</sub>
y<sub>7</sub>
y<sub>6</sub>
y<sub>5</sub>
y<sub>4</sub>
y<sub>3</sub>
y<sub>2</sub>
y<sub>1</sub>

Raw file  
 20150814\_A375SR\_Phospho\_BR2\_03  
 Scan 22375 Method FTMS; HCD Score 51.81 m/z 1035.97 Gene names NAP1L4

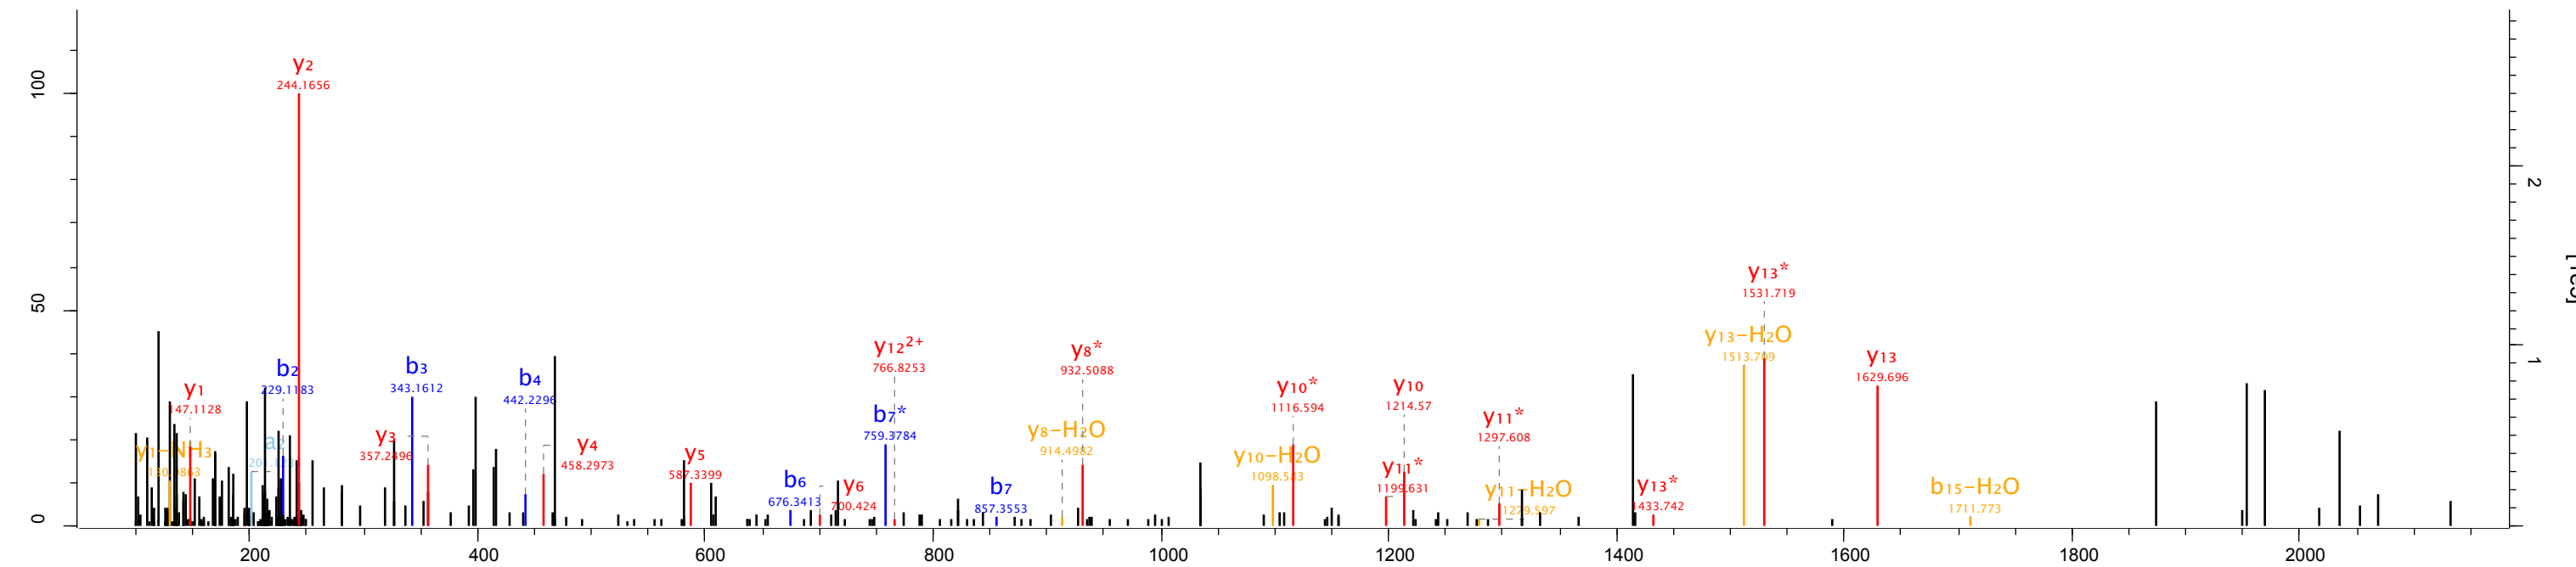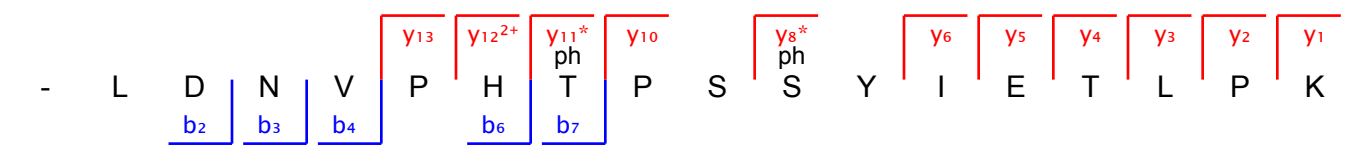

Raw file 20150814\_A375SR\_Phospho\_BR2\_03 Scan 23005 Method FTMS; HCD Score 83.16 m/z 744.33 Gene names PPP1R13L

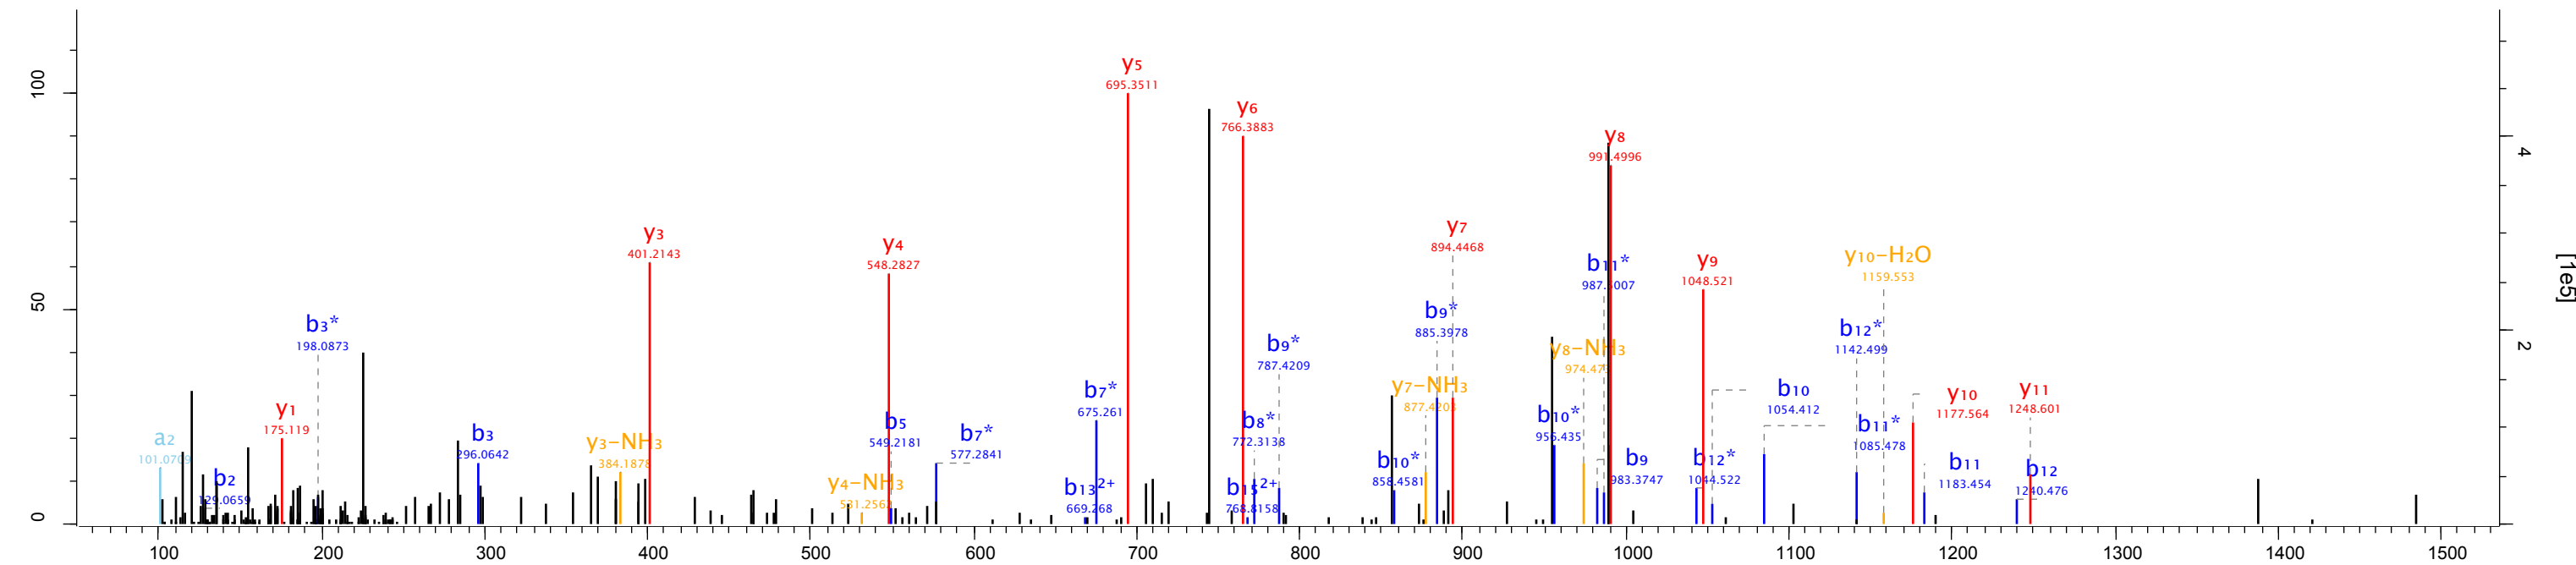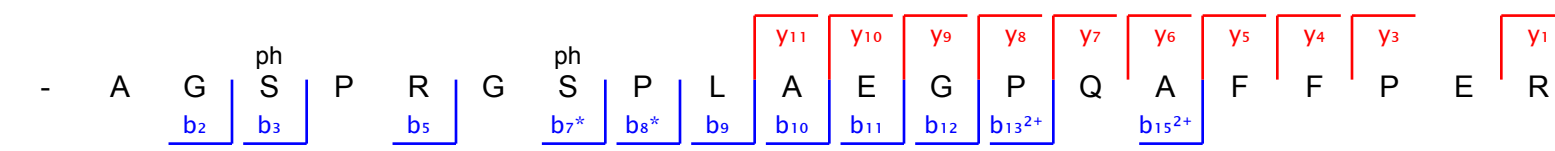

Raw file  
 20150814\_A375SR\_Phospho\_BR2\_03  
 Scan 23255 Method FTMS; HCD Score 145.77 m/z 925.44 Gene names SCAF11

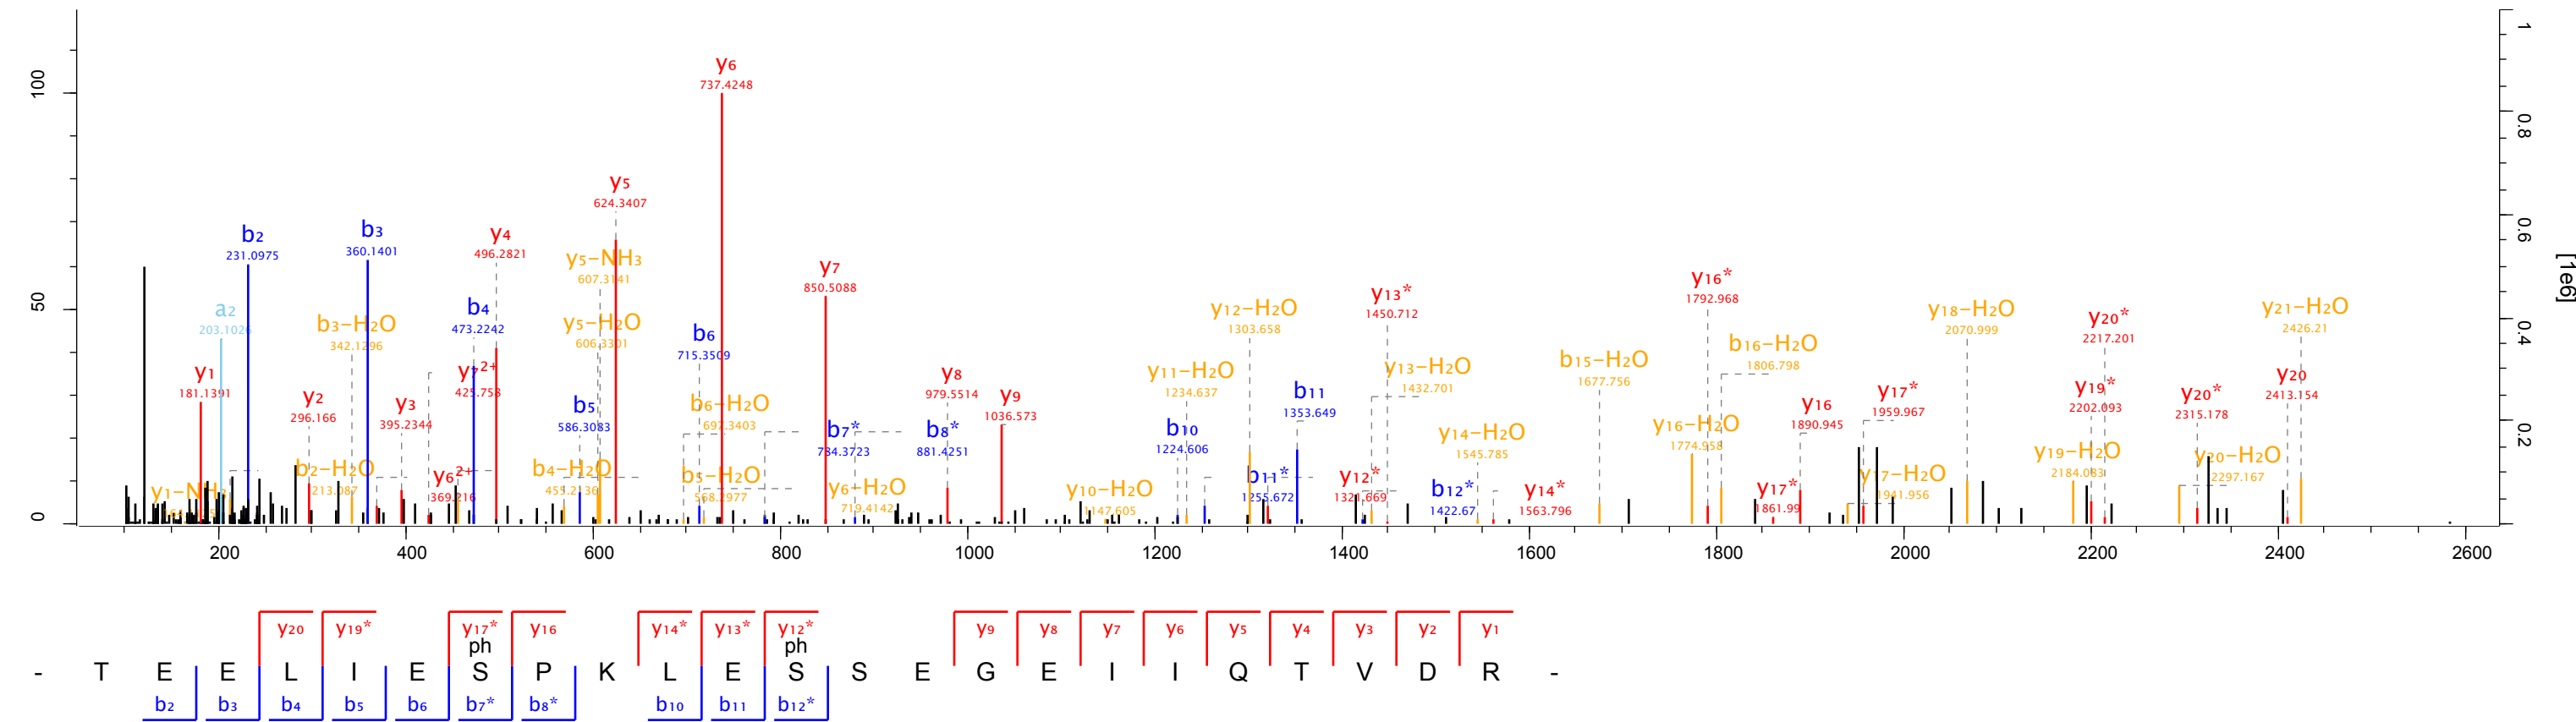

Raw file 20150814\_A375SR\_Phospho\_BR2\_03 Scan 23545 Method FTMS; HCD Score 169.72 m/z 1124.02 Gene names ATXN2

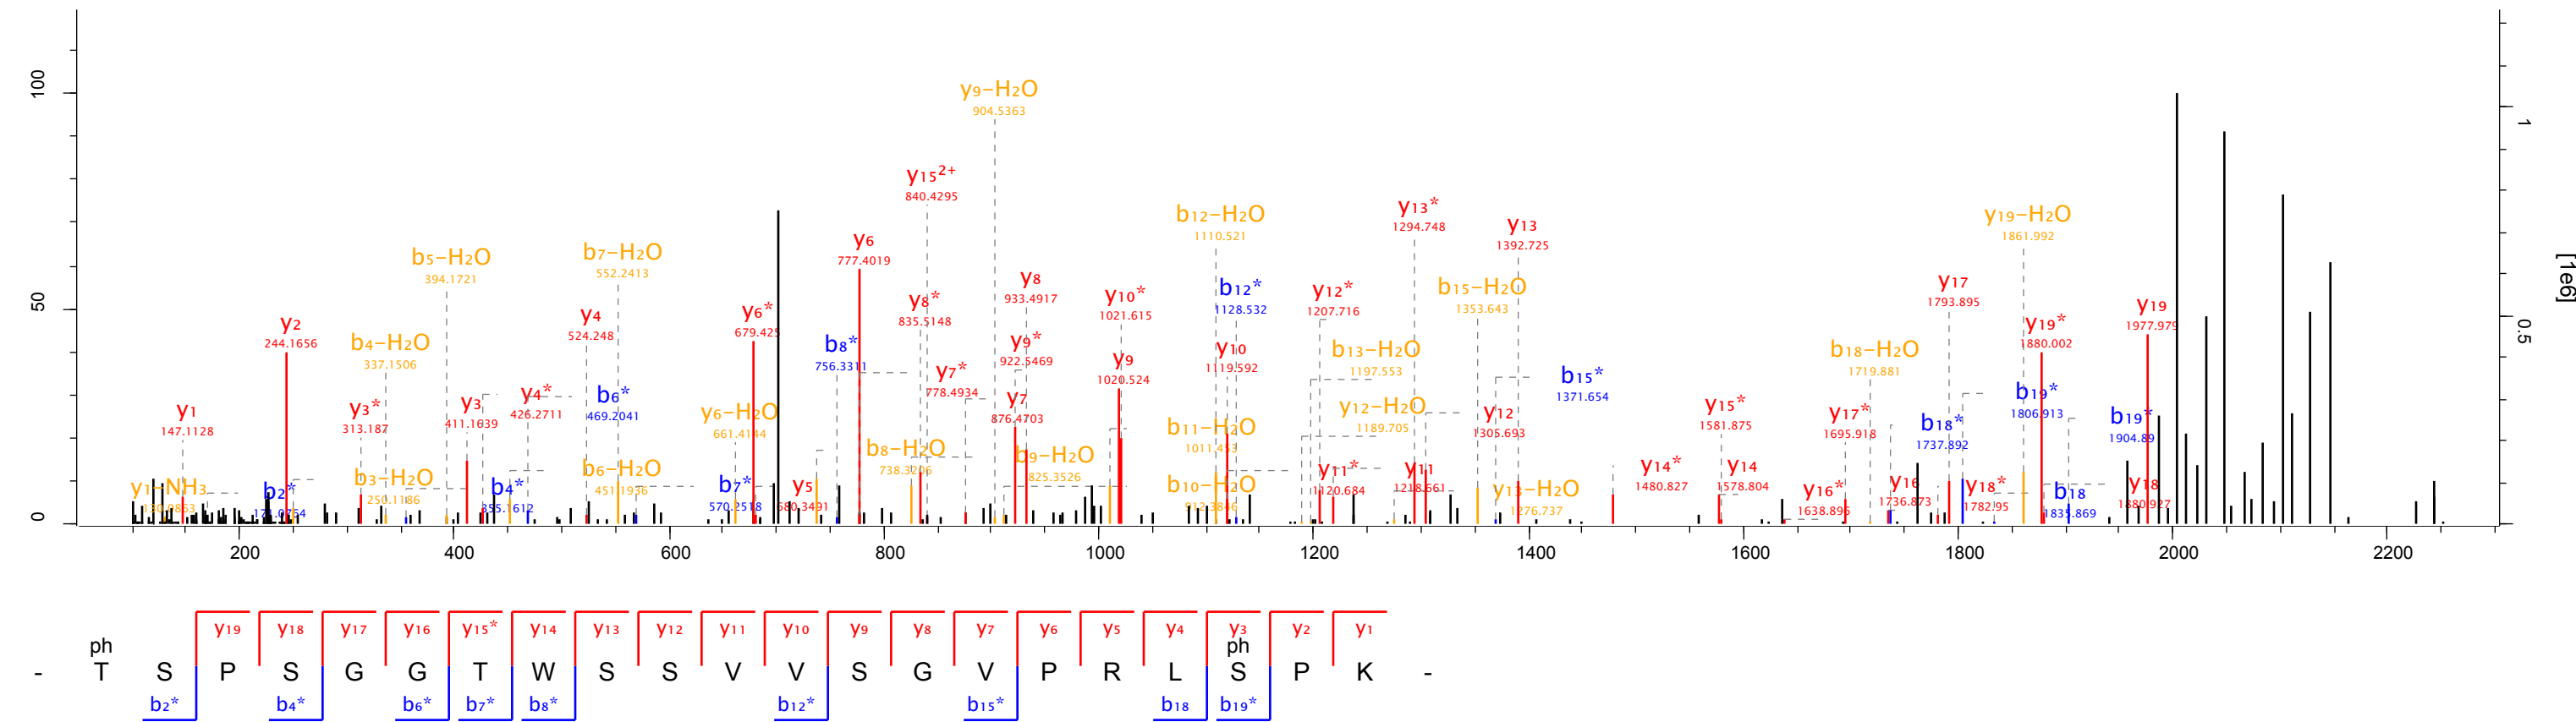

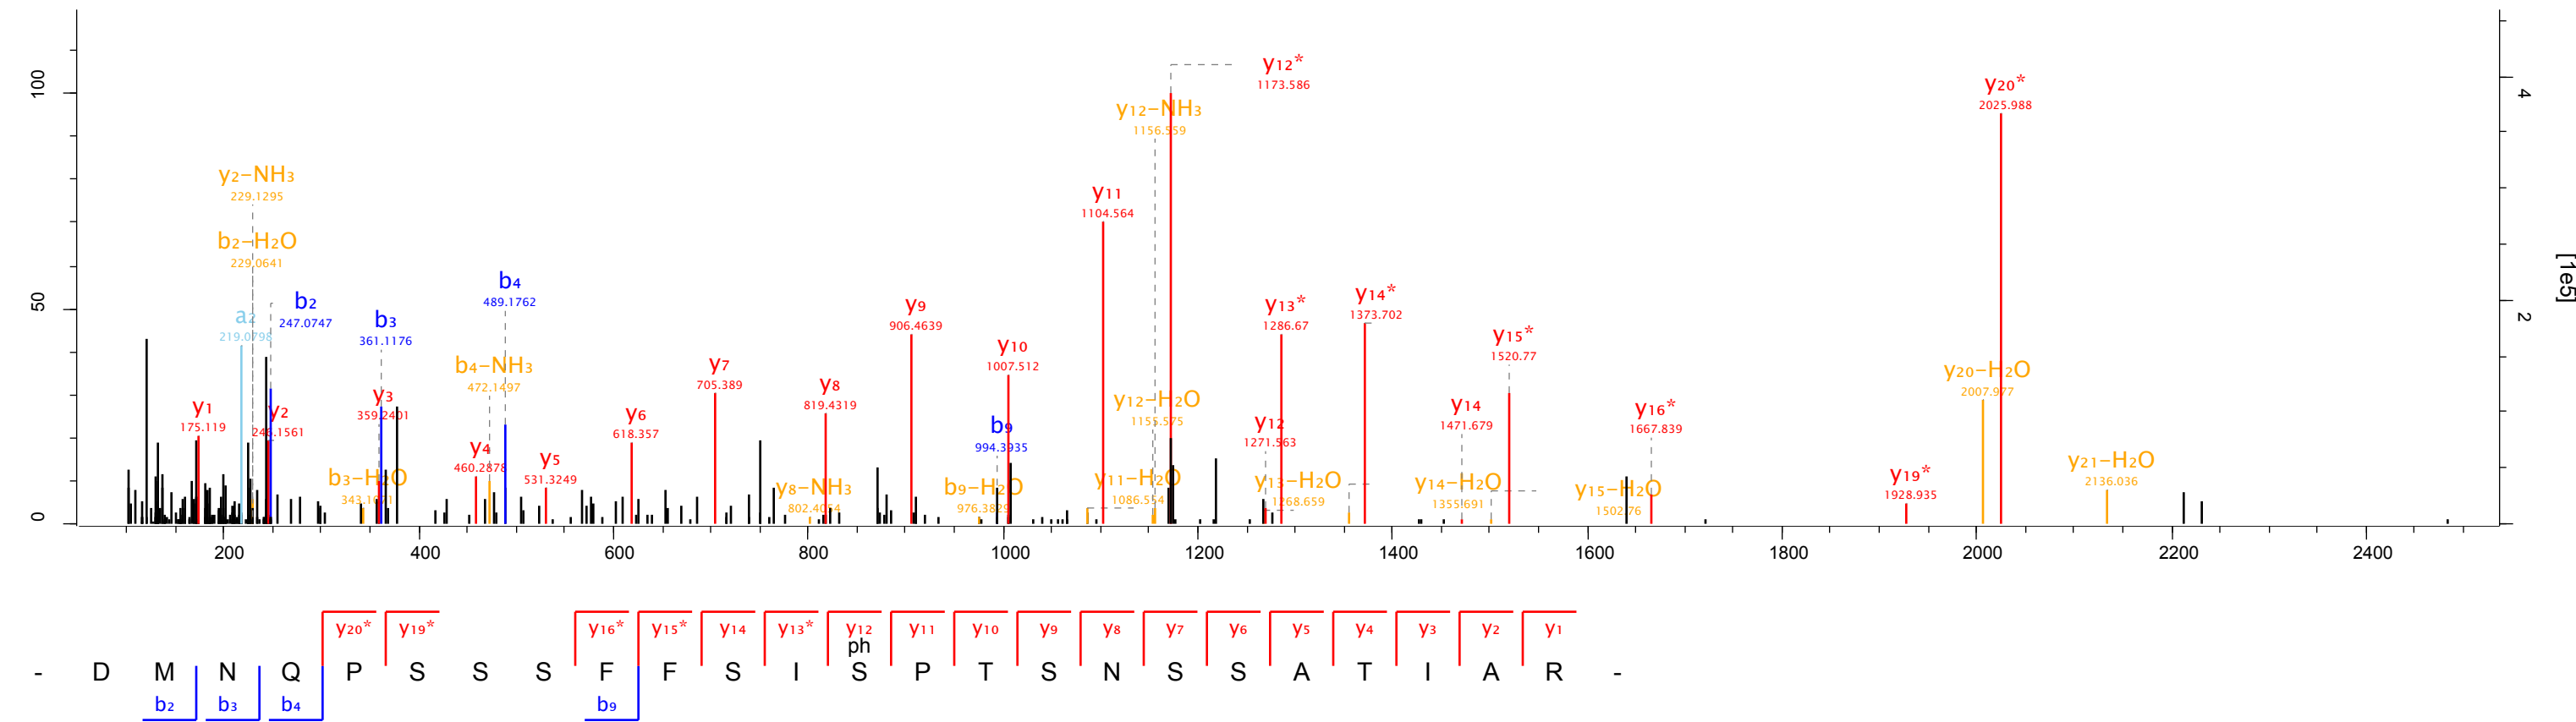



Raw file  
20150814\_A375SR\_Phospho\_BR2\_03

Scan 23665 Method FTMS; HCD Score 155.78 m/z 1092.8 Gene names SSFA2

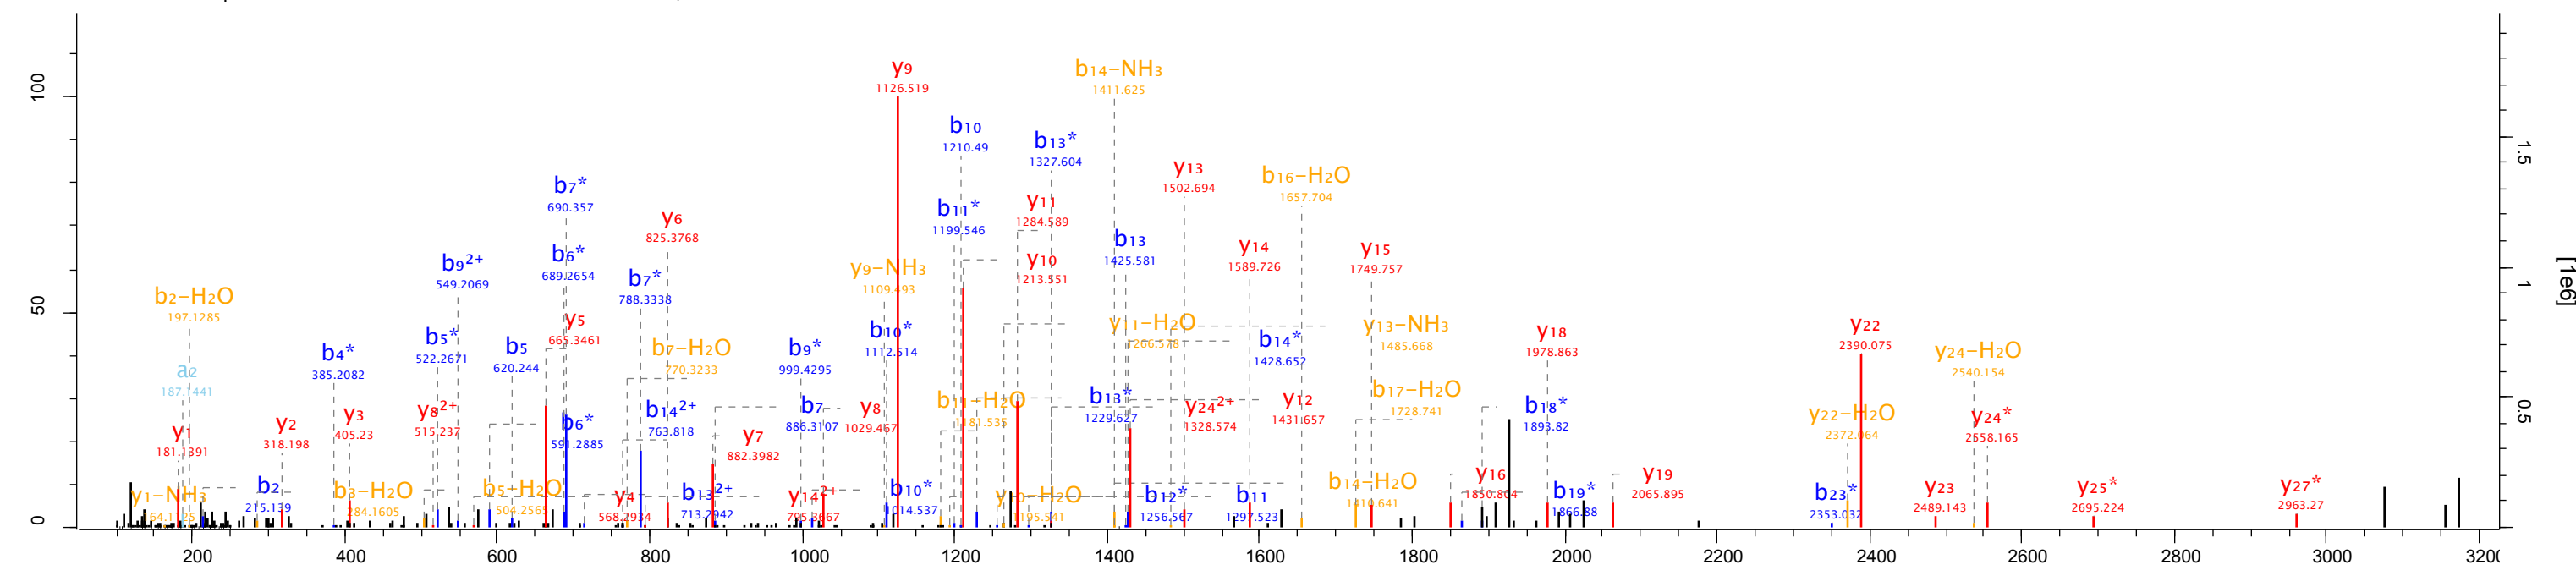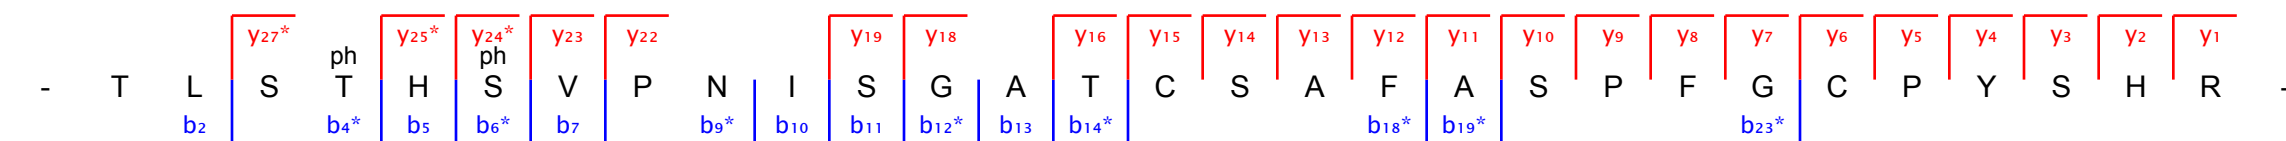

Raw file 20150814\_A375SR\_Phospho\_BR2\_03 Scan 2385 Method FTMS; HCD Score 81.66 m/z 640.28 Gene names MGMT

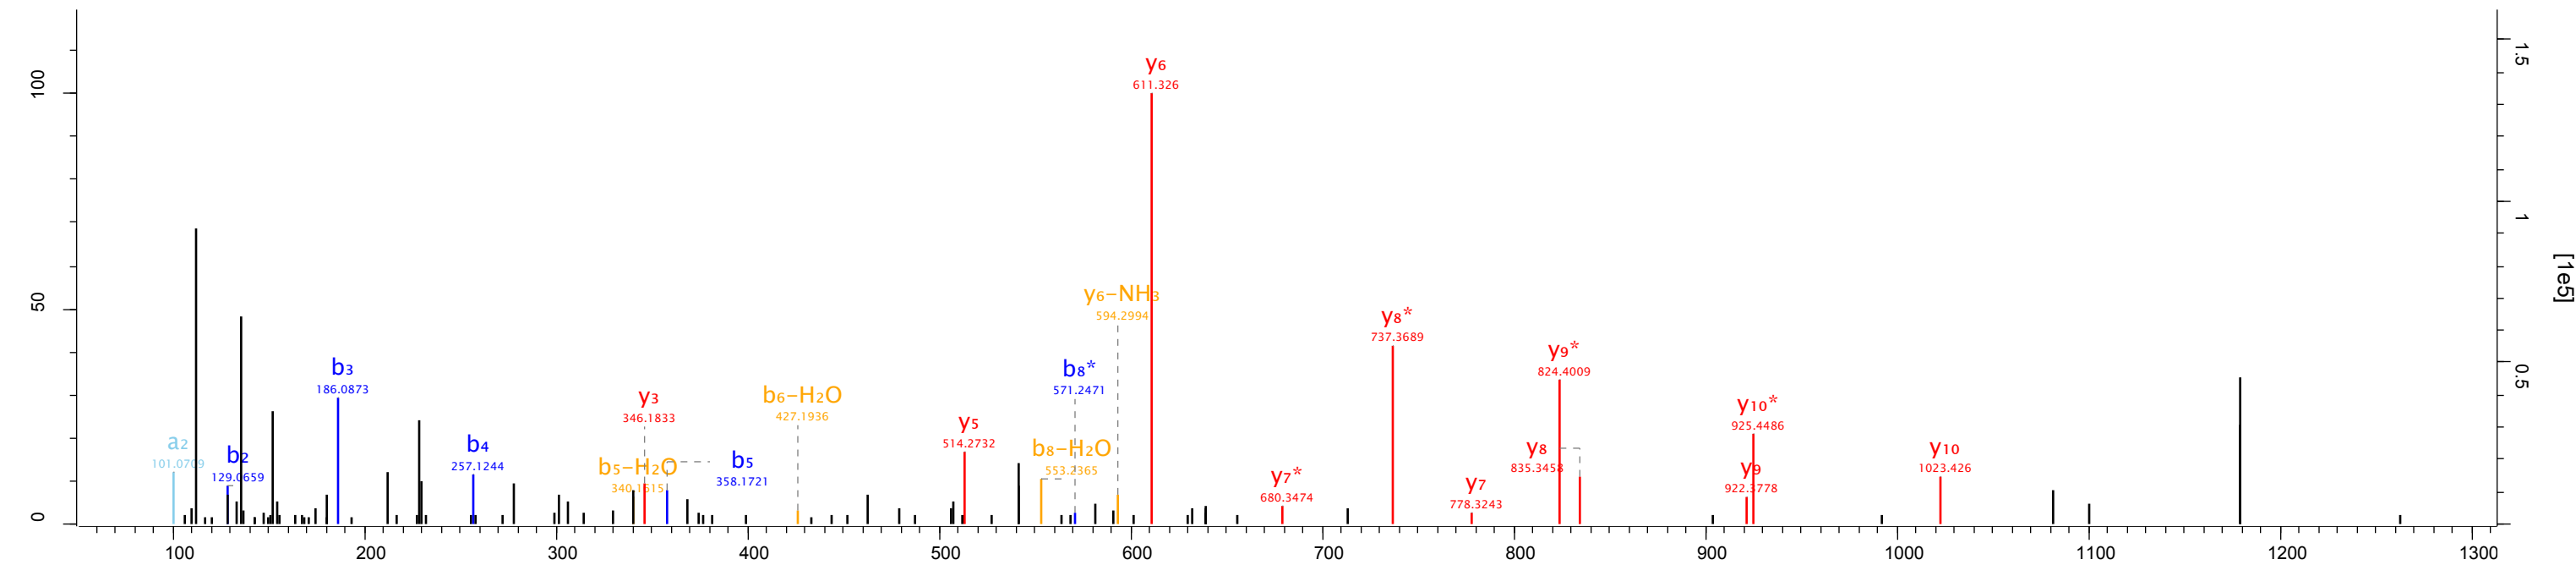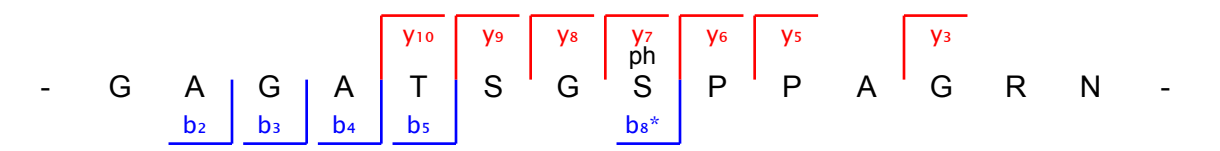

Raw file  
20150814\_A375SR\_Phospho\_BR2\_03

Scan 24185 Method FTMS; HCD Score 88.81 m/z 1042.98 Gene names TNRC6B

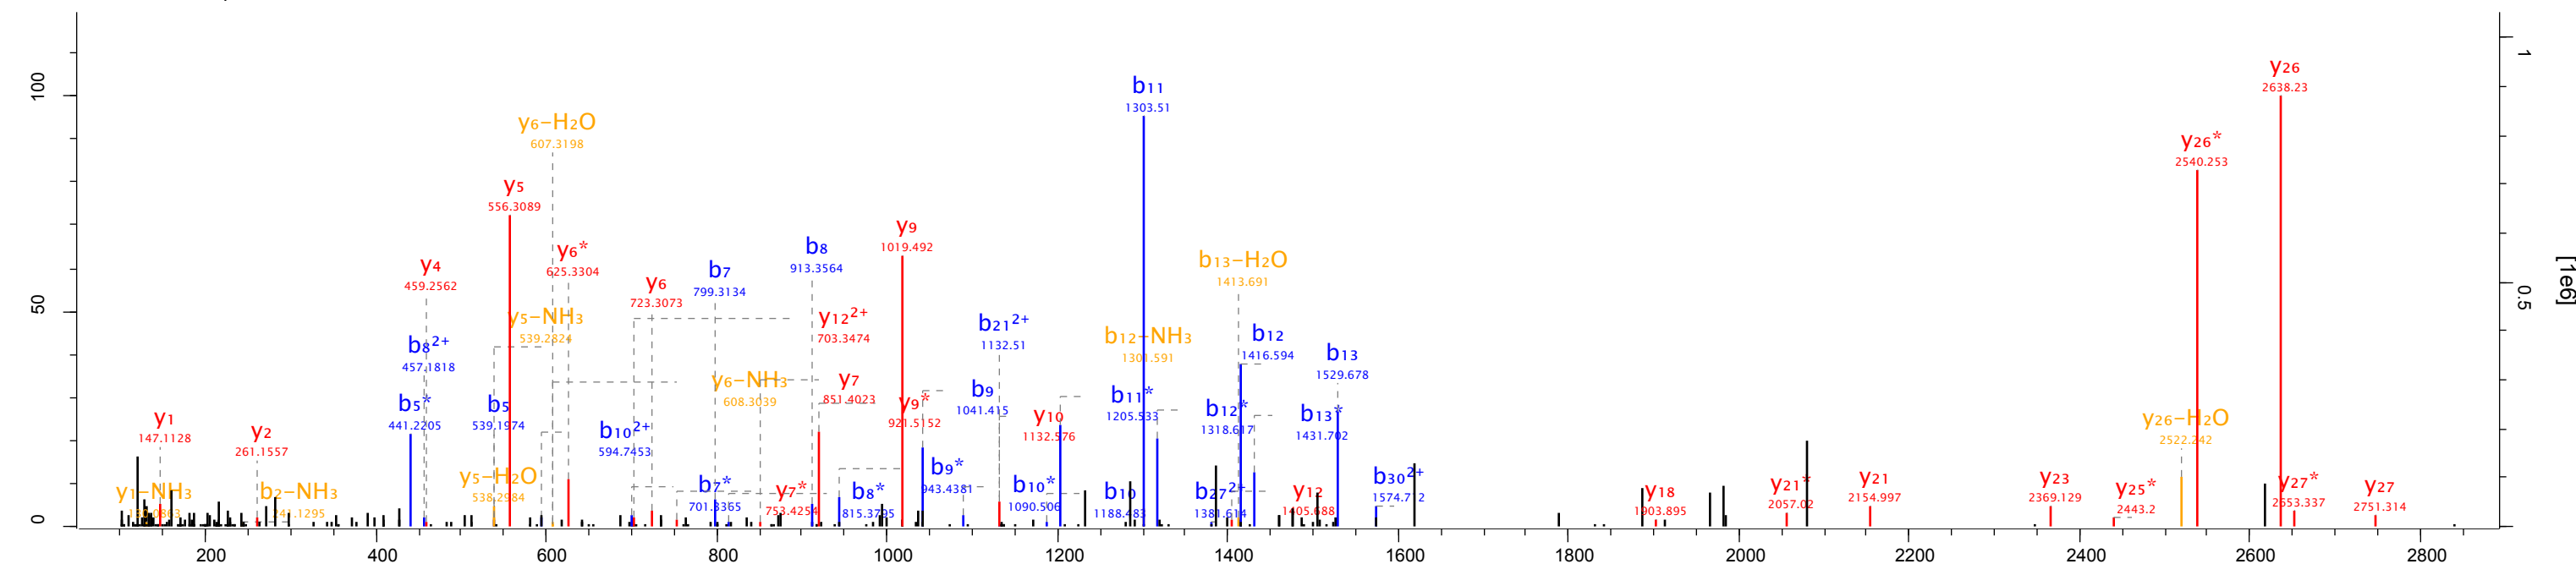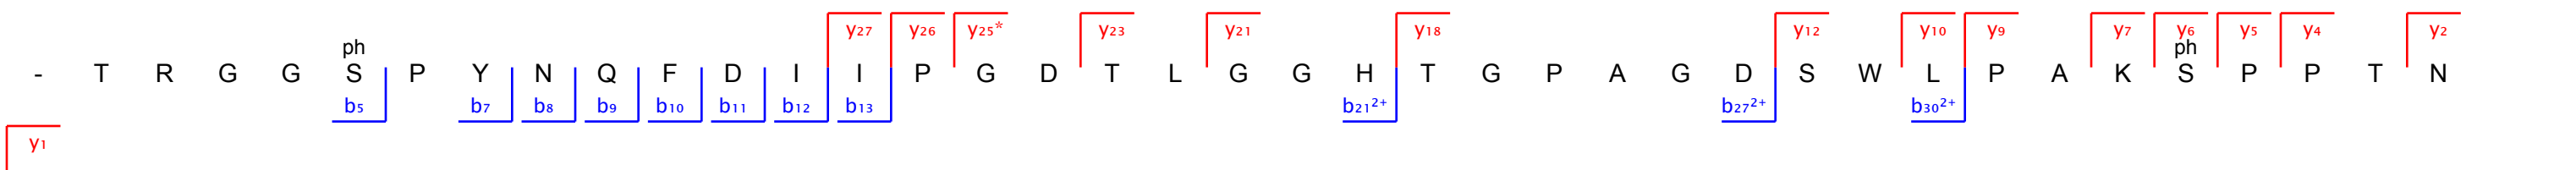

Raw file Scan Method Score m/z Gene names  
 20150814\_A375SR\_Phospho\_BR2\_03 24205 FTMS; HCD 276.31 969.08 ERF

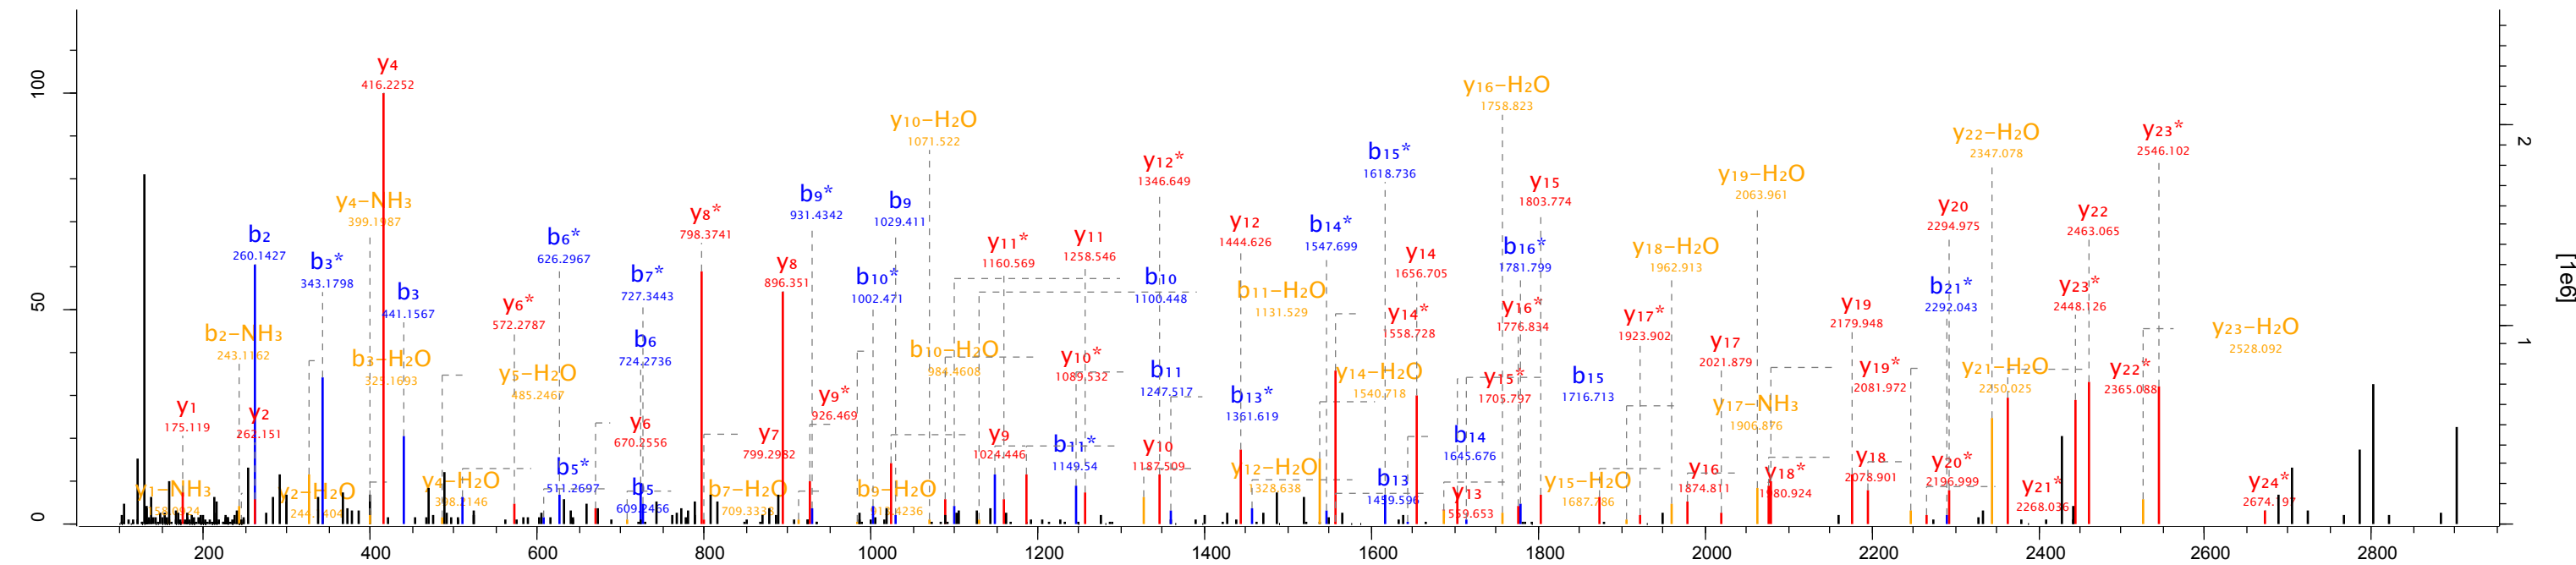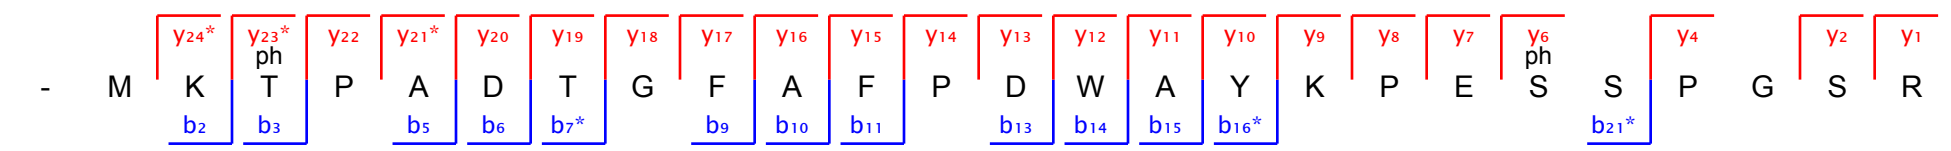

Raw file  
20150814\_A375SR\_Phospho\_BR2\_03

Scan 24355 Method FTMS; HCD Score 246.98 m/z 1247.2 Gene names PRKCDBP

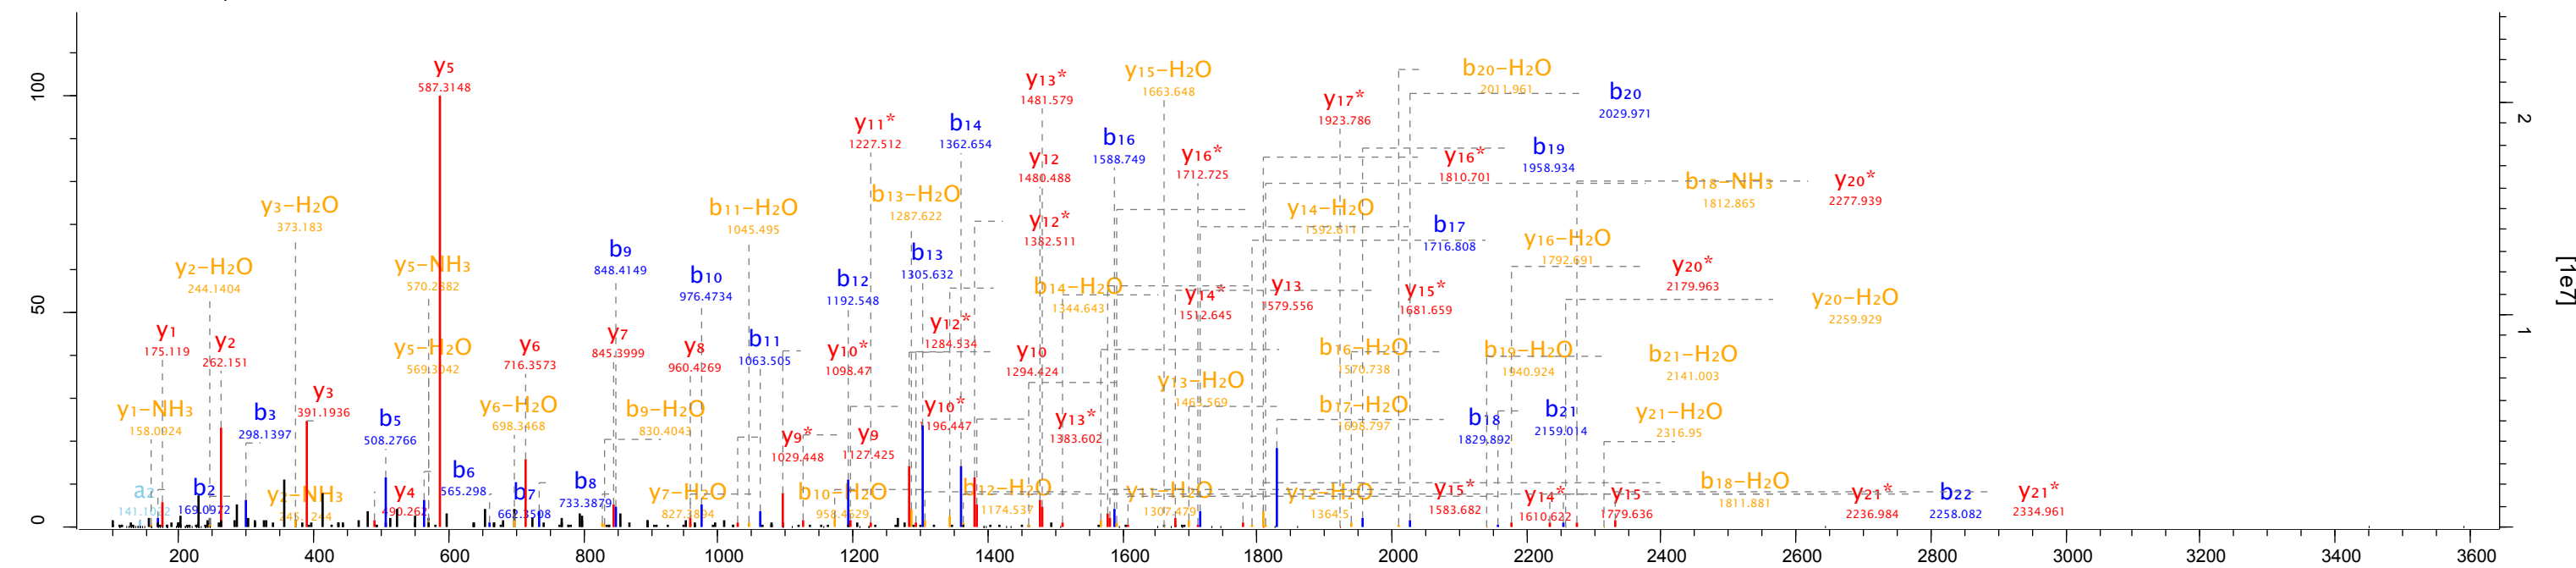

- A P E P L G P A D Q S E L G P E Q L E A E V G E S S D E E P V E S R -

Fragmentation mapping: b2, b3, b5, b6, b7, b8, b9, b10, b11, b12, b13, b14, b16, b17, b18, b19, b20, b21, b22, y1, y2, y3, y4, y5, y6, y7, y8, y9, y10, y11, y12, y13, y14, y15, y16, y17, y18, y20, y21, y22.

Raw file: 20150814\_A375SR\_Phospho\_BR2\_03  
 Scan: 24435 Method: FTMS; HCD Score: 102.47 m/z: 903.39 Gene names: KNOX1

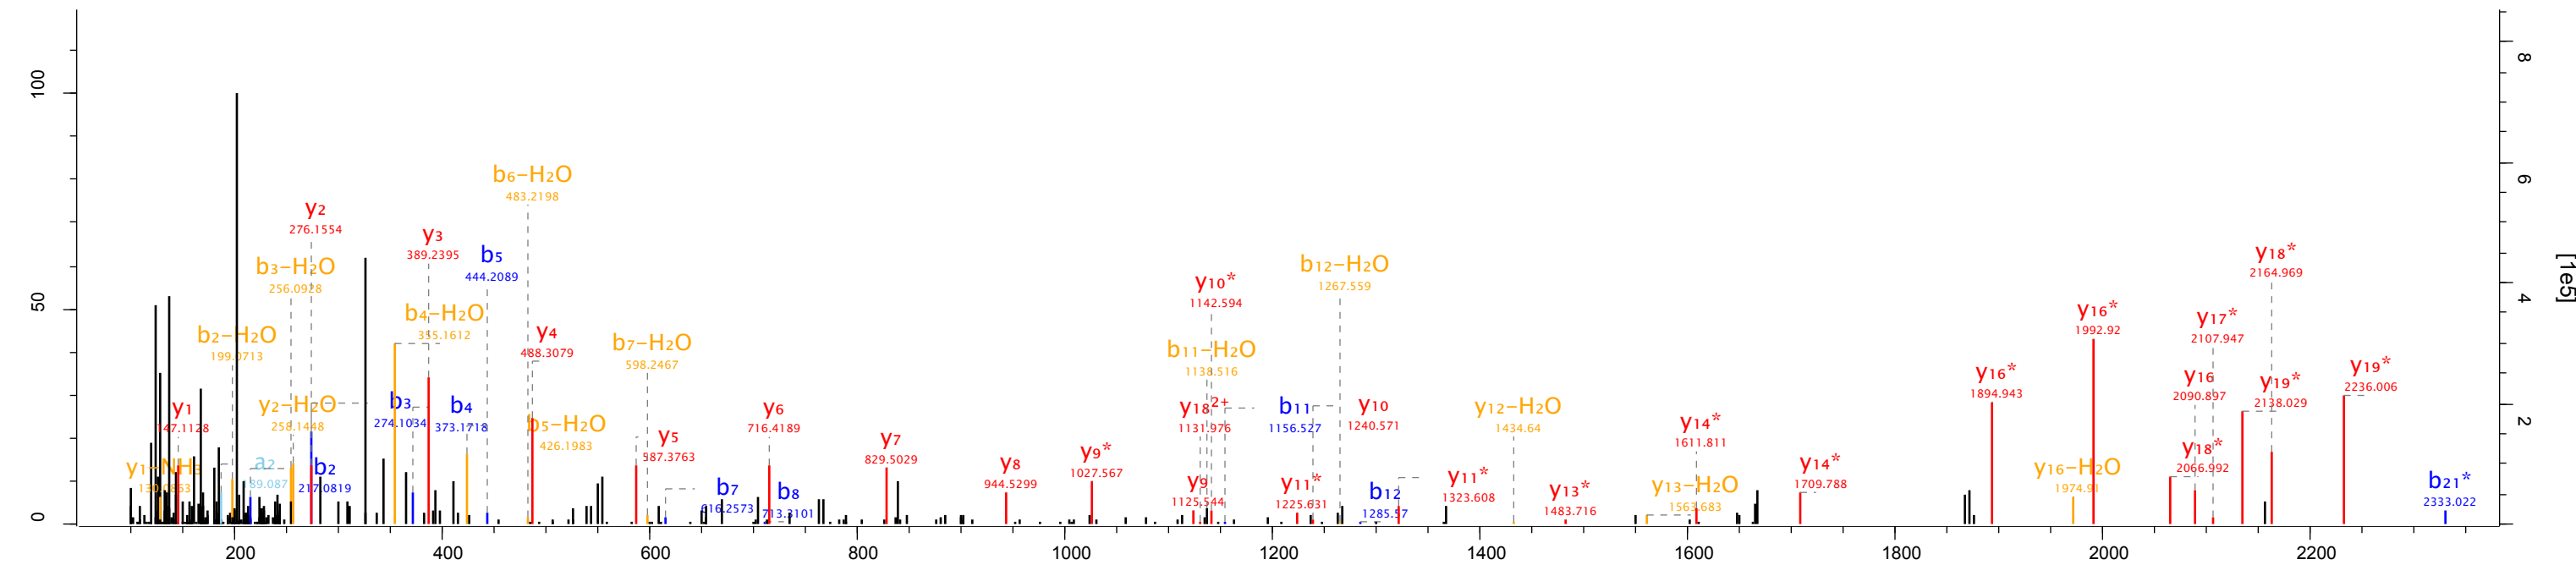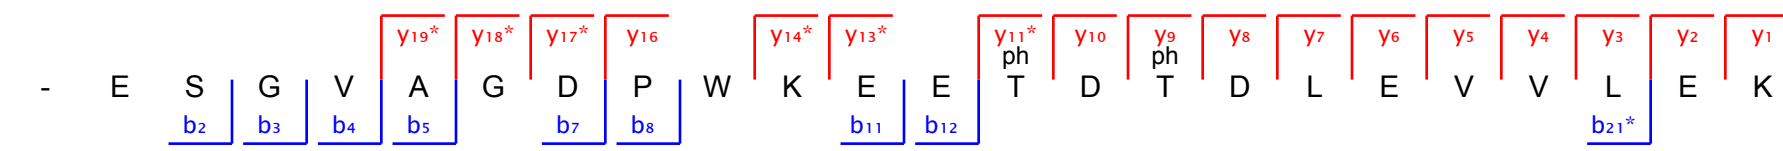

Raw file 20150814\_A375SR\_Phospho\_BR2\_03 Scan 24495 Method FTMS; HCD Score 297.74 m/z 1042 Gene names FLNA

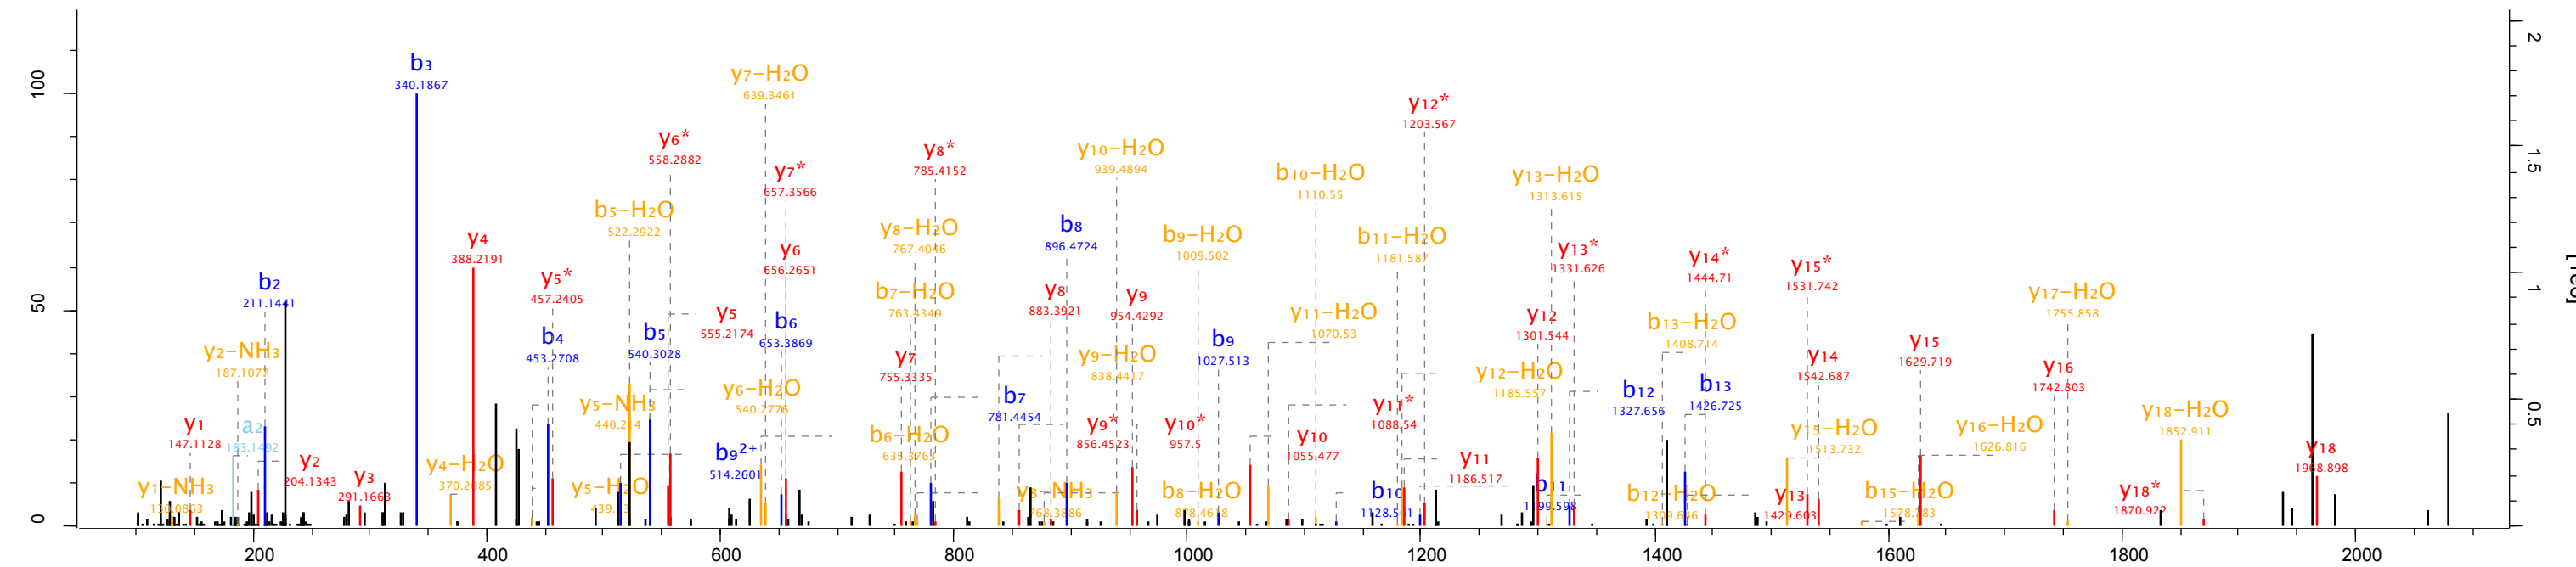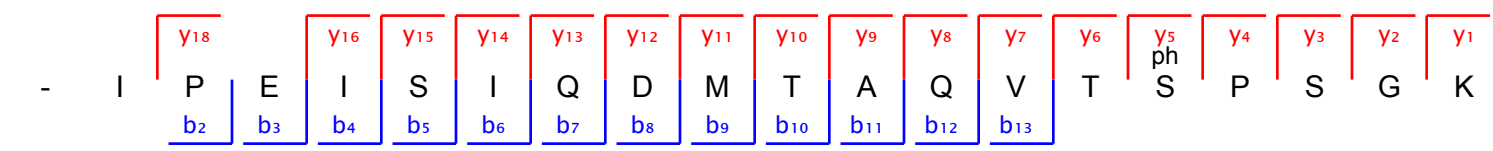

Raw file: 20150814\_A375SR\_Phospho\_BR2\_03  
 Scan: 25405 Method: FTMS; HCD Score: 123.24 m/z: 927.13 Gene names: MTOR

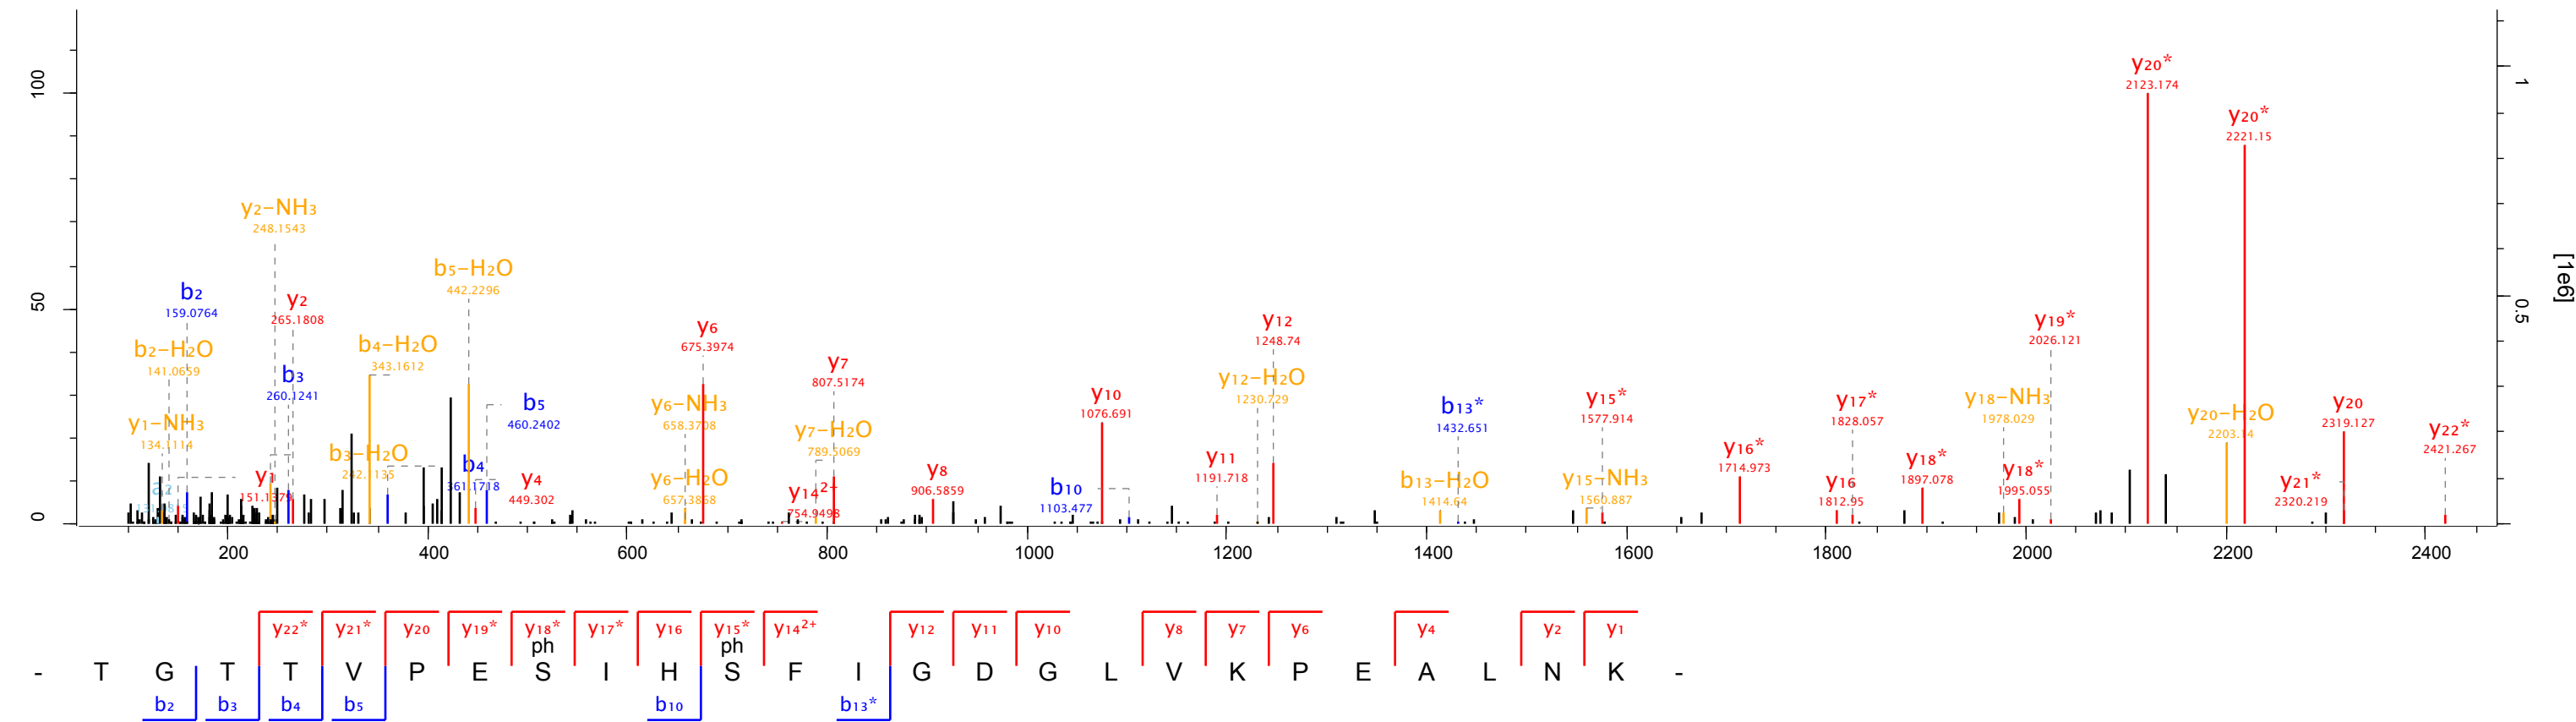



Raw file: 20150814\_A375SR\_Phospho\_BR2\_03  
 Scan: 25685 Method: FTMS; HCD Score: 185.96 m/z: 1010.92 Gene names: MAPK11P1L

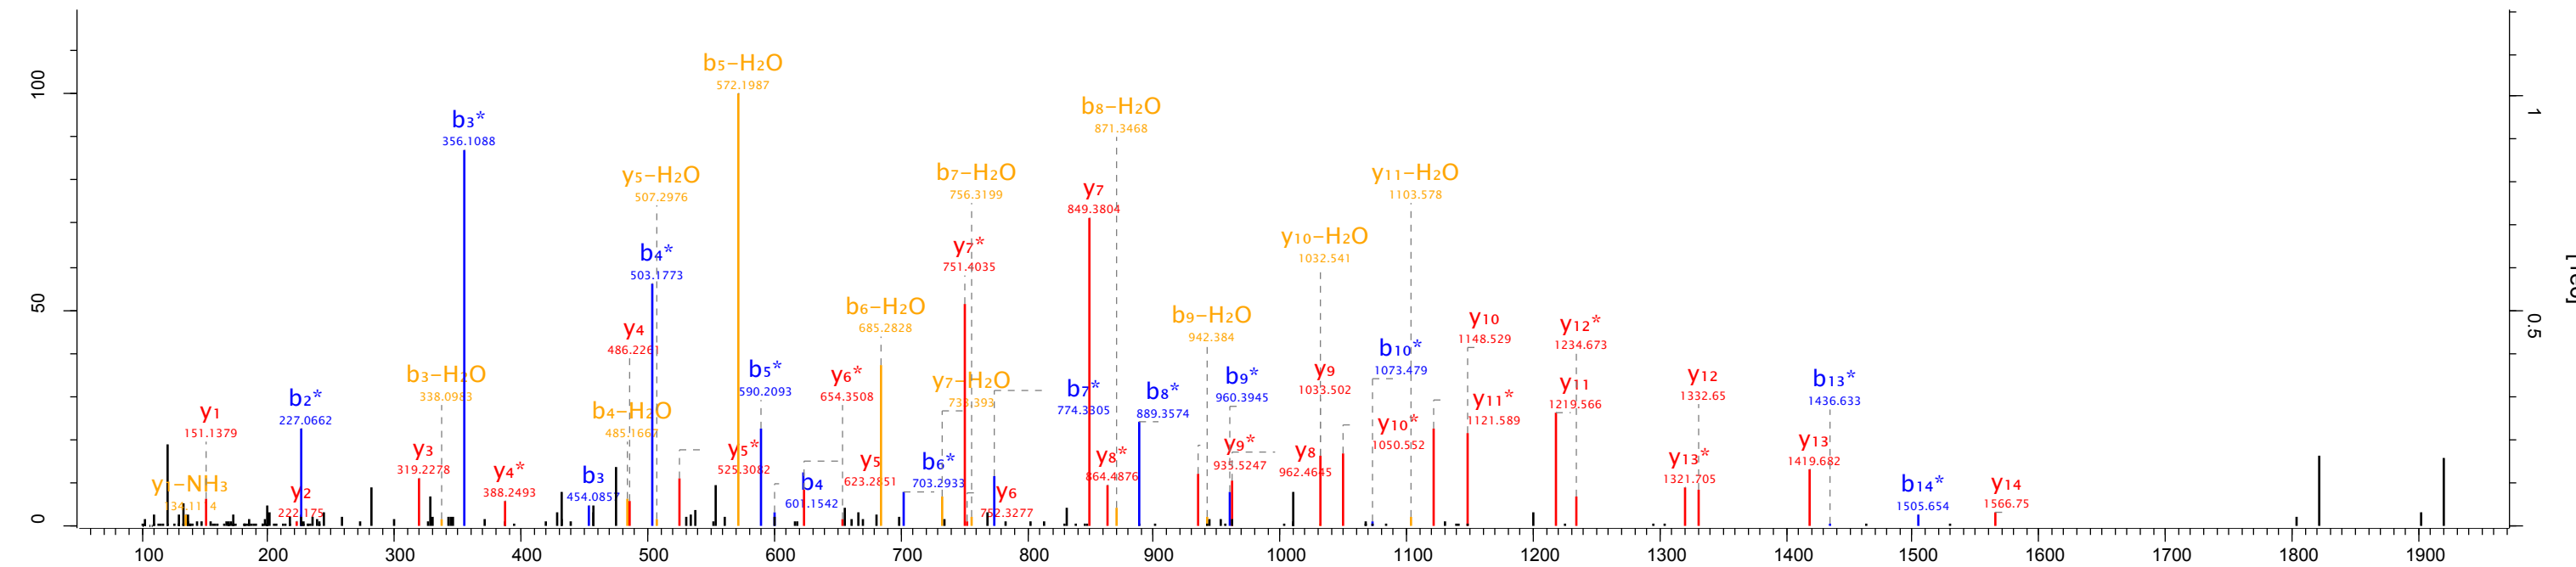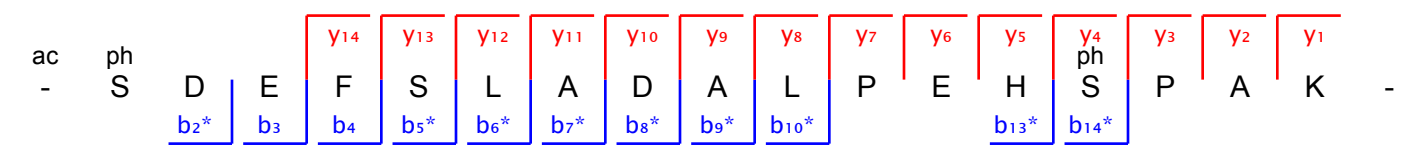

Raw file: 20150814\_A375SR\_Phospho\_BR2\_03  
 Scan: 26075 Method: FTMS; HCD Score: 96.02 m/z: 876.9 Gene names: NUP35

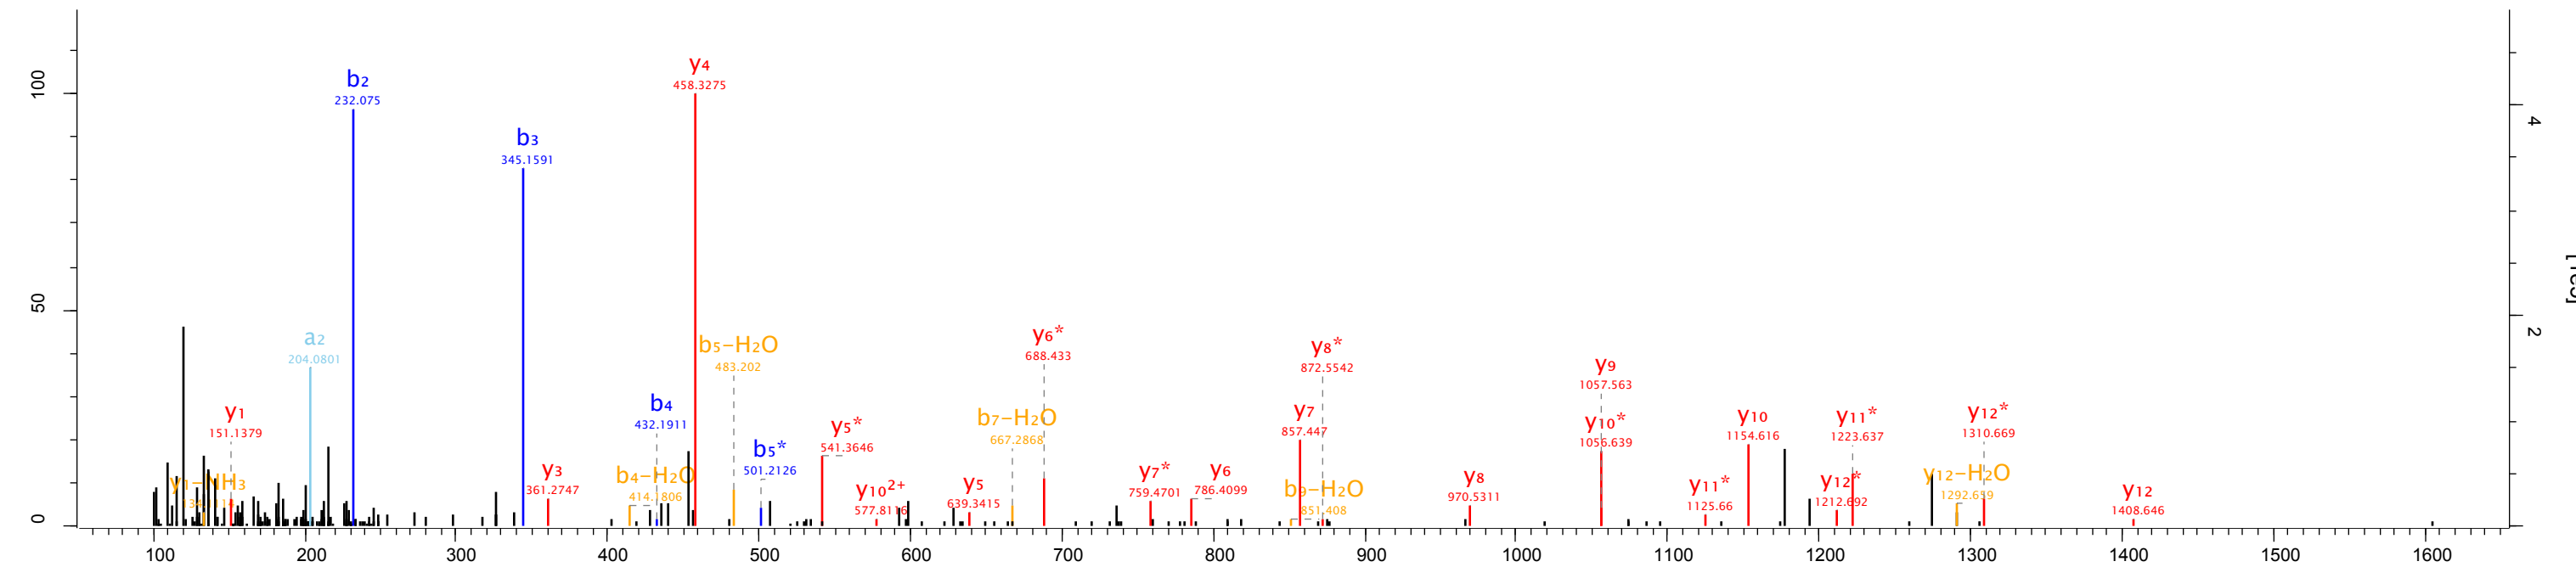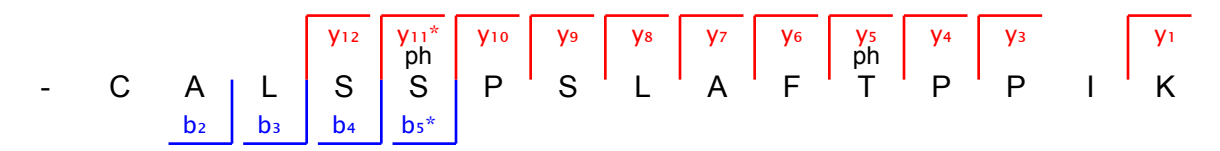

Raw file: 20150814\_A375SR\_Phospho\_BR2\_03  
 Scan: 26105 Method: FTMS; HCD Score: 169.58 m/z: 835.32 Gene names: MAP4

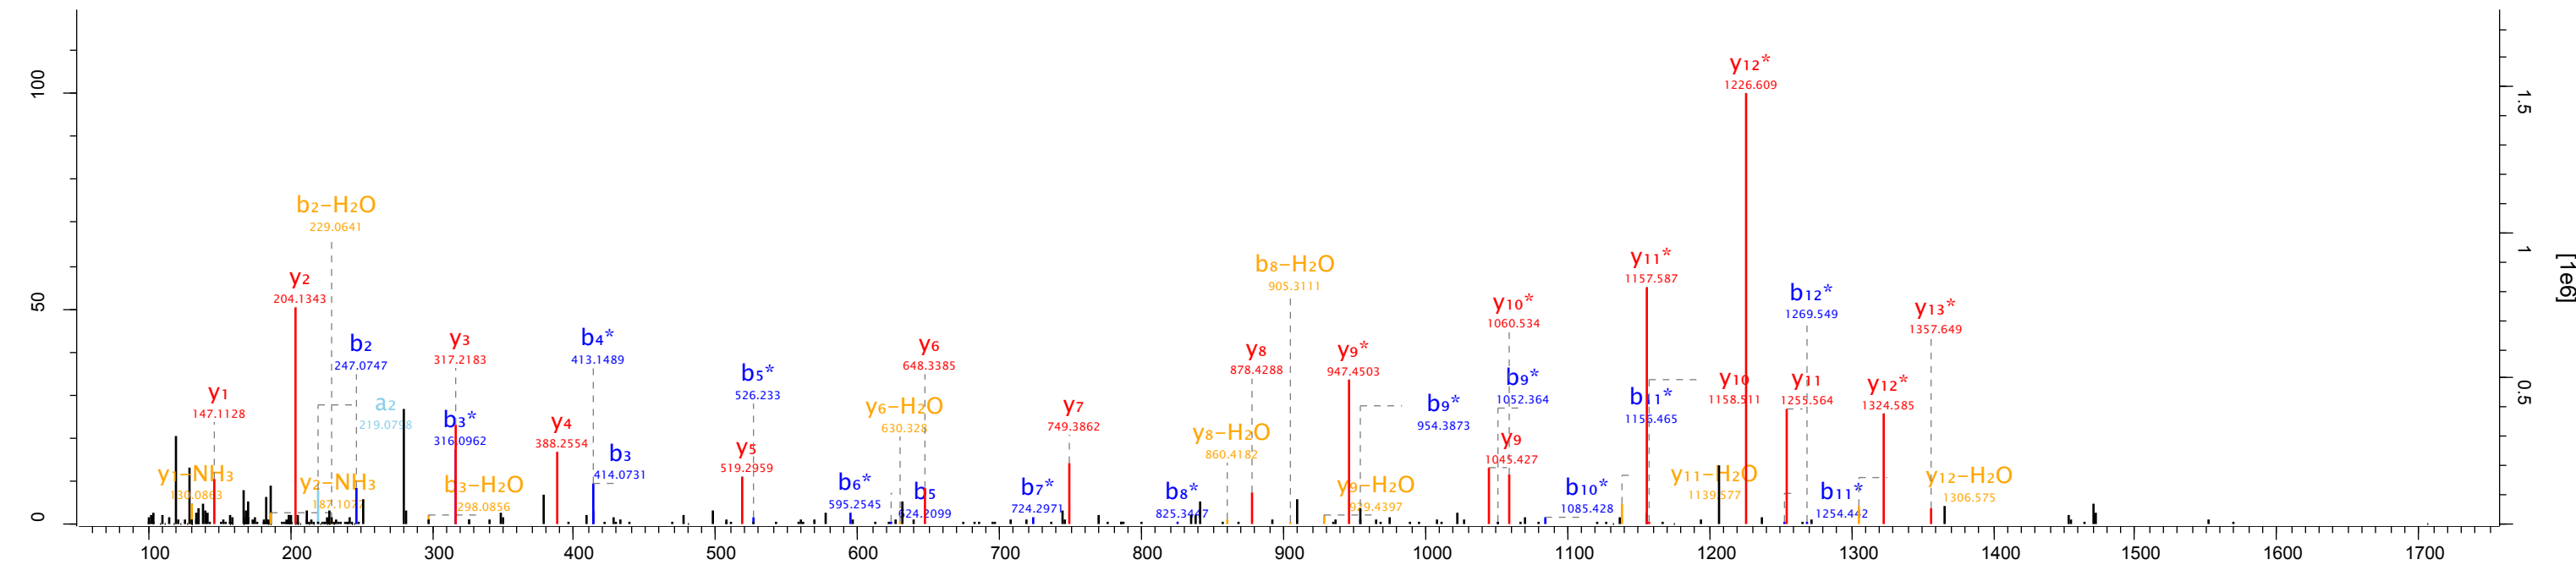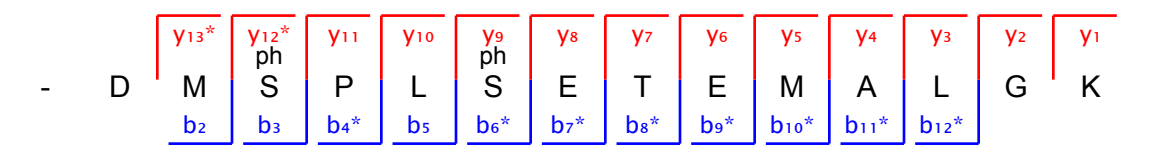

Raw file  
20150814\_A375SR\_Phospho\_BR2\_03

Scan 26205 Method FTMS; HCD Score 90.17 m/z 1028.17 Gene names AMOTL2

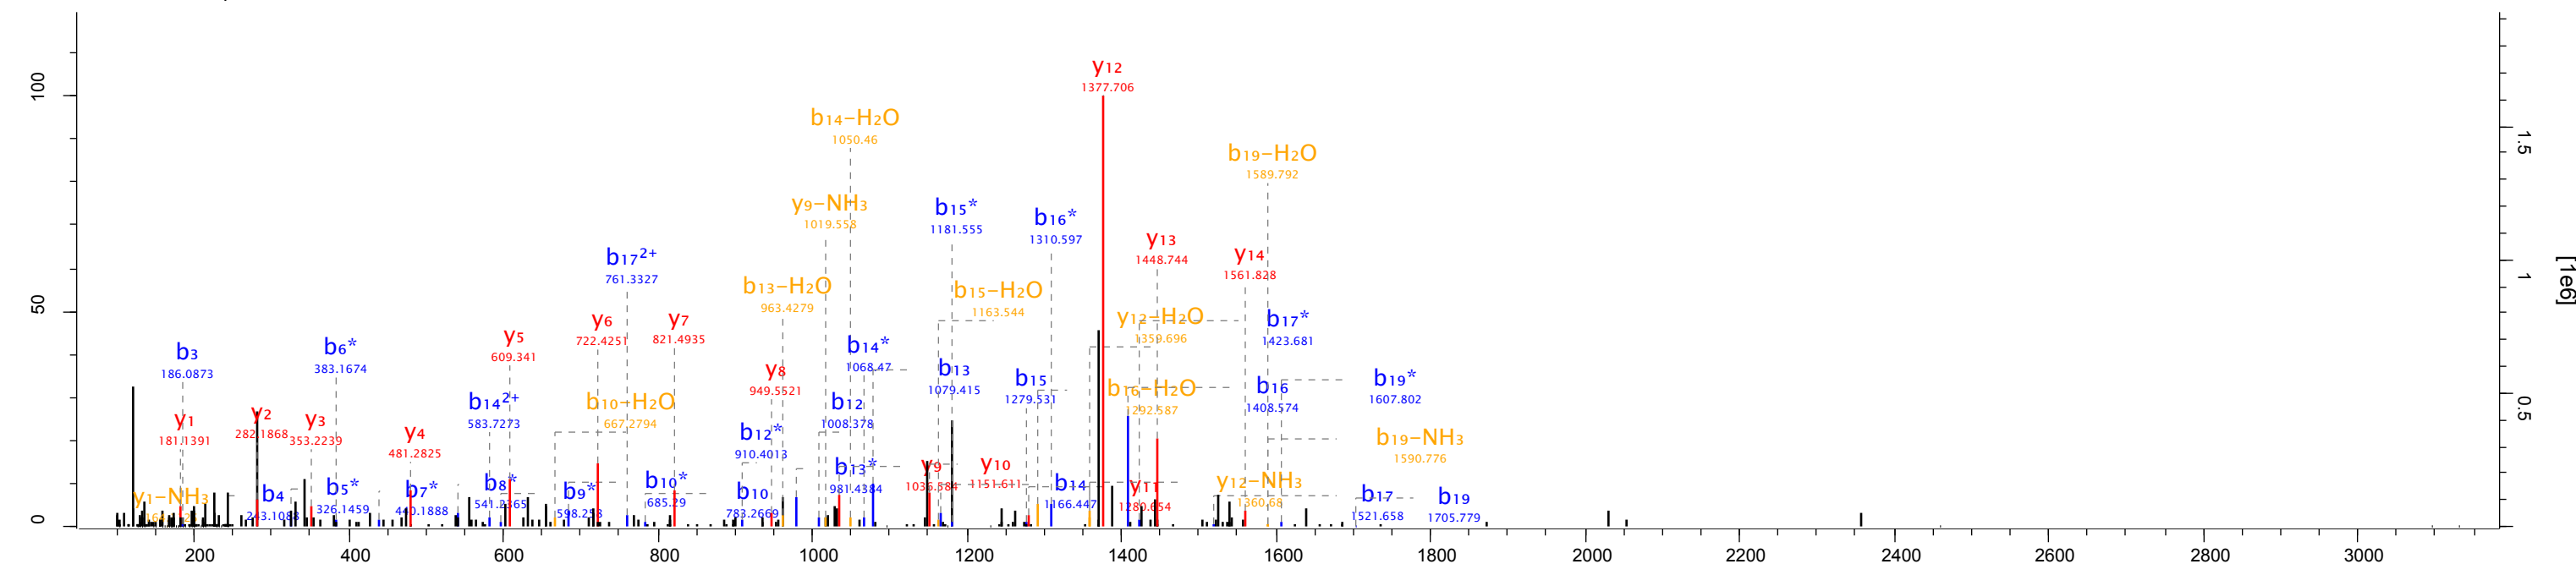

- G G A G T G G T G S P Q A S L E I L A P E D S Q V L Q Q A T R -

ph

b3 b4 b5\* b6\* b7\* b8\* b9\* b10 b12 b13 b14 b15 b16 b17 b19 y14 y13 y12 y11 y10 y9 y8 y7 y6 y5 y4 y3 y2 y1

Raw file: 20150814\_A375SR\_Phospho\_BR2\_03  
 Scan: 27135 Method: FTMS; HCD Score: 50.86 m/z: 987.74 Gene names: ERBB2IP

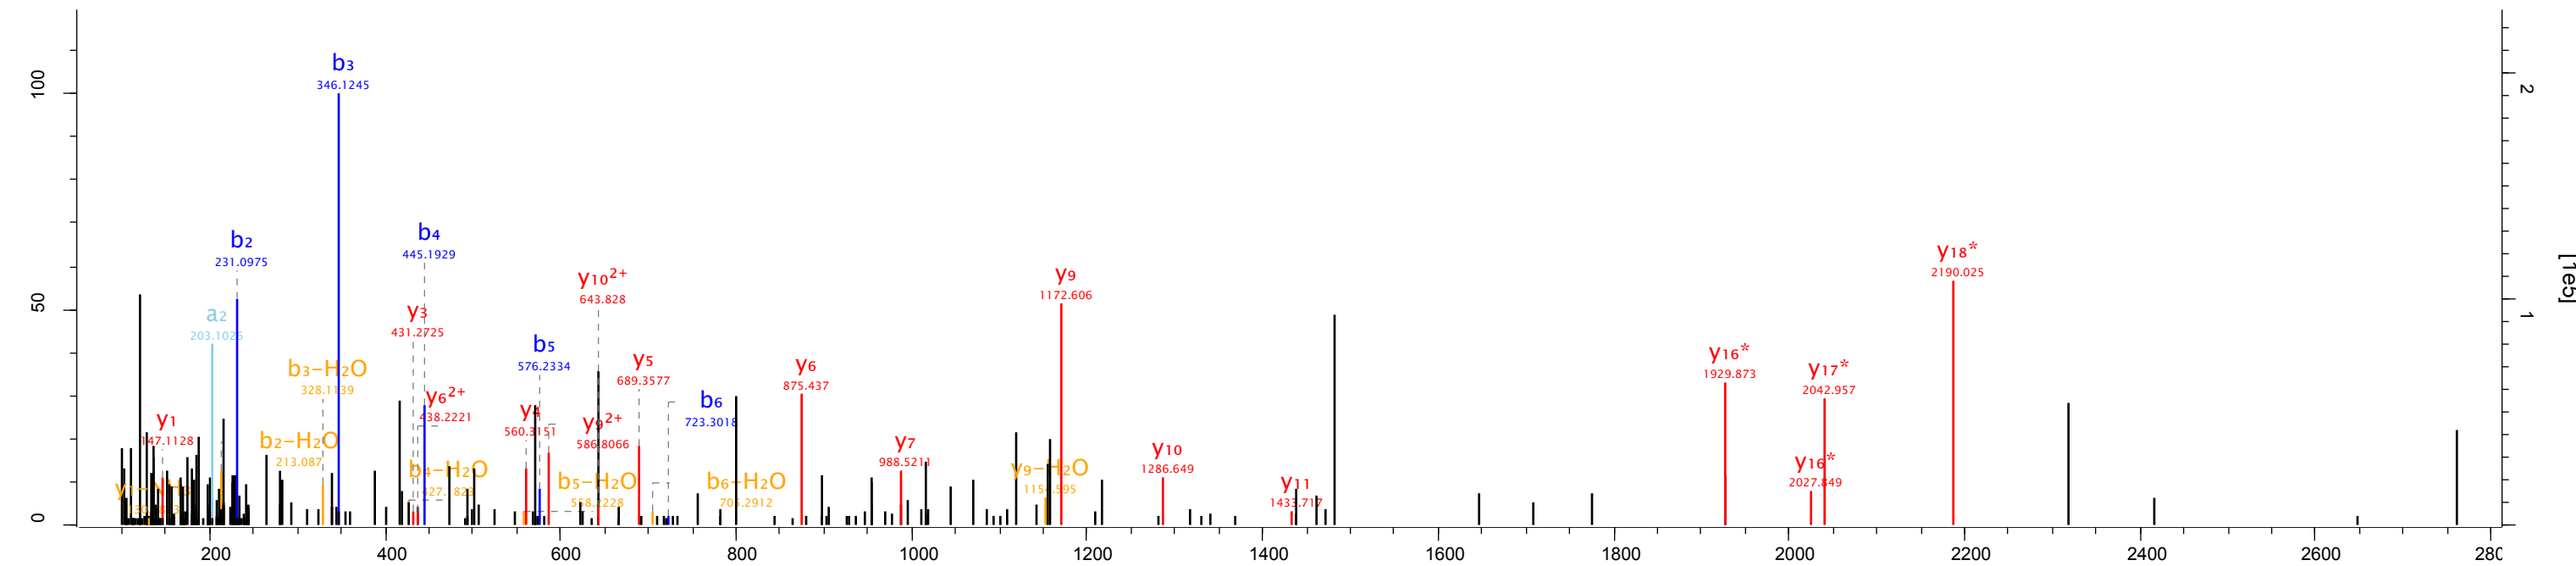

Sequence: - T E D V M F I S D N E S F N P S L W E E Q R K -

Fragmentation sites (b and y ions) are indicated by brackets below the sequence:

- b<sub>2</sub> (E-D)
- b<sub>3</sub> (D-V)
- b<sub>4</sub> (V-M)
- b<sub>5</sub> (M-F)
- b<sub>6</sub> (F-I)
- y<sub>18</sub><sup>\*</sup> (F-I)
- y<sub>17</sub><sup>\*</sup> (I-S)
- y<sub>16</sub><sup>\*</sup> (S-D)
- y<sub>11</sub> (S-F)
- y<sub>10</sub> (F-N)
- y<sub>9</sub> (N-P)
- y<sub>7</sub> (S-L)
- y<sub>6</sub> (L-W)
- y<sub>5</sub> (W-E)
- y<sub>4</sub> (E-E)
- y<sub>3</sub> (E-Q)
- y<sub>1</sub> (Q-R)

Raw file: 20150814\_A375SR\_Phospho\_BR2\_03  
 Scan: 27165 Method: FTMS; HCD Score: 80.75 m/z: 1116.47 Gene names: SUDS3

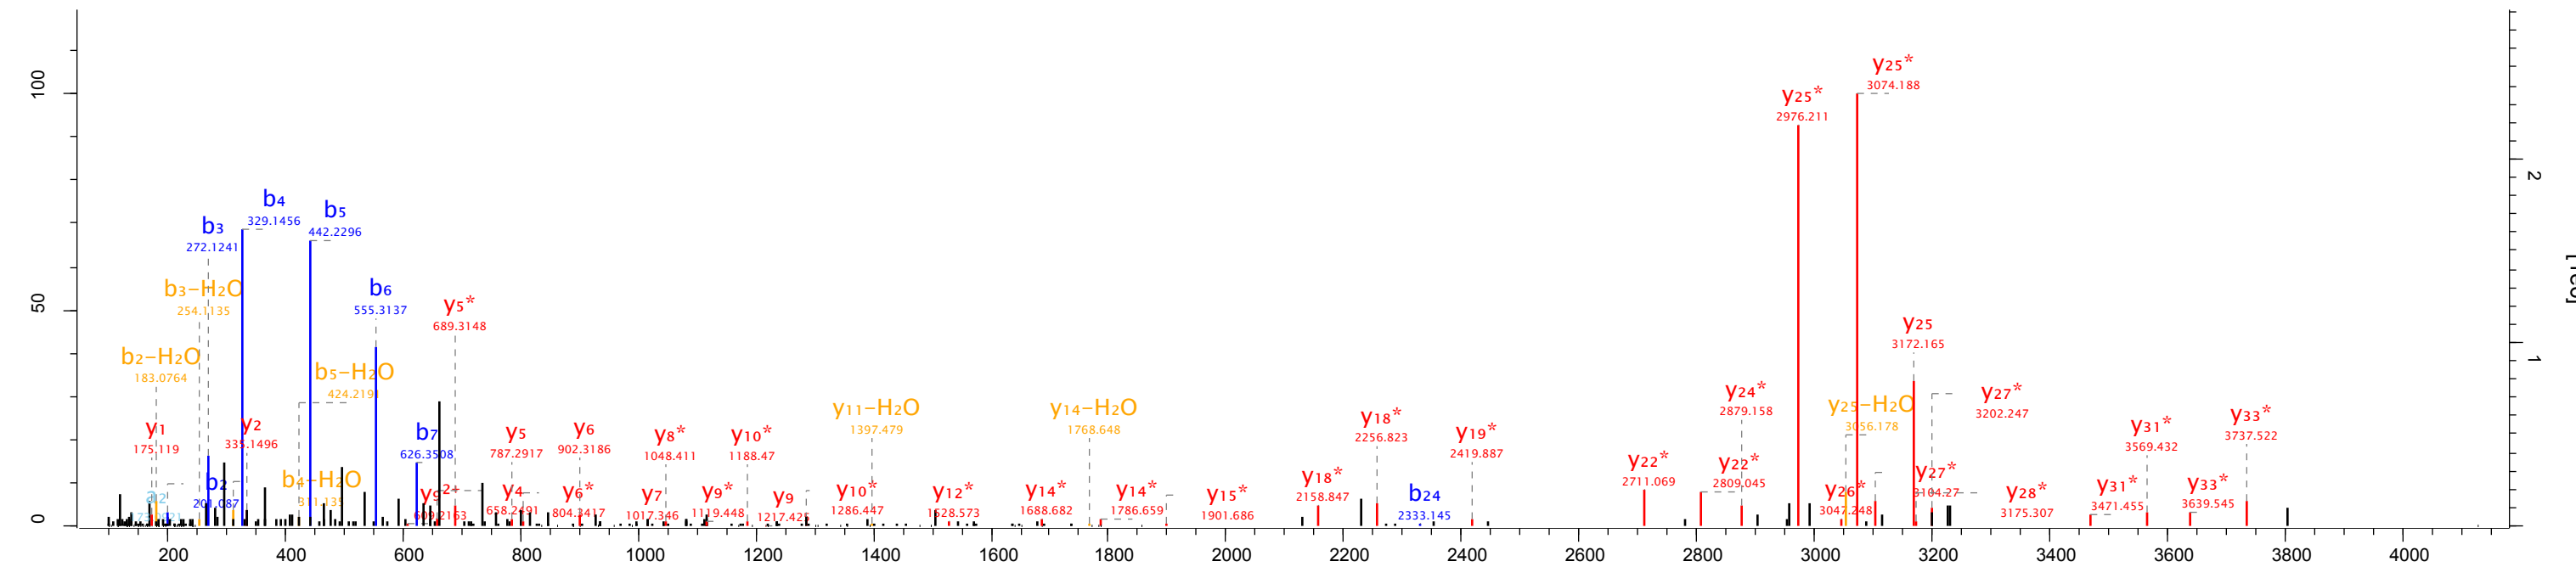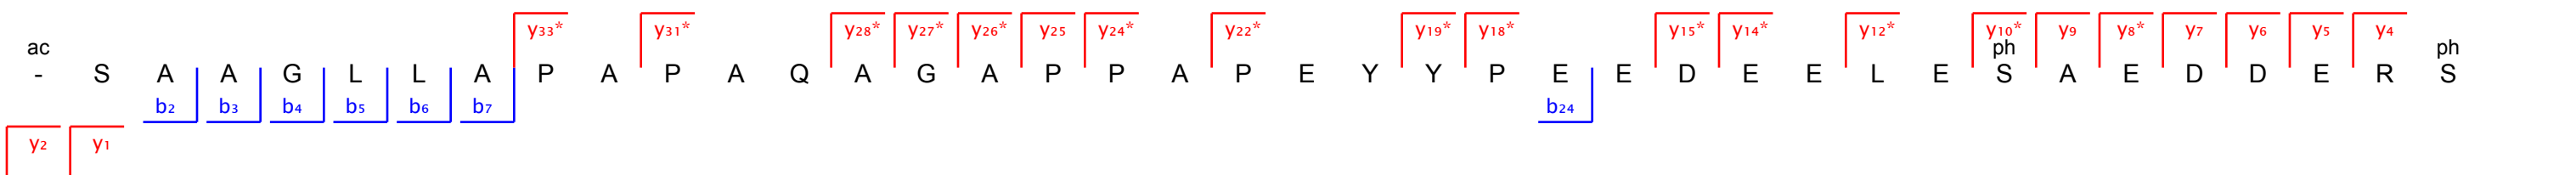

Raw file Scan Method Score m/z Gene names  
 20150814\_A375SR\_Phospho\_BR2\_03 27265 FTMS; HCD 119.74 1035.85 SPEN

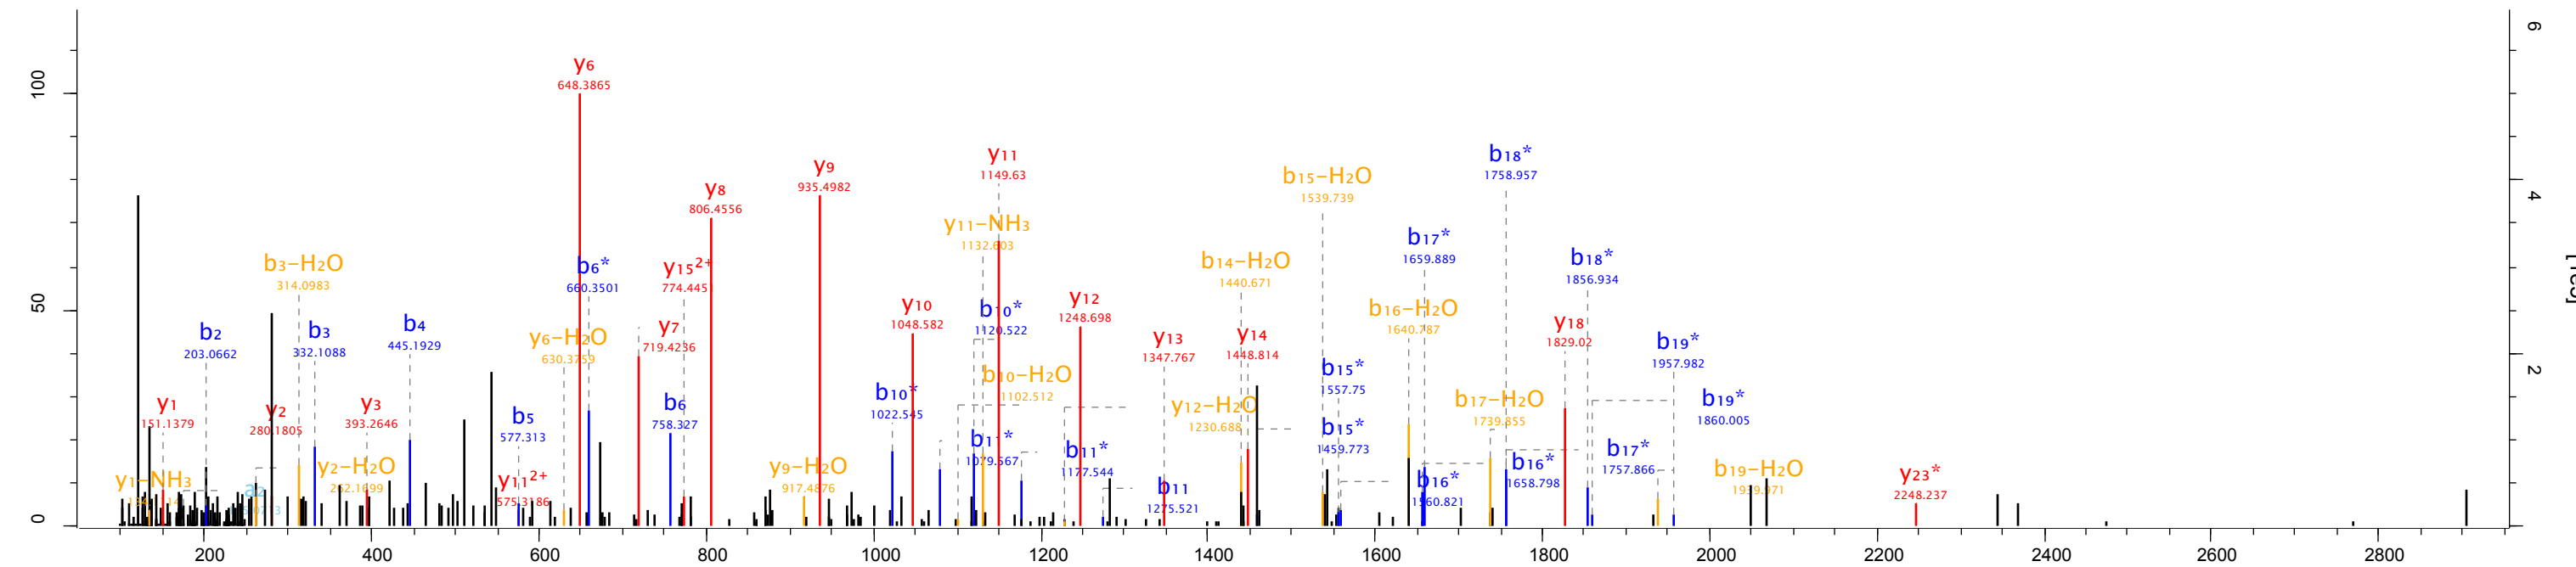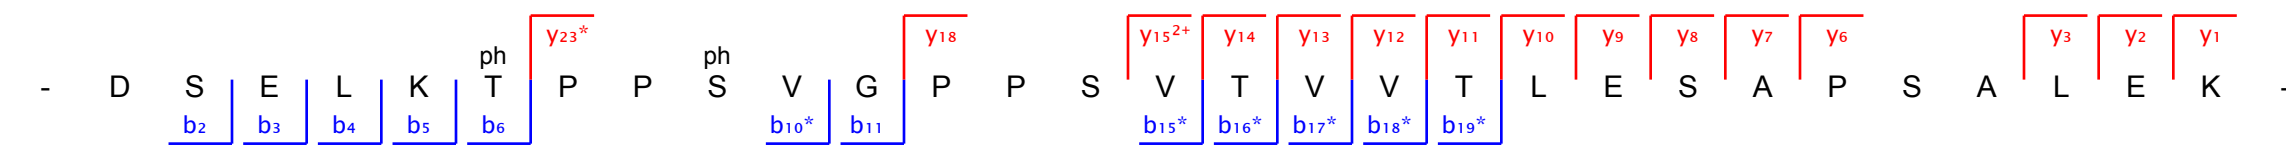

Raw file: 20150814\_A375SR\_Phospho\_BR2\_03  
 Scan: 27325 Method: FTMS; HCD Score: 162.49 m/z: 1585.66 Gene names: ESF1

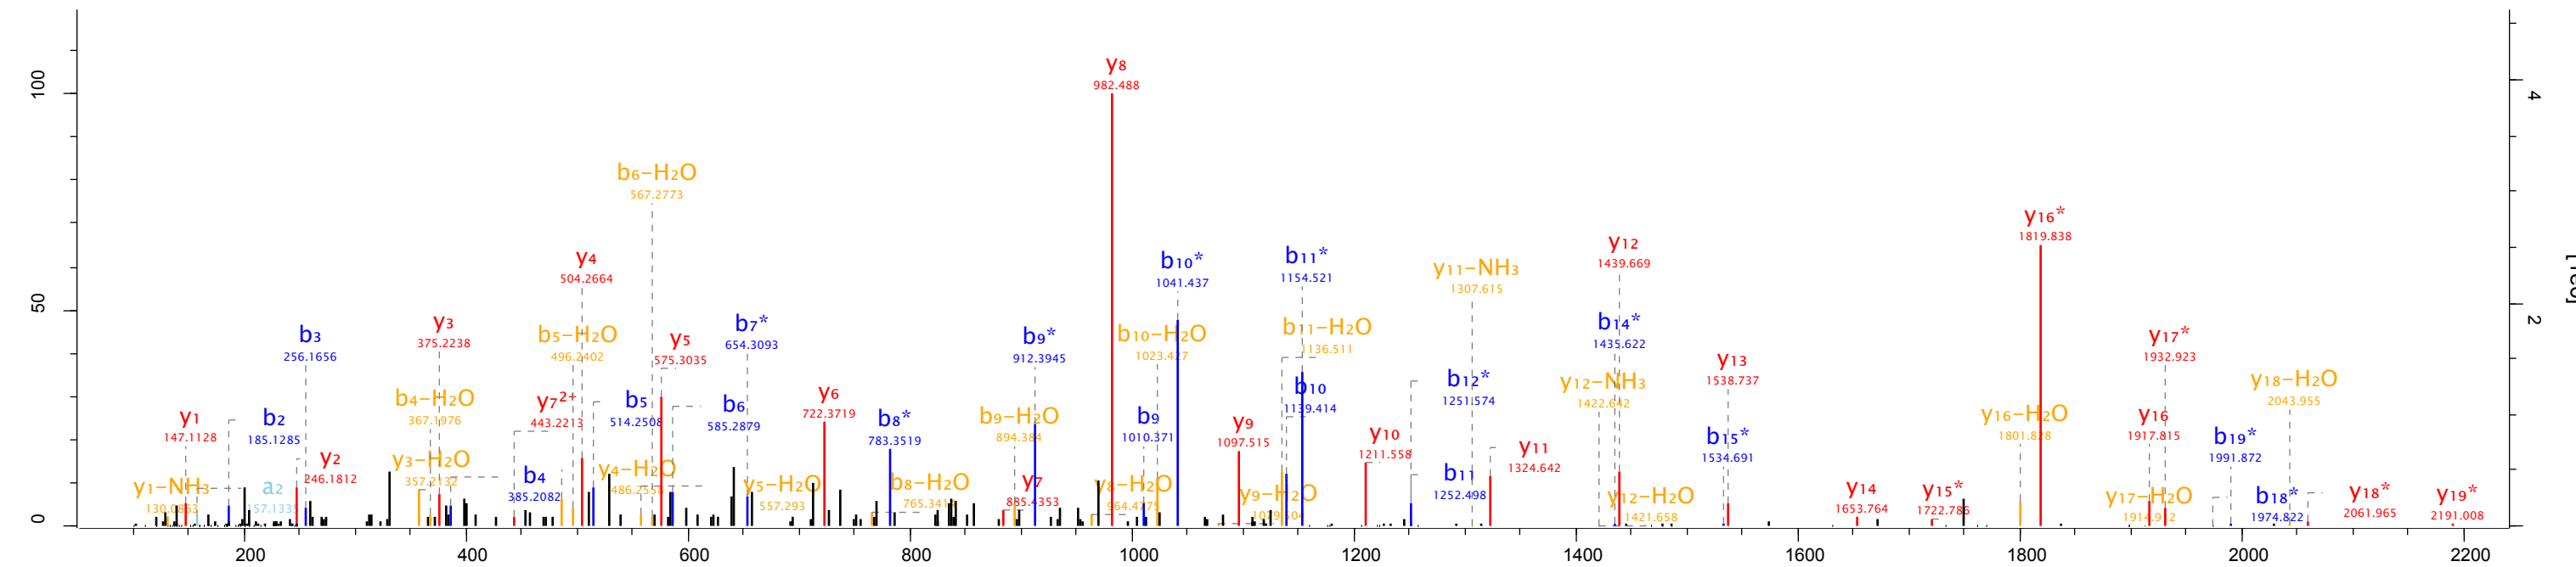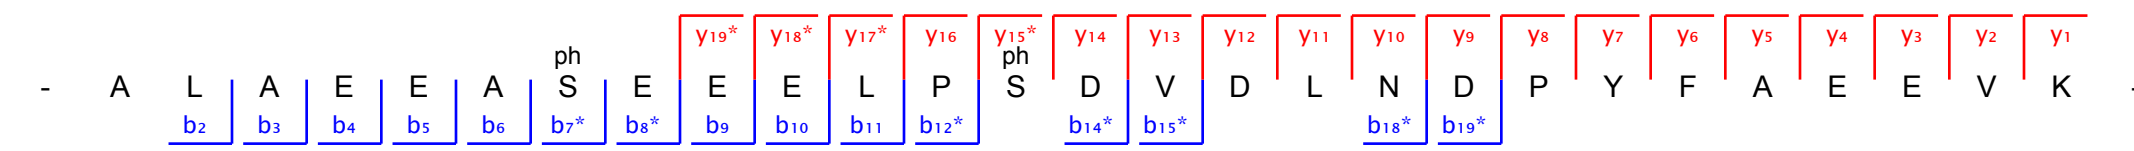



Raw file: 20150814\_A375SR\_Phospho\_BR2\_03  
 Scan: 27355 Method: FTMS; HCD Score: 170.8 m/z: 1128.06 Gene names: AFF4

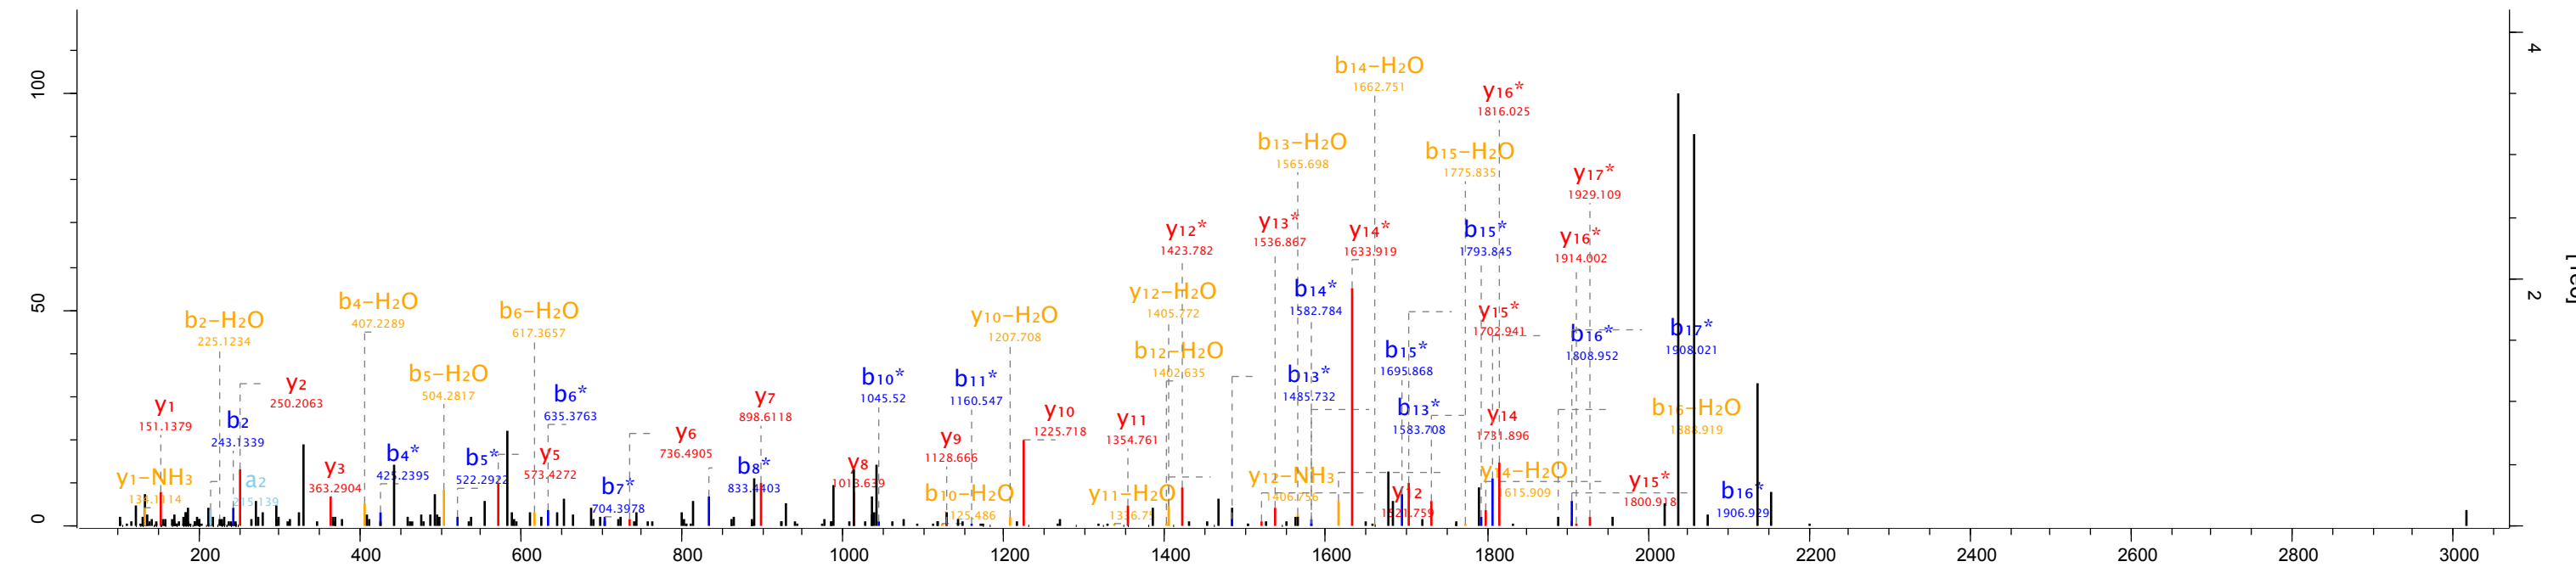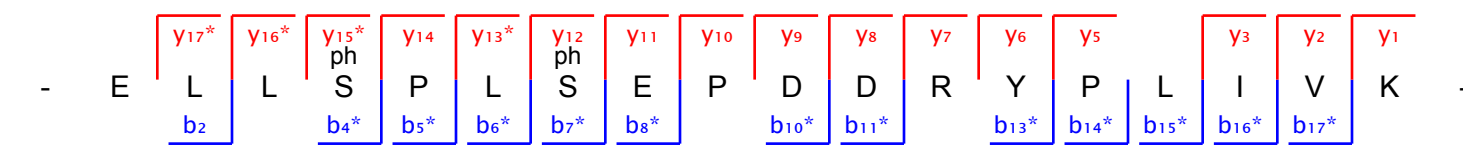

Raw file: 20150814\_A375SR\_Phospho\_BR2\_03  
 Scan: 27395 Method: FTMS; HCD Score: 144.27 m/z: 863.43 Gene names: NCAPD3

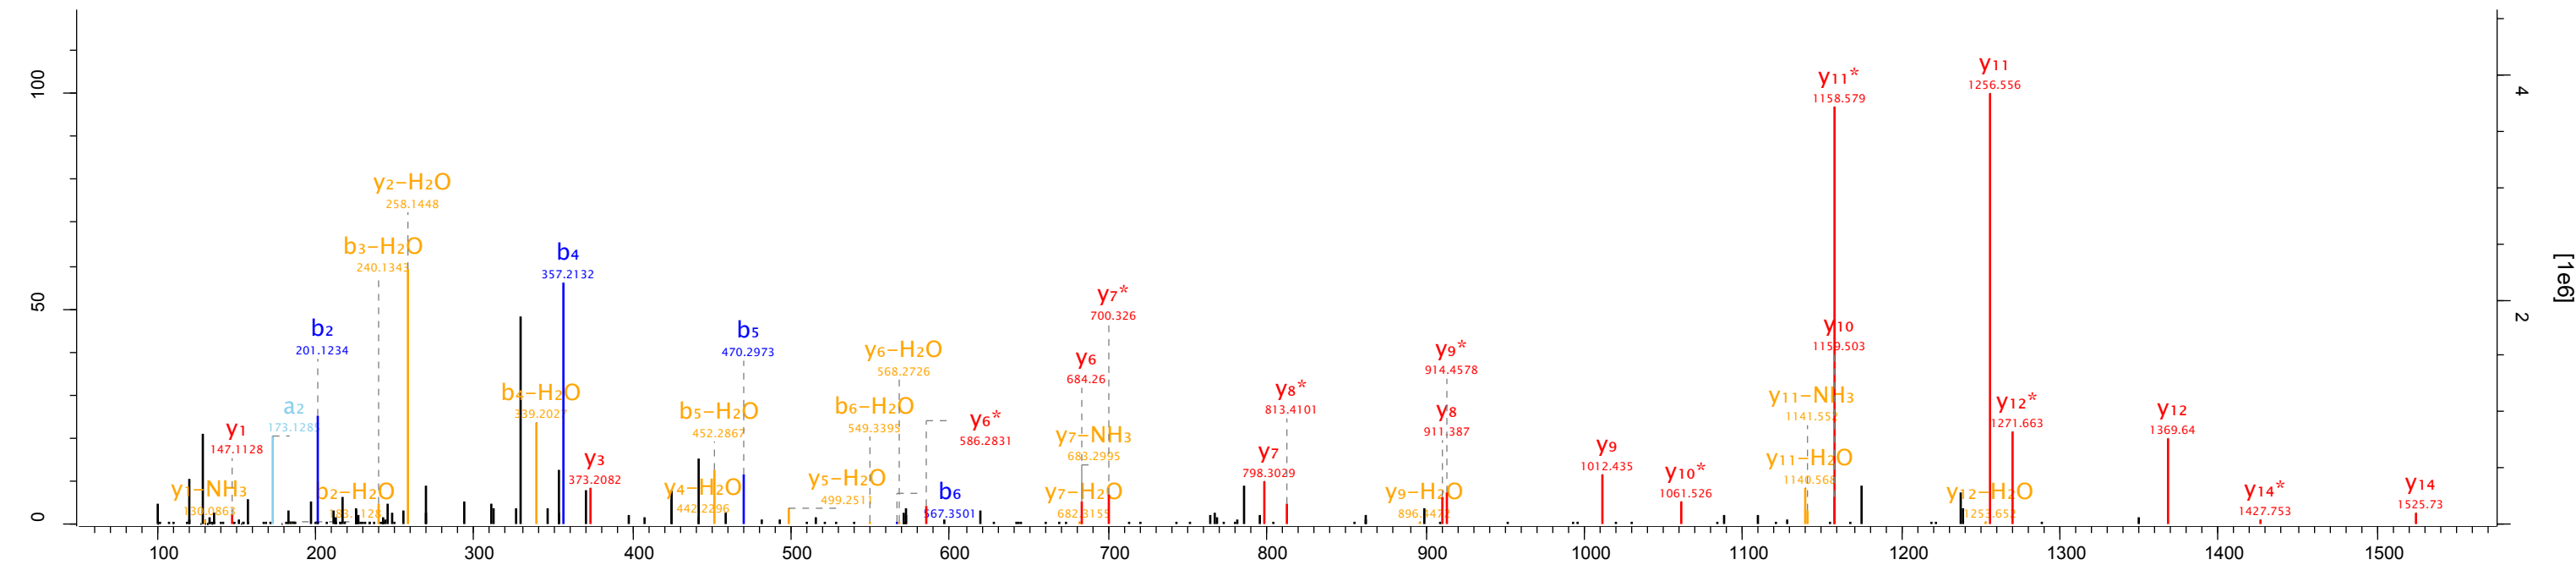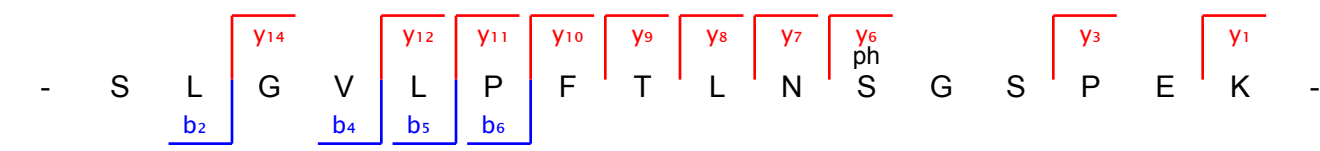

Raw file 20150814\_A375SR\_Phospho\_BR2\_03 Scan 28105 Method FTMS; HCD Score 65.99 m/z 1253.24 Gene names FERMT2

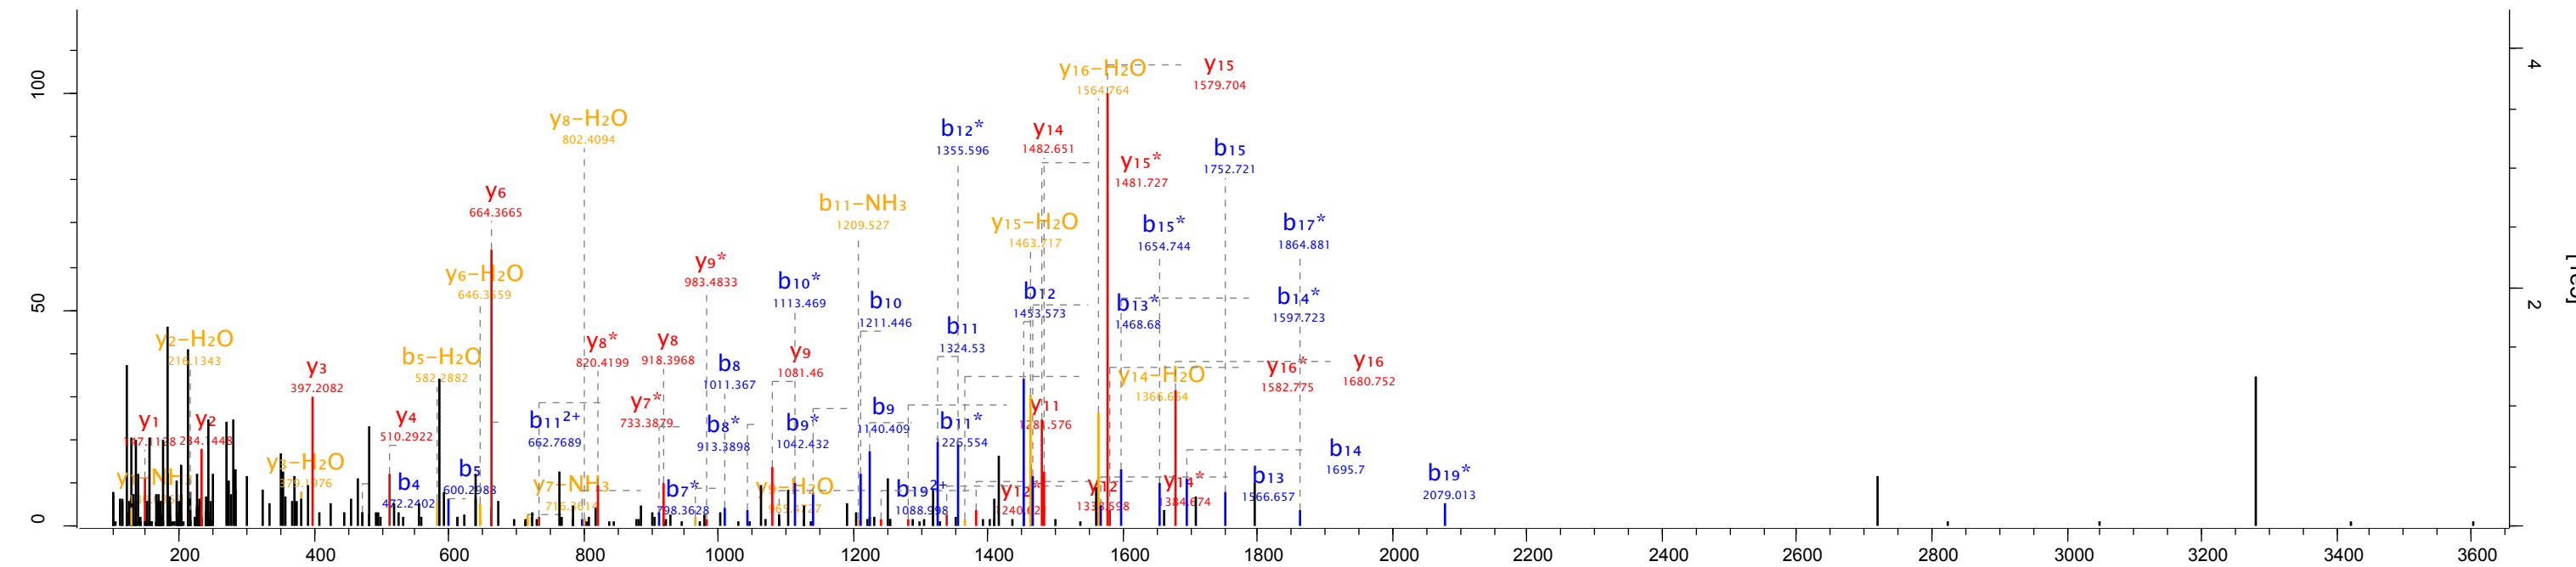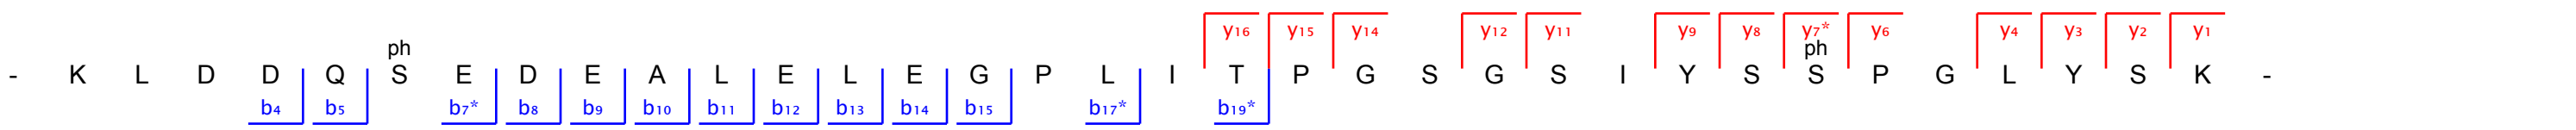

Raw file: 20150814\_A375SR\_Phospho\_BR2\_03  
 Scan: 28305 Method: FTMS; HCD Score: 138.02 m/z: 922.75 Gene names: SBNO1

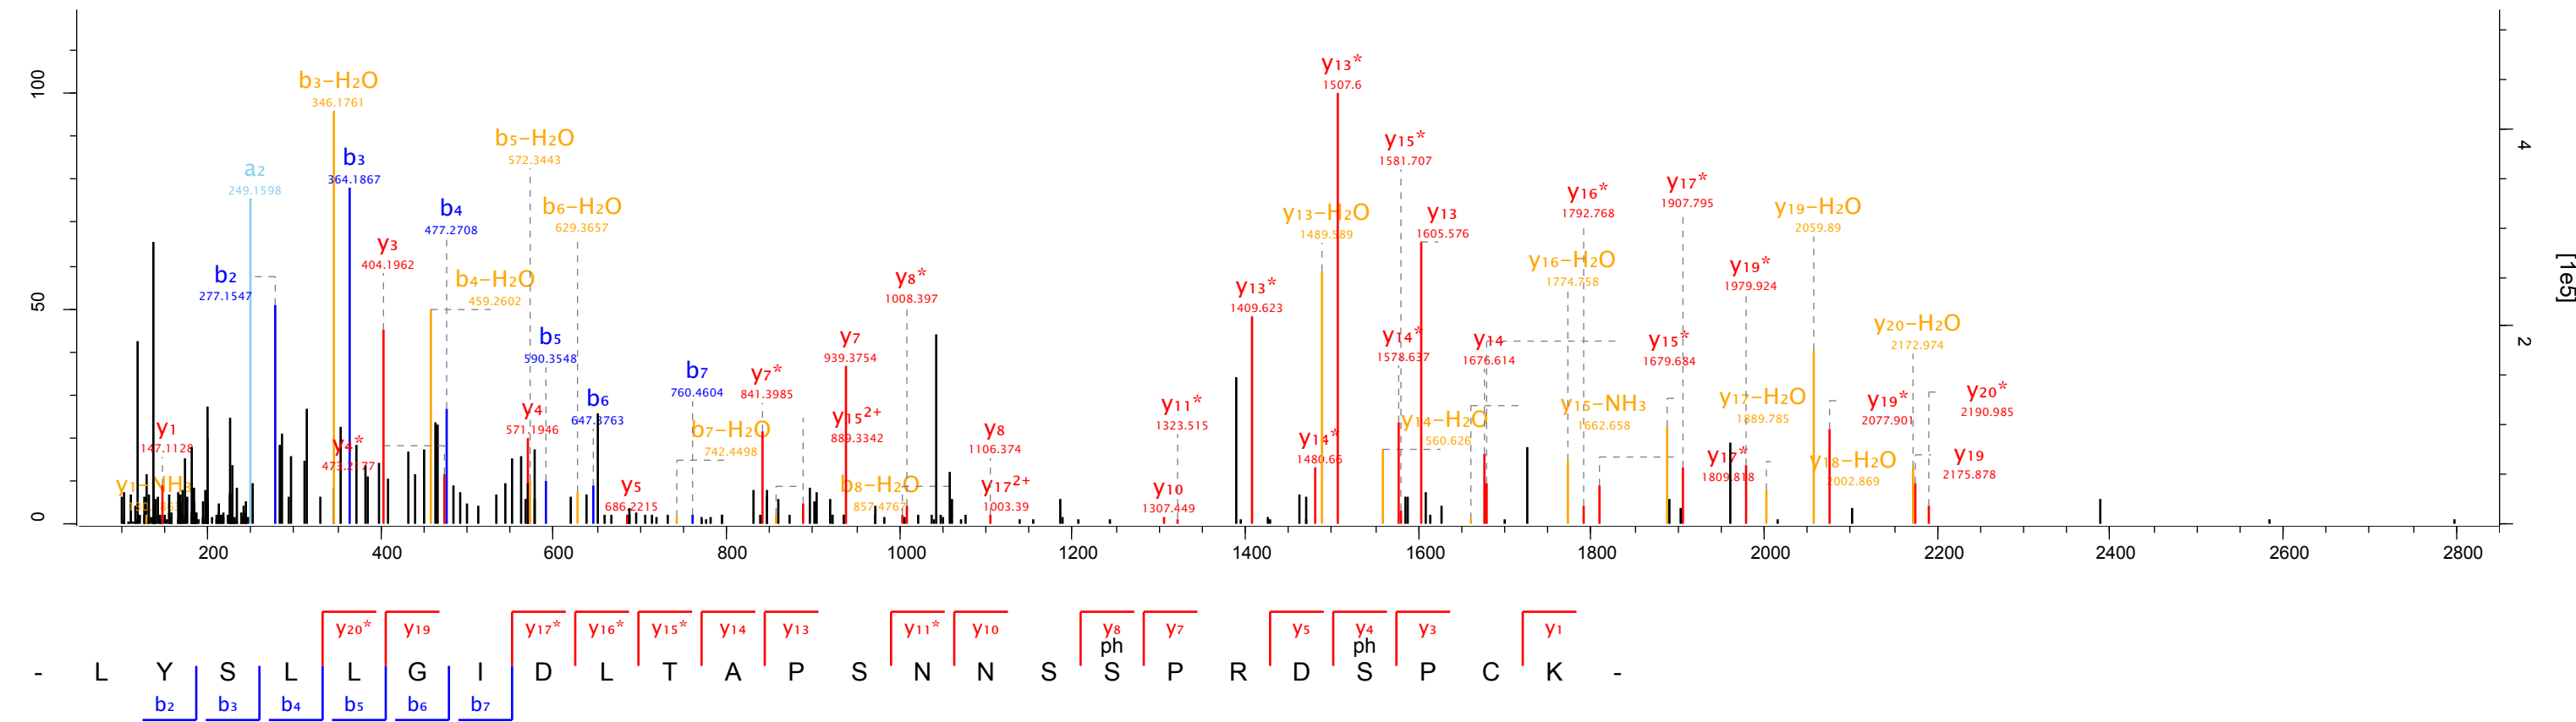

Raw file Scan Method Score m/z Gene names  
 20150814\_A375SR\_Phospho\_BR2\_03 28315 FTMS; HCD 202.49 785.68 TOM1L2

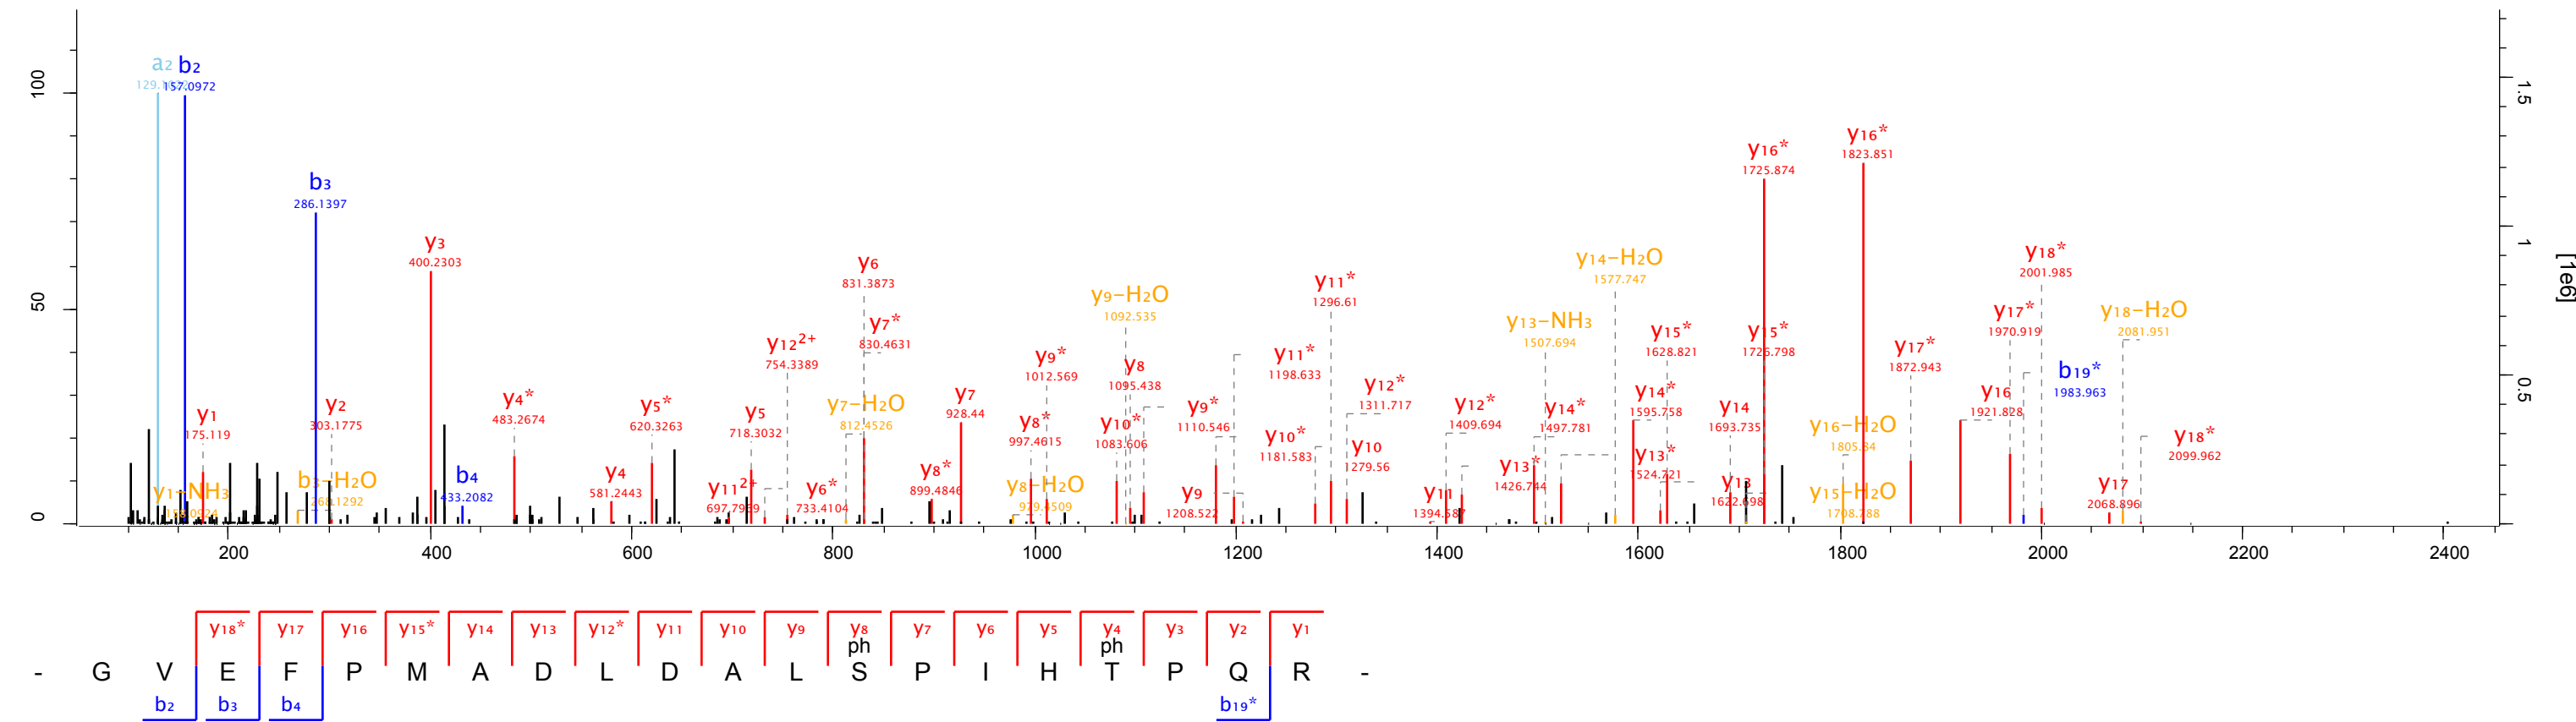

Raw file: 20150814\_A375SR\_Phospho\_BR2\_03  
 Scan: 28355 Method: FTMS; HCD Score: 216.29 m/z: 1127.99 Gene names: RBM12B

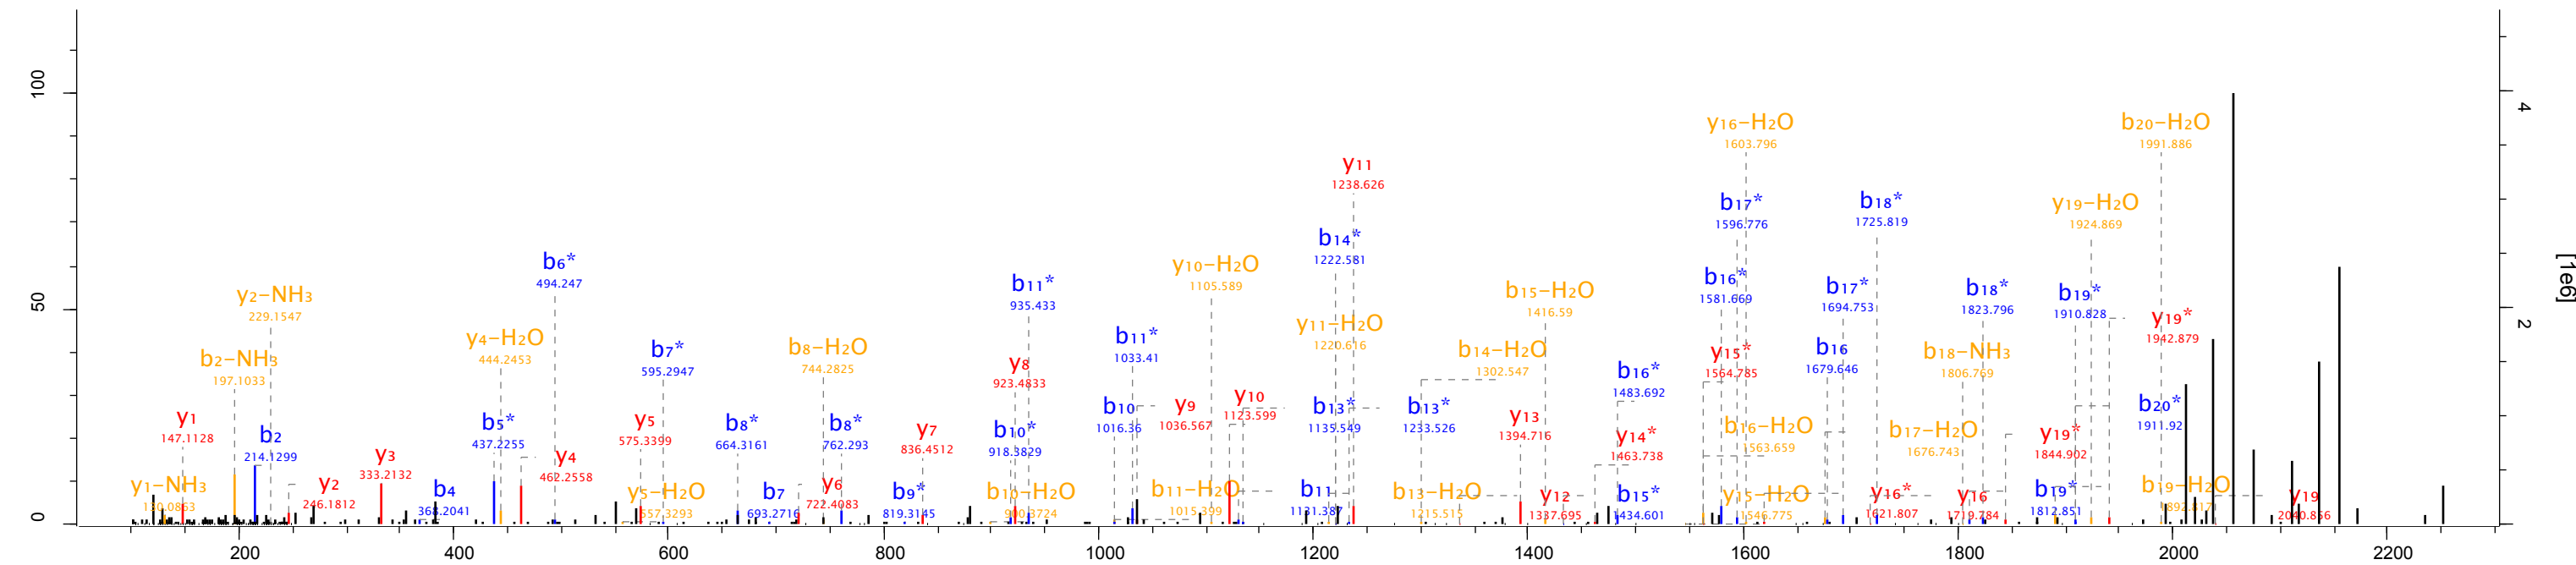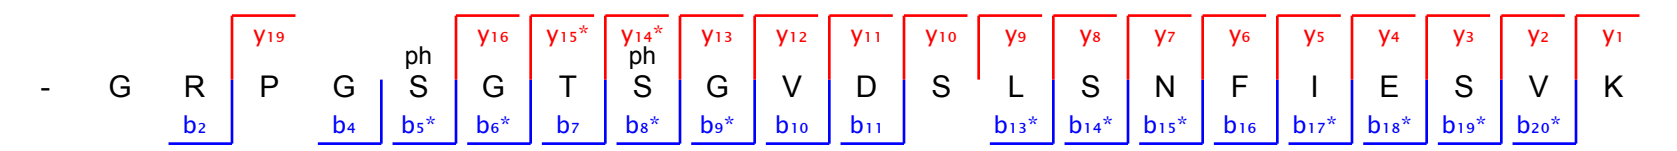

Raw file 20150814\_A375SR\_Phospho\_BR2\_03 Scan 28415 Method FTMS; HCD Score 120.25 m/z 1325.58 Gene names SEC16A

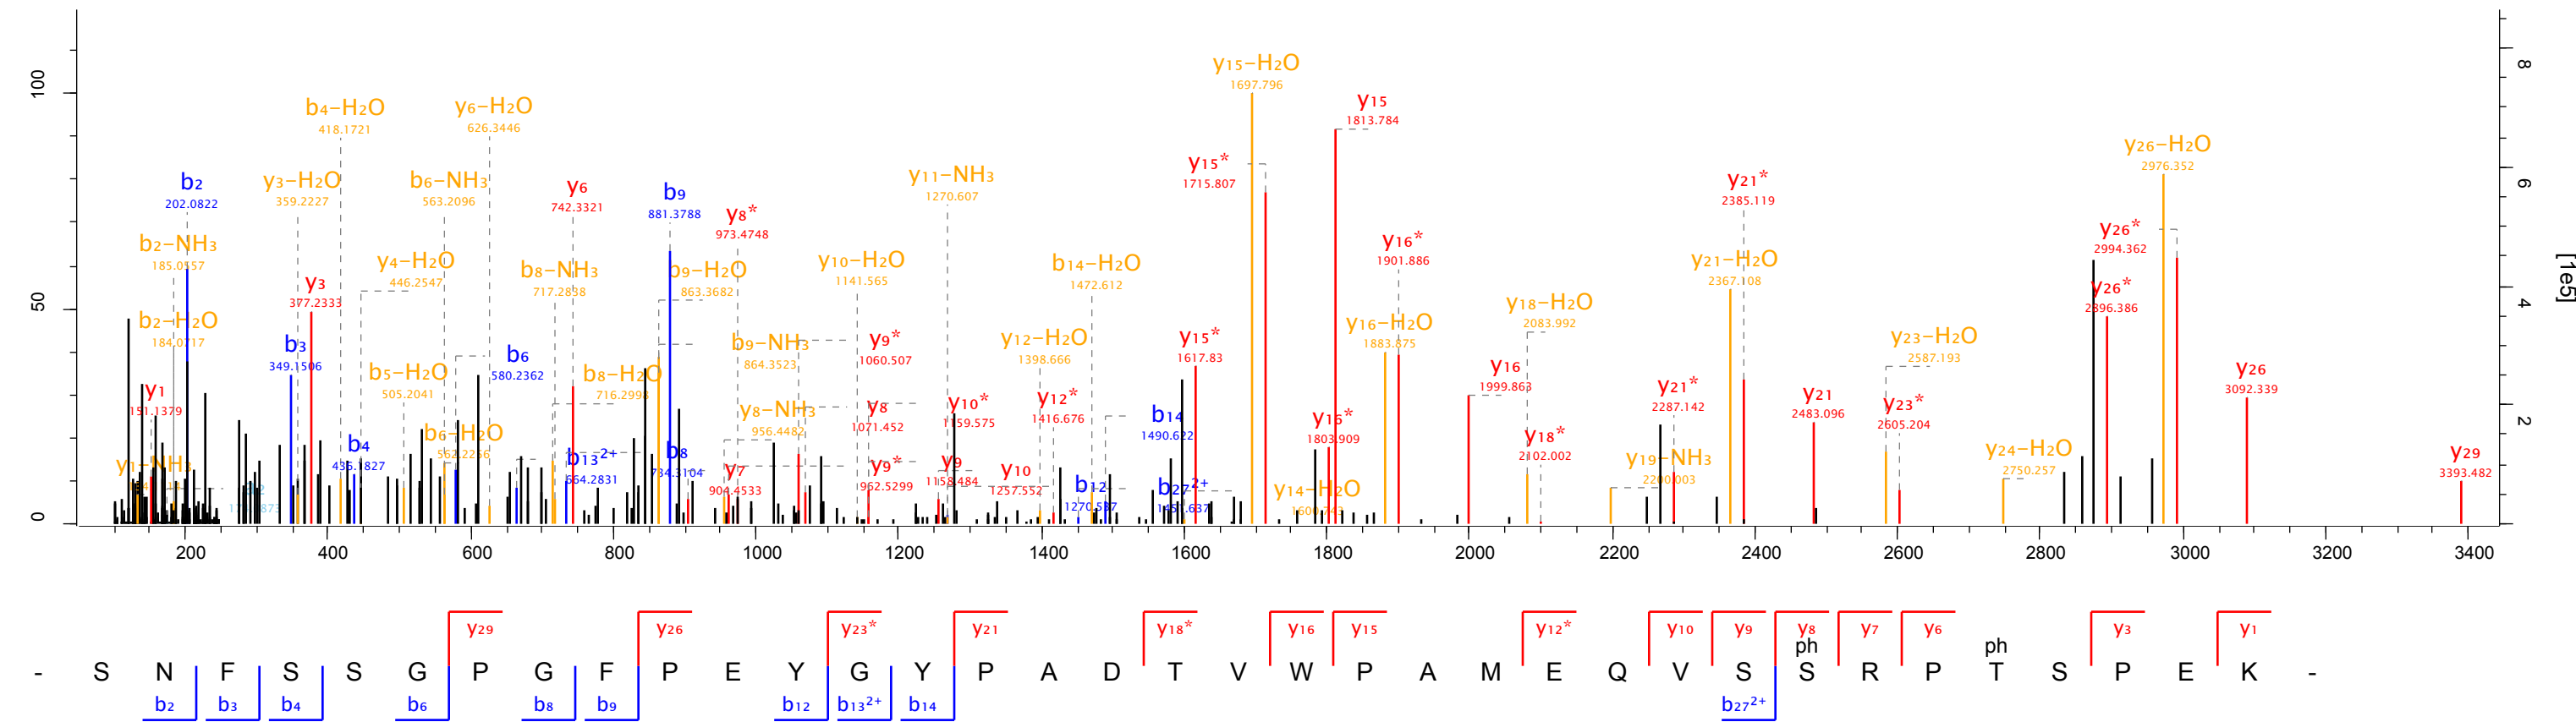

Raw file  
 20150814\_A375SR\_Phospho\_BR2\_03  
 Scan 28525 Method FTMS; HCD Score 249.47 m/z 1114.49 Gene names NOS1AP

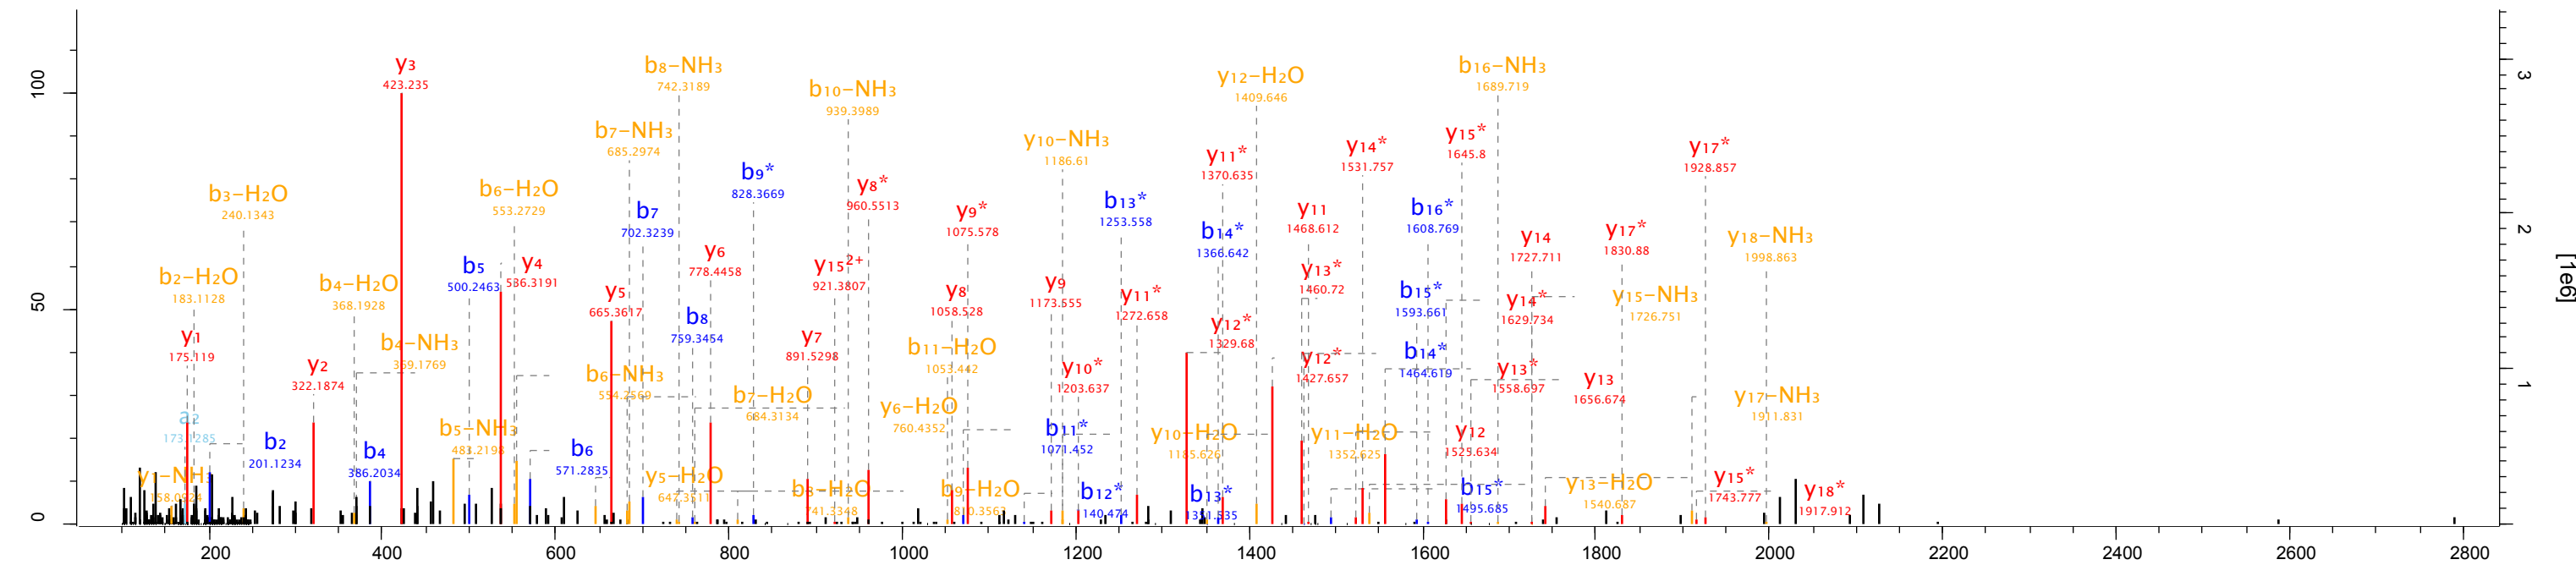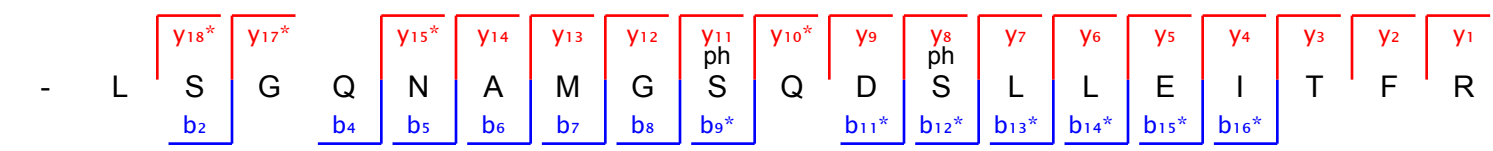



Raw file: 20150814\_A375SR\_Phospho\_BR2\_03  
 Scan: 28535 Method: FTMS; HCD Score: 70.81 m/z: 970.1 Gene names: EIF5B

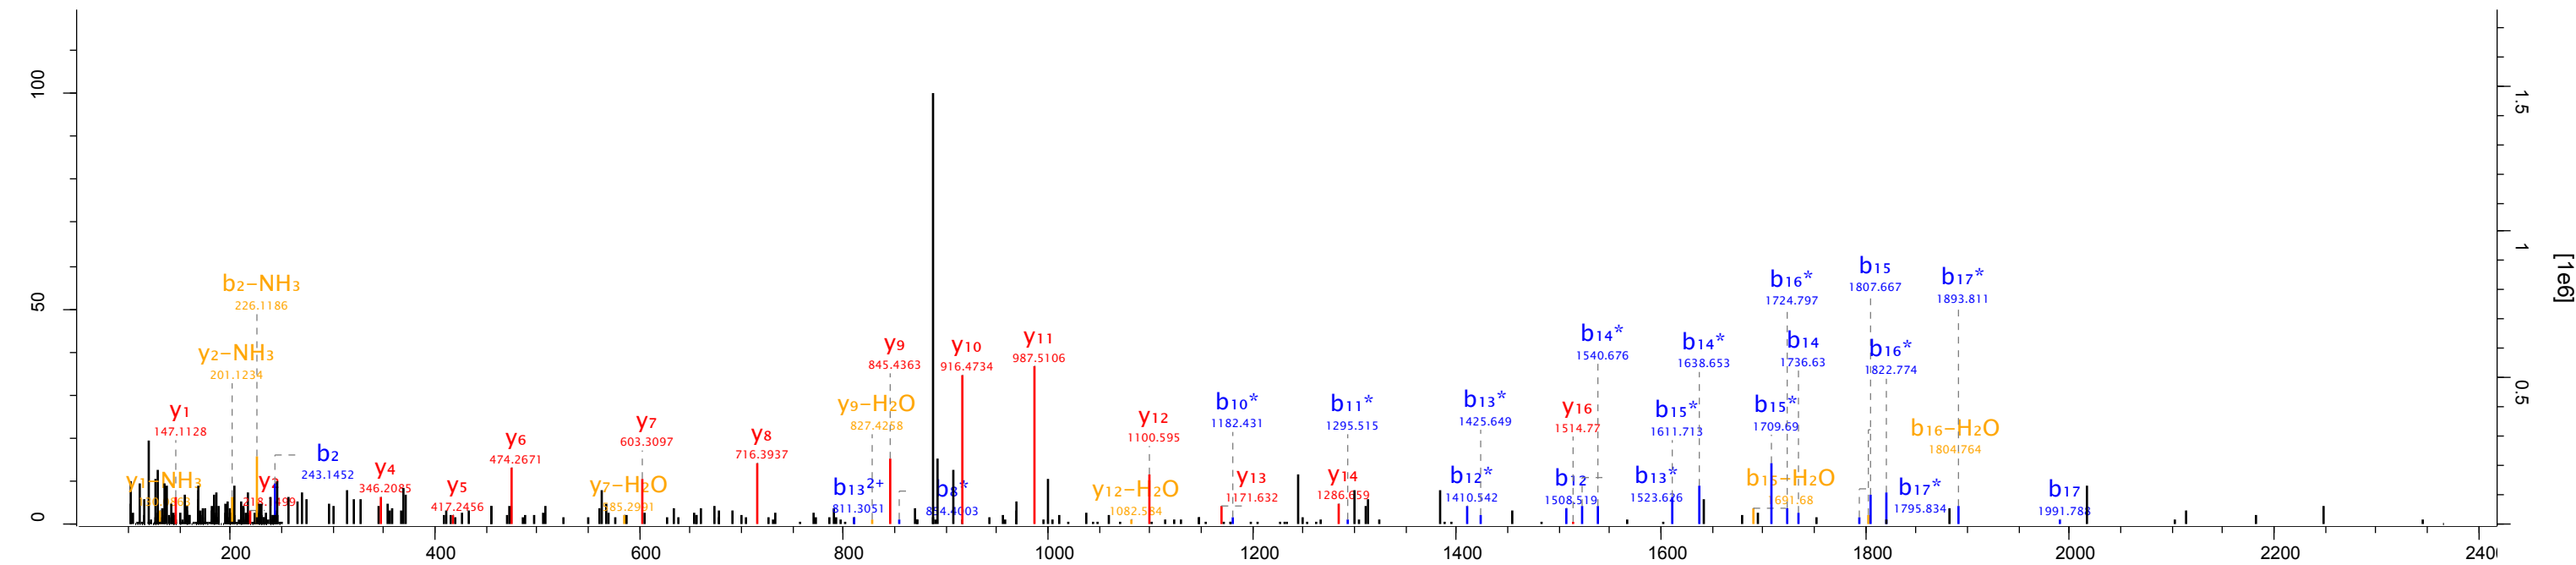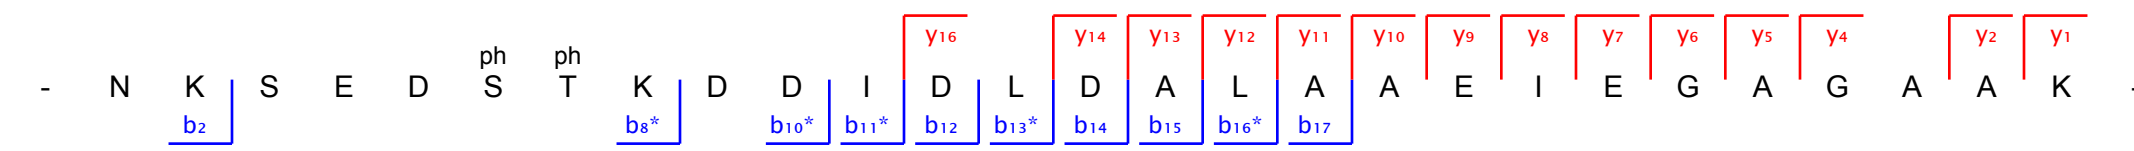

Raw file 20150814\_A375SR\_Phospho\_BR2\_03 Scan 28605 Method FTMS; HCD Score 47.5 m/z 804 Gene names SLC20A1

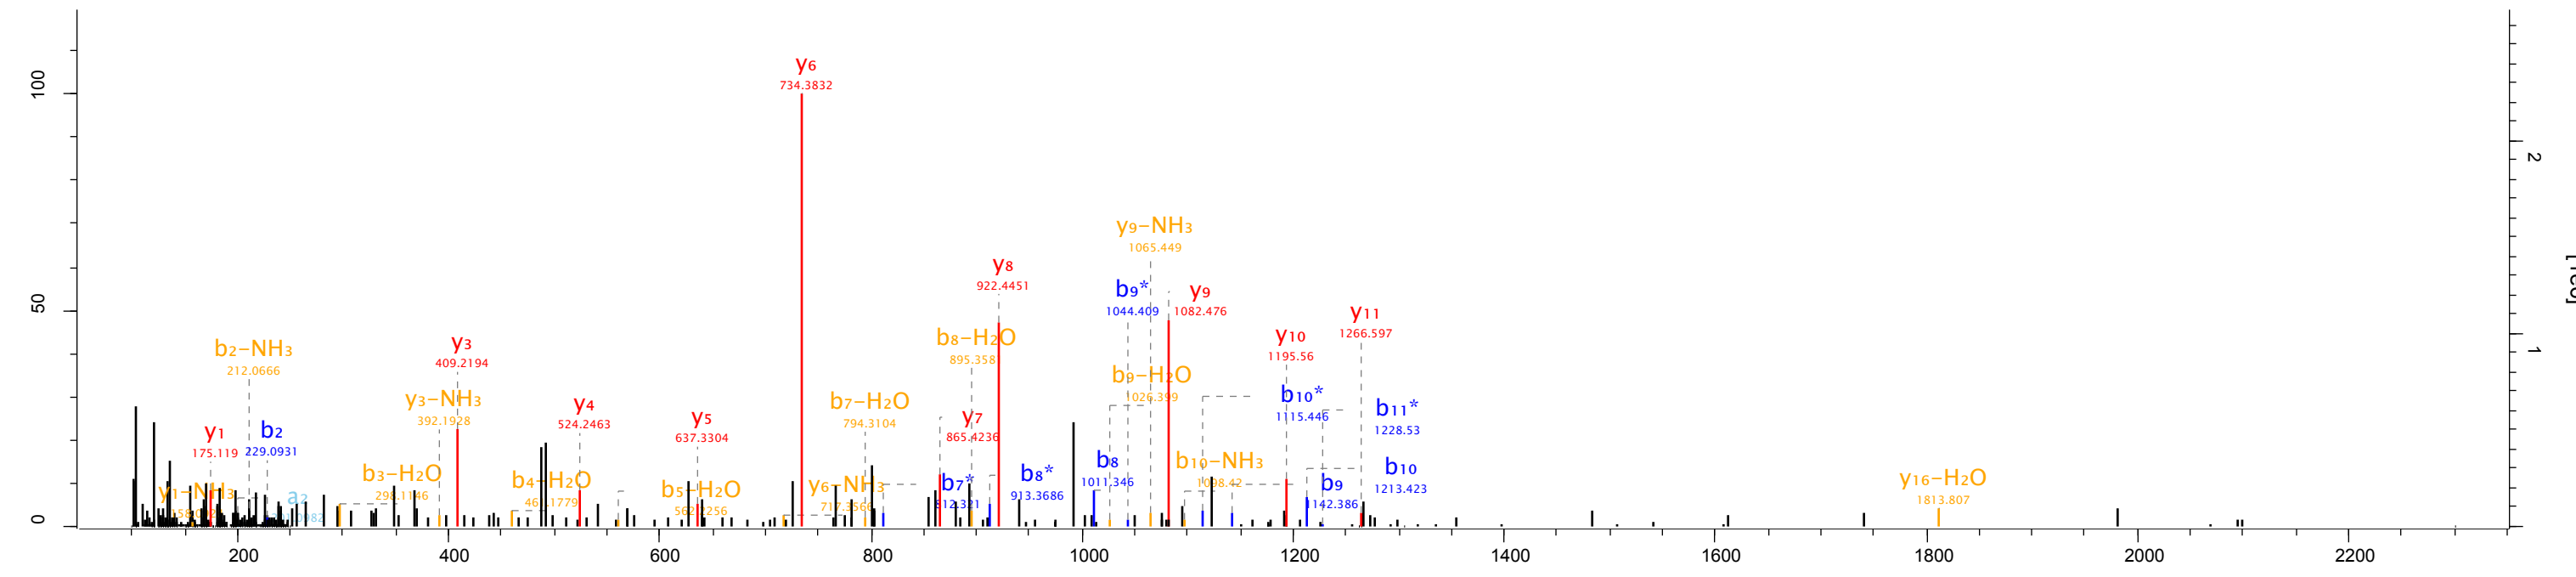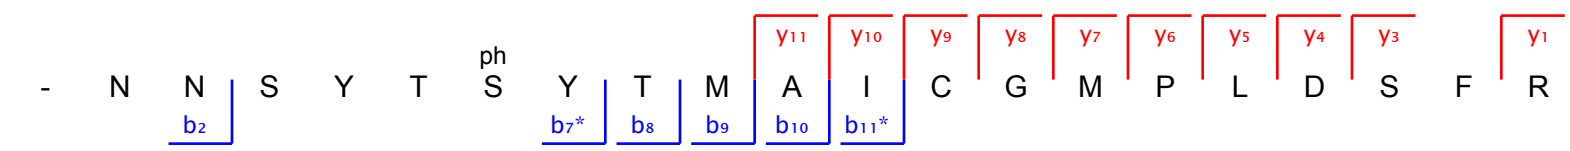

Raw file 20150814\_A375SR\_Phospho\_BR2\_03 Scan 28635 Method FTMS; HCD Score 162.1 m/z 1024.83 Gene names CIC

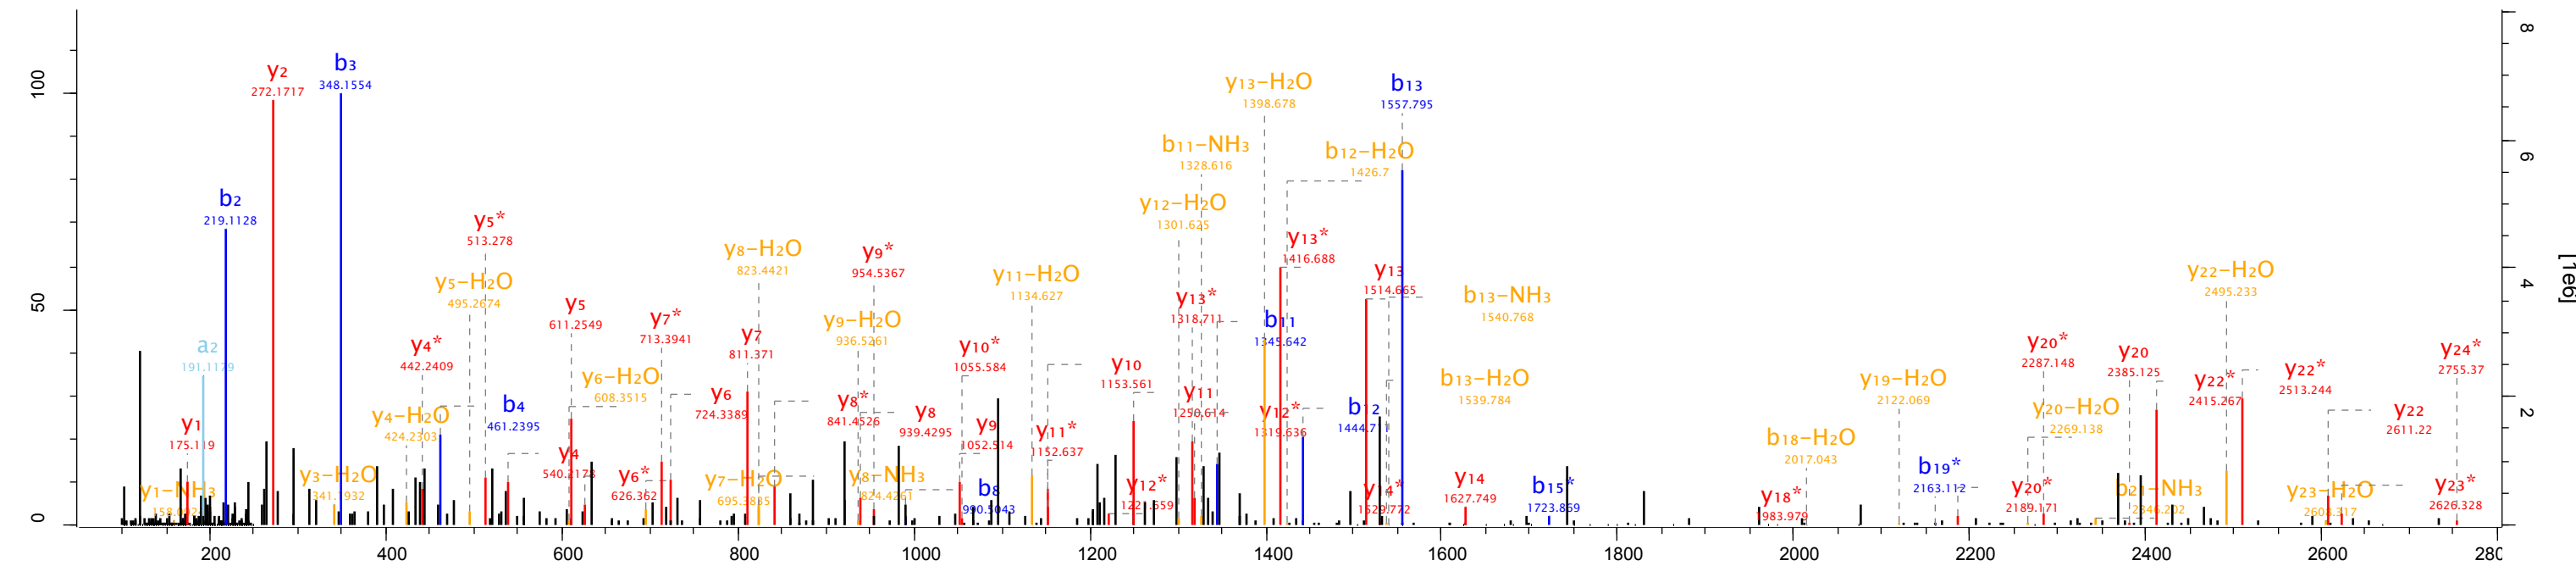

- F A E L P E F R P E E V L P S P T L Q S L A T S P R -

Fragmentation mapping (b-ions in blue, y-ions in red):

- b2: A
- b3: E
- b4: L
- b8: R
- b11: E
- b12: V
- b13: L
- b15\*: S
- b19\*: Q
- y1: R
- y2: P
- y4: T
- y5: L
- y6: S
- y7: L
- y8: A
- y9: T
- y10: S
- y11: P
- y12\*: S
- y13: Q
- y14: S
- y18\*: S
- y20: L
- y22\*: P
- y23\*: R
- y24\*: R

Raw file: 20150814\_A375SR\_Phospho\_BR2\_03  
 Scan: 28905 Method: FTMS; HCD Score: 90.88 m/z: 743.68 Gene names: PSMB7

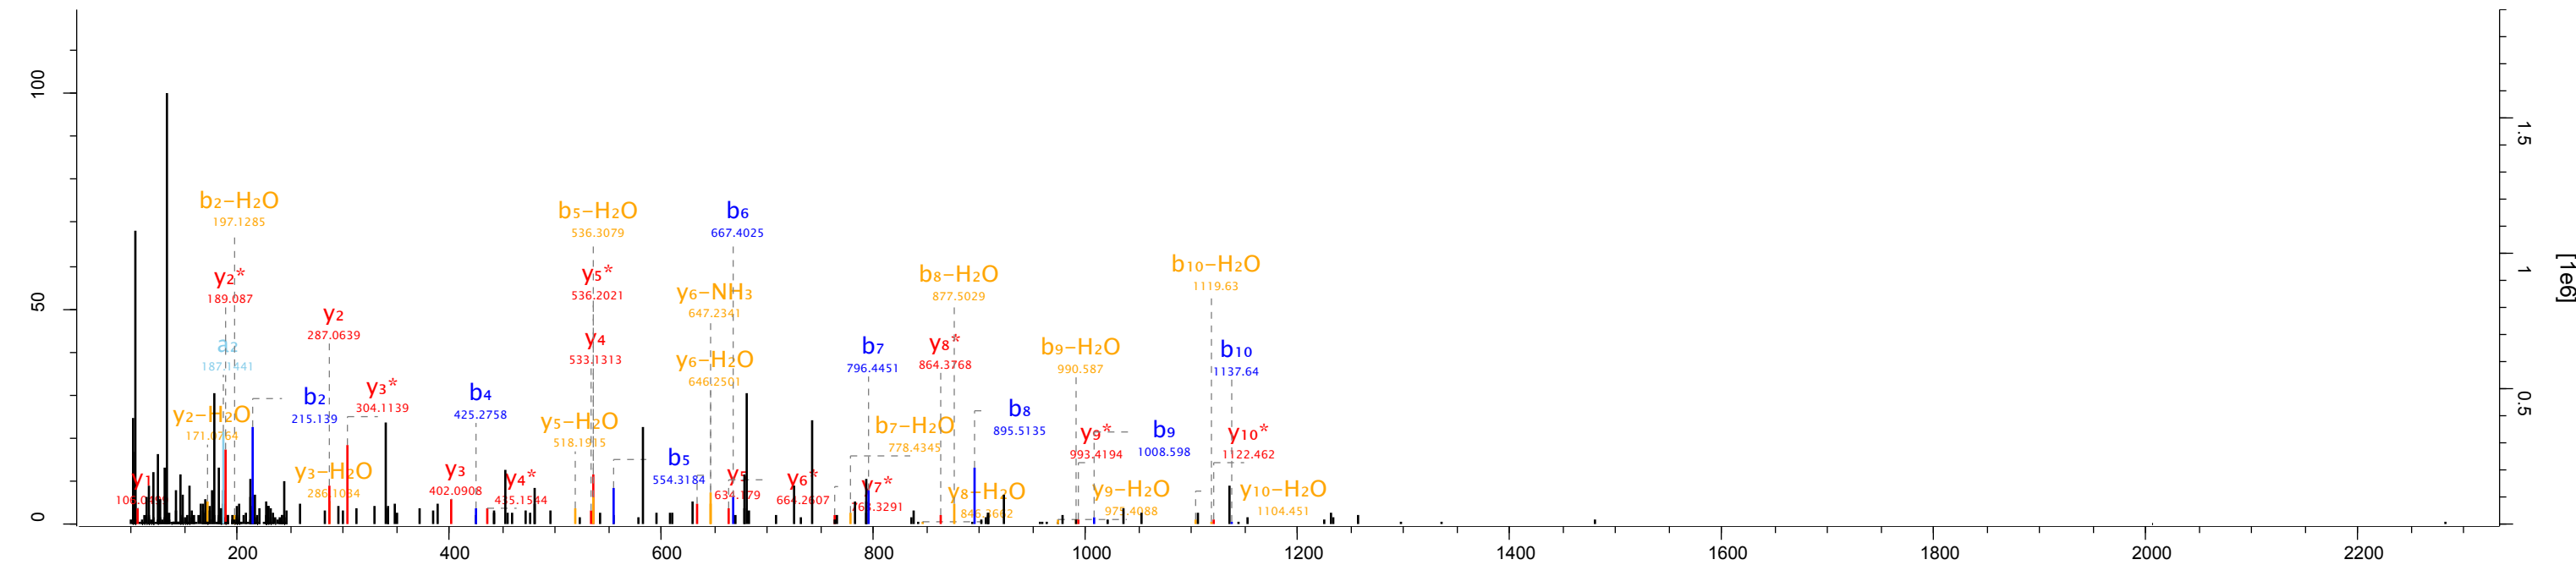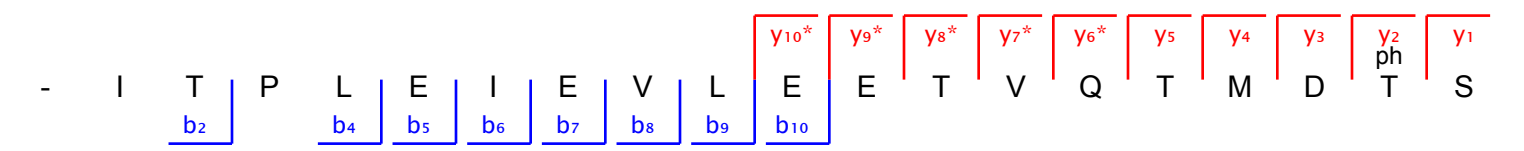

Raw file  
 20150814\_A375SR\_Phospho\_BR2\_03  
 Scan Method Score m/z Gene names  
 3275 FTMS; HCD 138.78 748.64 SRRM2

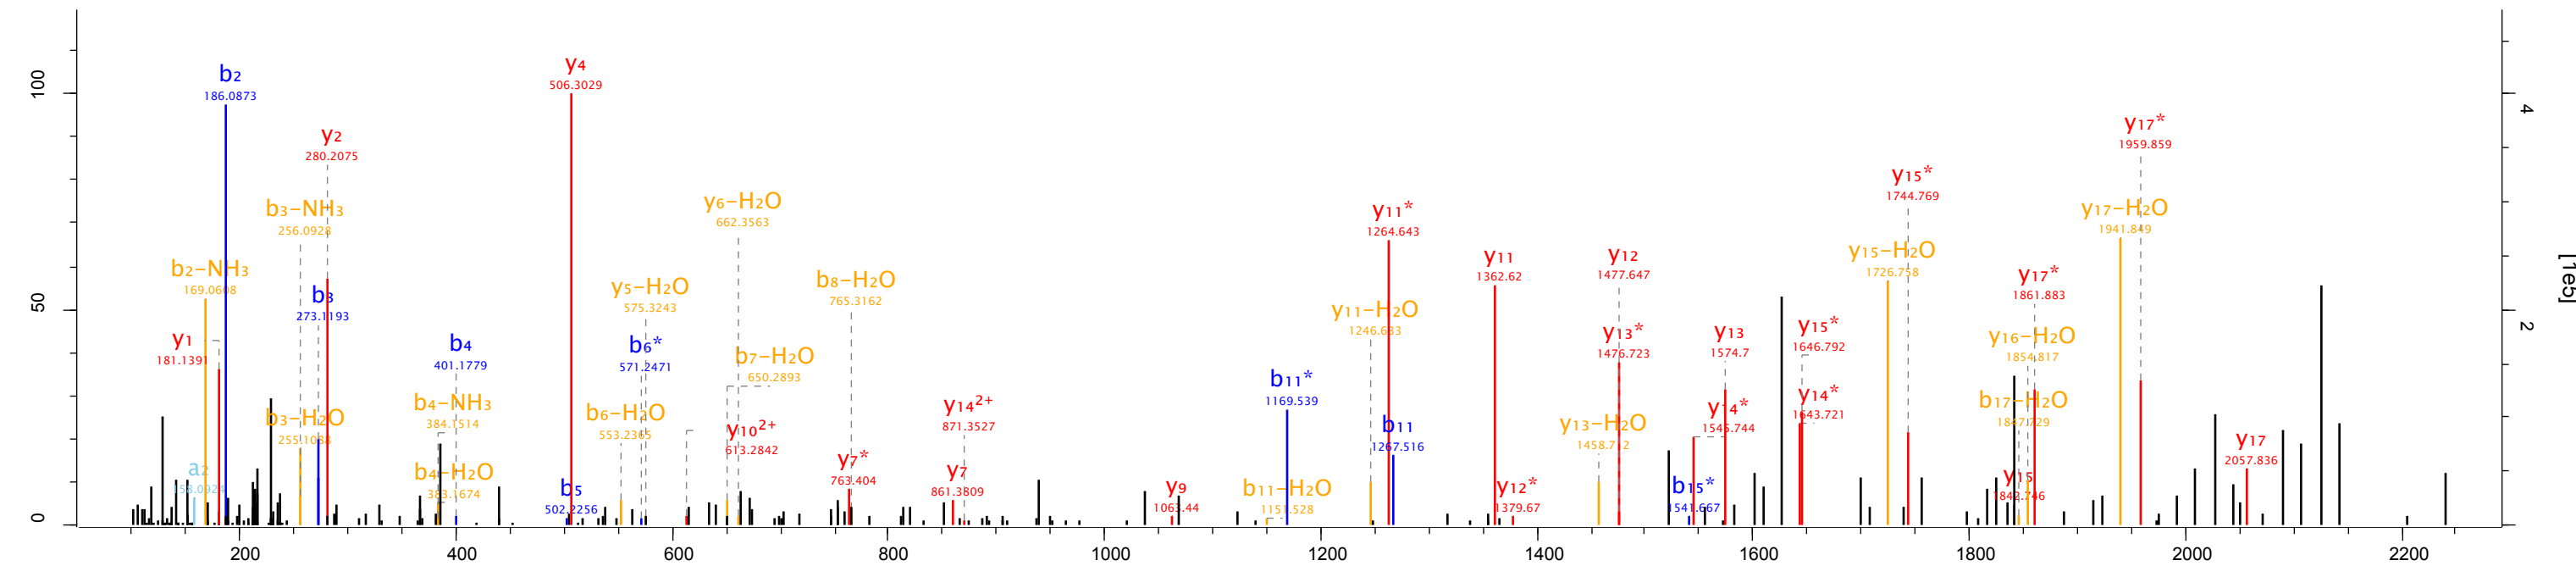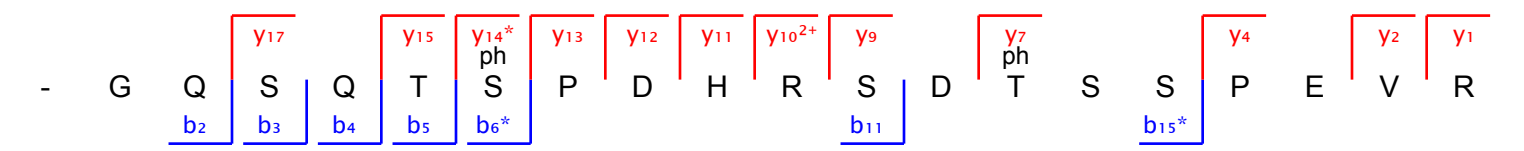

Raw file: 20150814\_A375SR\_Phospho\_BR2\_03  
 Scan: 3495 Method: FTMS; HCD Score: 96.76 m/z: 501.71 Gene names: BAD

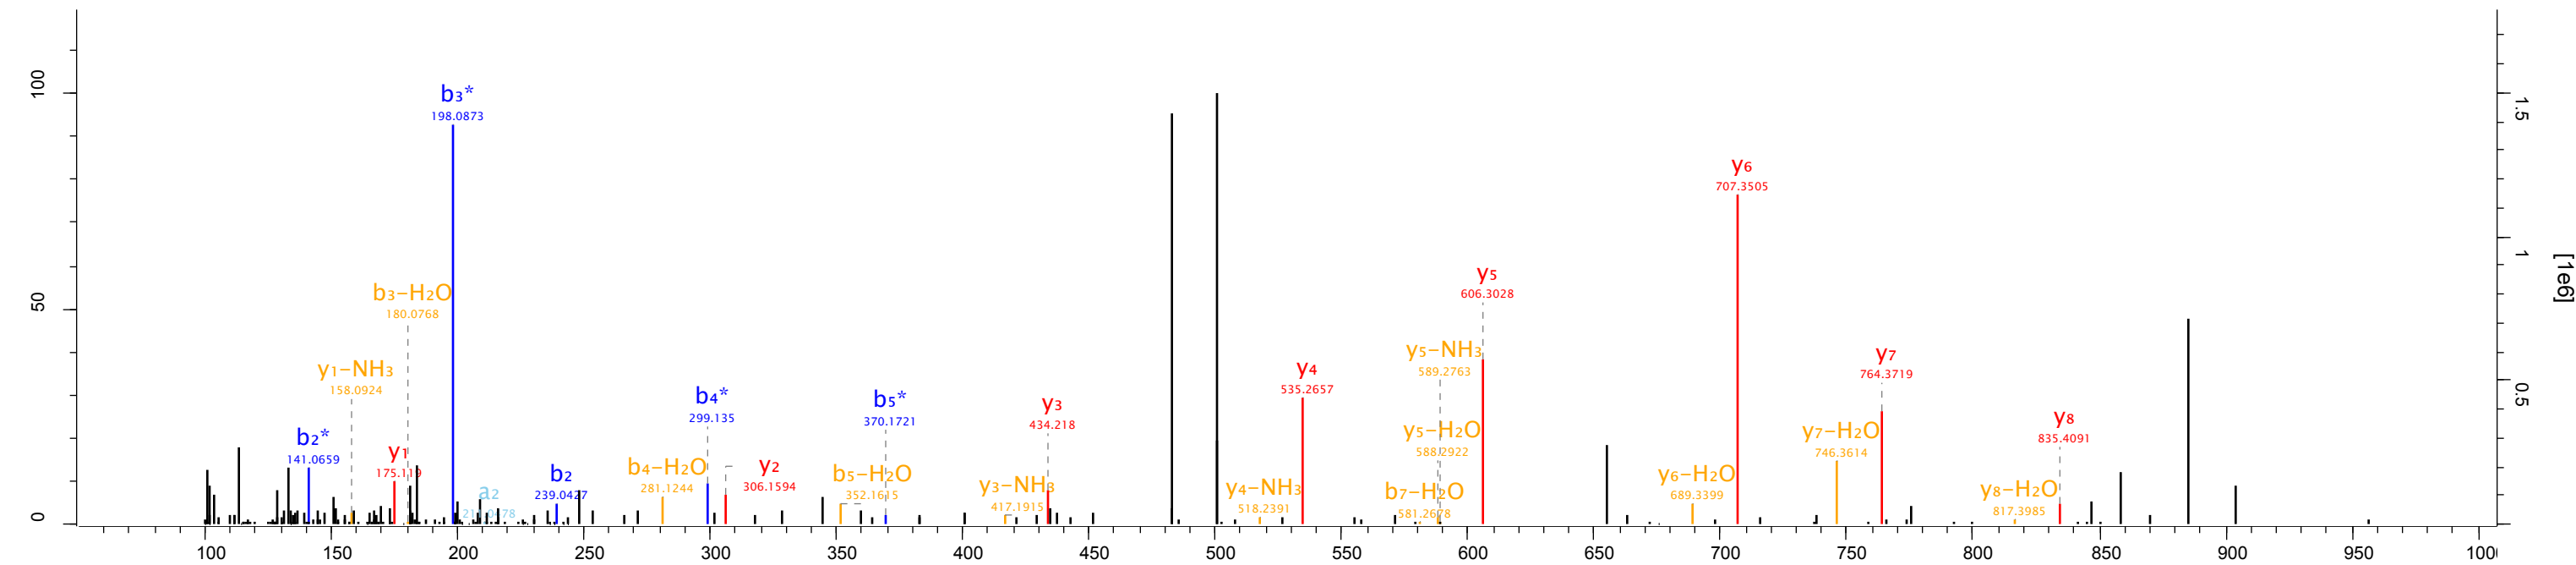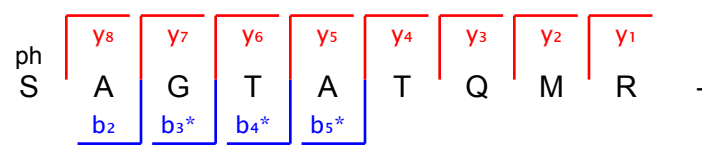

Raw file: 20150814\_A375SR\_Phospho\_BR2\_03  
 Scan: 3565 Method: FTMS; HCD Score: 141.69 m/z: 950.41 Gene names: MMTAG2

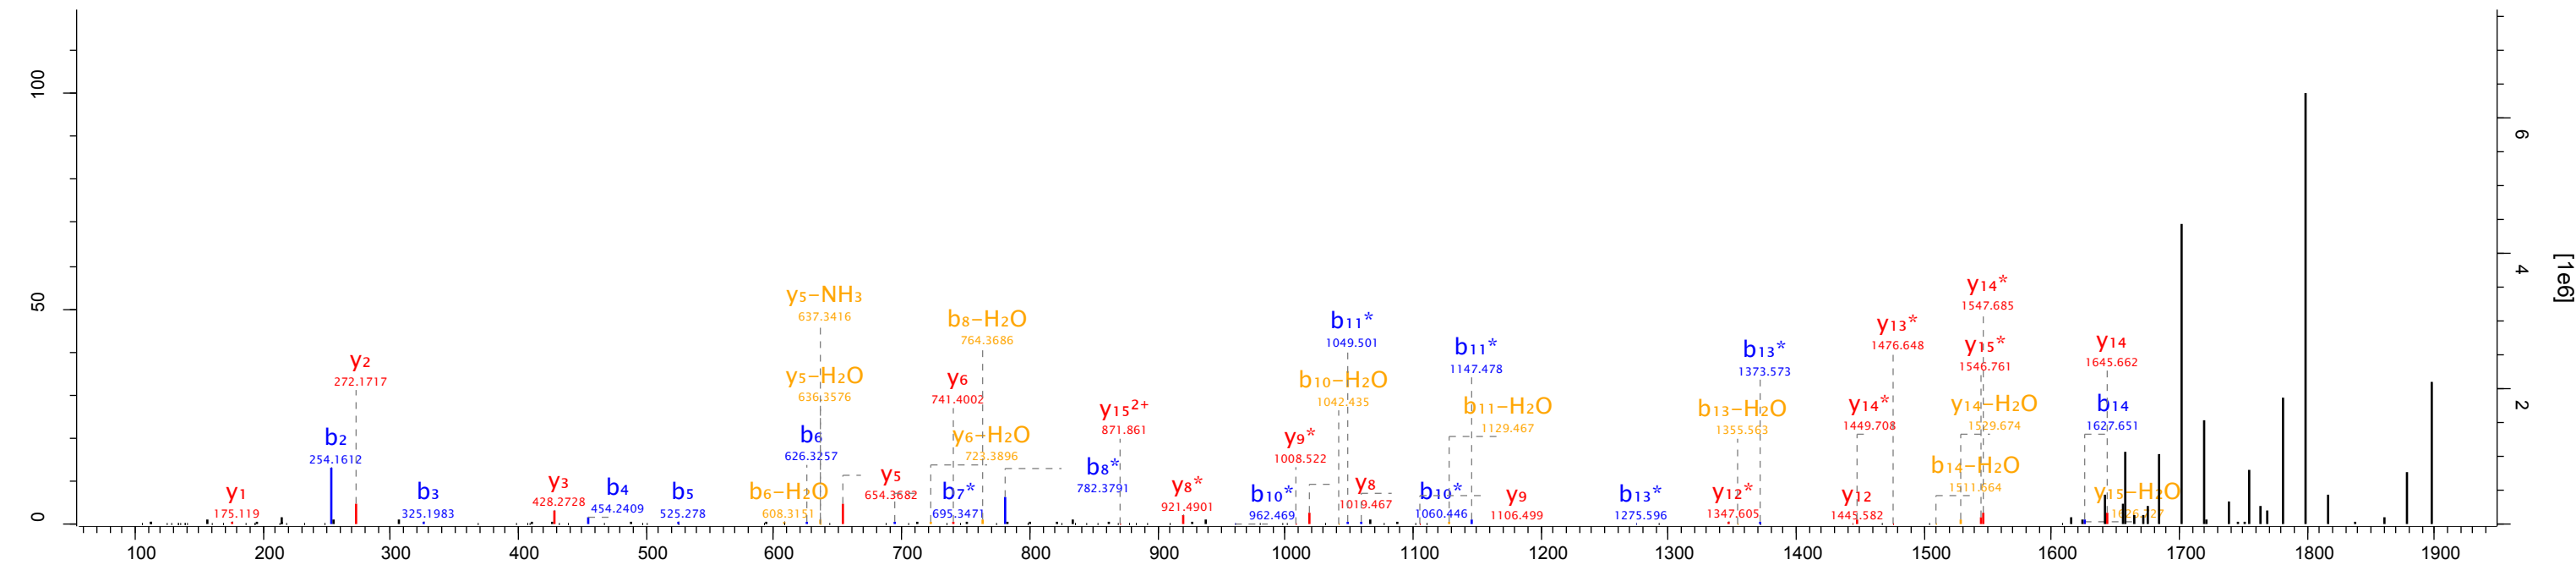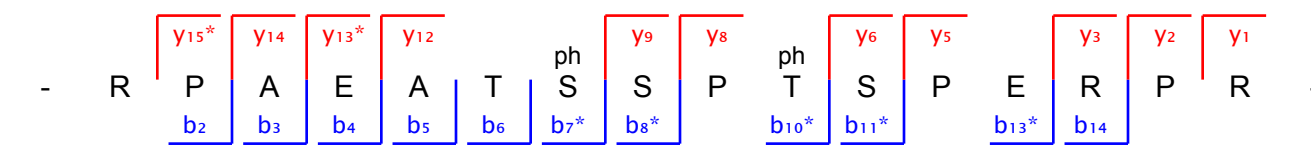

Raw file  
 20150814\_A375SR\_Phospho\_BR2\_03  
 Scan 3835 Method FTMS; HCD Score 110.14 m/z 576.25 Gene names C15orf52

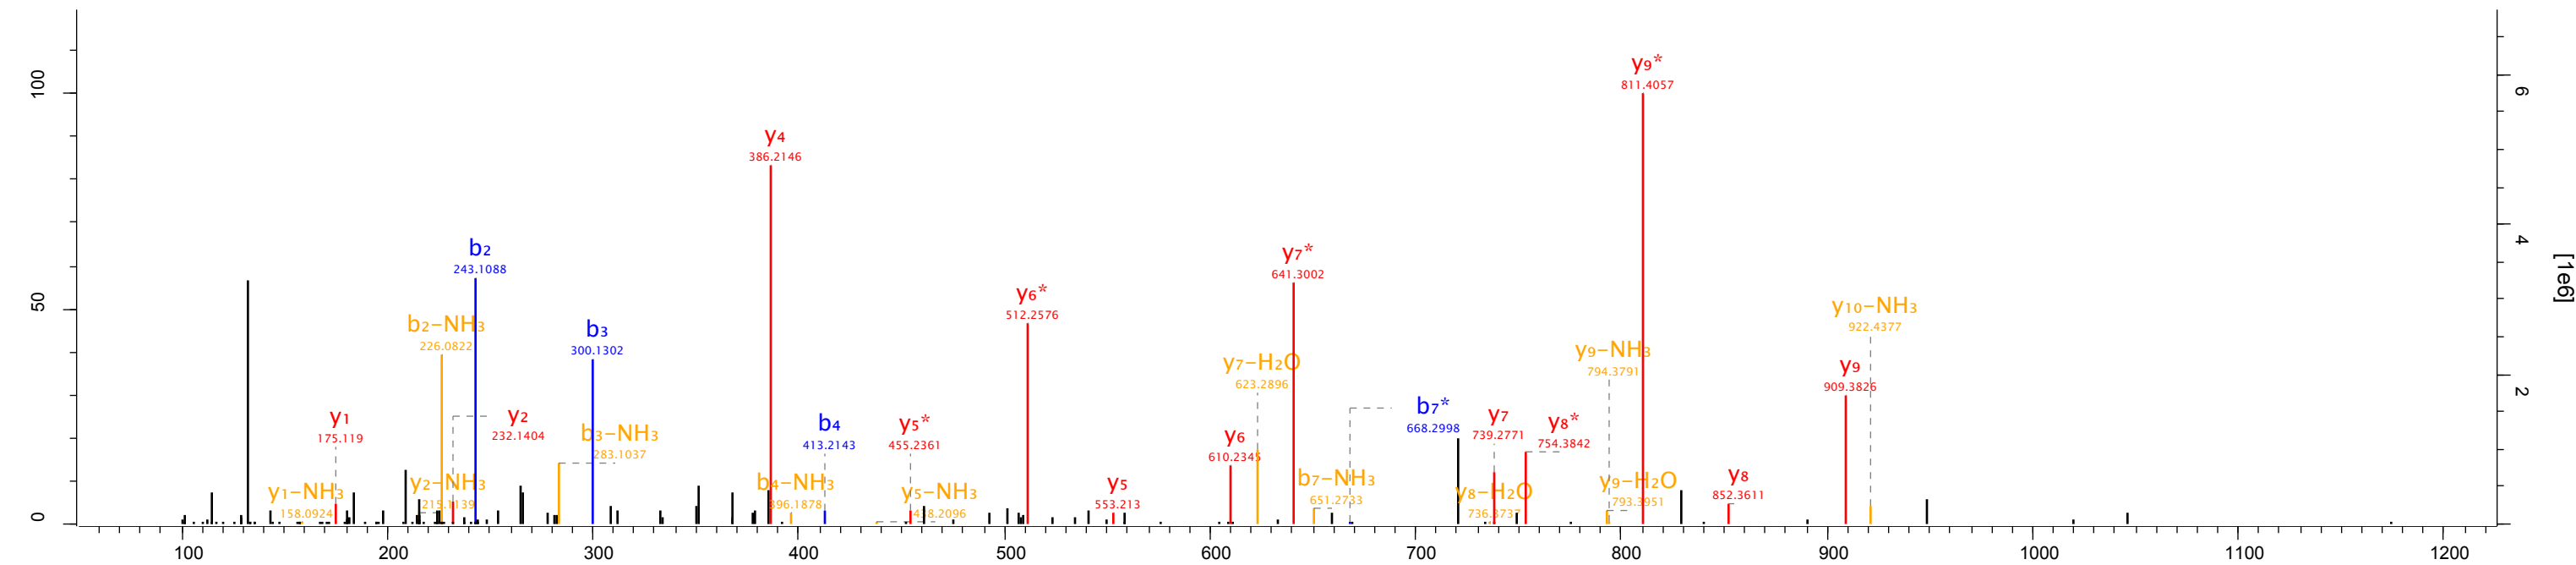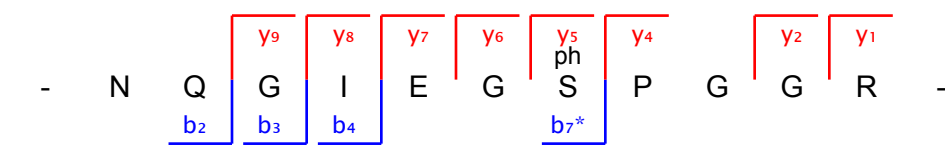



Raw file: 20150814\_A375SR\_Phospho\_BR2\_03  
 Scan: 4775 Method: FTMS; HCD Score: 145.82 m/z: 828.8 Gene names: STT3B

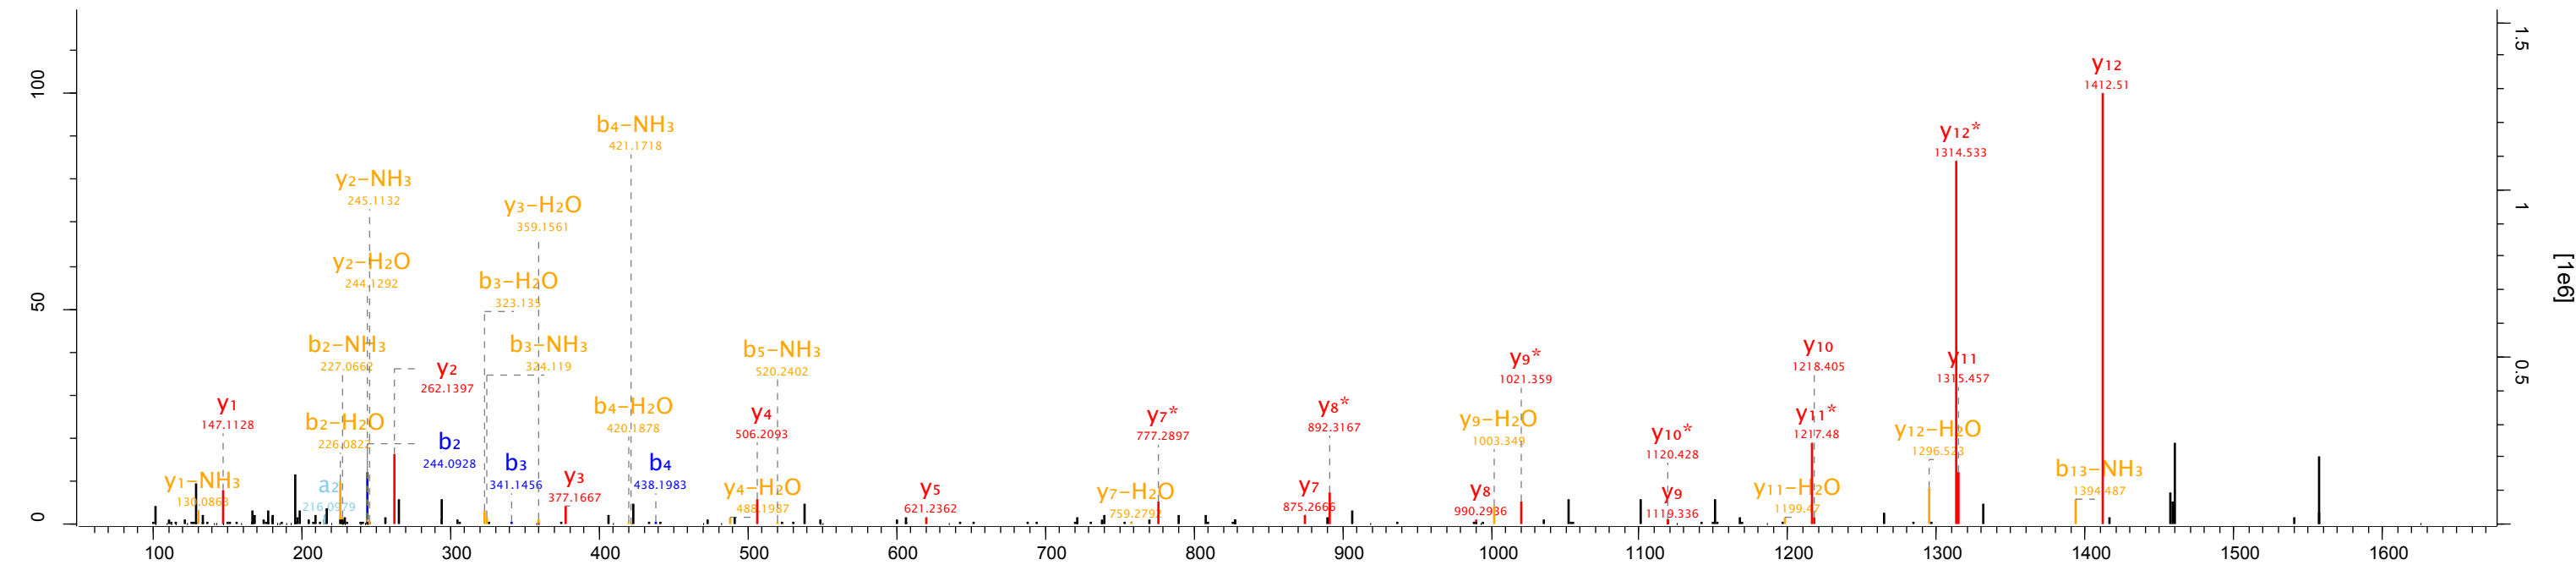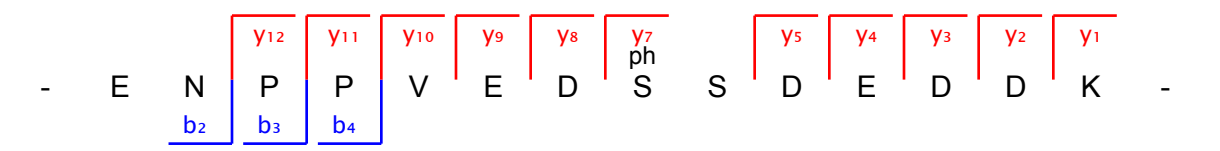

Raw file: 20150814\_A375SR\_Phospho\_BR2\_03  
 Scan: 4805 Method: FTMS; HCD Score: 107.11 m/z: 624.78 Gene names: PAN2

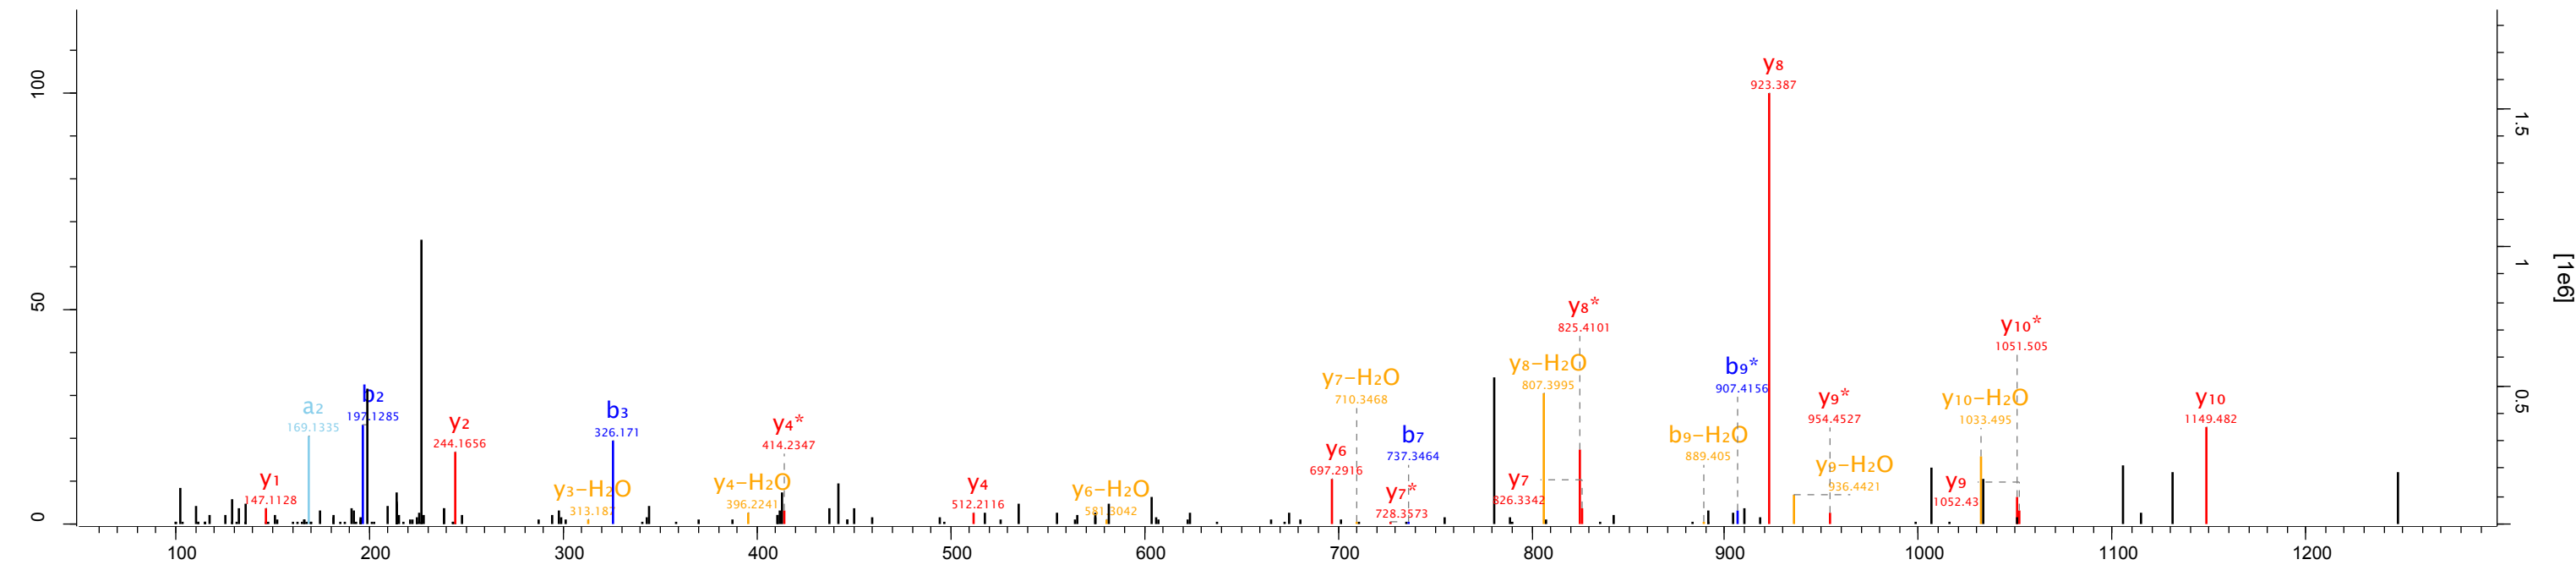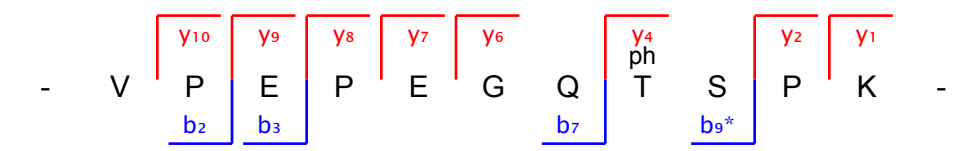

Raw file: 20150814\_A375SR\_Phospho\_BR2\_03  
 Scan: 4955 Method: FTMS; HCD Score: 191.49 m/z: 640.8 Gene names: ATXN2L

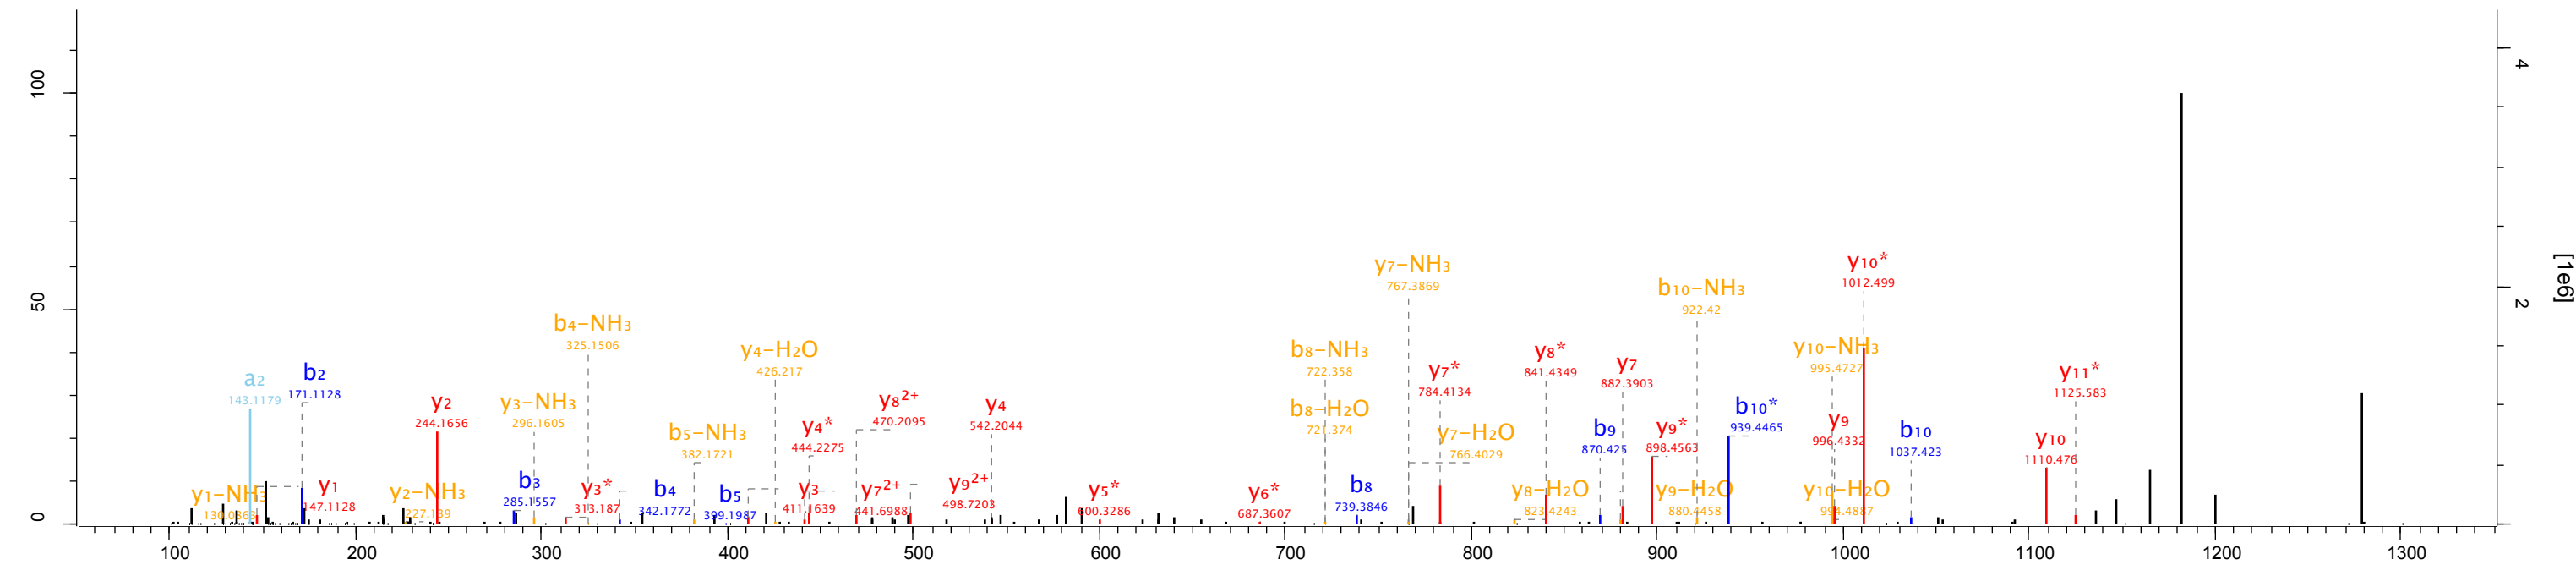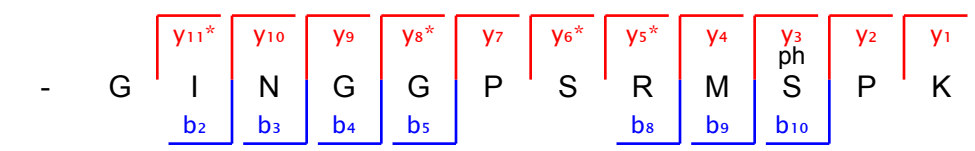

Raw file 20150814\_A375SR\_Phospho\_BR2\_03 Scan 5205 Method FTMS; HCD Score 169.08 m/z 906.39 Gene names GMIP

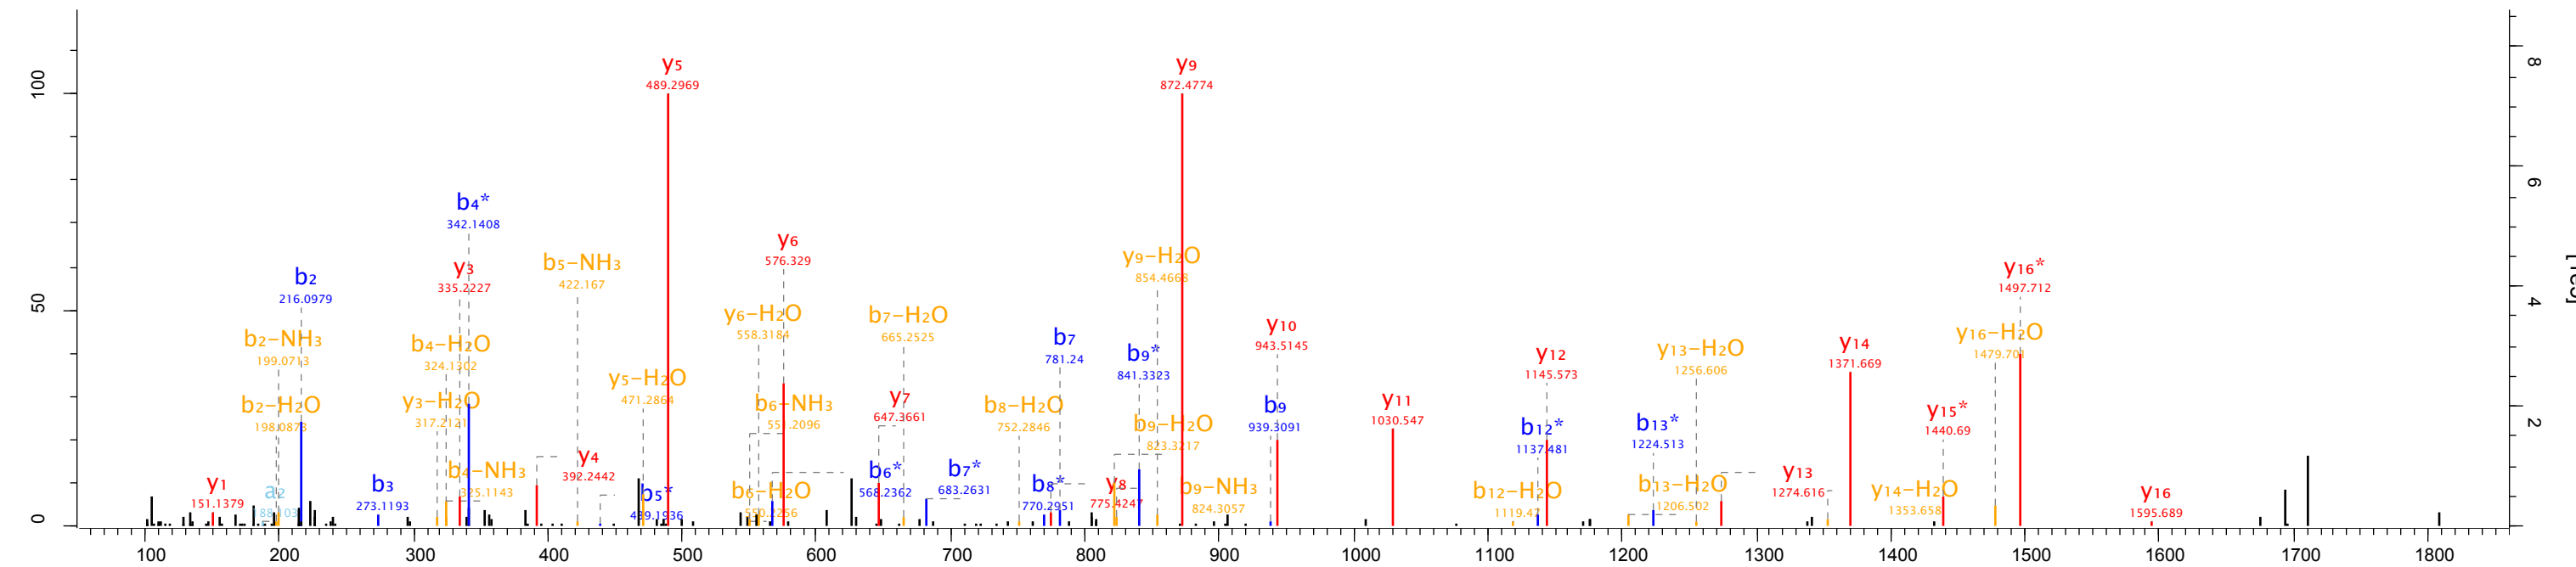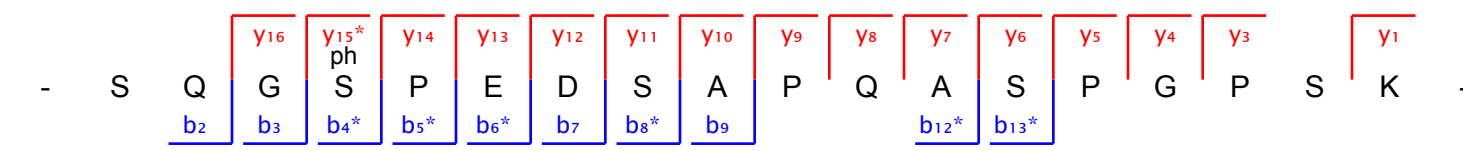

Raw file: 20150814\_A375SR\_Phospho\_BR2\_03  
 Scan: 5385 Method: FTMS; HCD Score: 69.64 m/z: 569.76 Gene names: BAIAP2;CCDC43

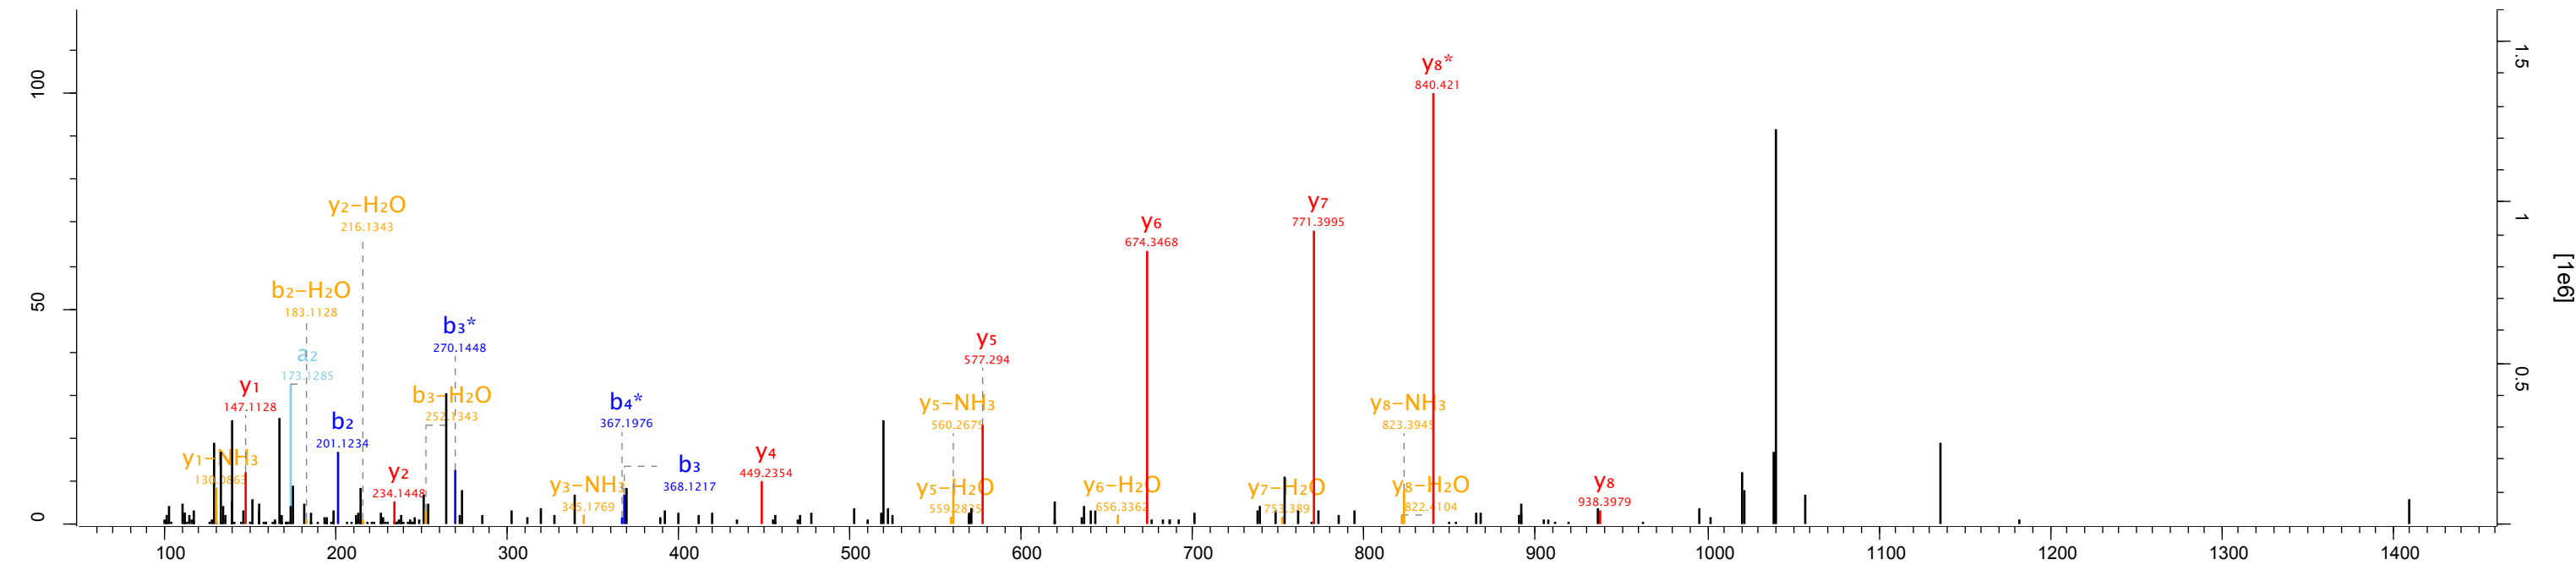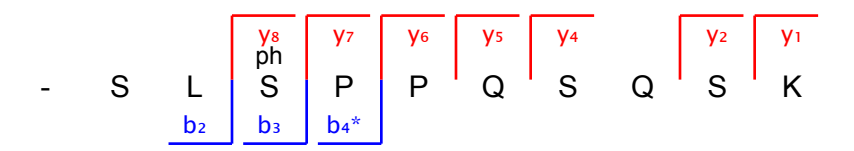

Raw file: 20150814\_A375SR\_Phospho\_BR2\_03  
 Scan: 5765 Method: FTMS; HCD Score: 98.49 m/z: 784.97 Gene names: NKAP

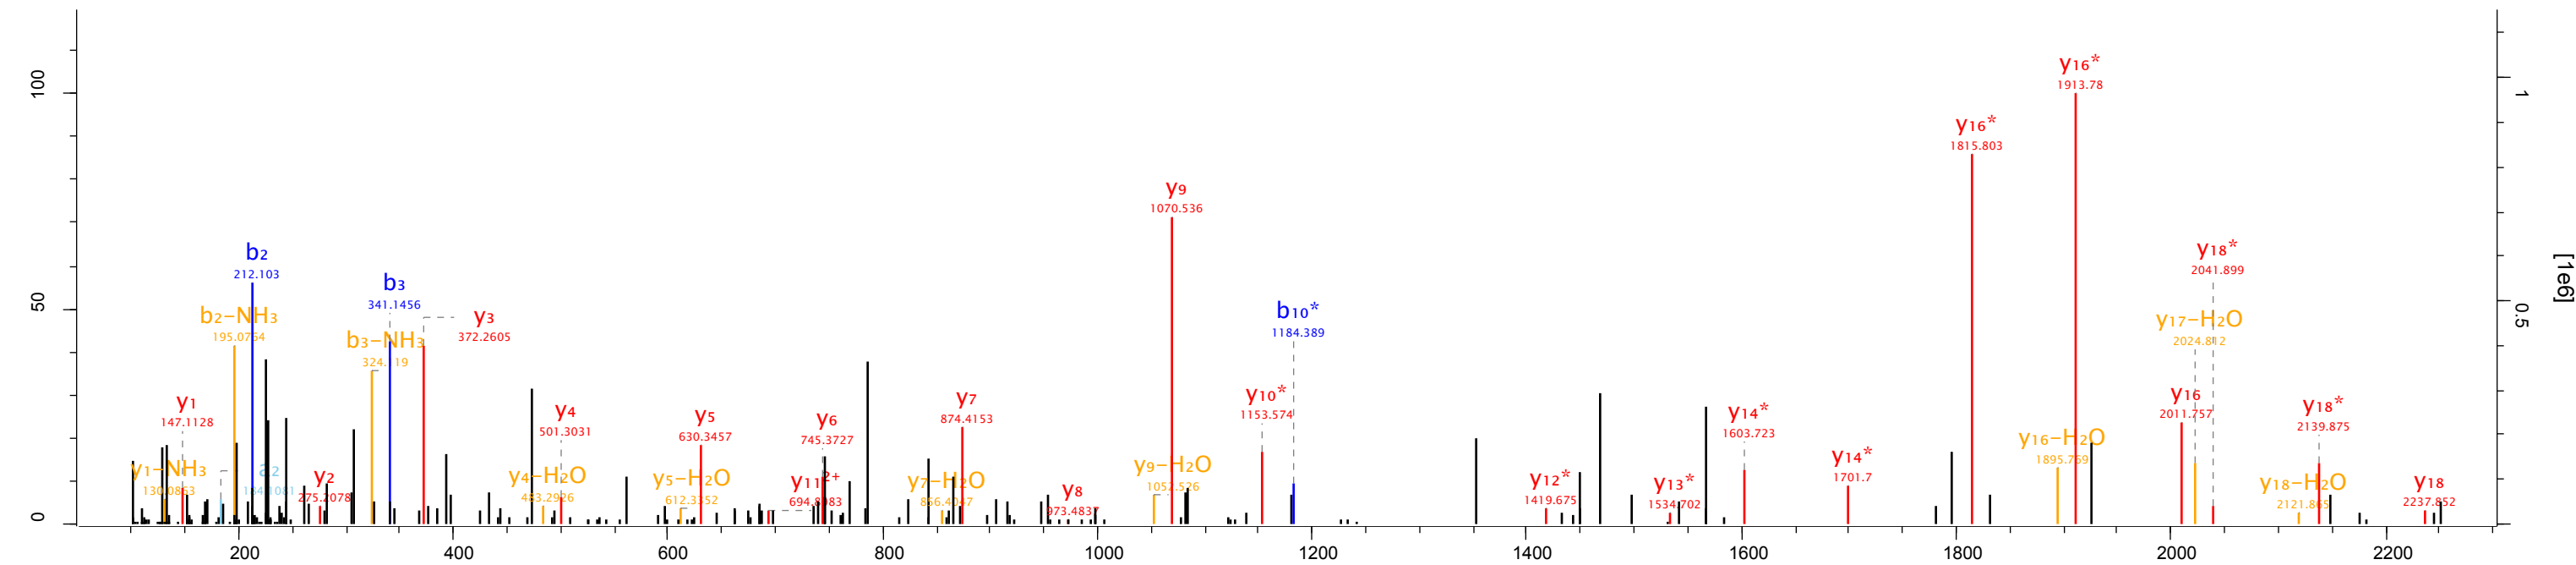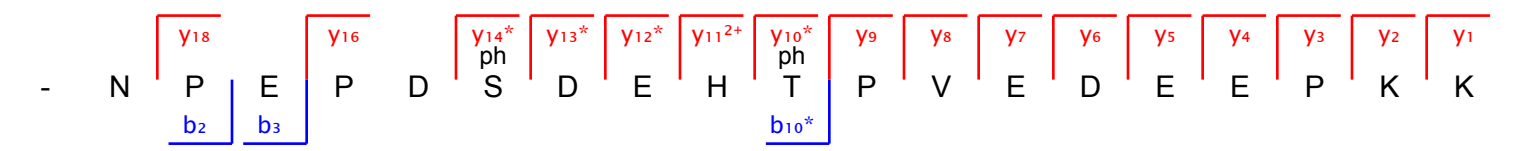

Raw file: 20150814\_A375SR\_Phospho\_BR2\_03  
 Scan: 6275 Method: FTMS; HCD Score: 198.57 m/z: 553.75 Gene names: CTNND1

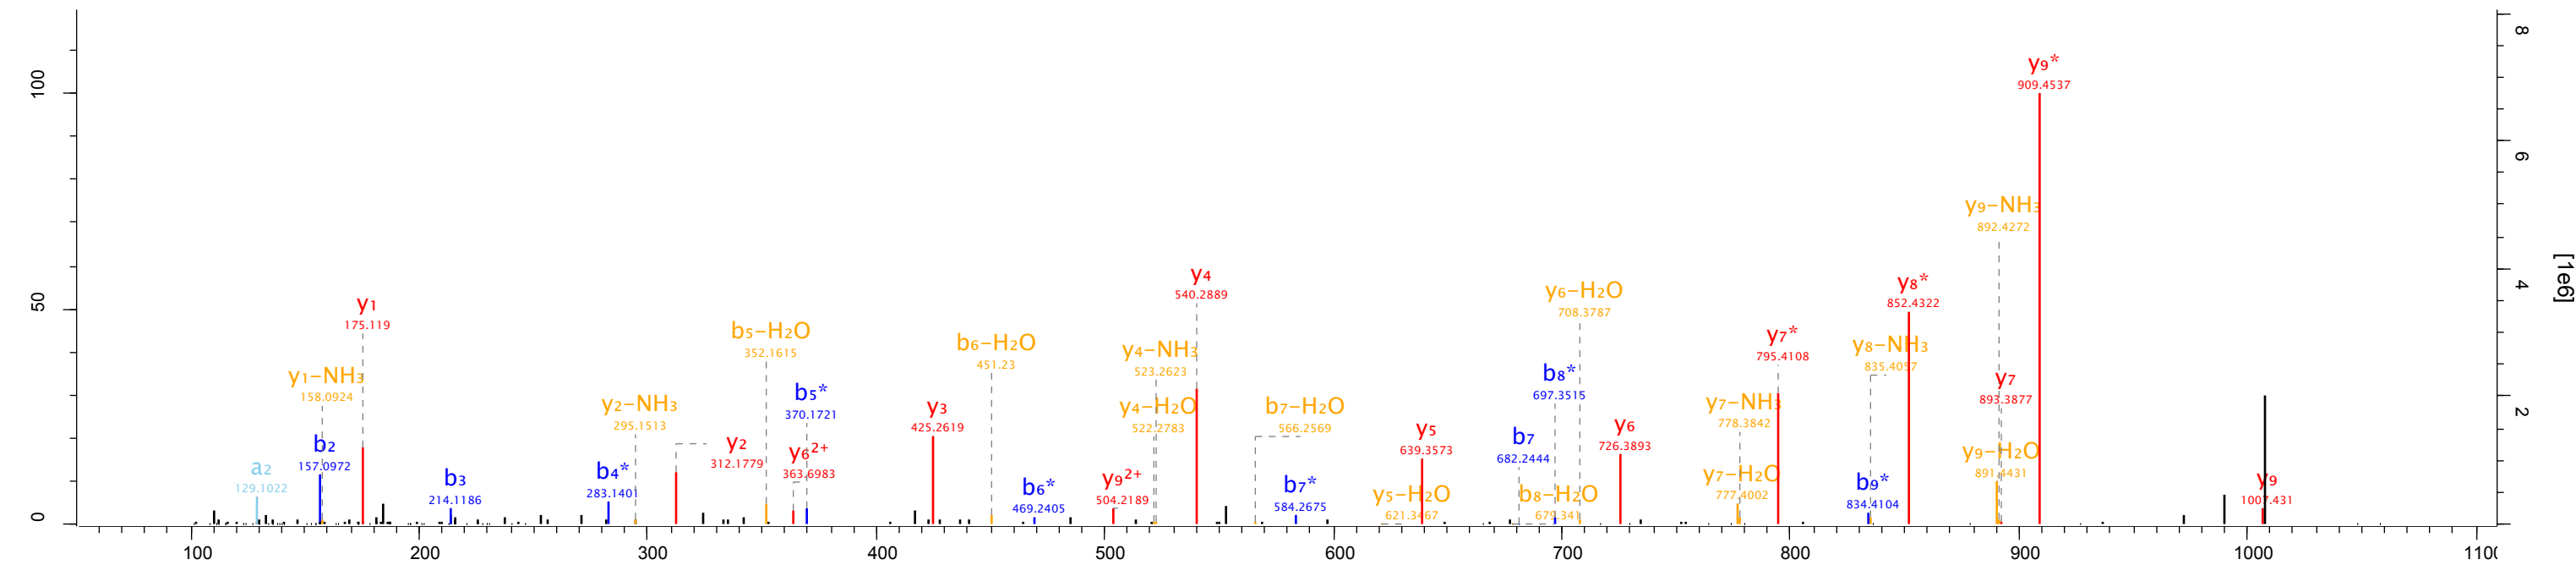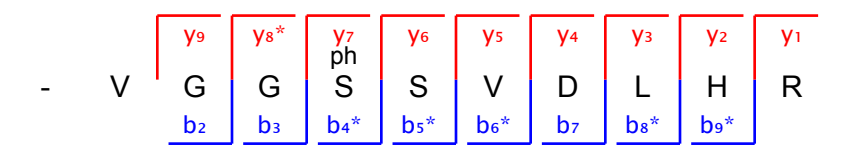

Raw file: 20150814\_A375SR\_Phospho\_BR2\_03  
 Scan: 6315 Method: FTMS; HCD Score: 181.83 m/z: 894.89 Gene names: SLC4A7

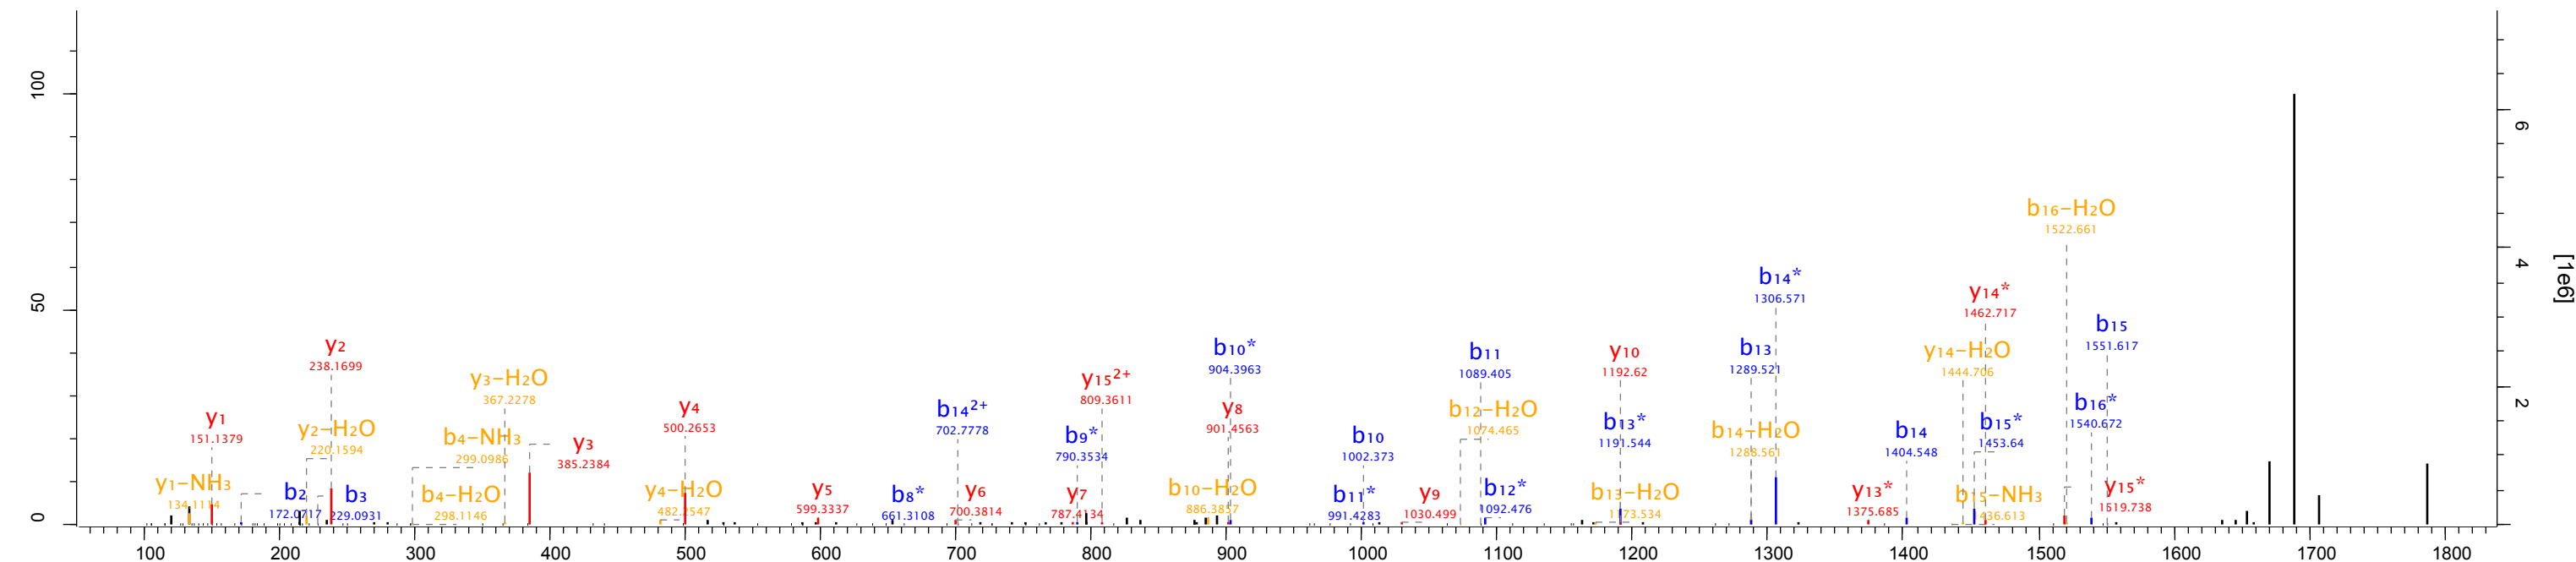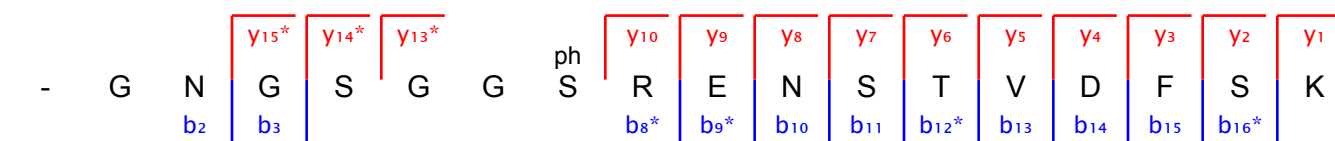



Raw file: 20150814\_A375SR\_Phospho\_BR2\_03  
 Scan: 6935 Method: FTMS; HCD Score: 124.78 m/z: 687.23 Gene names: GPATCH8

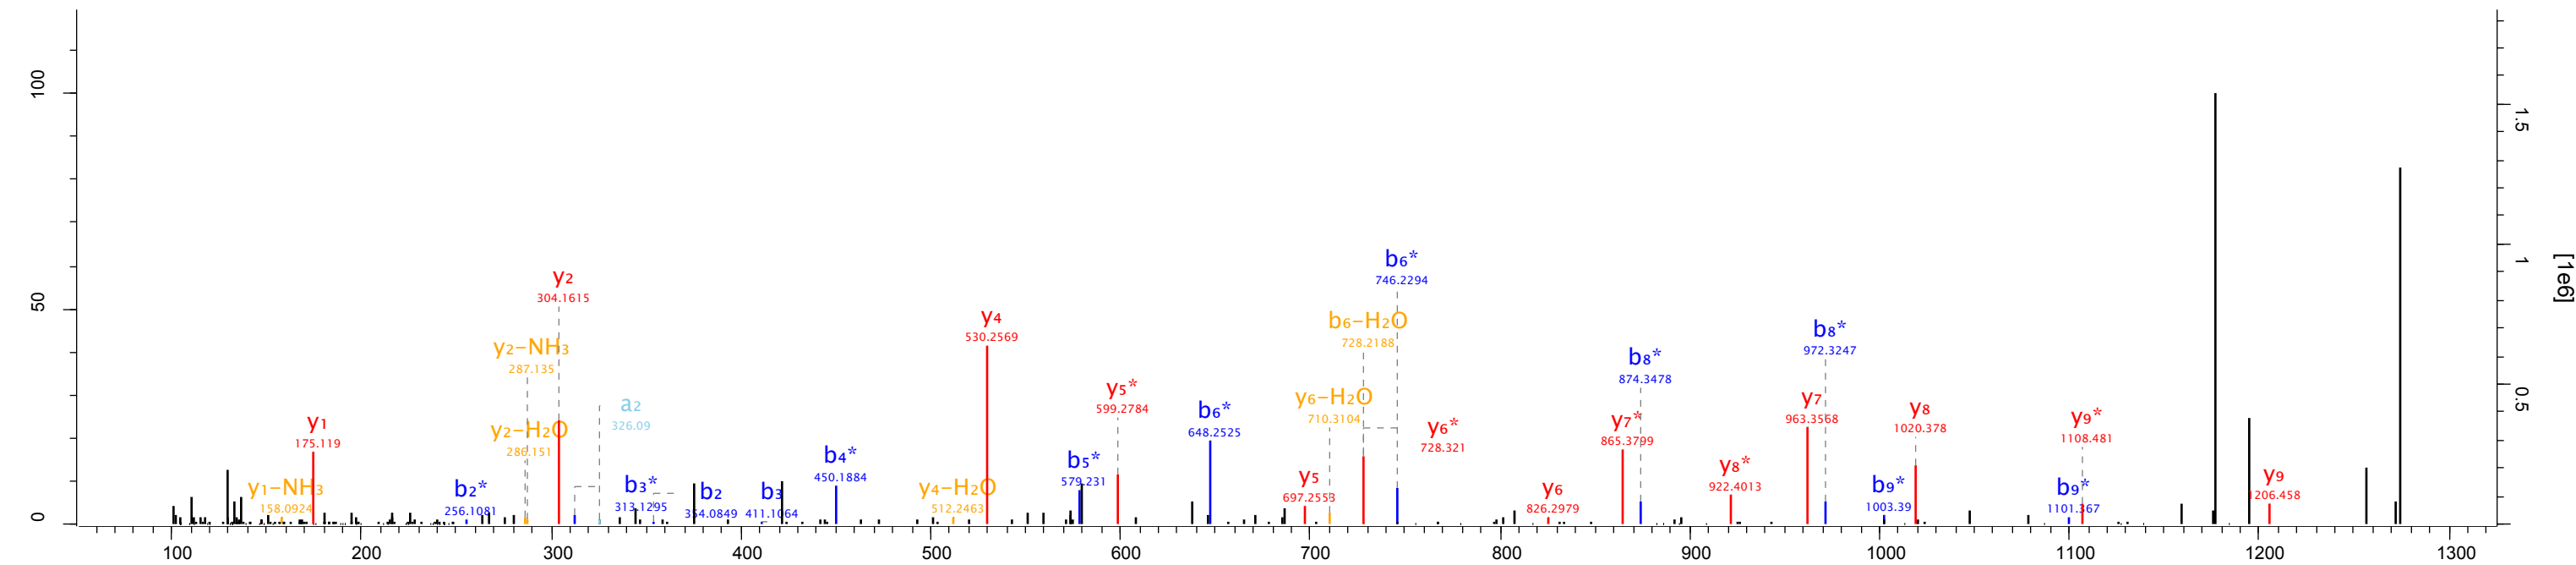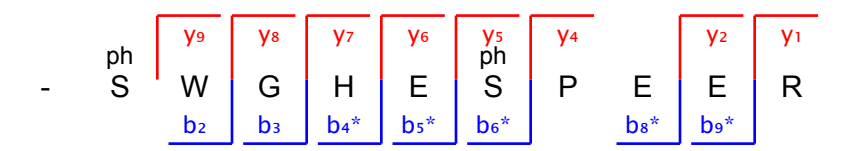

Raw file 20150814\_A375SR\_Phospho\_BR2\_03 Scan 7425 Method FTMS; HCD Score 194.55 m/z 590.75 Gene names MCM2

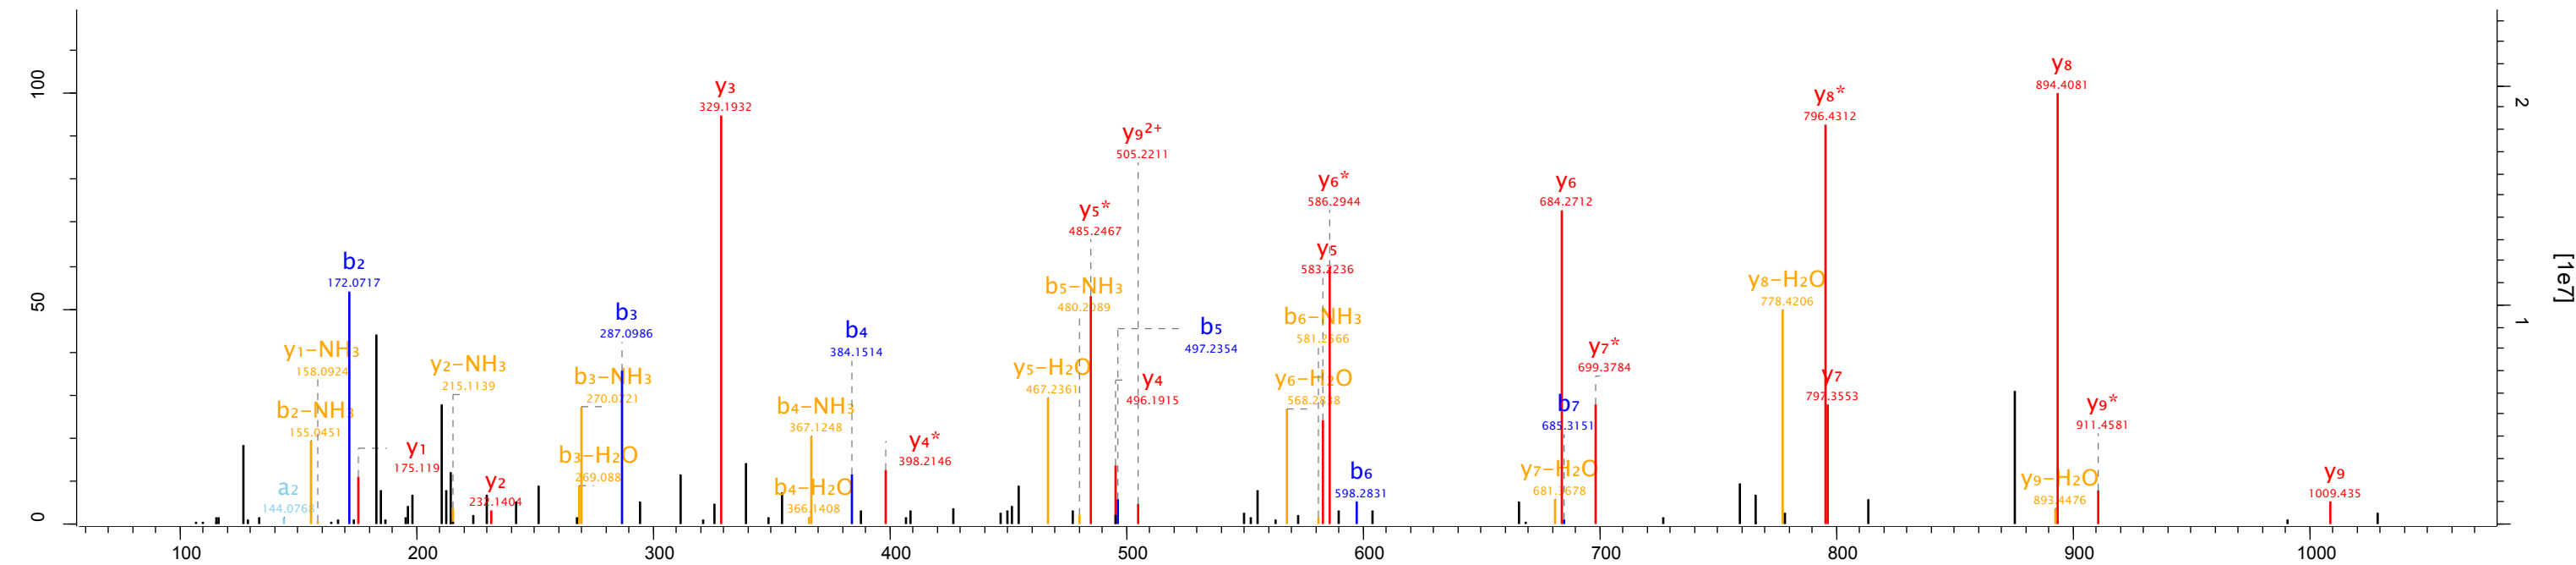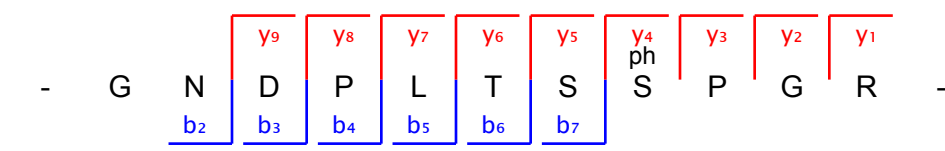

Raw file 20150814\_A375SR\_Phospho\_BR2\_03 Scan 7435 Method FTMS; HCD Score 231.28 m/z 803.69 Gene names YAP1

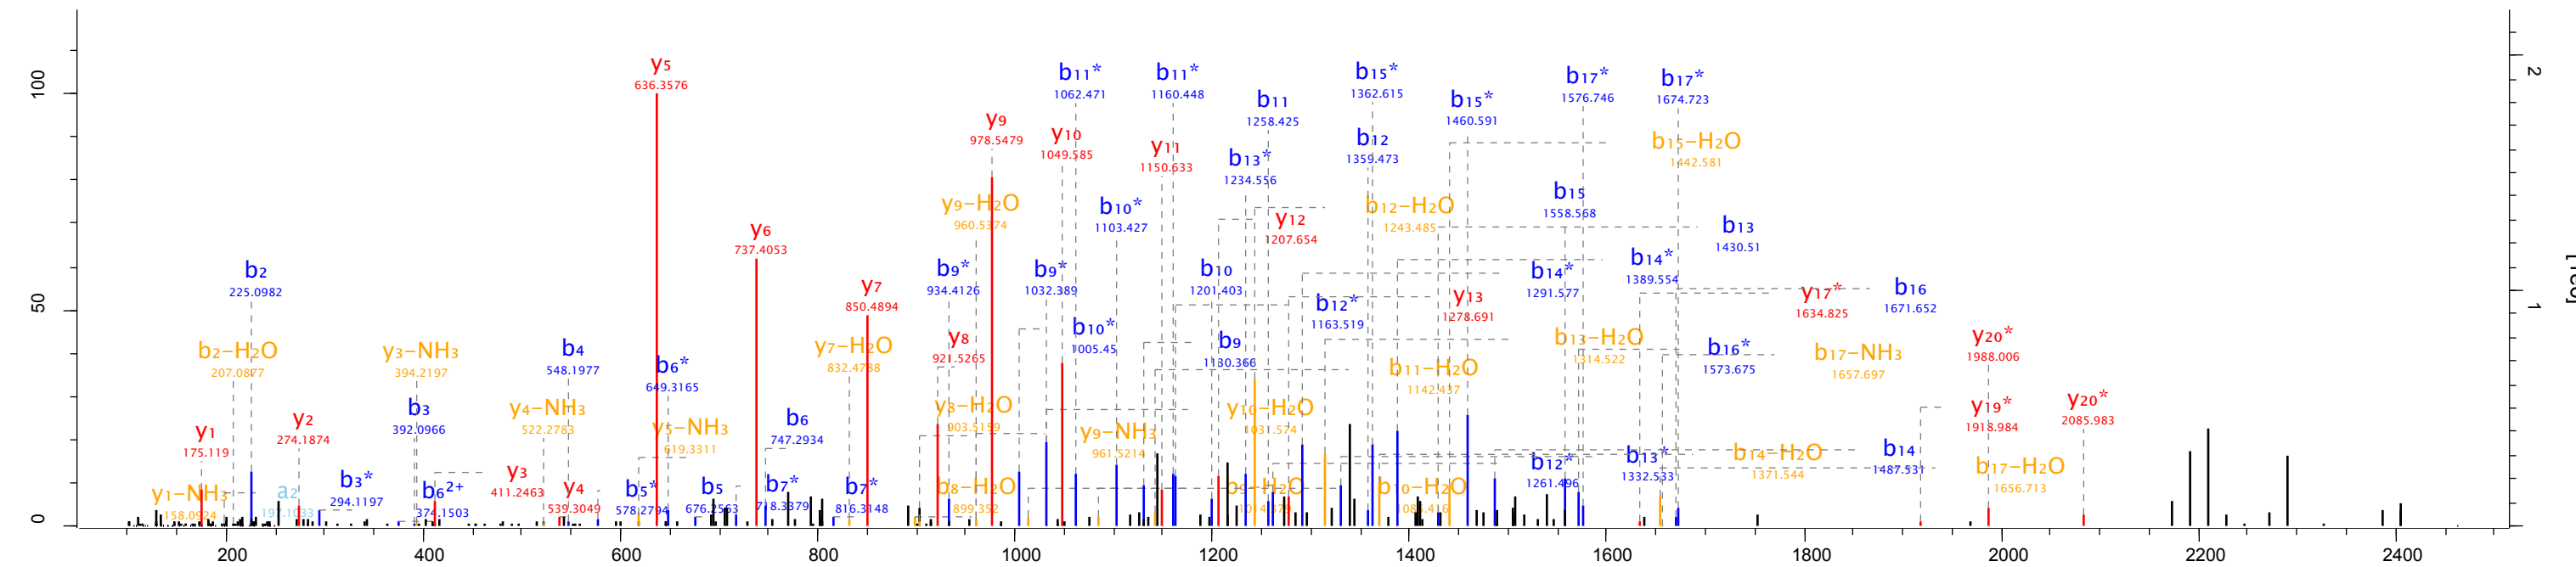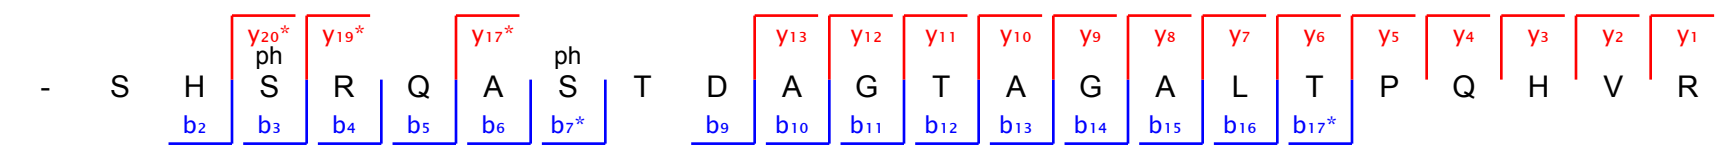

Raw file: 20150814\_A375SR\_Phospho\_BR2\_03  
 Scan: 7505 Method: FTMS; HCD Score: 111.52 m/z: 481.69 Gene names: ACIN1

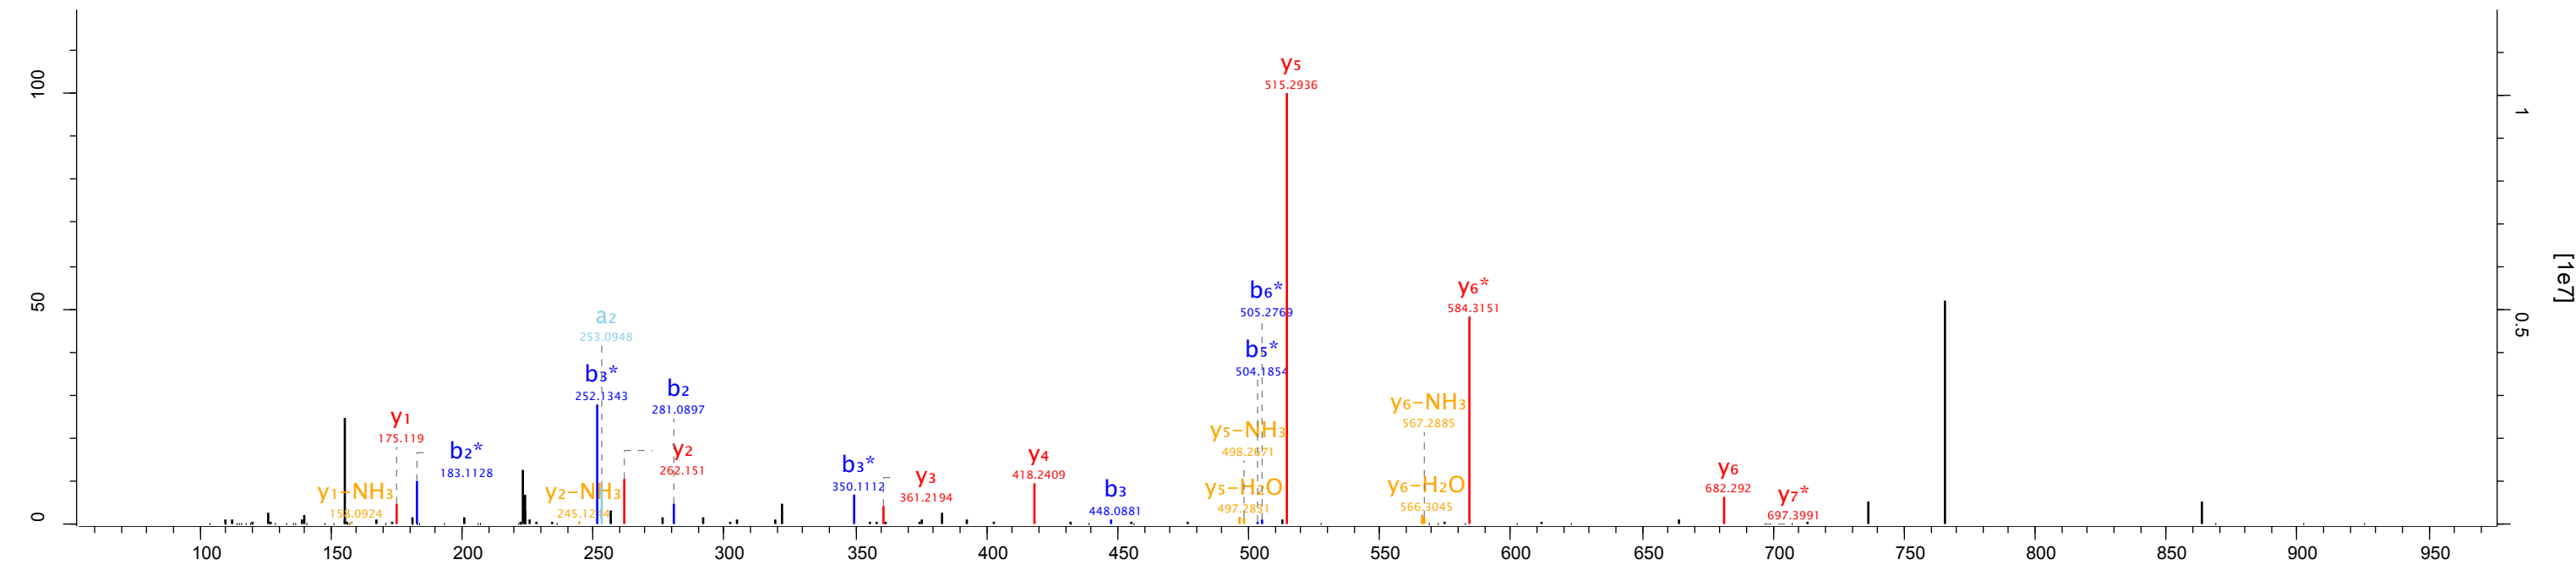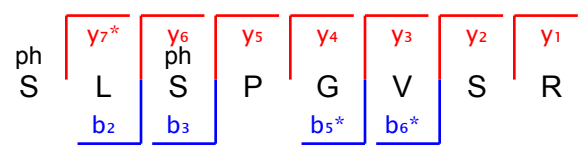

Raw file: 20150814\_A375SR\_Phospho\_BR2\_03  
 Scan: 7515 Method: FTMS; HCD Score: 154.47 m/z: 695.31 Gene names: LARP4

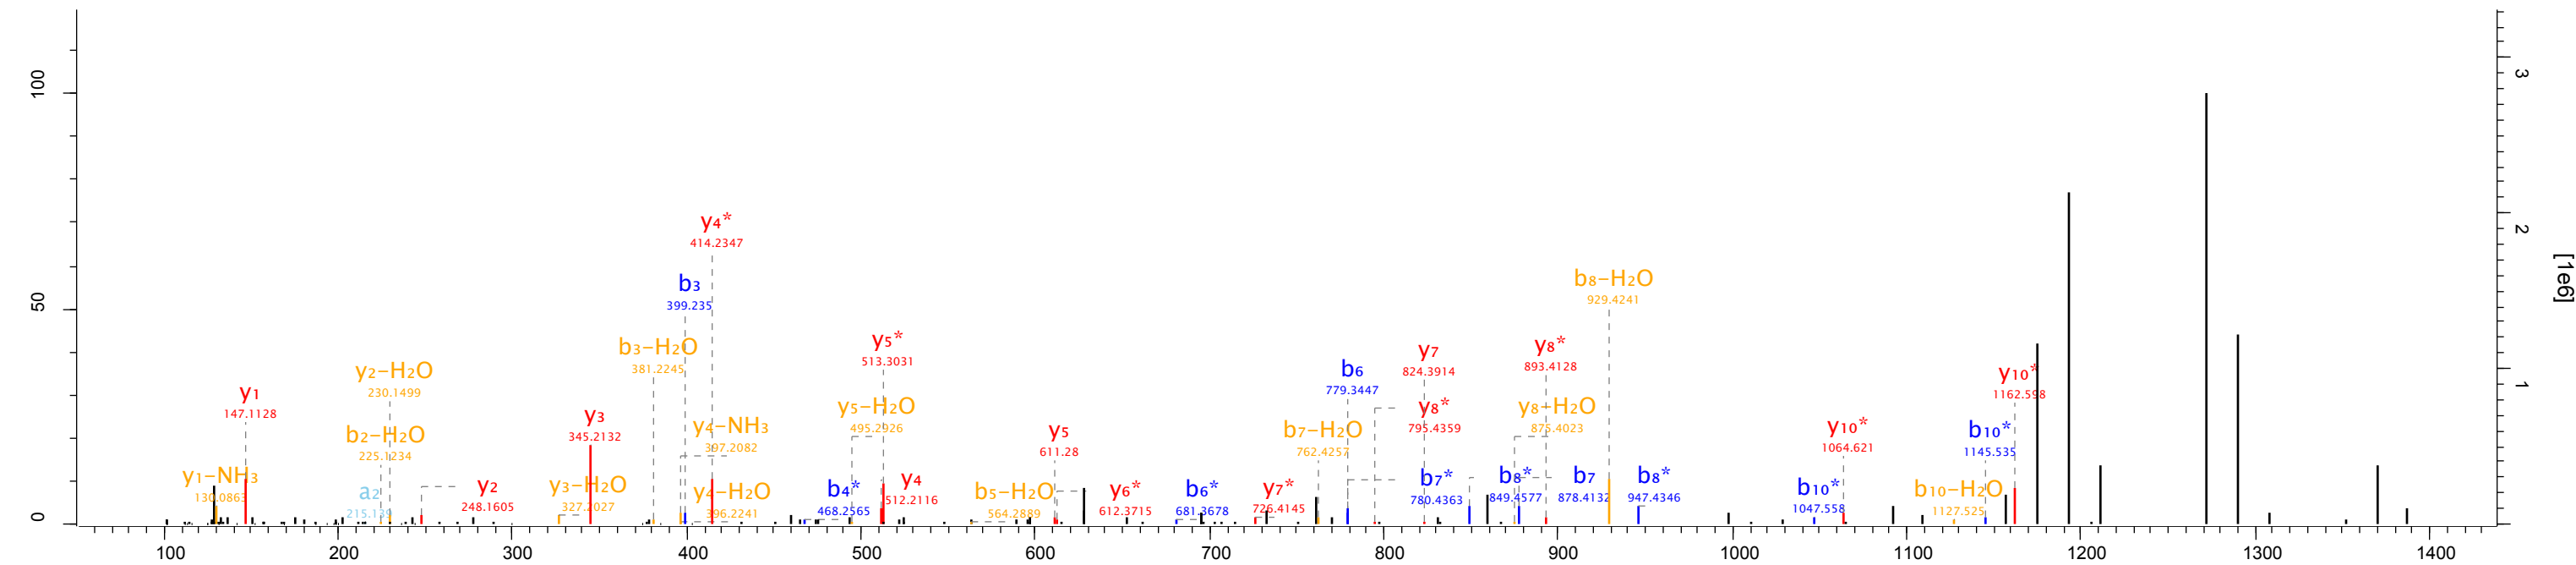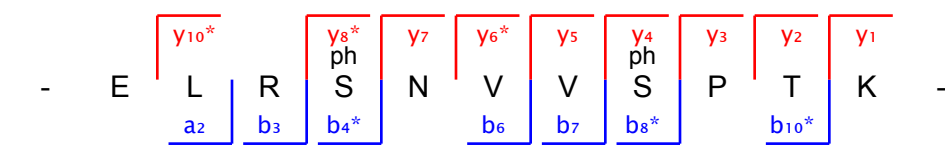

Raw file 20150814\_A375SR\_Phospho\_BR2\_03 Scan 7965 Method FTMS; HCD Score 132.62 m/z 470.23 Gene names PHRF1

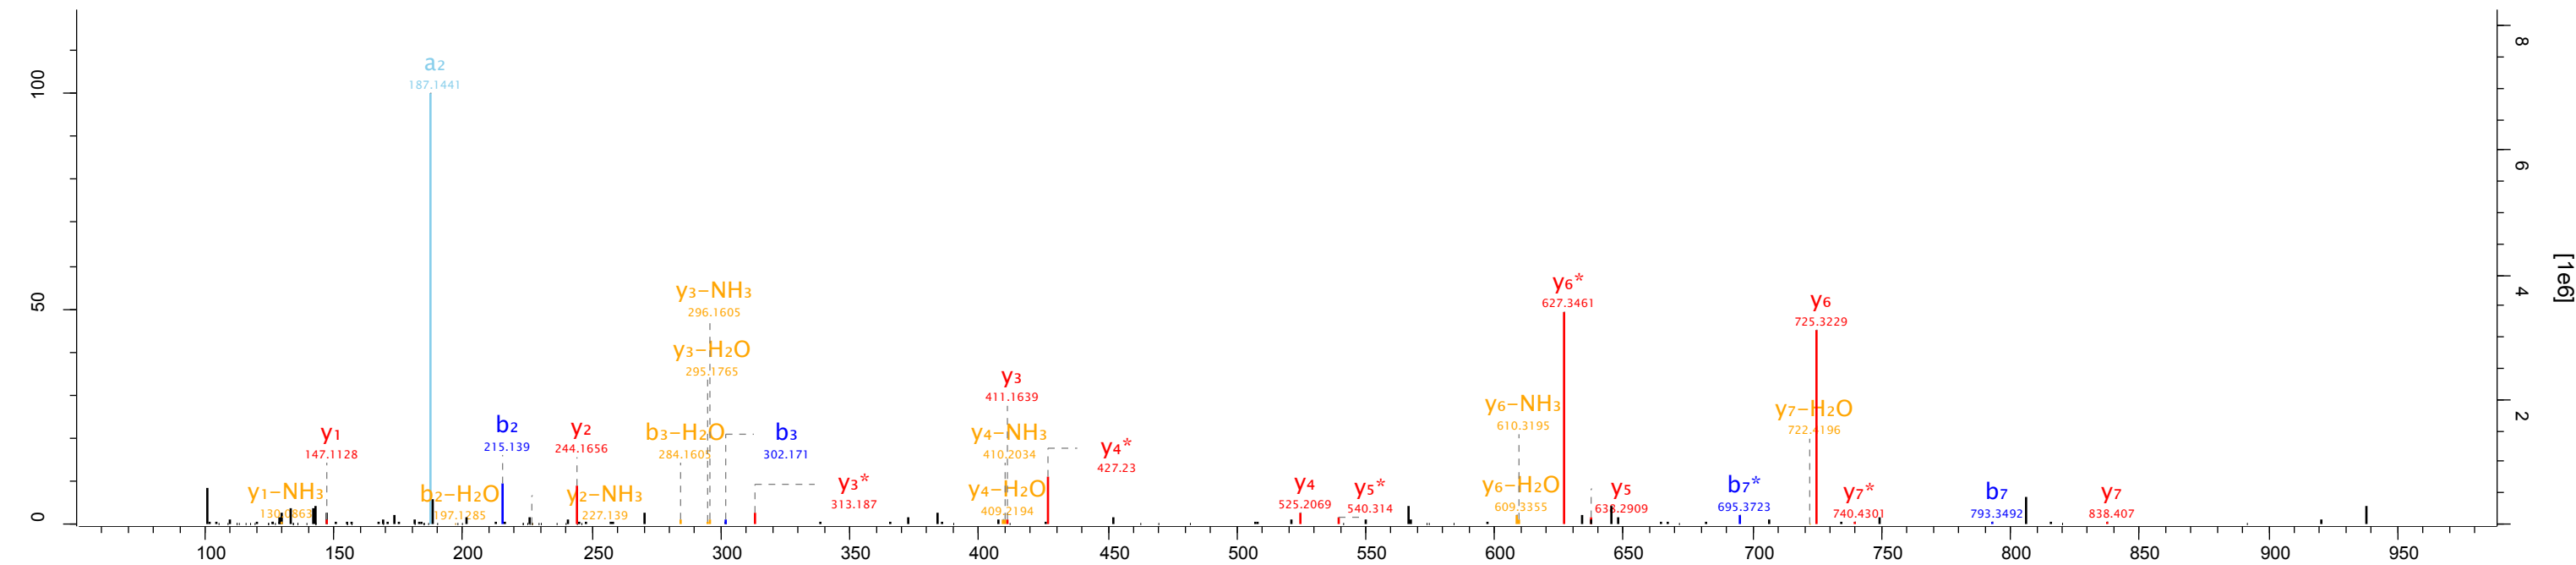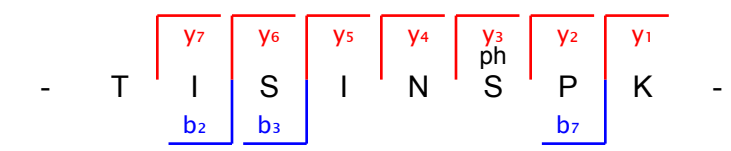

Raw file: 20150814\_A375SR\_Phospho\_BR2\_03  
 Scan: 8245 Method: FTMS; HCD Score: 142.23 m/z: 889.38 Gene names: CDC25B

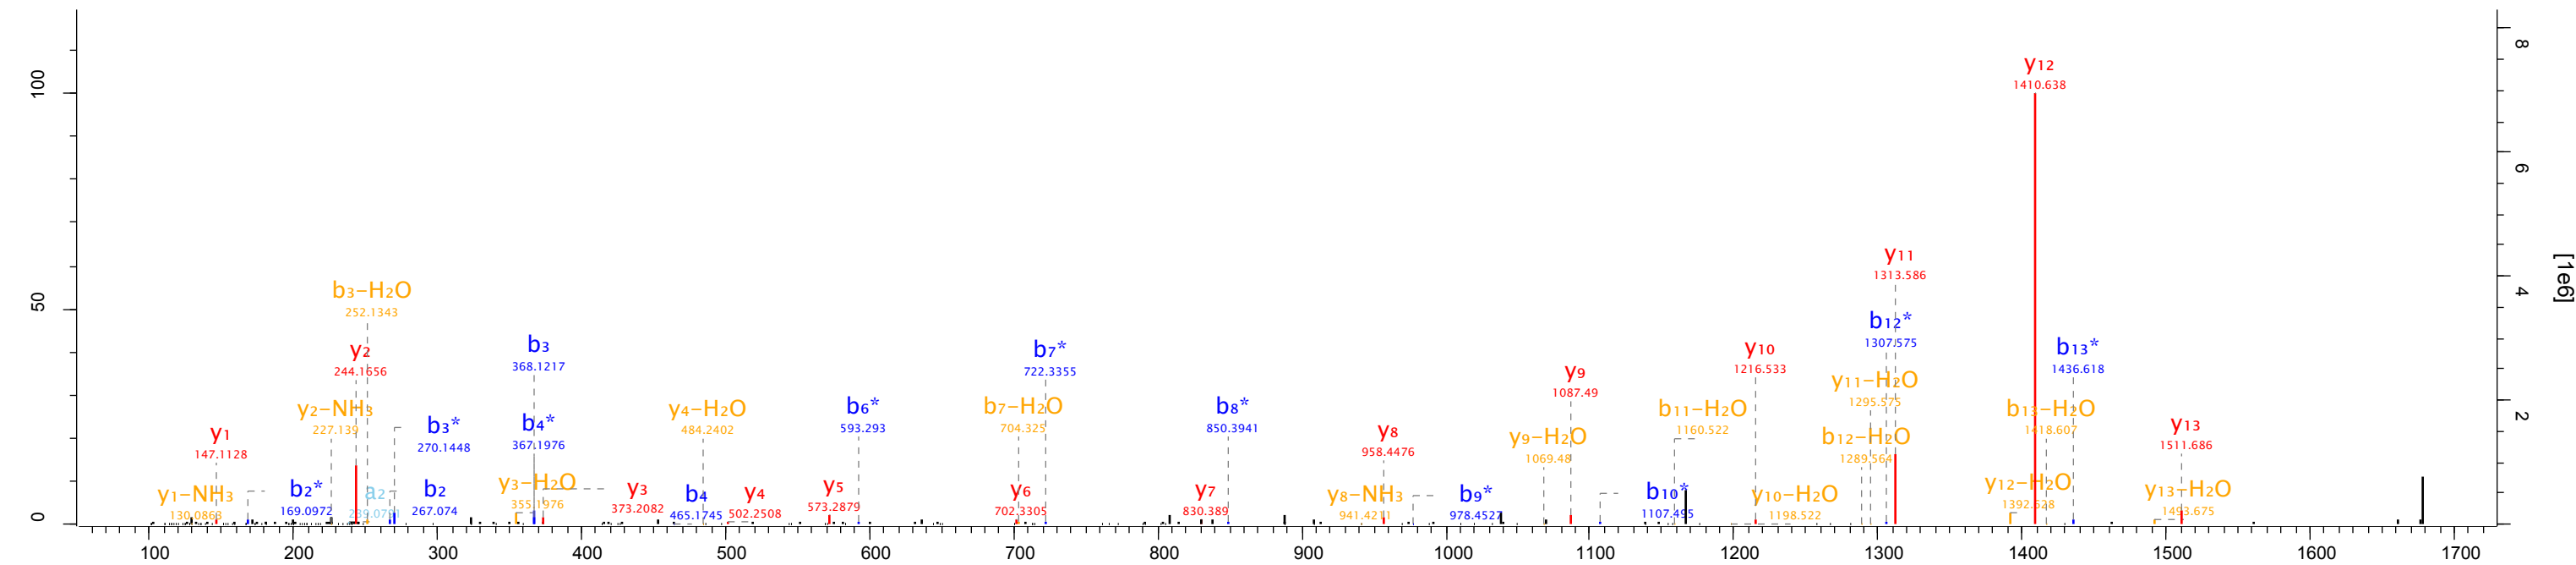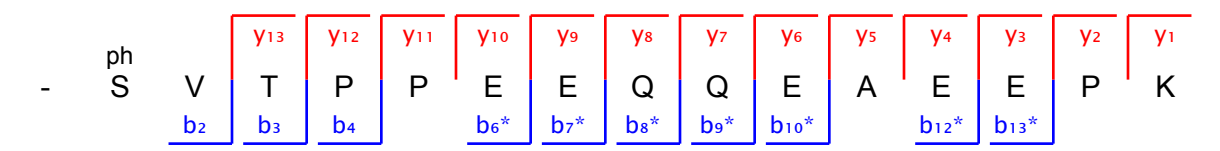

Raw file: 20150814\_A375SR\_Phospho\_BR2\_03  
 Scan: 8695 Method: FTMS; HCD Score: 65.38 m/z: 892.7 Gene names: RCOR3

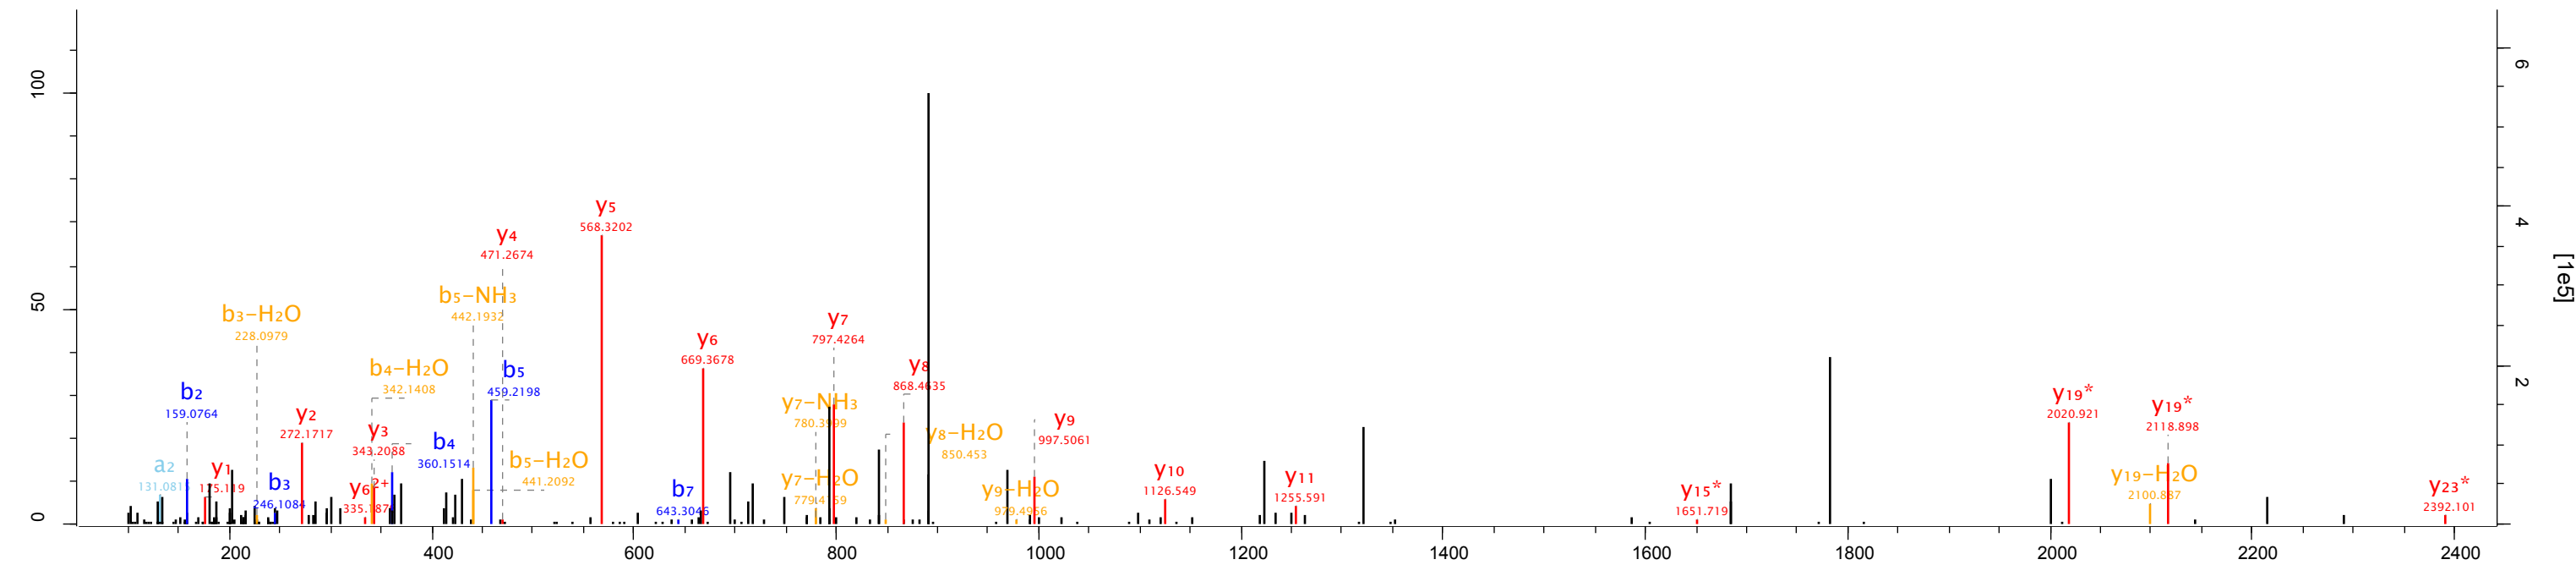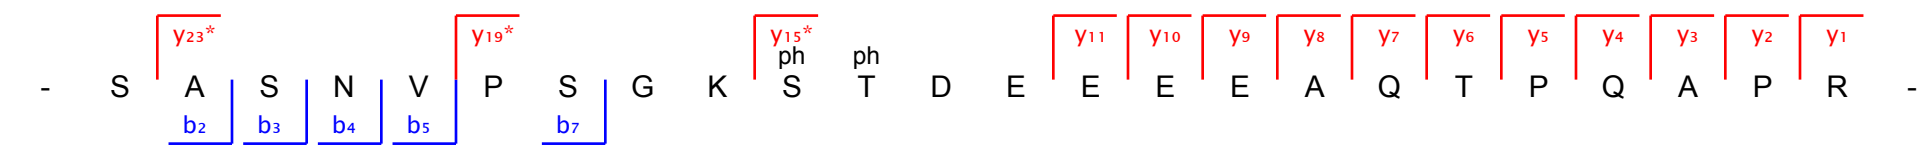



Raw file: 20150814\_A375SR\_Phospho\_BR2\_03  
 Scan: 8985 Method: FTMS; HCD Score: 64.01 m/z: 811.37 Gene names: ISL2

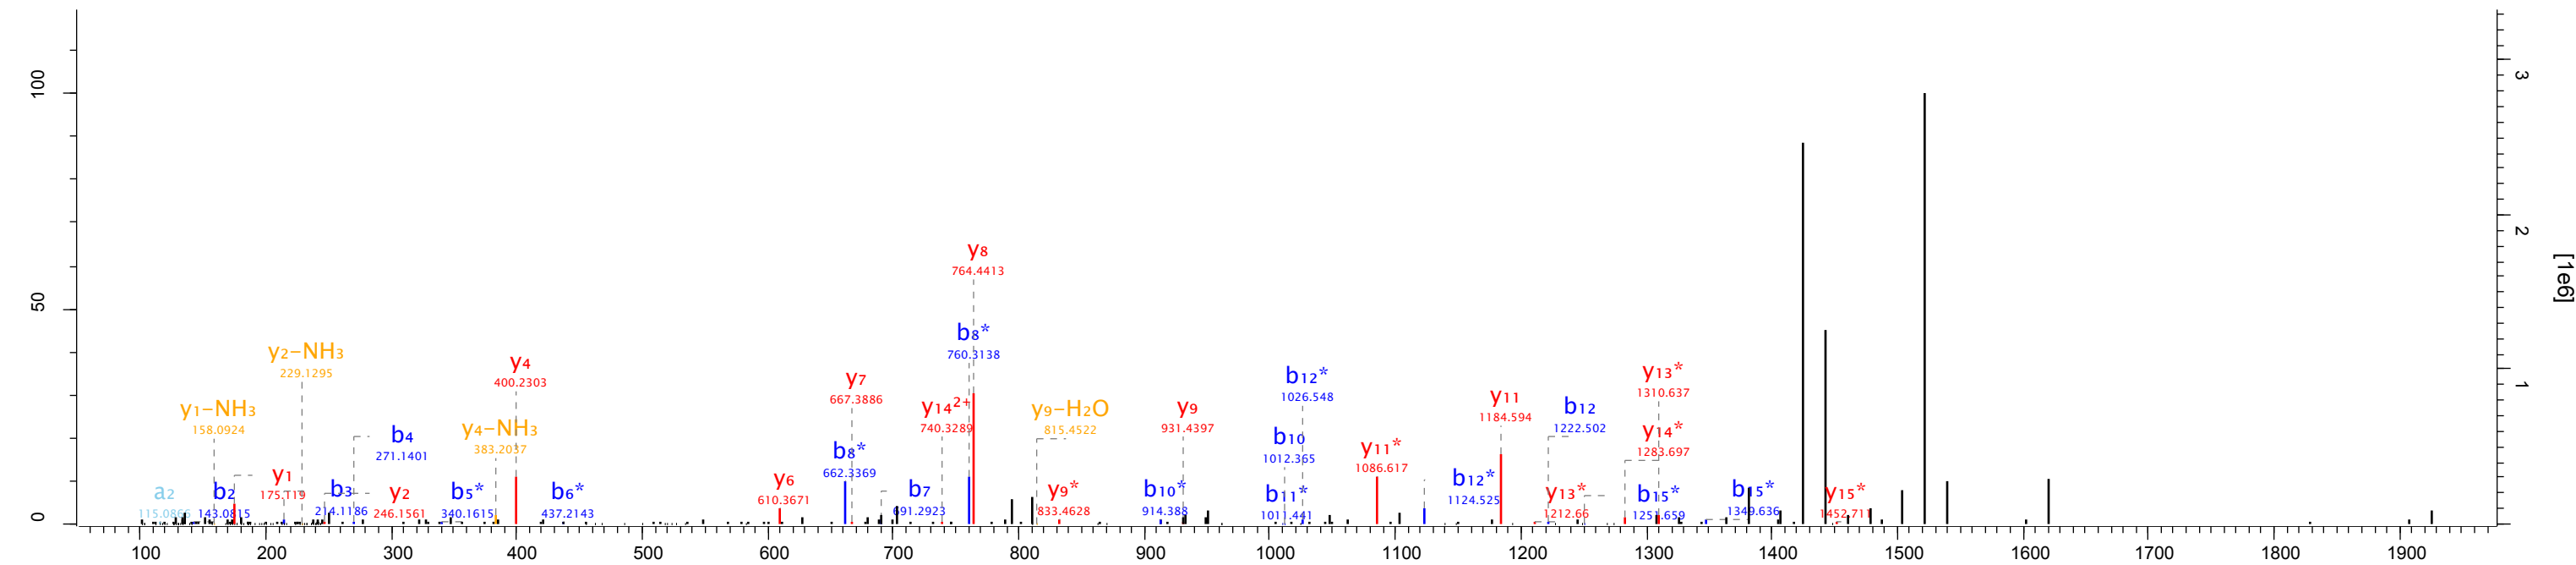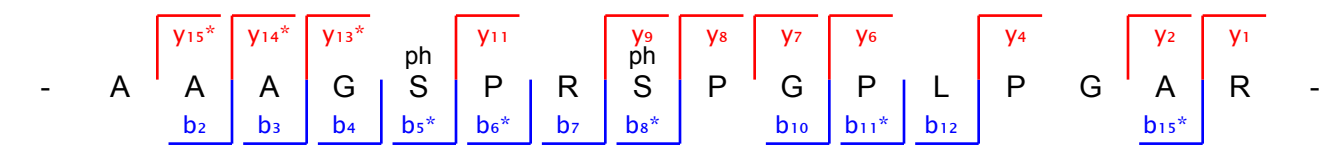

Raw file: 20150814\_A375SR\_Phospho\_BR2\_03  
 Scan: 9215 Method: FTMS; HCD Score: 111.99 m/z: 960.43 Gene names: CHD3

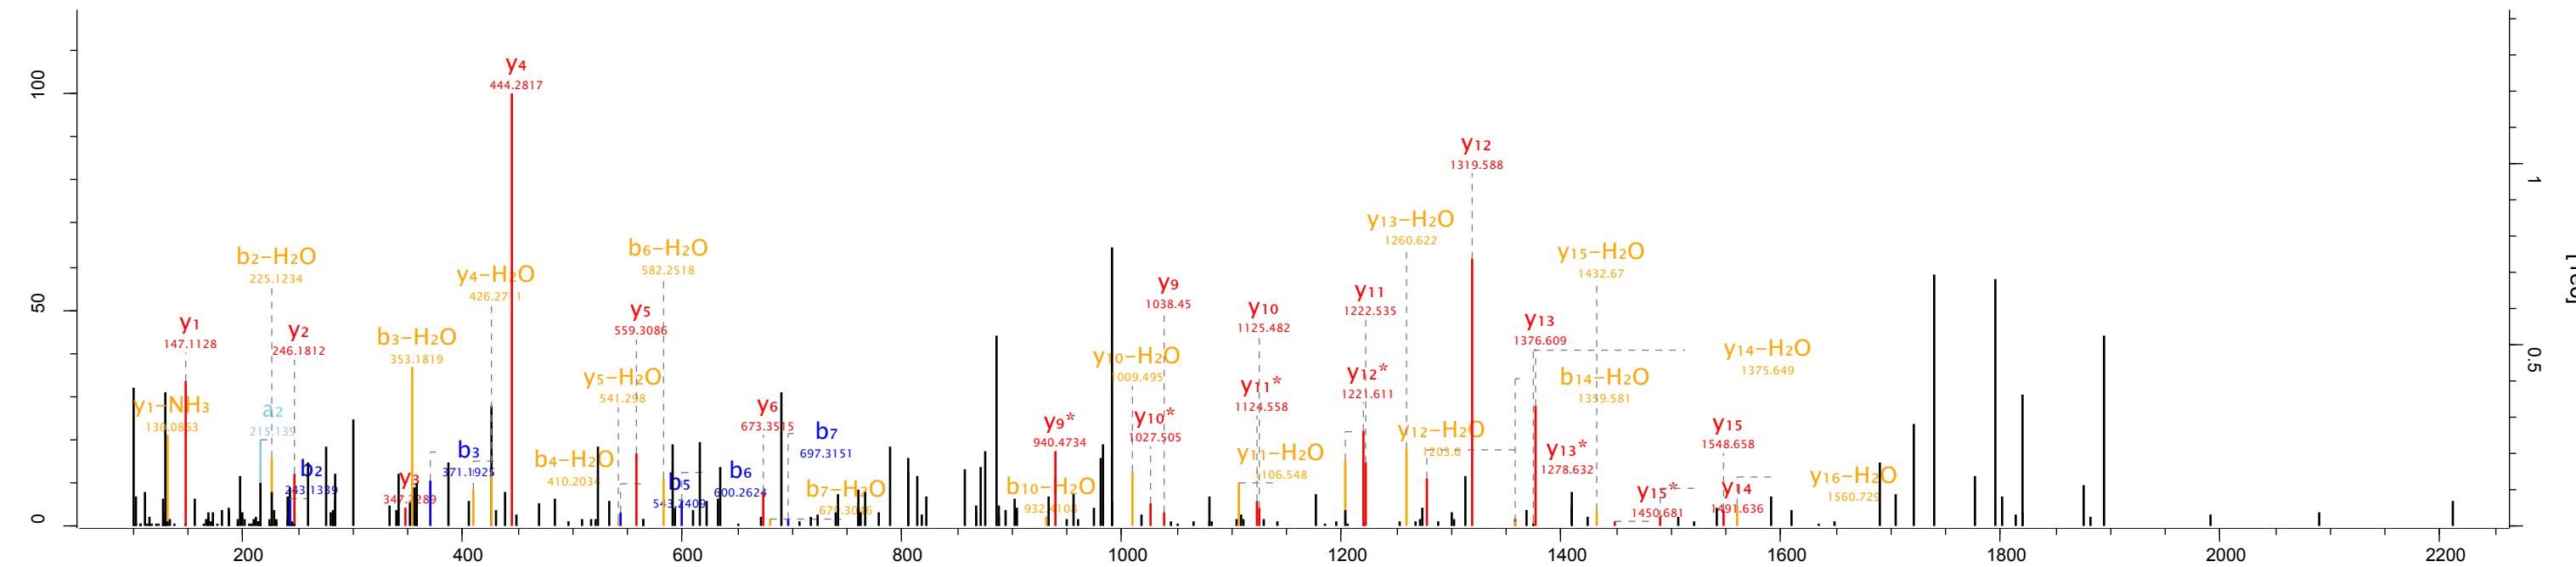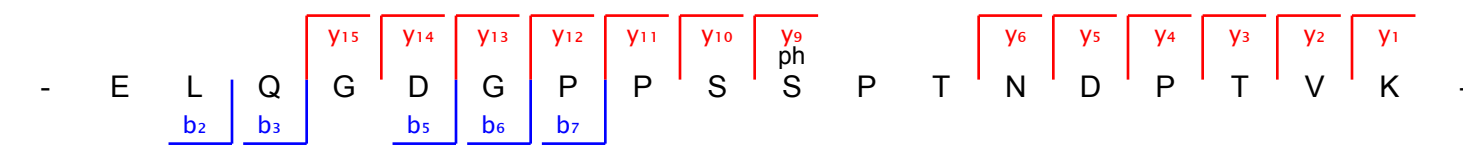

Raw file: 20150814\_A375SR\_Phospho\_BR2\_03  
 Scan: 9235 Method: FTMS; HCD Score: 112.82 m/z: 542.76 Gene names: DDX20

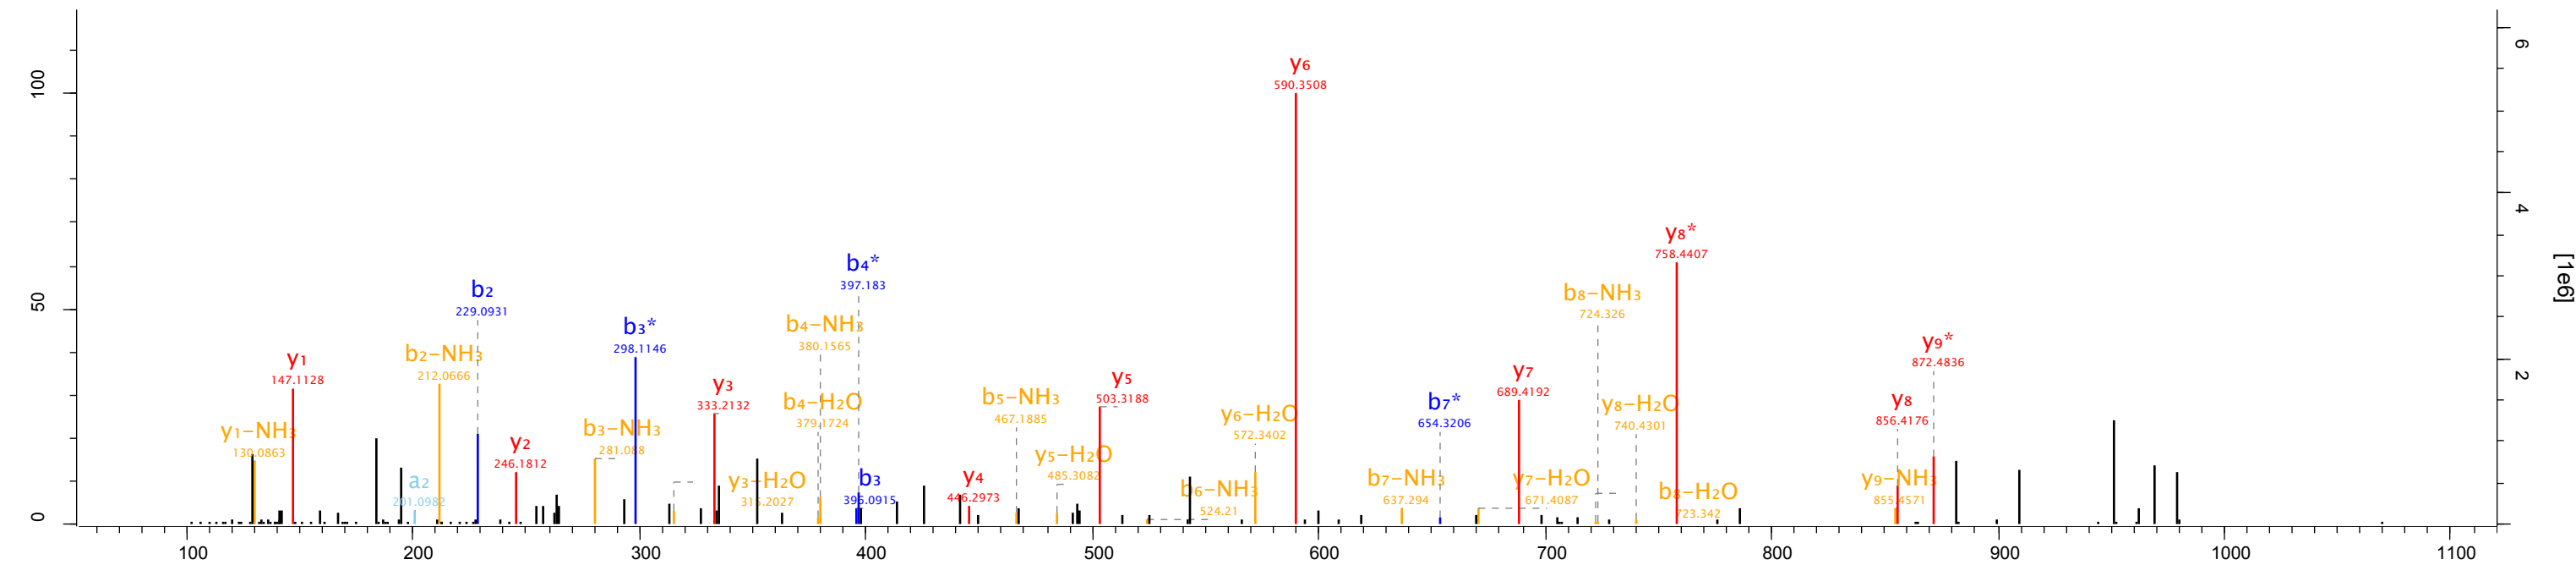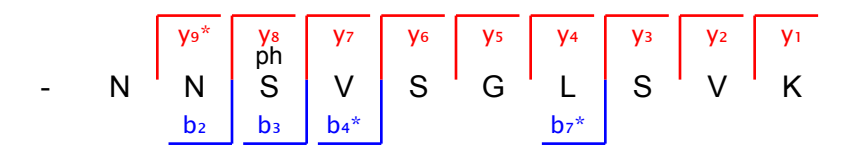

Raw file 20150814\_A375SR\_Phospho\_BR2\_03 Scan 9265 Method FTMS; HCD Score 91.13 m/z 896.37 Gene names SCAF11

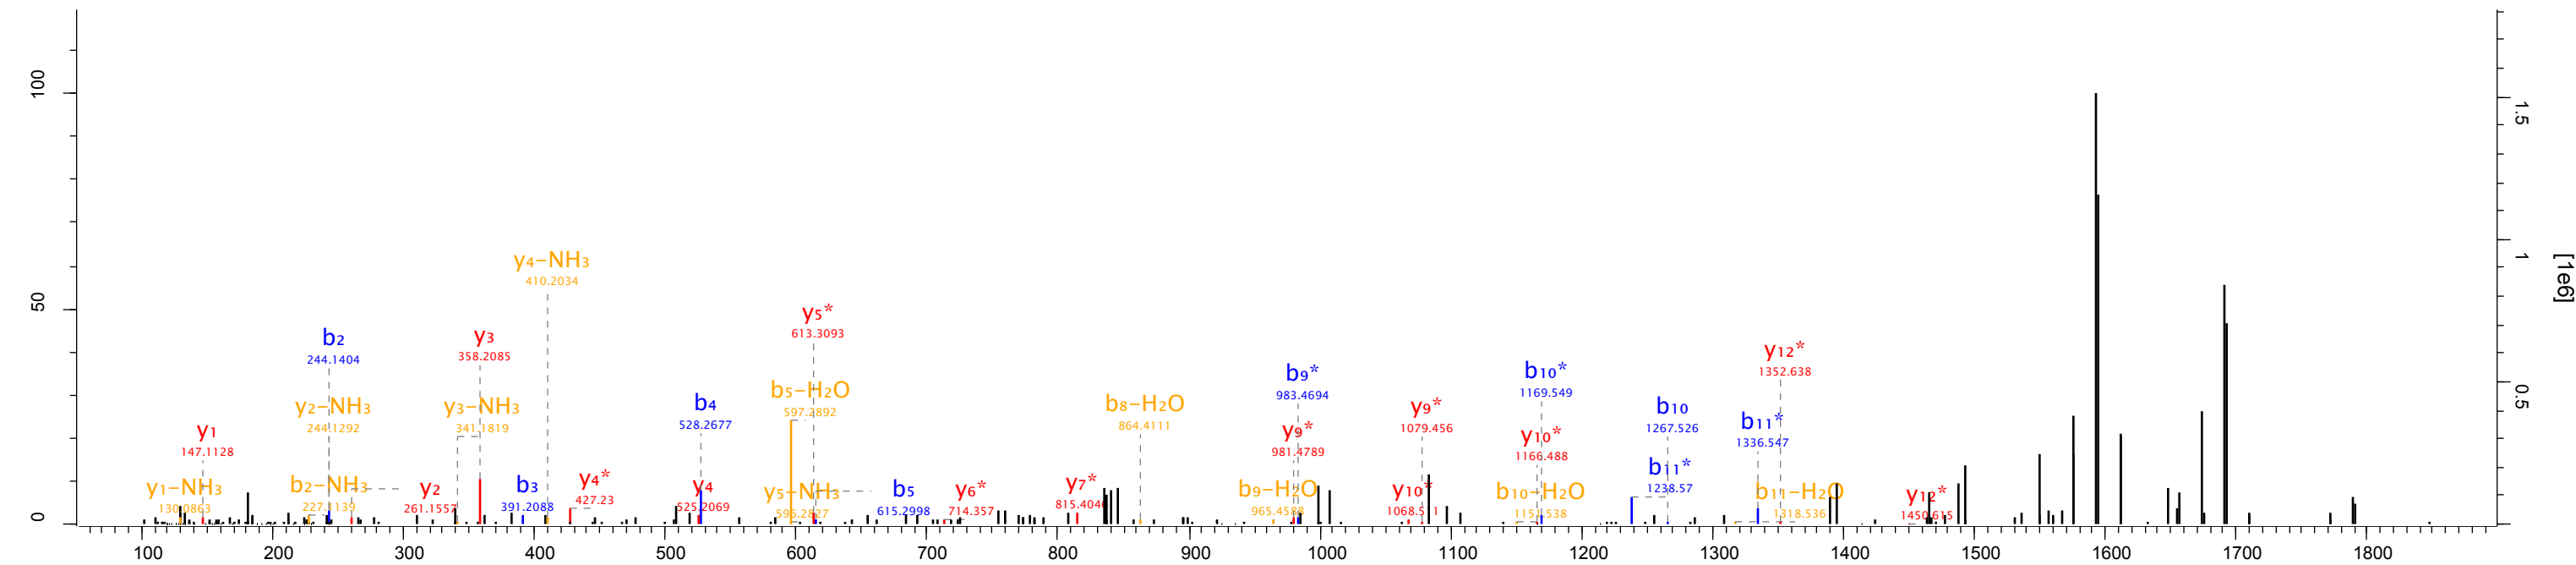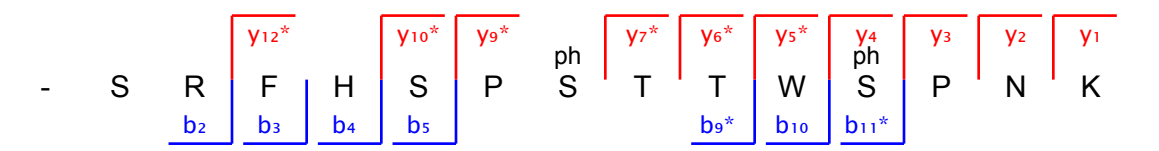

Raw file: 20150814\_A375SR\_Phospho\_BR2\_03  
 Scan: 9995 Method: FTMS; HCD Score: 175.57 m/z: 660.96 Gene names: CDK7

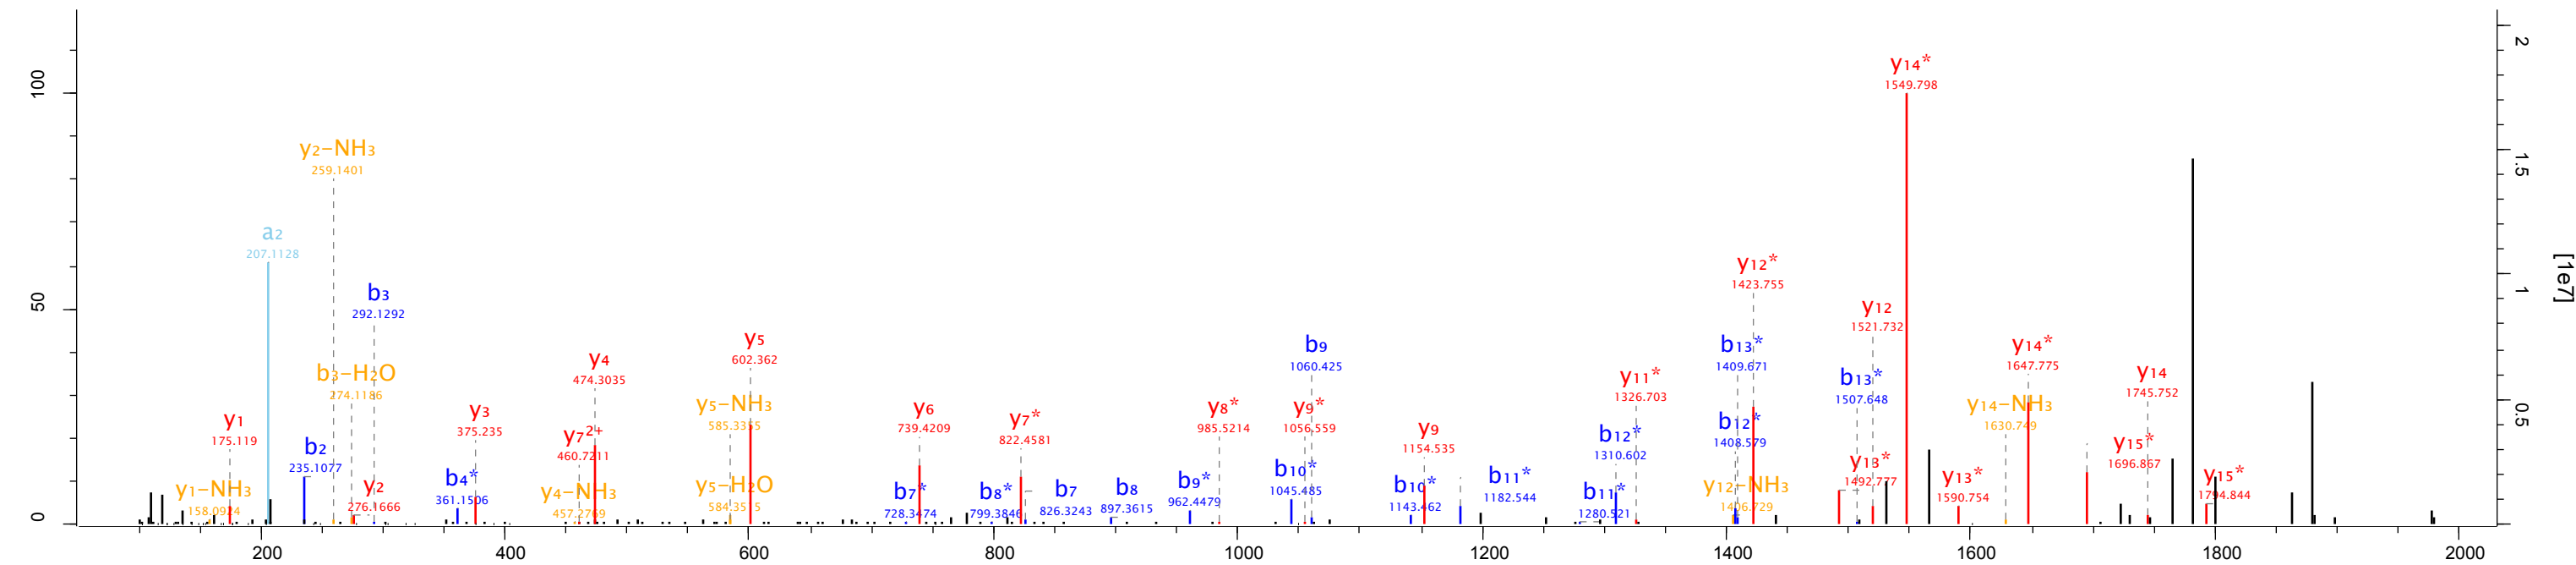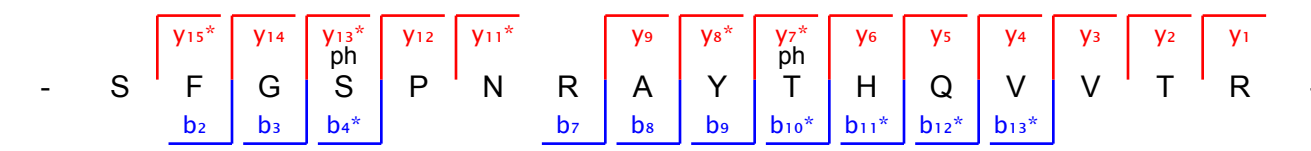

Raw file 20150814\_A375SR\_Phospho\_BR2\_04 Scan 10055 Method FTMS; HCD Score 237.73 m/z 820.85 Gene names ITGB4

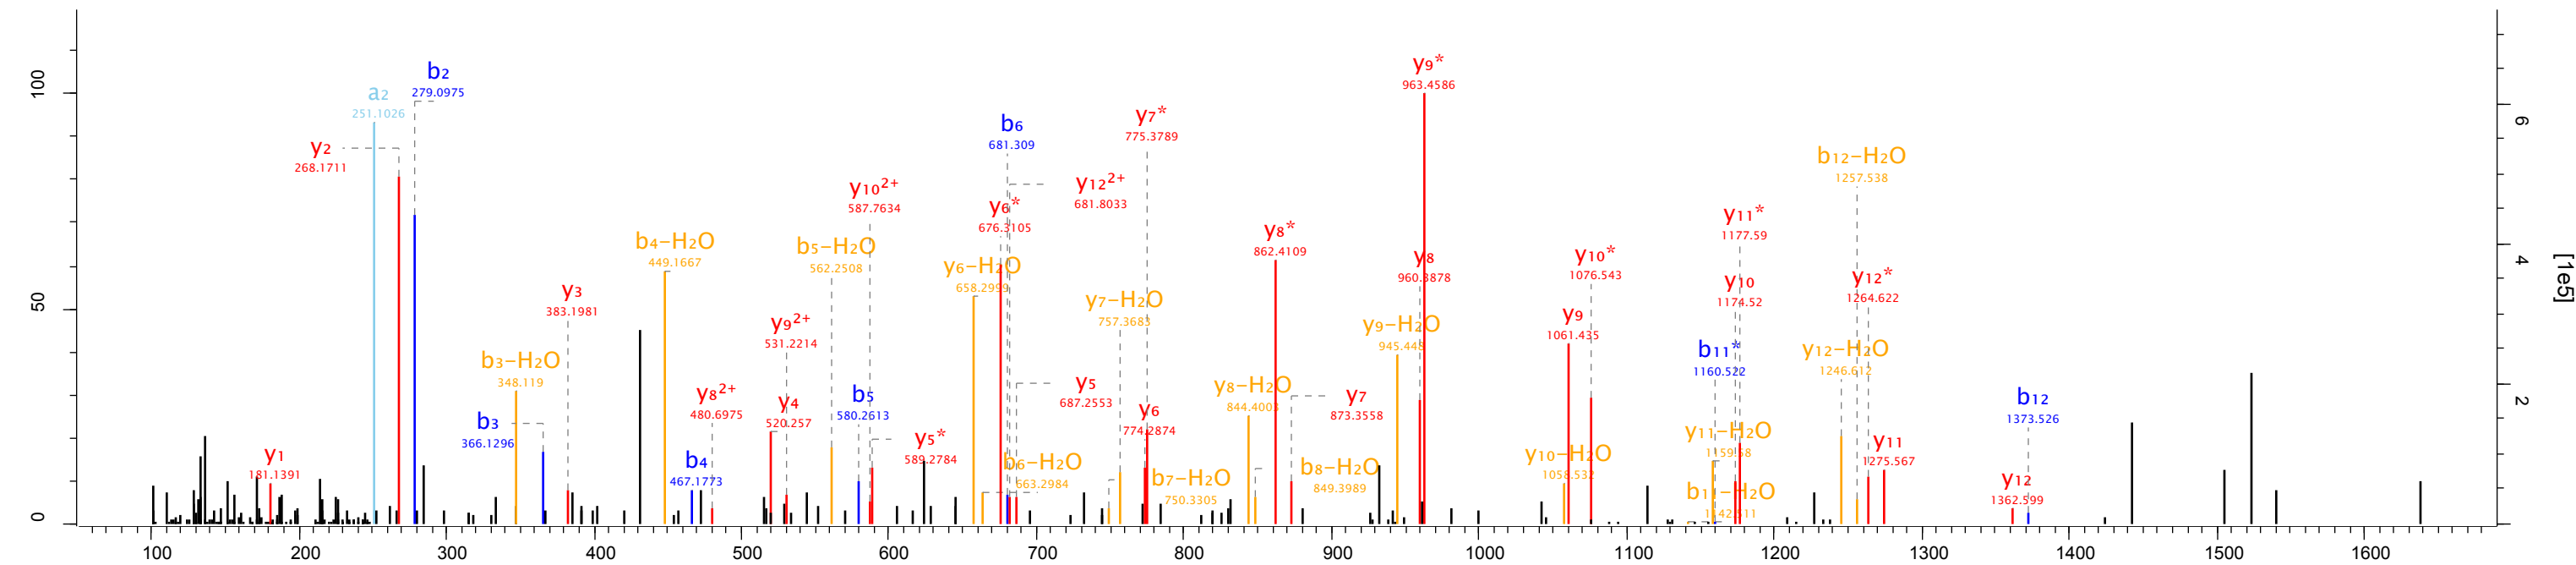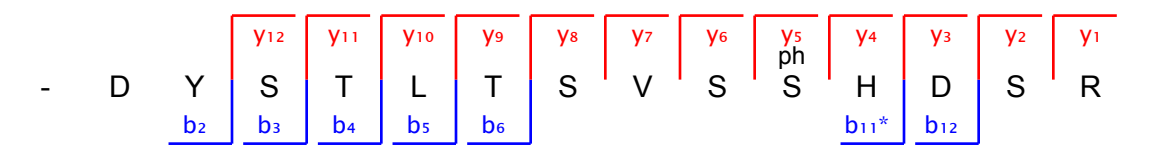

Raw file 20150814\_A375SR\_Phospho\_BR2\_04 Scan 10395 Method FTMS; HCD Score 83.53 m/z 533.75 Gene names NUP214

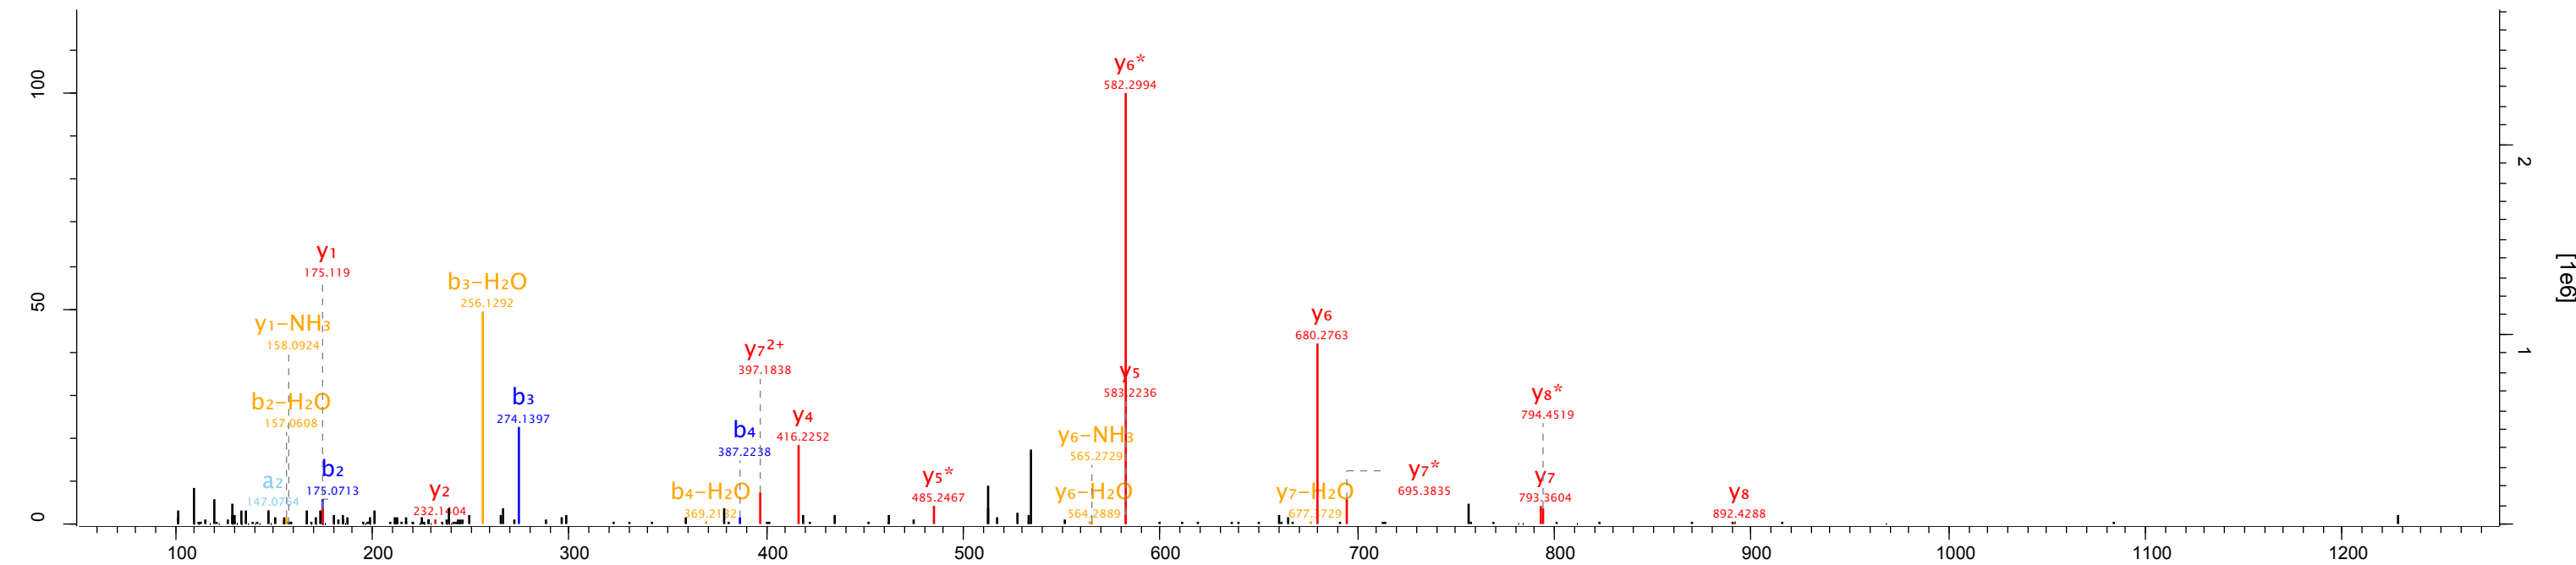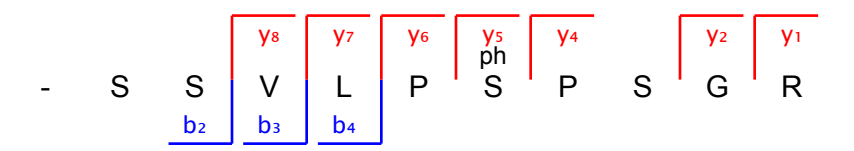

Raw file 20150814\_A375SR\_Phospho\_BR2\_04 Scan 10975 Method FTMS; HCD Score 117.25 m/z 527.74 Gene names SMARCA1

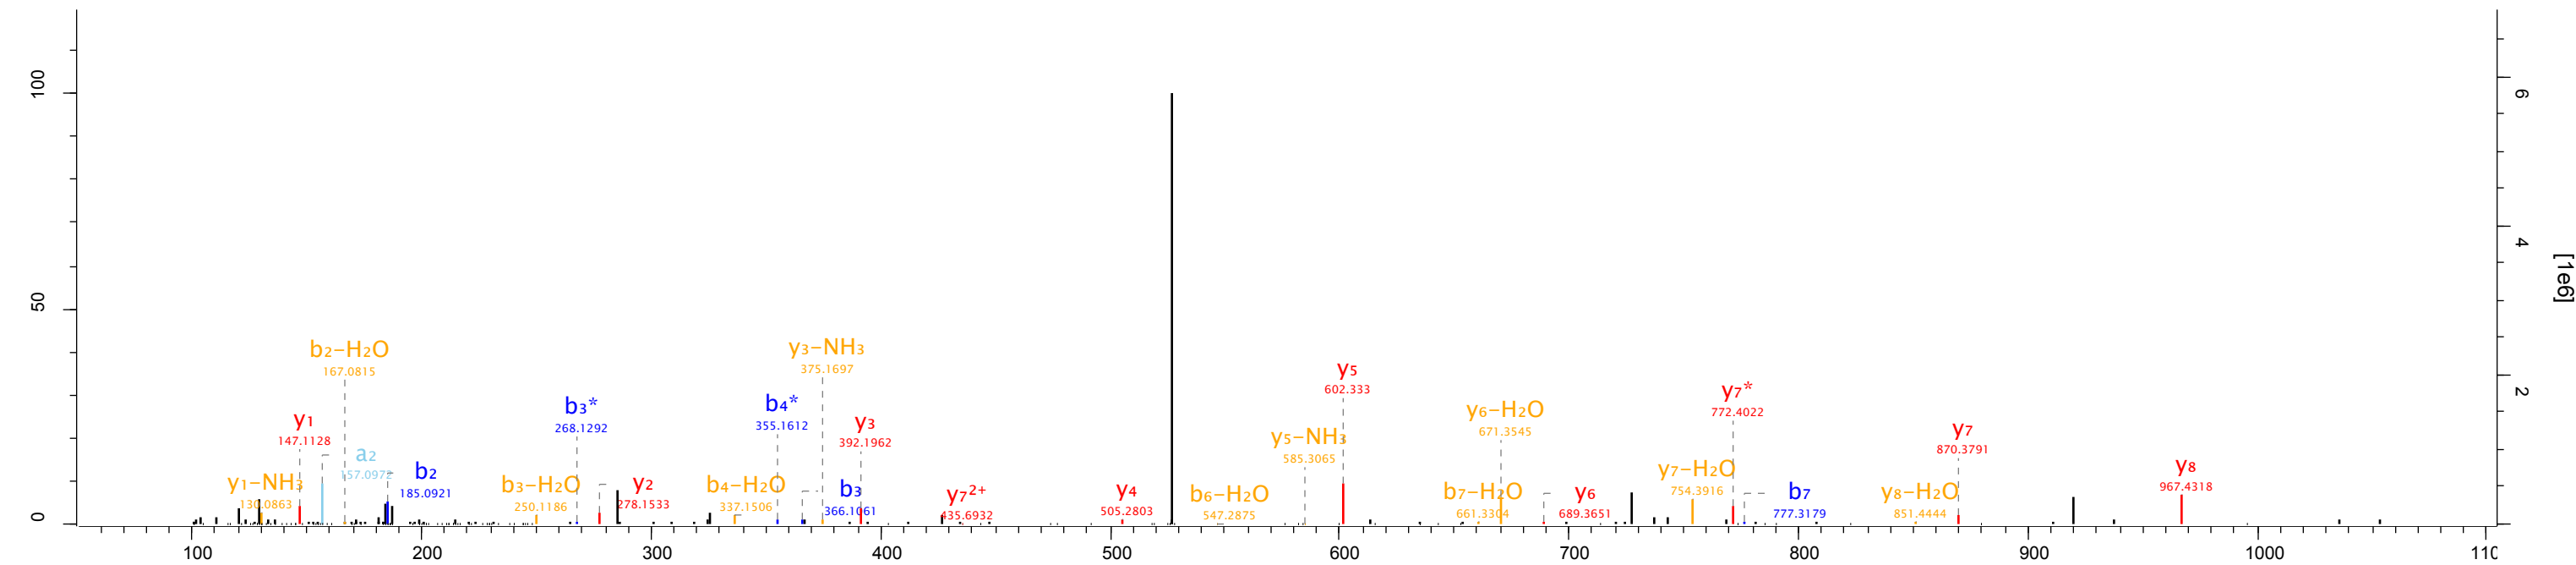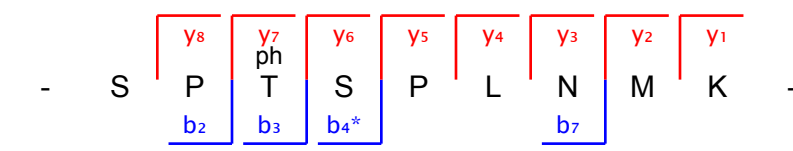



Raw file: 20150814\_A375SR\_Phospho\_BR2\_04  
 Scan: 11055 Method: FTMS; HCD Score: 102.45 m/z: 593.28 Gene names: FNDC3B

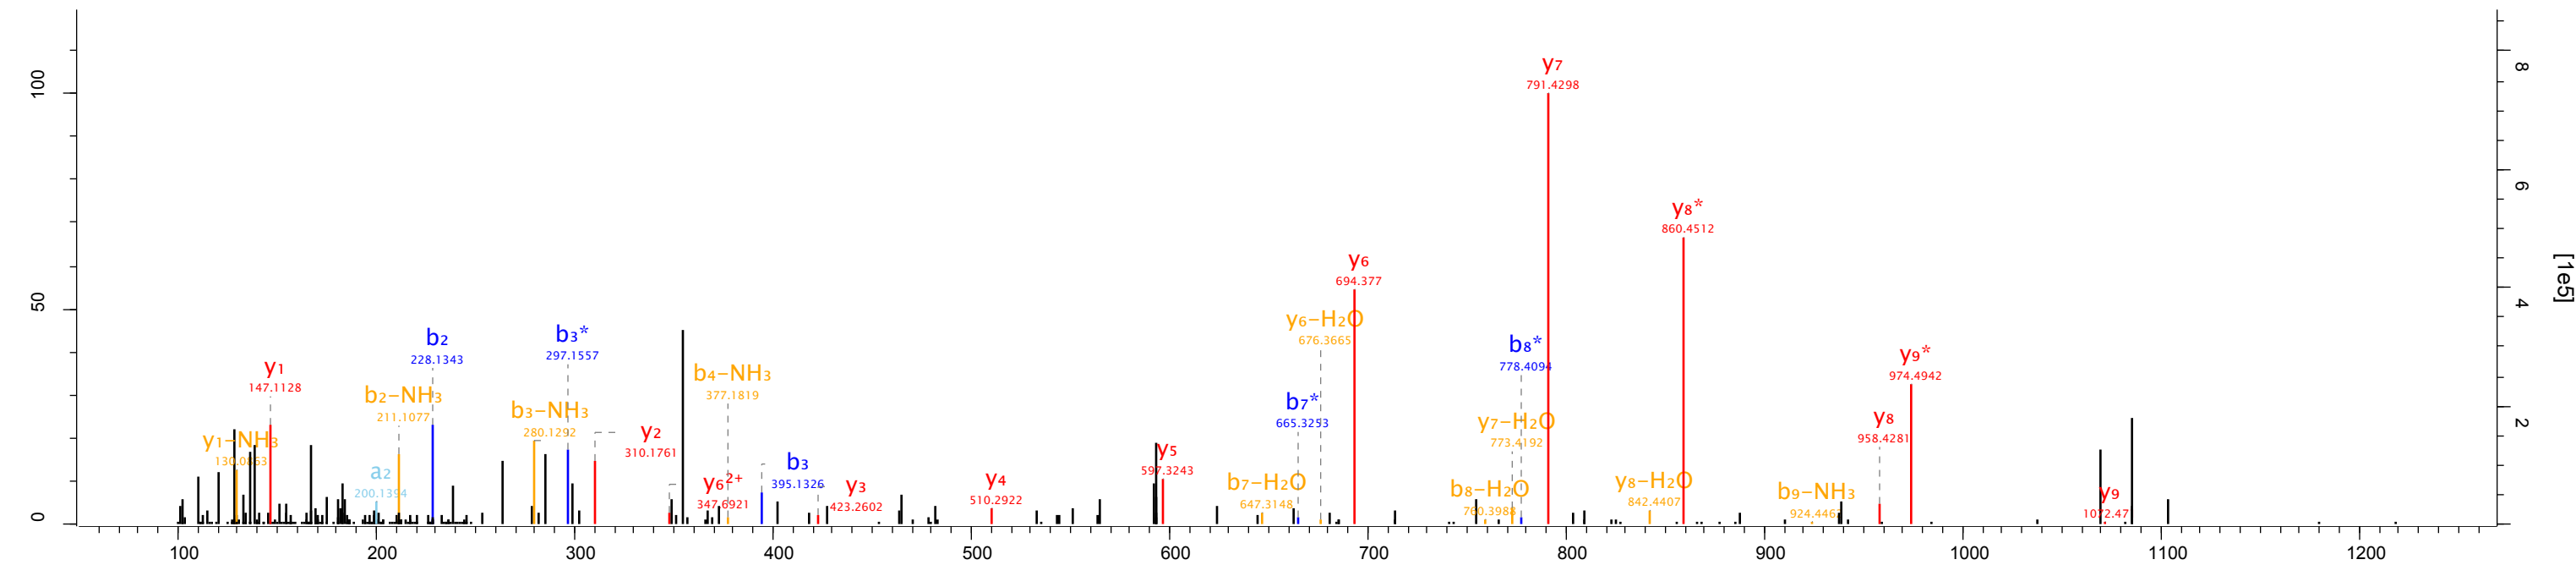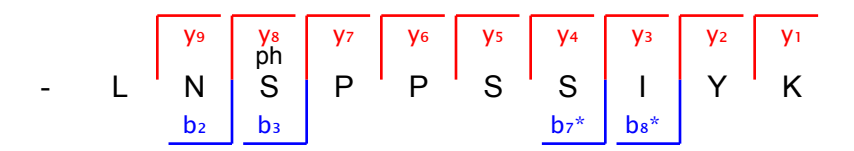

Raw file Scan Method Score m/z Gene names  
 20150814\_A375SR\_Phospho\_BR2\_04 11525 FTMS; HCD 176.58 600.75 PHF8

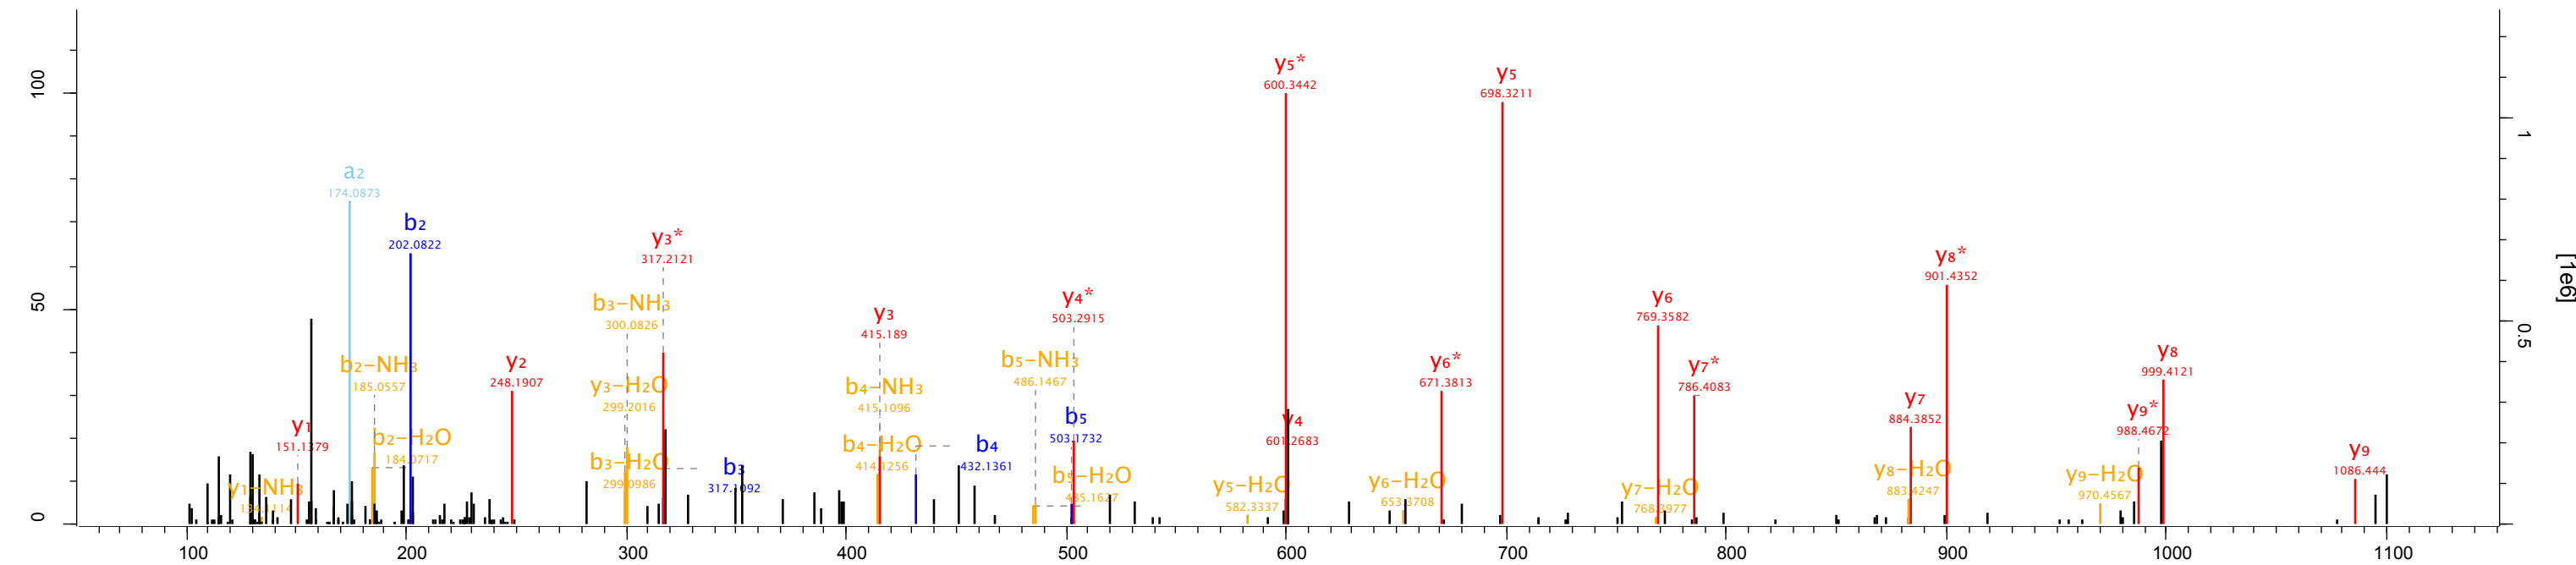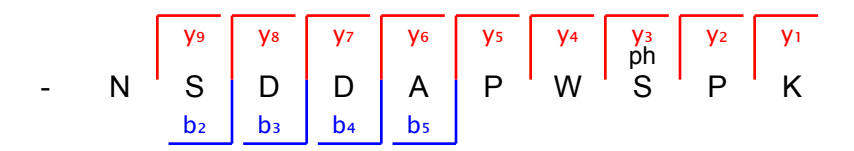

Raw file 20150814\_A375SR\_Phospho\_BR2\_04 Scan 11575 Method FTMS; HCD Score 91.79 m/z 629.31 Gene names FMNL2

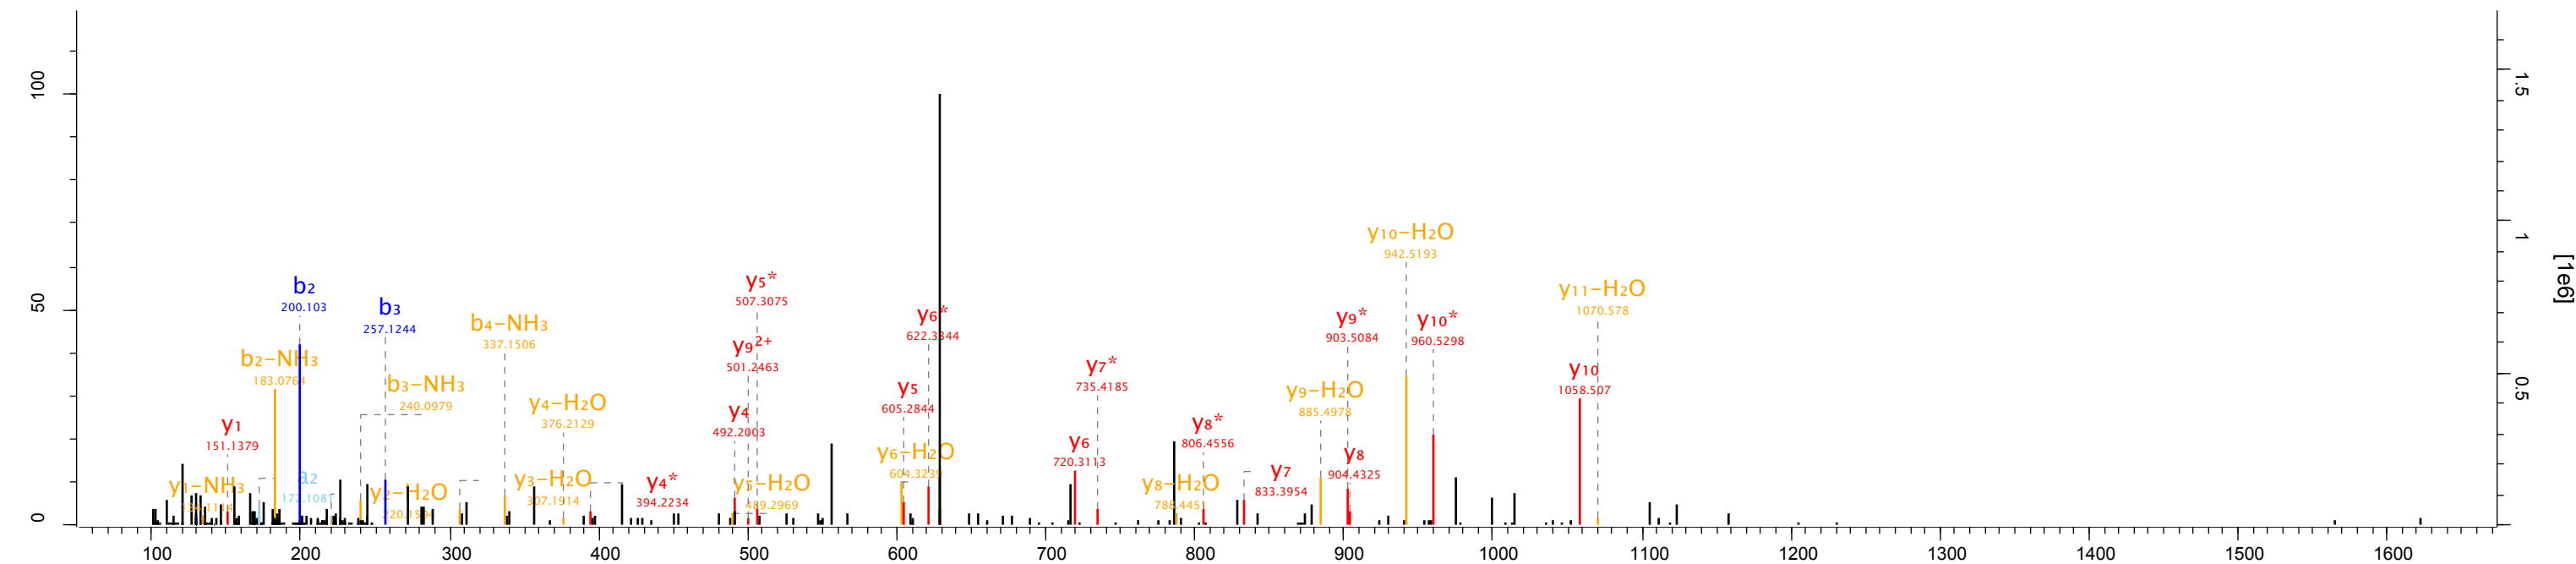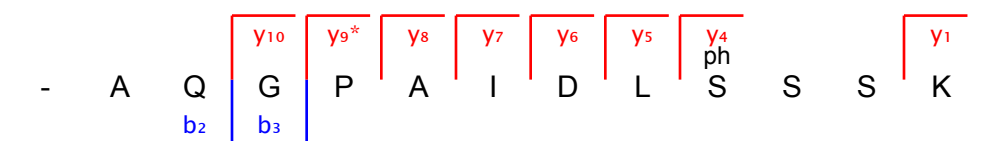

Raw file 20150814\_A375SR\_Phospho\_BR2\_04 Scan 11735 Method FTMS; HCD Score 248.47 m/z 872.41 Gene names CCDC86

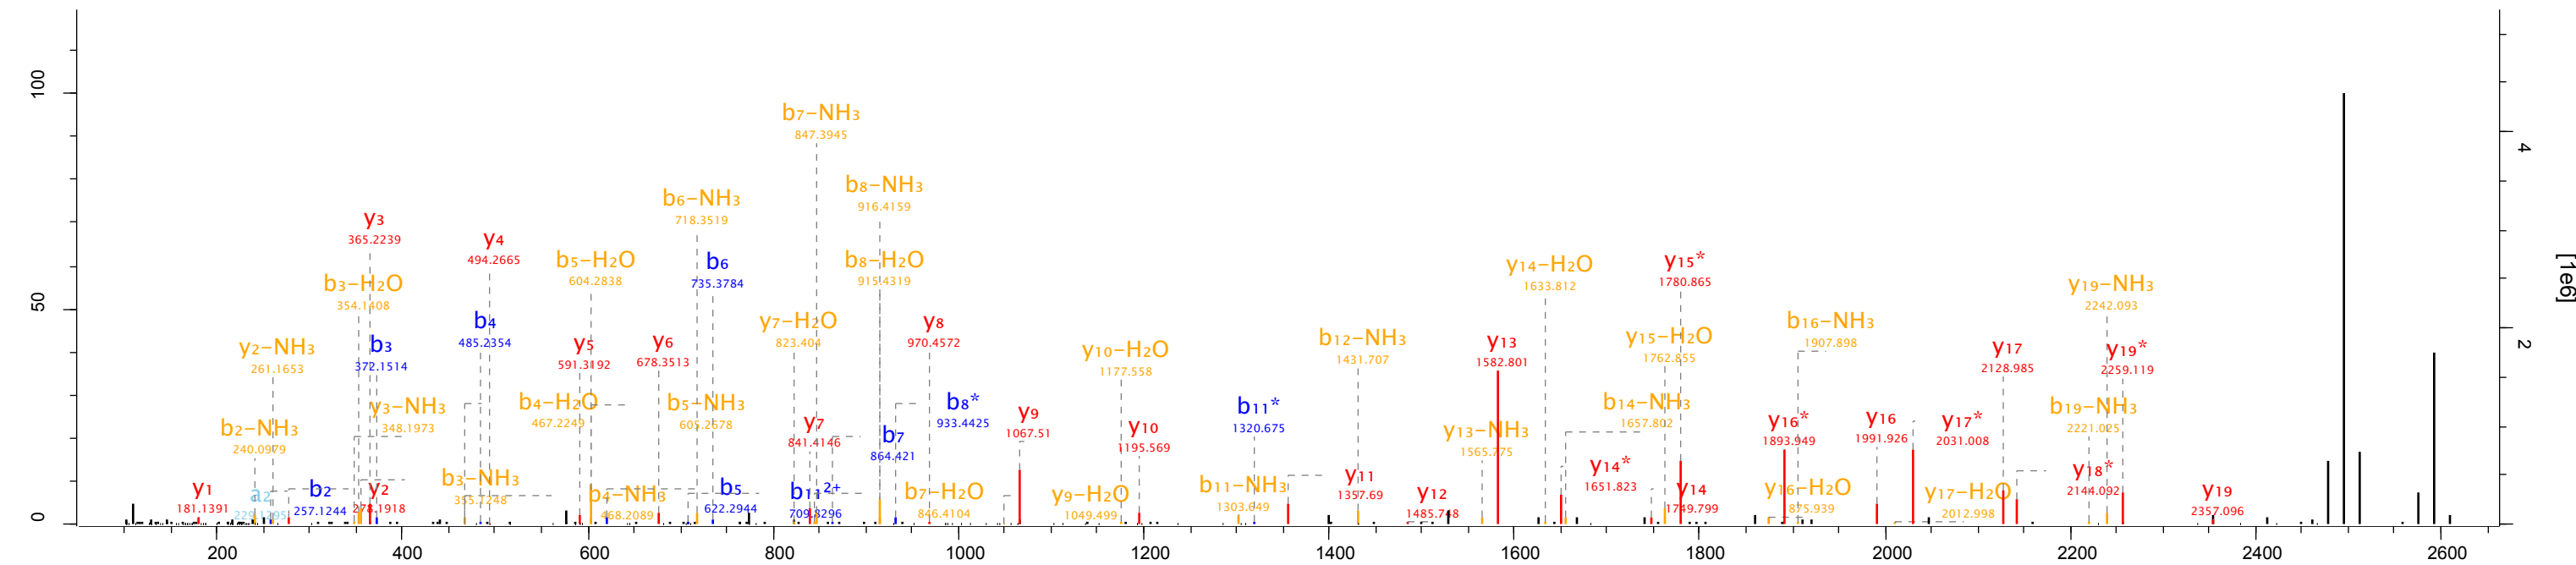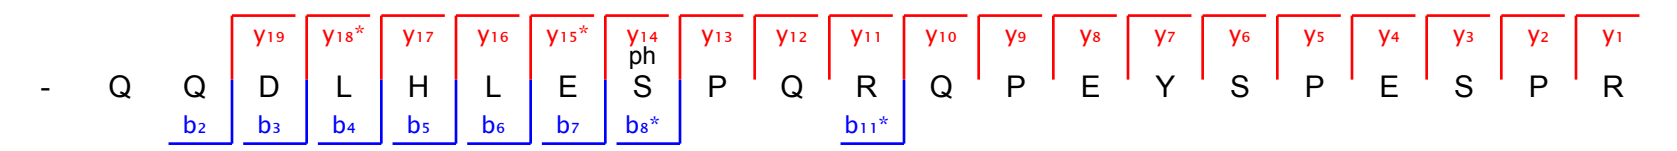

Raw file: 20150814\_A375SR\_Phospho\_BR2\_04  
 Scan: 11895 Method: FTMS; HCD Score: 221.86 m/z: 741.85 Gene names: PARD3

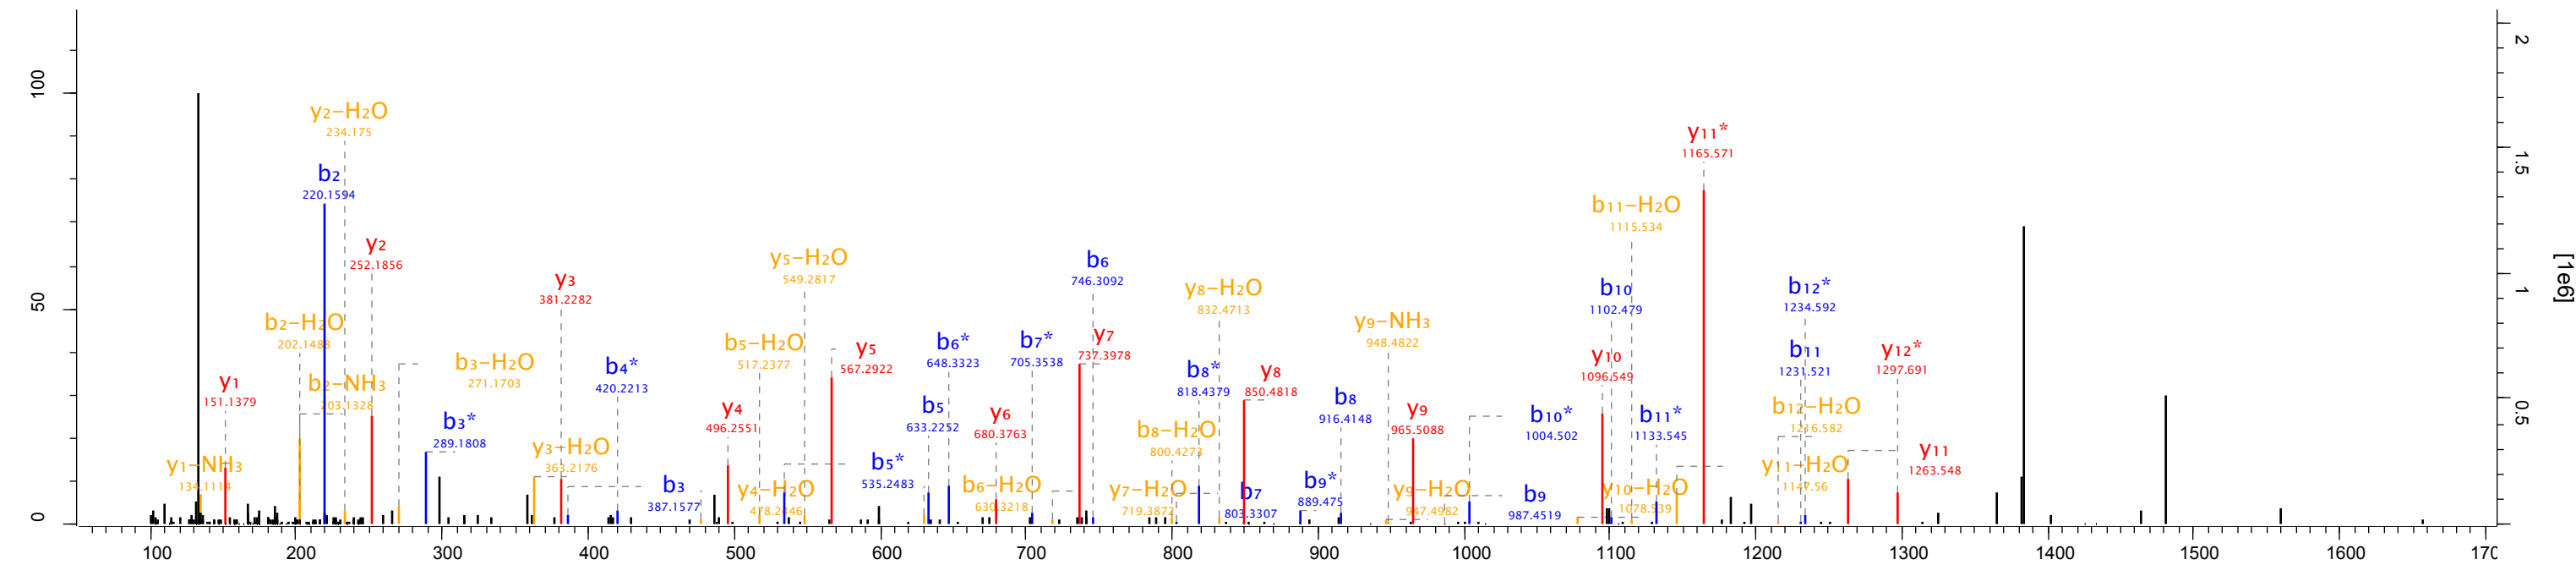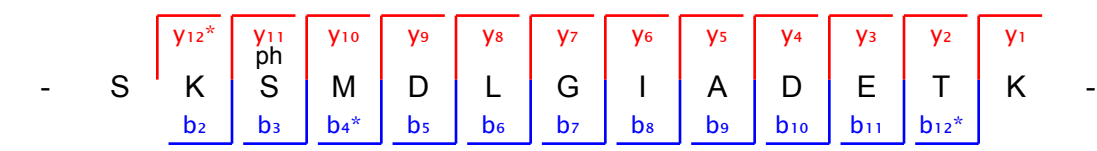

Raw file: 20150814\_A375SR\_Phospho\_BR2\_04  
 Scan: 11935 Method: FTMS; HCD Score: 67.35 m/z: 1102.17 Gene names: YBX1

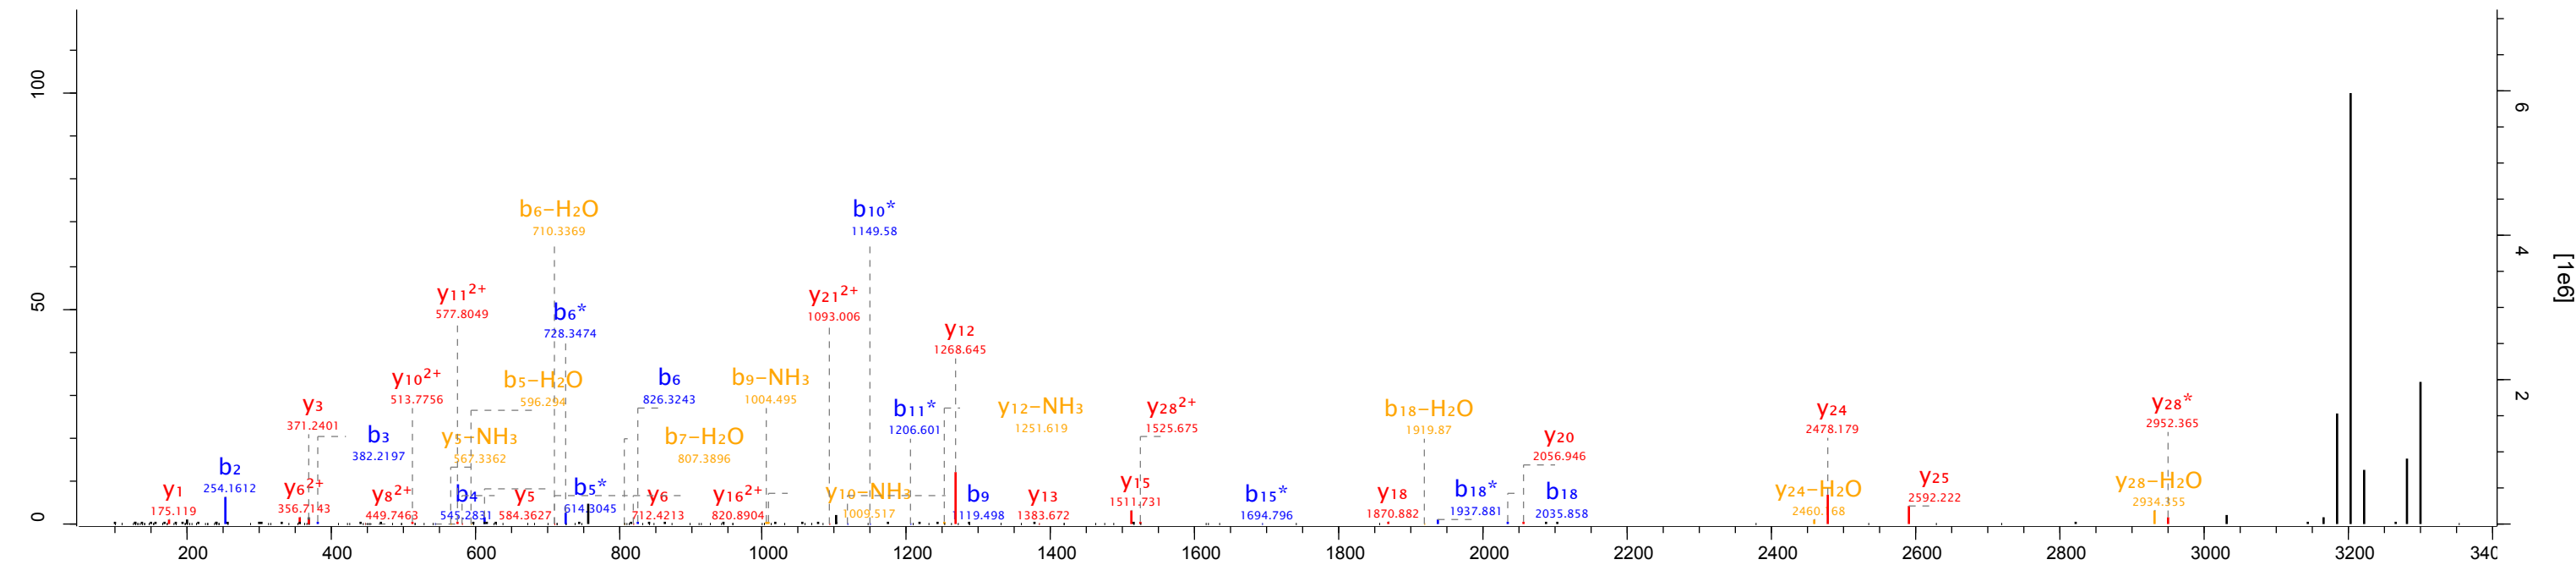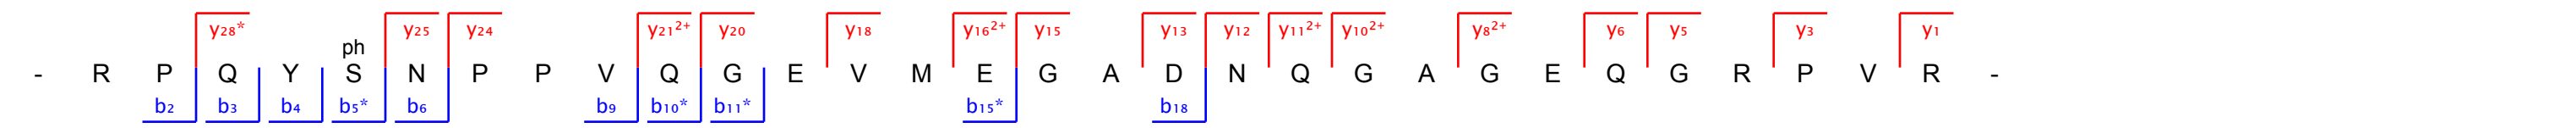

Raw file 20150814\_A375SR\_Phospho\_BR2\_04 Scan 11975 Method FTMS; HCD Score 164.05 m/z 746.34 Gene names C2CD2L

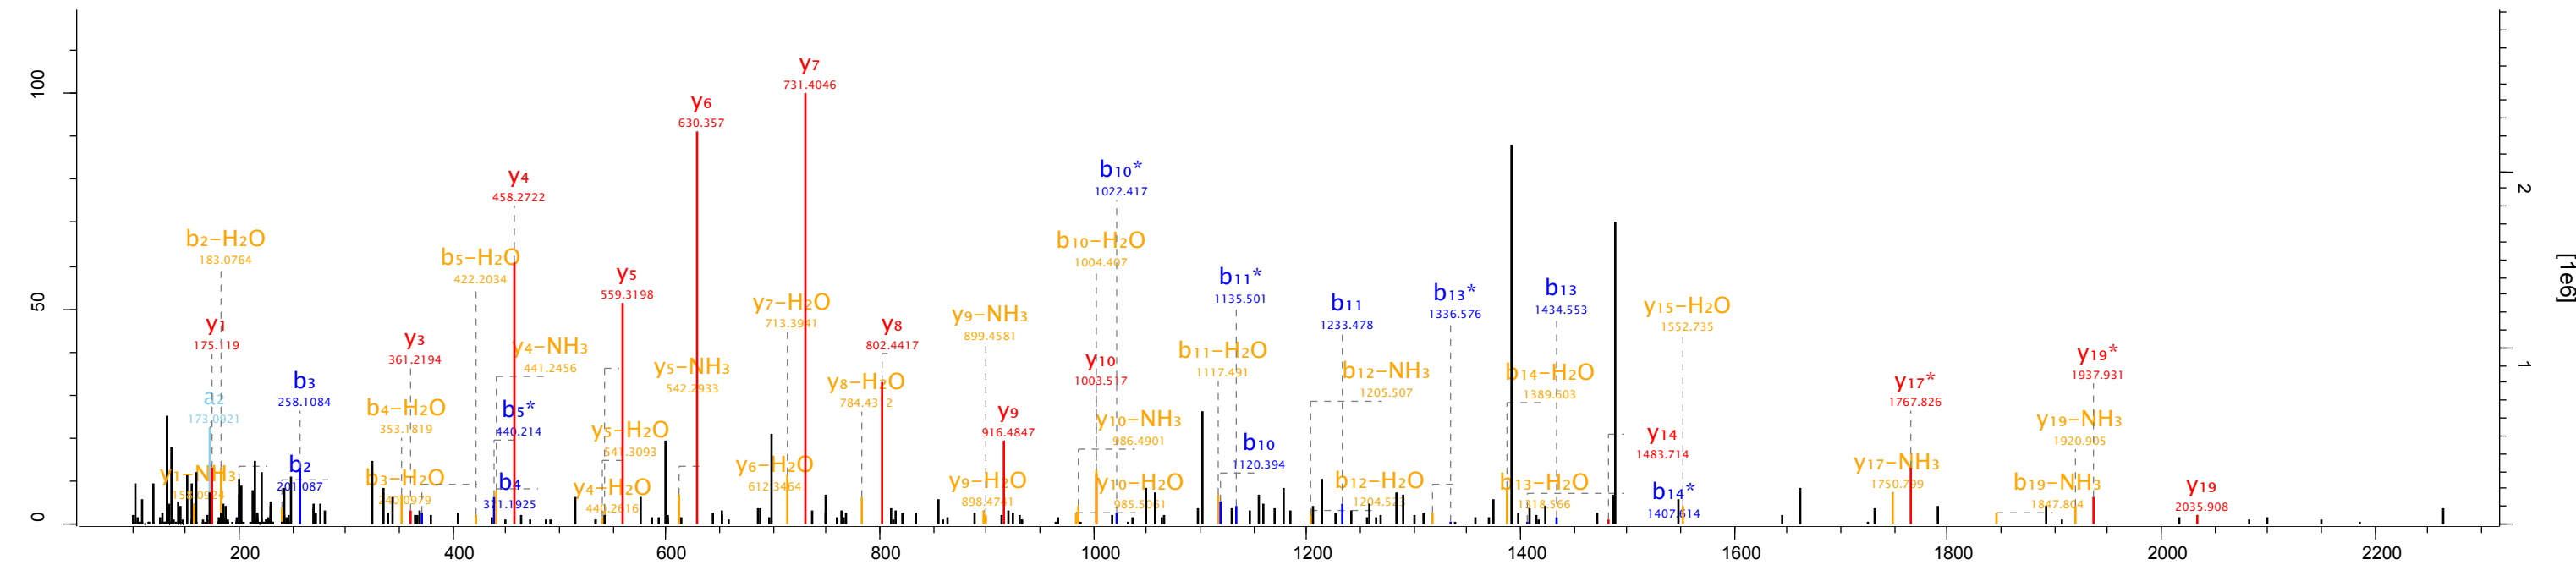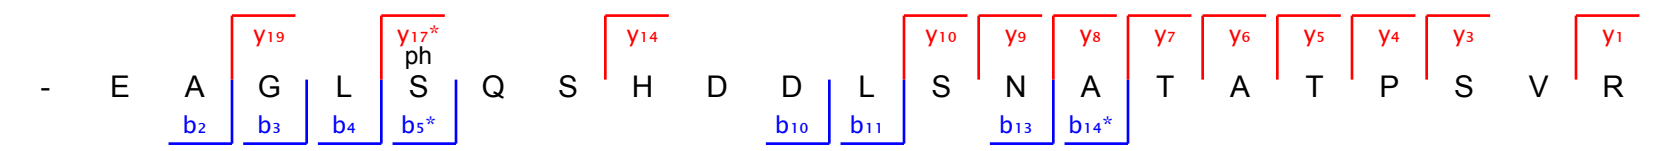

Raw file: 20150814\_A375SR\_Phospho\_BR2\_04  
 Scan: 12085 Method: FTMS; HCD Score: 41.91 m/z: 1132.47 Gene names: ZNF518A

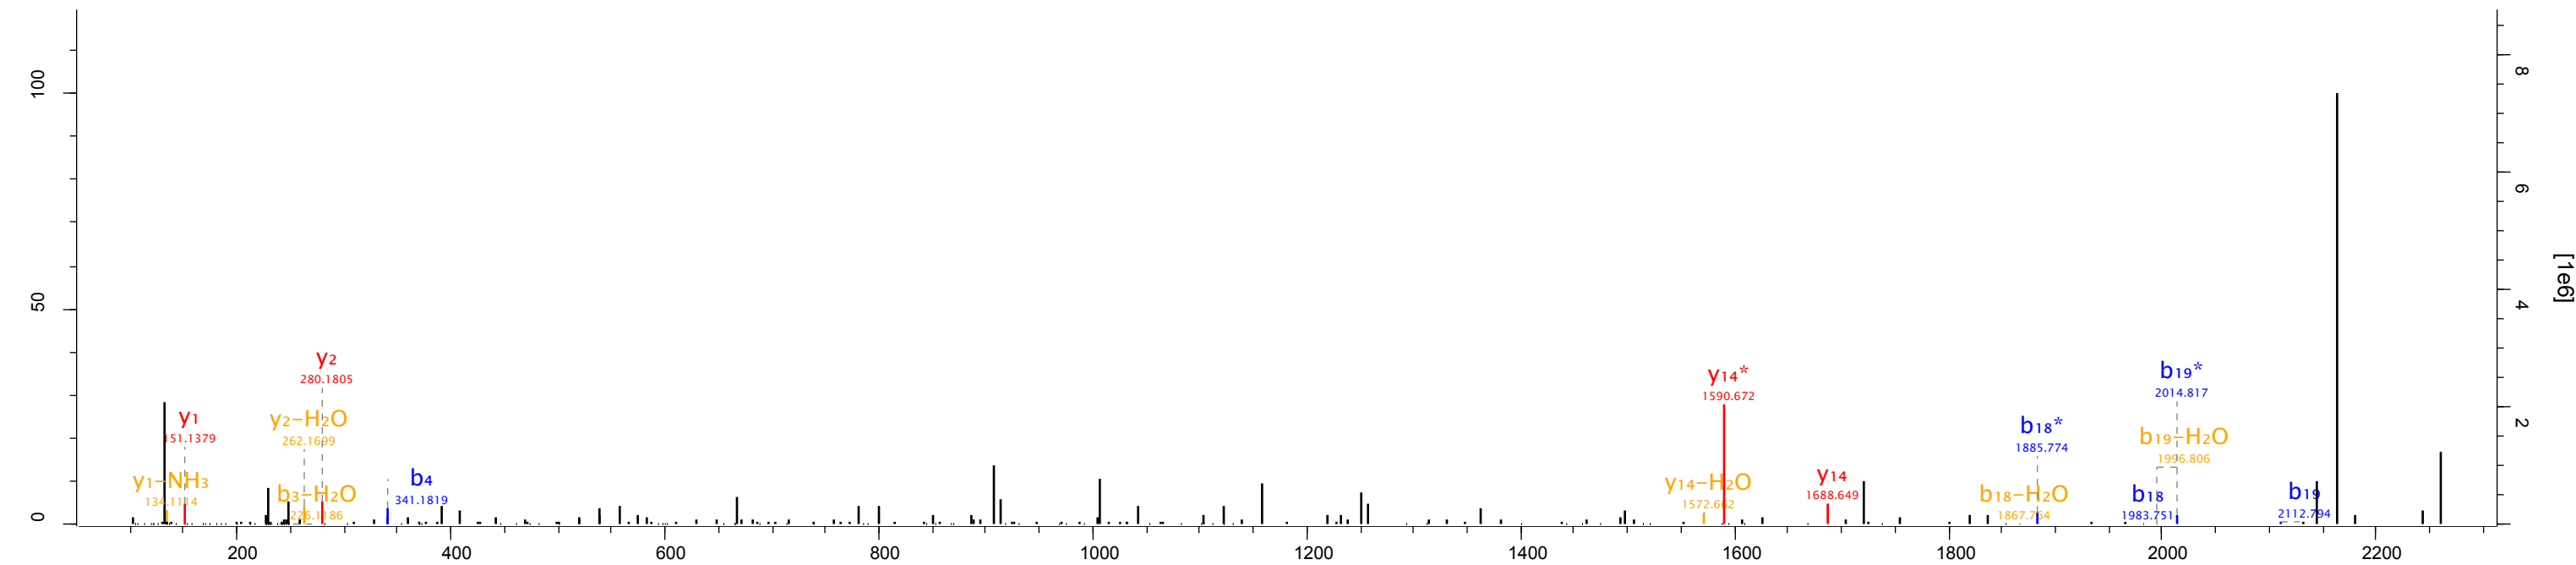

- A A T P F S C ph ph ph I L S G K A S S E K -

Fragmentation mapping:  
 - b4 (under P)  
 - y14 (over C)  
 - b18 (under S)  
 - b19 (under E)  
 - y2 (over E)  
 - y1 (over K)



Raw file 20150814\_A375SR\_Phospho\_BR2\_04 Scan 12095 Method FTMS; HCD Score 68.24 m/z 639.65 Gene names CIZ1

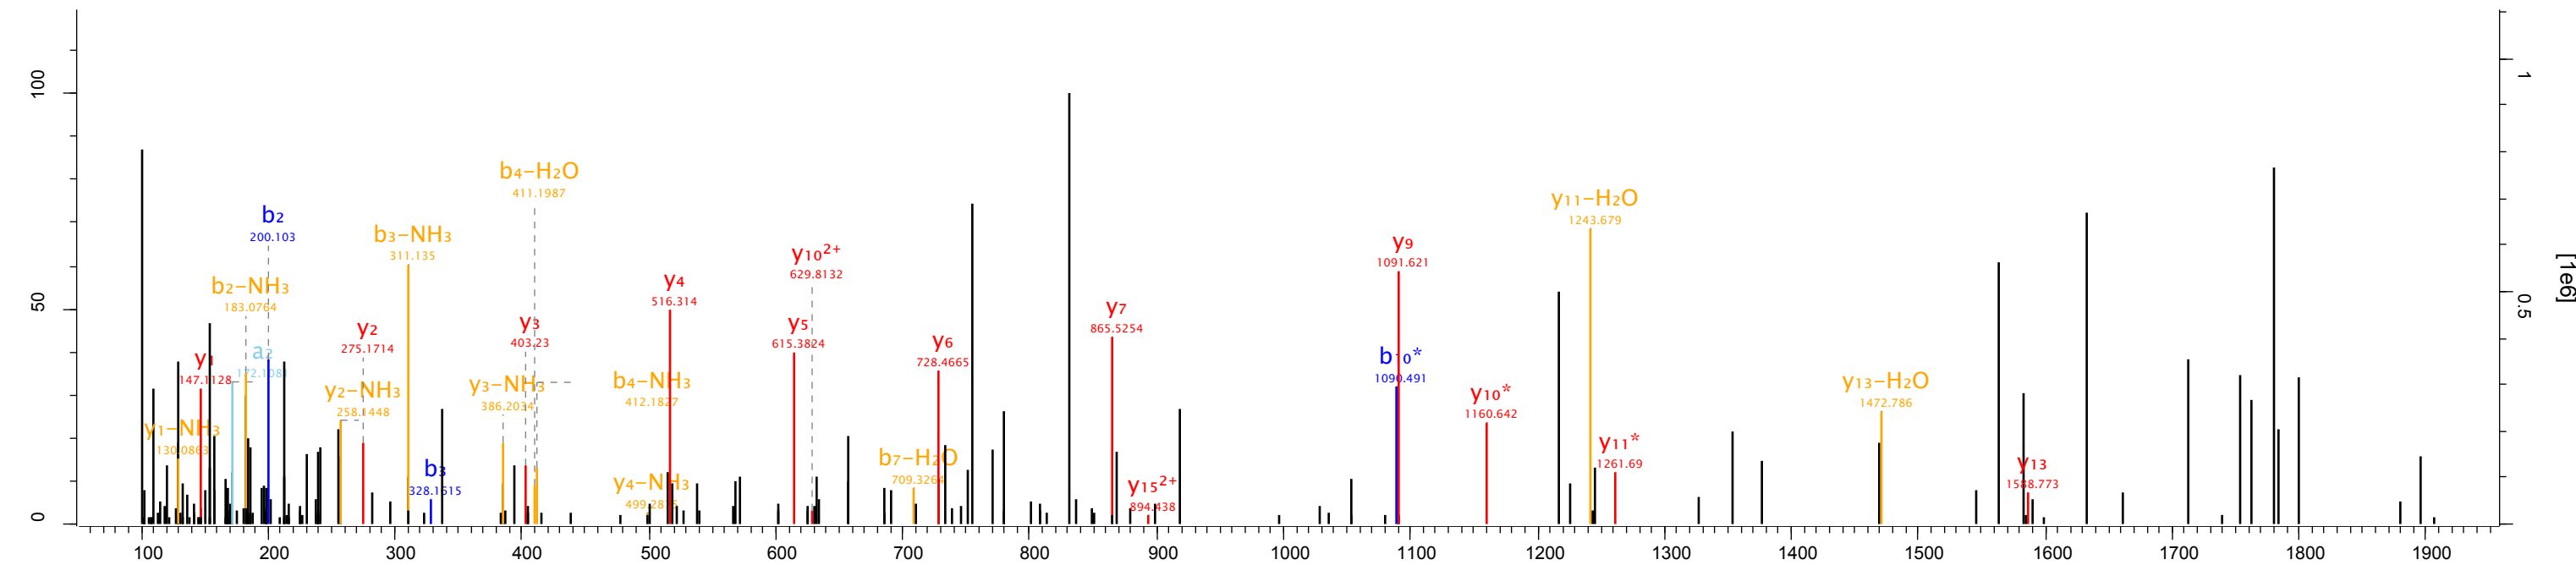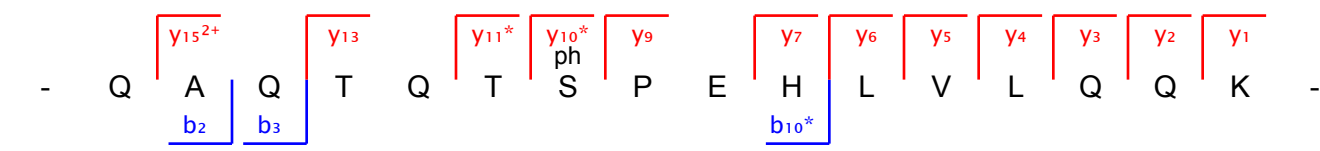

Raw file 20150814\_A375SR\_Phospho\_BR2\_04 Scan 12315 Method FTMS; HCD Score 100.04 m/z 568.25 Gene names PLAA

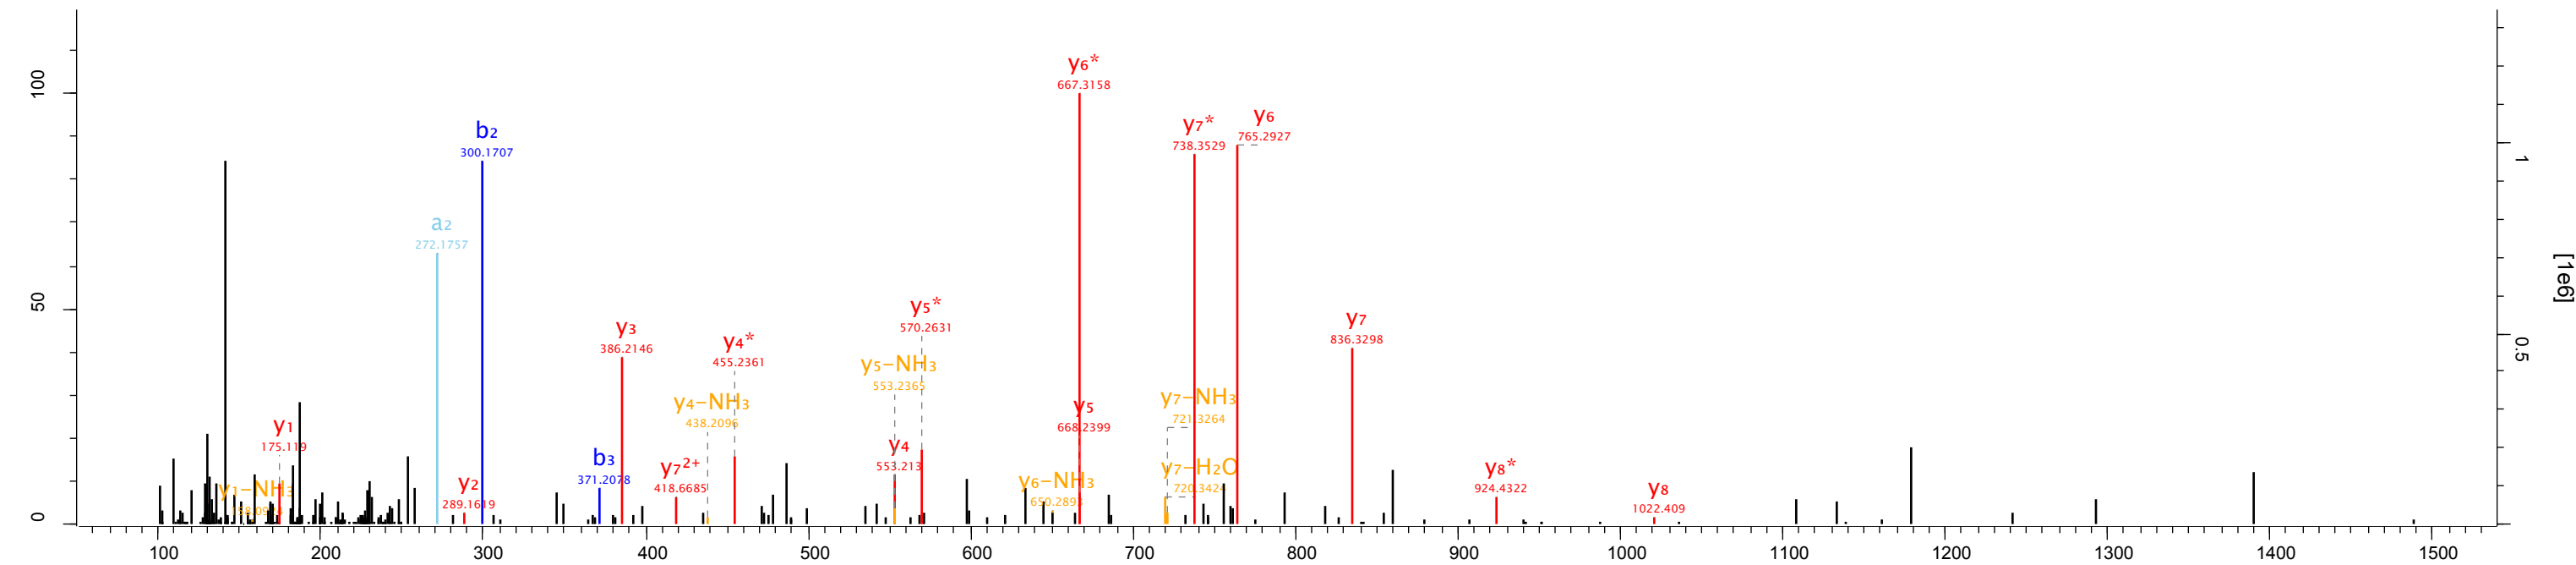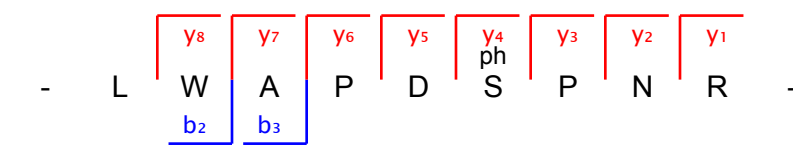

Raw file 20150814\_A375SR\_Phospho\_BR2\_04 Scan 12575 Method FTMS; HCD Score 127.83 m/z 760.85 Gene names MAP7D1

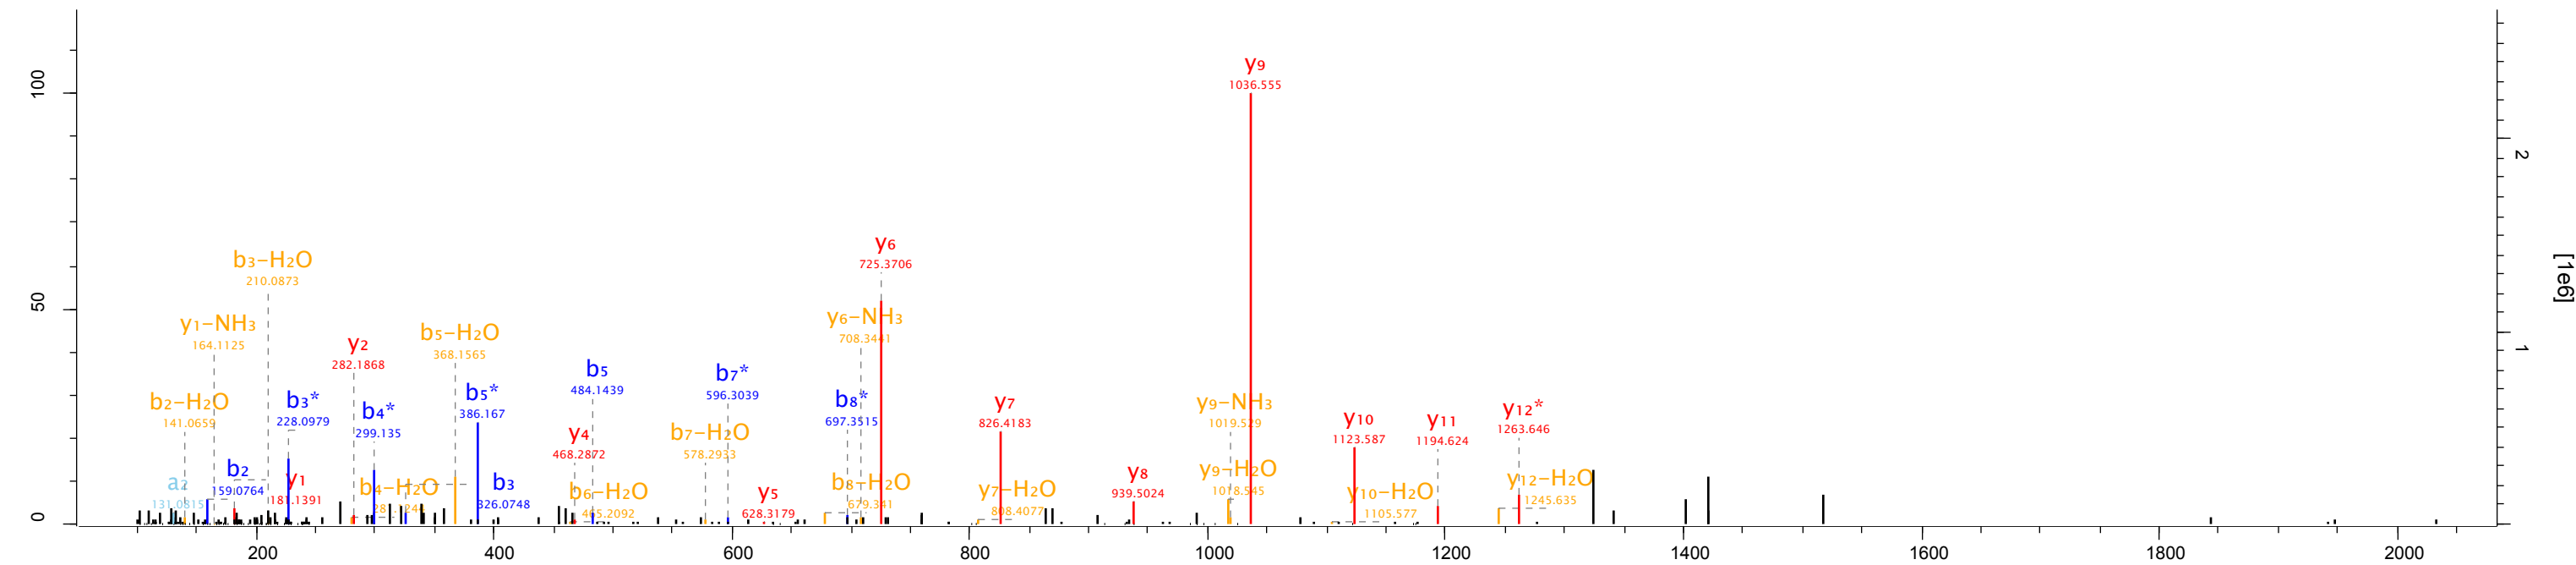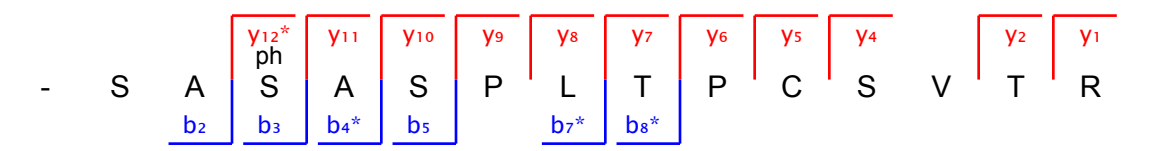

Raw file: 20150814\_A375SR\_Phospho\_BR2\_04  
 Scan: 1275 Method: FTMS; HCD Score: 74.79 m/z: 457.2 Gene names: DDX23

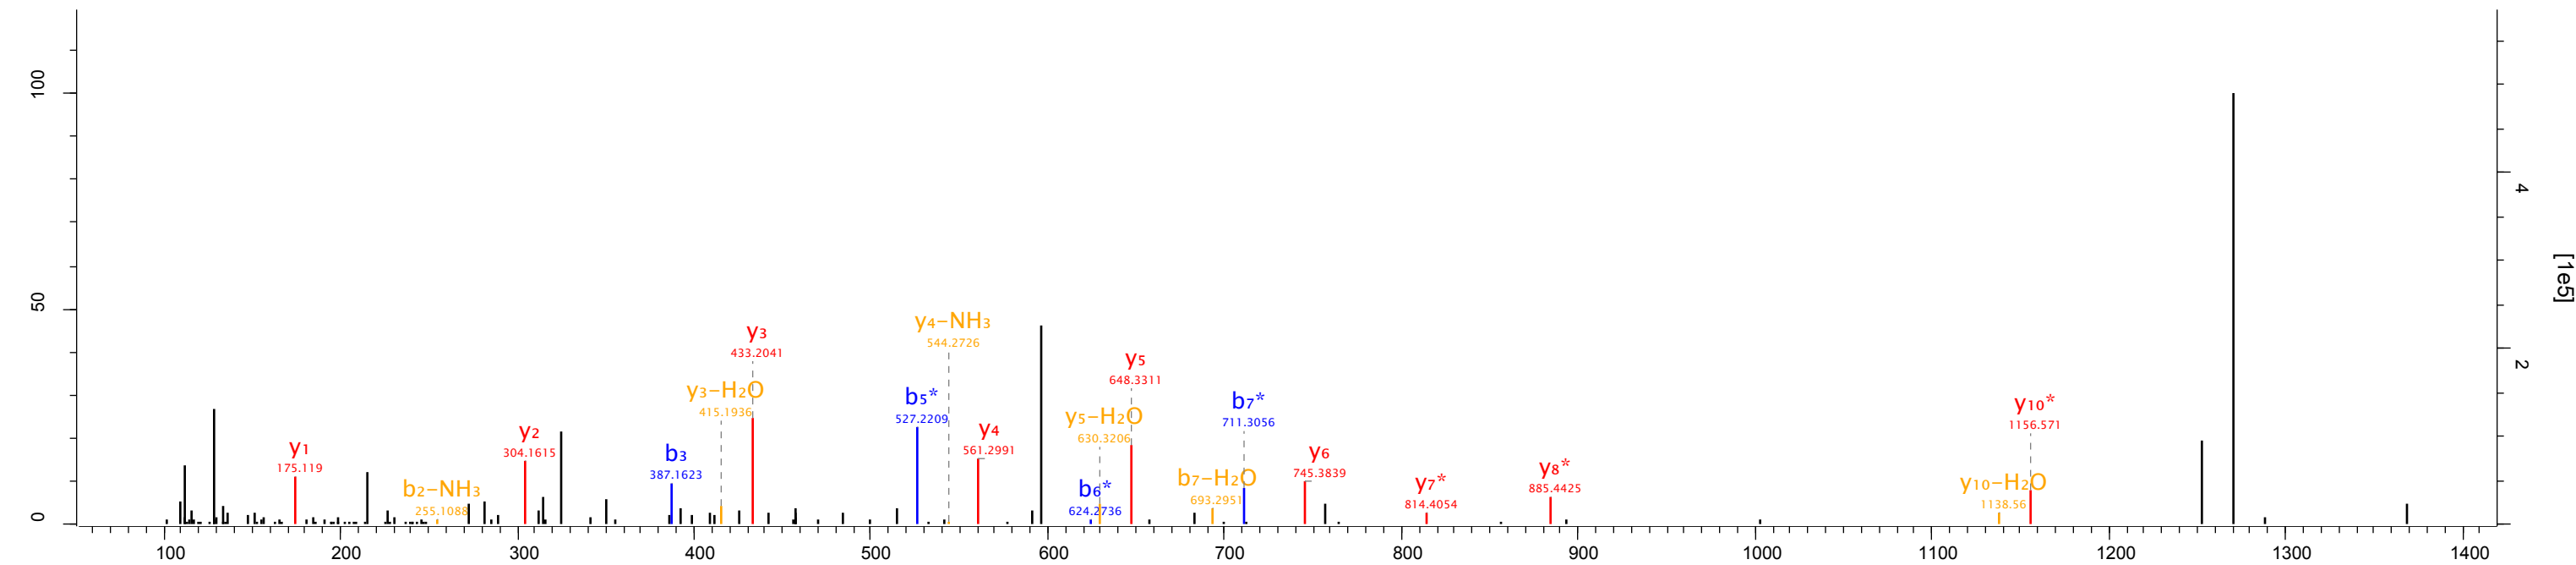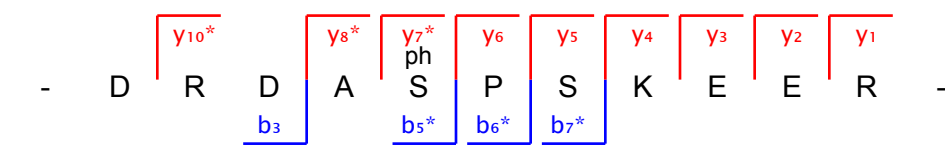

Raw file: 20150814\_A375SR\_Phospho\_BR2\_04  
 Scan: 13075 Method: FTMS; HCD Score: 302.66 m/z: 987.41 Gene names: MCM2

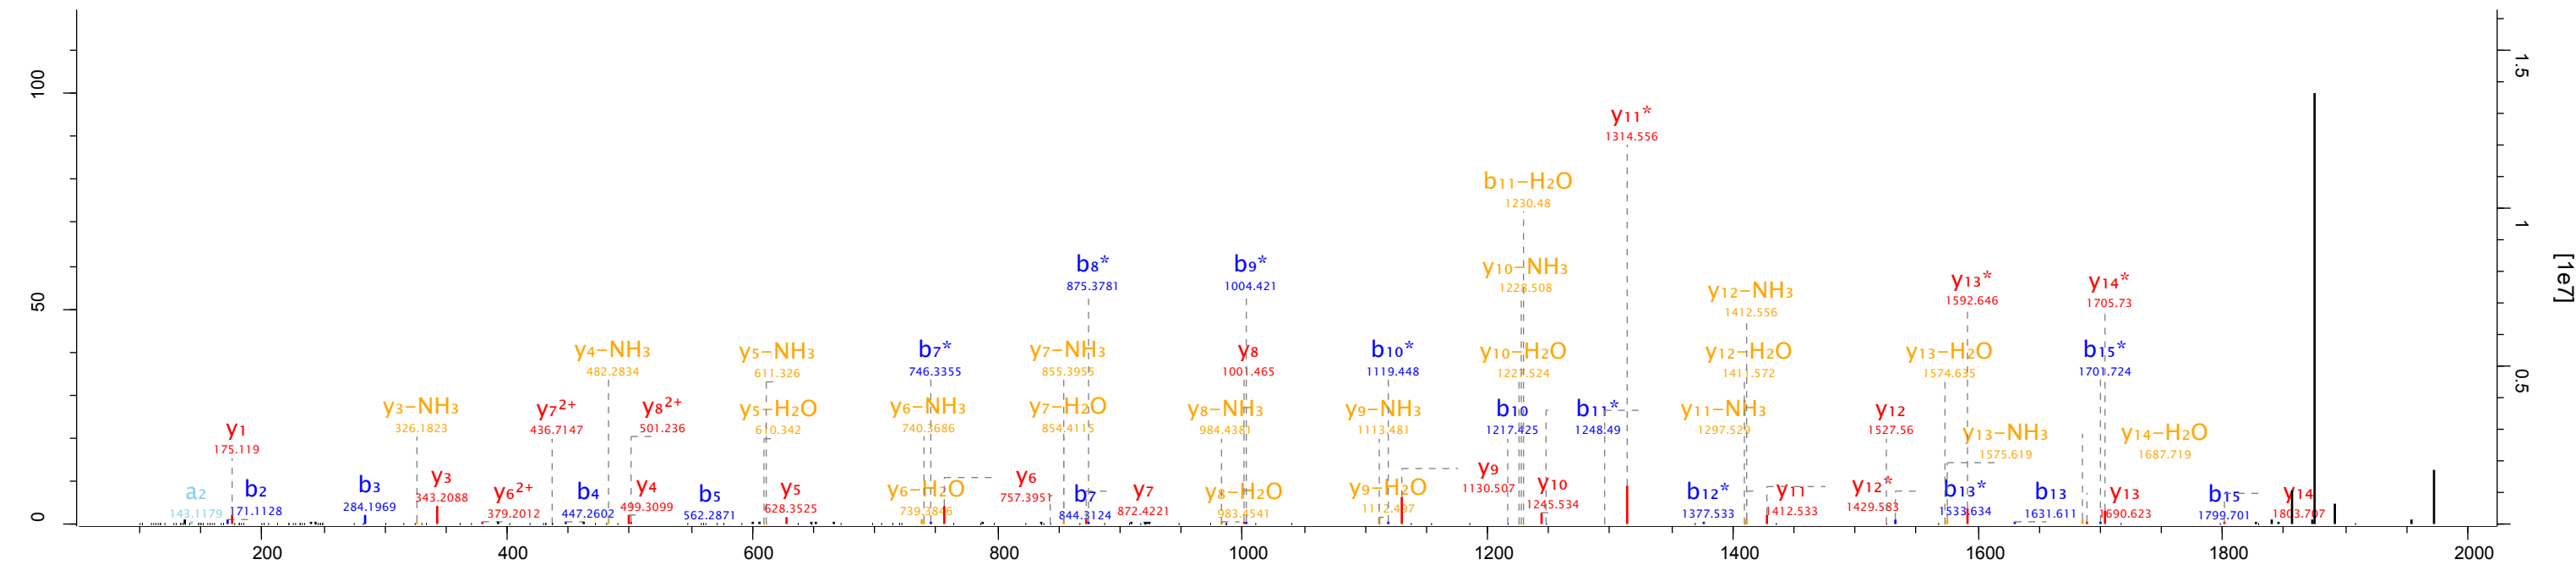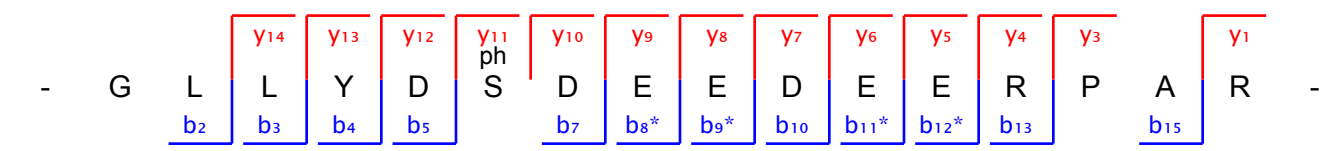

Raw file: 20150814\_A375SR\_Phospho\_BR2\_04  
 Scan: 13275 Method: FTMS; HCD Score: 99.9 m/z: 946.91 Gene names: AKAP12

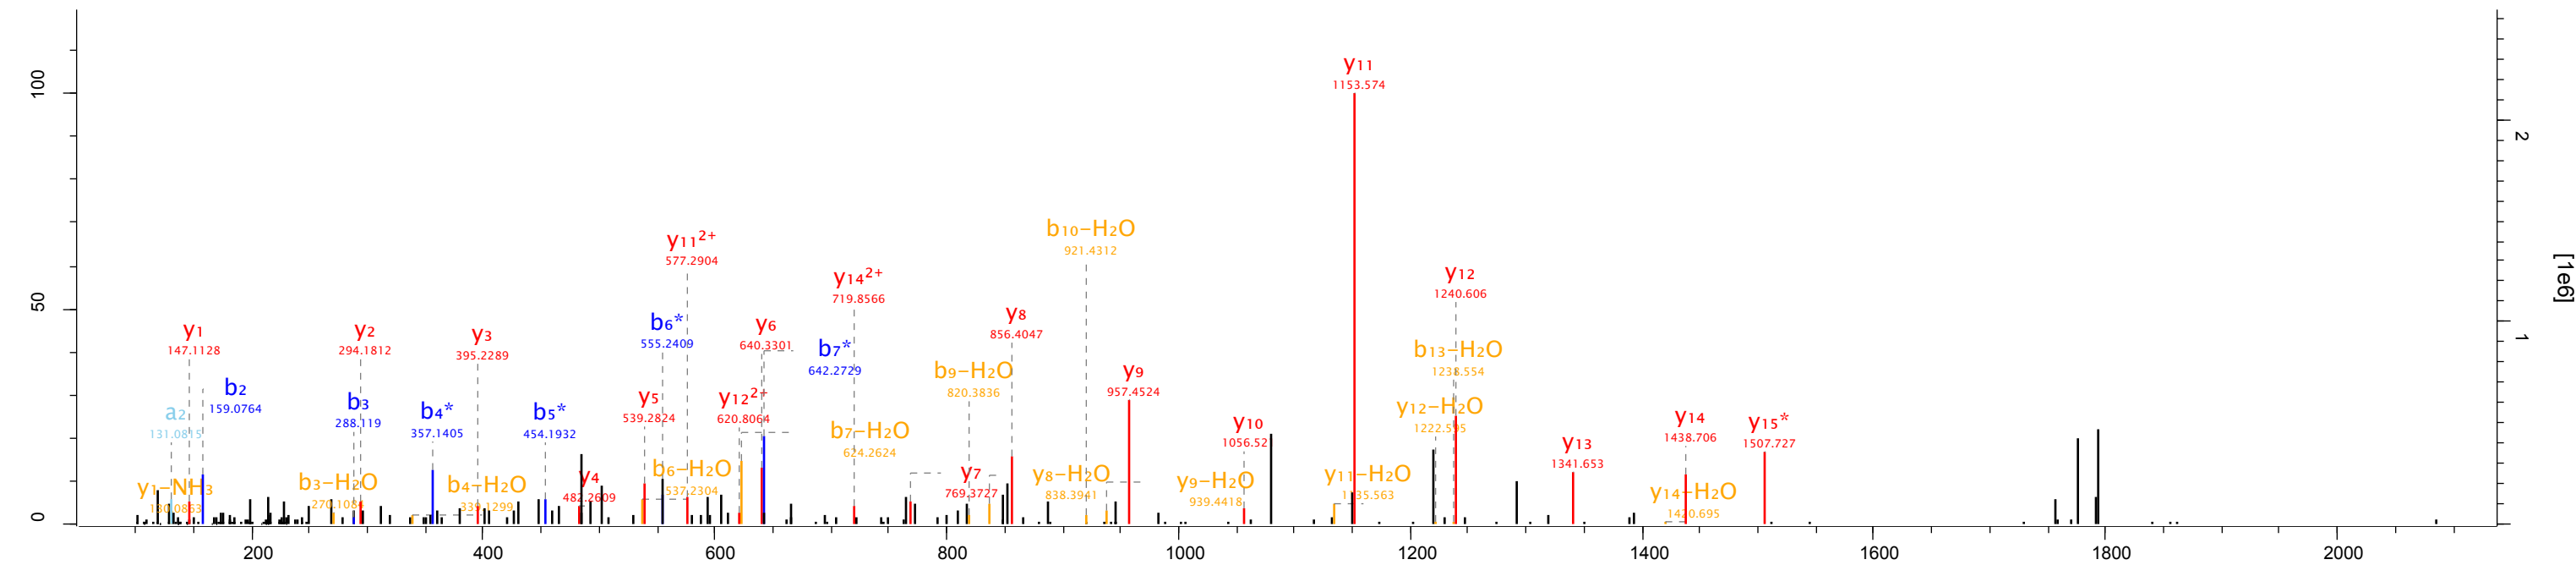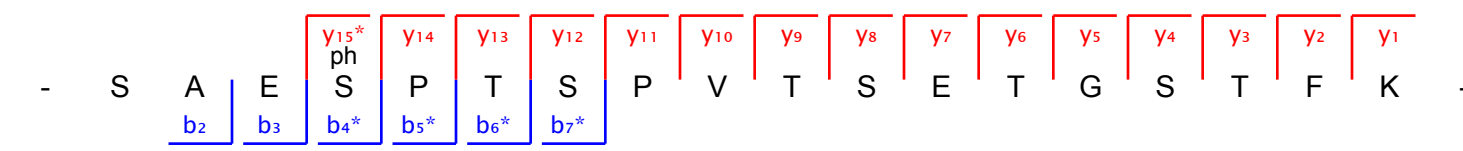

Raw file: 20150814\_A375SR\_Phospho\_BR2\_04  
 Scan: 13365 Method: FTMS; HCD Score: 206.77 m/z: 938.43 Gene names: DBNL

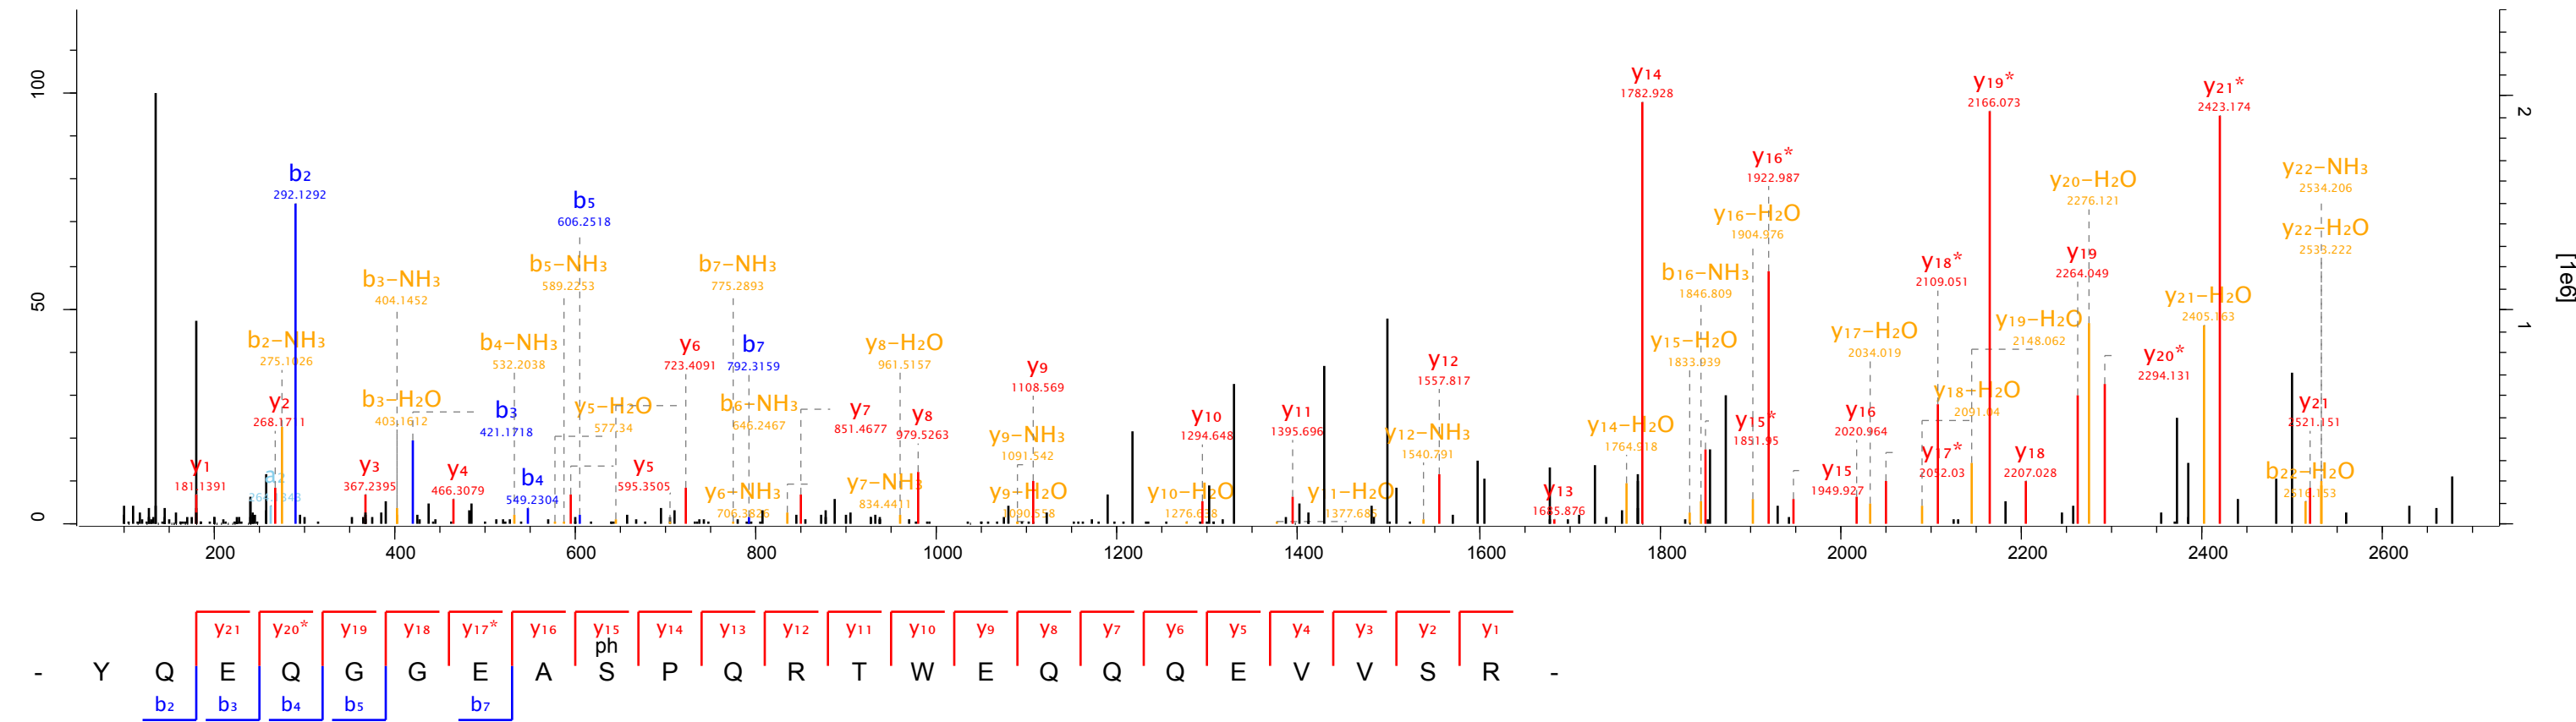

Raw file 20150814\_A375SR\_Phospho\_BR2\_04 Scan 13375 Method FTMS; HCD Score 140.45 m/z 1056.47 Gene names HNRNPA1;HNRNPA1L2

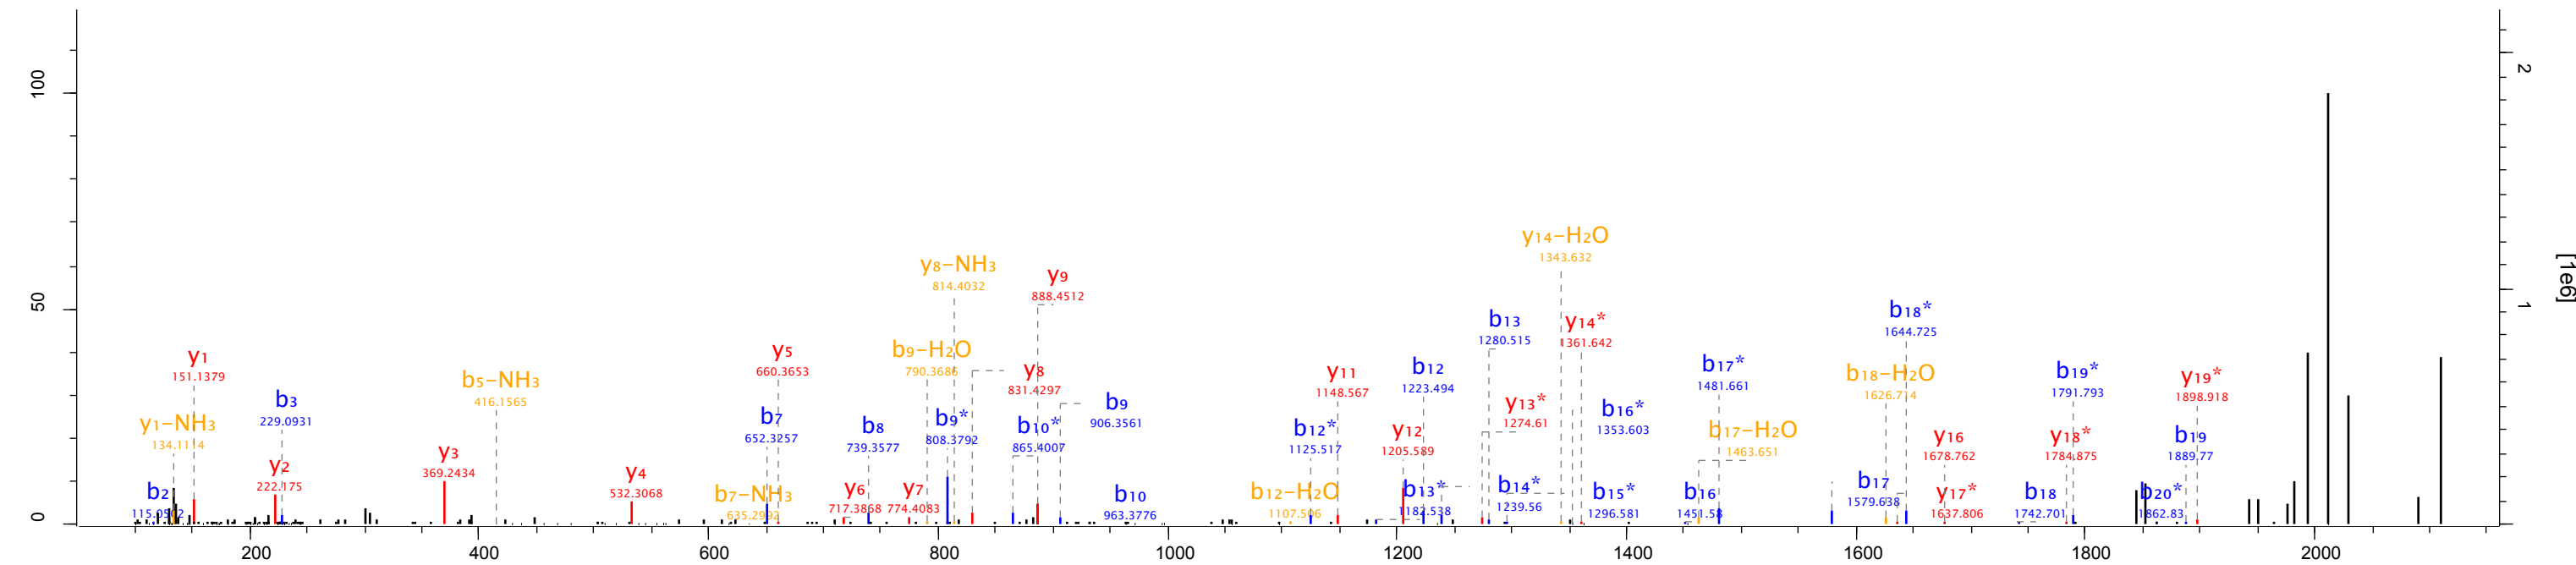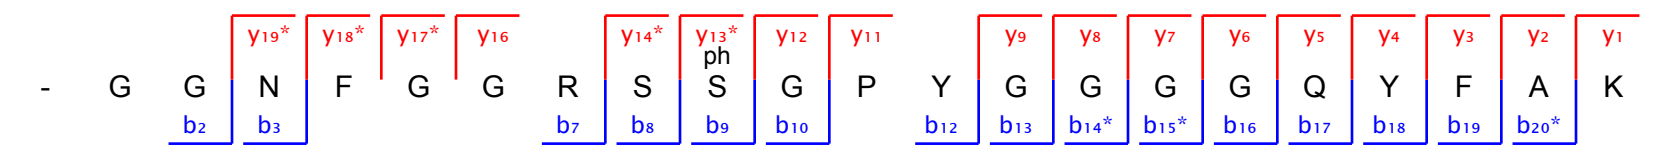



Raw file: 20150814\_A375SR\_Phospho\_BR2\_04  
 Scan: 13565 Method: FTMS; HCD Score: 216.3 m/z: 854.86 Gene names: GRIPAP1

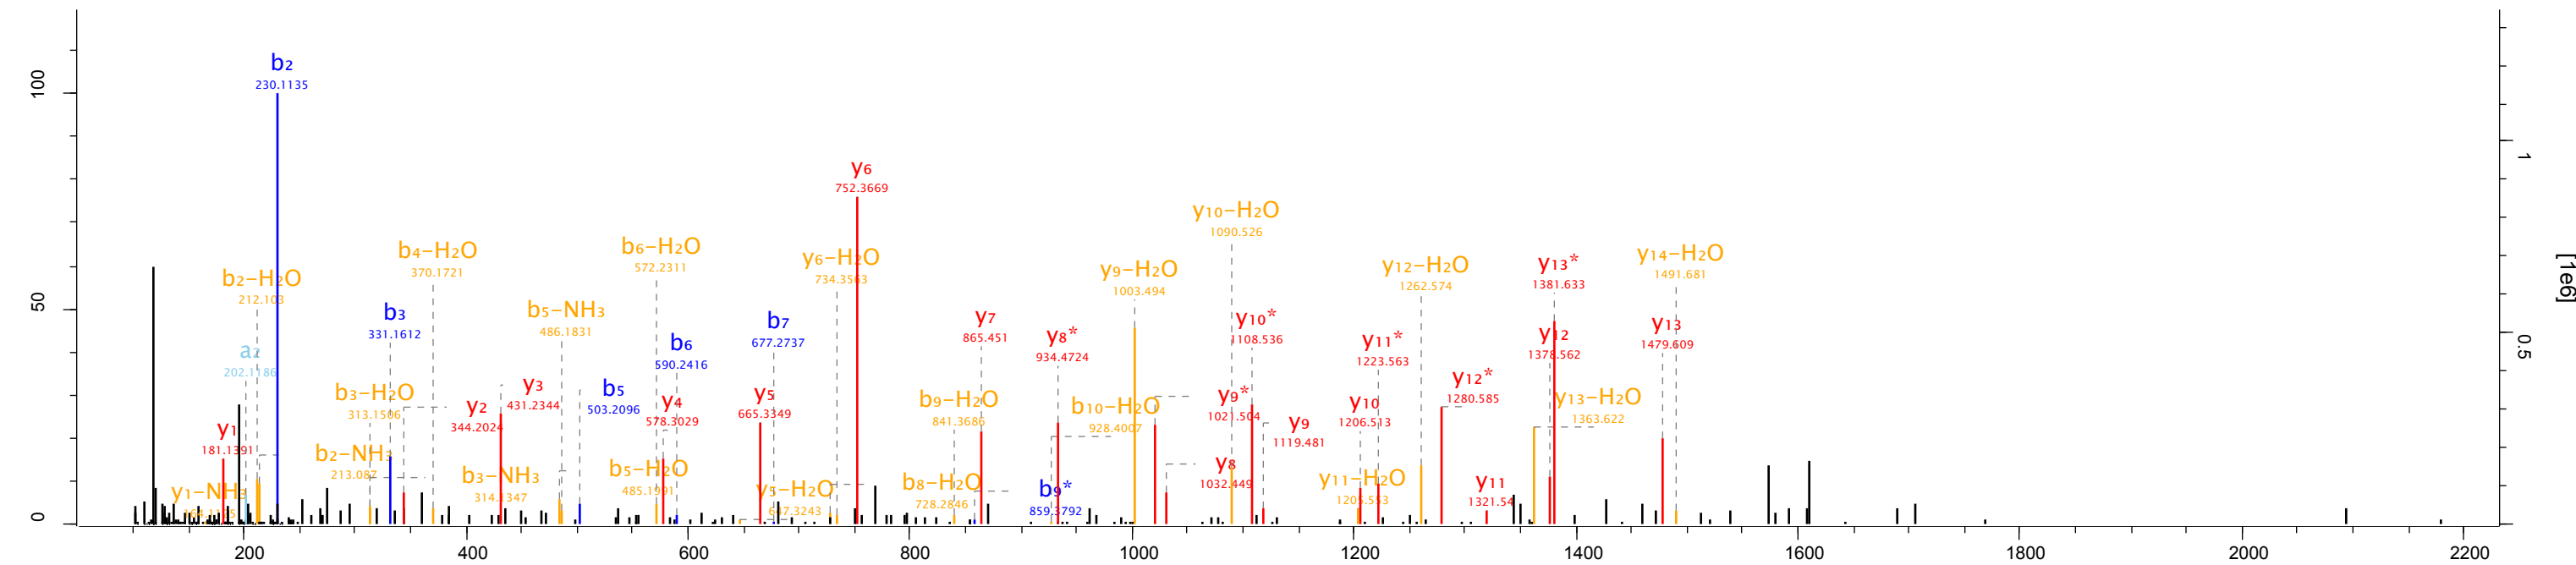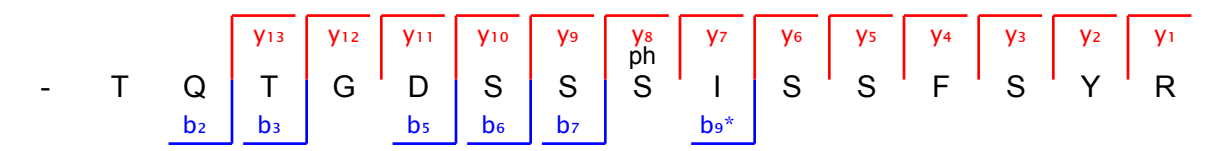

Raw file 20150814\_A375SR\_Phospho\_BR2\_04 Scan 13645 Method FTMS; HCD Score 190.24 m/z 743.32 Gene names CYBRD1

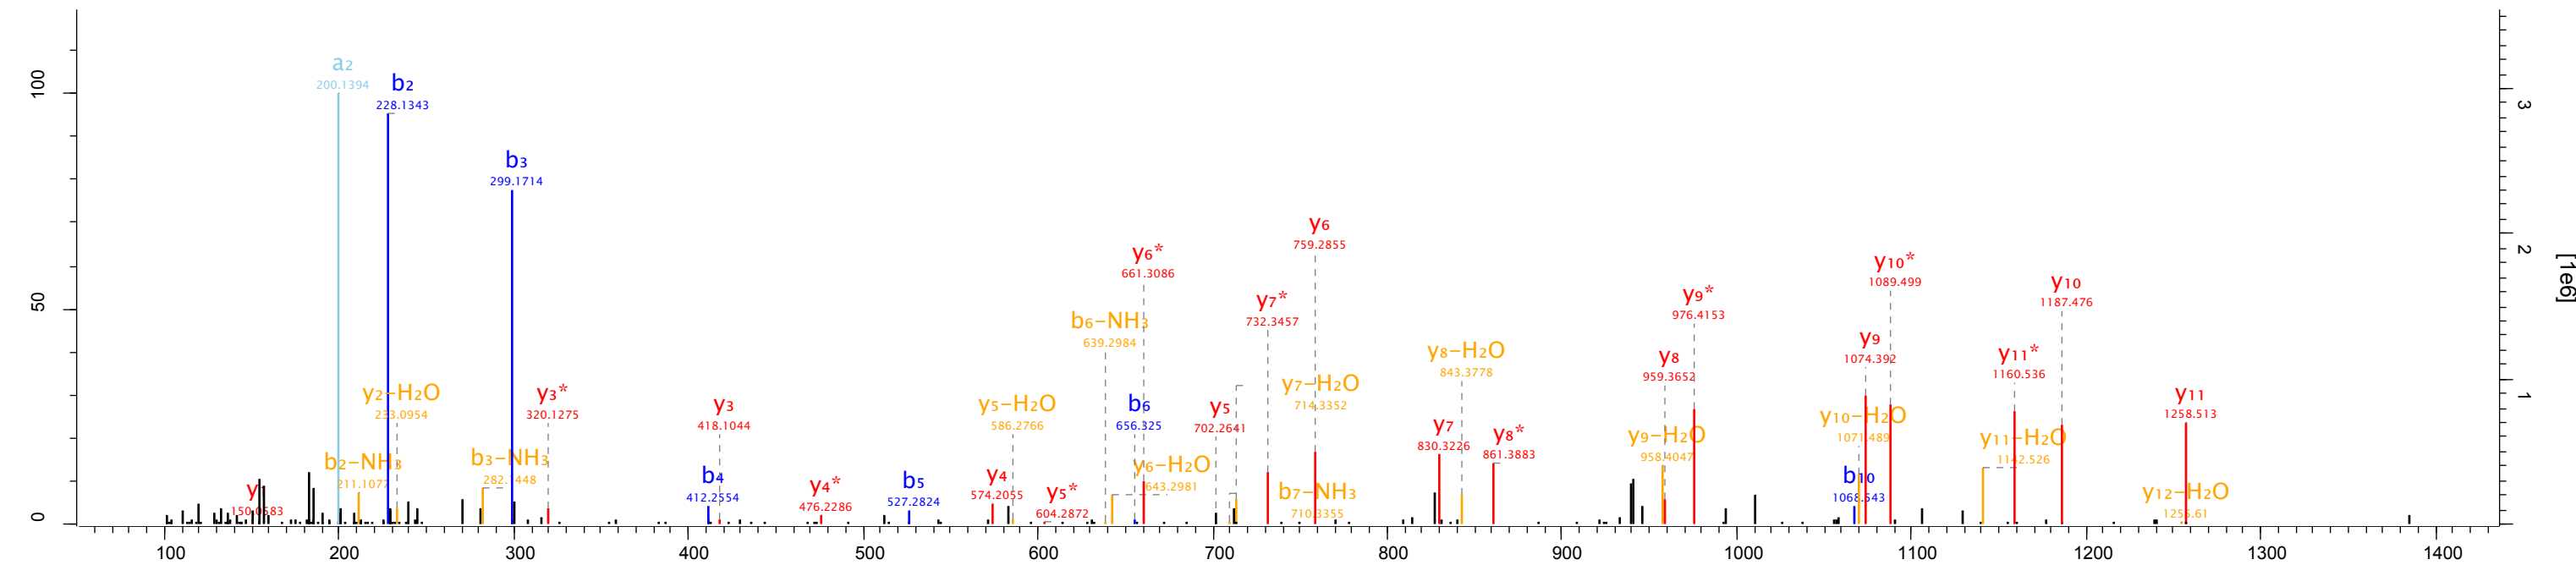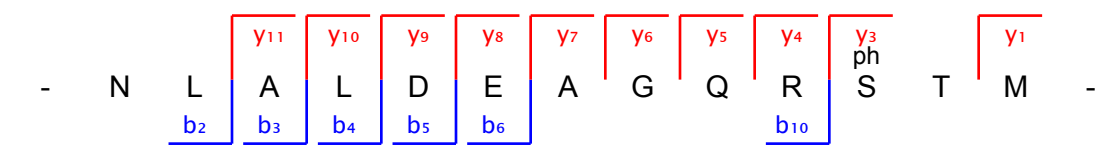

Raw file 20150814\_A375SR\_Phospho\_BR2\_04 Scan 13855 Method FTMS; HCD Score 175.19 m/z 824.84 Gene names CDK13

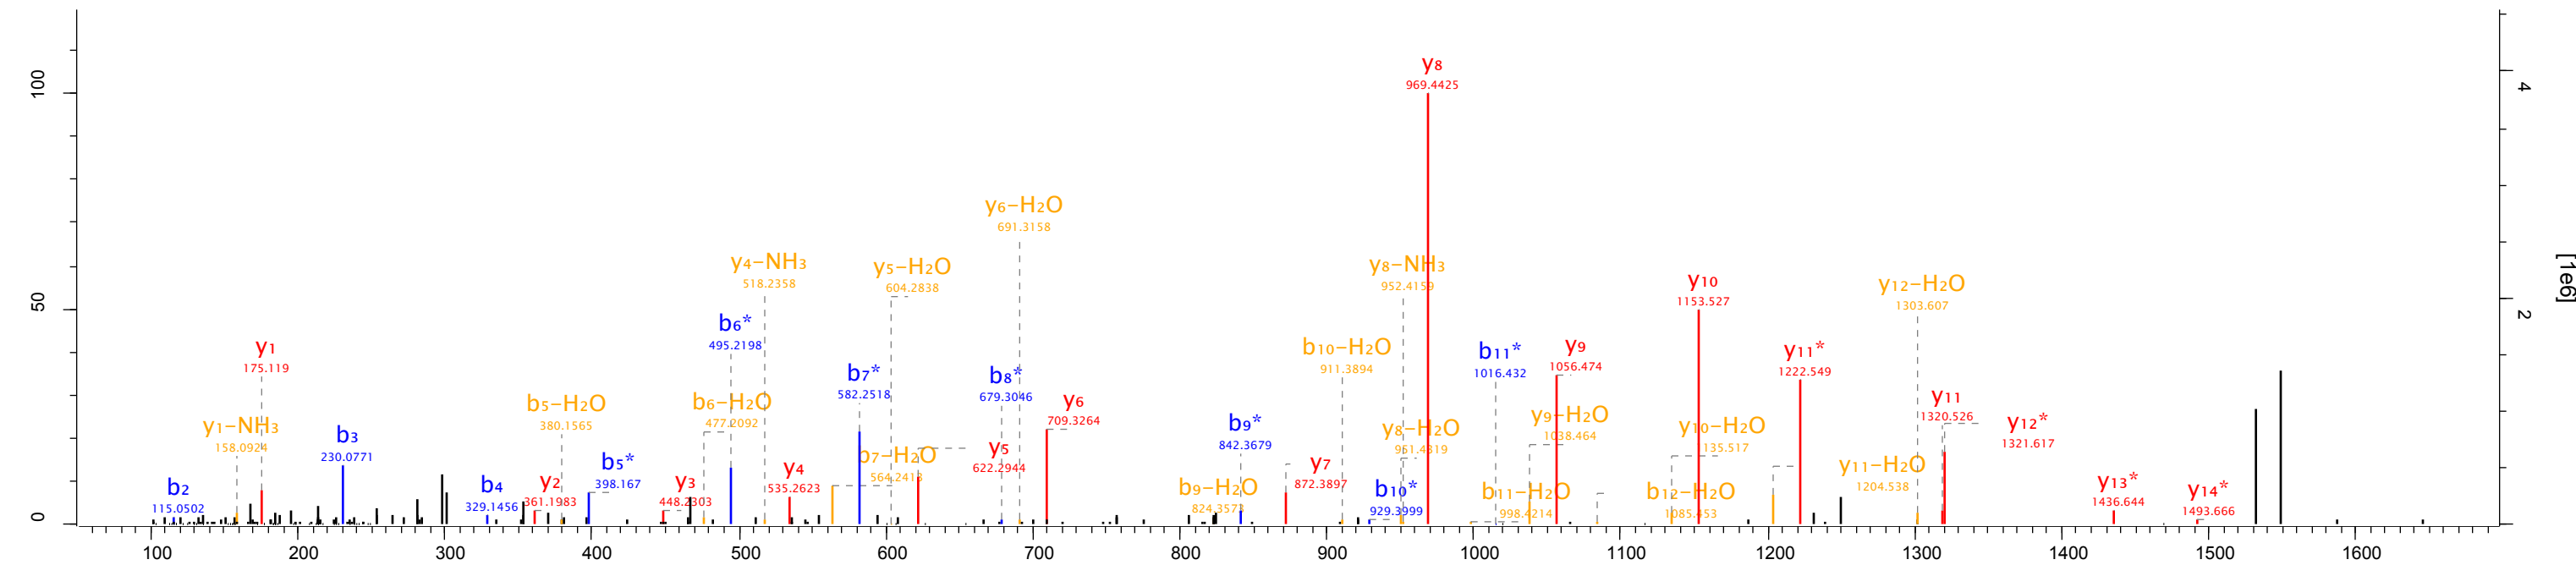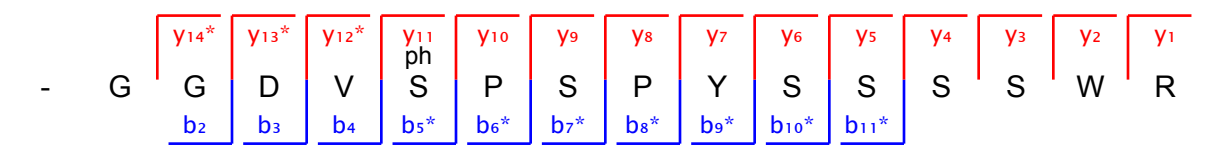

Raw file: 20150814\_A375SR\_Phospho\_BR2\_04  
 Scan: 14335 Method: FTMS; HCD Score: 162.32 m/z: 685.81 Gene names: RAB6A

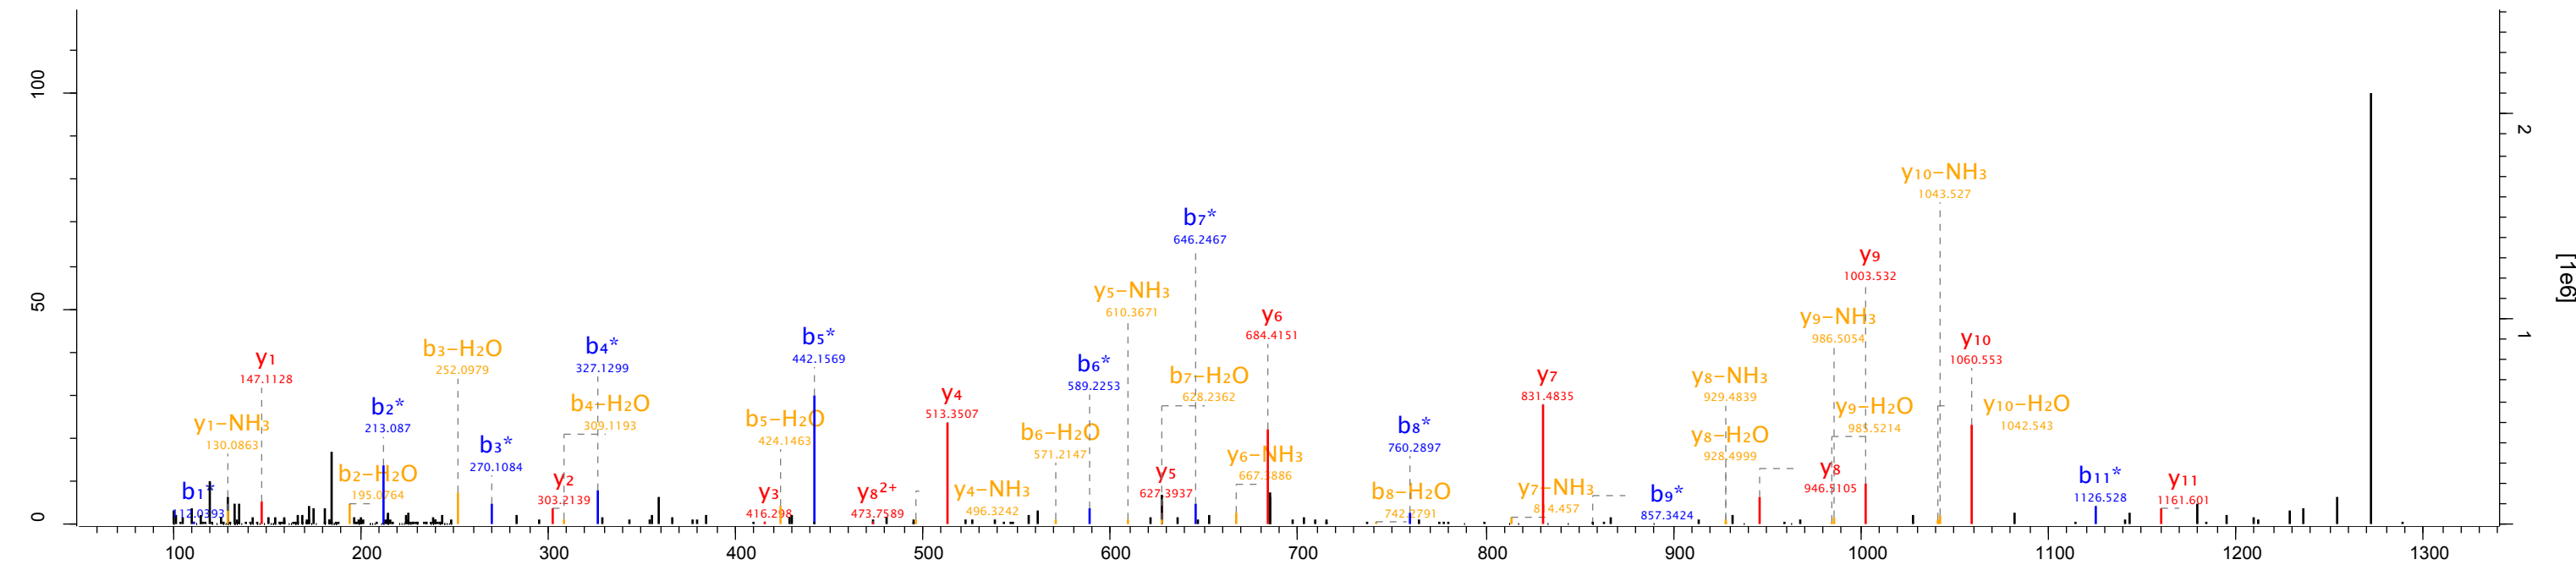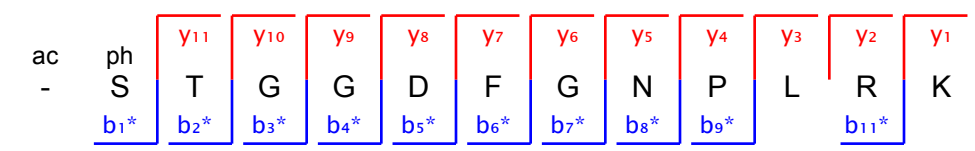

Raw file: 20150814\_A375SR\_Phospho\_BR2\_04  
 Scan: 14445 Method: FTMS; HCD Score: 155.16 m/z: 805.37 Gene names: PRRC2B

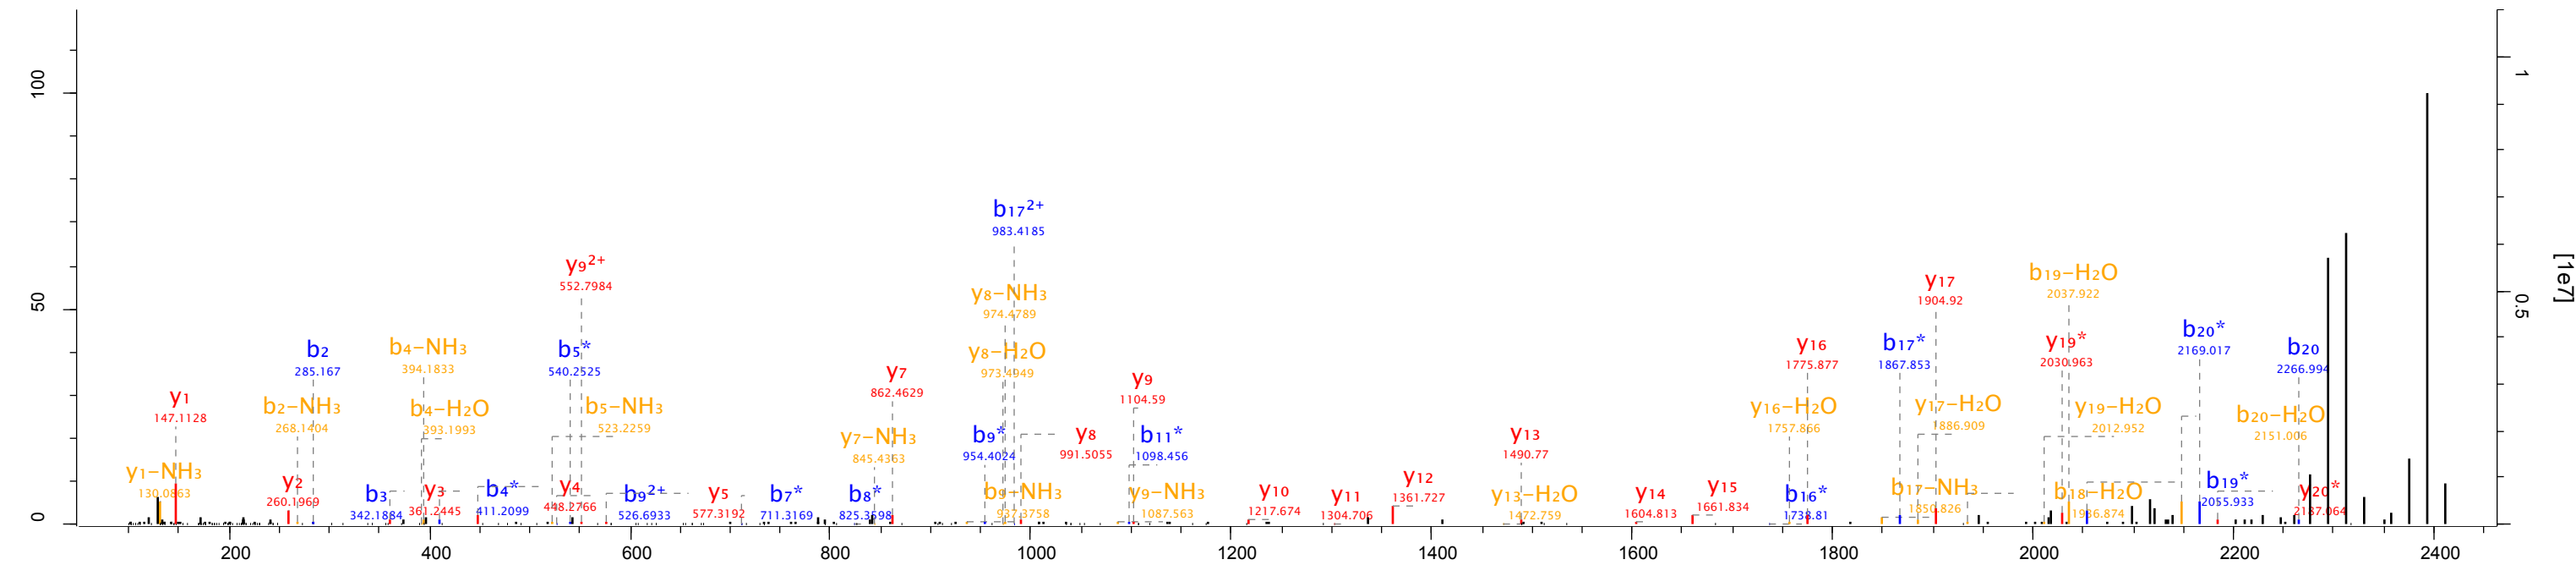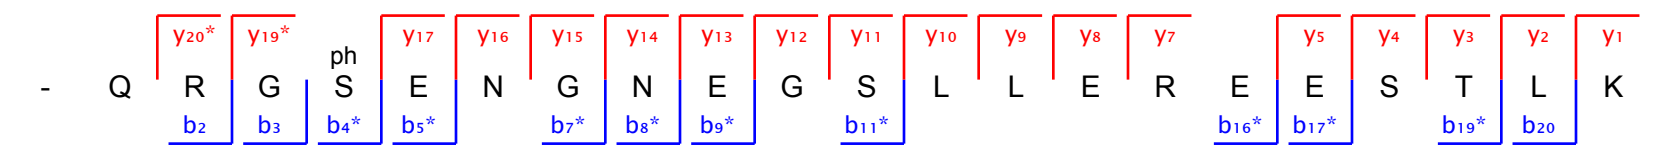

Raw file: 20150814\_A375SR\_Phospho\_BR2\_04  
 Scan: 14615 Method: FTMS; HCD Score: 280.08 m/z: 1181.5 Gene names: DNMT1

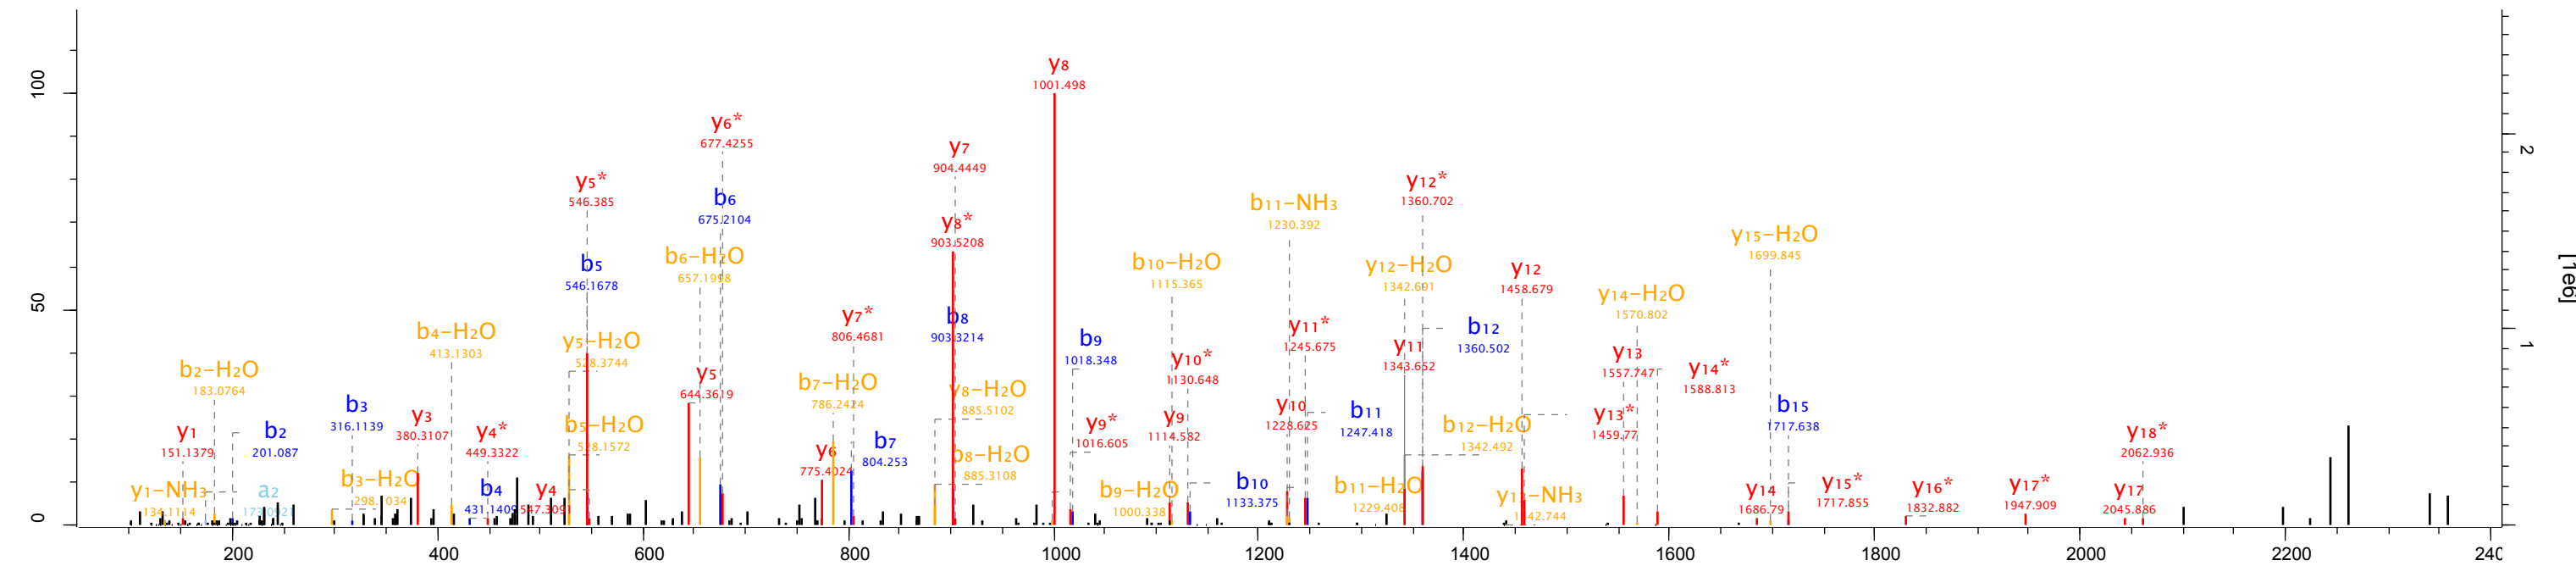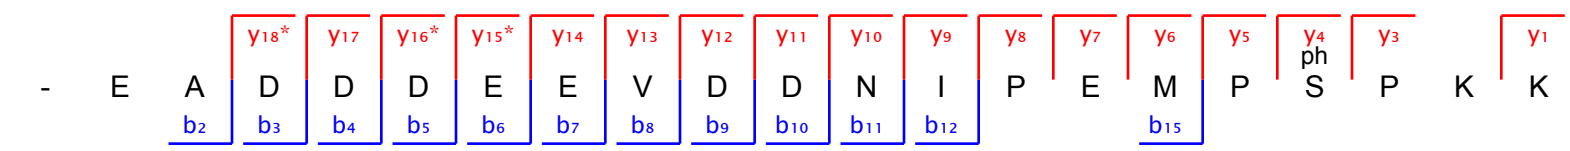

Raw file: 20150814\_A375SR\_Phospho\_BR2\_04  
 Scan: 15295 Method: FTMS; HCD Score: 58.61 m/z: 637.65 Gene names: RAB11FIP1

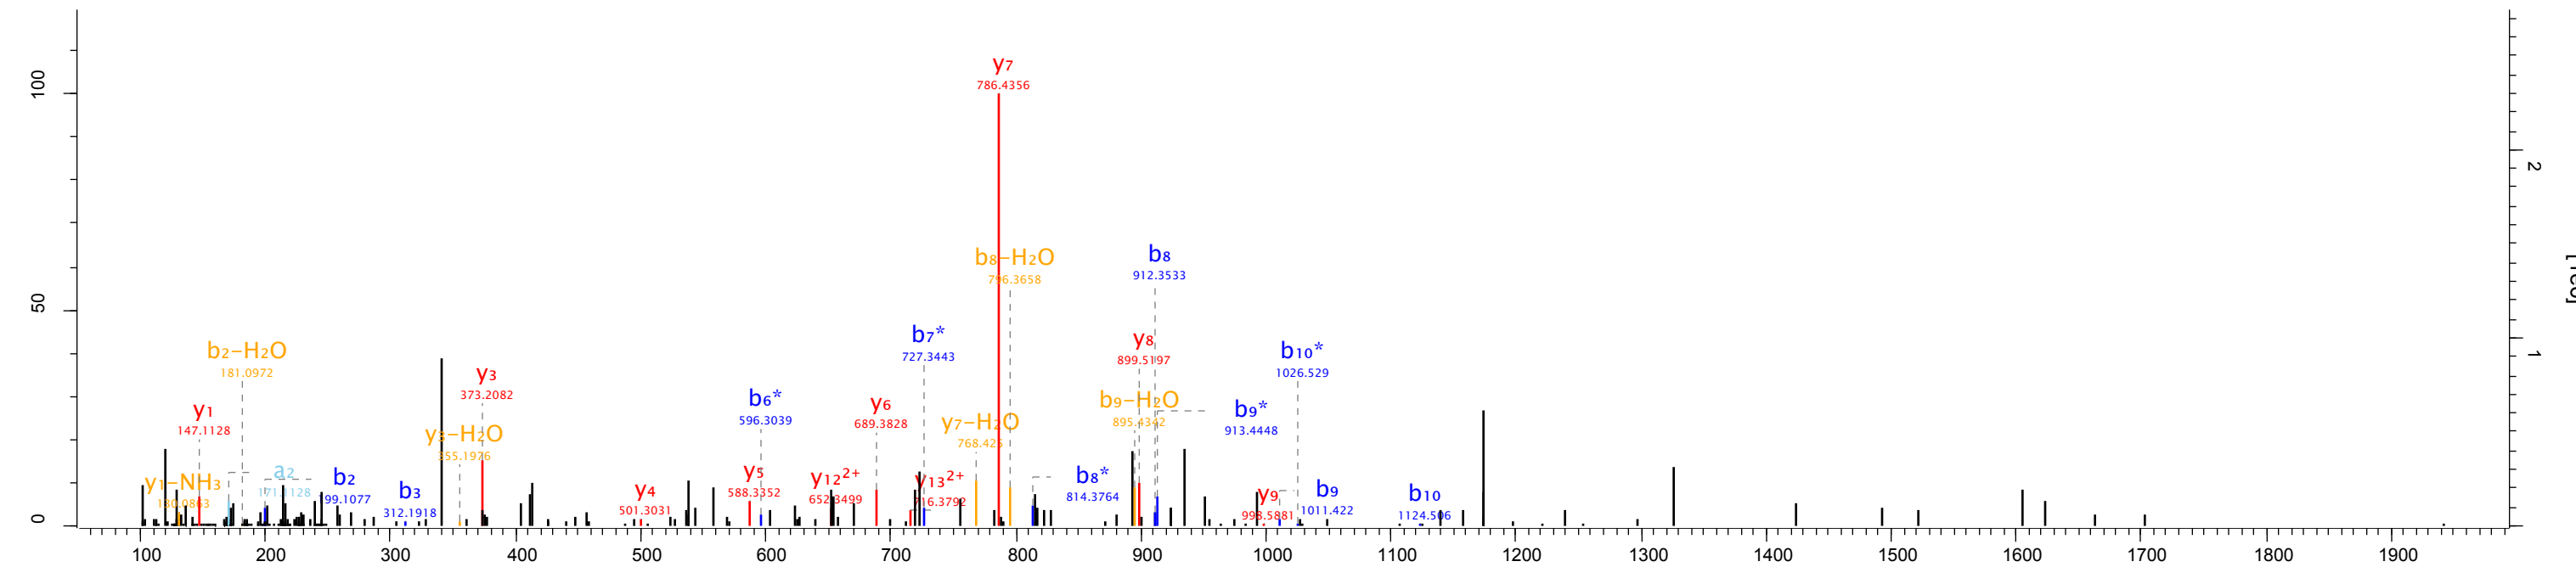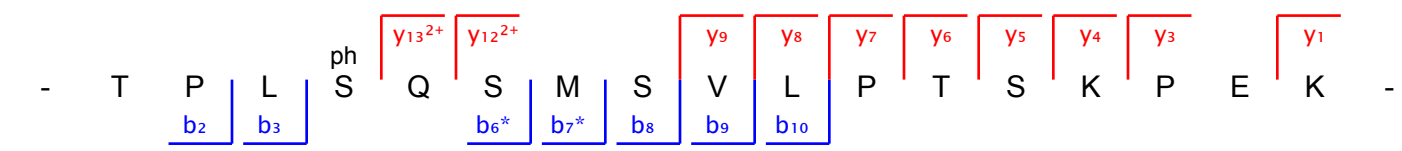

Raw file 20150814\_A375SR\_Phospho\_BR2\_04 Scan 15355 Method FTMS; HCD Score 127.32 m/z 819.37 Gene names ATP13A3

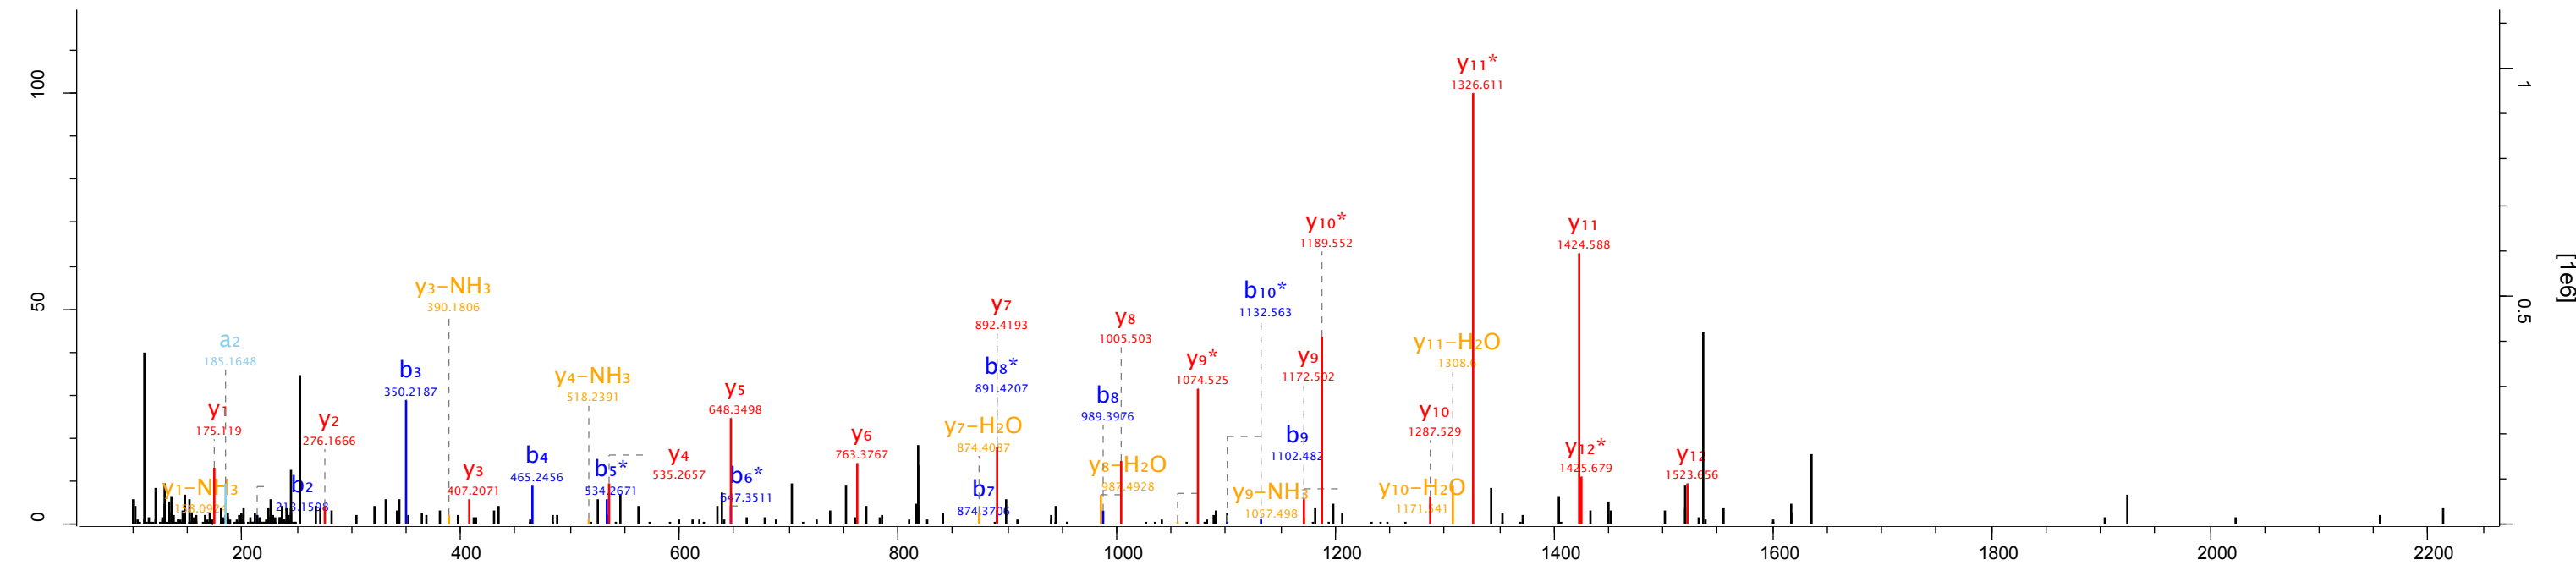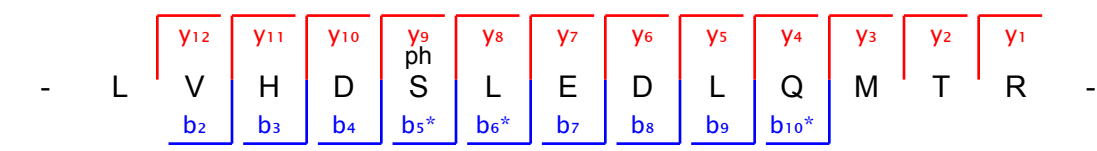



Raw file: 20150814\_A375SR\_Phospho\_BR2\_04  
 Scan: 15435 Method: FTMS; HCD Score: 316.76 m/z: 969.48 Gene names: PRRC2B

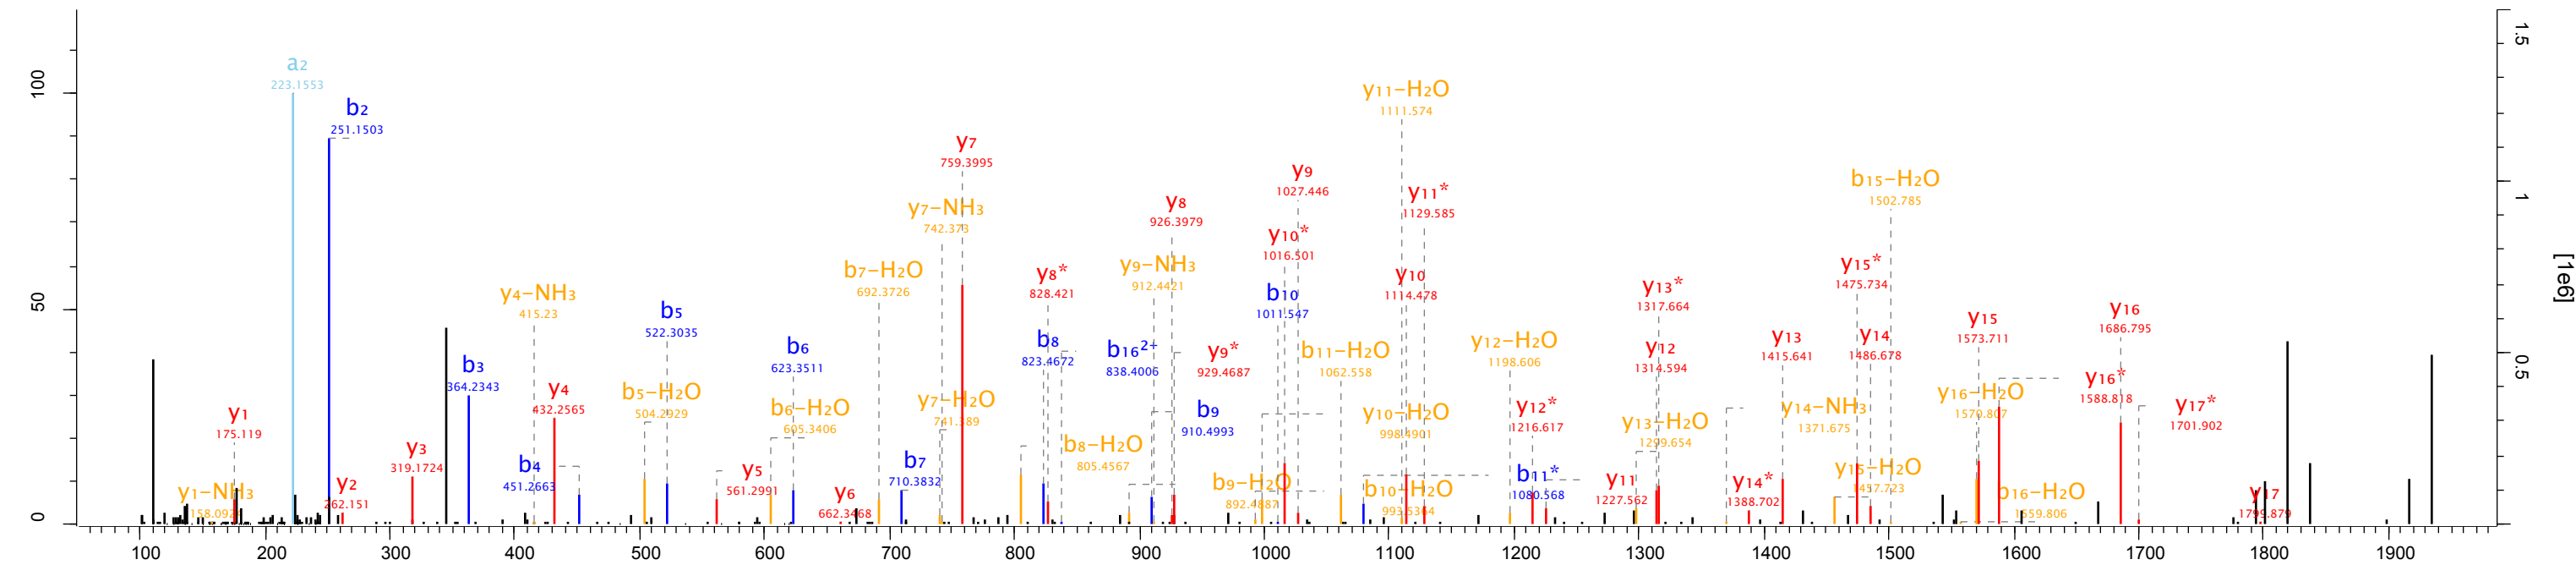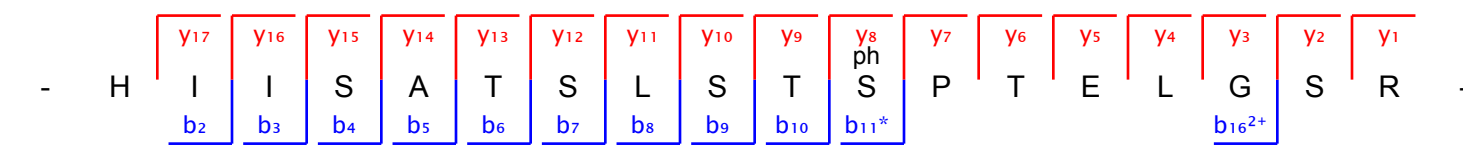

Raw file 20150814\_A375SR\_Phospho\_BR2\_04 Scan 16245 Method FTMS; HCD Score 146.08 m/z 608.77 Gene names PTPN12

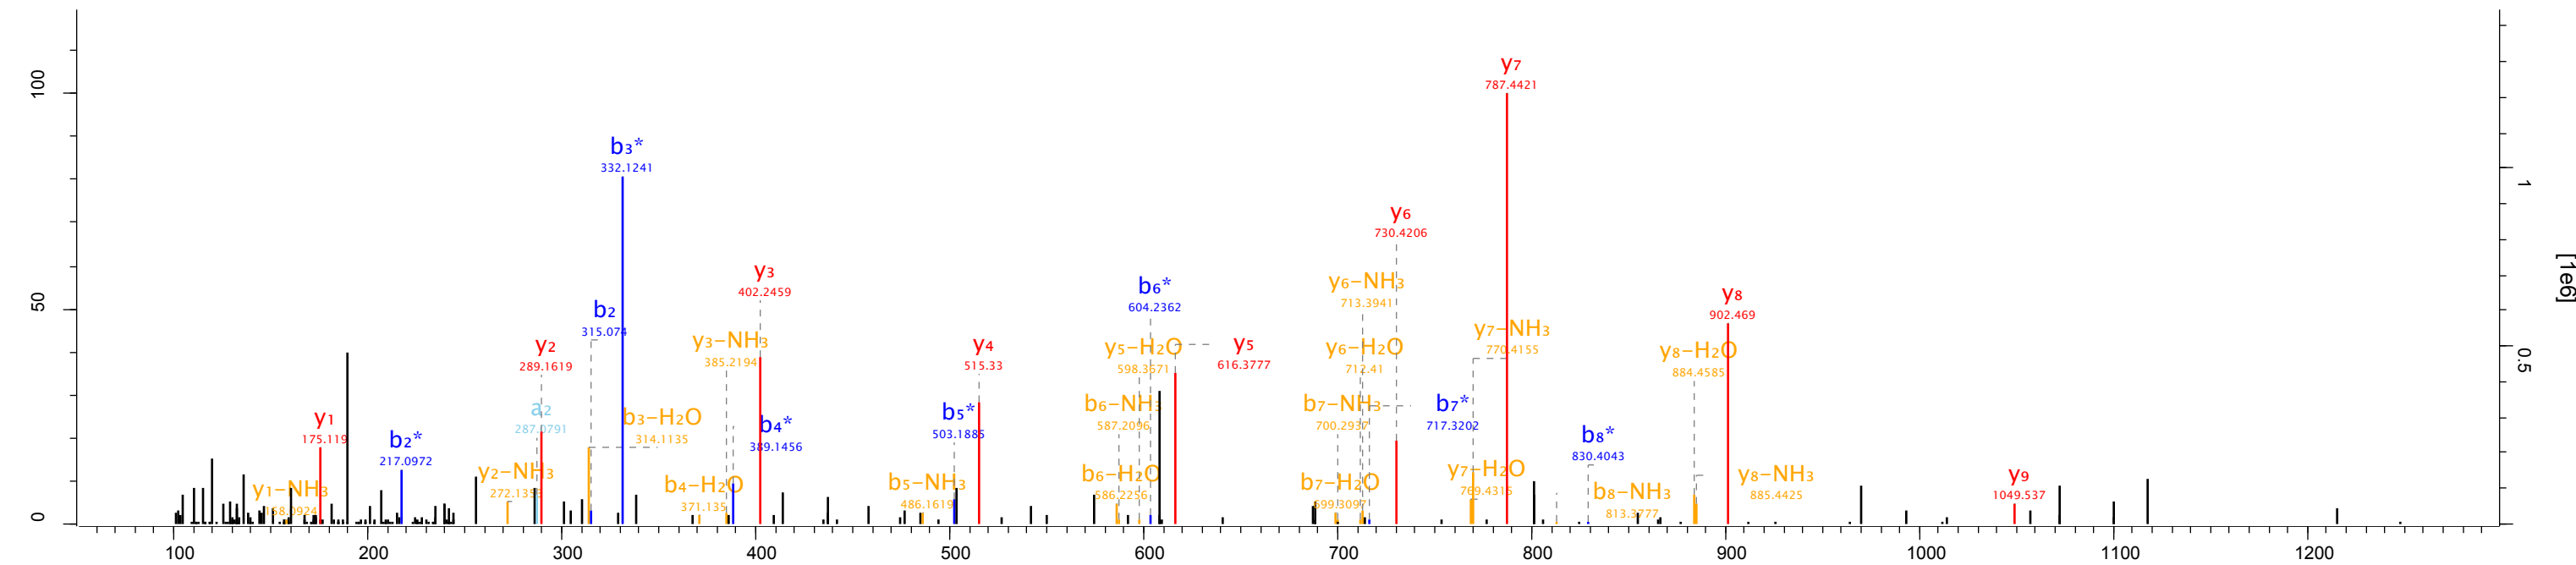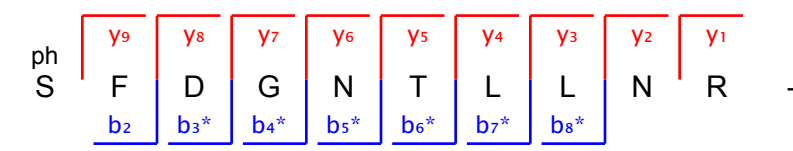

Raw file: 20150814\_A375SR\_Phospho\_BR2\_04  
 Scan: 16365 Method: FTMS; HCD Score: 178.56 m/z: 619.31 Gene names: CRTC3

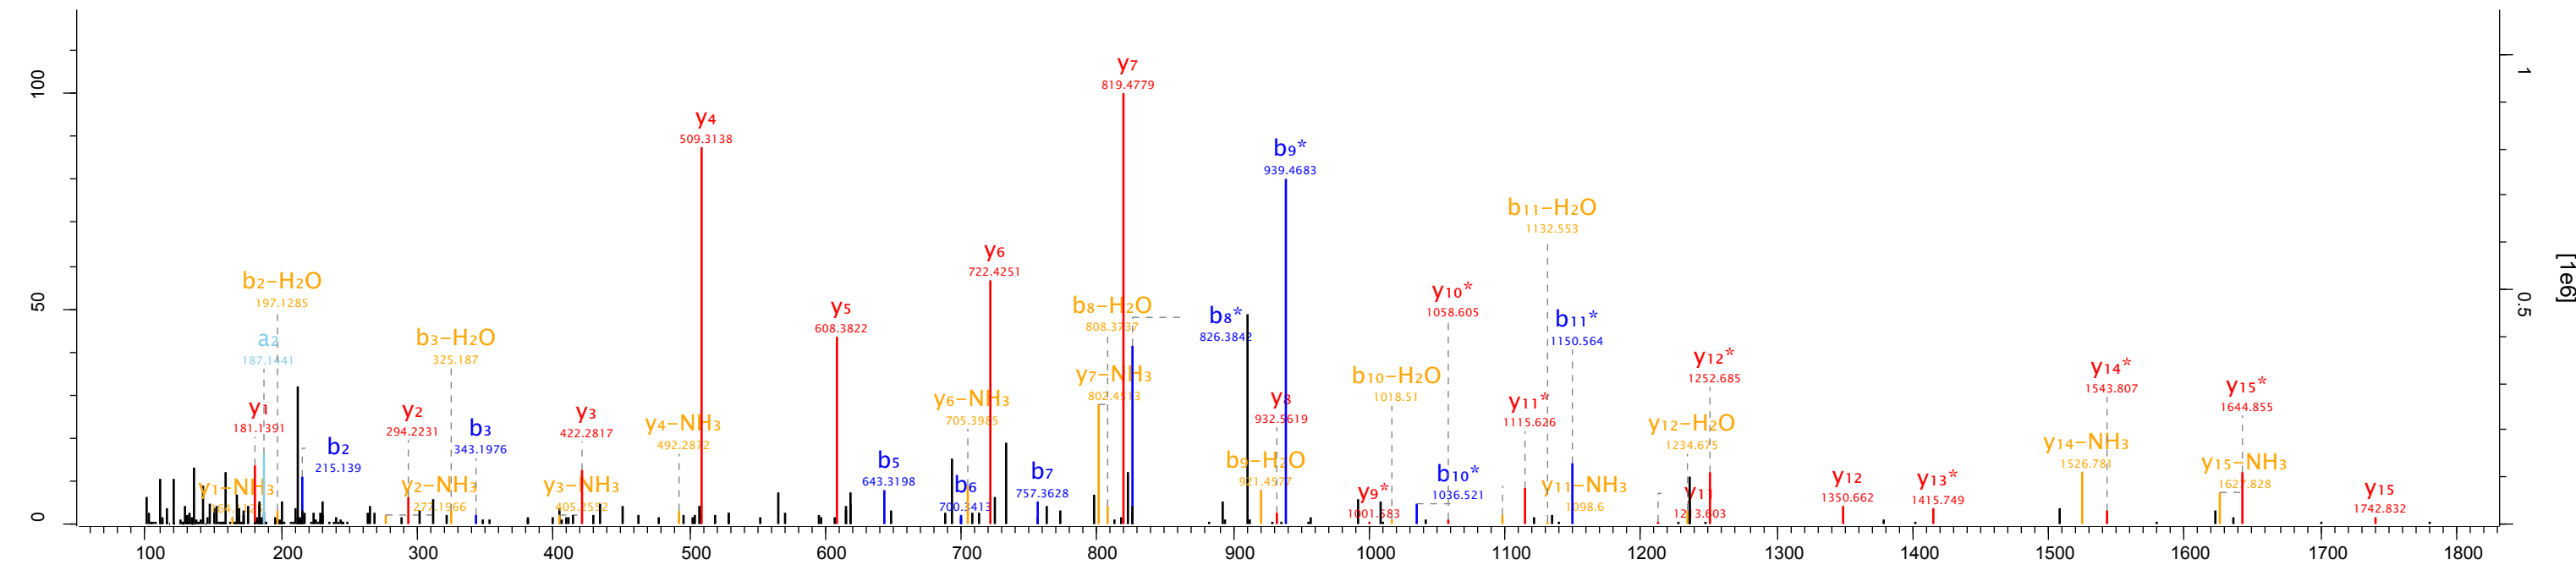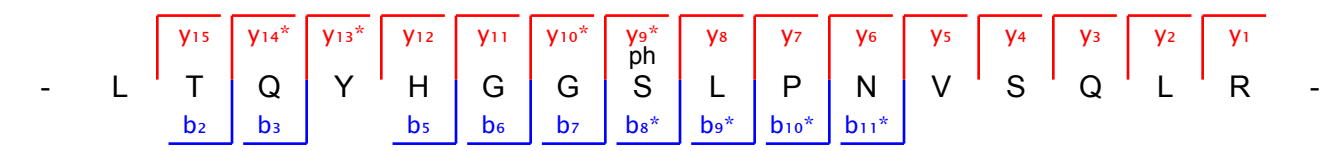

Raw file: 20150814\_A375SR\_Phospho\_BR2\_04  
 Scan: 16375 Method: FTMS; HCD Score: 81.7 m/z: 933.38 Gene names: STAU1

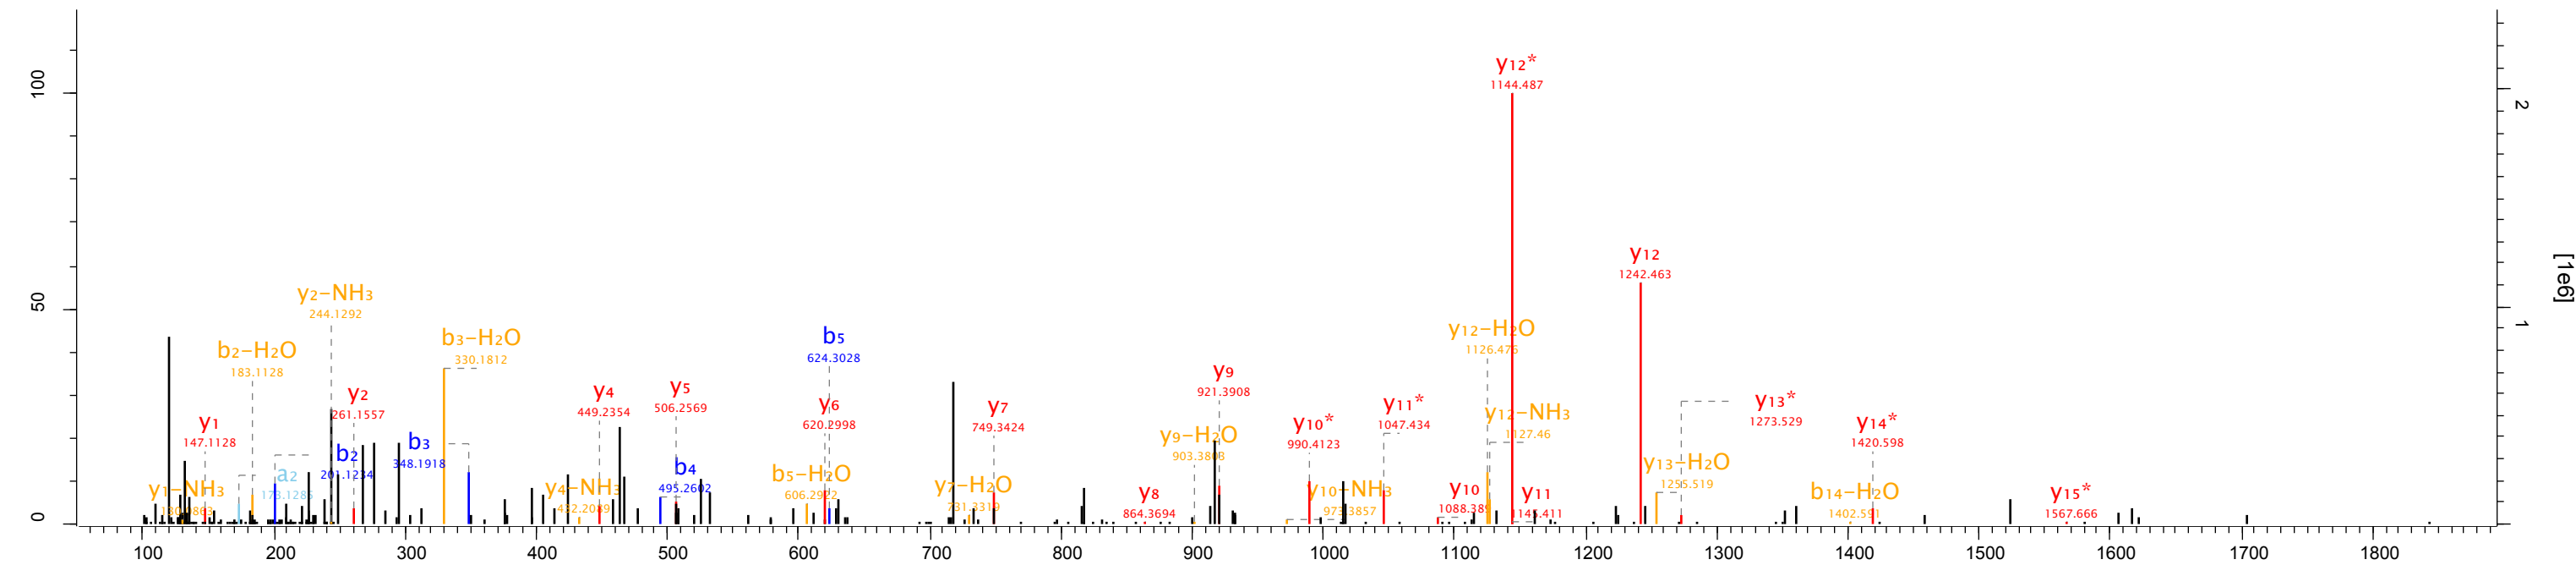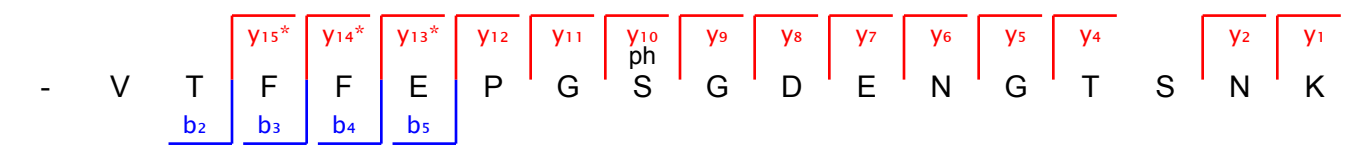

Raw file 20150814\_A375SR\_Phospho\_BR2\_04 Scan 16795 Method FTMS; HCD Score 96.22 m/z 879.4 Gene names BCAR2;TRERF1

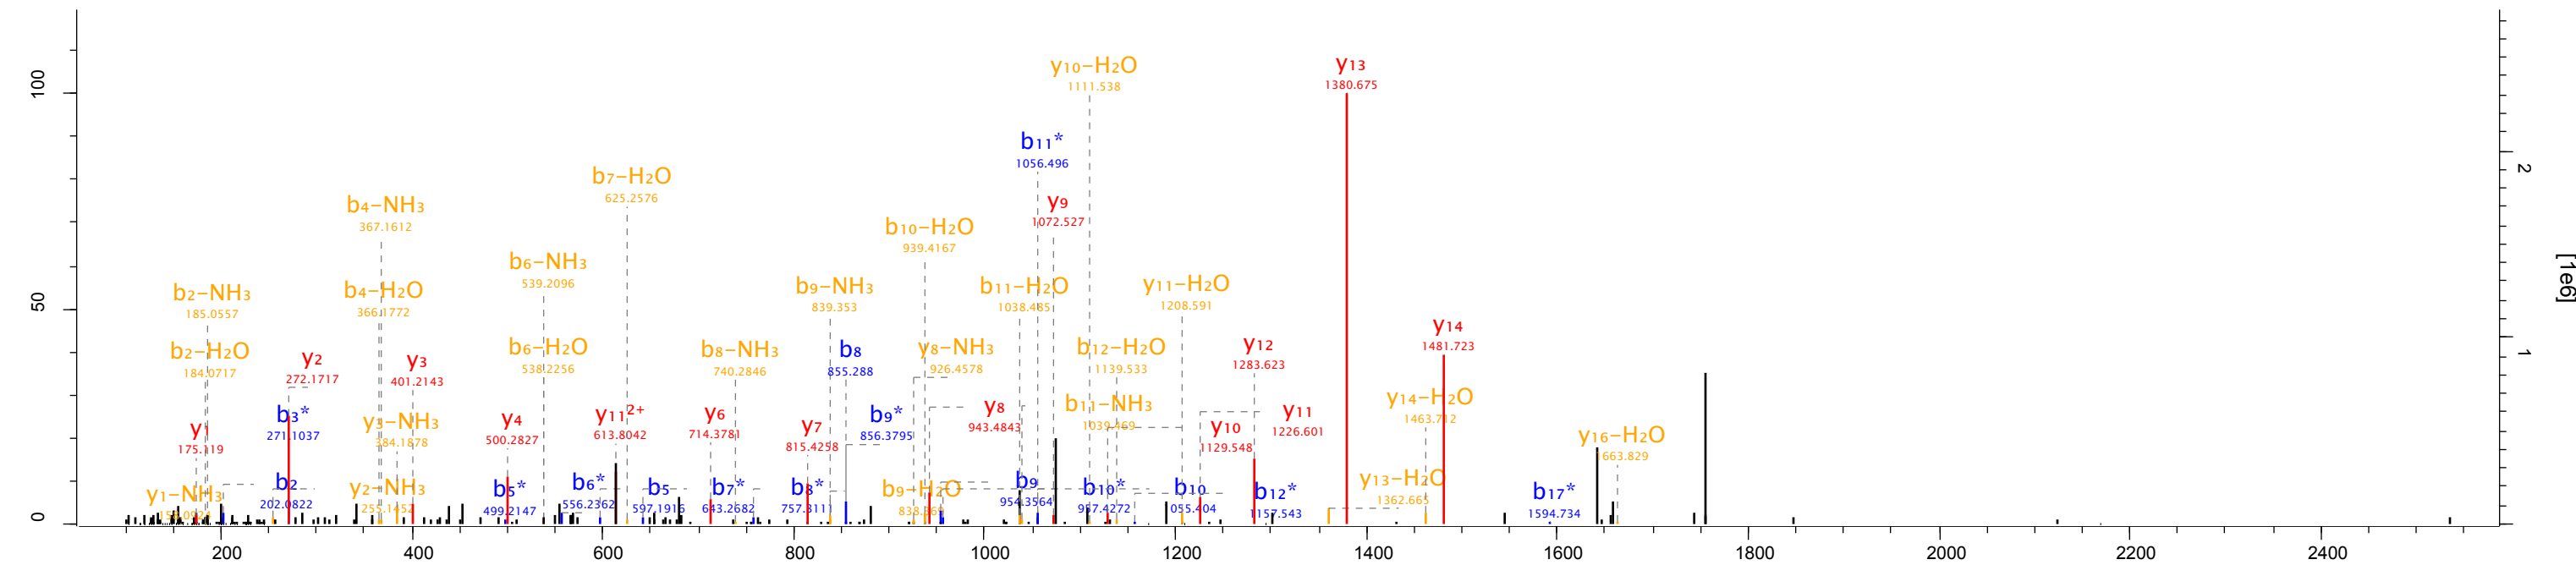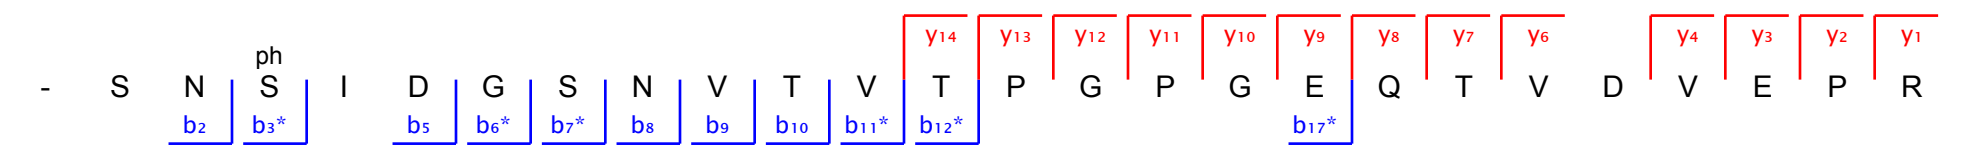

Raw file: 20150814\_A375SR\_Phospho\_BR2\_04  
 Scan: 16835 Method: FTMS; HCD Score: 265.65 m/z: 948.14 Gene names: TNKS1BP1

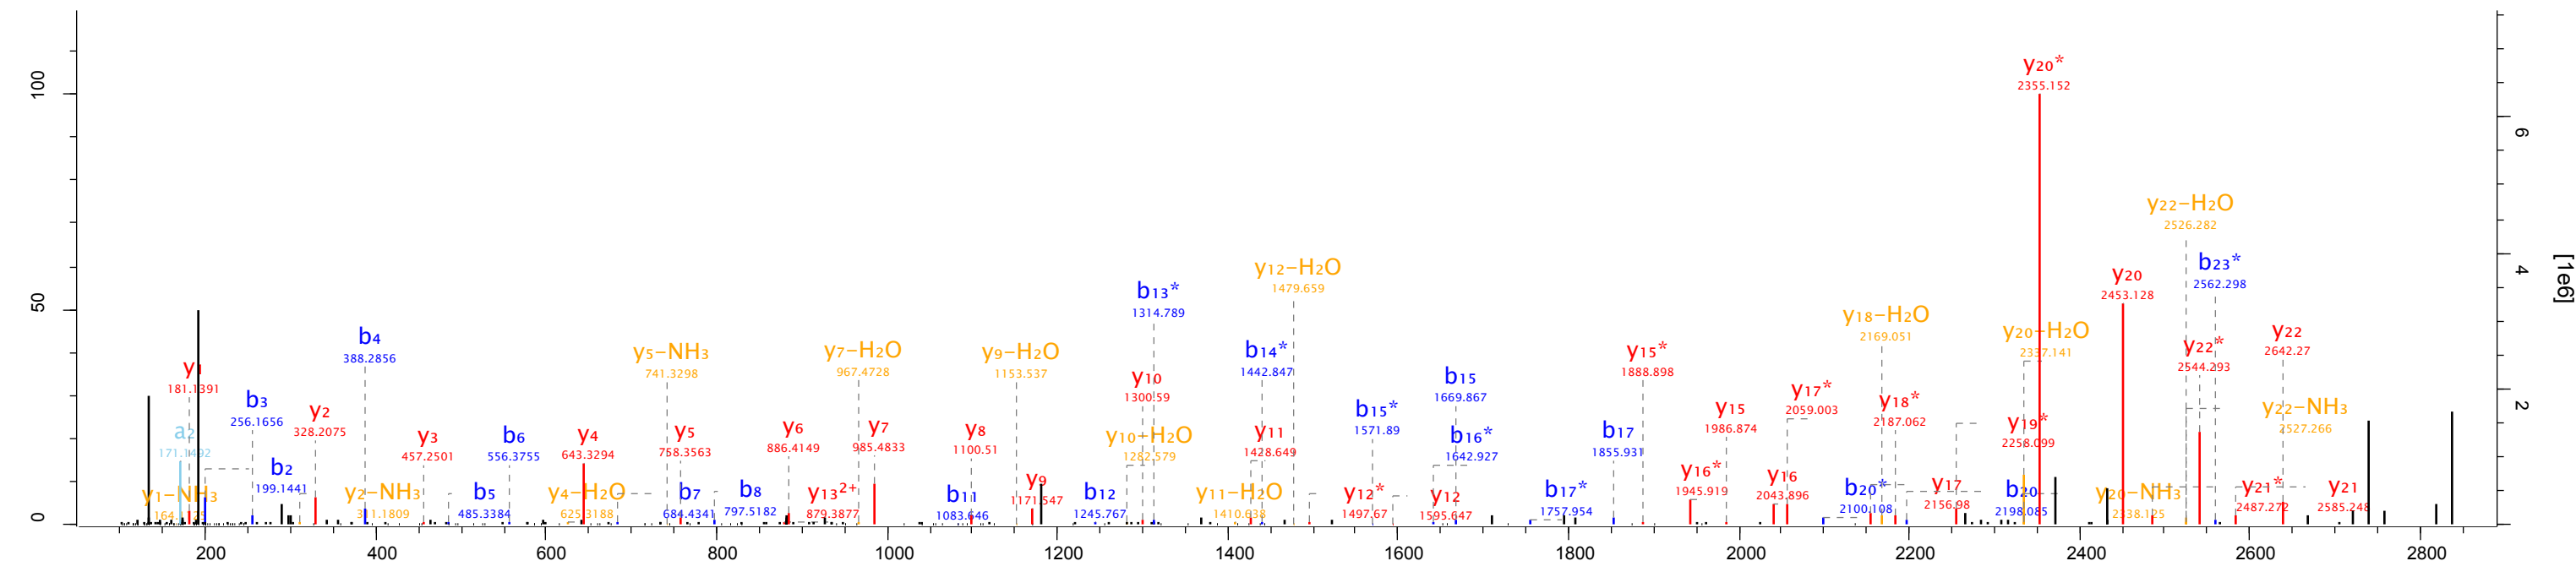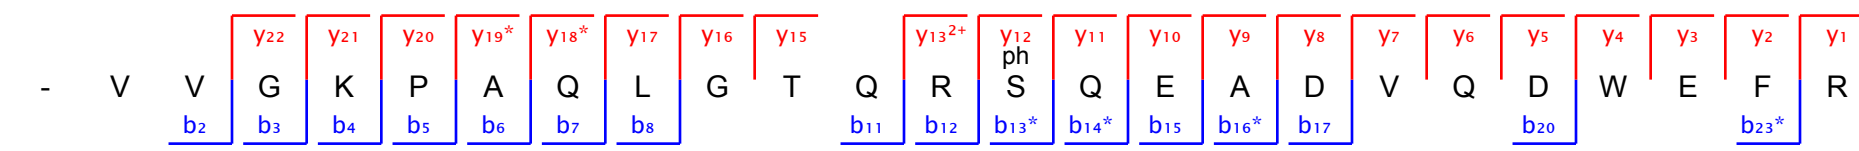

Raw file 20150814\_A375SR\_Phospho\_BR2\_04 Scan 16975 Method FTMS; HCD Score 185.19 m/z 752.84 Gene names CNPY2

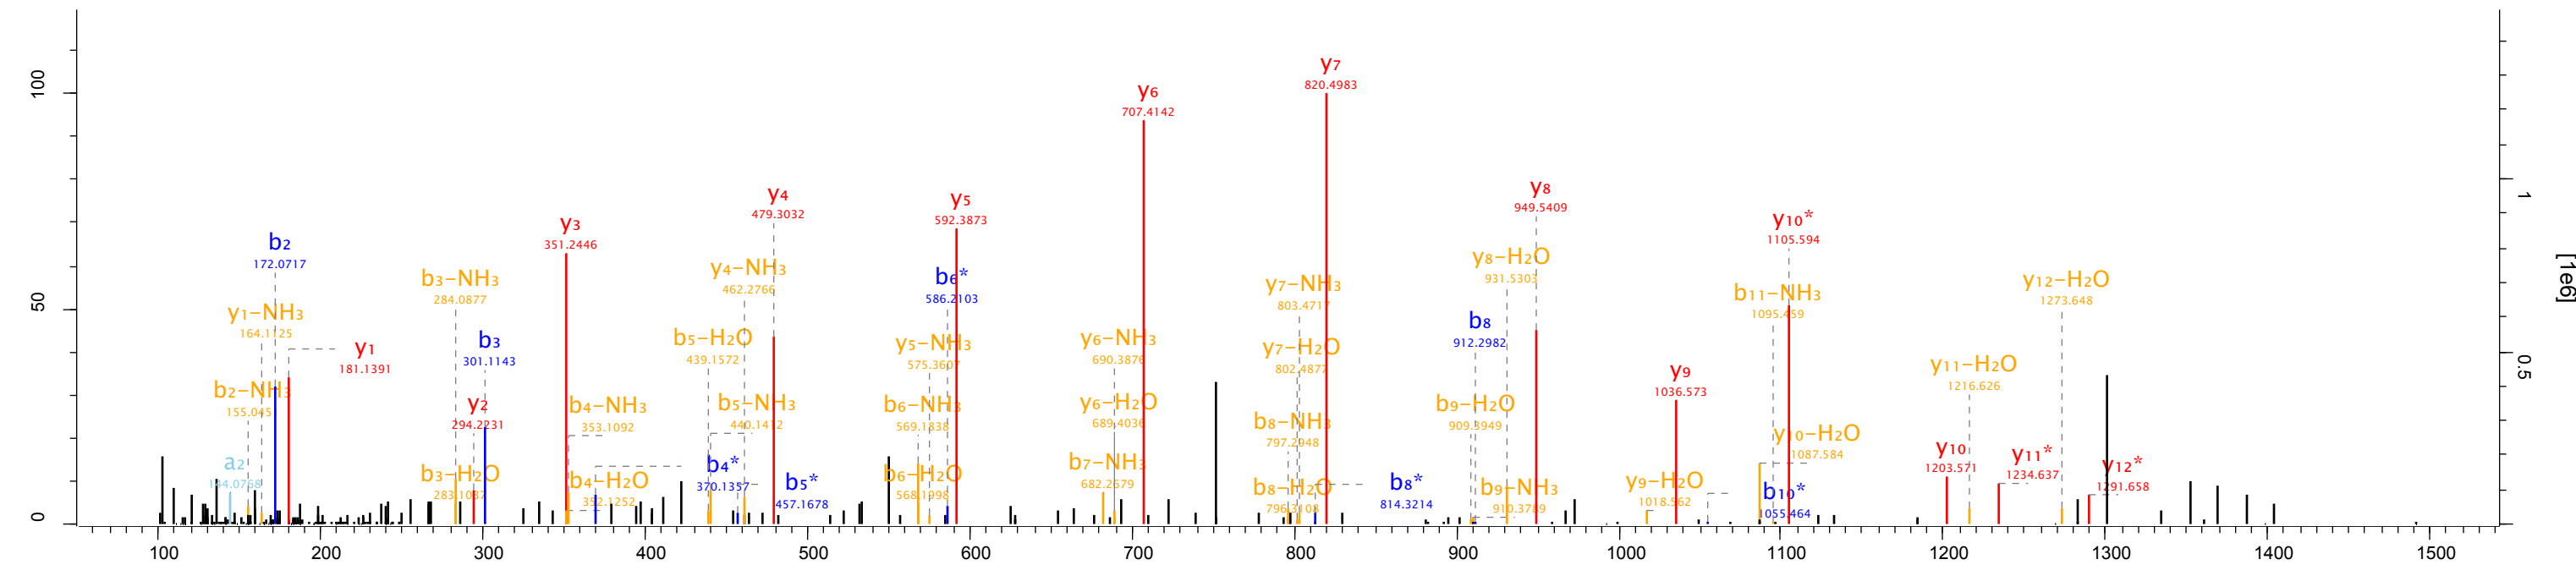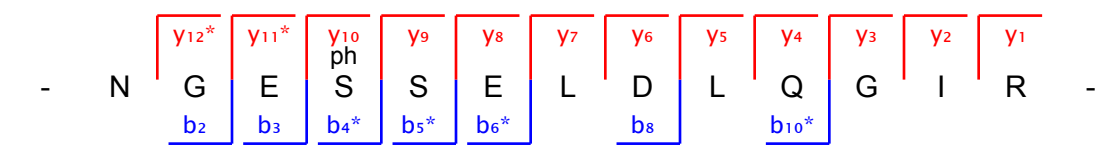

Raw file 20150814\_A375SR\_Phospho\_BR2\_04 Scan 17095 Method FTMS; HCD Score 113.69 m/z 525.74 Gene names AHNAK

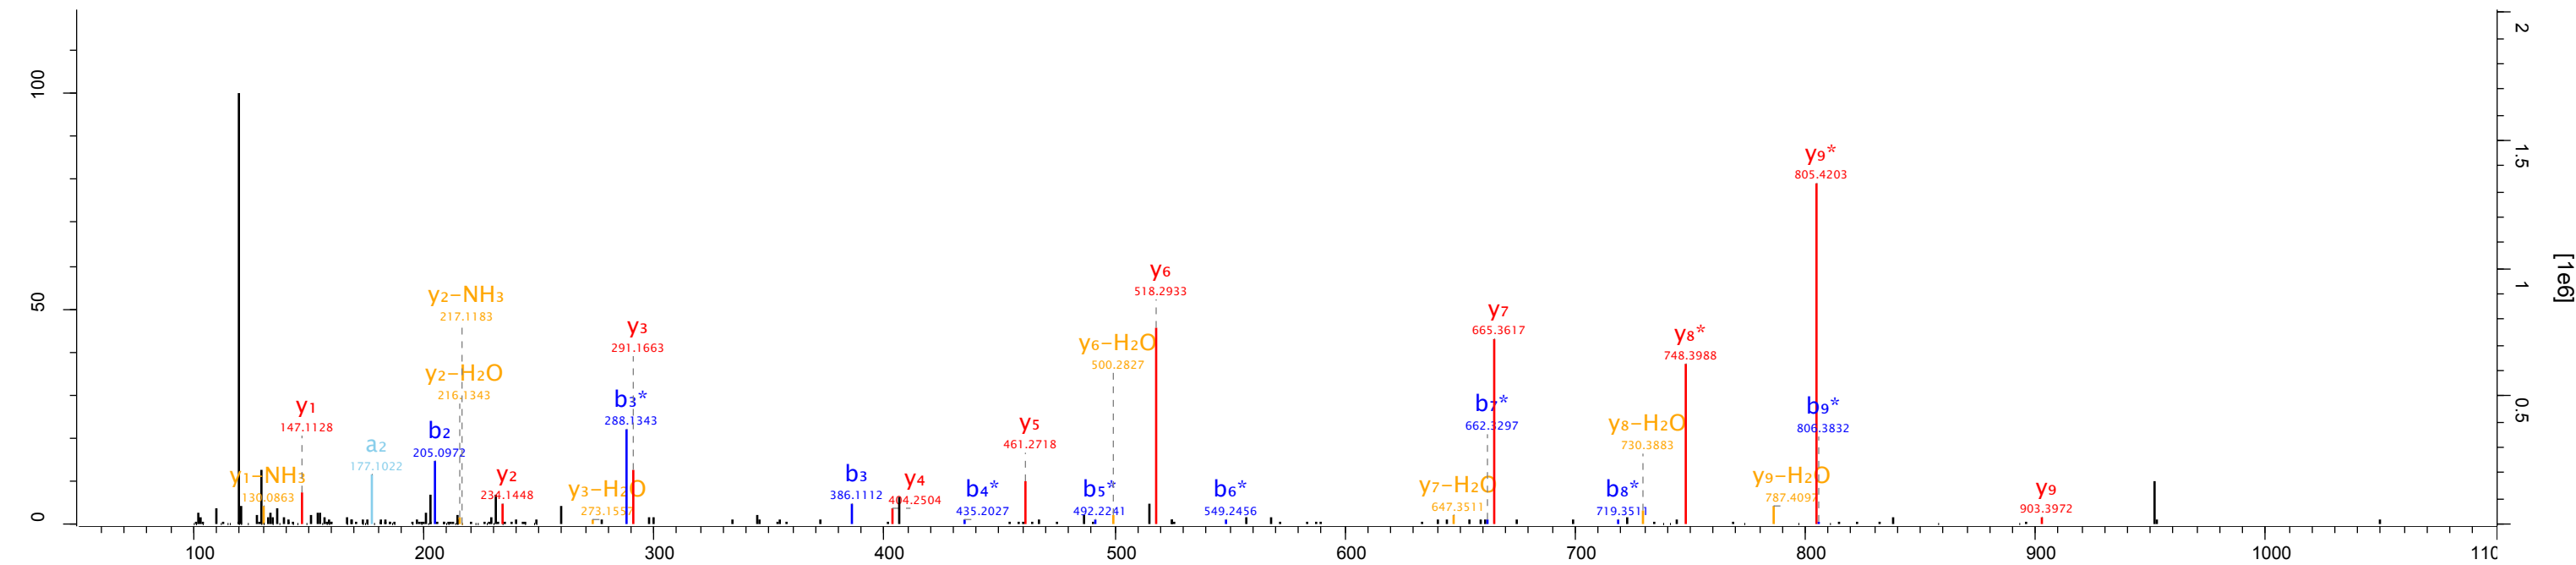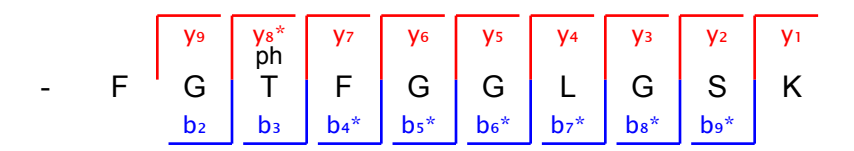



Raw file: 20150814\_A375SR\_Phospho\_BR2\_04  
 Scan: 17205 Method: FTMS; HCD Score: 135.56 m/z: 525.22 Gene names: KIDINS220

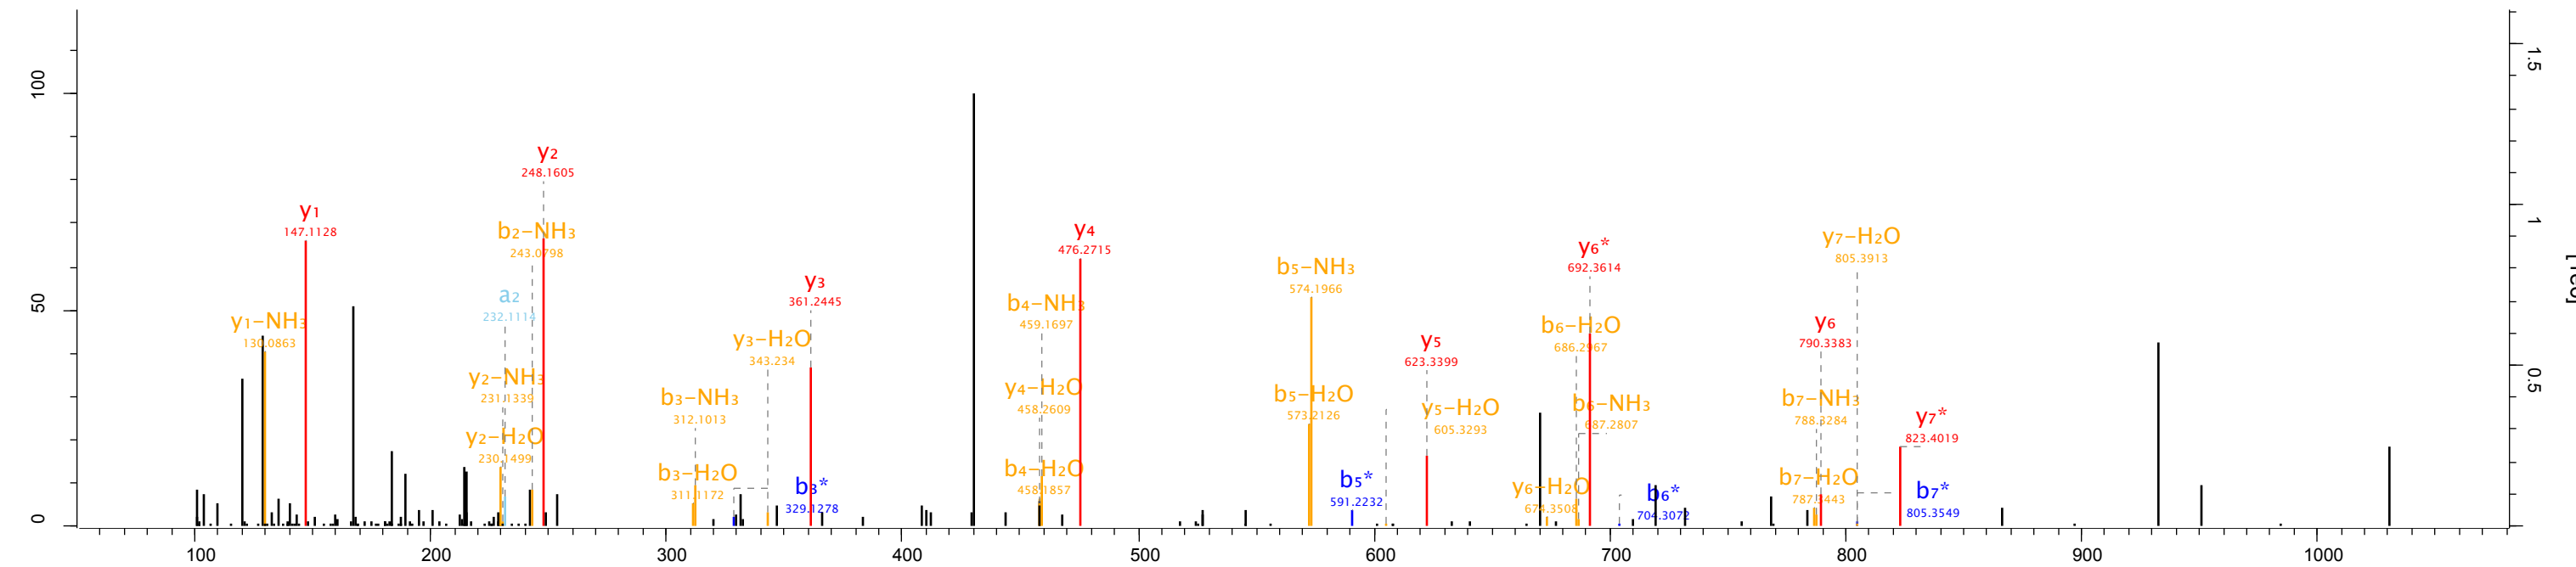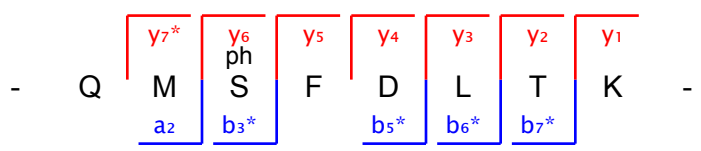

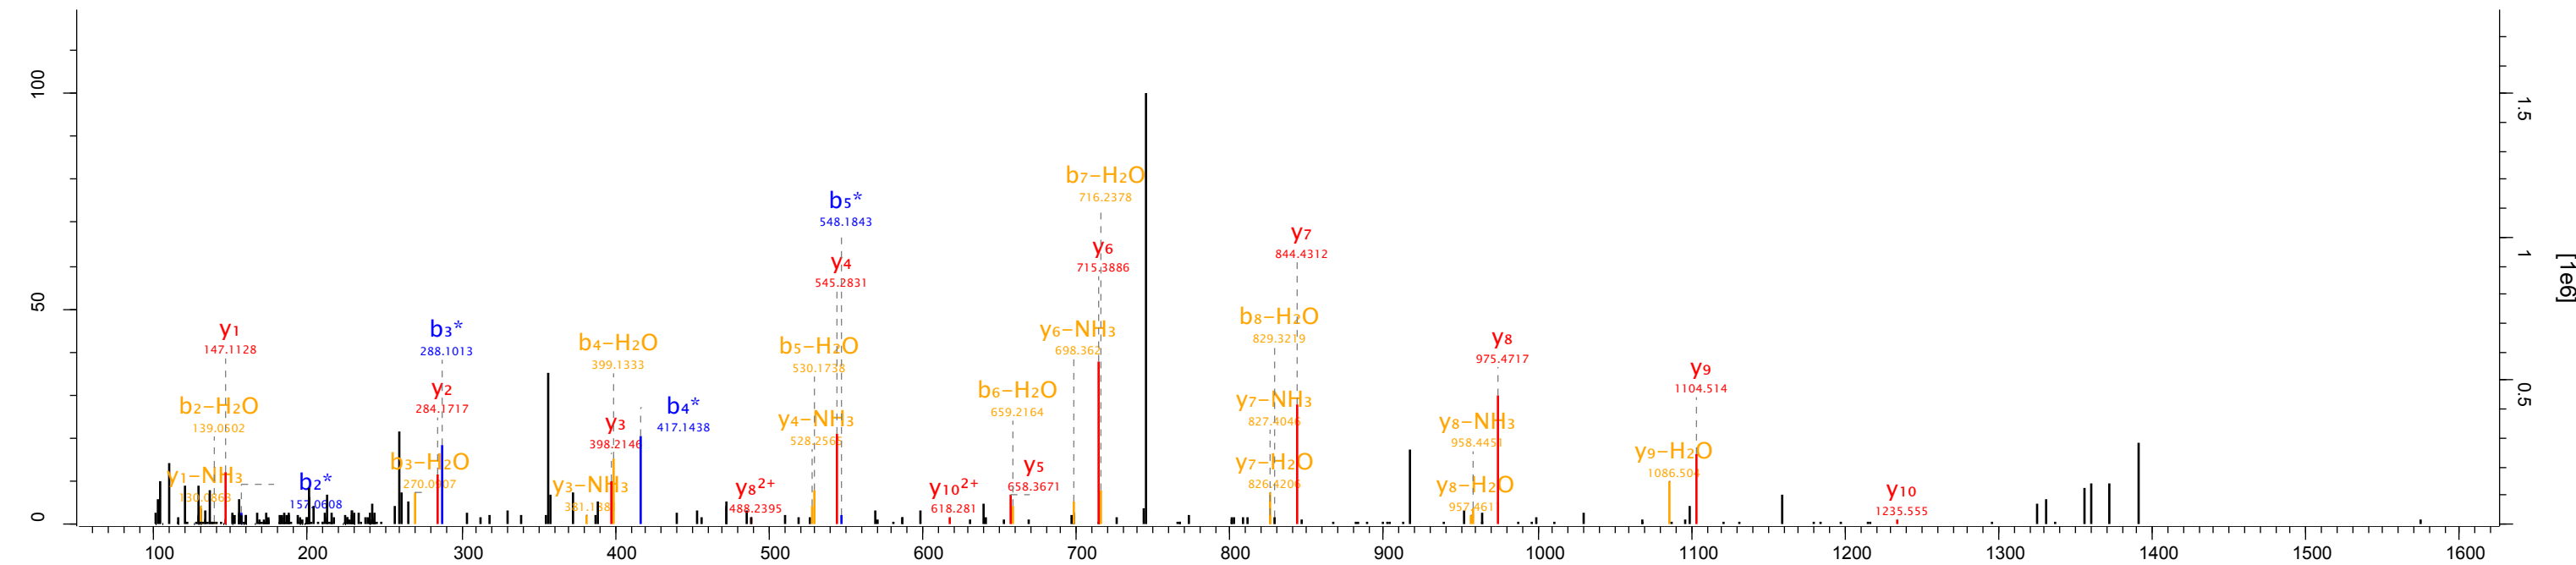

ph S - S M E M E G I F N H K -

b<sub>2</sub>\* b<sub>3</sub>\* b<sub>4</sub>\* b<sub>5</sub>\*

y<sub>10</sub> y<sub>9</sub> y<sub>8</sub> y<sub>7</sub> y<sub>6</sub> y<sub>5</sub> y<sub>4</sub> y<sub>3</sub> y<sub>2</sub> y<sub>1</sub>

Raw file: 20150814\_A375SR\_Phospho\_BR2\_04  
 Scan: 17375 Method: FTMS; HCD Score: 163.18 m/z: 1047.51 Gene names: CPEB4

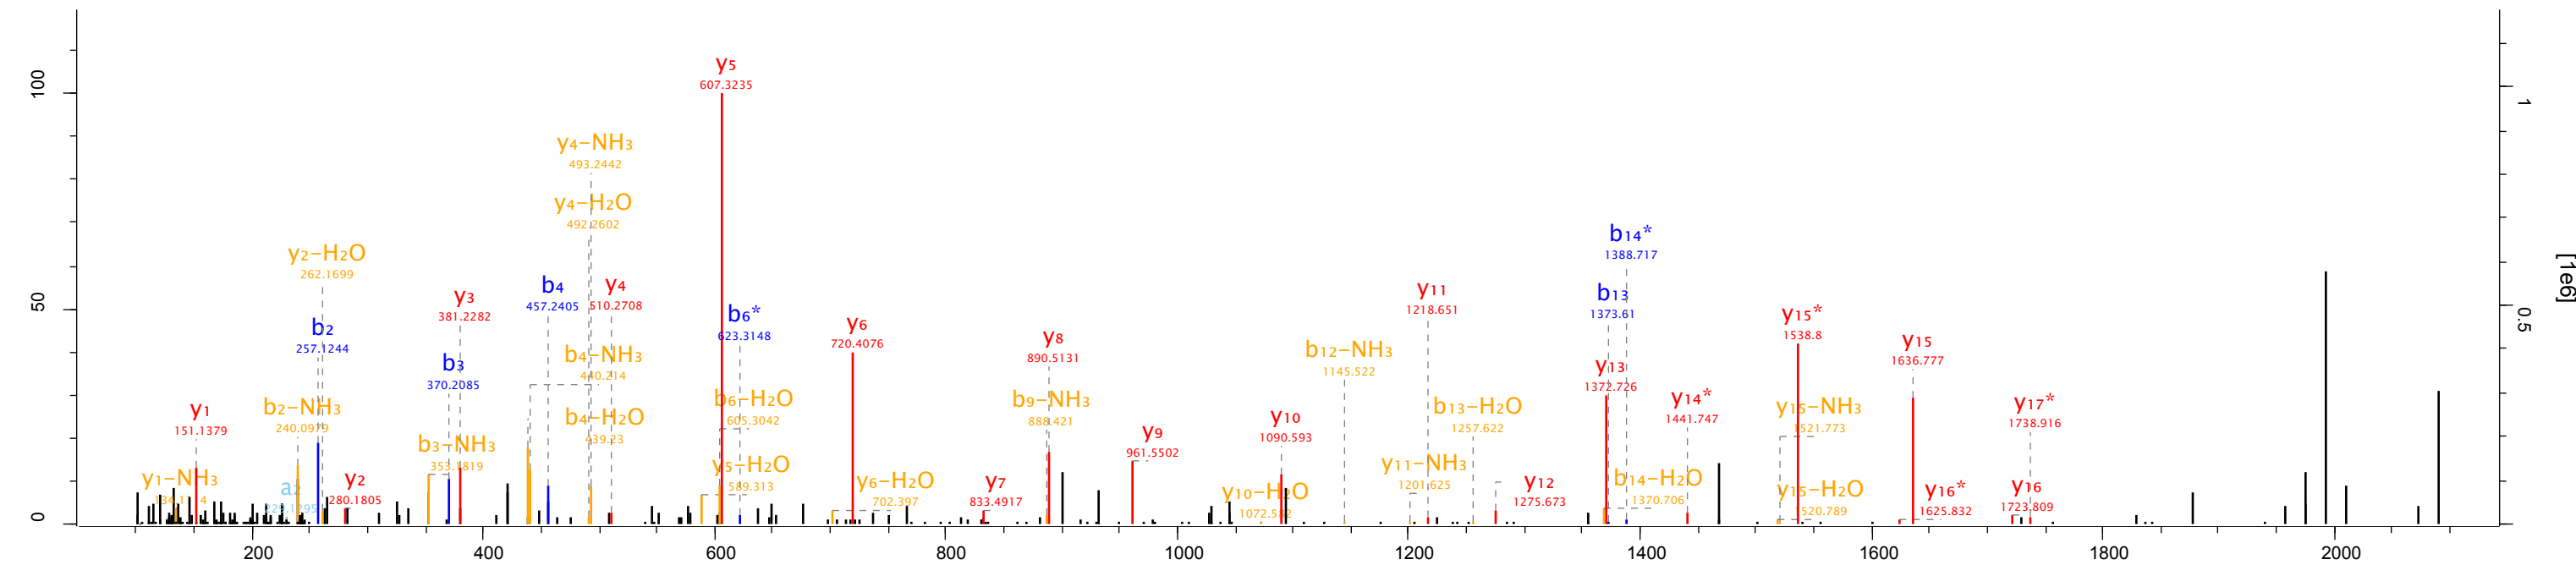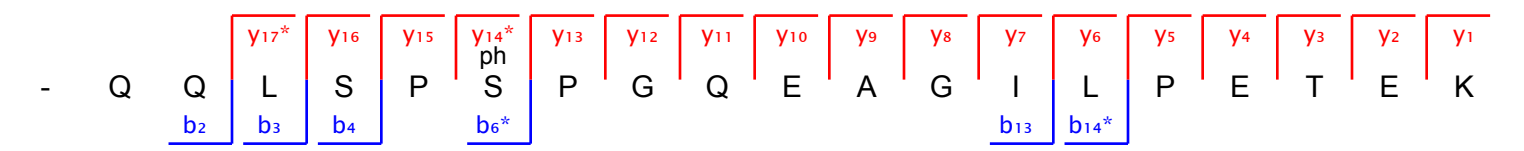

Raw file Scan Method Score m/z Gene names  
 20150814\_A375SR\_Phospho\_BR2\_04 17735 FTMS; HCD 156.87 649.95 LUC7L2

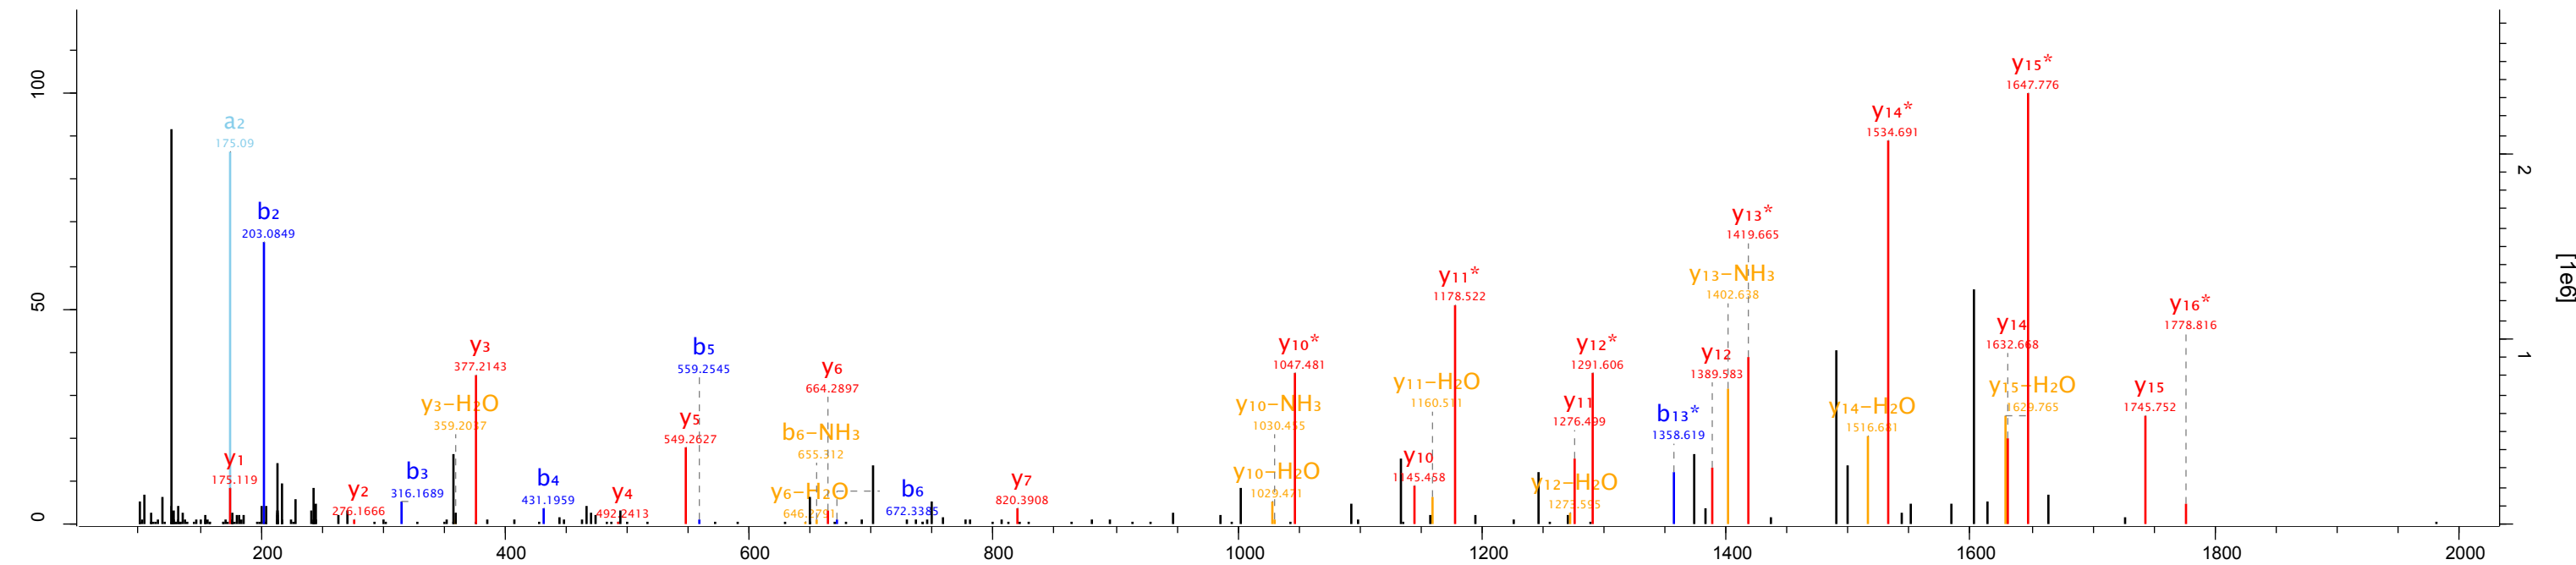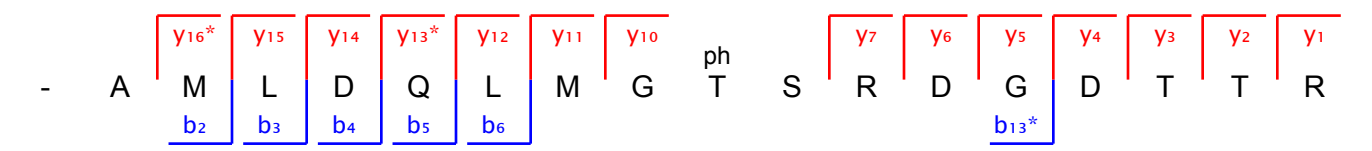

Raw file: 20150814\_A375SR\_Phospho\_BR2\_04  
 Scan: 18145 Method: FTMS; HCD Score: 48.77 m/z: 1009.94 Gene names: POM121

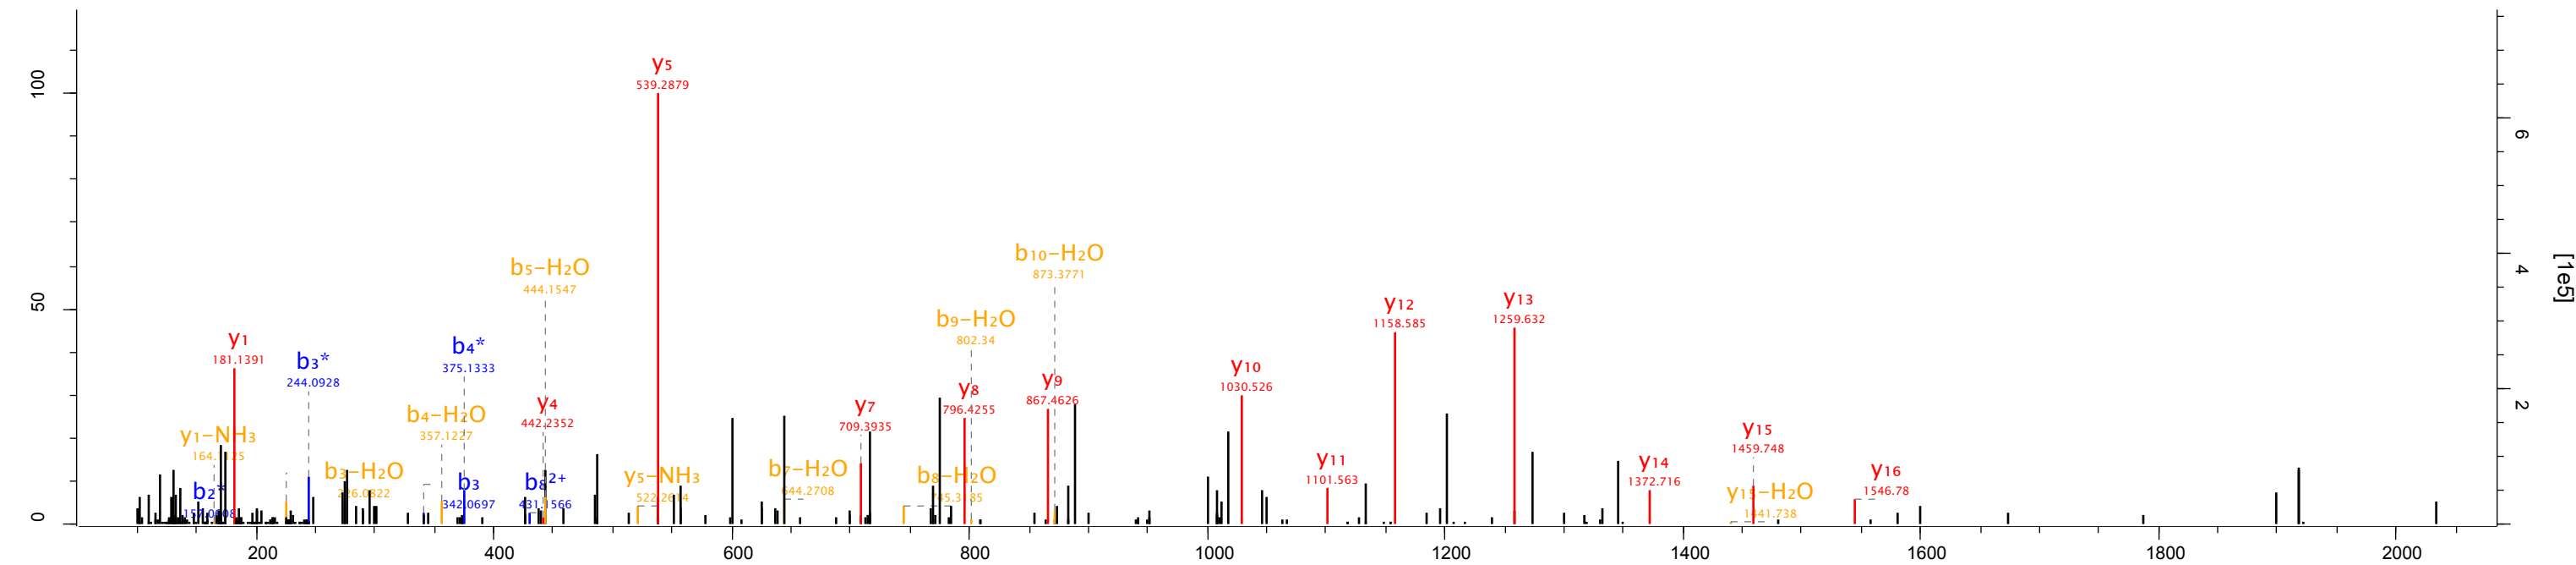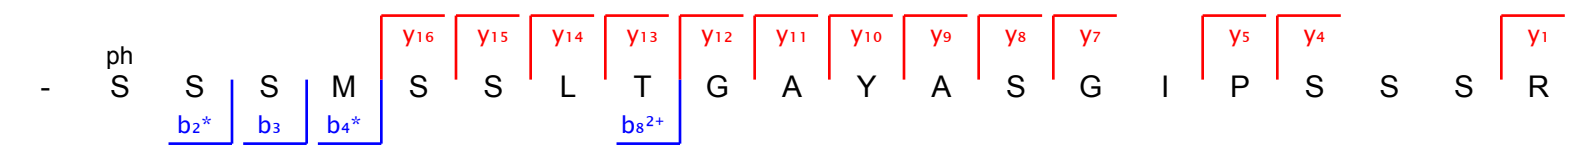

Raw file 20150814\_A375SR\_Phospho\_BR2\_04 Scan 18175 Method FTMS; HCD Score 80.31 m/z 640.26 Gene names IQSEC1

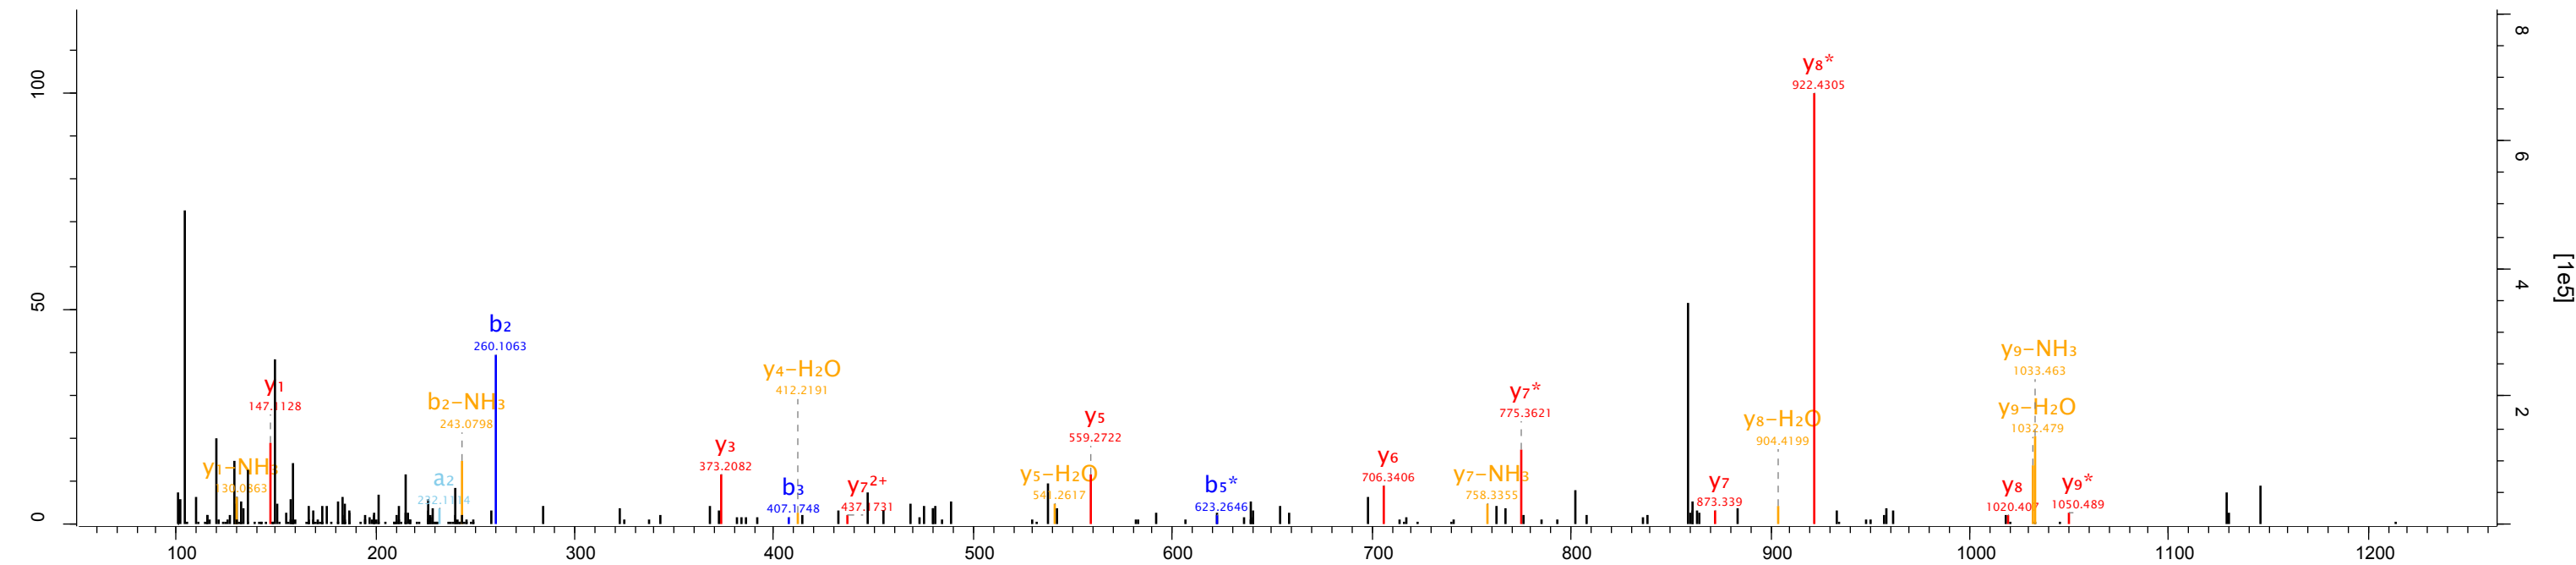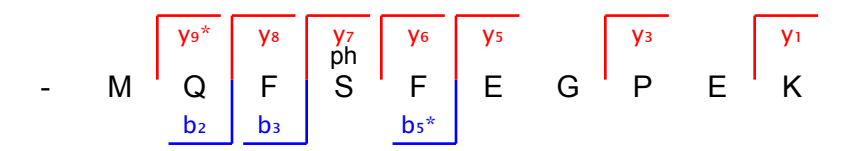

Raw file: 20150814\_A375SR\_Phospho\_BR2\_04  
 Scan: 18295 Method: FTMS; HCD Score: 200.77 m/z: 806.39 Gene names: PRKD3;PRKD1

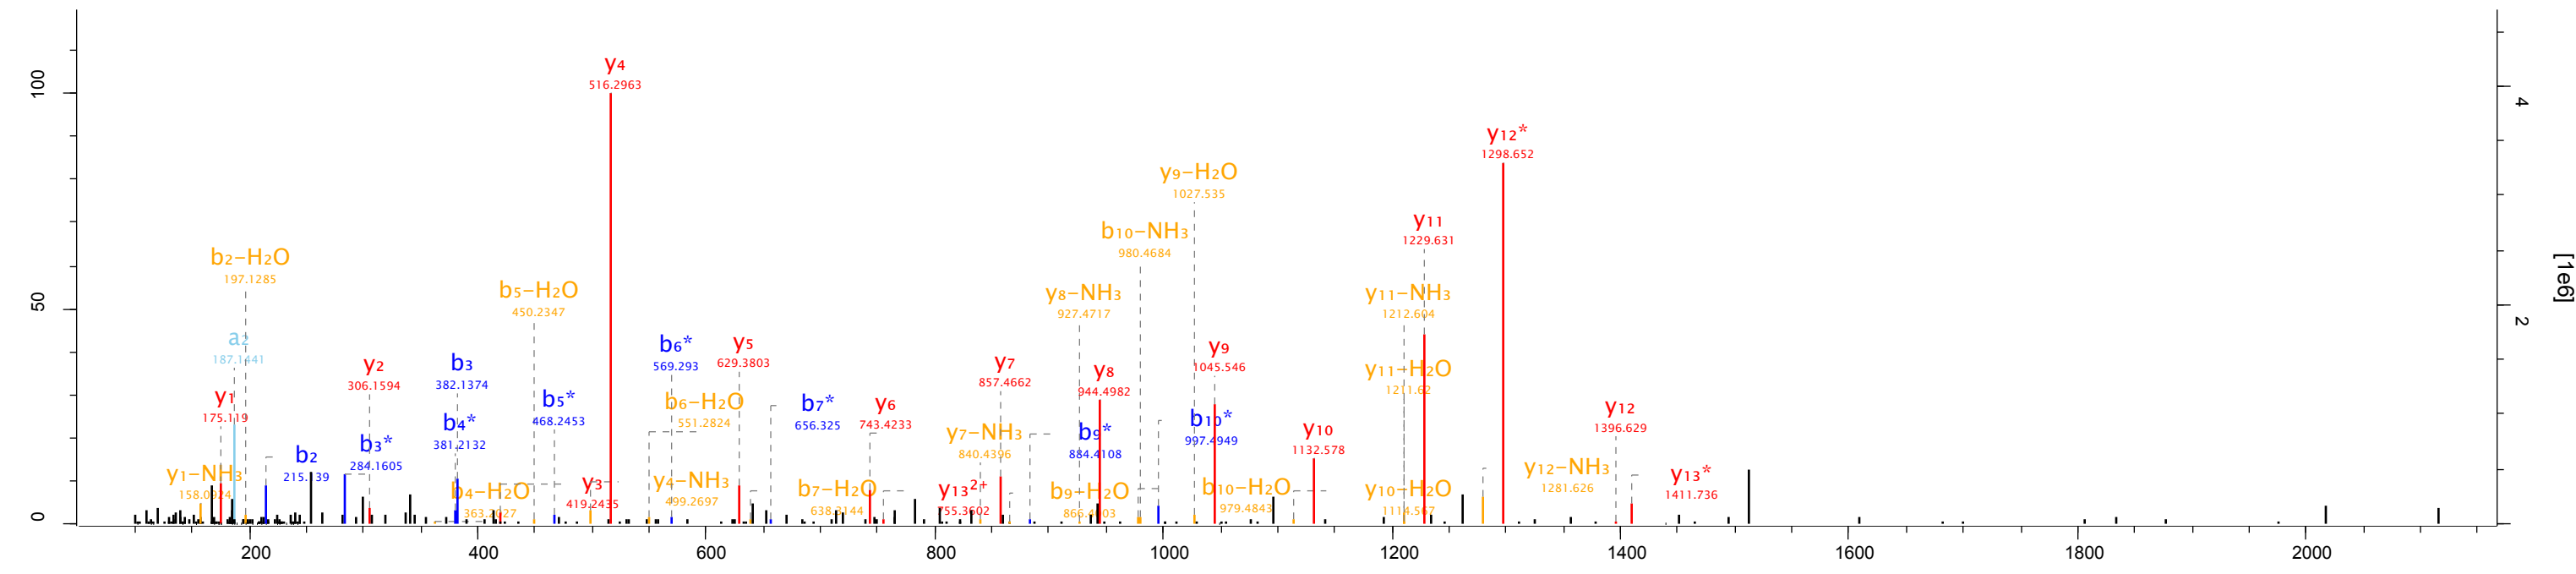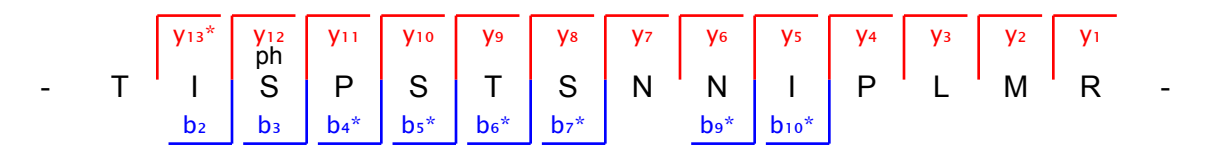

Raw file: 20150814\_A375SR\_Phospho\_BR2\_04  
 Scan: 18365 Method: FTMS; HCD Score: 102.56 m/z: 1273.66 Gene names: ZMYND8

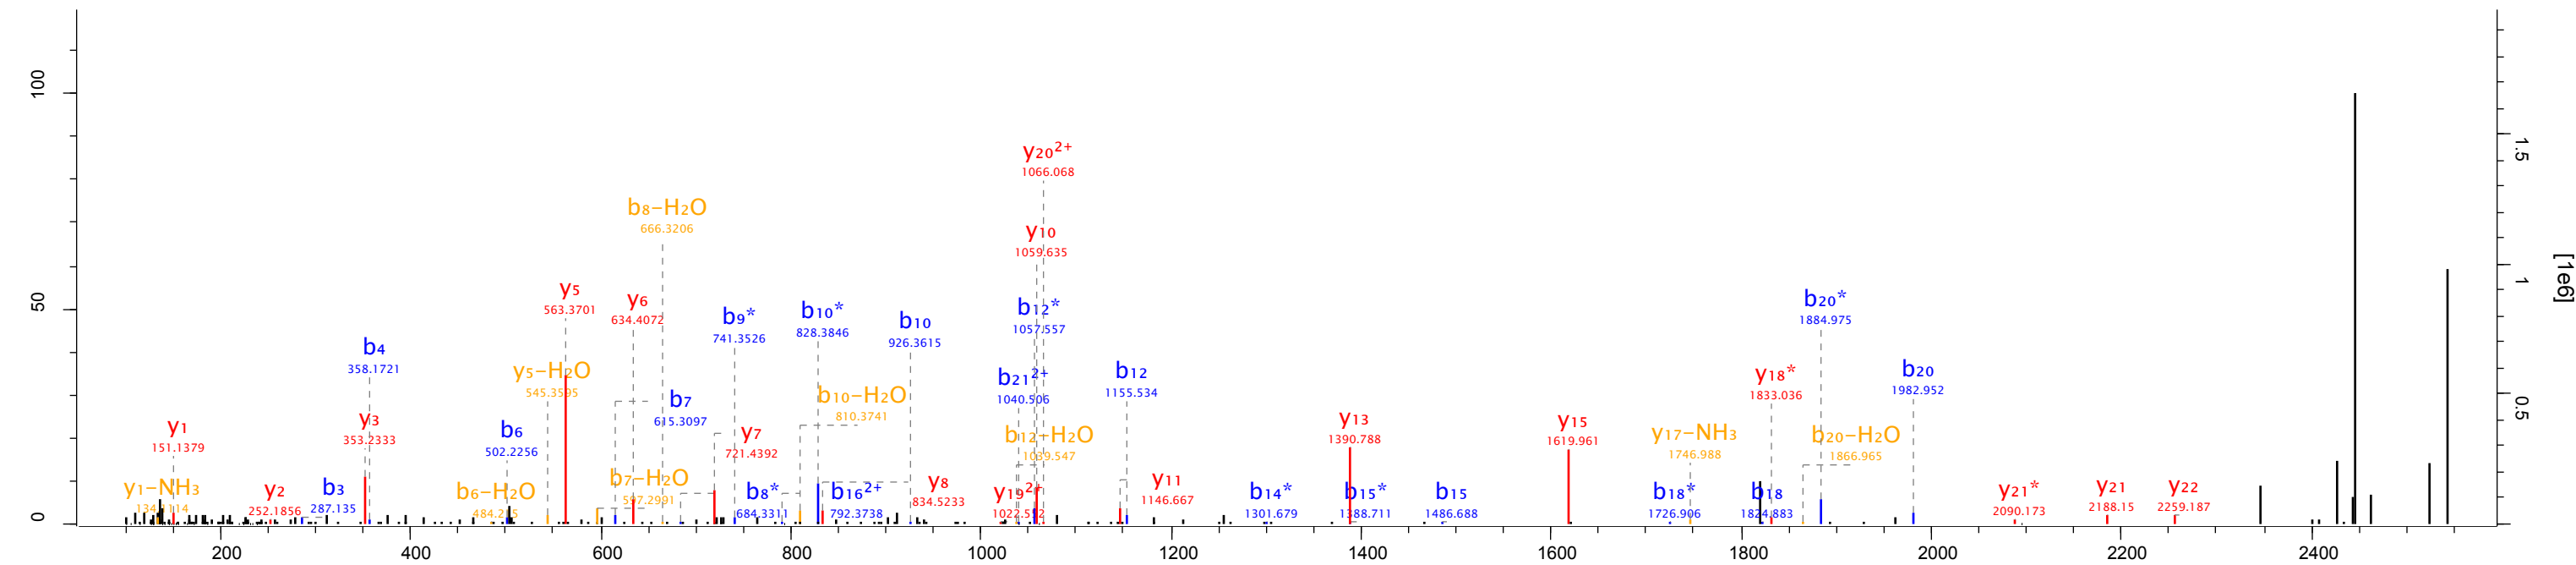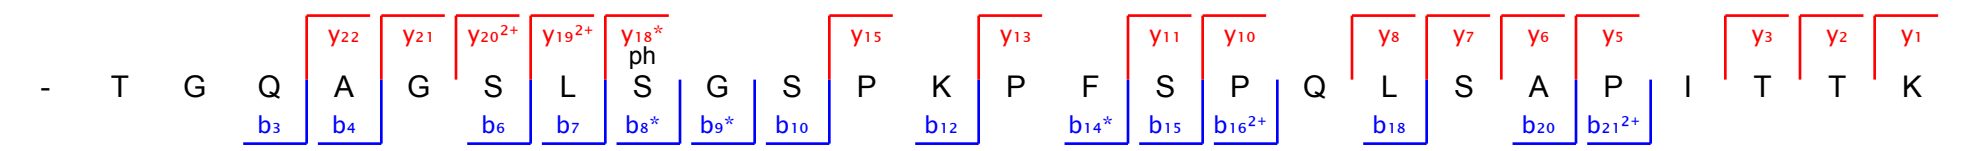



Raw file 20150814\_A375SR\_Phospho\_BR2\_04 Scan 18805 Method FTMS; HCD Score 82.7 m/z 927.07 Gene names ARID1A

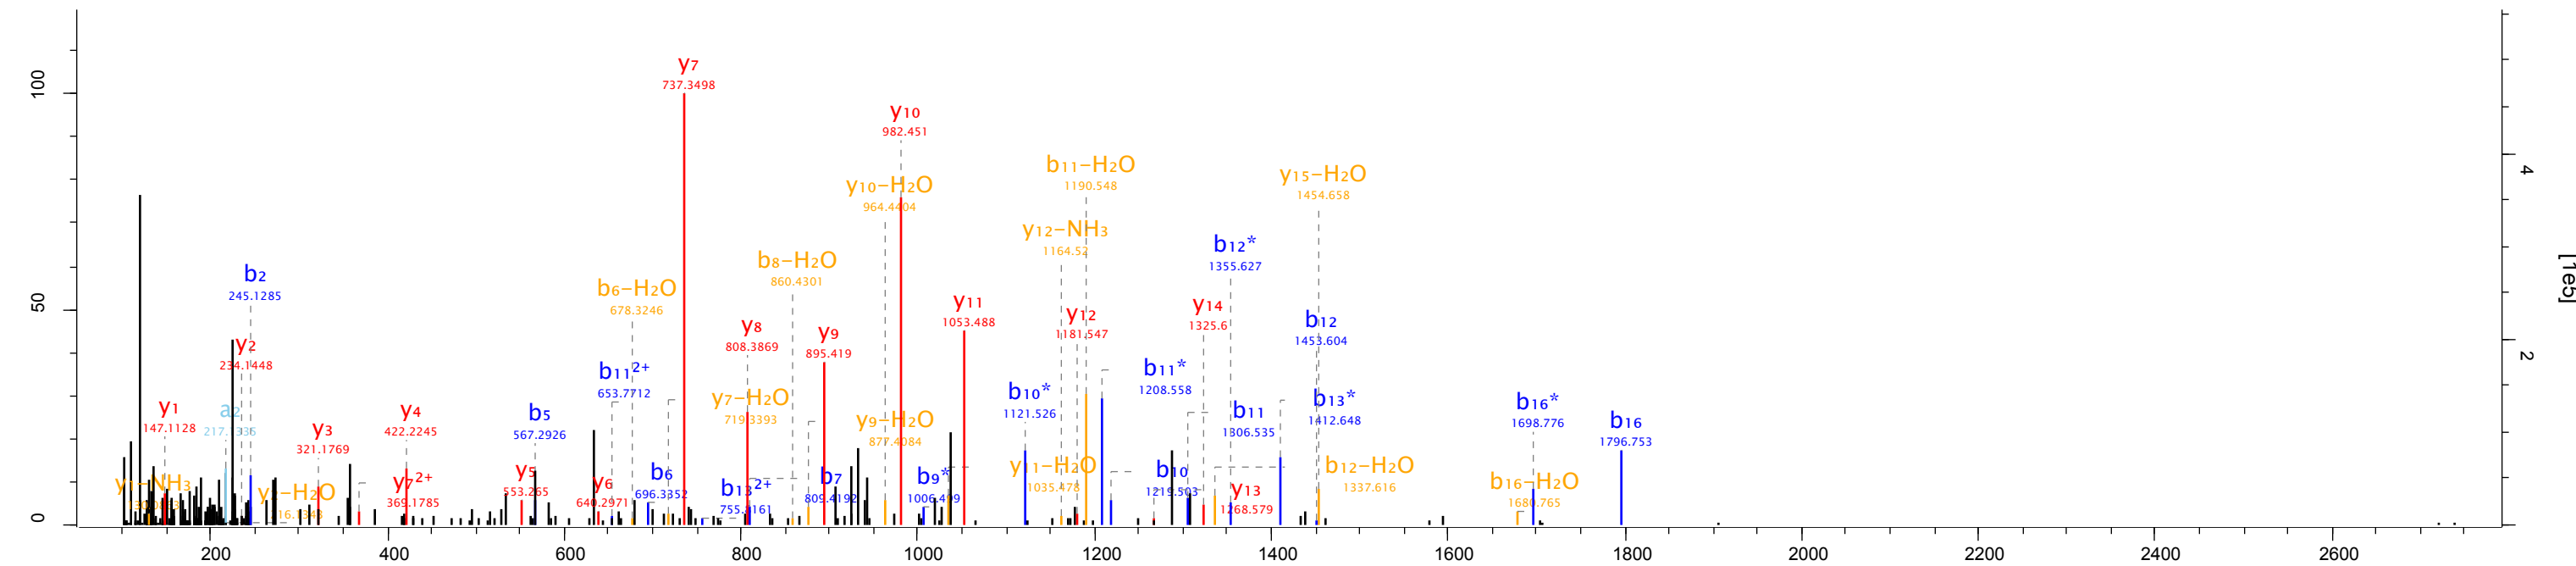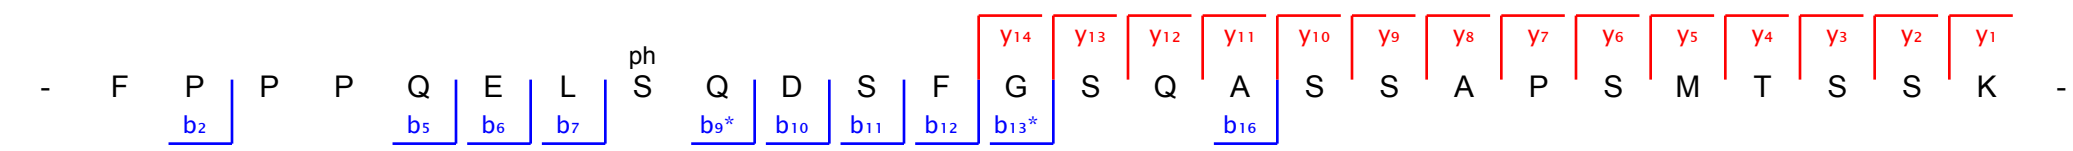

Raw file Scan Method m/z Gene names  
 20150814\_A375SR\_Phospho\_BR2\_04 18925 FTMS; HCD 218.19 822.71 SOX9

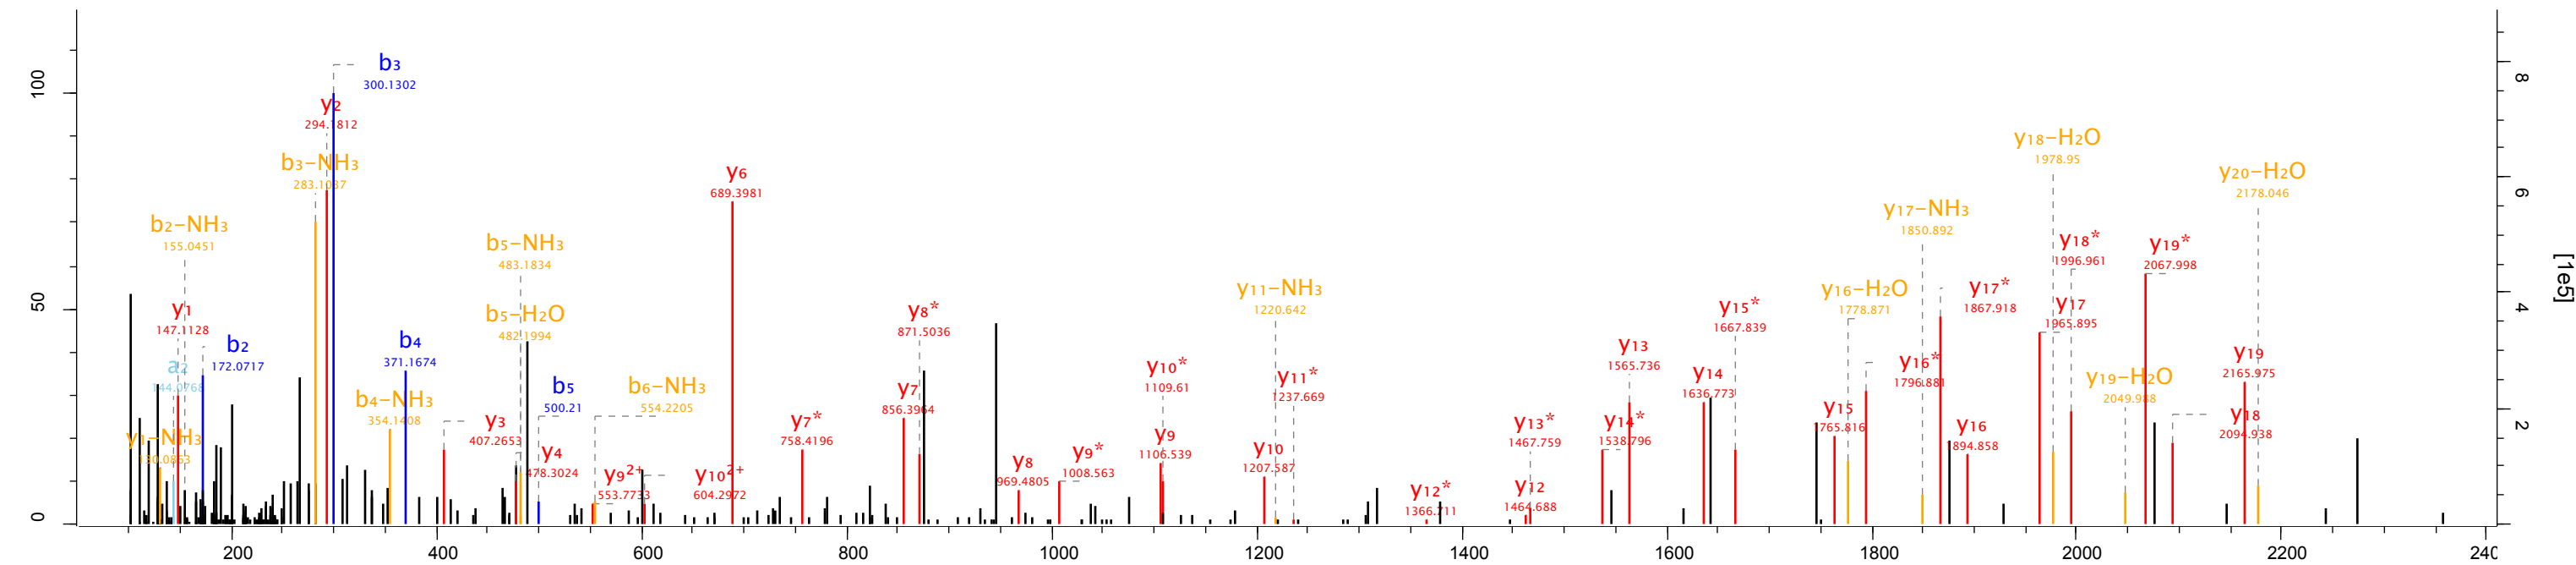

- N G Q A E A E E A T E Q T H I S P N A I F K -

Fragmentation labels below the sequence:

- b<sub>2</sub> (under G)
- b<sub>3</sub> (under Q)
- b<sub>4</sub> (under A)
- b<sub>5</sub> (under E)
- y<sub>1</sub> (under K)
- y<sub>2</sub> (under F)
- y<sub>3</sub> (under I)
- y<sub>4</sub> (under N)
- y<sub>6</sub> (under P)
- y<sub>7</sub> (under S)
- y<sub>8</sub> (under I)
- y<sub>9</sub> (under H)
- y<sub>10</sub> (under T)
- y<sub>11</sub>\* (under Q)
- y<sub>12</sub> (under E)
- y<sub>13</sub> (under T)
- y<sub>14</sub> (under A)
- y<sub>15</sub> (under E)
- y<sub>16</sub> (under E)
- y<sub>17</sub> (under A)
- y<sub>18</sub> (under E)
- y<sub>19</sub> (under A)

Raw file 20150814\_A375SR\_Phospho\_BR2\_04 Scan 18935 Method FTMS; HCD Score 50.44 m/z 985.47 Gene names TBC1D22A

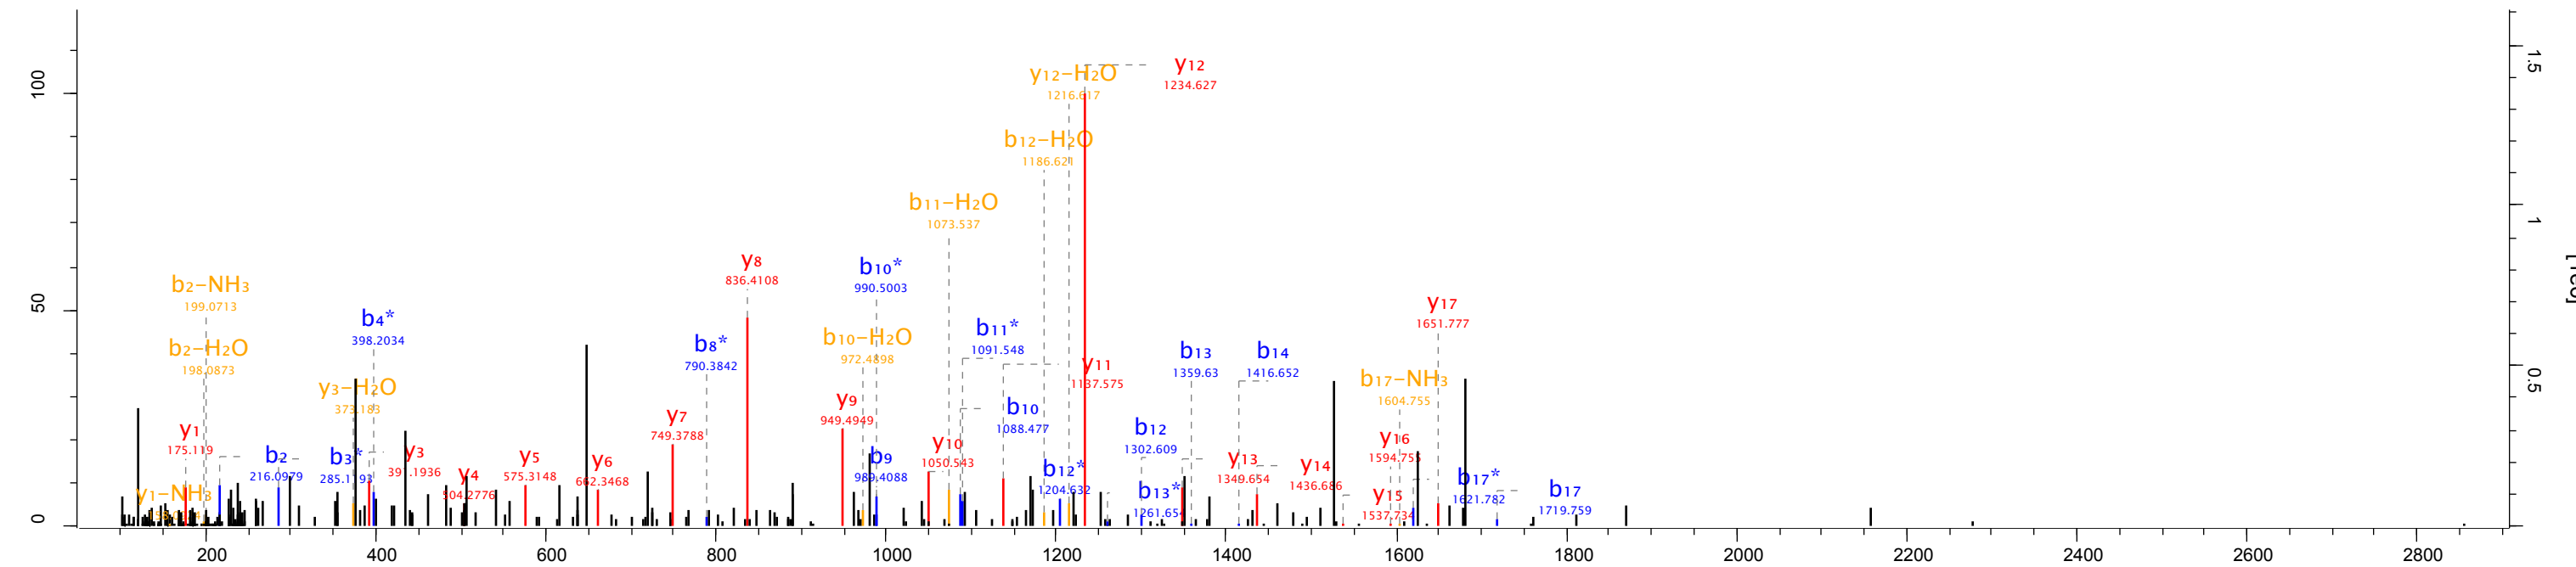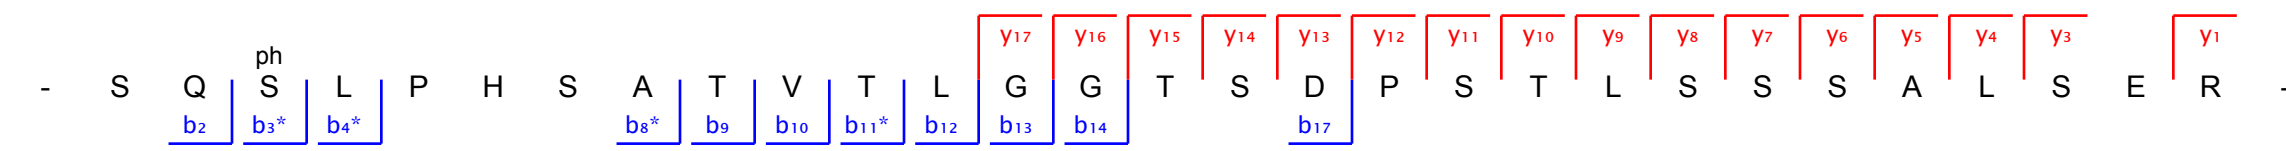

Raw file: 20150814\_A375SR\_Phospho\_BR2\_04  
 Scan: 19205  
 Method: FTMS; HCD  
 Score: 120.33  
 m/z: 912.97  
 Gene names: TET2

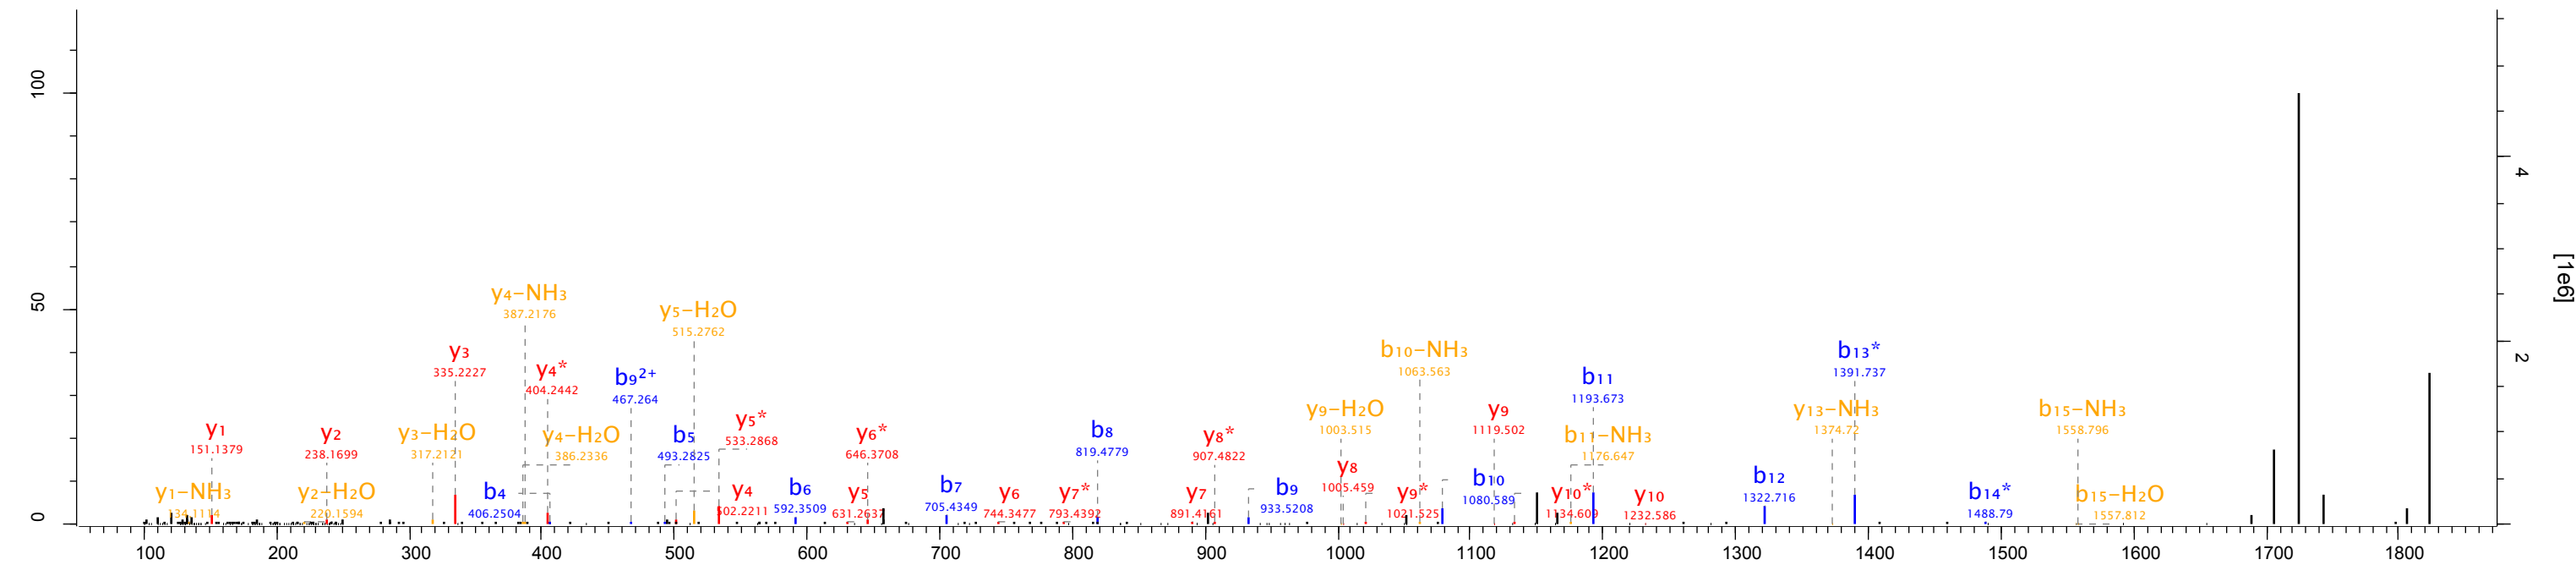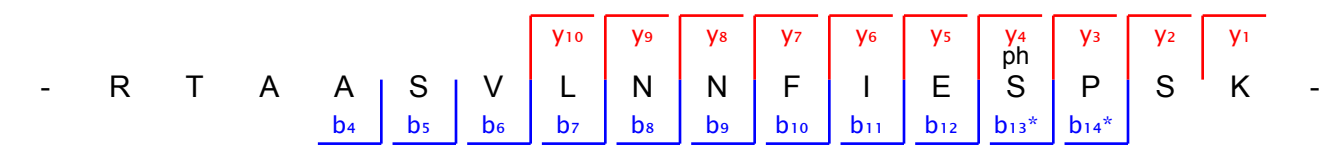

Raw file: 20150814\_A375SR\_Phospho\_BR2\_04  
 Scan: 20005 Method: FTMS; HCD Score: 183.93 m/z: 1006.14 Gene names: LMO7

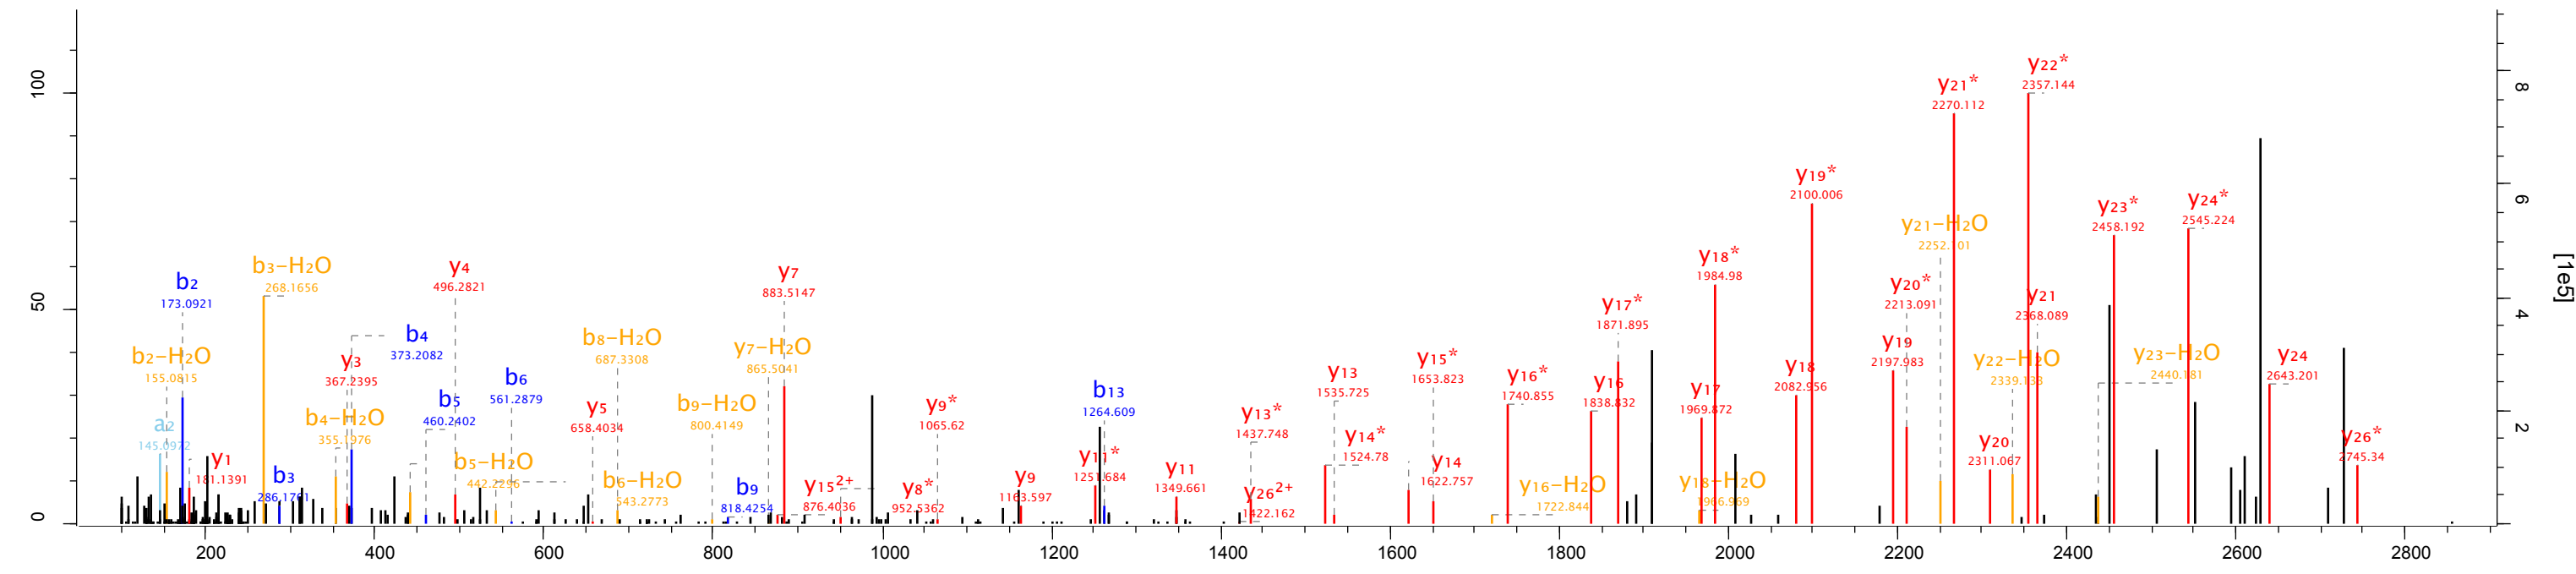

Protein sequence: - A T L S S T S G L D L M S E S G E G E I S P Q R E V S R -

Fragmentation sites (b and y ions) are indicated by brackets below the sequence:

- b ions (blue brackets):** b<sub>2</sub> (under T), b<sub>3</sub> (under L), b<sub>4</sub> (under S), b<sub>5</sub> (under S), b<sub>6</sub> (under T), b<sub>9</sub> (under L), b<sub>13</sub> (under S).
- y ions (red brackets):** y<sub>26</sub>\* (under L), y<sub>24</sub> (under S), y<sub>23</sub>\* (under T), y<sub>22</sub>\* (under S), y<sub>21</sub> (under G), y<sub>20</sub> (under L), y<sub>19</sub> (under D), y<sub>18</sub> (under L), y<sub>17</sub> (under M), y<sub>16</sub> (under S), y<sub>15</sub>\* (under E), y<sub>14</sub> (under S), y<sub>13</sub> (under G), y<sub>11</sub> (under G), y<sub>9</sub> (under I), y<sub>8</sub>\* (under S), y<sub>7</sub> (under P), y<sub>5</sub> (under R), y<sub>4</sub> (under E), y<sub>3</sub> (under V), y<sub>1</sub> (under S).

Raw file: 20150814\_A375SR\_Phospho\_BR2\_04  
 Scan: 20905 Method: FTMS; HCD Score: 220.37 m/z: 1255.89 Gene names: TNS1

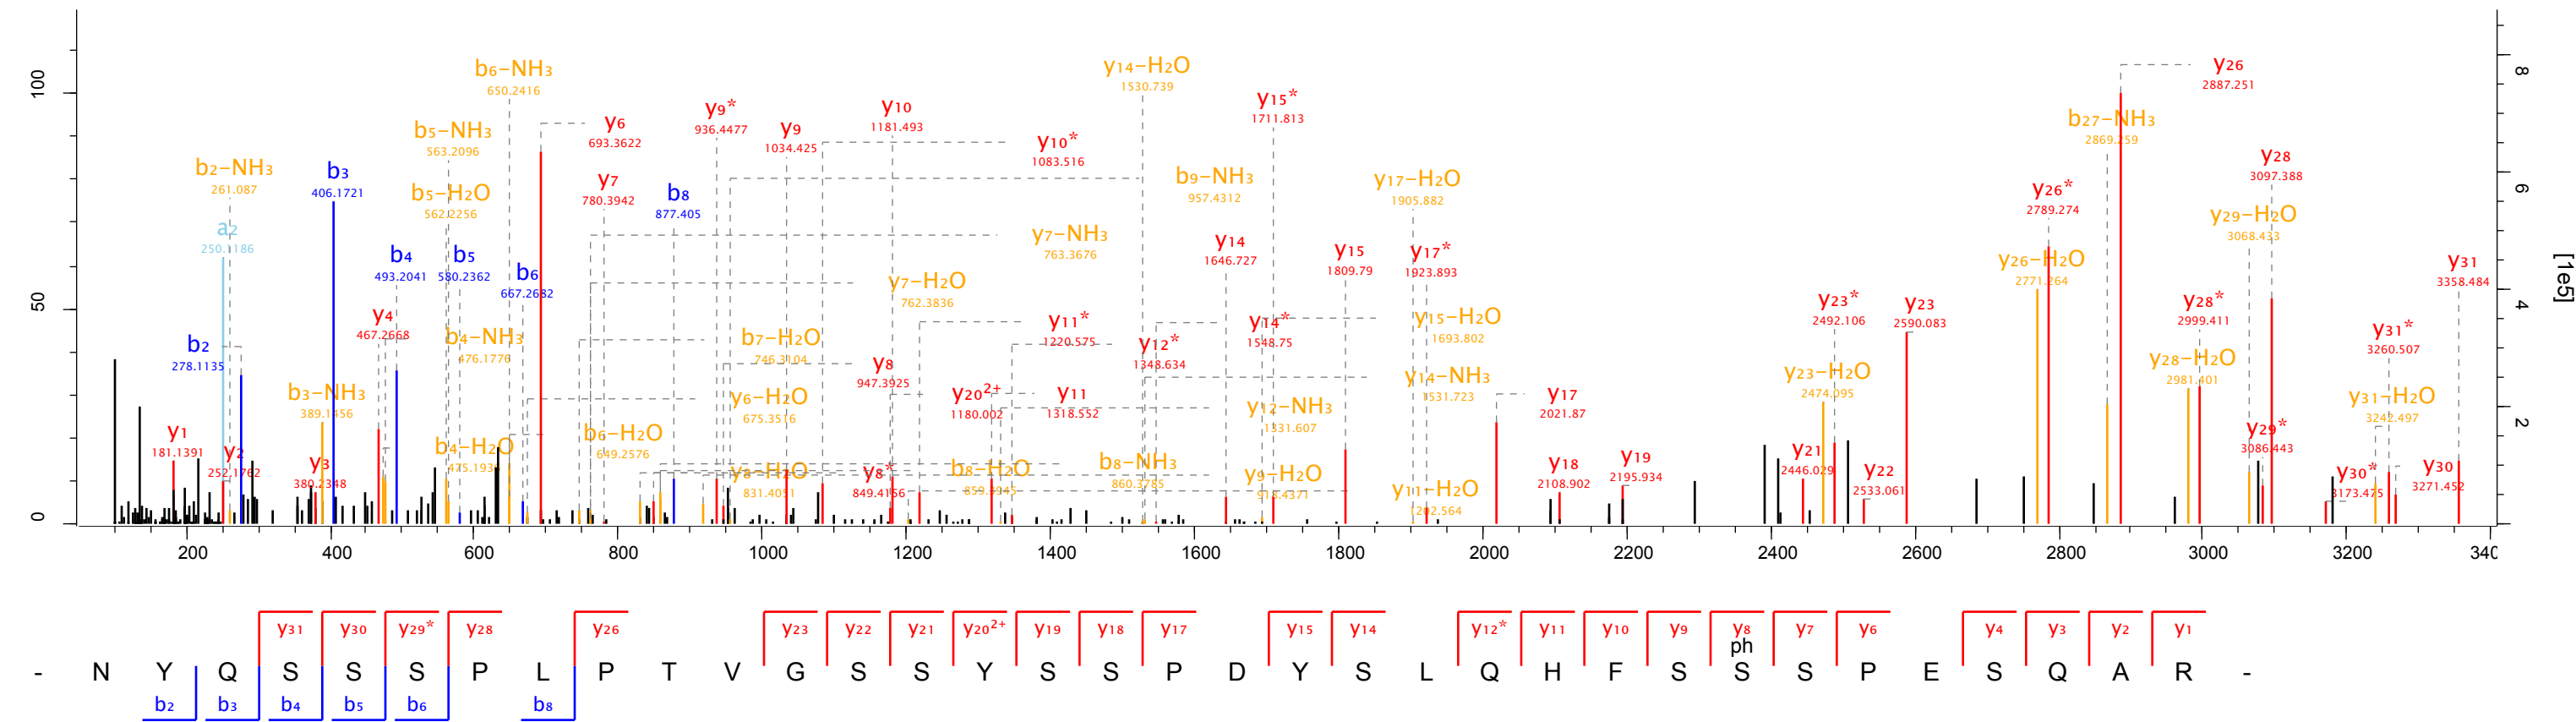

Raw file: 20150814\_A375SR\_Phospho\_BR2\_04  
 Scan: 21045 Method: FTMS; HCD Score: 60.82 m/z: 1003.41 Gene names: CKAP5

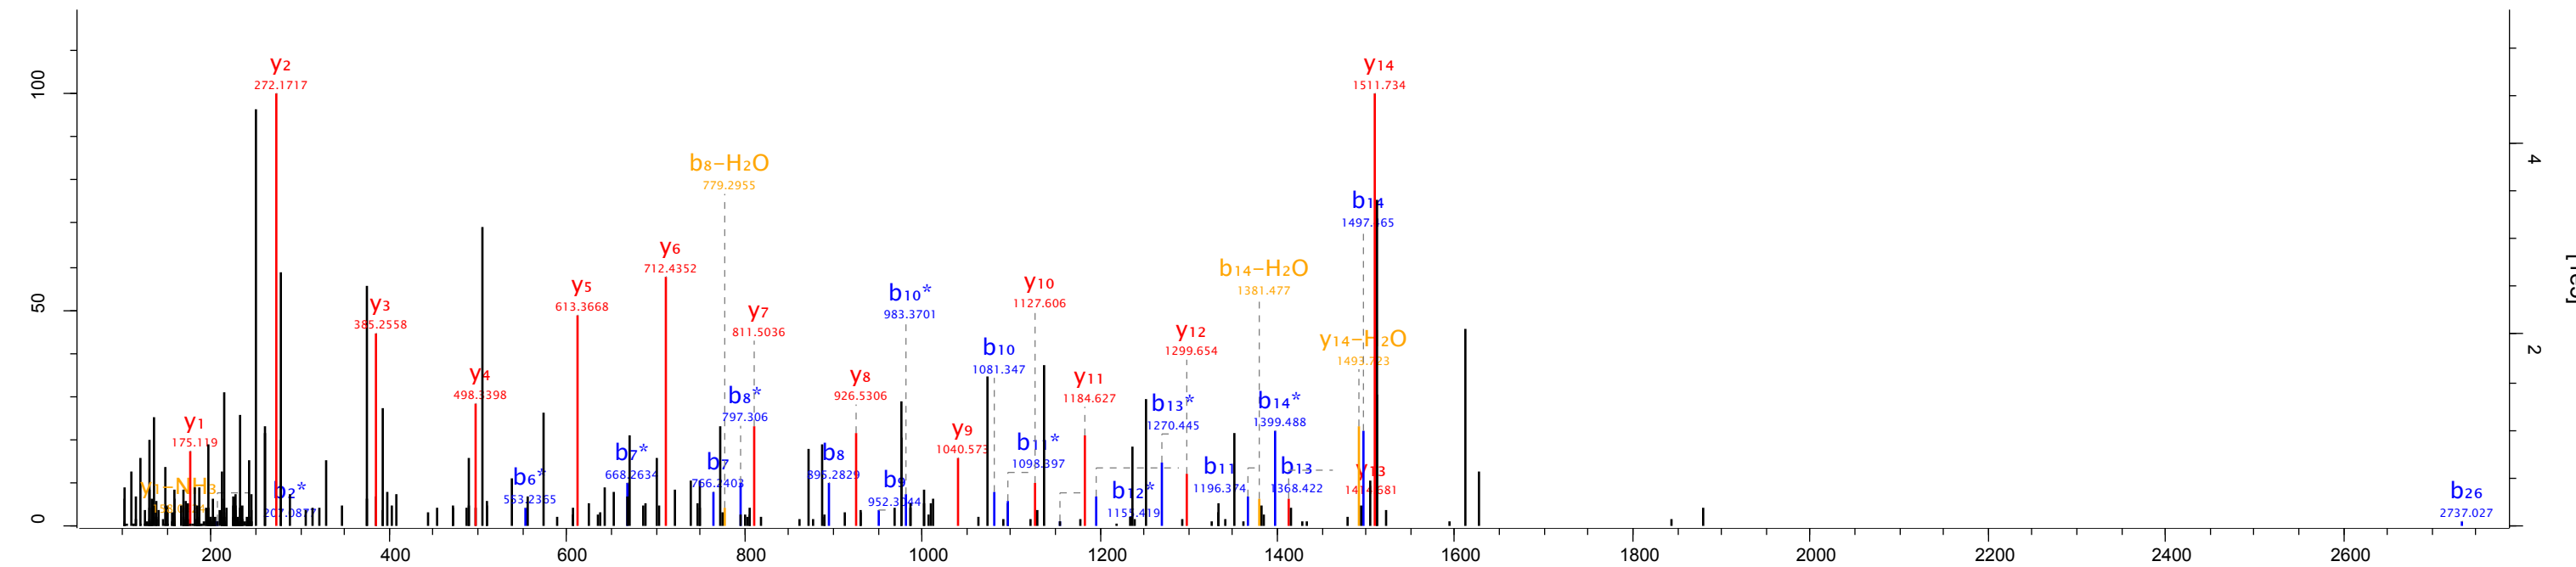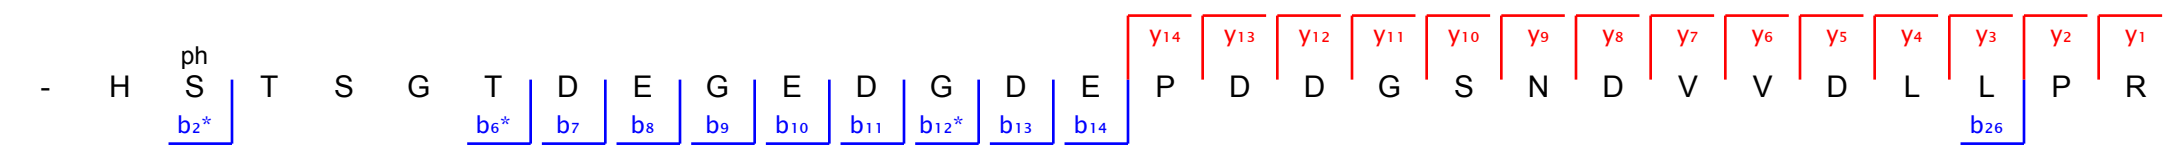

Raw file: 20150814\_A375SR\_Phospho\_BR2\_04  
 Scan: 21575 Method: FTMS; HCD Score: 66.77 m/z: 1023.47 Gene names: SMC3

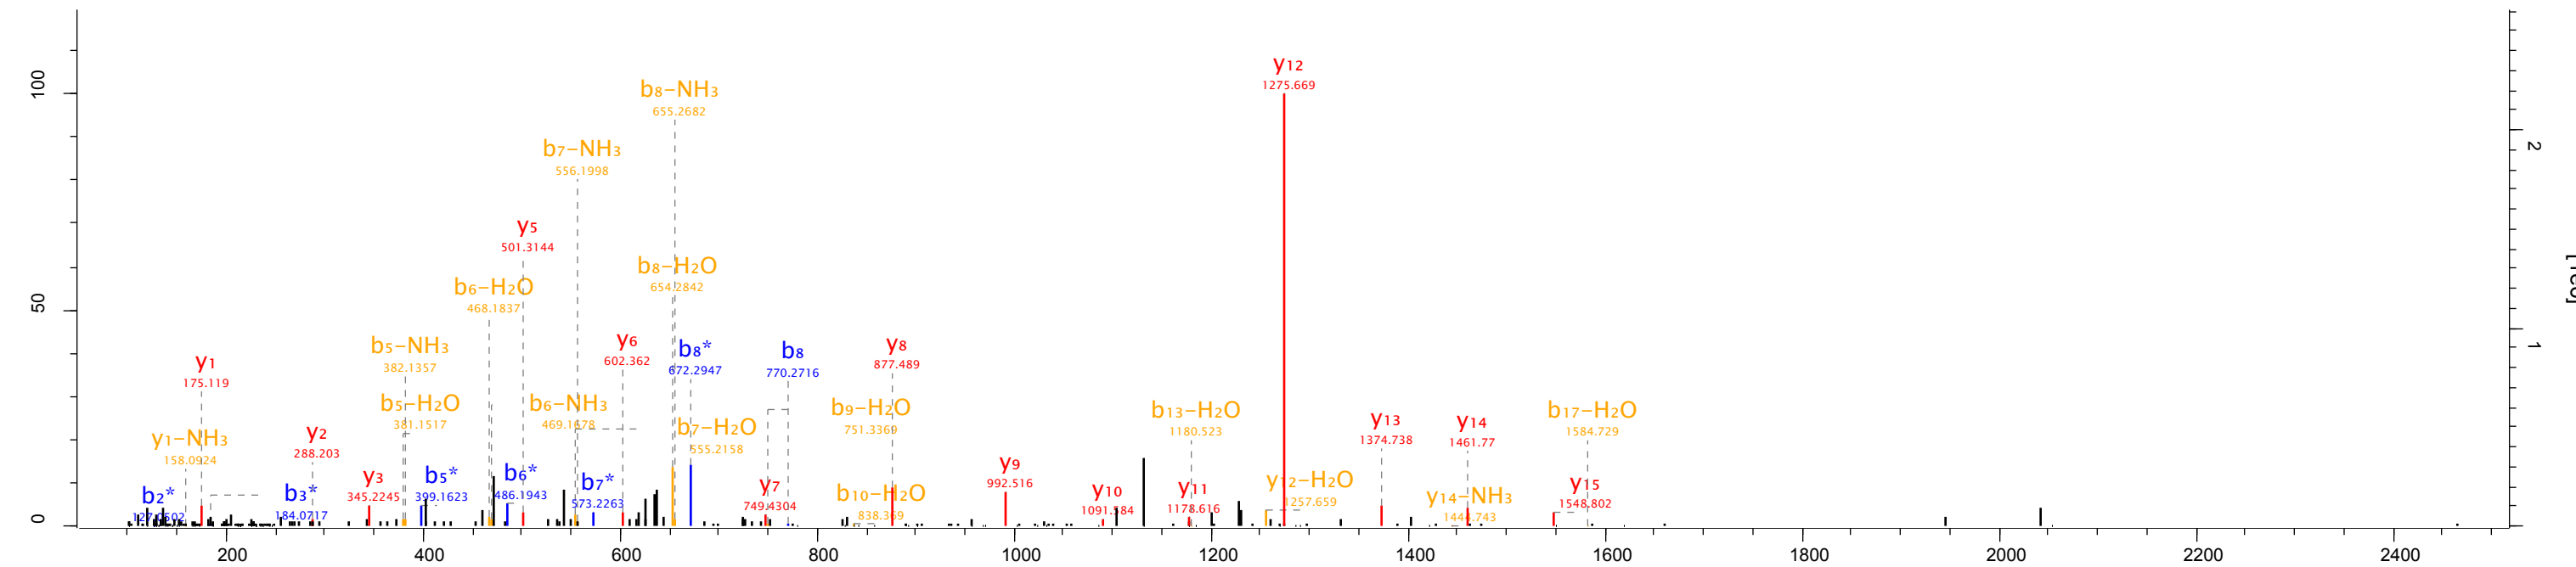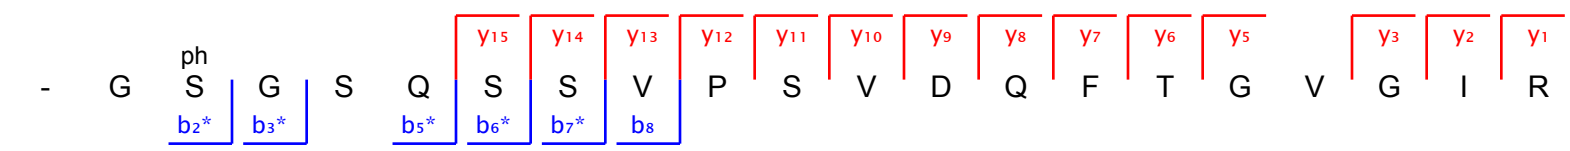



Raw file 20150814\_A375SR\_Phospho\_BR2\_04 Scan 21705 Method FTMS; HCD Score 68.04 m/z 976.52 Gene names ATF7IP

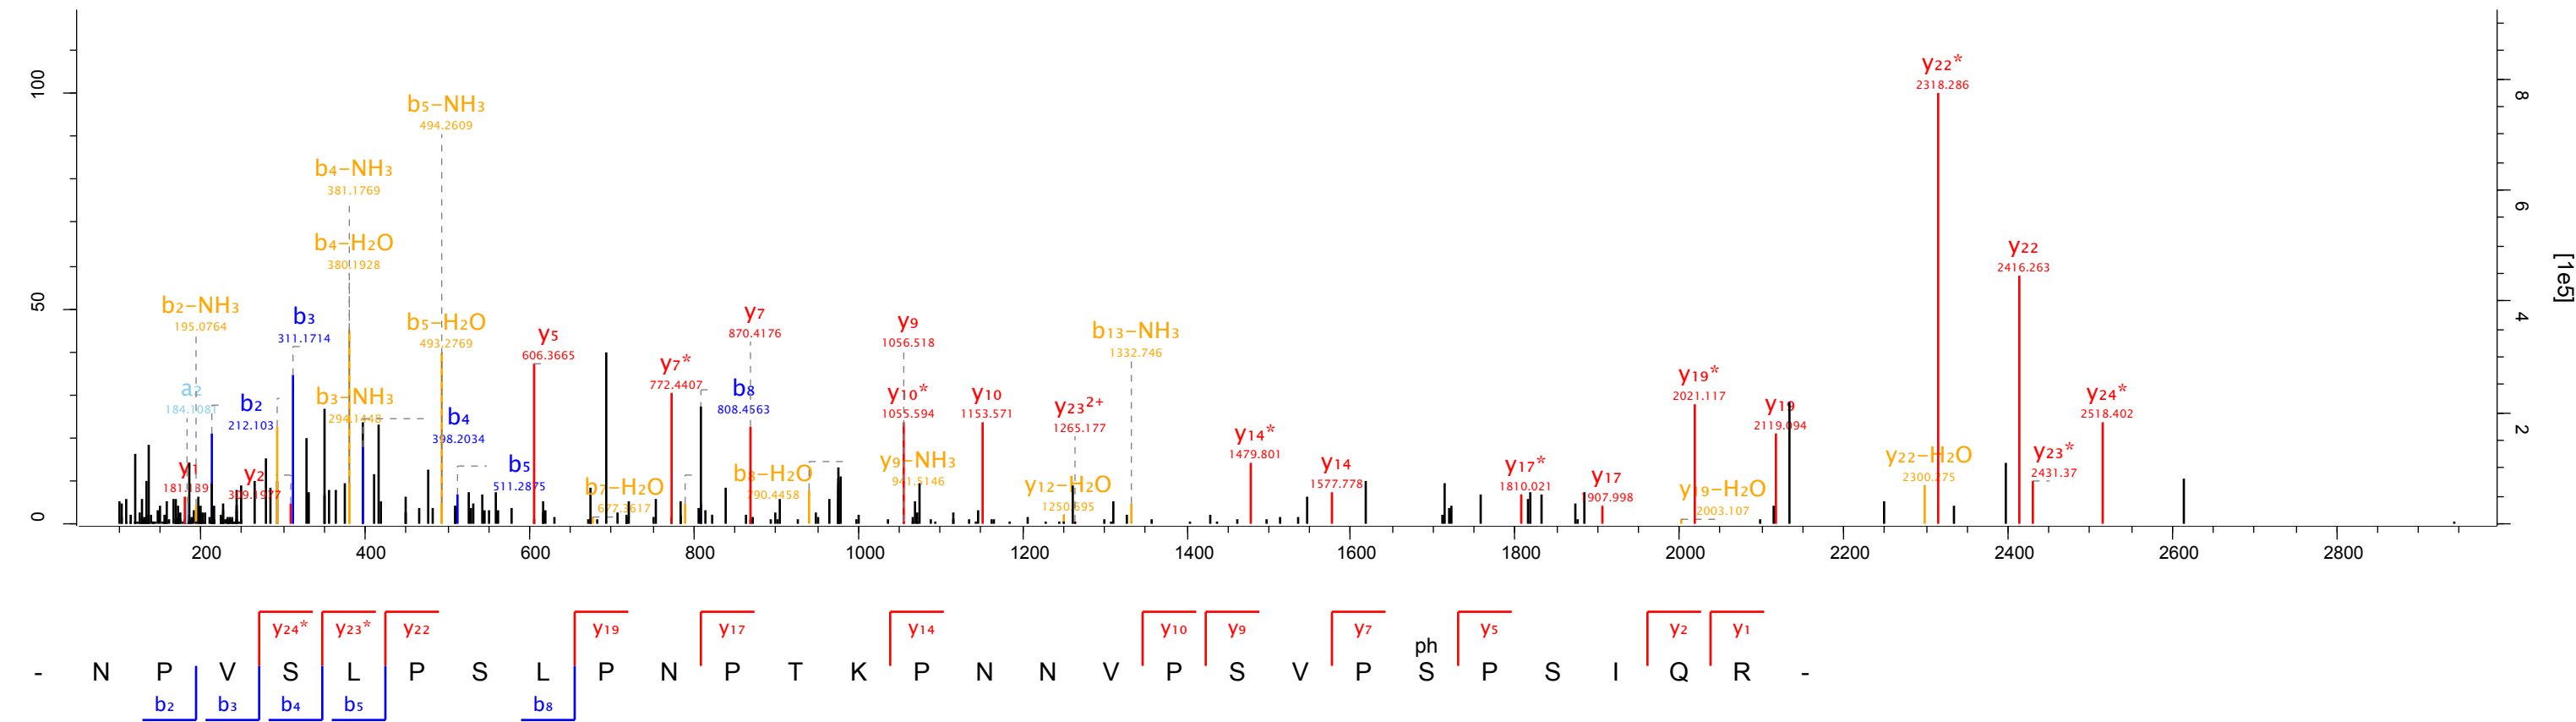

Raw file  
 20150814\_A375SR\_Phospho\_BR2\_04  
 Scan 21895 Method FTMS; HCD Score 81.88 m/z 956.09 Gene names FTSJ3

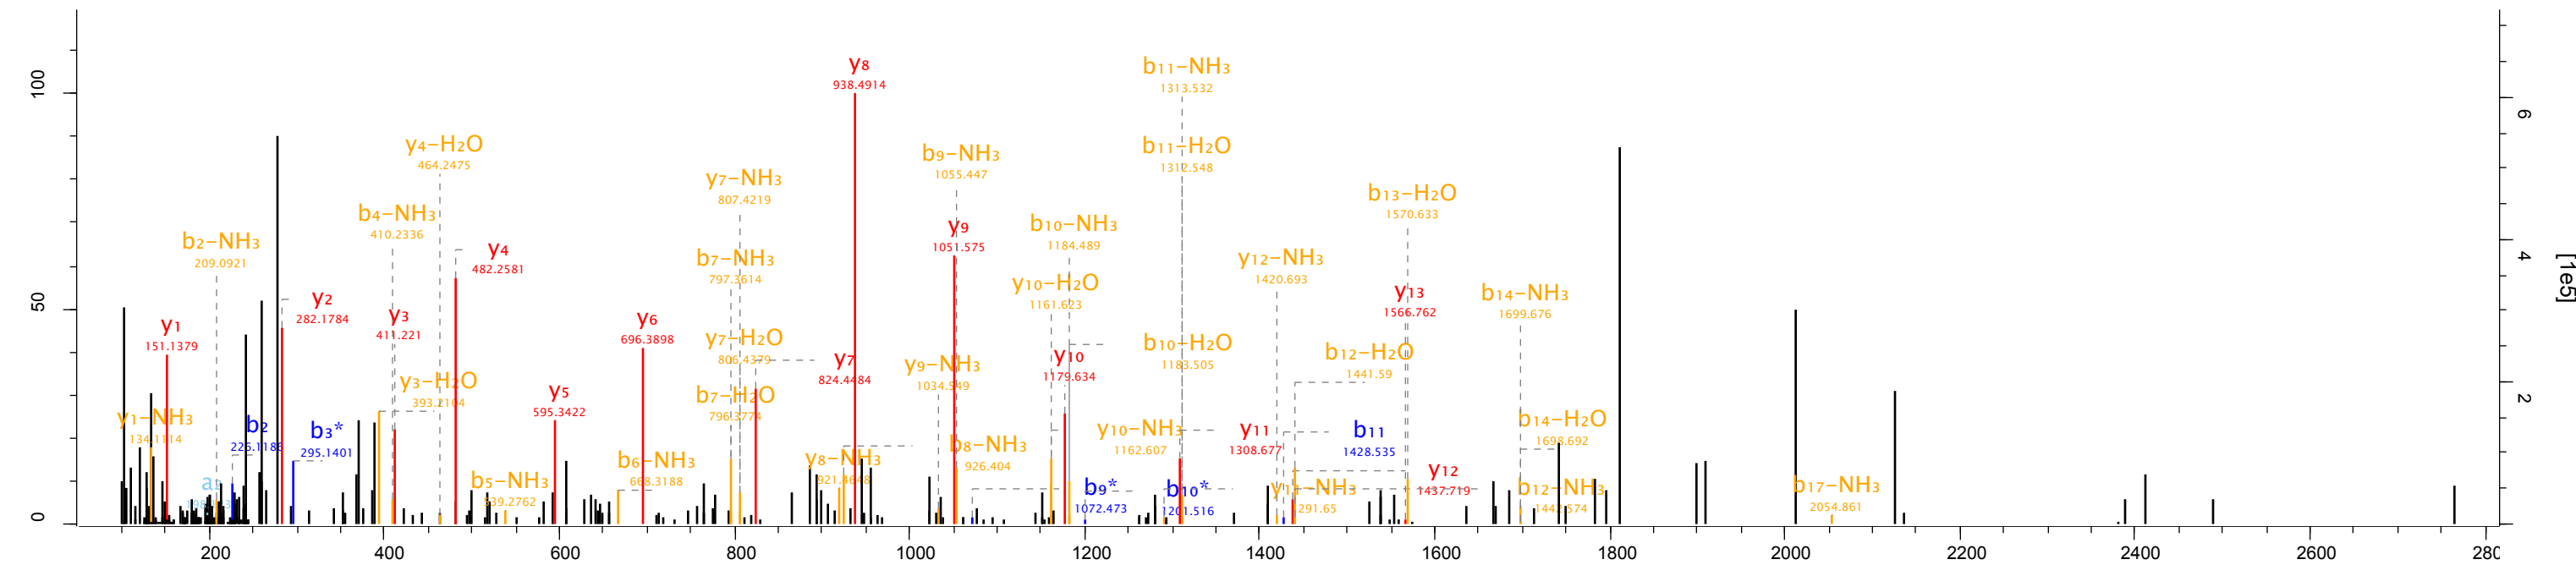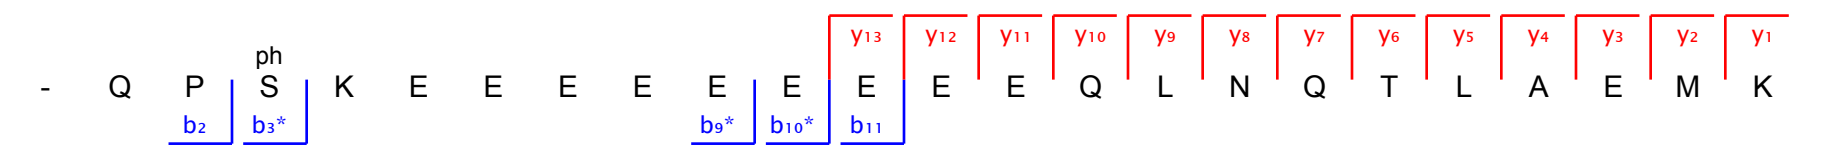

Raw file: 20150814\_A375SR\_Phospho\_BR2\_04  
 Scan: 22685 Method: FTMS; HCD Score: 136.77 m/z: 1032.01 Gene names: NR3C1

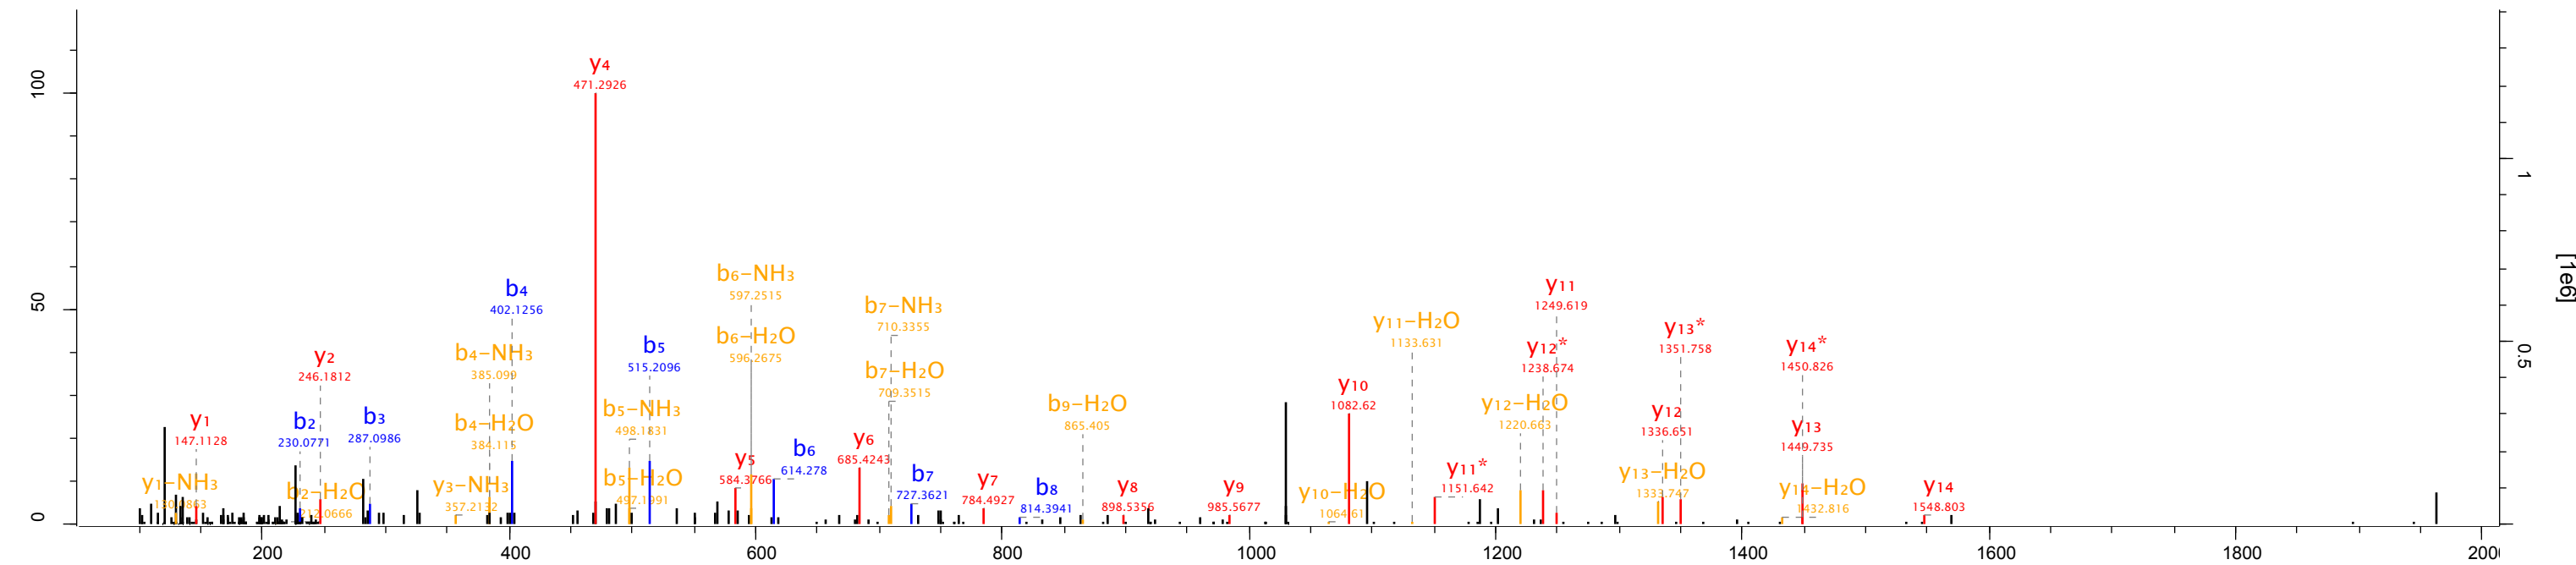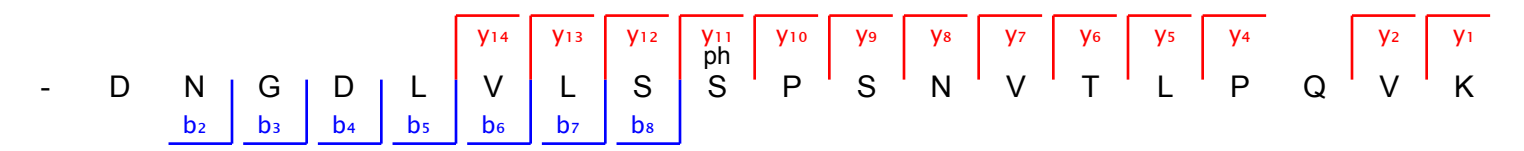

Raw file: 20150814\_A375SR\_Phospho\_BR2\_04  
 Scan: 22855 Method: FTMS; HCD Score: 156.4 m/z: 856.39 Gene names: DPYSL3

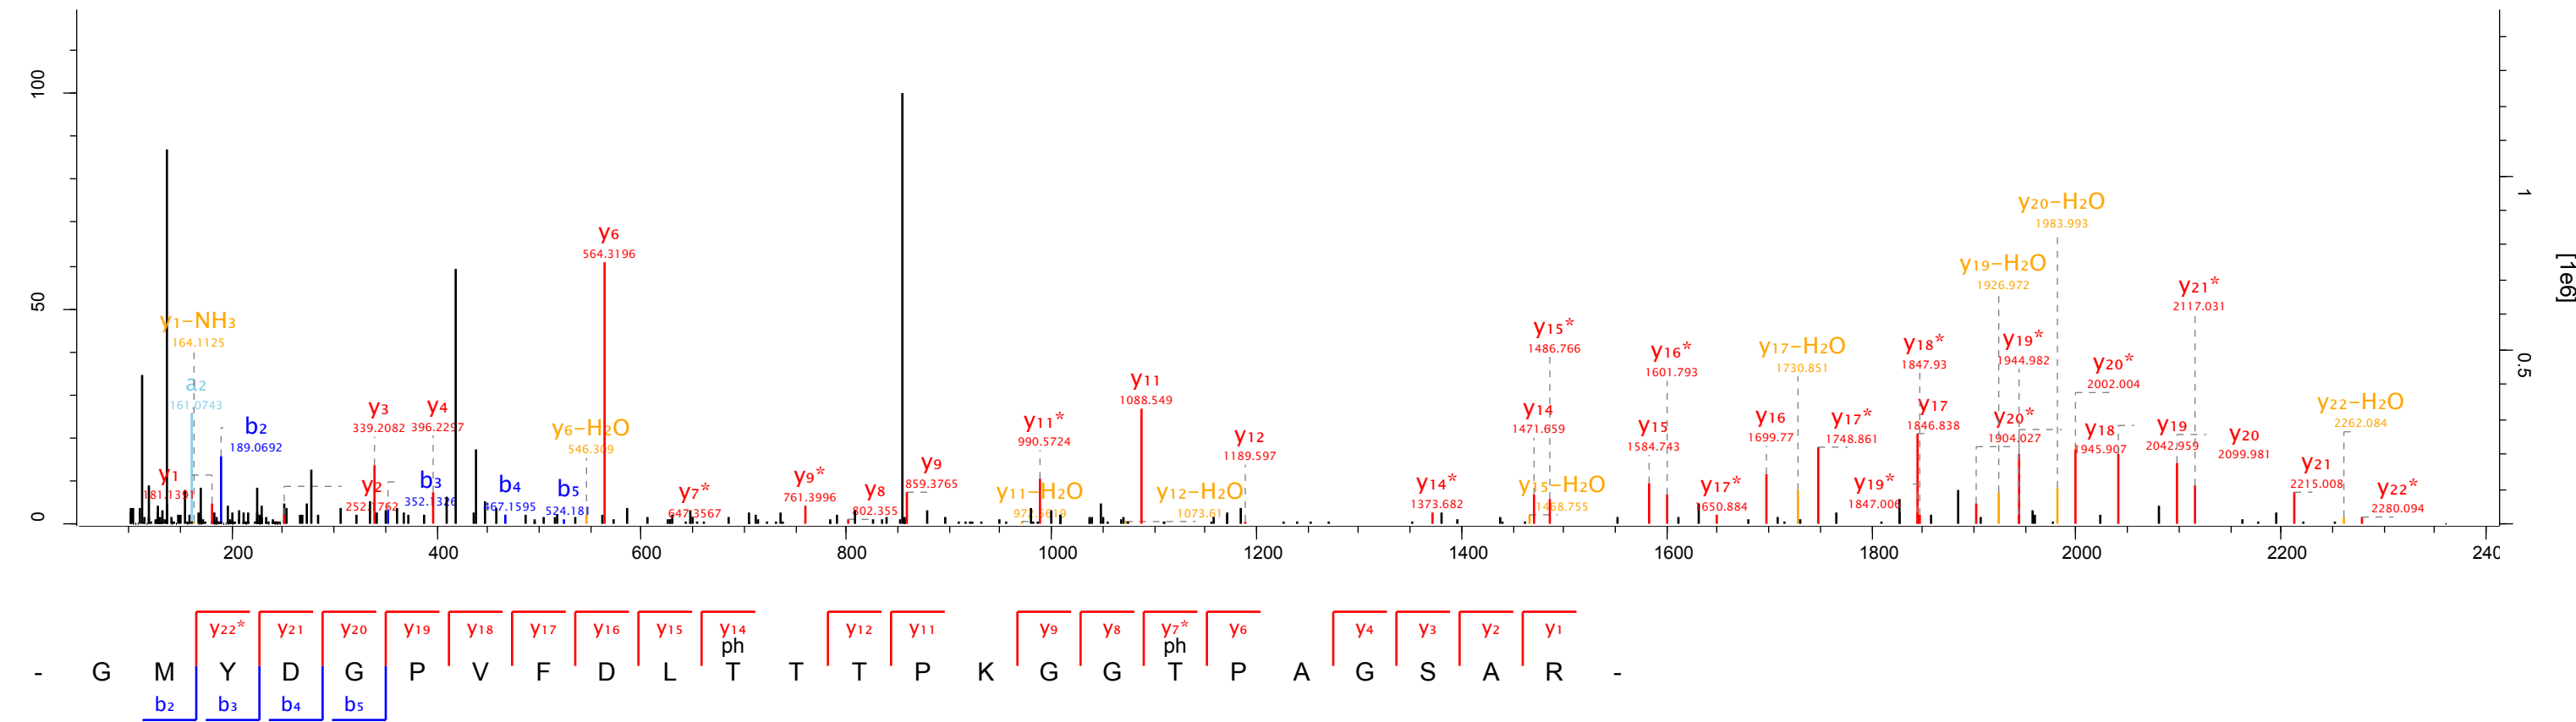

Raw file: 20150814\_A375SR\_Phospho\_BR2\_04  
 Scan: 23125 Method: FTMS; HCD Score: 130.95 m/z: 760.39 Gene names: KIAA1217

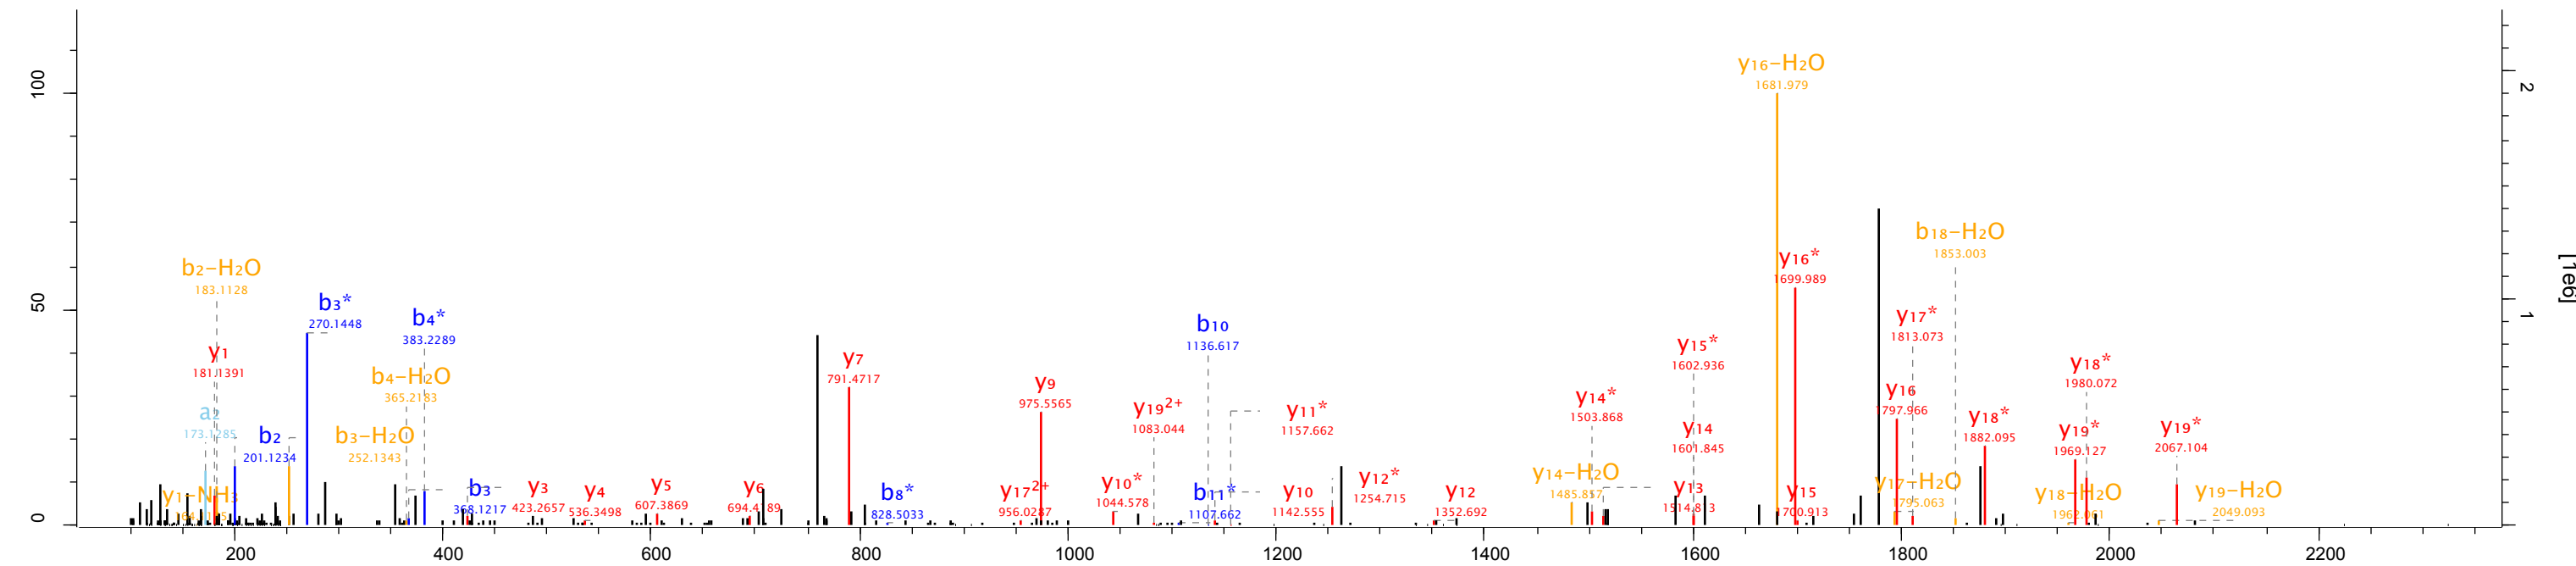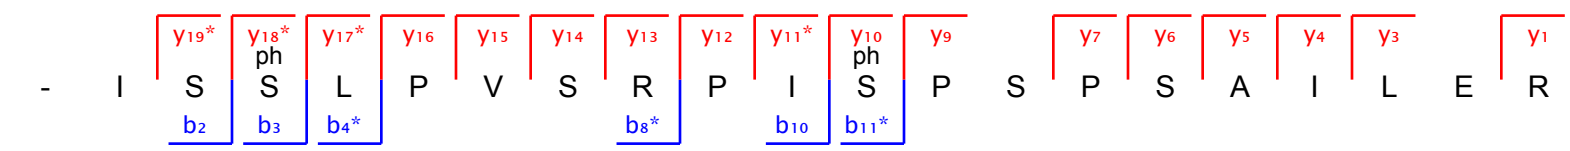

Raw file 20150814\_A375SR\_Phospho\_BR2\_04 Scan 23345 Method FTMS; HCD Score 75.13 m/z 1015.79 Gene names IRAK4

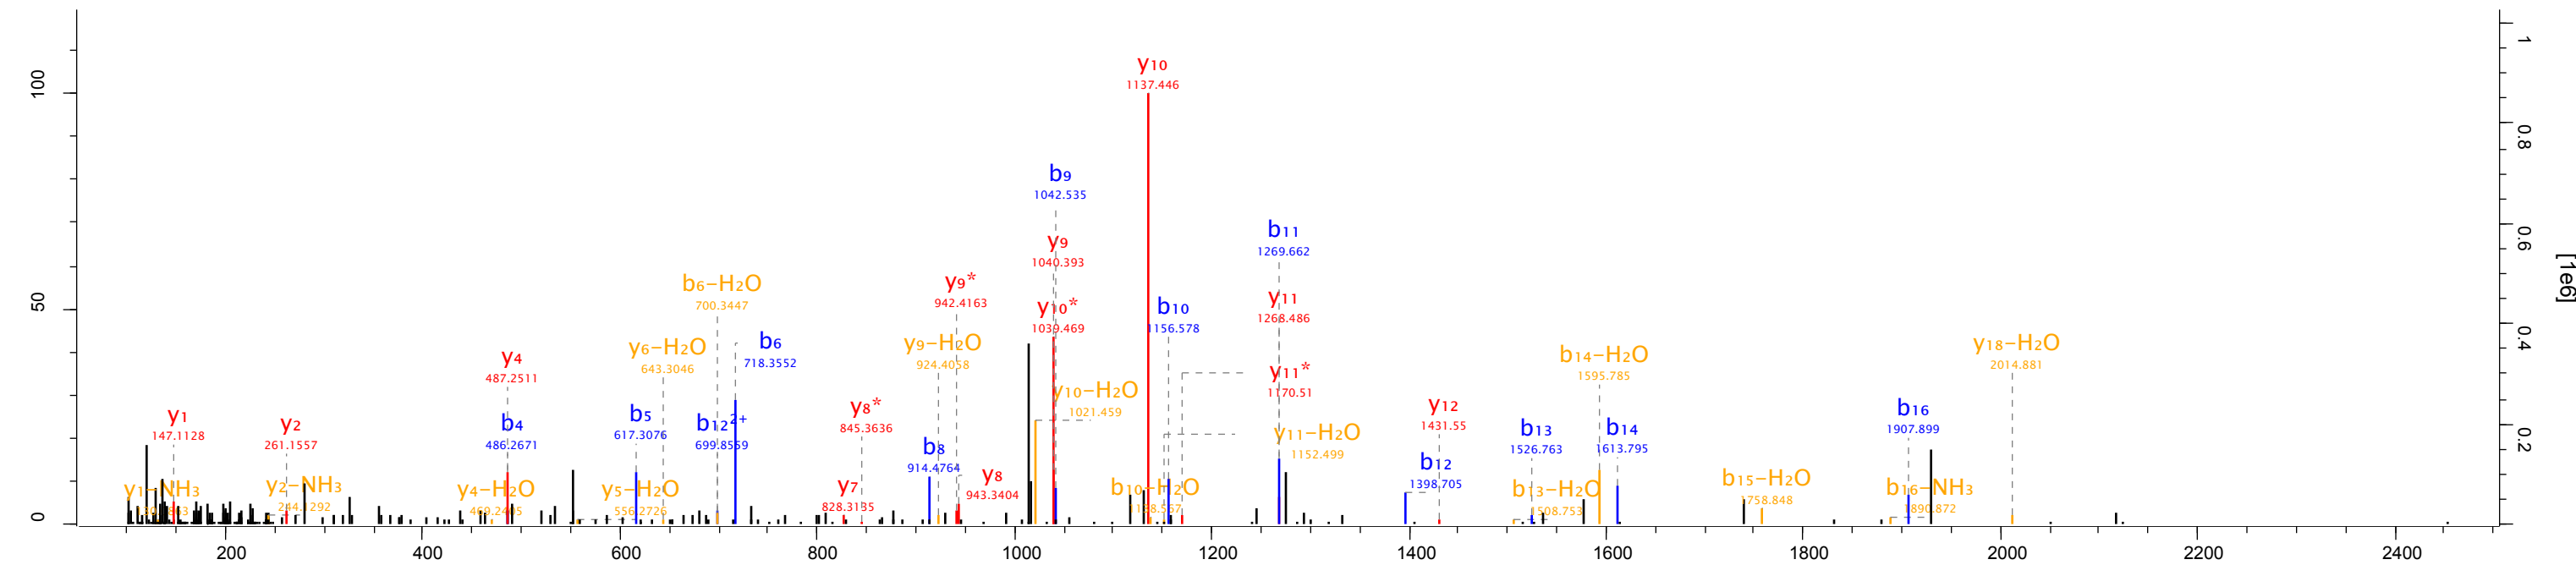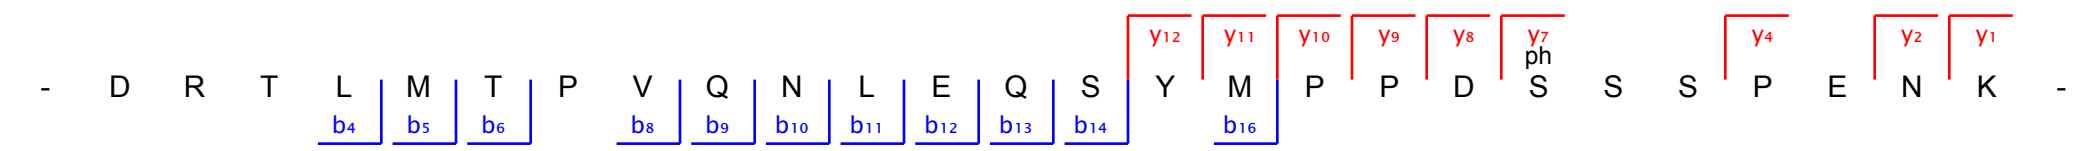

Raw file: 20150814\_A375SR\_Phospho\_BR2\_04  
 Scan: 23535 Method: FTMS; HCD Score: 105.06 m/z: 817.35 Gene names: SEPSECS

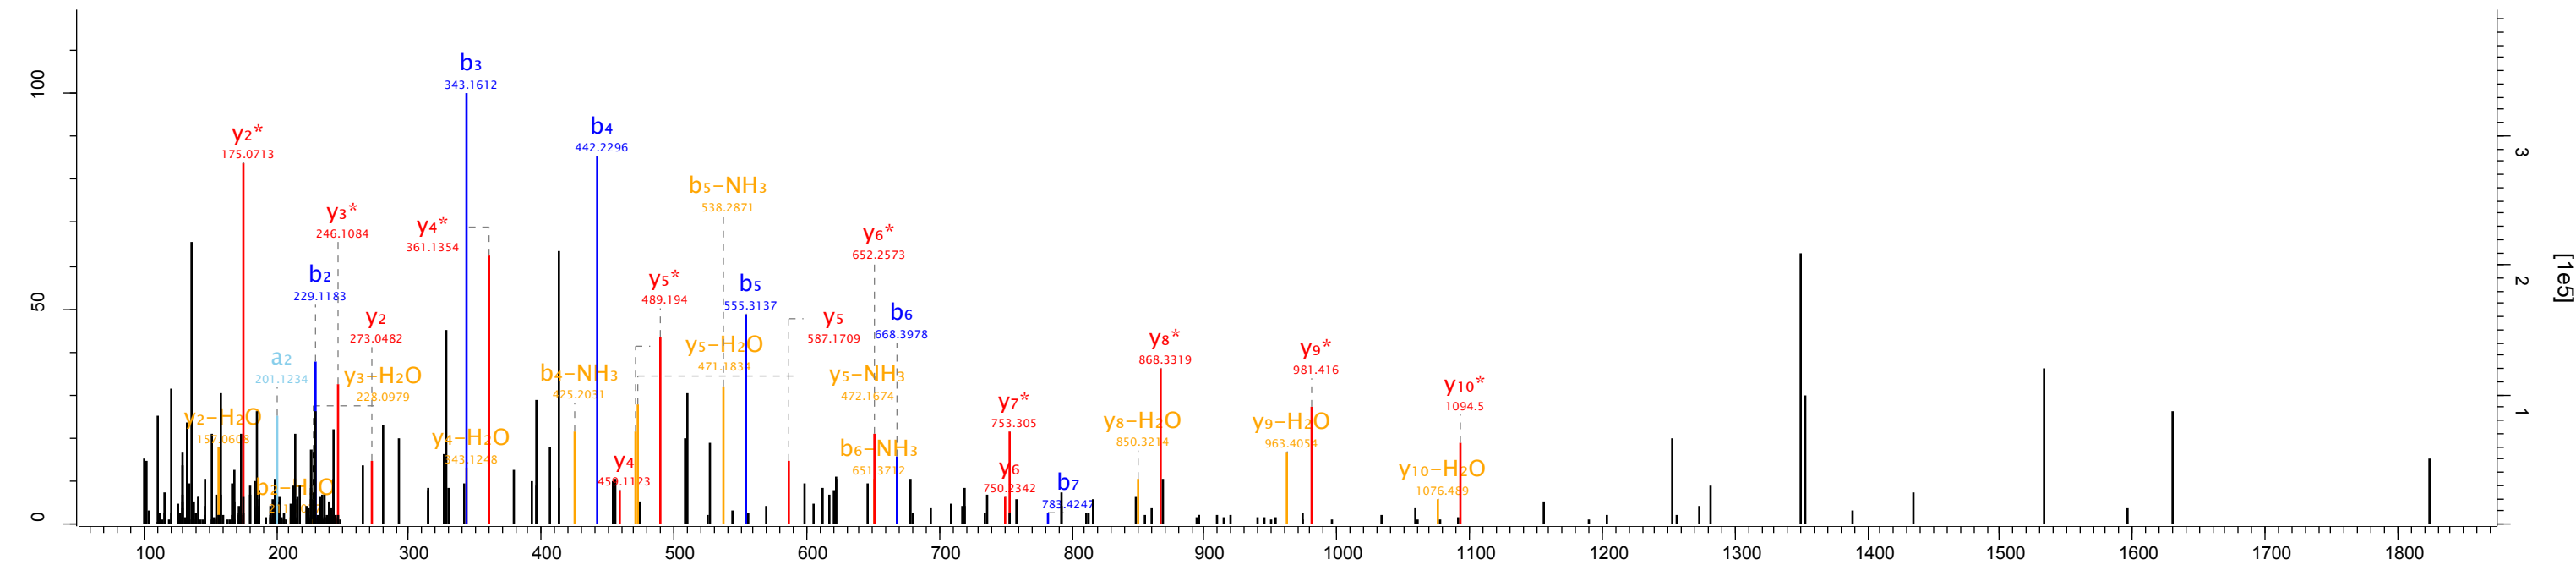

Peptide sequence: L D N V L L D T Y Q D A S S

Fragmentation sites (b-ions):

- b<sub>2</sub> (between D and N)
- b<sub>3</sub> (between N and V)
- b<sub>4</sub> (between V and L)
- b<sub>5</sub> (between L and L)
- b<sub>6</sub> (between L and D)
- b<sub>7</sub> (between D and T)

Fragmentation sites (y-ions):

- y<sub>2</sub> (between S and A)
- y<sub>3</sub> (between A and D)
- y<sub>4</sub> (between D and Y)
- y<sub>5</sub> (between Y and Q)
- y<sub>6</sub> (between Q and T)
- y<sub>7</sub> (between T and V)
- y<sub>8</sub> (between V and N)
- y<sub>9</sub> (between N and D)
- y<sub>10</sub> (between D and L)

Raw file Scan Method Score m/z Gene names  
 20150814\_A375SR\_Phospho\_BR2\_04 23585 FTMS; HCD 150.68 704.63 FAM83G

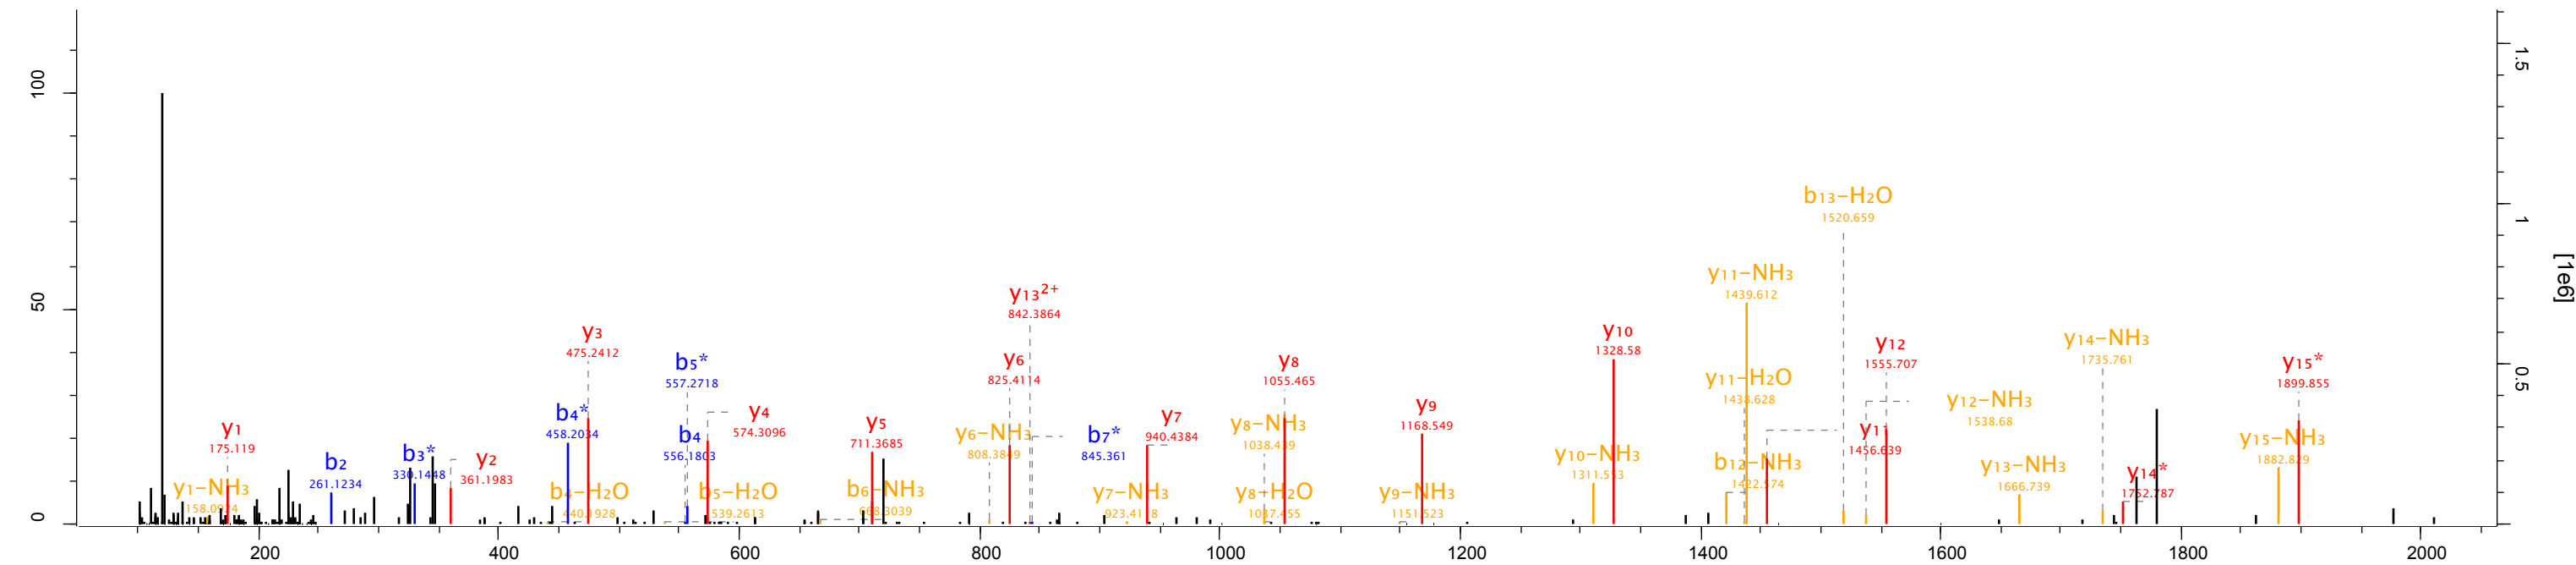

ac  
 - A F S Q V Q C L D D N H V N W R -  
 b2 b3\* b4 b5\* b7\*



Raw file: 20150814\_A375SR\_Phospho\_BR2\_04  
 Scan: 23965 Method: FTMS; HCD Score: 164.02 m/z: 863.4 Gene names: USP14

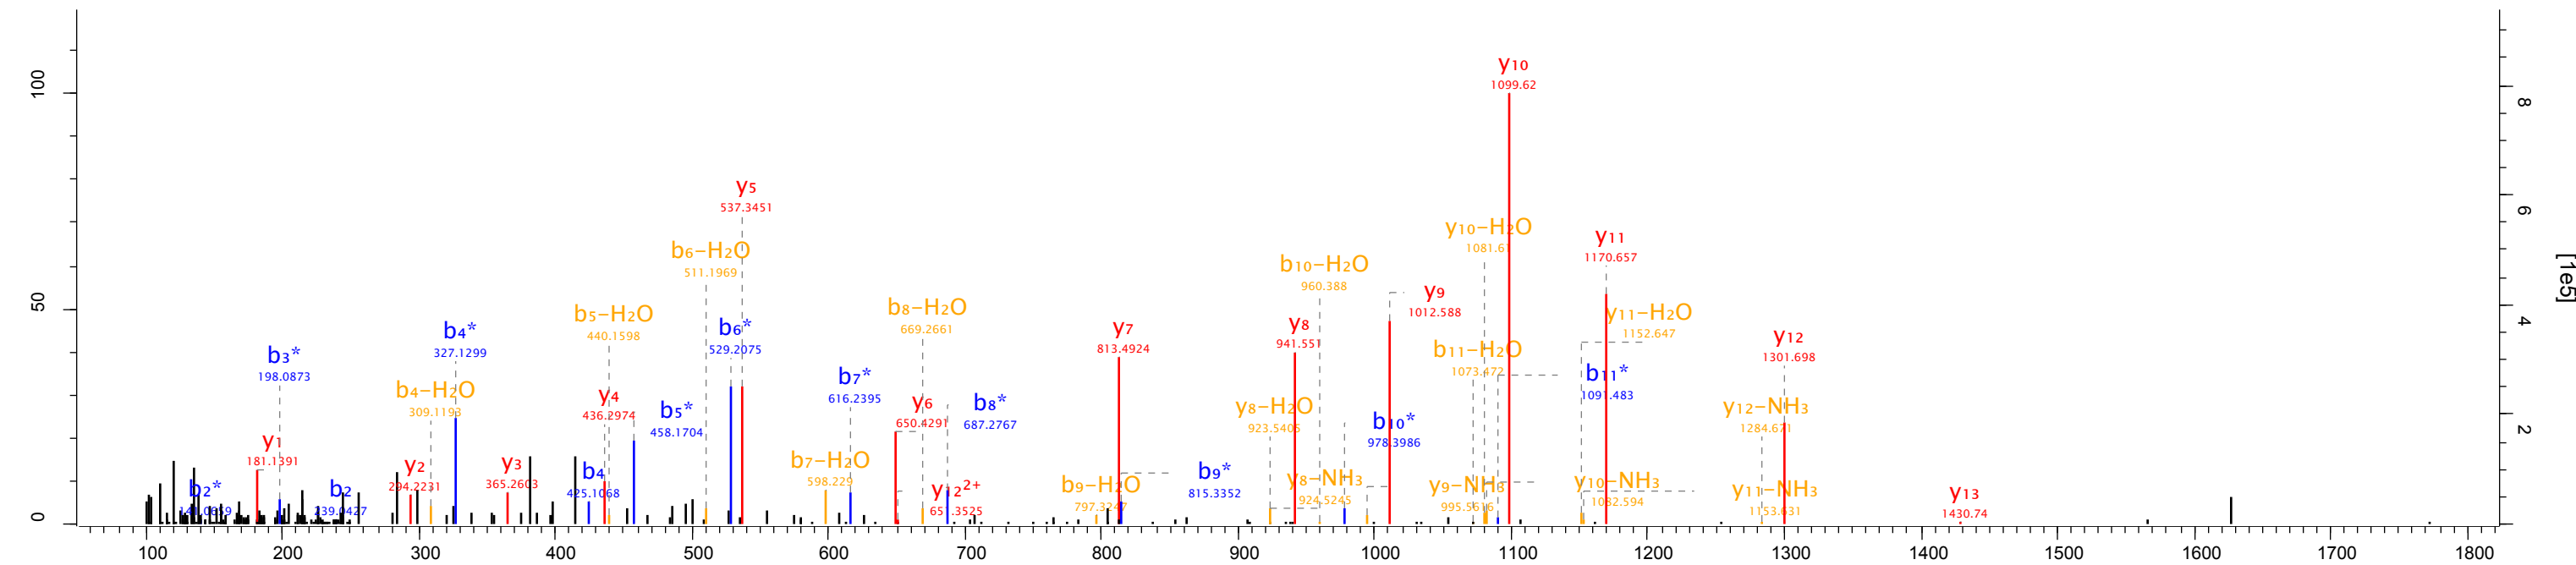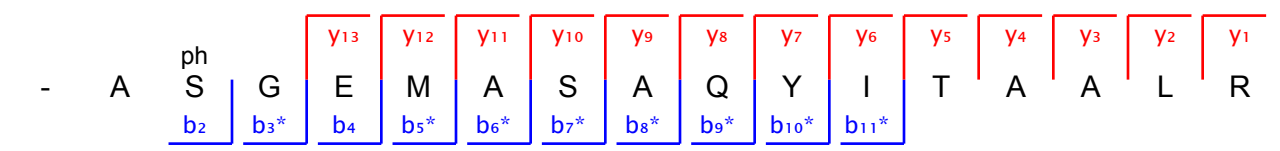

Raw file: 20150814\_A375SR\_Phospho\_BR2\_04  
 Scan: 24295 Method: FTMS; HCD Score: 97.58 m/z: 856.18 Gene names: CEP170B

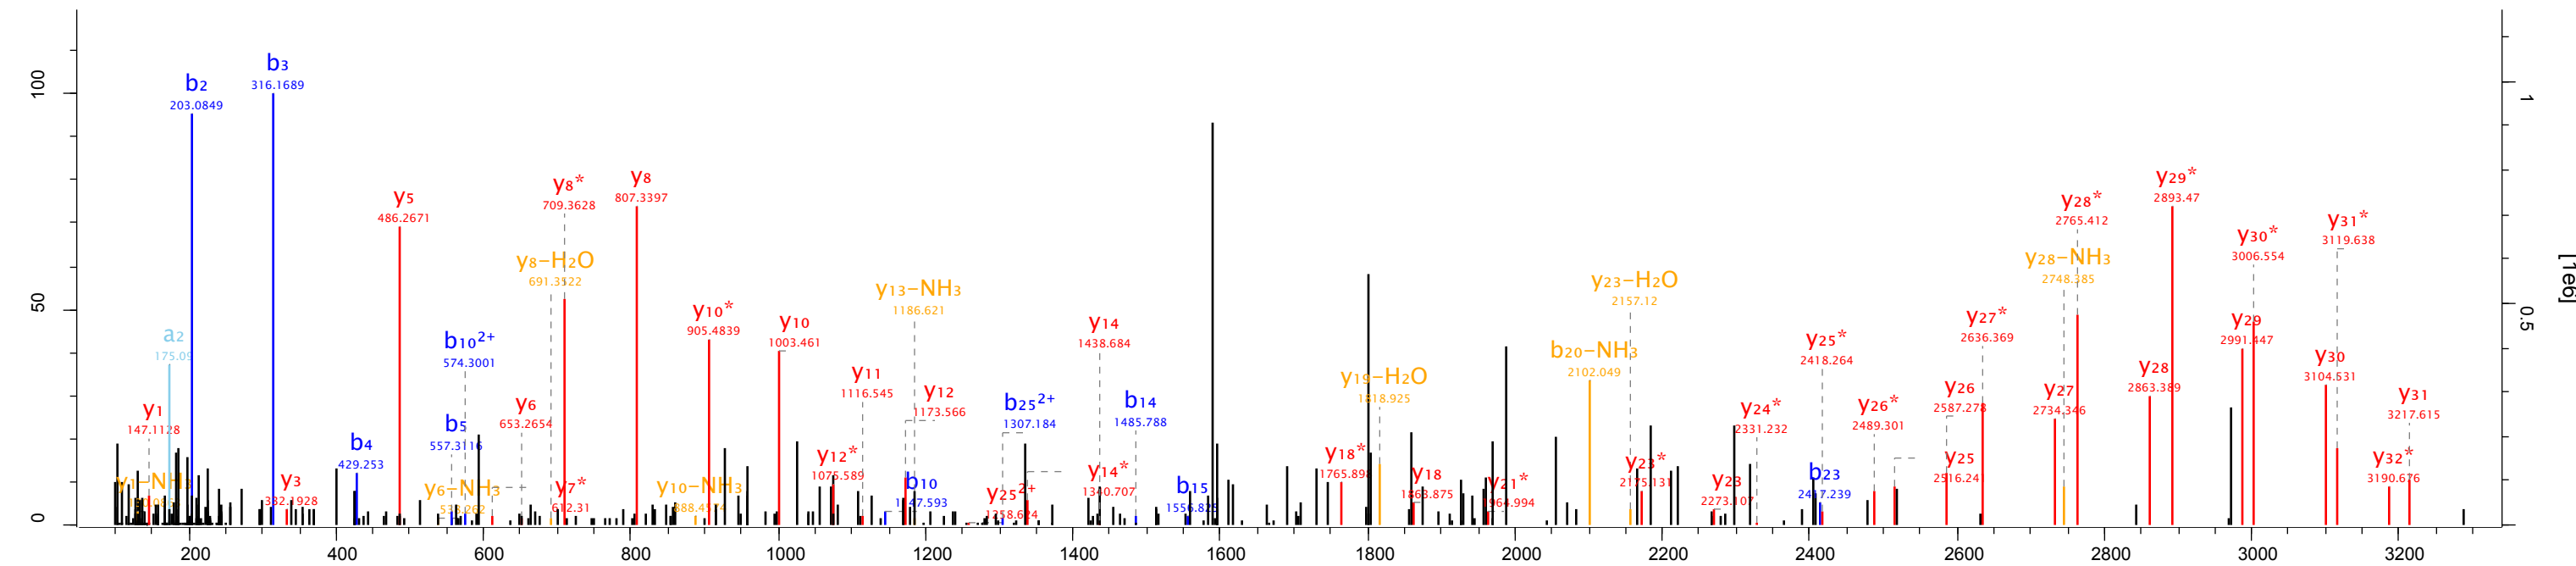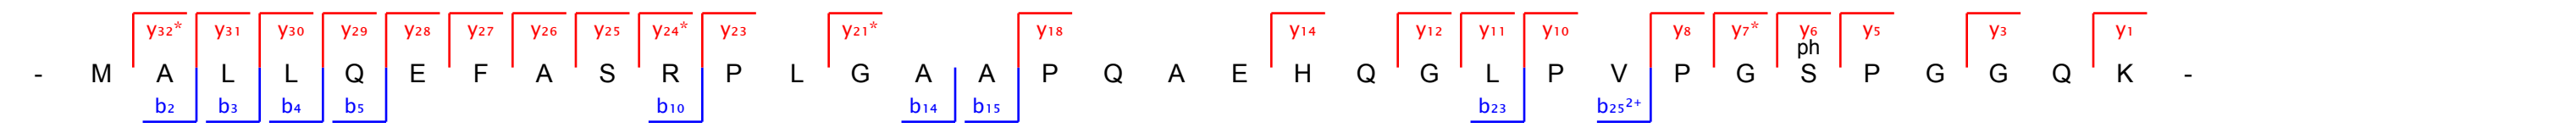

Raw file: 20150814\_A375SR\_Phospho\_BR2\_04  
 Scan: 2455 Method: FTMS; HCD Score: 233.4 m/z: 715.29 Gene names: UTP20

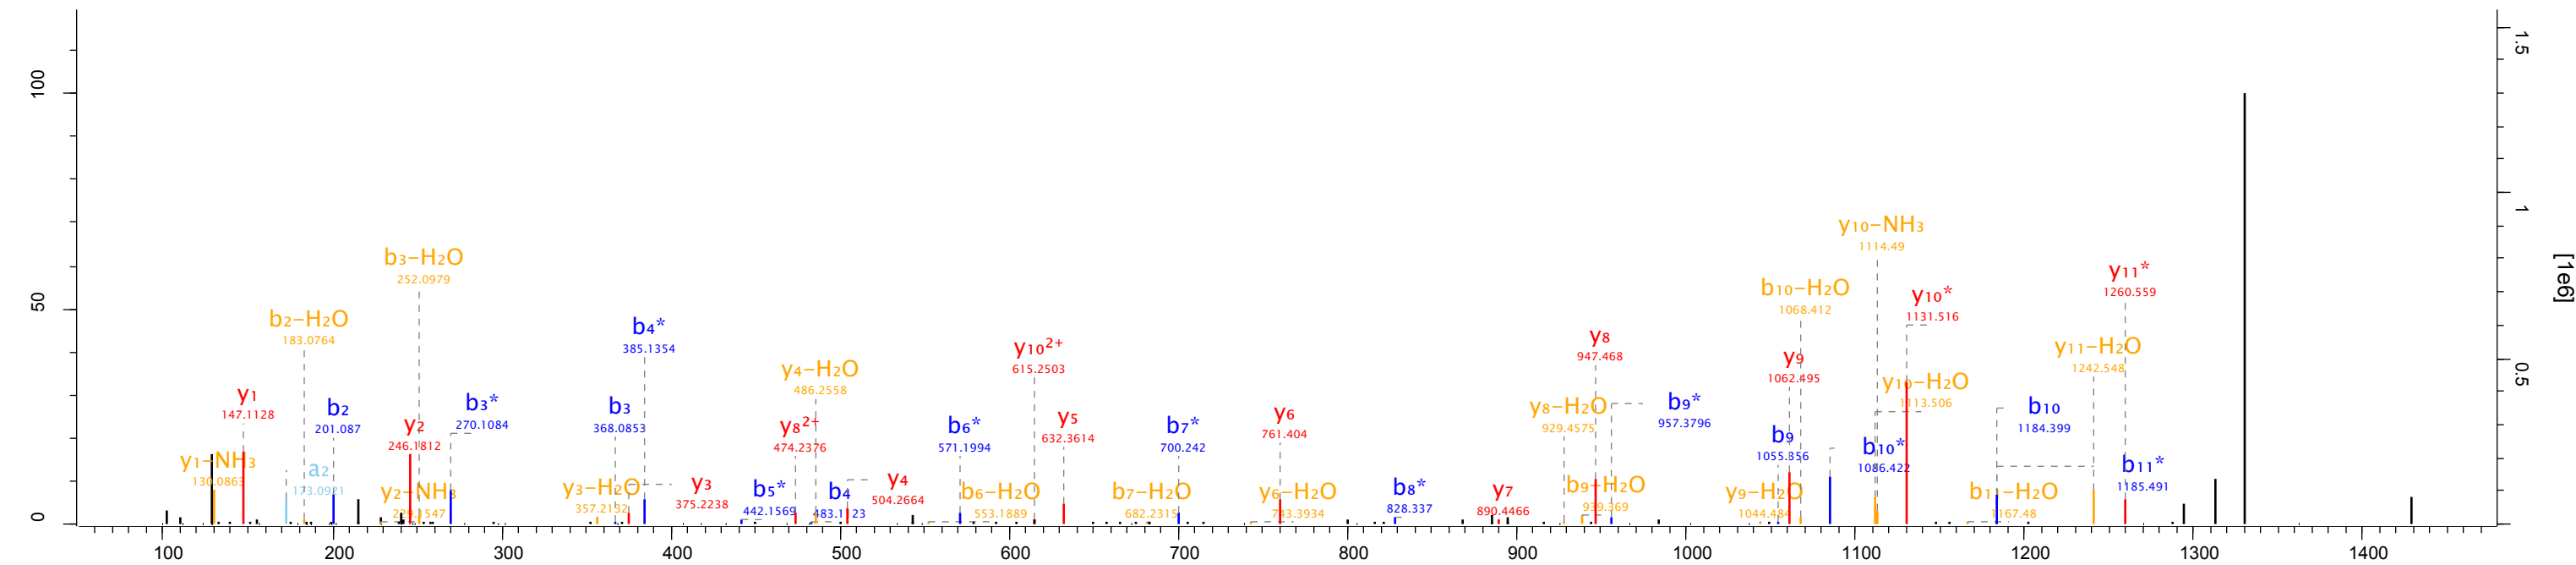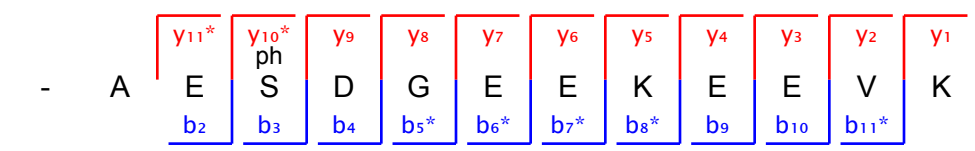

Raw file 20150814\_A375SR\_Phospho\_BR2\_04 Scan 24585 Method FTMS; HCD Score 213.83 m/z 738.6 Gene names DCP1A

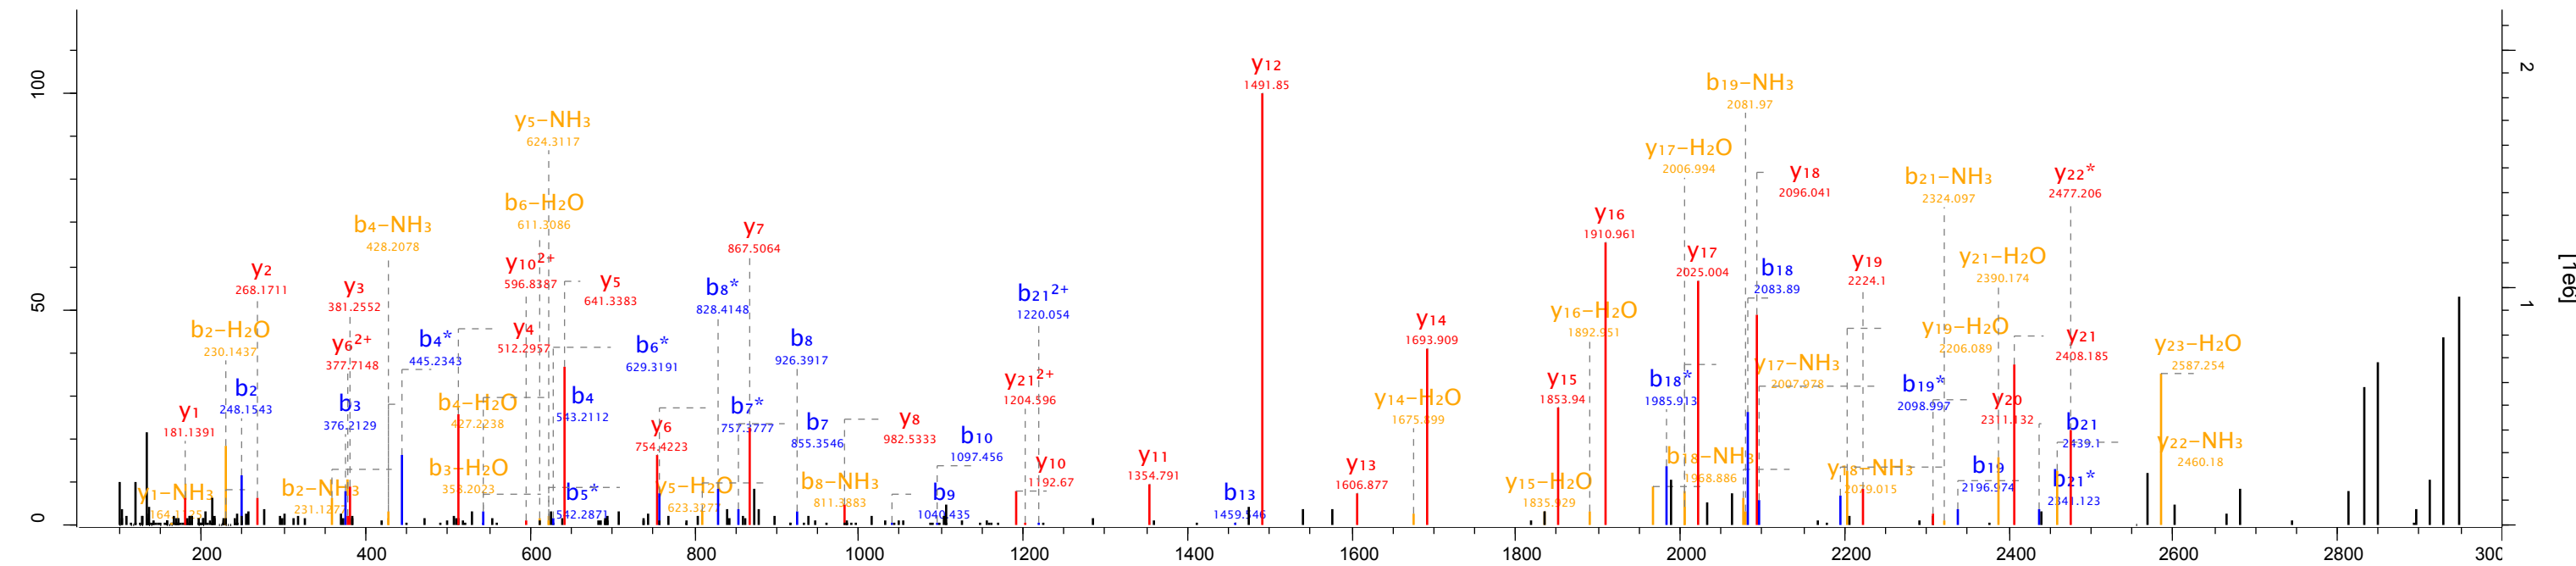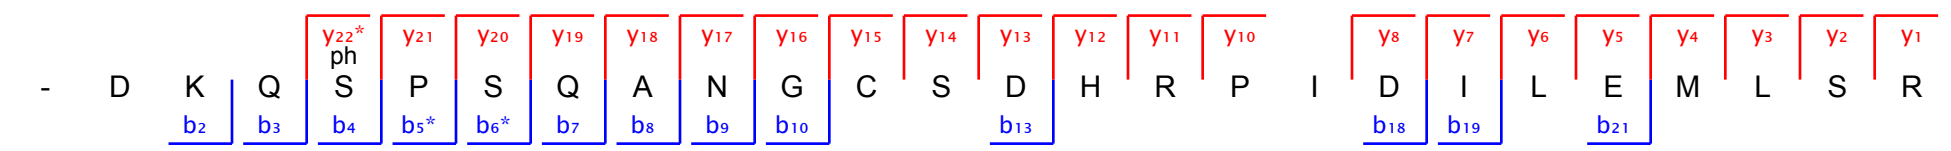

Raw file  
20150814\_A375SR\_Phospho\_BR2\_04

Scan 25285 Method FTMS; HCD Score 48.19 m/z 953.79 Gene names AKAP13

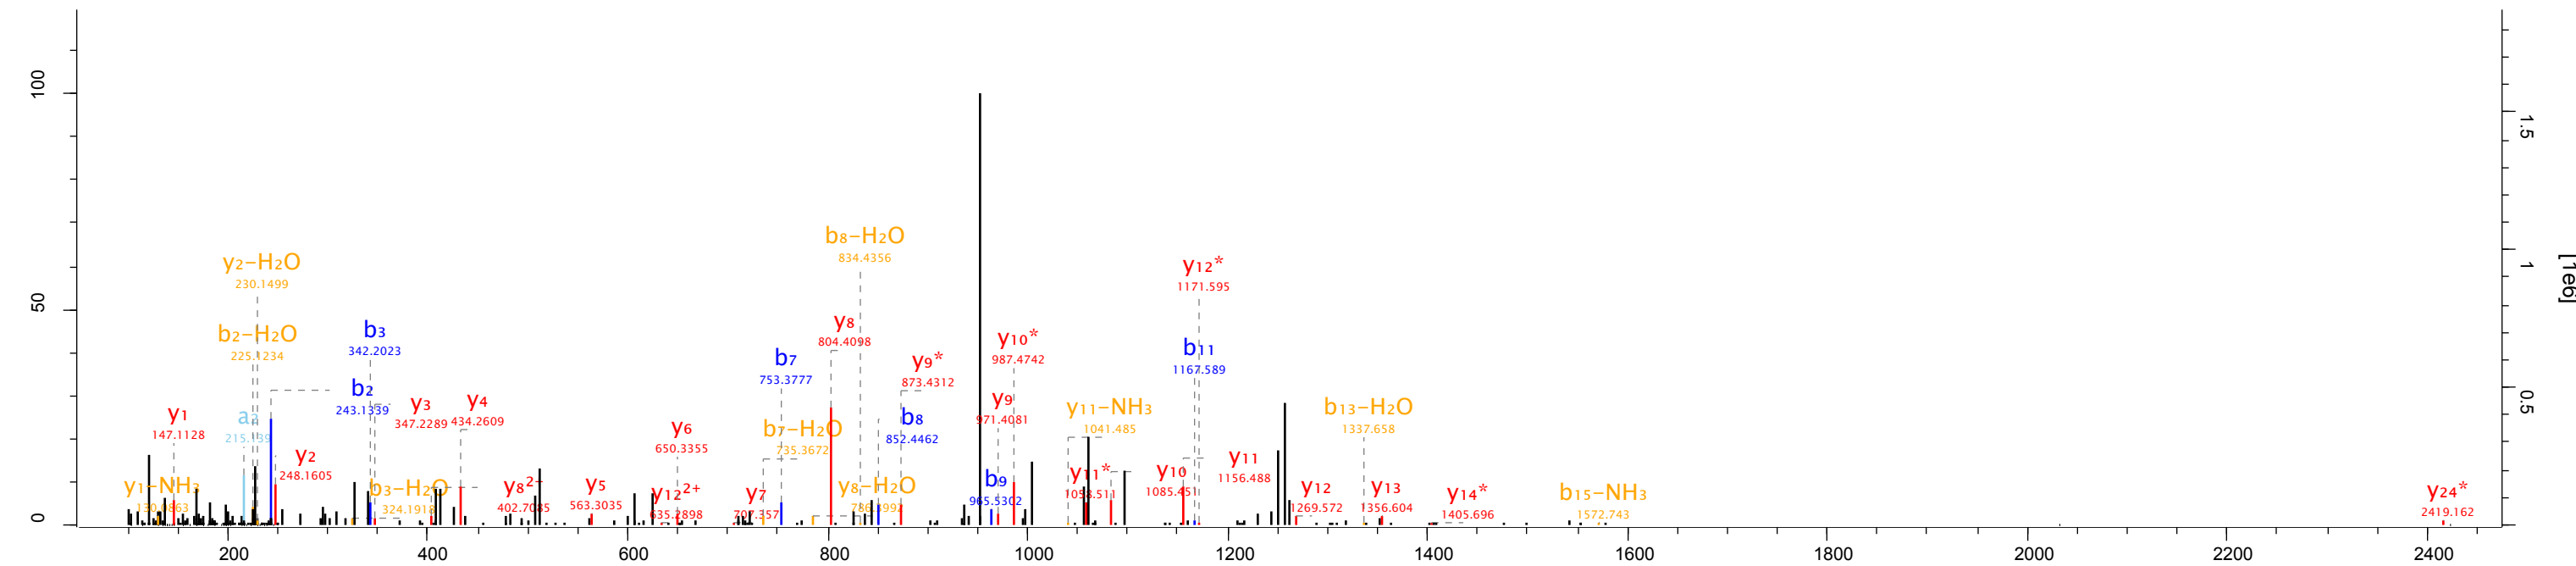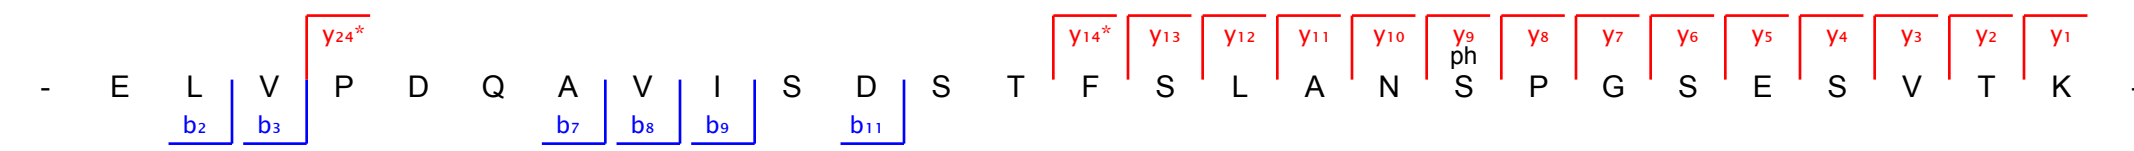

Raw file: 20150814\_A375SR\_Phospho\_BR2\_04  
 Scan: 26045 Method: FTMS; HCD Score: 89.15 m/z: 968.47 Gene names: EIF4EBP1

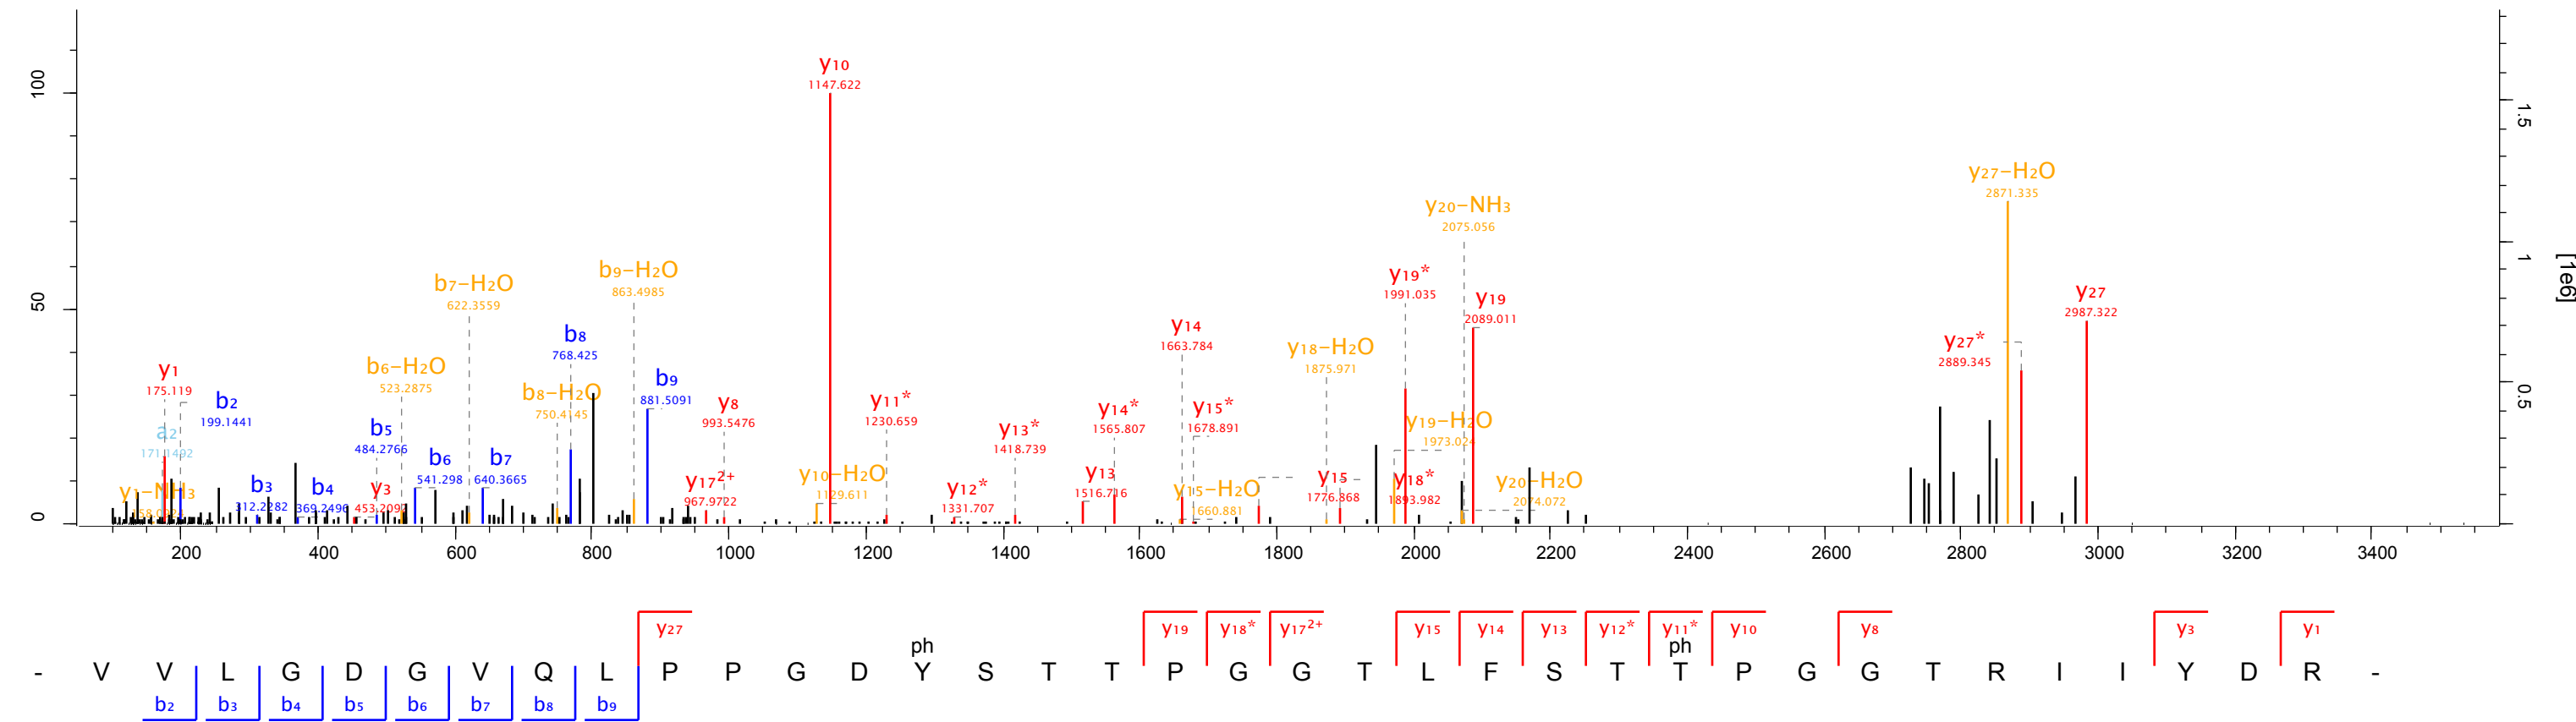

Raw file  
20150814\_A375SR\_Phospho\_BR2\_04

Scan 26525 Method FTMS; HCD Score 165.21 m/z 876.17 Gene names GAPVD1

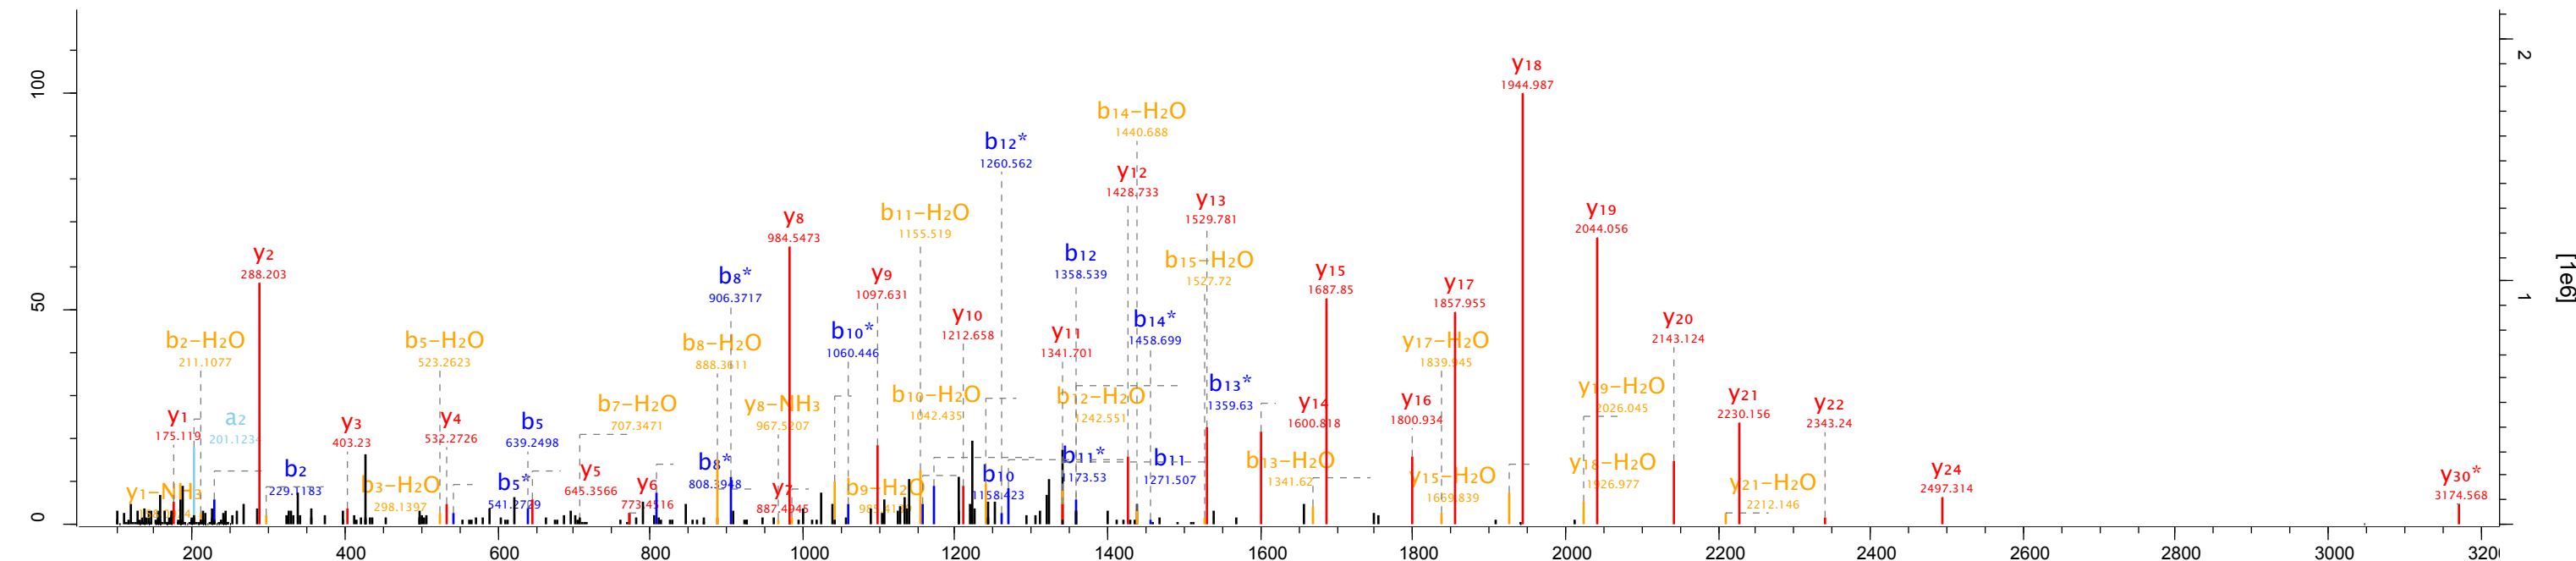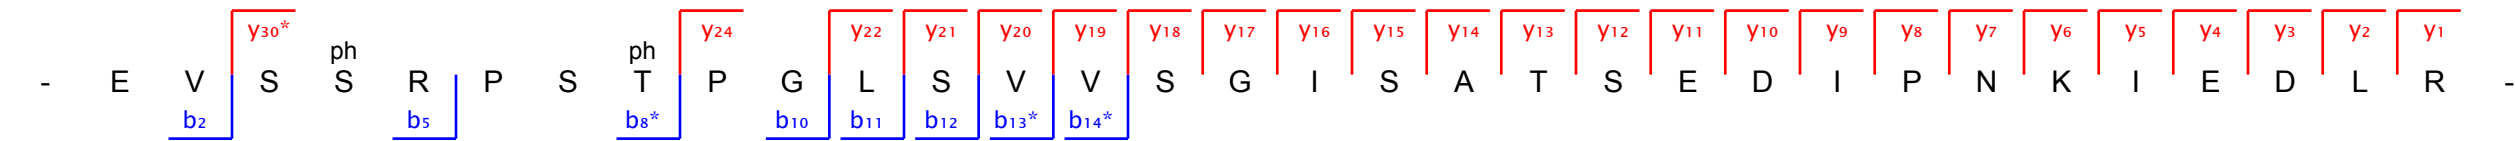

Raw file: 20150814\_A375SR\_Phospho\_BR2\_04  
 Scan: 26625 Method: FTMS; HCD Score: 122.44 m/z: 1092.49 Gene names: TCIRG1

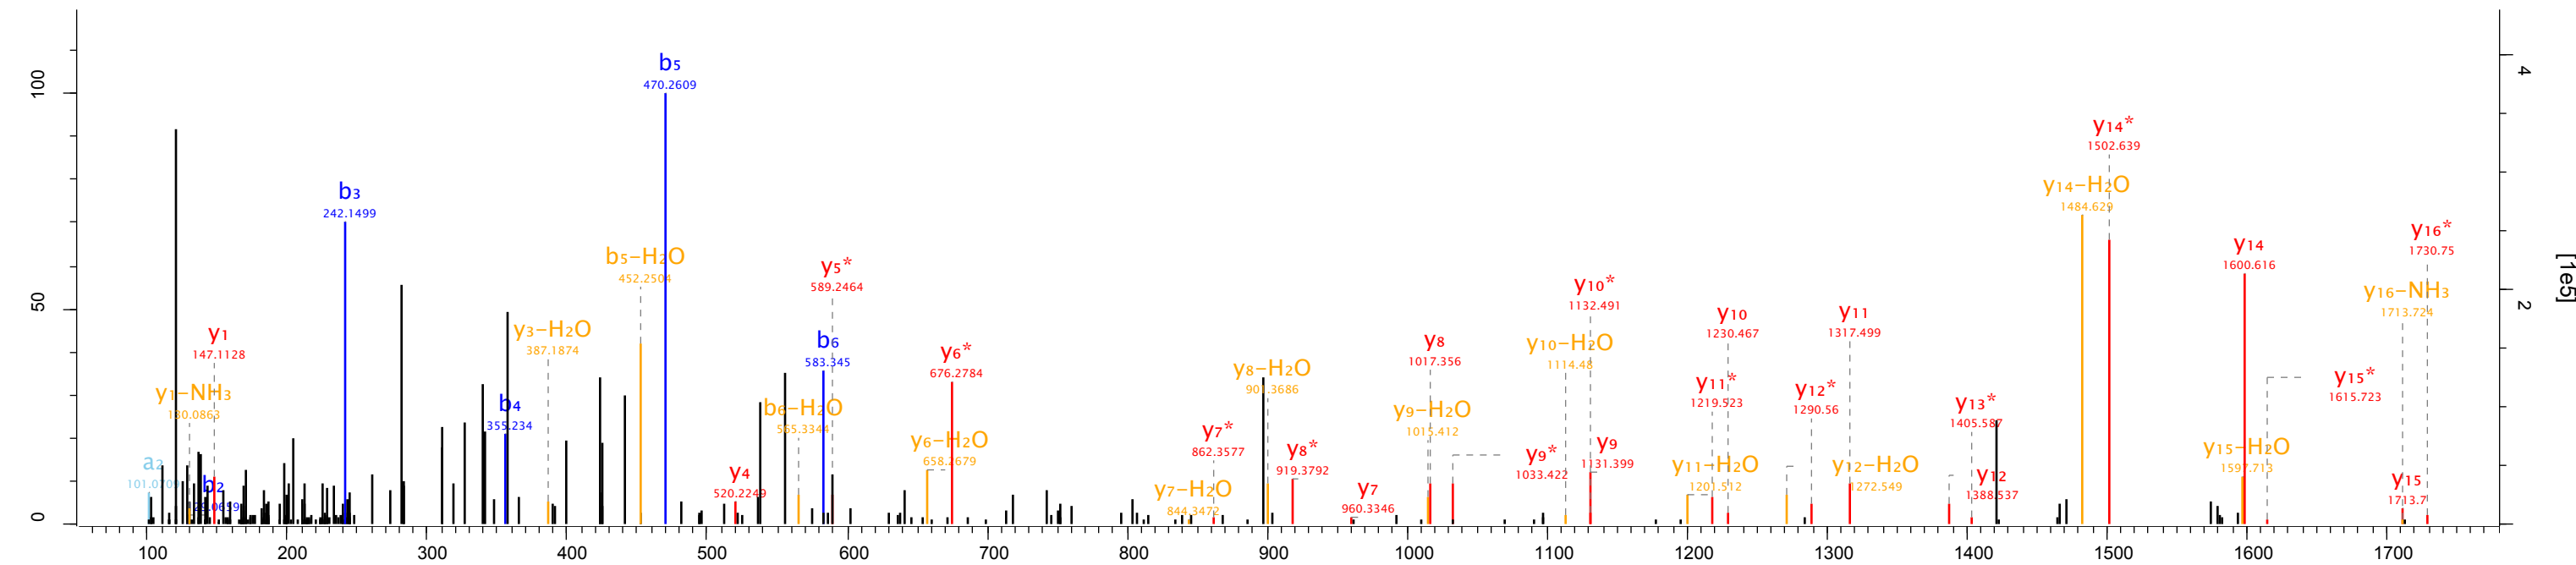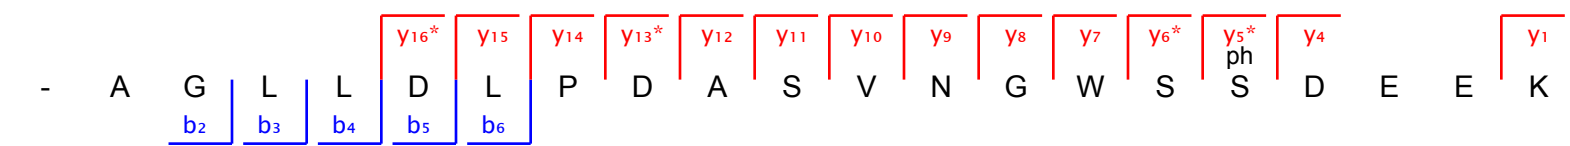



Raw file: 20150814\_A375SR\_Phospho\_BR2\_04  
 Scan: 26665 Method: FTMS; HCD Score: 64.52 m/z: 930.93 Gene names: ANKIB1

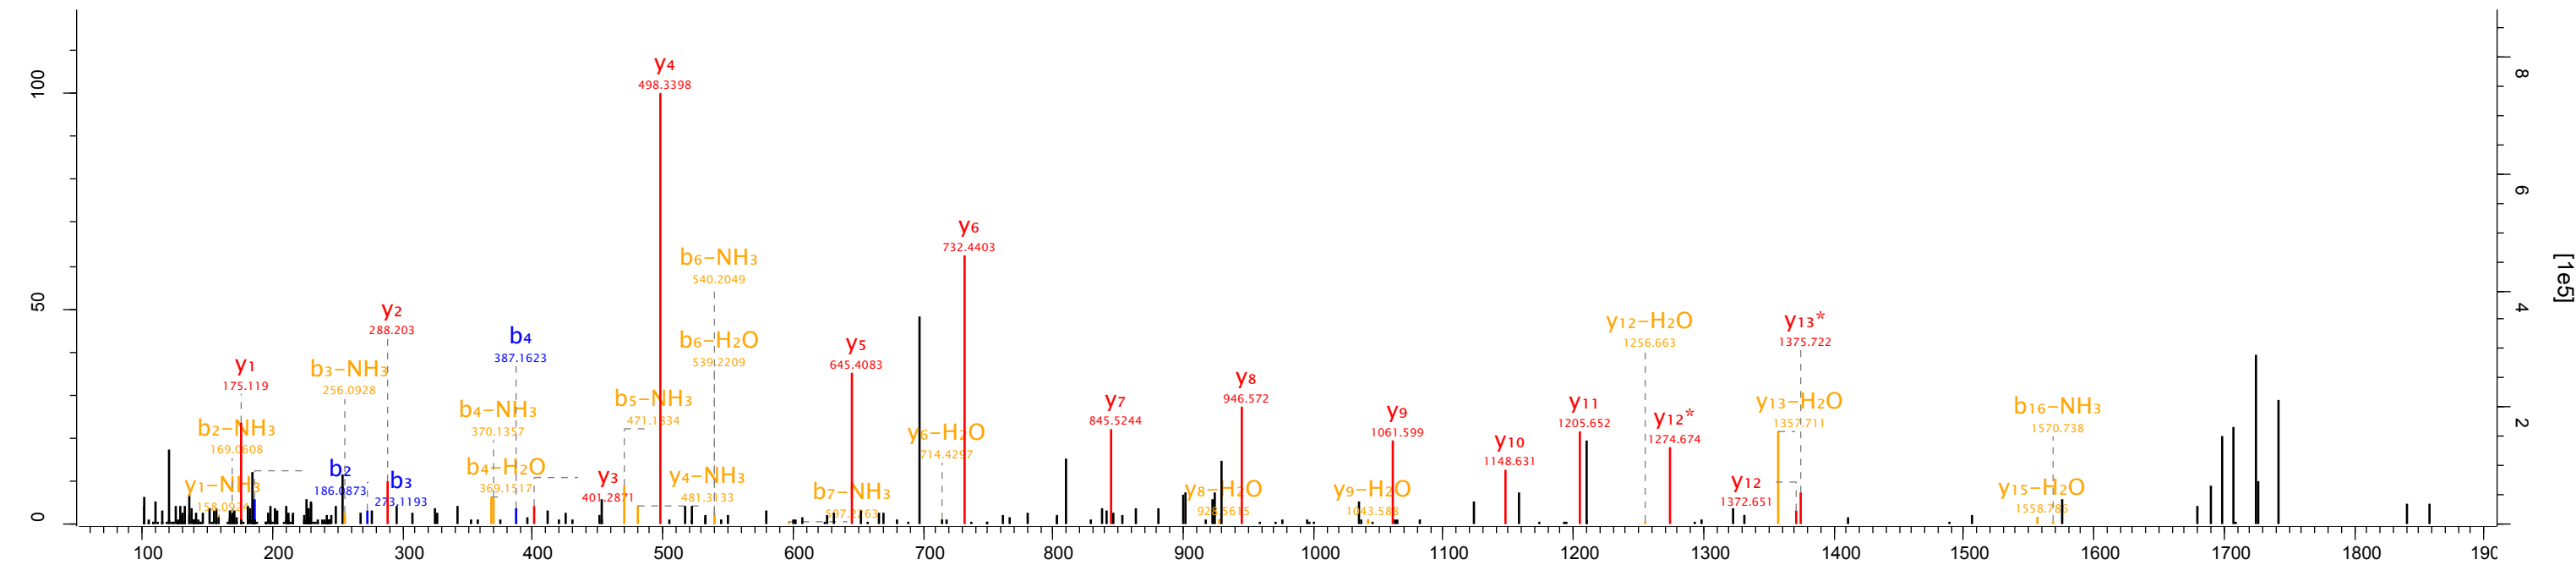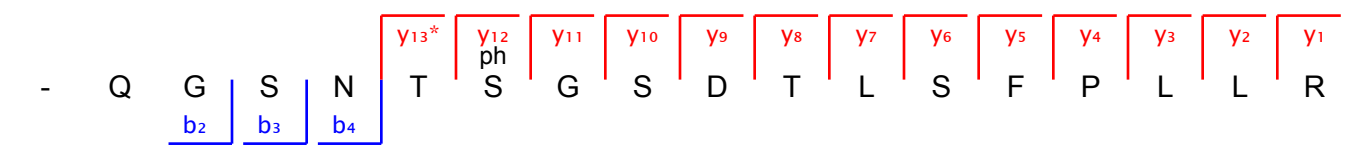

Raw file: 20150814\_A375SR\_Phospho\_BR2\_04  
 Scan: 27225 Method: FTMS; HCD Score: 269.81 m/z: 1447.61 Gene names: MAP1B

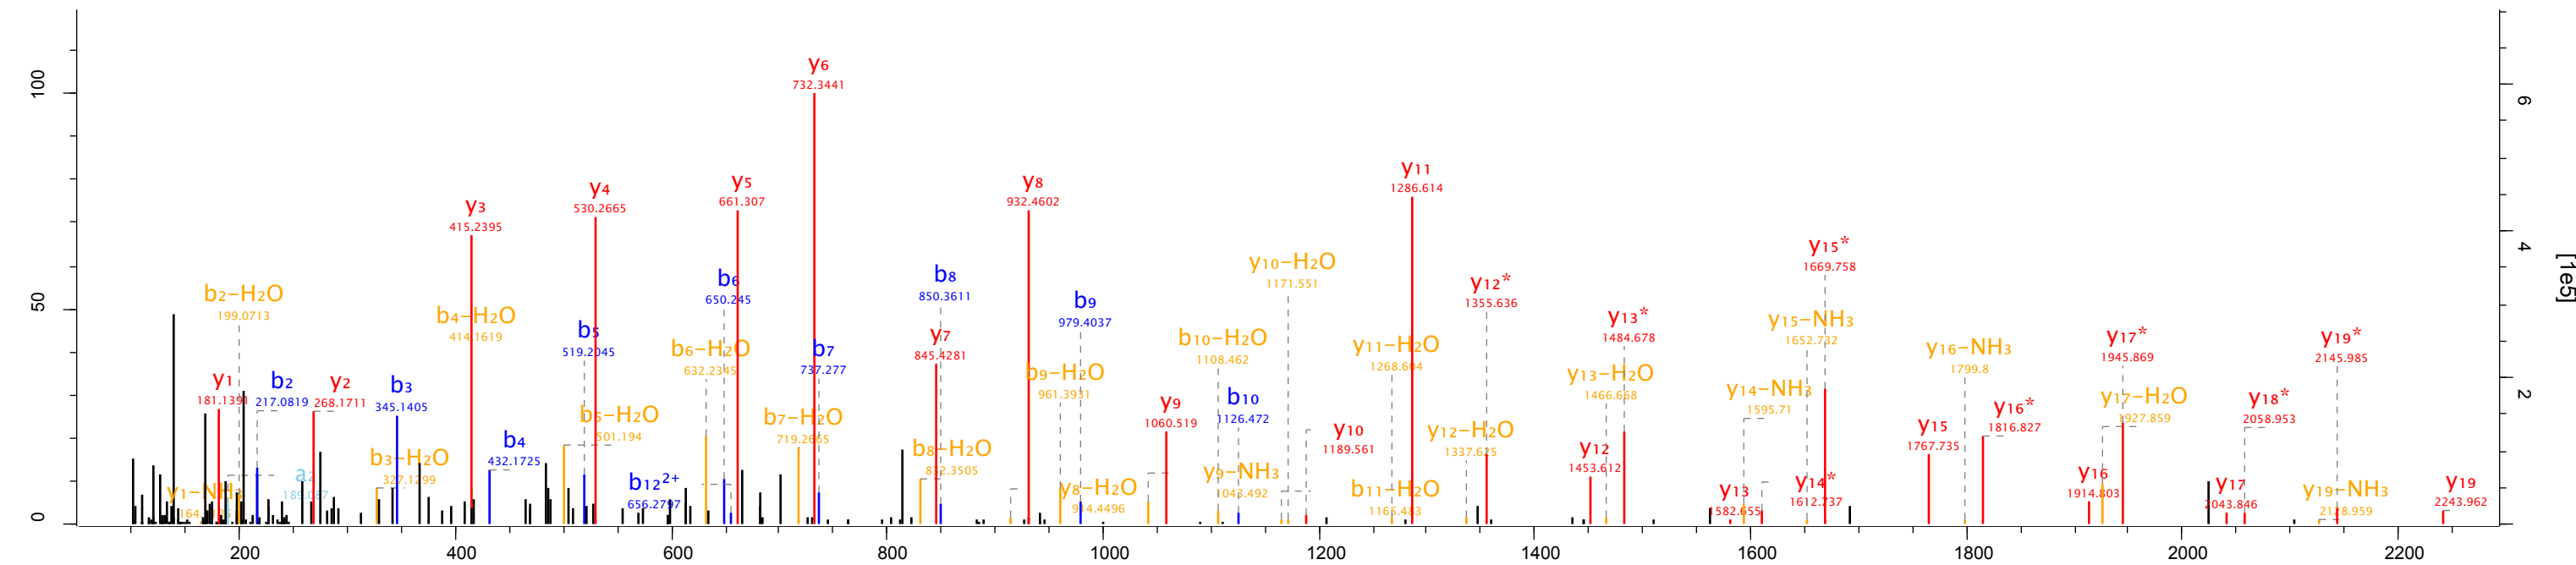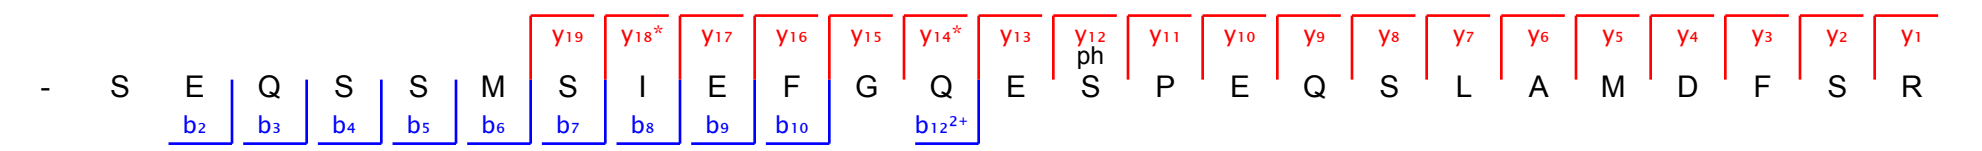

Raw file: 20150814\_A375SR\_Phospho\_BR2\_04  
 Scan: 27245 Method: FTMS; HCD Score: 116.58 m/z: 724.31 Gene names: PCM1

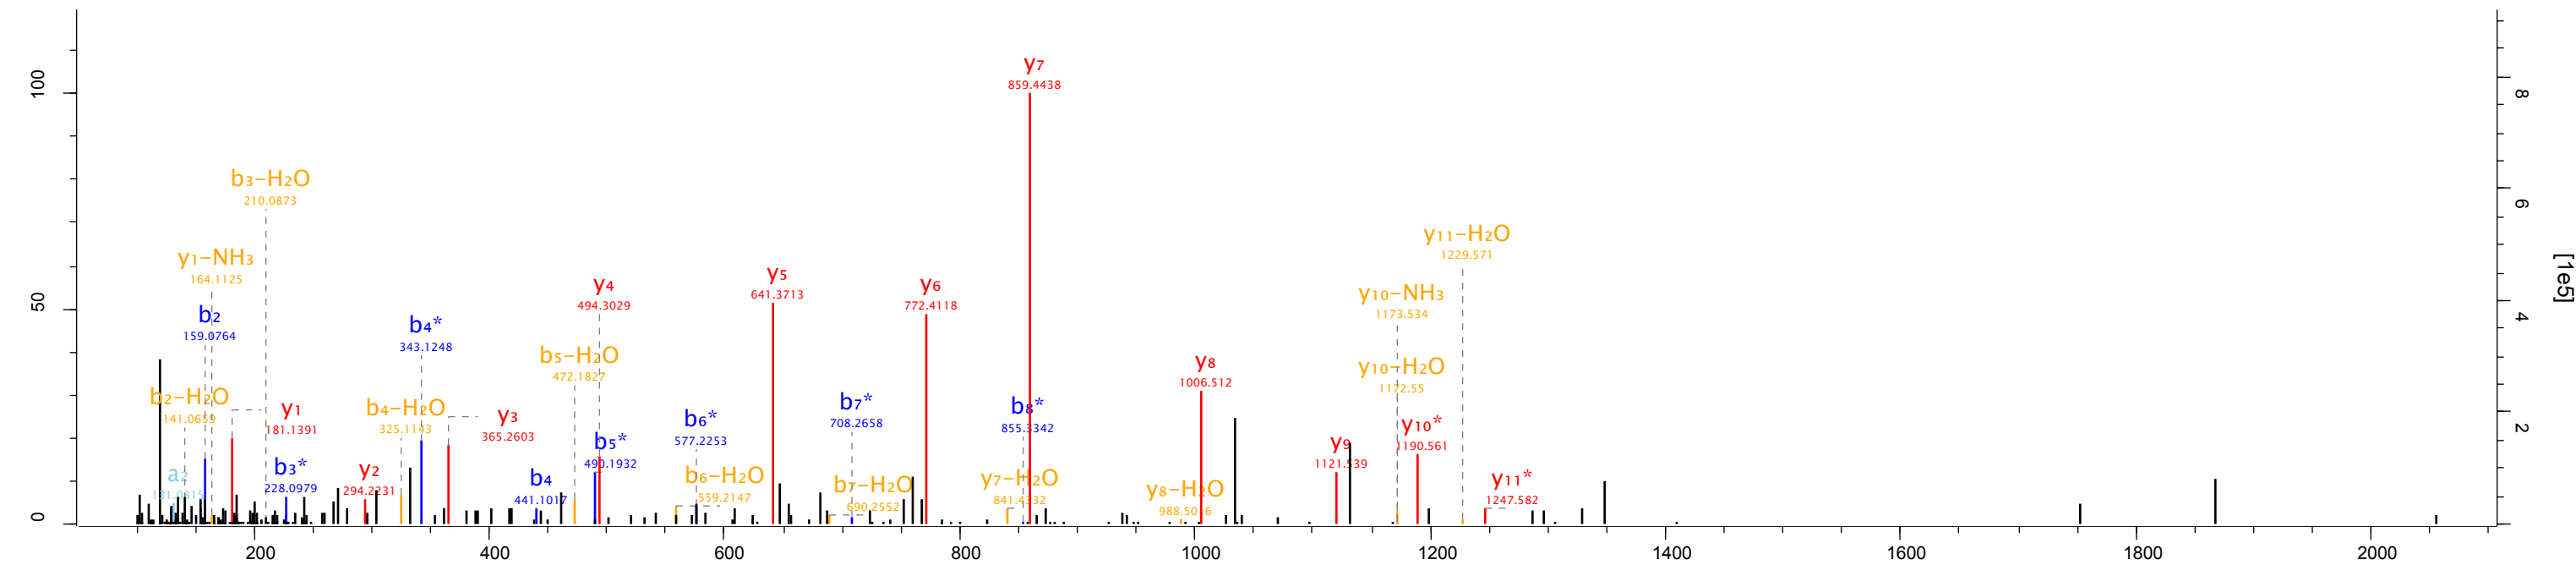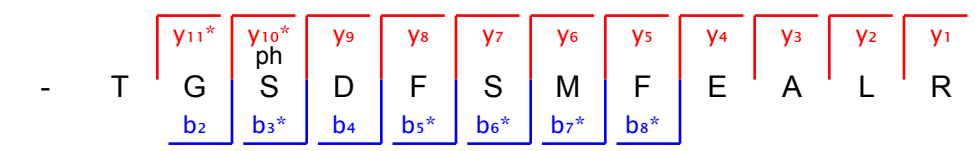

Raw file 20150814\_A375SR\_Phospho\_BR2\_04 Scan 27665 Method FTMS; HCD Score 91.44 m/z 1026.48 Gene names MVB12A

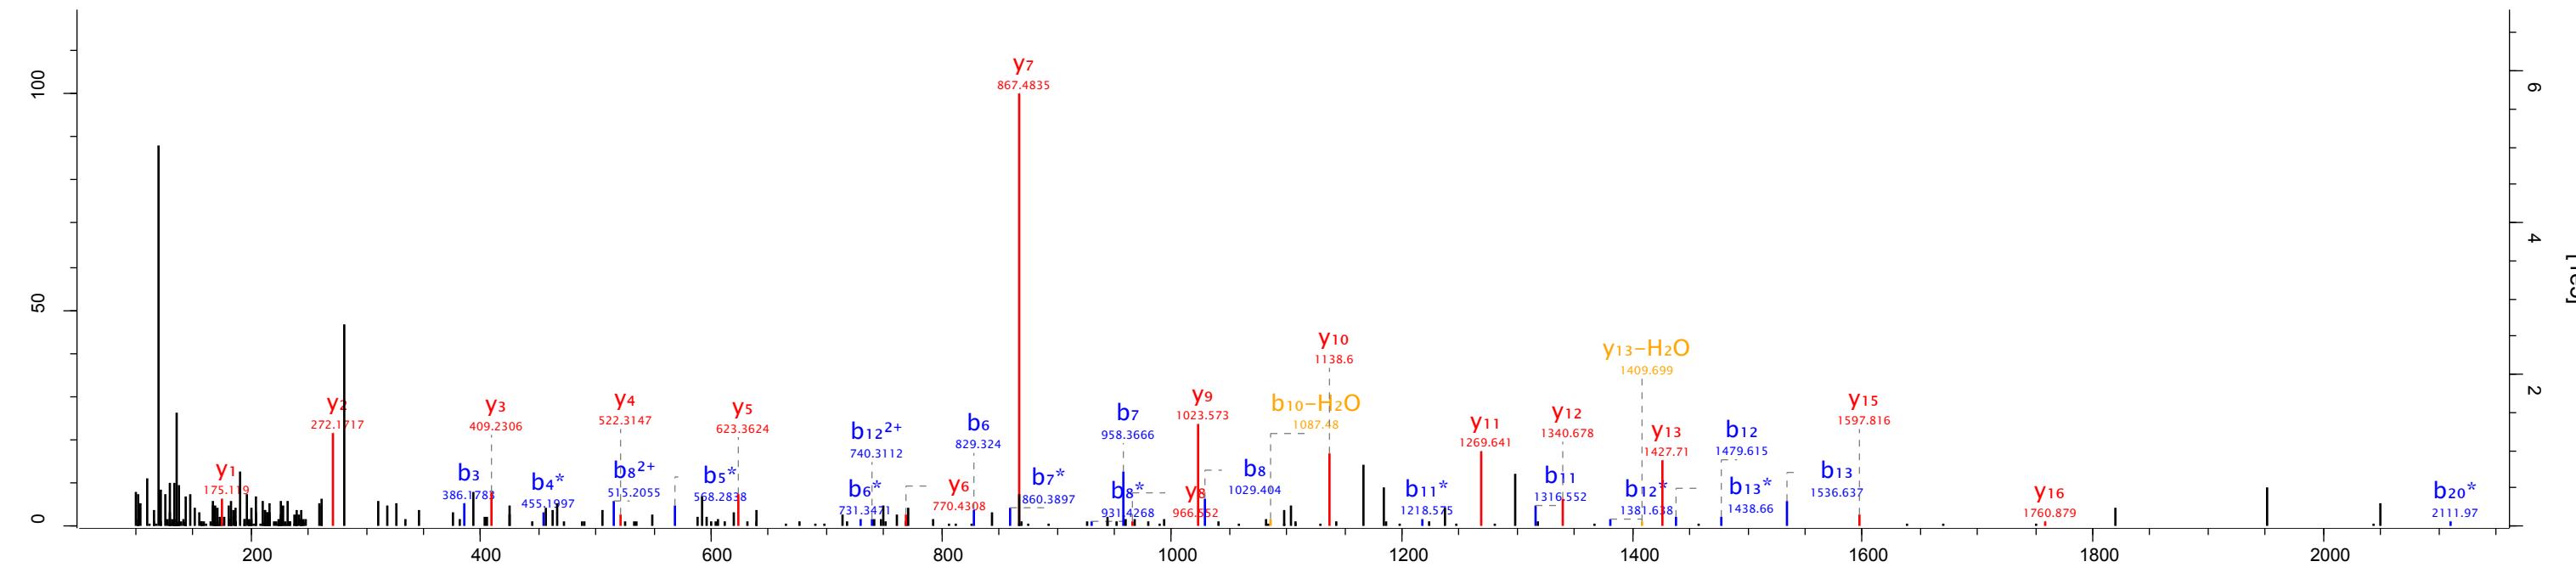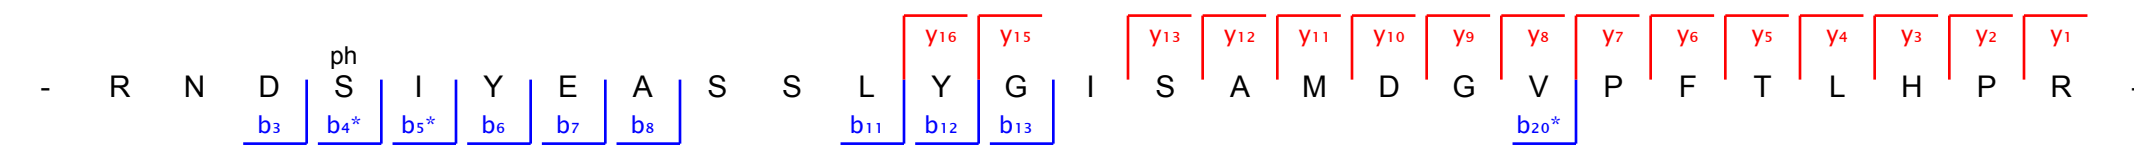

Raw file  
20150814\_A375SR\_Phospho\_BR2\_04

Scan 28035 Method FTMS; HCD Score 210.16 m/z 967 Gene names KIF13B

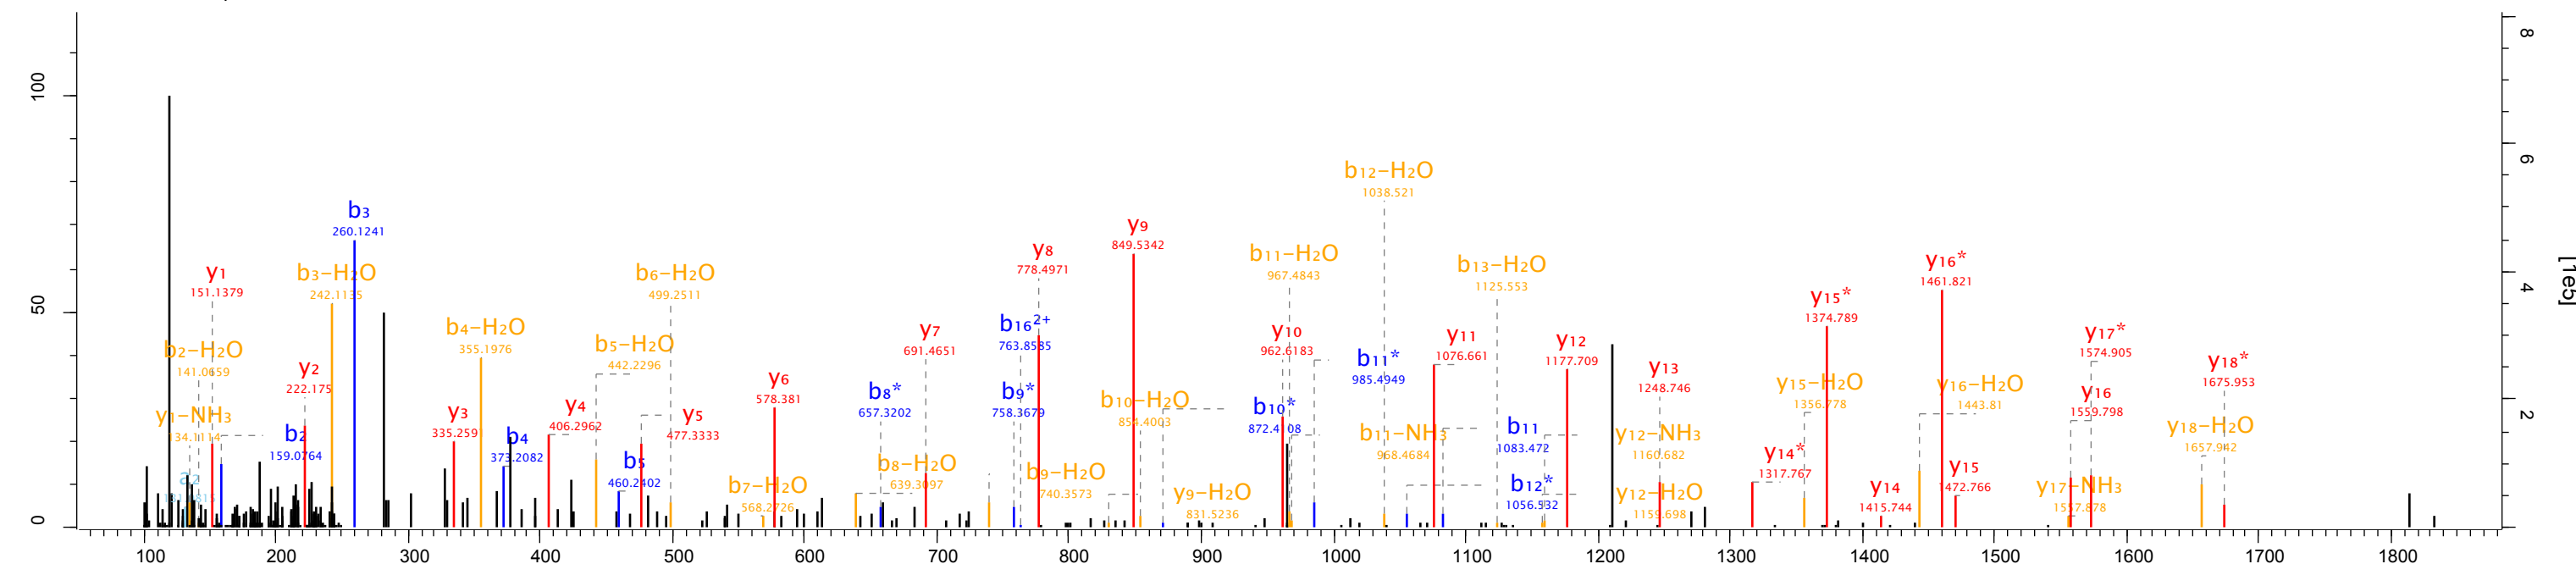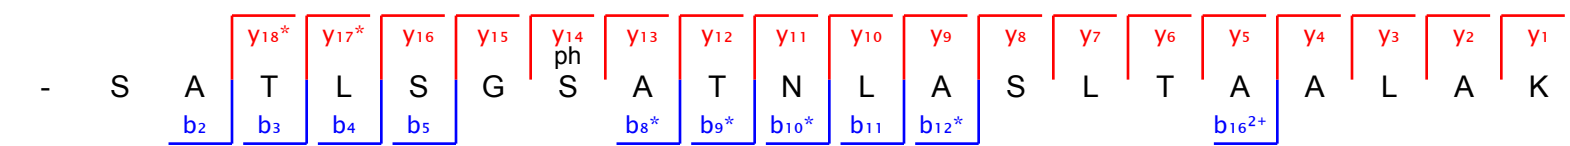

Raw file Scan Method Score m/z Gene names  
 20150814\_A375SR\_Phospho\_BR2\_04 28045 FTMS; HCD 361.3 987.97 PXN

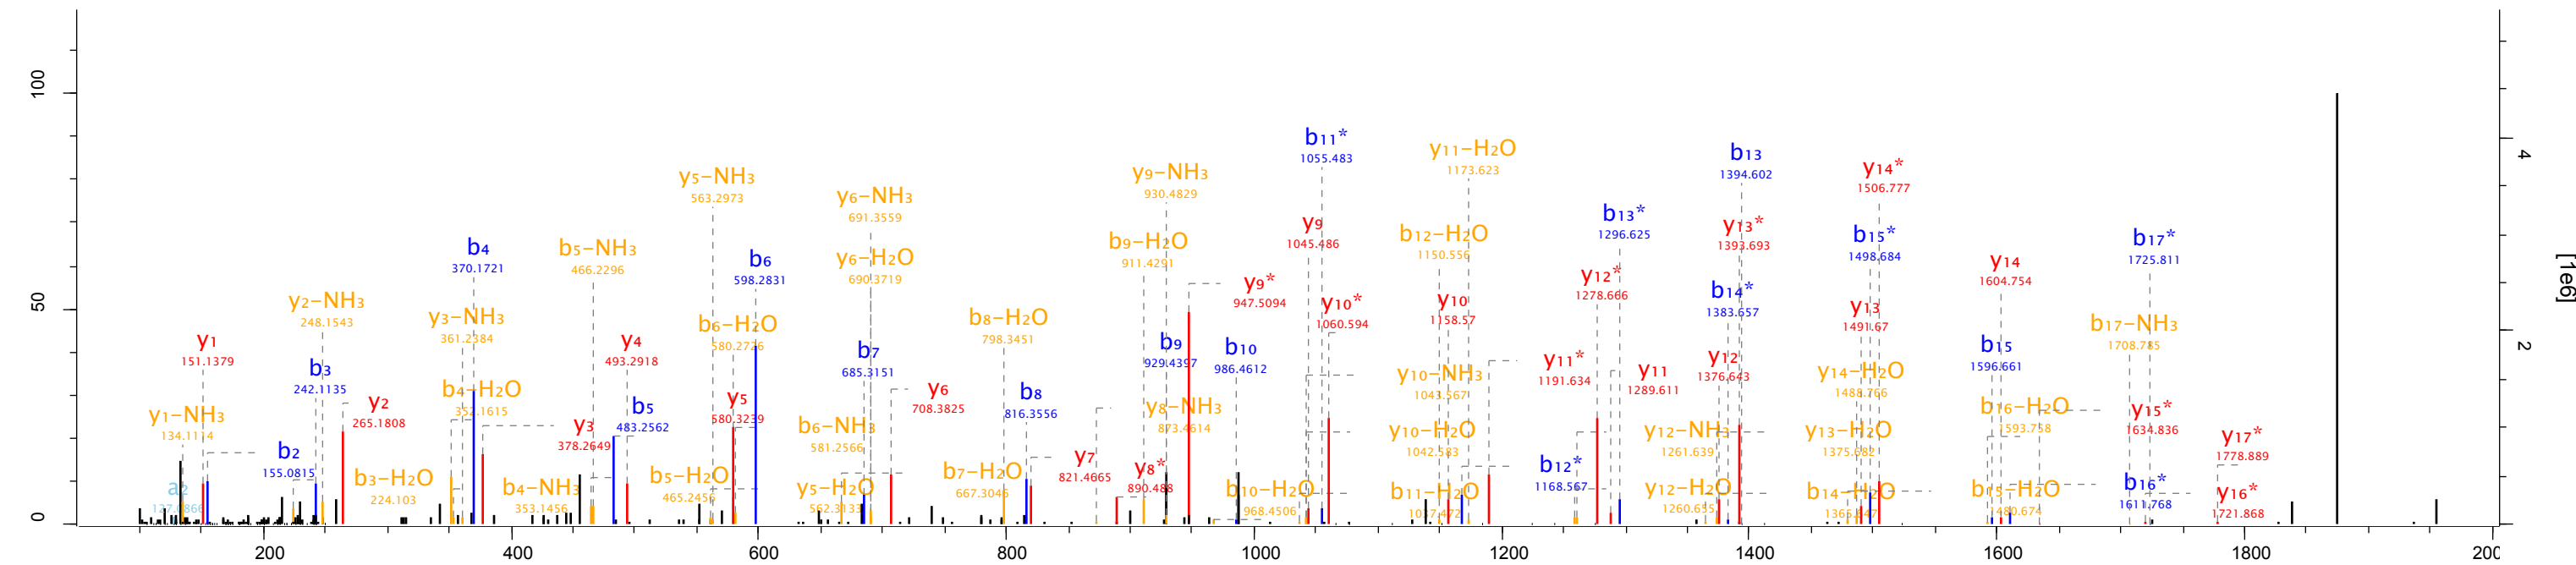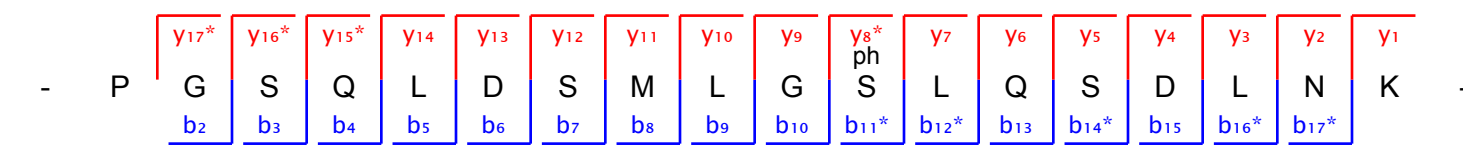

Raw file: 20150814\_A375SR\_Phospho\_BR2\_04  
 Scan: 28205 Method: FTMS; HCD Score: 208.17 m/z: 940.42 Gene names: PRC1

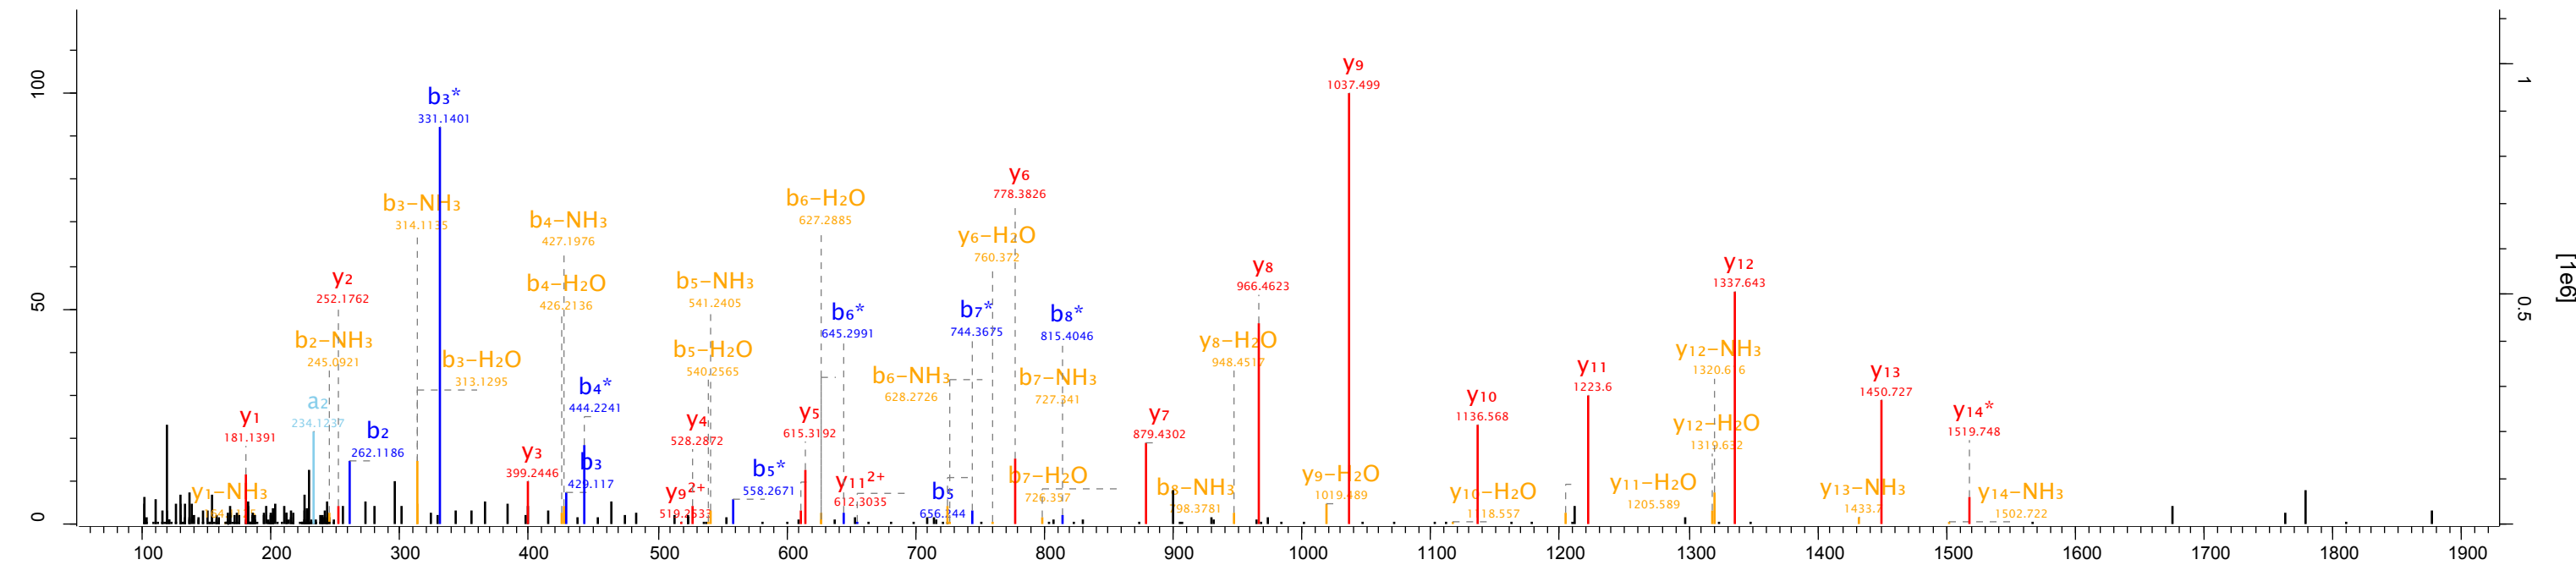

- N F S I N S V A S T Y S E F A R -

Fragmentation sites (b and y series) are indicated by boxes below the sequence:

- b2 (between F and S)
- b3 (between S and I)
- b4\* (between I and N)
- b5 (between N and S)
- b6\* (between S and V)
- b7\* (between V and A)
- b8\* (between A and S)

Corresponding y series (y1 to y14\*) are shown above the sequence, indicating the cleavage site after each amino acid.

Raw file: 20150814\_A375SR\_Phospho\_BR2\_04  
 Scan: 28475 Method: FTMS; HCD Score: 85.39 m/z: 1365.1 Gene names: MRE11A

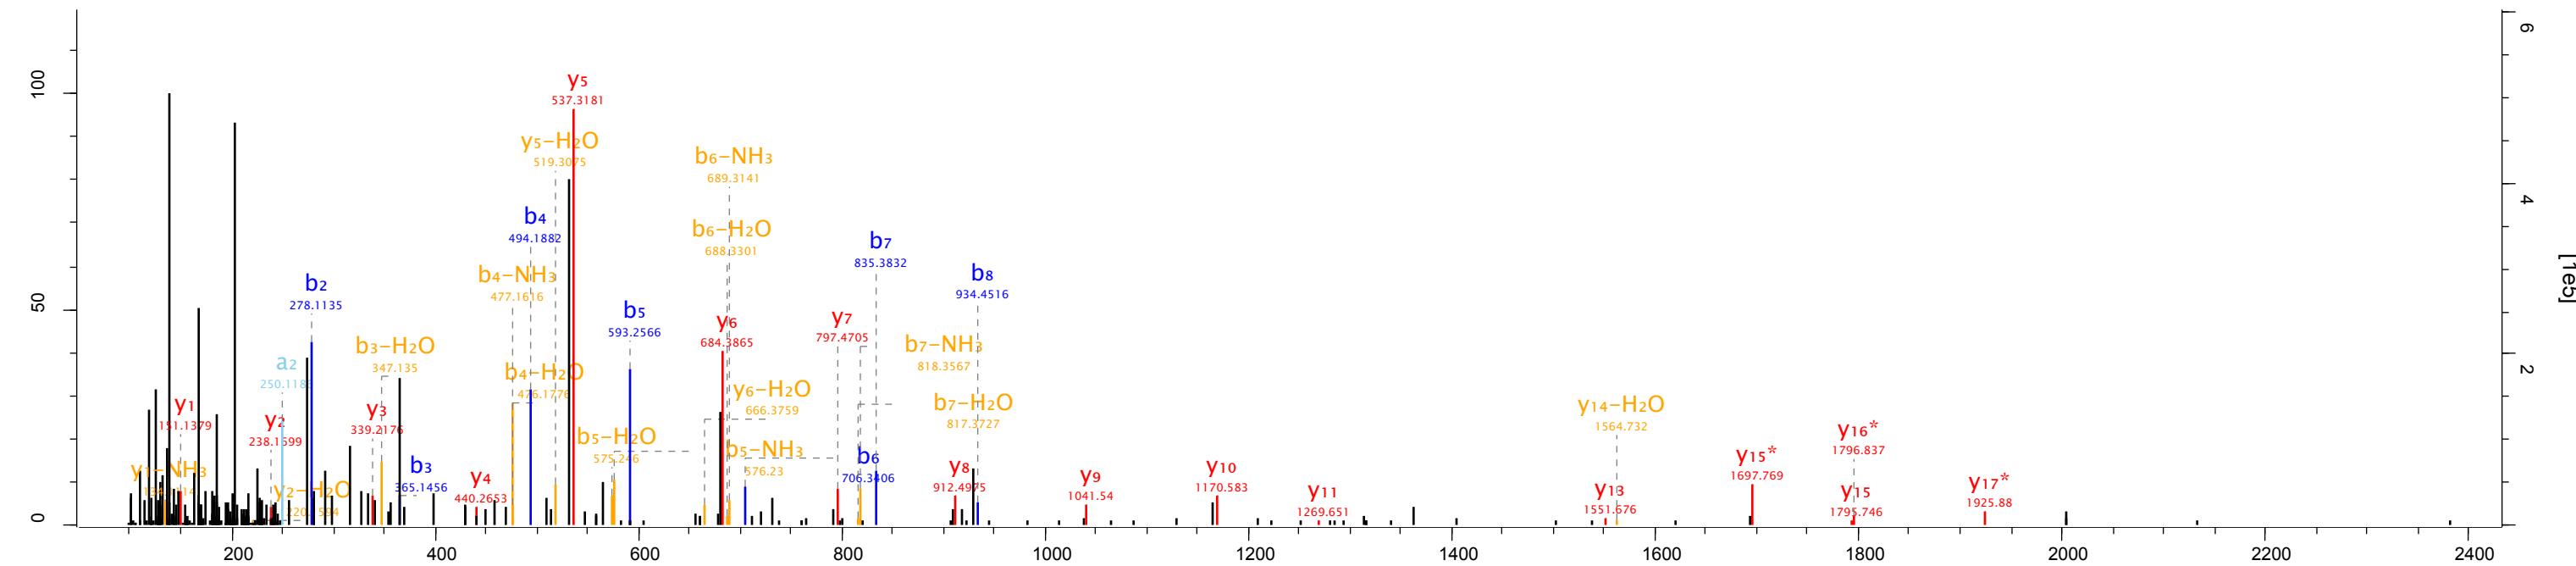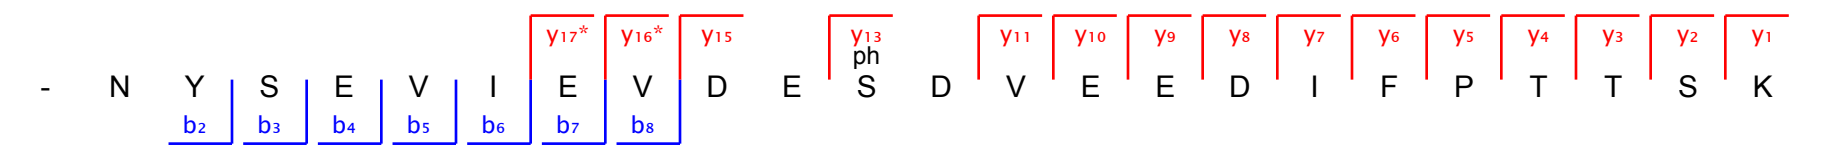



Raw file: 20150814\_A375SR\_Phospho\_BR2\_04  
 Scan: 28485 Method: FTMS; HCD Score: 197.68 m/z: 793.67 Gene names: CAST

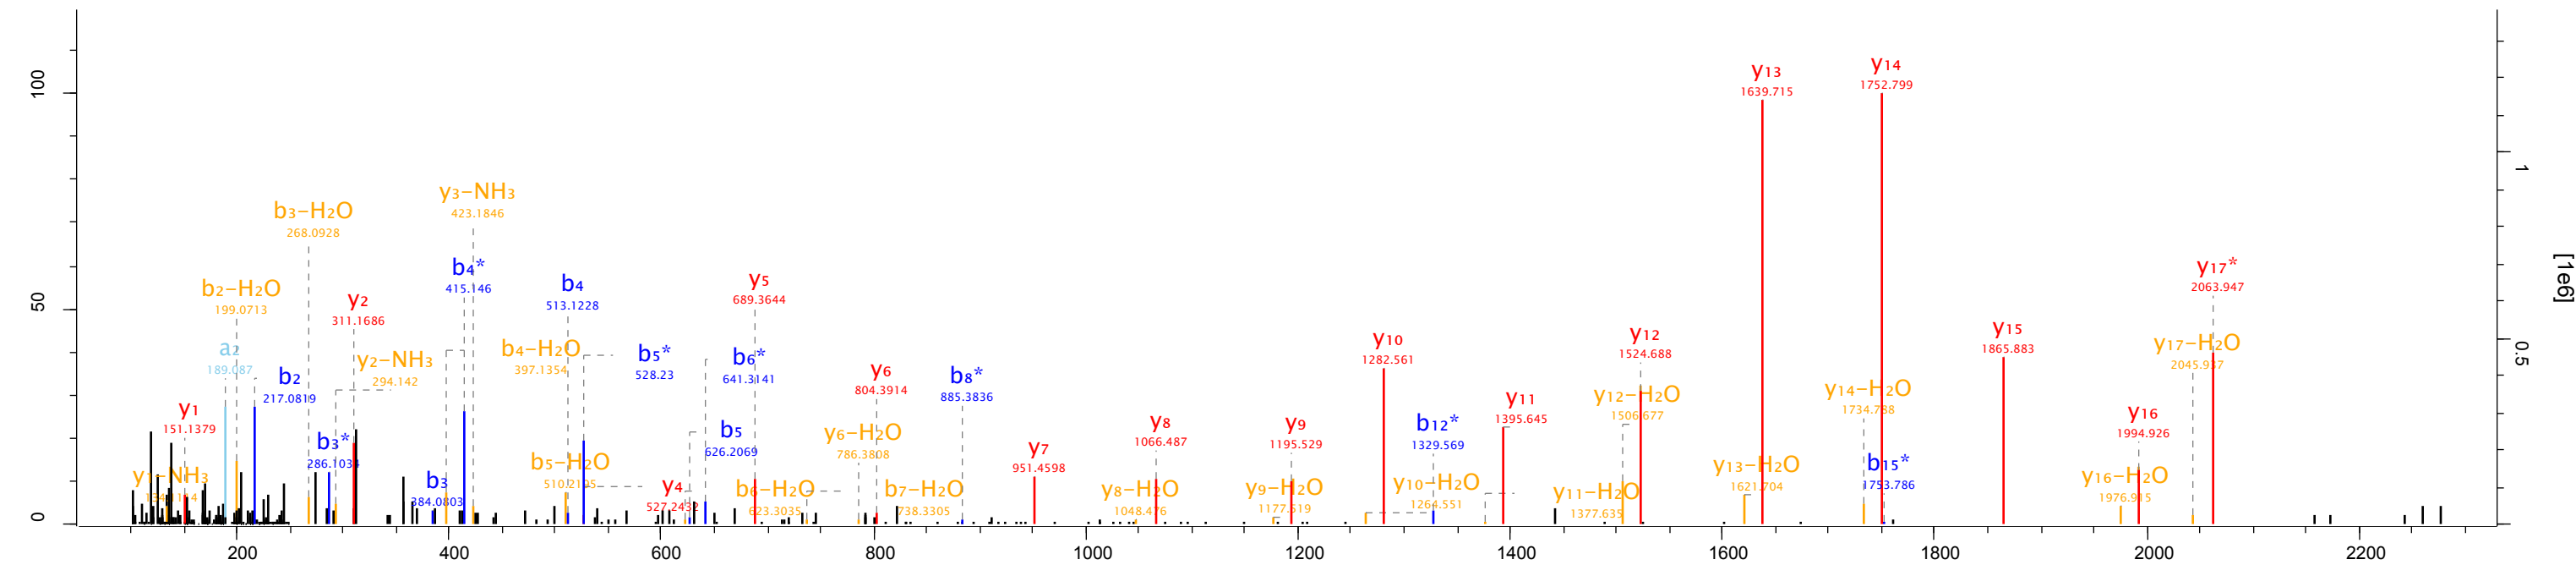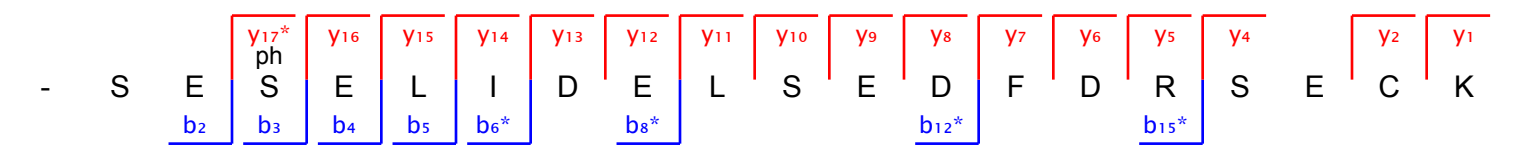

Raw file: 20150814\_A375SR\_Phospho\_BR2\_04  
 Scan: 28635 Method: FTMS; HCD Score: 301.37 m/z: 938.19 Gene names: BMS1

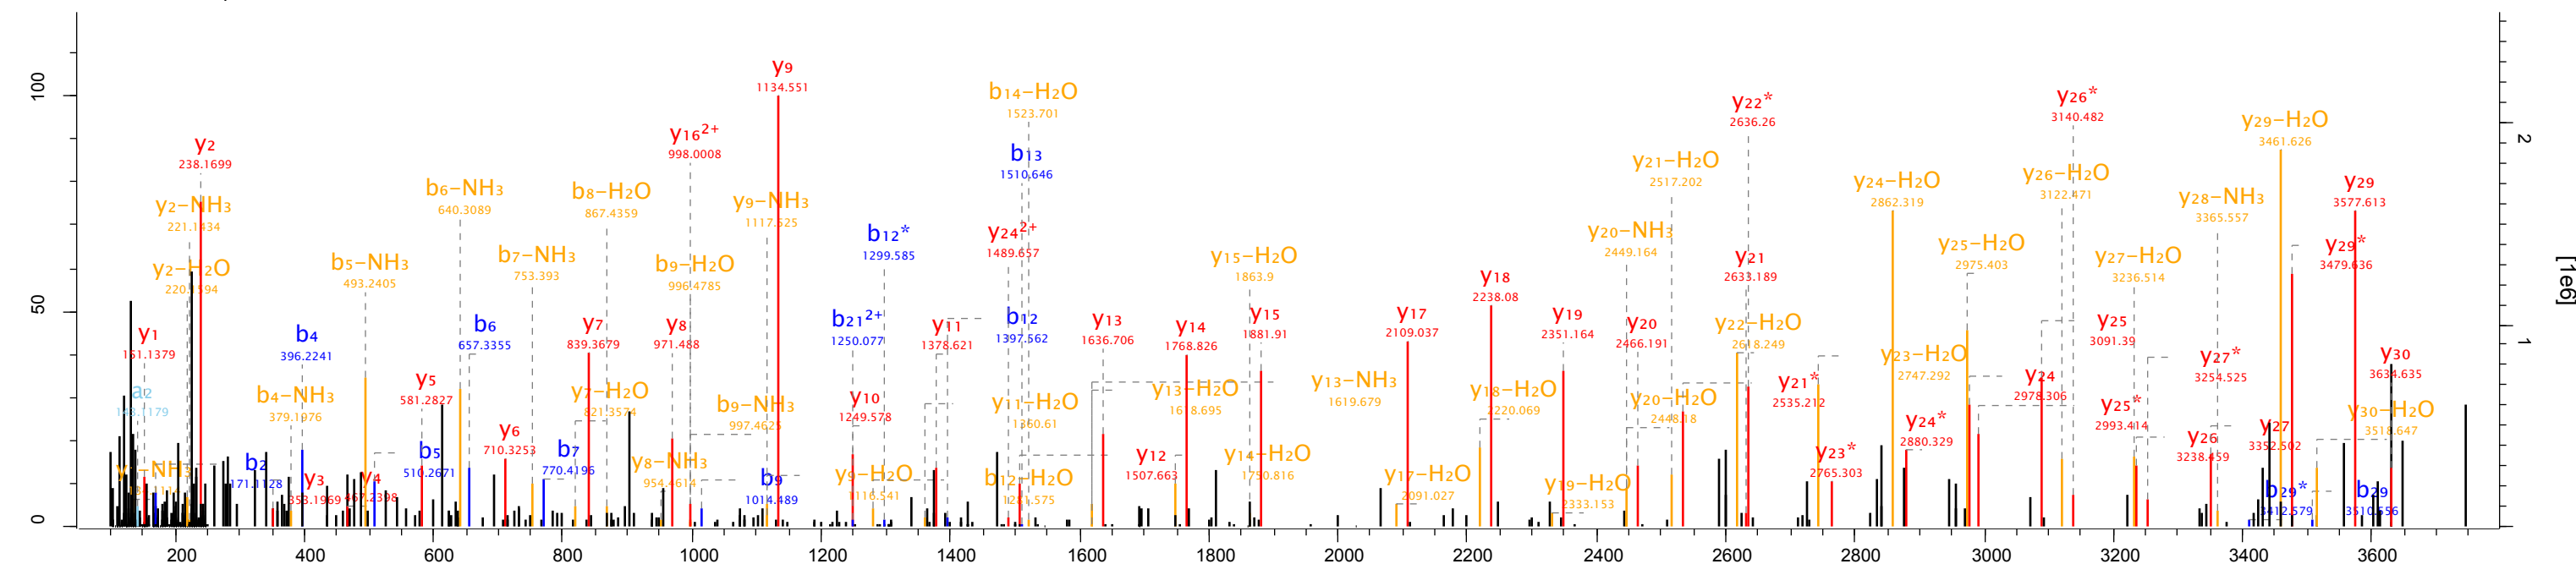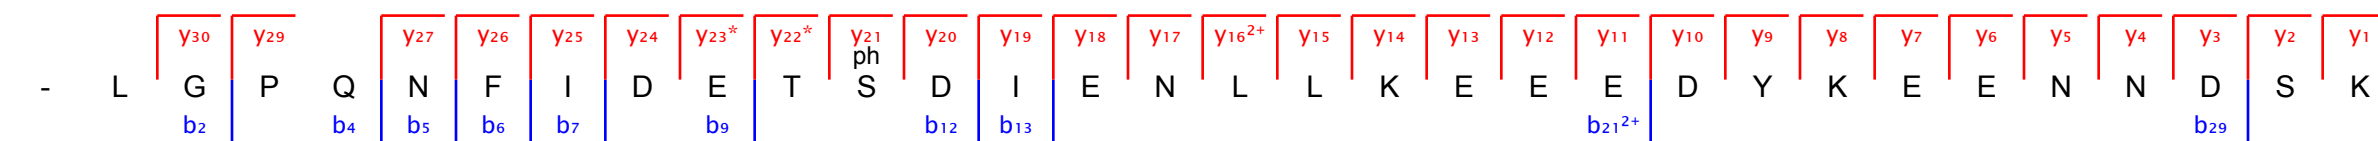

Raw file: 20150814\_A375SR\_Phospho\_BR2\_04  
 Scan: 28915 Method: FTMS; HCD Score: 106.61 m/z: 1011.15 Gene names: TRIM28

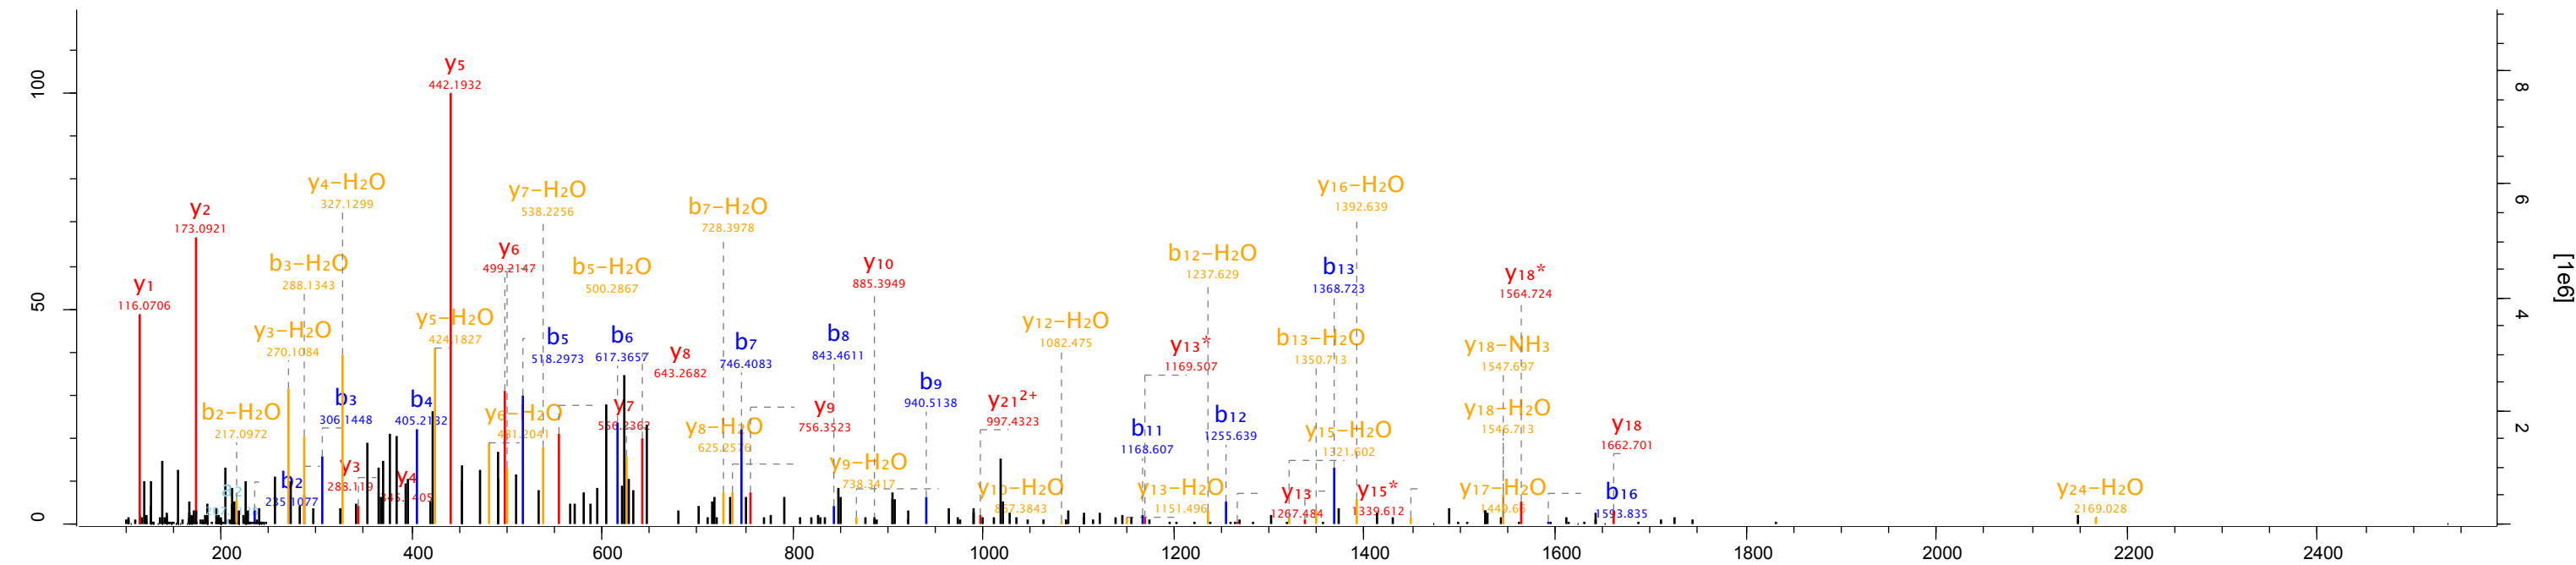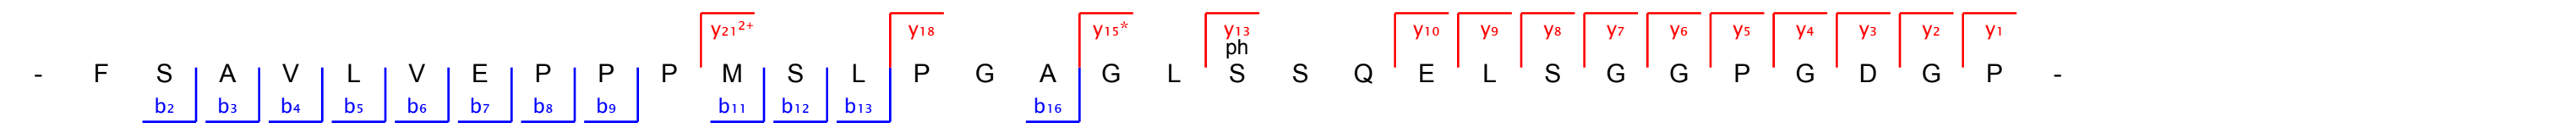

Raw file: 20150814\_A375SR\_Phospho\_BR2\_04  
 Scan: 28995 Method: FTMS; HCD Score: 125.67 m/z: 778.84 Gene names: PARN

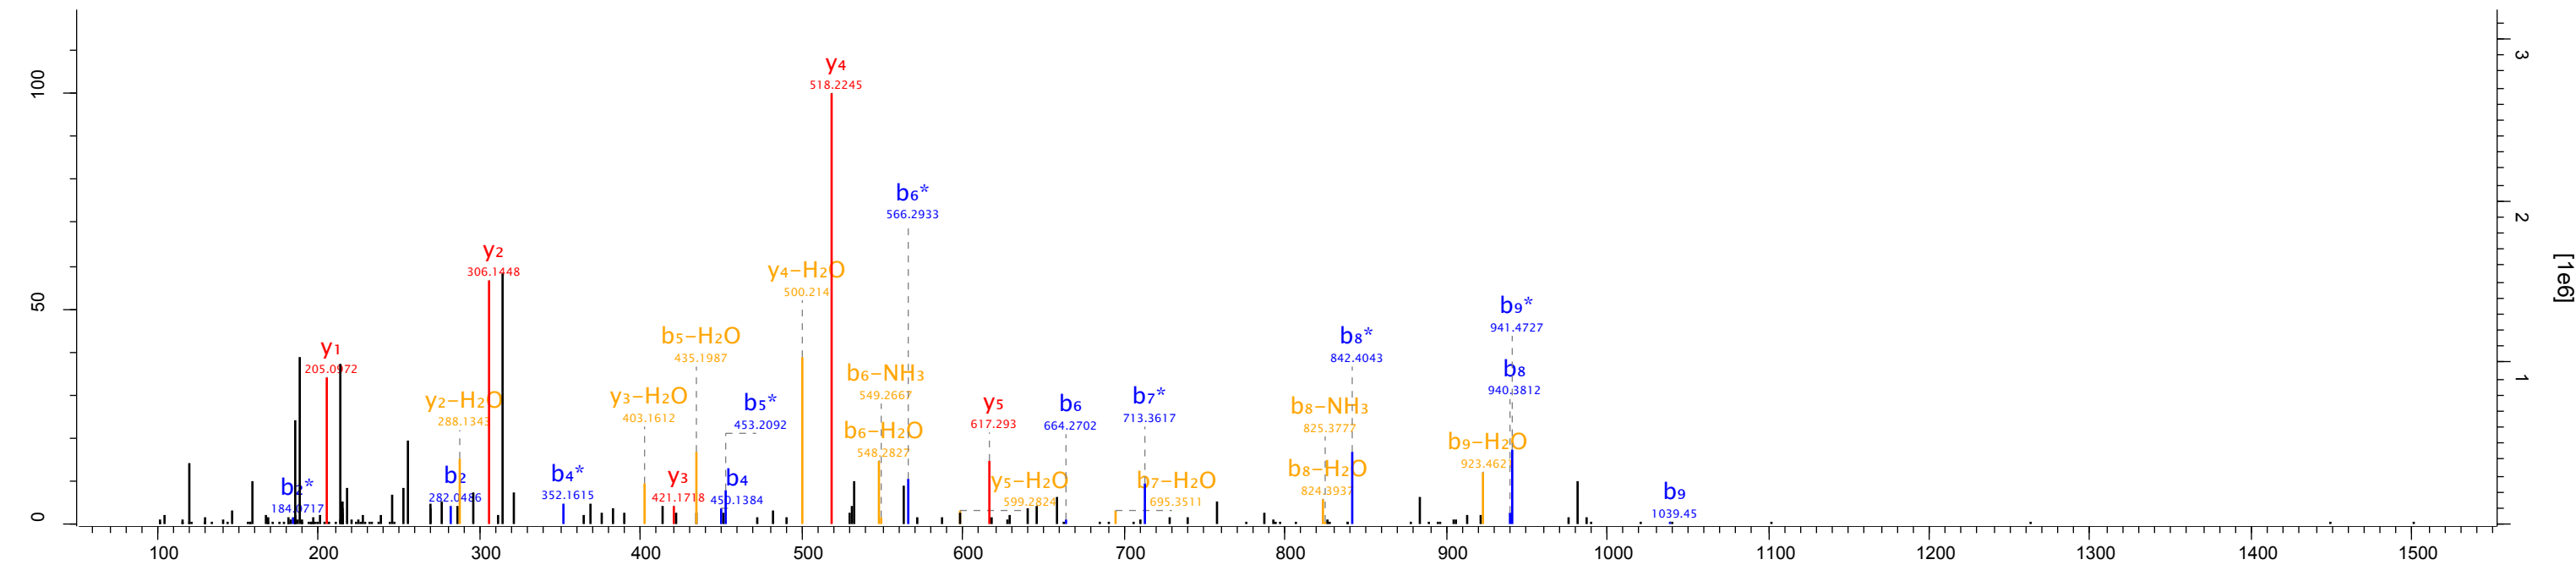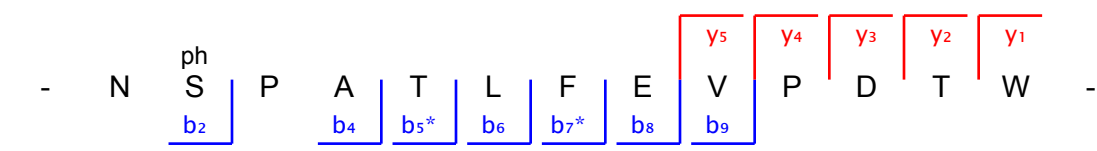

Raw file 20150814\_A375SR\_Phospho\_BR2\_04 Scan 3455 Method FTMS; HCD Score 73.5 m/z 496.21 Gene names VIM;GFAP

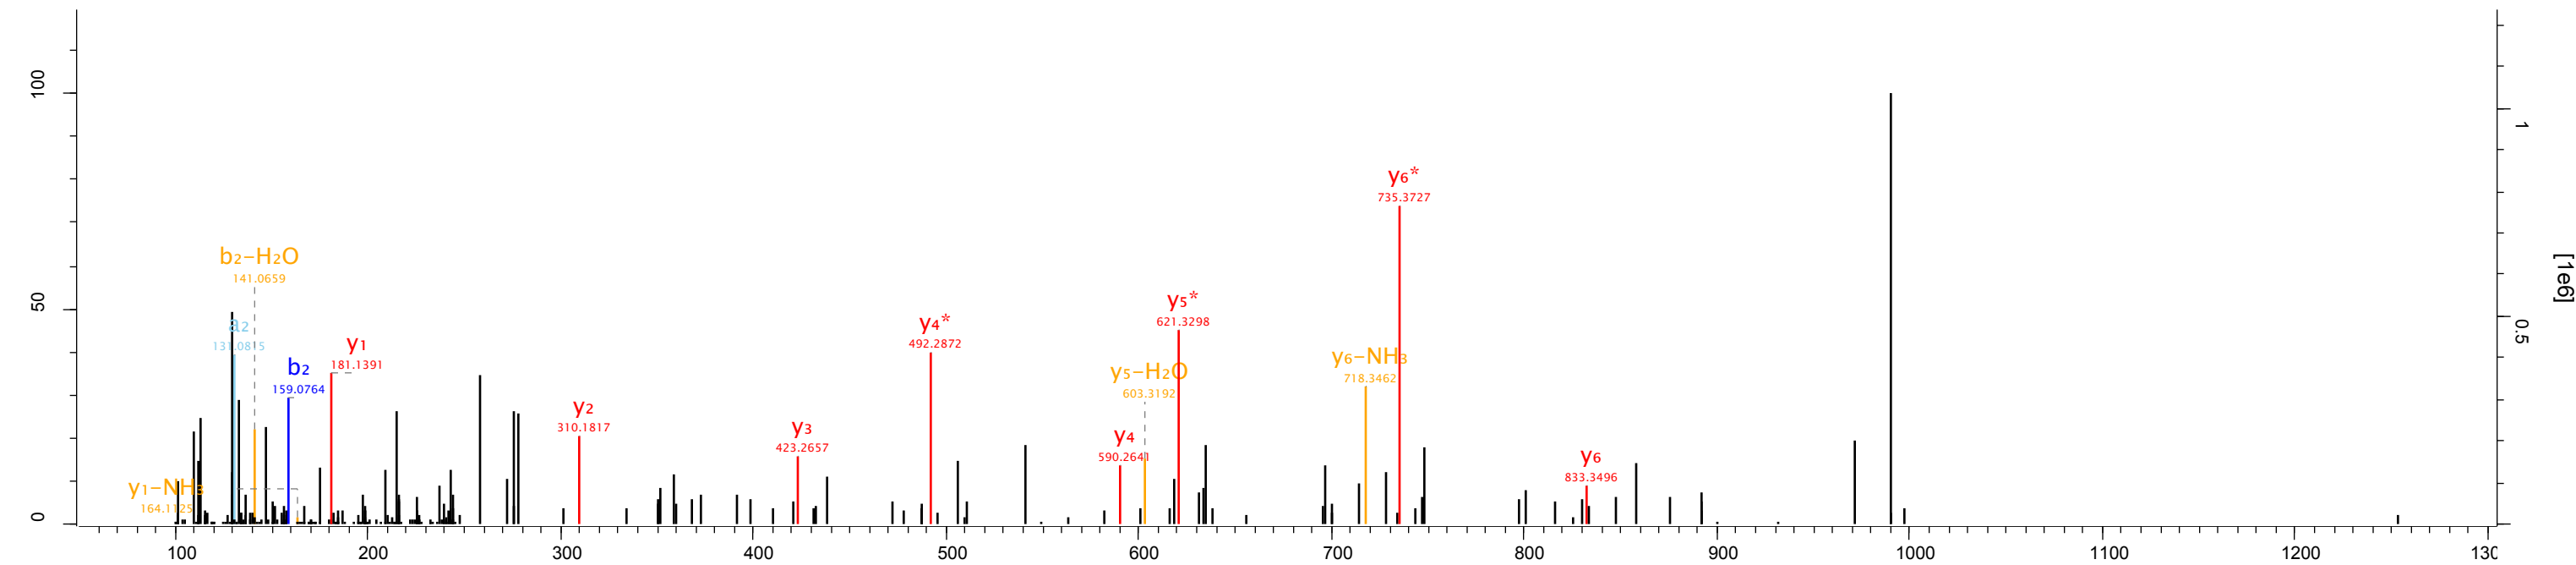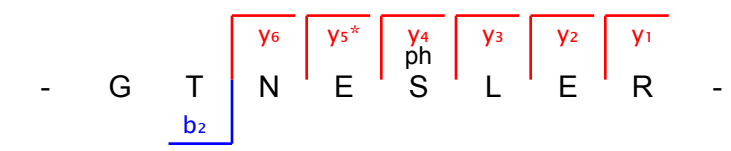

Raw file: 20150814\_A375SR\_Phospho\_BR2\_04  
 Scan: 3475 Method: FTMS; HCD Score: 94.19 m/z: 522.61 Gene names: APC

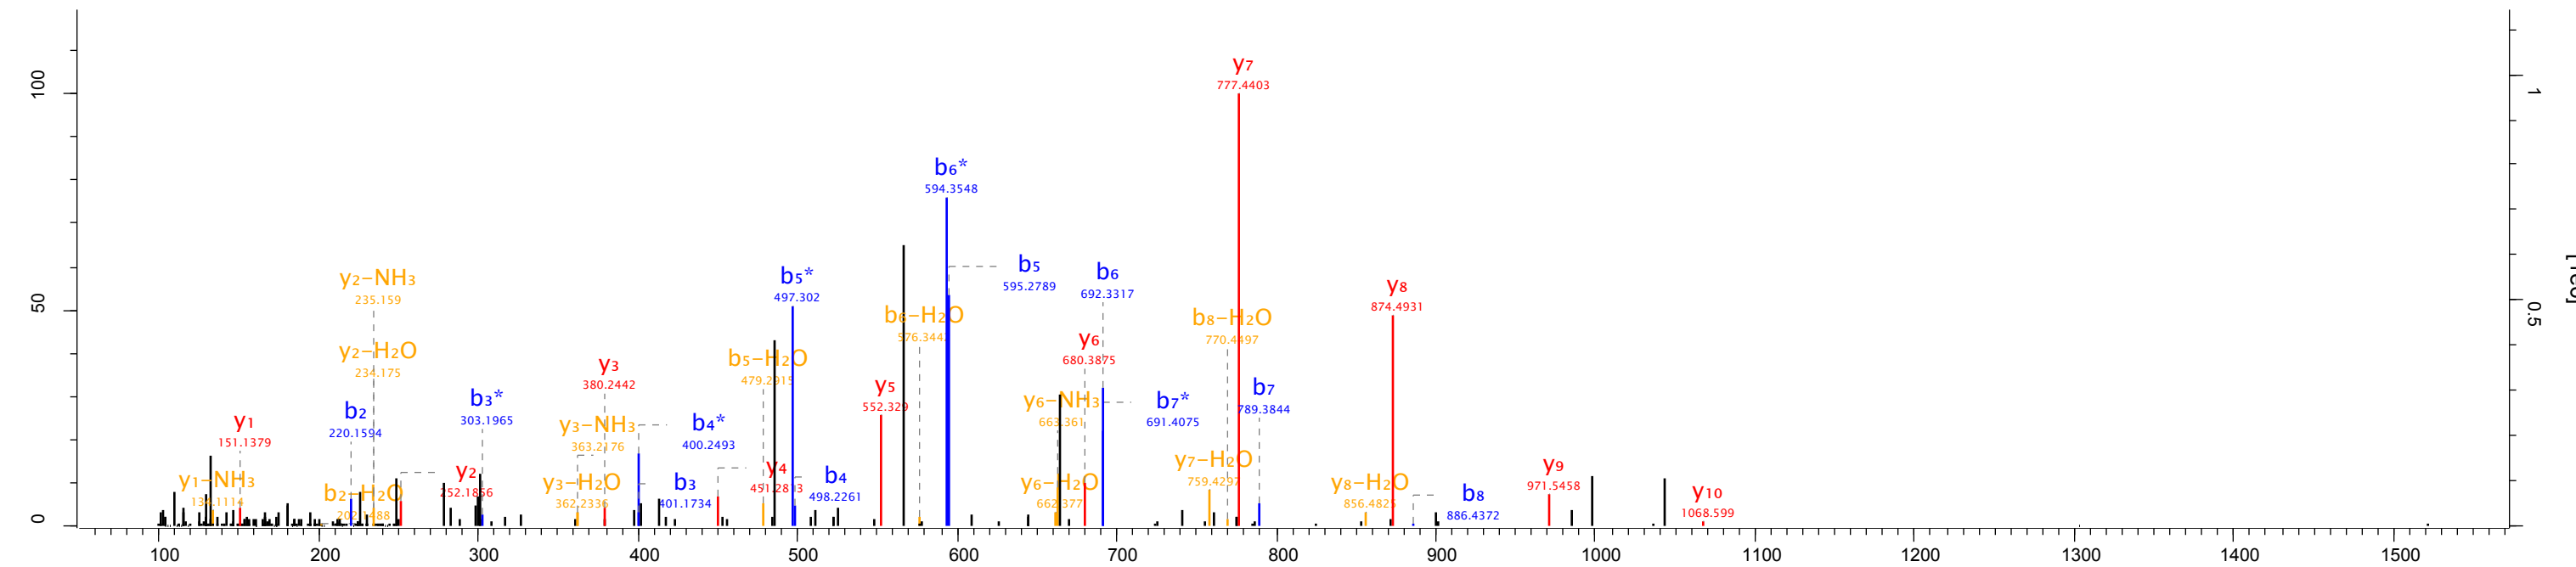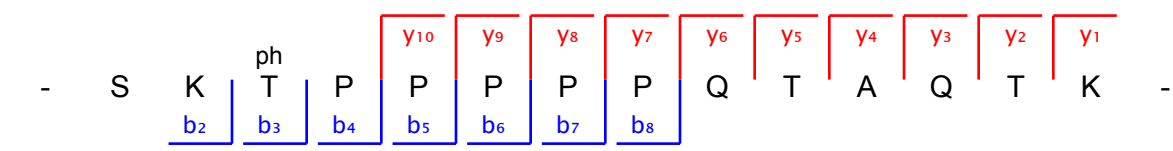

Raw file: 20150814\_A375SR\_Phospho\_BR2\_04  
 Scan: 3725 Method: FTMS; HCD Score: 81.8 m/z: 418.23 Gene names: SRRM2

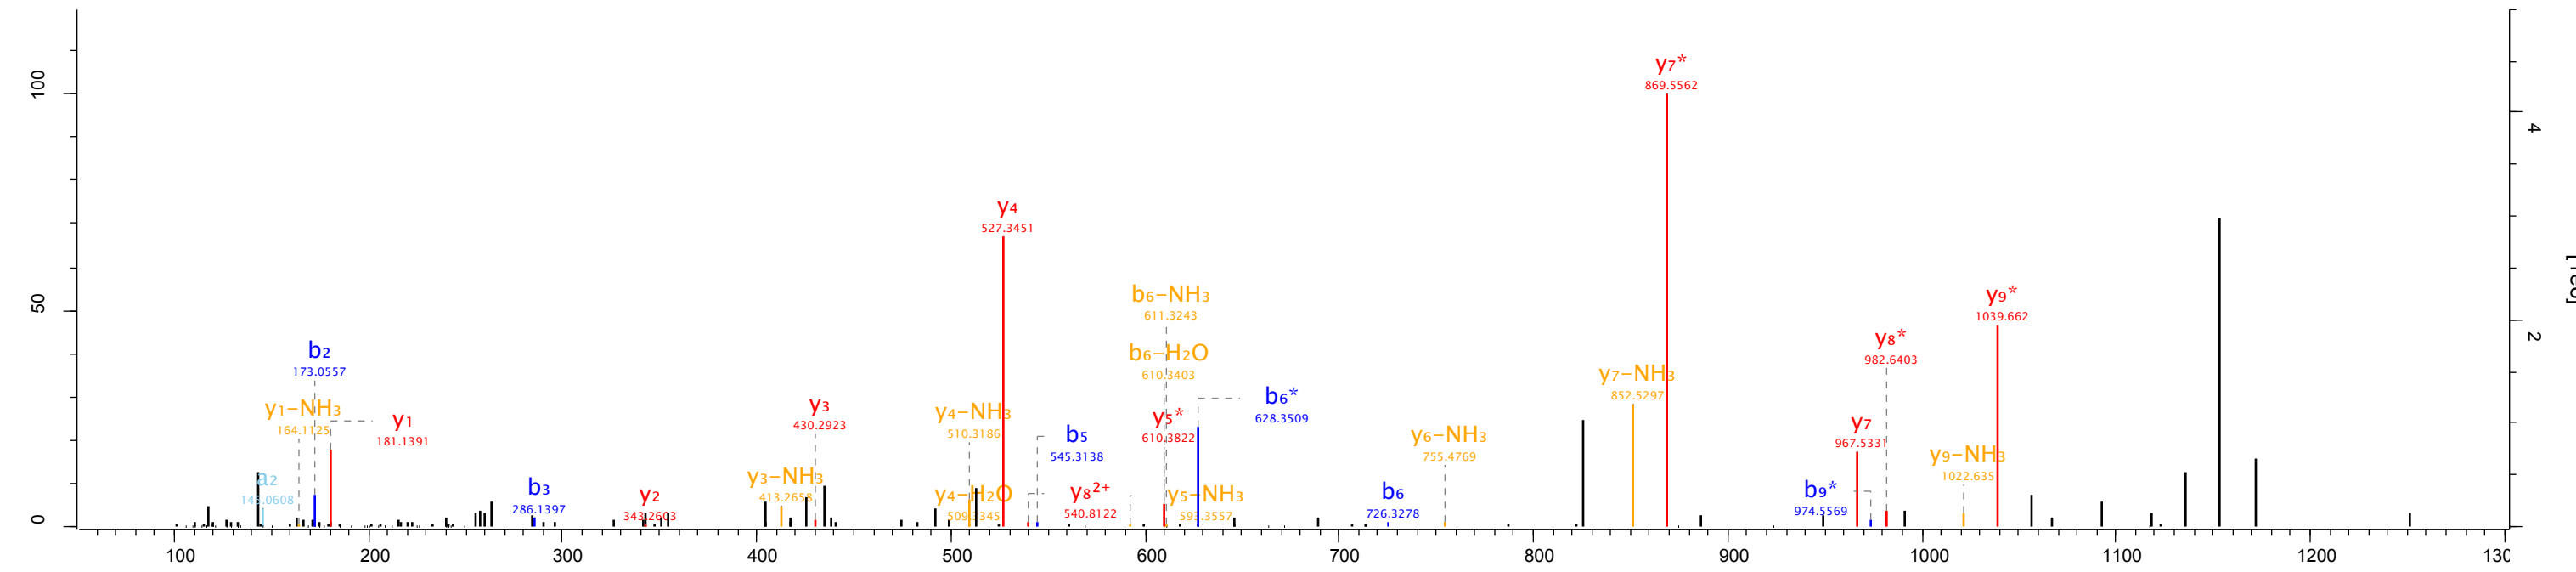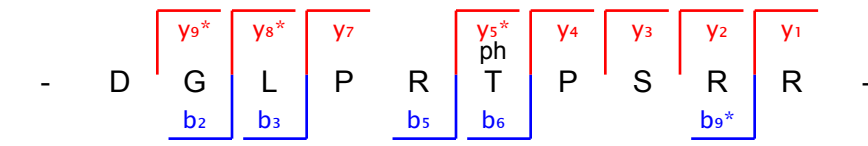

Raw file: 20150814\_A375SR\_Phospho\_BR2\_04  
 Scan: 3855 Method: FTMS; HCD Score: 91.93 m/z: 678.8 Gene names: SNAPC4

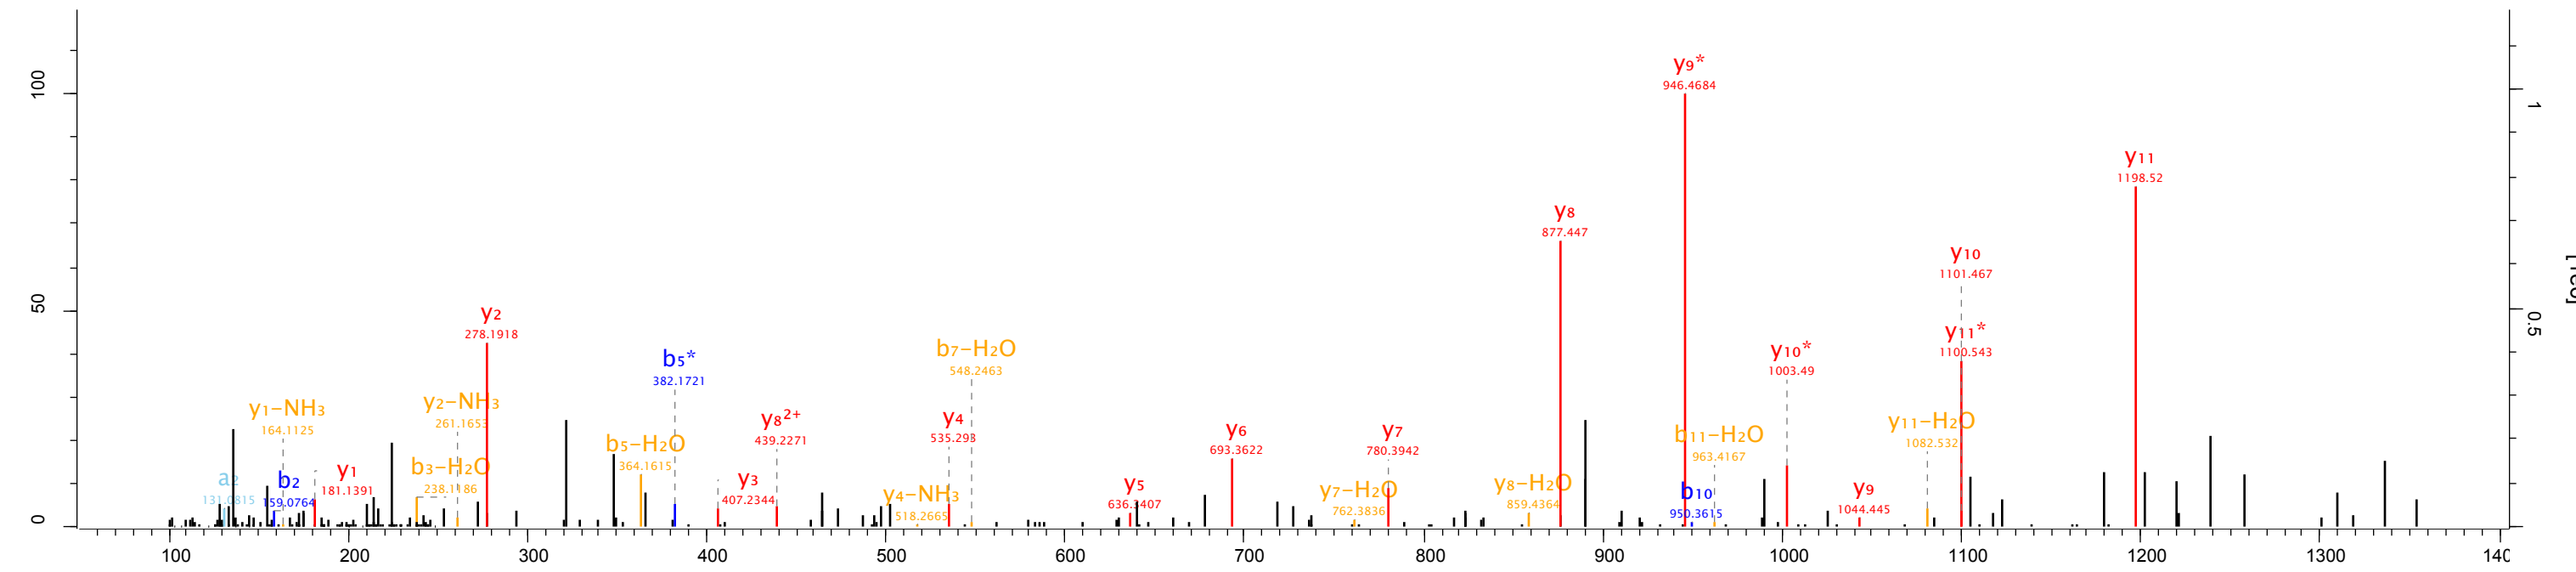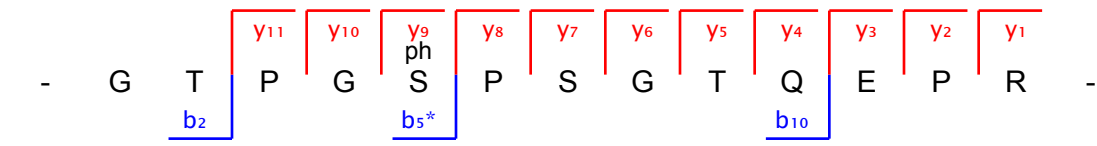



Raw file: 20150814\_A375SR\_Phospho\_BR2\_04  
 Scan: 5075 Method: FTMS; HCD Score: 92.54 m/z: 497.72 Gene names: VIM

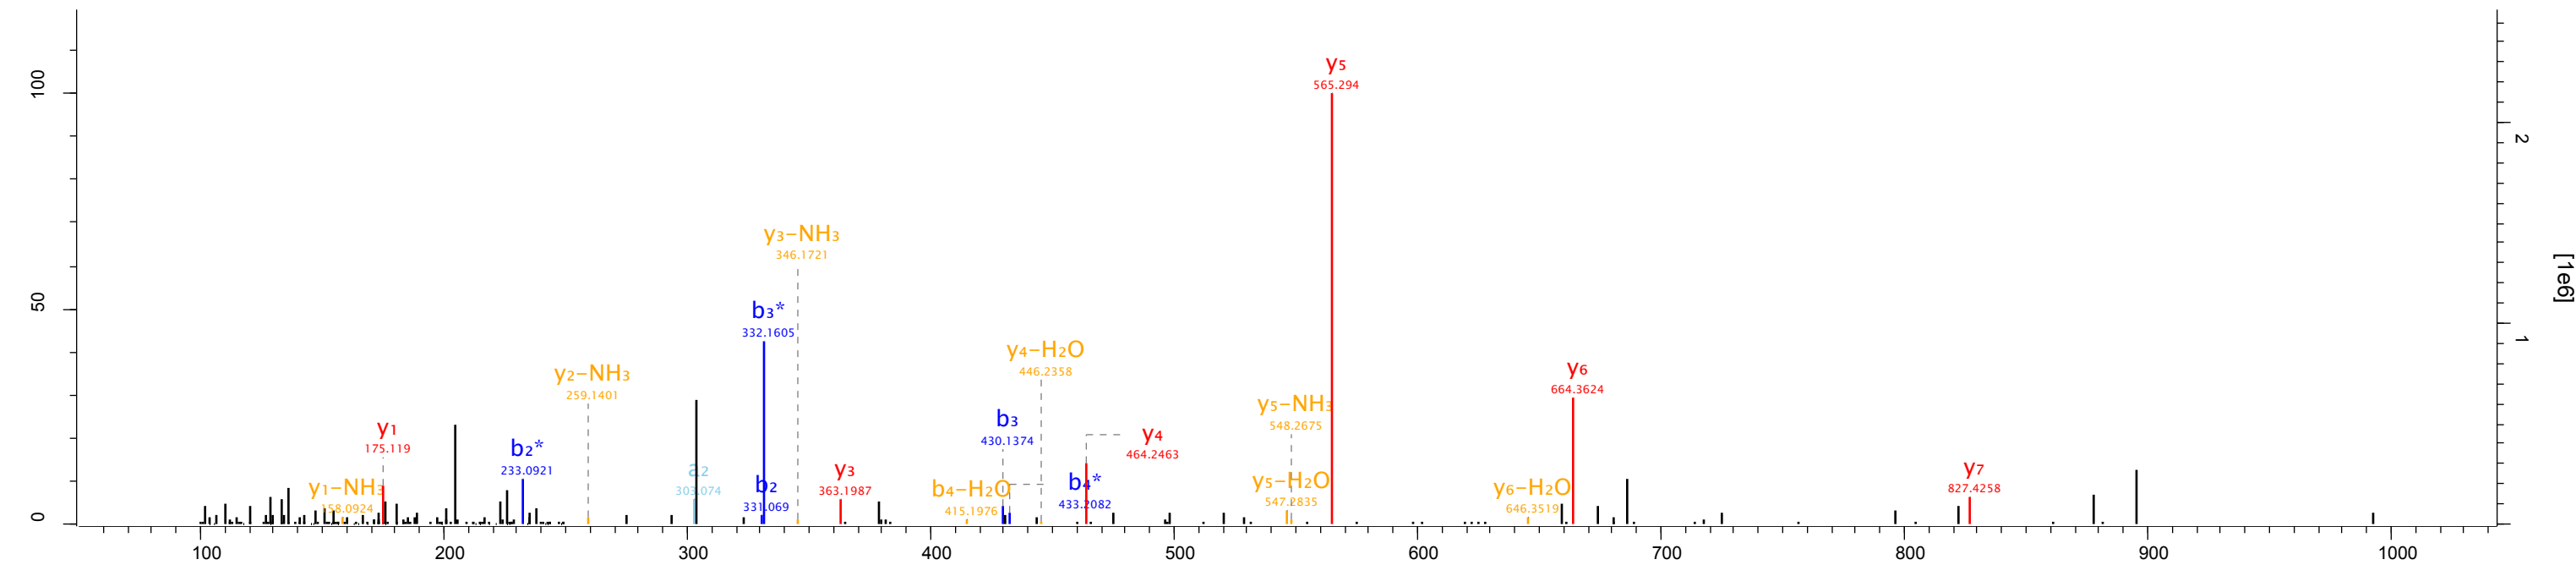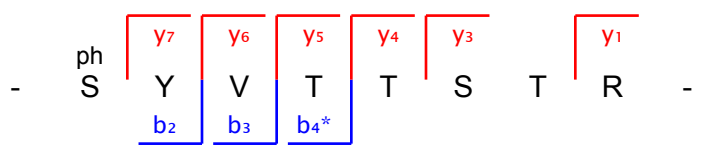

Raw file: 20150814\_A375SR\_Phospho\_BR2\_04  
 Scan: 5315 Method: FTMS; HCD Score: 123.42 m/z: 750.29 Gene names: RBMX;RBMXL1

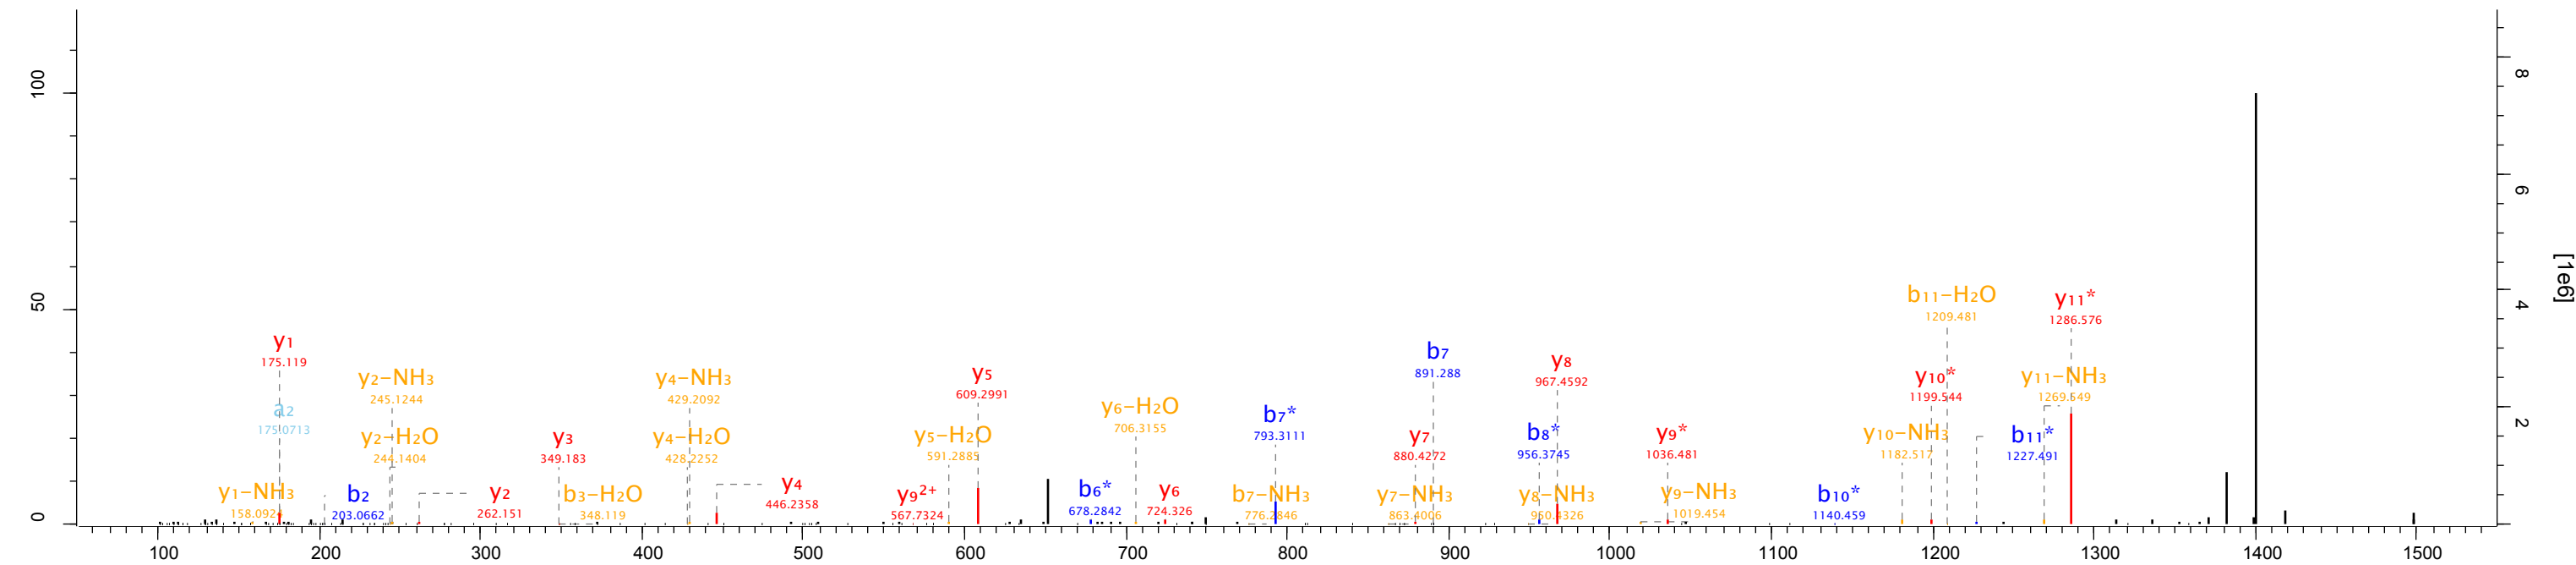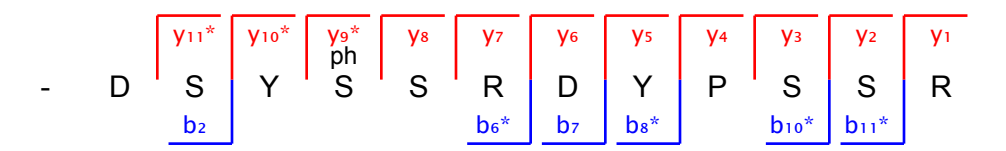

Raw file 20150814\_A375SR\_Phospho\_BR2\_04 Scan 5535 Method FTMS; HCD Score 252.32 m/z 684 Gene names CAAP1

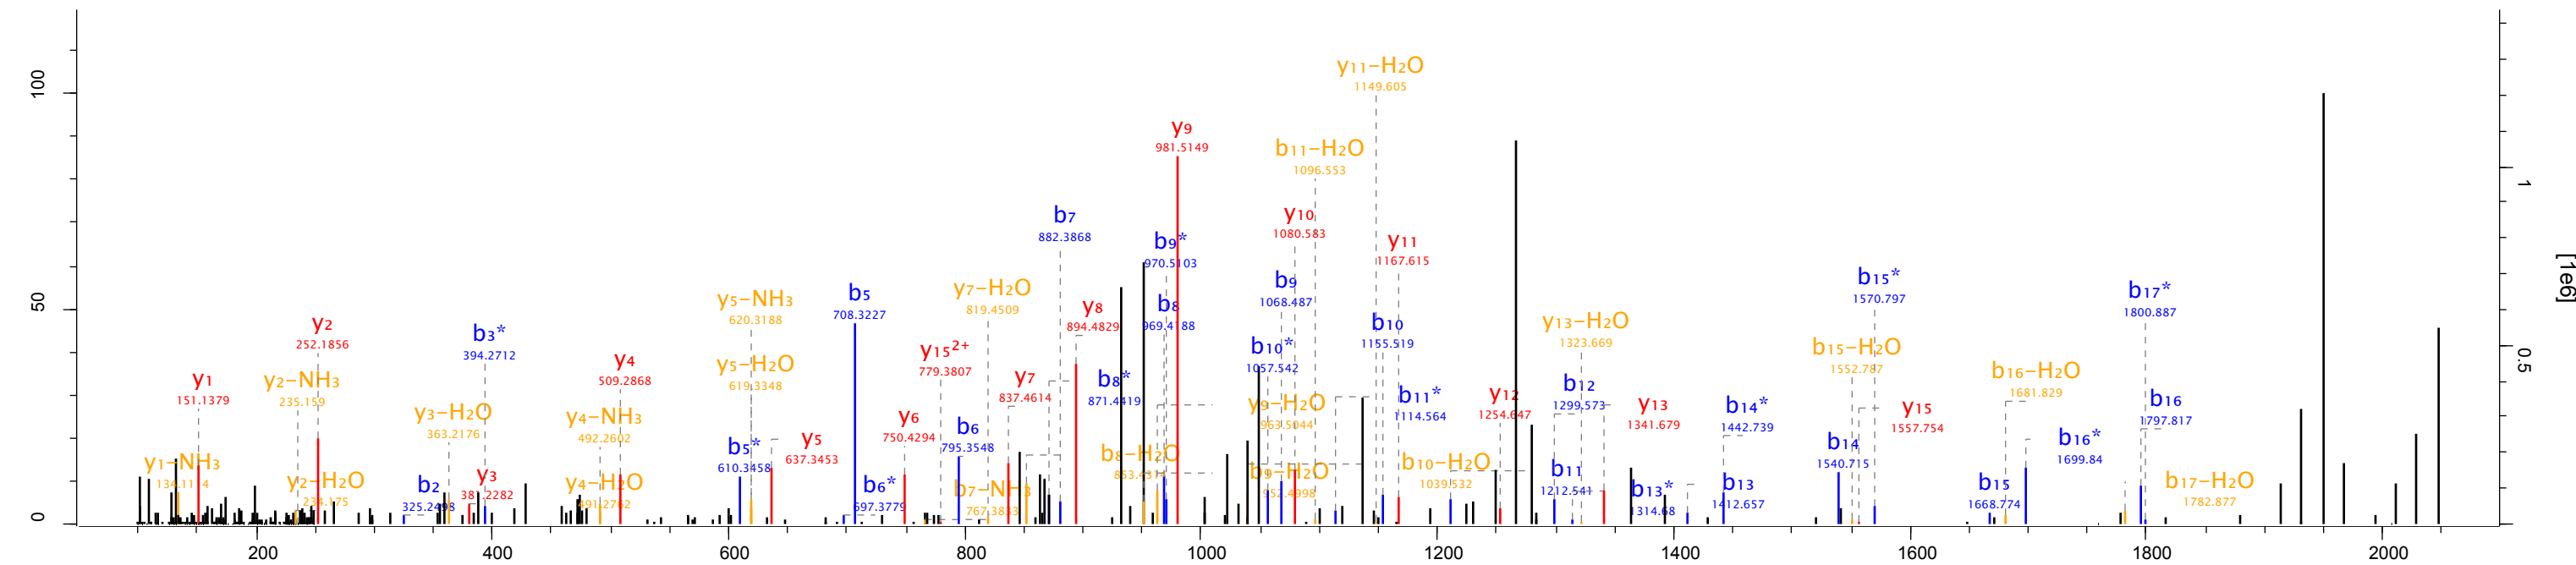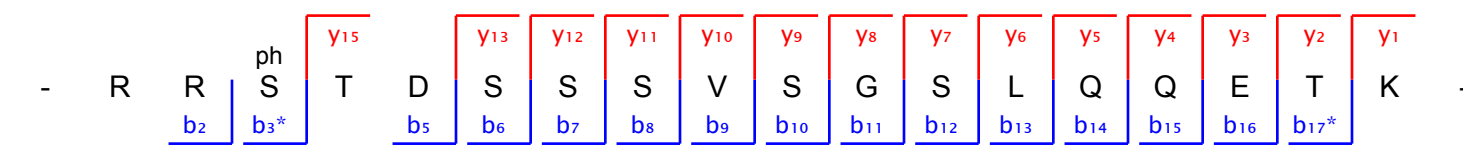

Raw file: 20150814\_A375SR\_Phospho\_BR2\_04  
 Scan: 6355 Method: FTMS; HCD Score: 43.87 m/z: 757.84 Gene names: TRA2A

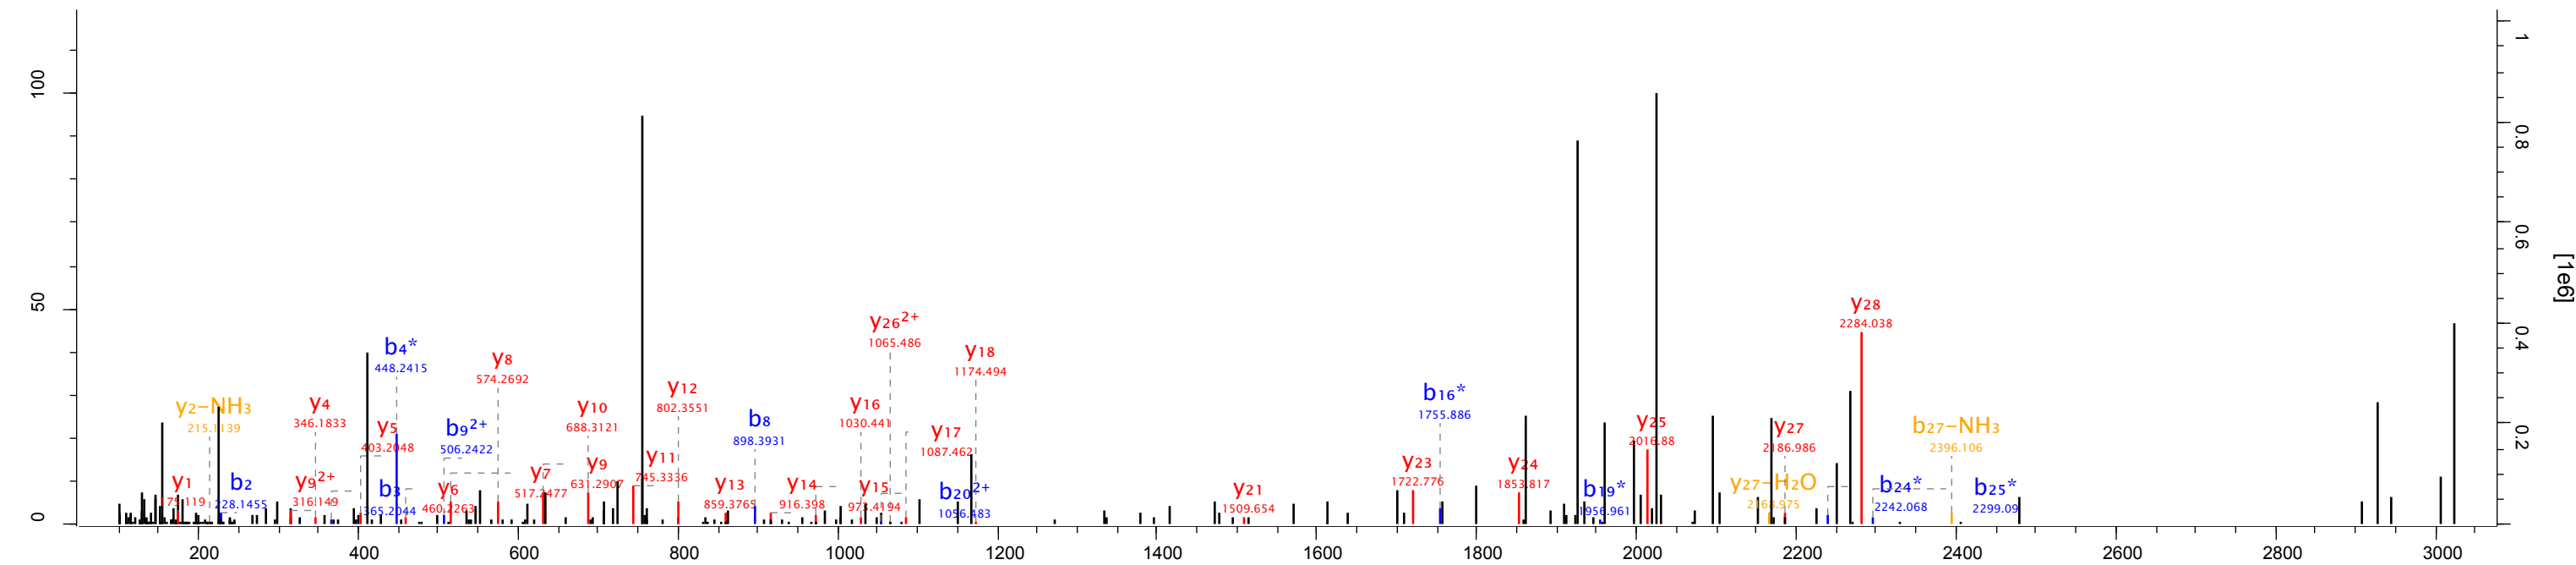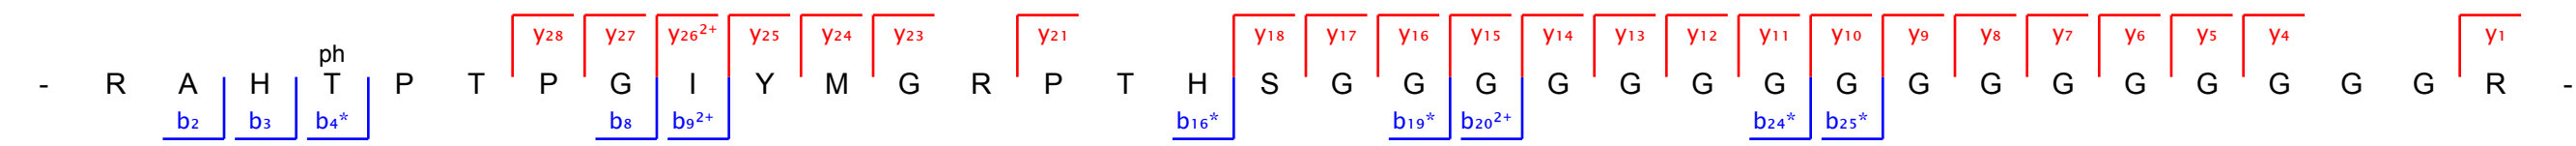

Raw file: 20150814\_A375SR\_Phospho\_BR2\_04  
 Scan: 7035 Method: FTMS; HCD Score: 92.9 m/z: 637.61 Gene names: RRAS2

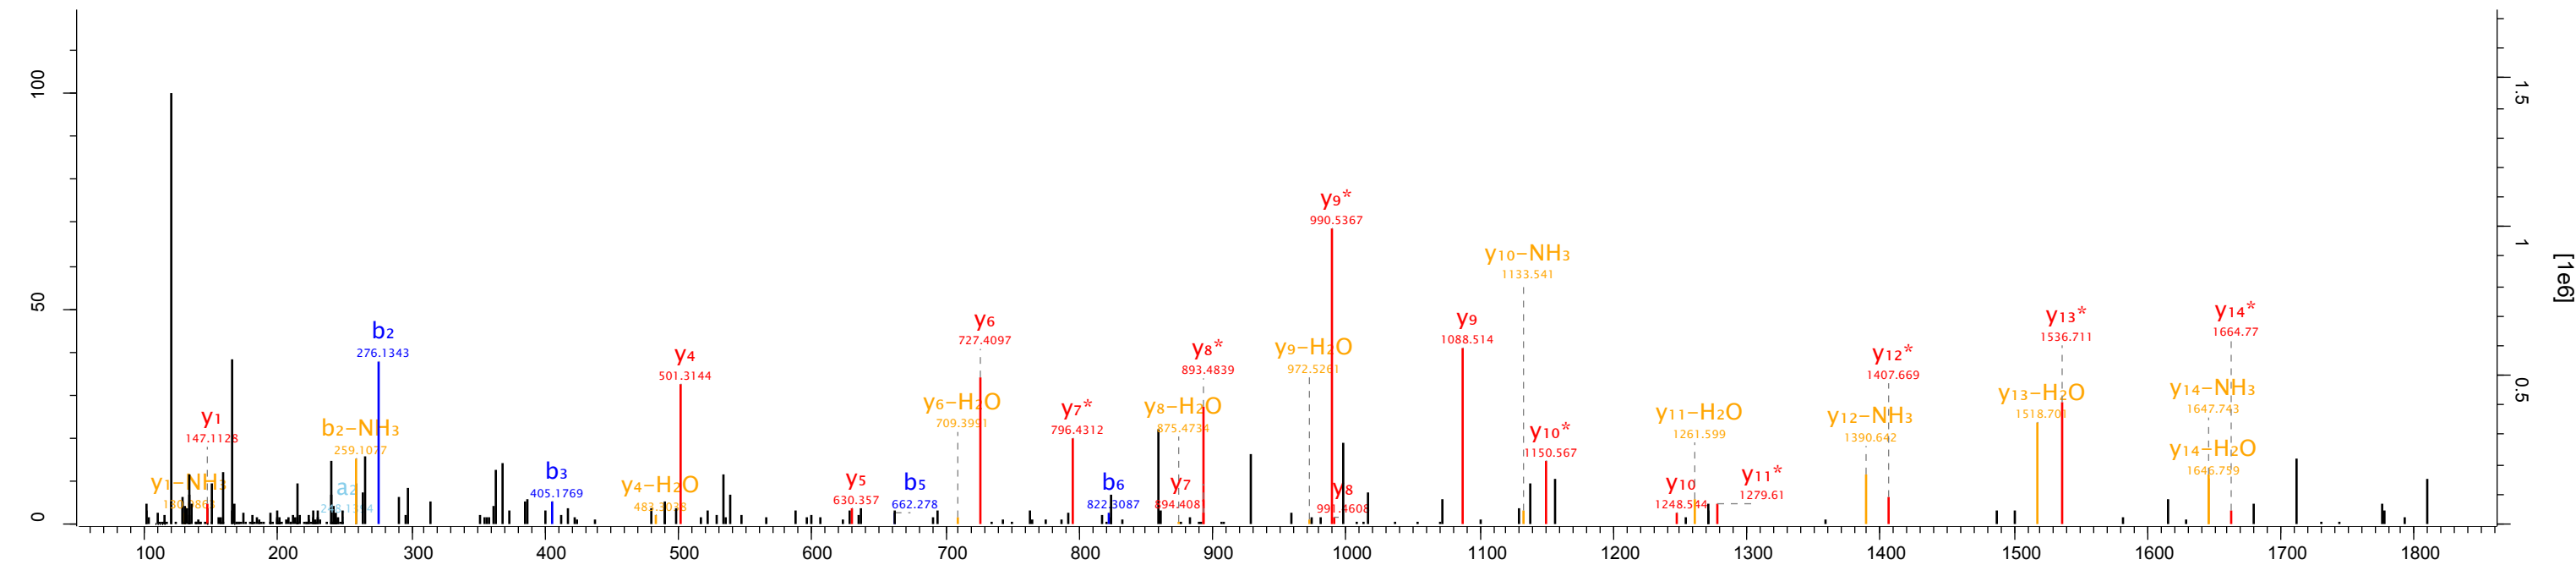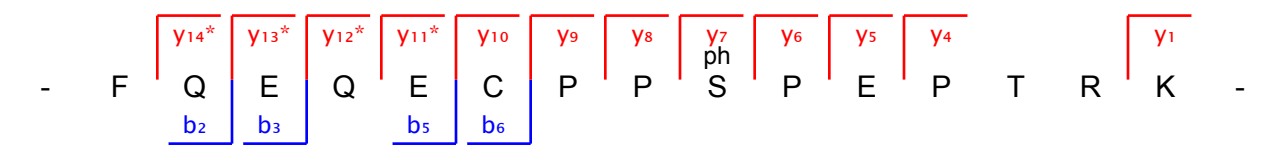

Raw file: 20150814\_A375SR\_Phospho\_BR2\_04  
 Scan: 7295 Method: FTMS; HCD Score: 54.09 m/z: 644.3 Gene names: LARP4B

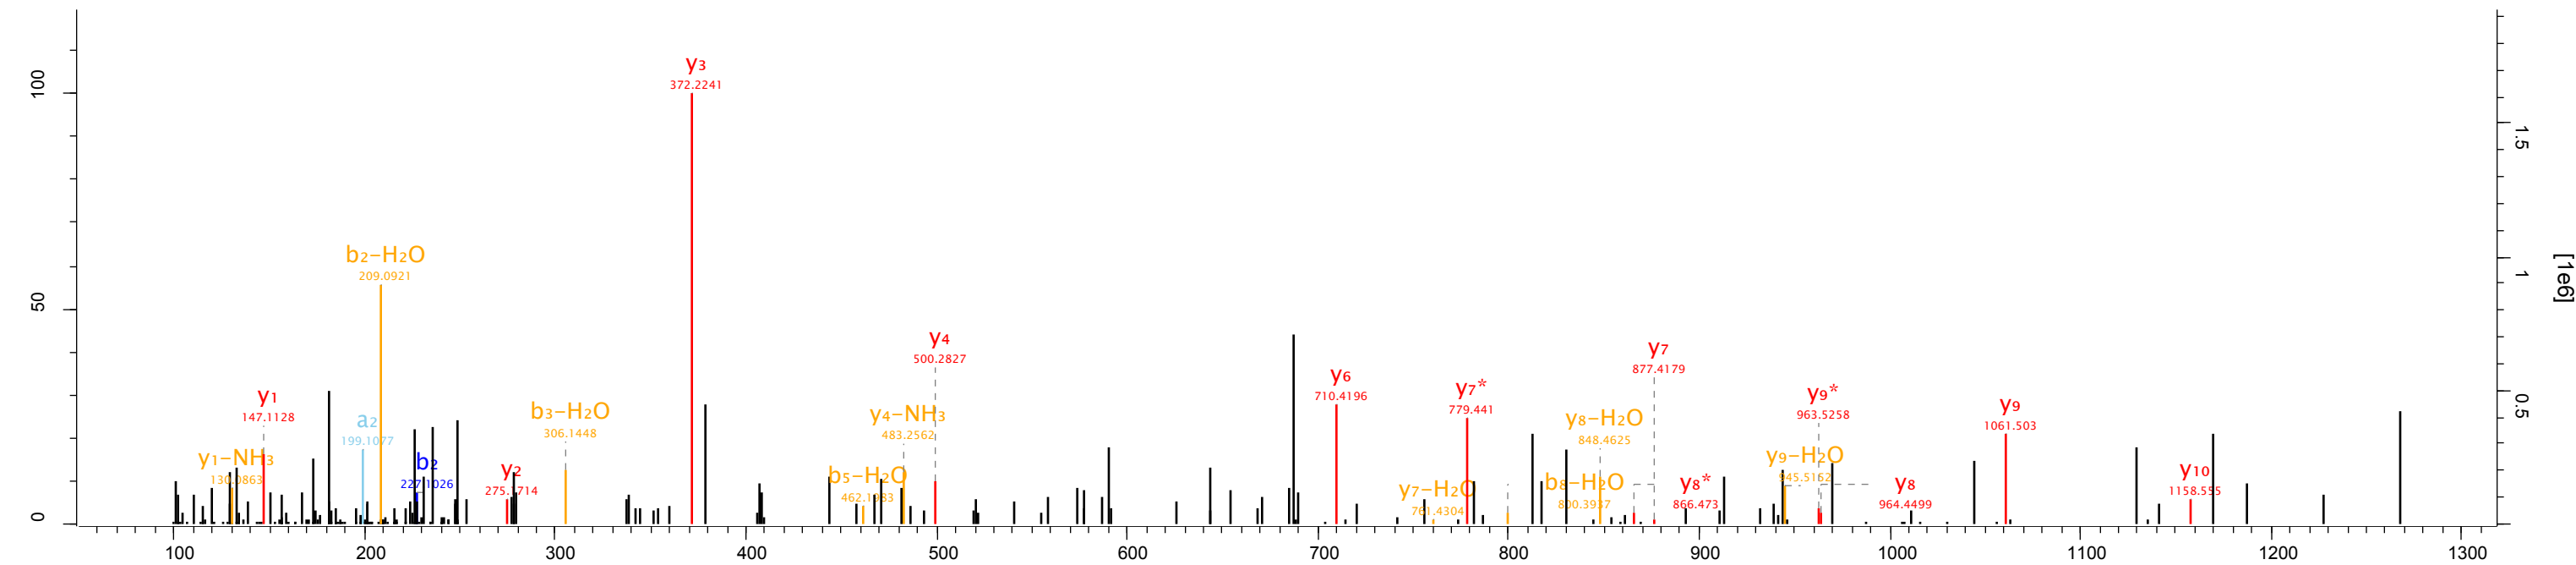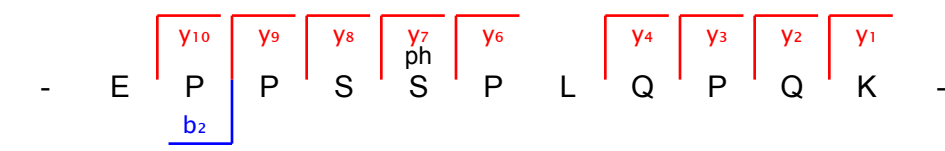

Raw file: 20150814\_A375SR\_Phospho\_BR2\_04  
 Scan: 7375 Method: FTMS; HCD Score: 110.53 m/z: 484.23 Gene names: HDAC7

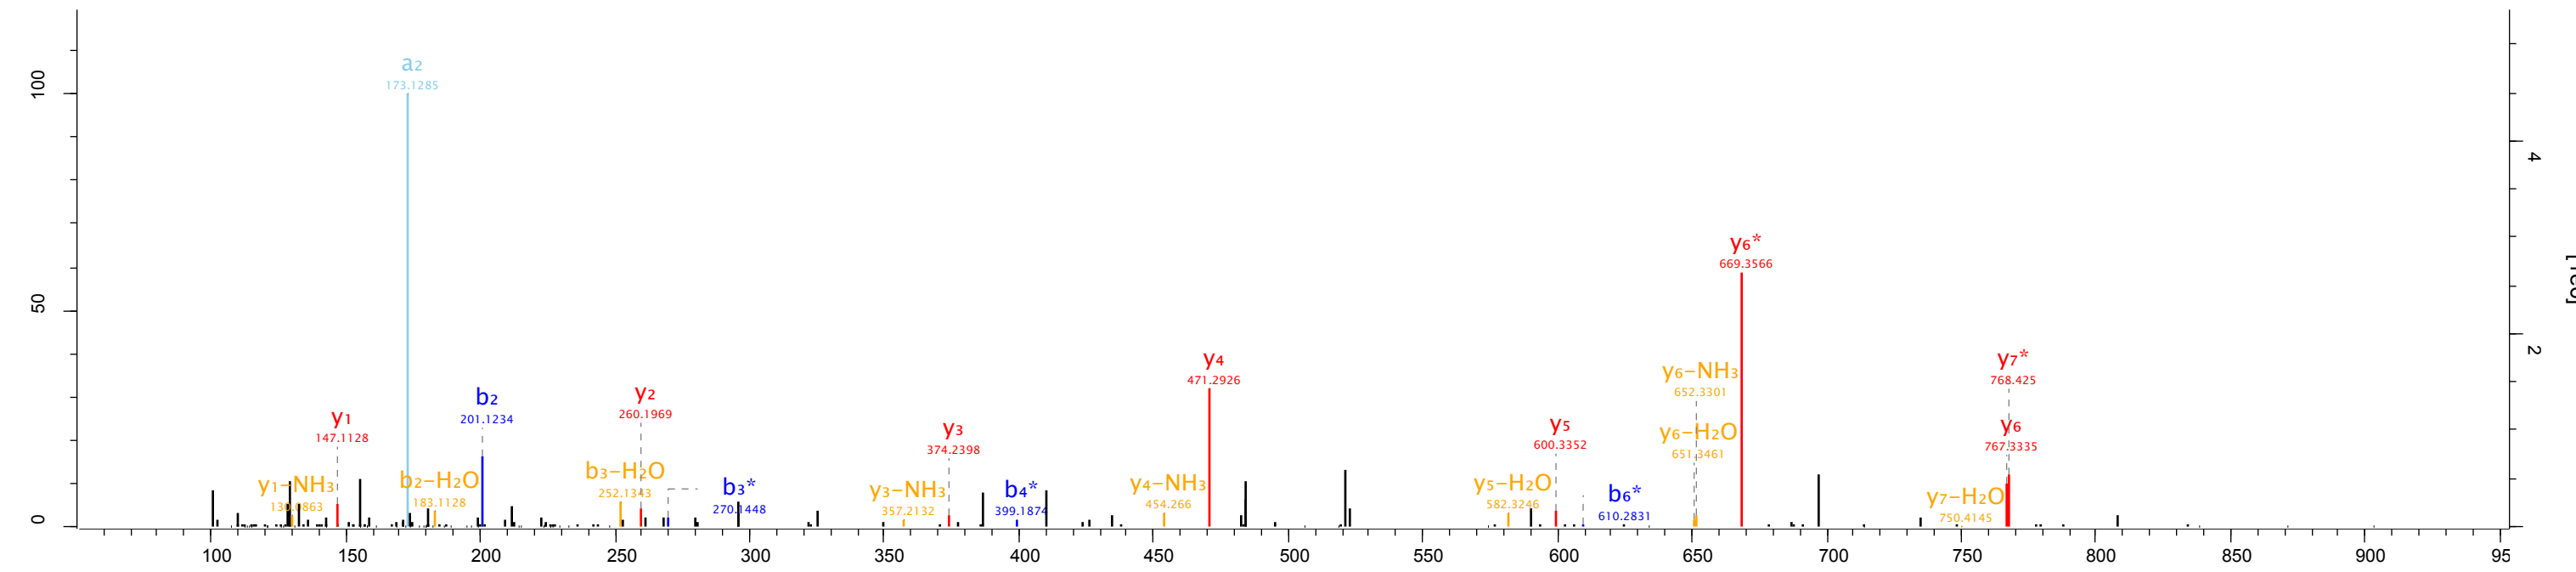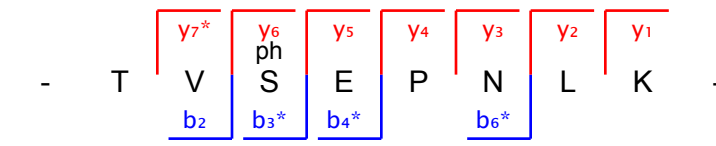

Raw file: 20150814\_A375SR\_Phospho\_BR2\_04  
 Scan: 7995 Method: FTMS; HCD Score: 66.61 m/z: 614.28 Gene names: TNRC6A

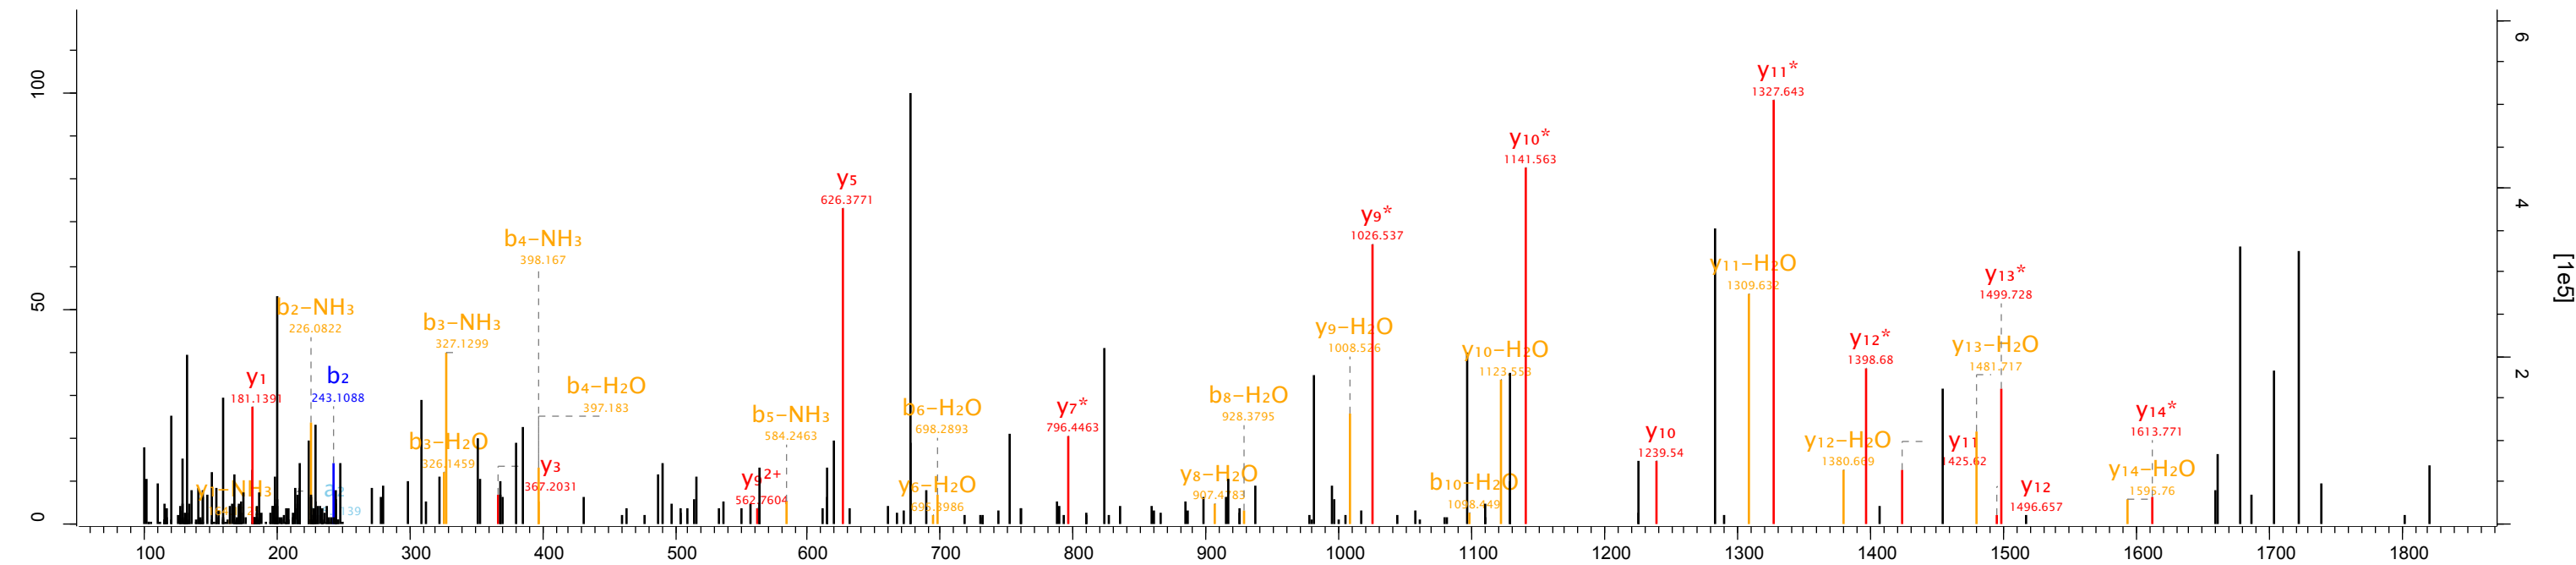

Protein sequence: - Q N T A W D T E T S P R G E R -

Fragmentation sites are indicated by brackets above the sequence:

- Red brackets above N, T, A, W, D, T, E, T, S, P, R, G, E, R indicate y-ion formation (y<sub>14</sub>\*, y<sub>13</sub>\*, y<sub>12</sub>\*, y<sub>11</sub>\*, y<sub>10</sub>\*, y<sub>9</sub>\*, y<sub>7</sub>\*, y<sub>5</sub>, y<sub>3</sub>, y<sub>1</sub>).
- Blue bracket below N indicates b<sub>2</sub> ion formation.



Raw file: 20150814\_A375SR\_Phospho\_BR2\_04  
 Scan: 8155 Method: FTMS; HCD Score: 165.34 m/z: 763 Gene names: STX4

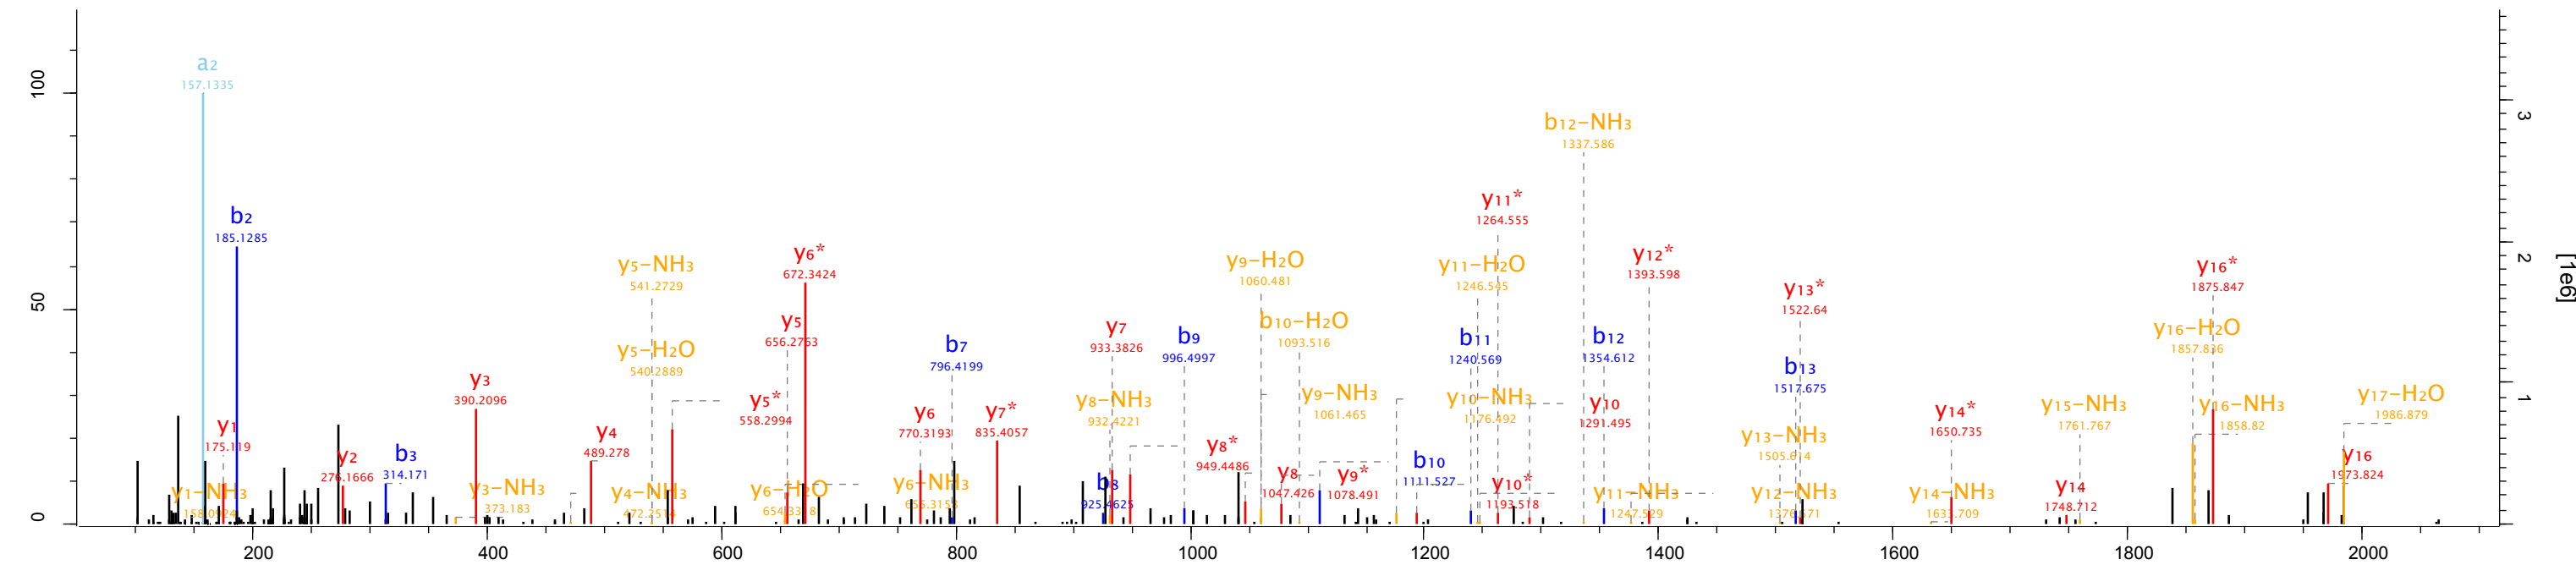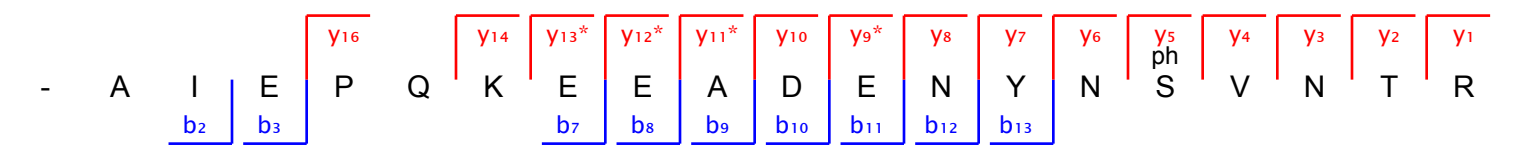

Raw file: 20150814\_A375SR\_Phospho\_BR2\_04  
 Scan: 8375 Method: FTMS; HCD Score: 141.83 m/z: 873.85 Gene names: RBMX

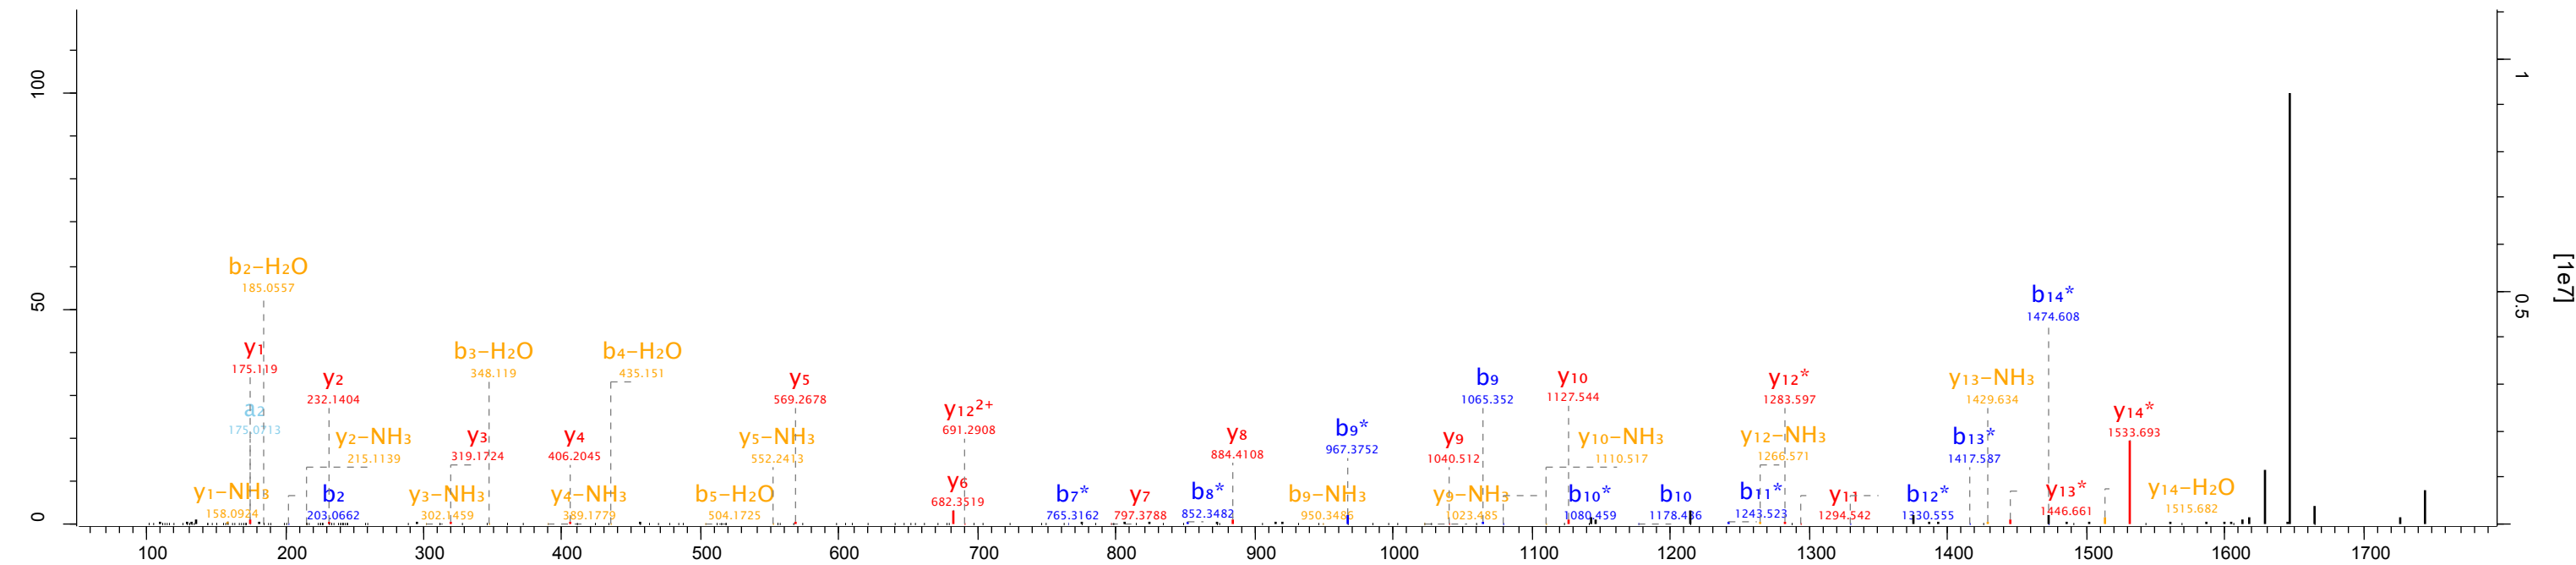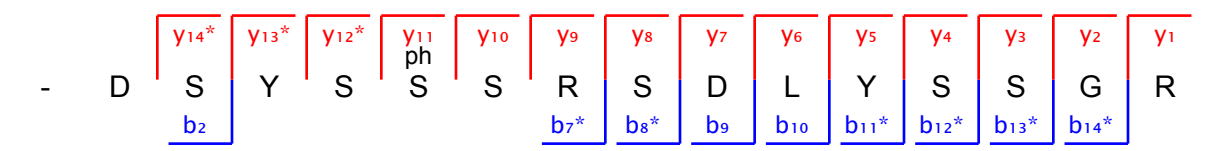

Raw file: 20150814\_A375SR\_Phospho\_BR2\_04  
 Scan: 8525 Method: FTMS; HCD Score: 116.55 m/z: 511.25 Gene names: PEBP1

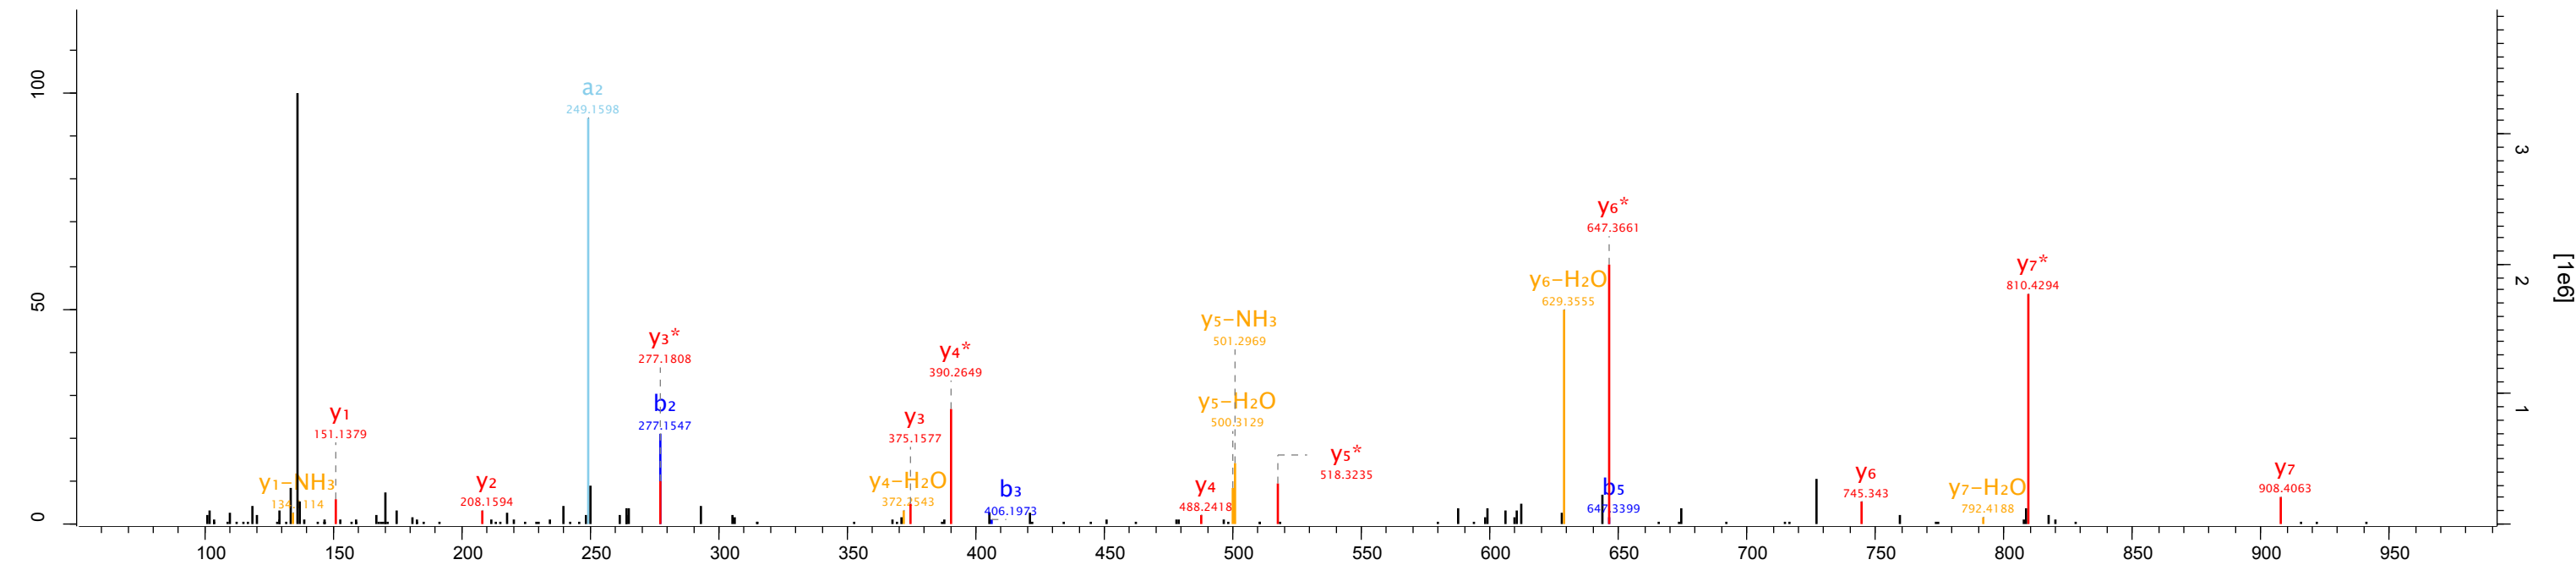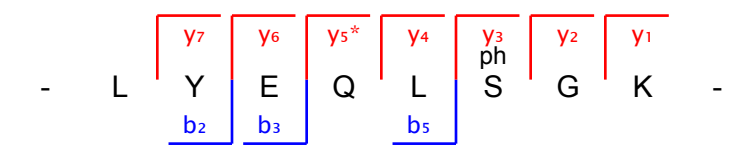

Raw file: 20150814\_A375SR\_Phospho\_BR2\_04  
 Scan: 8595 Method: FTMS; HCD Score: 145.19 m/z: 764.32 Gene names: ZMYND8

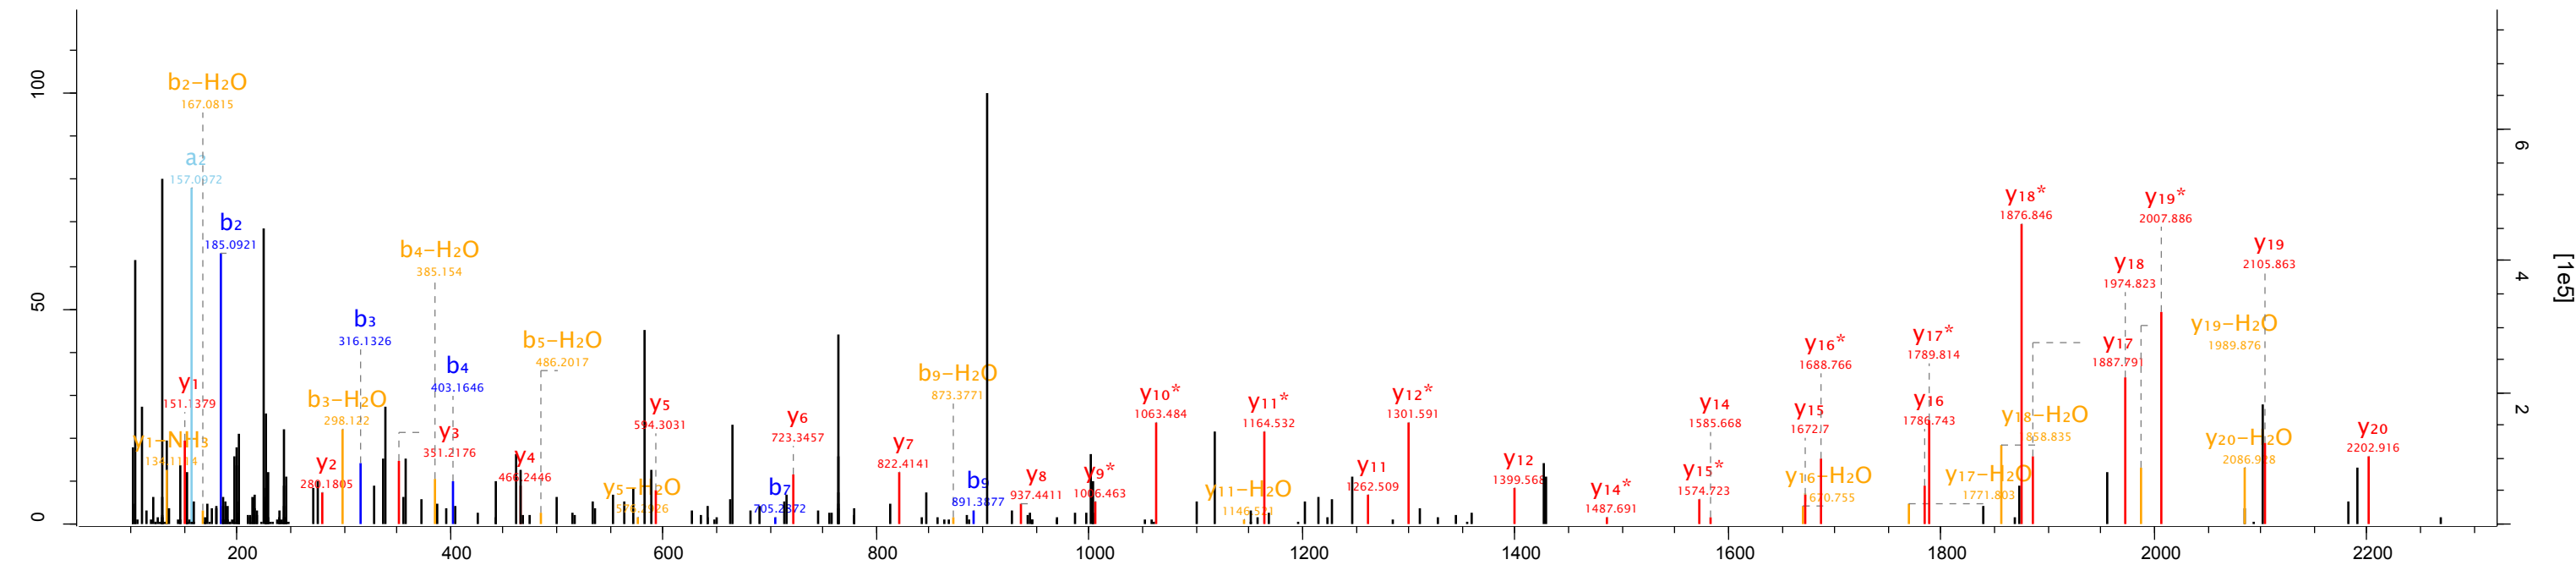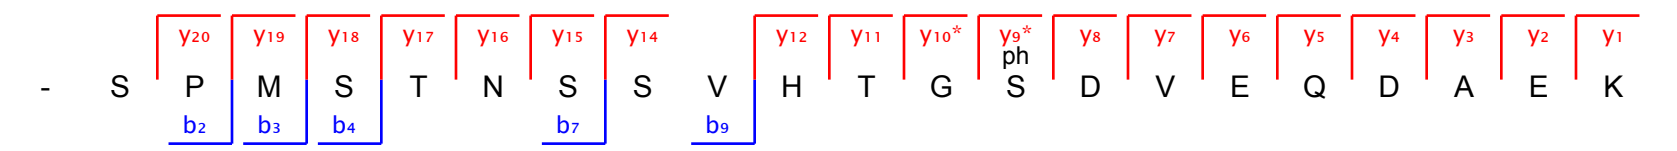

Raw file: 20150814\_A375SR\_Phospho\_BR2\_04  
 Scan: 8755 Method: FTMS; HCD Score: 226.99 m/z: 995.42 Gene names: TXNL1

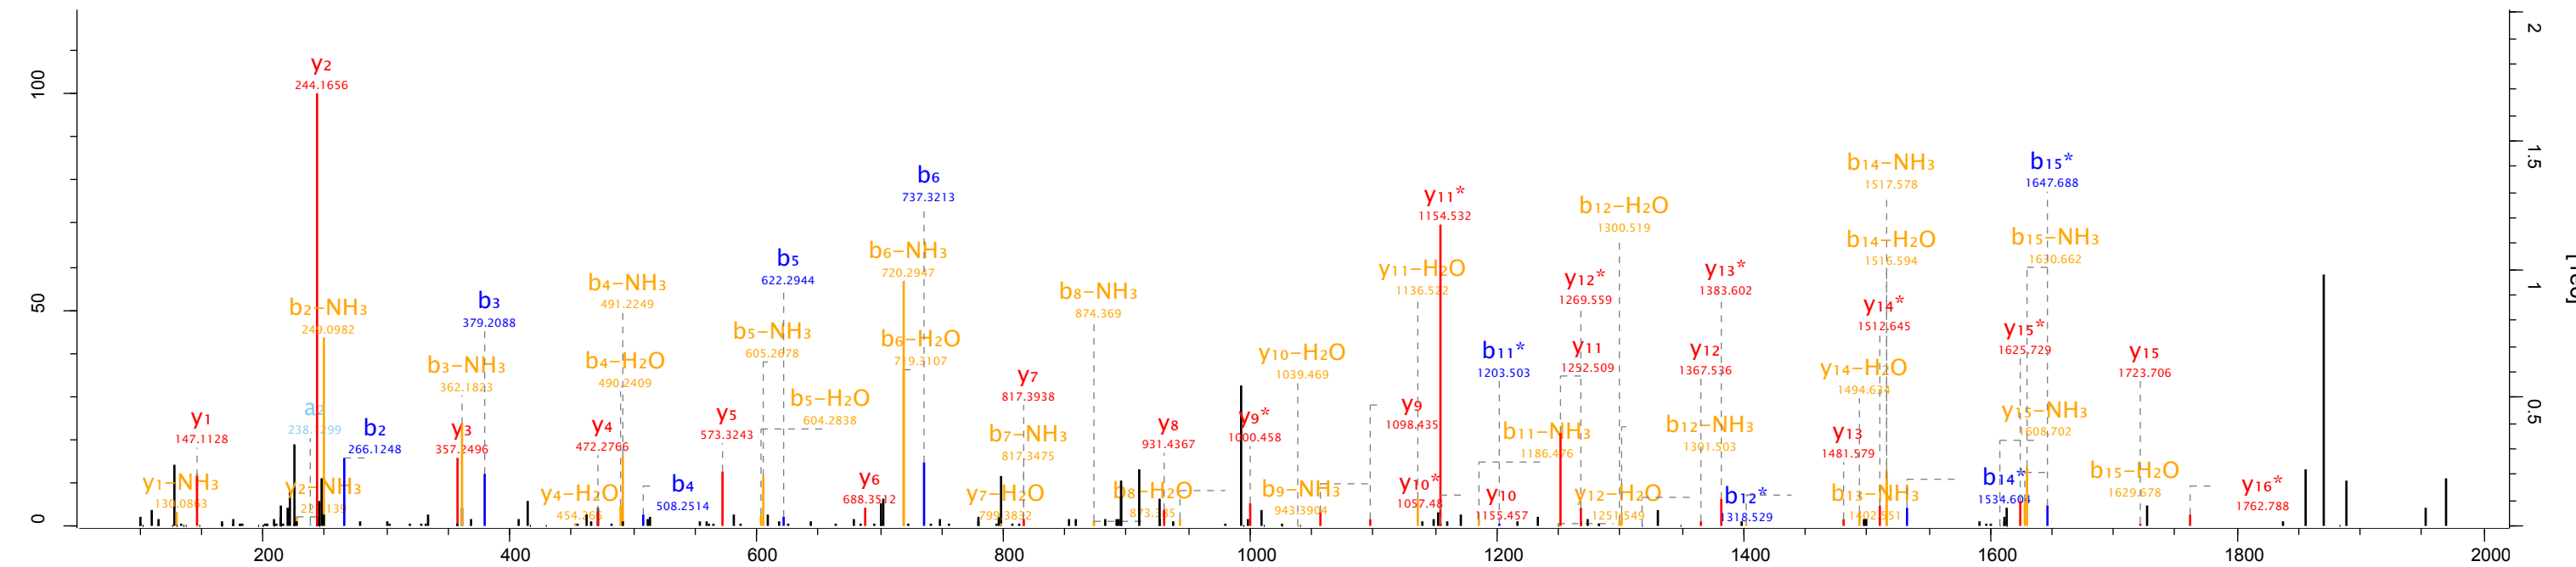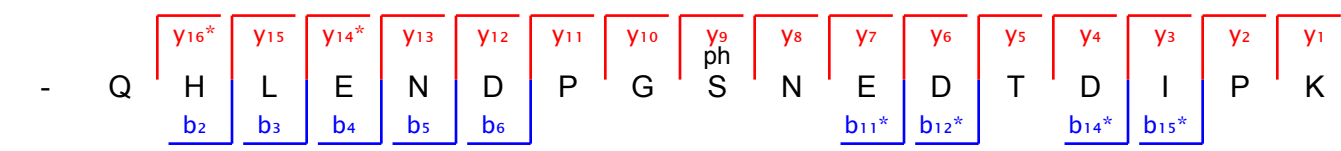

Raw file: 20150814\_A375SR\_Phospho\_BR2\_04  
 Scan: 8805 Method: FTMS; HCD Score: 91.14 m/z: 652.77 Gene names: TRAPPC12

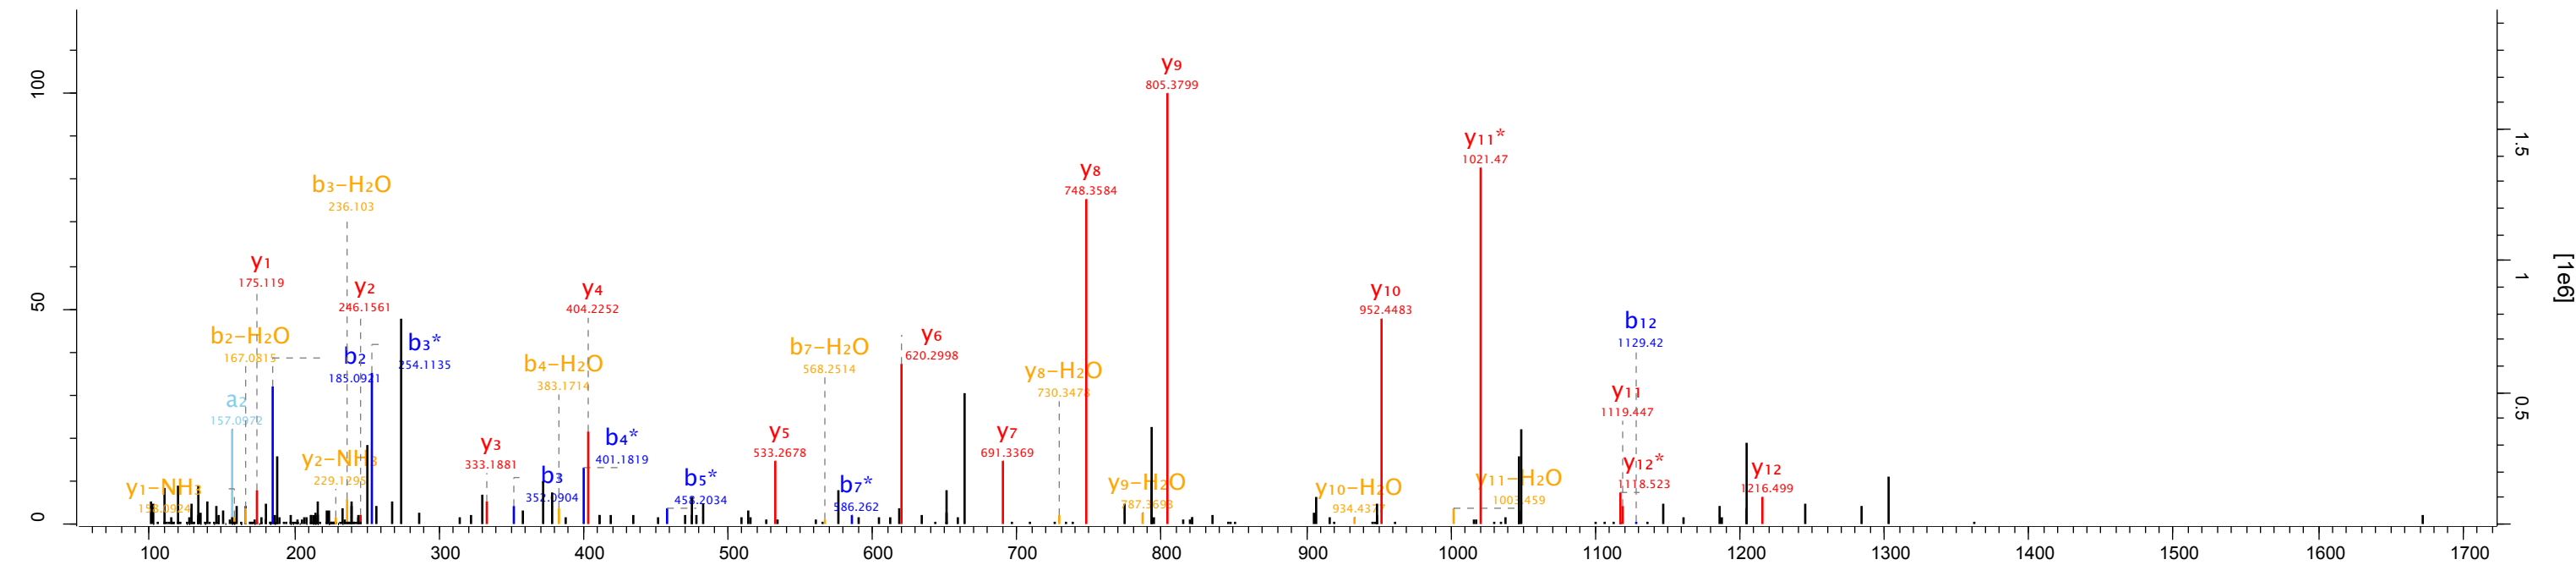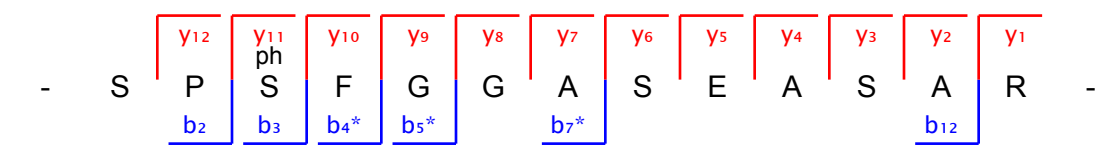

Raw file: 20150814\_A375SR\_Phospho\_BR2\_04  
 Scan: 8835 Method: FTMS; HCD Score: 284.93 m/z: 902.85 Gene names: STARD13

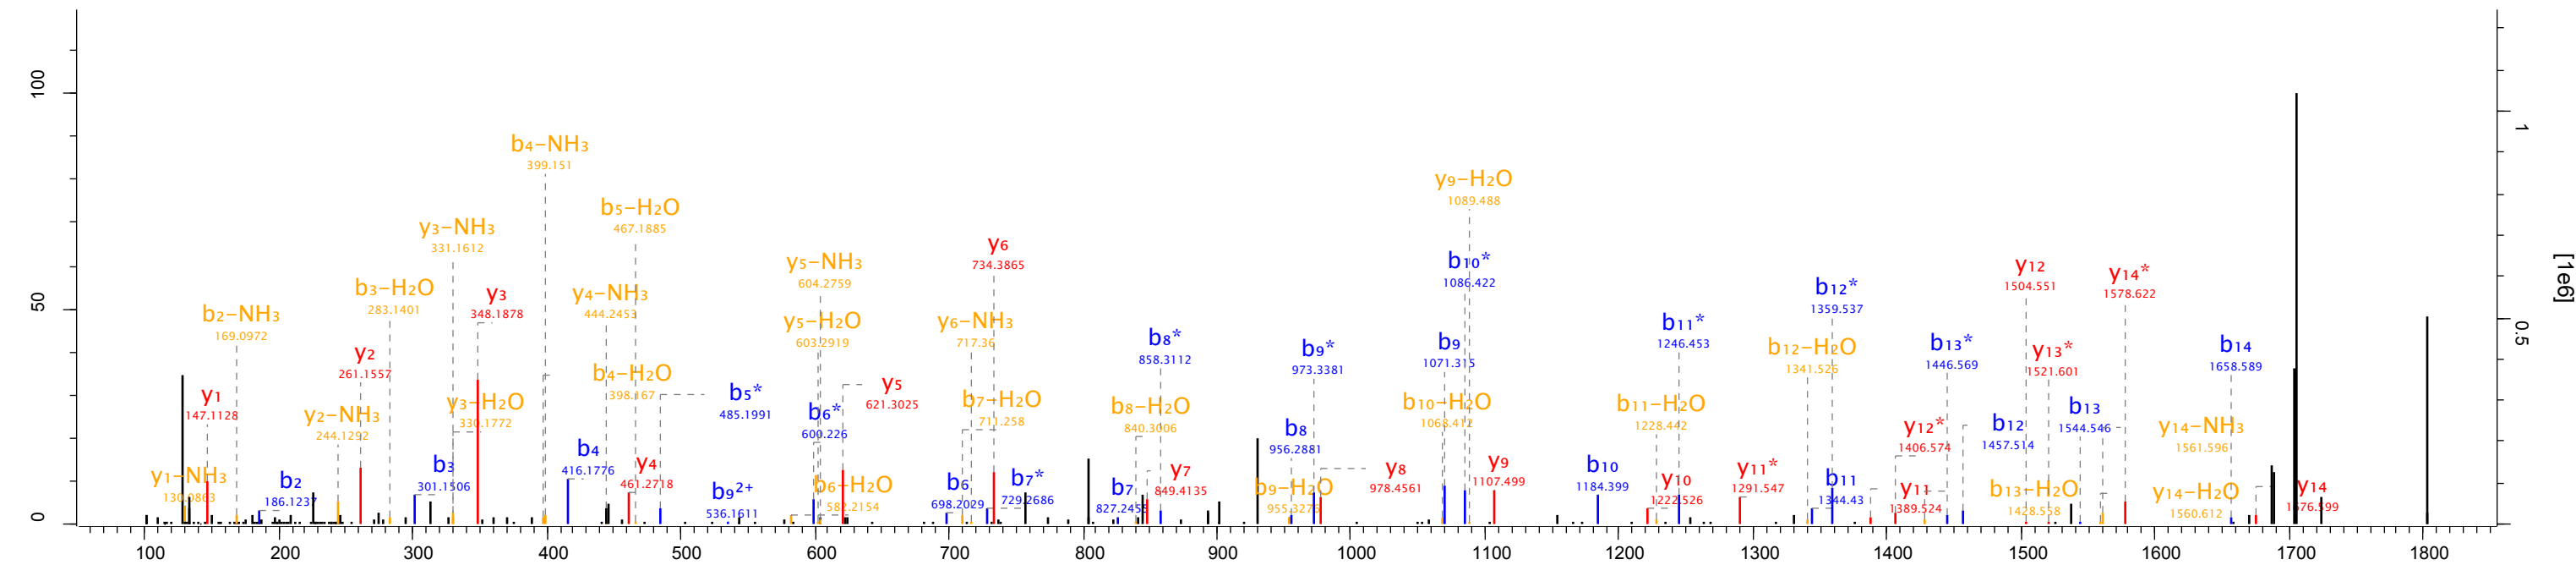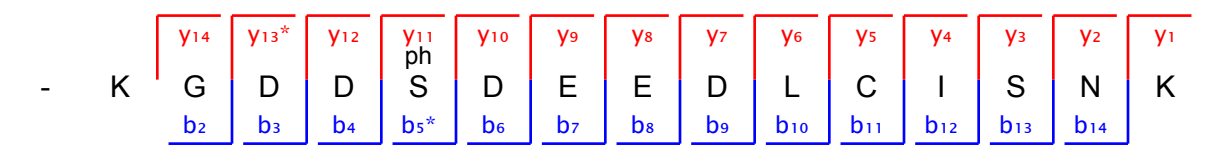

Raw file 20150814\_A375SR\_Phospho\_BR2\_04 Scan 9095 Method FTMS; HCD Score 163.62 m/z 669.32 Gene names MYBBP1A

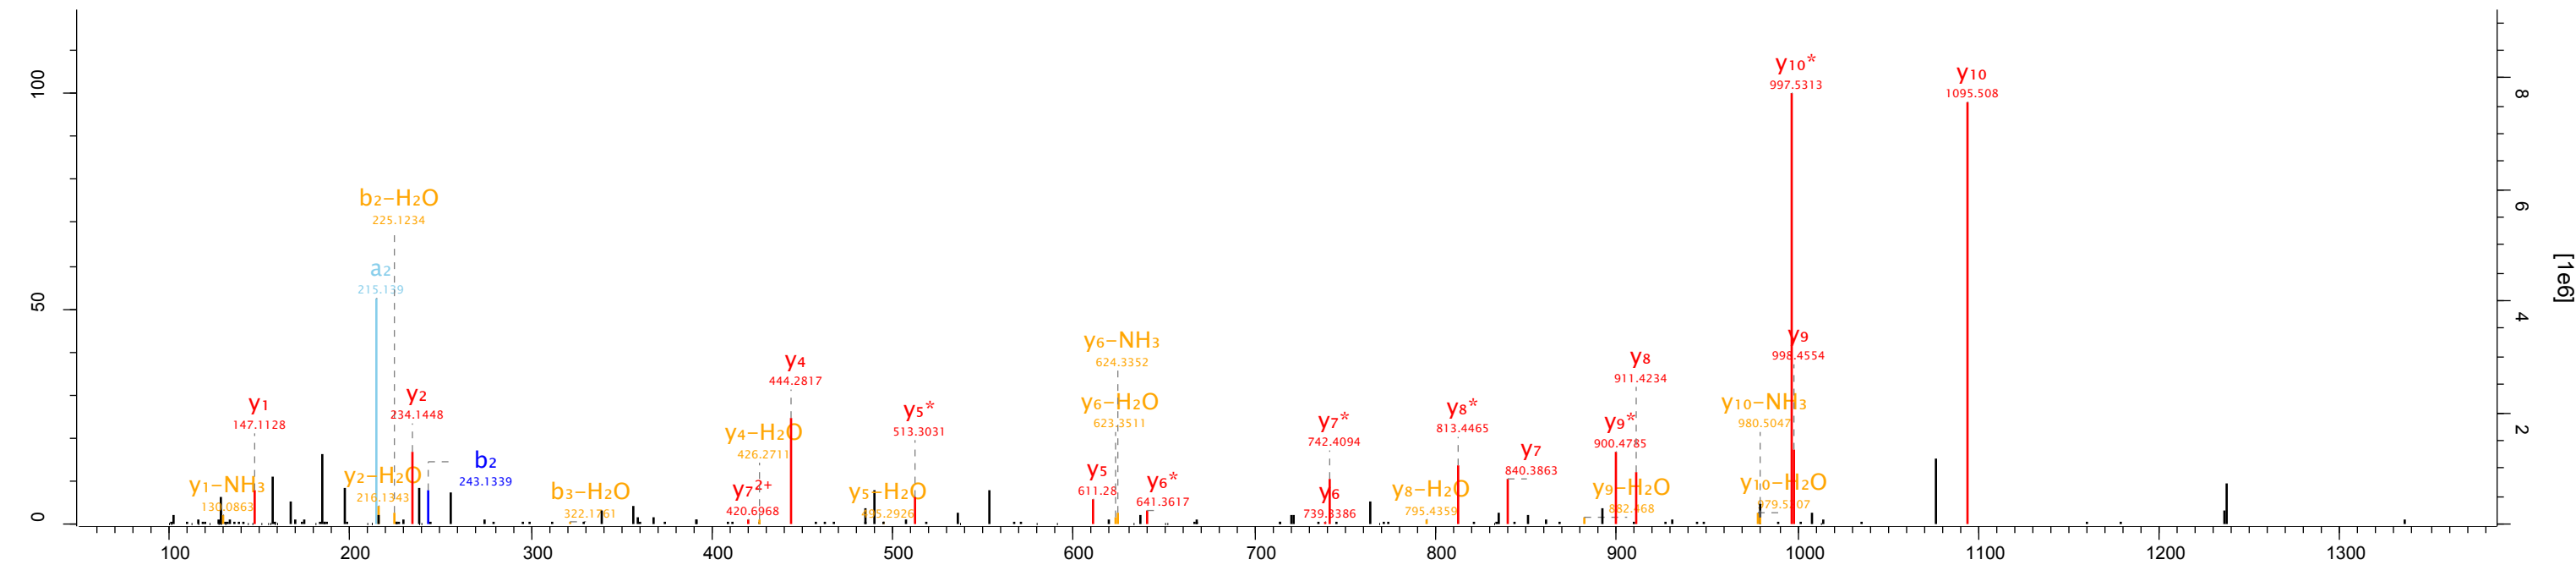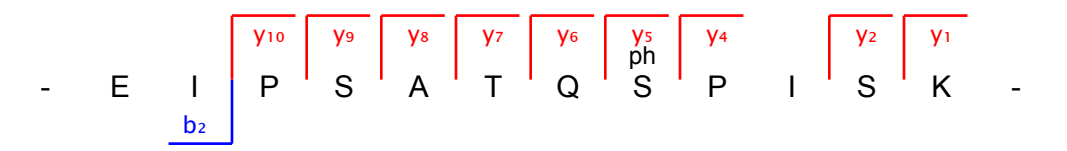



Raw file: 20150814\_A375SR\_Phospho\_BR2\_04  
 Scan: 9115 Method: FTMS; HCD Score: 212.37 m/z: 778.84 Gene names: VCL

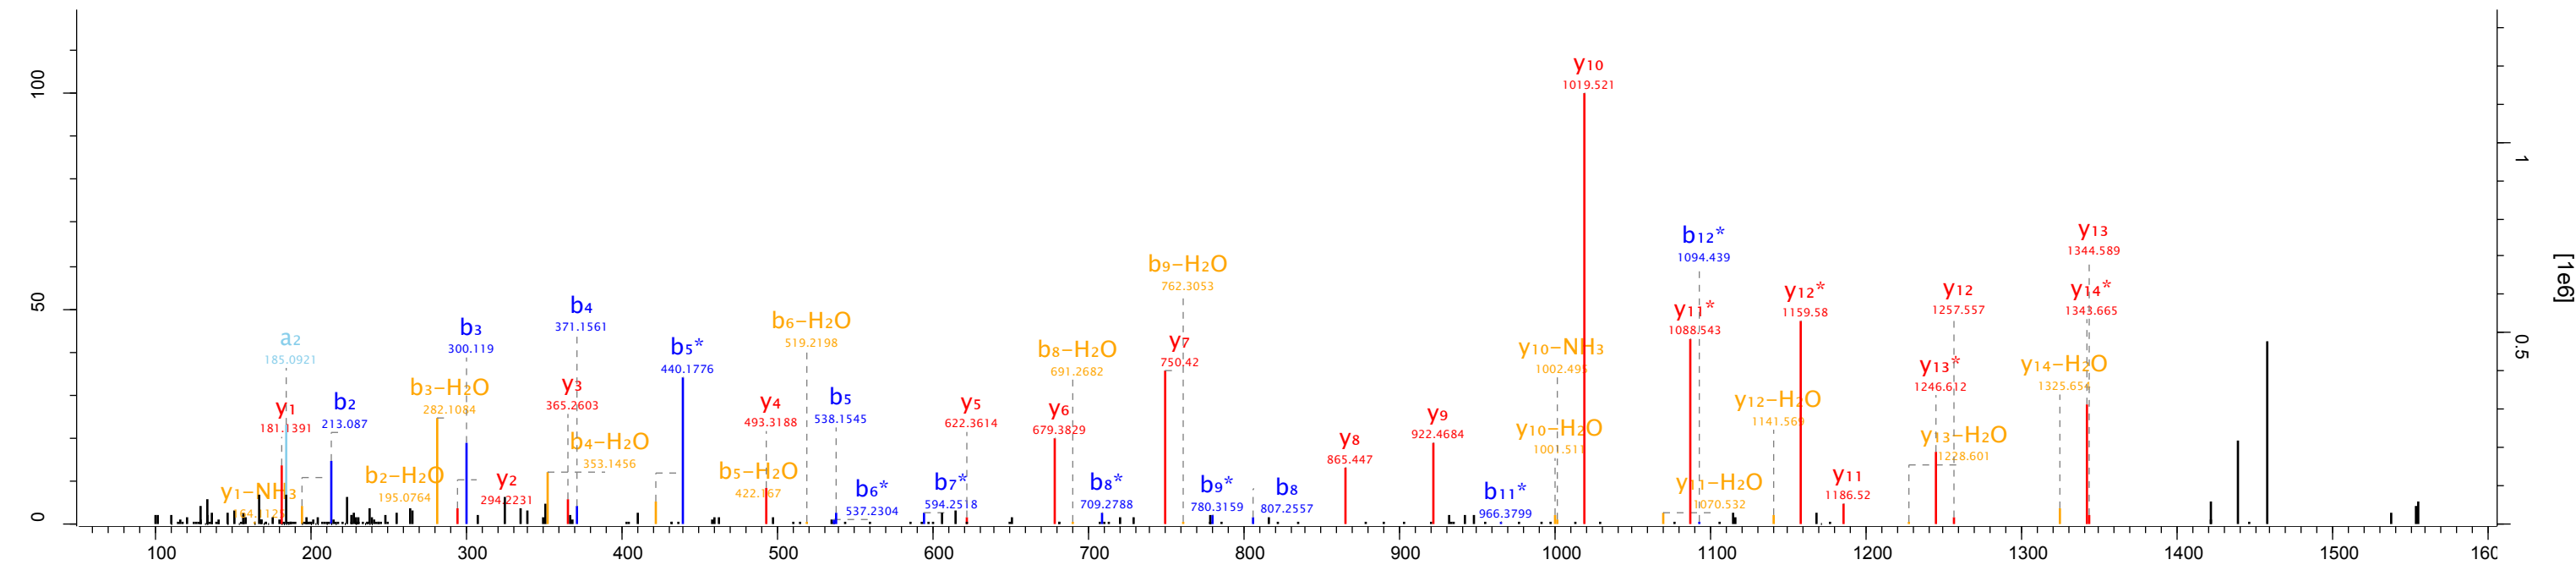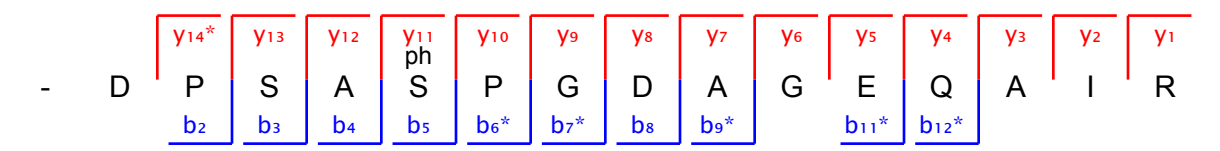

20150814\_A375SR\_Phospho\_BR2\_04

9155 FTMS; HCD 199.97 790.9 ESF1

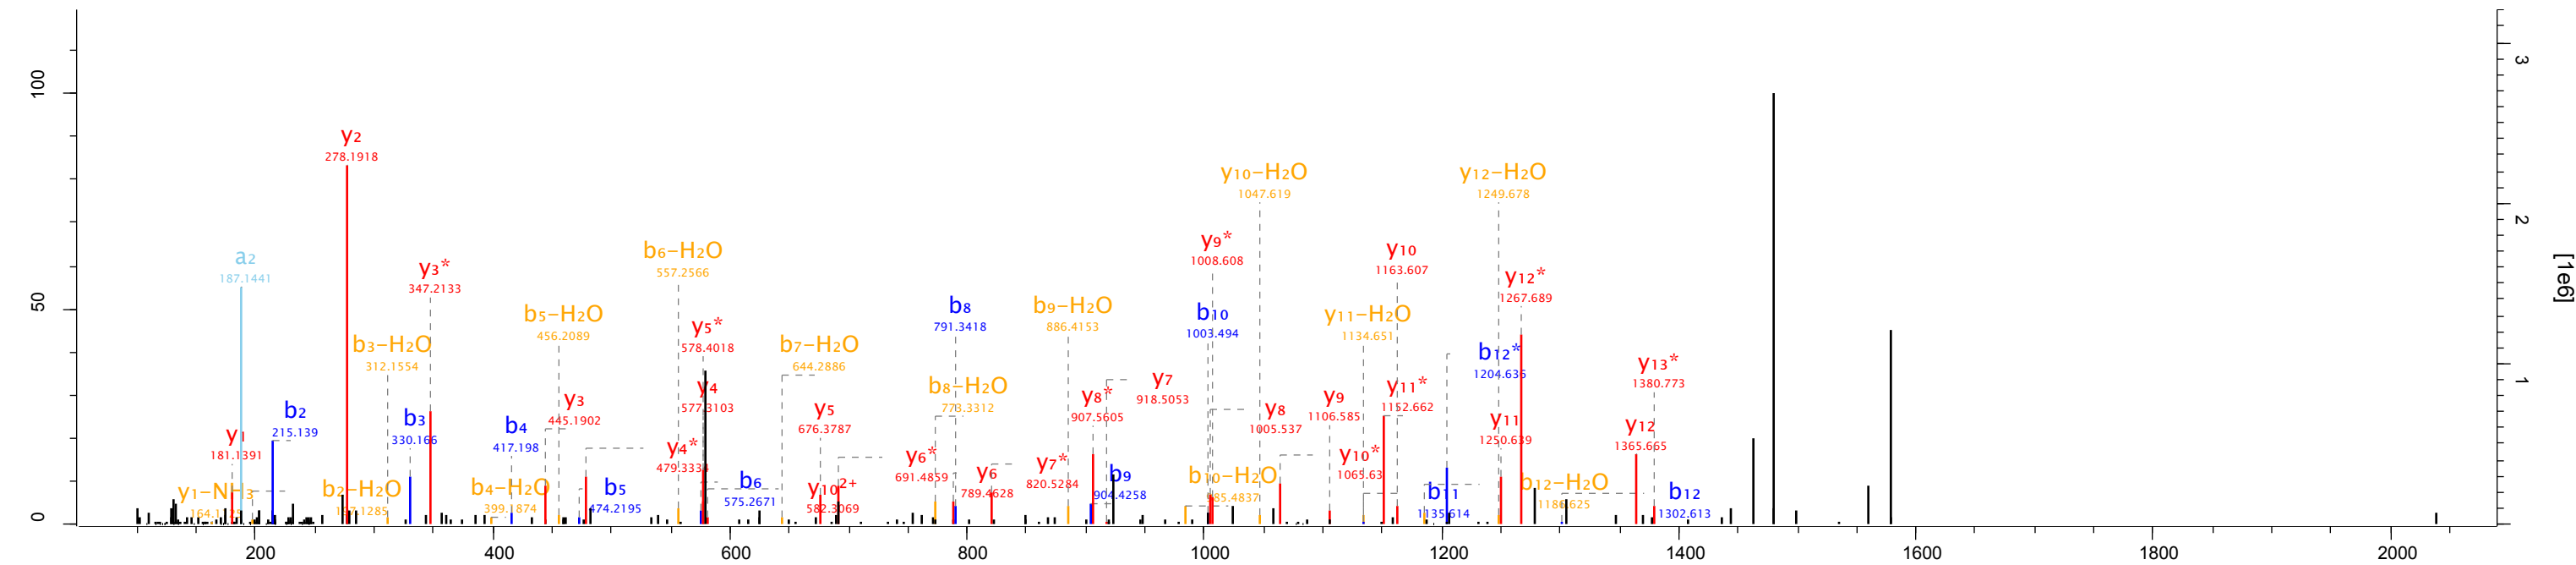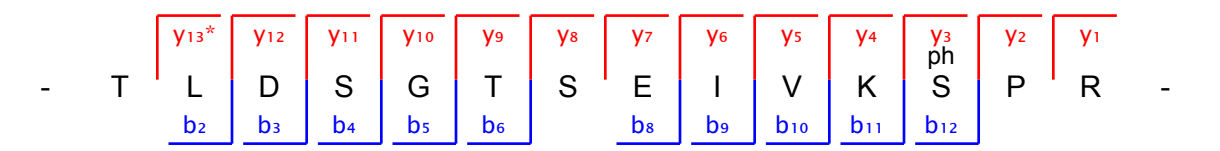

Raw file: 20150814\_A375SR\_Phospho\_BR2\_04  
 Scan: 9195 Method: FTMS; HCD Score: 198.47 m/z: 917.41 Gene names: SPTBN1

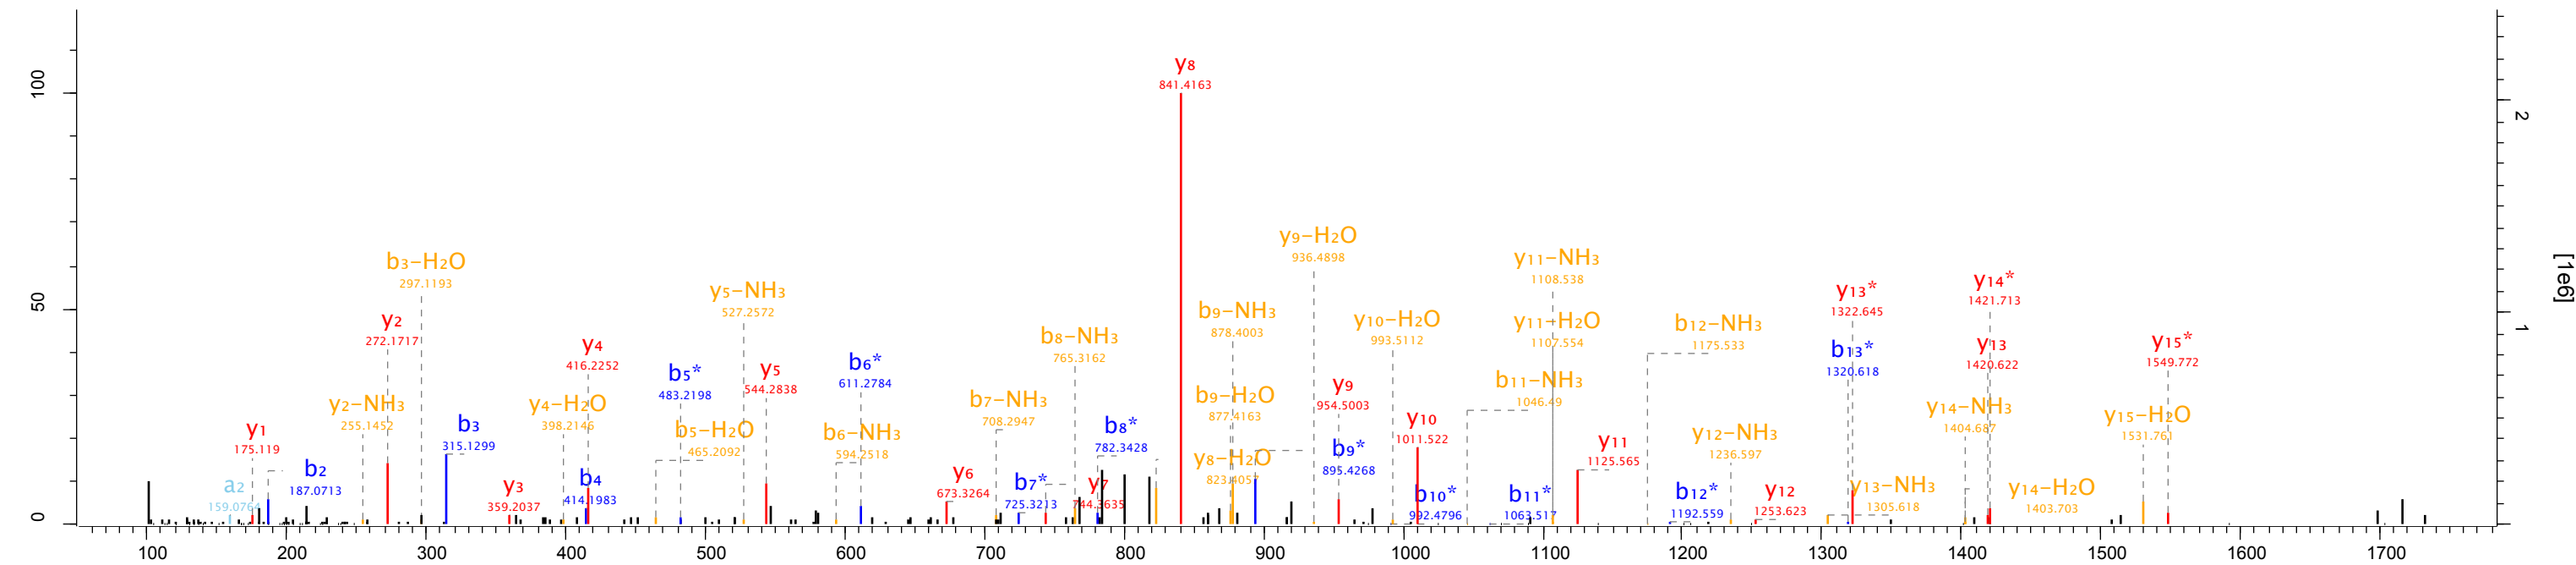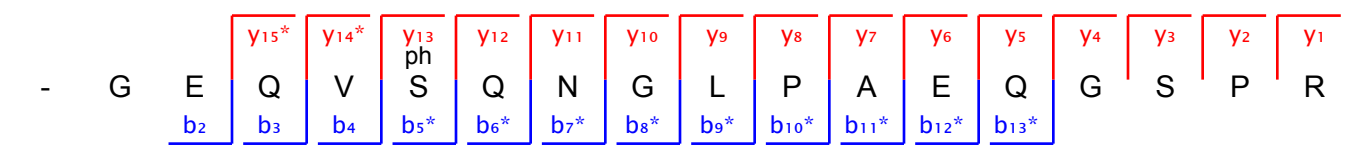

Raw file: 20150814\_A375SR\_Phospho\_BR2\_04  
 Scan: 9315 Method: FTMS; HCD Score: 87.08 m/z: 576.79 Gene names: HMGXB4

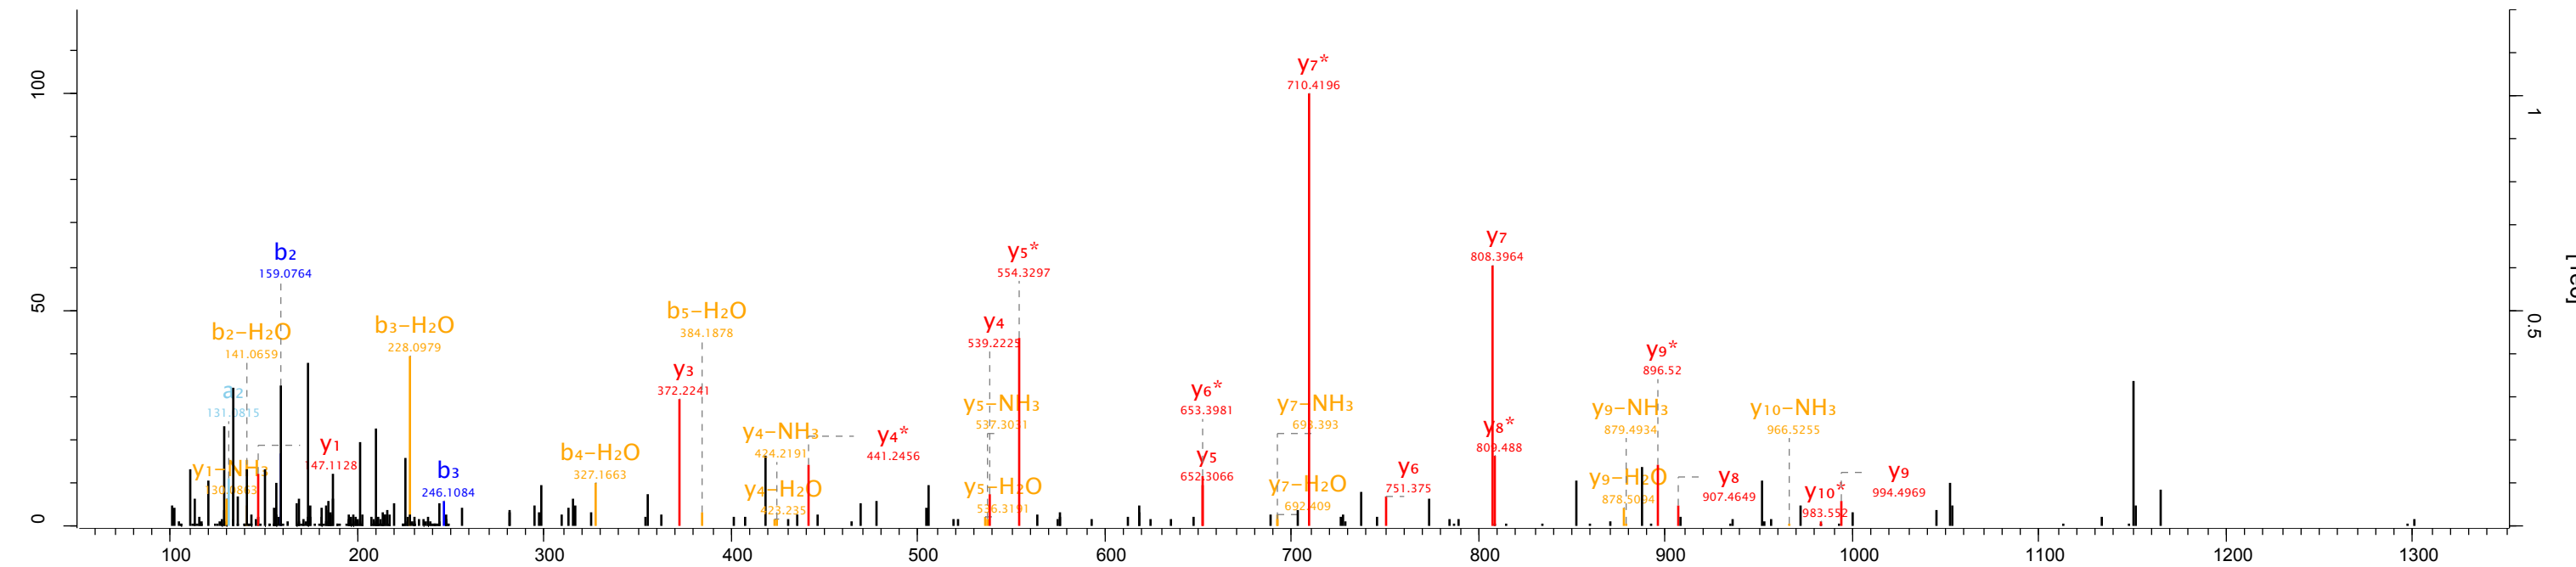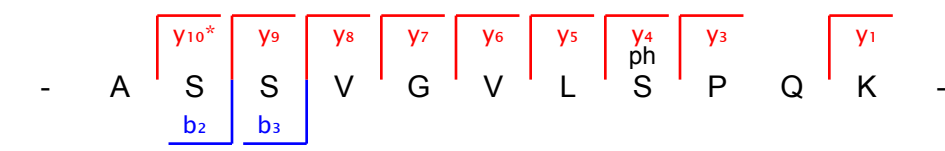

Raw file: 20150814\_A375SR\_Phospho\_BR2\_04  
 Scan: 9715 Method: FTMS; HCD Score: 108.53 m/z: 544.76 Gene names: DENND4A

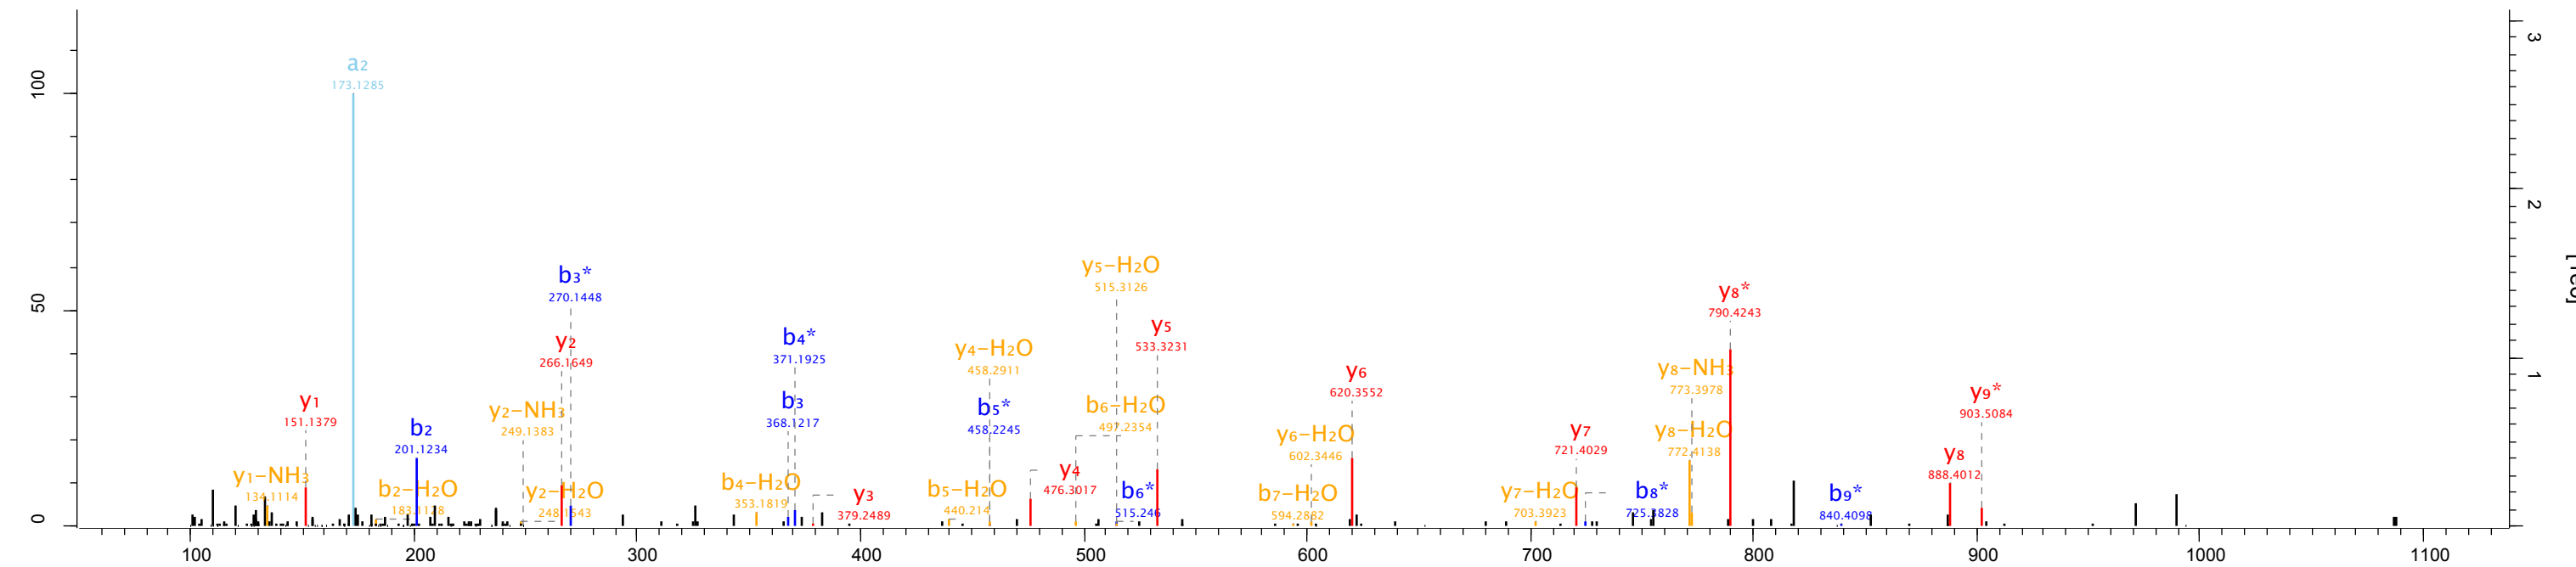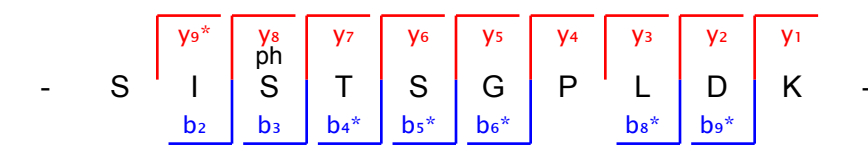

Raw file  
20150814\_A375SR\_Phospho\_BR2\_04

Scan 9835 Method FTMS; HCD Score 347.9 m/z 1015 Gene names USP24

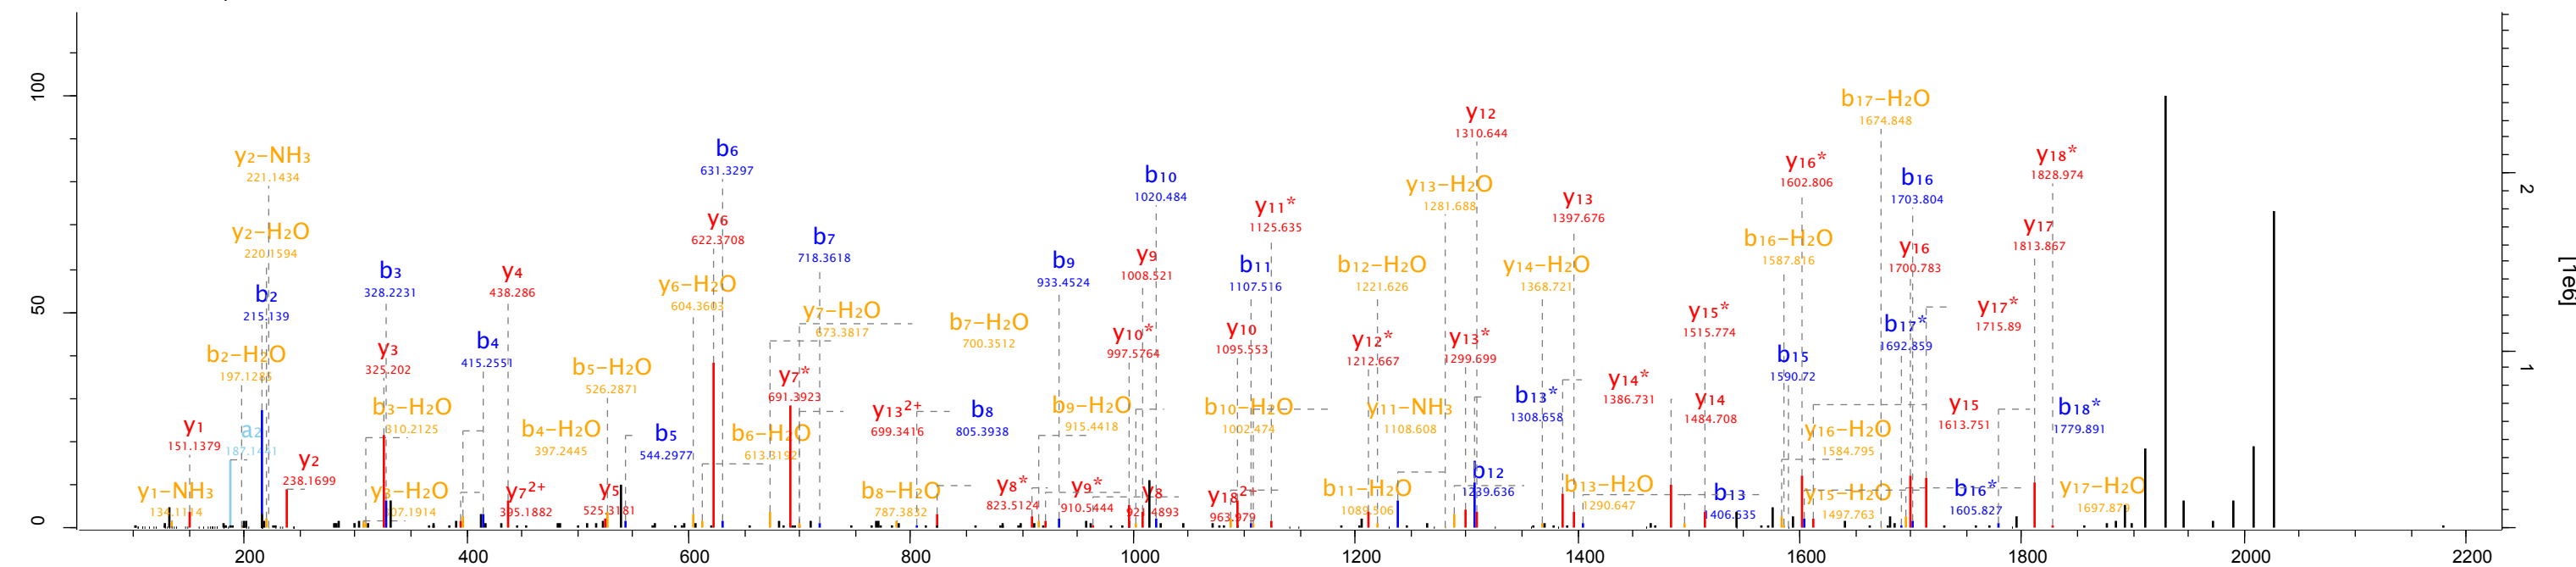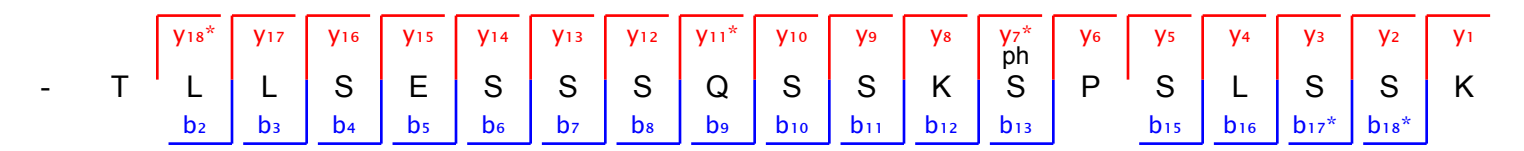

Raw file: 20150814\_A375SR\_Phospho\_BR2\_04  
 Scan: 9955 Method: FTMS; HCD Score: 171.32 m/z: 962.97 Gene names: YEATS2

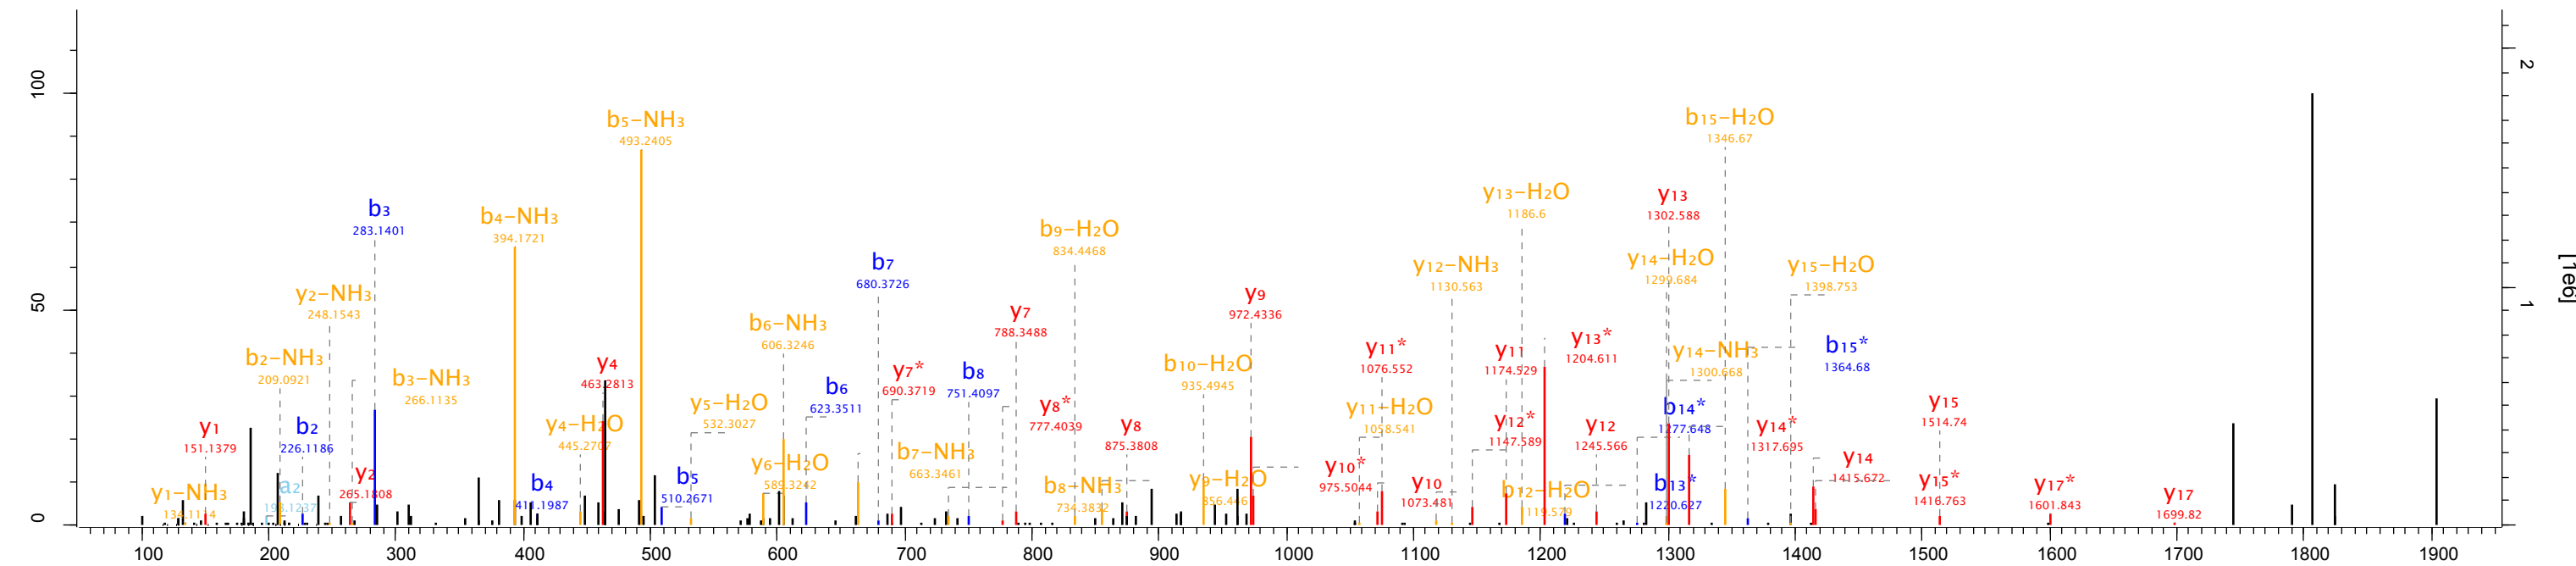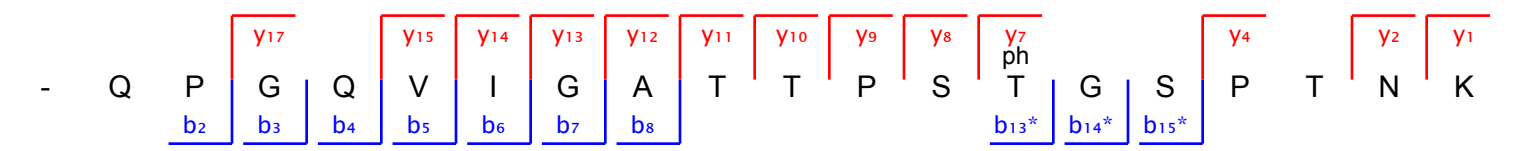

Raw file 20150814\_A375SR\_Phospho\_BR2\_05 Scan 10425 Method FTMS; HCD Score 145.69 m/z 755.83 Gene names SVIL

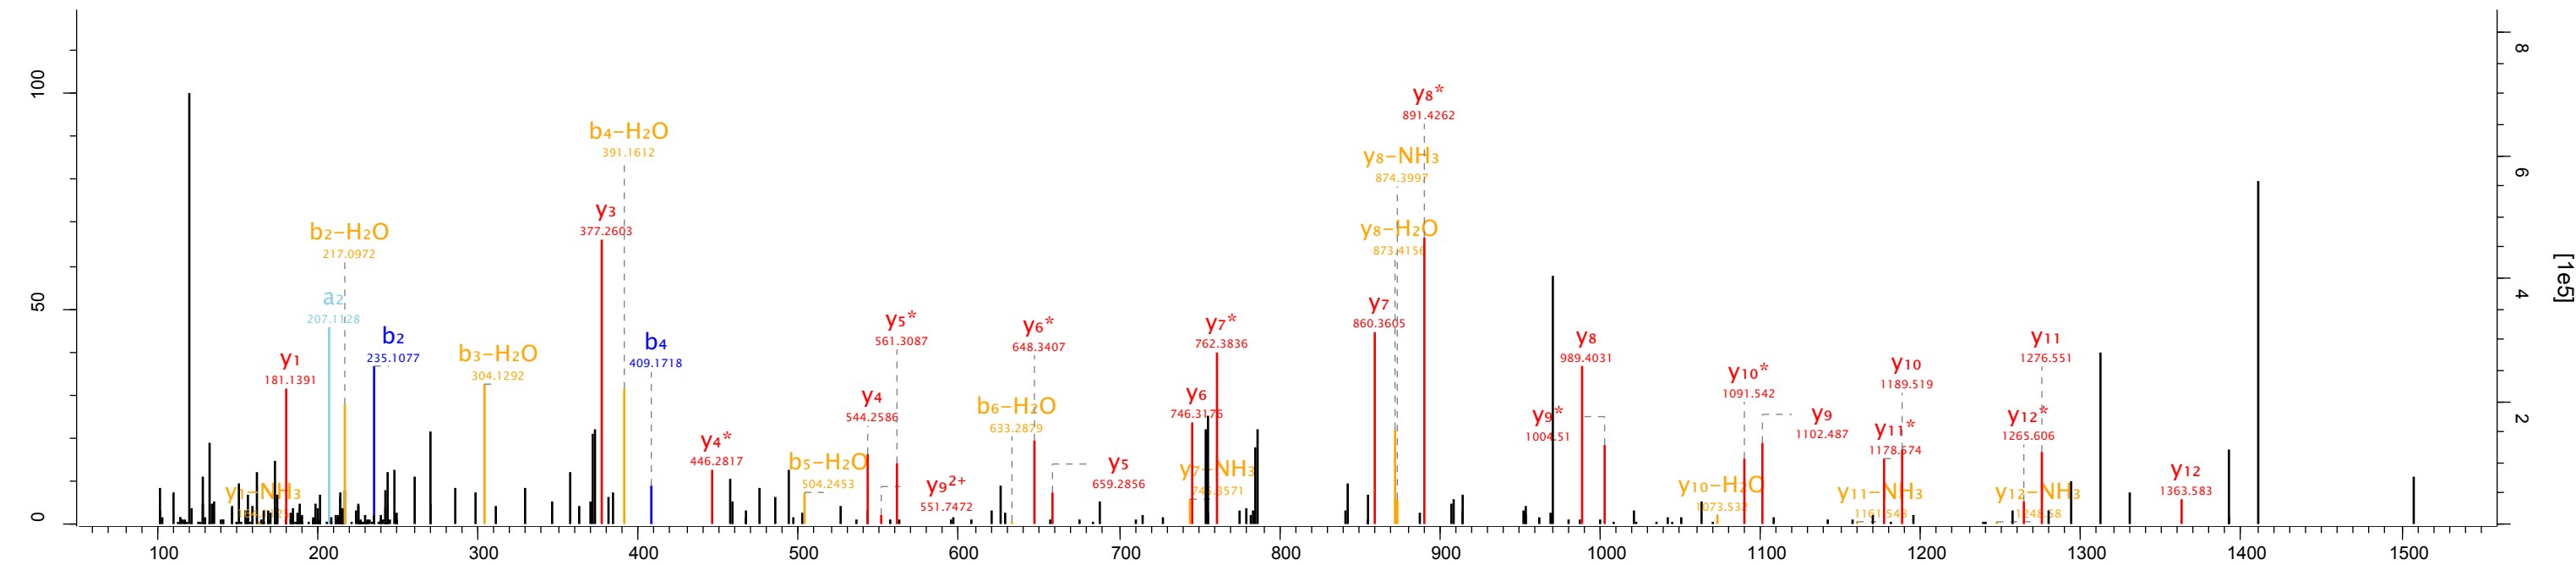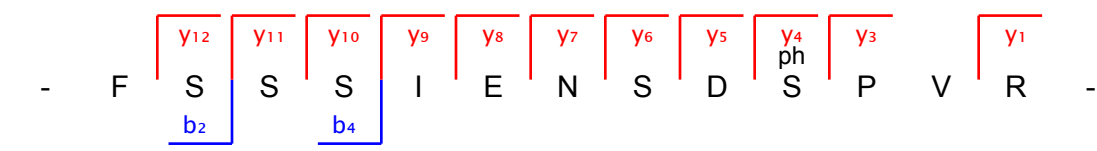



Raw file 20150814\_A375SR\_Phospho\_BR2\_05 Scan 11105 Method FTMS; HCD Score 73.5 m/z 591.97 Gene names TJAP1

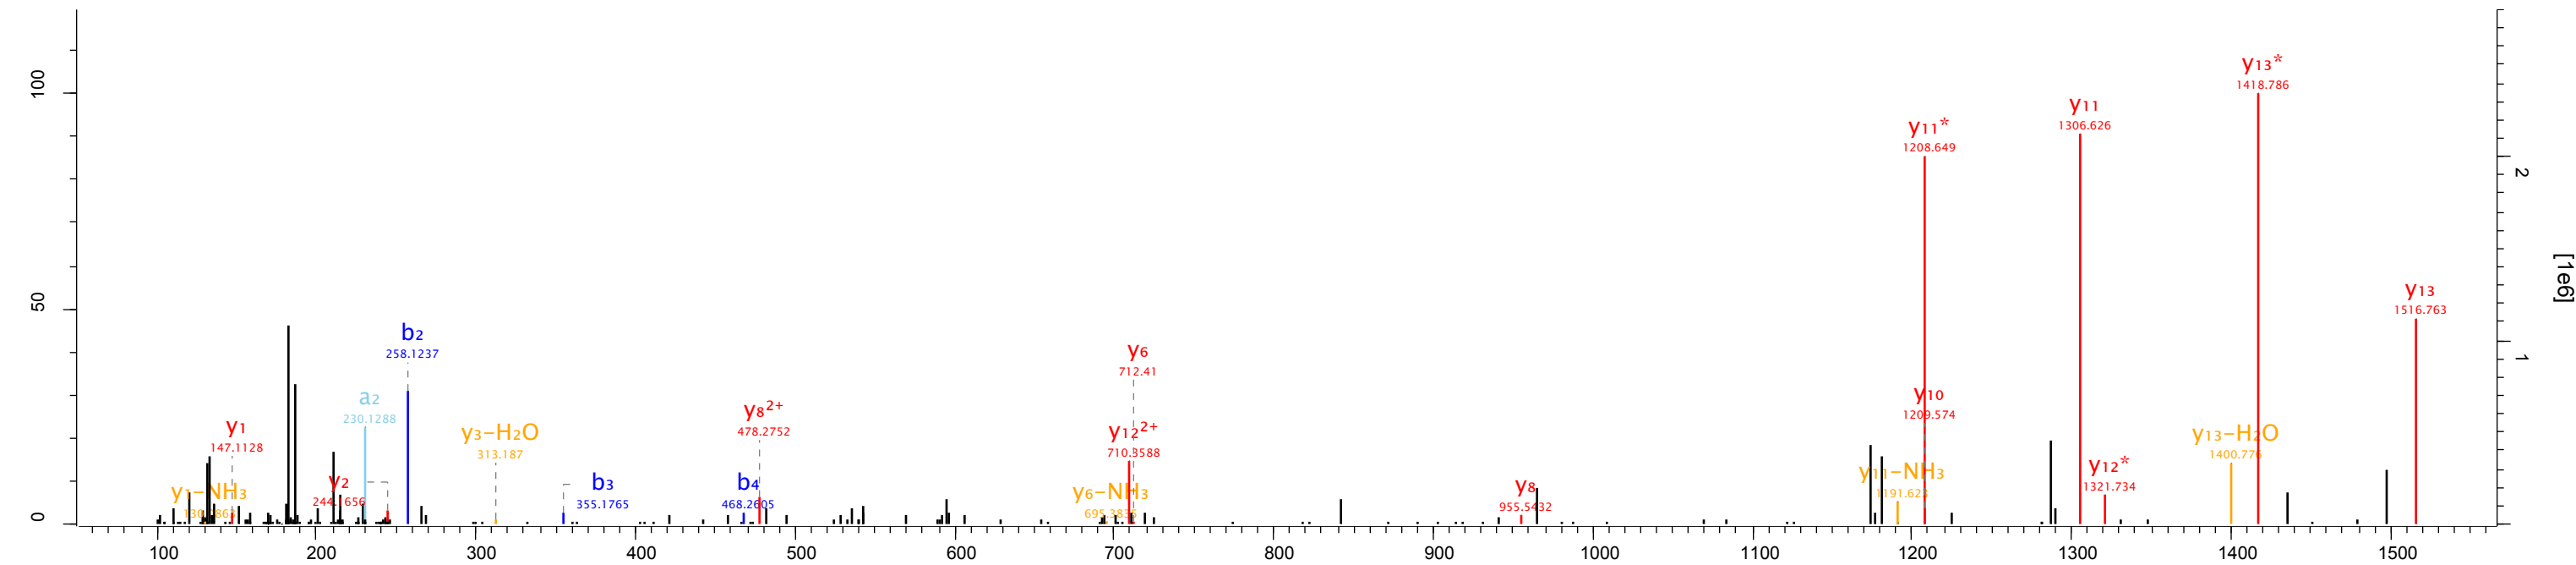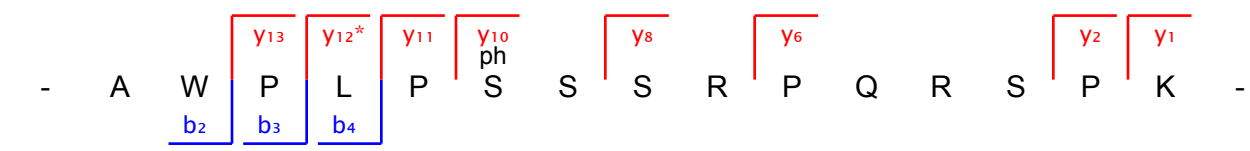

Raw file: 20150814\_A375SR\_Phospho\_BR2\_05  
 Scan: 11775 Method: FTMS; HCD Score: 83.89 m/z: 729.38 Gene names: PDE8A

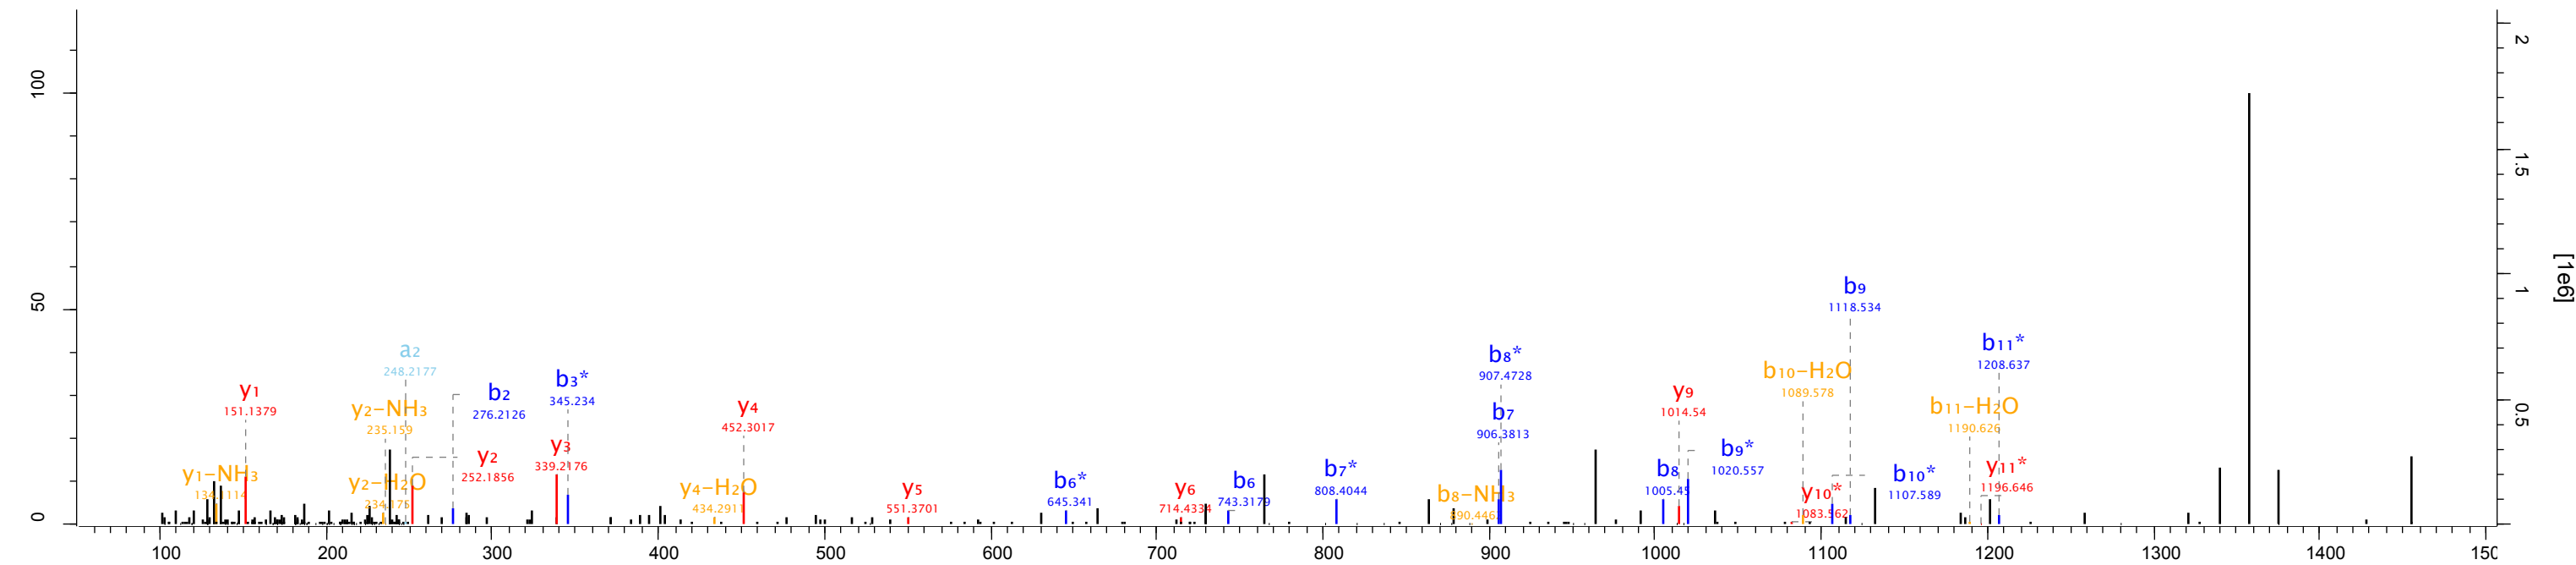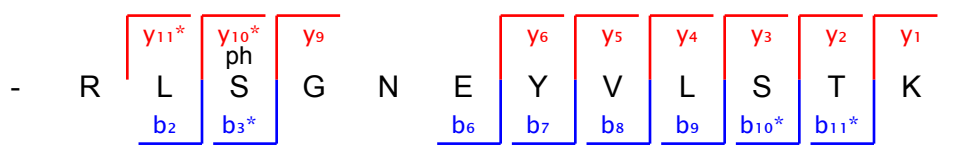

Raw file: 20150814\_A375SR\_Phospho\_BR2\_05  
 Scan: 1205 Method: FTMS; HCD Score: 100.73 m/z: 538.26 Gene names: TJP2

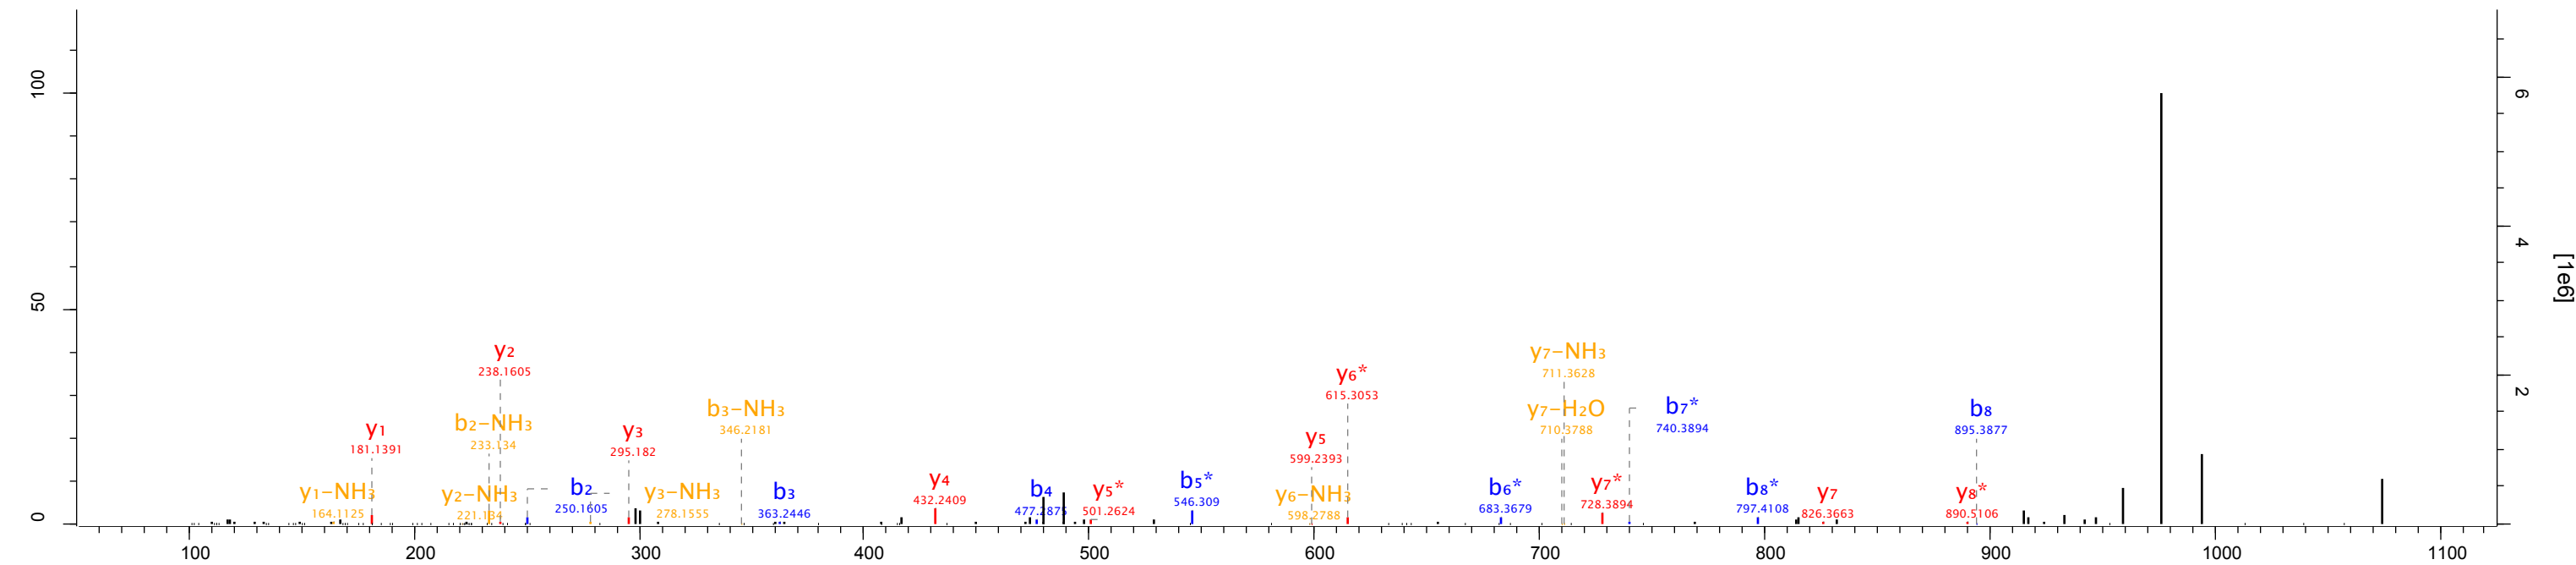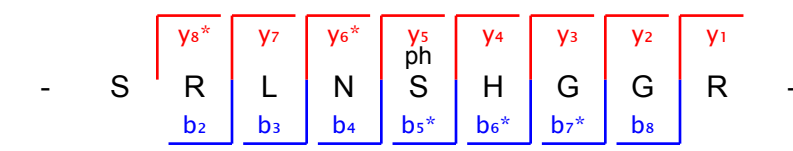

Raw file 20150814\_A375SR\_Phospho\_BR2\_05 Scan 12535 Method FTMS; HCD Score 211.5 m/z 937.45 Gene names CTNNB1

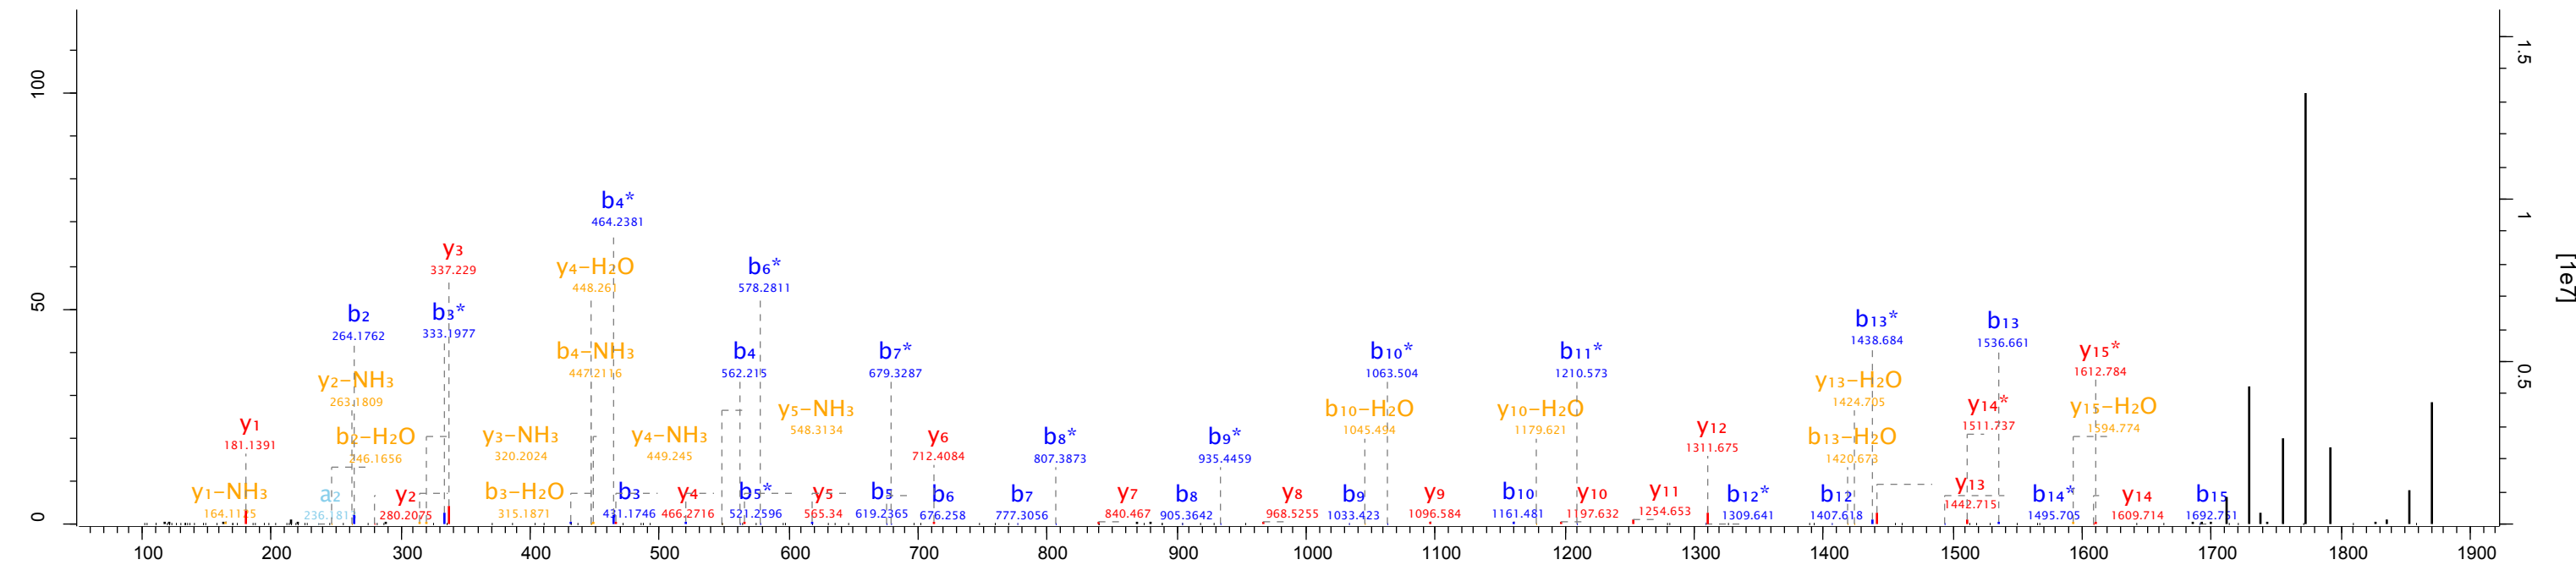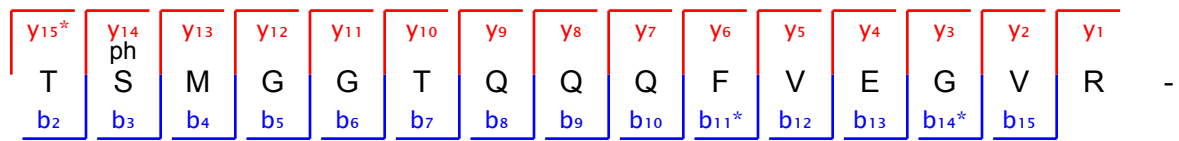

Raw file 20150814\_A375SR\_Phospho\_BR2\_05 Scan 13255 Method FTMS; HCD Score 98.94 m/z 601.32 Gene names LATS1

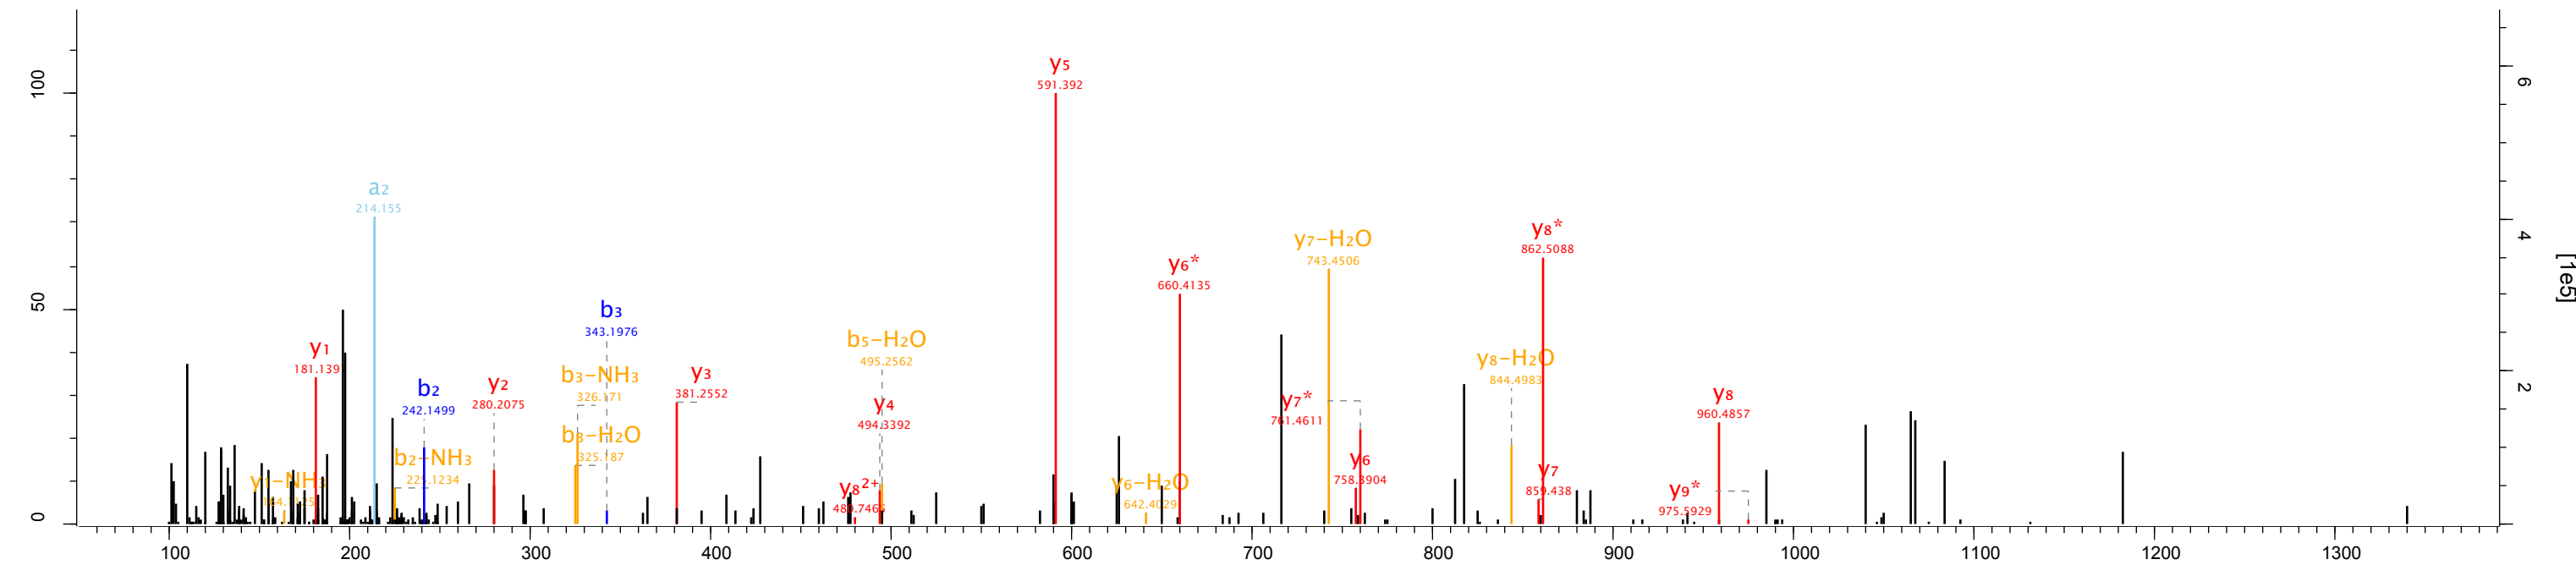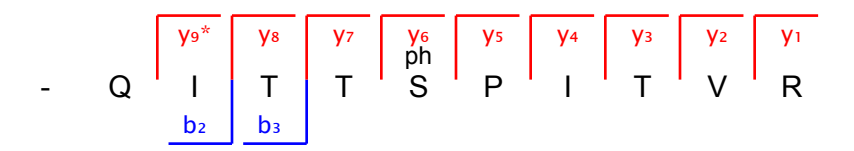

Raw file 20150814\_A375SR\_Phospho\_BR2\_05 Scan 13355 Method FTMS; HCD Score 296.34 m/z 1224.06 Gene names MYEF2

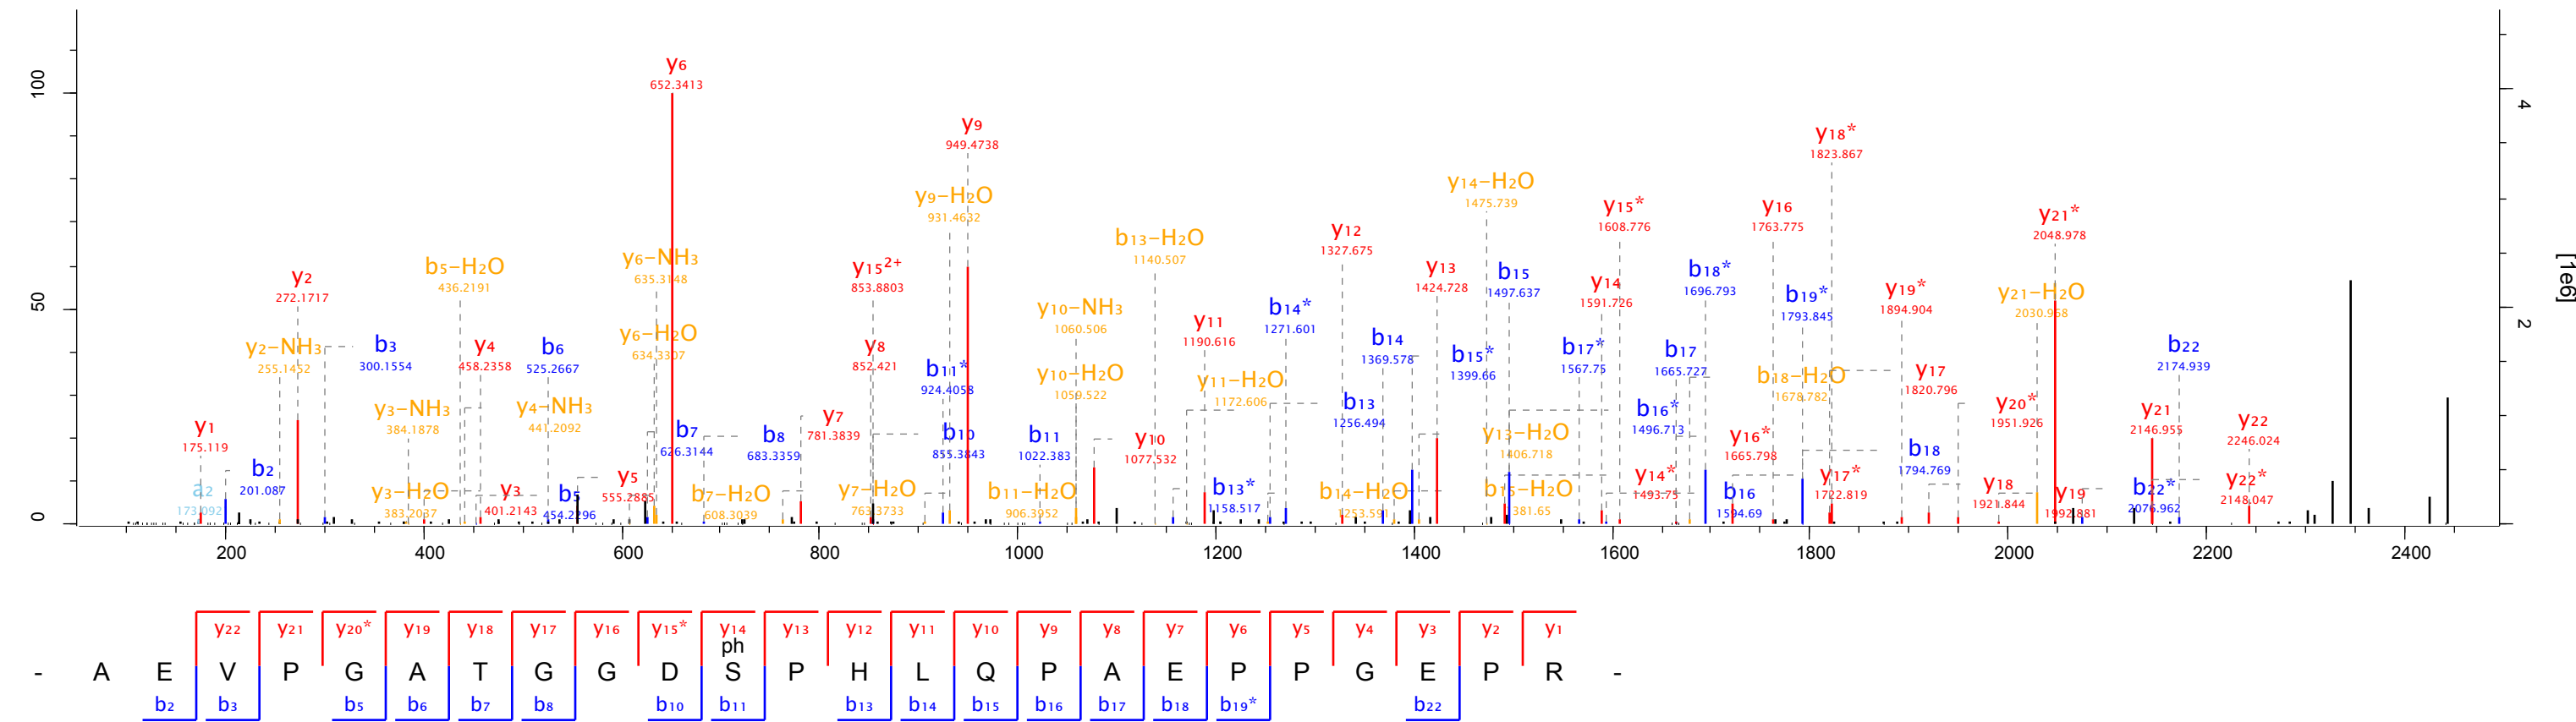

Raw file 20150814\_A375SR\_Phospho\_BR2\_05 Scan 13385 Method FTMS; HCD Score 149.86 m/z 786.87 Gene names TBC1D5

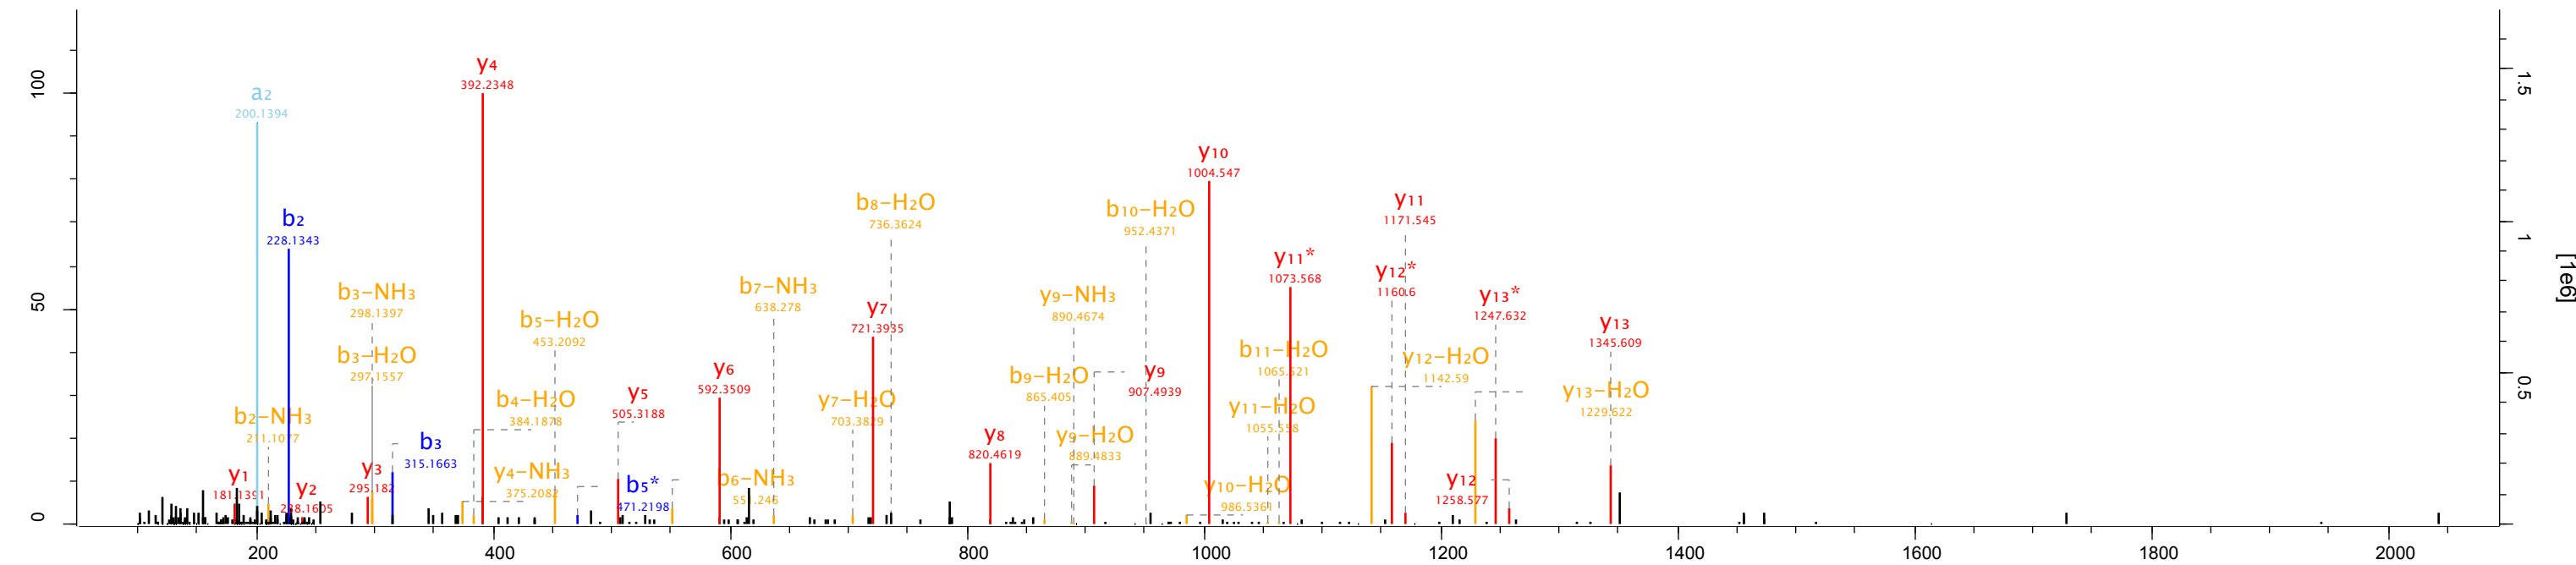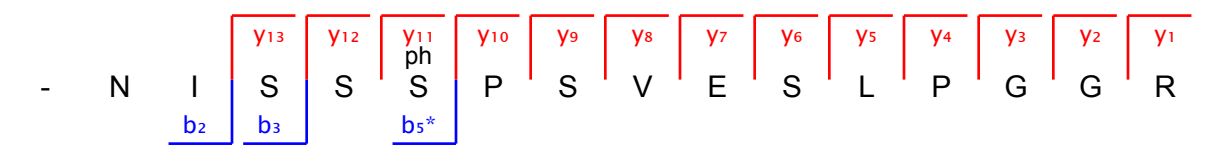

Raw file 20150814\_A375SR\_Phospho\_BR2\_05 Scan 13465 Method FTMS; HCD Score 121.9 m/z 501.27 Gene names MARCKS

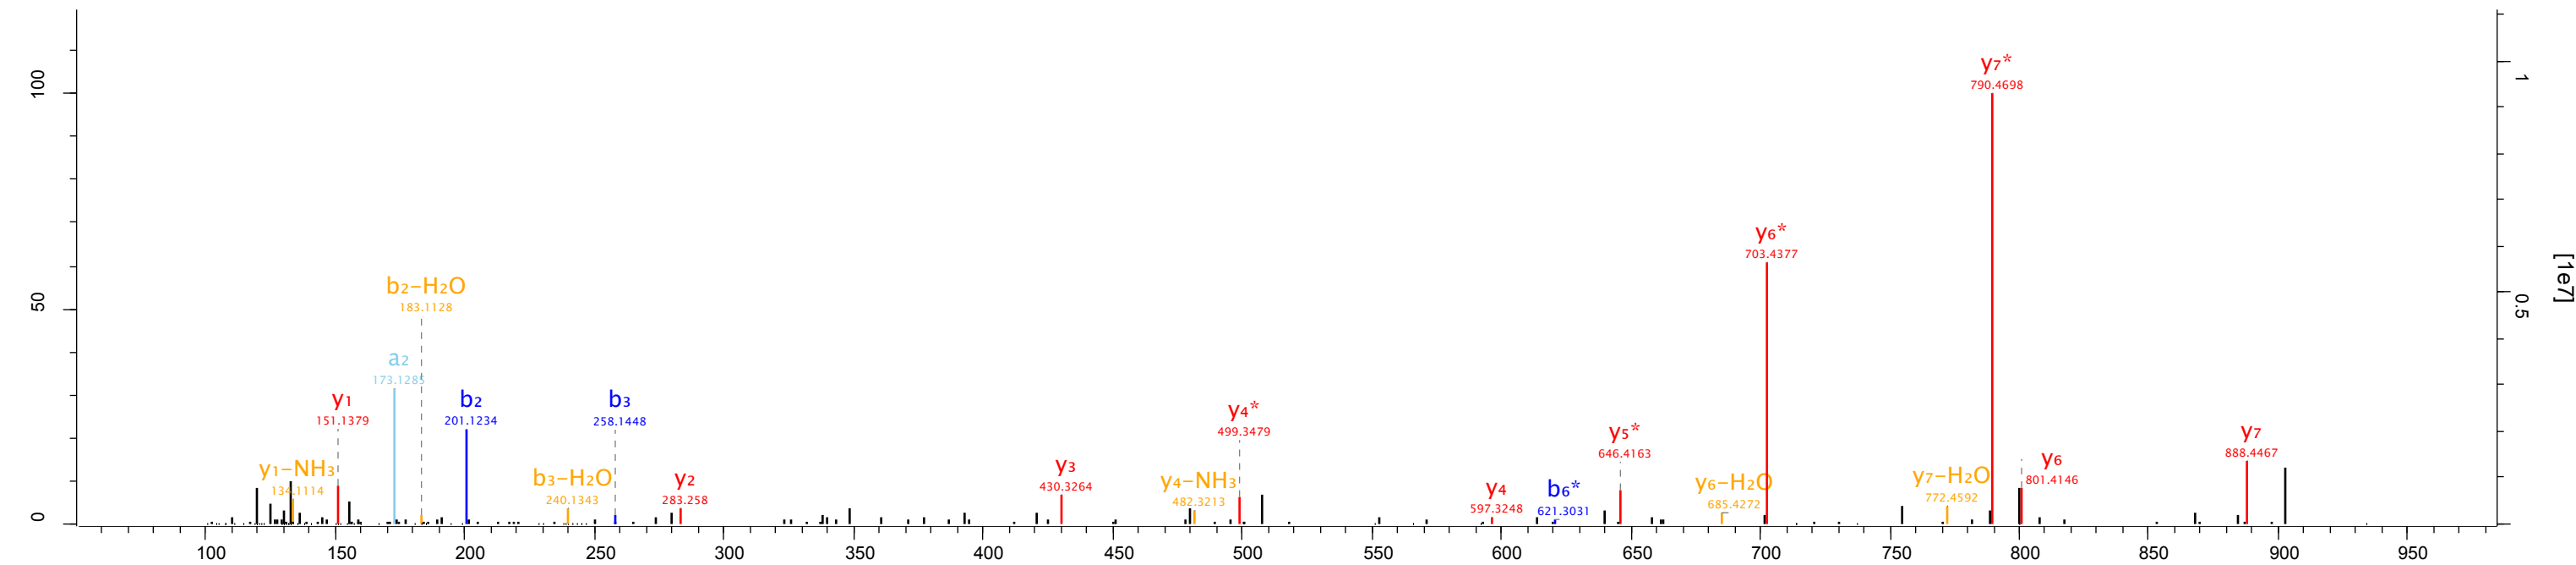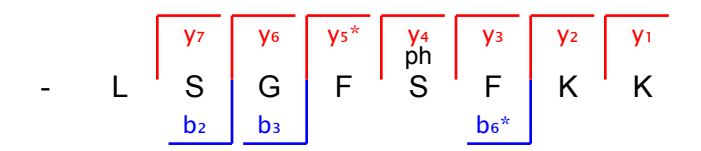



Raw file 20150814\_A375SR\_Phospho\_BR2\_05 Scan 13835 Method FTMS; HCD Score 264.22 m/z 1099.08 Gene names TAF12

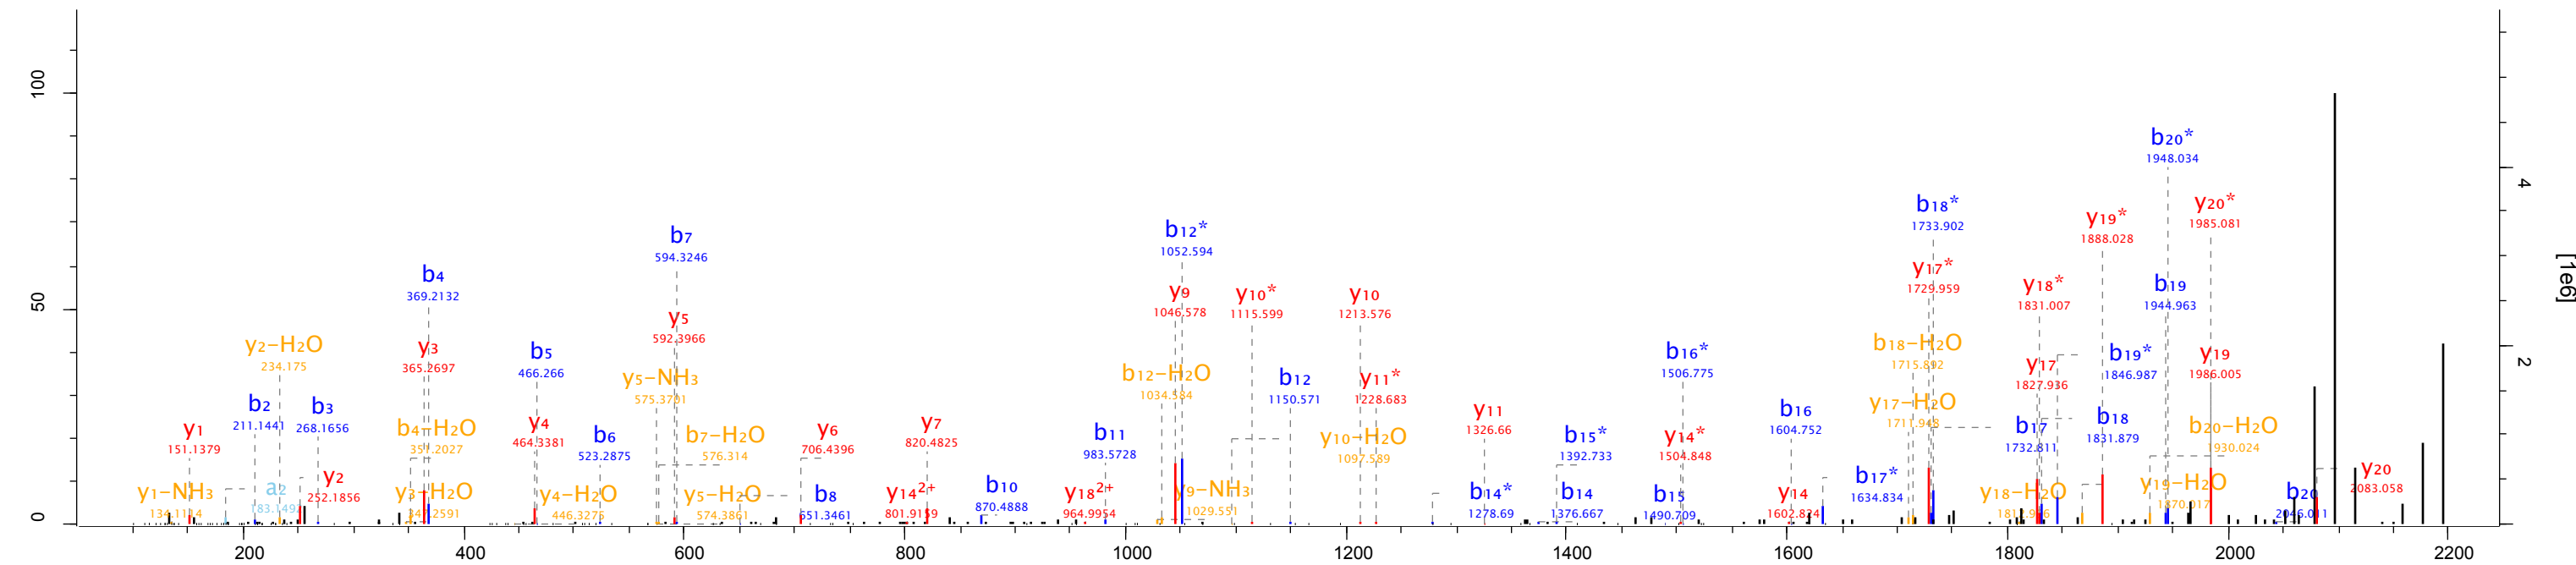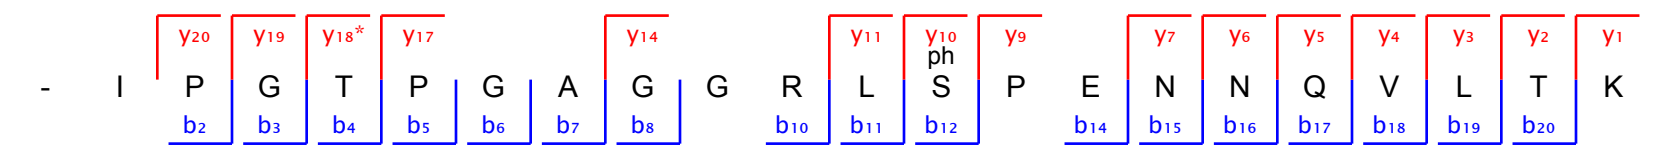

Raw file Scan Method Score m/z Gene names  
 20150814\_A375SR\_Phospho\_BR2\_05 14015 FTMS; HCD 146.63 999.43 MARCKS

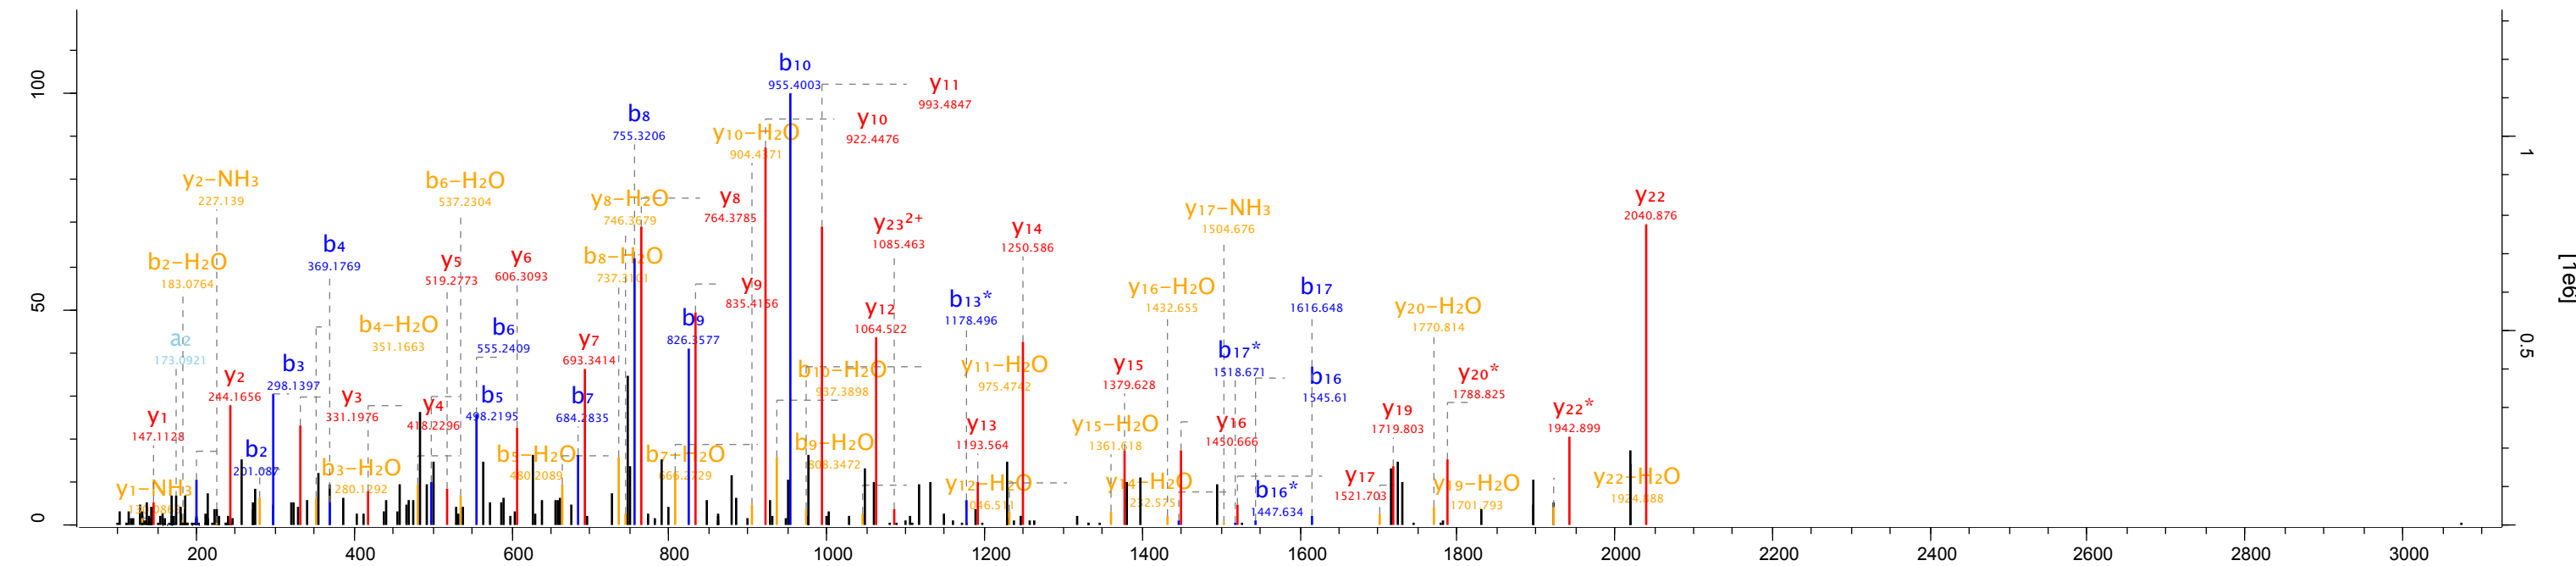

- E A P A E G E A A E P G S P T A A E G E A A S A A S S T S S P K -

b<sub>2</sub>
b<sub>3</sub>
b<sub>4</sub>
b<sub>5</sub>
b<sub>6</sub>
b<sub>7</sub>
b<sub>8</sub>
b<sub>9</sub>
b<sub>10</sub>
b<sub>13</sub>\*
b<sub>16</sub>
b<sub>17</sub>
y<sub>23</sub><sup>2+</sup>
y<sub>22</sub>
y<sub>20</sub>\*
y<sub>19</sub>
y<sub>17</sub>
y<sub>16</sub>
y<sub>15</sub>
y<sub>14</sub>
y<sub>13</sub>
y<sub>12</sub>
y<sub>11</sub>
y<sub>10</sub>
y<sub>9</sub>
y<sub>8</sub>
y<sub>7</sub>
y<sub>6</sub>
y<sub>5</sub>
y<sub>4</sub>
y<sub>3</sub>
y<sub>2</sub>
y<sub>1</sub>

Raw file: 20150814\_A375SR\_Phospho\_BR2\_05  
 Scan: 14035 Method: FTMS; HCD Score: 107.39 m/z: 583.79 Gene names: ZMYND8

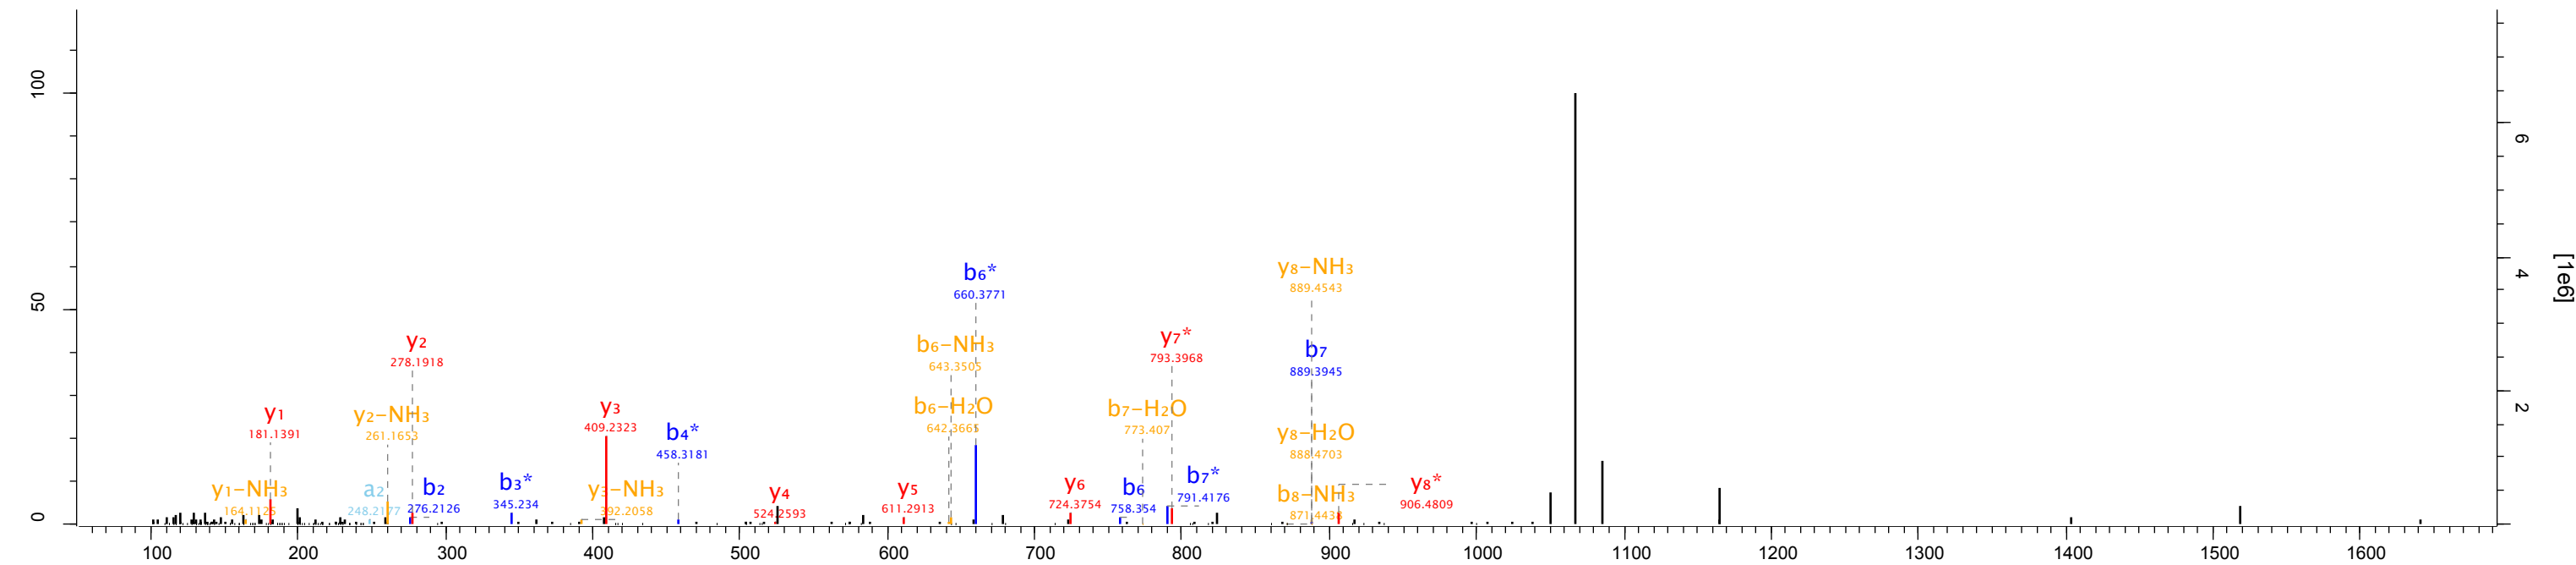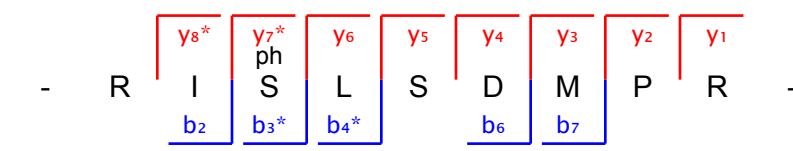

Raw file 20150814\_A375SR\_Phospho\_BR2\_05 Scan 14175 Method FTMS; HCD Score 108.26 m/z 801.36 Gene names SHROOM2

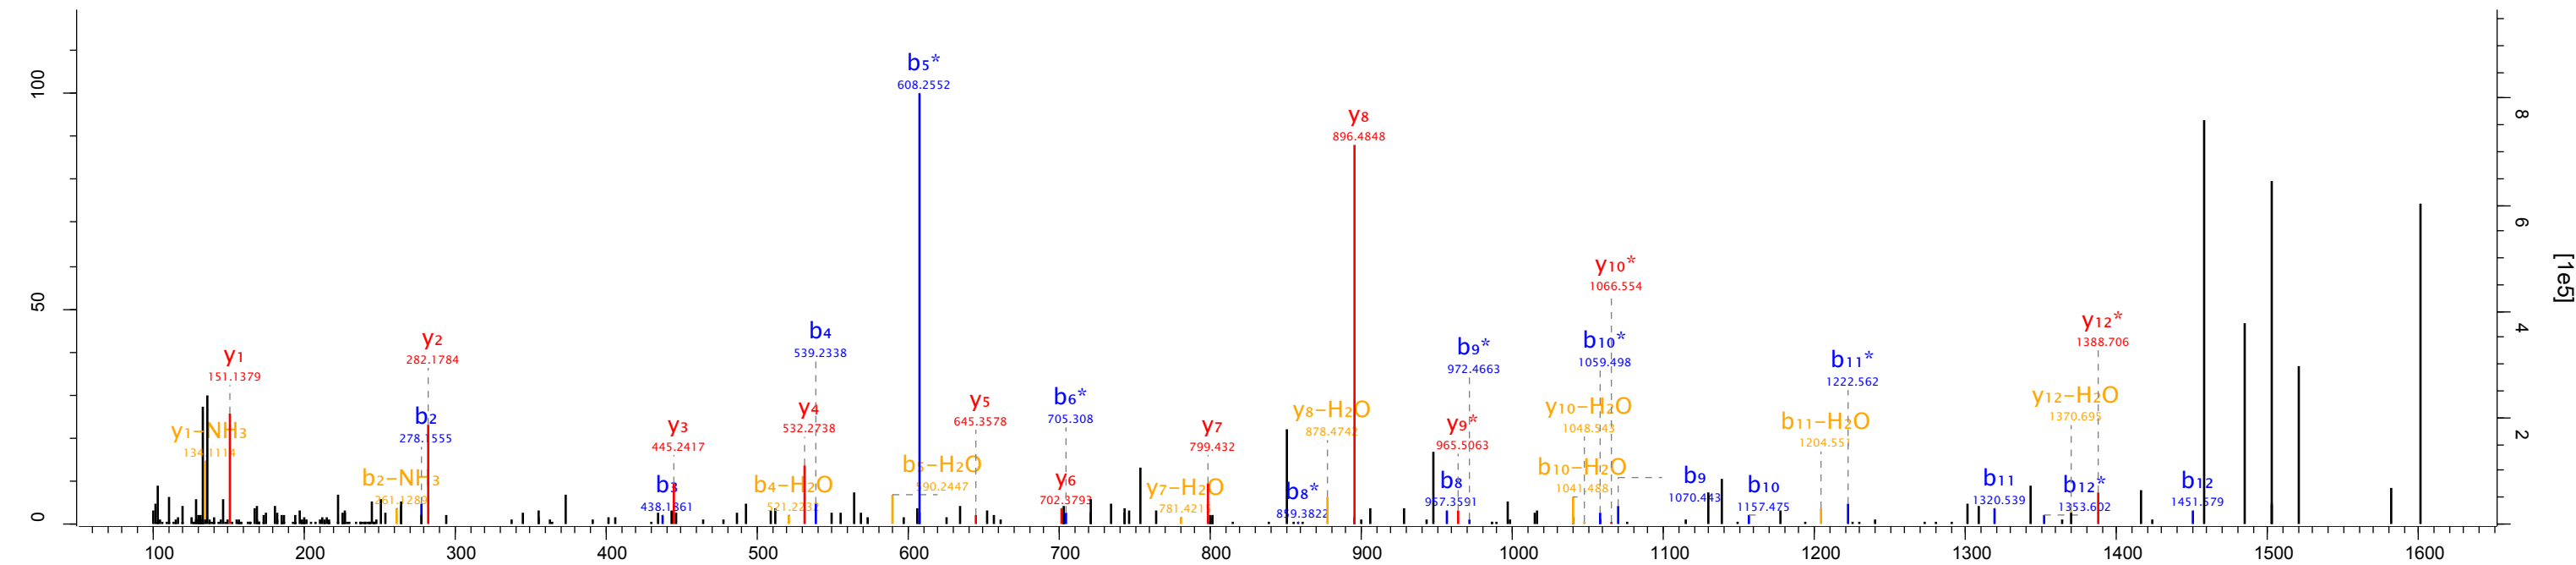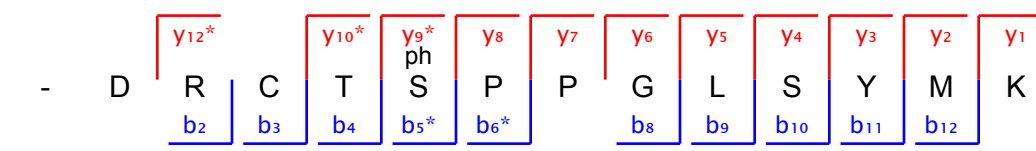

Raw file 20150814\_A375SR\_Phospho\_BR2\_05 Scan 14495 Method FTMS; HCD Score 176.39 m/z 870.93 Gene names ELF2

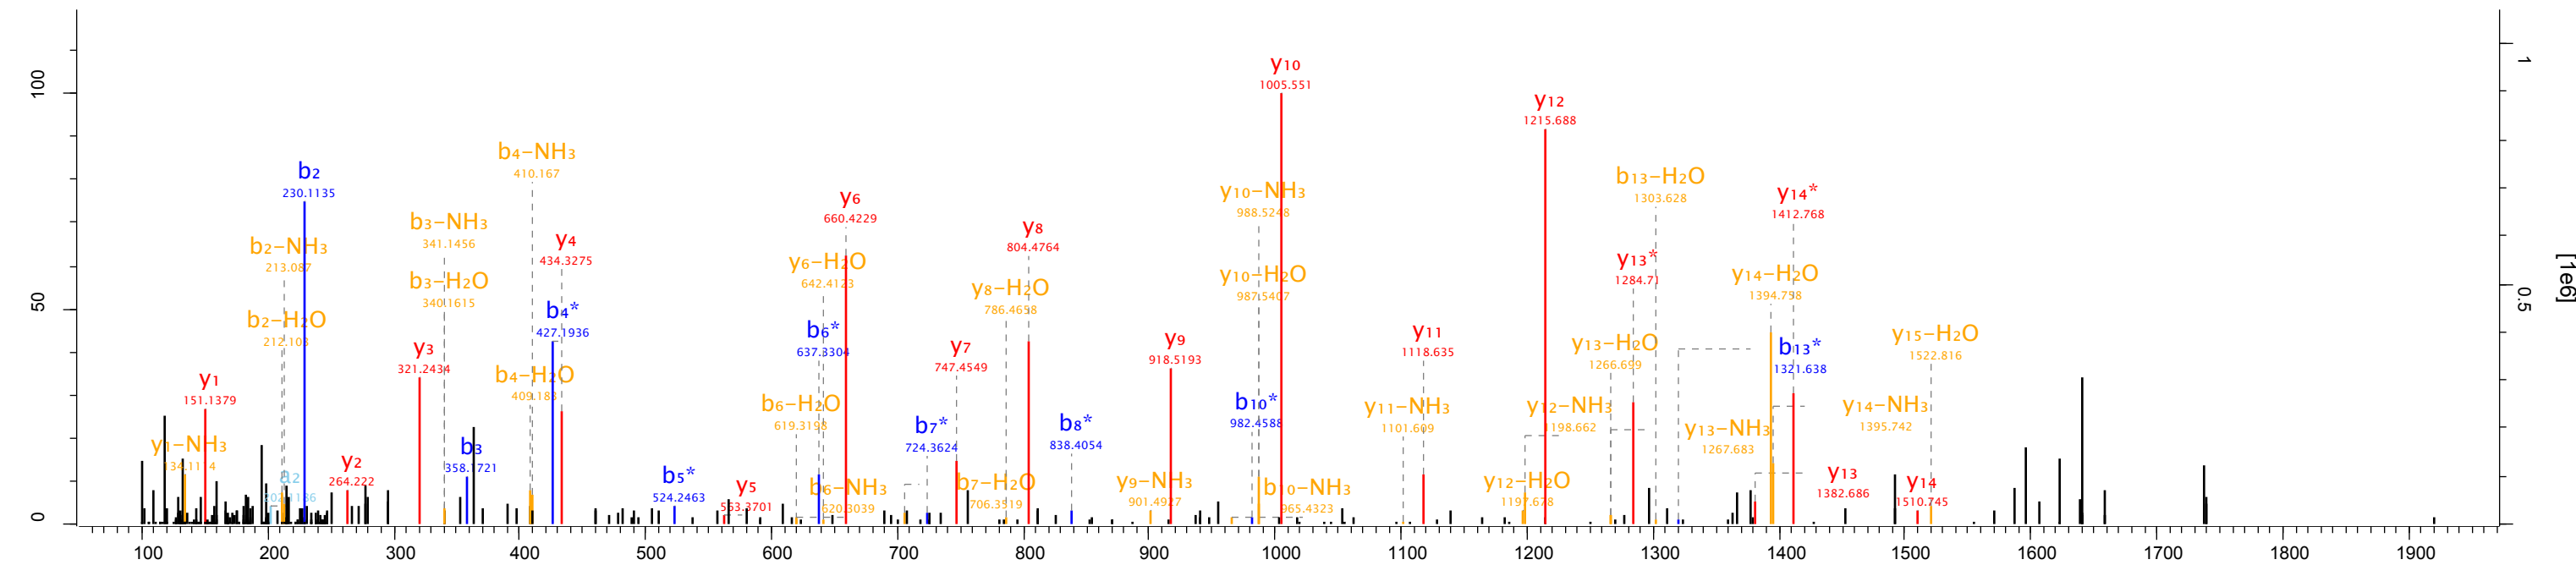

- T Q Q Q P I S N G S P E L G I K -

Fragmentation mapping (b and y ions) is shown below the sequence:

- Red boxes (y ions): y14 (Q), y13 (ph), y12 (P), y11 (I), y10 (S), y9 (N), y8 (G), y7 (S), y6 (P), y5 (E), y4 (L), y3 (G), y2 (I), y1 (K)
- Blue boxes (b ions): b2 (Q), b3 (Q), b4\* (Q), b5\* (P), b6\* (I), b7\* (S), b8\* (N), b10\* (S), b13\* (L)

Raw file: 20150814\_A375SR\_Phospho\_BR2\_05  
 Scan: 1455 Method: FTMS; HCD Score: 82.85 m/z: 543.27 Gene names: ZC3H18

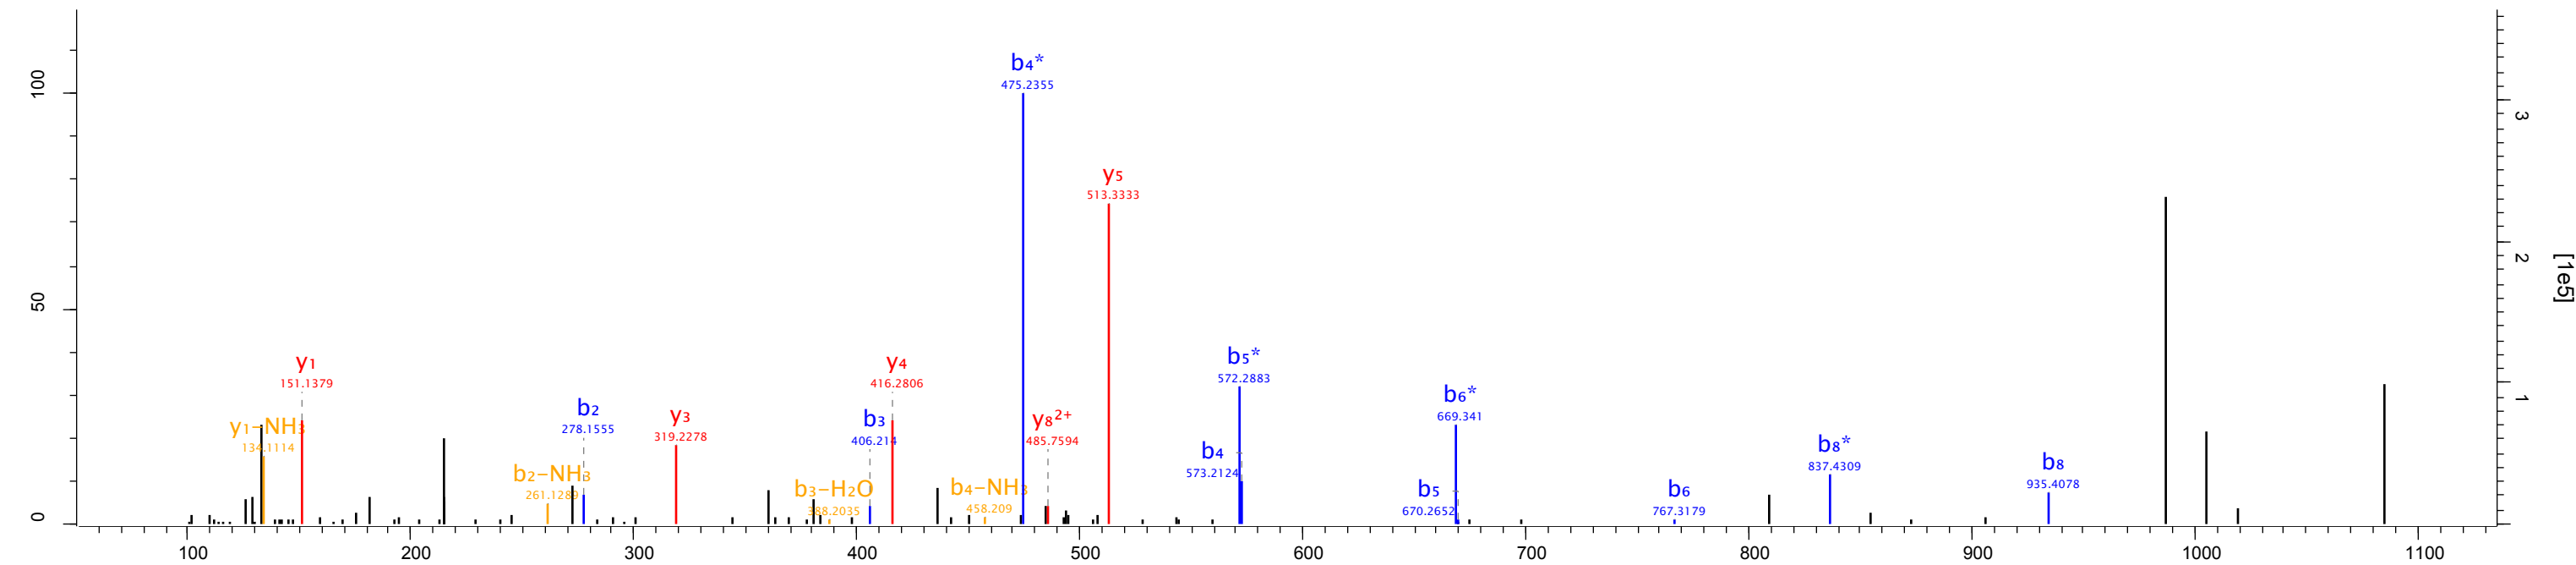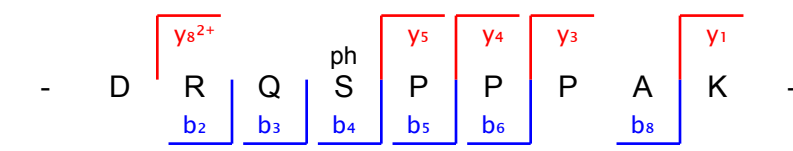

Raw file: 20150814\_A375SR\_Phospho\_BR2\_05  
 Scan: 15905 Method: FTMS; HCD Score: 127.2 m/z: 781.86 Gene names: SLC35F2

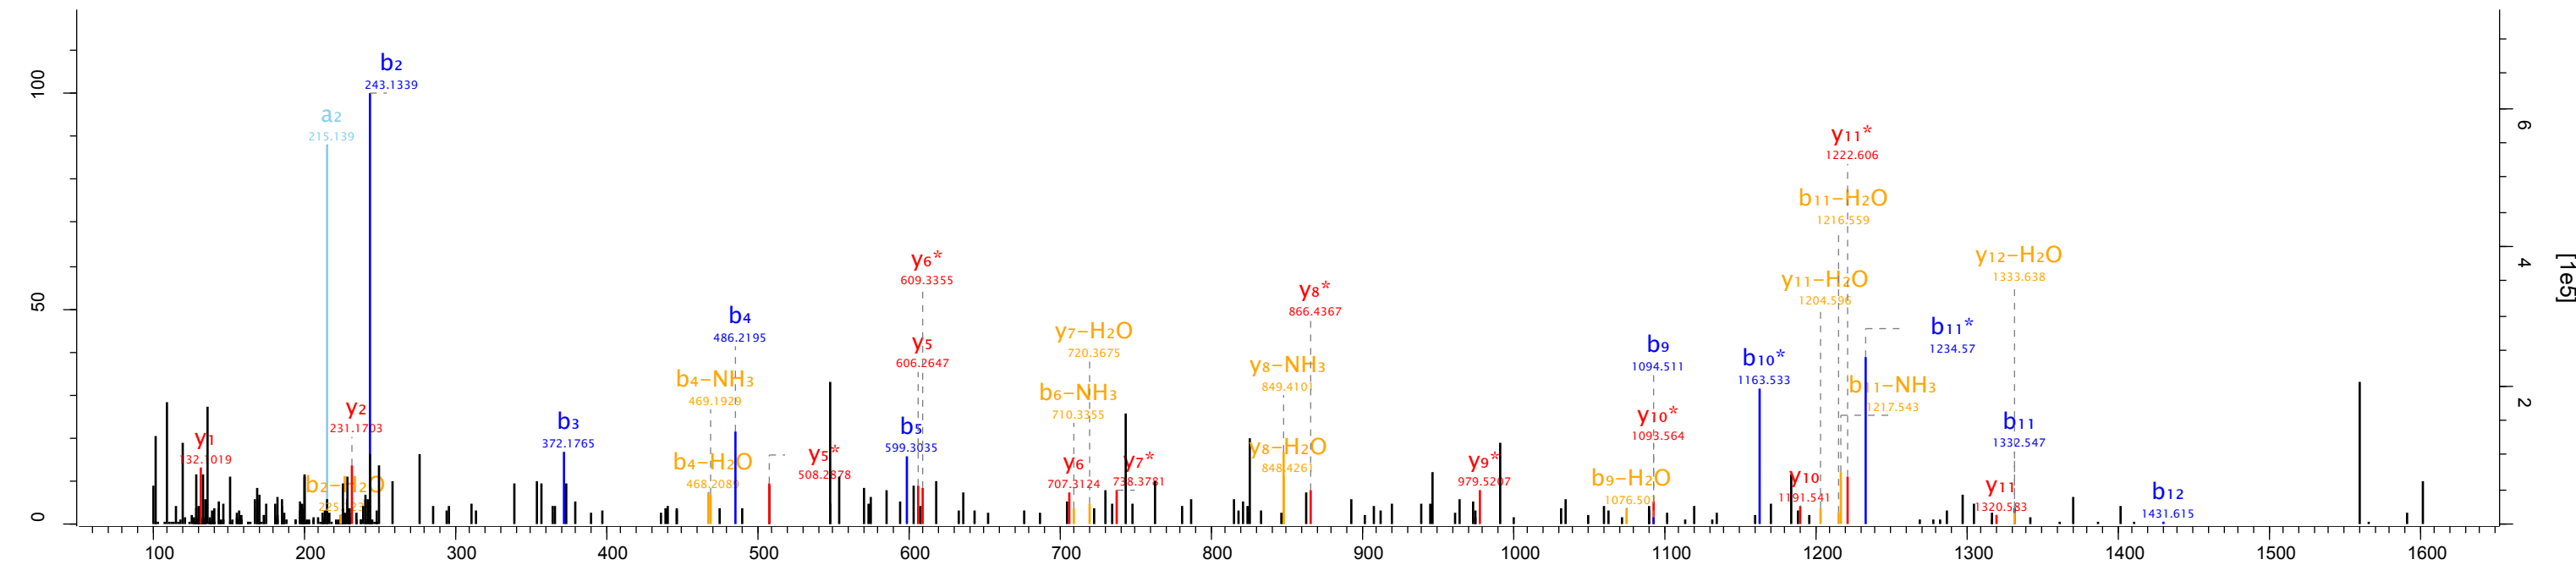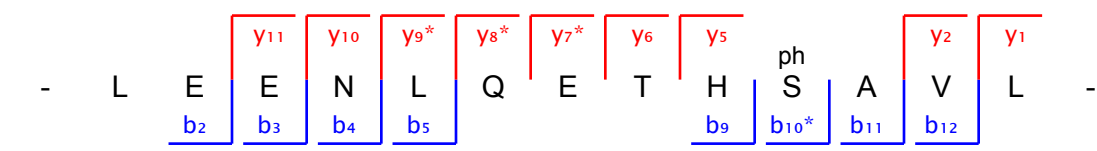

Raw file 20150814\_A375SR\_Phospho\_BR2\_05 Scan 15995 Method FTMS; HCD Score 188.19 m/z 918.44 Gene names USP42

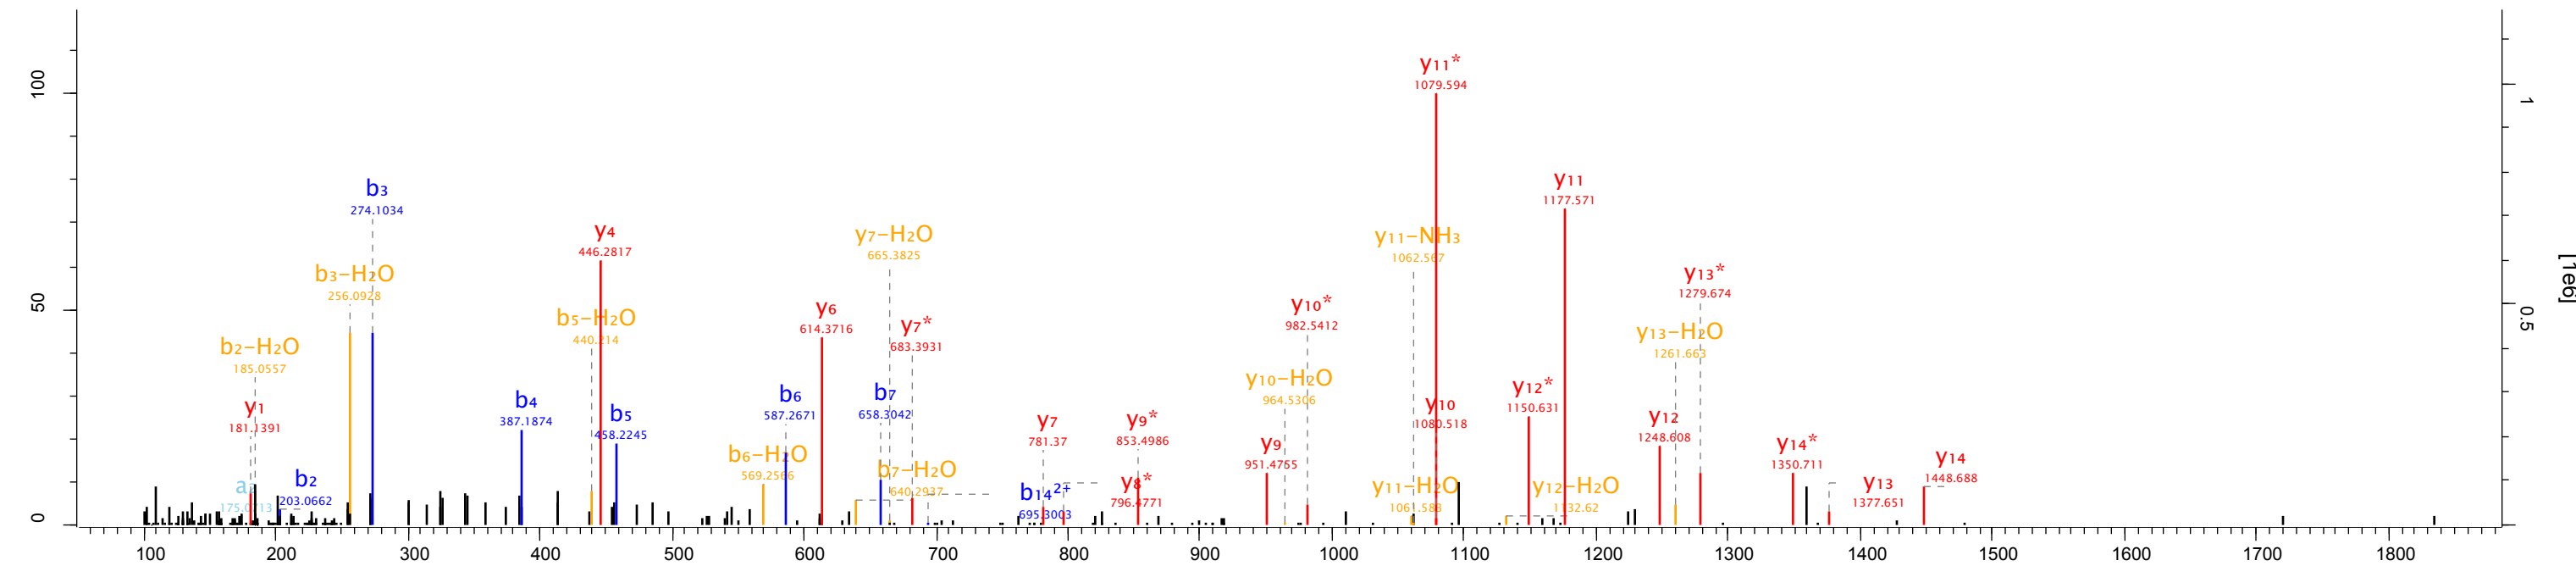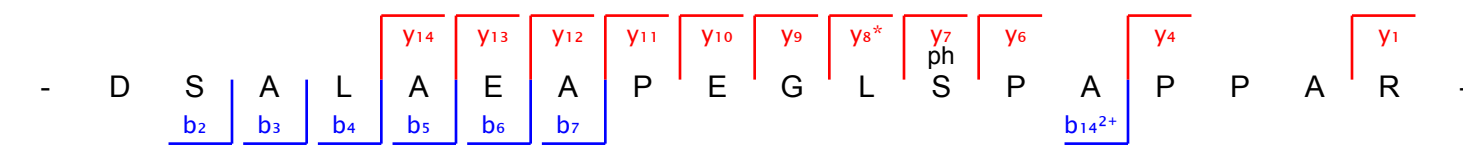



Raw file  
20150814\_A375SR\_Phospho\_BR2\_05

Scan 16065 Method FTMS; HCD Score 227.24 m/z 894.71 Gene names TFIP11

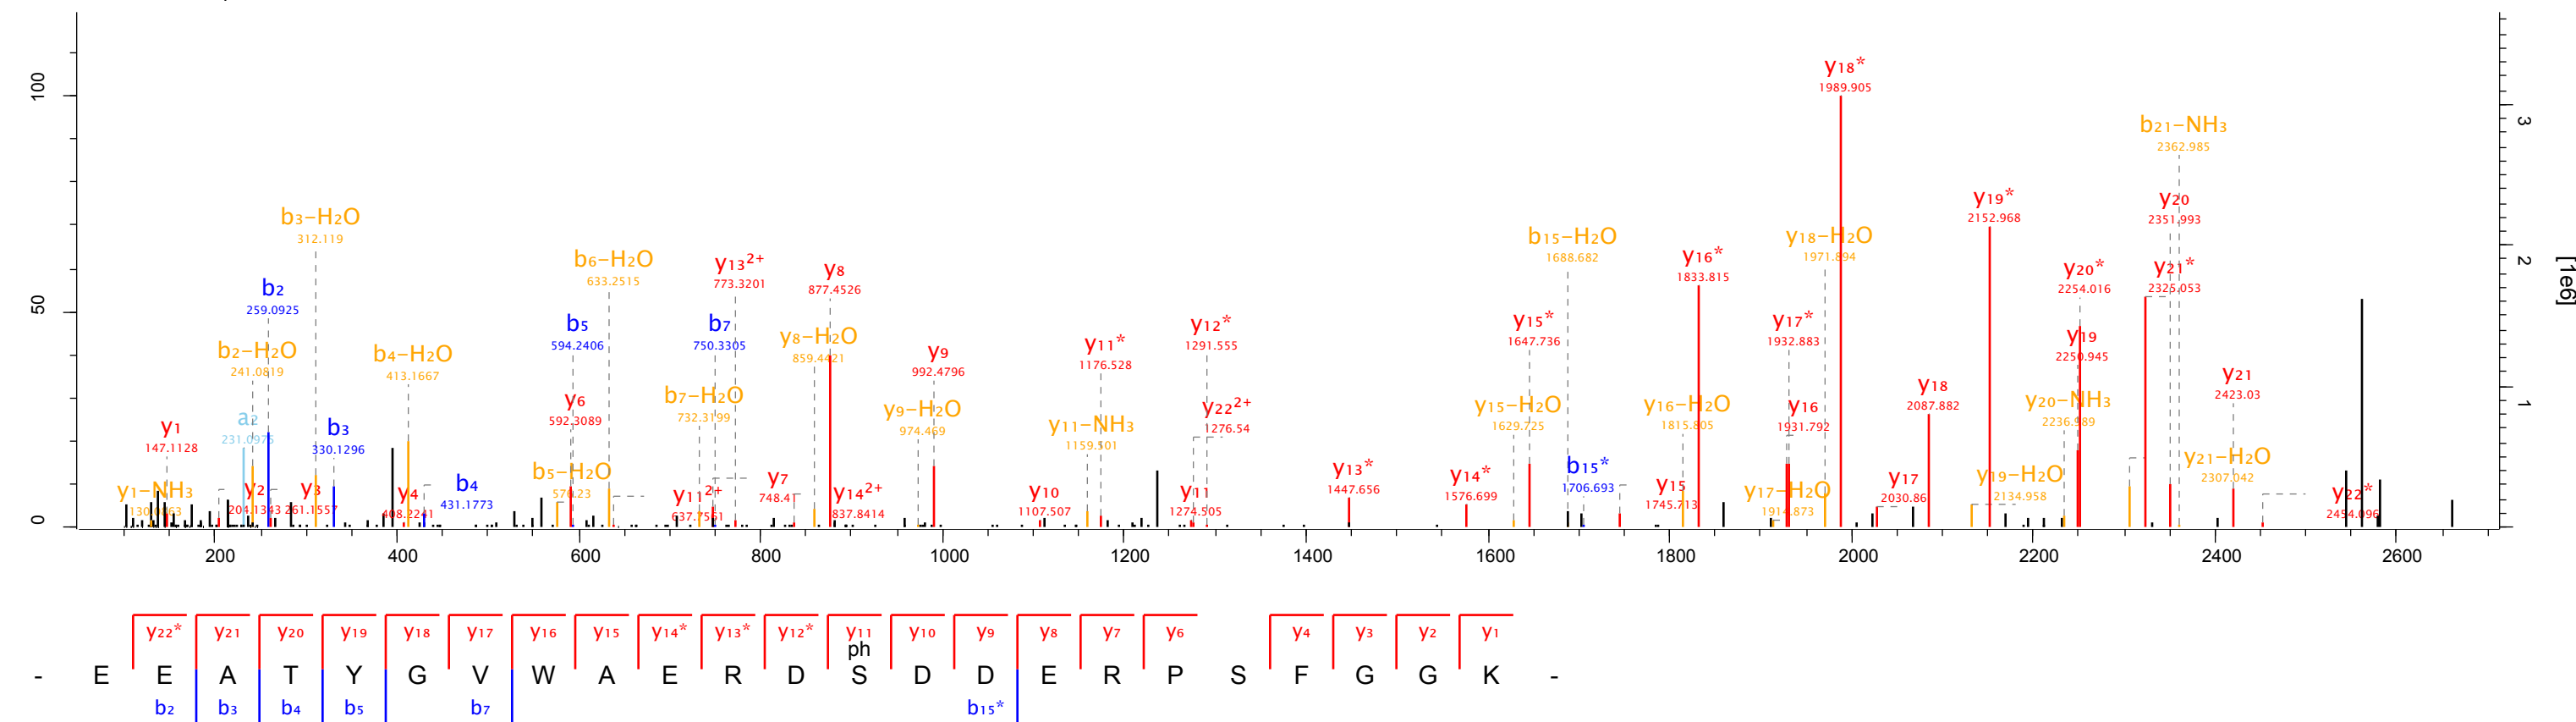

Raw file Scan Method Score m/z Gene names  
 20150814\_A375SR\_Phospho\_BR2\_05 16175 FTMS; HCD 260.66 1010.5 ZC3HC1

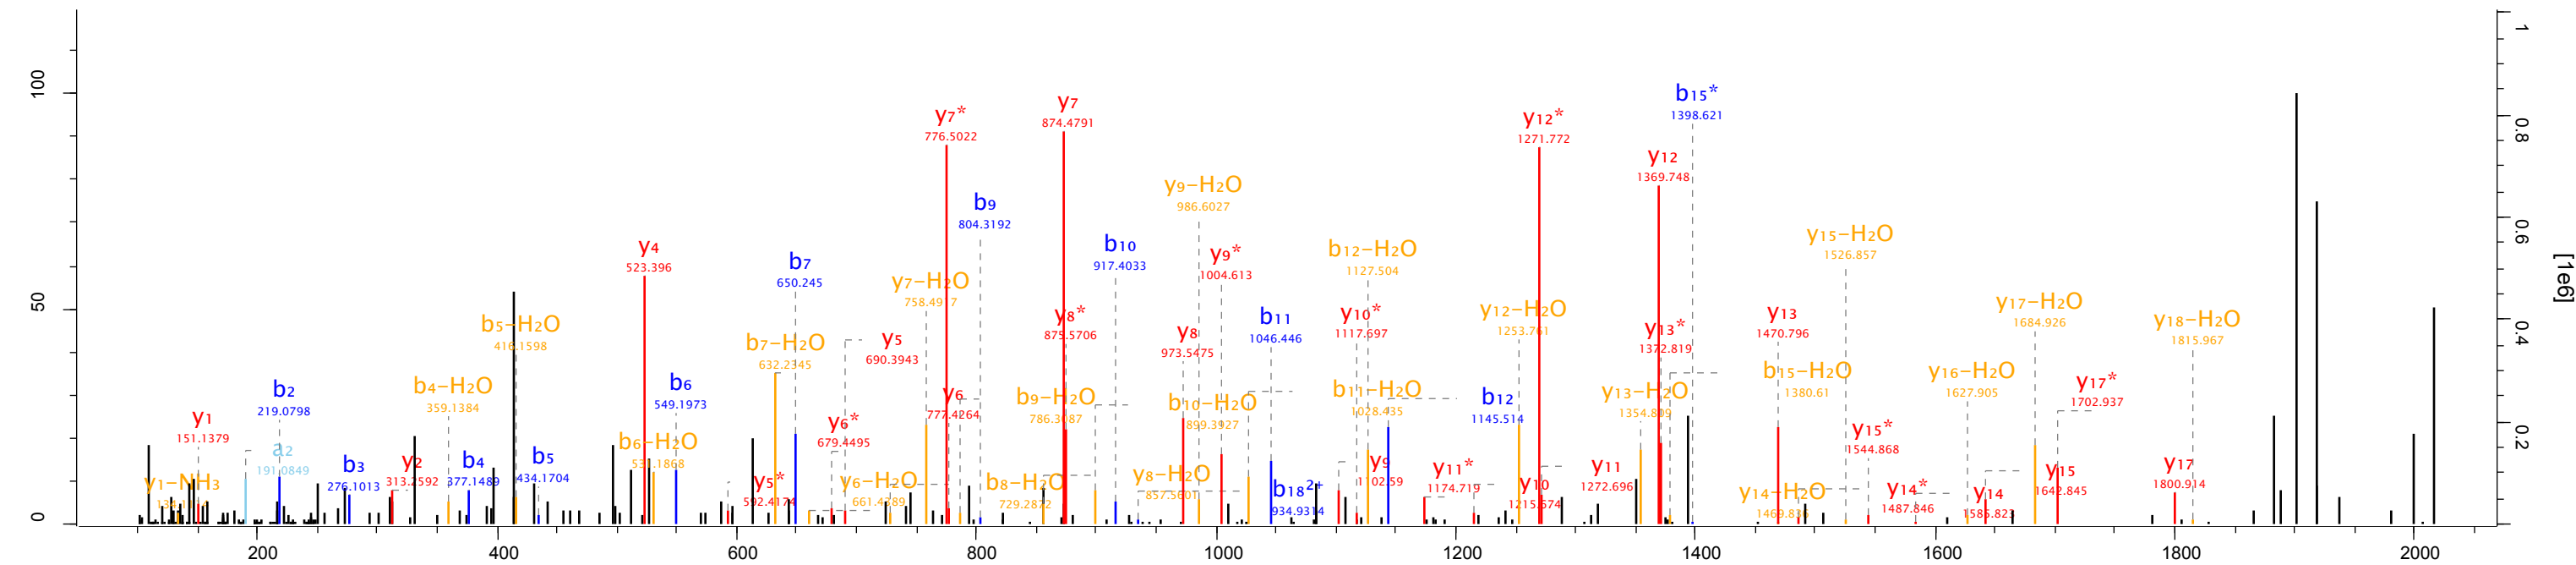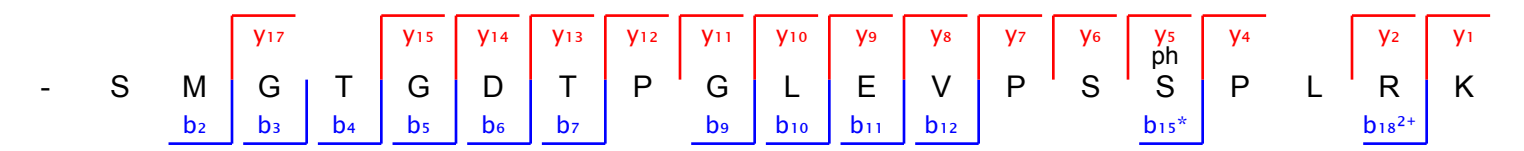

Raw file 20150814\_A375SR\_Phospho\_BR2\_05 Scan 16195 Method FTMS; HCD Score 141.45 m/z 604.26 Gene names FRYL

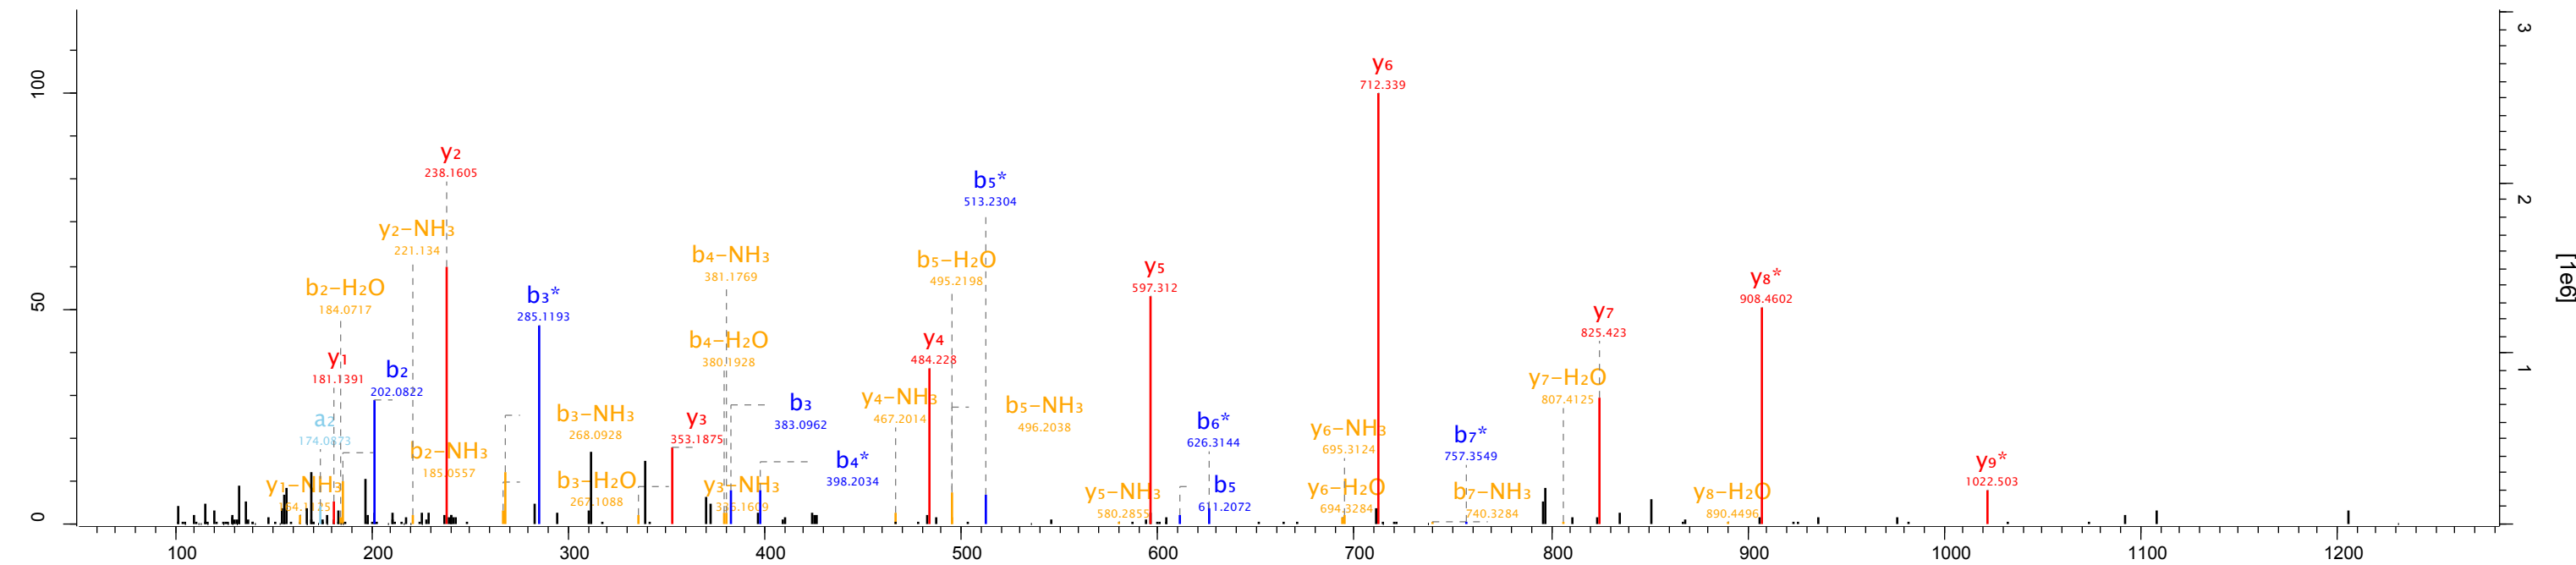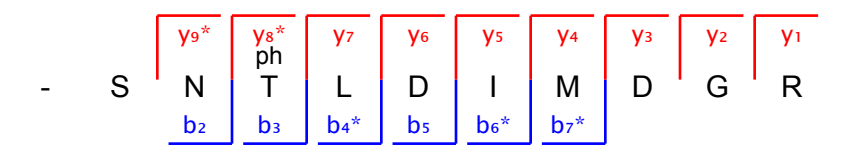

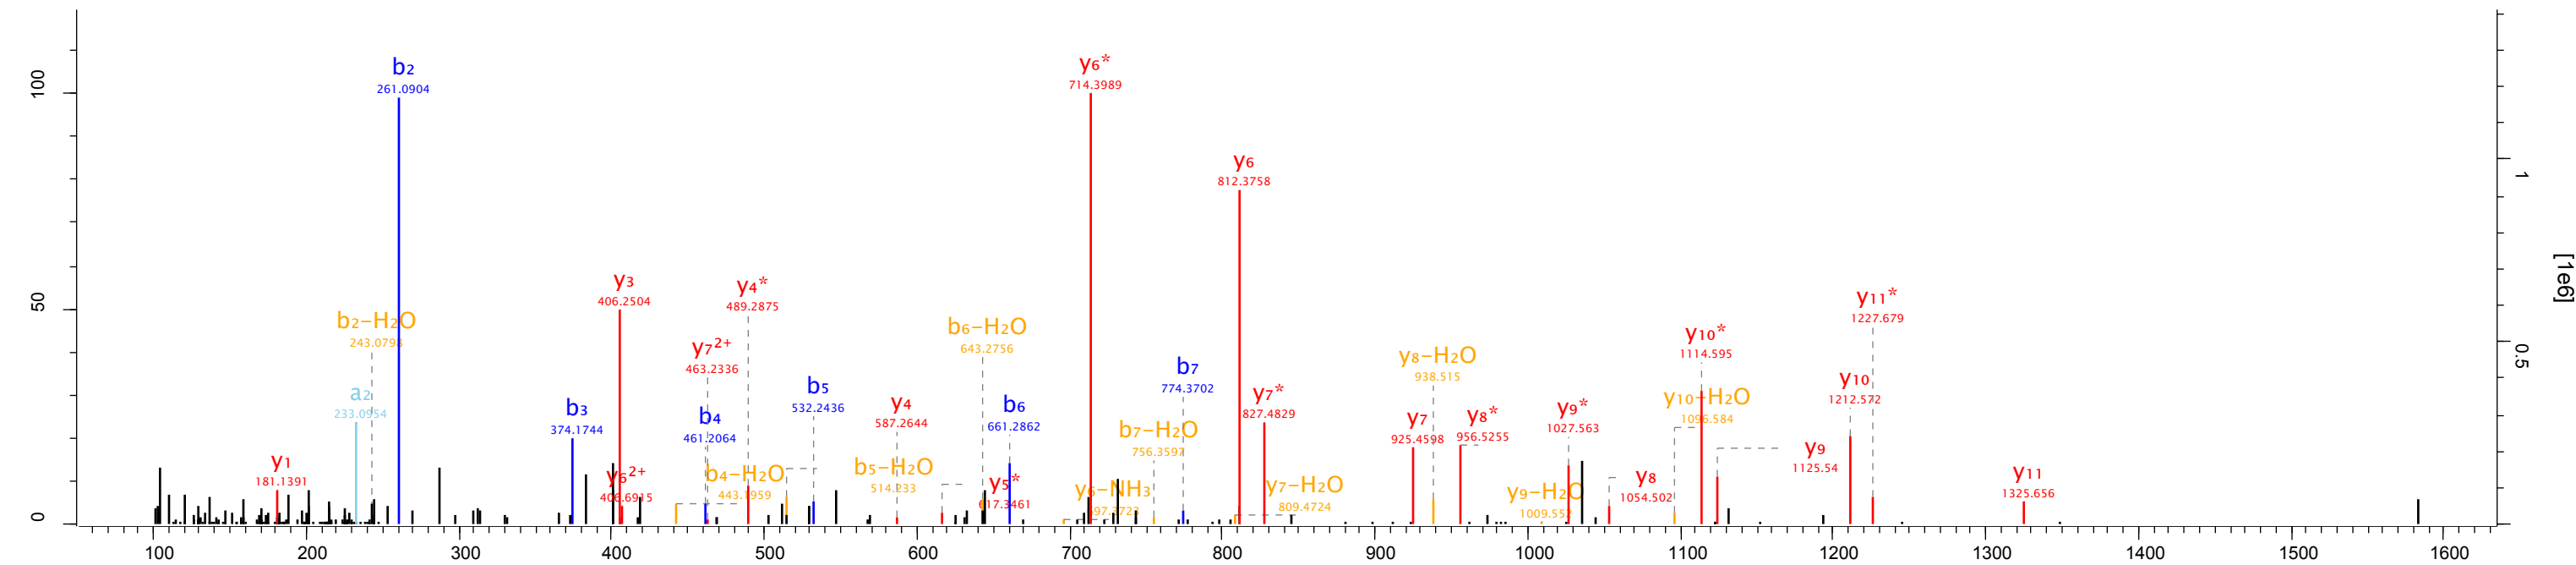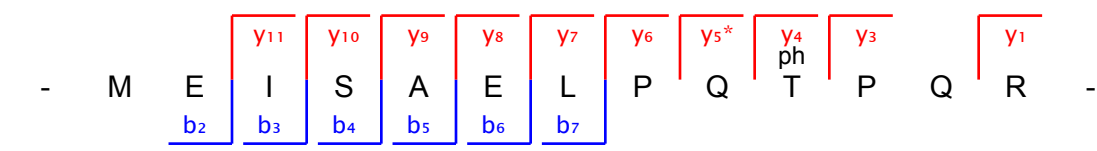

Raw file Scan Method Score m/z Gene names  
 20150814\_A375SR\_Phospho\_BR2\_05 16345 FTMS; HCD 160.02 758.37 FANCE

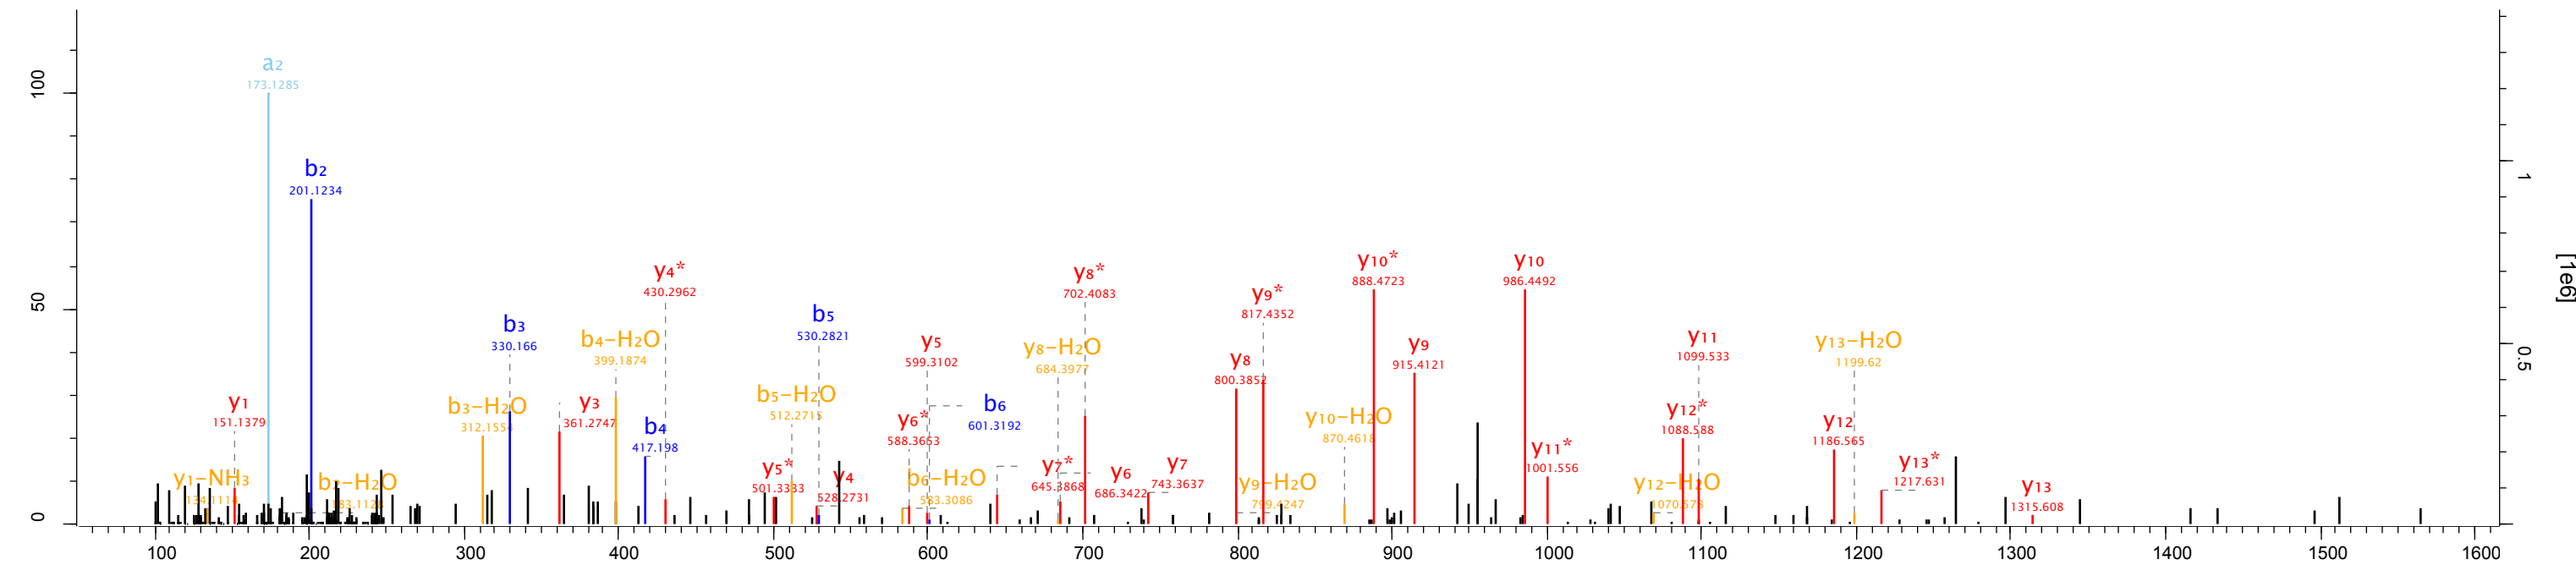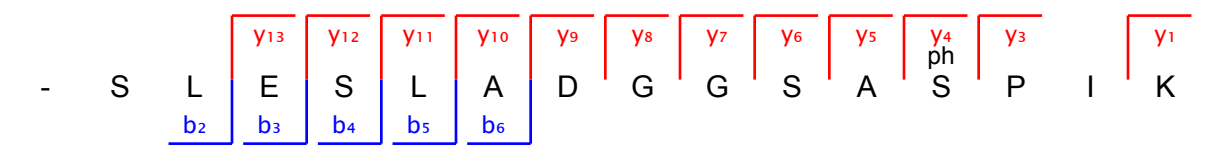

Raw file: 20150814\_A375SR\_Phospho\_BR2\_05  
 Scan: 16905  
 Method: FTMS; HCD  
 Score: 354.98  
 m/z: 1273.51  
 Gene names: ZRANB2

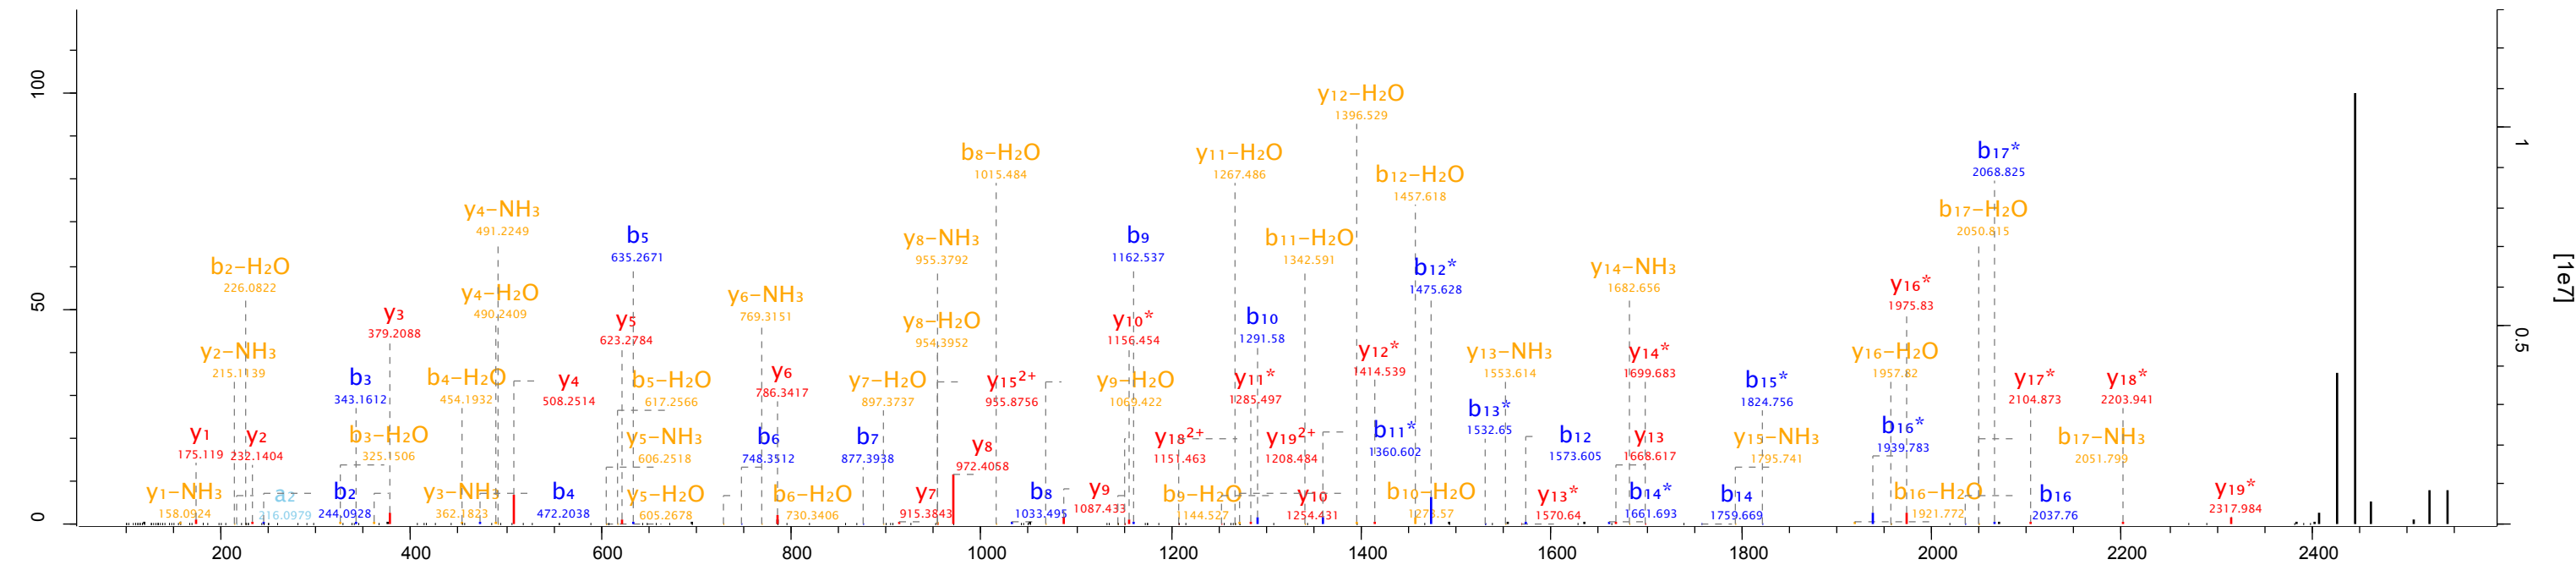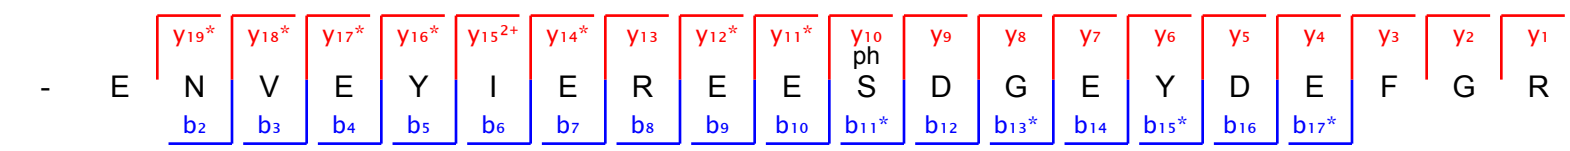

Raw file Scan Method Score m/z Gene names  
 20150814\_A375SR\_Phospho\_BR2\_05 17155 FTMS; HCD 127.85 867.65 PCBP2

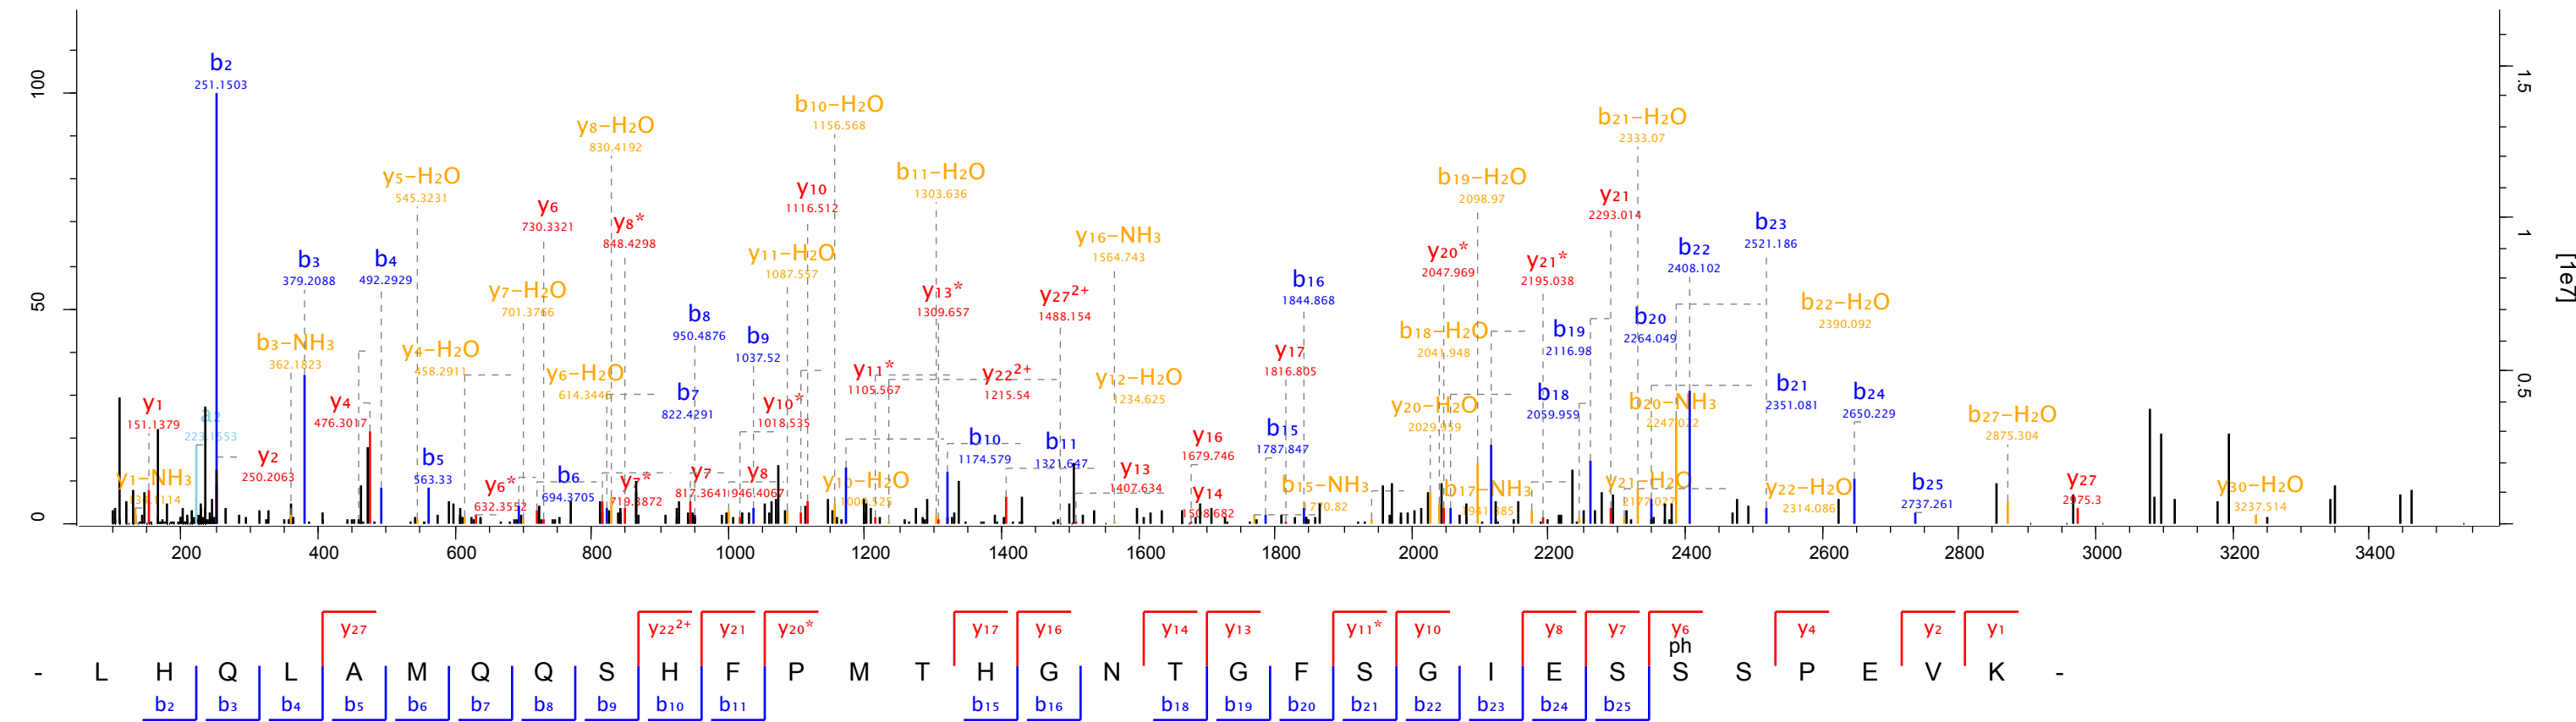

Raw file 20150814\_A375SR\_Phospho\_BR2\_05 Scan 17315 Method FTMS; HCD Score 225.27 m/z 717.04 Gene names BCL9L

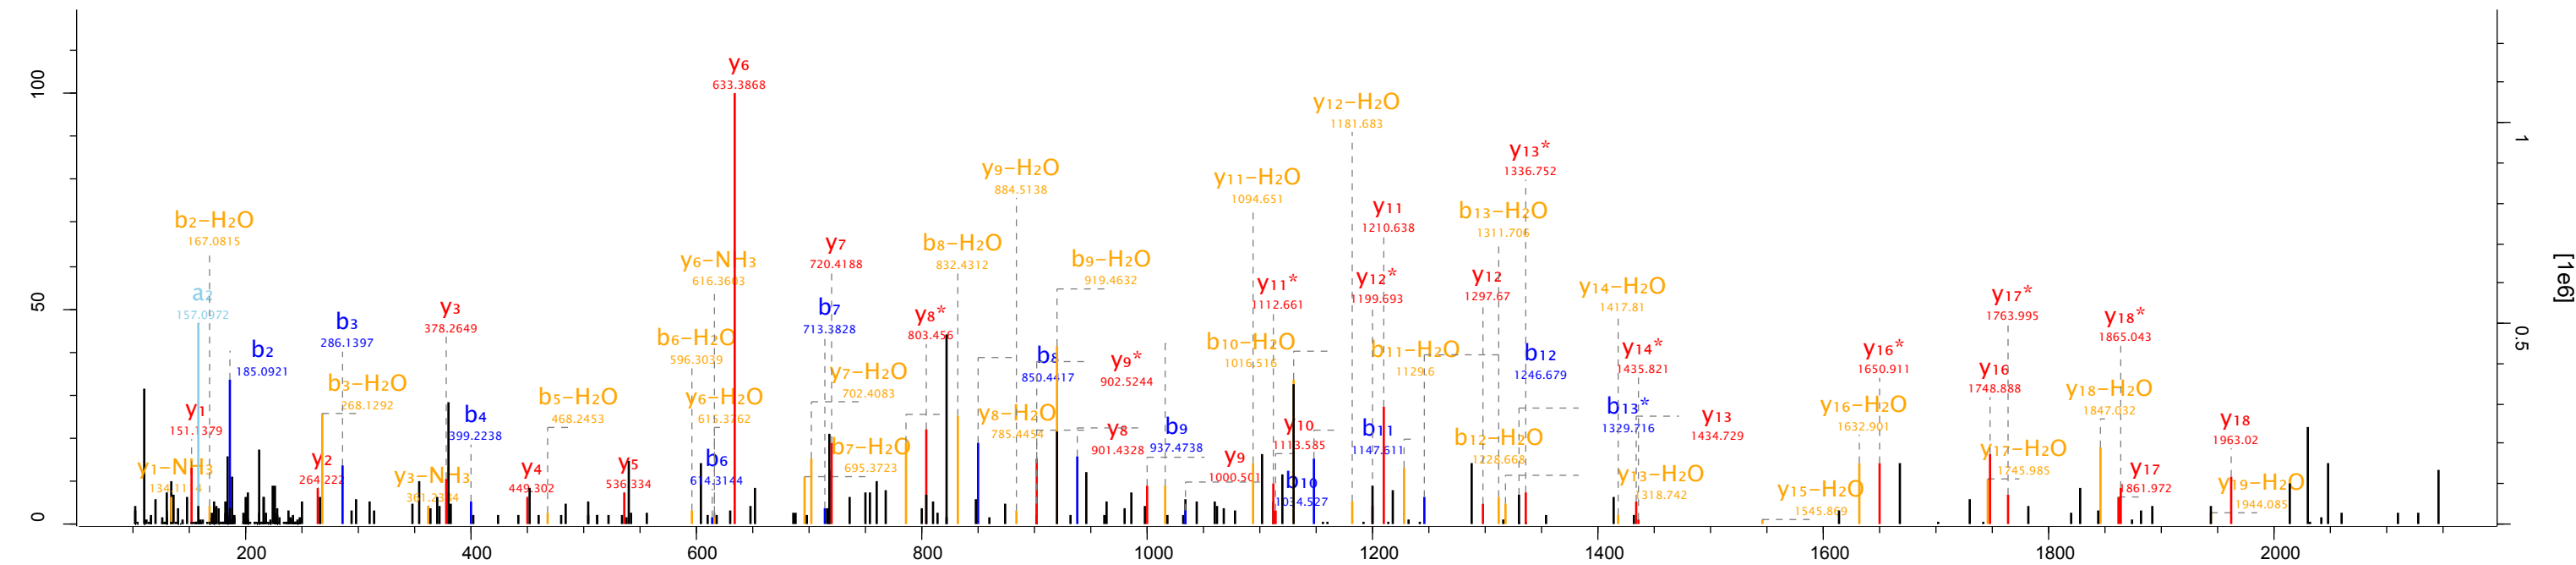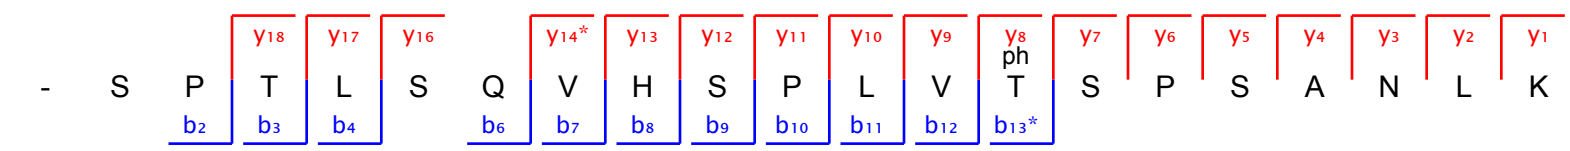



Raw file: 20150814\_A375SR\_Phospho\_BR2\_05  
 Scan: 18115 Method: FTMS; HCD Score: 74.13 m/z: 660.78 Gene names: FMN2

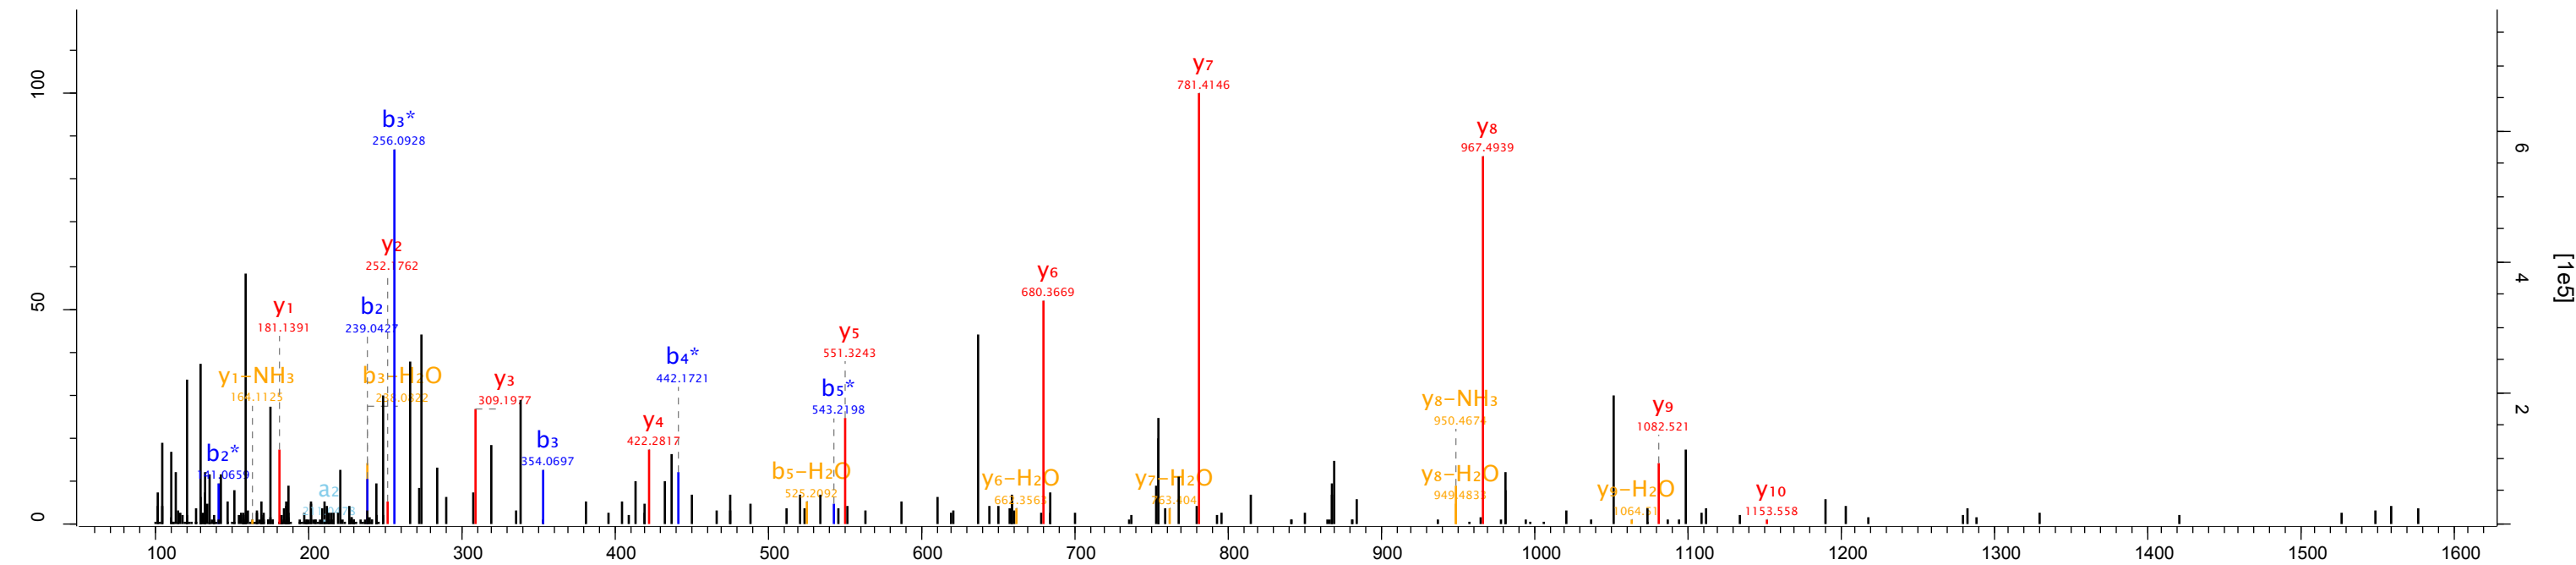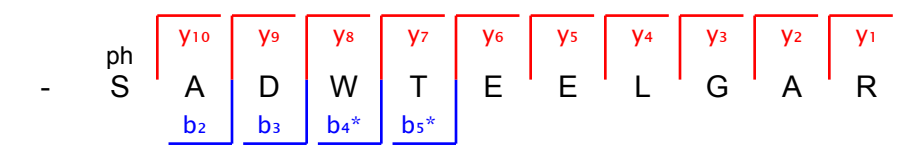

Raw file Scan Method Score m/z Gene names  
 20150814\_A375SR\_Phospho\_BR2\_05 18165 FTMS; HCD 132.48 881.48 RANBP2

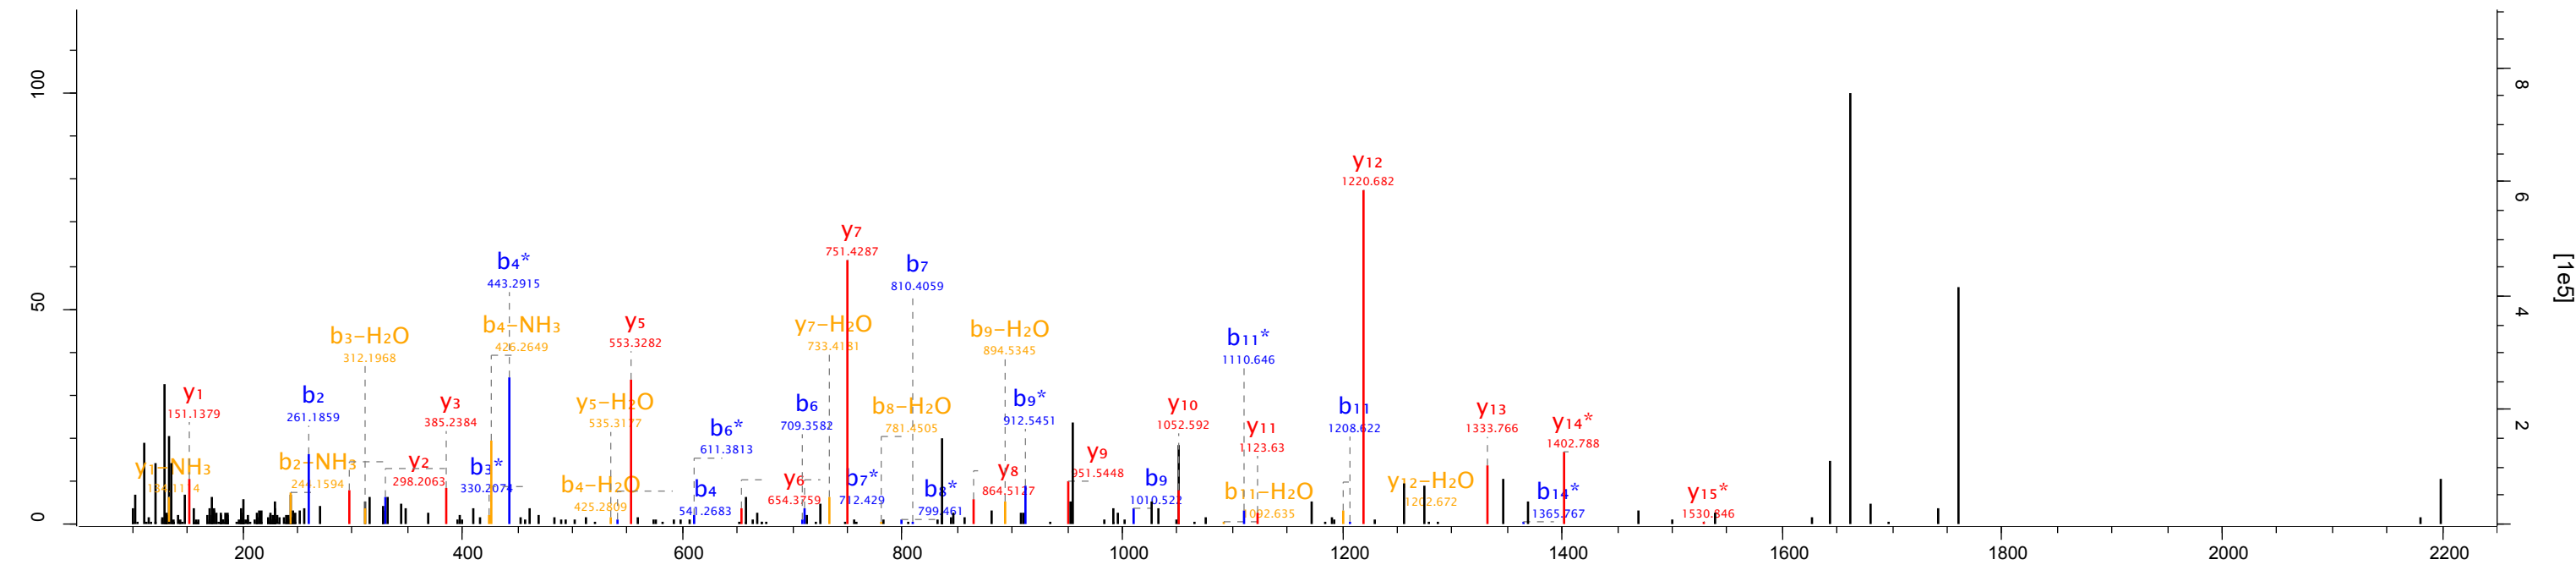

- K Q S L P A T S I P T P A S F K -

Fragmentation mapping (b and y ions):

- Q (b2), S (b3\*), L (b4), A (b6), T (b7), S (b8\*), I (b9), T (b11), S (b14\*)
- y15\* (K), y14\* (ph), y13 (L), y12 (P), y11 (A), y10 (T), y9 (S), y8 (I), y7 (P), y6 (T), y5 (P), y3 (S), y2 (F), y1 (K)

Raw file: 20150814\_A375SR\_Phospho\_BR2\_05  
 Scan: 1855 Method: FTMS; HCD Score: 84.05 m/z: 662.79 Gene names: VCX3A;VCX;VCX3B;VCX2

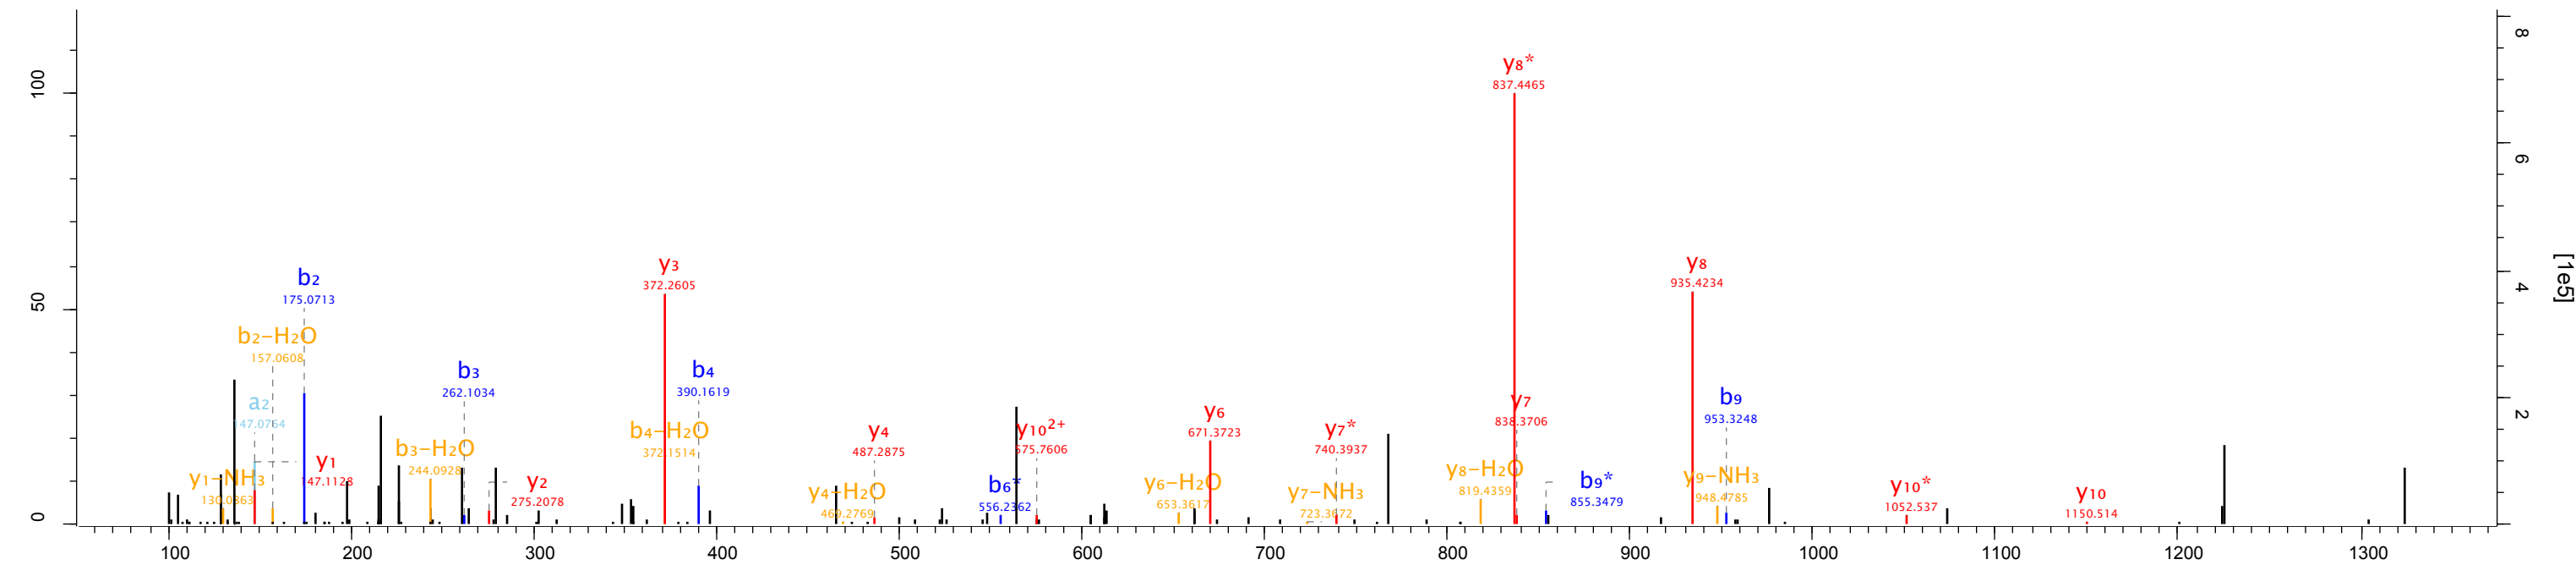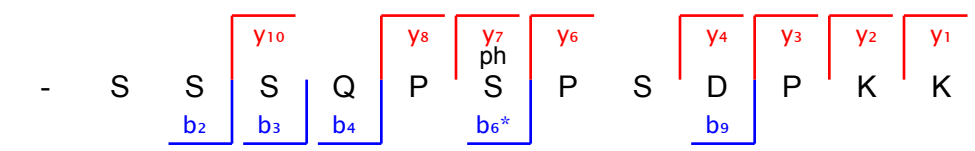

Raw file: 20150814\_A375SR\_Phospho\_BR2\_05  
 Scan: 18555 Method: FTMS; HCD Score: 285.42 m/z: 1017.49 Gene names: IRF2BPL

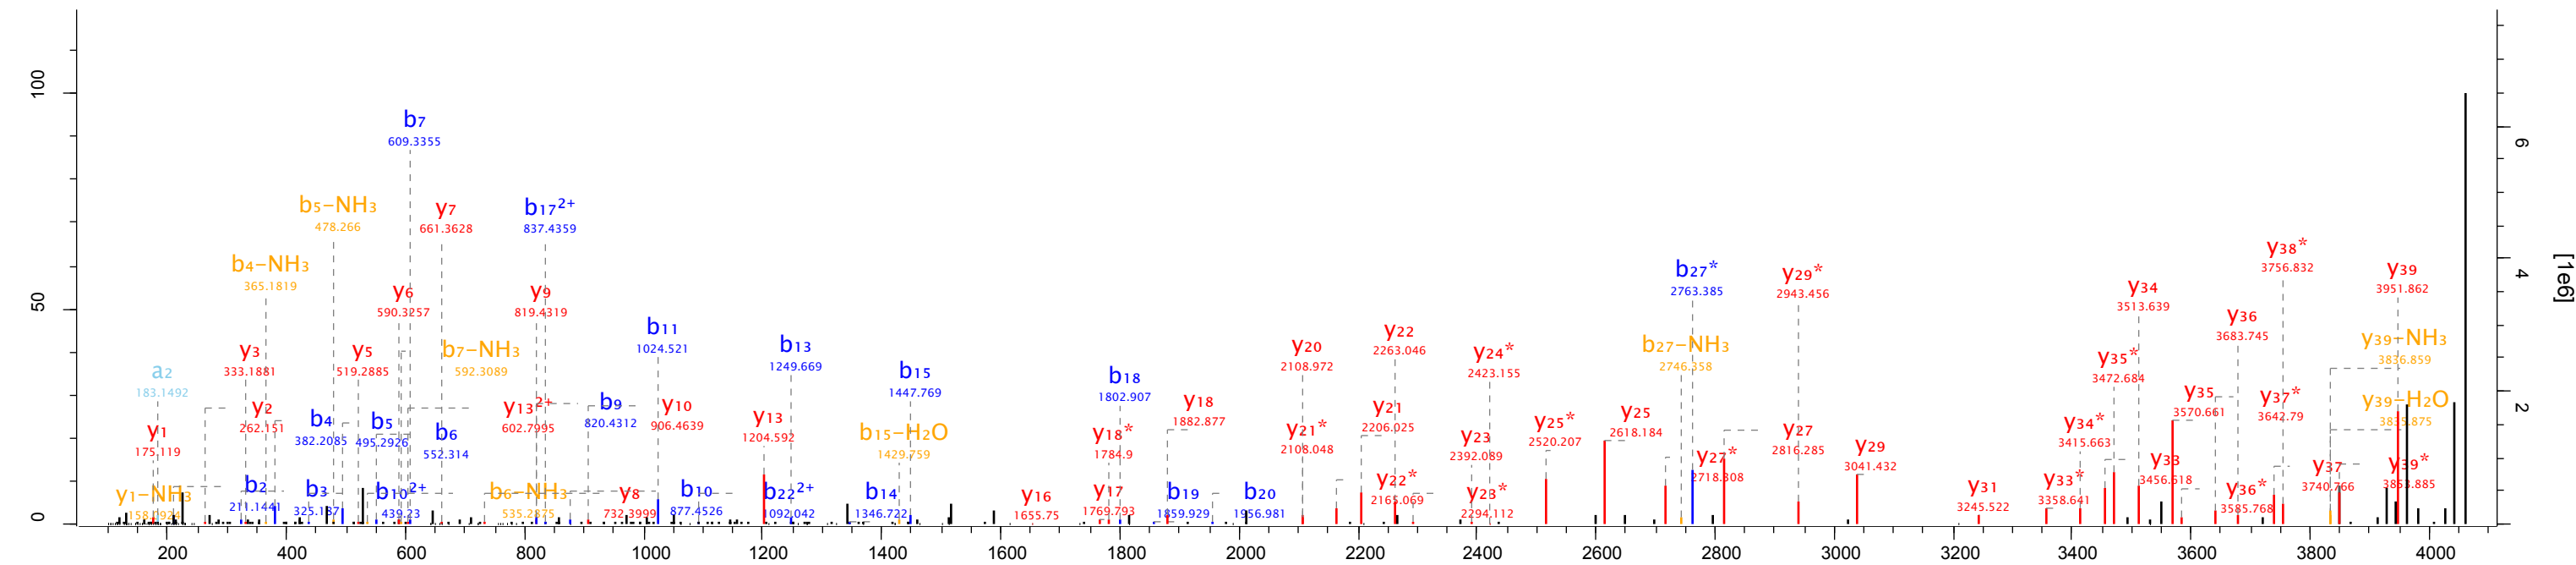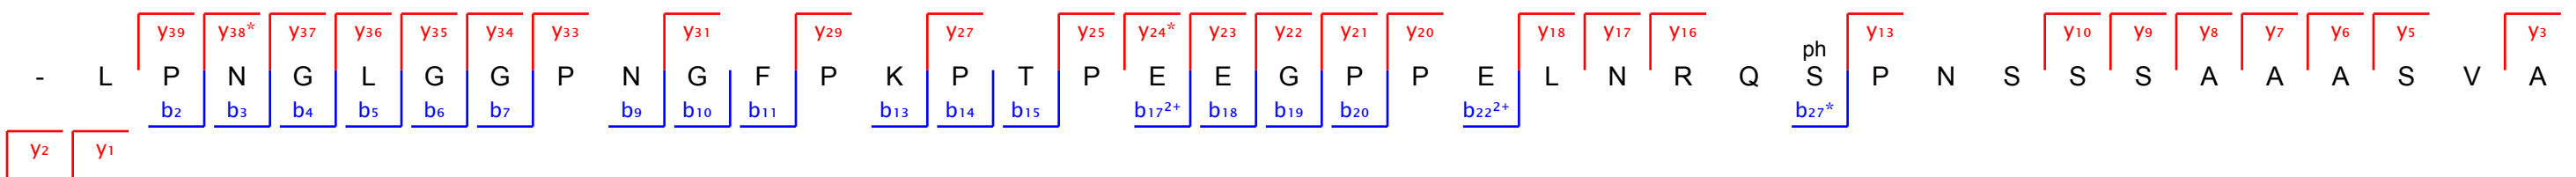

Raw file: 20150814\_A375SR\_Phospho\_BR2\_05  
 Scan: 18715 Method: FTMS; HCD Score: 280.2 m/z: 1035.49 Gene names: OSBPL3

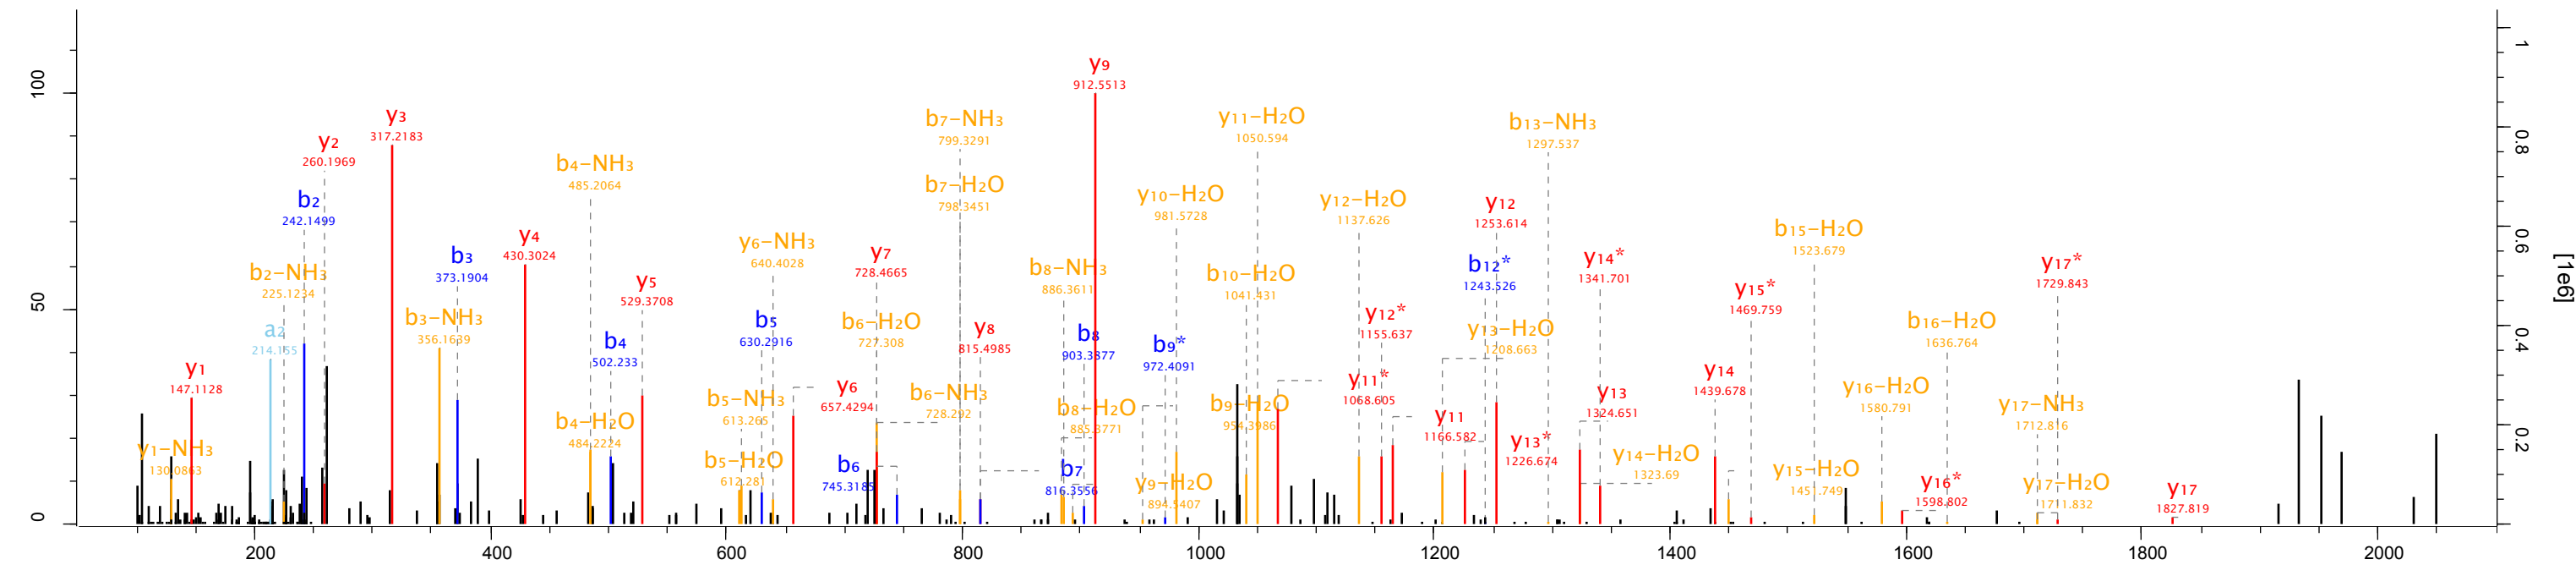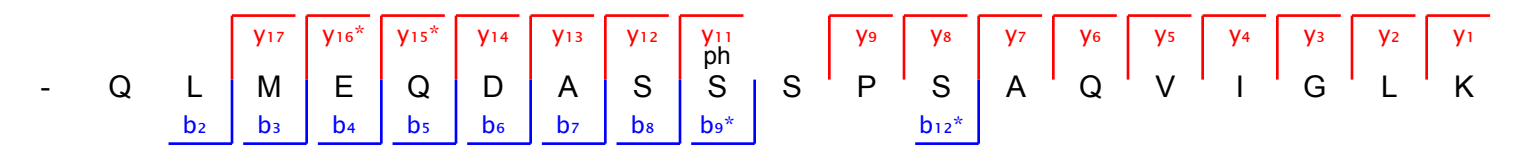

Raw file 20150814\_A375SR\_Phospho\_BR2\_05 Scan 18785 Method FTMS; HCD Score 147.42 m/z 971.43 Gene names TNKS1BP1

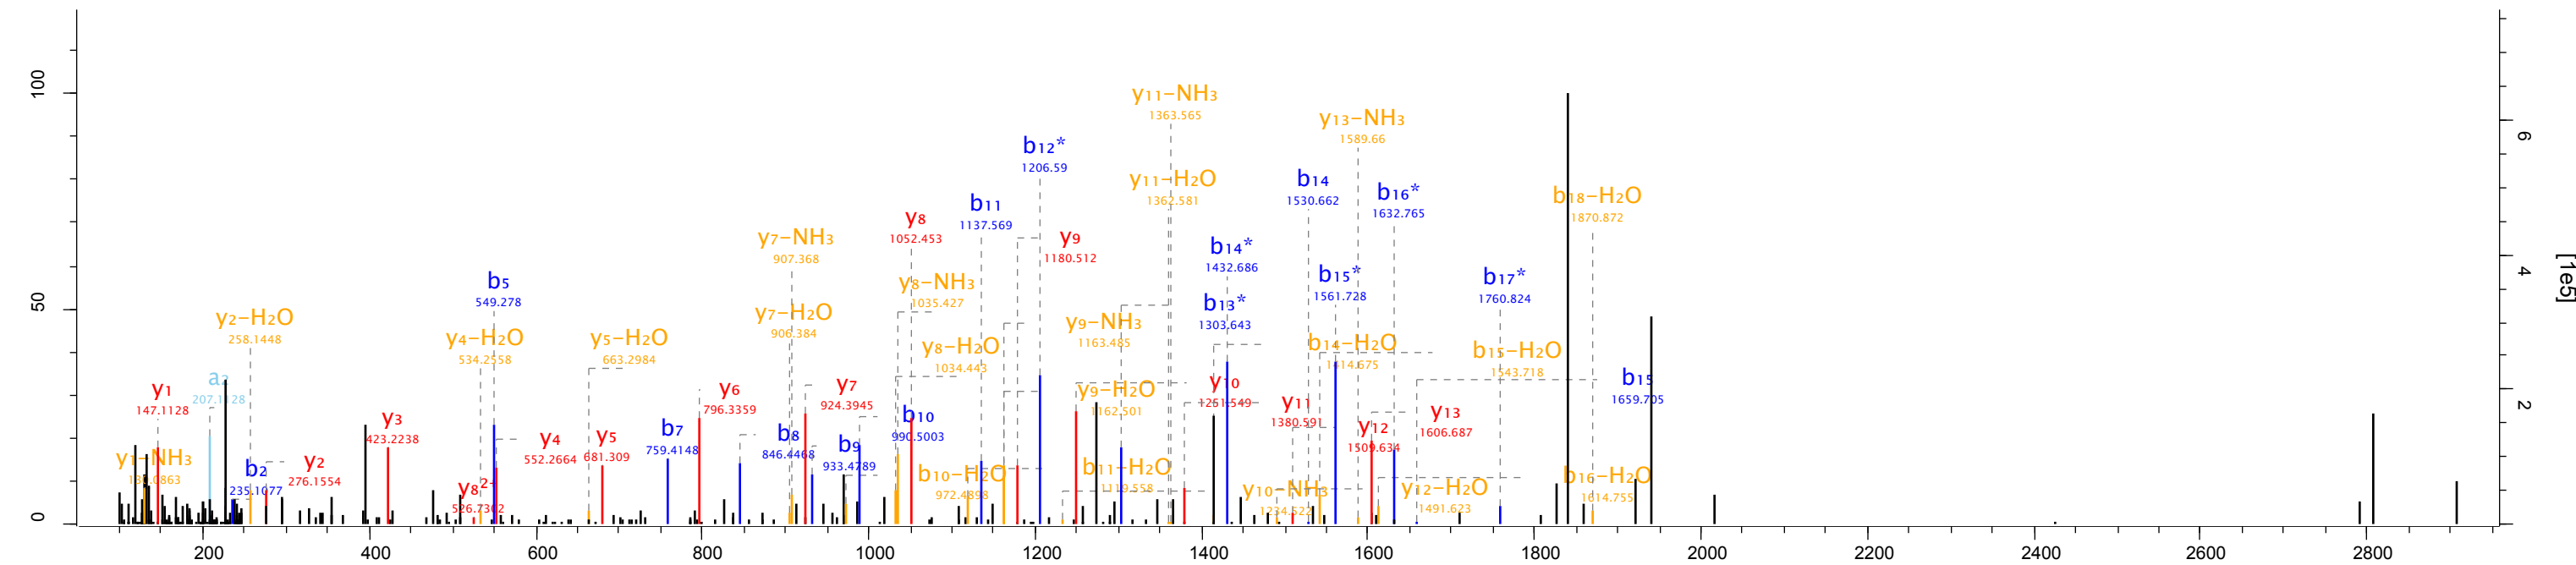

- S F G T R P L S S G F S P E E A Q Q Q D E E F E K -

Fragmentation mapping below the sequence:

- b<sub>2</sub> (under F)
- b<sub>5</sub> (under R)
- b<sub>7</sub> (under L)
- b<sub>8</sub> (under S)
- b<sub>9</sub> (under S)
- b<sub>10</sub> (under G)
- b<sub>11</sub> (under F)
- b<sub>12</sub>\* (under S)
- b<sub>13</sub>\* (under P)
- b<sub>14</sub> (under E)
- b<sub>15</sub> (under E)
- b<sub>16</sub>\* (under A)
- b<sub>17</sub>\* (under Q)

Fragmentation mapping above the sequence (y ions):

- y<sub>13</sub> (above P)
- y<sub>12</sub> (above E)
- y<sub>11</sub> (above E)
- y<sub>10</sub> (above A)
- y<sub>9</sub> (above Q)
- y<sub>8</sub> (above Q)
- y<sub>7</sub> (above Q)
- y<sub>6</sub> (above D)
- y<sub>5</sub> (above E)
- y<sub>4</sub> (above E)
- y<sub>3</sub> (above F)
- y<sub>2</sub> (above E)
- y<sub>1</sub> (above K)

Raw file 20150814\_A375SR\_Phospho\_BR2\_05 Scan 19555 Method FTMS; HCD Score 111.27 m/z 522.29 Gene names RICTOR

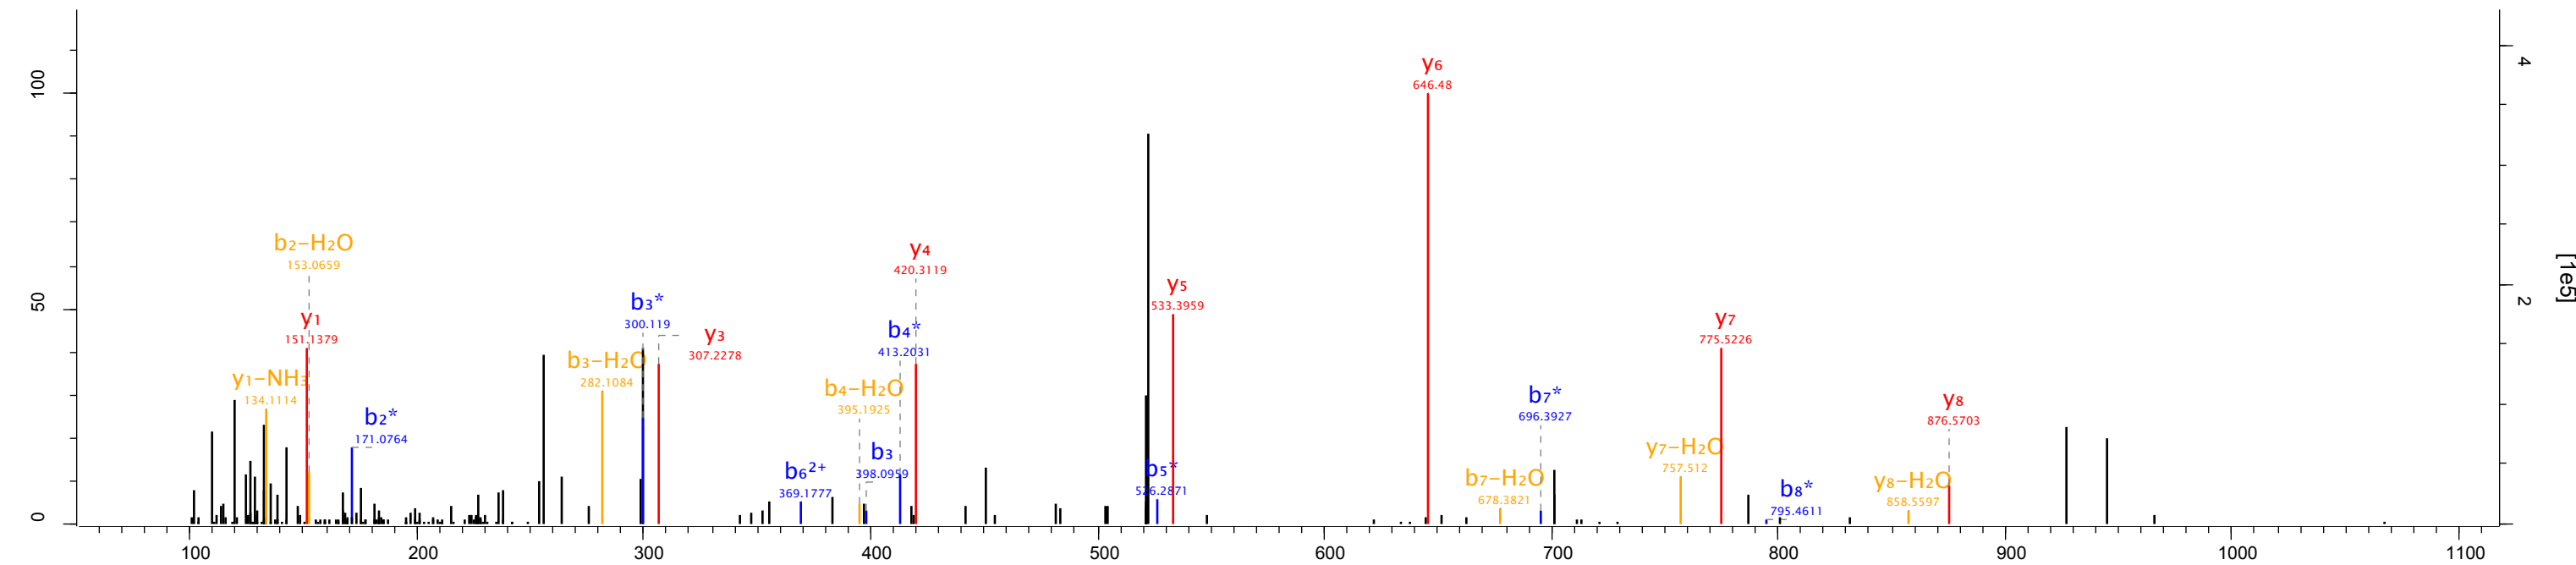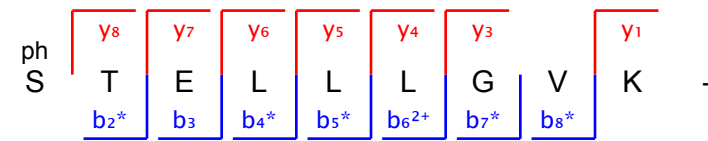

Raw file: 20150814\_A375SR\_Phospho\_BR2\_05  
 Scan: 2025 Method: FTMS; HCD Score: 108.34 m/z: 539.25 Gene names: BAZ2A

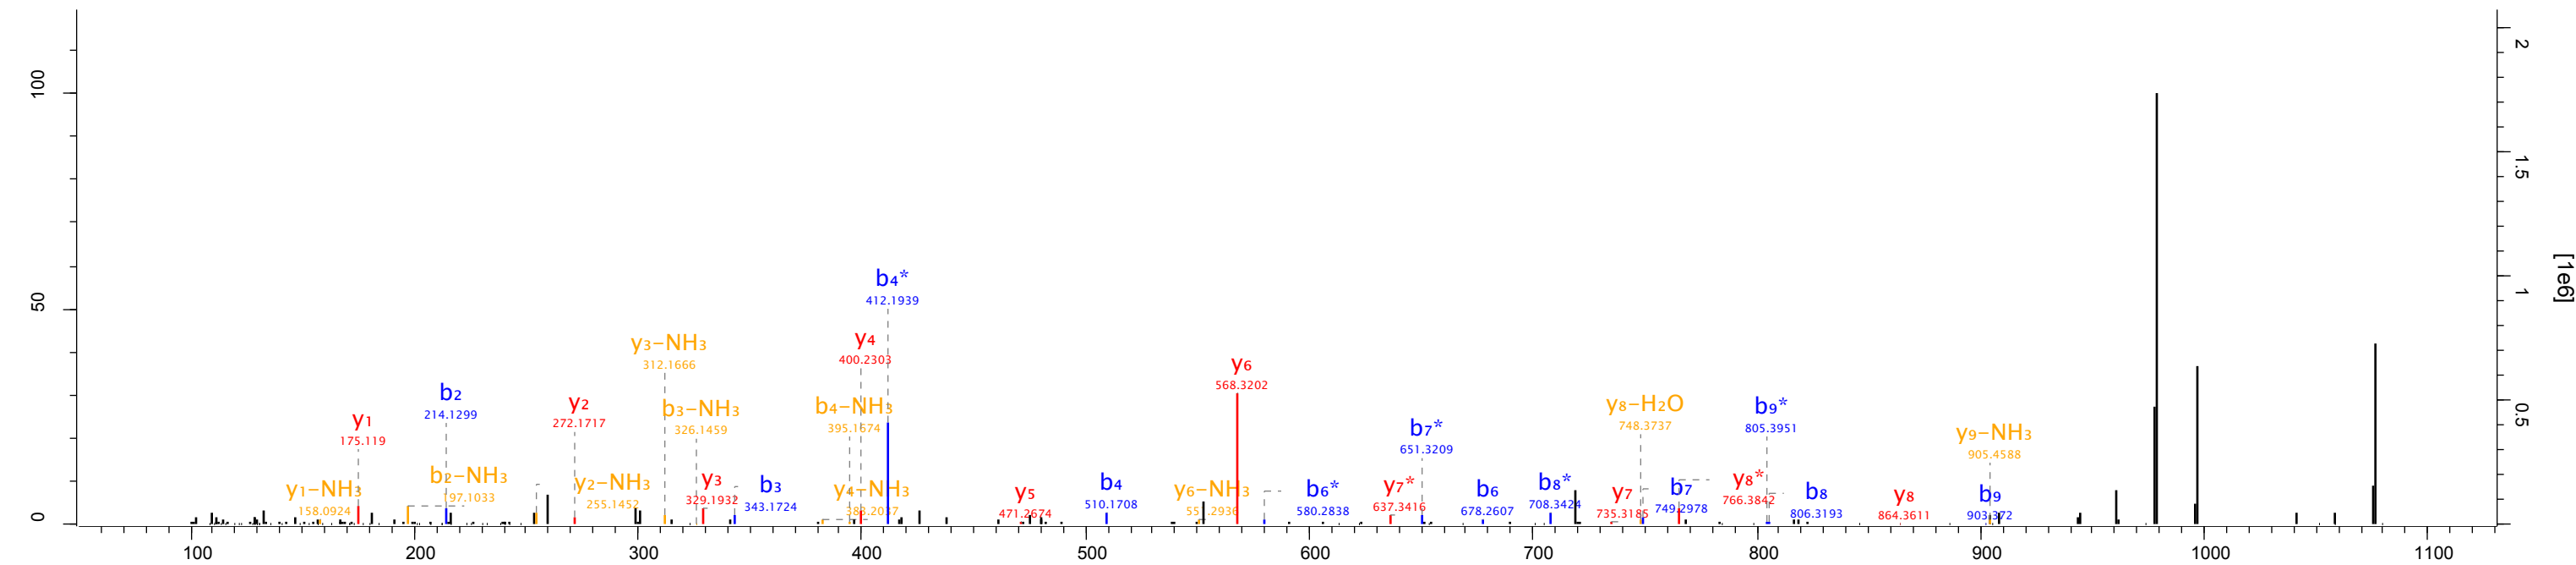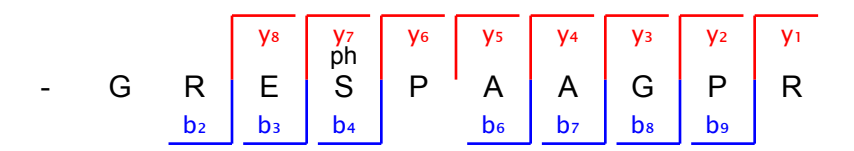



Raw file 20150814\_A375SR\_Phospho\_BR2\_05 Scan 20355 Method FTMS; HCD Score 67.08 m/z 590.81 Gene names MGA

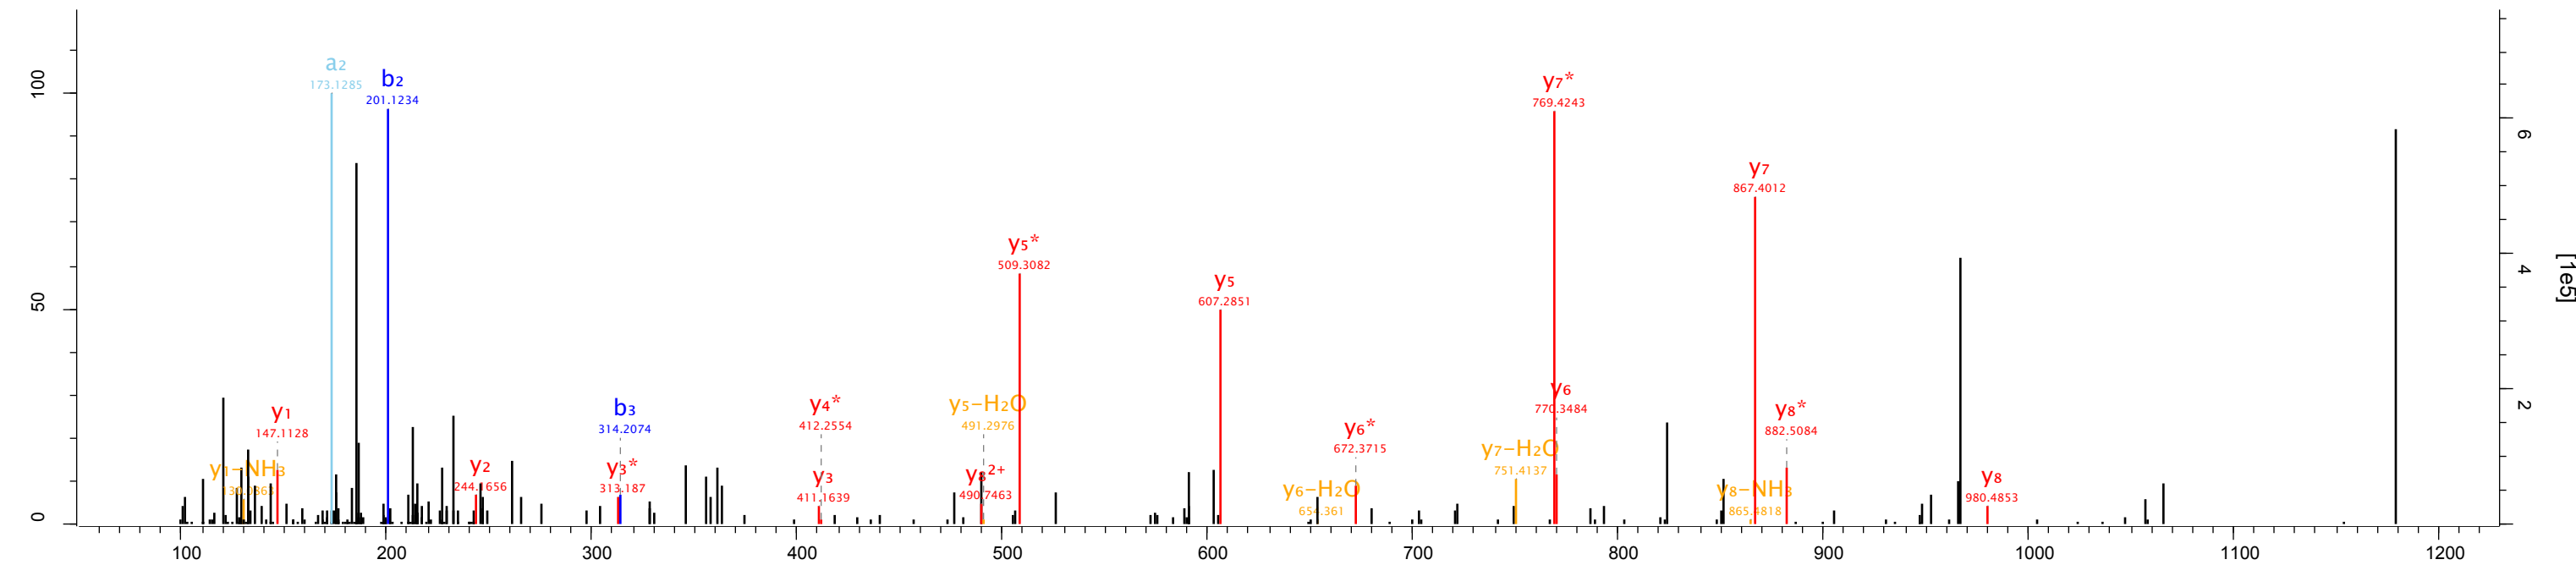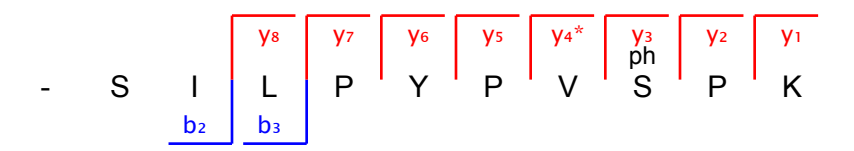

Raw file 20150814\_A375SR\_Phospho\_BR2\_05 Scan 20715 Method FTMS; HCD Score 151.22 m/z 654.34 Gene names DHX29

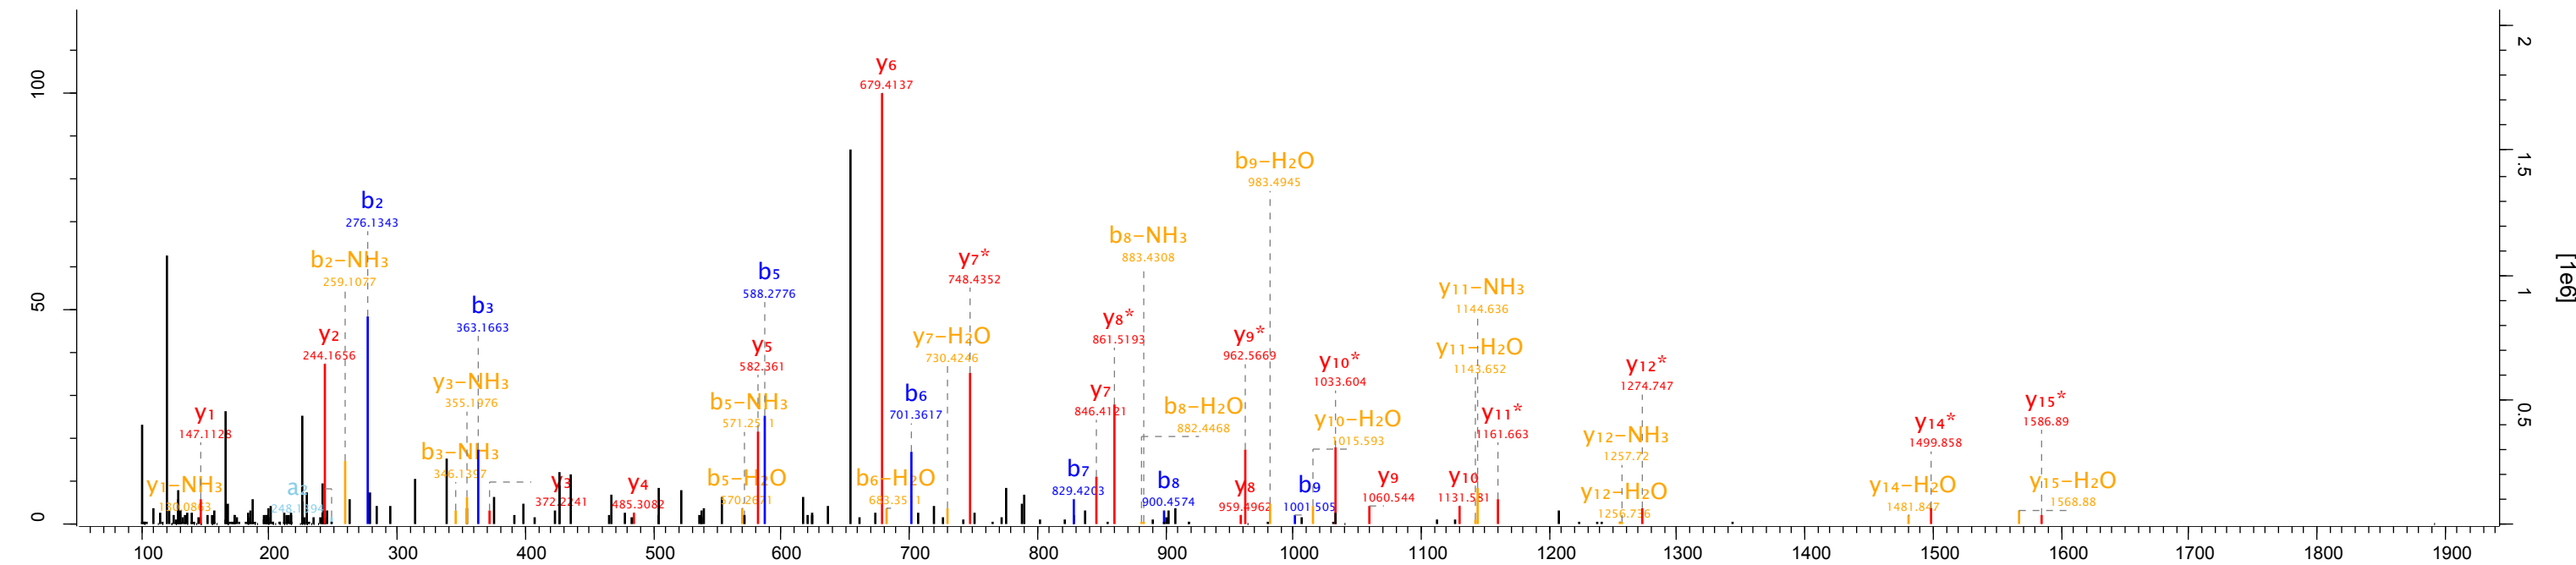

- F Q S P Q I Q A T I S P P L Q P K -

Fragmentation mapping: b2 (Q), b3 (S), b5 (Q), b6 (I), b7 (Q), b8 (A), b9 (T), y1 (K), y2 (P), y3 (Q), y4 (L), y5 (P), y6 (P), y7 (S), y8 (I), y9 (T), y10 (A), y11 (Q), y12 (I), y14 (P), y15 (S).

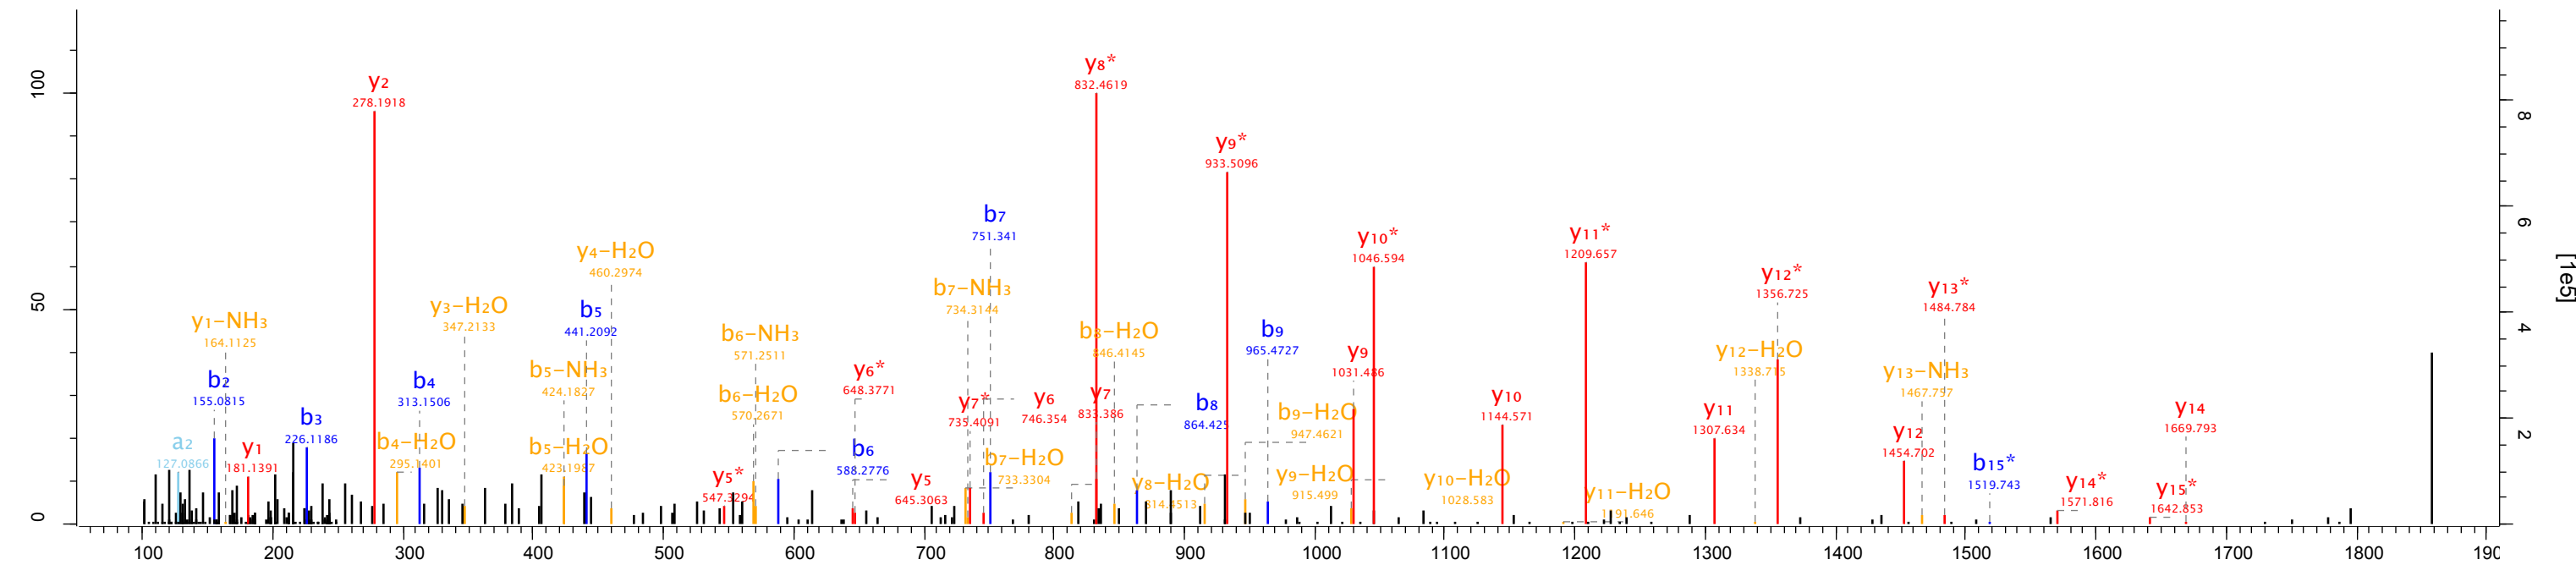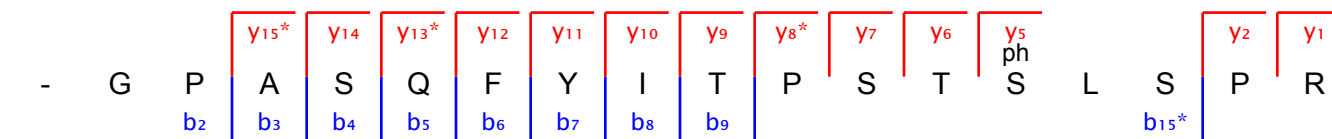

Raw file: 20150814\_A375SR\_Phospho\_BR2\_05  
 Scan: 20865 Method: FTMS; HCD Score: 110.8 m/z: 534.27 Gene names: PHLDA2

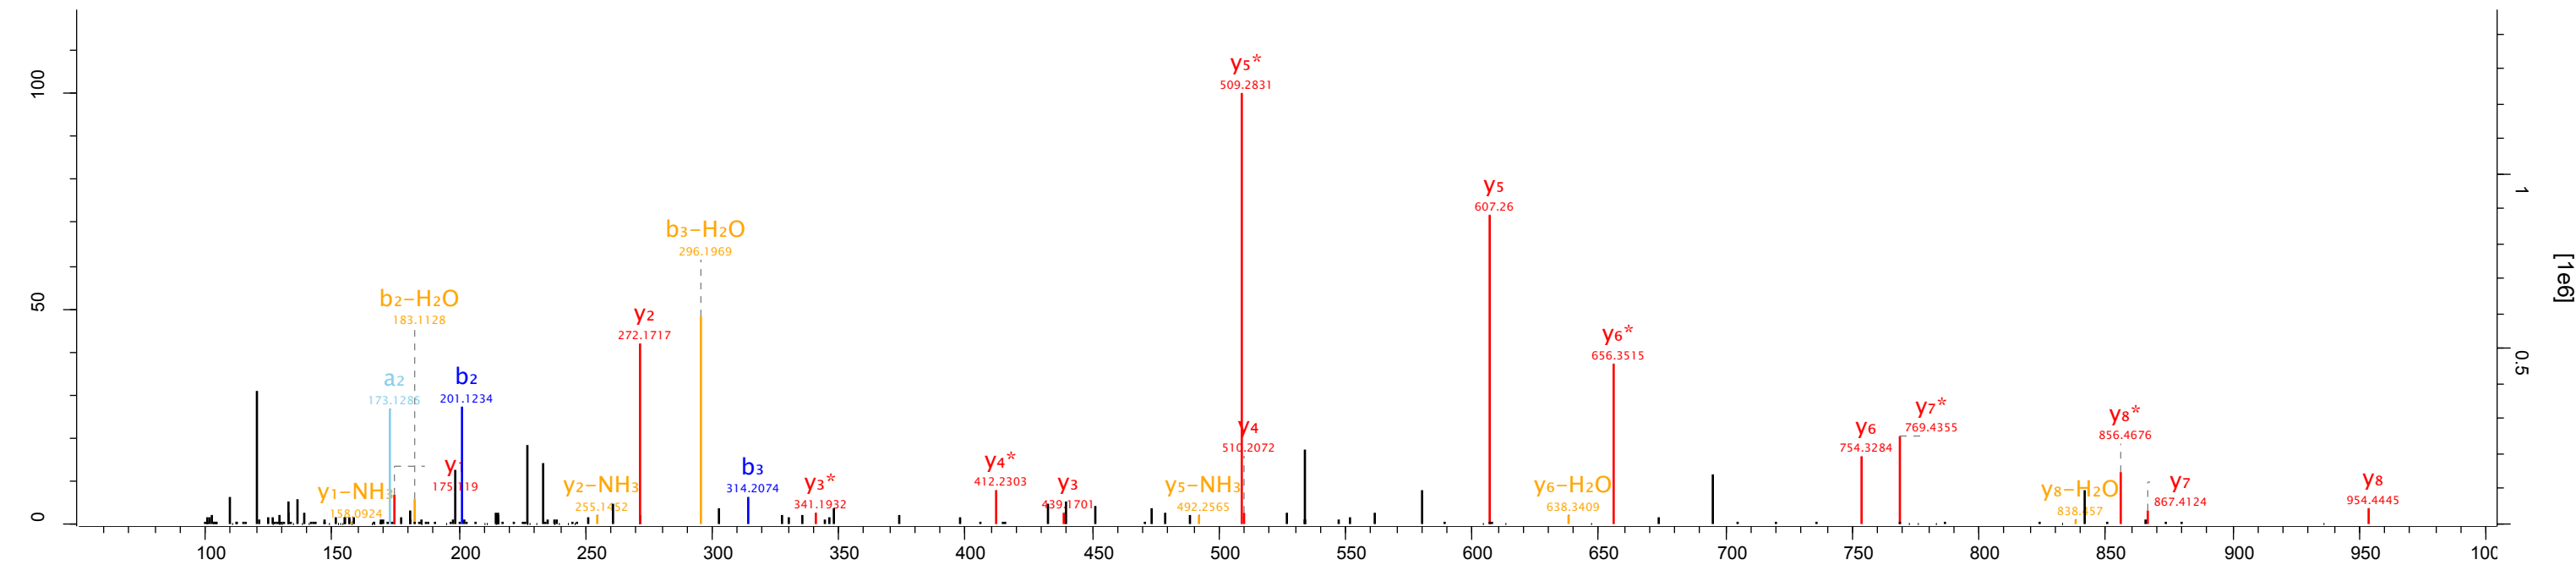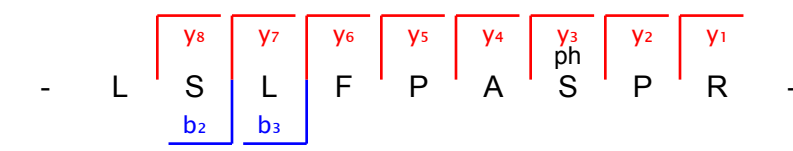

Raw file  
20150814\_A375SR\_Phospho\_BR2\_05

Scan 20995 Method FTMS; HCD Score 136.59 m/z 648.3 Gene names BUB1

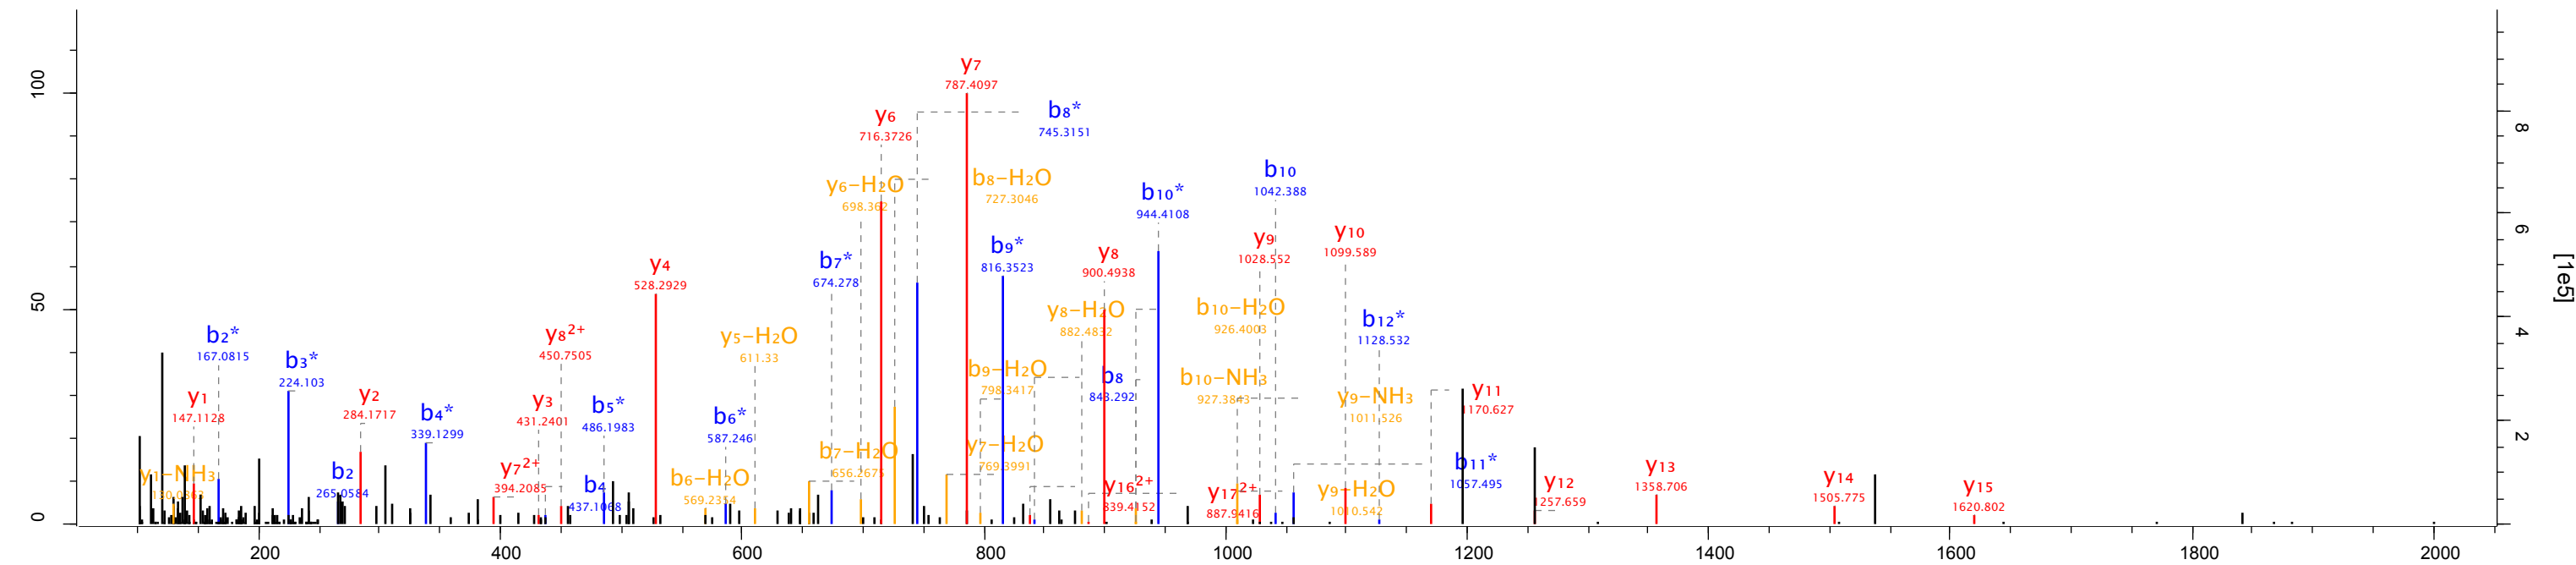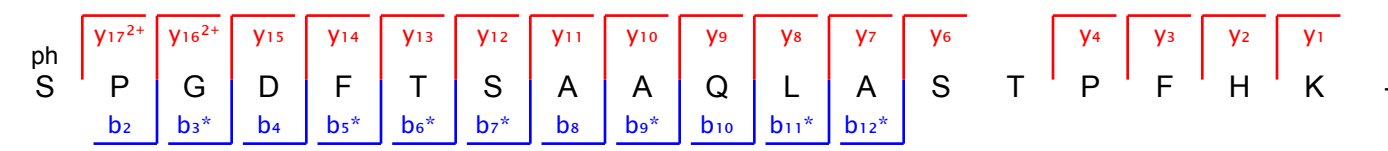

Raw file: 20150814\_A375SR\_Phospho\_BR2\_05  
 Scan: 21275 Method: FTMS; HCD Score: 123 m/z: 930.4 Gene names: LMO7

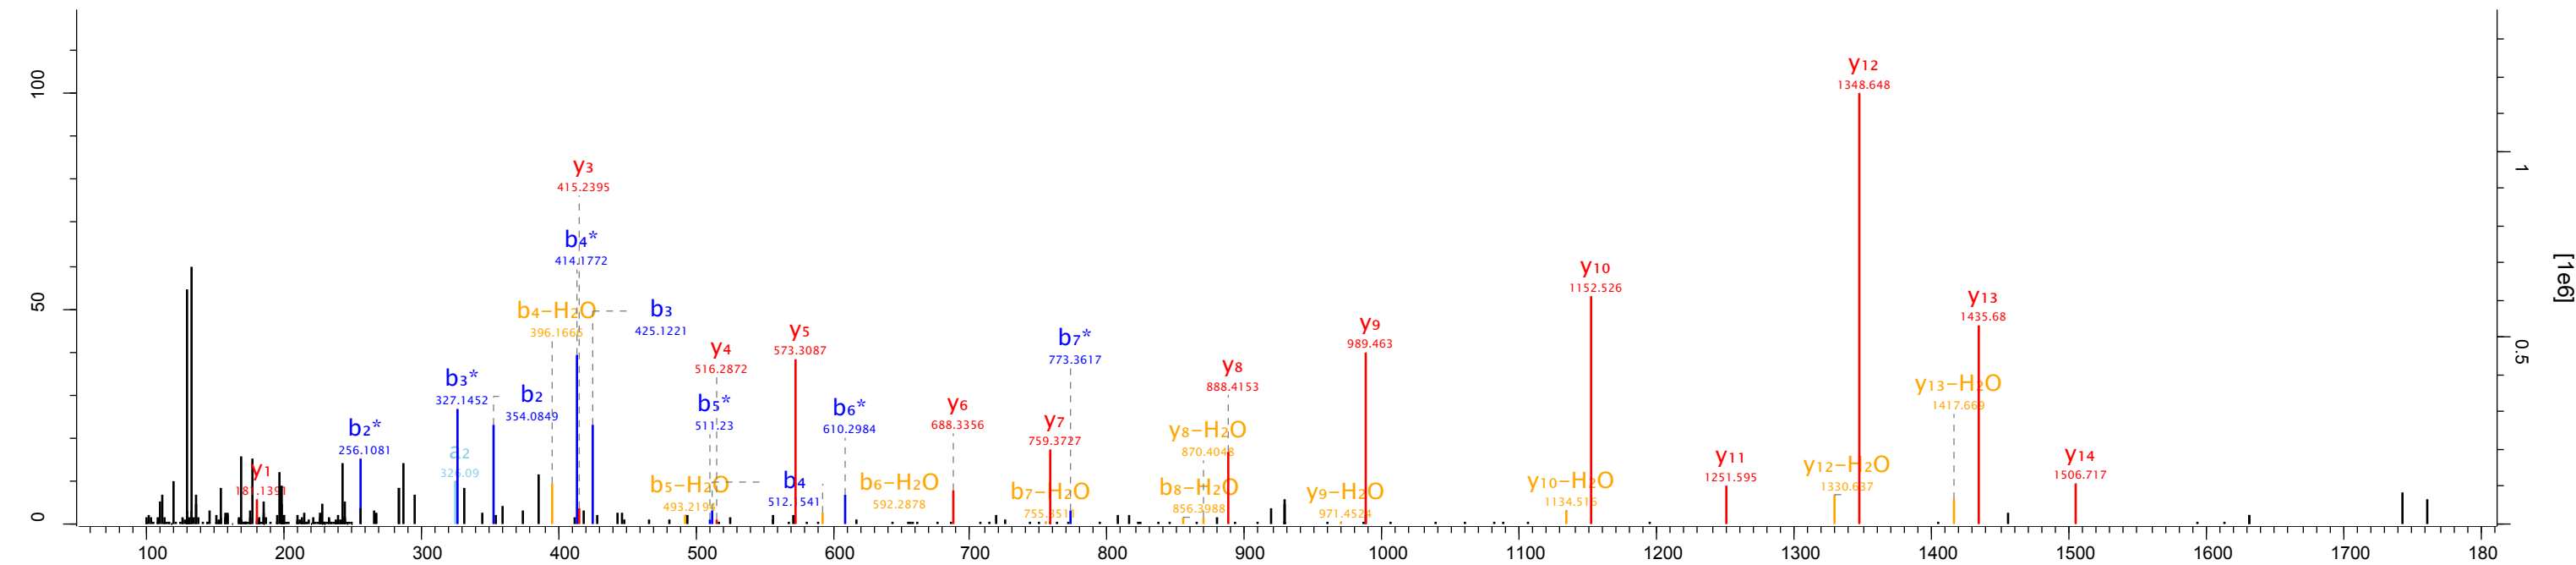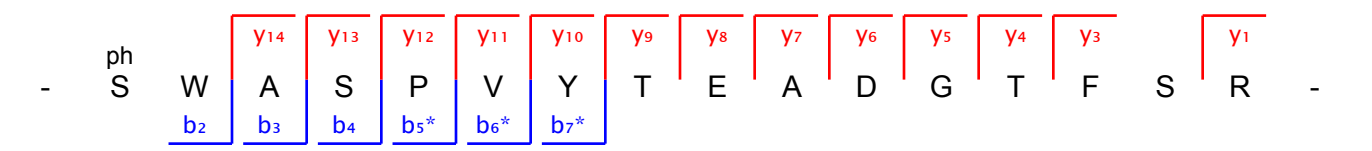

Raw file 20150814\_A375SR\_Phospho\_BR2\_05 Scan 21805 Method FTMS; HCD Score 97.82 m/z 684.85 Gene names MTBP

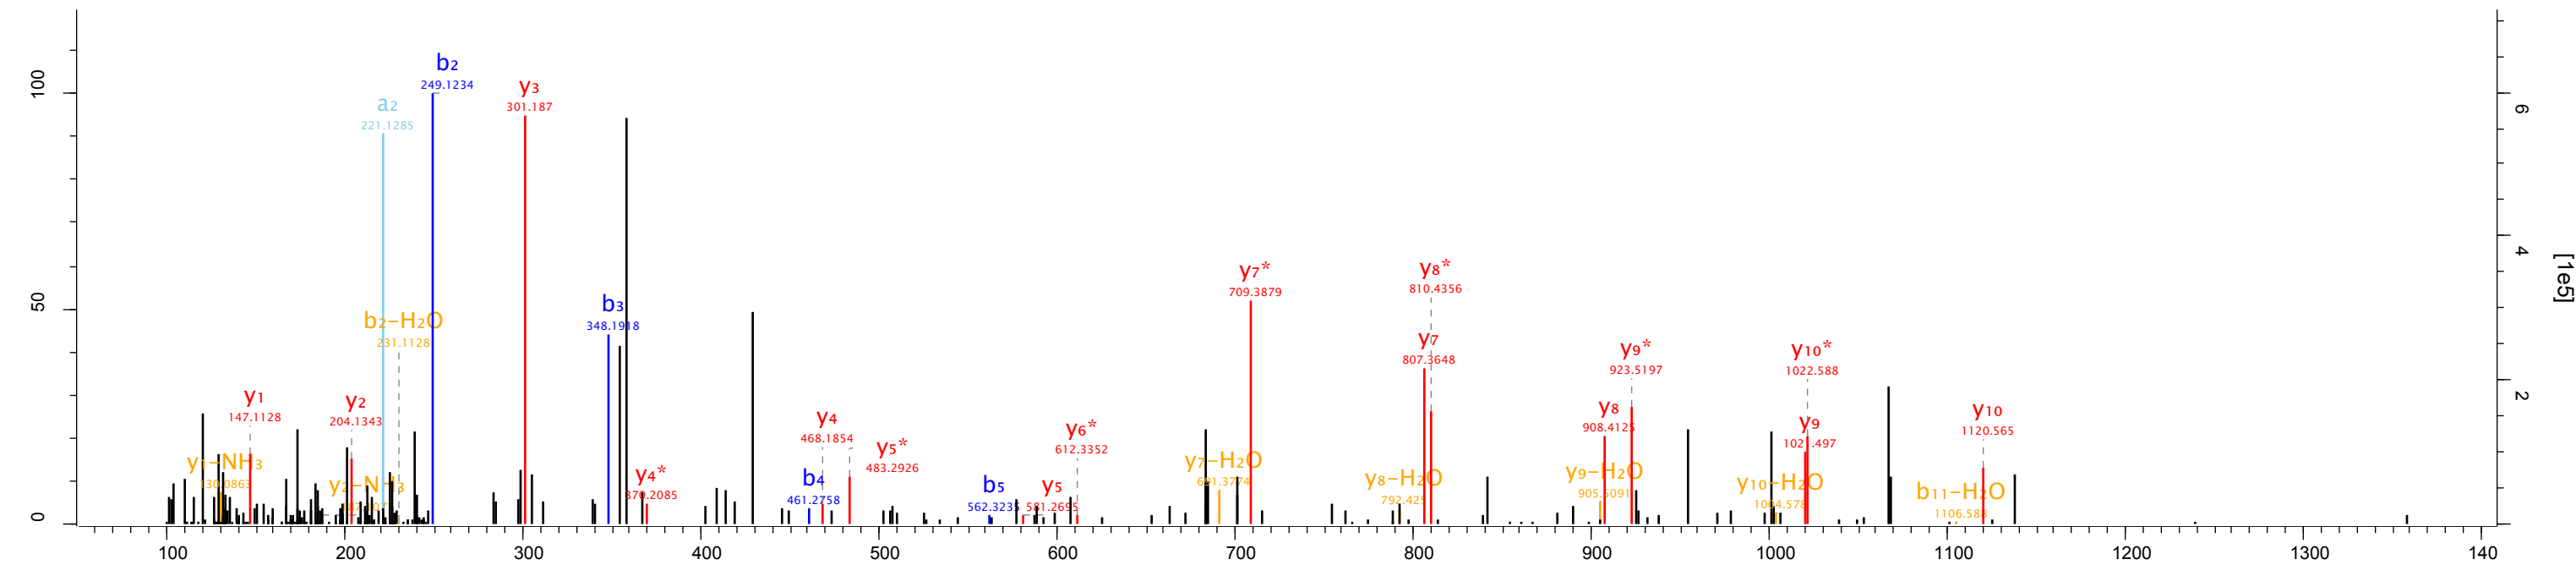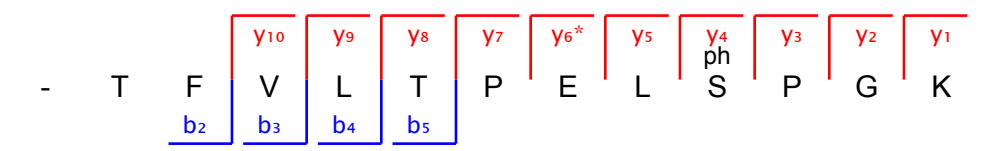

Raw file 20150814\_A375SR\_Phospho\_BR2\_05 Scan 21885 Method FTMS; HCD Score 202.28 m/z 889.42 Gene names KIF1B;KIF1Bbeta

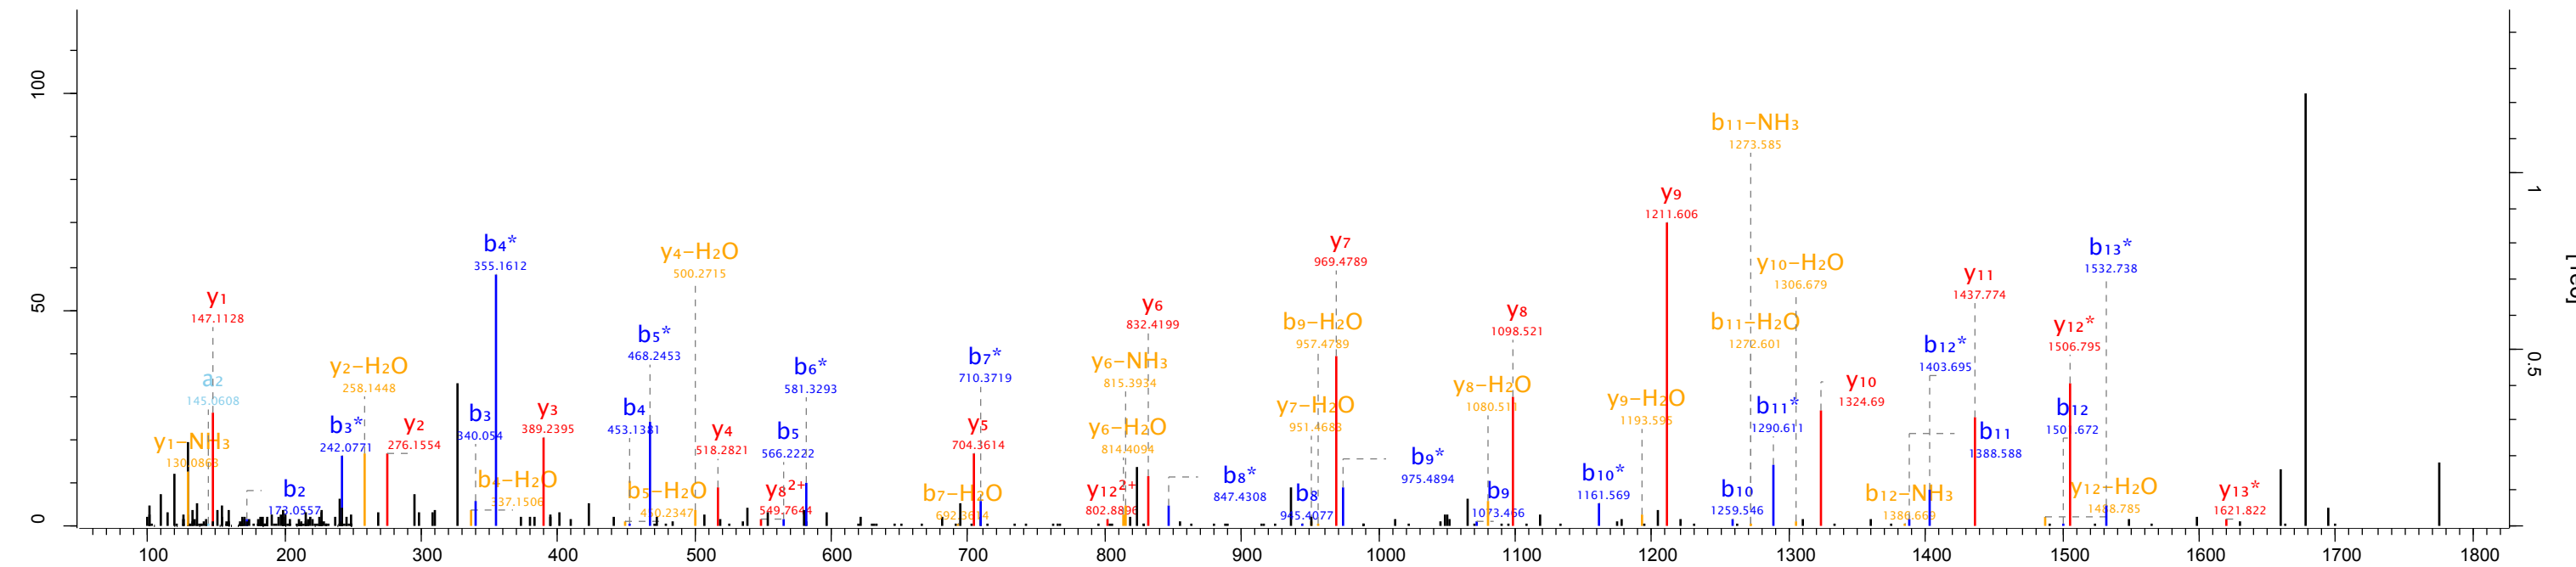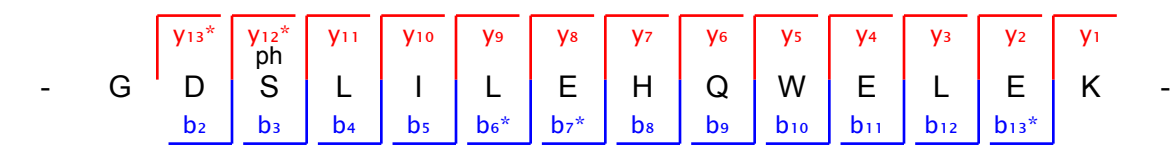



Raw file 20150814\_A375SR\_Phospho\_BR2\_05 Scan 23225 Method FTMS; HCD Score 81.59 m/z 742.89 Gene names SSFA2

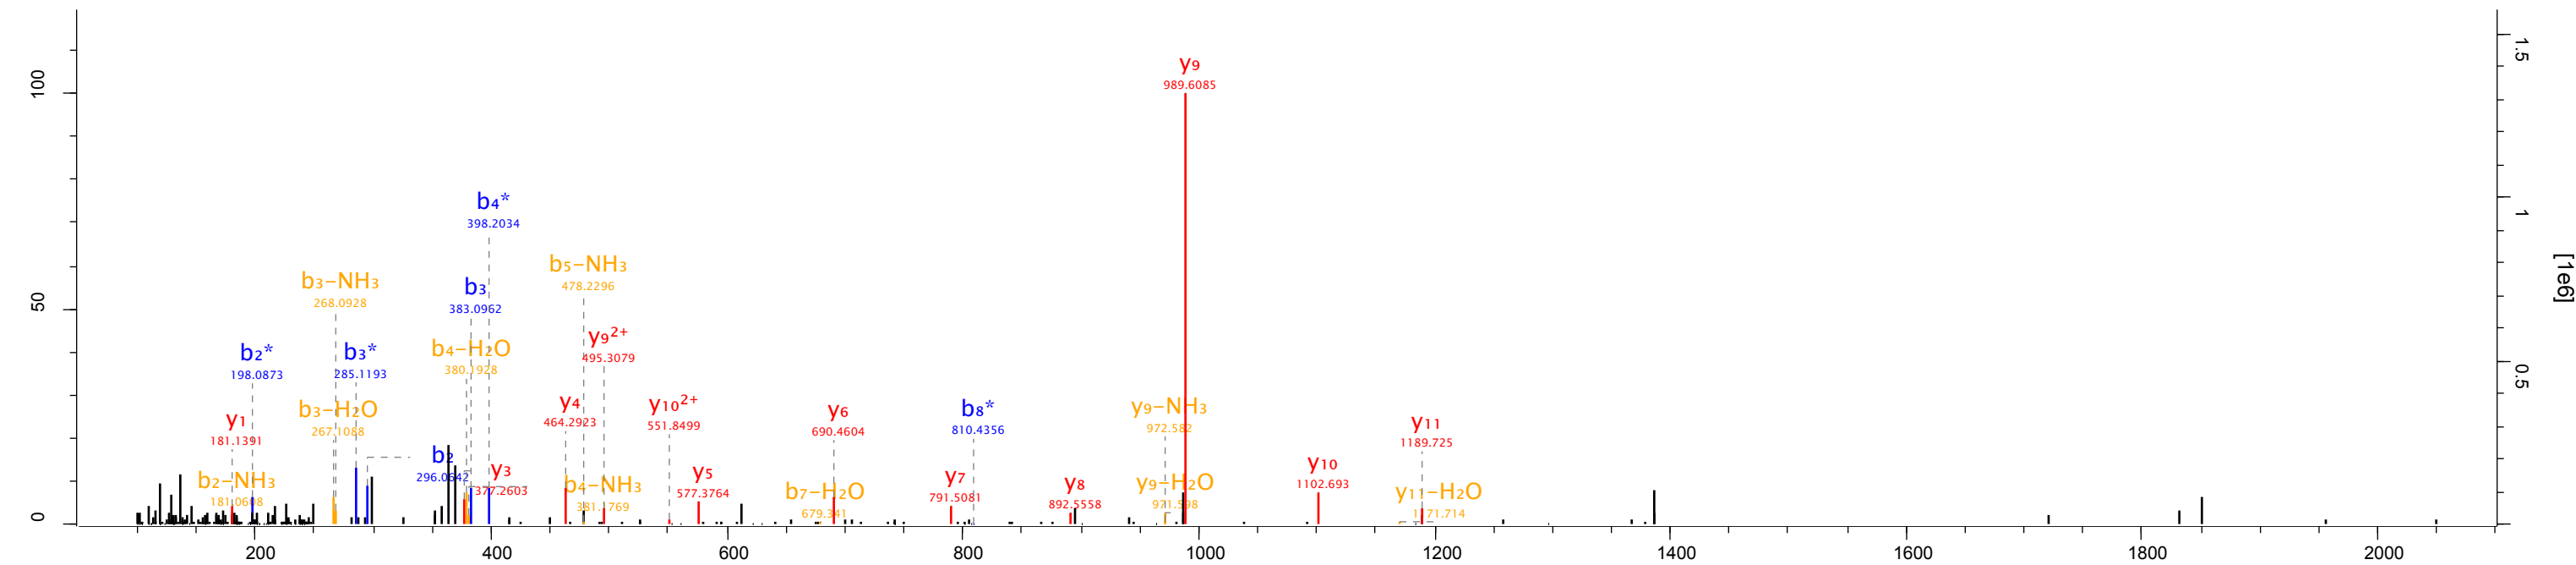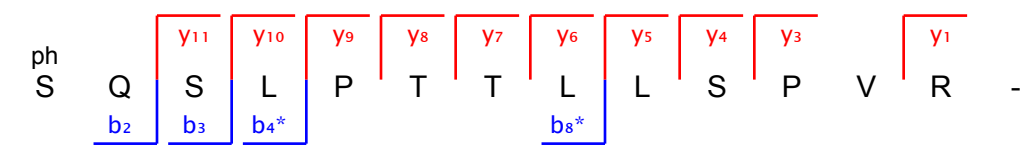

Raw file Scan Method Score m/z Gene names  
 20150814\_A375SR\_Phospho\_BR2\_05 23245 FTMS; HCD 189.56 781.37 KIAA0556

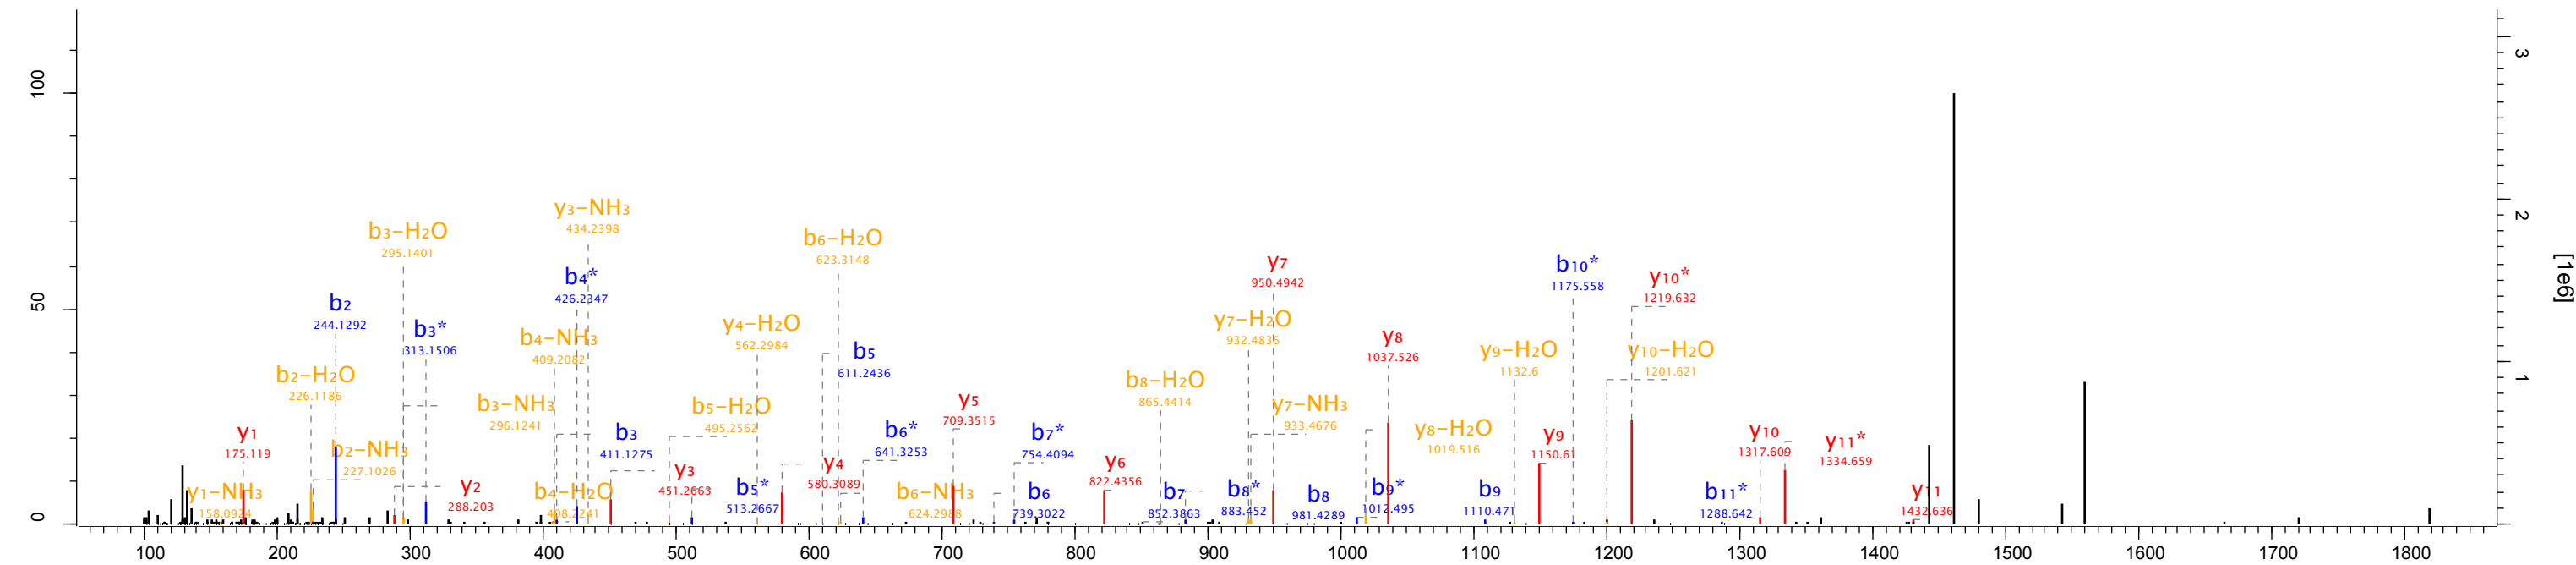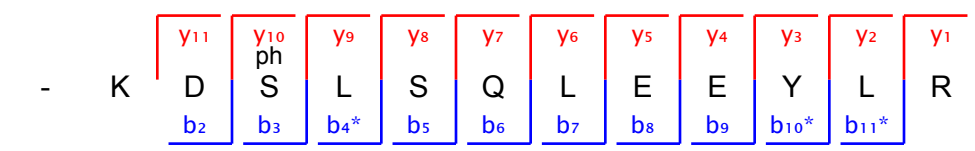

Raw file: 20150814\_A375SR\_Phospho\_BR2\_05  
 Scan: 23435 Method: FTMS; HCD Score: 258.14 m/z: 890.4 Gene names: PRKCA

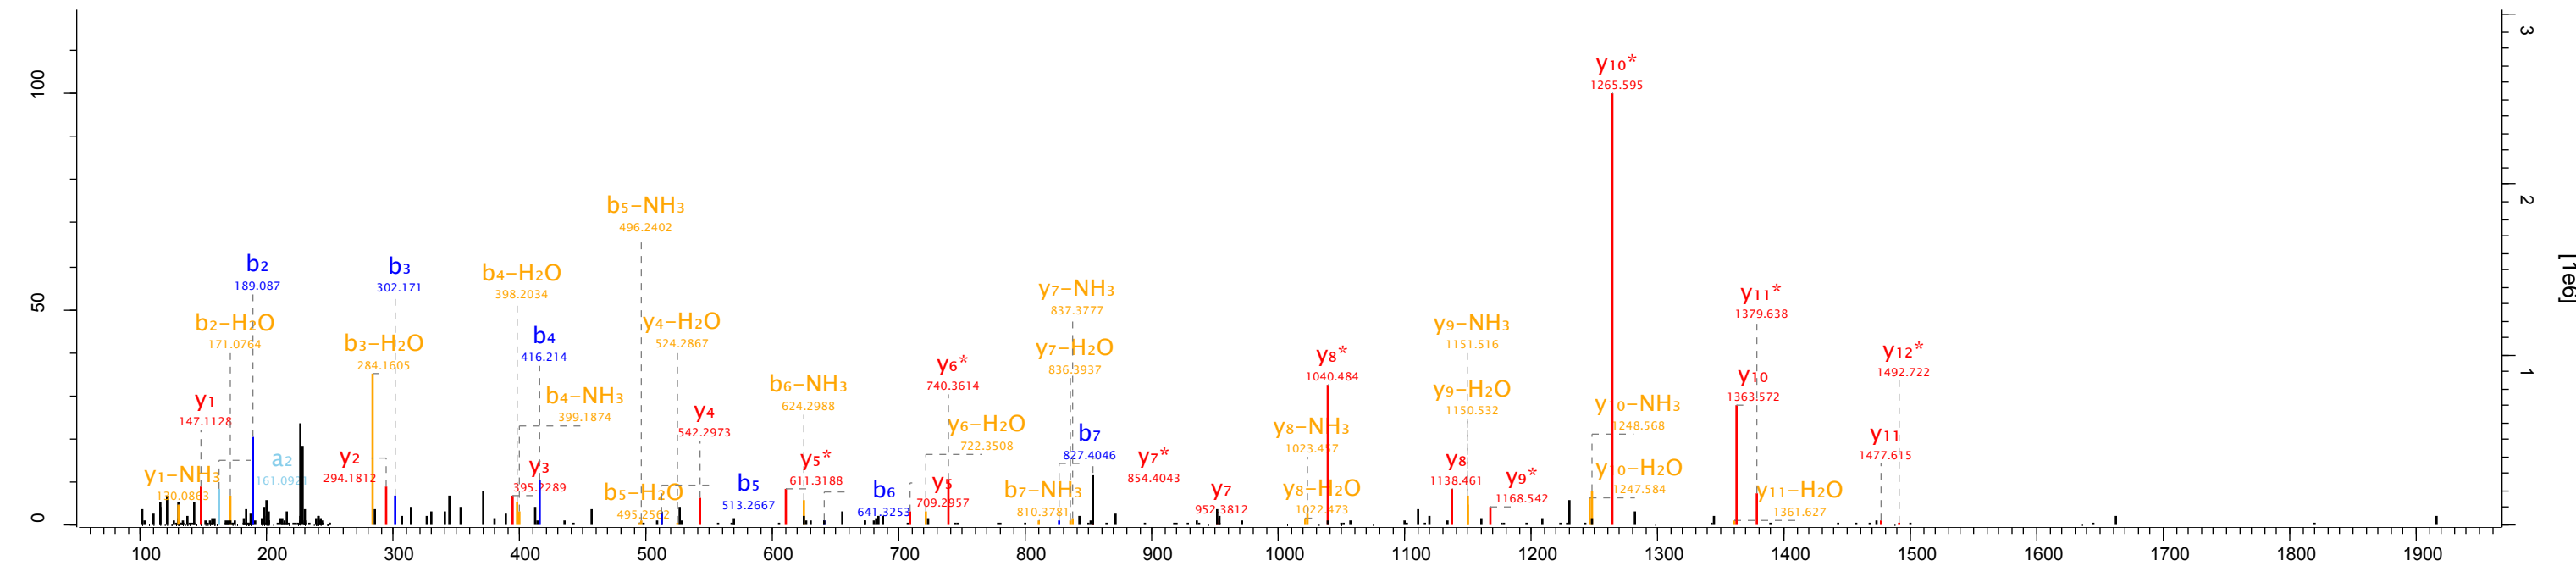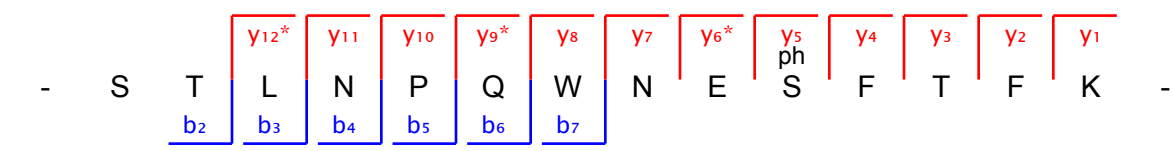

Raw file 20150814\_A375SR\_Phospho\_BR2\_05 Scan 23585 Method FTMS; HCD Score 101.14 m/z 1149.17 Gene names FXR2

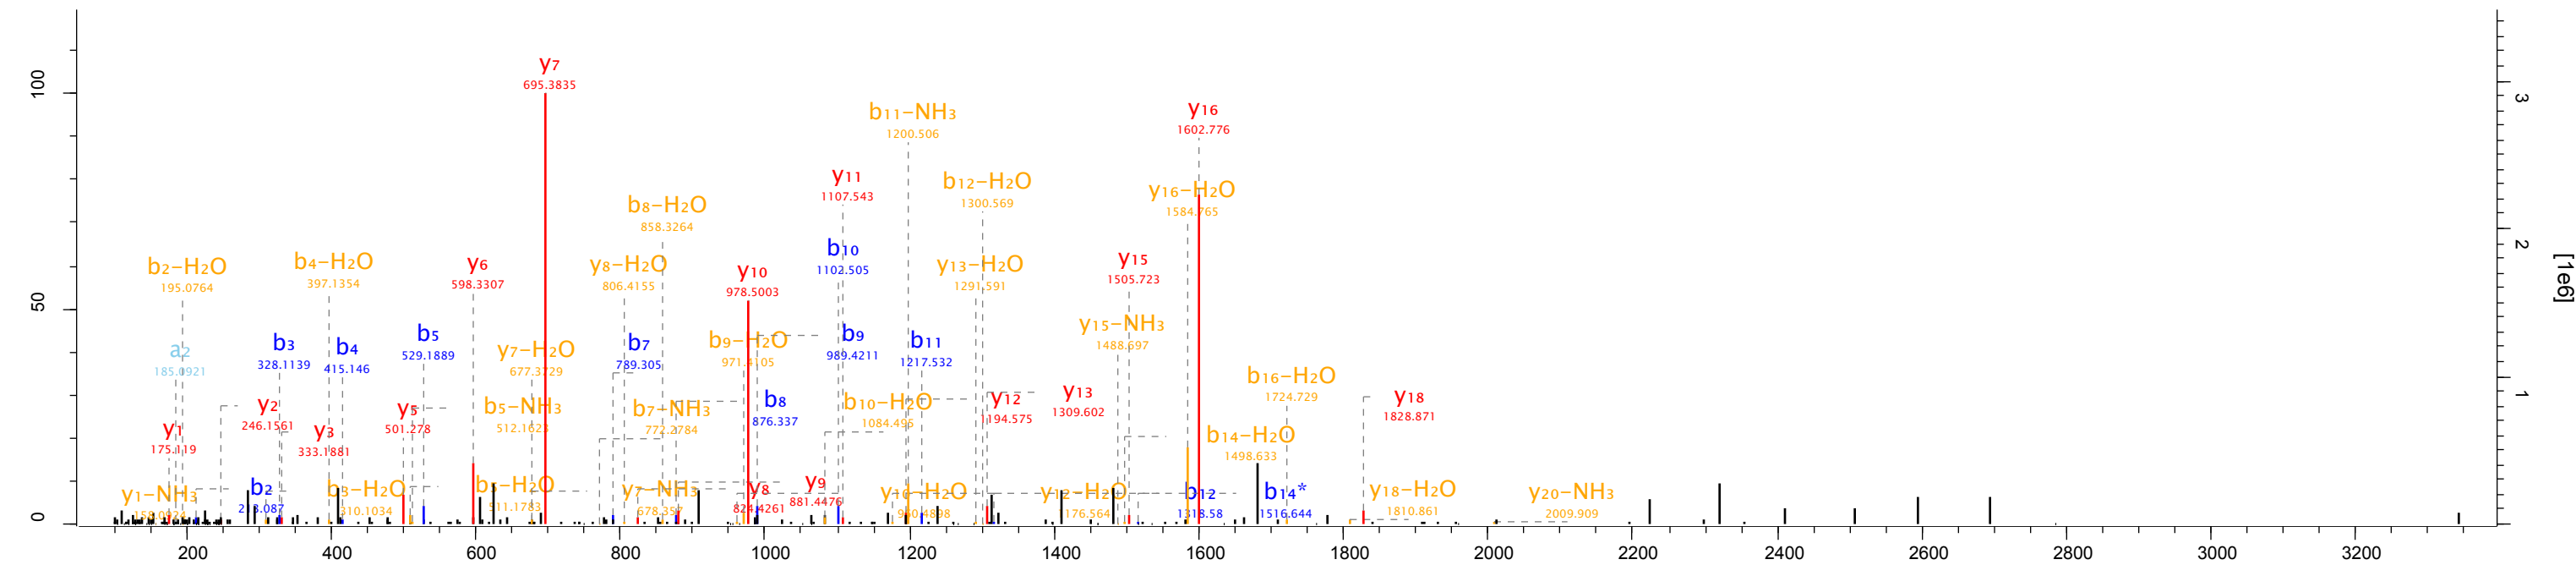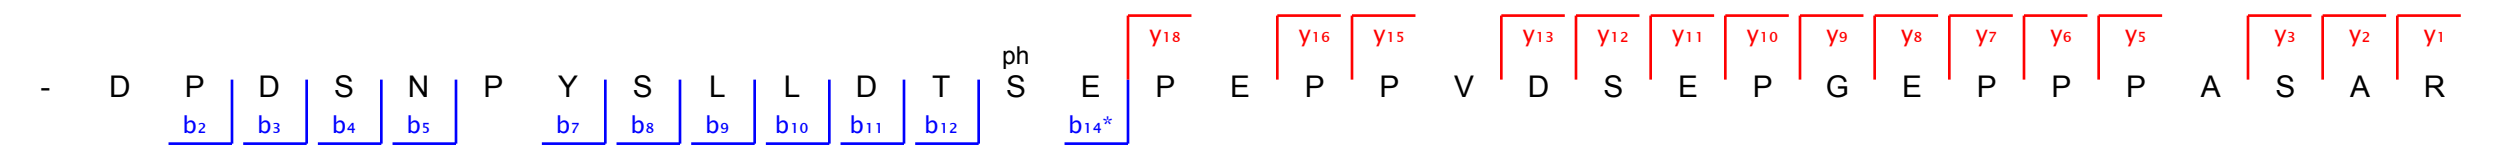

Raw file: 20150814\_A375SR\_Phospho\_BR2\_05  
 Scan: 24435 Method: FTMS; HCD Score: 184.57 m/z: 975.49 Gene names: TBRG1

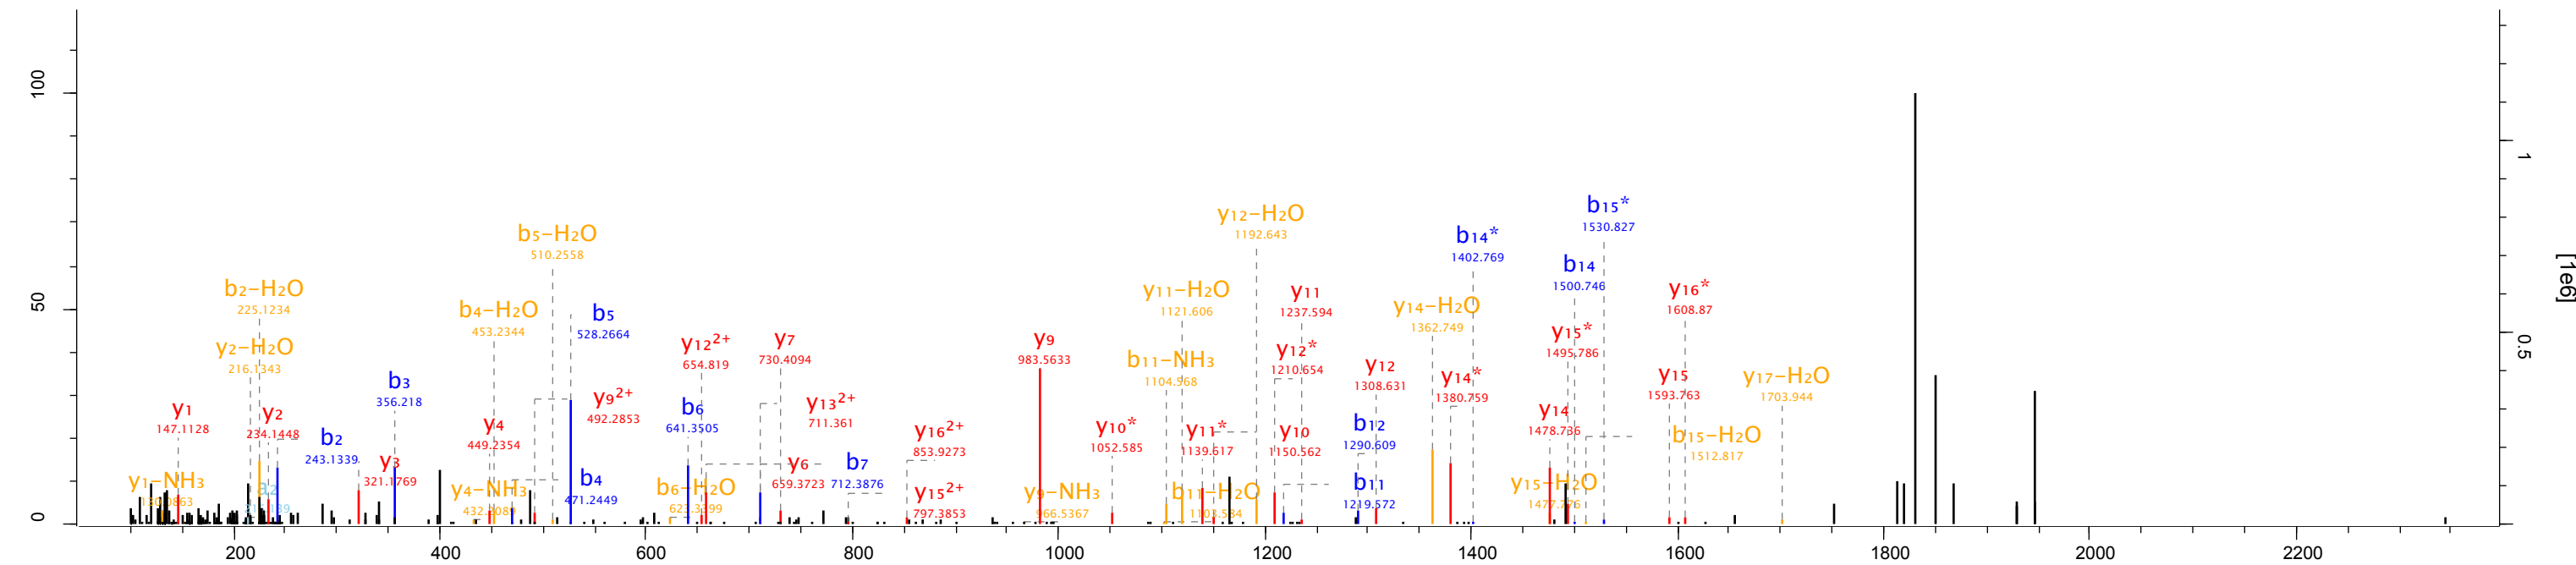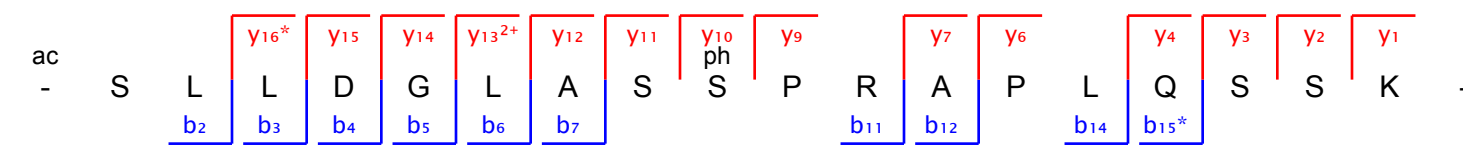

Raw file: 20150814\_A375SR\_Phospho\_BR2\_05  
 Scan: 24505 Method: FTMS; HCD Score: 198.49 m/z: 1104.56 Gene names: MICALL1

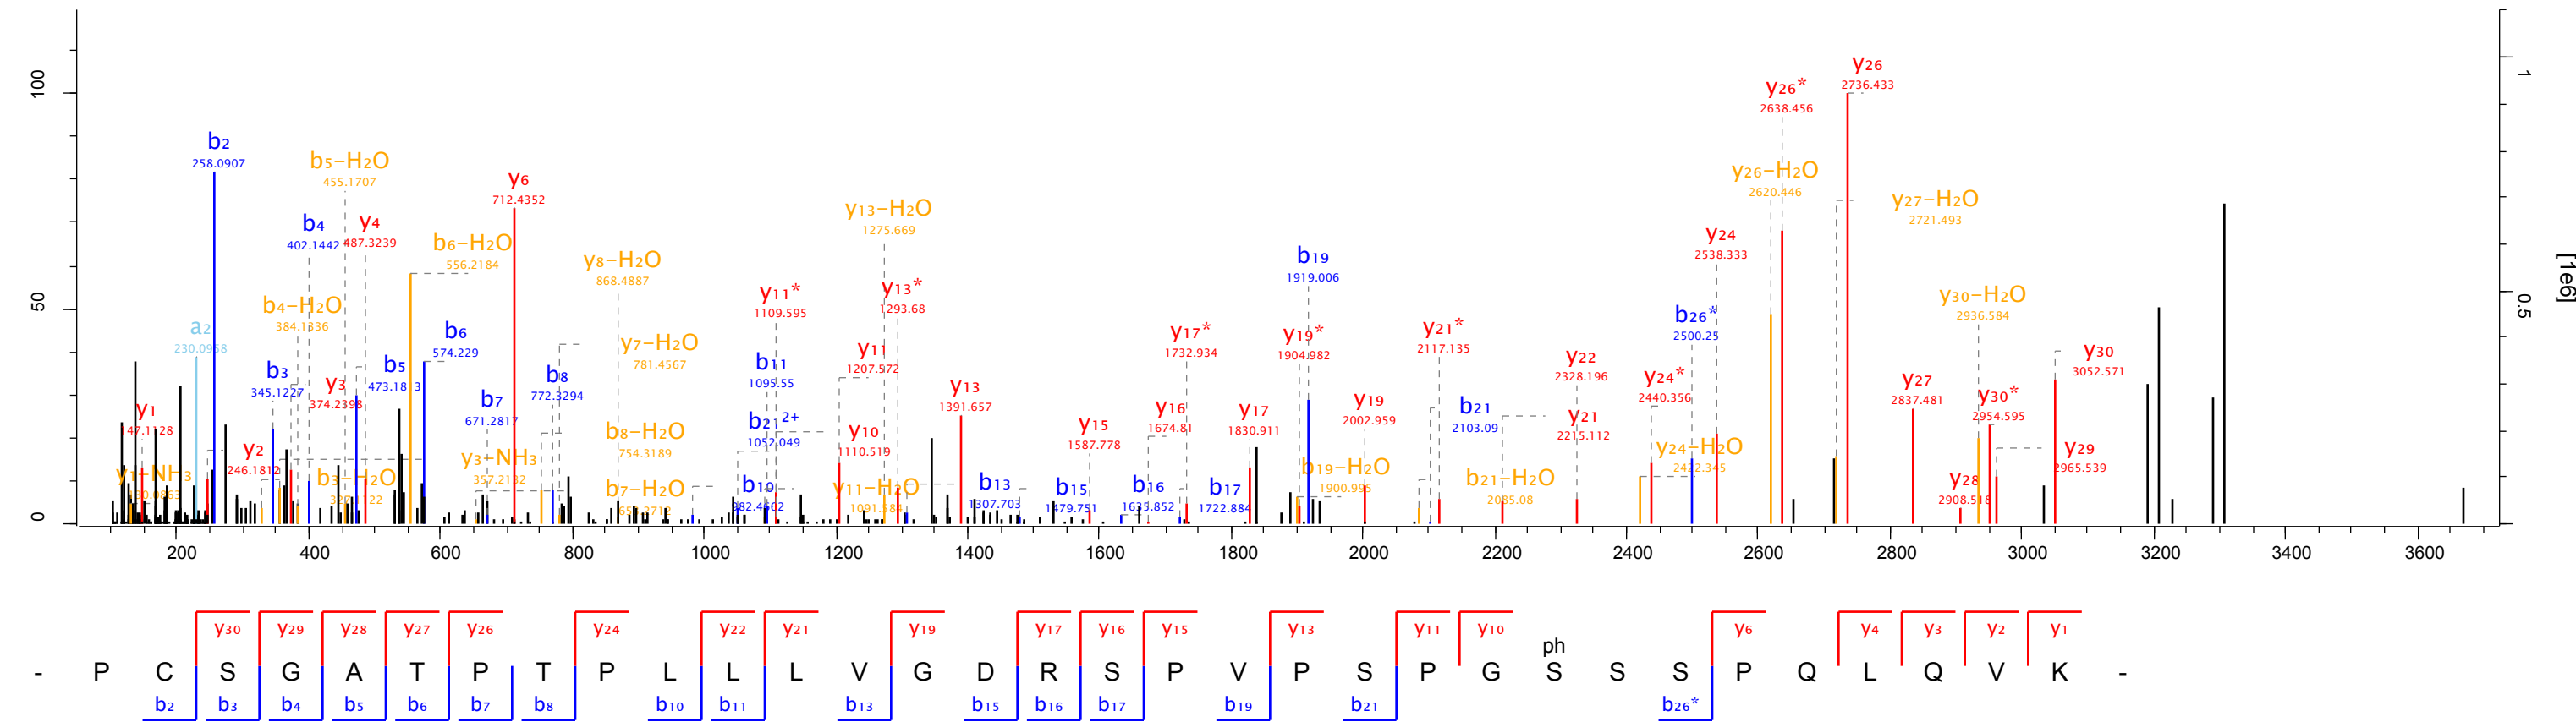

Raw file: 20150814\_A375SR\_Phospho\_BR2\_05  
 Scan: 24715 Method: FTMS; HCD Score: 269.14 m/z: 1066.56 Gene names: GAPDH

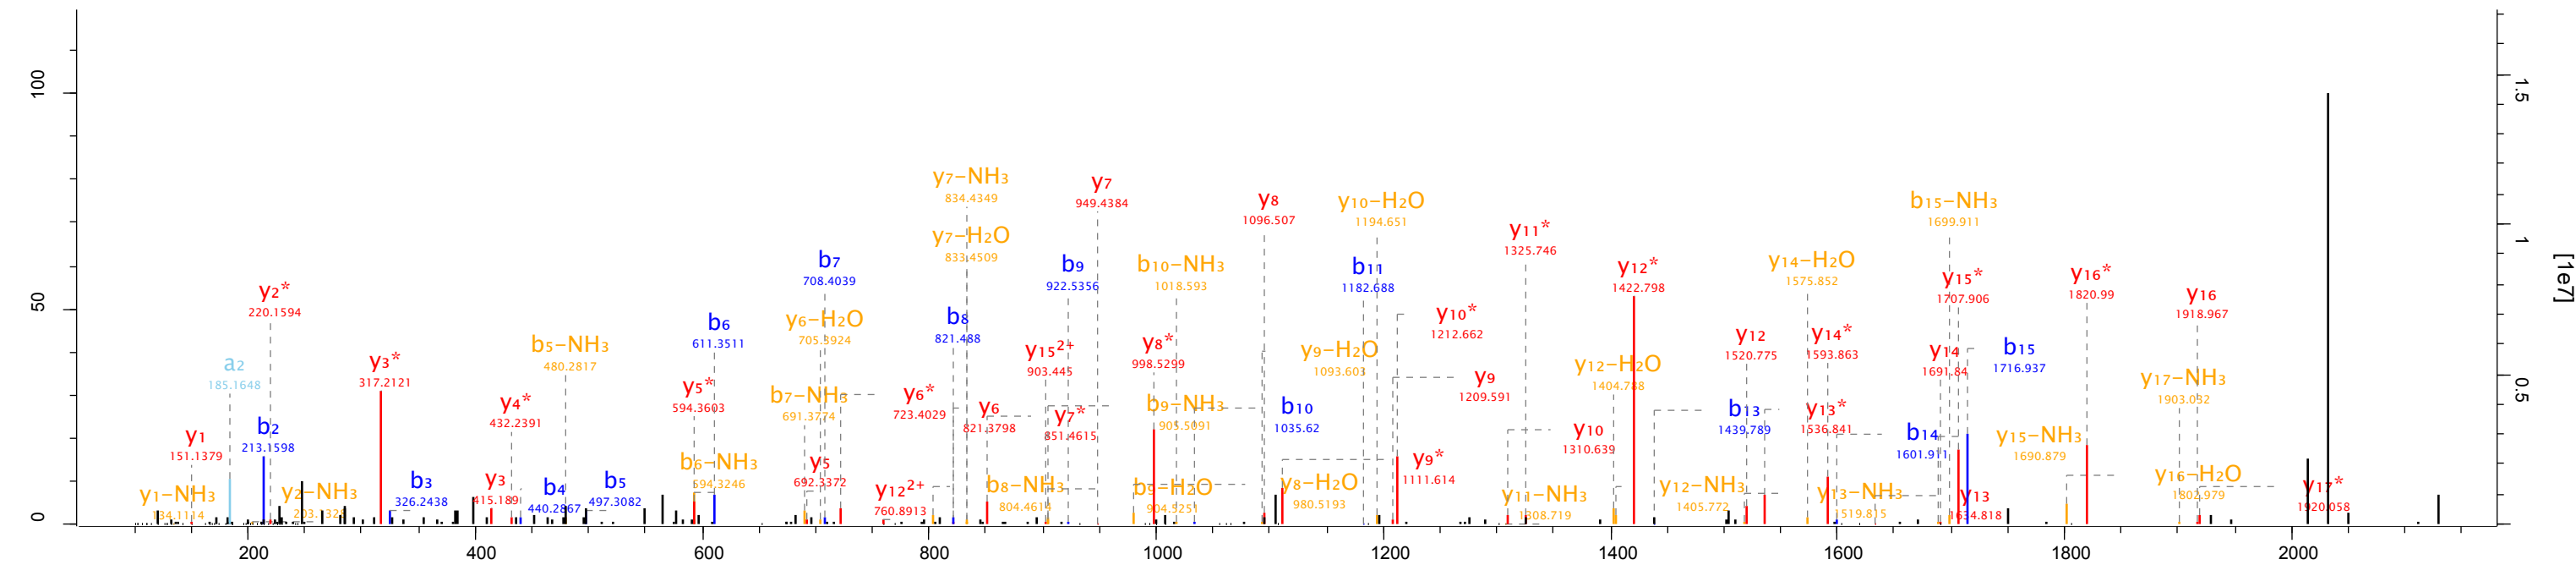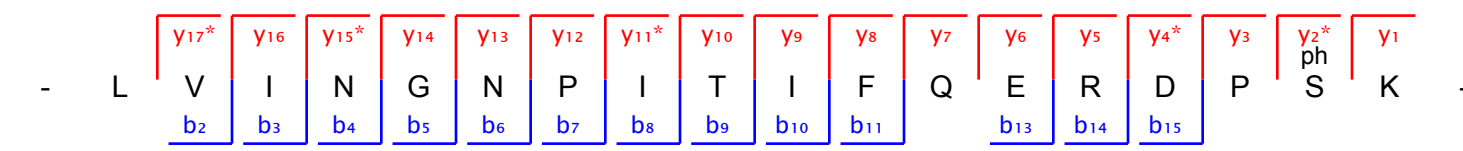

Raw file: 20150814\_A375SR\_Phospho\_BR2\_05  
 Scan: 2515 Method: FTMS; HCD Score: 176.43 m/z: 597.76 Gene names: LBR

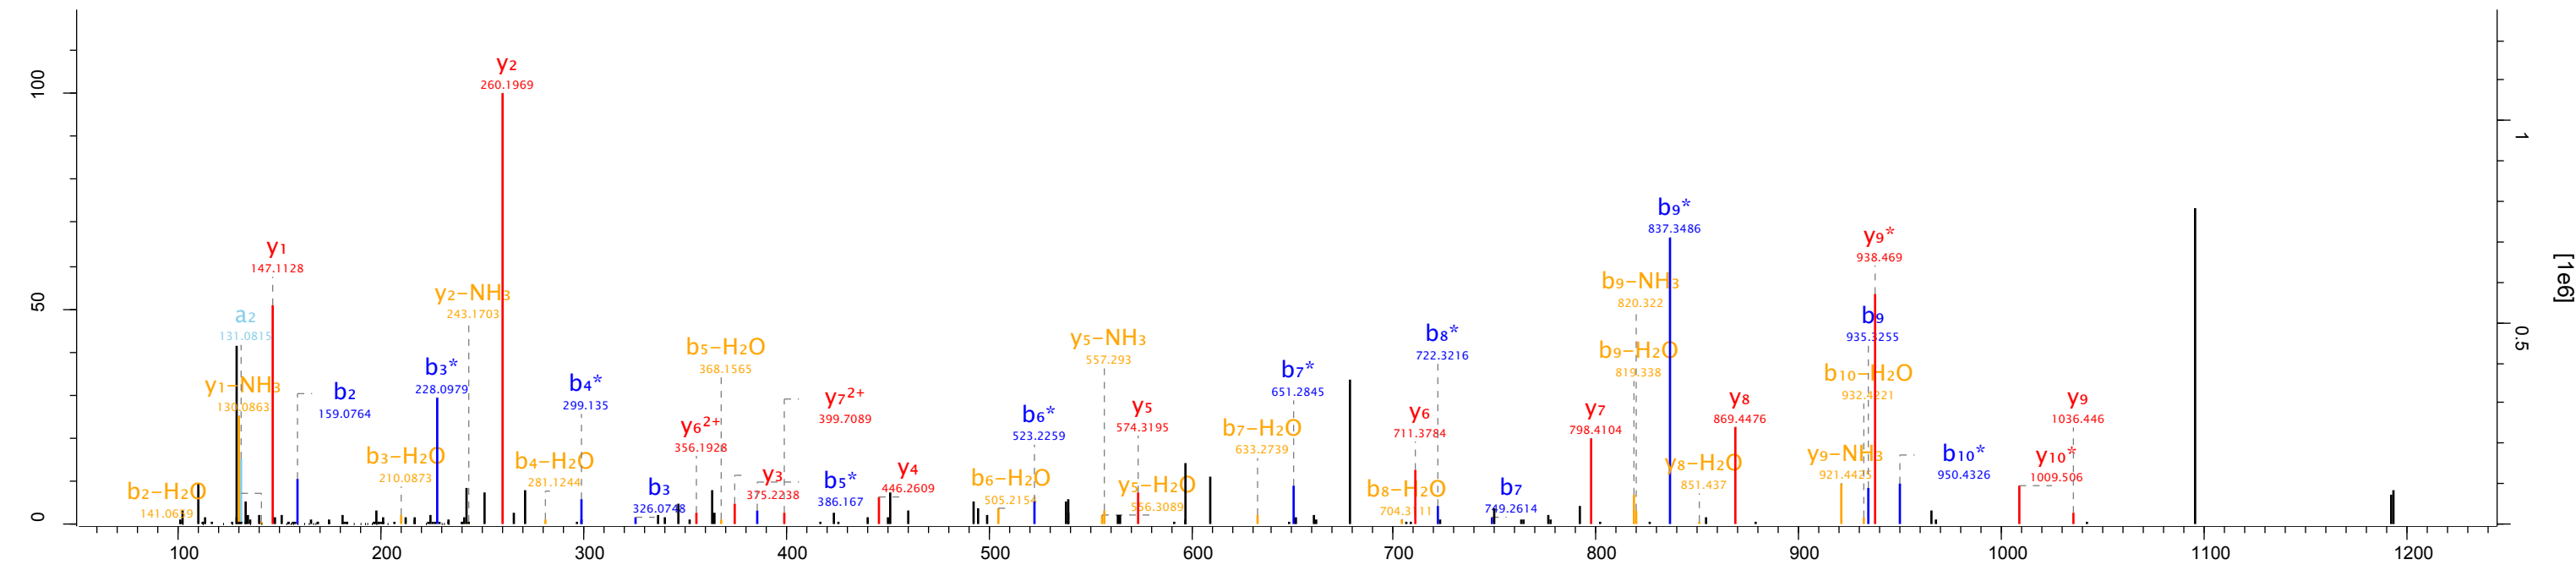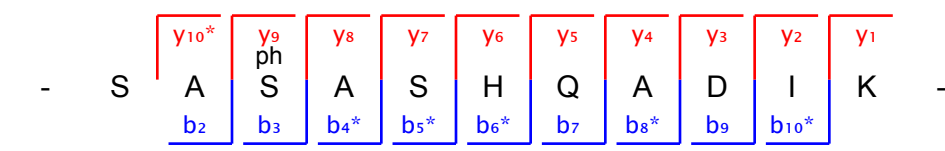



Raw file: 20150814\_A375SR\_Phospho\_BR2\_05  
 Scan: 25215 Method: FTMS; HCD Score: 40.35 m/z: 1126.86 Gene names: CHAF1A

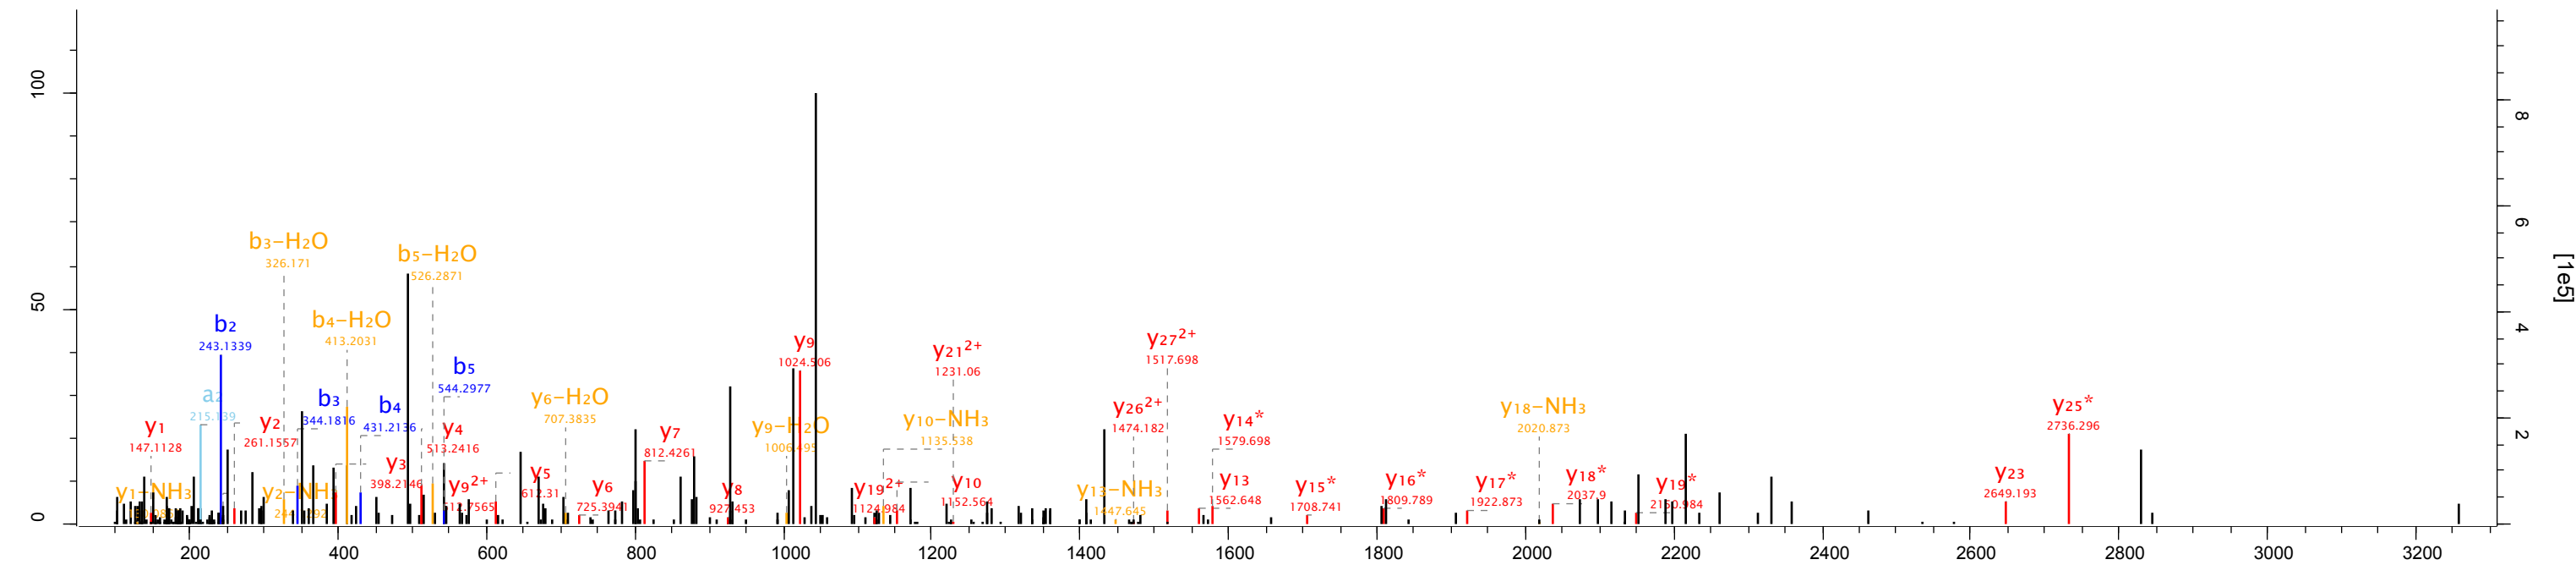

Sequence: - I E T S I G Q S T V I I D L T E D S N E Q P D S L V D H N K -

Fragmentation sites (b ions): b2 (E/T), b3 (T/S), b4 (S/I), b5 (I/G)

Fragmentation sites (y ions): y1 (K), y2 (N), y3 (H), y4 (D), y5 (V), y6 (L), y7 (S), y8 (D), y9 (P), y10 (Q), y13 (S), y14\* (D), y15\* (E), y16\* (T), y17\* (L), y18\* (D), y19\* (I), y21\* (V), y23 (S), y25\* (I), y26\* (S), y27\* (T)

Raw file 20150814\_A375SR\_Phospho\_BR2\_05 Scan 25775 Method FTMS; HCD Score 103.78 m/z 1129.81 Gene names CCDC86

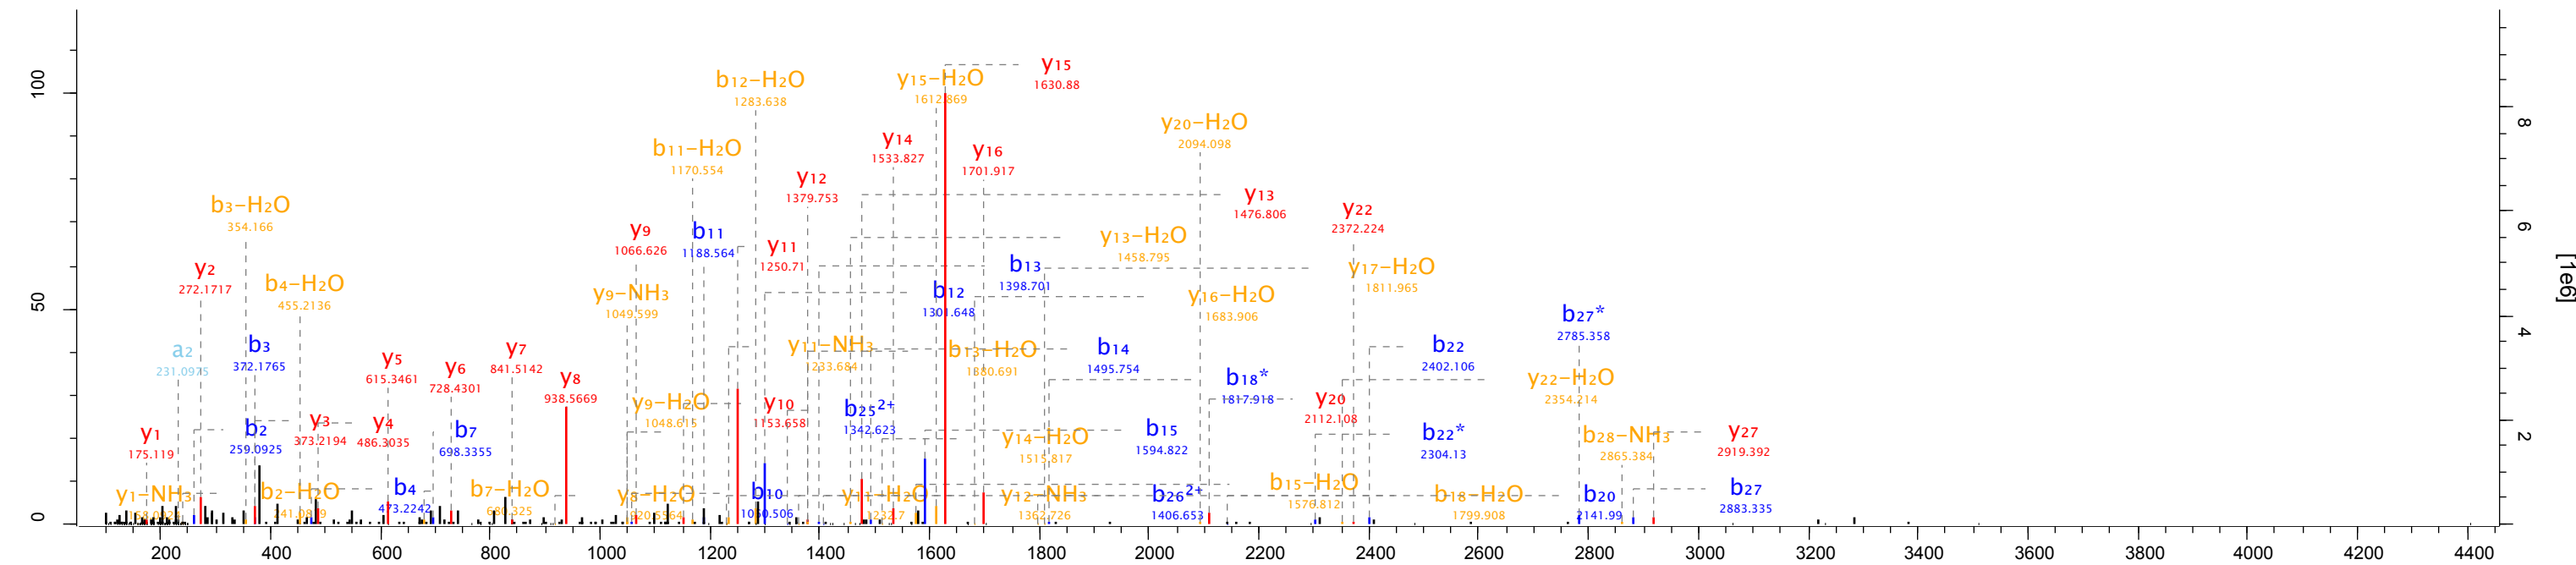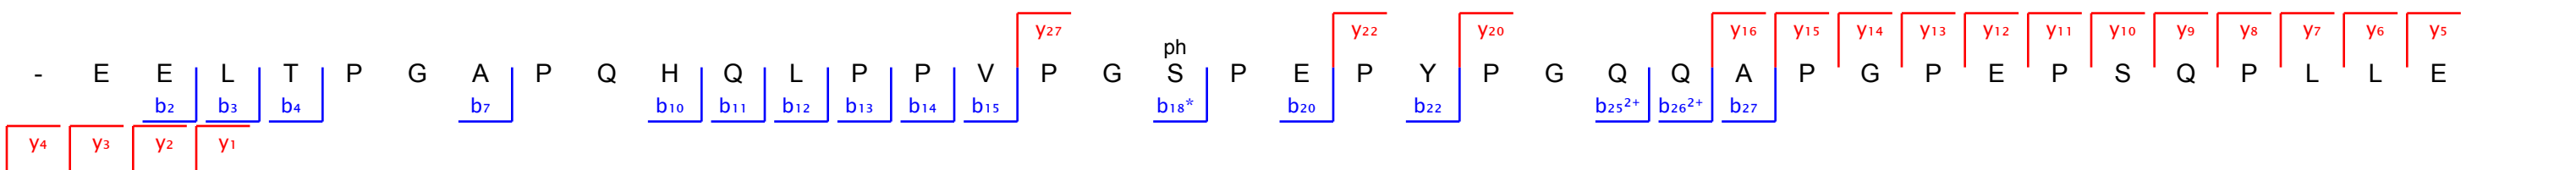

Raw file: 20150814\_A375SR\_Phospho\_BR2\_05  
 Scan: 2585 Method: FTMS; HCD Score: 137.78 m/z: 591.25 Gene names: THOC1

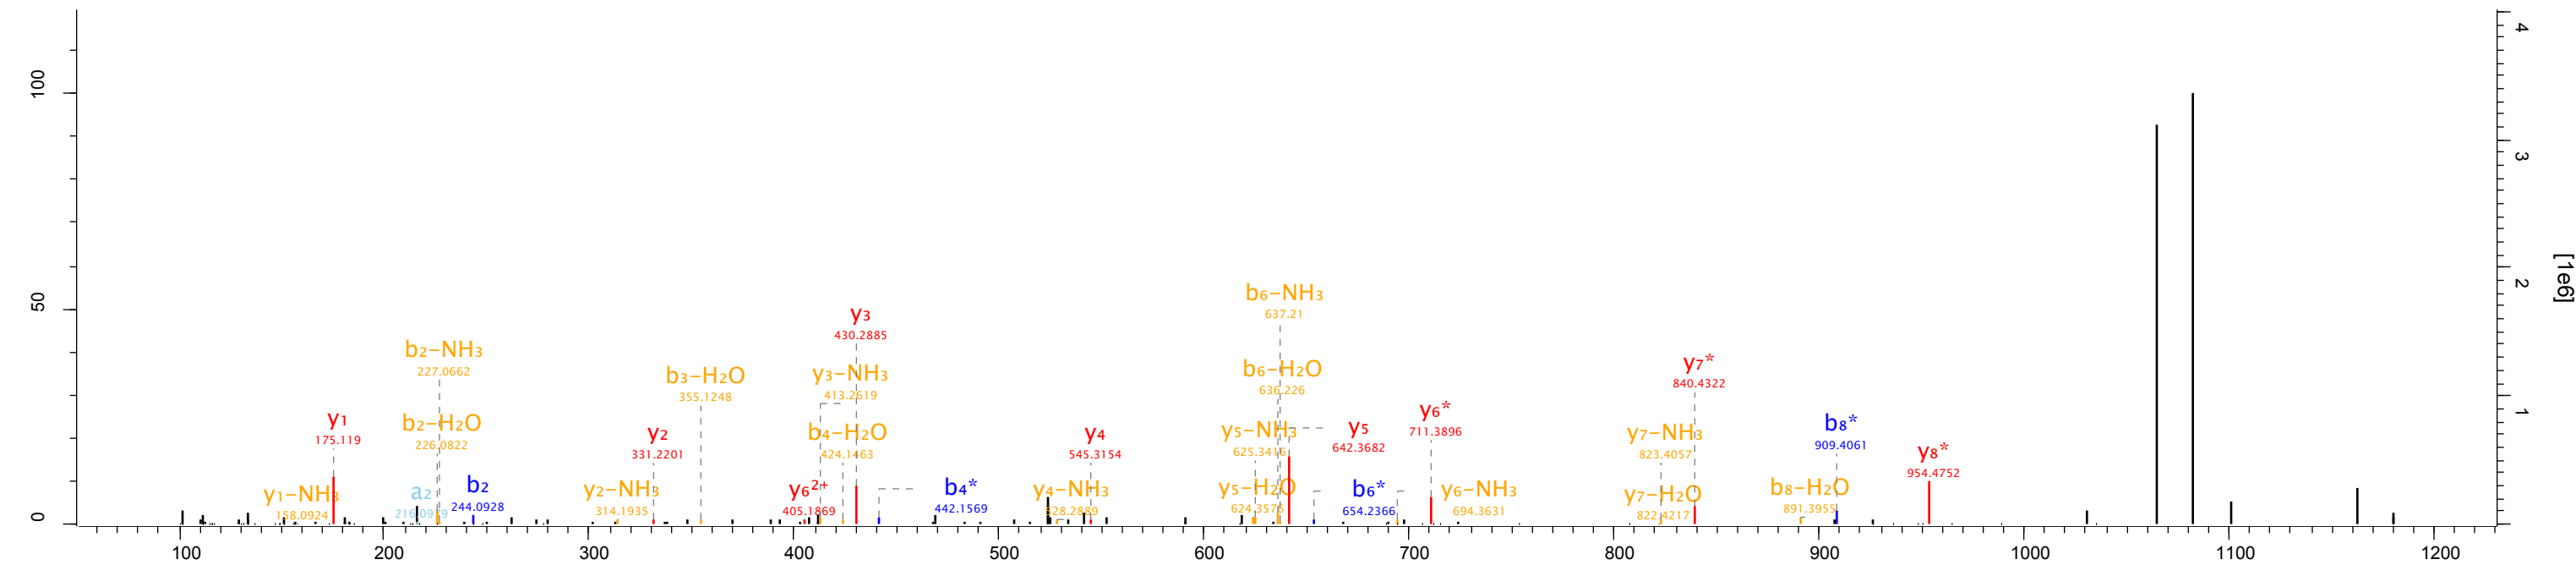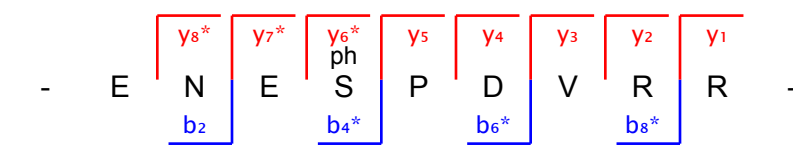

Raw file  
20150814\_A375SR\_Phospho\_BR2\_05

Scan 26075 Method FTMS; HCD Score 56.52 m/z 1058.5 Gene names ERC1

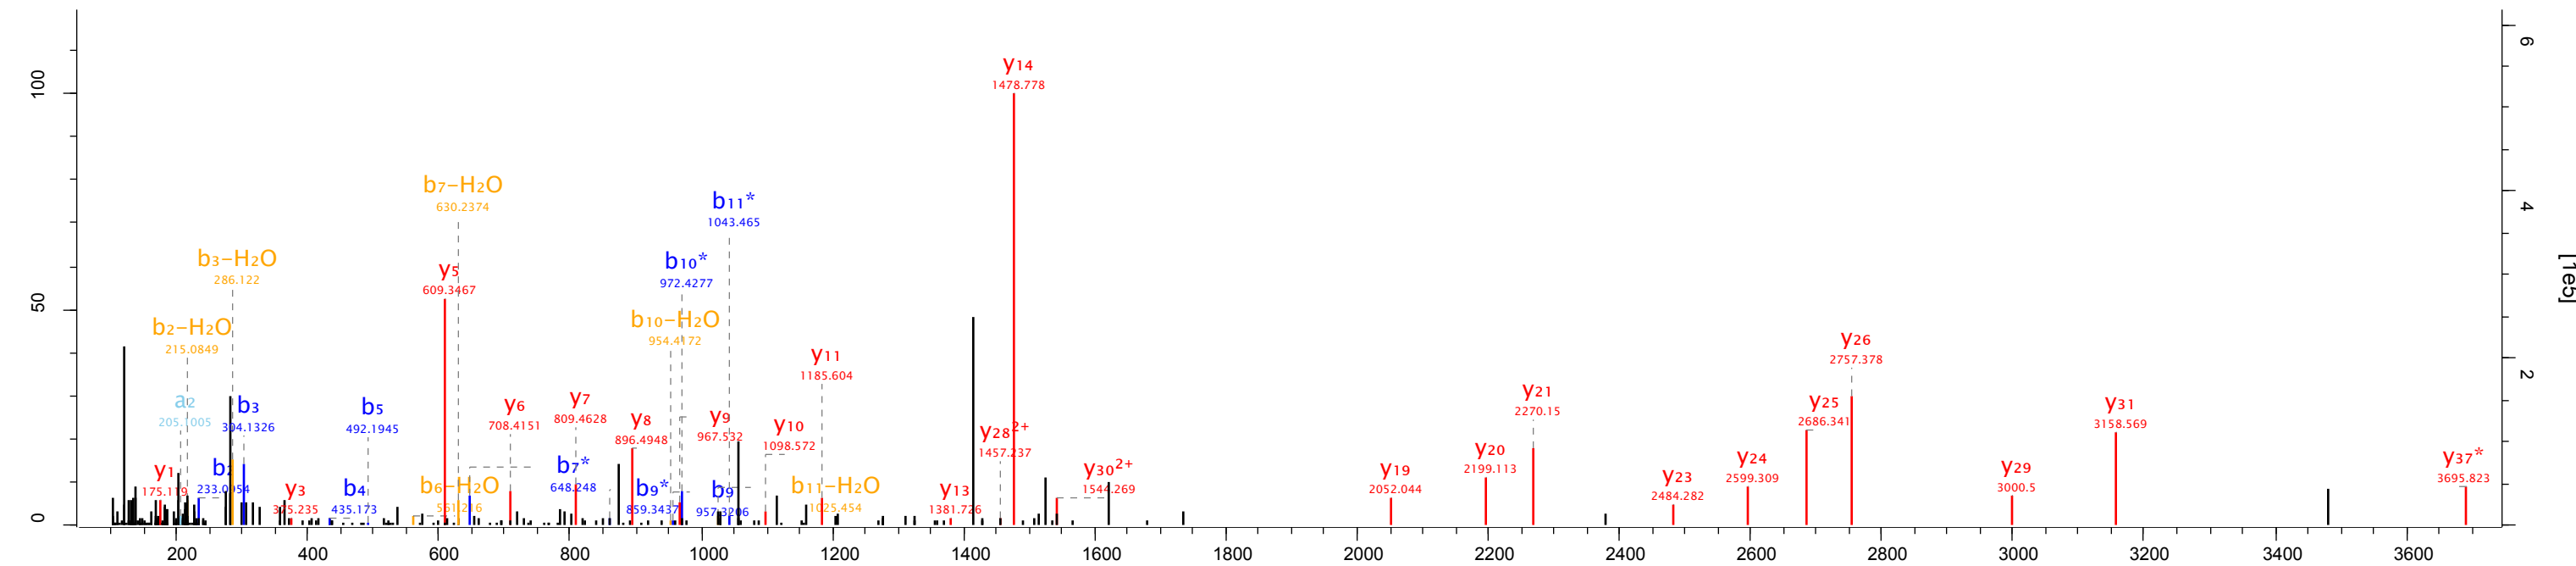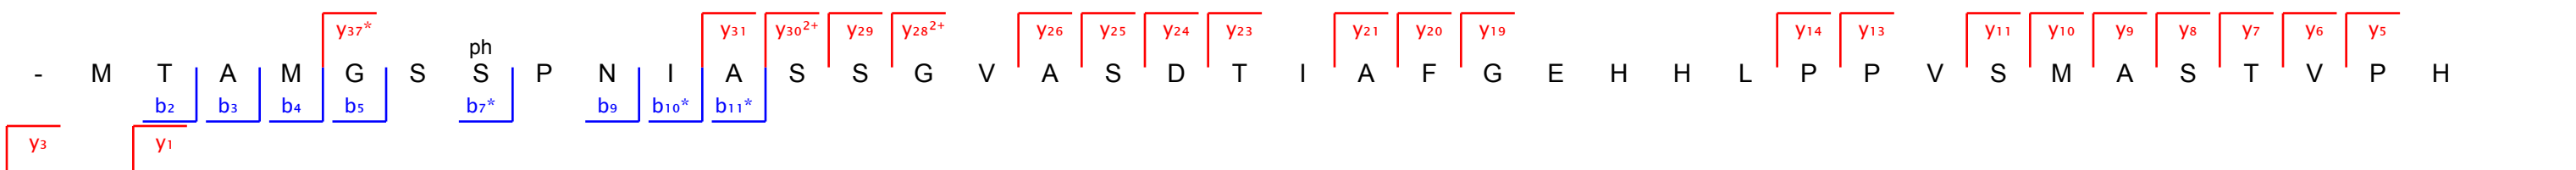

Raw file 20150814\_A375SR\_Phospho\_BR2\_05 Scan 26125 Method FTMS; HCD Score 129.43 m/z 920.39 Gene names SERBP1

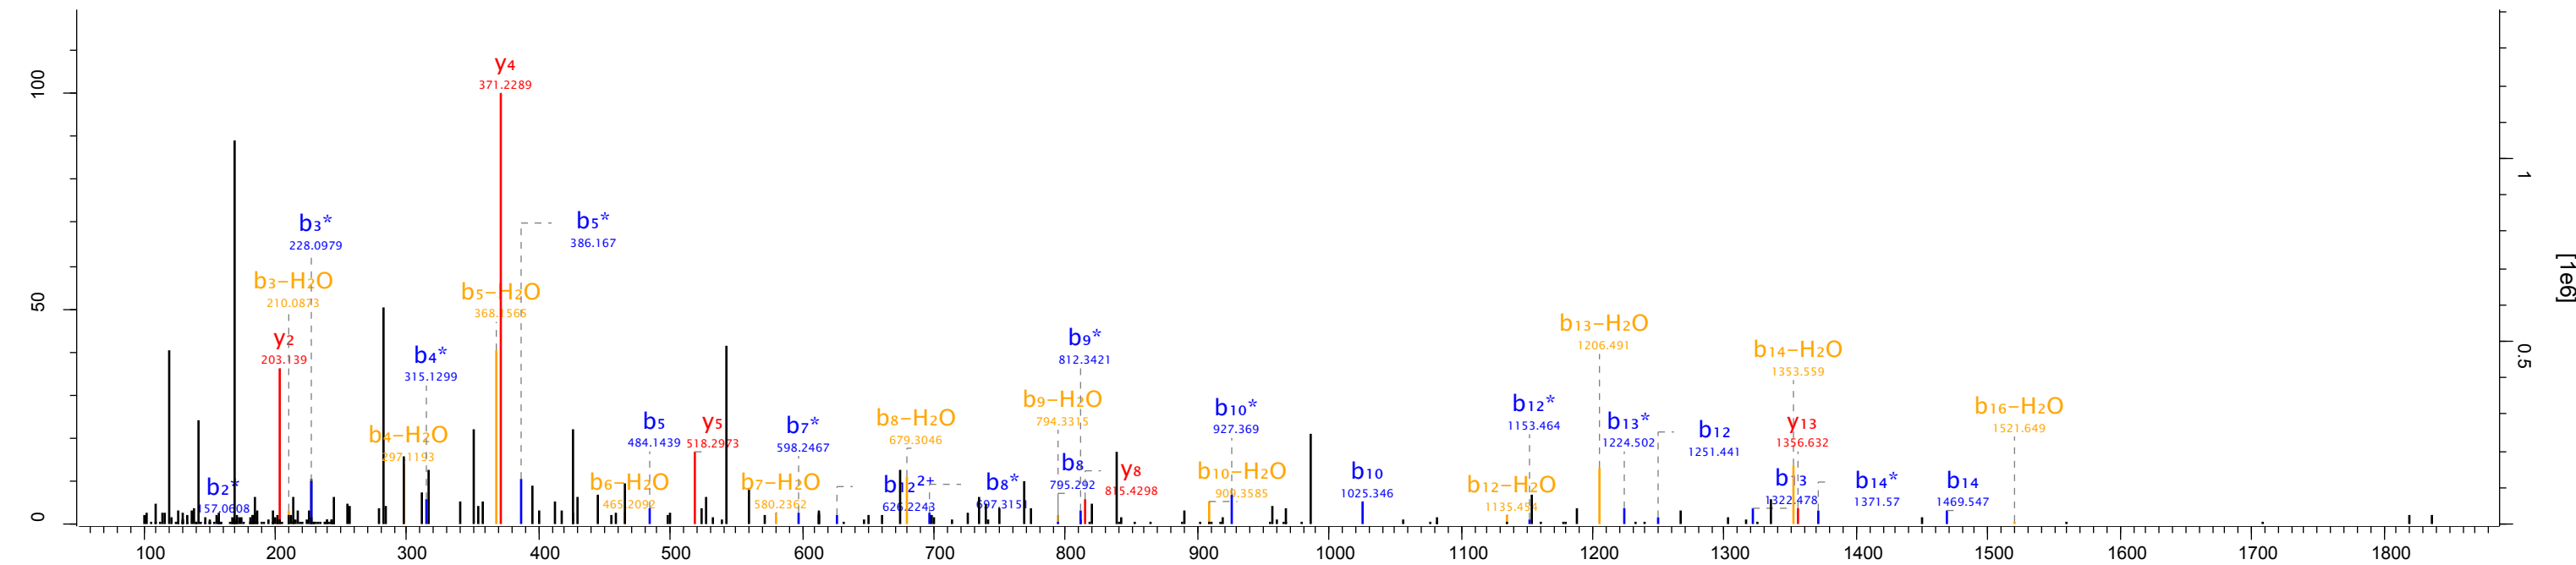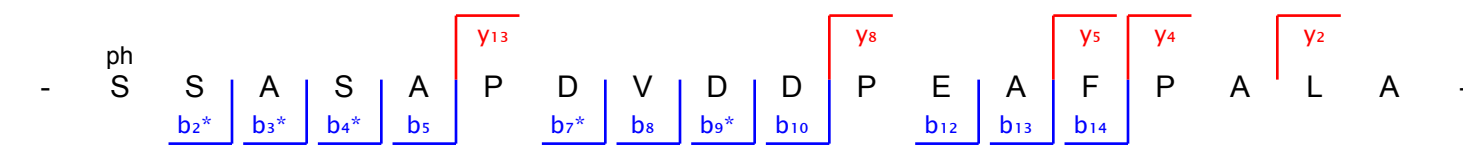

Raw file 20150814\_A375SR\_Phospho\_BR2\_05 Scan 26255 Method FTMS; HCD Score 60.25 m/z 959.92 Gene names BCAR3

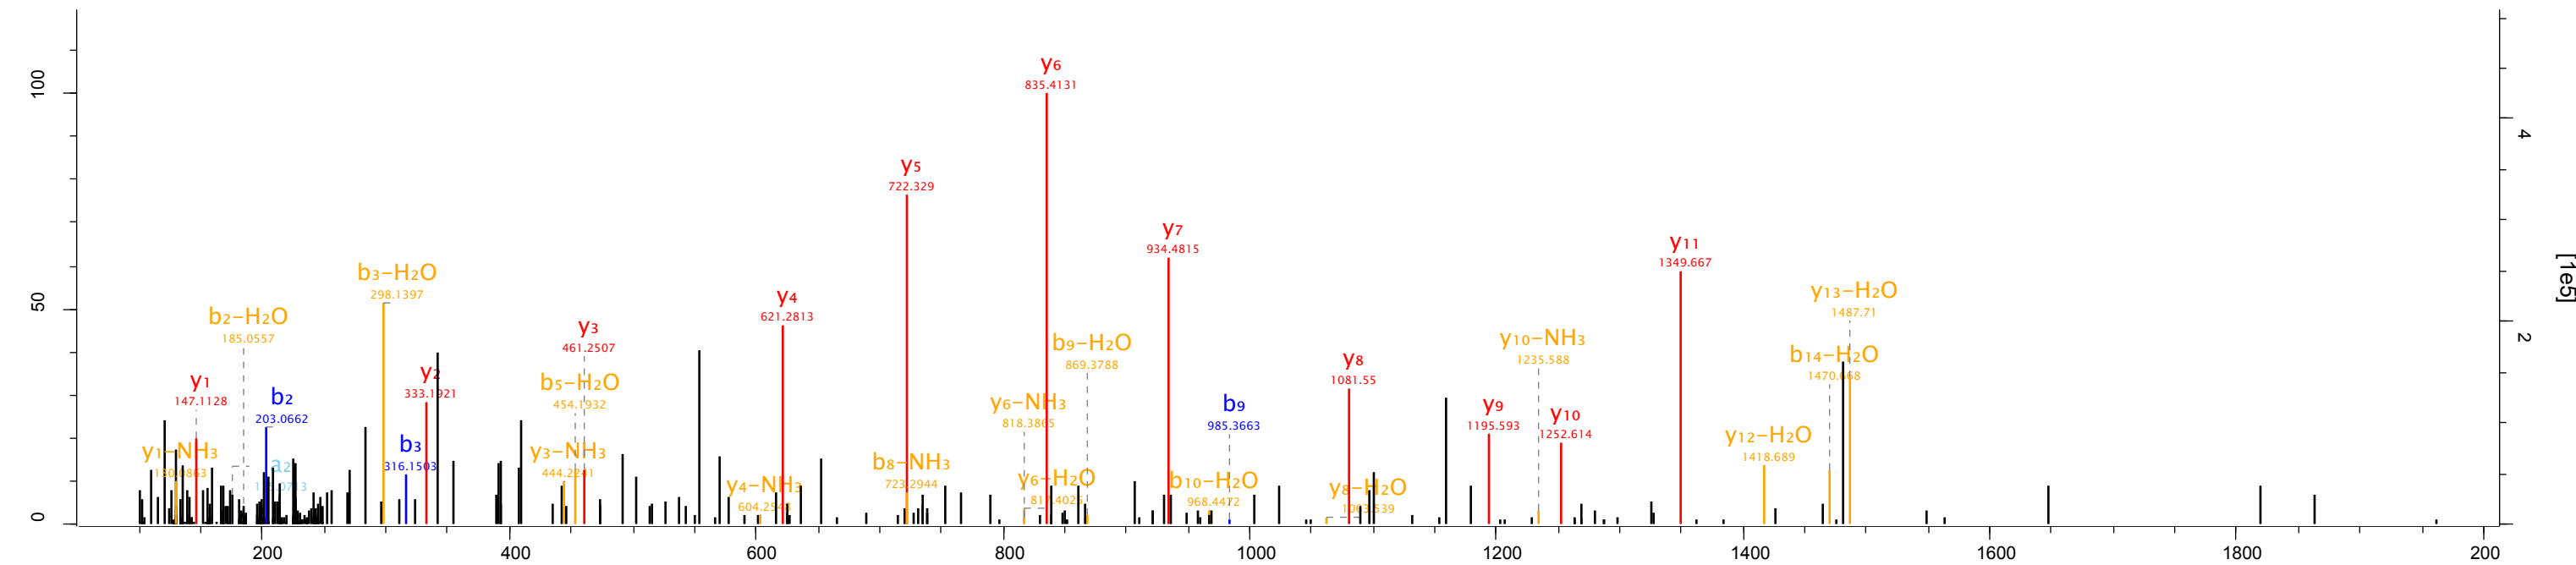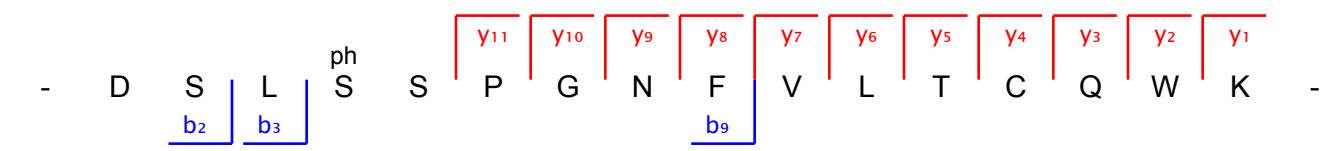

Raw file 20150814\_A375SR\_Phospho\_BR2\_05 Scan 26505 Method FTMS; HCD Score 247.01 m/z 1032.72 Gene names GPRC5A

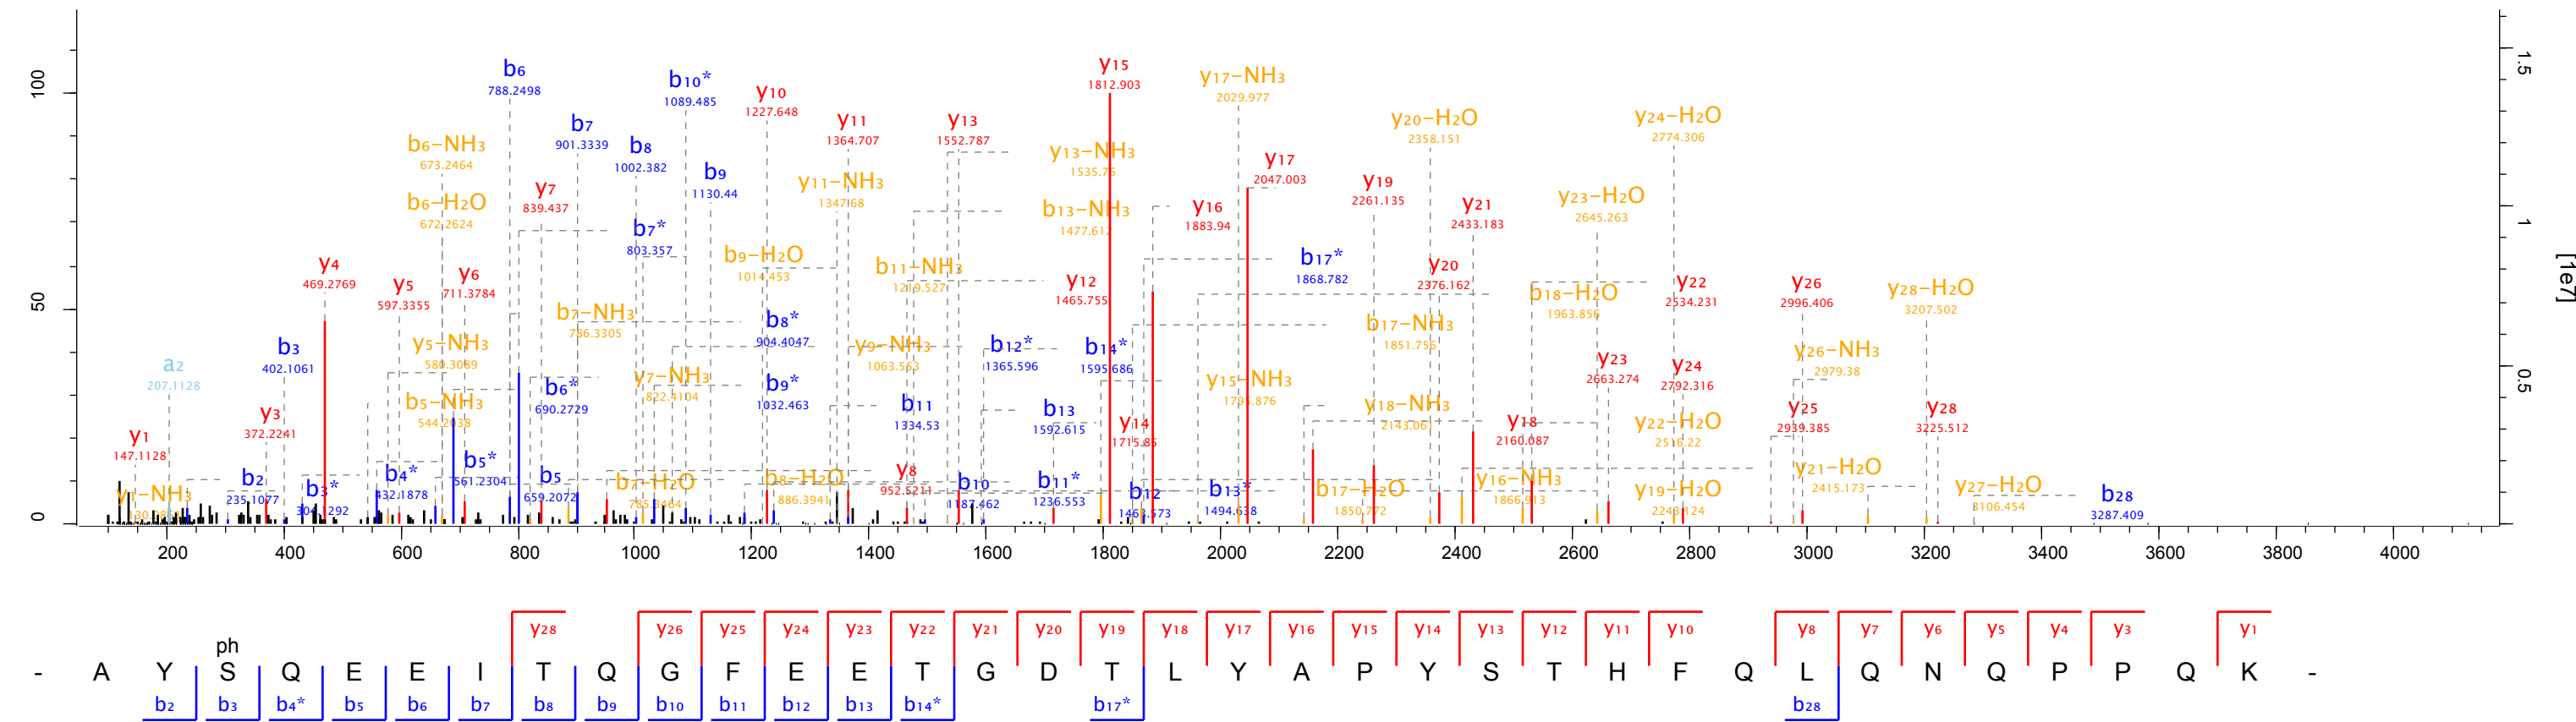

Raw file  
 20150814\_A375SR\_Phospho\_BR2\_05  
 Scan 26795 Method FTMS; HCD Score 58.86 m/z 708.02 Gene names POGZ

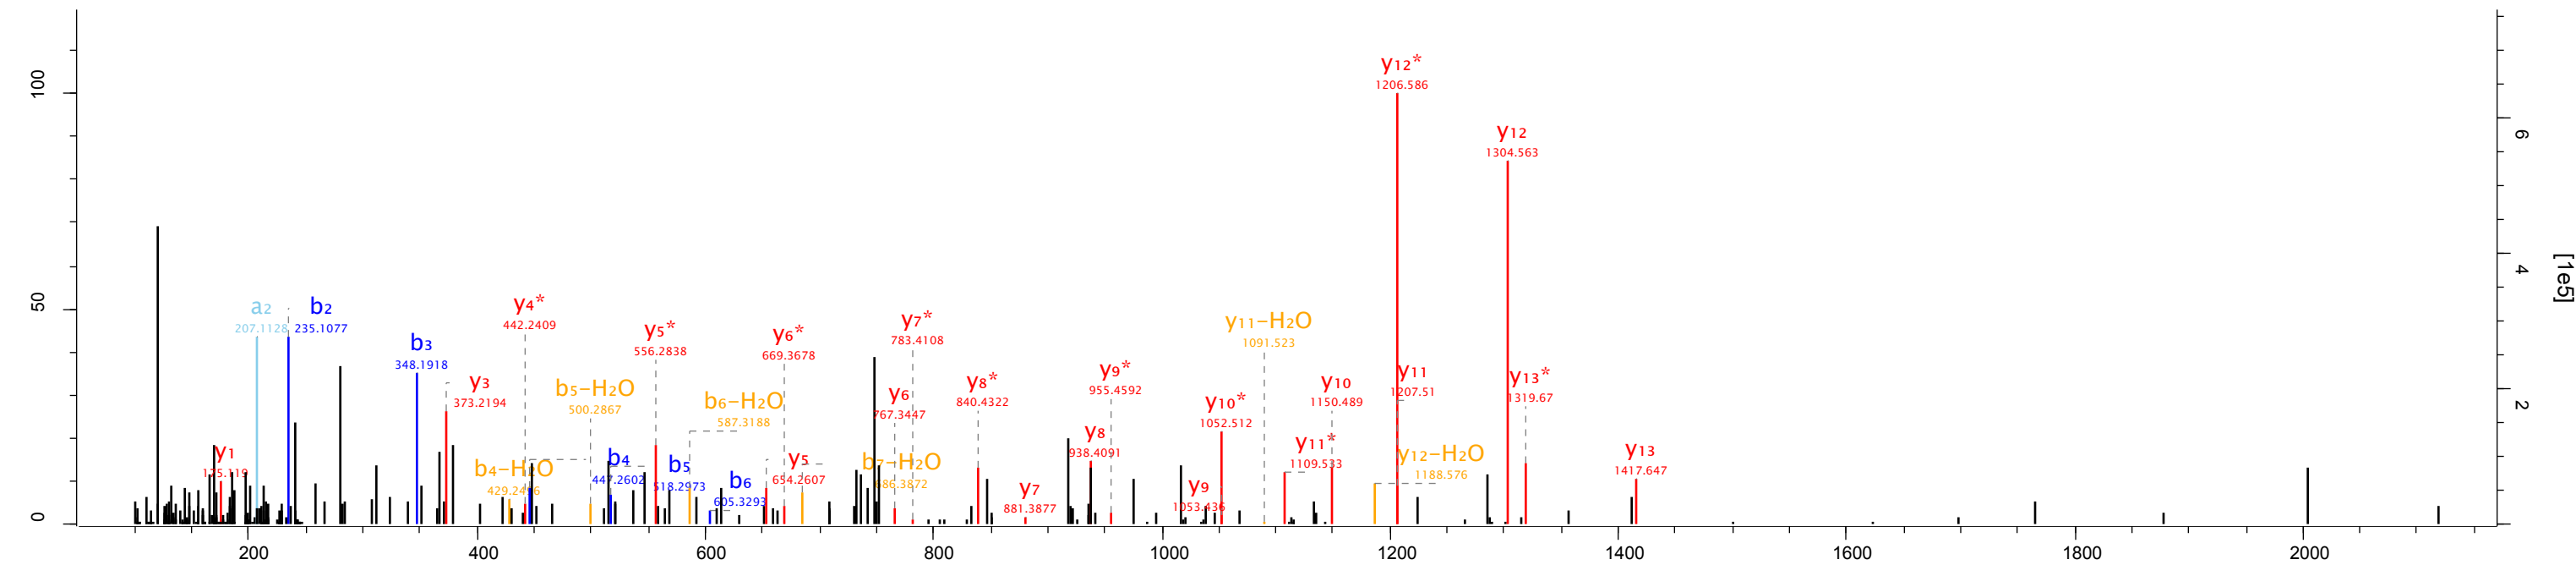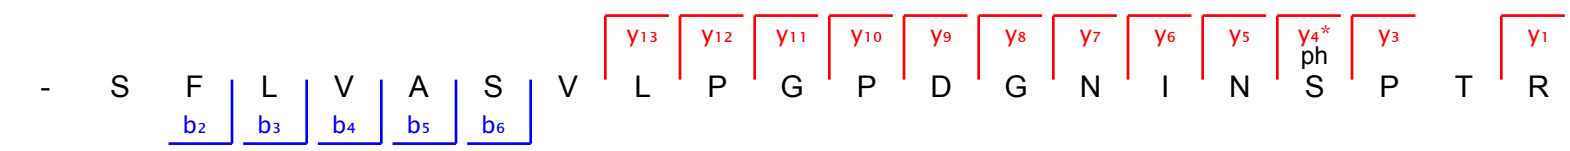



Raw file: 20150814\_A375SR\_Phospho\_BR2\_05  
 Scan: 27605 Method: FTMS; HCD Score: 251.68 m/z: 1097.88 Gene names: PPIL4

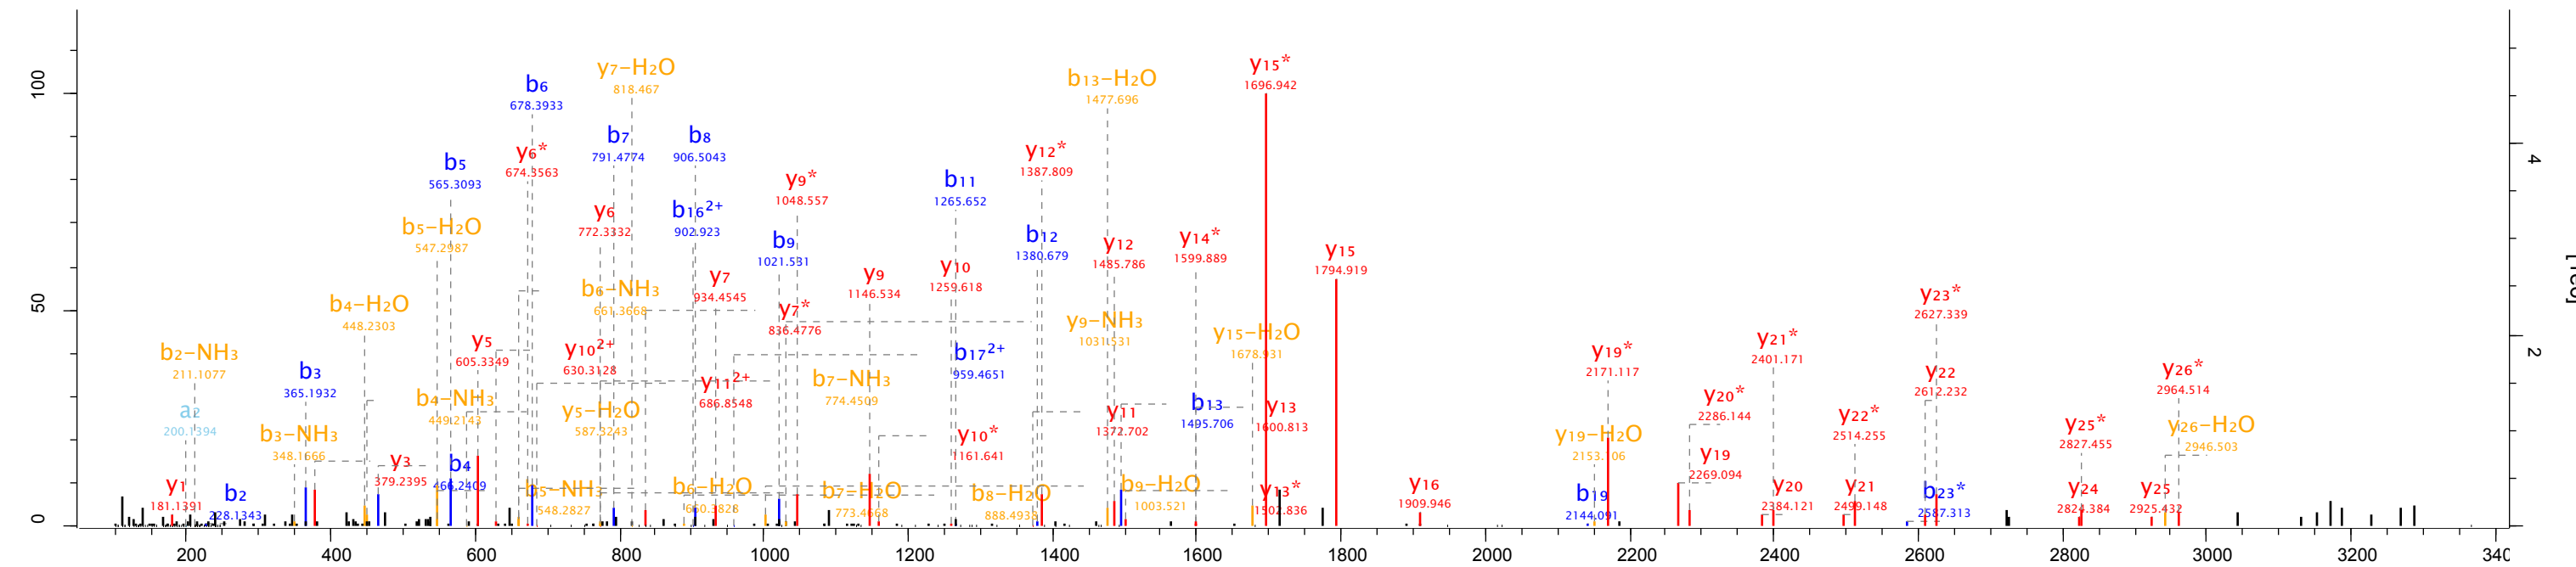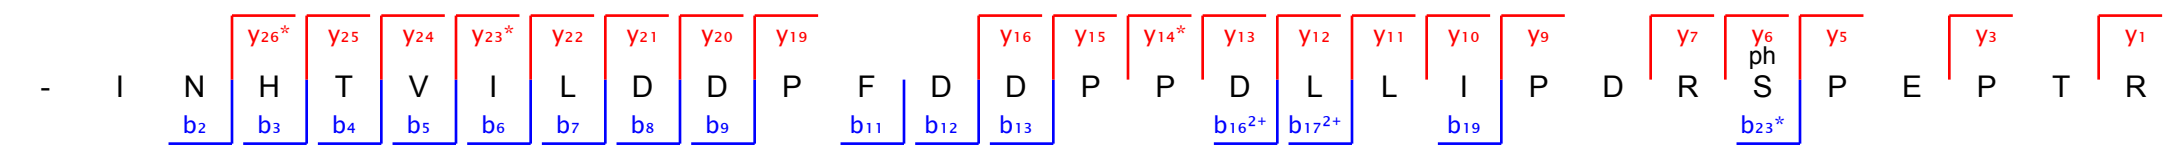

Raw file  
 20150814\_A375SR\_Phospho\_BR2\_05  
 Scan 27765 Method FTMS; HCD Score 112.34 m/z 1164.05 Gene names ERRFI1

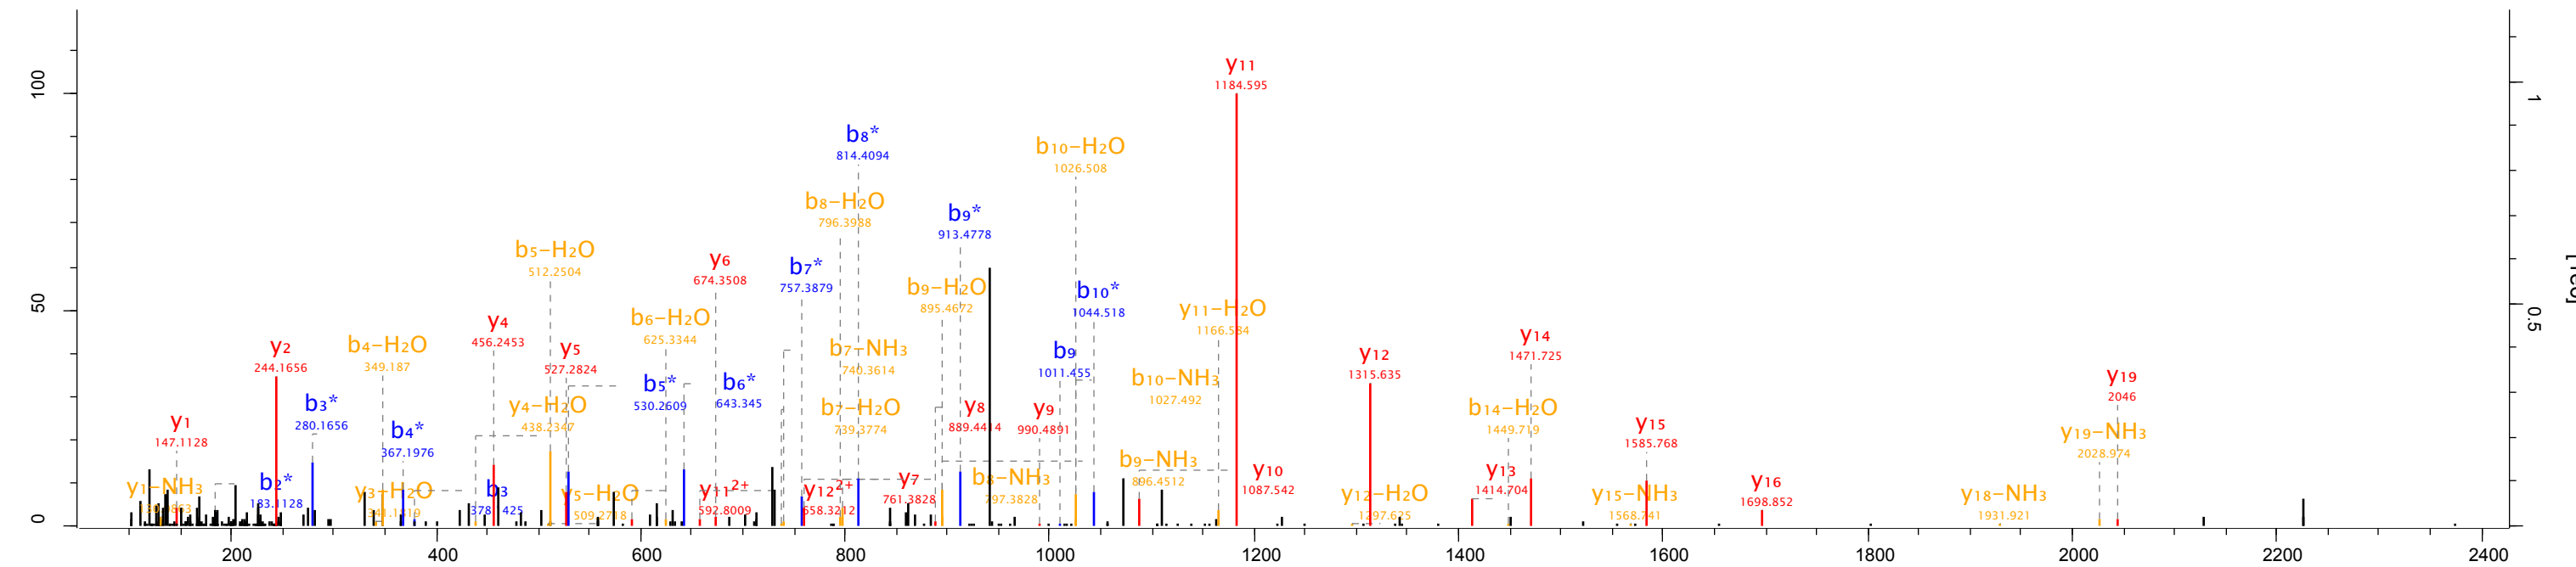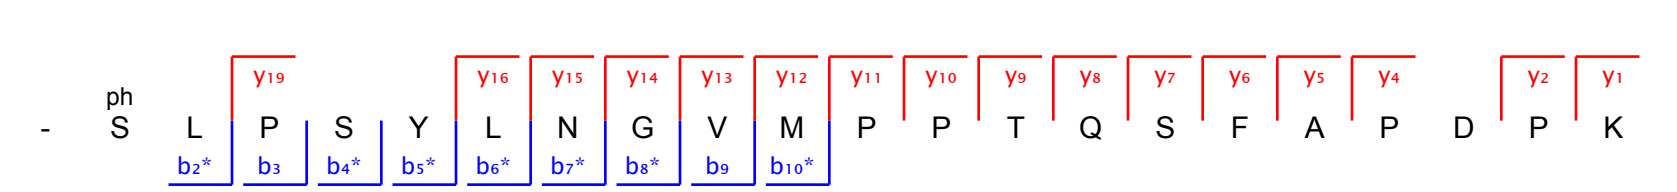

Raw file: 20150814\_A375SR\_Phospho\_BR2\_05  
 Scan: 2785 Method: FTMS; HCD Score: 96.82 m/z: 538.77 Gene names: ZNF592

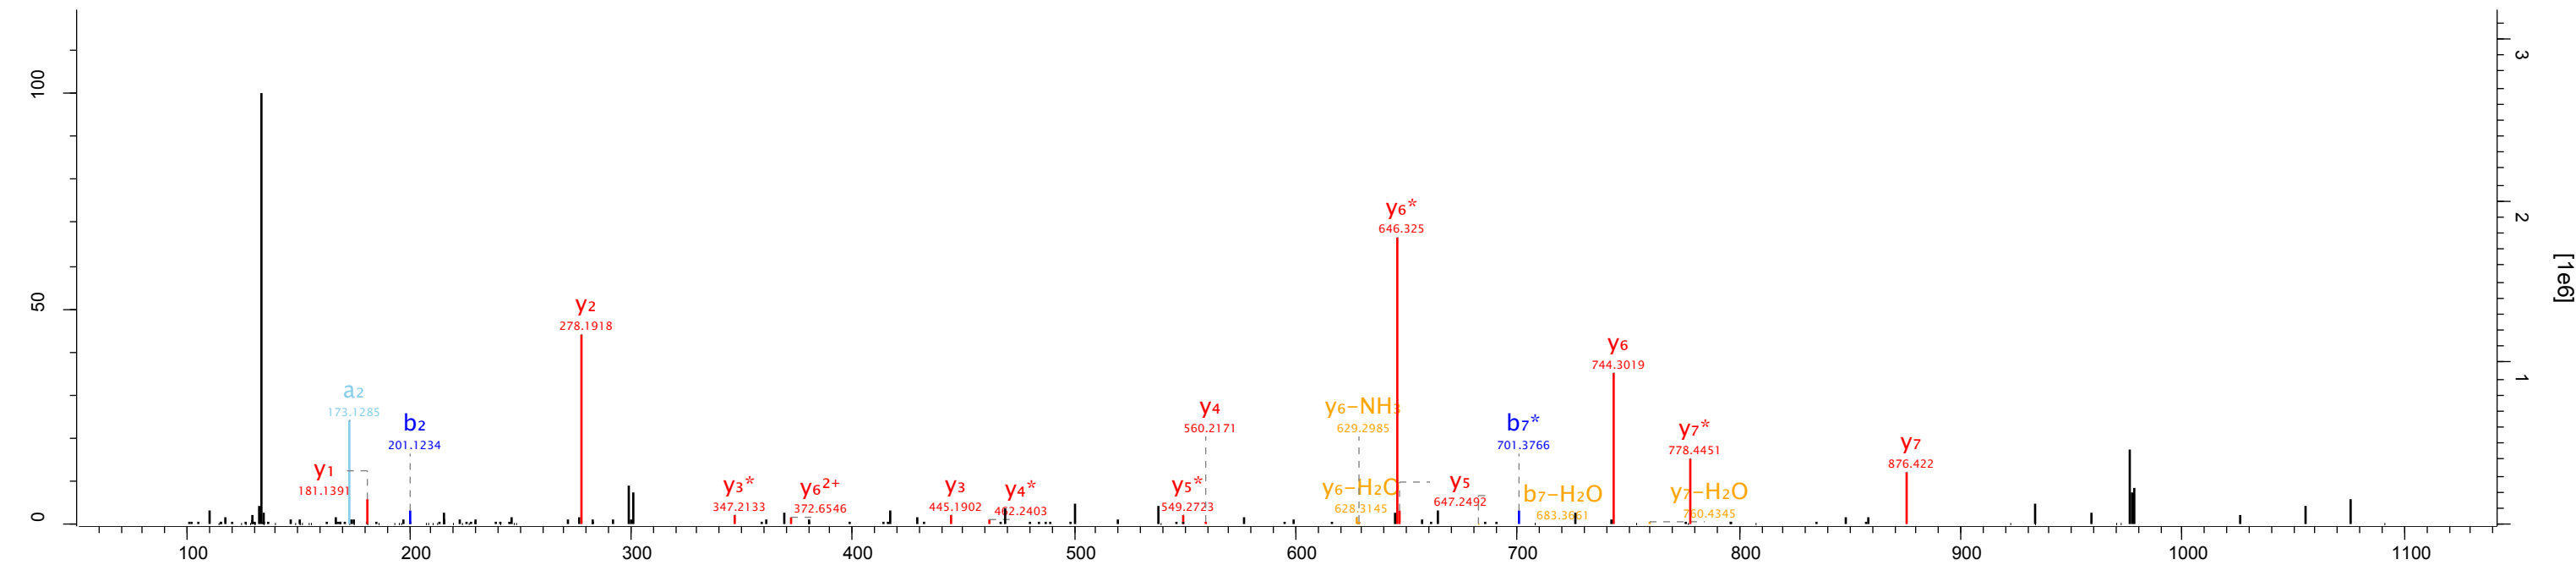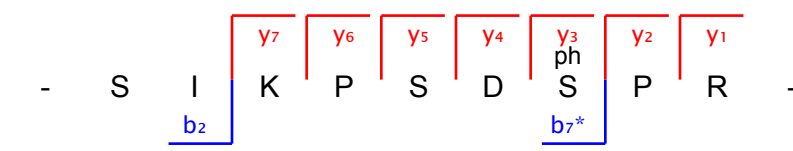

Raw file  
20150814\_A375SR\_Phospho\_BR2\_05

Scan 28145 Method FTMS; HCD Score 168.01 m/z 1314.9 Gene names SYAP1

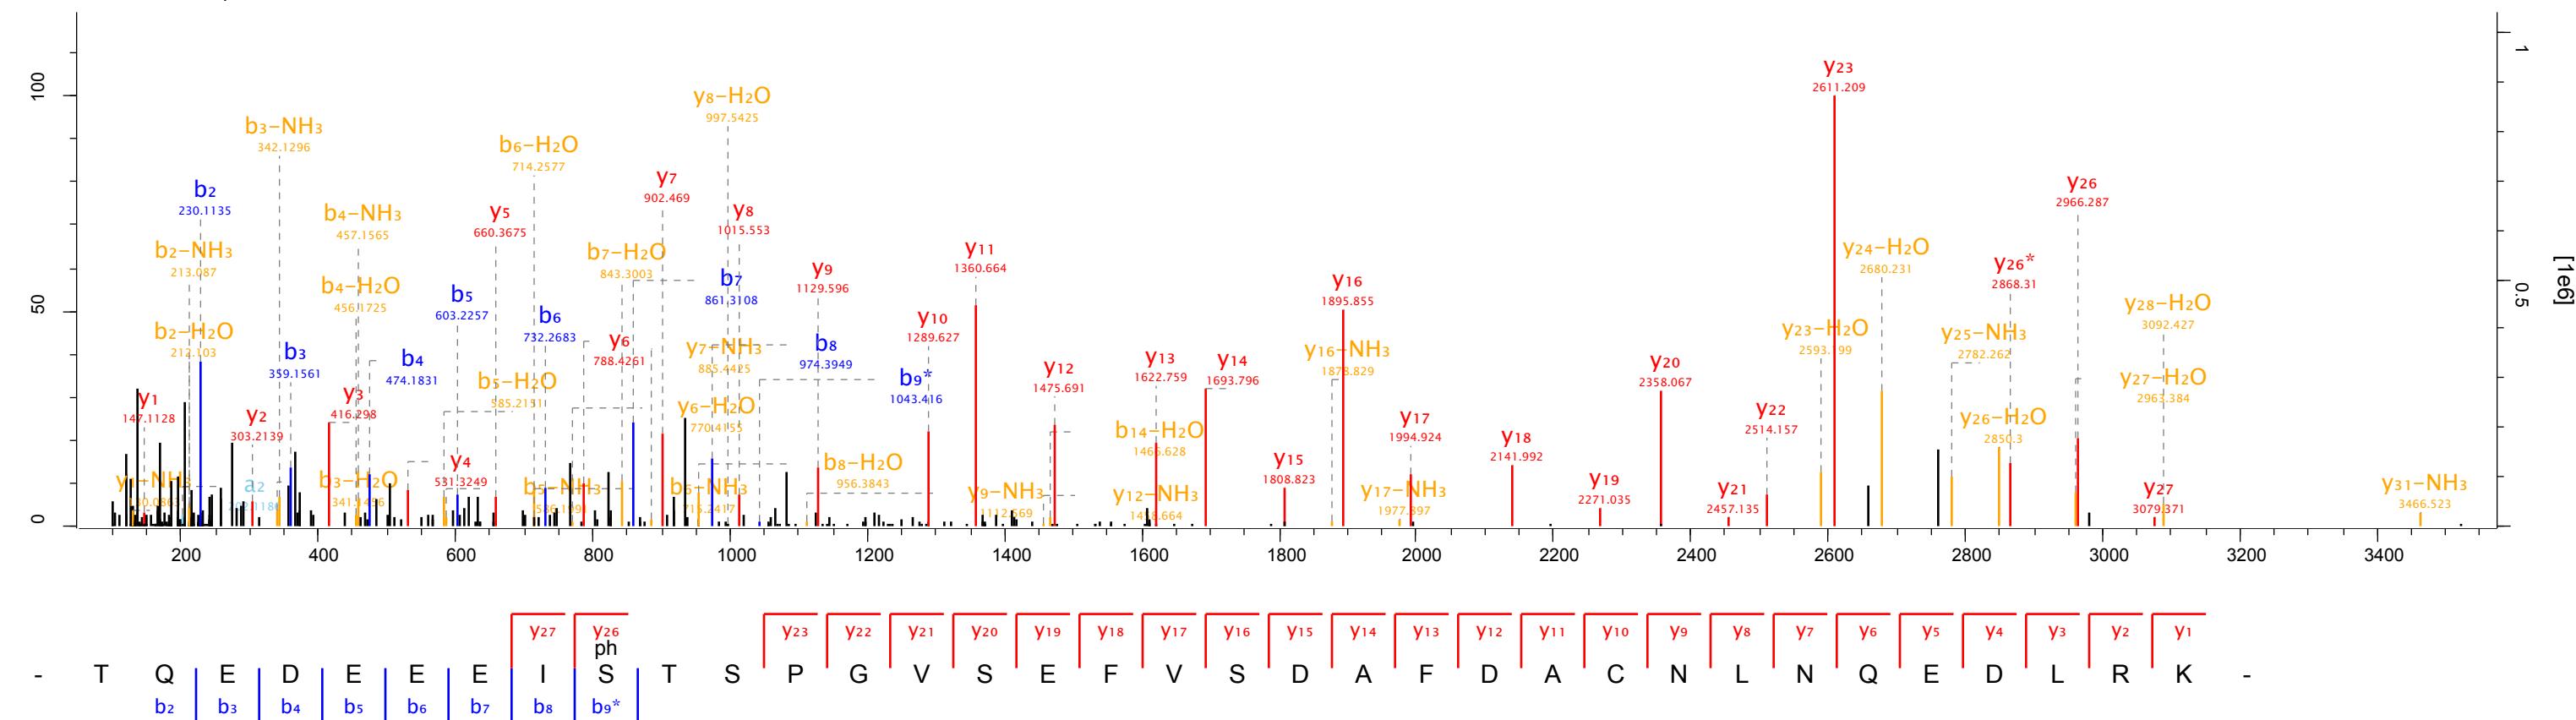

Raw file: 20150814\_A375SR\_Phospho\_BR2\_05  
 Scan: 3145 Method: FTMS; HCD Score: 90.33 m/z: 661.77 Gene names: SGK223

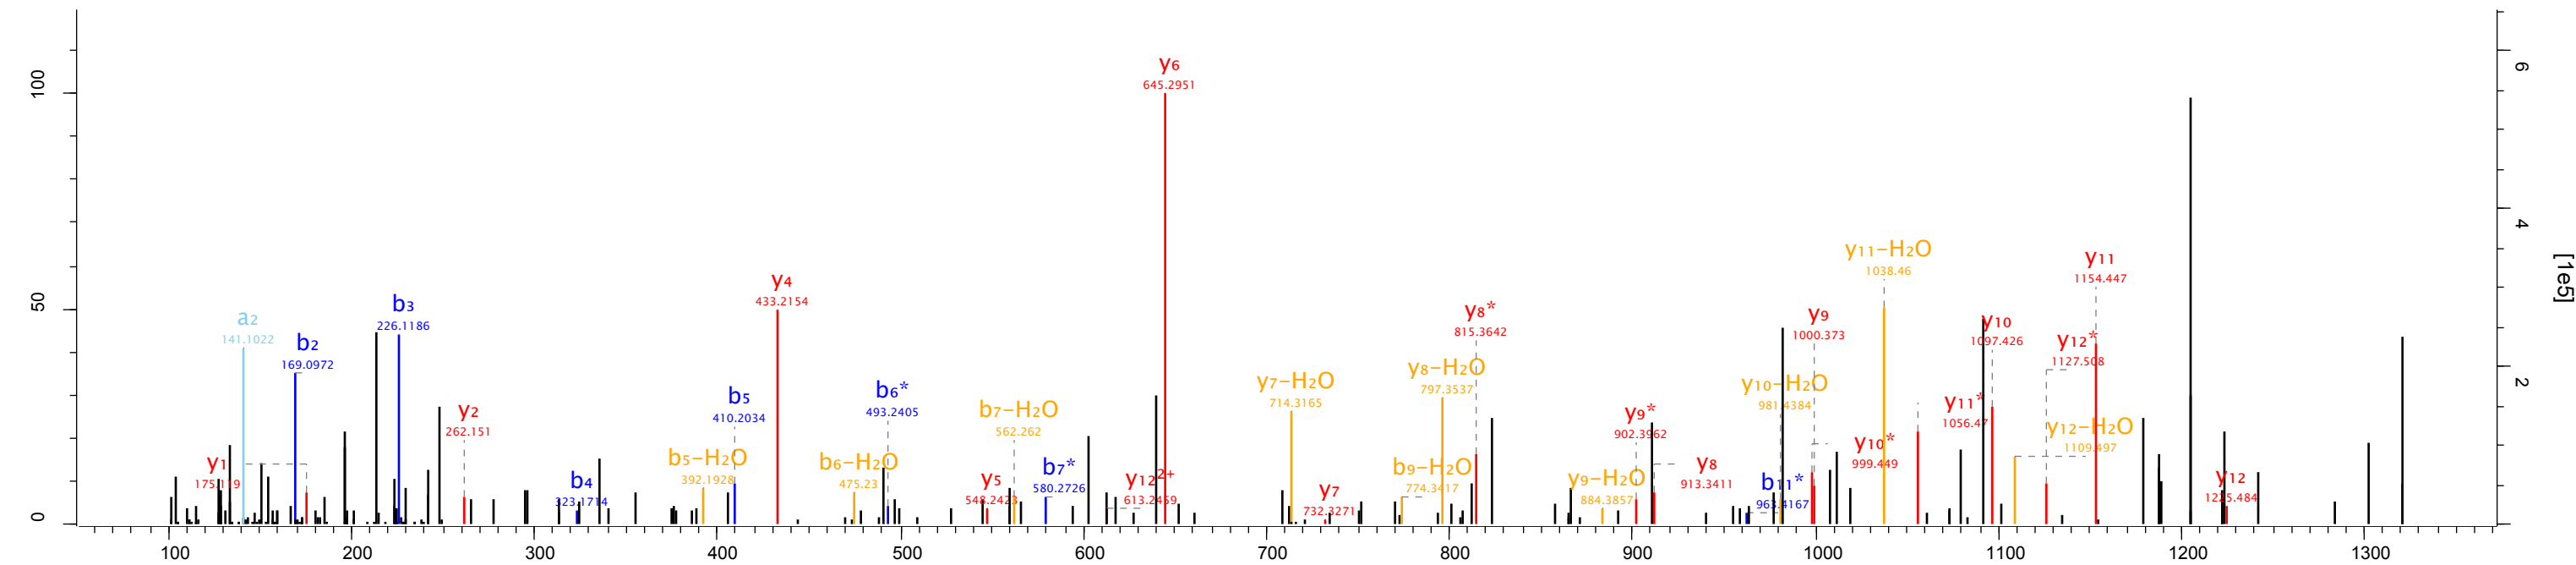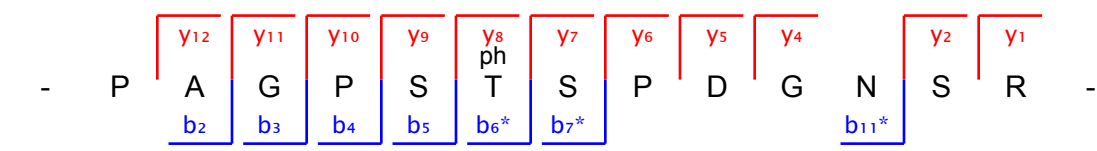

Raw file: 20150814\_A375SR\_Phospho\_BR2\_05  
 Scan: 3595 Method: FTMS; HCD Score: 91.31 m/z: 595.25 Gene names: SF1

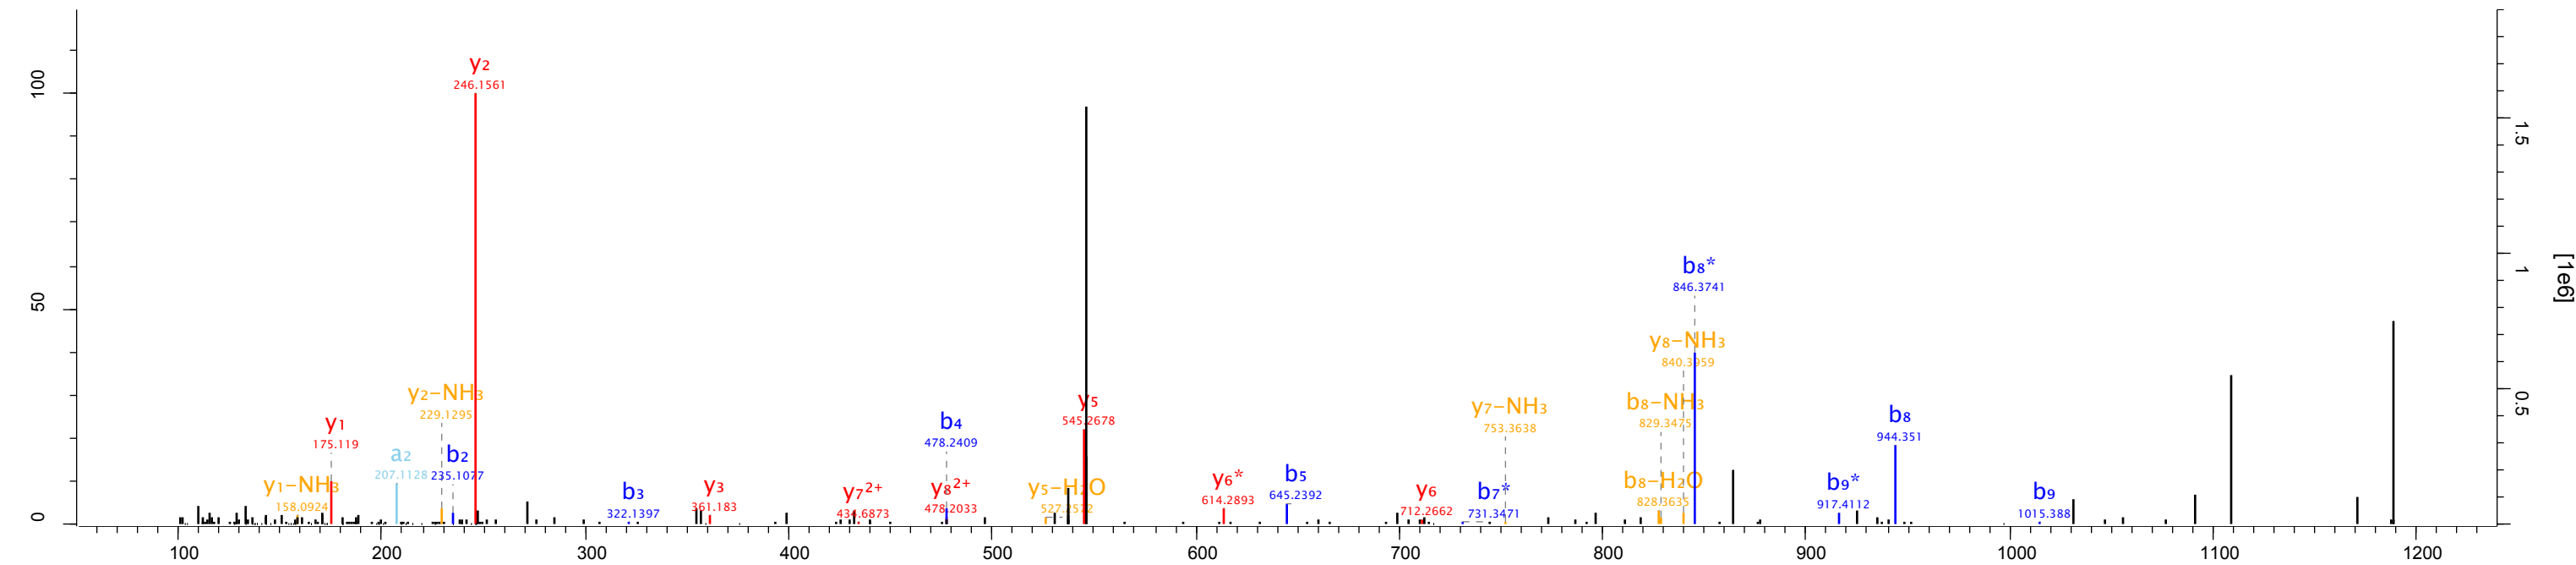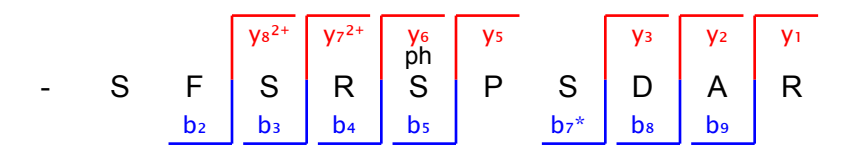

Raw file: 20150814\_A375SR\_Phospho\_BR2\_05  
 Scan: 3705 Method: FTMS; HCD Score: 98.25 m/z: 535.72 Gene names: LEO1

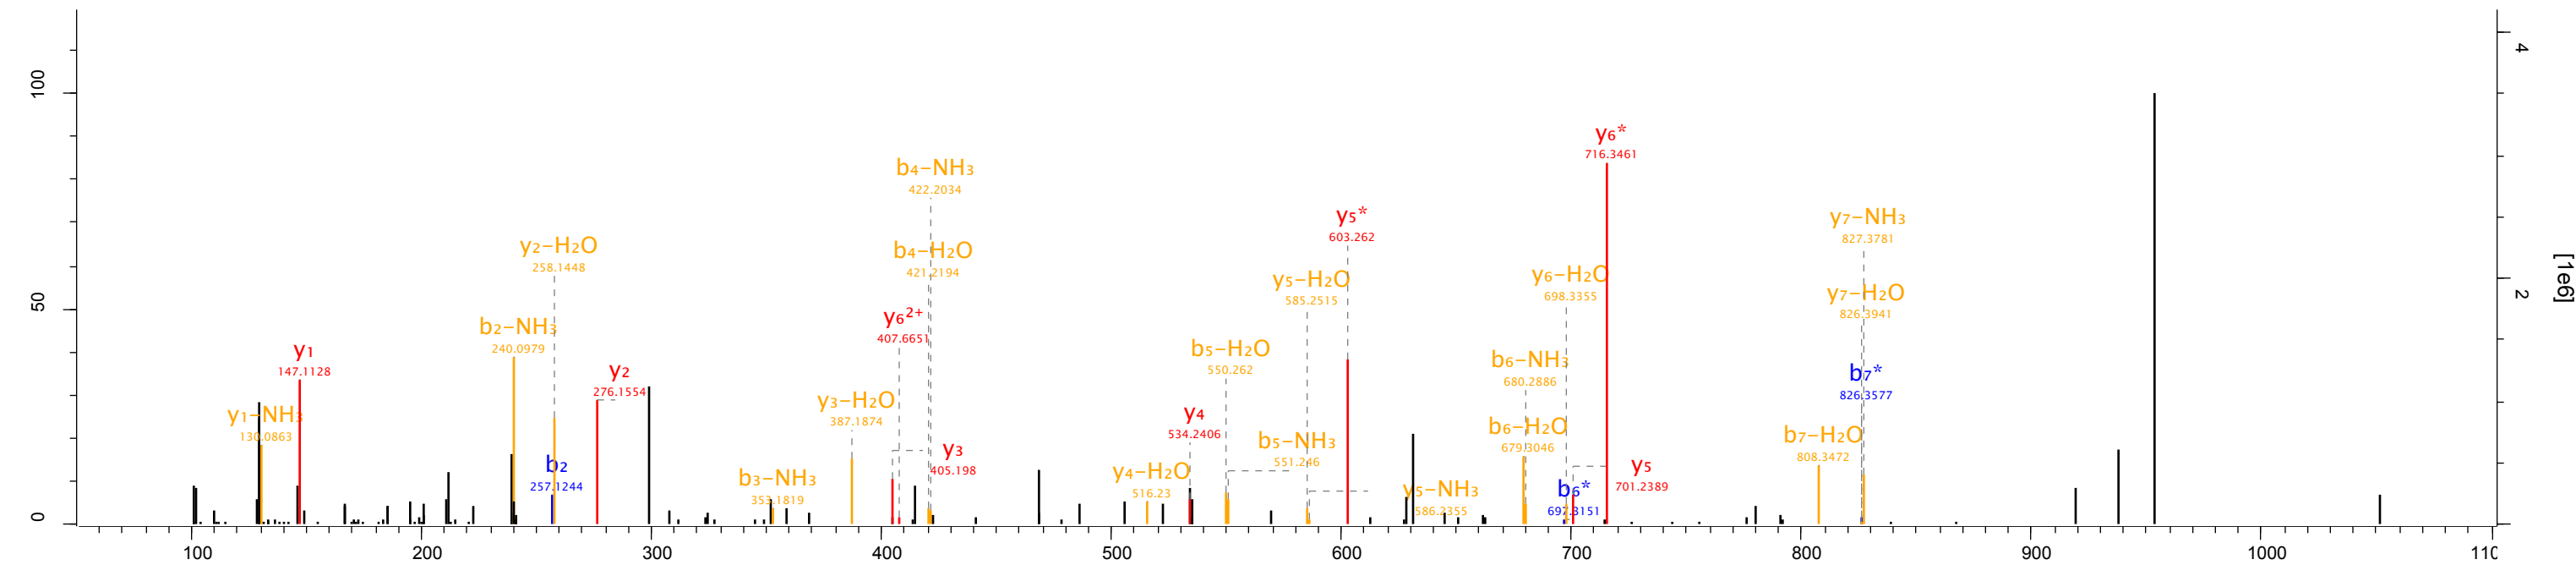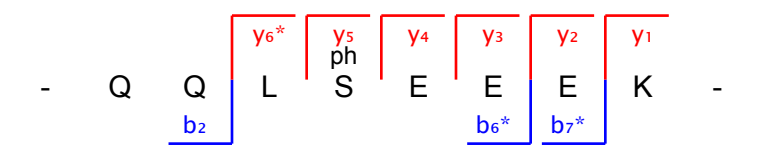

Raw file: 20150814\_A375SR\_Phospho\_BR2\_05  
 Scan: 3795 Method: FTMS; HCD Score: 115.91 m/z: 491.2 Gene names: TSC2

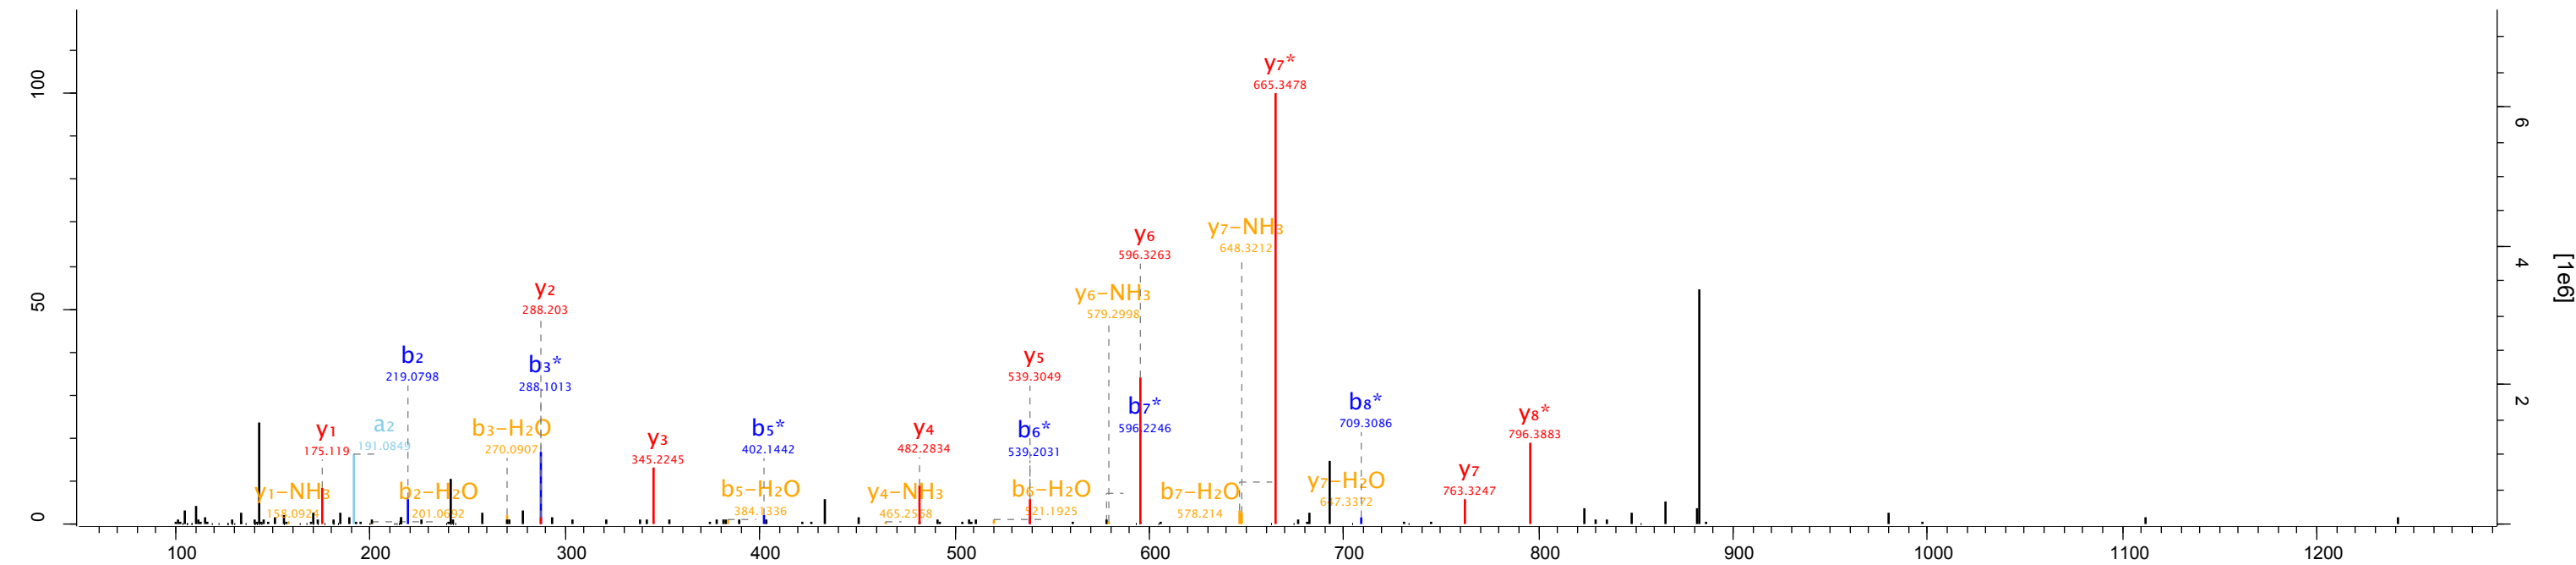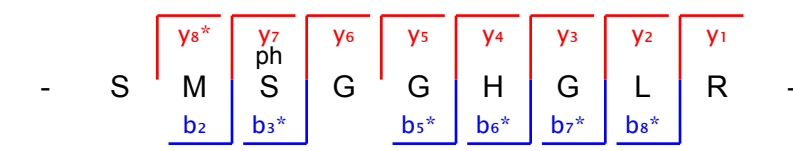



Raw file: 20150814\_A375SR\_Phospho\_BR2\_05  
 Scan: 3915 Method: FTMS; HCD Score: 110.38 m/z: 479.7 Gene names: VIM

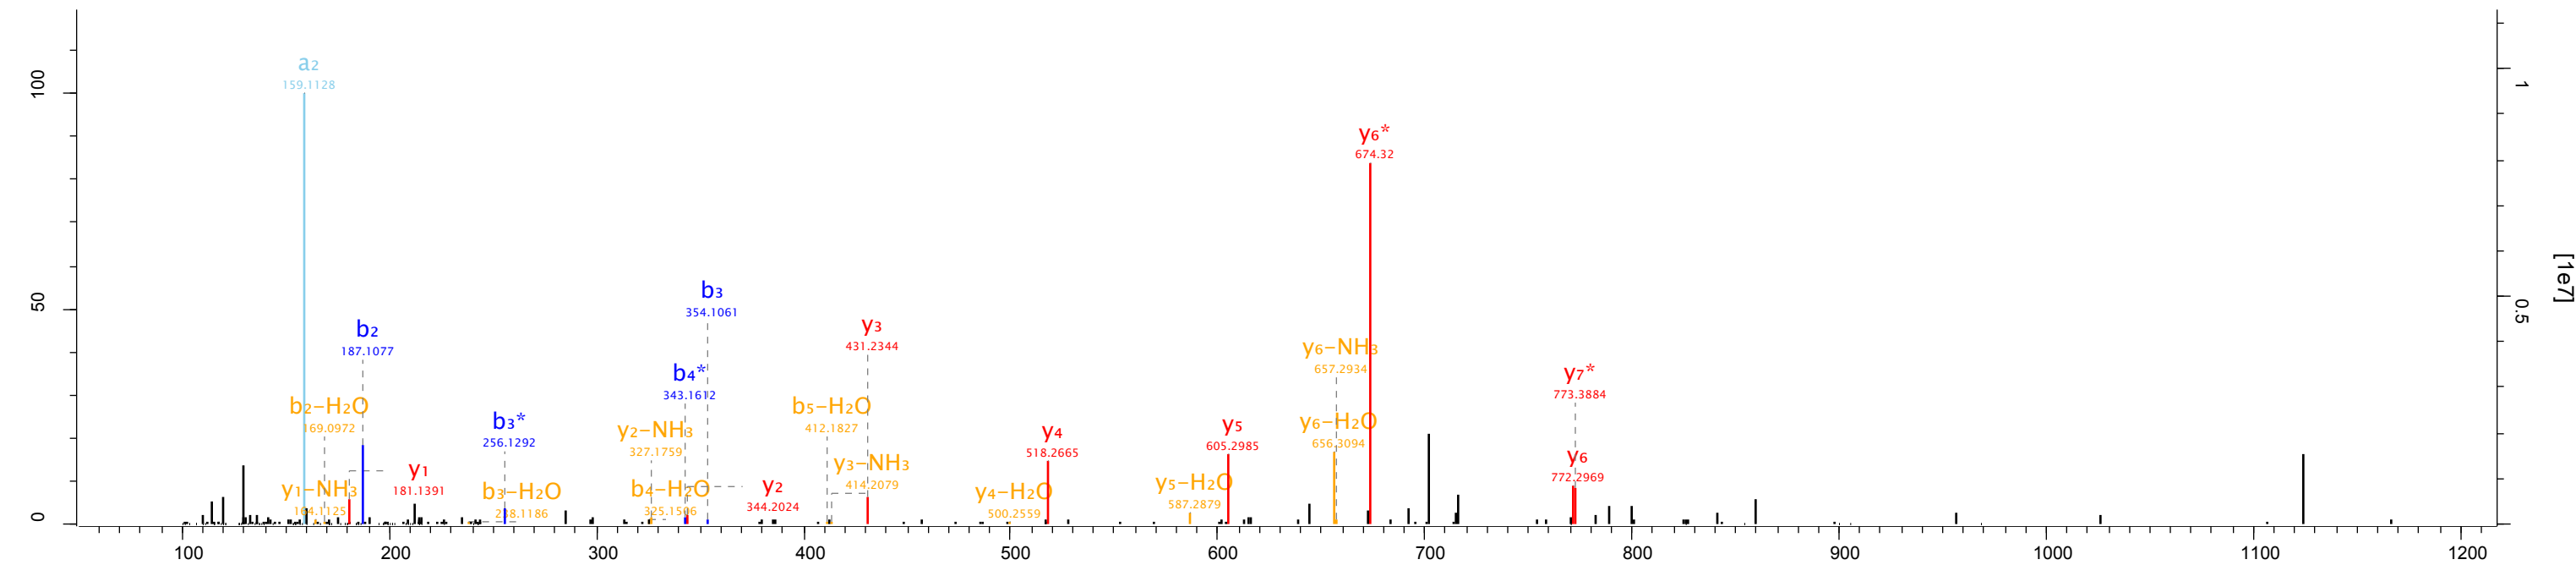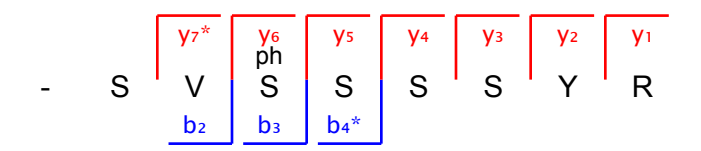

Raw file: 20150814\_A375SR\_Phospho\_BR2\_05  
 Scan: 3995 Method: FTMS; HCD Score: 134.01 m/z: 632.27 Gene names: ARHGAP29

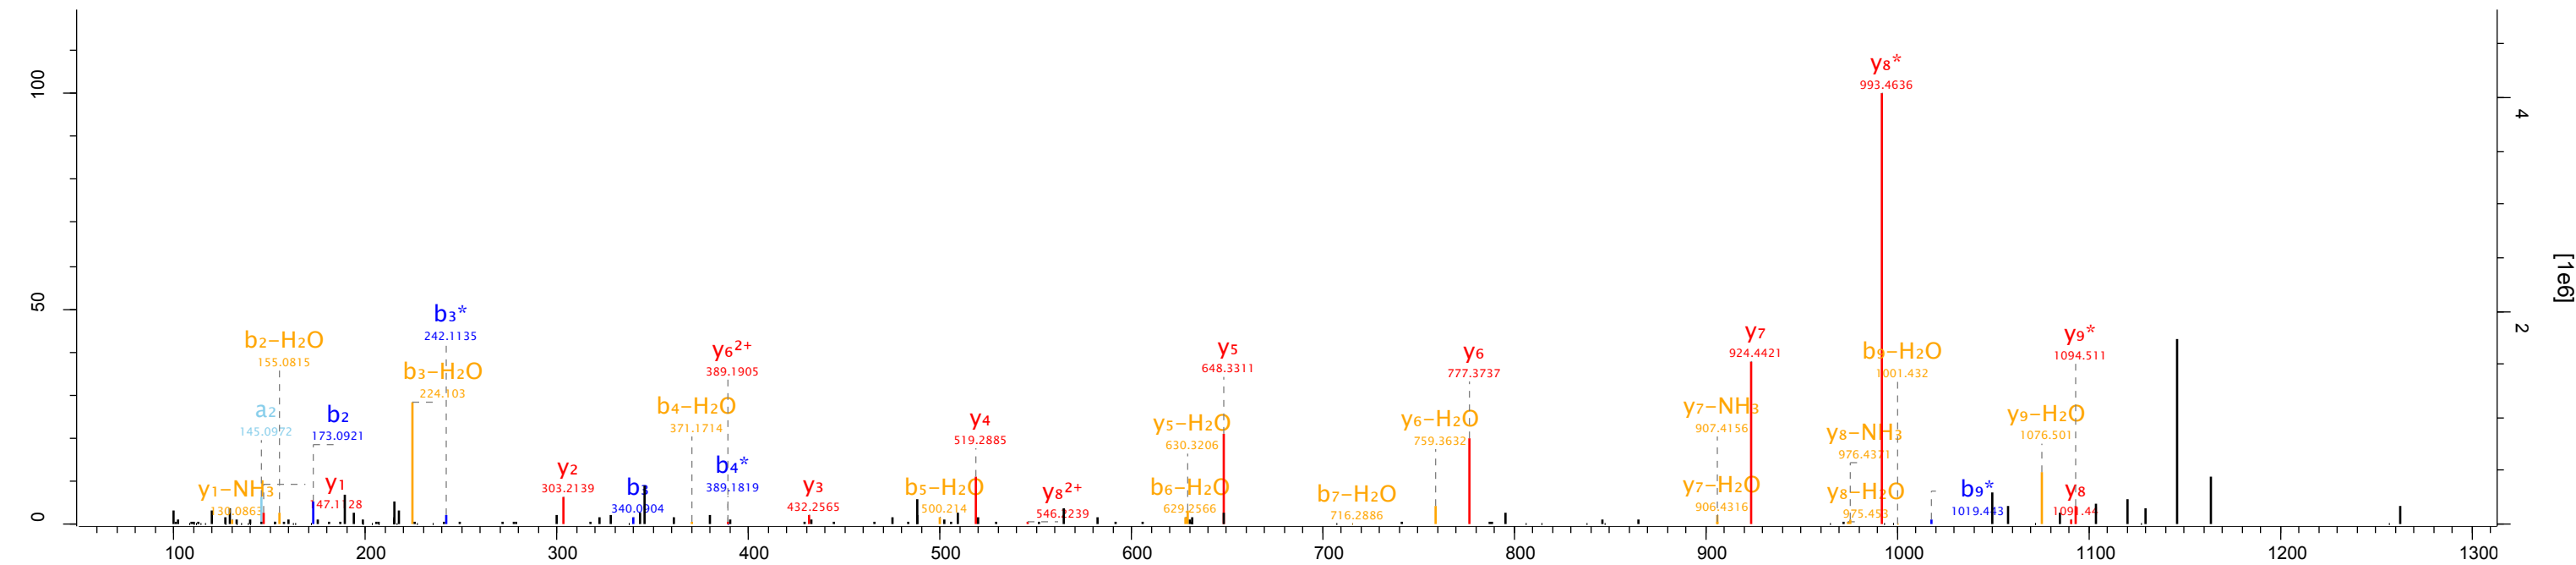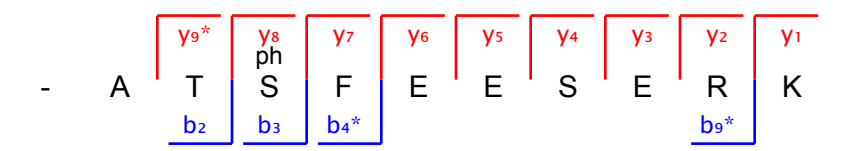

Raw file: 20150814\_A375SR\_Phospho\_BR2\_05  
 Scan: 4315 Method: FTMS; HCD Score: 238.83 m/z: 720.3 Gene names: PRPF40A

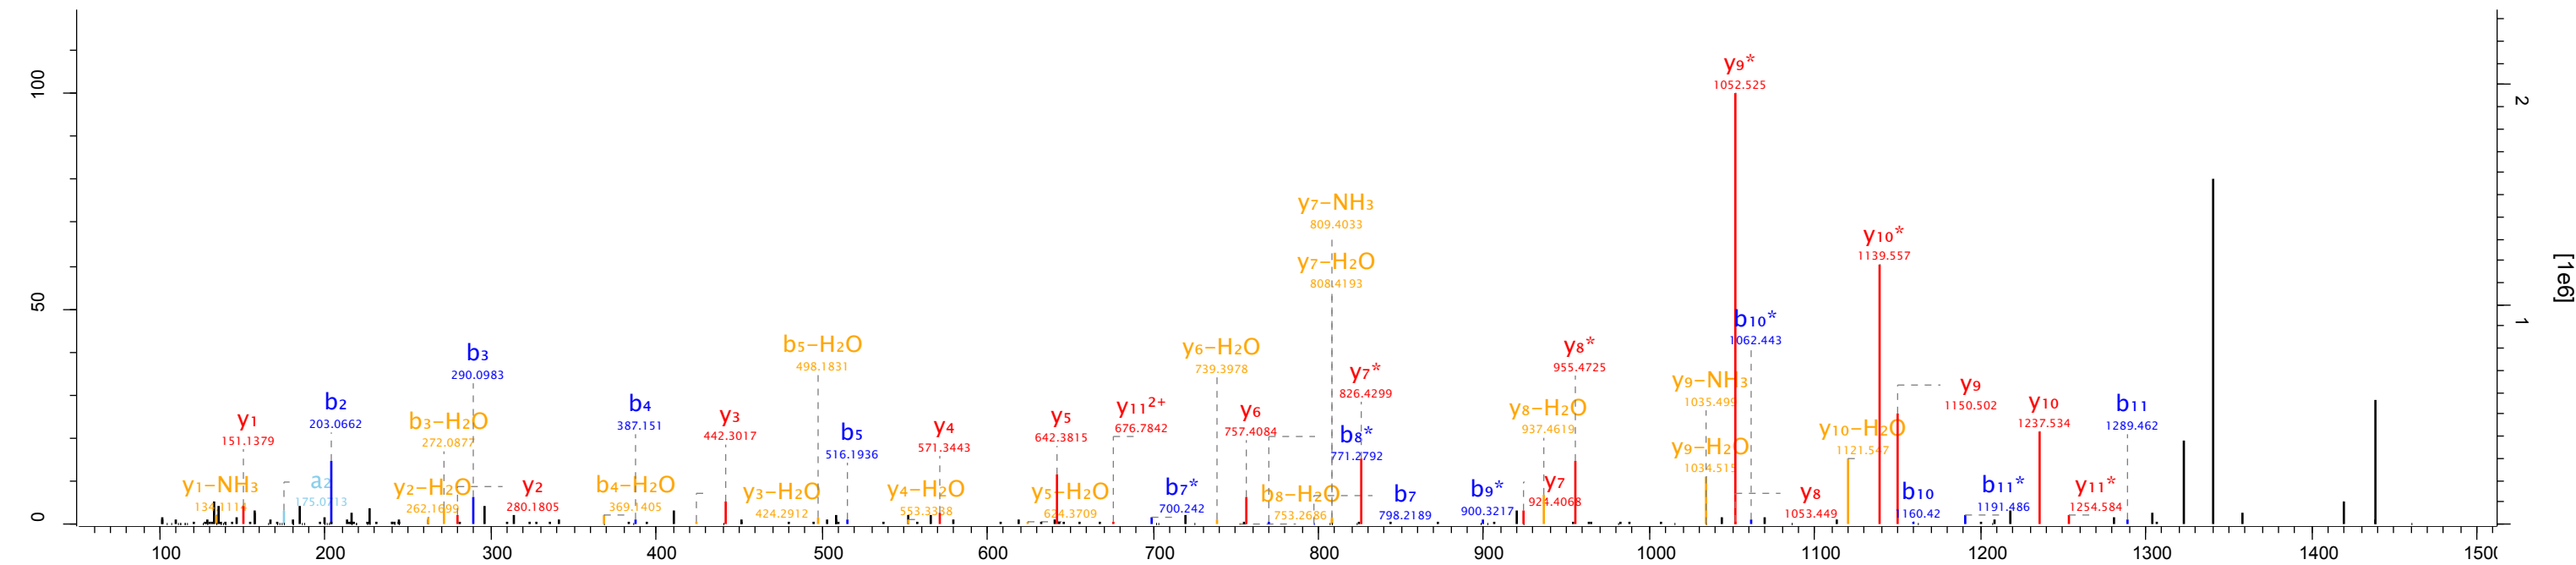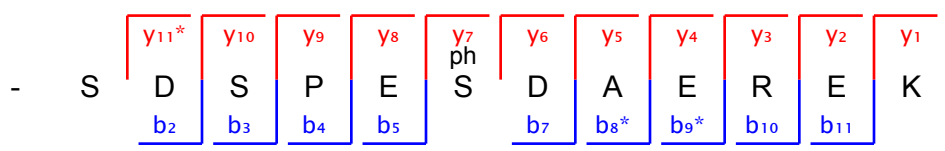

Raw file: 20150814\_A375SR\_Phospho\_BR2\_05  
 Scan: 5385 Method: FTMS; HCD Score: 97.18 m/z: 669.79 Gene names: DOCK4

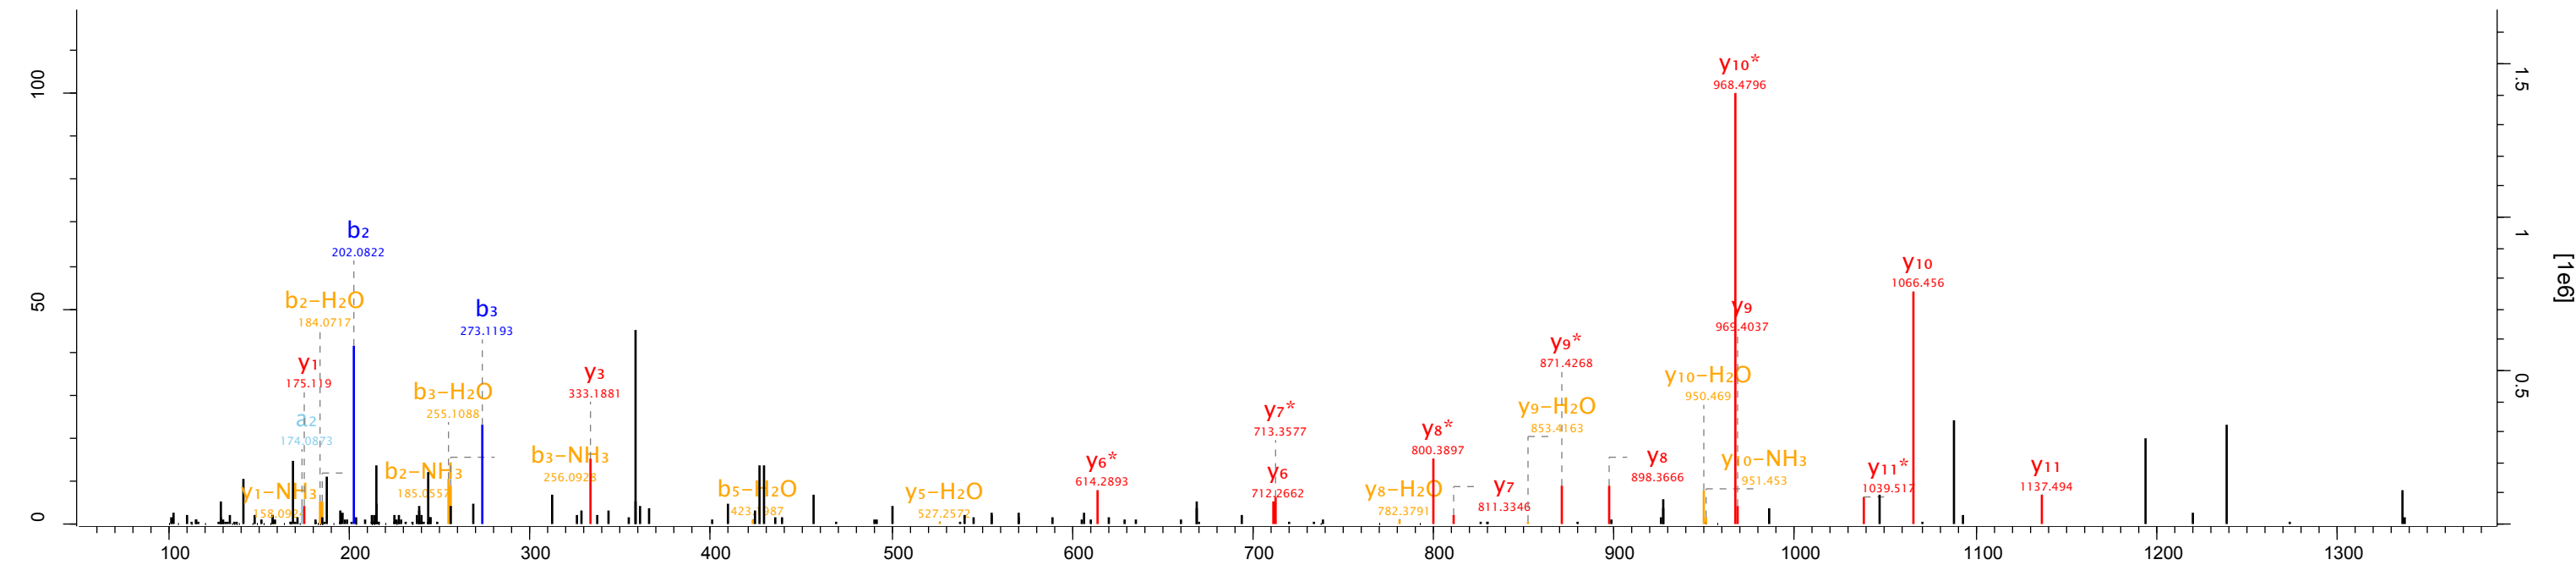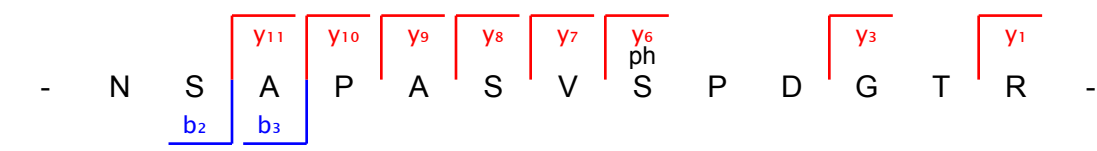

Raw file: 20150814\_A375SR\_Phospho\_BR2\_05  
 Scan: 7105 Method: FTMS; HCD Score: 227.86 m/z: 760.41 Gene names: HDGF

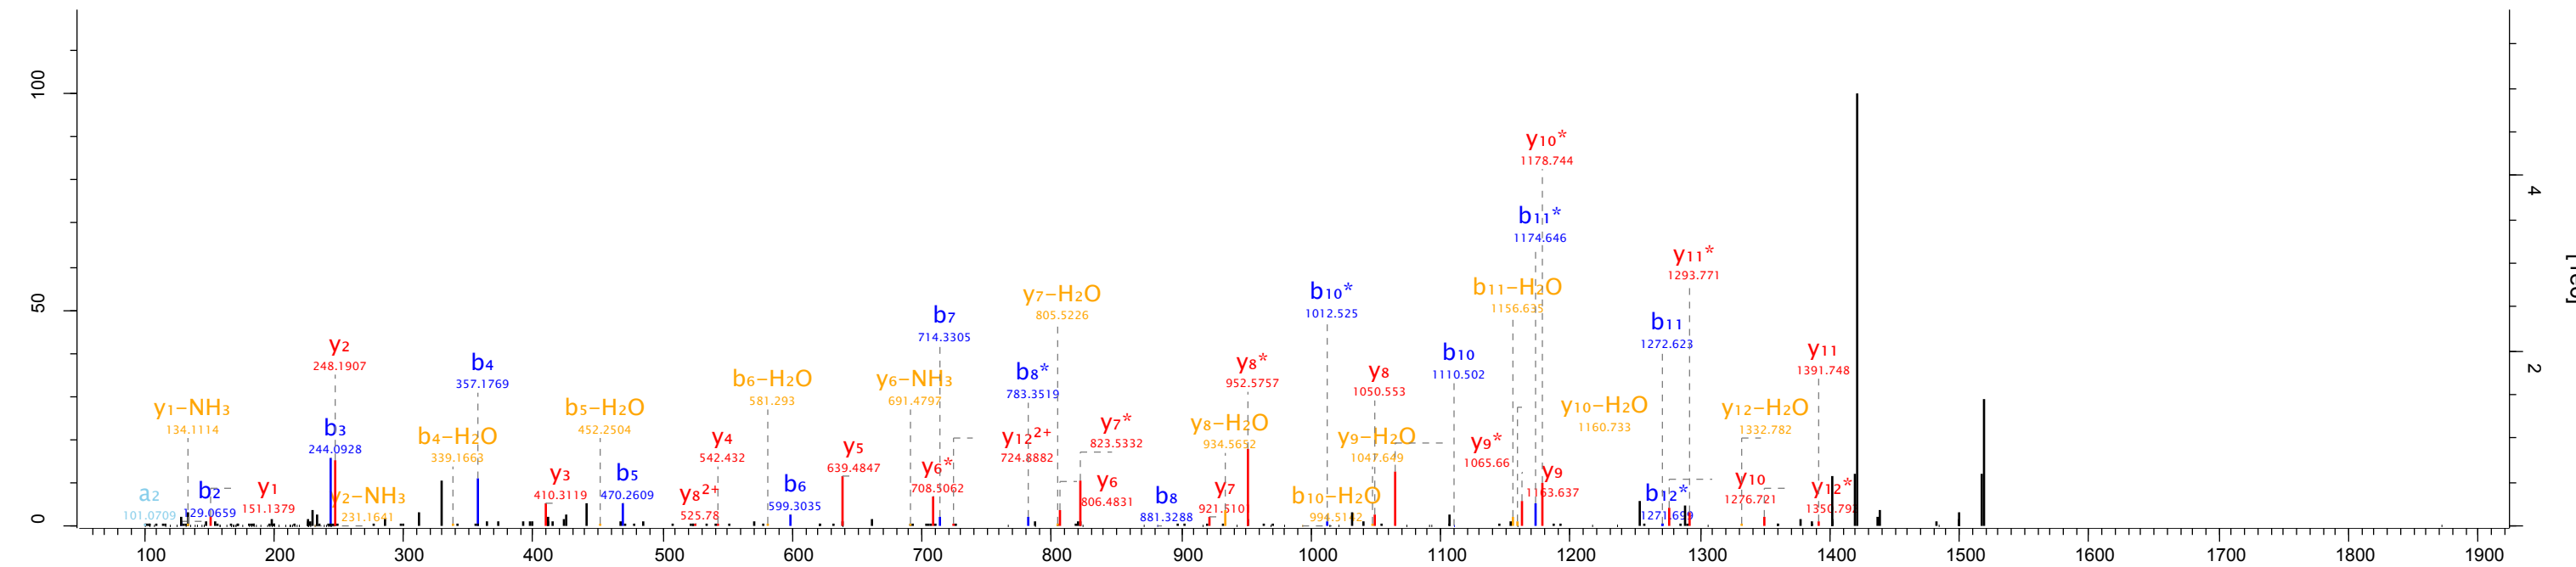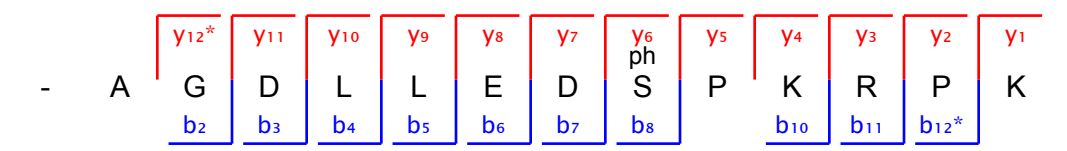

Raw file: 20150814\_A375SR\_Phospho\_BR2\_05  
 Scan: 8155 Method: FTMS; HCD Score: 67.14 m/z: 634.98 Gene names: ARHGAP4

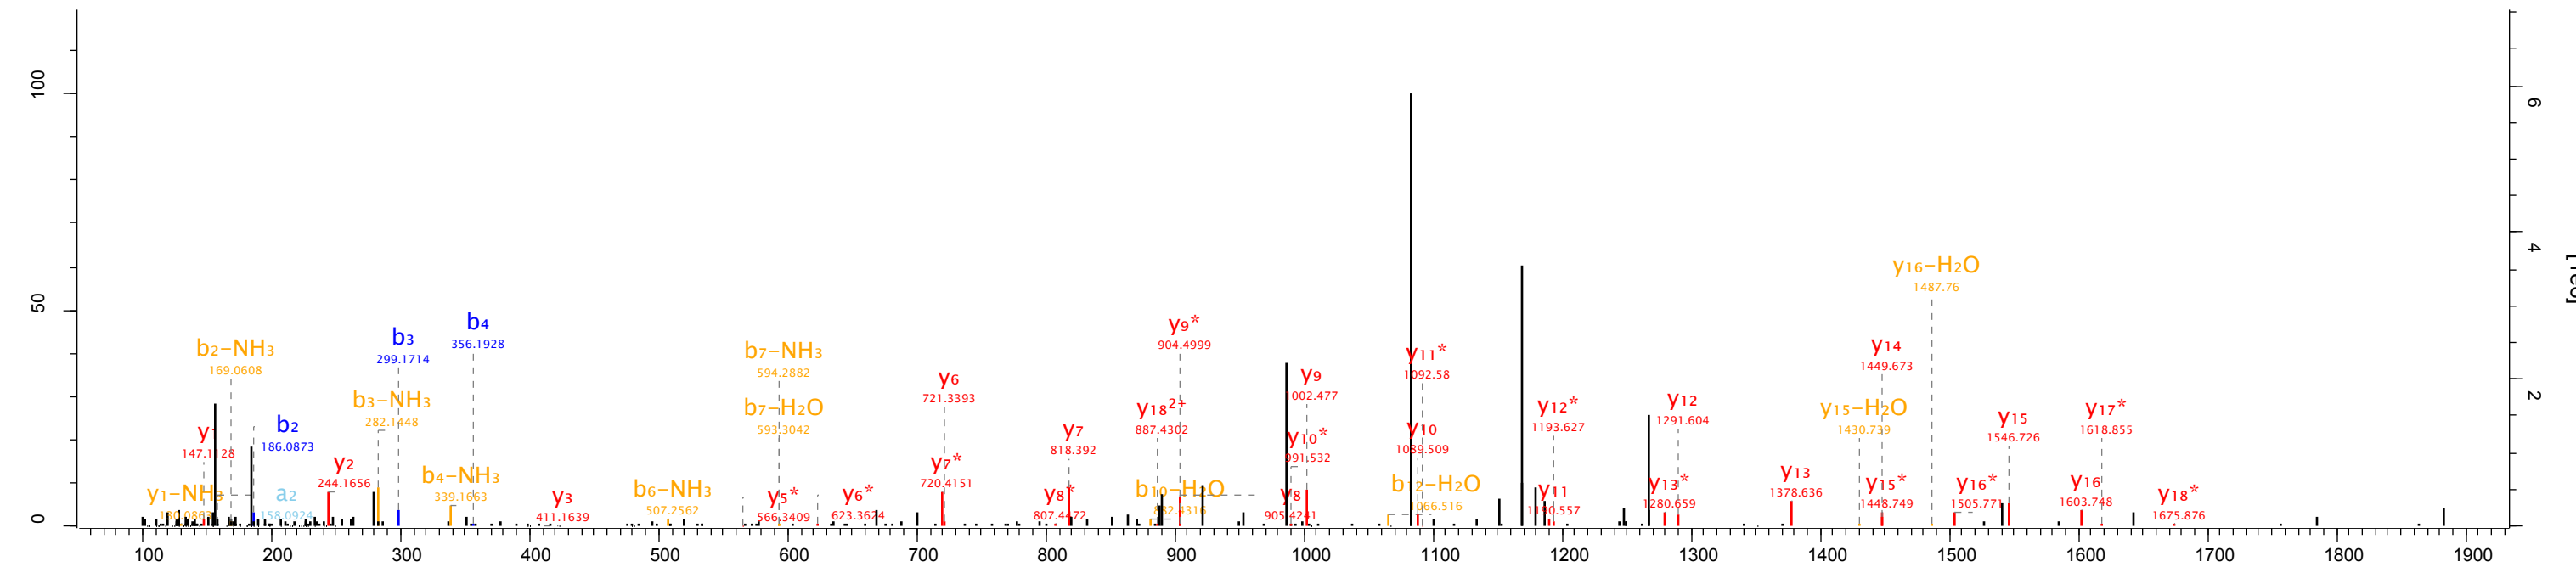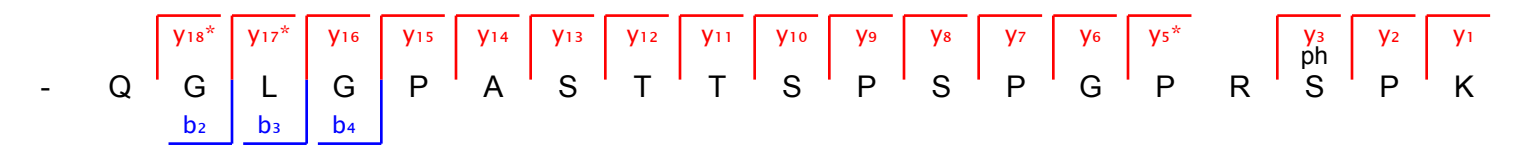

Raw file: 20150814\_A375SR\_Phospho\_BR2\_05  
 Scan: 8615 Method: FTMS; HCD Score: 257.71 m/z: 909.44 Gene names: EFHD2

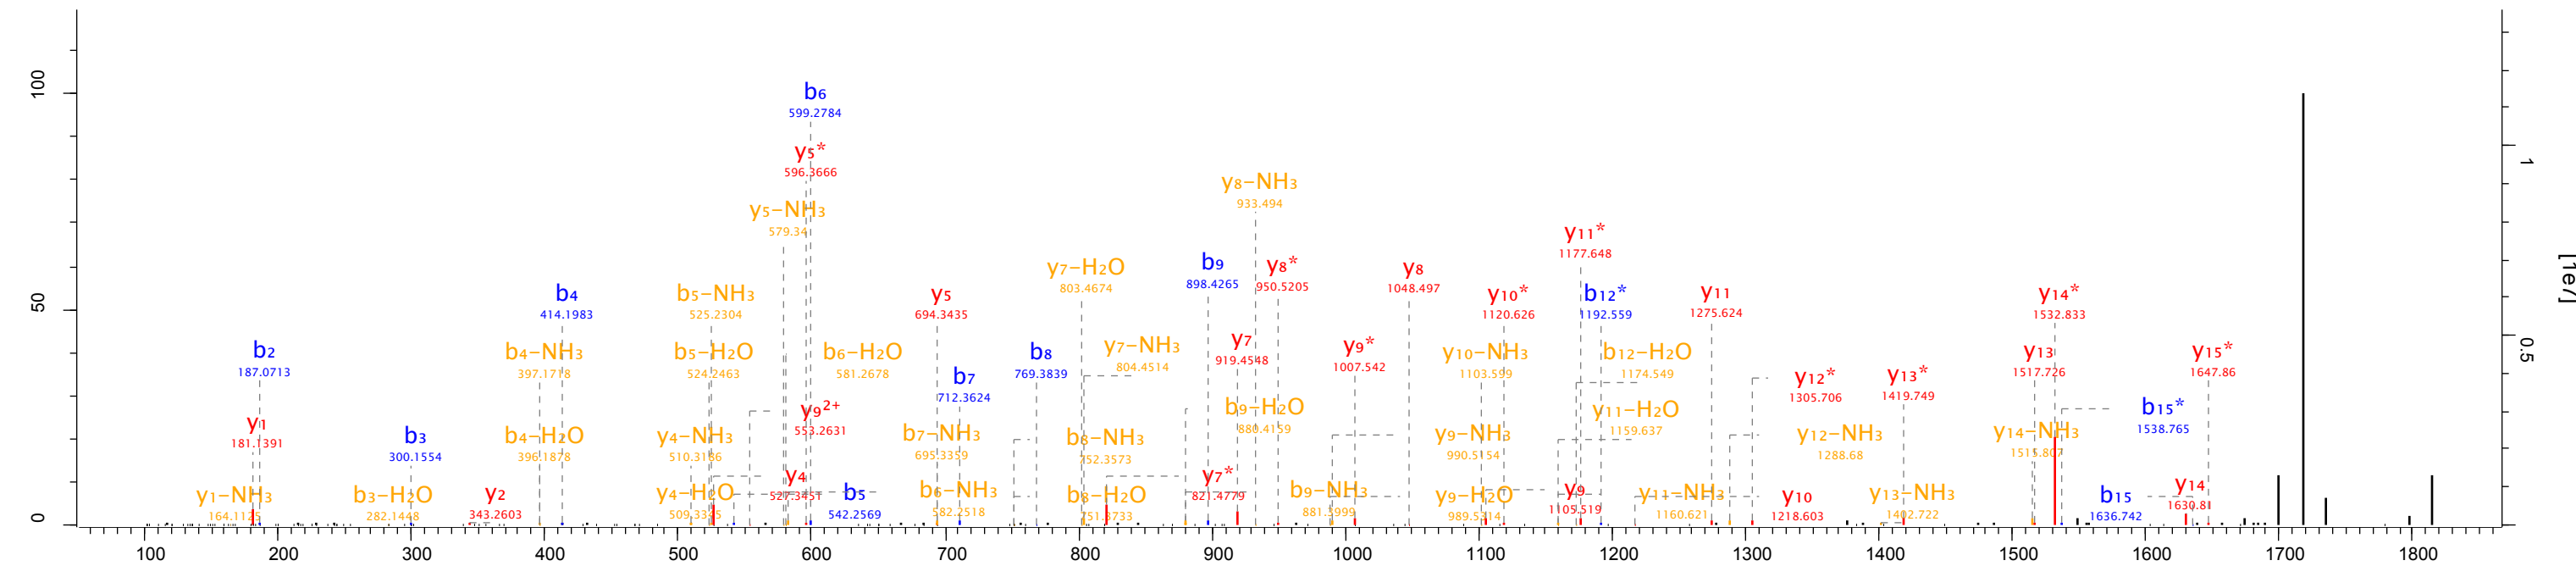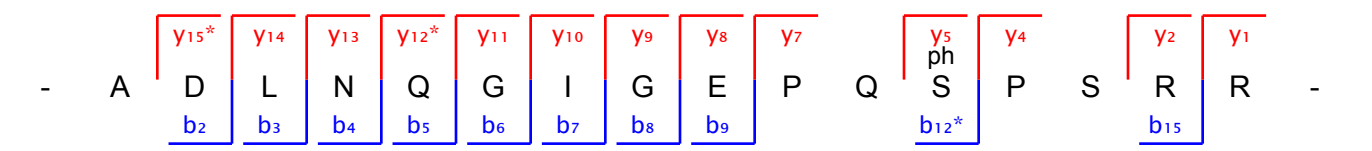

Raw file: 20150814\_A375SR\_Phospho\_BR2\_05  
 Scan: 8625 Method: FTMS; HCD Score: 189.04 m/z: 699.83 Gene names: IRS2

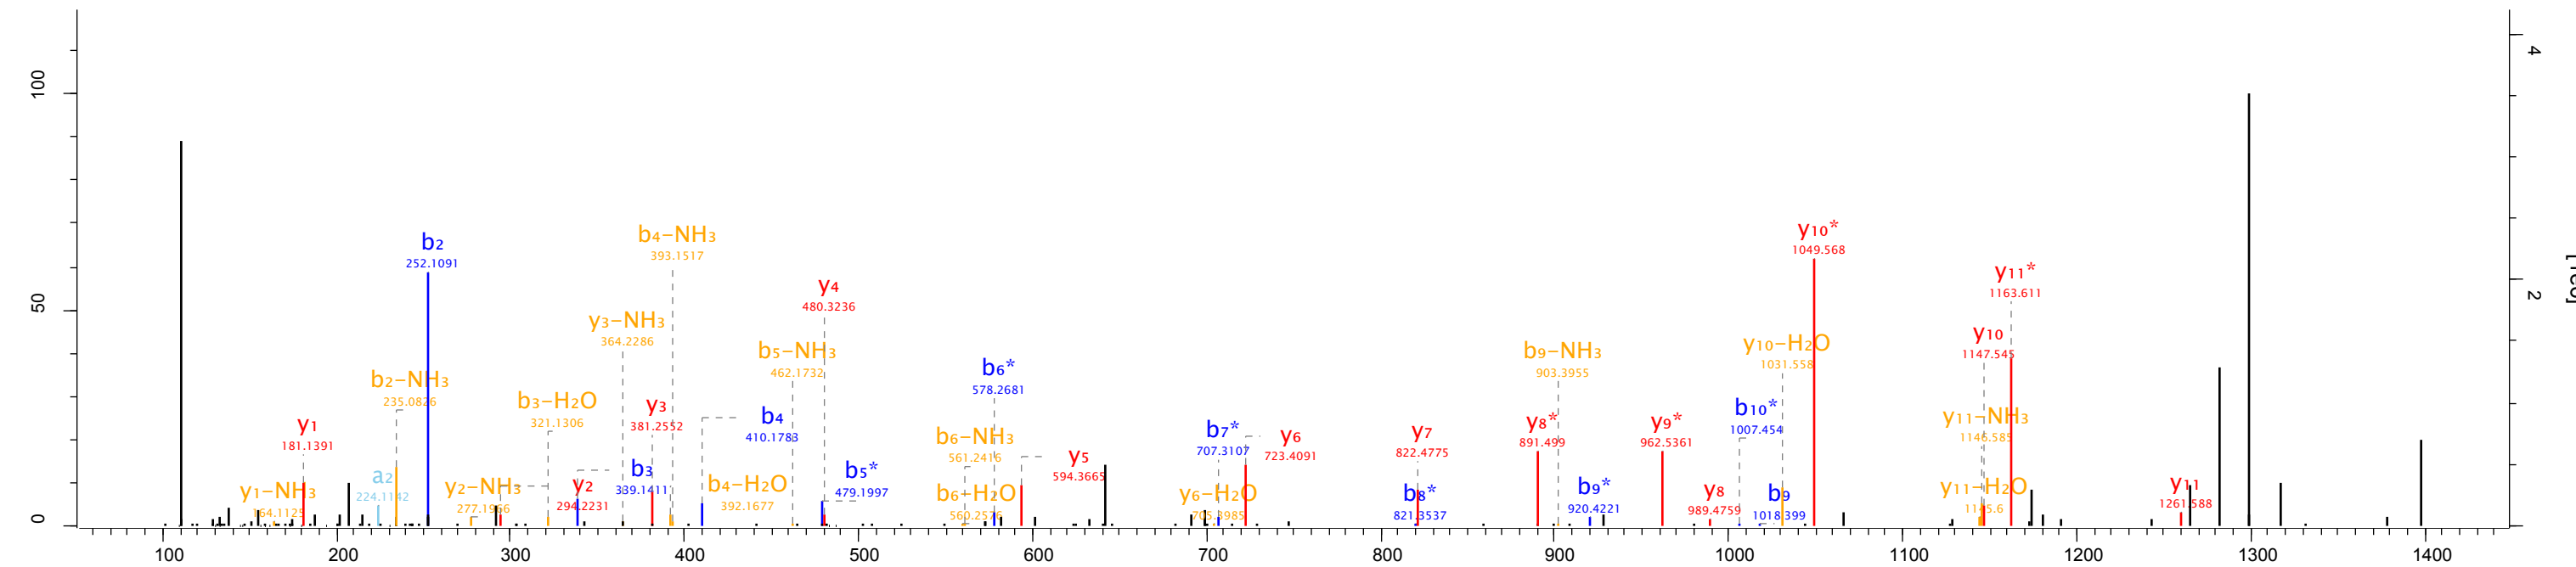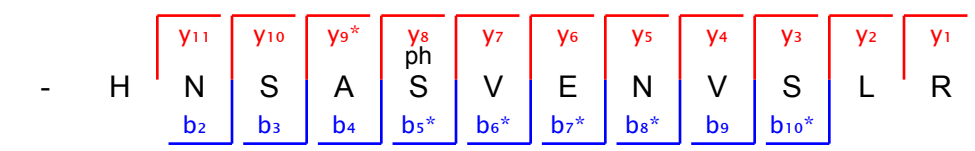



Raw file: 20150814\_A375SR\_Phospho\_BR2\_05  
 Scan: 8985 Method: FTMS; HCD Score: 130.79 m/z: 502.74 Gene names: ROBO1

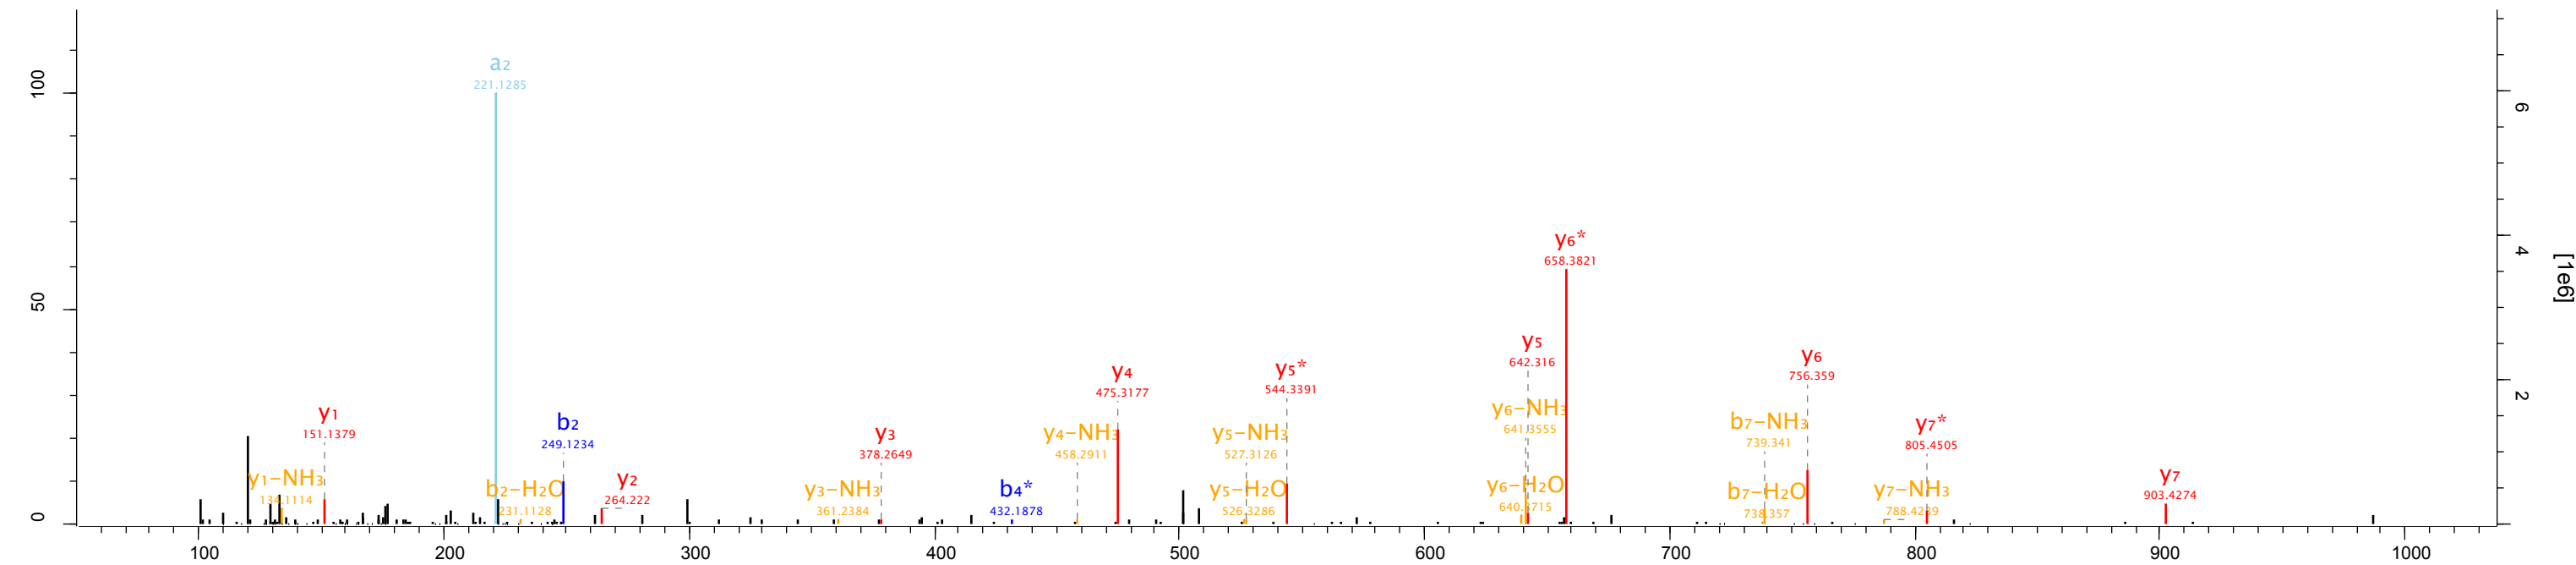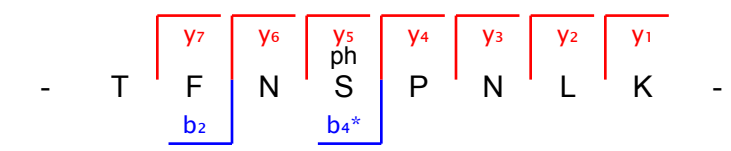

Raw file Scan Method Score m/z Gene names

20150814\_A375SR\_Phospho\_BR2\_05 9035 FTMS; HCD 143.85 856.39 ZBTB7A

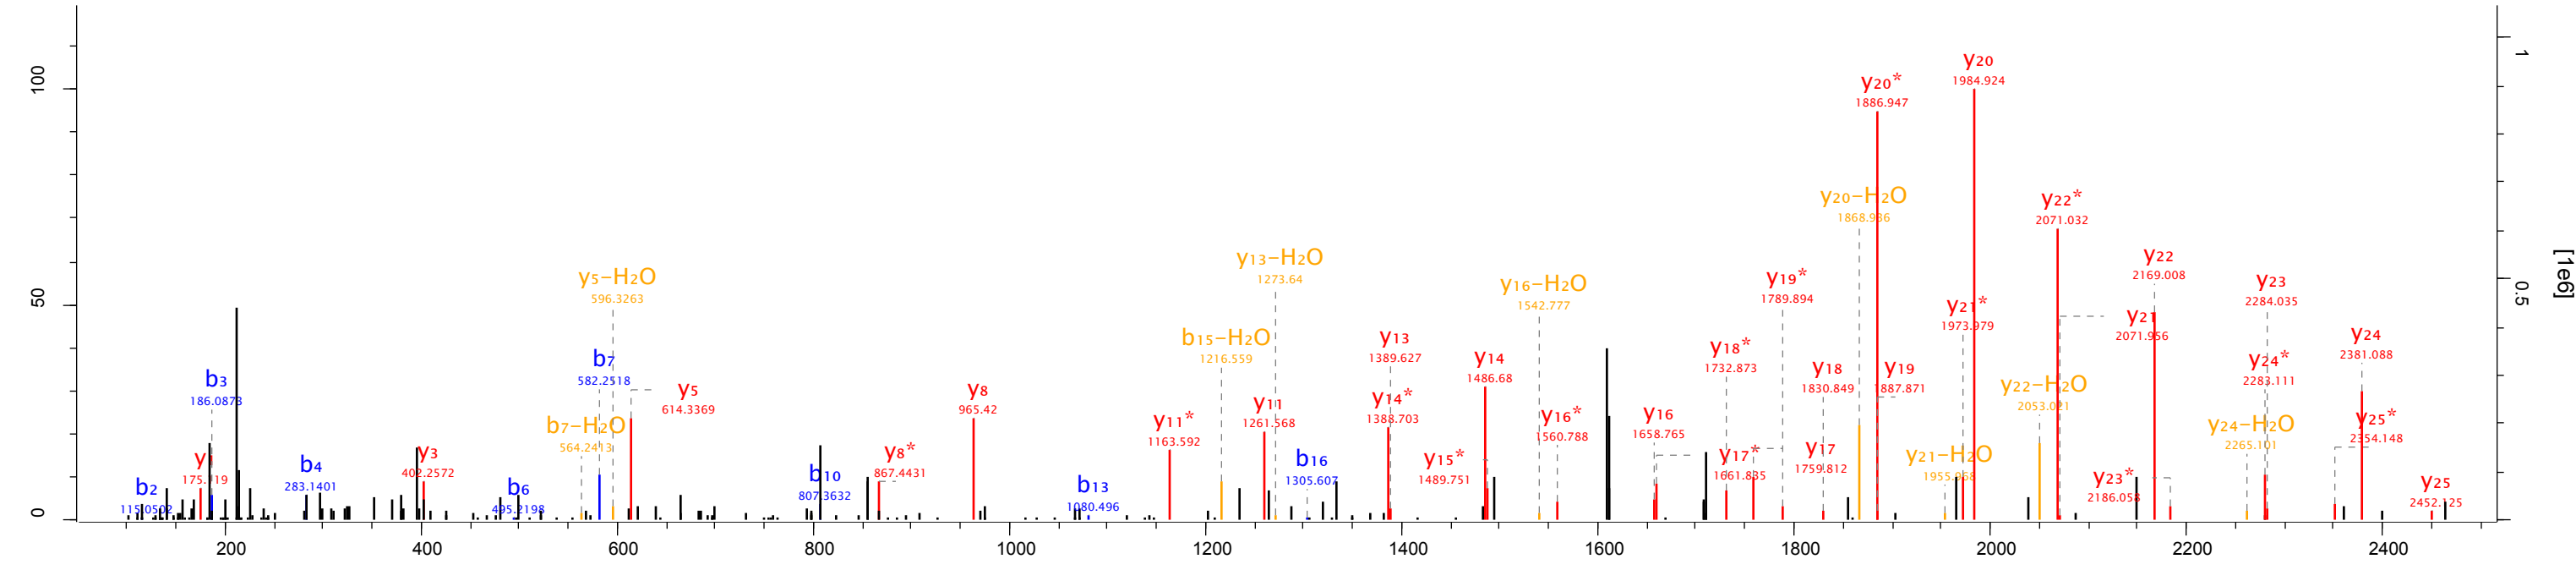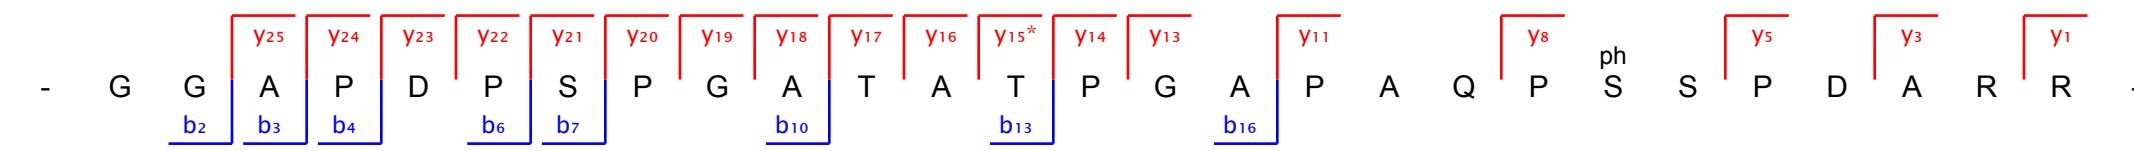

Raw file: 20150814\_A375SR\_Phospho\_BR2\_05  
 Scan: 9075 Method: FTMS; HCD Score: 124.51 m/z: 740.32 Gene names: MYBBP1A

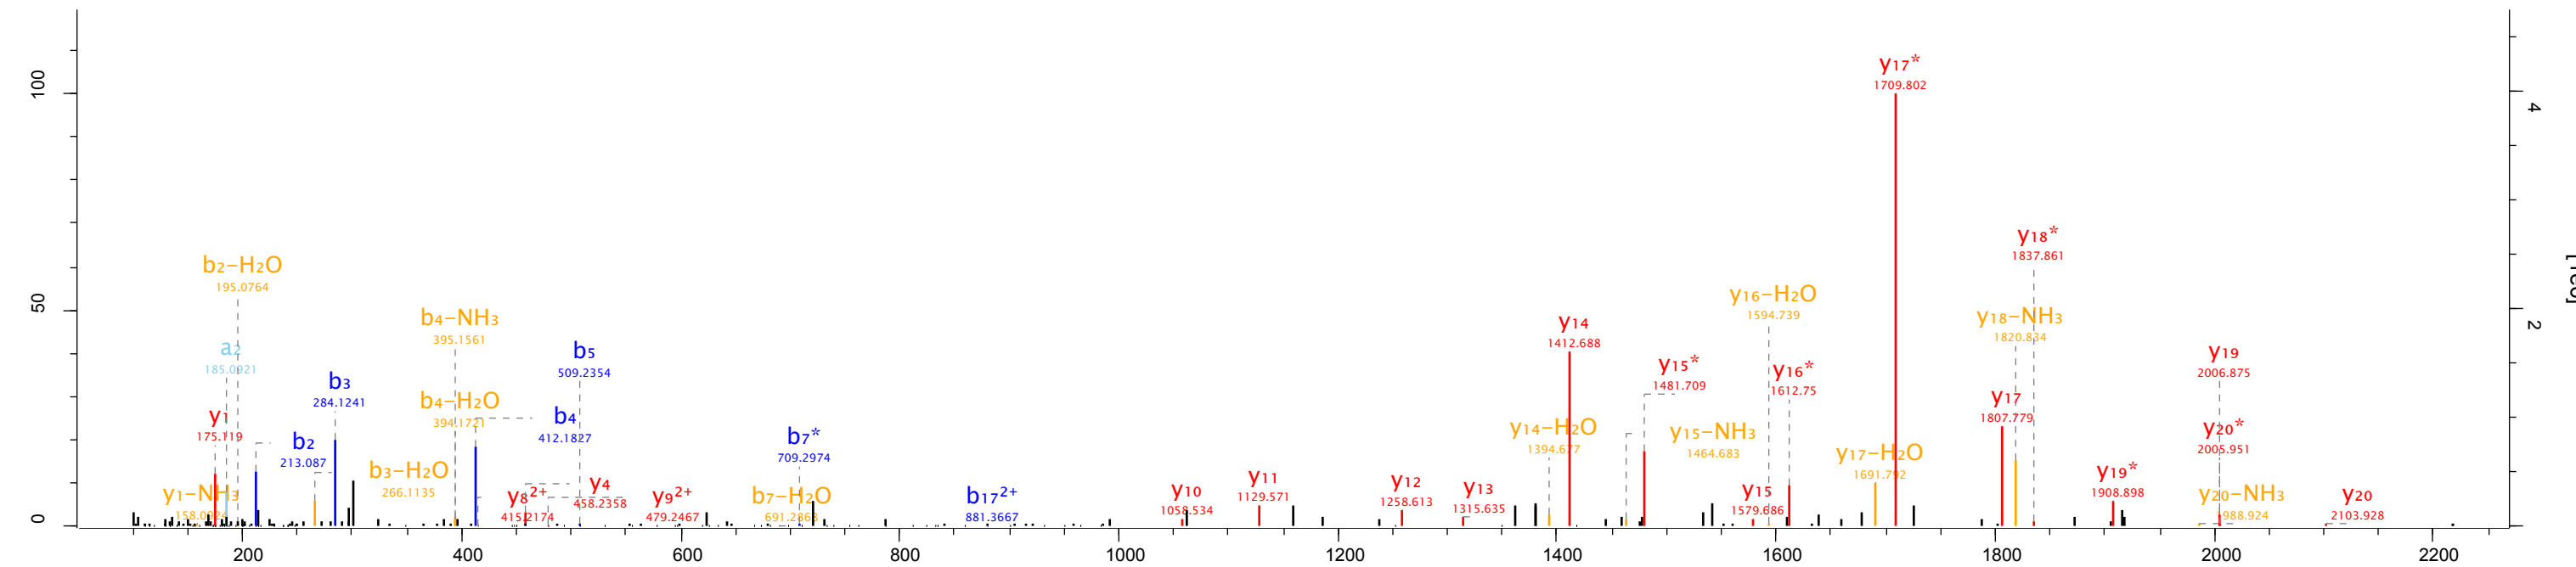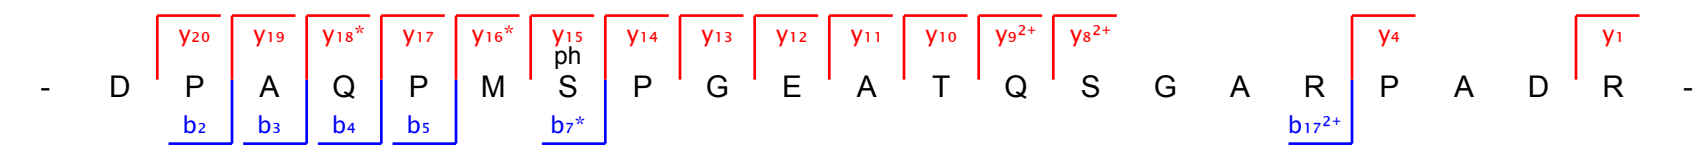

Raw file: 20150814\_A375SR\_Phospho\_BR2\_05  
 Scan: 9535 Method: FTMS; HCD Score: 128.22 m/z: 739.34 Gene names: CDC25C

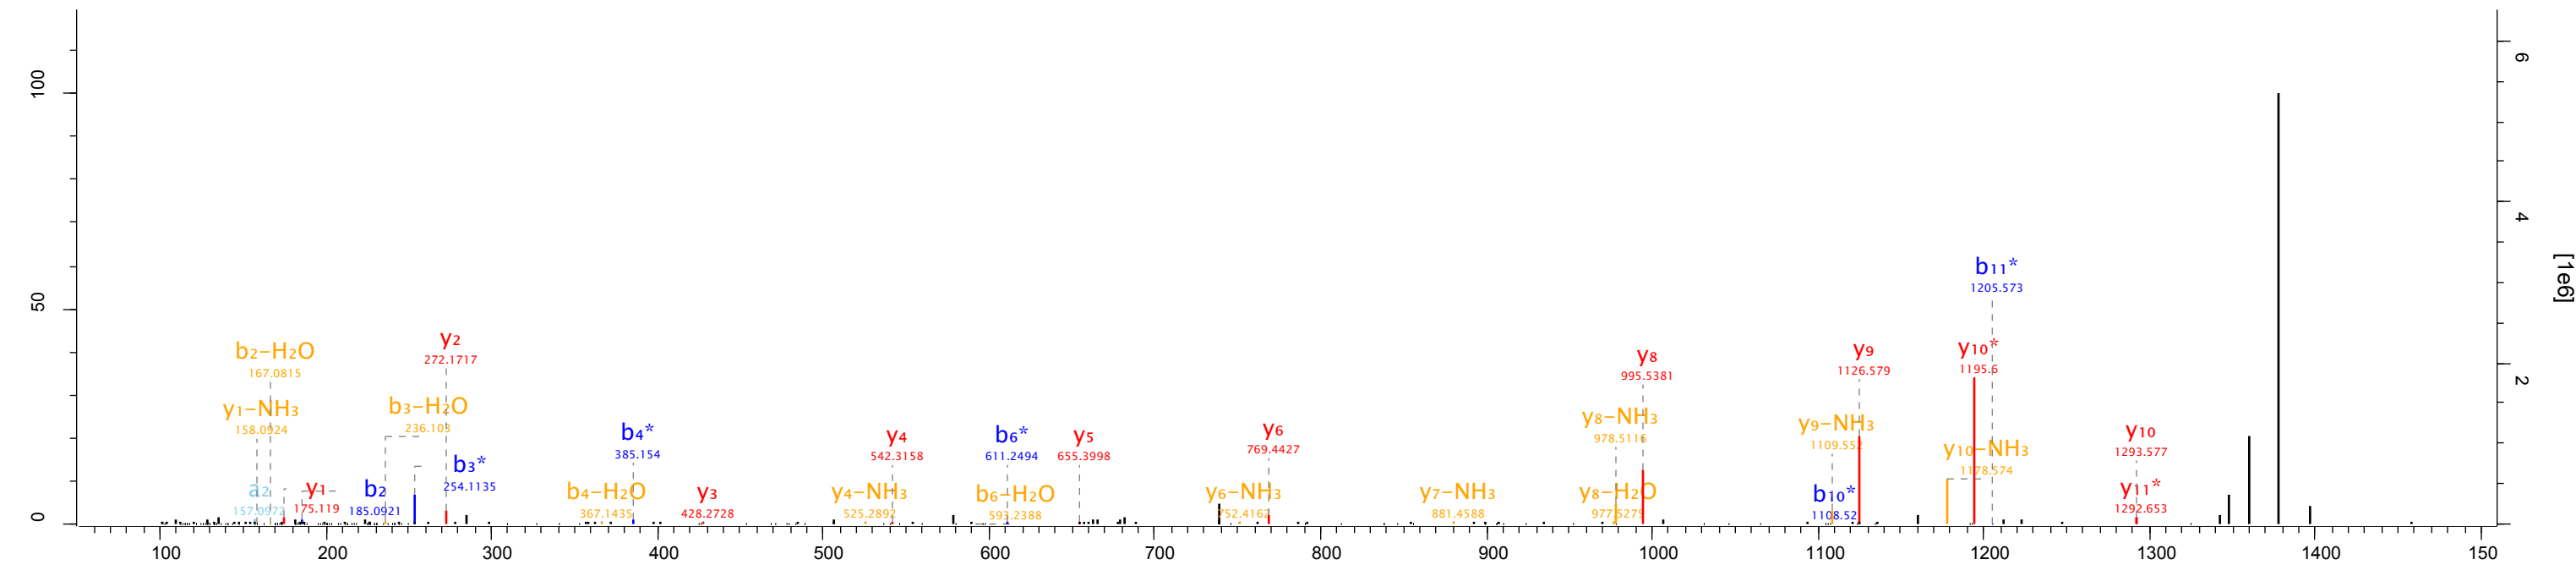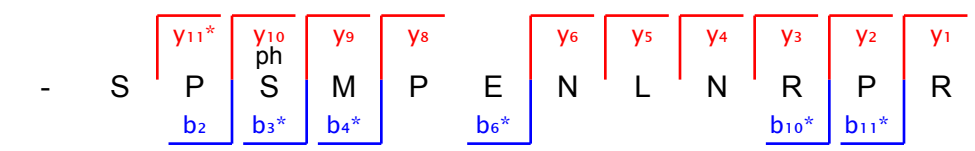

Raw file: 20150814\_A375SR\_Phospho\_BR2\_05  
 Scan: 9555 Method: FTMS; HCD Score: 93.1 m/z: 516.73 Gene names: TPM1

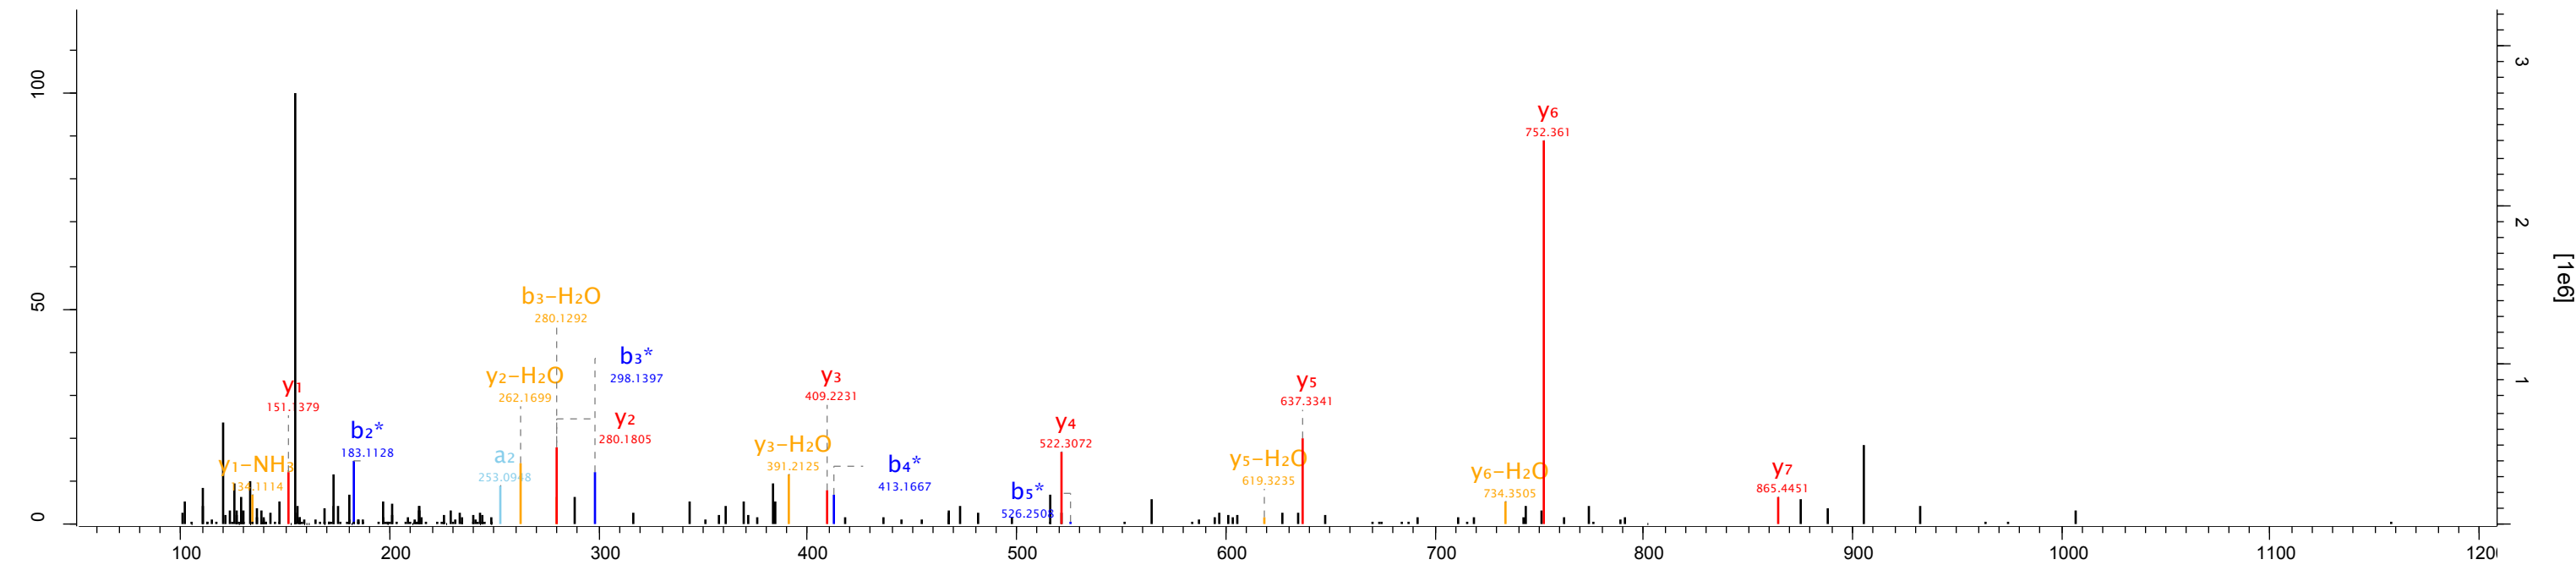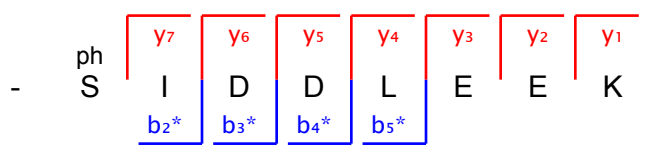

Raw file: 20150814\_A375SR\_Phospho\_BR2\_05  
 Scan: 9615 Method: FTMS; HCD Score: 89.26 m/z: 676.84 Gene names: MYO18A

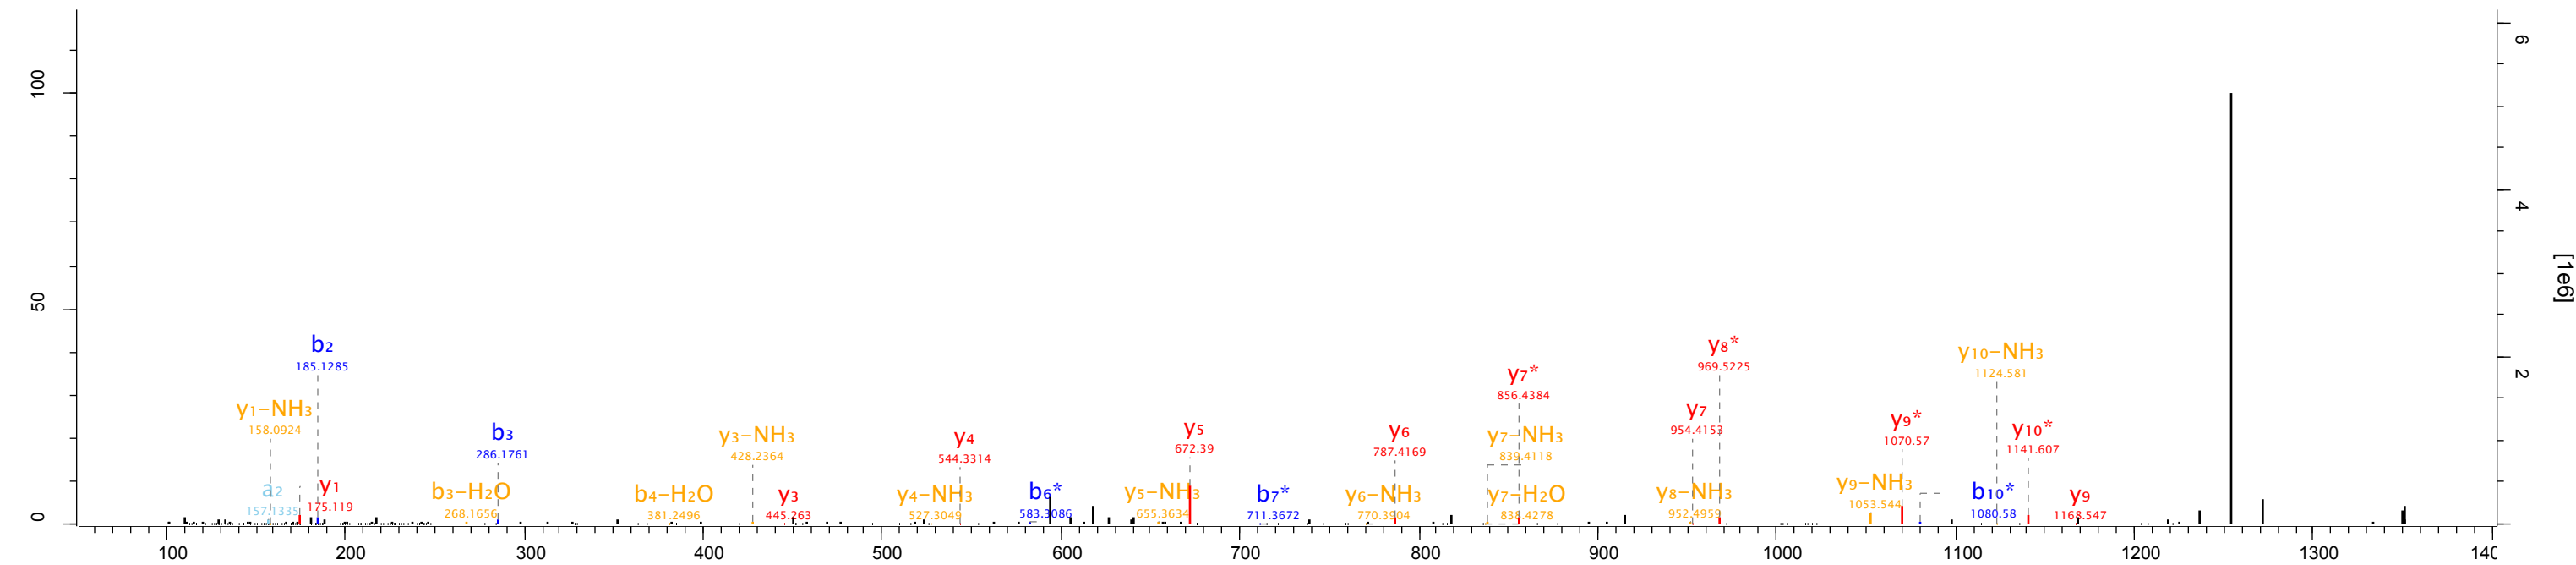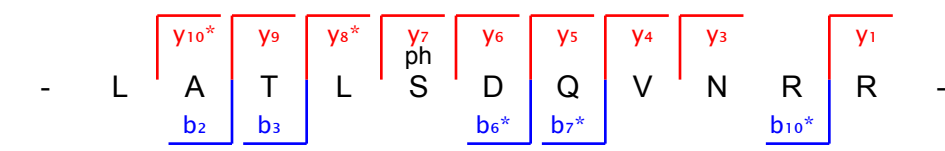

Raw file: 20150814\_A375SR\_Phospho\_BR2\_05  
 Scan: 9705 Method: FTMS; HCD Score: 87.18 m/z: 531.73 Gene names: RPTOR

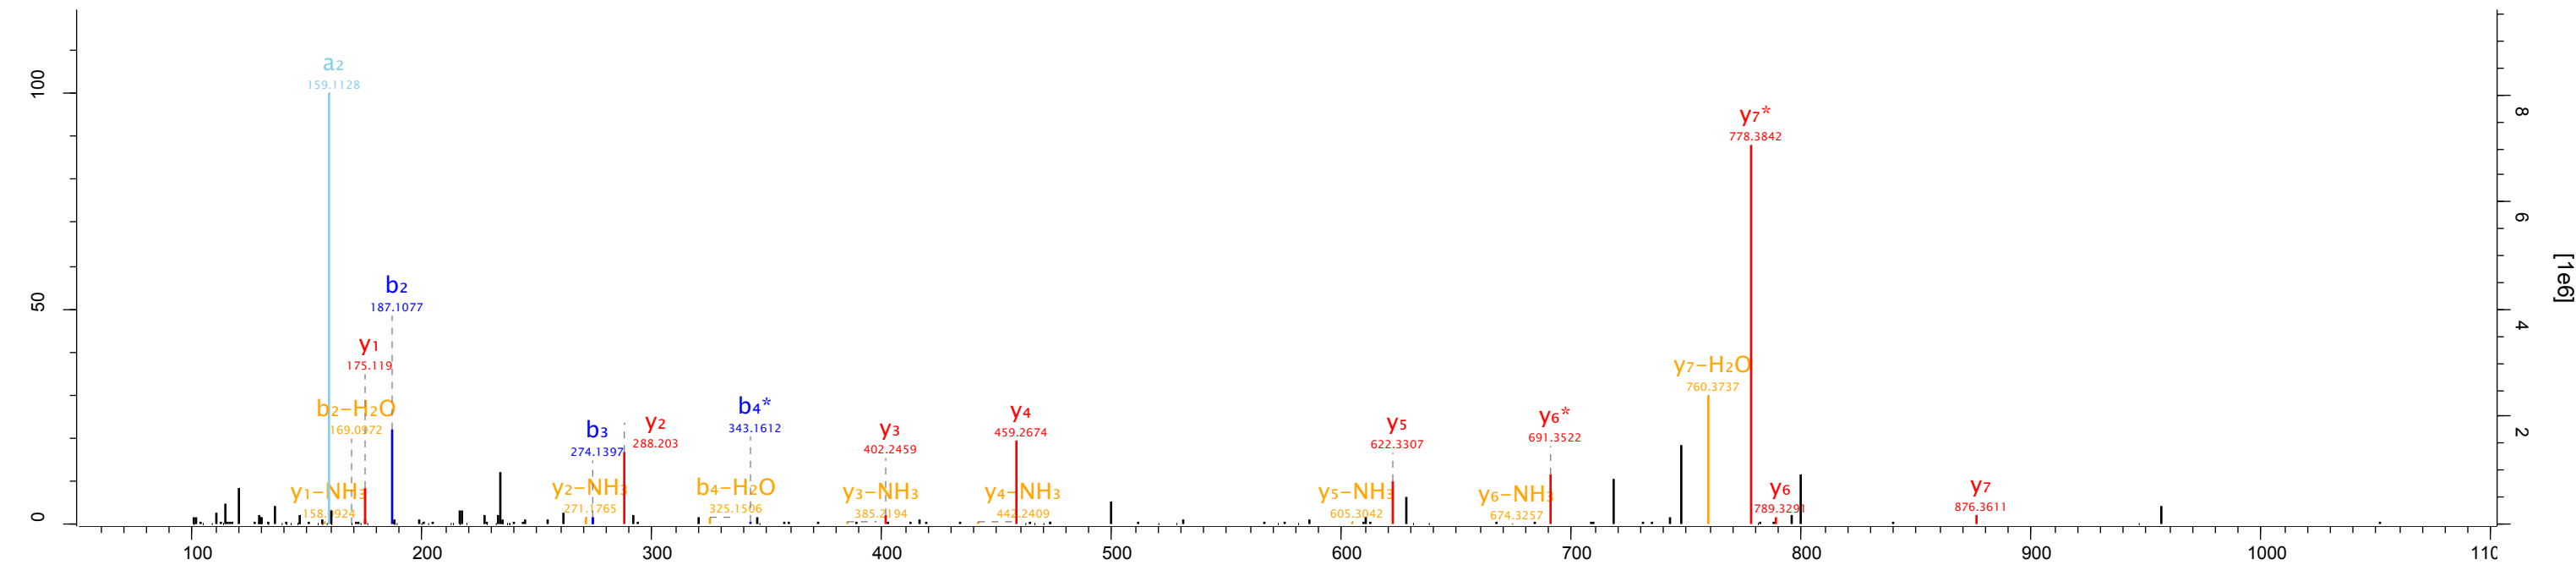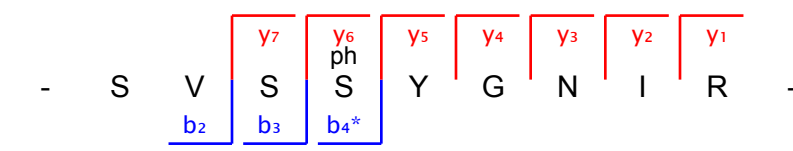

Raw file: 20150814\_A375SR\_Phospho\_BR2\_05  
 Scan: 9715 Method: FTMS; HCD Score: 210.66 m/z: 889.38 Gene names: NOP14

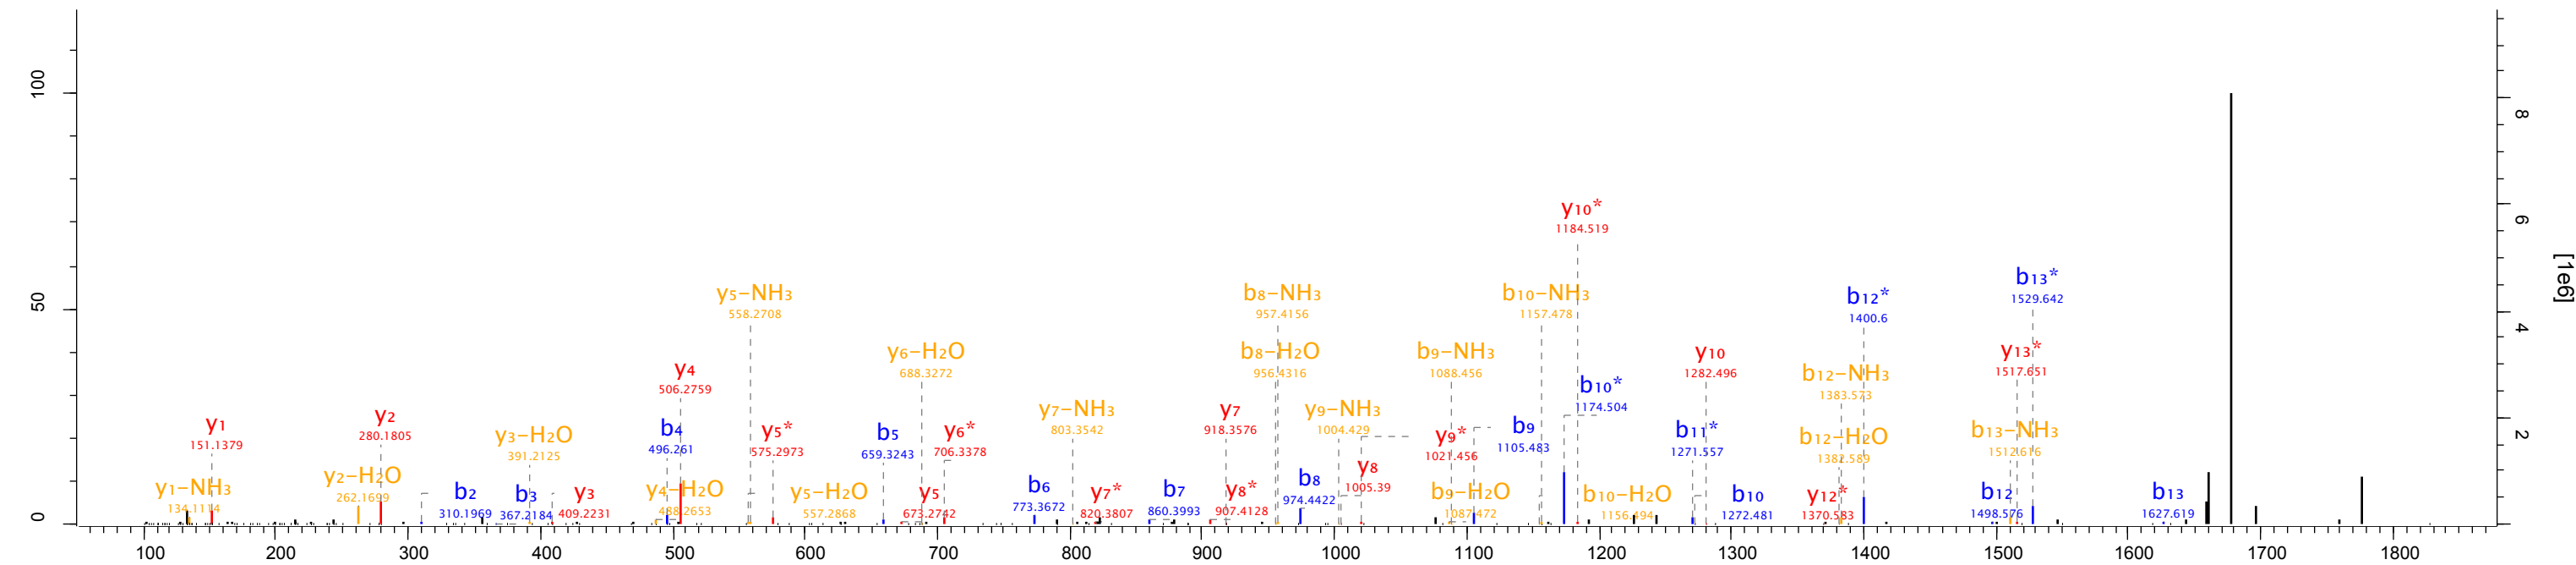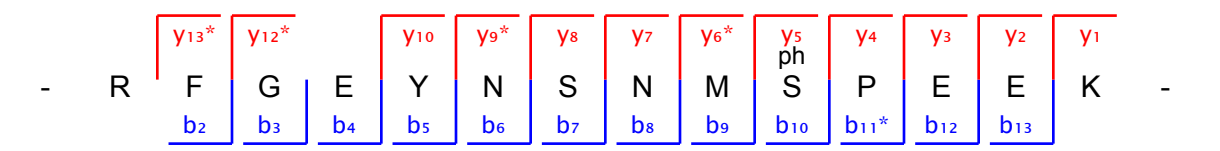



Raw file: 20150814\_A375SR\_Phospho\_BR2\_06  
 Scan: 10905 Method: FTMS; HCD Score: 64.1 m/z: 578.8 Gene names: HNRNPL

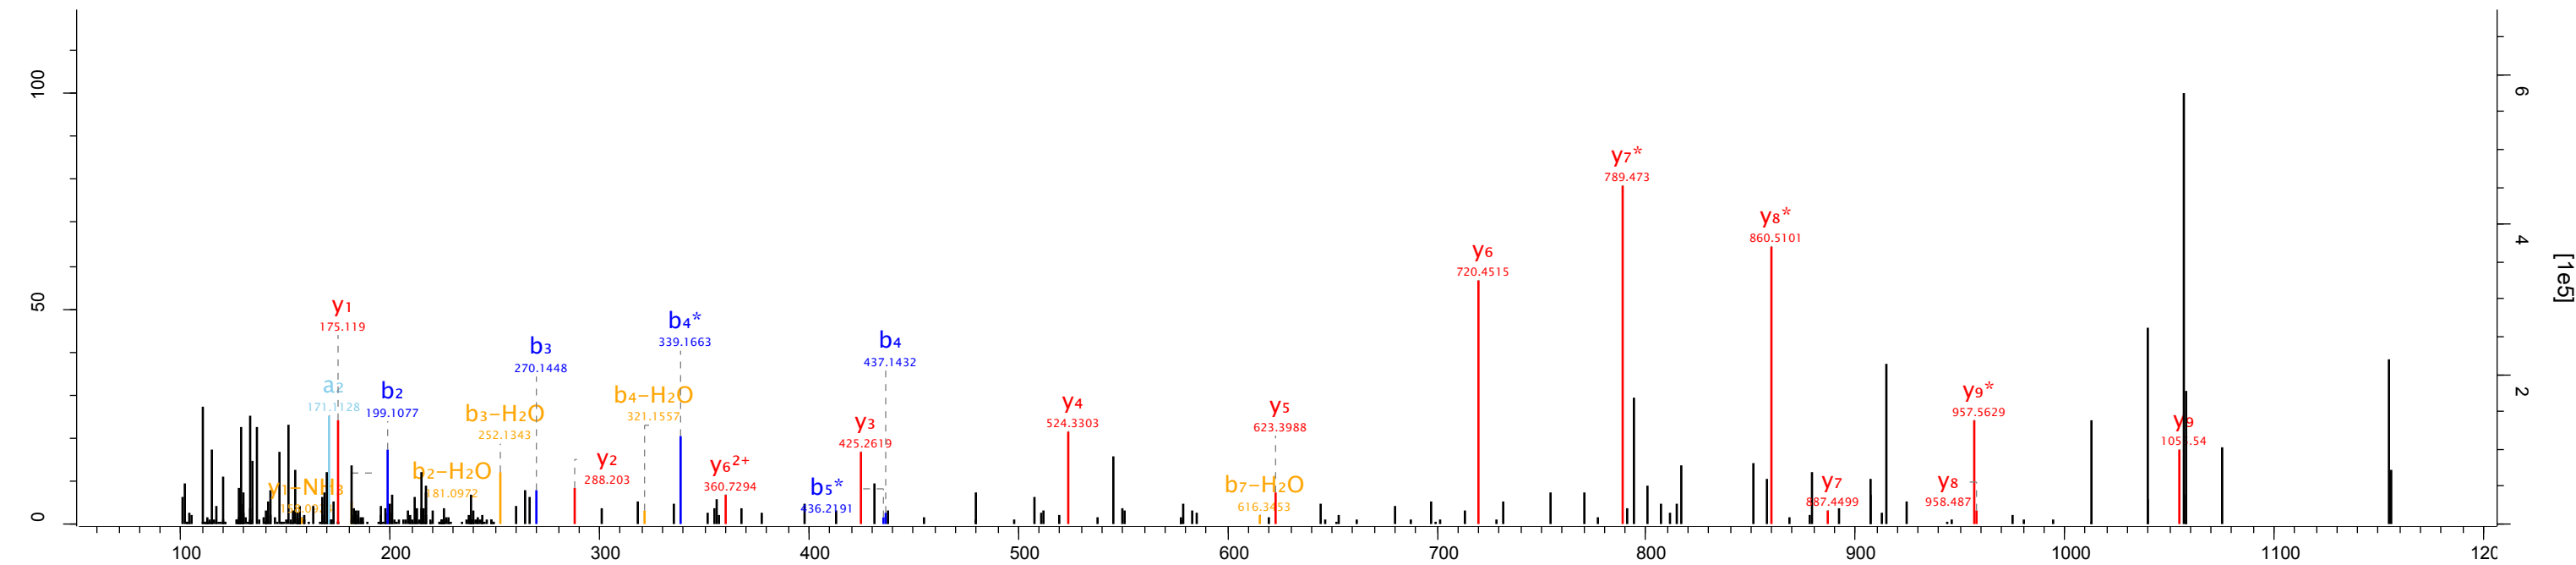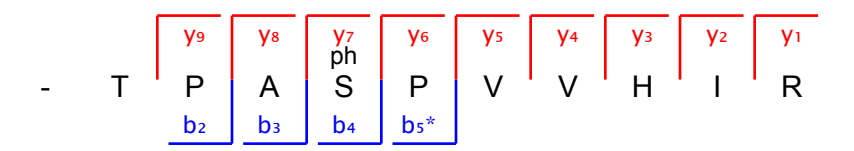

Raw file 20150814\_A375SR\_Phospho\_BR2\_06 Scan 11005 Method FTMS; HCD Score 198.99 m/z 896.73 Gene names GOLGA4

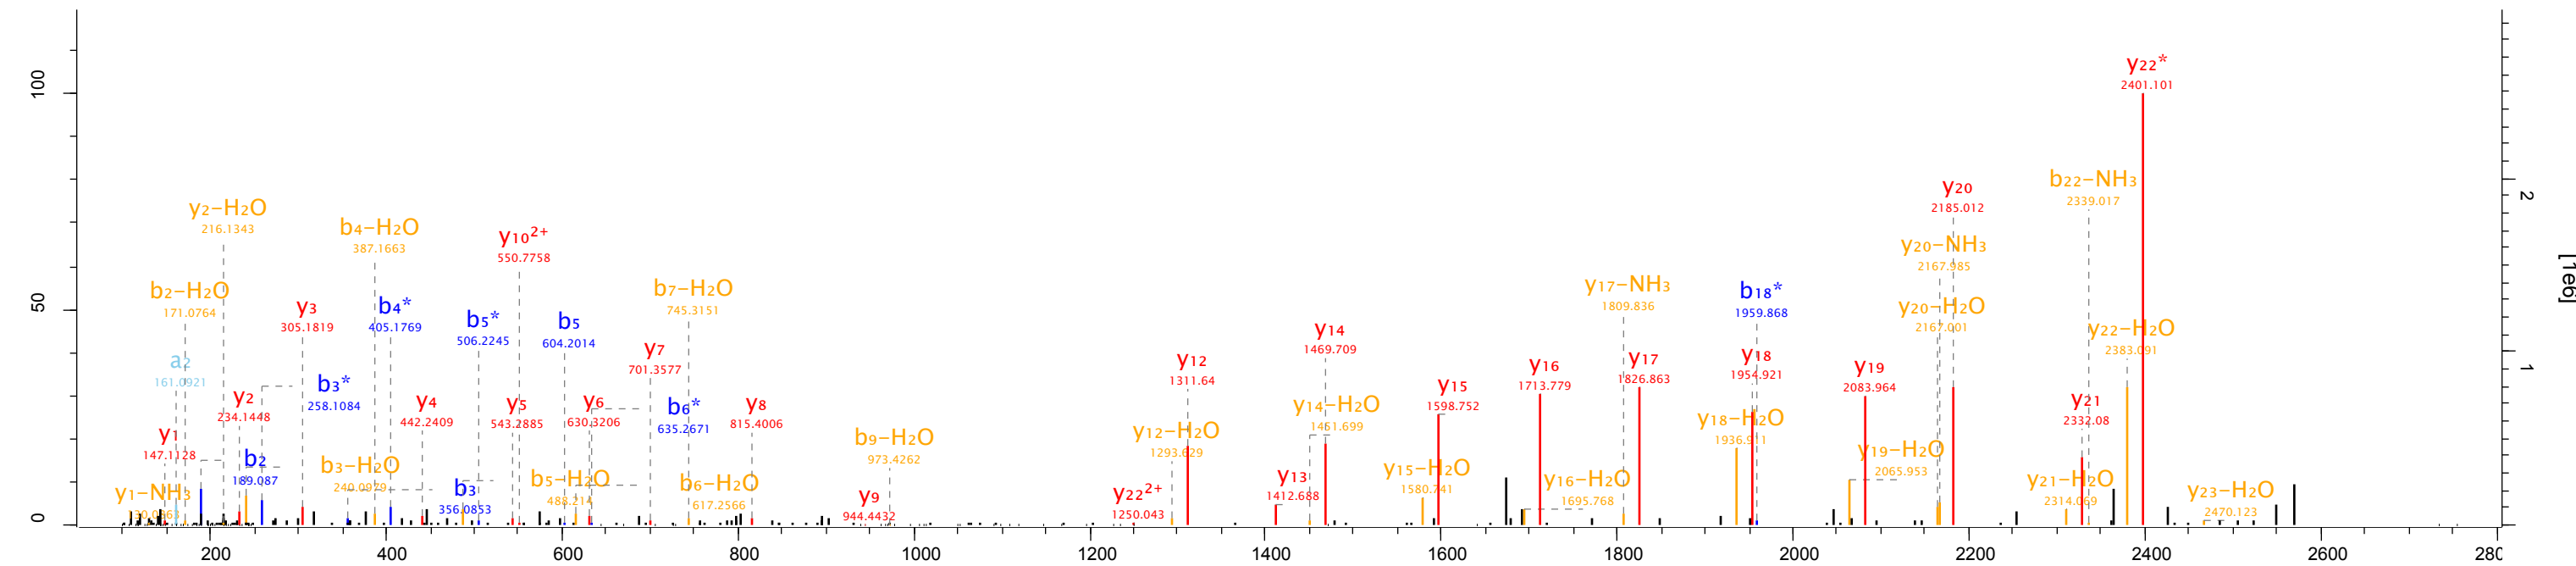

- T S S F T E Q L D E G T P N R E N A S T H A S K -

Fragmentation labels below the sequence:

- b<sub>2</sub> (under S)
- b<sub>3</sub> (under S)
- b<sub>4</sub><sup>\*</sup> (under F)
- b<sub>5</sub> (under T)
- b<sub>6</sub><sup>\*</sup> (under E)
- b<sub>18</sub><sup>\*</sup> (under A)
- y<sub>1</sub> to y<sub>22</sub><sup>\*</sup> (above the sequence from Q to K)

Raw file: 20150814\_A375SR\_Phospho\_BR2\_06  
 Scan: 11285 Method: FTMS; HCD Score: 47.9 m/z: 539.61 Gene names: PHGDH

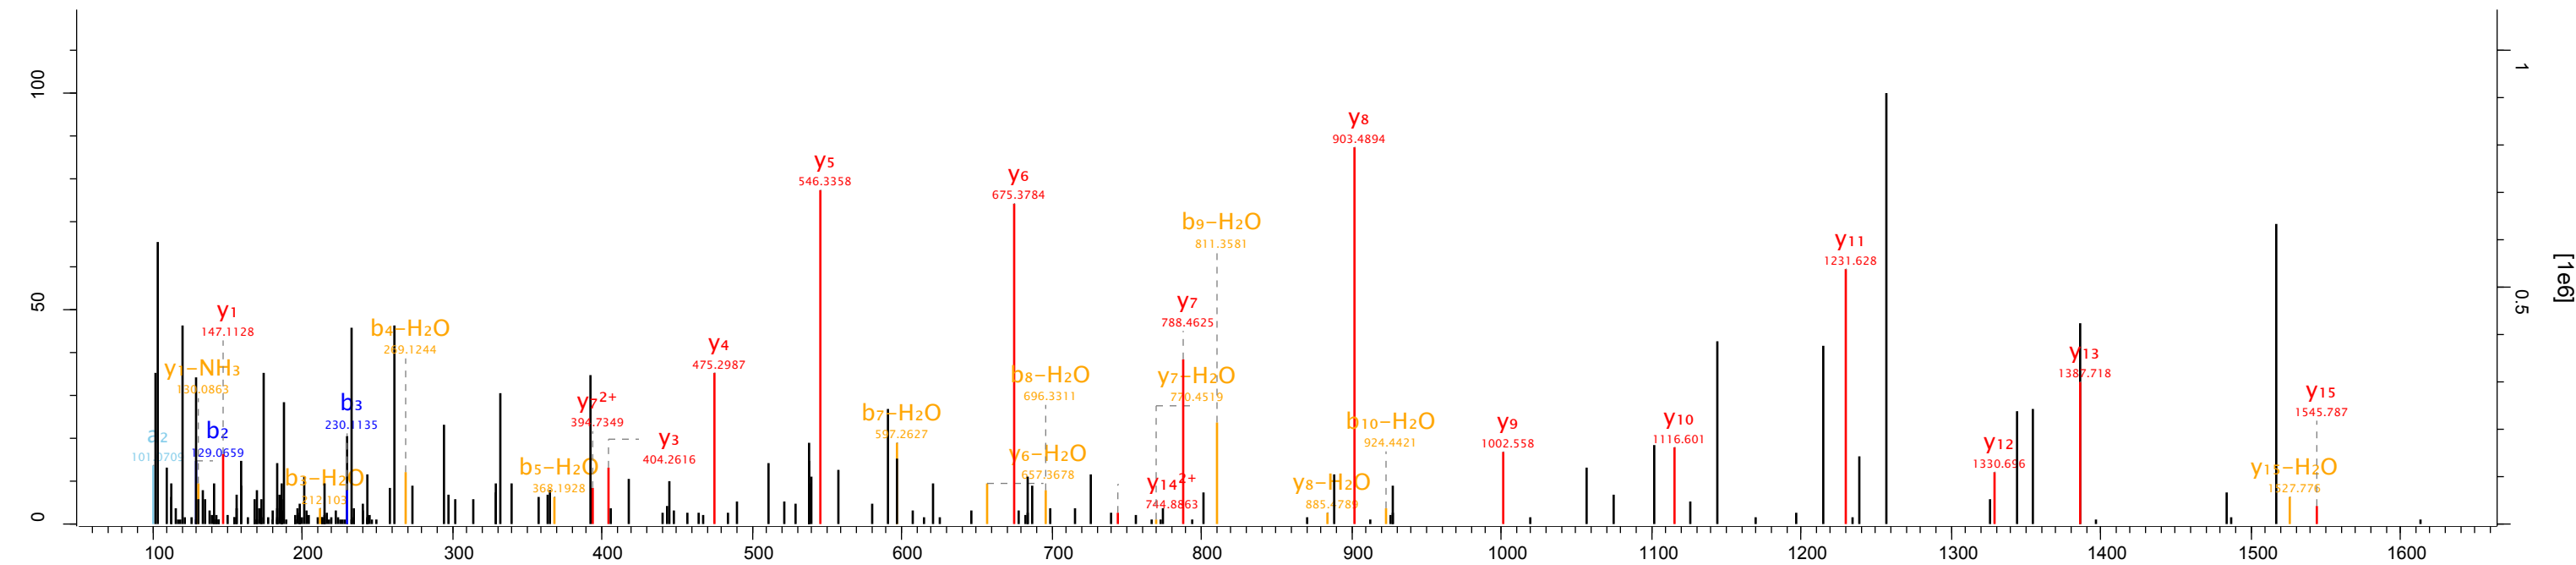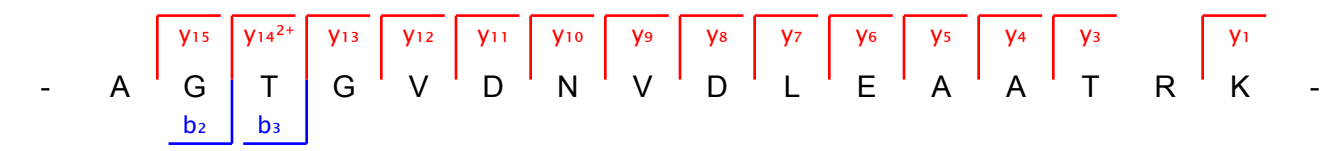

Raw file: 20150814\_A375SR\_Phospho\_BR2\_06  
 Scan: 12365 Method: FTMS; HCD Score: 200.99 m/z: 848.87 Gene names: RBMX;RBMXL1

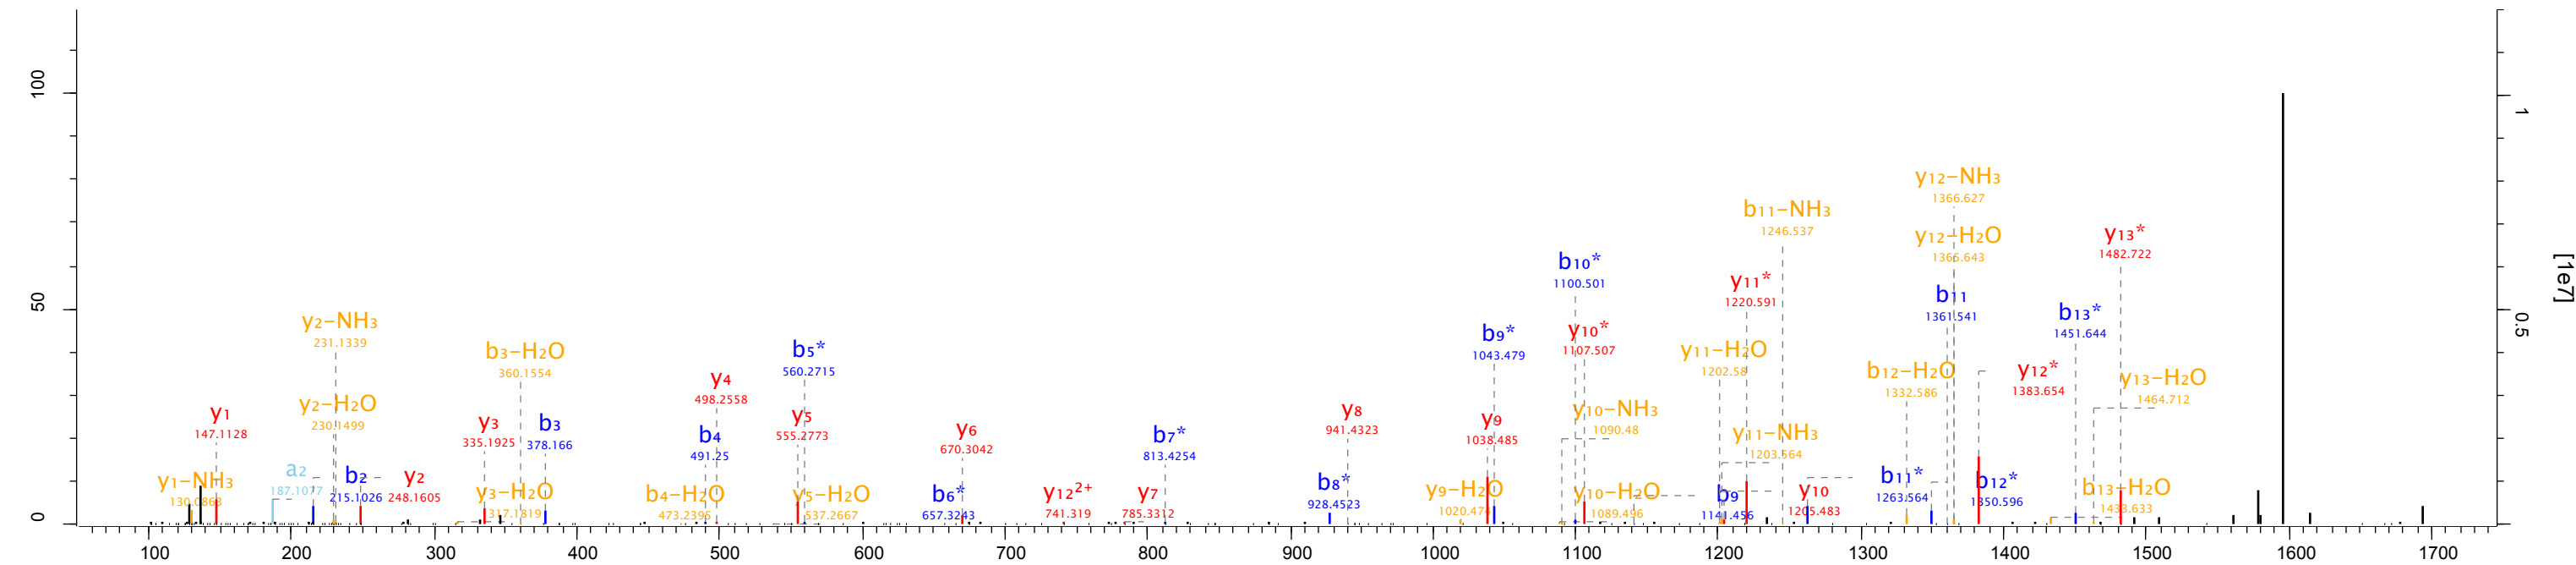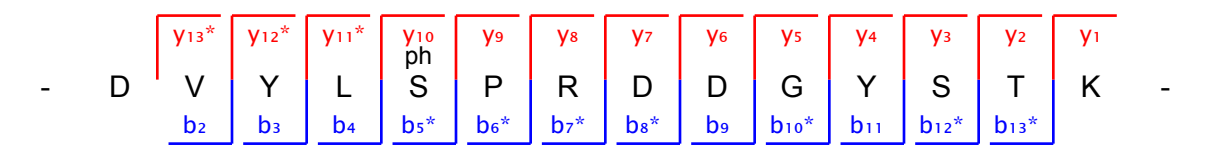

Raw file: 20150814\_A375SR\_Phospho\_BR2\_06  
 Scan: 1265 Method: FTMS; HCD Score: 67.88 m/z: 404.23 Gene names: HMGA1

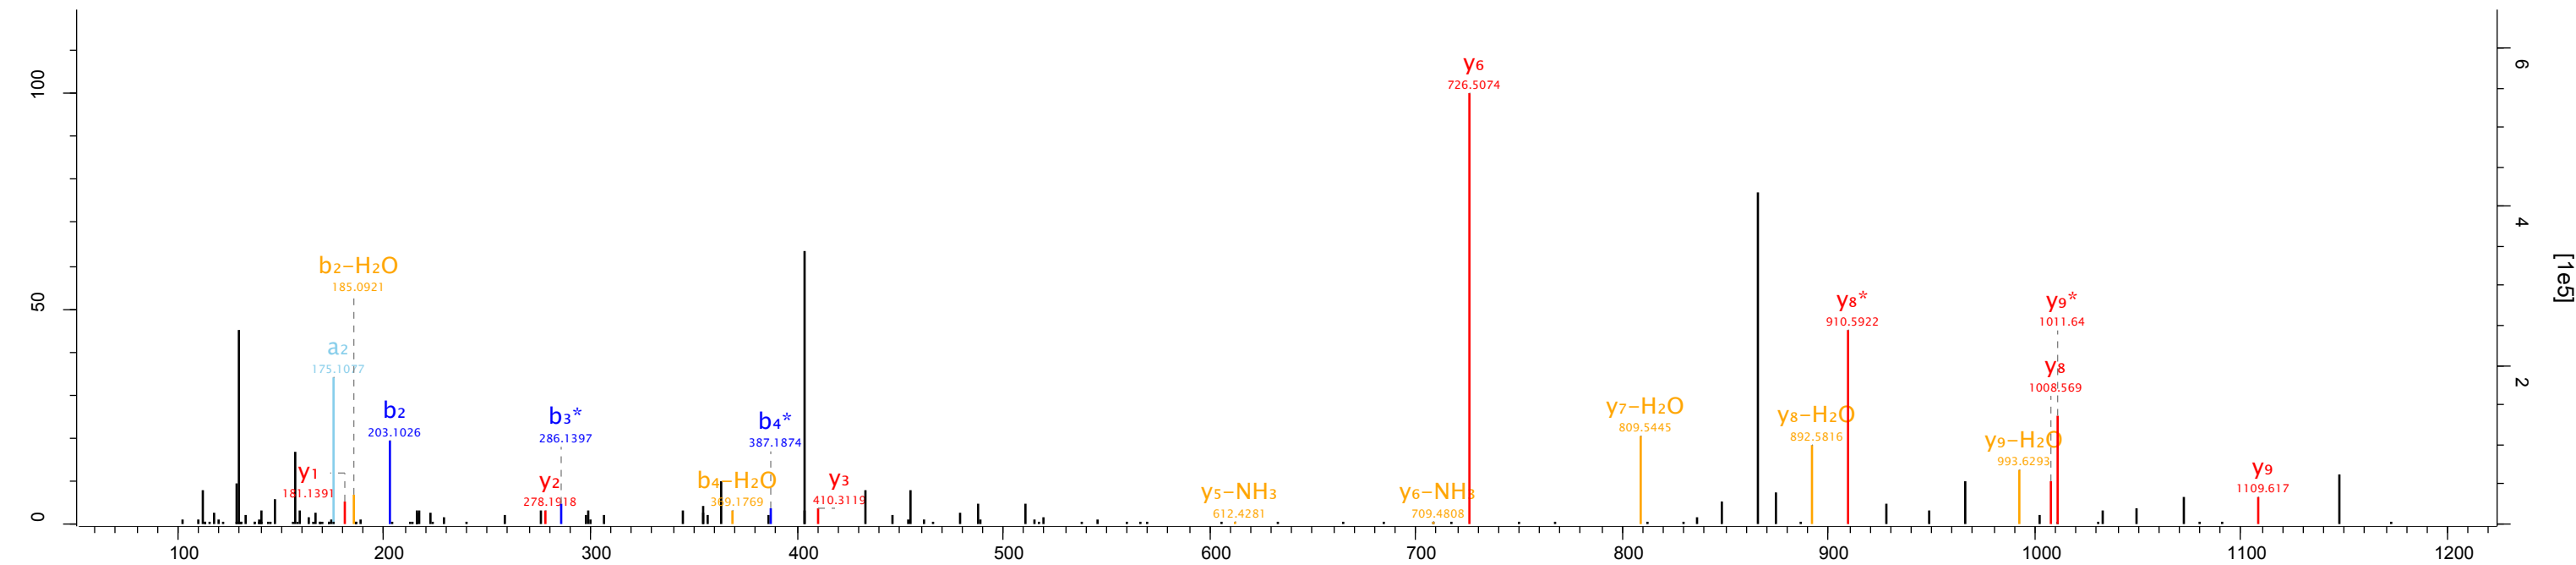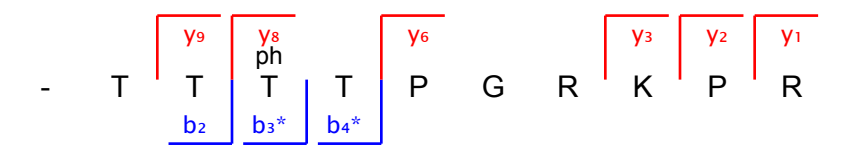

Raw file 20150814\_A375SR\_Phospho\_BR2\_06 Scan 12685 Method FTMS; HCD Score 75.76 m/z 585.31 Gene names C11orf30;EMSY

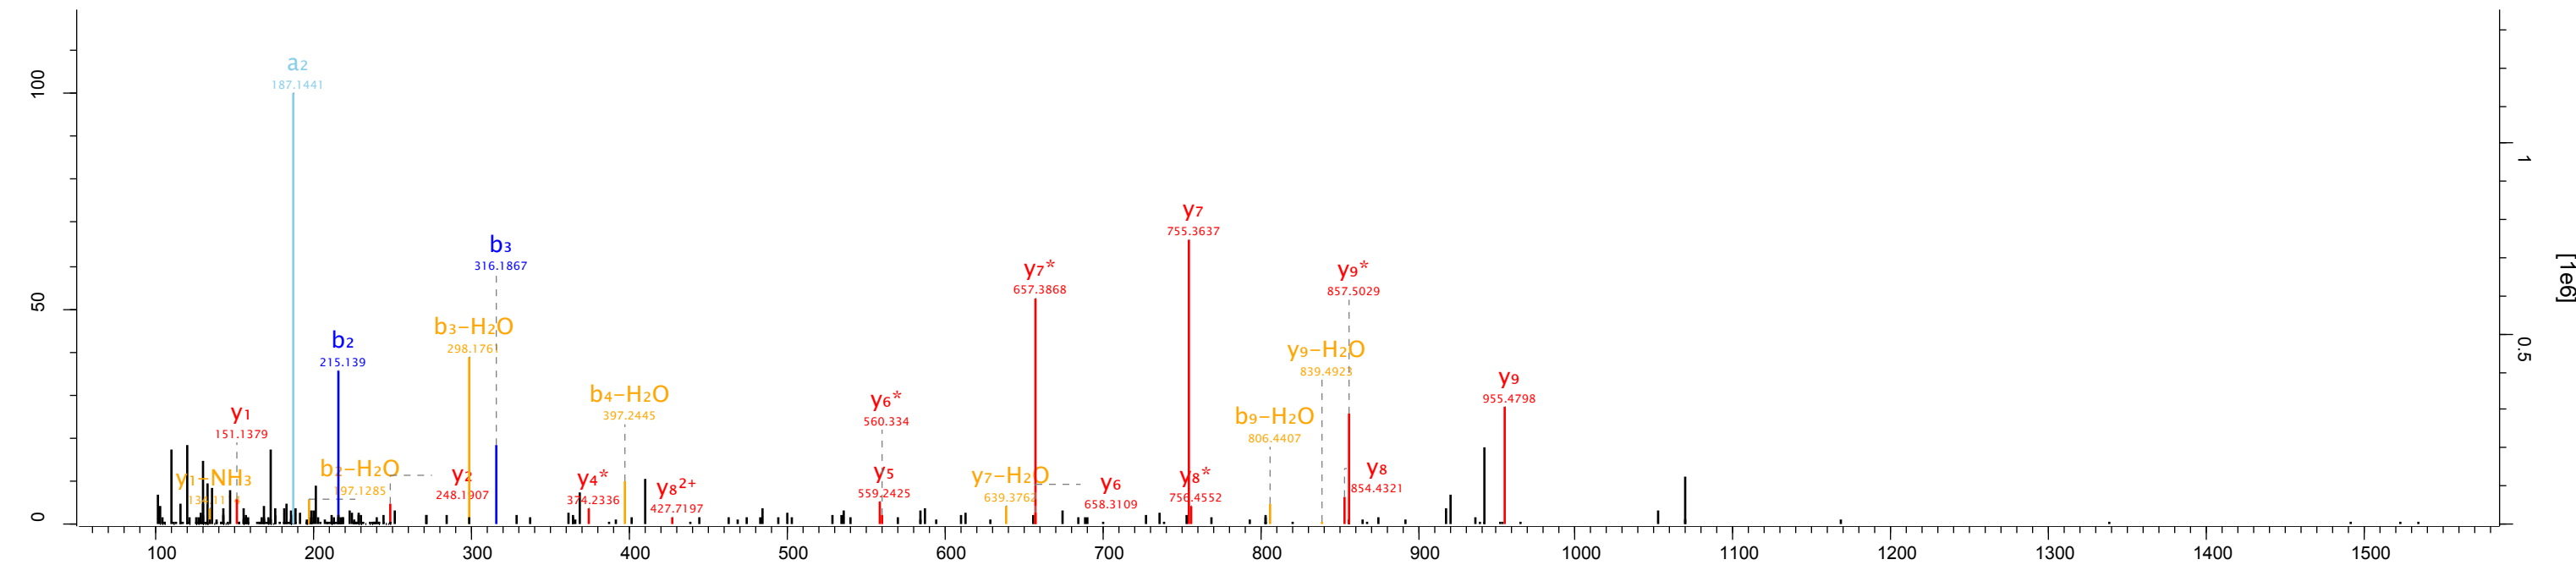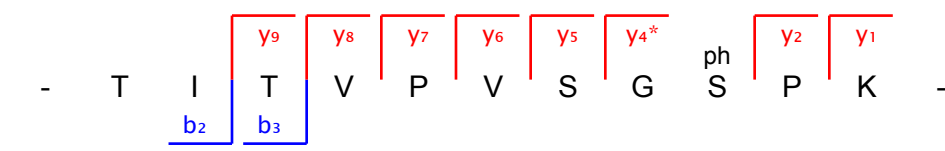

Raw file: 20150814\_A375SR\_Phospho\_BR2\_06  
 Scan: 14785 Method: FTMS; HCD Score: 219.43 m/z: 1147.02 Gene names: CENPB

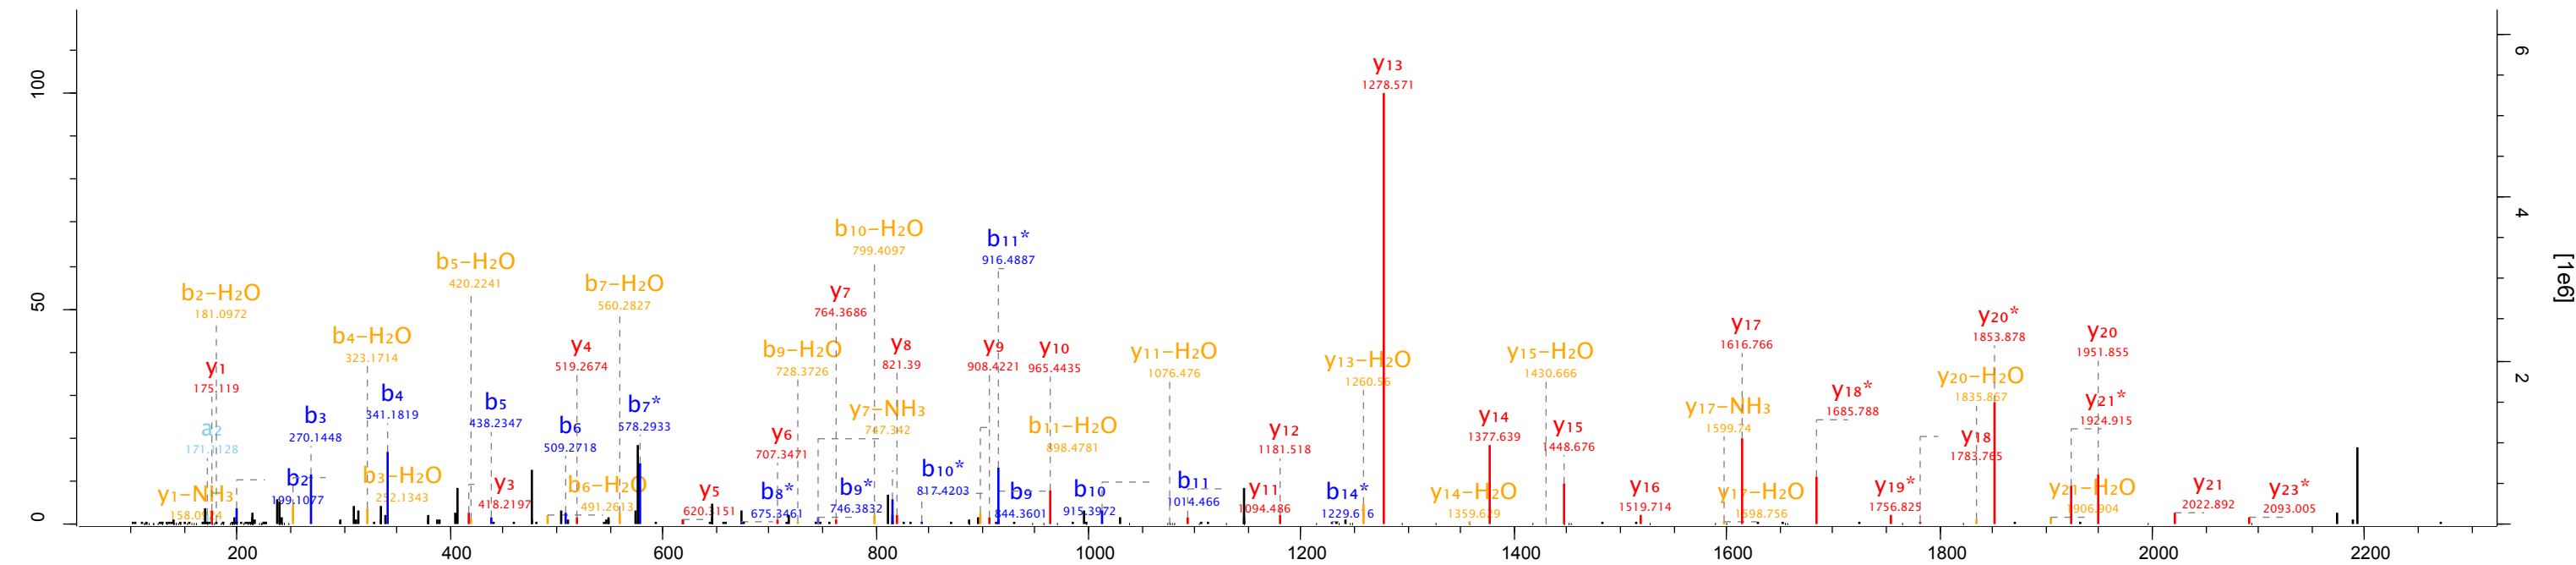

Protein sequence: - T P A A P A S P A A V P S E G S G G S T T G W R -

Fragmentation mapping (b and y ions):

- b2: P
- b3: A
- b4: A
- b5: P
- b6: A
- b7\*: S
- b8\*: P
- b9: A
- b10: A
- b11: V
- b14\*: E
- y1: R
- y3: G
- y4: S
- y5: T
- y6: S
- y7: G
- y8: G
- y9: S
- y10: G
- y11: S
- y12: T
- y13: T
- y14: G
- y15: W
- y16: R
- y17: -
- y18: ph
- y19\*: S
- y20: P
- y21: A
- y23\*: A

Raw file: 20150814\_A375SR\_Phospho\_BR2\_06  
 Scan: 14985 Method: FTMS; HCD Score: 171.05 m/z: 1030.98 Gene names: CAMSAP1

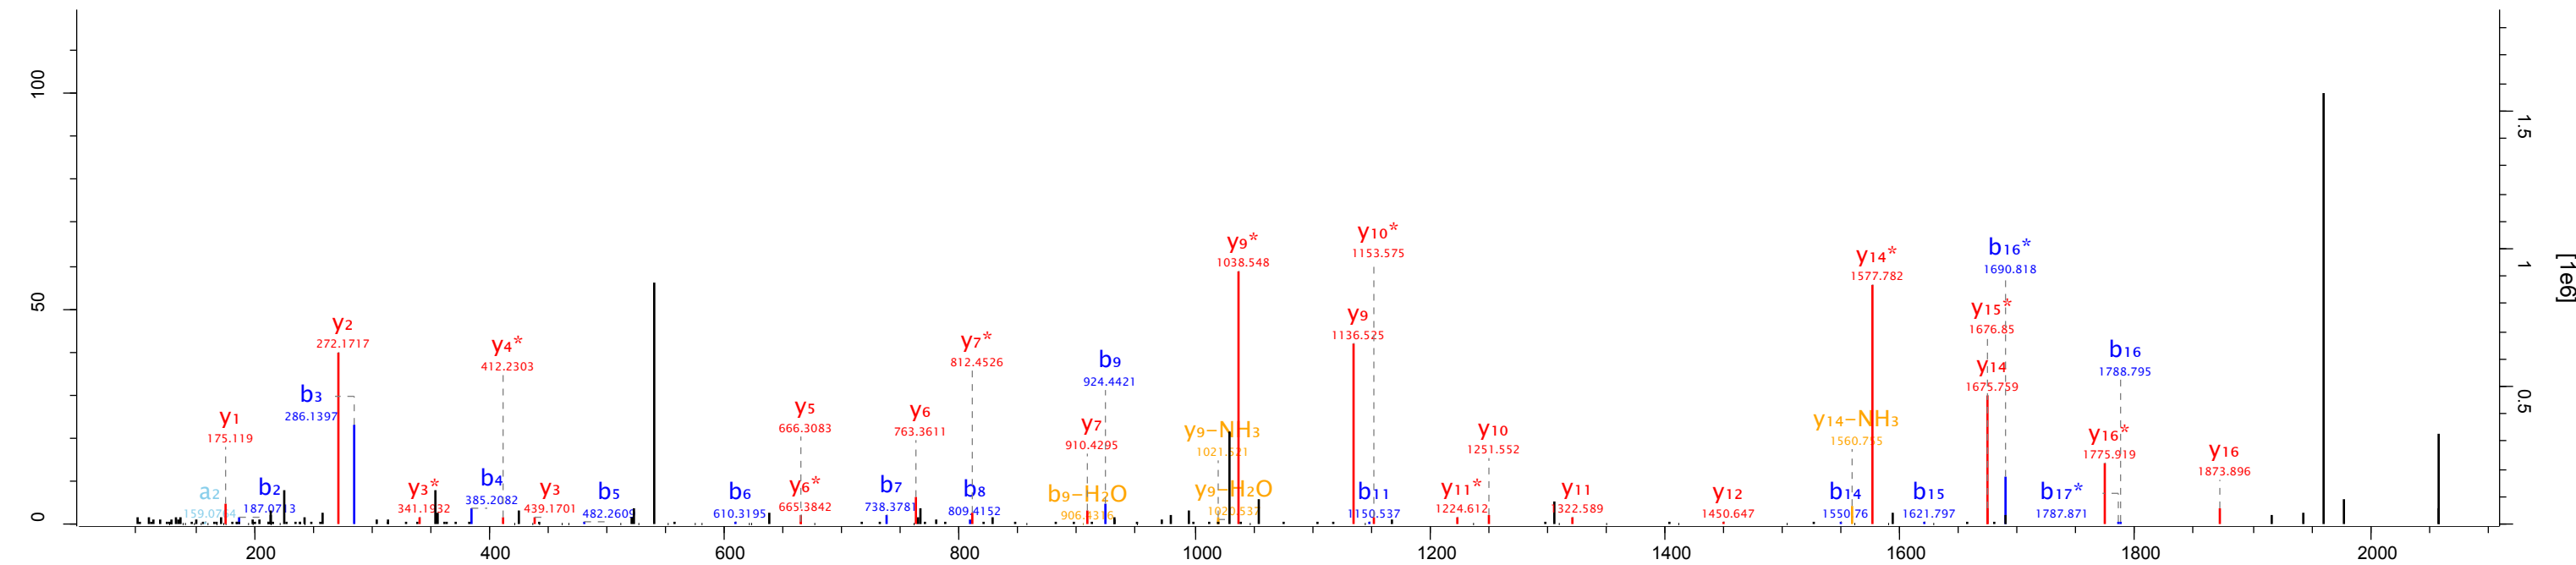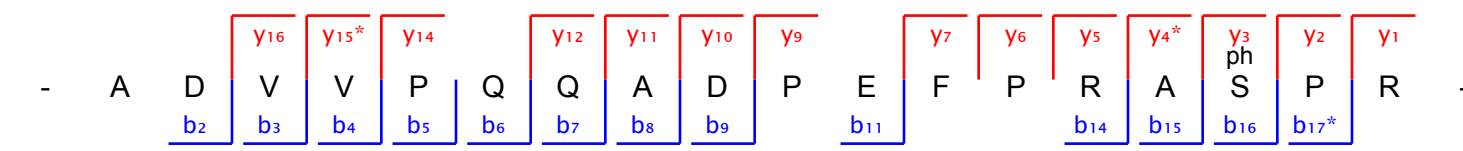



Raw file Scan Method Score m/z Gene names  
 20150814\_A375SR\_Phospho\_BR2\_06 15285 FTMS; HCD 185.38 1011.42 FXR2

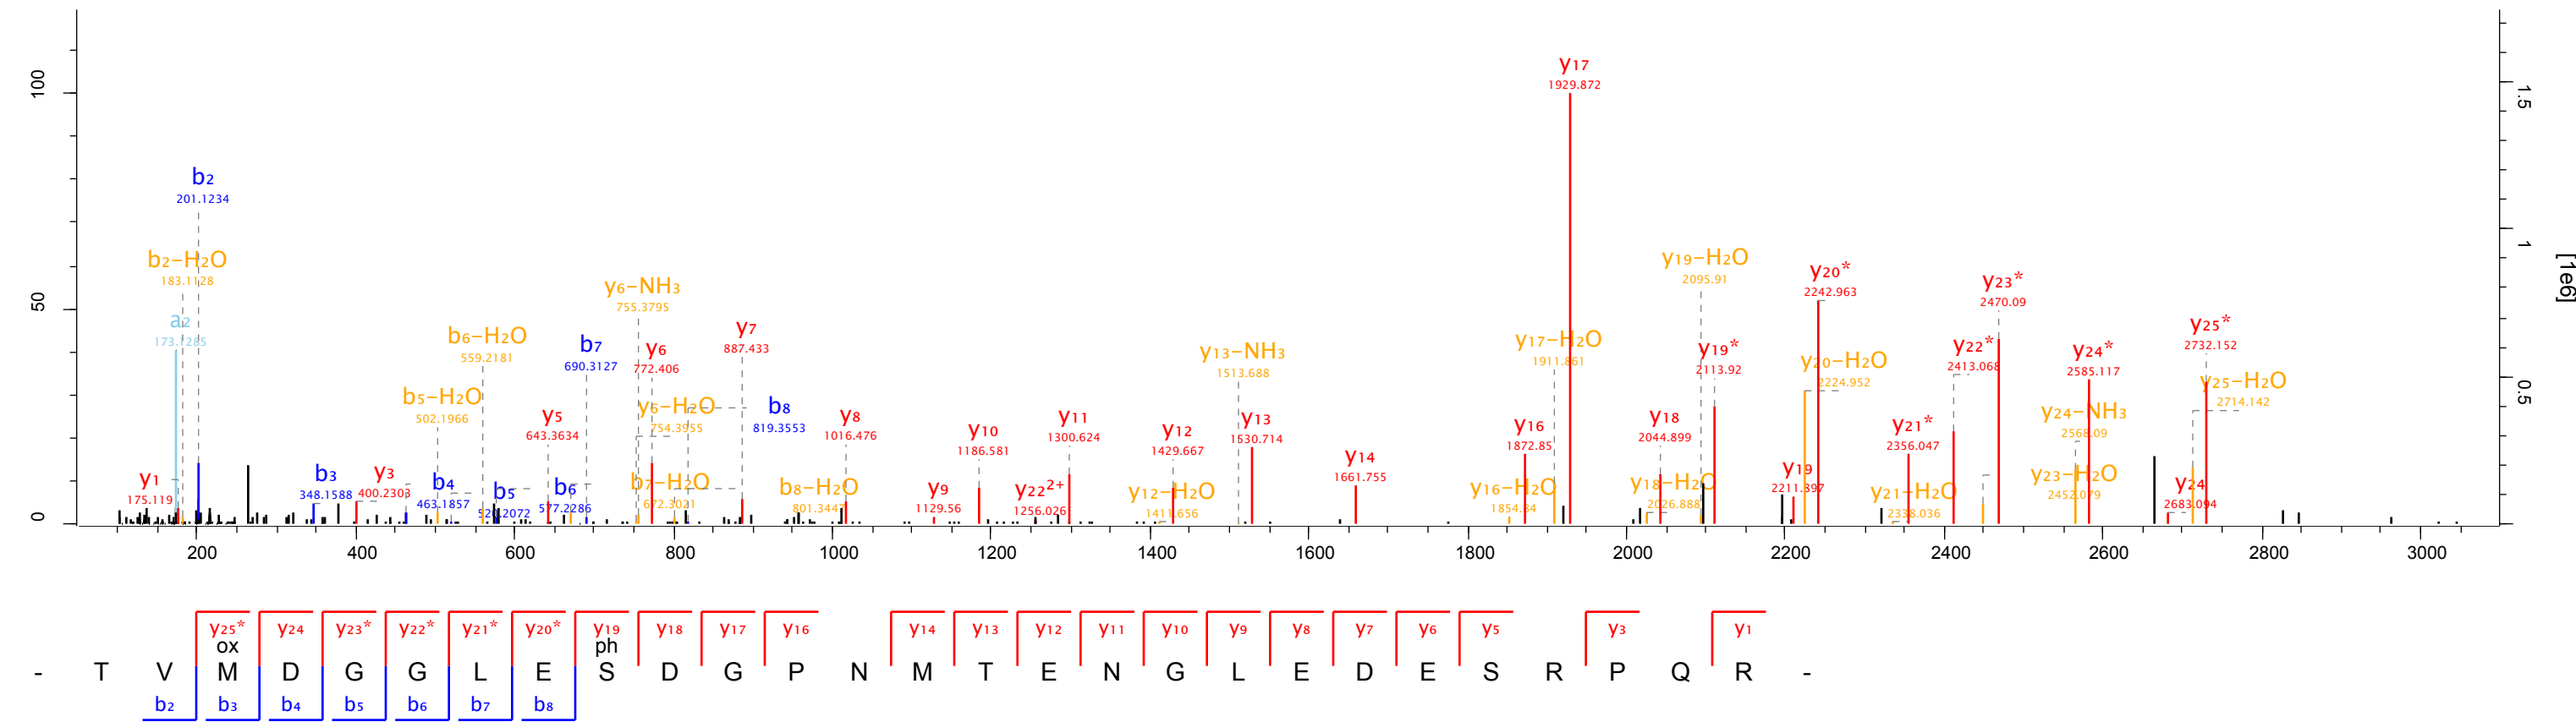

Raw file  
20150814\_A375SR\_Phospho\_BR2\_06

Scan 15675 Method FTMS; HCD Score 176.96 m/z 975.13 Gene names DBN1

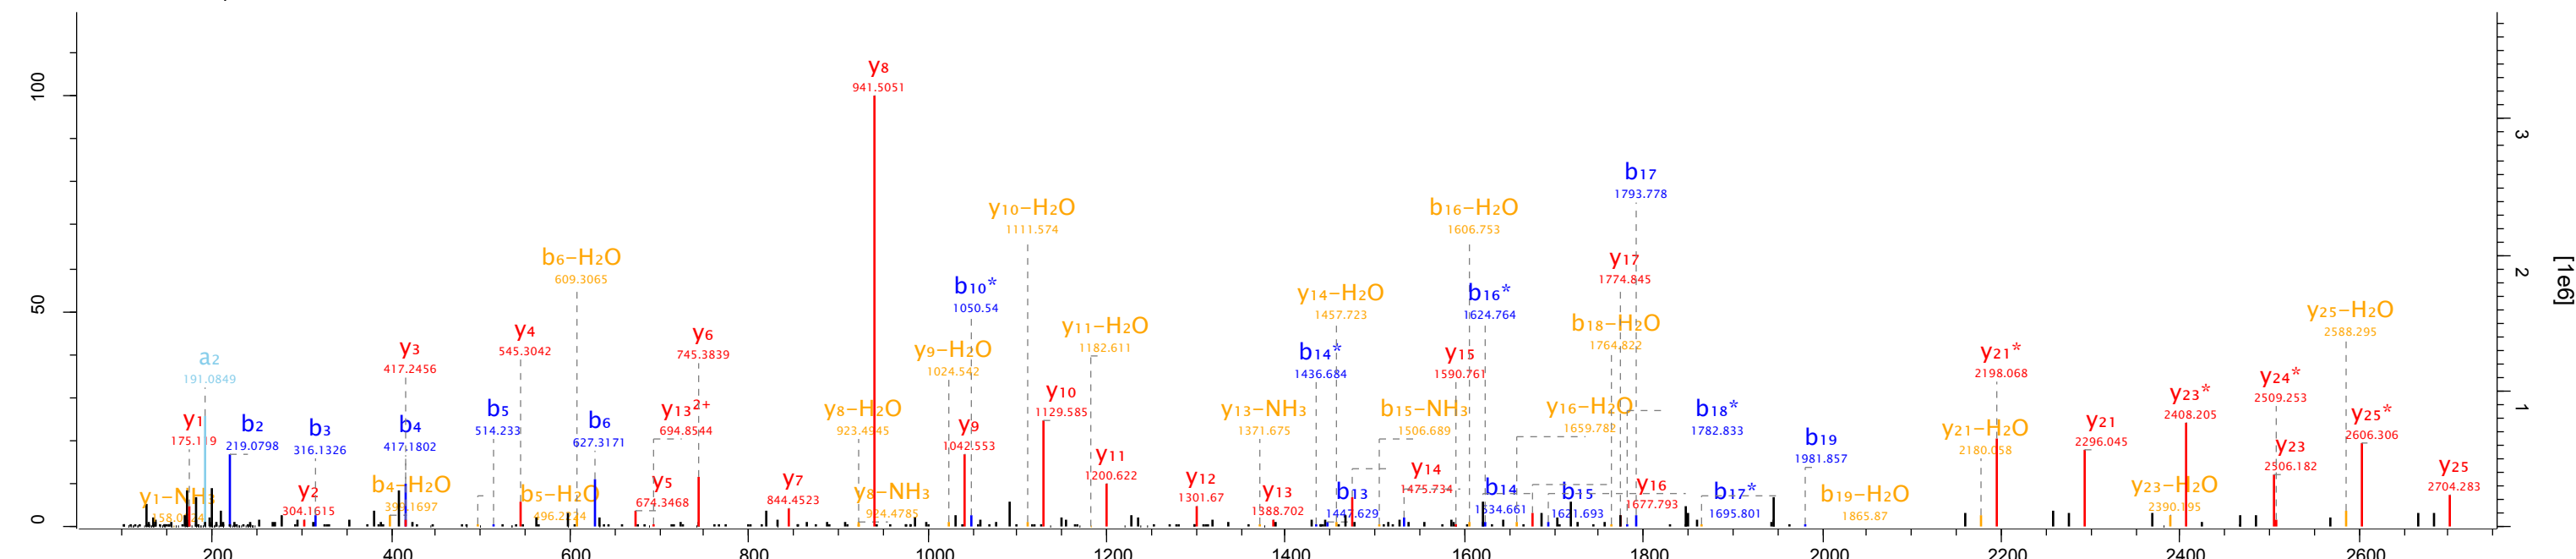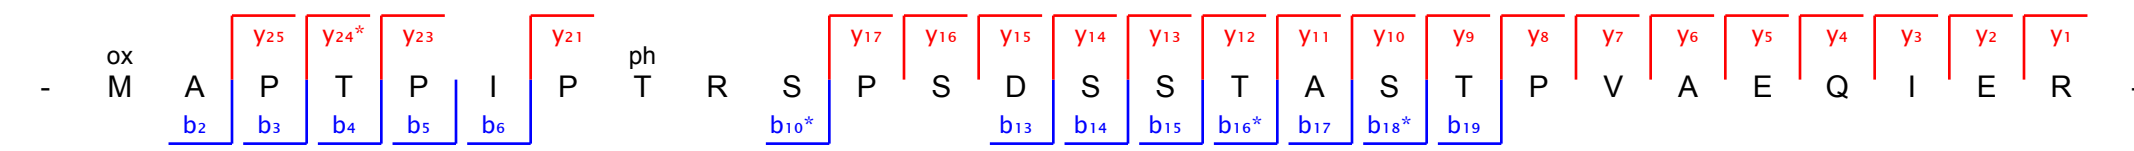

Raw file: 20150814\_A375SR\_Phospho\_BR2\_06  
 Scan: 17145 Method: FTMS; HCD Score: 98 m/z: 957.8 Gene names: CARHSP1

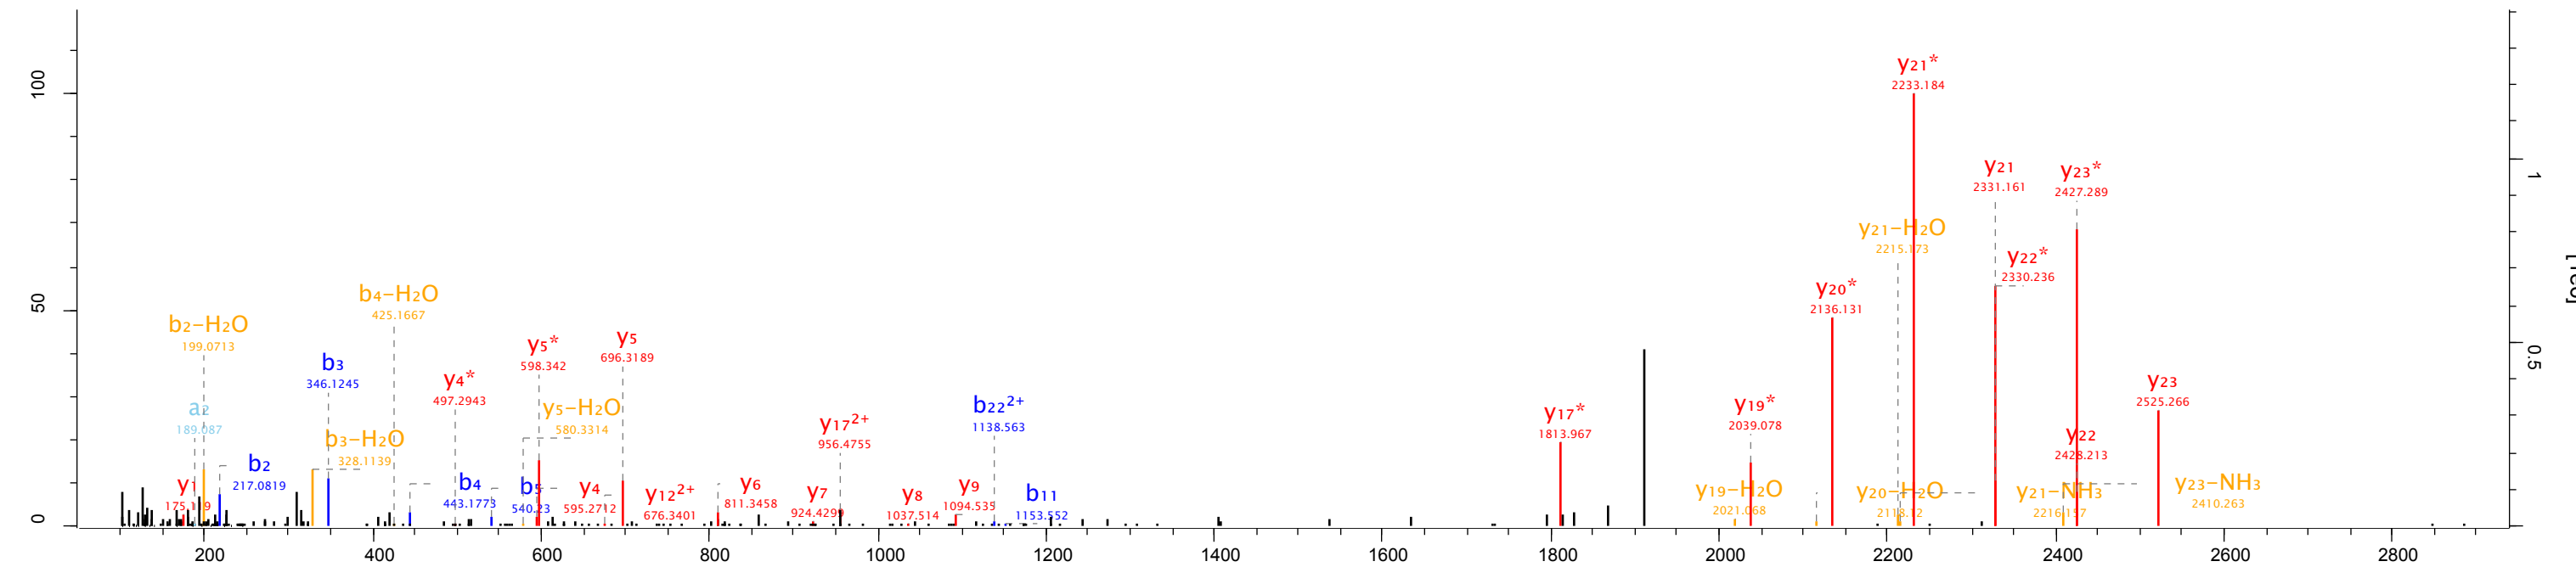

ac: - S S E P P P P P Q P P T H Q A S V G L L D T P R S R -

Fragmentation sites are indicated by brackets below the amino acid sequence:

- Blue brackets (b series): b<sub>2</sub> (S), b<sub>3</sub> (S), b<sub>4</sub> (E), b<sub>5</sub> (P), b<sub>11</sub> (P).
- Red brackets (y series): y<sub>1</sub> (R), y<sub>4</sub> (P), y<sub>5</sub> (T), y<sub>6</sub> (D), y<sub>7</sub> (L), y<sub>8</sub> (L), y<sub>9</sub> (G), y<sub>12</sub><sup>2+</sup> (A), y<sub>17</sub><sup>\*</sup> (P), y<sub>19</sub><sup>\*</sup> (P), y<sub>20</sub><sup>\*</sup> (P), y<sub>21</sub> (P), y<sub>22</sub> (P), y<sub>23</sub> (P).

Raw file 20150814\_A375SR\_Phospho\_BR2\_06 Scan 17195 Method FTMS; HCD Score 160.16 m/z 846.41 Gene names KANK2

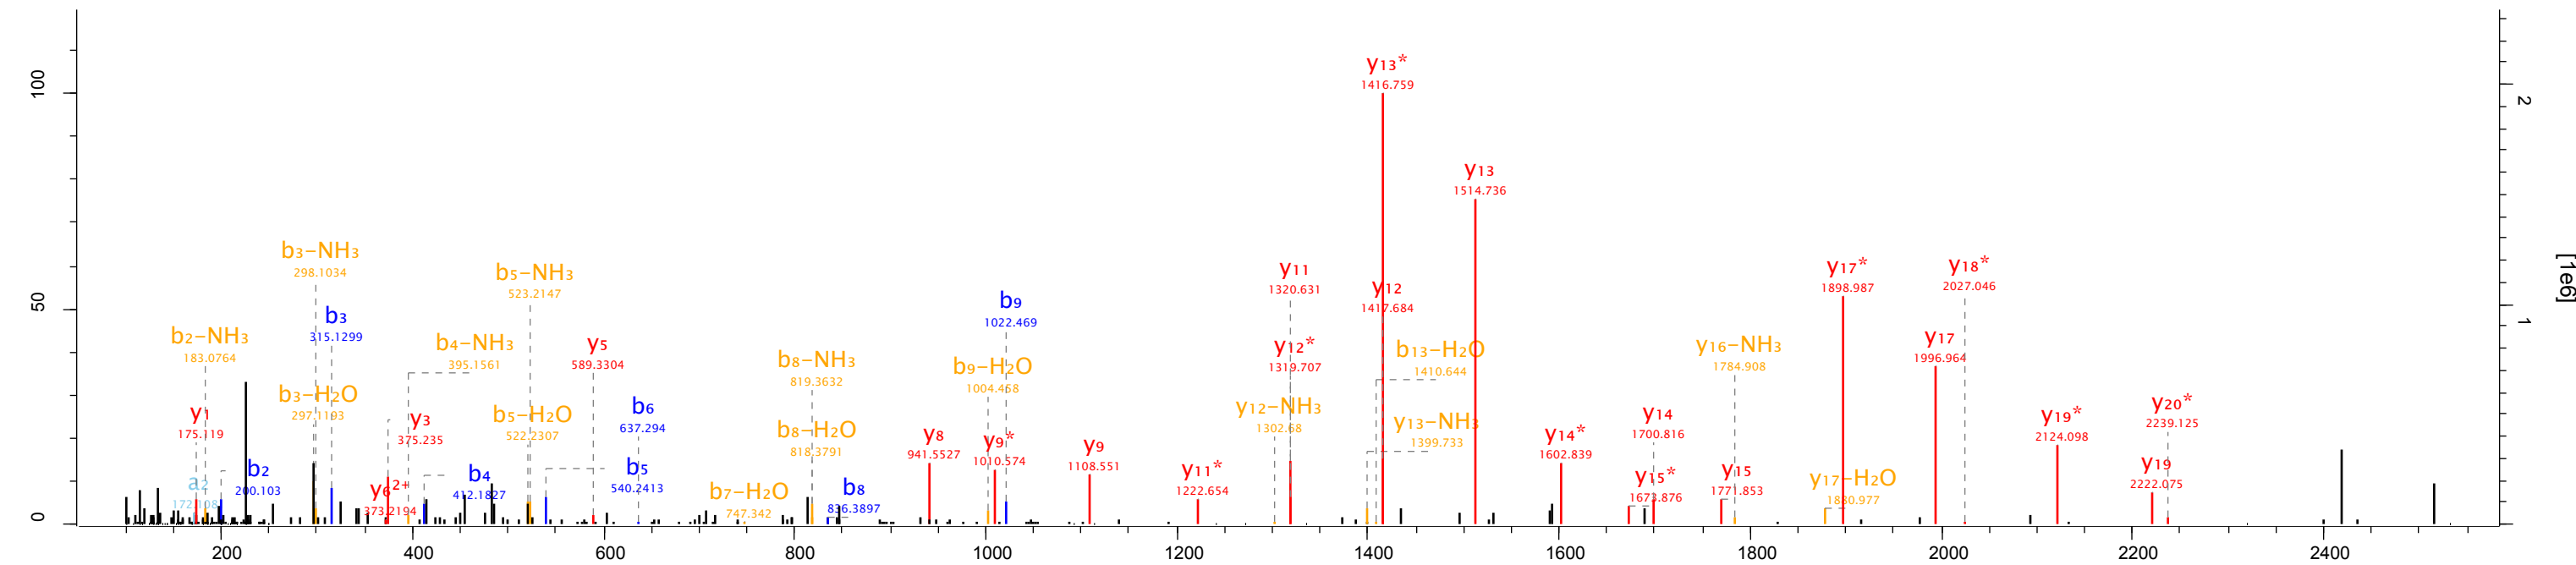

- Q A D P Q P Q A W P P P D S P V R V D T V R -

b<sub>2</sub>
b<sub>3</sub>
b<sub>4</sub>
b<sub>5</sub>
b<sub>6</sub>
b<sub>8</sub>
b<sub>9</sub>
y<sub>1</sub>
y<sub>3</sub>
y<sub>5</sub>
y<sub>6</sub><sup>2+</sup>
y<sub>8</sub>
y<sub>9</sub><sup>ph</sup>
y<sub>11</sub>
y<sub>12</sub>
y<sub>13</sub>
y<sub>14</sub>
y<sub>15</sub>
y<sub>17</sub>
y<sub>18</sub><sup>\*</sup>
y<sub>19</sub>
y<sub>20</sub><sup>\*</sup>

Raw file Scan Method Score m/z Gene names  
 20150814\_A375SR\_Phospho\_BR2\_06 17265 FTMS; HCD 51.73 606.79 ANXA2;ANXA2P2

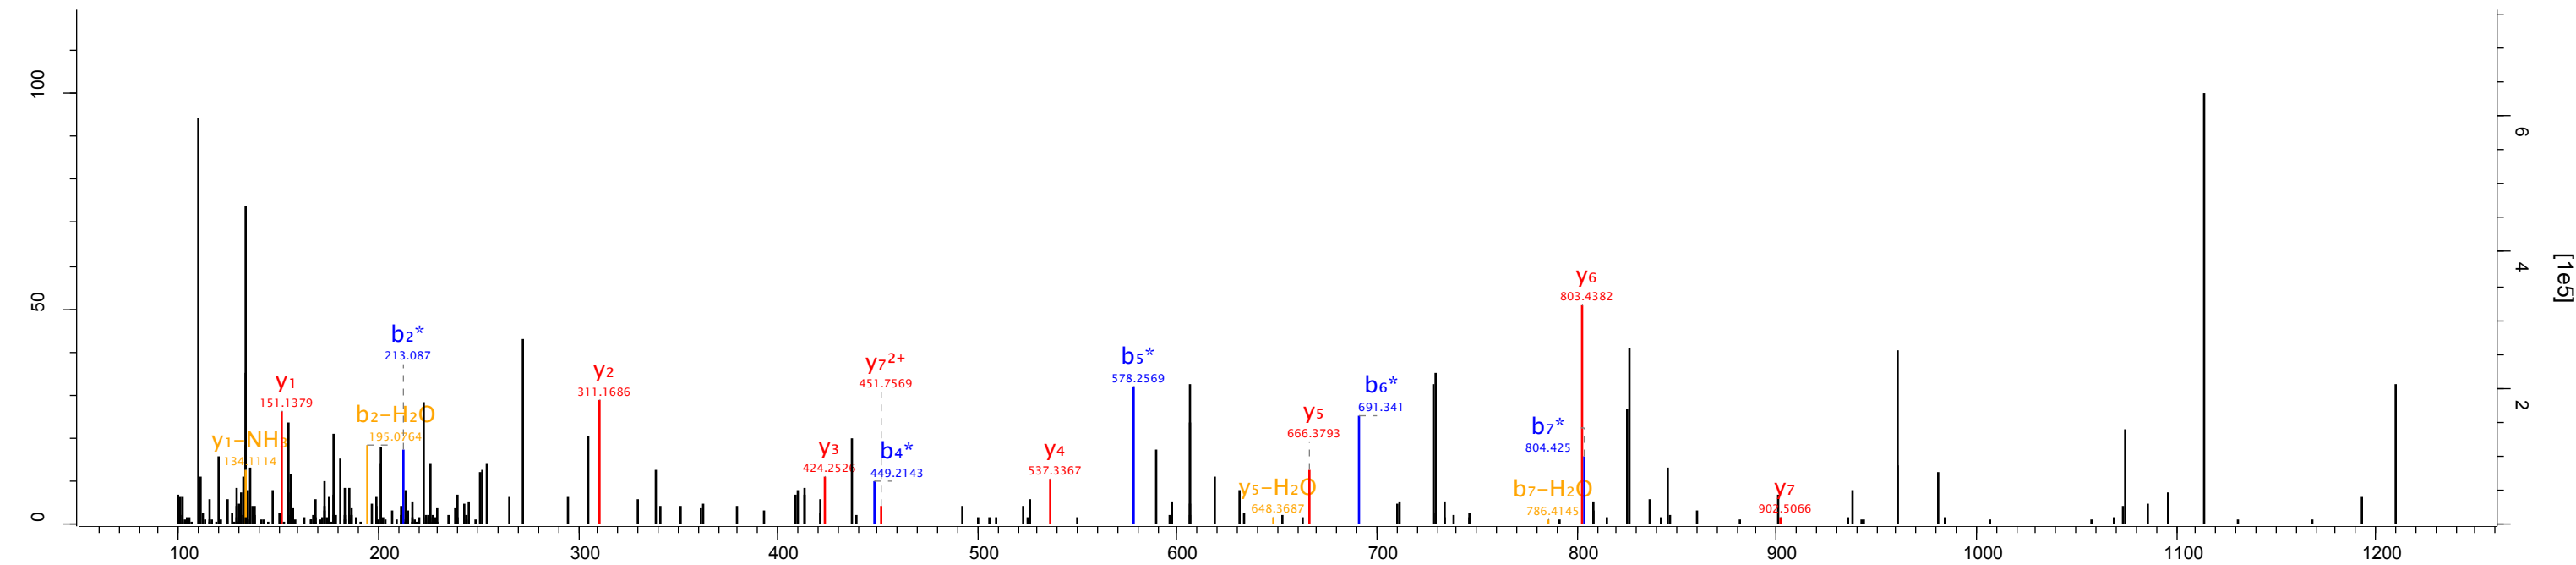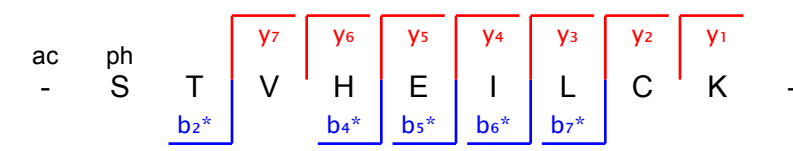

Raw file: 20150814\_A375SR\_Phospho\_BR2\_06  
 Scan: 17345 Method: FTMS; HCD Score: 186.72 m/z: 767.35 Gene names: MSH6

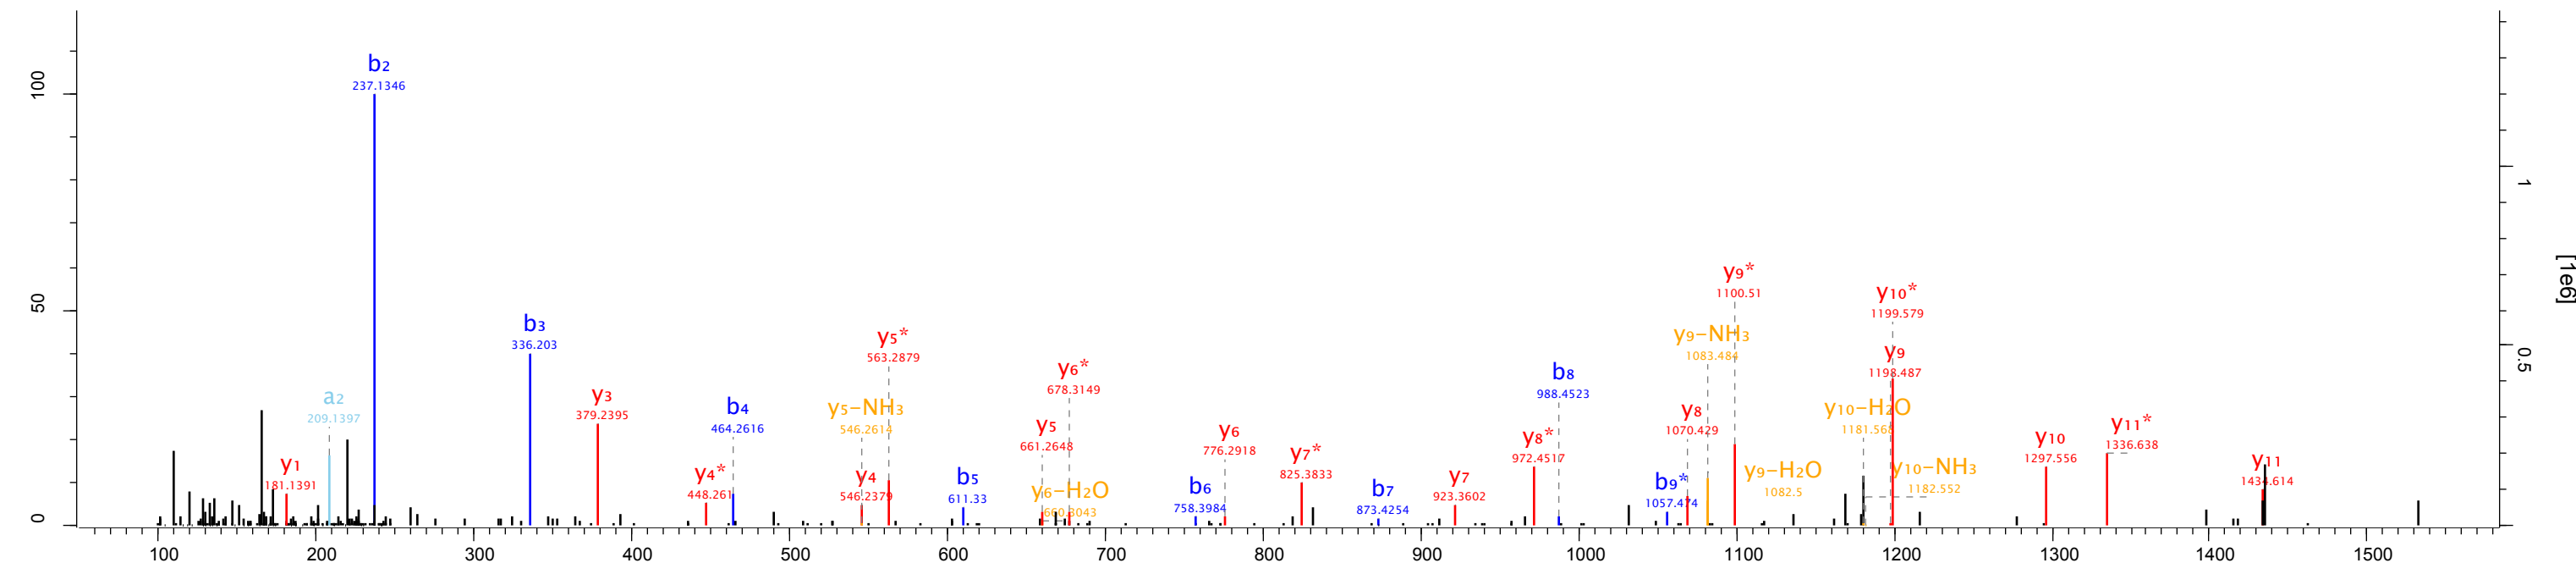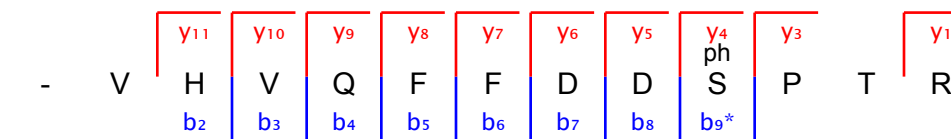

Raw file: 20150814\_A375SR\_Phospho\_BR2\_06  
 Scan: 17825 Method: FTMS; HCD Score: 94.39 m/z: 682.68 Gene names: RPS6KA4

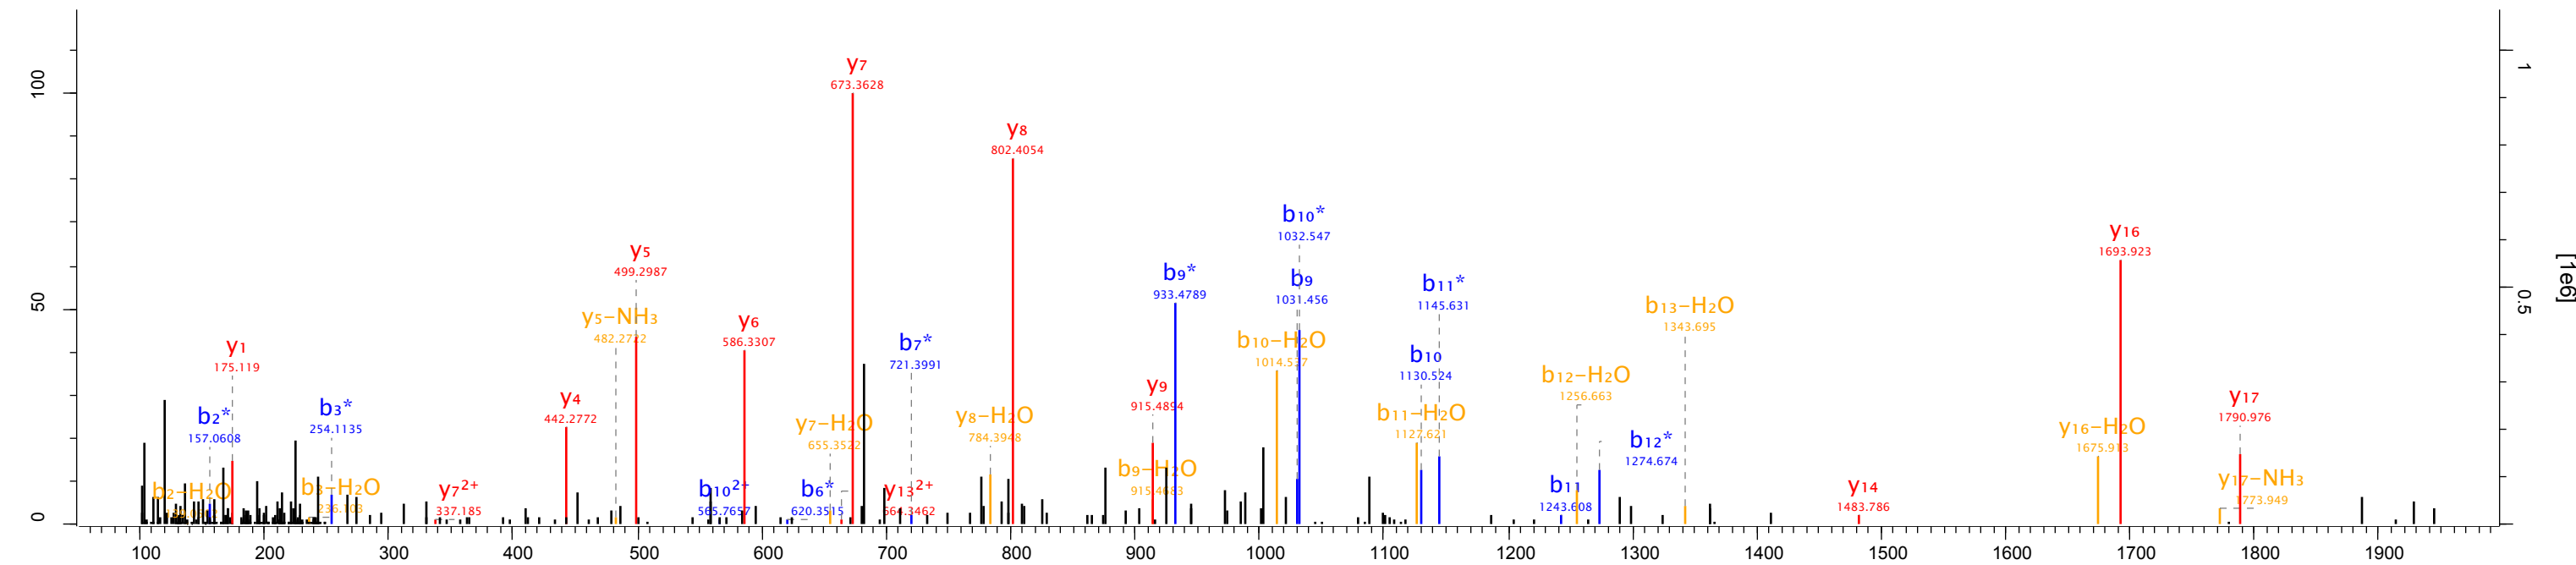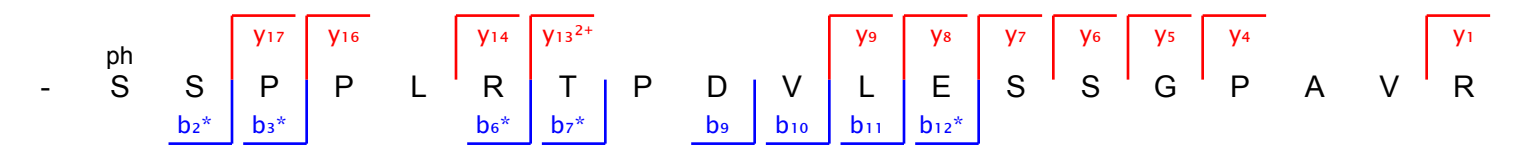

Raw file: 20150814\_A375SR\_Phospho\_BR2\_06  
 Scan: 18695 Method: FTMS; HCD Score: 141.07 m/z: 832.44 Gene names: EIF4G2

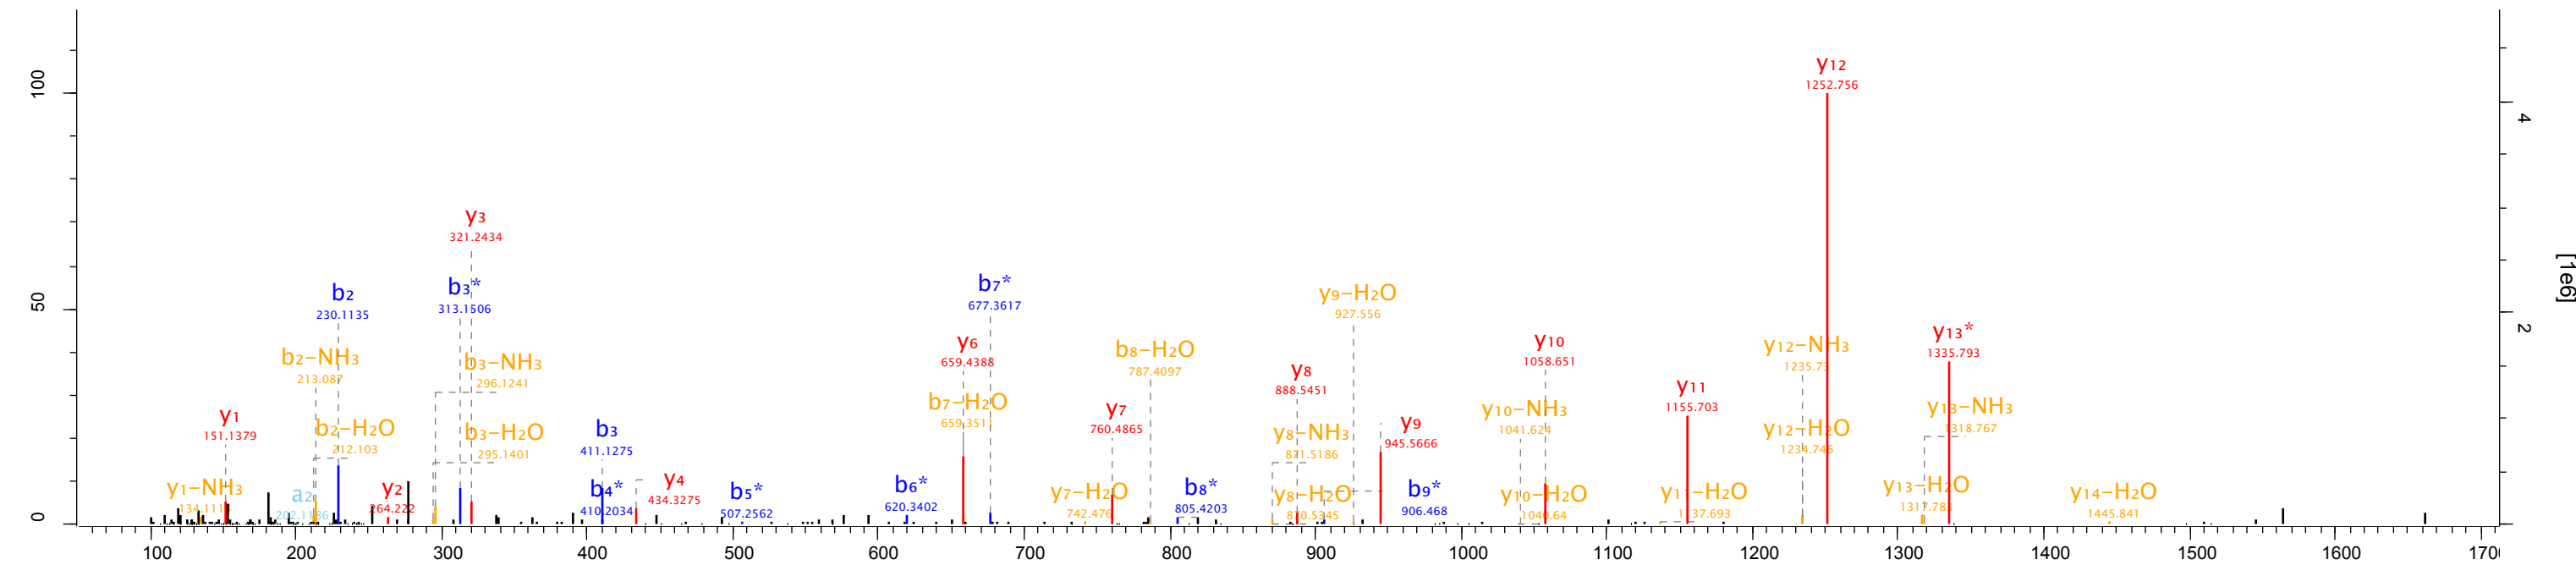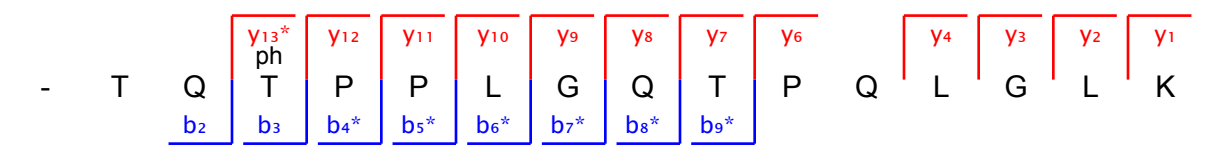



Raw file: 20150814\_A375SR\_Phospho\_BR2\_06  
 Scan: 18815 Method: FTMS; HCD Score: 89.36 m/z: 914.1 Gene names: AGGF1

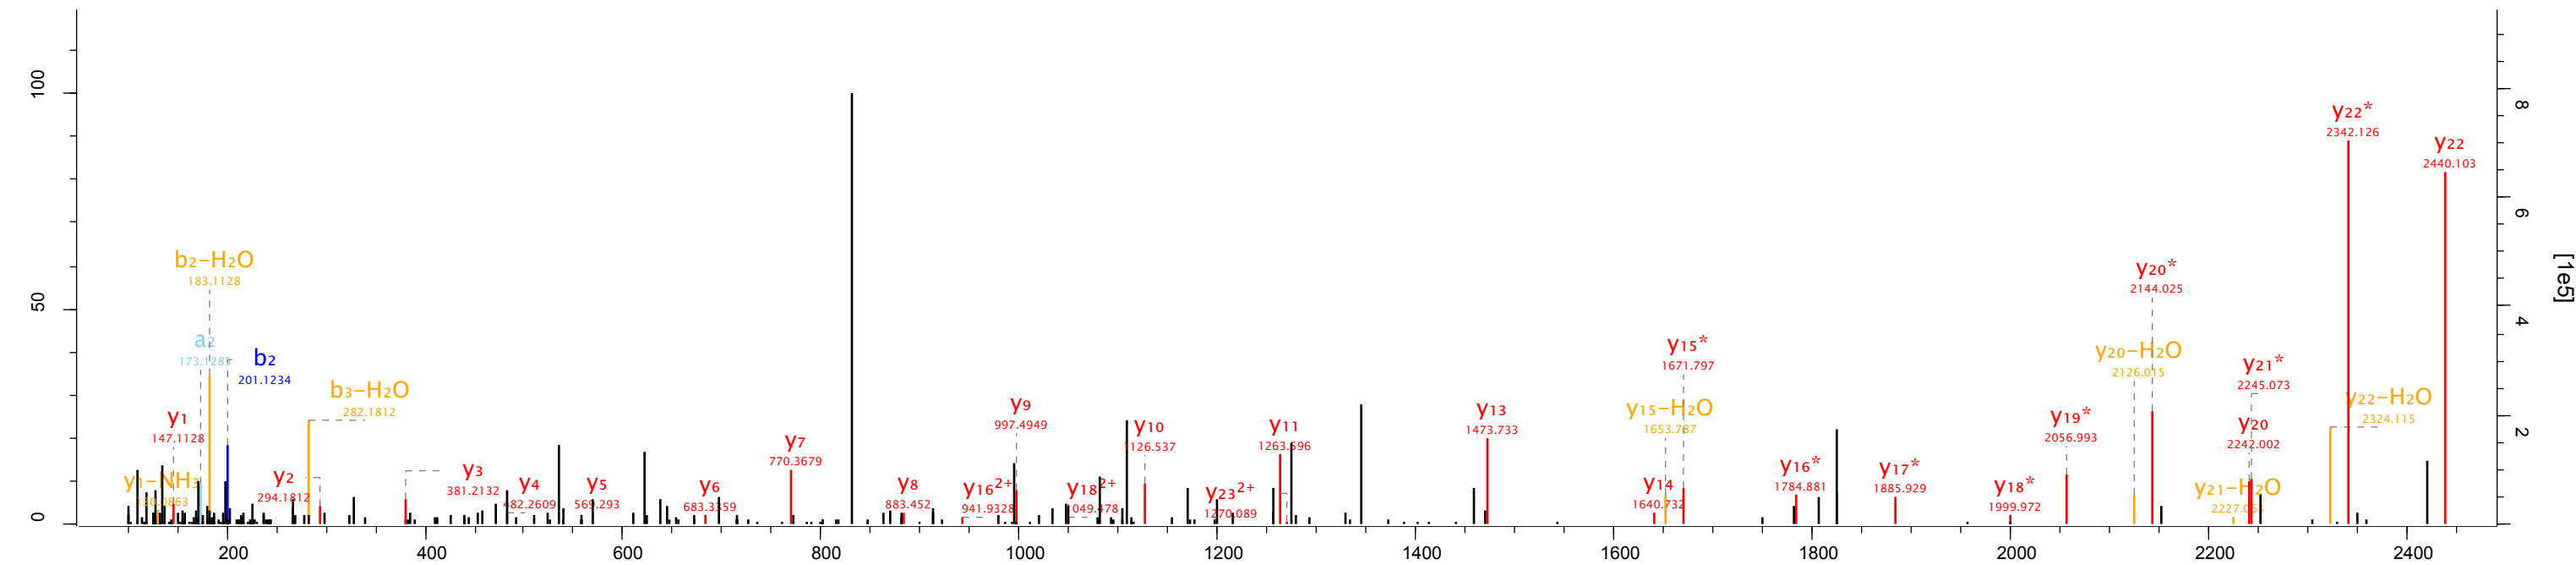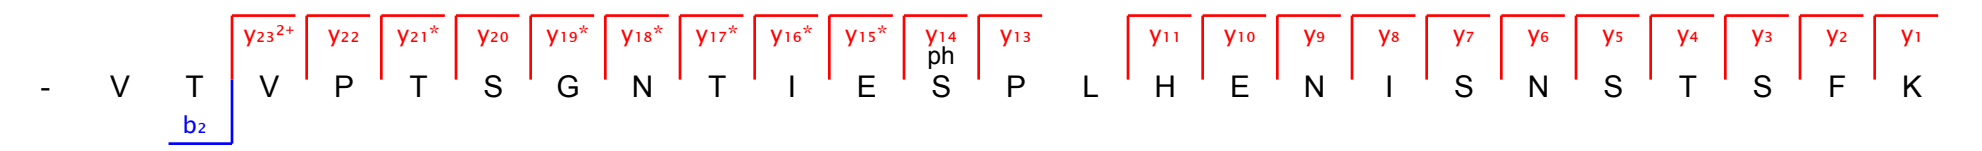

Raw file 20150814\_A375SR\_Phospho\_BR2\_06 Scan 19655 Method FTMS; HCD Score 92.79 m/z 671.97 Gene names NUPL1

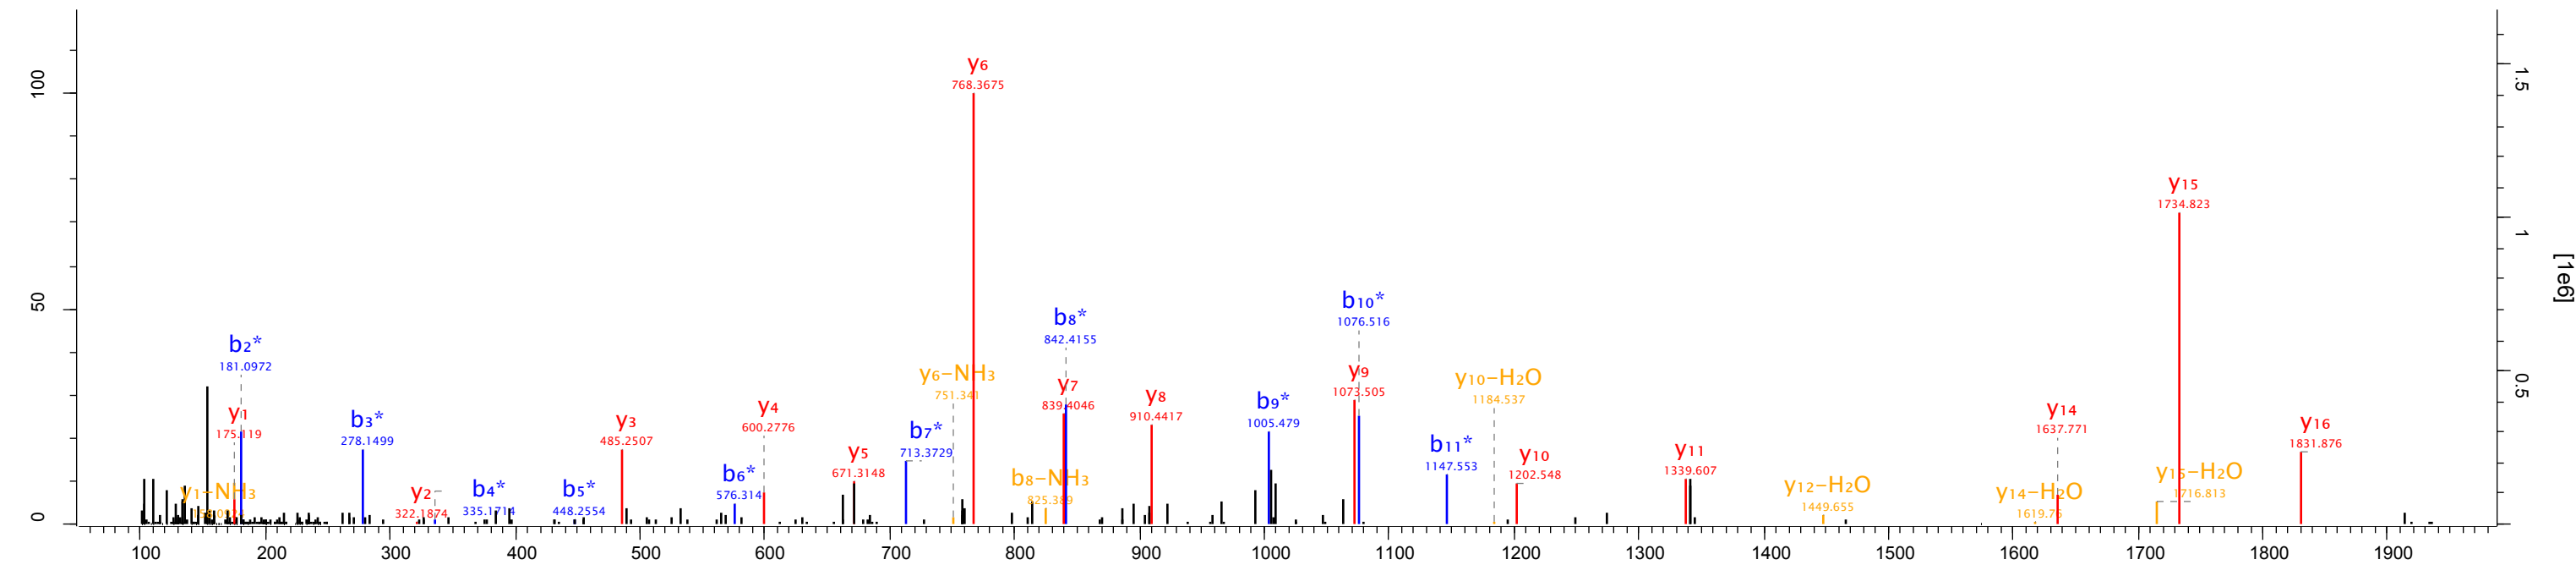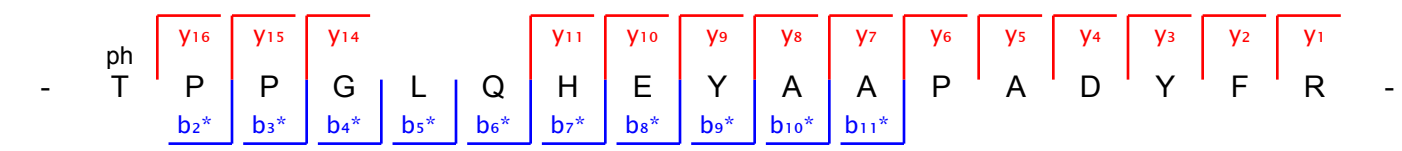

Raw file: 20150814\_A375SR\_Phospho\_BR2\_06  
 Scan: 19995 Method: FTMS; HCD Score: 92.44 m/z: 688.85 Gene names: KIAA1598

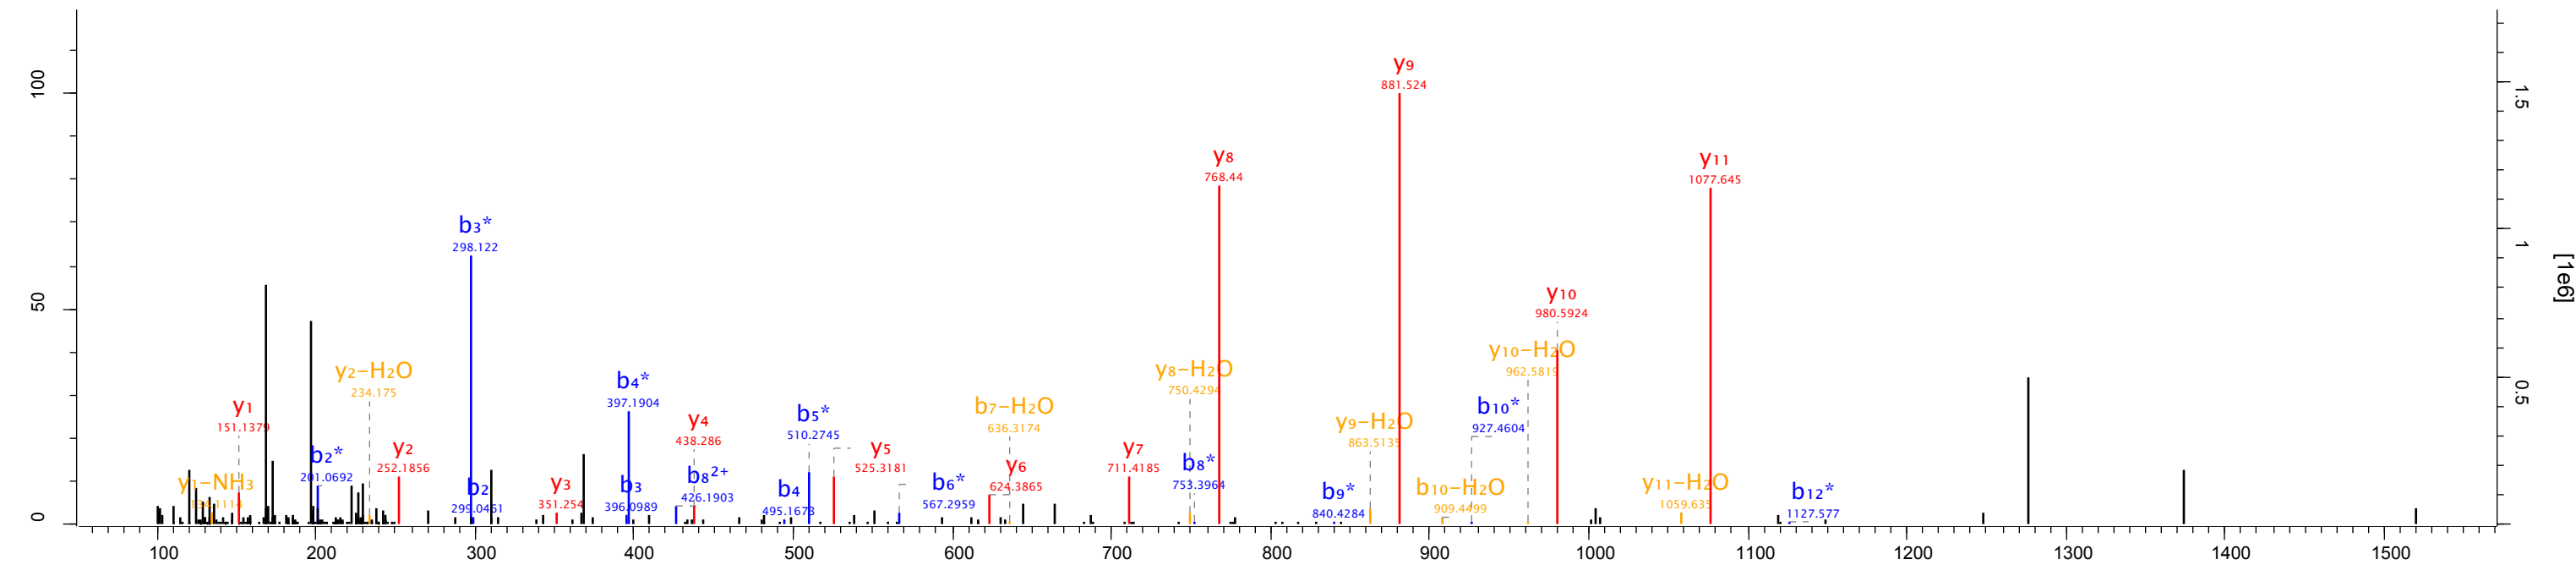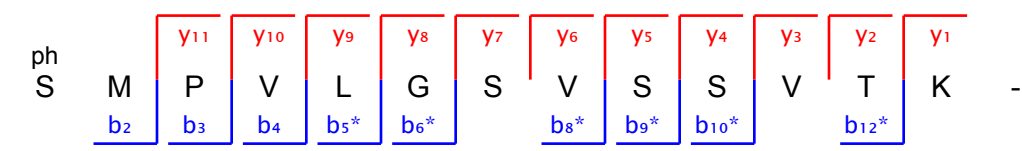

Raw file 20150814\_A375SR\_Phospho\_BR2\_06 Scan 20005 Method FTMS; HCD Score 161.2 m/z 1078.94 Gene names SUZ12

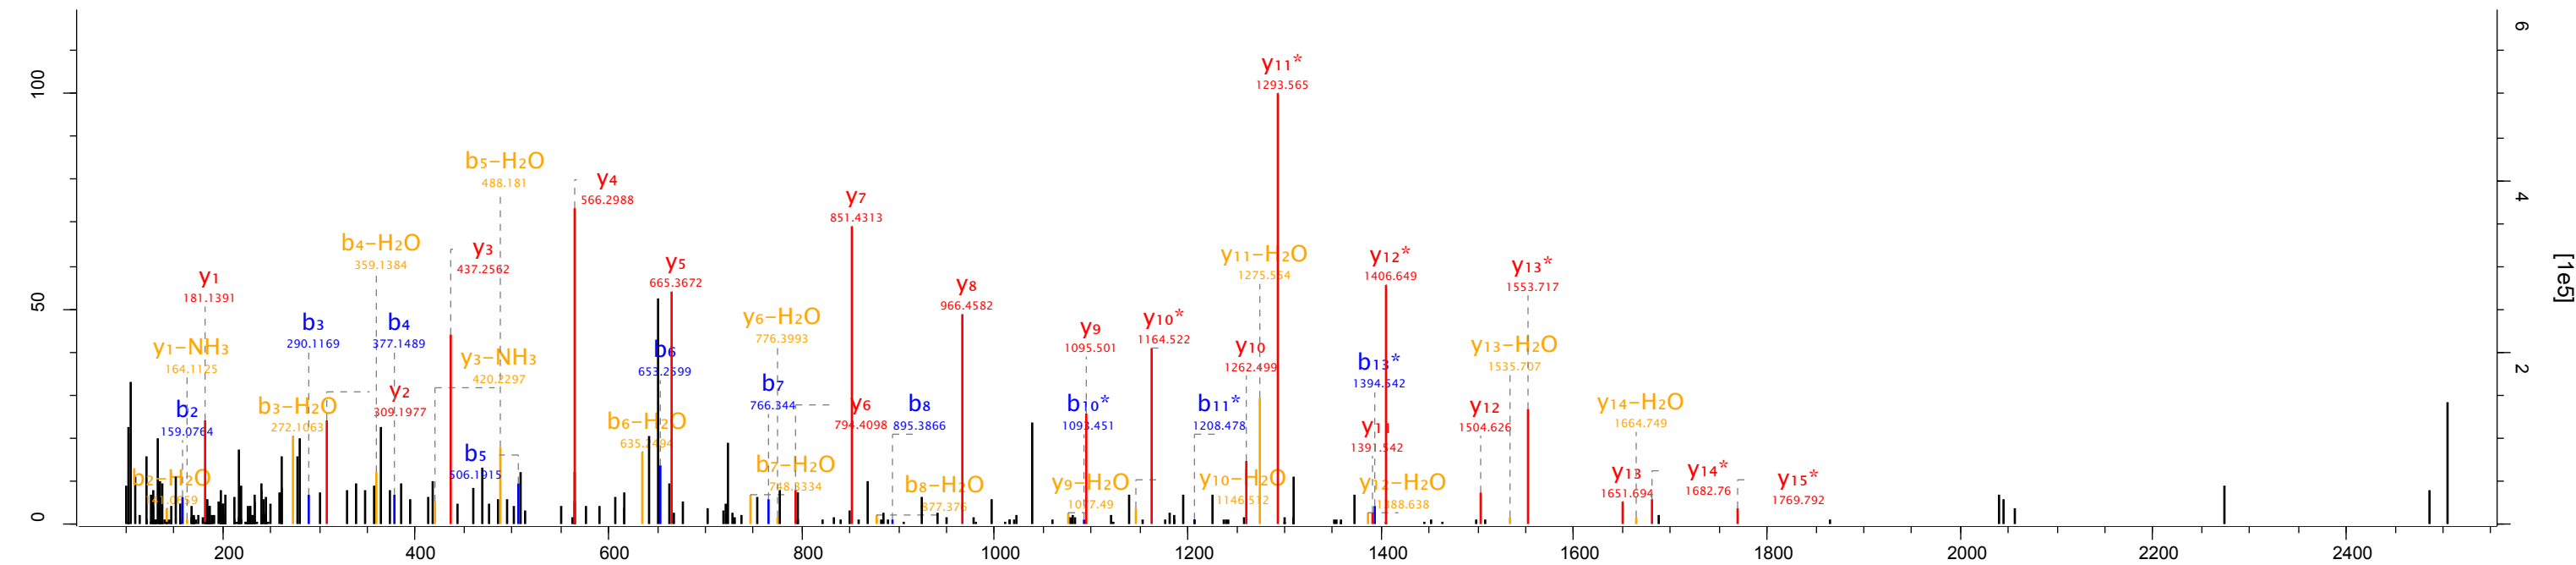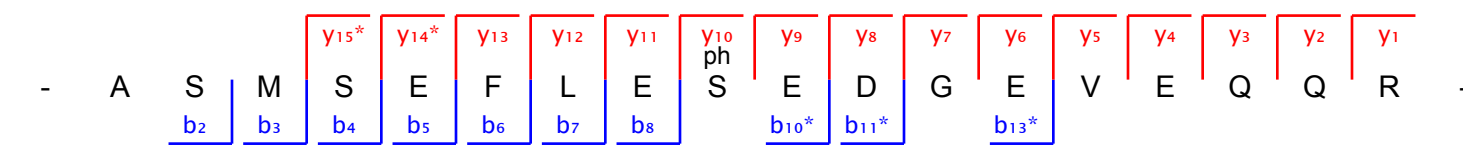

Raw file 20150814\_A375SR\_Phospho\_BR2\_06 Scan 2075 Method FTMS; HCD Score 96.14 m/z 454.73

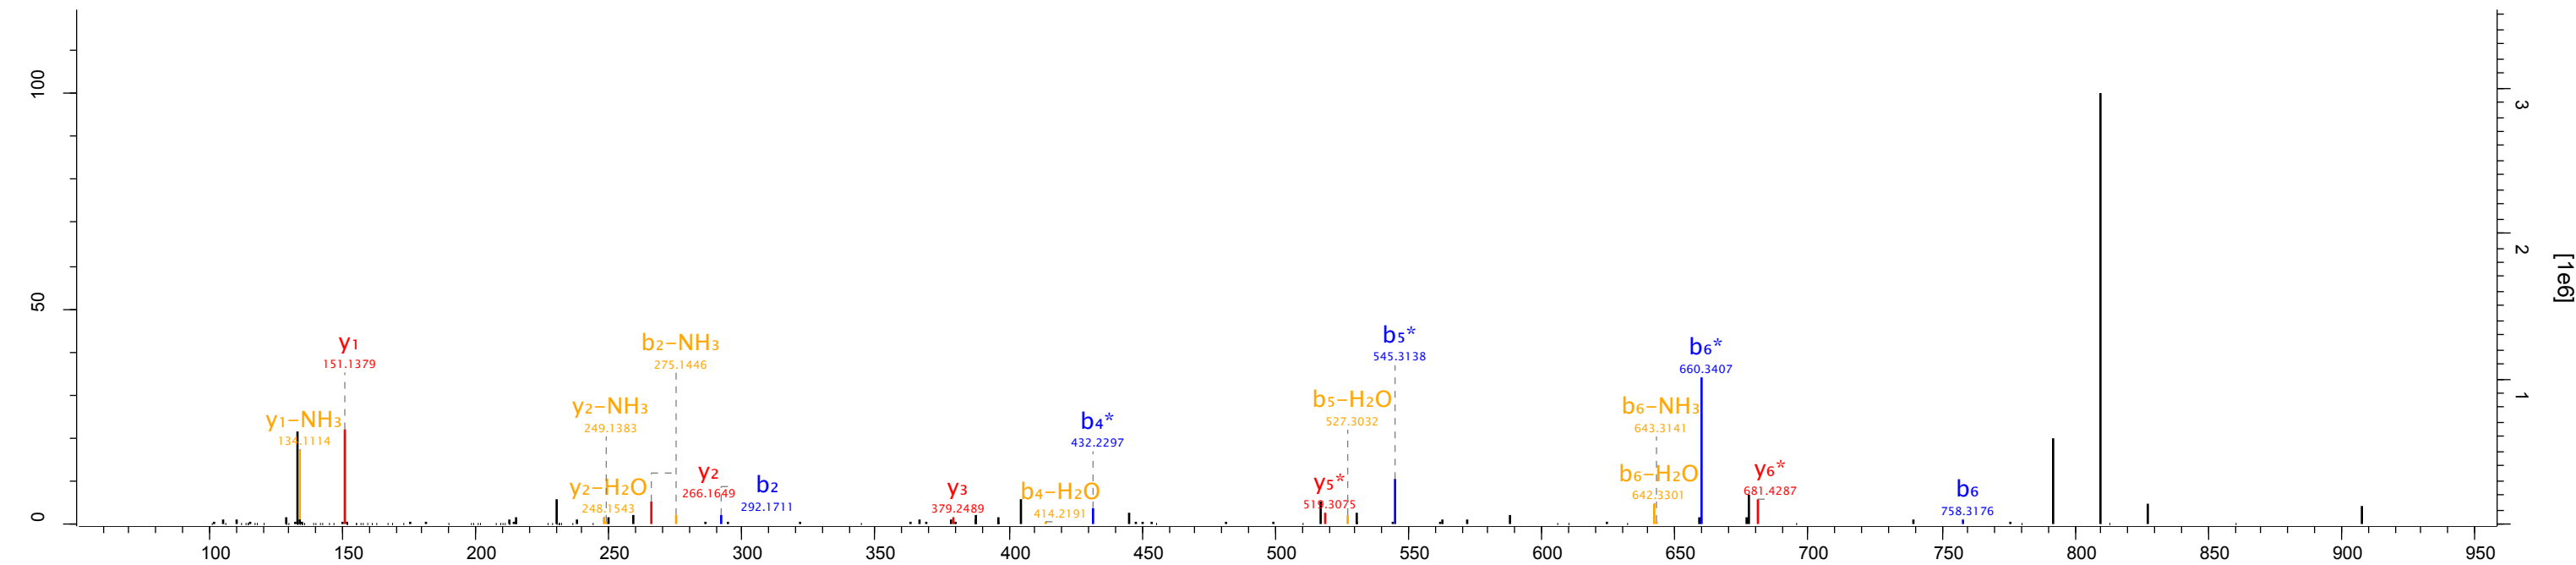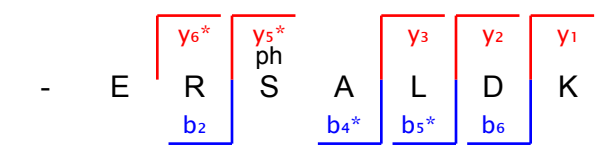

Raw file 20150814\_A375SR\_Phospho\_BR2\_06 Scan 20975 Method FTMS; HCD Score 102.57 m/z 604.98 Gene names FMNL1

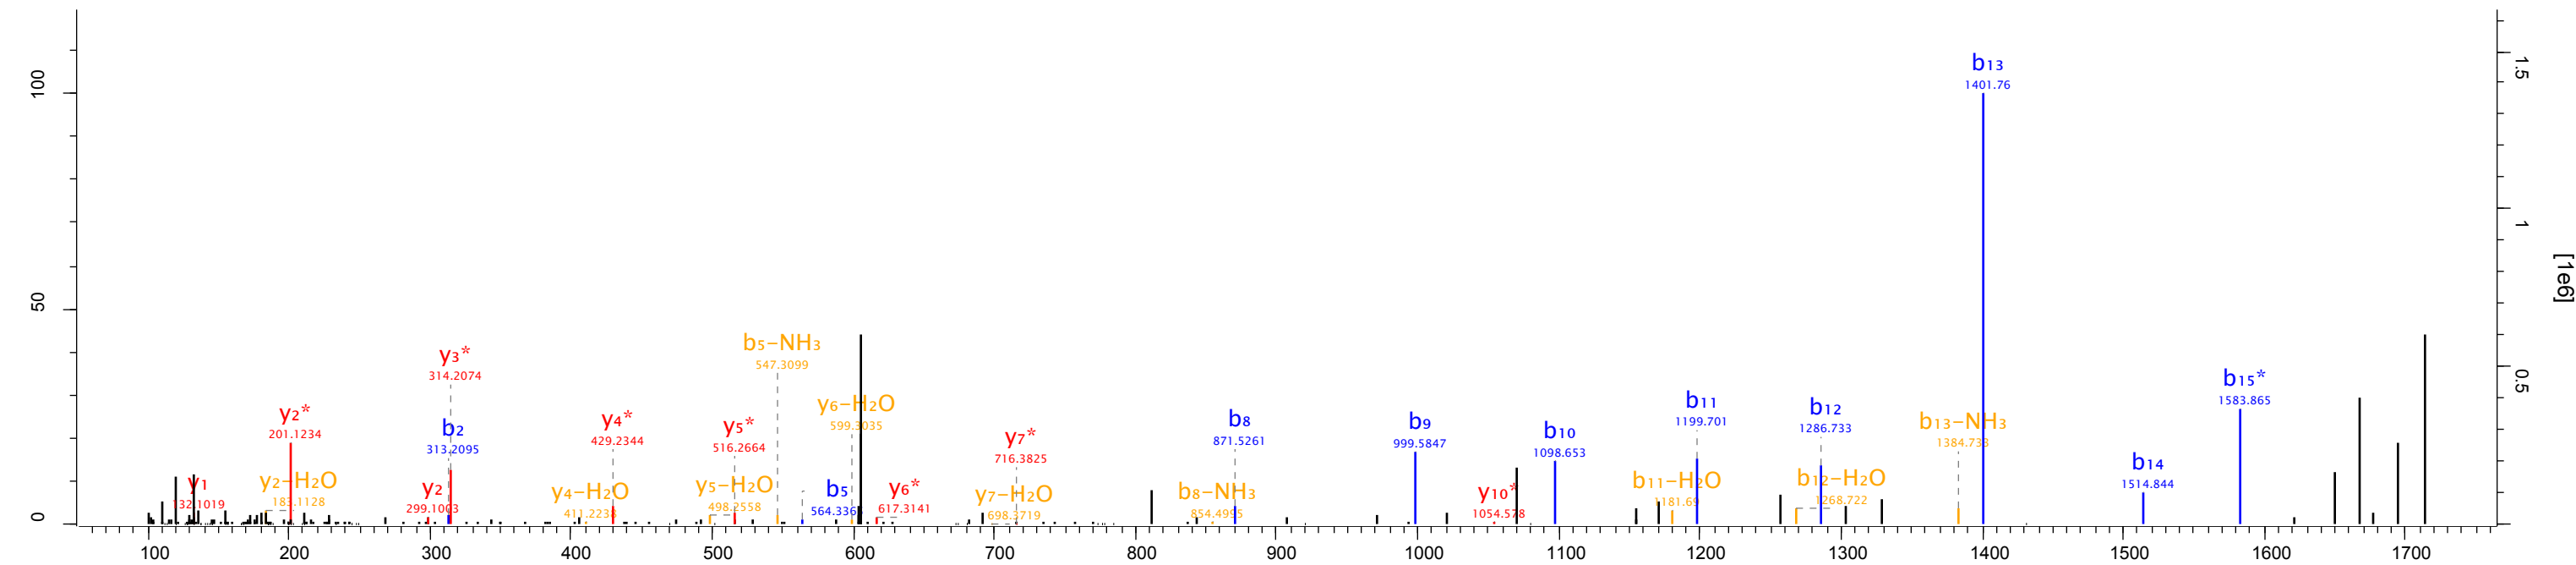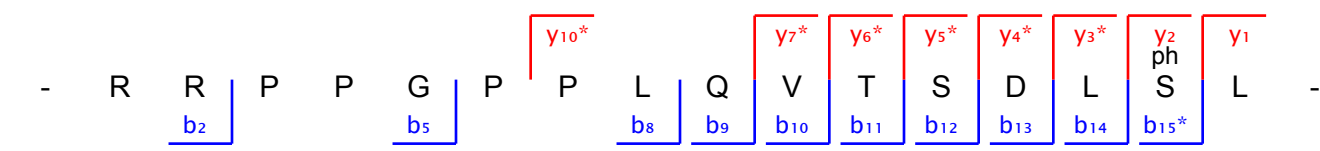

Raw file: 20150814\_A375SR\_Phospho\_BR2\_06  
 Scan: 21075 Method: FTMS; HCD Score: 59.25 m/z: 607.67 Gene names: MTAP

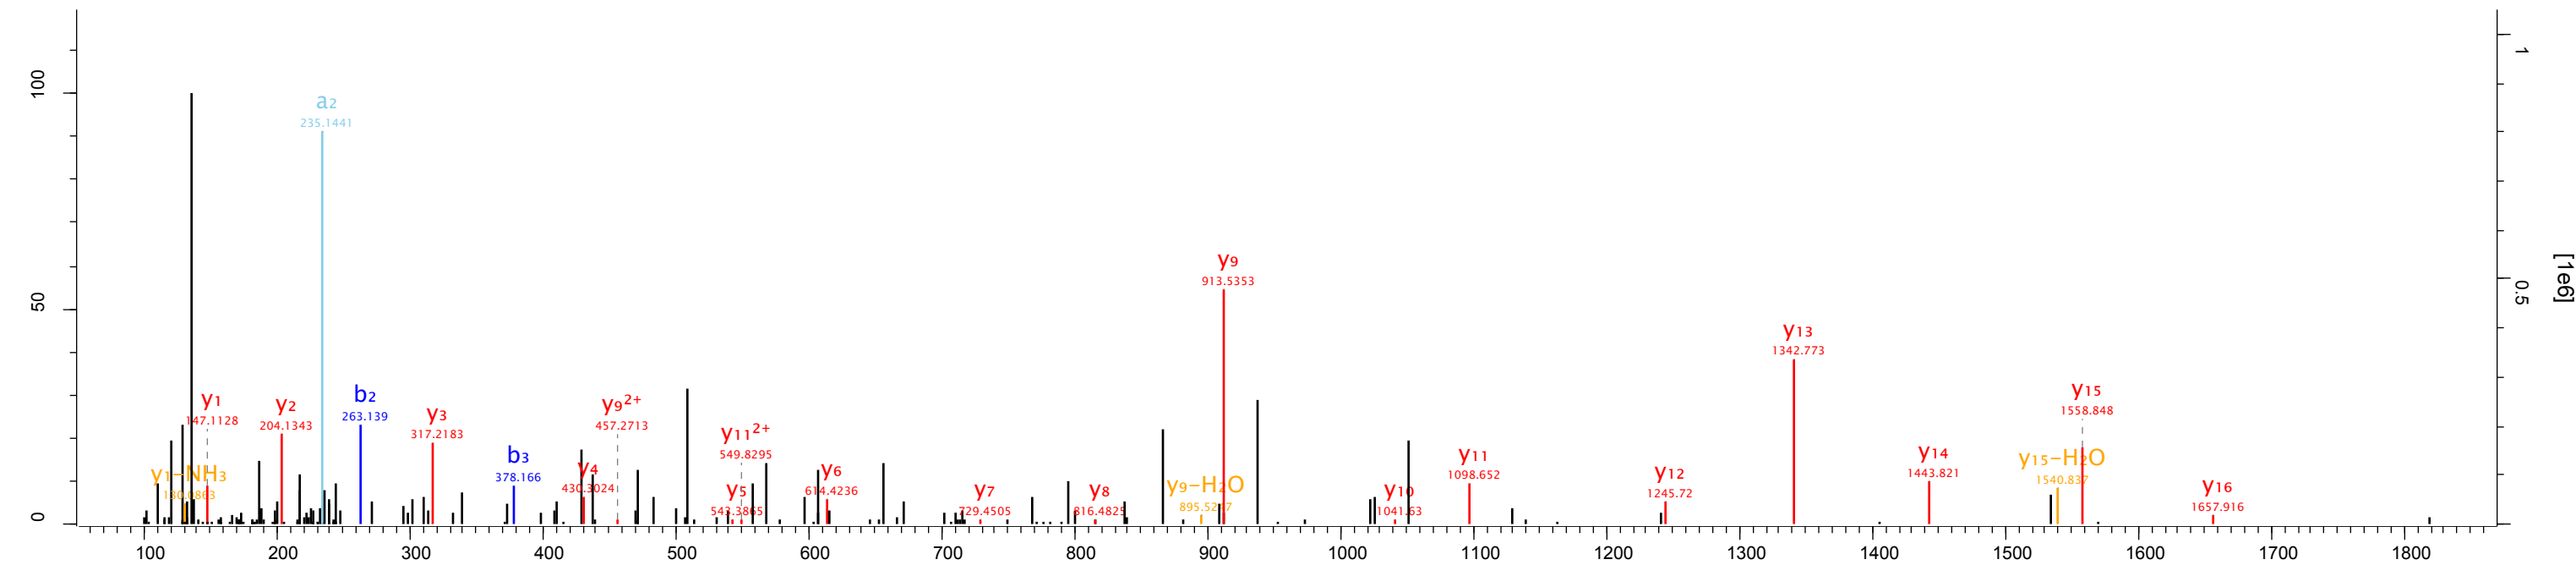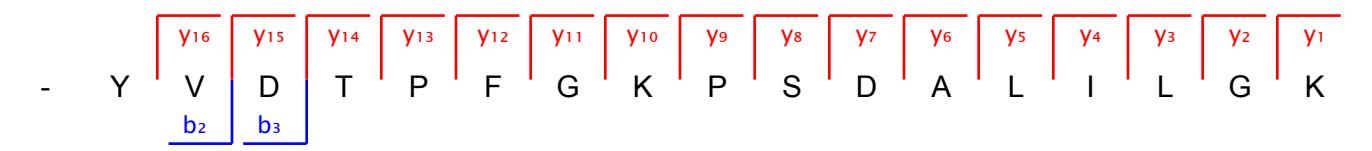

Raw file Scan Method Score m/z Gene names  
 20150814\_A375SR\_Phospho\_BR2\_06 21765 FTMS; HCD 96.07 897.08 JMY

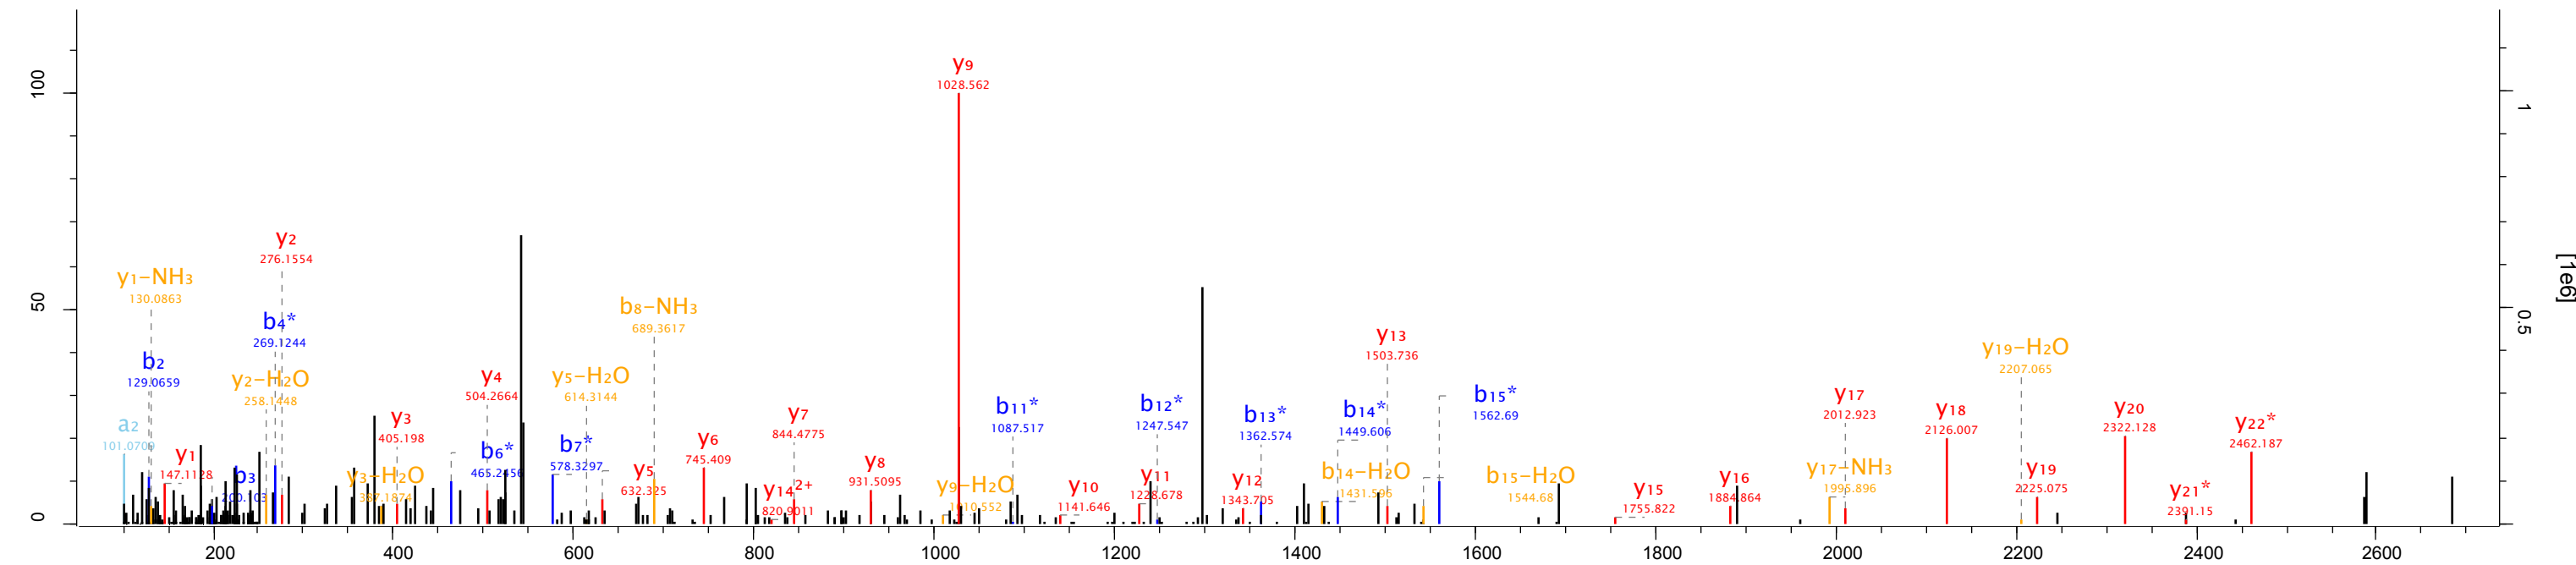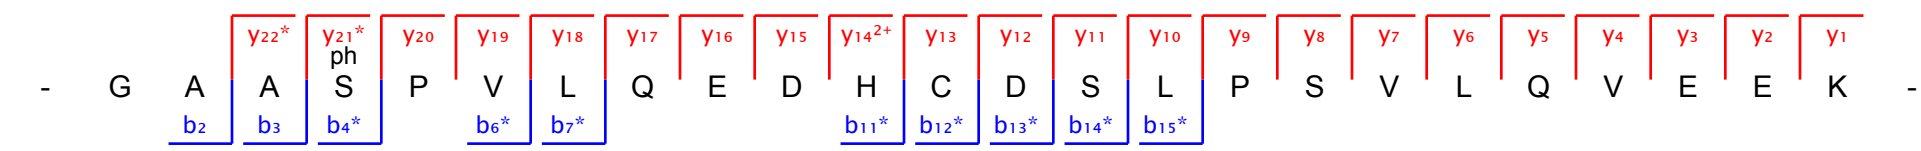



Raw file: 20150814\_A375SR\_Phospho\_BR2\_06  
 Scan: 21805 Method: FTMS; HCD Score: 135.69 m/z: 805.41 Gene names: PPIP5K2

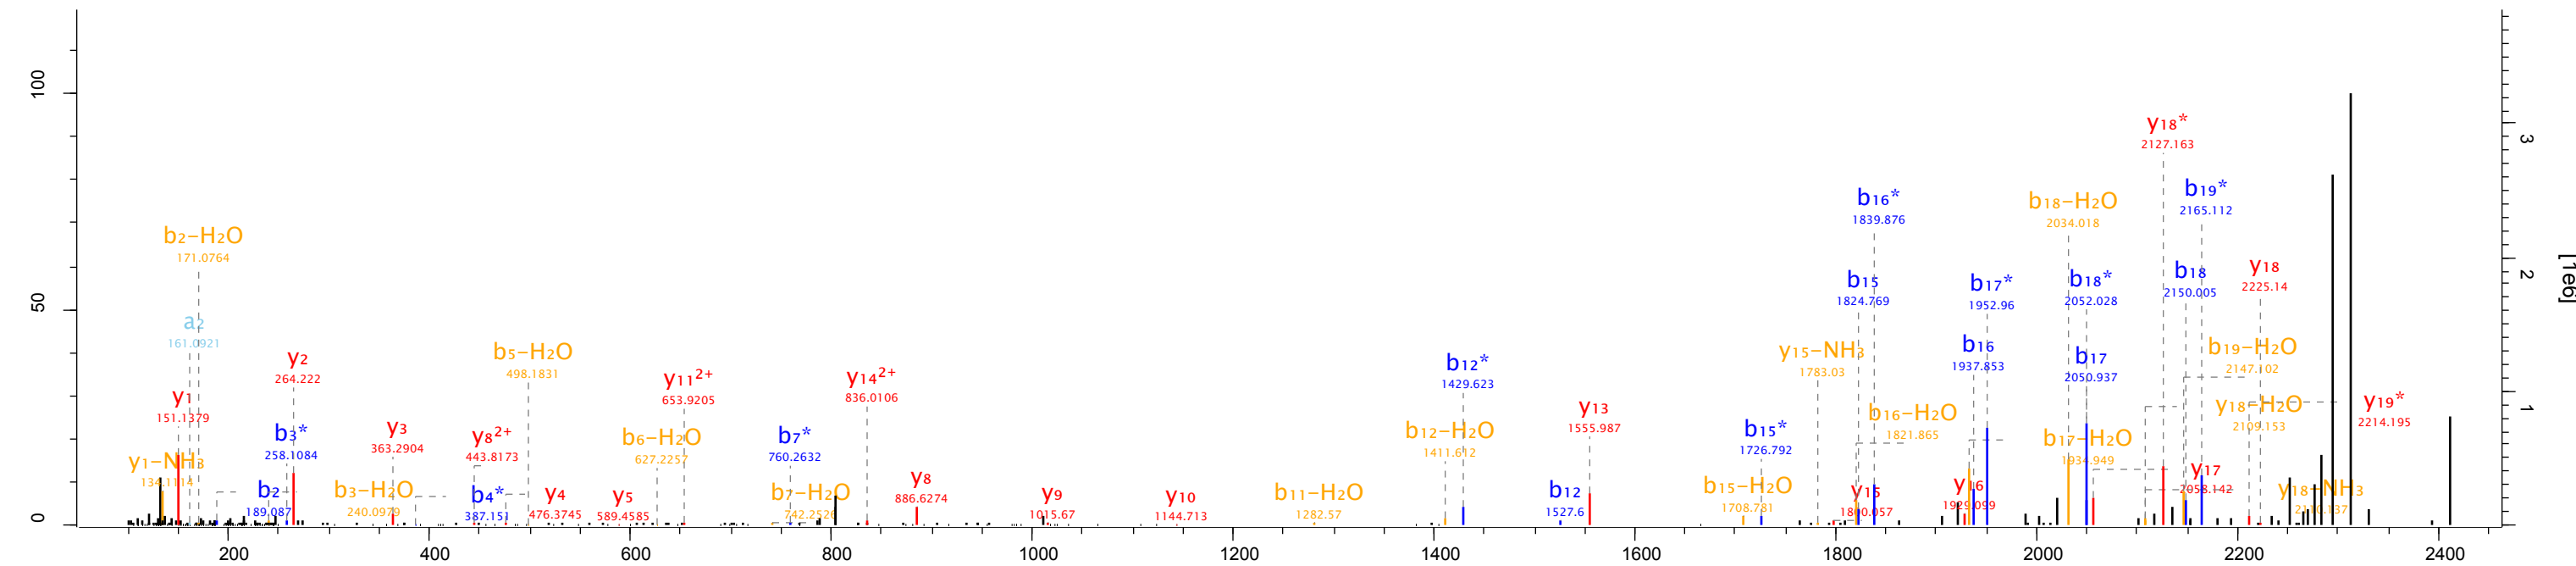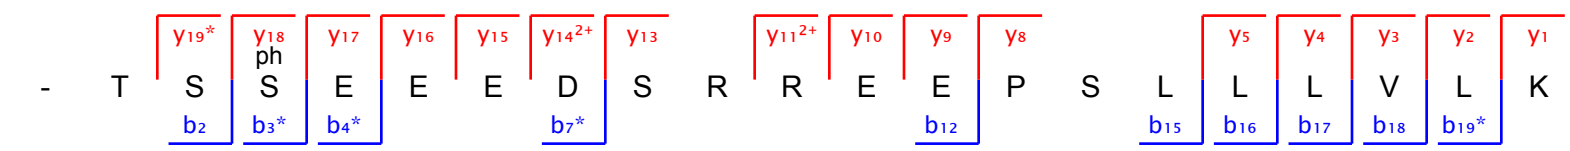

Raw file: 20150814\_A375SR\_Phospho\_BR2\_06  
 Scan: 22515 Method: FTMS; HCD Score: 336.61 m/z: 1018.45 Gene names: BAIAP2L2

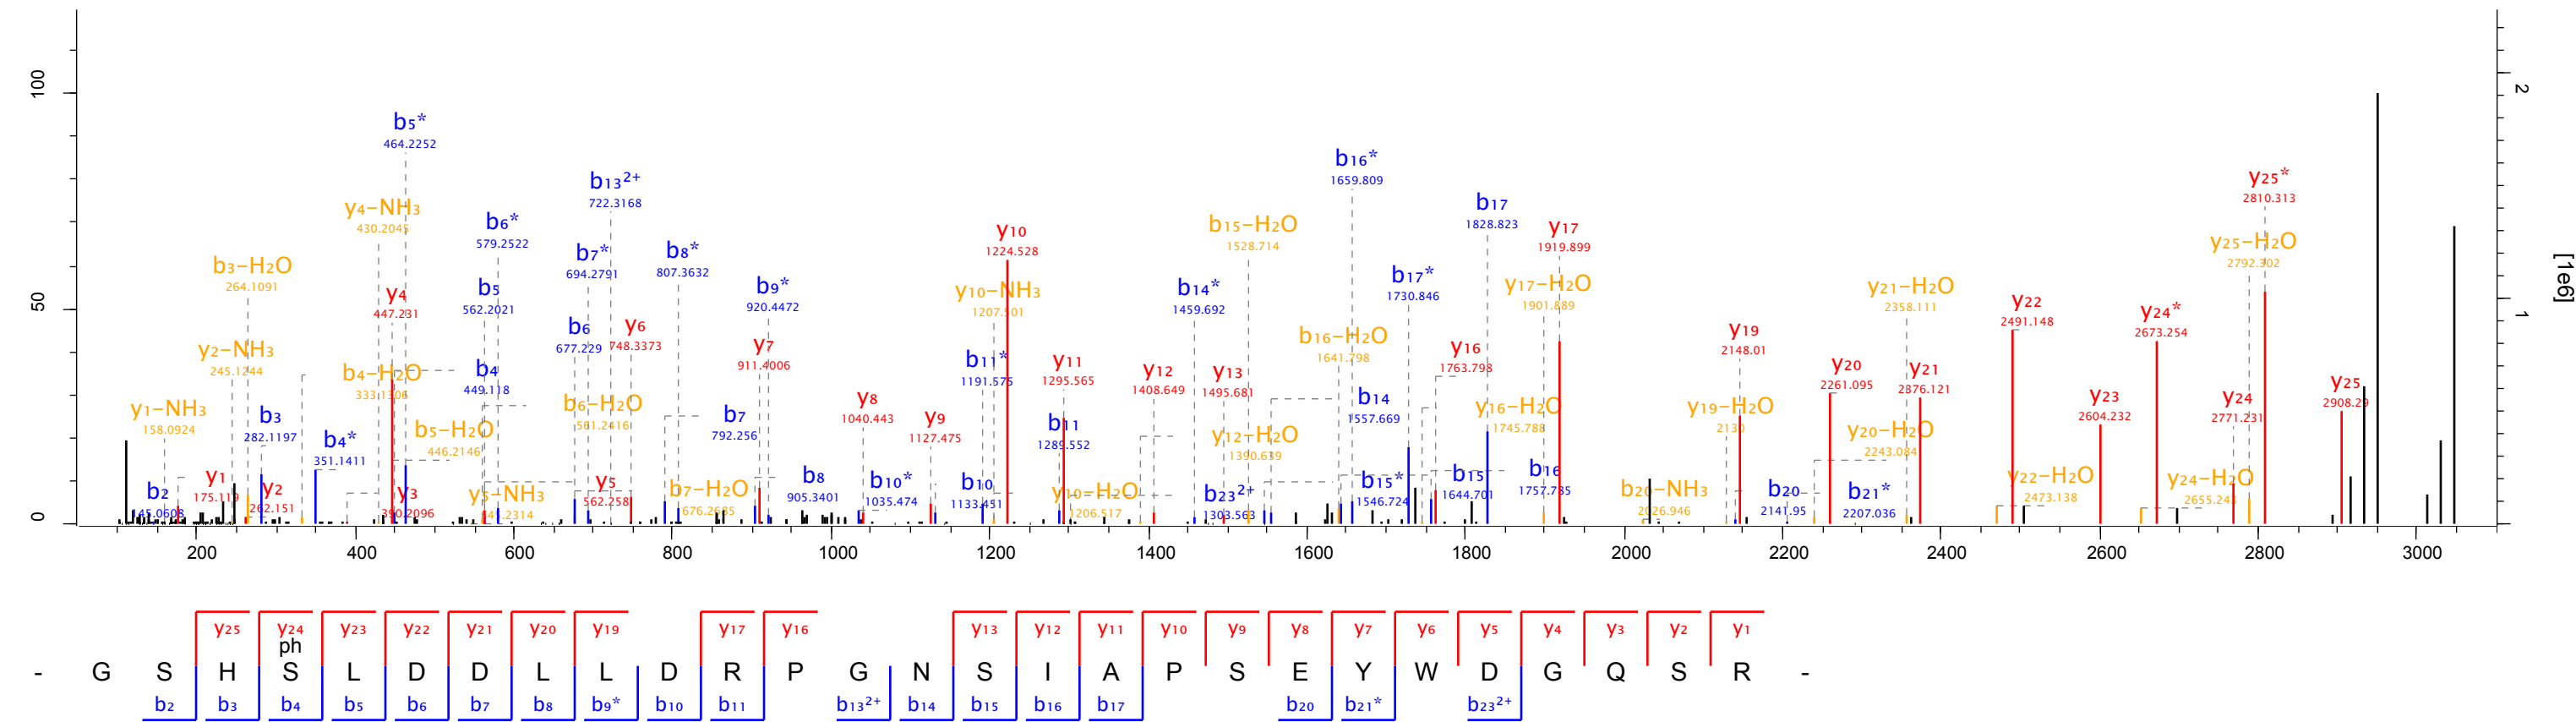

Raw file: 20150814\_A375SR\_Phospho\_BR2\_06  
 Scan: 22875 Method: FTMS; HCD Score: 137.99 m/z: 801.91 Gene names: TBC1D4

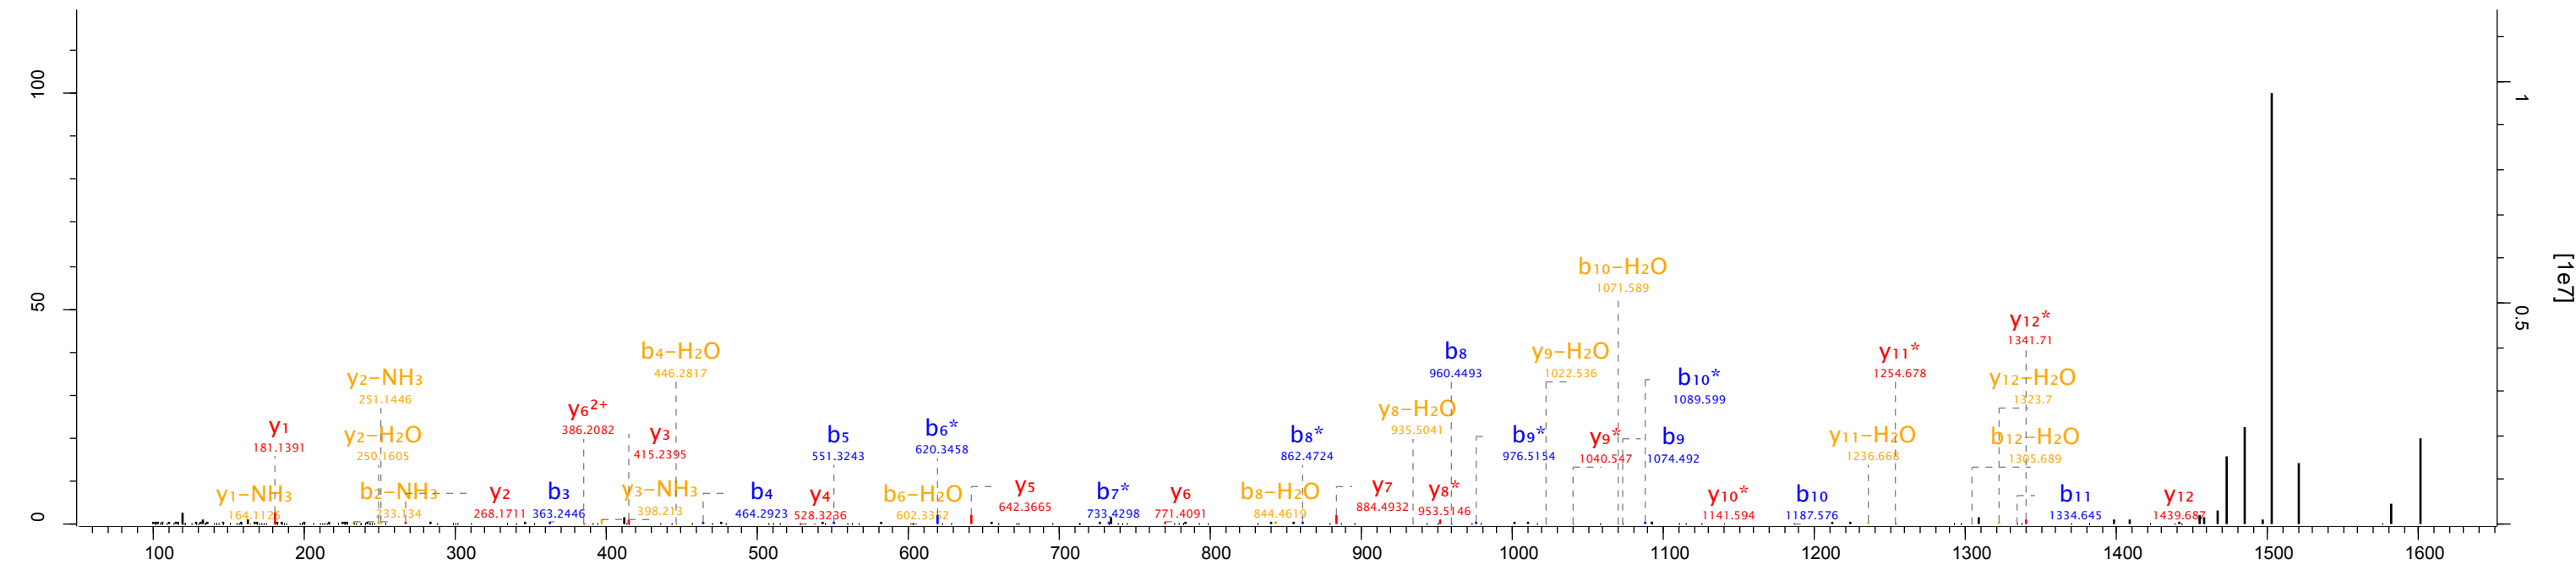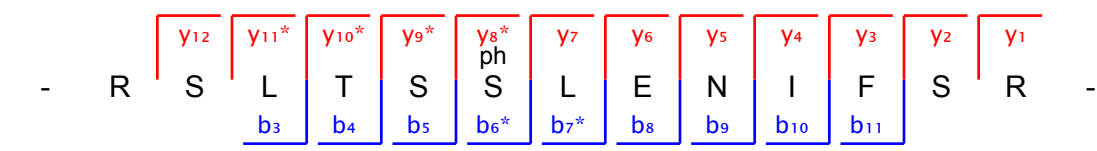

Raw file 20150814\_A375SR\_Phospho\_BR2\_06 Scan 23055 Method FTMS; HCD Score 53.36 m/z 760.73 Gene names NF1

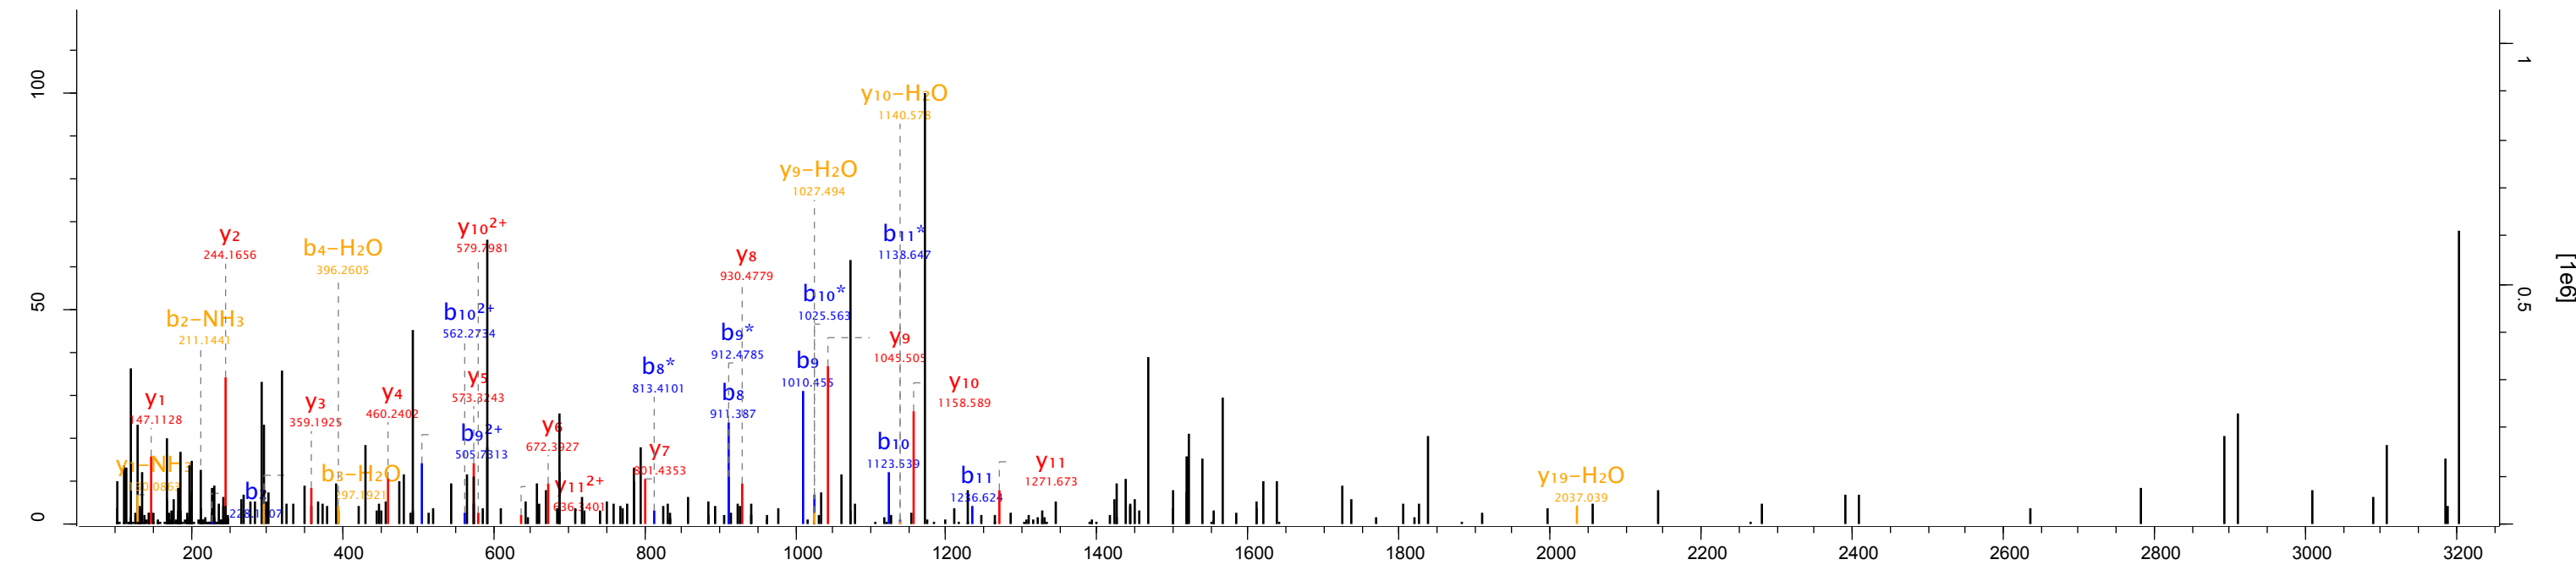

- K V S V S E S N V L L D E E V L T D P K -

ph

b<sub>2</sub> b<sub>8</sub> b<sub>9</sub> b<sub>10</sub> b<sub>11</sub> y<sub>1</sub> y<sub>2</sub> y<sub>3</sub> y<sub>4</sub> y<sub>5</sub> y<sub>6</sub> y<sub>7</sub> y<sub>8</sub> y<sub>9</sub> y<sub>10</sub> y<sub>11</sub>

Raw file 20150814\_A375SR\_Phospho\_BR2\_06 Scan 23735 Method FTMS; HCD Score 122.87 m/z 593.98 Gene names LMNA

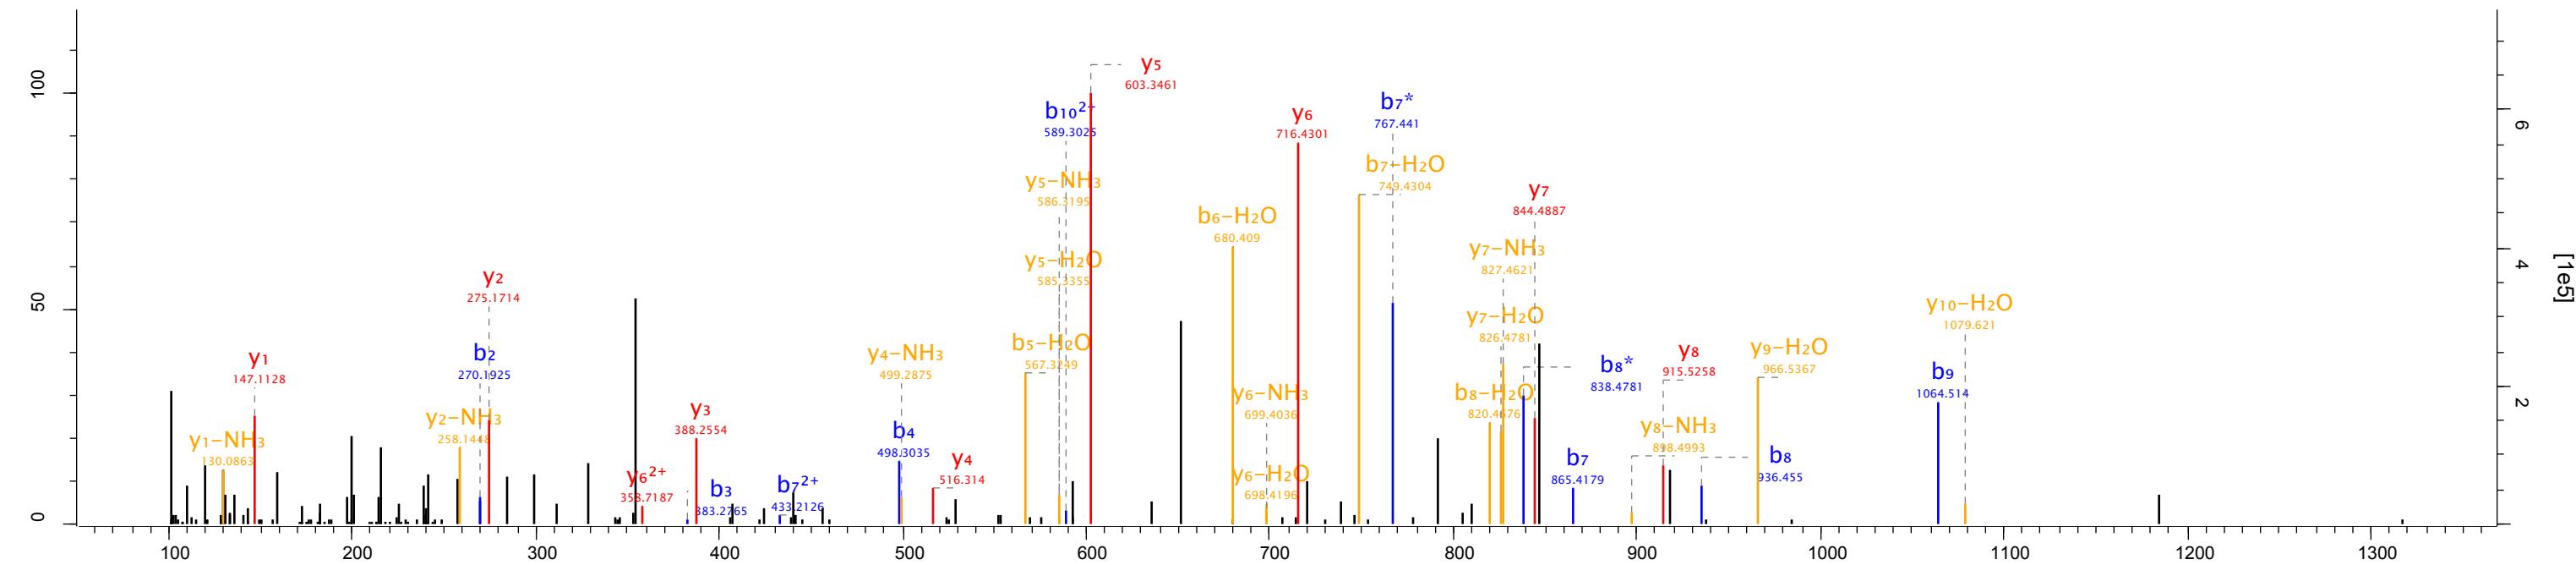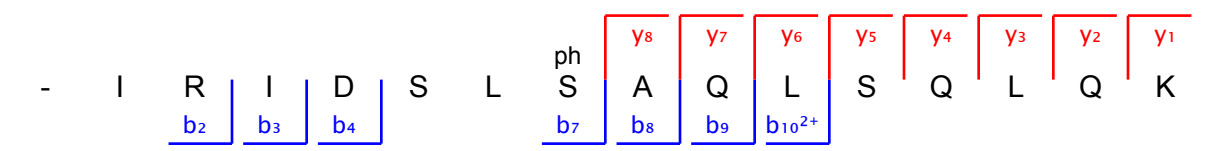

Raw file 20150814\_A375SR\_Phospho\_BR2\_06 Scan 2425 Method FTMS; HCD Score 41.01 m/z 694.82 Gene names SRRM2

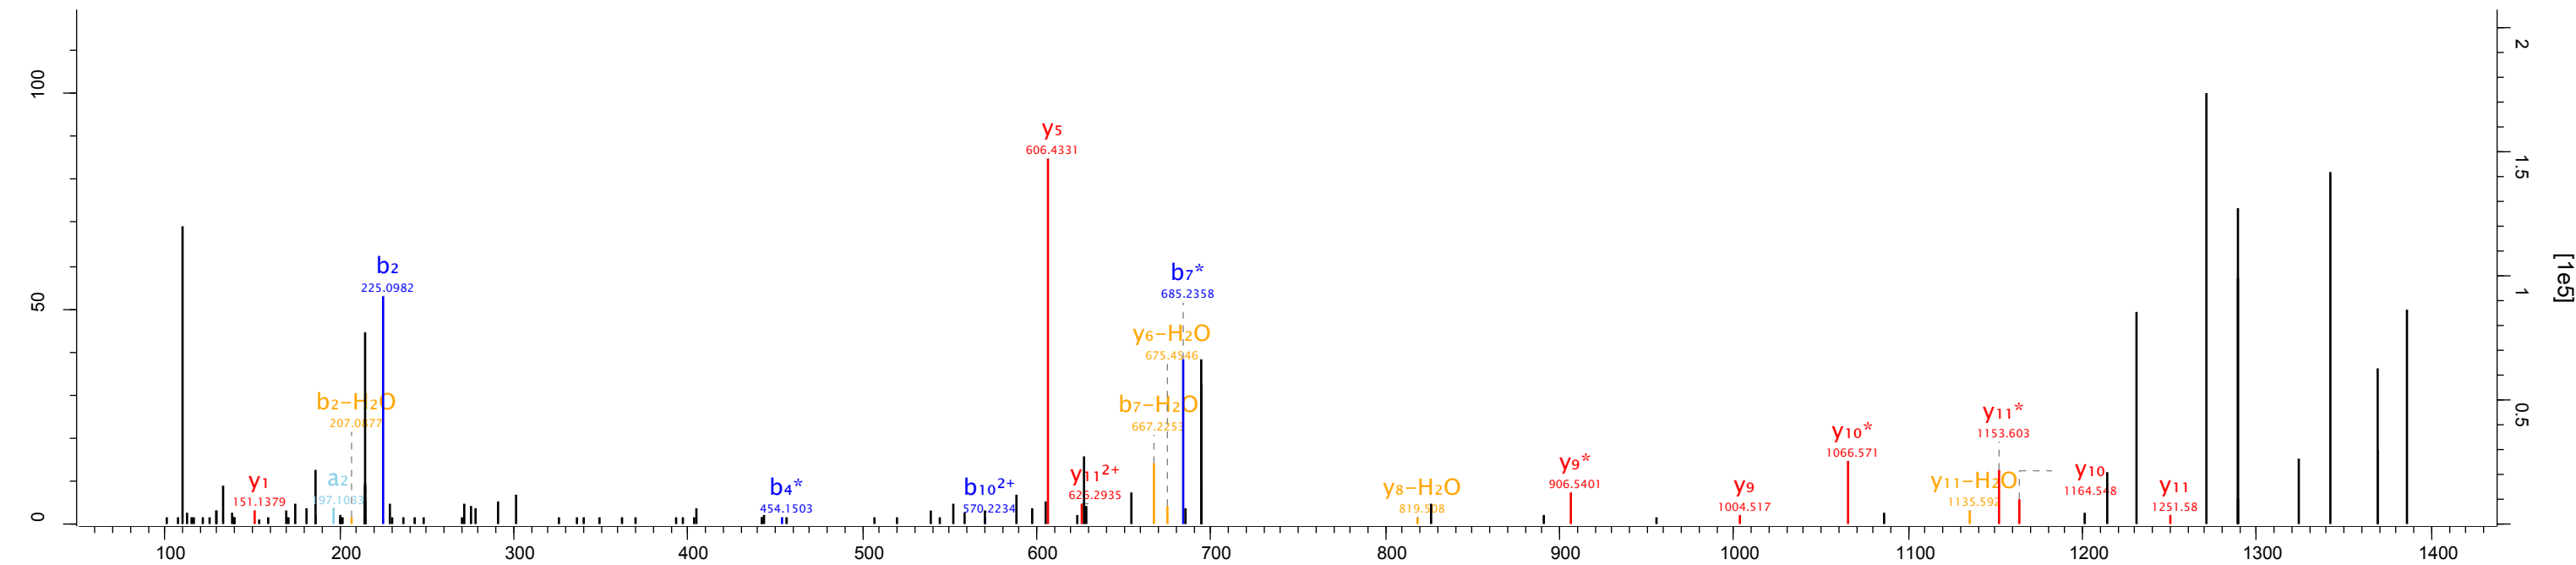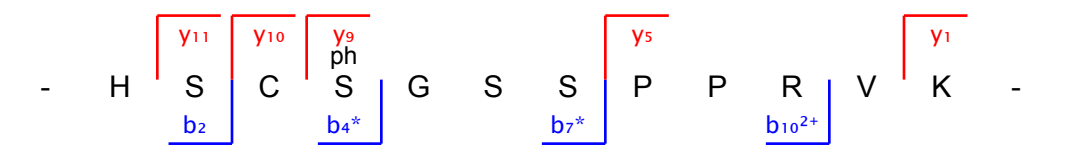

Raw file  
 20150814\_A375SR\_Phospho\_BR2\_06  
 Scan 24765 Method FTMS; HCD Score 155.35 m/z 969.91 Gene names C1orf226

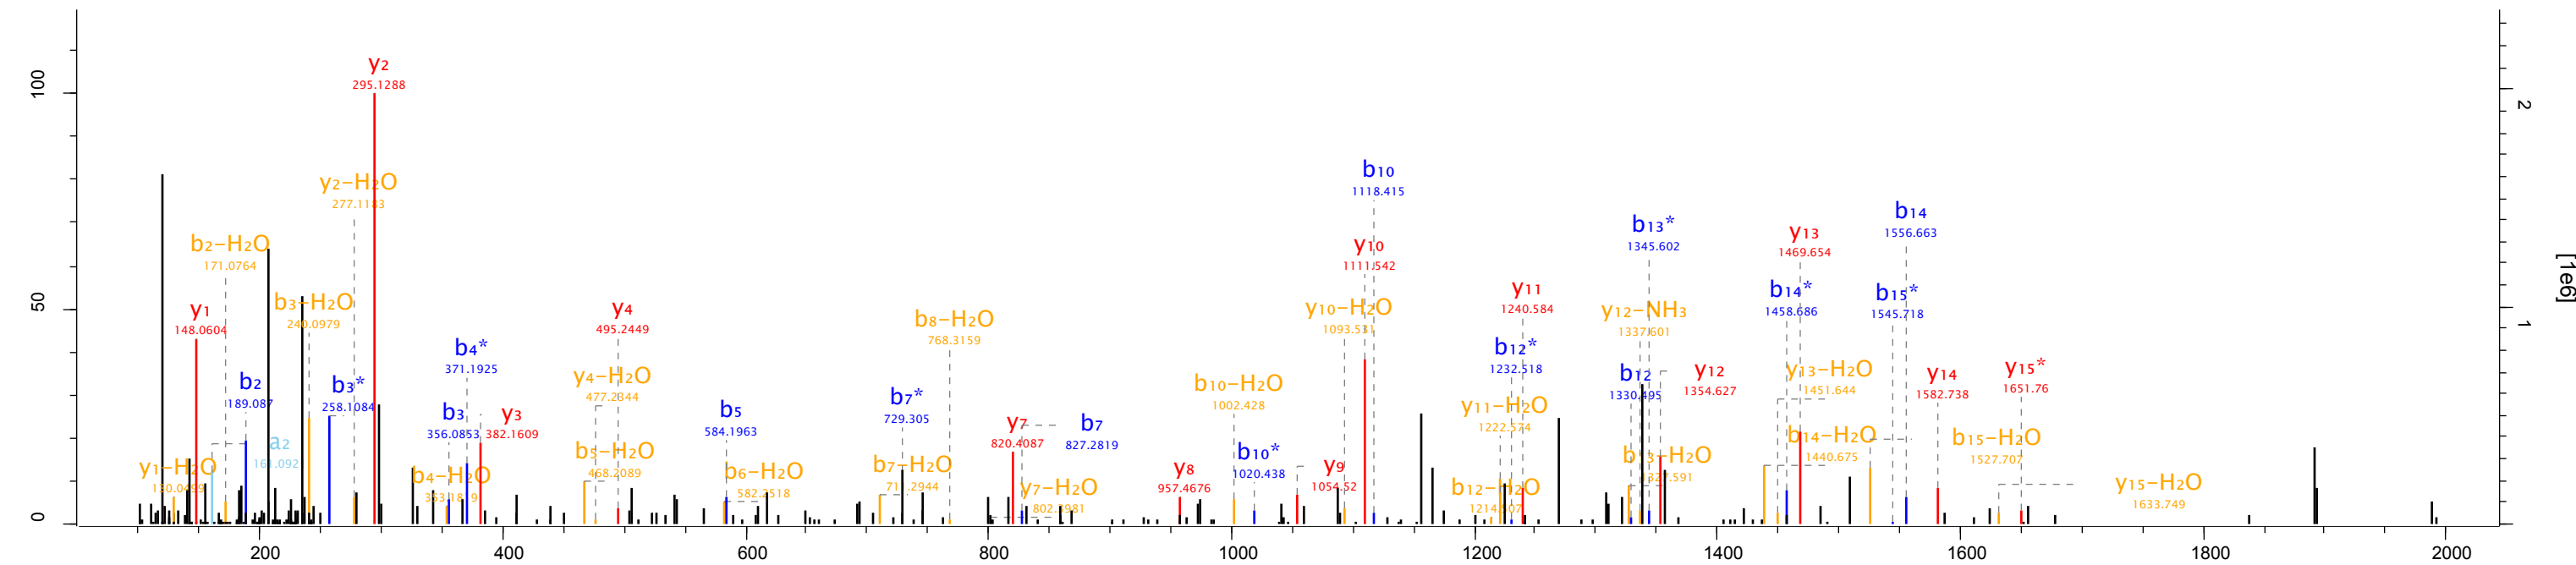

- T S S L D N E G P H P D L L S F E -

b<sub>2</sub>
y<sub>15</sub><sup>\*</sup>  
ph
y<sub>14</sub>
y<sub>13</sub>
y<sub>12</sub>
y<sub>11</sub>
y<sub>10</sub>
y<sub>9</sub>
y<sub>8</sub>
y<sub>7</sub>
b<sub>3</sub>
b<sub>4</sub><sup>\*</sup>
b<sub>5</sub>
b<sub>7</sub>
b<sub>10</sub>
b<sub>12</sub>
b<sub>13</sub><sup>\*</sup>
b<sub>14</sub>
b<sub>15</sub><sup>\*</sup>

Raw file 20150814\_A375SR\_Phospho\_BR2\_06 Scan 26275 Method FTMS; HCD Score 84.89 m/z 1065.49 Gene names AP2A1

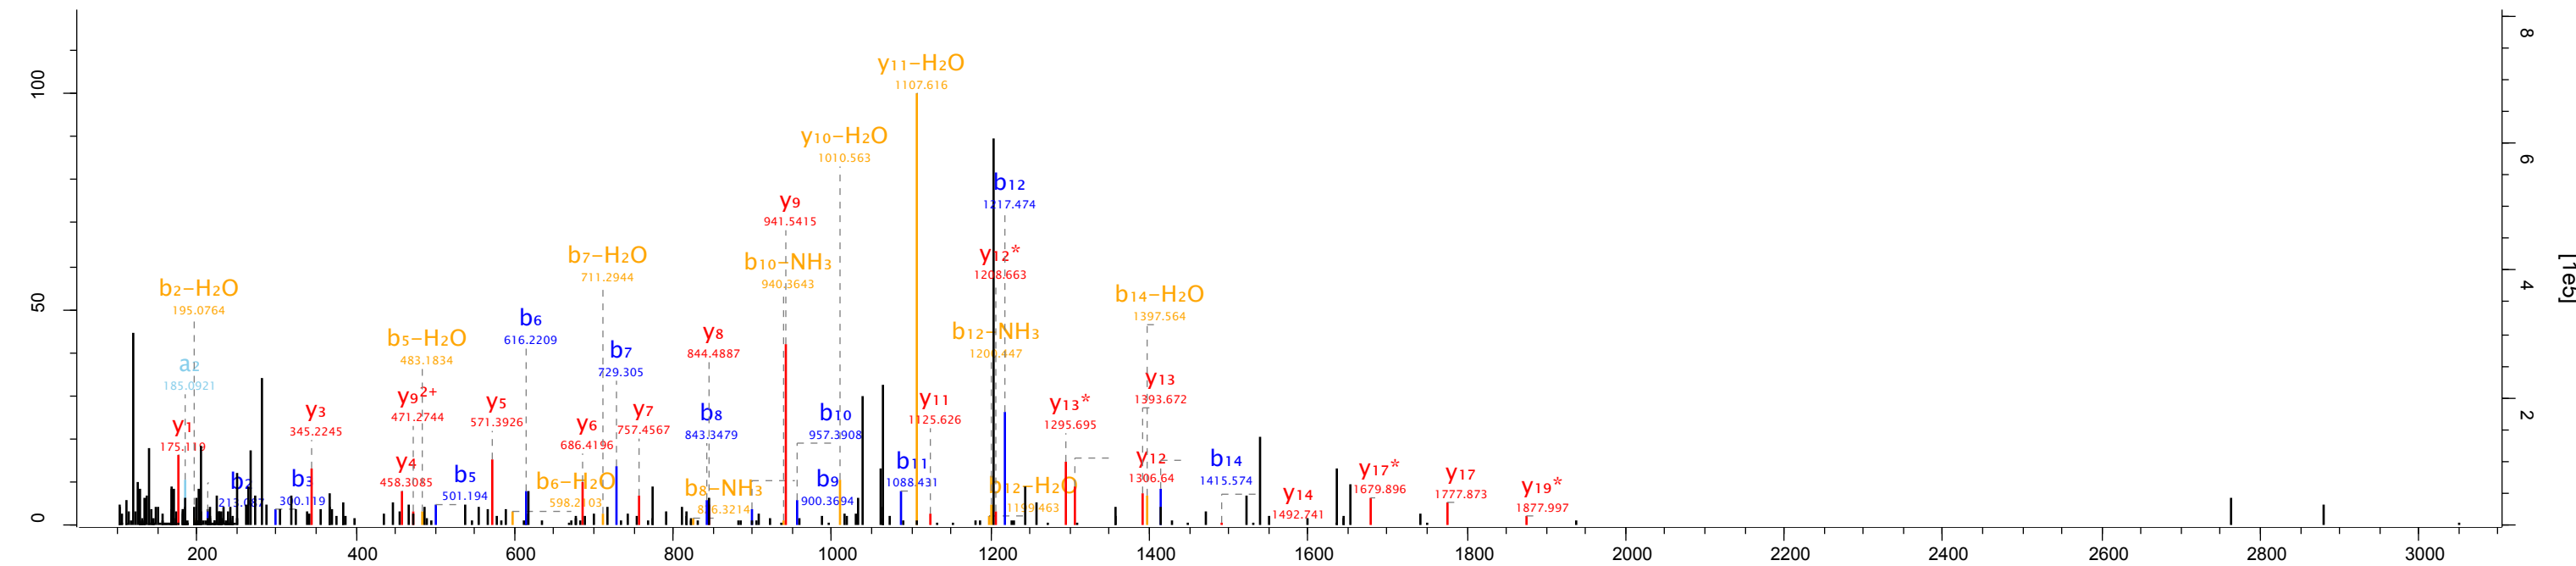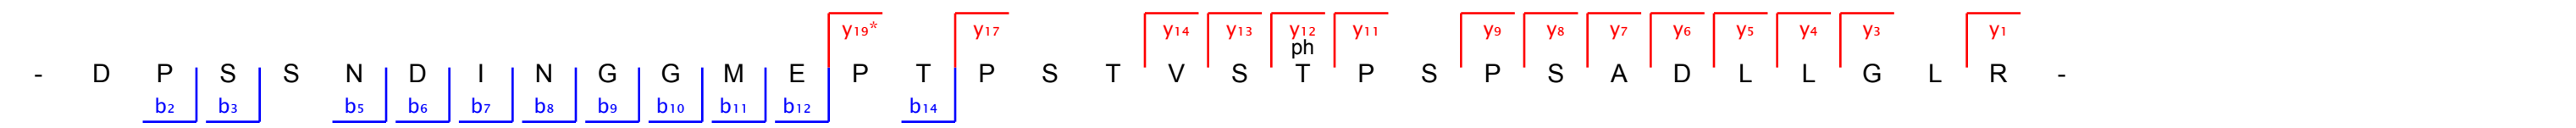



Raw file Scan Method Score m/z Gene names  
 20150814\_A375SR\_Phospho\_BR2\_06 27135 FTMS; HCD 303.76 943.95 DNAJC5

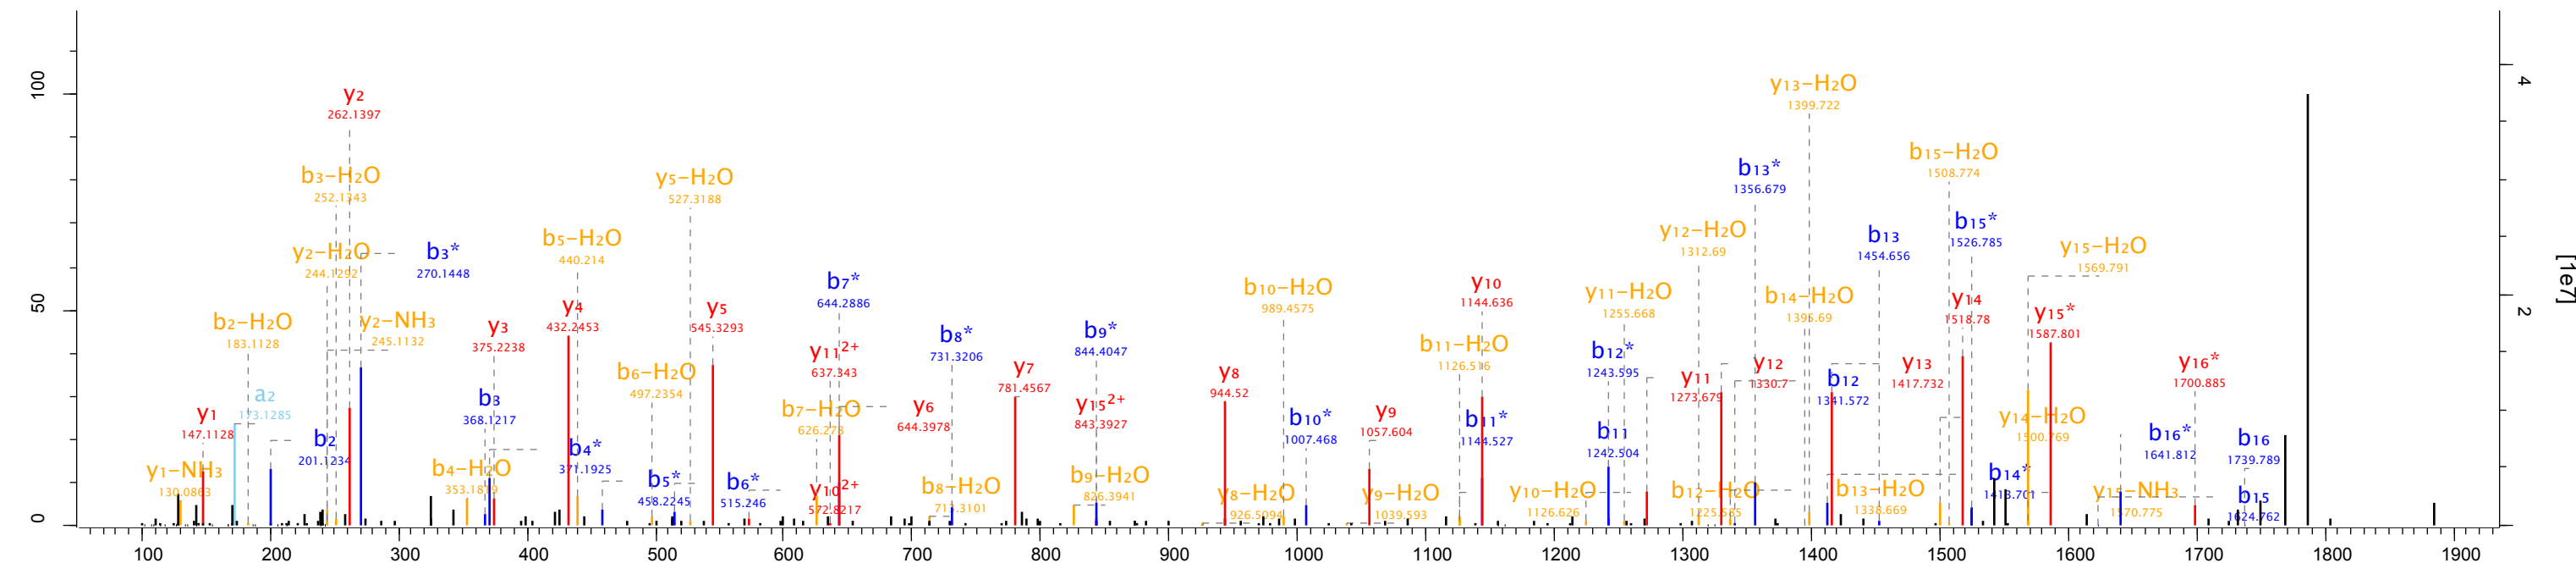

- S L S T S G E S L Y H V L G L D K -

y<sub>16</sub>\*
y<sub>15</sub><sup>ph</sup>\*
y<sub>14</sub>
y<sub>13</sub>
y<sub>12</sub>
y<sub>11</sub>
y<sub>10</sub>
y<sub>9</sub>
y<sub>8</sub>
y<sub>7</sub>
y<sub>6</sub>
y<sub>5</sub>
y<sub>4</sub>
y<sub>3</sub>
y<sub>2</sub>
y<sub>1</sub>

b<sub>2</sub>
b<sub>3</sub>
b<sub>4</sub>\*
b<sub>5</sub>\*
b<sub>6</sub>\*
b<sub>7</sub>\*
b<sub>8</sub>\*
b<sub>9</sub>\*
b<sub>10</sub>\*
b<sub>11</sub>
b<sub>12</sub>
b<sub>13</sub>
b<sub>14</sub>\*
b<sub>15</sub>
b<sub>16</sub>

Raw file: 20150814\_A375SR\_Phospho\_BR2\_06  
 Scan: 27575 Method: FTMS; HCD Score: 240.2 m/z: 1084.97 Gene names: YWHAE

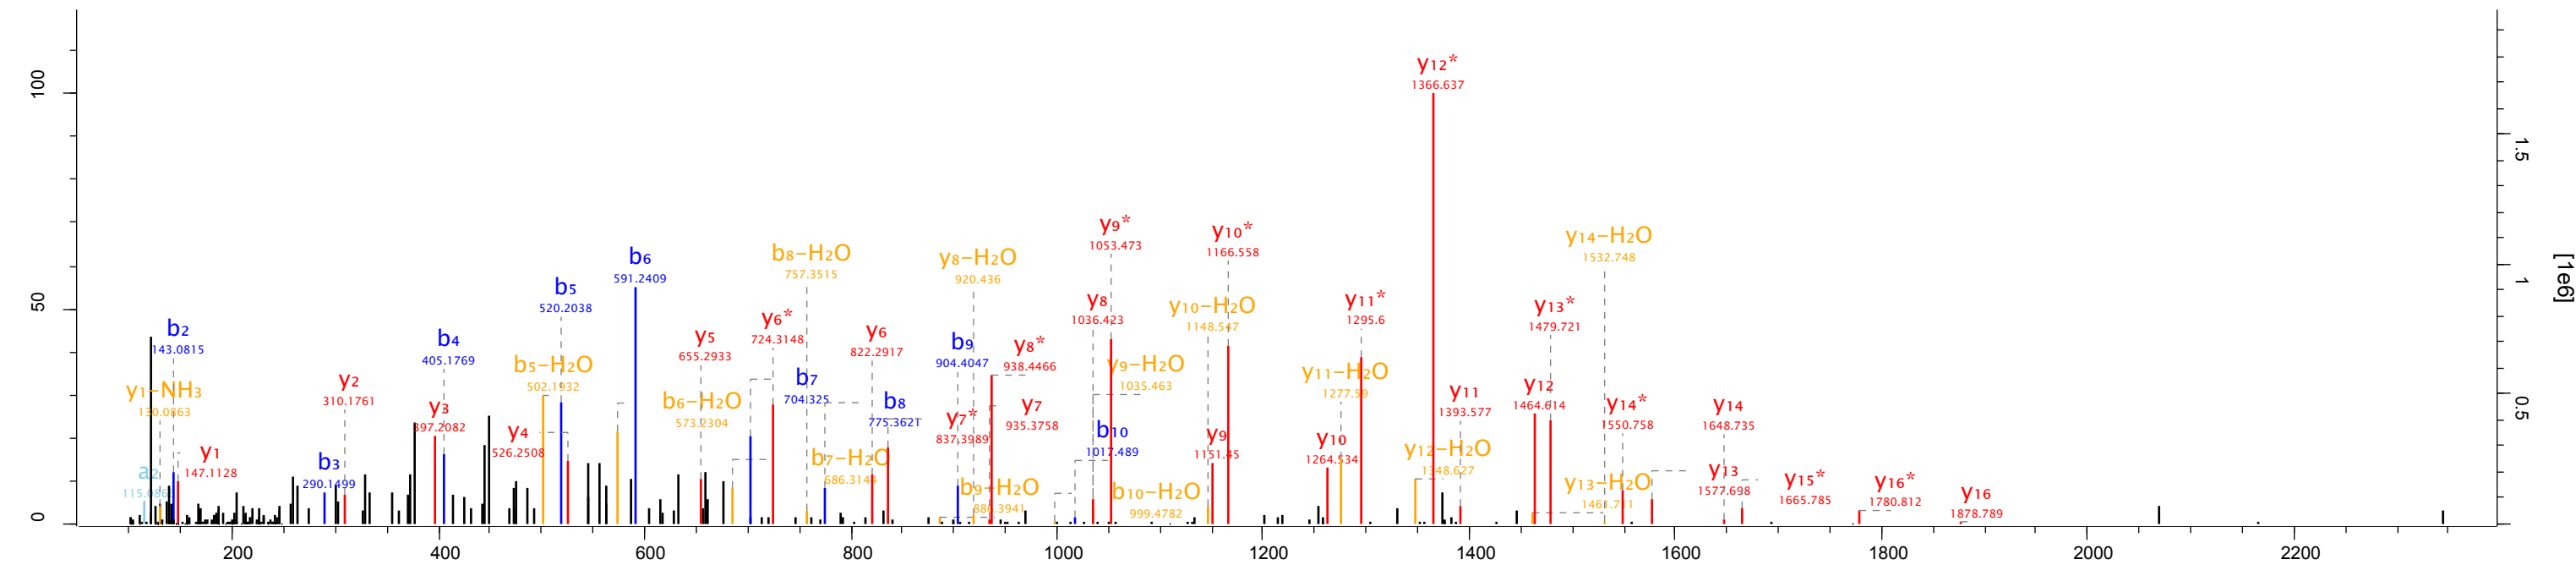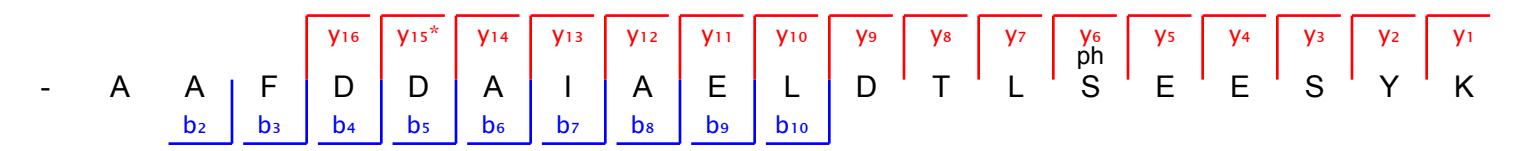

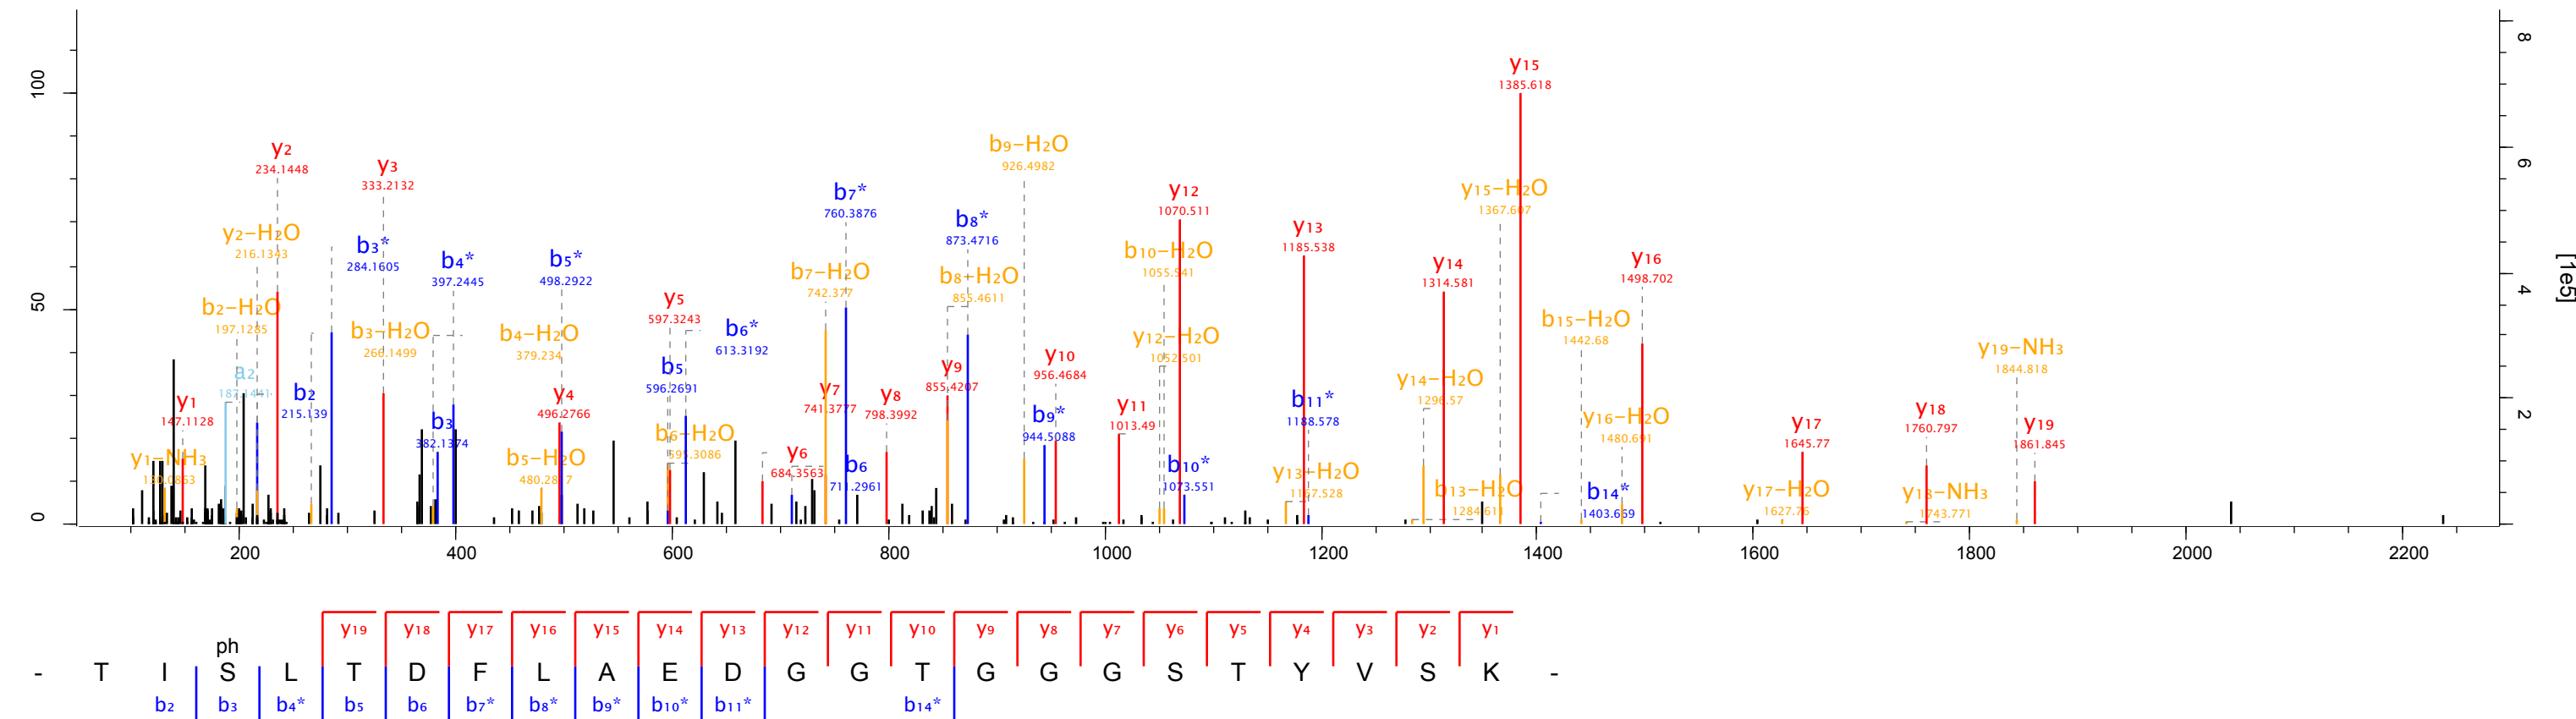

Raw file: 20150814\_A375SR\_Phospho\_BR2\_06  
 Scan: 27825 Method: FTMS; HCD Score: 69.73 m/z: 982.49 Gene names: CAMSAP1

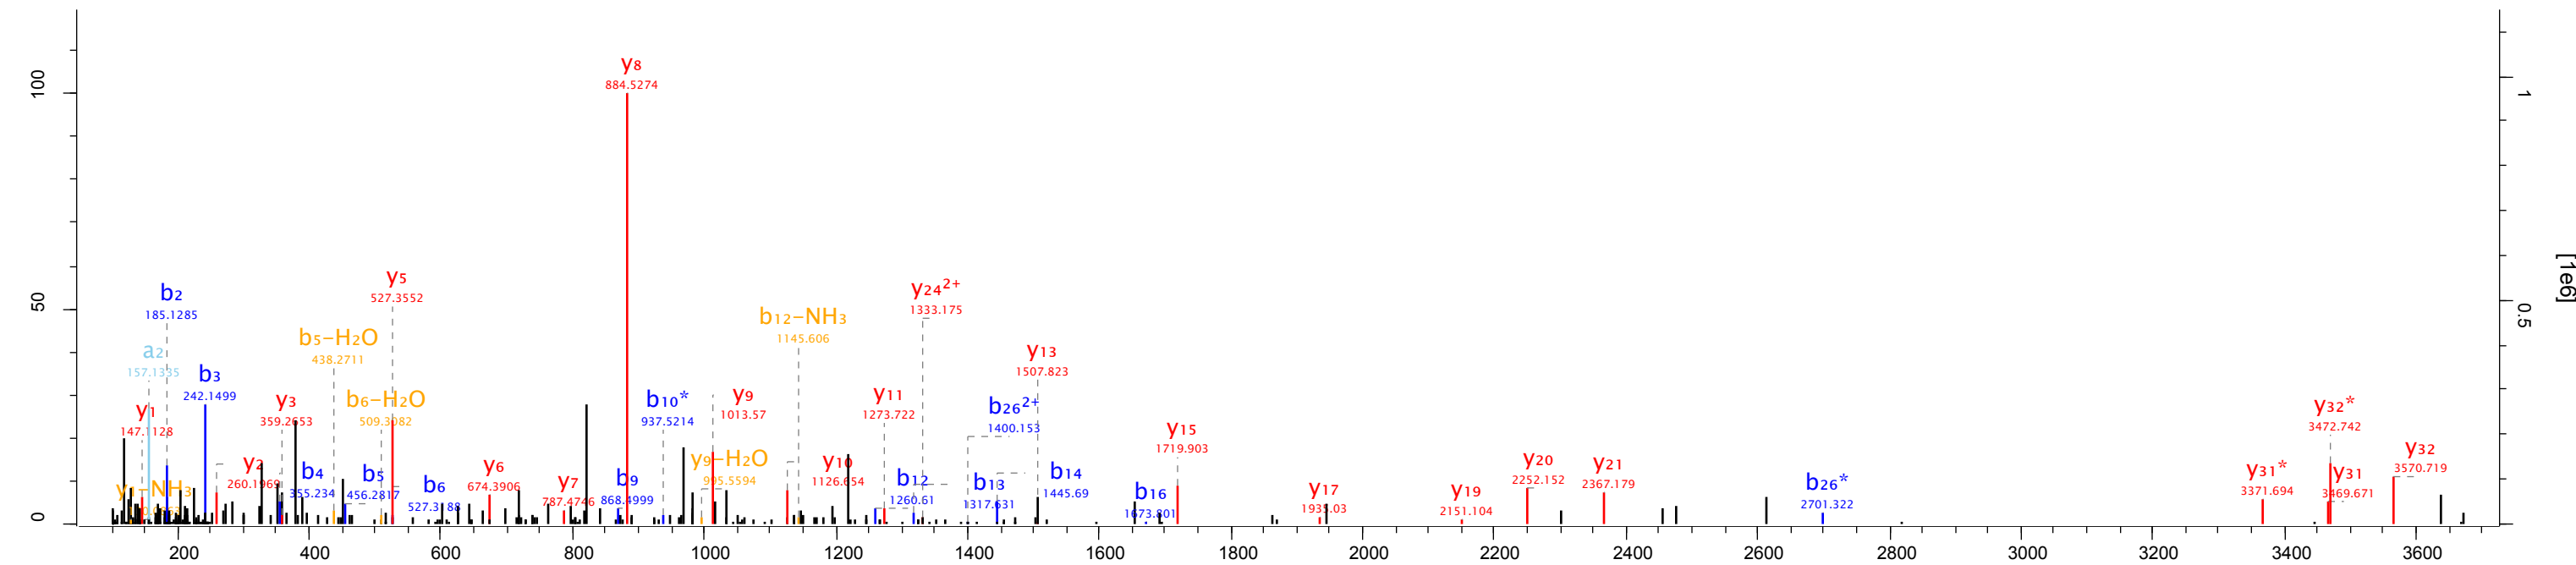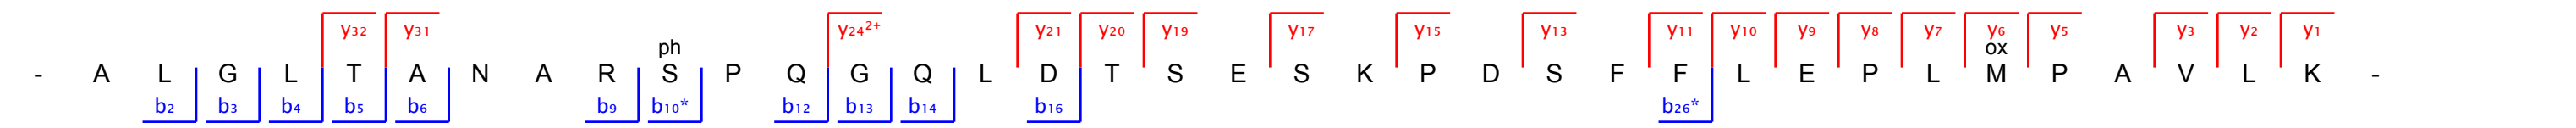

Raw file 20150814\_A375SR\_Phospho\_BR2\_06 Scan 28185 Method FTMS; HCD Score 123.06 m/z 737.67 Gene names UBAP2L

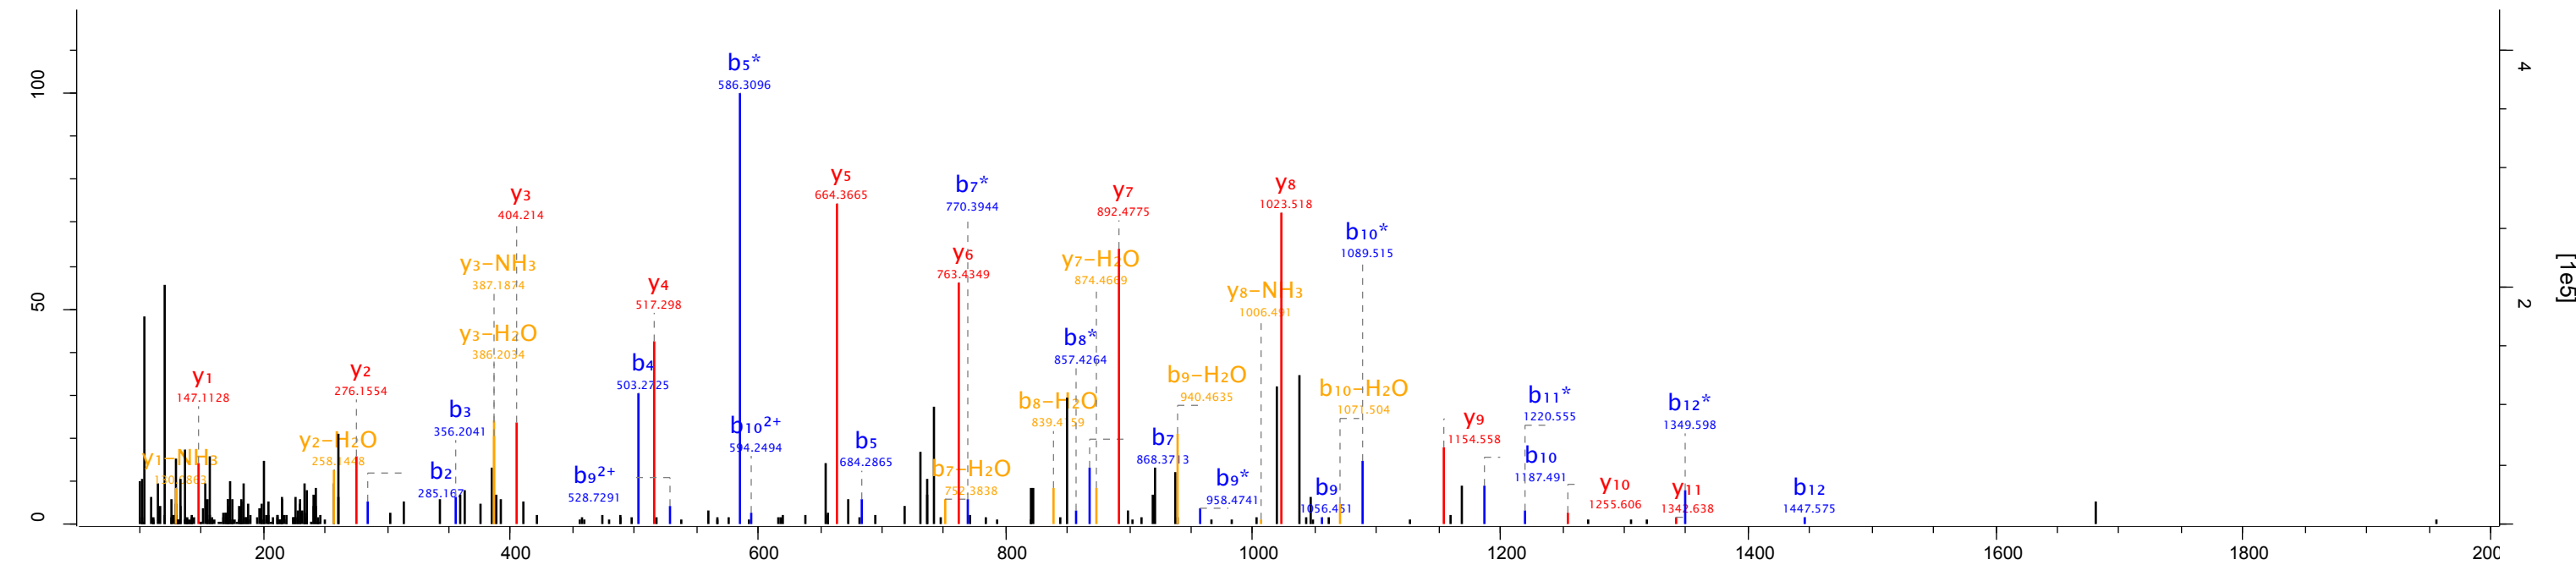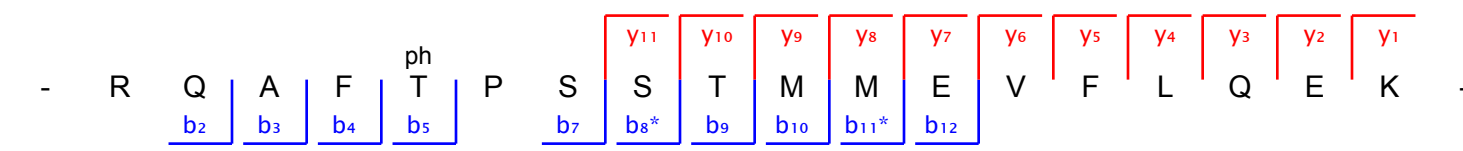

Raw file: 20150814\_A375SR\_Phospho\_BR2\_06  
 Scan: 28285 Method: FTMS; HCD Score: 68.78 m/z: 1229.24 Gene names: PPP6R1

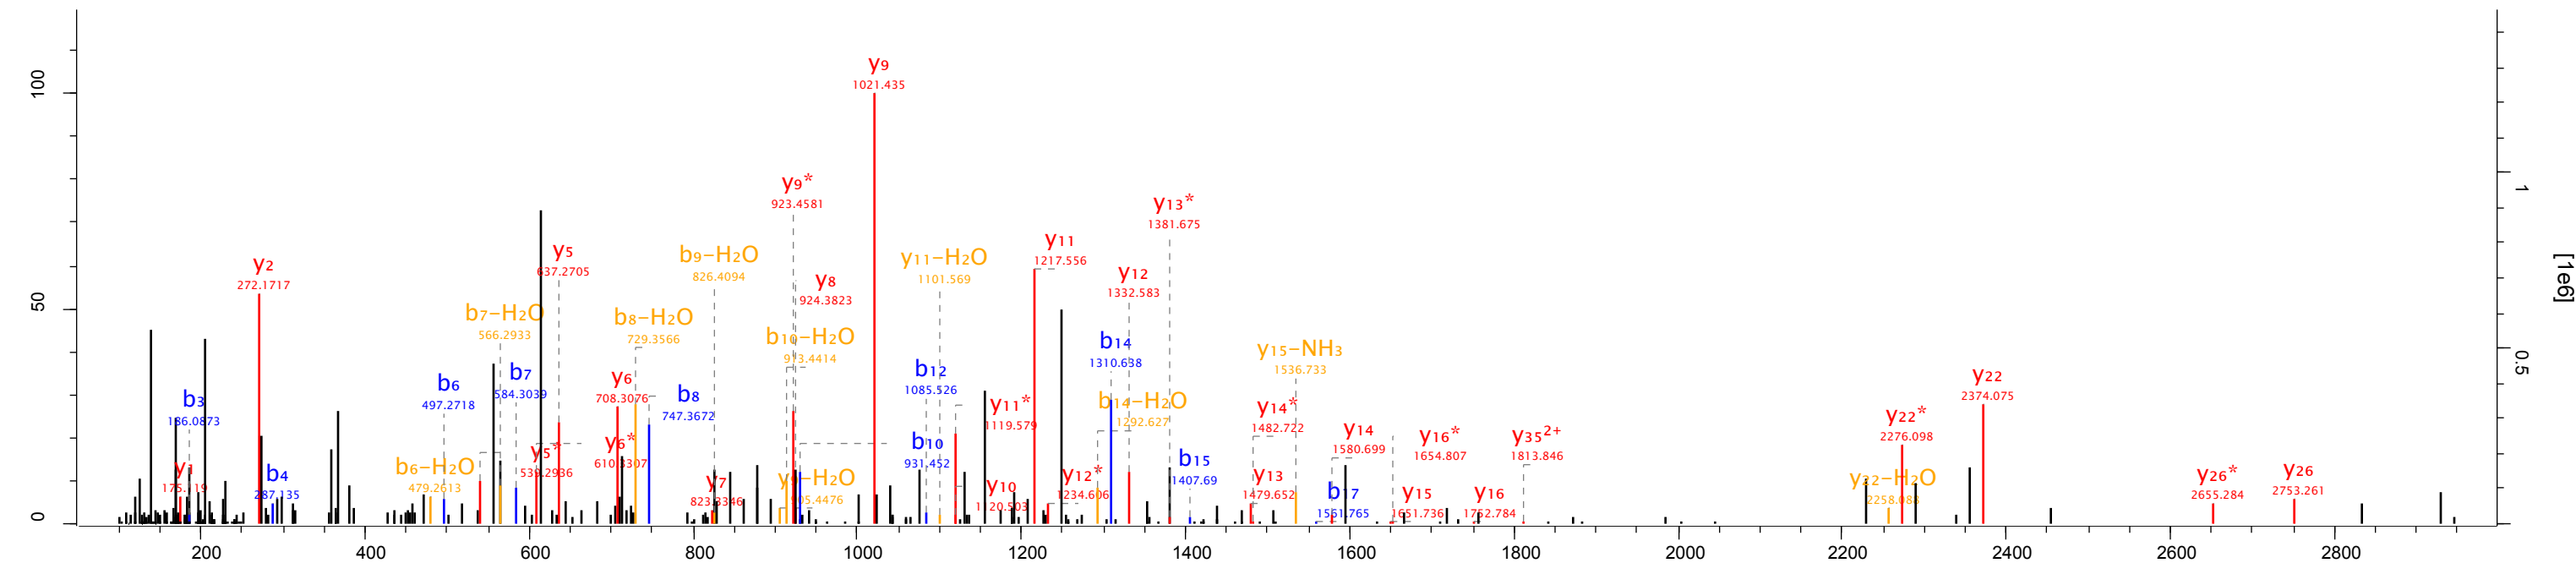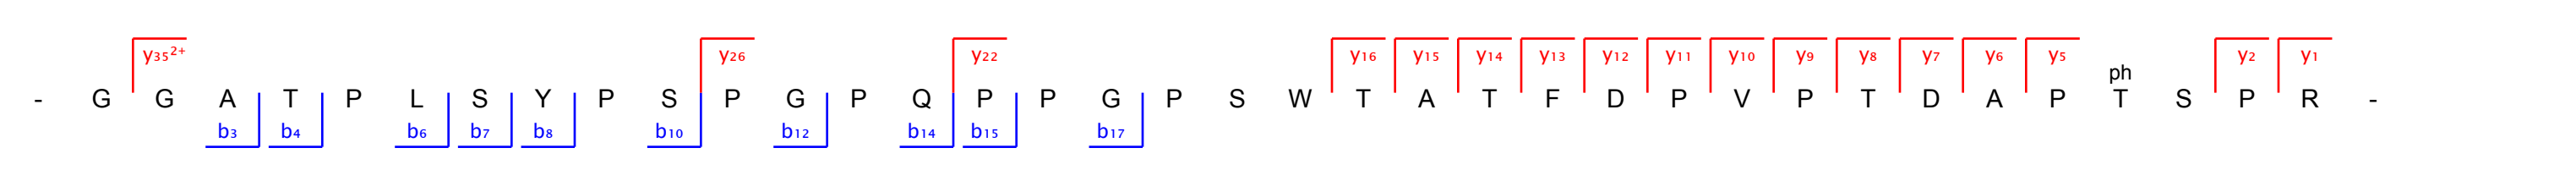

Raw file 20150814\_A375SR\_Phospho\_BR2\_06 Scan 28325 Method FTMS; HCD Score 132.73 m/z 1390.28 Gene names ZCRB1

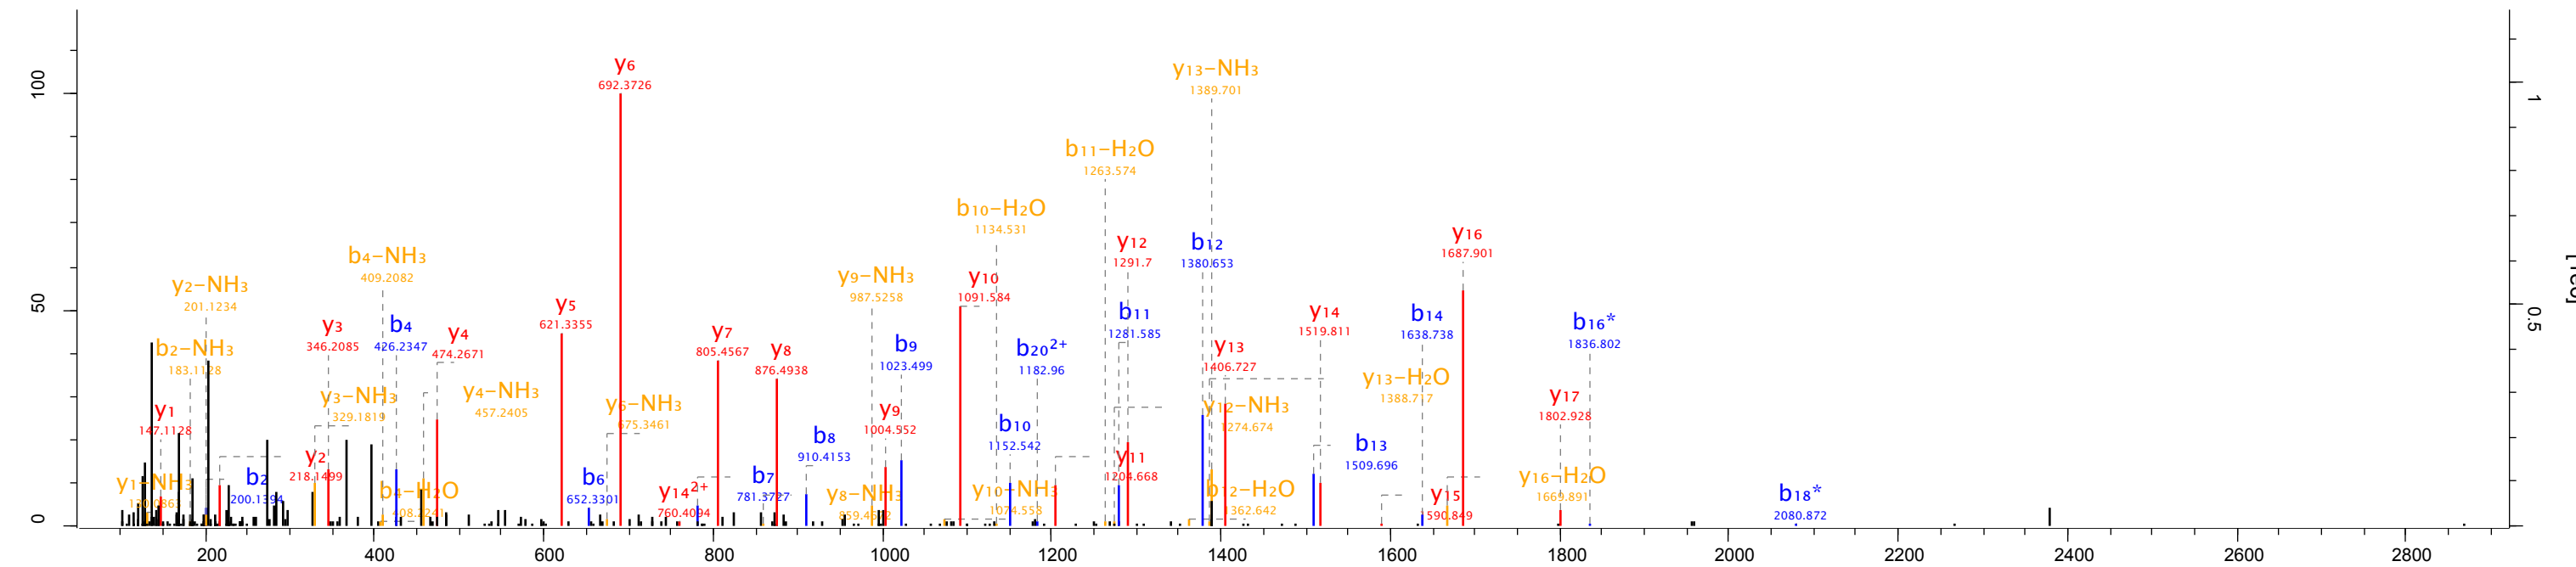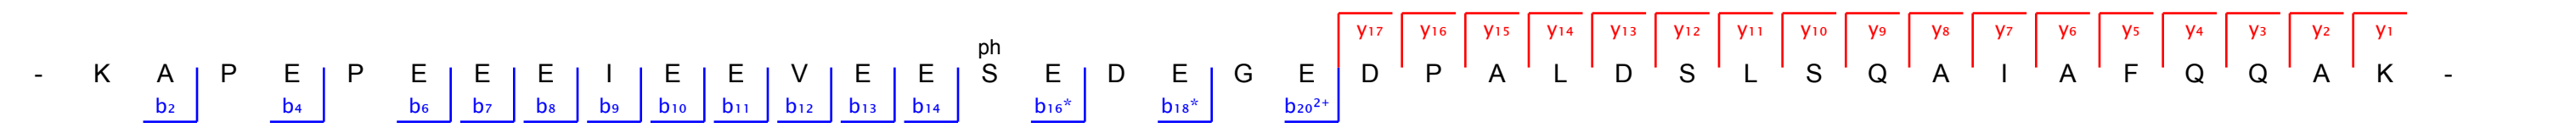

Raw file 20150814\_A375SR\_Phospho\_BR2\_06 Scan 28415 Method FTMS; HCD Score 155.61 m/z 728.69 Gene names hCG\_2039718;RFFL

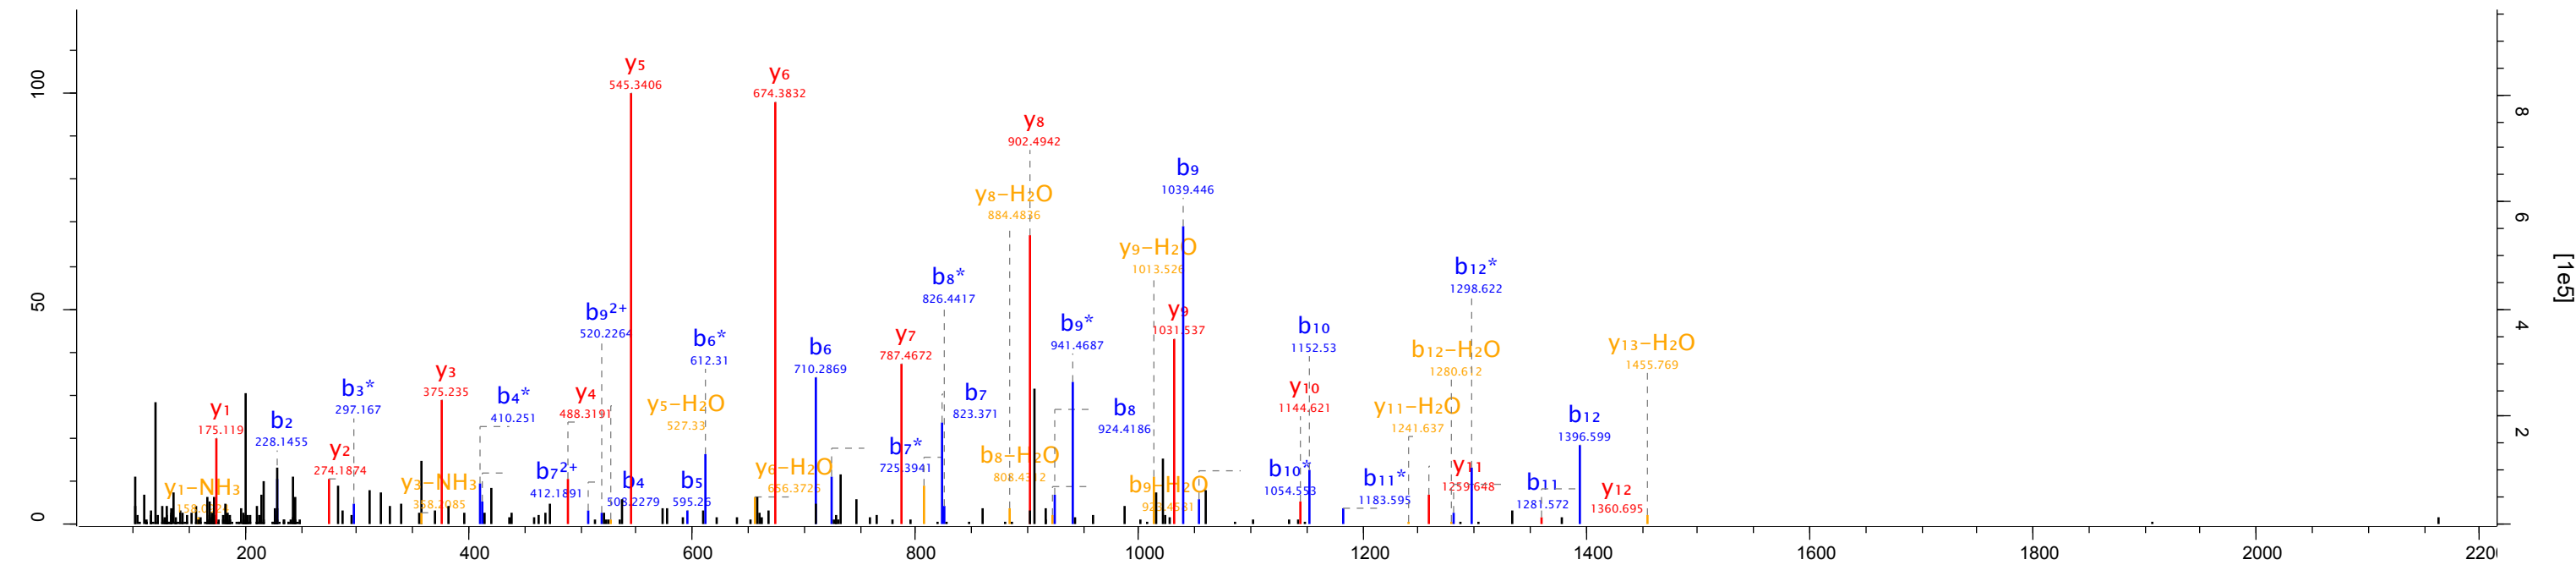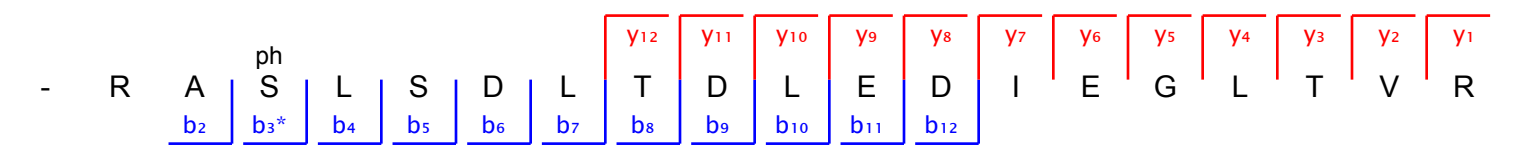



Raw file  
 20150814\_A375SR\_Phospho\_BR2\_06  
 Scan 28555 Method FTMS; HCD Score 120.9 m/z 604.29 Gene names CLASP2

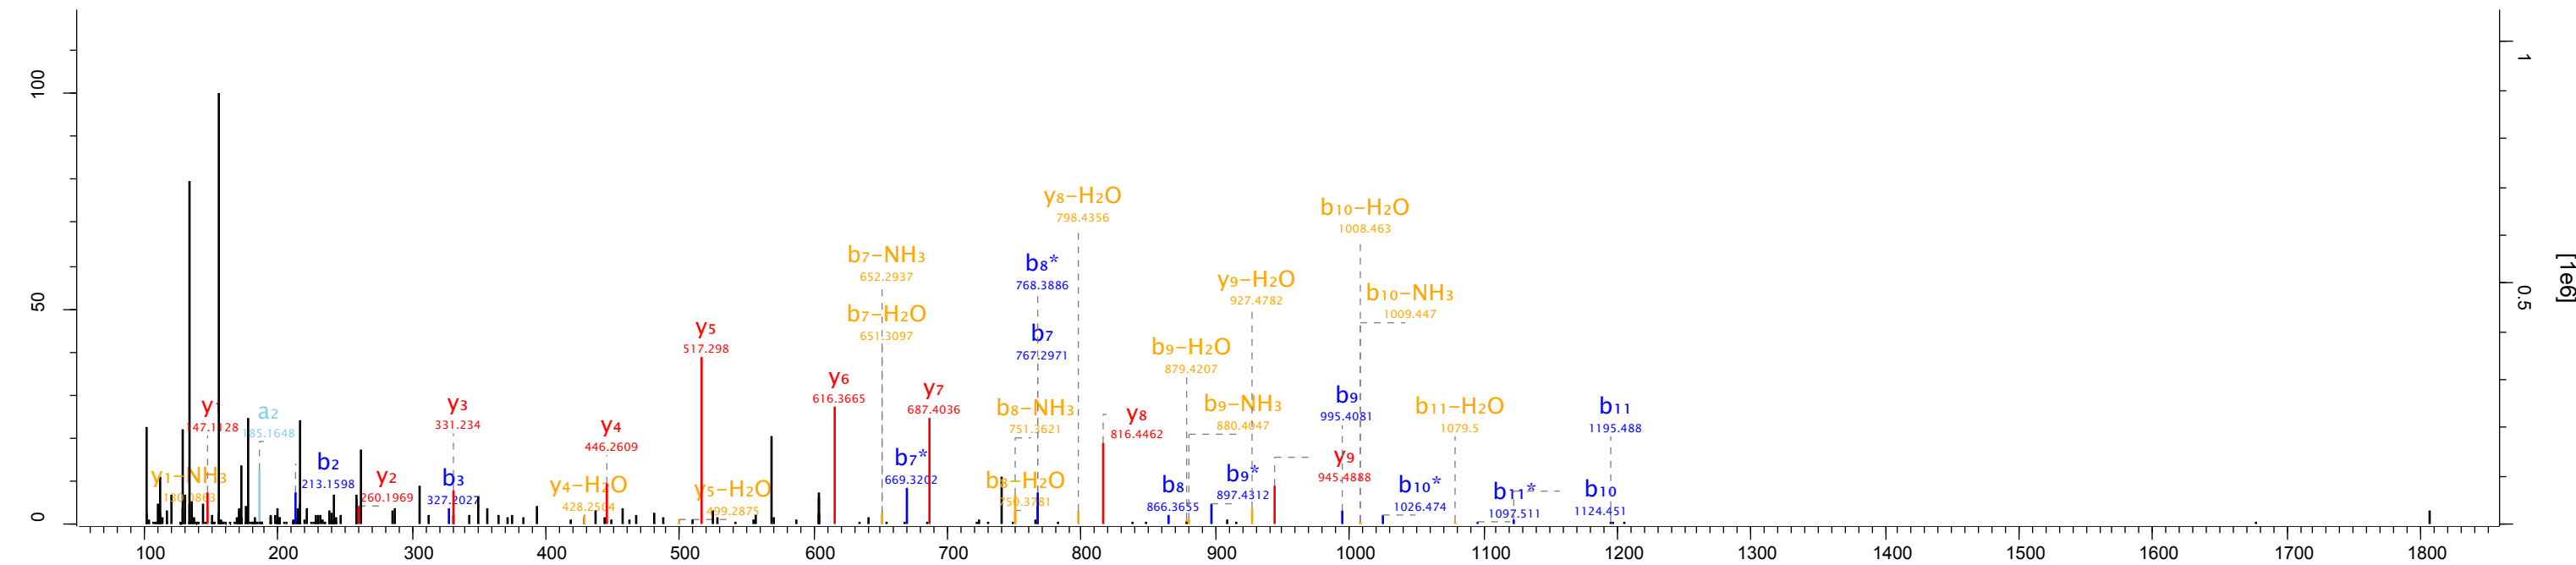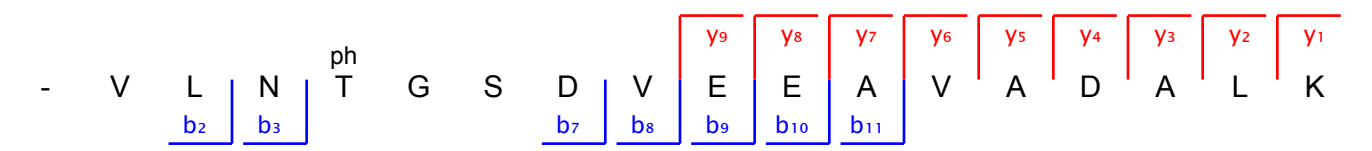

Raw file 20150814\_A375SR\_Phospho\_BR2\_06 Scan 28805 Method FTMS; HCD Score 158.08 m/z 1026.53 Gene names YAP1

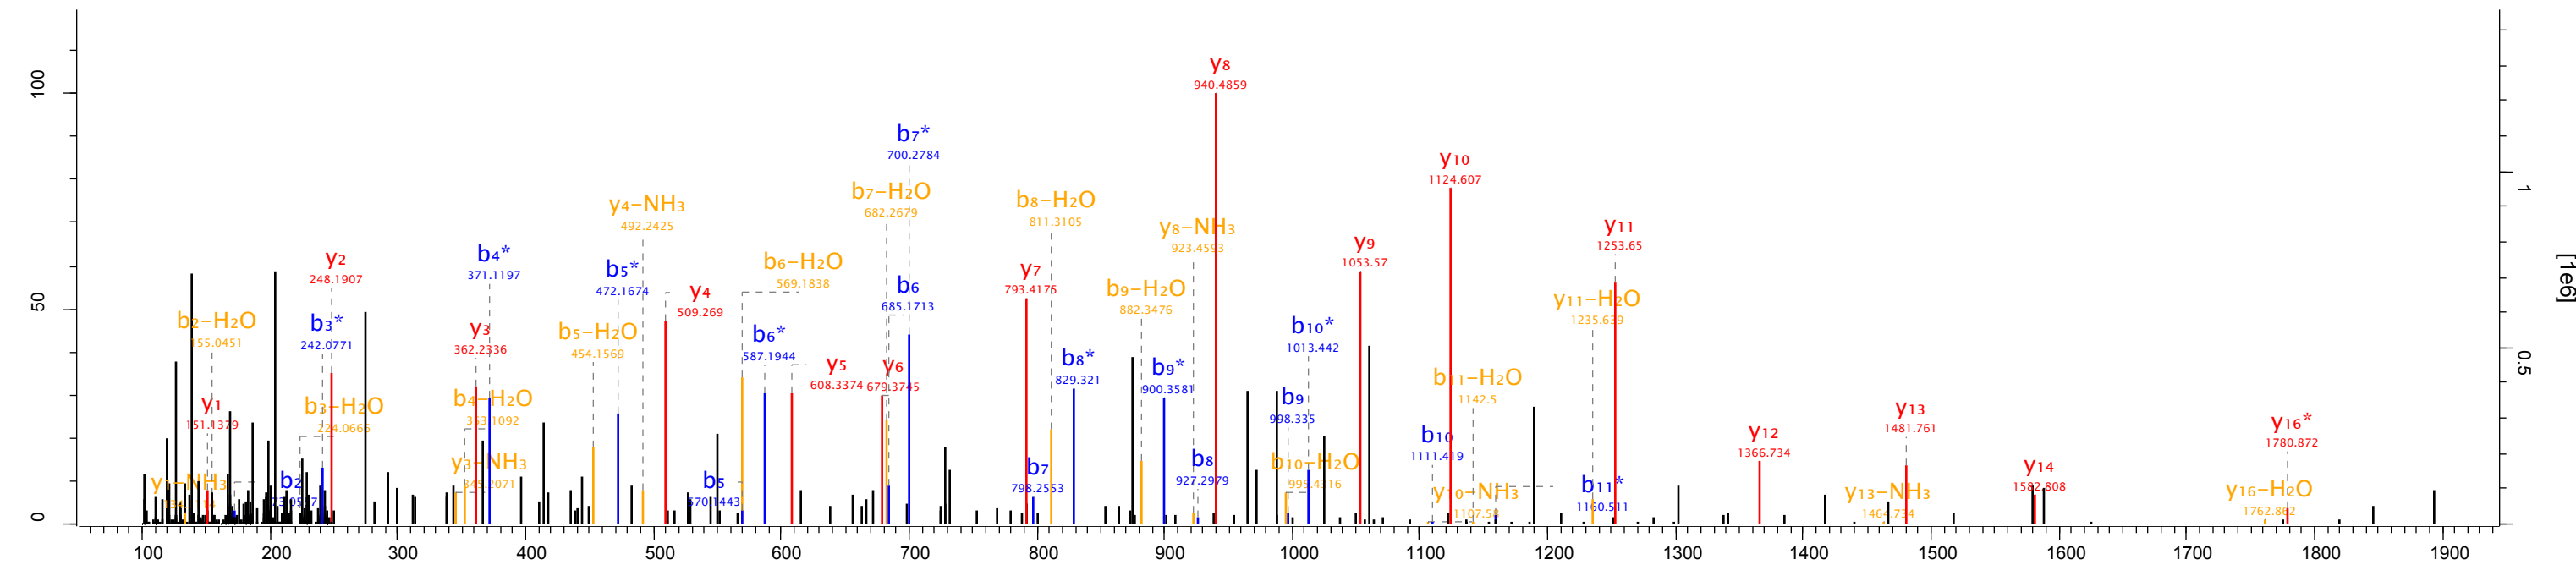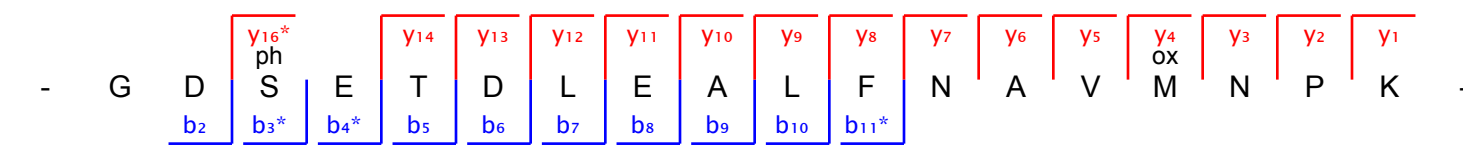

Raw file 20150814\_A375SR\_Phospho\_BR2\_06 Scan 3115 Method FTMS; HCD Score 100.93 m/z 590.28 Gene names MCM4

20150814\_A375SR\_Phospho\_BR2\_06

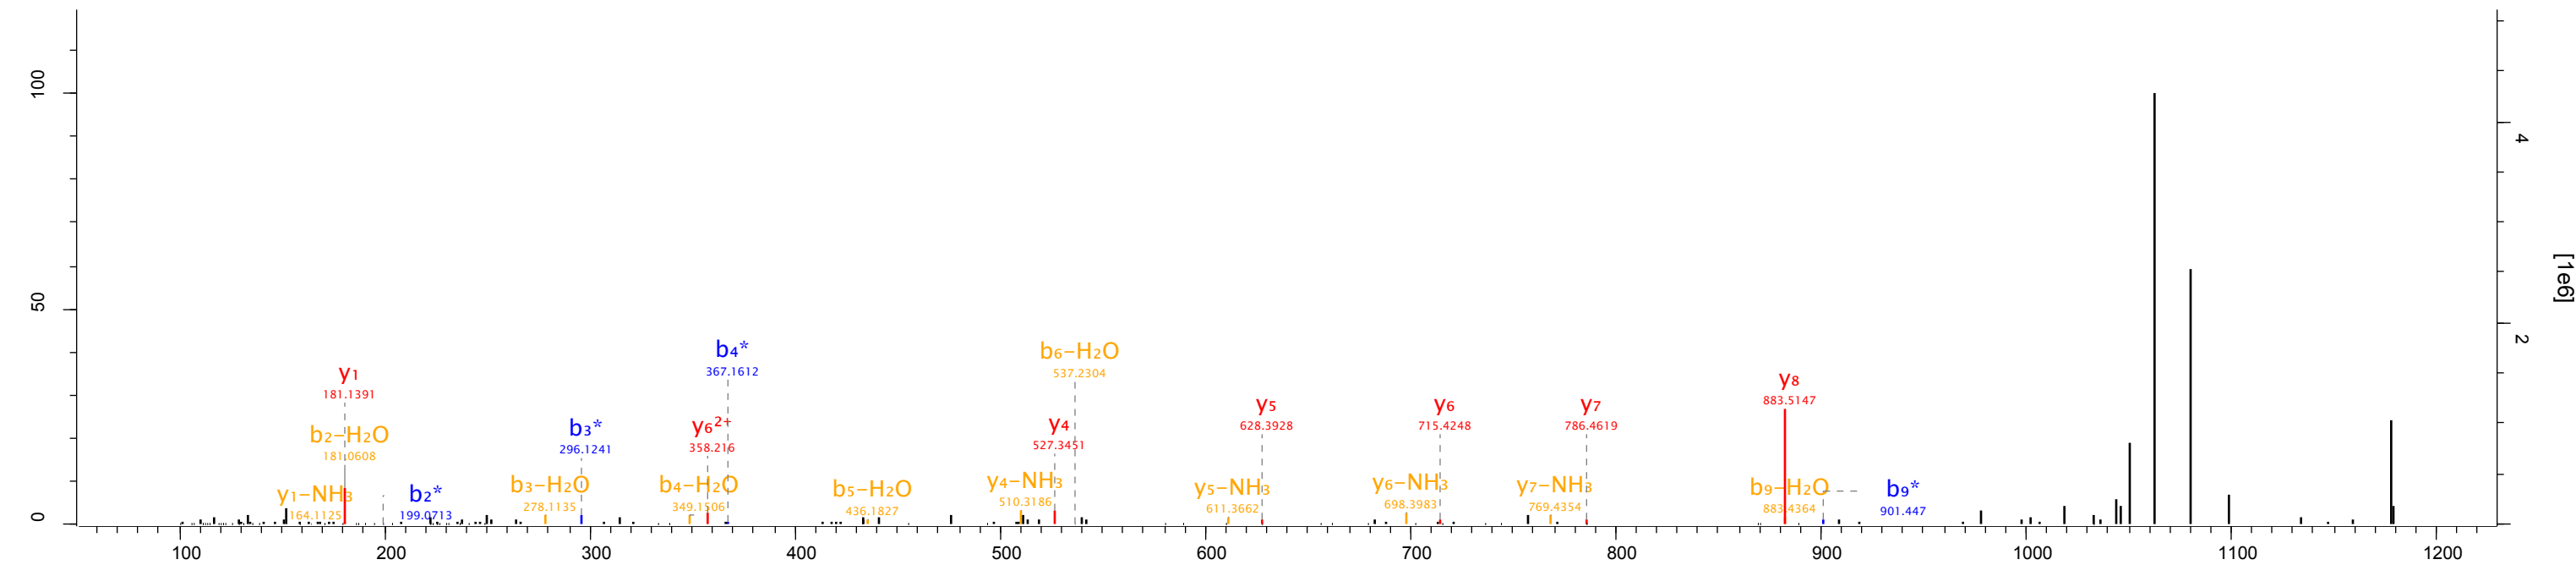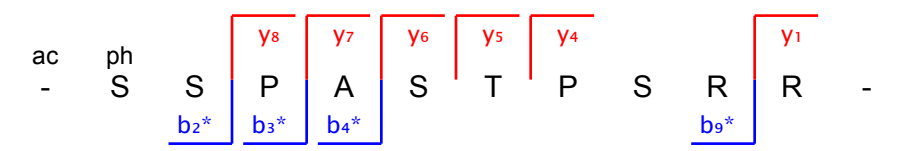

Raw file: 20150814\_A375SR\_Phospho\_BR2\_06  
 Scan: 4275 Method: FTMS; HCD Score: 106.63 m/z: 572.61 Gene names: SP110

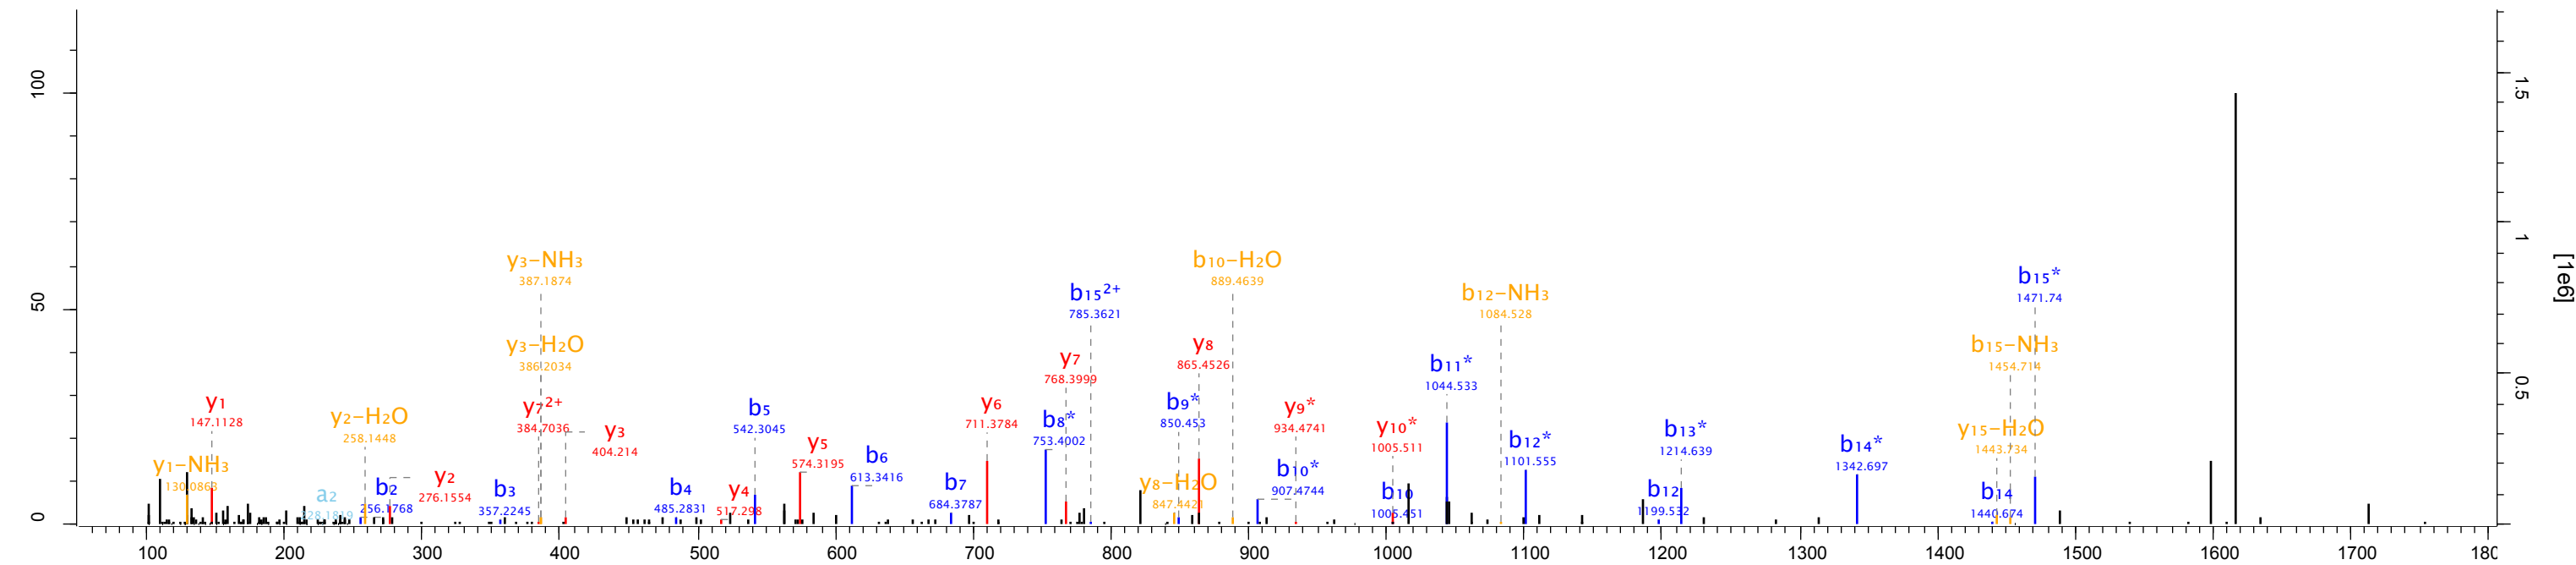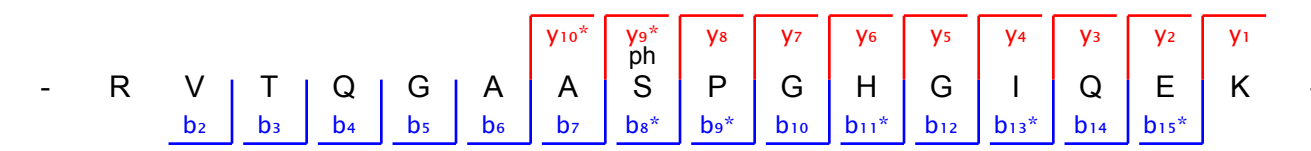

Raw file: 20150814\_A375SR\_Phospho\_BR2\_06  
 Scan: 4395 Method: FTMS; HCD Score: 193.54 m/z: 591.76 Gene names: SLC1A5

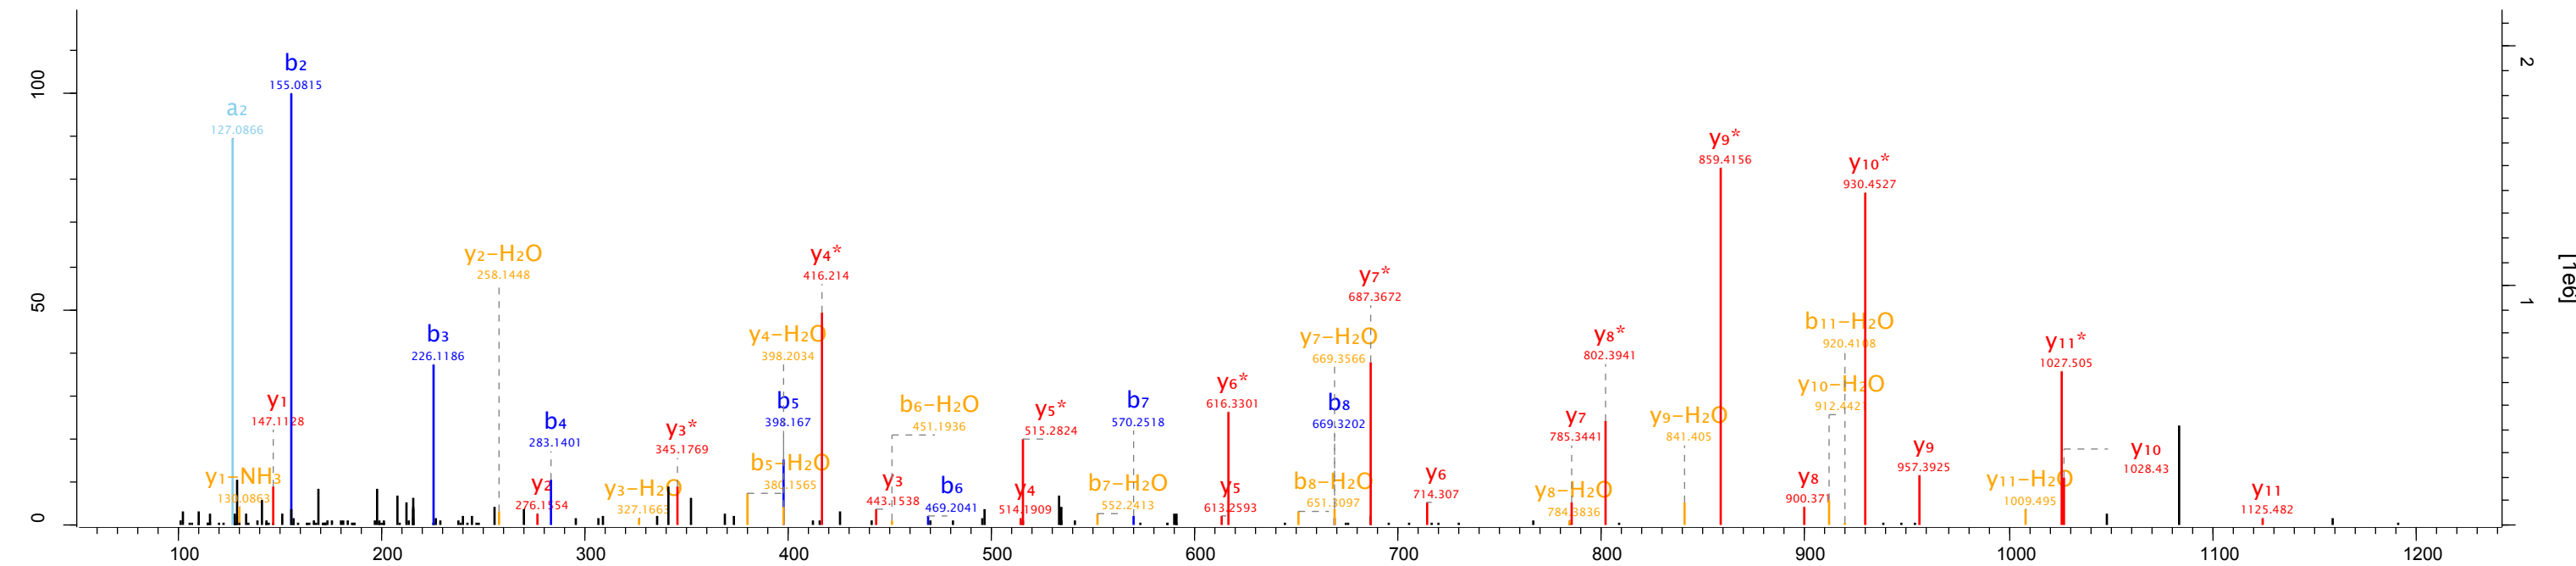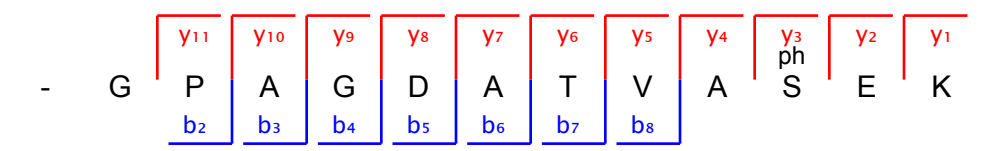

Raw file: 20150814\_A375SR\_Phospho\_BR2\_06  
 Scan: 4515 Method: FTMS; HCD Score: 80.13 m/z: 707.83 Gene names: PRRC2C

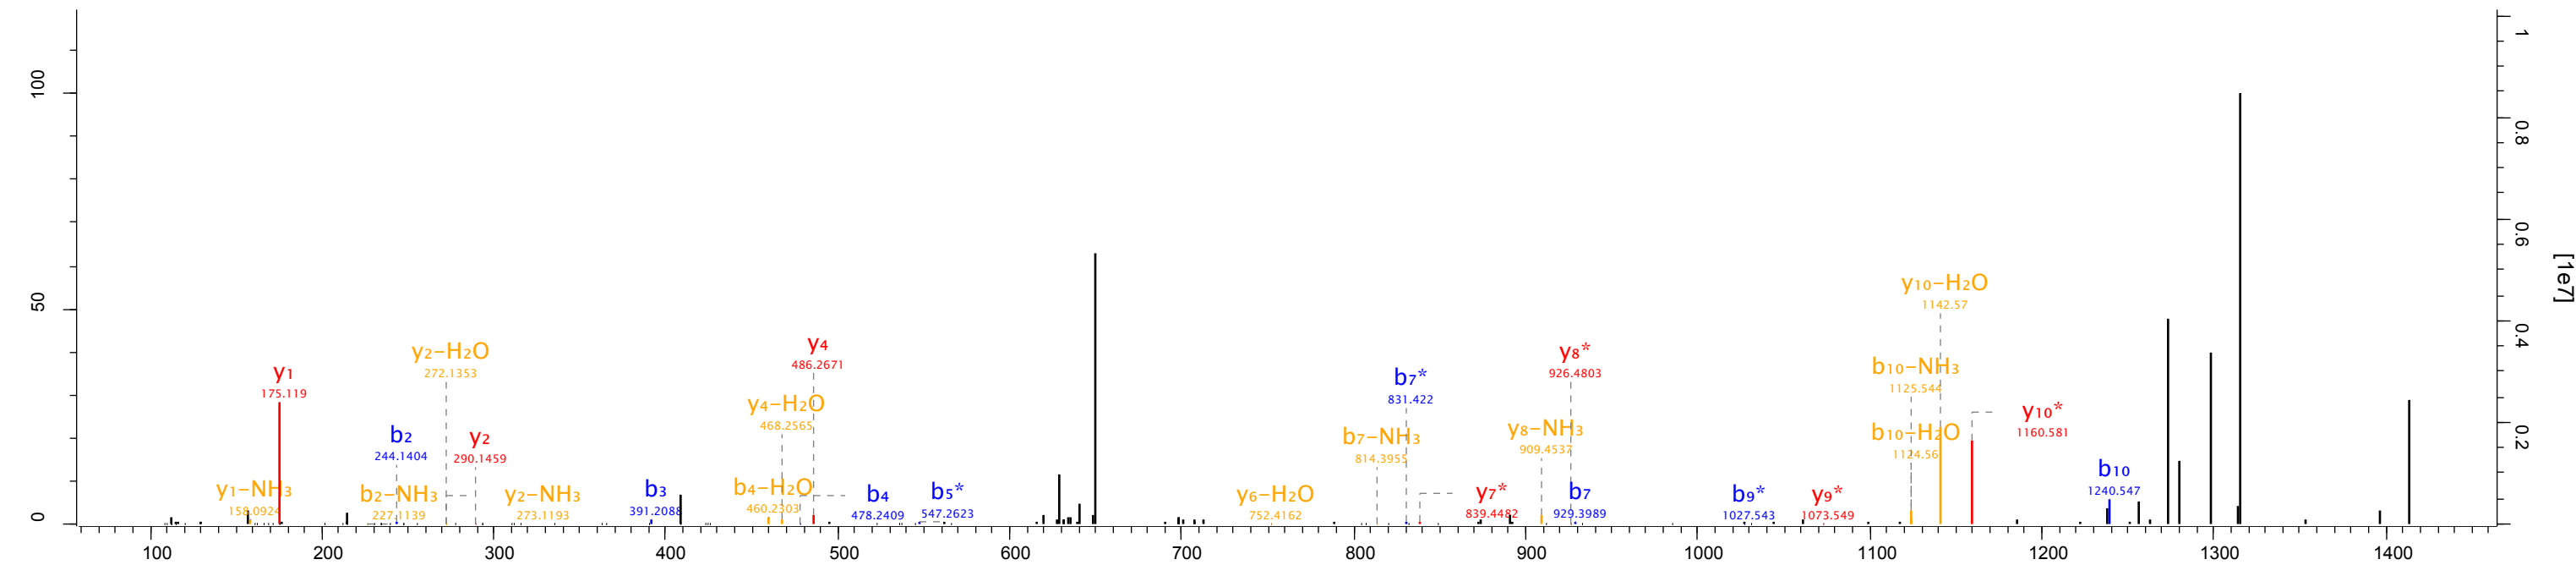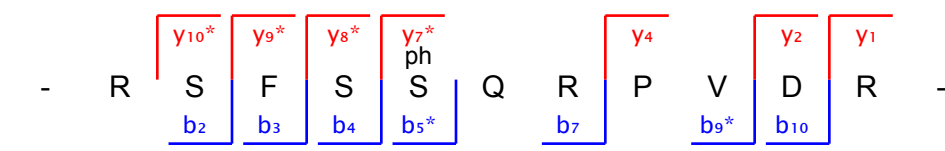

Raw file: 20150814\_A375SR\_Phospho\_BR2\_06  
 Scan: 5525 Method: FTMS; HCD Score: 103.2 m/z: 579.28 Gene names: FAM122A

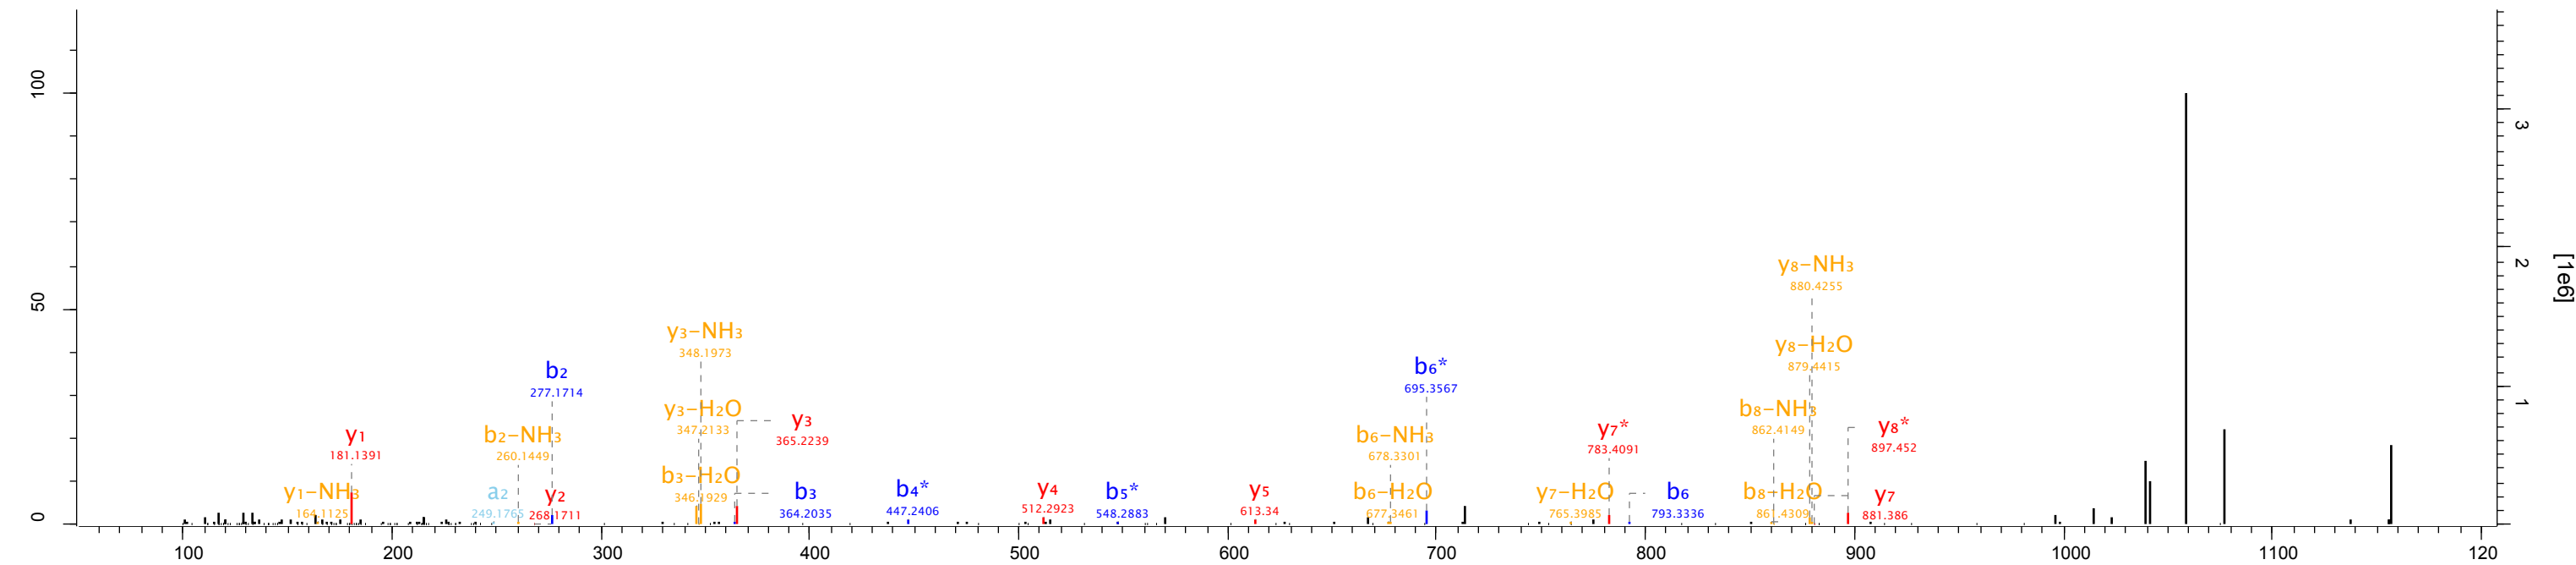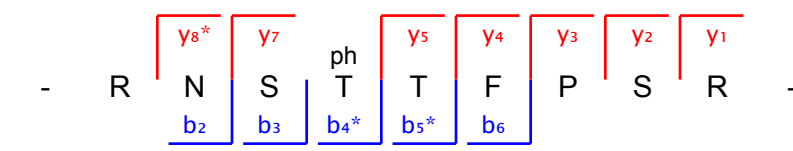

Raw file 20150814\_A375SR\_Phospho\_BR2\_06 Scan 5555 Method FTMS; HCD Score 142.12 m/z 558.26 Gene names CLASP1

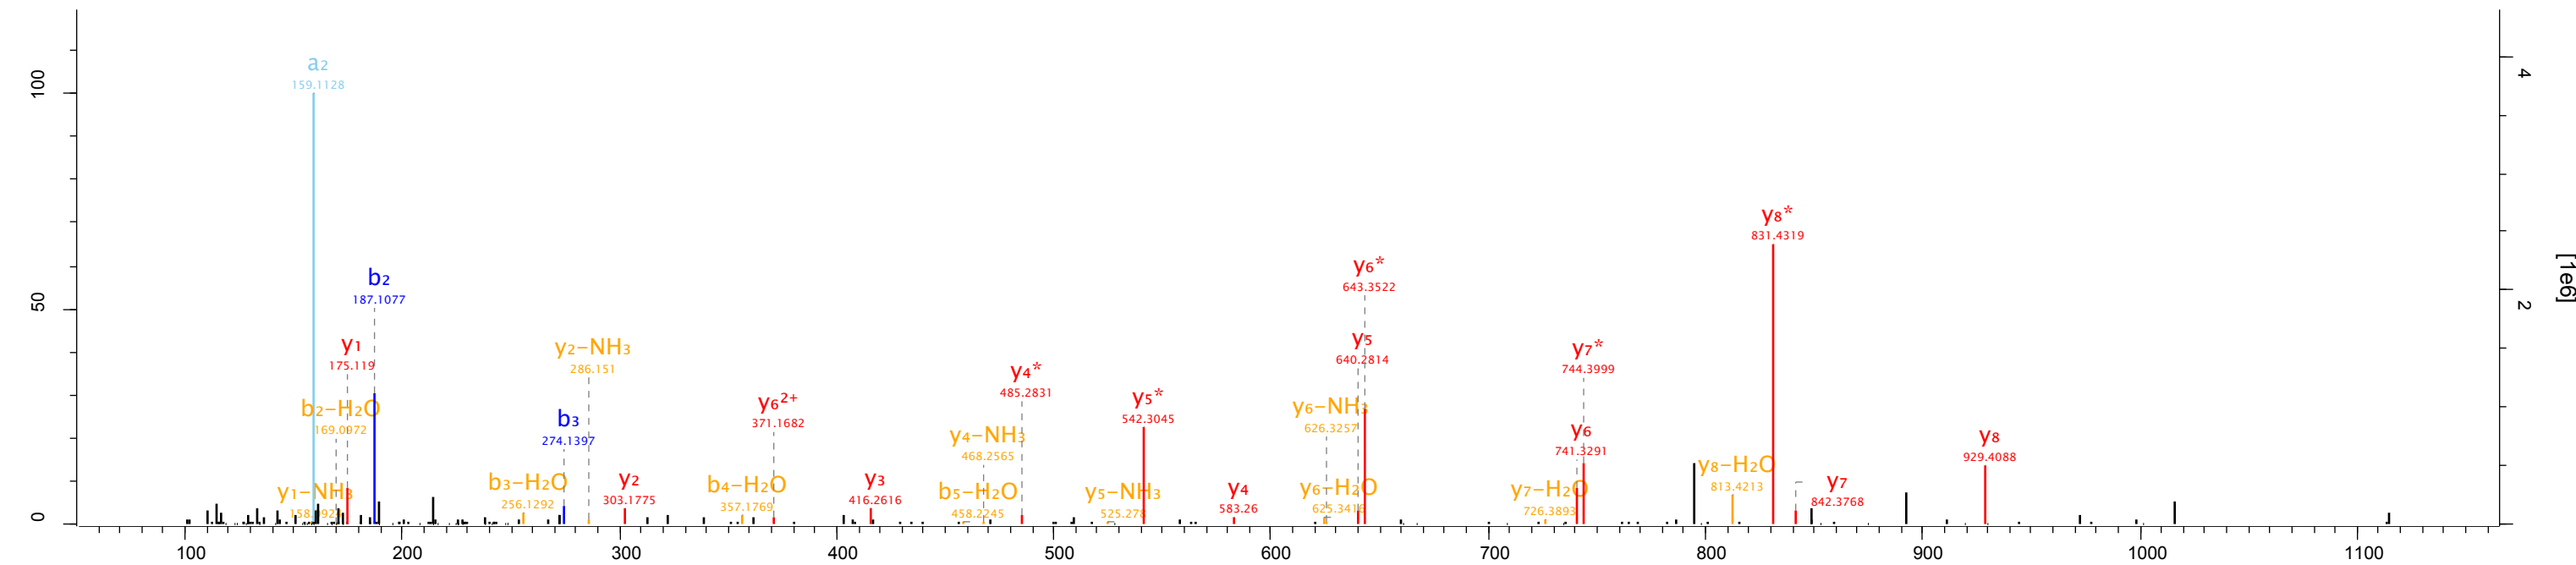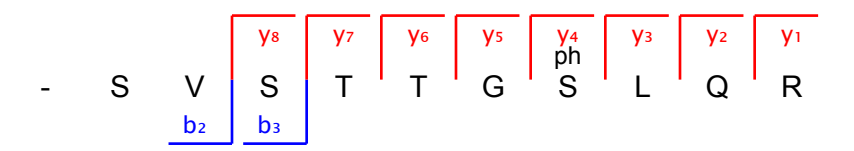



Raw file: 20150814\_A375SR\_Phospho\_BR2\_06  
 Scan: 5805 Method: FTMS; HCD Score: 165.17 m/z: 744.68 Gene names: TP53BP1

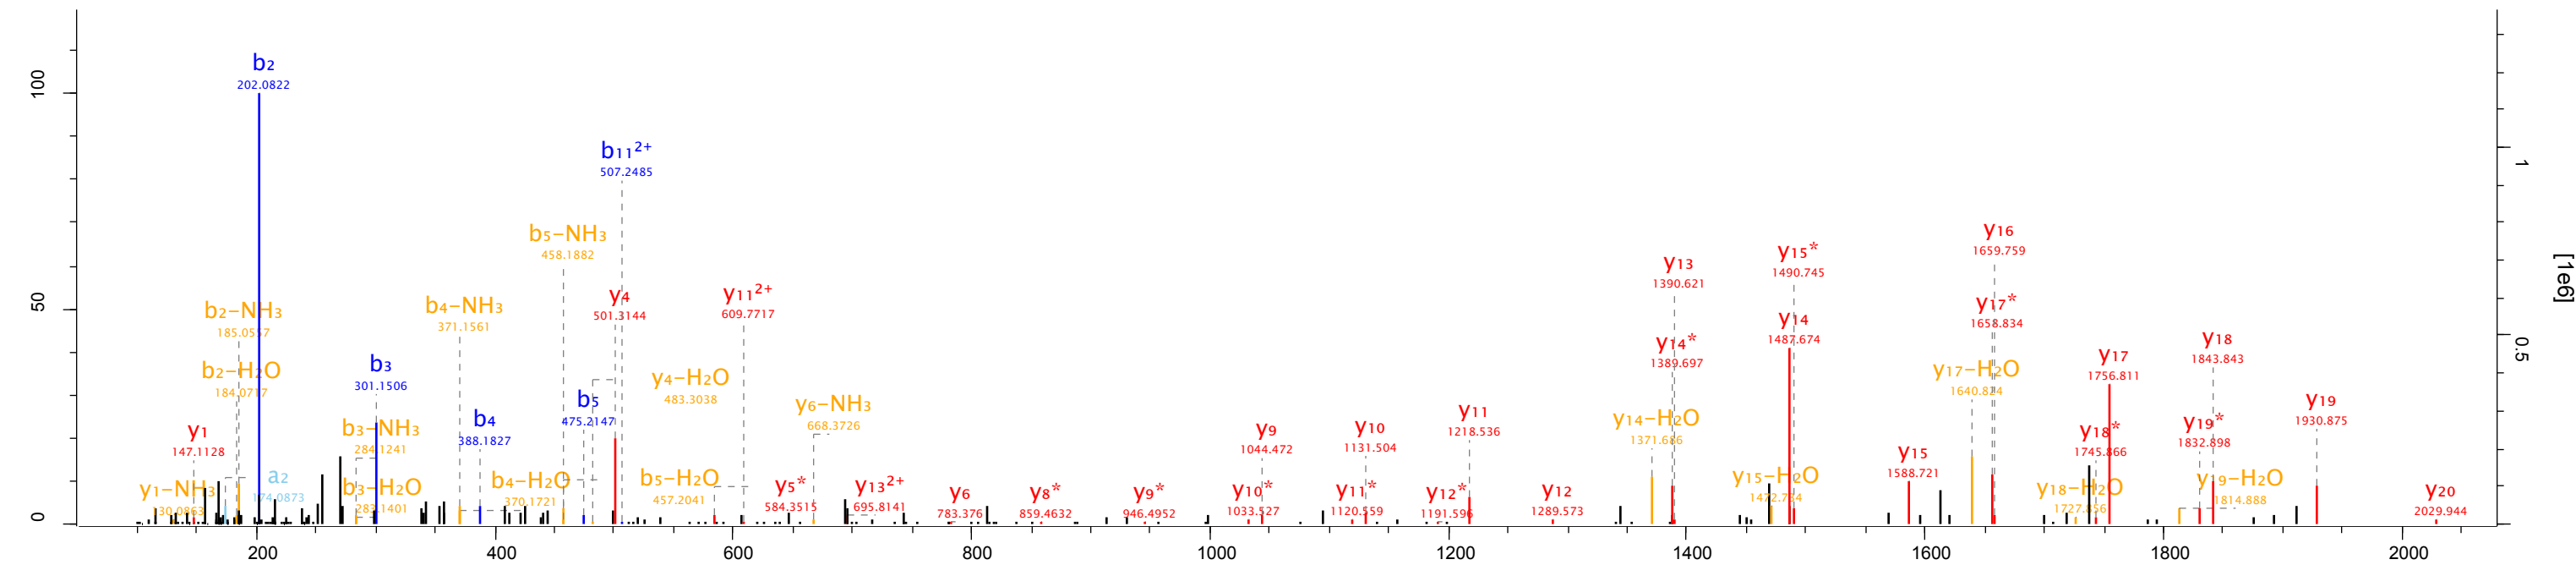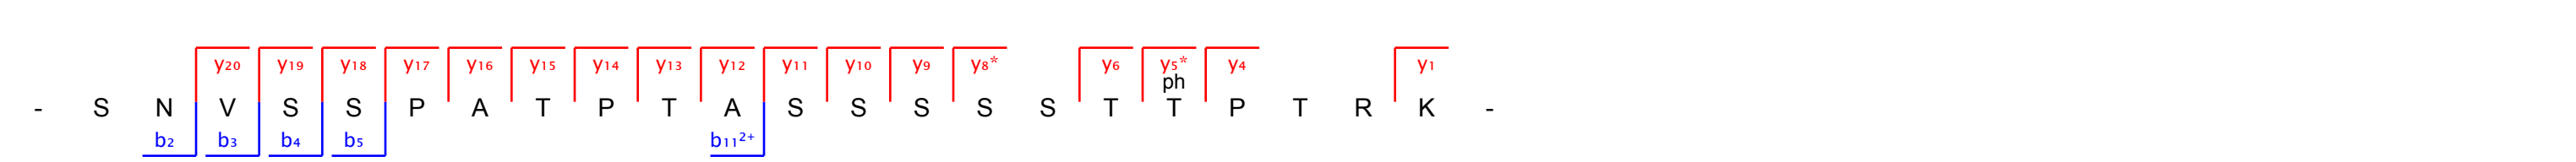

Raw file: 20150814\_A375SR\_Phospho\_BR2\_06  
 Scan: 6385 Method: FTMS; HCD Score: 63.09 m/z: 350.54 Gene names: ZNF326

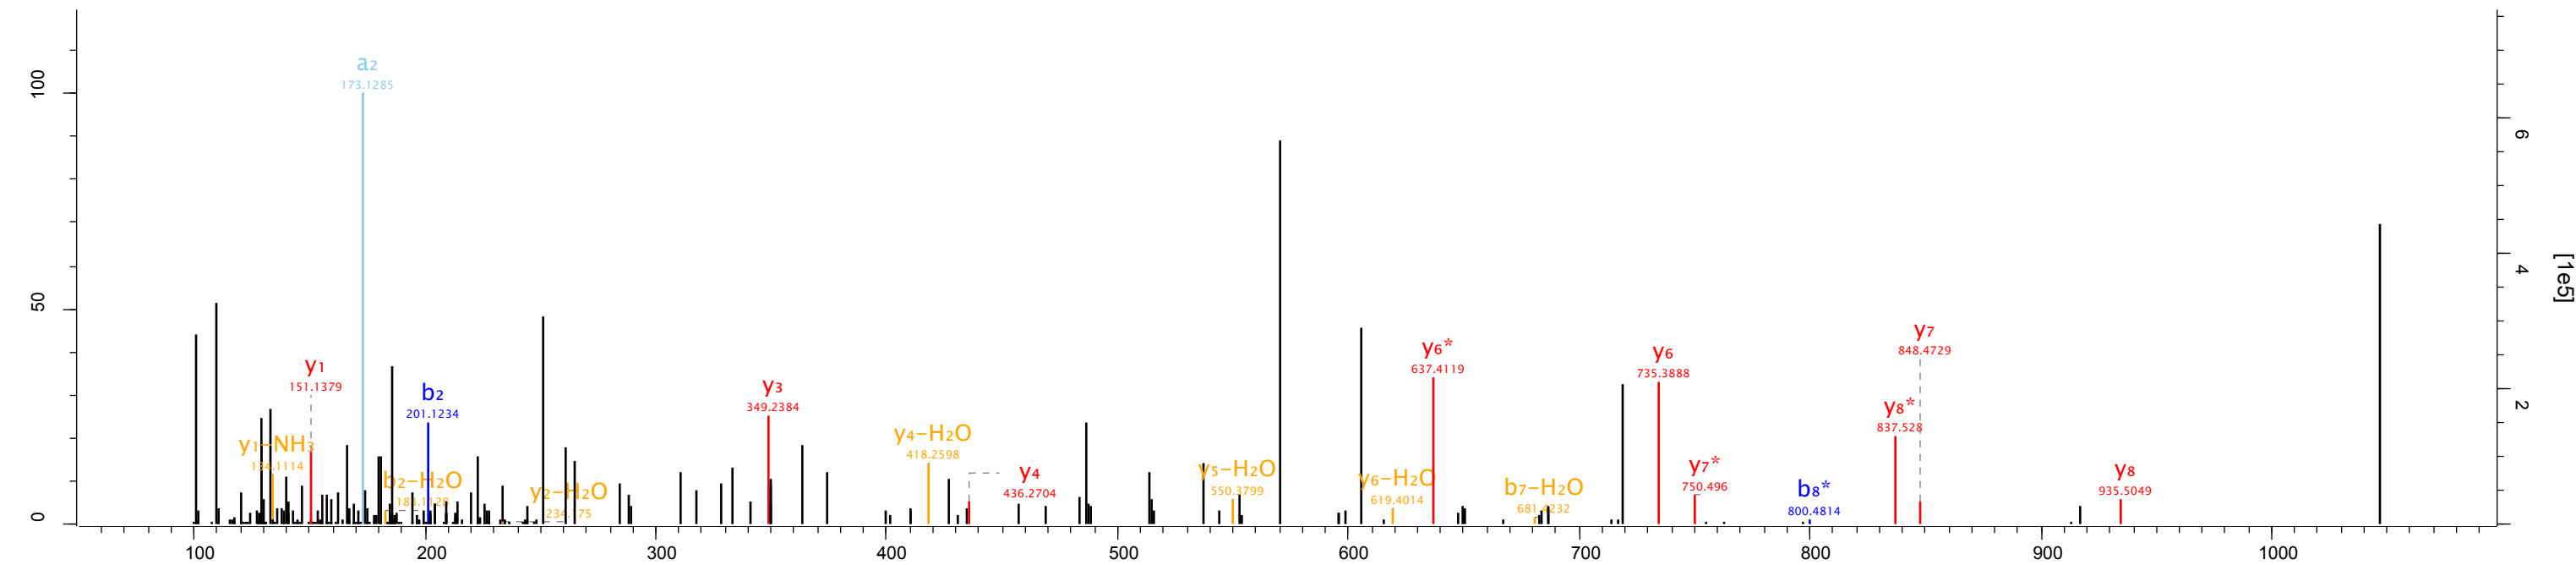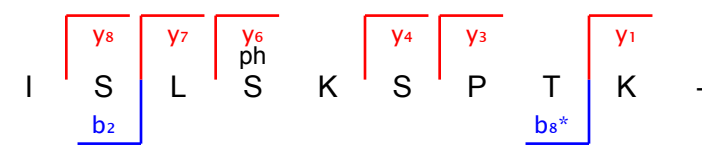

Raw file 20150814\_A375SR\_Phospho\_BR2\_06 Scan 6405 Method FTMS; HCD Score 78.74 m/z 515.74 Gene names DMXL2

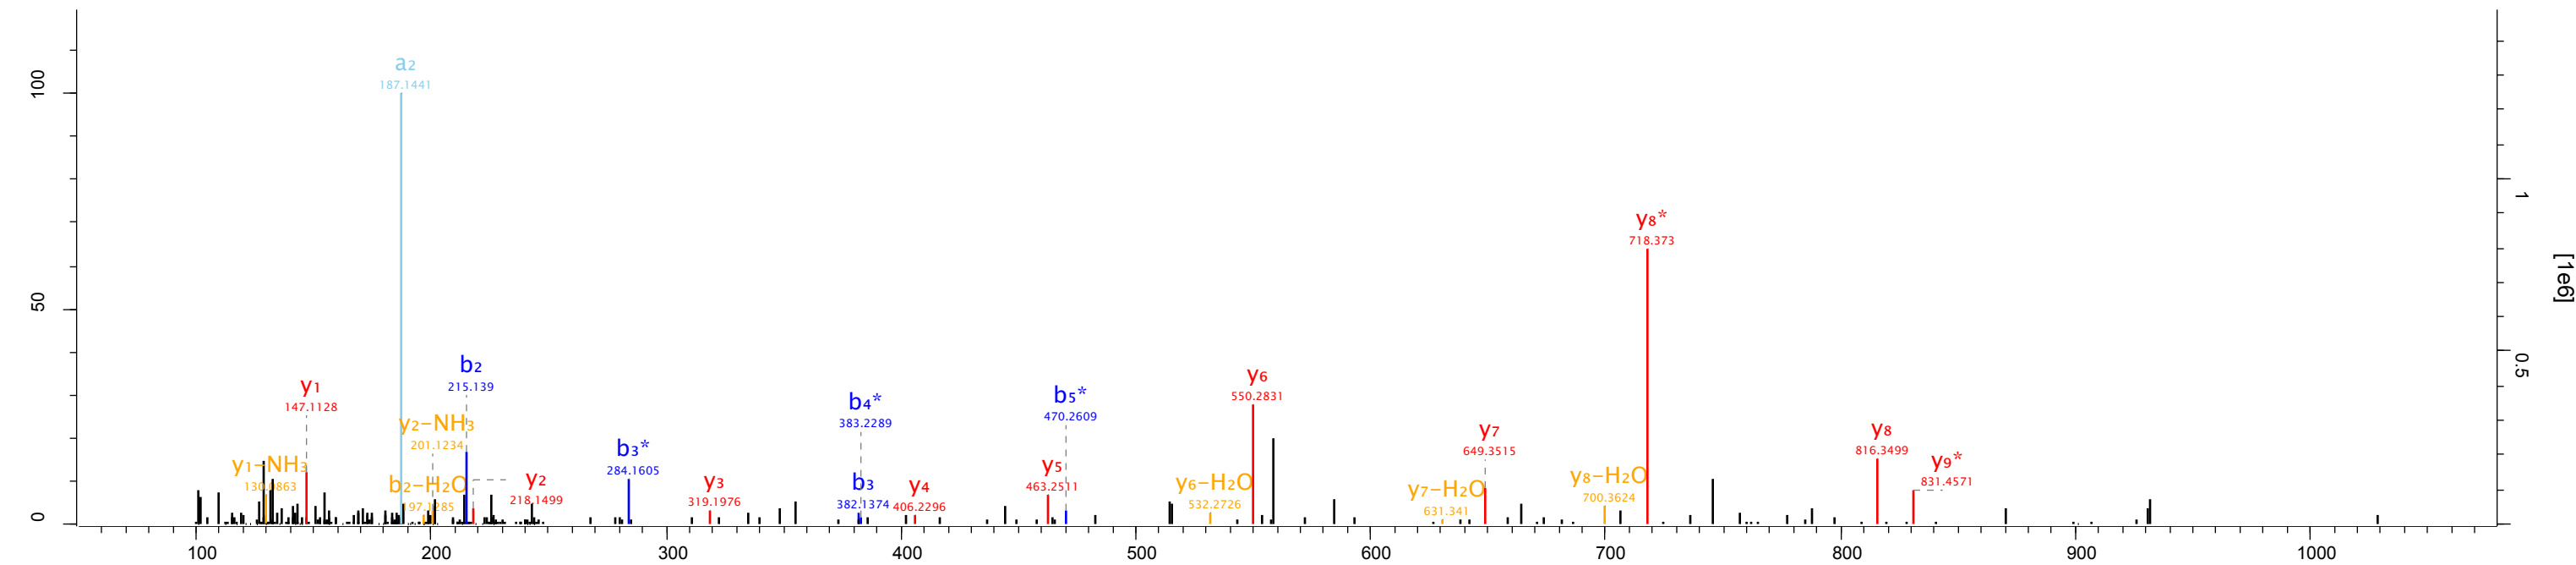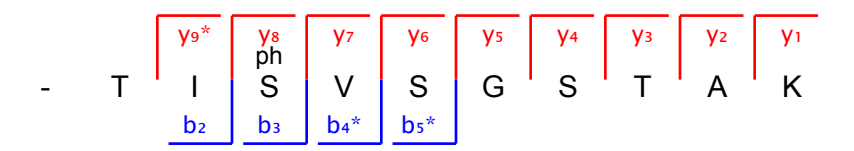

Raw file: 20150814\_A375SR\_Phospho\_BR2\_06  
 Scan: 7945 Method: FTMS; HCD Score: 60.35 m/z: 599.78 Gene names: TP53BP1

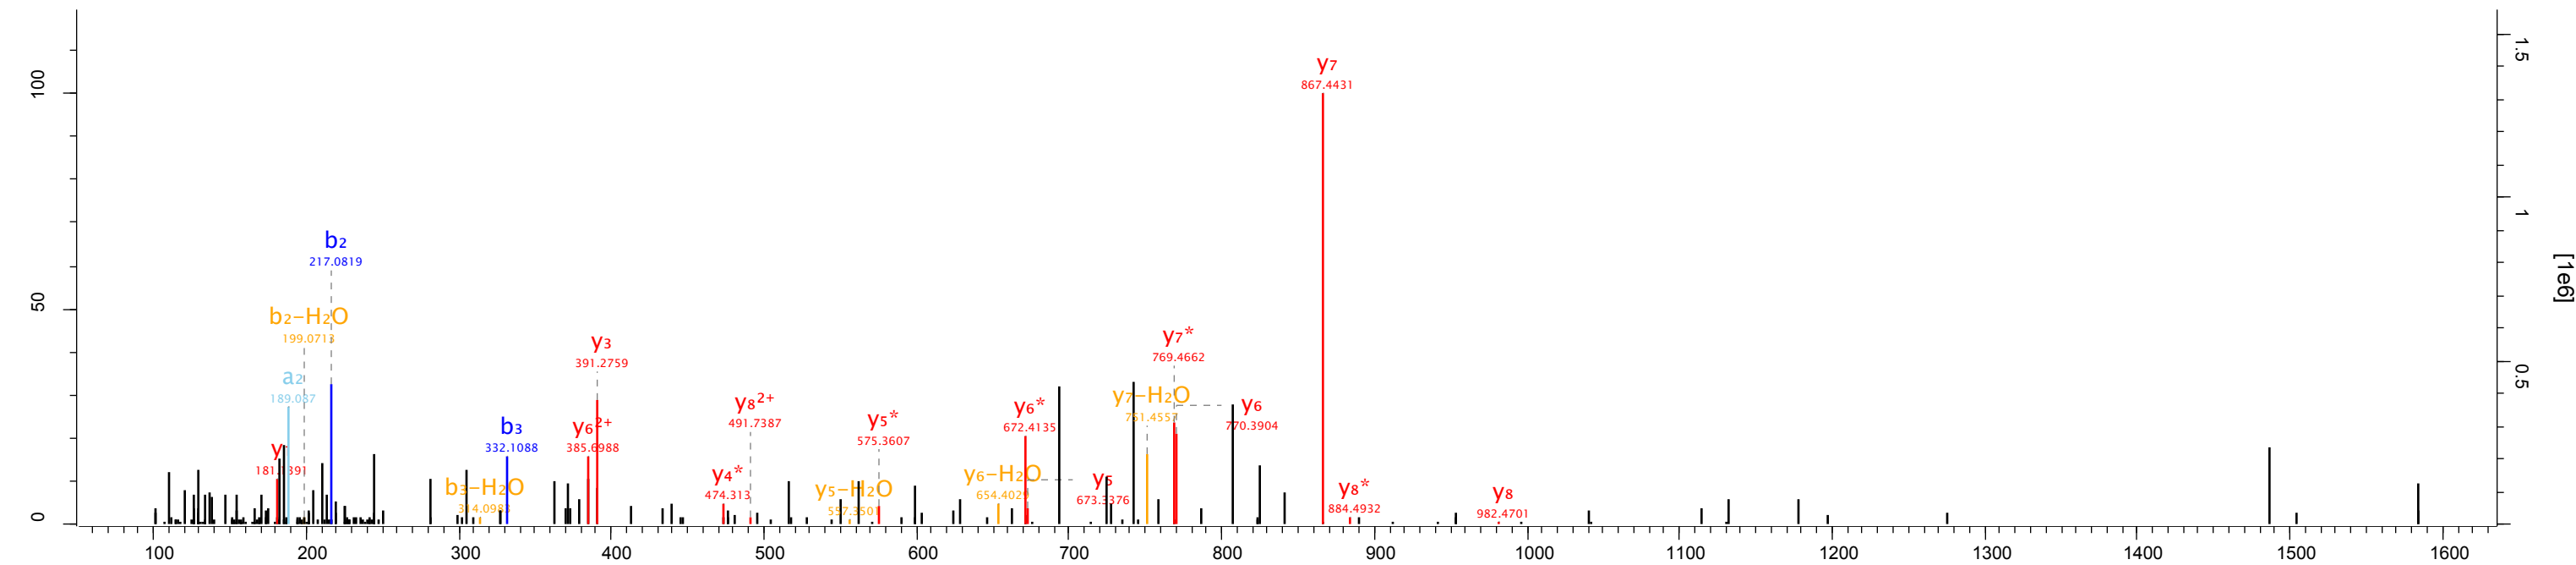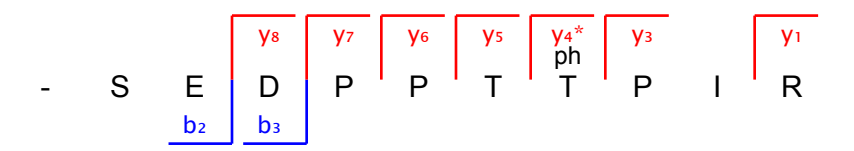

Raw file: 20150814\_A375SR\_Phospho\_BR2\_06  
 Scan: 8405 Method: FTMS; HCD Score: 106.67 m/z: 1002.49 Gene names: SYMPK

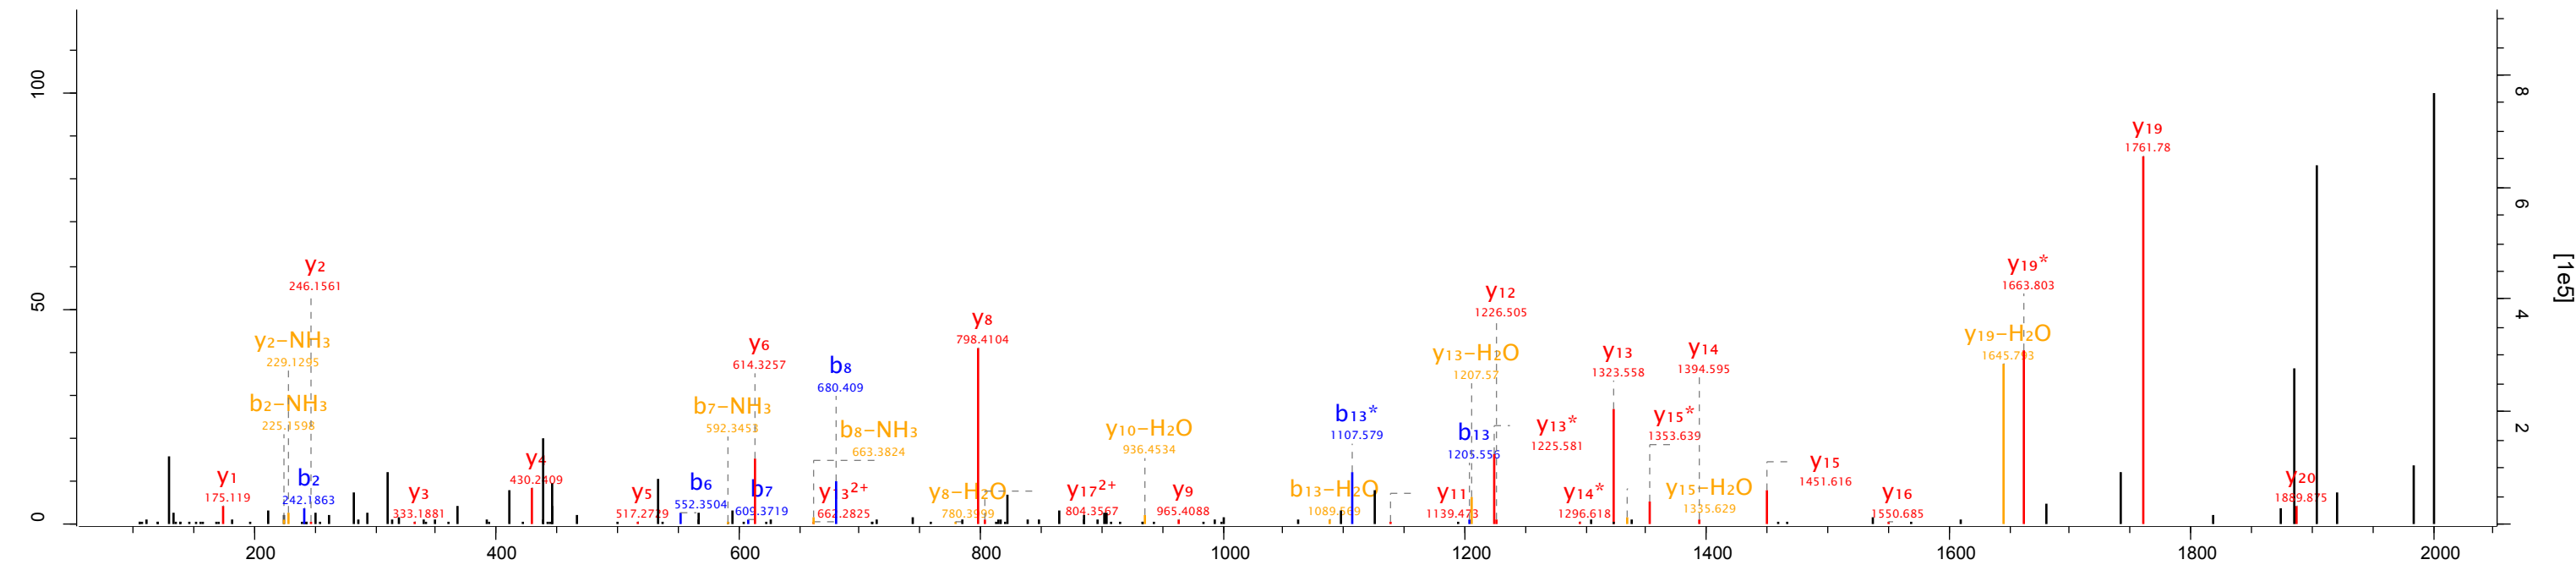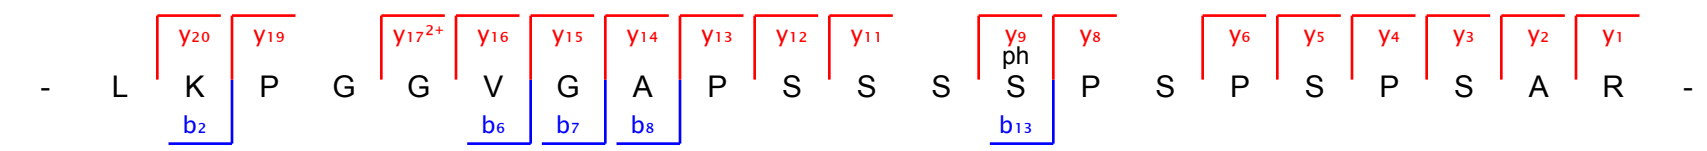

Raw file 20150814\_A375SR\_Phospho\_BR2\_06 Scan 8635 Method FTMS; HCD Score 76.84 m/z 450.72 Gene names ZNF740

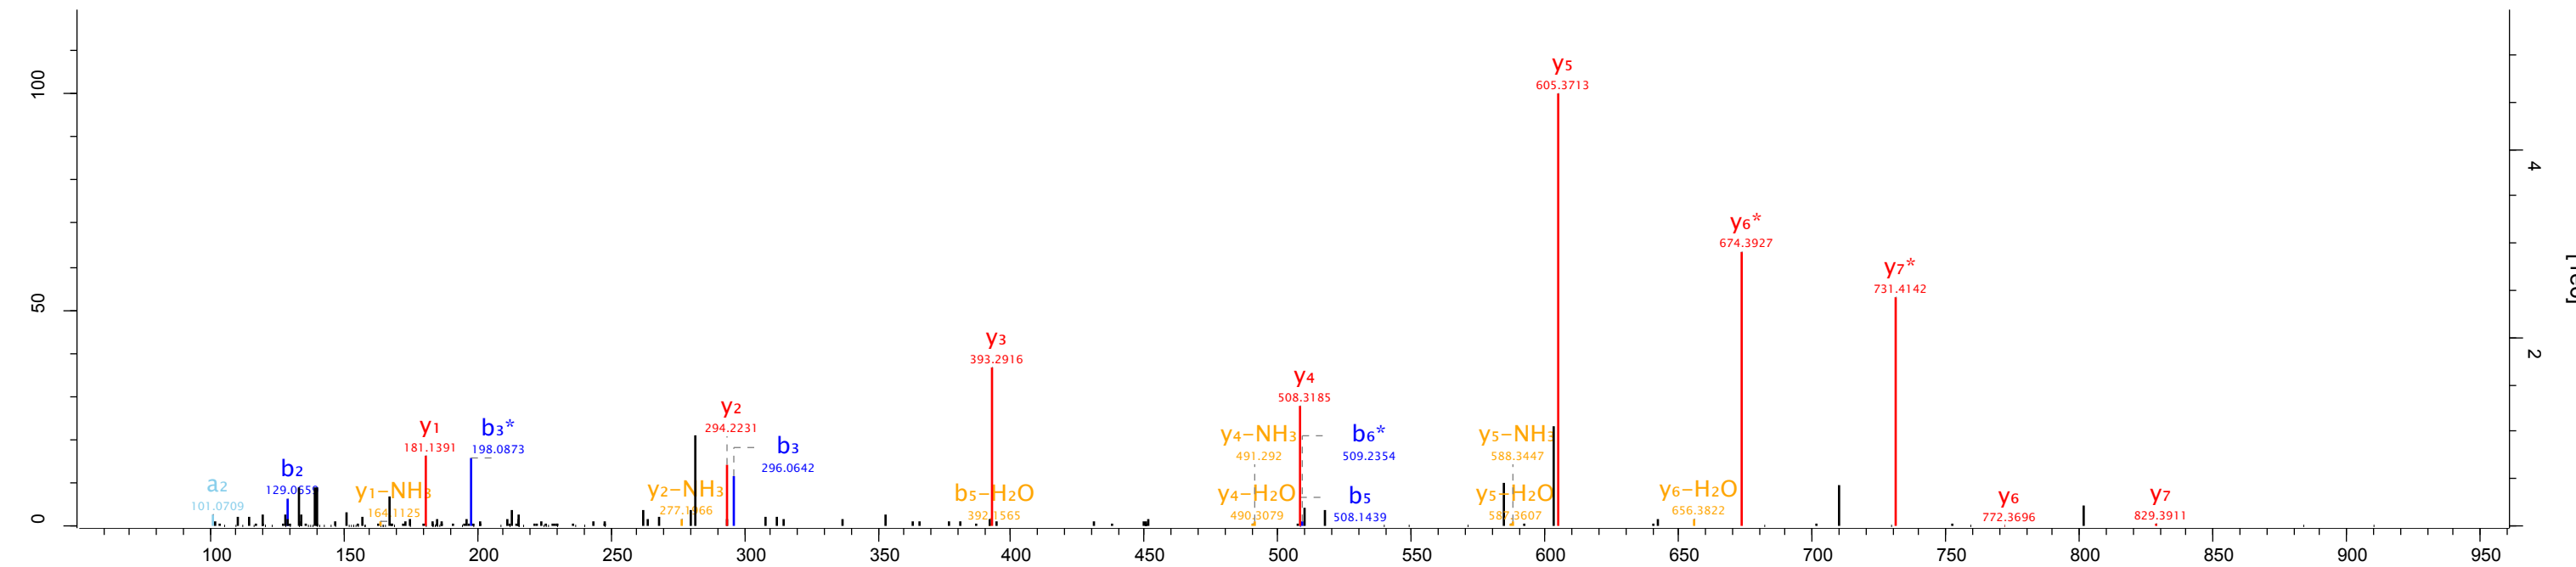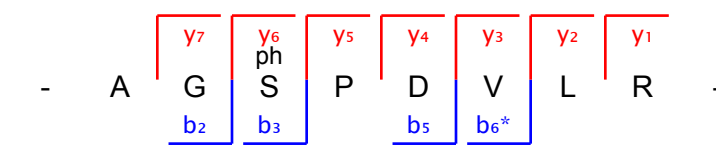

Raw file: 20150814\_A375SR\_Phospho\_BR2\_06  
 Scan: 9385 Method: FTMS; HCD Score: 87.22 m/z: 579.28 Gene names: XRCC6

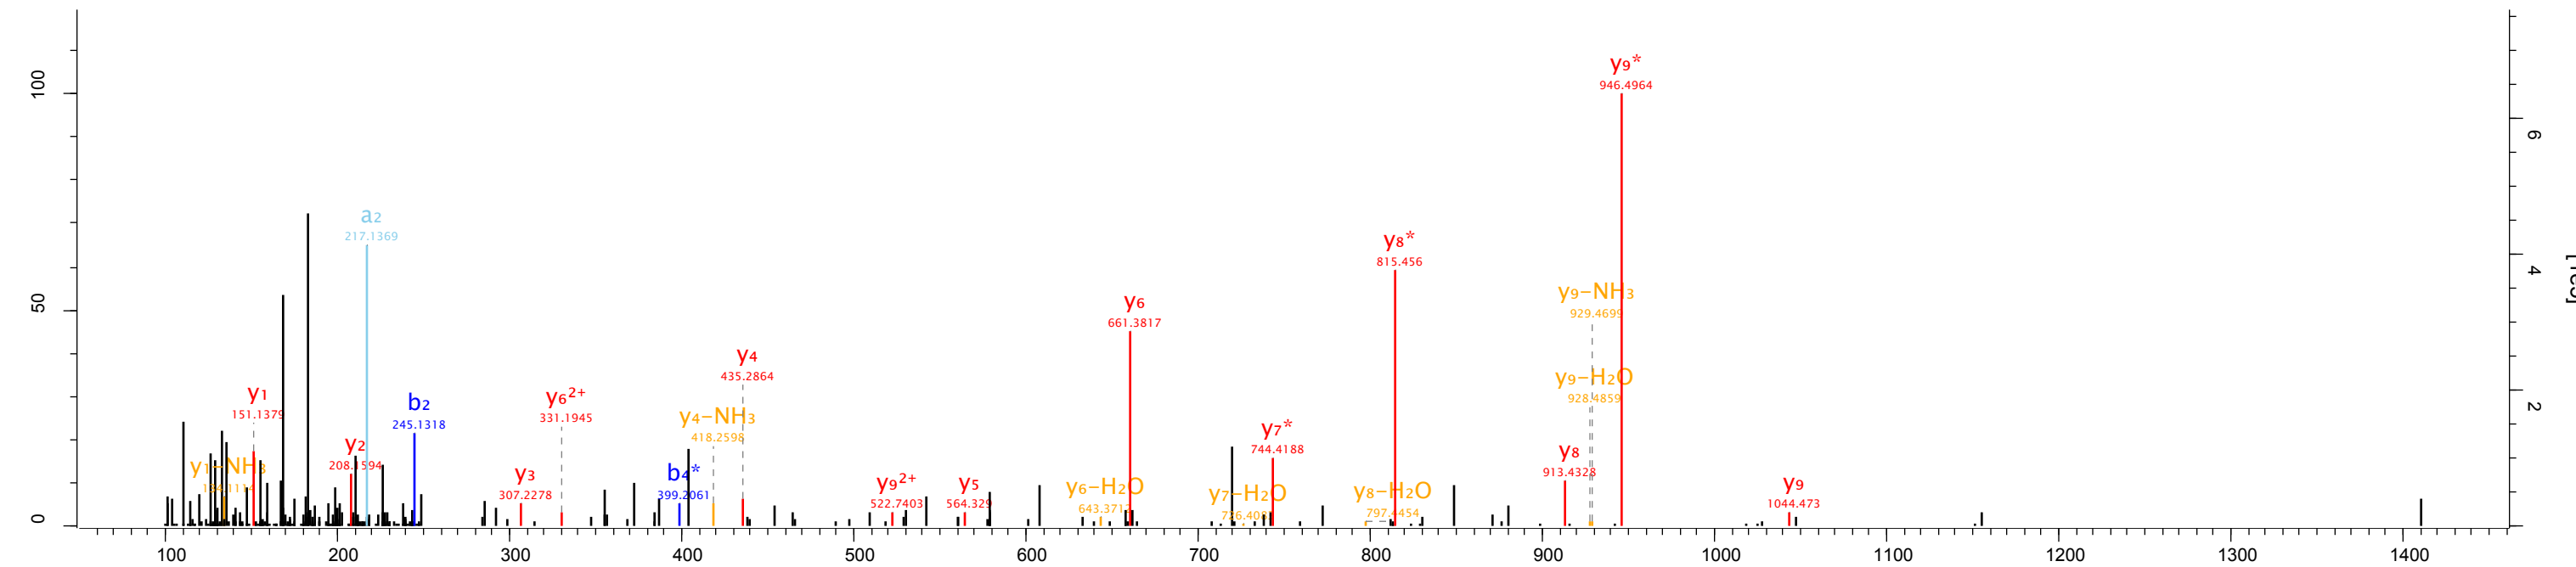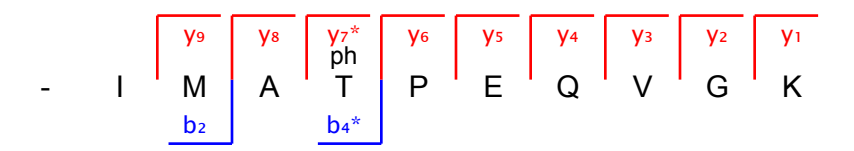

Raw file: 20150814\_A375SR\_Phospho\_BR2\_07  
 Scan: 10505 Method: FTMS; HCD Score: 156.49 m/z: 601.8 Gene names: SRSF6

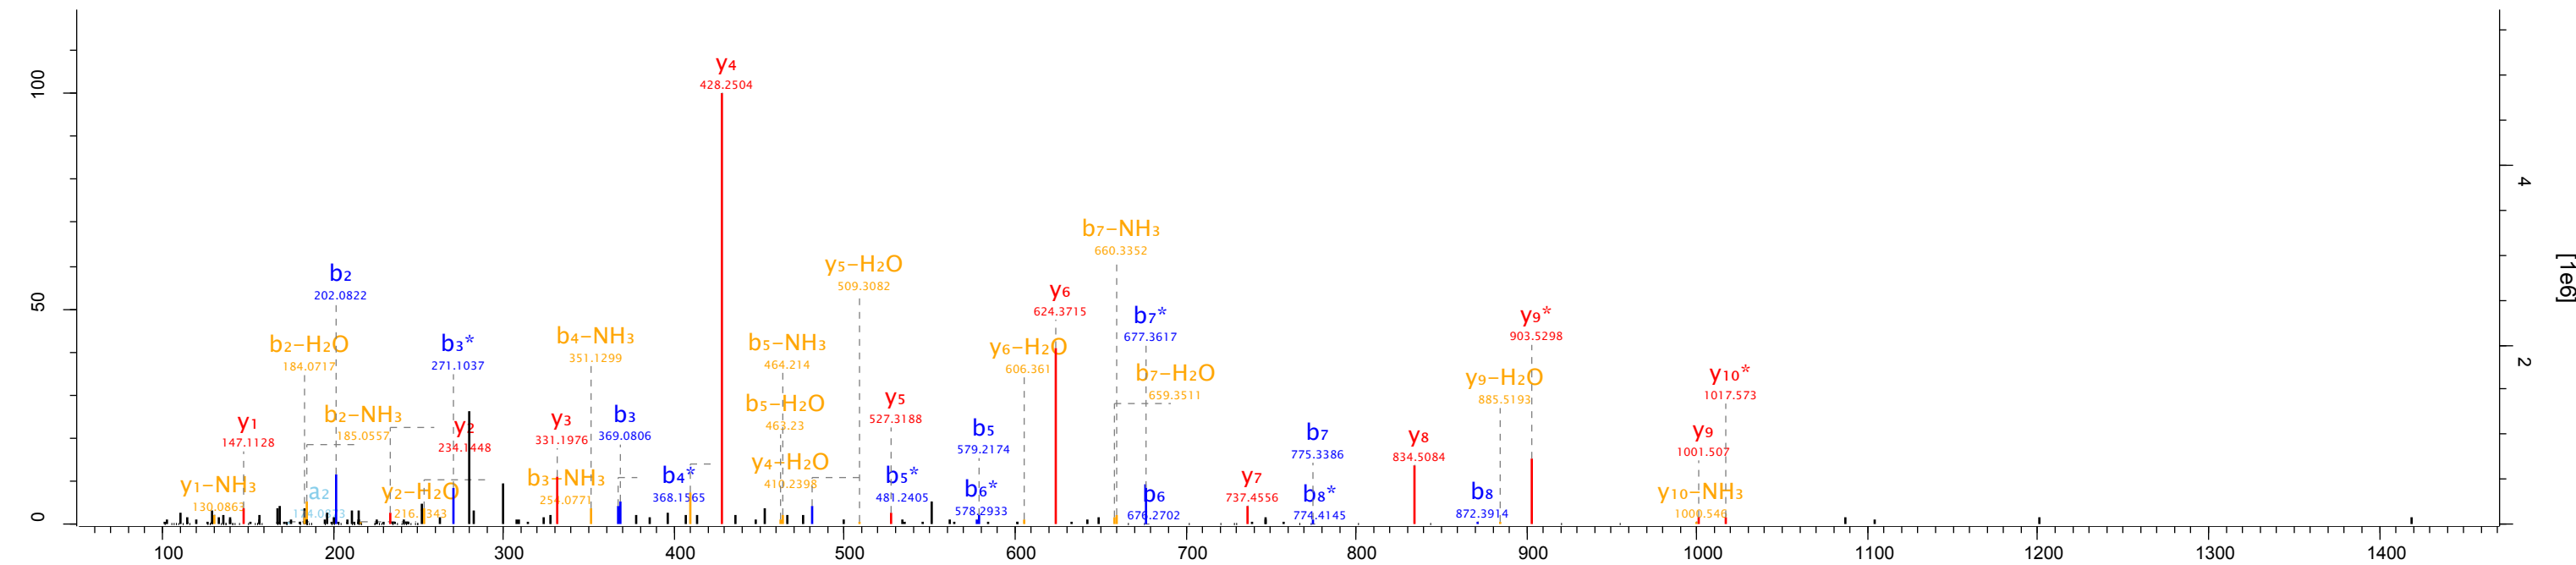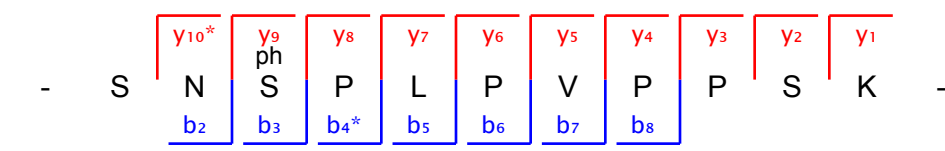



Raw file 20150814\_A375SR\_Phospho\_BR2\_07 Scan 10725 Method FTMS; HCD Score 58.46 m/z 470.25 Gene names SCRIB

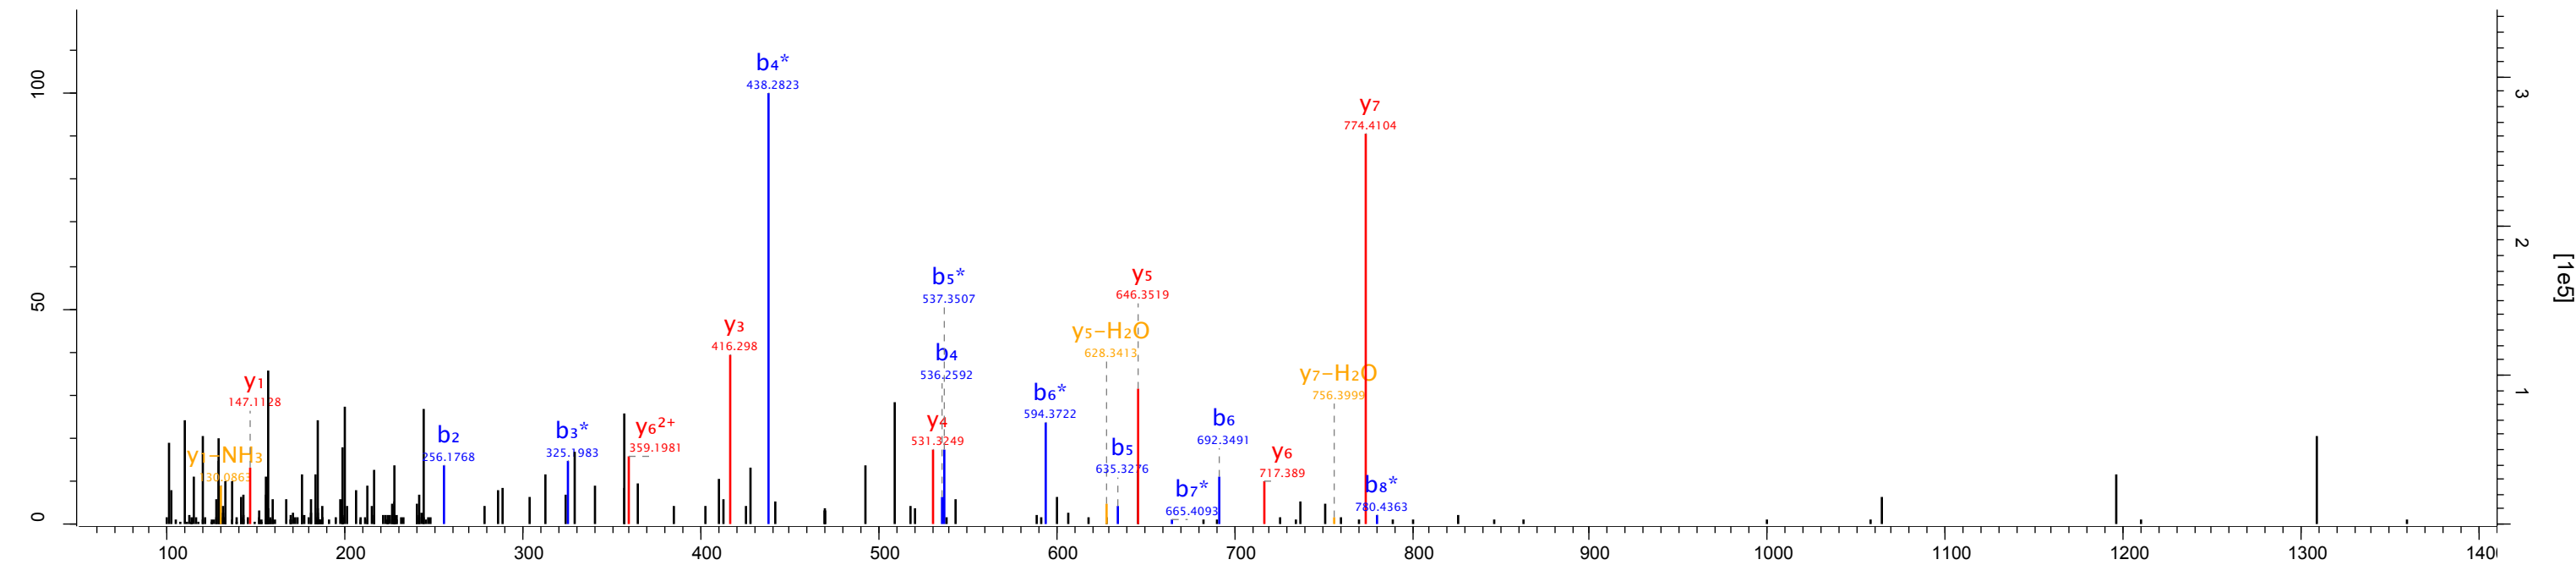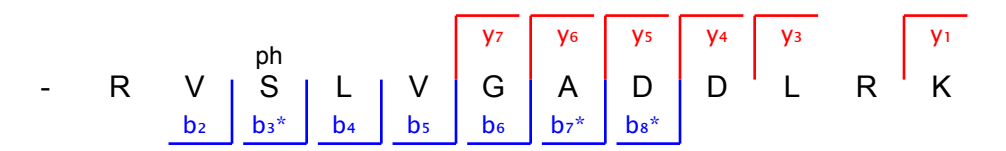

Raw file: 20150814\_A375SR\_Phospho\_BR2\_07  
 Scan: 11835 Method: FTMS; HCD Score: 64.89 m/z: 697.84 Gene names: SLC35F6

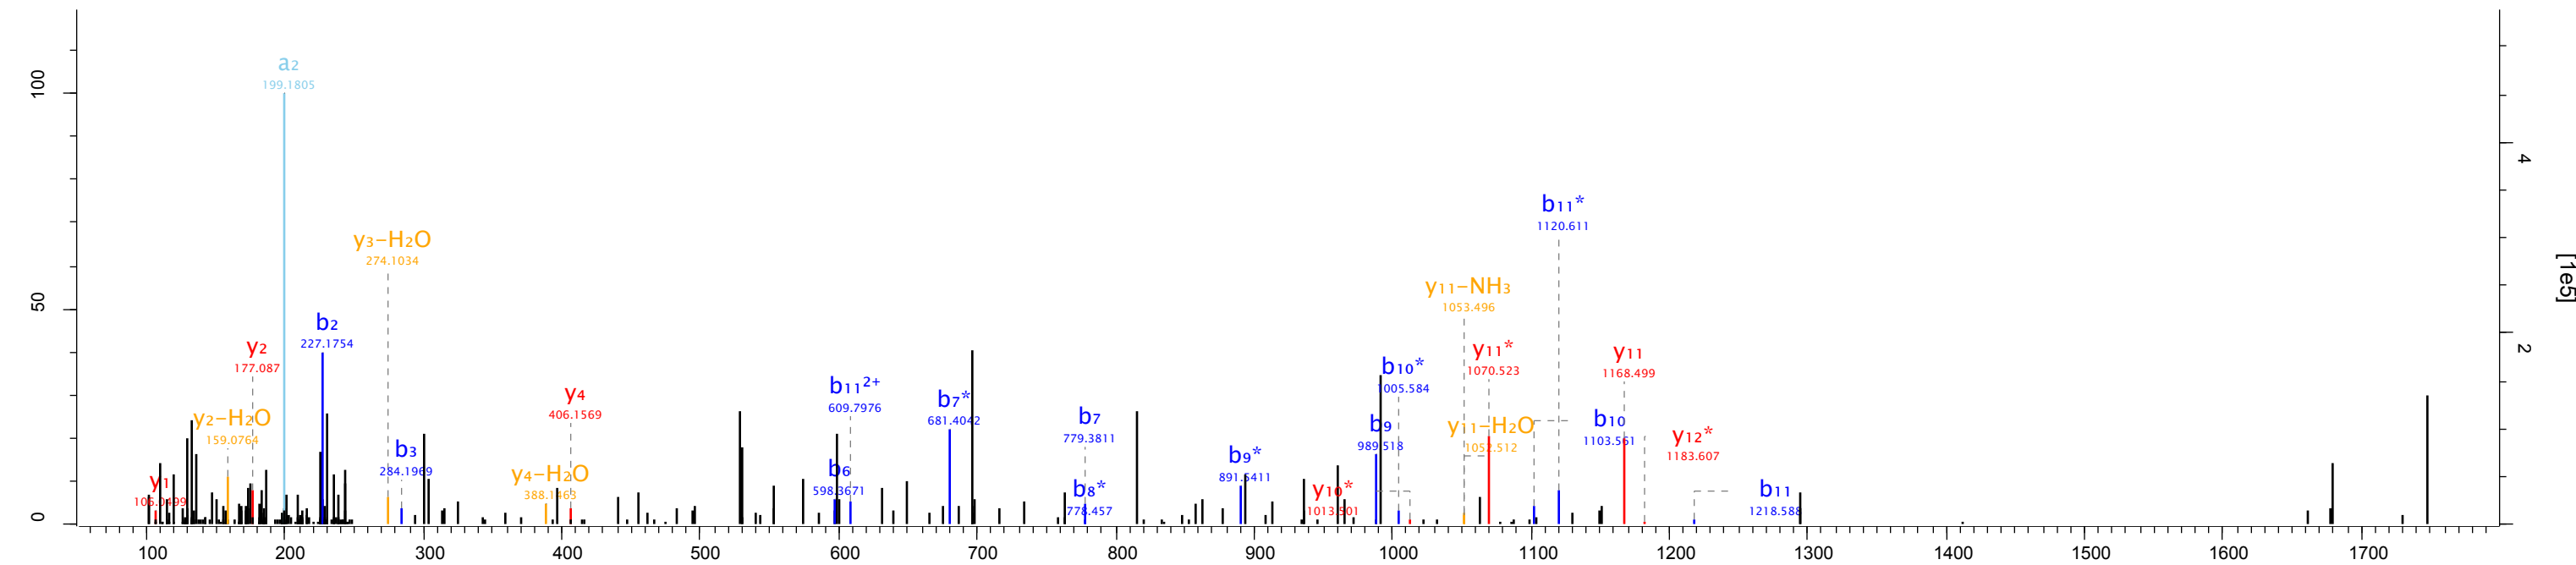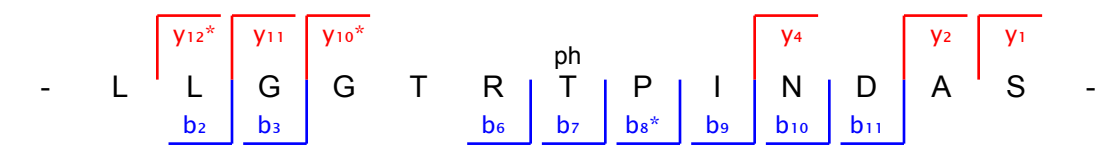

Raw file: 20150814\_A375SR\_Phospho\_BR2\_07  
 Scan: 11875 Method: FTMS; HCD Score: 69.42 m/z: 642.33 Gene names: SOX5

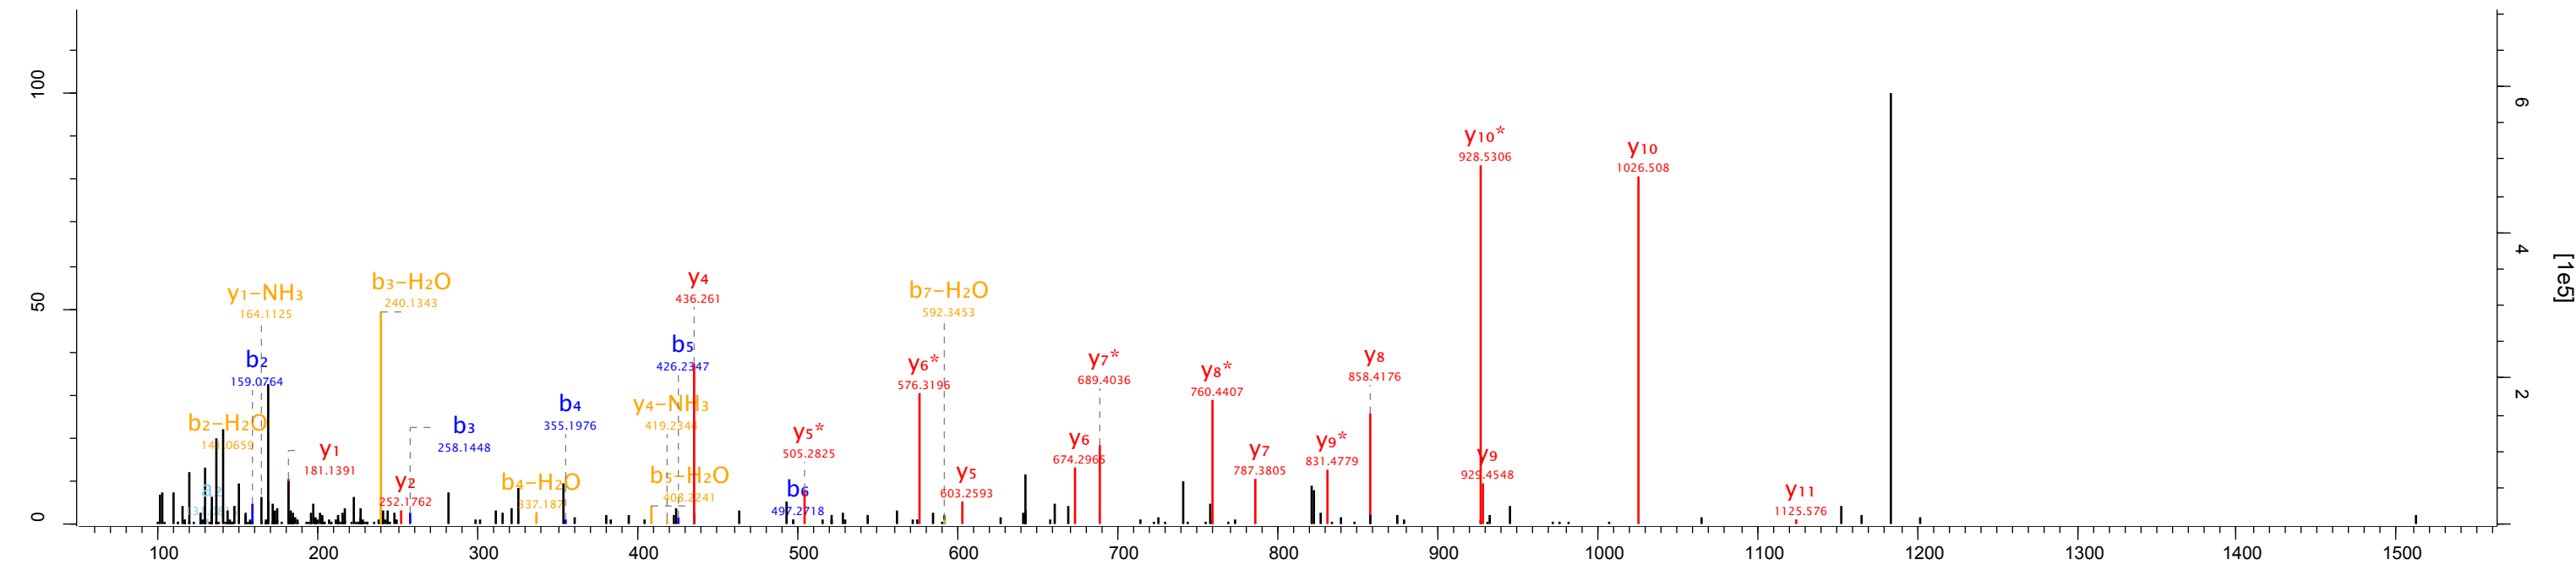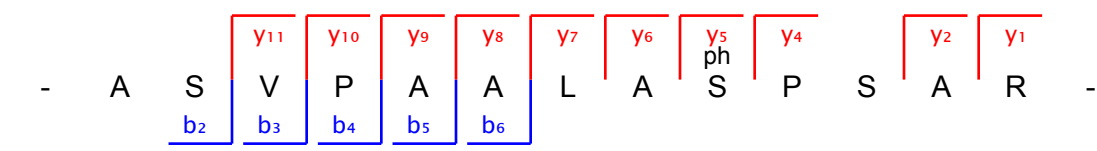

Raw file: 20150814\_A375SR\_Phospho\_BR2\_07  
 Scan: 14055 Method: FTMS; HCD Score: 56.08 m/z: 719.66 Gene names: ADD3

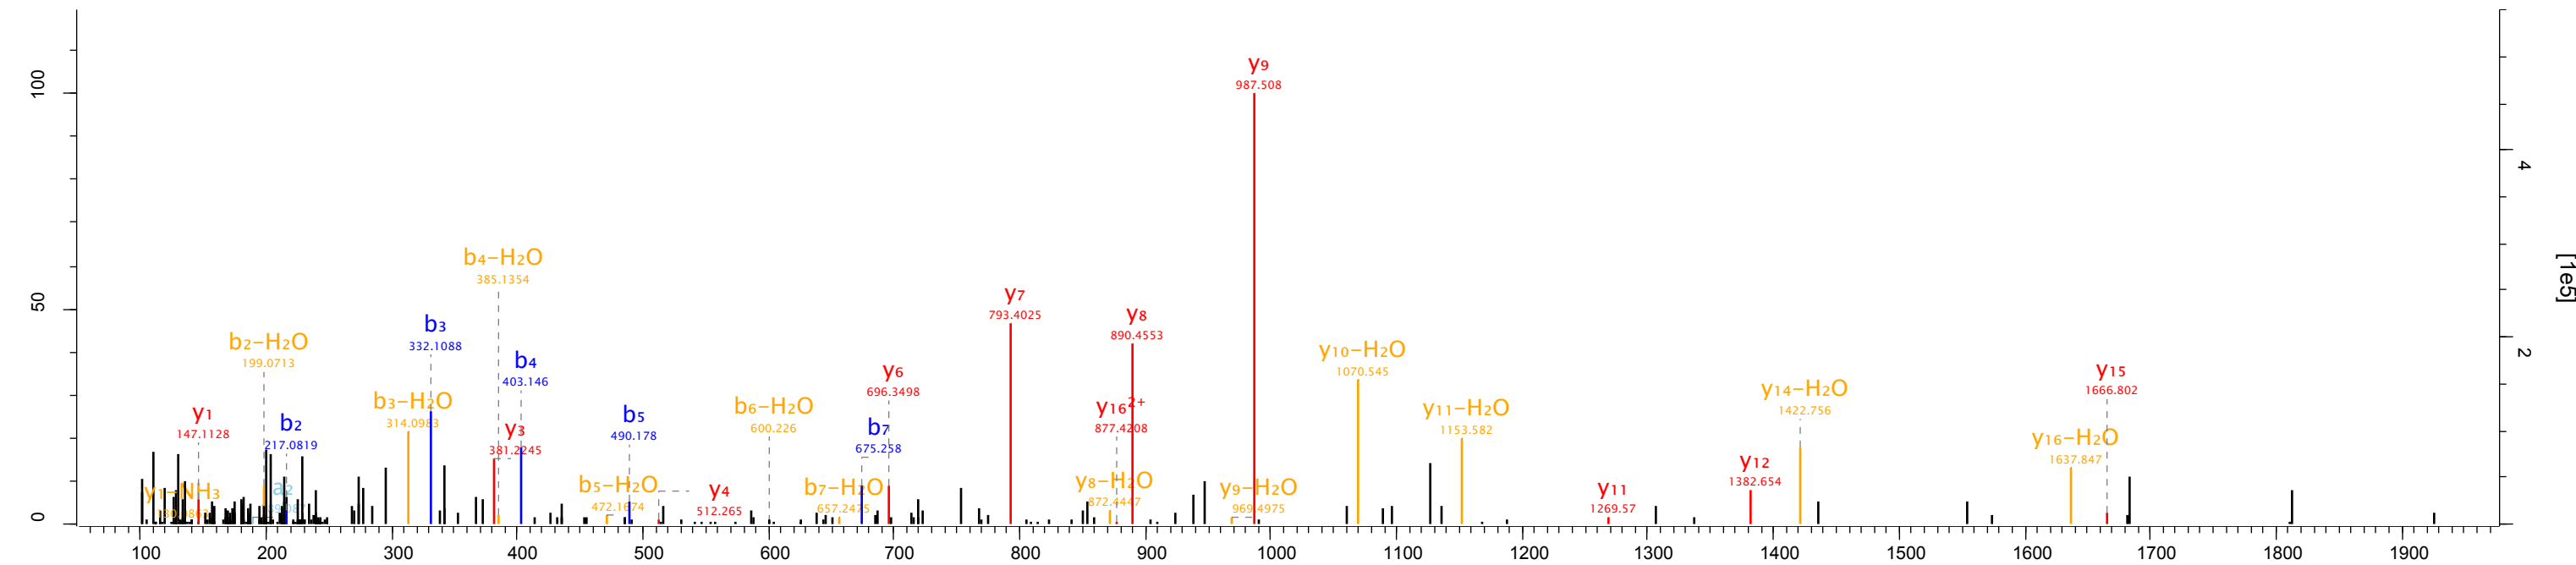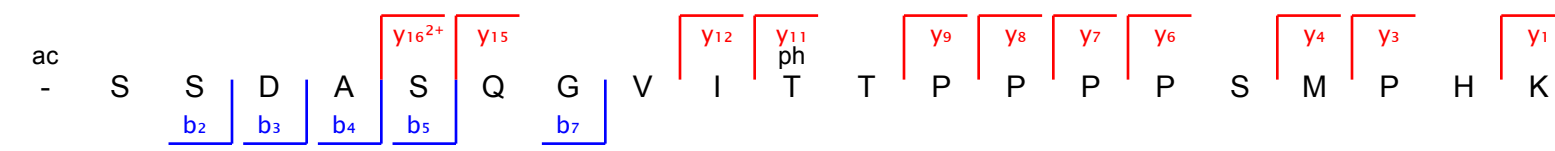

Raw file: 20150814\_A375SR\_Phospho\_BR2\_07  
 Scan: 14075 Method: FTMS; HCD Score: 159.13 m/z: 930.06 Gene names: PHC2

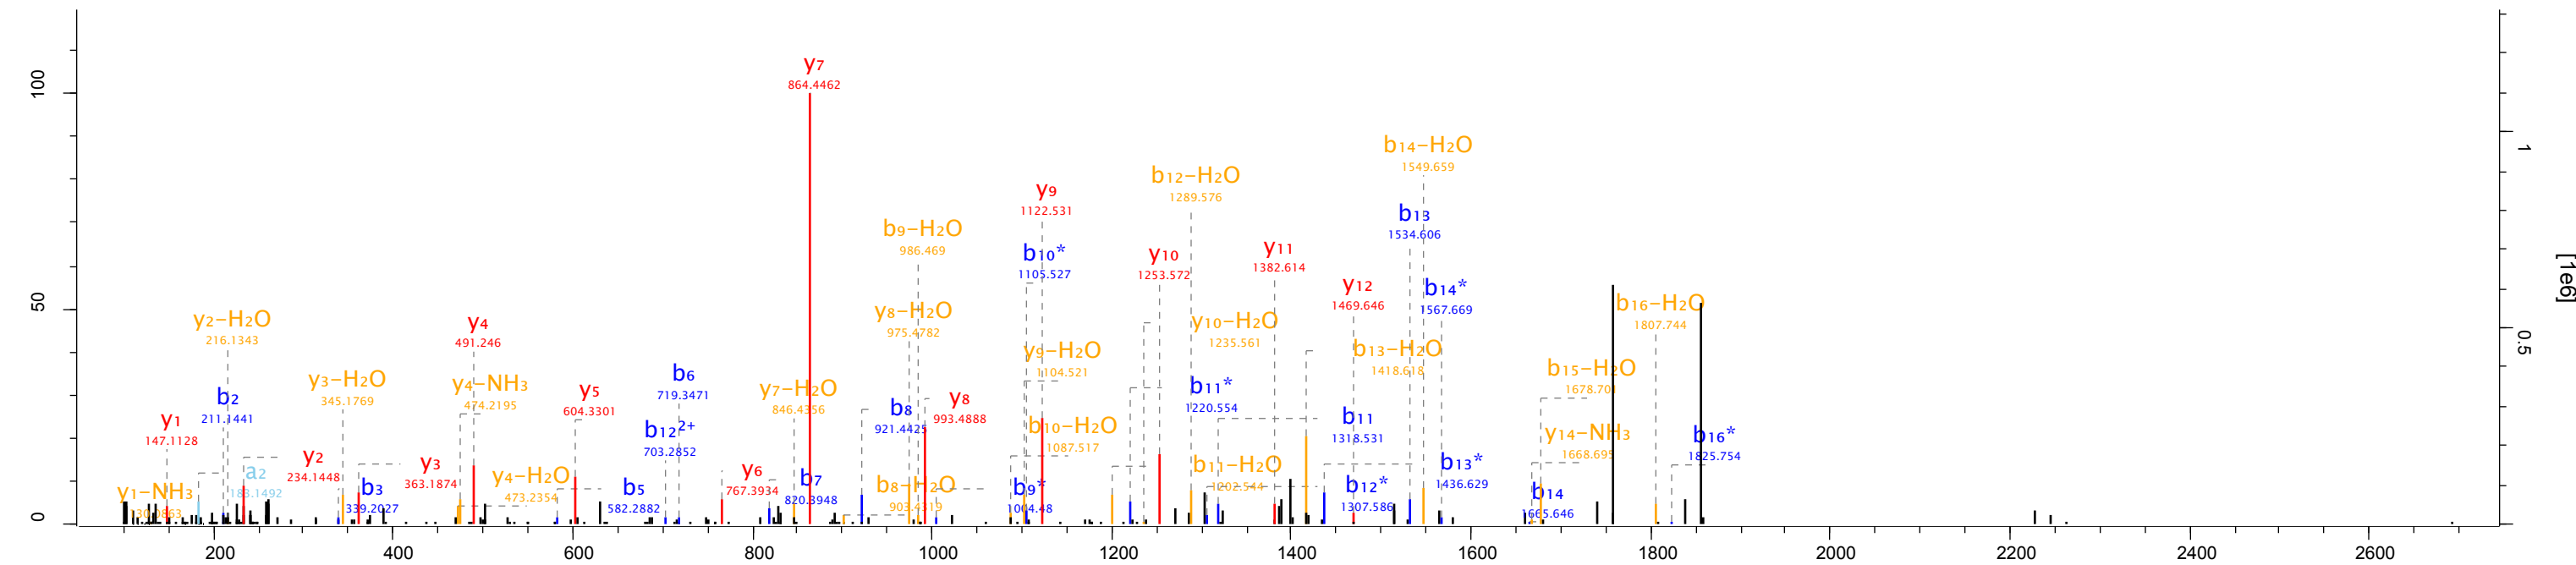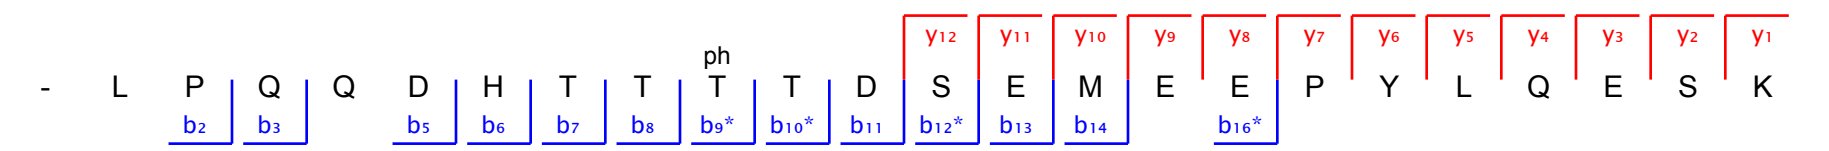

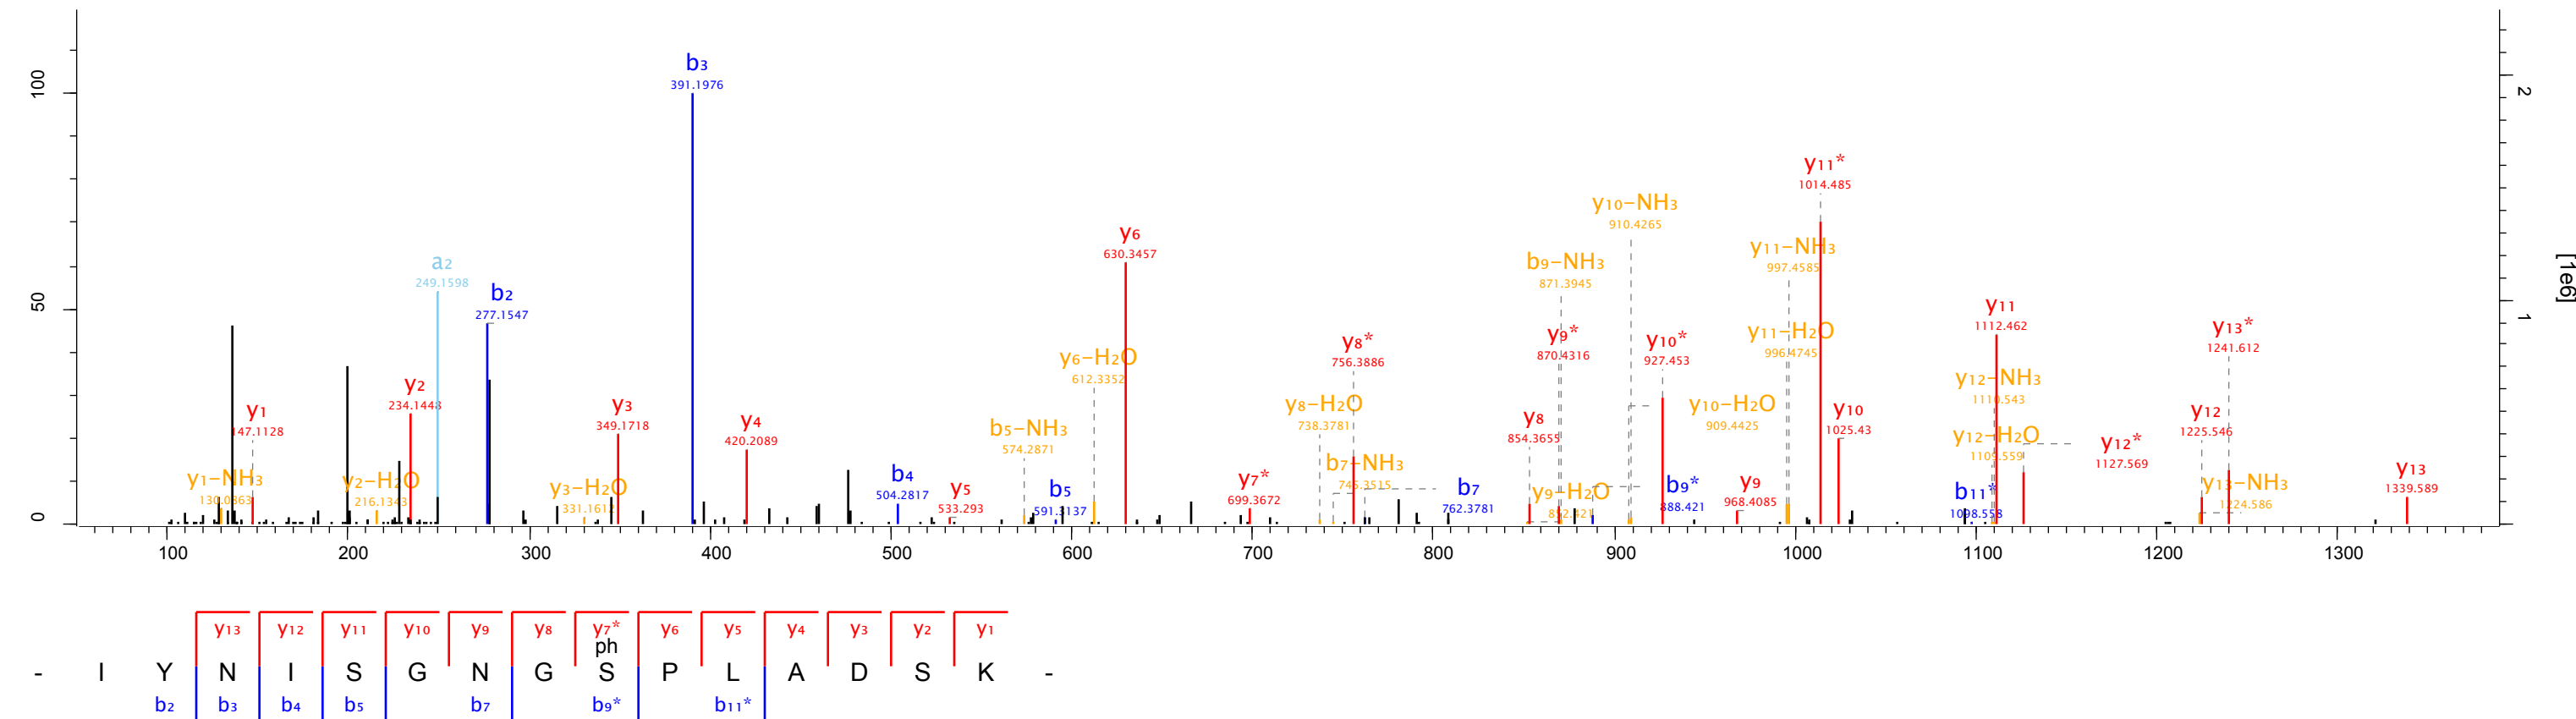

Raw file 20150814\_A375SR\_Phospho\_BR2\_07 Scan 14945 Method FTMS; HCD Score 120.85 m/z 707.35 Gene names VGLL4

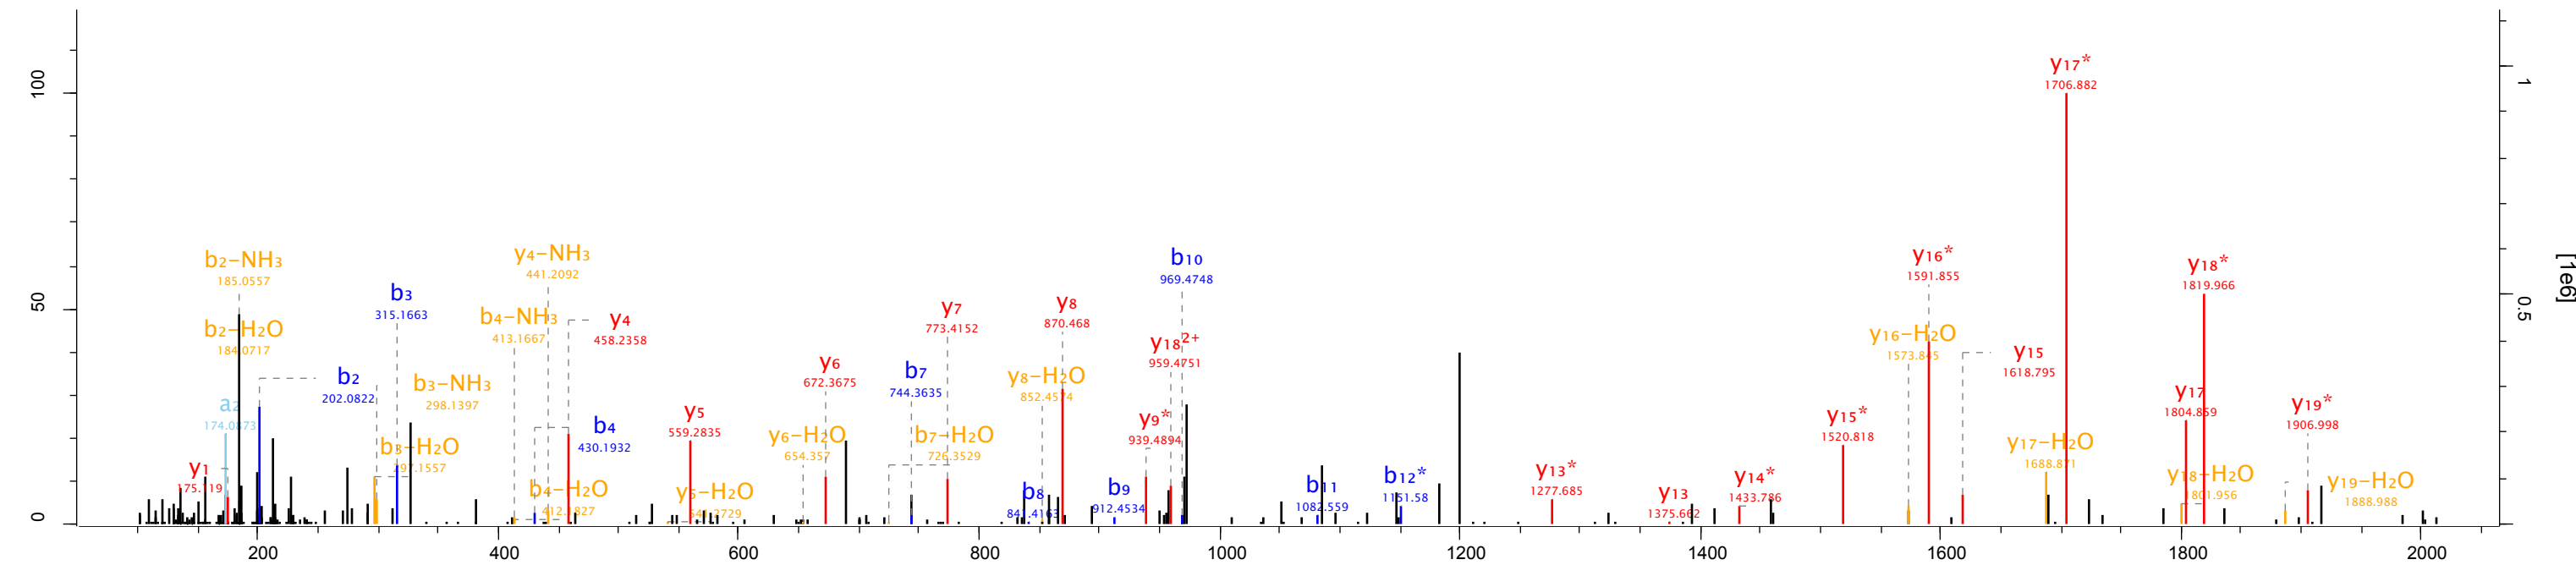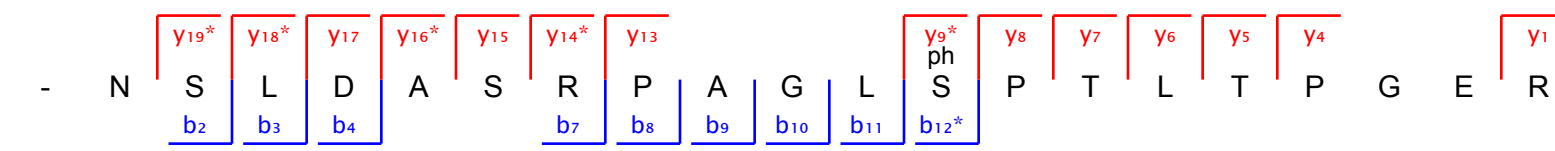

Raw file: 20150814\_A375SR\_Phospho\_BR2\_07  
 Scan: 15165 Method: FTMS; HCD Score: 77.22 m/z: 660.65 Gene names: LRRC16A

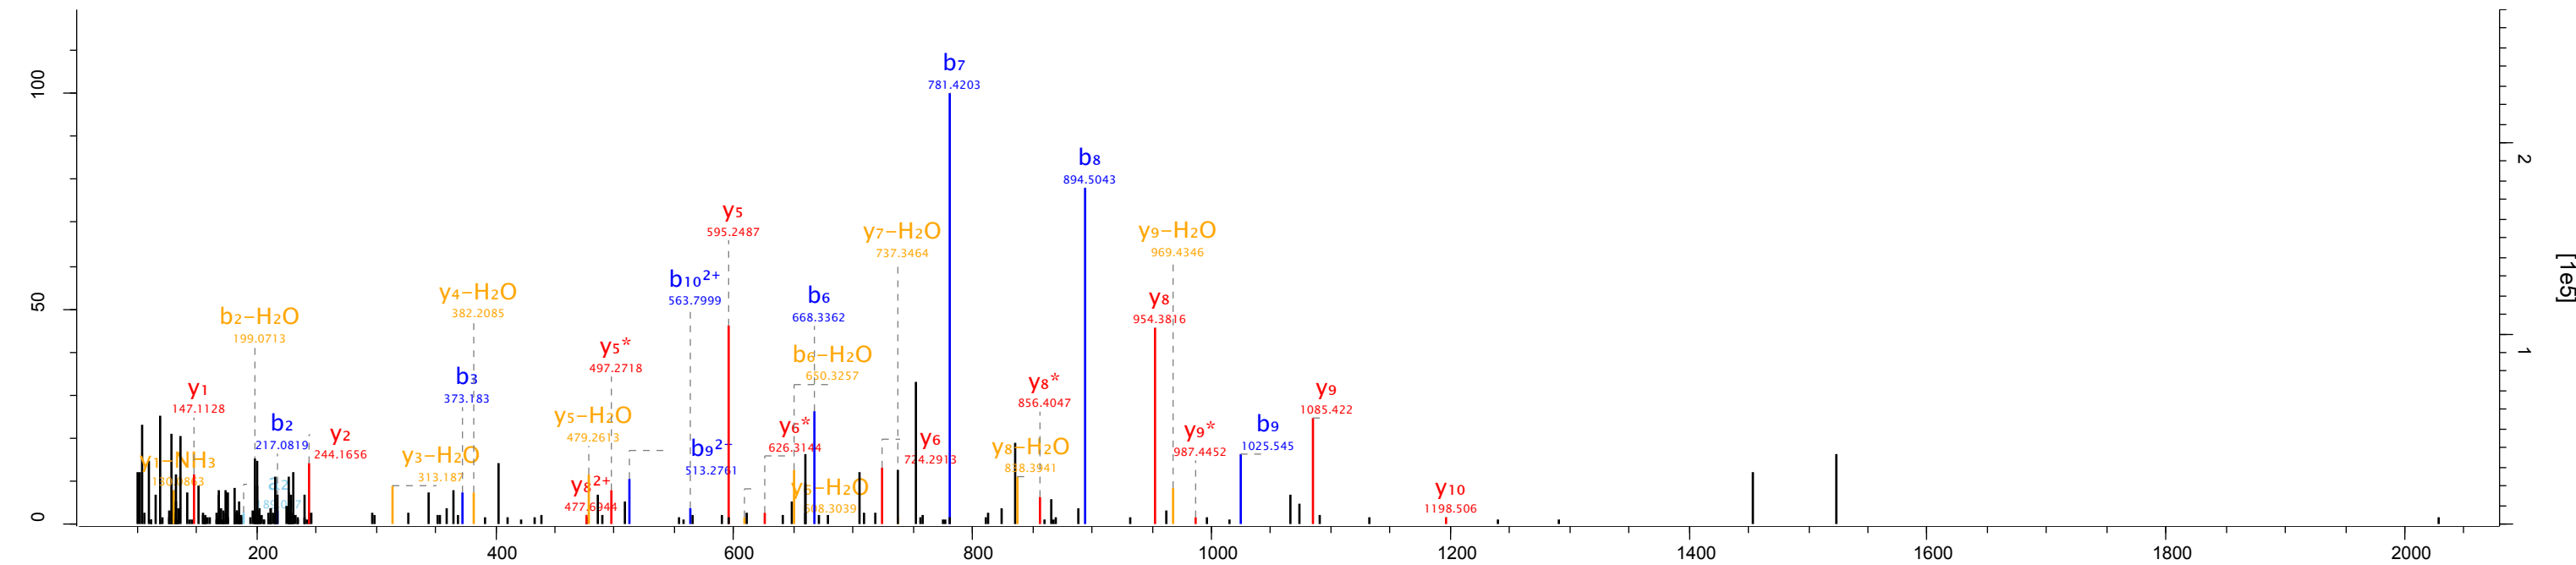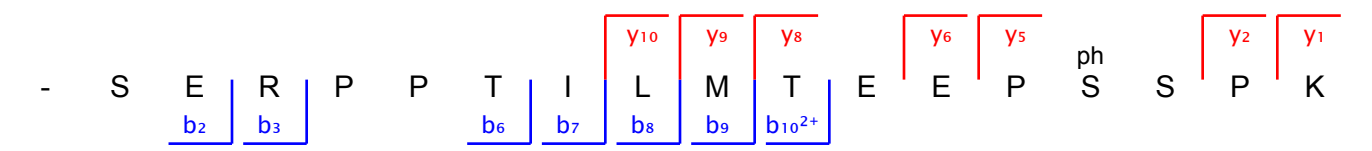



Raw file 20150814\_A375SR\_Phospho\_BR2\_07 Scan 16635 Method FTMS; HCD Score 116.06 m/z 966.97 Gene names TGM2

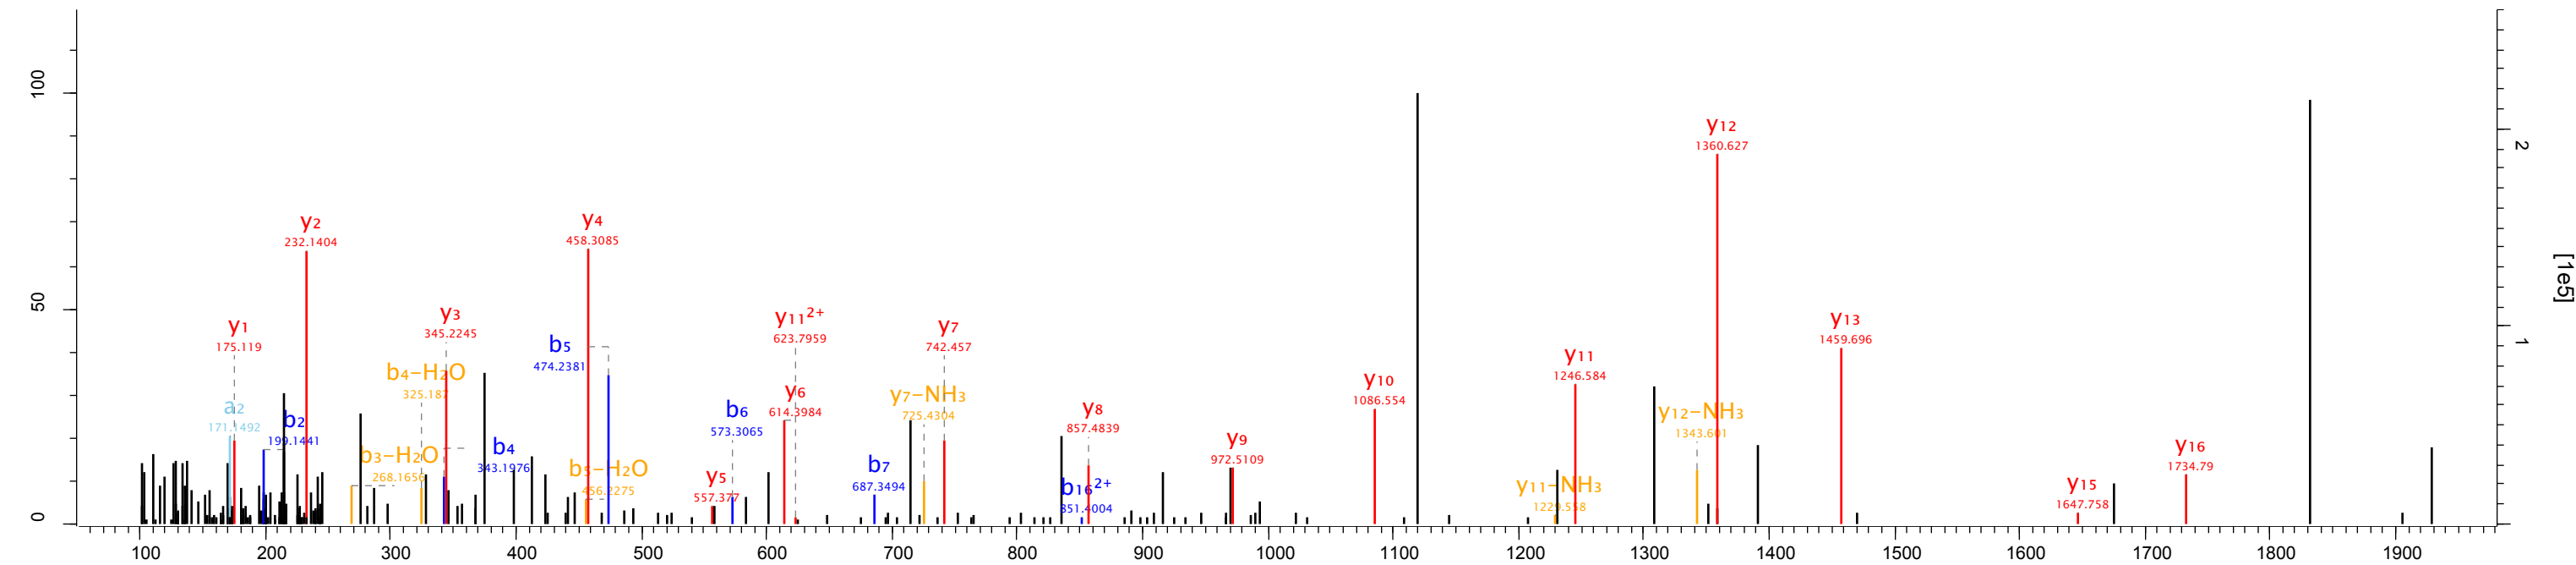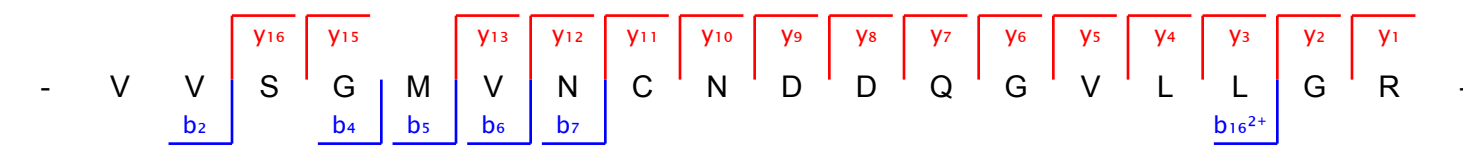

Raw file 20150814\_A375SR\_Phospho\_BR2\_07 Scan 16895 Method FTMS; HCD Score 141.79 m/z 846.42 Gene names ANKRD34A

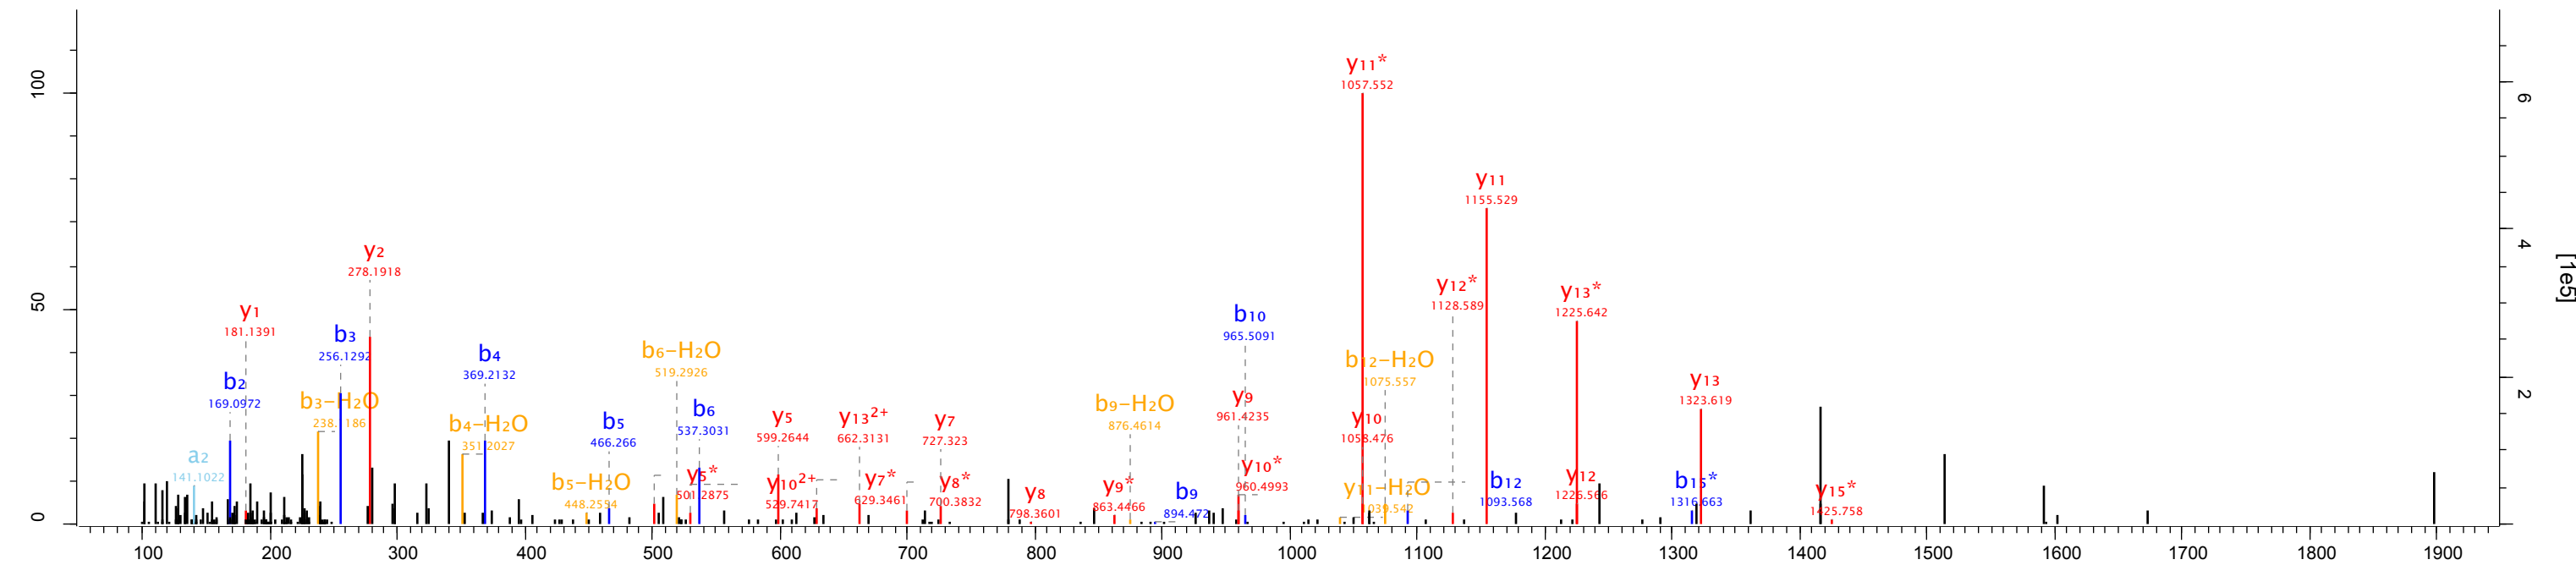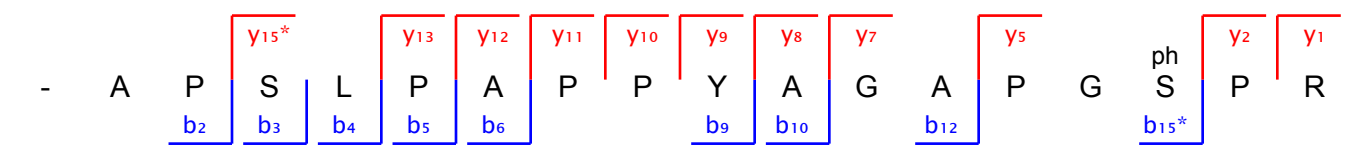

Raw file 20150814\_A375SR\_Phospho\_BR2\_07 Scan 18685 Method FTMS; HCD Score 77.06 m/z 825.37 Gene names AKAP2

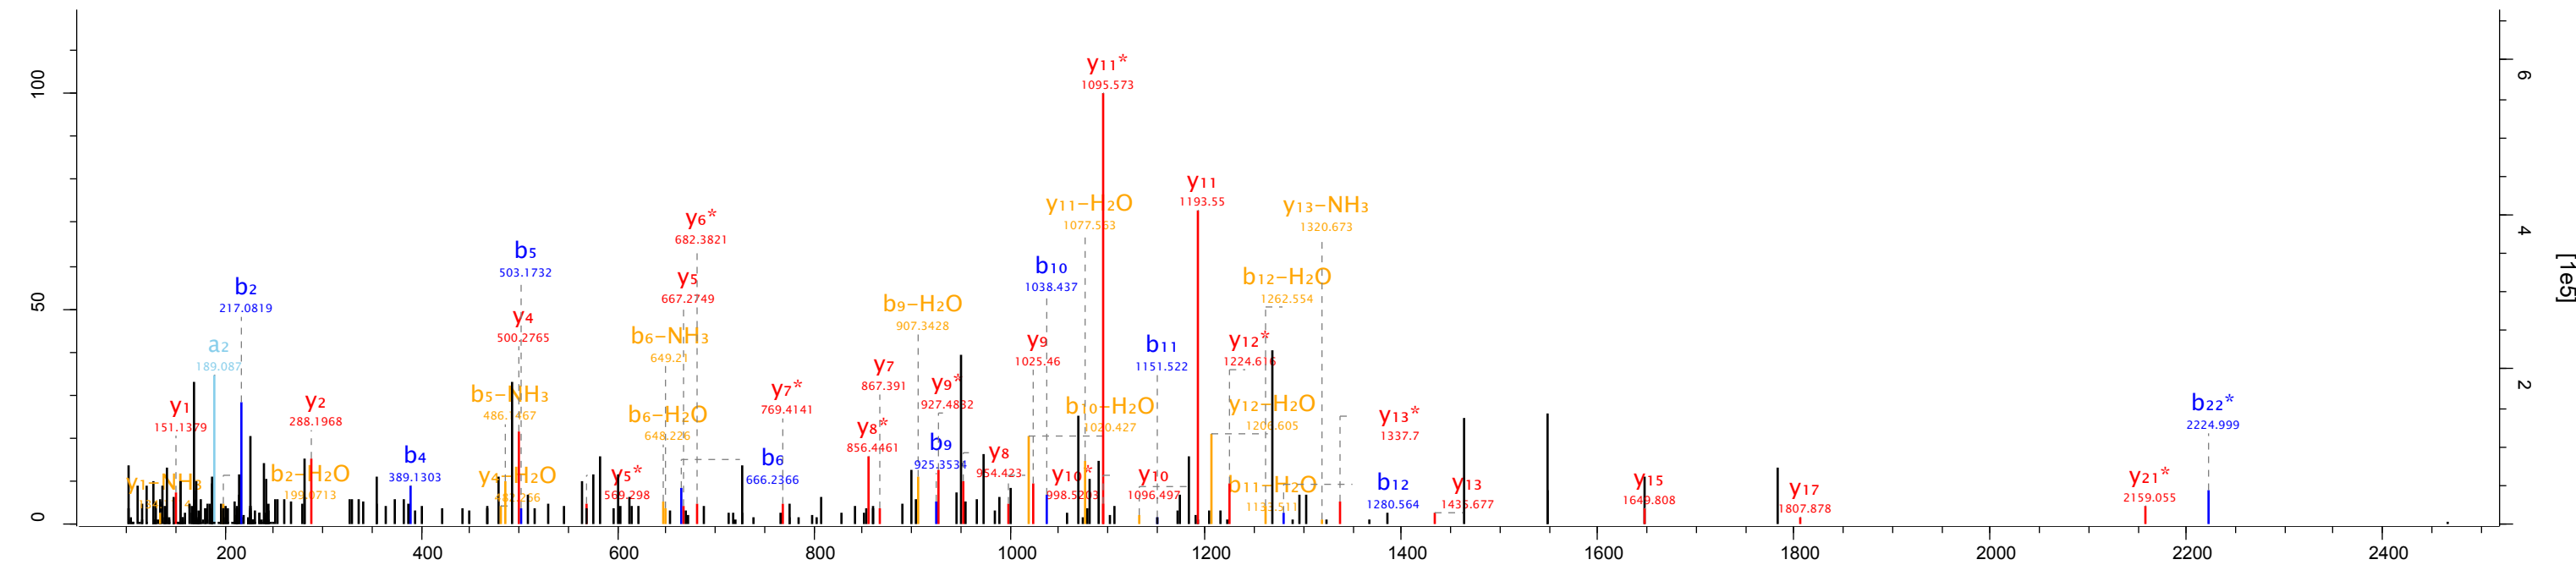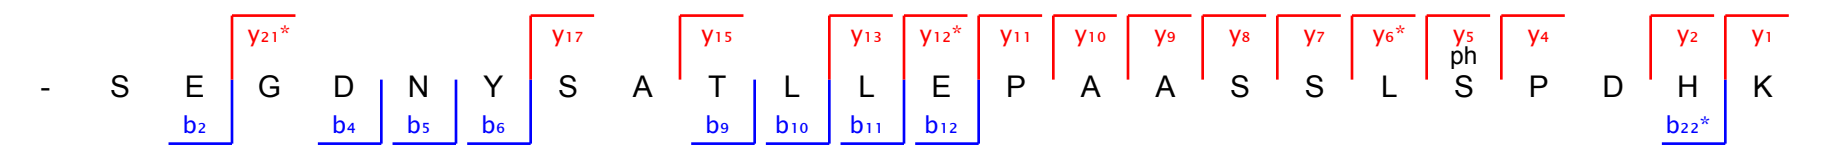

Raw file: 20150814\_A375SR\_Phospho\_BR2\_07  
 Scan: 20605 Method: FTMS; HCD Score: 62.86 m/z: 862.43 Gene names: ADD1

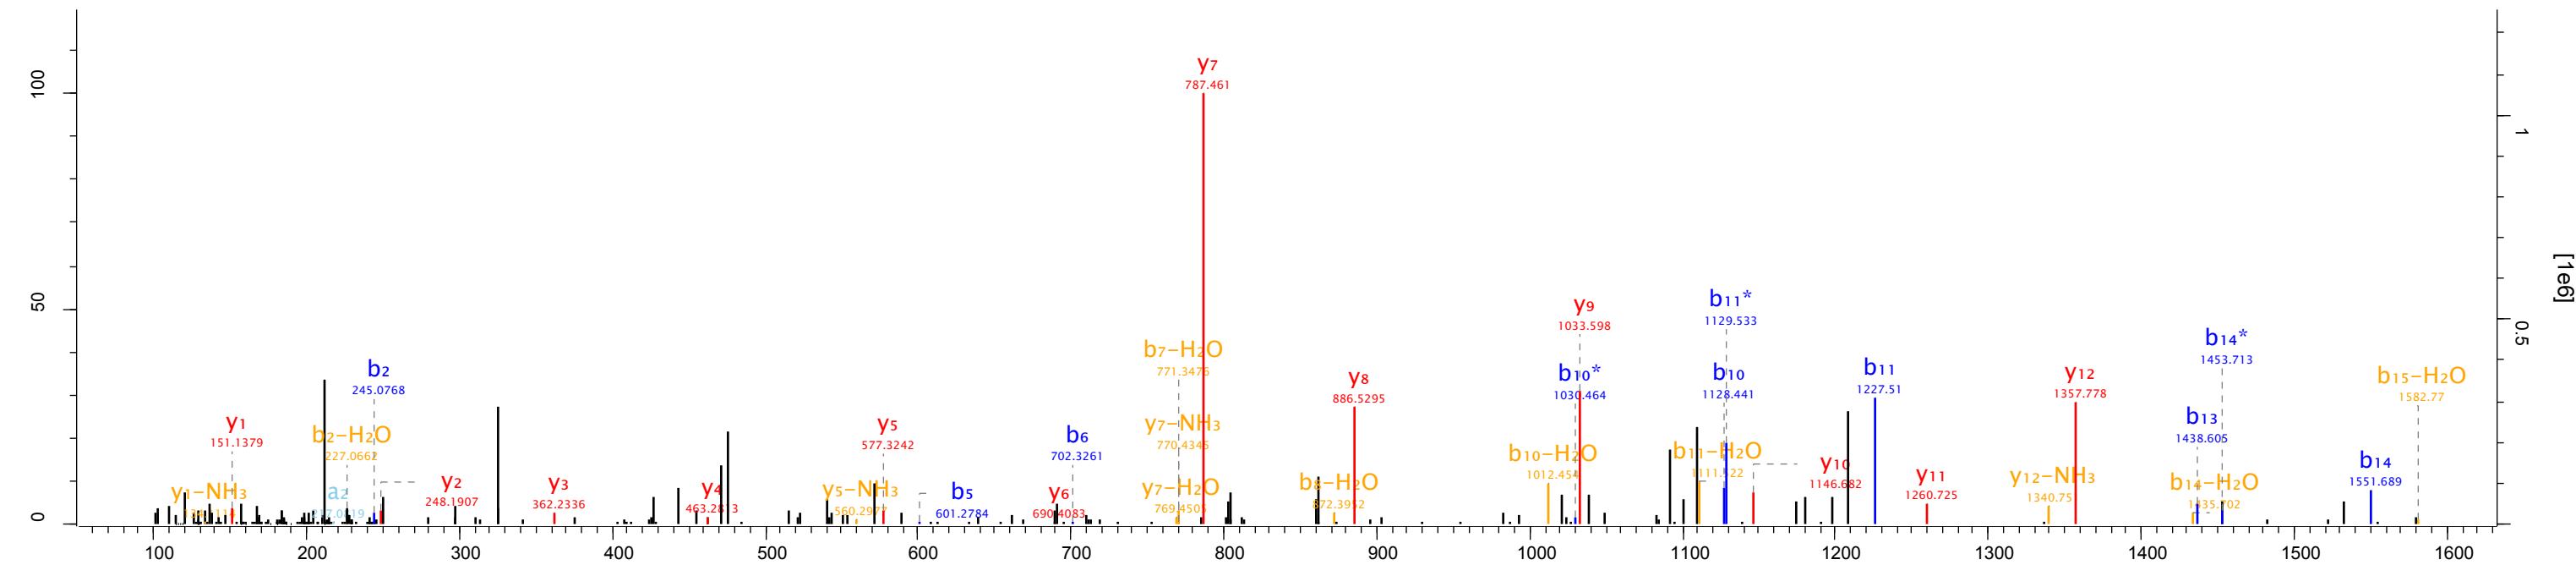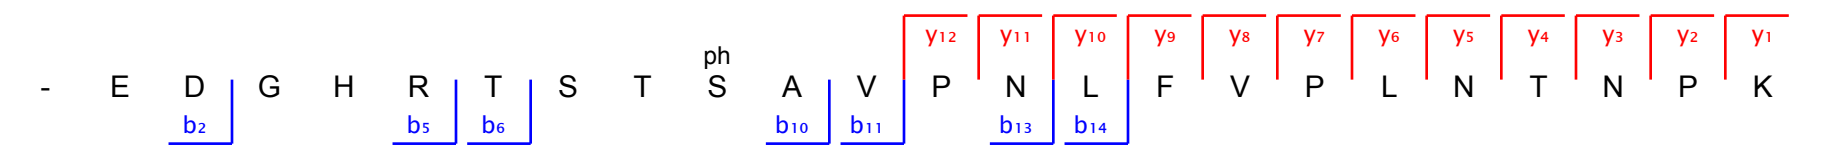

20150814\_A375SR\_Phospho\_BR2\_07 2145 FTMS; HCD 135.81 690.81 PML

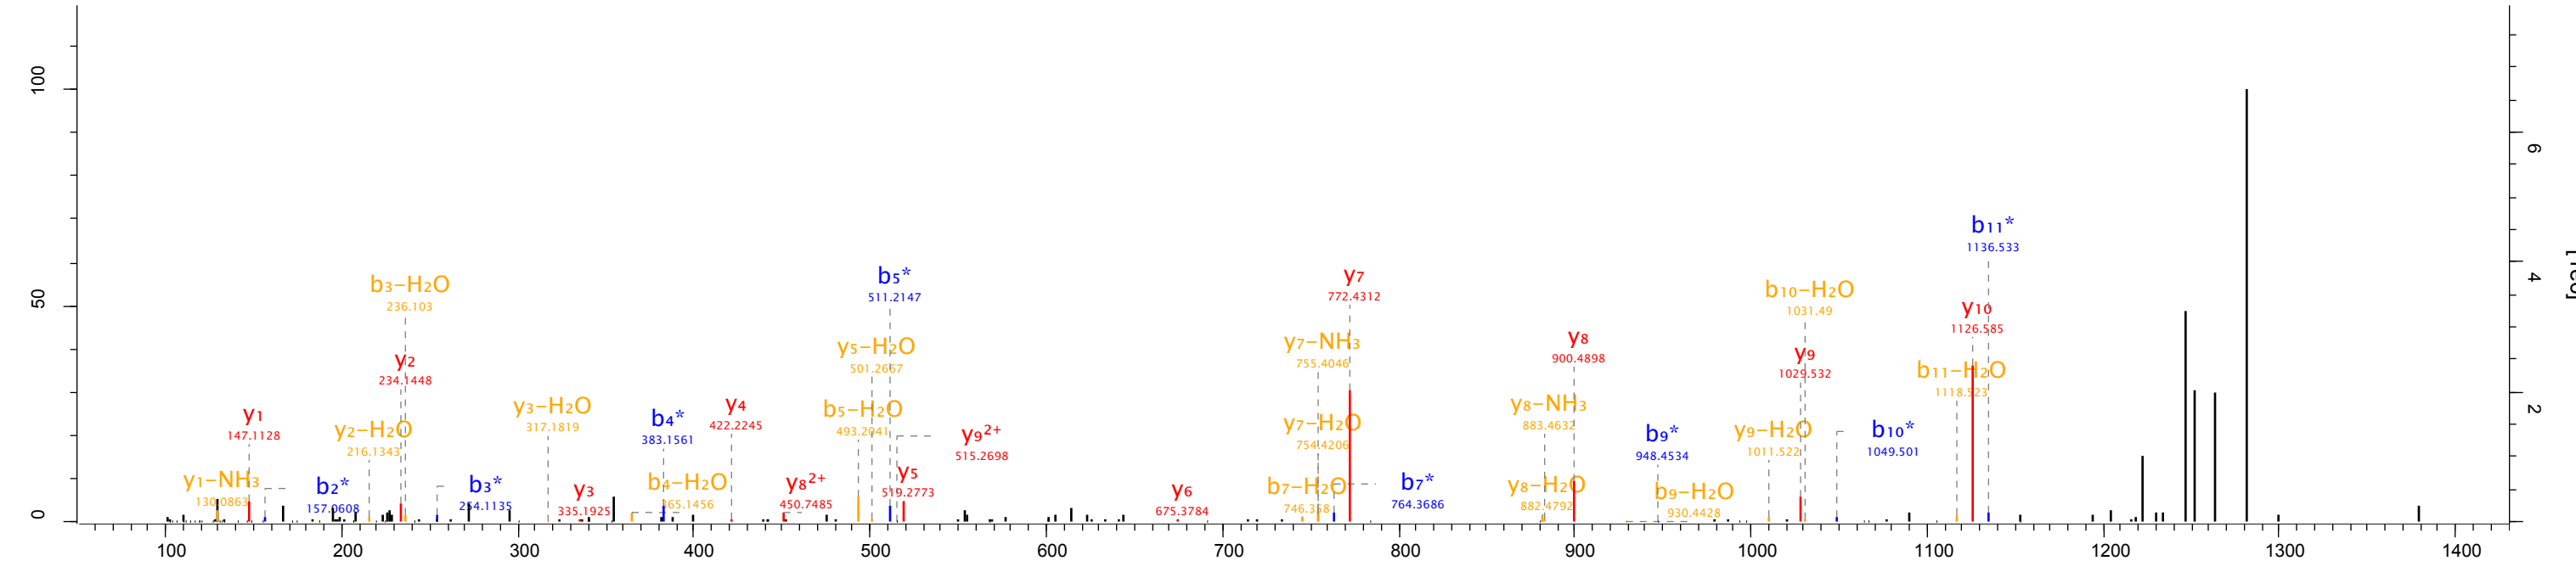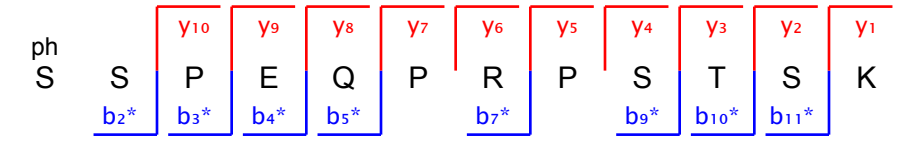

Raw file 20150814\_A375SR\_Phospho\_BR2\_07 Scan 23405 Method FTMS; HCD Score 48.27 m/z 1056.82 Gene names FAM134A

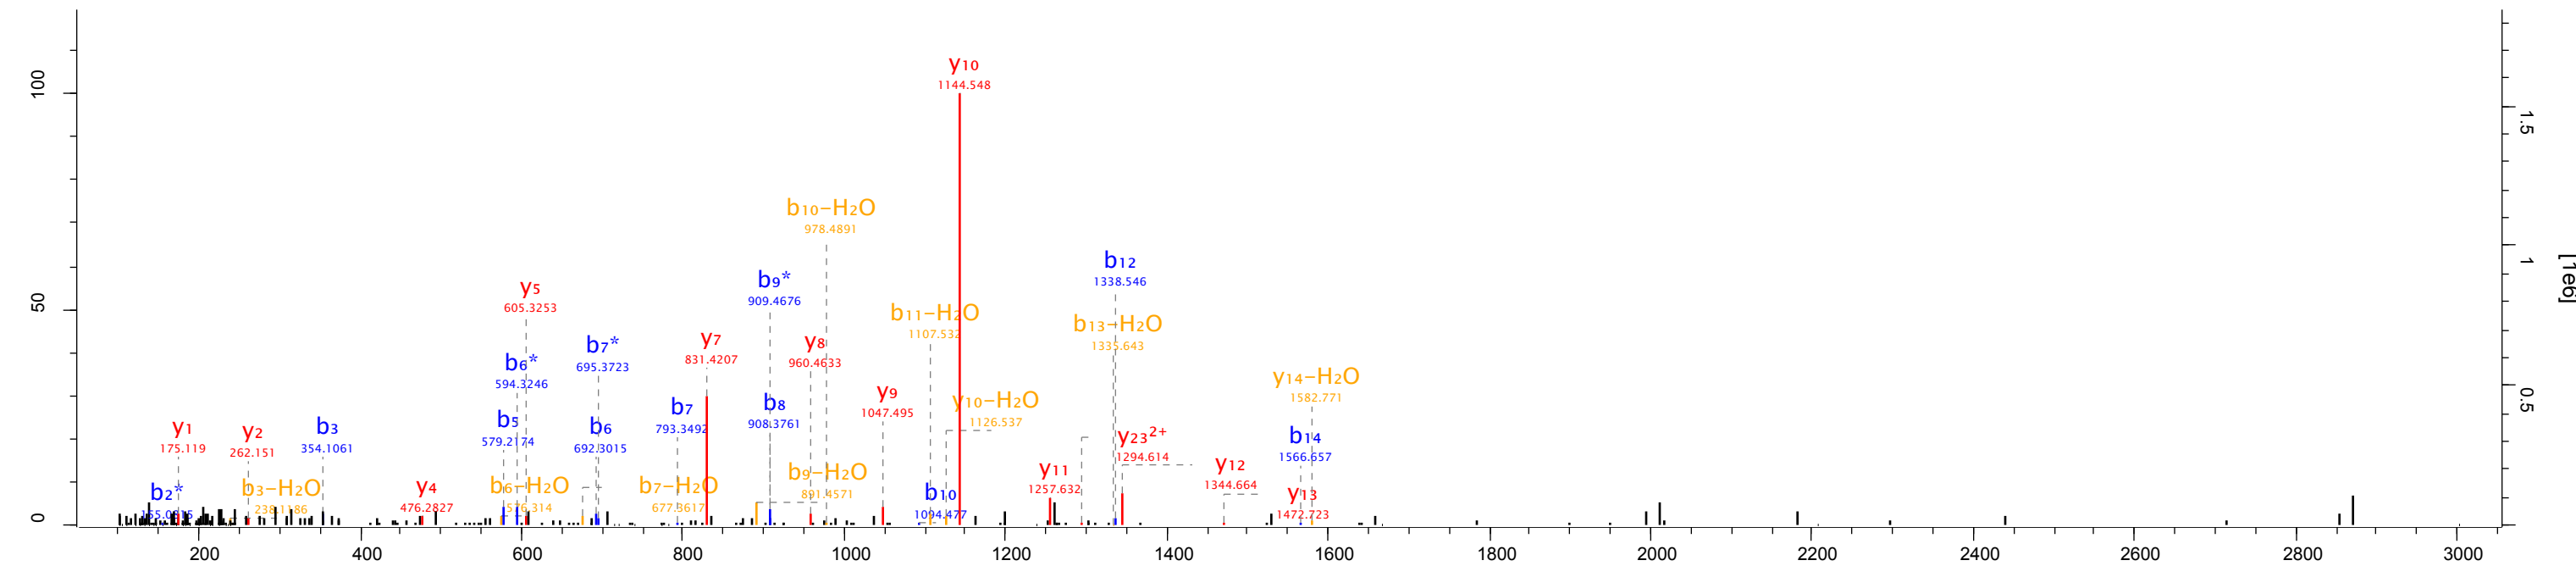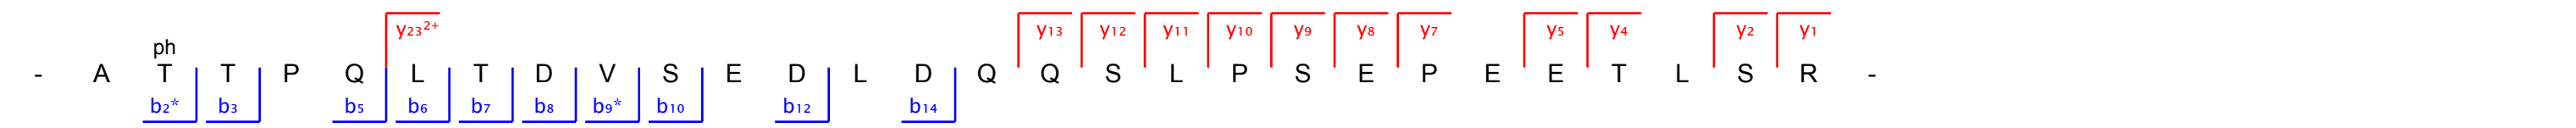

Raw file Scan Method m/z Gene names  
 20150814\_A375SR\_Phospho\_BR2\_07 23645 FTMS; HCD 44.54 982.47 TFDP2

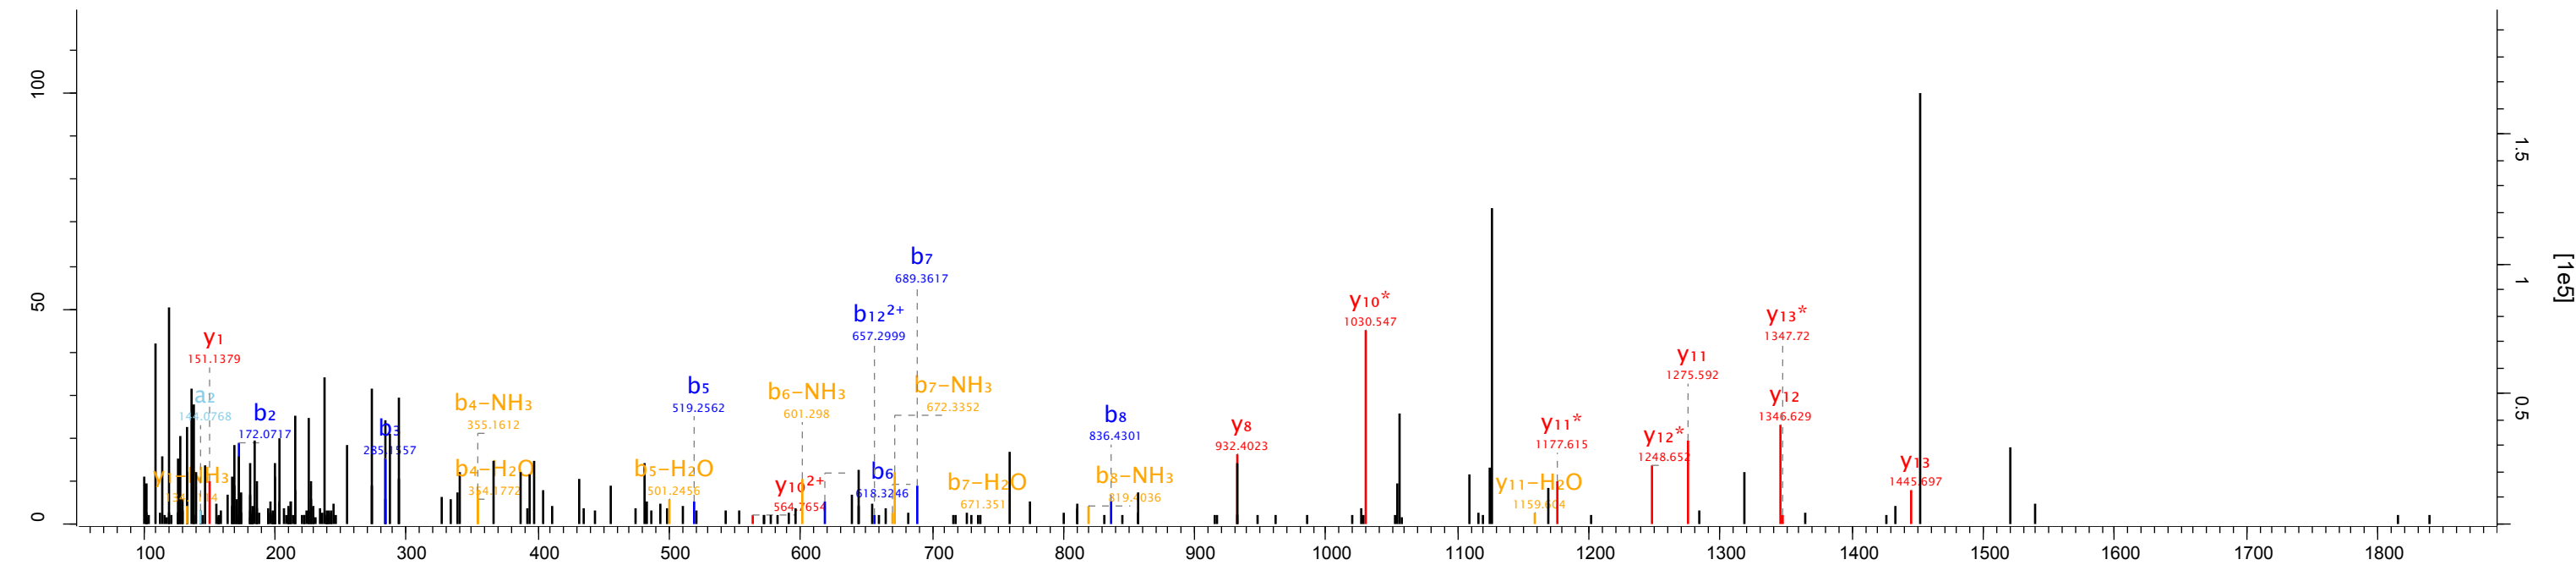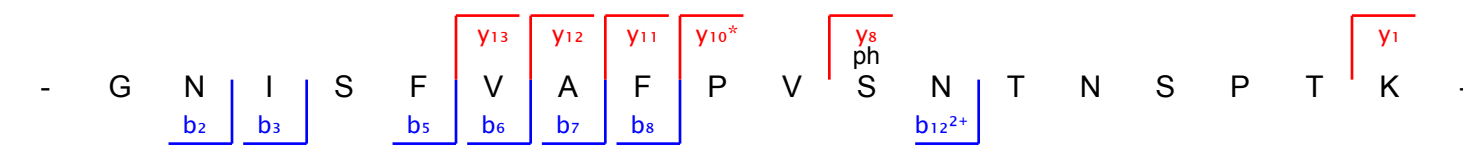

Raw file: 20150814\_A375SR\_Phospho\_BR2\_07  
 Scan: 23875 Method: FTMS; HCD Score: 54 m/z: 1009.49 Gene names: NPM1

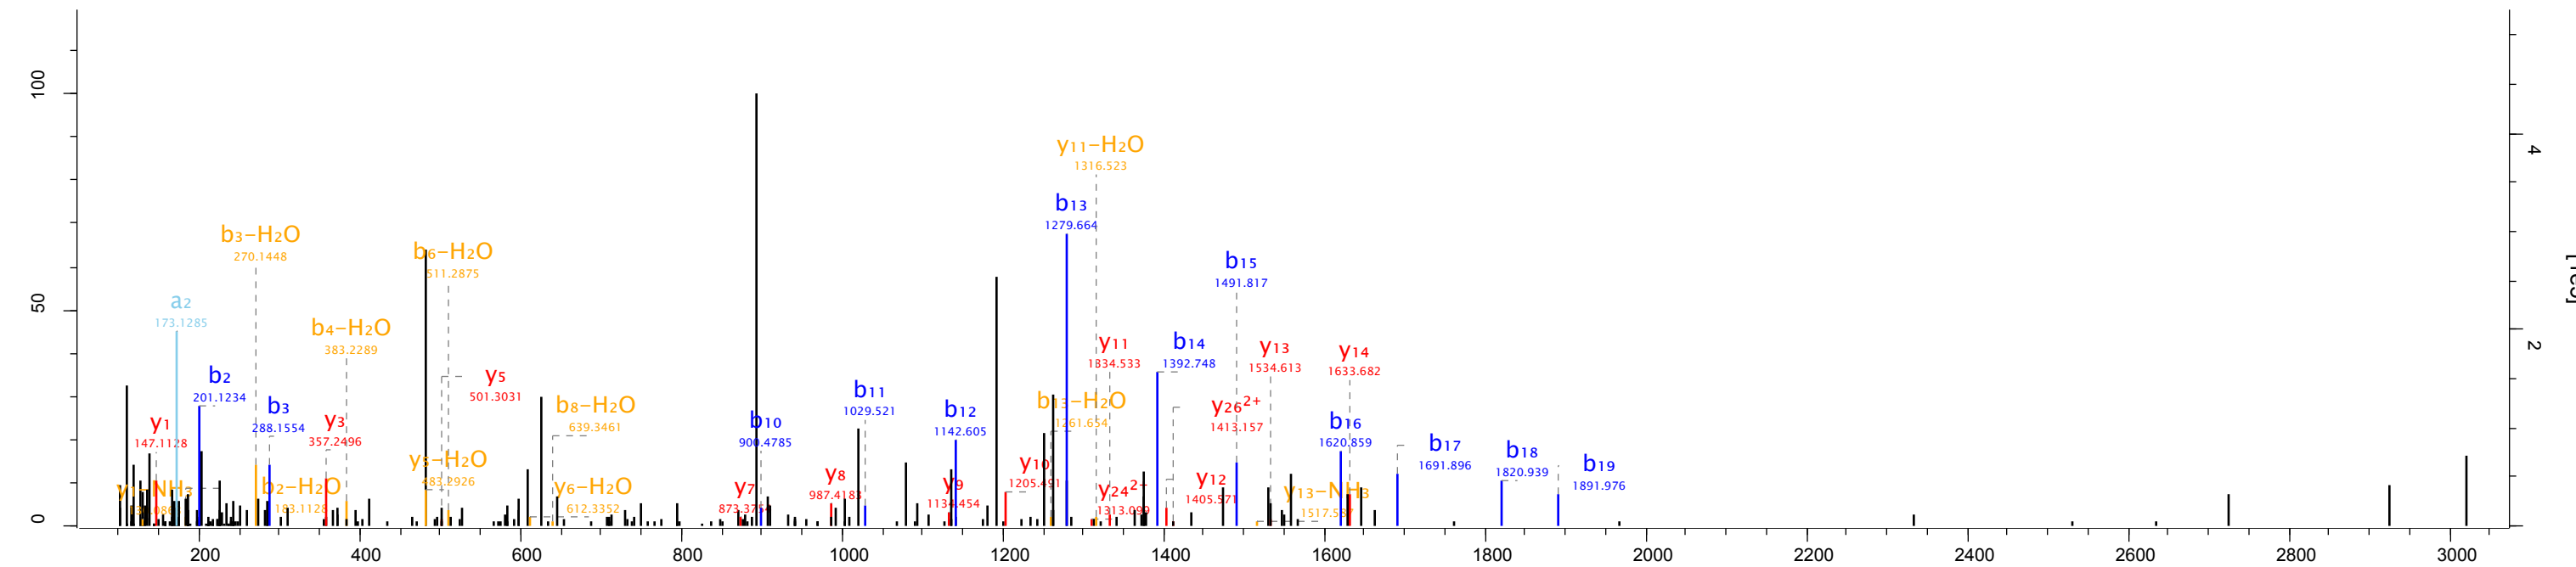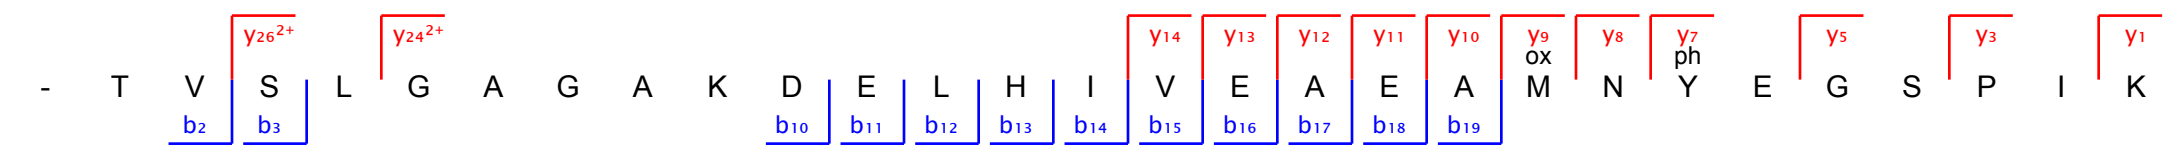



Raw file: 20150814\_A375SR\_Phospho\_BR2\_07  
 Scan: 27265 Method: FTMS; HCD Score: 48.8 m/z: 983.53 Gene names: MMACHC

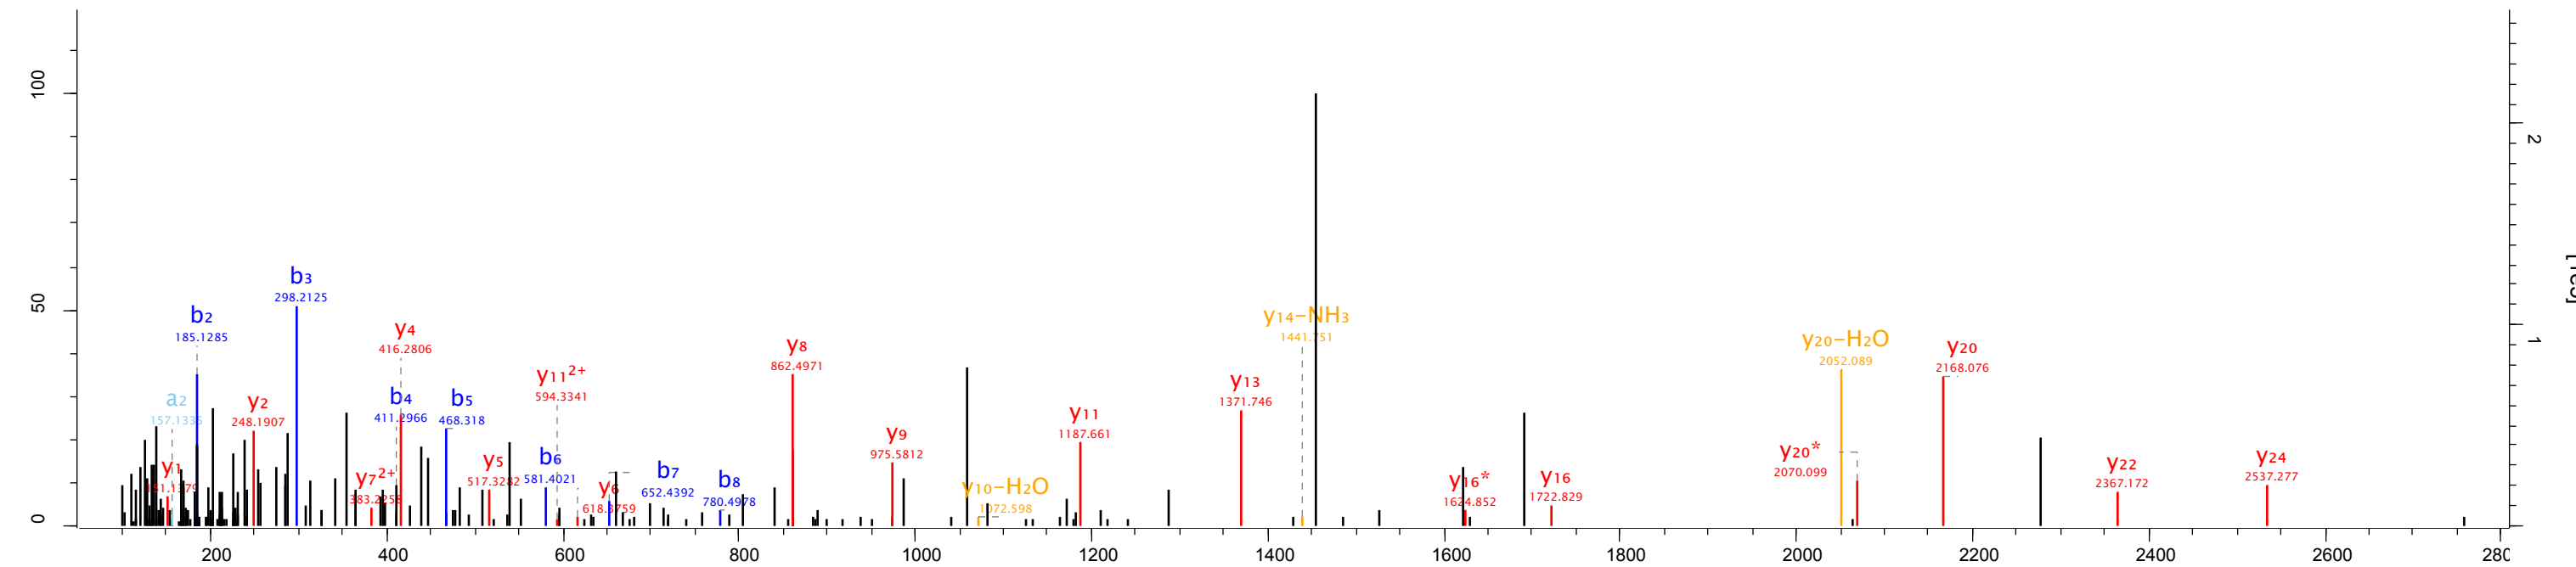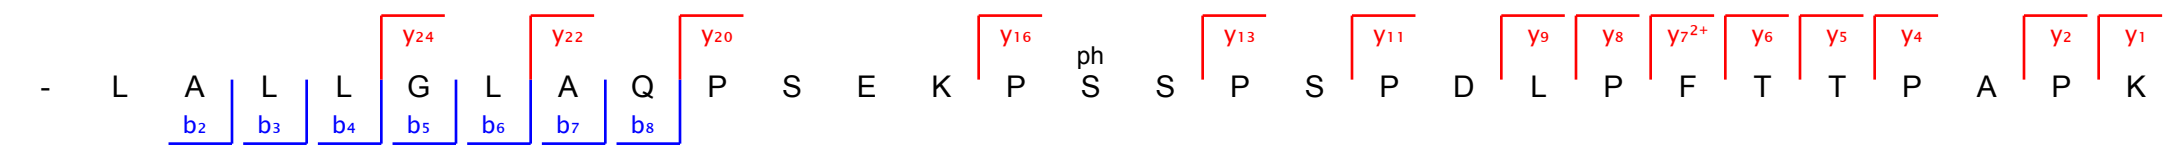

Raw file: 20150814\_A375SR\_Phospho\_BR2\_07  
 Scan: 2905 Method: FTMS; HCD Score: 72.93 m/z: 583.63 Gene names: RBM12B

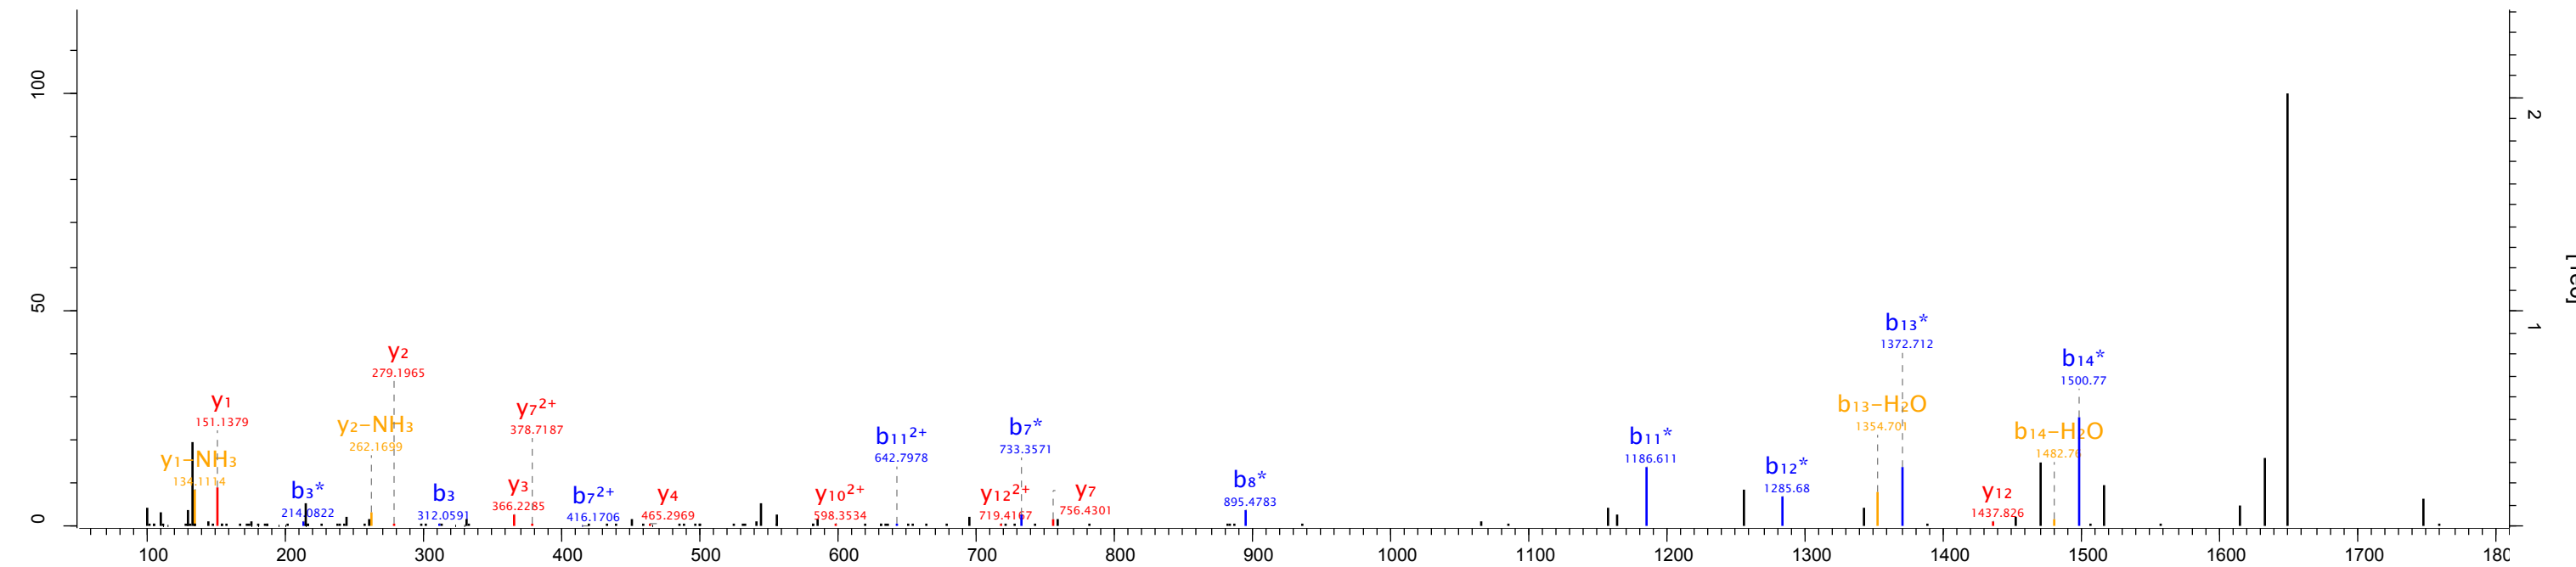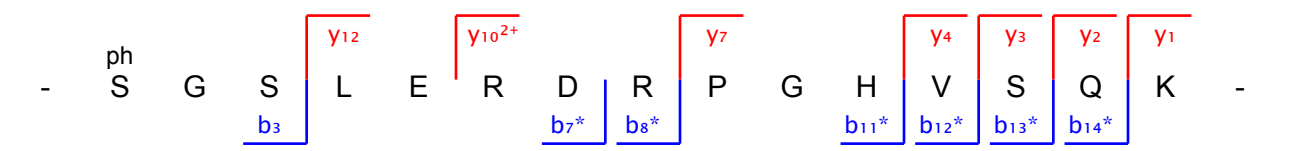

Raw file 20150814\_A375SR\_Phospho\_BR2\_07 Scan 3545 Method FTMS; HCD Score 185.25 m/z 613.28 Gene names EIF4G1

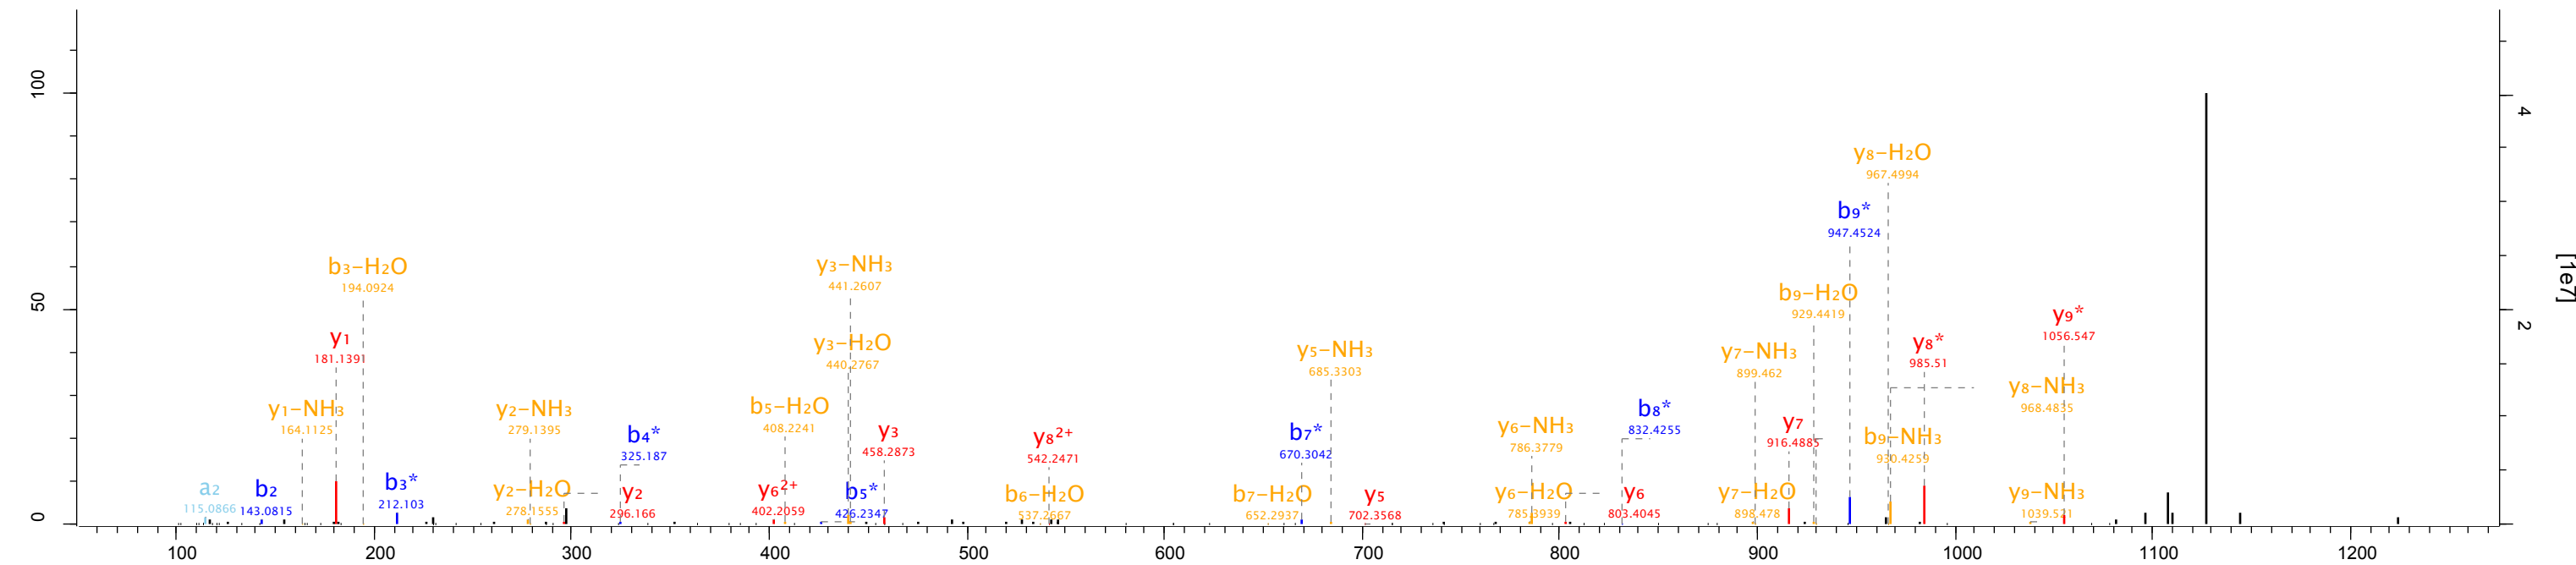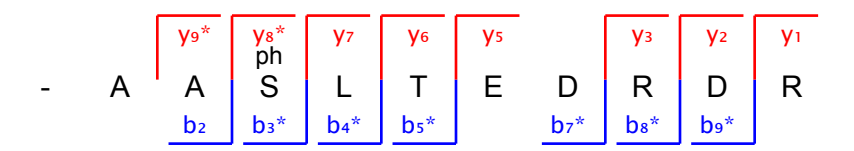

Raw file: 20150814\_A375SR\_Phospho\_BR2\_07  
 Scan: 3655 Method: FTMS; HCD Score: 66.27 m/z: 387.52 Gene names: TRIM33

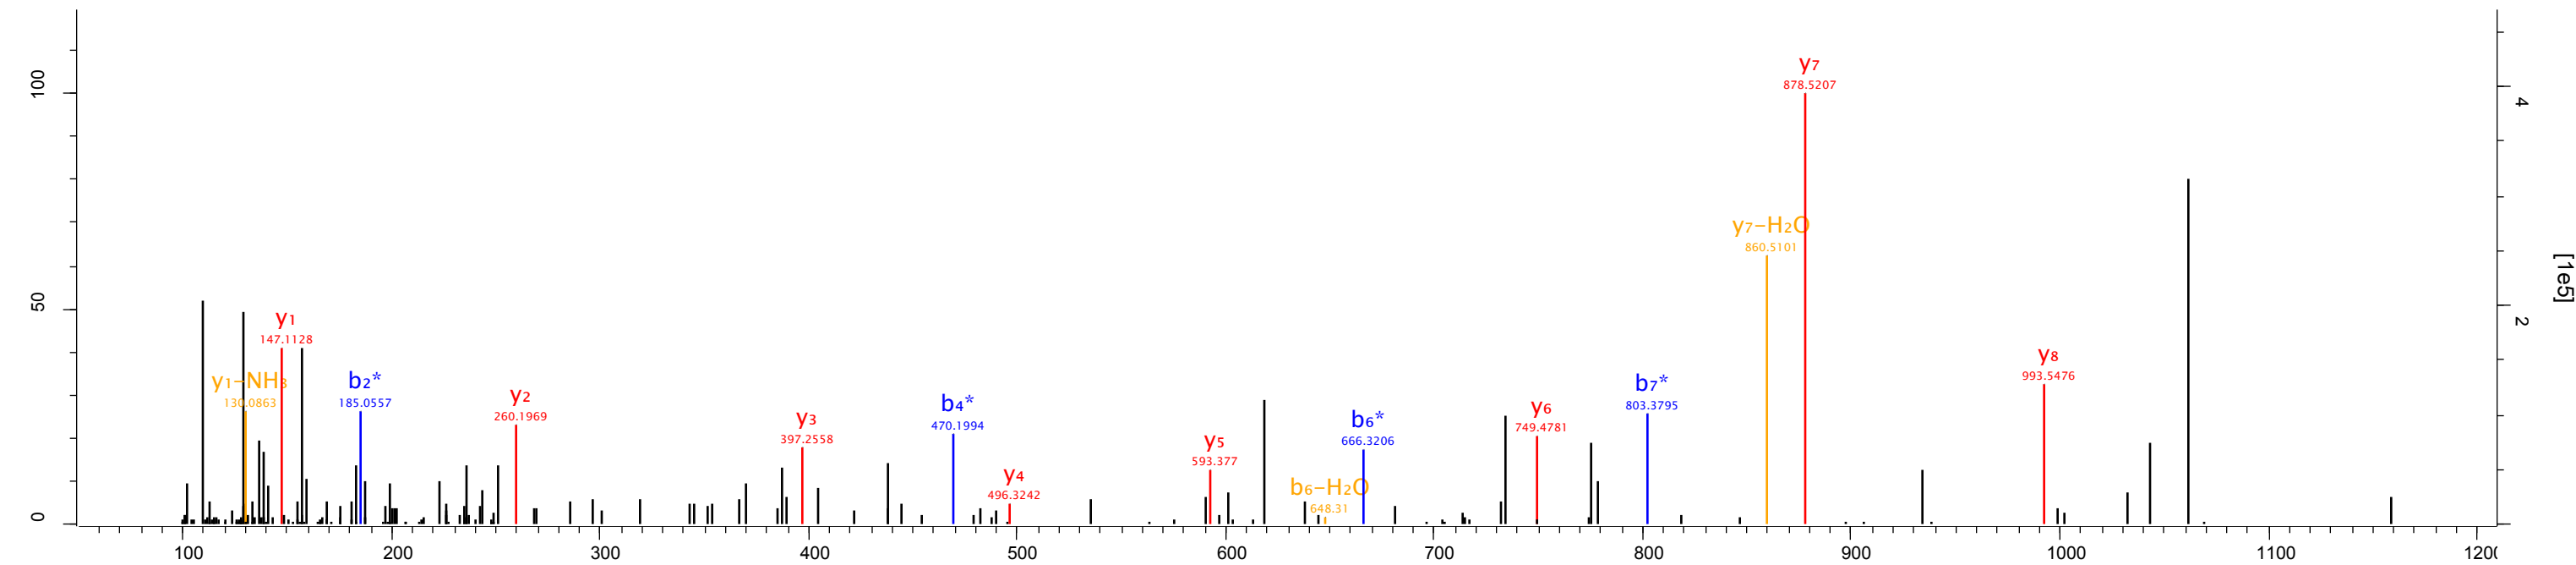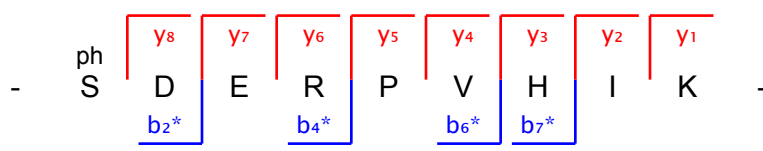

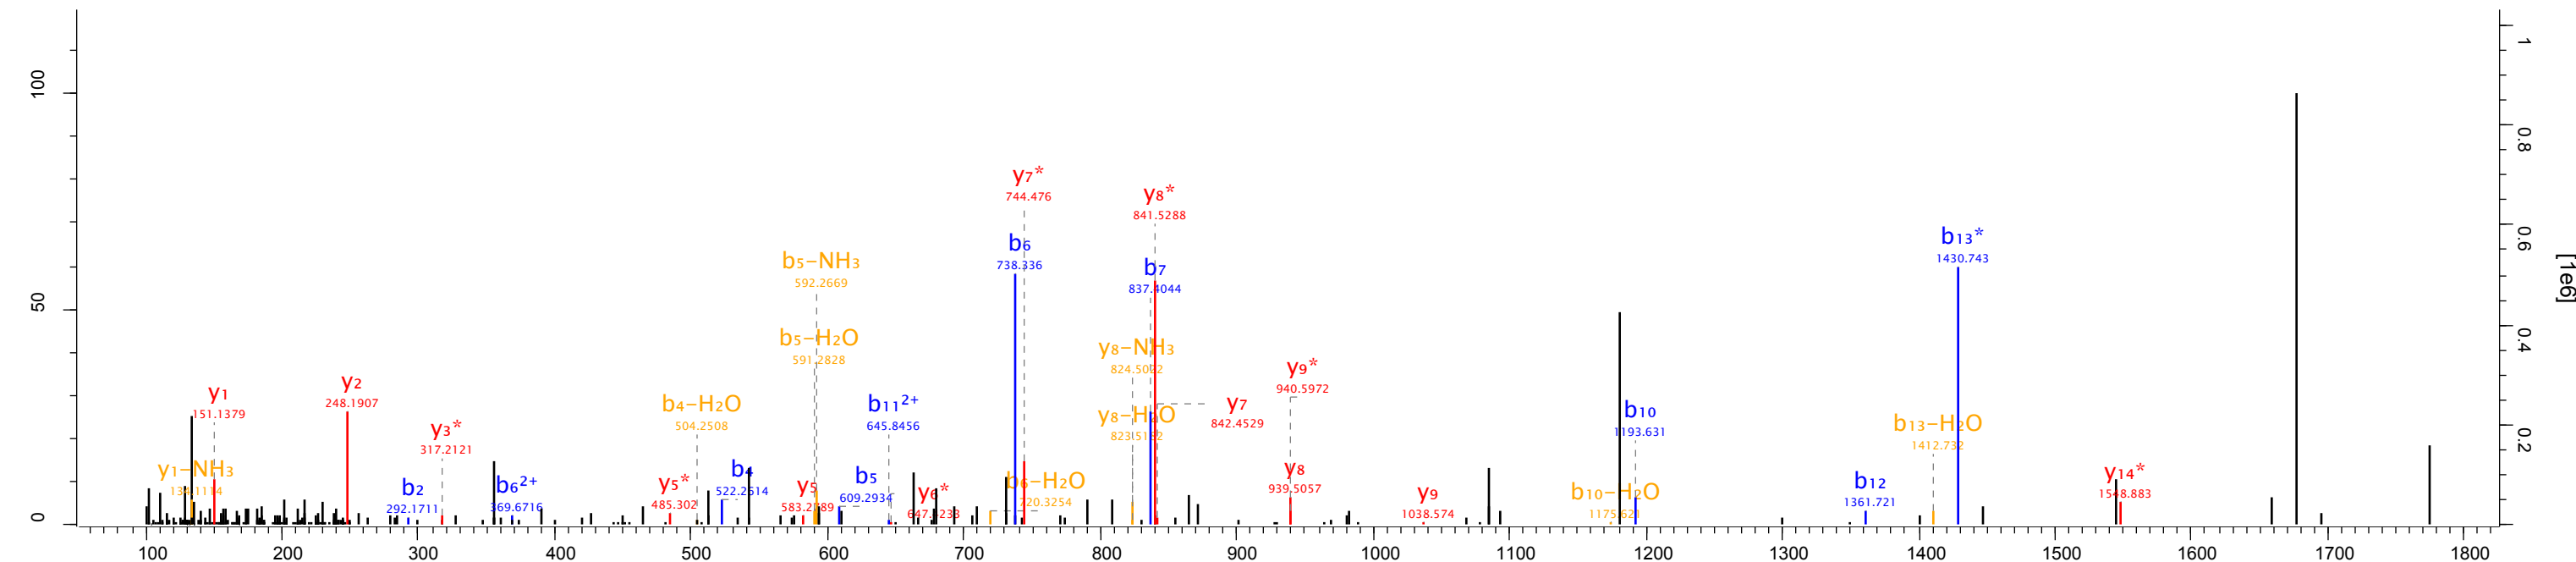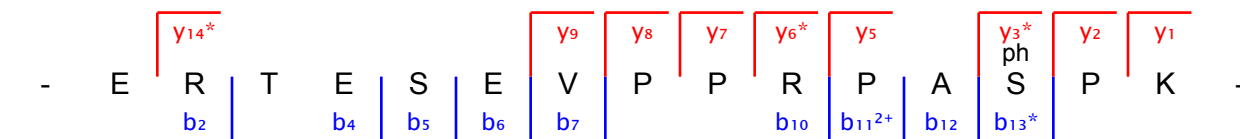

Raw file: 20150814\_A375SR\_Phospho\_BR2\_07  
 Scan: 5075 Method: FTMS; HCD Score: 64.54 m/z: 563.29 Gene names: RBMX

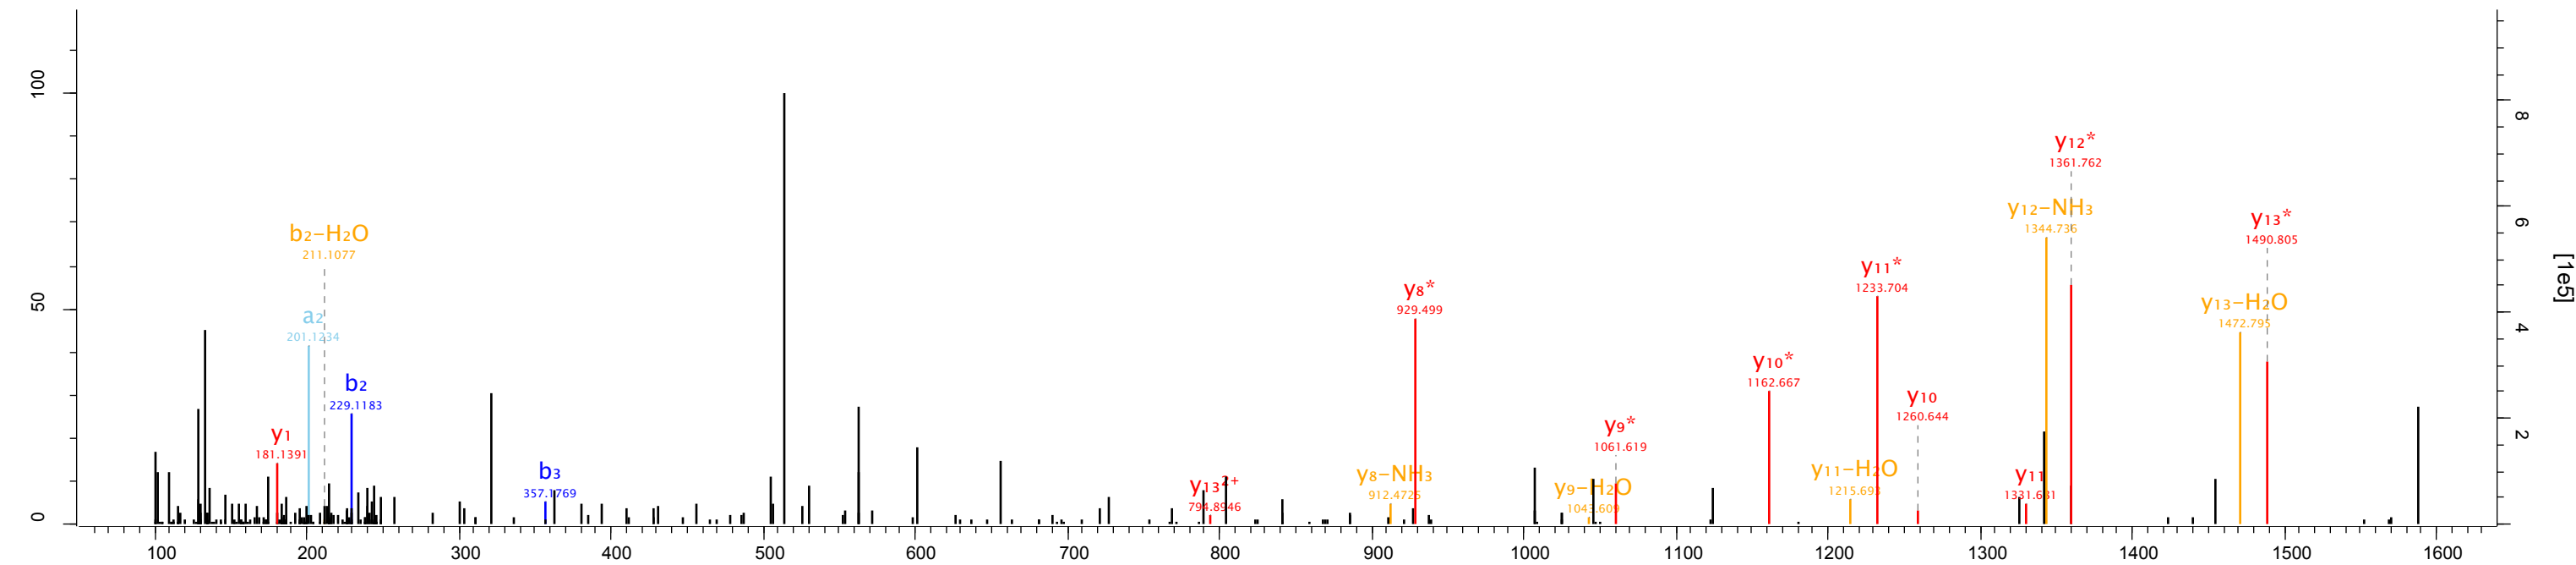

Sequence: - V E Q A T K P S F E S G R R -

Fragmentation mapping:

- Red boxes: y13\* (E), y12\* (Q), y11 (A), y10 (T), y9\* (K), y8\* (P)
- Blue boxes: b2 (E), b3 (Q)

Raw file: 20150814\_A375SR\_Phospho\_BR2\_07  
 Scan: 5875 Method: FTMS; HCD Score: 163.33 m/z: 606.3 Gene names: PHLDB2

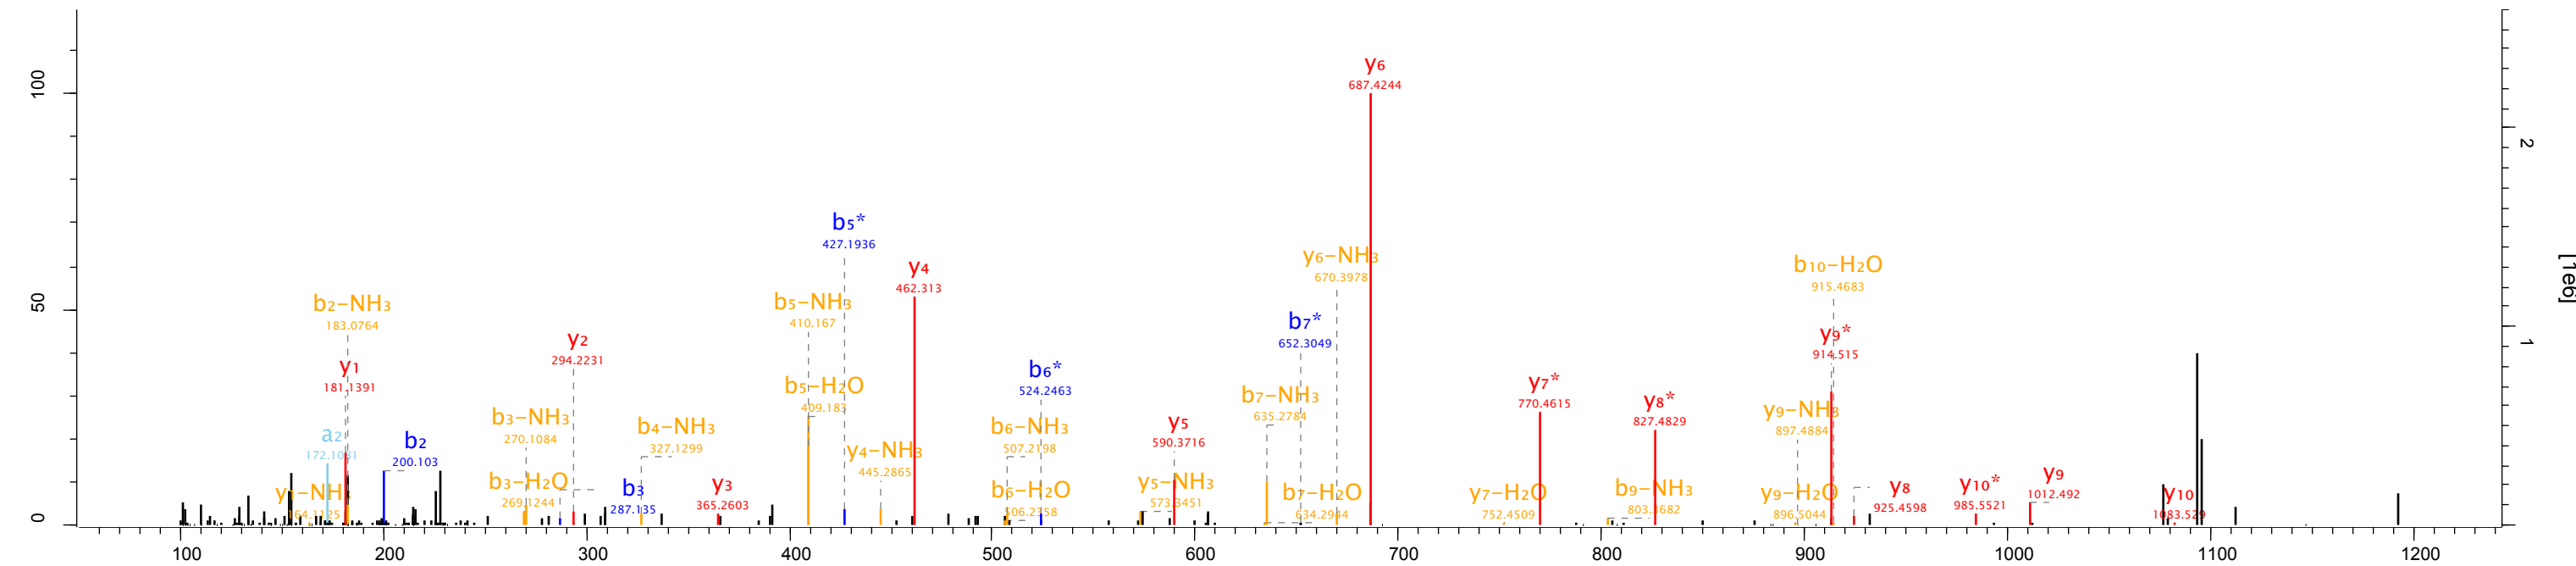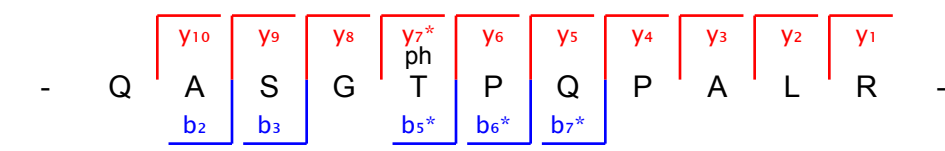

Raw file 20150814\_A375SR\_Phospho\_BR2\_07 Scan 6255 Method FTMS; HCD Score 113.61 m/z 499.25 Gene names LIN52

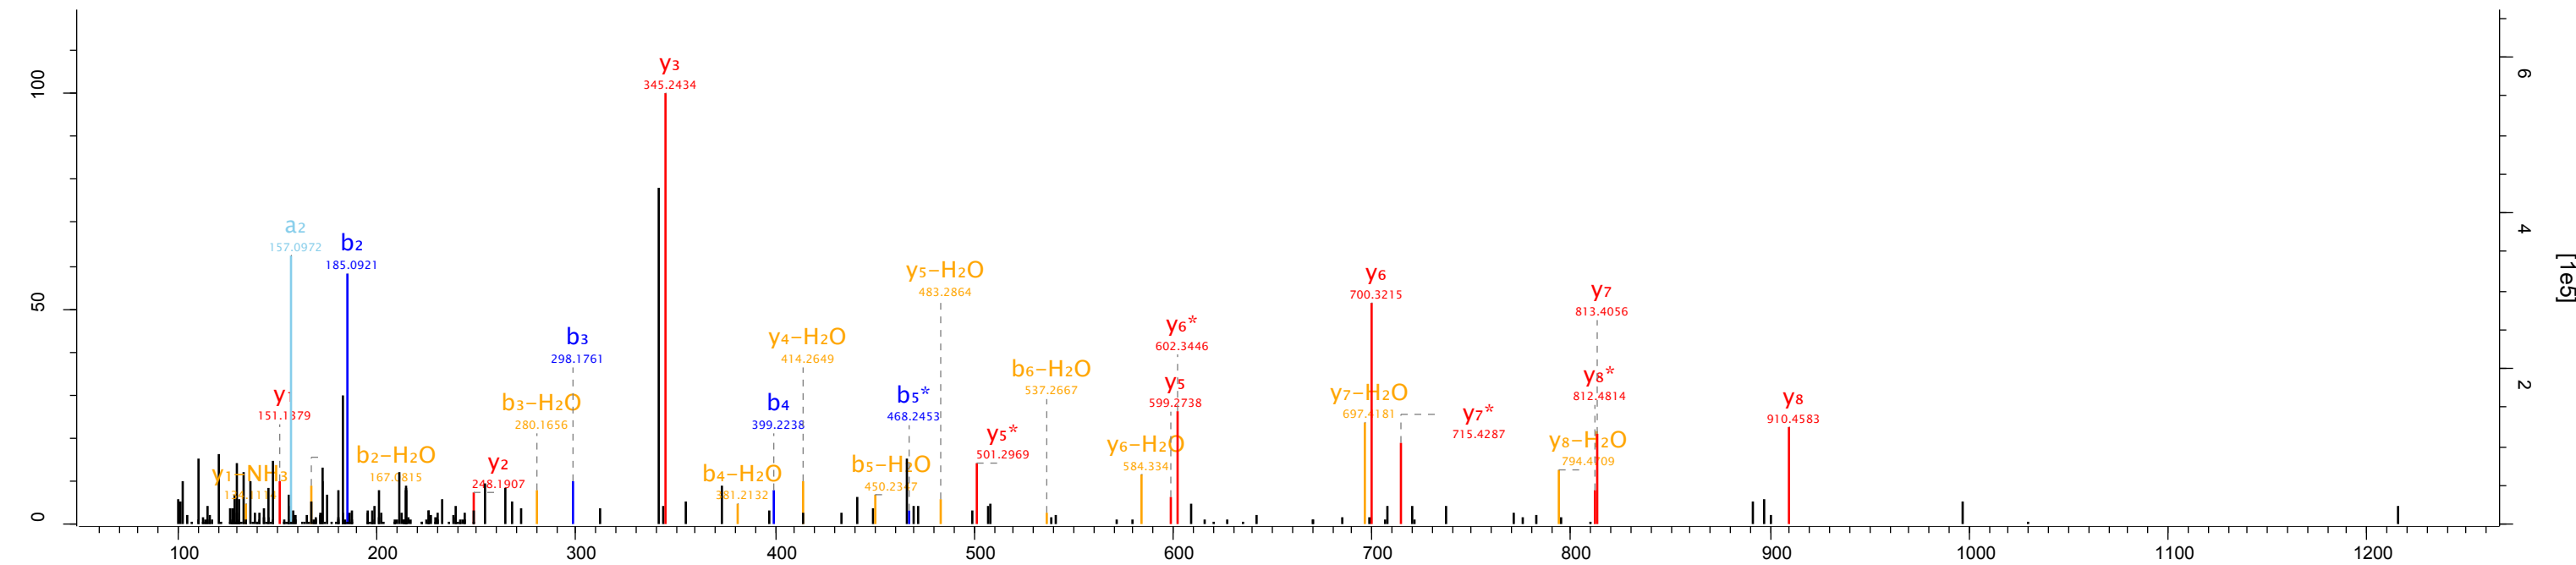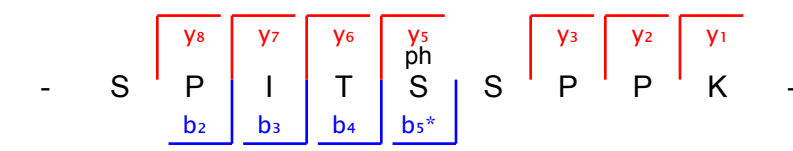



Raw file: 20150814\_A375SR\_Phospho\_BR2\_07  
 Scan: 6295 Method: FTMS; HCD Score: 64.44 m/z: 501.74 Gene names: RAPGEF2

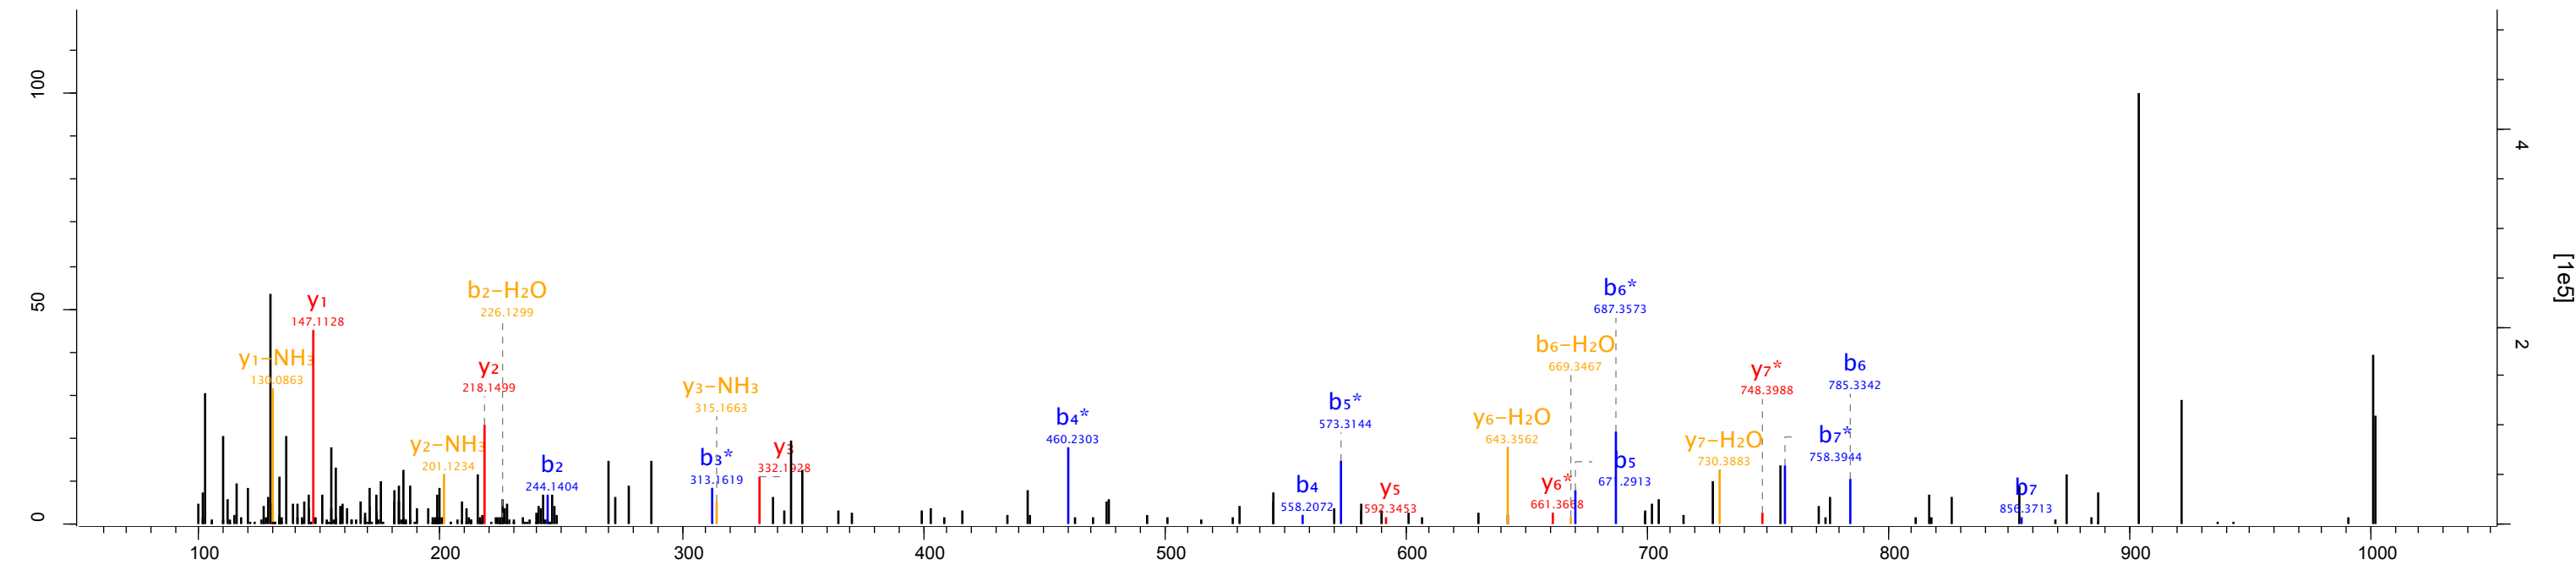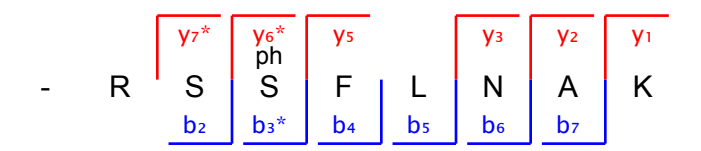

Raw file: 20150814\_A375SR\_Phospho\_BR2\_07  
 Scan: 6415 Method: FTMS; HCD Score: 84.89 m/z: 617.28 Gene names: CPSF7

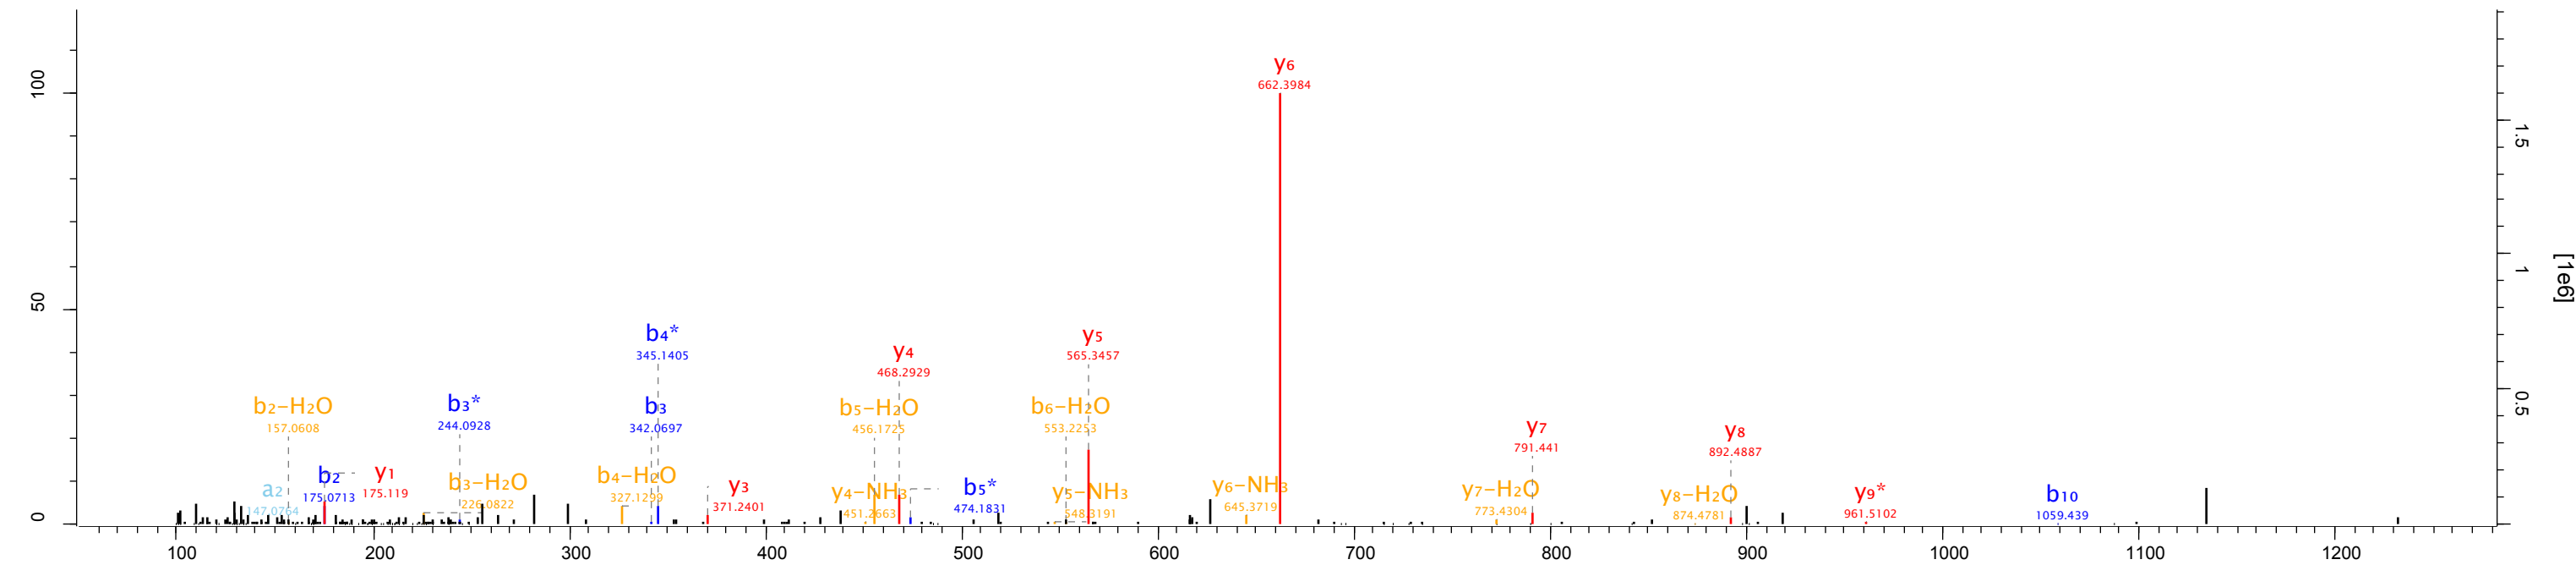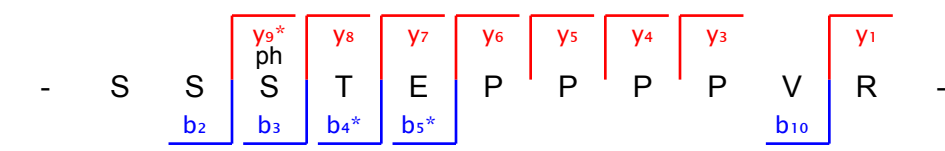

Raw file 20150814\_A375SR\_Phospho\_BR2\_07 Scan 6485 Method FTMS; HCD Score 135.47 m/z 732.3 Gene names PAWR

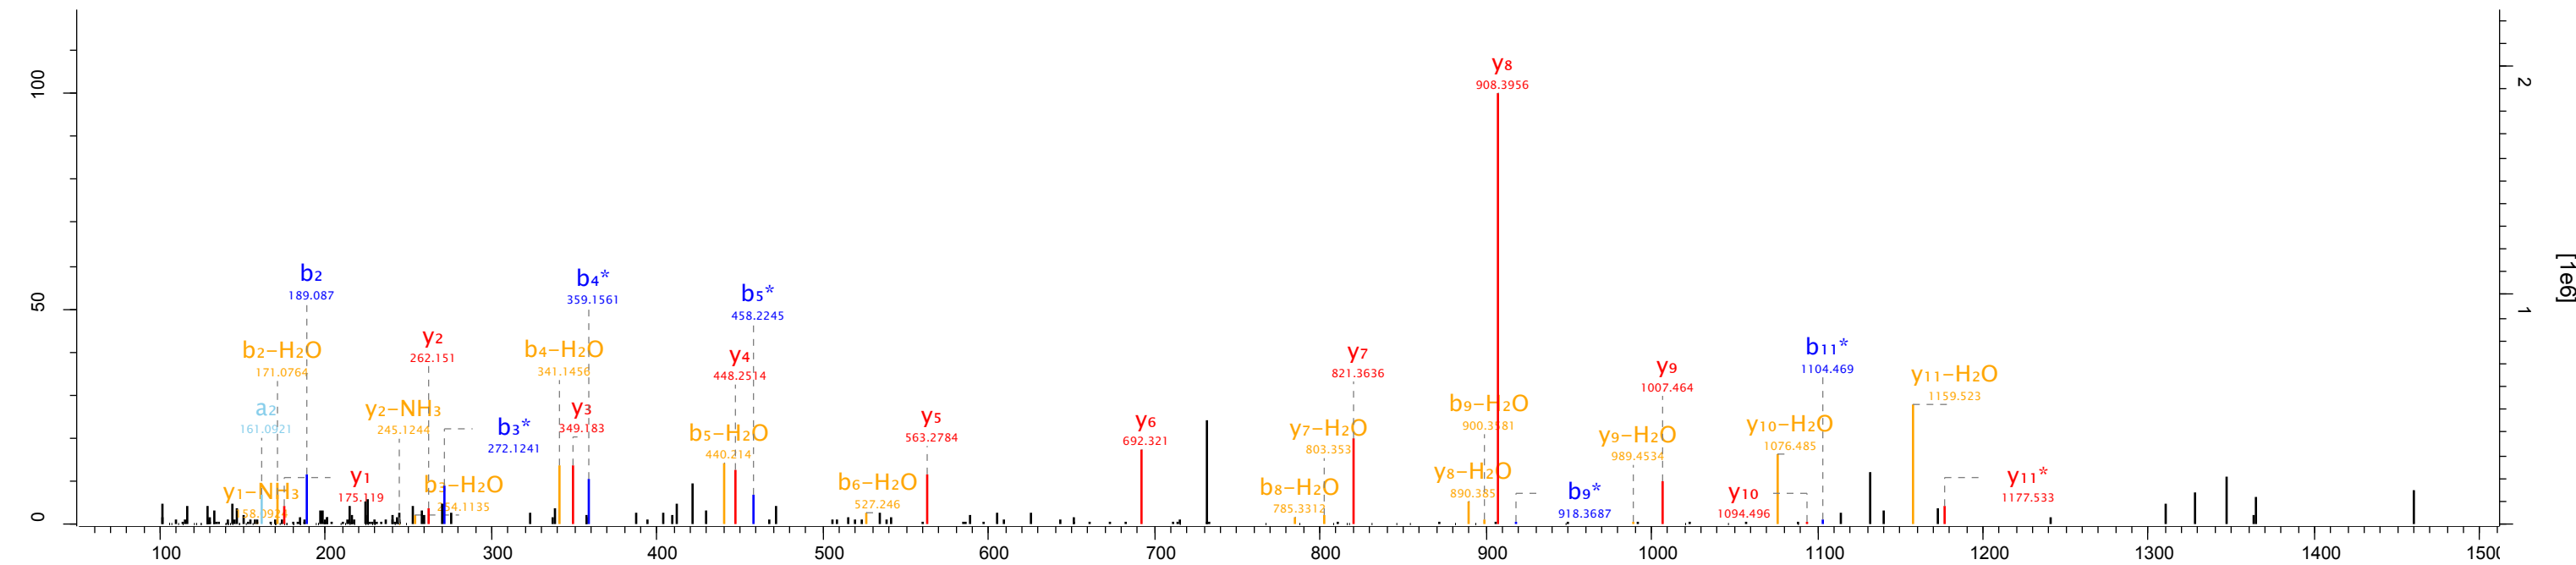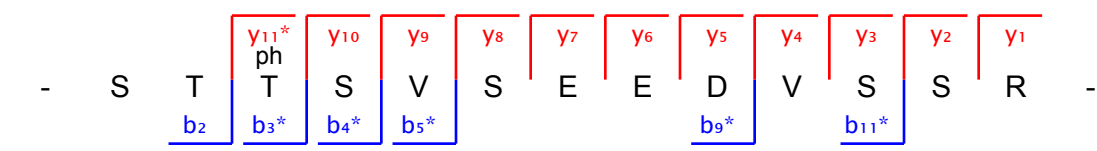

Raw file: 20150814\_A375SR\_Phospho\_BR2\_07  
 Scan: 6805 Method: FTMS; HCD Score: 49.33 m/z: 579.28 Gene names: TSC22D4

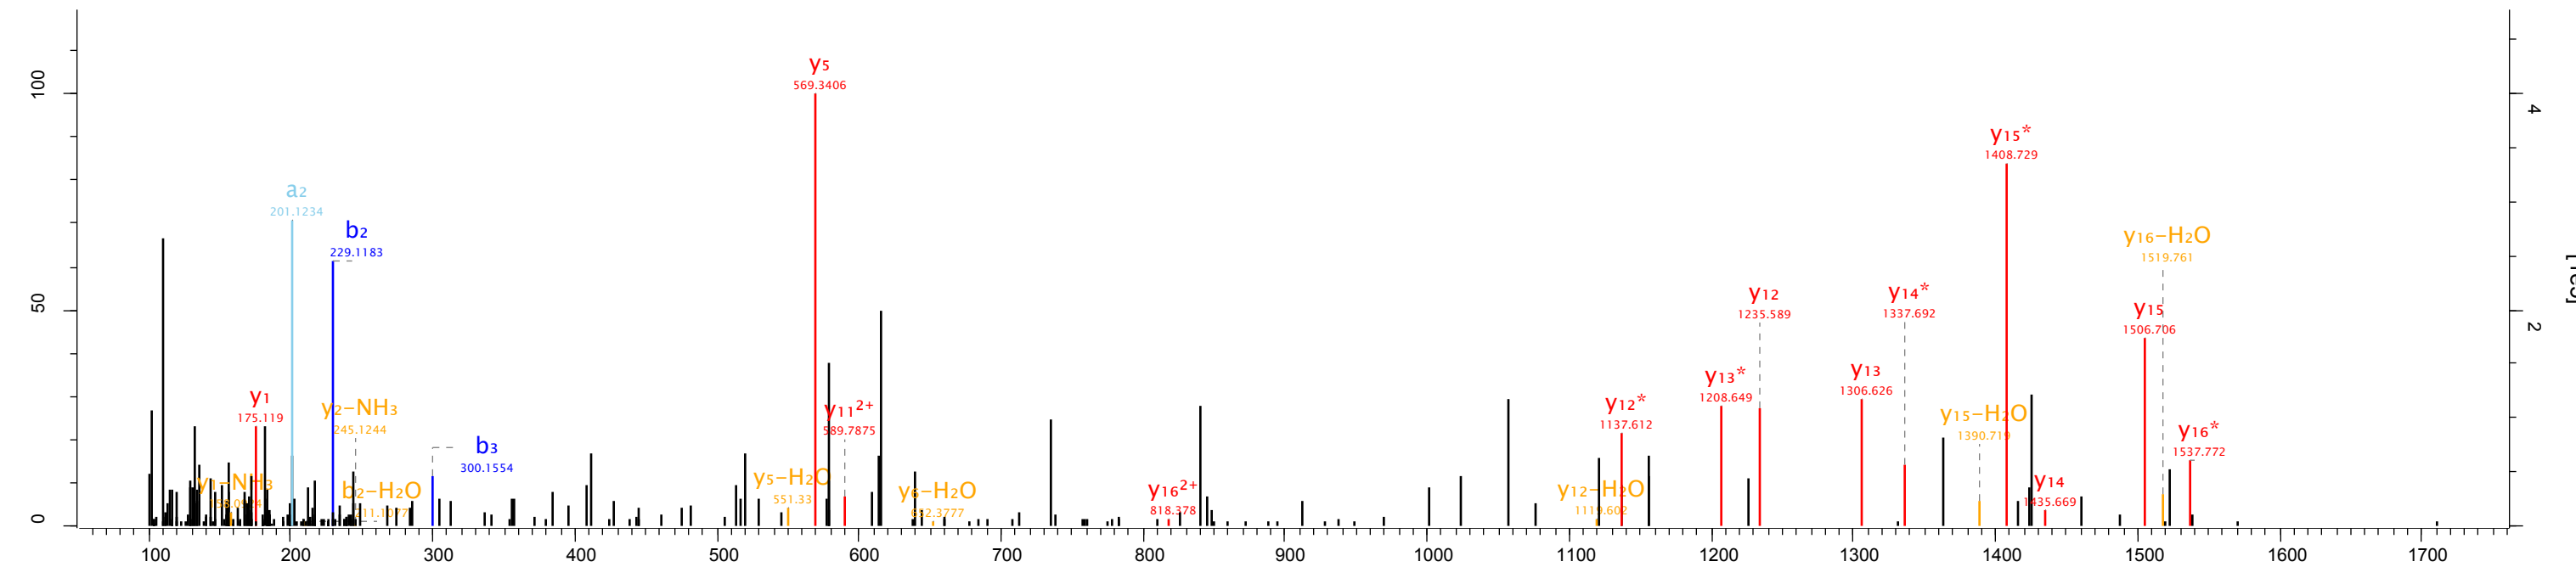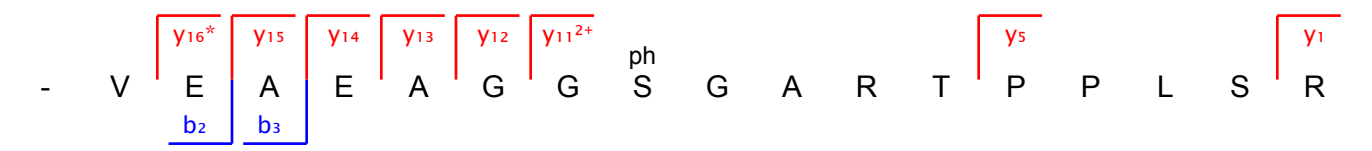

Raw file: 20150814\_A375SR\_Phospho\_BR2\_07  
 Scan: 7065 Method: FTMS; HCD Score: 181.71 m/z: 552.24 Gene names: TNKS1BP1

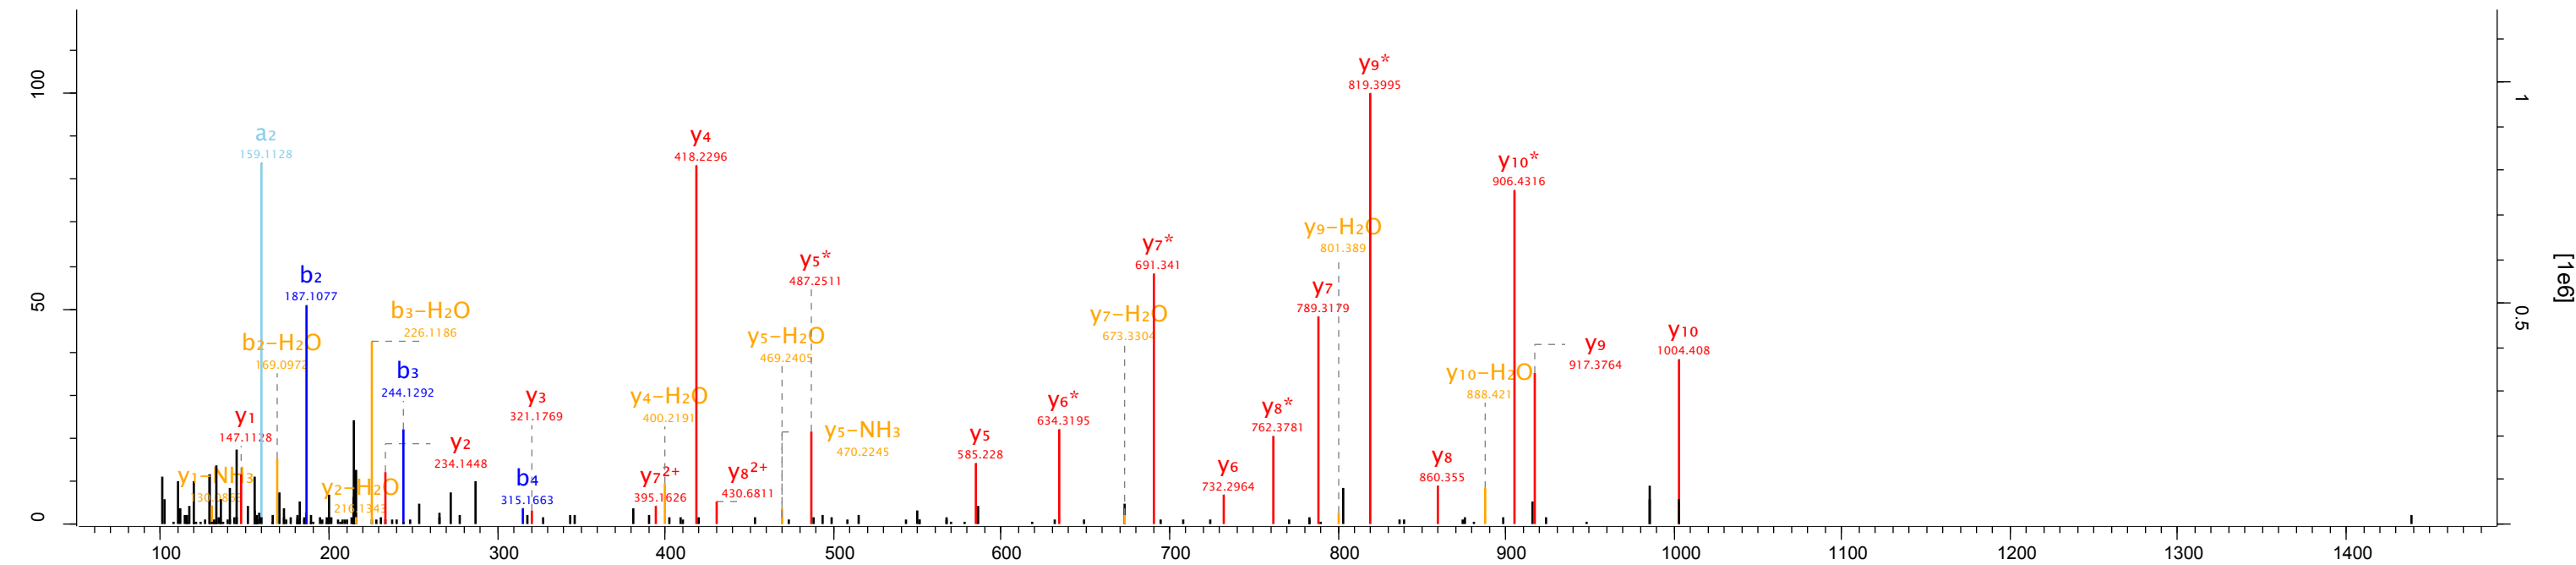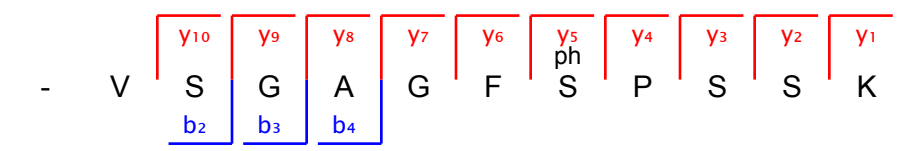

Raw file  
 20150814\_A375SR\_Phospho\_BR2\_07  
 Scan 7175 Method FTMS; HCD Score 159.01 m/z 837.88 Gene names TRIM3

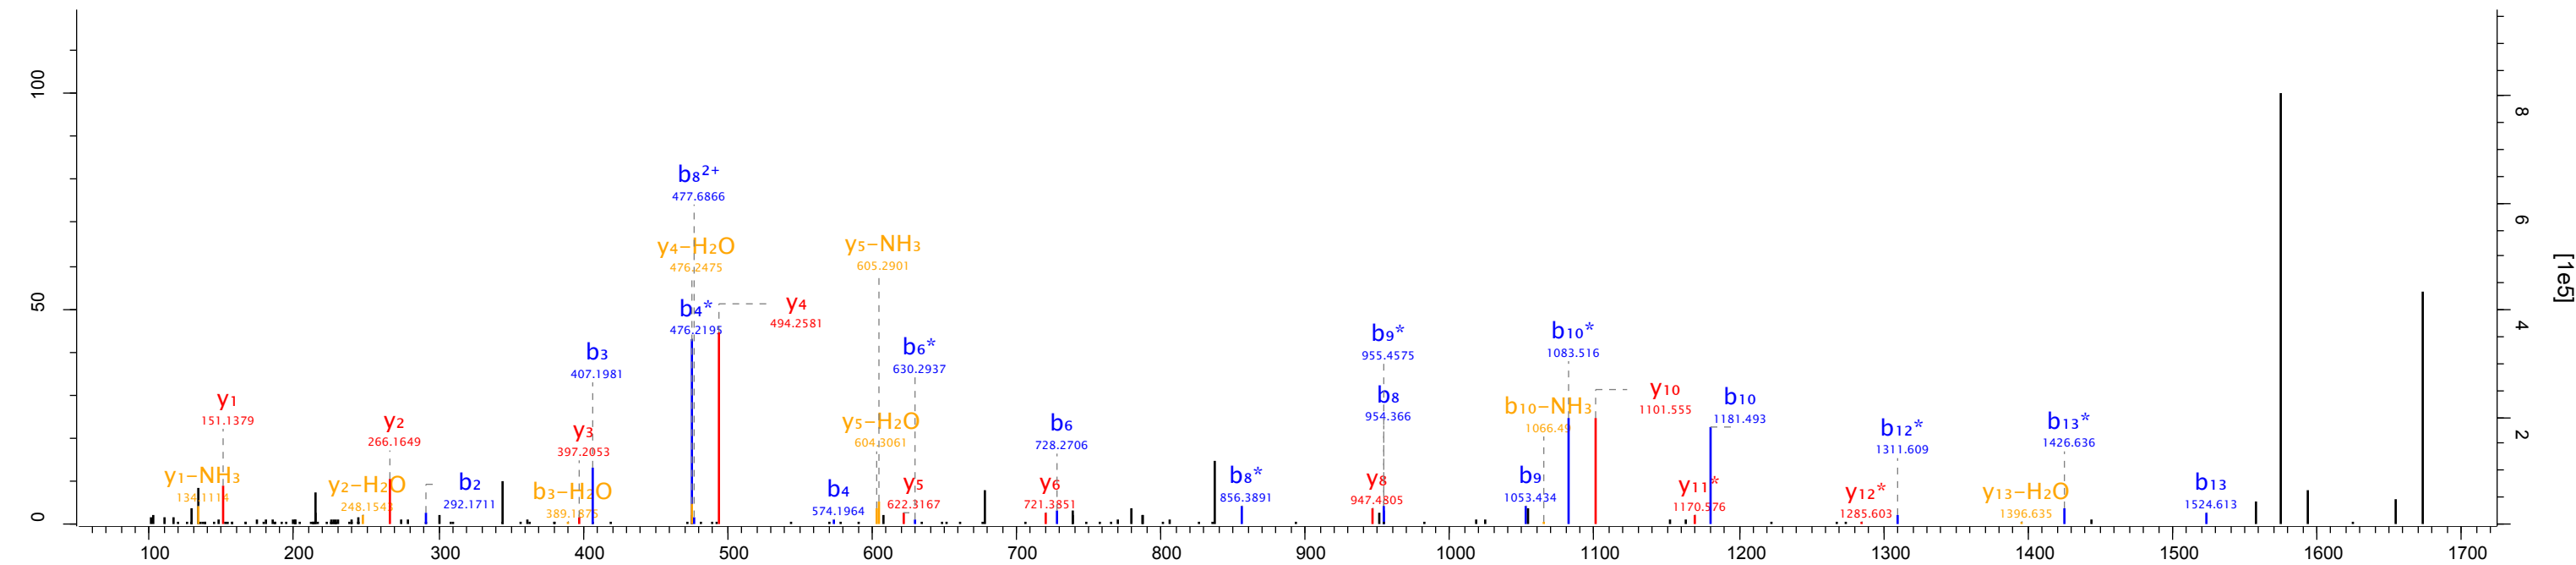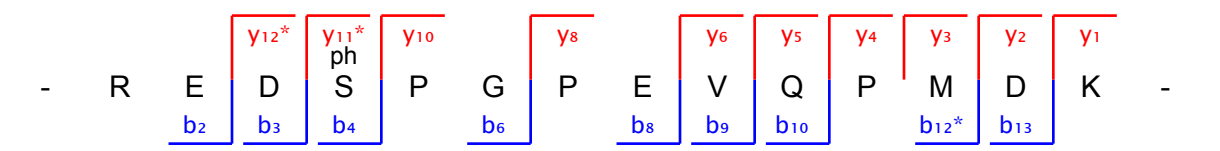

Raw file: 20150814\_A375SR\_Phospho\_BR2\_07  
 Scan: 8115 Method: FTMS; HCD Score: 80.31 m/z: 553.75 Gene names: BNC1

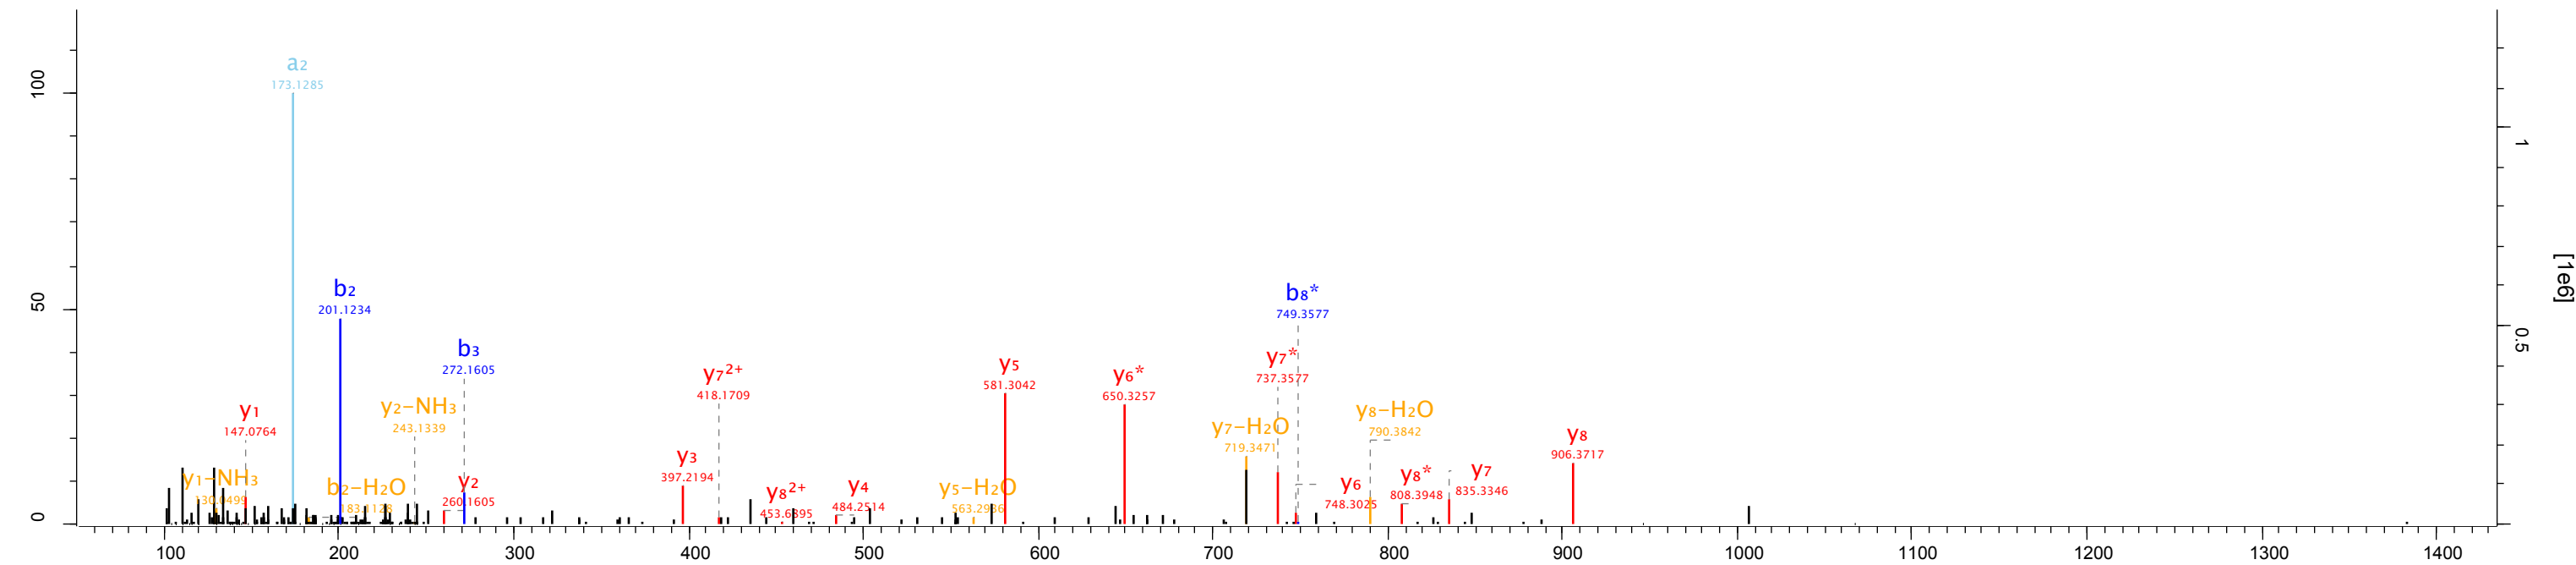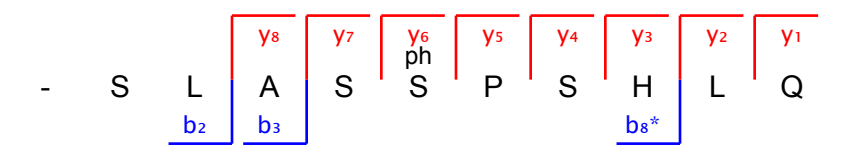

Raw file: 20150814\_A375SR\_Phospho\_BR2\_07  
 Scan: 8515 Method: FTMS; HCD Score: 91.62 m/z: 411.59 Gene names: BICD2

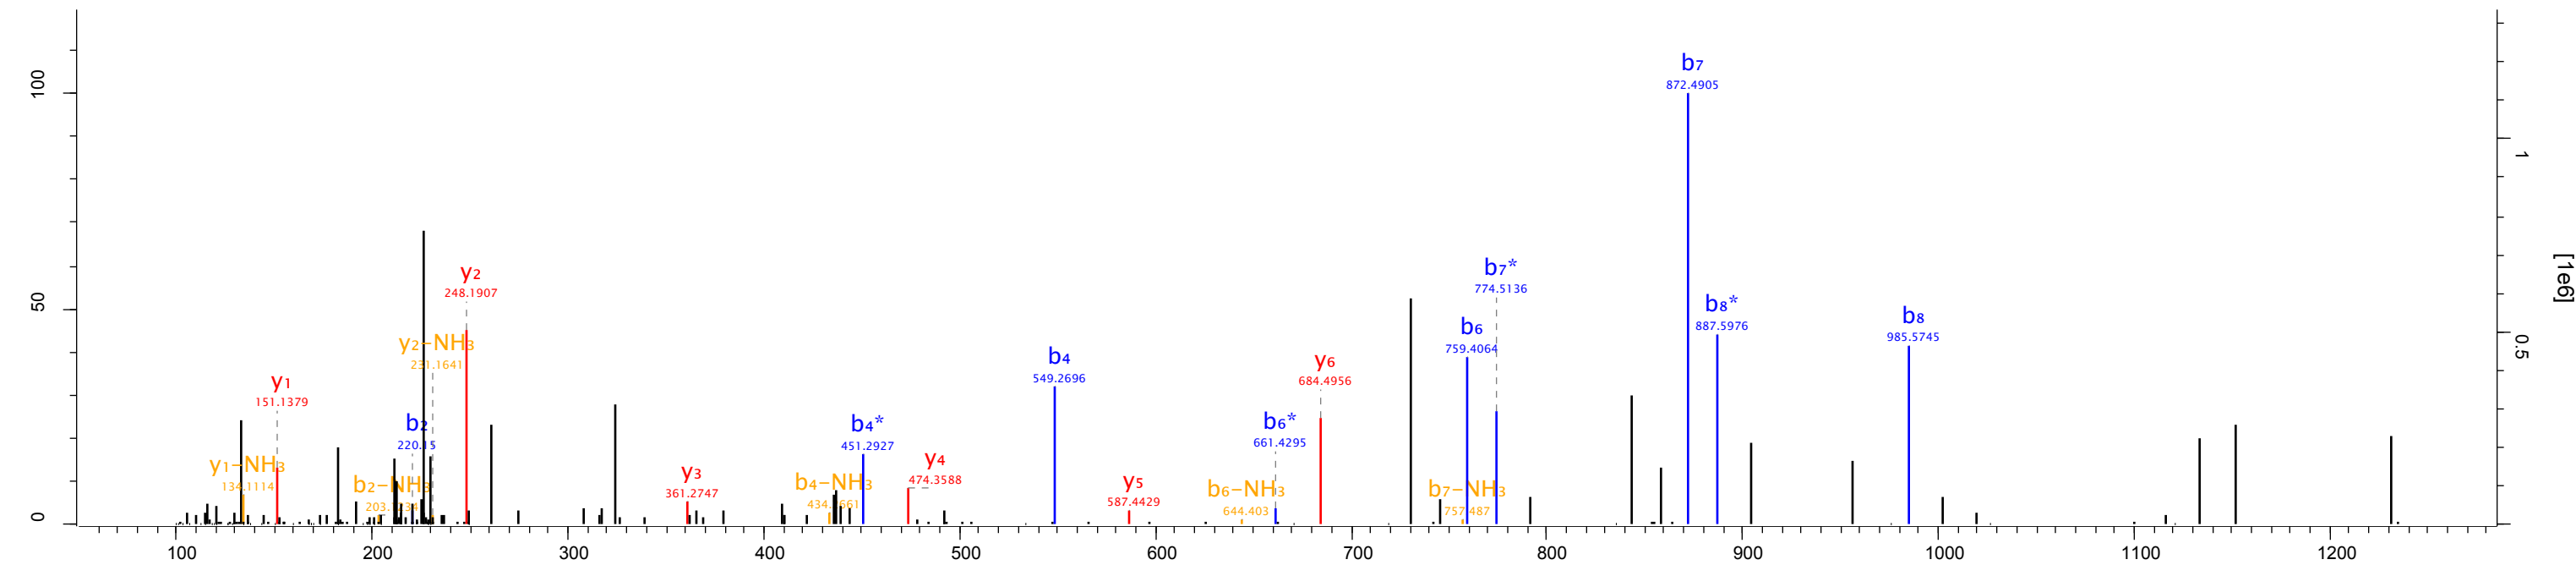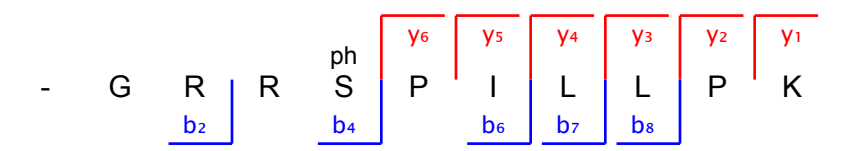



Raw file: 20150814\_A375SR\_Phospho\_BR2\_07  
 Scan: 8765 Method: FTMS; HCD Score: 77.89 m/z: 585.78 Gene names: FANCI

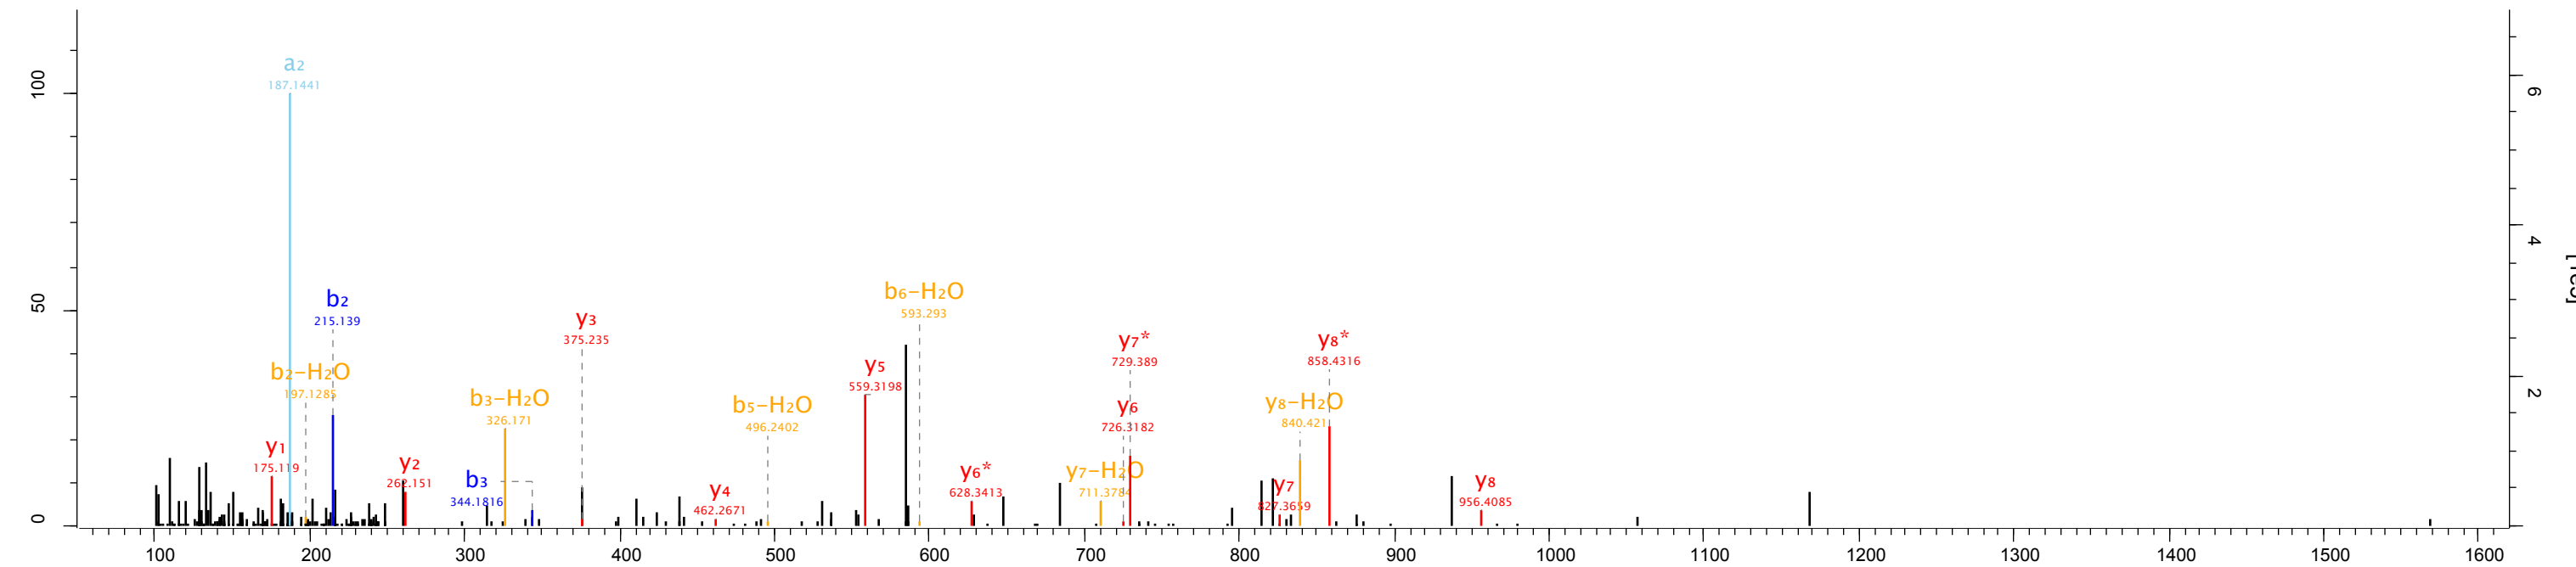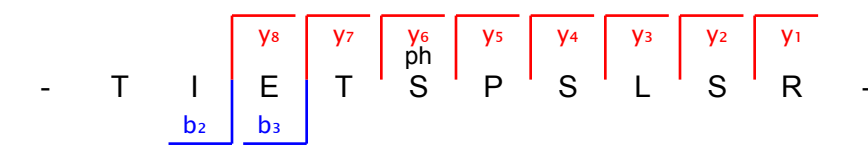

Raw file  
 20150814\_A375SR\_Phospho\_BR2\_07  
 Scan 8955 Method FTMS; HCD Score 138.91 m/z 523.91 Gene names MACF1

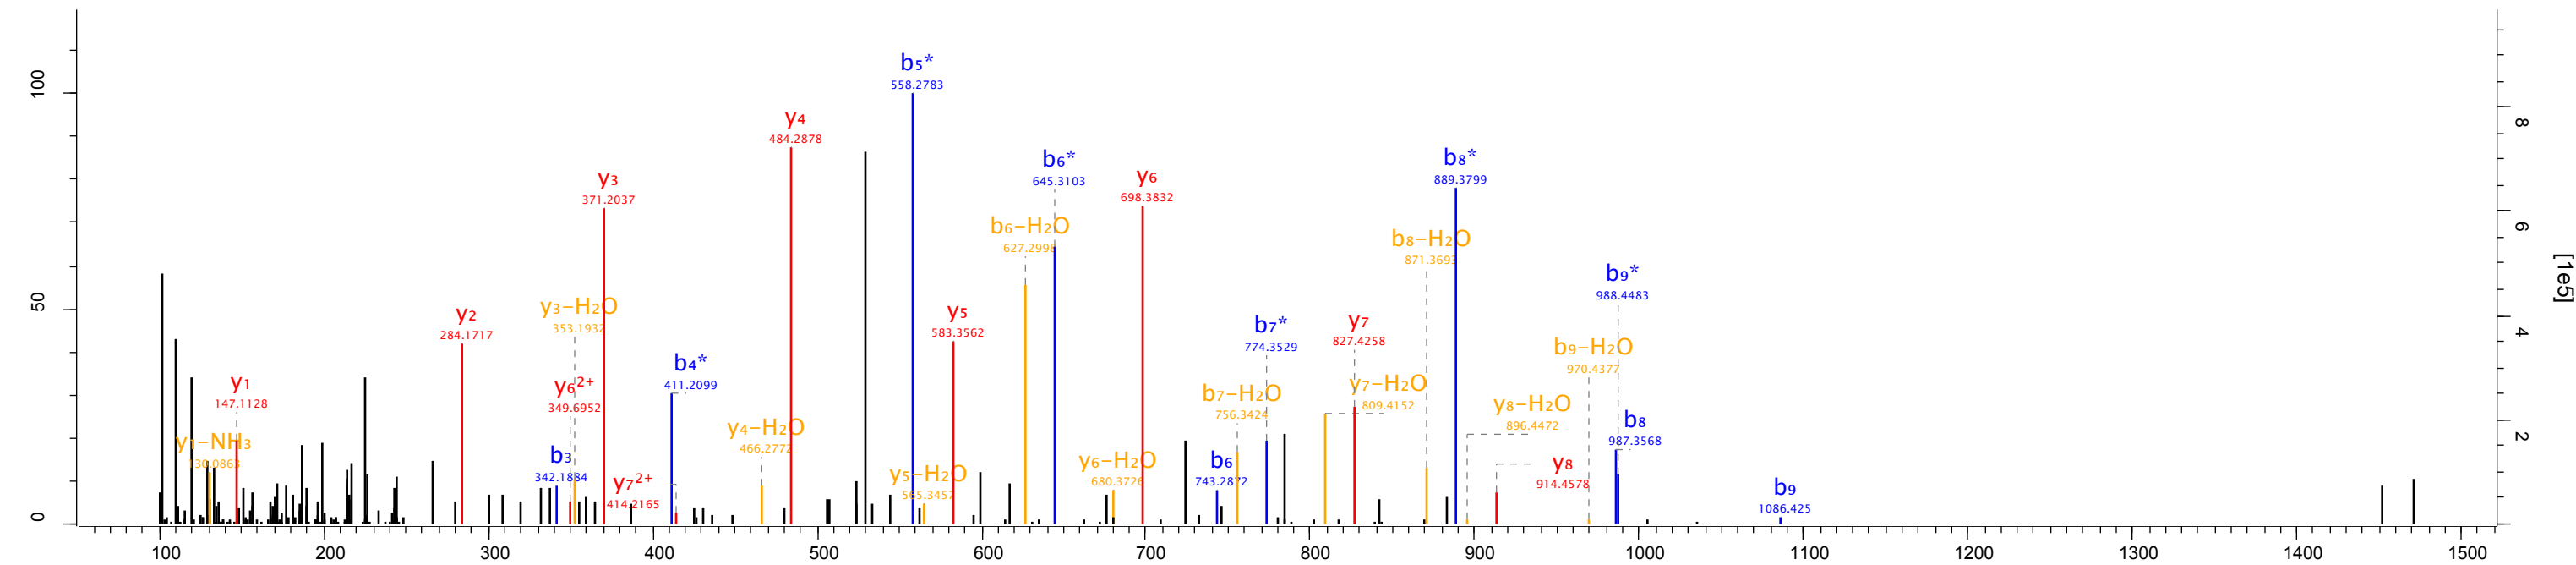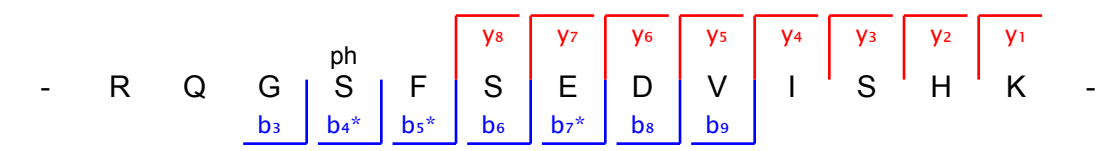

Raw file 20150814\_A375SR\_Phospho\_BR2\_07 Scan 9015 Method FTMS; HCD Score 76.36 m/z 581.3 Gene names PLEKHA4

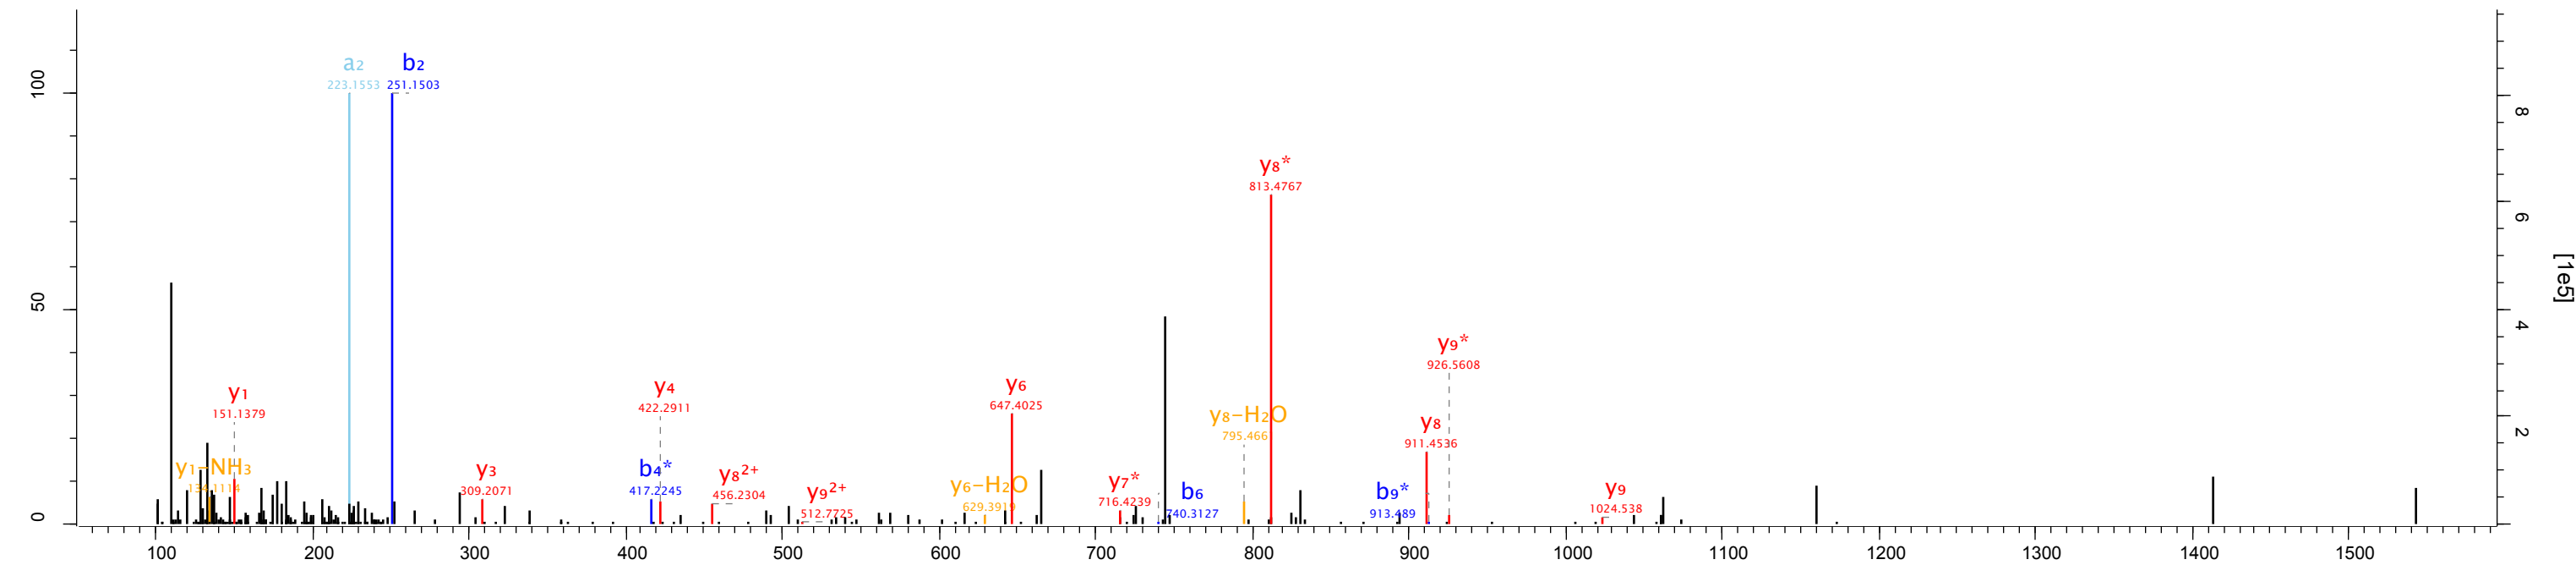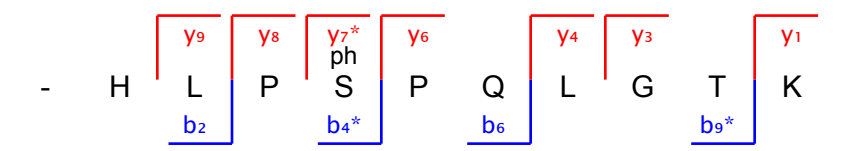

Raw file: 20150814\_A375SR\_Phospho\_BR2\_07  
 Scan: 9265 Method: FTMS; HCD Score: 180.78 m/z: 709.82 Gene names: PYGO2

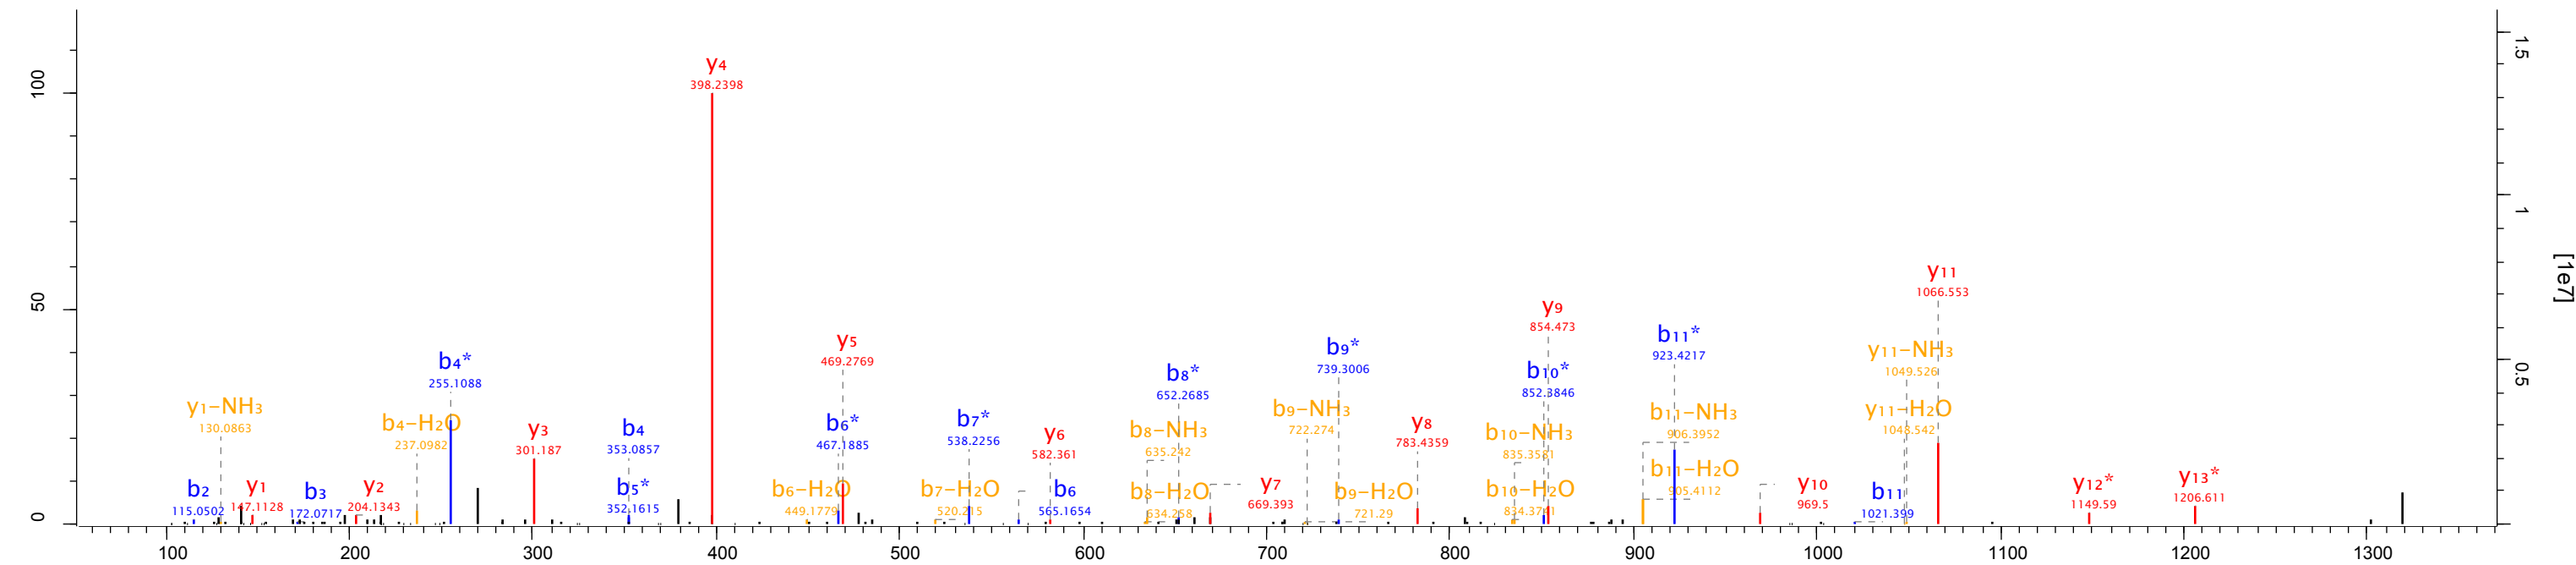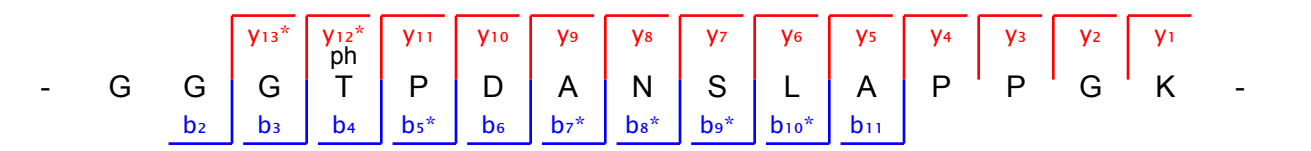

Raw file: 20150814\_A375SR\_Phospho\_BR2\_07  
 Scan: 9865 Method: FTMS; HCD Score: 123.72 m/z: 459.9 Gene names: SRRM2

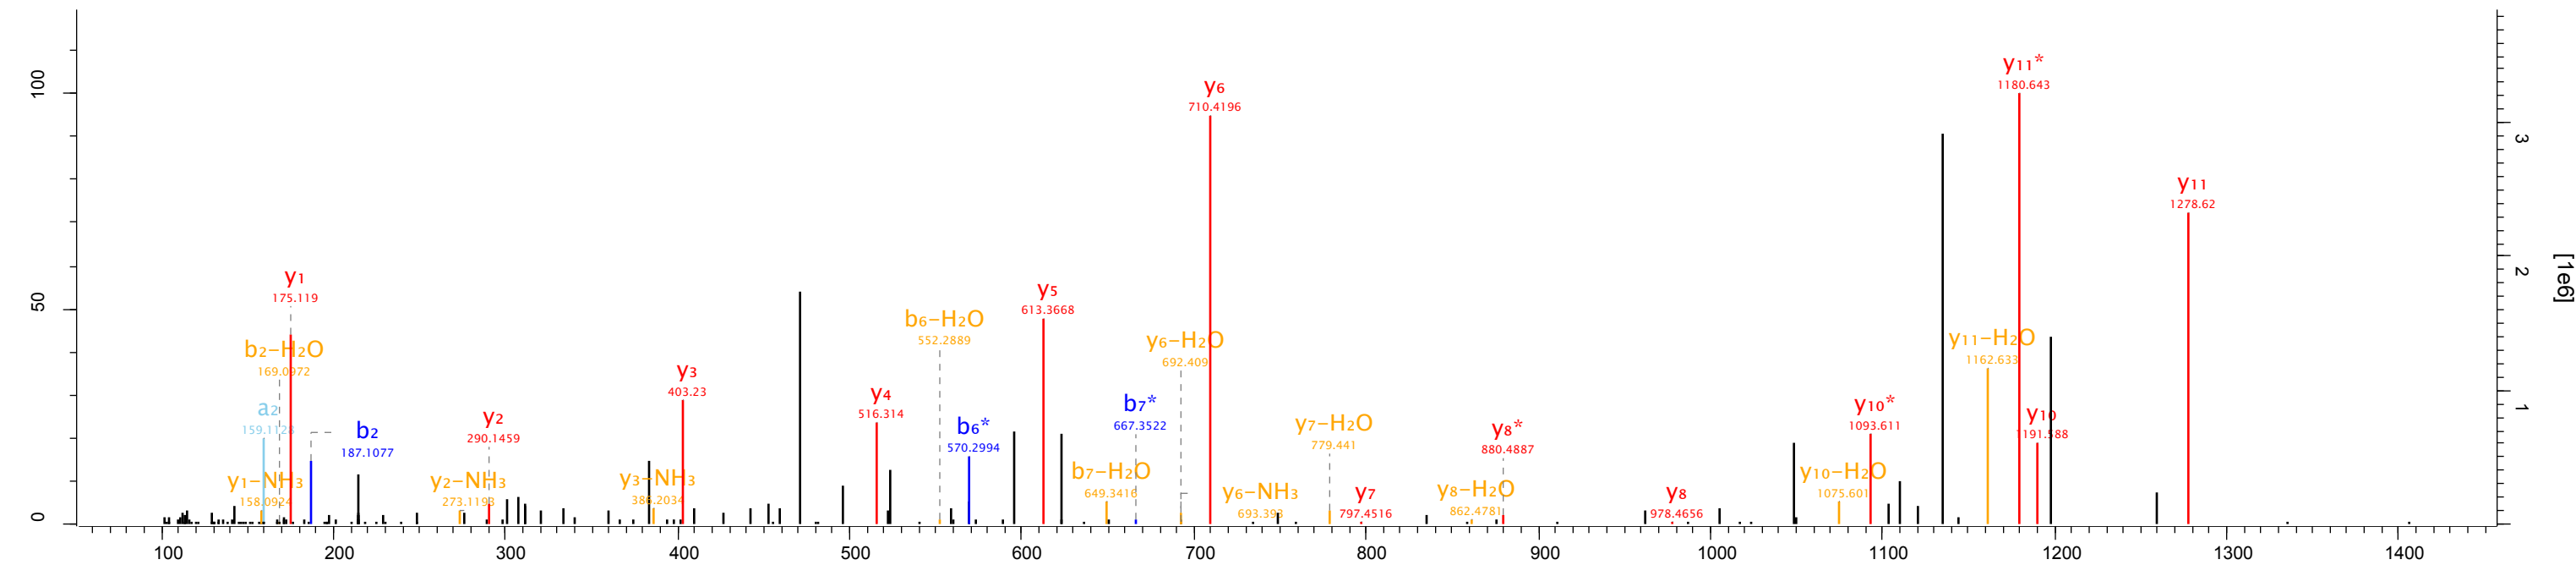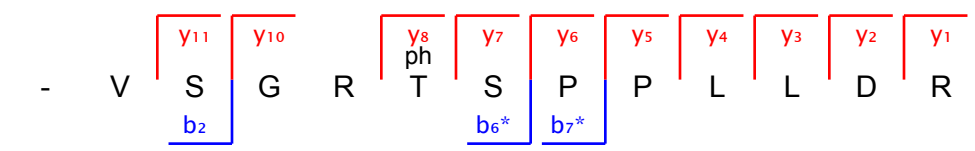

Raw file: 20150814\_A375SR\_Phospho\_BR2\_08  
 Scan: 10605 Method: FTMS; HCD Score: 62.2 m/z: 675.33 Gene names: CCDC6

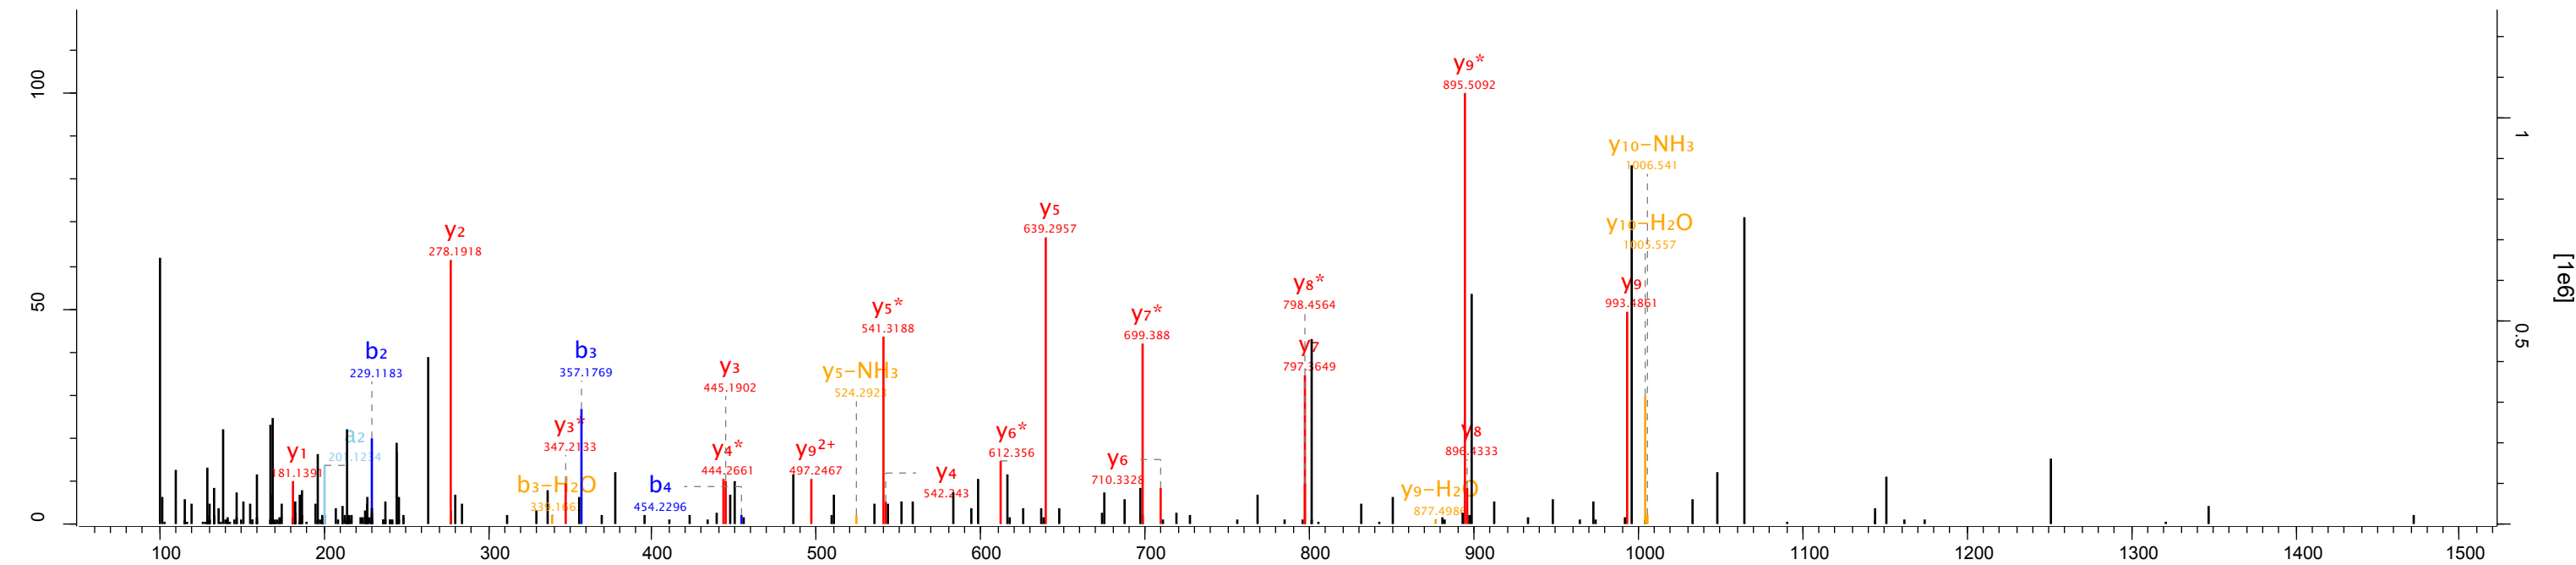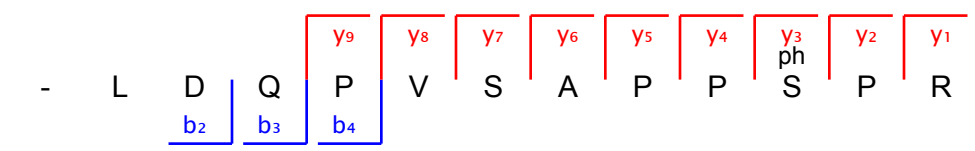

Raw file: 20150814\_A375SR\_Phospho\_BR2\_08  
 Scan: 10635 Method: FTMS; HCD Score: 78.24 m/z: 522.26 Gene names: PROSER2

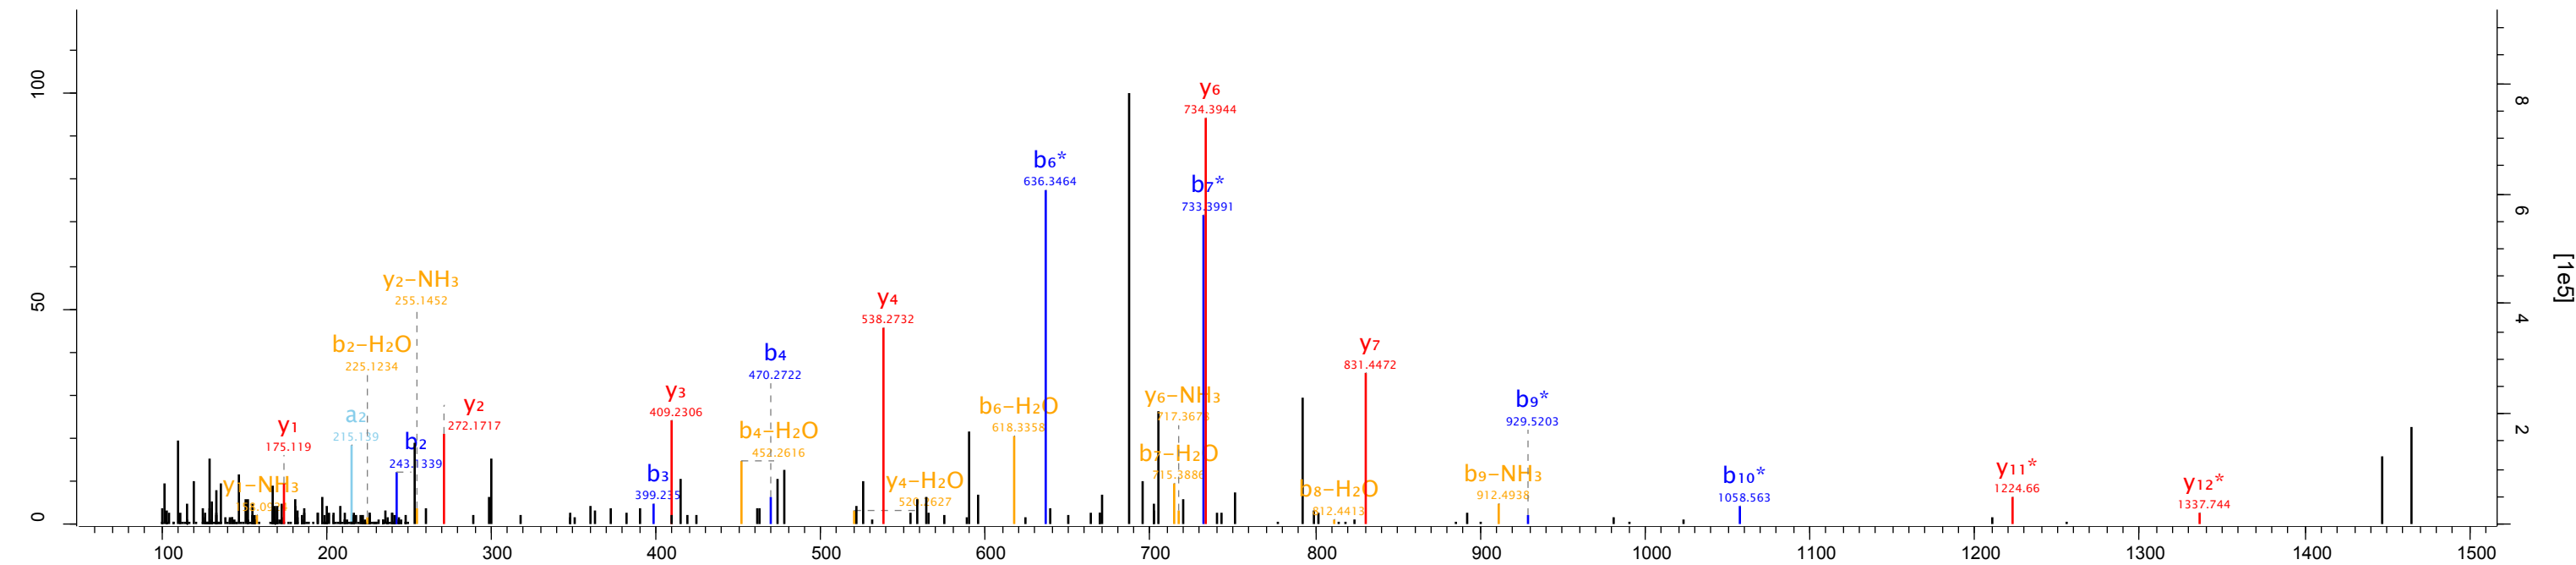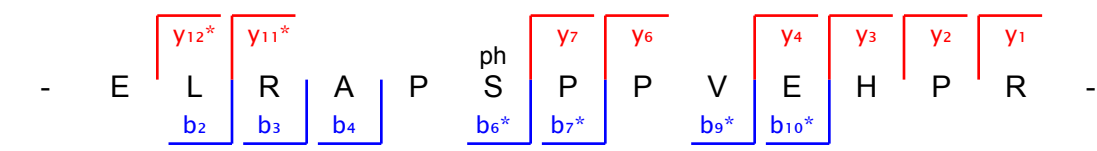

Raw file: 20150814\_A375SR\_Phospho\_BR2\_08  
 Scan: 10935 Method: FTMS; HCD Score: 110.84 m/z: 501.23 Gene names: ABLIM1

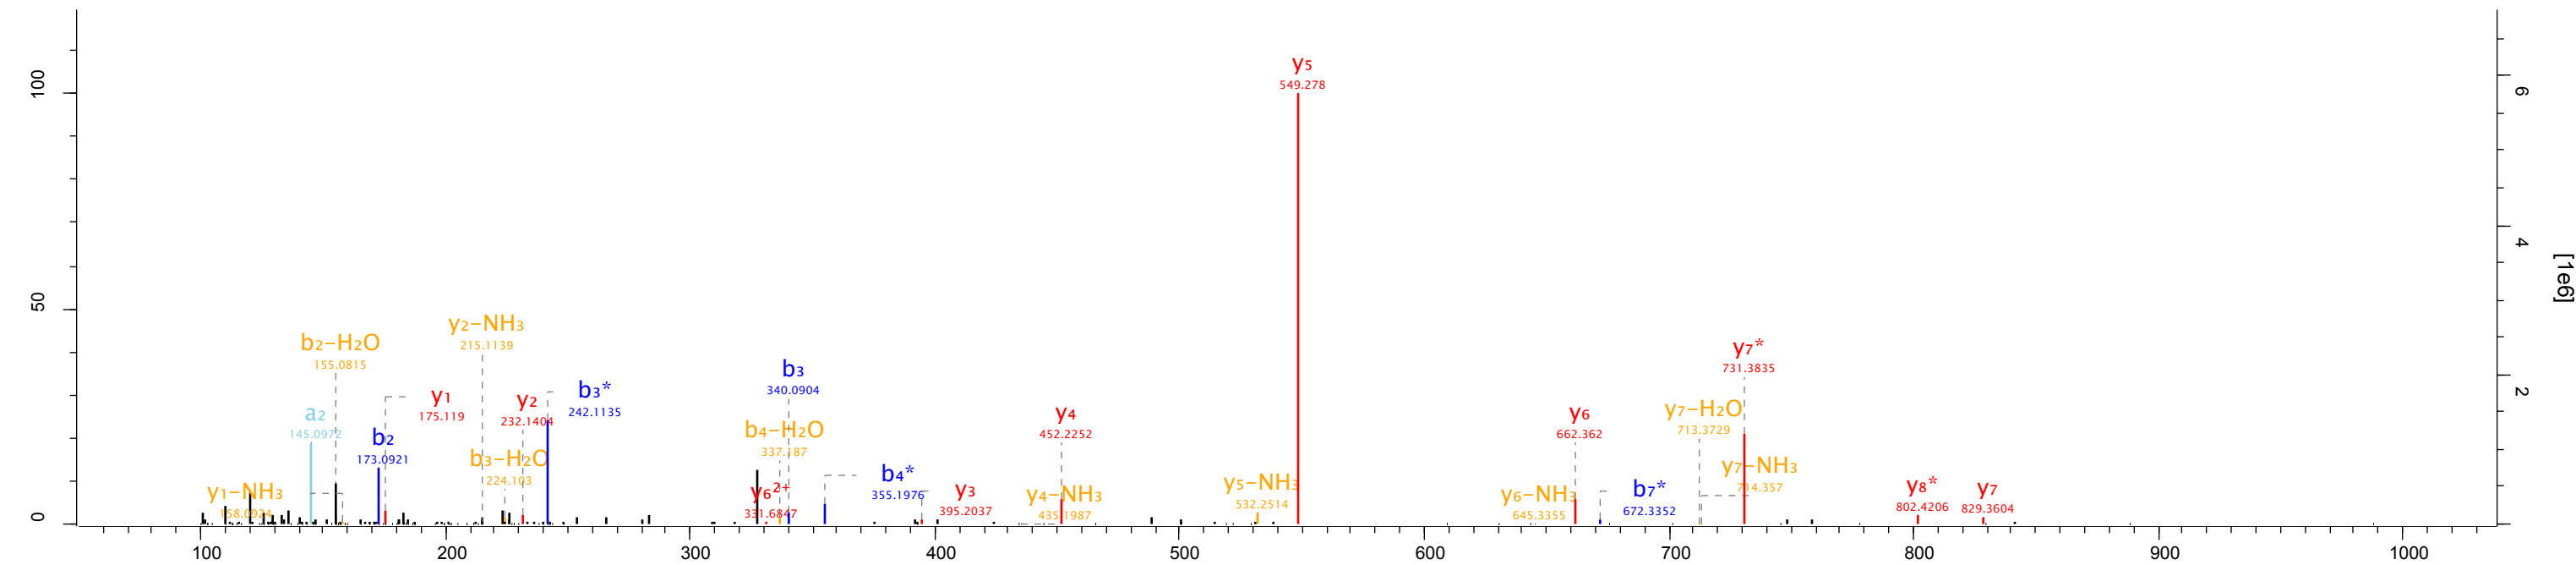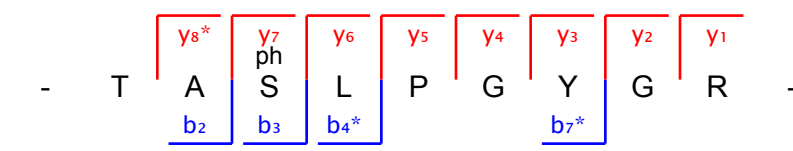



Raw file: 20150814\_A375SR\_Phospho\_BR2\_08  
 Scan: 11115 Method: FTMS; HCD Score: 214.15 m/z: 827.6 Gene names: ACIN1

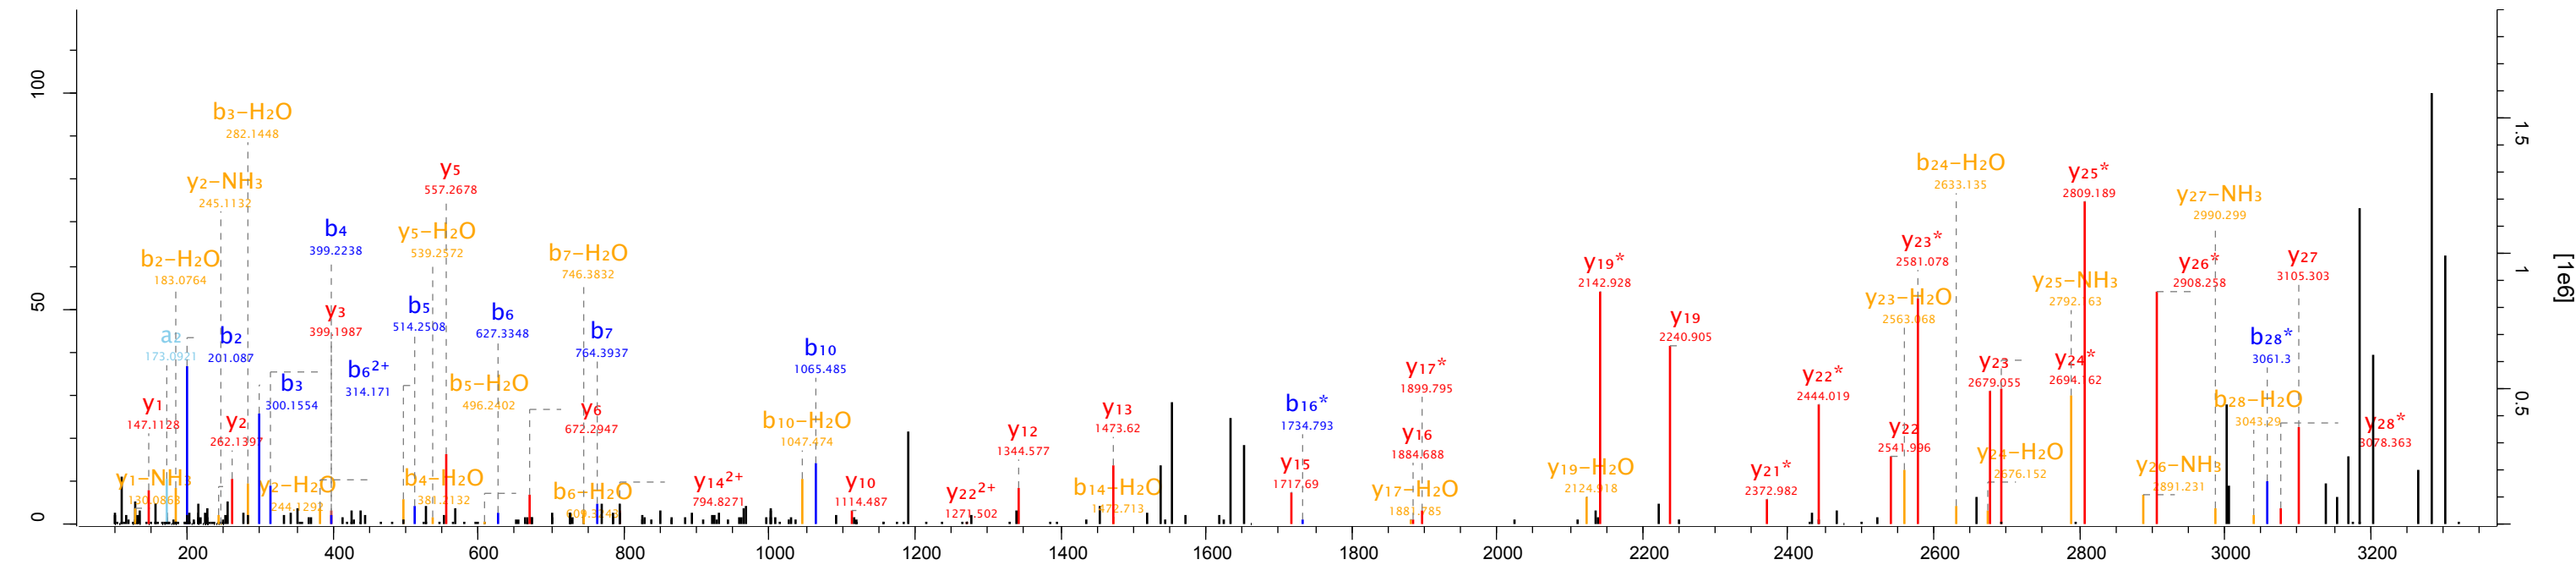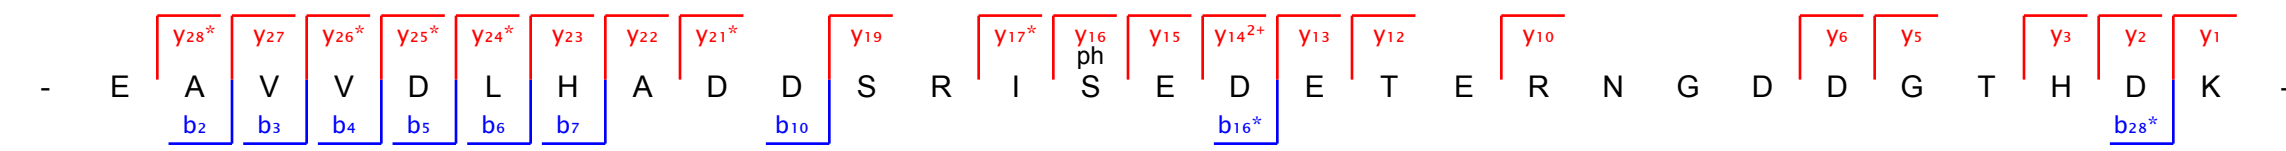

Raw file: 20150814\_A375SR\_Phospho\_BR2\_08  
 Scan: 11995 Method: FTMS; HCD Score: 115.63 m/z: 617.33 Gene names: MICALL1

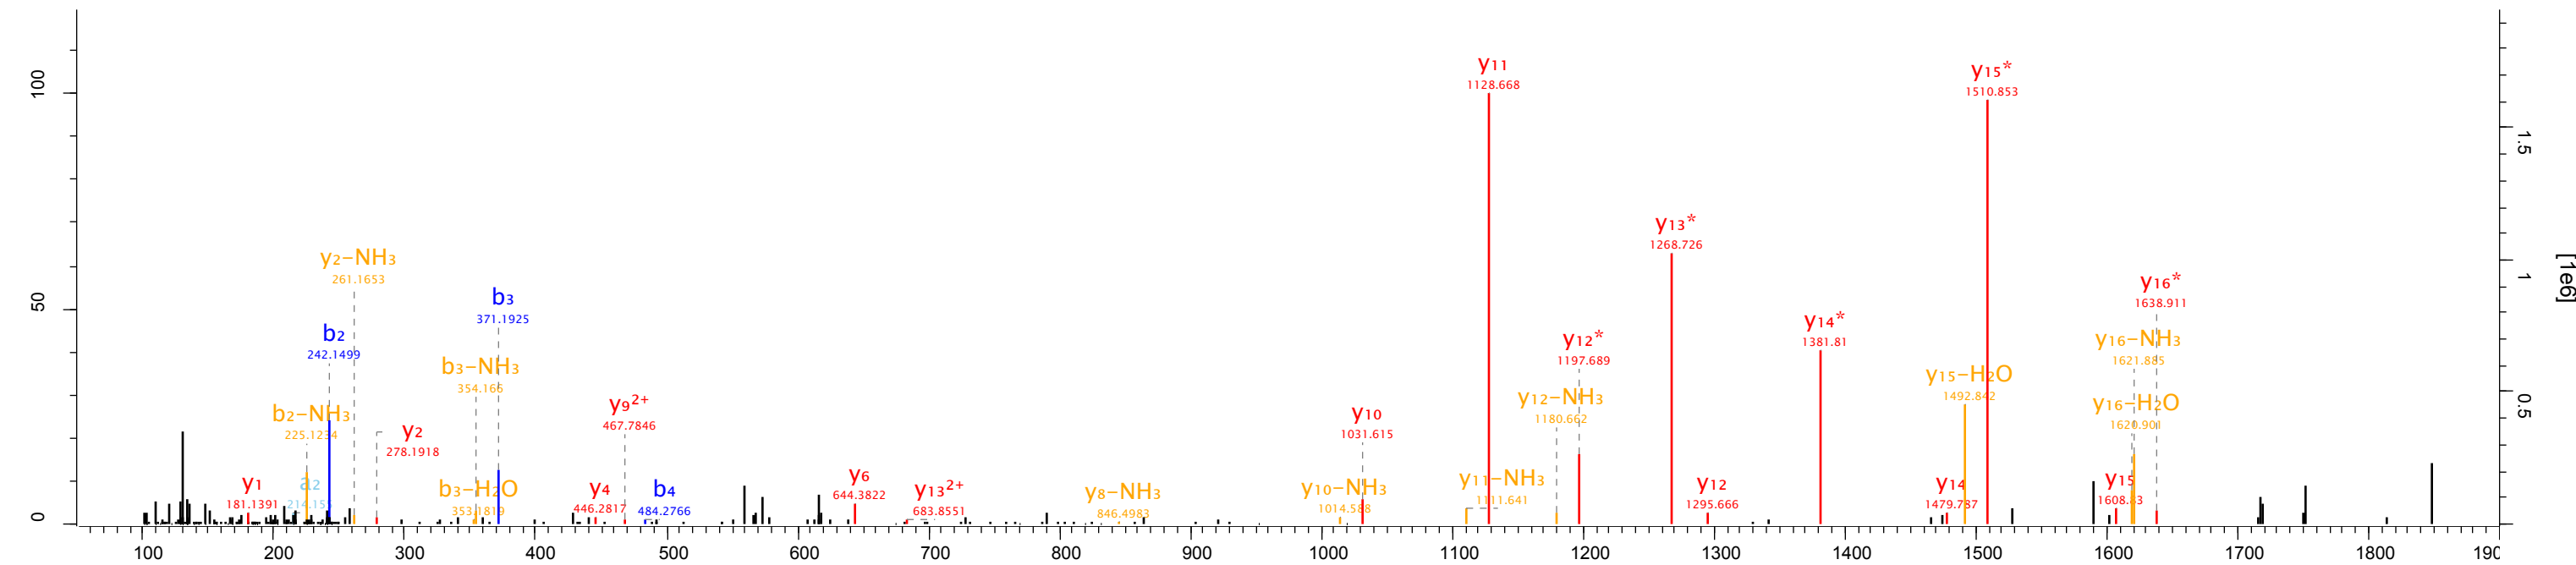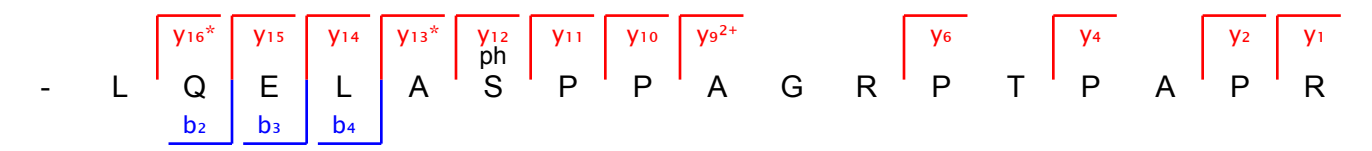

Raw file 20150814\_A375SR\_Phospho\_BR2\_08 Scan 12125 Method FTMS; HCD Score 74.78 m/z 590.76 Gene names SRRM2

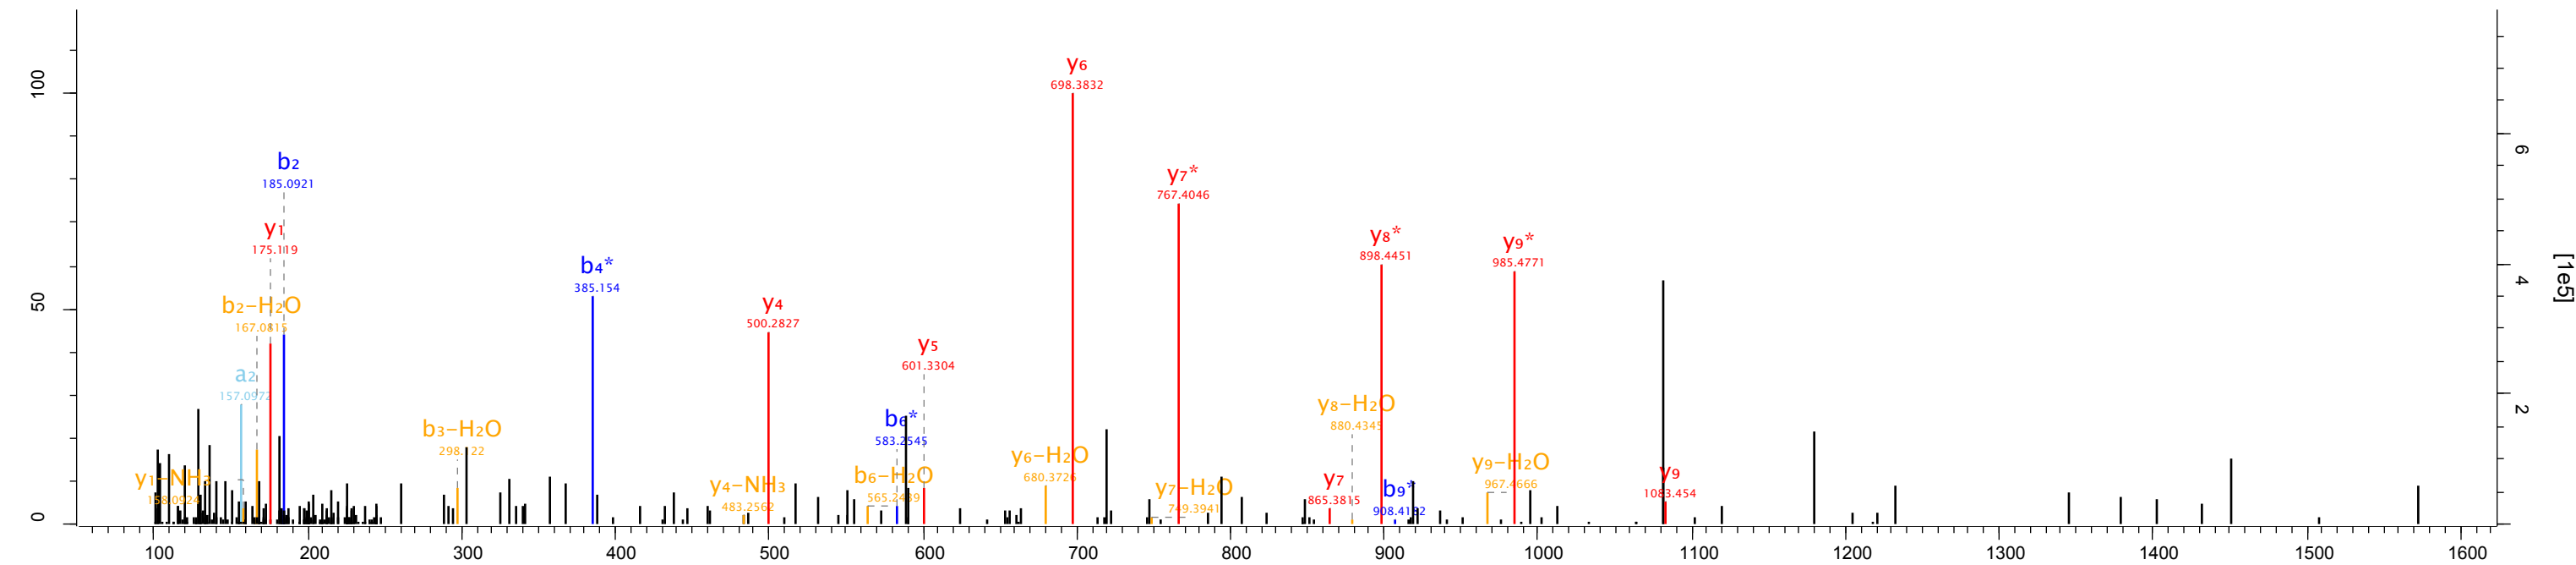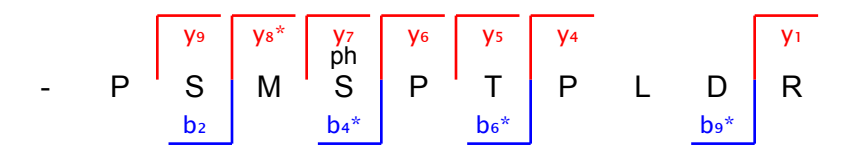

Raw file: 20150814\_A375SR\_Phospho\_BR2\_08  
 Scan: 12495 Method: FTMS; HCD Score: 121.02 m/z: 684.29 Gene names: GSK3A;GSK3B

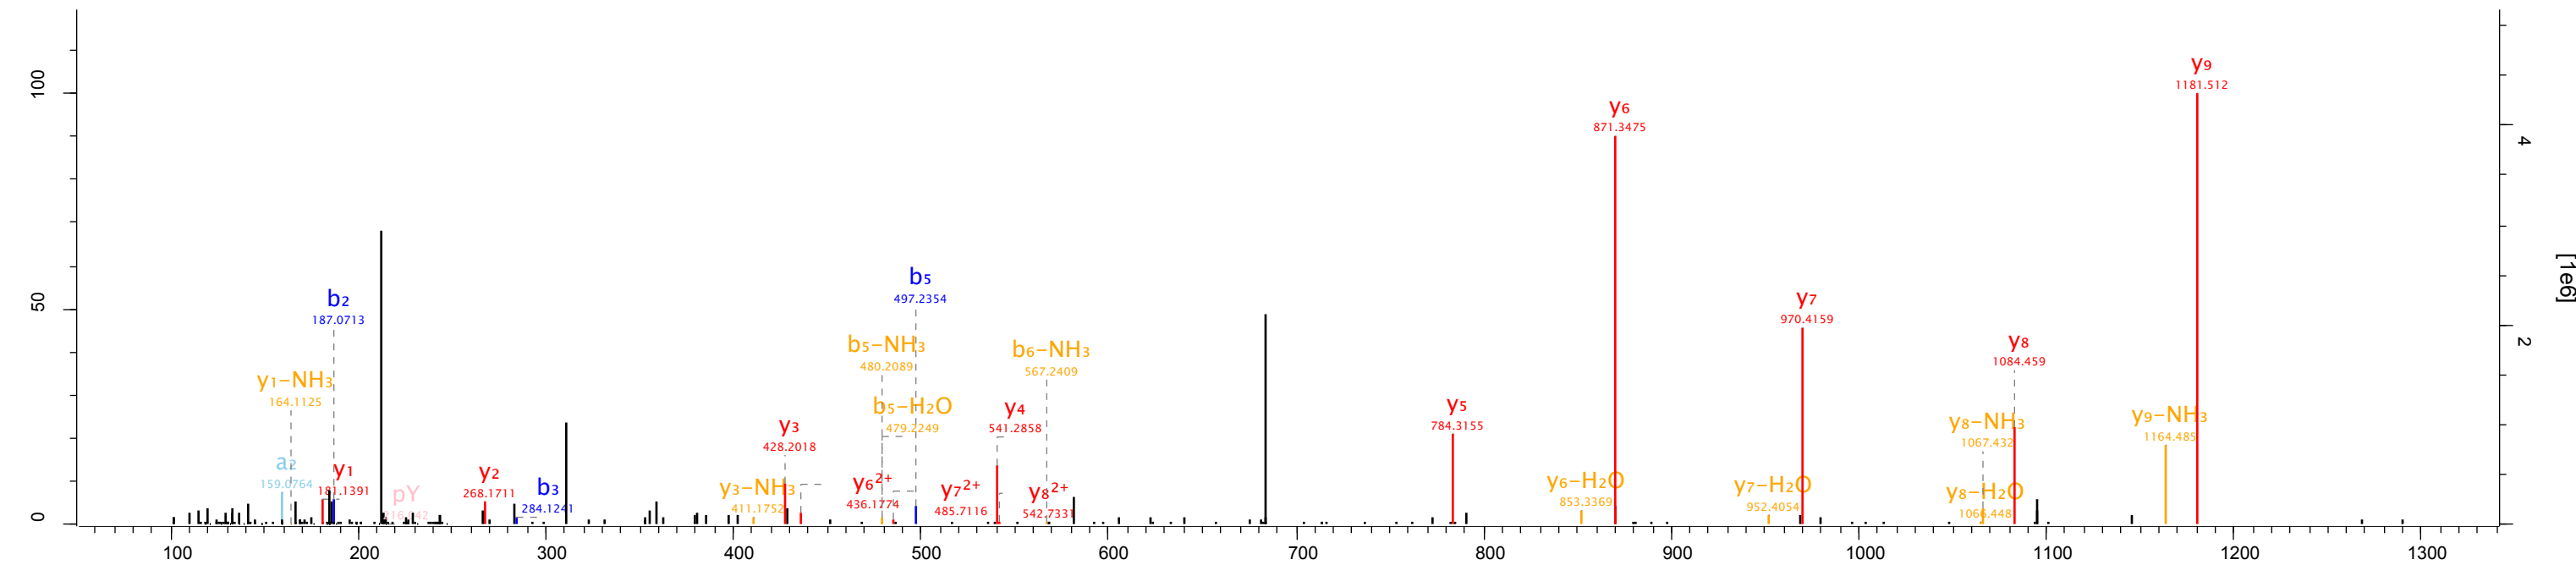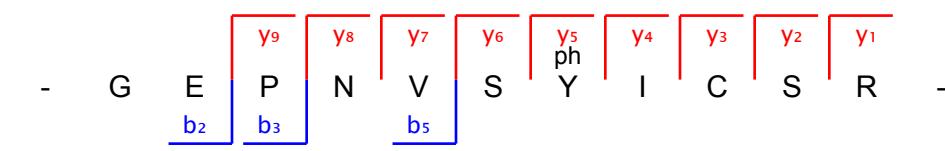

Raw file: 20150814\_A375SR\_Phospho\_BR2\_08  
 Scan: 12785 Method: FTMS; HCD Score: 56.14 m/z: 566.32 Gene names: PHF3

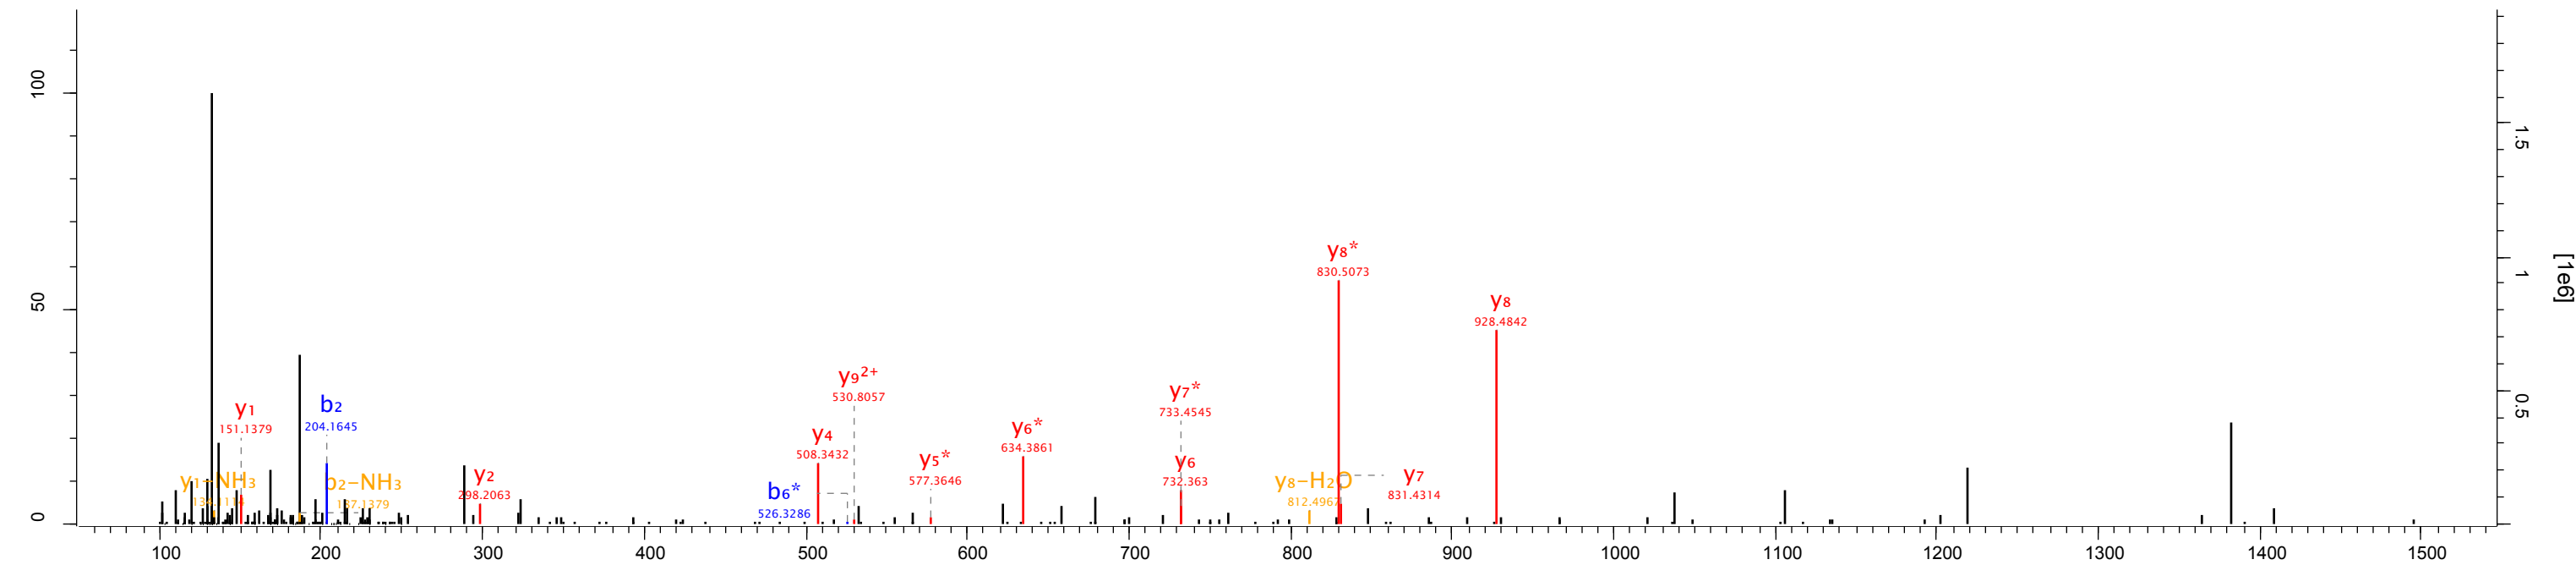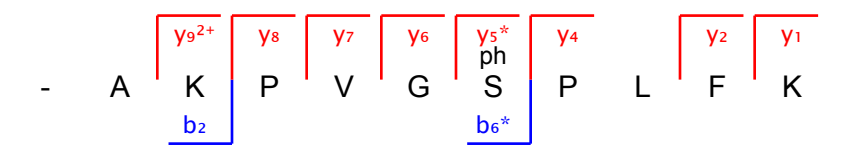

Raw file: 20150814\_A375SR\_Phospho\_BR2\_08  
 Scan: 13145 Method: FTMS; HCD Score: 101.01 m/z: 708.83 Gene names: ERBB2IP

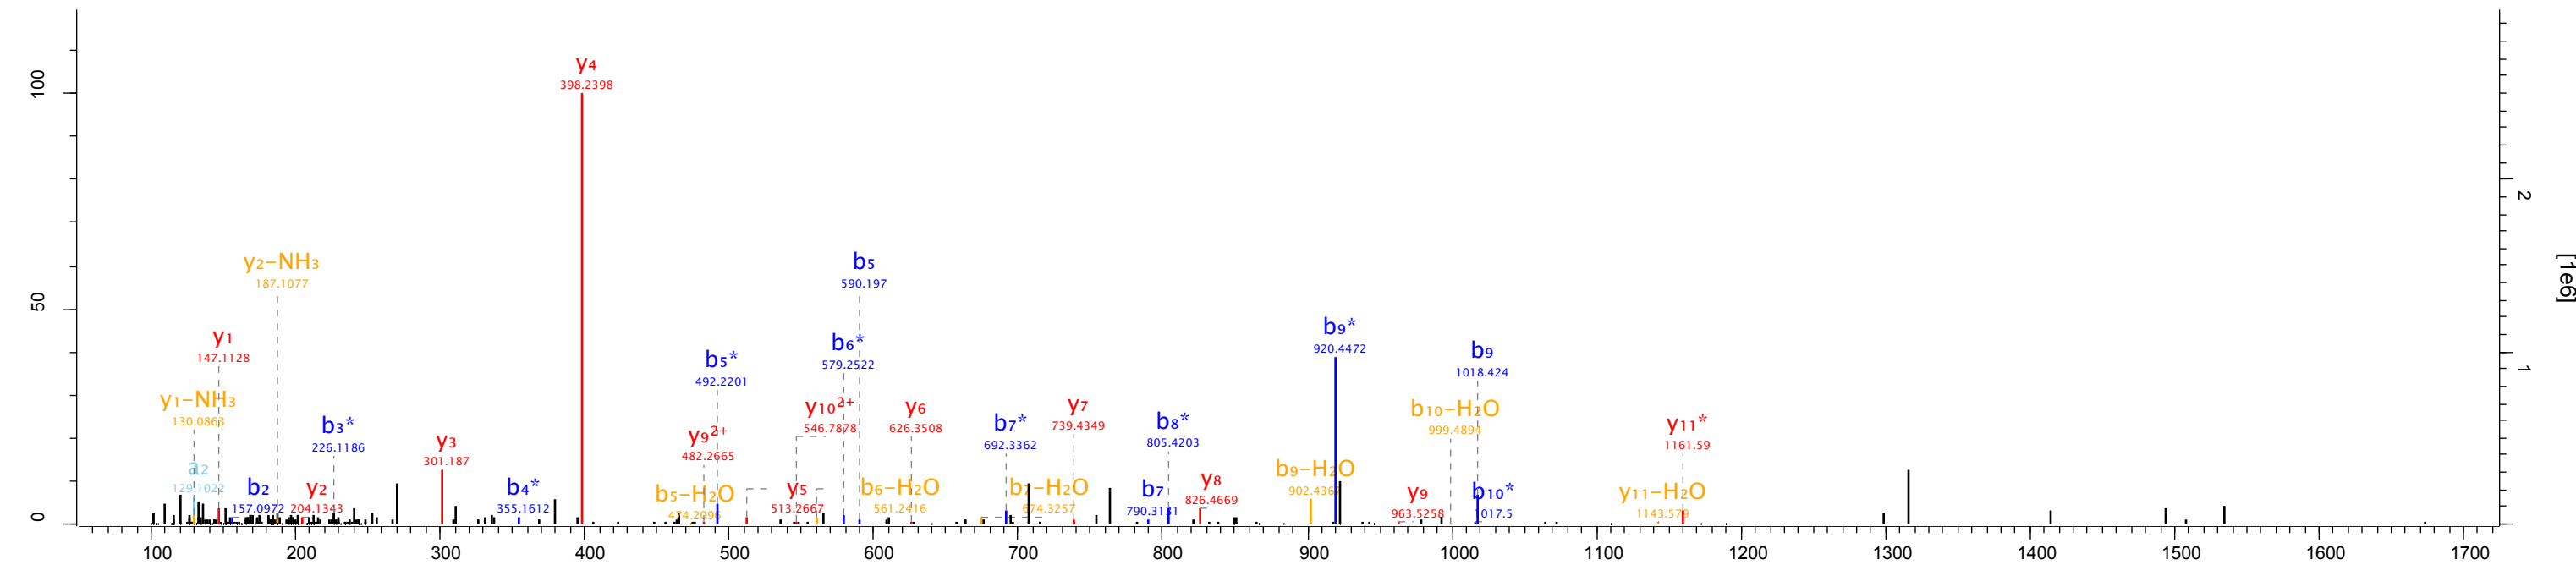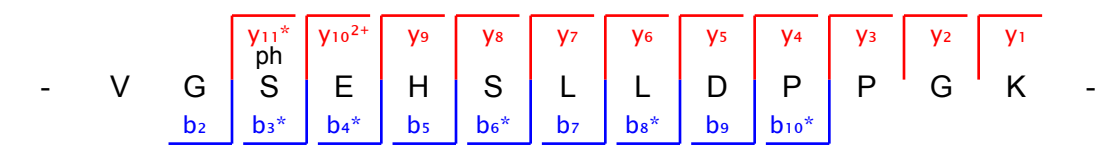

Raw file: 20150814\_A375SR\_Phospho\_BR2\_08  
 Scan: 14335 Method: FTMS; HCD Score: 130.56 m/z: 788.88 Gene names: VIM

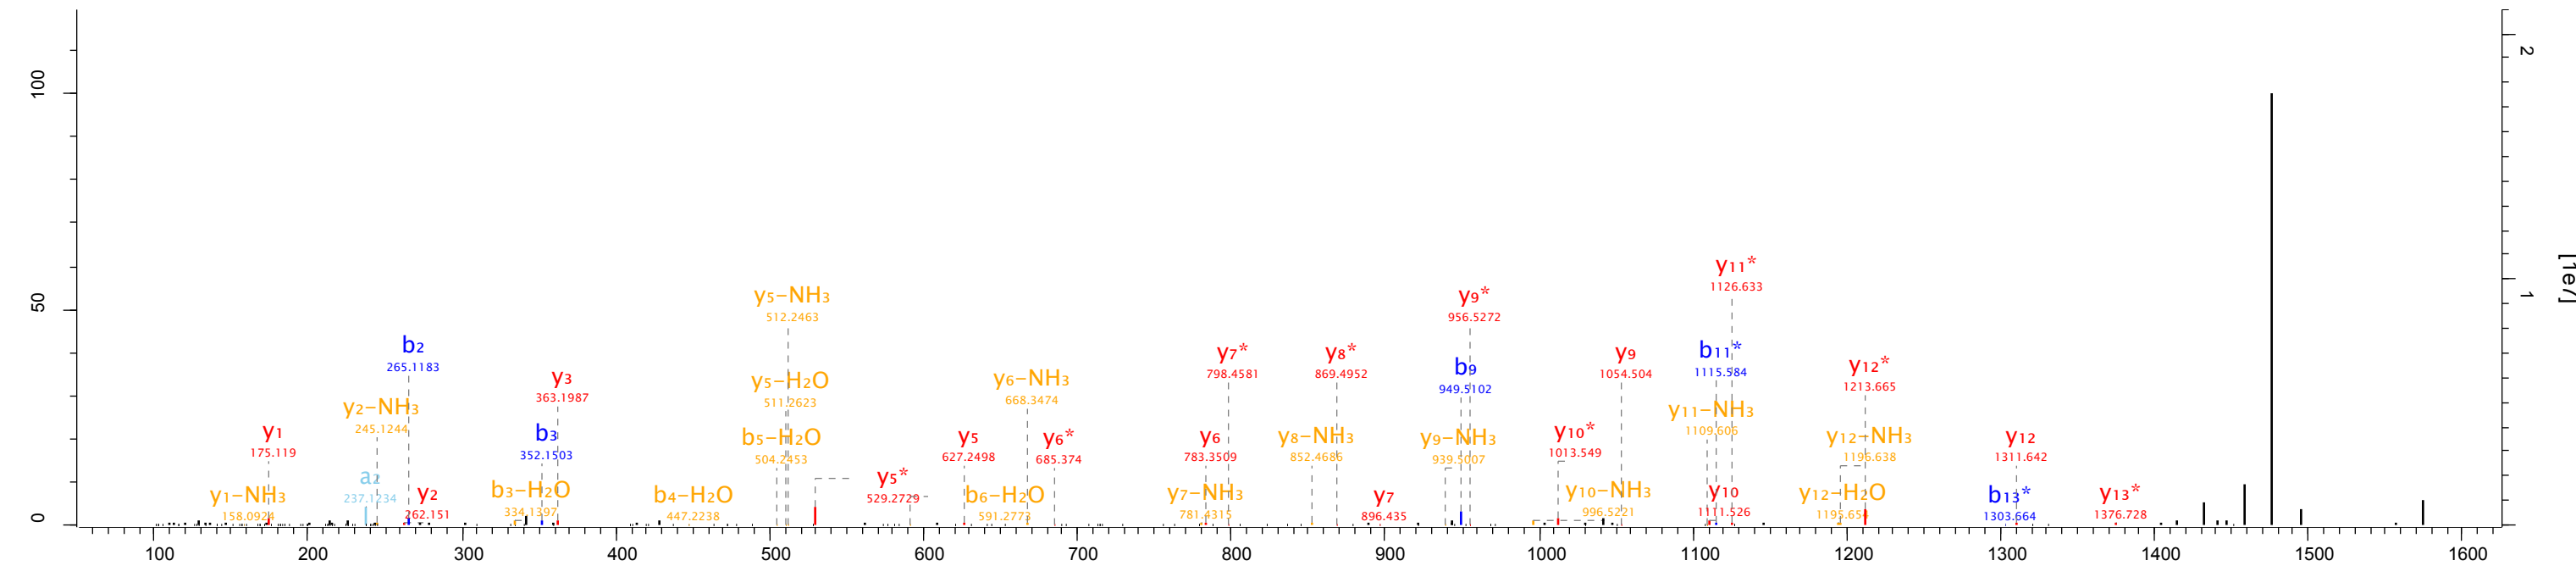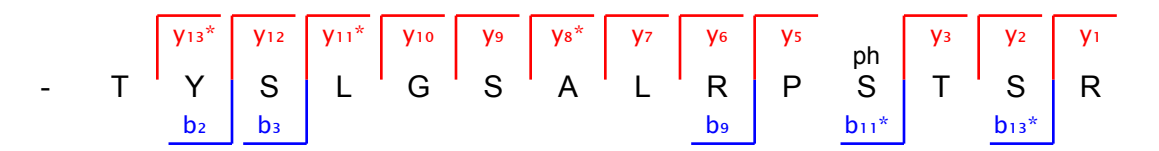

Raw file: 20150814\_A375SR\_Phospho\_BR2\_08  
 Scan: 16105 Method: FTMS; HCD Score: 184.83 m/z: 831.44 Gene names: ADAR

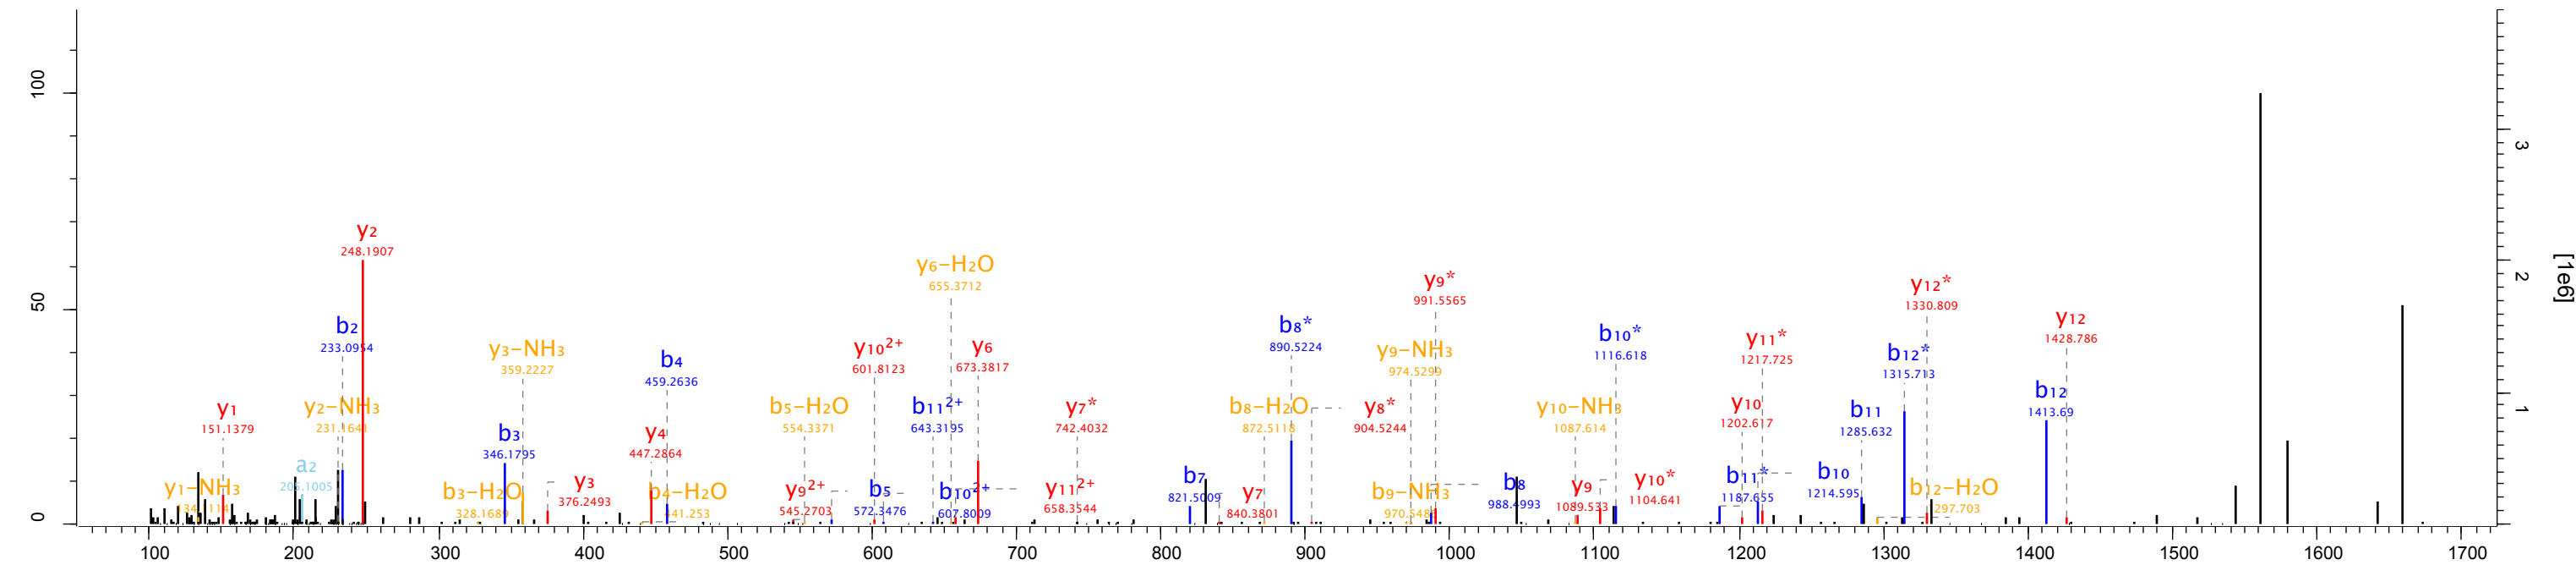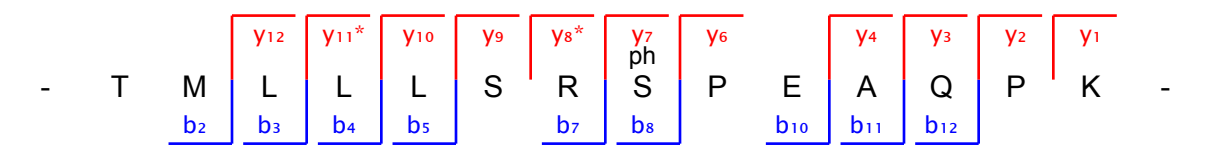



Raw file: 20150814\_A375SR\_Phospho\_BR2\_08  
 Scan: 17115 Method: FTMS; HCD Score: 125.3 m/z: 510.27 Gene names: DENND4C

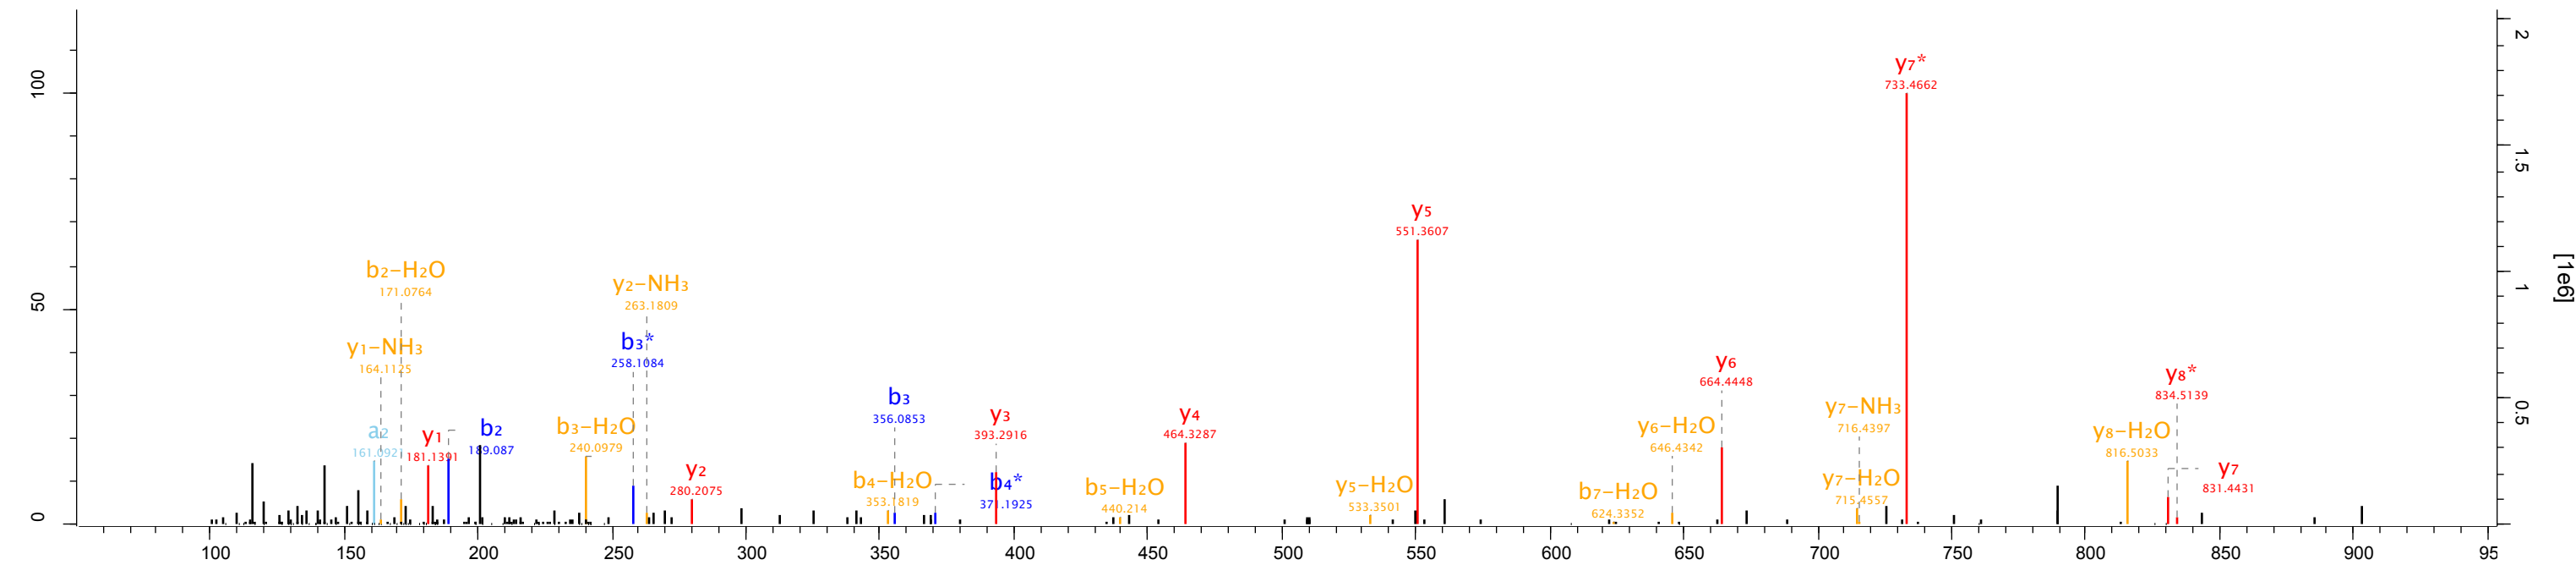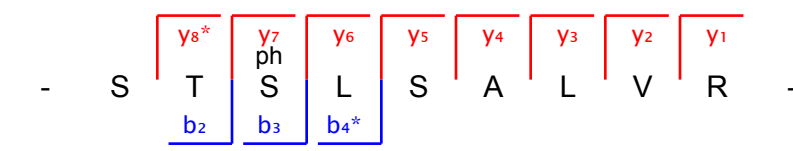

Raw file 20150814\_A375SR\_Phospho\_BR2\_08 Scan 17155 Method FTMS; HCD Score 56.68 m/z 764.07 Gene names SORBS2

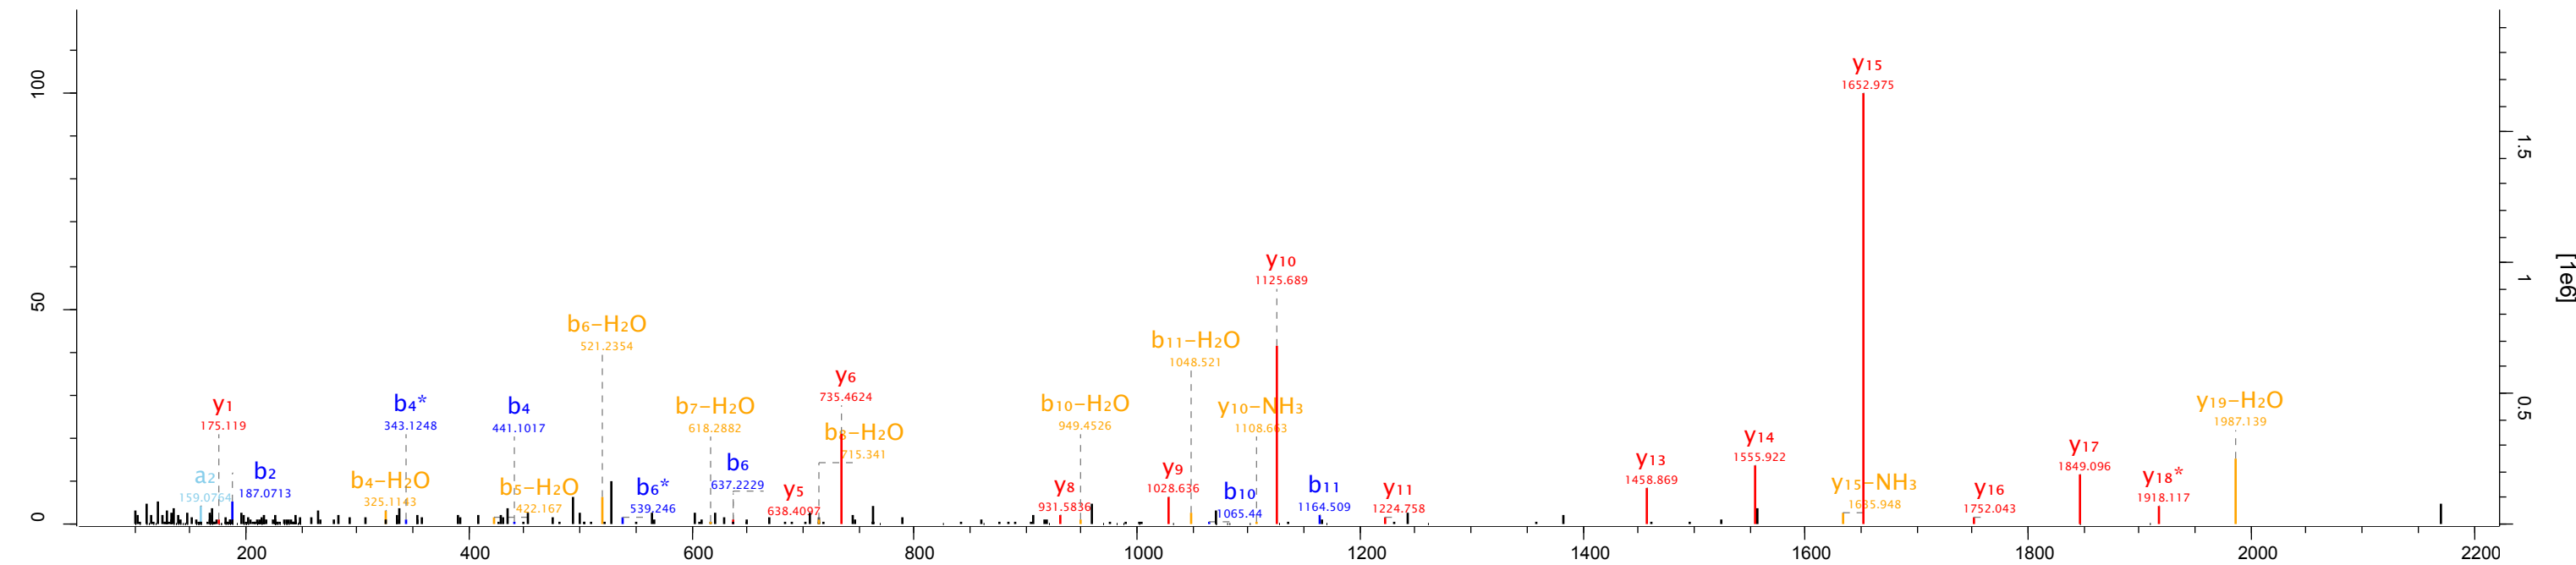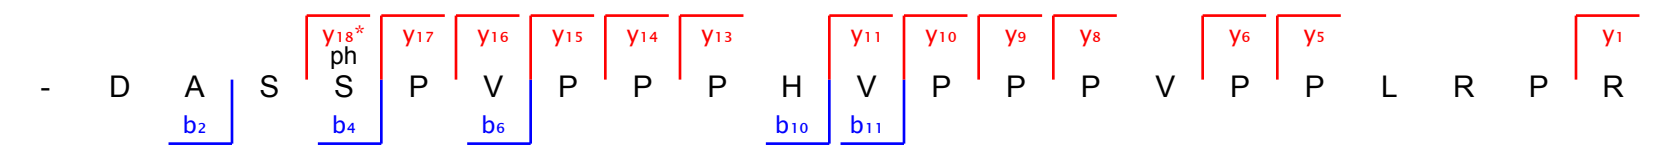

Raw file: 20150814\_A375SR\_Phospho\_BR2\_08  
 Scan: 17175 Method: FTMS; HCD Score: 96.27 m/z: 652.84 Gene names: RAI14

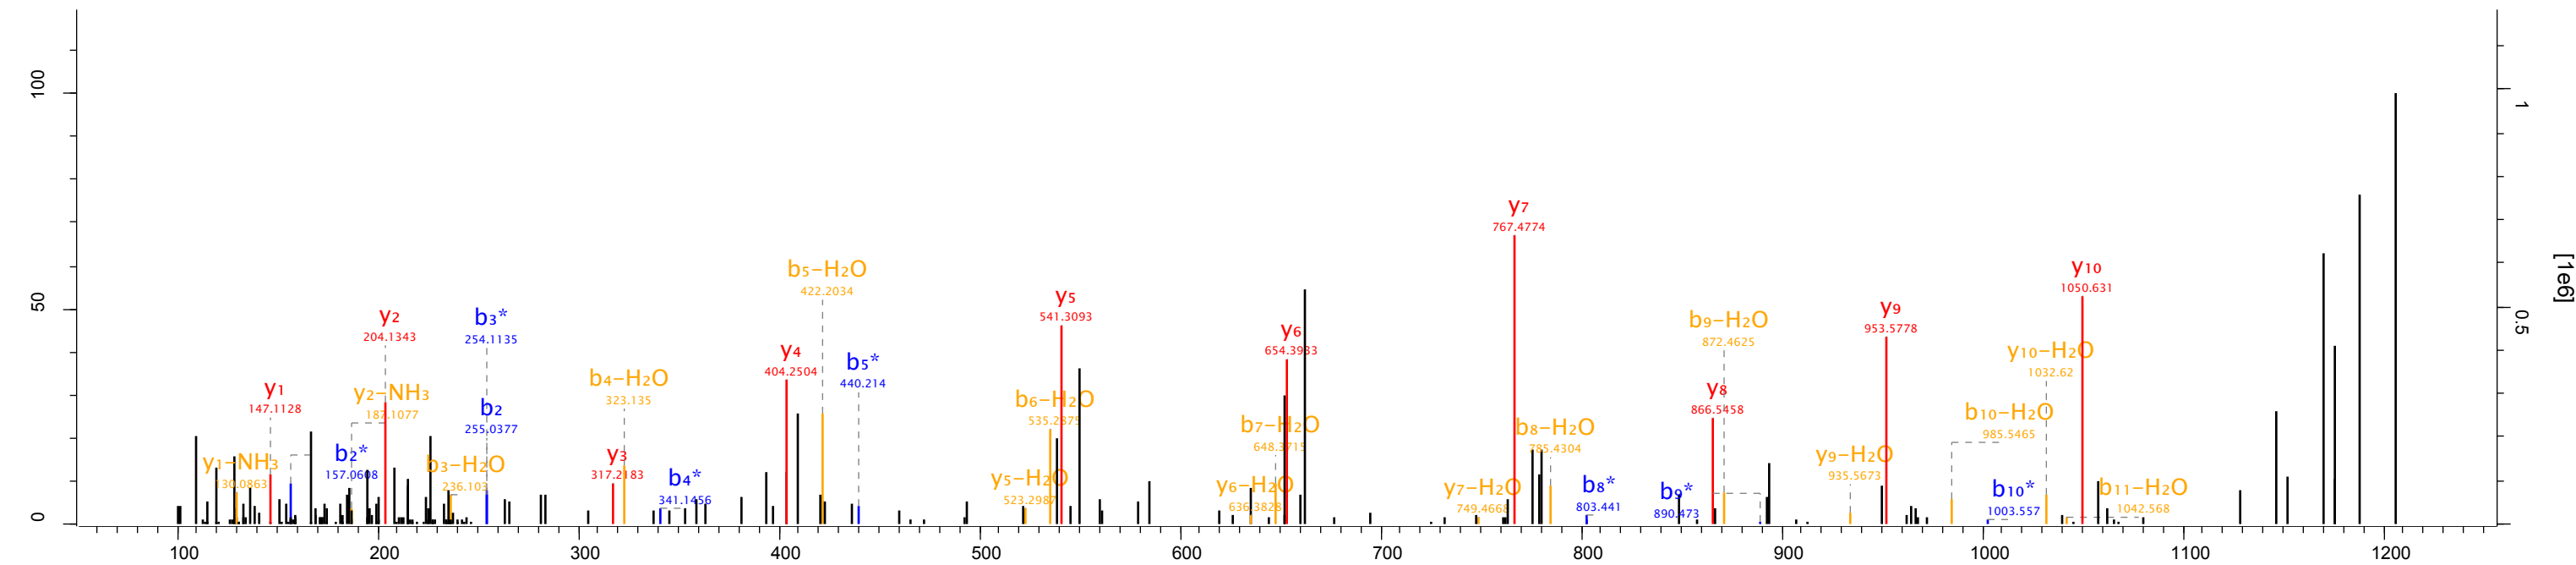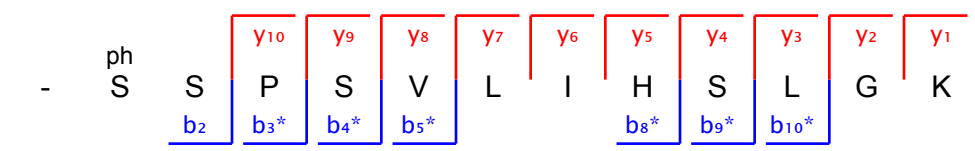

Raw file 20150814\_A375SR\_Phospho\_BR2\_08 Scan 17615 Method FTMS; HCD Score 154.72 m/z 639.31 Gene names PKM

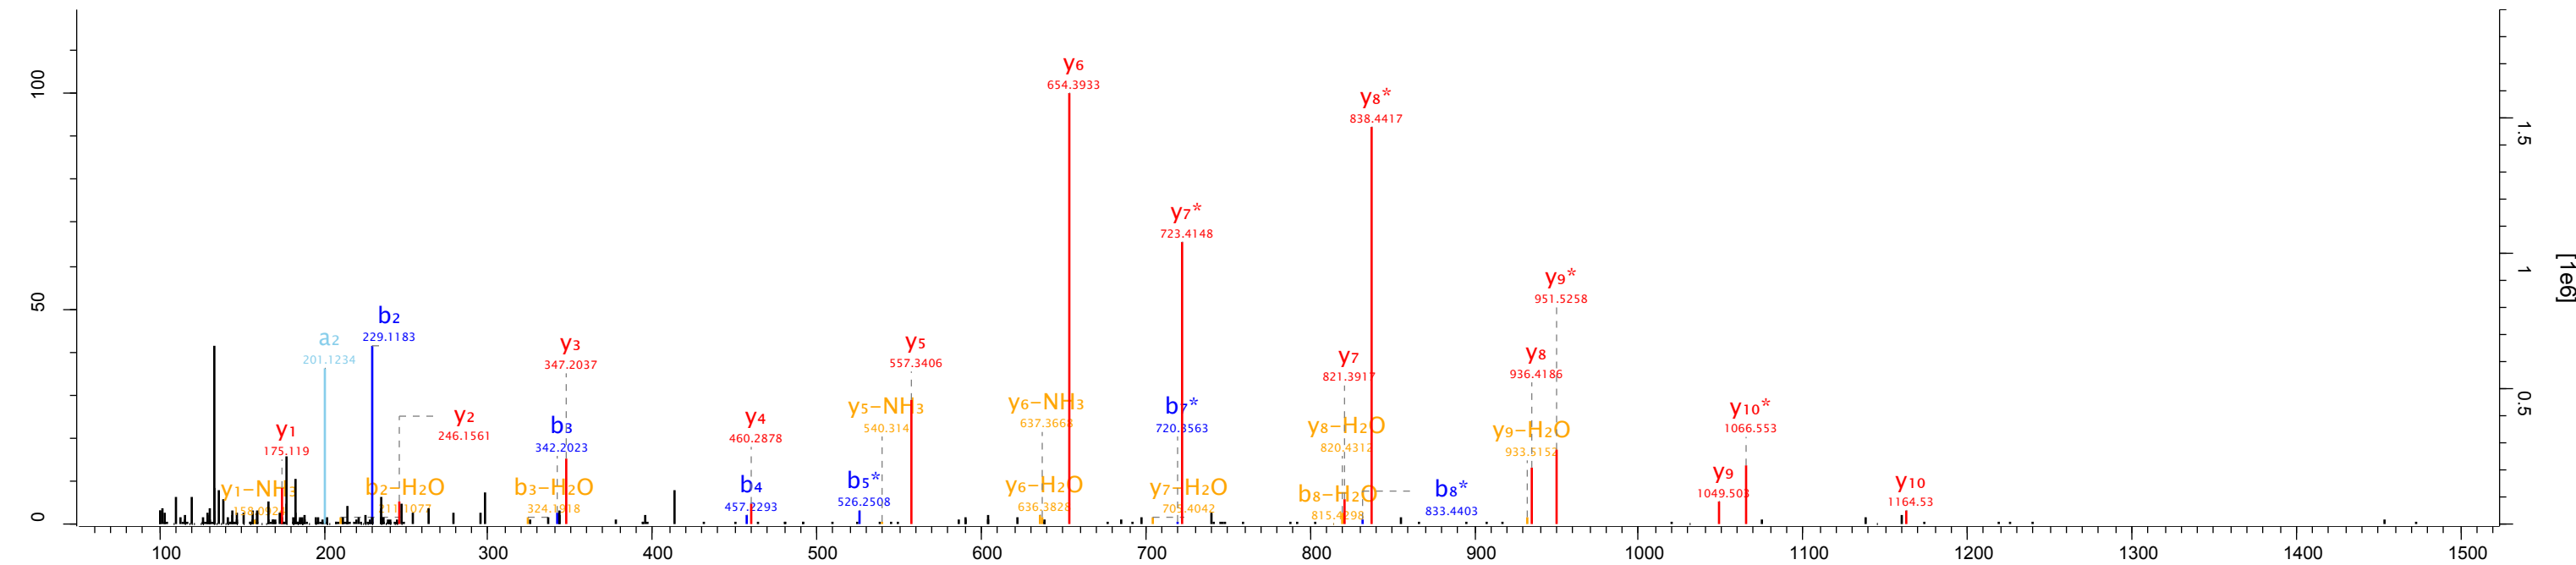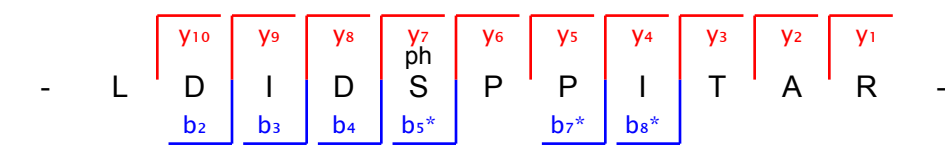

Raw file: 20150814\_A375SR\_Phospho\_BR2\_08  
 Scan: 17985 Method: FTMS; HCD Score: 184.48 m/z: 714.86 Gene names: HSPD1

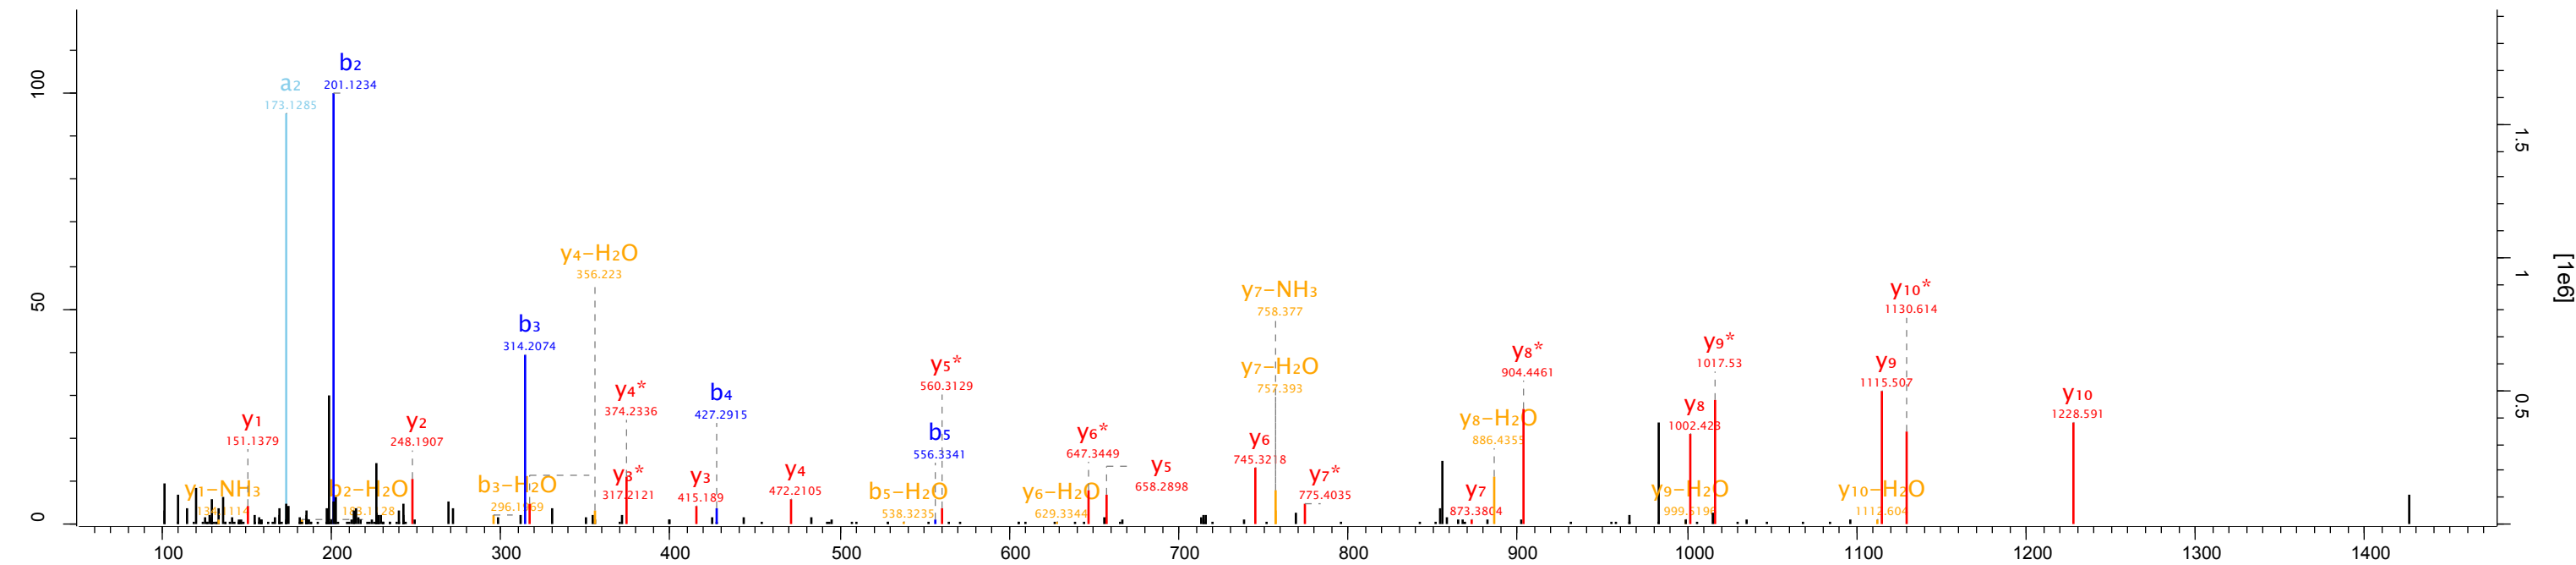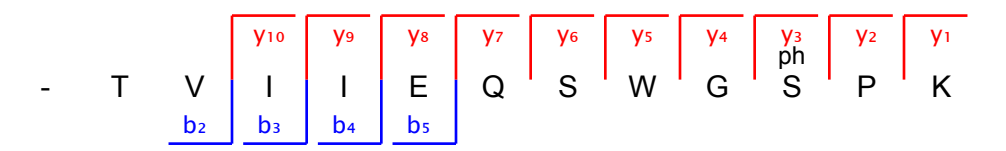

Raw file 20150814\_A375SR\_Phospho\_BR2\_08 Scan 18235 Method FTMS; HCD Score 151.28 m/z 688.6 Gene names RAPGEF2

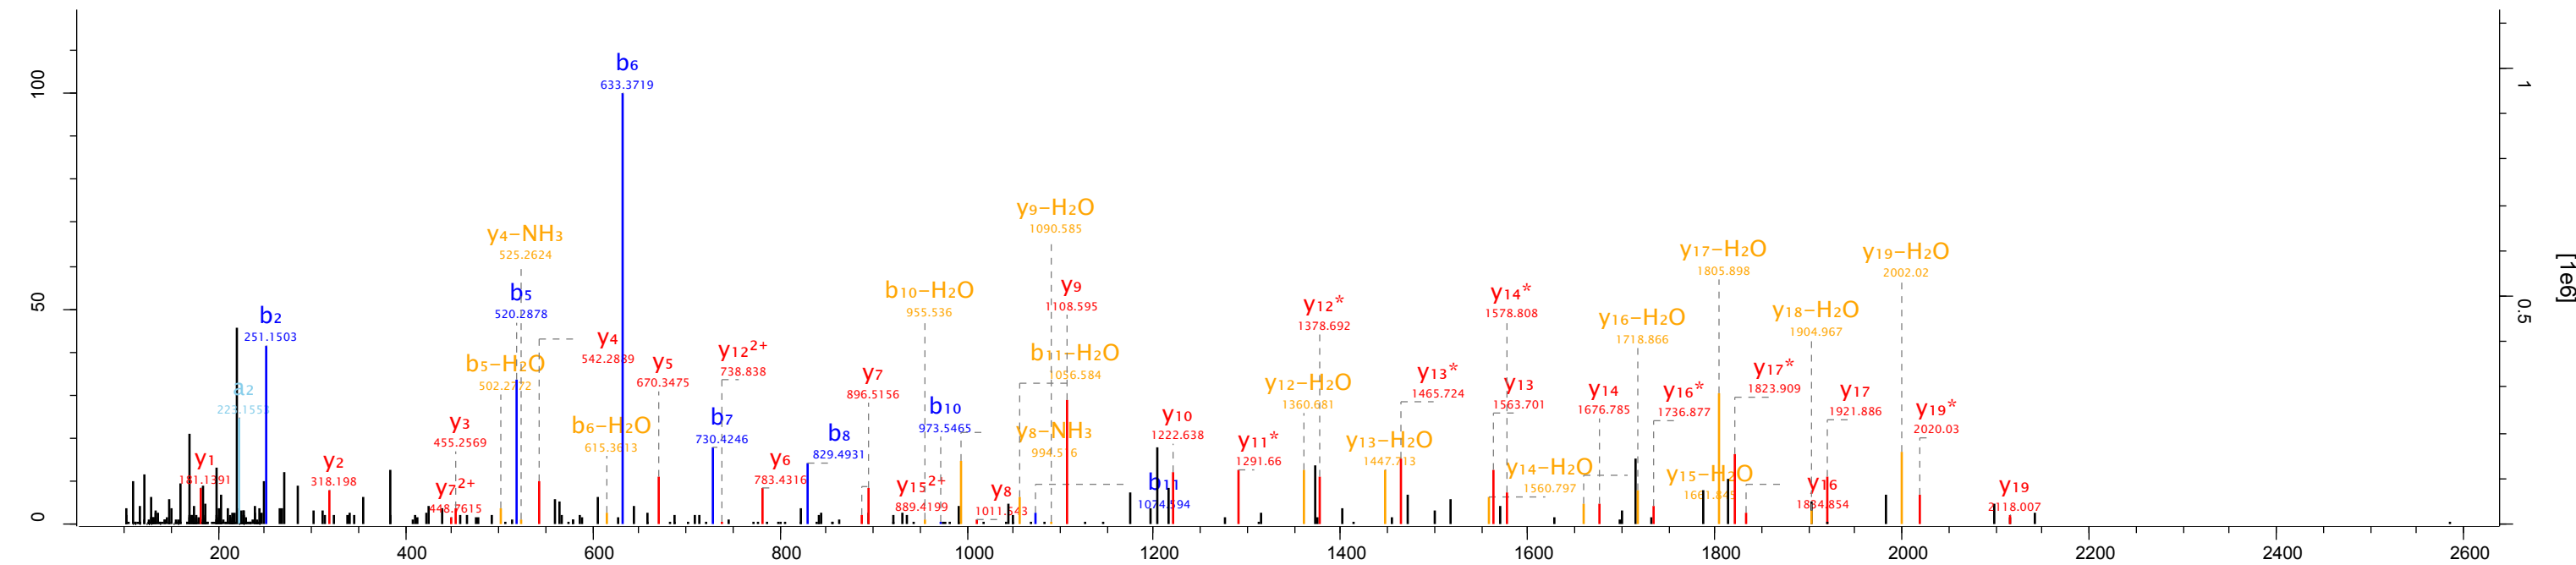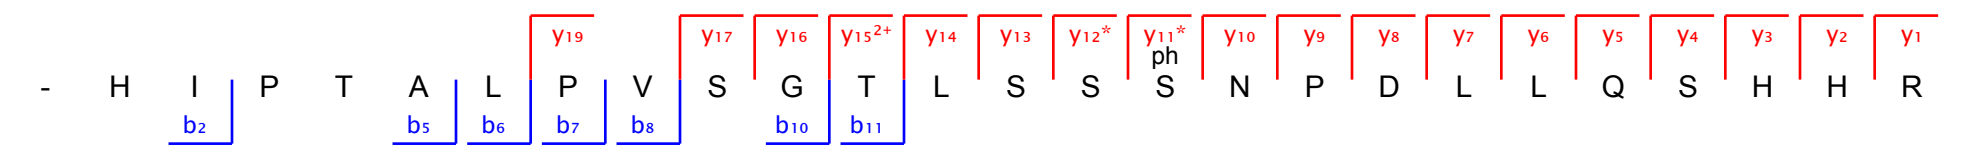

Raw file 20150814\_A375SR\_Phospho\_BR2\_08 Scan 18315 Method FTMS; HCD Score 139.81 m/z 867.92 Gene names ZC3H11A

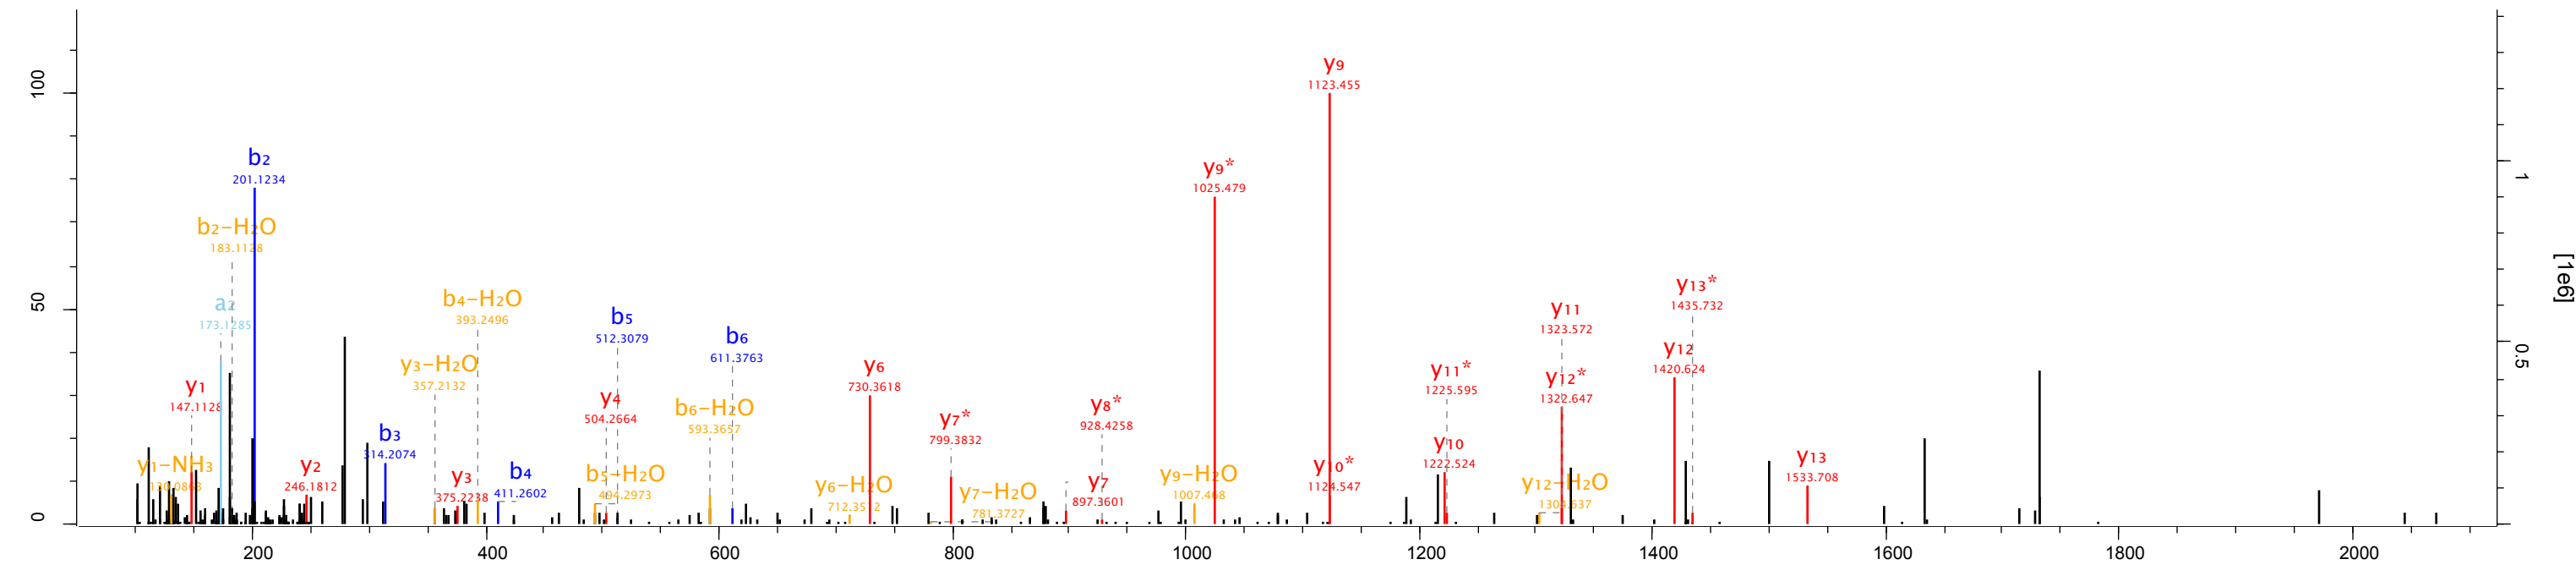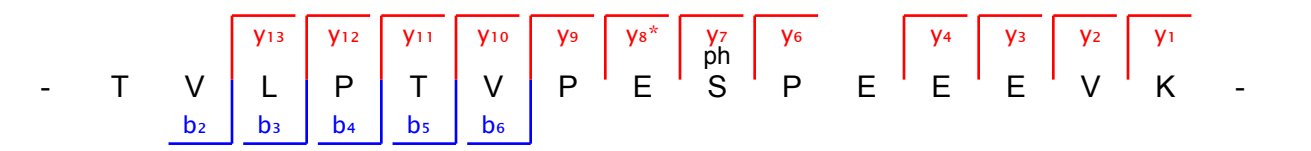

Raw file: 20150814\_A375SR\_Phospho\_BR2\_08  
 Scan: 18875 Method: FTMS; HCD Score: 126.84 m/z: 780.34 Gene names: PLCG1

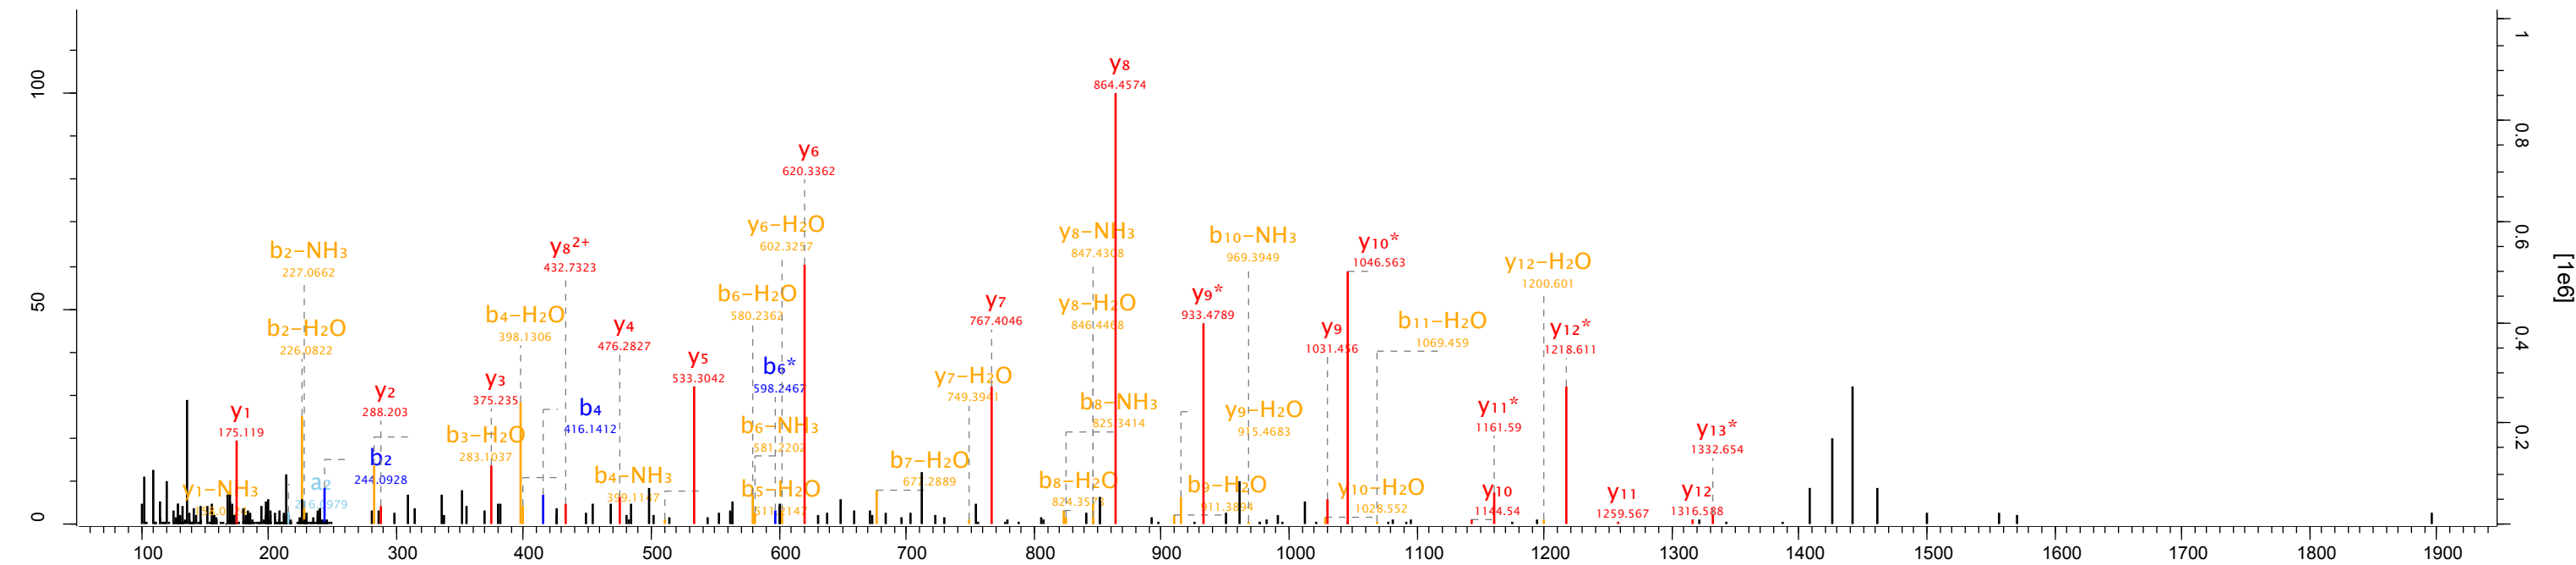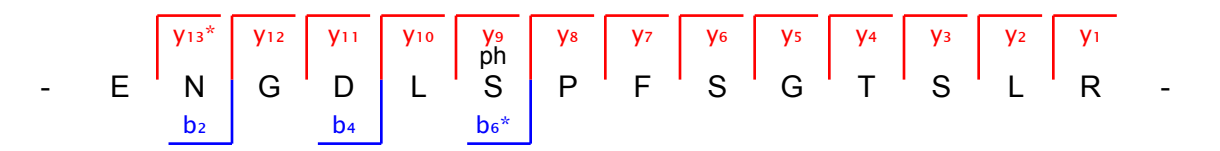



Raw file: 20150814\_A375SR\_Phospho\_BR2\_08  
 Scan: 19555 Method: FTMS; HCD Score: 131.04 m/z: 634.07 Gene names: EEF1G

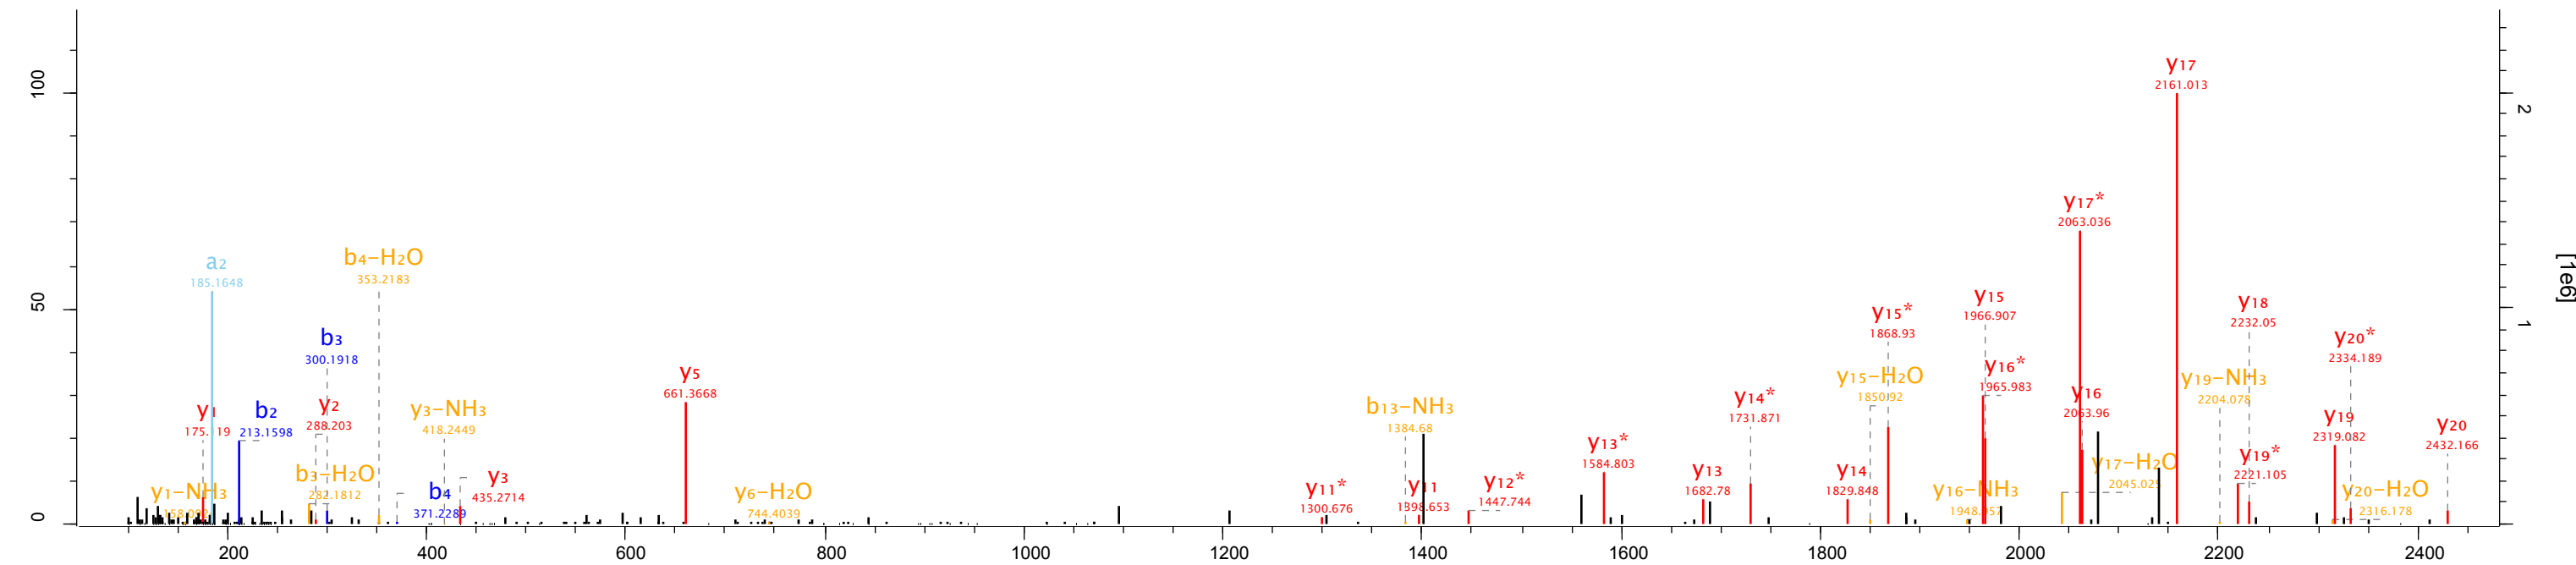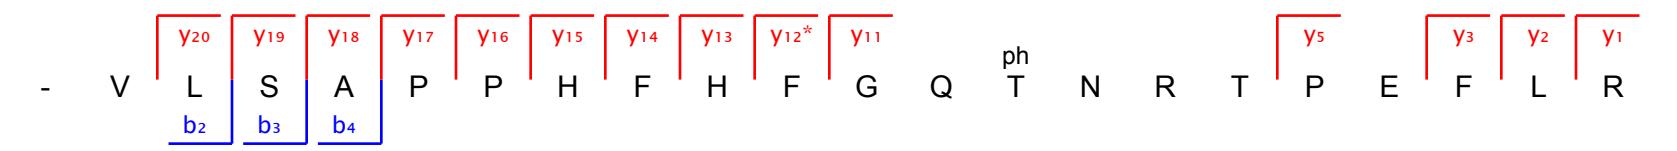

Raw file: 20150814\_A375SR\_Phospho\_BR2\_08  
 Scan: 19575 Method: FTMS; HCD Score: 151.98 m/z: 808.39 Gene names: C12orf43

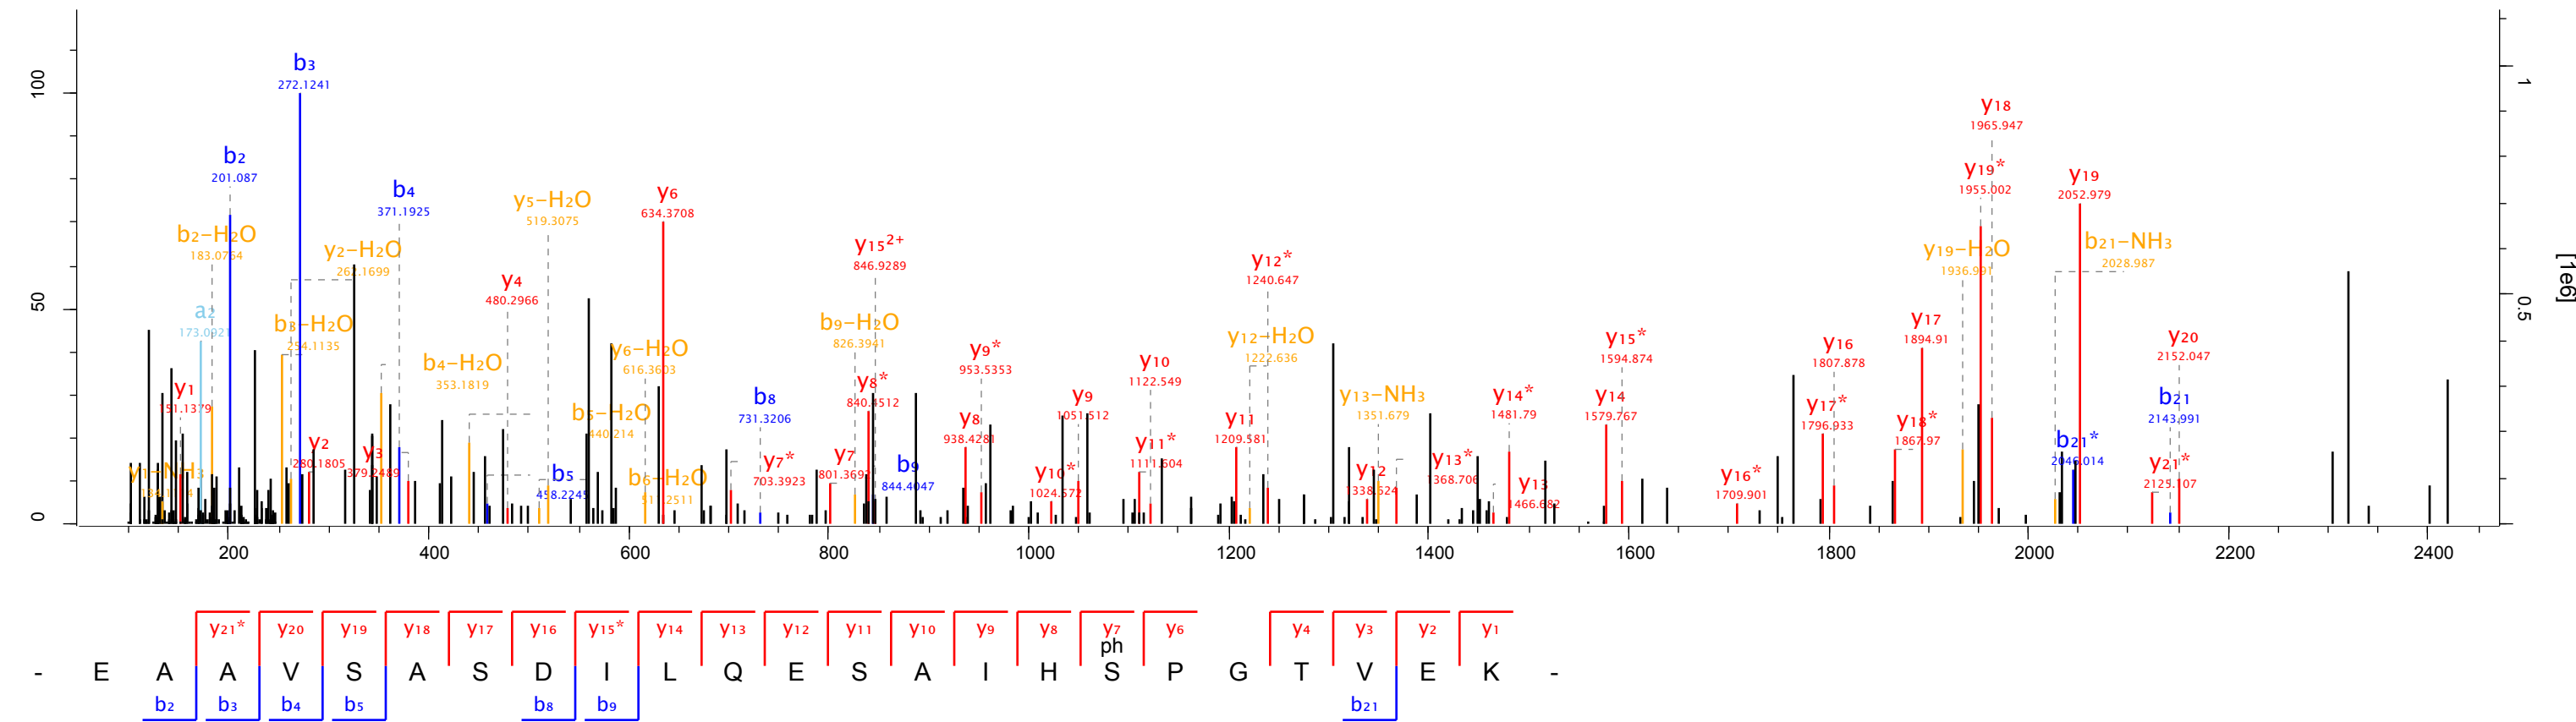

Raw file 20150814\_A375SR\_Phospho\_BR2\_08 Scan 22325 Method FTMS; HCD Score 199.37 m/z 737.37 Gene names TICRR

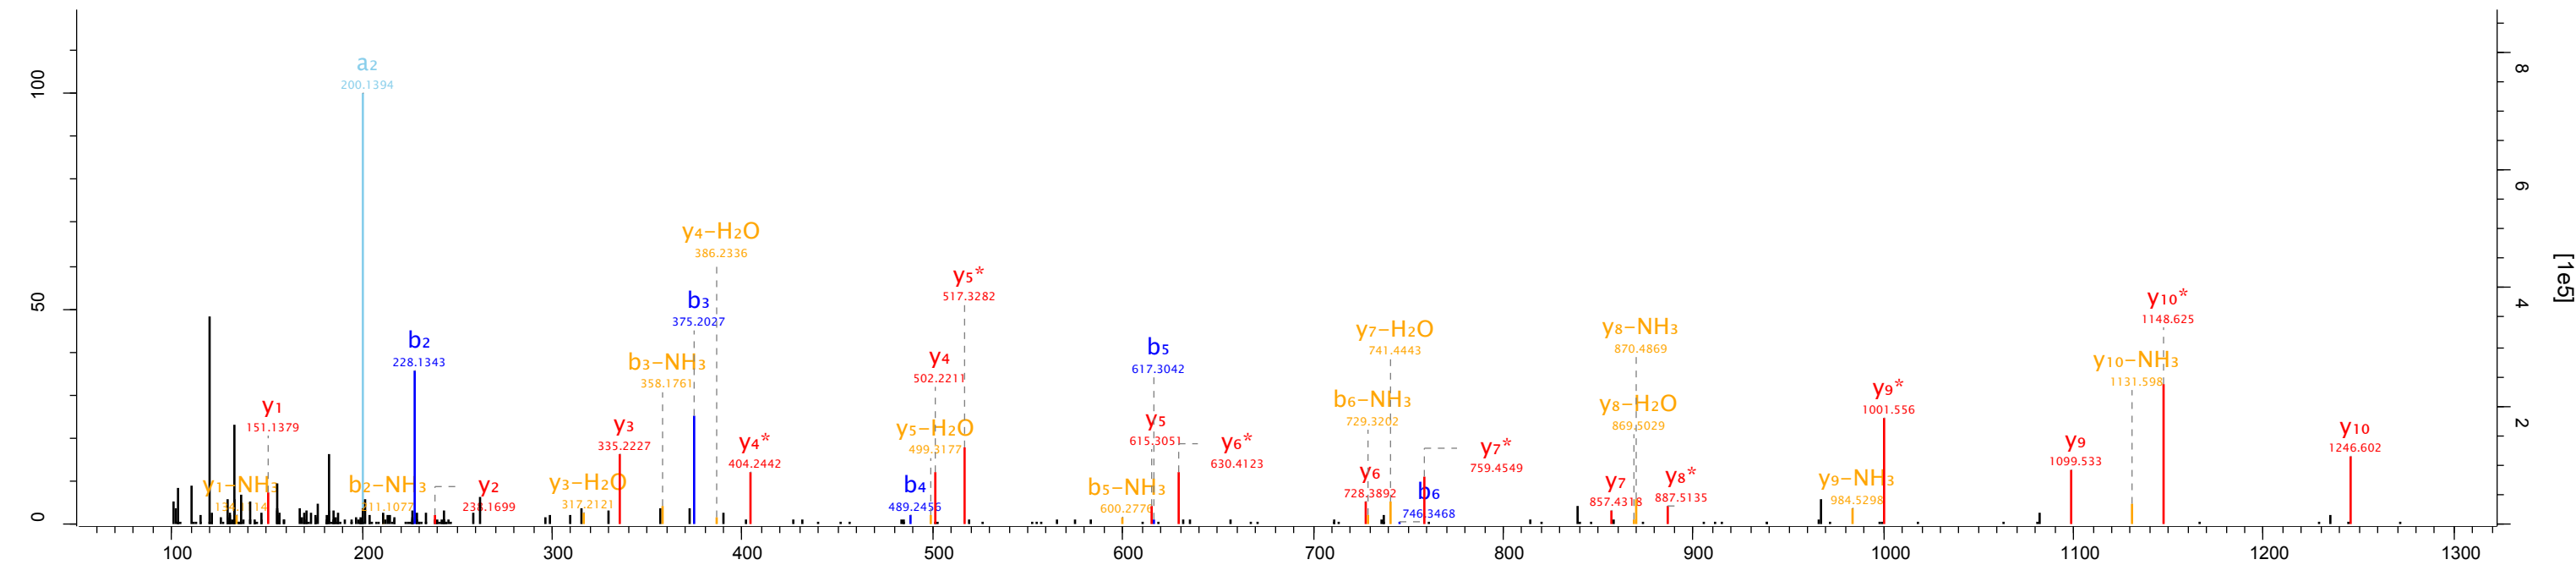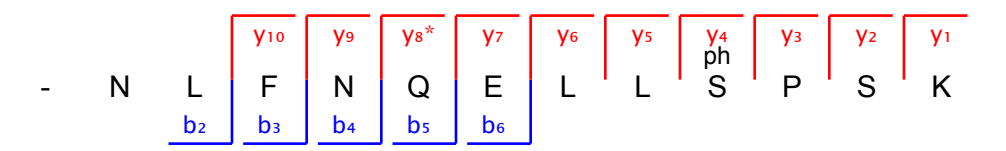

Raw file: 20150814\_A375SR\_Phospho\_BR2\_08  
 Scan: 25945 Method: FTMS; HCD Score: 89.75 m/z: 875.1 Gene names: CLMP

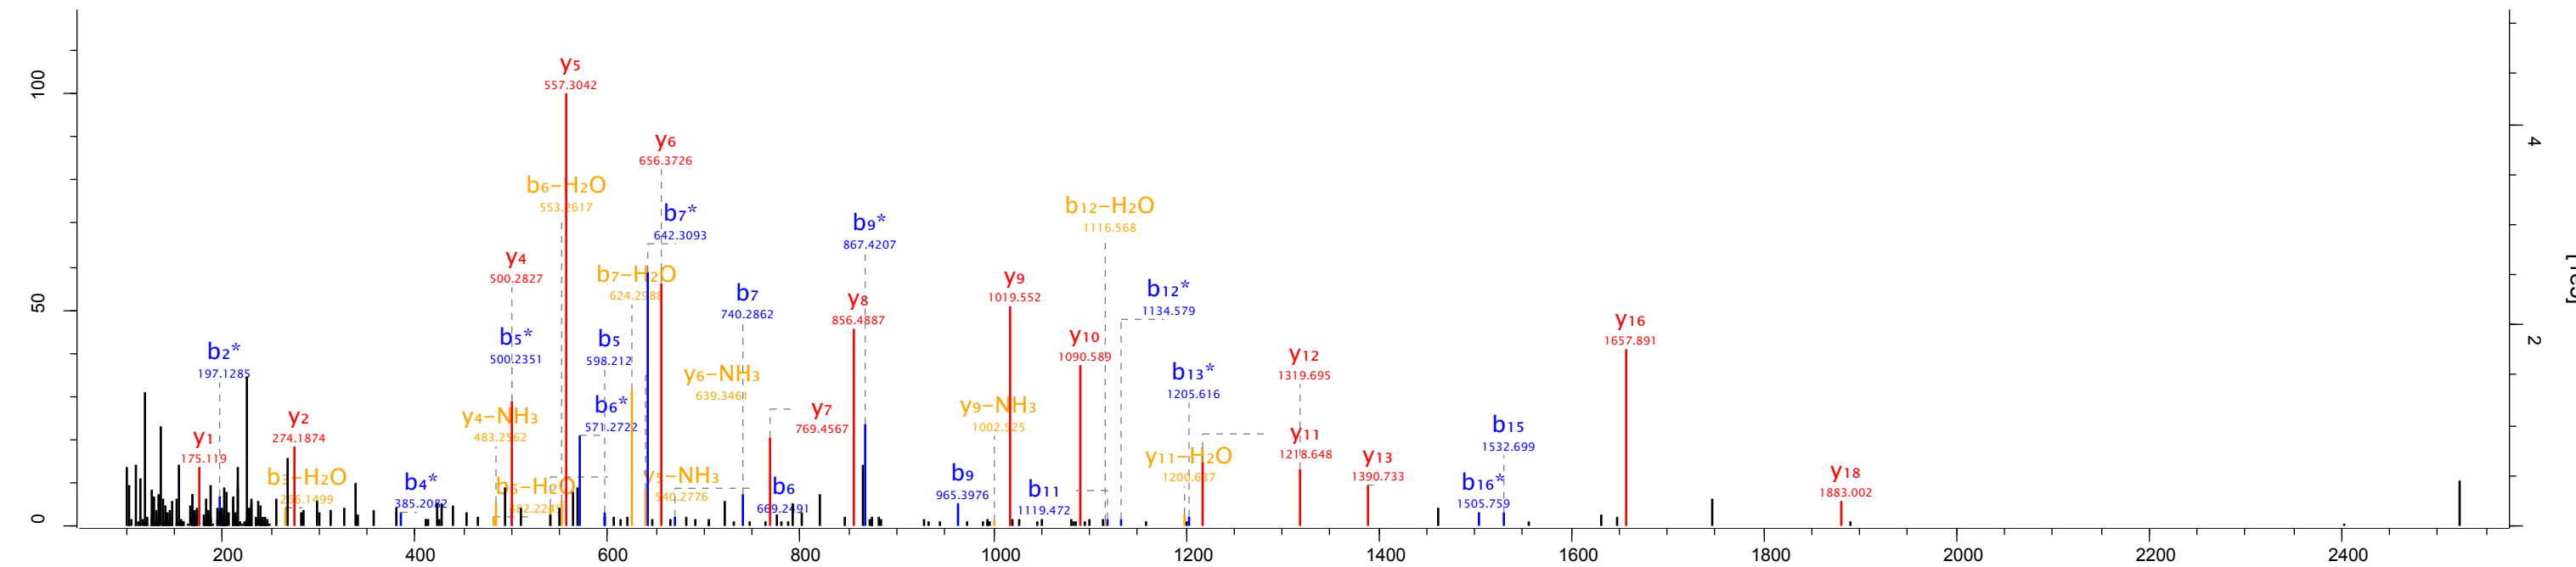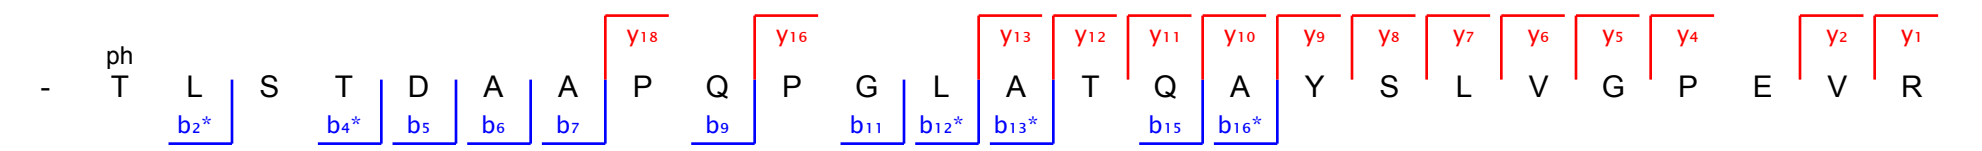



Raw file 20150814\_A375SR\_Phospho\_BR2\_08 Scan 27445 Method FTMS; HCD Score 69.77 m/z 806.73 Gene names DAXX

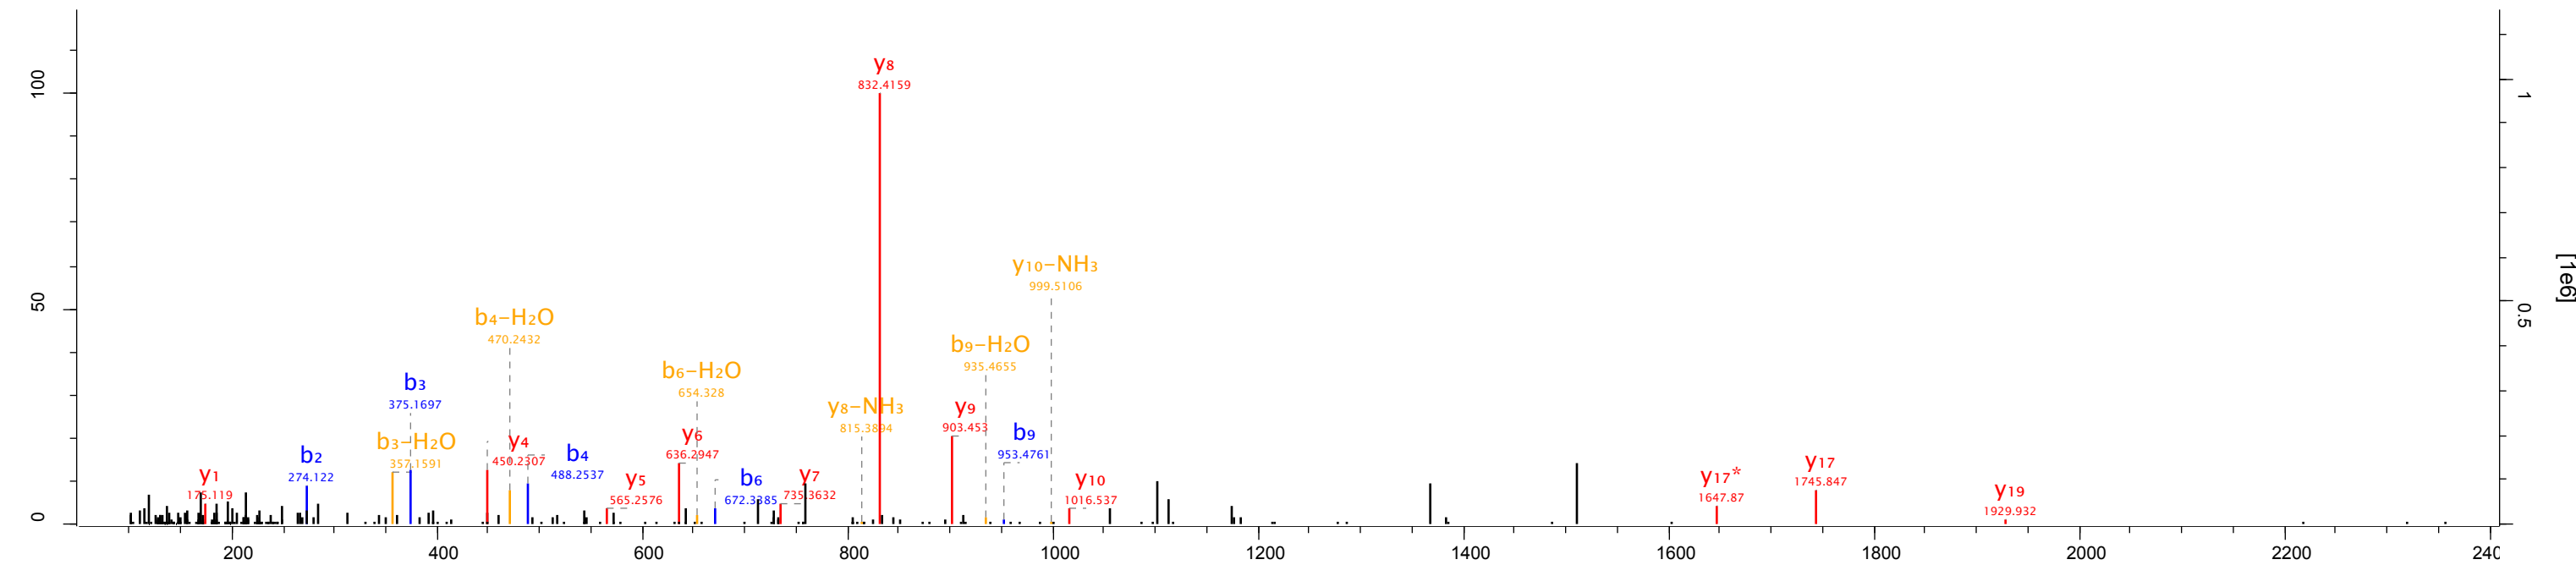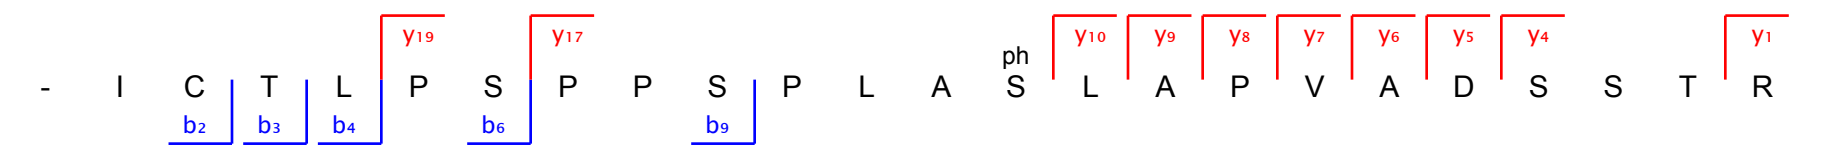

Raw file  
20150814\_A375SR\_Phospho\_BR2\_08

Scan 28465 Method FTMS; HCD Score 75.44 m/z 806.08 Gene names MBD1

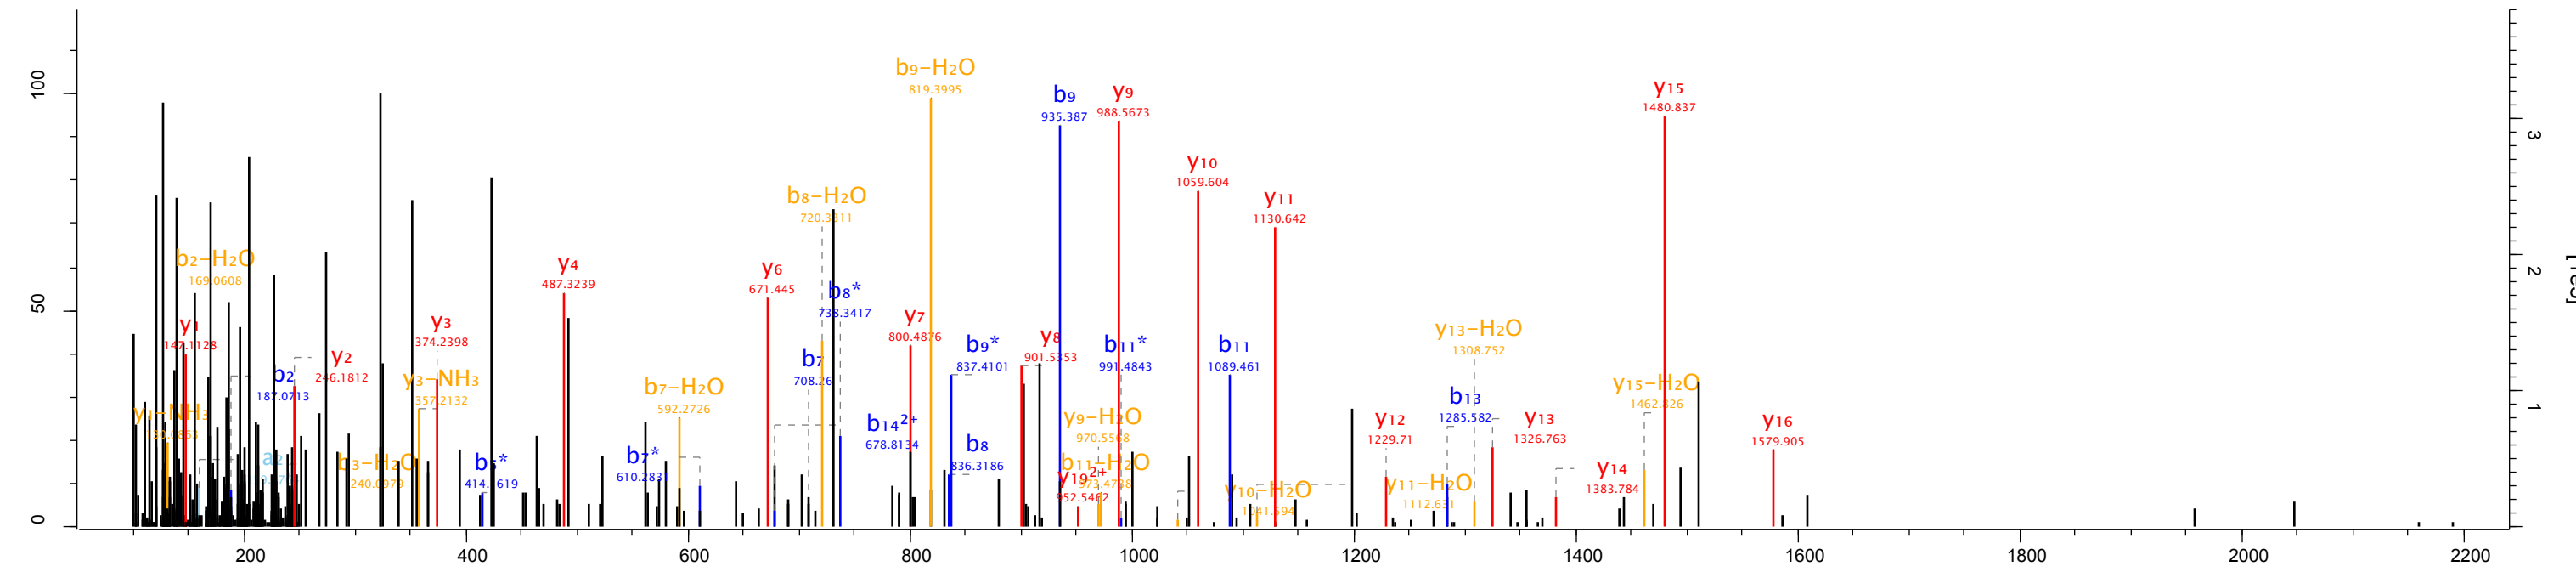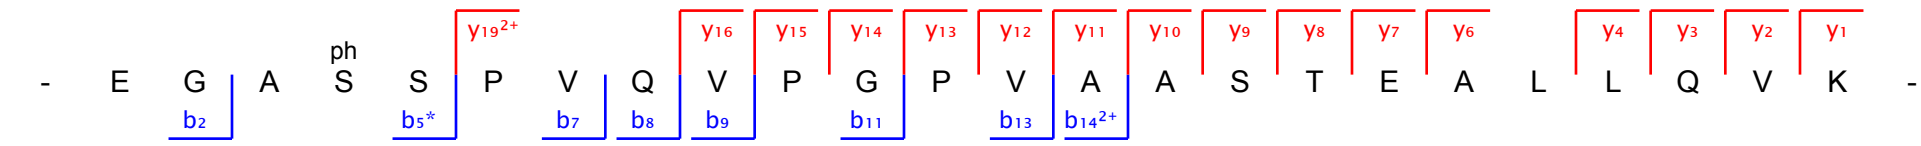

Raw file: 20150814\_A375SR\_Phospho\_BR2\_08  
 Scan: 3015 Method: FTMS; HCD Score: 126.83 m/z: 559.75 Gene names: CAP2

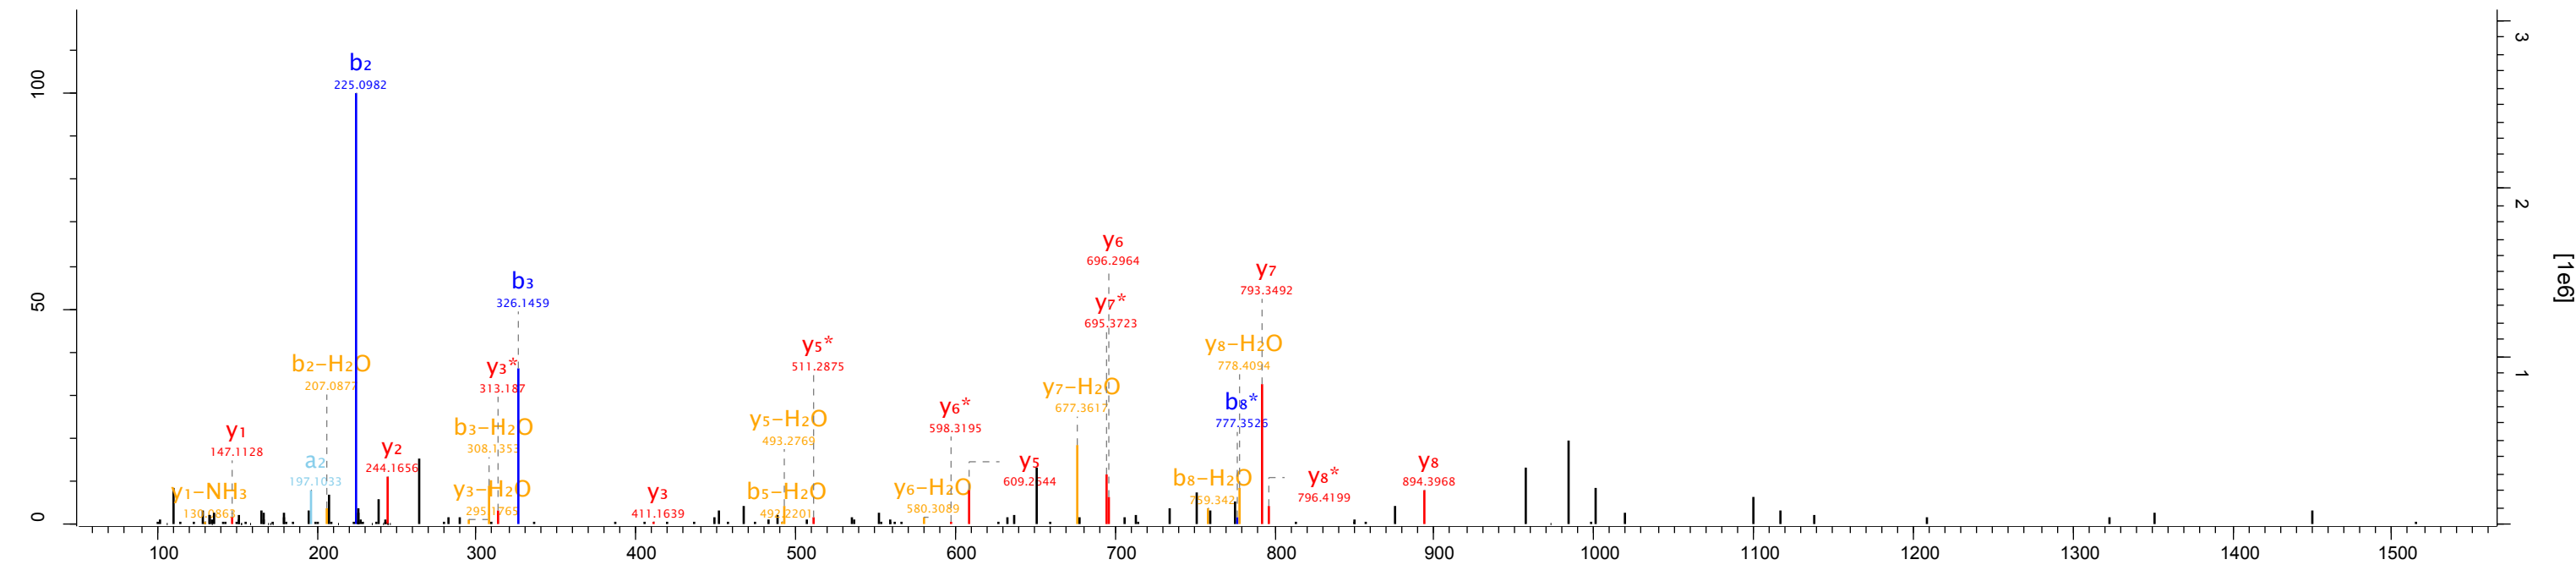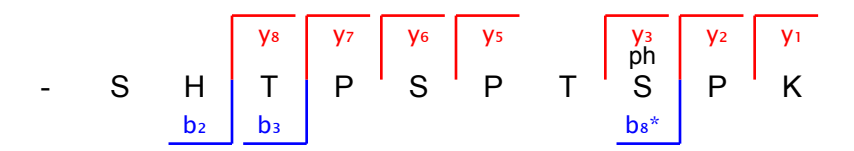



Raw file: 20150814\_A375SR\_Phospho\_BR2\_08  
 Scan: 3485 Method: FTMS; HCD Score: 176.94 m/z: 609.32 Gene names: SRRM1

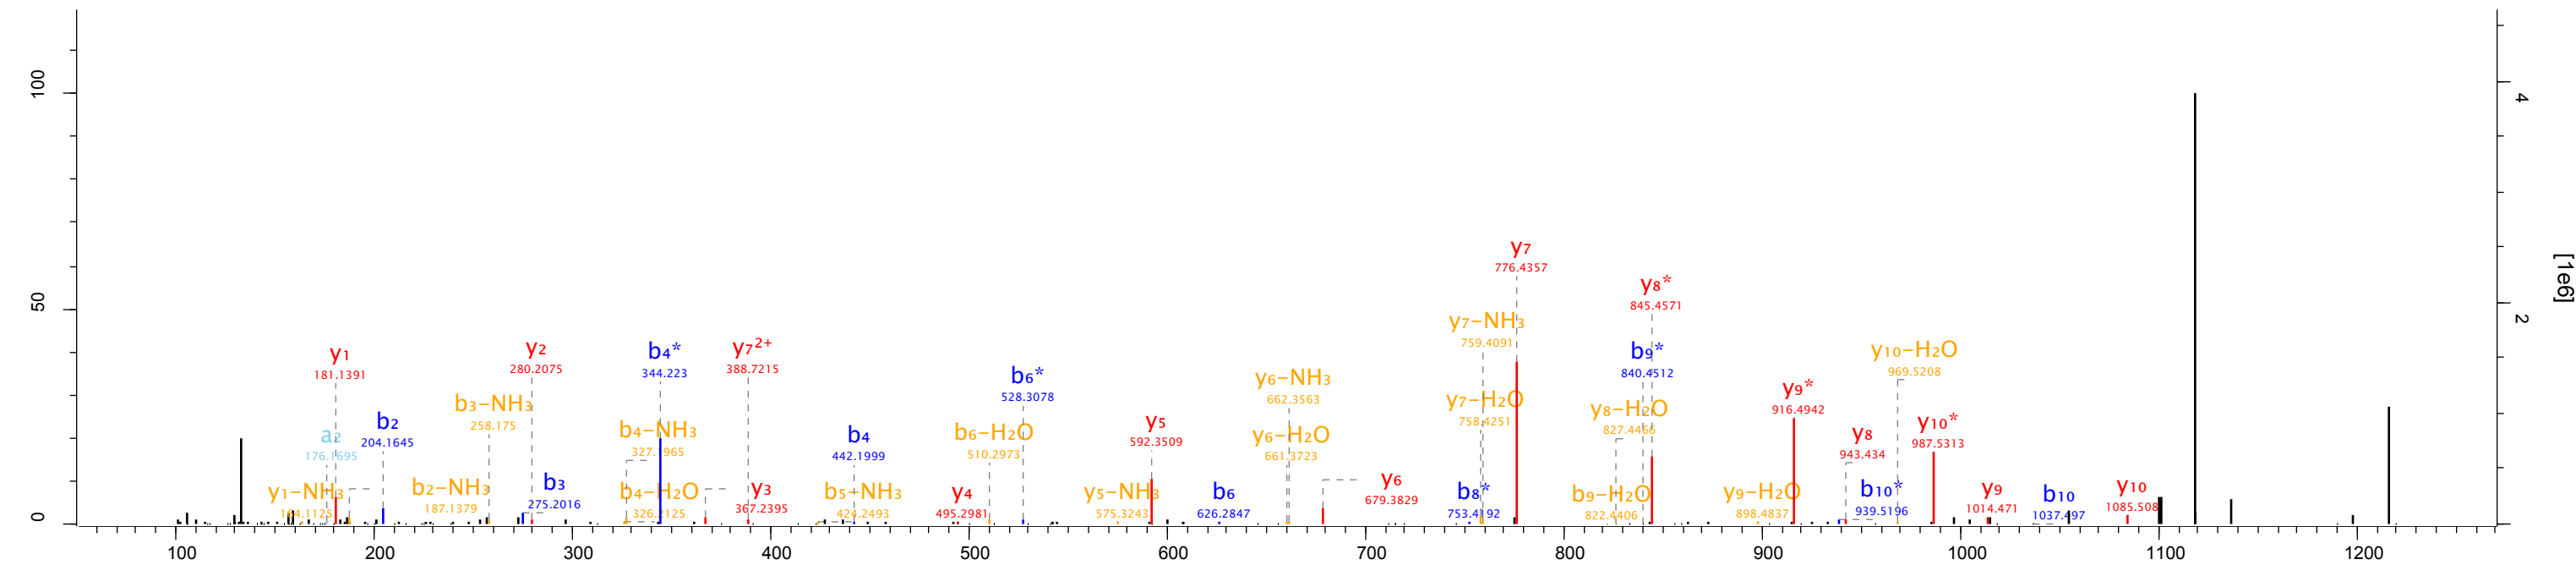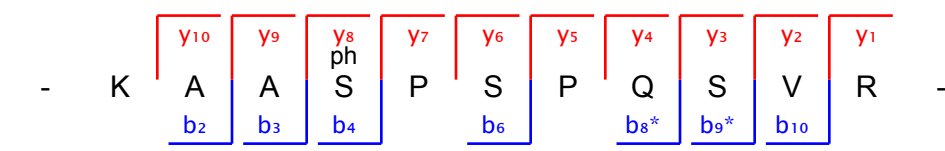

Raw file: 20150814\_A375SR\_Phospho\_BR2\_08  
 Scan: 5345 Method: FTMS; HCD Score: 111.11 m/z: 518.26 Gene names: ELMSAN1

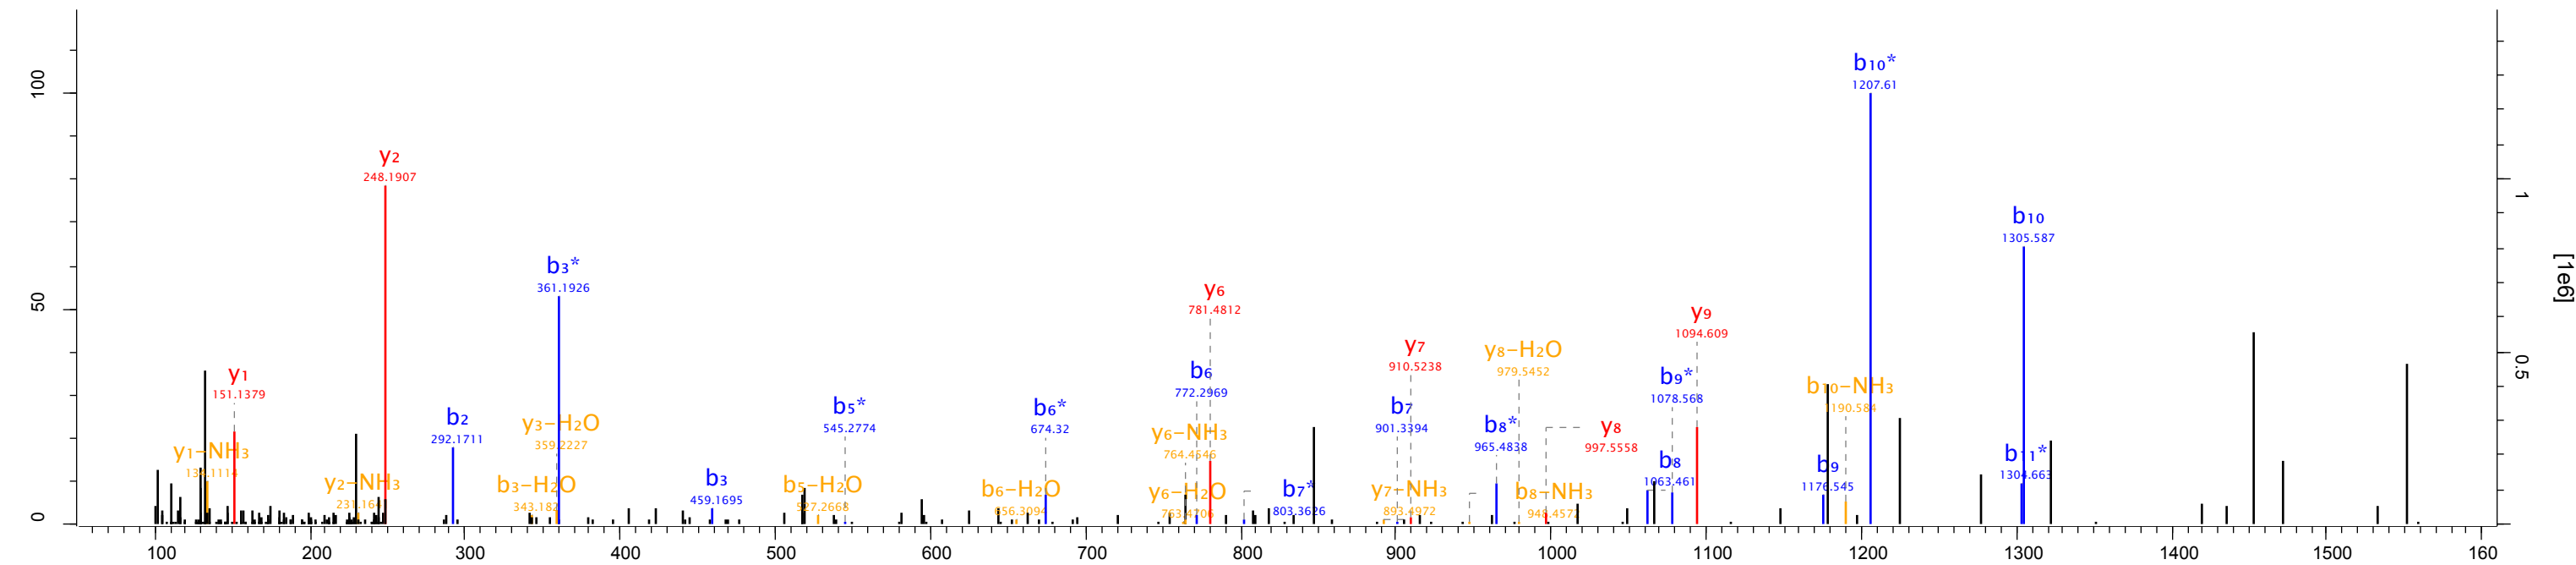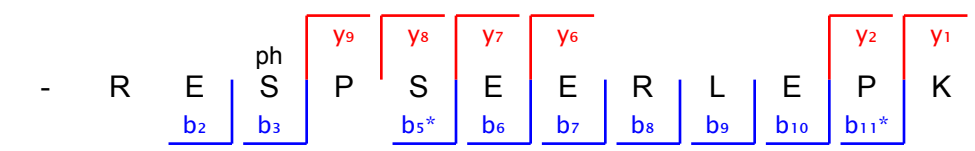

Raw file 20150814\_A375SR\_Phospho\_BR2\_08 Scan 6045 Method FTMS; HCD Score 158.86 m/z 770.39 Gene names NUP93

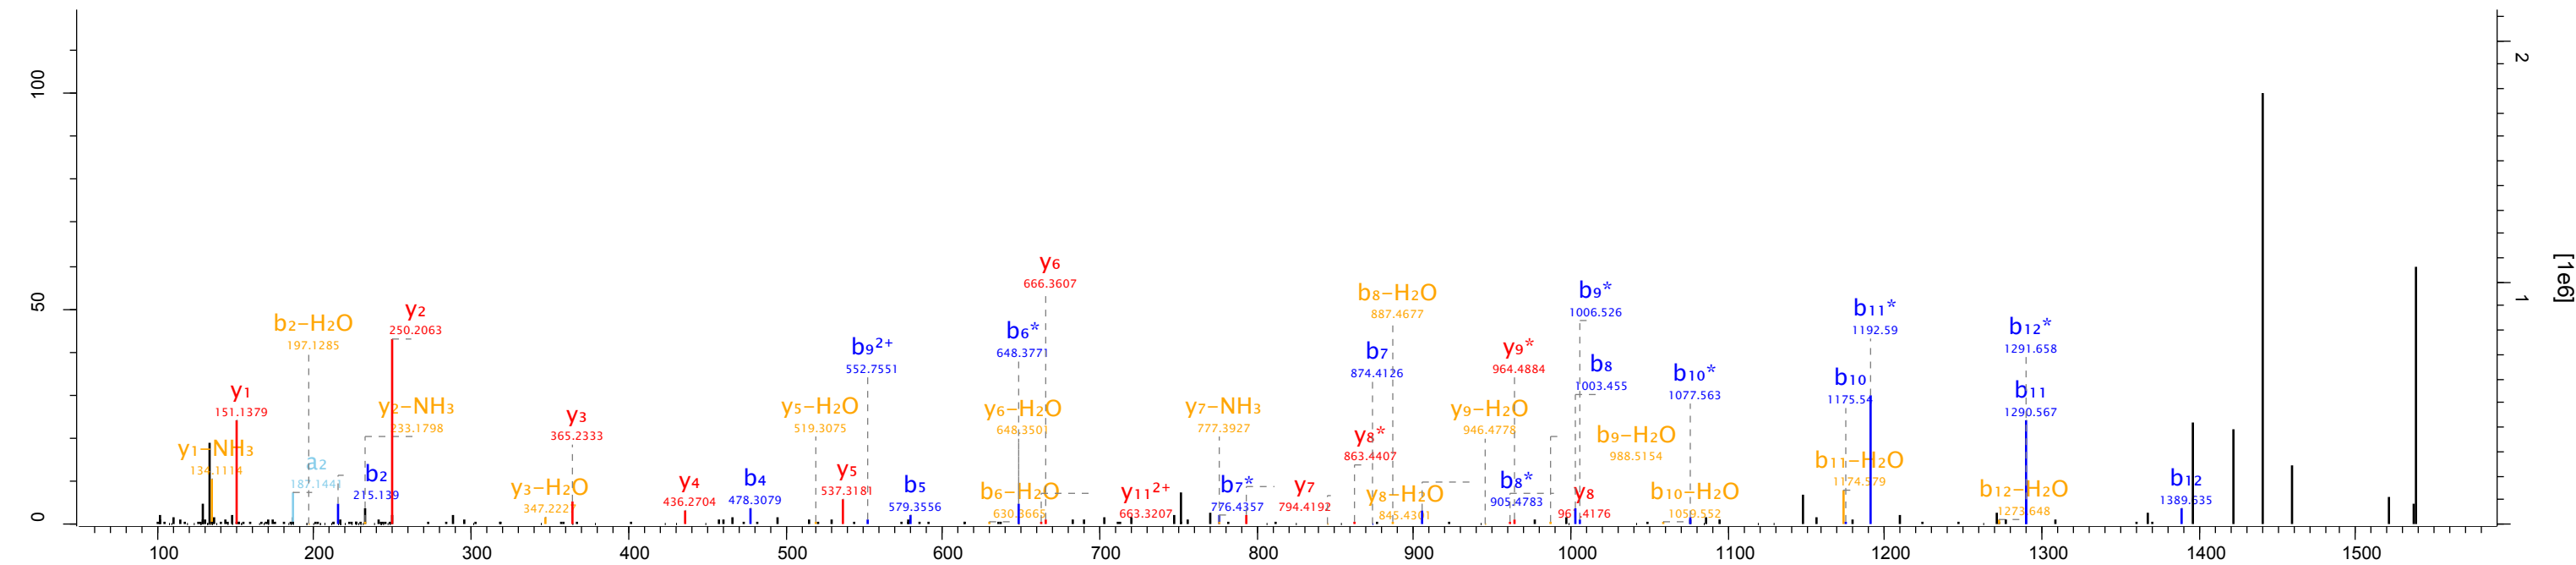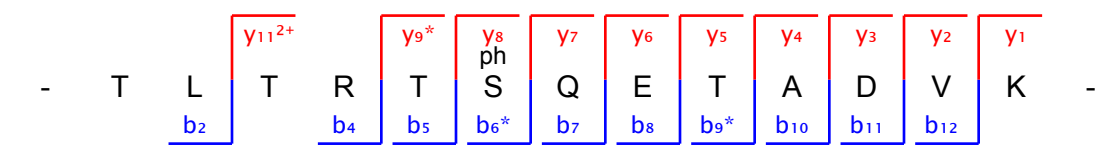

Raw file: 20150814\_A375SR\_Phospho\_BR2\_08  
 Scan: 6195 Method: FTMS; HCD Score: 84.95 m/z: 632.61 Gene names: FOSL1

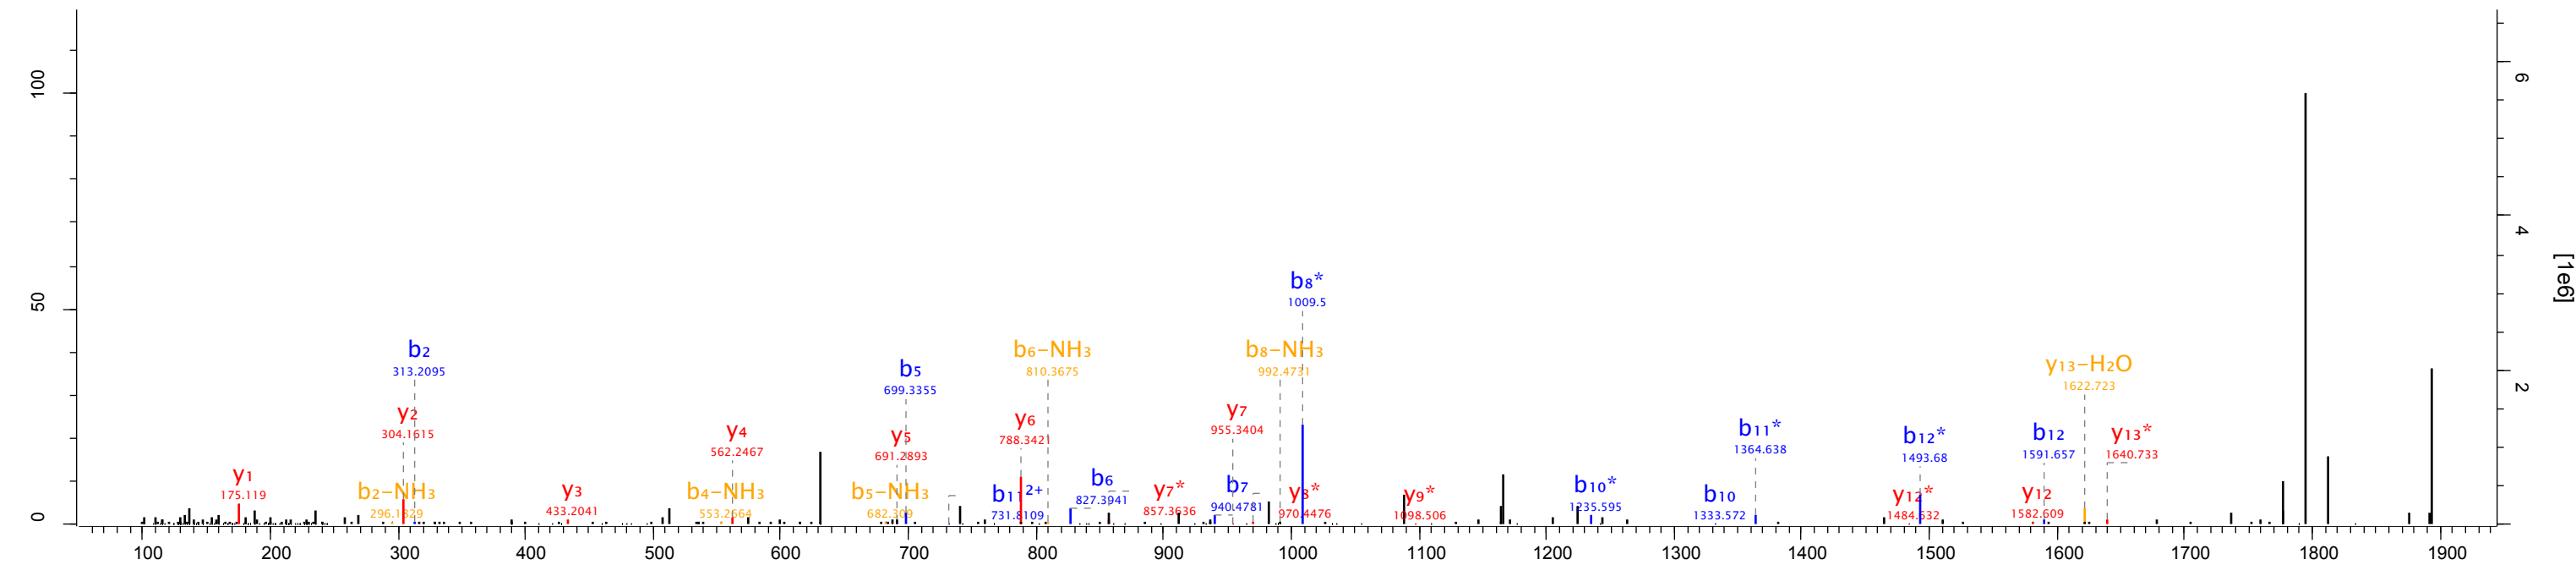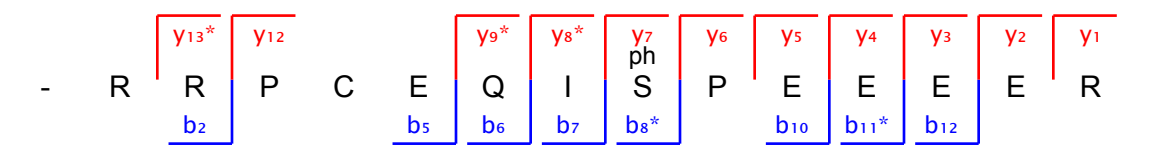

Raw file: 20150814\_A375SR\_Phospho\_BR2\_08  
 Scan: 6205 Method: FTMS; HCD Score: 139.61 m/z: 640.81 Gene names: LARP4

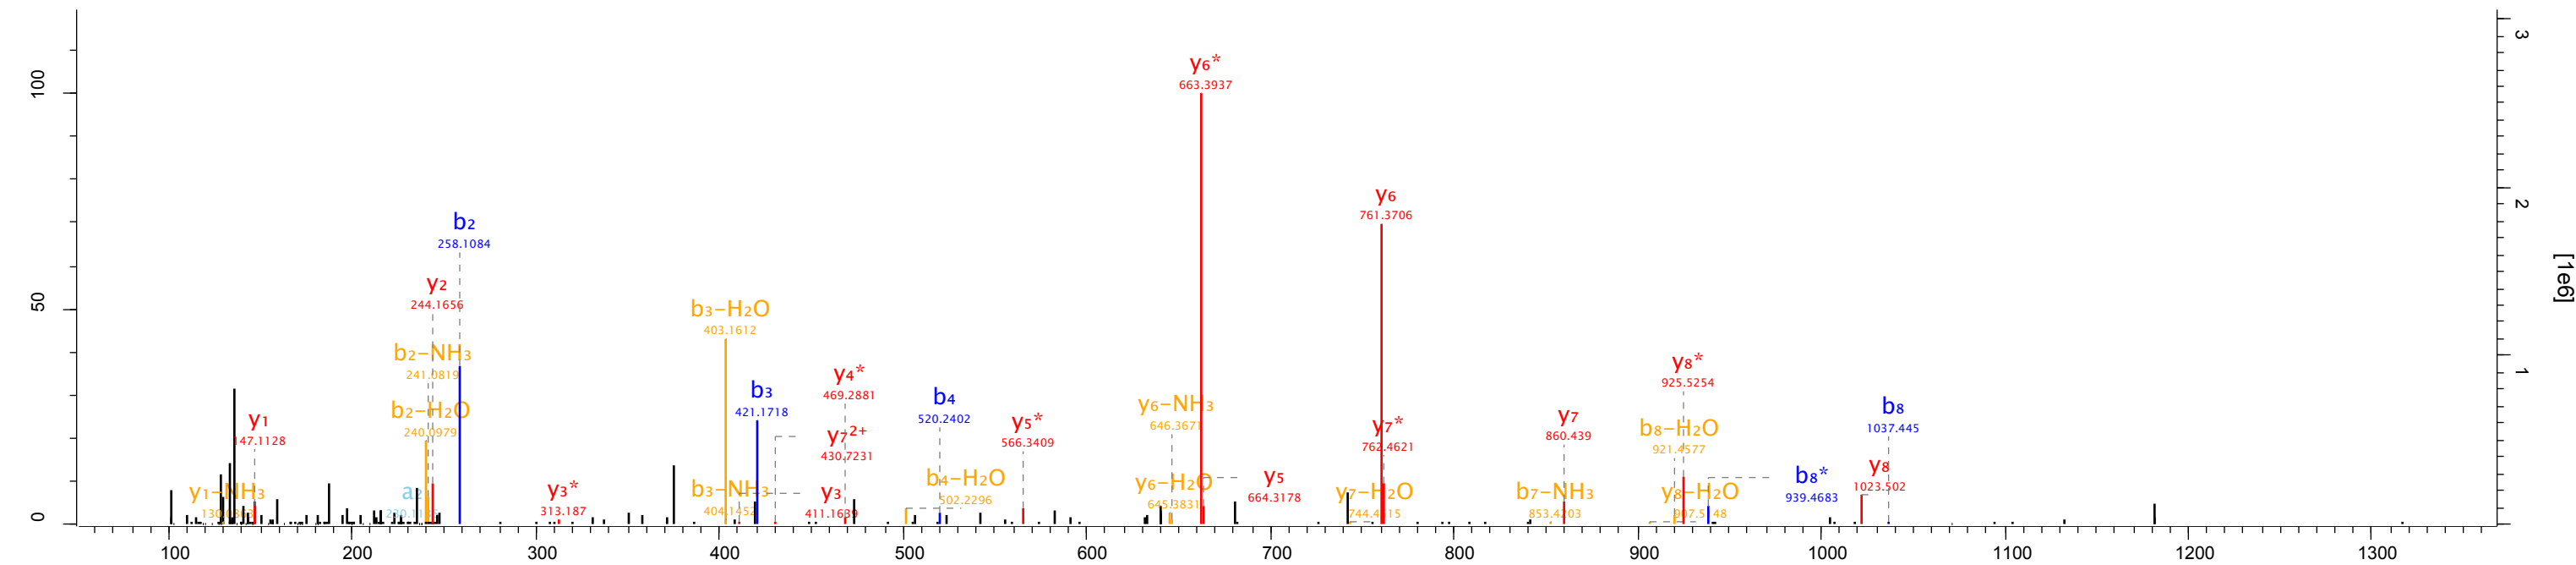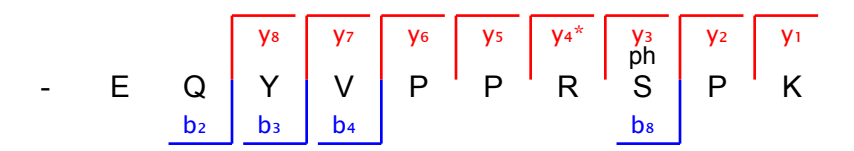

Raw file: 20150814\_A375SR\_Phospho\_BR2\_08  
 Scan: 6715 Method: FTMS; HCD Score: 205.08 m/z: 900.43 Gene names: NUMA1

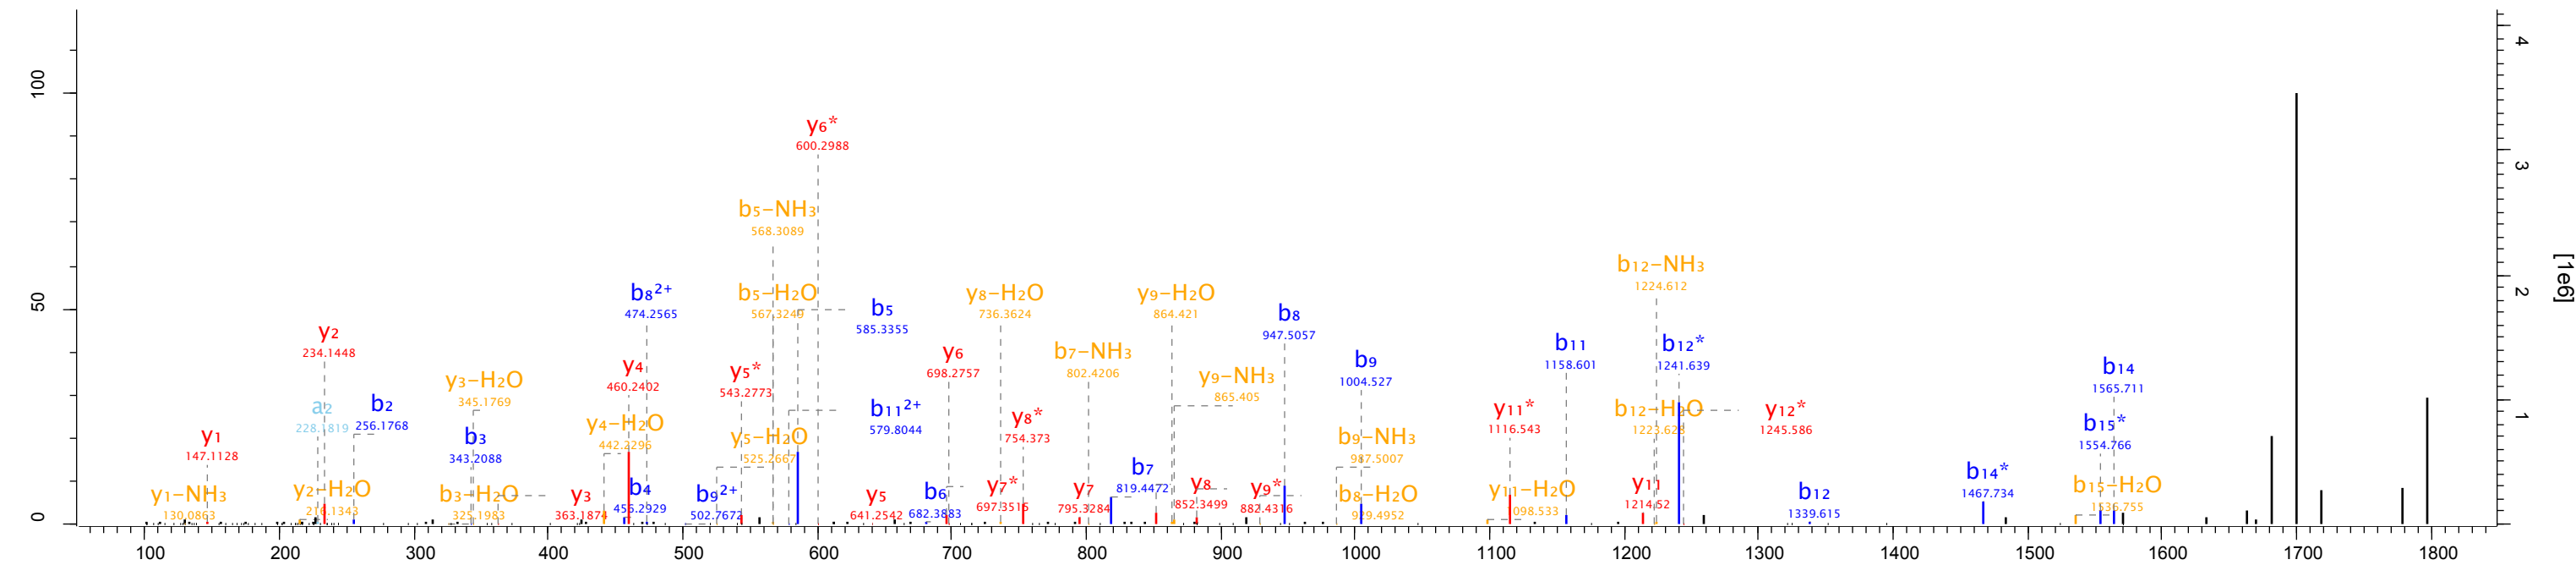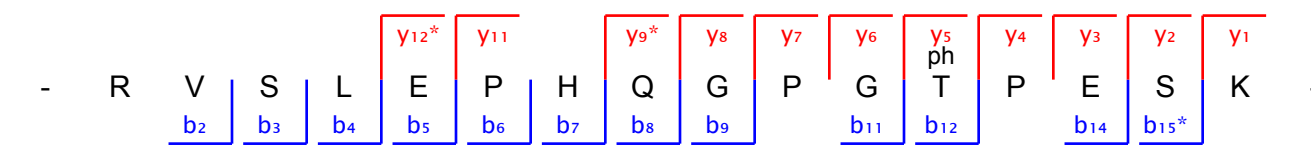

Raw file: 20150814\_A375SR\_Phospho\_BR2\_08  
 Scan: 7765 Method: FTMS; HCD Score: 138.65 m/z: 469.23 Gene names: PEAK1

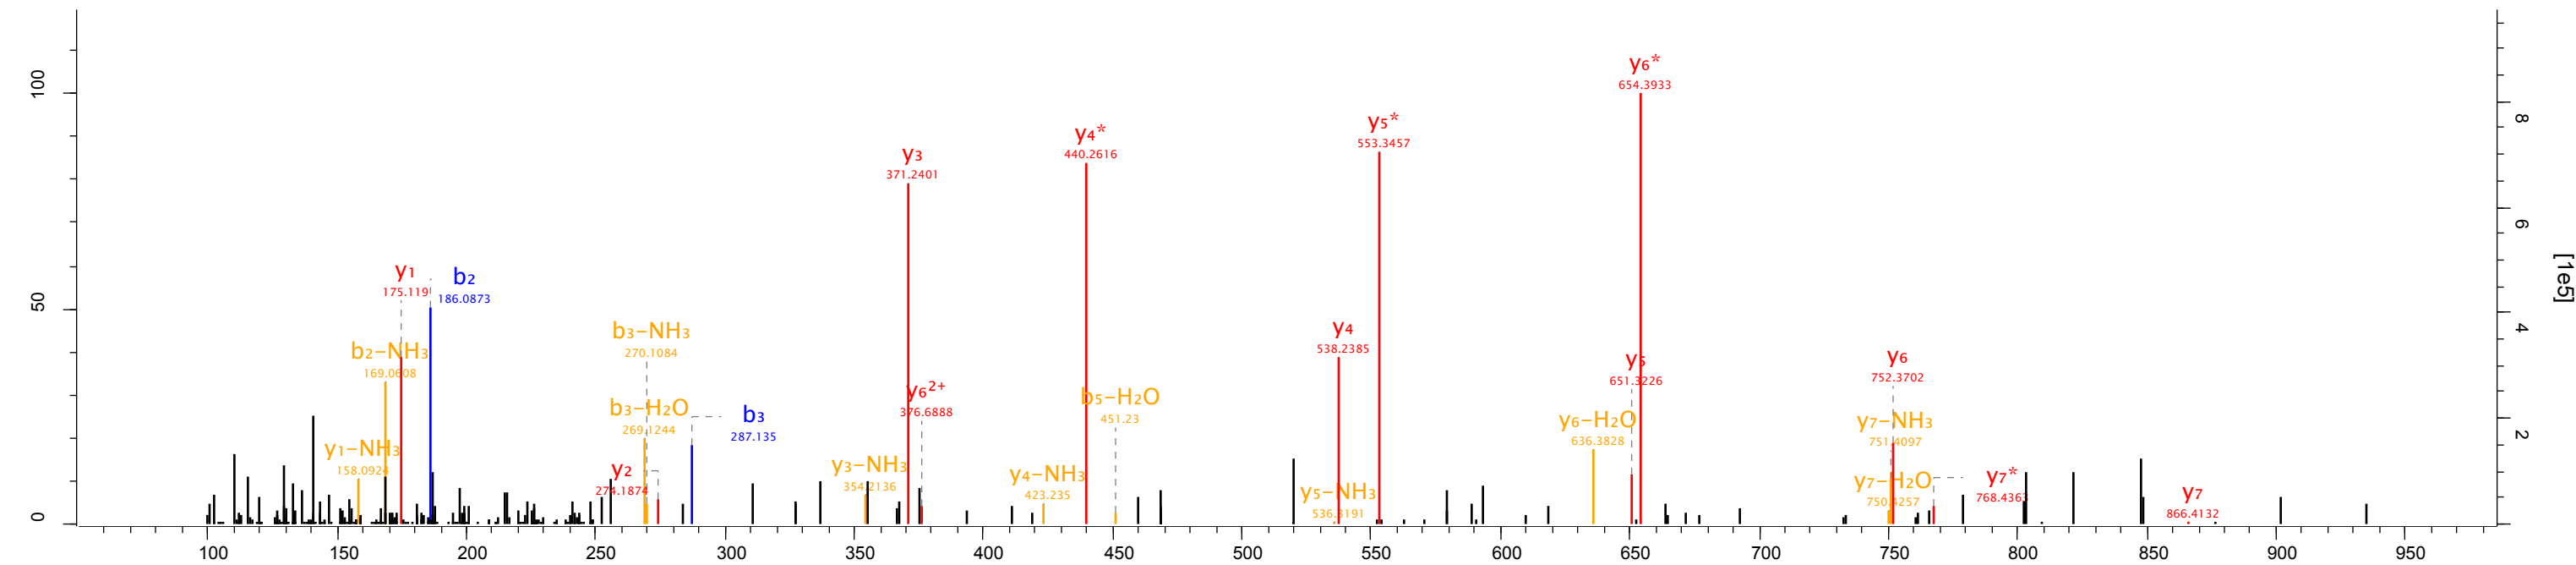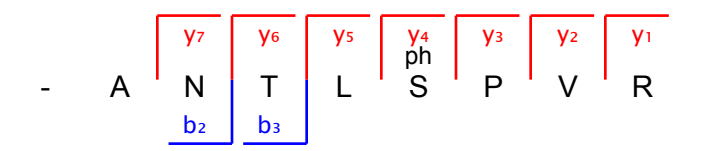

Raw file: 20150814\_A375SR\_Phospho\_BR2\_08  
 Scan: 8215 Method: FTMS; HCD Score: 199.37 m/z: 705.81 Gene names: USP1

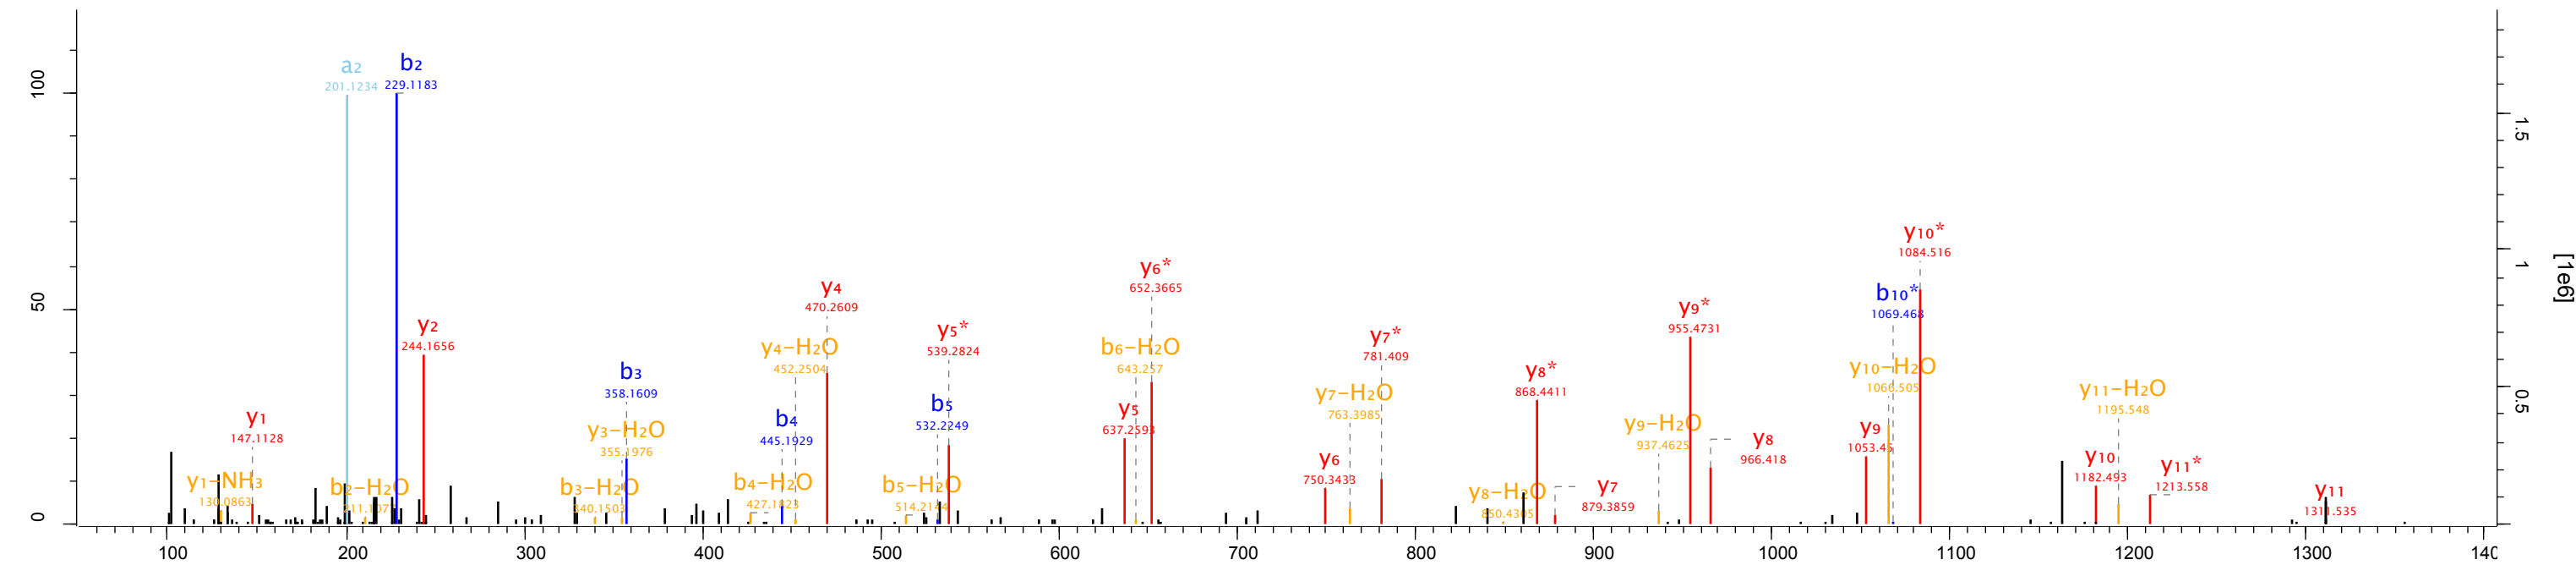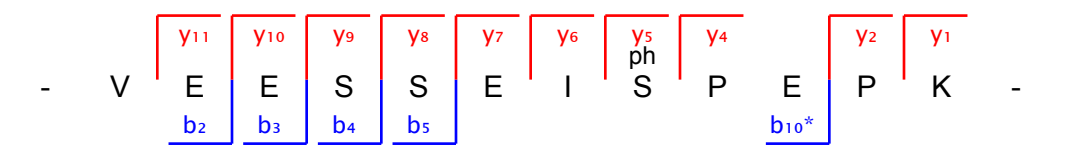



Raw file: 20150814\_A375SR\_Phospho\_BR2\_08  
 Scan: 8325 Method: FTMS; HCD Score: 54.9 m/z: 518.6 Gene names: ADD1

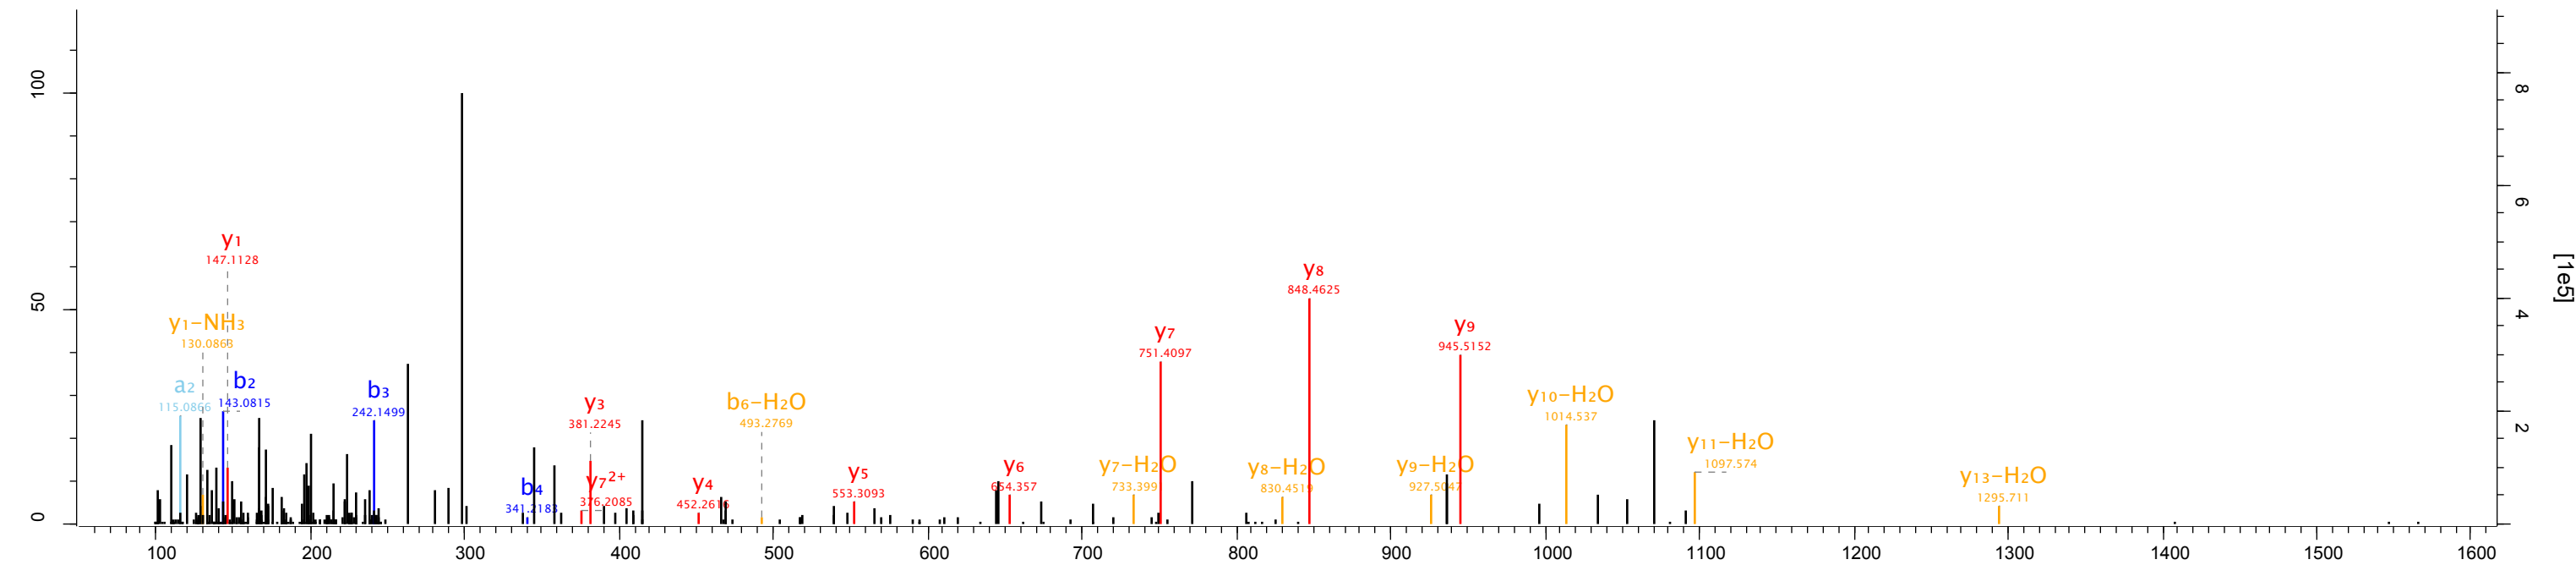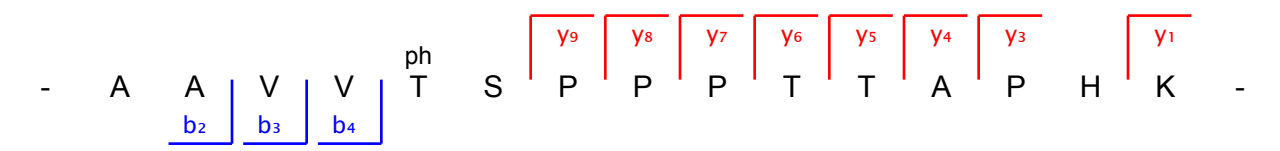

Raw file 20150814\_A375SR\_Phospho\_BR2\_08 Scan 8445 Method FTMS; HCD Score 50.87 m/z 429.22 Gene names DCAF10

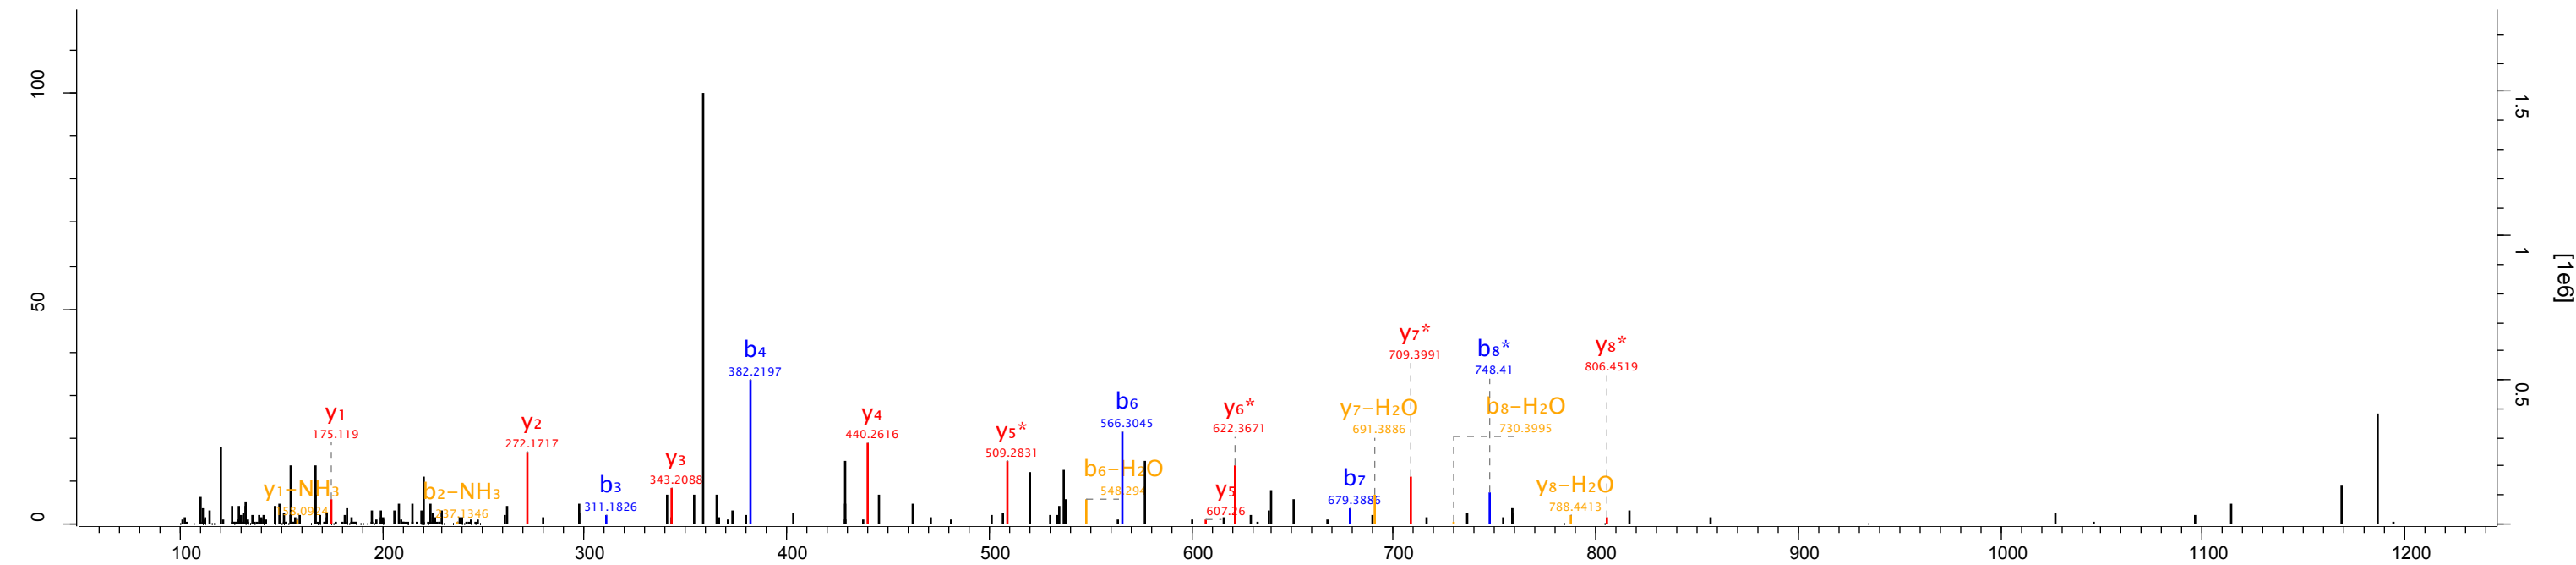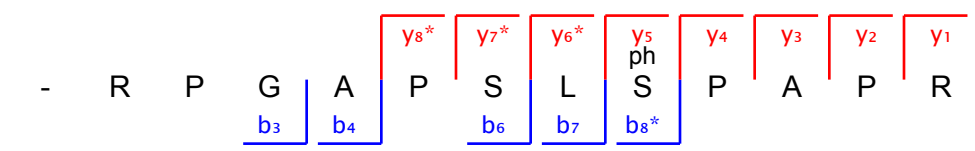

Raw file 20150814\_A375SR\_Phospho\_BR2\_08 Scan 9125 Method FTMS; HCD Score 171.29 m/z 778.9 Gene names CAP1

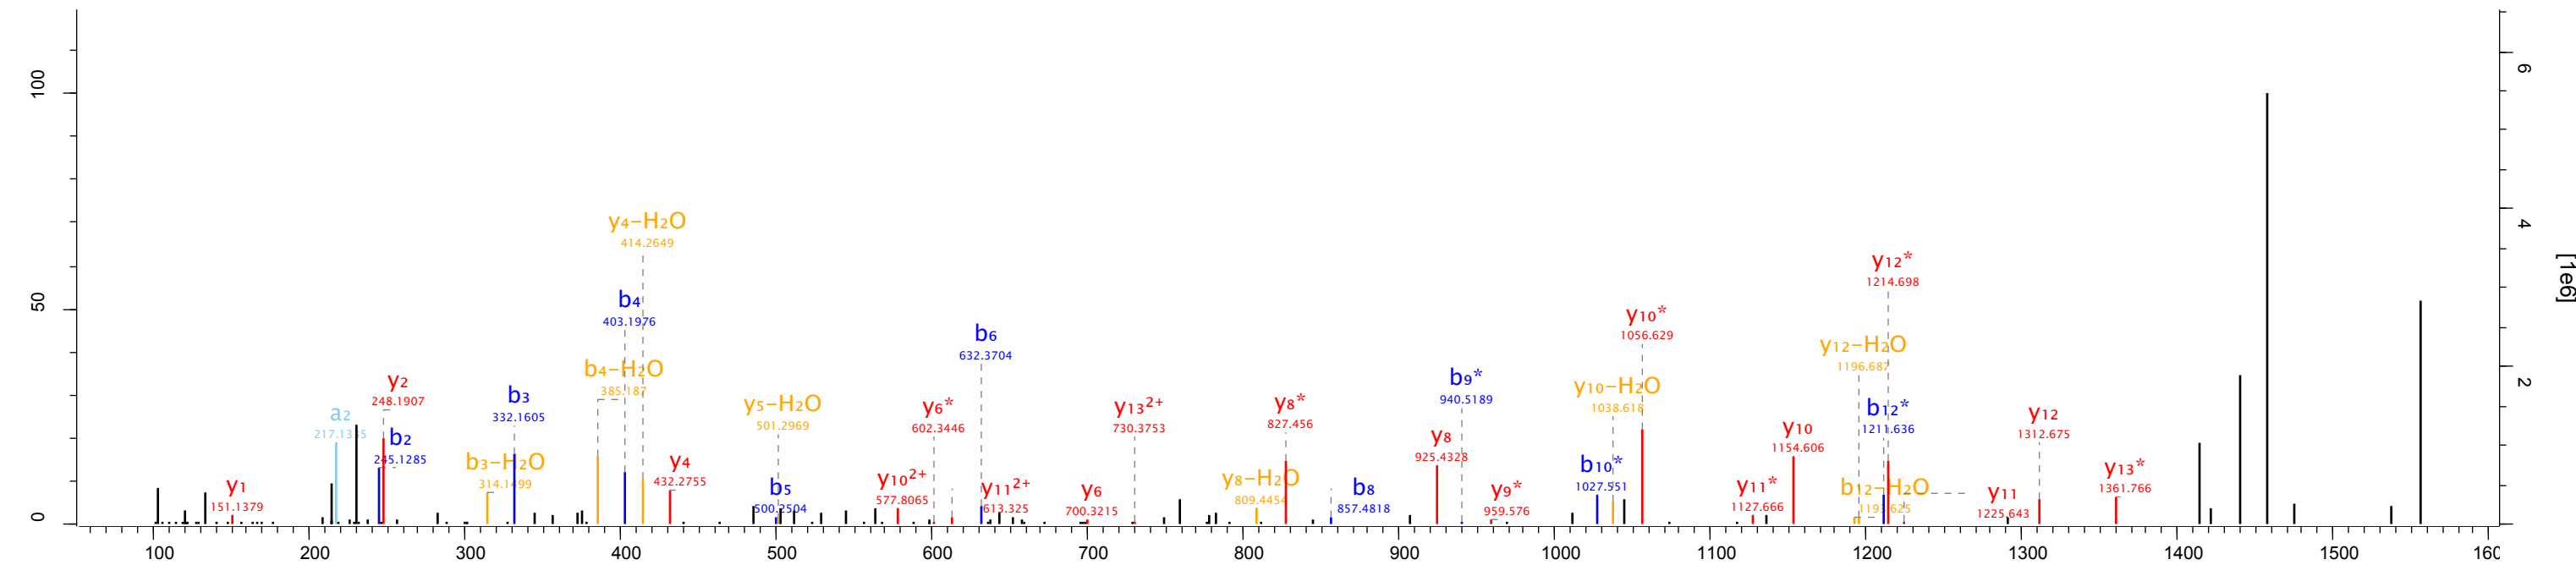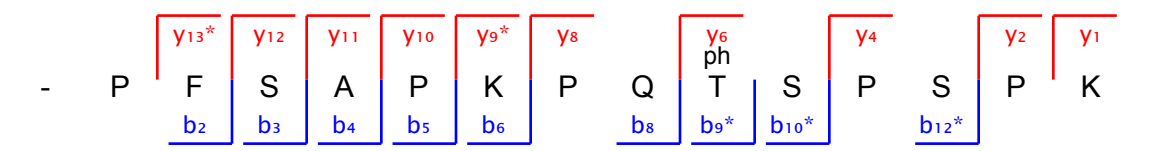

Raw file 20150814\_A375SR\_Phospho\_BR2\_09 Scan 10445 Method FTMS; HCD Score 136.81 m/z 632.8 Gene names CDCA3

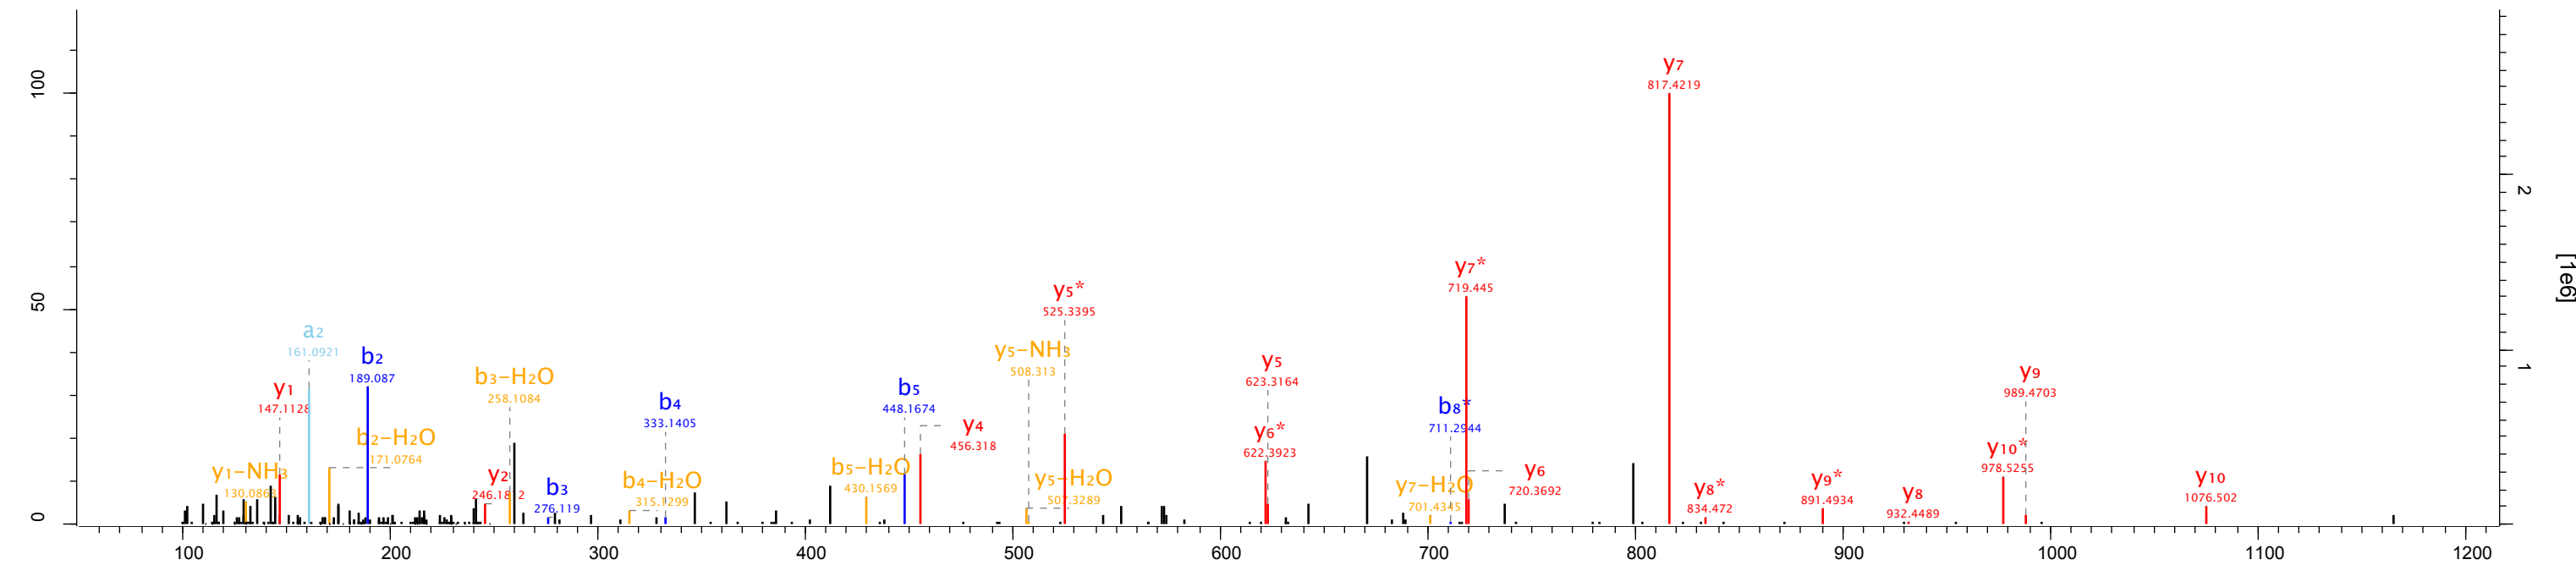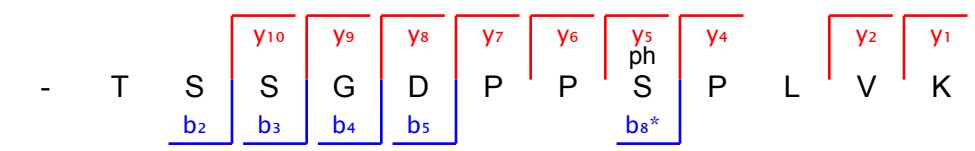



Raw file 20150814\_A375SR\_Phospho\_BR2\_09 Scan 13085 Method FTMS; HCD Score 102.89 m/z 569.94 Gene names FRMD6

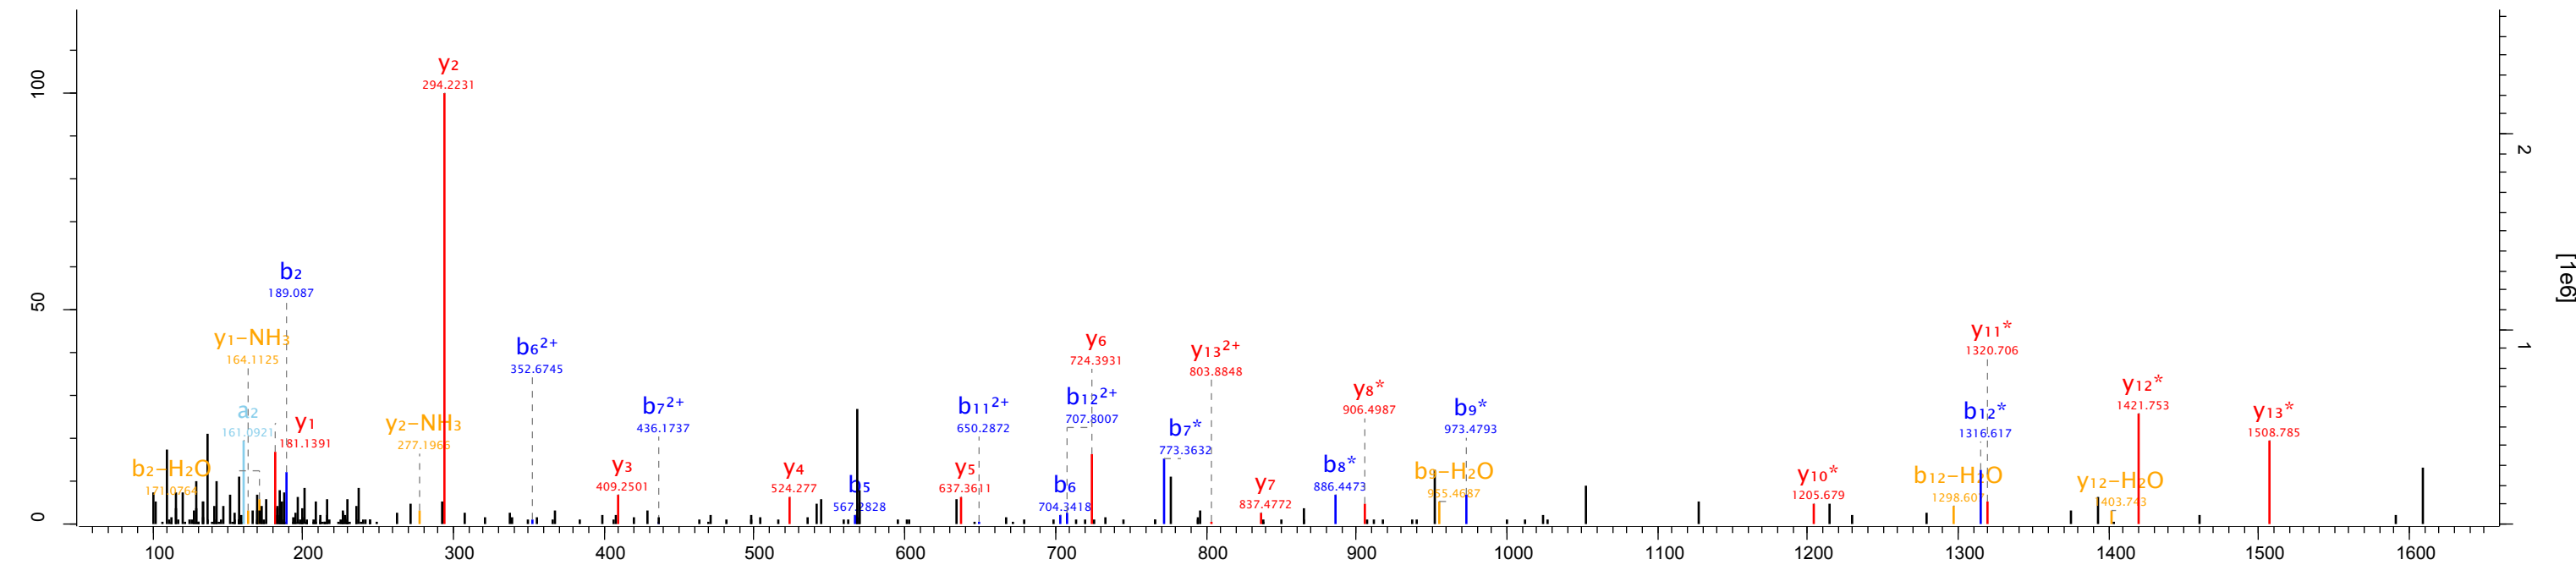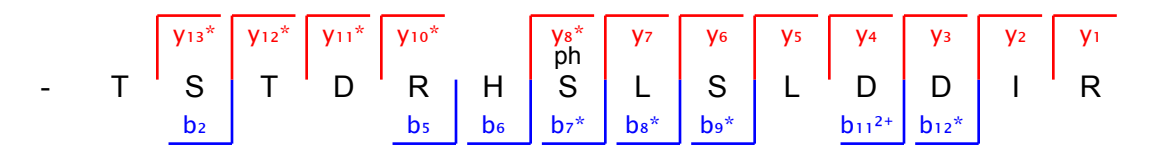

Raw file: 20150814\_A375SR\_Phospho\_BR2\_09  
 Scan: 14065 Method: FTMS; HCD Score: 112.44 m/z: 568.79 Gene names: SLC20A1

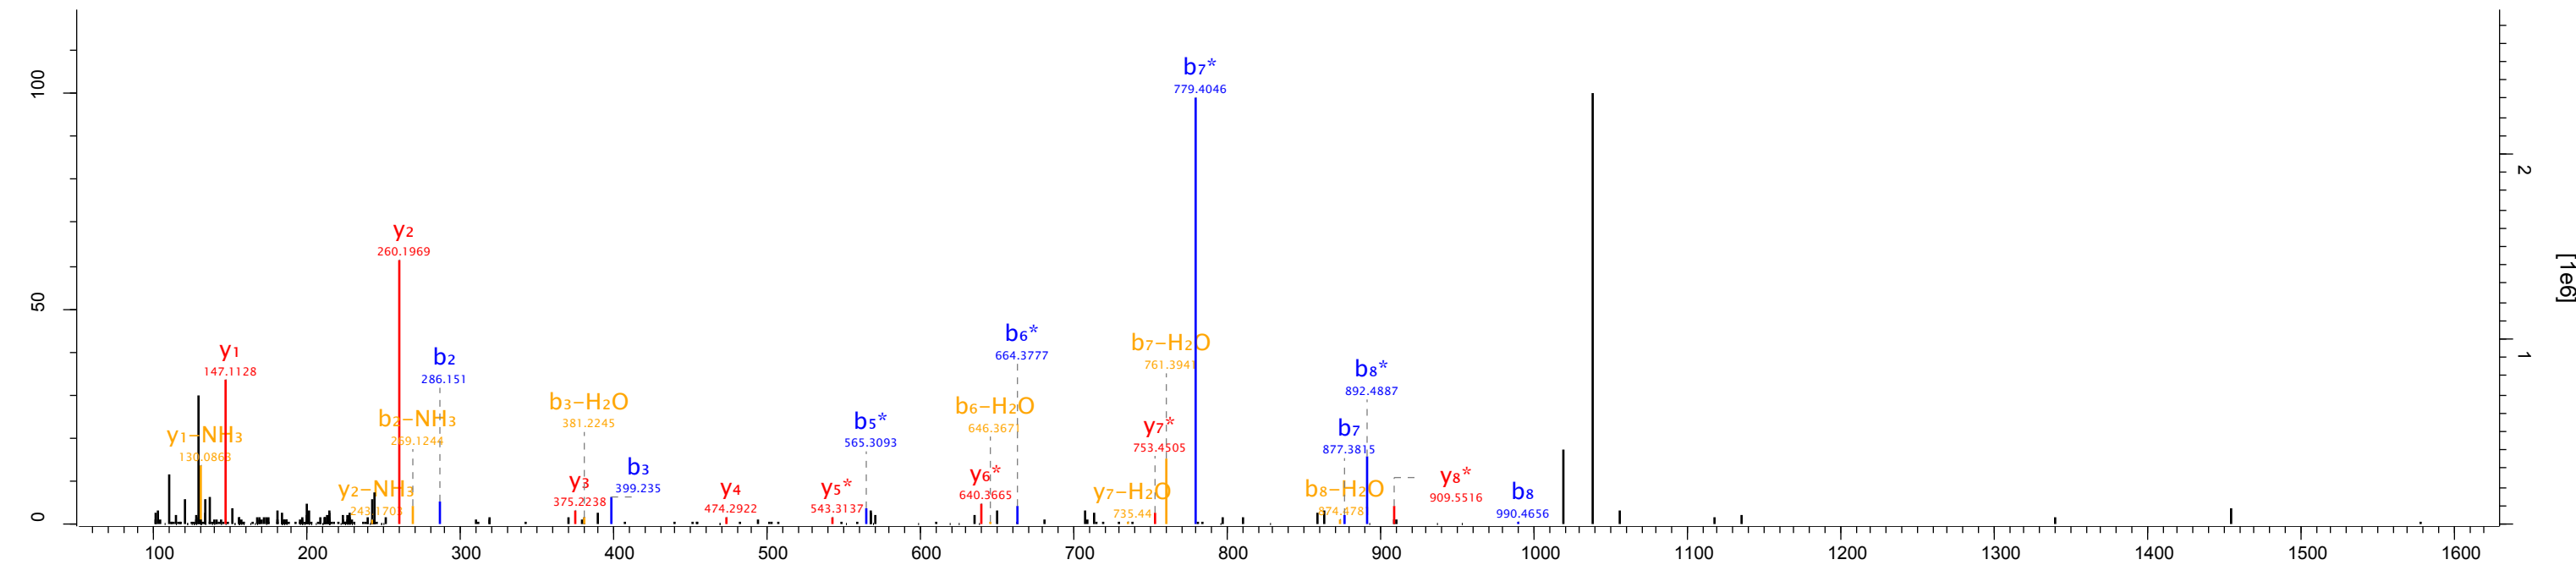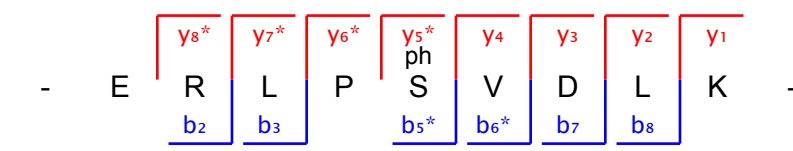

Raw file: 20150814\_A375SR\_Phospho\_BR2\_09  
 Scan: 16765 Method: FTMS; HCD Score: 134.98 m/z: 1007.1 Gene names: BRD2

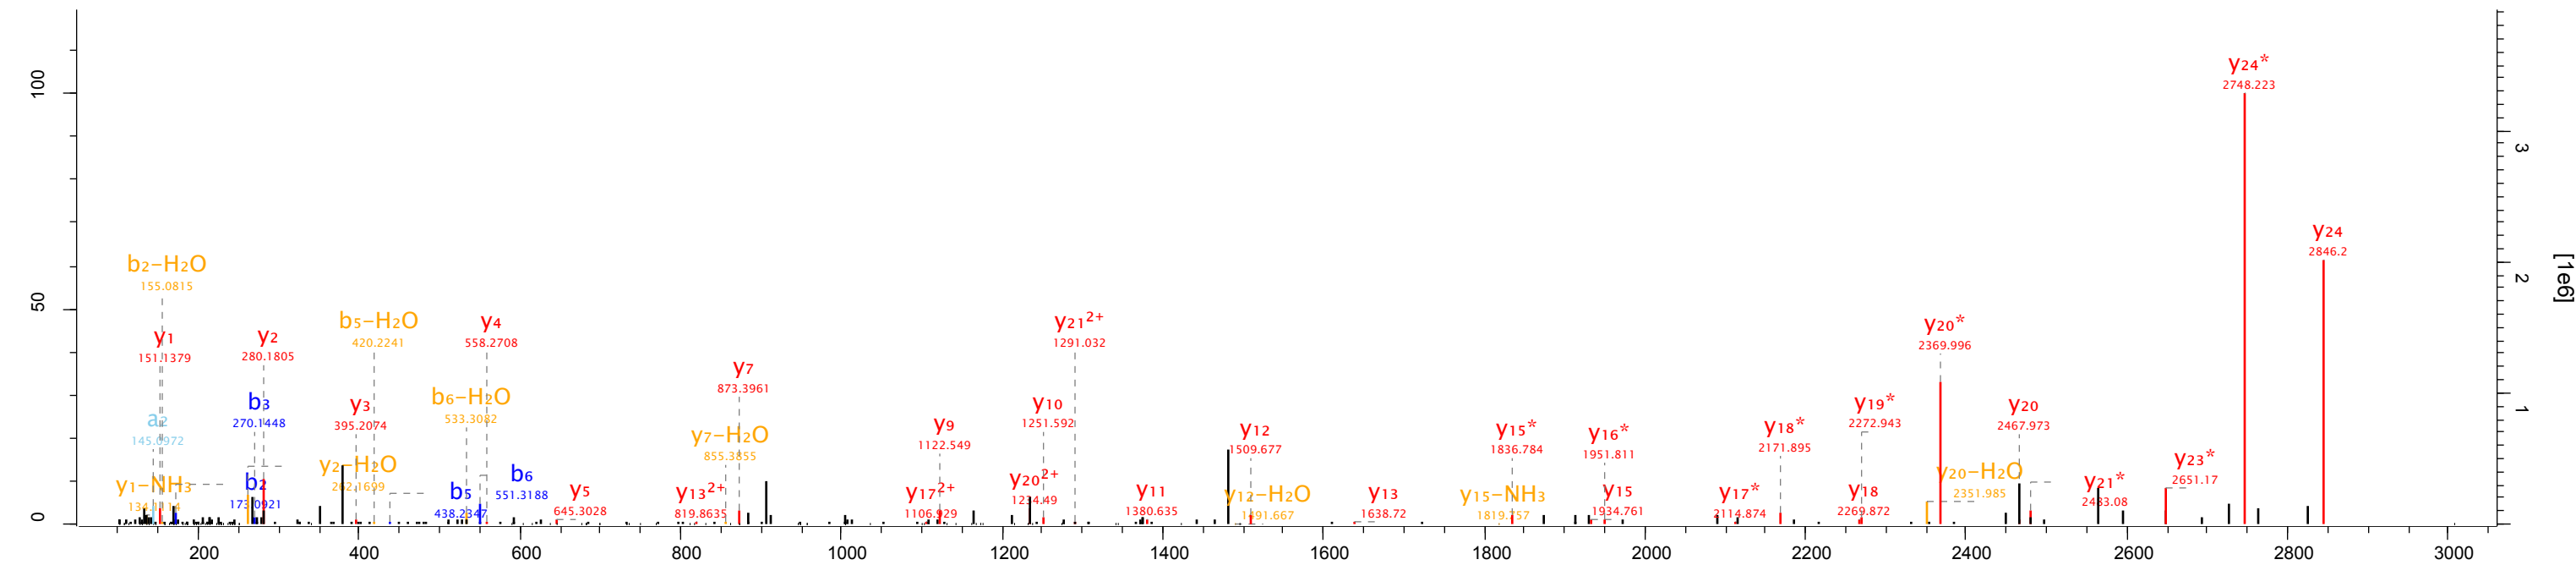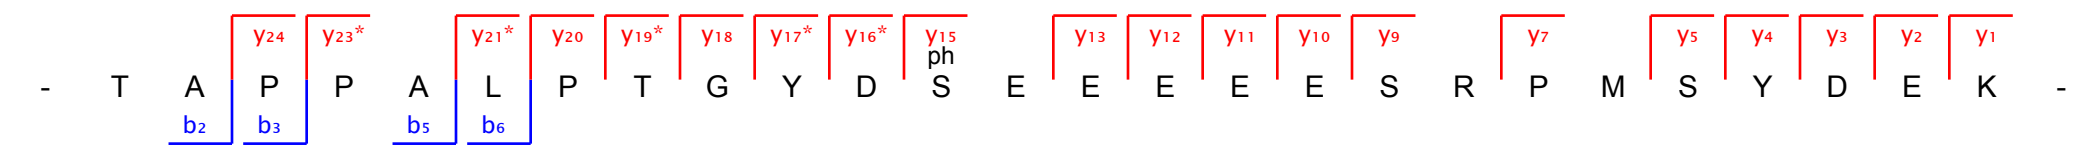



Raw file 20150814\_A375SR\_Phospho\_BR2\_09 Scan 16835 Method FTMS; HCD Score 138.15 m/z 764.4 Gene names SAMHD1

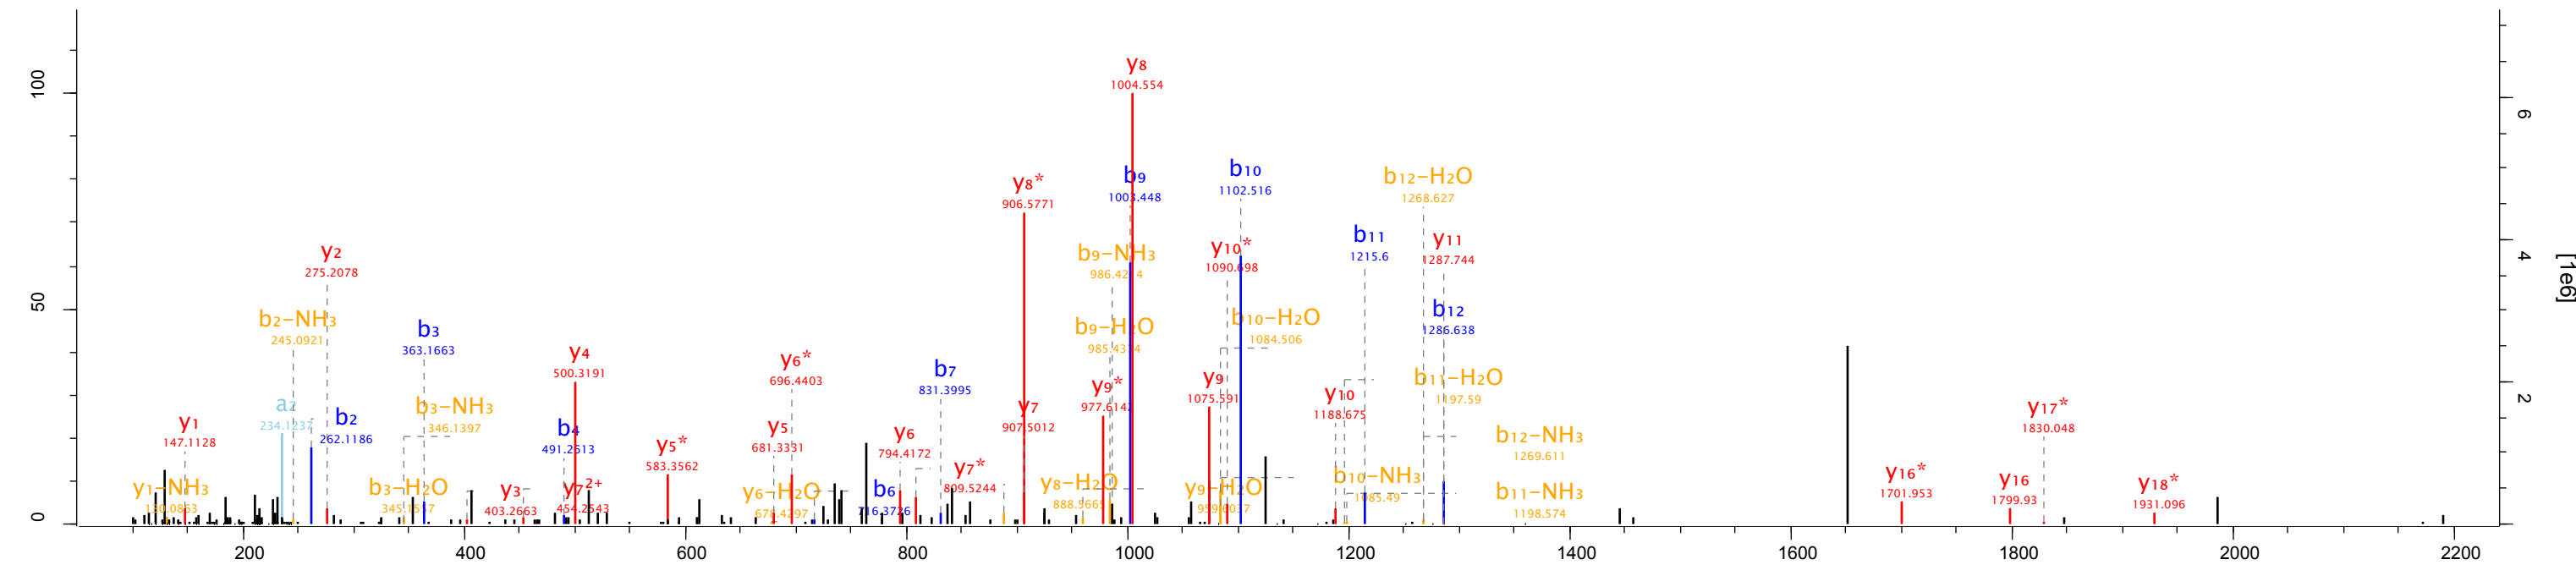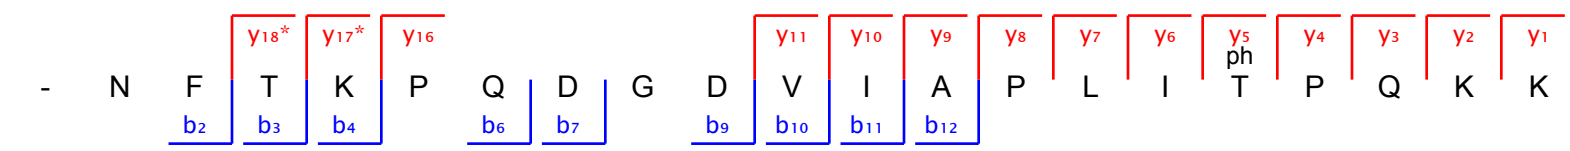

Raw file 20150814\_A375SR\_Phospho\_BR2\_09 Scan 17285 Method FTMS; HCD Score 184.3 m/z 802.74 Gene names MAP1S

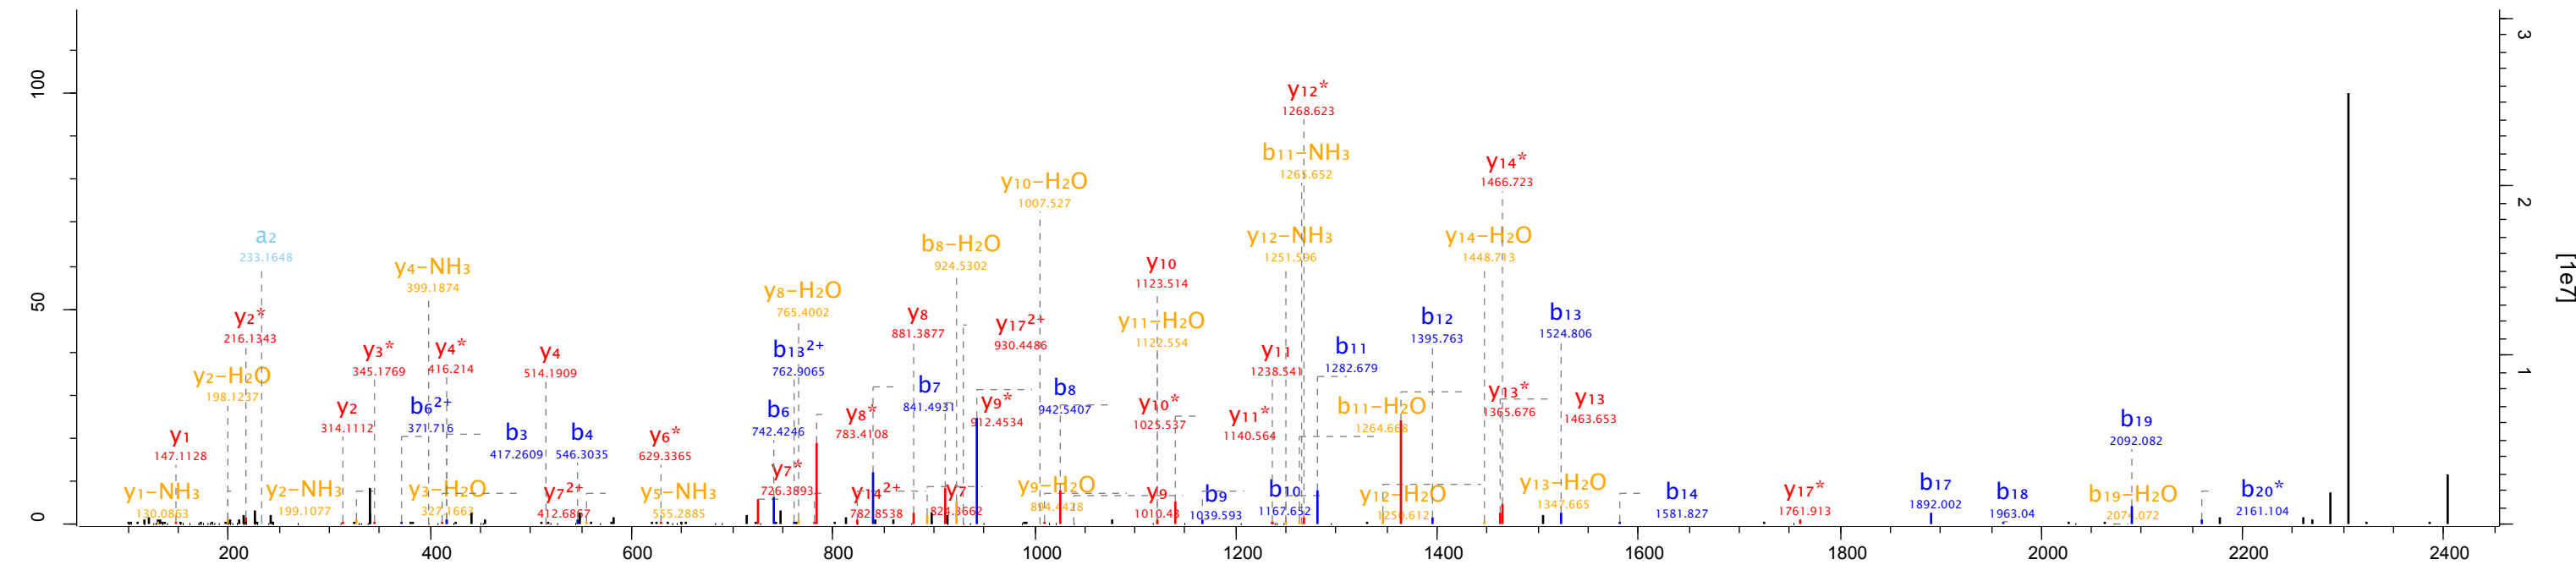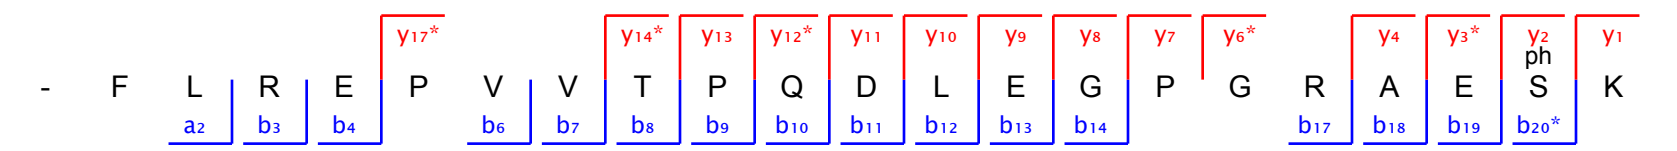

Raw file  
 20150814\_A375SR\_Phospho\_BR2\_09  
 Scan 18655 Method FTMS; HCD Score 141.99 m/z 522.62 Gene names DTX3L

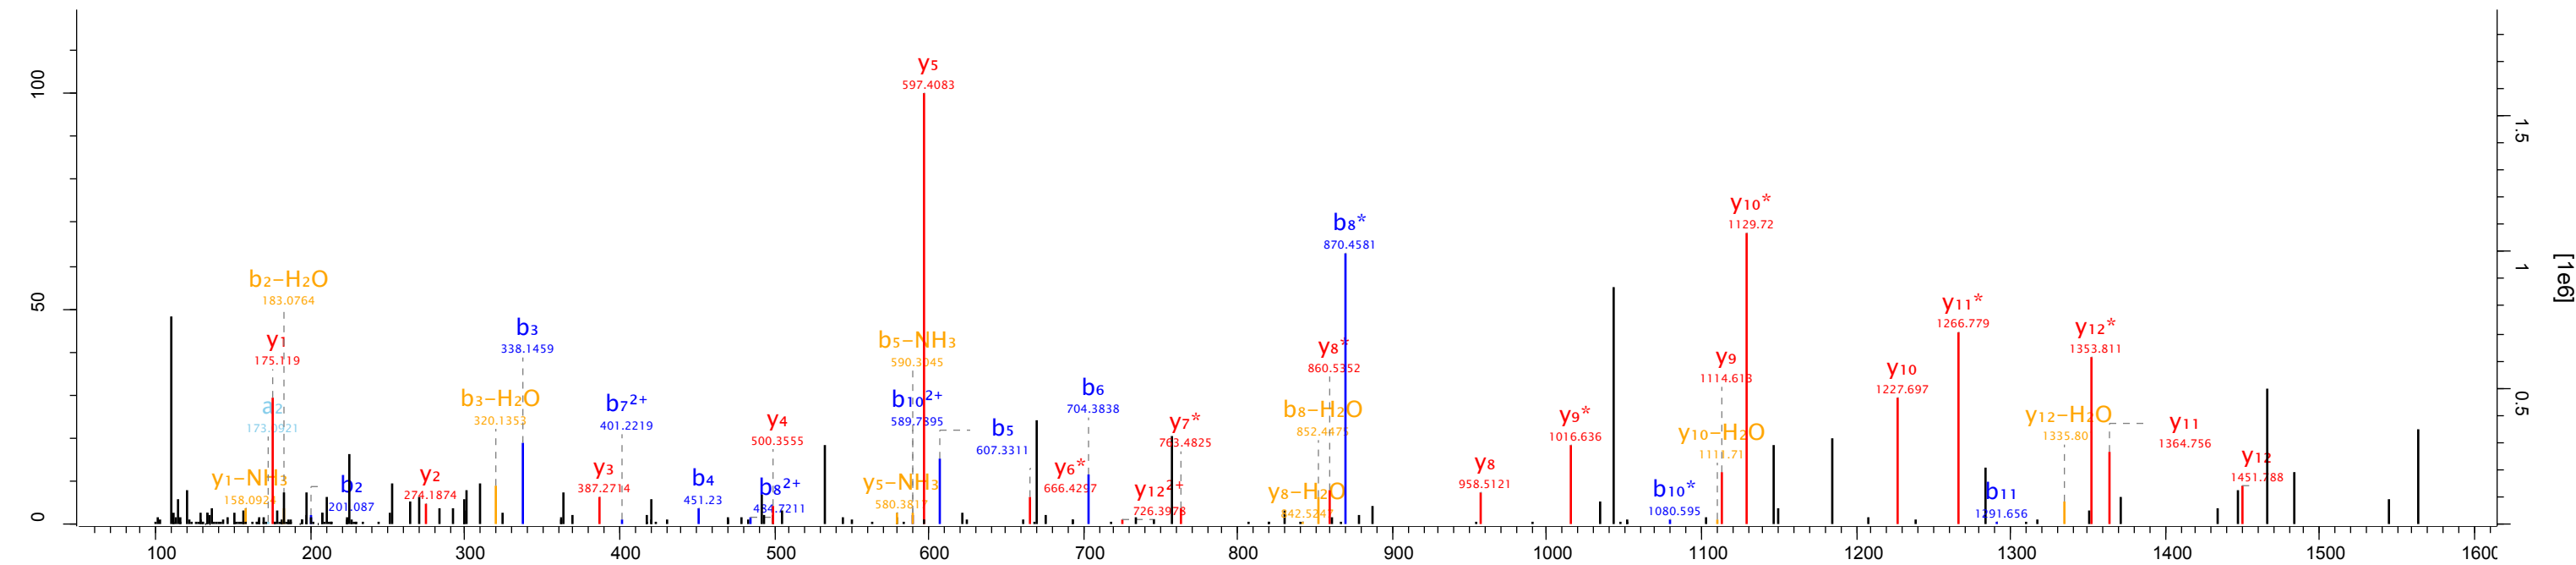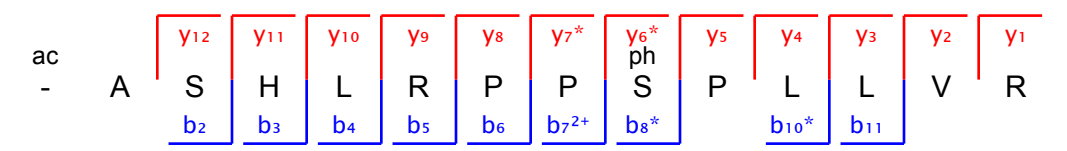

Raw file 20150814\_A375SR\_Phospho\_BR2\_09 Scan 19085 Method FTMS; HCD Score 56.71 m/z 604.65 Gene names LYSDM3

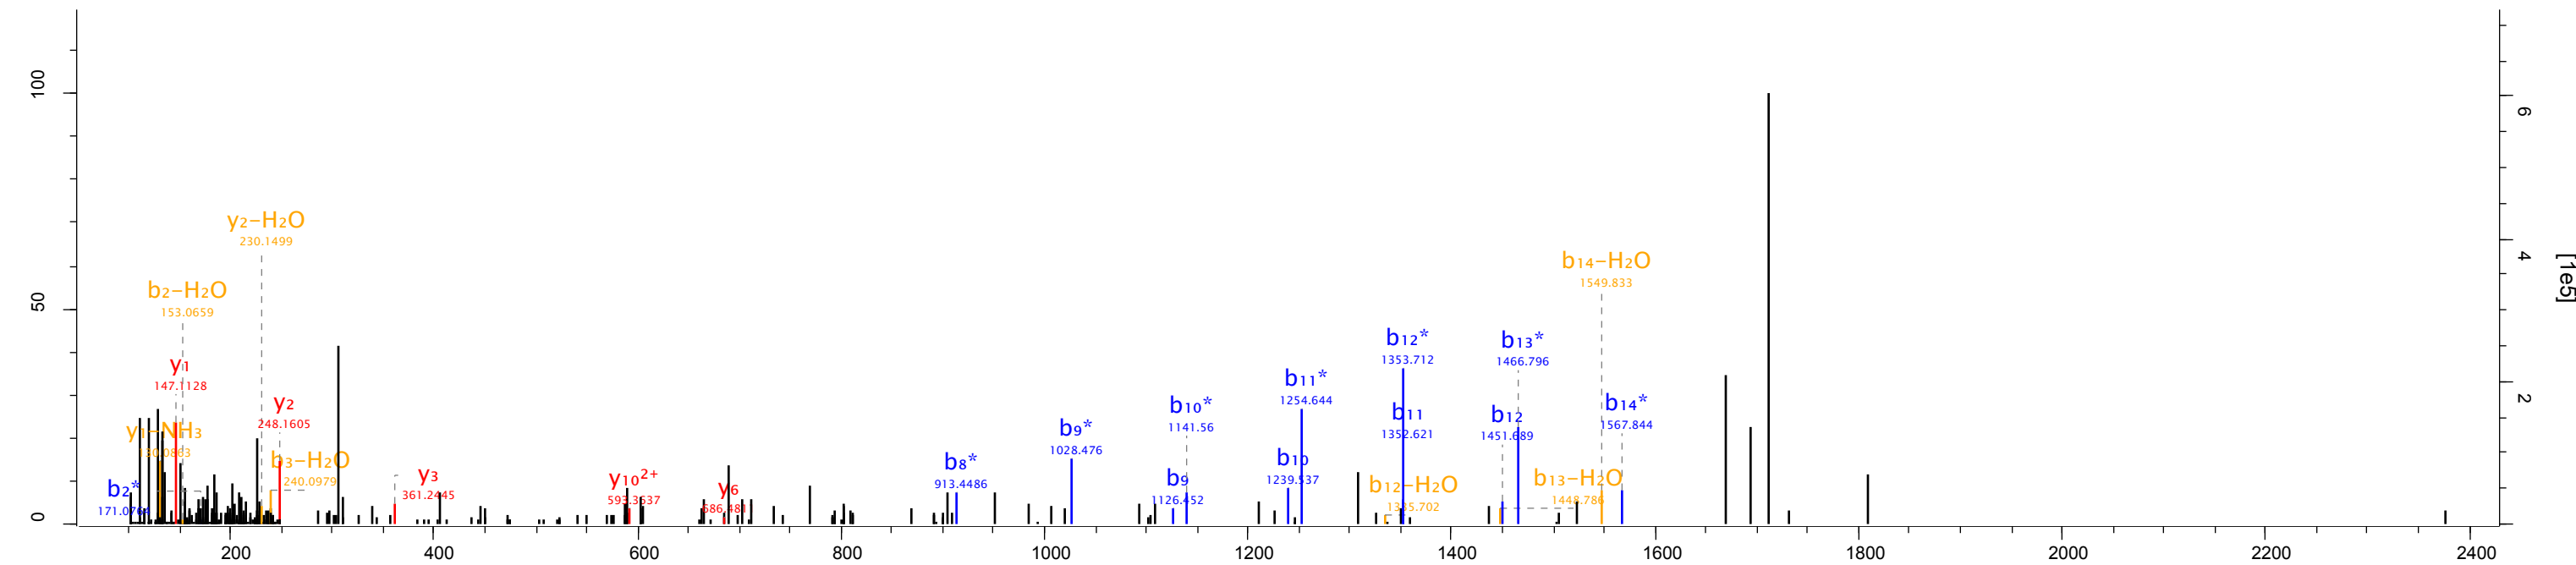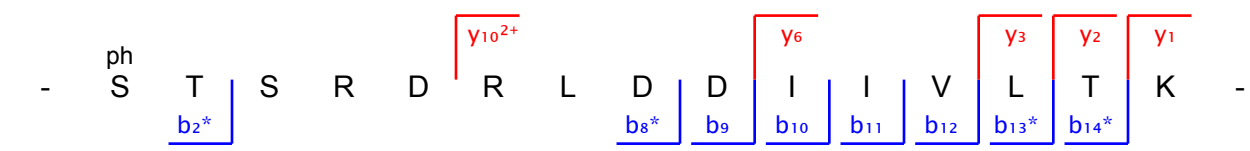

Raw file: 20150814\_A375SR\_Phospho\_BR2\_09  
 Scan: 20225 Method: FTMS; HCD Score: 124.2 m/z: 558.95 Gene names: AHNAK

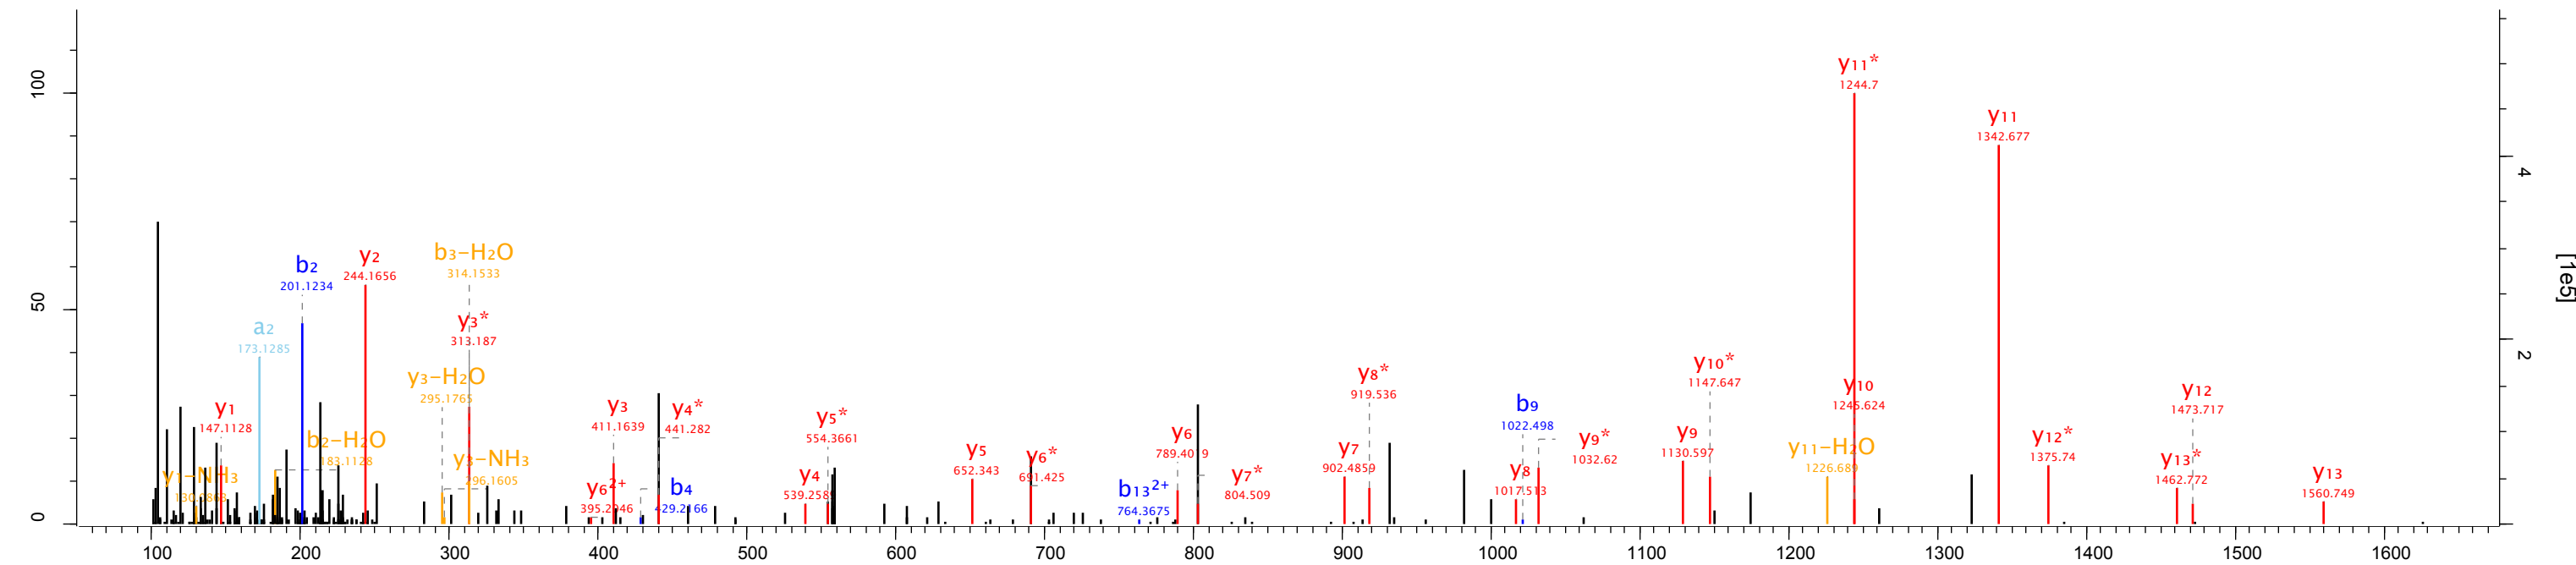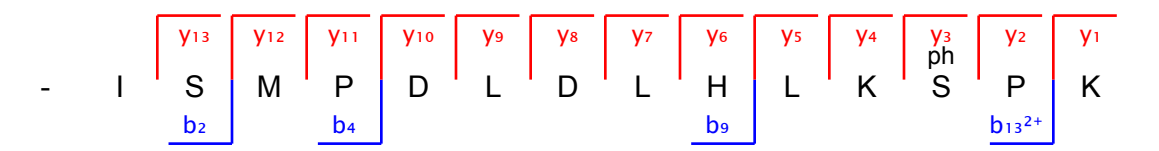

Raw file: 20150814\_A375SR\_Phospho\_BR2\_09  
 Scan: 20805 Method: FTMS; HCD Score: 76.16 m/z: 754.04 Gene names: PHF2

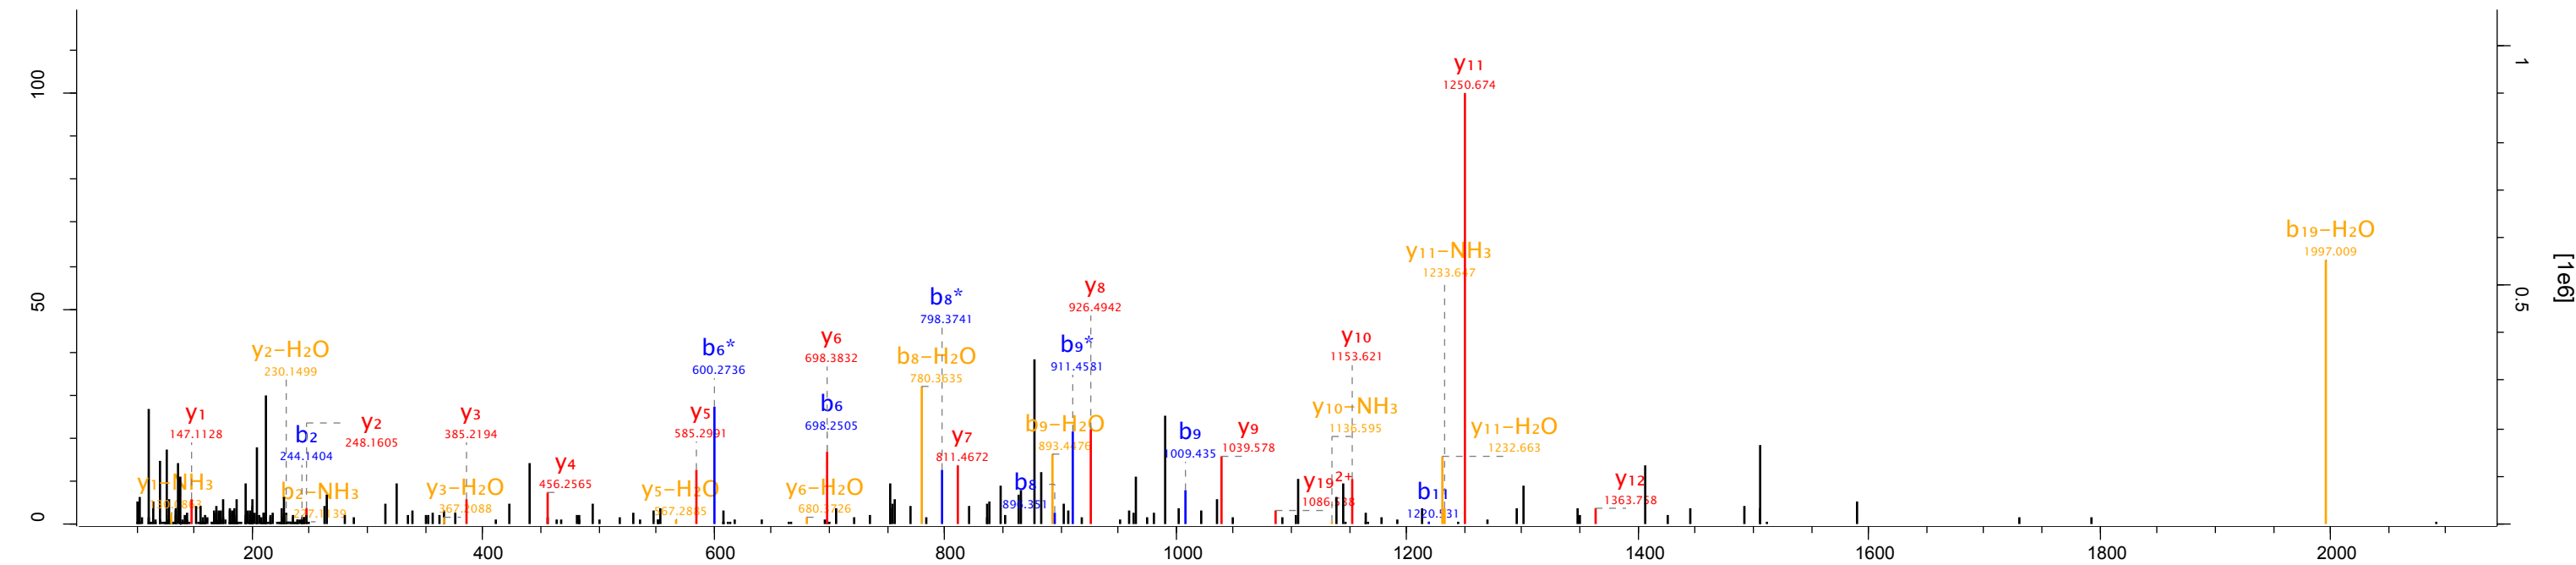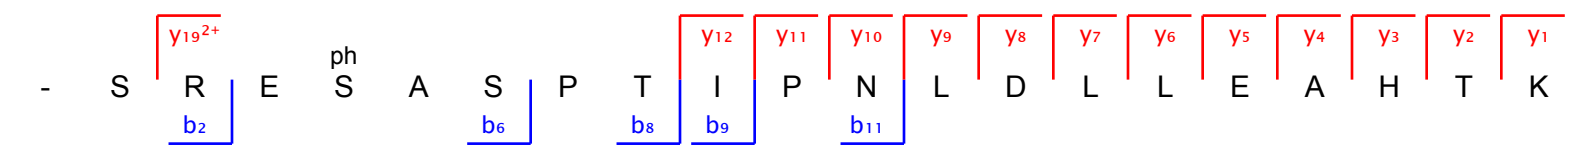

Raw file: 20150814\_A375SR\_Phospho\_BR2\_09  
 Scan: 22785 Method: FTMS; HCD Score: 125.04 m/z: 875.97 Gene names: ZFH3

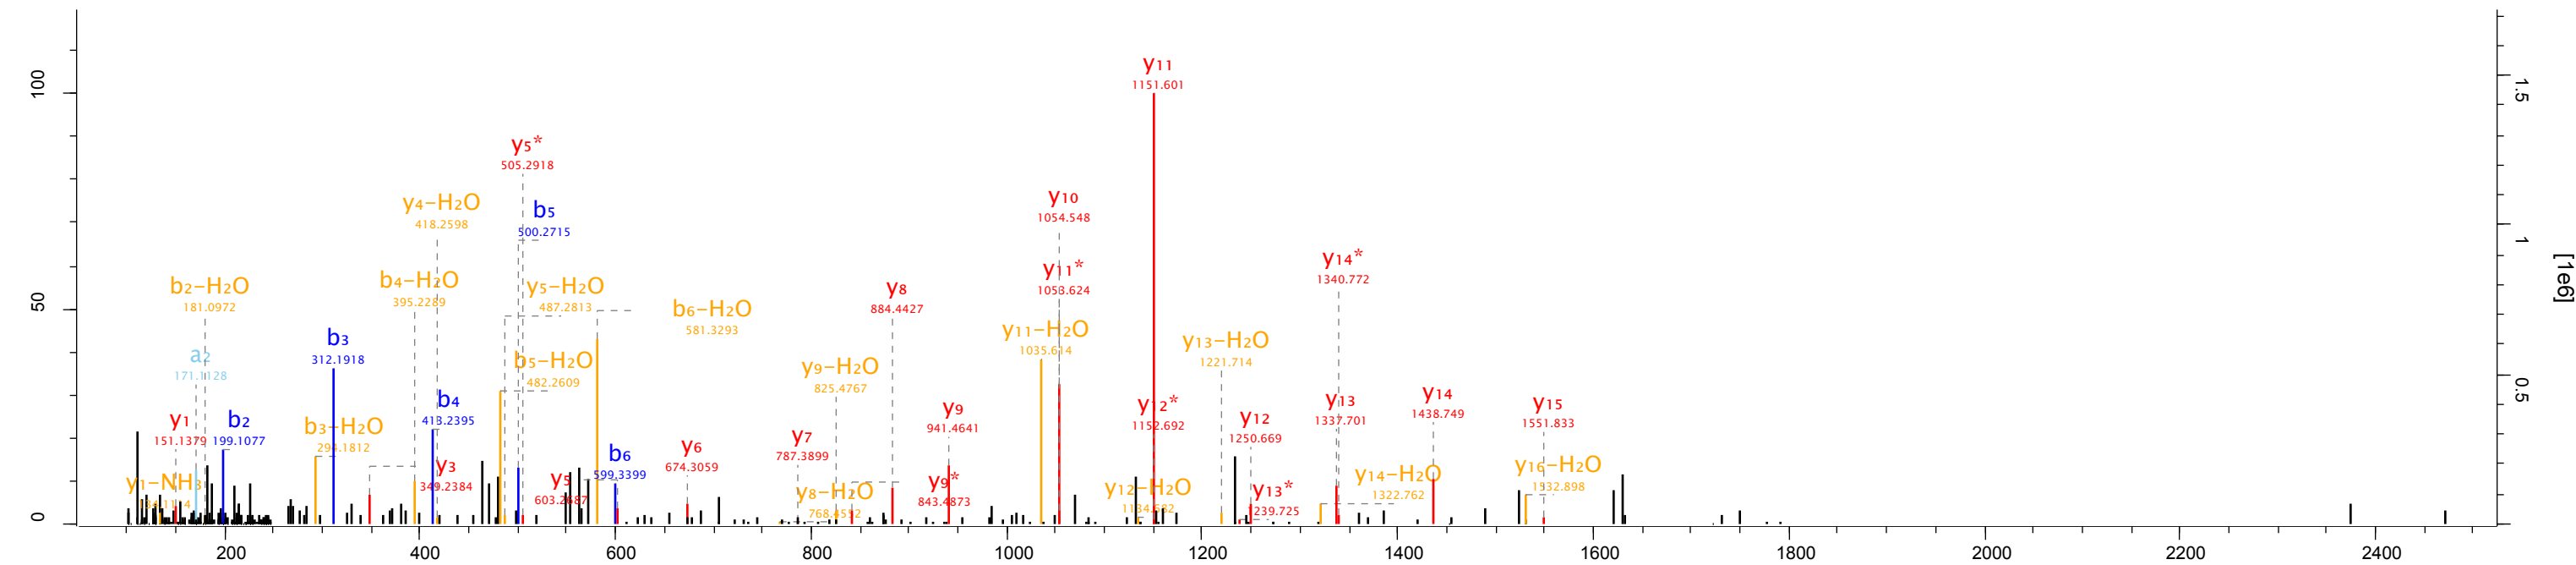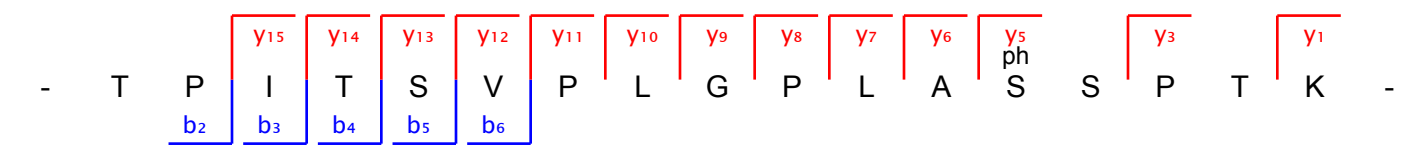

Raw file: 20150814\_A375SR\_Phospho\_BR2\_09  
 Scan: 24135 Method: FTMS; HCD Score: 106.4 m/z: 485.24 Gene names: KIAA0930

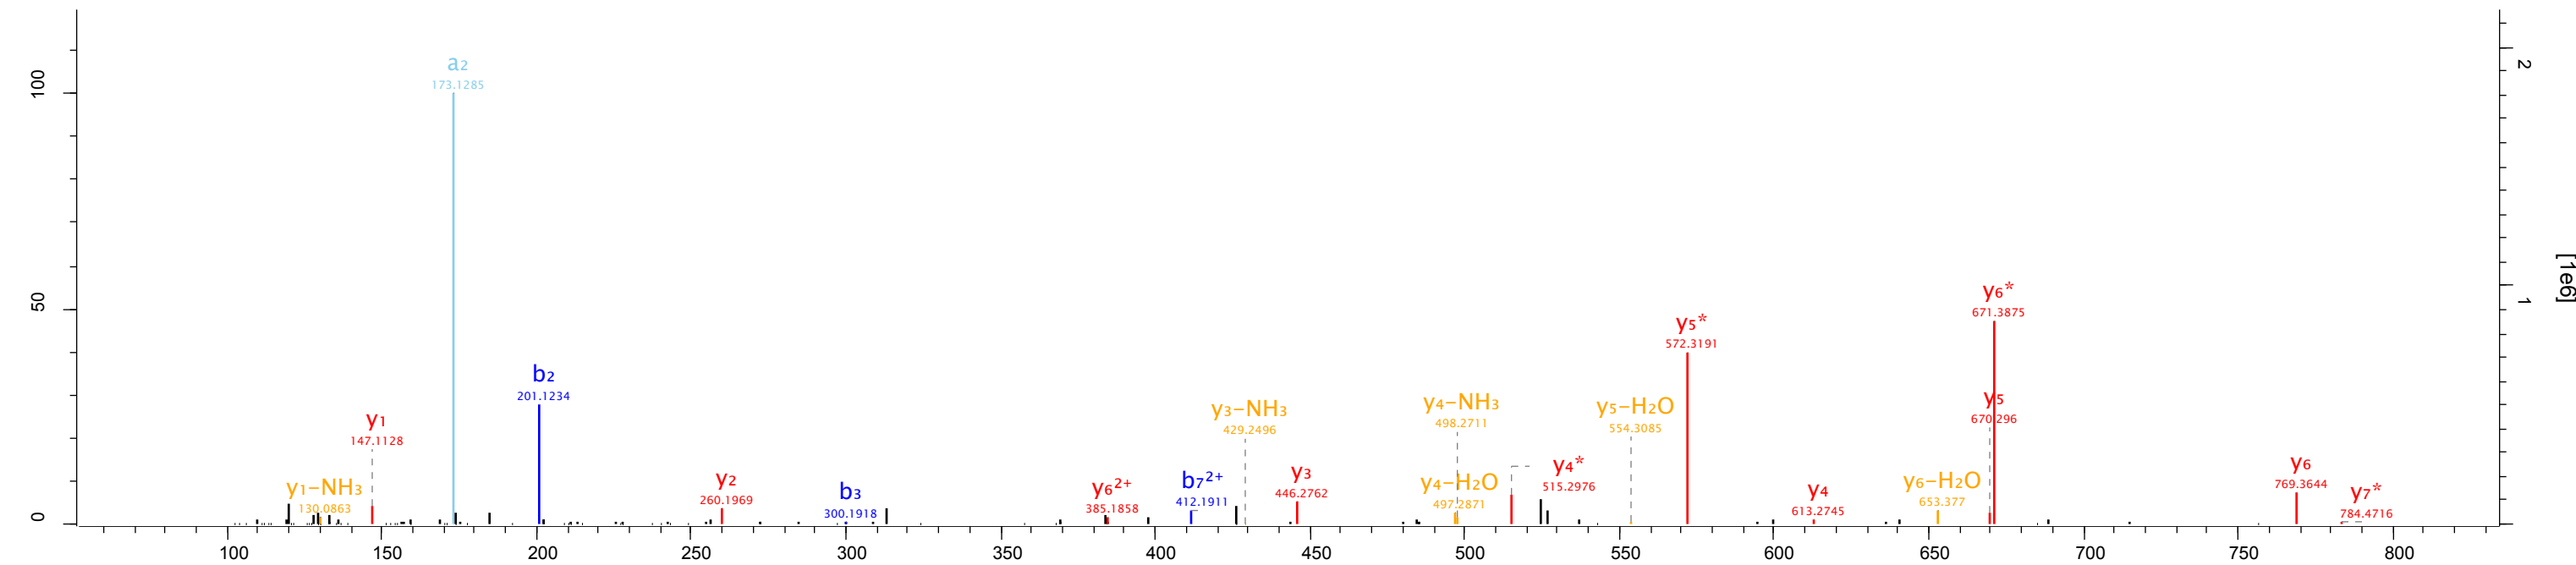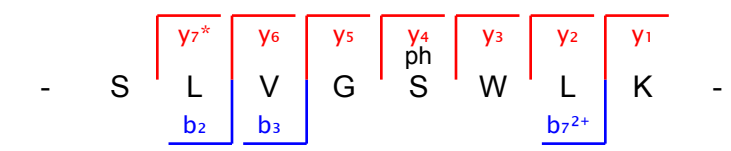



Raw file  
 20150814\_A375SR\_Phospho\_BR2\_09  
 Scan 25905 Method FTMS; HCD Score 105.06 m/z 827.41 Gene names TFEB

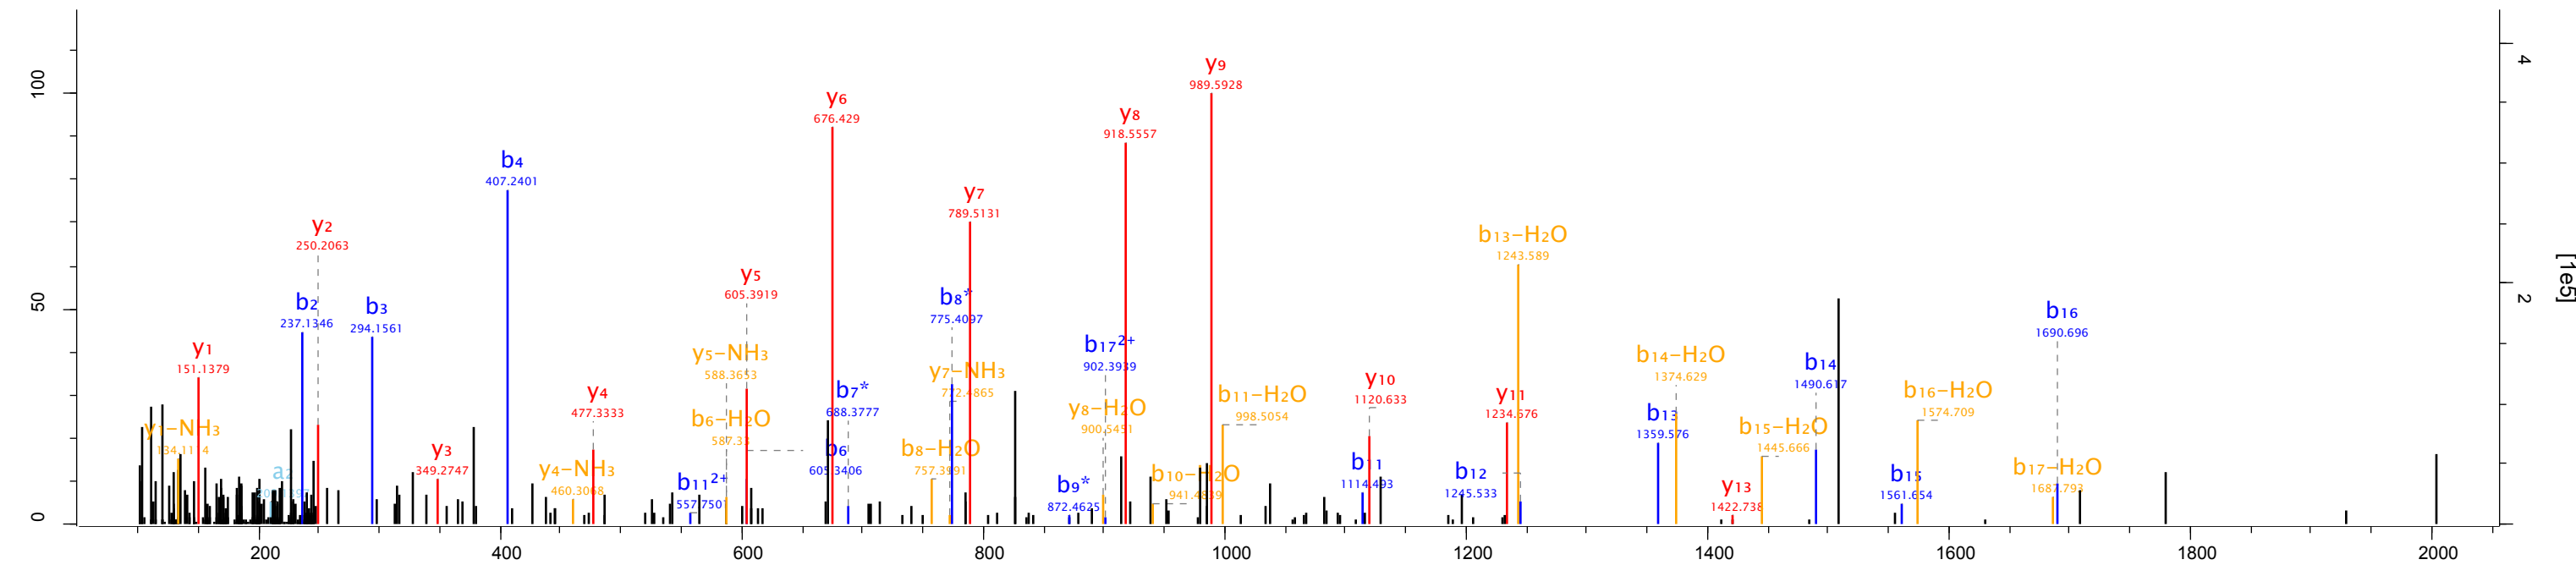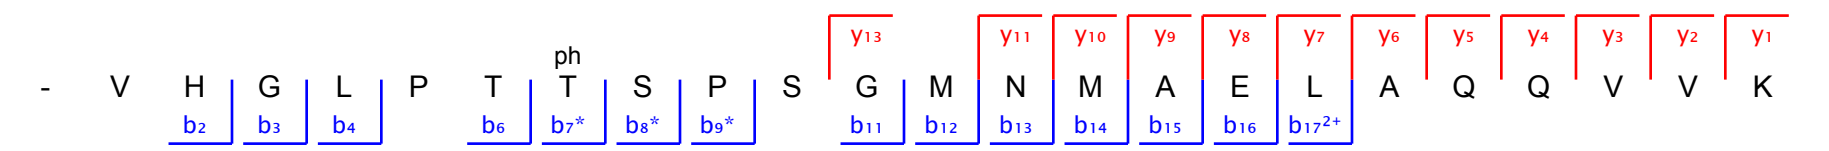

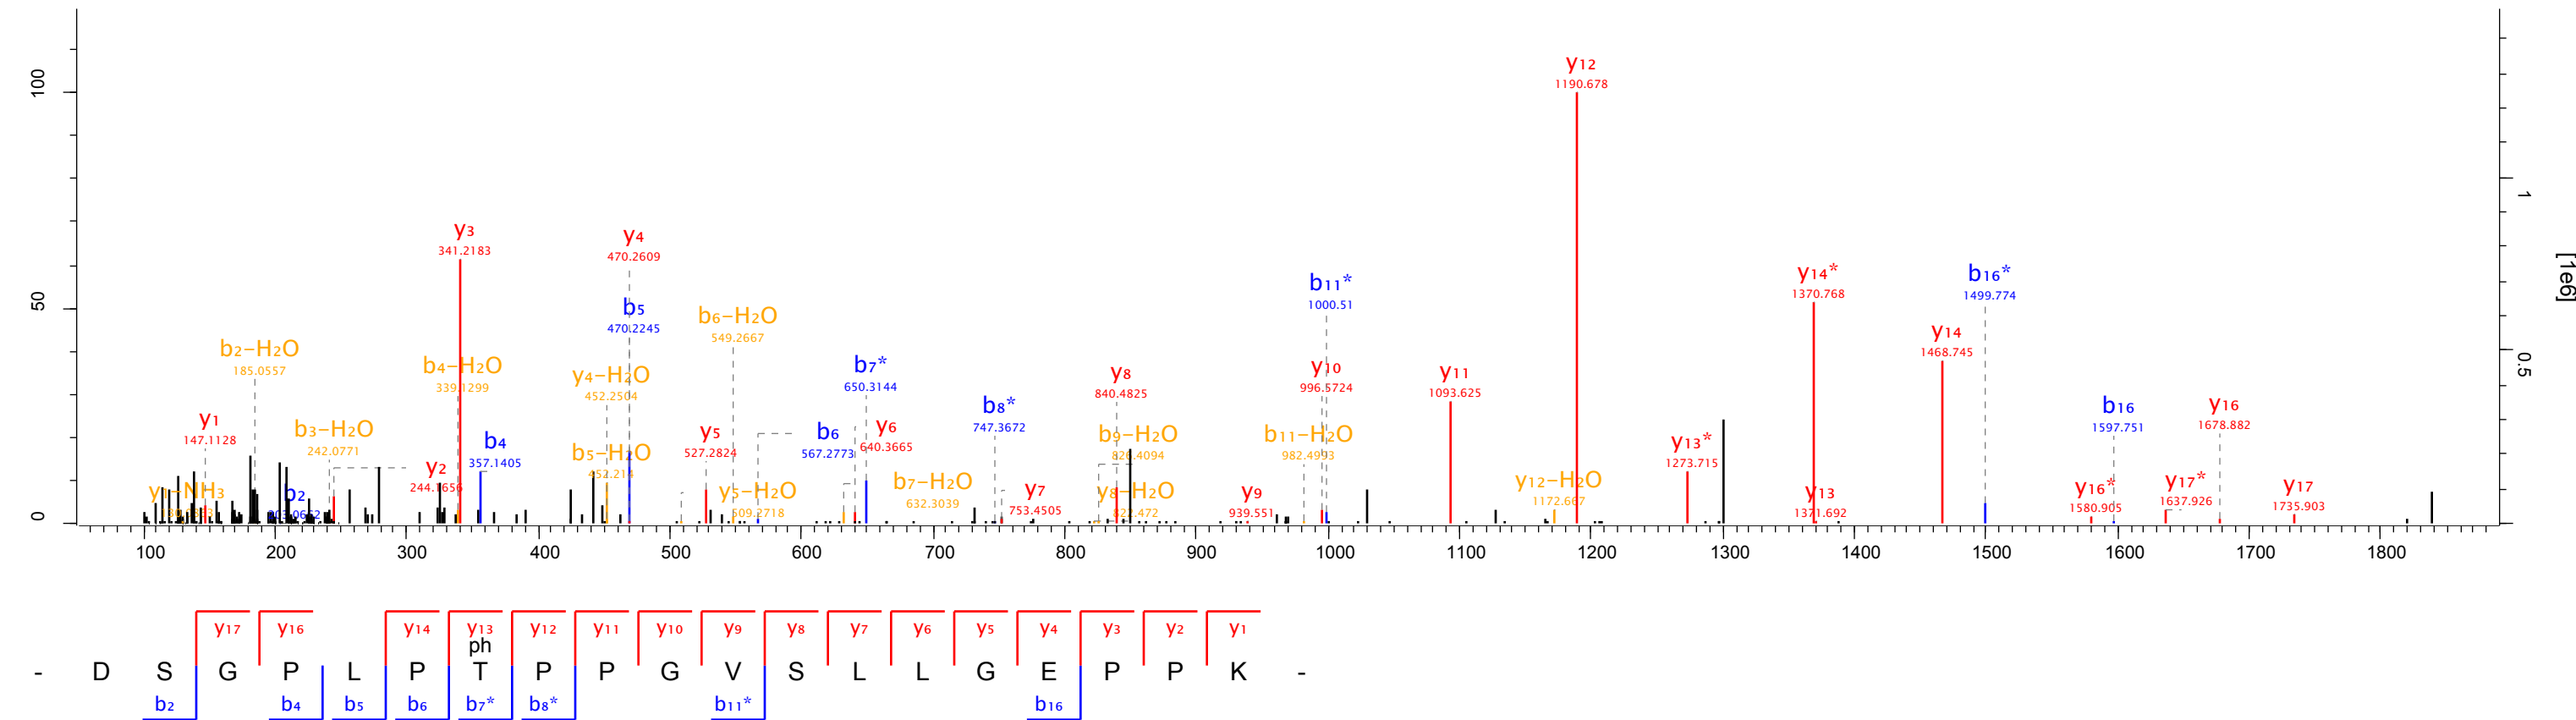

Raw file Scan Method Score m/z Gene names  
 20150814\_A375SR\_Phospho\_BR2\_09 27745 FTMS; HCD 212.65 990.45 AHNAK

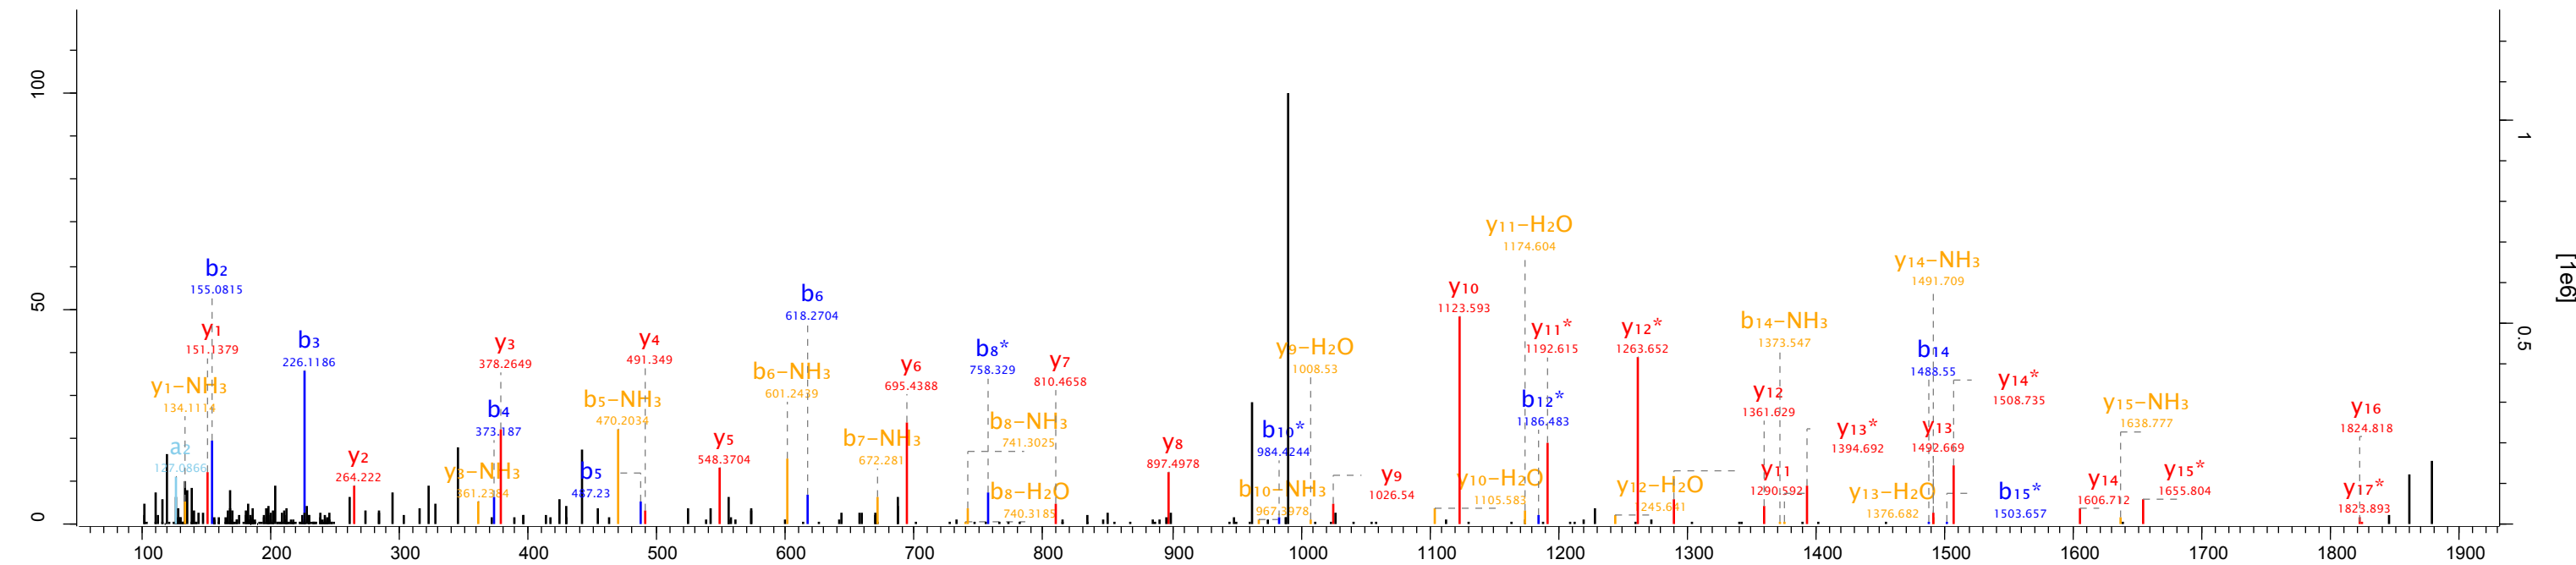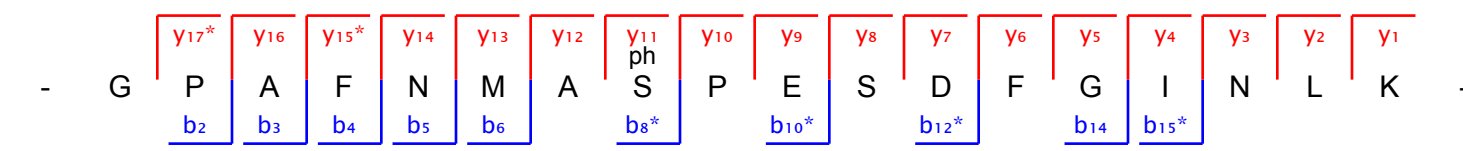

Raw file Scan Method m/z Gene names  
 20150814\_A375SR\_Phospho\_BR2\_09 28445 FTMS; HCD 103.78 1413.18 FAM122A

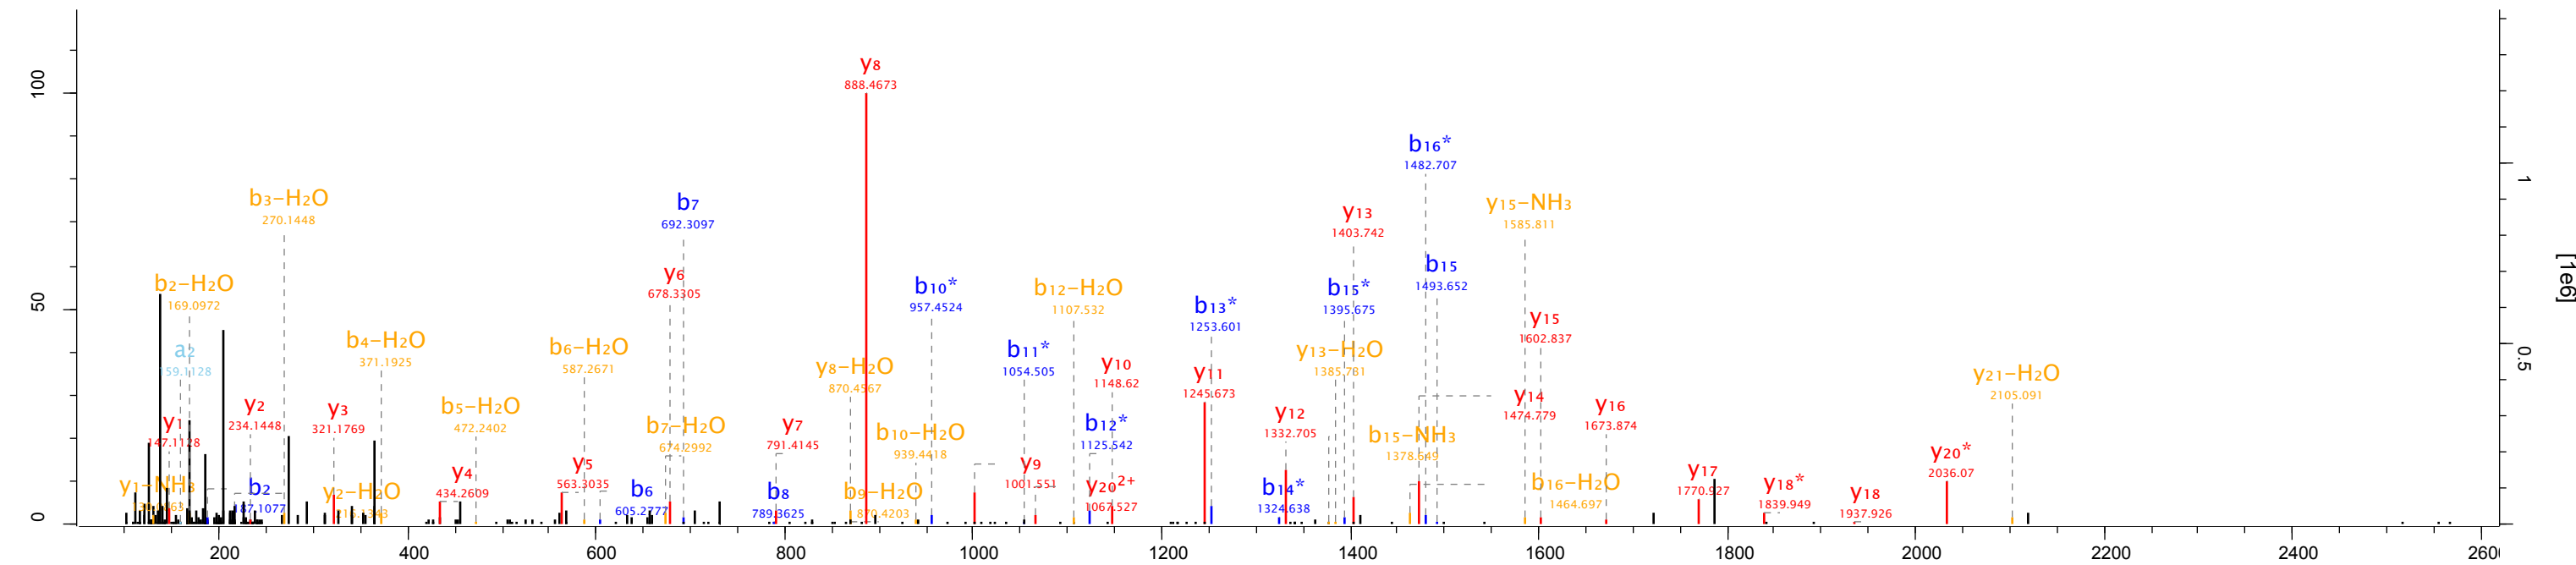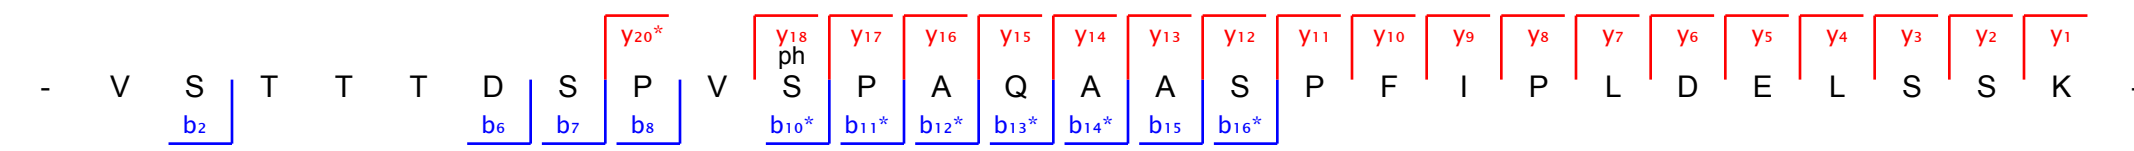

Raw file 20150814\_A375SR\_Phospho\_BR2\_09 Scan 28455 Method FTMS; HCD Score 128.71 m/z 851.17 Gene names LUZP1

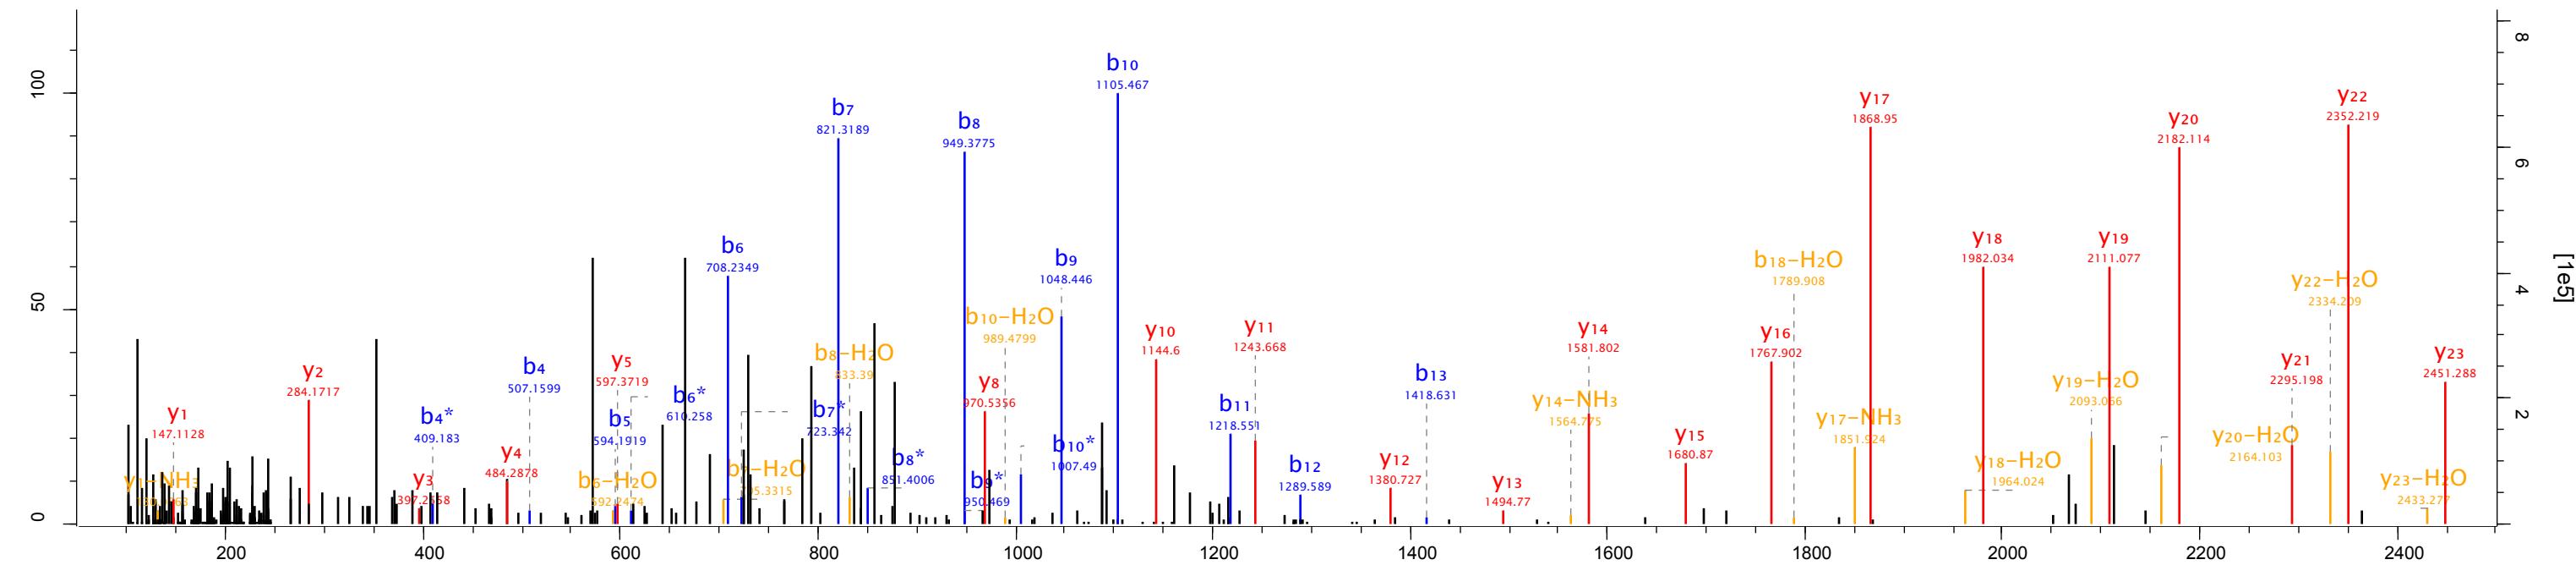

Sequence: - H T S T S N I Q V G L A E L T S V S N H V S S P F E L S I H K -

Fragmentation sites (b/y ions):

- b4 (T), b5 (S), b6 (N), b7 (I), b8 (Q), b9 (V), b10 (G), b11 (L), b12 (A), b13 (E)
- y1 (K), y2 (H), y3 (I), y4 (S), y5 (L), y8 (P), y10 (S), y11 (V), y12 (H), y13 (N), y14 (S), y15 (V), y16 (S), y17 (T), y18 (L), y19 (E), y20 (A), y21 (L), y22 (G), y23 (V)

Raw file  
20150814\_A375SR\_Phospho\_BR2\_09

Scan 28745 Method FTMS; HCD Score 169.02 m/z 754.4 Gene names ITGB4

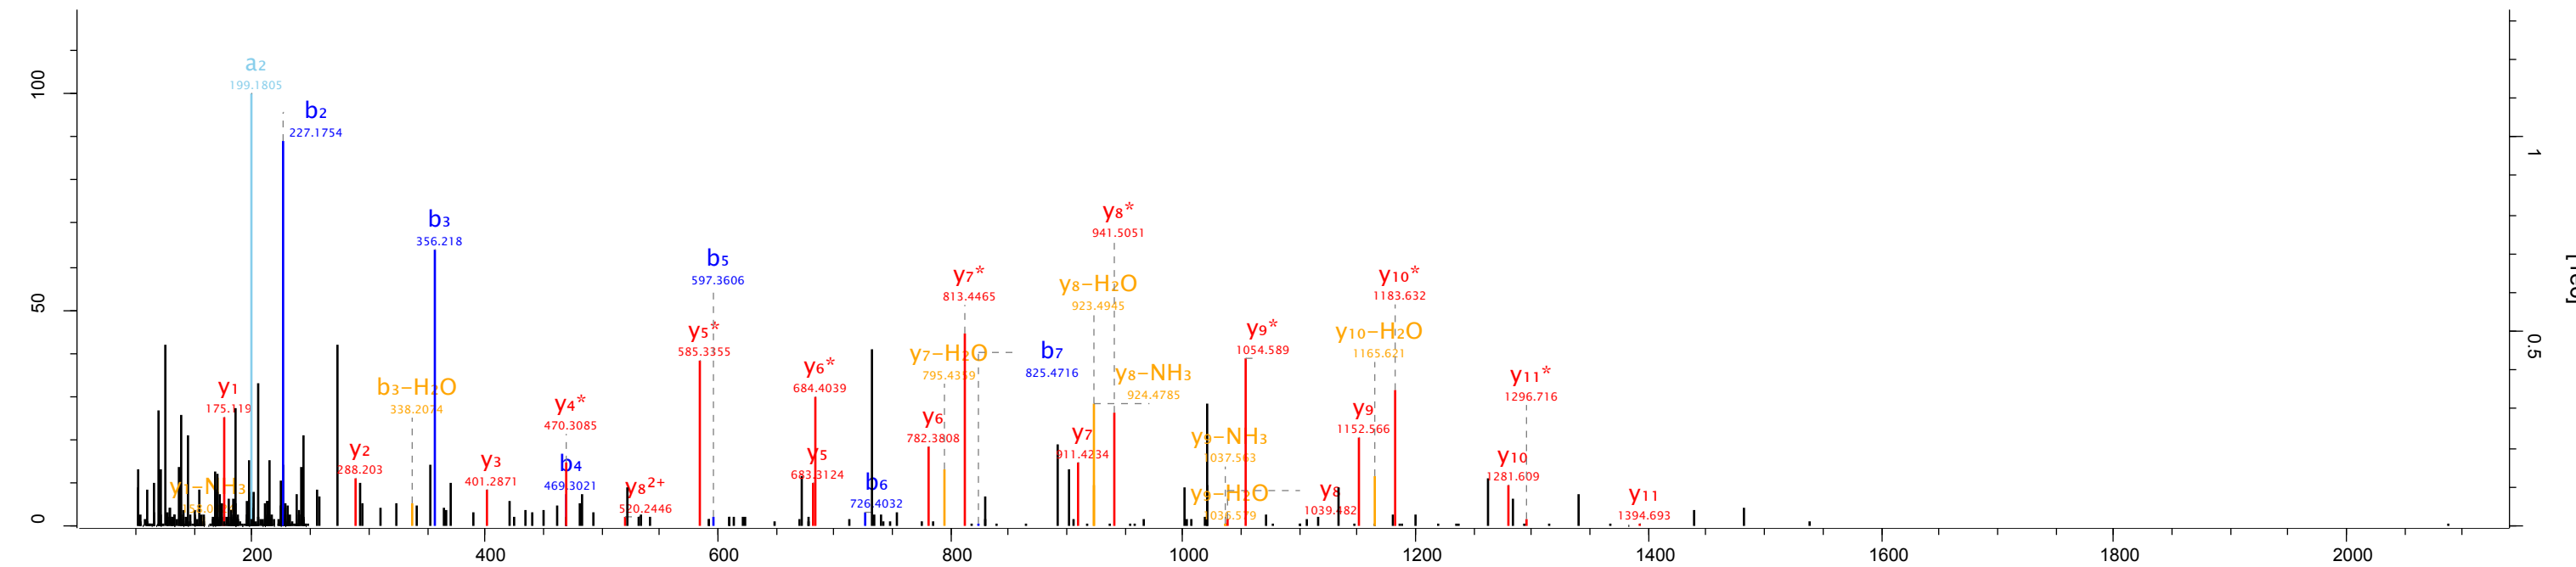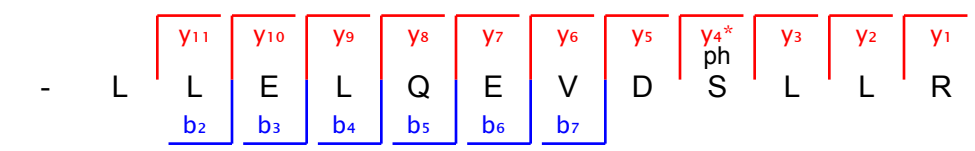

Raw file: 20150814\_A375SR\_Phospho\_BR2\_09  
 Scan: 3045 Method: FTMS; HCD Score: 106.79 m/z: 456.25 Gene names: MAP1B

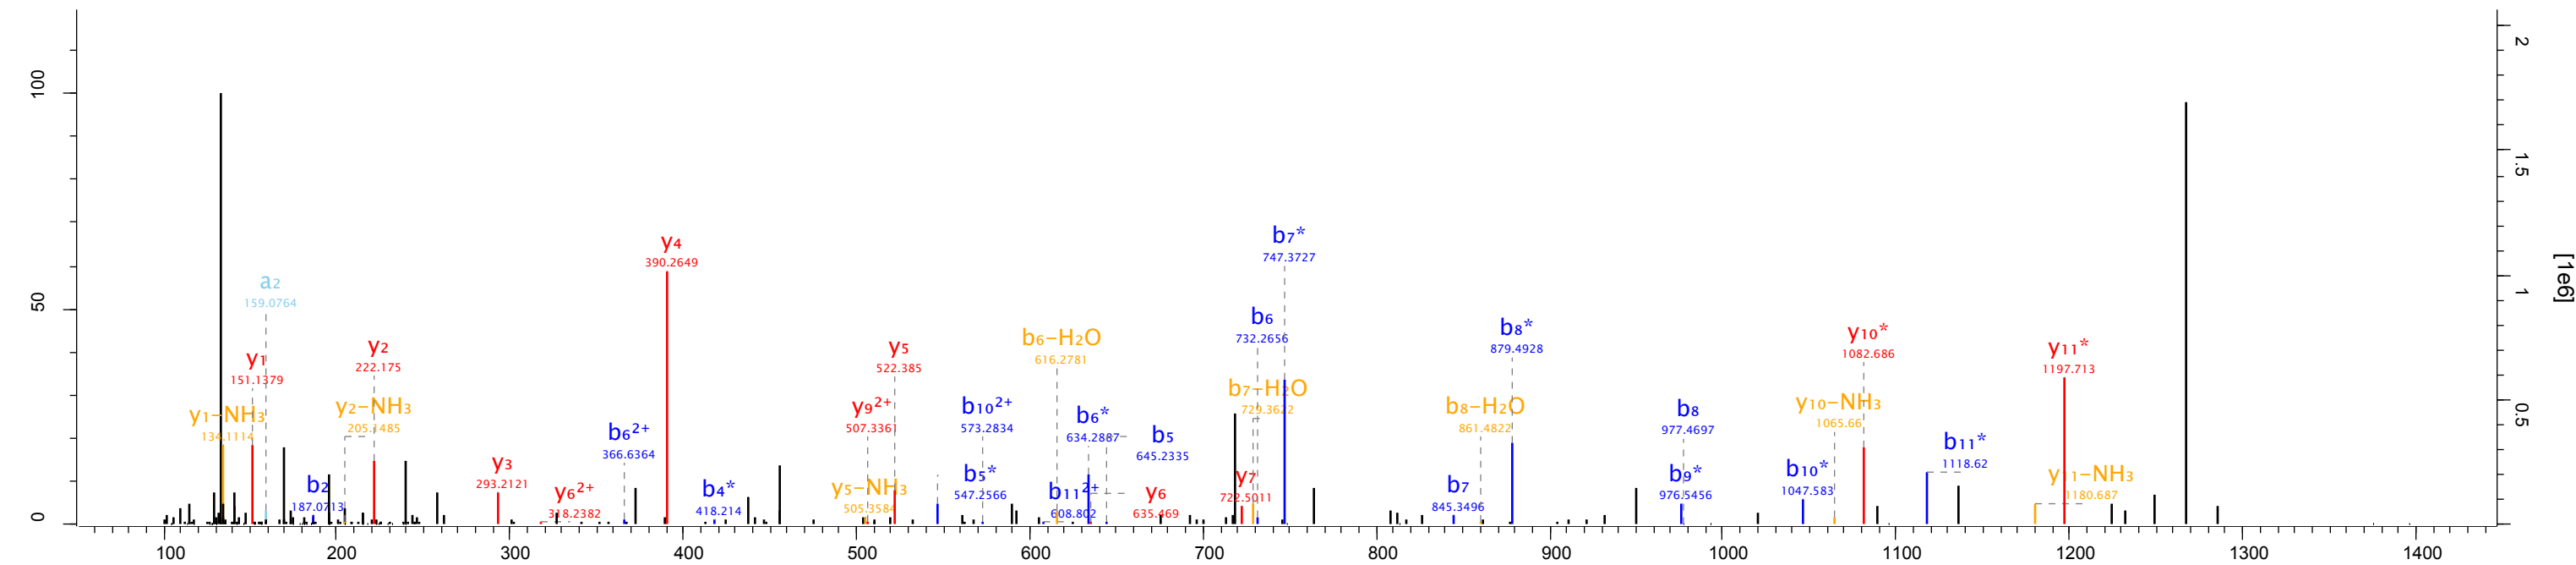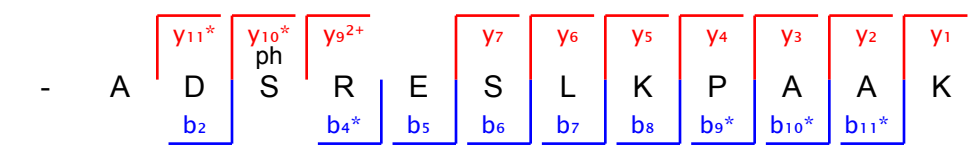

Raw file: 20150814\_A375SR\_Phospho\_BR2\_09  
 Scan: 3445 Method: FTMS; HCD Score: 76.34 m/z: 517.57 Gene names: MAGEA11

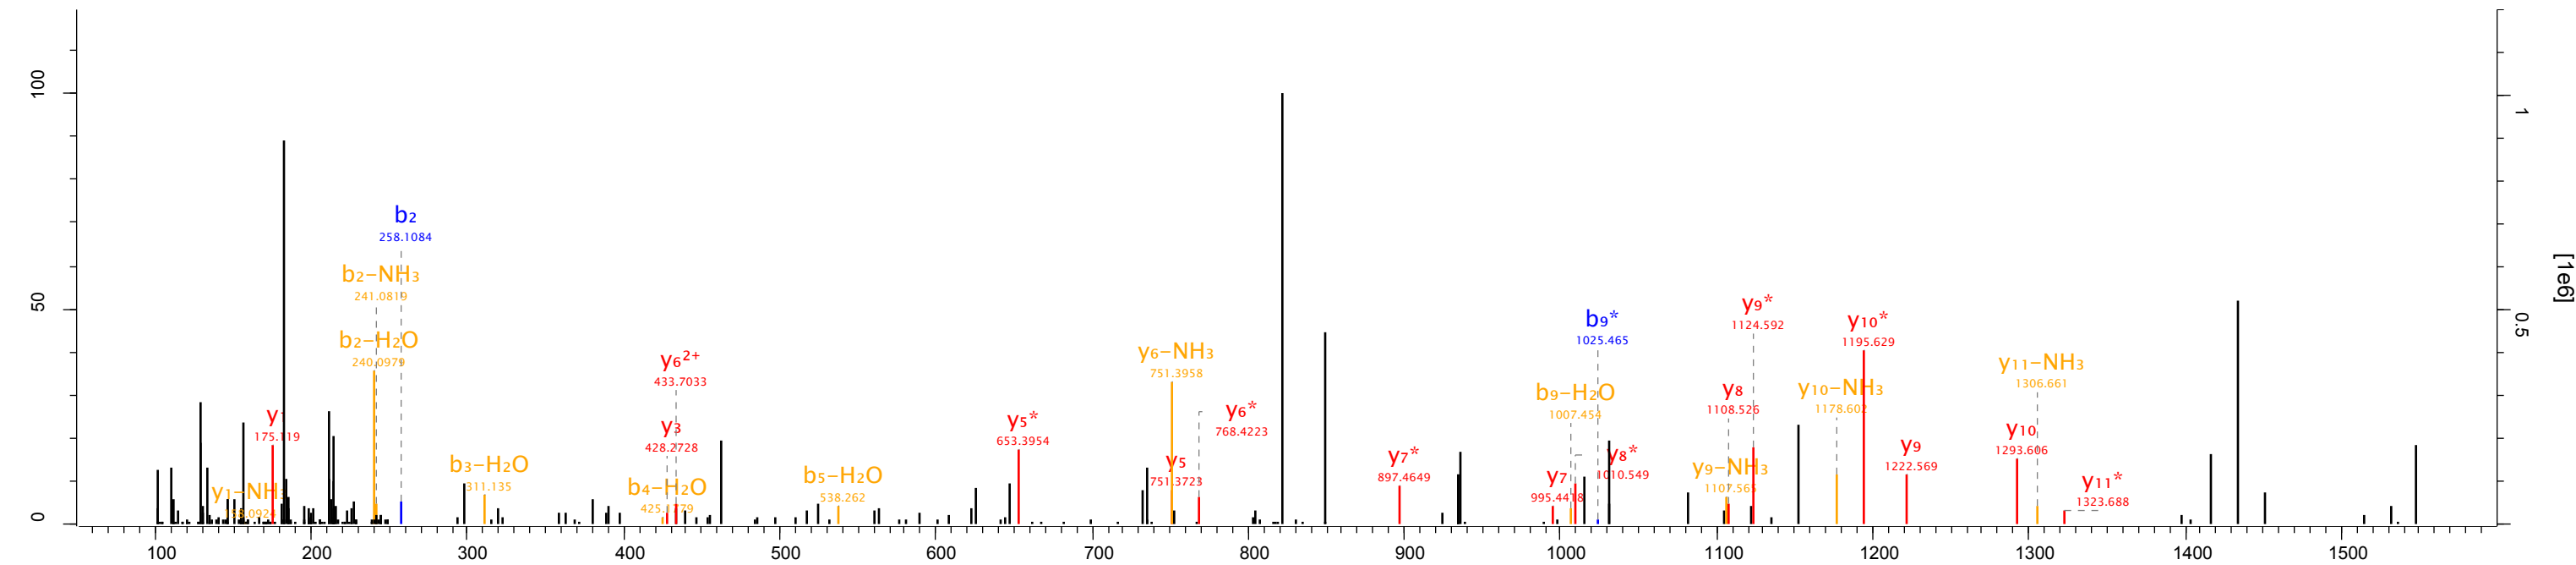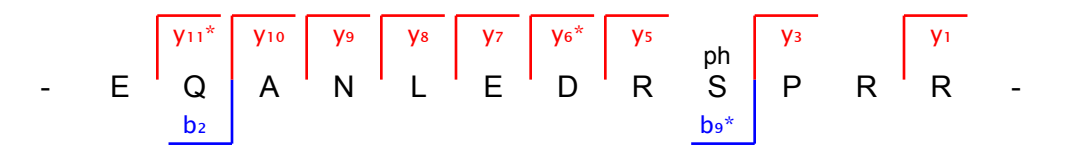



Raw file 20150814\_A375SR\_Phospho\_BR2\_09 Scan 3765 Method FTMS; HCD Score 96.6 m/z 544.78 Gene names EHBP1

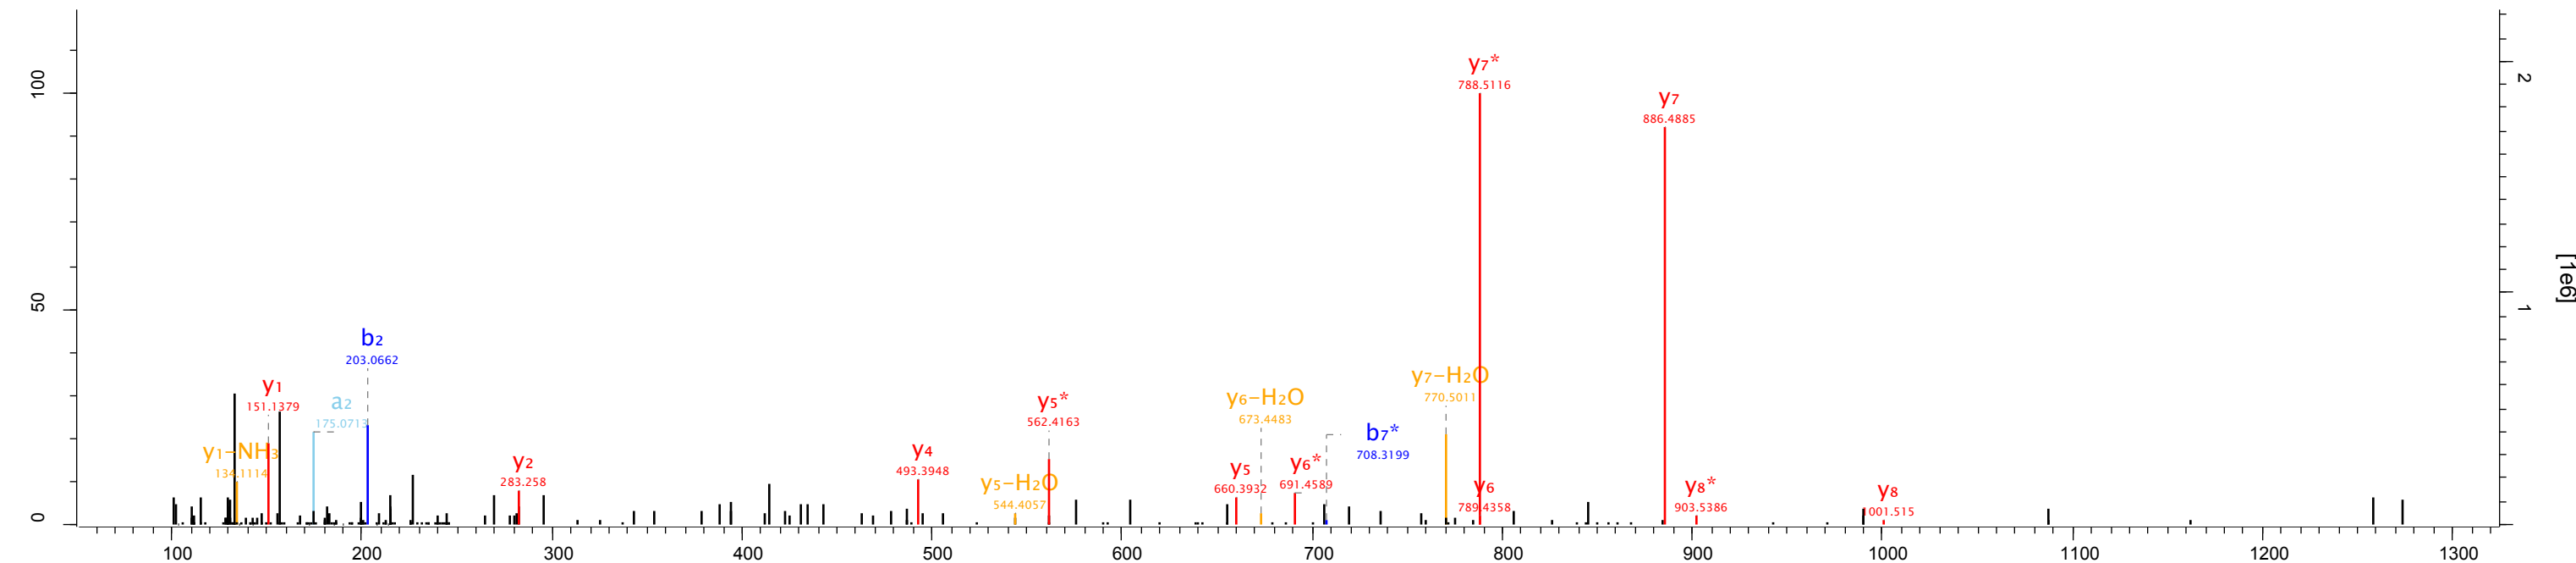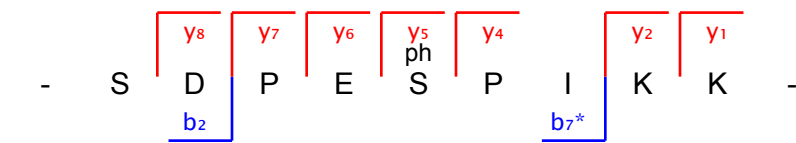

Raw file 20150814\_A375SR\_Phospho\_BR2\_09 Scan 4285 Method FTMS; HCD Score 40.68 m/z 617.81 Gene names SRRM2

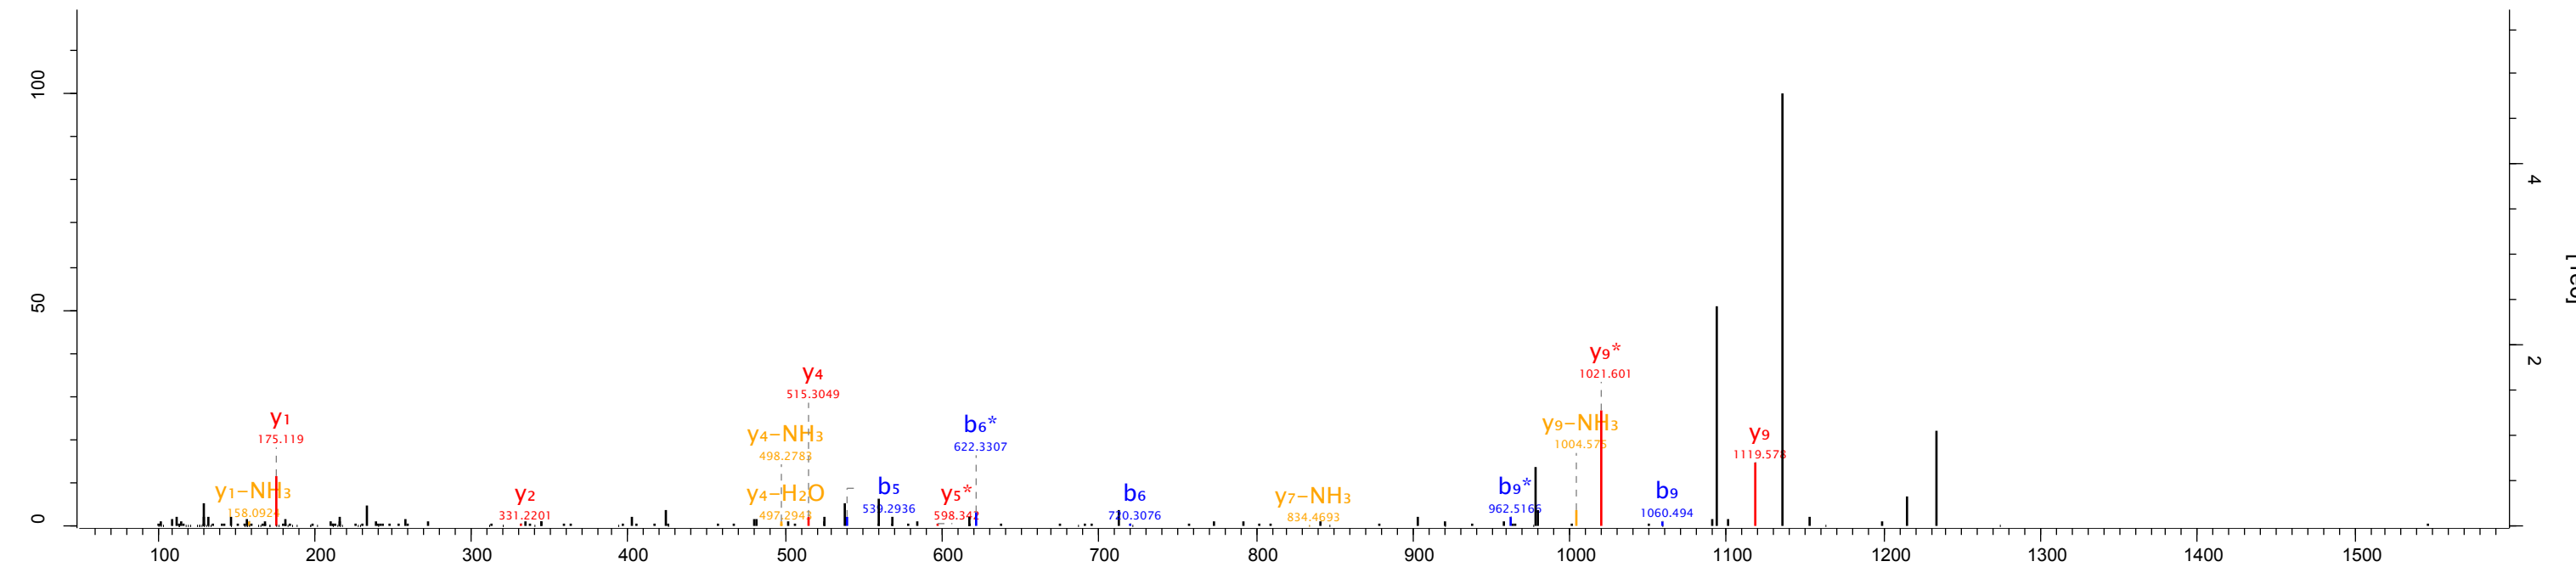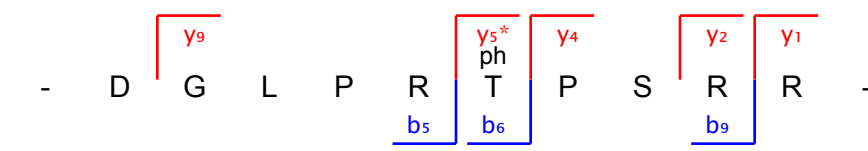

Raw file: 20150814\_A375SR\_Phospho\_BR2\_09  
 Scan: 4875 Method: FTMS; HCD Score: 81.52 m/z: 534.26 Gene names: HNRNPU

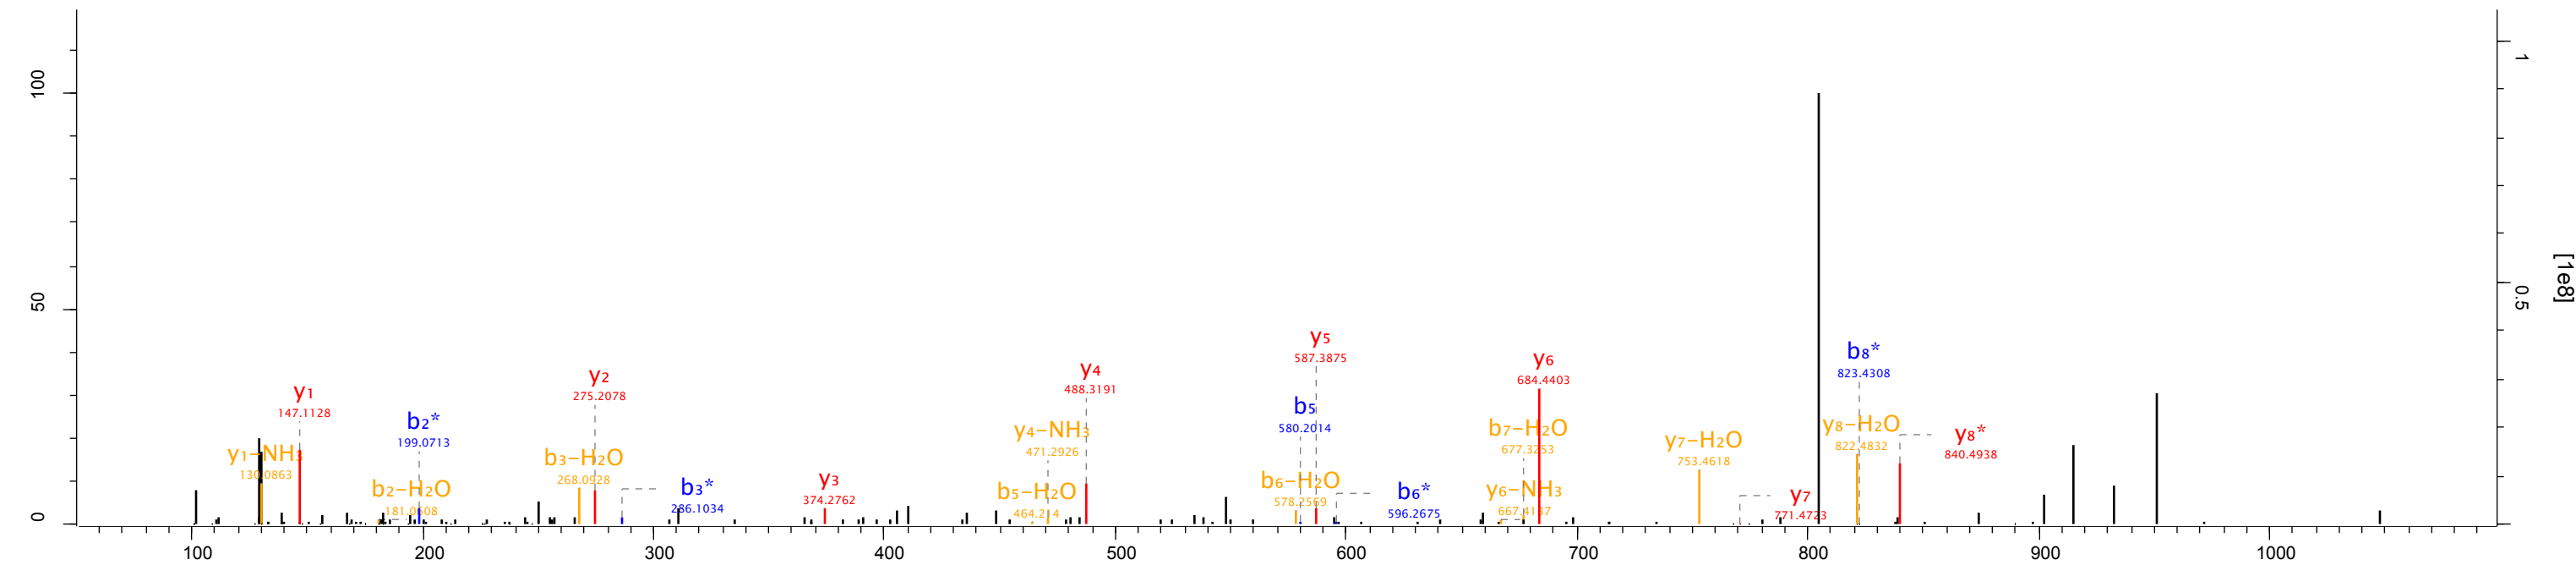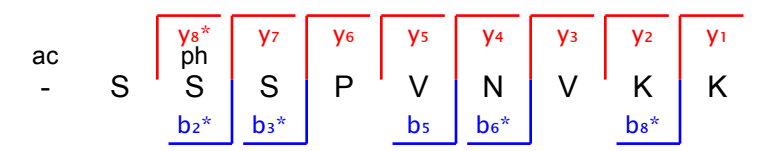

Raw file: 20150814\_A375SR\_Phospho\_BR2\_09  
 Scan: 5205 Method: FTMS; HCD Score: 148.75 m/z: 640.97 Gene names: PI4KB

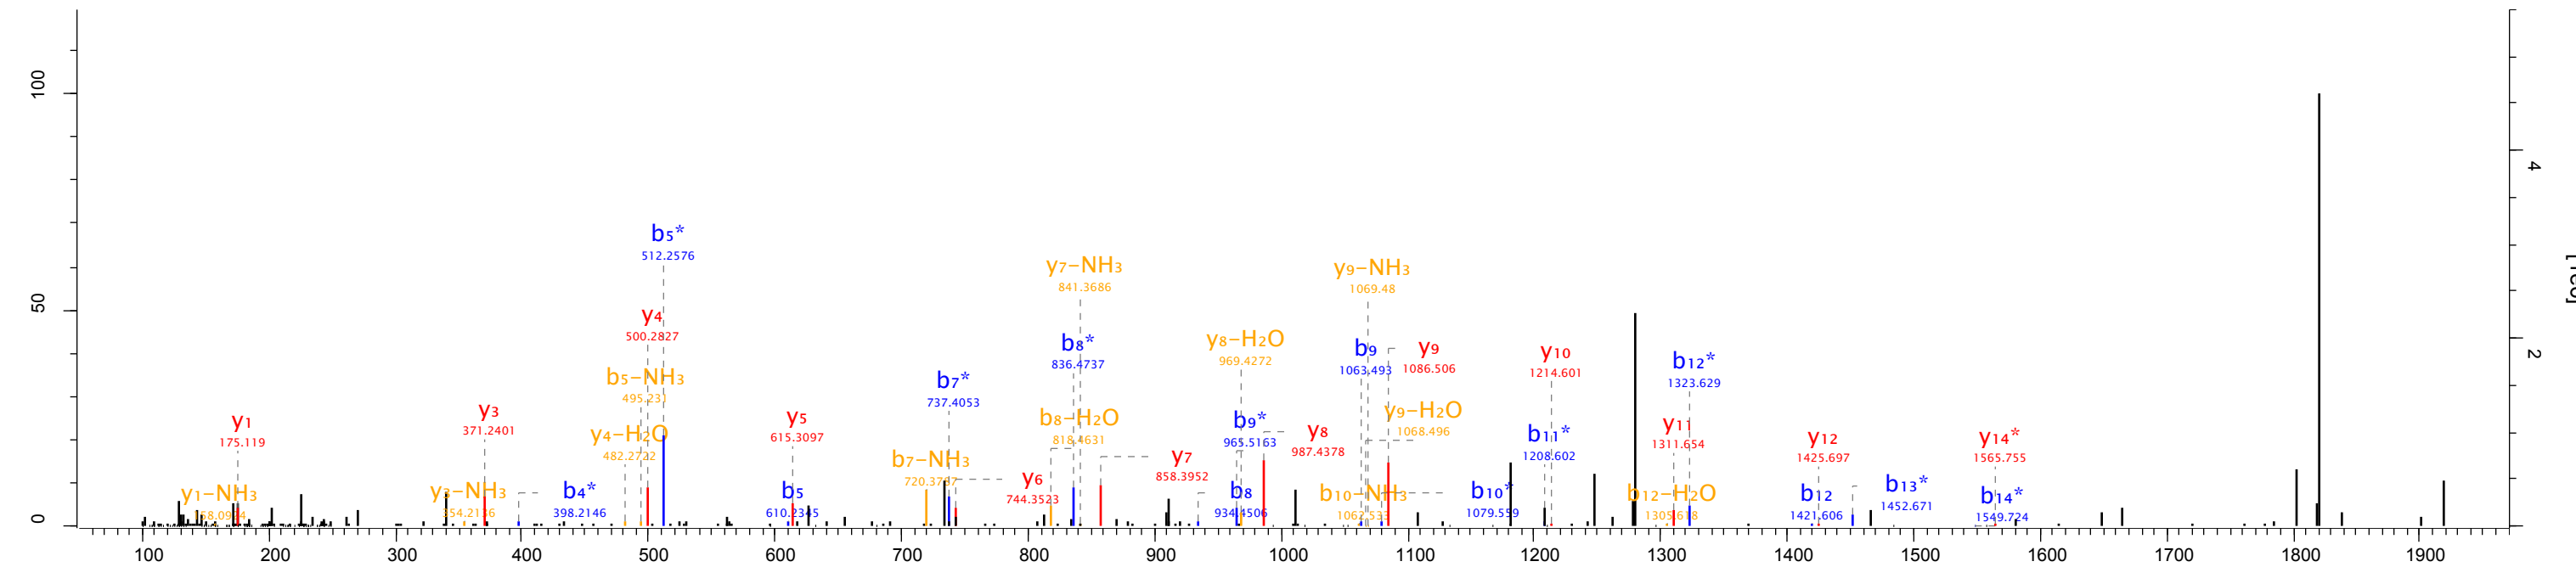

- R T A ph S N P K V E N E D E P V R -

y<sub>14</sub>\*
y<sub>12</sub>
y<sub>11</sub>
y<sub>10</sub>
y<sub>9</sub>
y<sub>8</sub>
y<sub>7</sub>
y<sub>6</sub>
y<sub>5</sub>
y<sub>4</sub>
y<sub>3</sub>
y<sub>1</sub>

b<sub>4</sub>\*
b<sub>5</sub>
b<sub>7</sub>\*
b<sub>8</sub>
b<sub>9</sub>
b<sub>10</sub>\*
b<sub>11</sub>\*
b<sub>12</sub>
b<sub>13</sub>\*
b<sub>14</sub>\*

Raw file  
 20150814\_A375SR\_Phospho\_BR2\_09  
 Scan 6885 Method FTMS; HCD Score 189.81 m/z 716.88 Gene names C9orf142

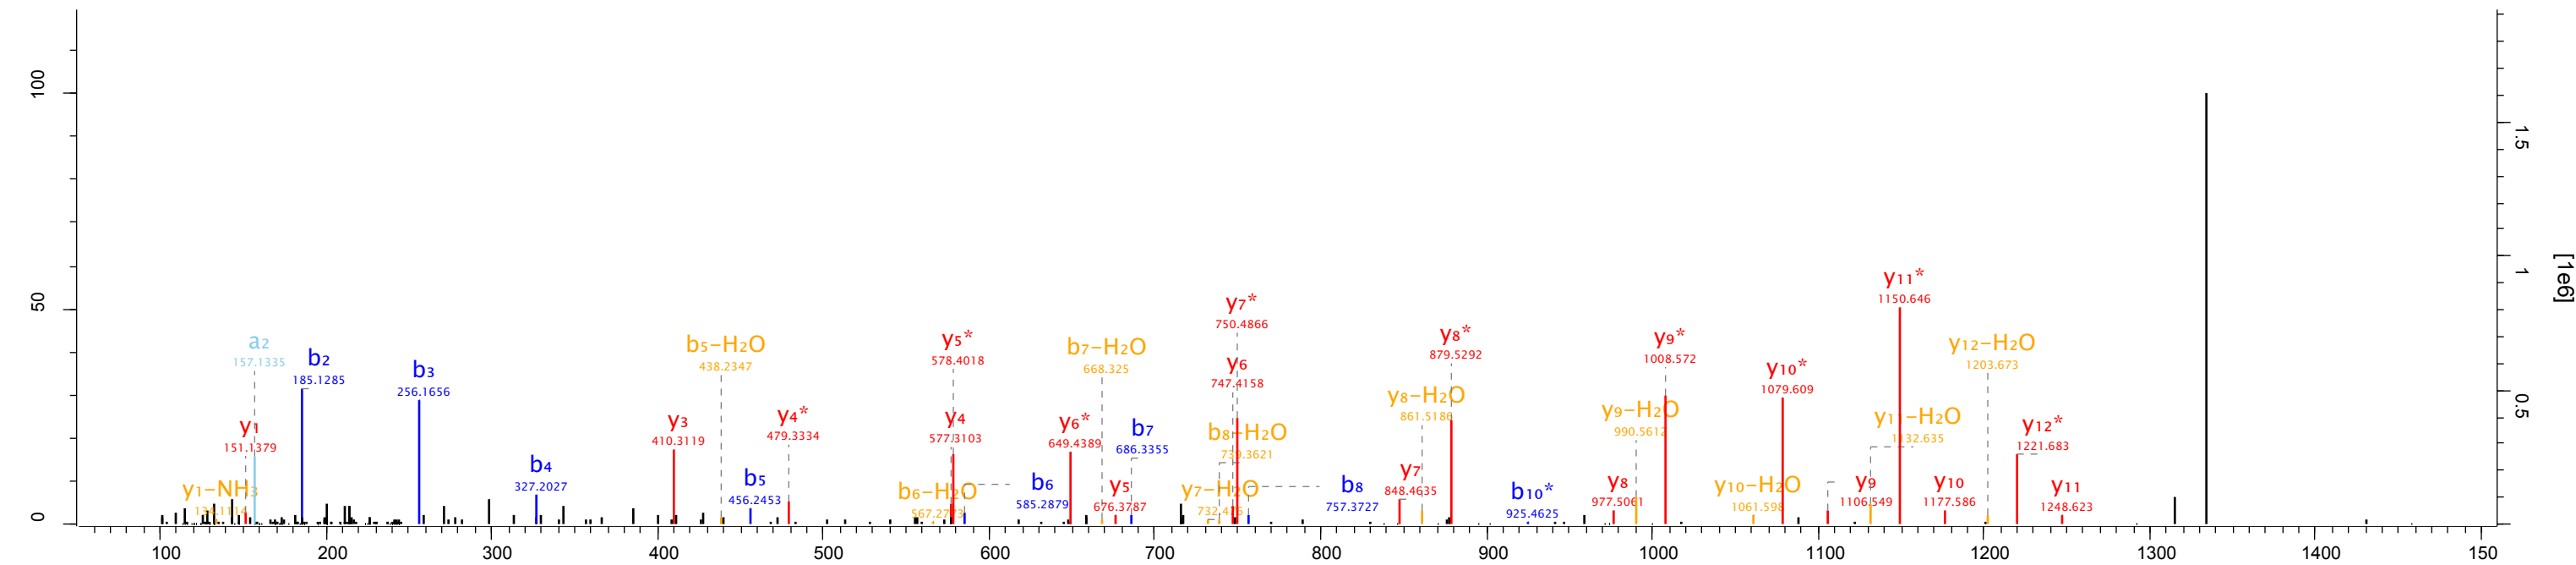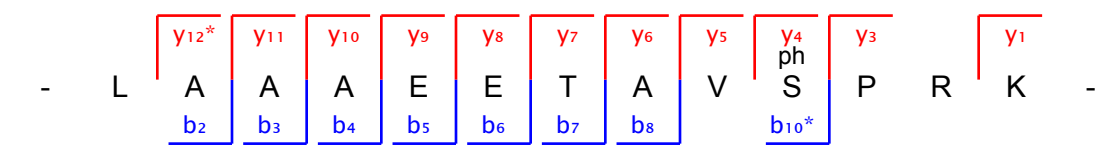

Raw file: 20150814\_A375SR\_Phospho\_BR2\_09  
 Scan: 6935 Method: FTMS; HCD Score: 111.93 m/z: 722.9 Gene names: MAP1B

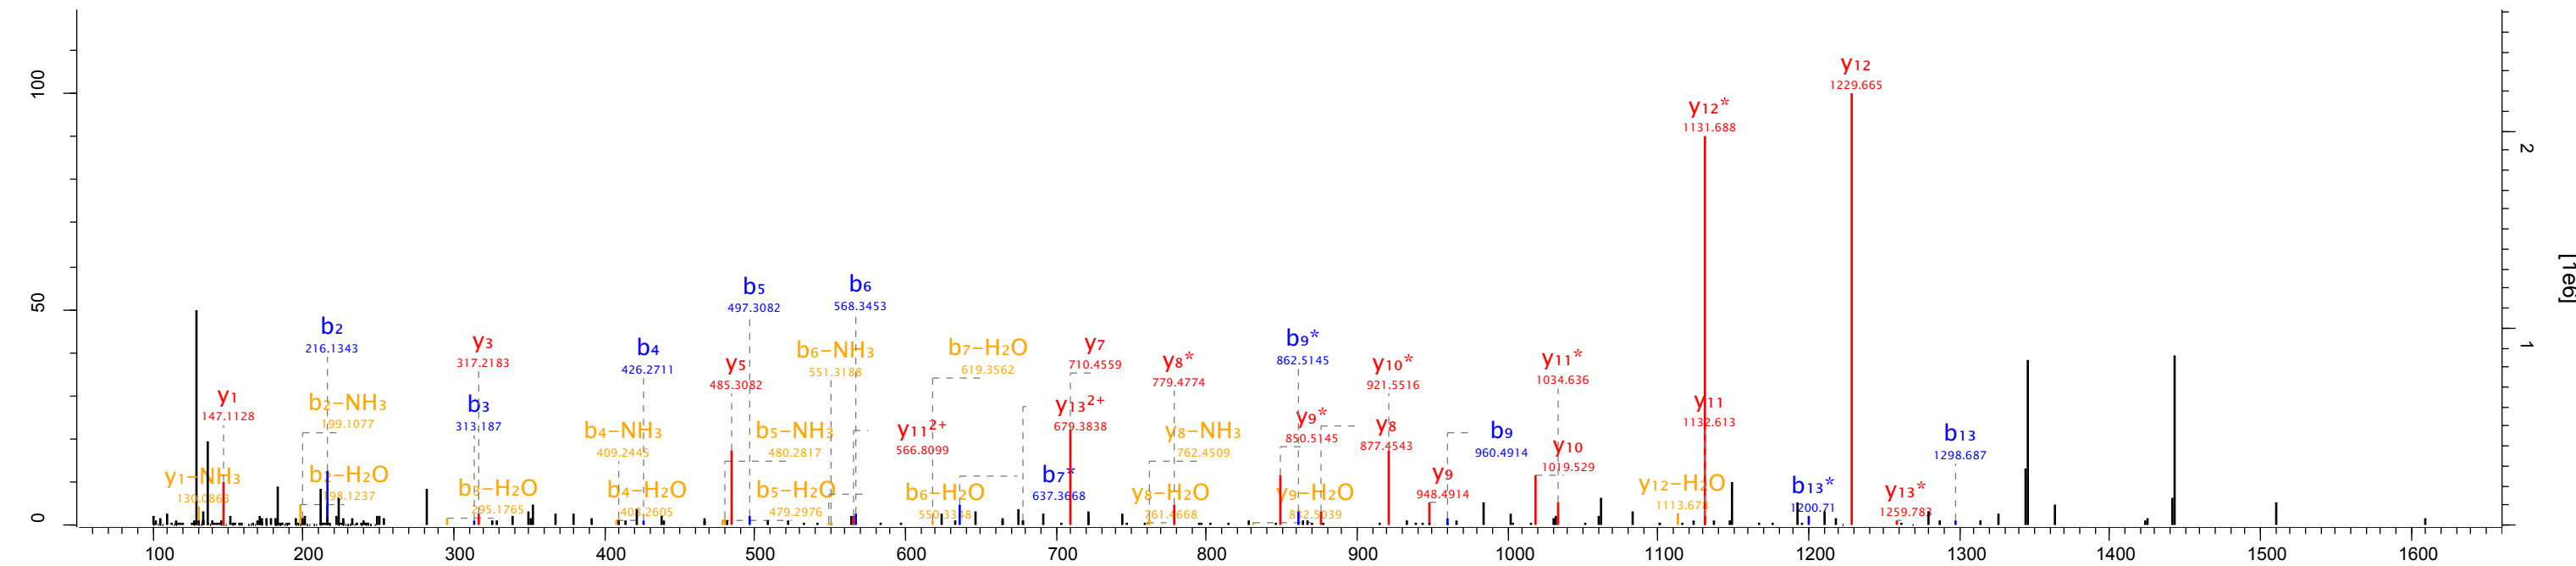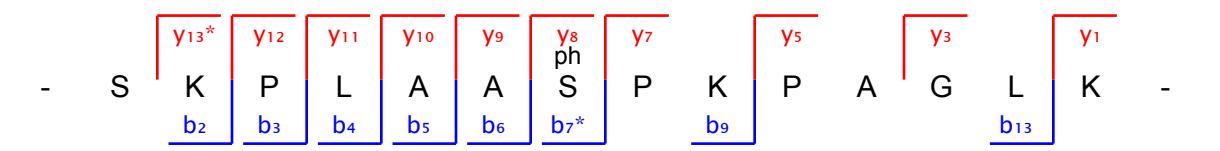

Raw file: 20150814\_A375SR\_Phospho\_BR2\_09  
 Scan: 7405 Method: FTMS; HCD Score: 112.59 m/z: 500.25 Gene names: FRYL

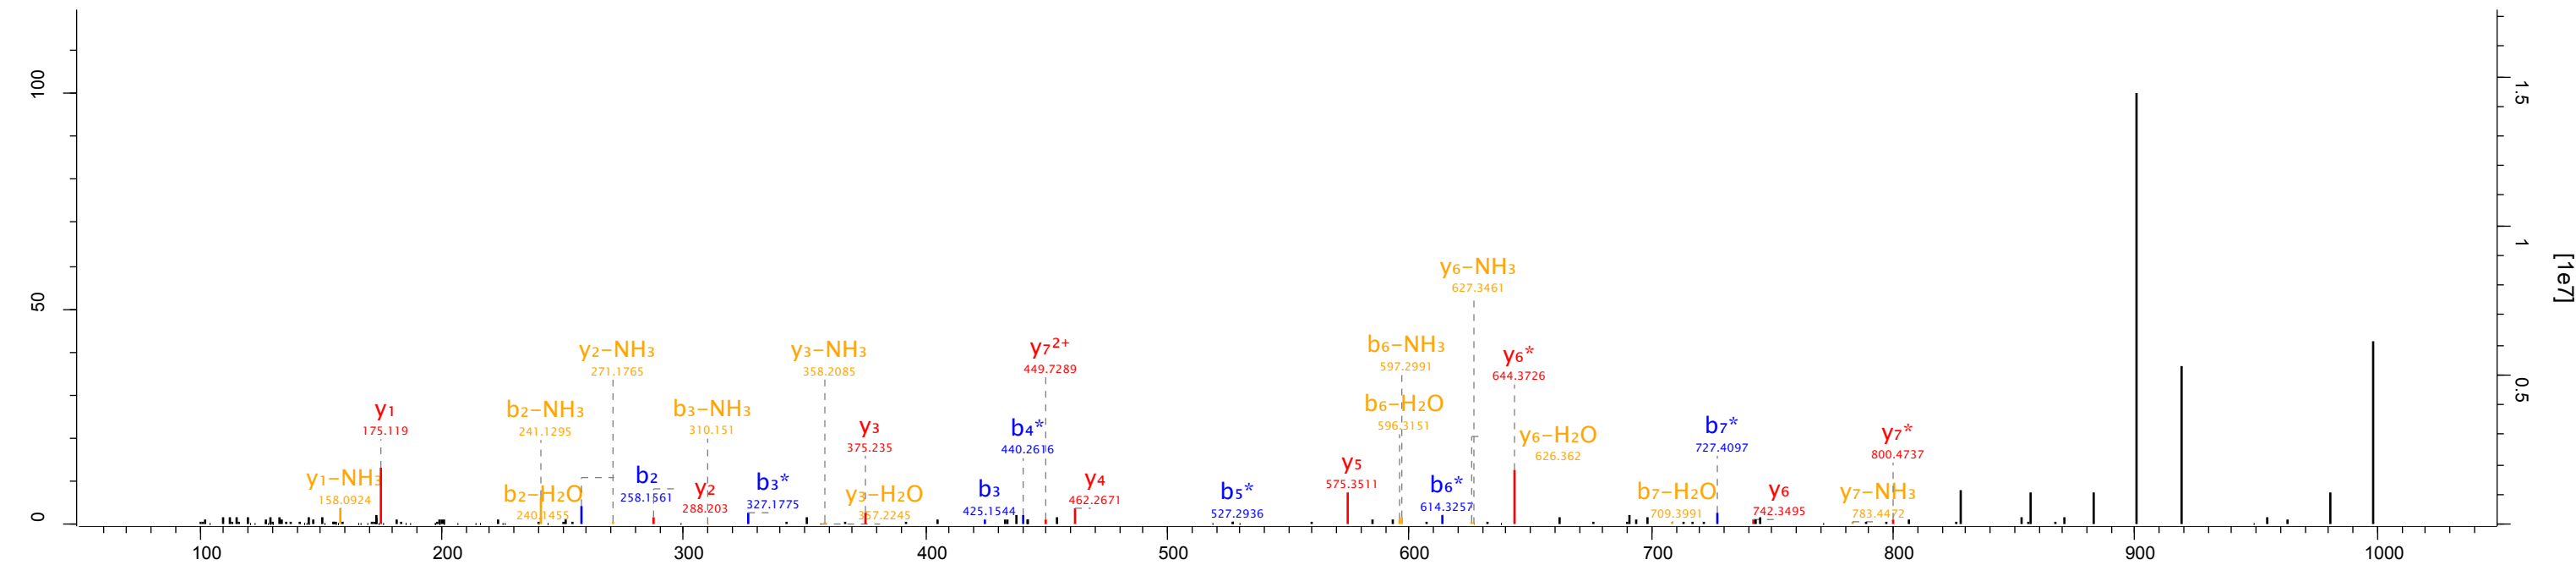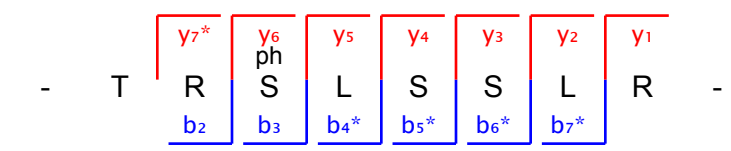

Raw file 20150814\_A375SR\_Phospho\_BR2\_09 Scan 7735 Method FTMS; HCD Score 78.38 m/z 640.61 Gene names SF3B1

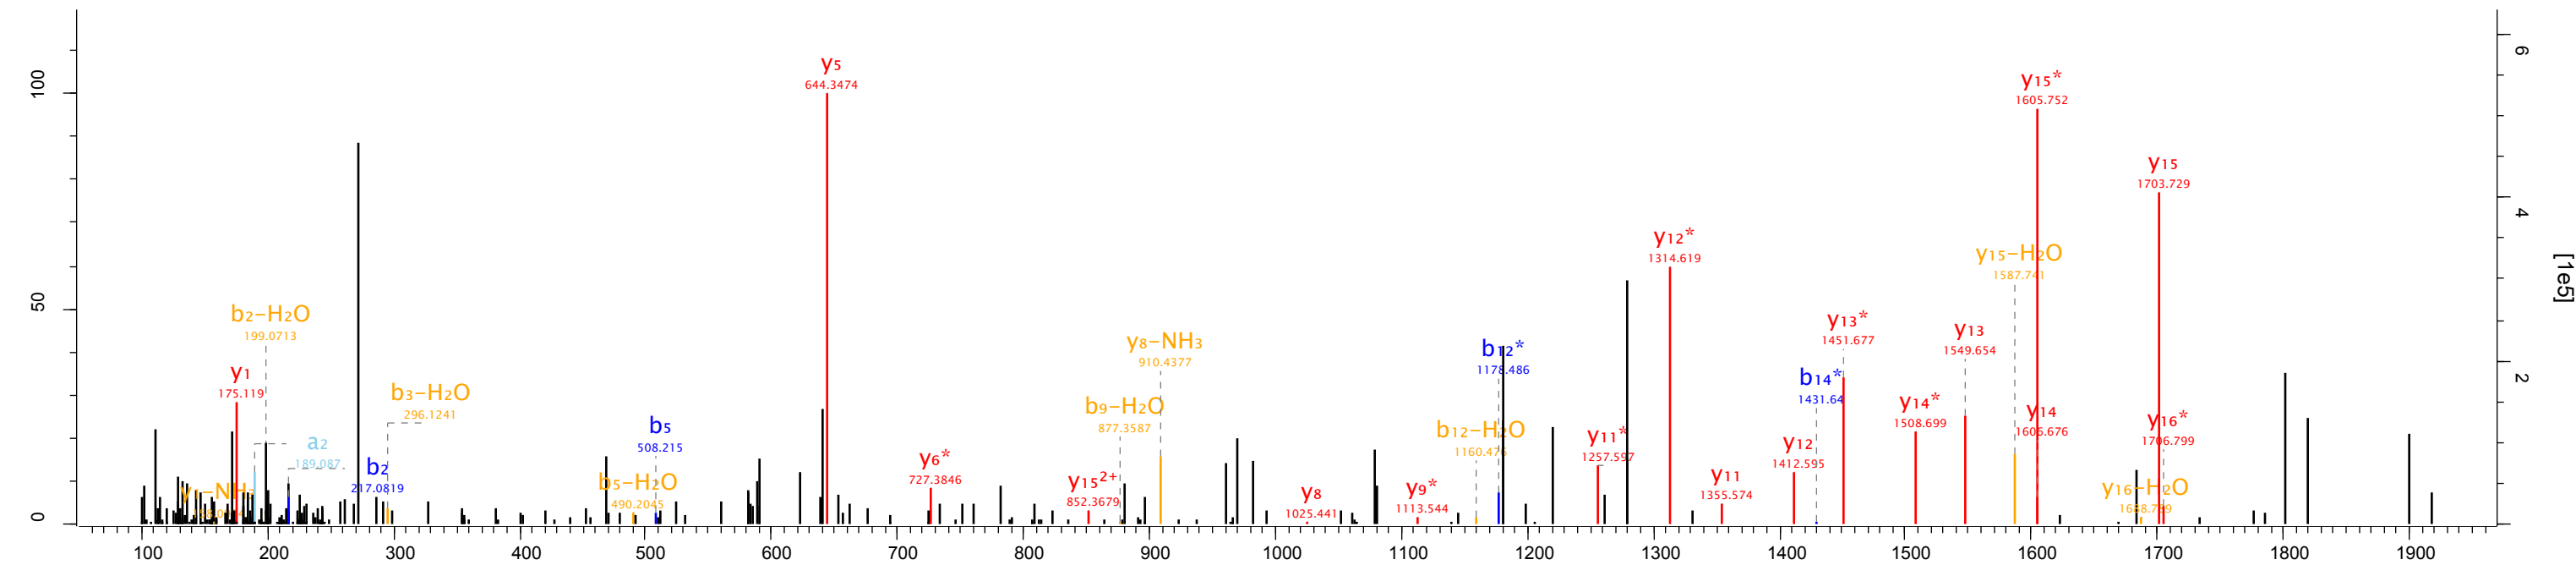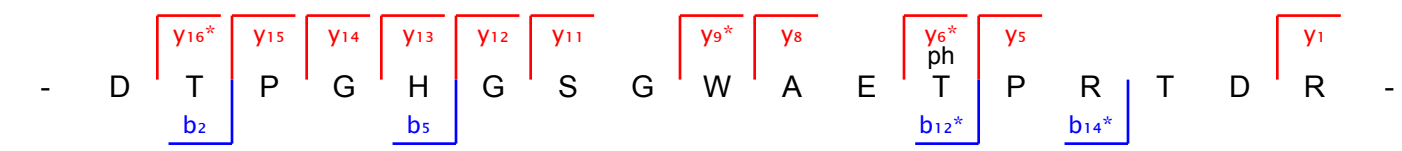



Raw file: 20150814\_A375SR\_Phospho\_BR2\_09  
 Scan: 8445 Method: FTMS; HCD Score: 108.57 m/z: 676.02 Gene names: BCL9

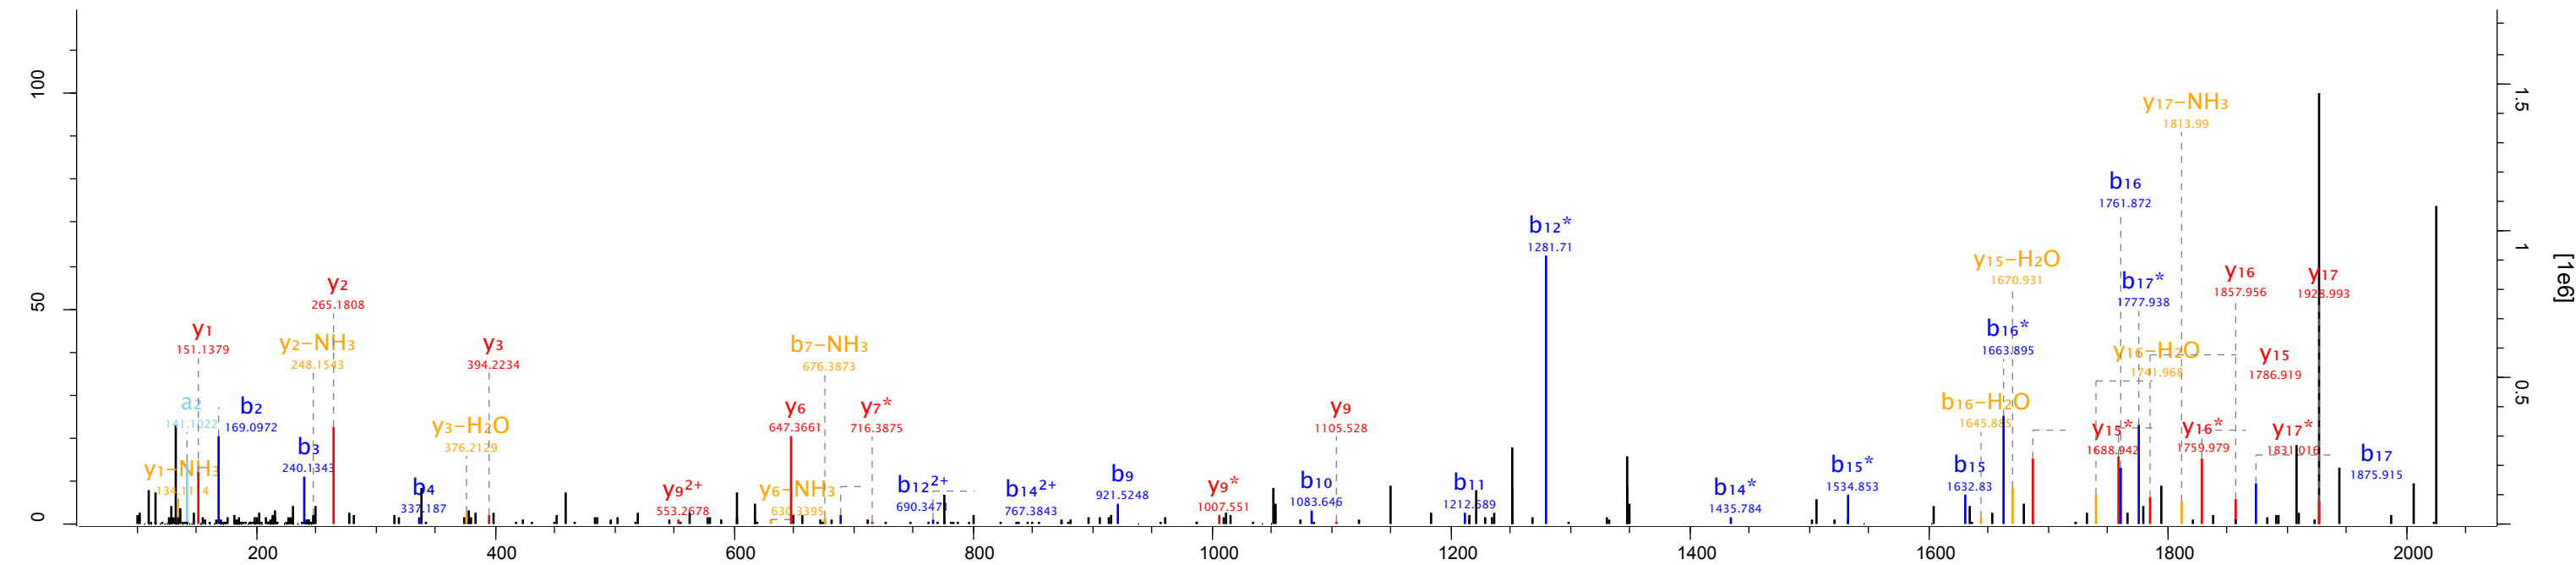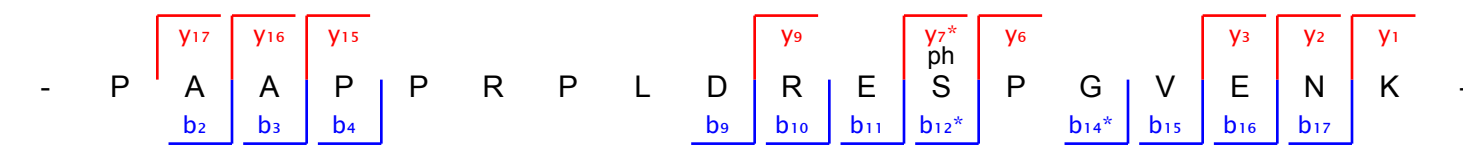

Raw file: 20150814\_A375SR\_Phospho\_BR2\_09  
 Scan: 9215 Method: FTMS; HCD Score: 103.89 m/z: 528.77 Gene names: DOCK7

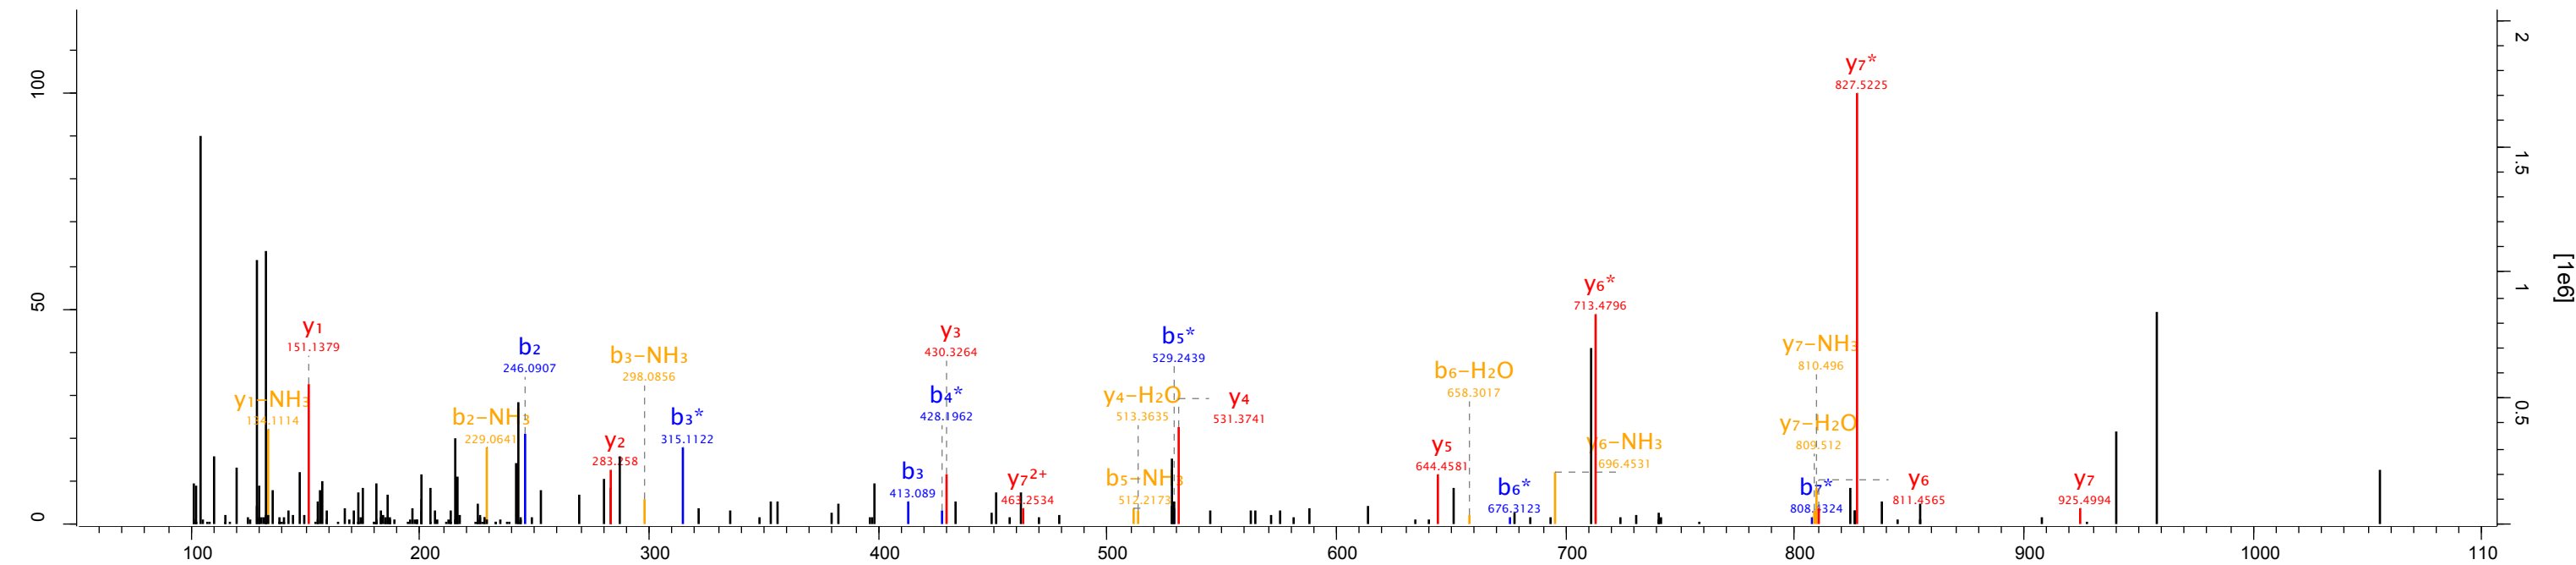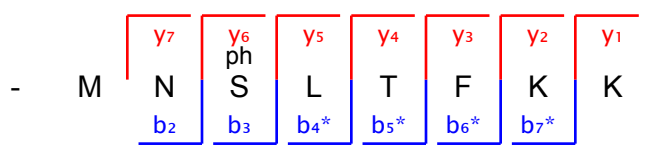

Raw file: 20150814\_A375SR\_Phospho\_BR2\_09  
 Scan: 9425 Method: FTMS; HCD Score: 100.28 m/z: 600.95 Gene names: CDCA3

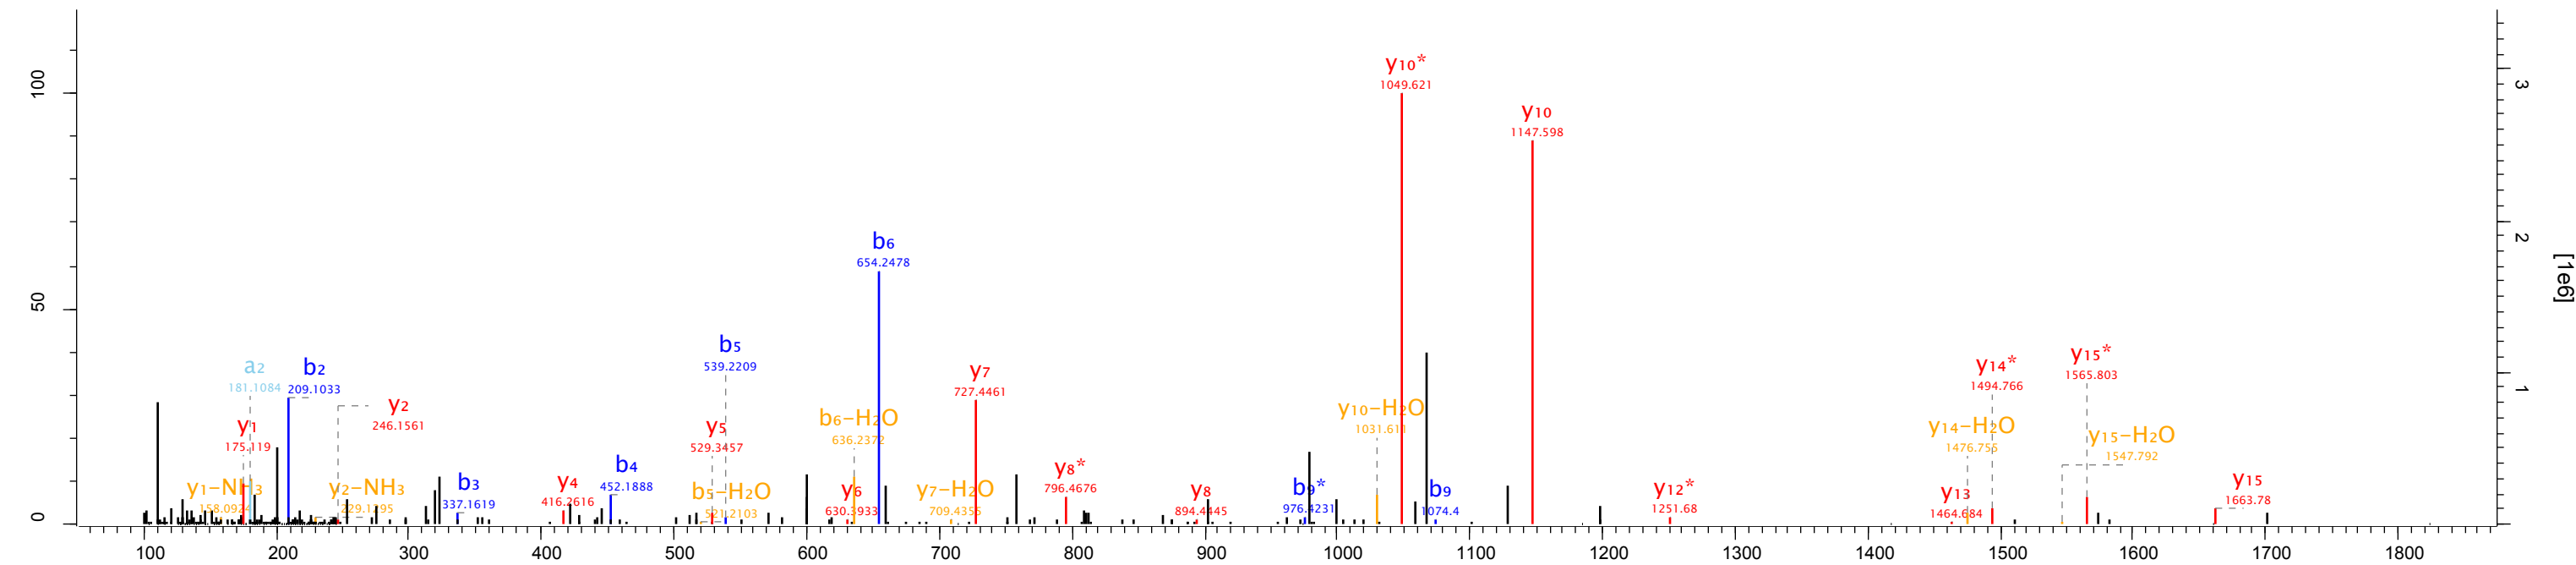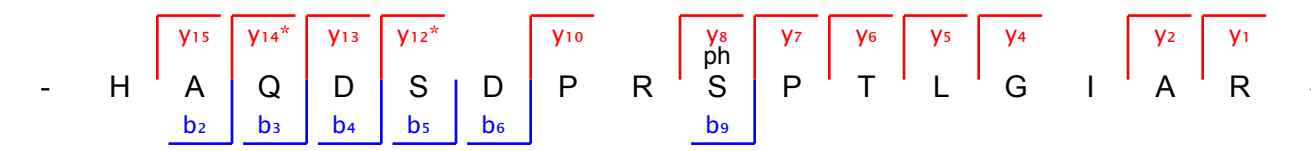

Raw file: 20150814\_A375SR\_Phospho\_BR2\_02  
 Scan: 10596 Method: FTMS; HCD Score: 161.46 m/z: 855.32 Gene names: IRS2

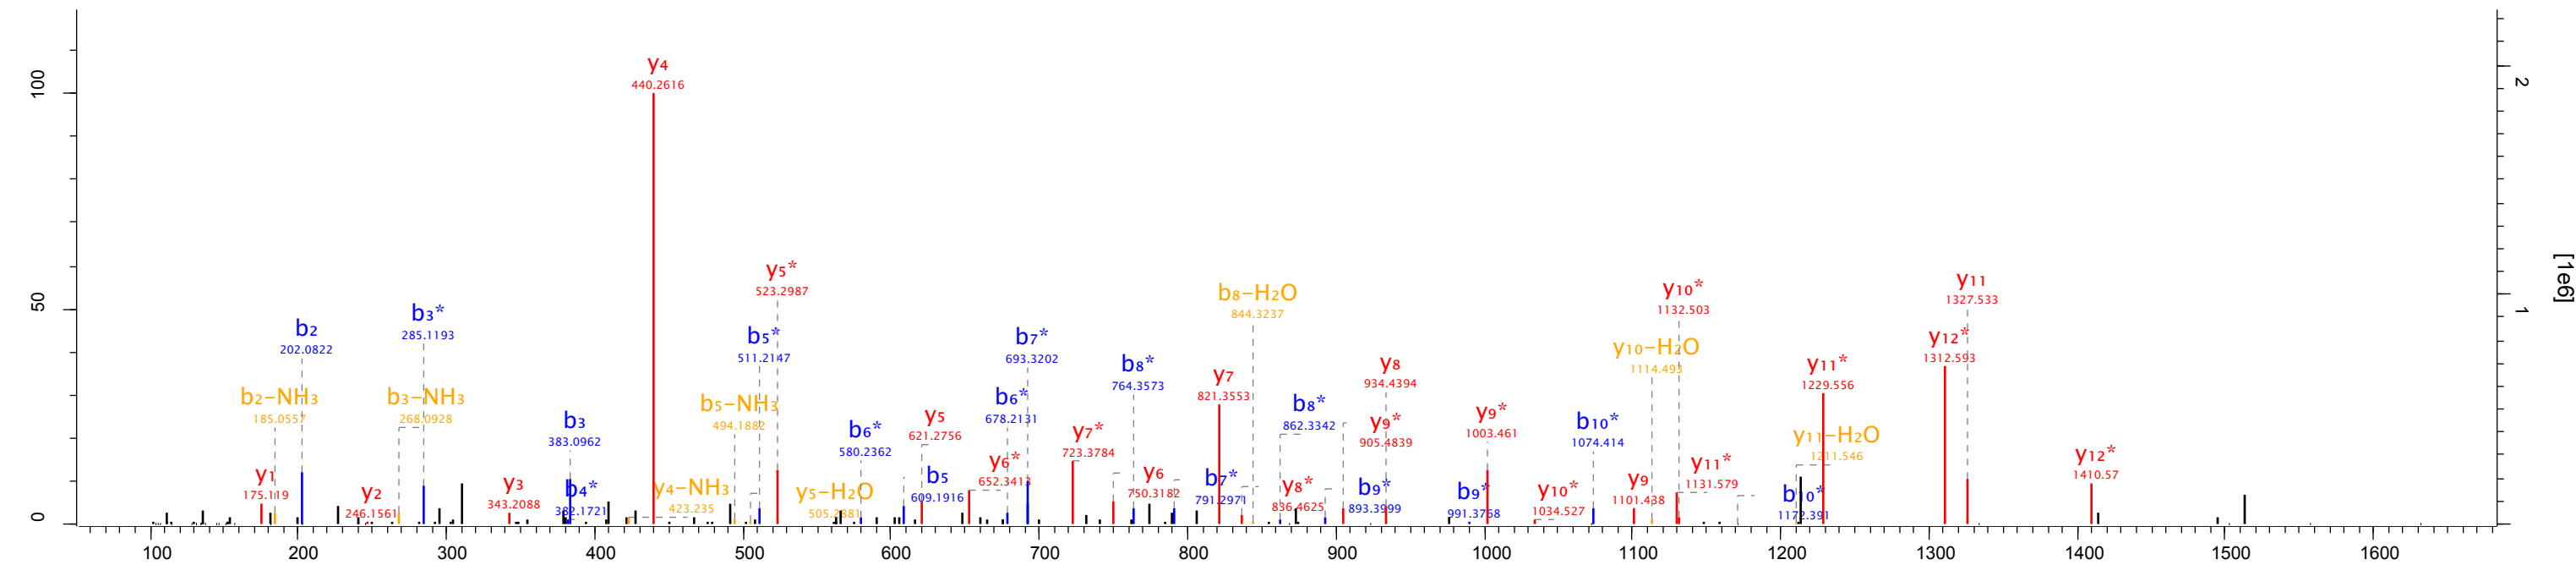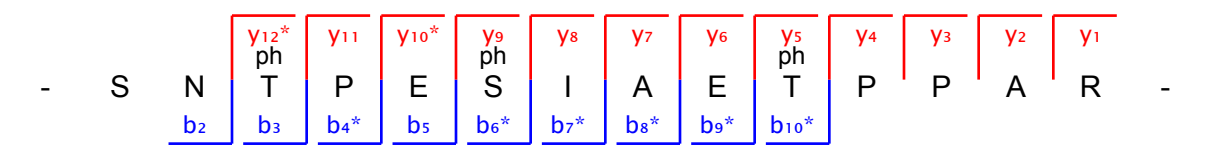

Raw file: 20150814\_A375SR\_Phospho\_BR2\_02  
 Scan: 11216 Method: FTMS; HCD Score: 88.98 m/z: 1036.43 Gene names: FBXO38

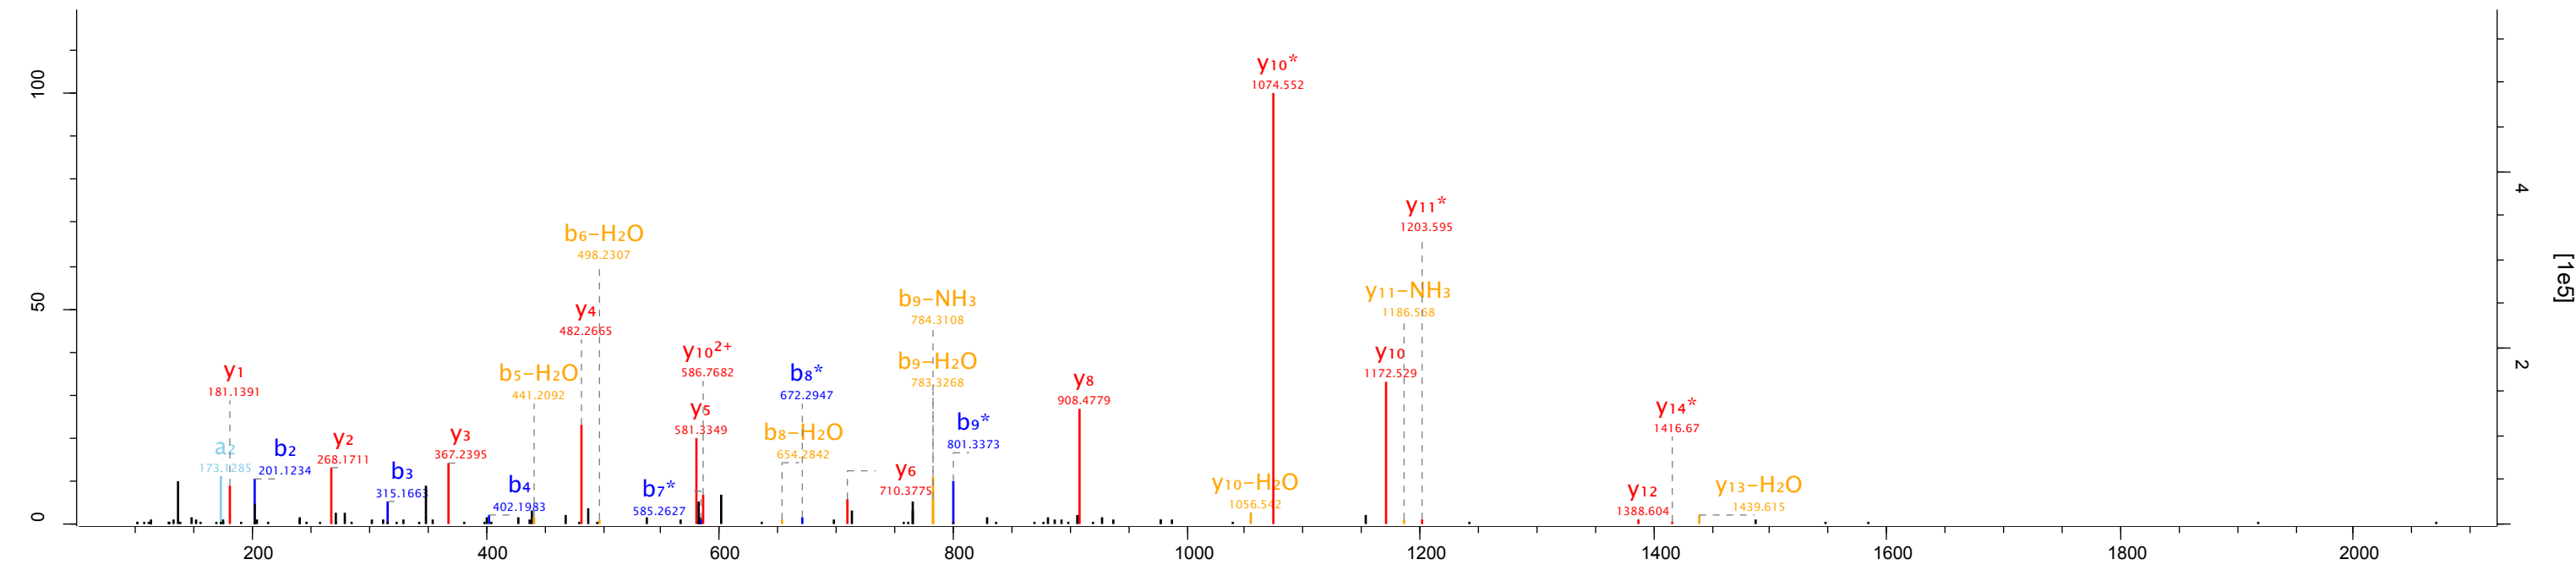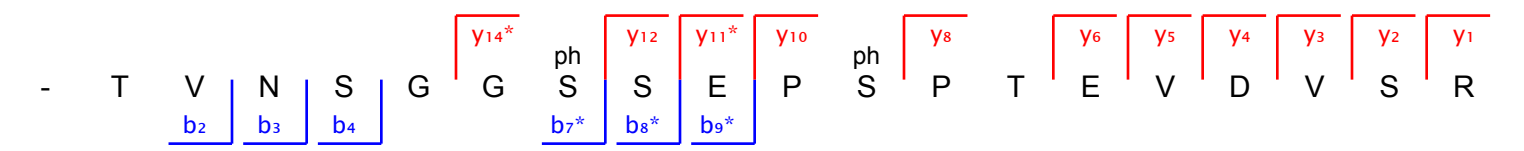

Raw file: 20150814\_A375SR\_Phospho\_BR2\_02  
 Scan: 11446 Method: FTMS; HCD Score: 130.32 m/z: 909.42 Gene names: SRRM2

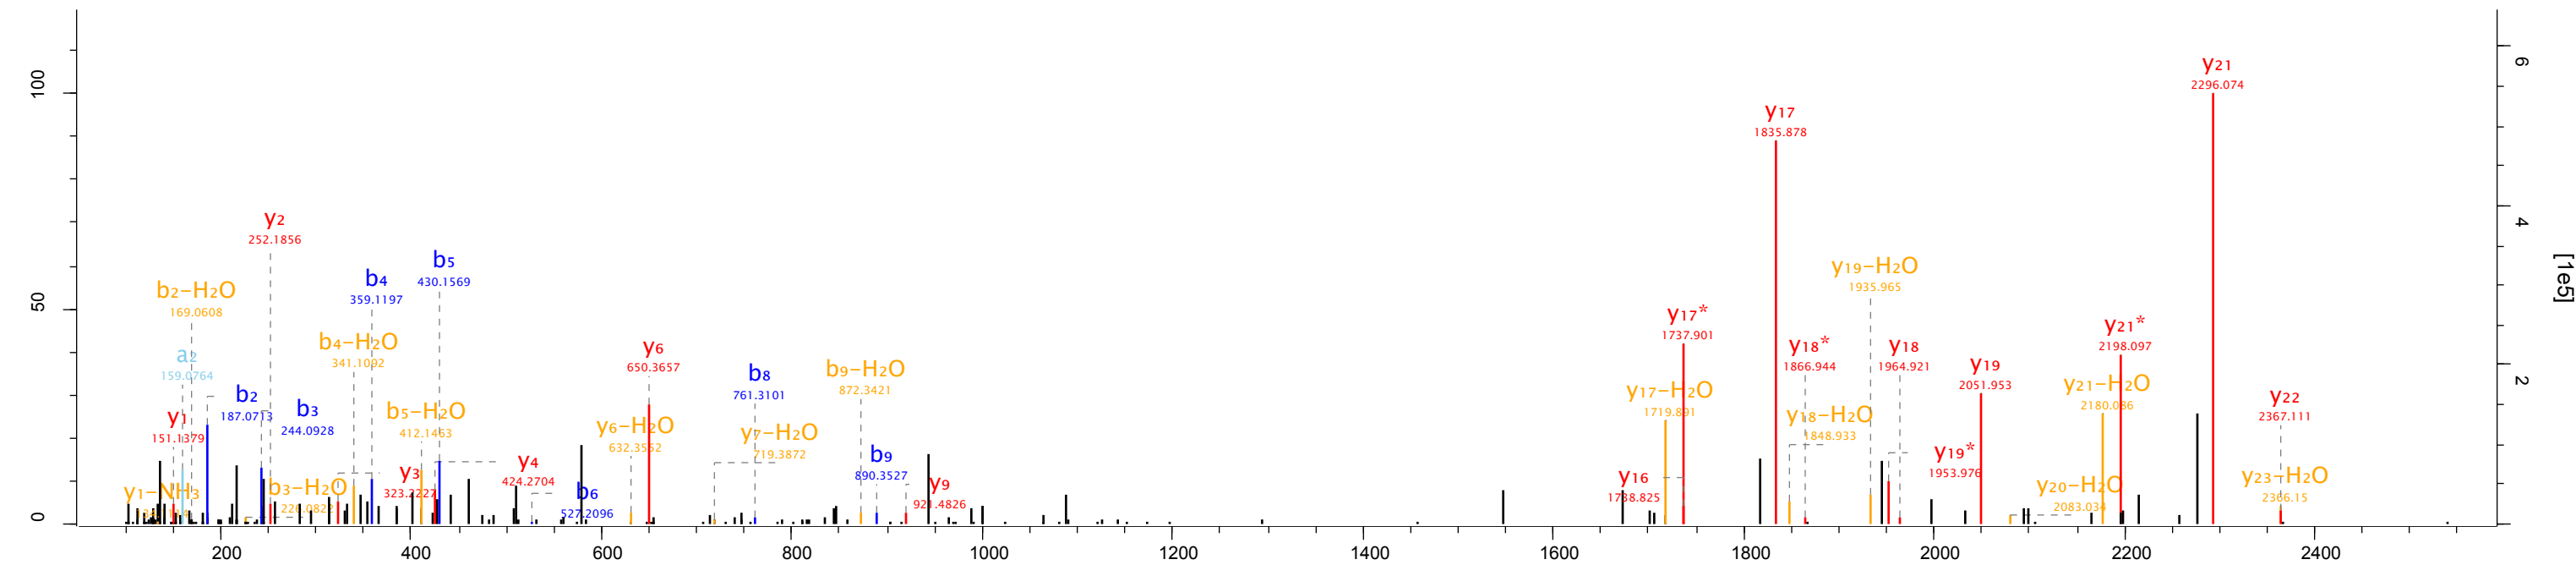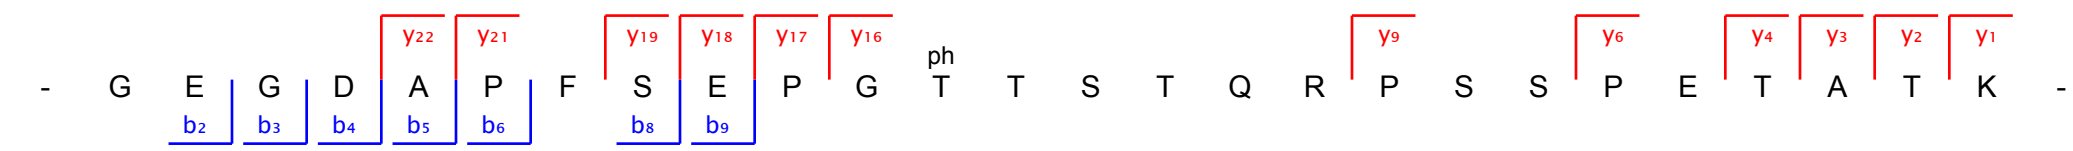

Raw file: 20150814\_A375SR\_Phospho\_BR2\_02  
 Scan: 12186 Method: FTMS; HCD Score: 67.91 m/z: 773.69 Gene names: TSC2

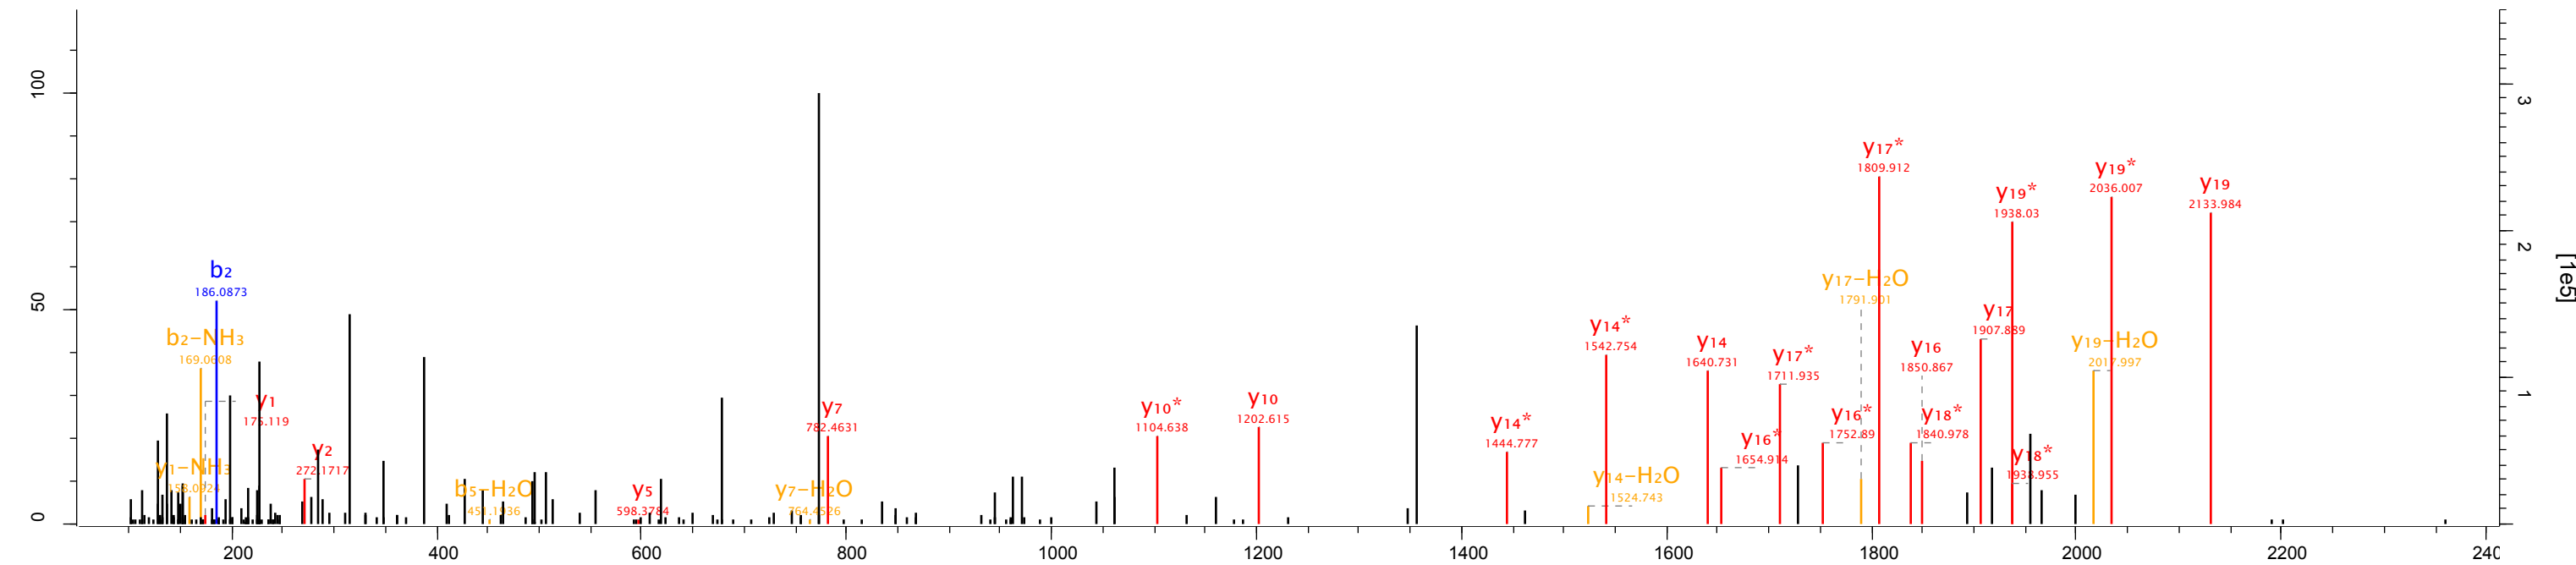

Sequence: - G Q P E G P L P S S S P R S P S G L R P R -

Fragmentation sites (b and y ions) are indicated by brackets above the sequence:

- b<sub>2</sub> (blue bracket under G-Q)
- y<sub>19</sub> (red bracket above P-E)
- y<sub>18</sub><sup>\*</sup> (red bracket above E-G)
- y<sub>17</sub> (red bracket above G-P)
- y<sub>16</sub> (red bracket above P-L)
- y<sub>14</sub> (red bracket above P-S)
- y<sub>10</sub> (red bracket above P-R)
- y<sub>7</sub> (red bracket above P-S)
- y<sub>5</sub> (red bracket above G-L)
- y<sub>2</sub> (red bracket above P-R)
- y<sub>1</sub> (red bracket above R)

Raw file 20150814\_A375SR\_Phospho\_BR2\_02 Scan 12316 Method FTMS; HCD Score 50.2 m/z 910.87 Gene names SRSF6

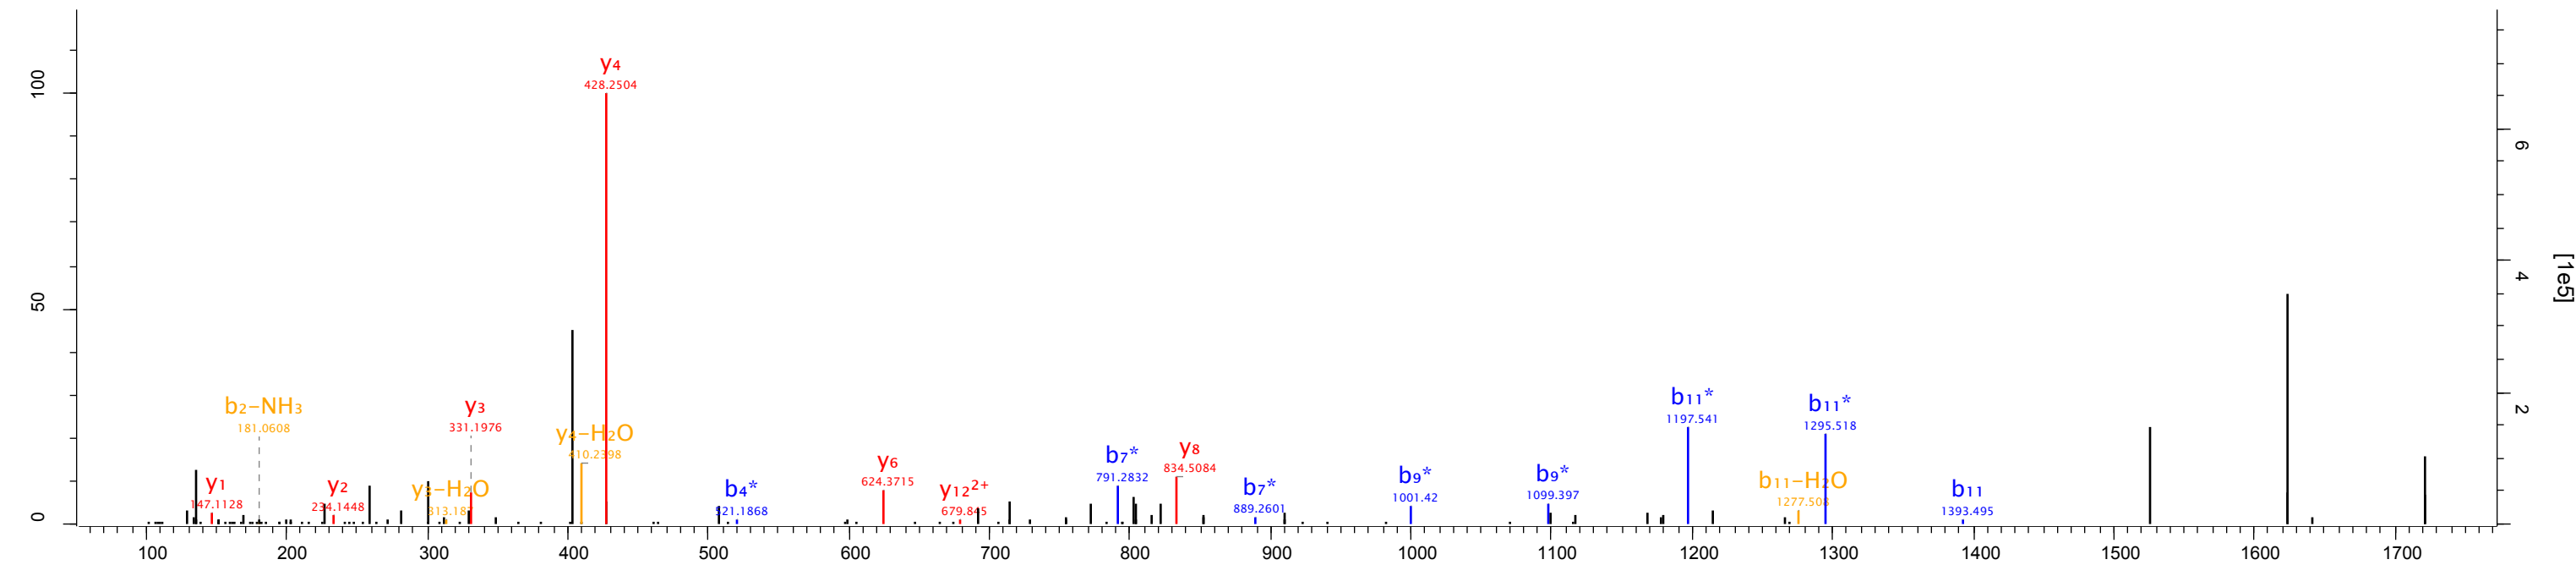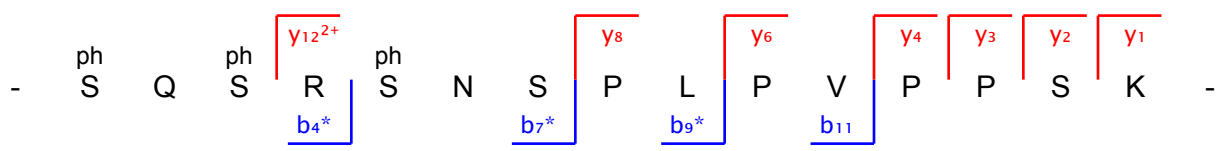



Raw file 20150814\_A375SR\_Phospho\_BR2\_02 Scan 12386 Method FTMS; HCD Score 144.08 m/z 1212.02 Gene names MICALL1

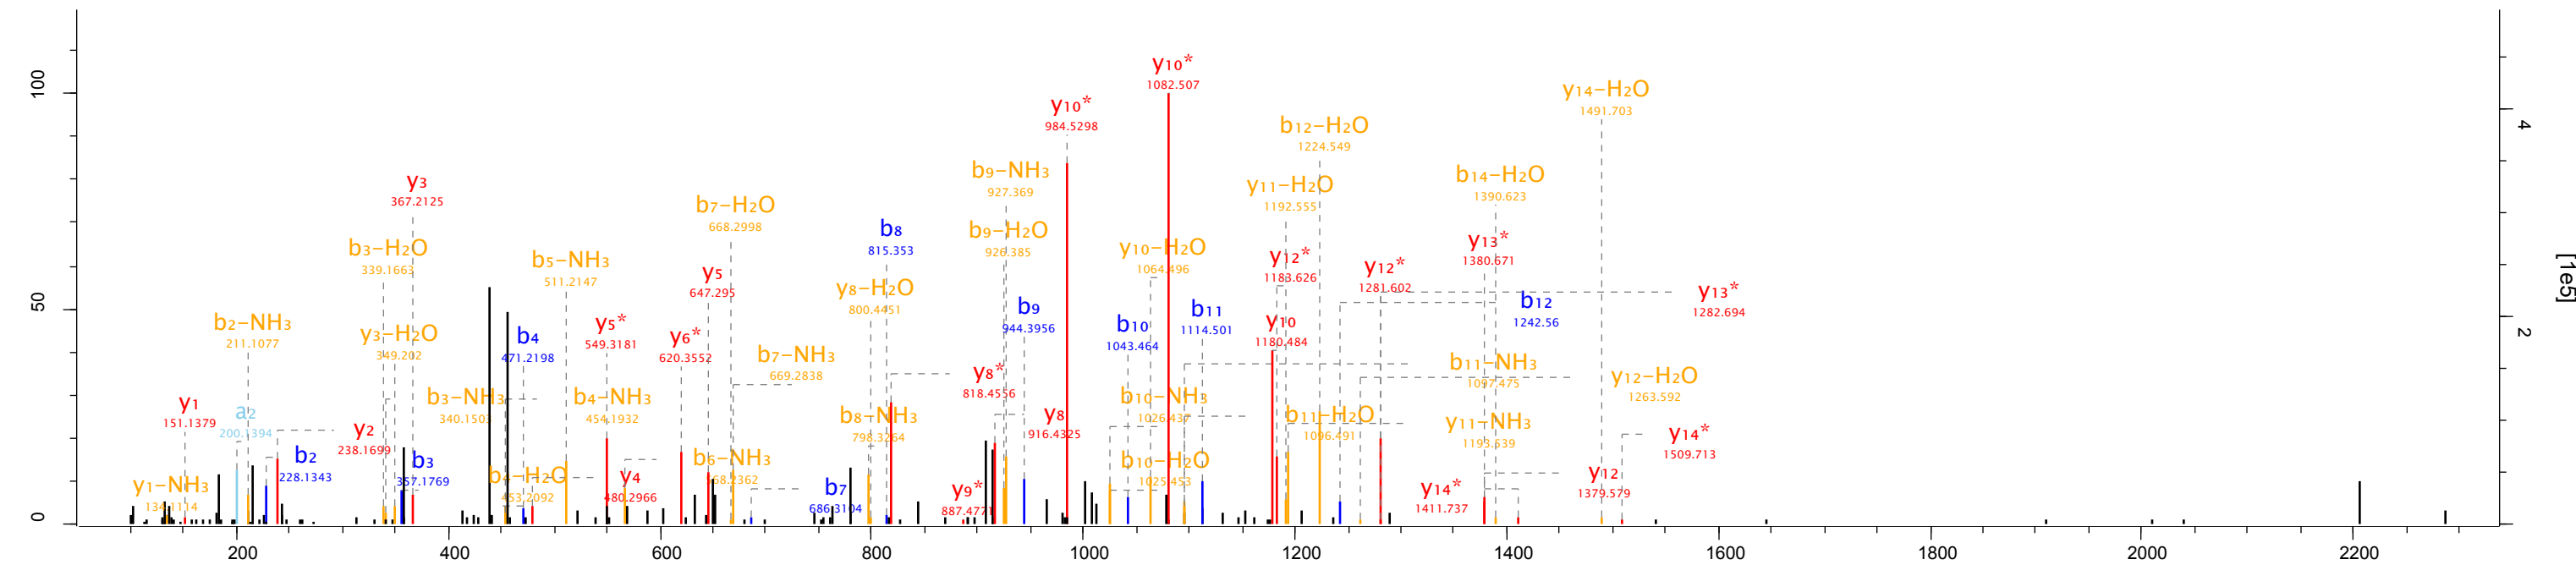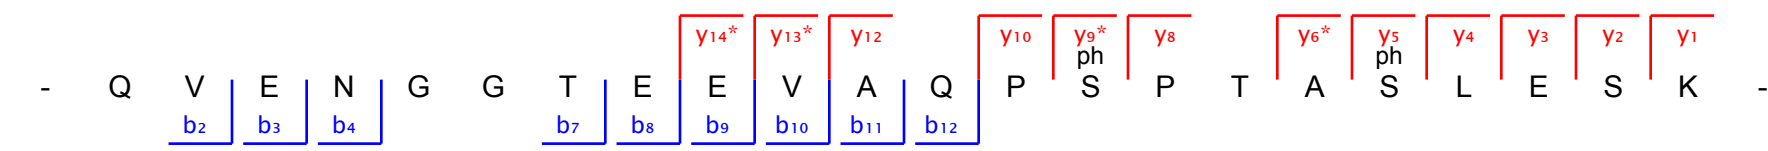

Raw file 20150814\_A375SR\_Phospho\_BR2\_02 Scan 12586 Method FTMS; HCD Score 53.52 m/z 951.39 Gene names FARP1

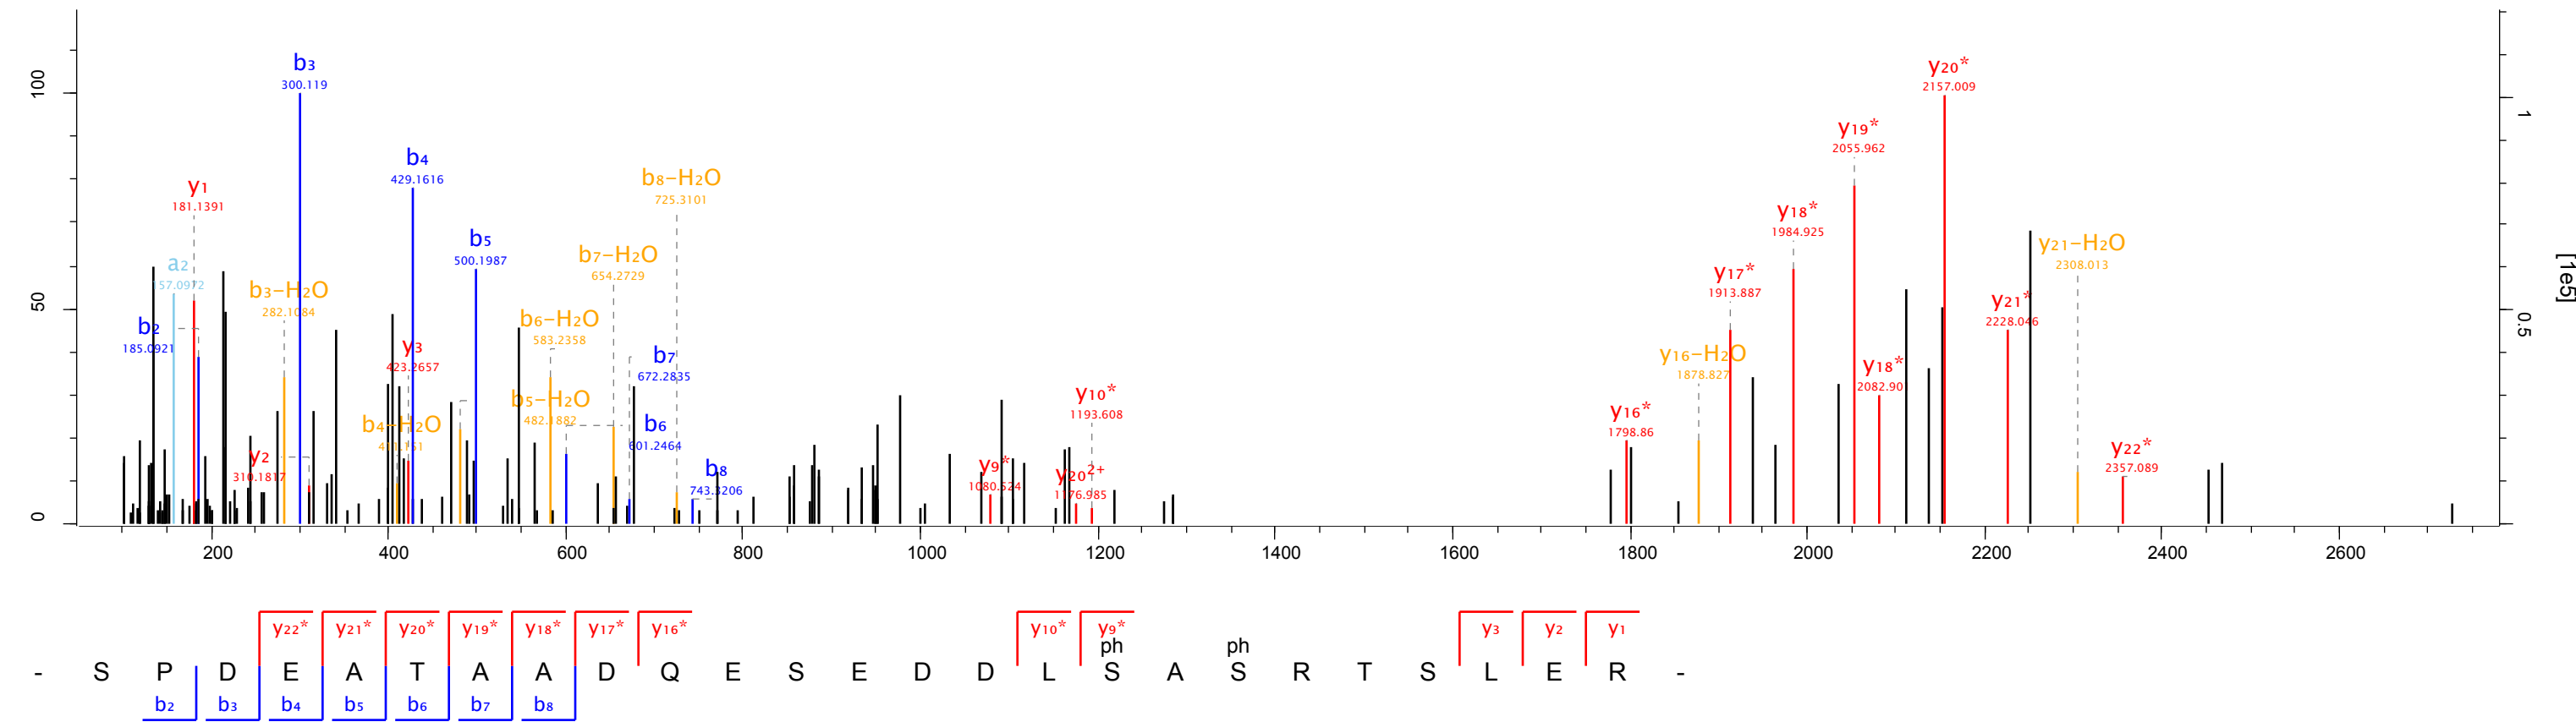

Raw file 20150814\_A375SR\_Phospho\_BR2\_02 Scan 12636 Method FTMS; HCD Score 182.13 m/z 859.3 Gene names RANBP10

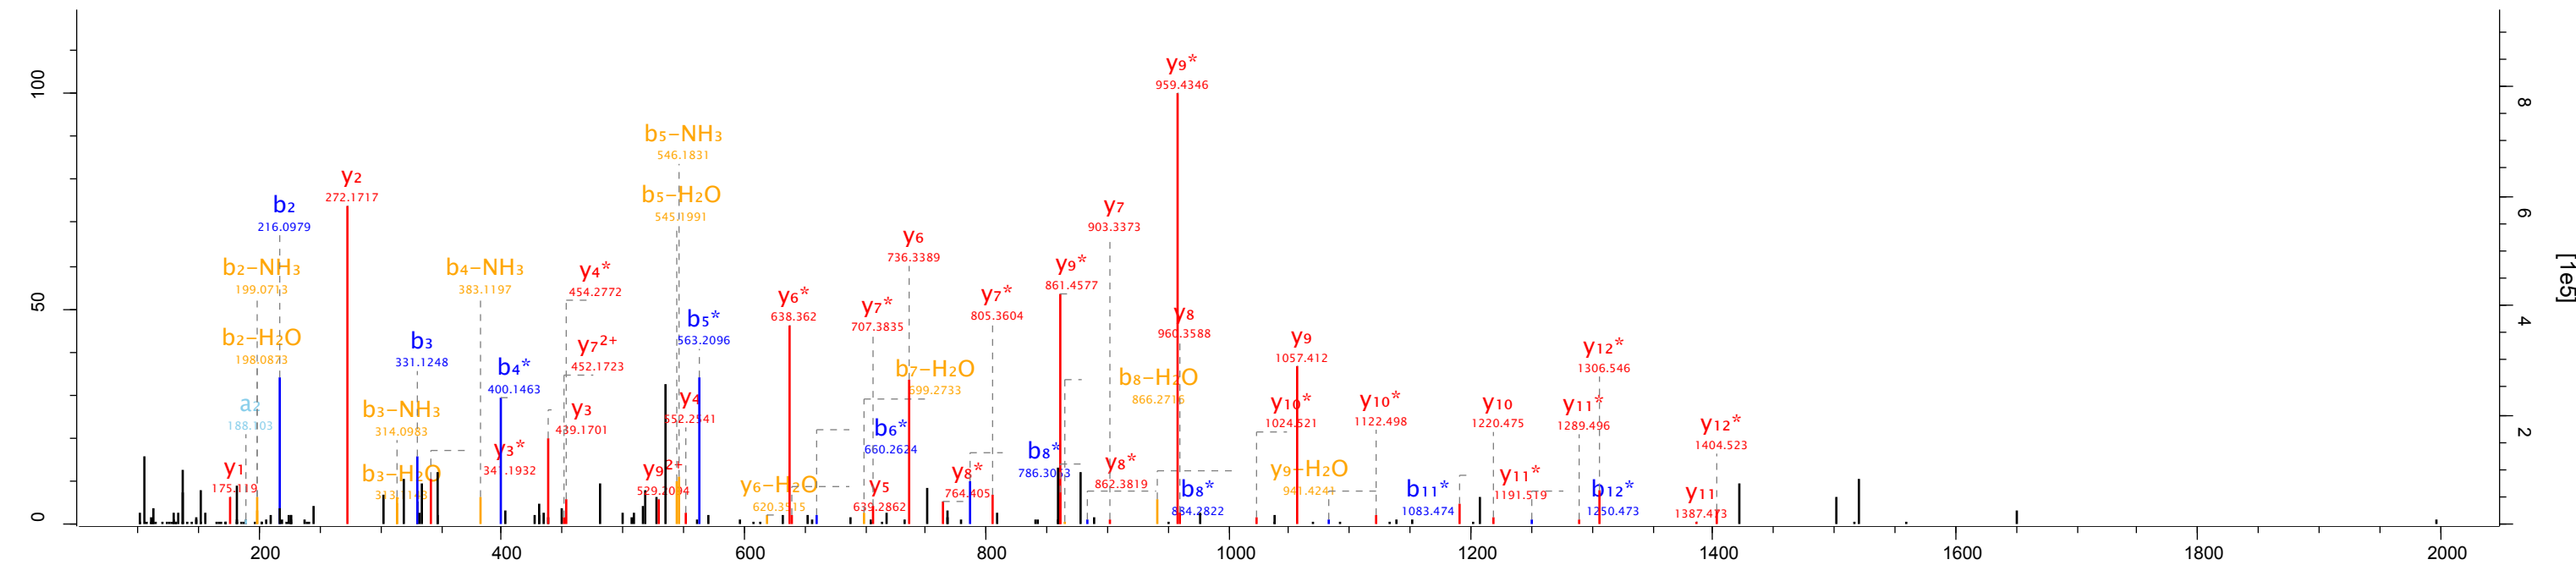

- S Q D S Y P G S P S L S P R -

b<sub>2</sub>
b<sub>3</sub>
b<sub>4</sub><sup>\*</sup>
b<sub>5</sub><sup>\*</sup>
b<sub>6</sub><sup>\*</sup>
b<sub>8</sub><sup>\*</sup>
b<sub>11</sub><sup>\*</sup>
b<sub>12</sub><sup>\*</sup>

y<sub>12</sub><sup>\*</sup>
y<sub>11</sub> ph
y<sub>10</sub>
y<sub>9</sub>
y<sub>8</sub>
y<sub>7</sub> ph
y<sub>6</sub>
y<sub>5</sub>
y<sub>4</sub>
y<sub>3</sub> ph
y<sub>2</sub>
y<sub>1</sub>

Raw file Scan Method Score m/z Gene names  
 20150814\_A375SR\_Phospho\_BR2\_02 12886 FTMS; HCD 67.42 847.28 C19orf44

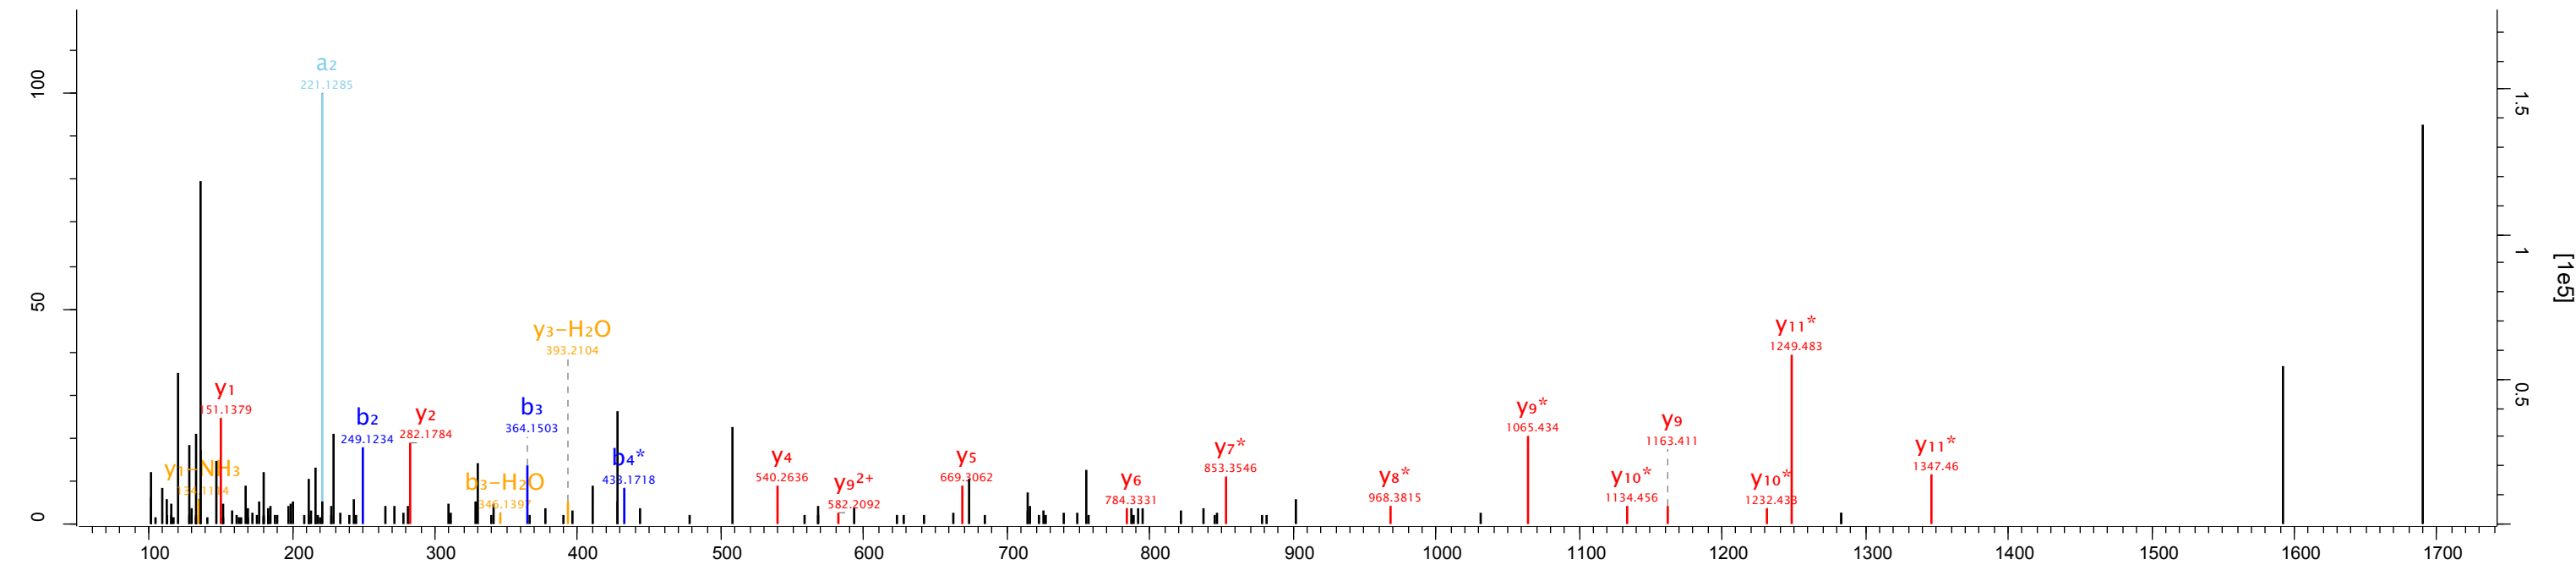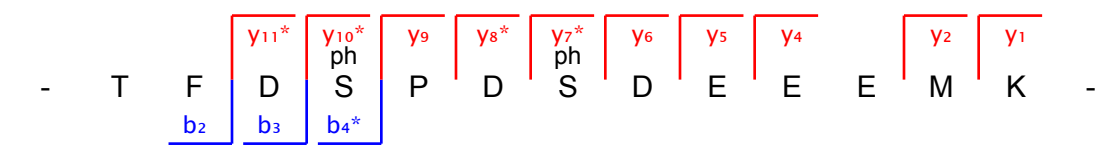

Raw file 20150814\_A375SR\_Phospho\_BR2\_02 Scan 13986 Method FTMS; HCD Score 143.46 m/z 762.33 Gene names TCOF1

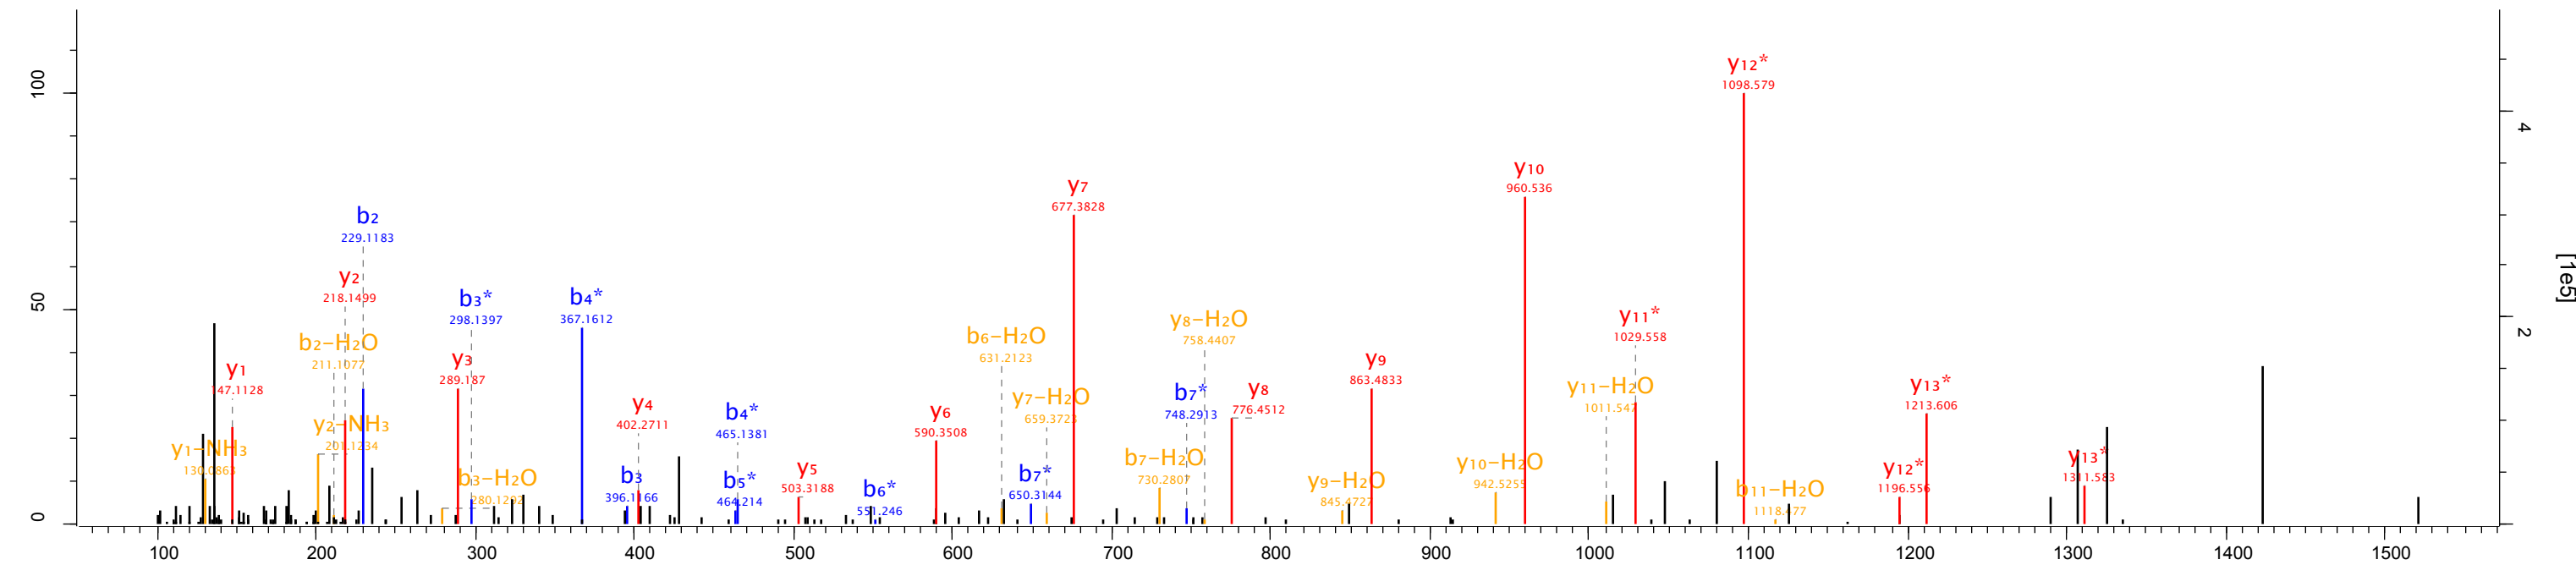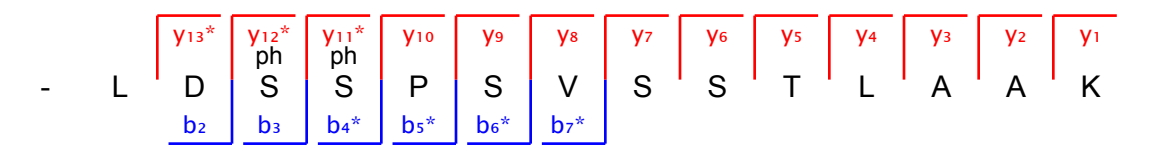



Raw file 20150814\_A375SR\_Phospho\_BR2\_02 Scan 17156 Method FTMS; HCD Score 128.47 m/z 1168.46 Gene names KIDINS220

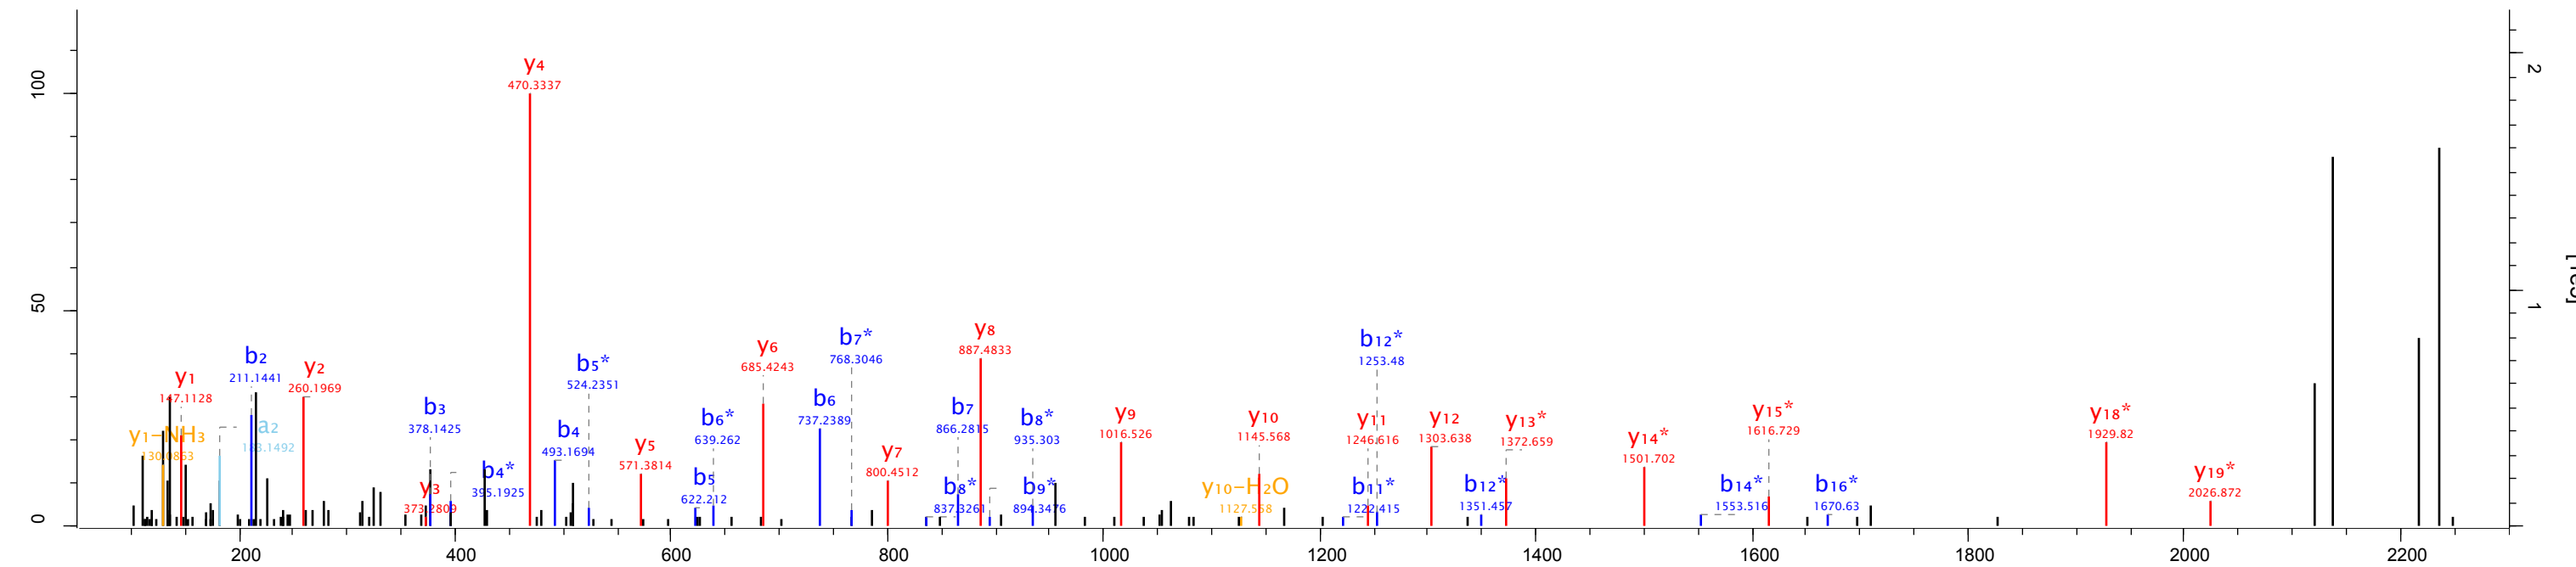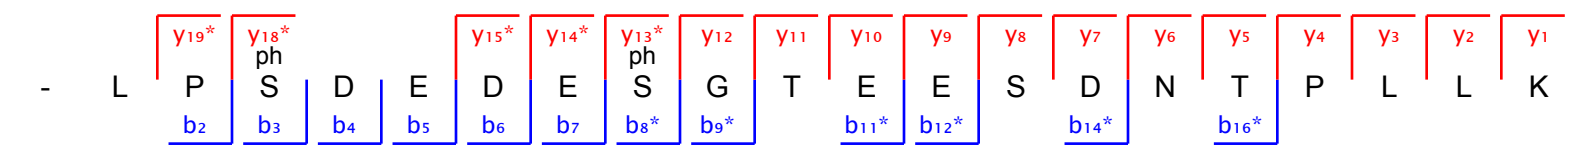

Raw file: 20150814\_A375SR\_Phospho\_BR2\_02  
 Scan: 17246 Method: FTMS; HCD Score: 121.86 m/z: 966.13 Gene names: SRP72

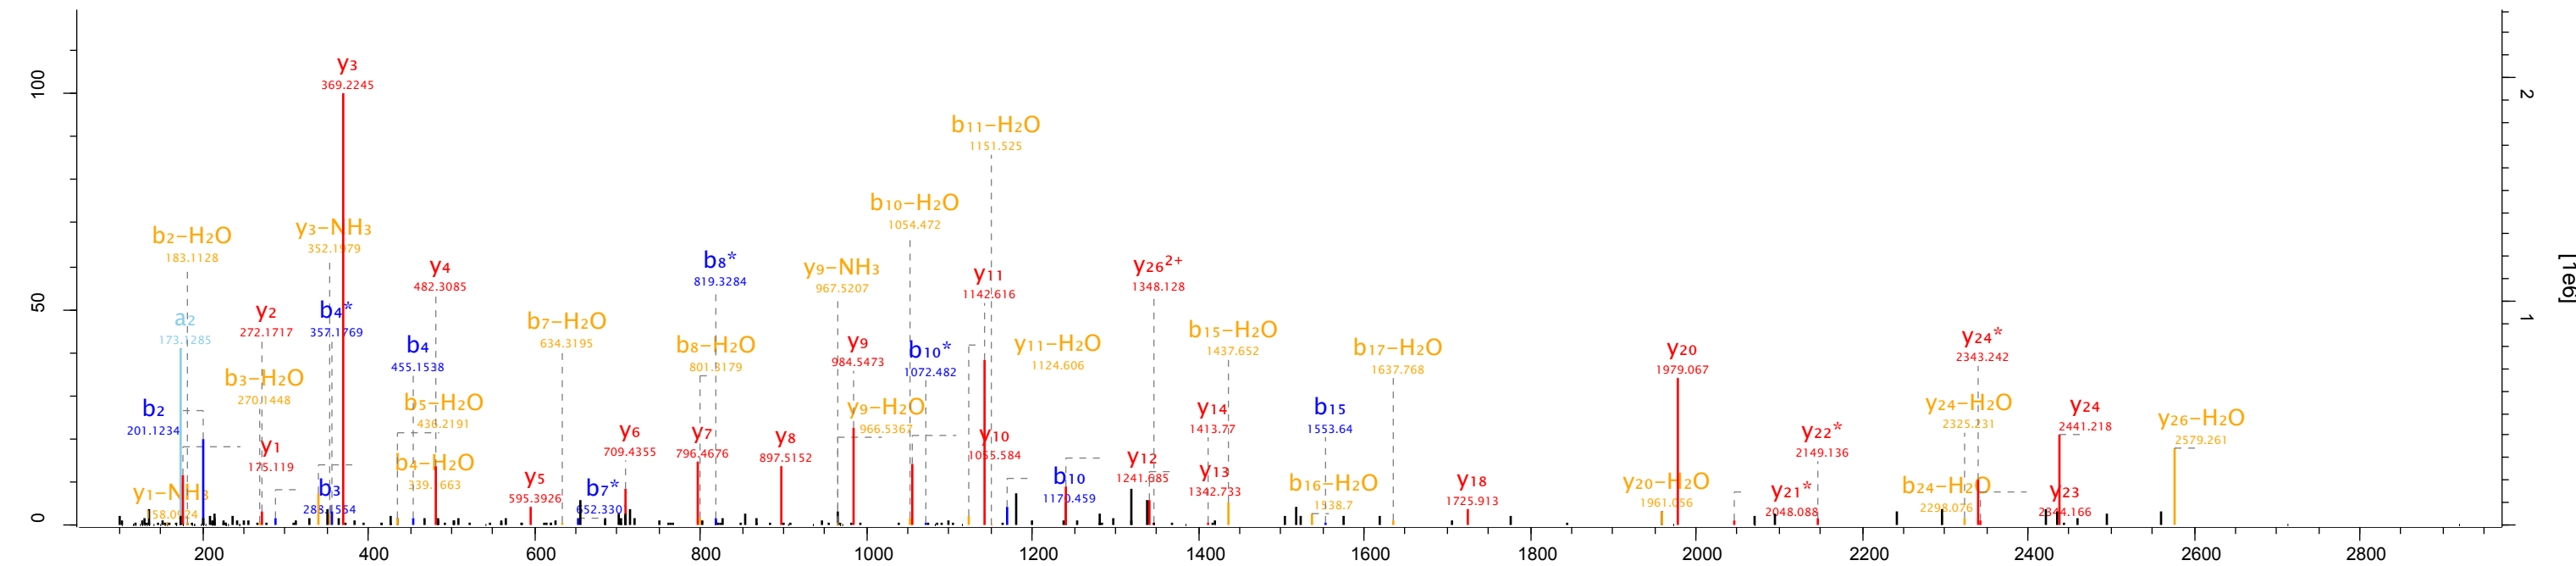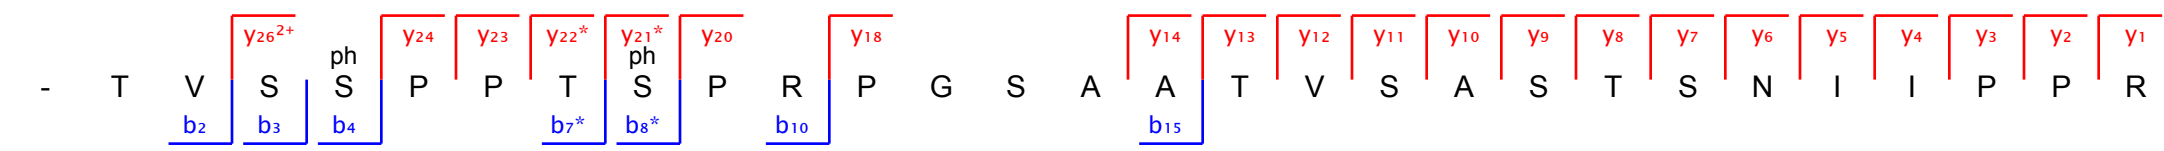



Raw file 20150814\_A375SR\_Phospho\_BR2\_02 Scan 21296 Method FTMS; HCD Score 44.31 m/z 909.39 Gene names CAMKK2

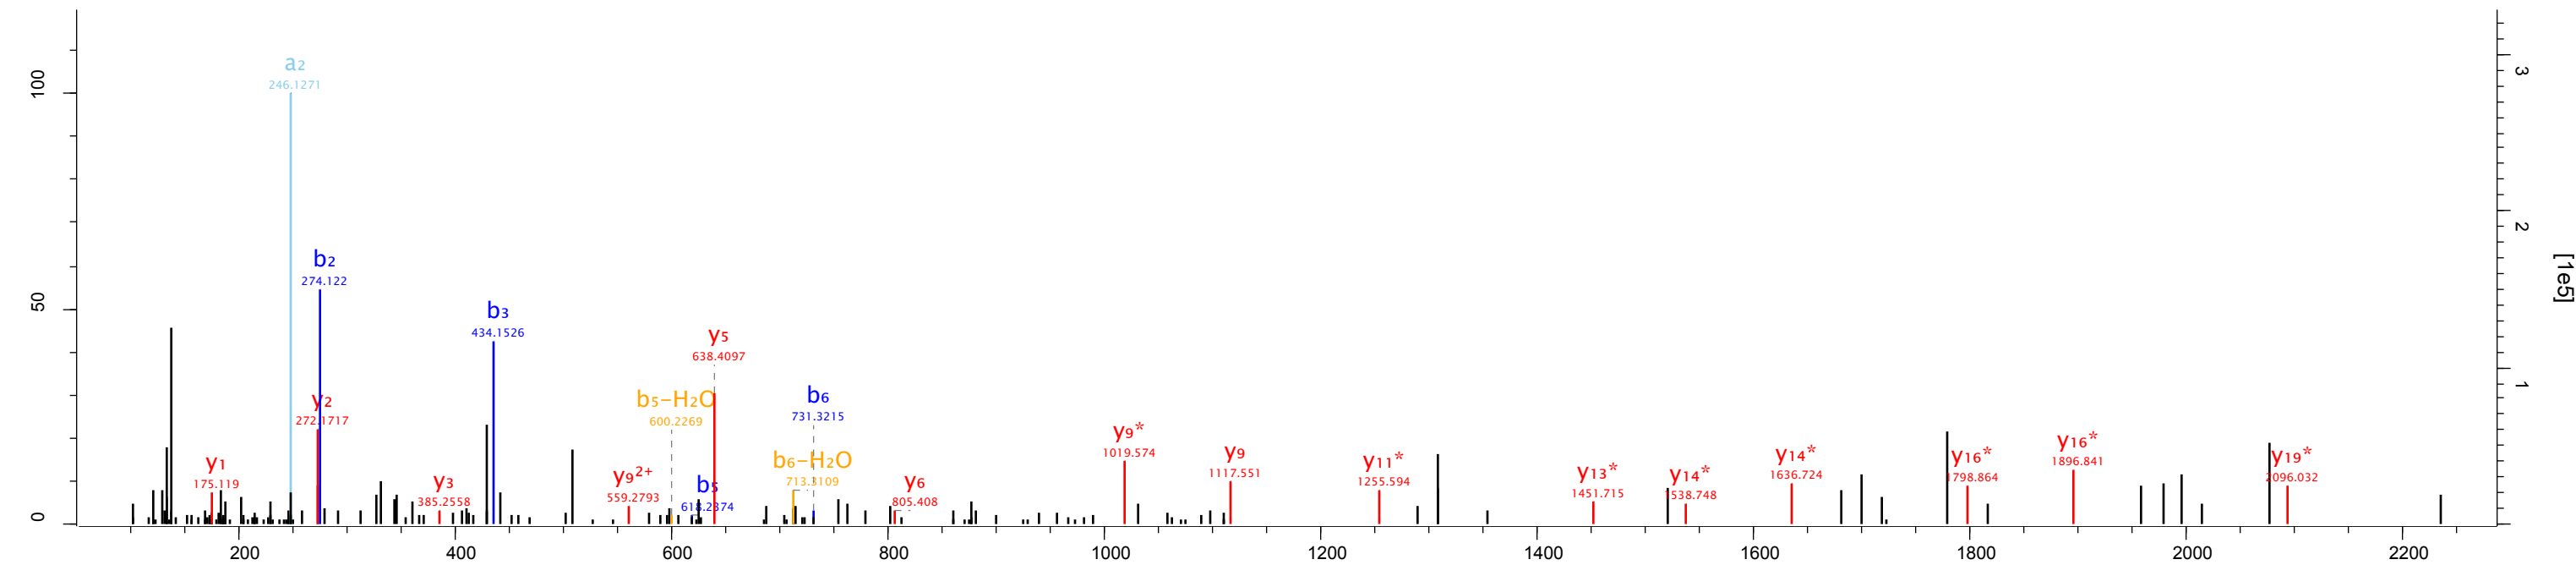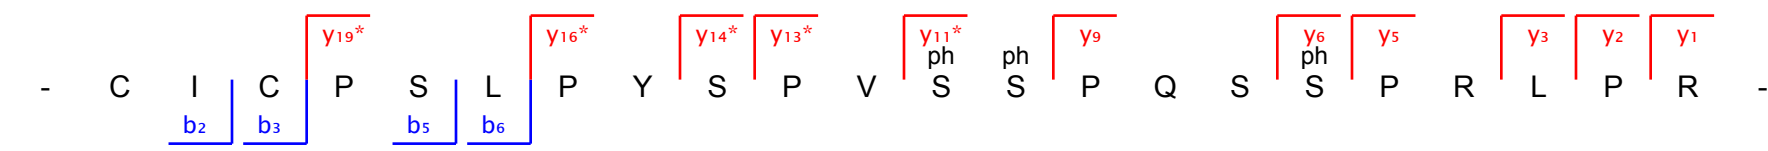

Raw file: 20150814\_A375SR\_Phospho\_BR2\_02  
 Scan: 2946 Method: FTMS; HCD Score: 69.27 m/z: 914.86 Gene names: CLASP1

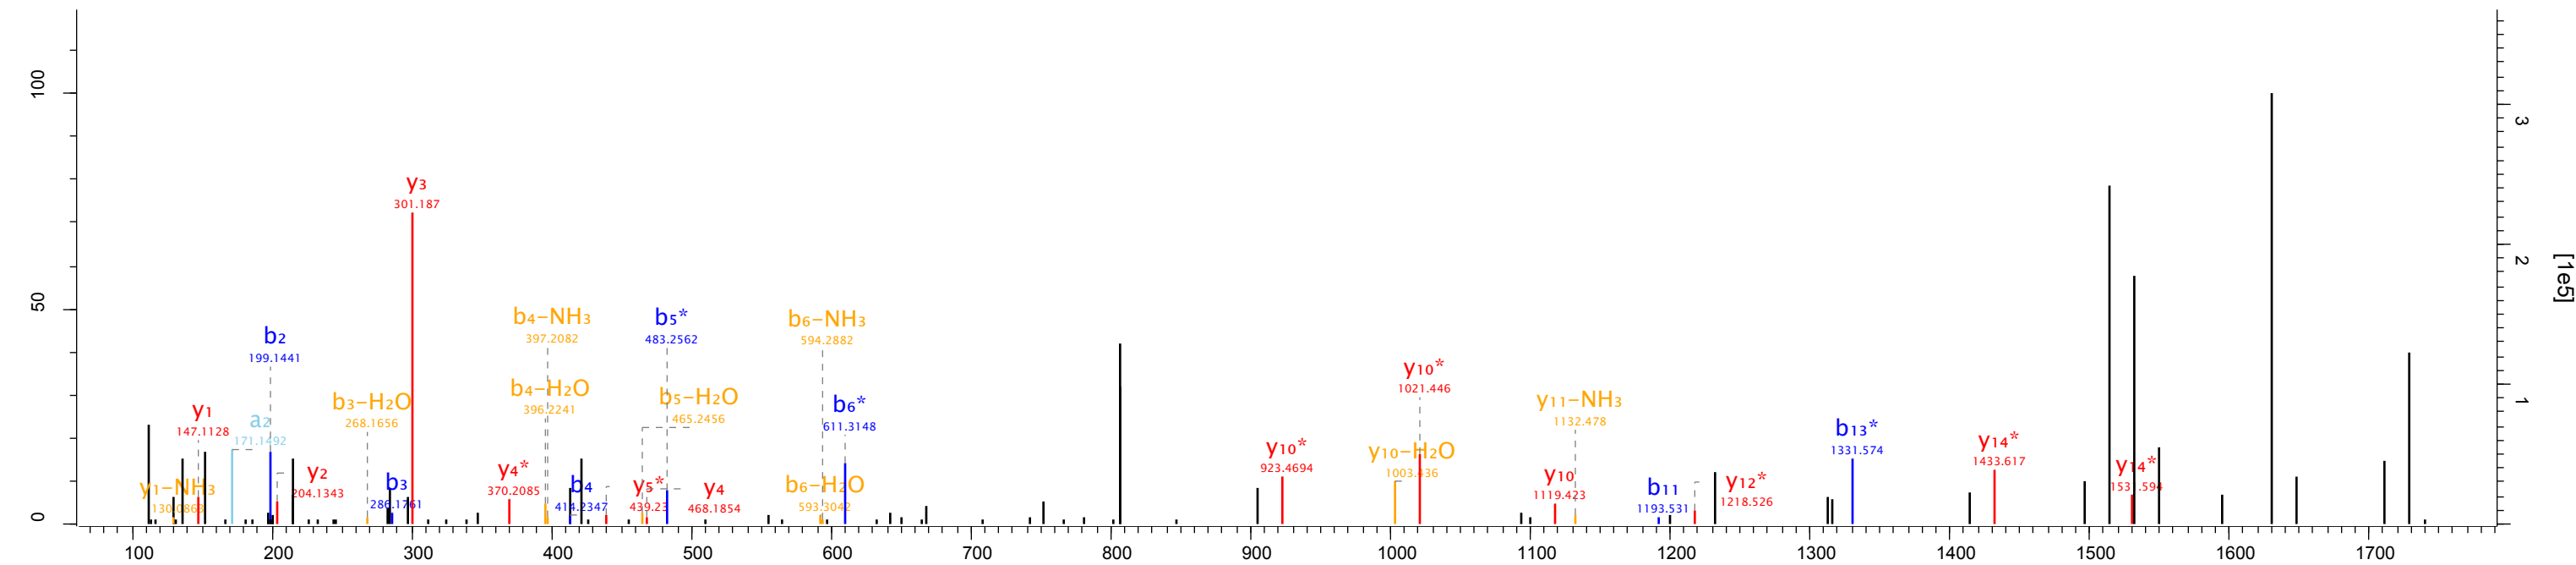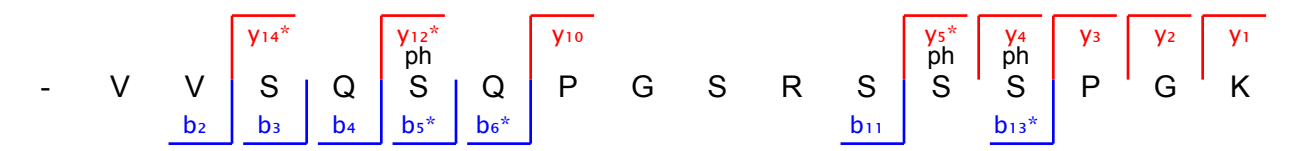

Raw file: 20150814\_A375SR\_Phospho\_BR2\_02  
 Scan: 3156 Method: FTMS; HCD Score: 102.5 m/z: 562.76 Gene names: SRSF2

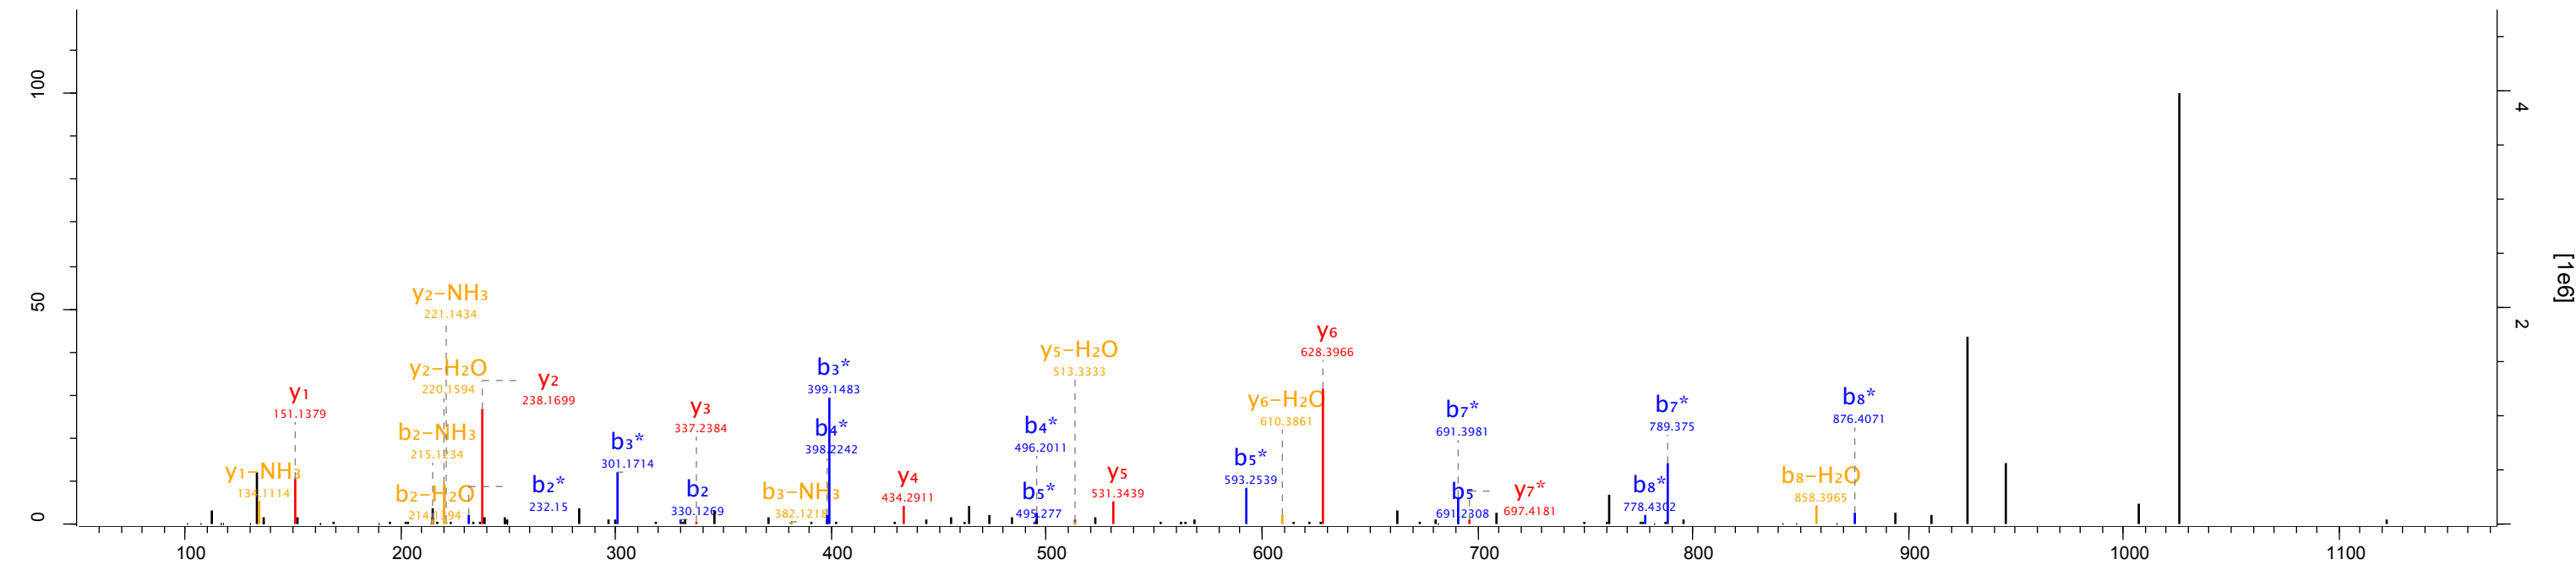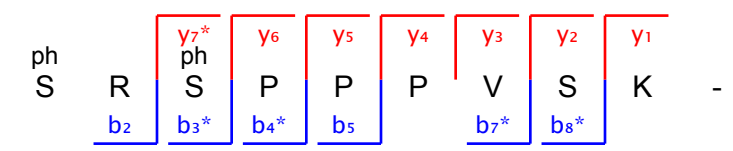

Raw file: 20150814\_A375SR\_Phospho\_BR2\_02  
 Scan: 4686 Method: FTMS; HCD Score: 108.5 m/z: 865.82 Gene names: RB1CC1

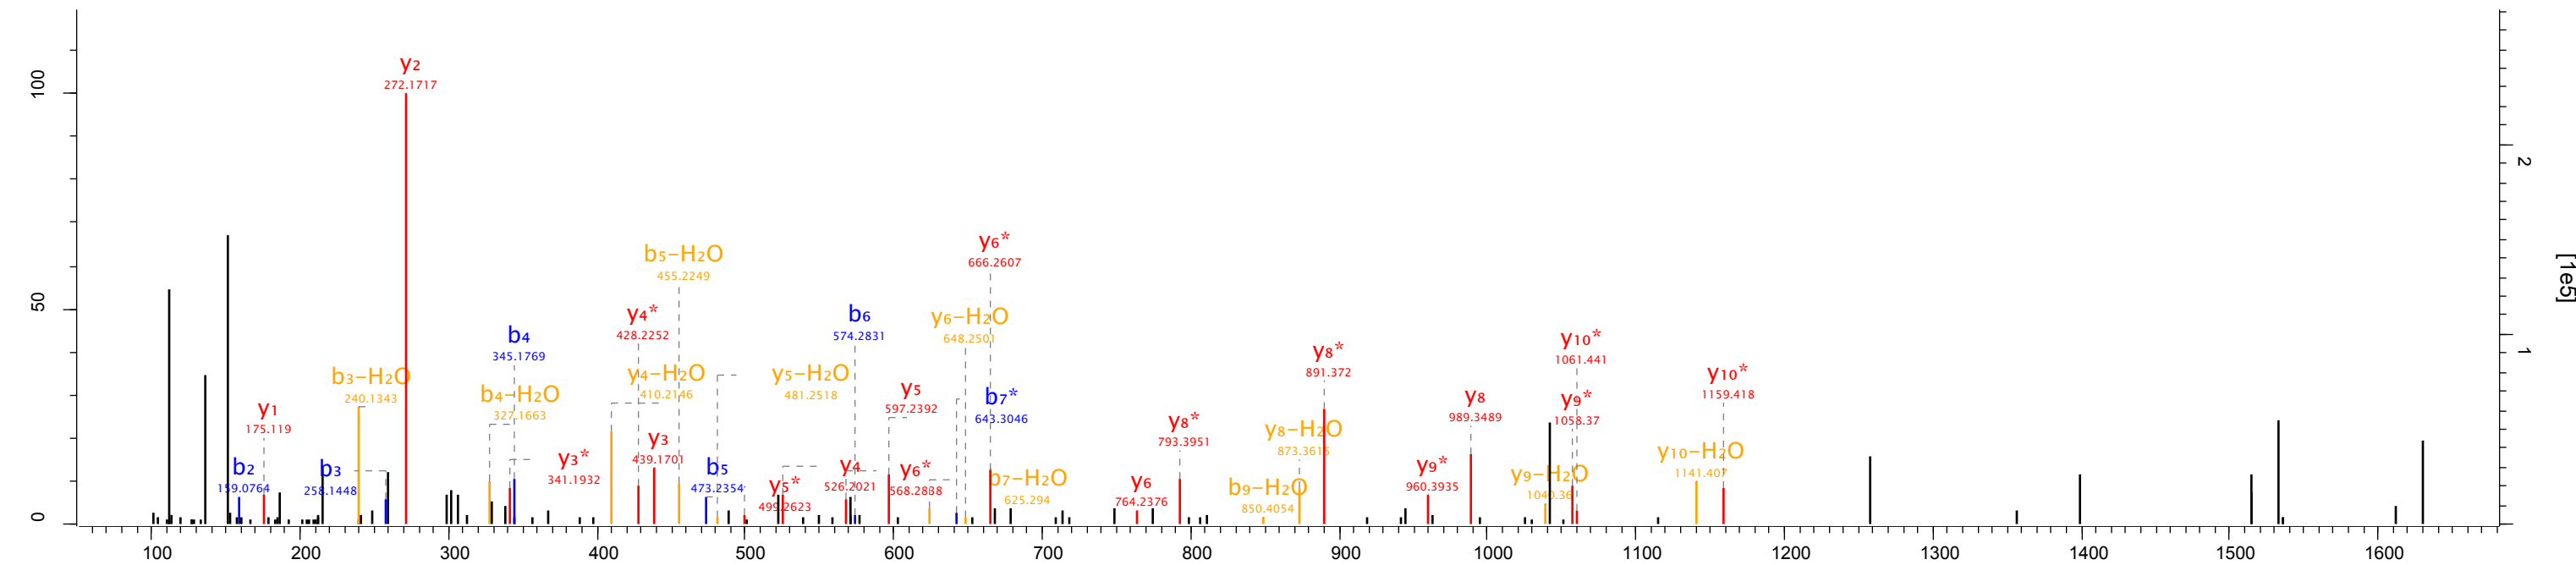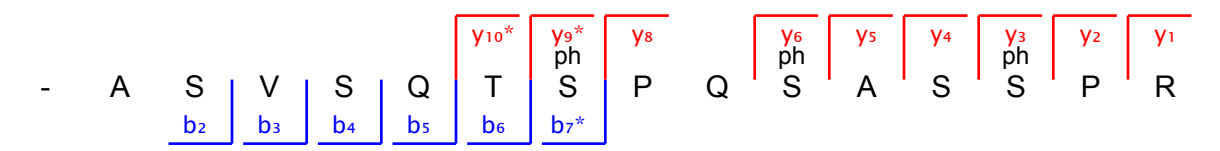

Raw file: 20150814\_A375SR\_Phospho\_BR2\_02  
 Scan: 5386 Method: FTMS; HCD Score: 60.8 m/z: 956.87 Gene names: NUP214

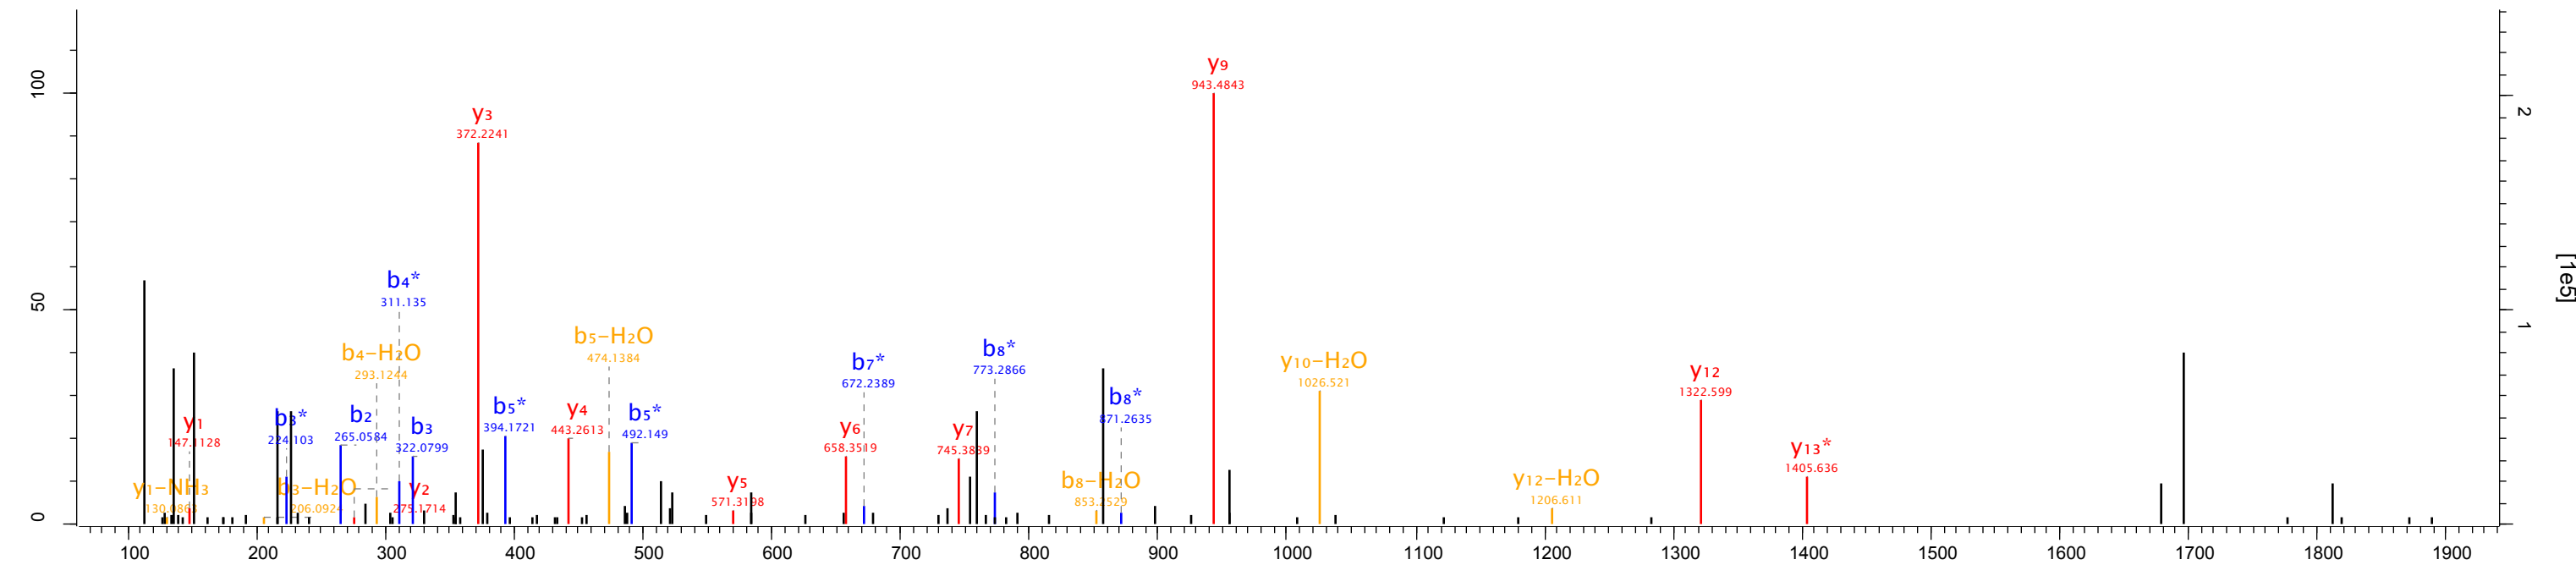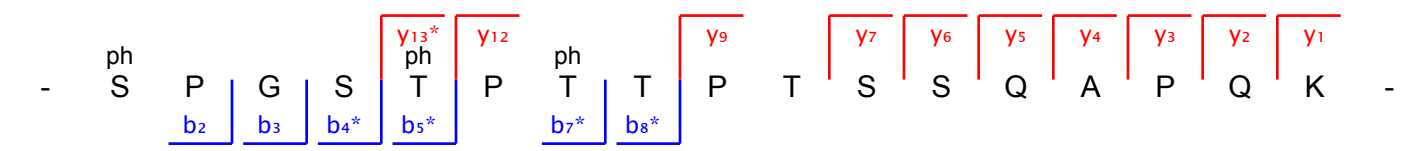

Raw file: 20150814\_A375SR\_Phospho\_BR2\_02  
 Scan: 5826 Method: FTMS; HCD Score: 47.09 m/z: 540.21 Gene names: CDK12

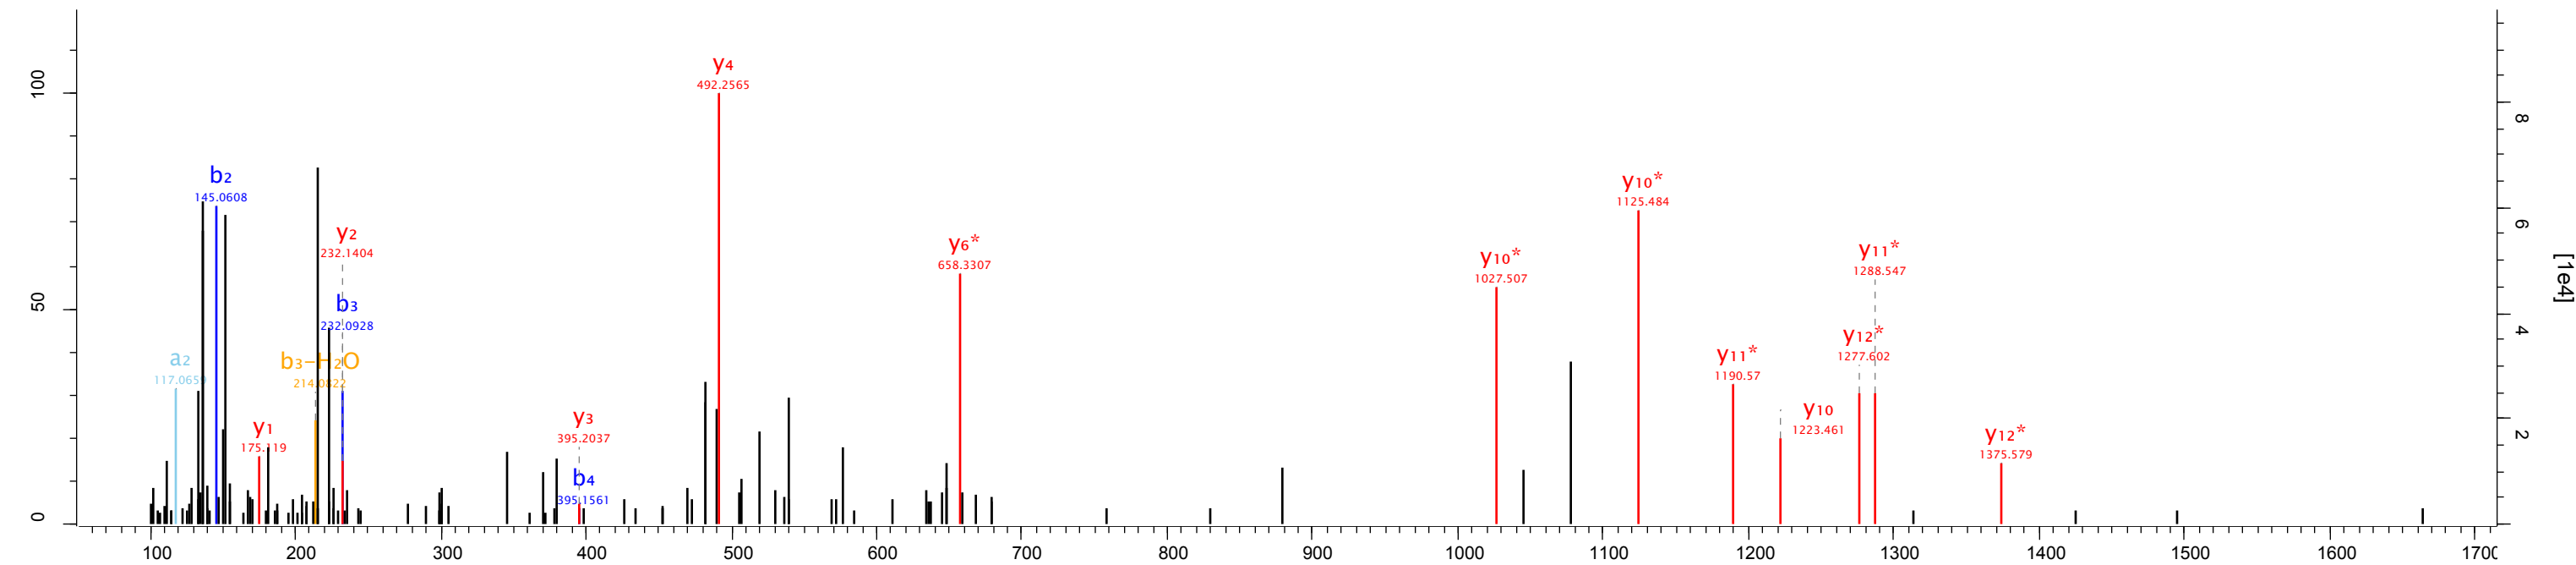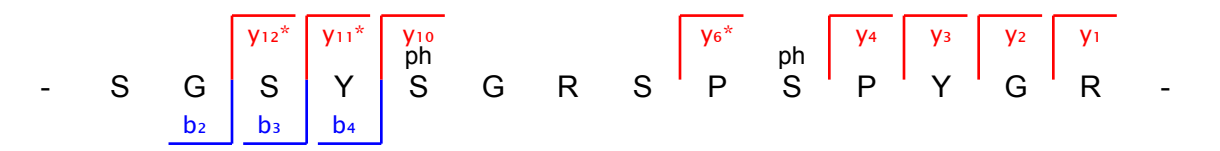

Raw file: 20150814\_A375SR\_Phospho\_BR2\_02  
 Scan: 5986 Method: FTMS; HCD Score: 139.47 m/z: 736.95 Gene names: EPB41L1

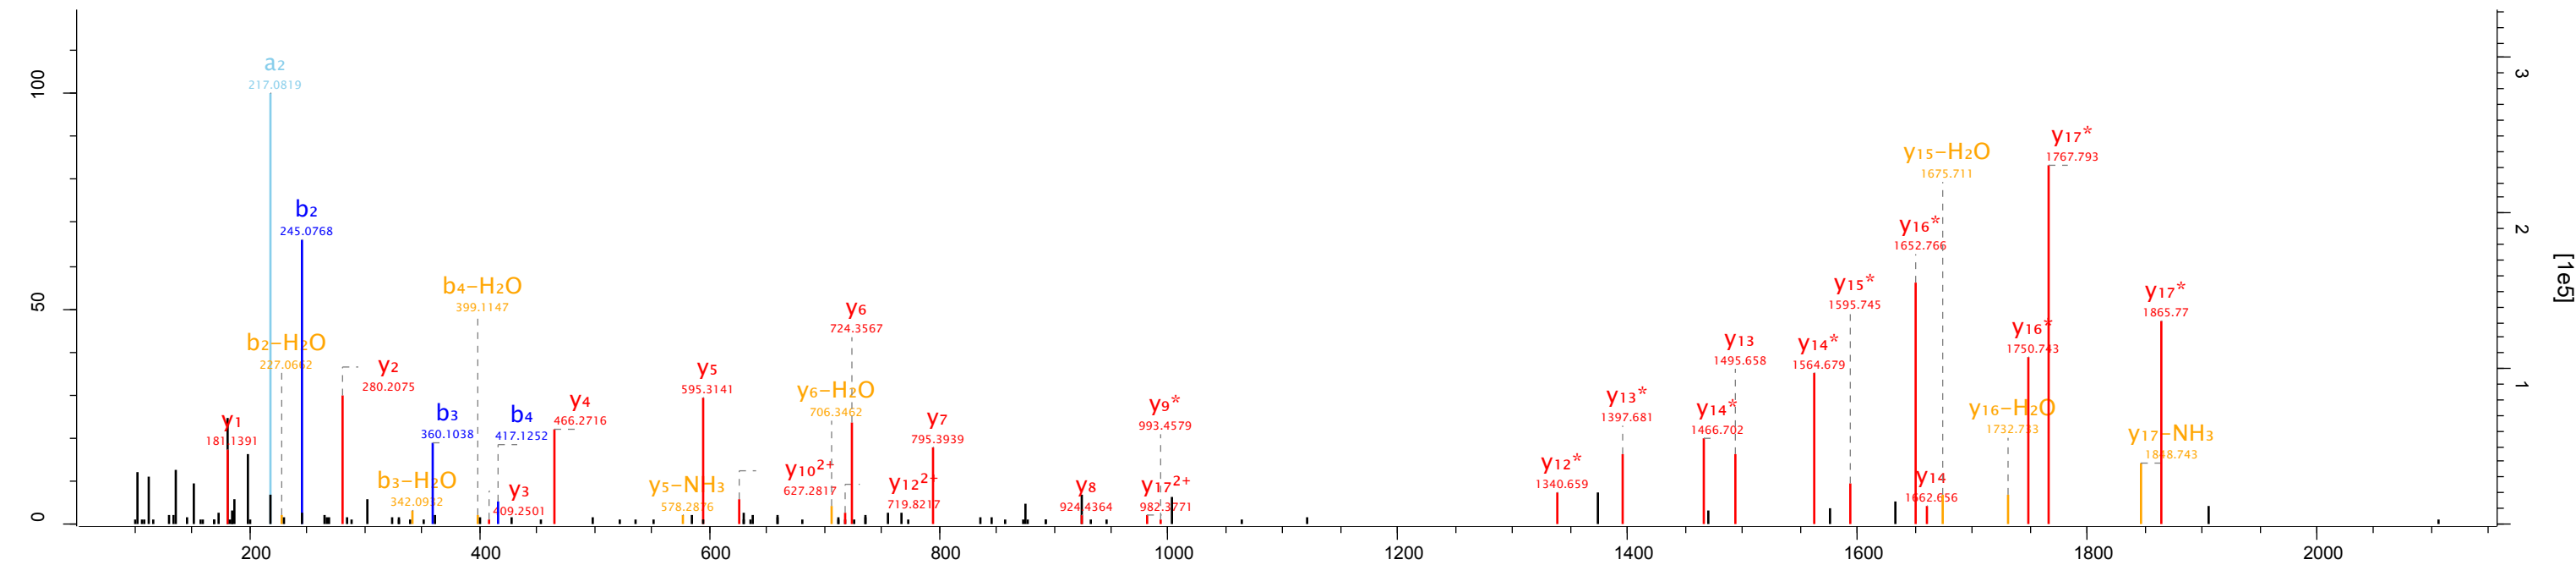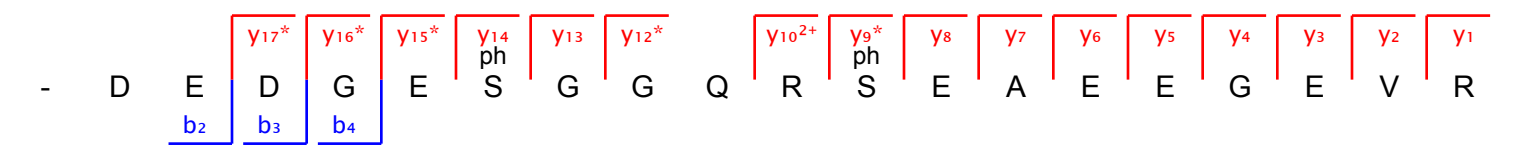

Raw file: 20150814\_A375SR\_Phospho\_BR2\_02  
 Scan: 6156 Method: FTMS; HCD Score: 60.55 m/z: 598.24 Gene names: CLASP1

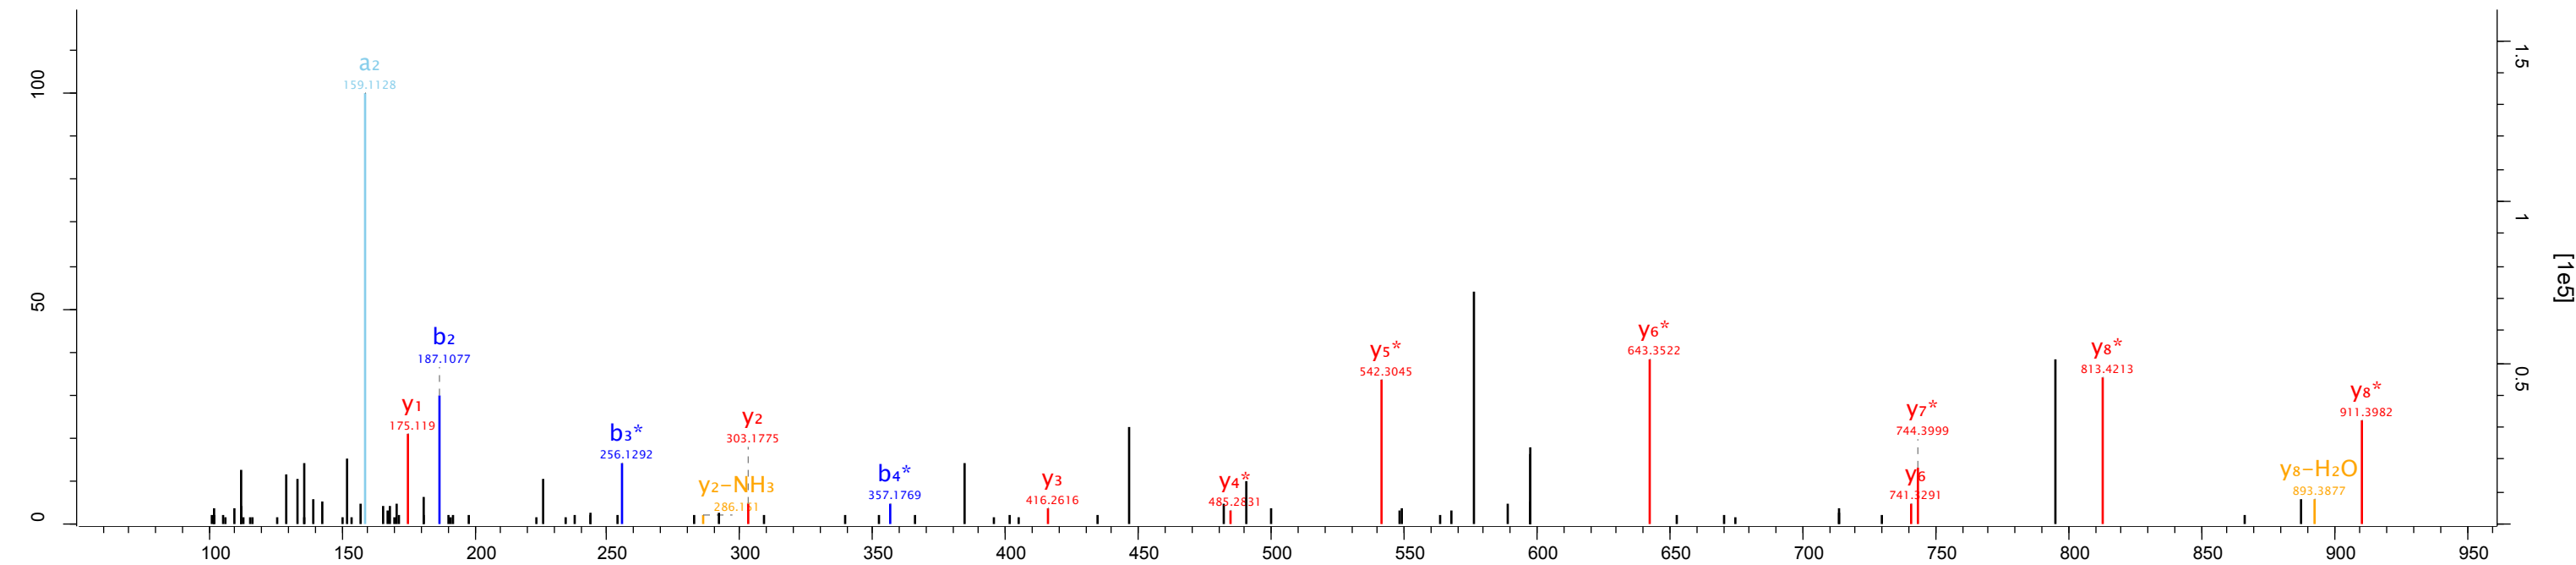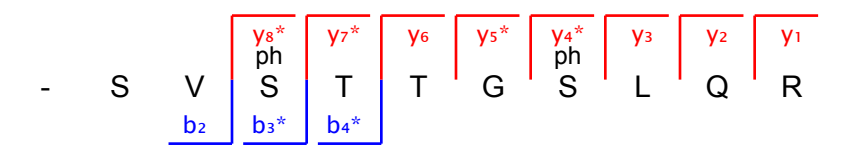



Raw file 20150814\_A375SR\_Phospho\_BR2\_02 Scan 6356 Method FTMS; HCD Score 89.88 m/z 748.81 Gene names TBC1D5

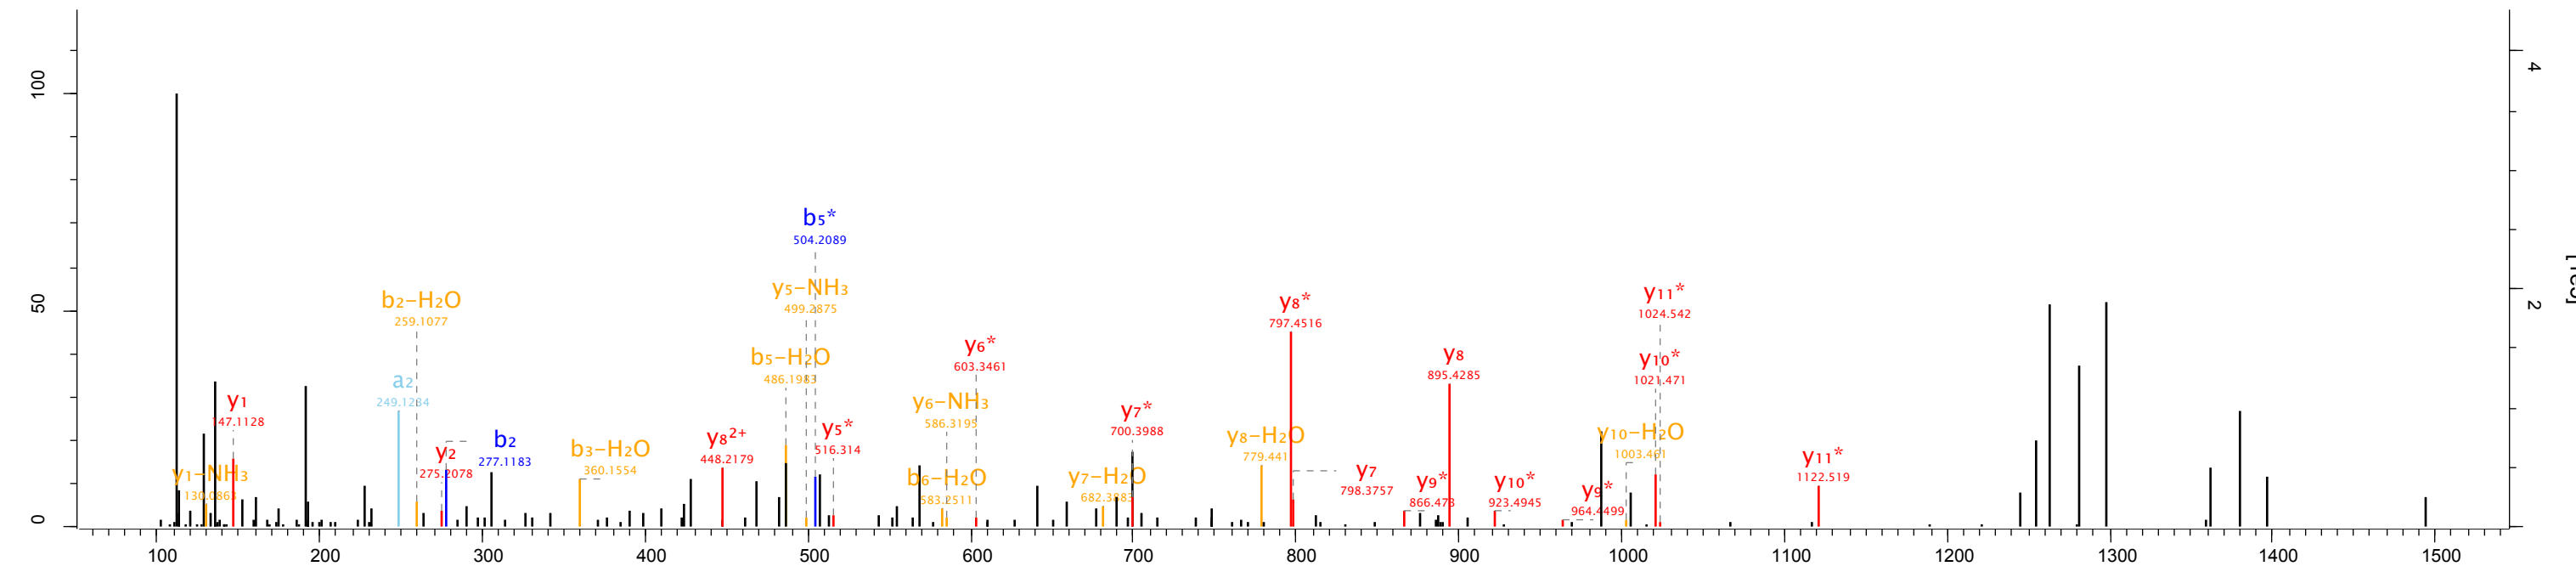

- E F T G S P P S S A T K K -  
 b2 b5\* y11\* y10\* y9\* ph y8 y7 y6\* y5\* y2 y1

Raw file: 20150814\_A375SR\_Phospho\_BR2\_02  
 Scan: 6596 Method: FTMS; HCD Score: 62.34 m/z: 567.22 Gene names: KIF13B

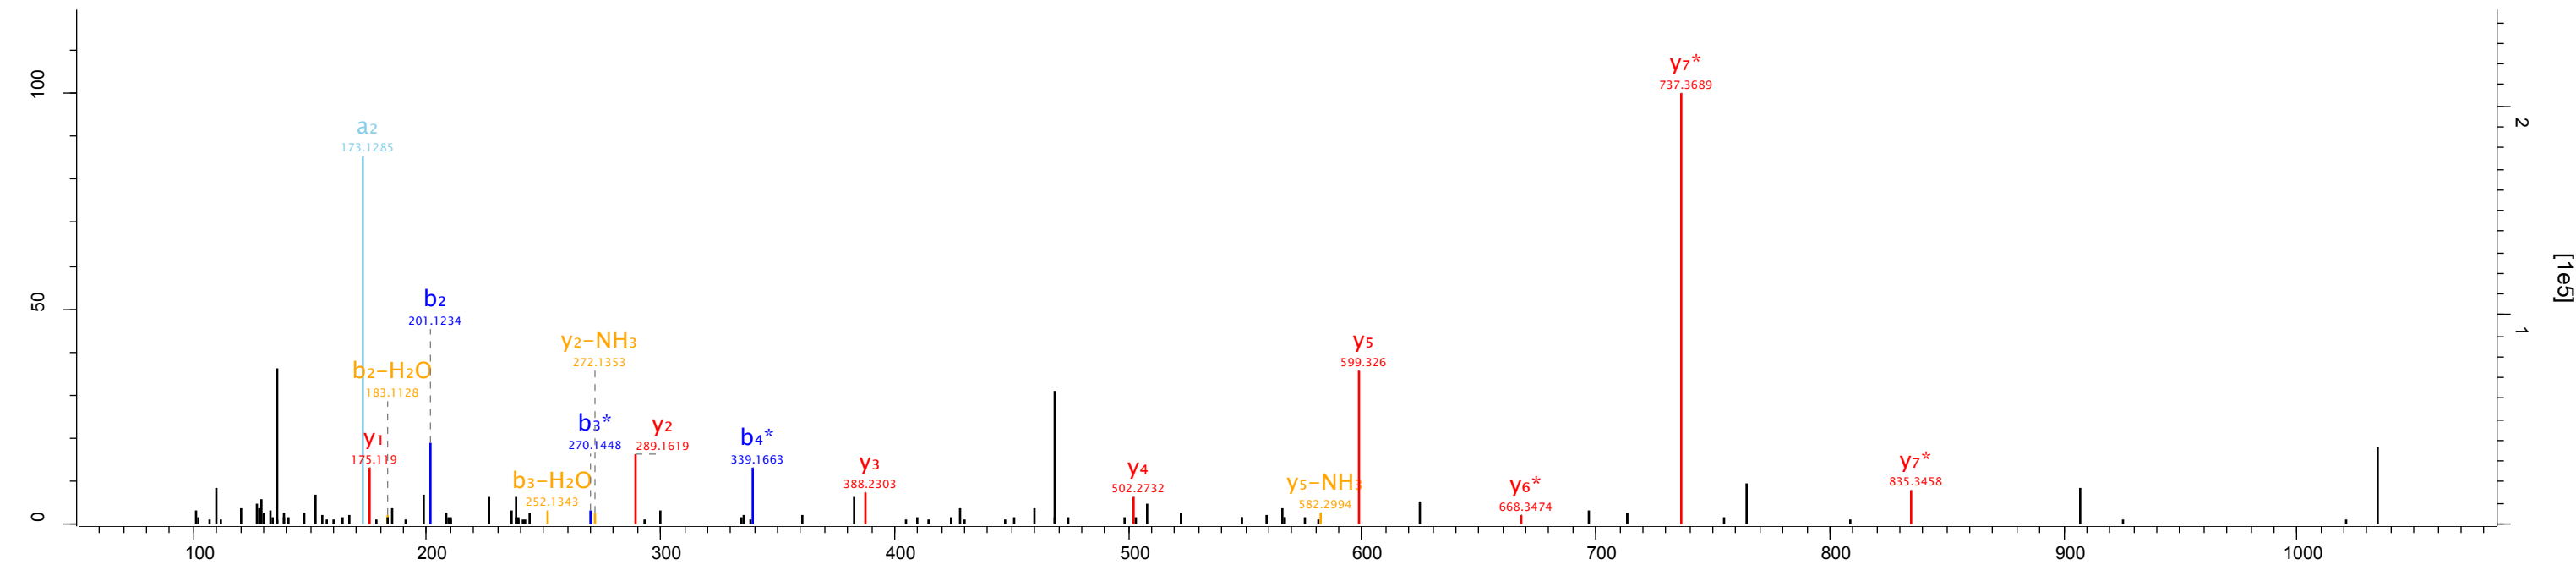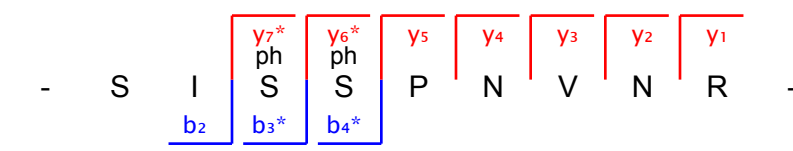

Raw file: 20150814\_A375SR\_Phospho\_BR2\_02  
 Scan: 6656 Method: FTMS; HCD Score: 116.19 m/z: 544.22 Gene names: STXBP5

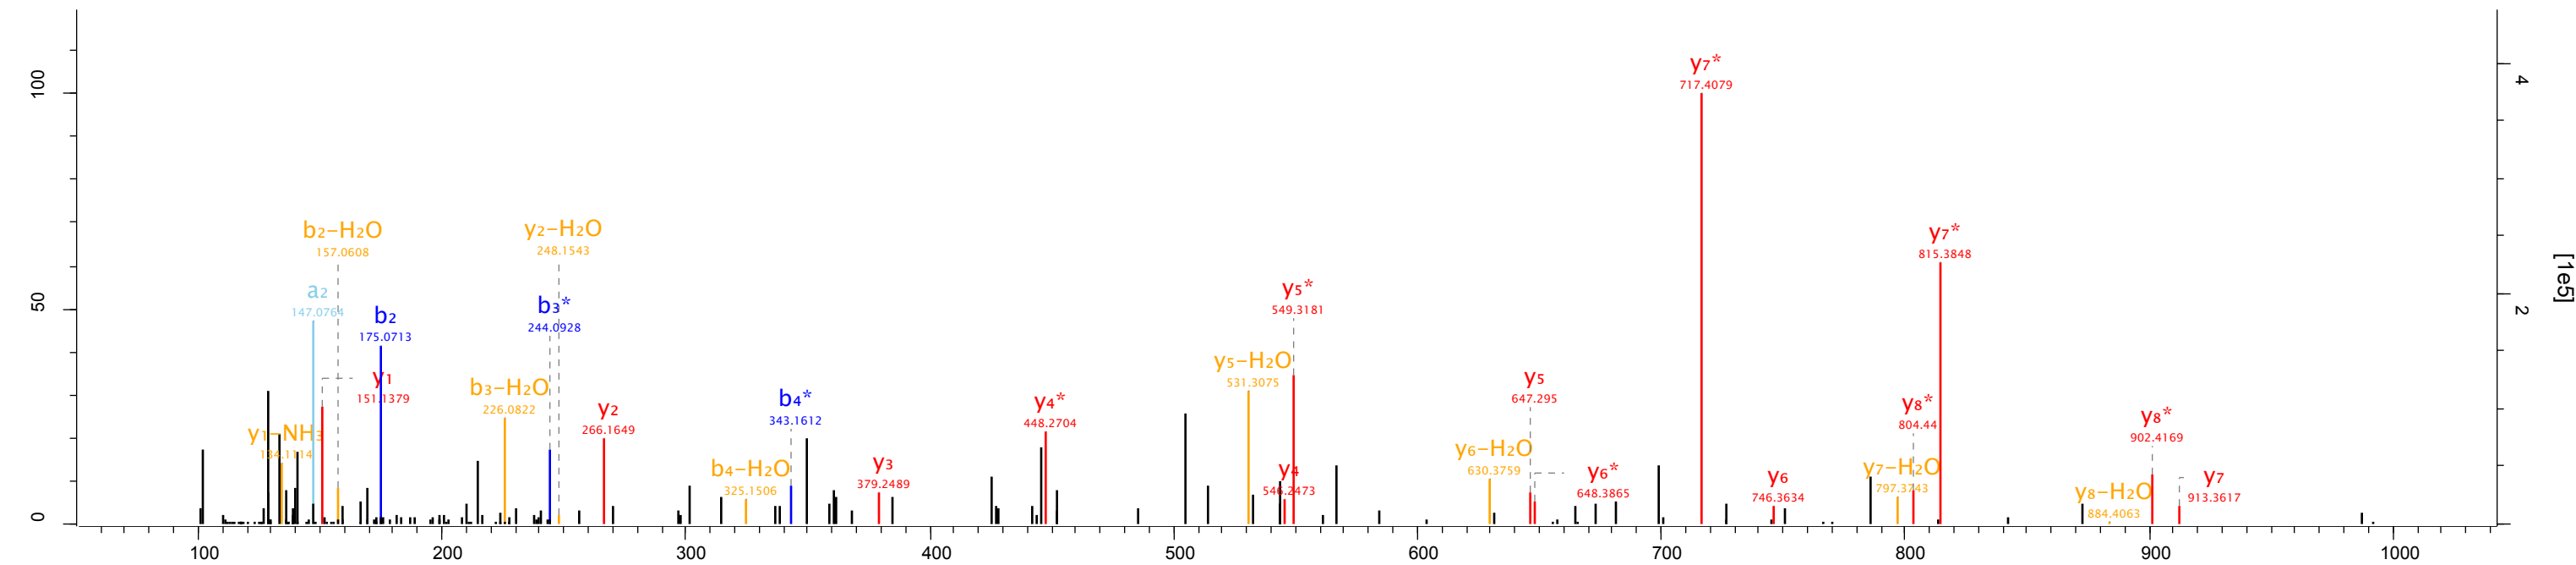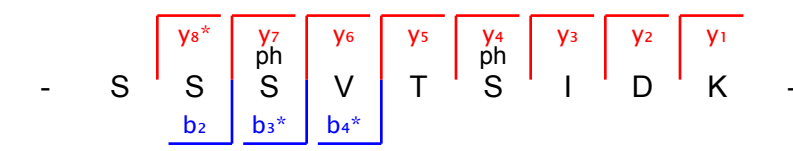

Raw file 20150814\_A375SR\_Phospho\_BR2\_02 Scan 7106 Method FTMS; HCD Score 79.47 m/z 934.79 Gene names TRIM44

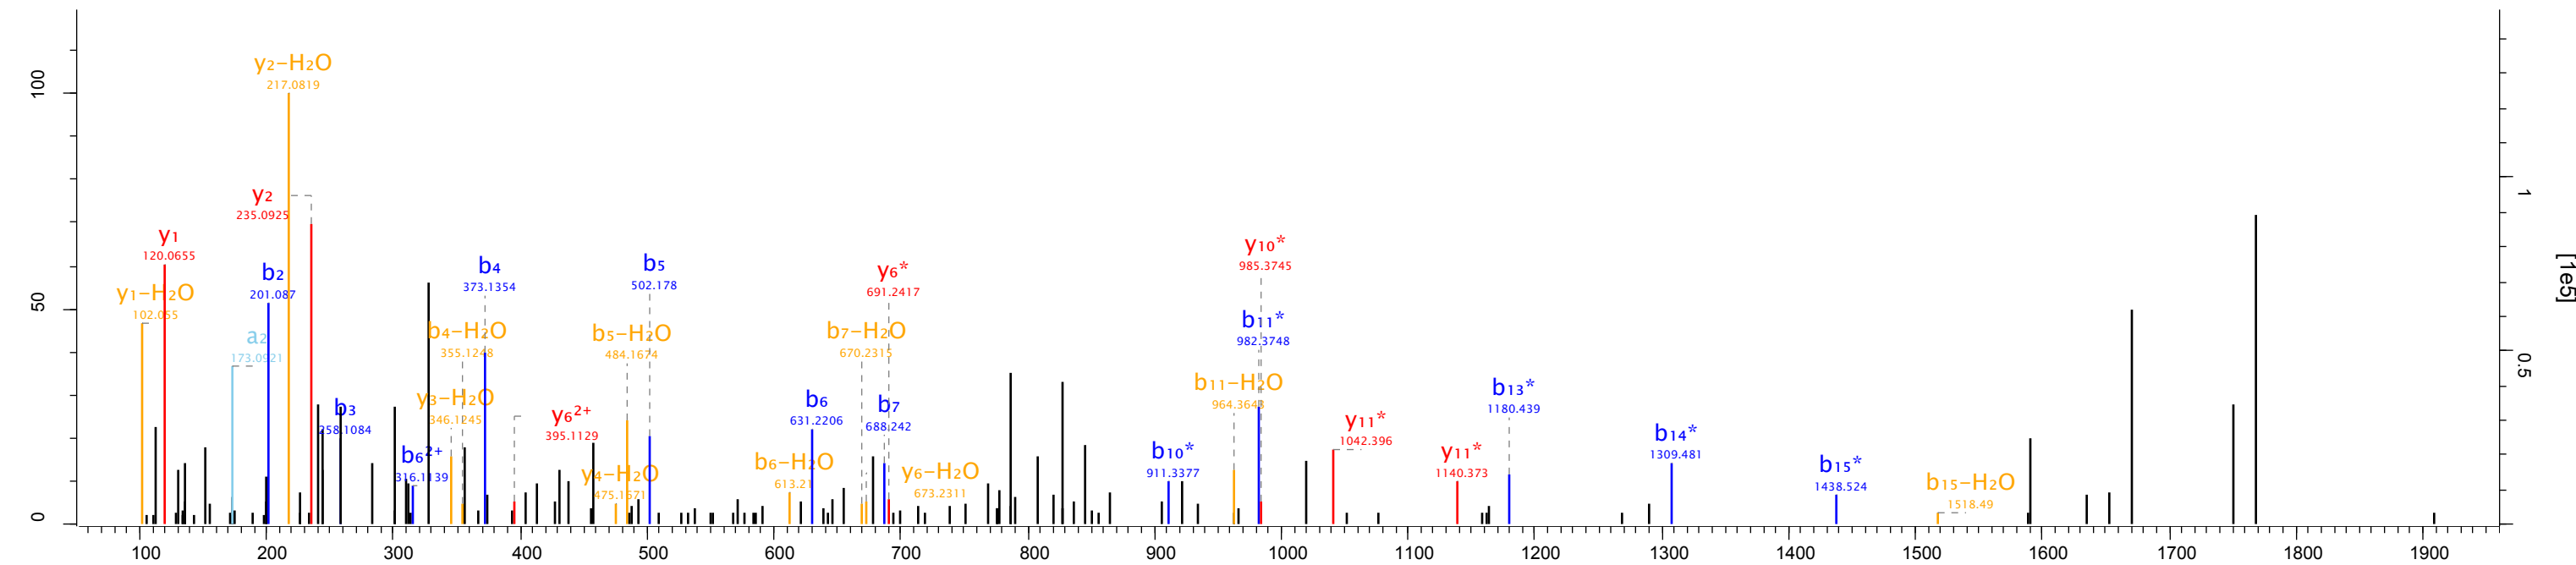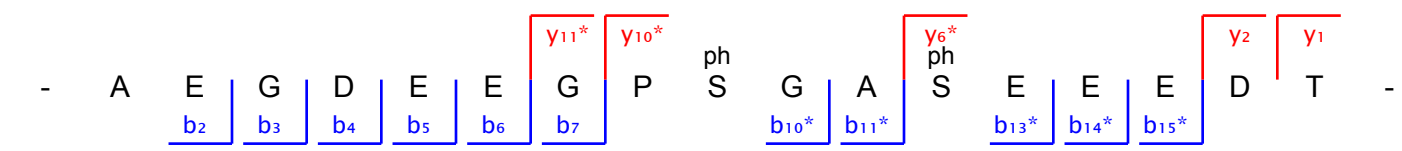

Raw file: 20150814\_A375SR\_Phospho\_BR2\_02  
 Scan: 7556 Method: FTMS; HCD Score: 62.58 m/z: 926.86 Gene names: PDCD4

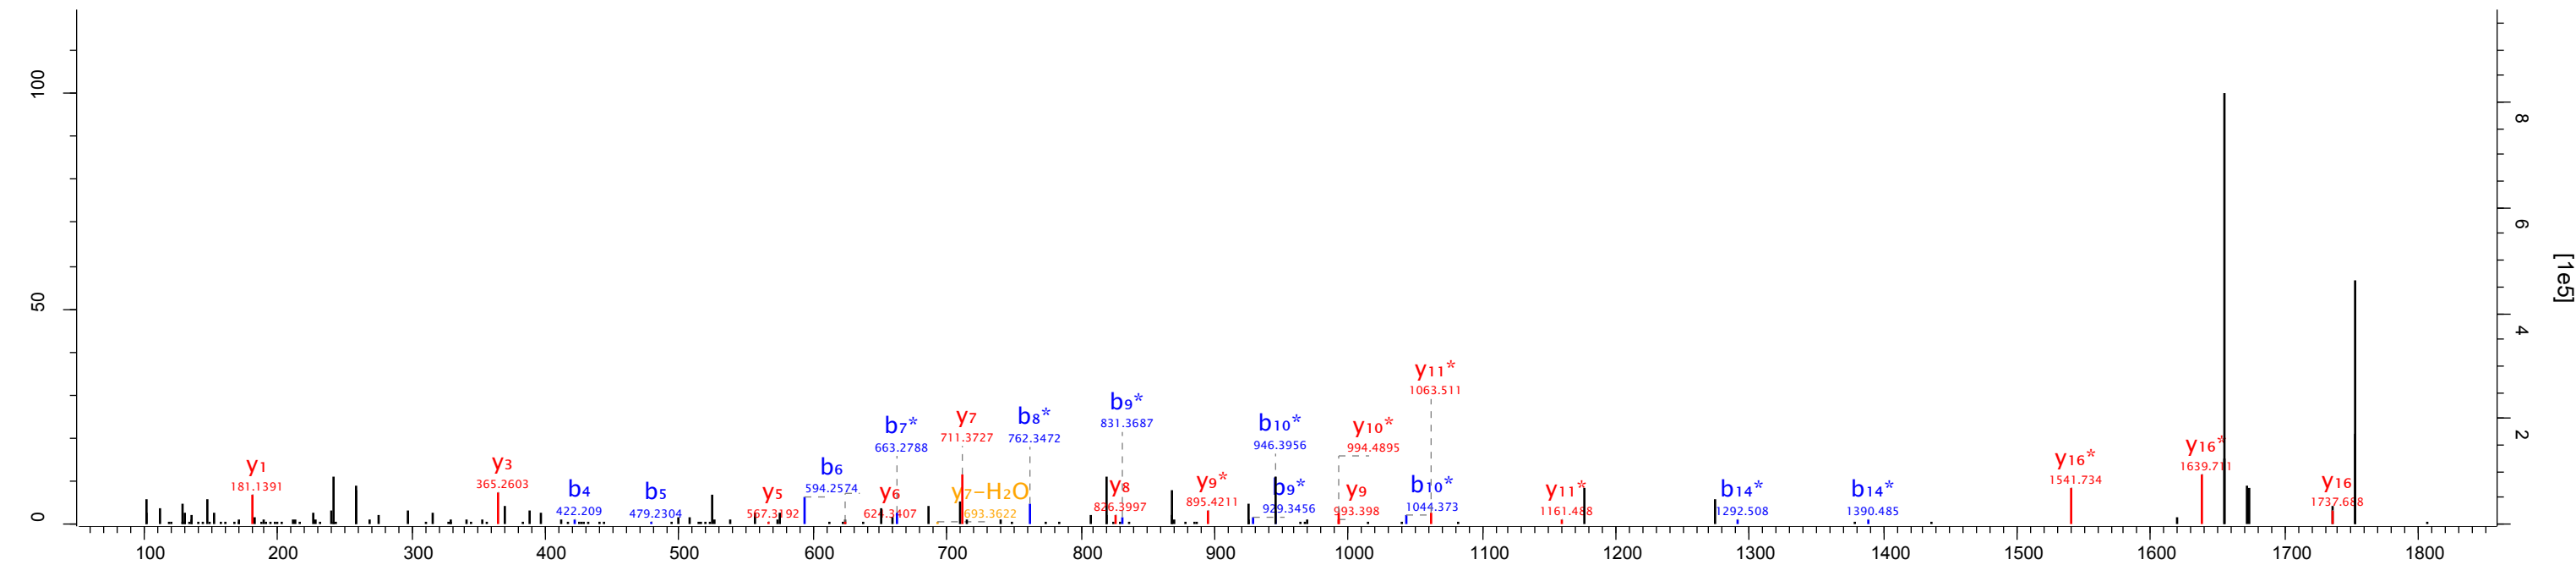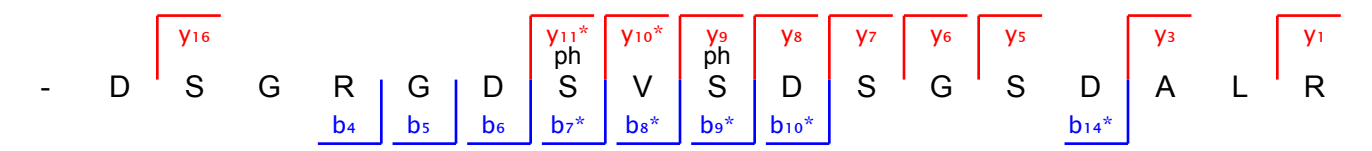

Raw file: 20150814\_A375SR\_Phospho\_BR2\_02  
 Scan: 7626 Method: FTMS; HCD Score: 151.57 m/z: 809.29 Gene names: SF3B1

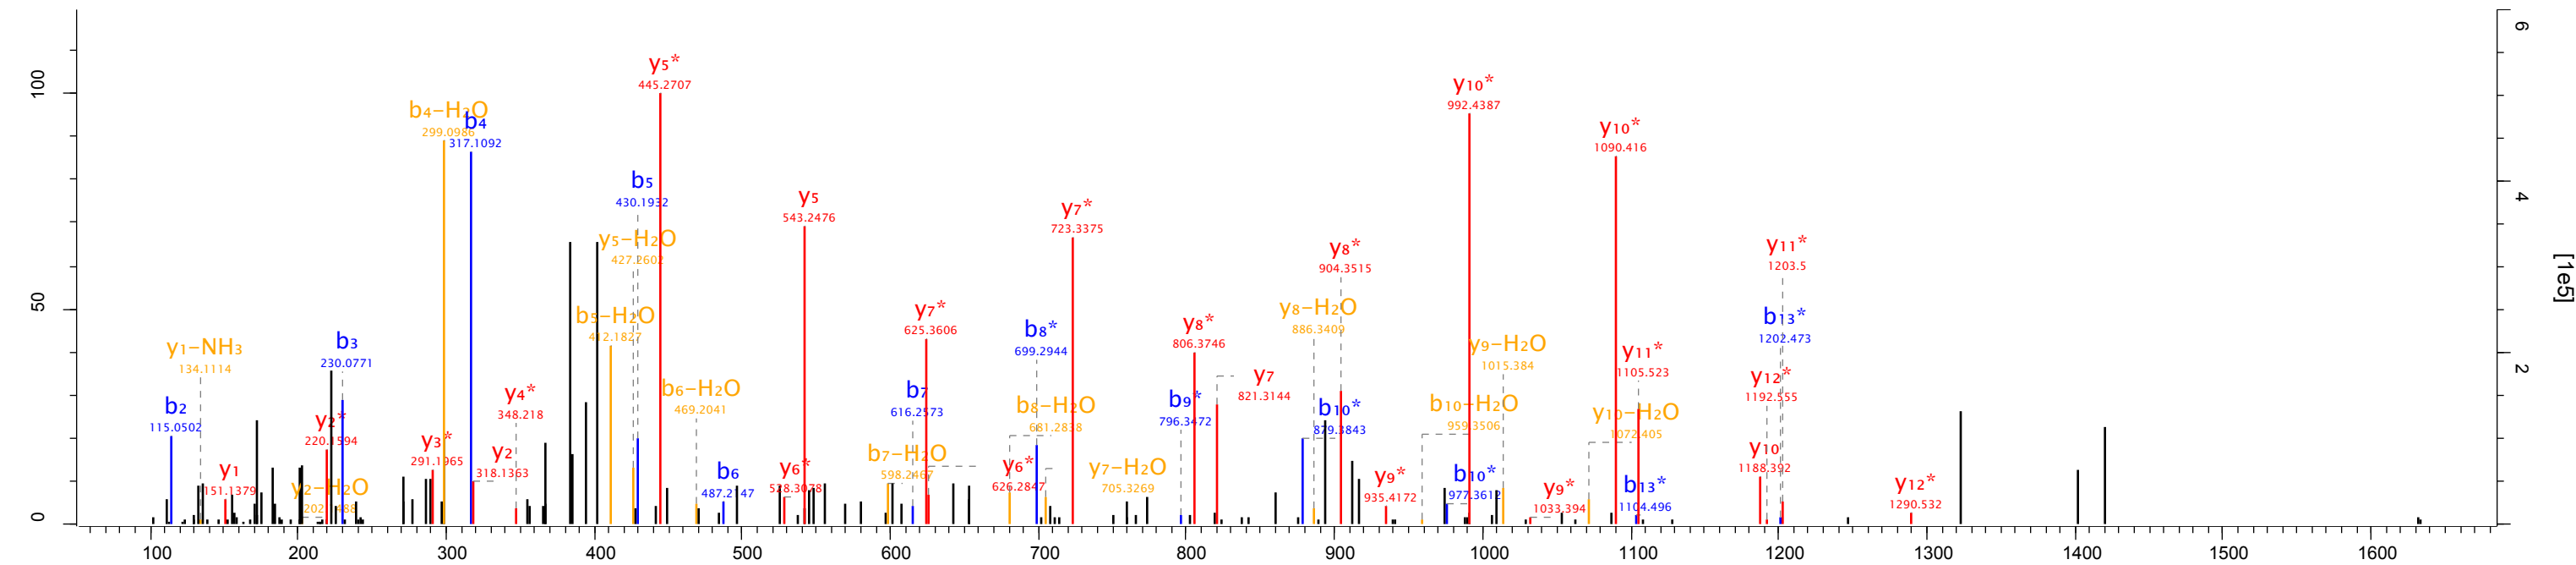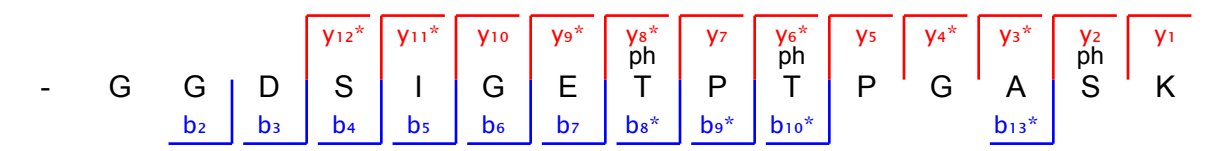

Raw file 20150814\_A375SR\_Phospho\_BR2\_02 Scan 8156 Method FTMS; HCD Score 61.62 m/z 713.79 Gene names DNTTIP2

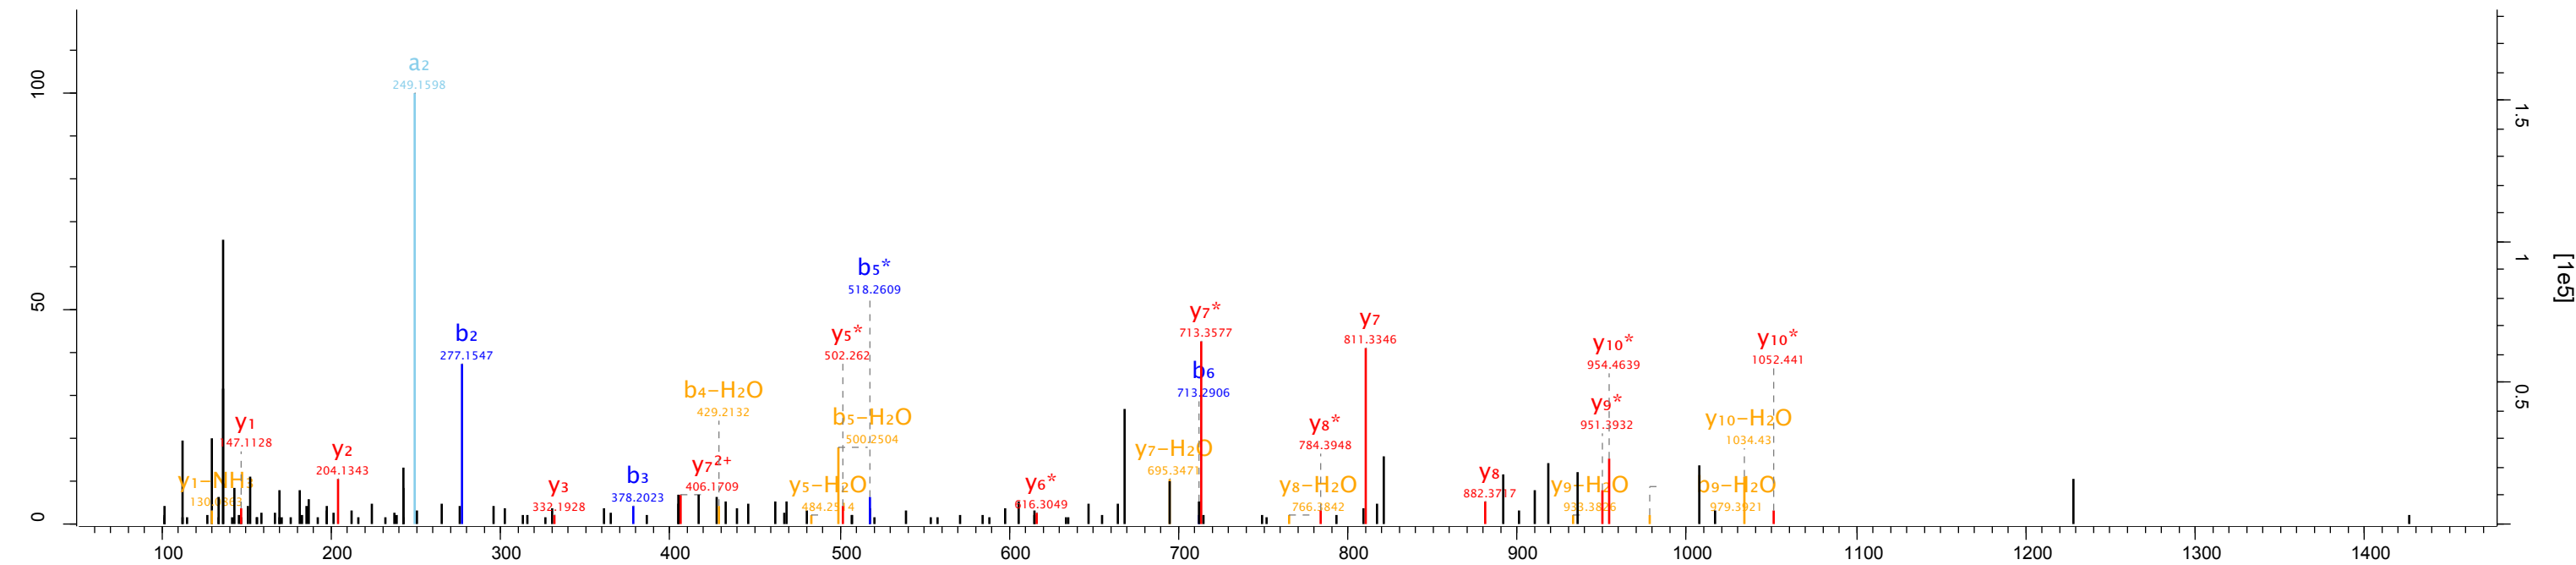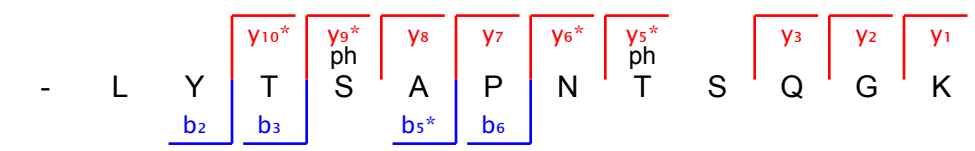

Raw file: 20150814\_A375SR\_Phospho\_BR2\_02  
 Scan: 8266 Method: FTMS; HCD Score: 59.01 m/z: 628.6 Gene names: RABEP1

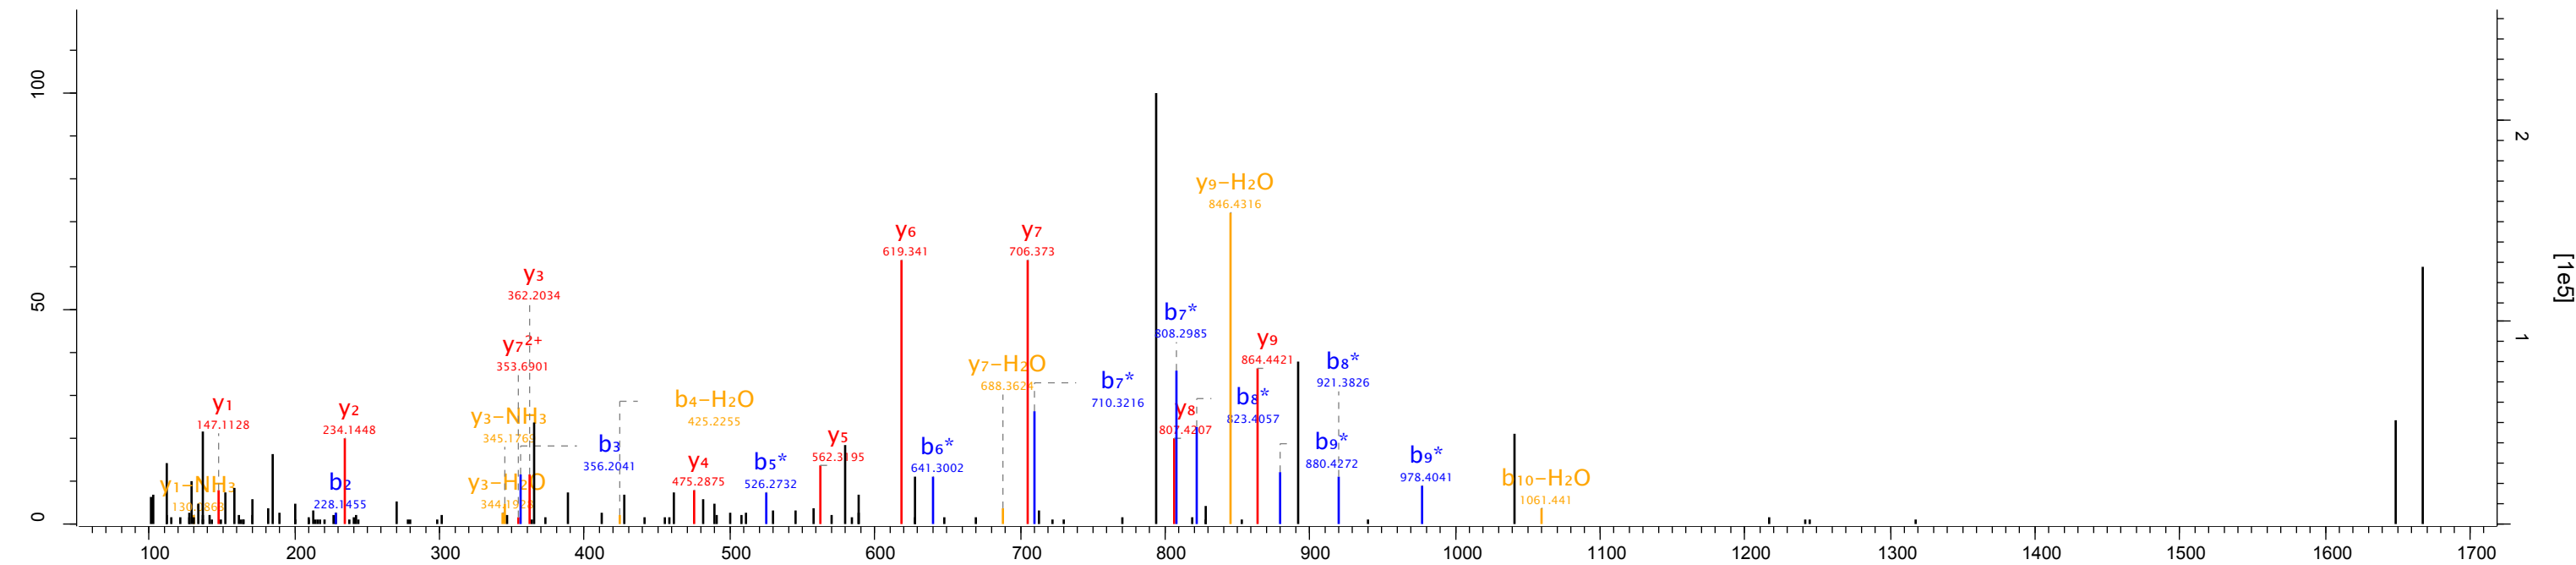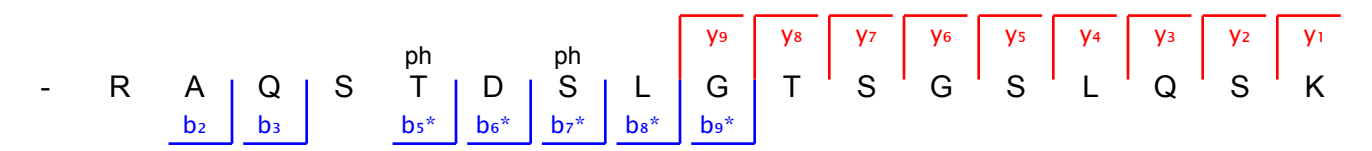



Raw file: 20150814\_A375SR\_Phospho\_BR2\_02  
 Scan: 8916 Method: FTMS; HCD Score: 75.77 m/z: 803.82 Gene names: TNS3

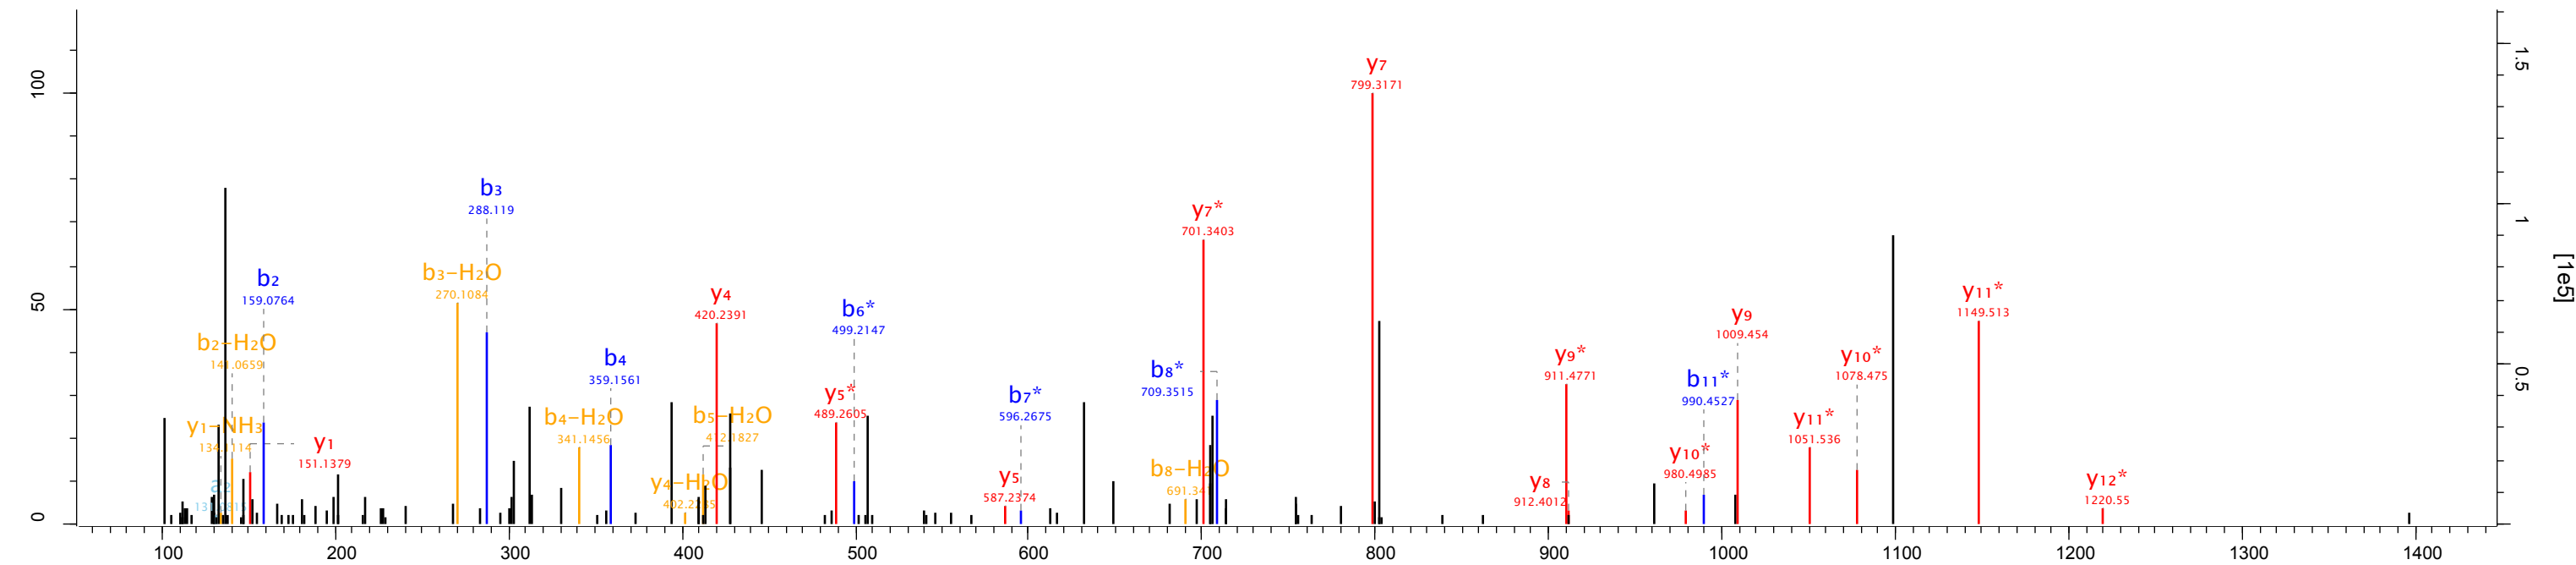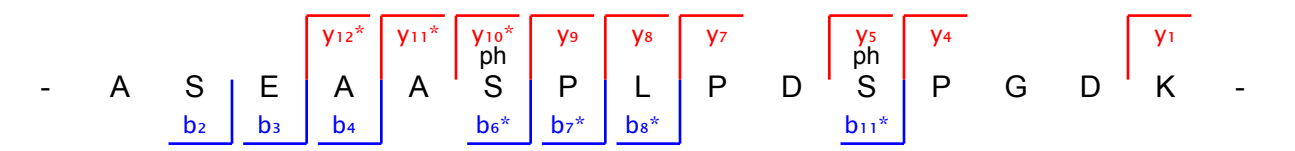

Raw file 20150814\_A375SR\_Phospho\_BR2\_02 Scan 9586 Method FTMS; HCD Score 267.8 m/z 1019.41 Gene names PDS5B

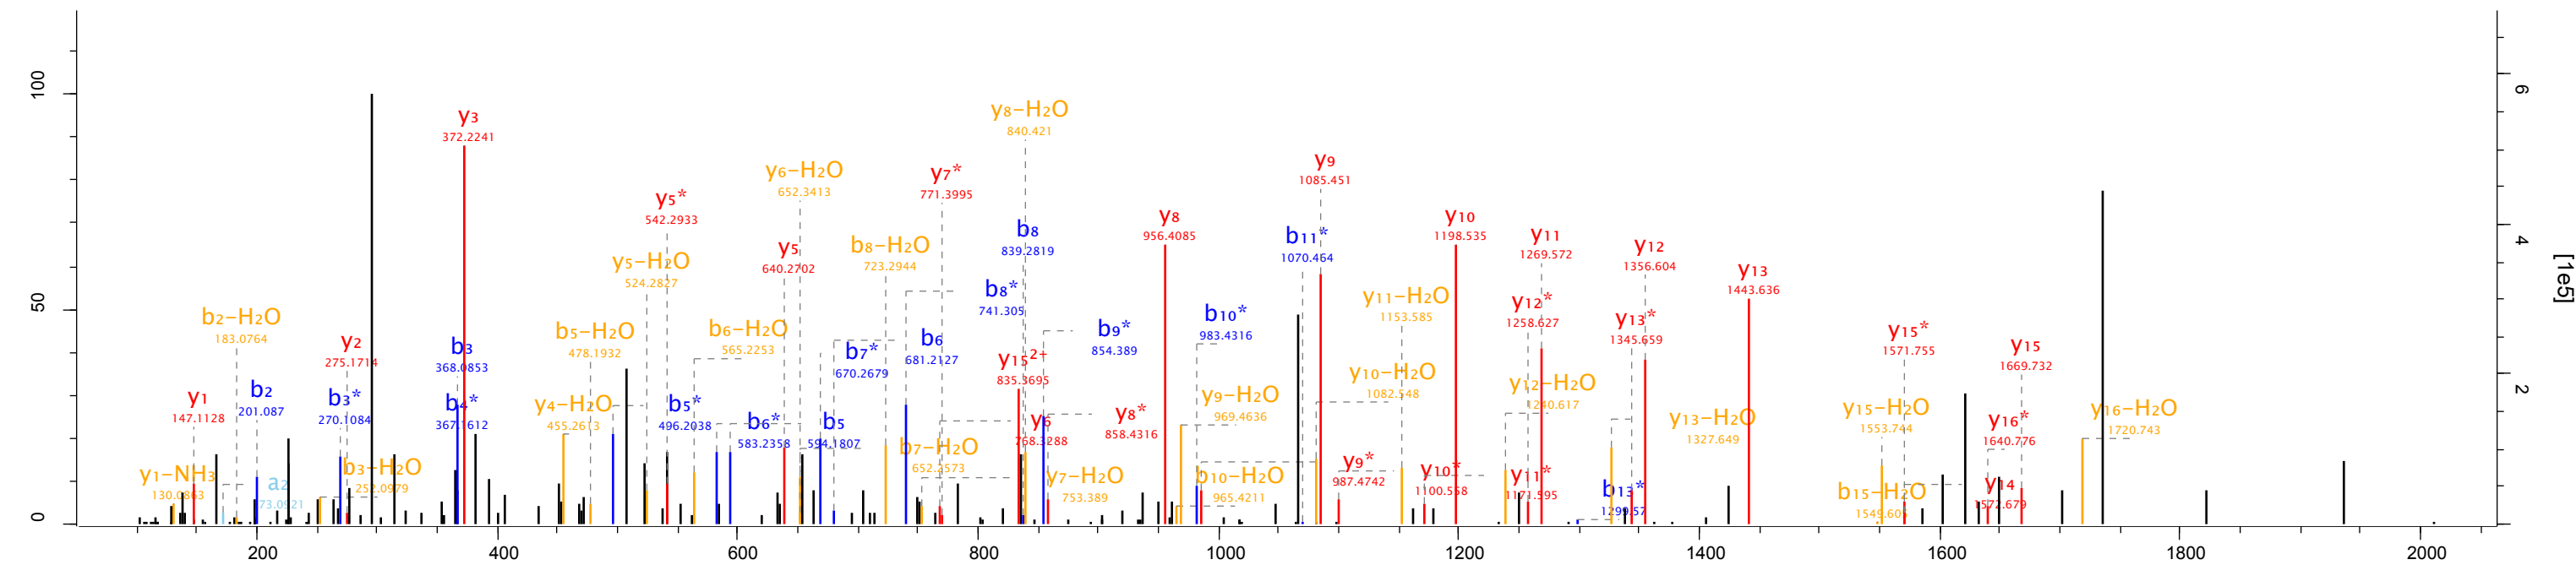

- A E S<sub>b<sub>3</sub></sub> P<sub>b<sub>4</sub>\*</sub> E<sub>b<sub>5</sub></sub> S<sub>b<sub>6</sub></sub> S<sub>b<sub>7</sub>\*</sub> A<sub>b<sub>8</sub></sub> I<sub>b<sub>9</sub>\*</sub> E<sub>b<sub>10</sub>\*</sub> S<sub>b<sub>11</sub>\*</sub> T<sub>b<sub>13</sub>\*</sub> S T P Q K -

Y ion series: y<sub>16</sub>\* ph, y<sub>15</sub>, y<sub>14</sub>, y<sub>13</sub>, y<sub>12</sub>, y<sub>11</sub>, y<sub>10</sub>, y<sub>9</sub>, y<sub>8</sub>, y<sub>7</sub>\*, y<sub>6</sub>, y<sub>5</sub> ph

Raw file: 20150814\_A375SR\_Phospho\_BR2\_02  
 Scan: 9916 Method: FTMS; HCD Score: 79.38 m/z: 721.79 Gene names: FOXC2

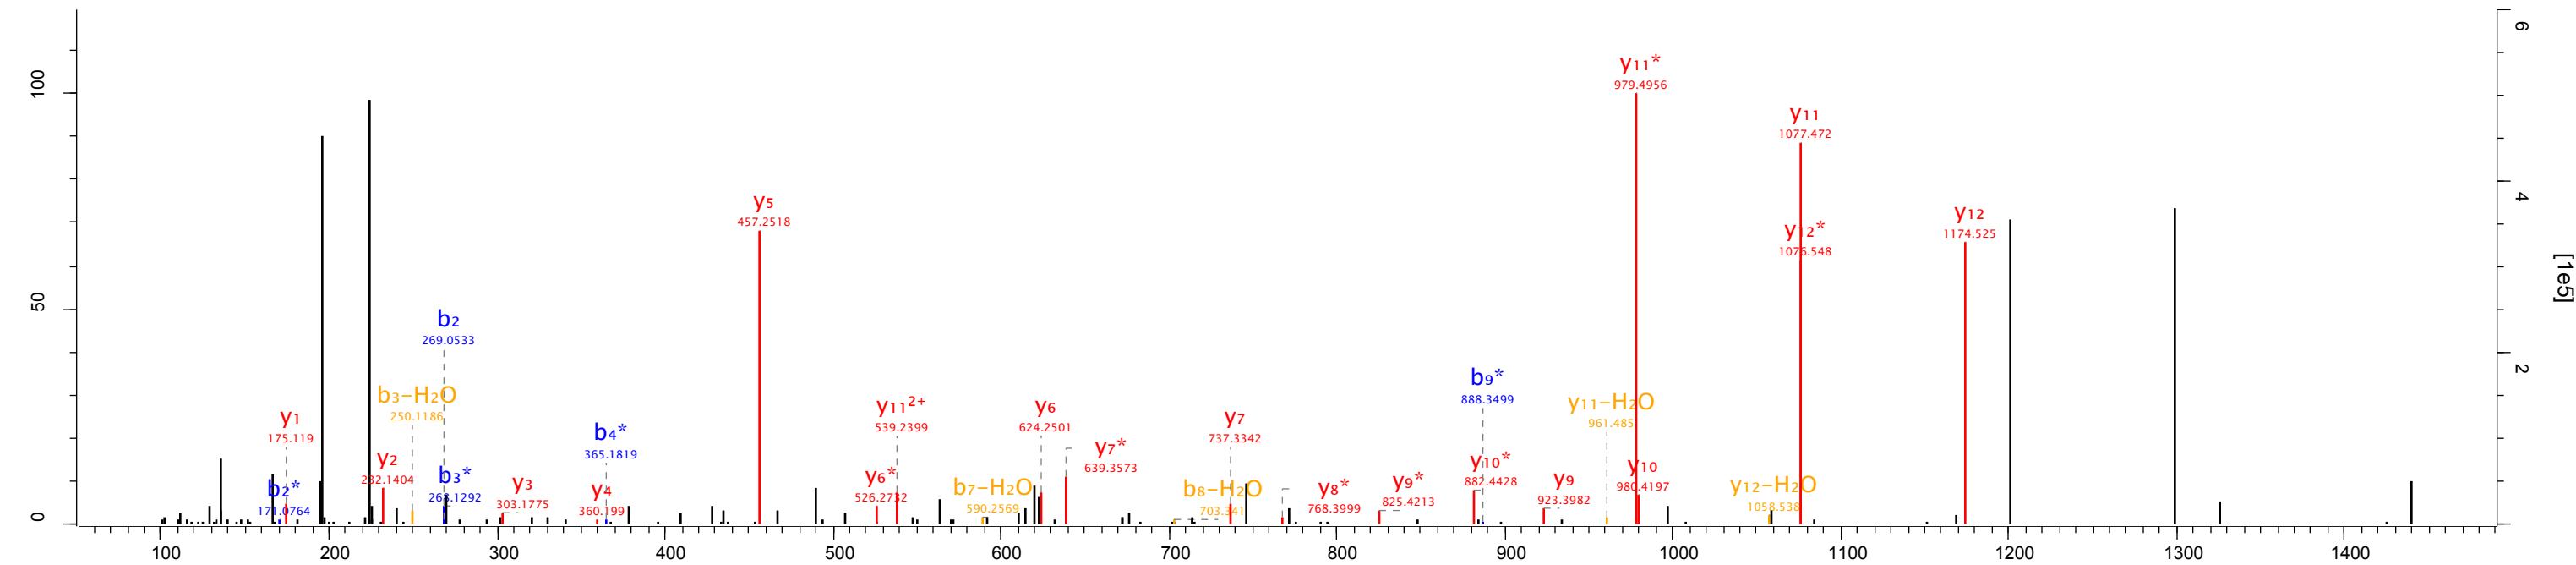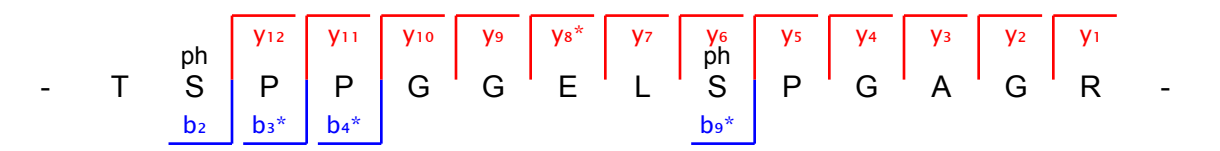

Raw file: 20150814\_A375SR\_Phospho\_BR2\_03  
 Scan: 10166 Method: FTMS; HCD Score: 55.98 m/z: 641.32 Gene names: PLEKHG2

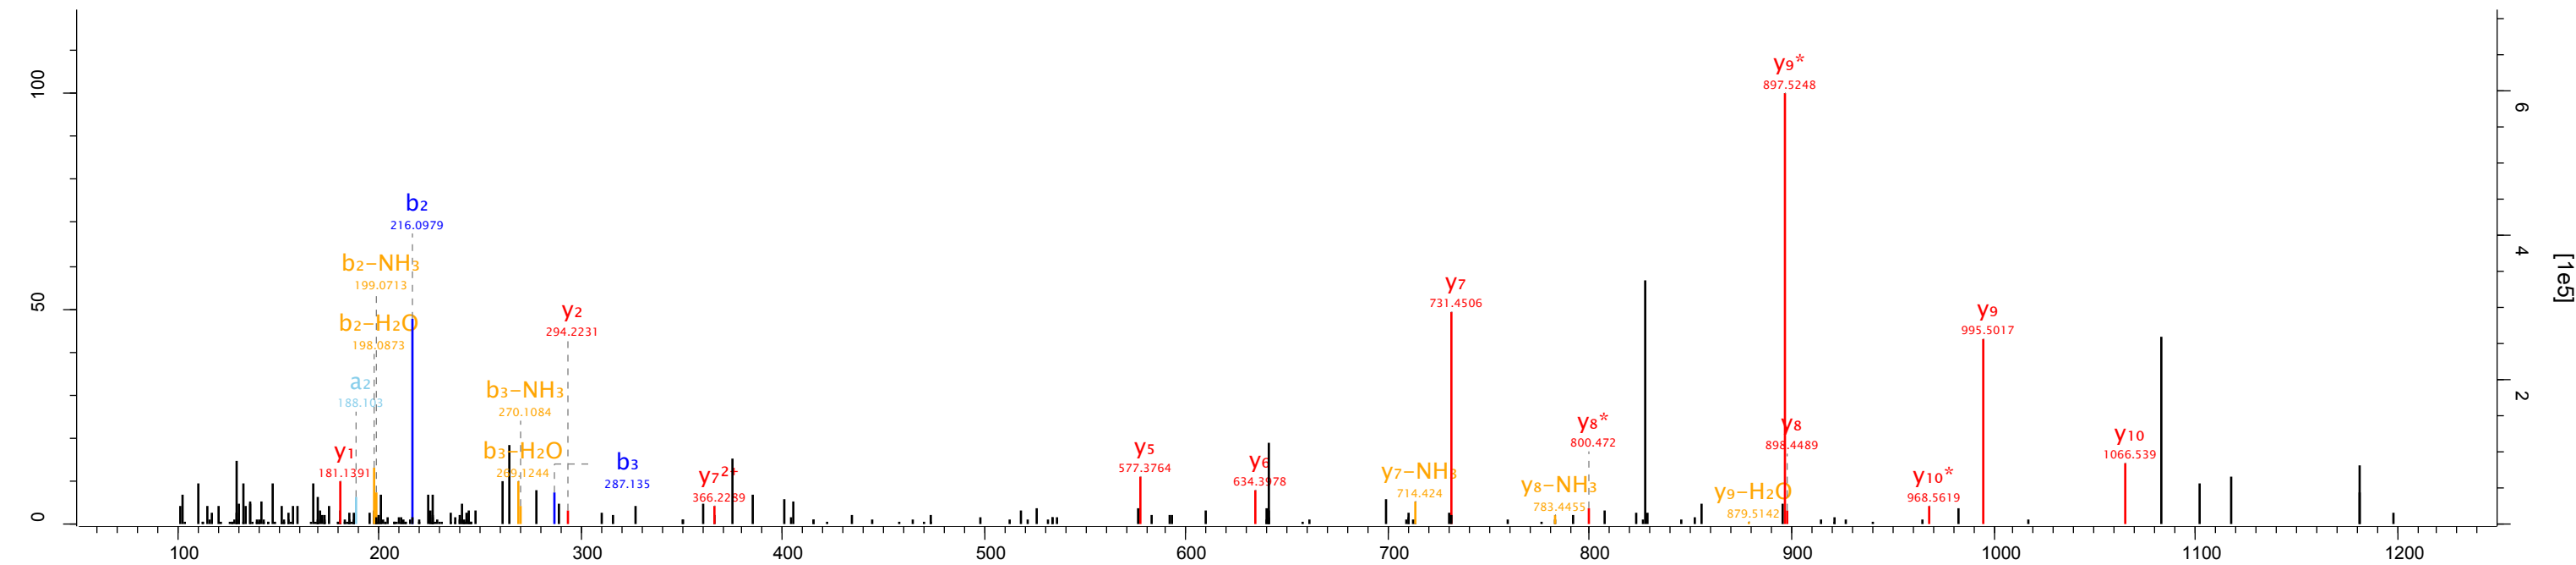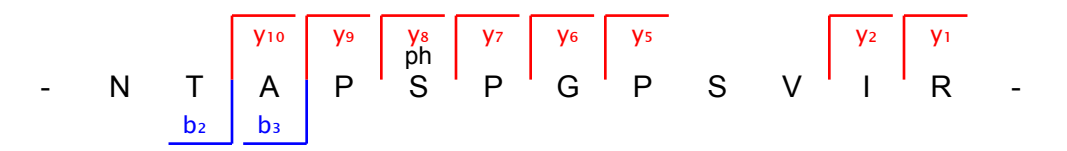

Raw file: 20150814\_A375SR\_Phospho\_BR2\_03  
 Scan: 10196 Method: FTMS; HCD Score: 89.19 m/z: 787.37 Gene names: RPP25

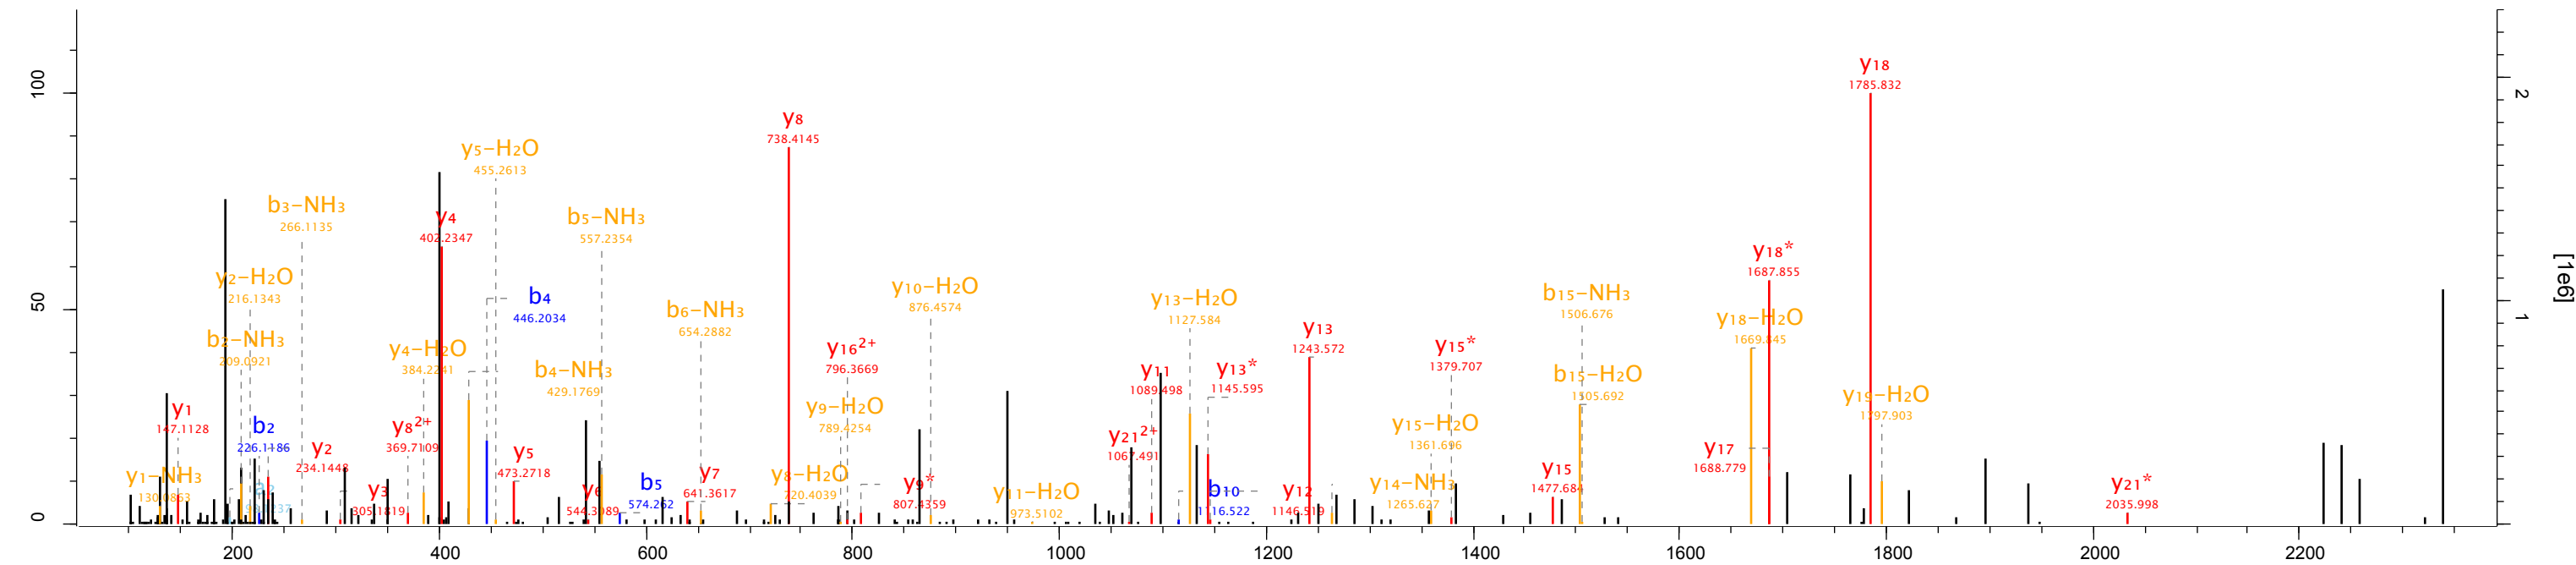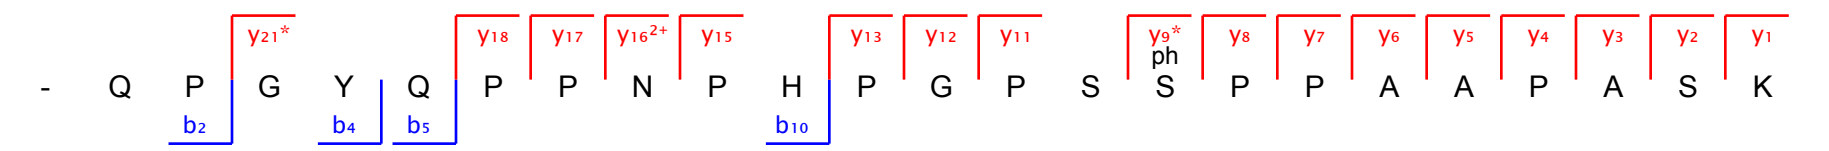

Raw file 20150814\_A375SR\_Phospho\_BR2\_03 Scan 10286 Method FTMS; HCD Score 74.43 m/z 577.91 Gene names SRSF10

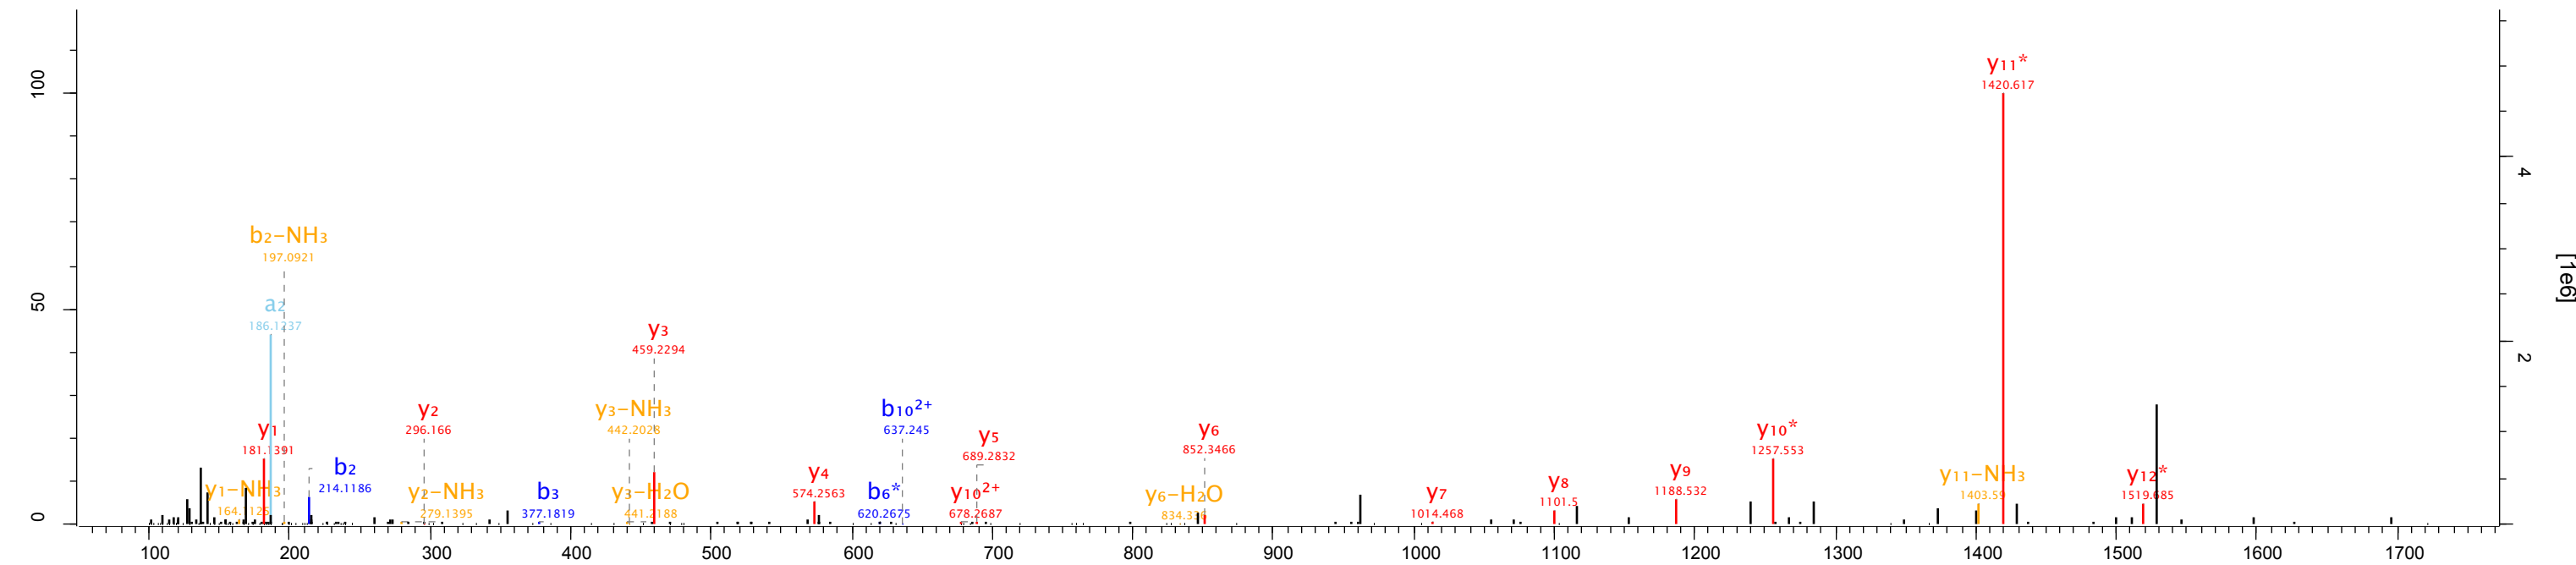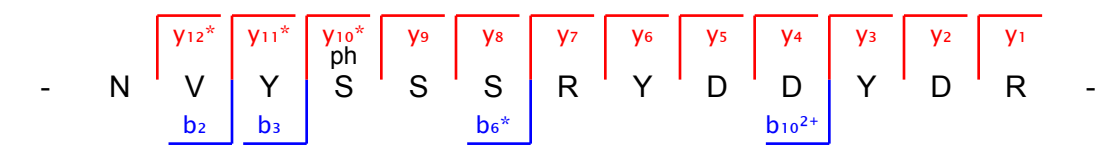

Raw file  
 20150814\_A375SR\_Phospho\_BR2\_03  
 Scan 10956 Method FTMS; HCD Score 178.23 m/z 1051.46 Gene names CSNK1A1

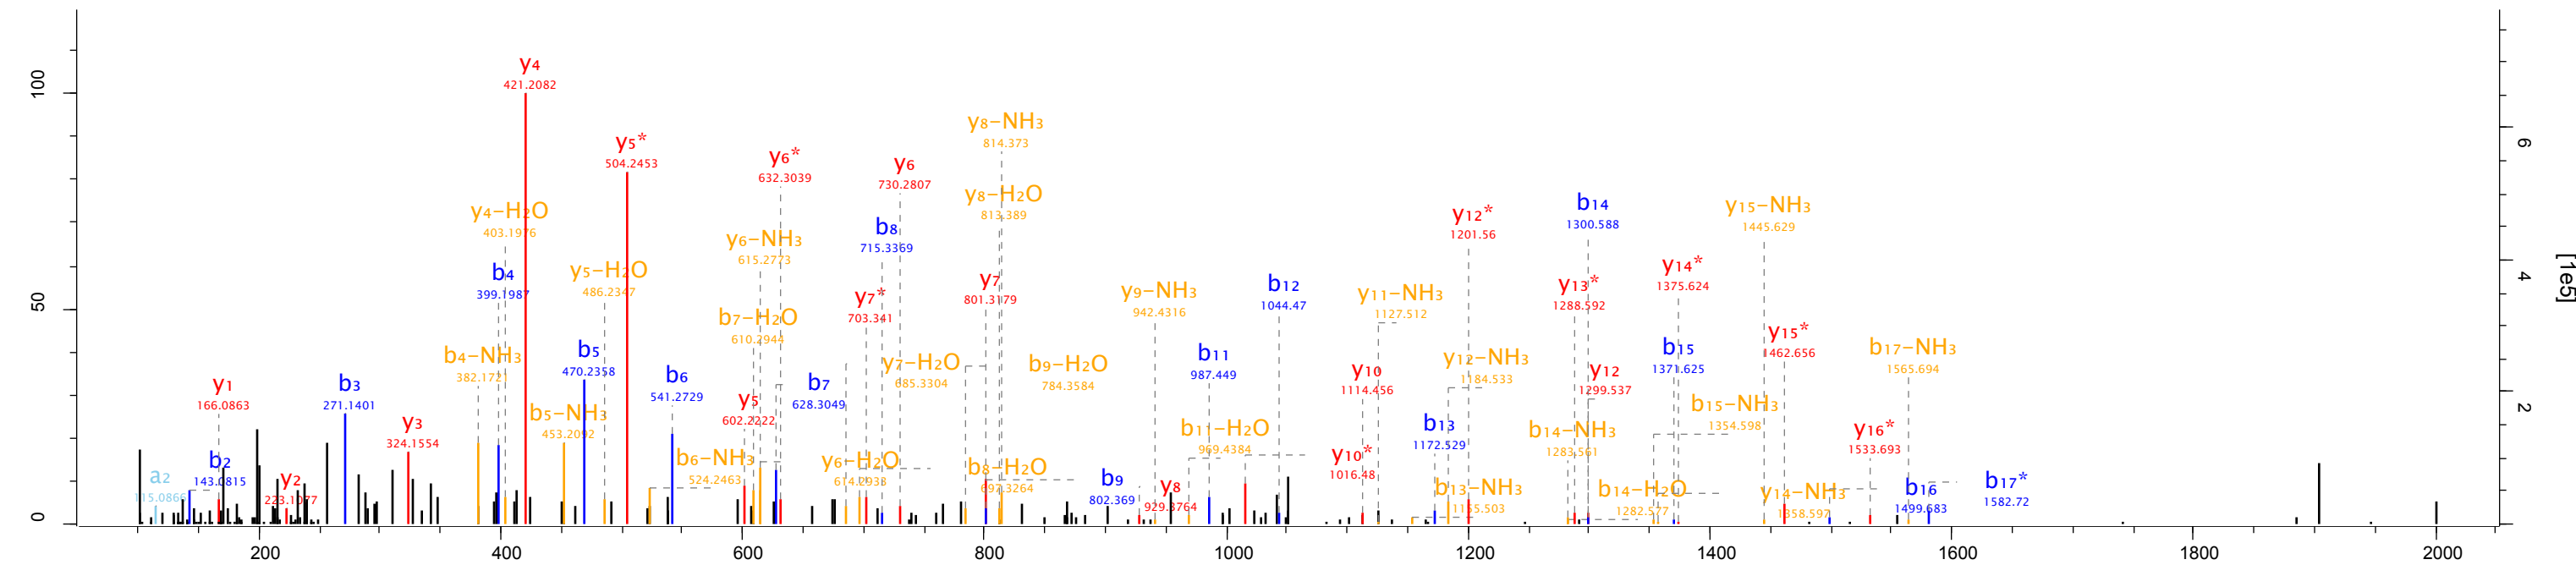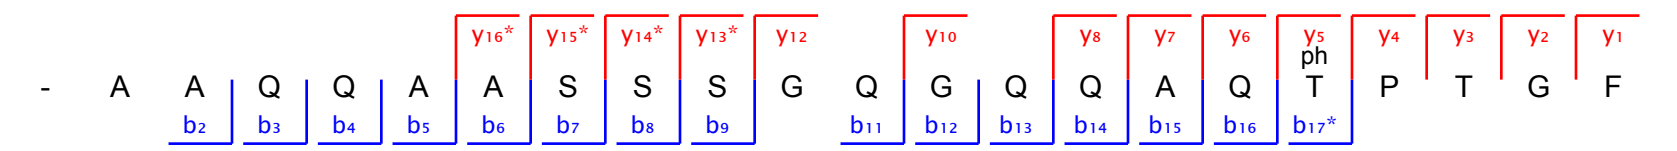

Raw file: 20150814\_A375SR\_Phospho\_BR2\_03  
 Scan: 11236 Method: FTMS; HCD Score: 107.09 m/z: 550.26 Gene names: SRRM2

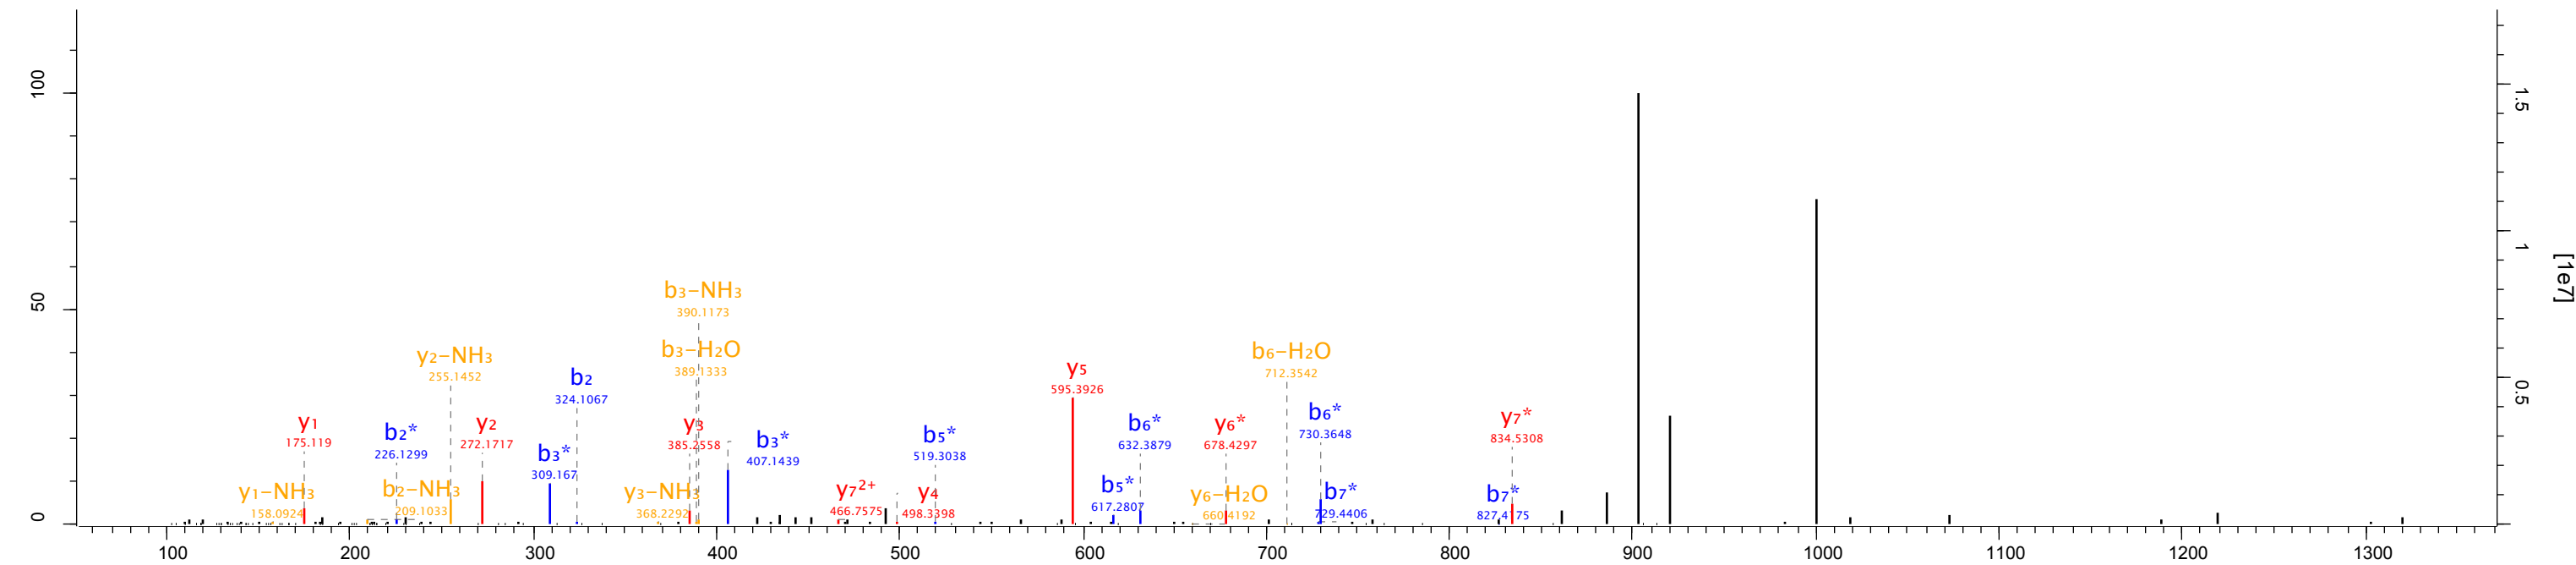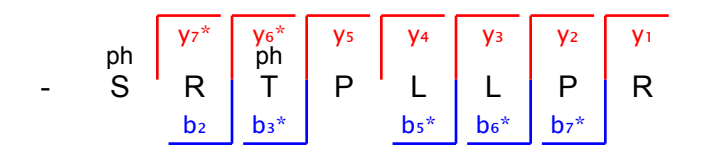



Raw file 20150814\_A375SR\_Phospho\_BR2\_03 Scan 11286 Method FTMS; HCD Score 247.32 m/z 1082.45 Gene names BANF1

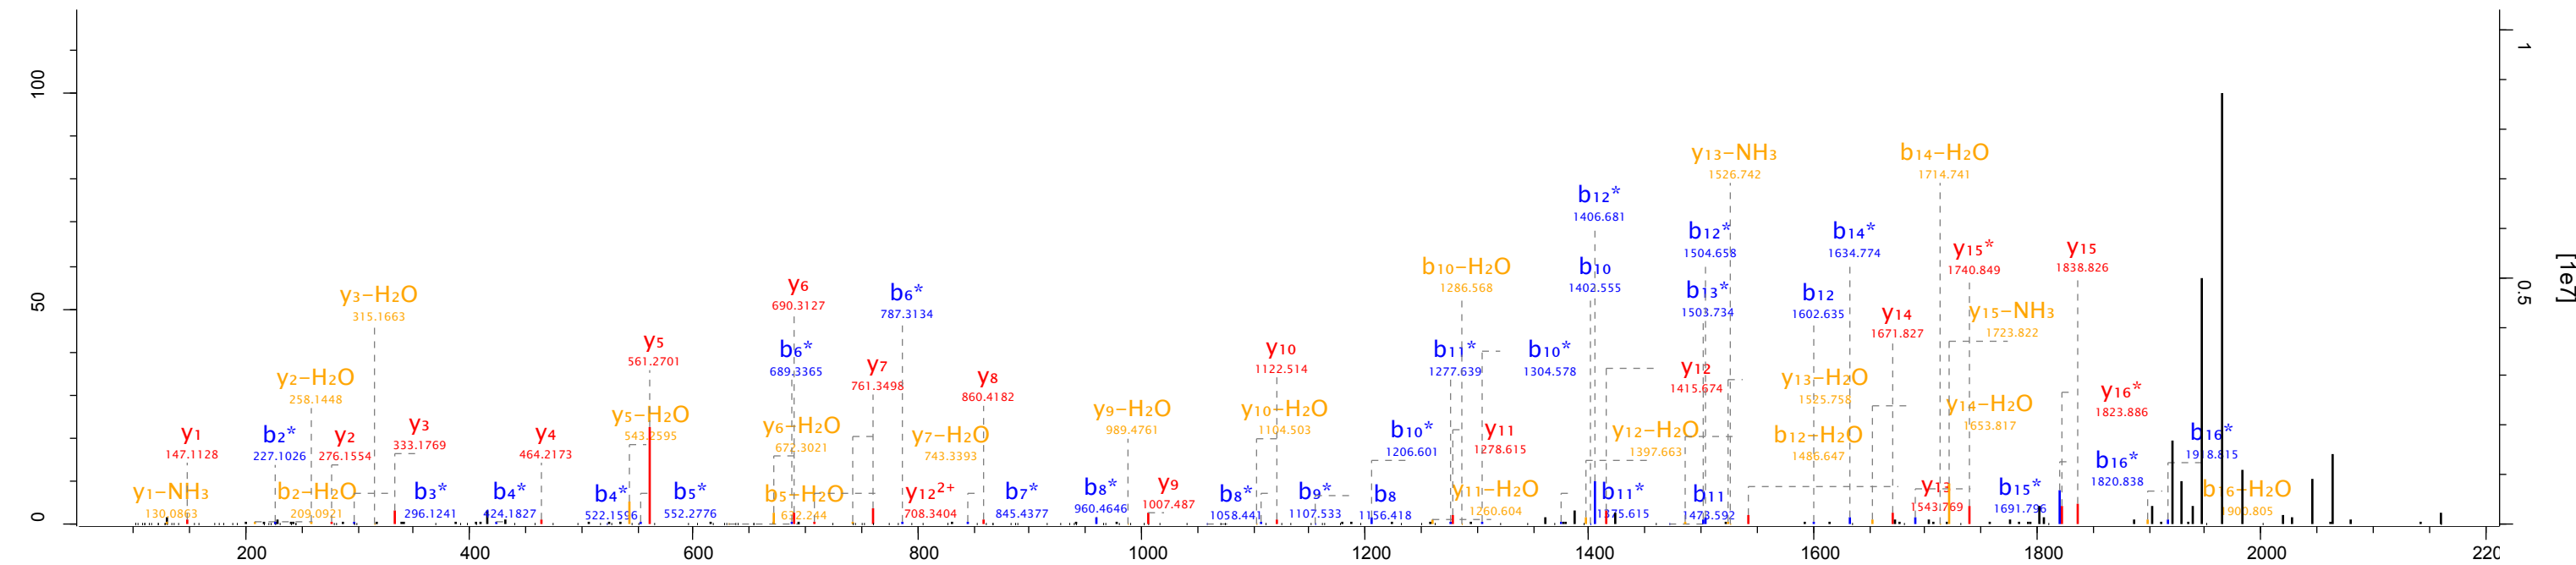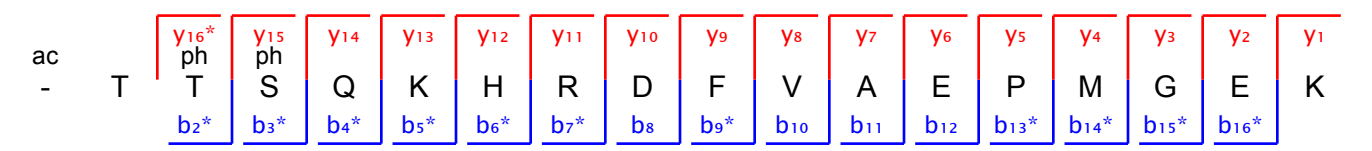

Raw file 20150814\_A375SR\_Phospho\_BR2\_03 Scan 11446 Method FTMS; HCD Score 173.19 m/z 847.36 Gene names LRRC16A

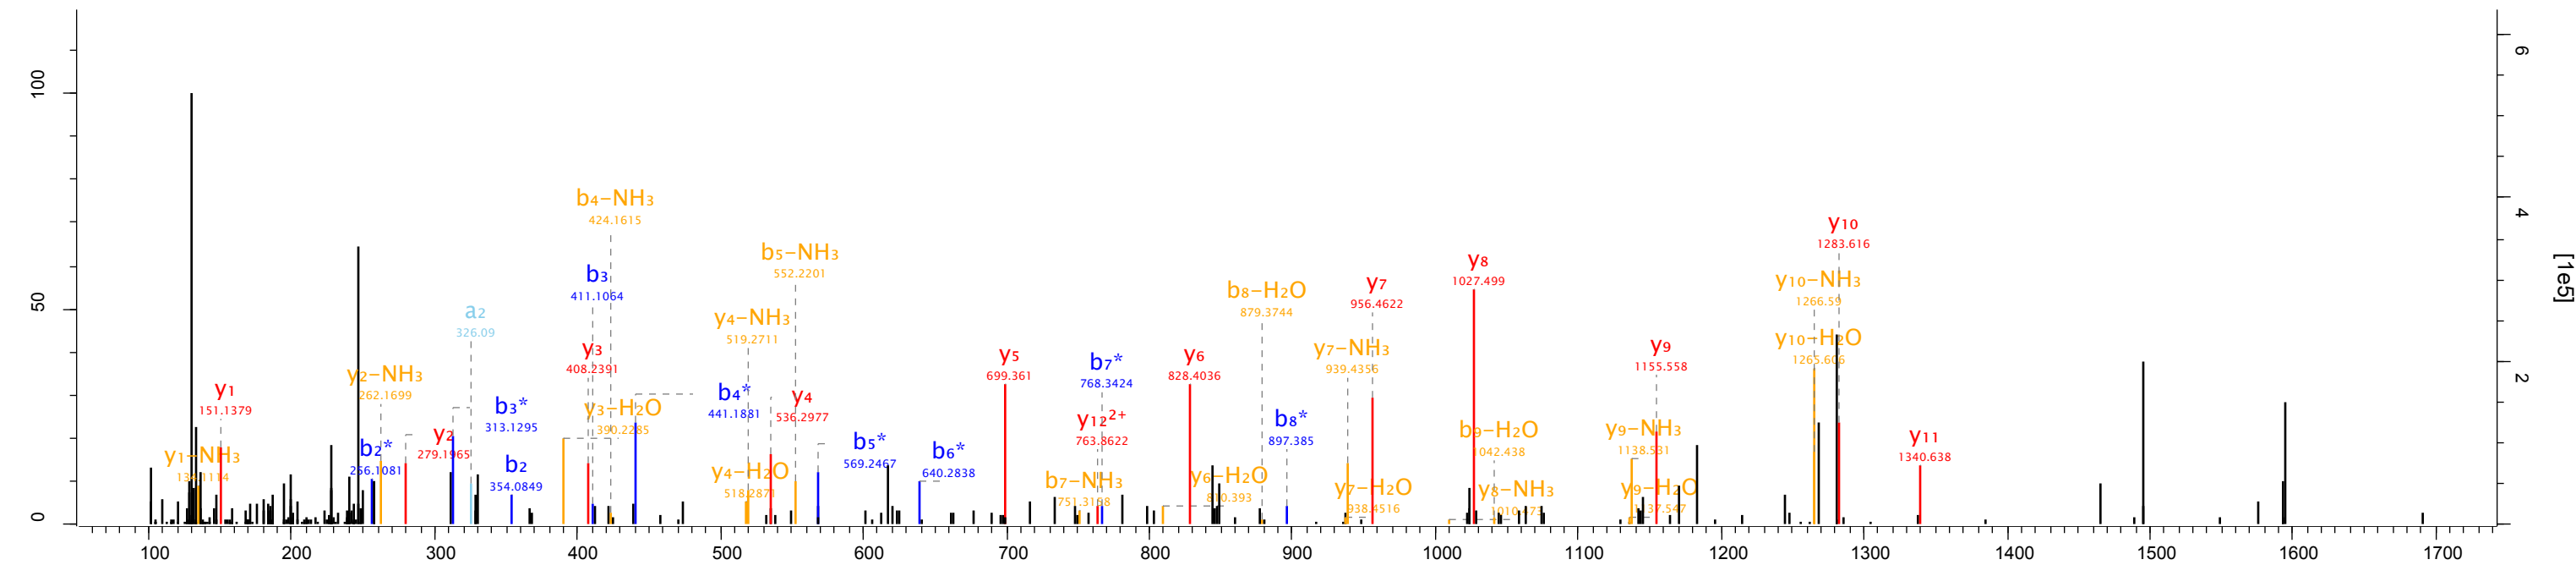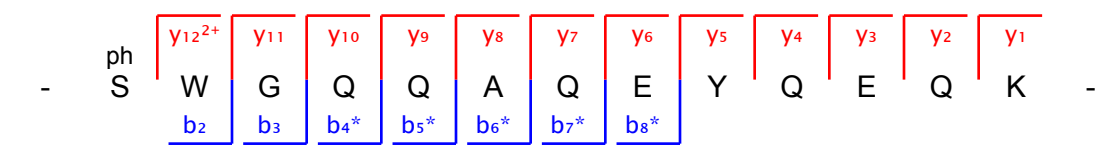

Raw file 20150814\_A375SR\_Phospho\_BR2\_03 Scan 11646 Method FTMS; HCD Score 122.87 m/z 782.84 Gene names RANBP10

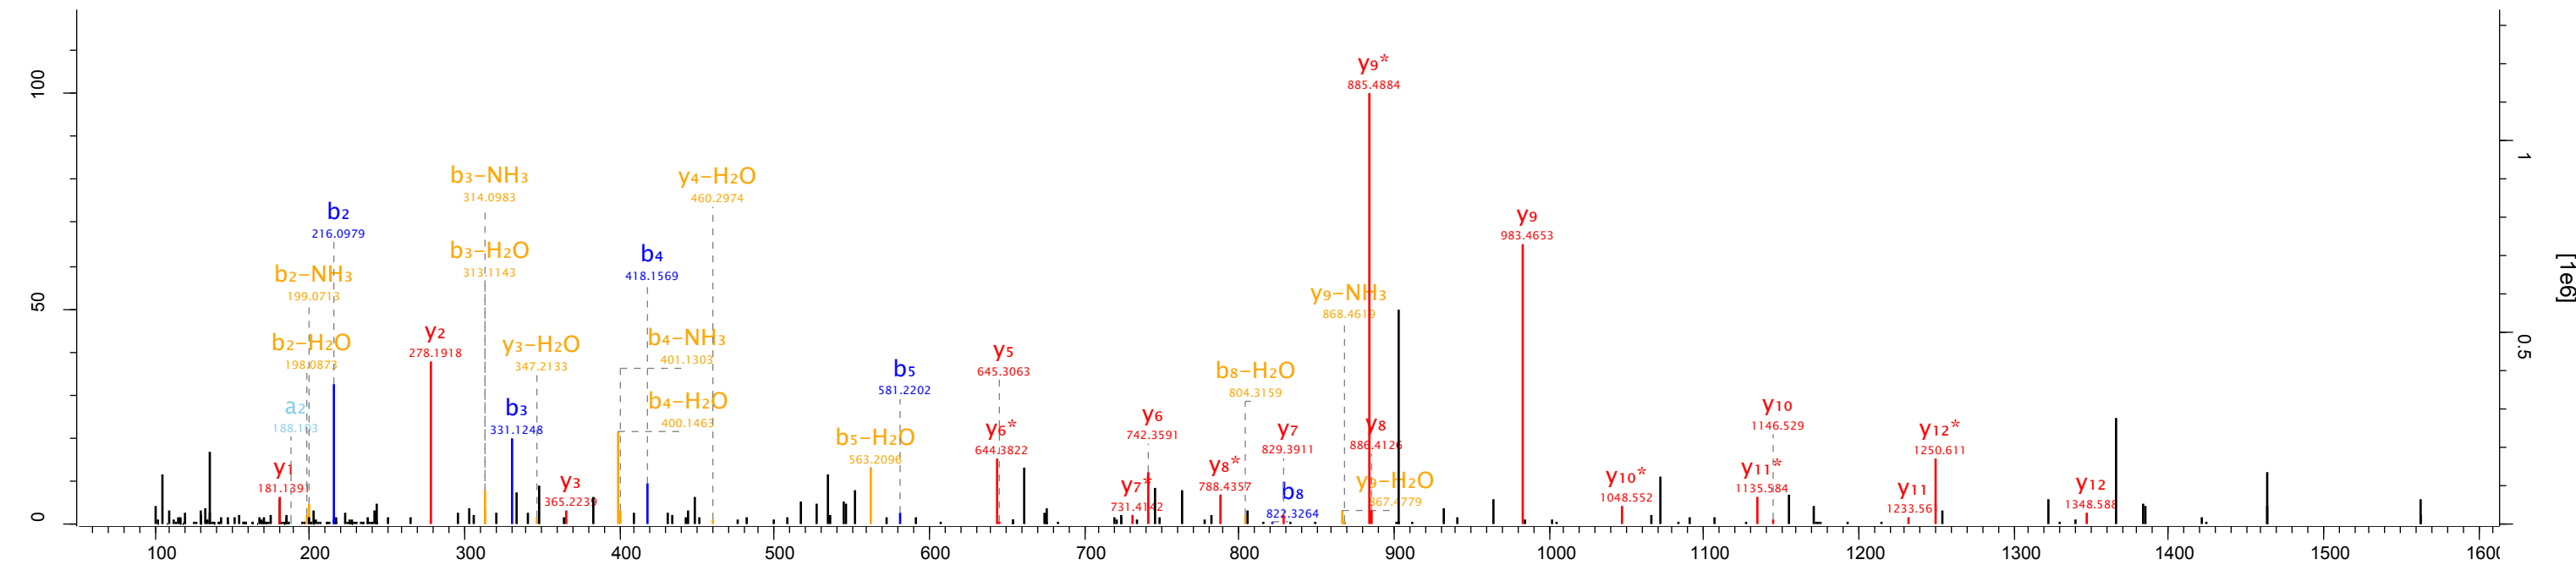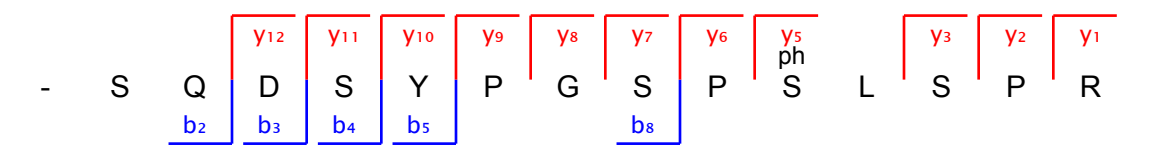

Raw file 20150814\_A375SR\_Phospho\_BR2\_03 Scan 12026 Method FTMS; HCD Score 143.04 m/z 865.03 Gene names DOCK7

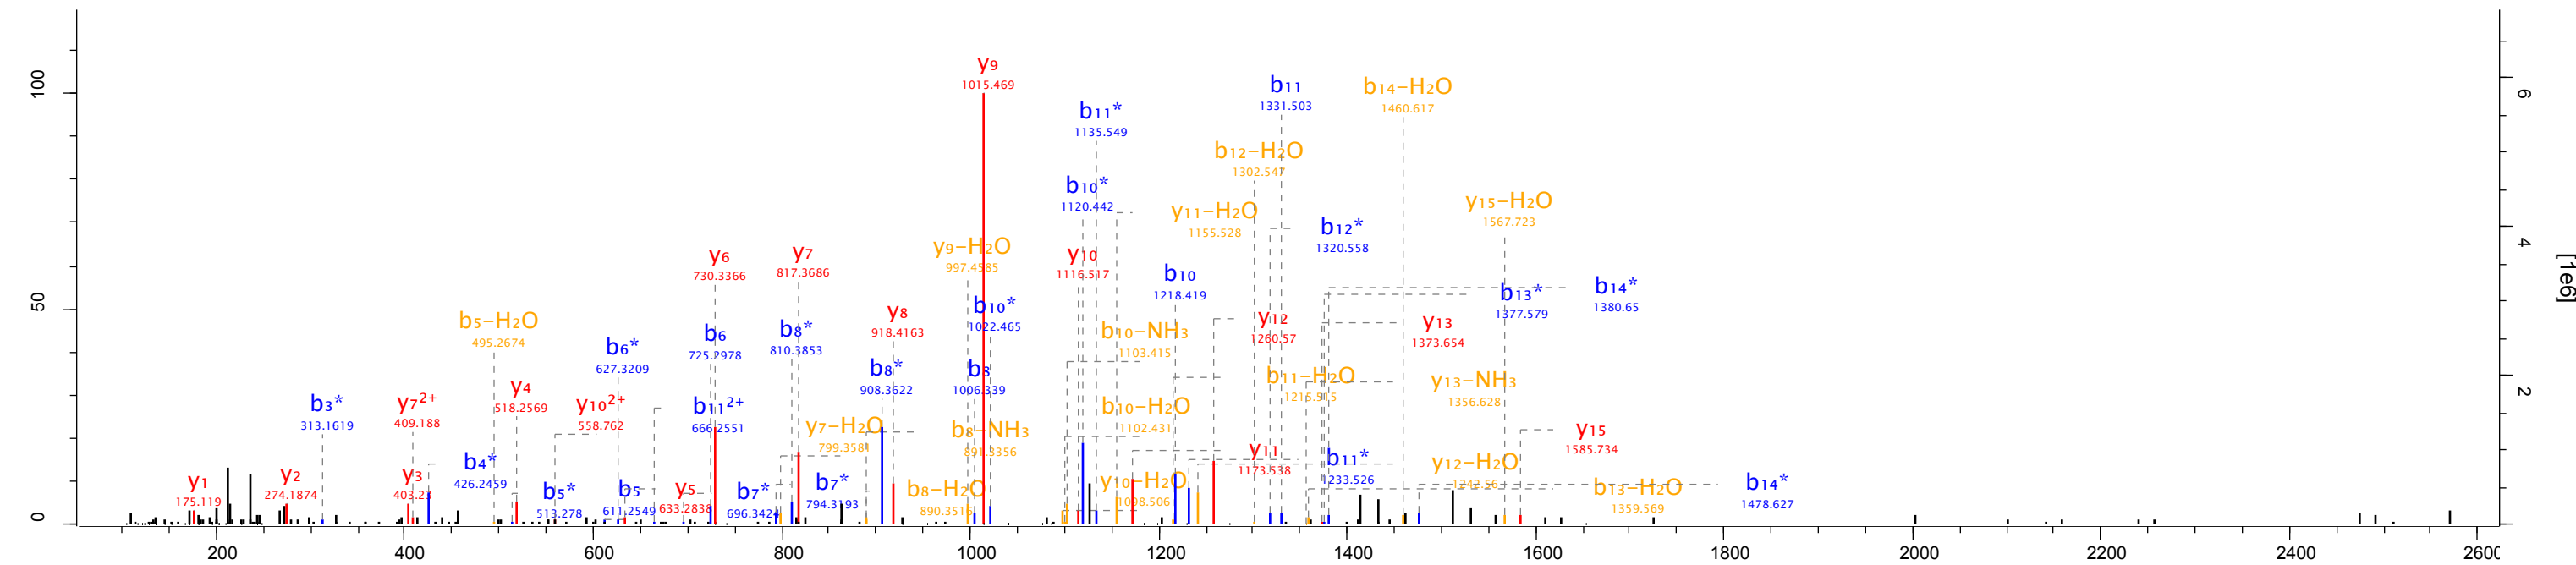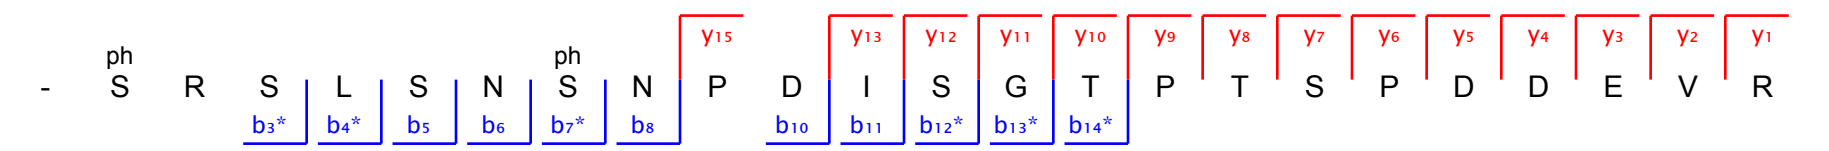

Raw file: 20150814\_A375SR\_Phospho\_BR2\_03  
 Scan: 12556 Method: FTMS; HCD Score: 264.86 m/z: 1172.97 Gene names: PLEC

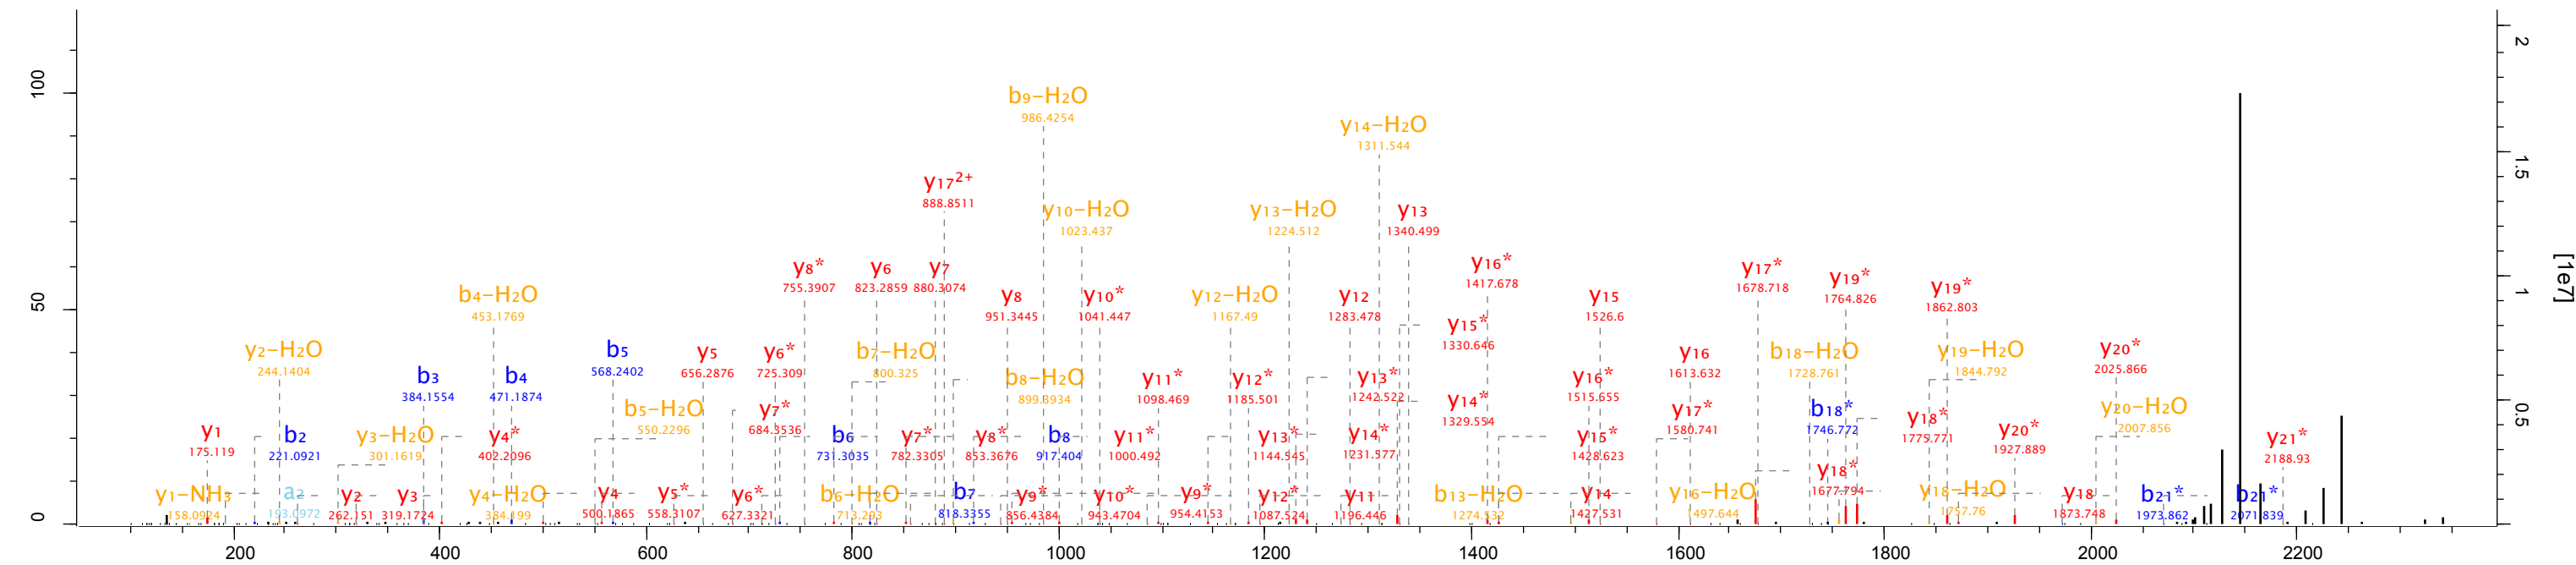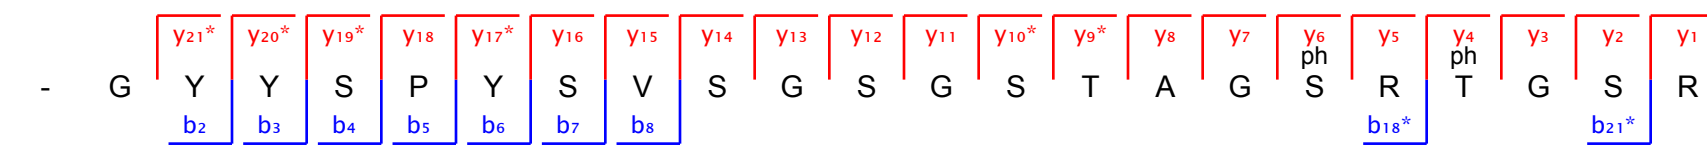

Raw file 20150814\_A375SR\_Phospho\_BR2\_03 Scan 12806 Method FTMS; HCD Score 176.18 m/z 959.88 Gene names SMARCA4

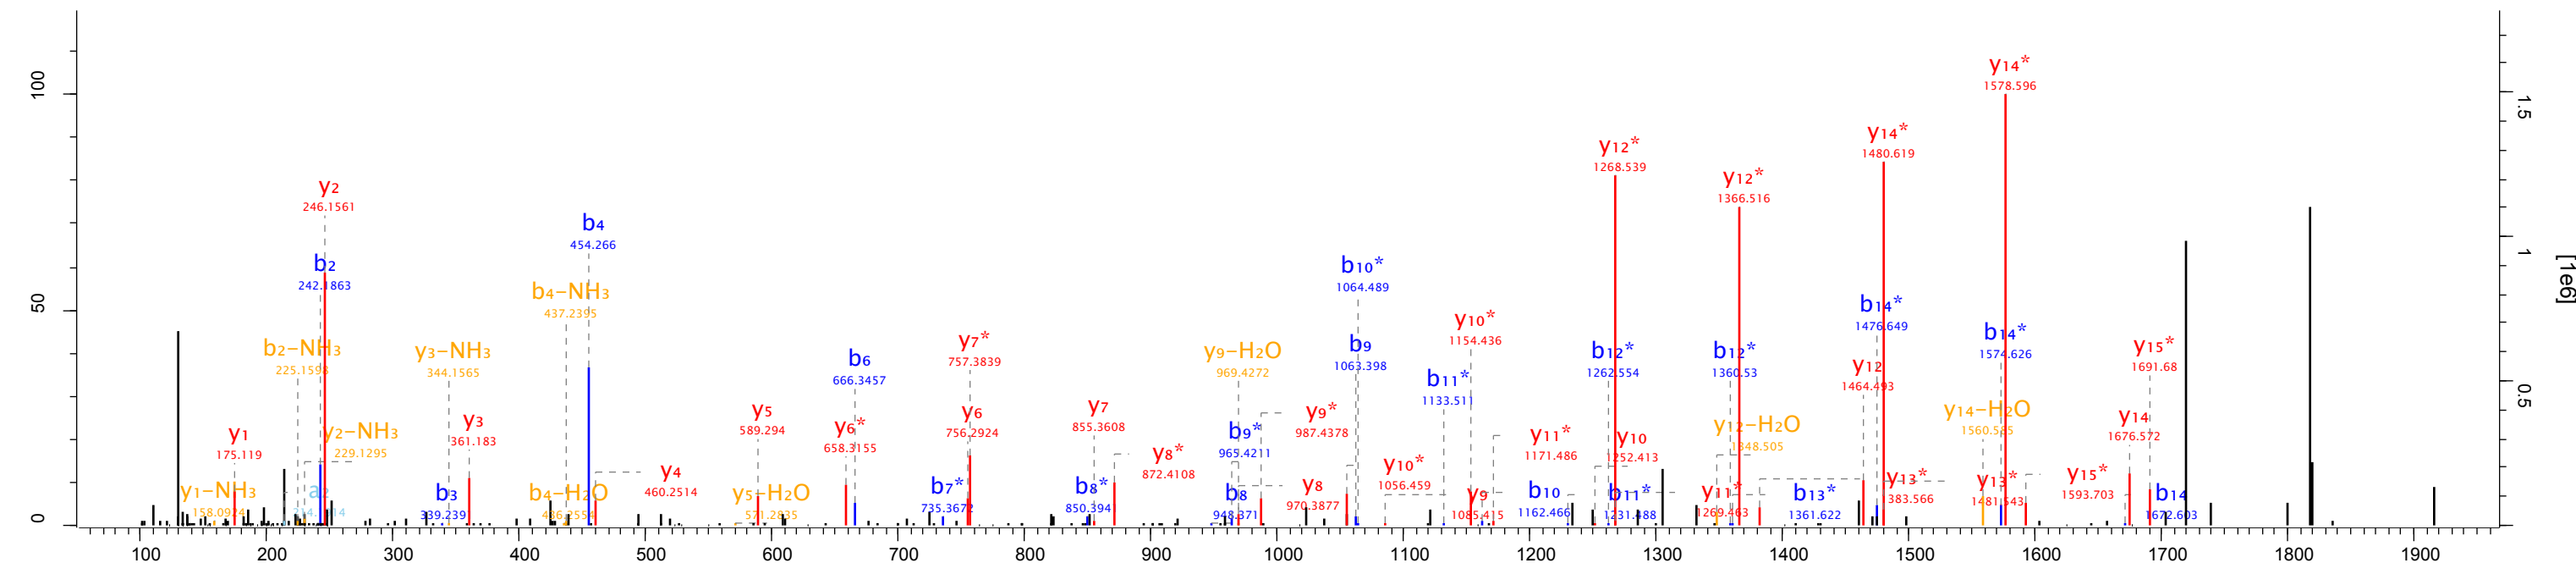

- K I P D P D S D D V S E V D A R -

b<sub>2</sub> b<sub>3</sub> b<sub>4</sub> b<sub>6</sub> b<sub>7</sub>\* b<sub>8</sub> b<sub>9</sub> b<sub>10</sub> b<sub>11</sub>\* b<sub>12</sub>\* b<sub>13</sub>\* b<sub>14</sub>

y<sub>15</sub>\* y<sub>14</sub> y<sub>13</sub>\* y<sub>12</sub> y<sub>11</sub>\* y<sub>10</sub> ph y<sub>9</sub> y<sub>8</sub> y<sub>7</sub> y<sub>6</sub> ph y<sub>5</sub> y<sub>4</sub> y<sub>3</sub> y<sub>2</sub> y<sub>1</sub>

Raw file 20150814\_A375SR\_Phospho\_BR2\_03 Scan 13066 Method FTMS; HCD Score 65.43 m/z 972.96 Gene names ZNF385A;SOX6

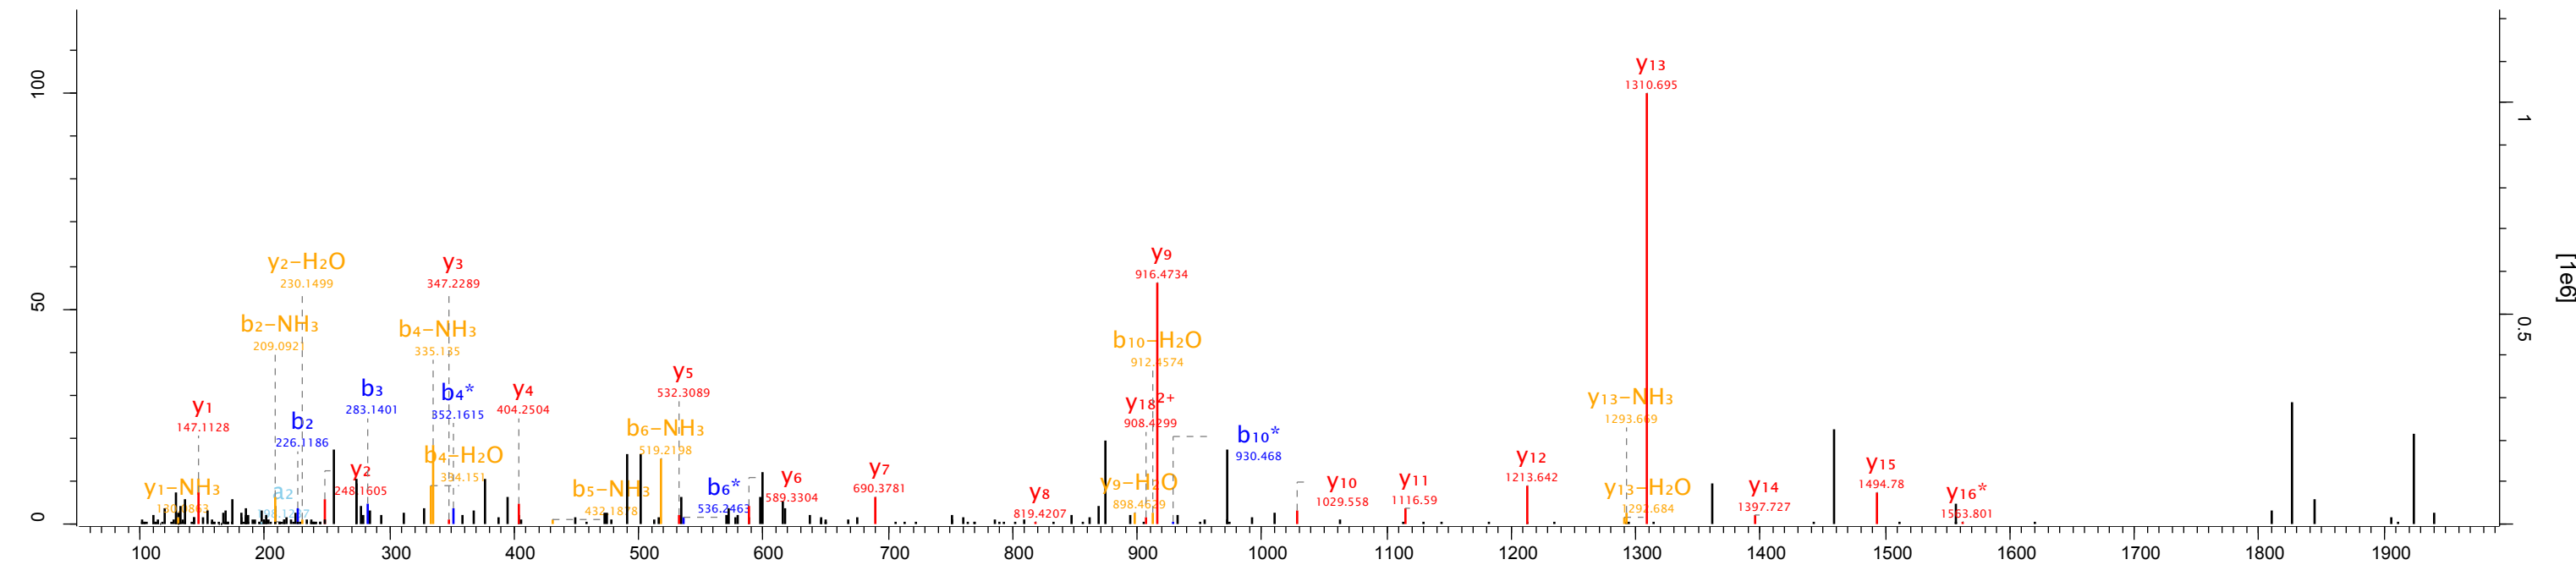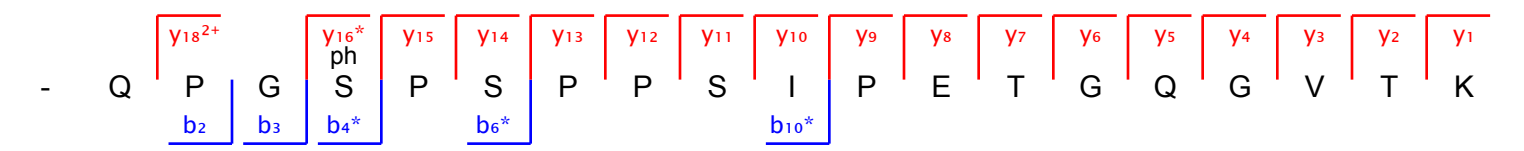

Raw file 20150814\_A375SR\_Phospho\_BR2\_03 Scan 13076 Method FTMS; HCD Score 122.74 m/z 471.17 Gene names SAFB

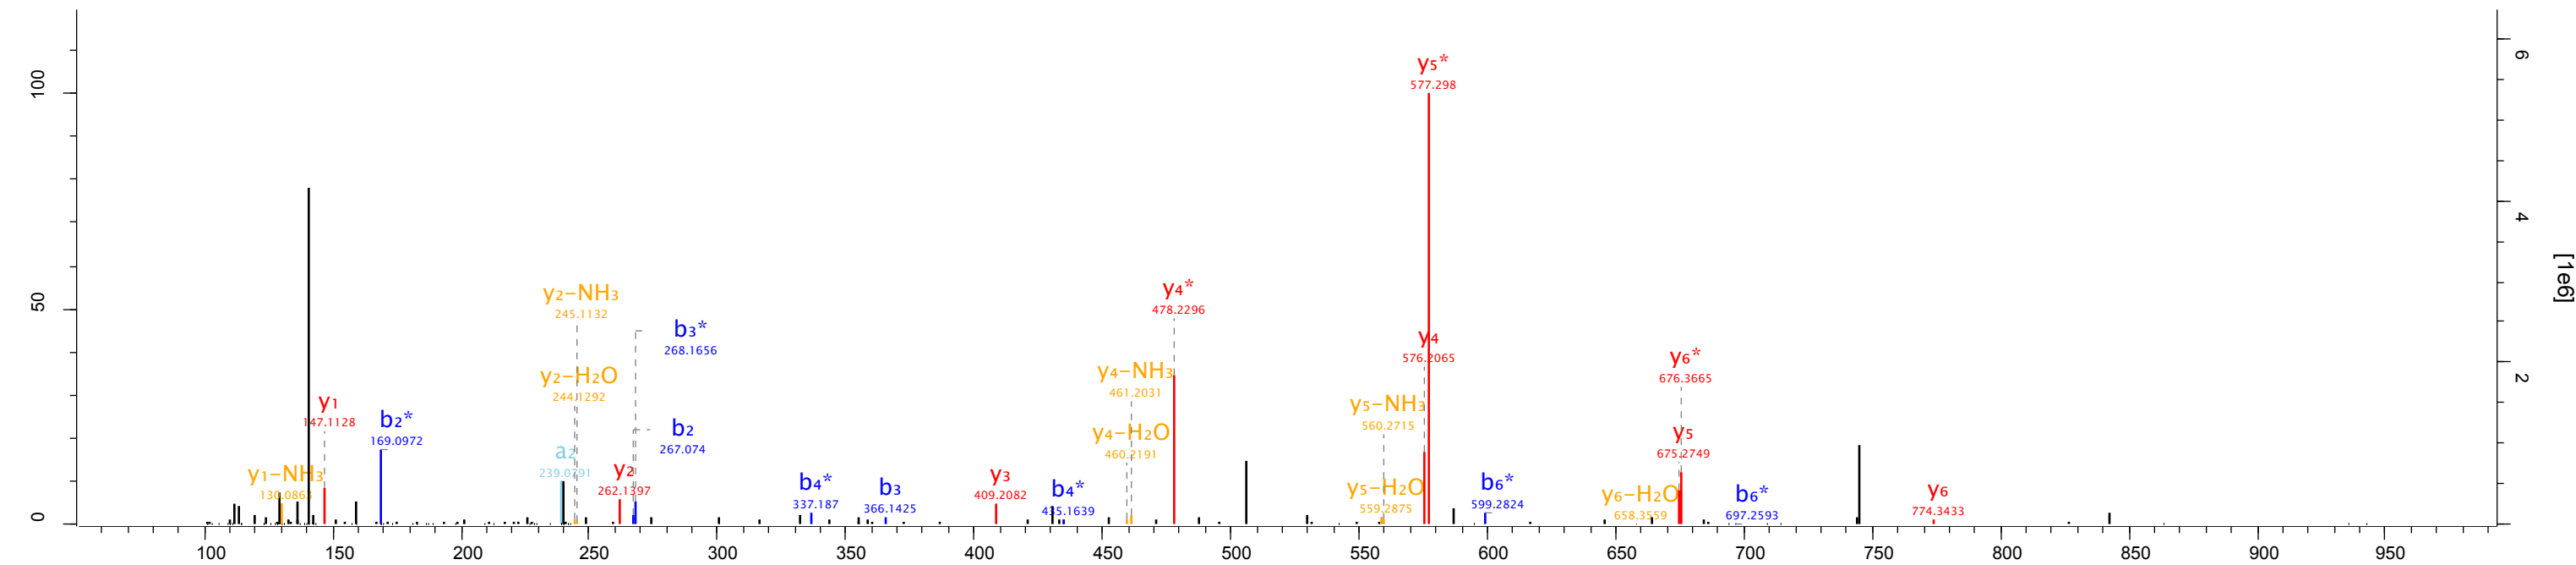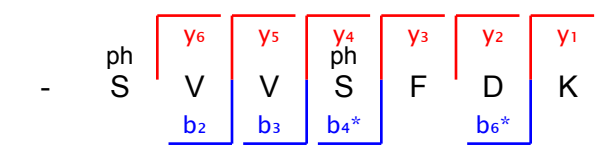



Raw file: 20150814\_A375SR\_Phospho\_BR2\_03  
 Scan: 13246 Method: FTMS; HCD Score: 186.35 m/z: 673.31 Gene names: EMD

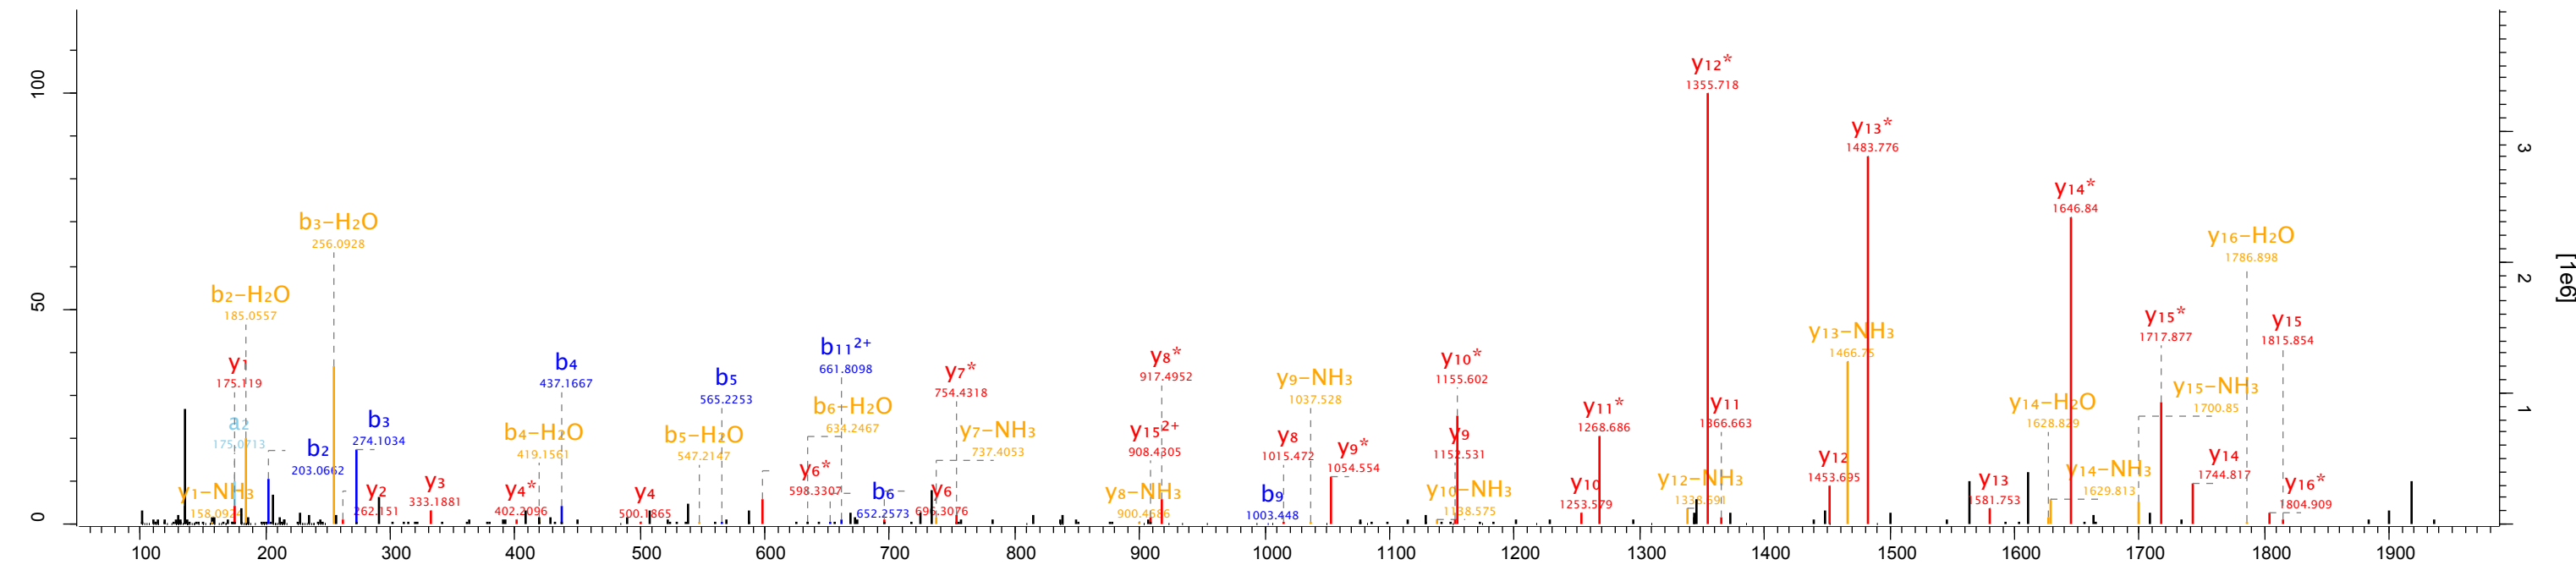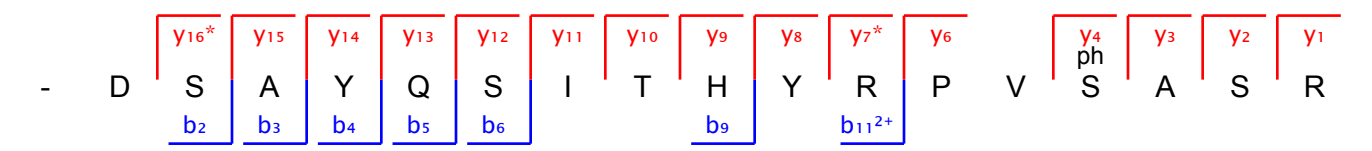

Raw file 20150814\_A375SR\_Phospho\_BR2\_03 Scan 13306 Method FTMS; HCD Score 74.51 m/z 633.63 Gene names RPAP3

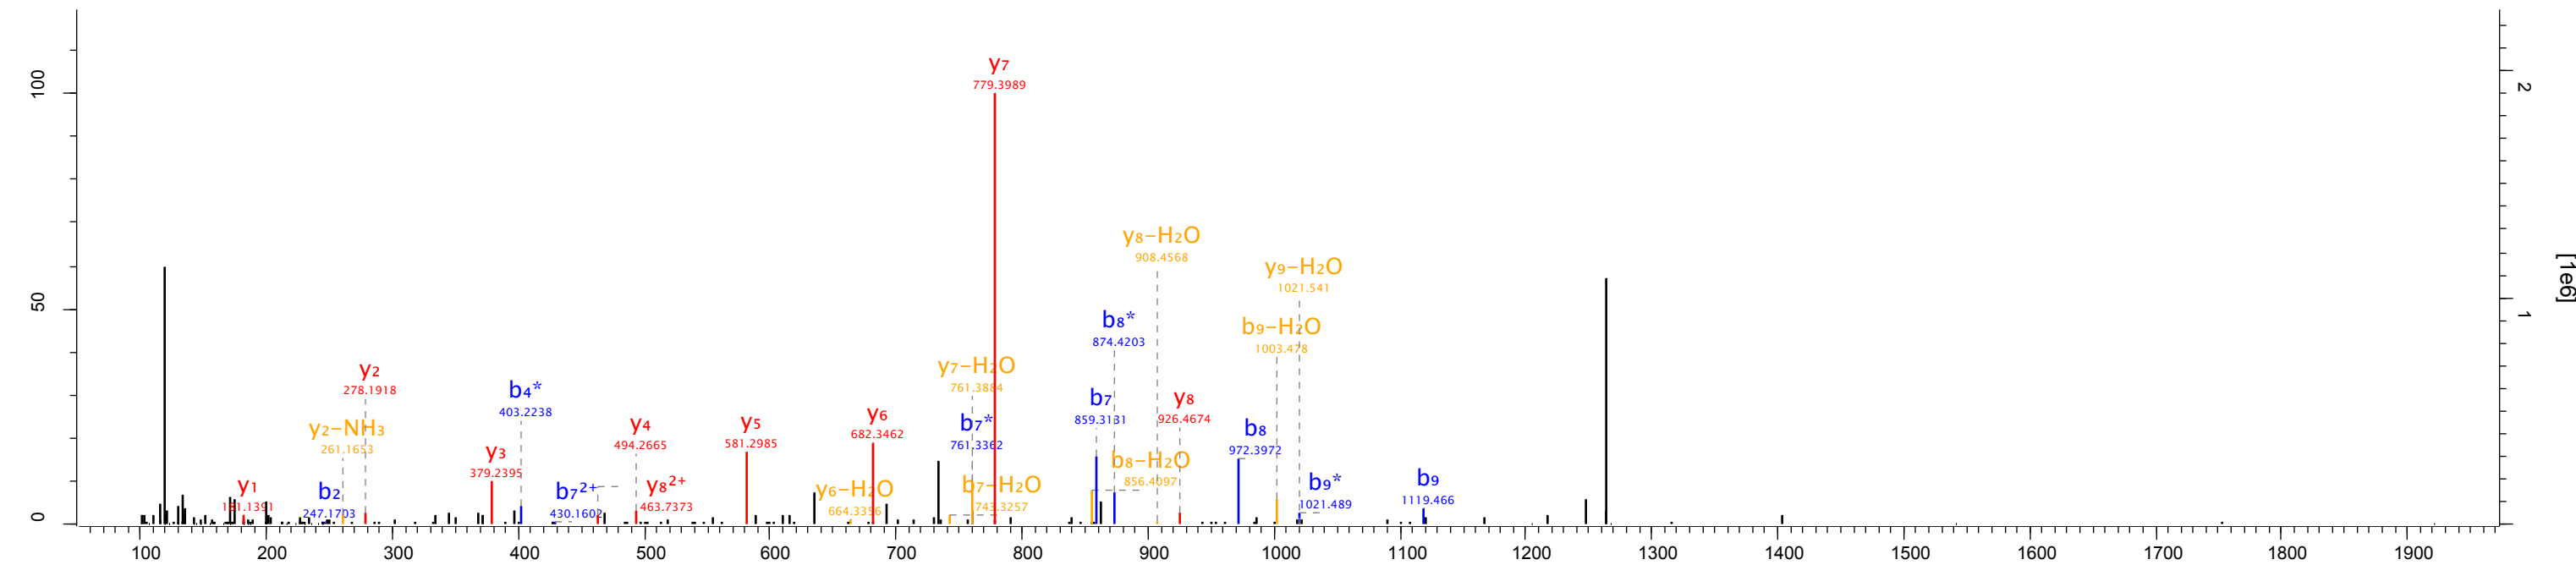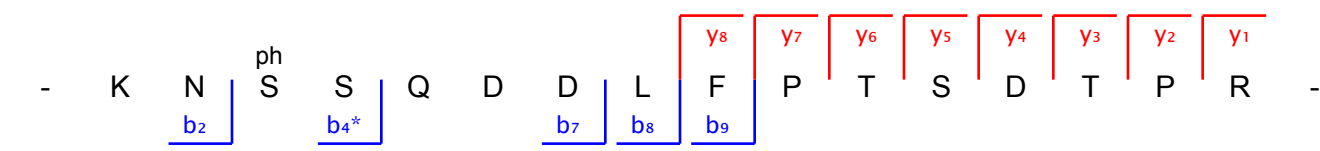

Raw file: 20150814\_A375SR\_Phospho\_BR2\_03  
 Scan: 13316 Method: FTMS; HCD Score: 132.08 m/z: 612.77 Gene names: ITGB4

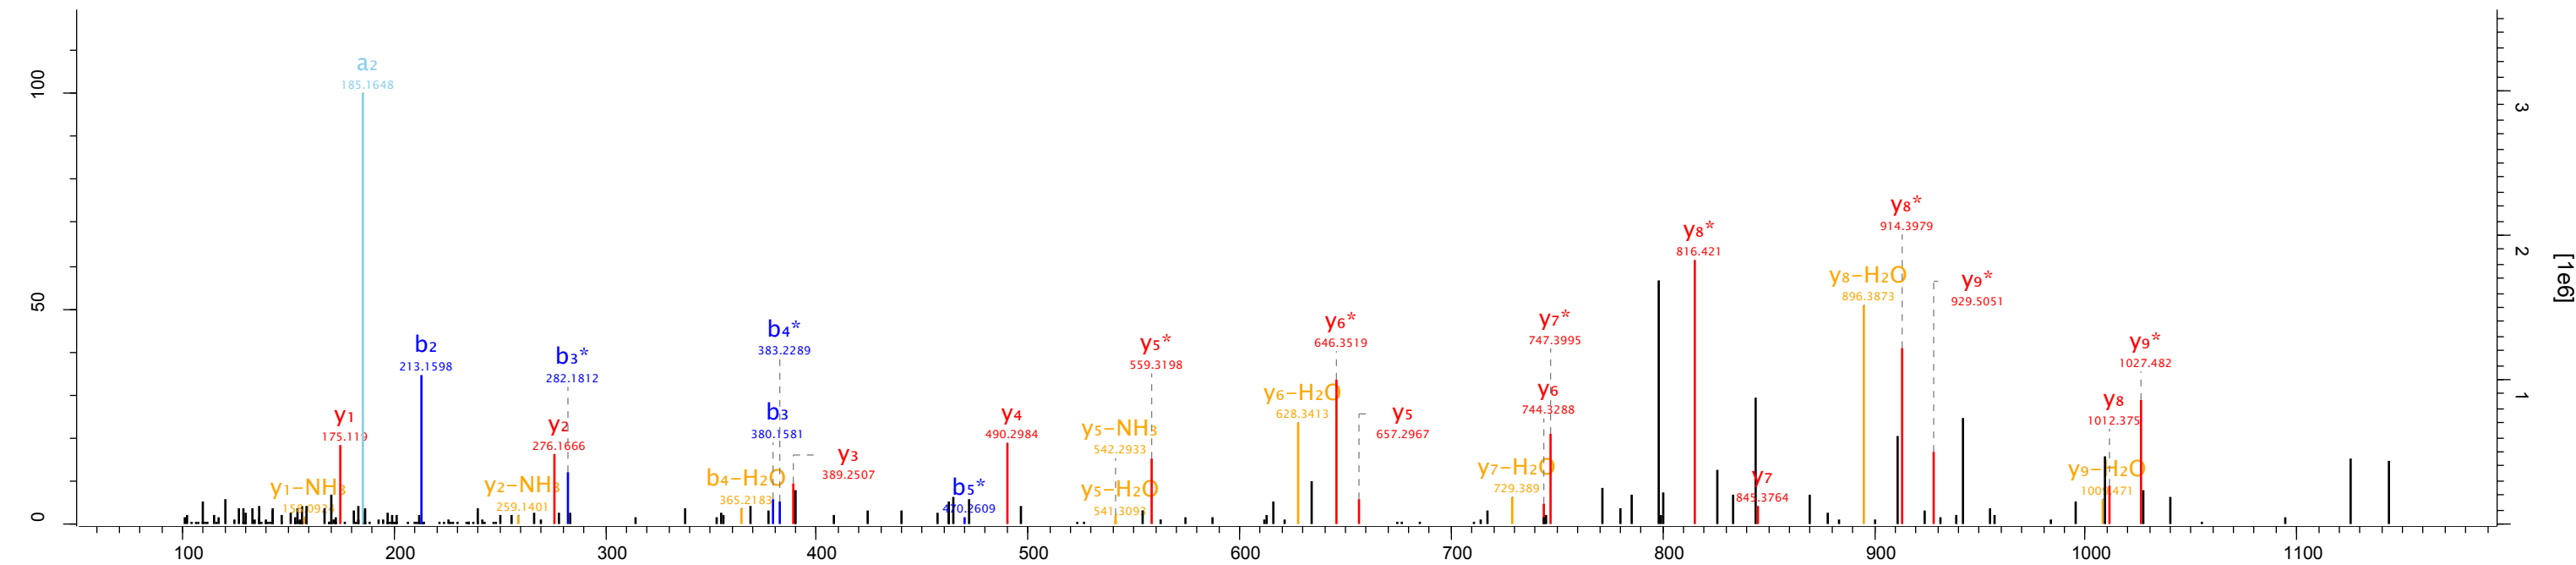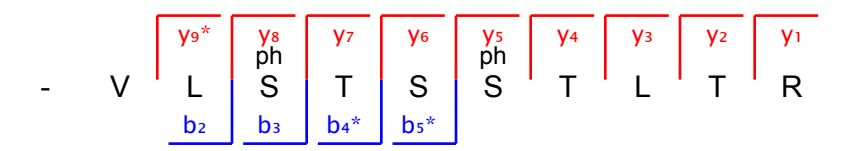

Raw file: 20150814\_A375SR\_Phospho\_BR2\_03  
 Scan: 13726 Method: FTMS; HCD Score: 191.41 m/z: 881.87 Gene names: GOLGA4

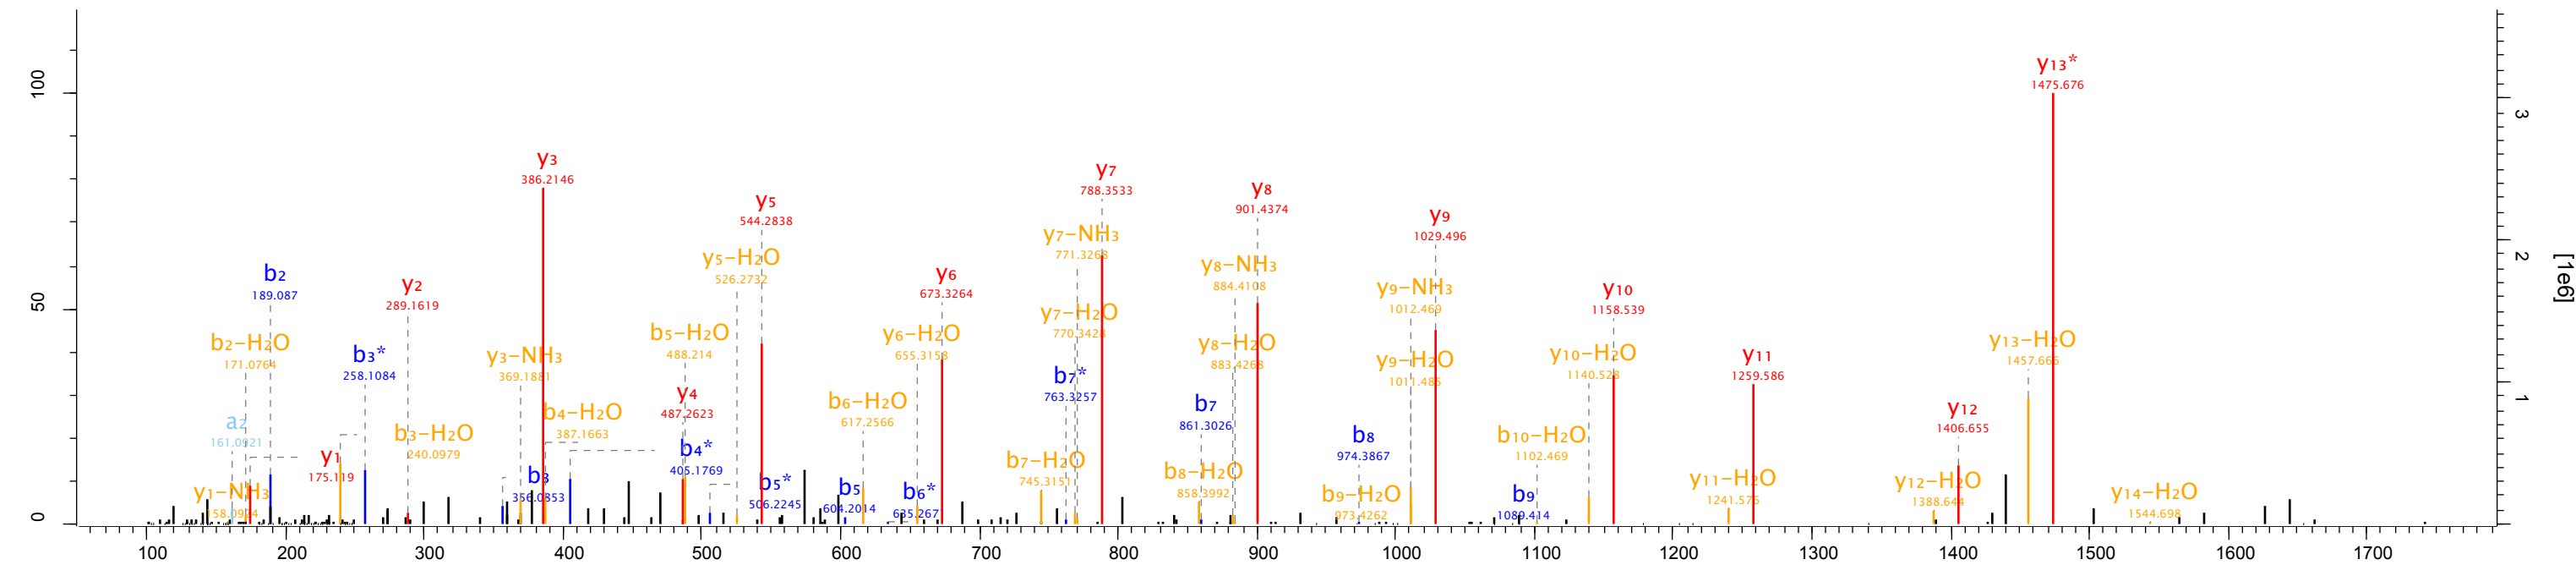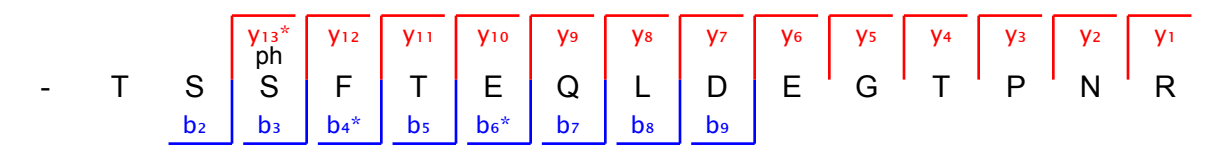

Raw file 20150814\_A375SR\_Phospho\_BR2\_03 Scan 13796 Method FTMS; HCD Score 230.69 m/z 1174.97 Gene names DOCK7

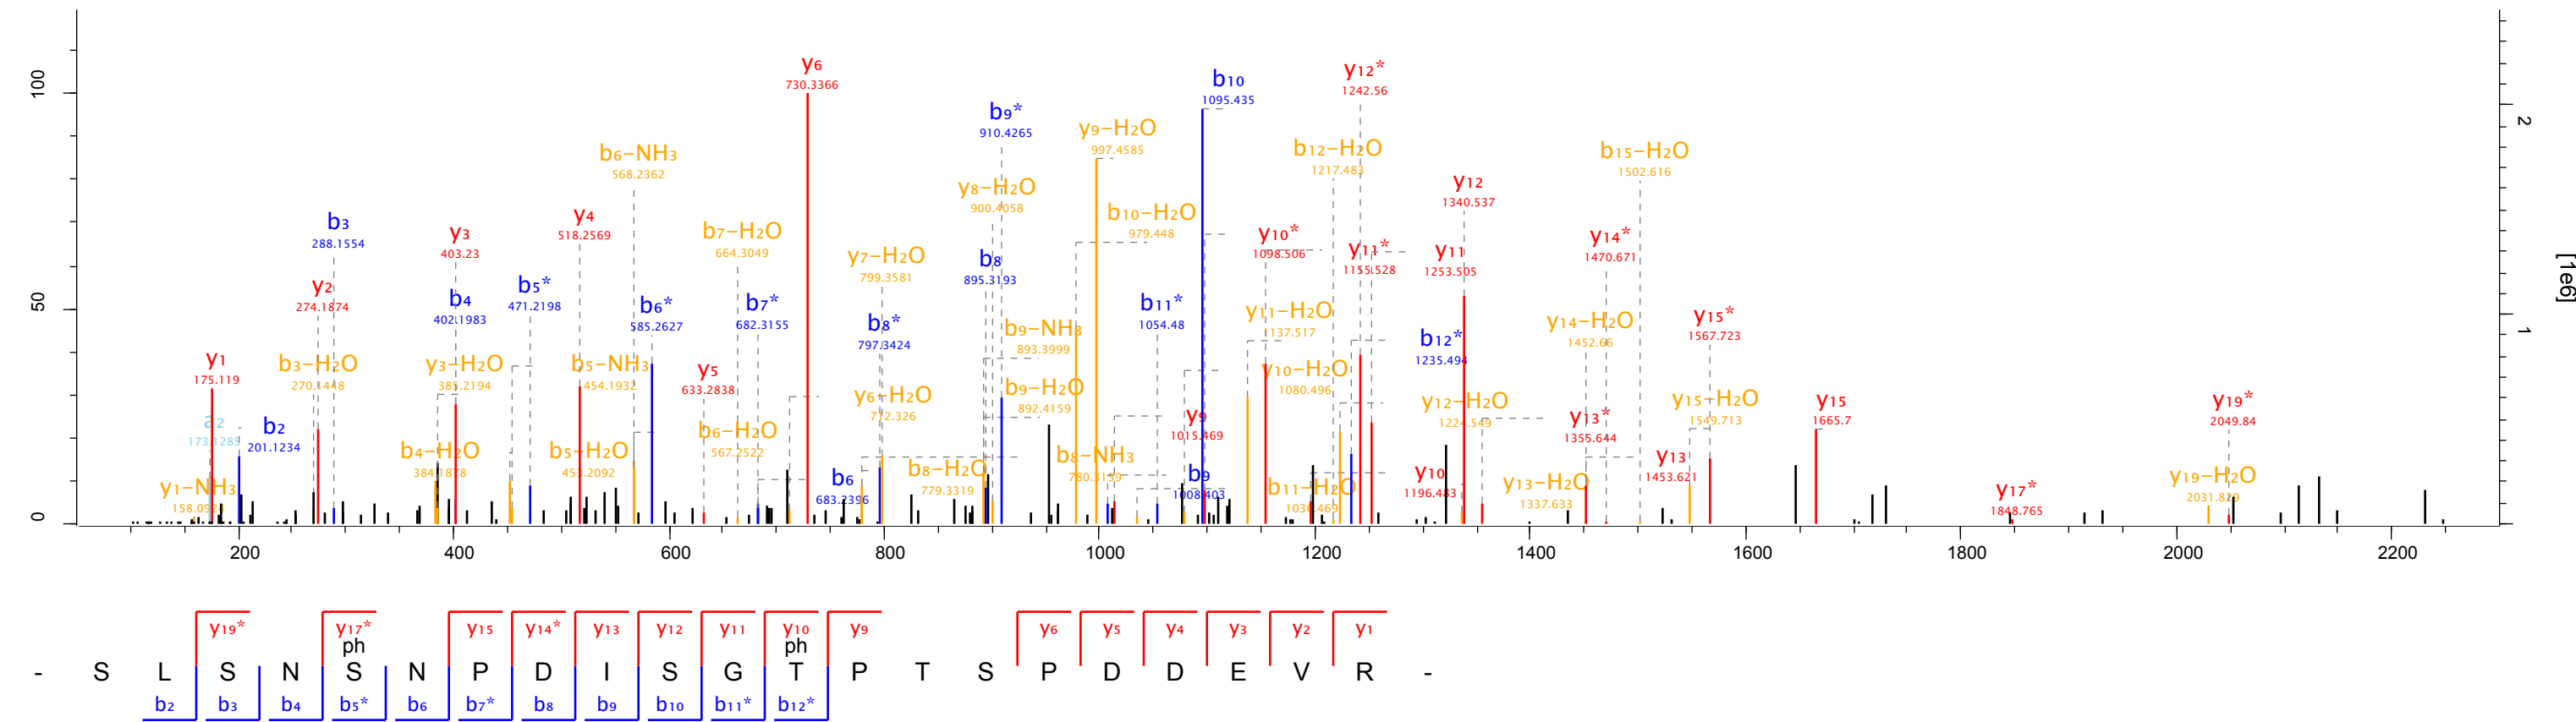

Raw file: 20150814\_A375SR\_Phospho\_BR2\_03  
 Scan: 13846 Method: FTMS; HCD Score: 135.08 m/z: 555.78 Gene names: SRSF4;SRSF6;SRSF5

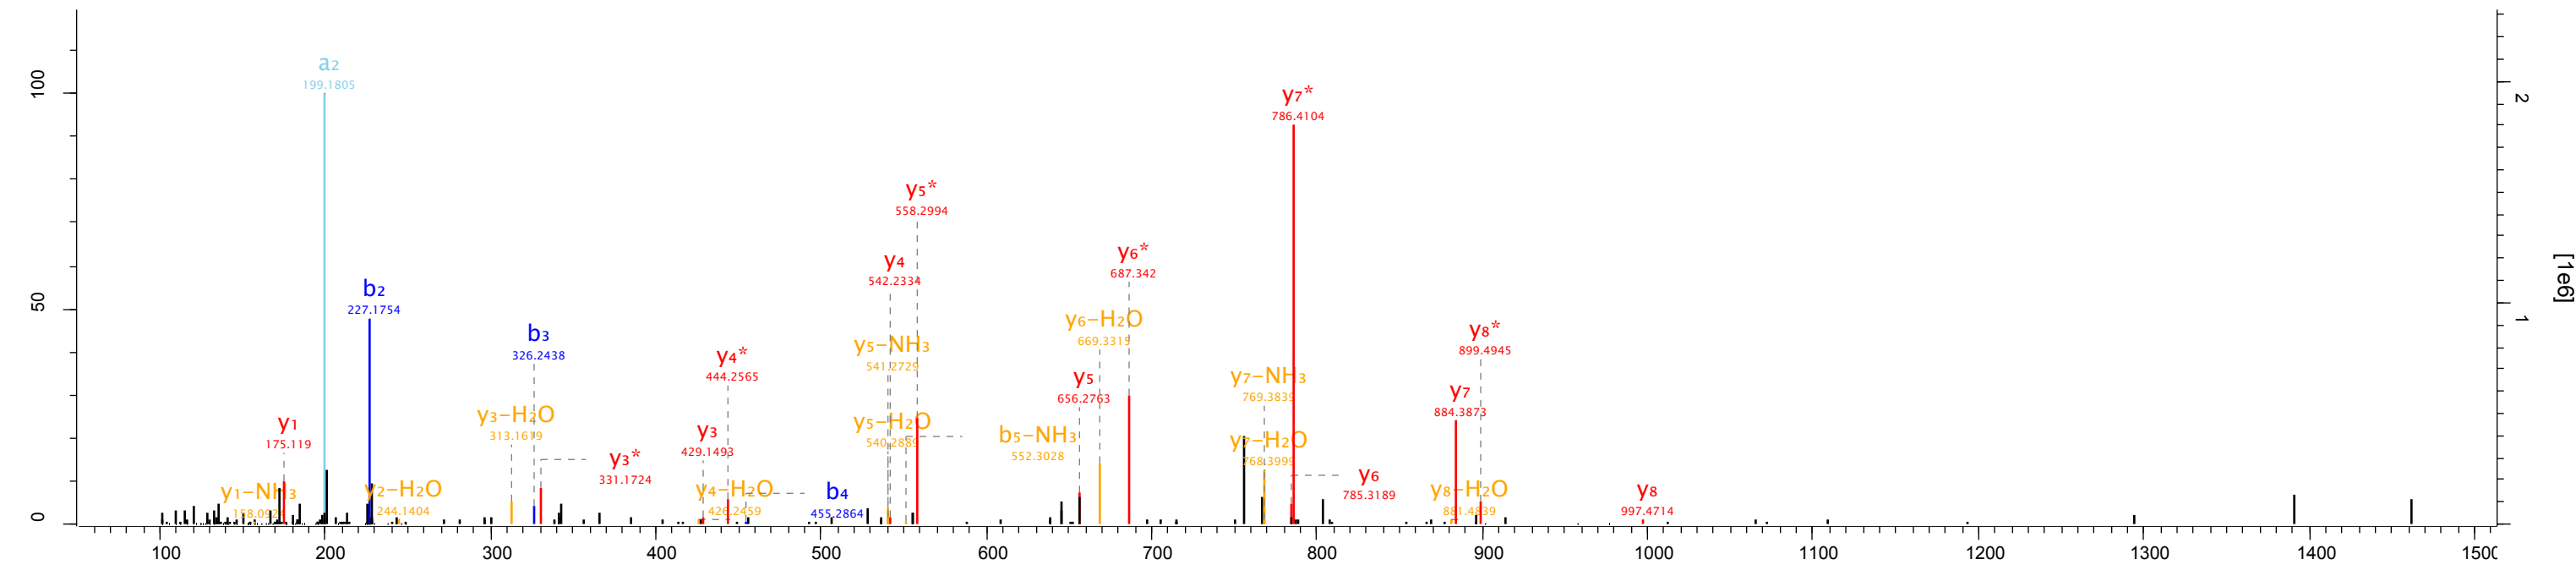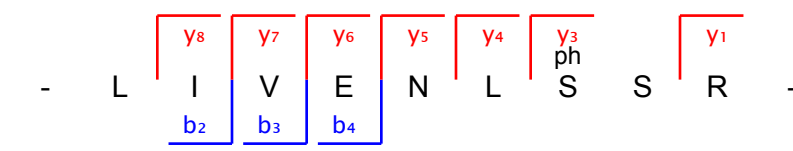

Raw file: 20150814\_A375SR\_Phospho\_BR2\_03  
 Scan: 13946 Method: FTMS; HCD Score: 70.03 m/z: 854 Gene names: HERC1

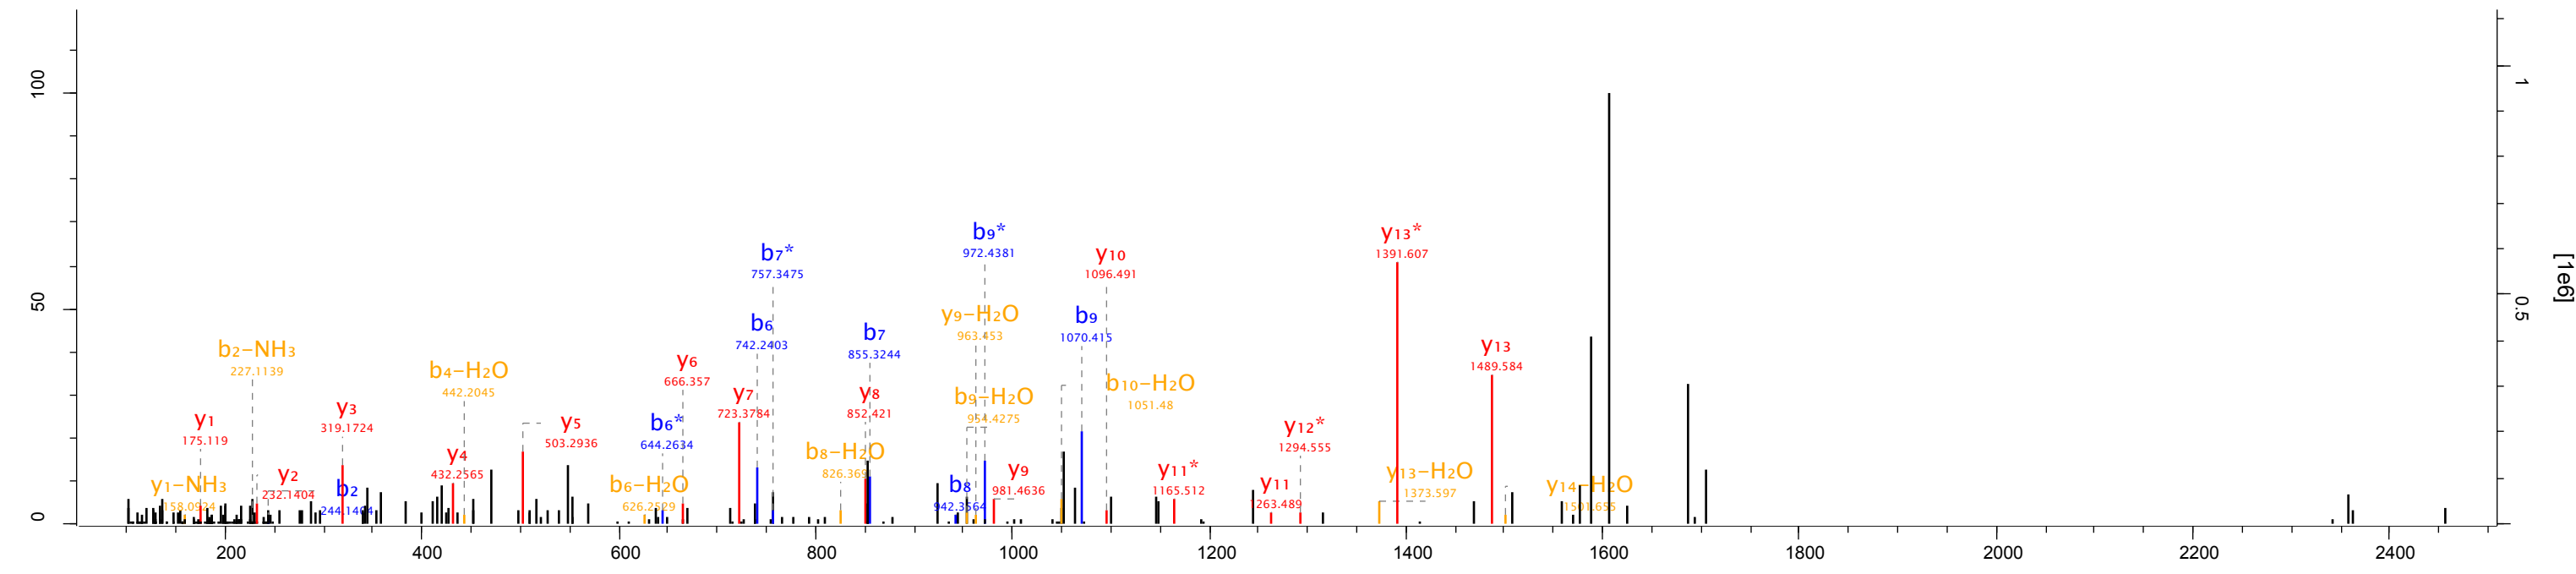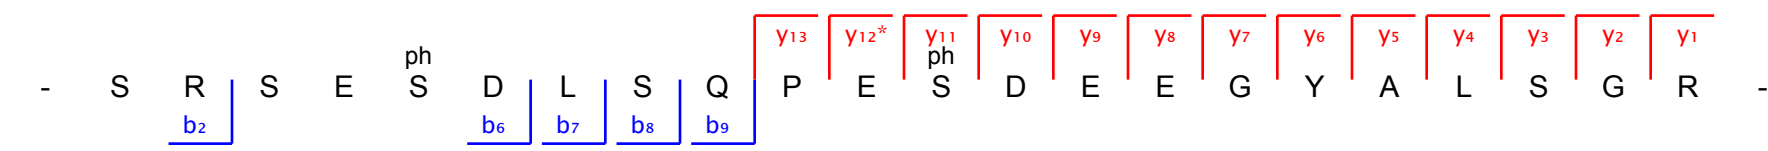

Raw file Scan Method Score m/z Gene names  
 20150814\_A375SR\_Phospho\_BR2\_03 13956 FTMS; HCD 285.1 849.06 FGFR10P

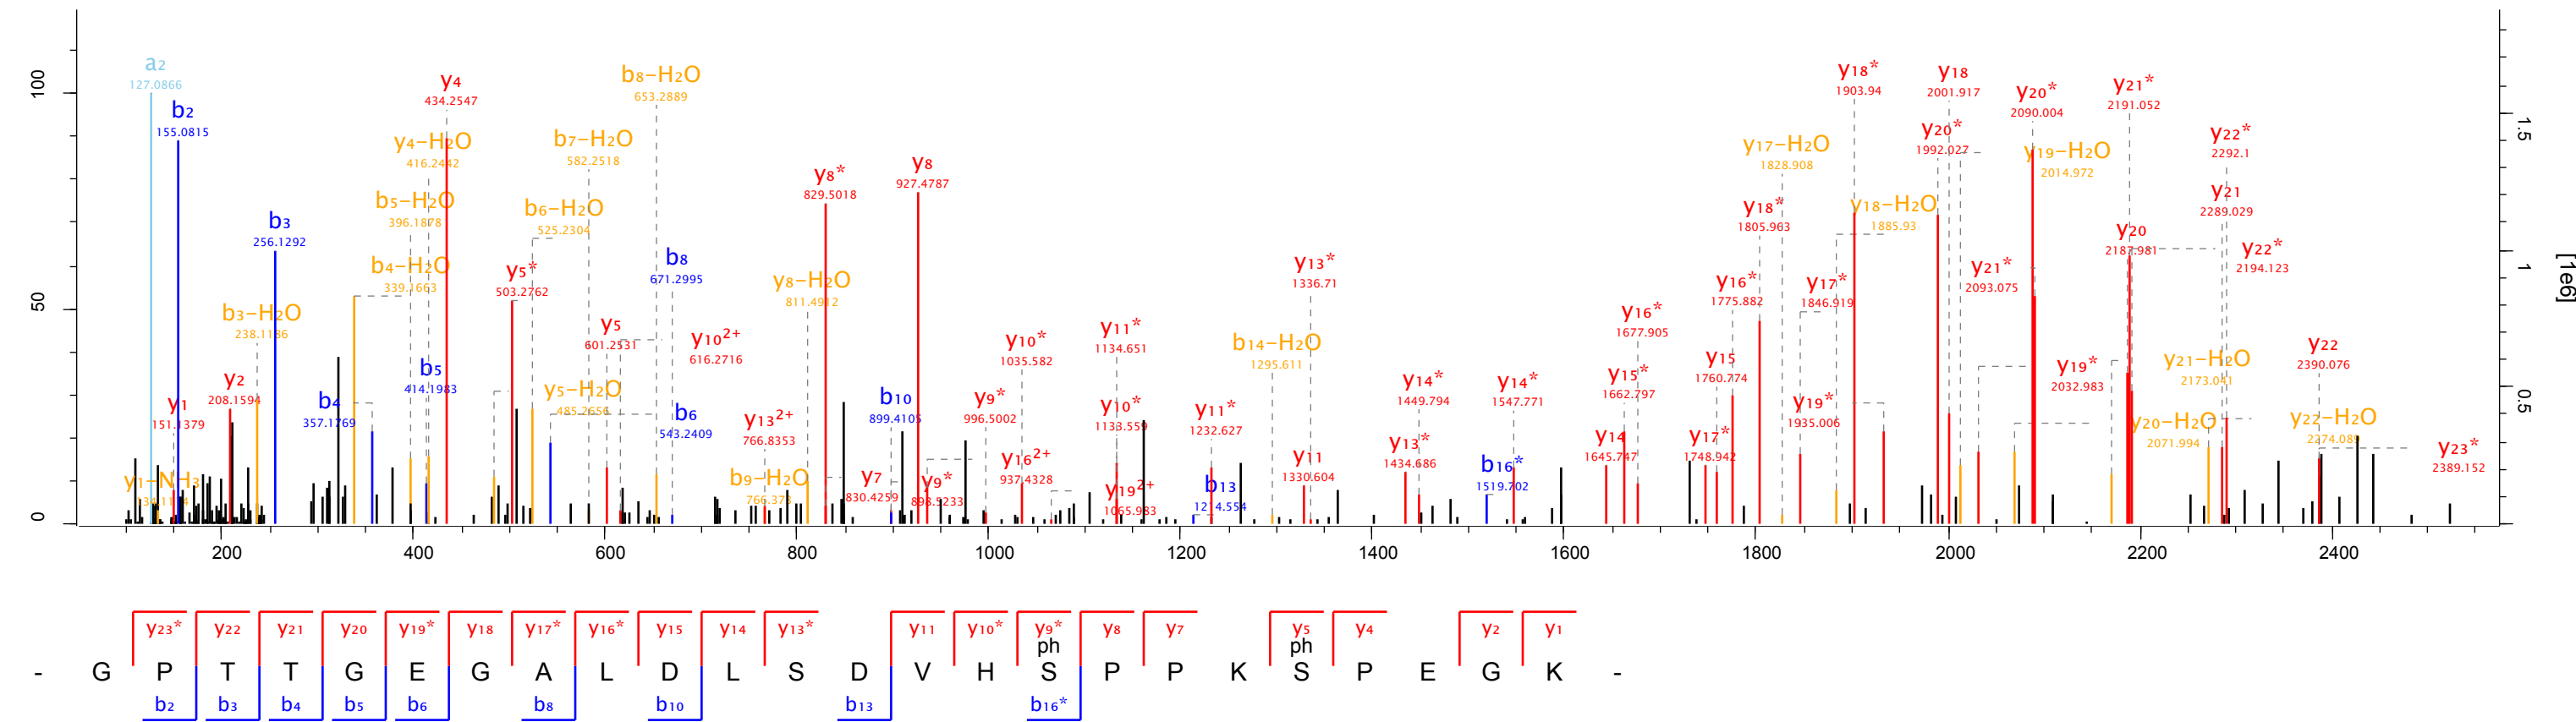



Raw file: 20150814\_A375SR\_Phospho\_BR2\_03  
 Scan: 14236 Method: FTMS; HCD Score: 83.76 m/z: 846.87 Gene names: FARP2

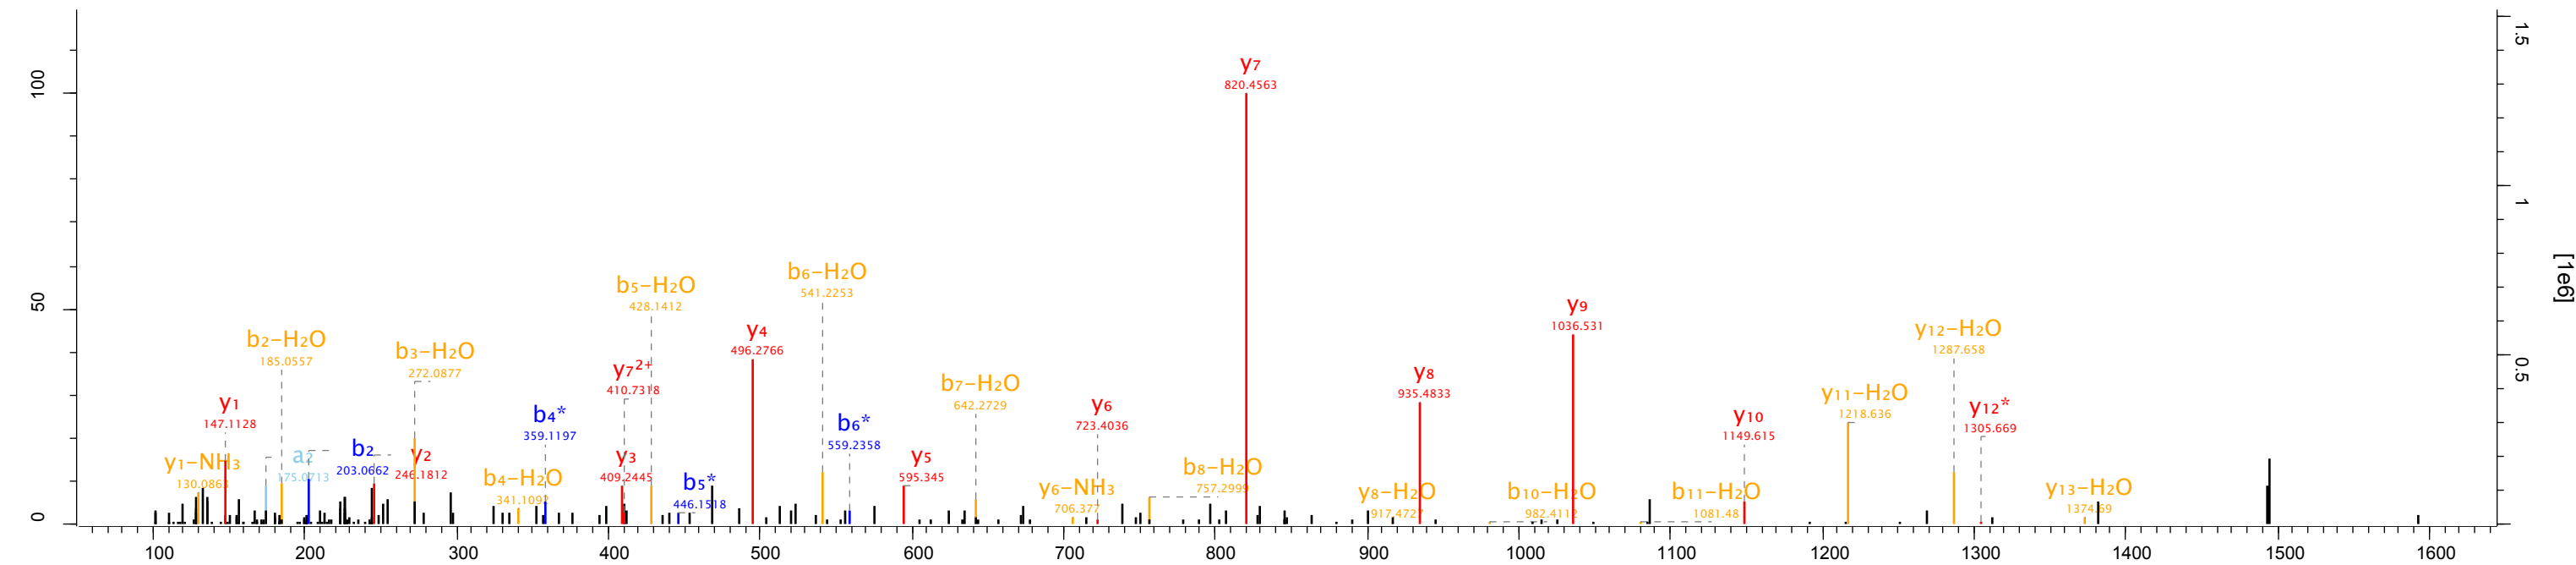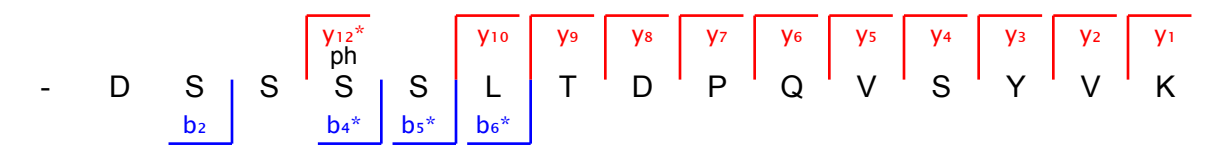

Raw file Scan Method Score m/z Gene names  
 20150814\_A375SR\_Phospho\_BR2\_03 14916 FTMS; HCD 142 509.25 SASH1

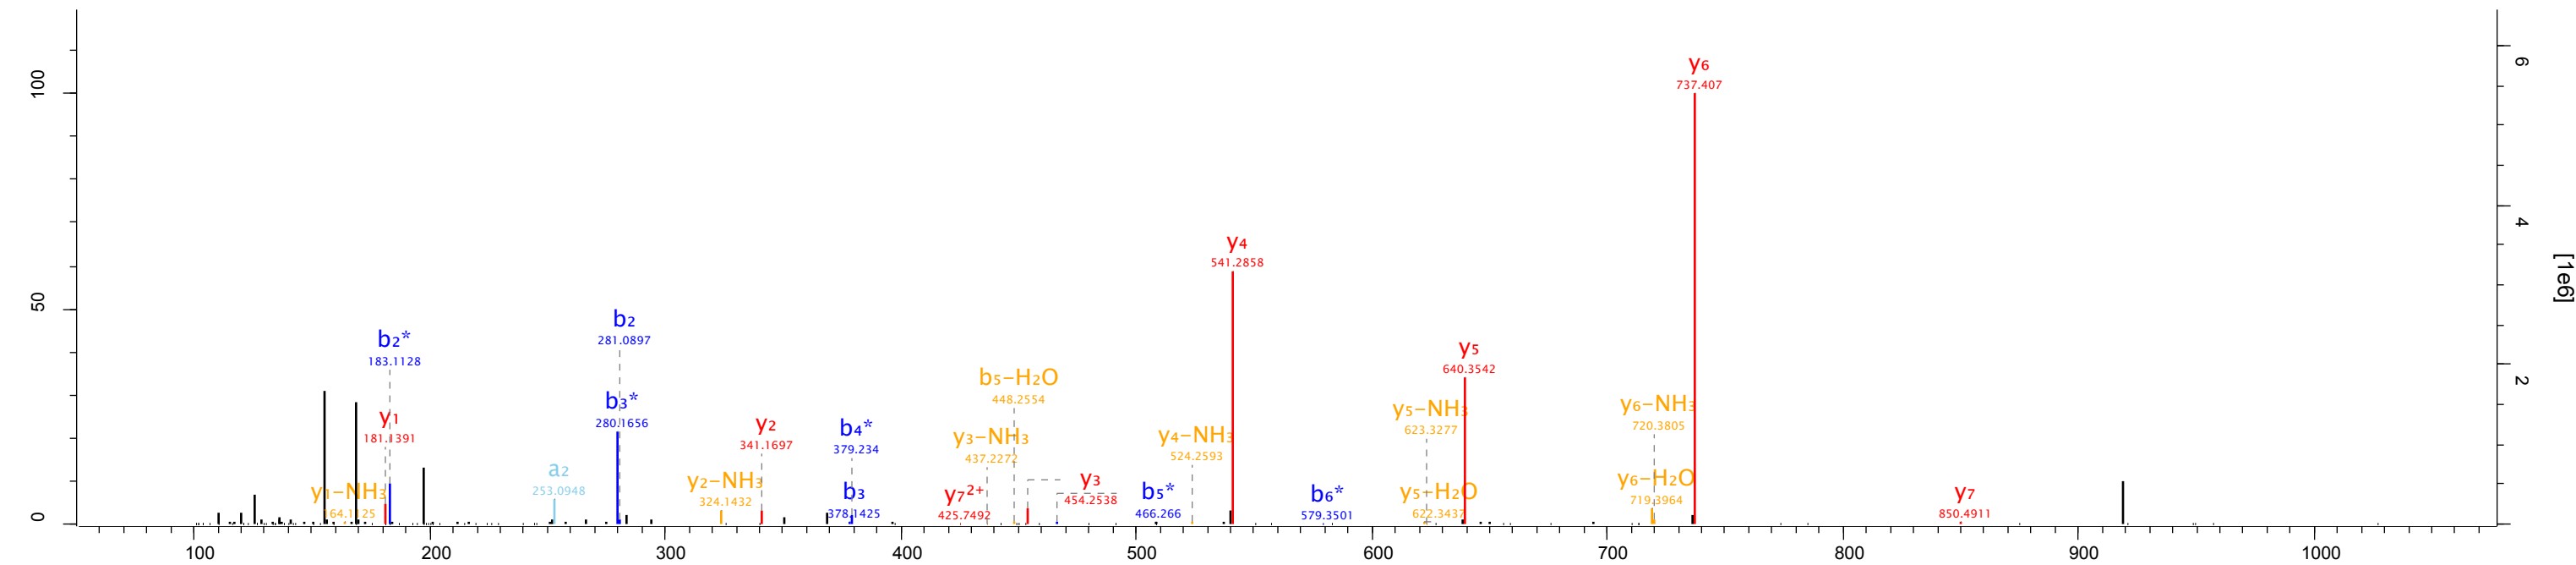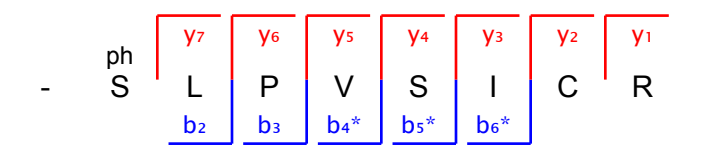

Raw file 20150814\_A375SR\_Phospho\_BR2\_03 Scan 14956 Method FTMS; HCD Score 207.16 m/z 919.87 Gene names CLIP1

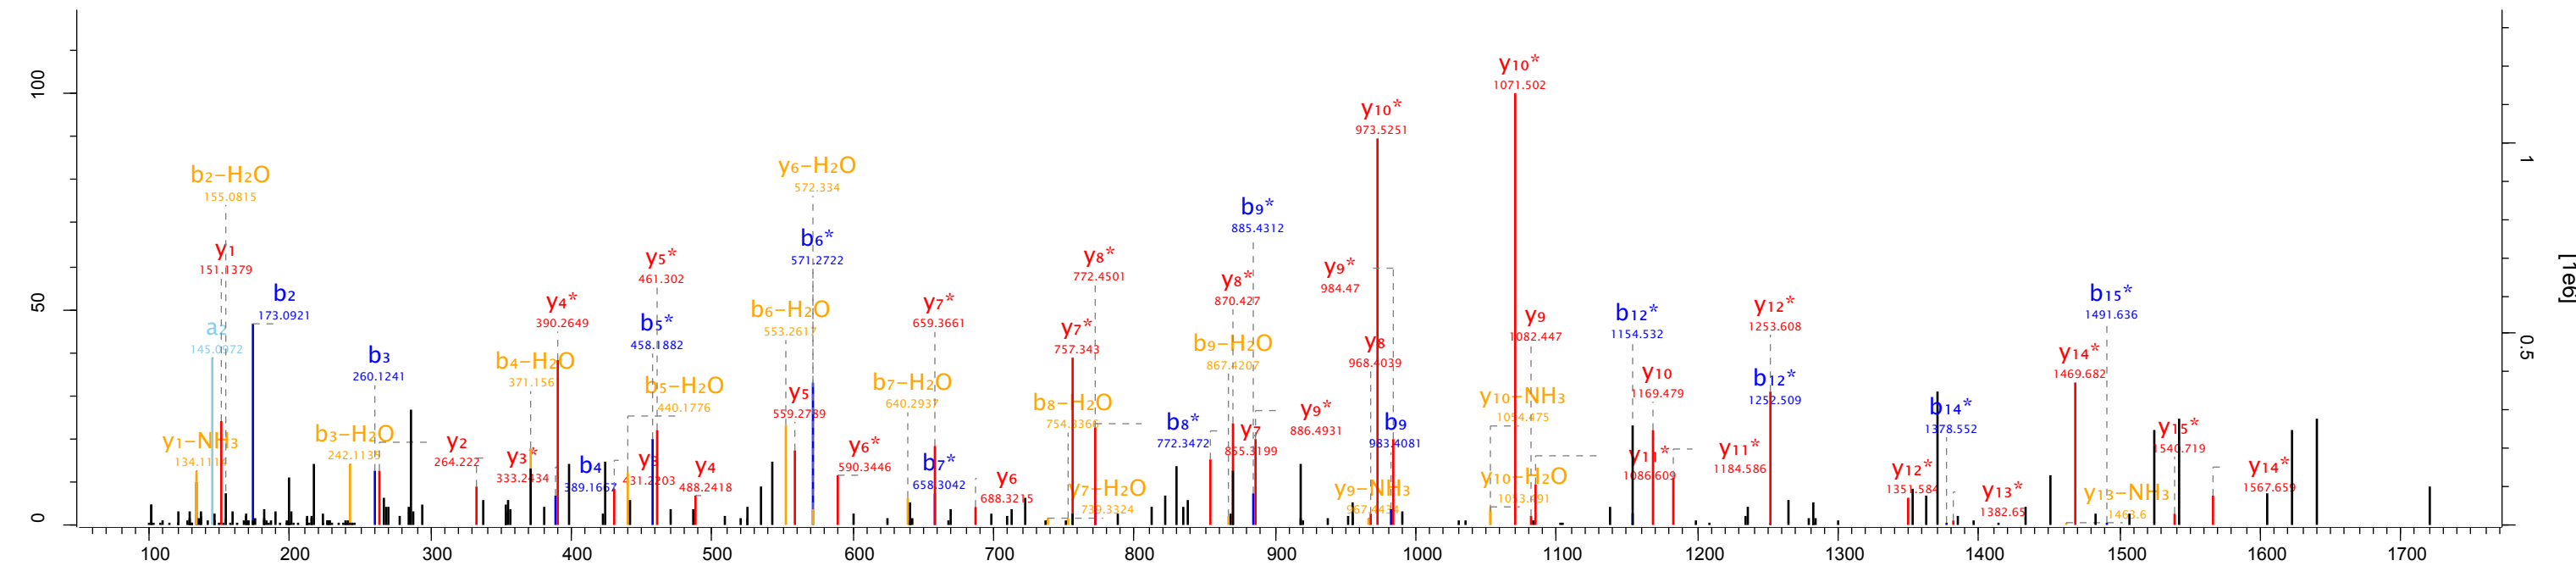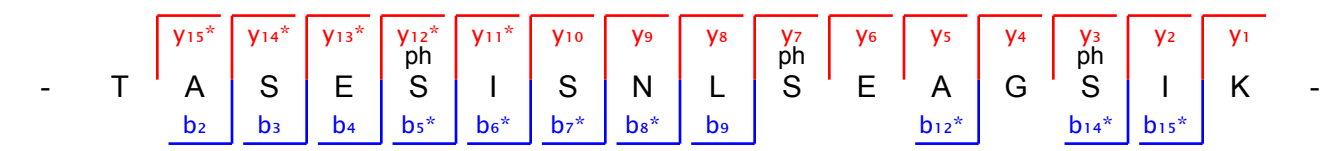

Raw file 20150814\_A375SR\_Phospho\_BR2\_03 Scan 15236 Method FTMS; HCD Score 68.88 m/z 719.1 Gene names SRRM1

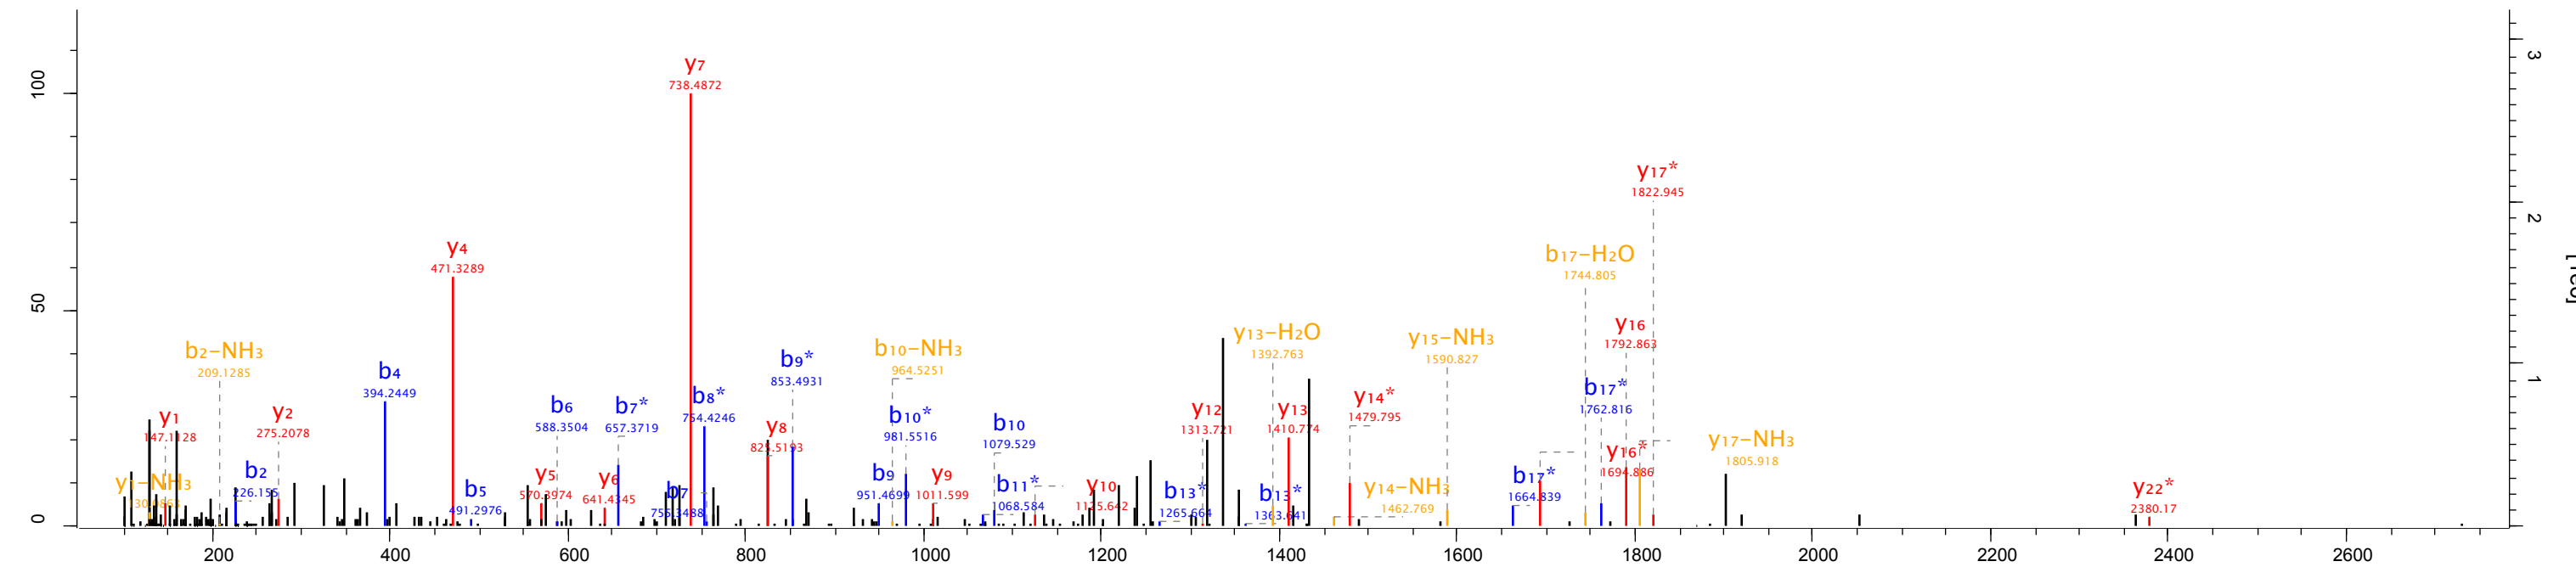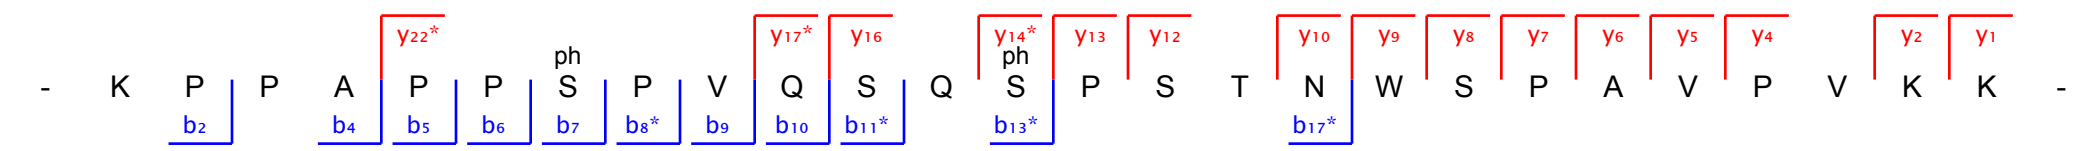

Raw file: 20150814\_A375SR\_Phospho\_BR2\_03  
 Scan: 15246 Method: FTMS; HCD Score: 86.18 m/z: 698.33 Gene names: ADAM9

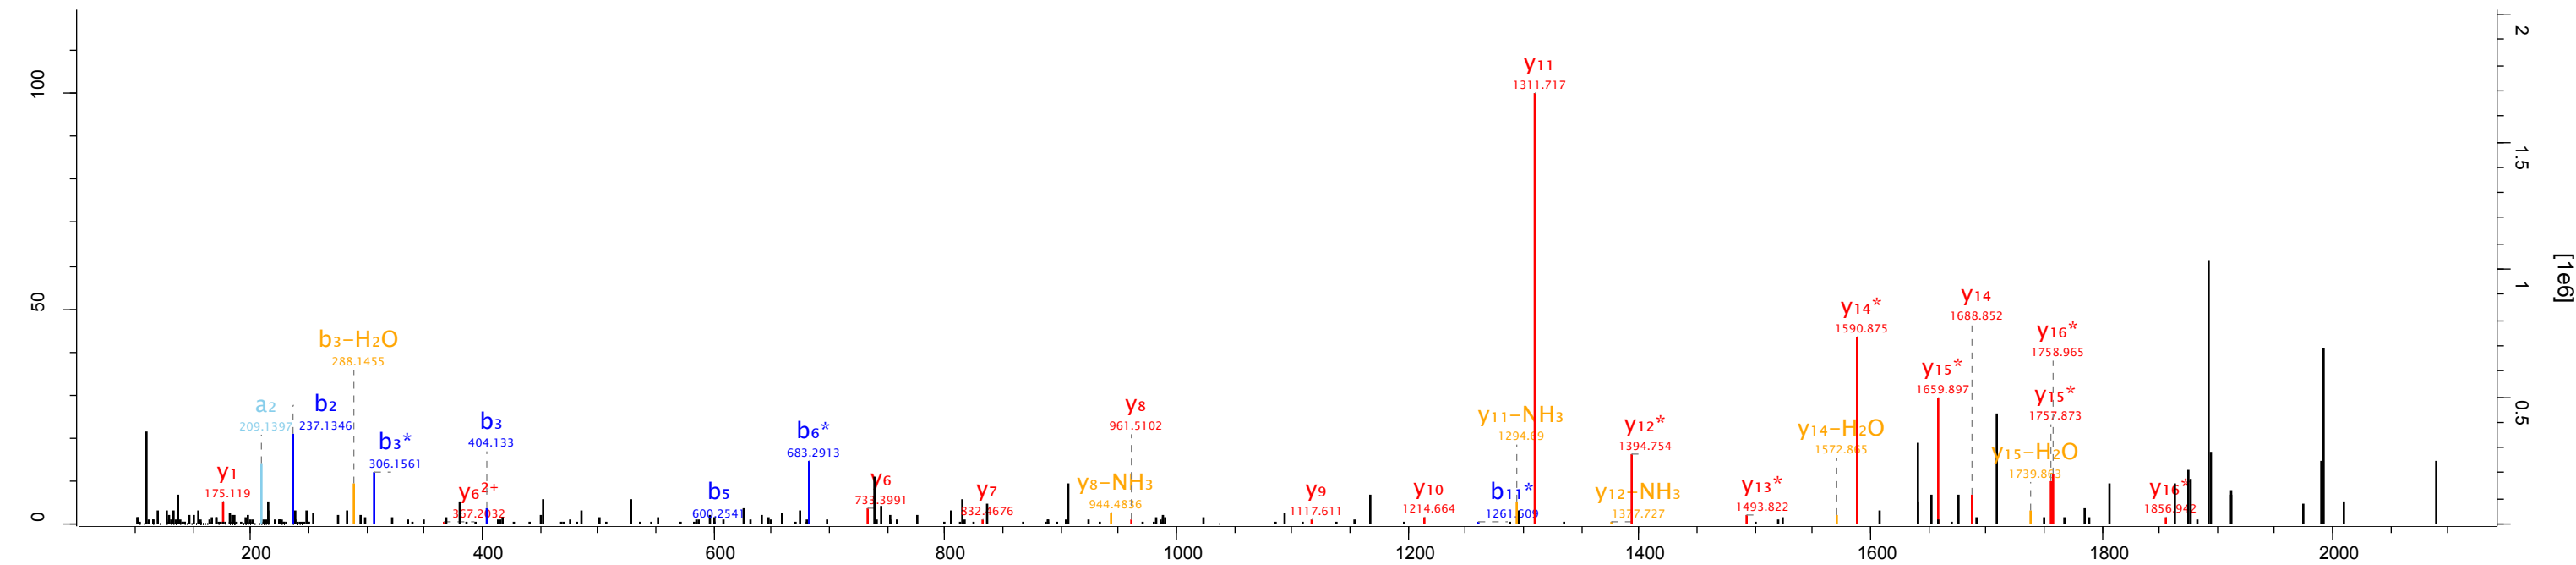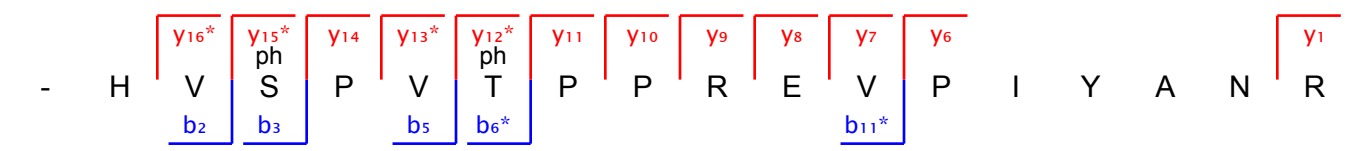

Raw file: 20150814\_A375SR\_Phospho\_BR2\_03  
 Scan: 15286 Method: FTMS; HCD Score: 61.82 m/z: 754.34 Gene names: ZC3H13

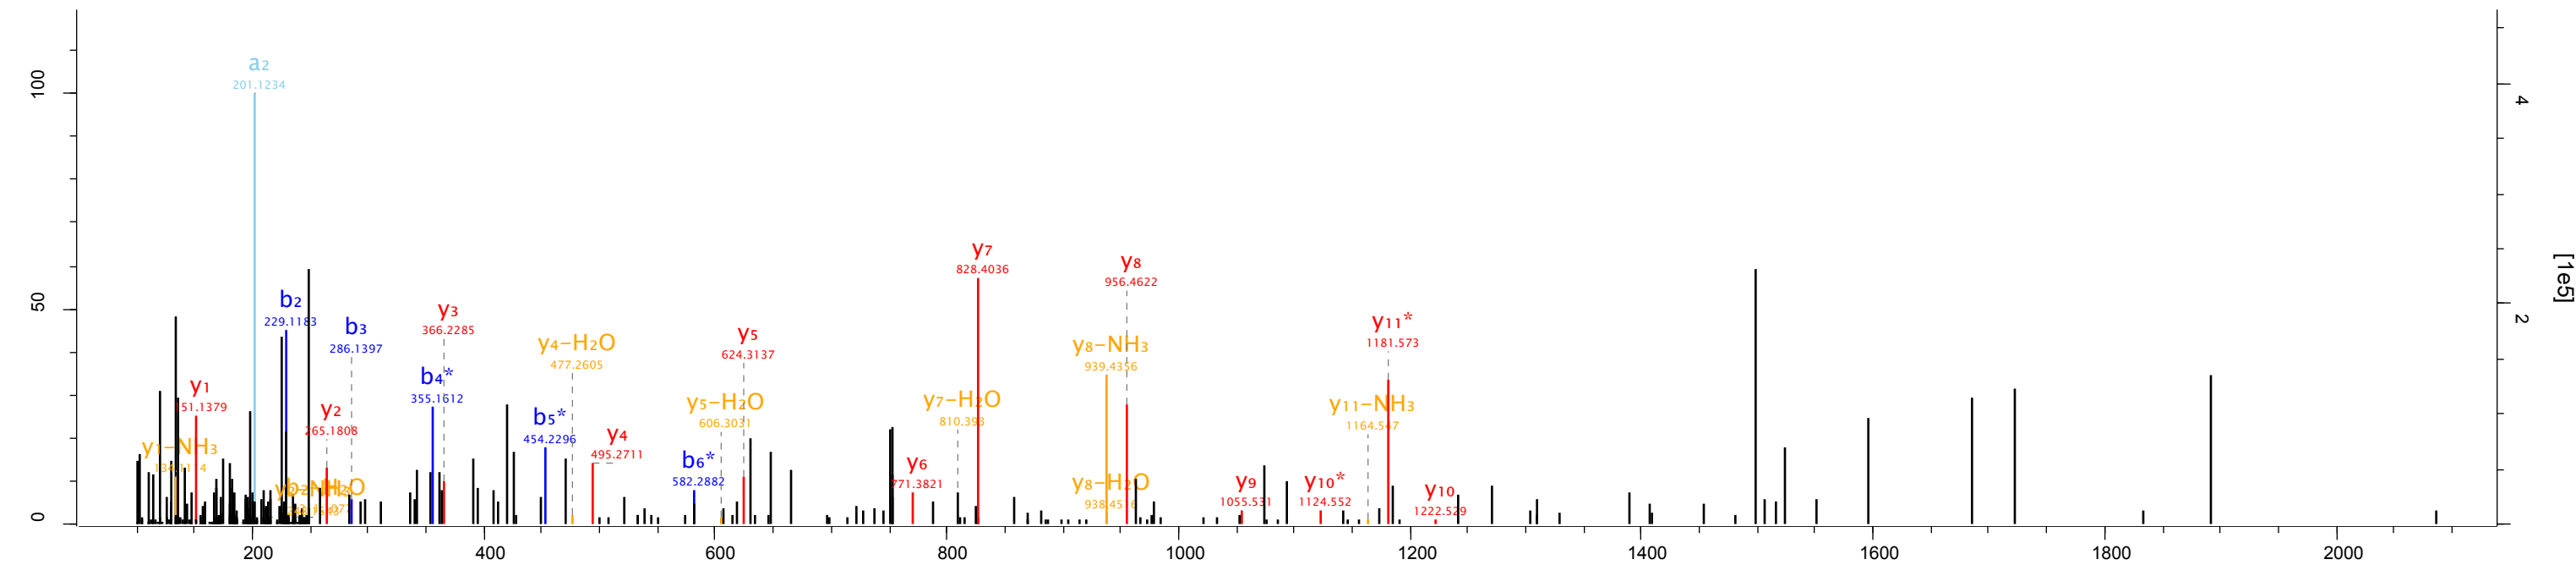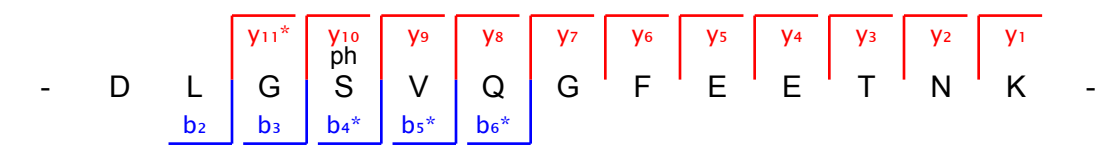

Raw file  
20150814\_A375SR\_Phospho\_BR2\_03

Scan 15306 Method FTMS; HCD Score 107.07 m/z 672.64 Gene names RAB11FIP5

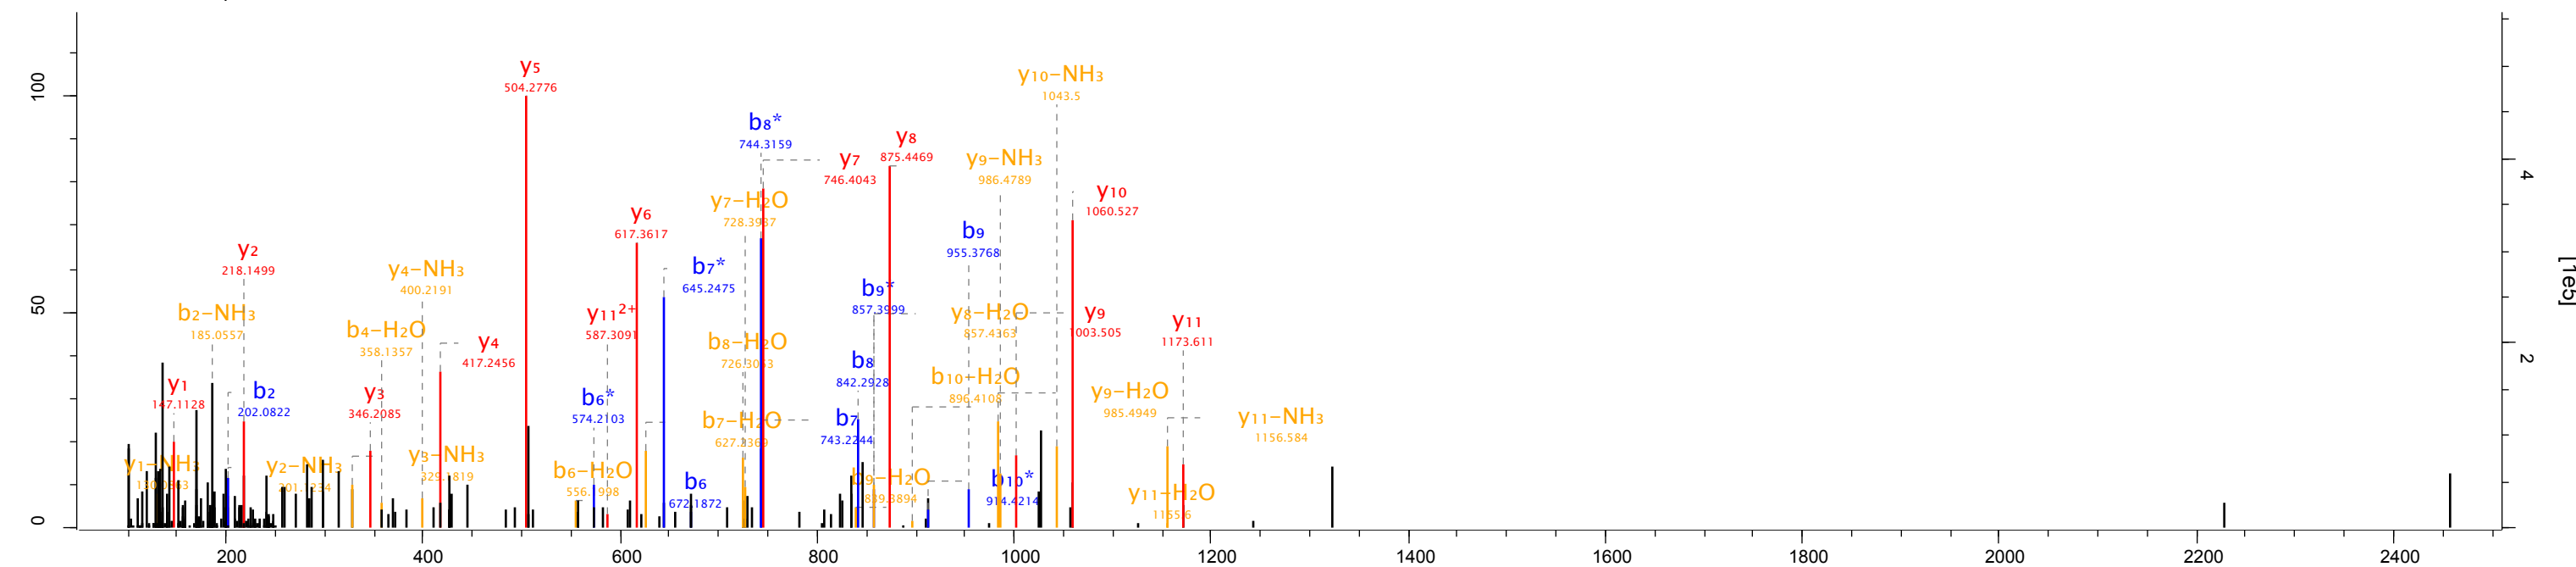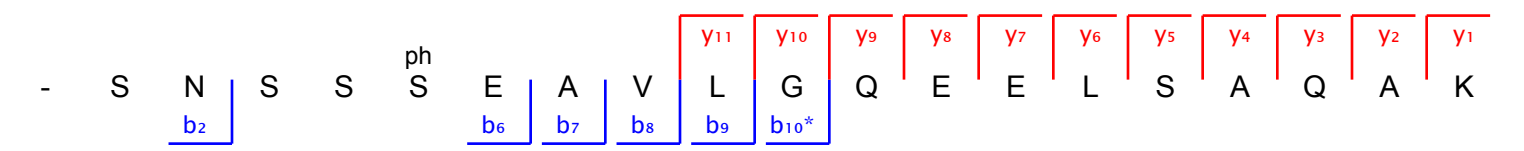

Raw file: 20150814\_A375SR\_Phospho\_BR2\_03  
 Scan: 15506 Method: FTMS; HCD Score: 145.44 m/z: 808.87 Gene names: KIAA1671

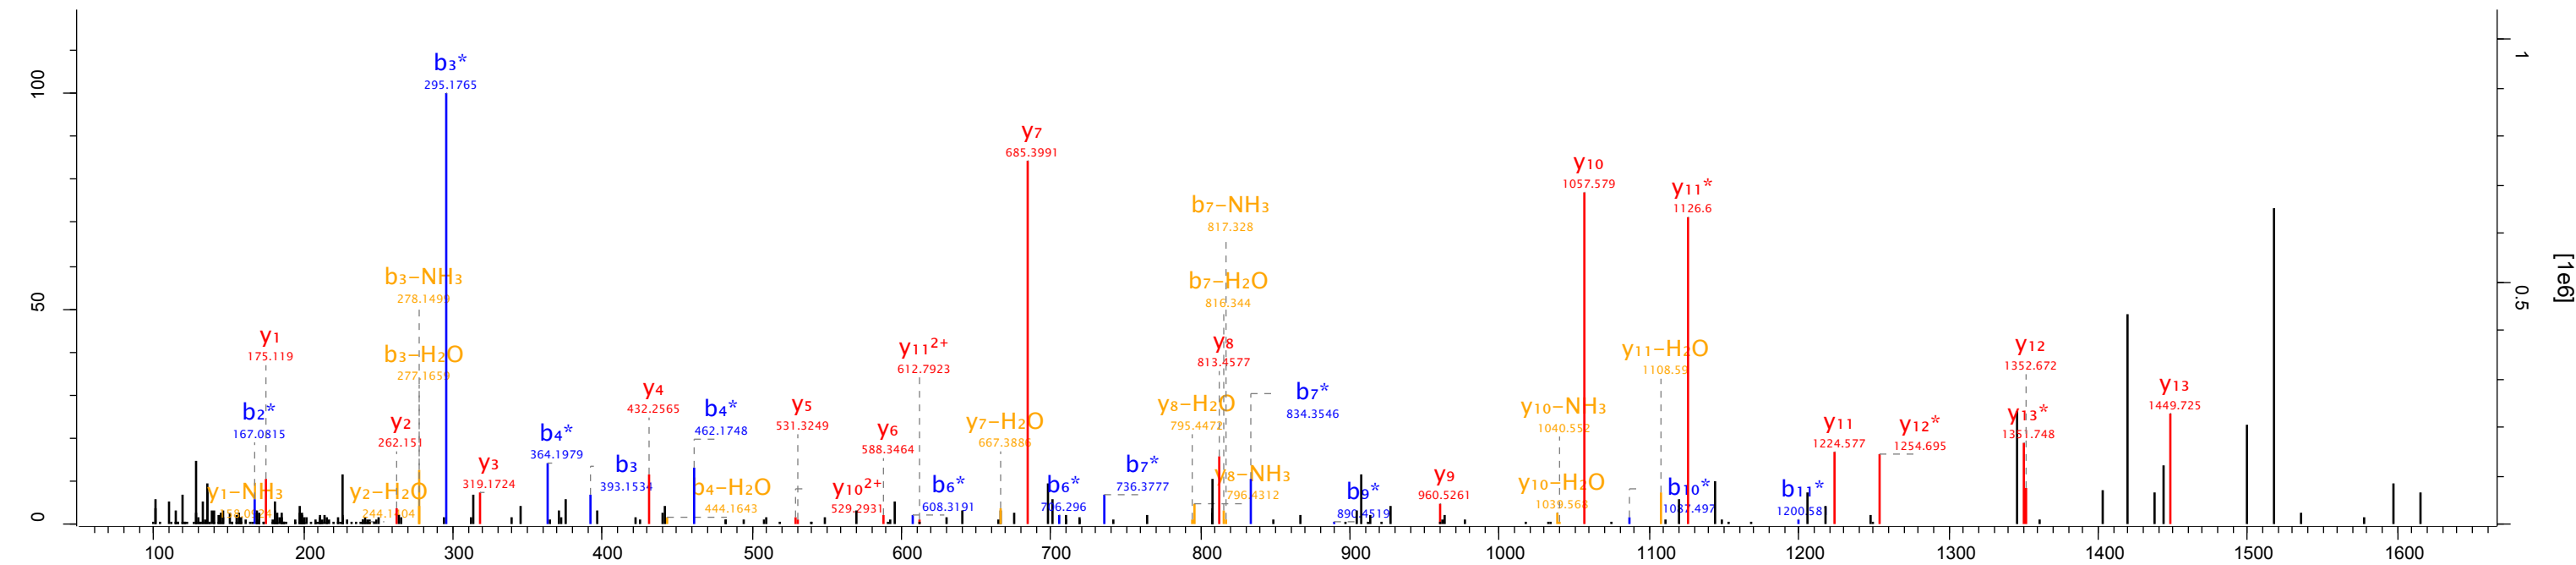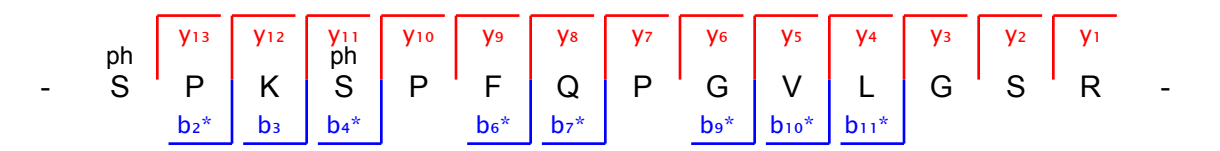



Raw file Scan Method Score m/z Gene names  
 20150814\_A375SR\_Phospho\_BR2\_03 15586 FTMS; HCD 183.25 1100.97 TRIM32

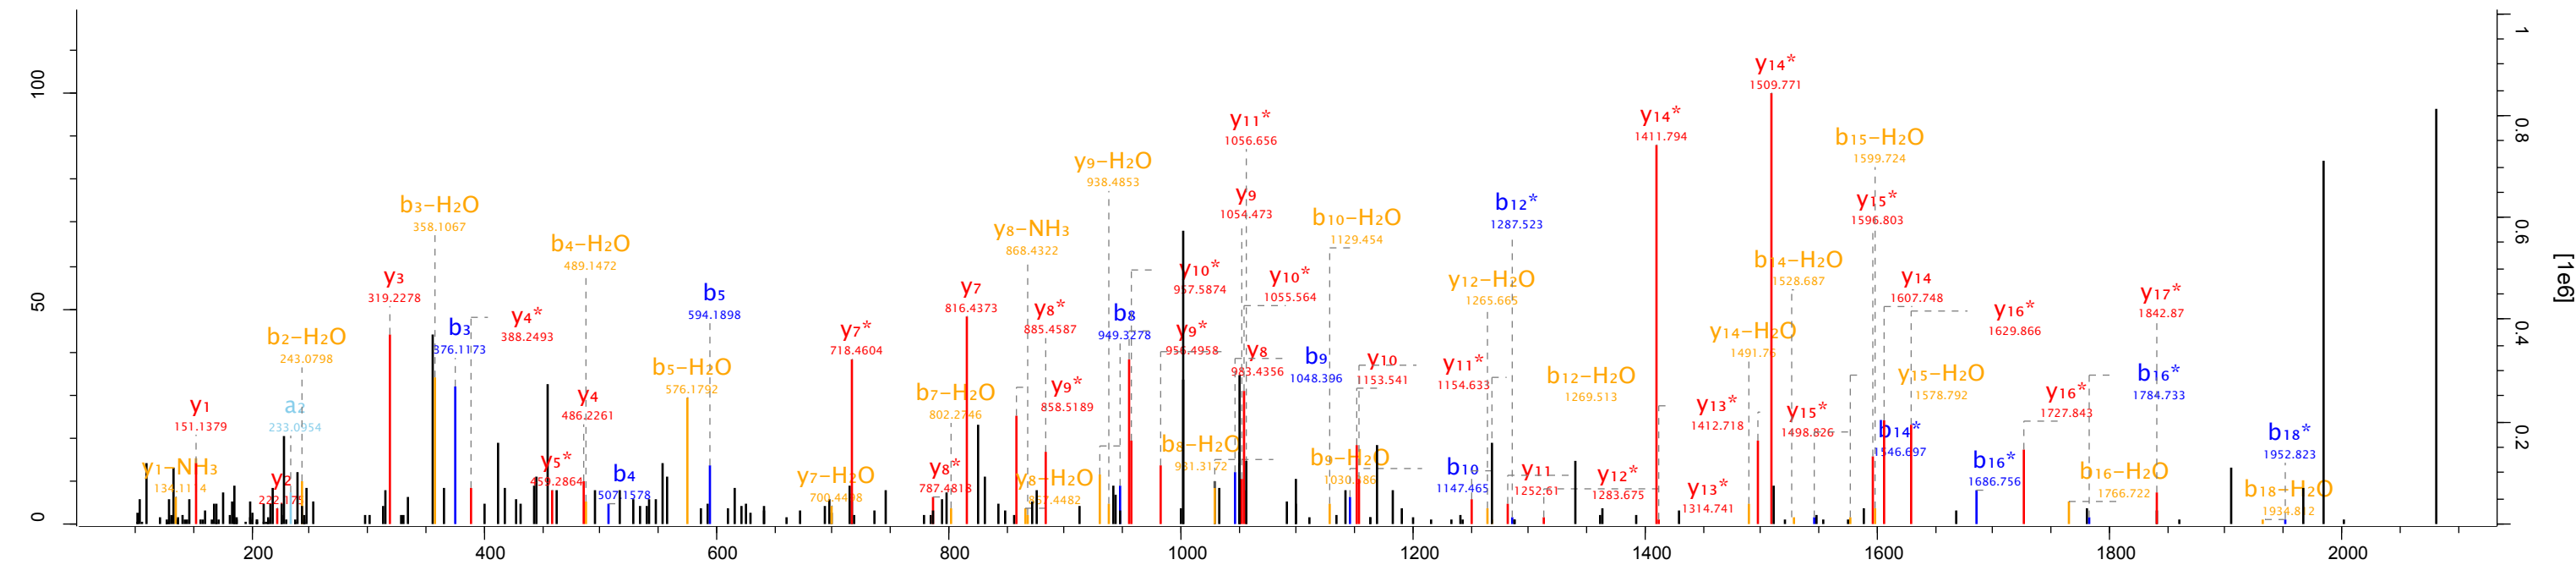

- E M D M S P E E V V A S P R A S P A K -  
 a<sub>2</sub> b<sub>3</sub> b<sub>4</sub> b<sub>5</sub> b<sub>8</sub> b<sub>9</sub> b<sub>10</sub> b<sub>12</sub>\* b<sub>14</sub>\* b<sub>16</sub>\* b<sub>18</sub>\*

Raw file: 20150814\_A375SR\_Phospho\_BR2\_03  
 Scan: 15626 Method: FTMS; HCD Score: 80.36 m/z: 693.97 Gene names: TNKS1BP1

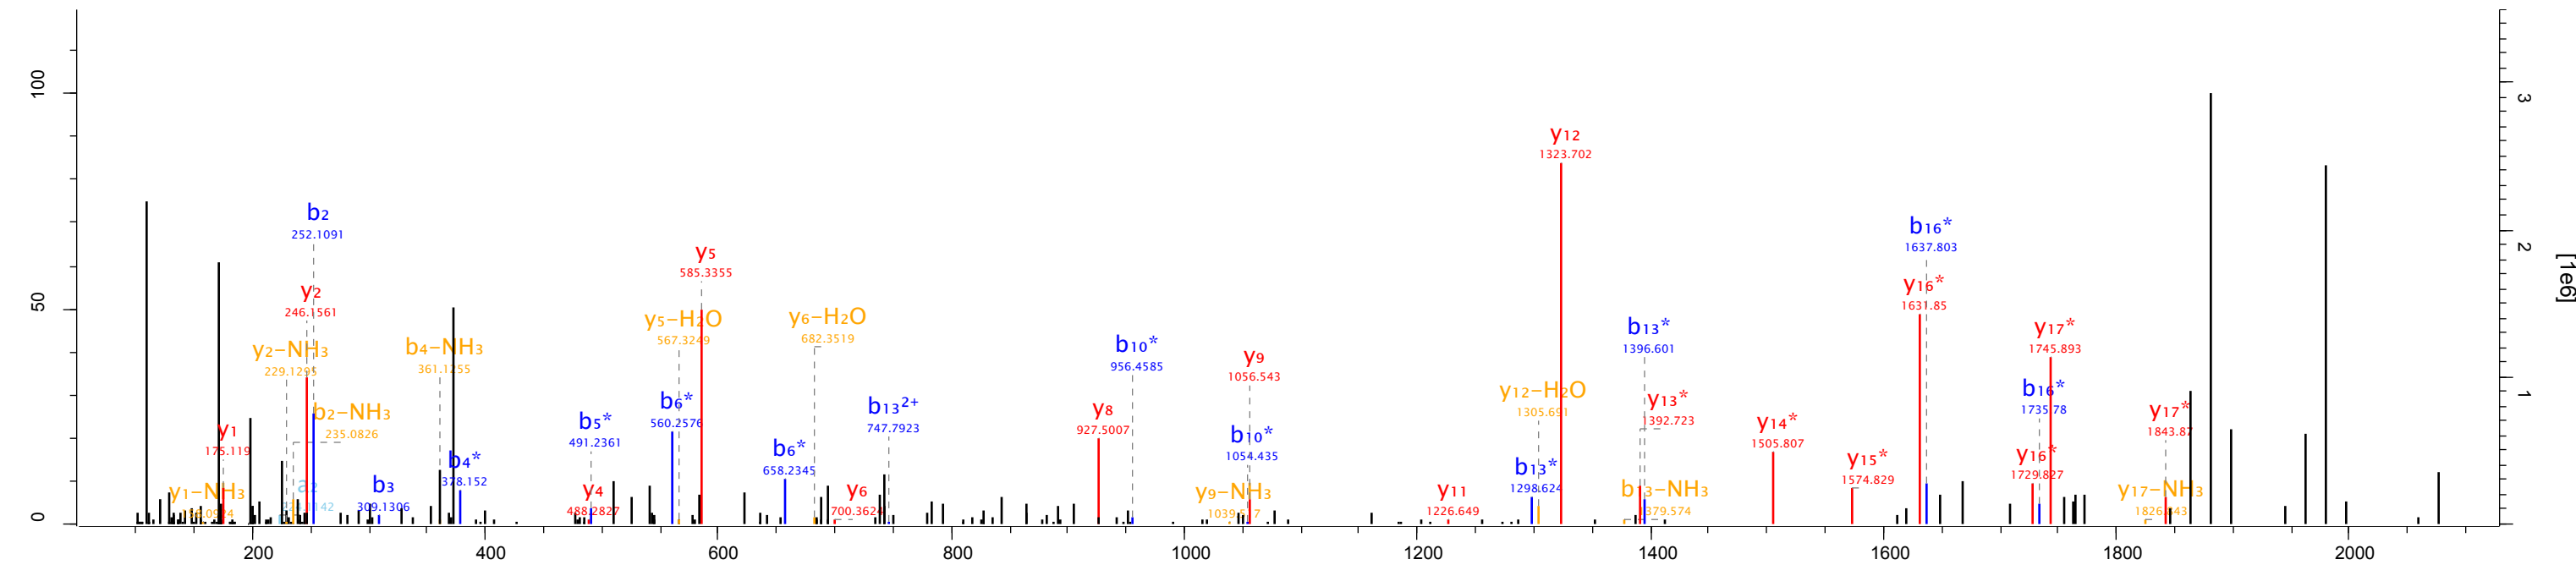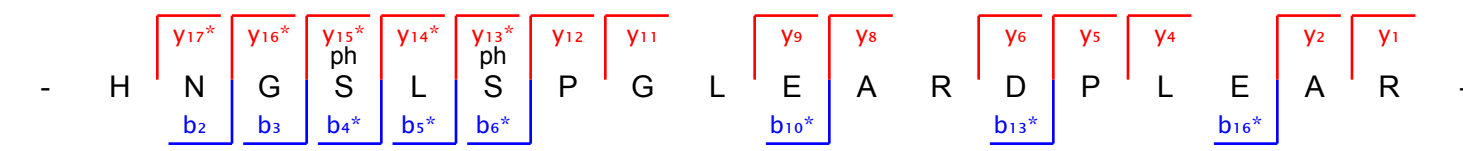

Raw file  
 20150814\_A375SR\_Phospho\_BR2\_03  
 Scan 15876 Method FTMS; HCD Score 161.51 m/z 620.75 Gene names MSN

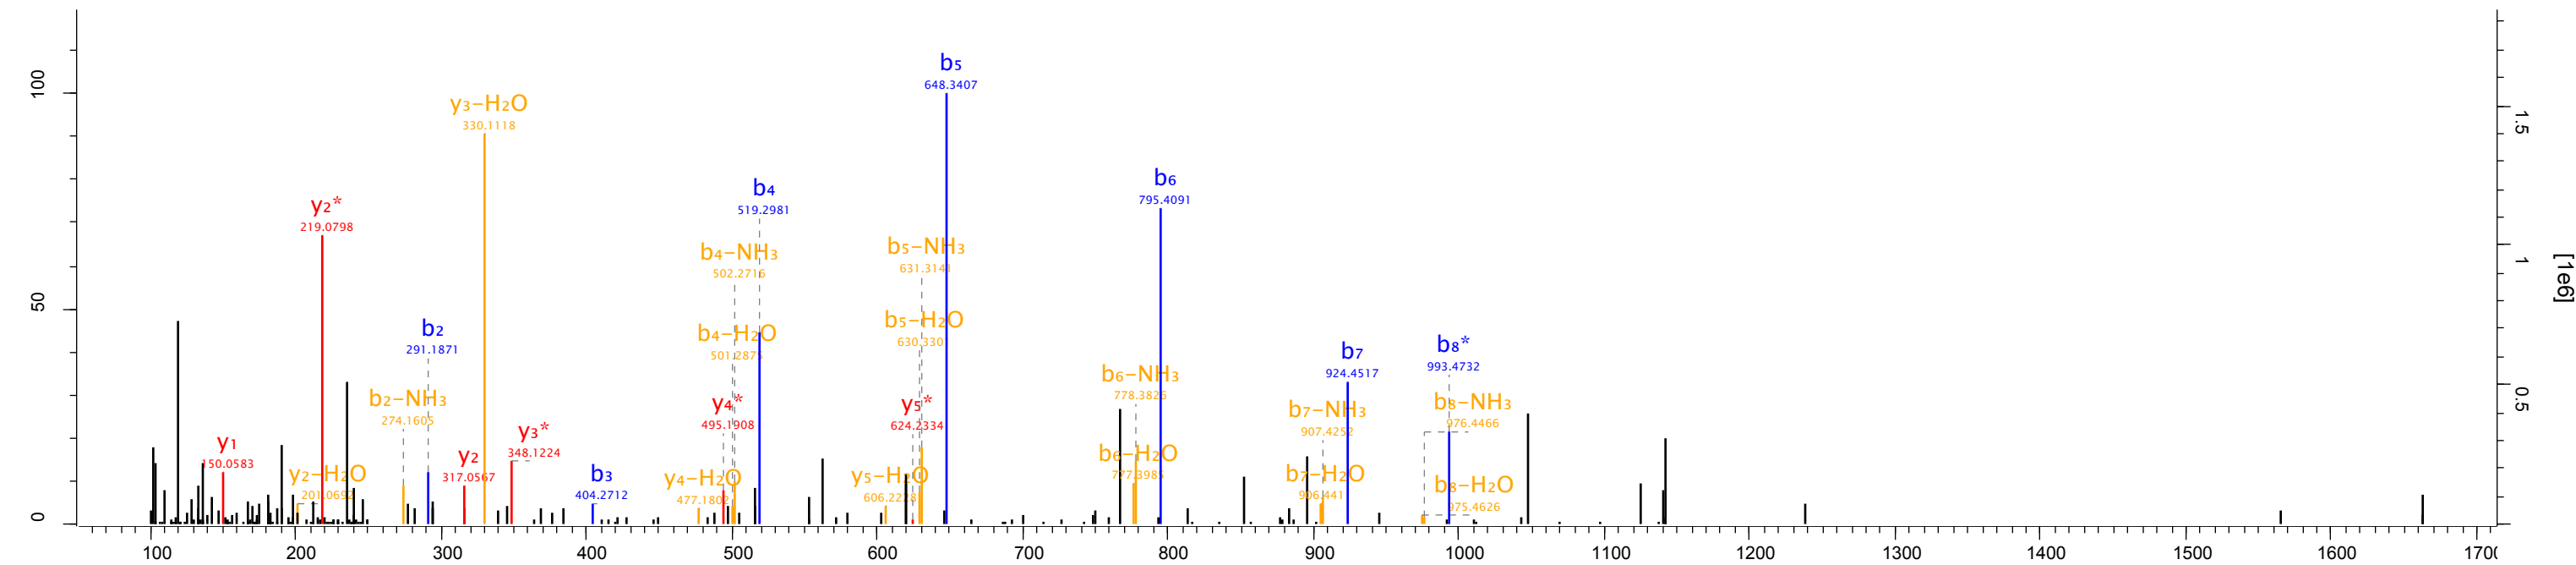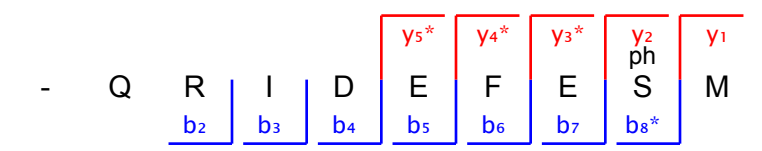

Raw file: 20150814\_A375SR\_Phospho\_BR2\_03  
 Scan: 15946 Method: FTMS; HCD Score: 71.14 m/z: 966.9 Gene names: C19orf44

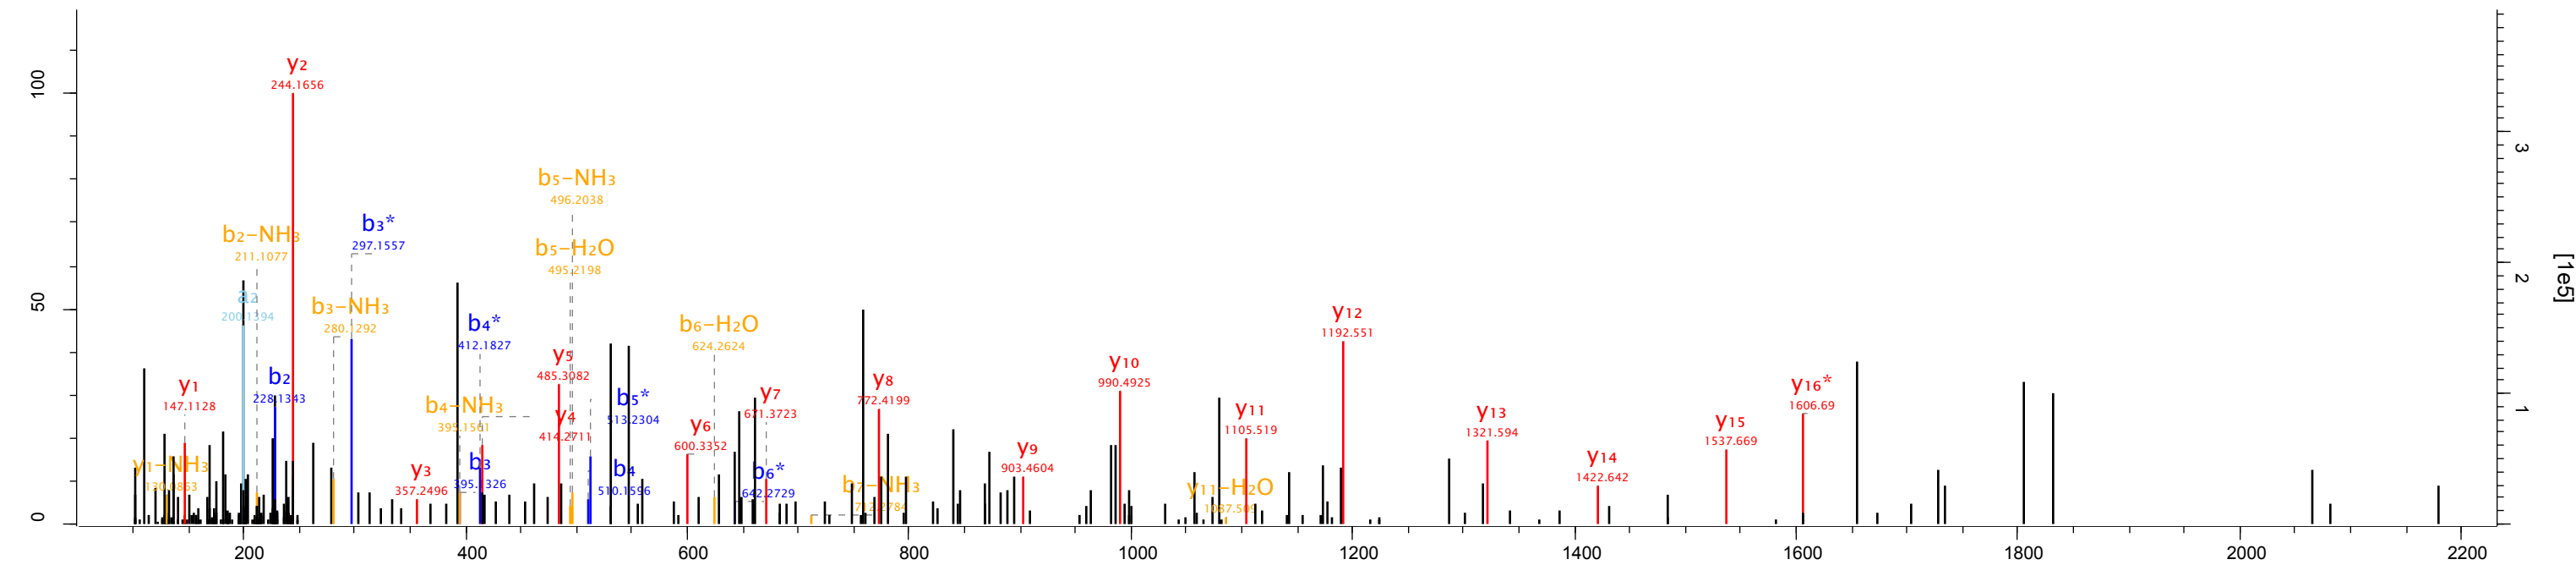

- N L Y<sub>16</sub><sup>\*</sup>  
ph Y<sub>15</sub> Y<sub>14</sub> Y<sub>13</sub> Y<sub>12</sub> Y<sub>11</sub> Y<sub>10</sub> Y<sub>9</sub> Y<sub>8</sub> Y<sub>7</sub> Y<sub>6</sub> Y<sub>5</sub> Y<sub>4</sub> Y<sub>3</sub> Y<sub>2</sub> Y<sub>1</sub> -  
b<sub>2</sub> b<sub>3</sub> b<sub>4</sub> b<sub>5</sub><sup>\*</sup> b<sub>6</sub><sup>\*</sup> S D S M T A D A G L P K -

Raw file 20150814\_A375SR\_Phospho\_BR2\_03 Scan 16066 Method FTMS; HCD Score 85.6 m/z 848.37 Gene names C2CD5

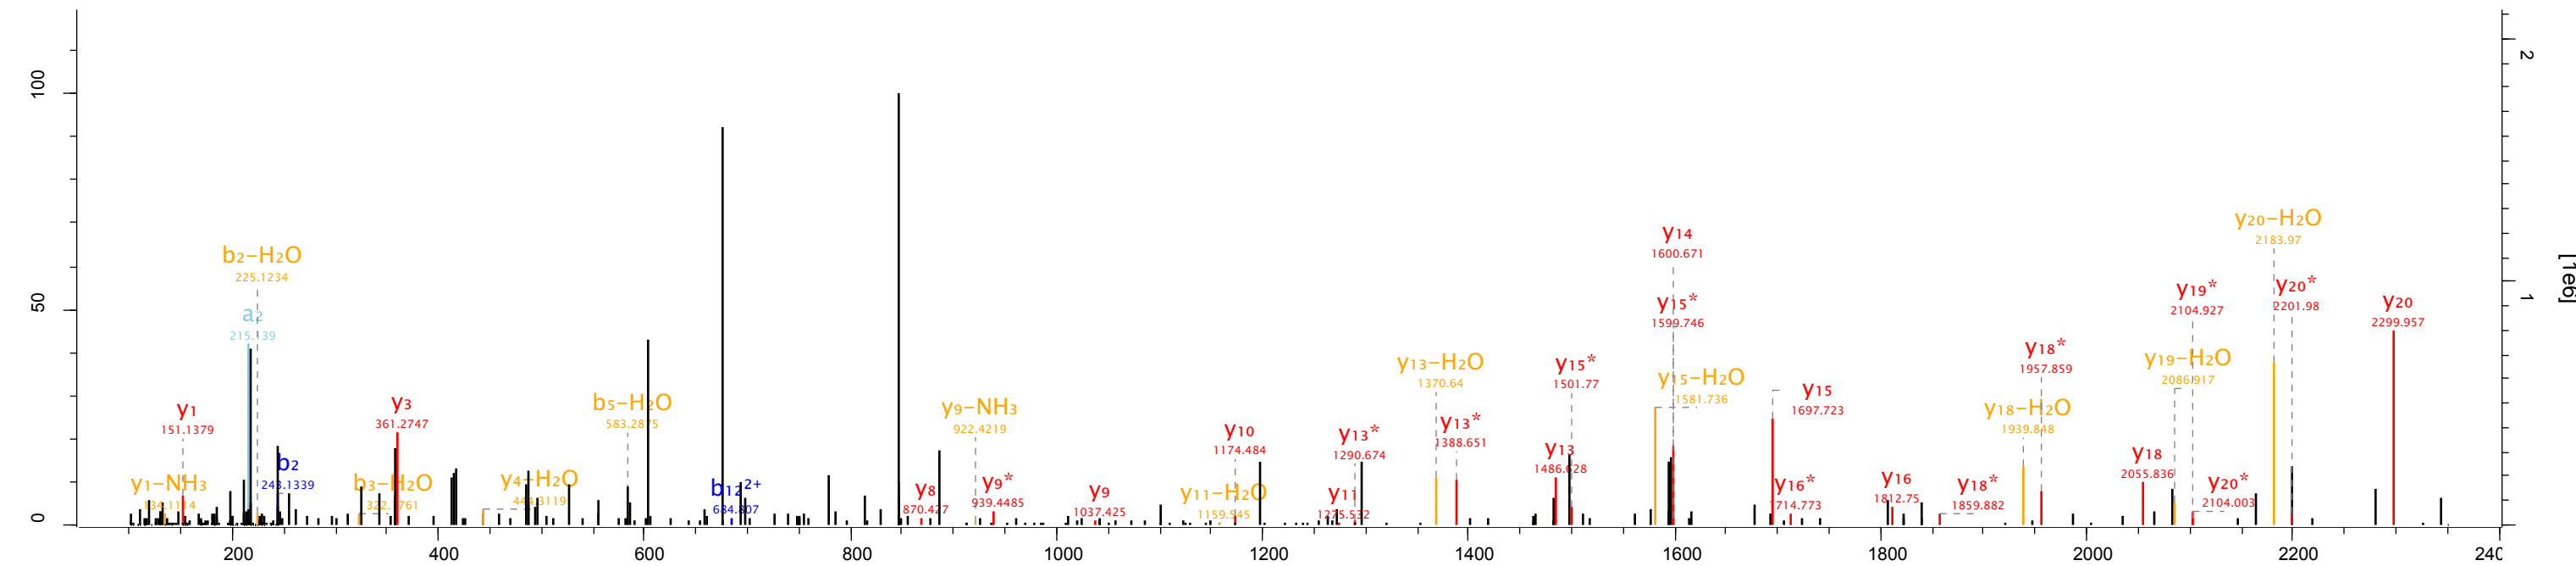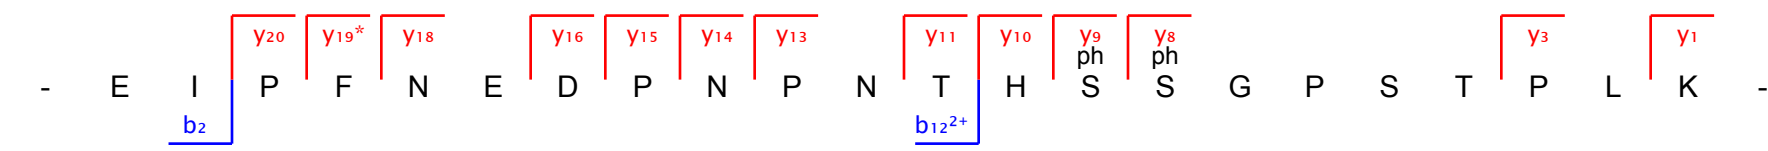

Raw file 20150814\_A375SR\_Phospho\_BR2\_03 Scan 16306 Method FTMS; HCD Score 137.27 m/z 693.78 Gene names CTNND1

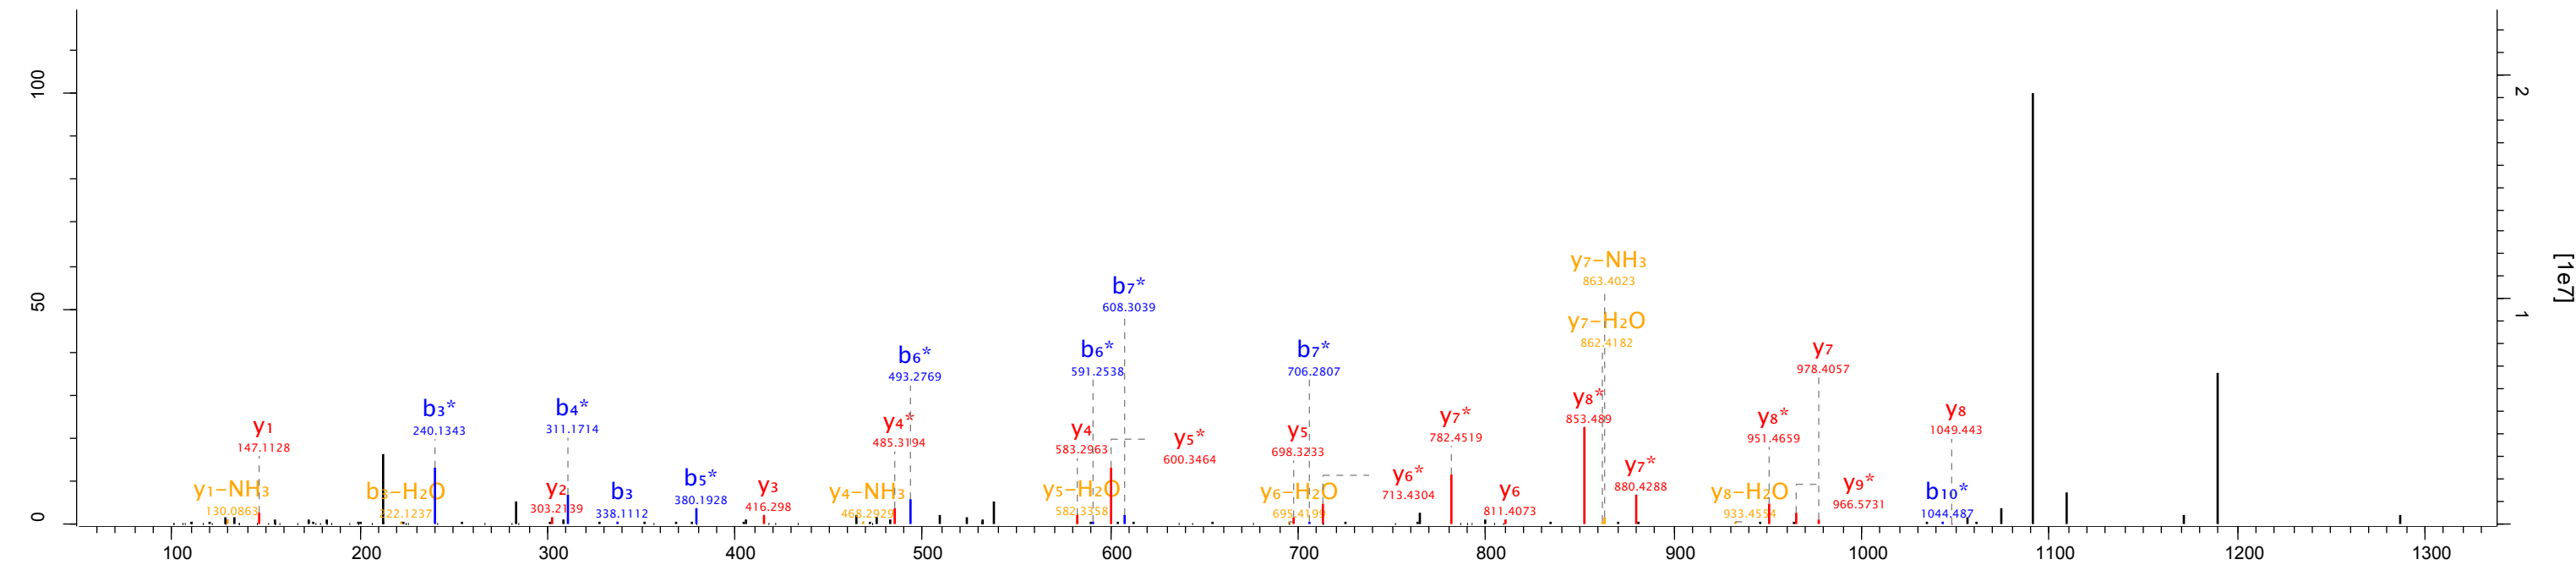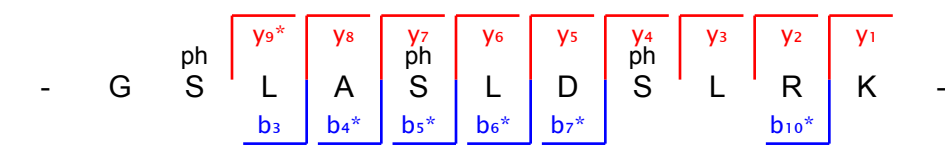

Raw file 20150814\_A375SR\_Phospho\_BR2\_03 Scan 16326 Method FTMS; HCD Score 54.87 m/z 909.44 Gene names CABLES1

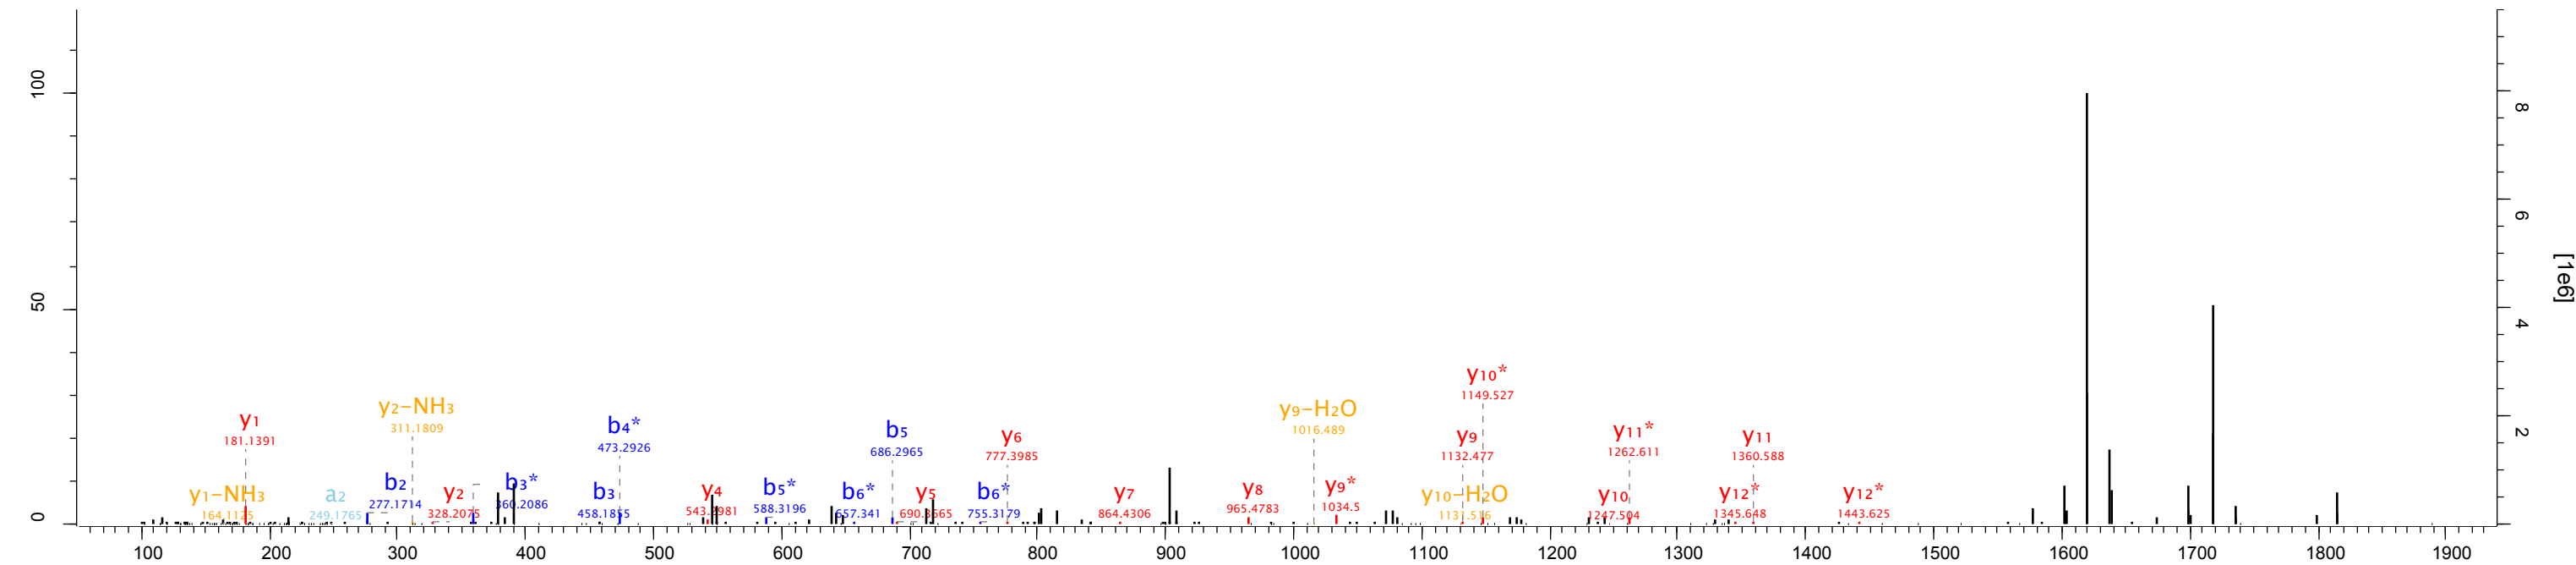

- R N y<sub>12</sub><sup>\*</sup>  
ph y<sub>11</sub> y<sub>10</sub> y<sub>9</sub> y<sub>8</sub> y<sub>7</sub> y<sub>6</sub> y<sub>5</sub> y<sub>4</sub> Q y<sub>2</sub> y<sub>1</sub> -  
b<sub>2</sub> b<sub>3</sub> b<sub>4</sub><sup>\*</sup> b<sub>5</sub> b<sub>6</sub><sup>\*</sup> T S S F S

Raw file: 20150814\_A375SR\_Phospho\_BR2\_03  
 Scan: 16366 Method: FTMS; HCD Score: 87.67 m/z: 676.3 Gene names: CALM1;CALM2;CALM3

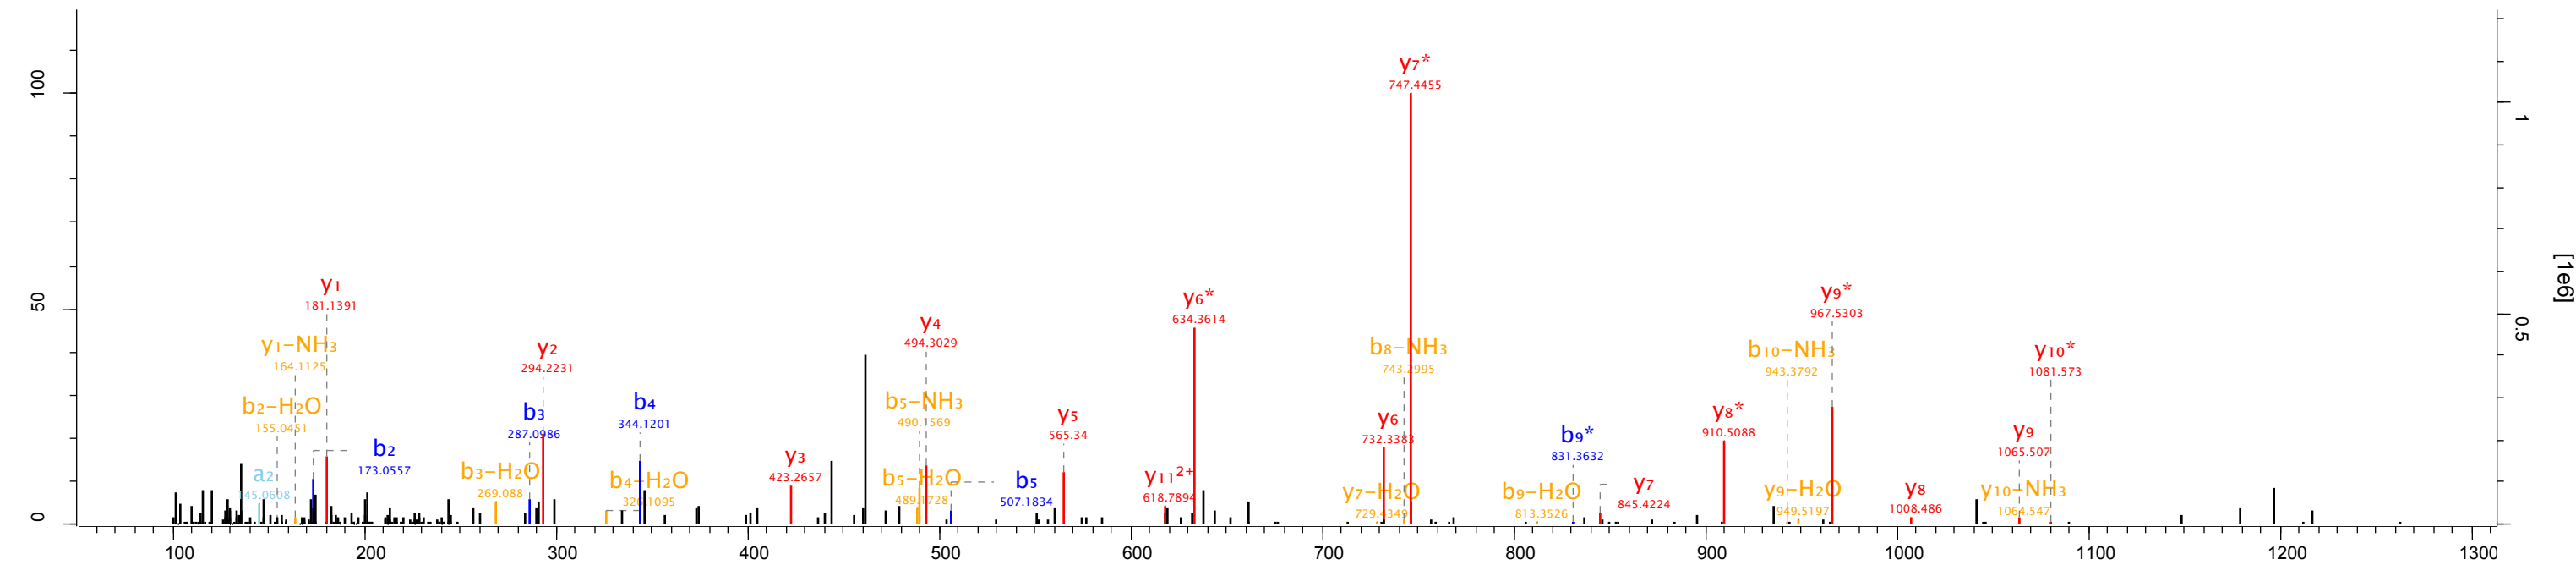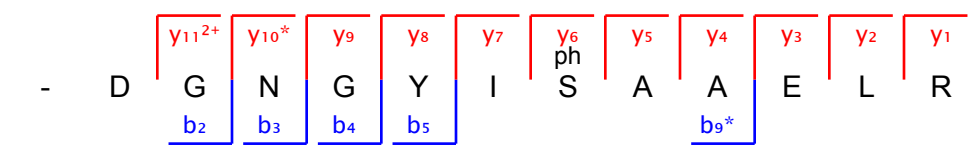



Raw file: 20150814\_A375SR\_Phospho\_BR2\_03  
 Scan: 16756 Method: FTMS; HCD Score: 176.86 m/z: 1126.44 Gene names: CEP170

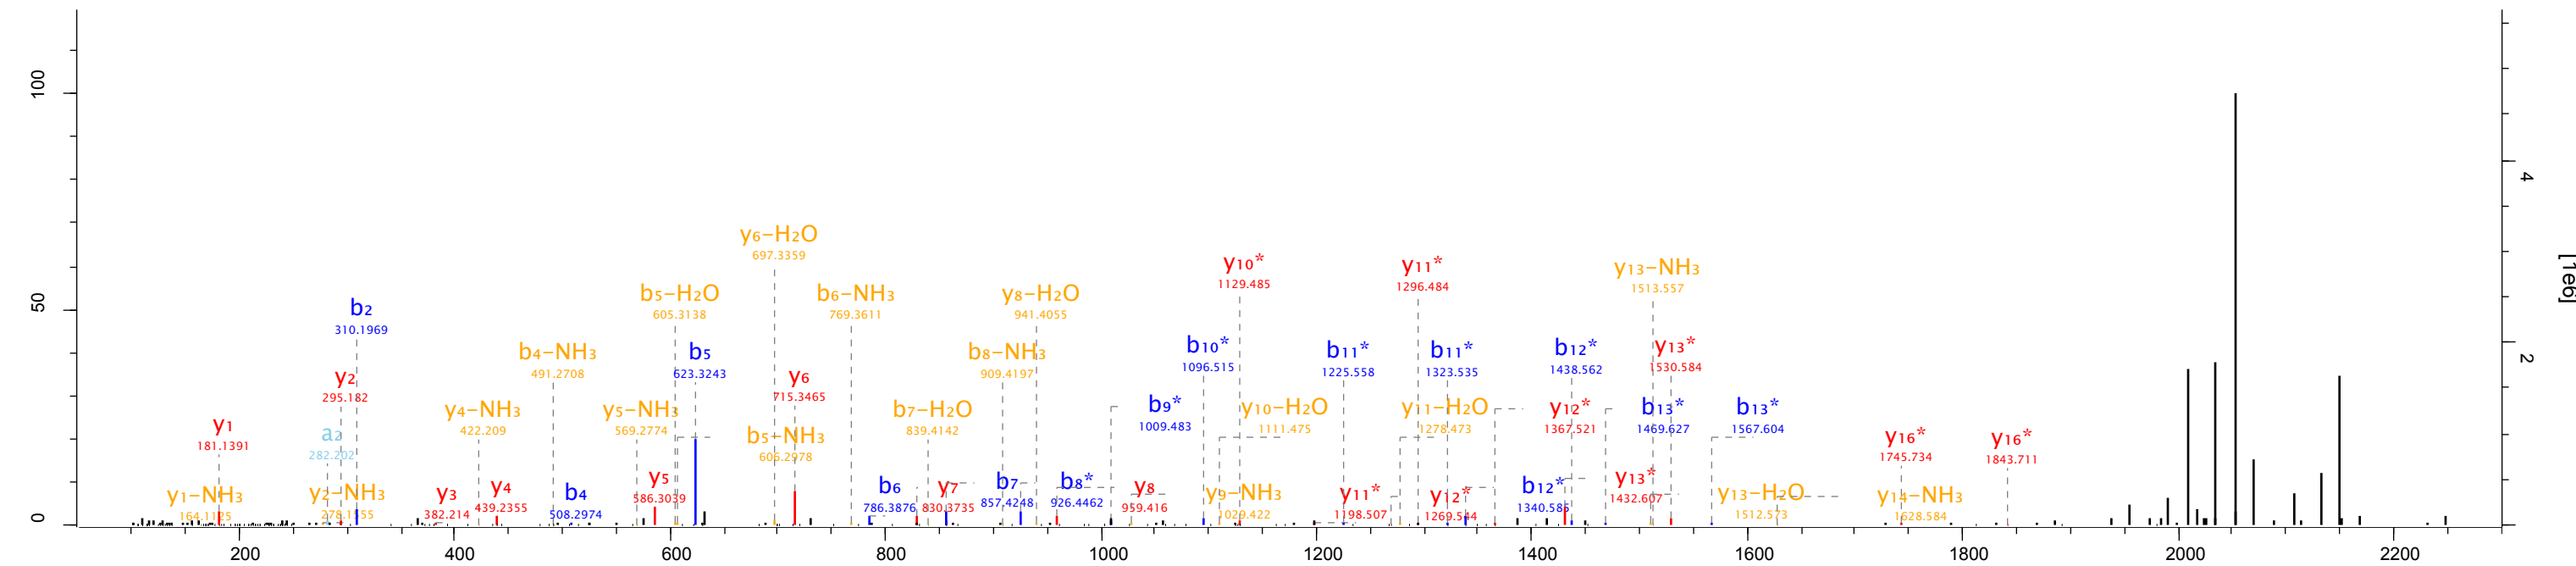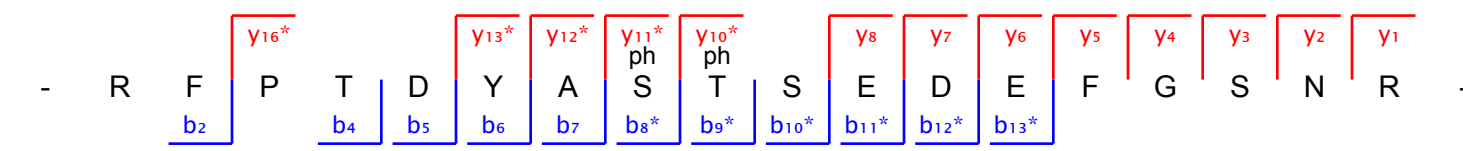

Raw file 20150814\_A375SR\_Phospho\_BR2\_03 Scan 16886 Method FTMS; HCD Score 106.94 m/z 937.47 Gene names NUP88

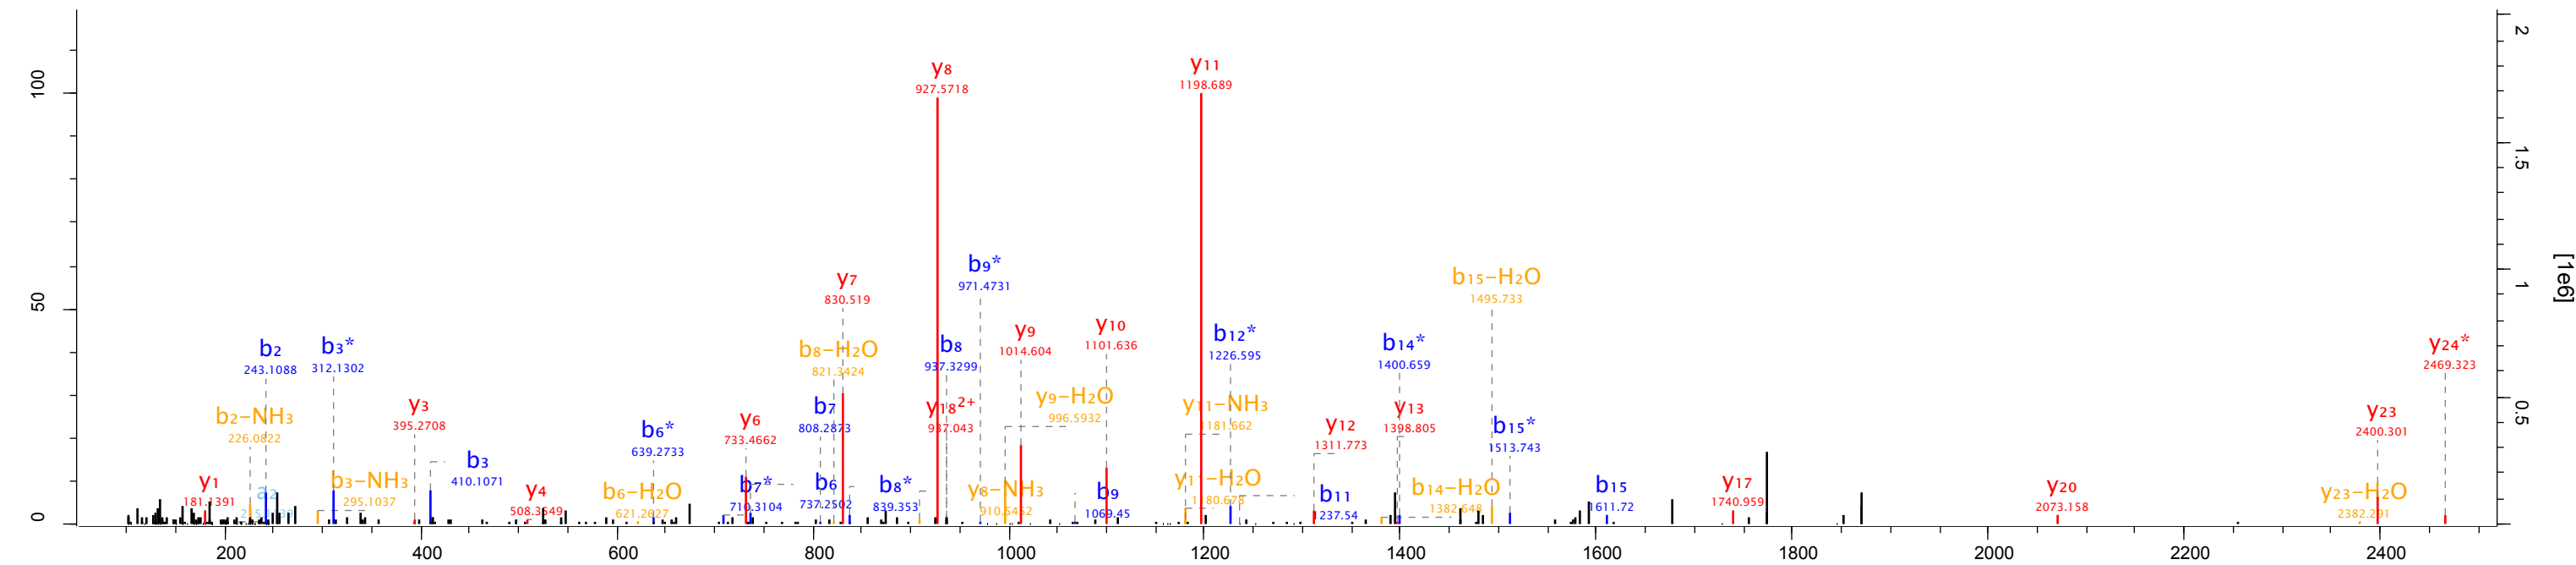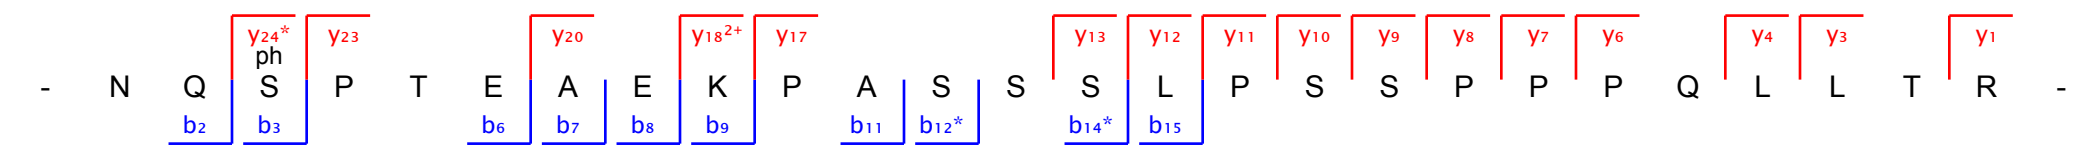

Raw file 20150814\_A375SR\_Phospho\_BR2\_03 Scan 17086 Method FTMS; HCD Score 62.07 m/z 700.32 Gene names ZC3HC1

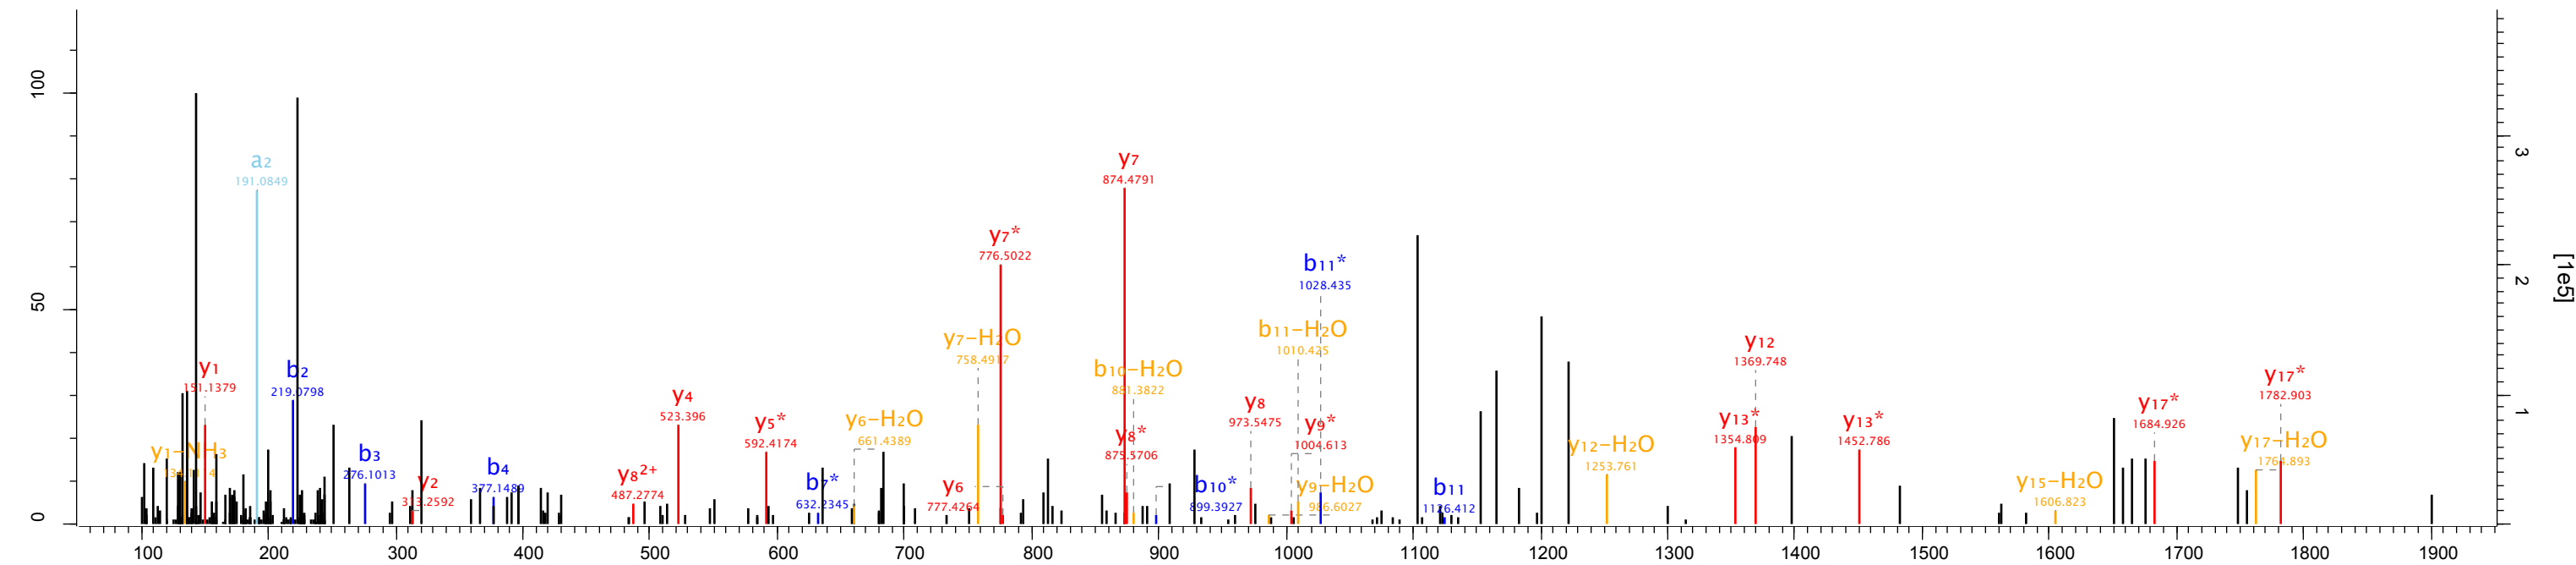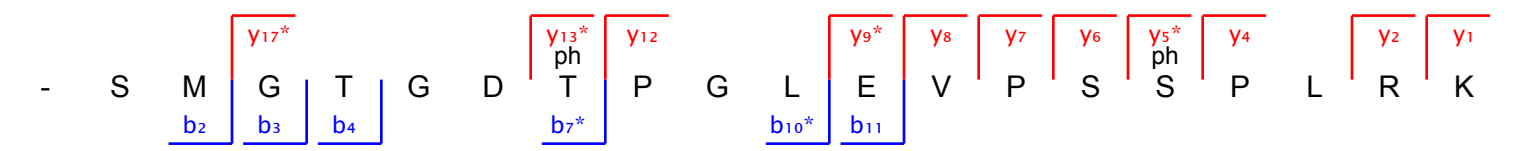

Raw file: 20150814\_A375SR\_Phospho\_BR2\_03  
 Scan: 17156 Method: FTMS; HCD Score: 117.48 m/z: 591.28 Gene names: MAP1S

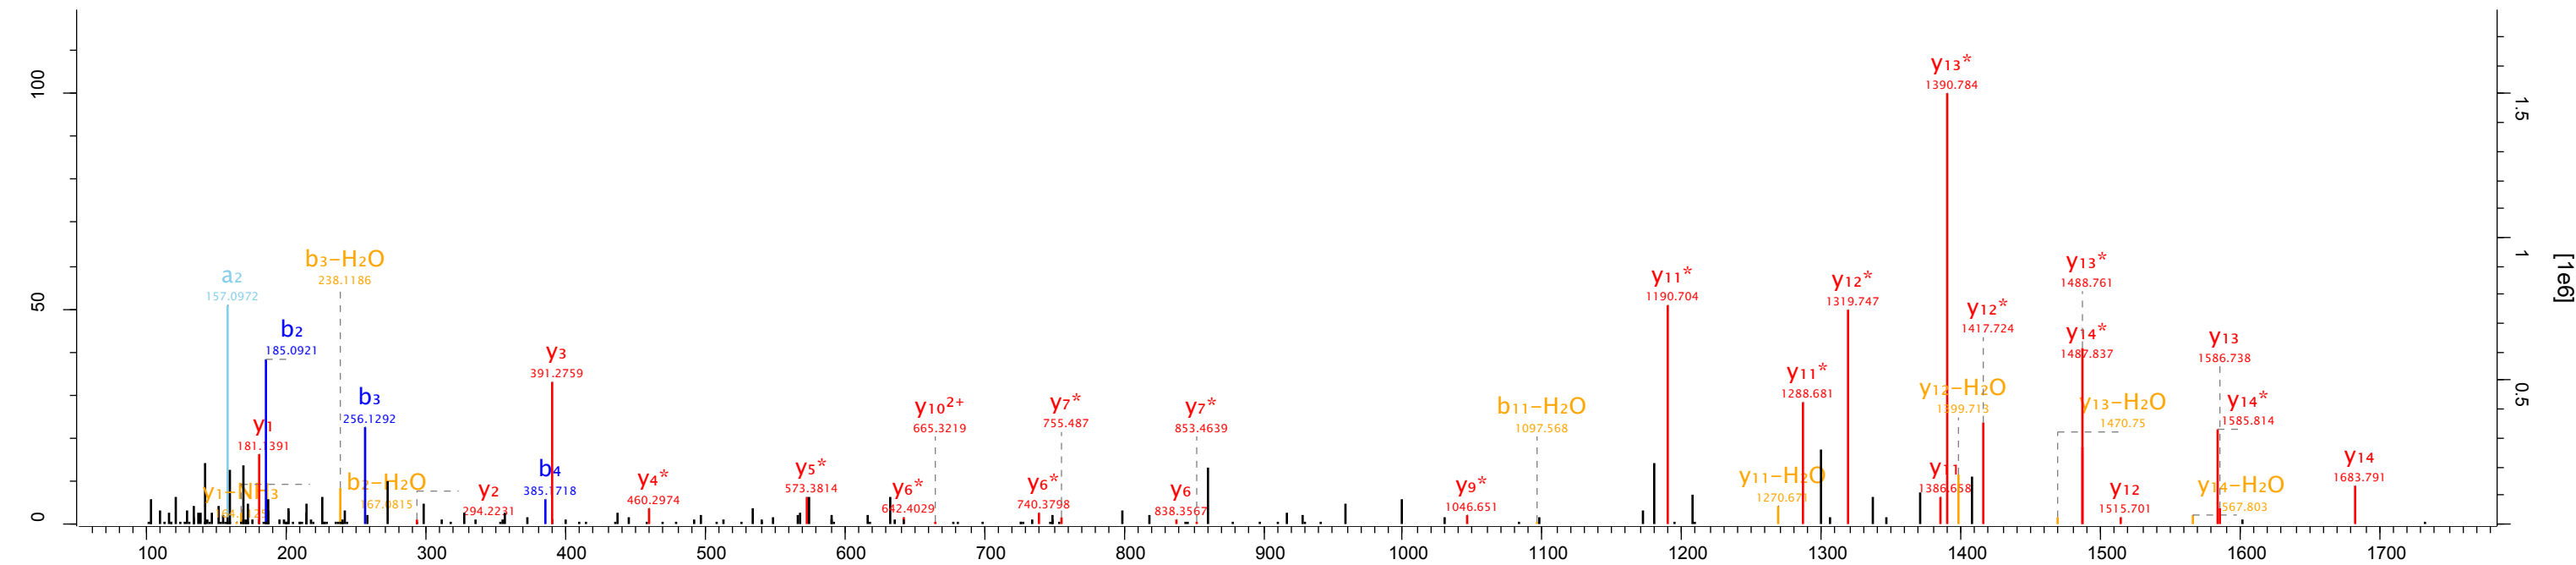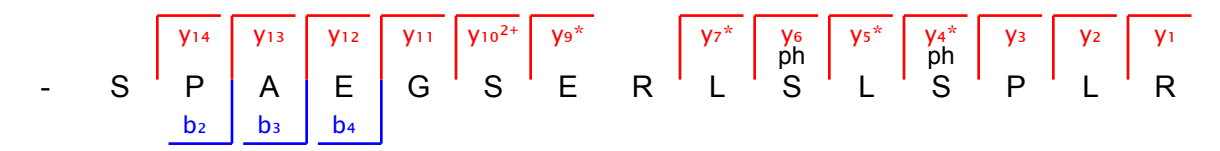

Raw file 20150814\_A375SR\_Phospho\_BR2\_03 Scan 17406 Method FTMS; HCD Score 88.08 m/z 618.77 Gene names SHROOM3

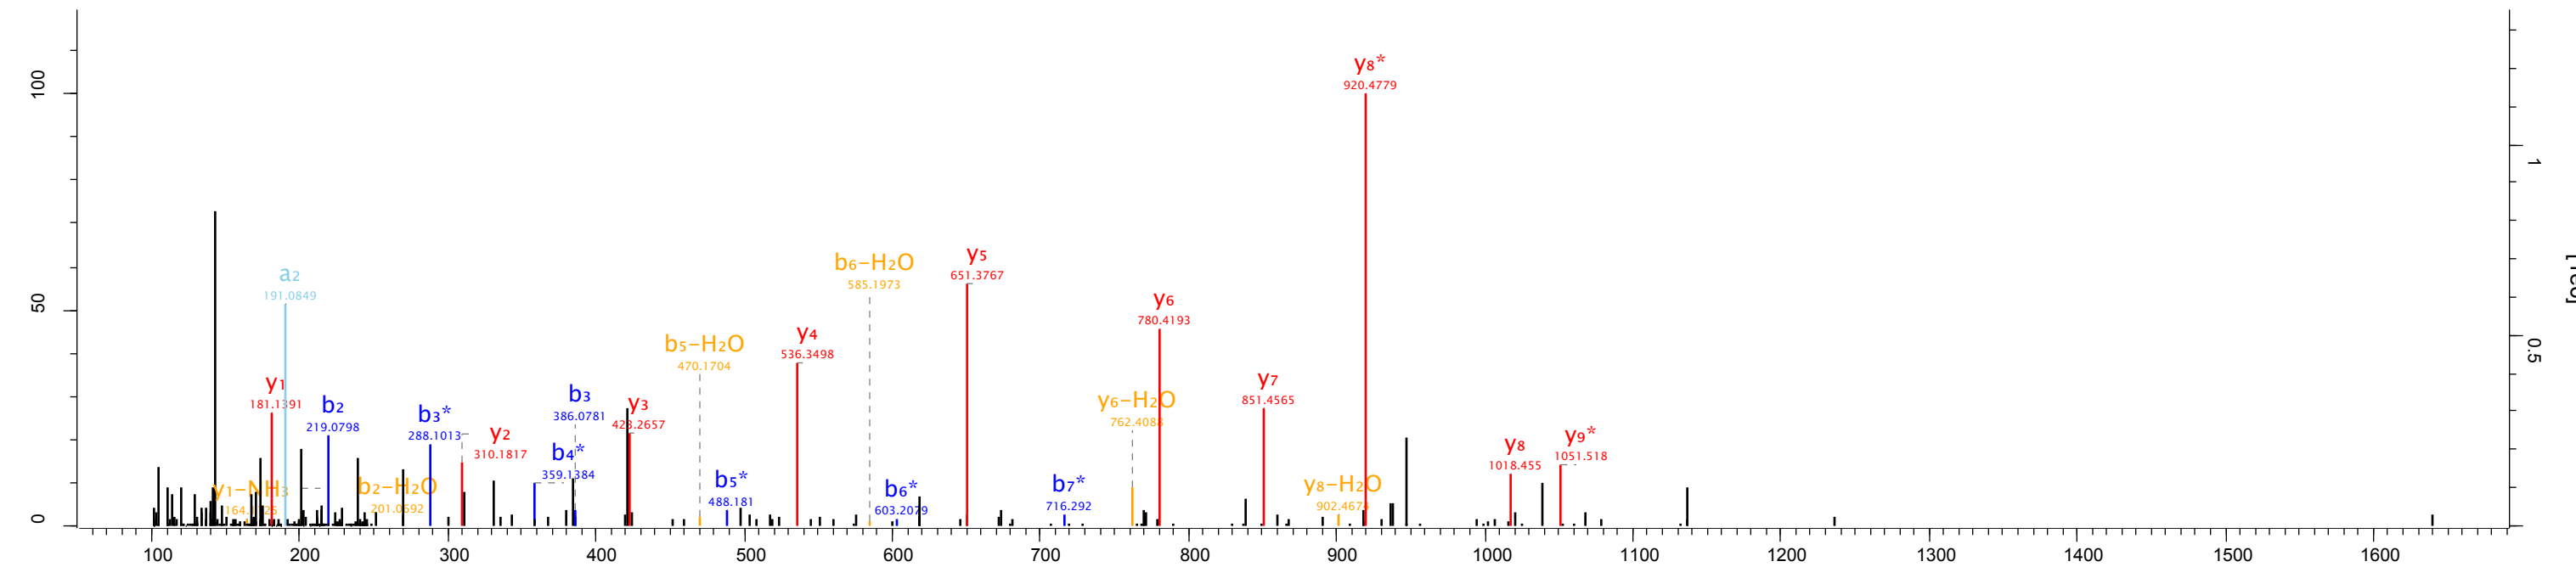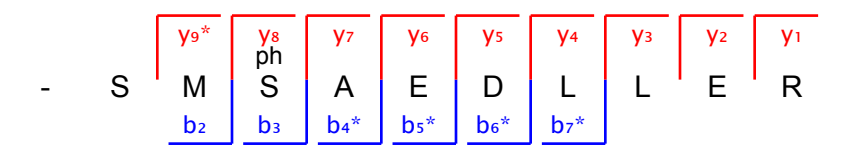

Raw file: 20150814\_A375SR\_Phospho\_BR2\_03  
 Scan: 17626 Method: FTMS; HCD Score: 360.55 m/z: 1103.79 Gene names: PTPN12

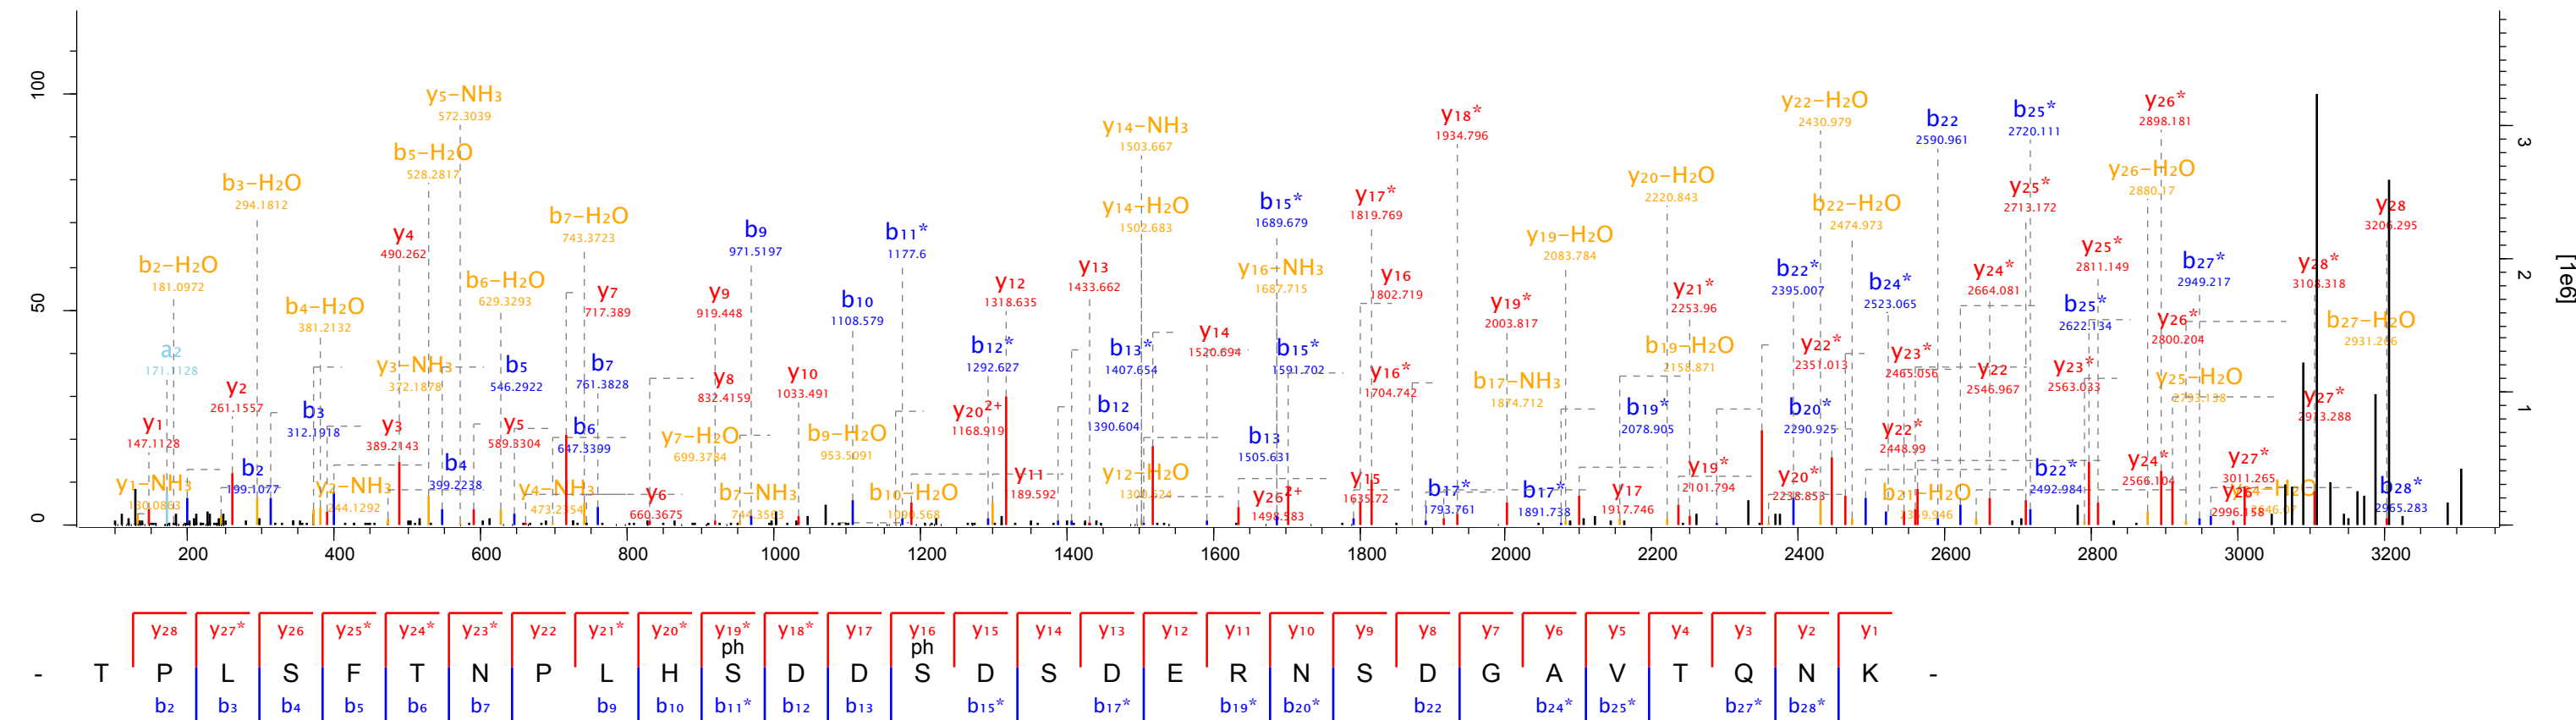

Raw file 20150814\_A375SR\_Phospho\_BR2\_03 Scan 17706 Method FTMS; HCD Score 119.46 m/z 1200.54 Gene names USP34

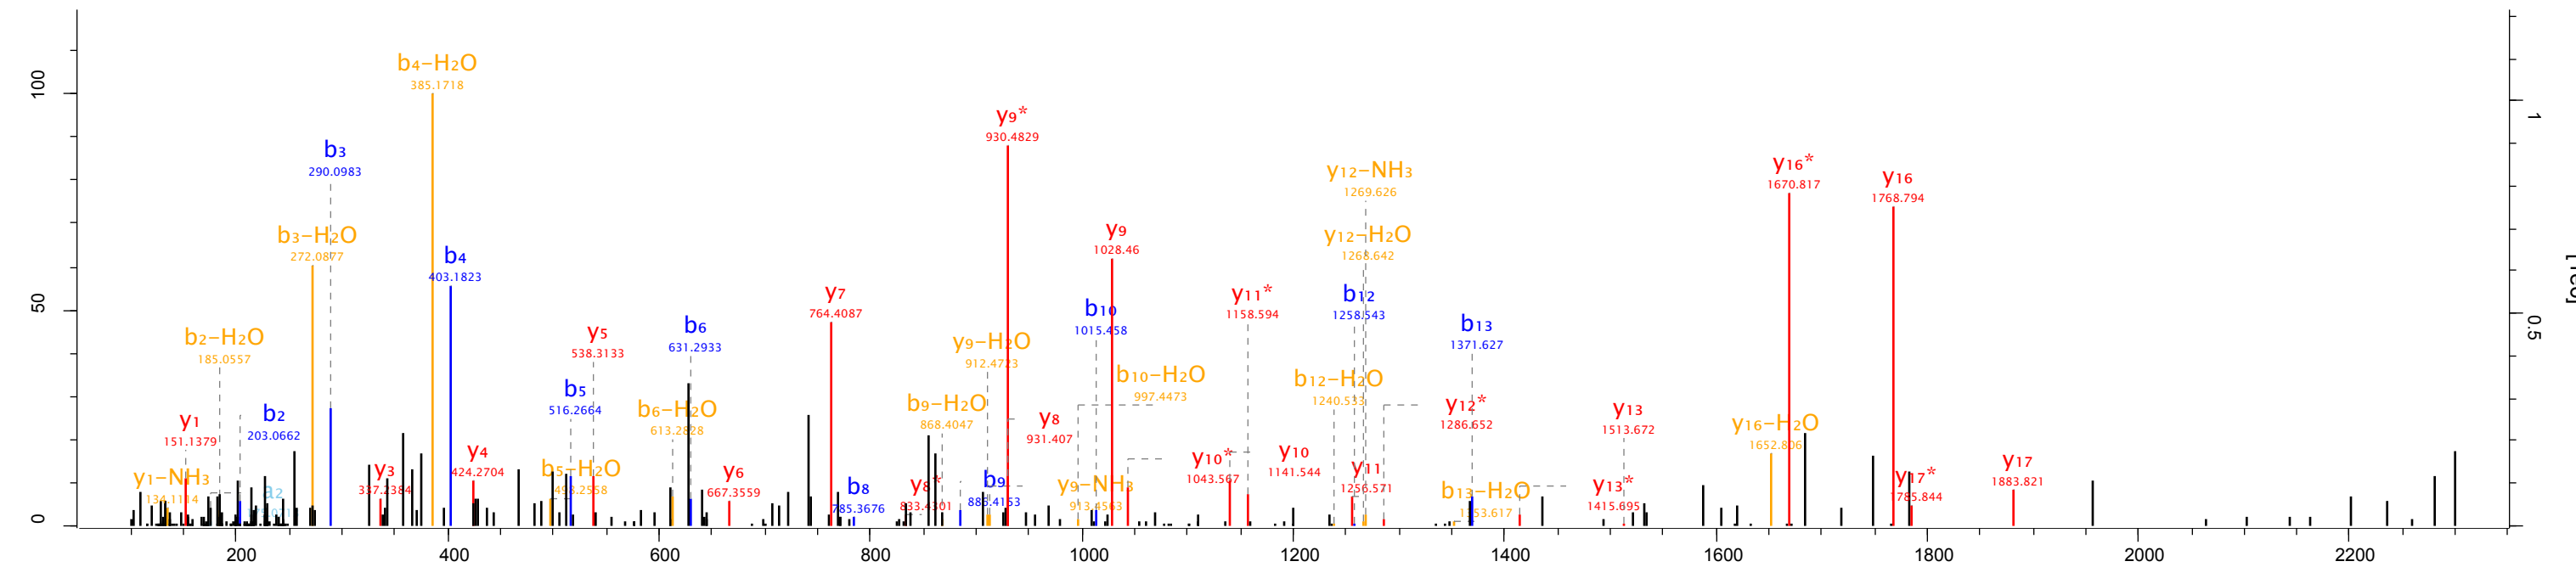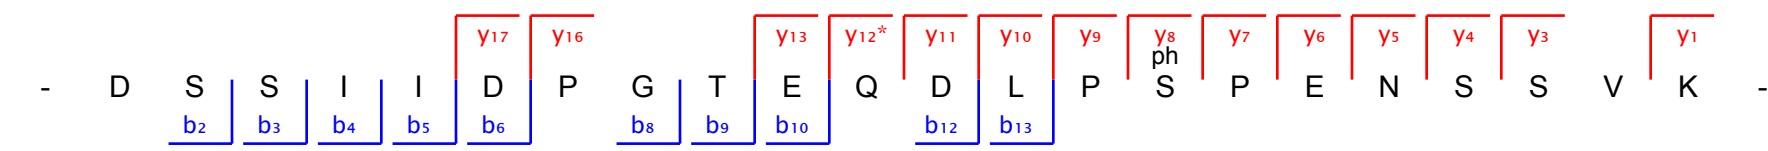

Raw file 20150814\_A375SR\_Phospho\_BR2\_03 Scan 17846 Method FTMS; HCD Score 220.89 m/z 932.35 Gene names RPRD2

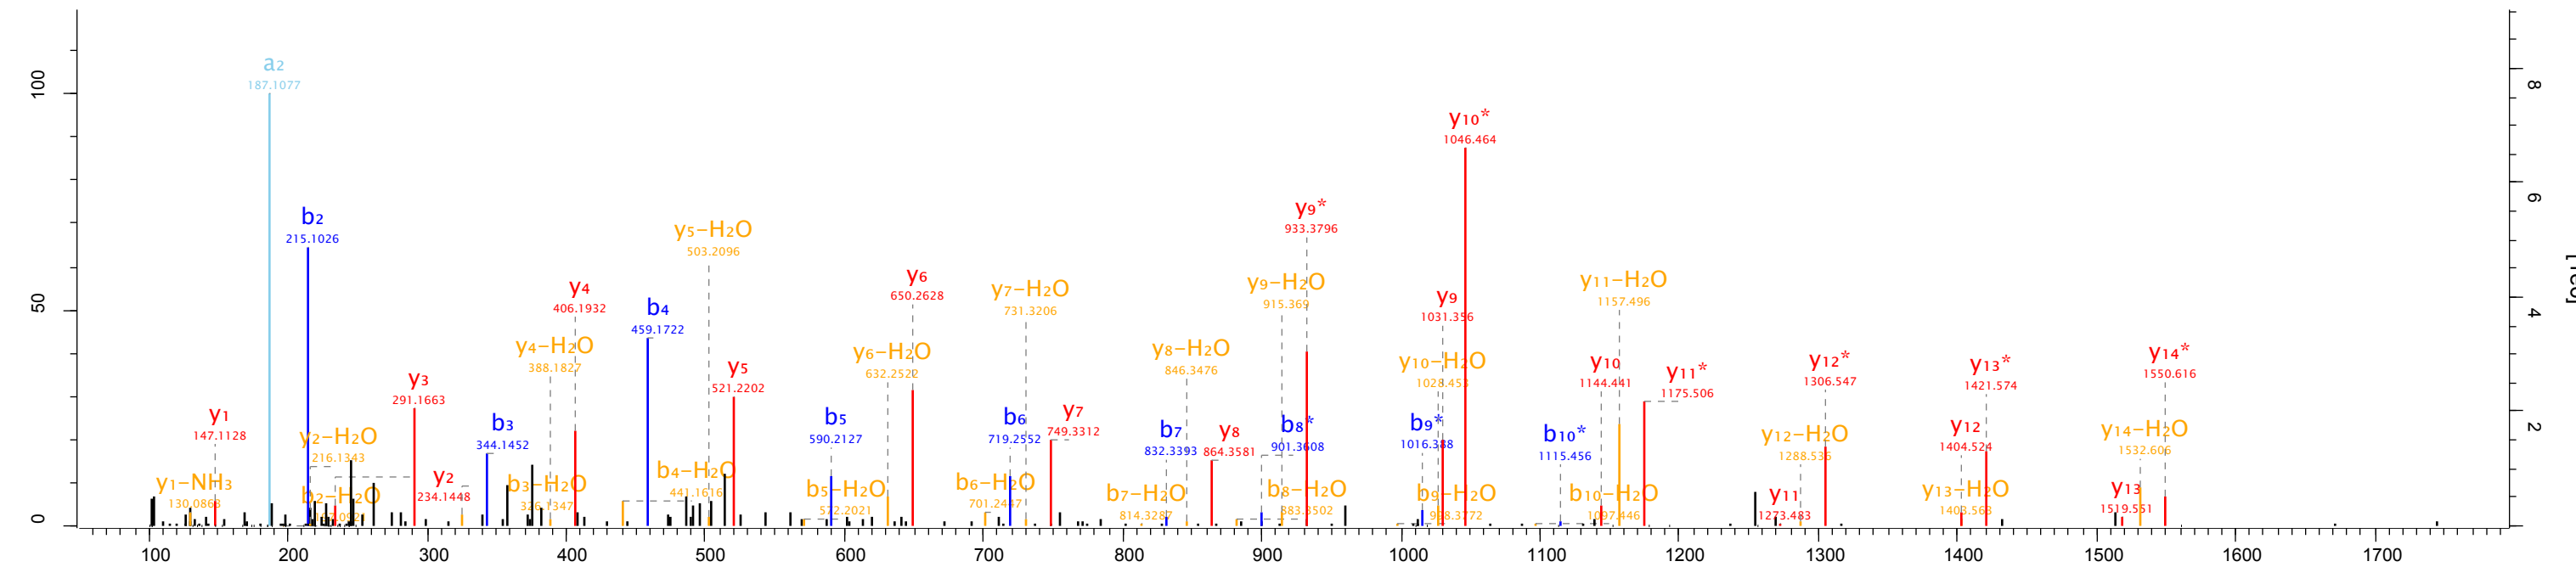

- D V E D M E L S D V E D D G S K -  
 b2 b3 b4 b5 b6 b7 b8\* b9\* b10\*



Raw file 20150814\_A375SR\_Phospho\_BR2\_03 Scan 17966 Method FTMS; HCD Score 70.09 m/z 896.86 Gene names TICRR

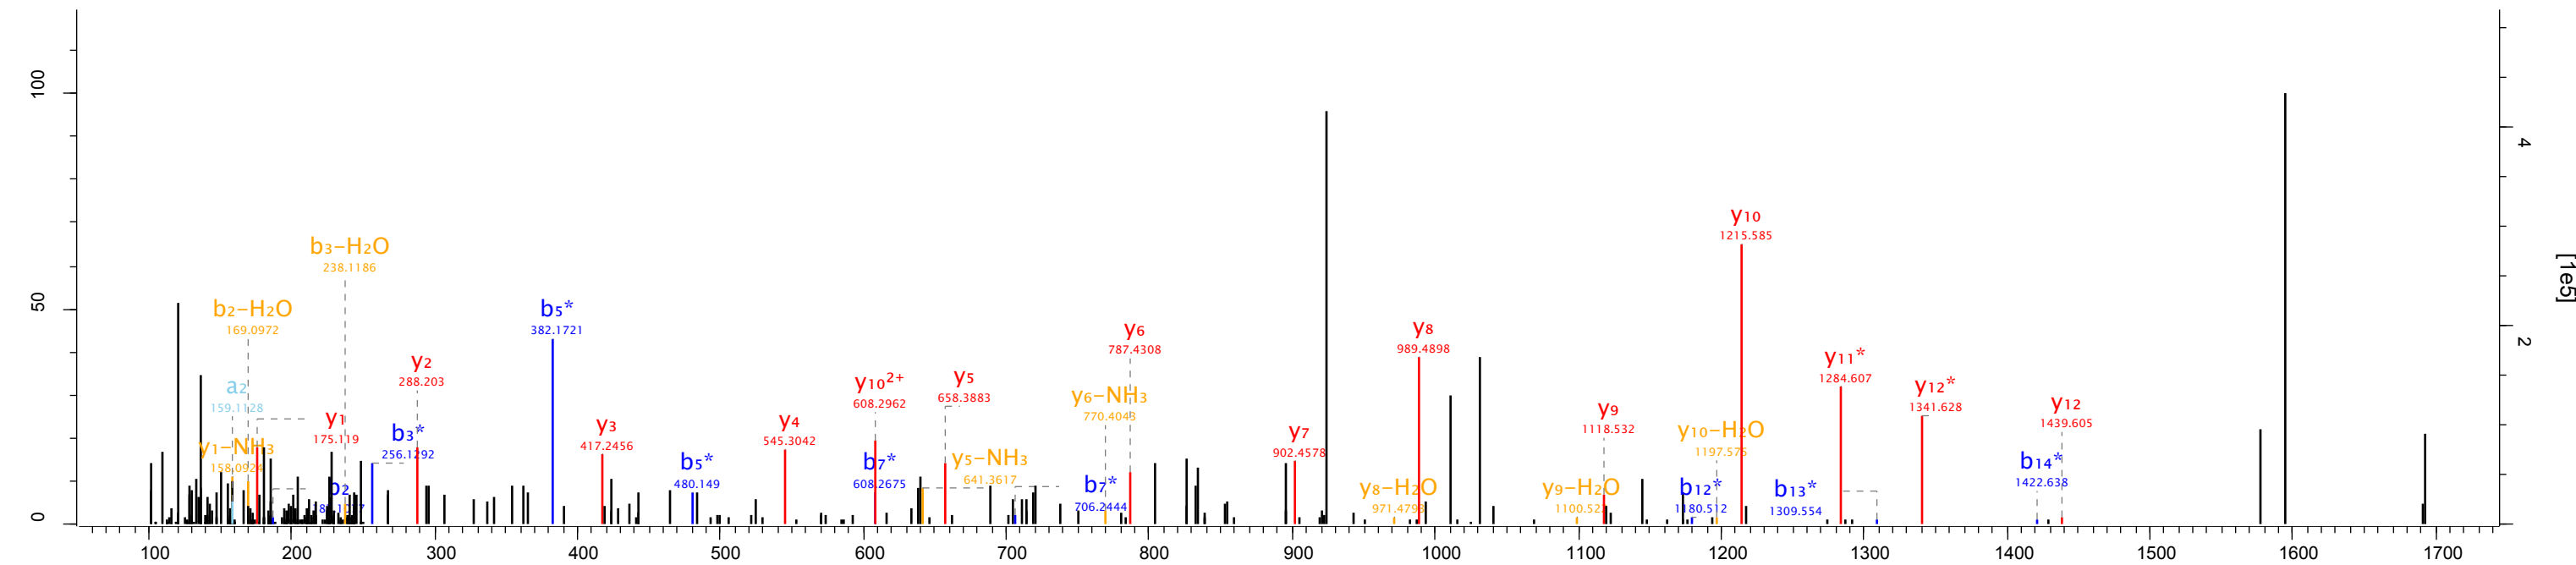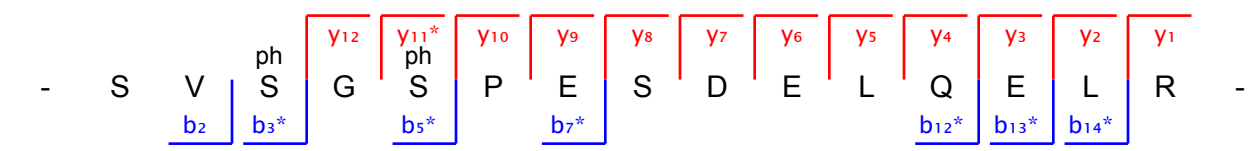

Raw file 20150814\_A375SR\_Phospho\_BR2\_03 Scan 18046 Method FTMS; HCD Score 114.01 m/z 741.86 Gene names PITPNC1

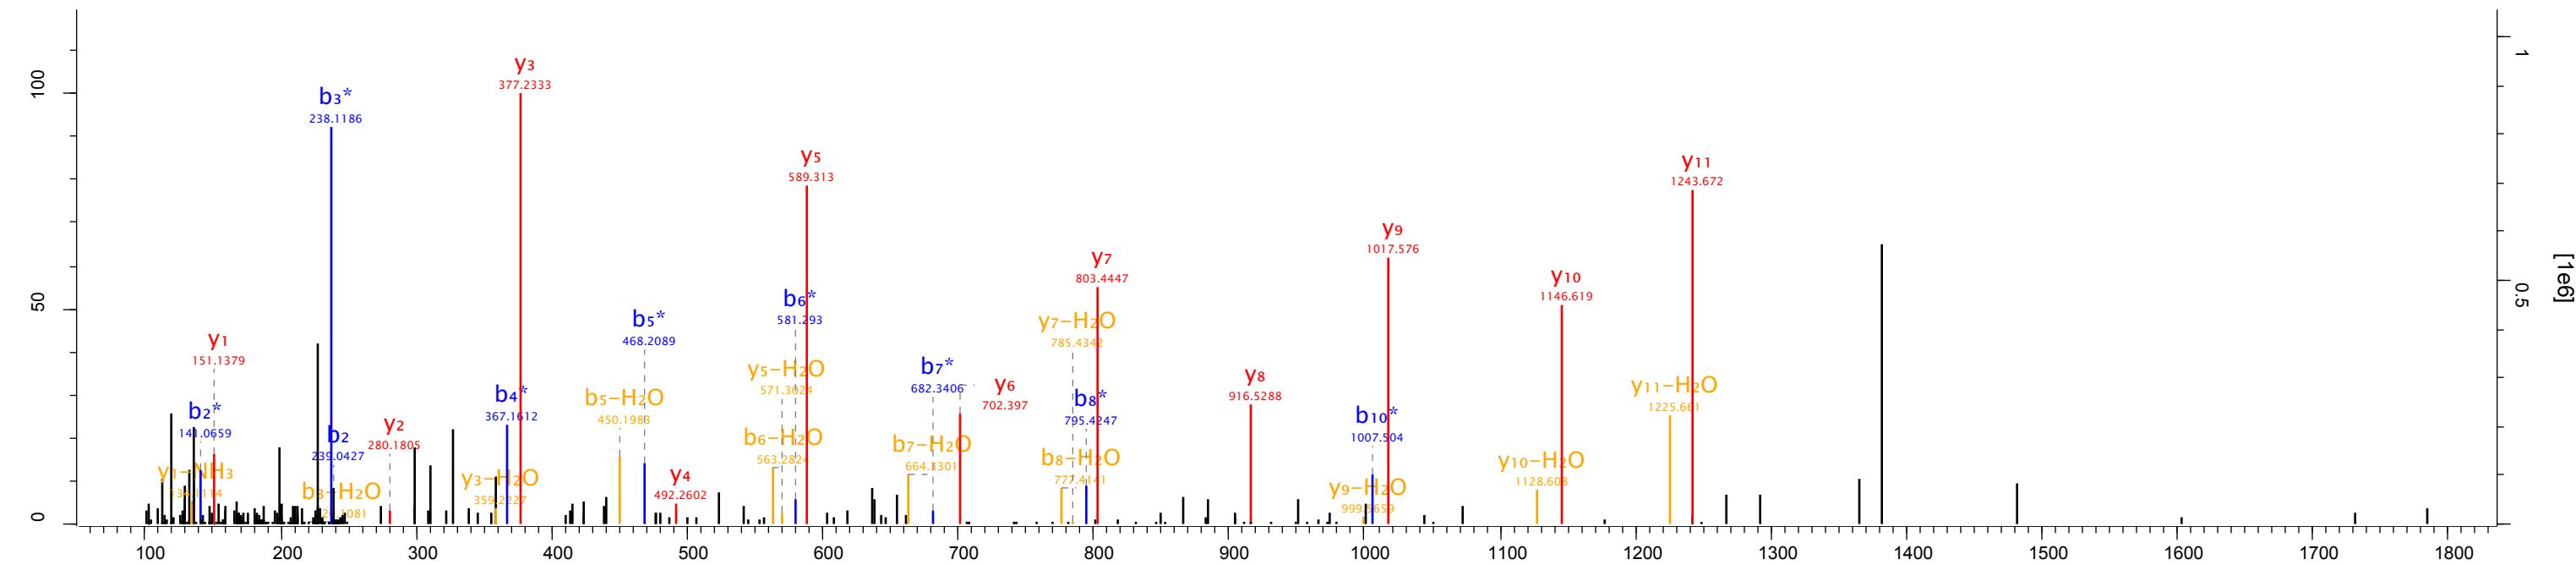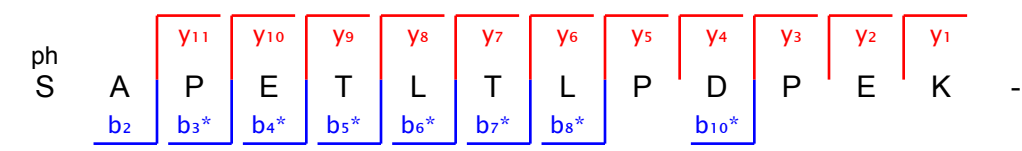

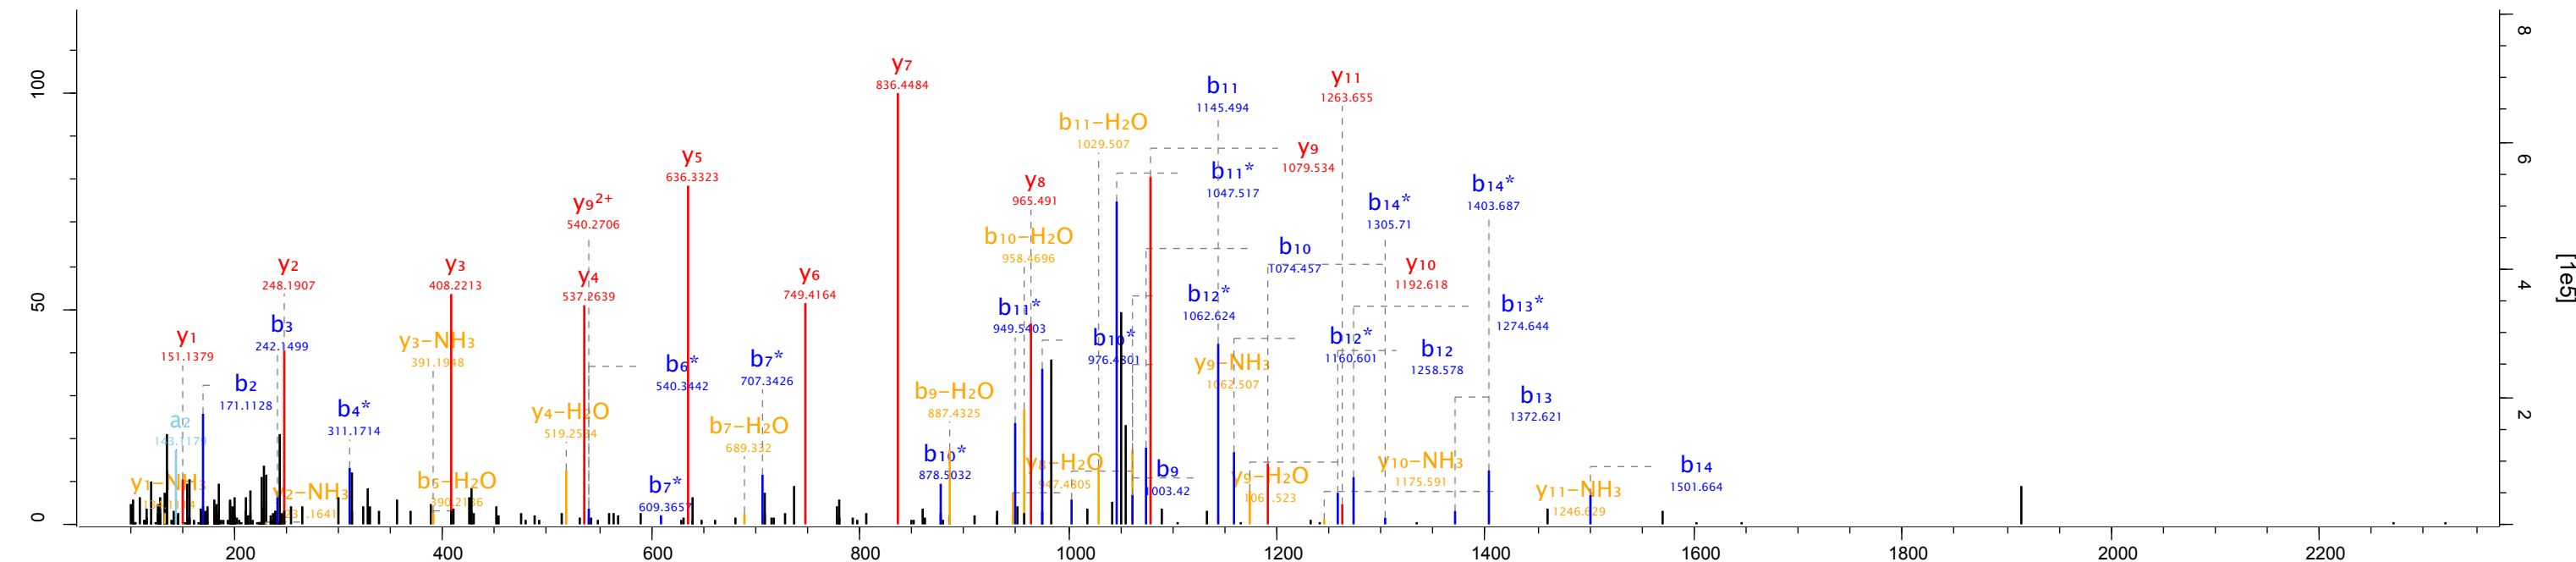

- V A A S P K S P T A A A L N E S L V E C P K -

Fragmentation labels (b and y ions) are shown below the corresponding amino acids in the sequence:

- V: b<sub>2</sub>
- A: b<sub>3</sub>
- S: b<sub>4</sub><sup>\*</sup>
- P: b<sub>6</sub><sup>\*</sup>
- K: b<sub>7</sub><sup>\*</sup>
- A: b<sub>9</sub>
- A: b<sub>10</sub>
- A: b<sub>11</sub>
- L: b<sub>12</sub>
- N: b<sub>13</sub>
- E: b<sub>14</sub>

Phosphorylation sites (ph) are indicated above the S residues in the sequence.

Raw file: 20150814\_A375SR\_Phospho\_BR2\_03  
 Scan: 18246 Method: FTMS; HCD Score: 150.55 m/z: 878.36 Gene names: APC

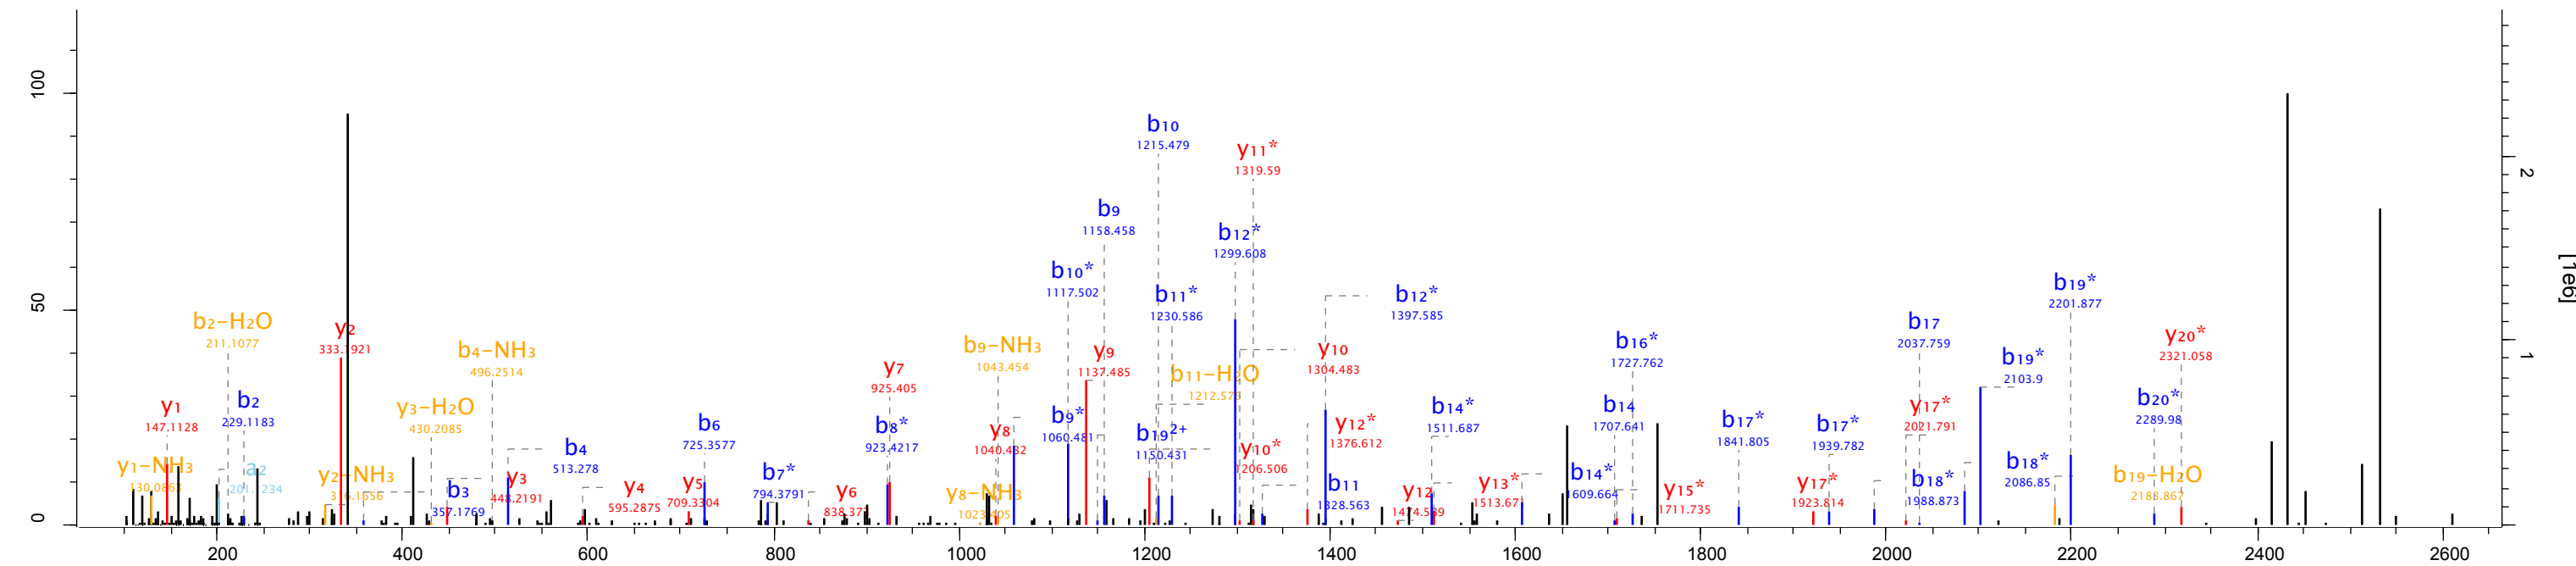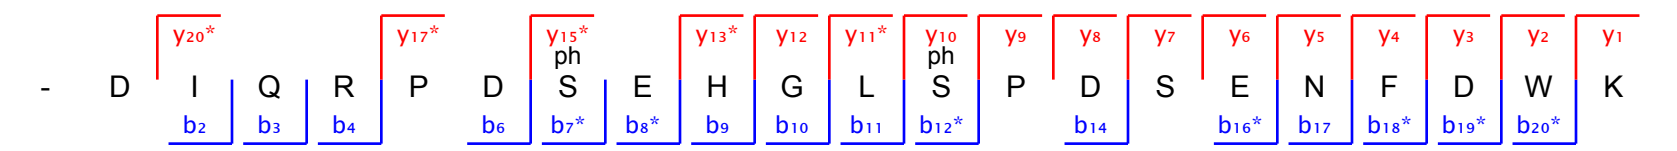

Raw file 20150814\_A375SR\_Phospho\_BR2\_03 Scan 18366 Method FTMS; HCD Score 118.51 m/z 893.86 Gene names HN1

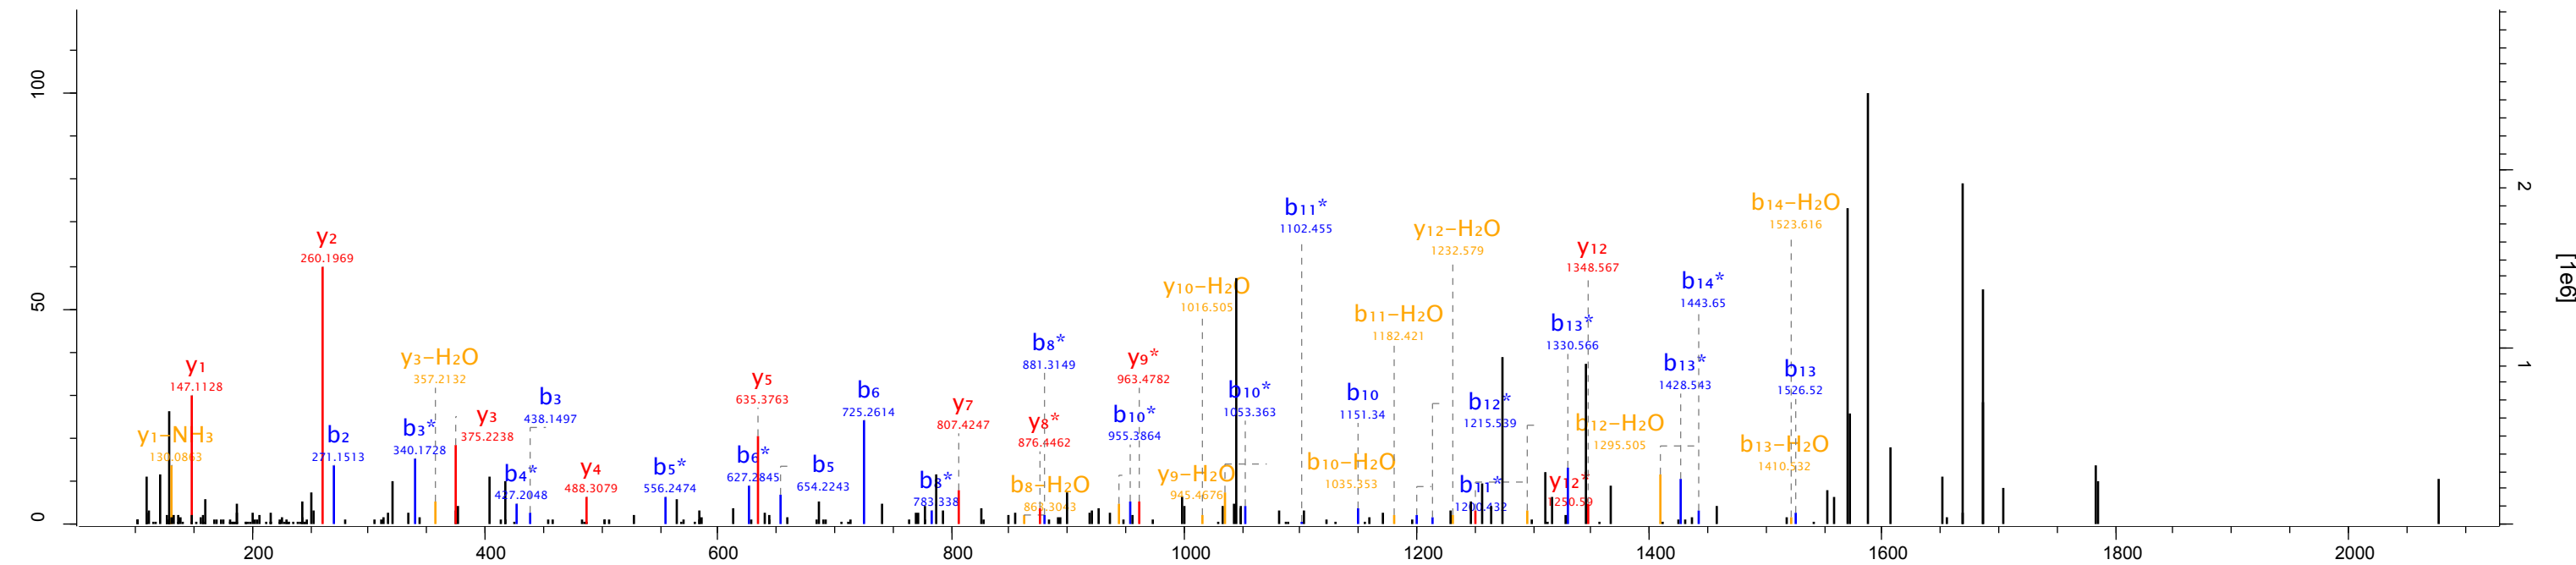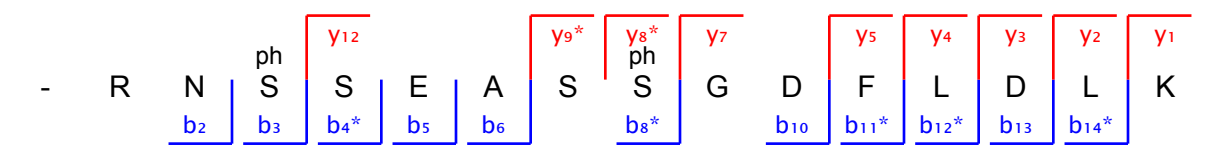

Raw file 20150814\_A375SR\_Phospho\_BR2\_03 Scan 18656 Method FTMS; HCD Score 86.19 m/z 822.36 Gene names HNRNPA2B1

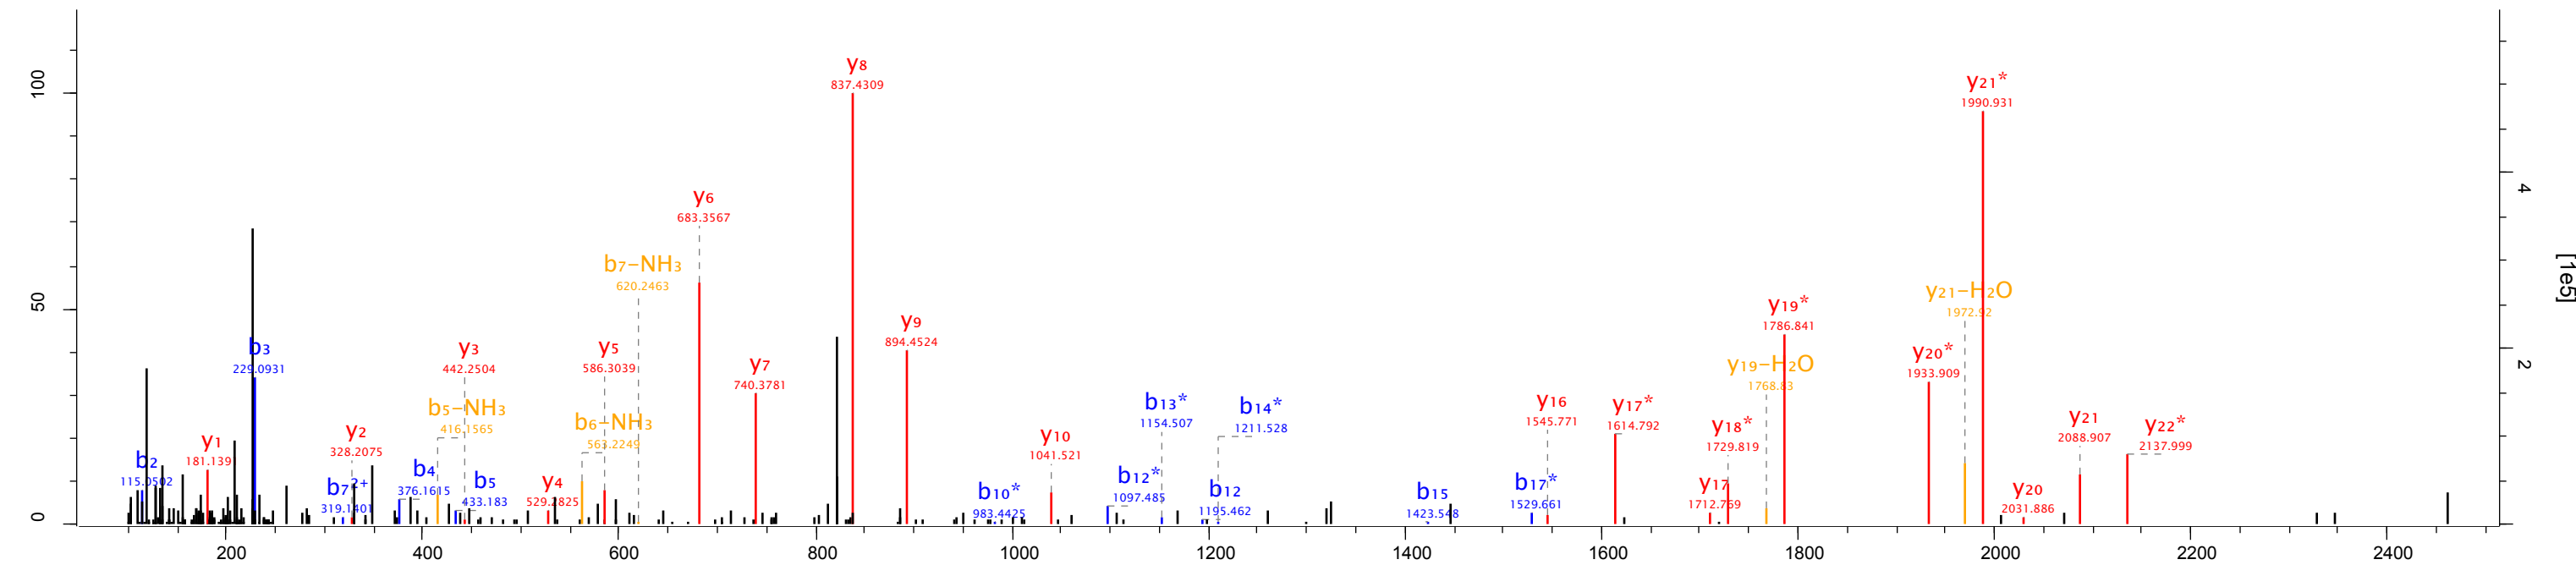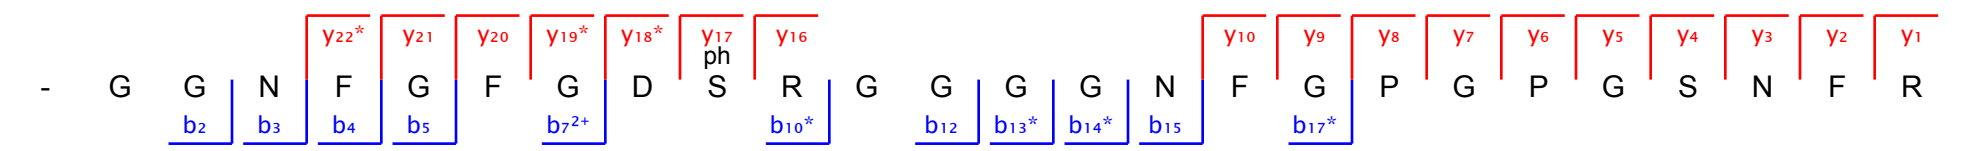

Raw file 20150814\_A375SR\_Phospho\_BR2\_03 Scan 18756 Method FTMS; HCD Score 101.01 m/z 638.33 Gene names MAST4

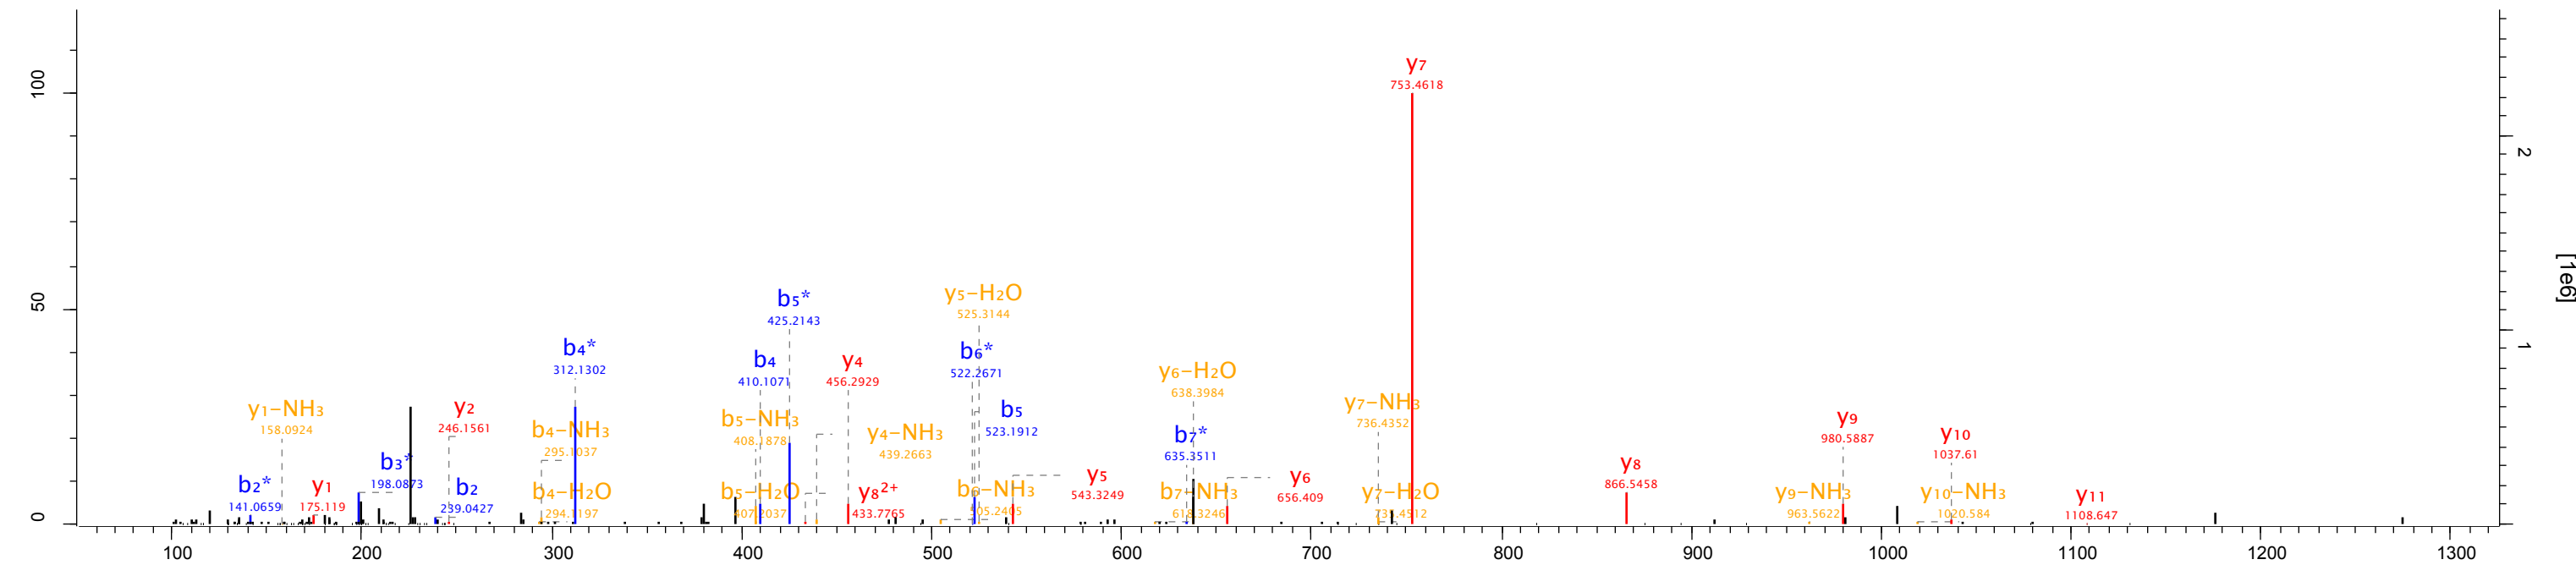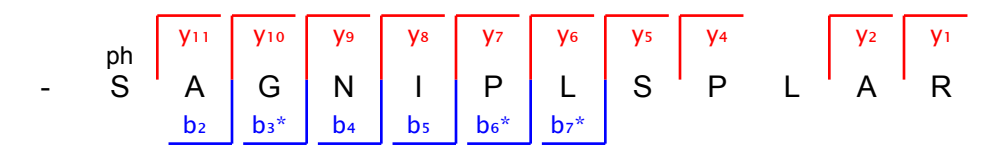

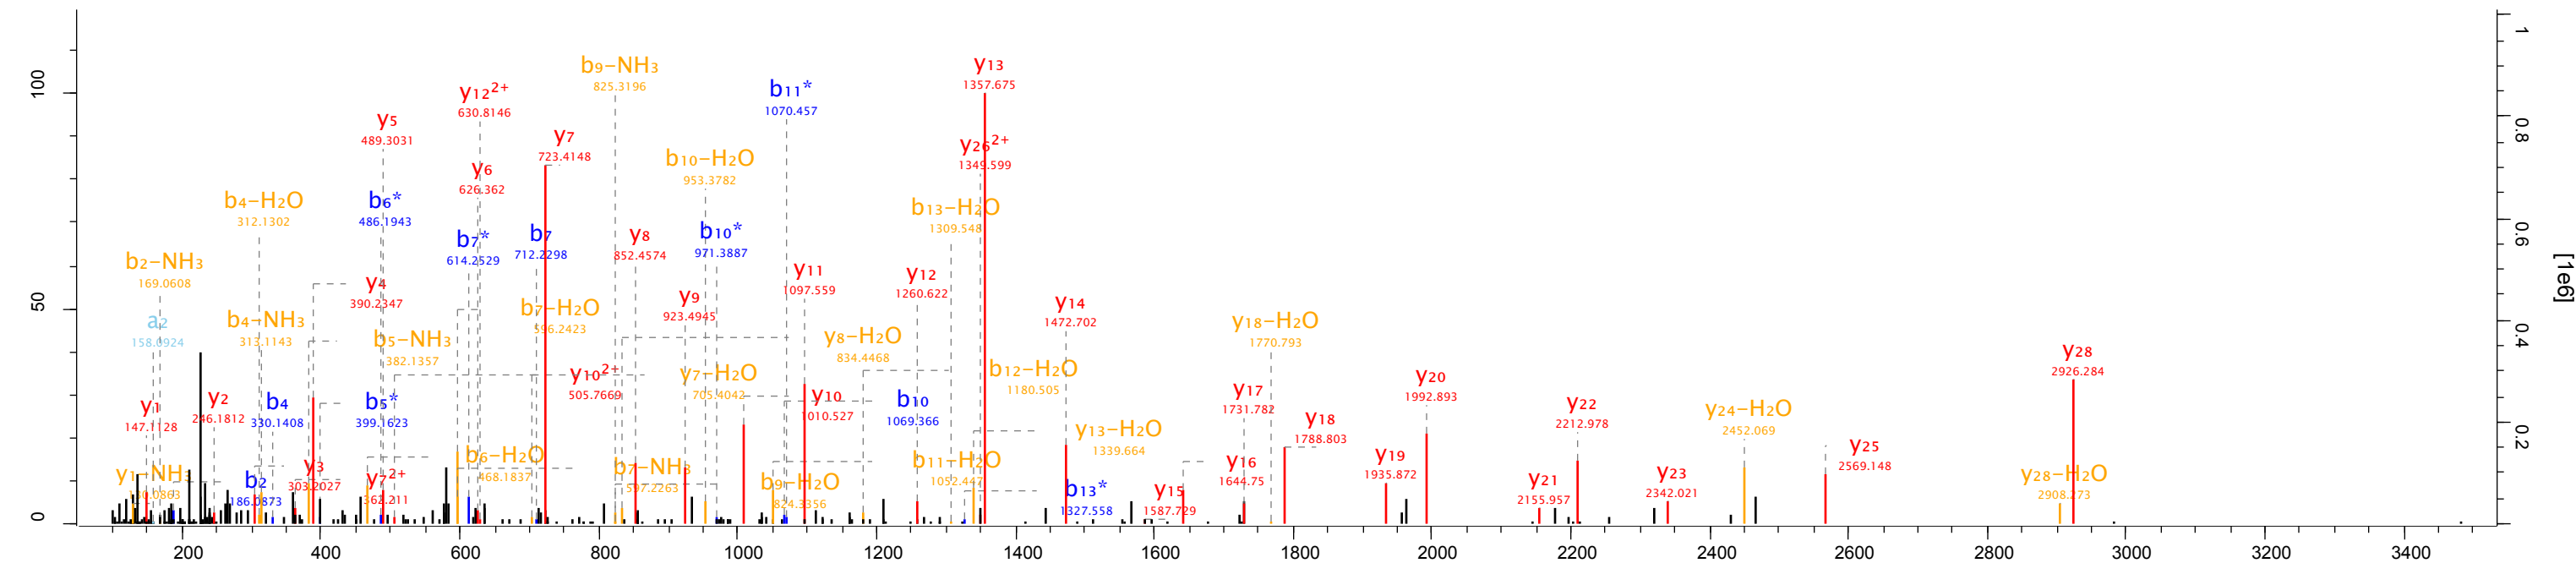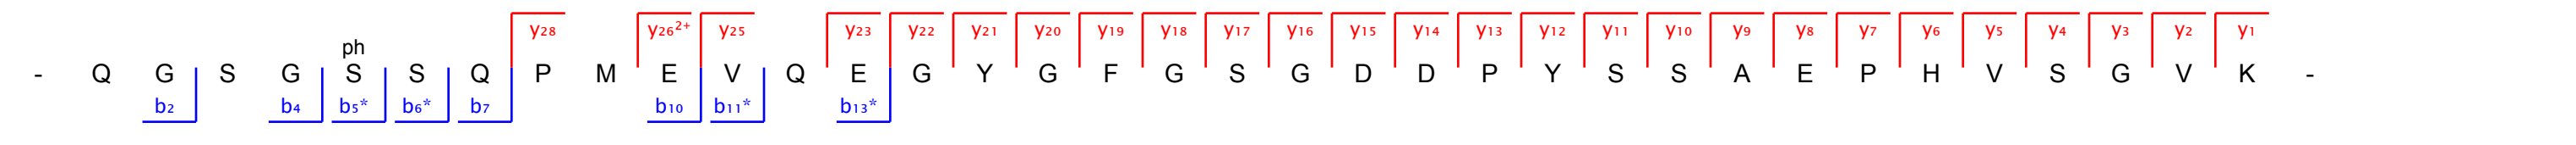



Raw file 20150814\_A375SR\_Phospho\_BR2\_03 Scan 18846 Method FTMS; HCD Score 187.16 m/z 923.46 Gene names ARHGAP11A

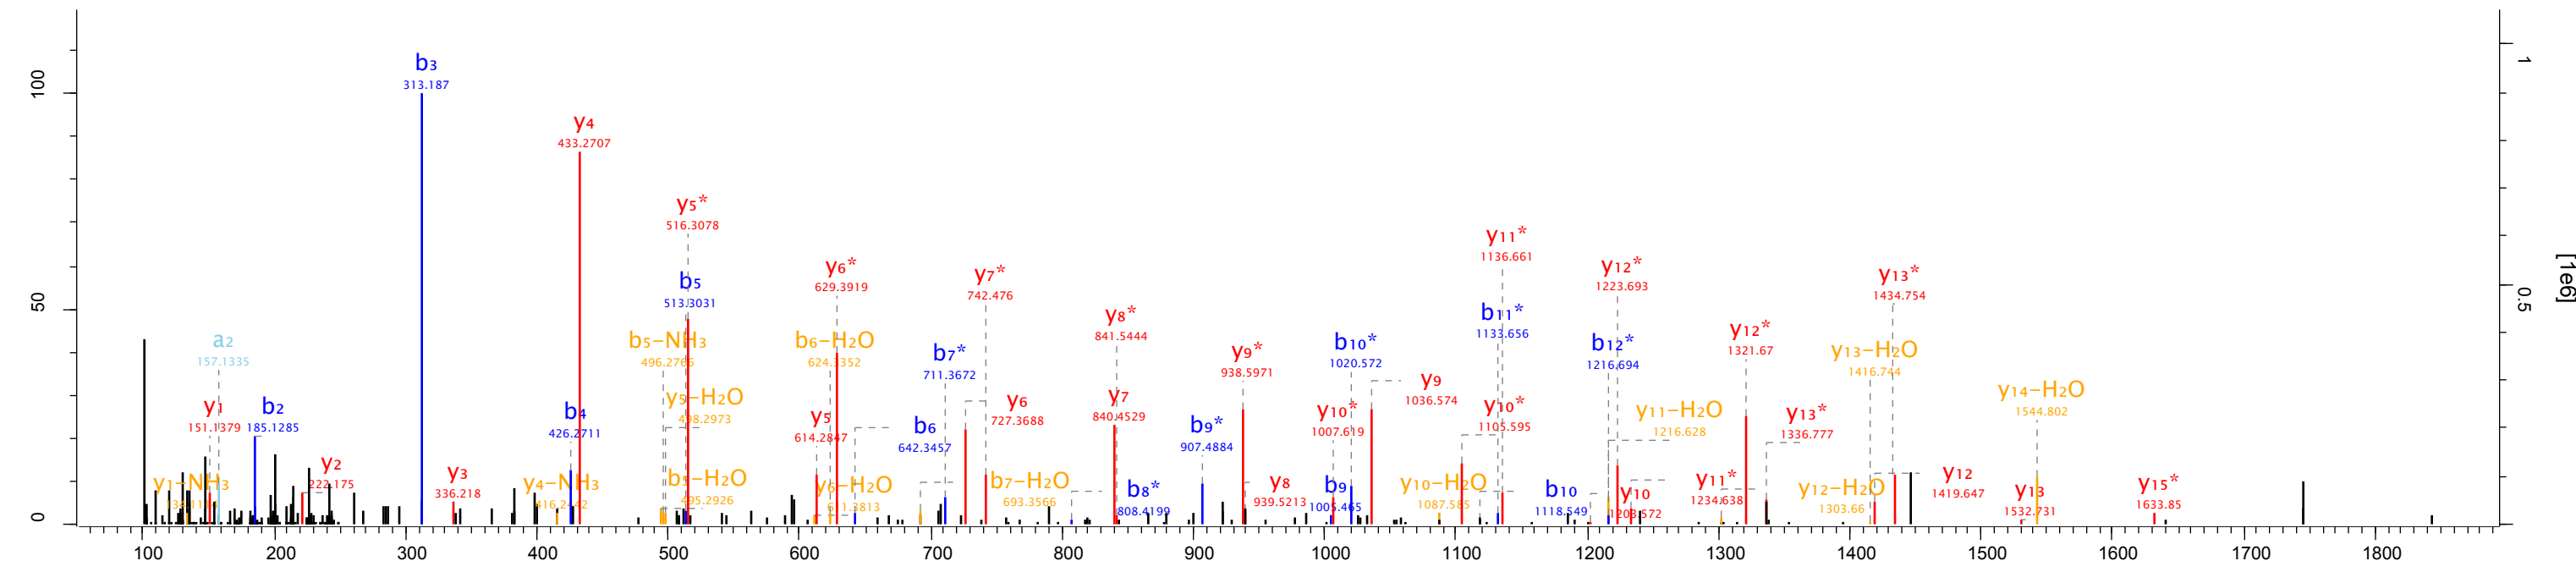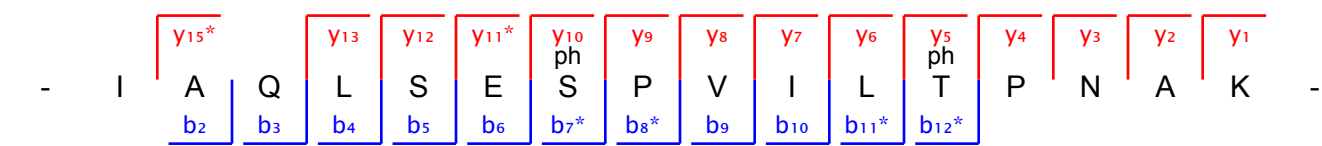

Raw file 20150814\_A375SR\_Phospho\_BR2\_03 Scan 19506 Method FTMS; HCD Score 89.77 m/z 1062.85 Gene names PHACTR4

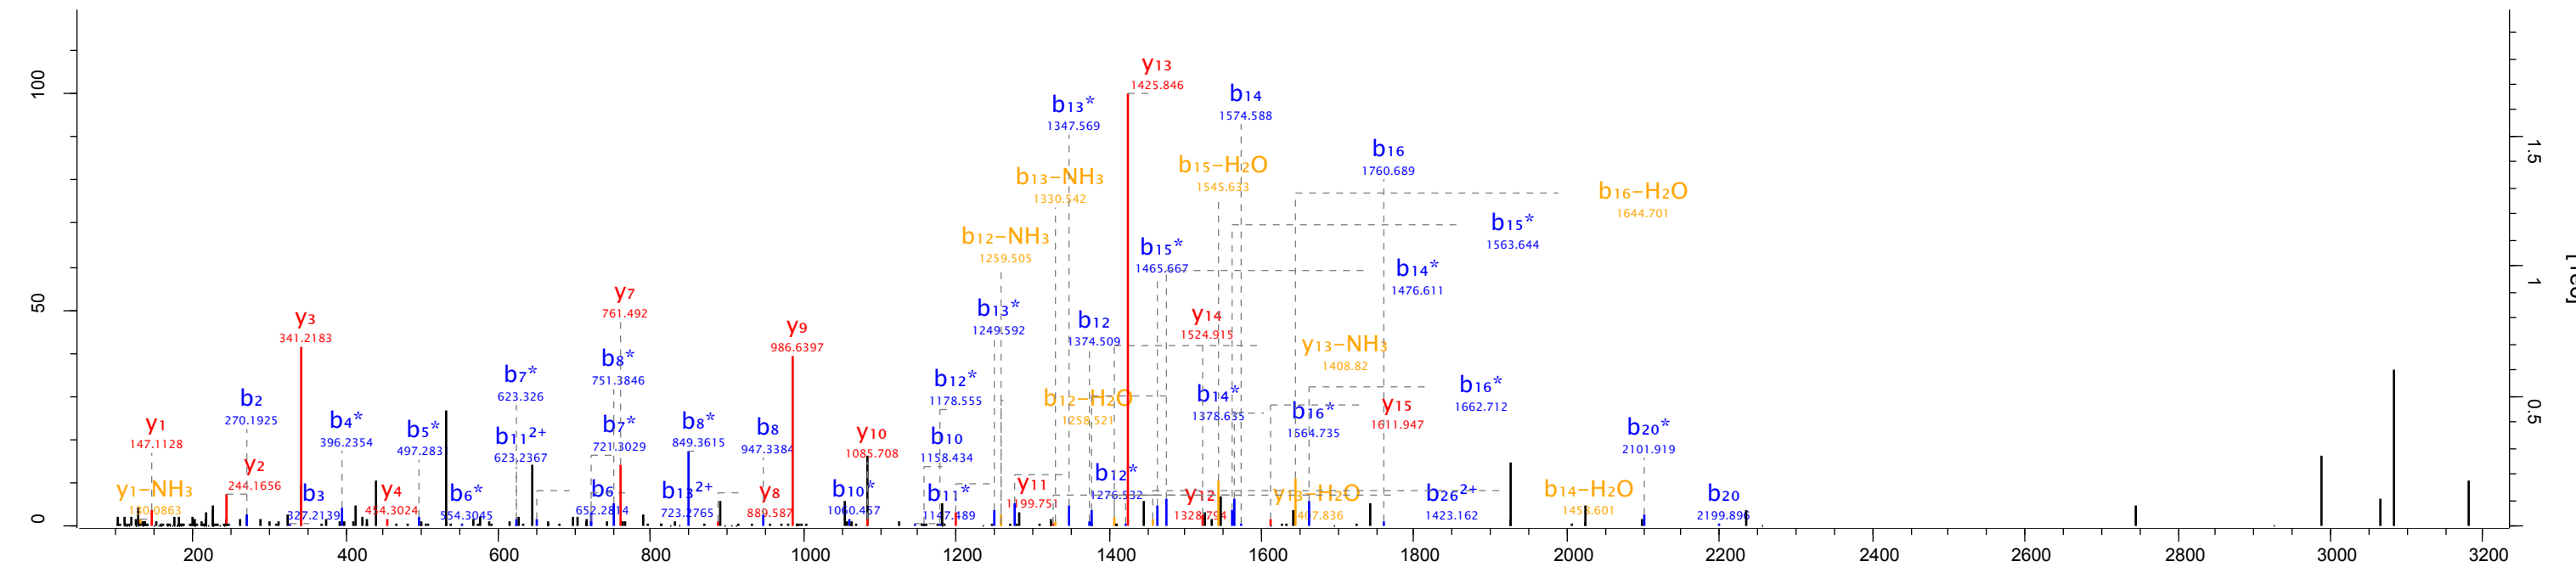

- R L G S T G S Q P N S E A E S V P E N V P K P P L L P P K -

ph ph

b<sub>2</sub> b<sub>3</sub> b<sub>4</sub>\* b<sub>5</sub>\* b<sub>6</sub> b<sub>7</sub>\* b<sub>8</sub> b<sub>10</sub> b<sub>11</sub>\* b<sub>12</sub> b<sub>13</sub>\* b<sub>14</sub> b<sub>15</sub>\* b<sub>16</sub> b<sub>20</sub> b<sub>26</sub><sup>2+</sup> y<sub>1</sub> y<sub>2</sub> y<sub>3</sub> y<sub>4</sub> y<sub>7</sub> y<sub>8</sub> y<sub>9</sub> y<sub>10</sub> y<sub>11</sub> y<sub>12</sub> y<sub>13</sub> y<sub>14</sub> y<sub>15</sub>

Raw file 20150814\_A375SR\_Phospho\_BR2\_03 Scan 19696 Method FTMS; HCD Score 84.13 m/z 1040.98 Gene names FRYL

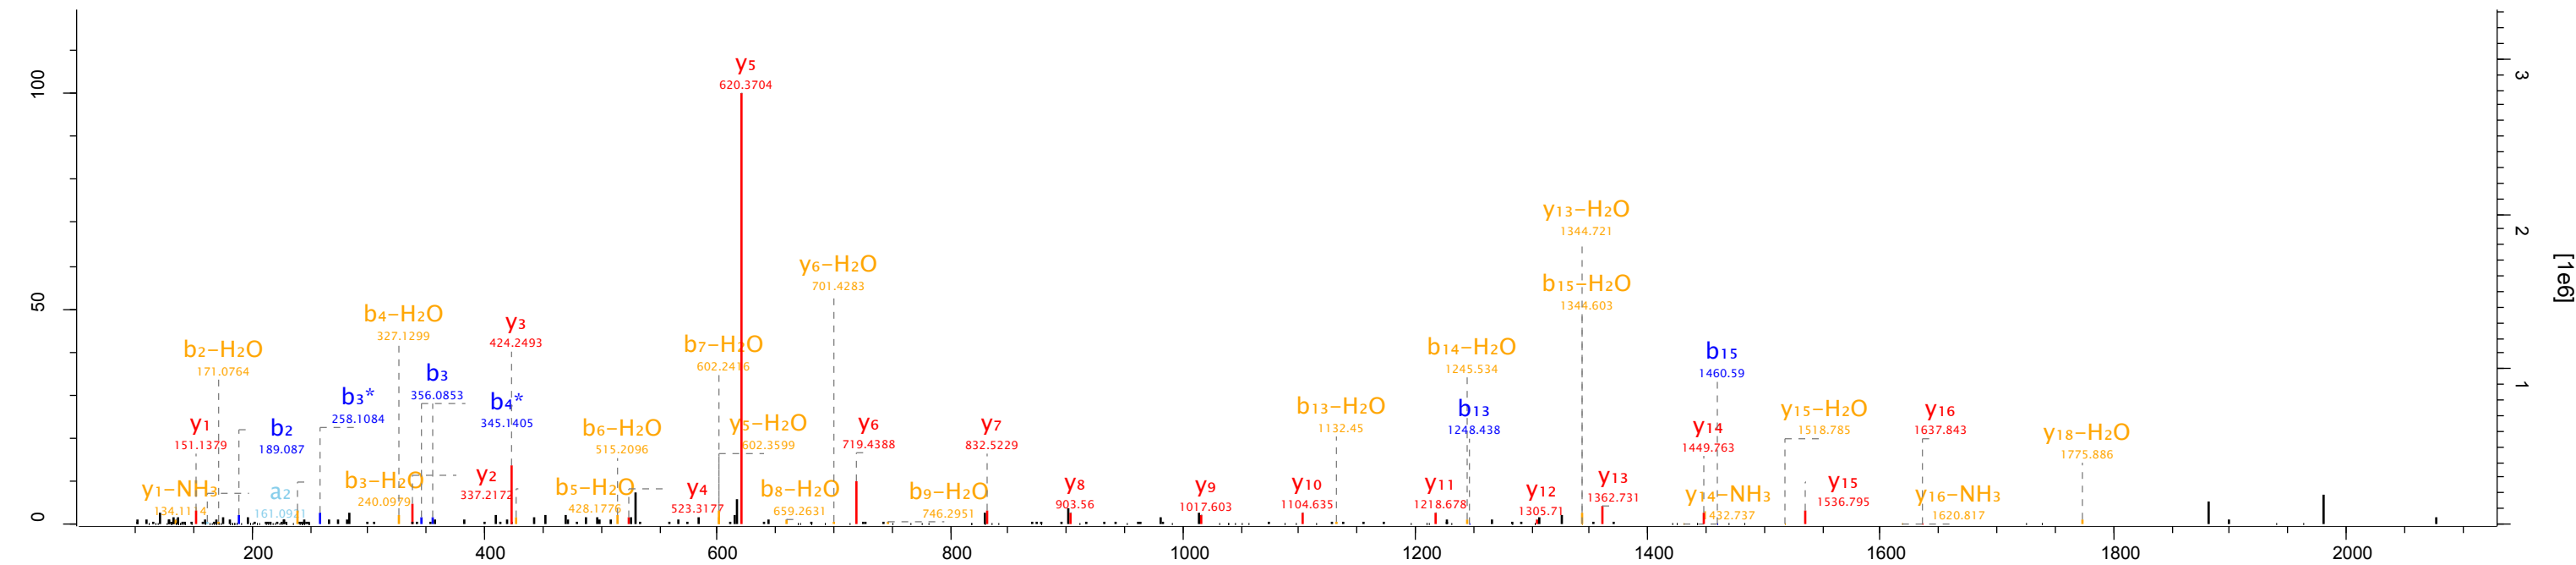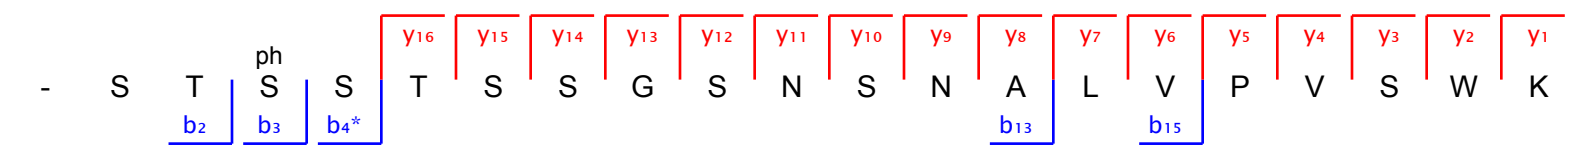

Raw file: 20150814\_A375SR\_Phospho\_BR2\_03  
 Scan: 19756 Method: FTMS; HCD Score: 228.8 m/z: 1074.78 Gene names: LIMA1;TRMT1

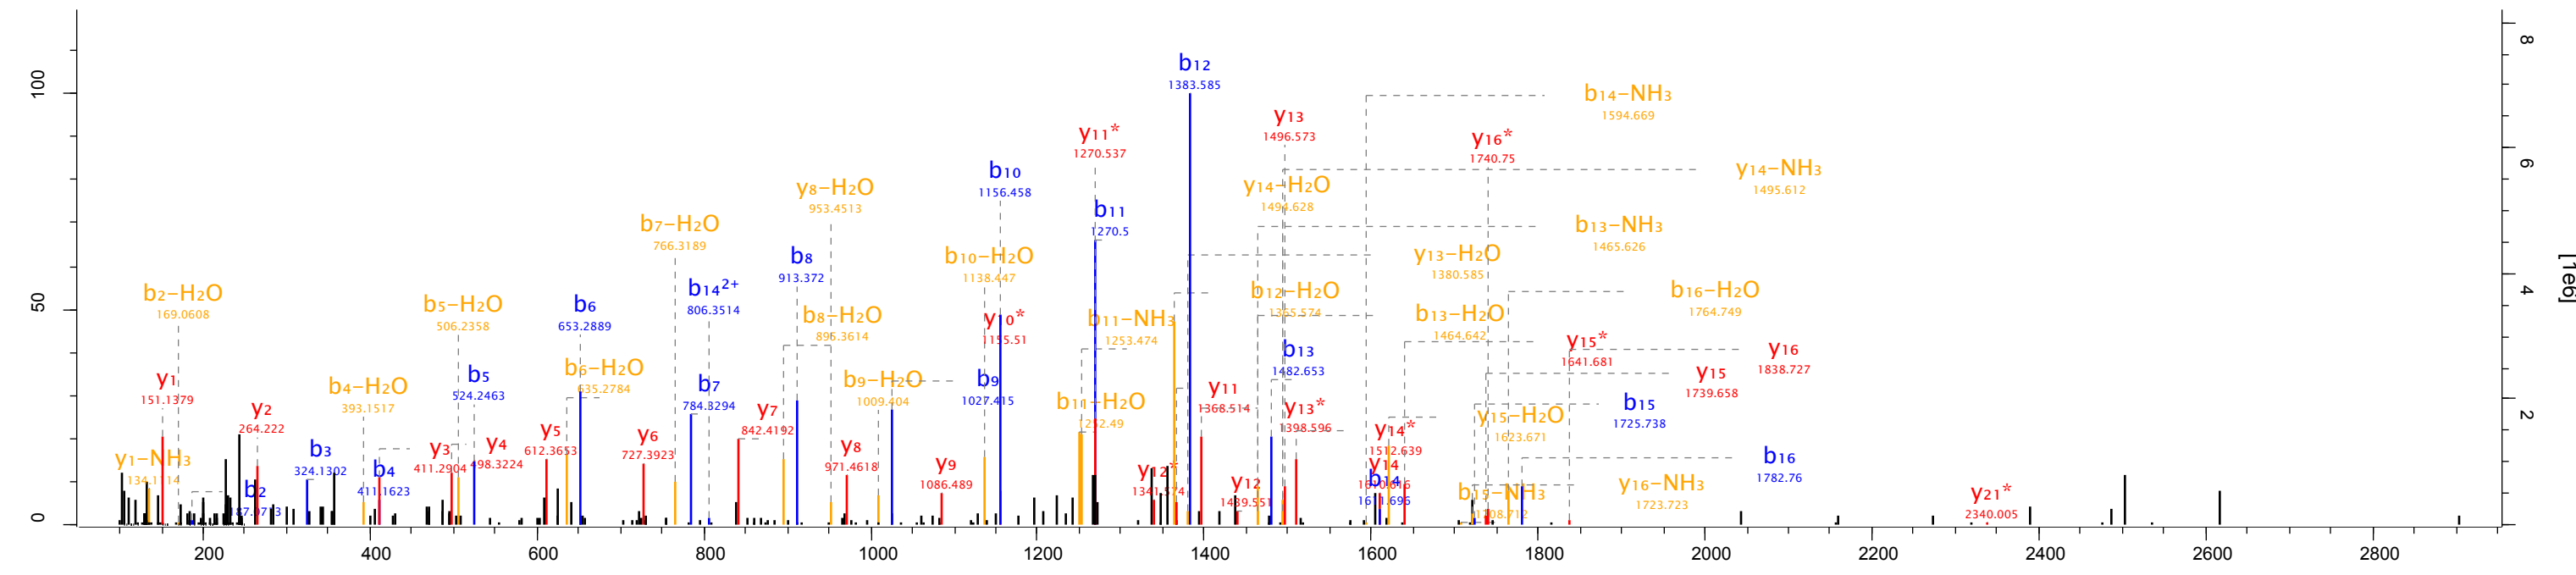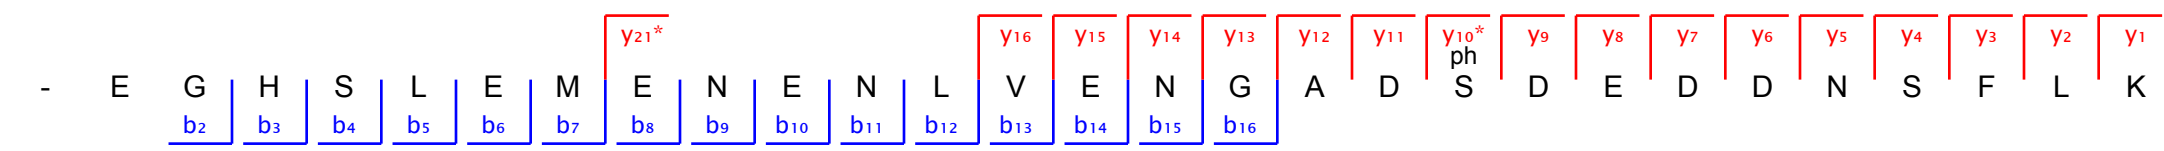

Raw file 20150814\_A375SR\_Phospho\_BR2\_03 Scan 19776 Method FTMS; HCD Score 289.86 m/z 1159.97 Gene names USP9X

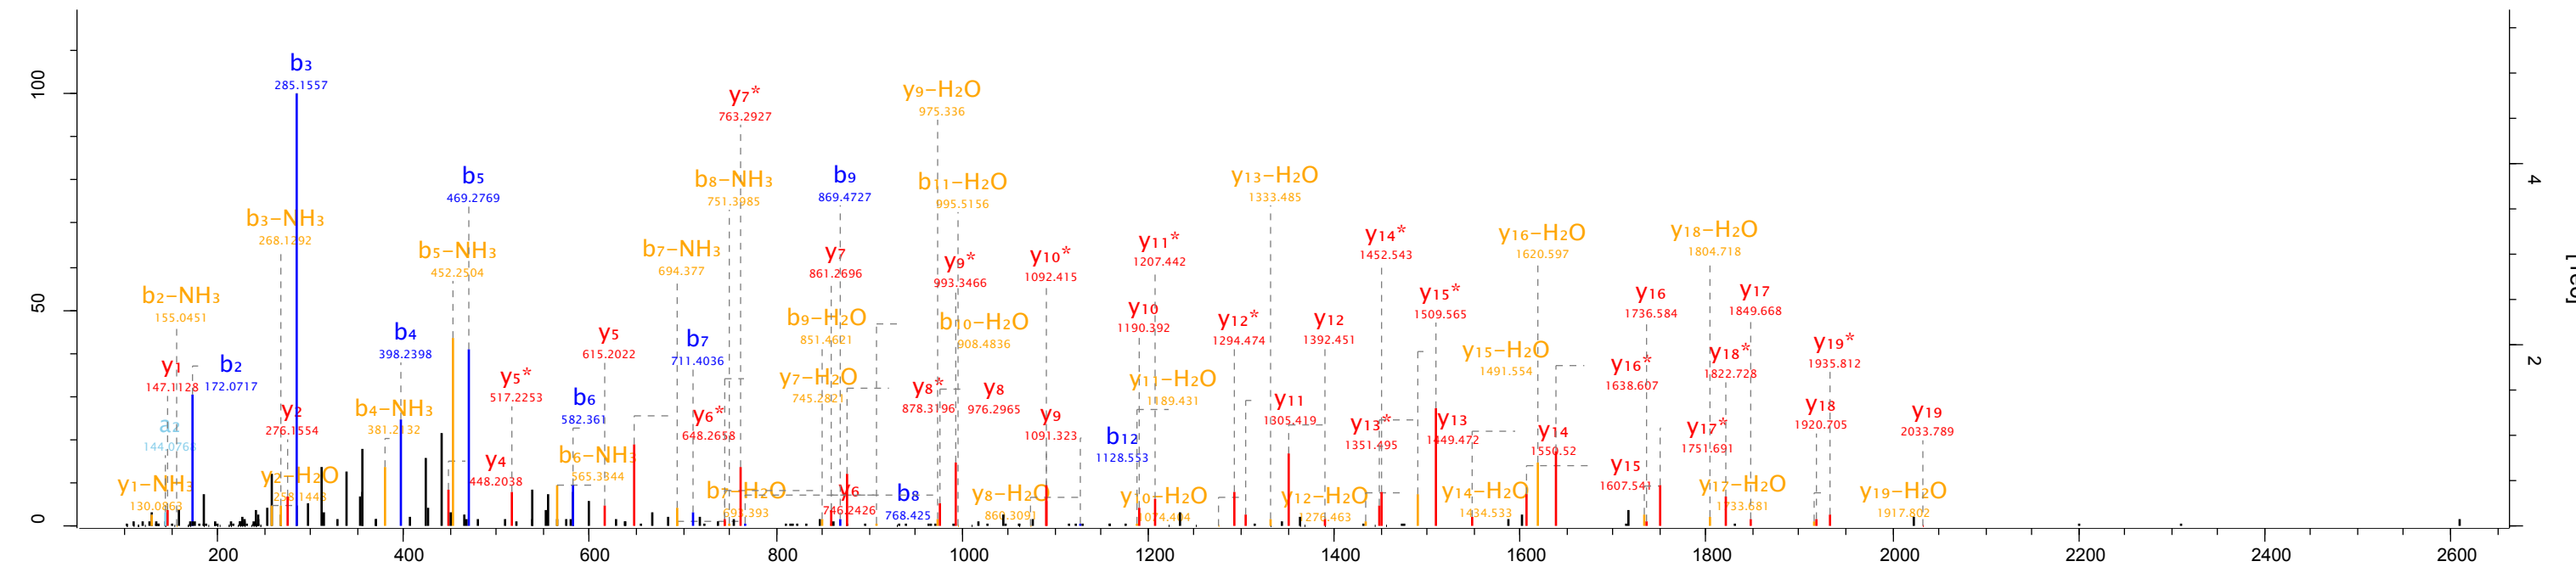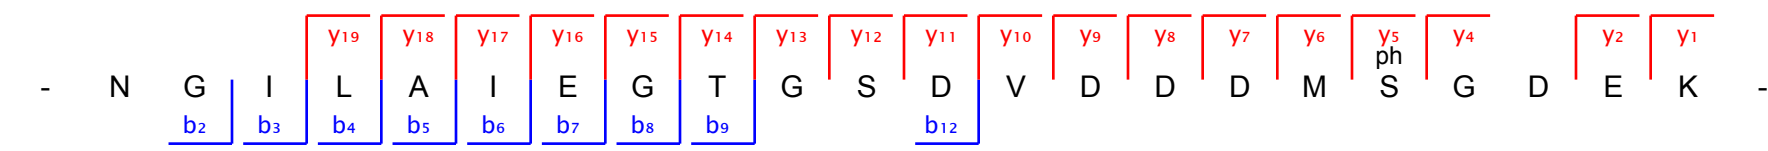

Raw file: 20150814\_A375SR\_Phospho\_BR2\_03  
 Scan: 19876 Method: FTMS; HCD Score: 131.17 m/z: 582.78 Gene names: C5orf30

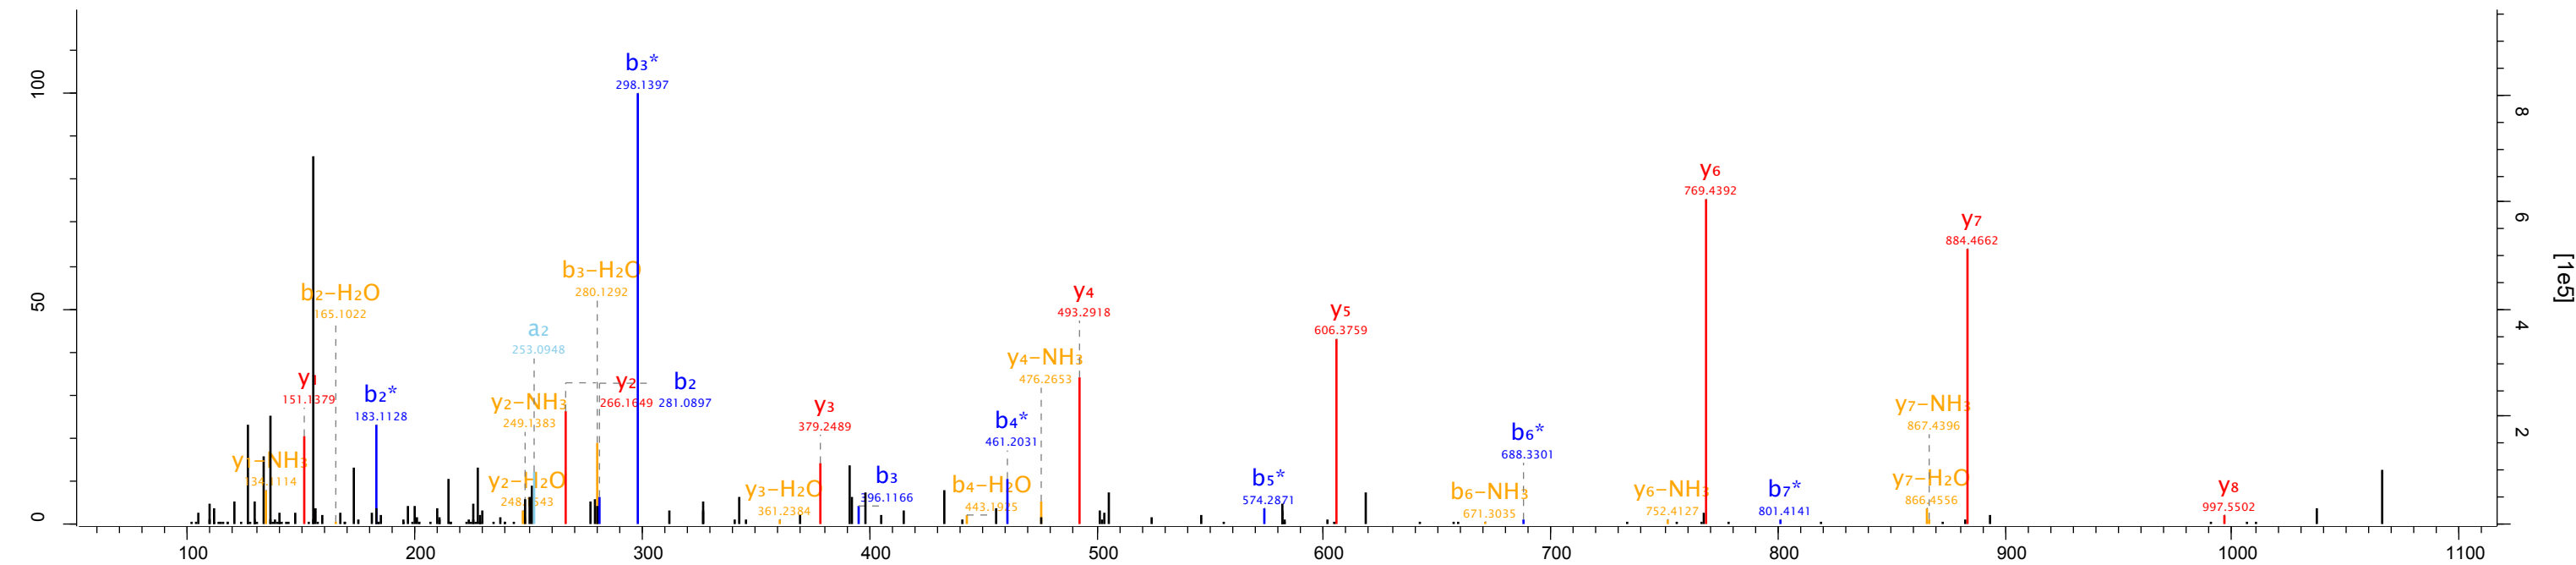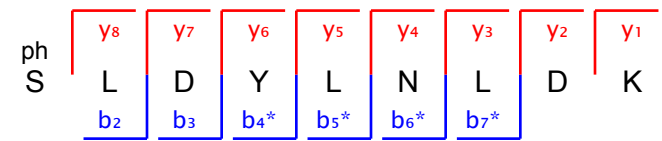

Raw file 20150814\_A375SR\_Phospho\_BR2\_03 Scan 20036 Method FTMS; HCD Score 130.27 m/z 901.35 Gene names FAM129A

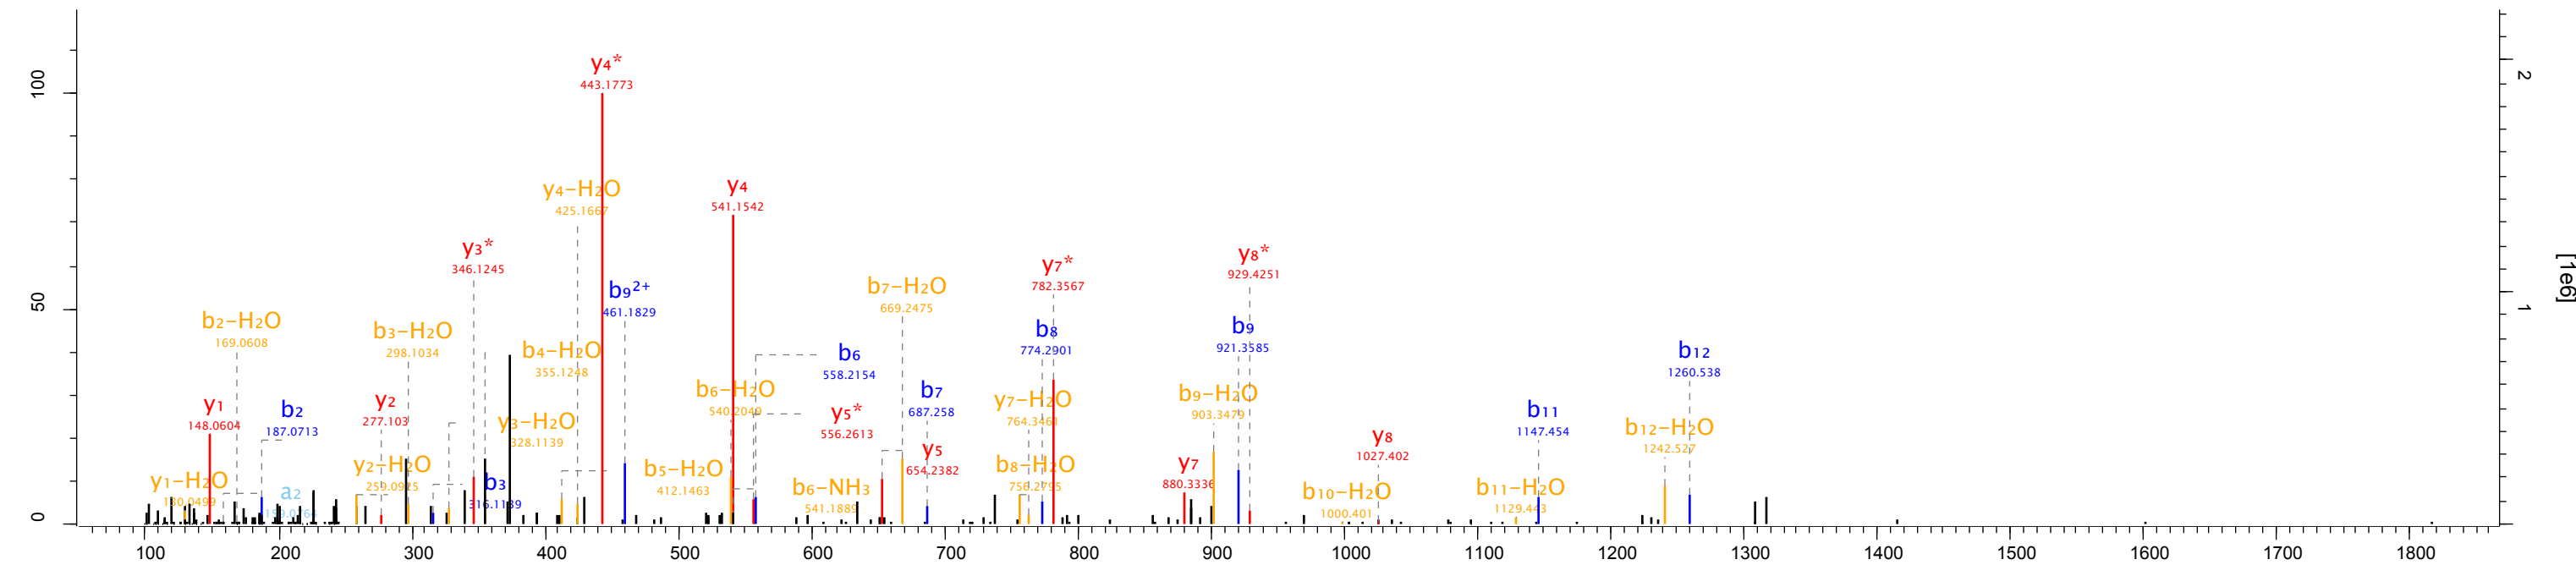

- E G E G G Q E S F P E L P S E E -

Fragmentation mapping (b and y ions) is shown below the sequence:

- b<sub>2</sub> (under G), b<sub>3</sub> (under E)
- b<sub>6</sub> (under Q), b<sub>7</sub> (under E), b<sub>8</sub> (under S), b<sub>9</sub> (under F), b<sub>11</sub> (under E), b<sub>12</sub> (under L)
- y<sub>1</sub> (under E), y<sub>2</sub> (under E), y<sub>3</sub><sup>\*</sup> (under S), y<sub>4</sub> (under F), y<sub>5</sub> (under L), y<sub>7</sub> (under P), y<sub>8</sub> (under F)

Raw file  
20150814\_A375SR\_Phospho\_BR2\_03

Scan 20156 Method FTMS; HCD Score 205.84 m/z 997.72 Gene names EIF4EBP1

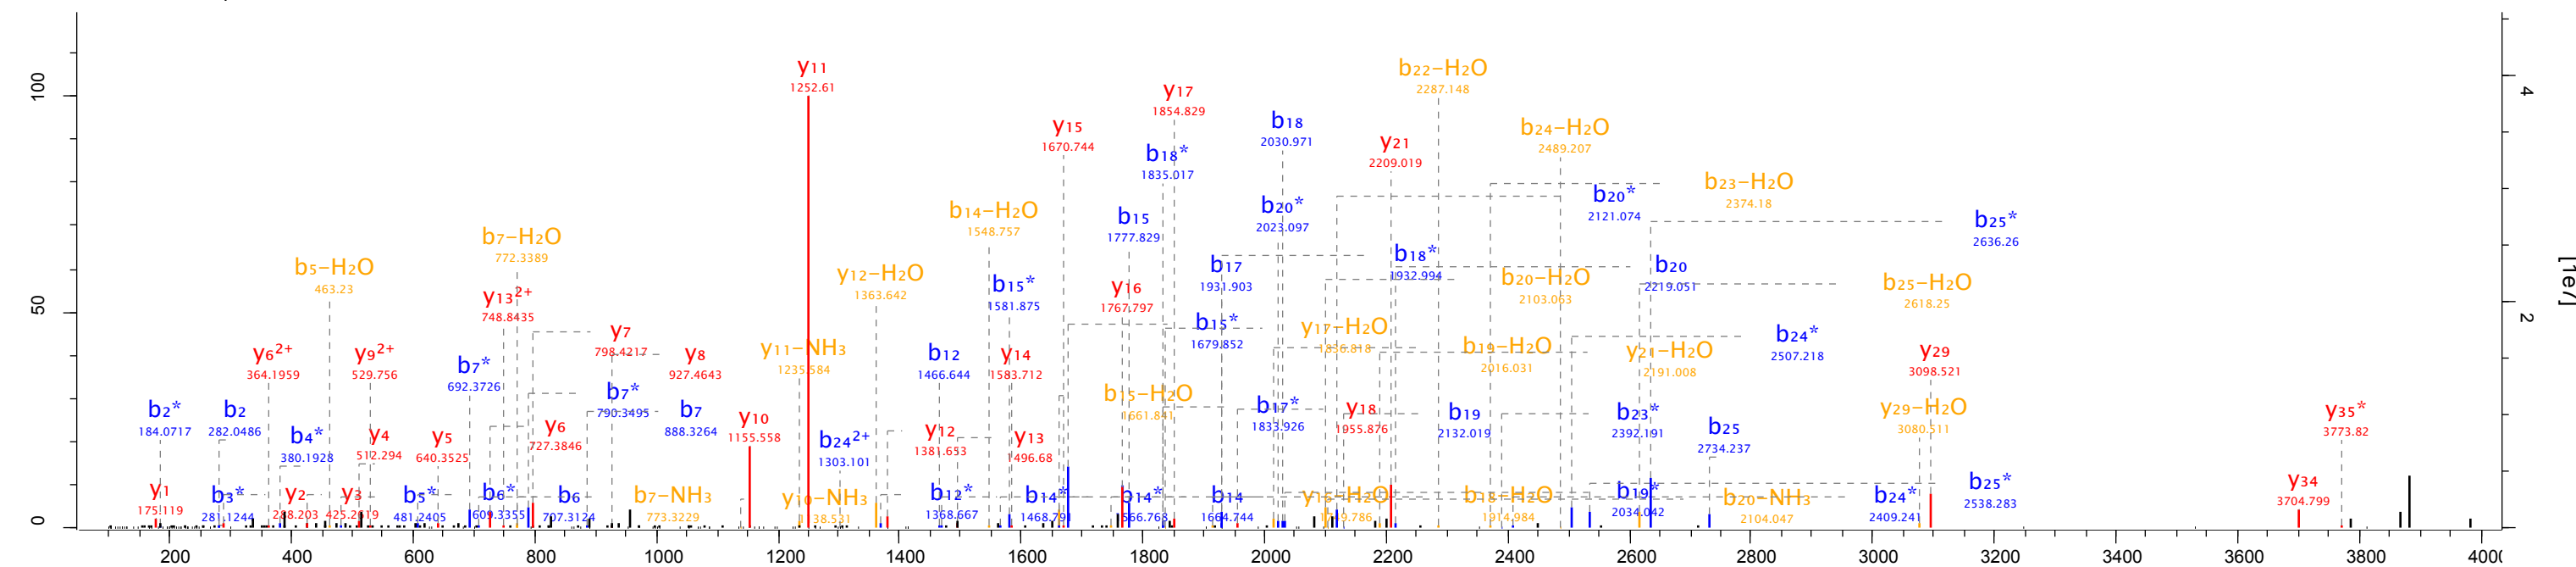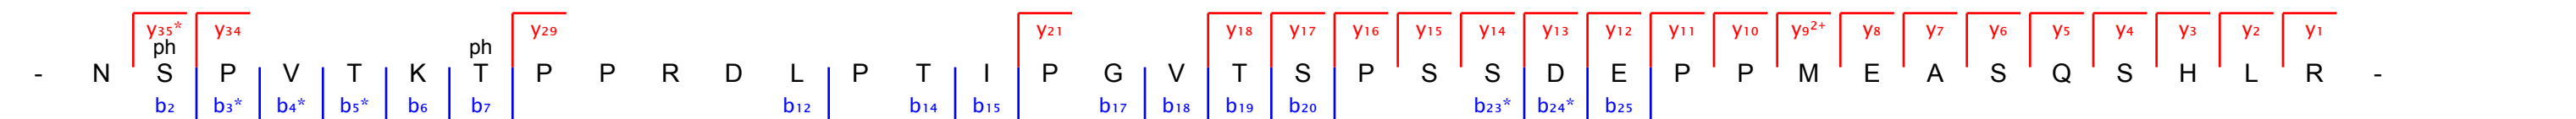



Raw file: 20150814\_A375SR\_Phospho\_BR2\_03  
 Scan: 20316  
 Method: FTMS; HCD  
 Score: 82.86  
 m/z: 1049.46  
 Gene names: MAP1B

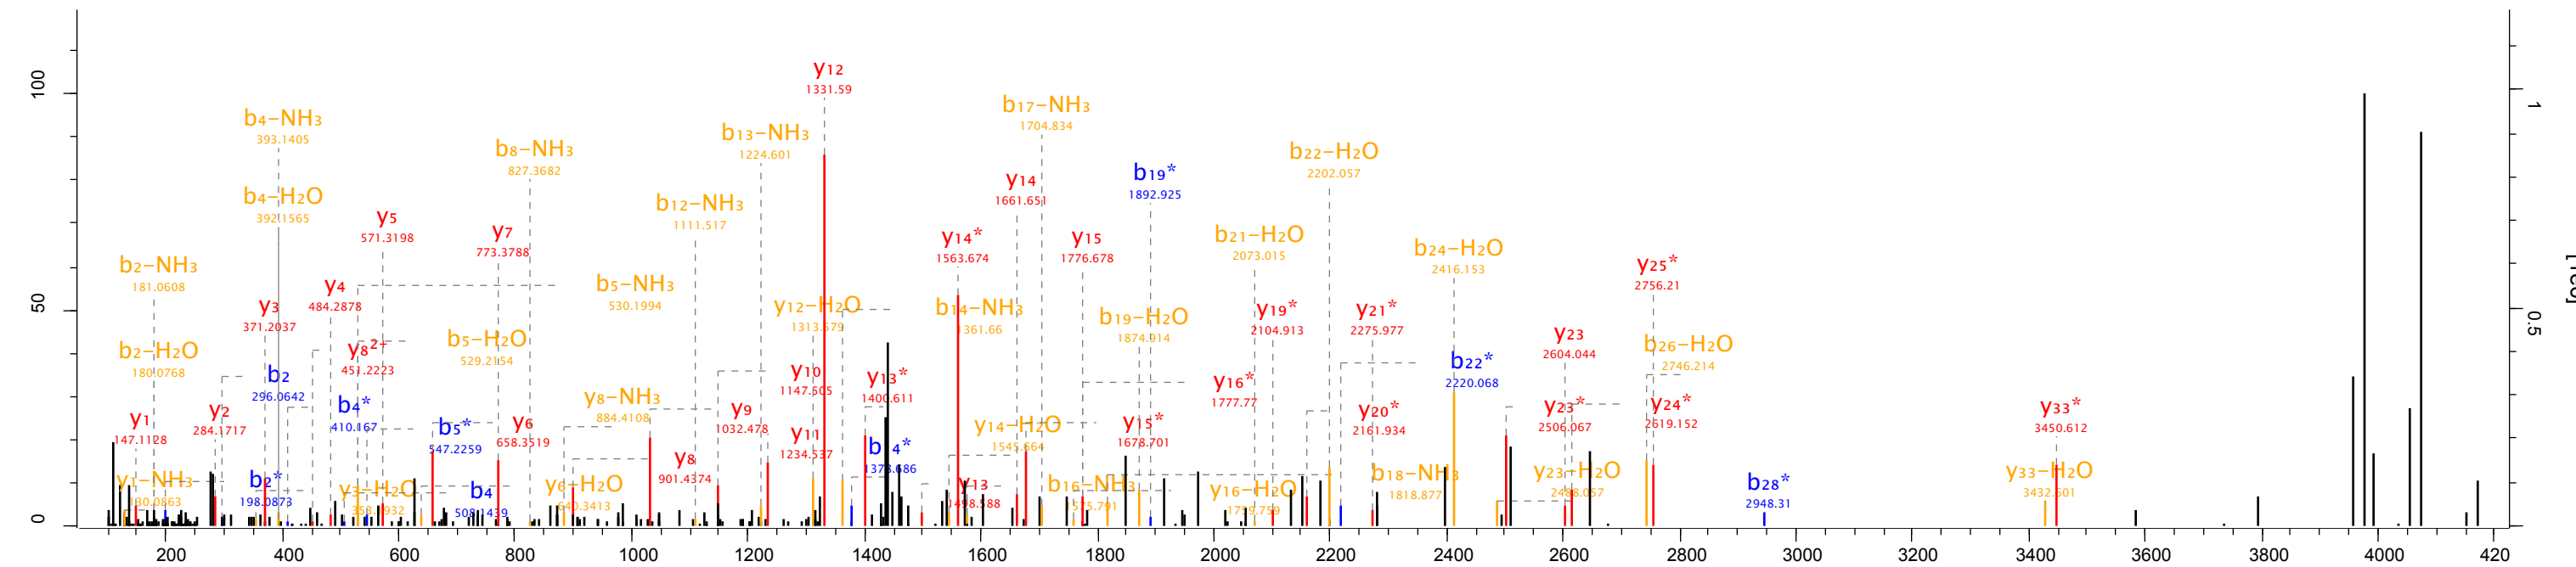

Protein sequence: - Q S P D H P T V G A G V L H I T E N G P T E V D Y S P S D M Q D S S L S H K

Fragmentation sites (b and y ions) are indicated by brackets below the sequence:

- b<sub>2</sub>: S
- b<sub>4</sub>: D
- b<sub>5</sub>\*: H
- b<sub>14</sub>\*: H
- b<sub>19</sub>\*: G
- b<sub>22</sub>\*: E
- b<sub>28</sub>\*: S
- y<sub>1</sub>: K
- y<sub>2</sub>: H
- y<sub>3</sub>: S
- y<sub>4</sub>: L
- y<sub>5</sub>: S
- y<sub>6</sub>: S
- y<sub>7</sub>: D
- y<sub>8</sub>: Q
- y<sub>9</sub>: M
- y<sub>10</sub>: D
- y<sub>11</sub>: S
- y<sub>12</sub>: P
- y<sub>13</sub>: S
- y<sub>14</sub>: Y
- y<sub>15</sub>: D
- y<sub>16</sub>\*: V
- y<sub>19</sub>\*: P
- y<sub>20</sub>\*: G
- y<sub>21</sub>\*: N
- y<sub>23</sub>: T
- y<sub>24</sub>\*: I
- y<sub>25</sub>\*: H
- y<sub>33</sub>\*: P

Raw file: 20150814\_A375SR\_Phospho\_BR2\_03  
 Scan: 20686 Method: FTMS; HCD Score: 165.17 m/z: 698.69 Gene names: CTTNBP2NL

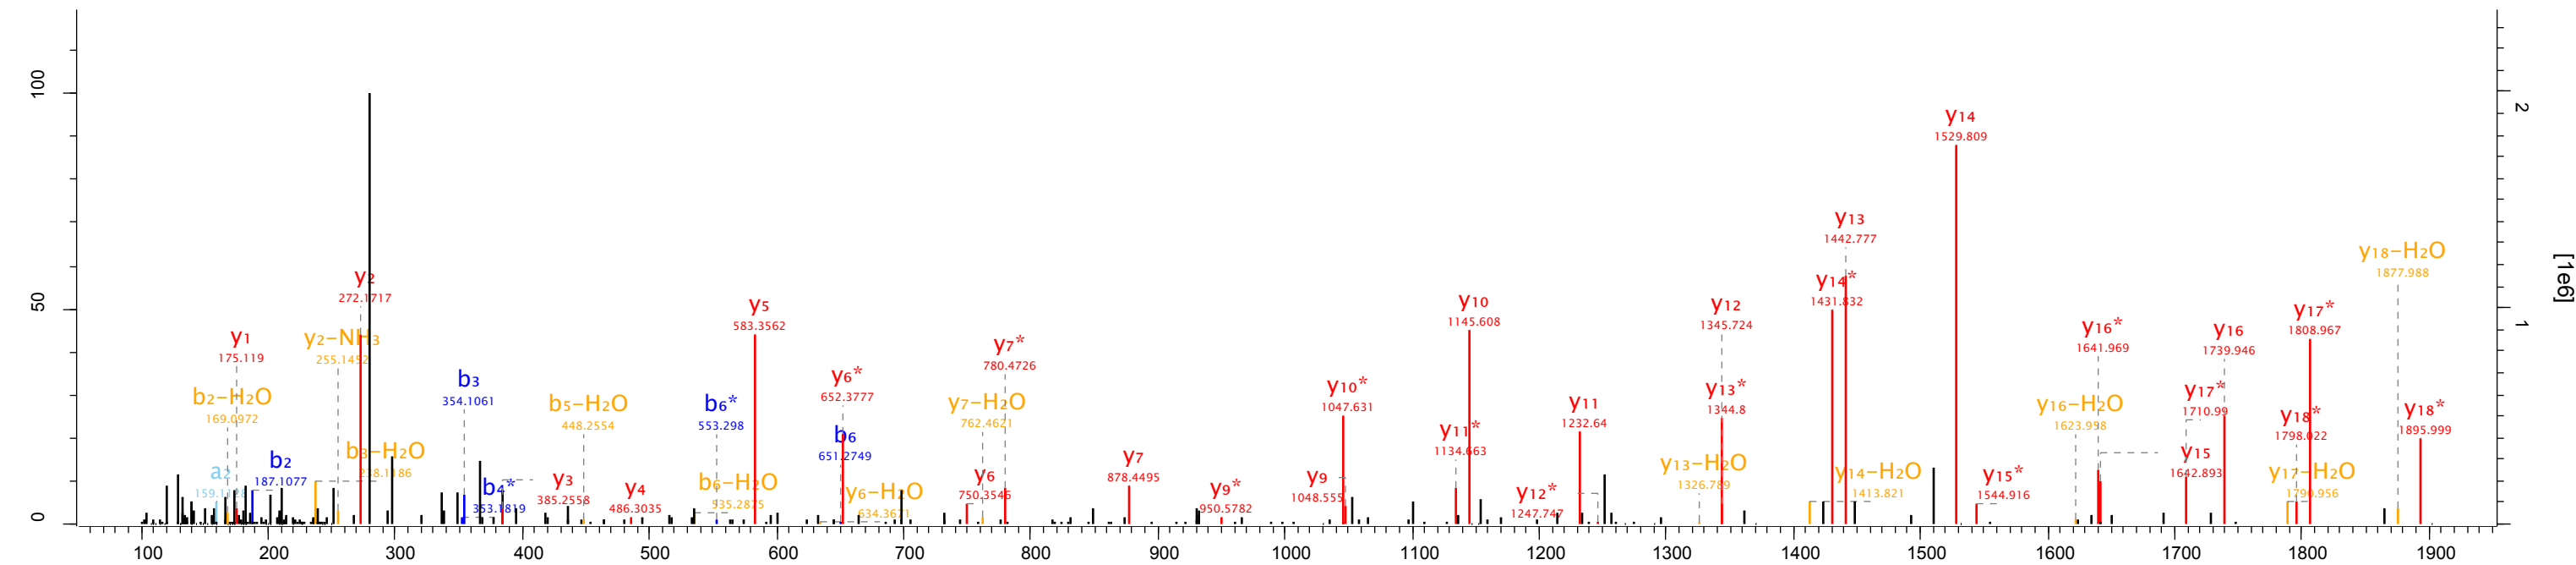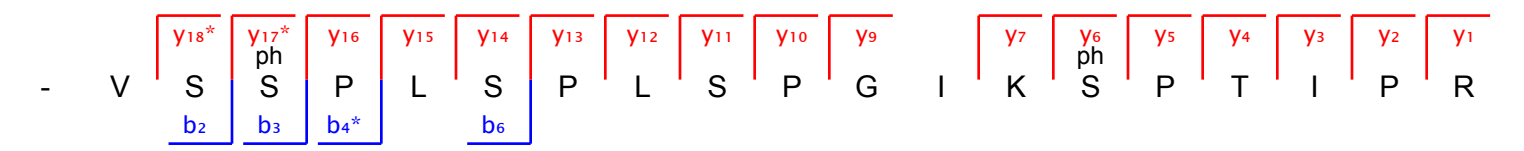

Raw file 20150814\_A375SR\_Phospho\_BR2\_03 Scan 20876 Method FTMS; HCD Score 173.54 m/z 973.17 Gene names AHNAK

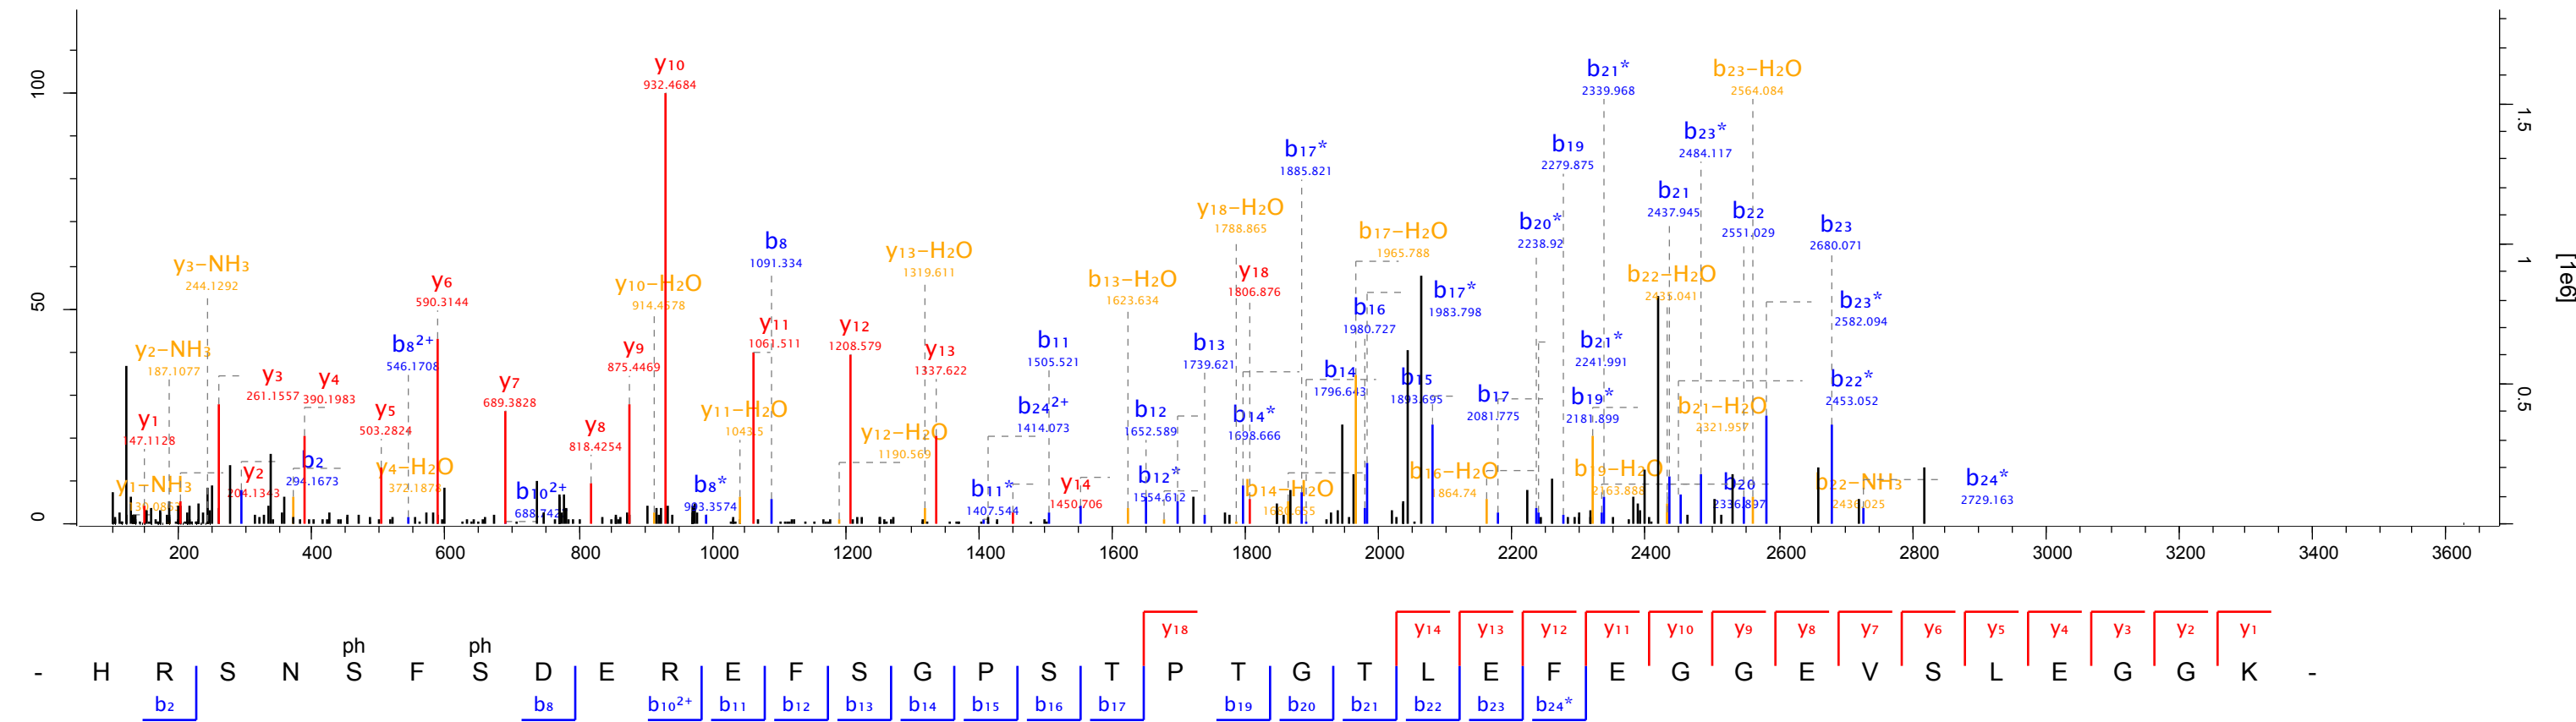

Raw file: 20150814\_A375SR\_Phospho\_BR2\_03  
 Scan: 21066 Method: FTMS; HCD Score: 80.98 m/z: 1229.01 Gene names: SENP6

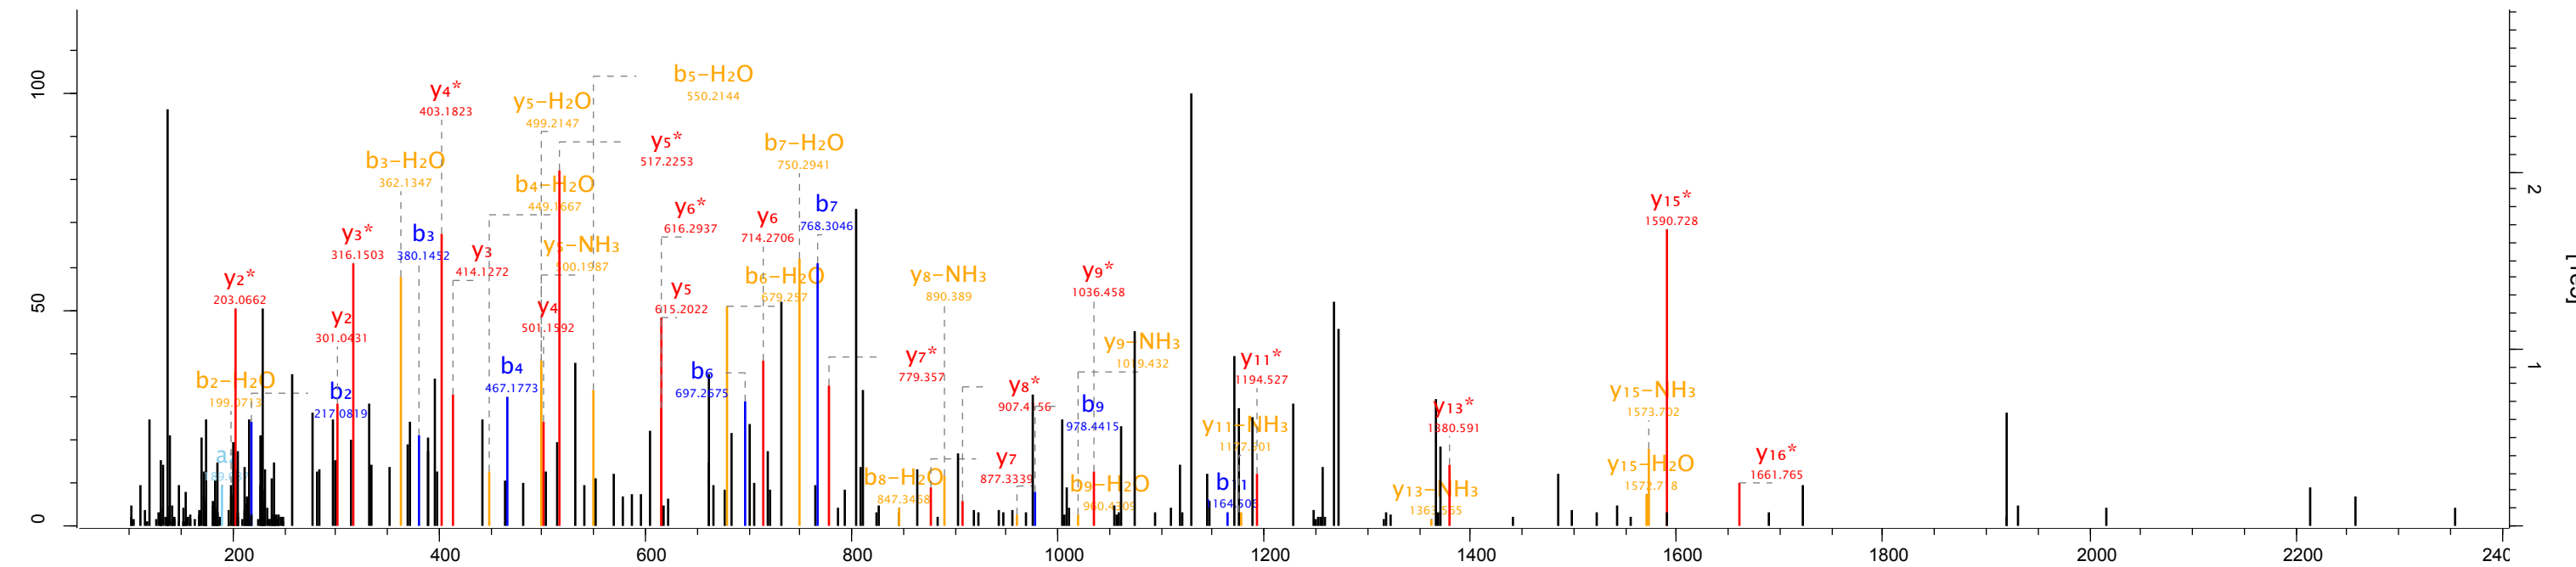

- D T Y S T E A P L G E G T E Q Y V N S I S D -  
 b<sub>2</sub> b<sub>3</sub> b<sub>4</sub> b<sub>6</sub> b<sub>7</sub> b<sub>9</sub> b<sub>11</sub> y<sub>16</sub>\* y<sub>15</sub>\* y<sub>13</sub>\* y<sub>11</sub>\* y<sub>9</sub>\* y<sub>8</sub>\* y<sub>7</sub> y<sub>6</sub> y<sub>5</sub> y<sub>4</sub> y<sub>3</sub> y<sub>2</sub> ph

Raw file 20150814\_A375SR\_Phospho\_BR2\_03 Scan 21776 Method FTMS; HCD Score 132.26 m/z 1372.63 Gene names DDHD1

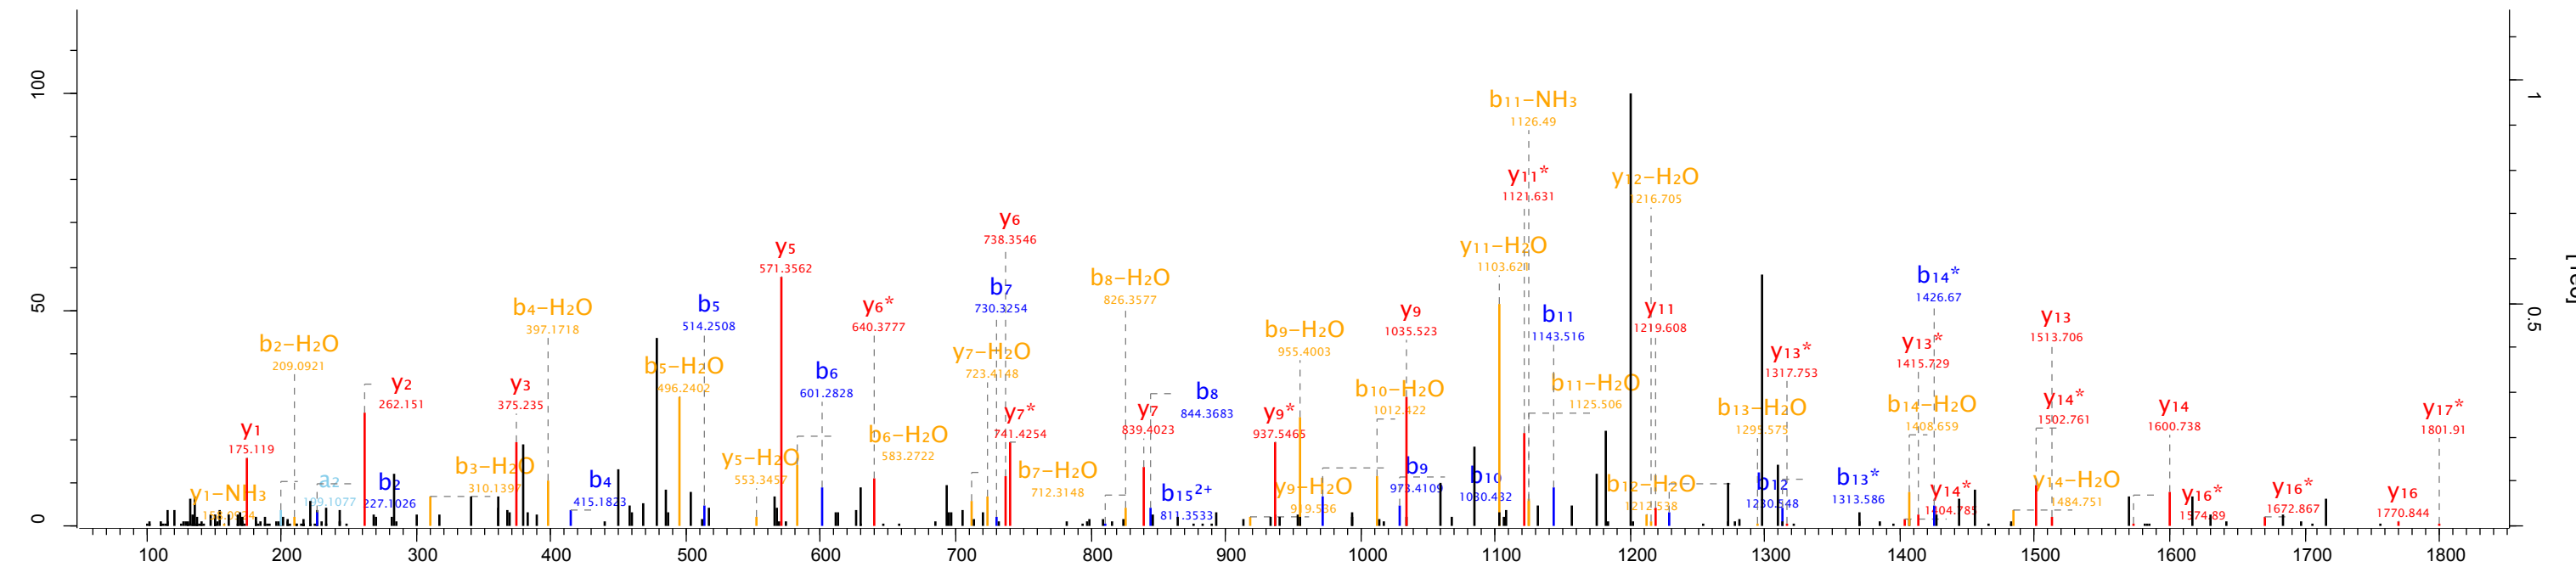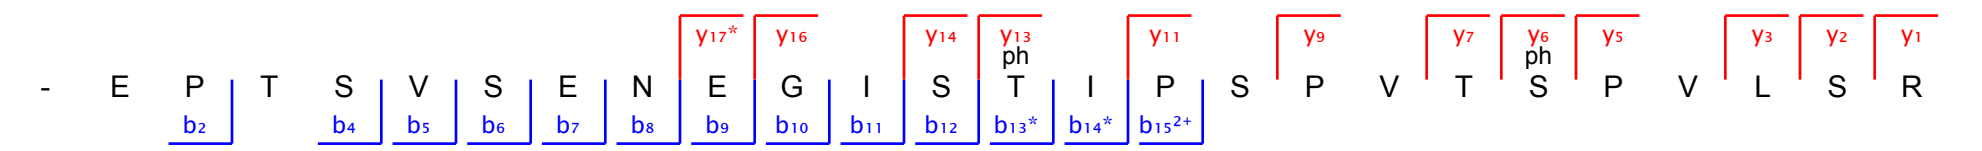

Raw file 20150814\_A375SR\_Phospho\_BR2\_03 Scan 21906 Method FTMS; HCD Score 271.72 m/z 1196.01 Gene names ARMC10

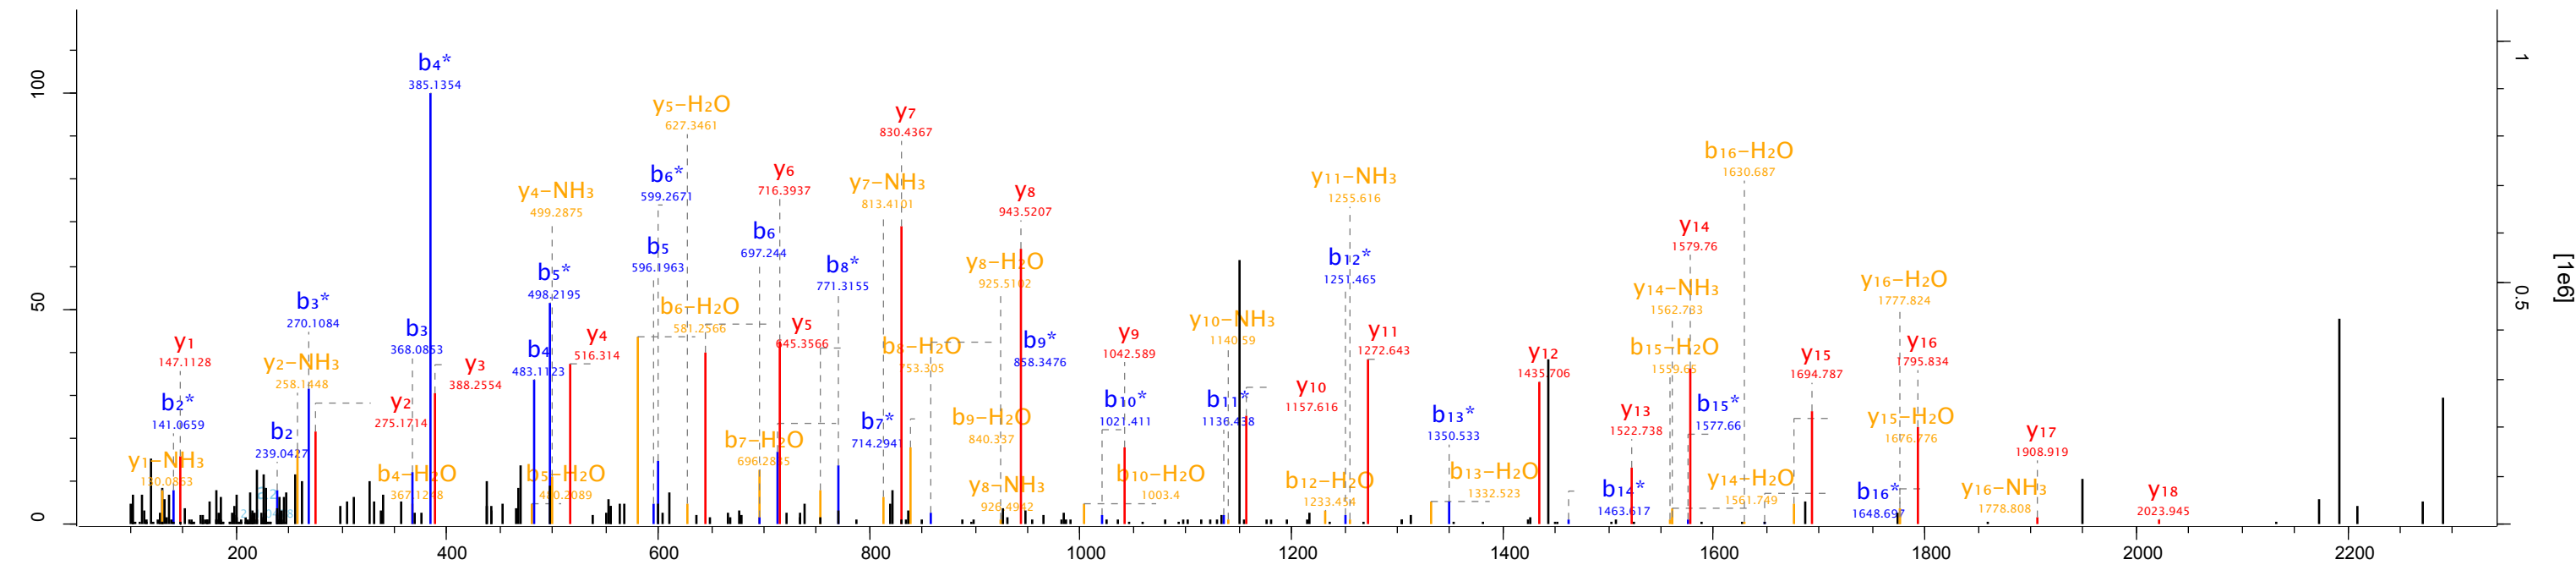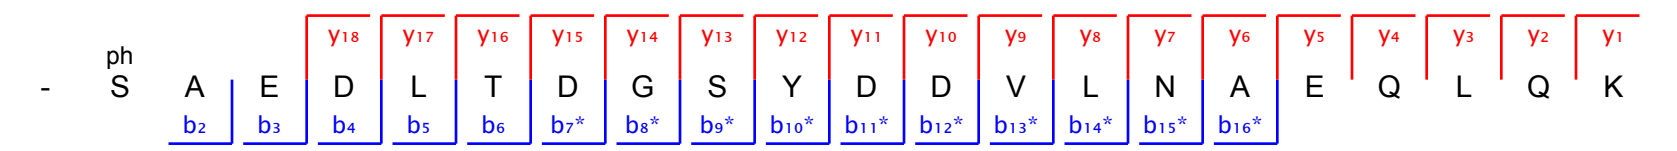

Raw file 20150814\_A375SR\_Phospho\_BR2\_03 Scan 22026 Method FTMS; HCD Score 202.97 m/z 907.43 Gene names FAM122A

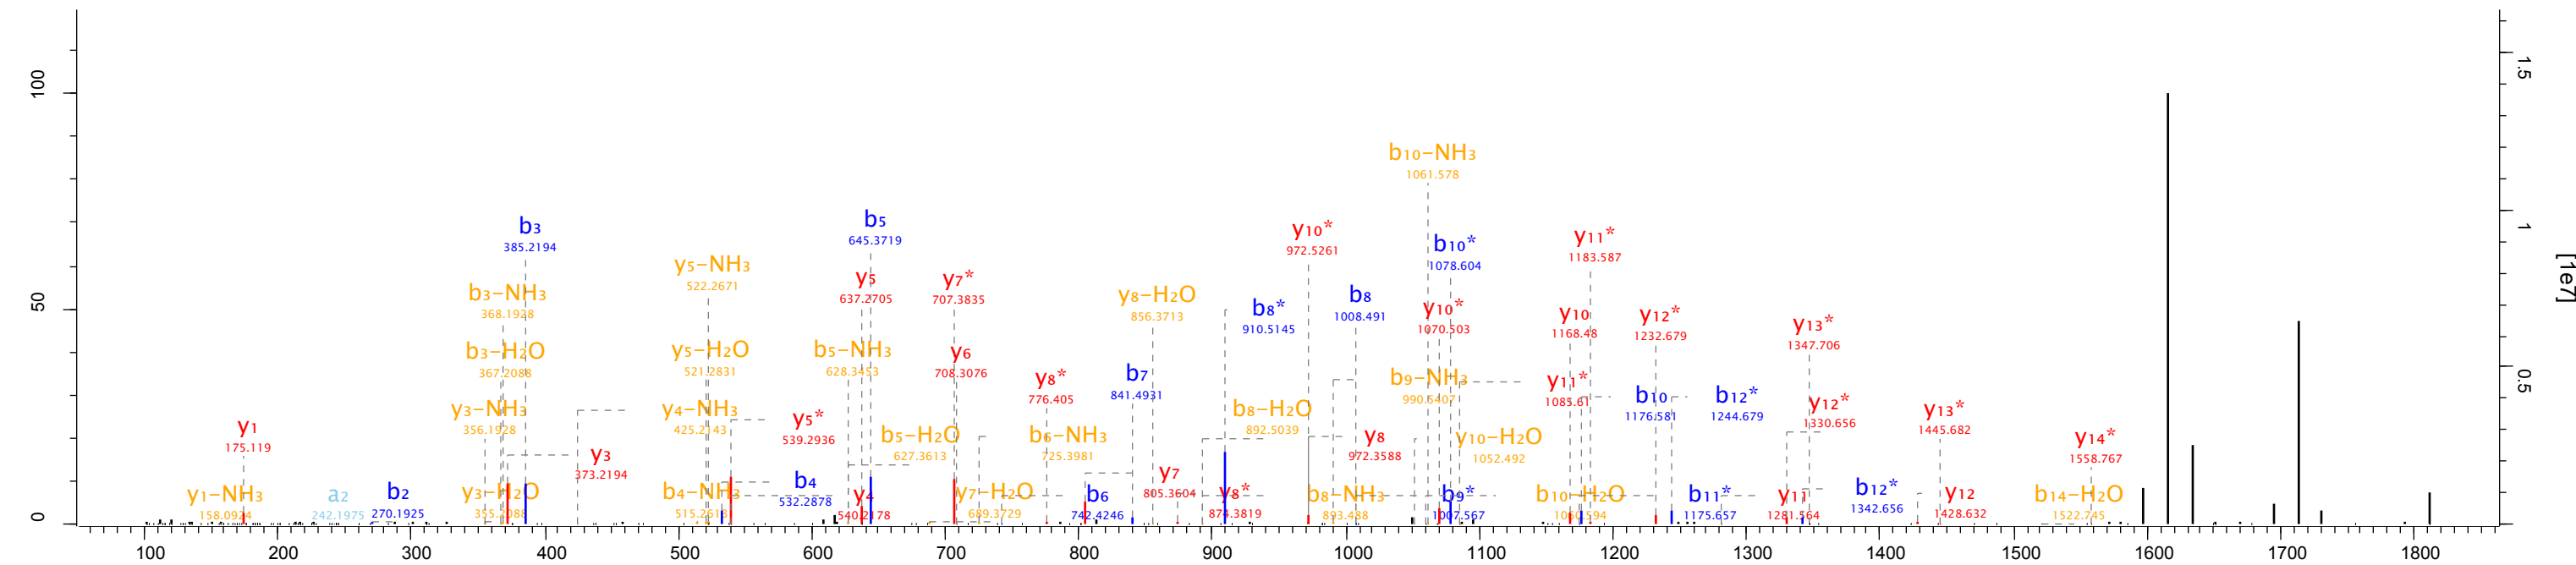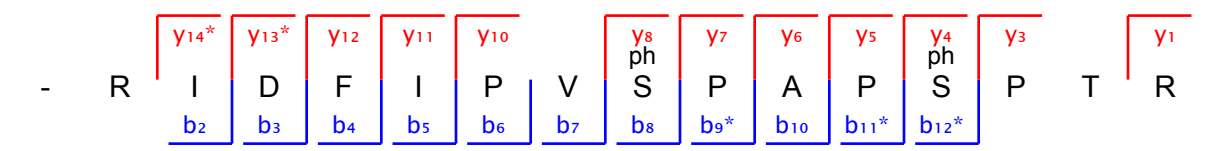

Raw file: 20150814\_A375SR\_Phospho\_BR2\_03  
 Scan: 22286 Method: FTMS; HCD Score: 205.98 m/z: 746.81 Gene names: ARFGAP2

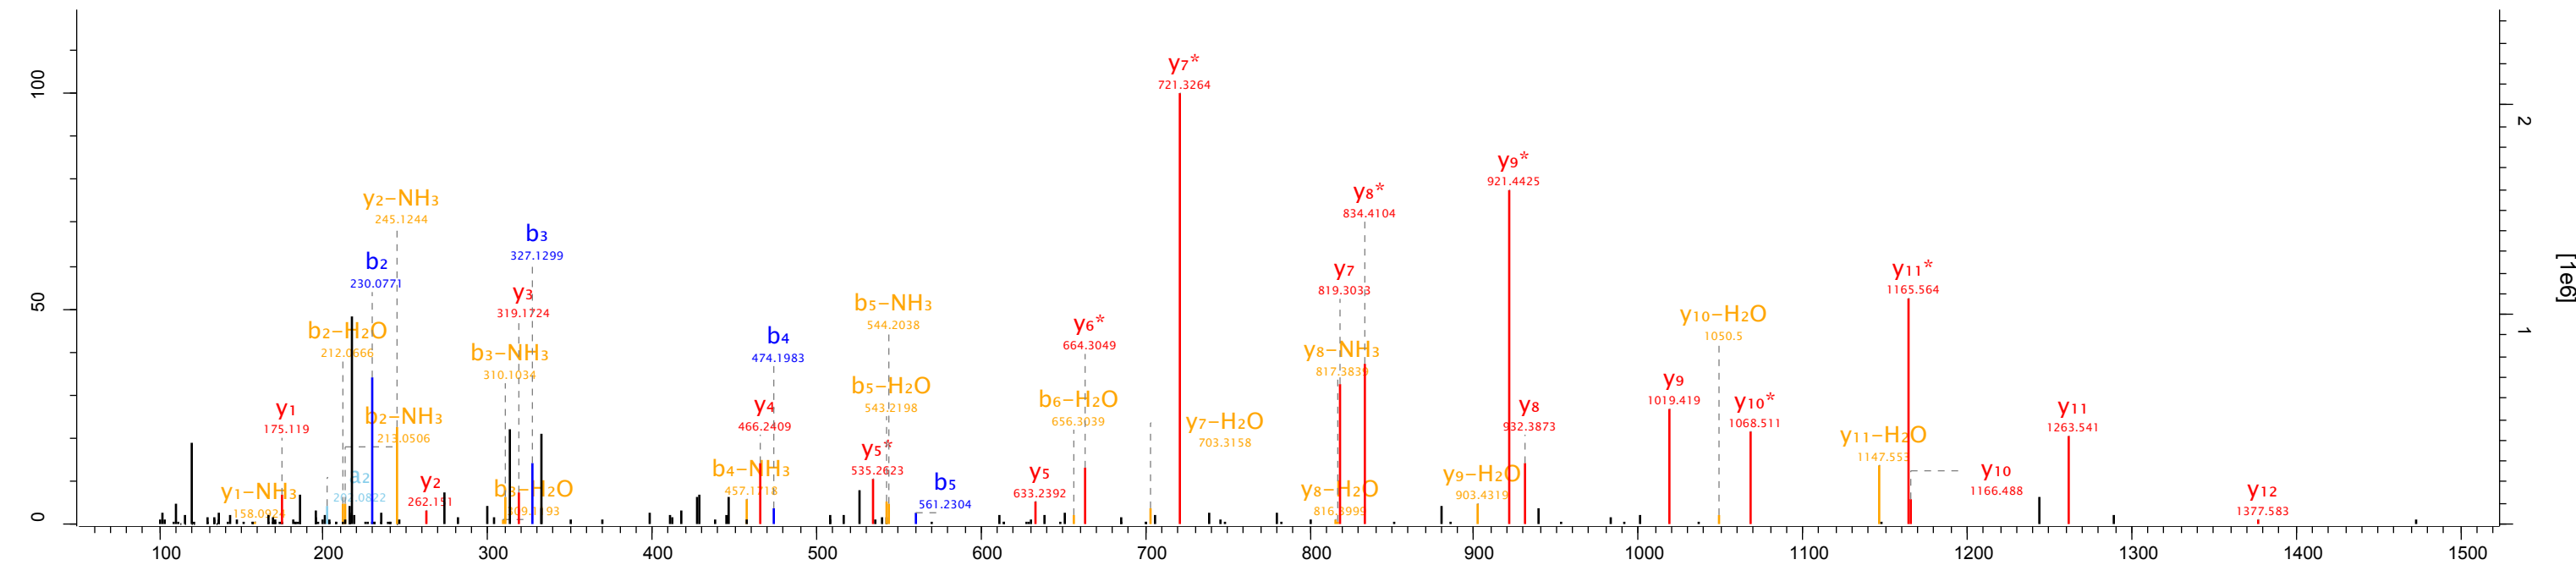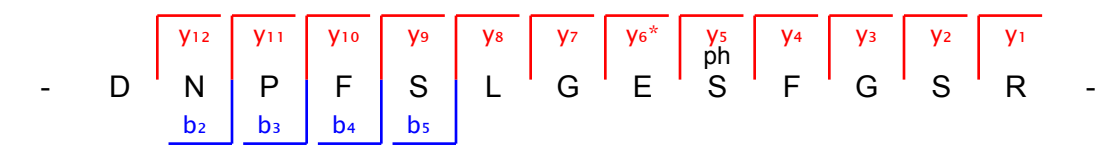



Raw file  
 20150814\_A375SR\_Phospho\_BR2\_03  
 Scan 22556 Method FTMS; HCD Score 158.52 m/z 971.4 Gene names HELZ

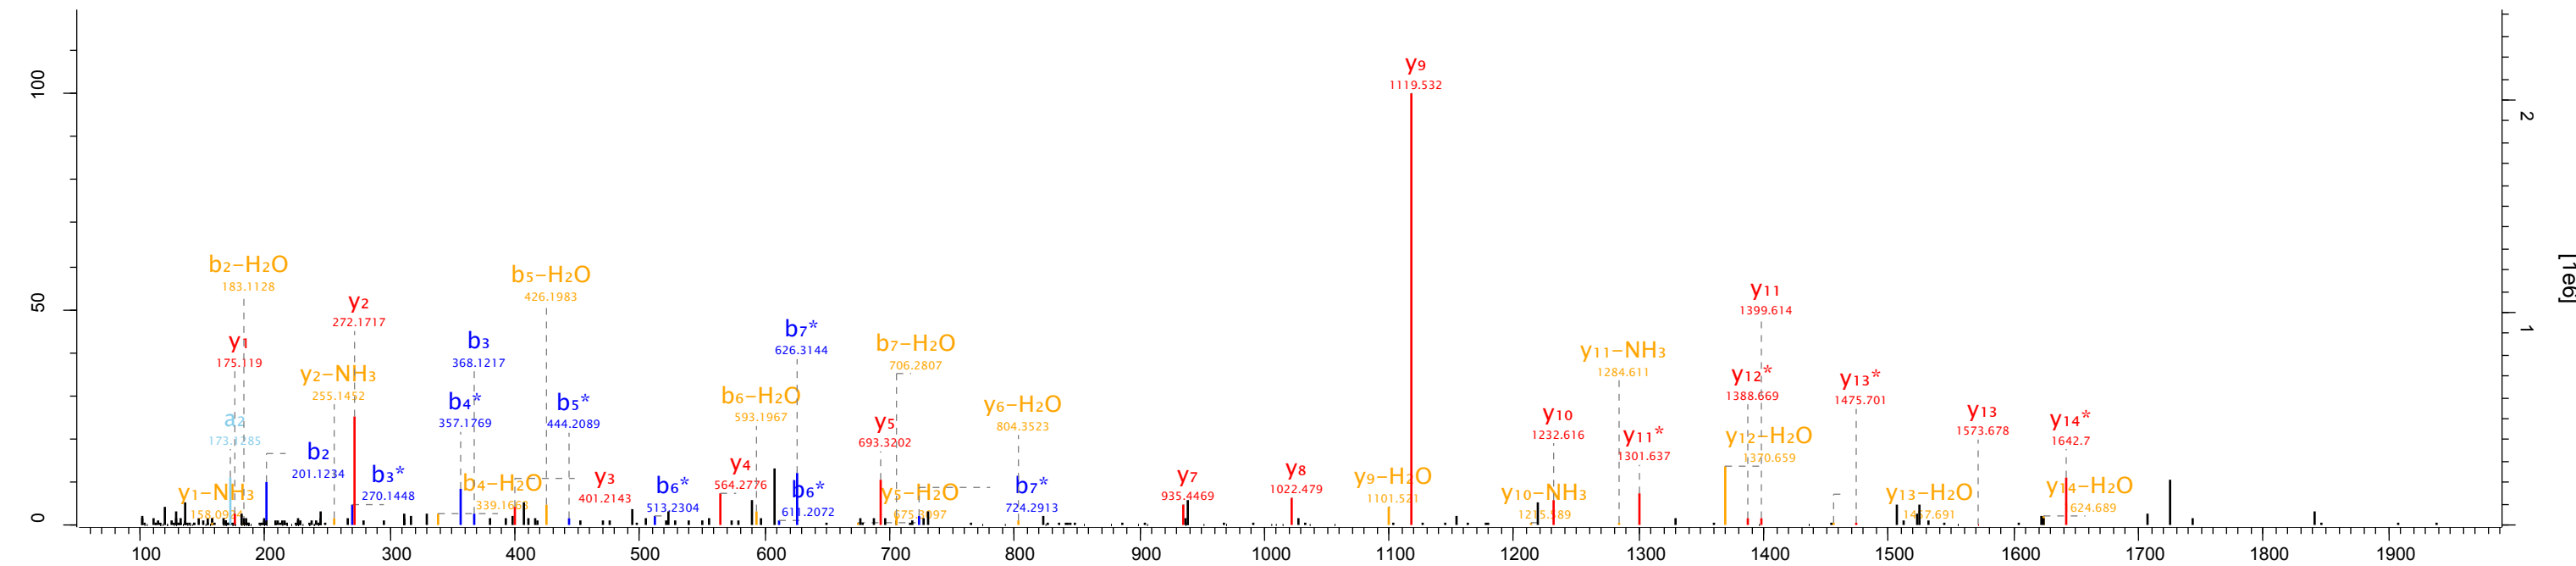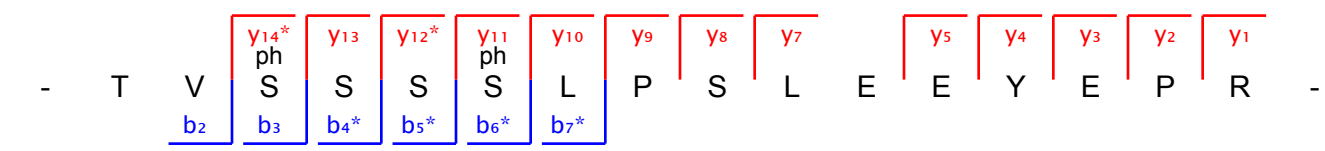

Raw file: 20150814\_A375SR\_Phospho\_BR2\_03  
 Scan: 22586 Method: FTMS; HCD Score: 60.34 m/z: 1120.17 Gene names: EIF4EBP2

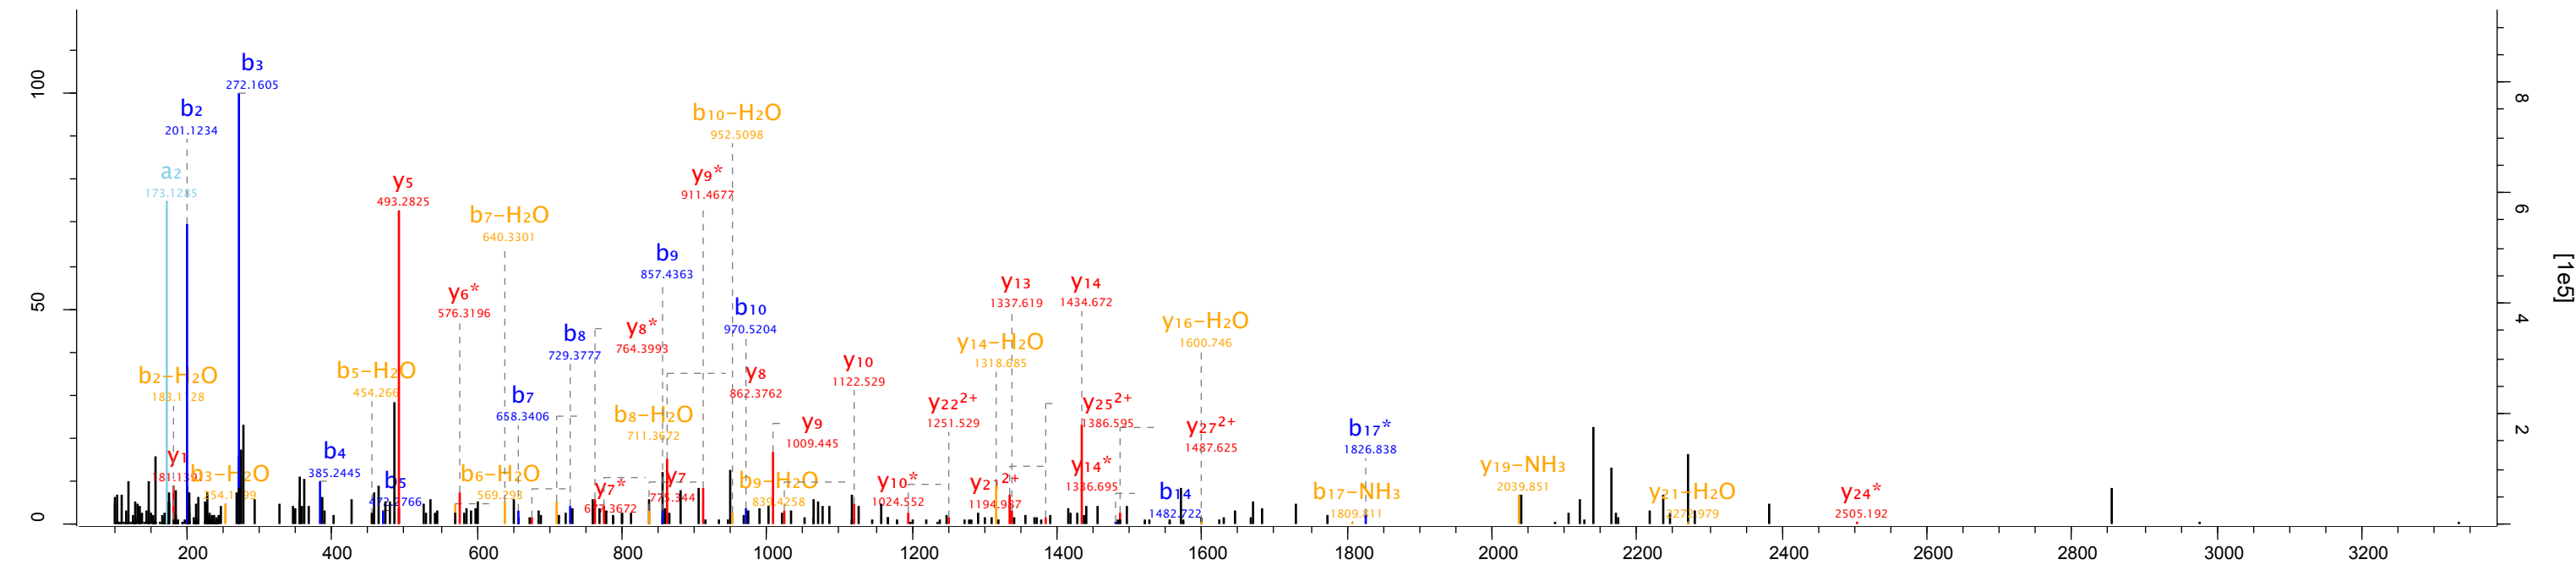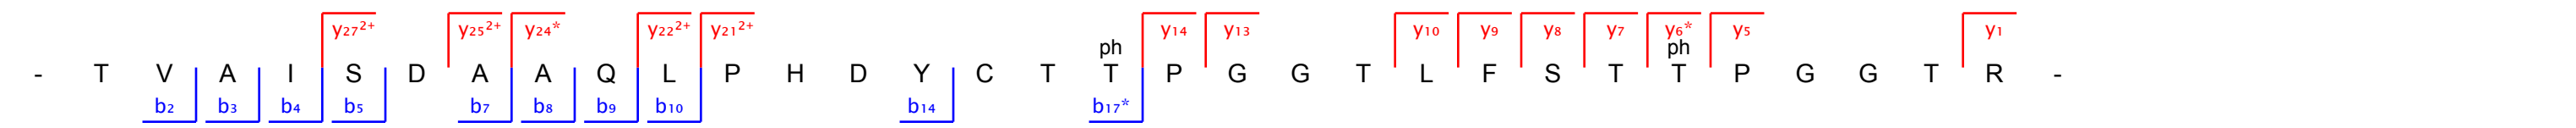

Raw file: 20150814\_A375SR\_Phospho\_BR2\_03  
 Scan: 22686 Method: FTMS; HCD Score: 230.93 m/z: 1006.96 Gene names: LUZP1

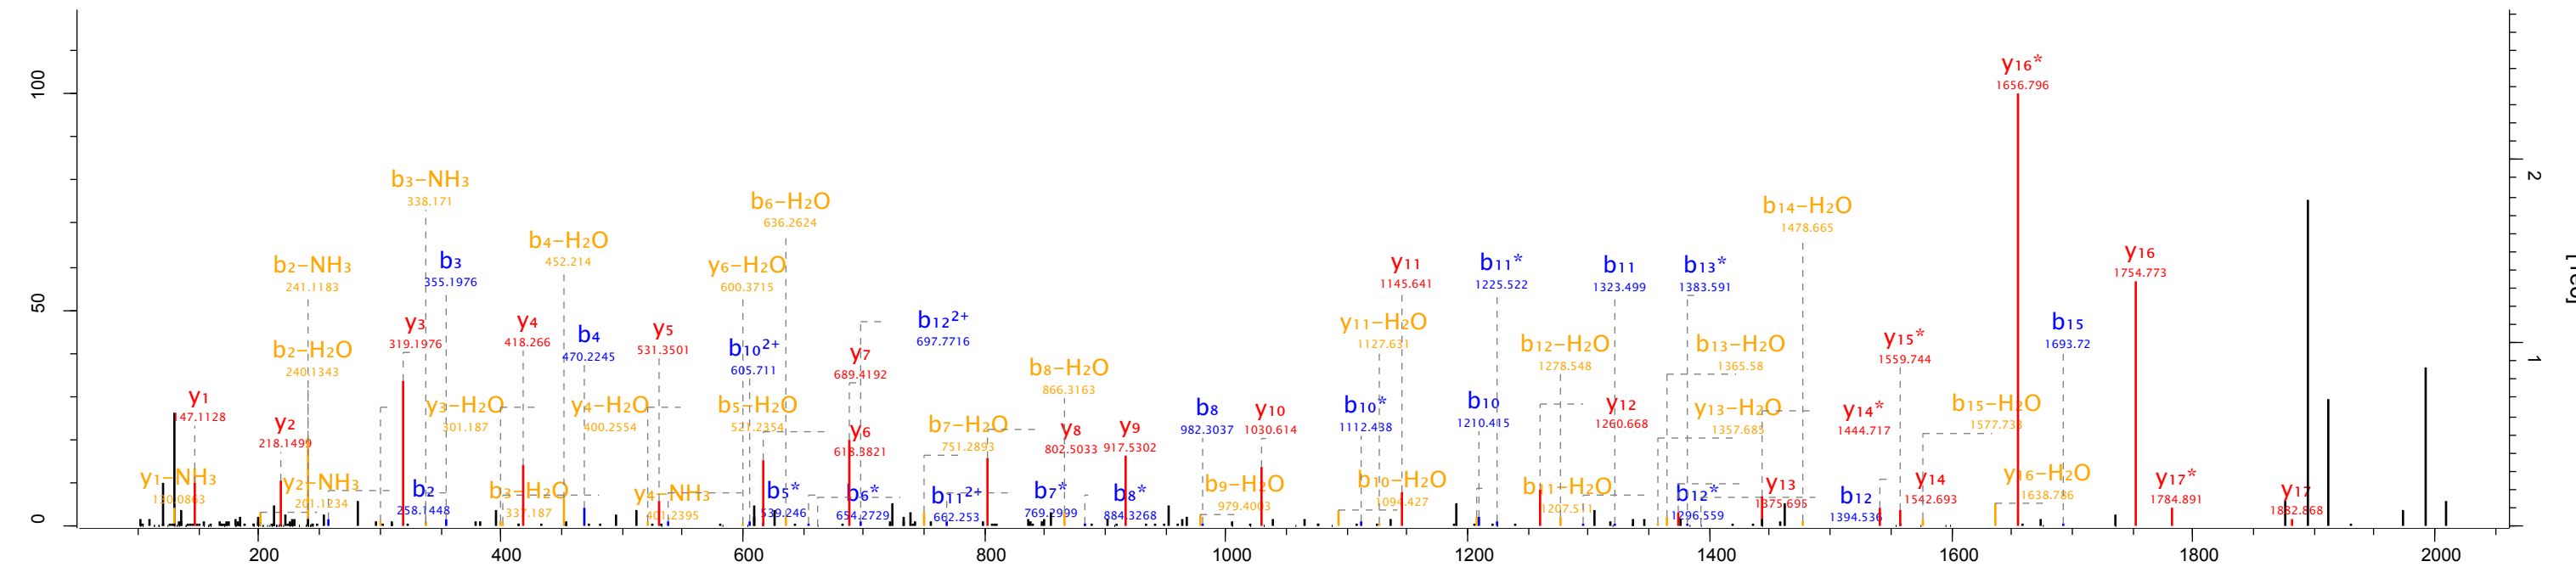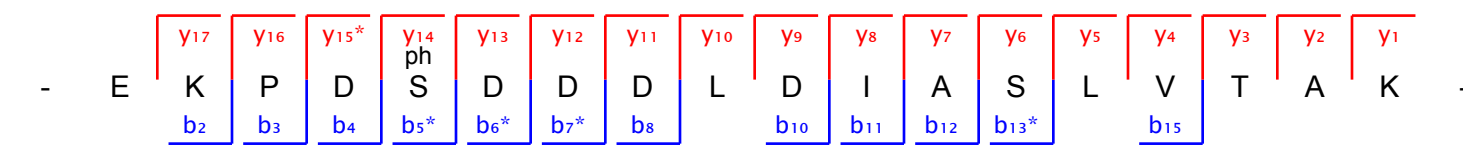

Raw file Scan Method Score m/z Gene names  
 20150814\_A375SR\_Phospho\_BR2\_03 23406 FTMS; HCD 210.92 1204.19 SIPA1L1

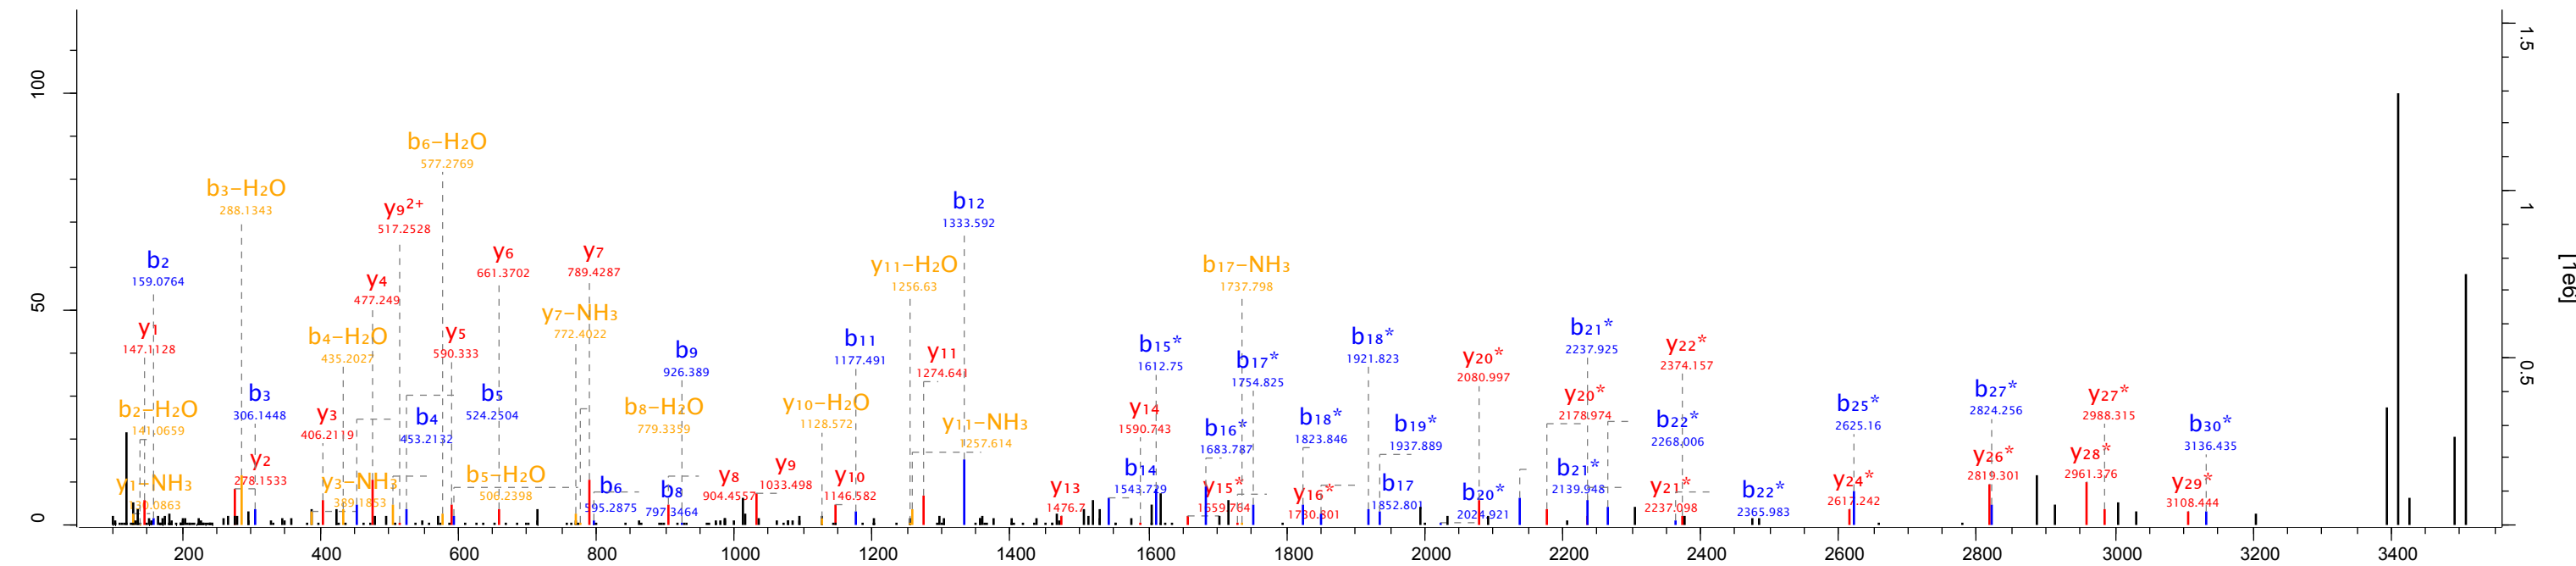

- A S F F A A S D E N H R P L S A A A S D Q L E D Q A L A Q M K -

b<sub>2</sub>
b<sub>3</sub>
b<sub>4</sub>
b<sub>5</sub>
b<sub>6</sub>
b<sub>8</sub>
b<sub>9</sub>
b<sub>11</sub>
b<sub>12</sub>
b<sub>14</sub>
b<sub>15</sub>\*
b<sub>16</sub>\*
b<sub>17</sub>
b<sub>18</sub>\*
b<sub>19</sub>\*
b<sub>20</sub>\*
b<sub>21</sub>\*
b<sub>22</sub>\*
b<sub>25</sub>\*
b<sub>27</sub>\*
b<sub>30</sub>\*

y<sub>29</sub>\*
y<sub>28</sub>\*
y<sub>27</sub>\*
y<sub>26</sub>\*
y<sub>24</sub>\*
y<sub>22</sub>\*
y<sub>21</sub>\*
y<sub>20</sub>\*
y<sub>16</sub>\*
y<sub>15</sub>ph
y<sub>14</sub>
y<sub>13</sub>
y<sub>11</sub>
y<sub>10</sub>
y<sub>9</sub>
y<sub>8</sub>
y<sub>7</sub>
y<sub>6</sub>
y<sub>5</sub>
y<sub>4</sub>
y<sub>3</sub>
y<sub>2</sub>
y<sub>1</sub>

Raw file 20150814\_A375SR\_Phospho\_BR2\_03 Scan 23416 Method FTMS; HCD Score 130.25 m/z 864.04 Gene names CLSPN

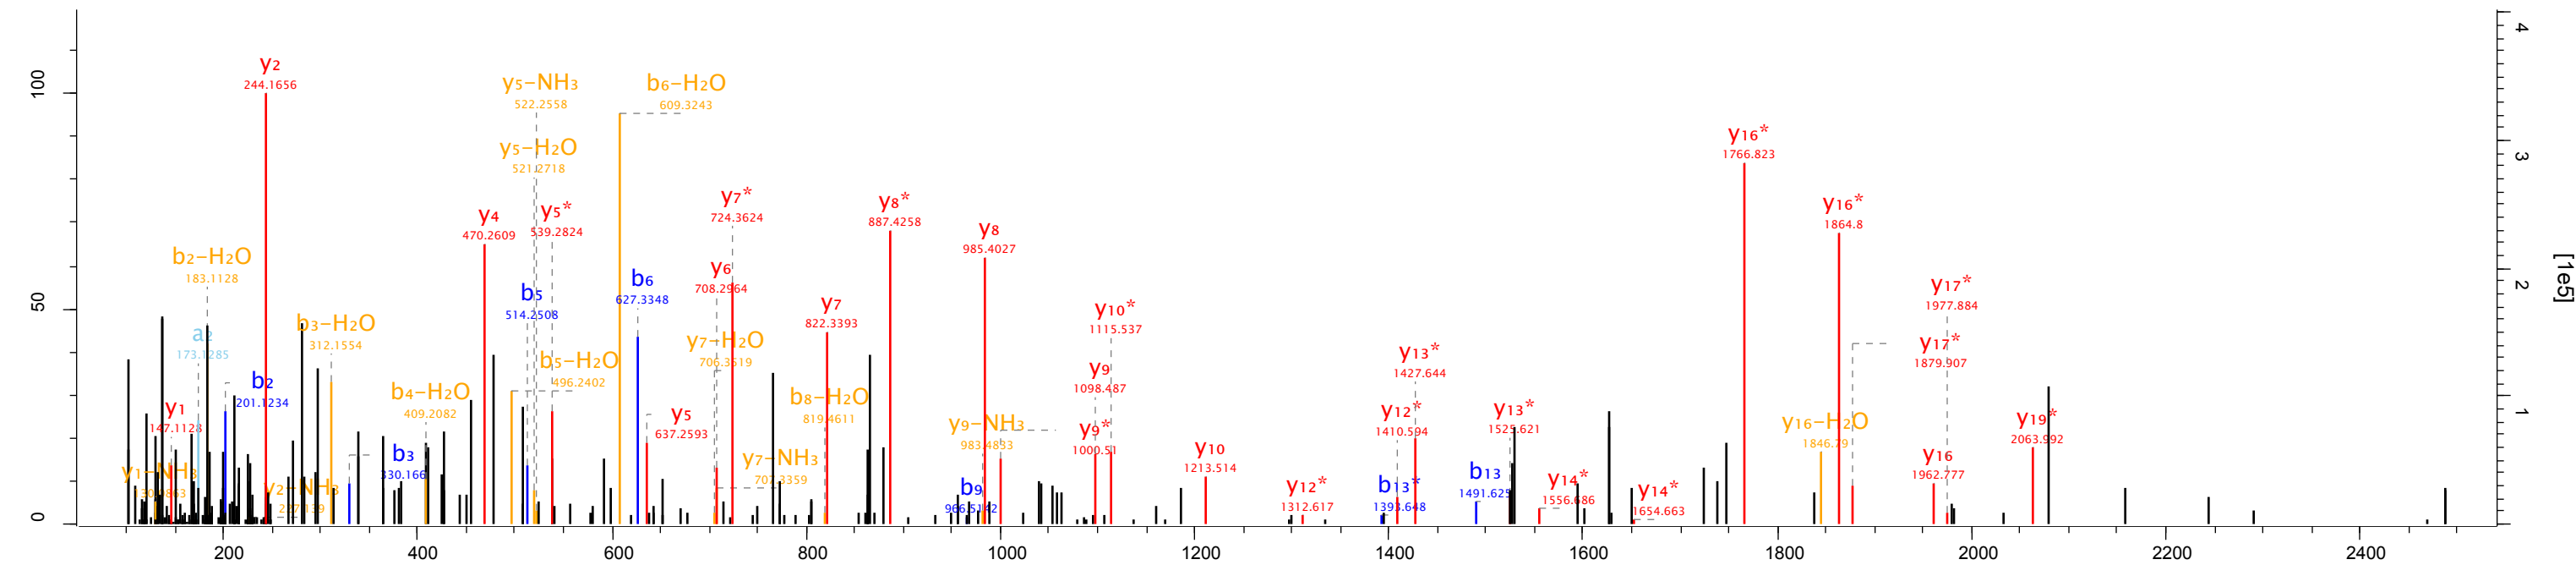

- L S E P S L P I E D S Q D L Y N A S P E P K -

Fragmentation mapping (b and y ions):

- b2: S
- b3: E
- b5: S
- b6: L
- b9: I
- b13: D
- y1: K
- y2: E
- y4: P
- y5: S
- y6: A
- y7: N
- y8: Y
- y9: L
- y10: D
- y12: S
- y13: D
- y14: S
- y16: P
- y17: L
- y19: P

Raw file 20150814\_A375SR\_Phospho\_BR2\_03 Scan 23506 Method FTMS; HCD Score 109.54 m/z 922.09 Gene names INCENP

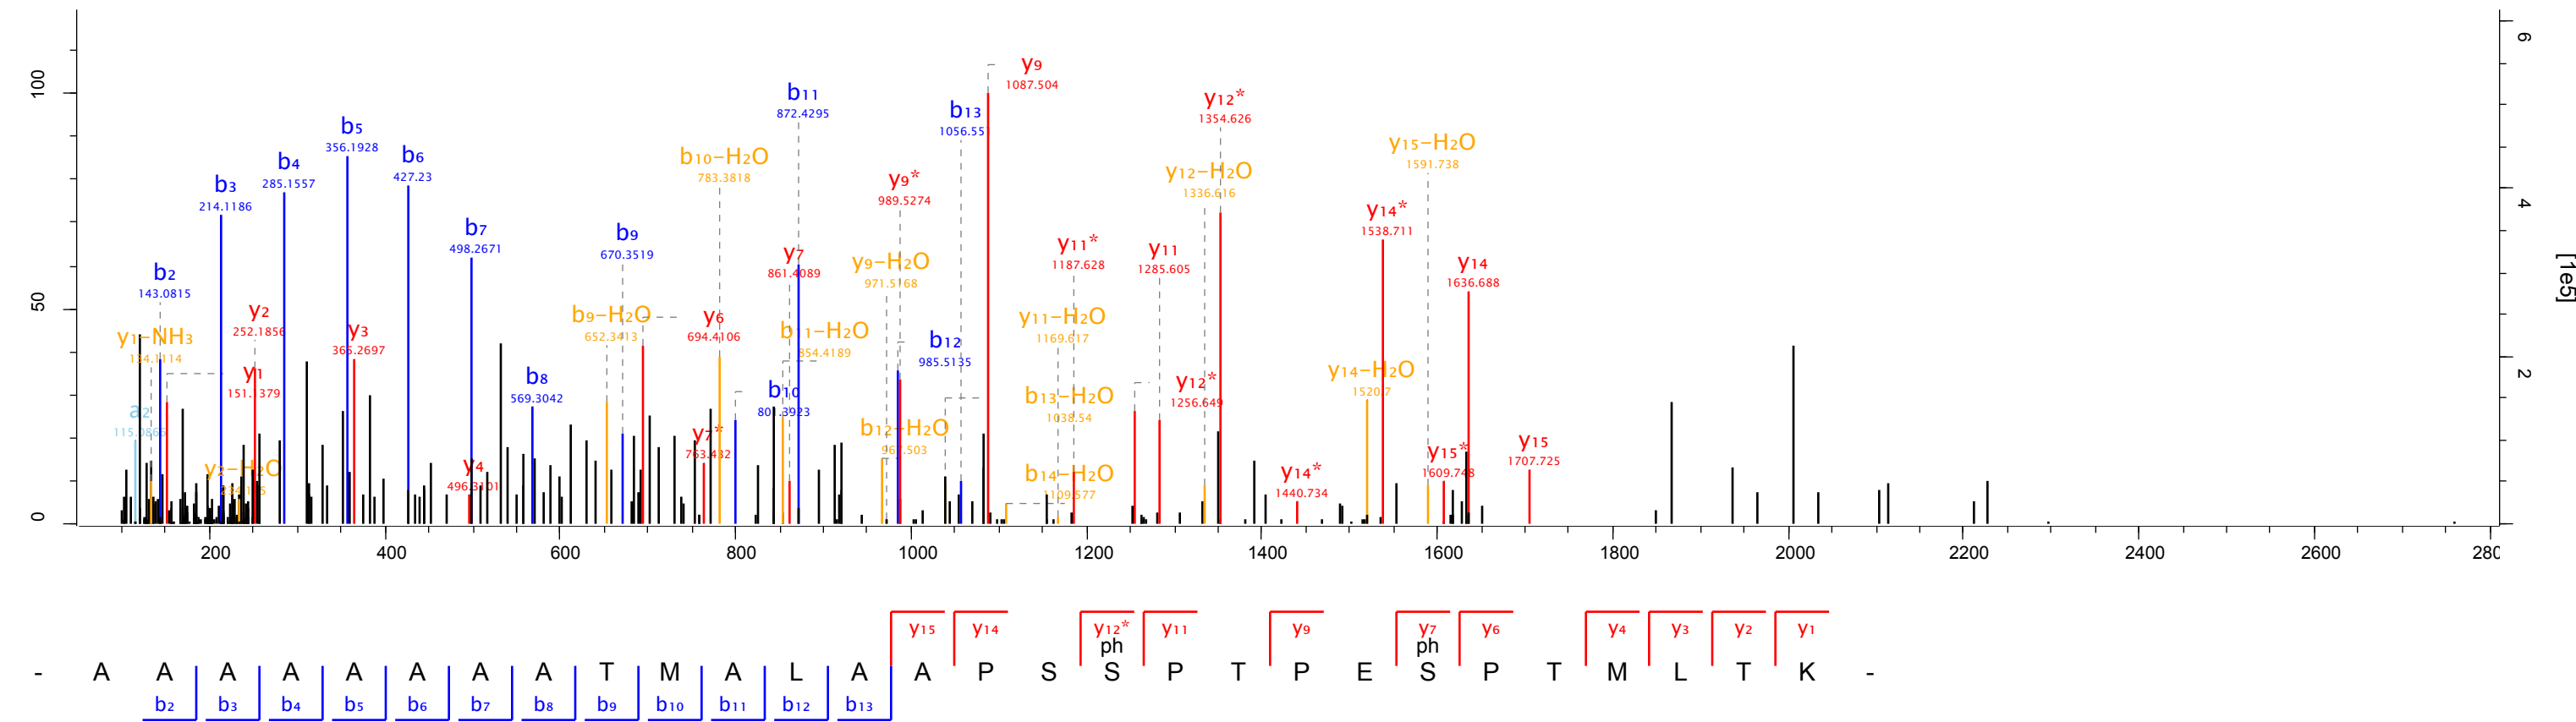

Raw file: 20150814\_A375SR\_Phospho\_BR2\_03  
 Scan: 23606 Method: FTMS; HCD Score: 87.74 m/z: 910.77 Gene names: CABLES1

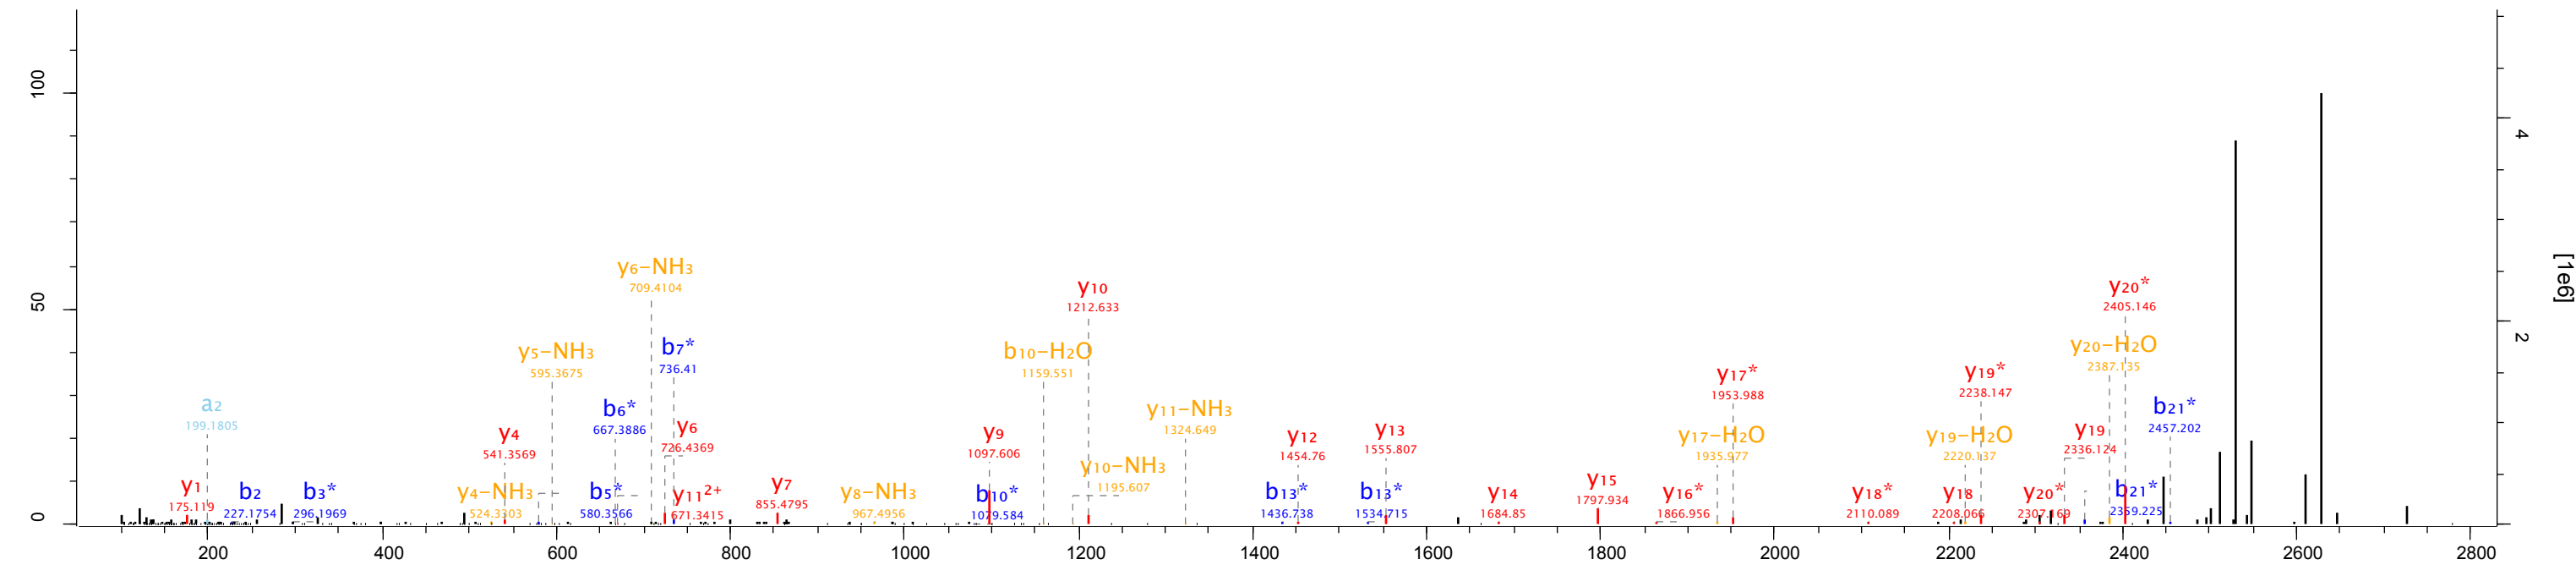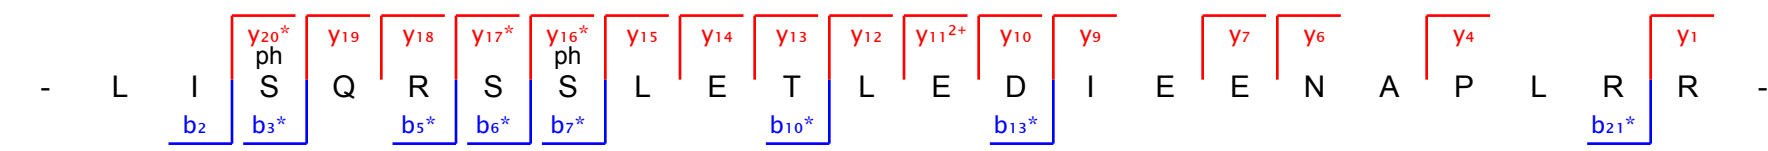

Raw file 20150814\_A375SR\_Phospho\_BR2\_03 Scan 23716 Method FTMS; HCD Score 117.2 m/z 789.83 Gene names TRIP11

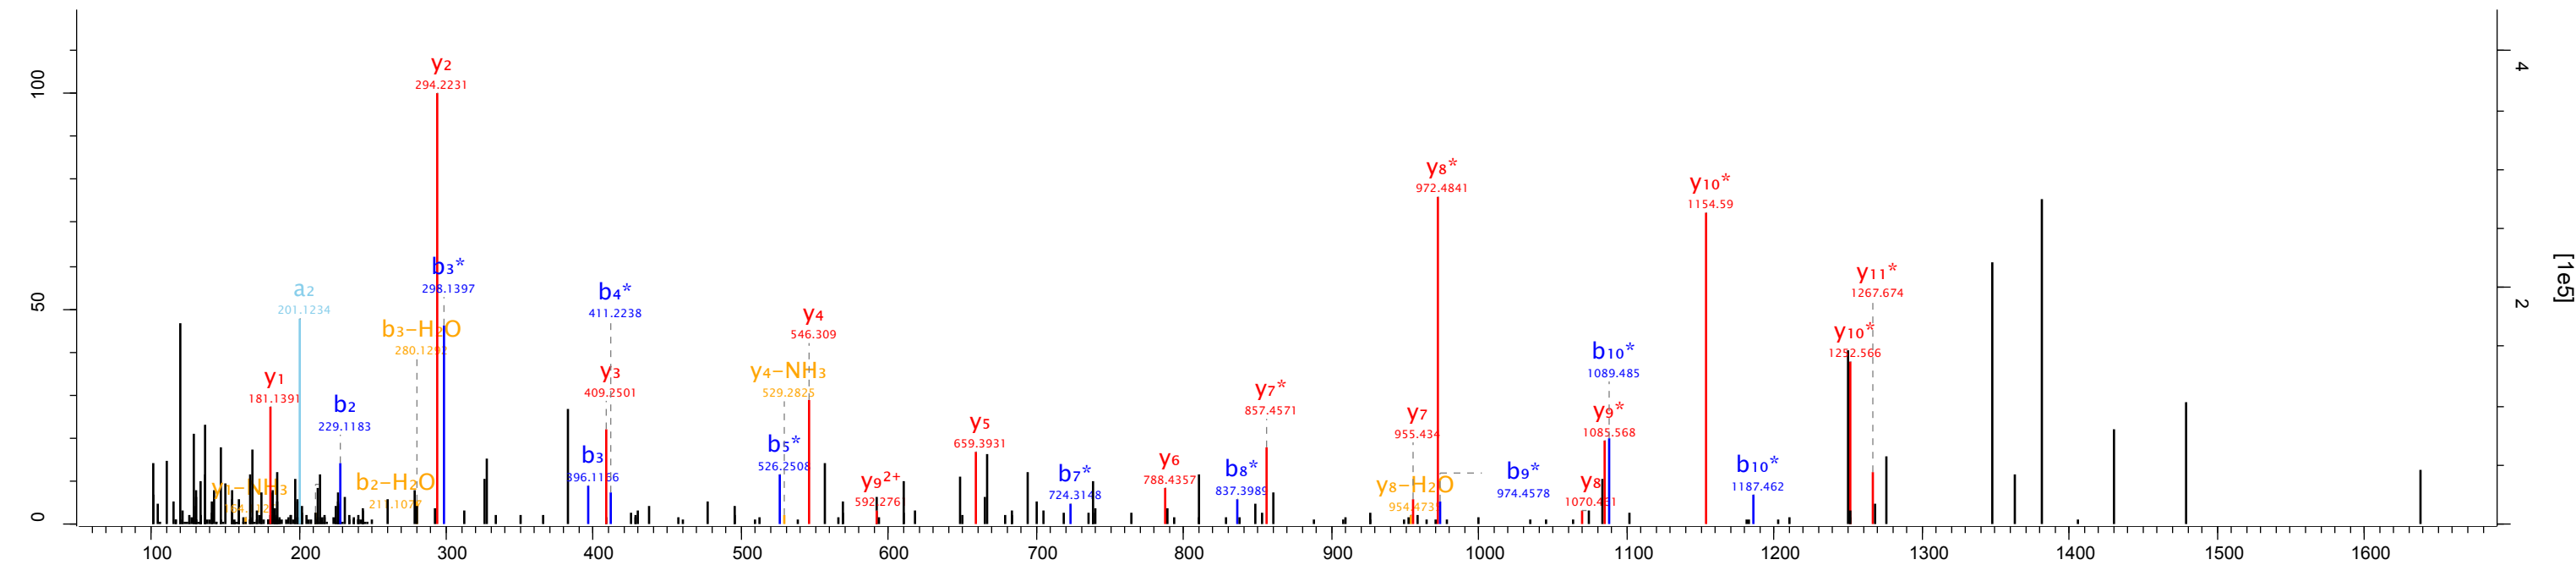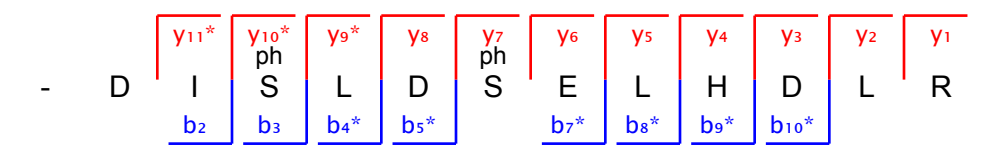



Raw file 20150814\_A375SR\_Phospho\_BR2\_03 Scan 24006 Method FTMS; HCD Score 142.22 m/z 1041.42 Gene names AKAP13

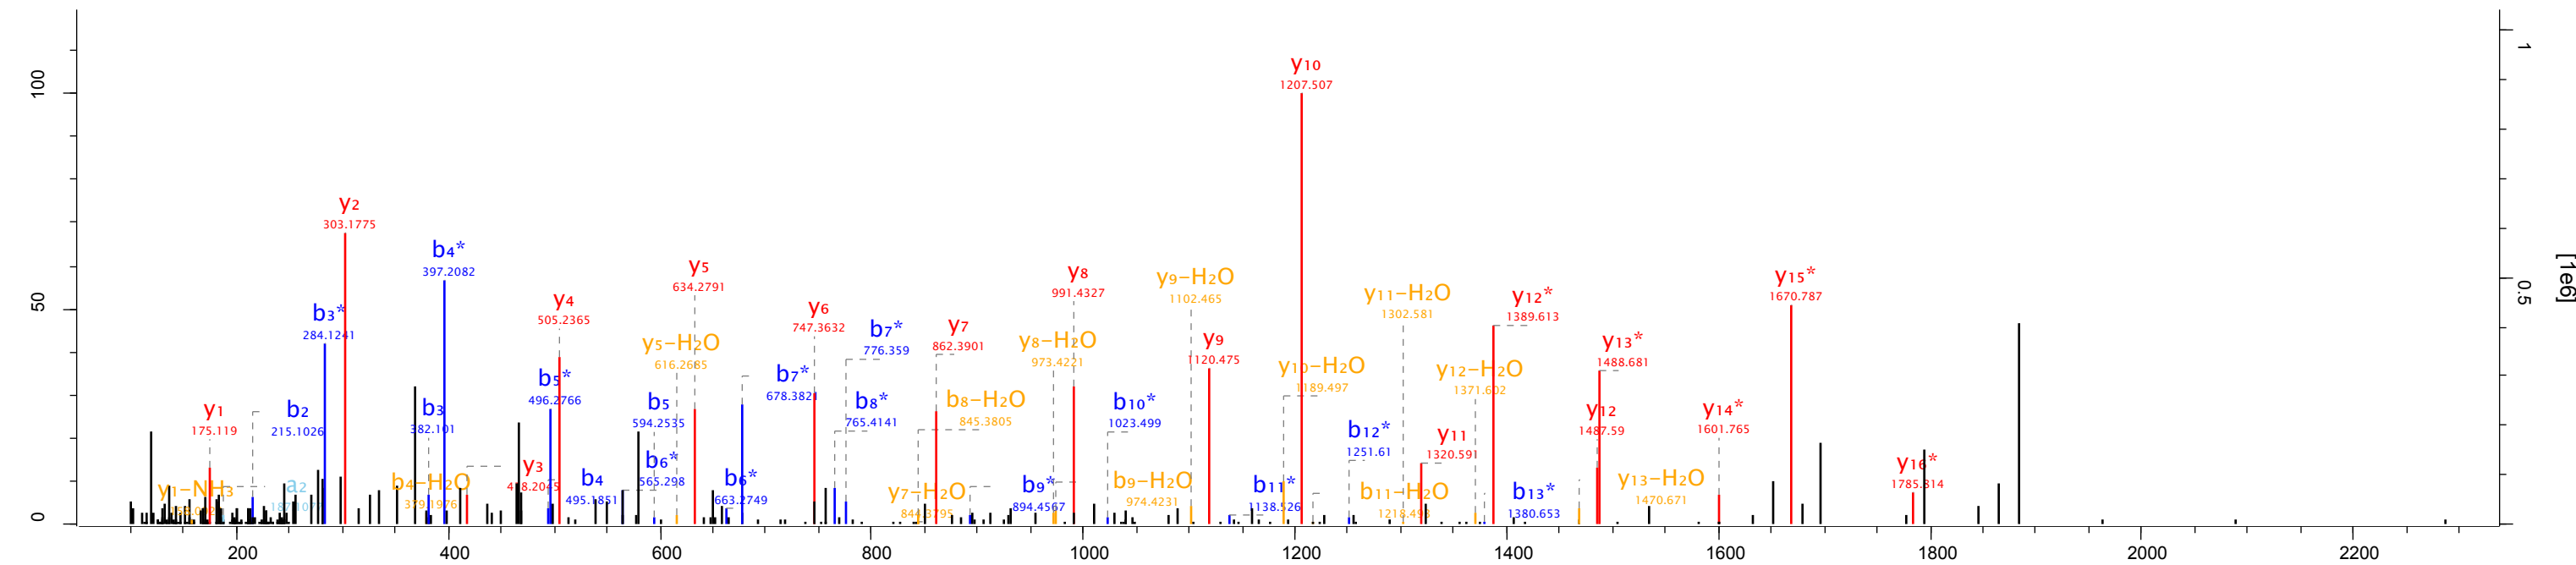

- V y16\* y15\*  
ph y14\* y13\* y12  
ph y11 y10 y9 y8 y7 y6 y5 y4 y3 y2 y1 -

b2 b3 b4 b5 b6\* b7\* b8\* b9\* b10\* b11\* b12\* b13\*

Raw file 20150814\_A375SR\_Phospho\_BR2\_03 Scan 24276 Method FTMS; HCD Score 64.86 m/z 726.81 Gene names ERF

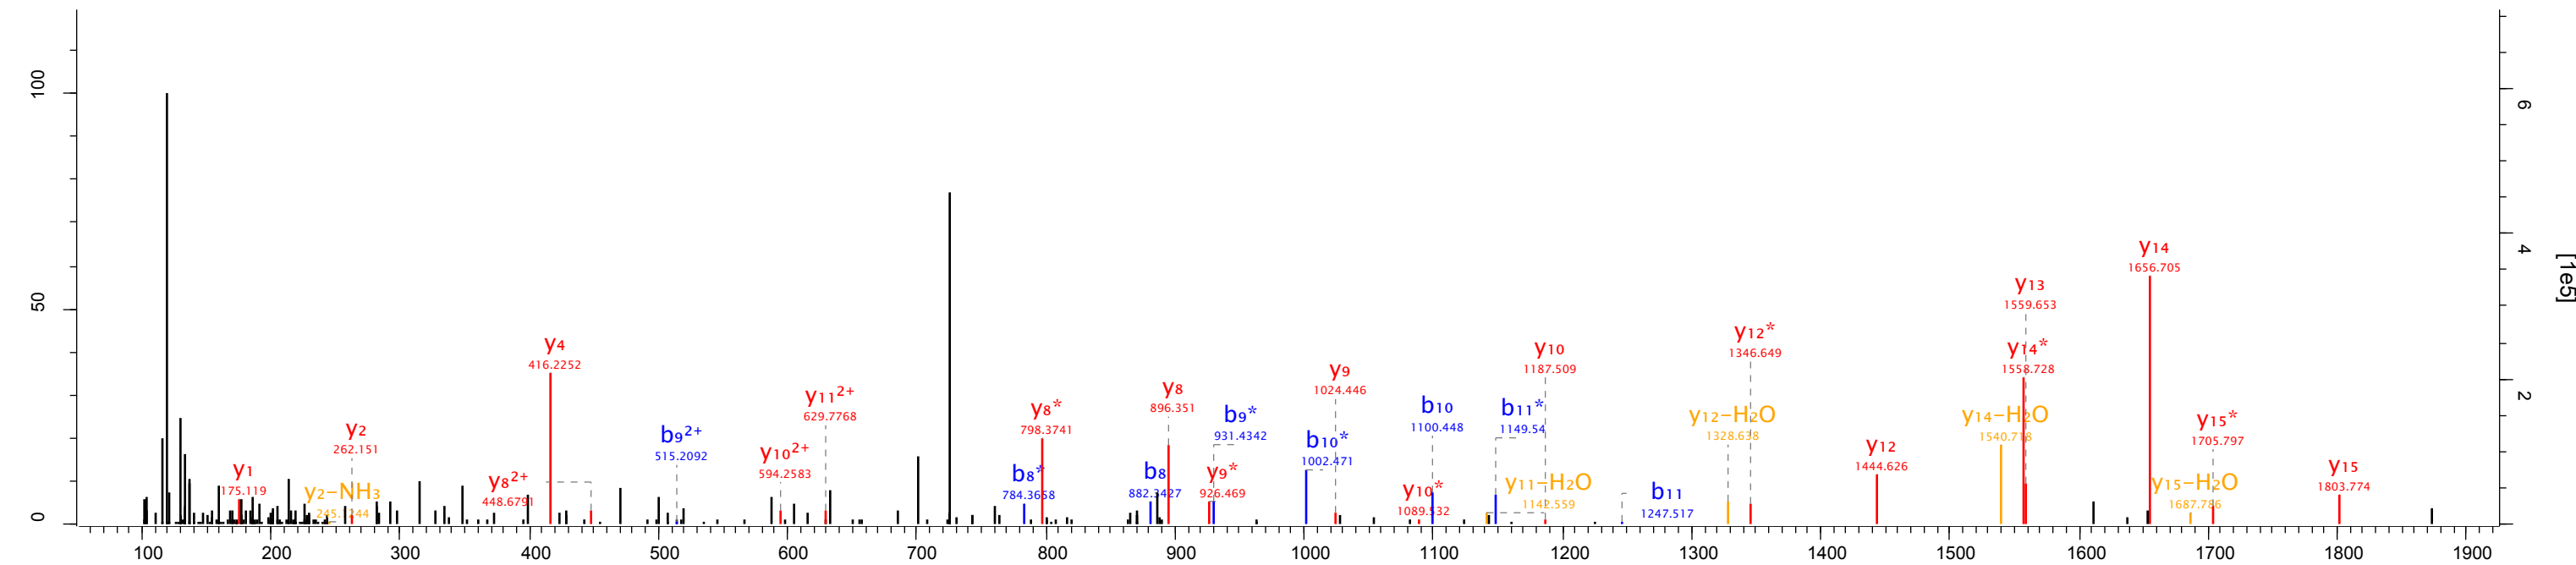

- M K T P A D T G F A F P D W A Y K P E S S P G S R -

ph

b<sub>8</sub> b<sub>9</sub><sup>\*</sup> b<sub>10</sub> b<sub>11</sub> y<sub>15</sub> y<sub>14</sub> y<sub>13</sub> y<sub>12</sub> y<sub>11</sub><sup>2+</sup> y<sub>10</sub> y<sub>9</sub> y<sub>8</sub> y<sub>4</sub> y<sub>2</sub> y<sub>1</sub>

Raw file 20150814\_A375SR\_Phospho\_BR2\_03 Scan 24476 Method FTMS; HCD Score 92.78 m/z 1113.18 Gene names DDX24

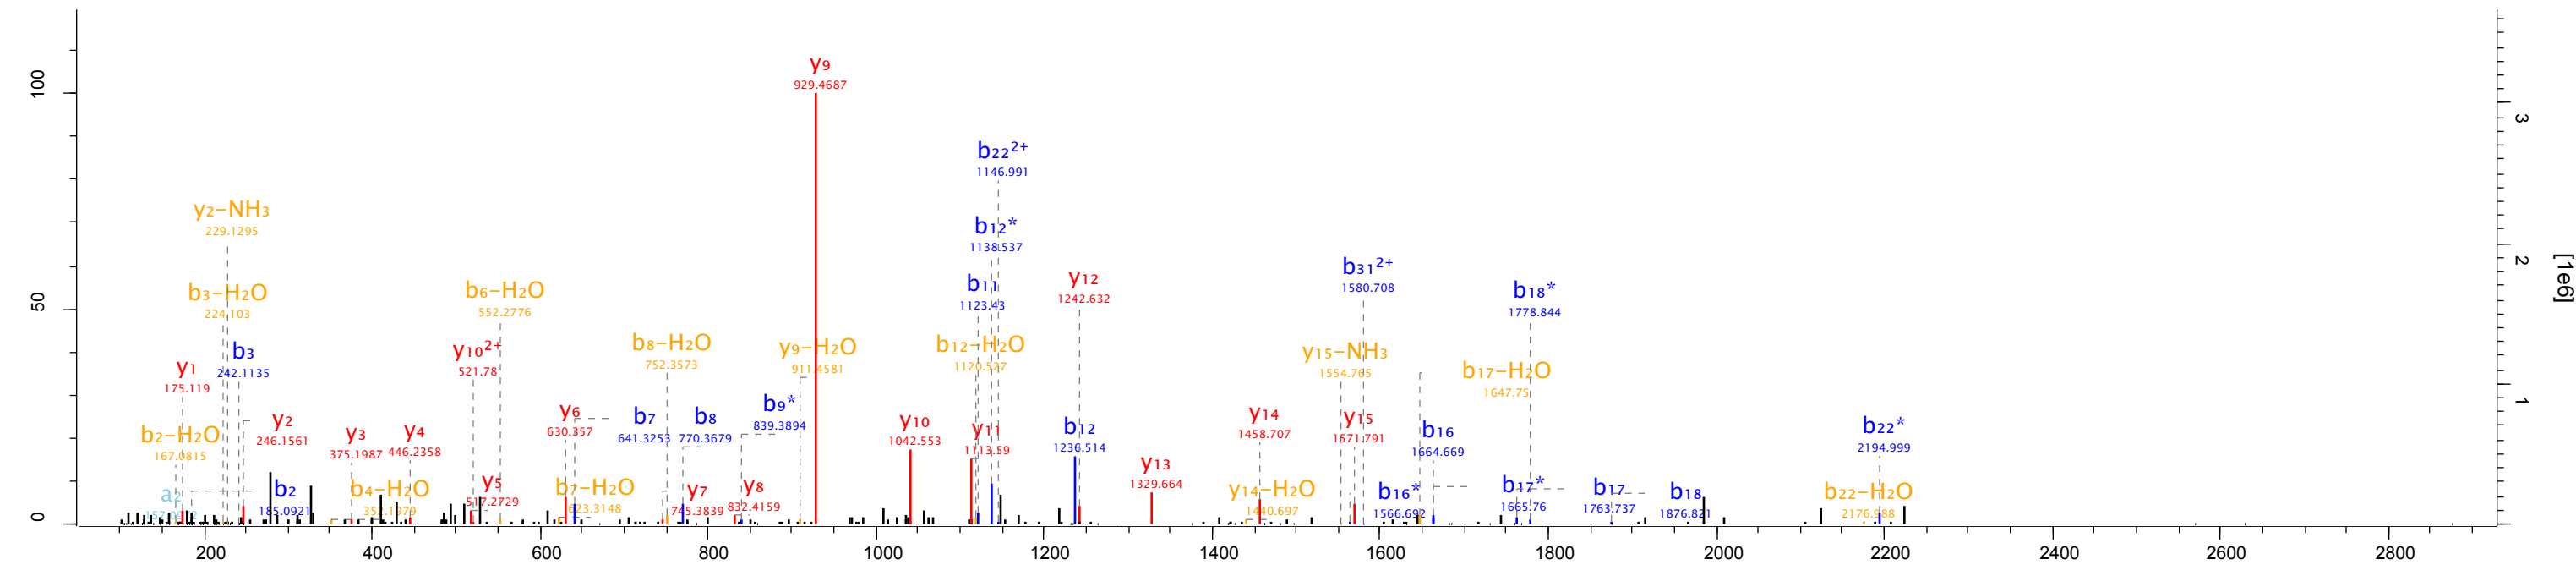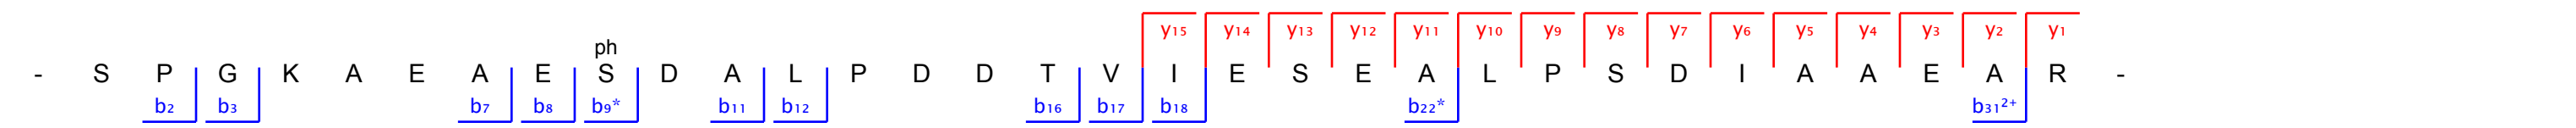

Raw file 20150814\_A375SR\_Phospho\_BR2\_03 Scan 24576 Method FTMS; HCD Score 71.7 m/z 715.96 Gene names IRS2

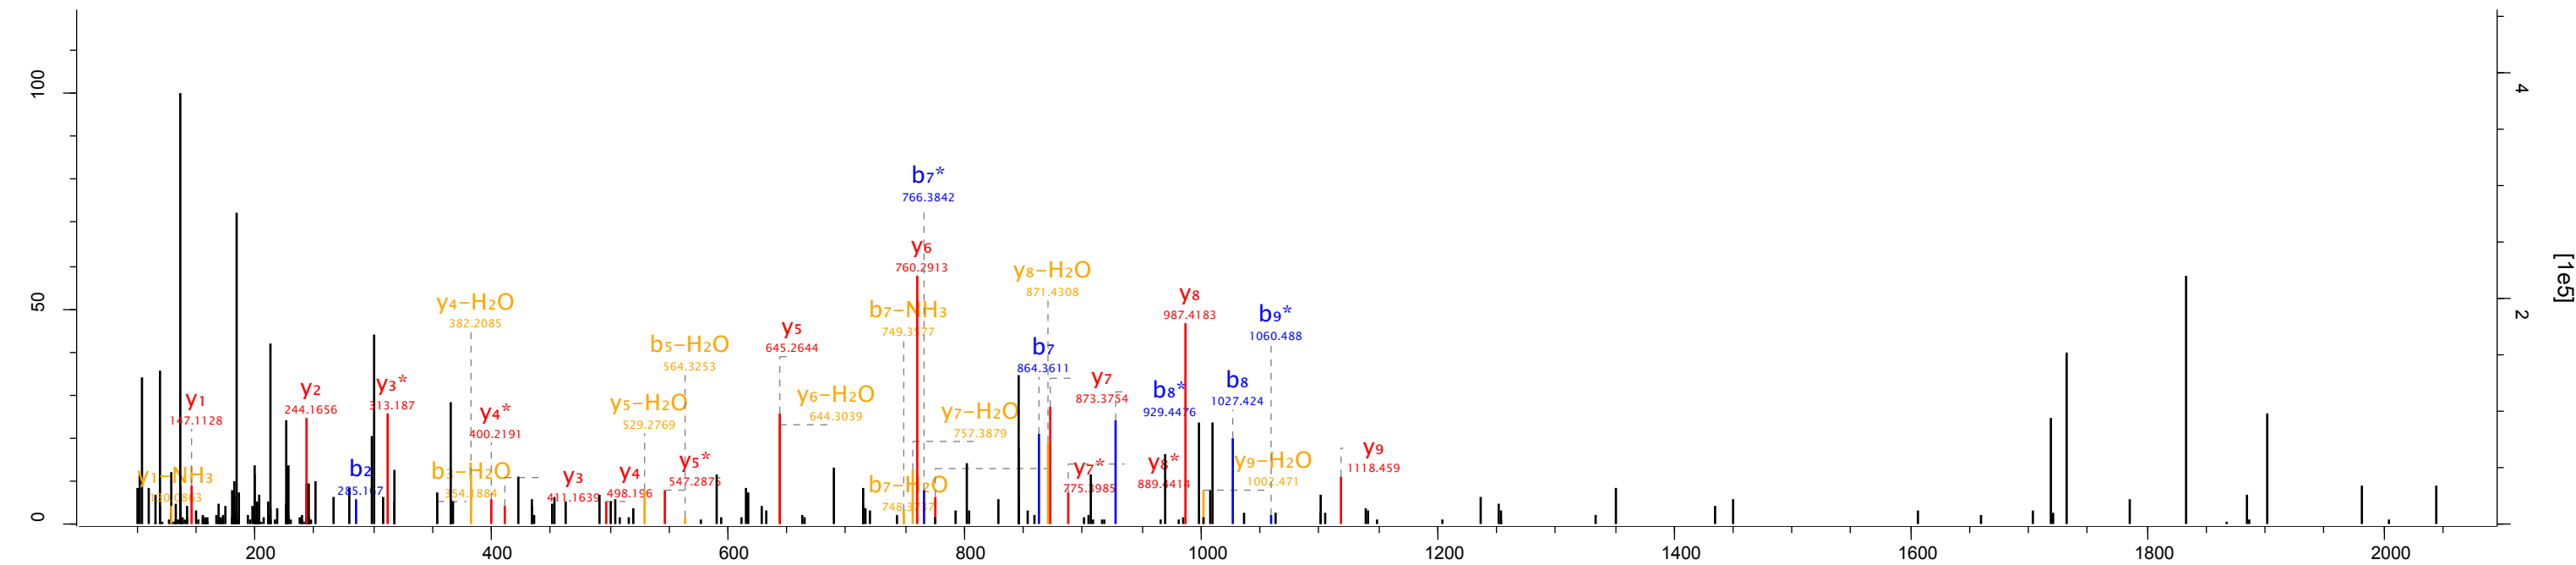

- Q R S P L S D Y M N L D F S S P K -

ph

b<sub>2</sub> b<sub>7</sub> b<sub>8</sub> b<sub>9</sub>\*

y<sub>9</sub> y<sub>8</sub> y<sub>7</sub> y<sub>6</sub> y<sub>5</sub> y<sub>4</sub> y<sub>3</sub> y<sub>2</sub> y<sub>1</sub>

ph

Raw file: 20150814\_A375SR\_Phospho\_BR2\_03  
 Scan: 24836 Method: FTMS; HCD Score: 154.02 m/z: 1398 Gene names: CCDC6

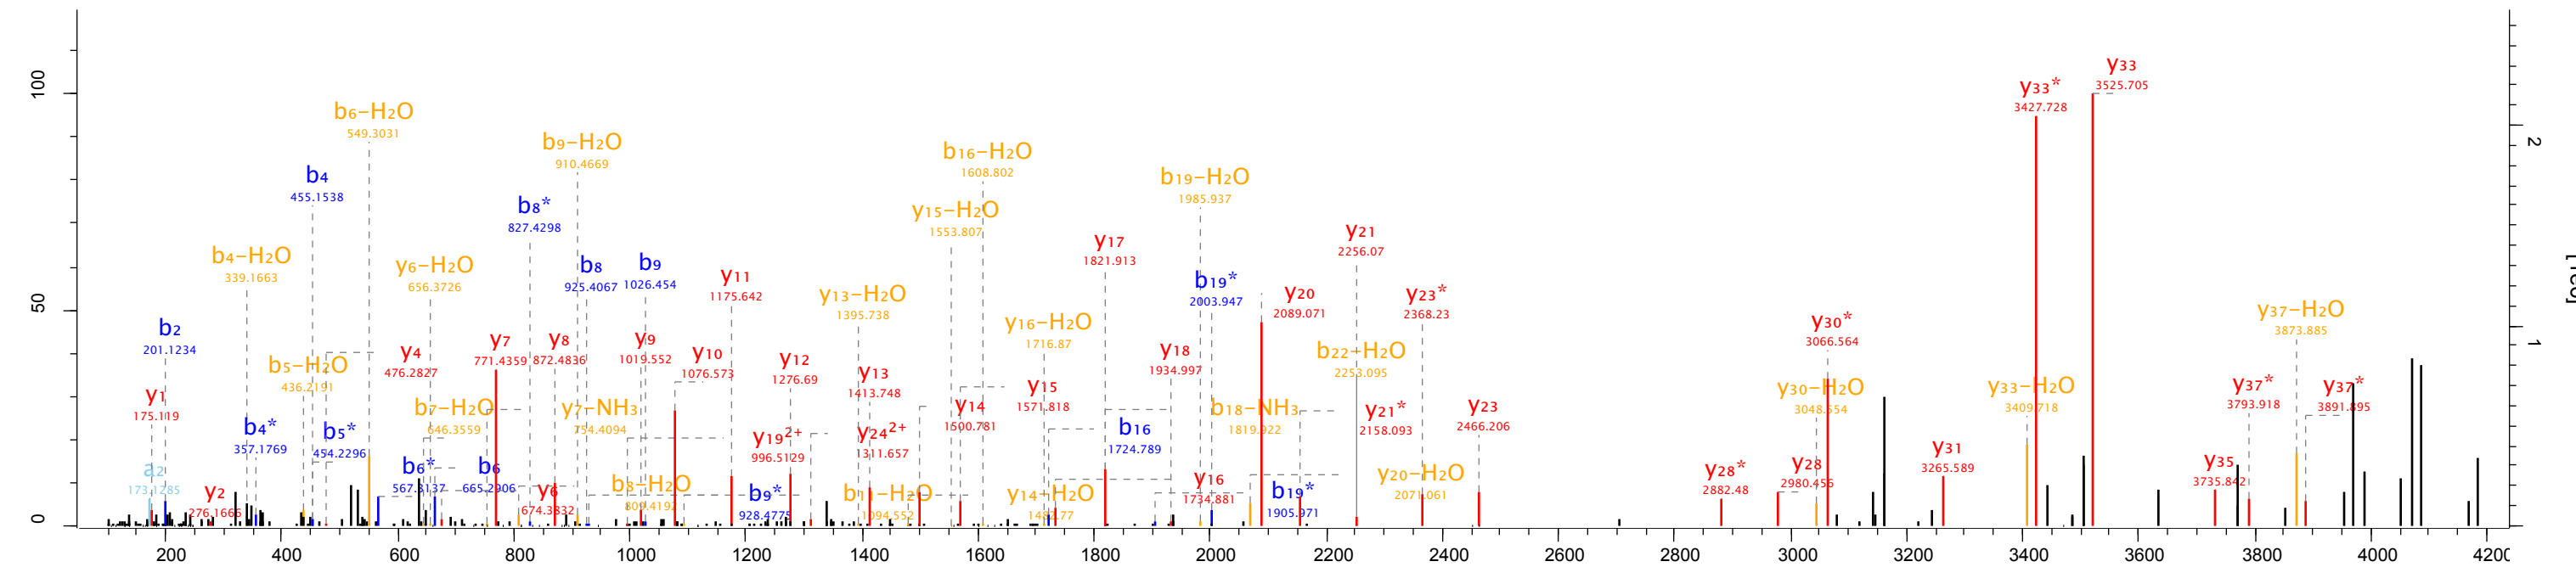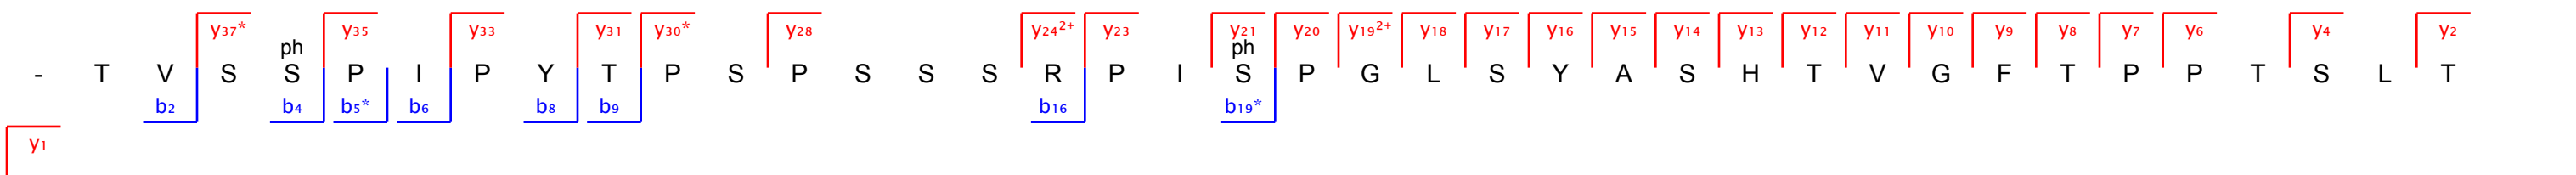

Raw file  
20150814\_A375SR\_Phospho\_BR2\_03

Scan 25016 Method FTMS; HCD Score 142.45 m/z 764.31 Gene names FOXO3

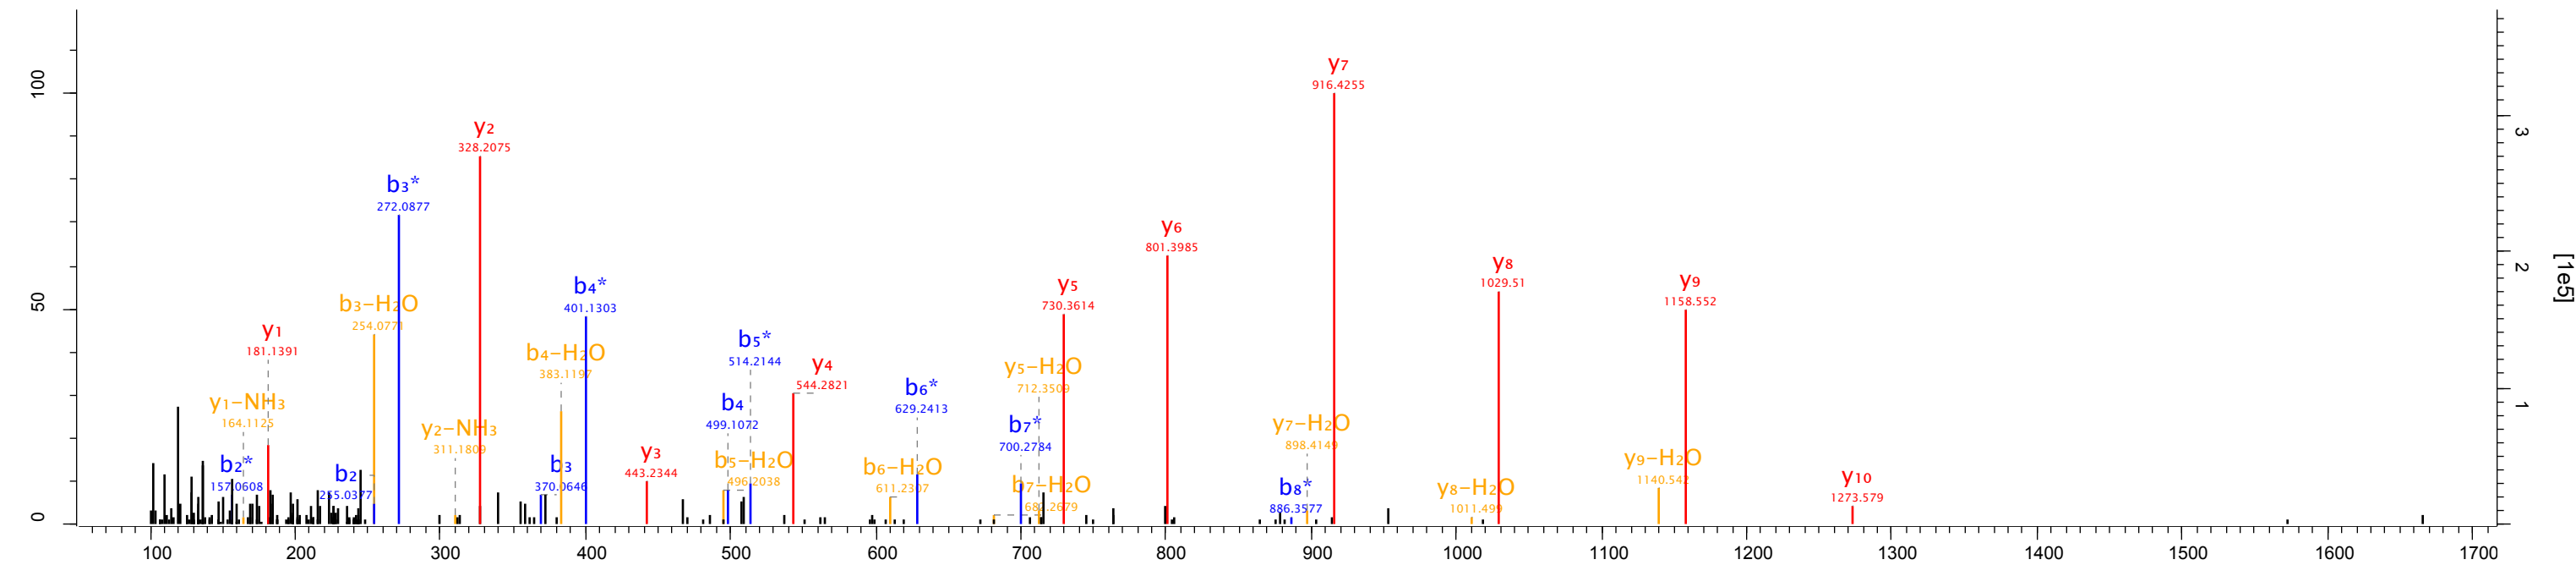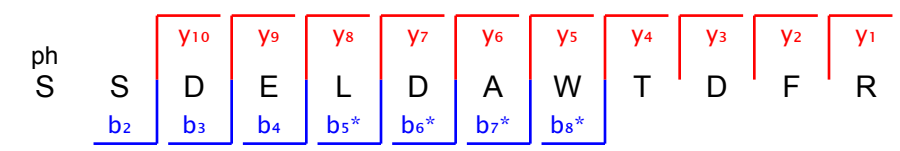

Raw file Scan Method Score m/z Gene names  
 20150814\_A375SR\_Phospho\_BR2\_03 25296 FTMS; HCD 254.33 1218.53 ABCF1

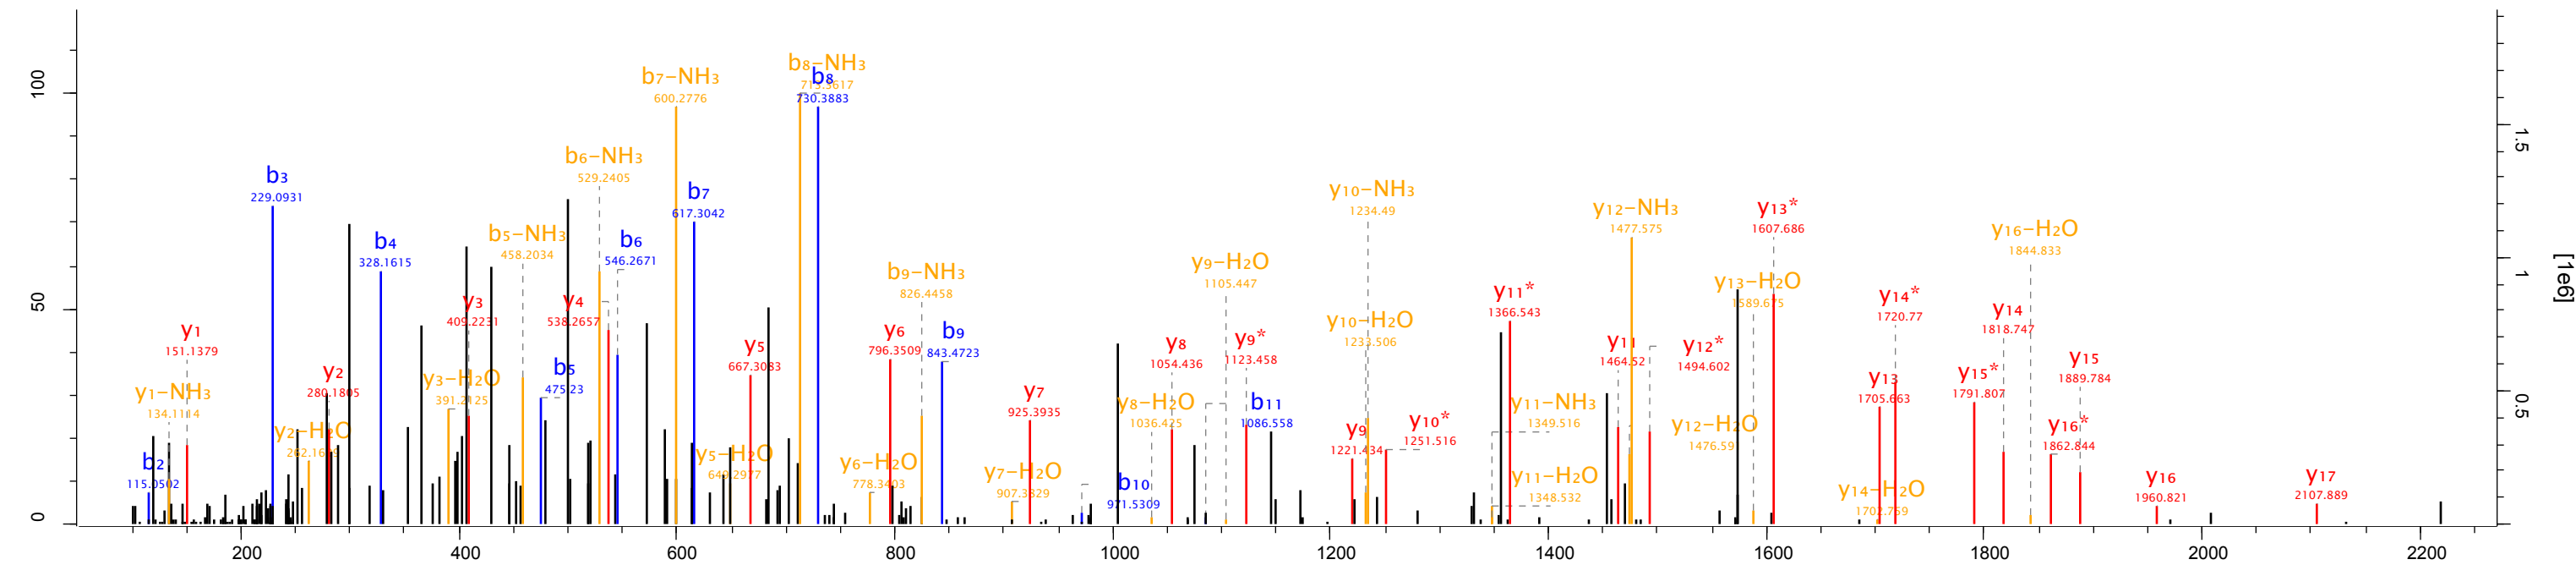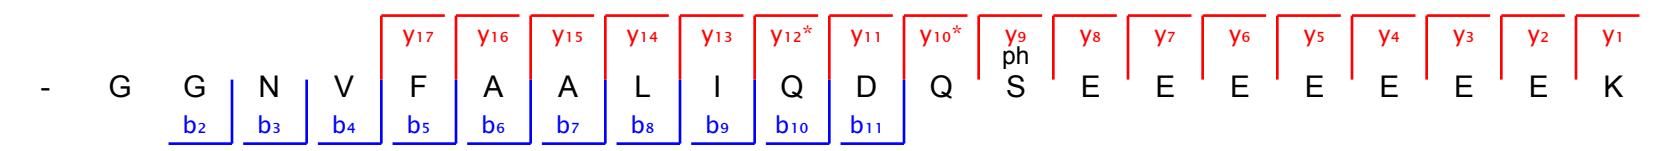

Raw file: 20150814\_A375SR\_Phospho\_BR2\_03  
 Scan: 25436 Method: FTMS; HCD Score: 237.91 m/z: 1357.59 Gene names: CEBPZ

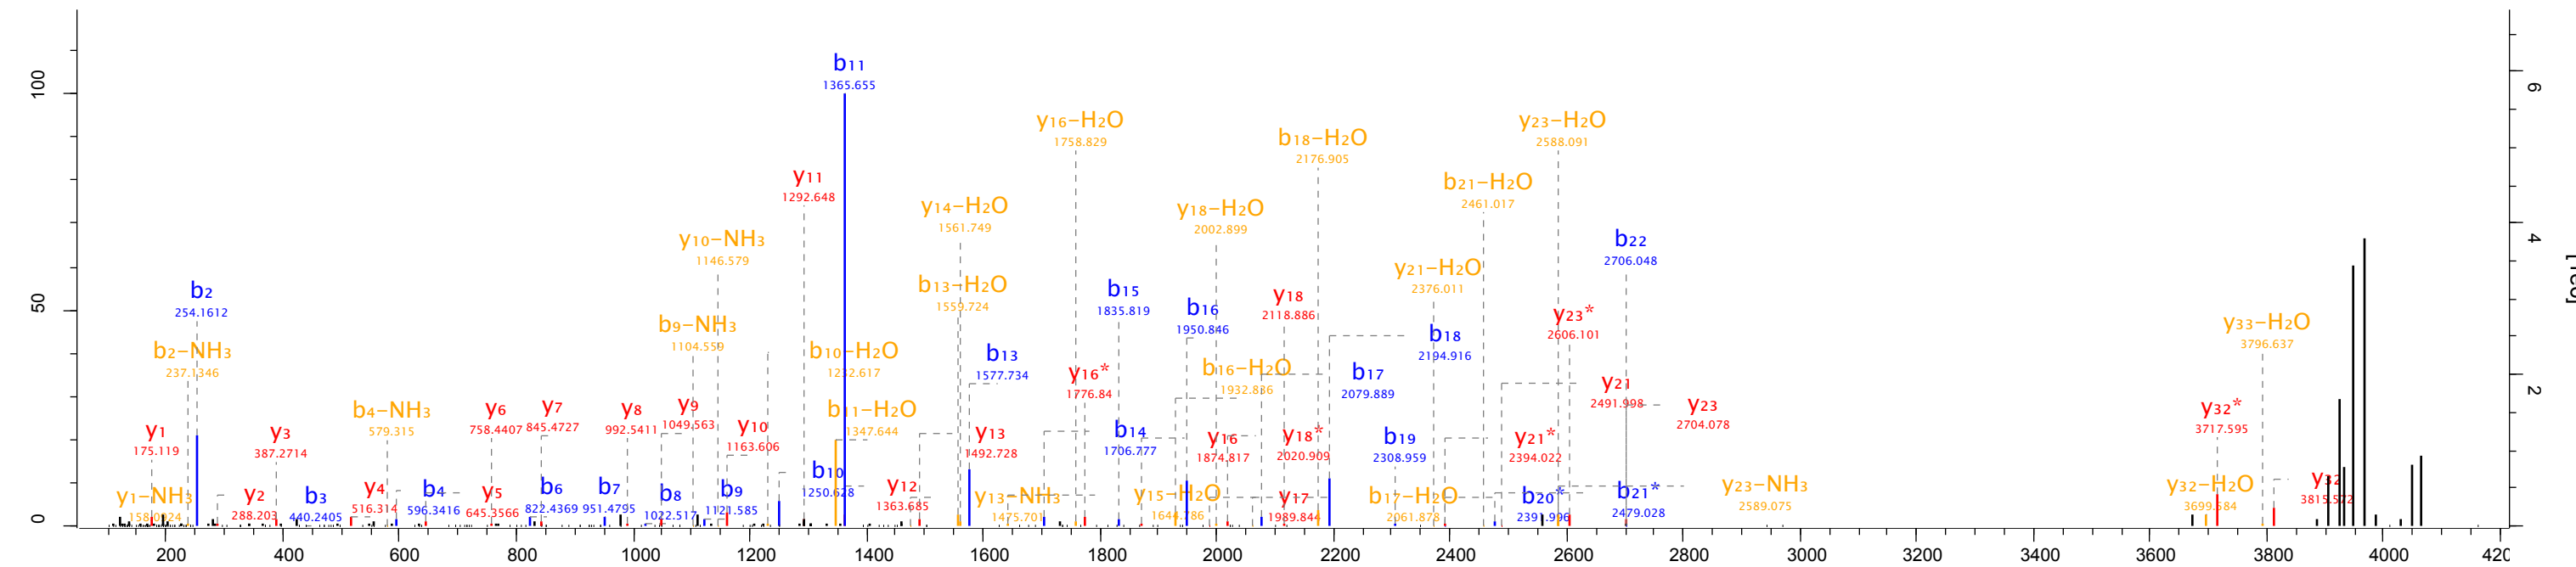

Sequence: R P W R P E E A V E D P D E E D E D N T S E A E N G F S L E E V L R -

Fragmentation sites (b and y ions) are indicated by boxes below the sequence:

- Red boxes (y ions): y32, y23, y21, y18, y17, y16, y13, y12, y11, y10, y9, y8, y7, y6, y5, y4, y3, y2, y1
- Blue boxes (b ions): b2, b3, b4, b6, b7, b8, b9, b10, b11, b13, b14, b15, b16, b17, b18, b19, b20\*, b21\*, b22



Raw file 20150814\_A375SR\_Phospho\_BR2\_03 Scan 25526 Method FTMS; HCD Score 147.88 m/z 909.42 Gene names AKIRIN2

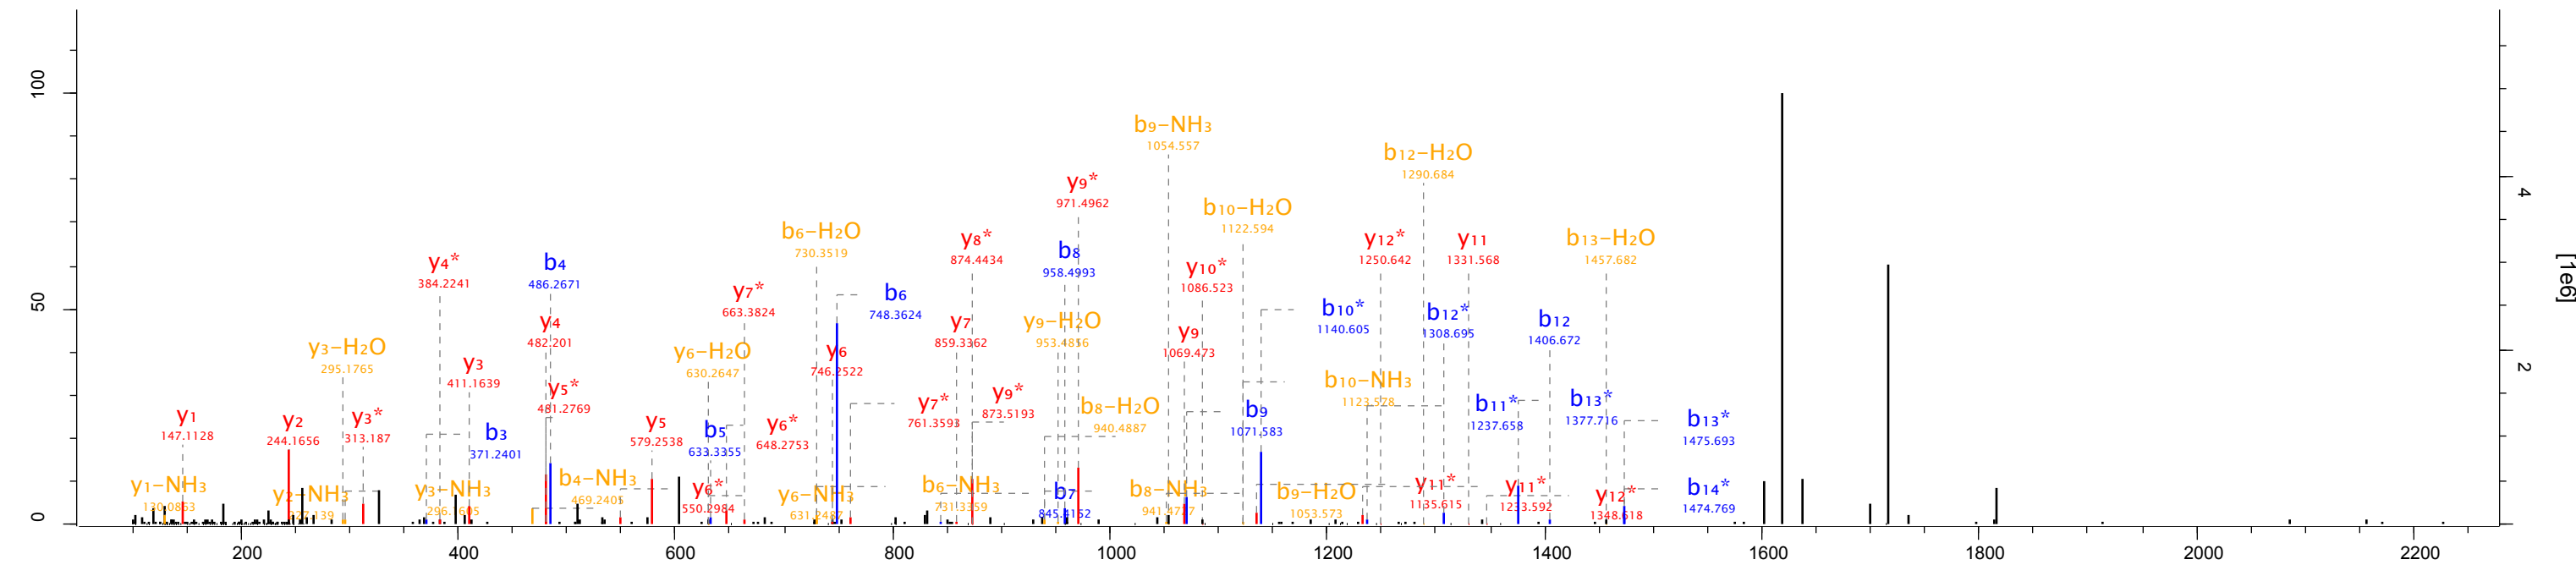

- R T L D F D P L L S P A S P K -

b3 b4 b5 b6 b7 b8 b9 b10\* b11\* b12 b13\* b14\*

Raw file 20150814\_A375SR\_Phospho\_BR2\_03 Scan 25696 Method FTMS; HCD Score 97.37 m/z 770.33 Gene names HBS1L

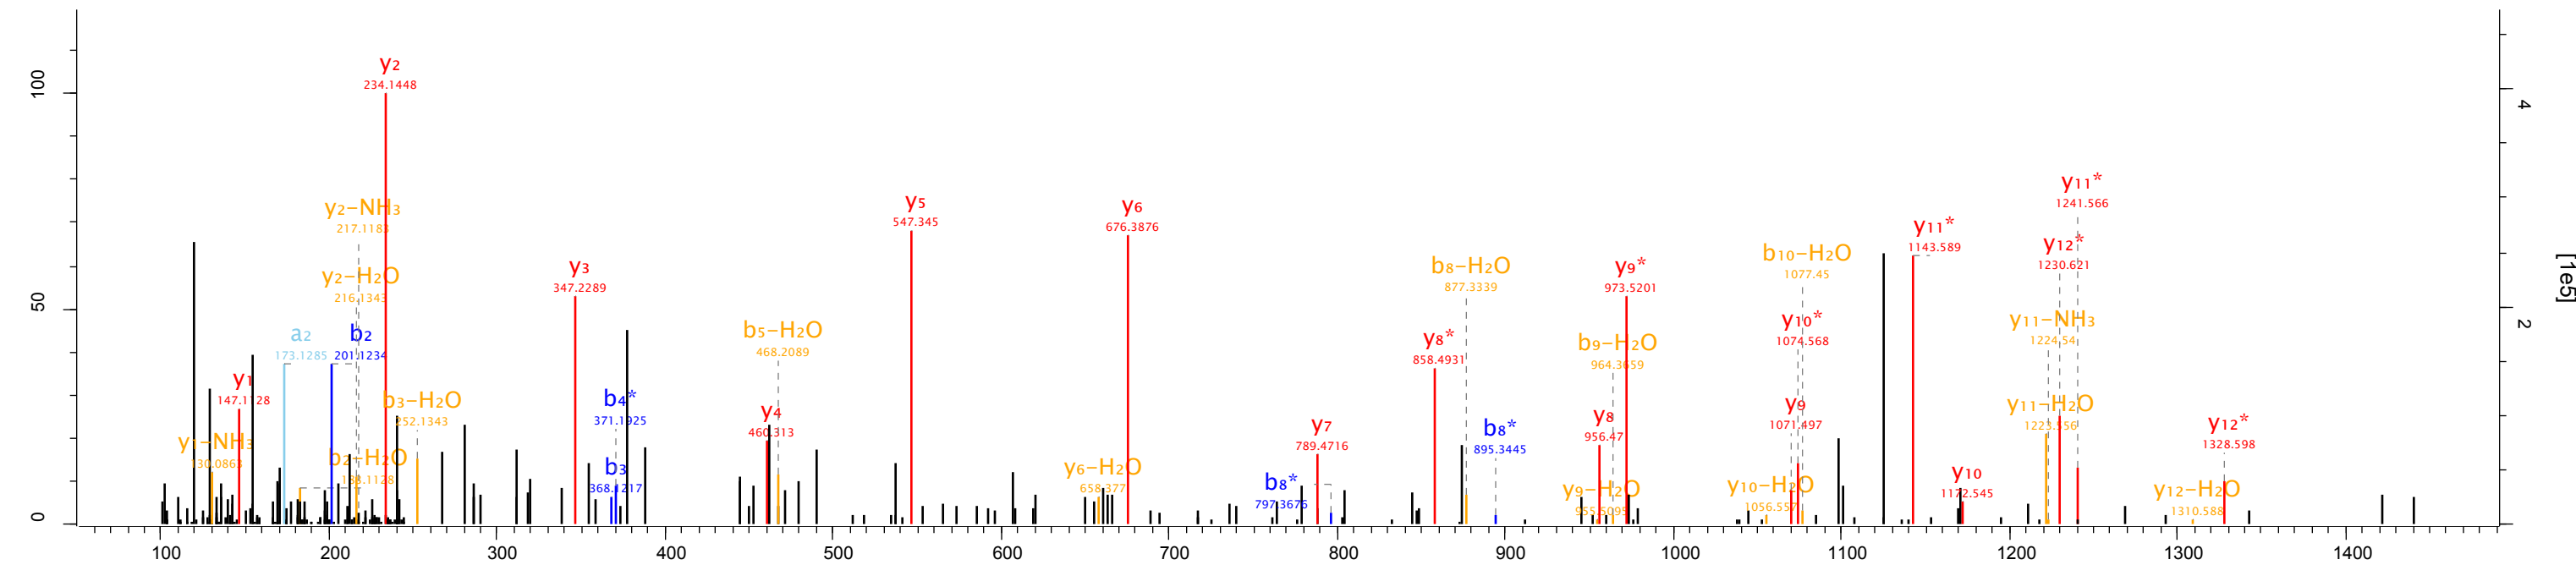

- L y12\* y11\*  
ph y10 y9 y8  
ph y7 y6 y5 y4 y3 y2 y1 -

S S T D S L E S L L S K

b2 b3 b4\* b8\*

Raw file: 20150814\_A375SR\_Phospho\_BR2\_03  
 Scan: 26916 Method: FTMS; HCD Score: 132.28 m/z: 956.12 Gene names: EPHA2

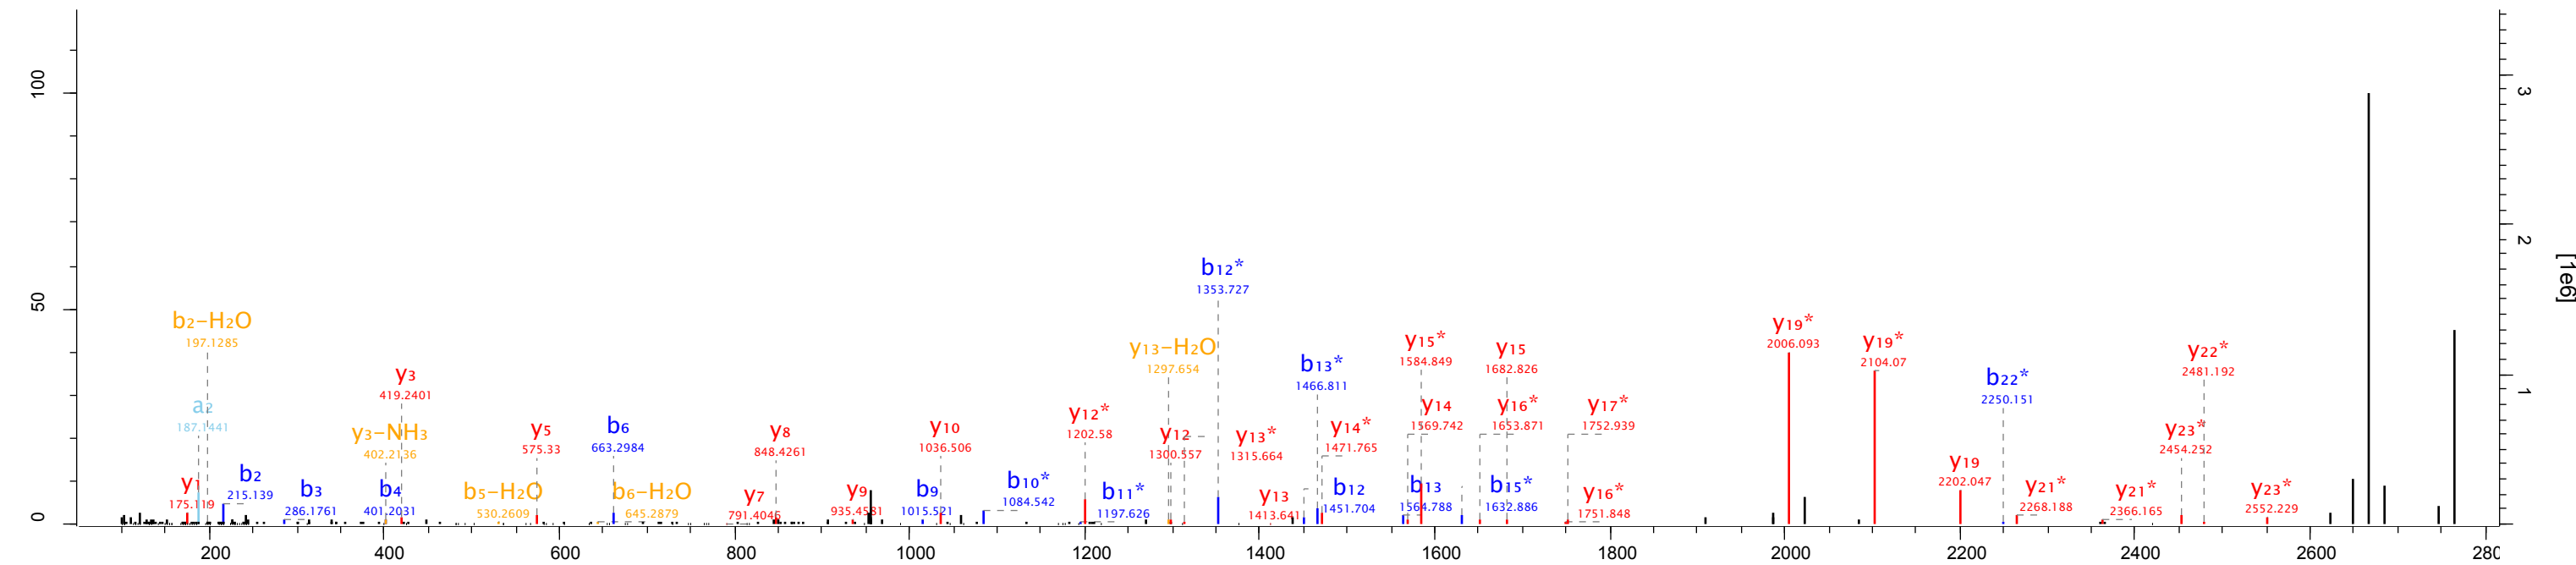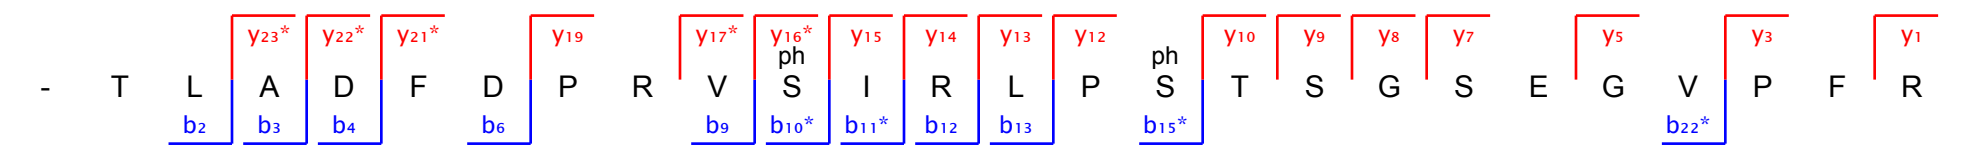

Raw file: 20150814\_A375SR\_Phospho\_BR2\_03  
 Scan: 2756 Method: FTMS; HCD Score: 53.39 m/z: 672.81 Gene names: ELL2

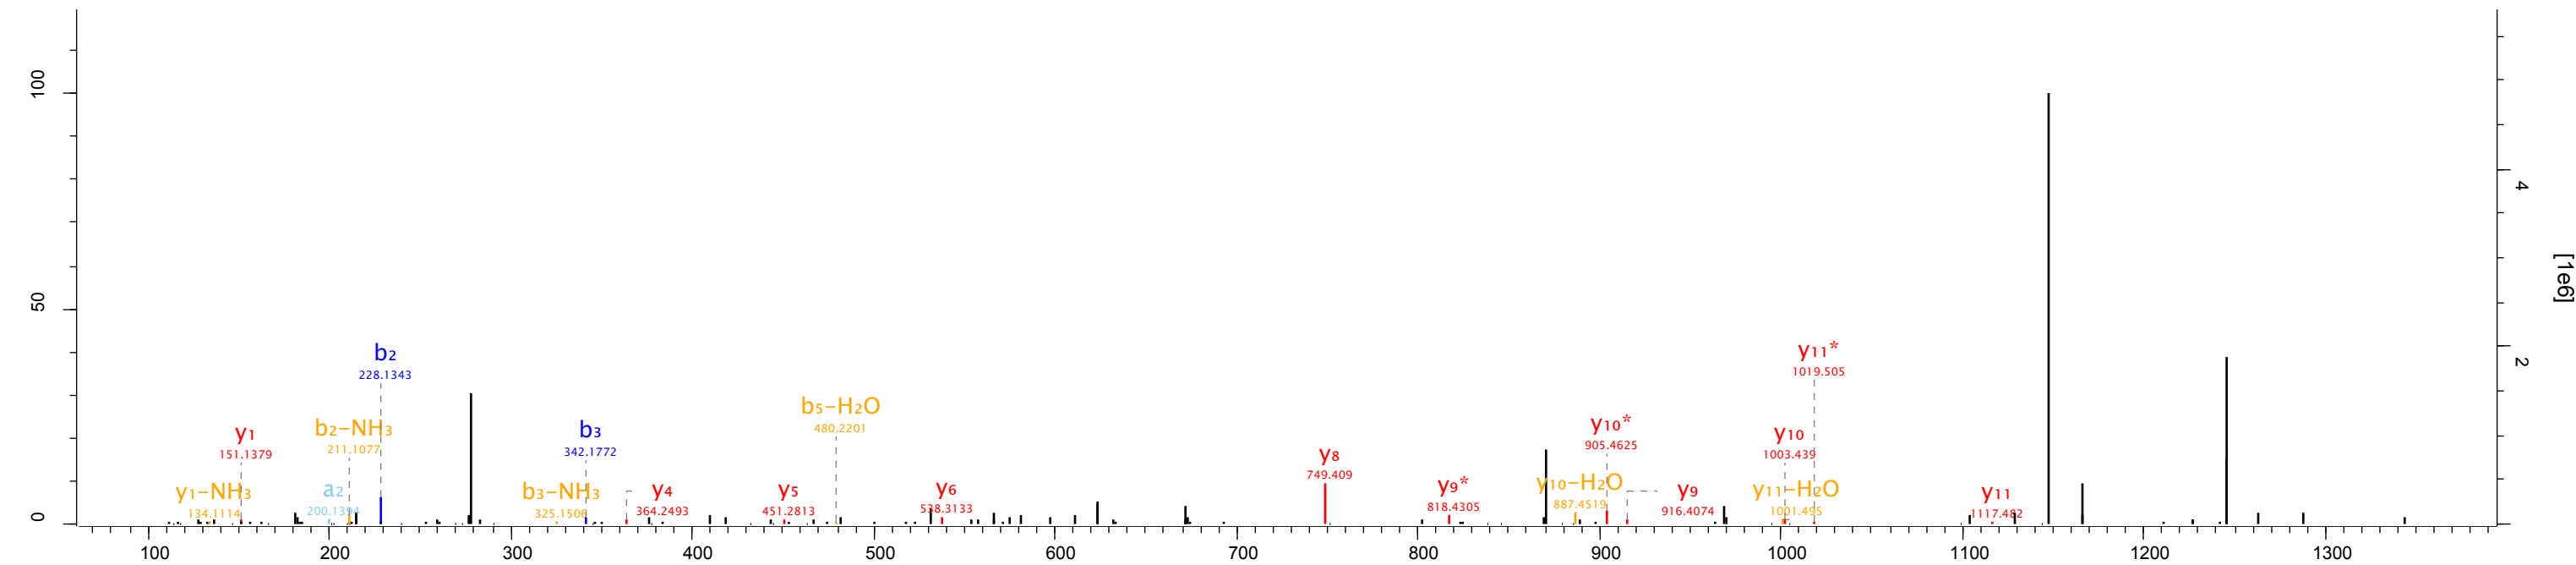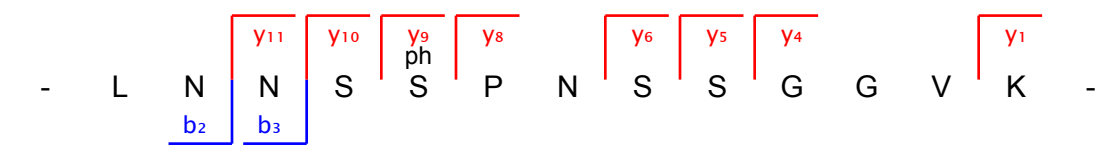

Raw file  
 20150814\_A375SR\_Phospho\_BR2\_03  
 Scan 28026 Method FTMS; HCD Score 265.72 m/z 1349.59 Gene names WRAP53

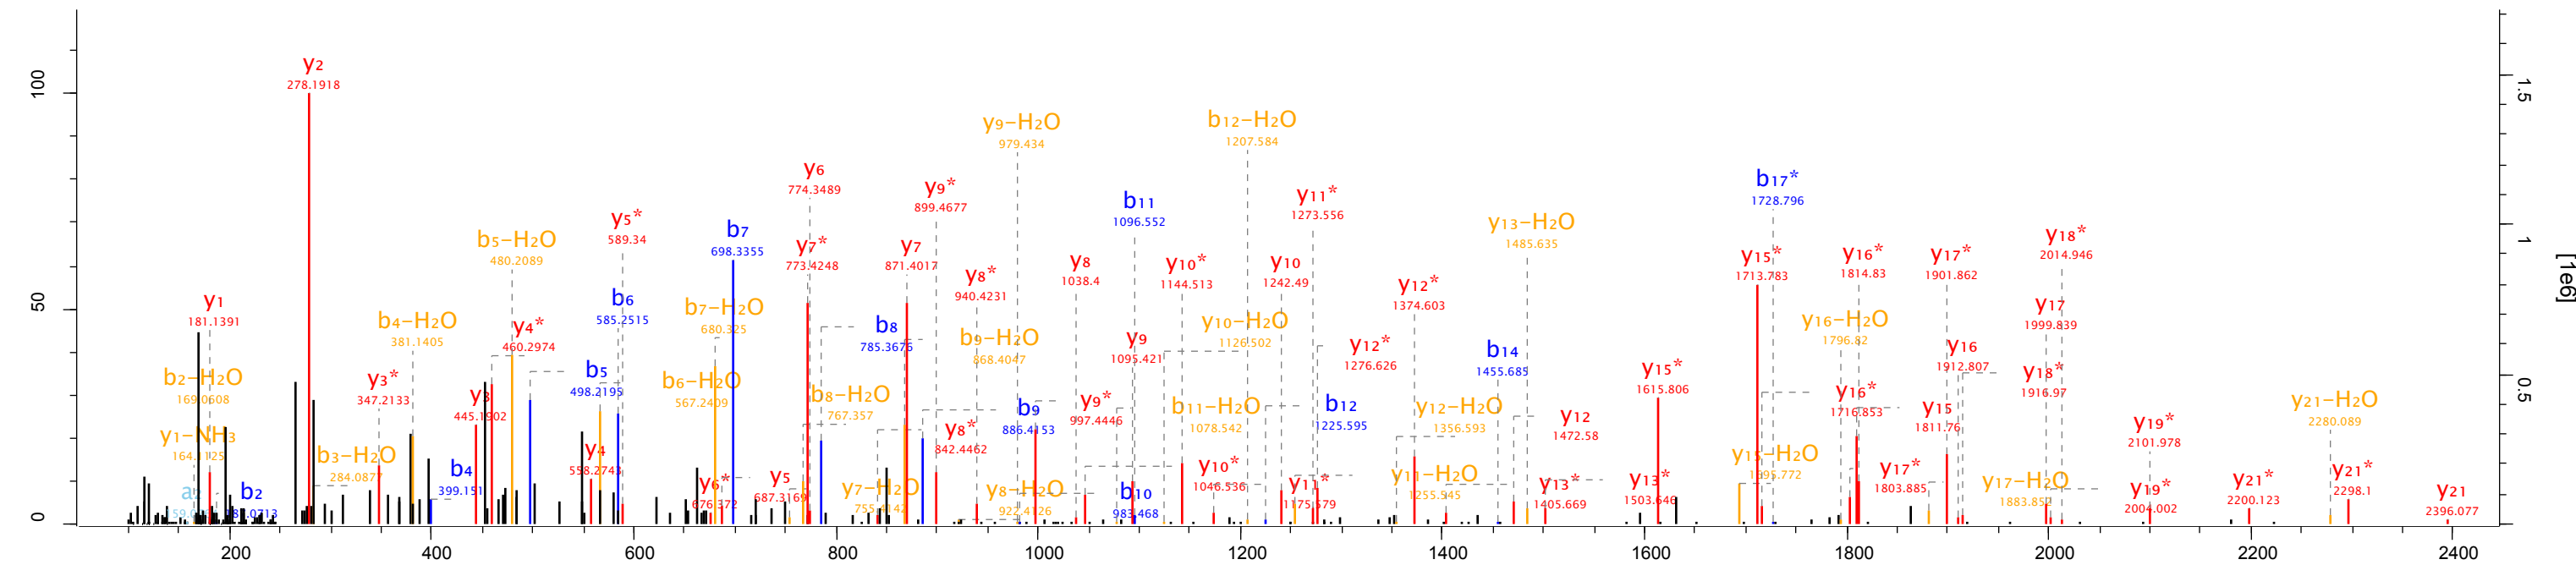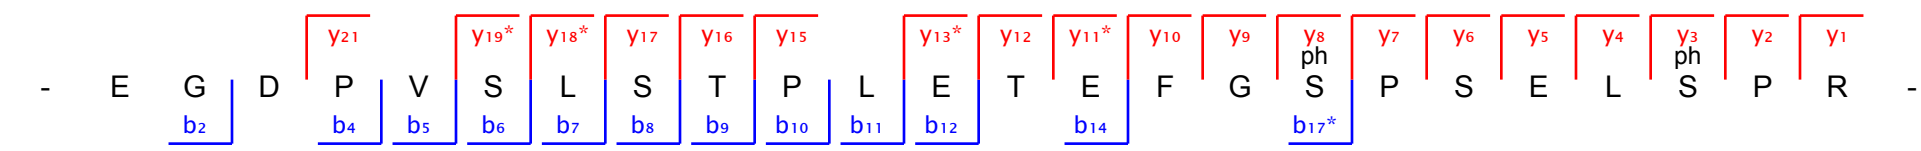

Raw file: 20150814\_A375SR\_Phospho\_BR2\_03  
 Scan: 28046 Method: FTMS; HCD Score: 68.76 m/z: 1026.14 Gene names: RAVER1

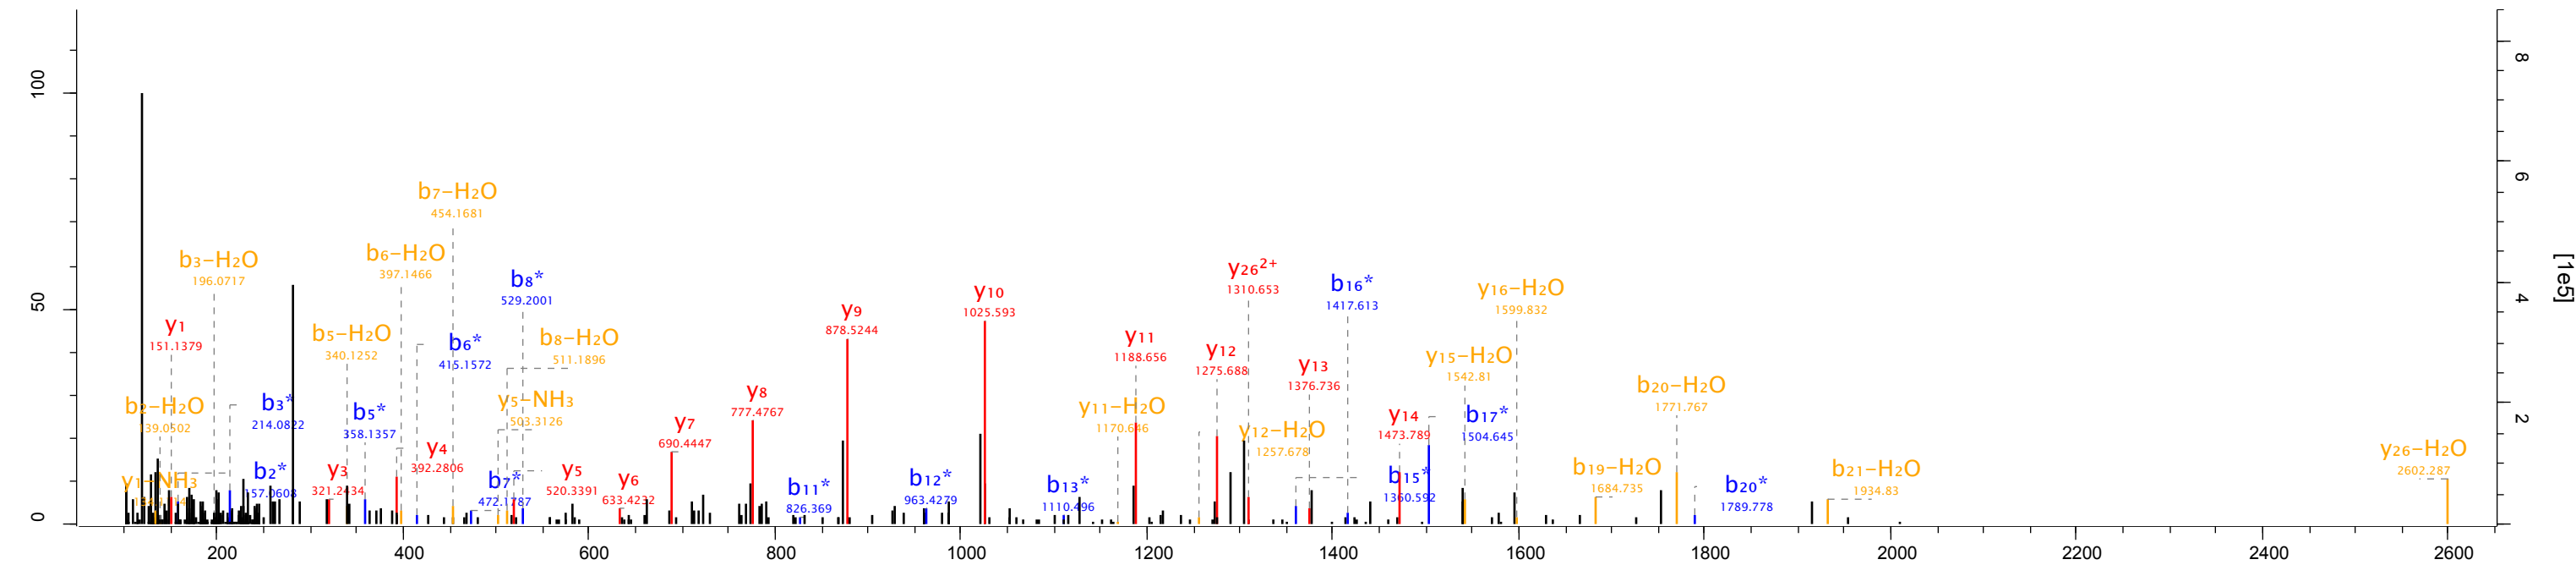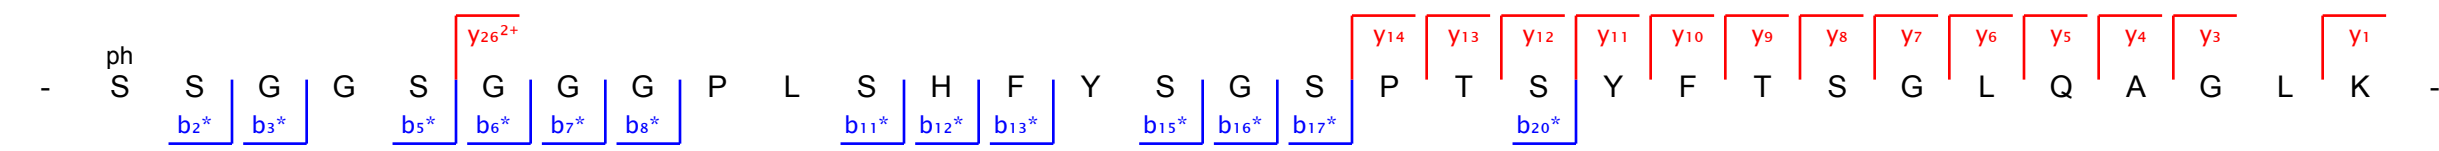

Raw file 20150814\_A375SR\_Phospho\_BR2\_03 Scan 28646 Method FTMS; HCD Score 110.57 m/z 1109.19 Gene names MYO18A

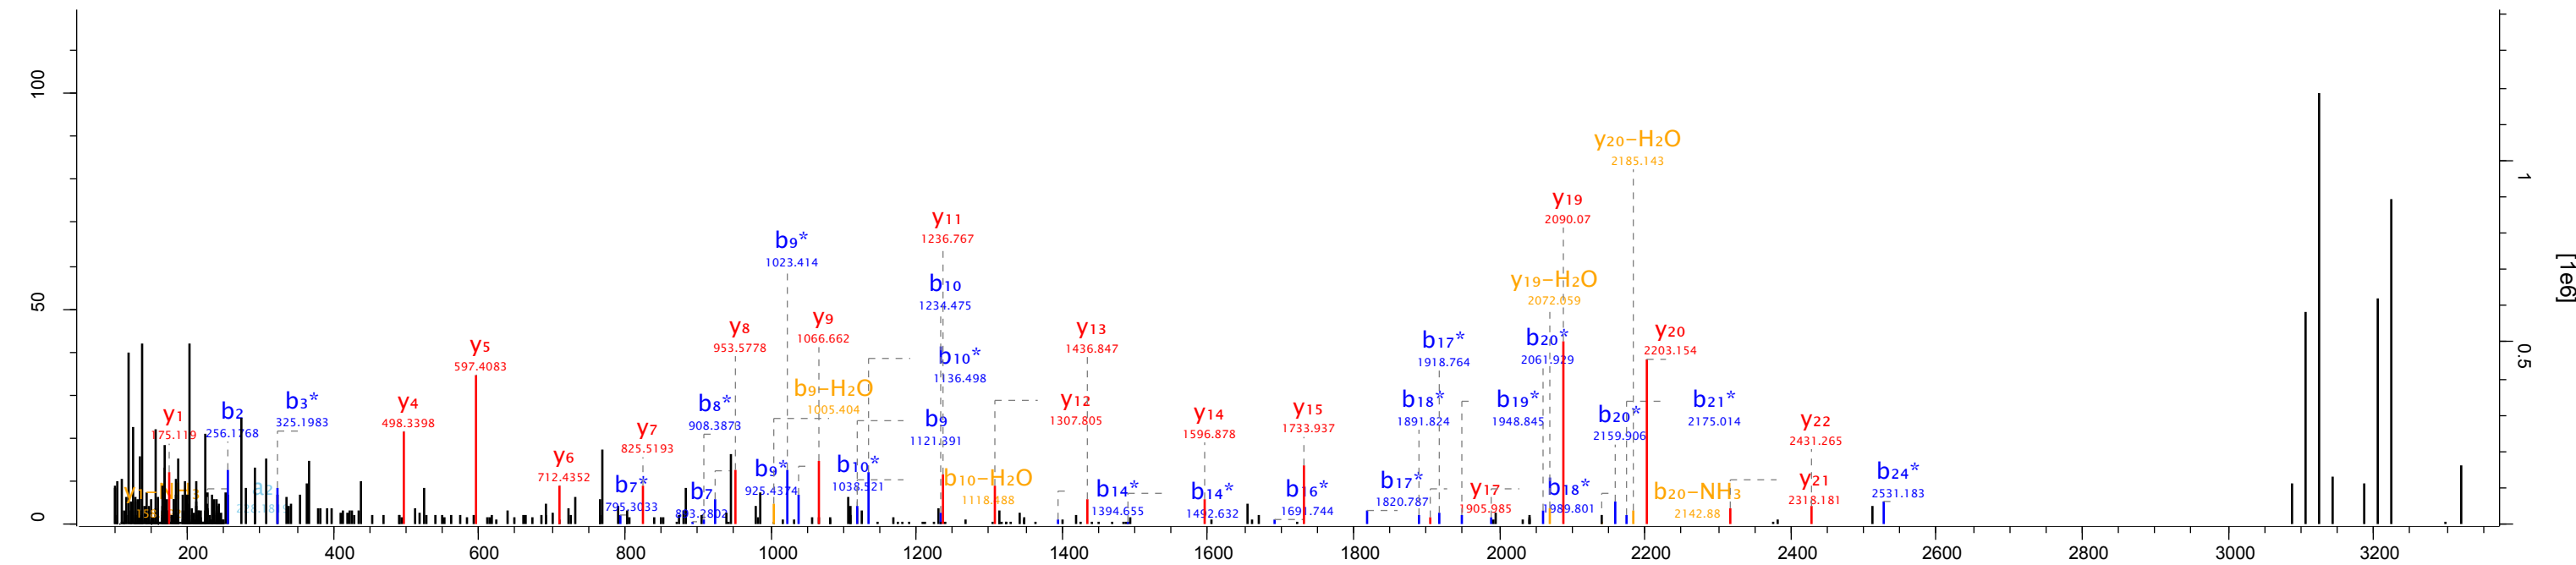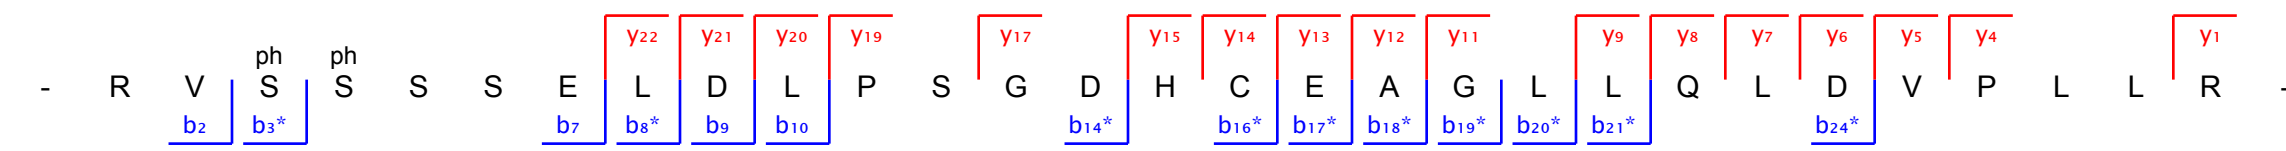

Raw file  
20150814\_A375SR\_Phospho\_BR2\_03

Scan 28686 Method FTMS; HCD Score 322.66 m/z 1475.2 Gene names MAP1B

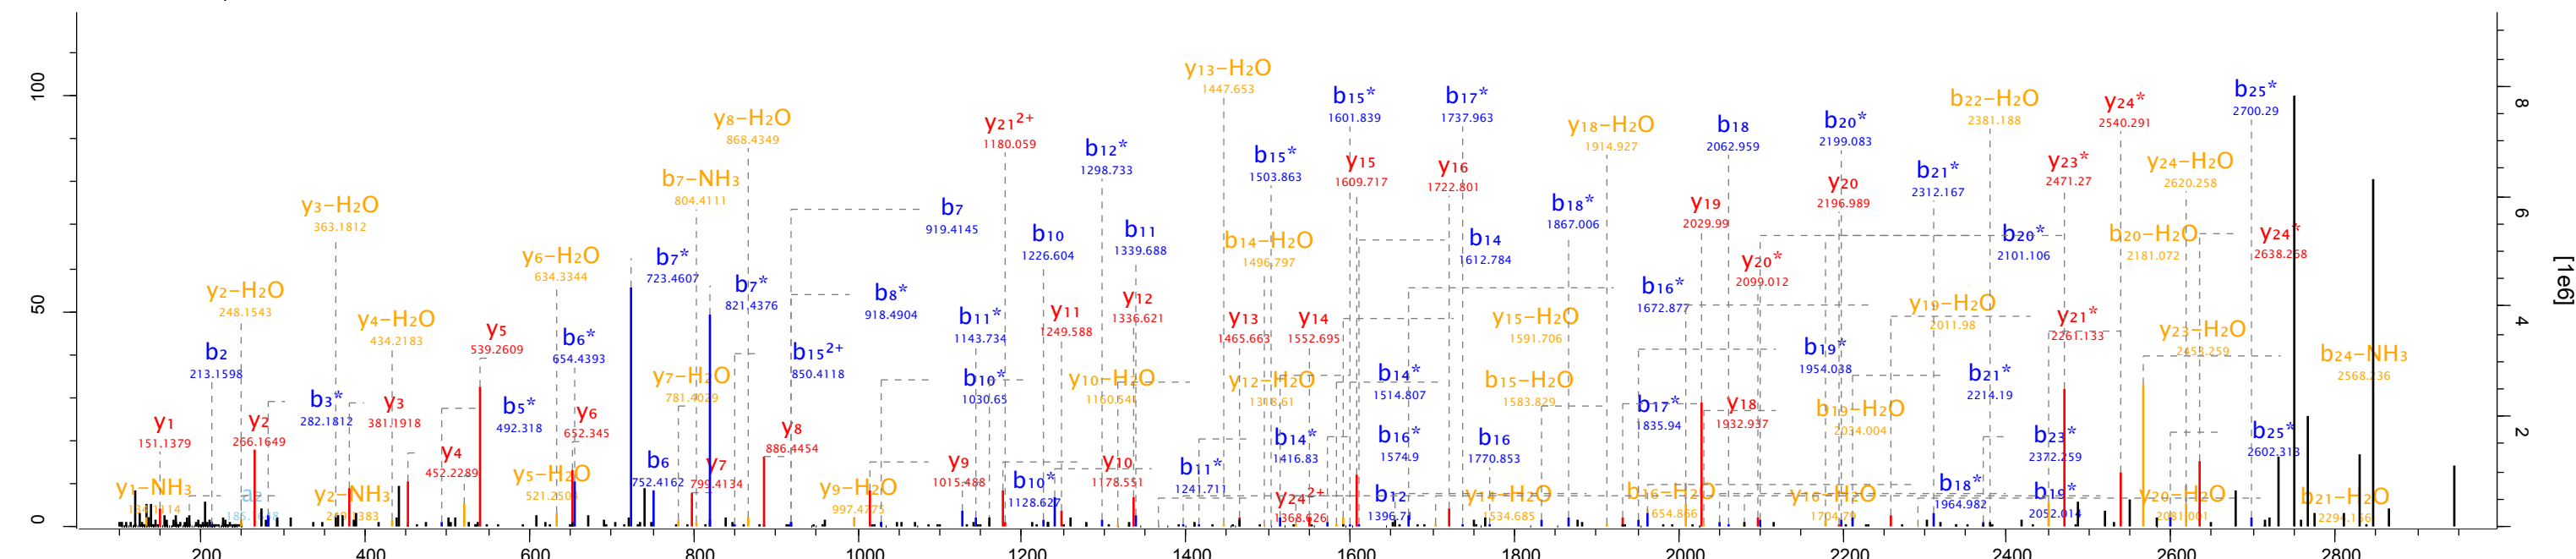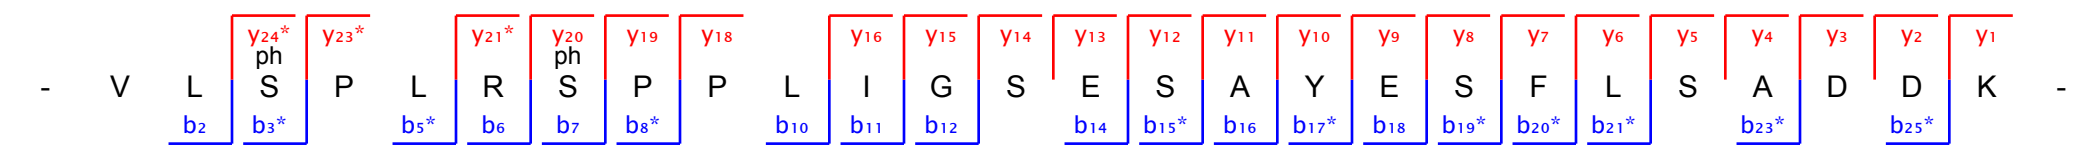



Raw file 20150814\_A375SR\_Phospho\_BR2\_03 Scan 28706 Method FTMS; HCD Score 184.72 m/z 964.79 Gene names CDK12

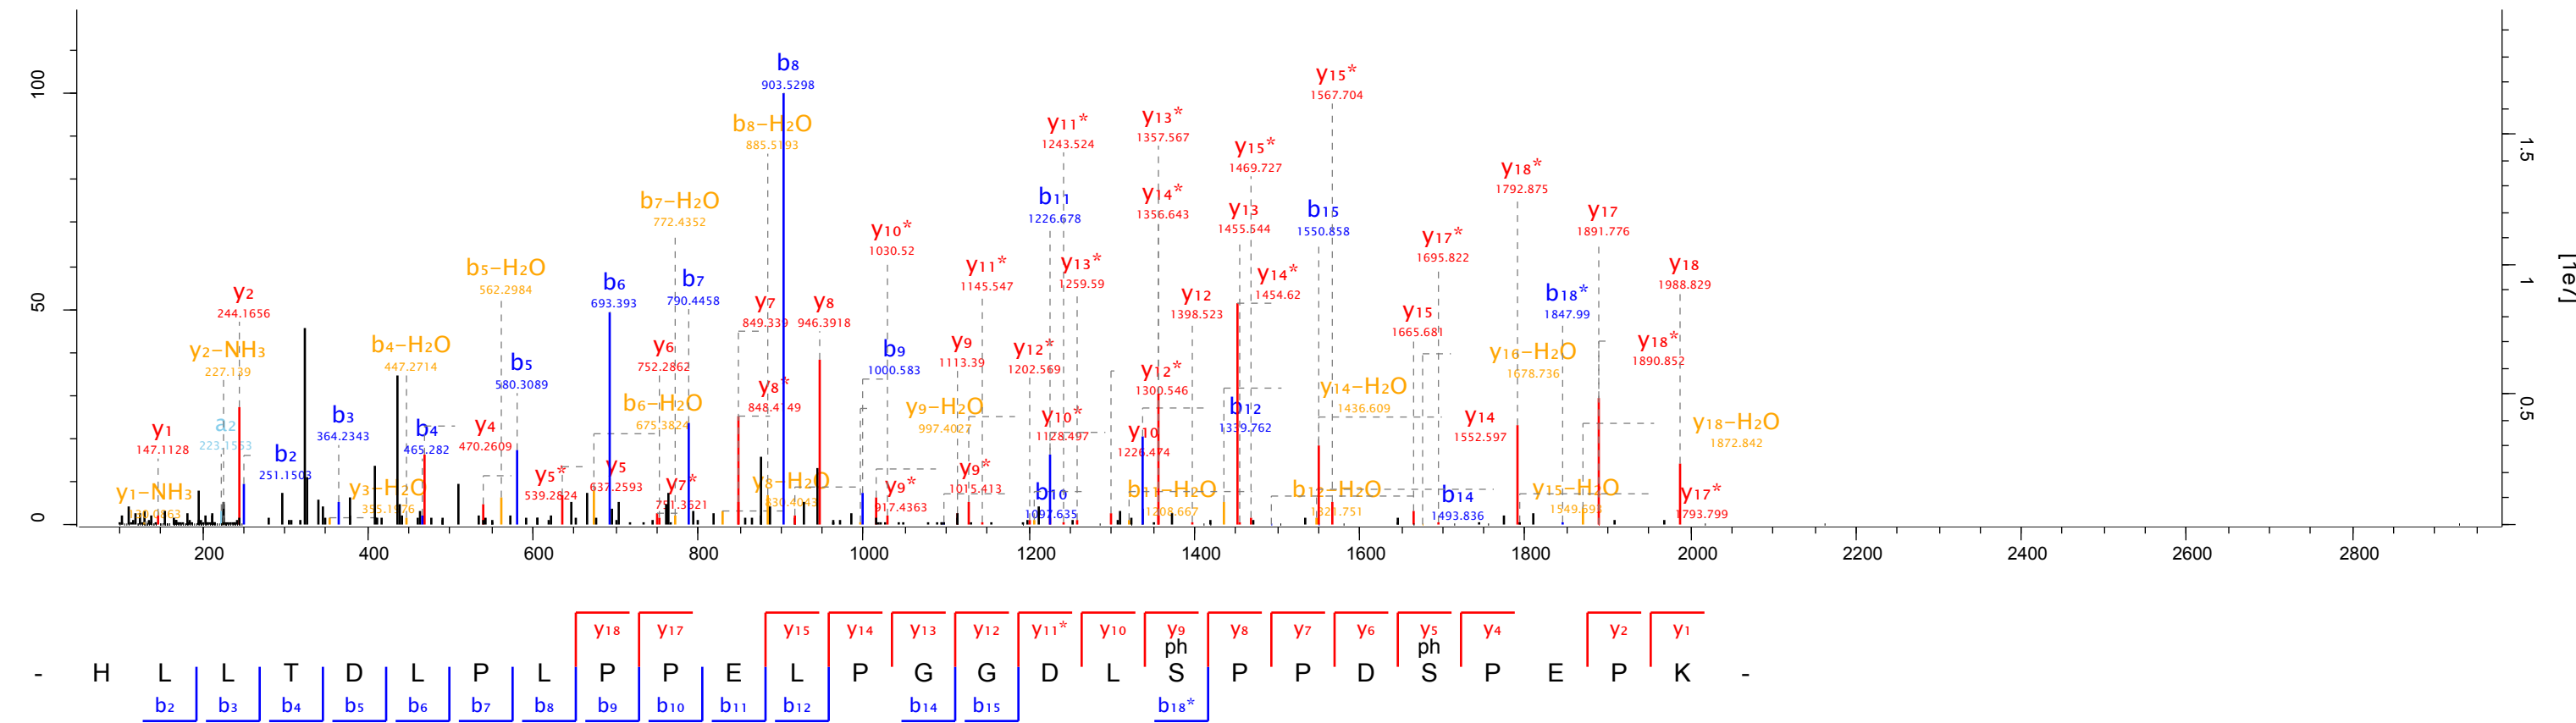

Raw file: 20150814\_A375SR\_Phospho\_BR2\_03  
 Scan: 28716 Method: FTMS; HCD Score: 223.86 m/z: 953.47 Gene names: PAK4;NRBP2

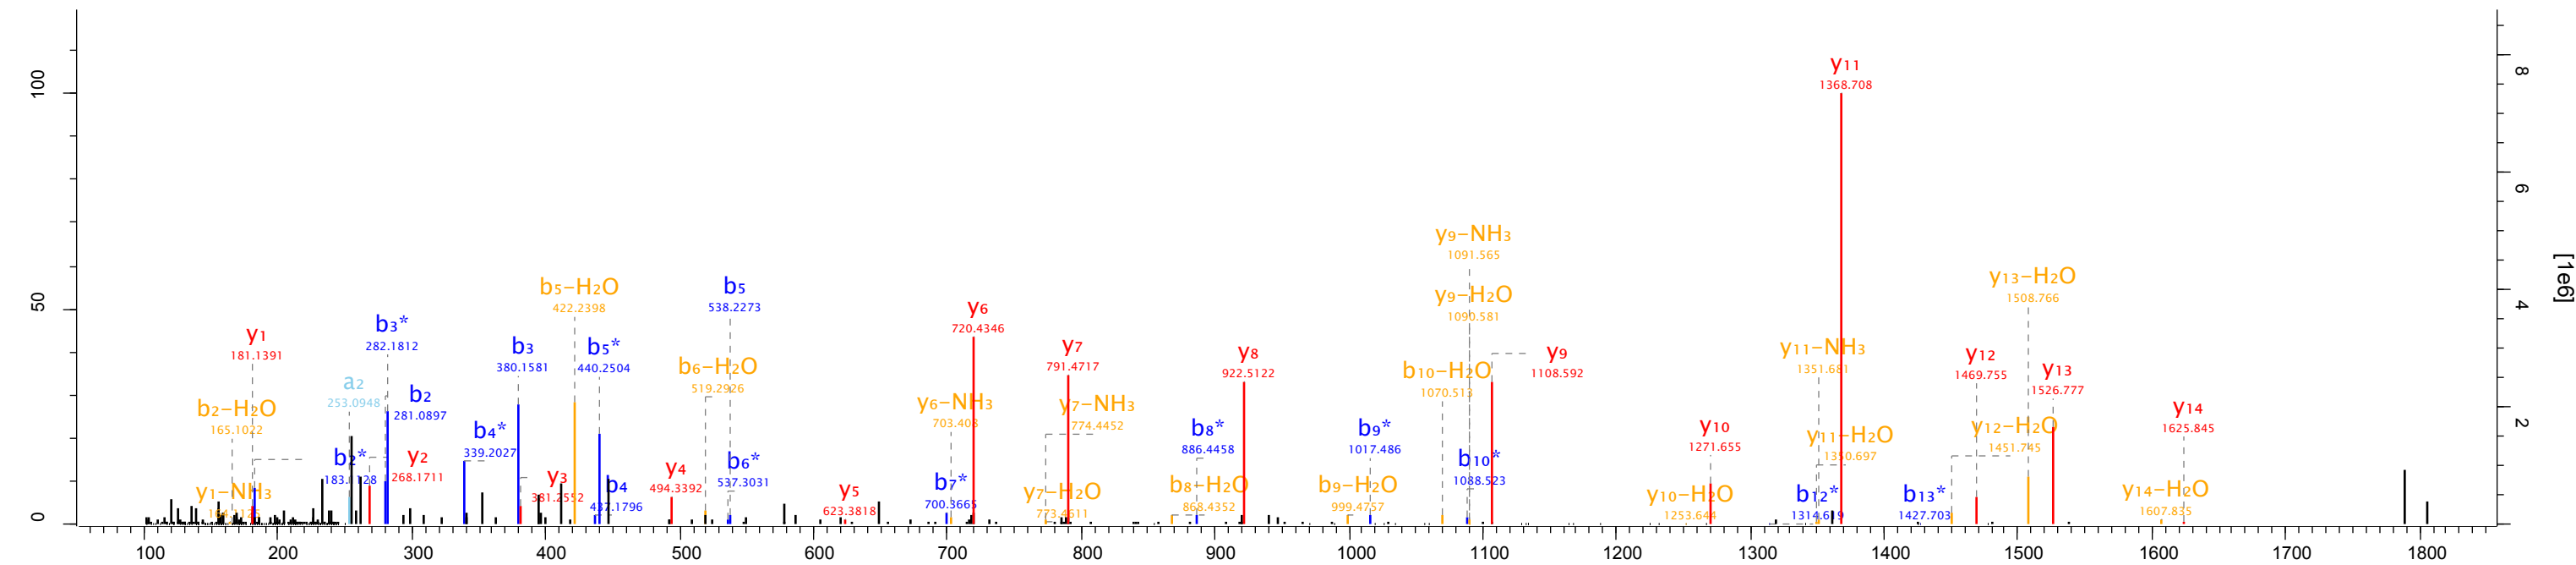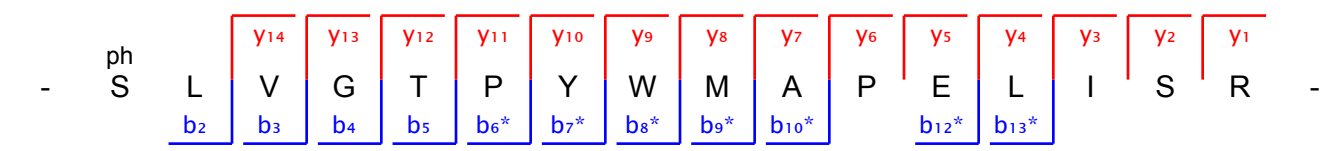

Raw file 20150814\_A375SR\_Phospho\_BR2\_03 Scan 28826 Method FTMS; HCD Score 184.53 m/z 1046.53 Gene names SPICE1

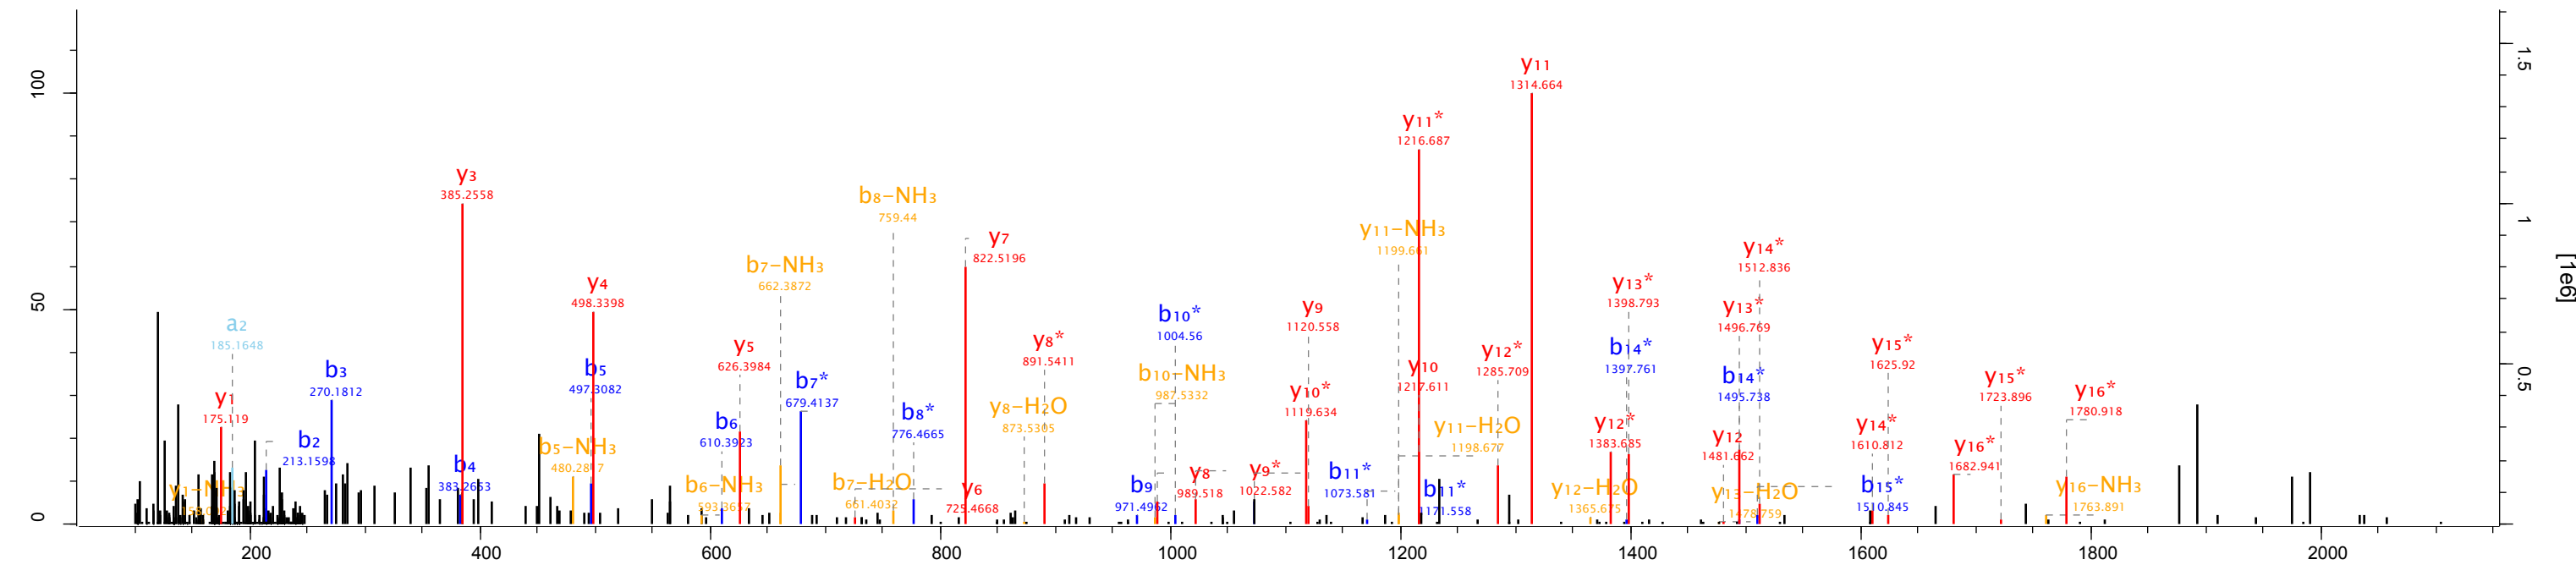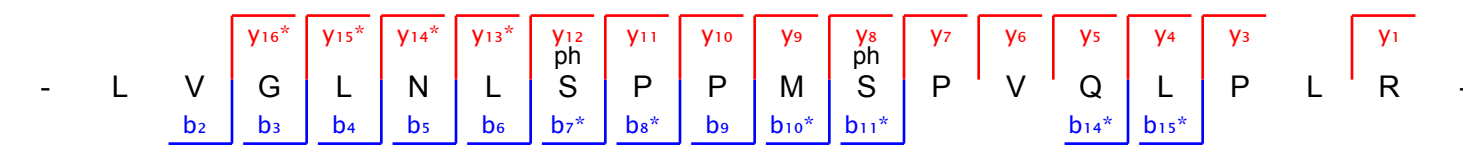

Raw file  
20150814\_A375SR\_Phospho\_BR2\_03

Scan 28846 Method FTMS; HCD Score 59.37 m/z 957.17 Gene names CDC42EP3

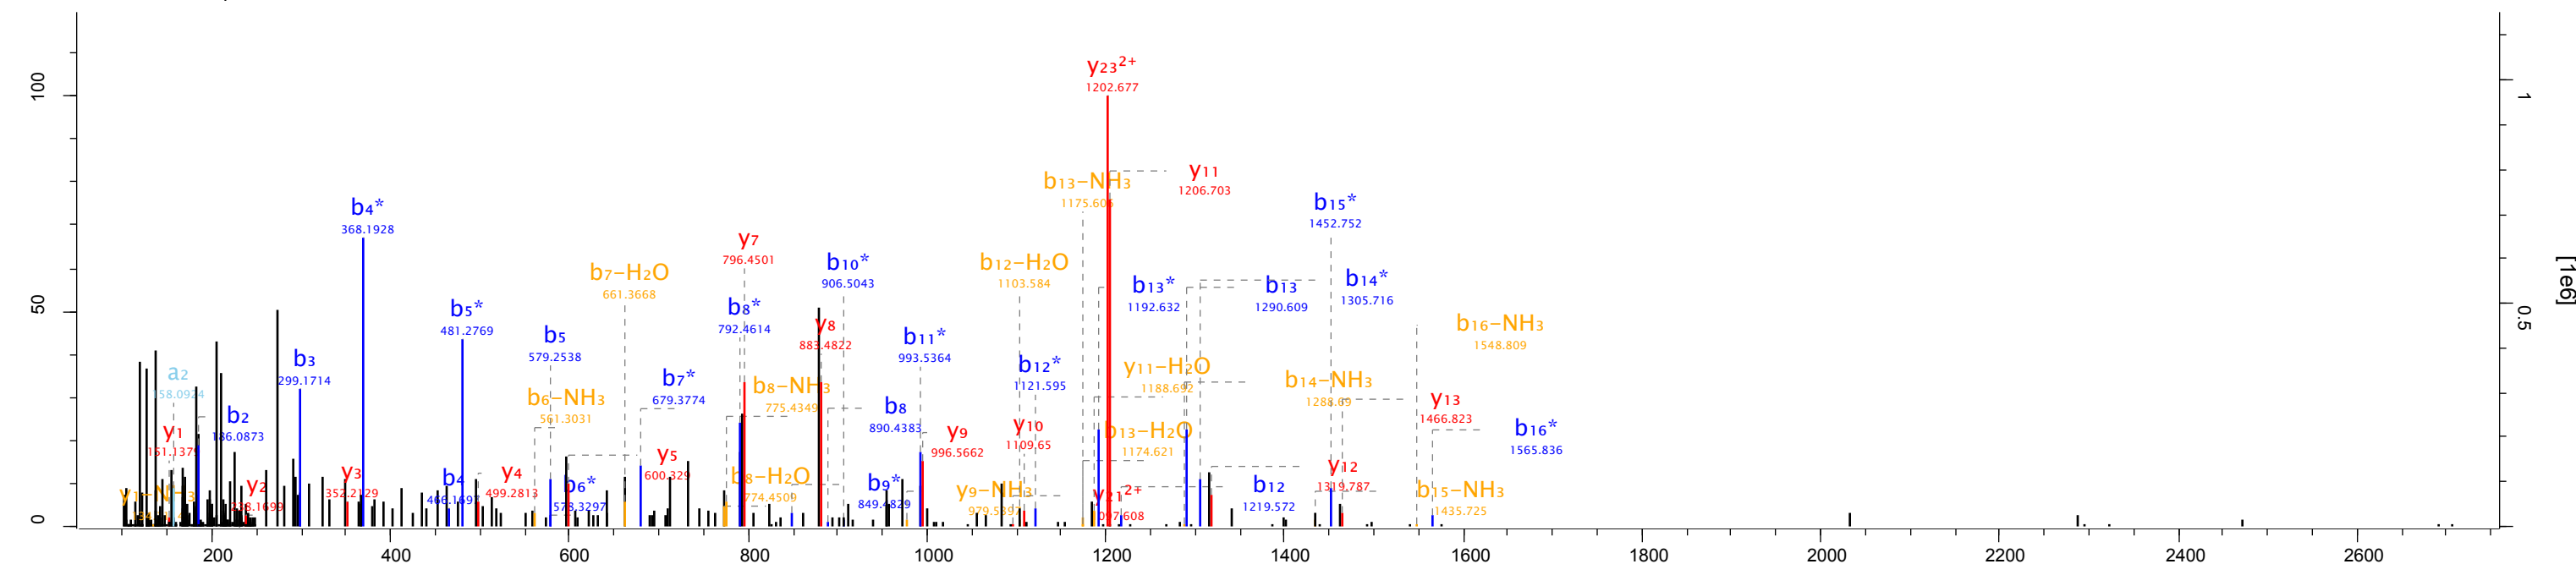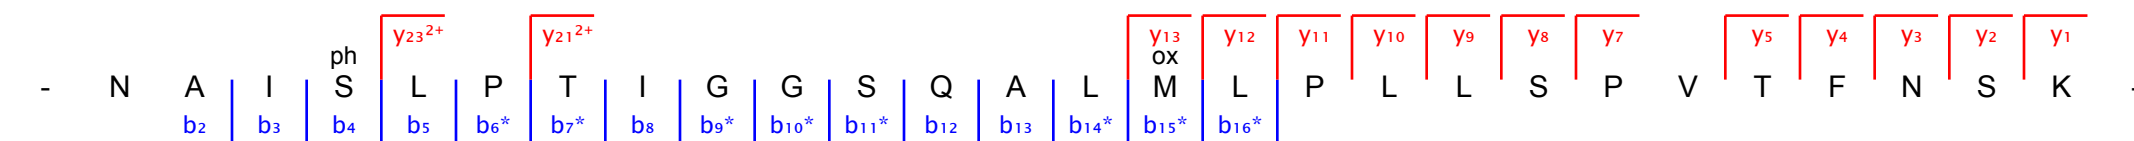

Raw file: 20150814\_A375SR\_Phospho\_BR2\_03  
 Scan: 2886 Method: FTMS; HCD Score: 99.29 m/z: 778.34 Gene names: ERC1

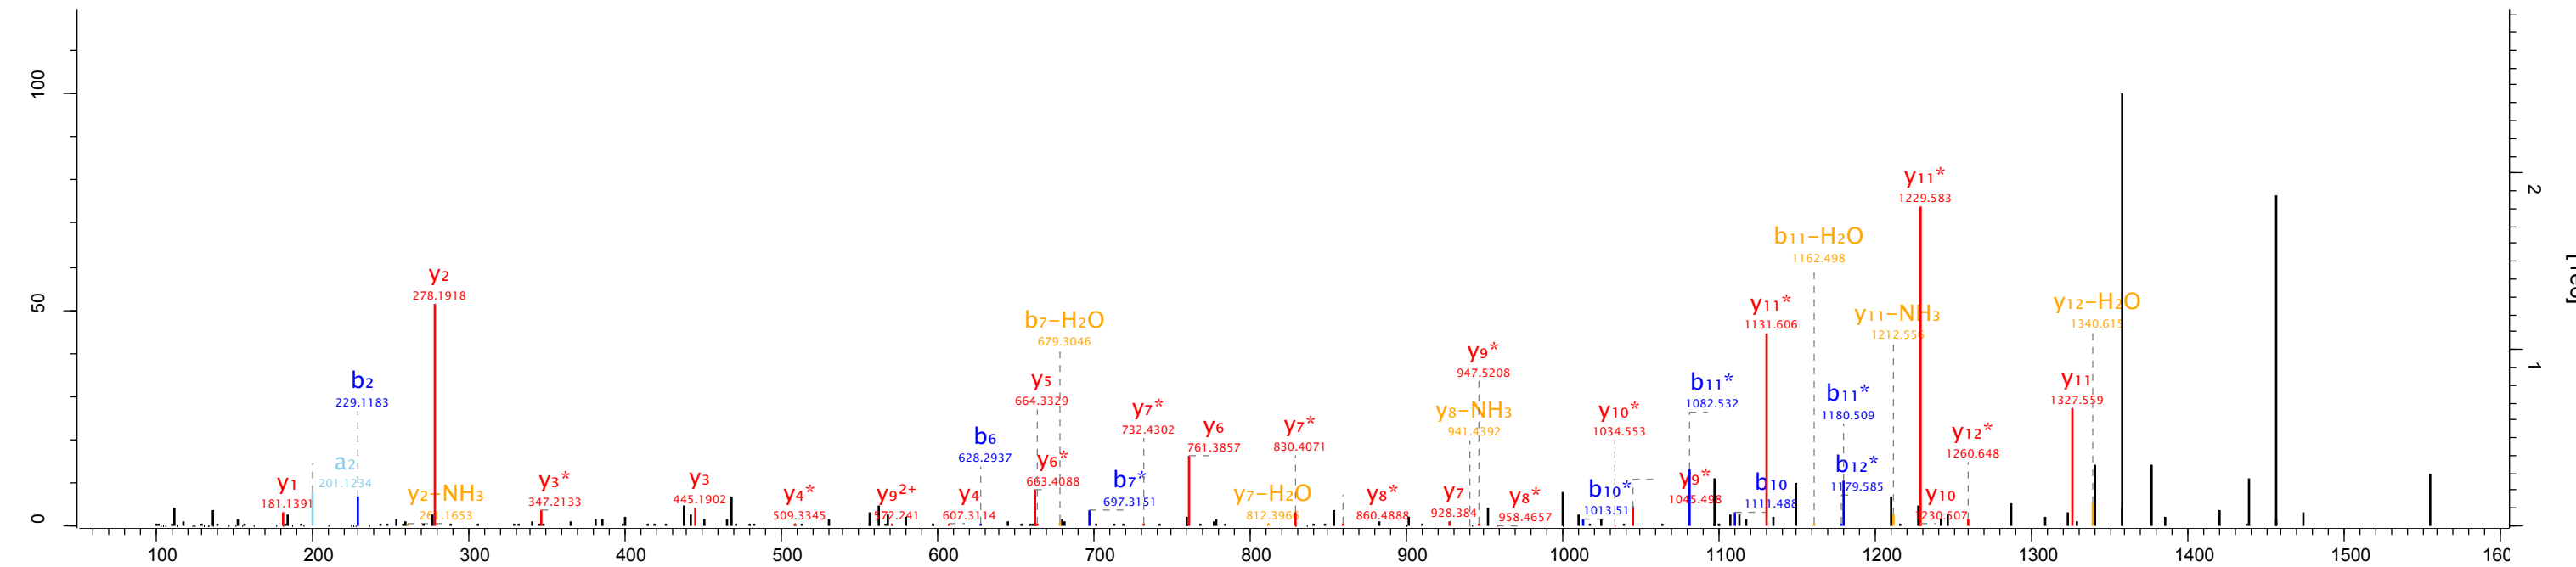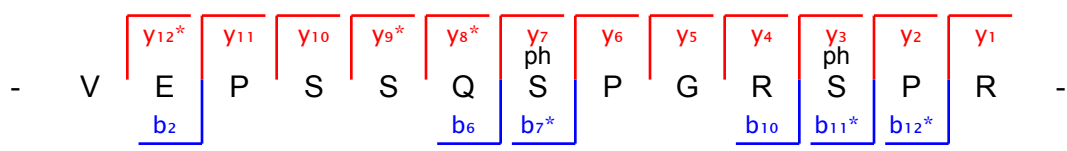

Raw file: 20150814\_A375SR\_Phospho\_BR2\_03  
 Scan: 2906 Method: FTMS; HCD Score: 65.9 m/z: 502.22 Gene names: PCF11

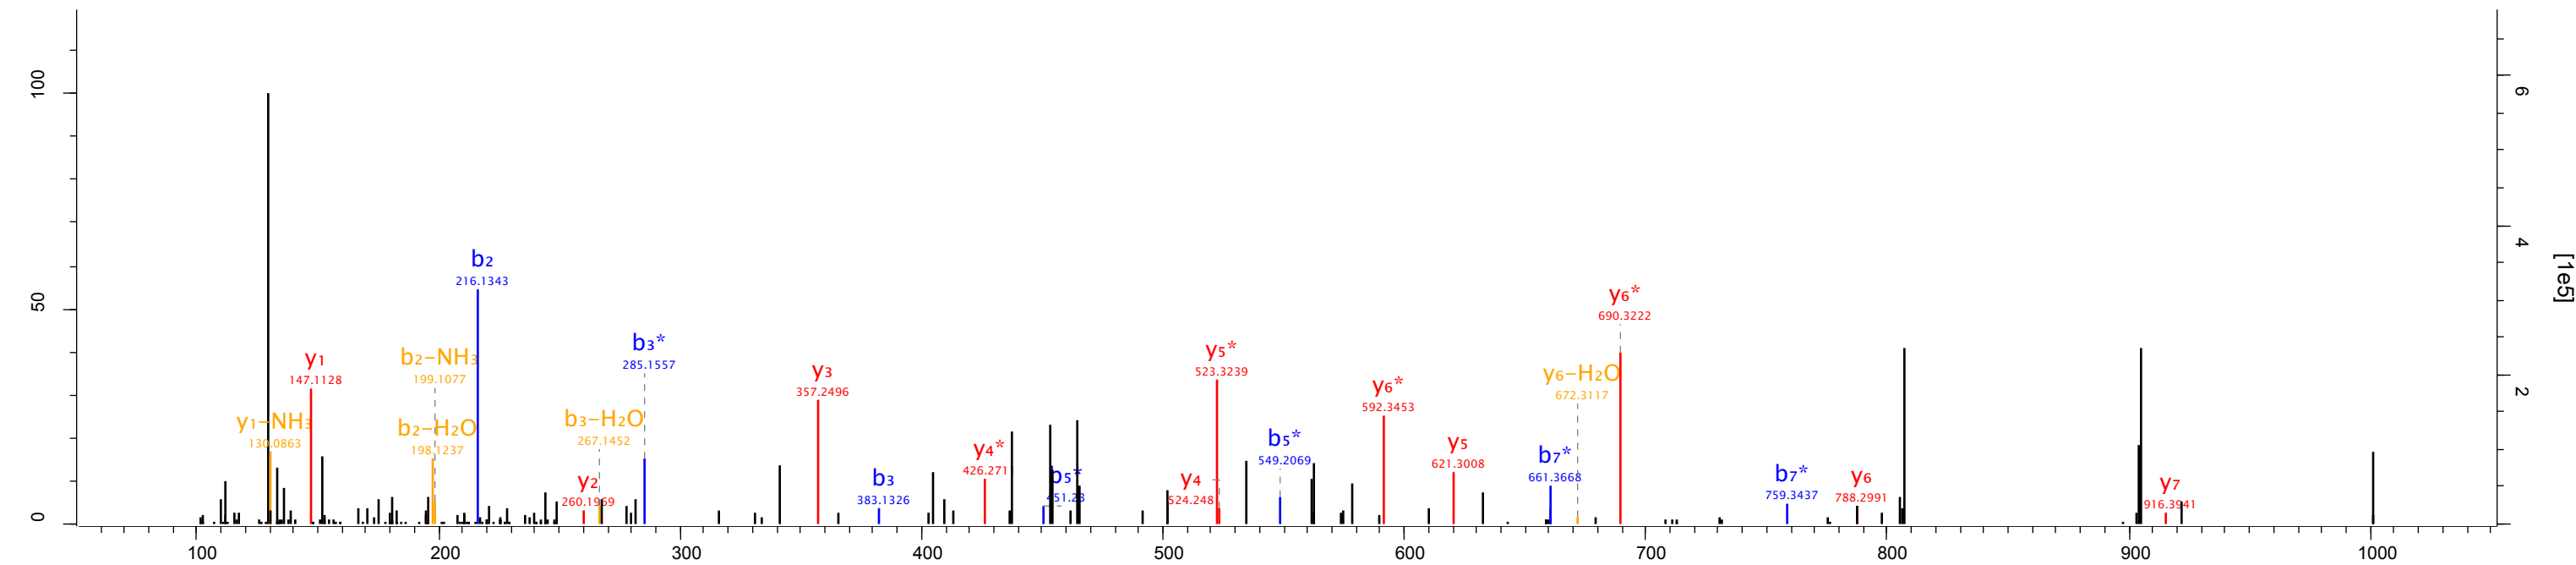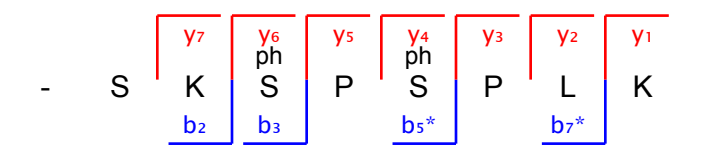

Raw file: 20150814\_A375SR\_Phospho\_BR2\_03  
 Scan: 3406 Method: FTMS; HCD Score: 188.78 m/z: 684.79 Gene names: C7orf43

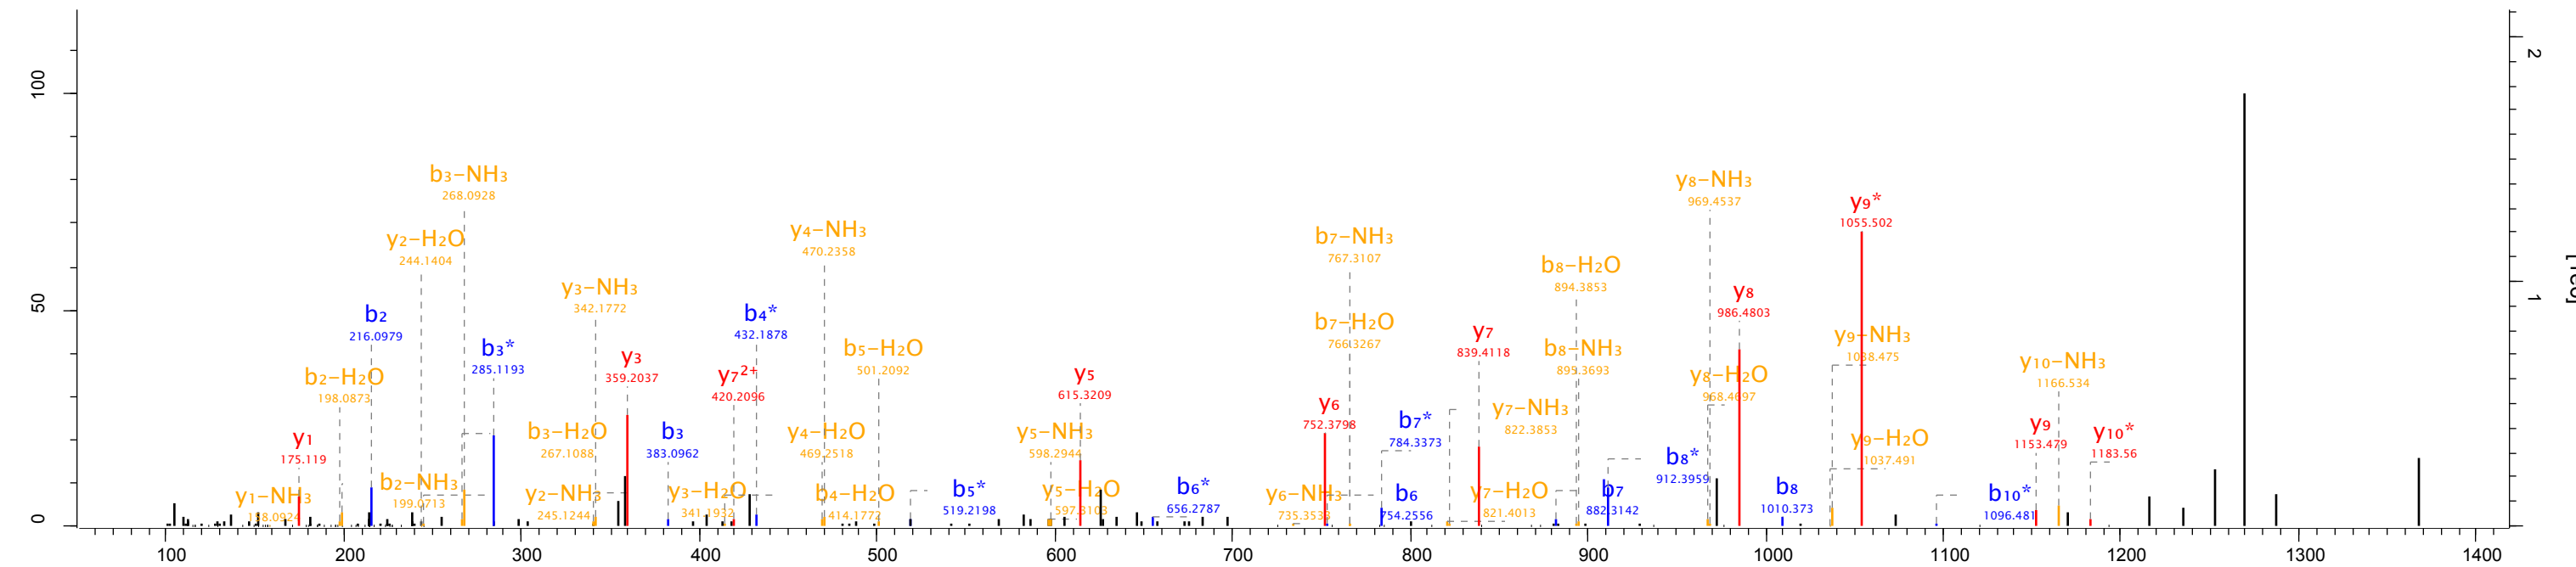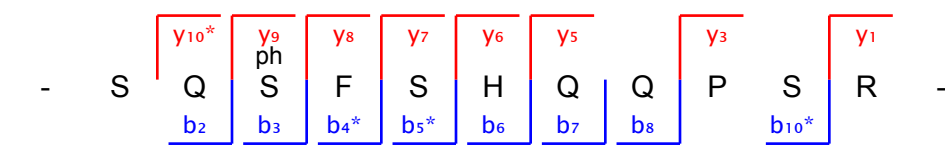

Raw file: 20150814\_A375SR\_Phospho\_BR2\_03  
 Scan: 3646 Method: FTMS; HCD Score: 65.65 m/z: 682.3 Gene names: PAPOLA

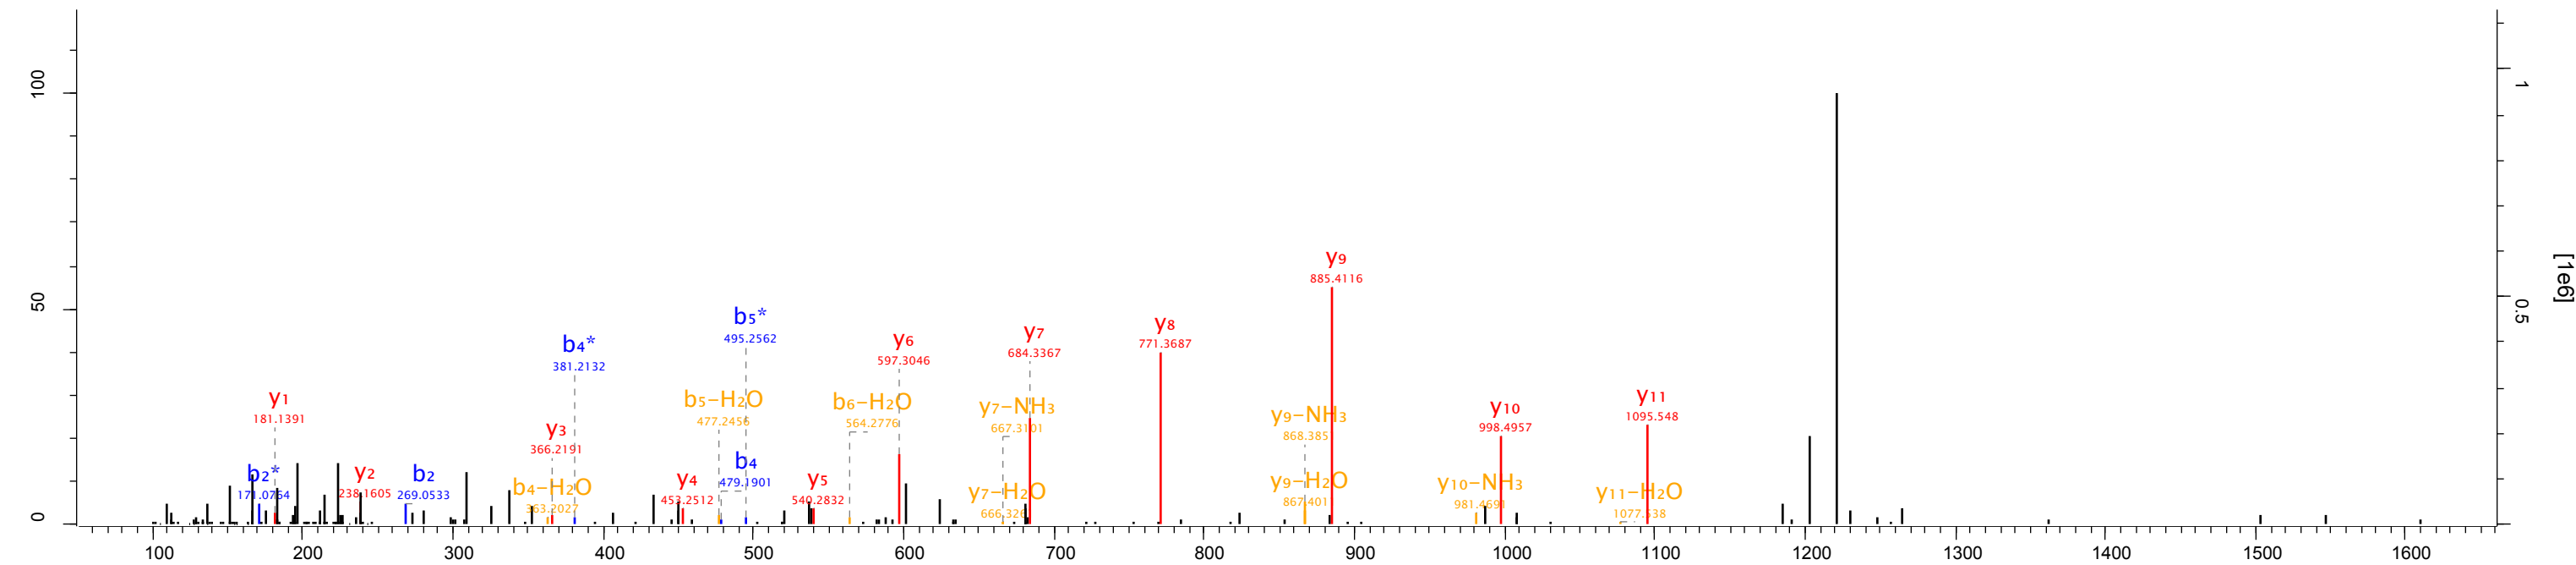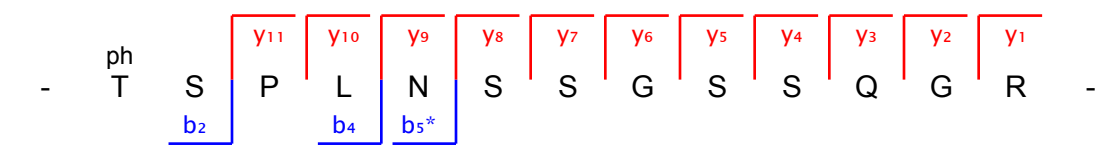



20150814\_A375SR\_Phospho\_BR2\_03 3906 FTMS; HCD 83.54 767.32 SRRM1

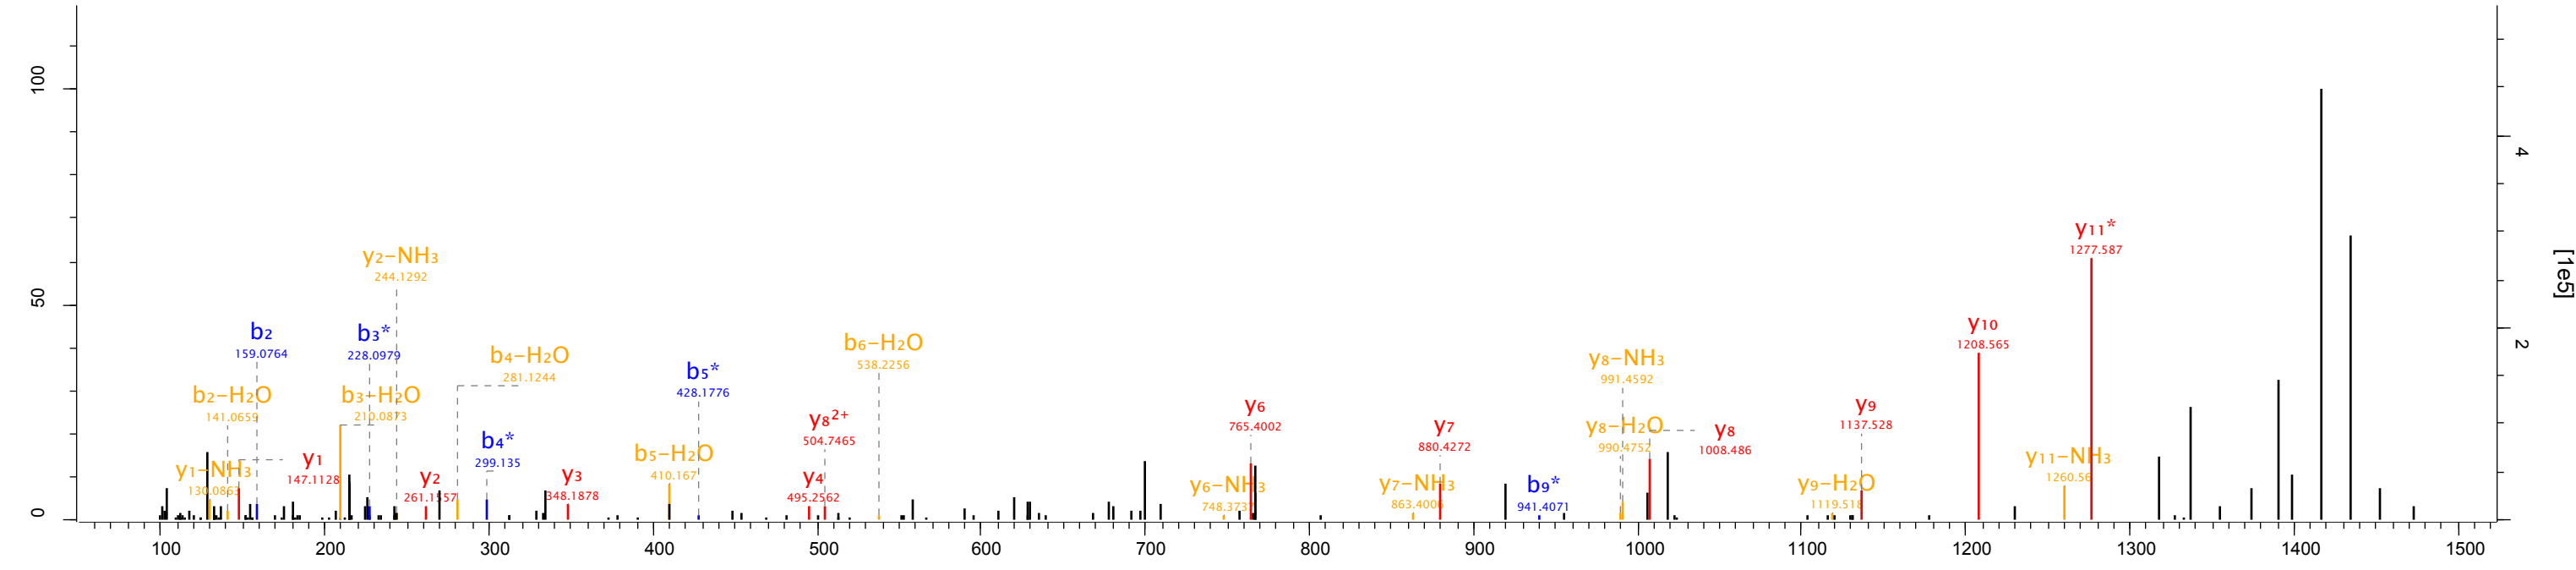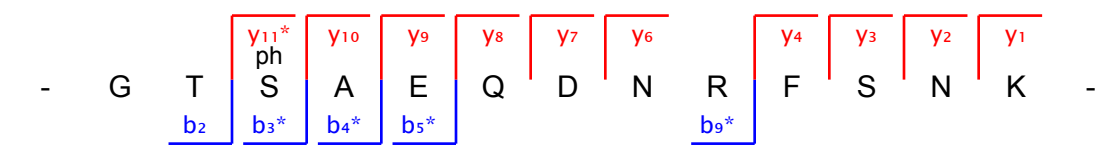

Raw file: 20150814\_A375SR\_Phospho\_BR2\_03  
 Scan: 4236 Method: FTMS; HCD Score: 58.97 m/z: 623.28 Gene names: MINK1

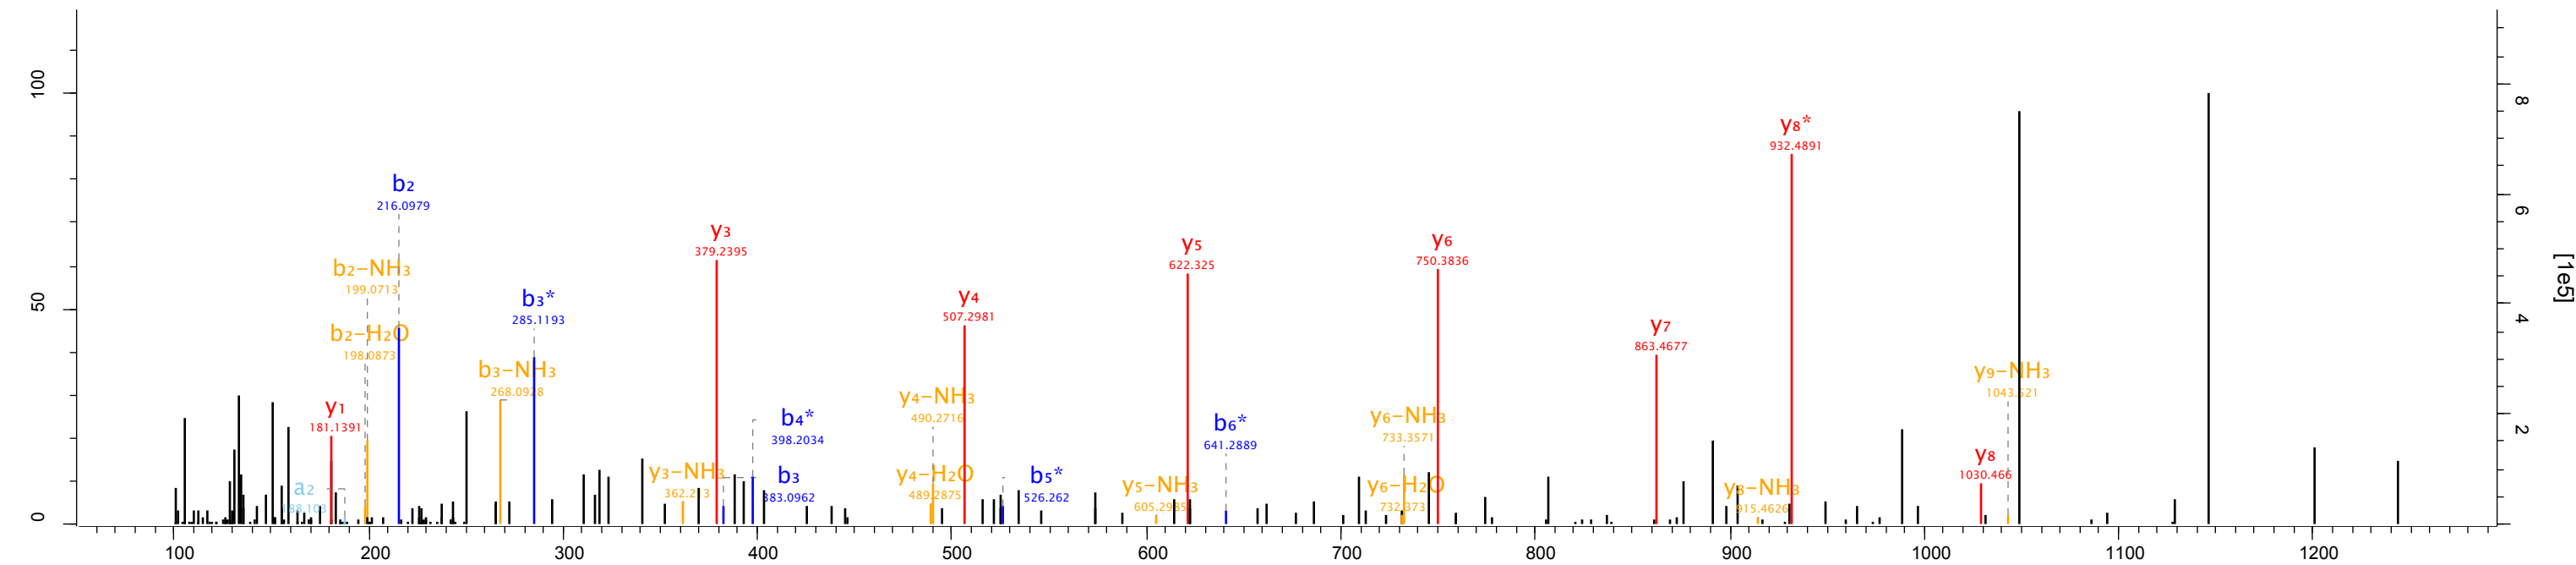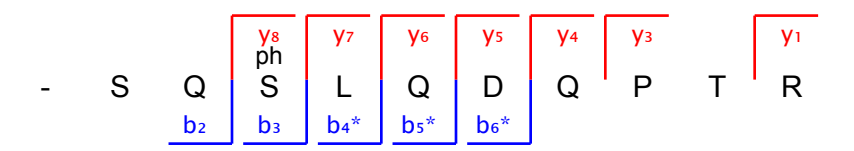

Raw file: 20150814\_A375SR\_Phospho\_BR2\_03  
 Scan: 4316 Method: FTMS; HCD Score: 49.59 m/z: 618.24 Gene names: STX12

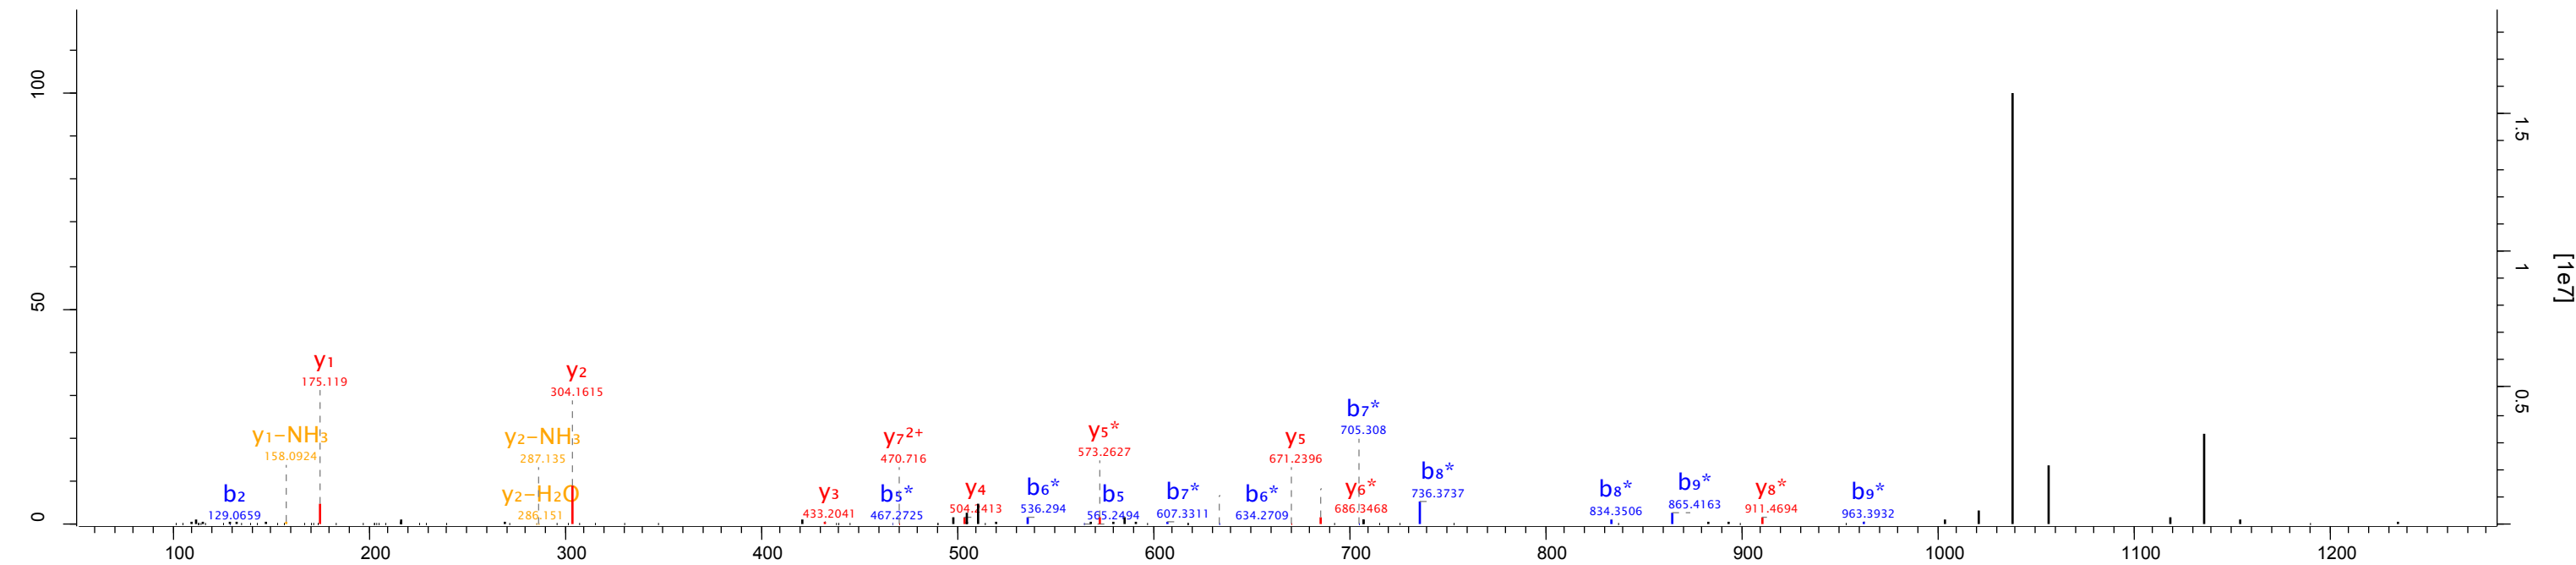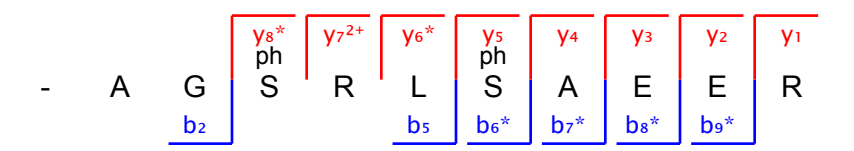

Raw file: 20150814\_A375SR\_Phospho\_BR2\_03  
 Scan: 4346 Method: FTMS; HCD Score: 183.24 m/z: 748.84 Gene names: PKP4

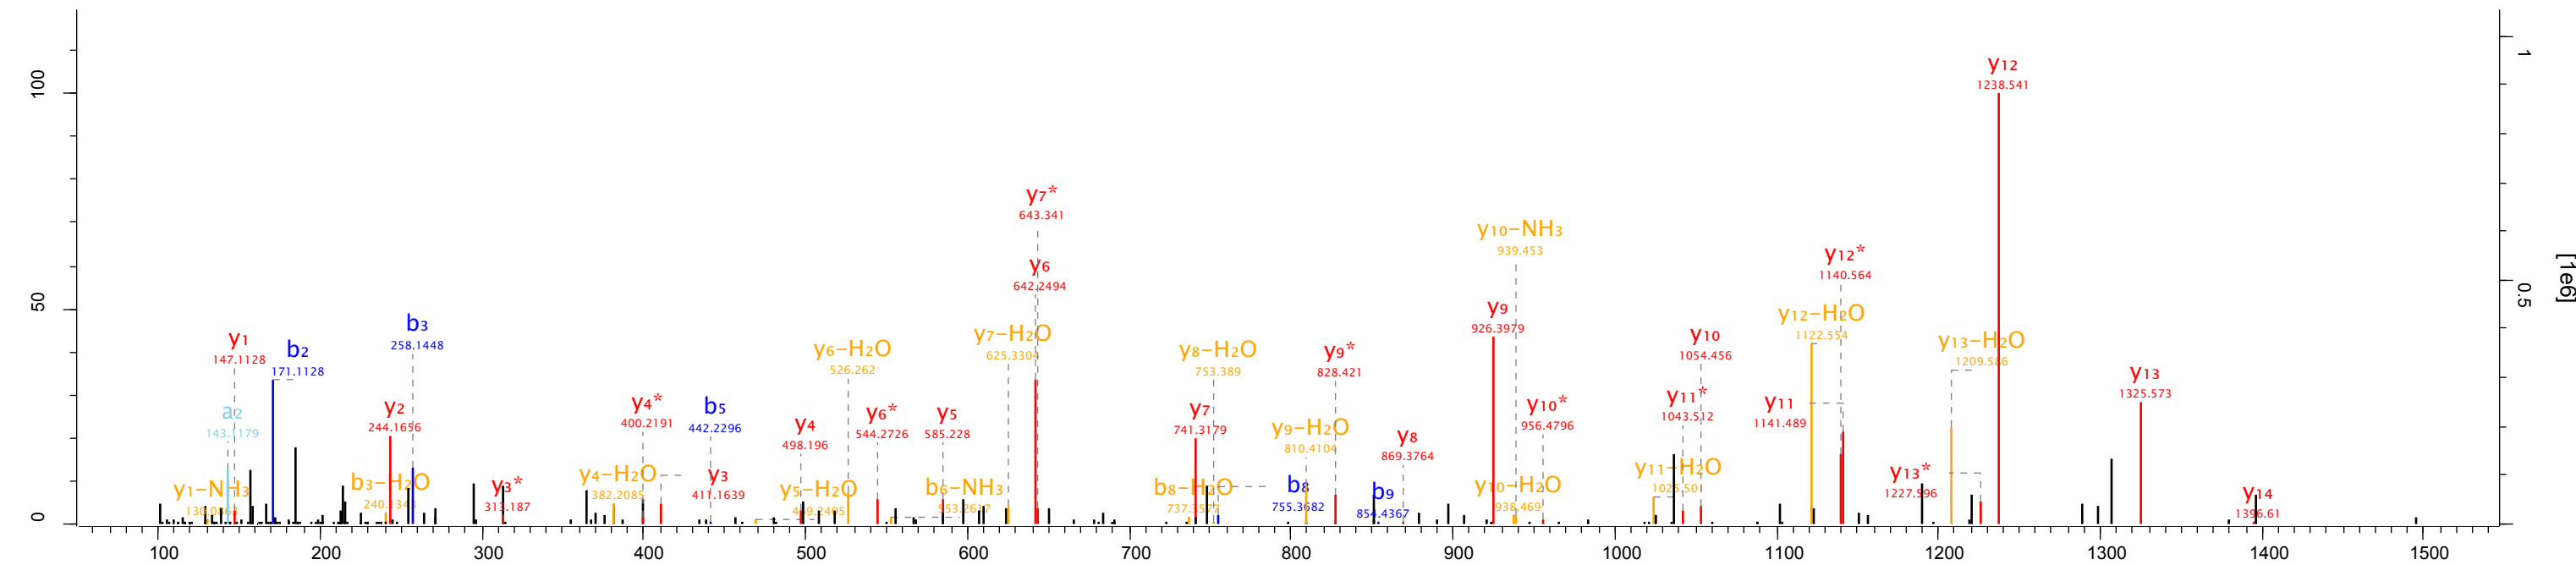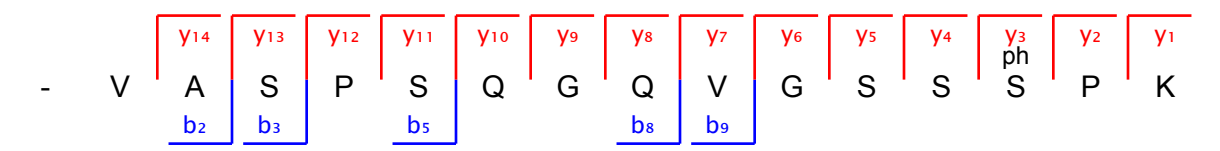

Raw file: 20150814\_A375SR\_Phospho\_BR2\_03  
 Scan: 4676 Method: FTMS; HCD Score: 173.39 m/z: 434.18 Gene names: FIP1L1

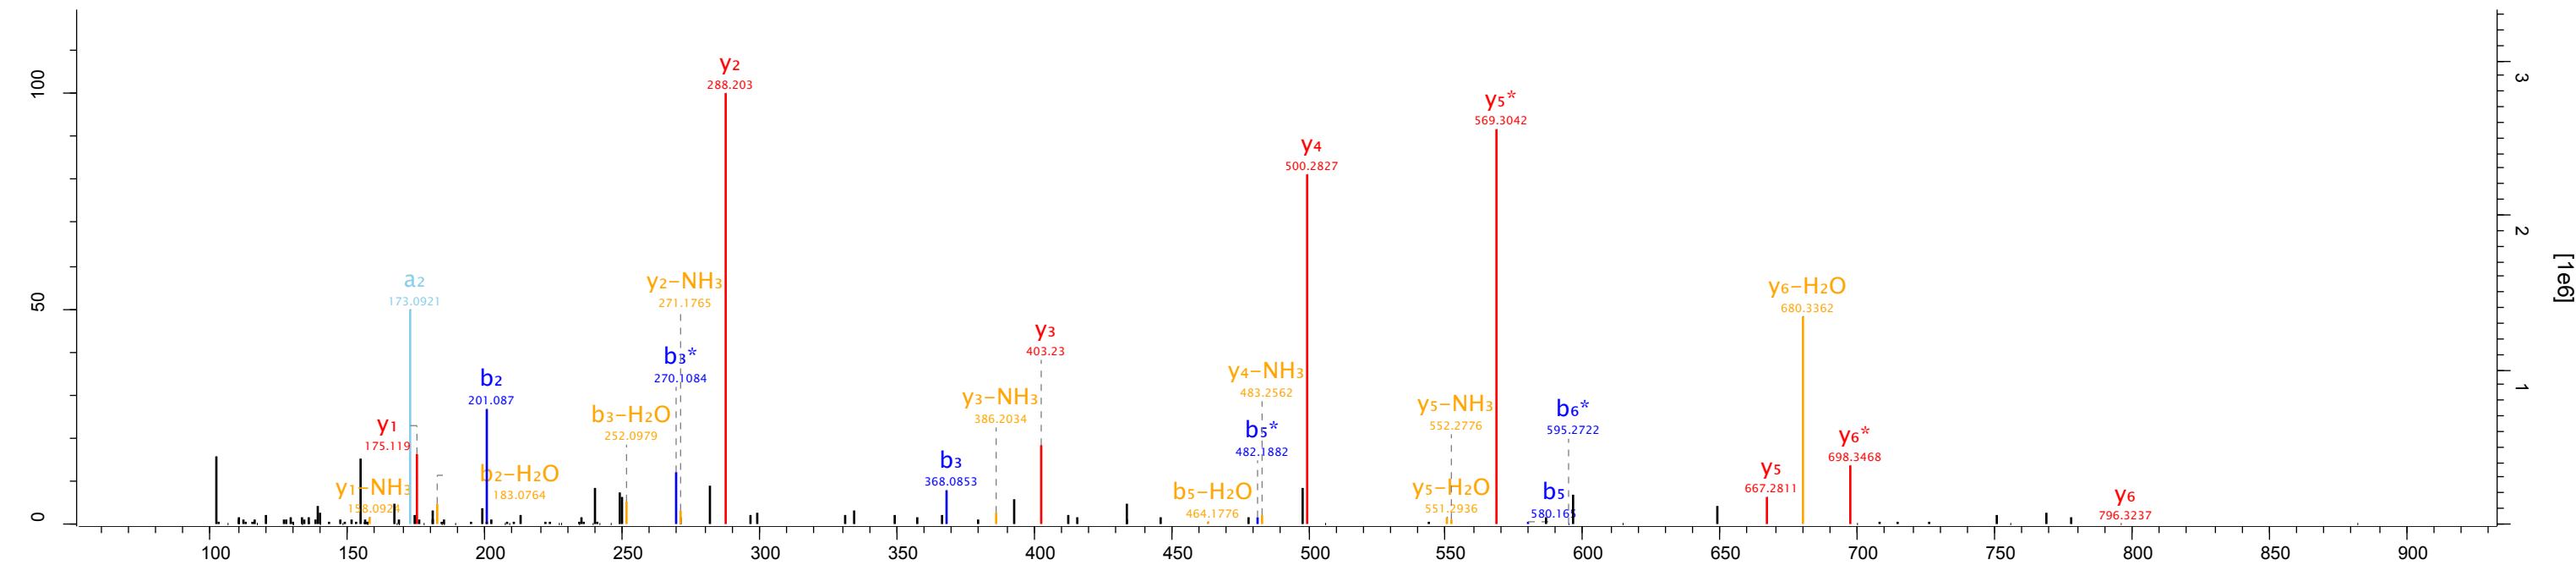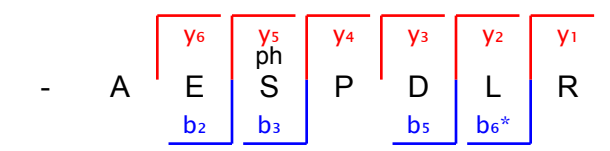

Raw file: 20150814\_A375SR\_Phospho\_BR2\_03  
 Scan: 5186 Method: FTMS; HCD Score: 264.84 m/z: 874.84 Gene names: ITGAV

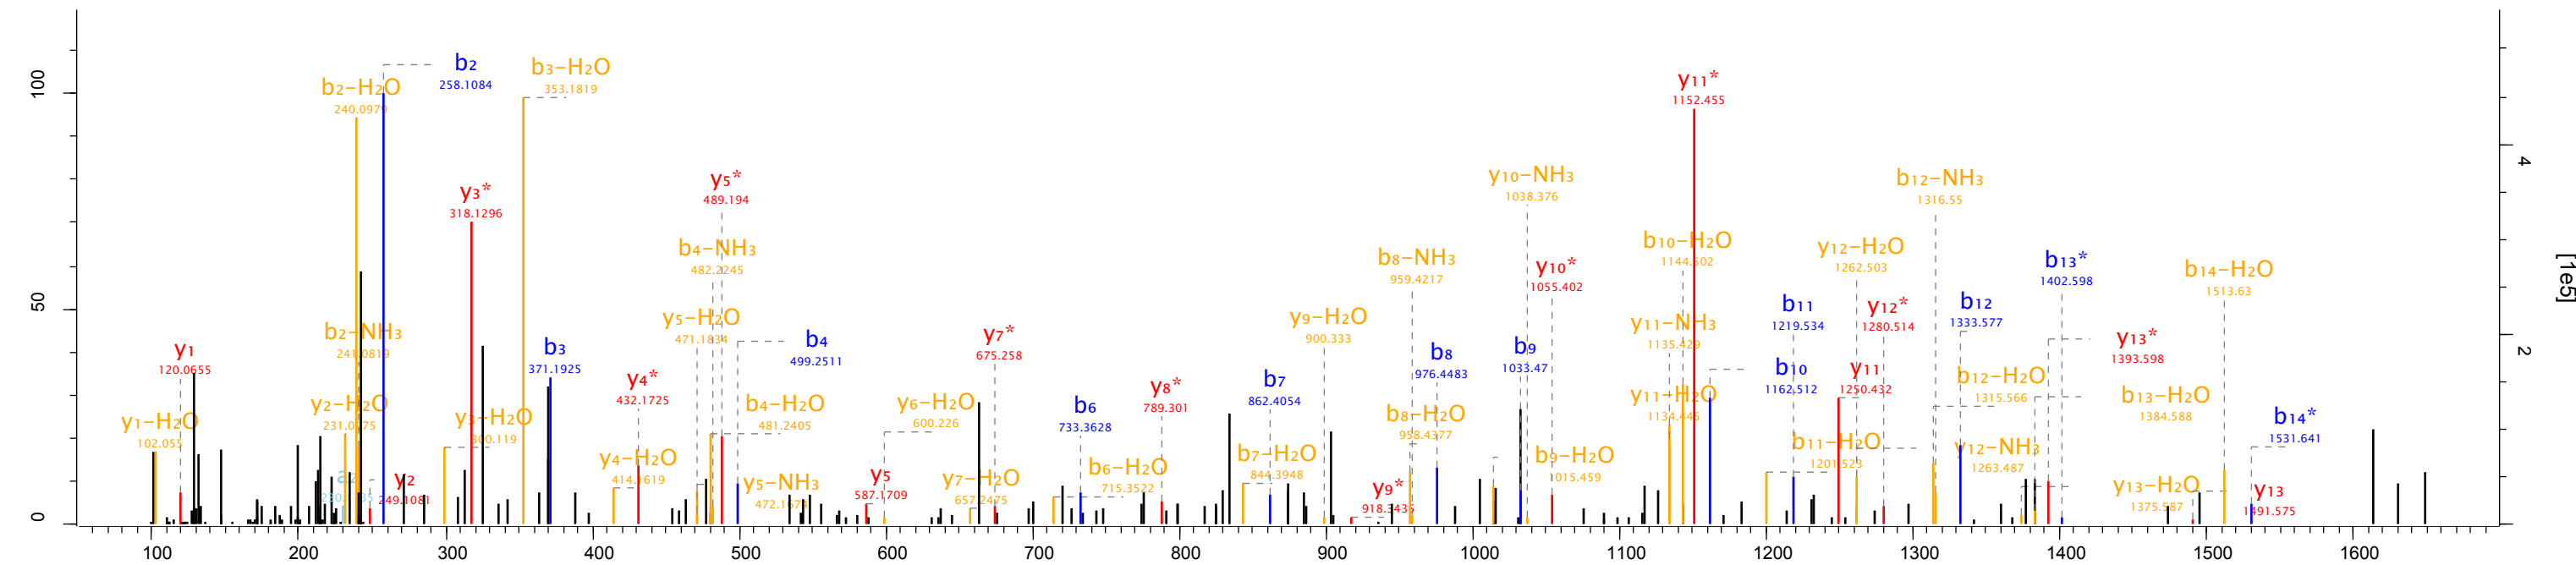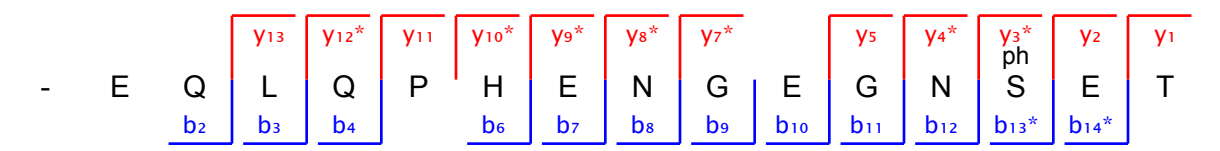

Raw file: 20150814\_A375SR\_Phospho\_BR2\_03  
 Scan: 5246 Method: FTMS; HCD Score: 120.99 m/z: 730.8 Gene names: EPS8

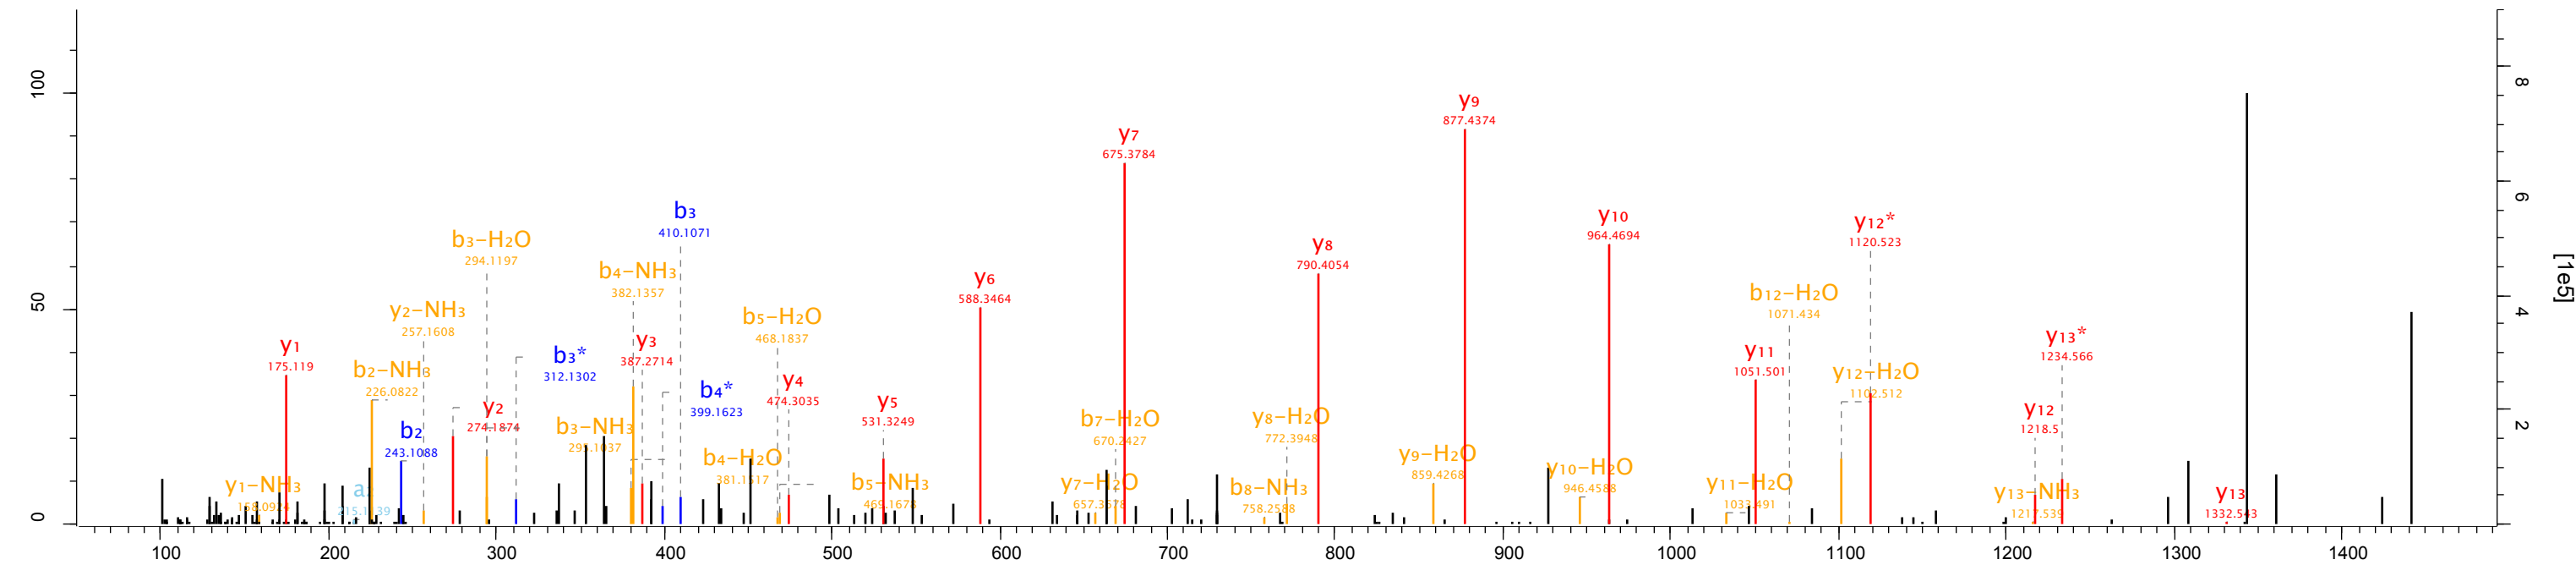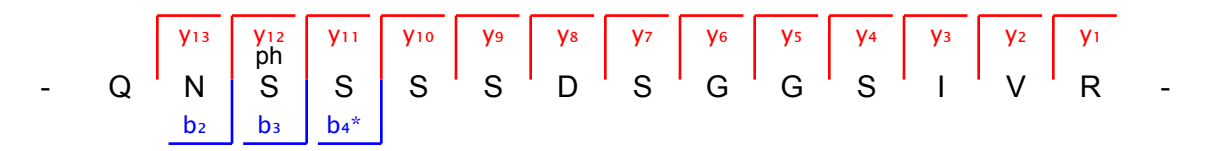

Raw file: 20150814\_A375SR\_Phospho\_BR2\_03  
 Scan: 5446 Method: FTMS; HCD Score: 74.61 m/z: 571.2 Gene names: CWC22

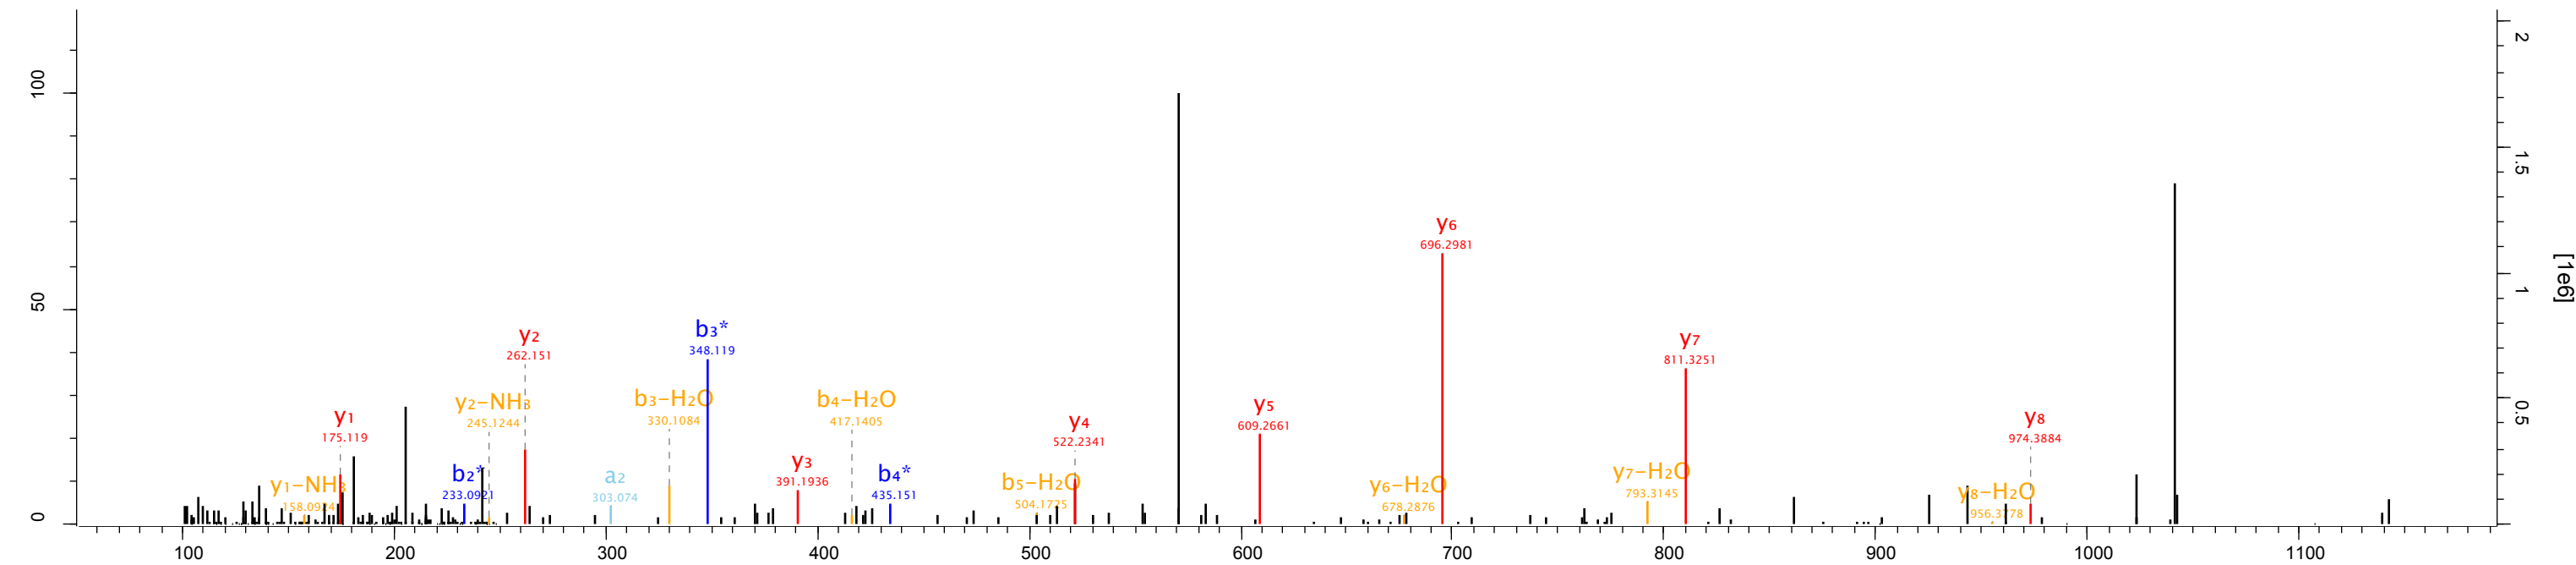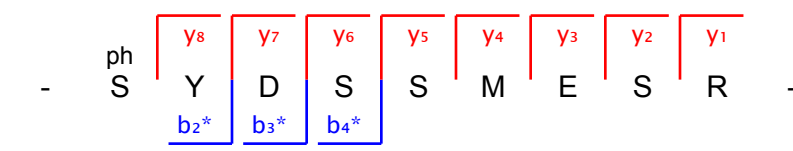



Raw file: 20150814\_A375SR\_Phospho\_BR2\_03  
 Scan: 5636 Method: FTMS; HCD Score: 138.15 m/z: 753.66 Gene names: HSF1

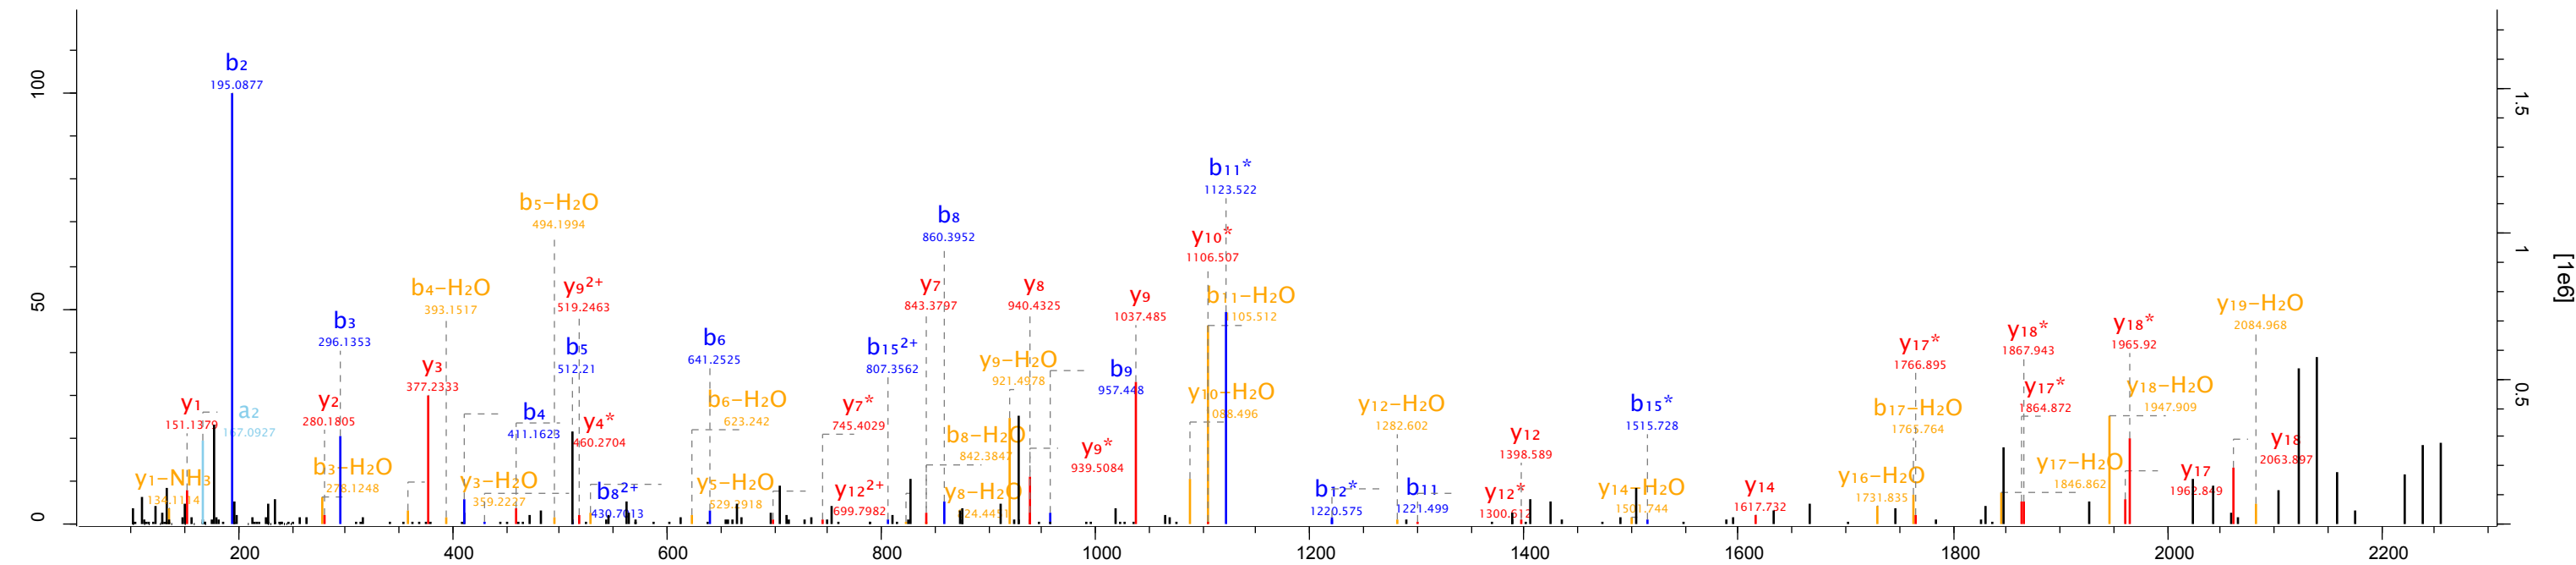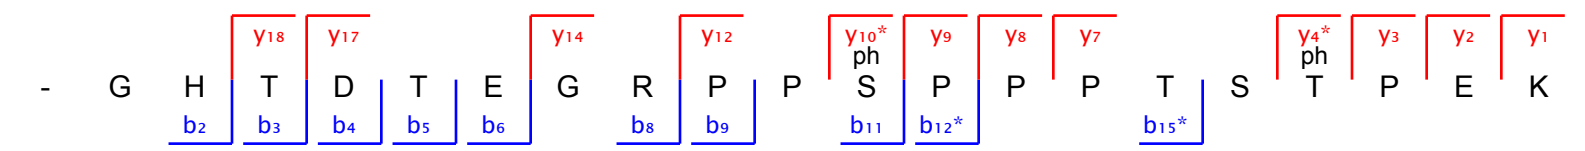

Raw file: 20150814\_A375SR\_Phospho\_BR2\_03  
 Scan: 5756 Method: FTMS; HCD Score: 148.55 m/z: 742.3 Gene names: ATAD2

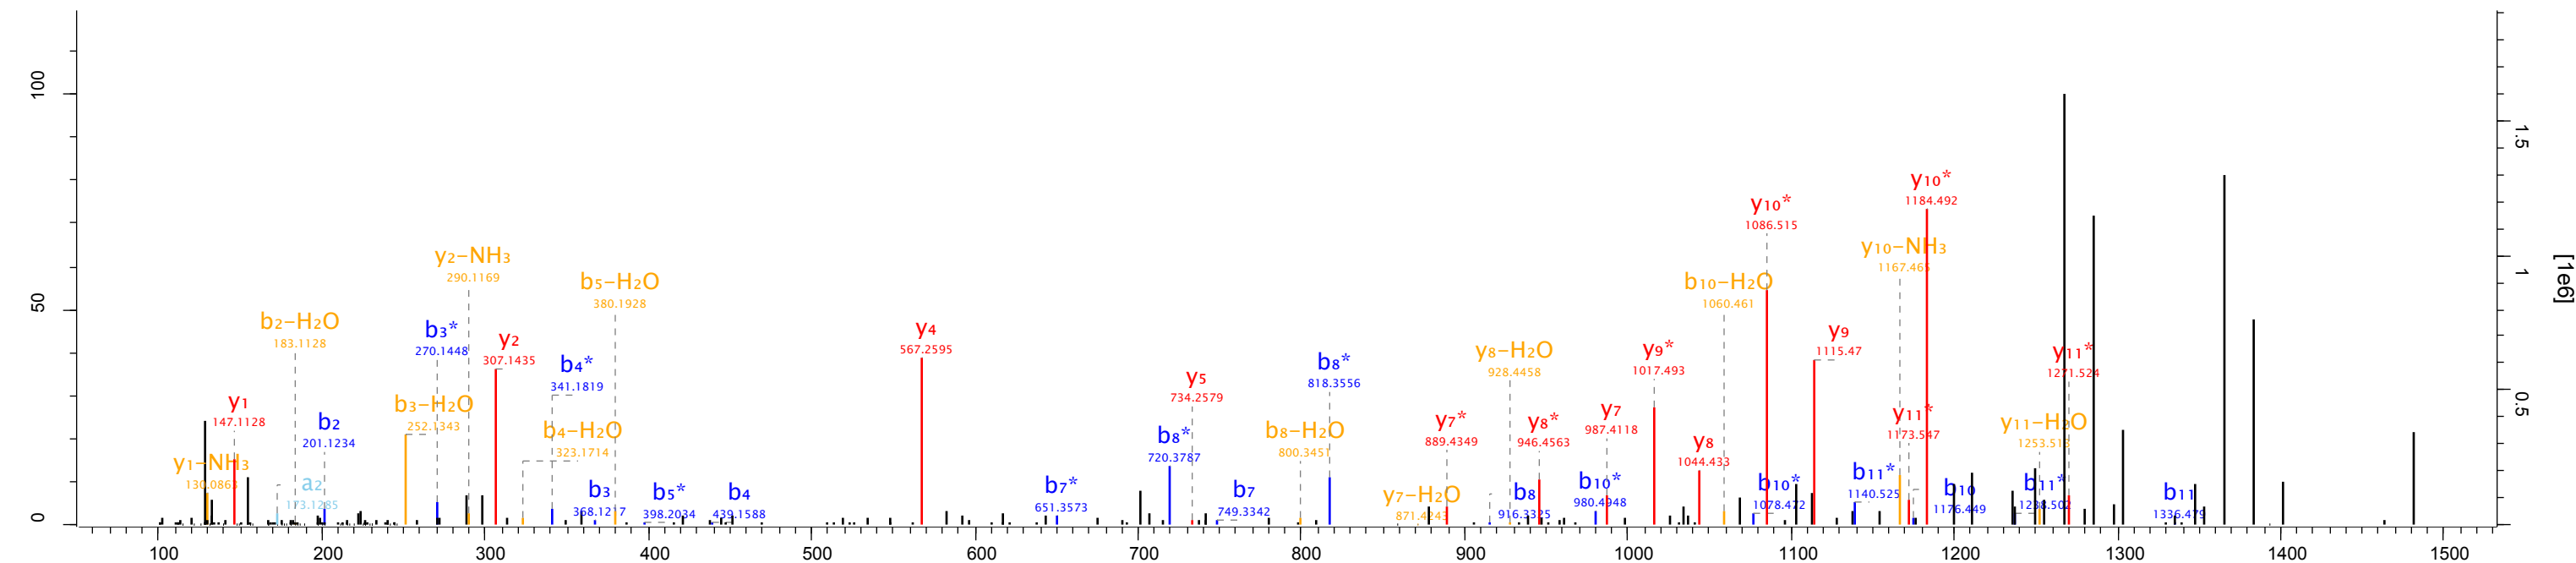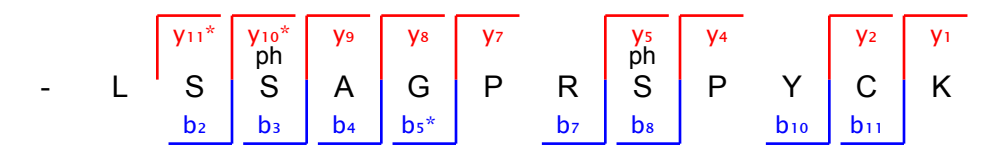

Raw file: 20150814\_A375SR\_Phospho\_BR2\_03  
 Scan: 5966 Method: FTMS; HCD Score: 147.7 m/z: 631.31 Gene names: TOMM34

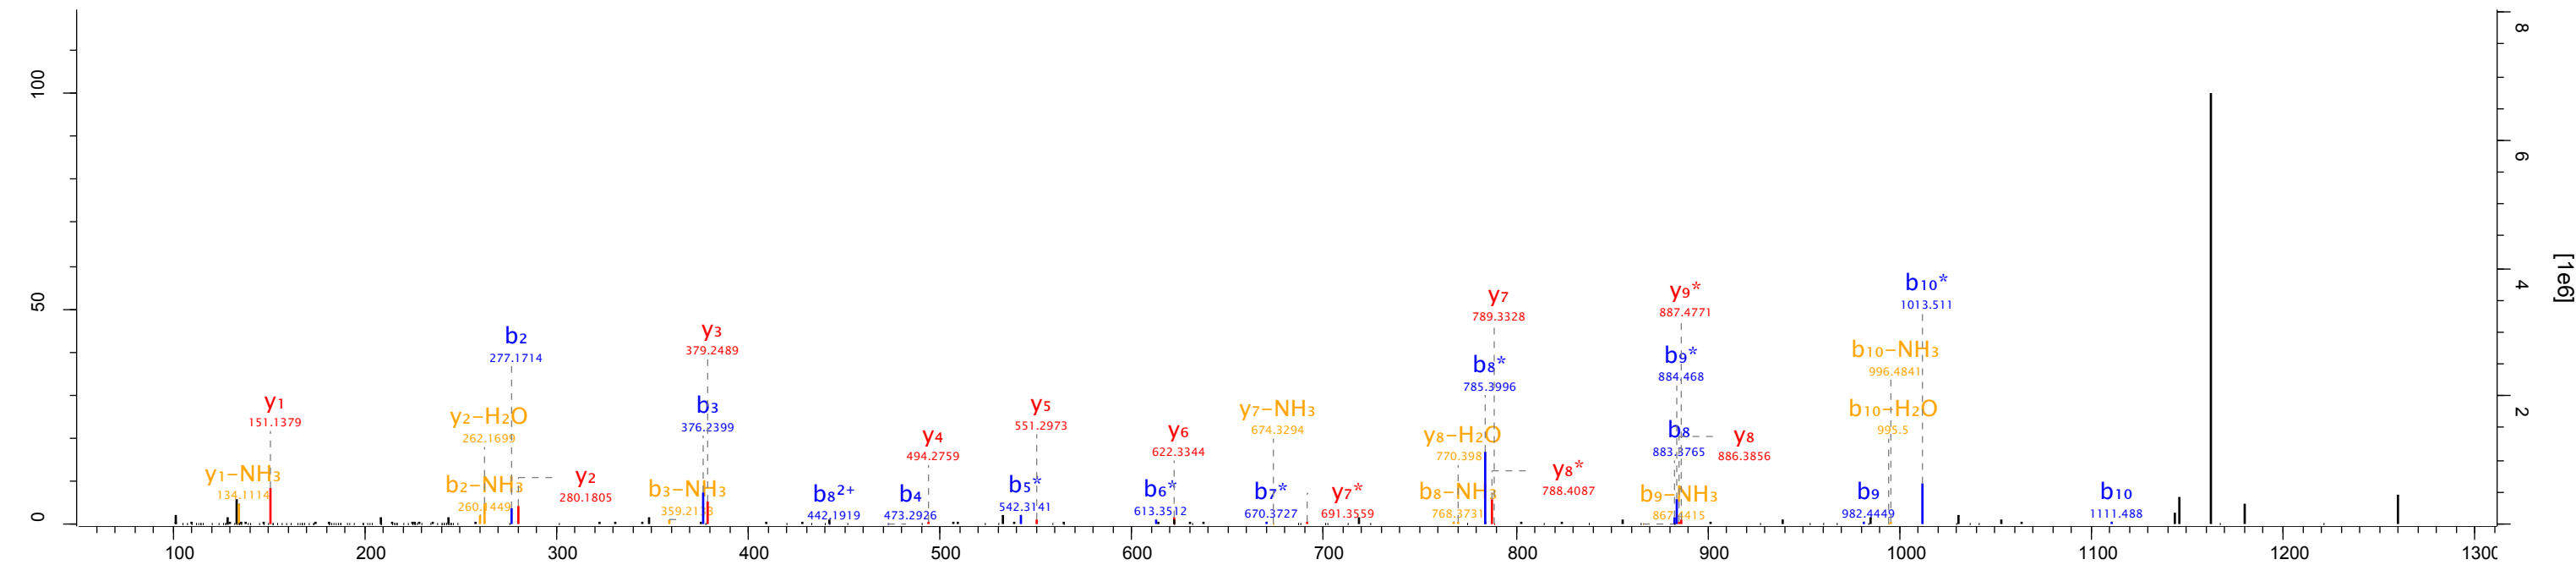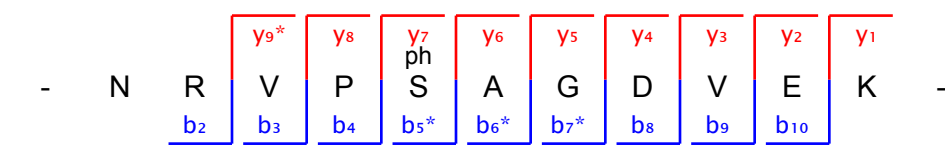

Raw file: 20150814\_A375SR\_Phospho\_BR2\_03  
 Scan: 6036 Method: FTMS; HCD Score: 150.04 m/z: 527.24 Gene names: KIF13B

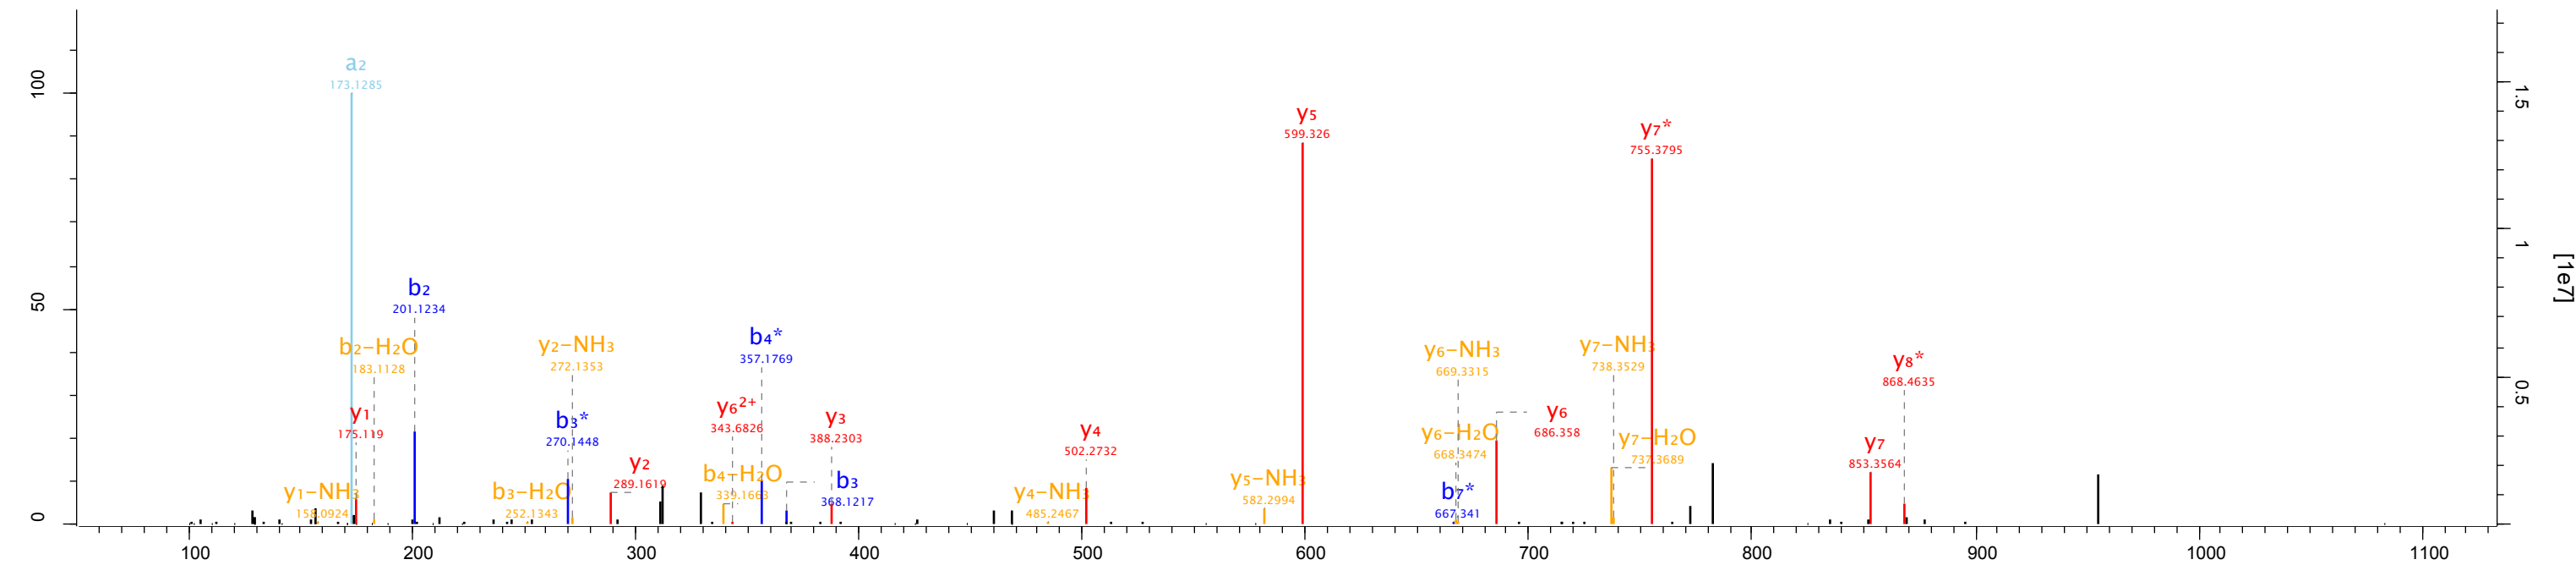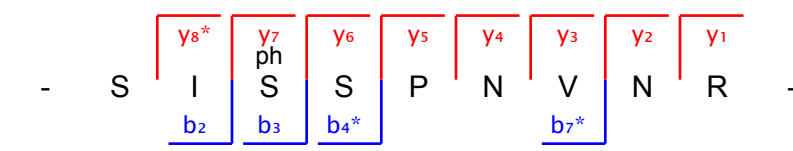

Raw file: 20150814\_A375SR\_Phospho\_BR2\_03  
 Scan: 6196 Method: FTMS; HCD Score: 65.5 m/z: 594.78 Gene names: ARHGEF7

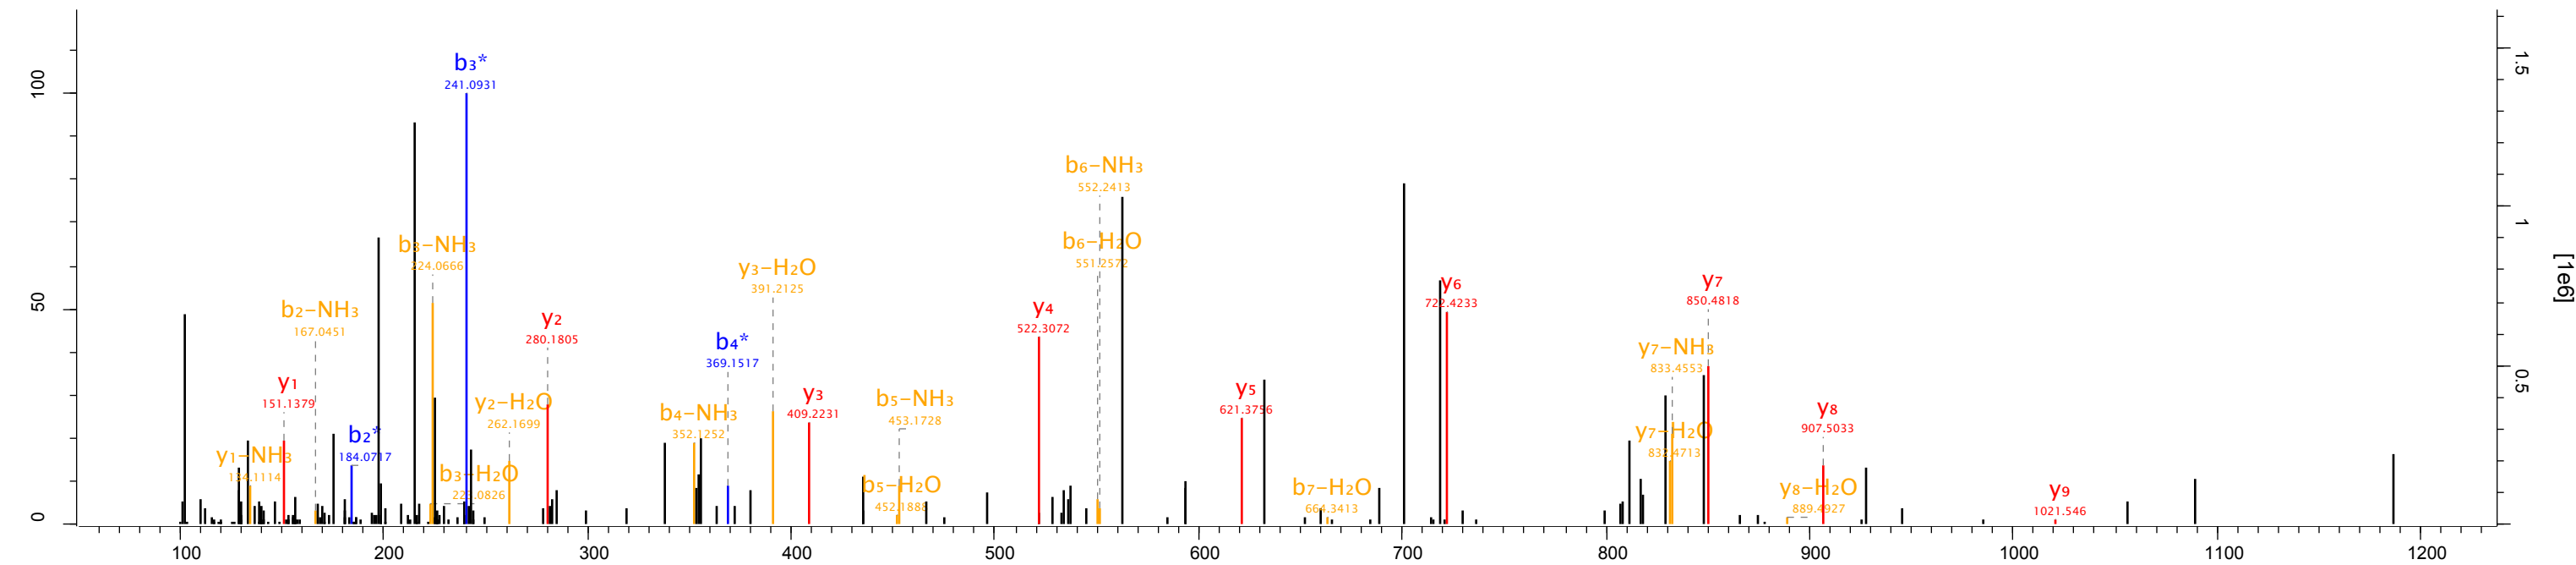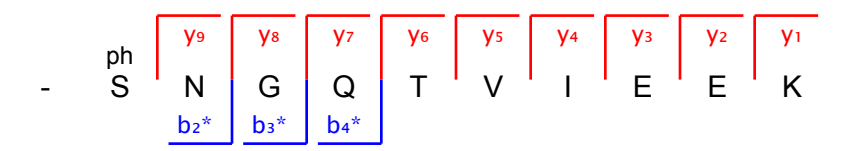

Raw file: 20150814\_A375SR\_Phospho\_BR2\_03  
 Scan: 6246 Method: FTMS; HCD Score: 113.01 m/z: 710.3 Gene names: PTPN14

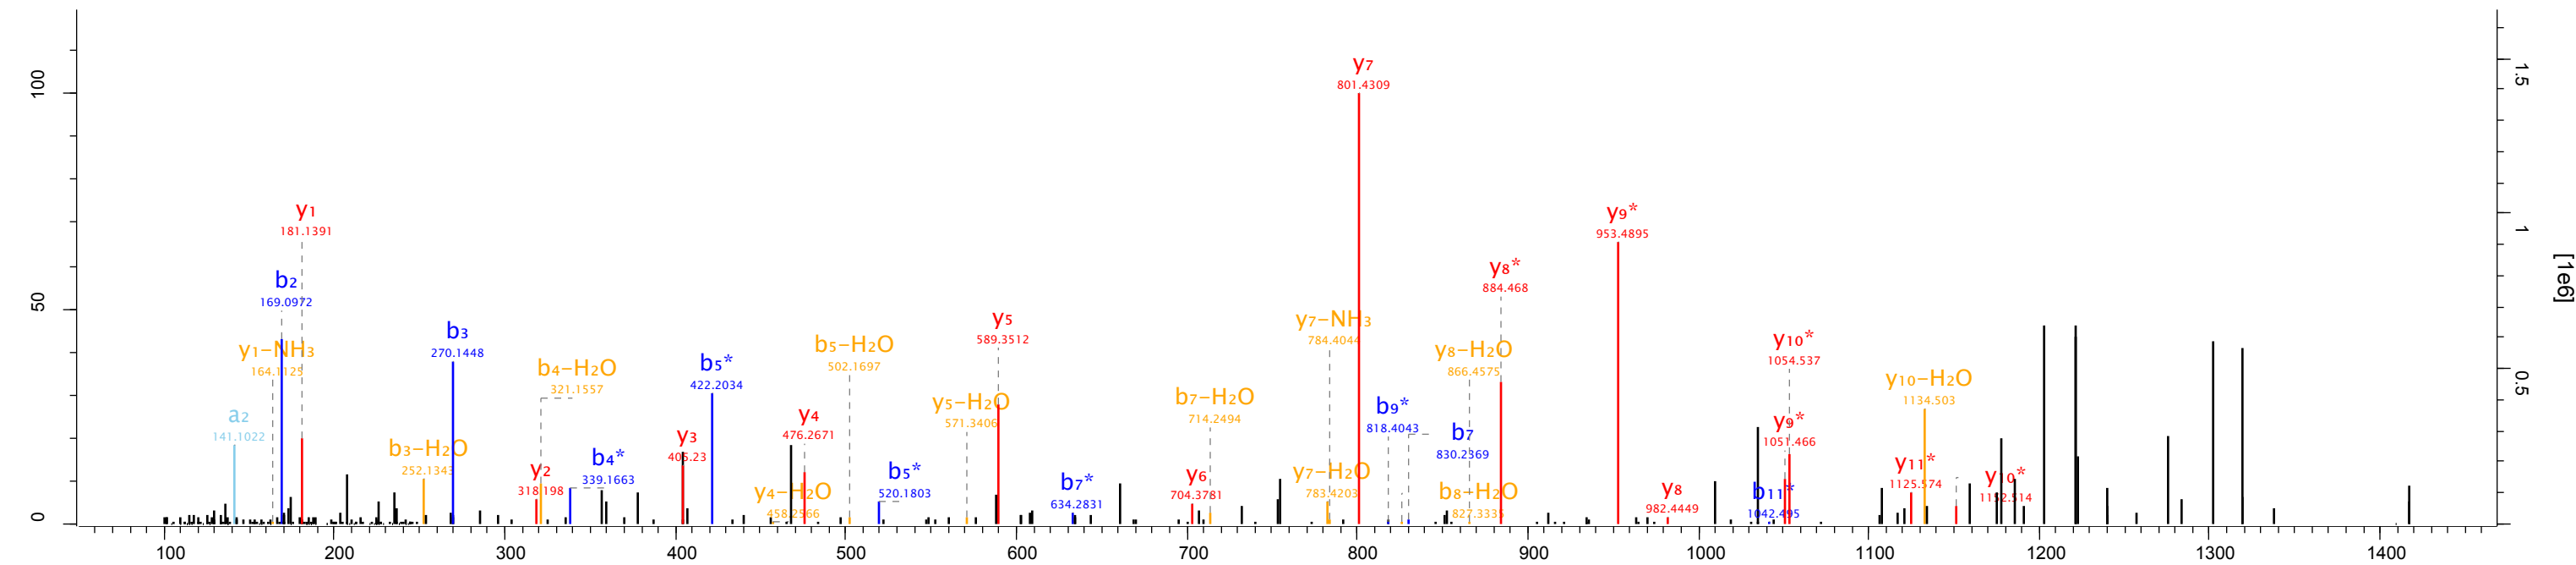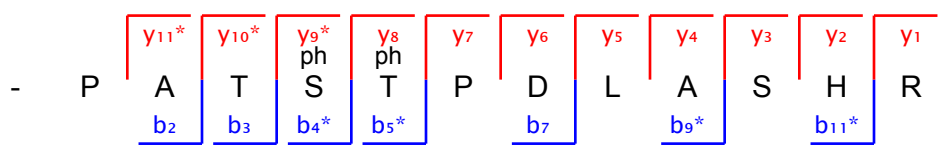

Raw file: 20150814\_A375SR\_Phospho\_BR2\_03  
 Scan: 6526 Method: FTMS; HCD Score: 57.83 m/z: 594.94 Gene names: DOCK4

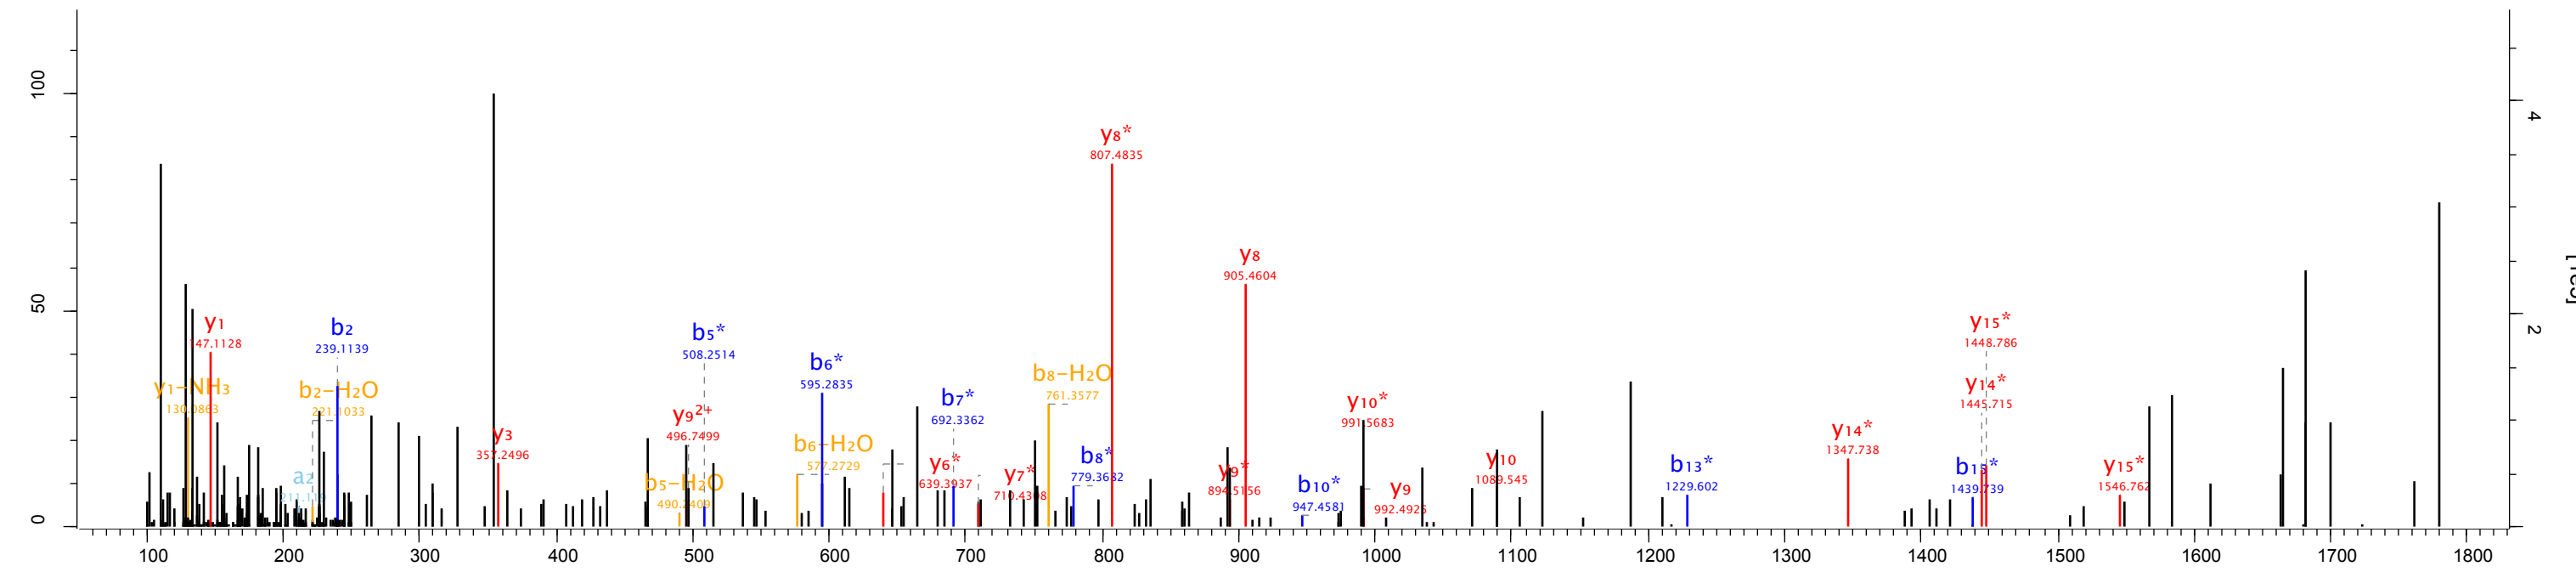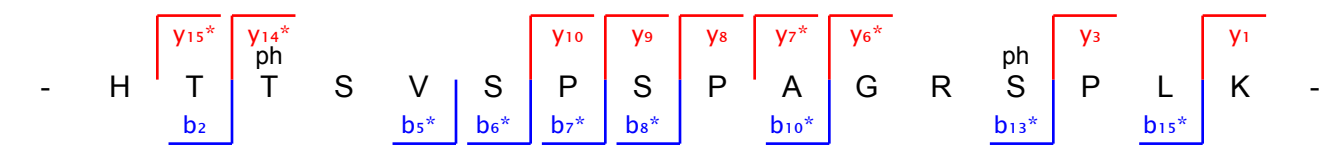

Raw file 20150814\_A375SR\_Phospho\_BR2\_03 Scan 6786 Method FTMS; HCD Score 62.2 m/z 471.54 Gene names CROCC

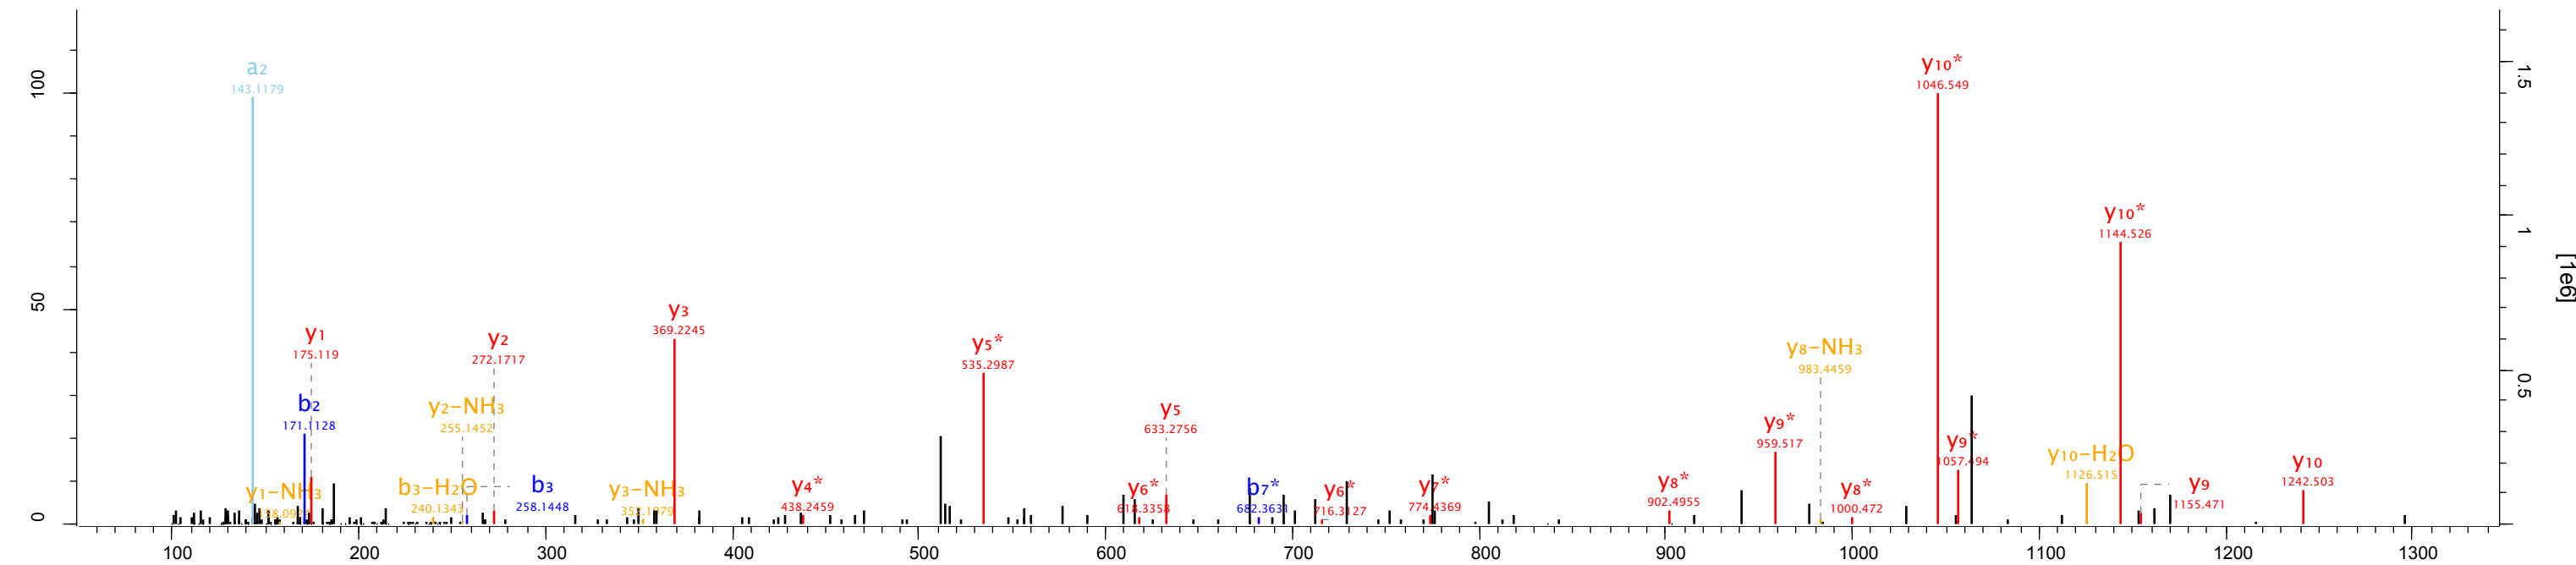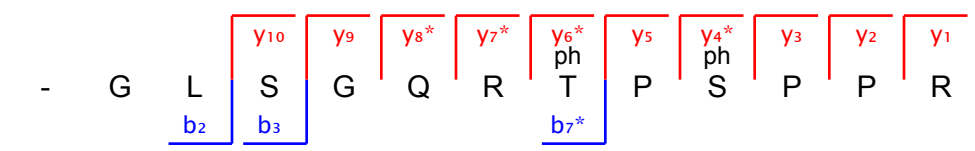



Raw file 20150814\_A375SR\_Phospho\_BR2\_03 Scan 6826 Method FTMS; HCD Score 88.78 m/z 721.29 Gene names IKKBK

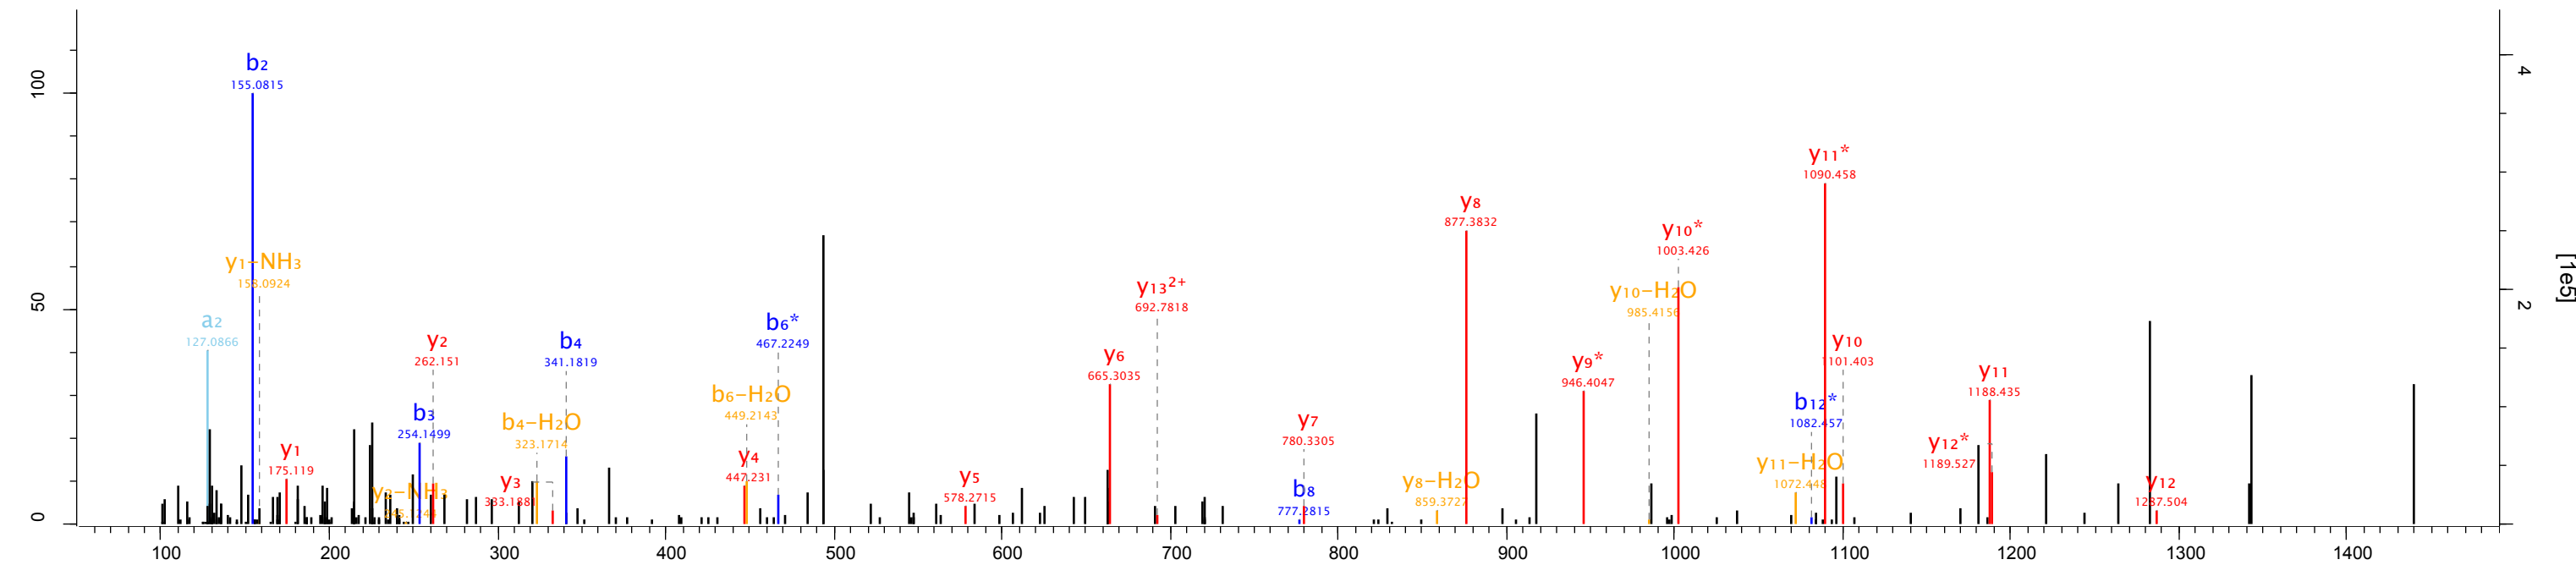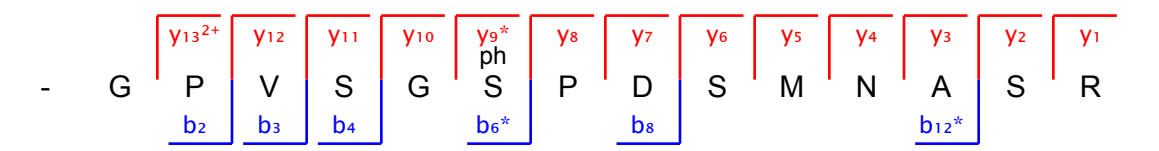

Raw file: 20150814\_A375SR\_Phospho\_BR2\_03  
 Scan: 7026 Method: FTMS; HCD Score: 199.89 m/z: 950.39 Gene names: SUB1

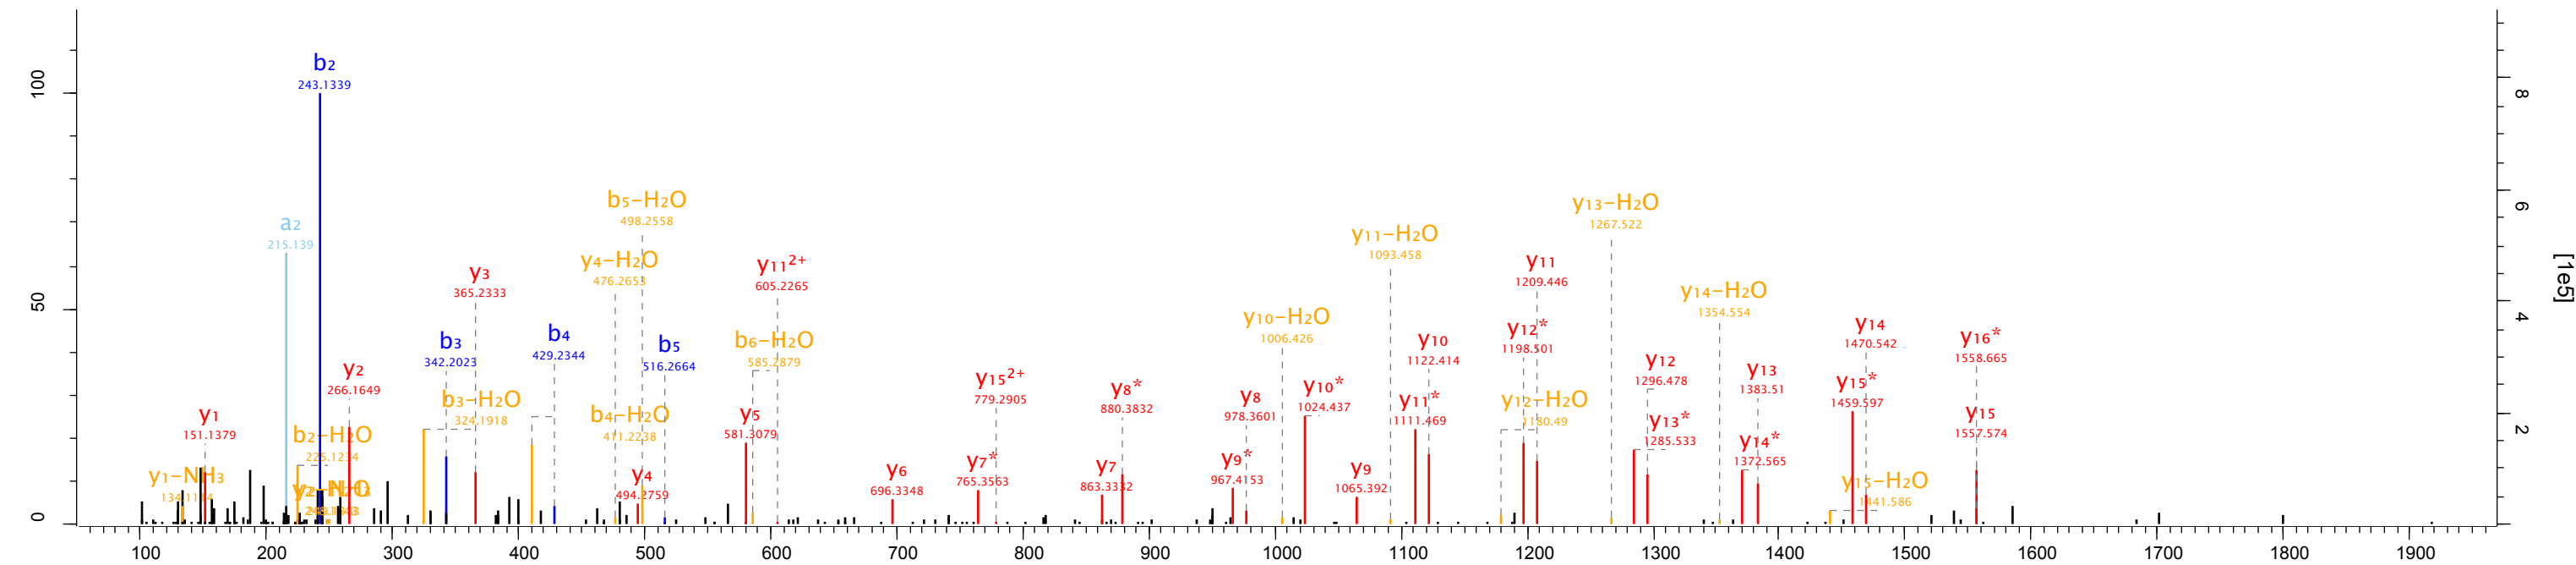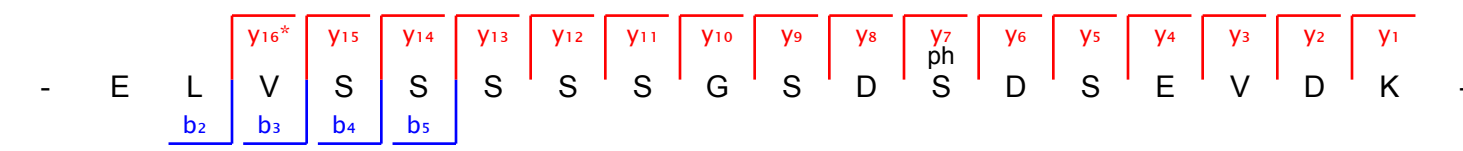

Raw file Scan Method Score m/z Gene names  
 20150814\_A375SR\_Phospho\_BR2\_03 7126 FTMS; HCD 242.24 1143.97 BAG3

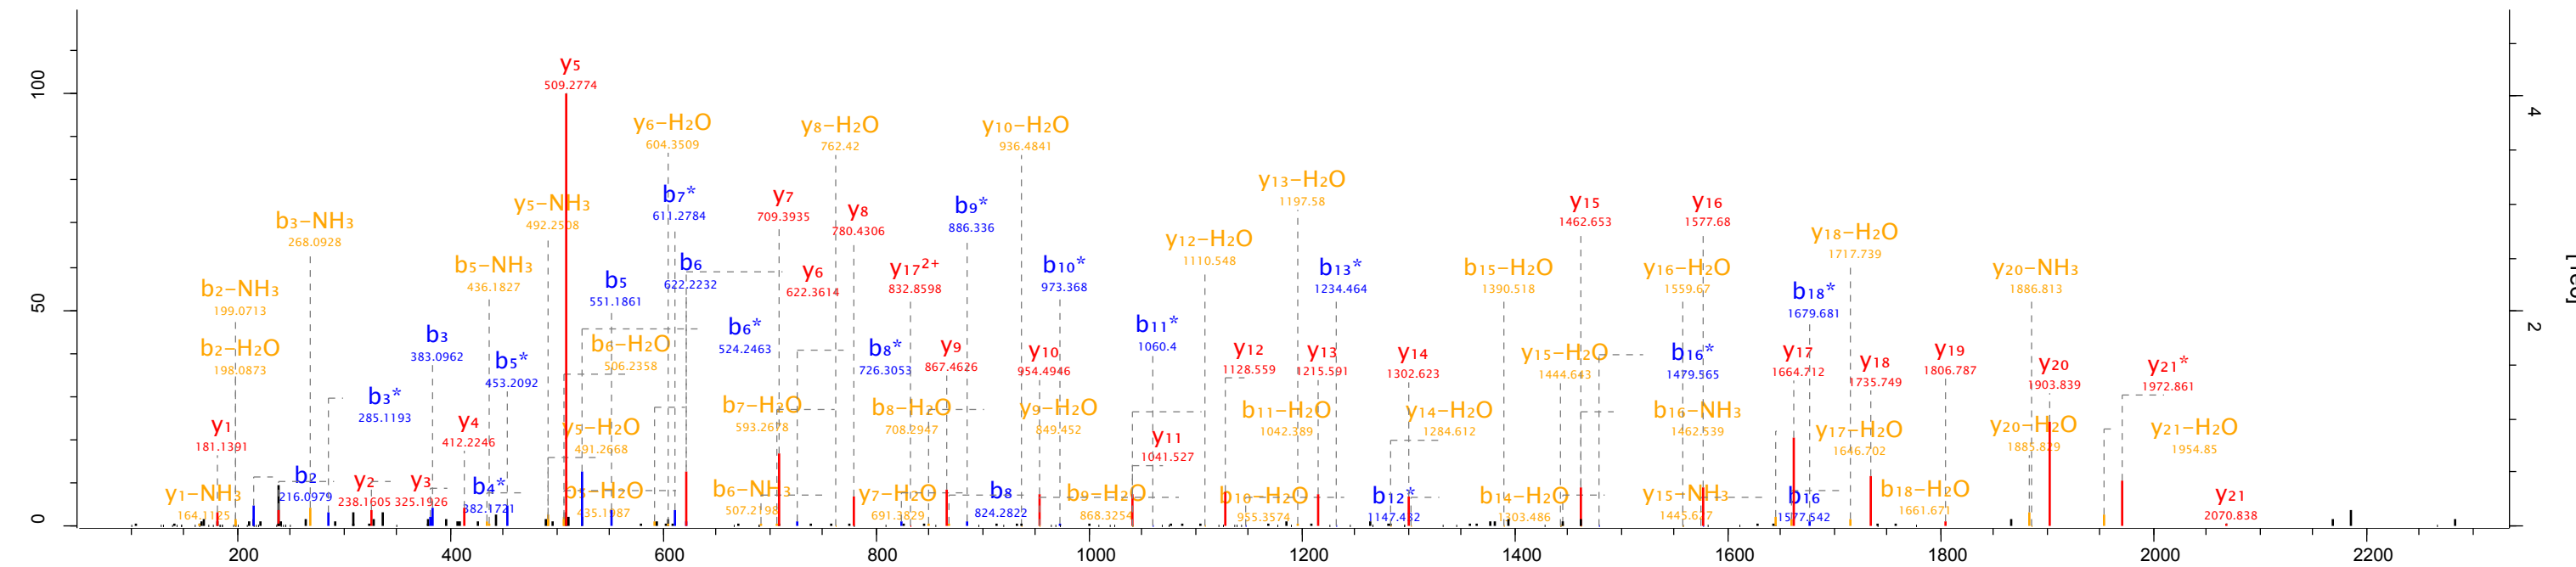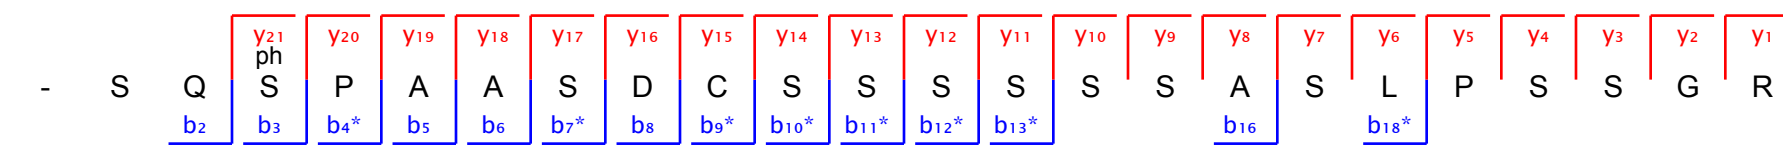

Raw file 20150814\_A375SR\_Phospho\_BR2\_03 Scan 7286 Method FTMS; HCD Score 68.17 m/z 778.36 Gene names IRS2

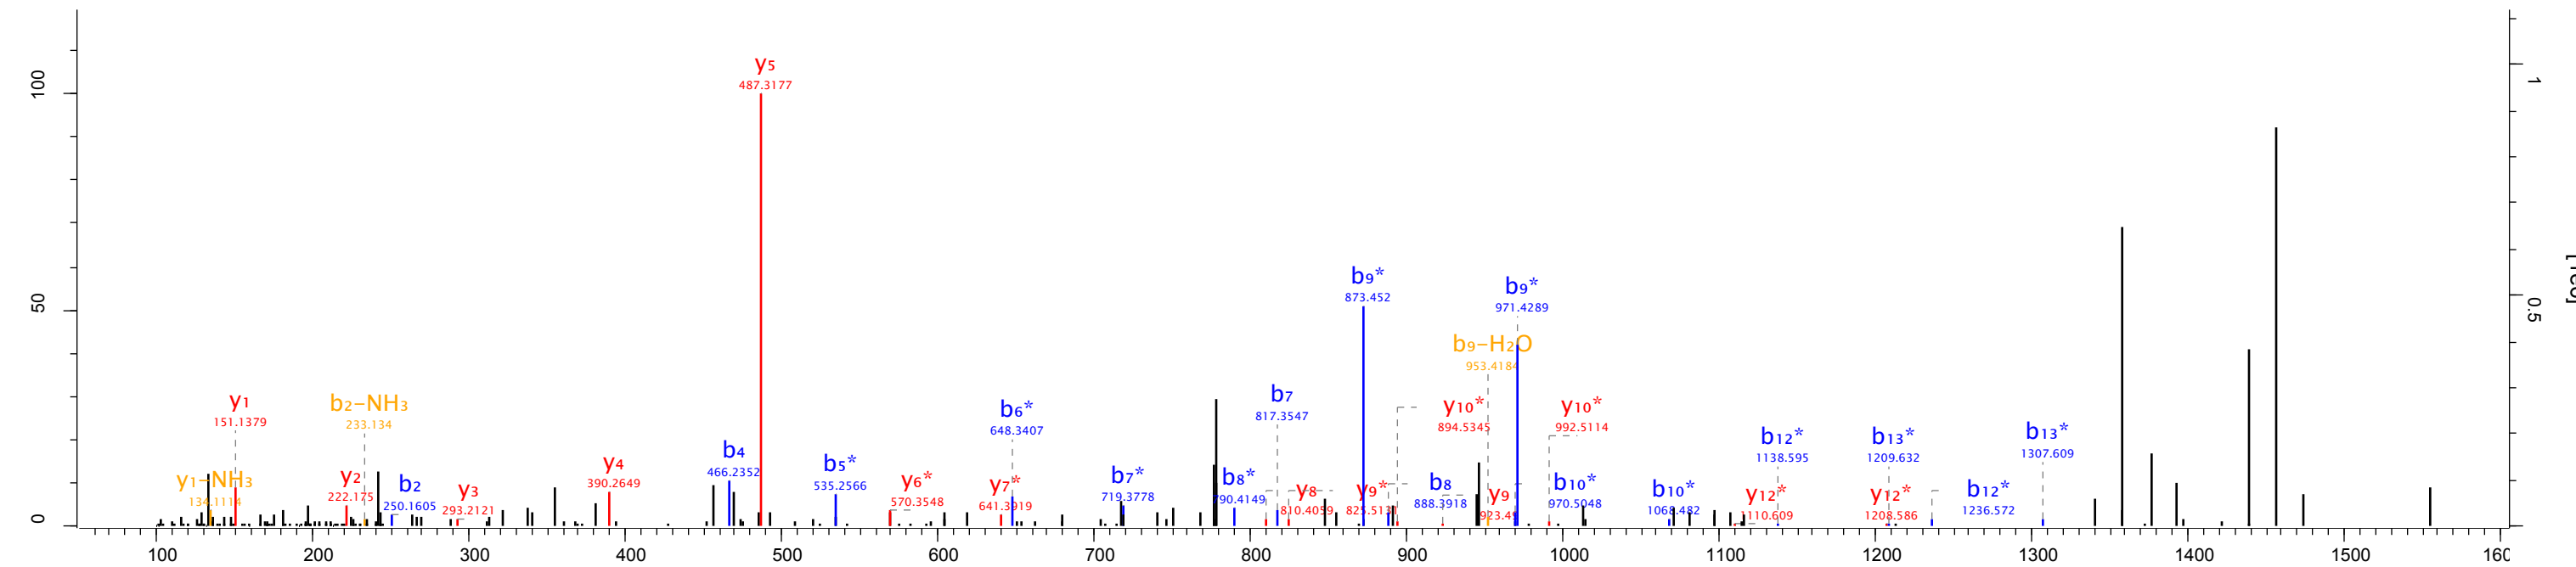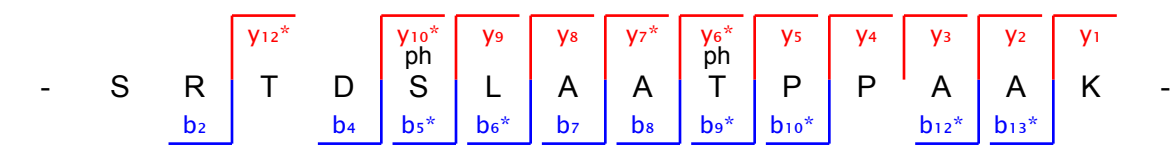

Raw file: 20150814\_A375SR\_Phospho\_BR2\_03  
 Scan: 7316 Method: FTMS; HCD Score: 251.29 m/z: 948.4 Gene names: MTDH

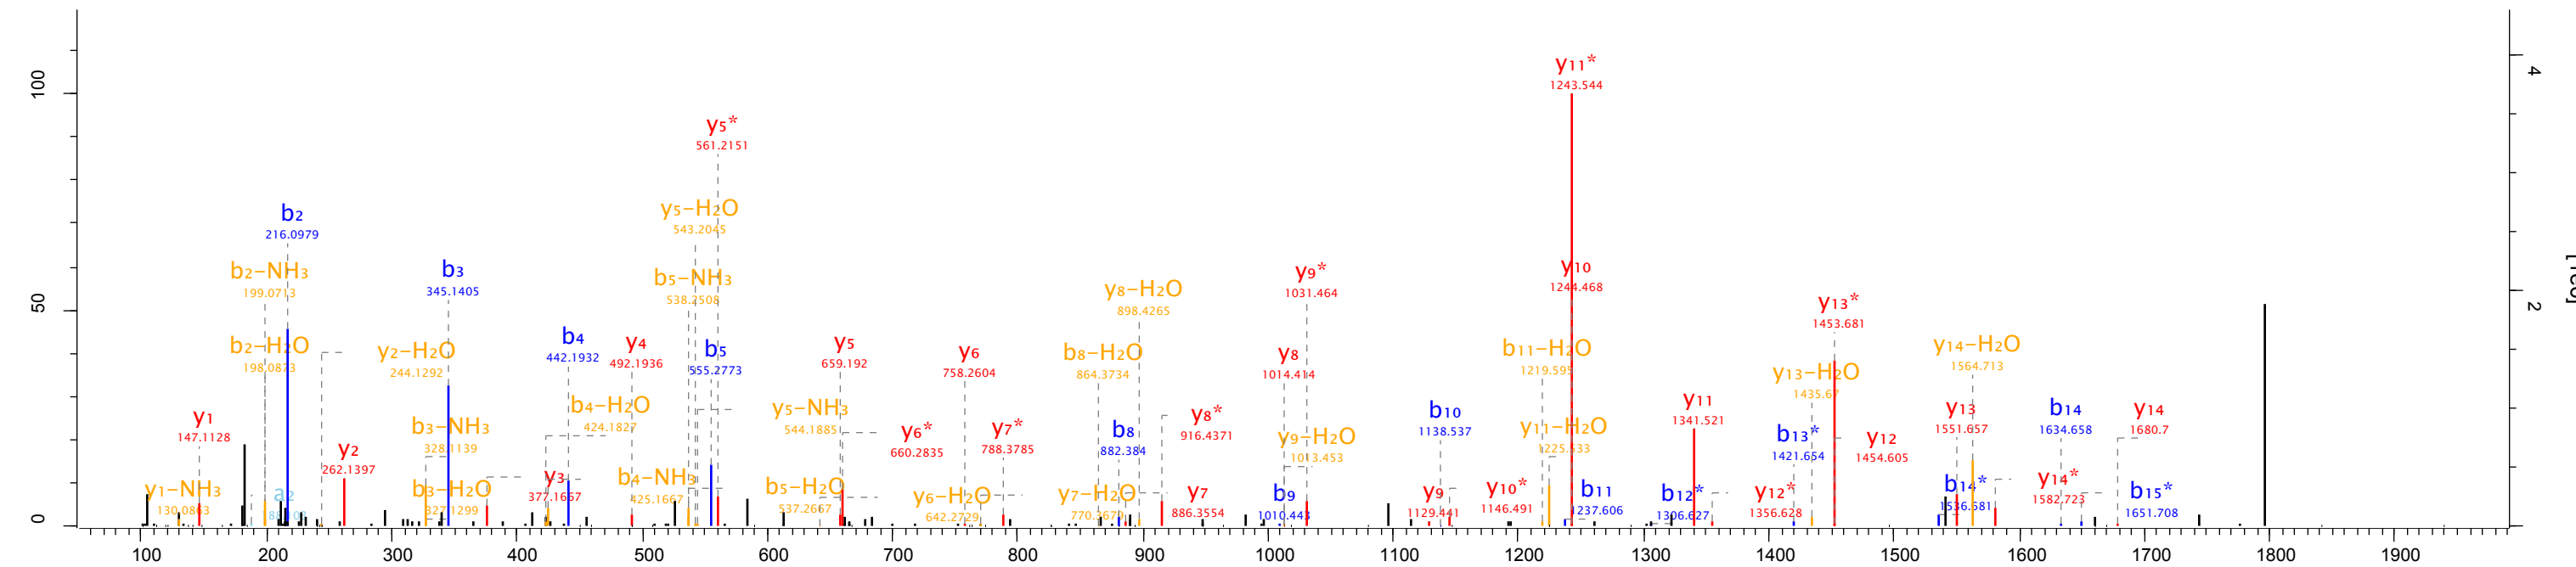

Peptide sequence: - S Q E P I P D D Q K V S D D D K -

Fragmentation mapping (b and y ions):

- Red boxes (y ions): y14 (E), y13 (P), y12 (I), y11 (P), y10 (D), y9 (D), y8 (Q), y7 (K), y6 (V), y5<sup>ph</sup> (S), y4 (D), y3 (D), y2 (D), y1 (K)
- Blue boxes (b ions): b2 (Q), b3 (E), b4 (P), b5 (I), b8 (D), b9 (Q), b10 (K), b11 (V), b12\* (S), b13\* (D), b14 (D), b15\* (D)

Raw file: 20150814\_A375SR\_Phospho\_BR2\_03  
 Scan: 7526 Method: FTMS; HCD Score: 136.88 m/z: 1070.45 Gene names: UTP20

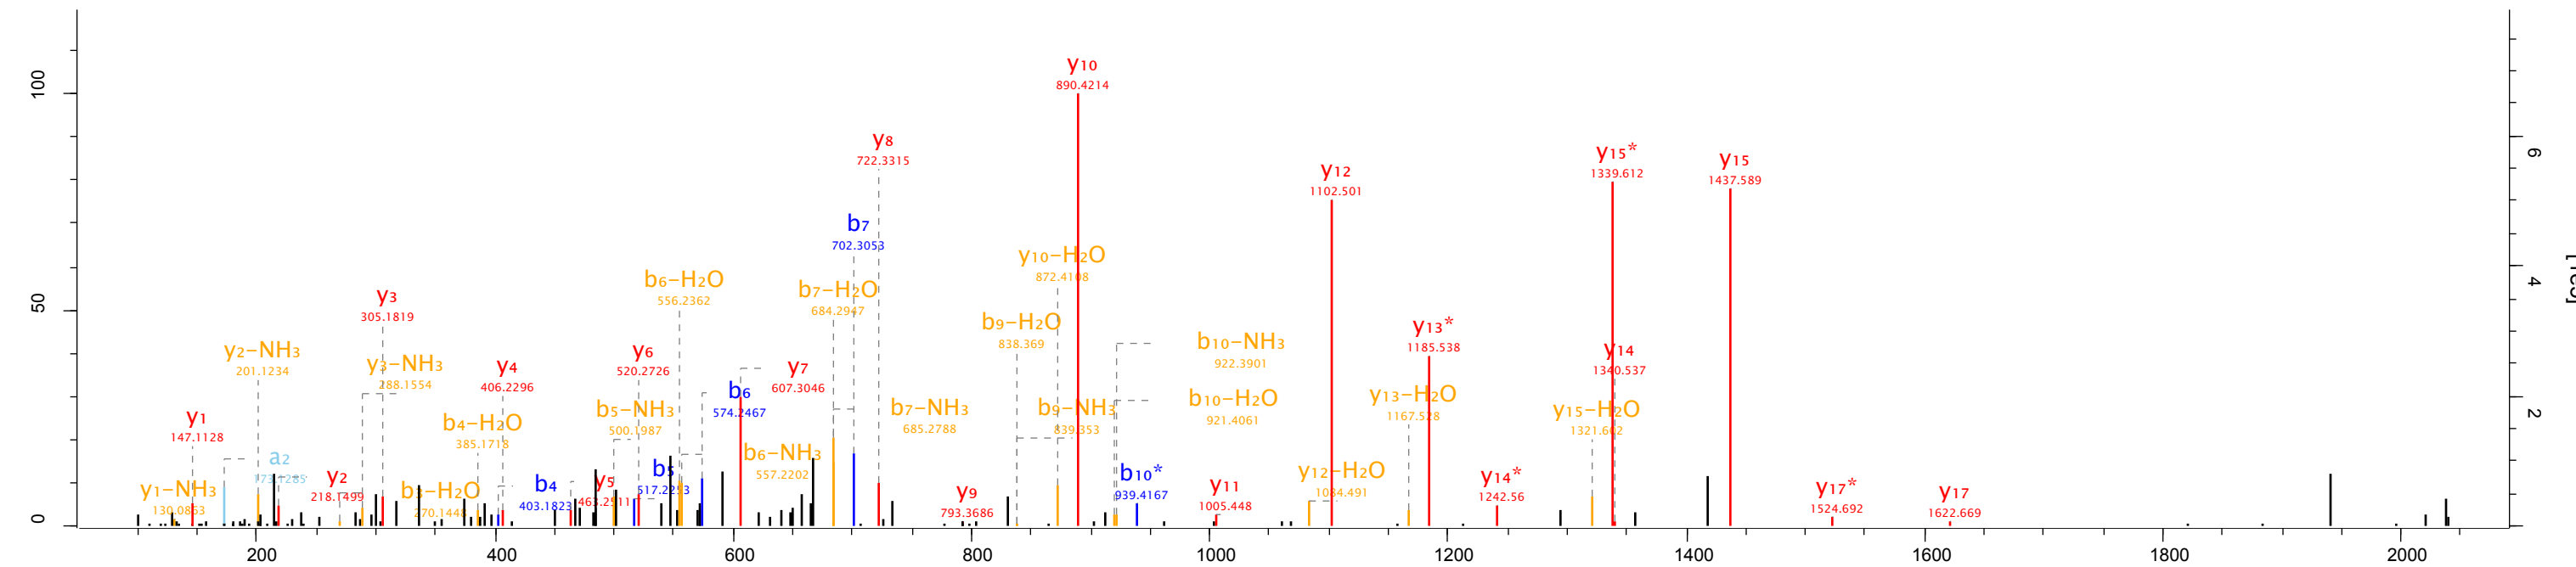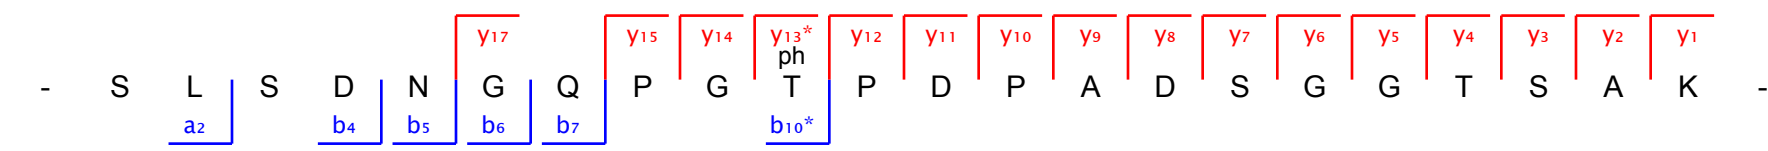

Raw file 20150814\_A375SR\_Phospho\_BR2\_03 Scan 7626 Method FTMS; HCD Score 70.56 m/z 752.31 Gene names CLASP2

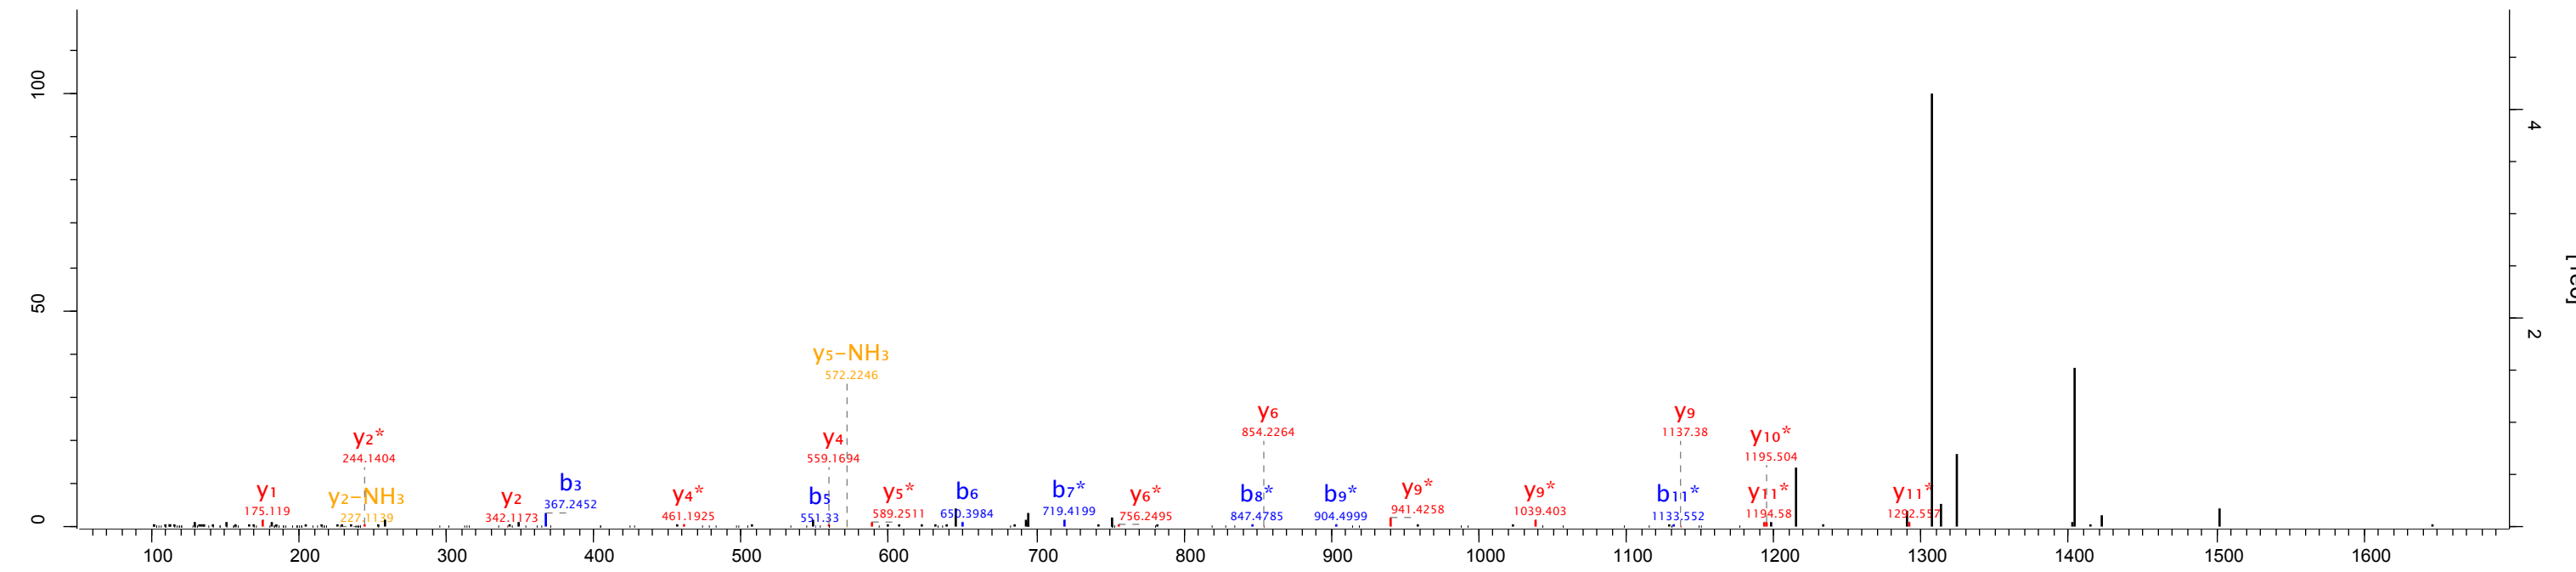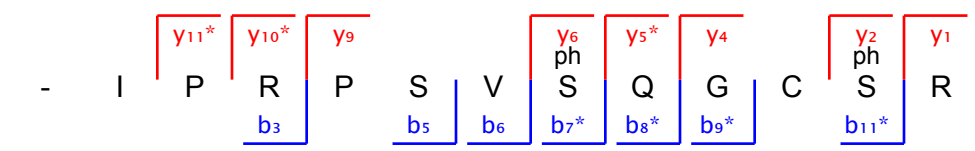

Raw file: 20150814\_A375SR\_Phospho\_BR2\_03  
 Scan: 7826 Method: FTMS; HCD Score: 62.28 m/z: 527.88 Gene names: CEP170

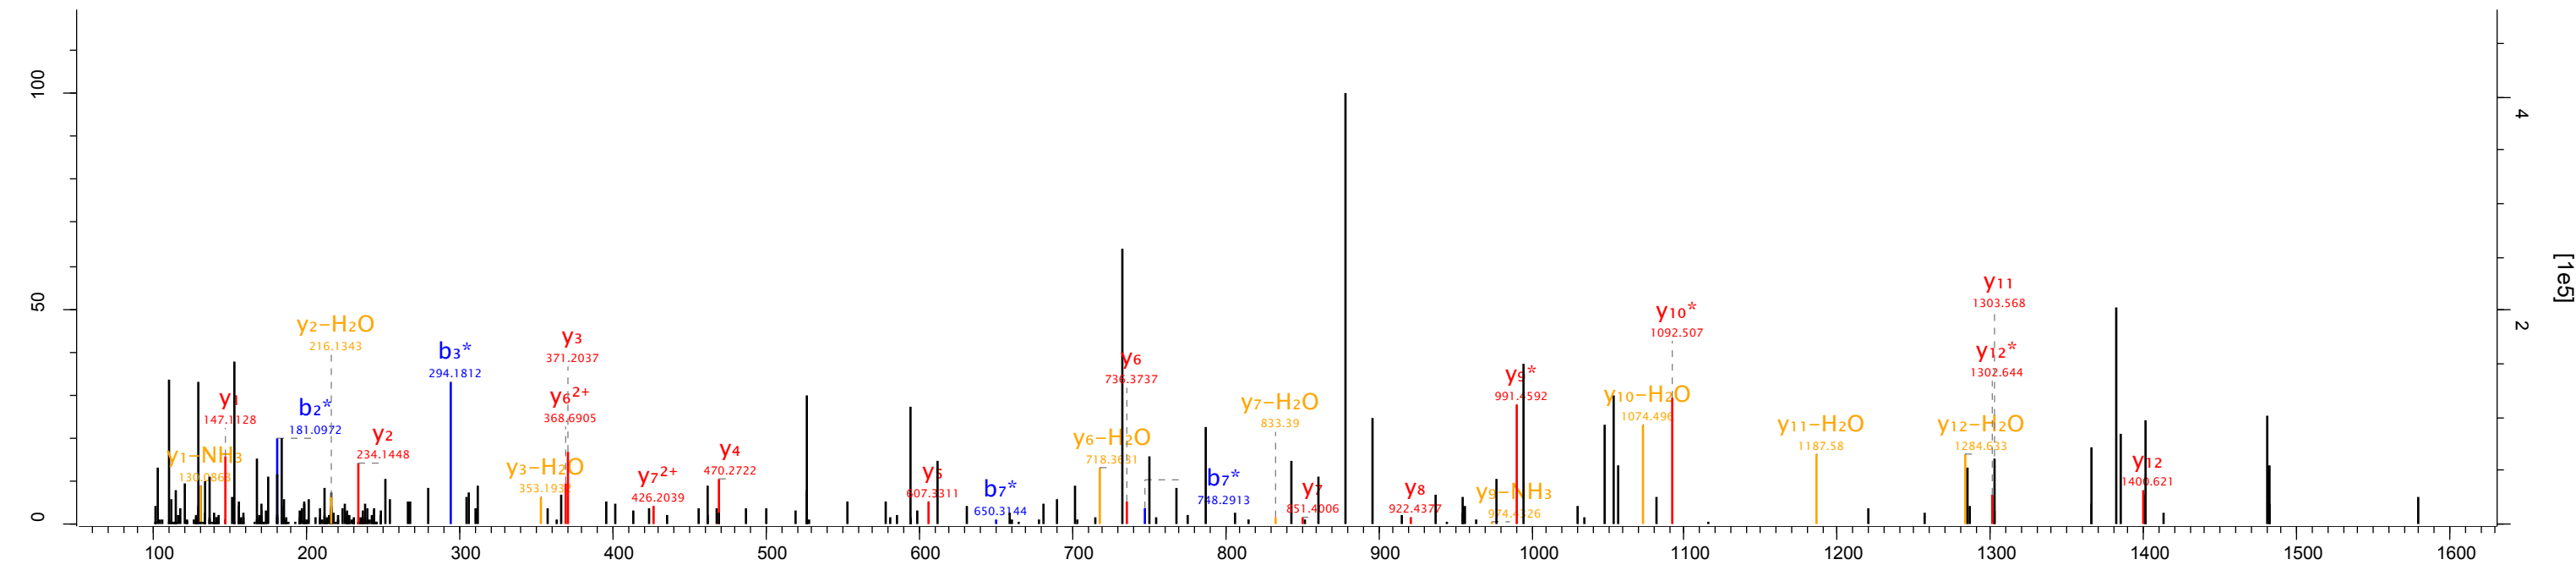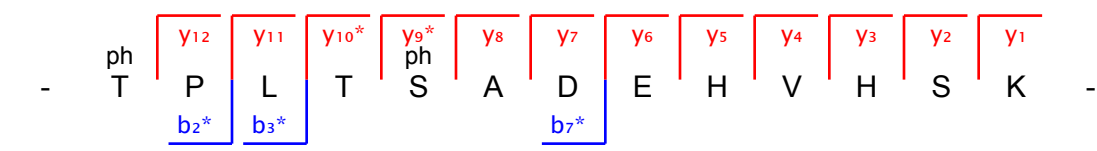



Raw file: 20150814\_A375SR\_Phospho\_BR2\_03  
 Scan: 7886 Method: FTMS; HCD Score: 106.42 m/z: 603.76 Gene names: EML3

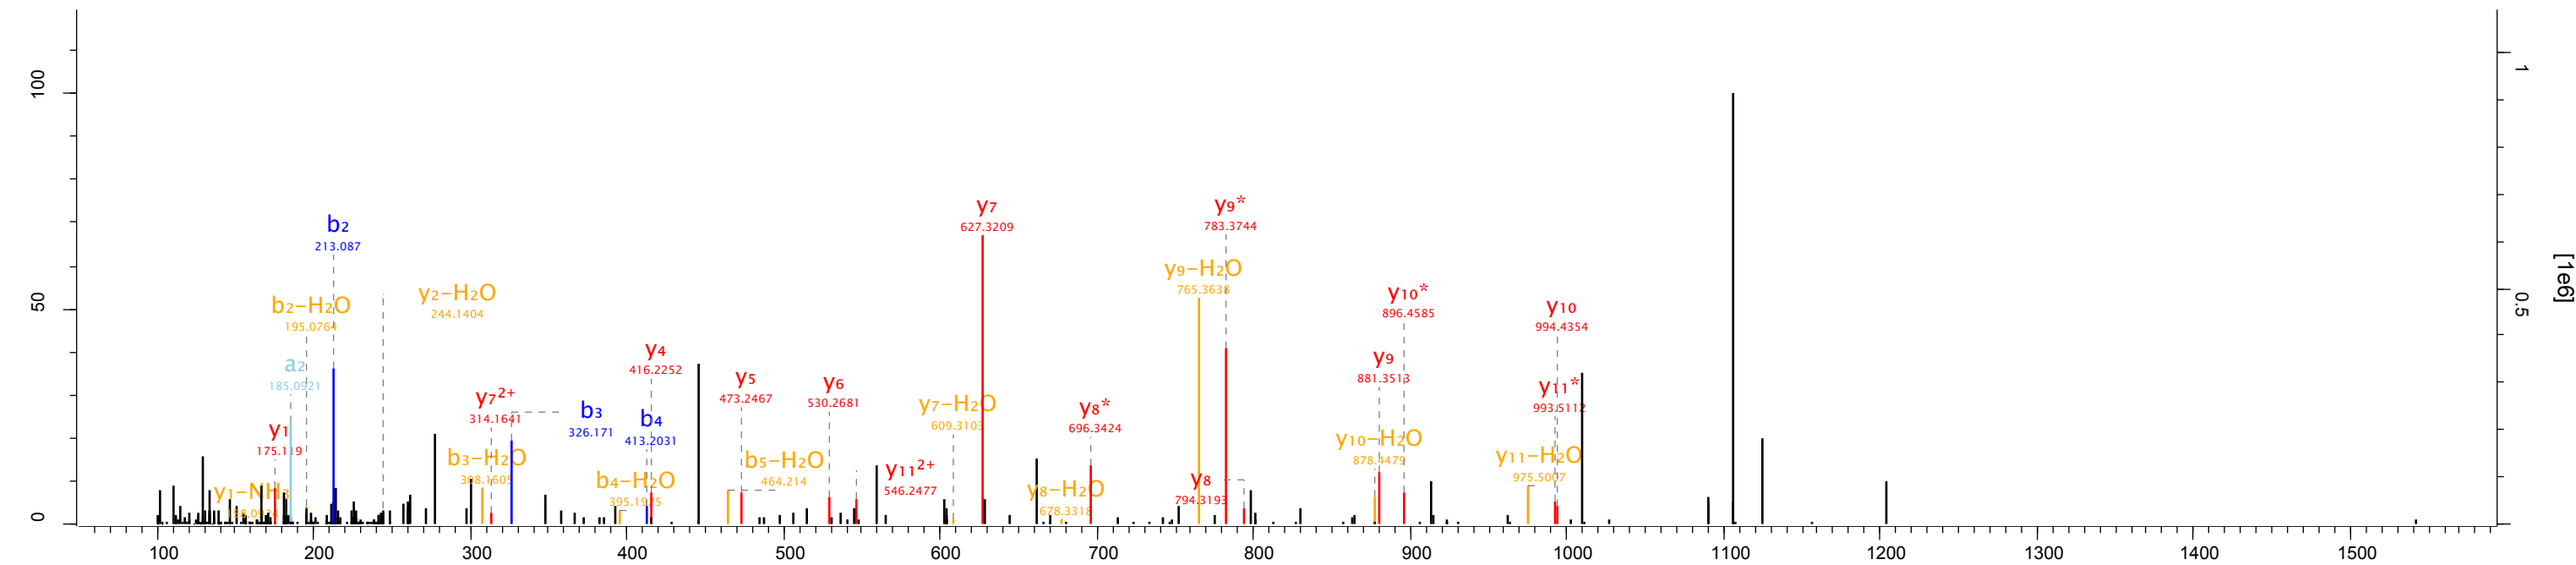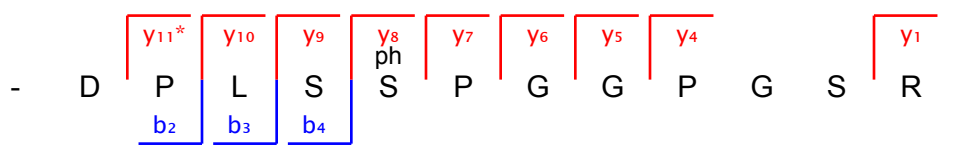

Raw file: 20150814\_A375SR\_Phospho\_BR2\_03  
 Scan: 7916 Method: FTMS; HCD Score: 201.14 m/z: 865.9 Gene names: HNRNPA1

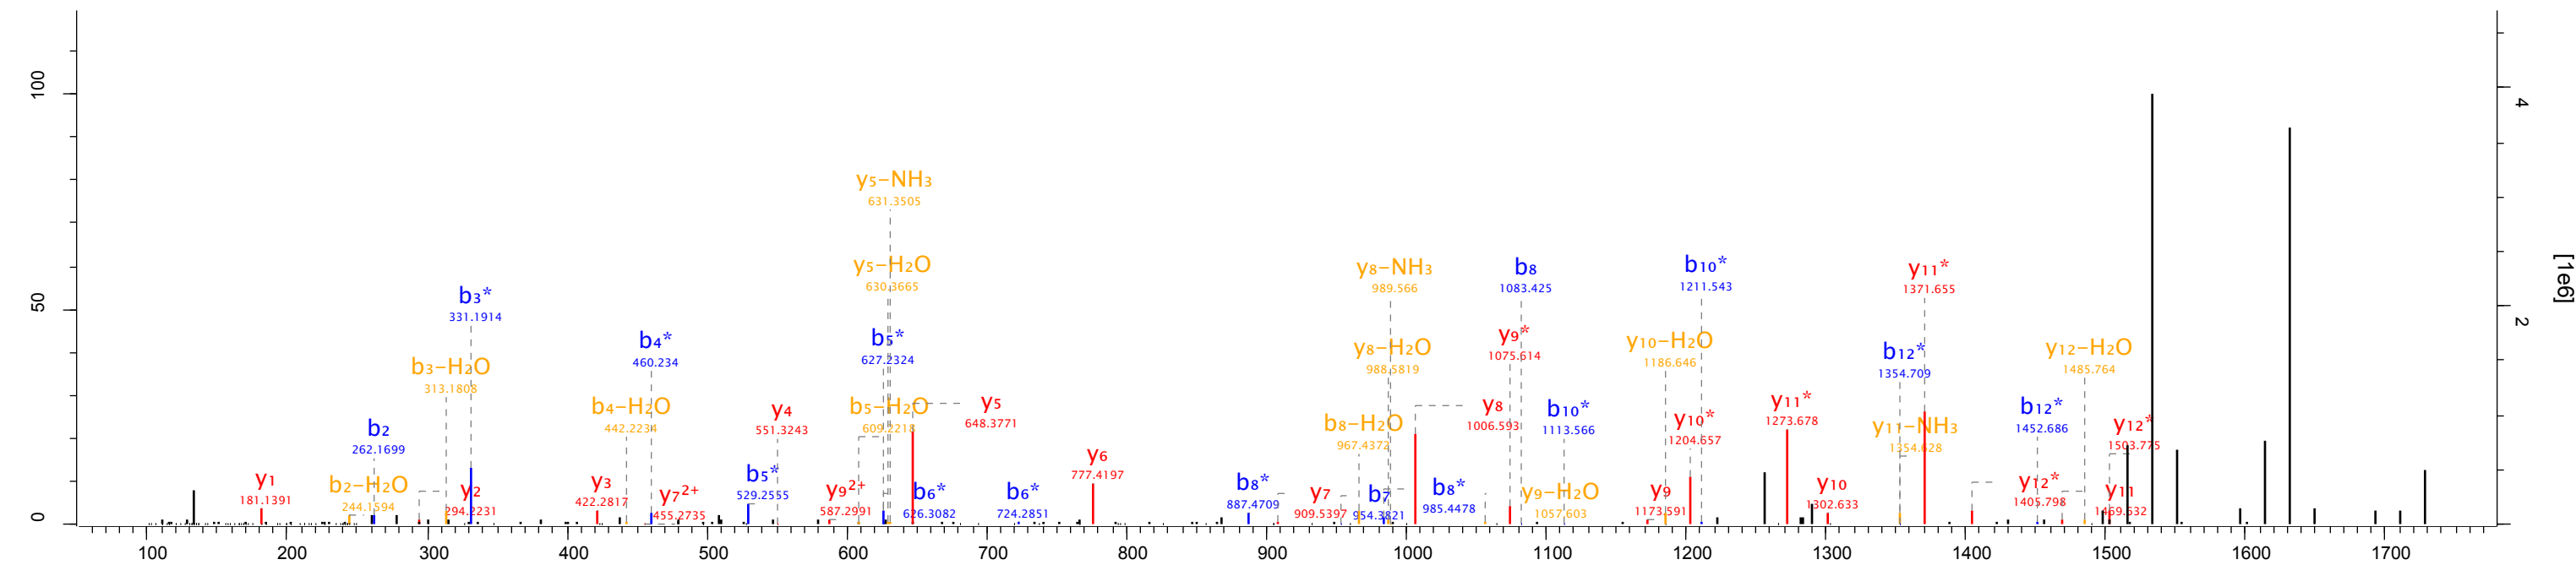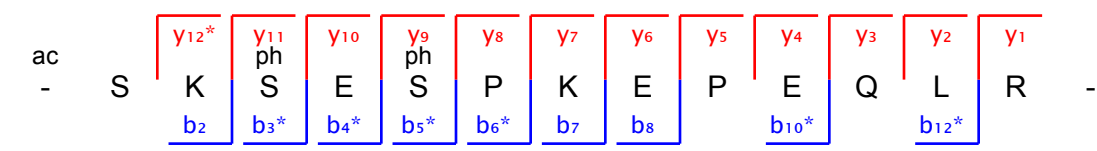

Raw file Scan Method Score m/z Gene names  
 20150814\_A375SR\_Phospho\_BR2\_03 8156 FTMS; HCD 180.08 894.9 SOX5

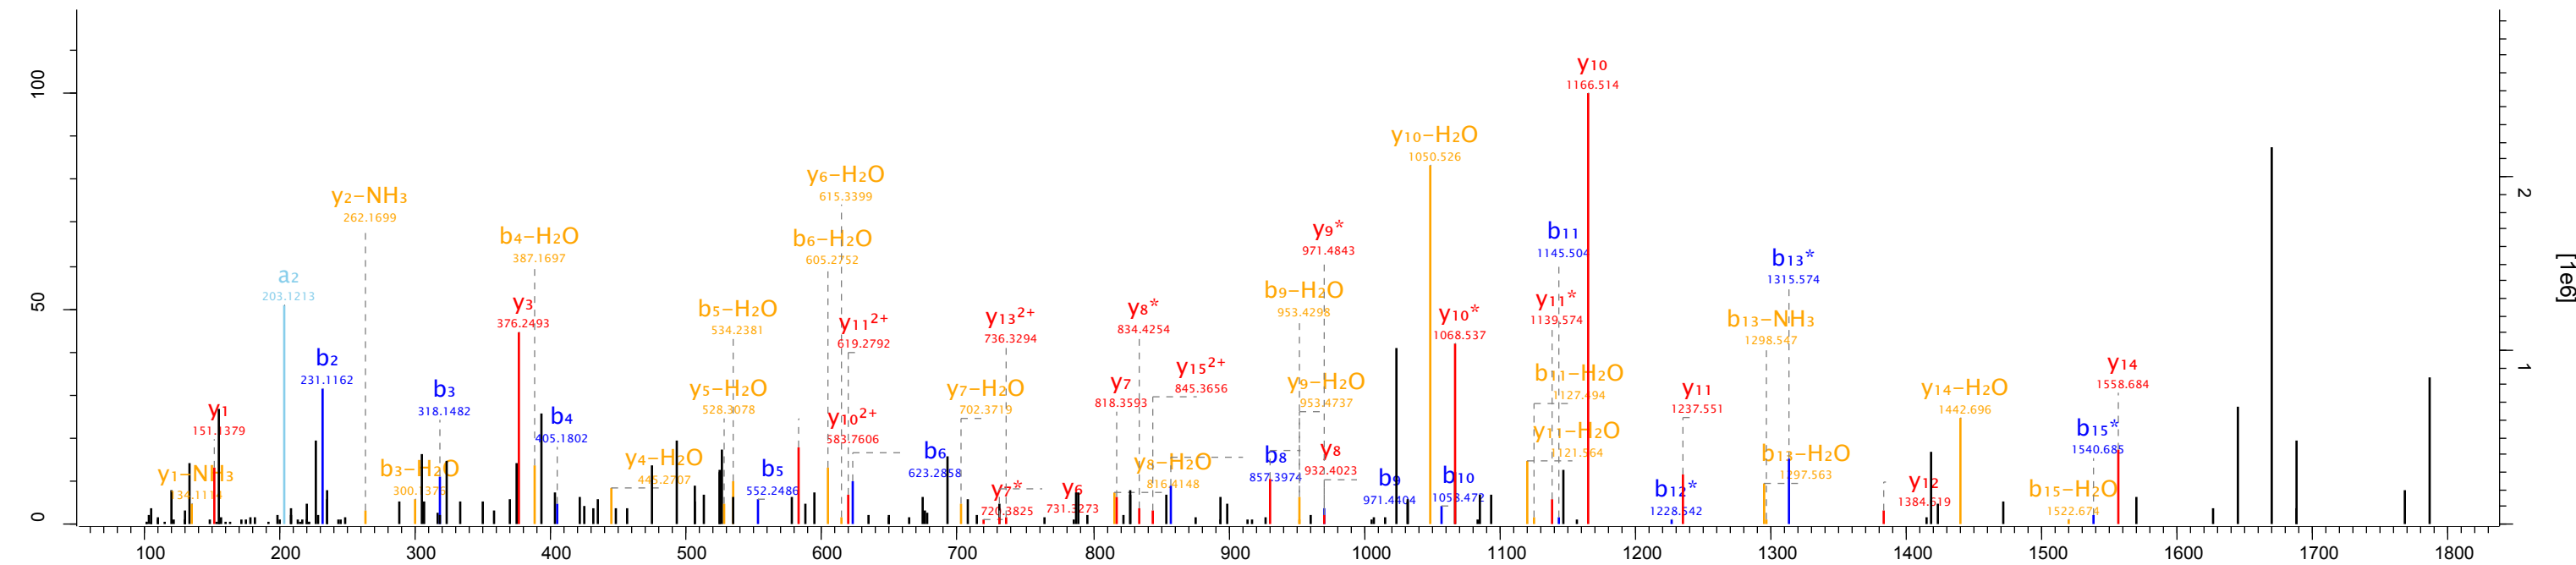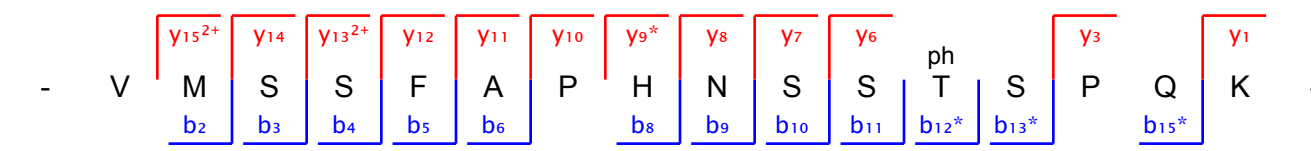

Raw file: 20150814\_A375SR\_Phospho\_BR2\_03  
 Scan: 9066 Method: FTMS; HCD Score: 54.1 m/z: 785.38 Gene names: CRYBB1

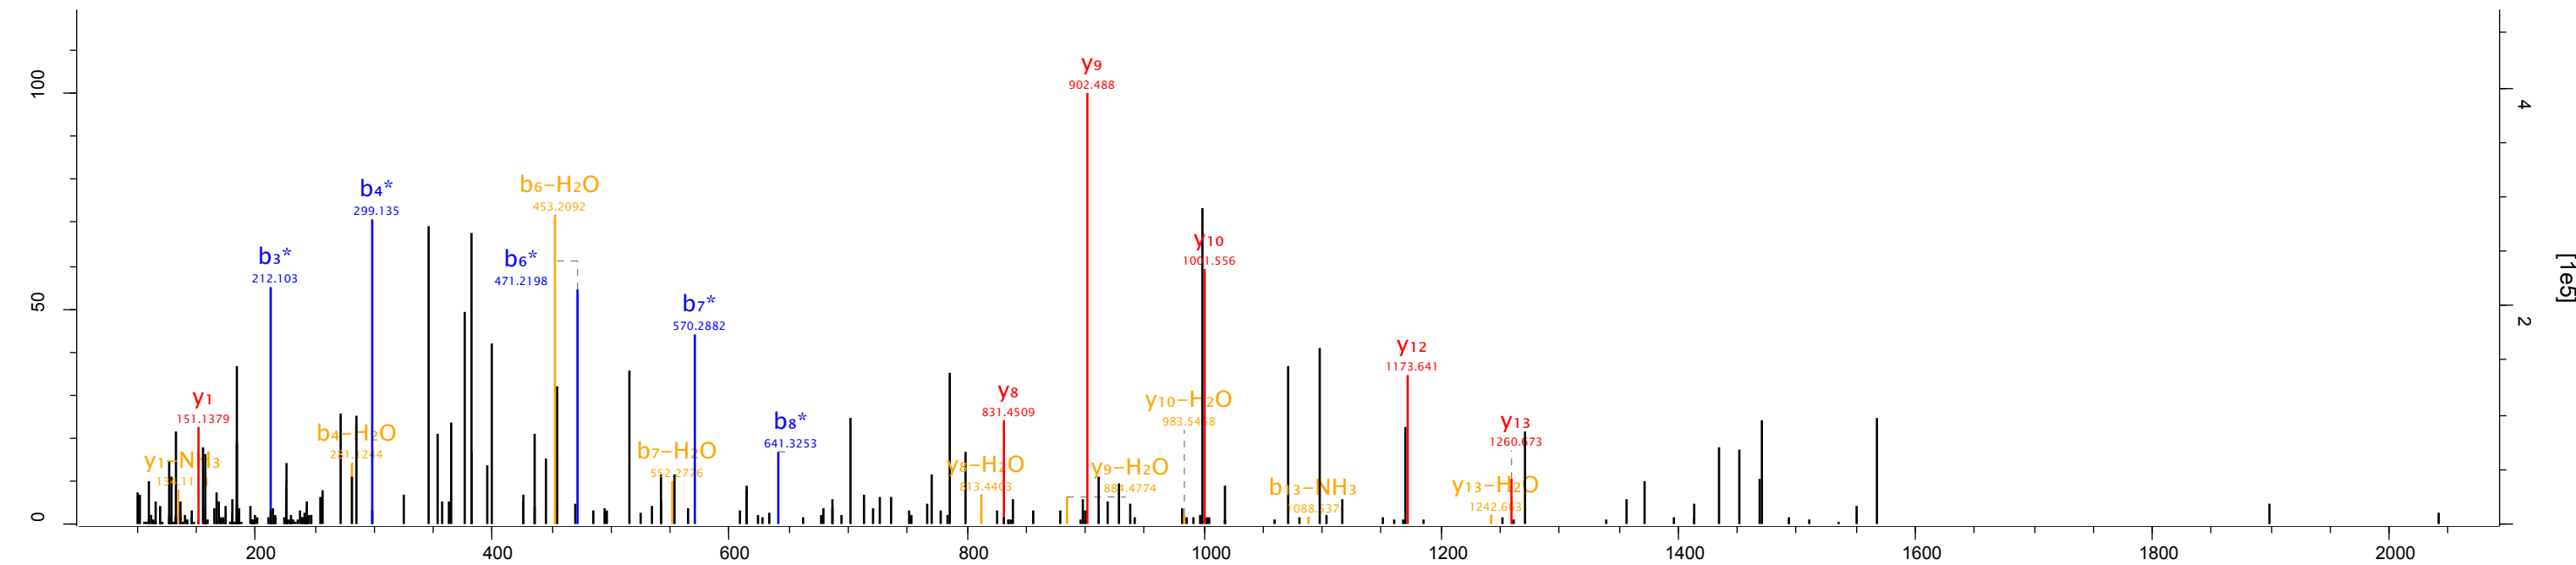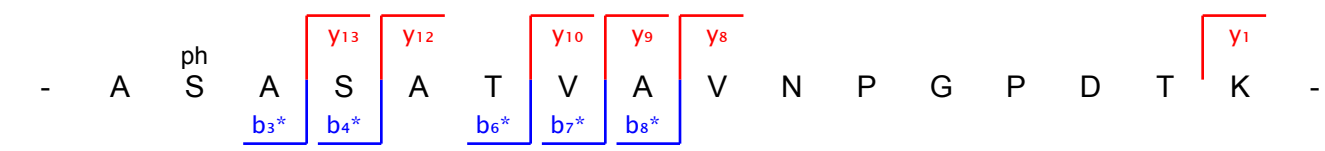

Raw file: 20150814\_A375SR\_Phospho\_BR2\_03  
 Scan: 9886 Method: FTMS; HCD Score: 146.97 m/z: 876.37 Gene names: WDR62

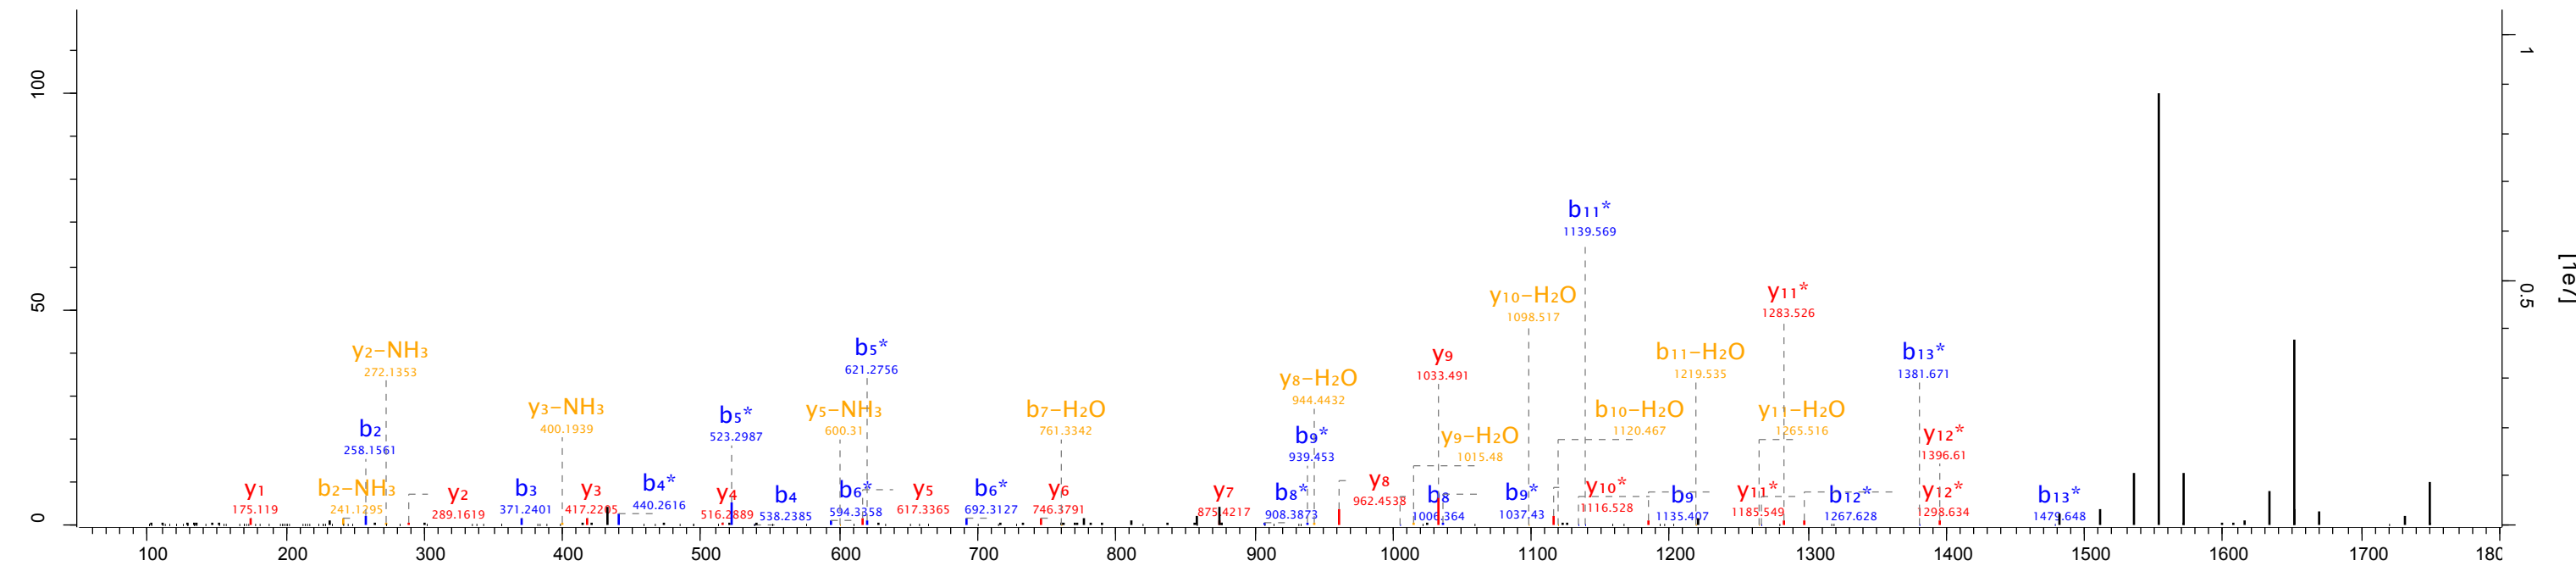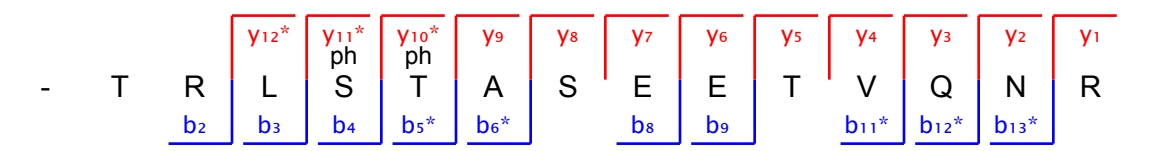

Raw file: 20150814\_A375SR\_Phospho\_BR2\_03  
 Scan: 9946 Method: FTMS; HCD Score: 139.81 m/z: 831.87 Gene names: PCM1

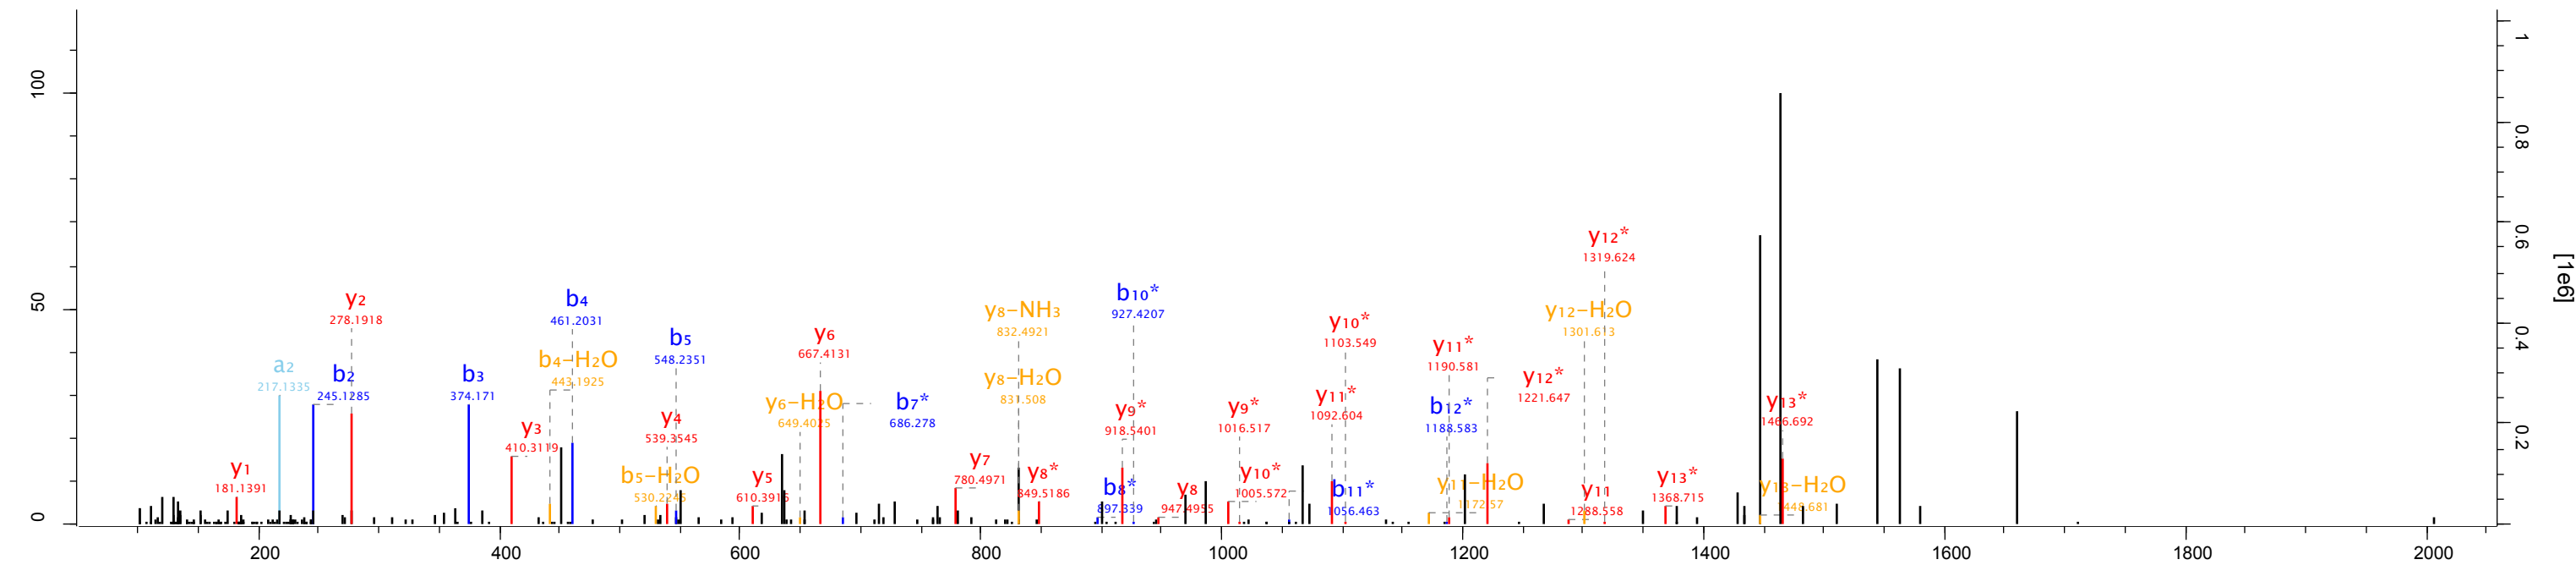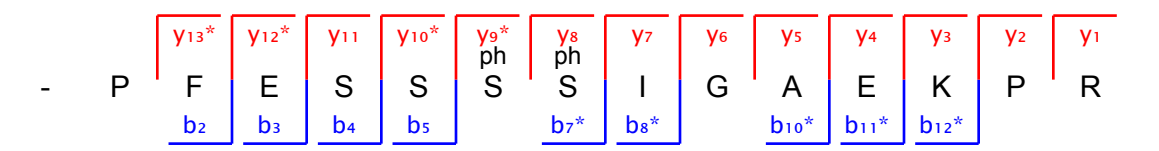

Raw file: 20150814\_A375SR\_Phospho\_BR2\_03  
 Scan: 9956 Method: FTMS; HCD Score: 55.82 m/z: 637.79 Gene names: CSNK1D

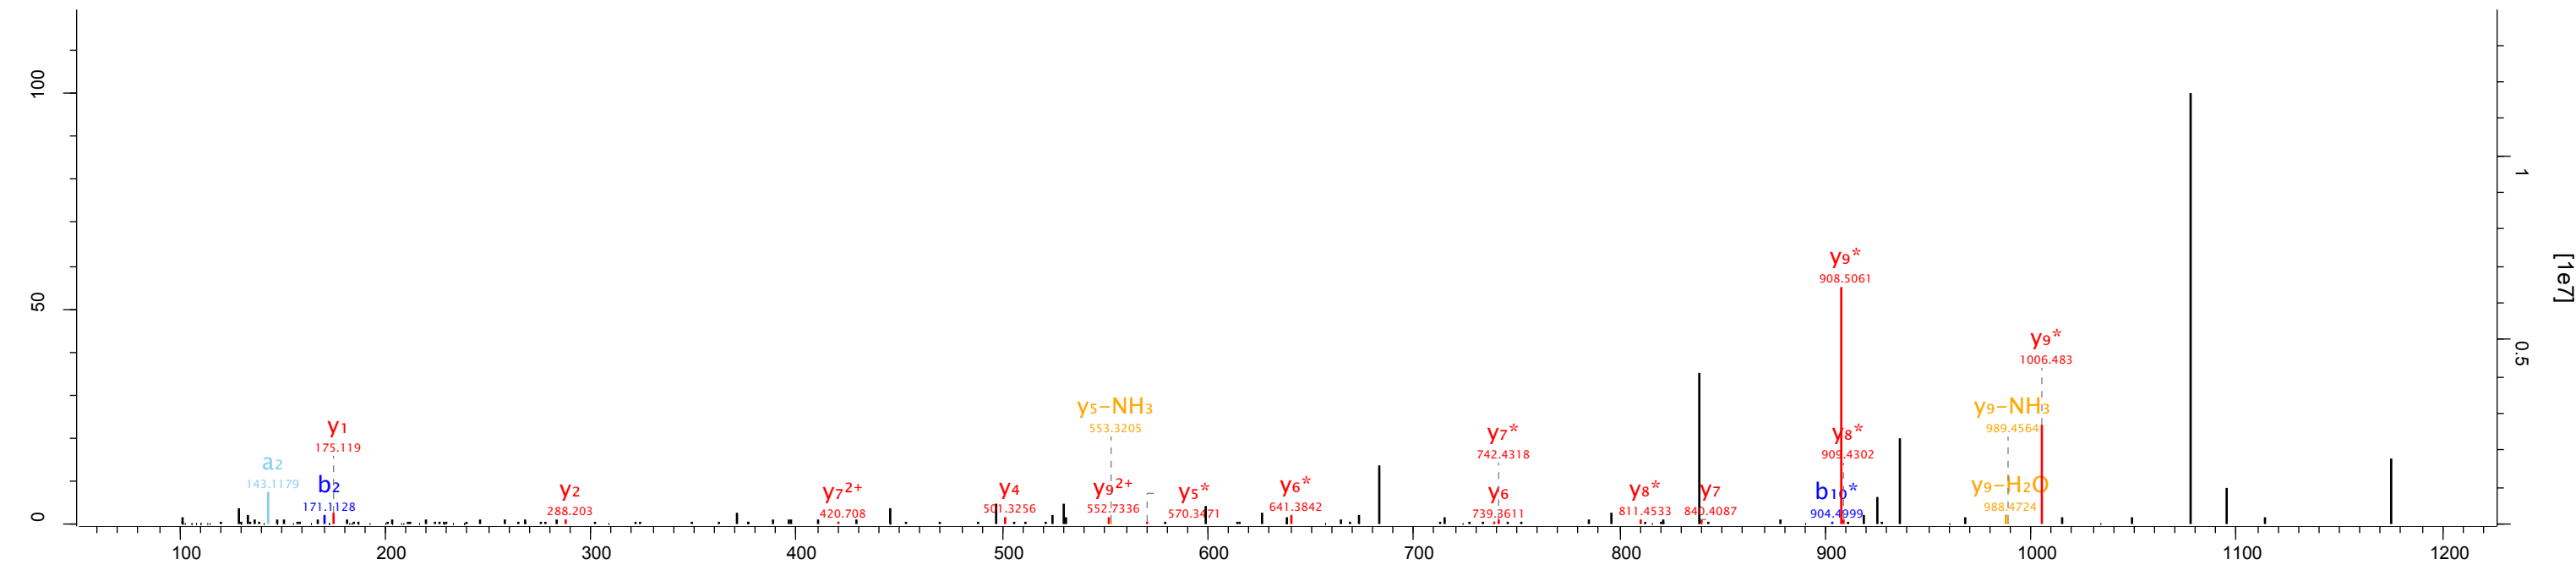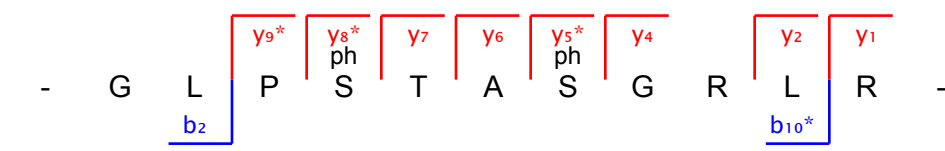

Raw file 20150814\_A375SR\_Phospho\_BR2\_04 Scan 10266 Method FTMS; HCD Score 184.14 m/z 927.88 Gene names EEF1B2

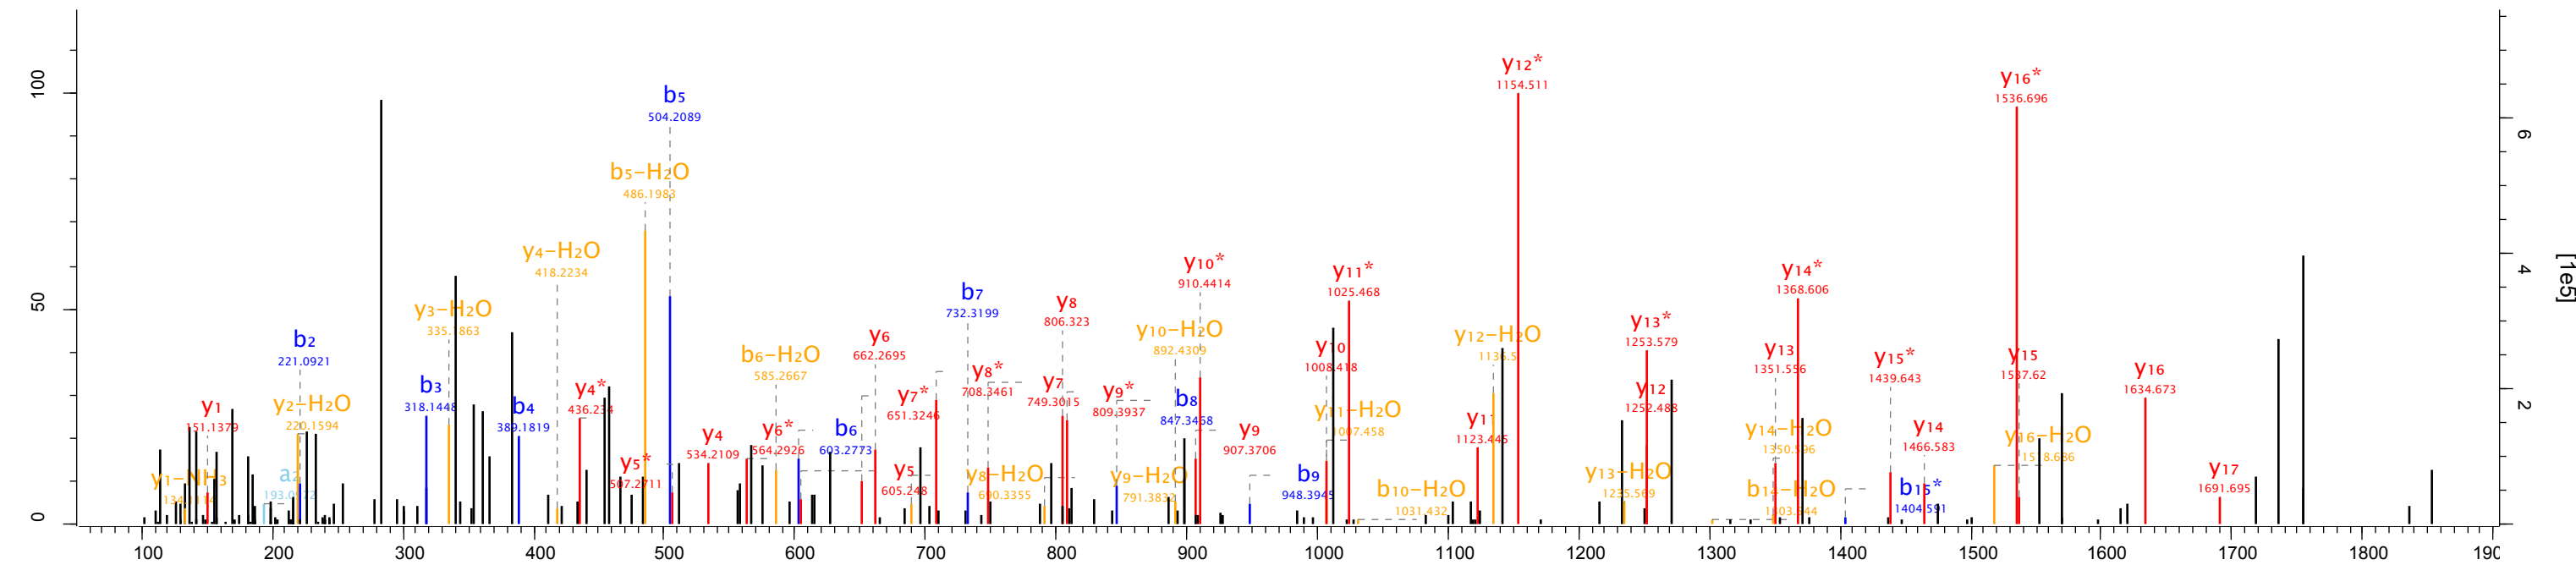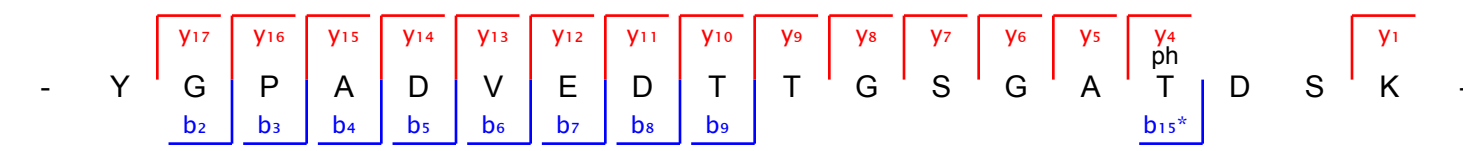



Raw file 20150814\_A375SR\_Phospho\_BR2\_04 Scan 10316 Method FTMS; HCD Score 160.97 m/z 930.92 Gene names SMG9

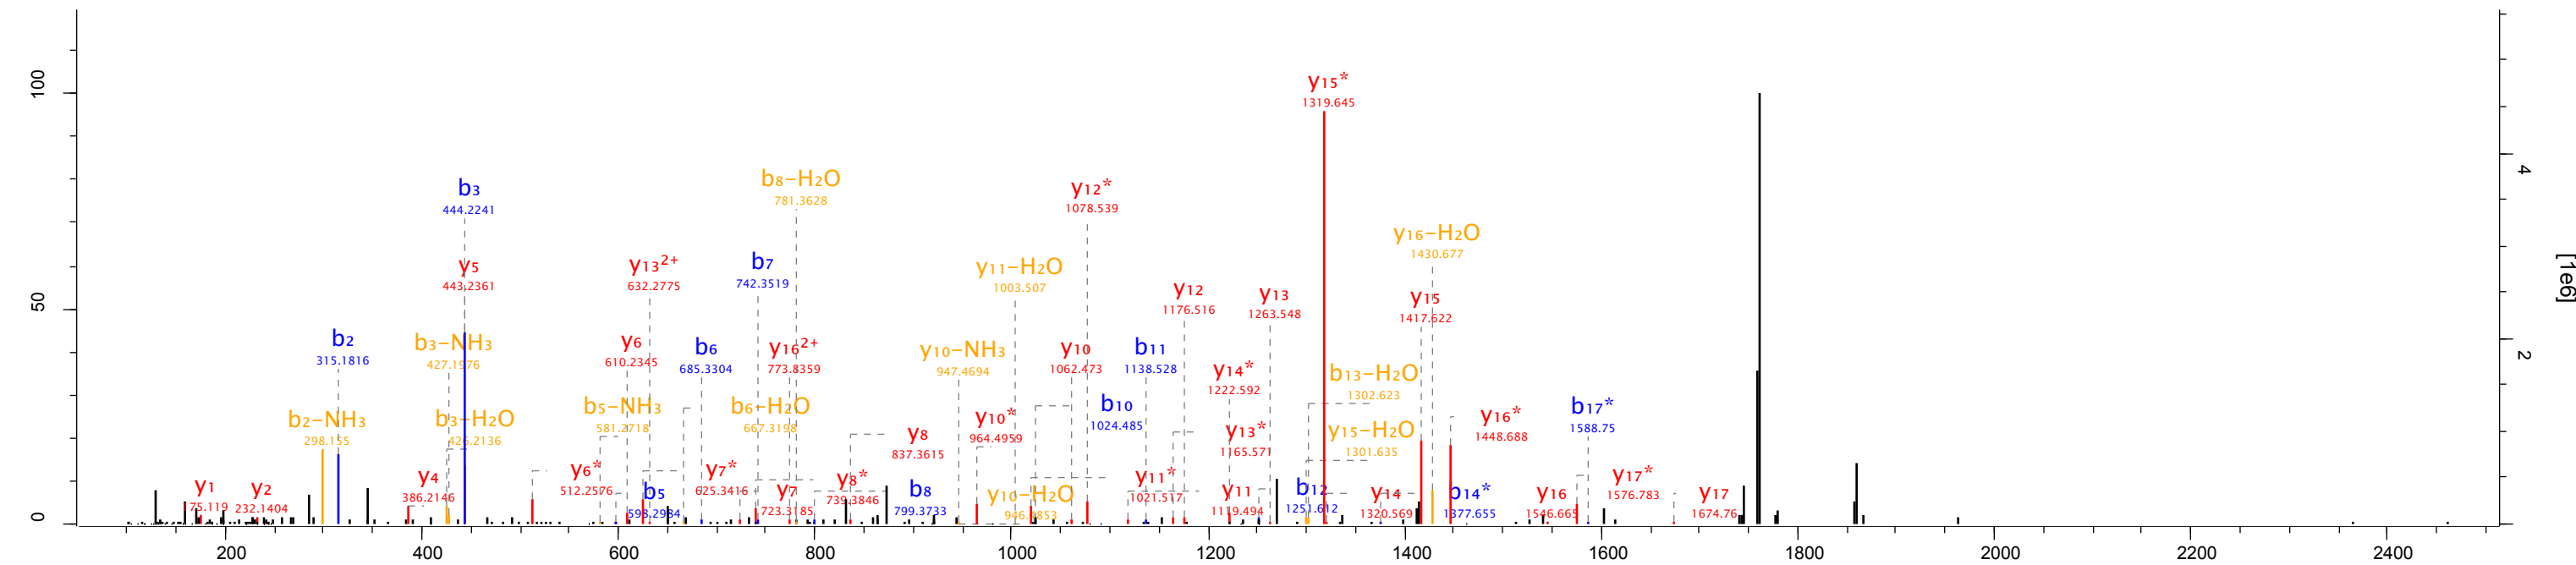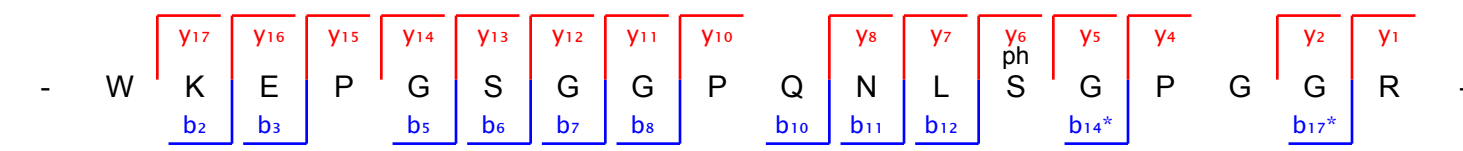

Raw file: 20150814\_A375SR\_Phospho\_BR2\_04  
 Scan: 10376 Method: FTMS; HCD Score: 223.44 m/z: 891.39 Gene names: SLC7A5

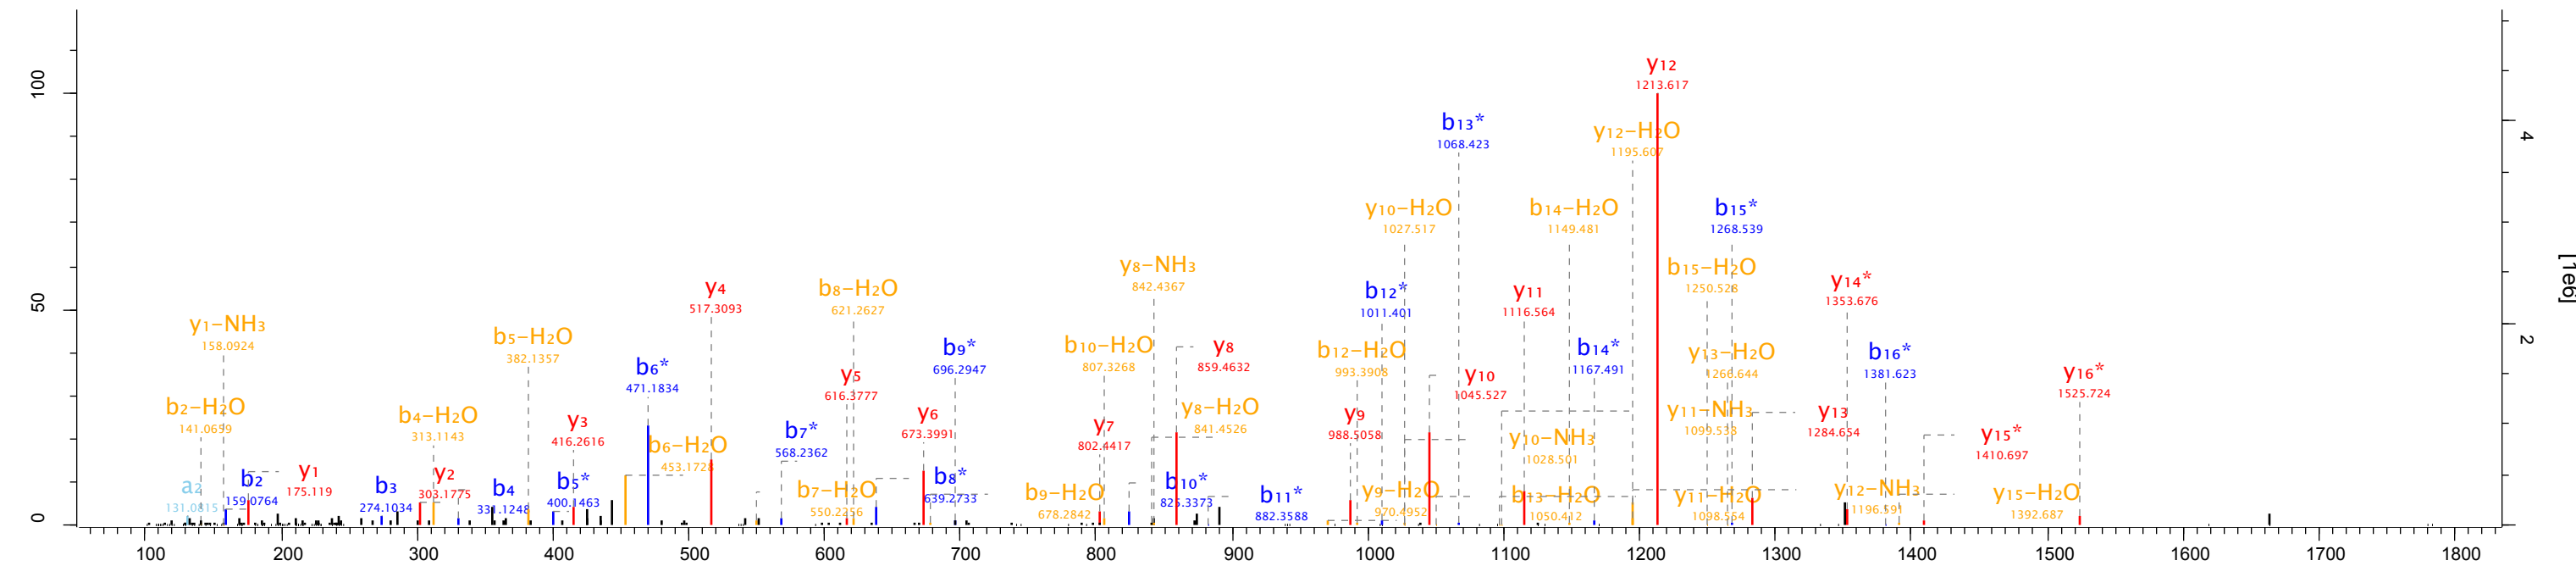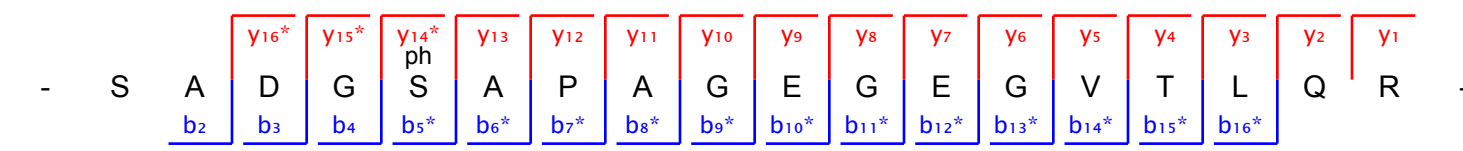

Raw file  
 20150814\_A375SR\_Phospho\_BR2\_04  
 Scan 10506 Method FTMS; HCD Score 199.56 m/z 870.65 Gene names CRTCI

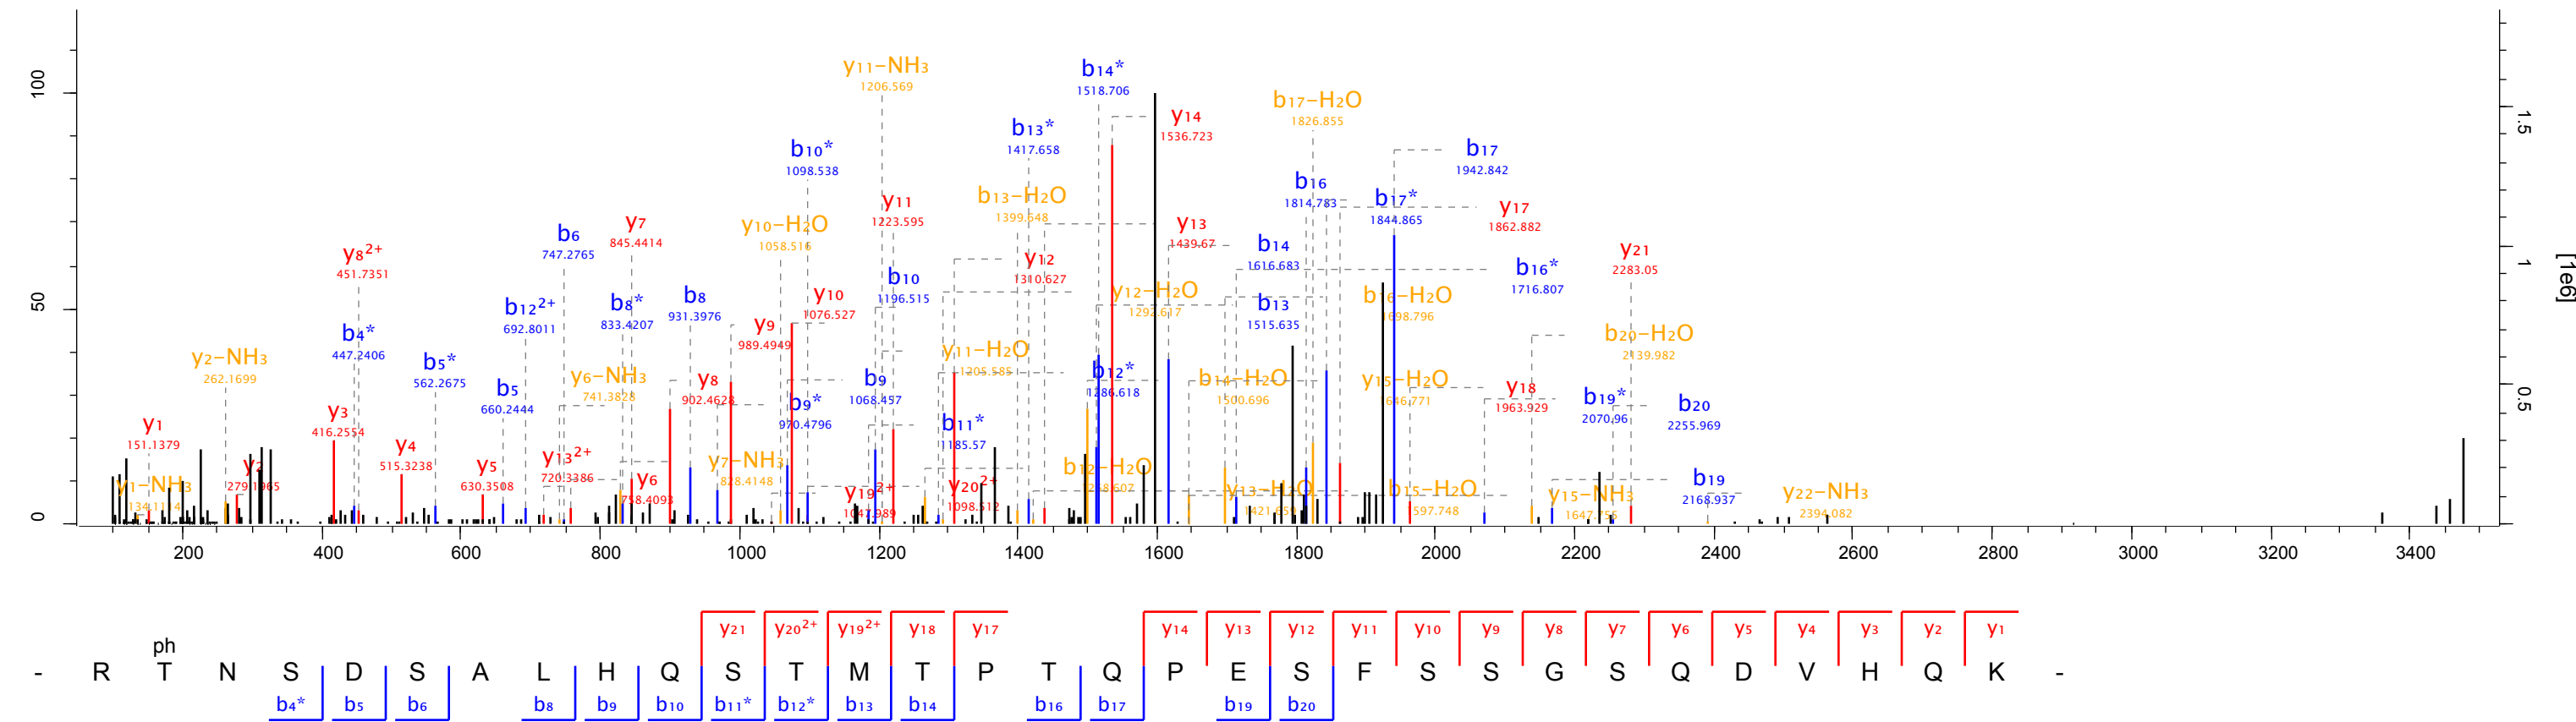

Raw file: 20150814\_A375SR\_Phospho\_BR2\_04  
 Scan: 10526 Method: FTMS; HCD Score: 48.57 m/z: 616.79 Gene names: CEP95

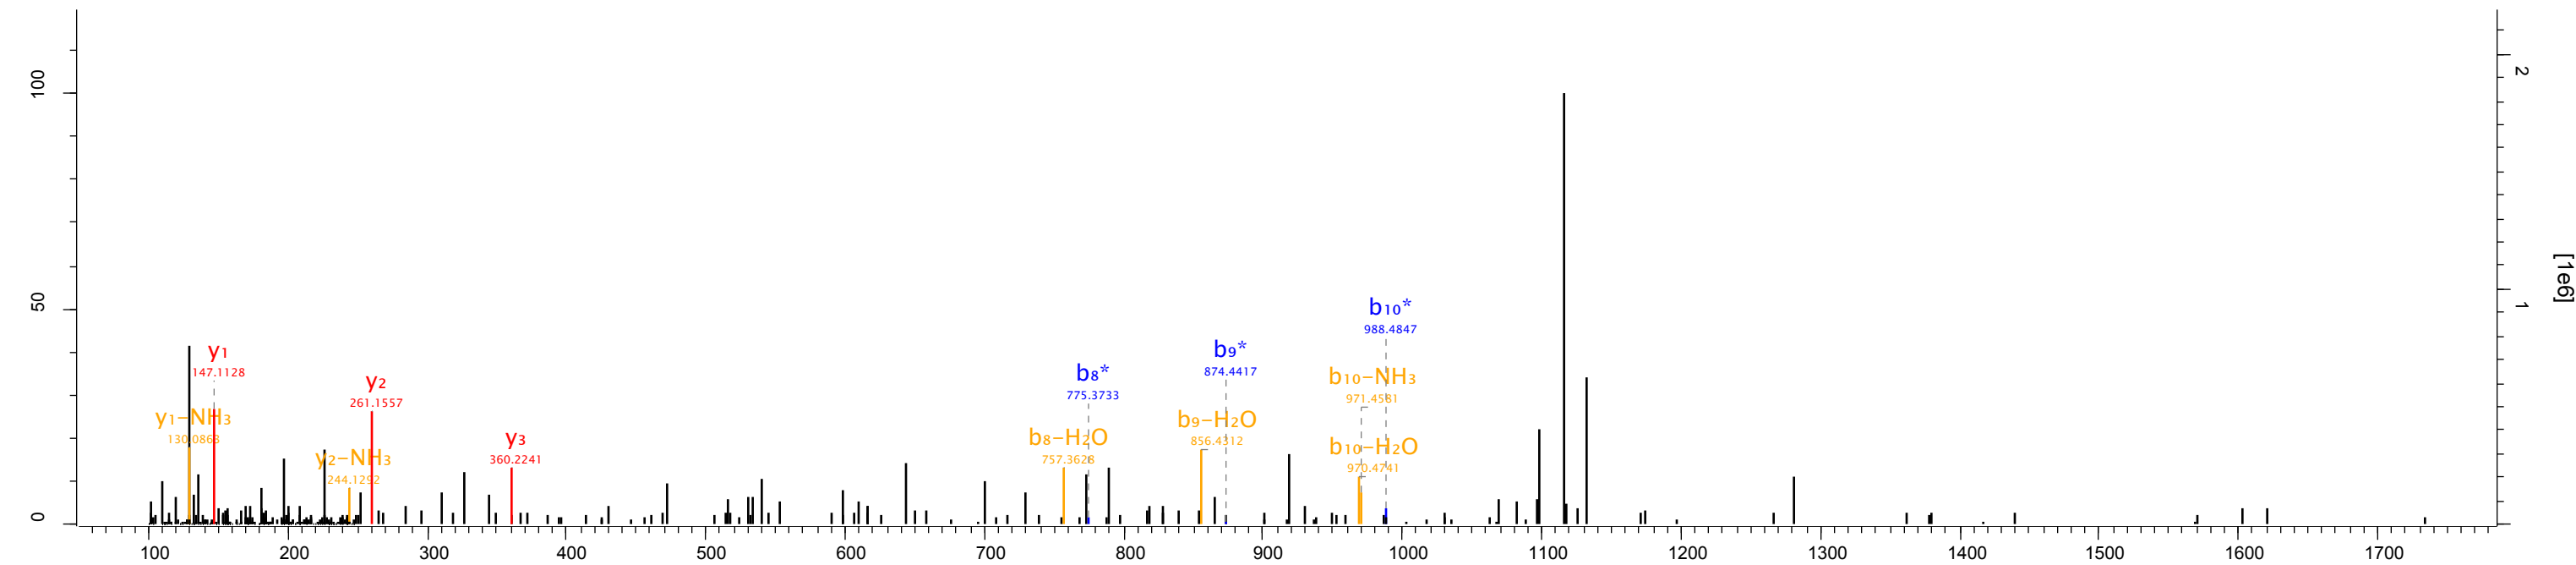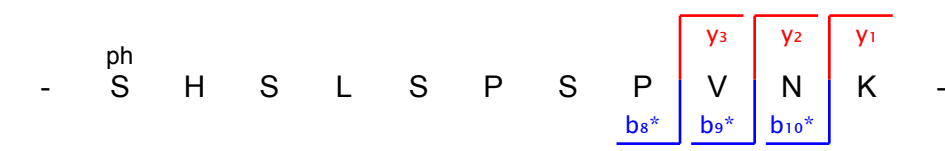

Raw file: 20150814\_A375SR\_Phospho\_BR2\_04  
 Scan: 10726 Method: FTMS; HCD Score: 86.08 m/z: 879.72 Gene names: RAD23A

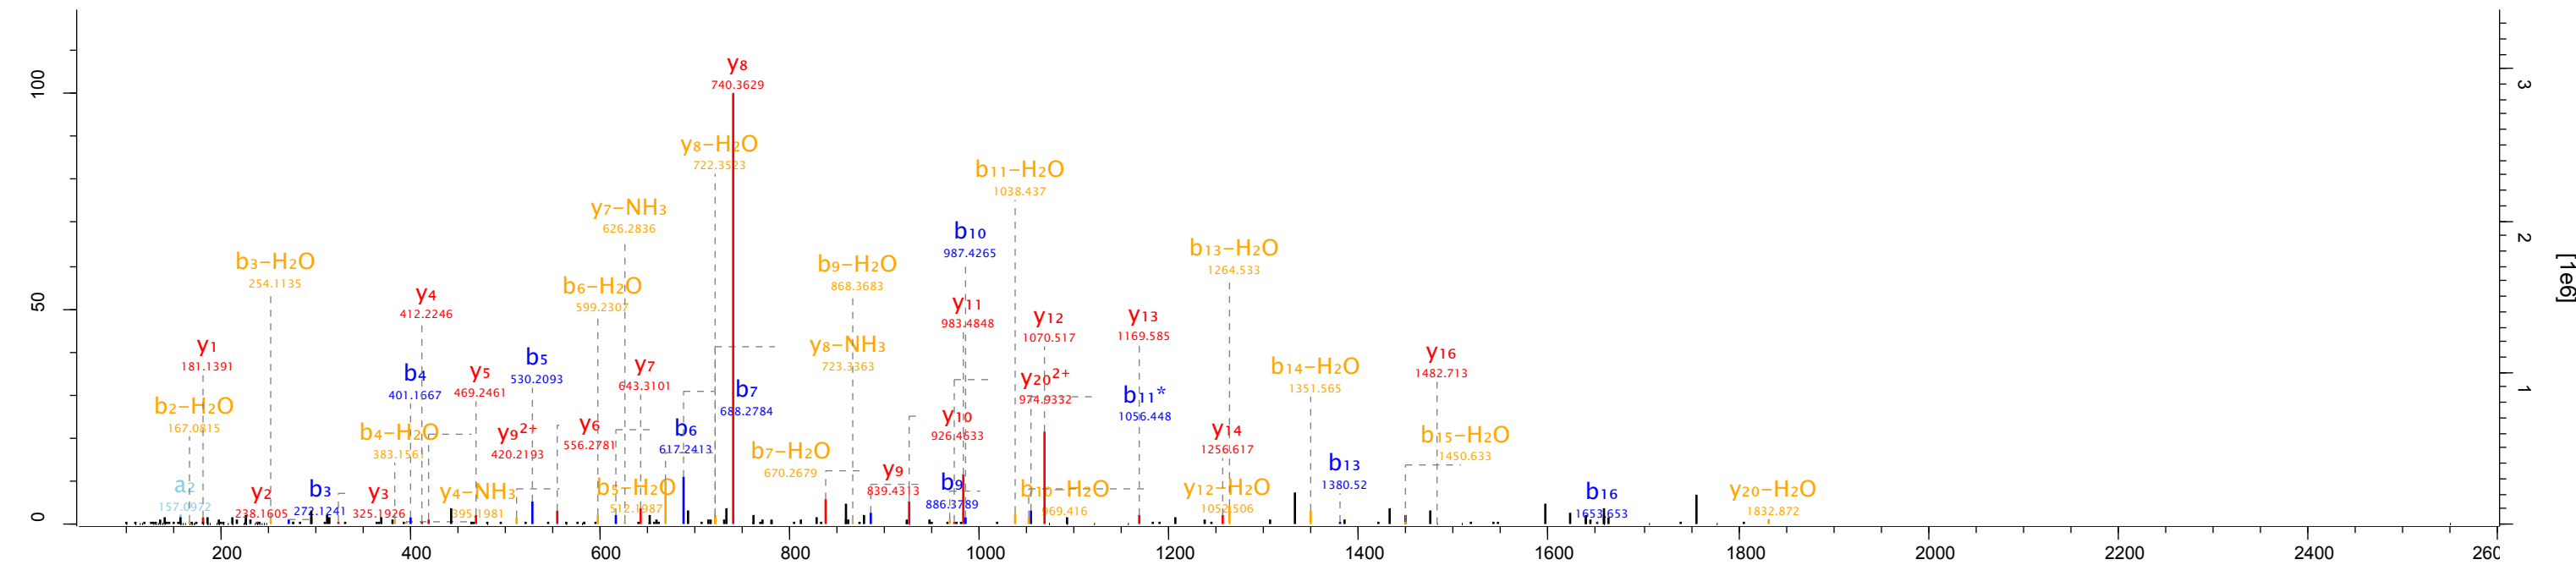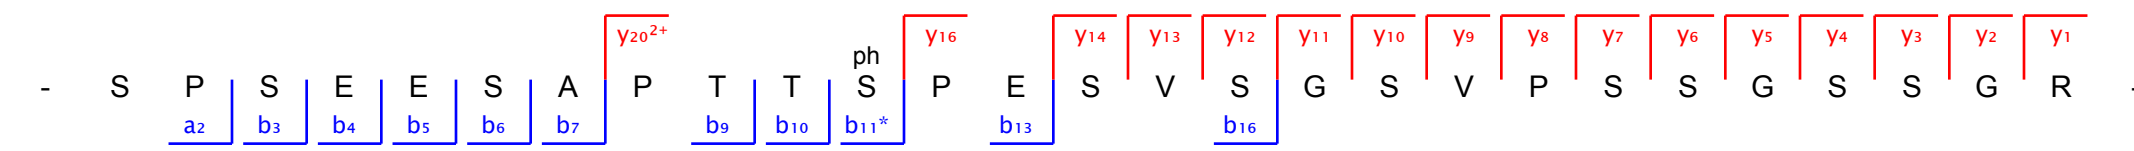

Raw file: 20150814\_A375SR\_Phospho\_BR2\_04  
 Scan: 11066 Method: FTMS; HCD Score: 130.27 m/z: 697.82 Gene names: FKBP1A;FKBP12-Exin

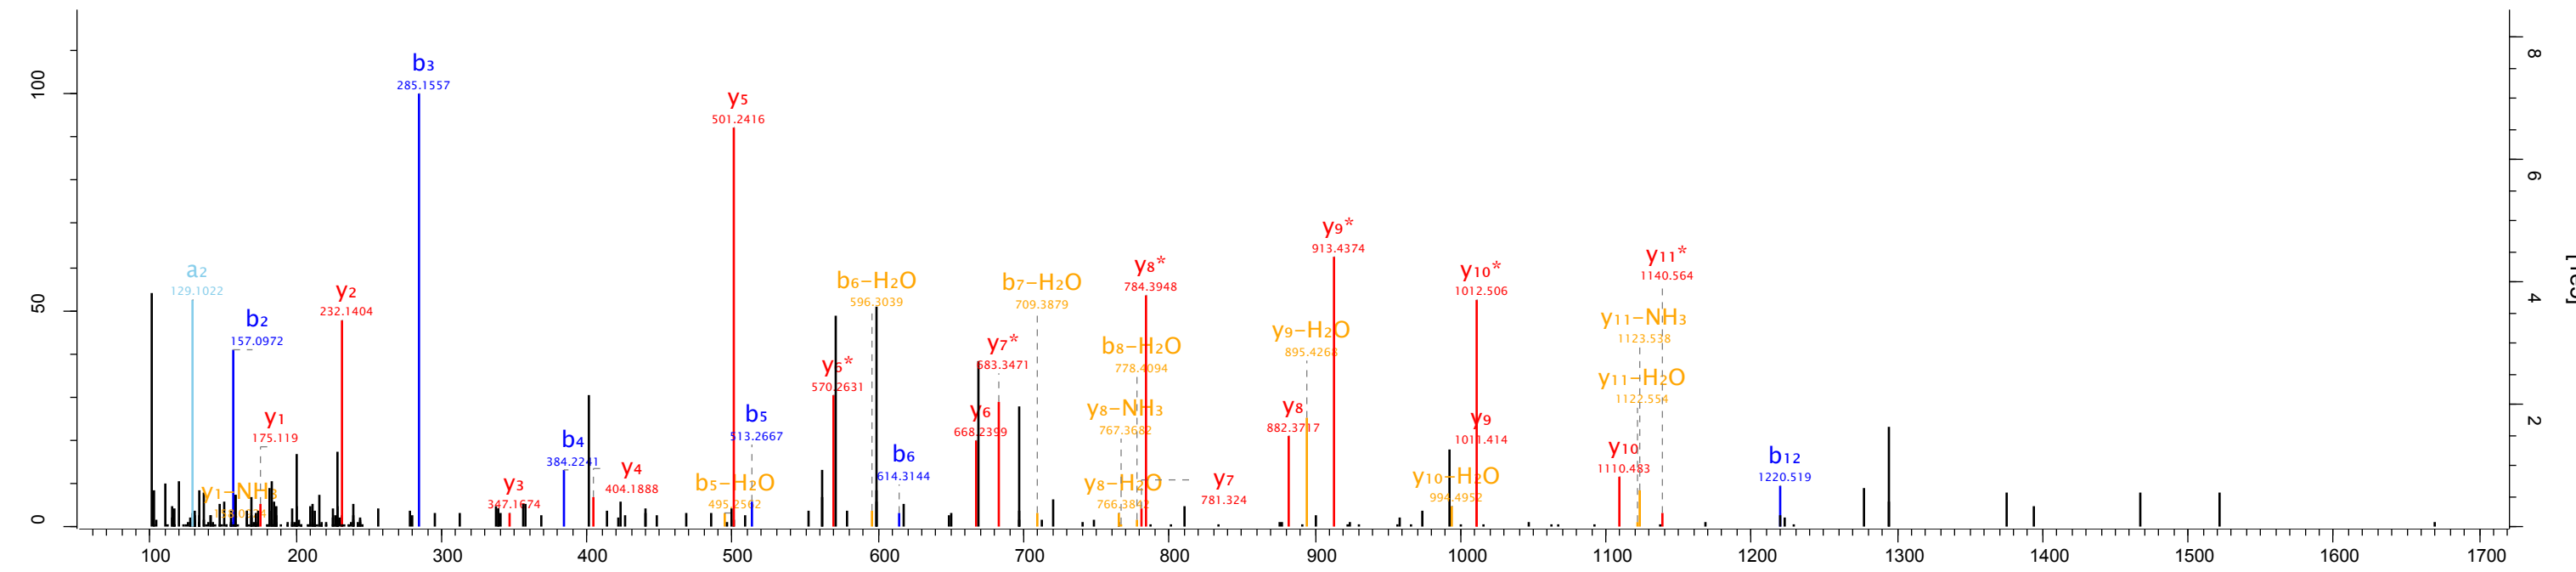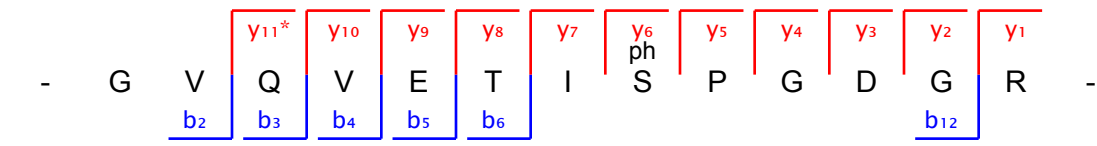

Raw file: 20150814\_A375SR\_Phospho\_BR2\_04  
 Scan: 11086  
 Method: FTMS; HCD  
 Score: 517.56  
 m/z: 1246.51  
 Gene names: PNISR

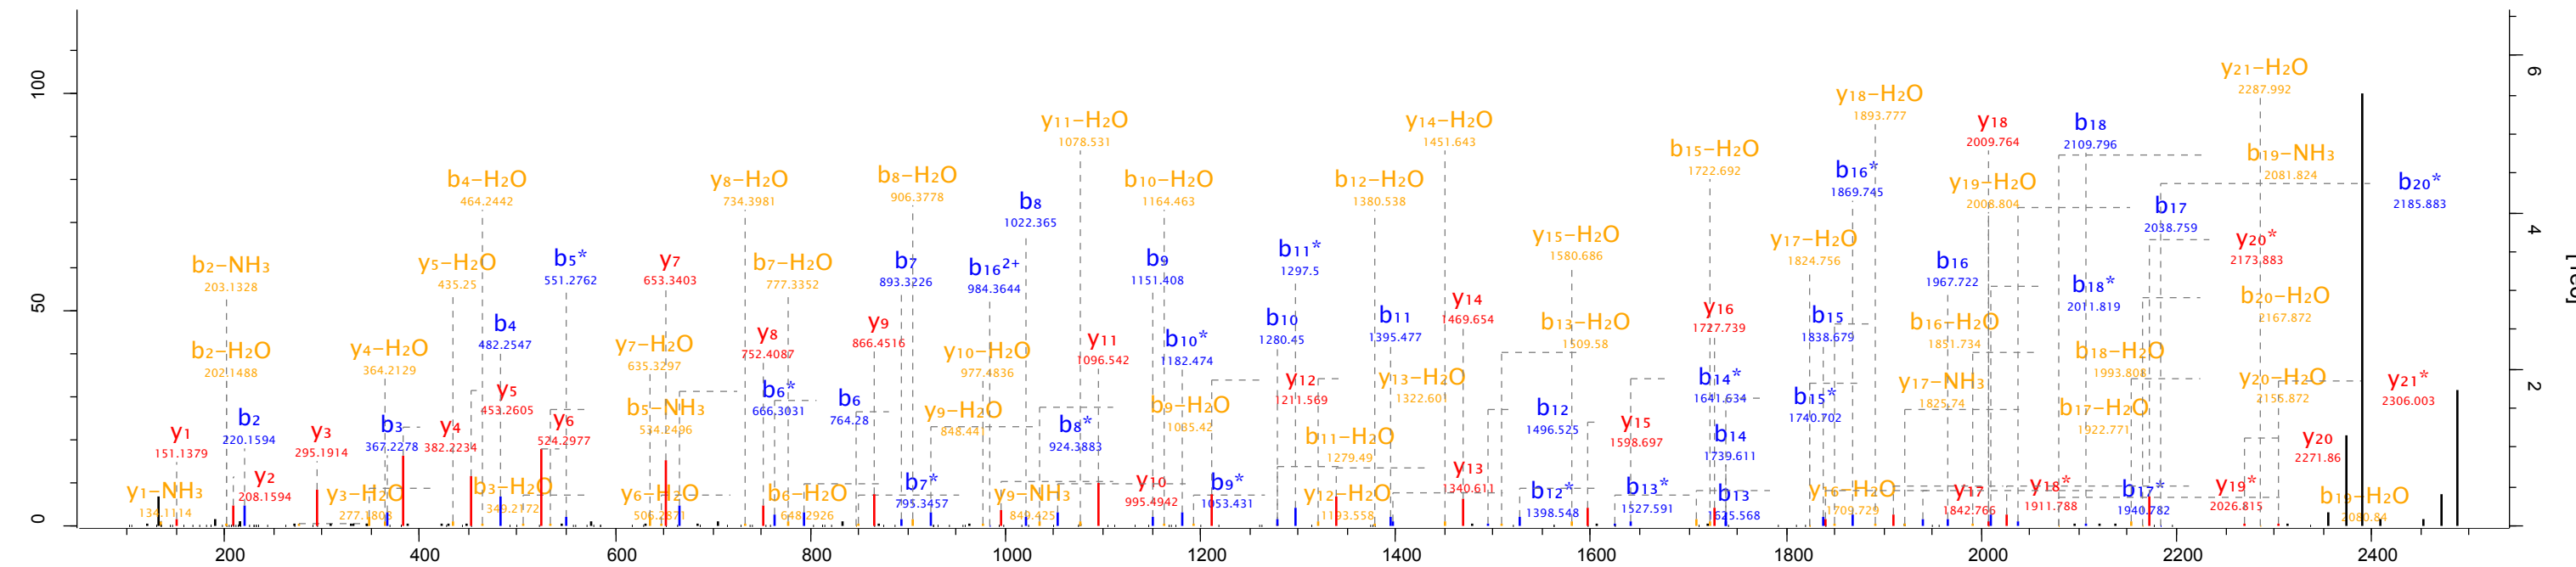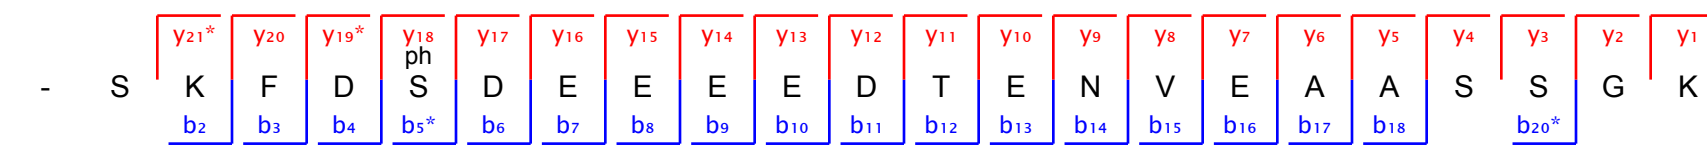

Raw file  
20150814\_A375SR\_Phospho\_BR2\_04

Scan 11416 Method FTMS; HCD Score 138.05 m/z 793.87 Gene names TENC1

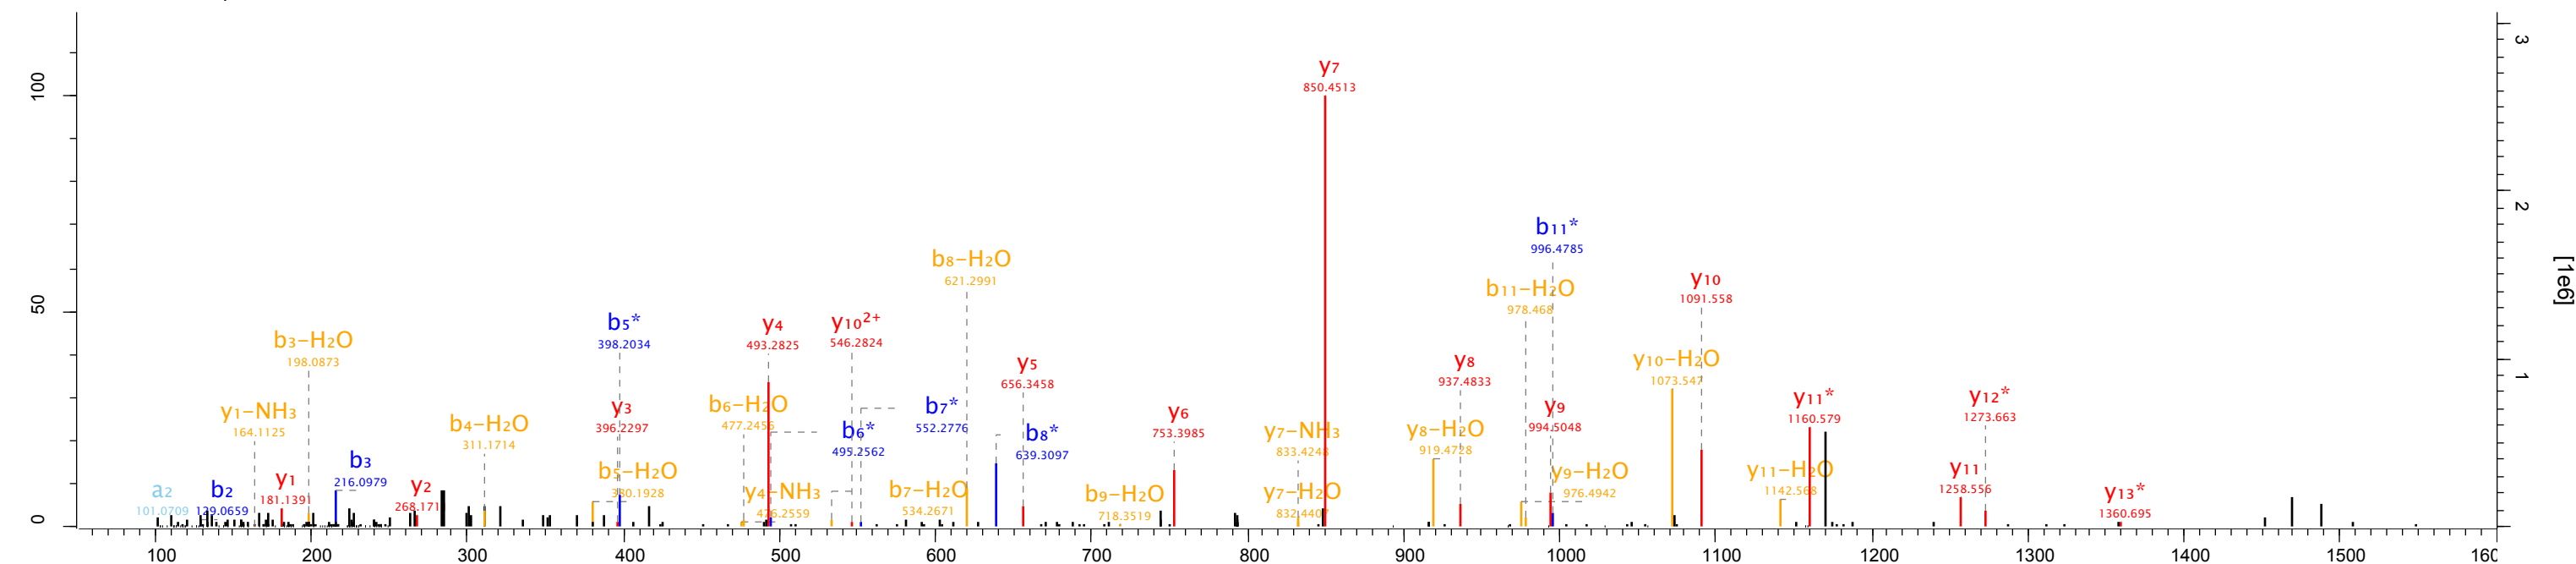

- A G S I S P G S P P Y P Q S R -

Fragmentation scheme showing b and y ions for the peptide sequence: A G S I S P G S P P Y P Q S R. The b ions are labeled b2 through b8\* and the y ions are labeled y1 through y13\*.





Raw file 20150814\_A375SR\_Phospho\_BR2\_04 Scan 11696 Method FTMS; HCD Score 62.8 m/z 530.23 Gene names PRKD1

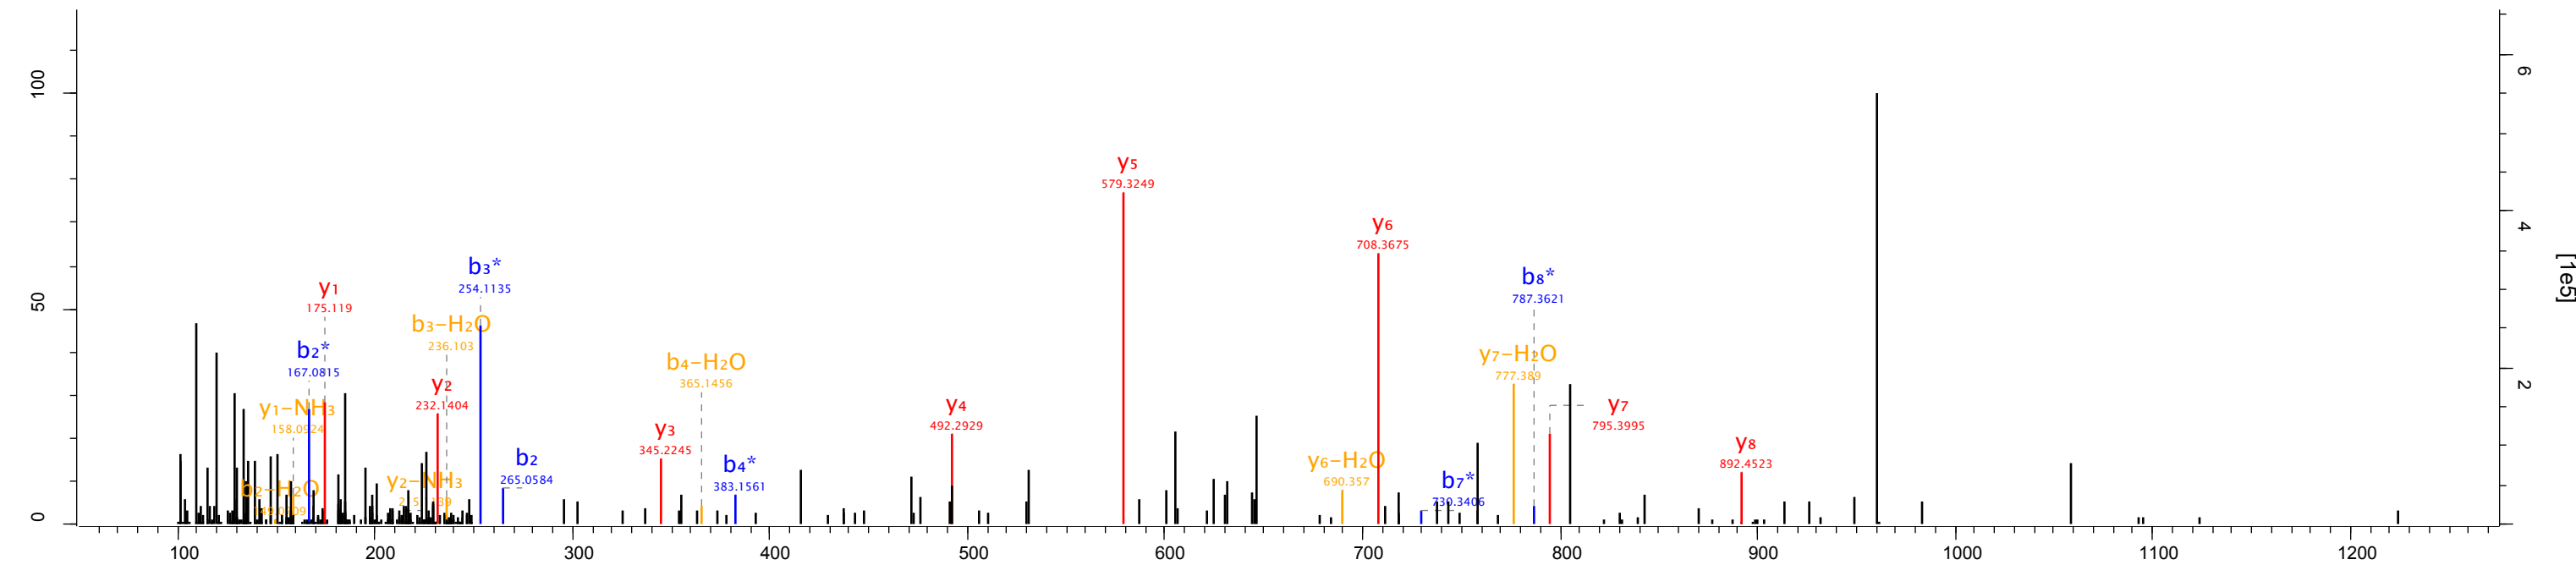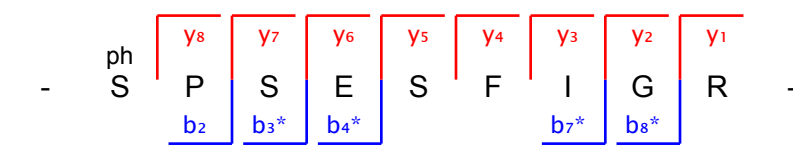

Raw file 20150814\_A375SR\_Phospho\_BR2\_04 Scan 1196 Method FTMS; HCD Score 139.11 m/z 556.25 Gene names SNIP1

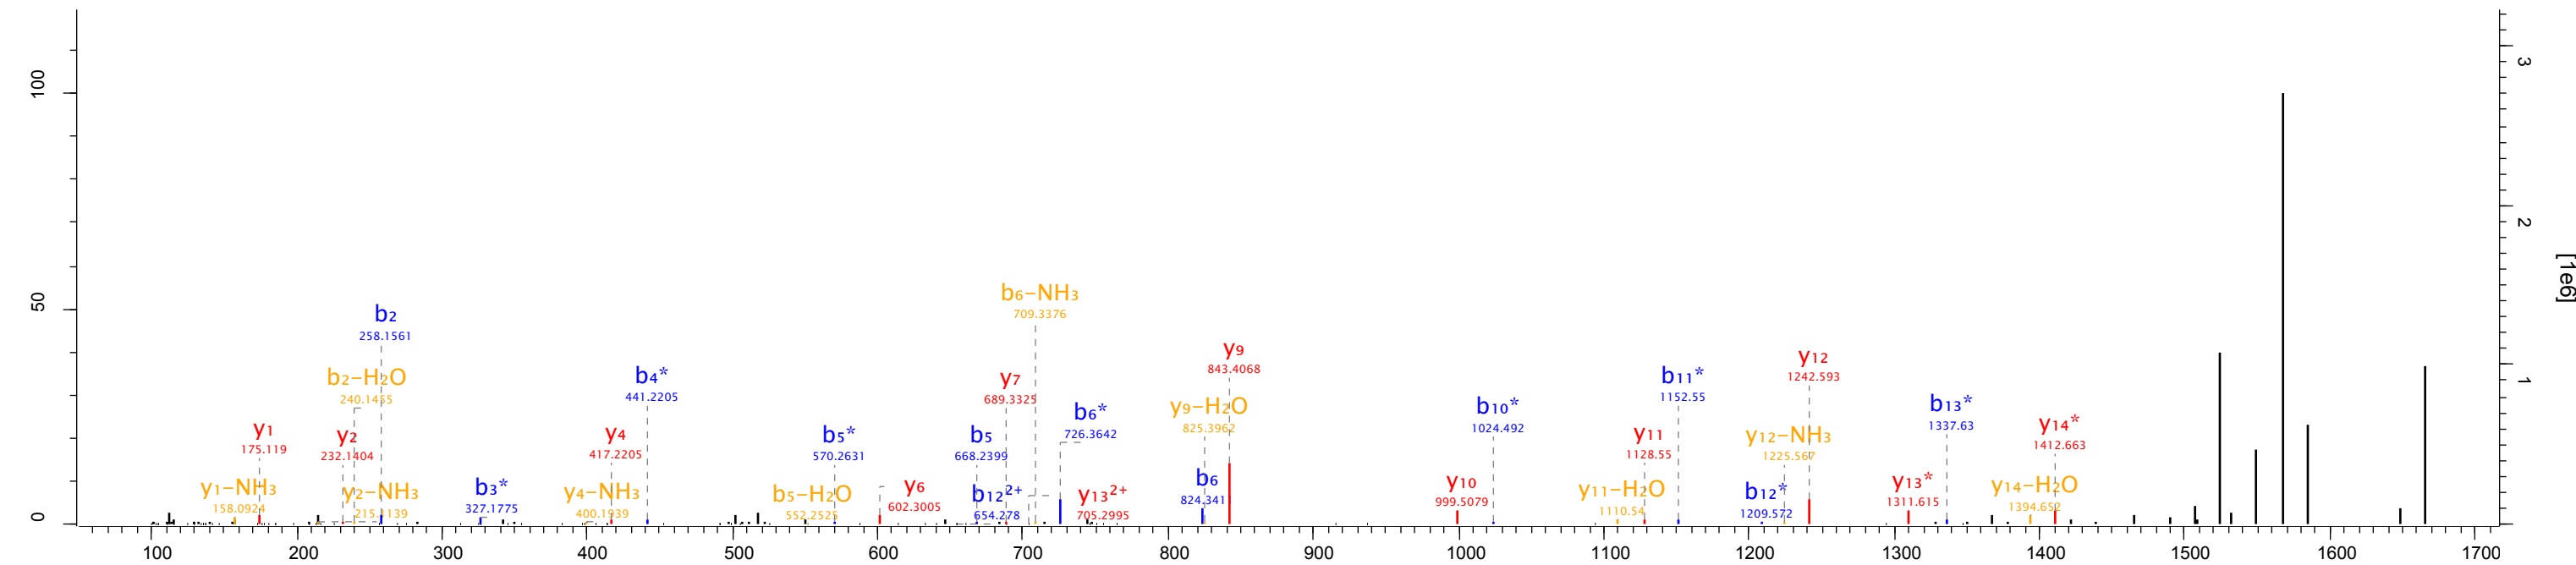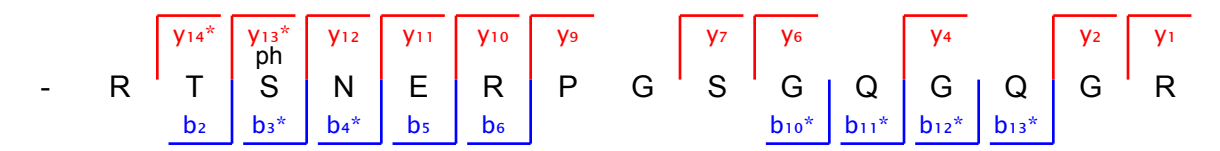

Raw file: 20150814\_A375SR\_Phospho\_BR2\_04  
 Scan: 12066 Method: FTMS; HCD Score: 239.39 m/z: 879.92 Gene names: RAD51AP1

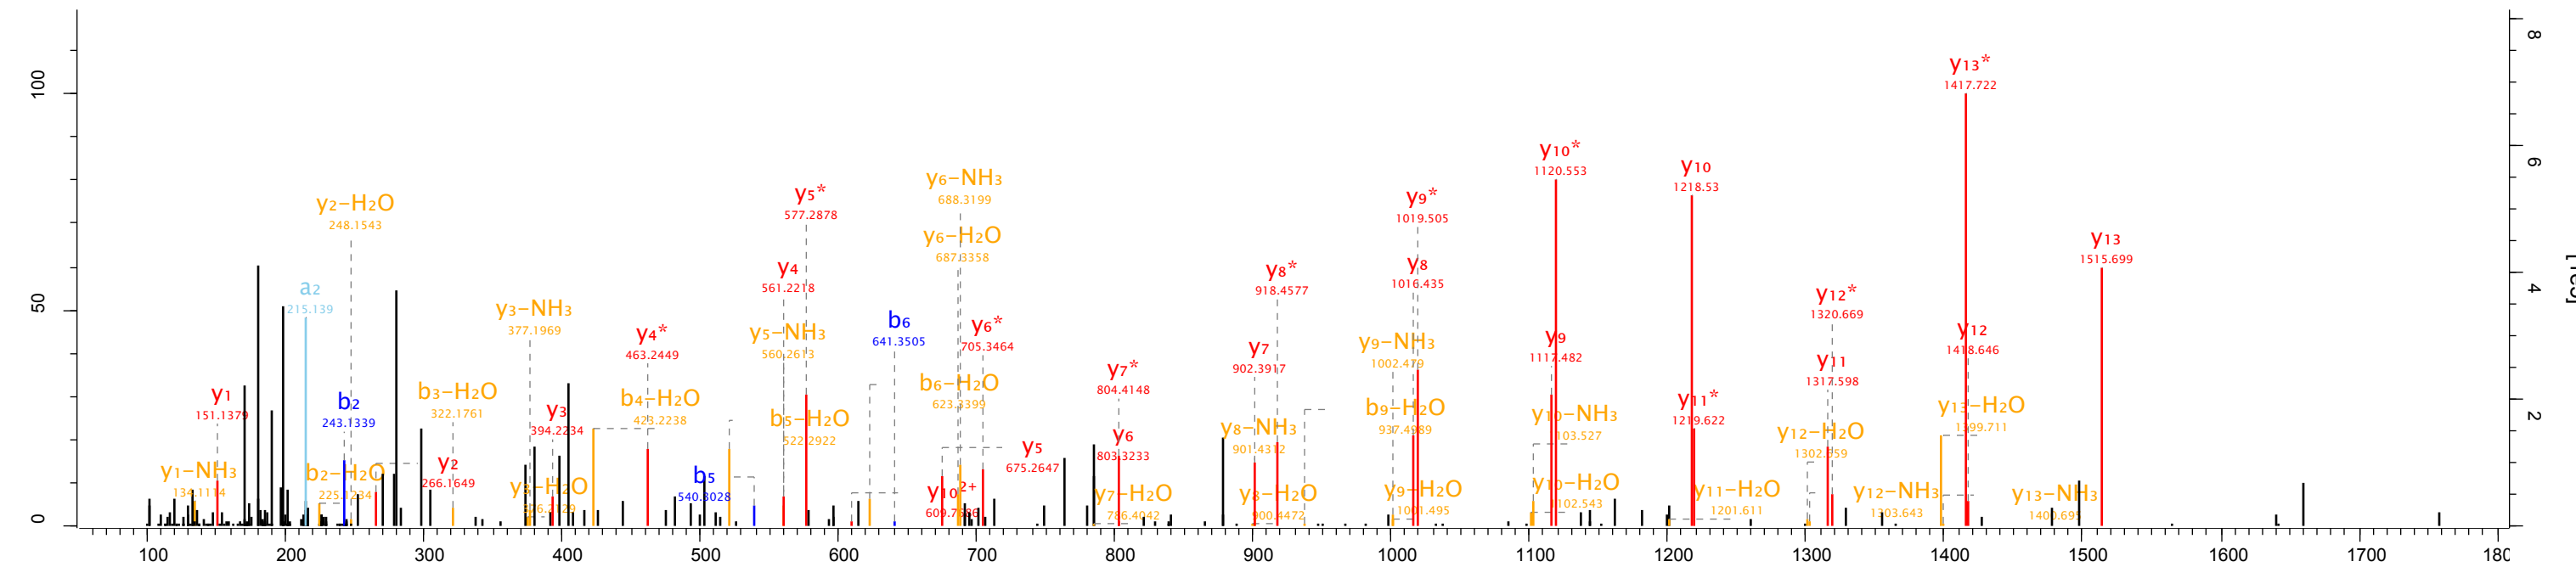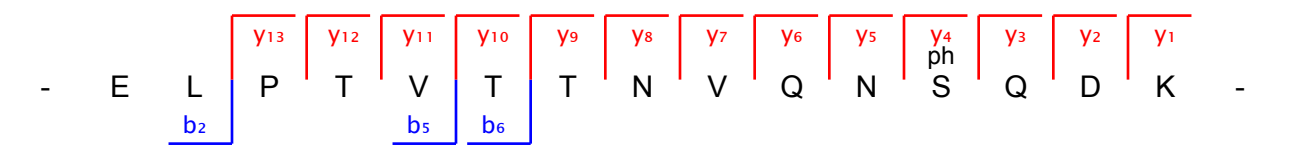

Raw file: 20150814\_A375SR\_Phospho\_BR2\_04  
 Scan: 12176 Method: FTMS; HCD Score: 103.41 m/z: 744.32 Gene names: MAP3K7;DKFZp586F0420

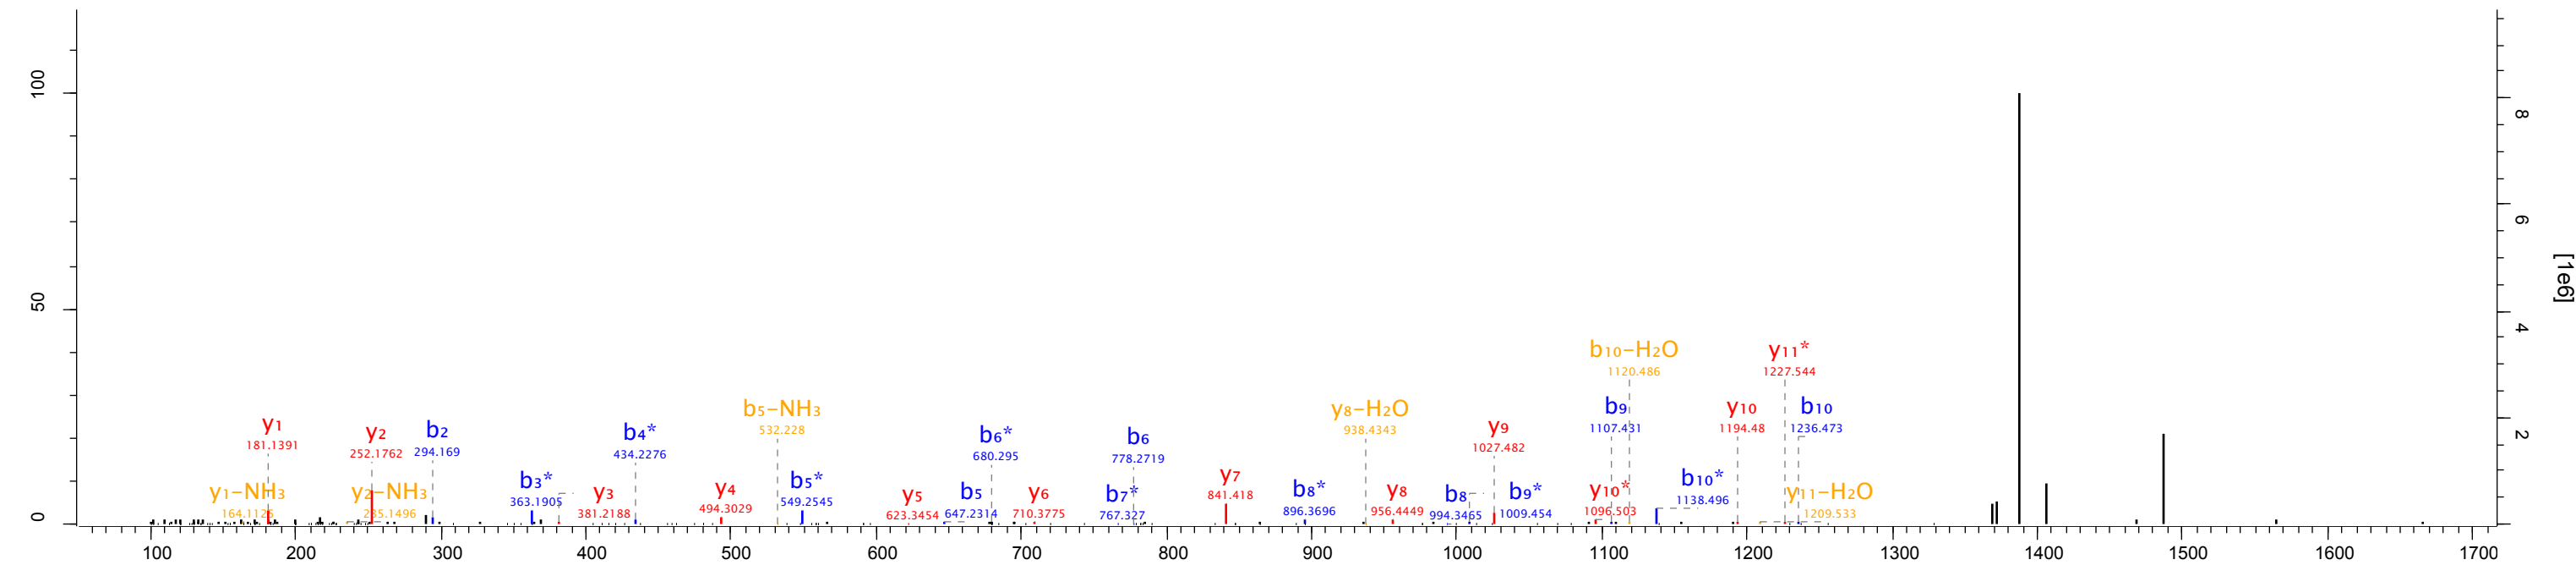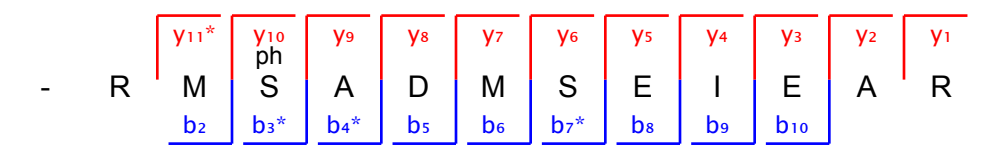

Raw file 20150814\_A375SR\_Phospho\_BR2\_04 Scan 12286 Method FTMS; HCD Score 162.93 m/z 776.79 Gene names CBX3

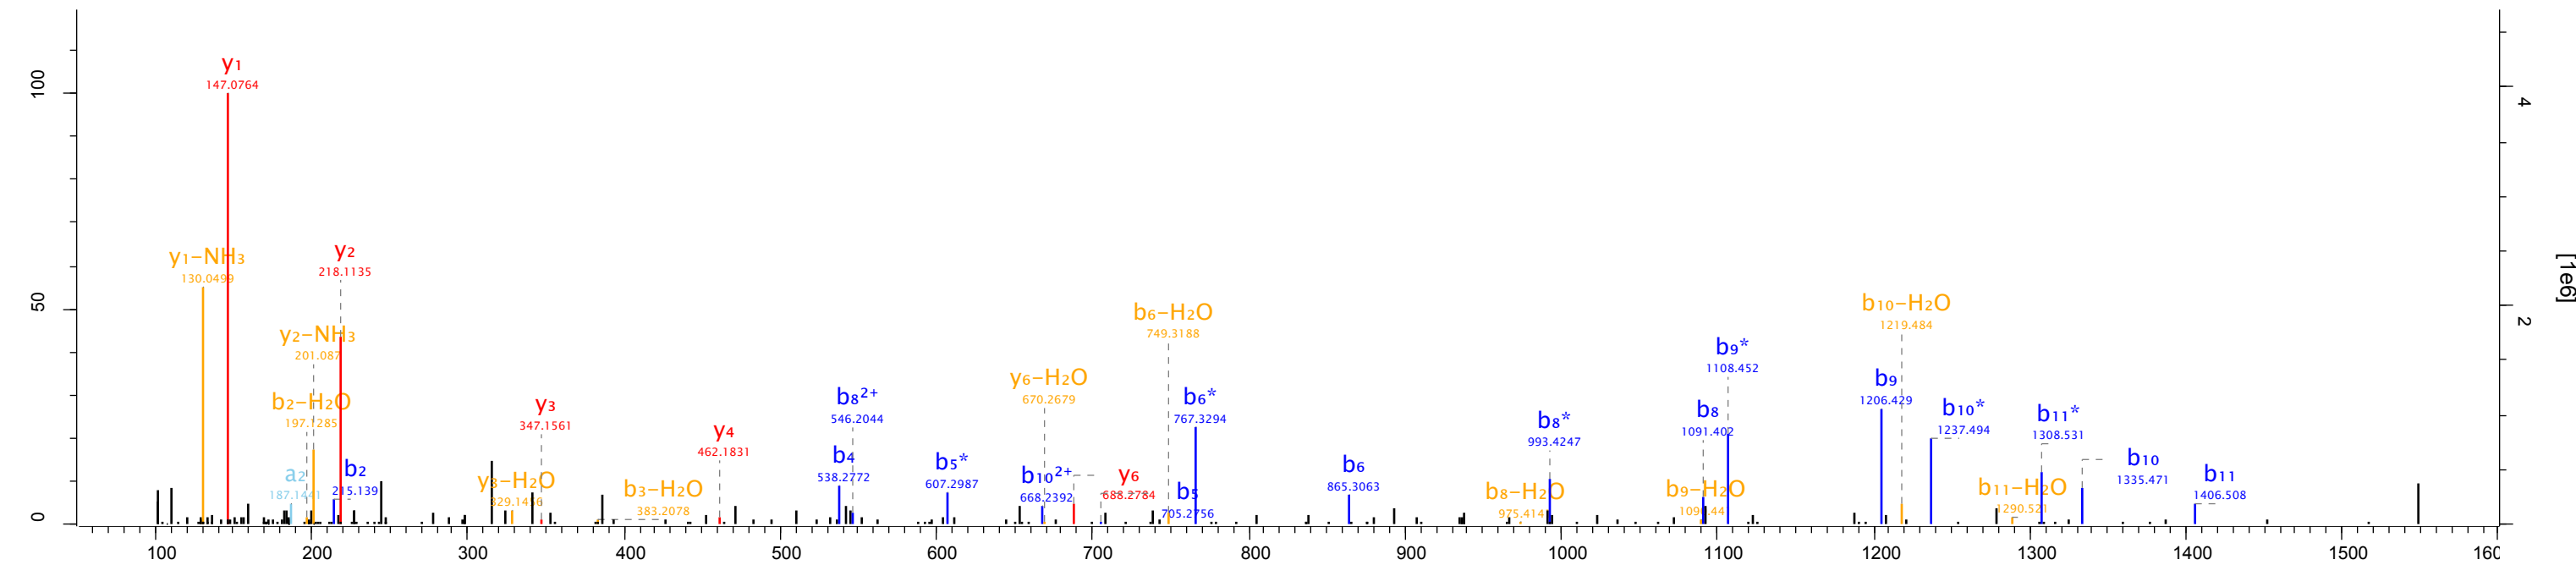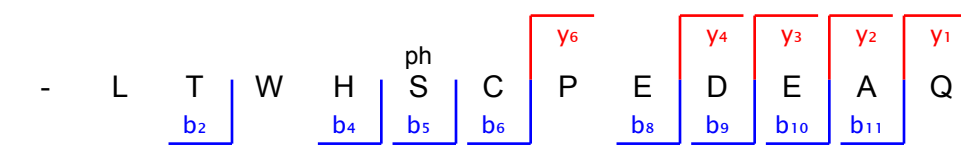

Raw file 20150814\_A375SR\_Phospho\_BR2\_04 Scan 12366 Method FTMS; HCD Score 171.63 m/z 790.05 Gene names SUB1

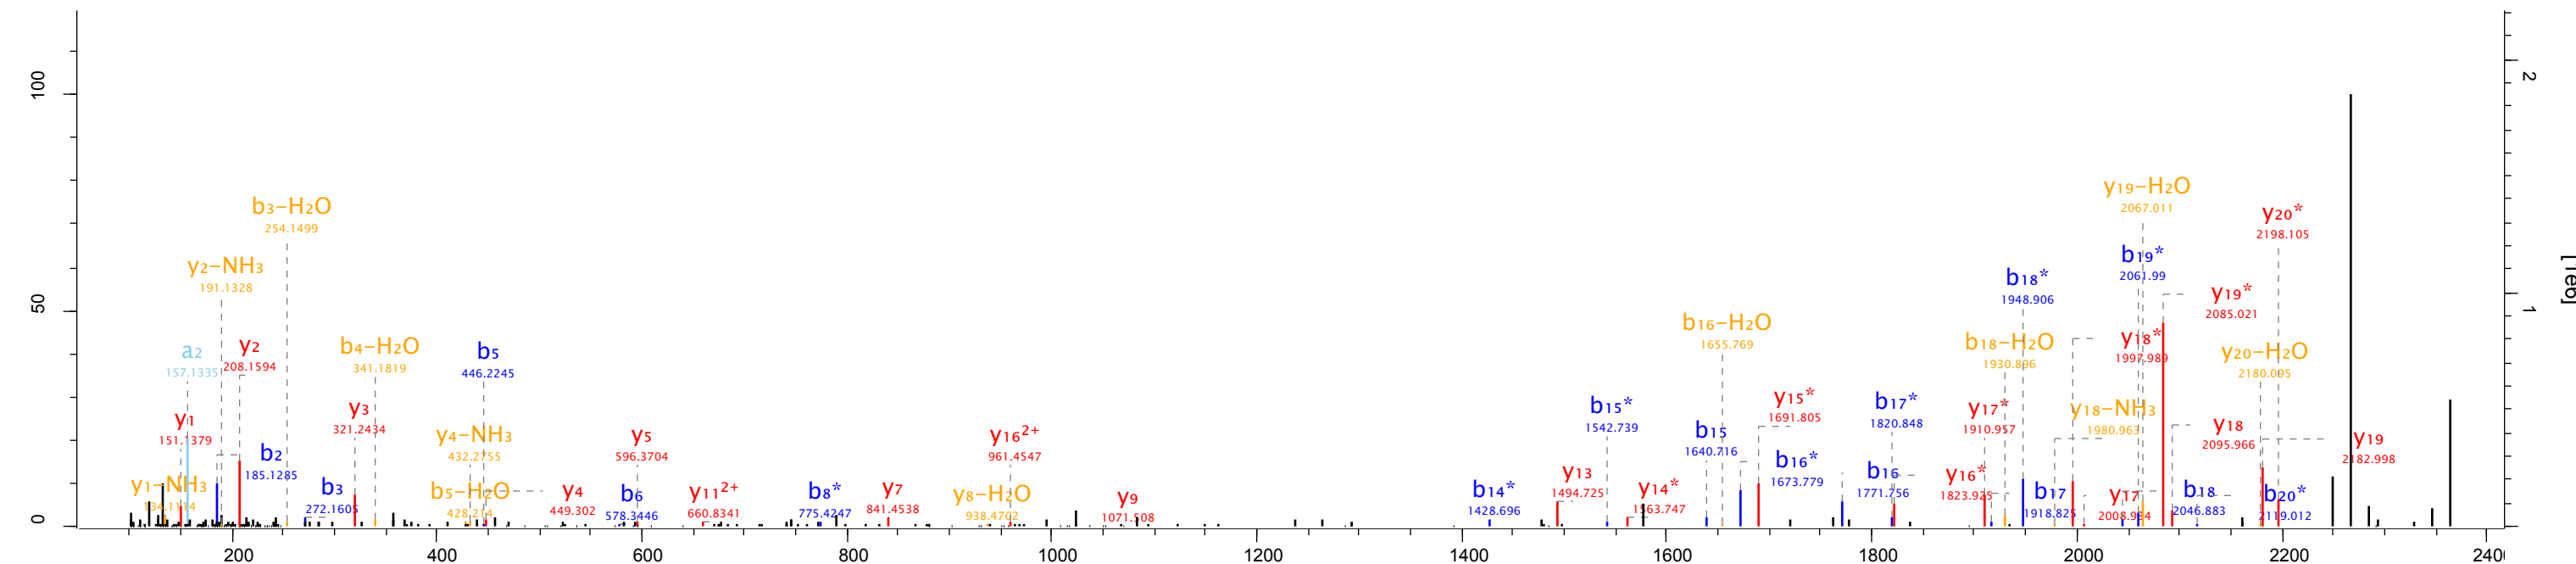

- A L S S S K Q S S S R D D N M F Q I G K -

Fragmentation scheme showing b and y ions for the peptide sequence: L S S S K Q S S S R D D N M F Q I G K. The b ions are shown in blue boxes below the sequence, and the y ions are shown in red boxes above the sequence. The y14\* ion is labeled 'ph'.

Raw file Scan Method Score m/z Gene names  
 20150814\_A375SR\_Phospho\_BR2\_04 12456 FTMS; HCD 233.01 904.93 SSBP3

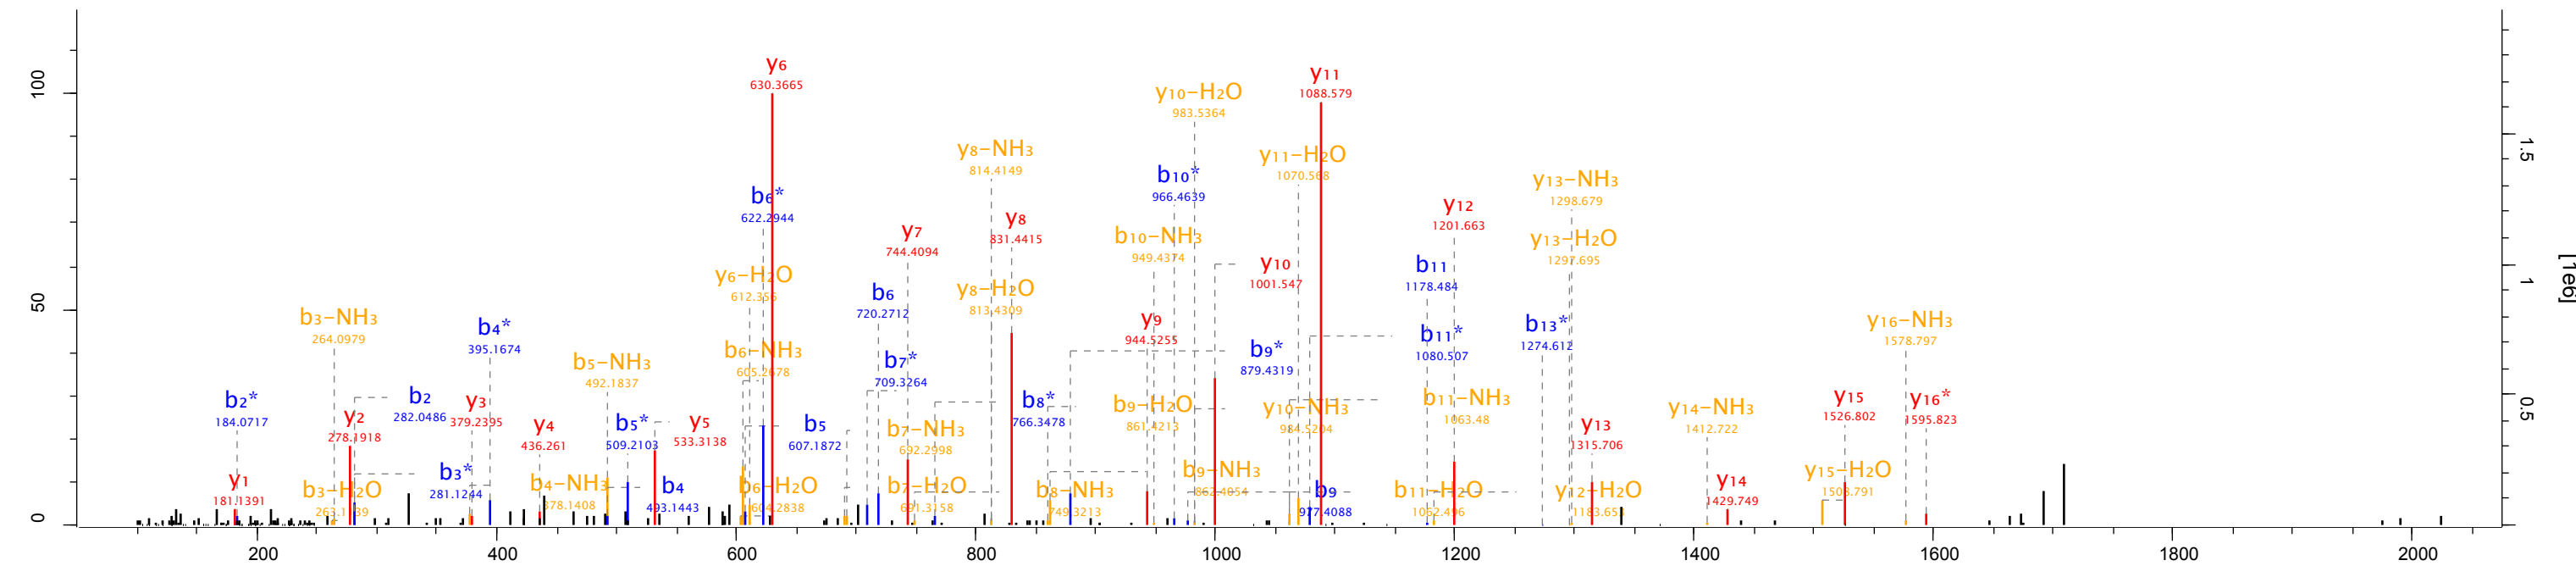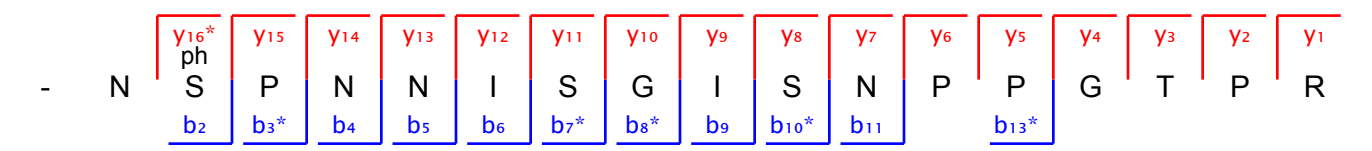



Raw file 20150814\_A375SR\_Phospho\_BR2\_04 Scan 1246 Method FTMS; HCD Score 74.15 m/z 643.26 Gene names AKAP12

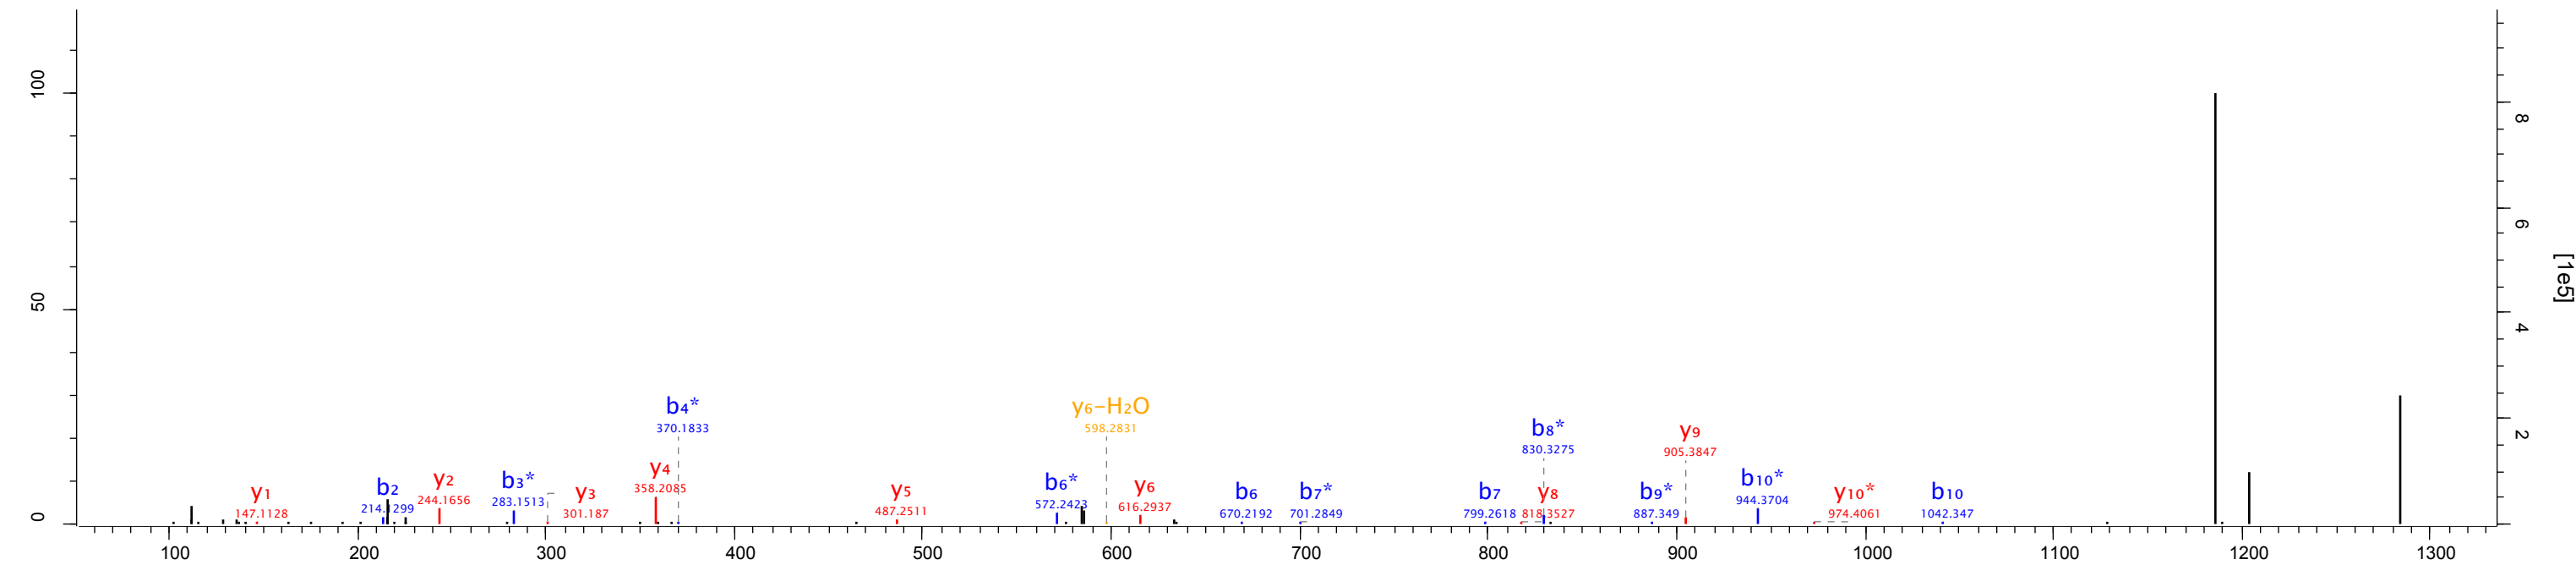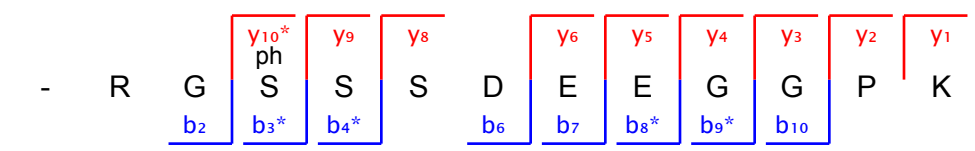

Raw file 20150814\_A375SR\_Phospho\_BR2\_04 Scan 12516 Method FTMS; HCD Score 211.15 m/z 701.27 Gene names PPFIBP1

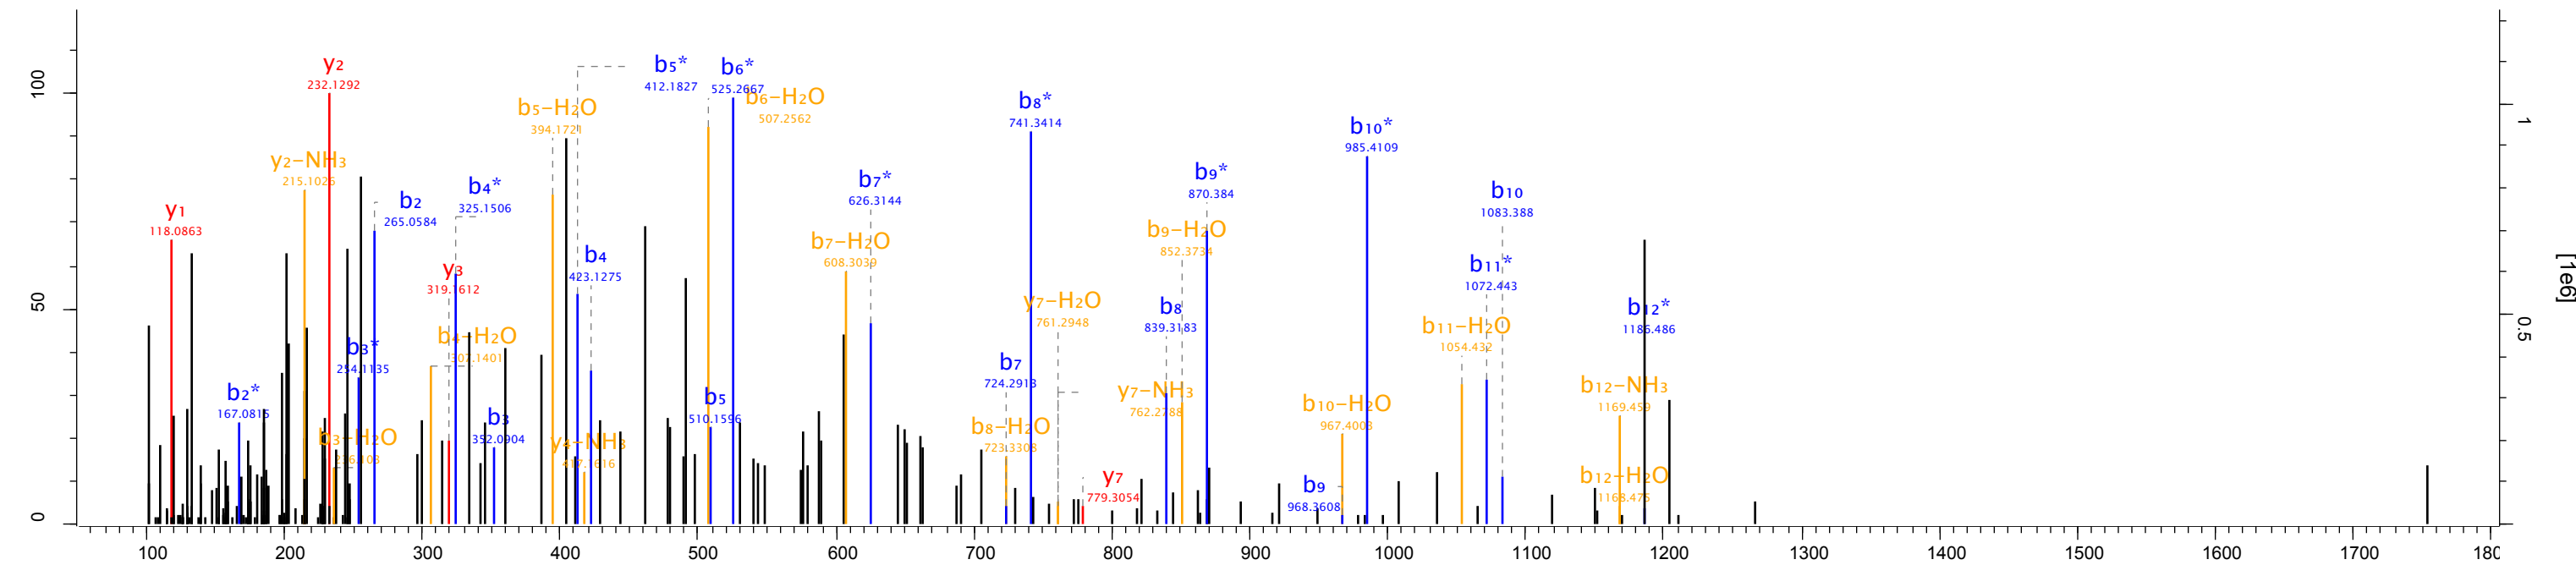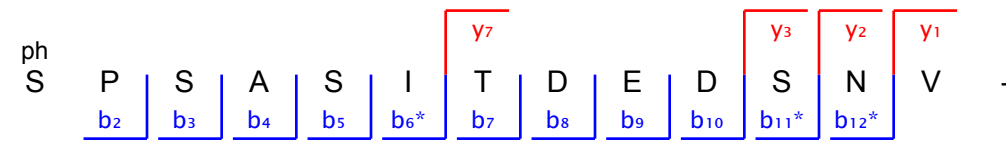

Raw file: 20150814\_A375SR\_Phospho\_BR2\_04  
 Scan: 12526 Method: FTMS; HCD Score: 95.23 m/z: 907.4 Gene names: NPHP4

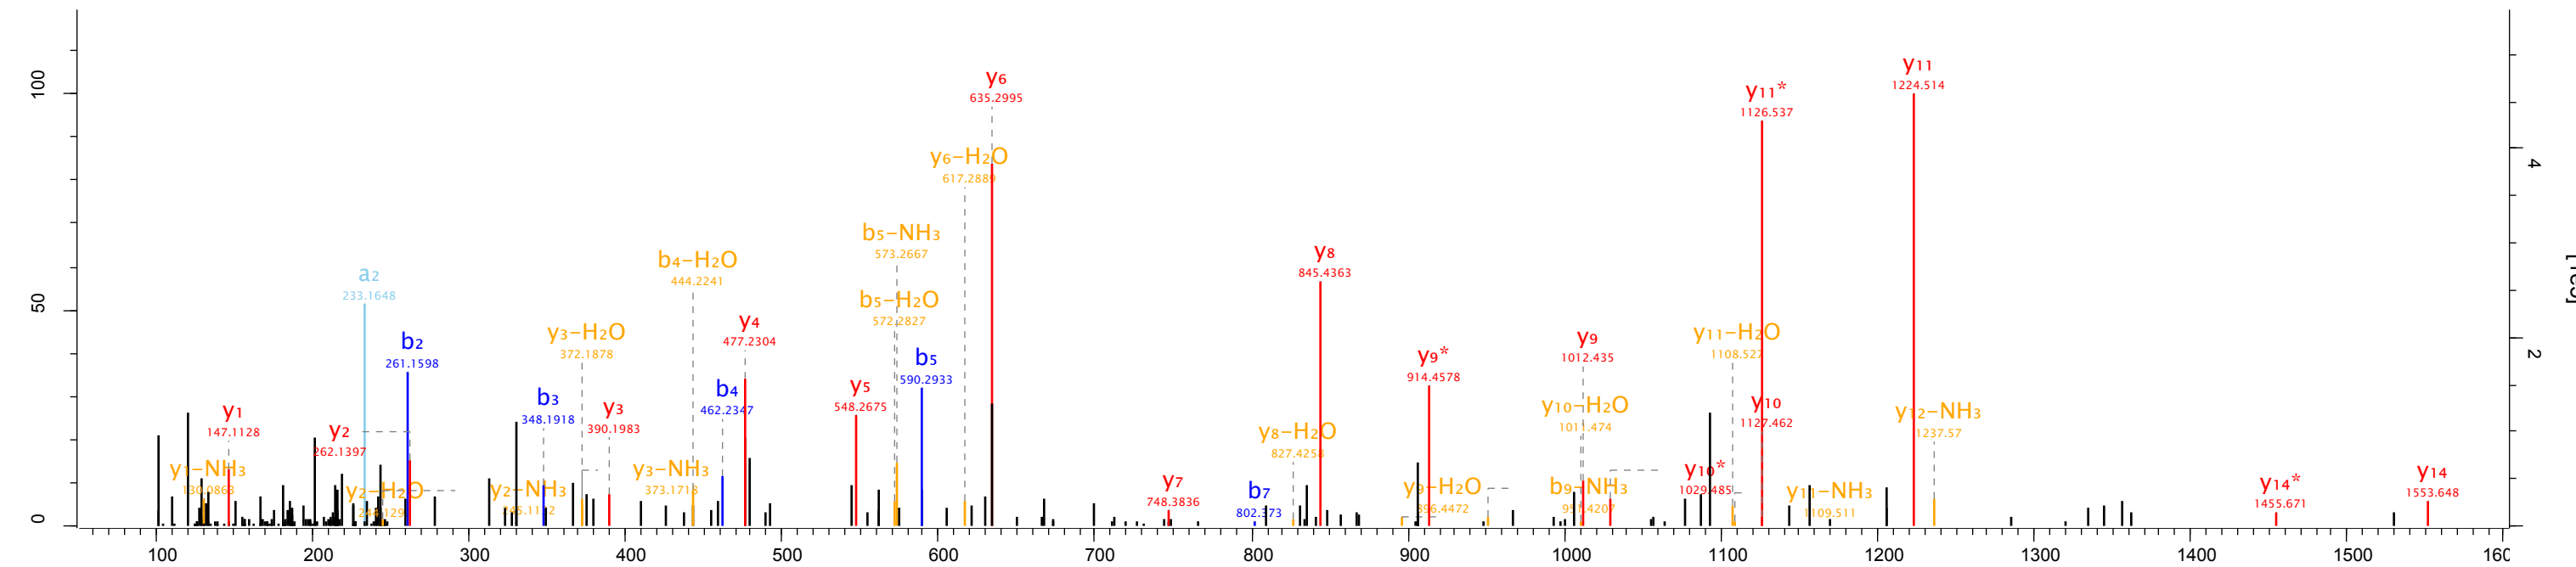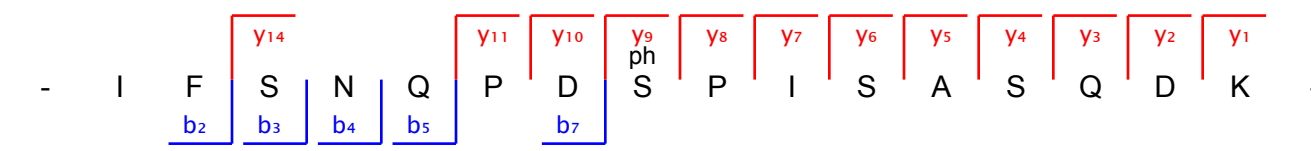

Raw file Scan Method Score m/z Gene names  
 20150814\_A375SR\_Phospho\_BR2\_04 12726 FTMS; HCD 256.01 823.36 RASAL2

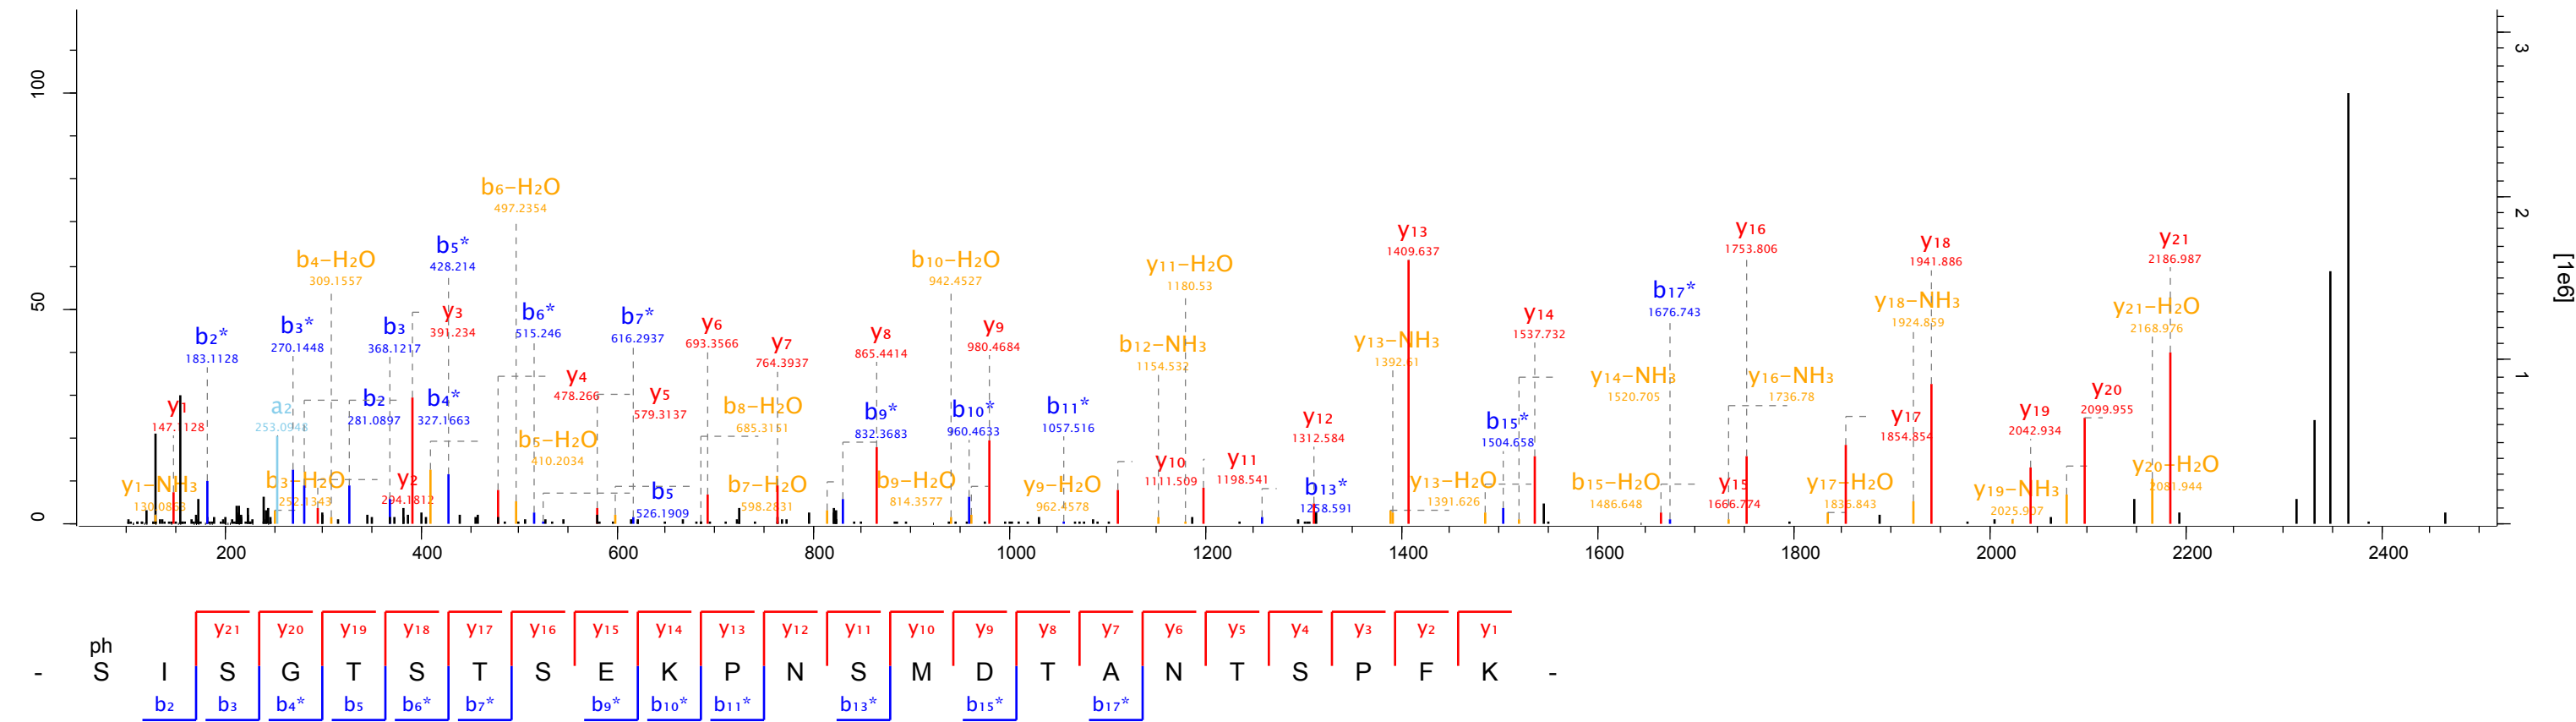

Raw file: 20150814\_A375SR\_Phospho\_BR2\_04  
 Scan: 12806 Method: FTMS; HCD Score: 148.85 m/z: 792.85 Gene names: HEXIM2

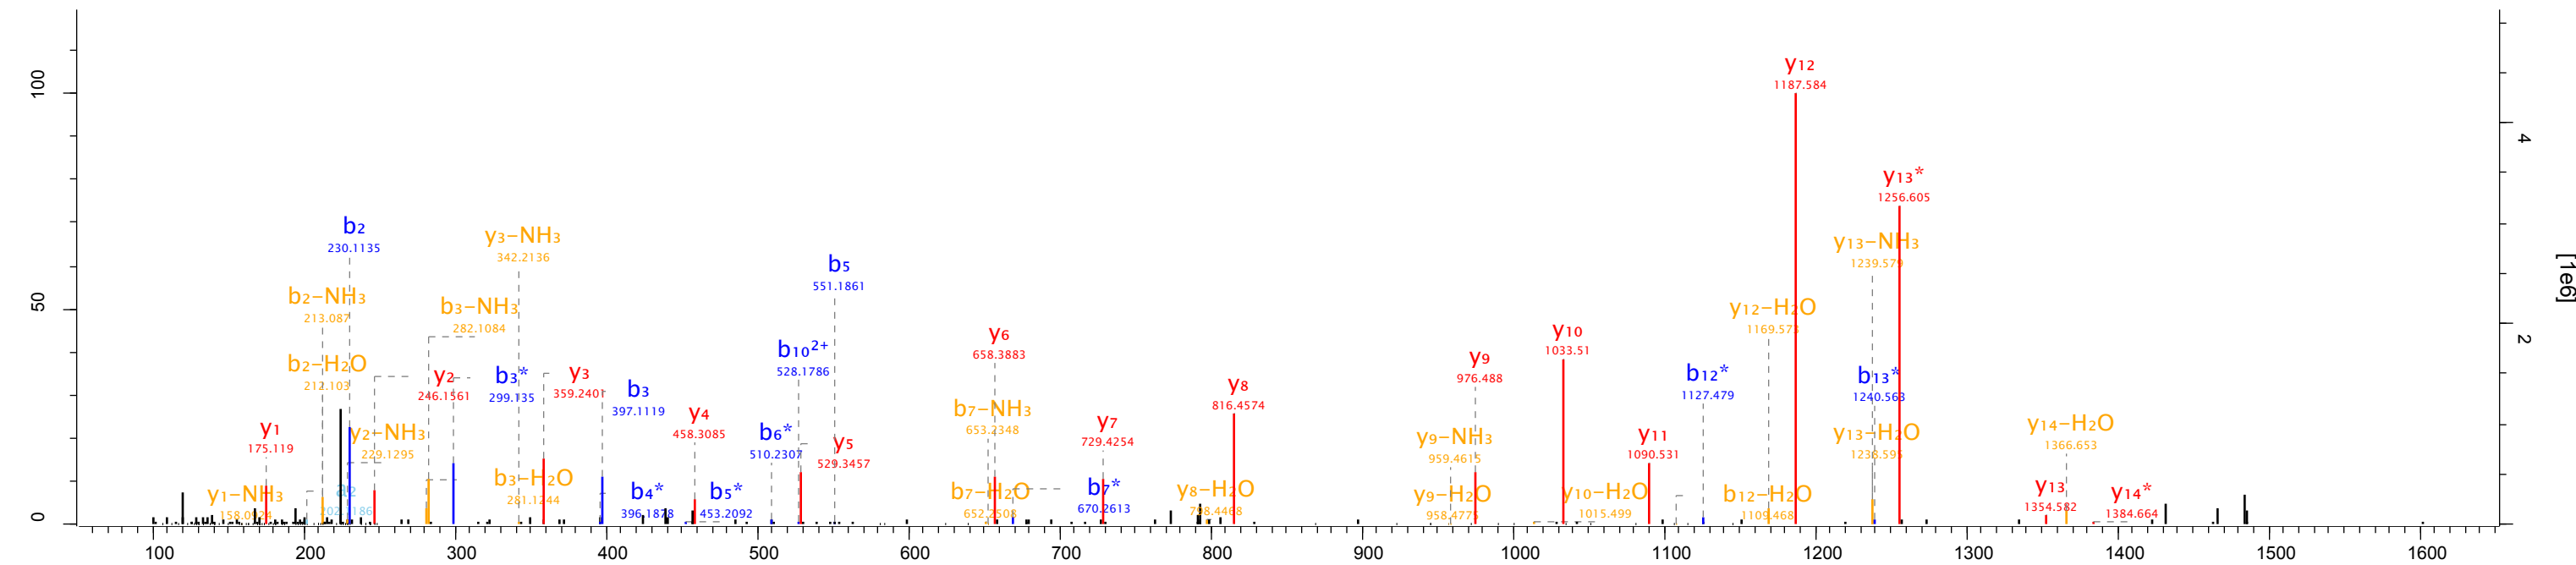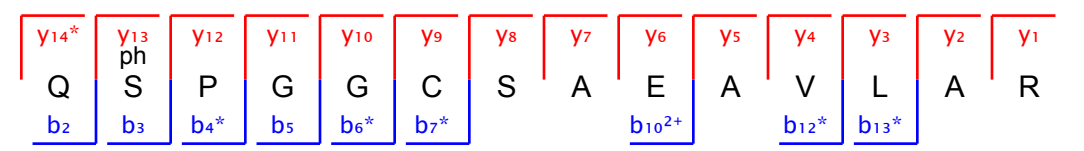

Raw file: 20150814\_A375SR\_Phospho\_BR2\_04  
 Scan: 13026 Method: FTMS; HCD Score: 128.41 m/z: 542.76 Gene names: CLIP2

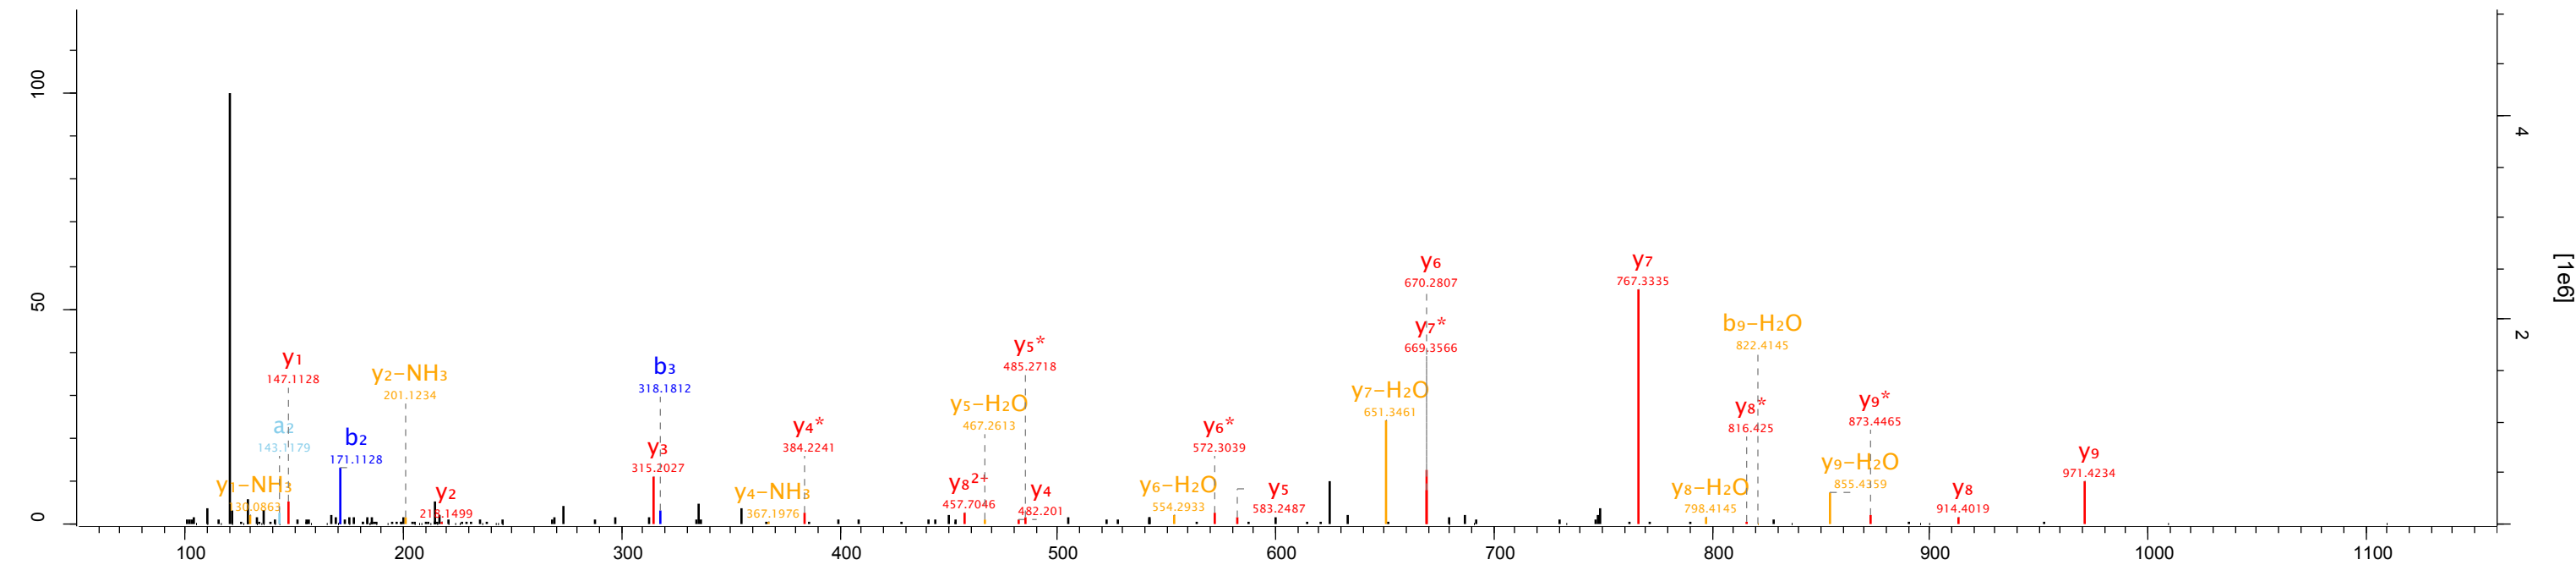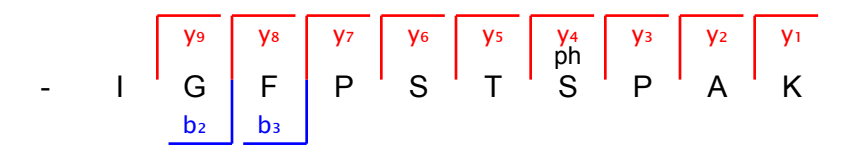

Raw file 20150814\_A375SR\_Phospho\_BR2\_04 Scan 13156 Method FTMS; HCD Score 114.75 m/z 616.62 Gene names KANK1

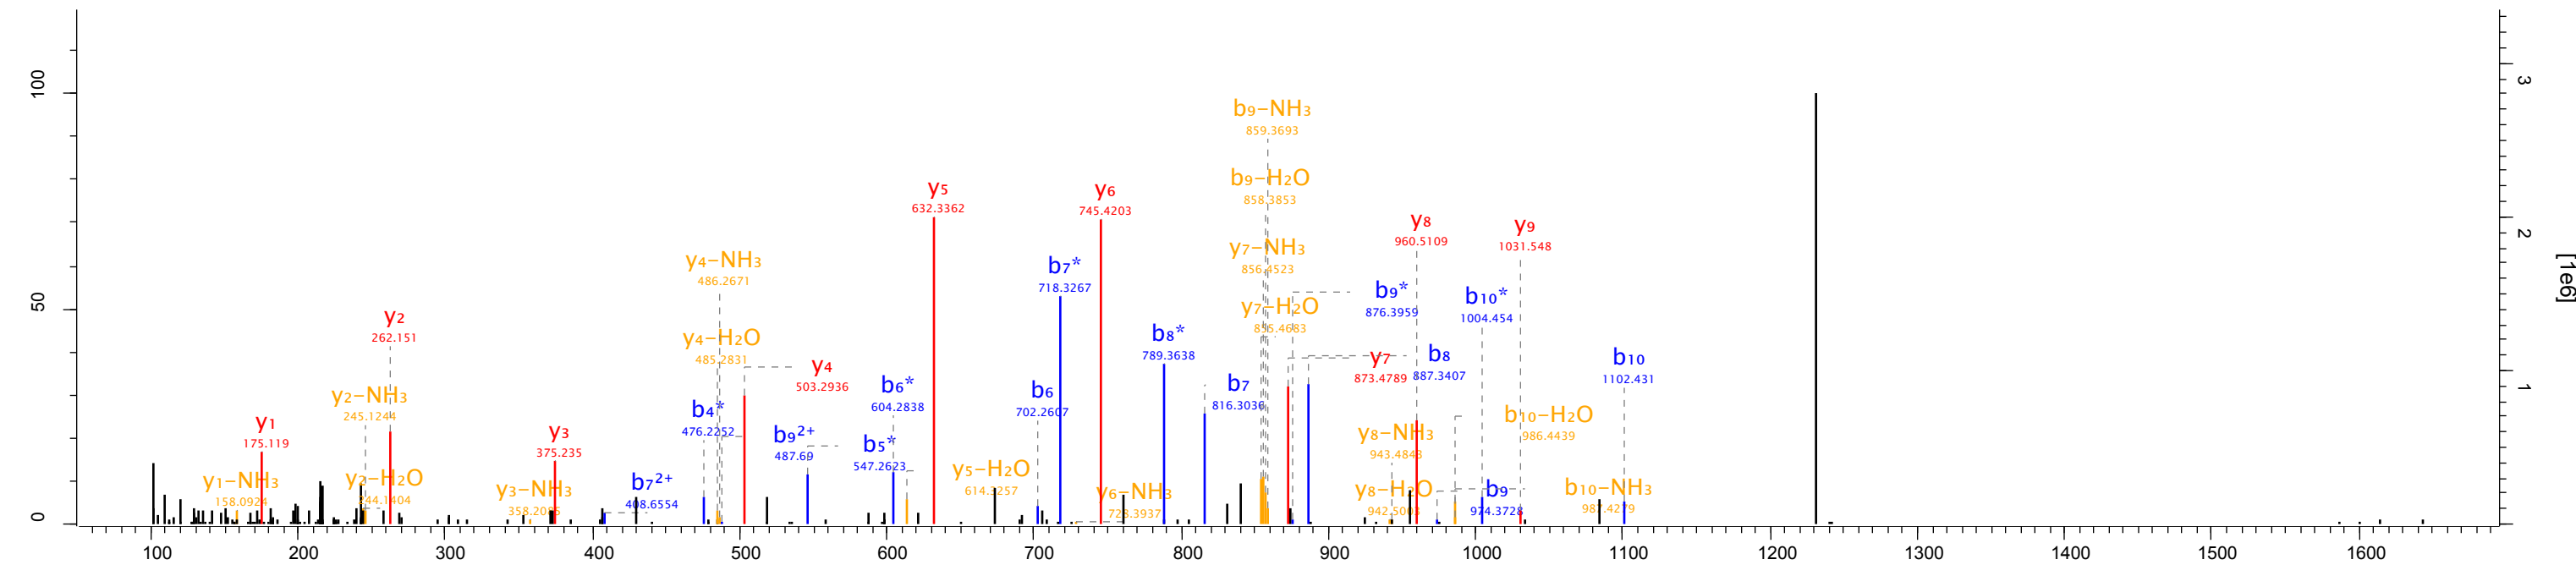

- R S Y S A G N A S Q L E Q L S R -

ph

b4\* b5\* b6 b7 b8 b9 b10

y9 y8 y7 y6 y5 y4 y3 y2 y1

Raw file: 20150814\_A375SR\_Phospho\_BR2\_04  
 Scan: 13326 Method: FTMS; HCD Score: 169.85 m/z: 701.28 Gene names: PRRC2C

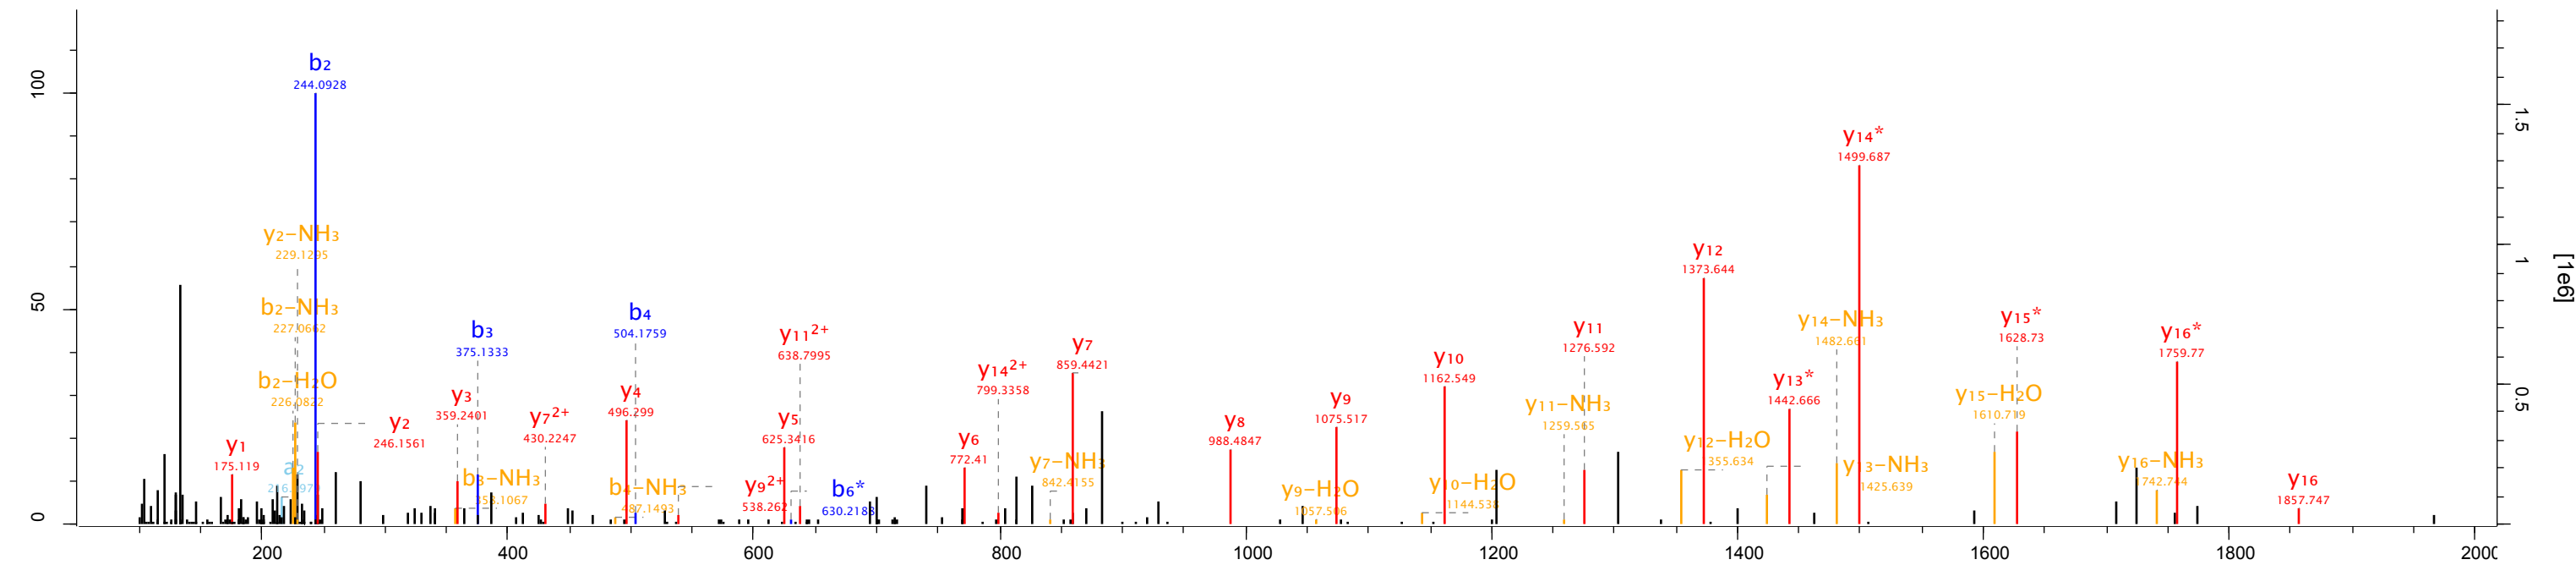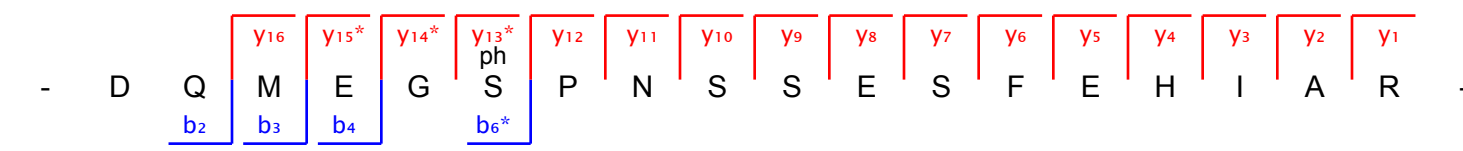



Raw file 20150814\_A375SR\_Phospho\_BR2\_04 Scan 13716 Method FTMS; HCD Score 138.76 m/z 528.73 Gene names DOCK5

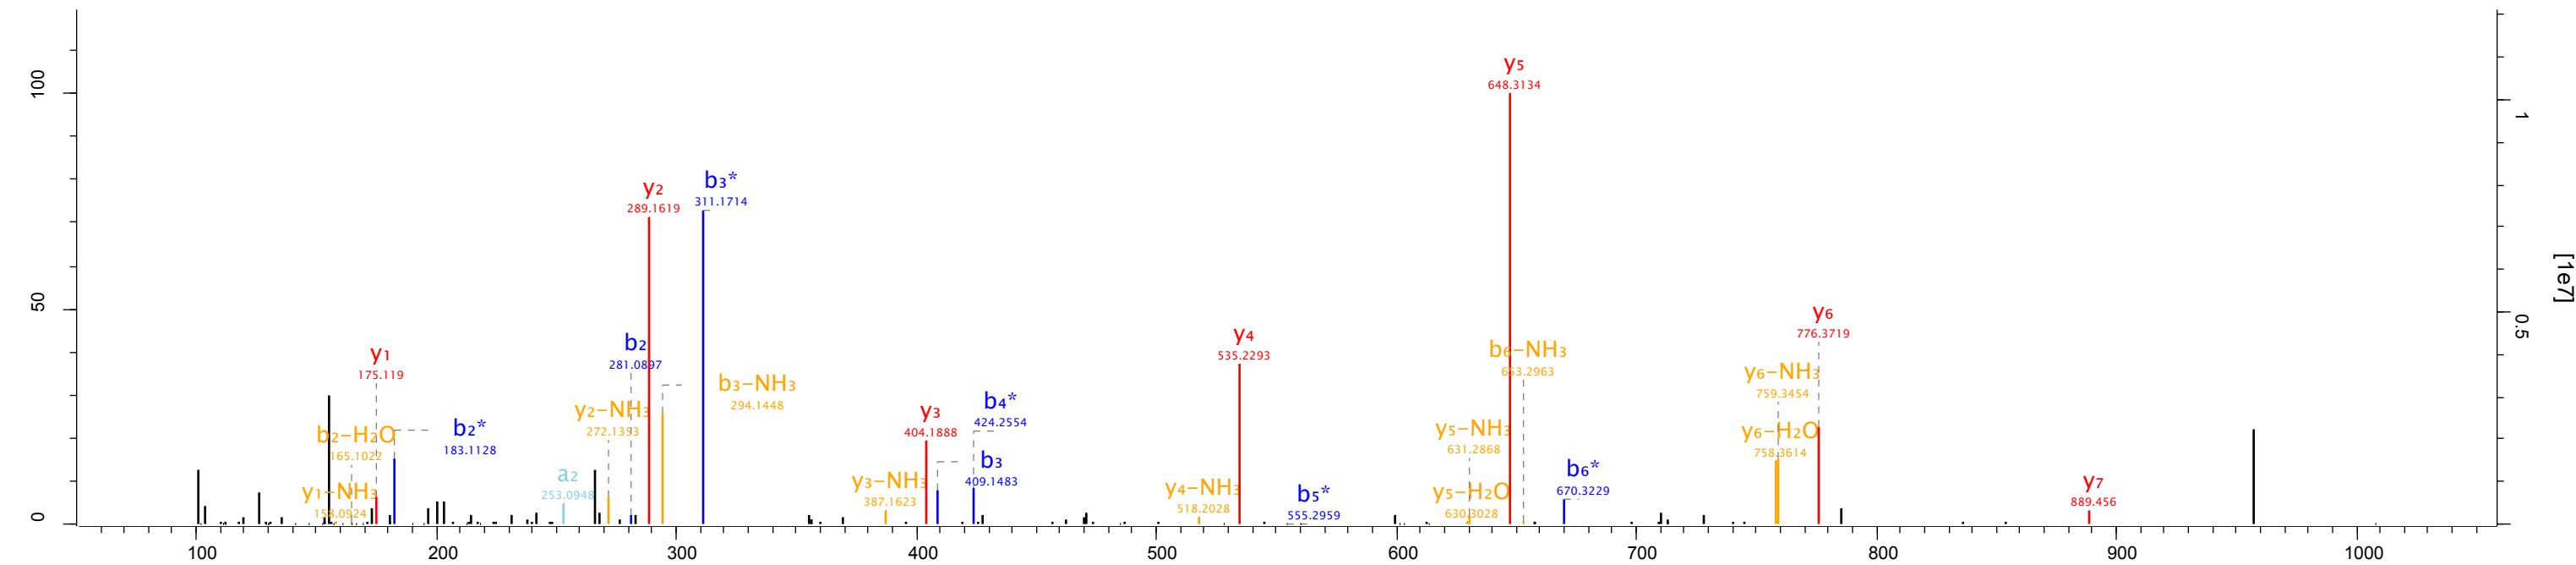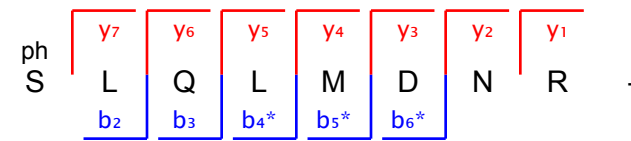

Raw file 20150814\_A375SR\_Phospho\_BR2\_04 Scan 13866 Method FTMS; HCD Score 85.15 m/z 477.71 Gene names ASH2L

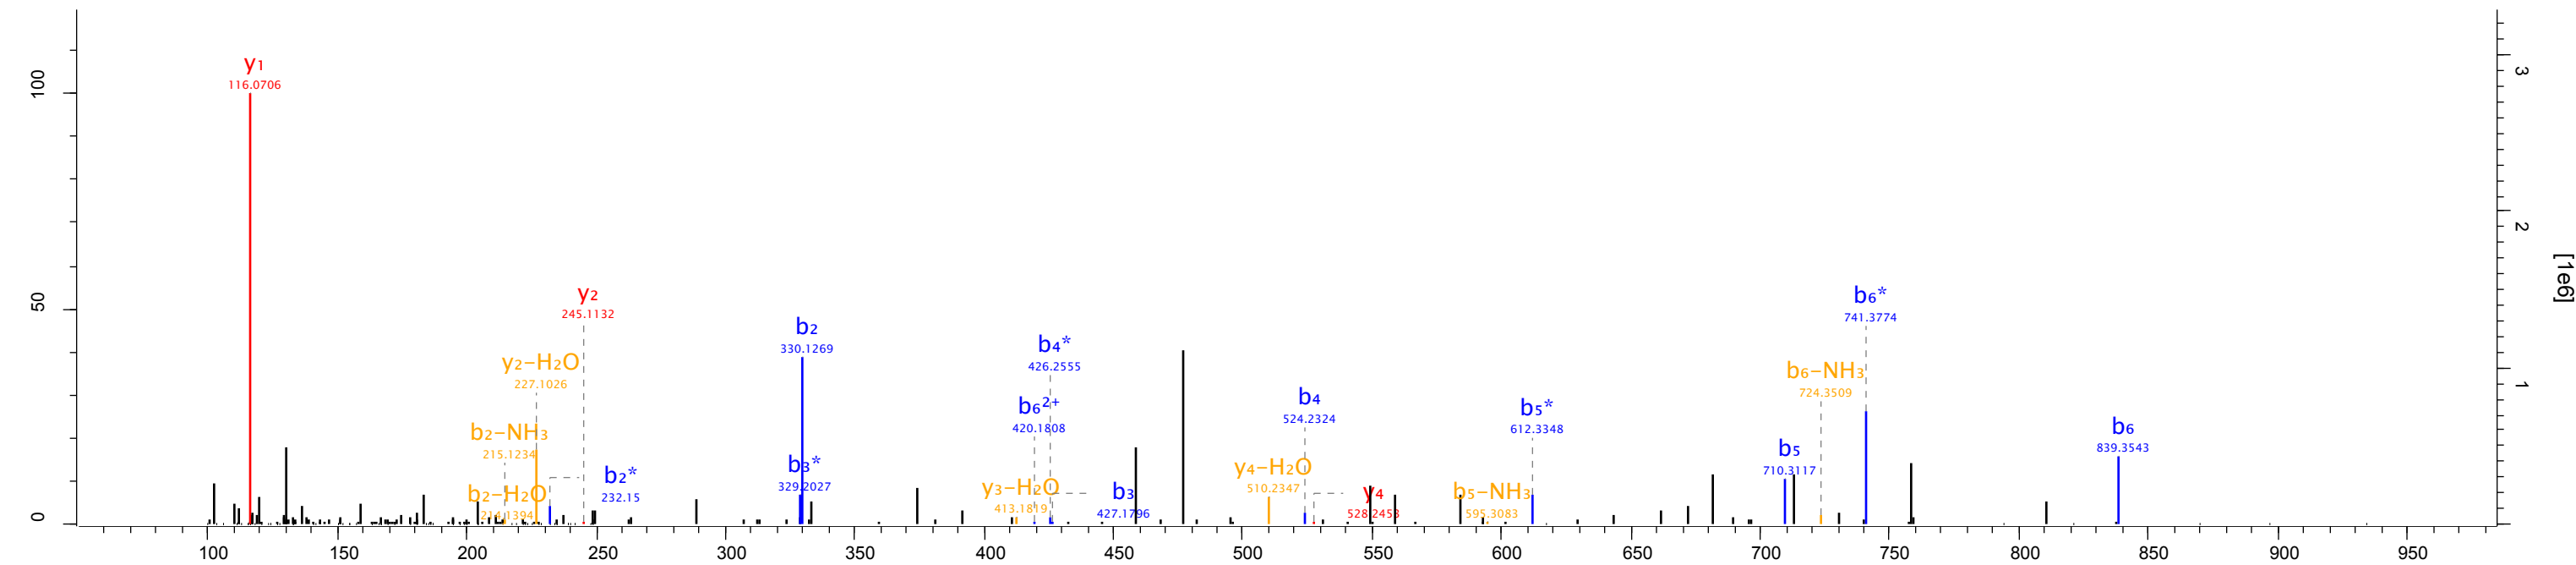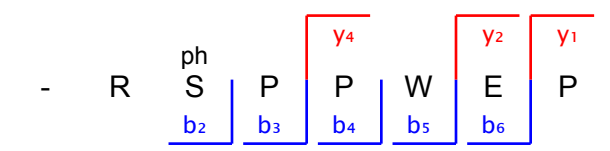

Raw file: 20150814\_A375SR\_Phospho\_BR2\_04  
 Scan: 13876 Method: FTMS; HCD Score: 303.54 m/z: 939.45 Gene names: TP53BP2

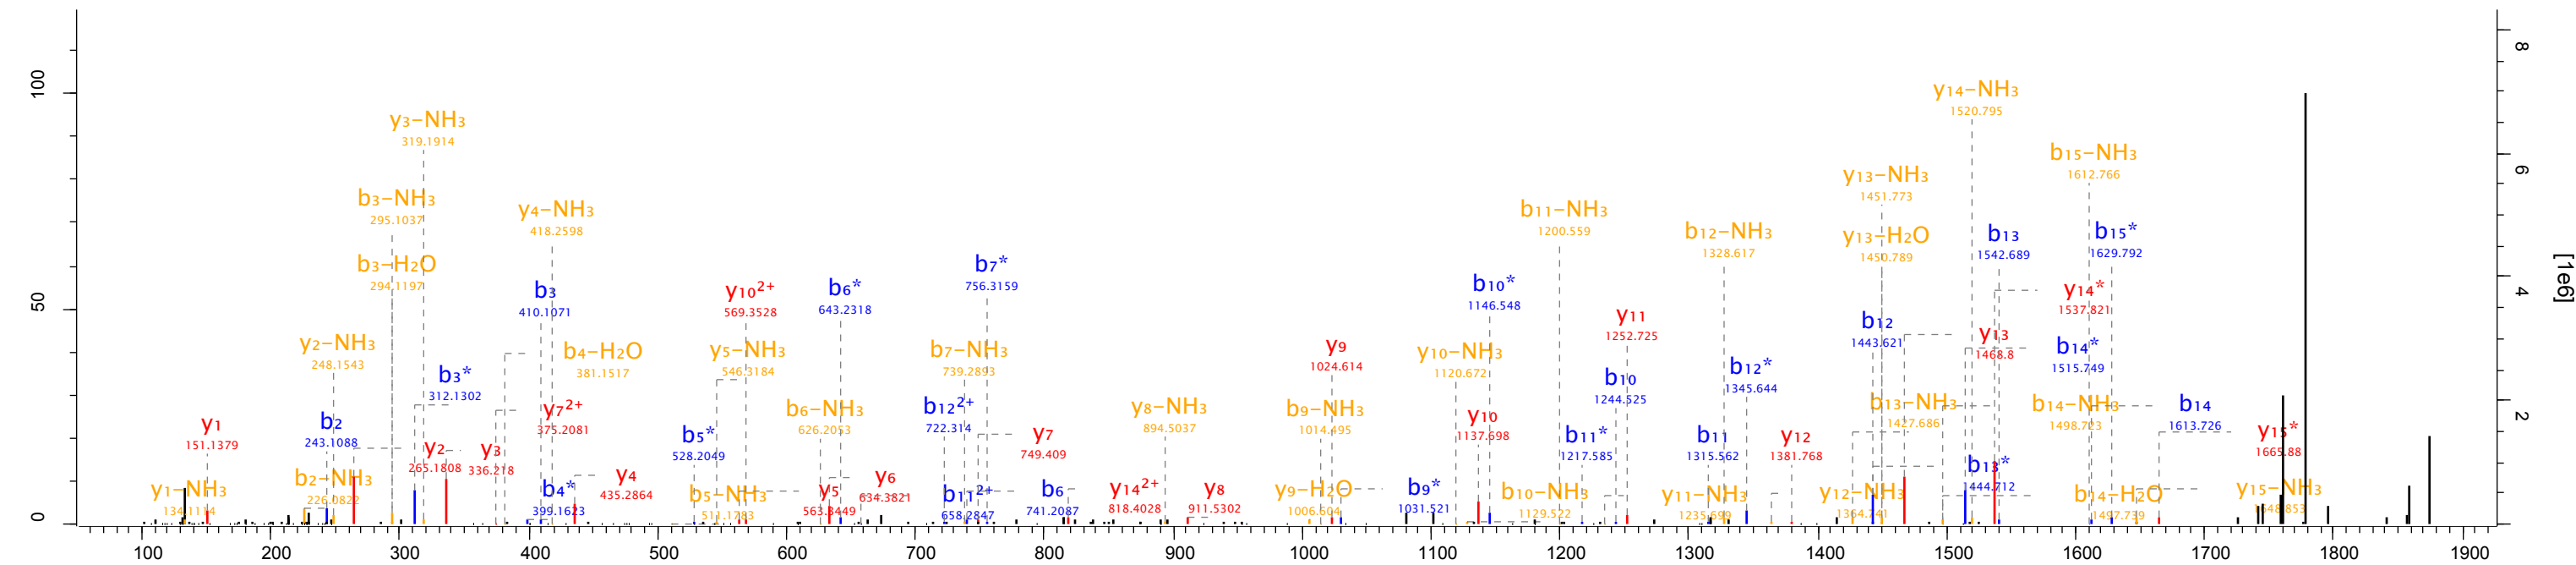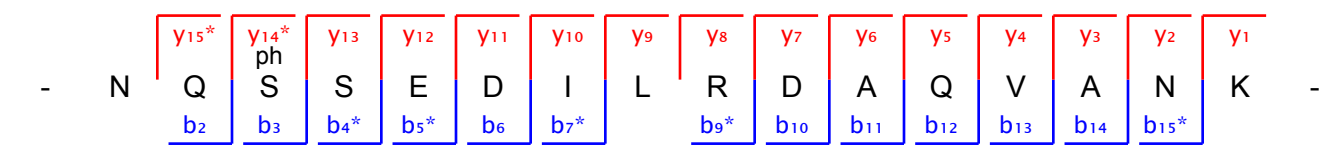

Raw file 20150814\_A375SR\_Phospho\_BR2\_04 Scan 13956 Method FTMS; HCD Score 122.47 m/z 955.95 Gene names SLAIN2

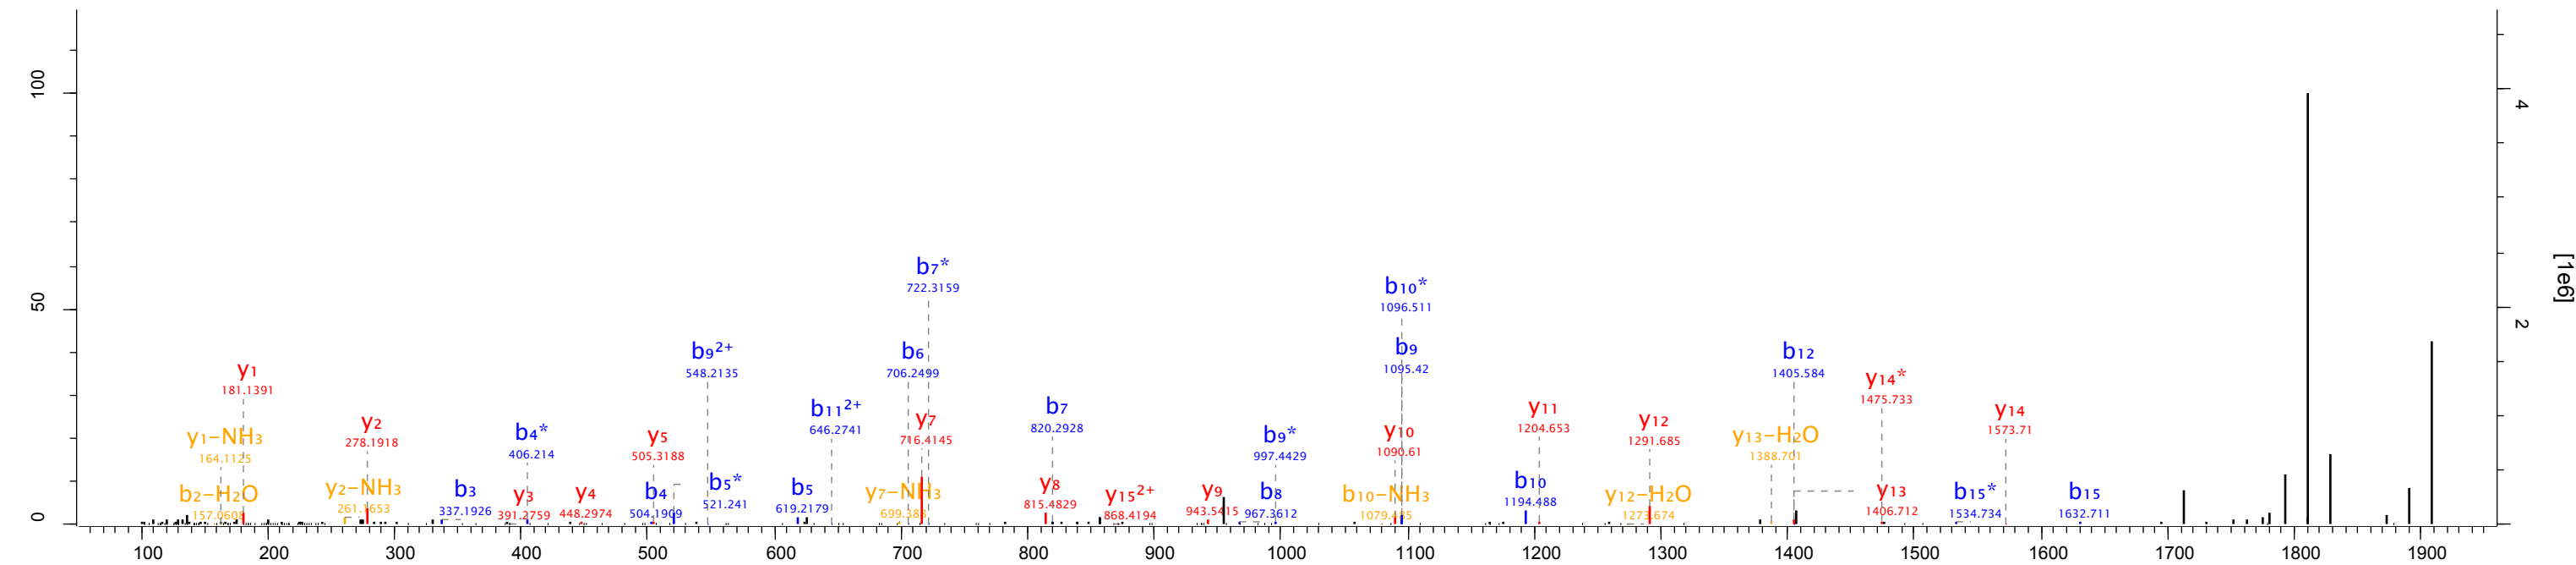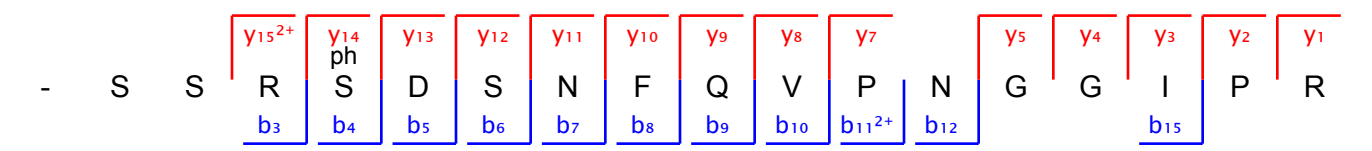

Raw file Scan Method Score m/z Gene names  
 20150814\_A375SR\_Phospho\_BR2\_04 14396 FTMS; HCD 178.84 844.38 RB1

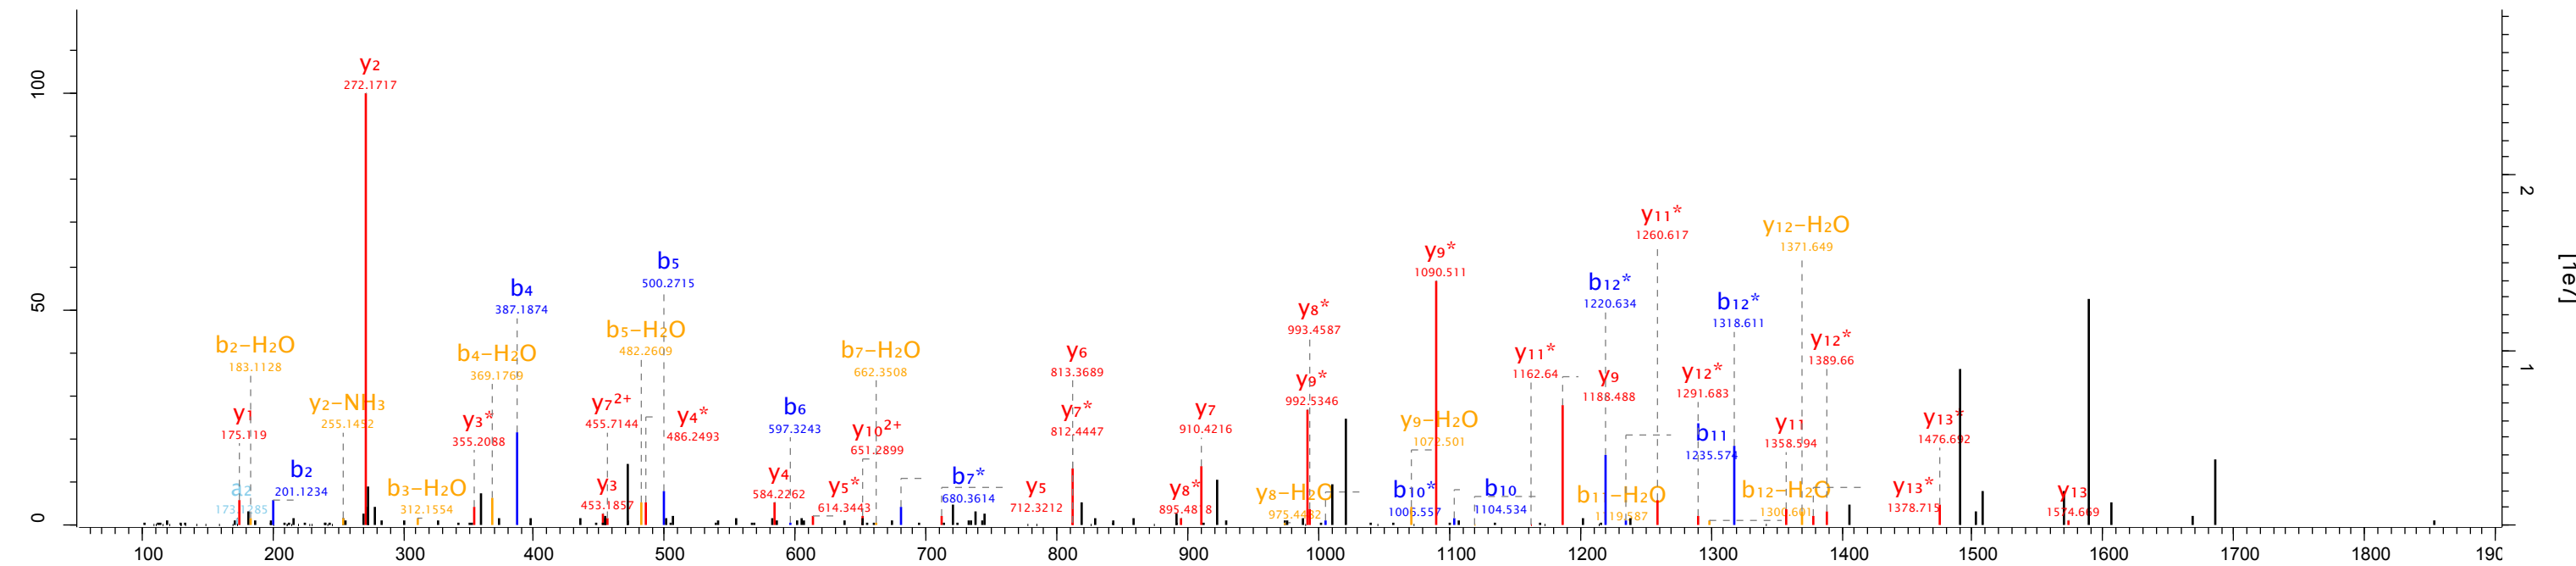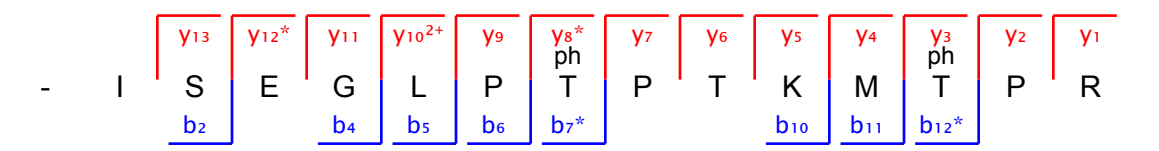

Raw file: 20150814\_A375SR\_Phospho\_BR2\_04  
 Scan: 14476 Method: FTMS; HCD Score: 229.96 m/z: 867.77 Gene names: RPRD2

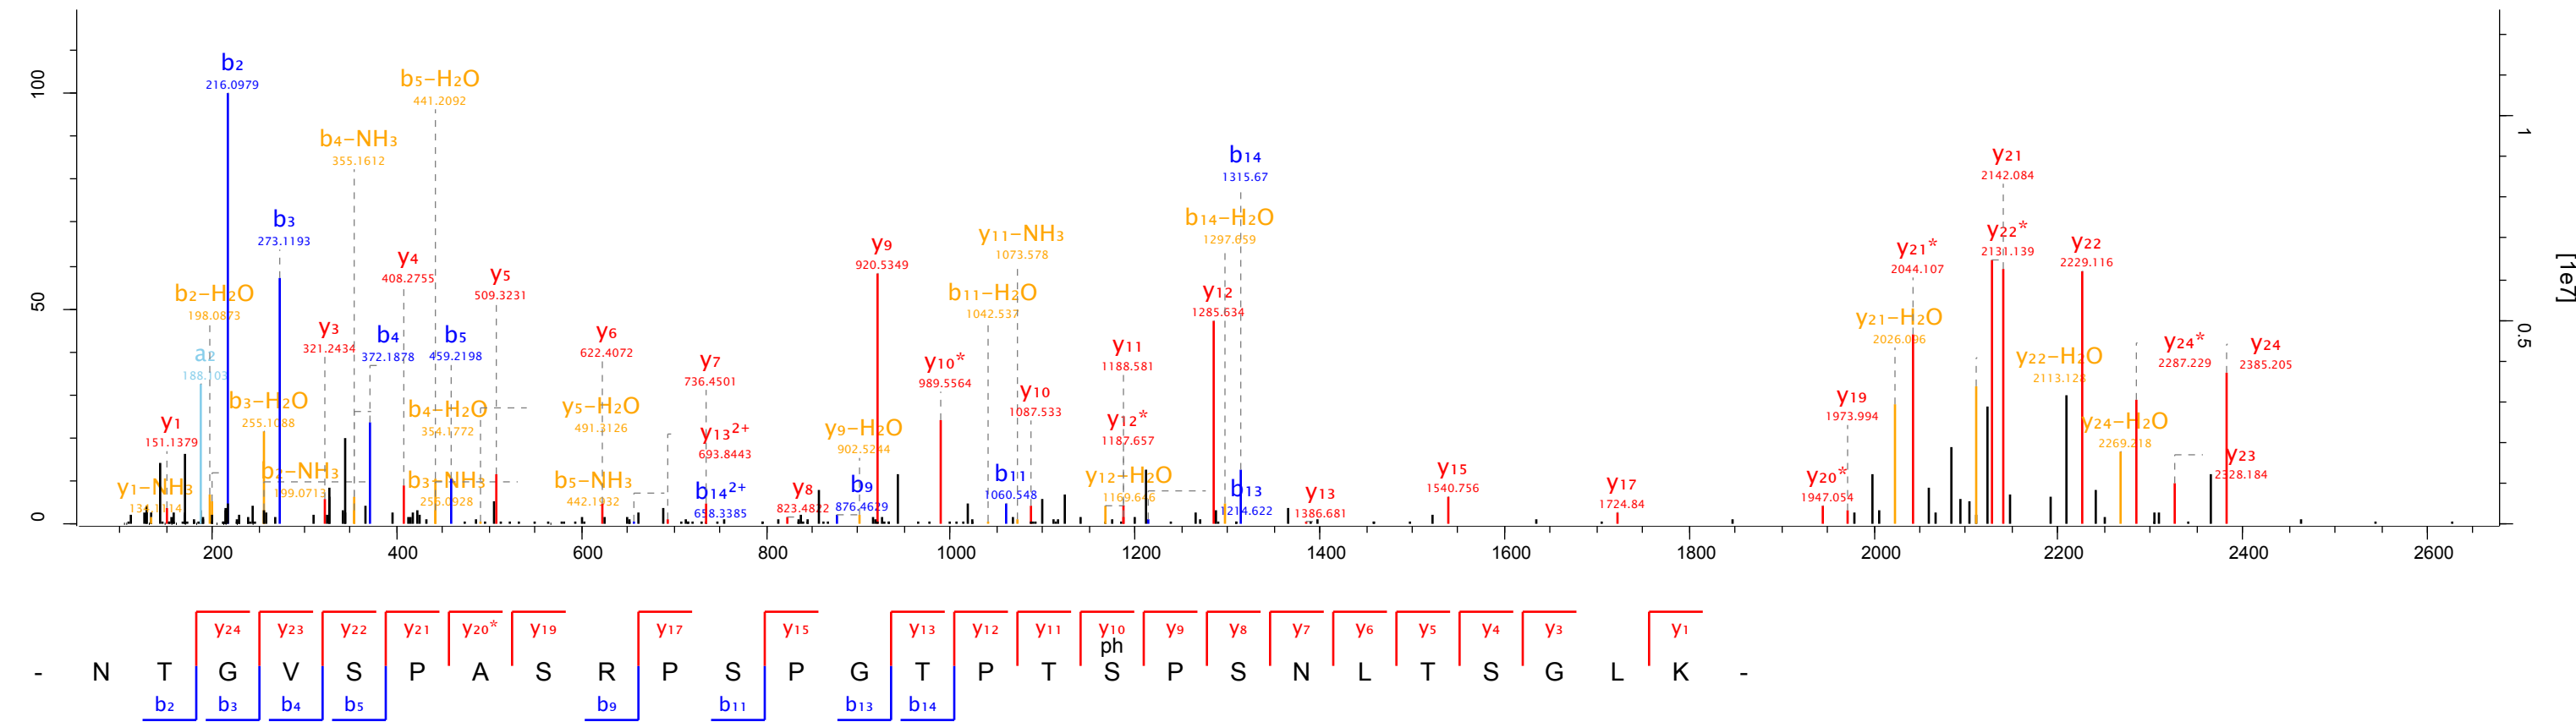

Raw file Scan Method Score m/z Gene names  
 20150814\_A375SR\_Phospho\_BR2\_04 14716 FTMS; HCD 215.62 921.07 PBX2

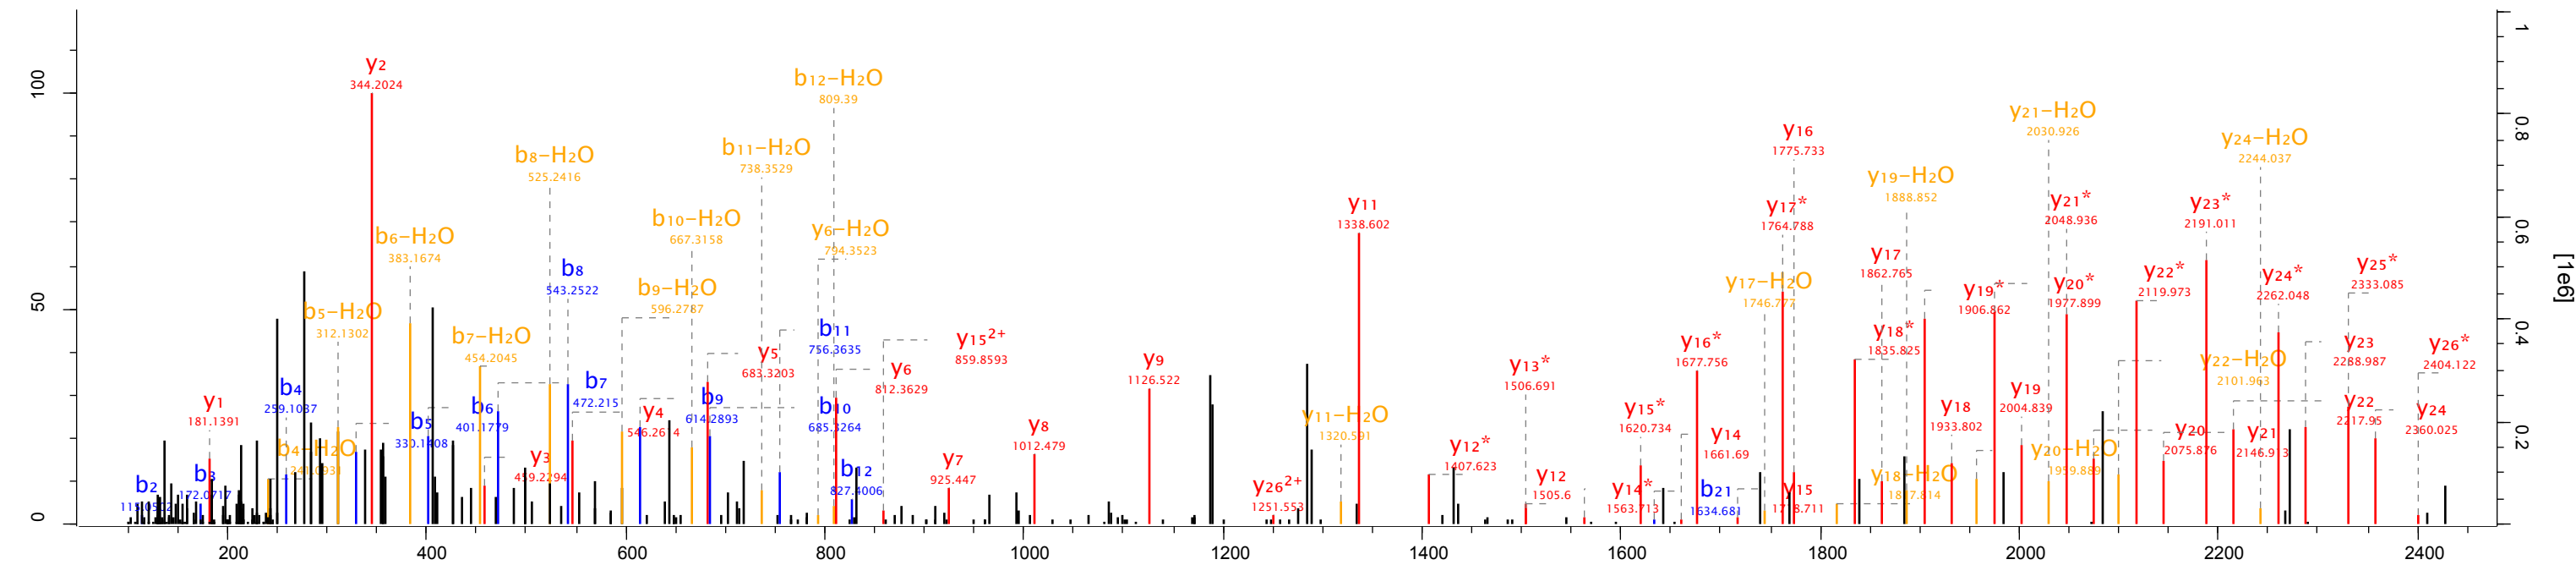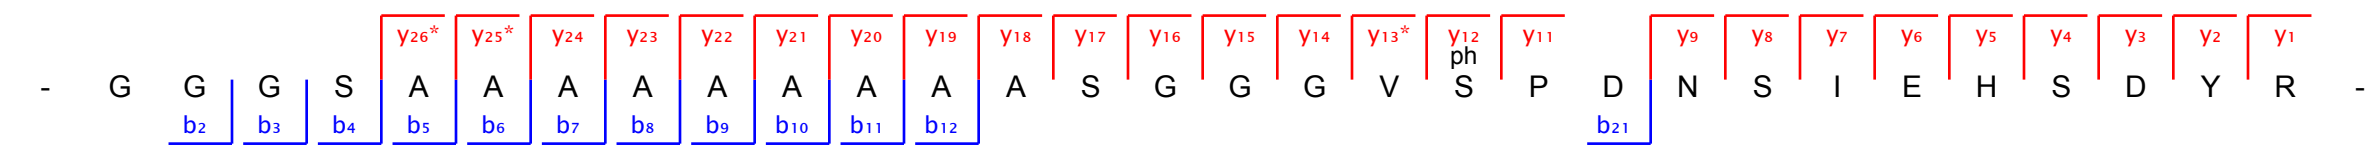

Raw file: 20150814\_A375SR\_Phospho\_BR2\_04  
 Scan: 14766 Method: FTMS; HCD Score: 181.54 m/z: 981.93 Gene names: RNF20

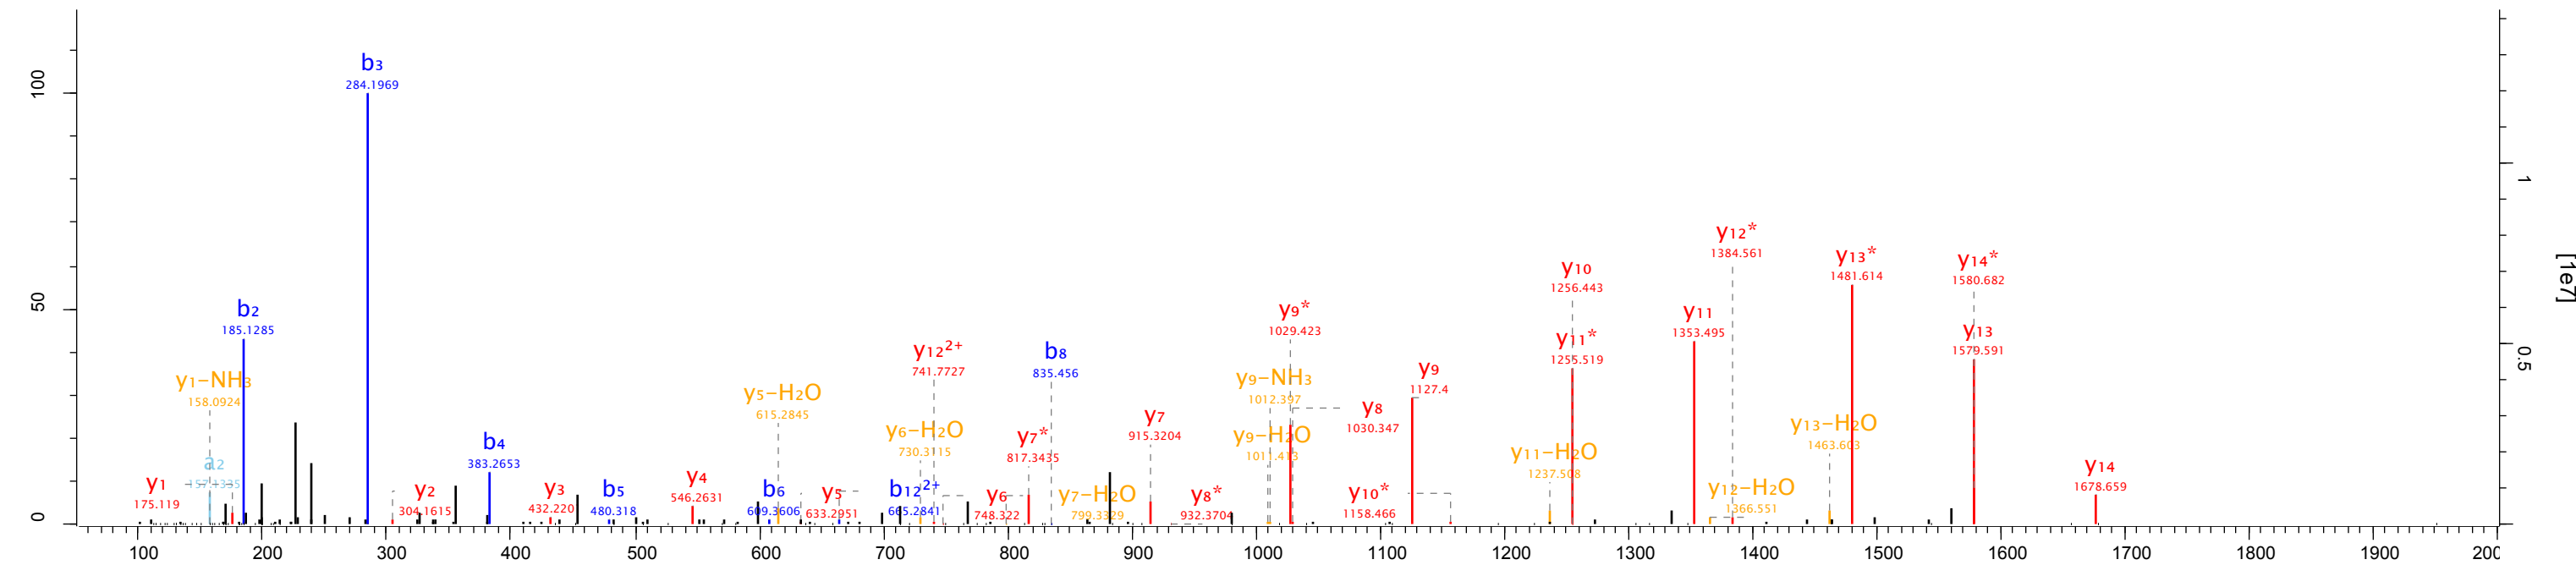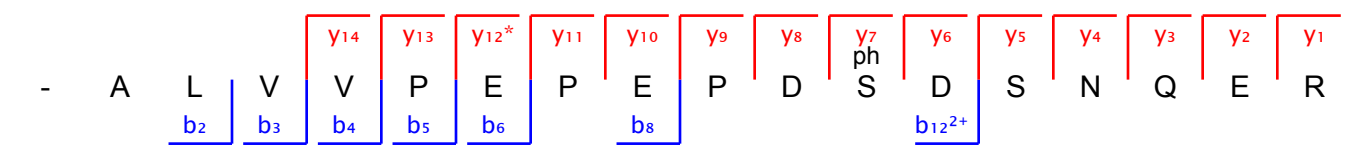



Raw file 20150814\_A375SR\_Phospho\_BR2\_04 Scan 14876 Method FTMS; HCD Score 163.09 m/z 698.34 Gene names C2orf49

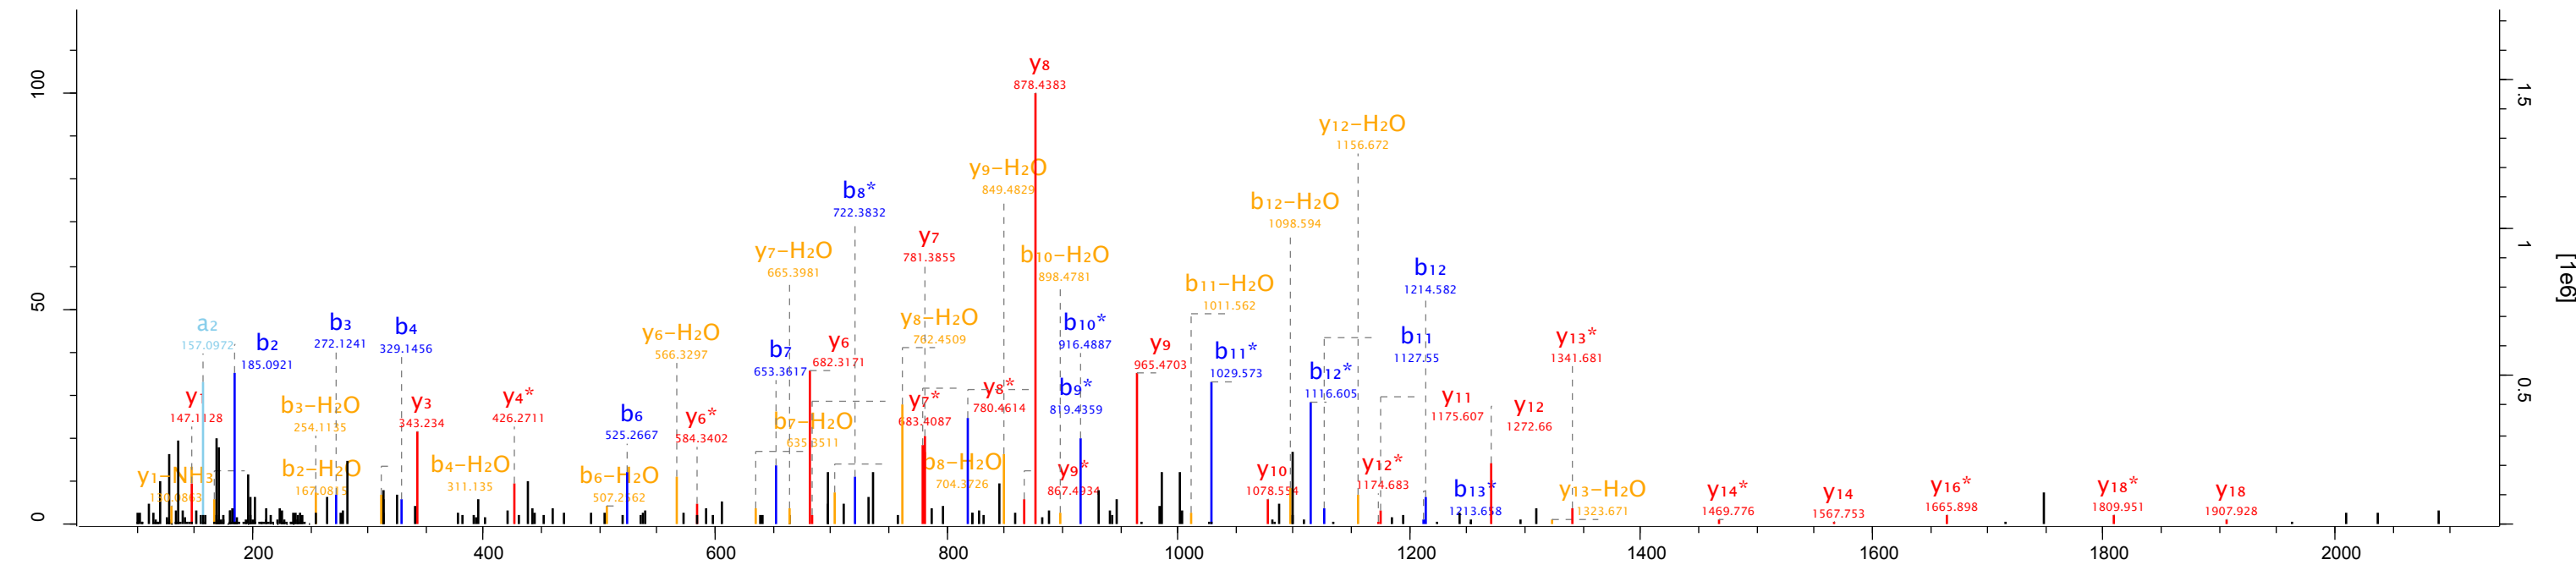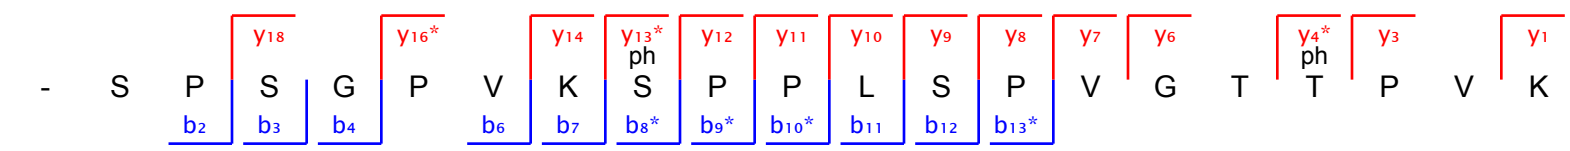

Raw file: 20150814\_A375SR\_Phospho\_BR2\_04  
 Scan: 14956 Method: FTMS; HCD Score: 192.57 m/z: 1066.99 Gene names: EPRS

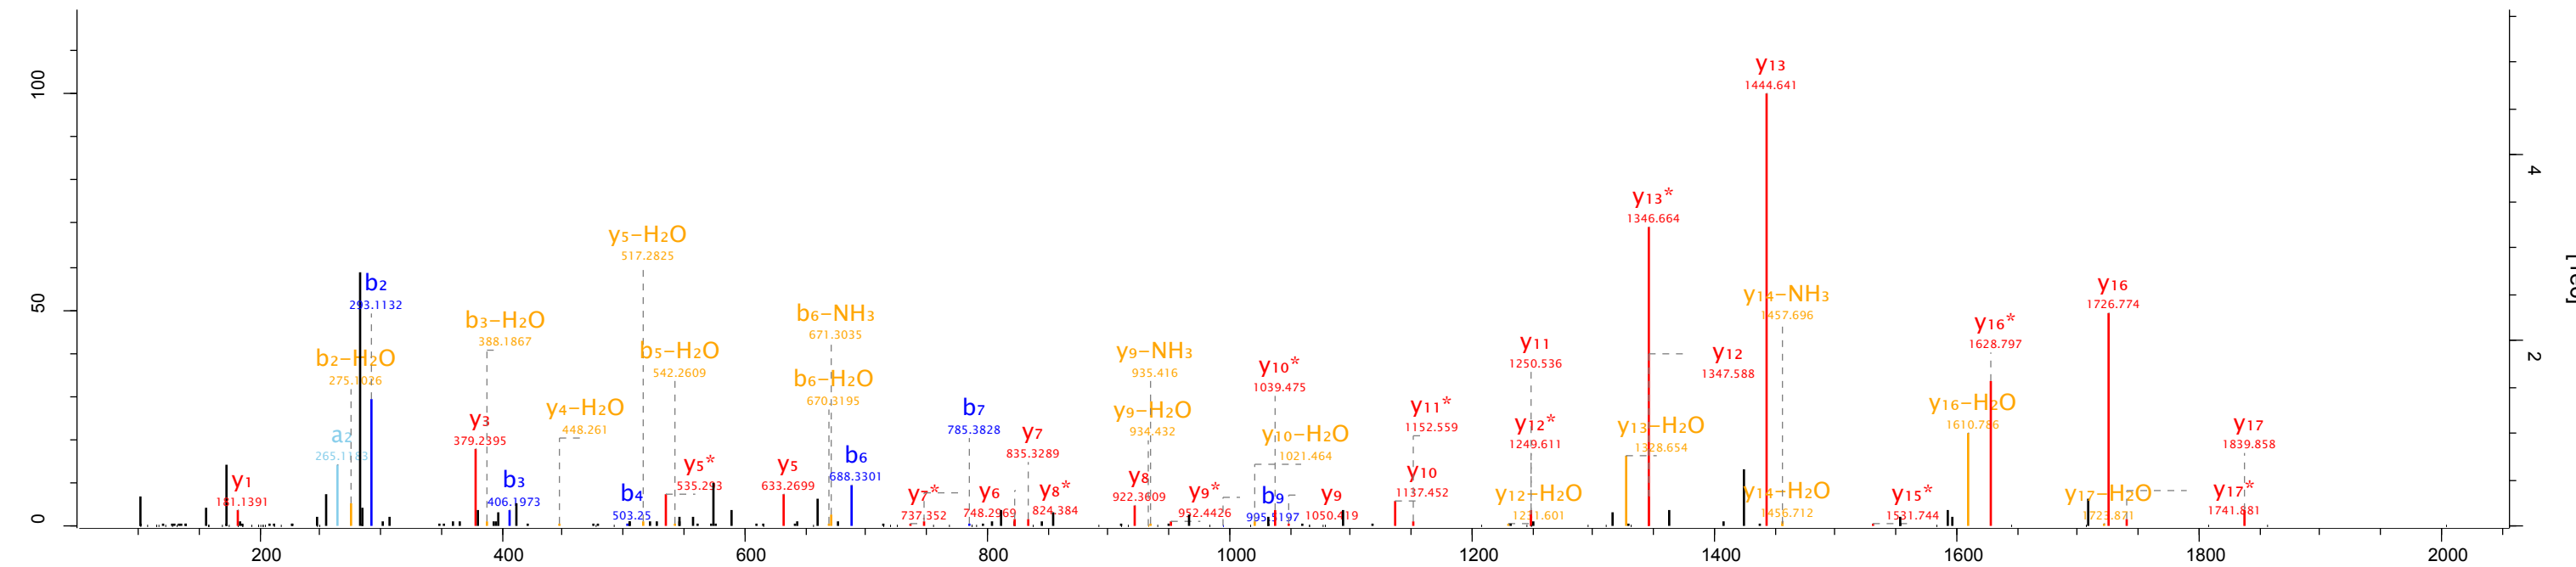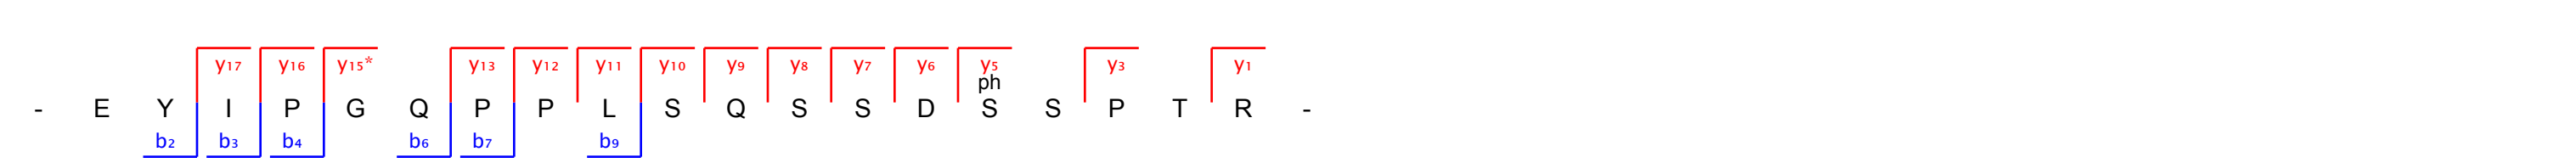

Raw file 20150814\_A375SR\_Phospho\_BR2\_04 Scan 15116 Method FTMS; HCD Score 250.86 m/z 931.94 Gene names SLC4A7

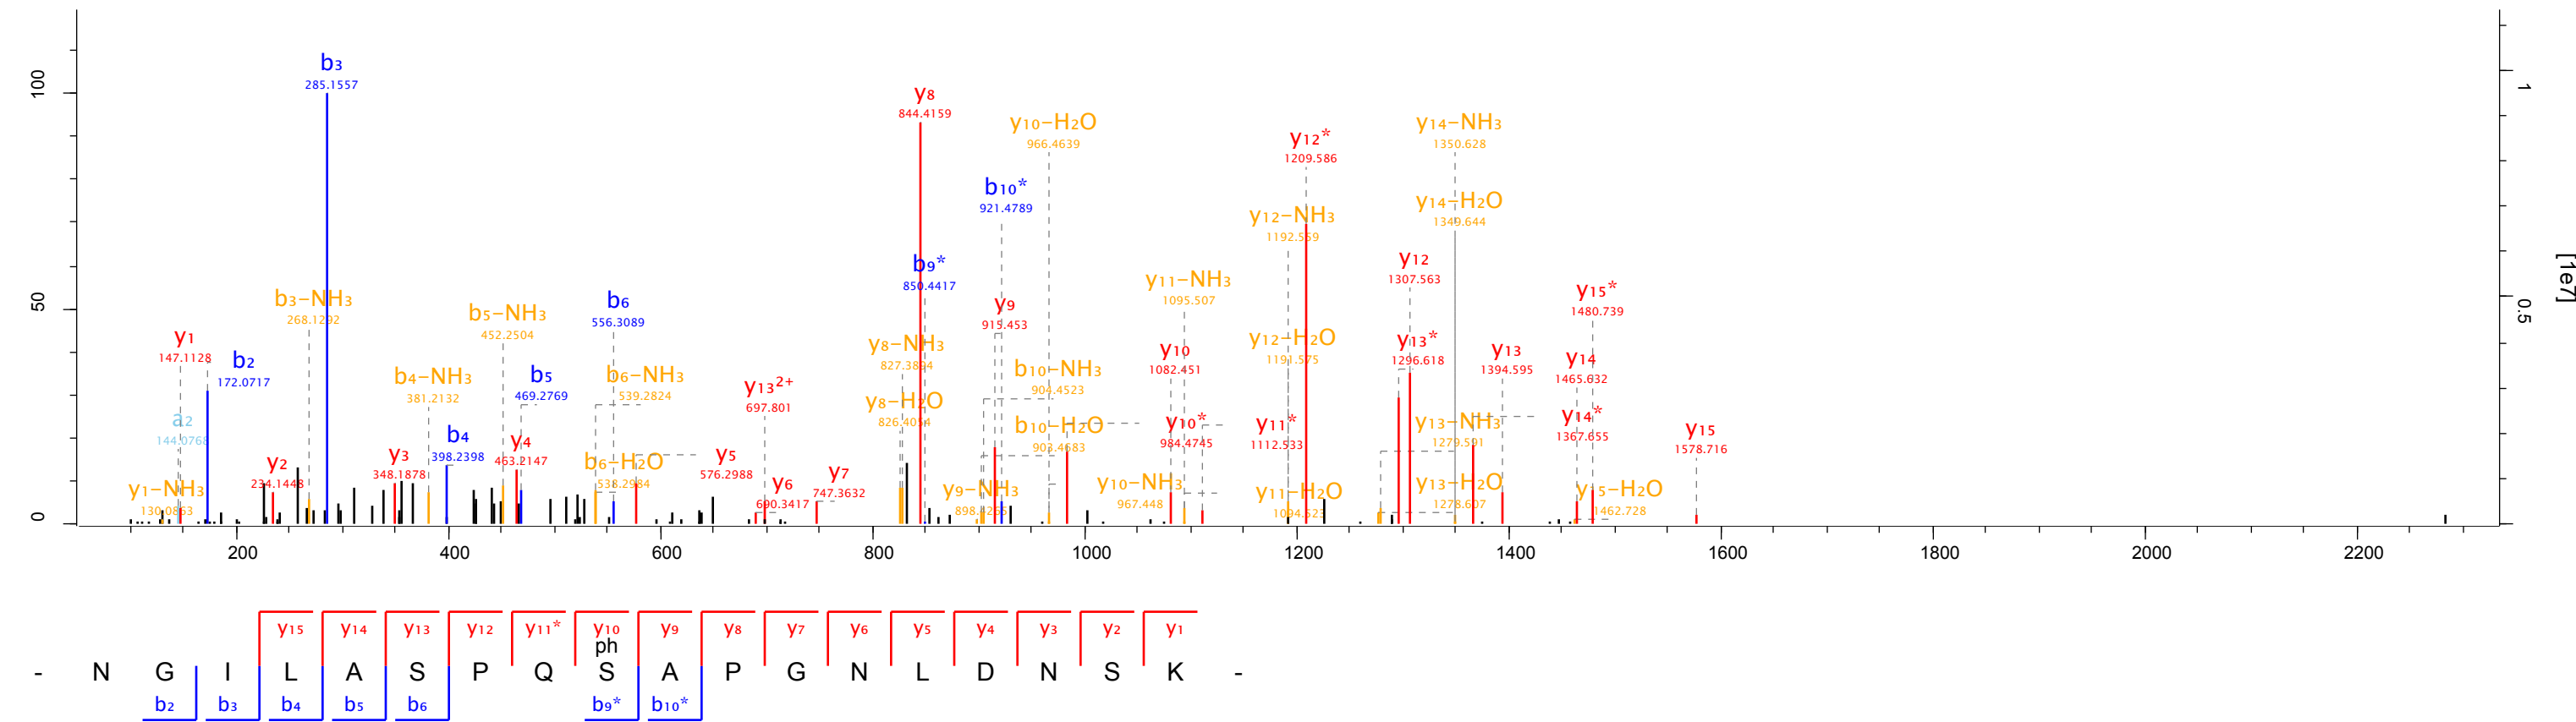

Raw file: 20150814\_A375SR\_Phospho\_BR2\_04  
 Scan: 15246 Method: FTMS; HCD Score: 193.28 m/z: 674.35 Gene names: YTHDF2

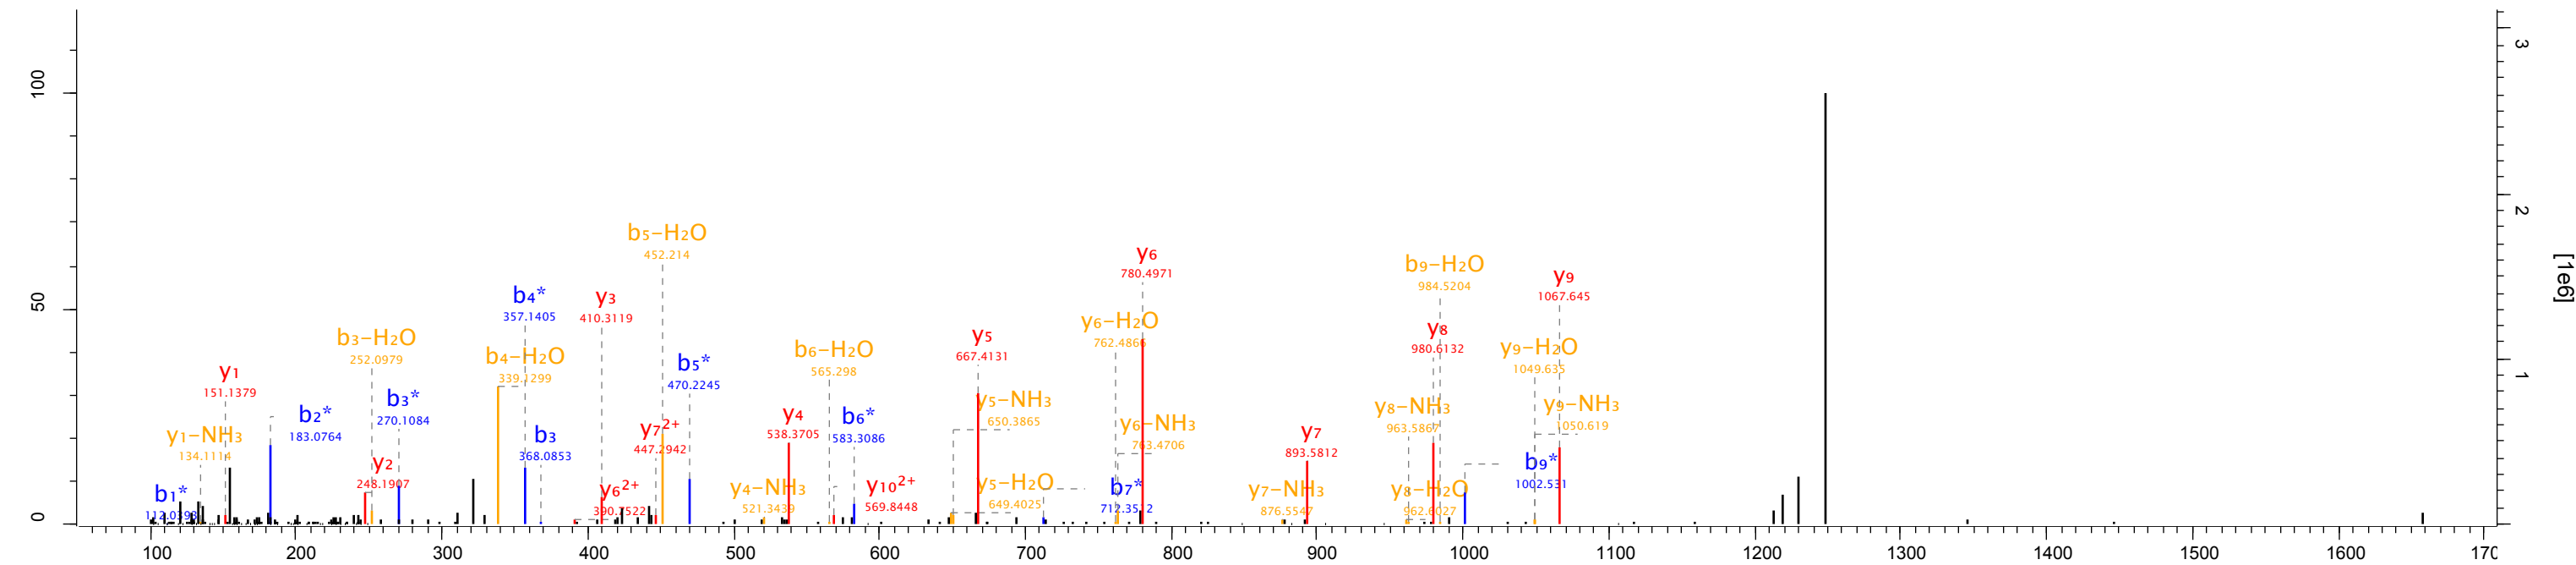

ac - ph S A S S L L E Q R P K -  
 b1\* b2\* b3 b4\* b5\* b6\* b7\* b9\*

Raw file 20150814\_A375SR\_Phospho\_BR2\_04 Scan 16246 Method FTMS; HCD Score 198.72 m/z 956.48 Gene names TNRC18

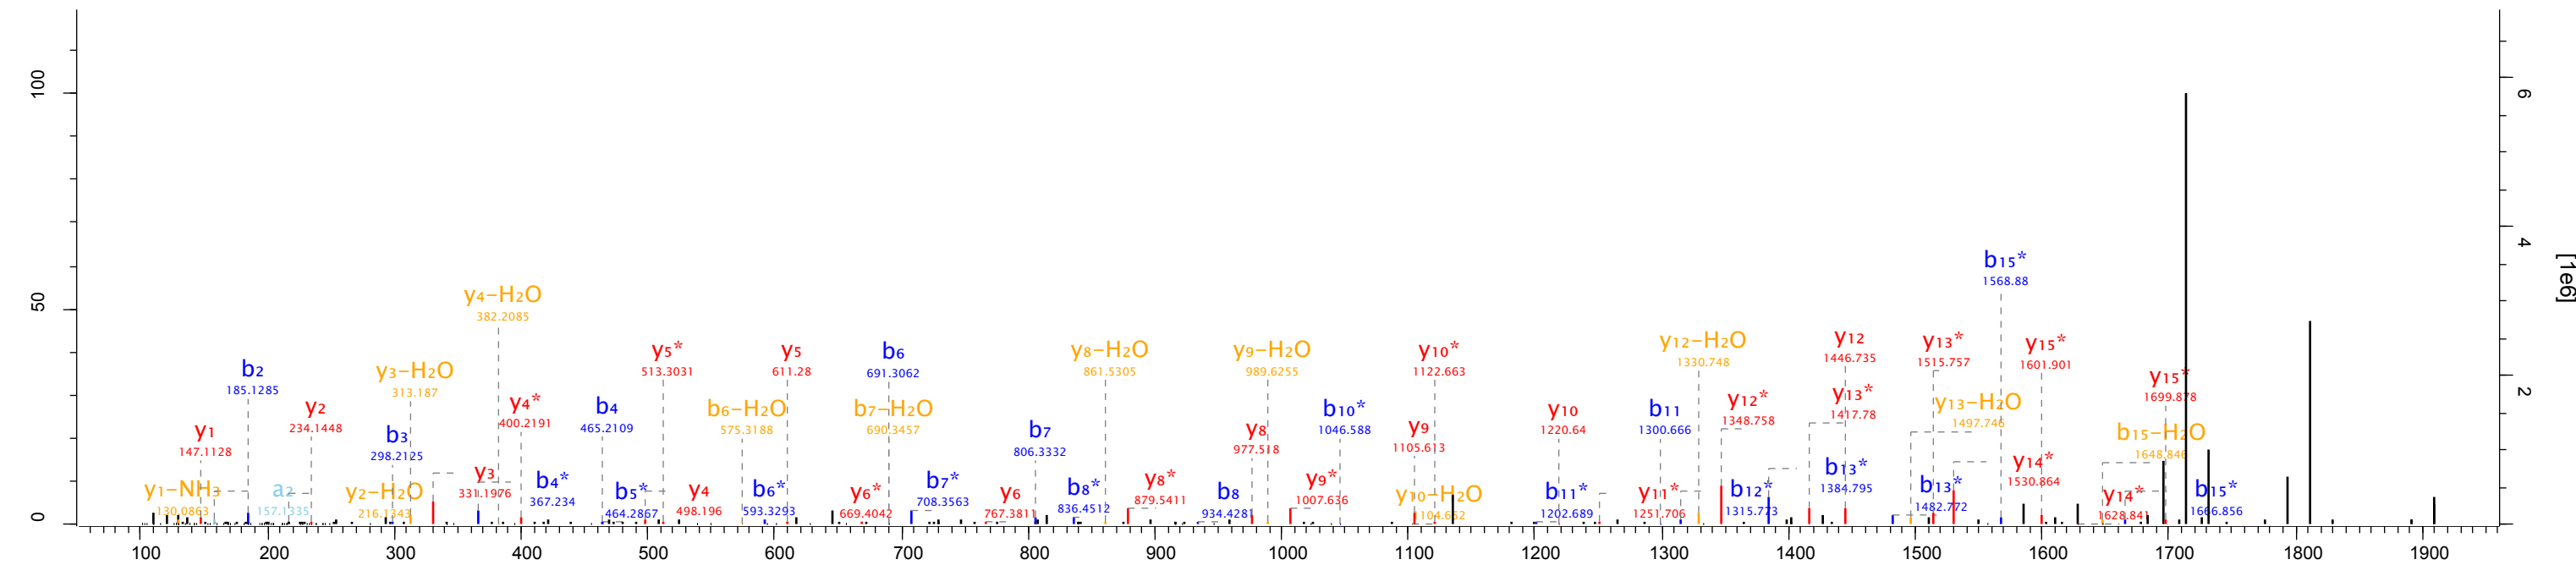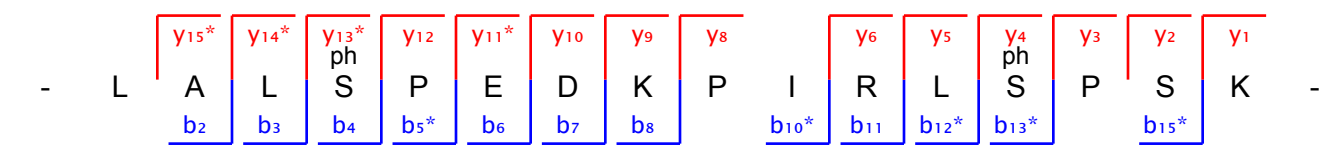

Raw file: 20150814\_A375SR\_Phospho\_BR2\_04  
 Scan: 16266 Method: FTMS; HCD Score: 206.93 m/z: 894.76 Gene names: RICTOR

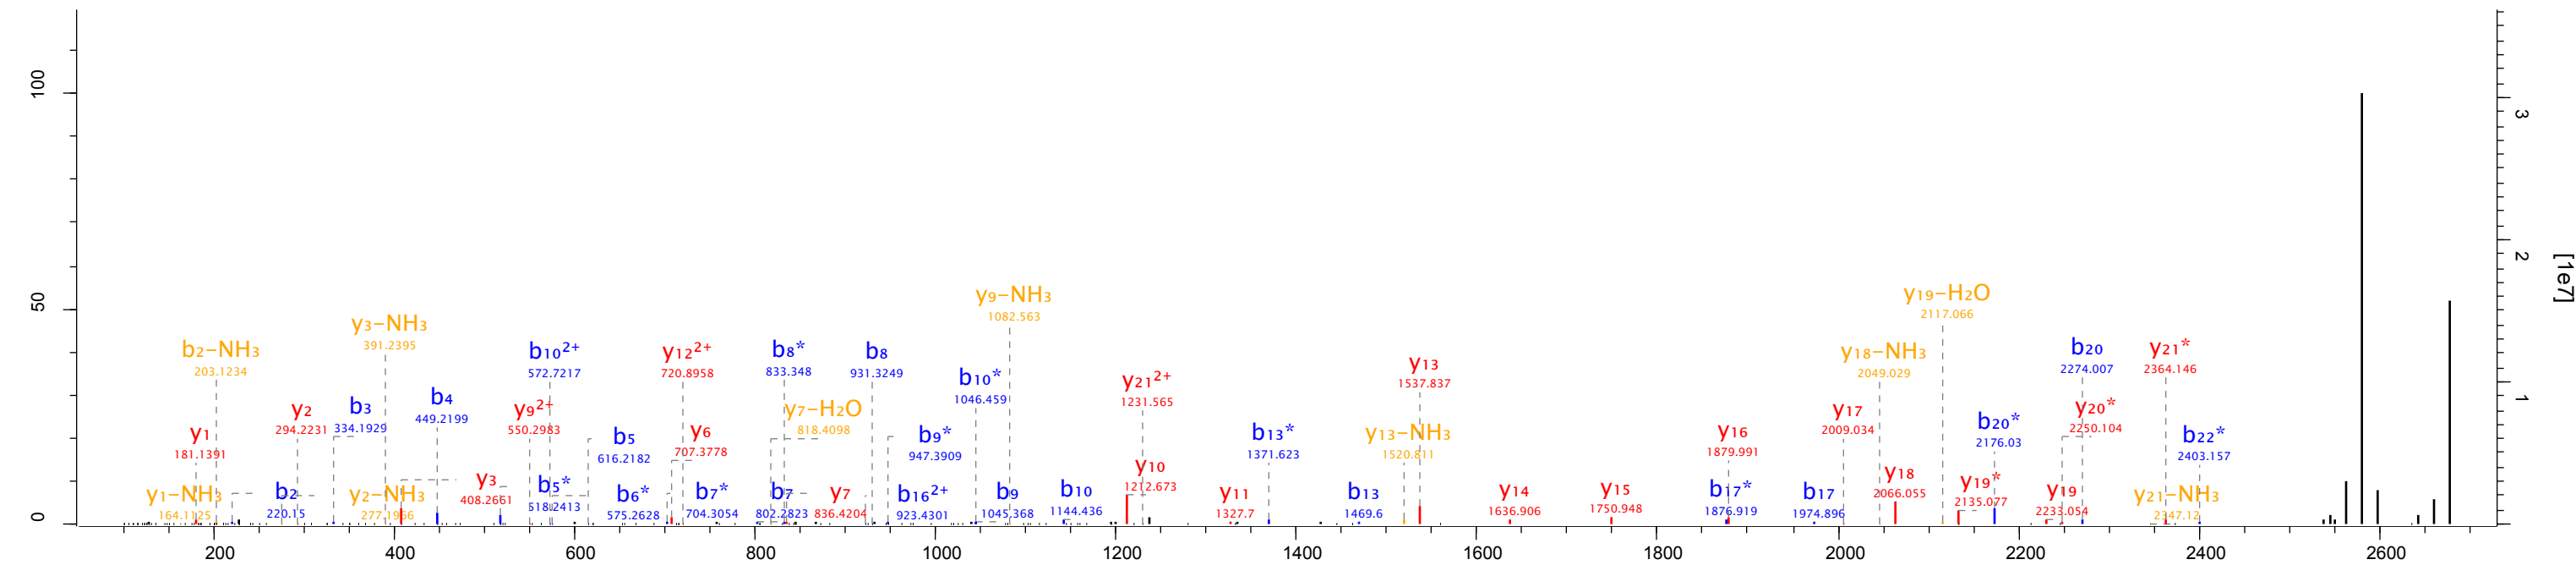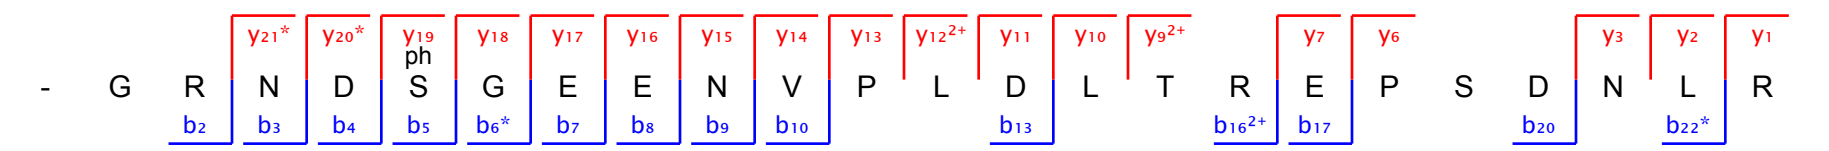

Raw file: 20150814\_A375SR\_Phospho\_BR2\_04  
 Scan: 16476 Method: FTMS; HCD Score: 264.46 m/z: 1152.97 Gene names: MAPK1

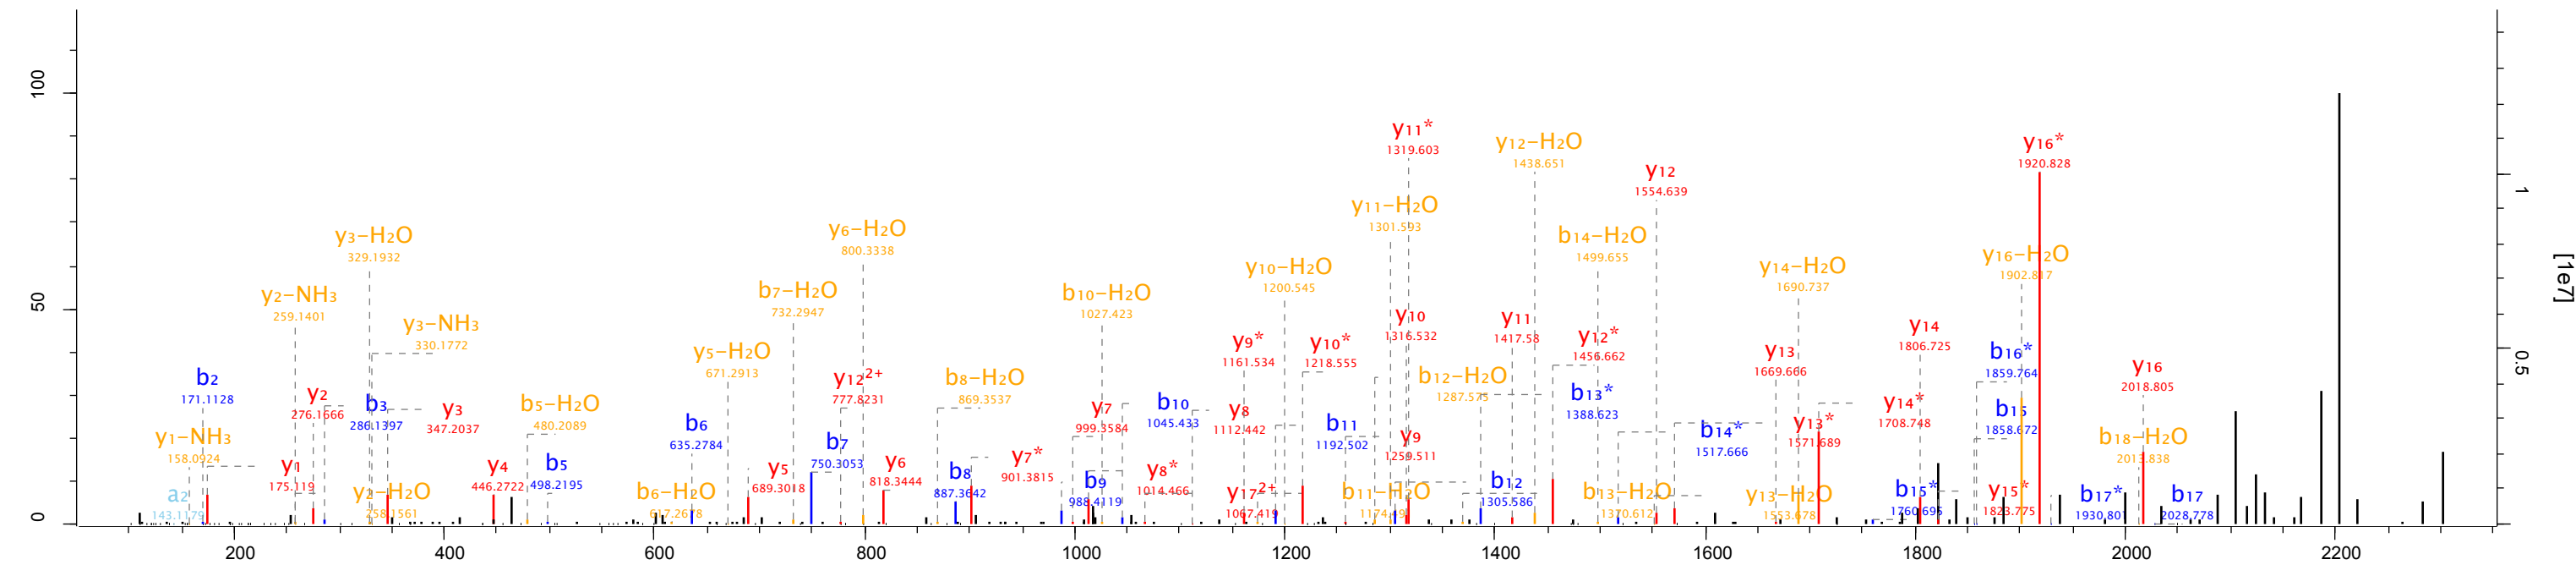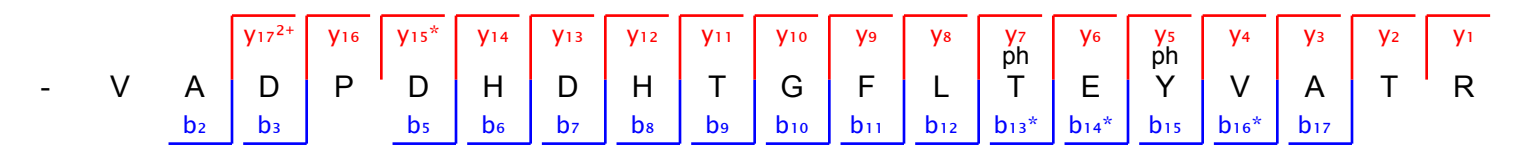

Raw file  
 20150814\_A375SR\_Phospho\_BR2\_04  
 Scan 16586 Method FTMS; HCD Score 58.85 m/z 574.94 Gene names PEBP1

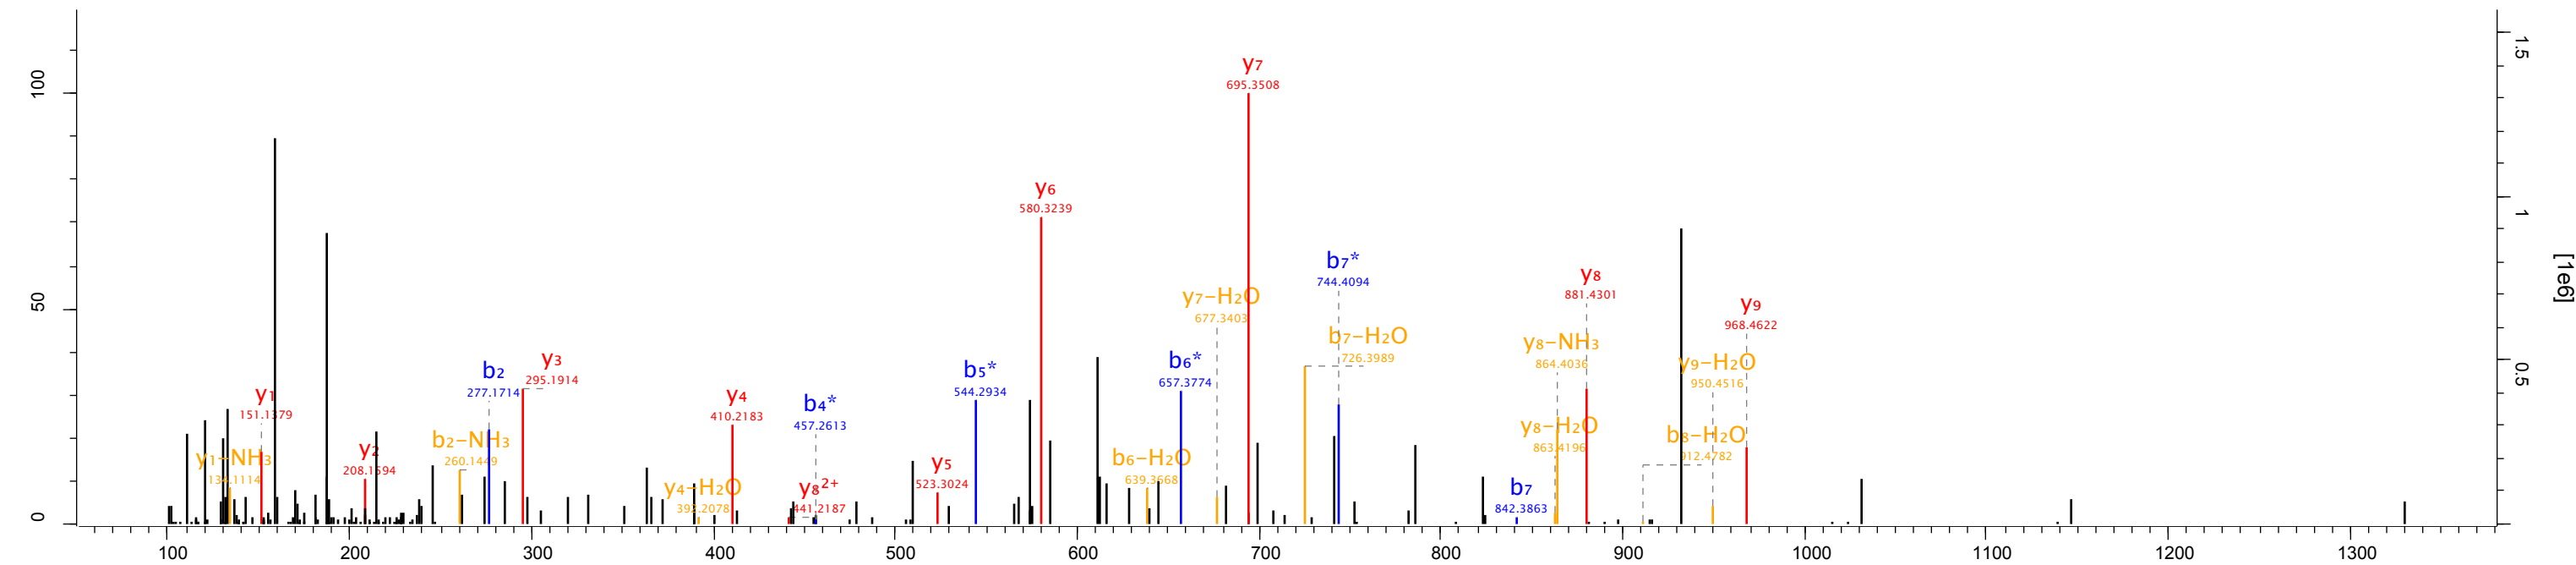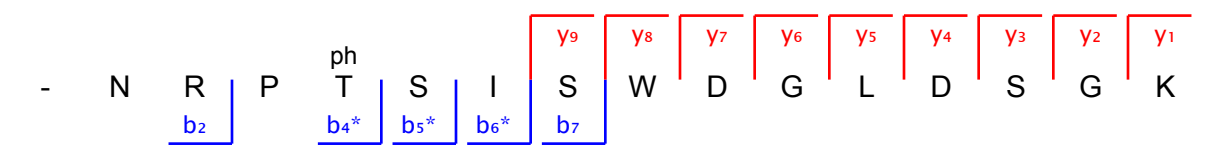



Raw file 20150814\_A375SR\_Phospho\_BR2\_04 Scan 16946 Method FTMS; HCD Score 186.62 m/z 1013.9 Gene names NAF1

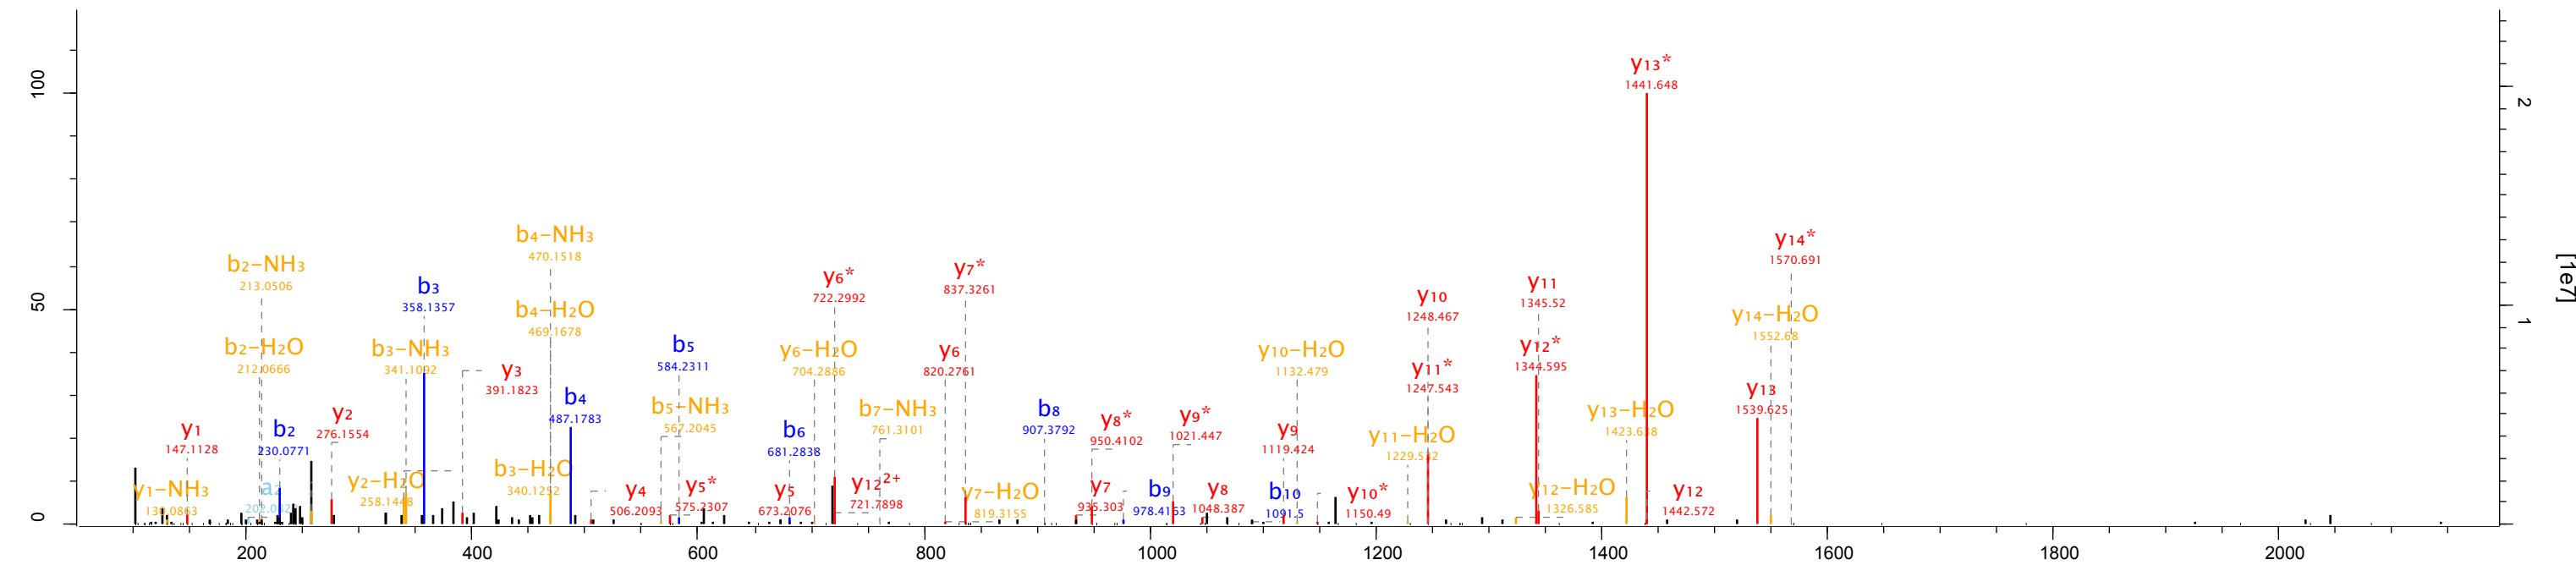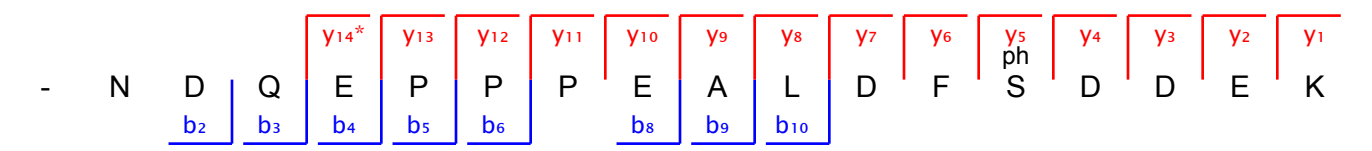

Raw file 20150814\_A375SR\_Phospho\_BR2\_04 Scan 16996 Method FTMS; HCD Score 167.88 m/z 1000.42 Gene names LMO7

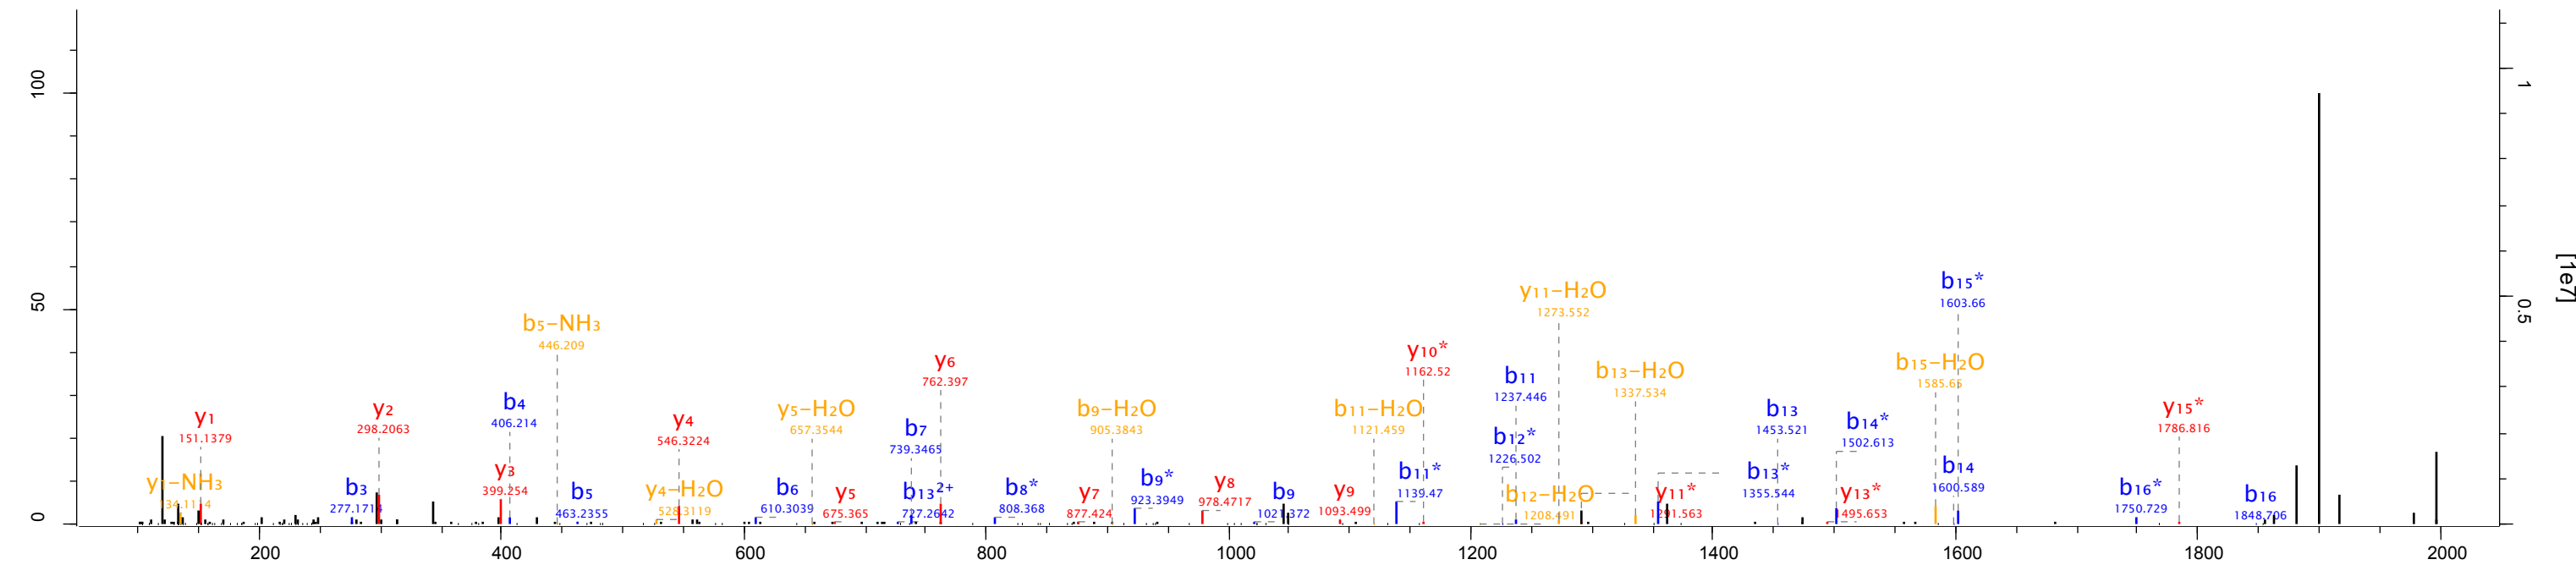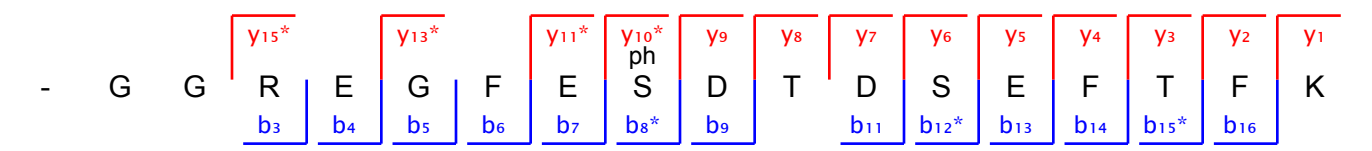

Raw file: 20150814\_A375SR\_Phospho\_BR2\_04  
 Scan: 17016 Method: FTMS; HCD Score: 164.41 m/z: 699.81 Gene names: CIC

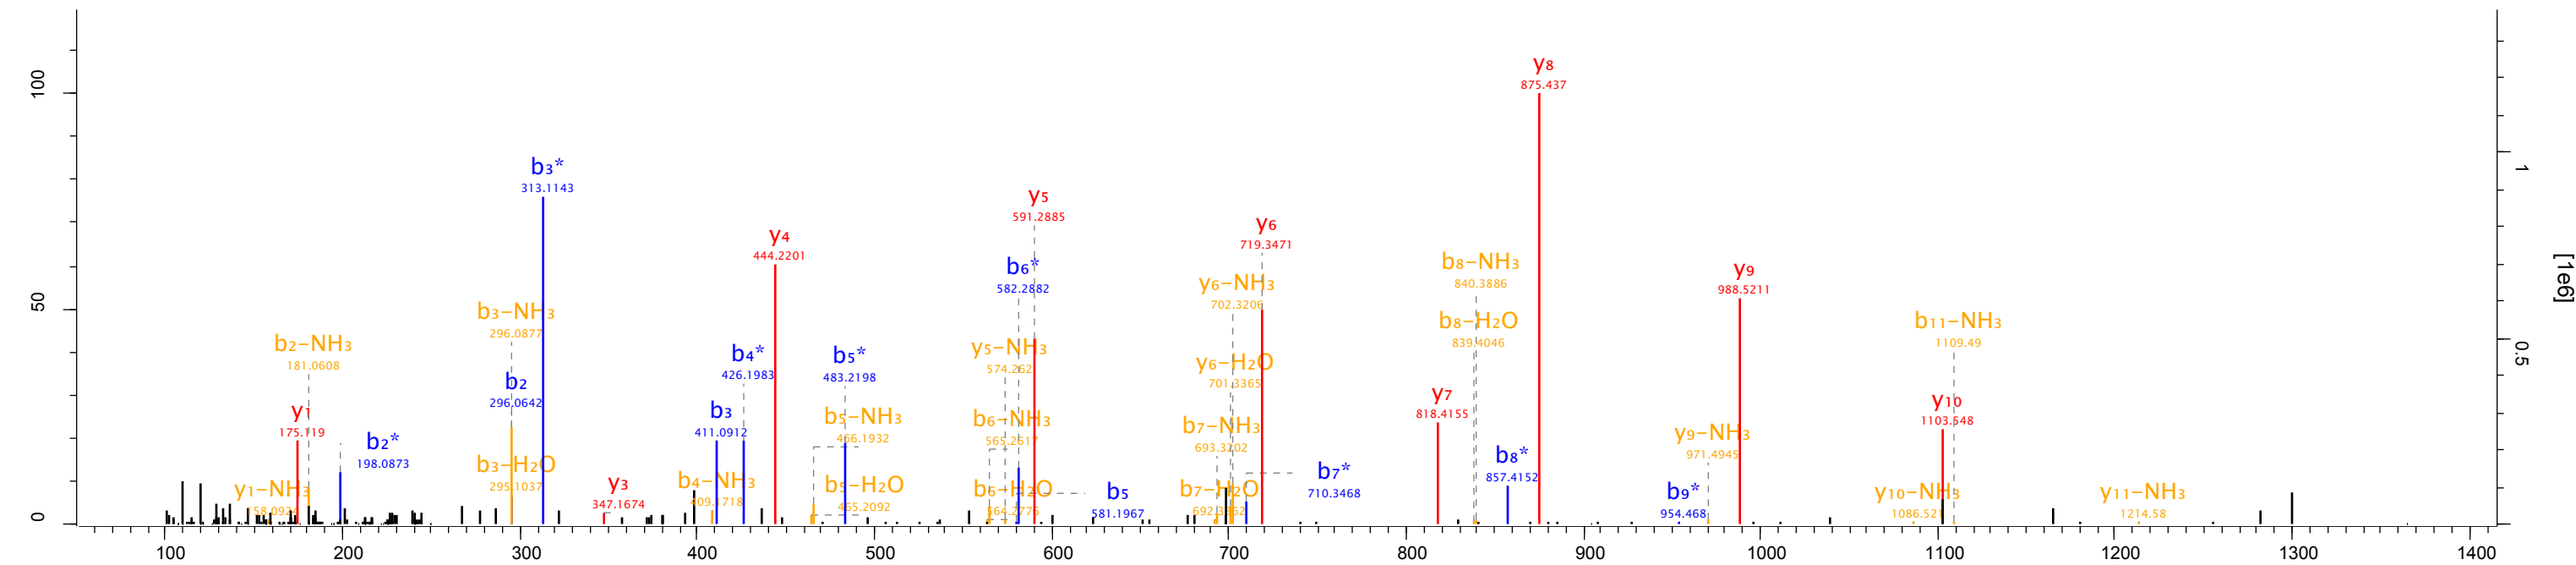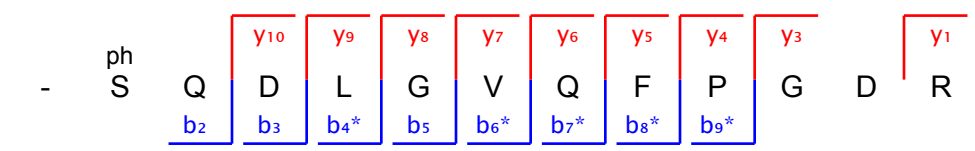

Raw file: 20150814\_A375SR\_Phospho\_BR2\_04  
 Scan: 1716 Method: FTMS; HCD Score: 56.2 m/z: 448.21 Gene names: OXSR1

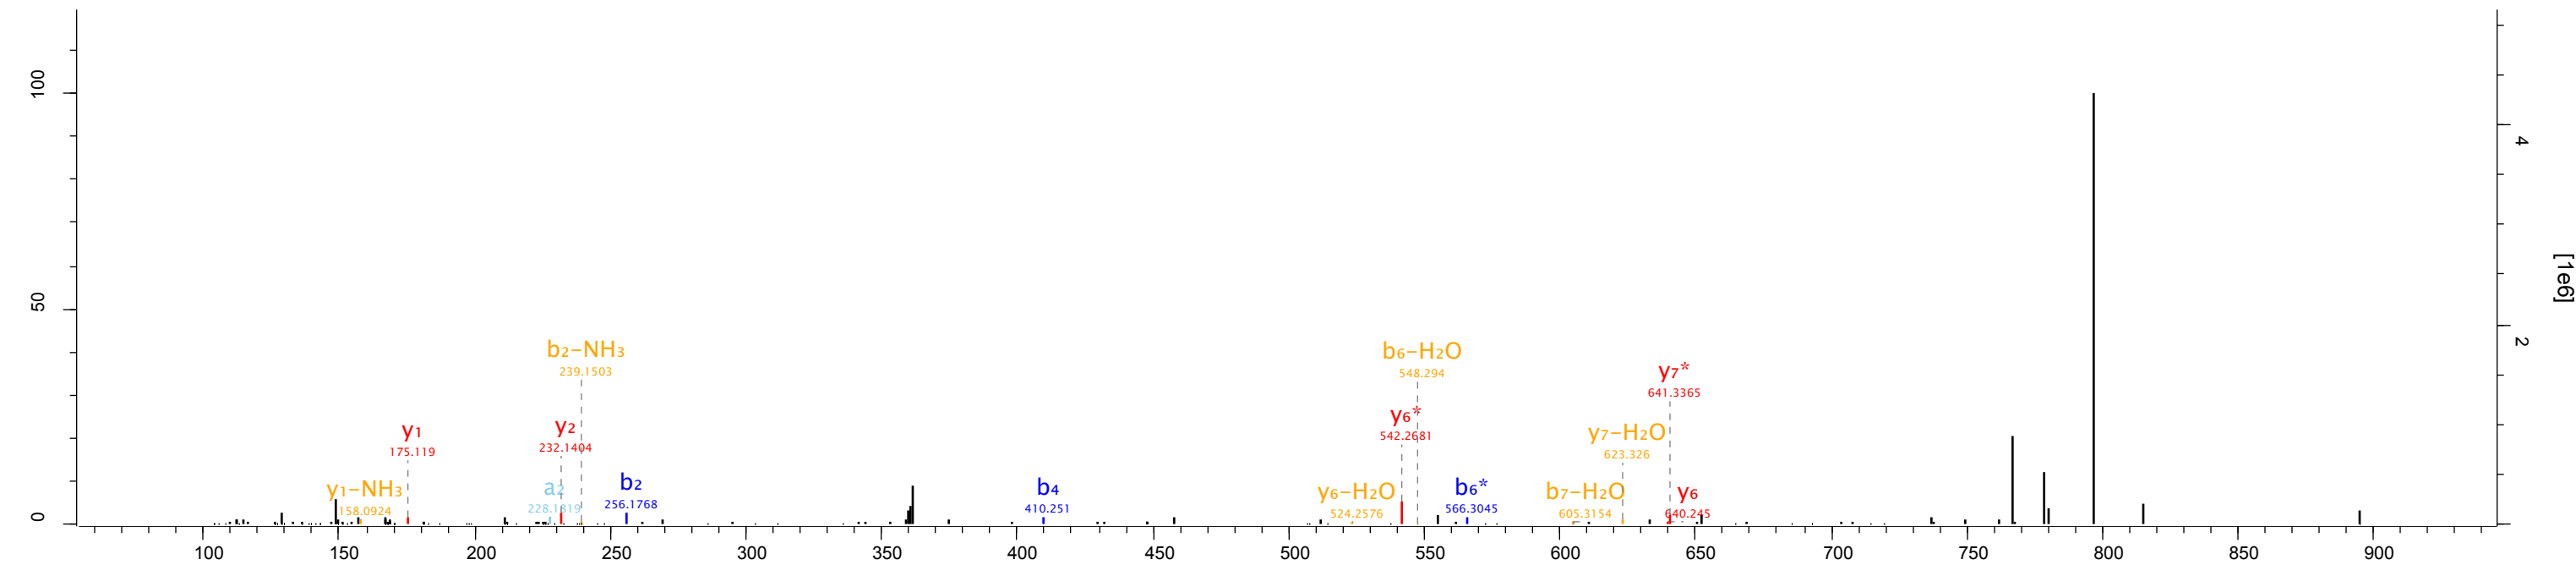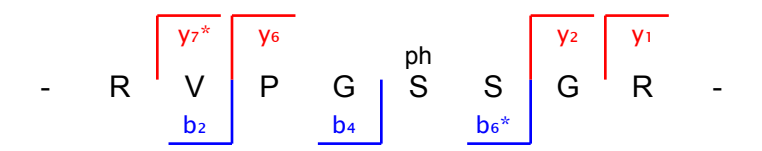

Raw file 20150814\_A375SR\_Phospho\_BR2\_04 Scan 17516 Method FTMS; HCD Score 123.81 m/z 716.82 Gene names MLPH

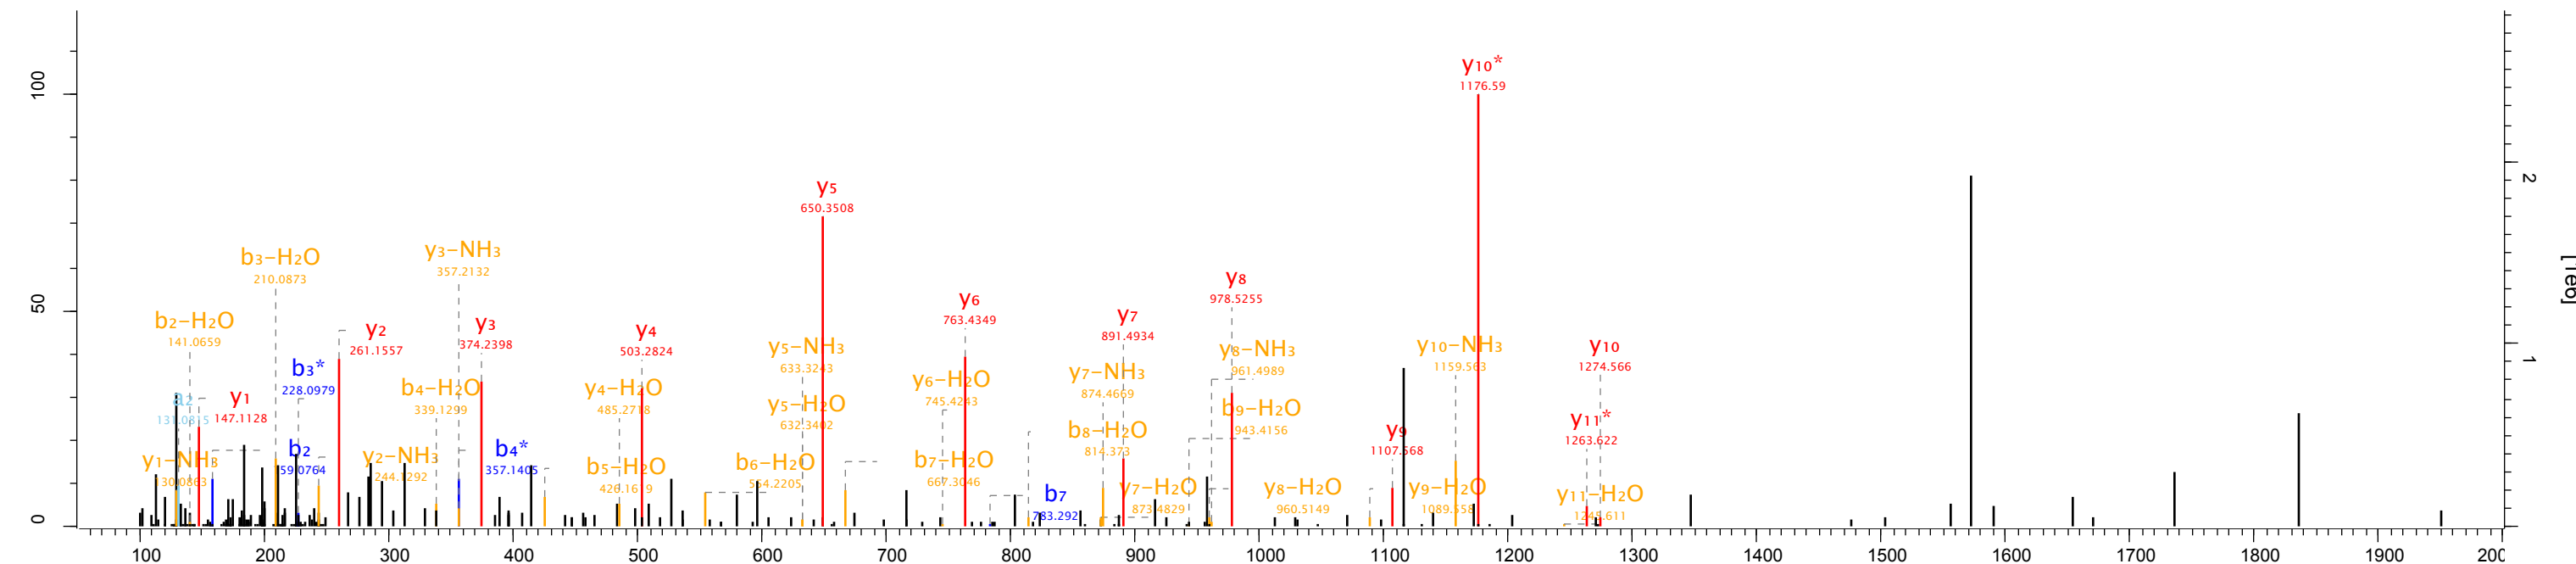

- A y11\* y10  
ph y9 y8 y7 y6 y5 y4 y3 y2 y1 -  
b2 b3\* b4\* S Q I F E L N K -  
b7

Raw file Scan Method Score m/z Gene names  
 20150814\_A375SR\_Phospho\_BR2\_04 1766 FTMS; HCD 272.43 724.35 NASP

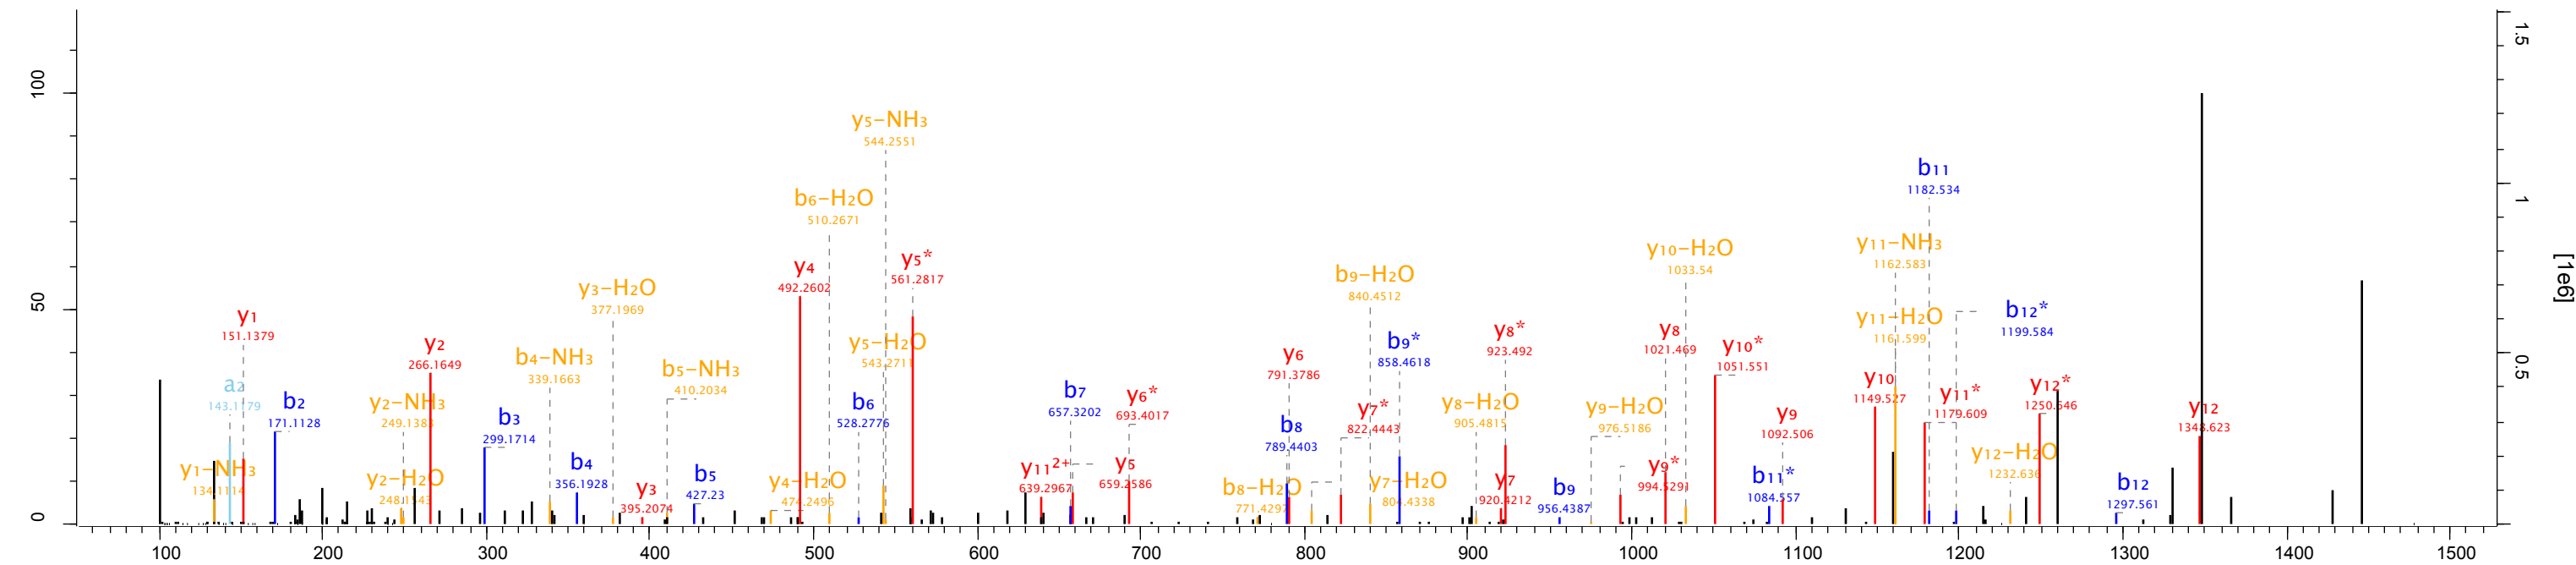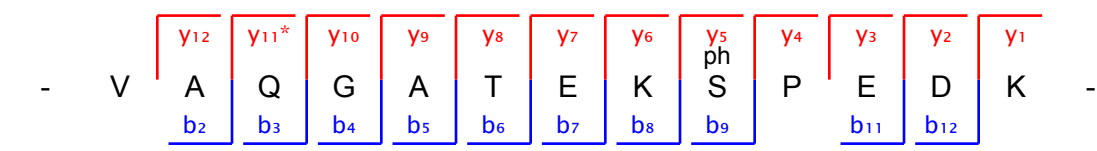

Raw file: 20150814\_A375SR\_Phospho\_BR2\_04  
 Scan: 17706 Method: FTMS; HCD Score: 200.77 m/z: 731.36 Gene names: KIFAP3

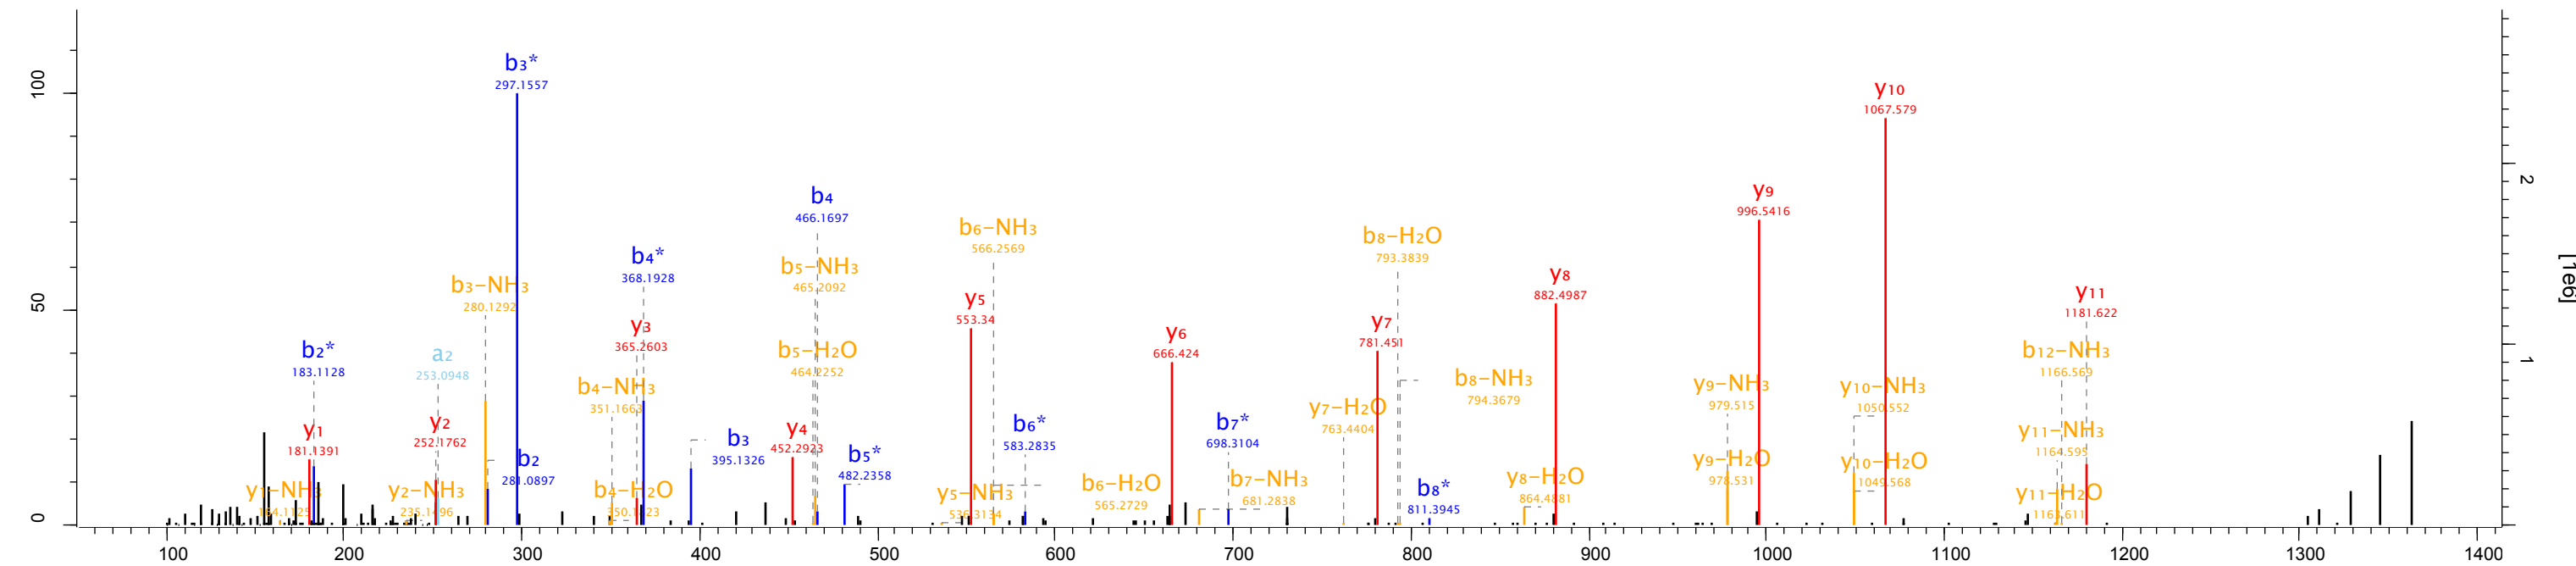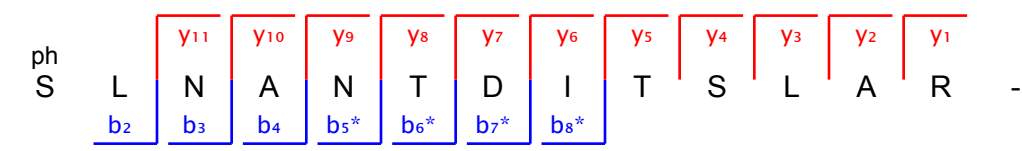

Raw file 20150814\_A375SR\_Phospho\_BR2\_04 Scan 17746 Method FTMS; HCD Score 127.01 m/z 1052.4 Gene names DMXL1

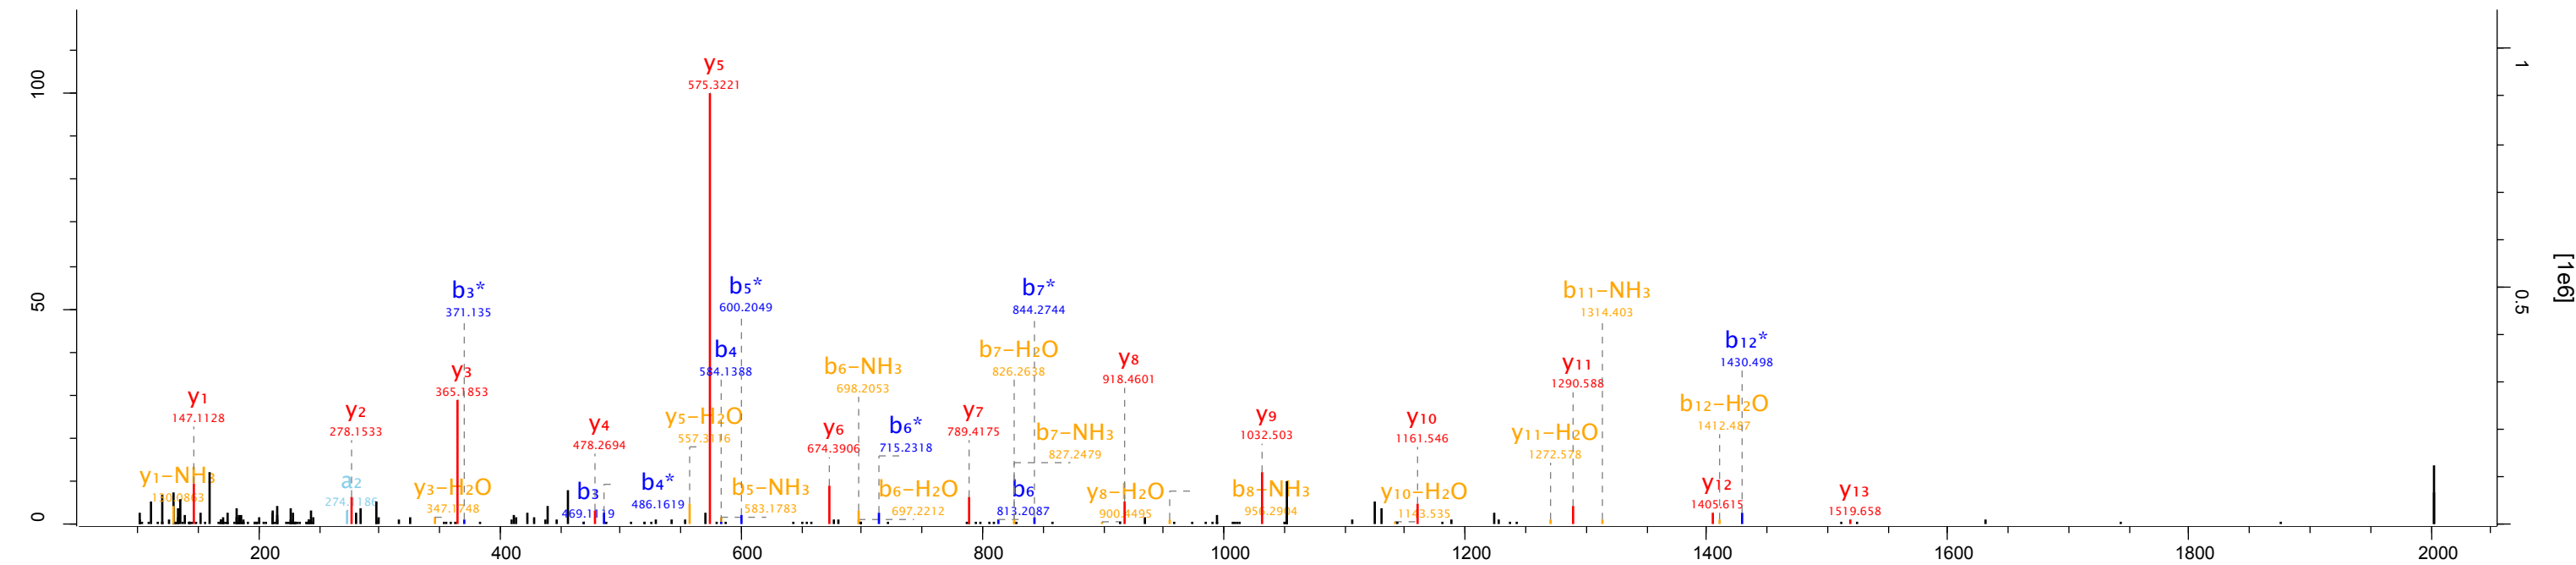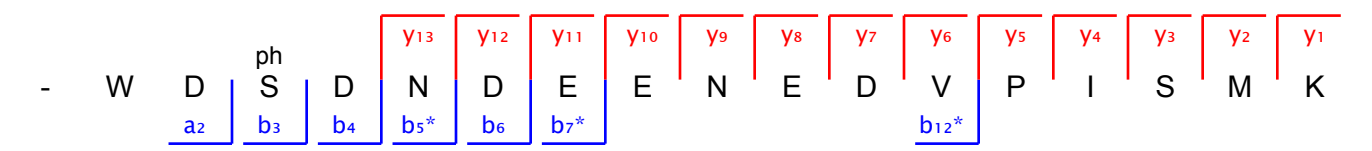



Raw file 20150814\_A375SR\_Phospho\_BR2\_04 Scan 18086 Method FTMS; HCD Score 119.27 m/z 942.76 Gene names MACF1

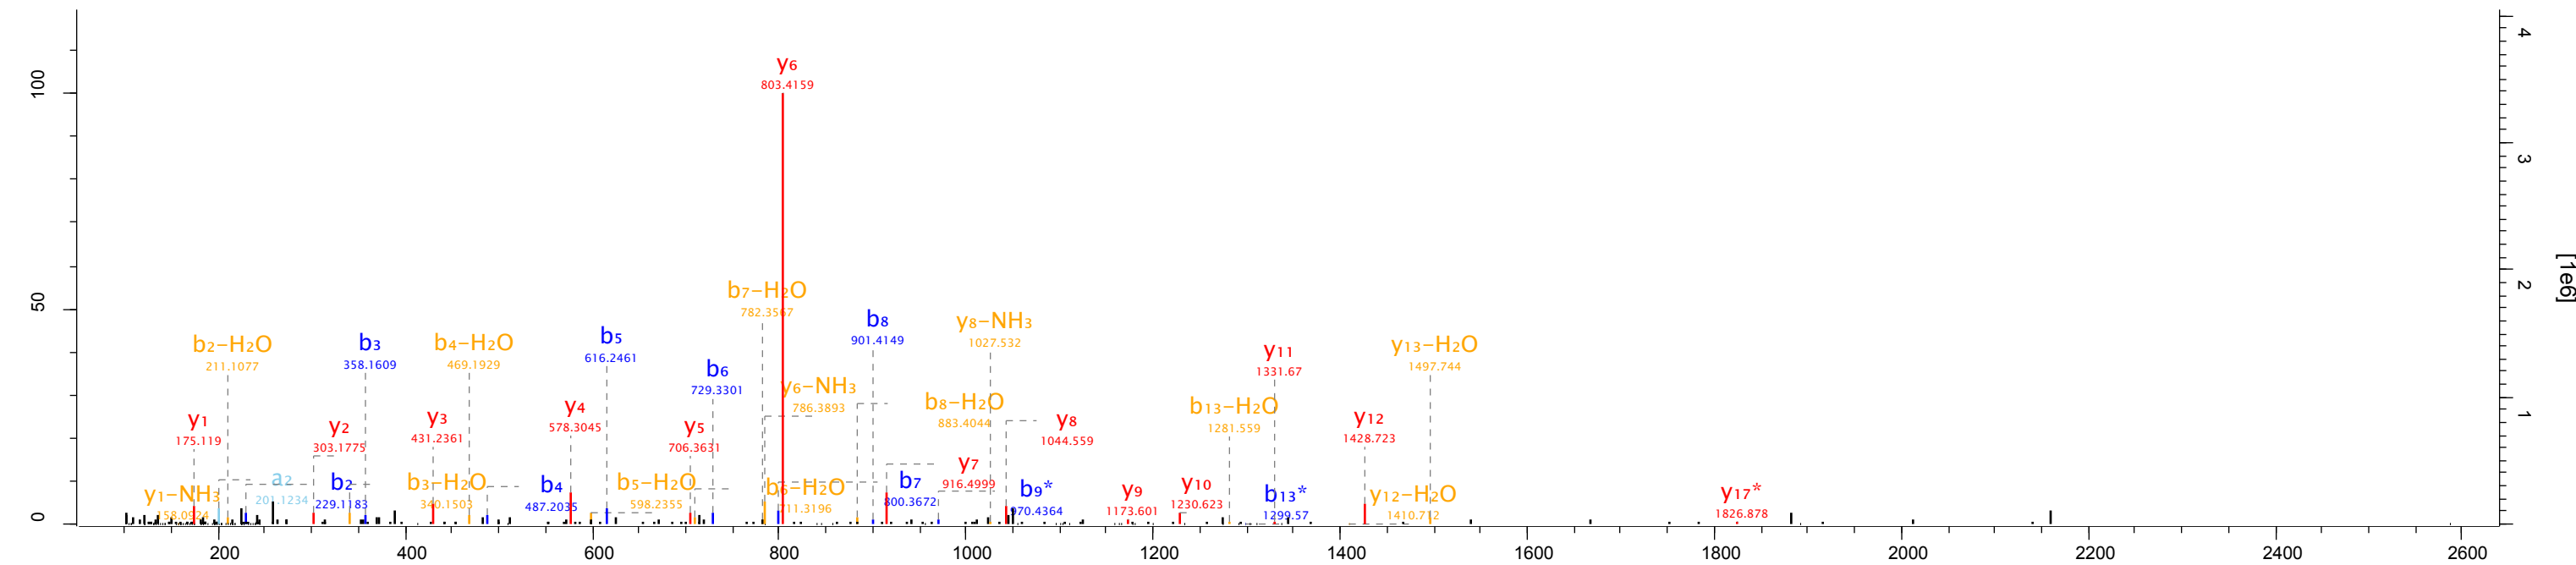

- E V E E L A T S G G Q S P T E G E P Q F Q Q R -

b<sub>2</sub>
b<sub>3</sub>
b<sub>4</sub>
b<sub>5</sub>
b<sub>6</sub>
b<sub>7</sub>
b<sub>8</sub>
b<sub>9</sub>\*
b<sub>13</sub>\*
y<sub>17</sub>\*
ph
y<sub>12</sub>
y<sub>11</sub>
y<sub>10</sub>
y<sub>9</sub>
y<sub>8</sub>
y<sub>7</sub>
y<sub>6</sub>
y<sub>5</sub>
y<sub>4</sub>
y<sub>3</sub>
y<sub>2</sub>
y<sub>1</sub>

Raw file 20150814\_A375SR\_Phospho\_BR2\_04 Scan 18446 Method FTMS; HCD Score 240.18 m/z 814.05 Gene names SLC9A3R1

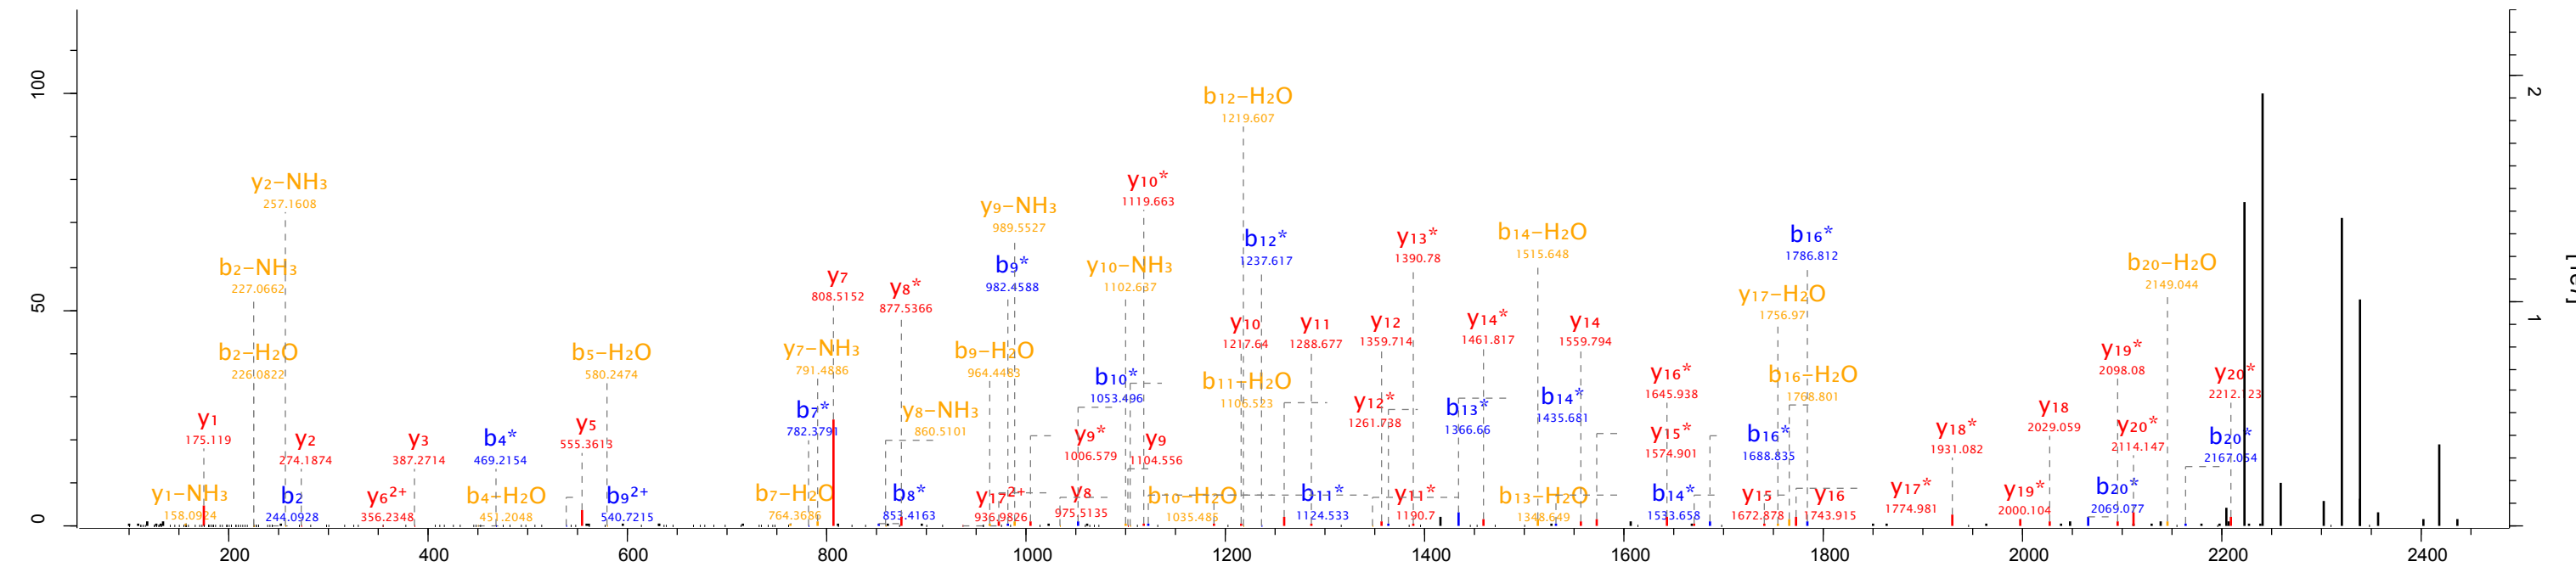

- E N S R E A L A E A A L E S P R P A L V R -

Fragmentation mapping below the sequence:

- Red boxes (Y ions):** y20\*, y19<sup>ph</sup>, y18, y17\*, y16, y15, y14, y13\*, y12, y11, y10, y9, y8<sup>ph</sup>, y7, y6<sup>2+</sup>, y5
- Blue boxes (B ions):** b2, b4\*, b7\*, b8\*, b9\*, b10\*, b11\*, b12\*, b13\*, b14\*, b16\*, b20\*

Raw file: 20150814\_A375SR\_Phospho\_BR2\_04  
 Scan: 18536 Method: FTMS; HCD Score: 325.18 m/z: 1035.49 Gene names: OSBPL3

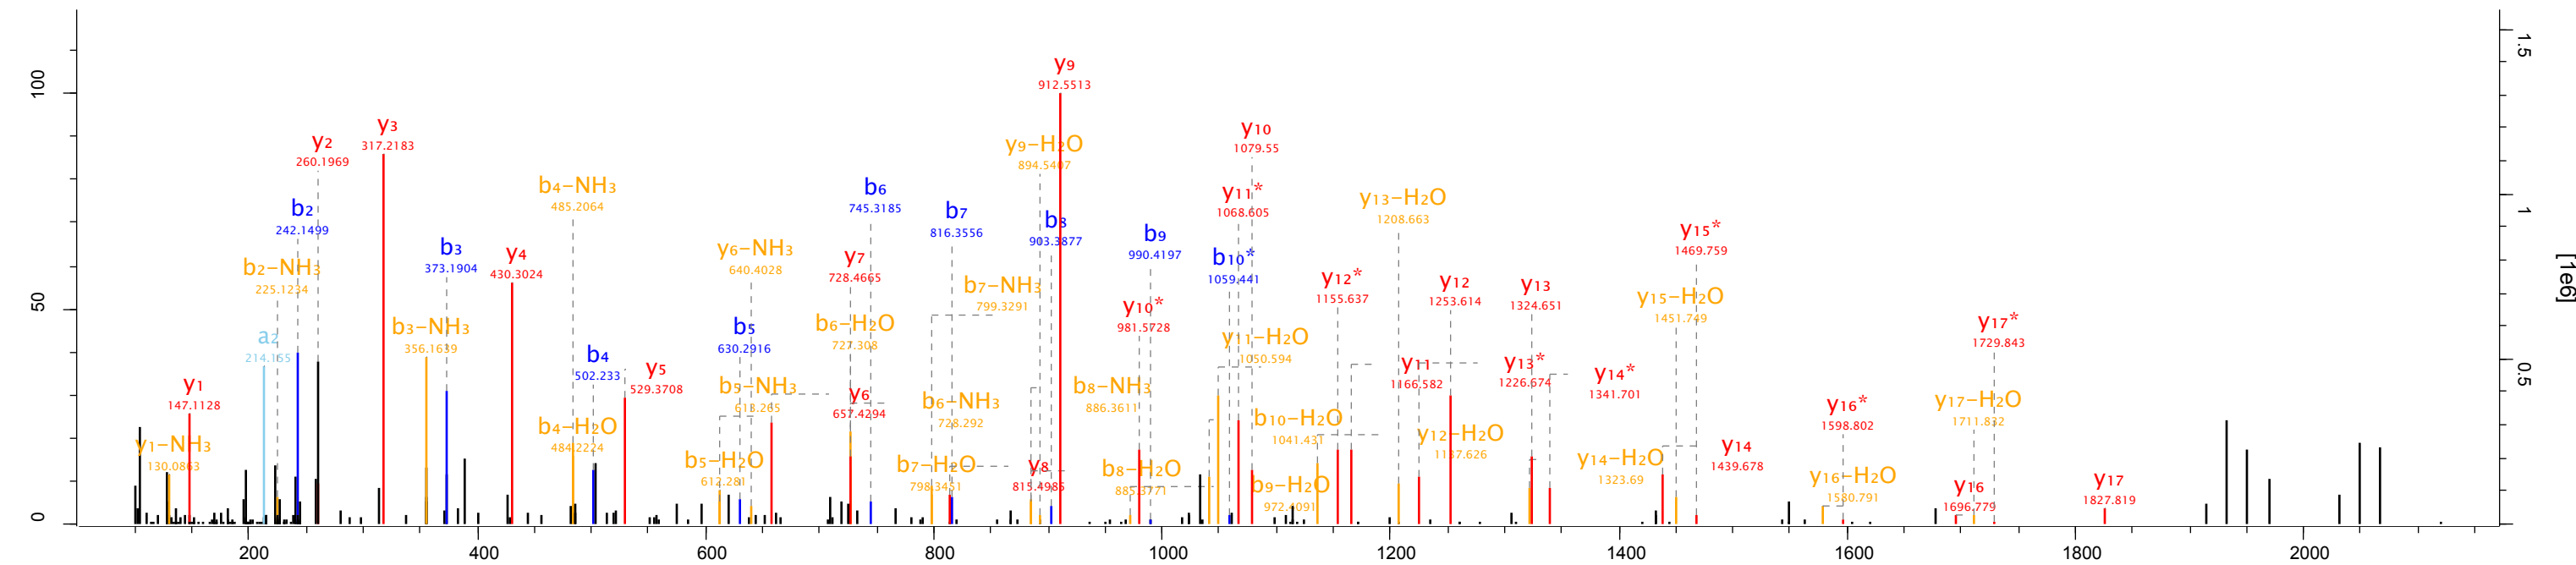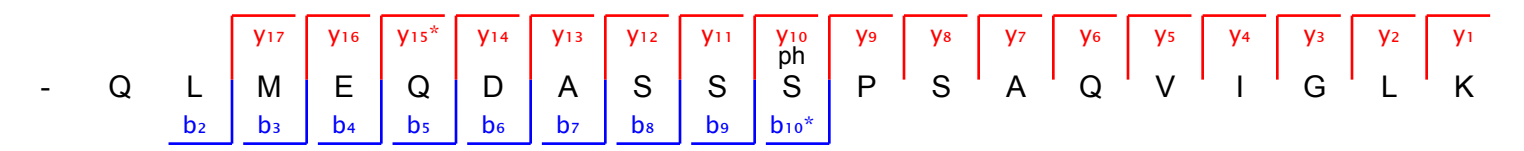

Raw file: 20150814\_A375SR\_Phospho\_BR2\_04  
 Scan: 18626 Method: FTMS; HCD Score: 108.23 m/z: 757.37 Gene names: ITPR3

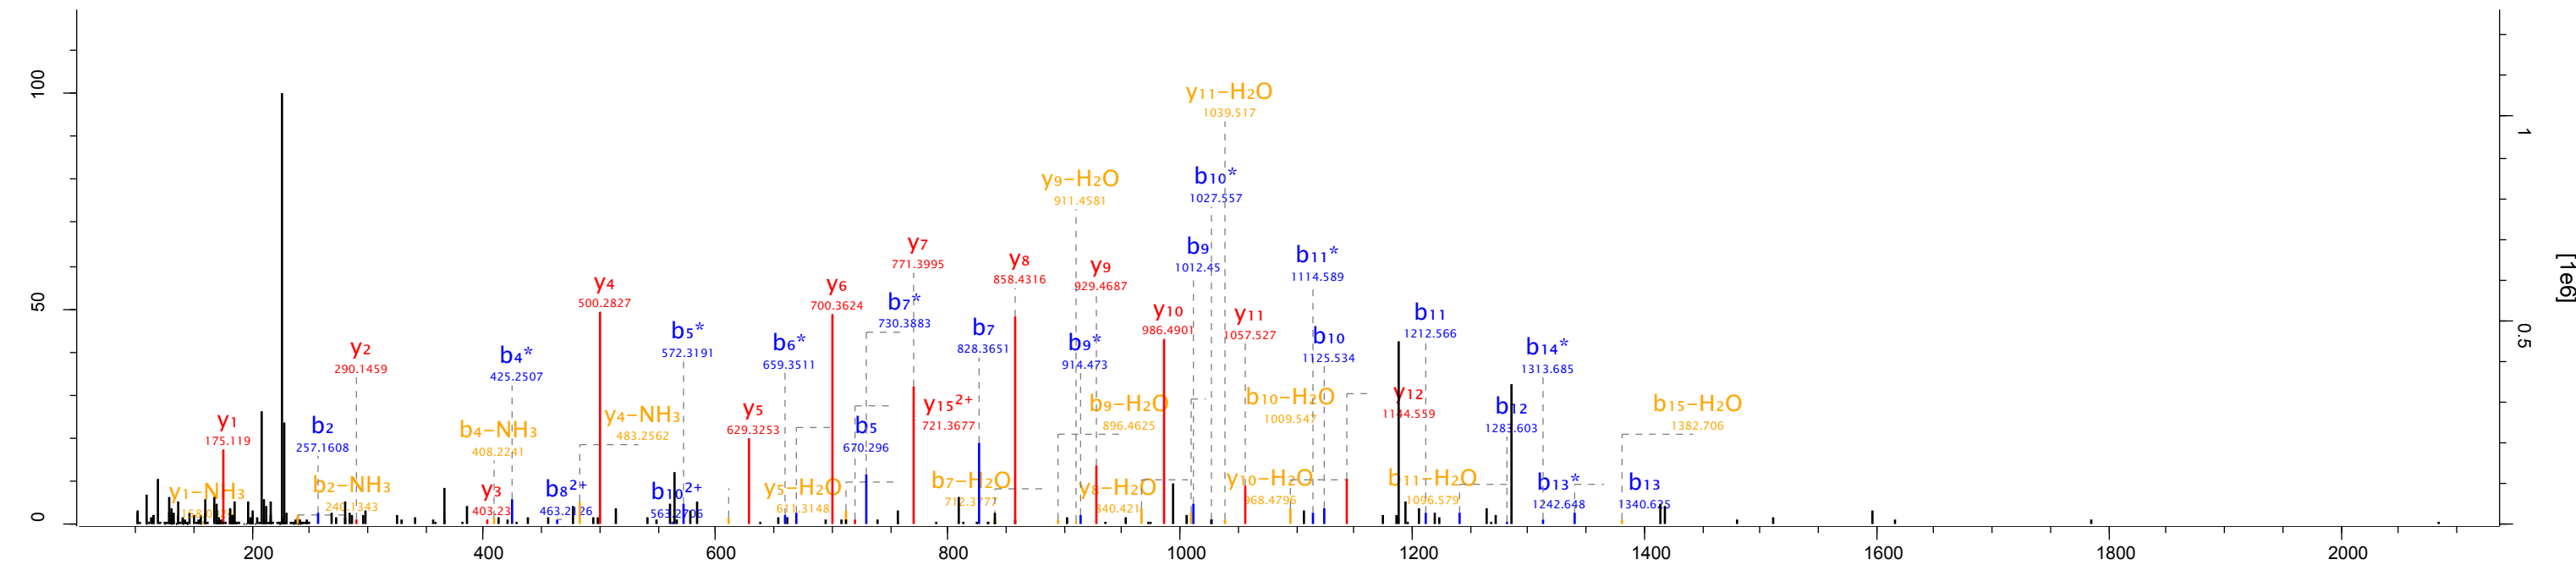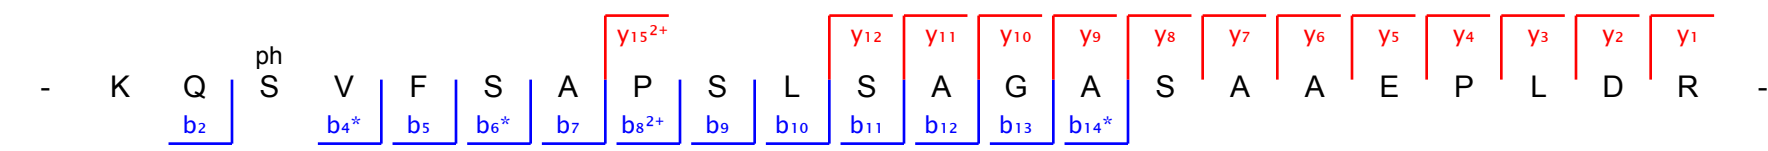

Raw file: 20150814\_A375SR\_Phospho\_BR2\_04  
 Scan: 18856 Method: FTMS; HCD Score: 80.39 m/z: 668.35 Gene names: ANKHD1

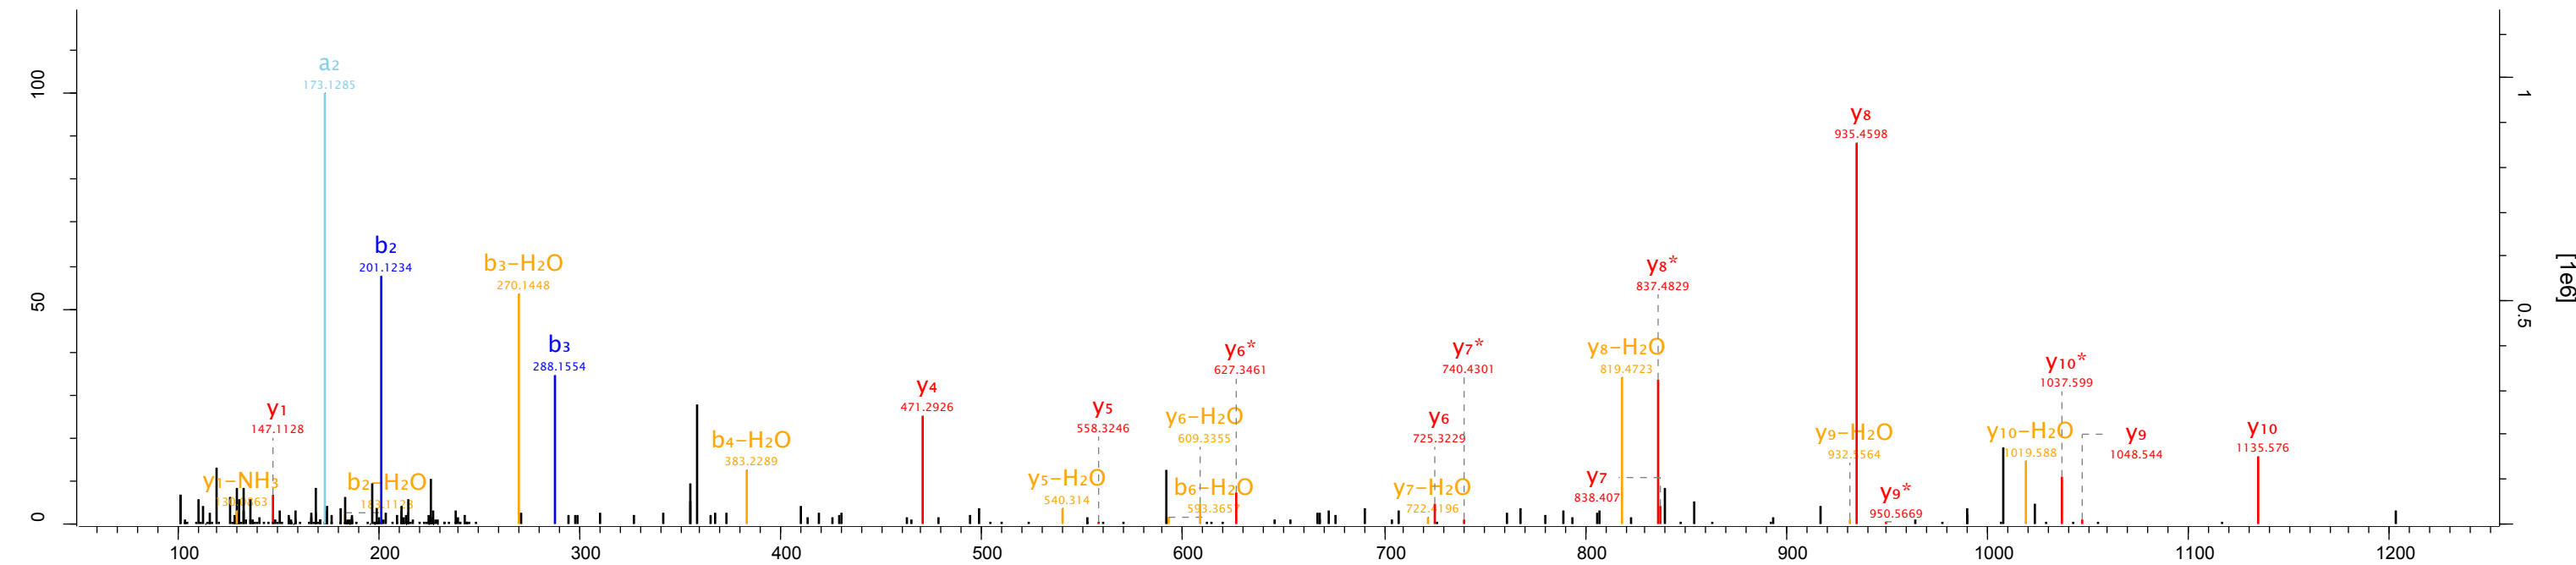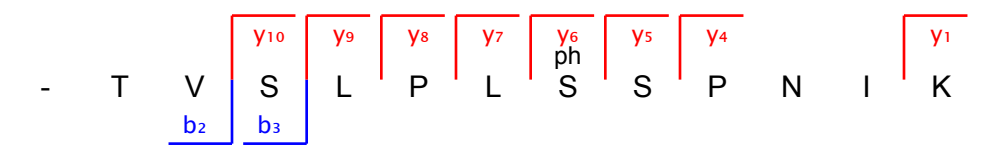

Raw file: 20150814\_A375SR\_Phospho\_BR2\_04  
 Scan: 19176 Method: FTMS; HCD Score: 145.81 m/z: 576.28 Gene names: AHNAK2

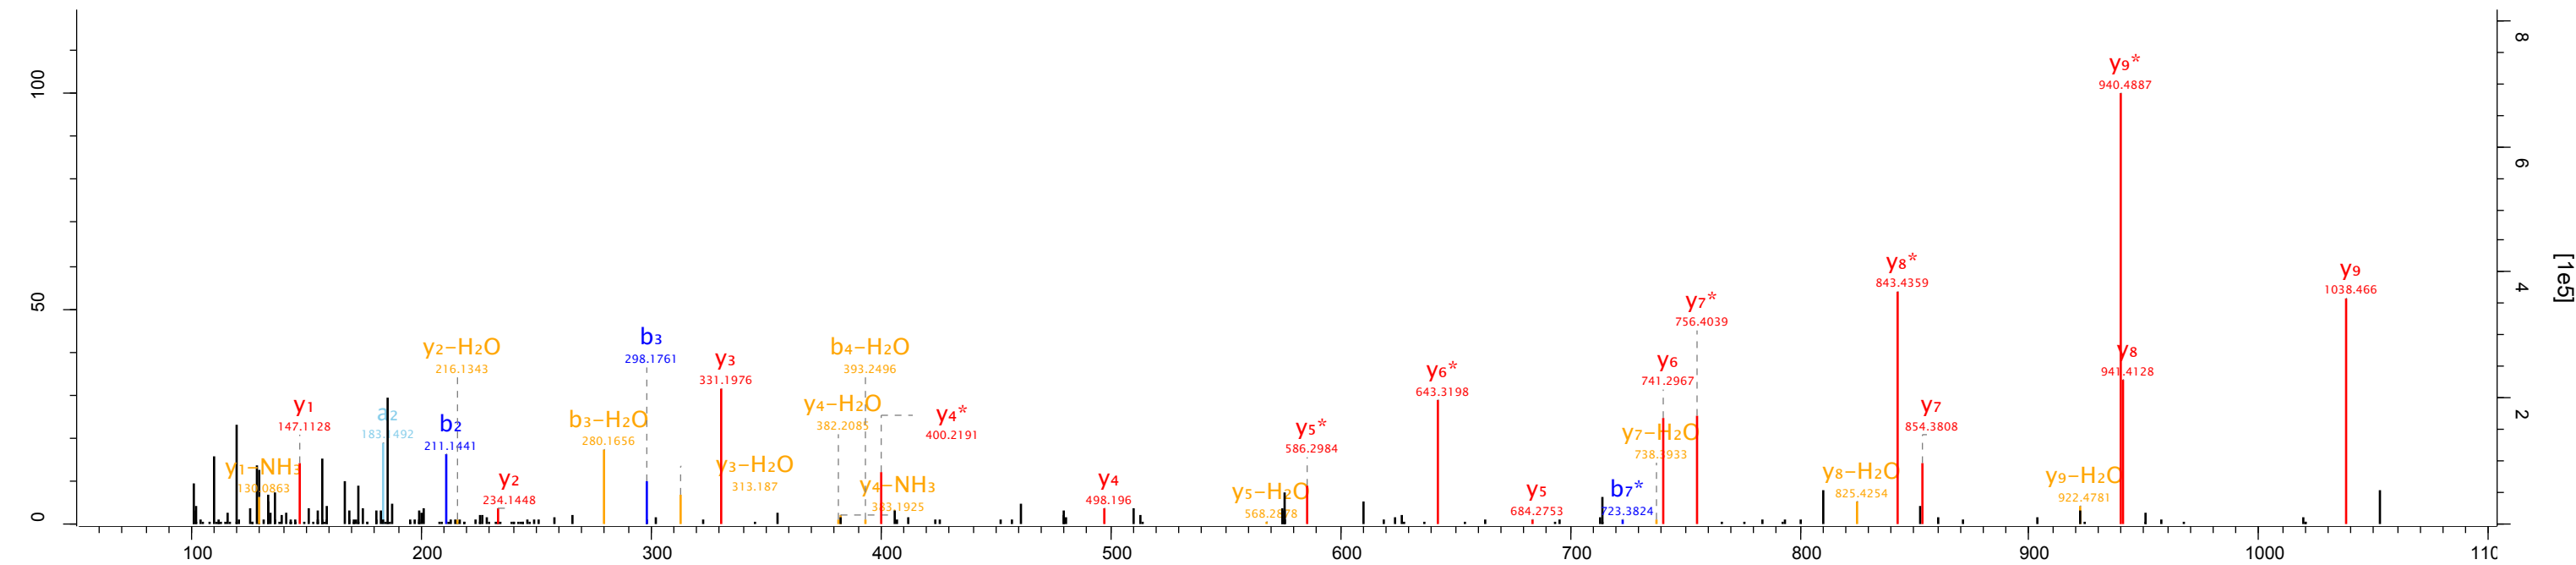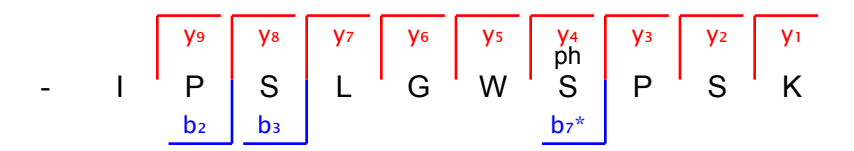

Raw file 20150814\_A375SR\_Phospho\_BR2\_04 Scan 19386 Method FTMS; HCD Score 53.19 m/z 721.85 Gene names SLC7A6OS

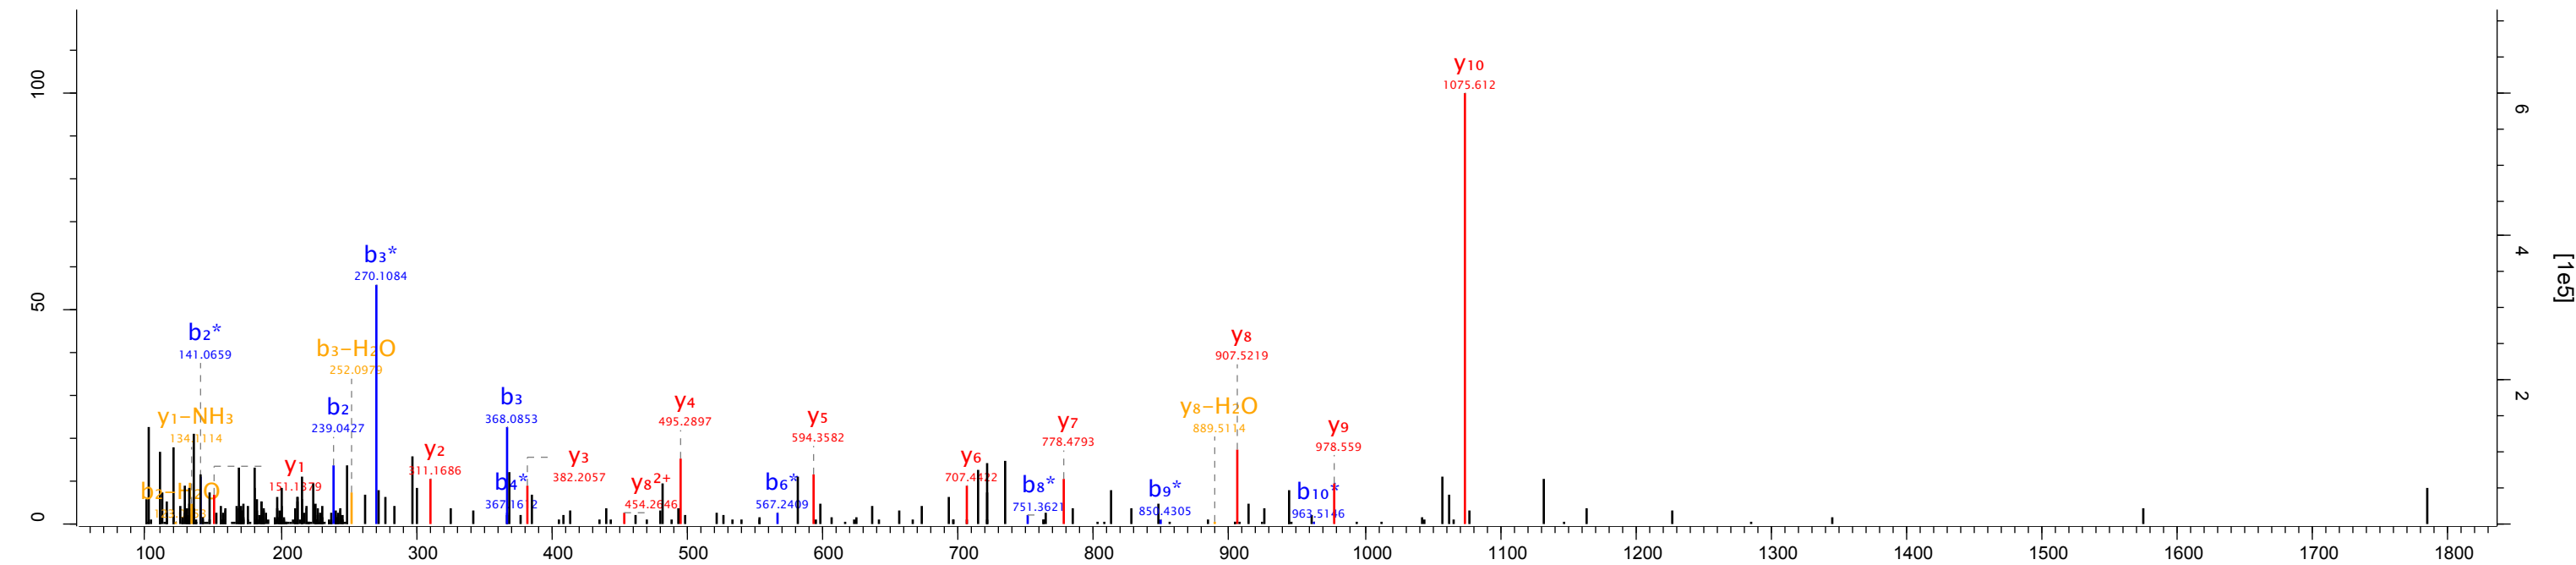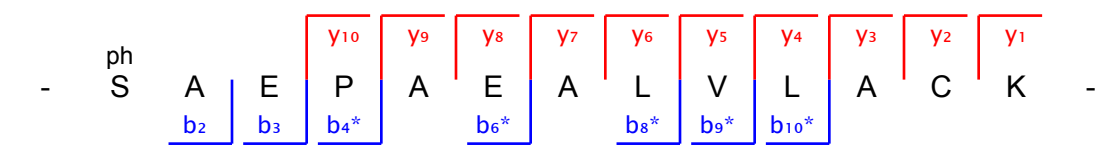

Raw file 20150814\_A375SR\_Phospho\_BR2\_04 Scan 1966 Method FTMS; HCD Score 83.93 m/z 587.25 Gene names HTATSF1

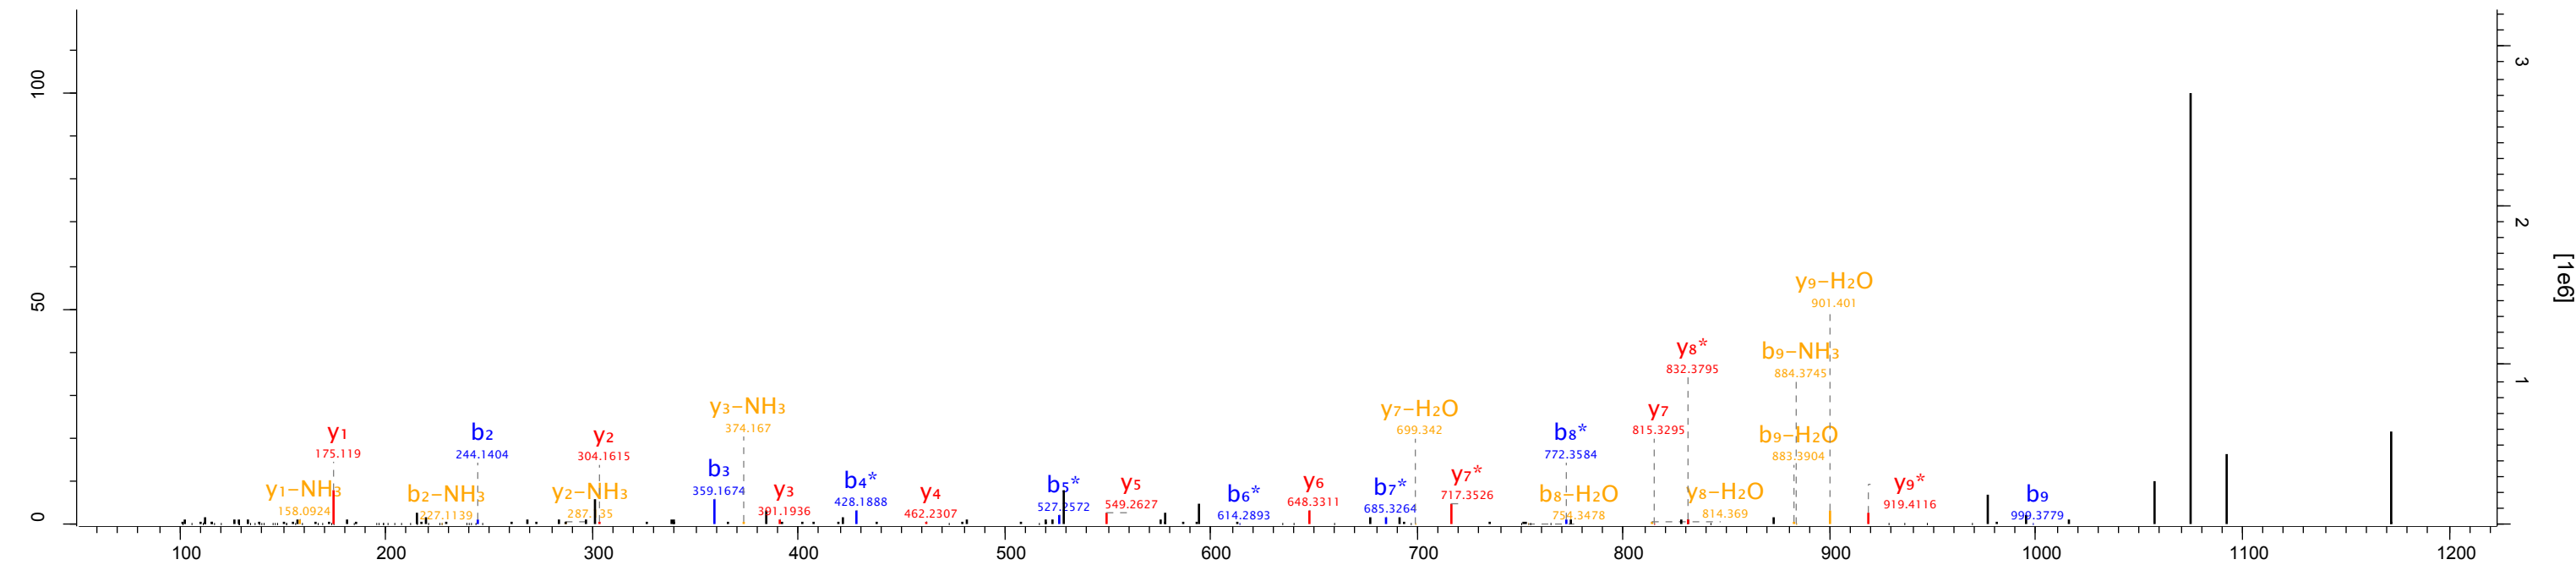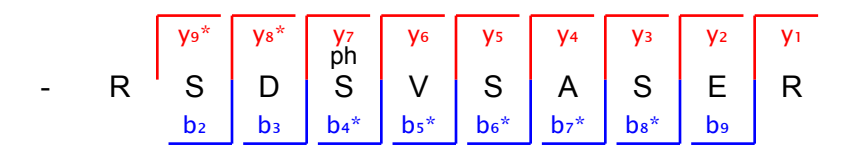



Raw file: 20150814\_A375SR\_Phospho\_BR2\_04  
 Scan: 19946 Method: FTMS; HCD Score: 247.36 m/z: 938.4 Gene names: YBX3;YBX2;YBX1

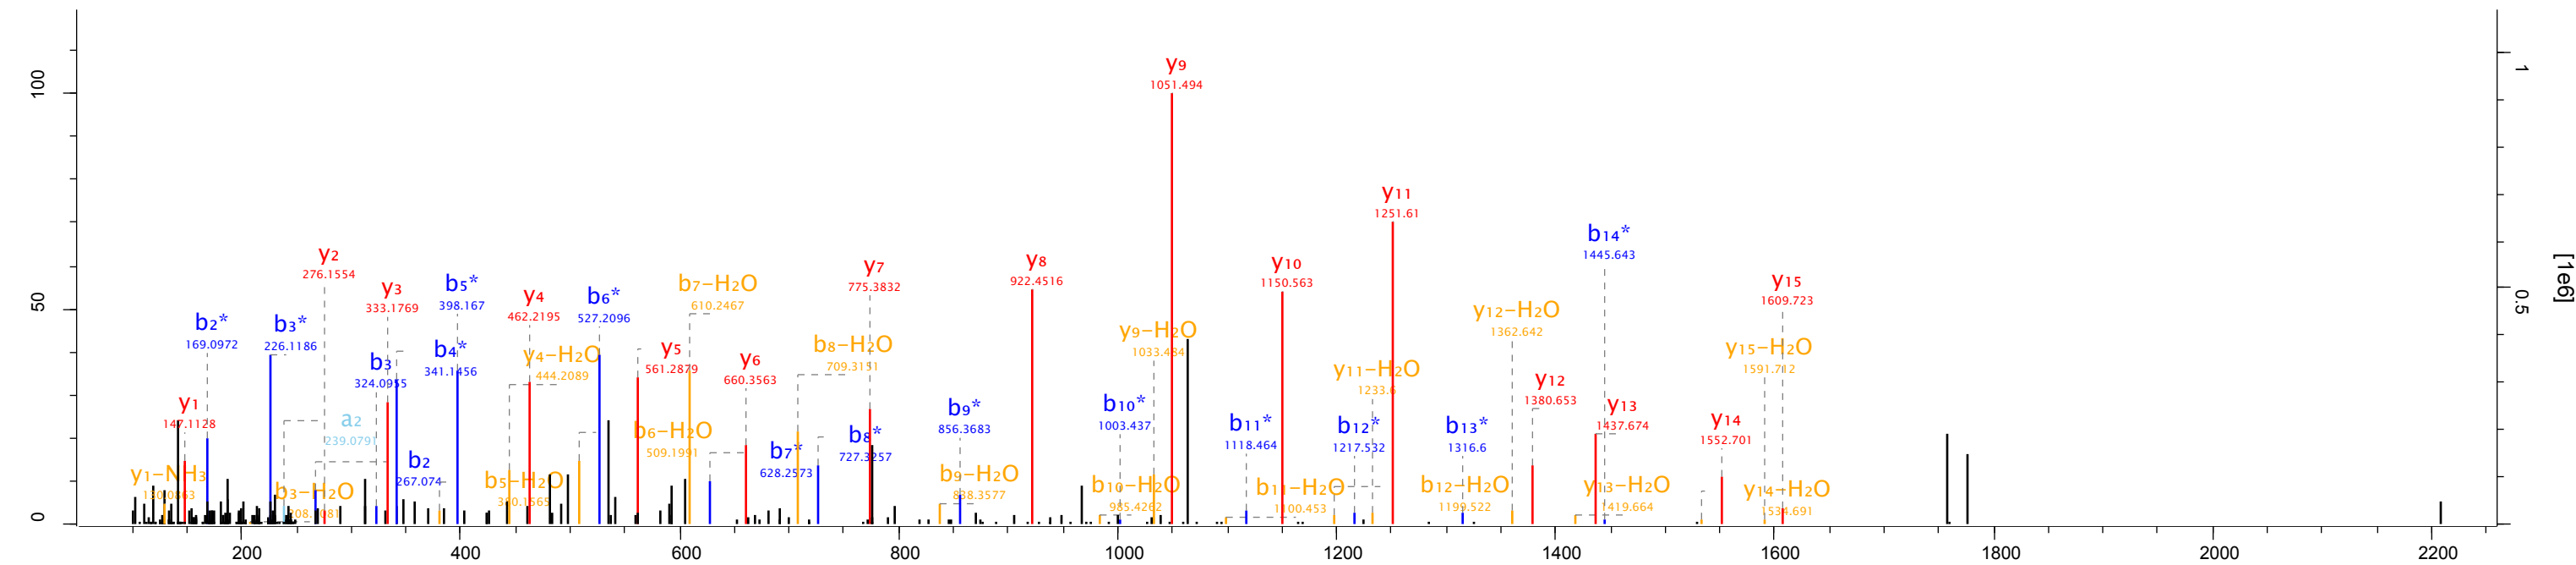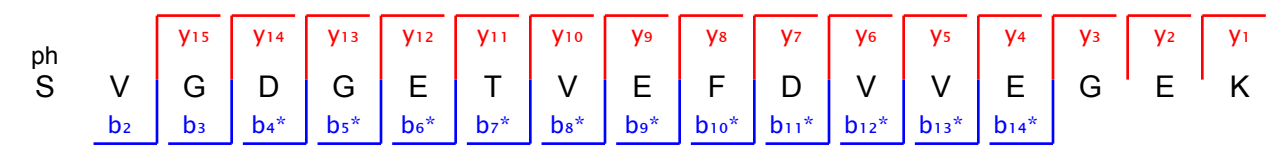

Raw file: 20150814\_A375SR\_Phospho\_BR2\_04  
 Scan: 20006 Method: FTMS; HCD Score: 304.31 m/z: 1172.06 Gene names: FAM208A

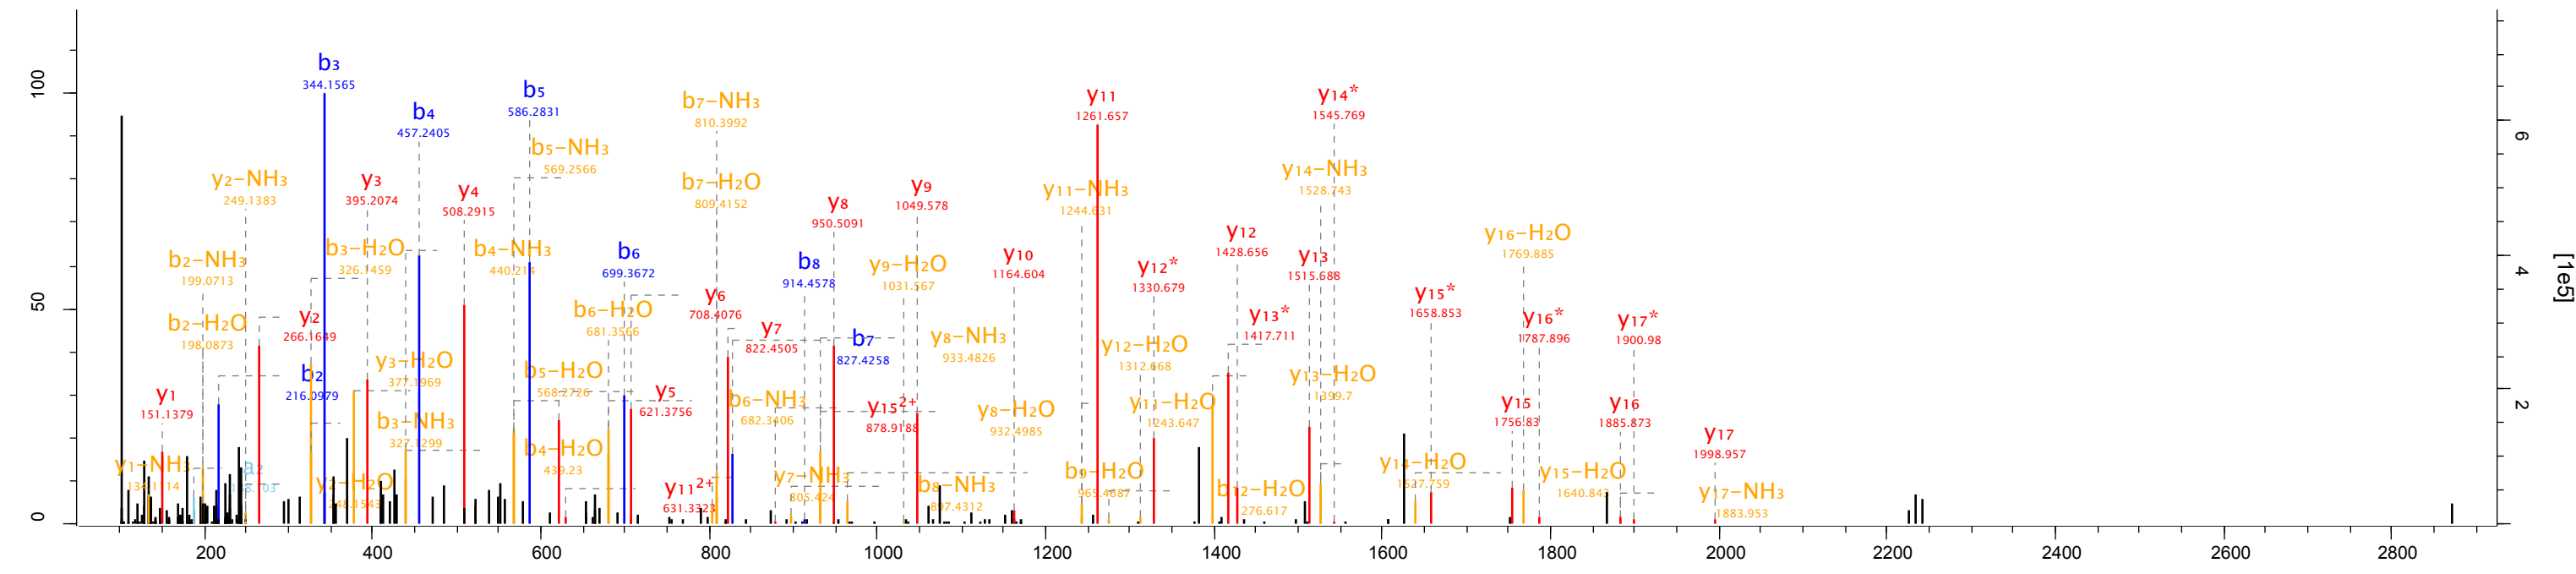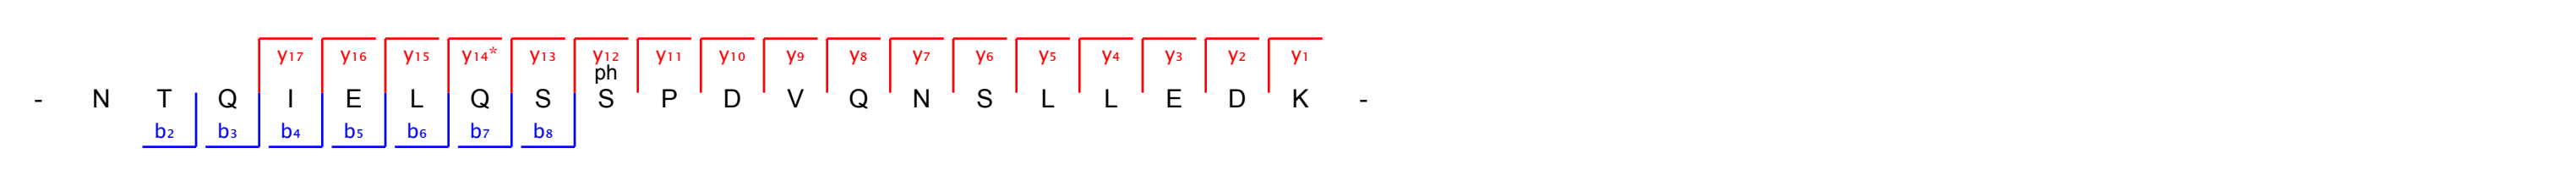

Raw file: 20150814\_A375SR\_Phospho\_BR2\_04  
 Scan: 20666 Method: FTMS; HCD Score: 50.49 m/z: 940.79 Gene names: AMOT

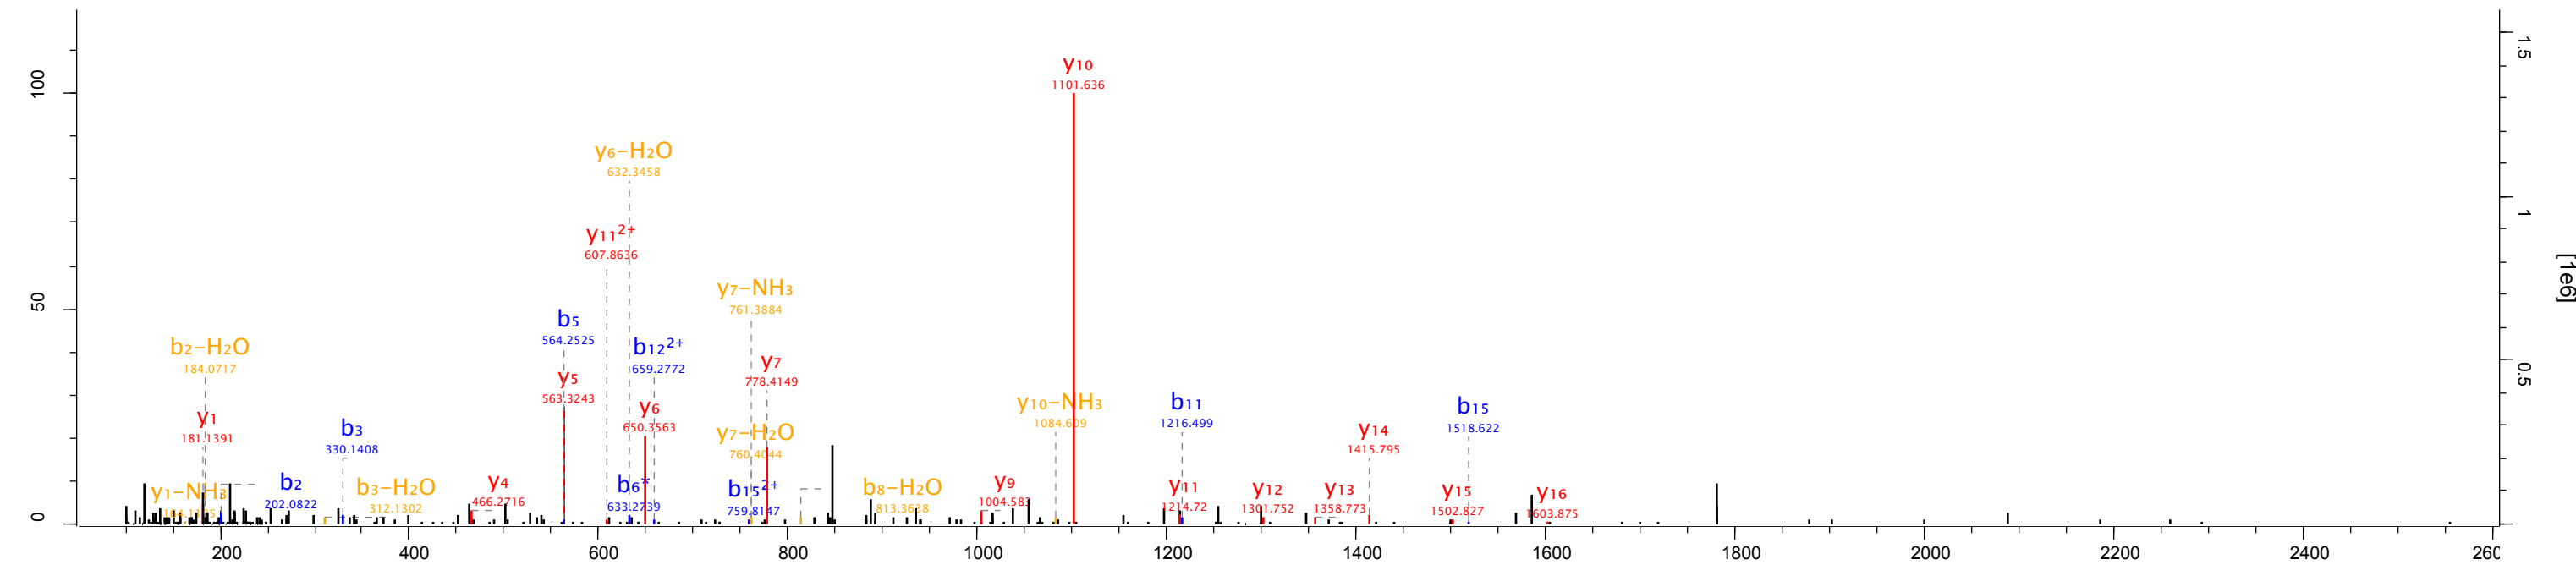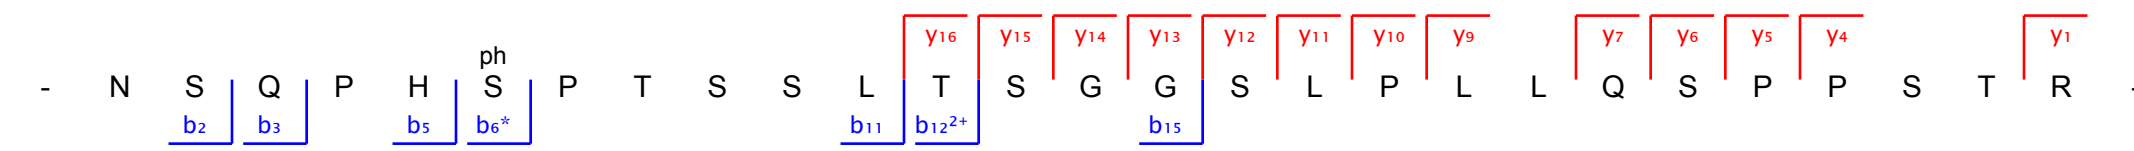

Raw file: 20150814\_A375SR\_Phospho\_BR2\_04  
 Scan: 20726 Method: FTMS; HCD Score: 102.4 m/z: 873.43 Gene names: PHACTR4

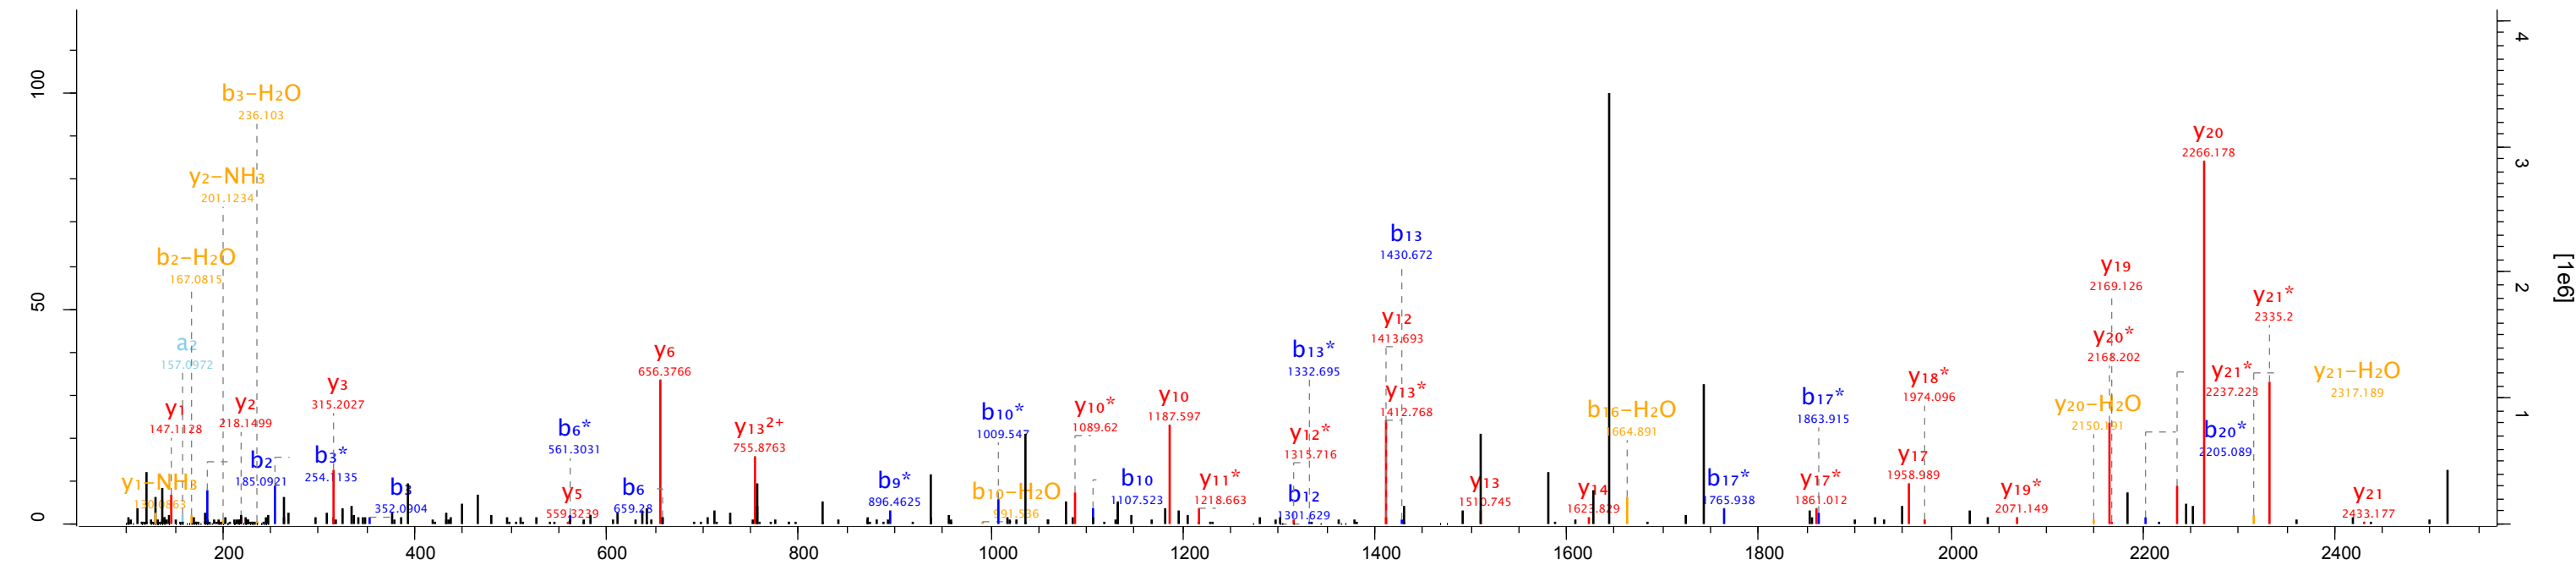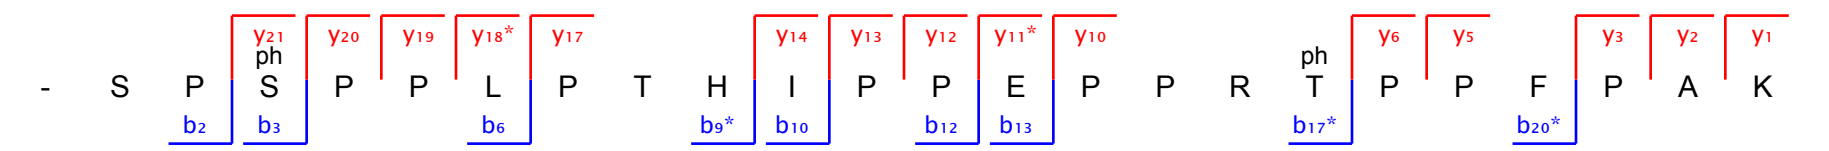

Raw file: 20150814\_A375SR\_Phospho\_BR2\_04  
 Scan: 20786 Method: FTMS; HCD Score: 178.77 m/z: 989.51 Gene names: PLEKHA5

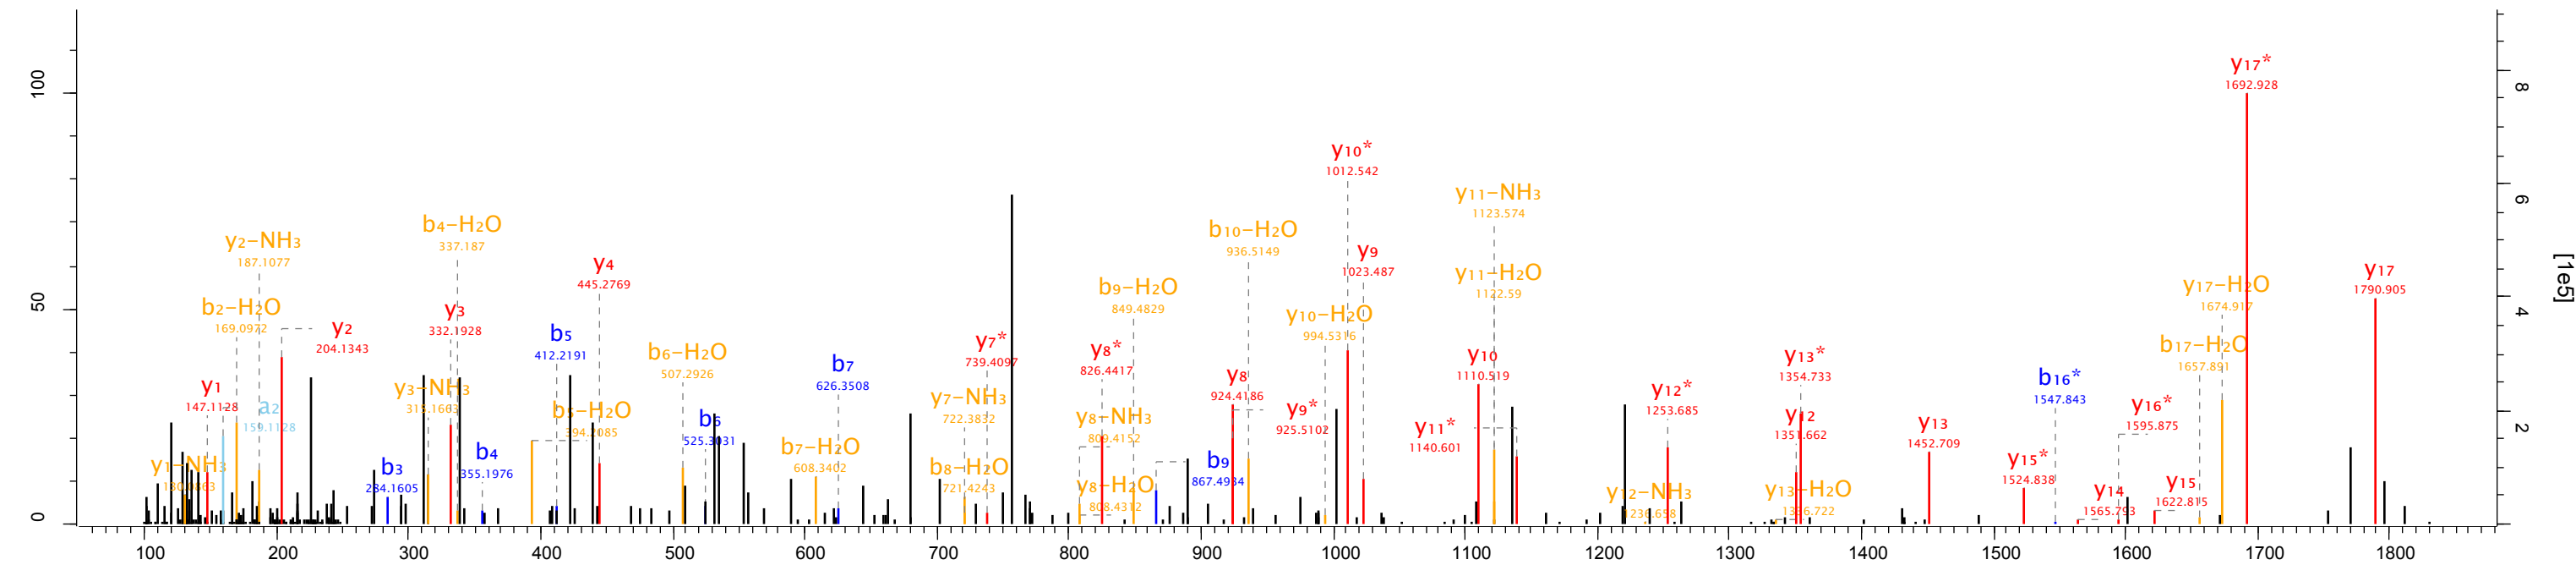

Sequence: - S V P A G L T L Q S V S P Q ph S L Q G K -

Fragmentation sites (b ions): a2, b3, b4, b5, b6, b7, b9, b16\*

Fragmentation sites (y ions): y1, y2, y3, y4, y7, y8, y9, y10, y11, y12, y13, y14, y15, y16, y17

Raw file: 20150814\_A375SR\_Phospho\_BR2\_04  
 Scan: 20996 Method: FTMS; HCD Score: 169.67 m/z: 844.36 Gene names: FBXO4

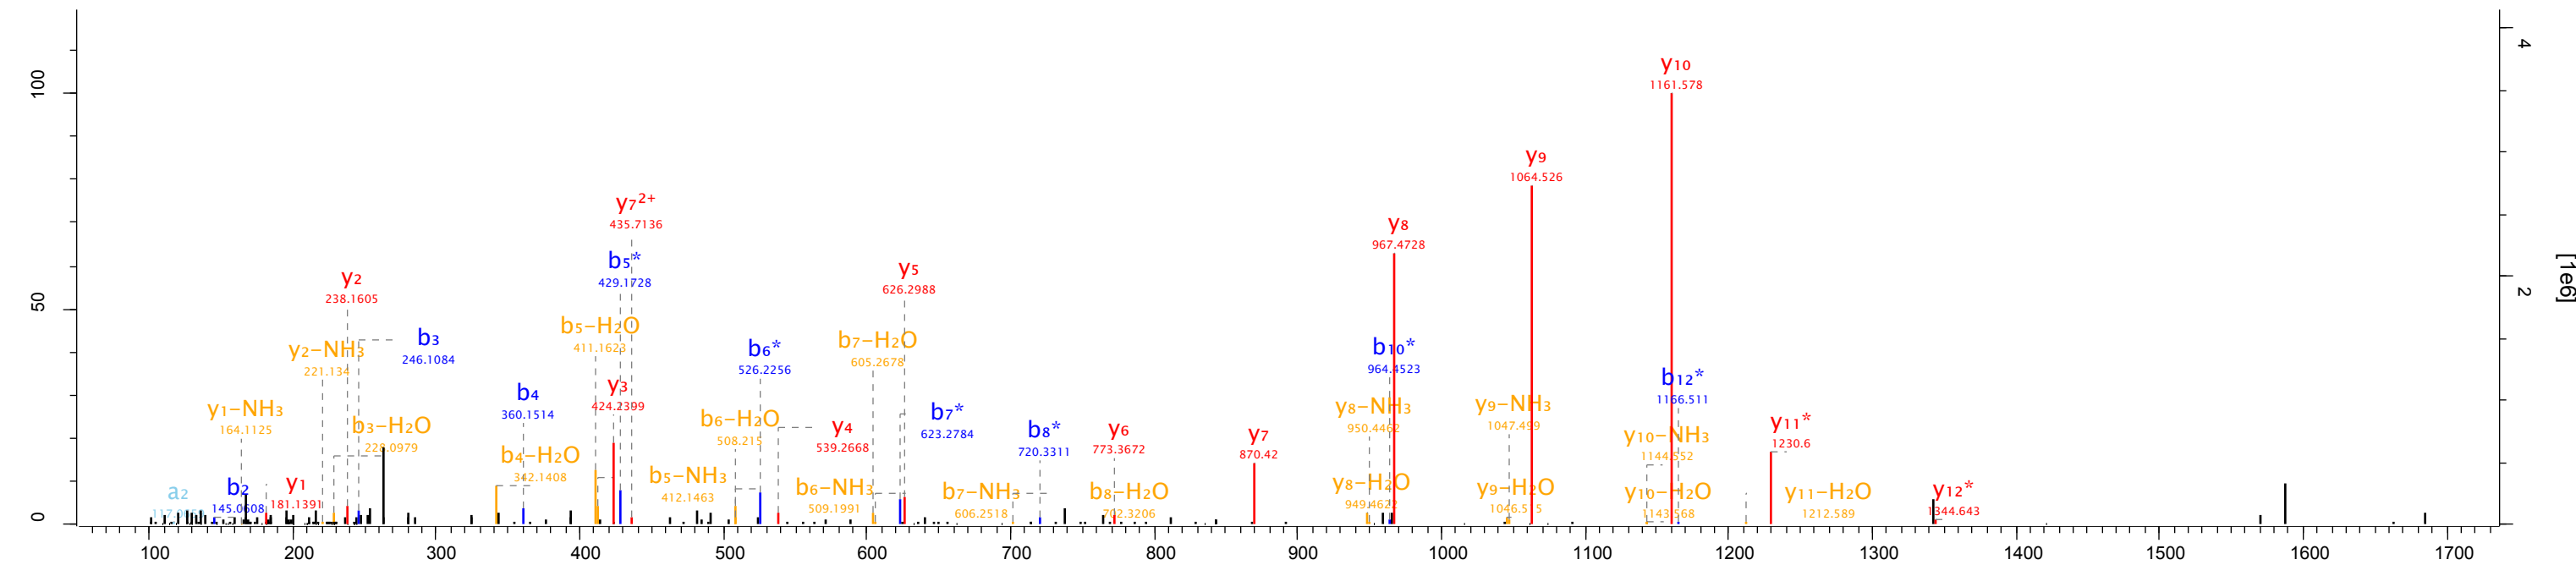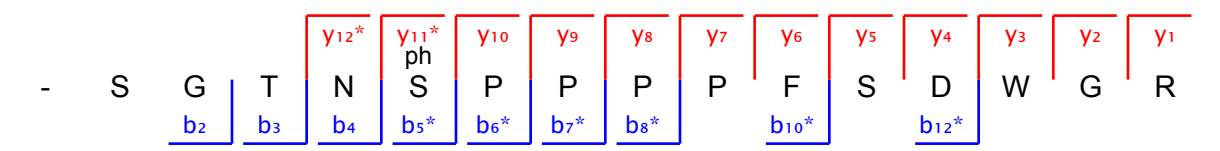

Raw file 20150814\_A375SR\_Phospho\_BR2\_04 Scan 21106 Method FTMS; HCD Score 248.45 m/z 1051.45 Gene names SYNRG

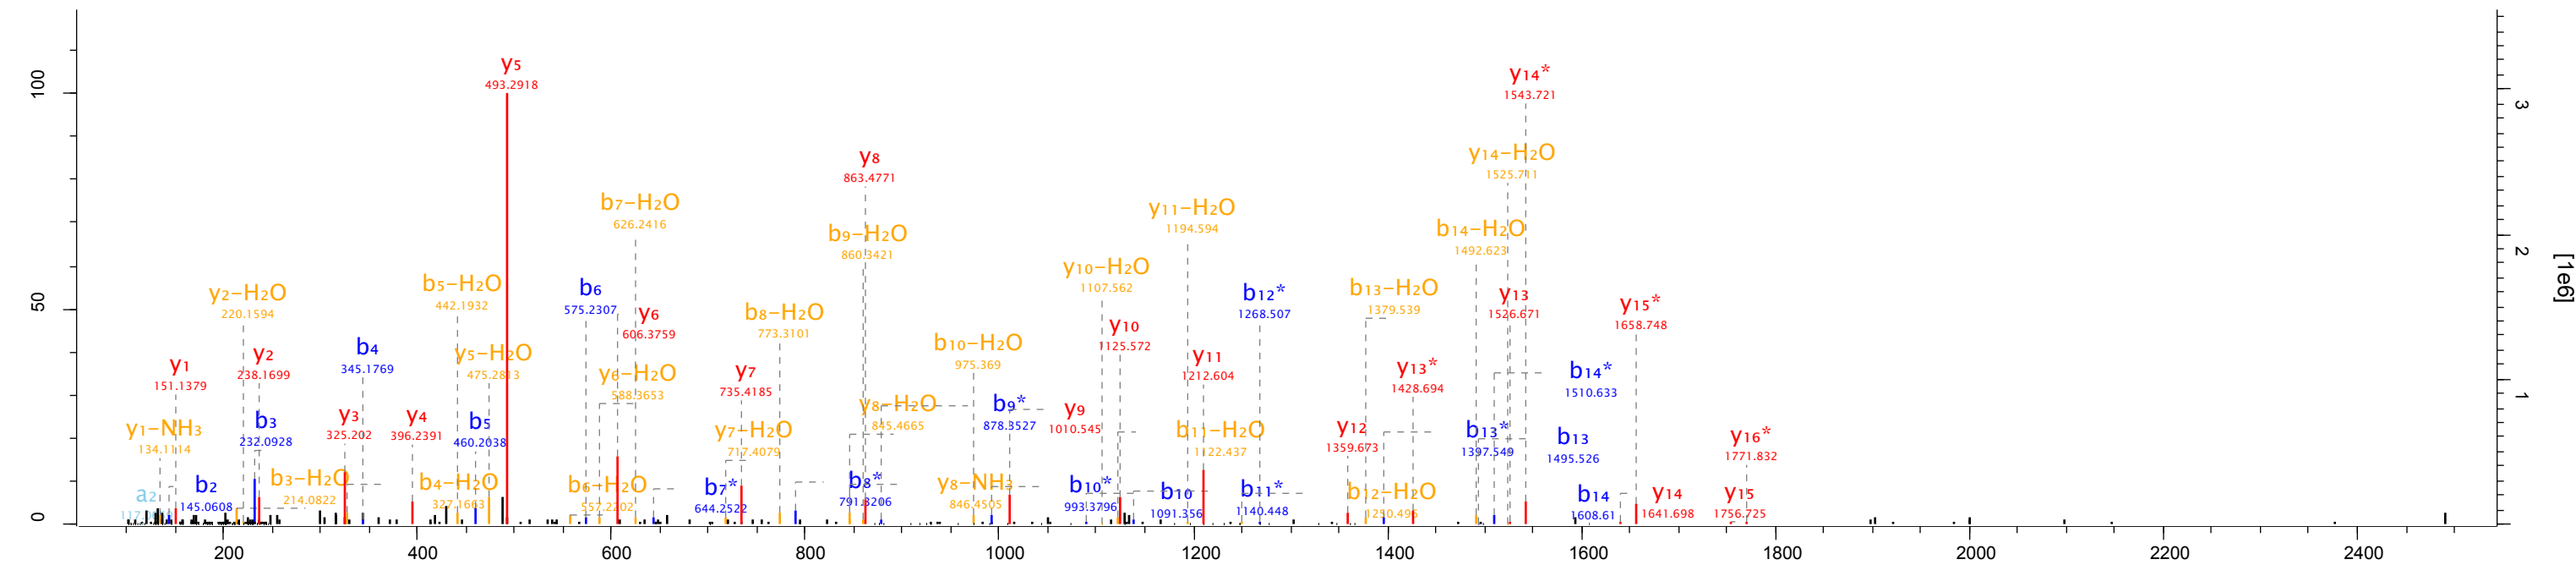

- S G S L D D S F S D F Q E L P A S S K -

b<sub>2</sub>
b<sub>3</sub>
y<sub>16</sub>\*
y<sub>15</sub>
y<sub>14</sub>
y<sub>13</sub>ph
y<sub>12</sub>
y<sub>11</sub>
y<sub>10</sub>
y<sub>9</sub>
y<sub>8</sub>
y<sub>7</sub>
y<sub>6</sub>
y<sub>5</sub>
y<sub>4</sub>
y<sub>3</sub>
y<sub>2</sub>
y<sub>1</sub>





Raw file: 20150814\_A375SR\_Phospho\_BR2\_04  
 Scan: 21356 Method: FTMS; HCD Score: 66.82 m/z: 1270.17 Gene names: HNRNPC

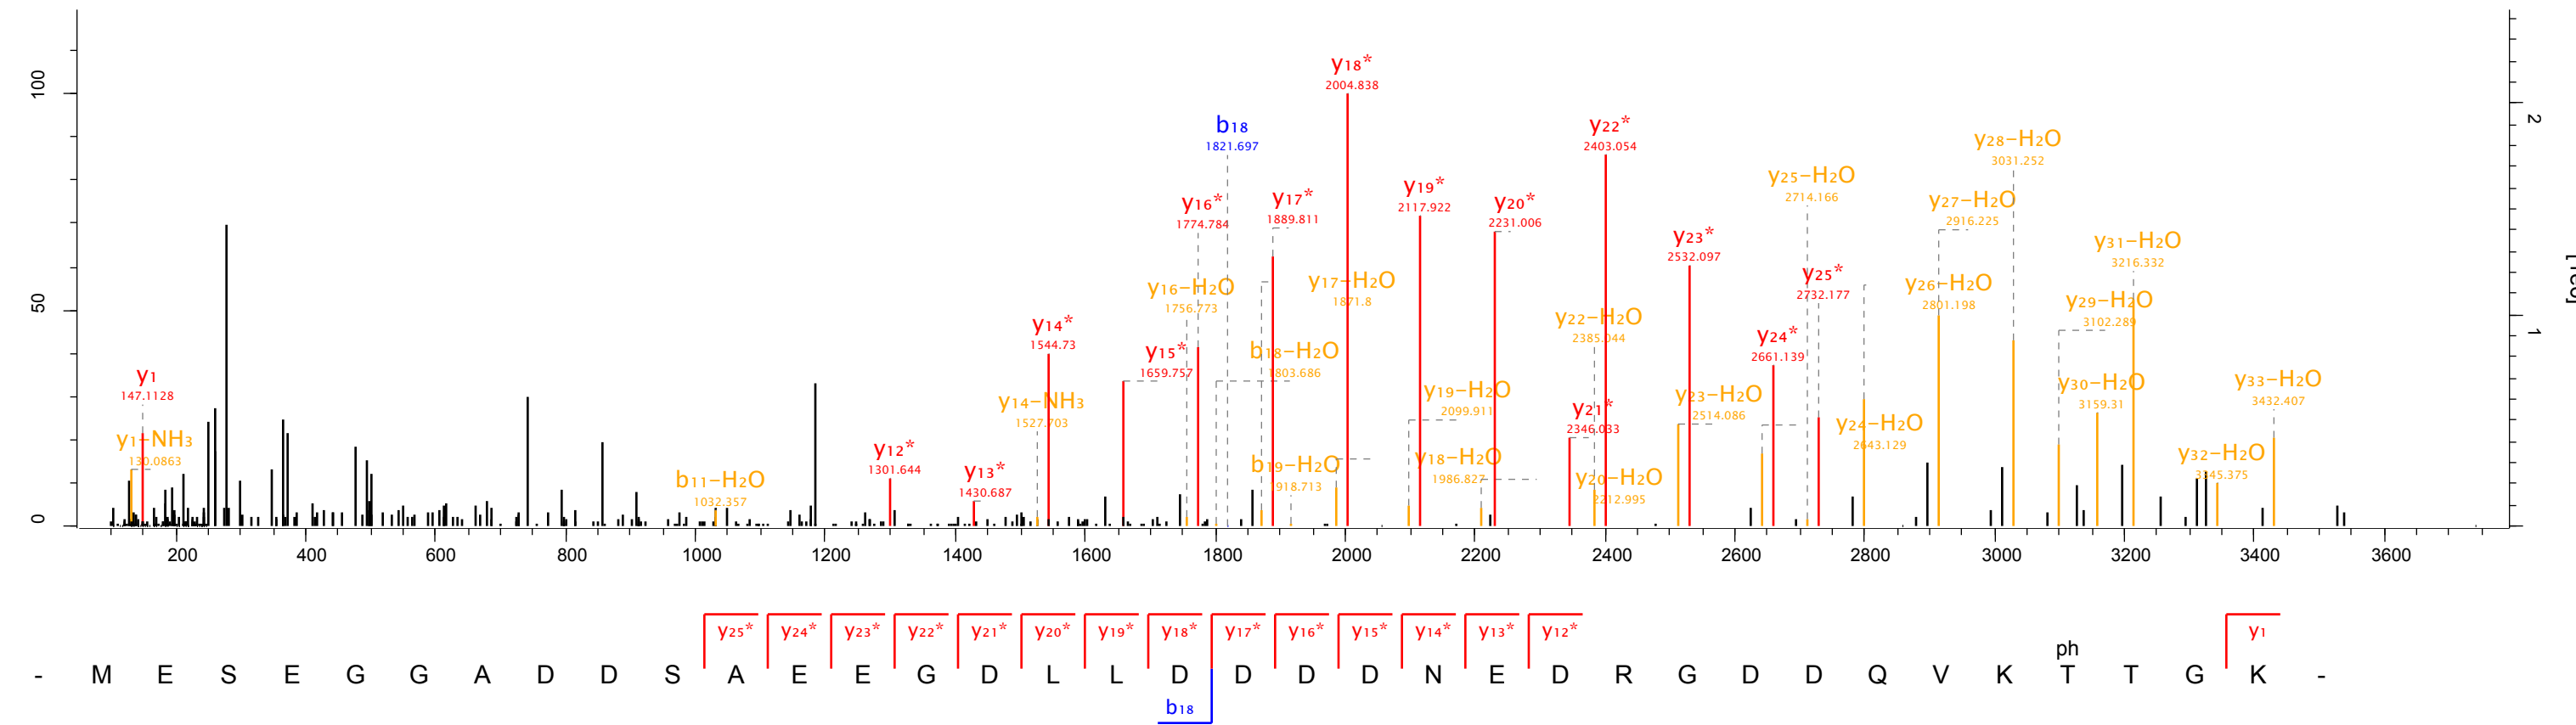

Raw file: 20150814\_A375SR\_Phospho\_BR2\_04  
 Scan: 21466 Method: FTMS; HCD Score: 100.76 m/z: 1128.54 Gene names: CHD4

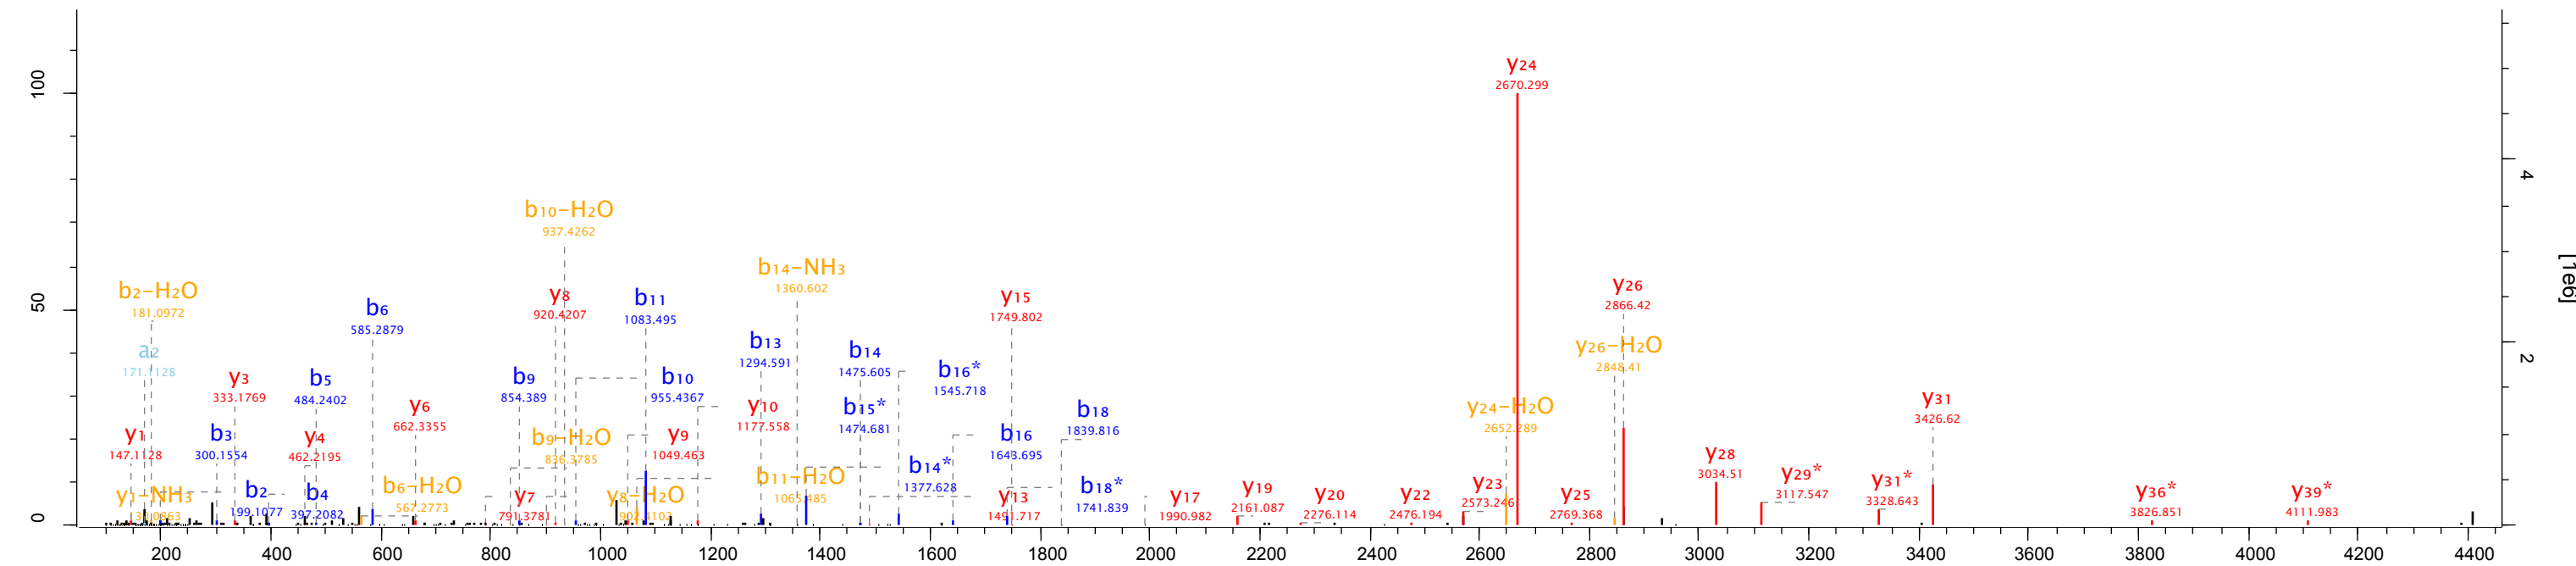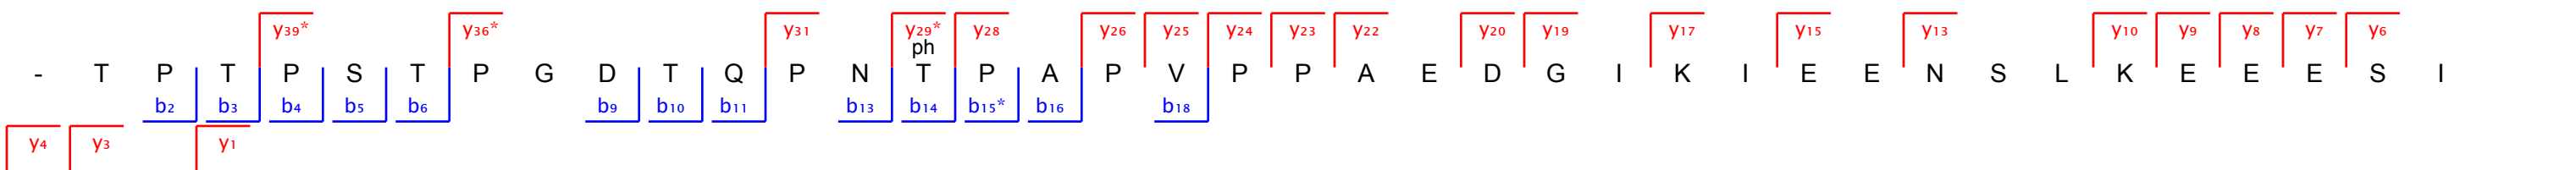

Raw file  
20150814\_A375SR\_Phospho\_BR2\_04

Scan 21806 Method FTMS; HCD Score 219.76 m/z 1029.16 Gene names MAP1B

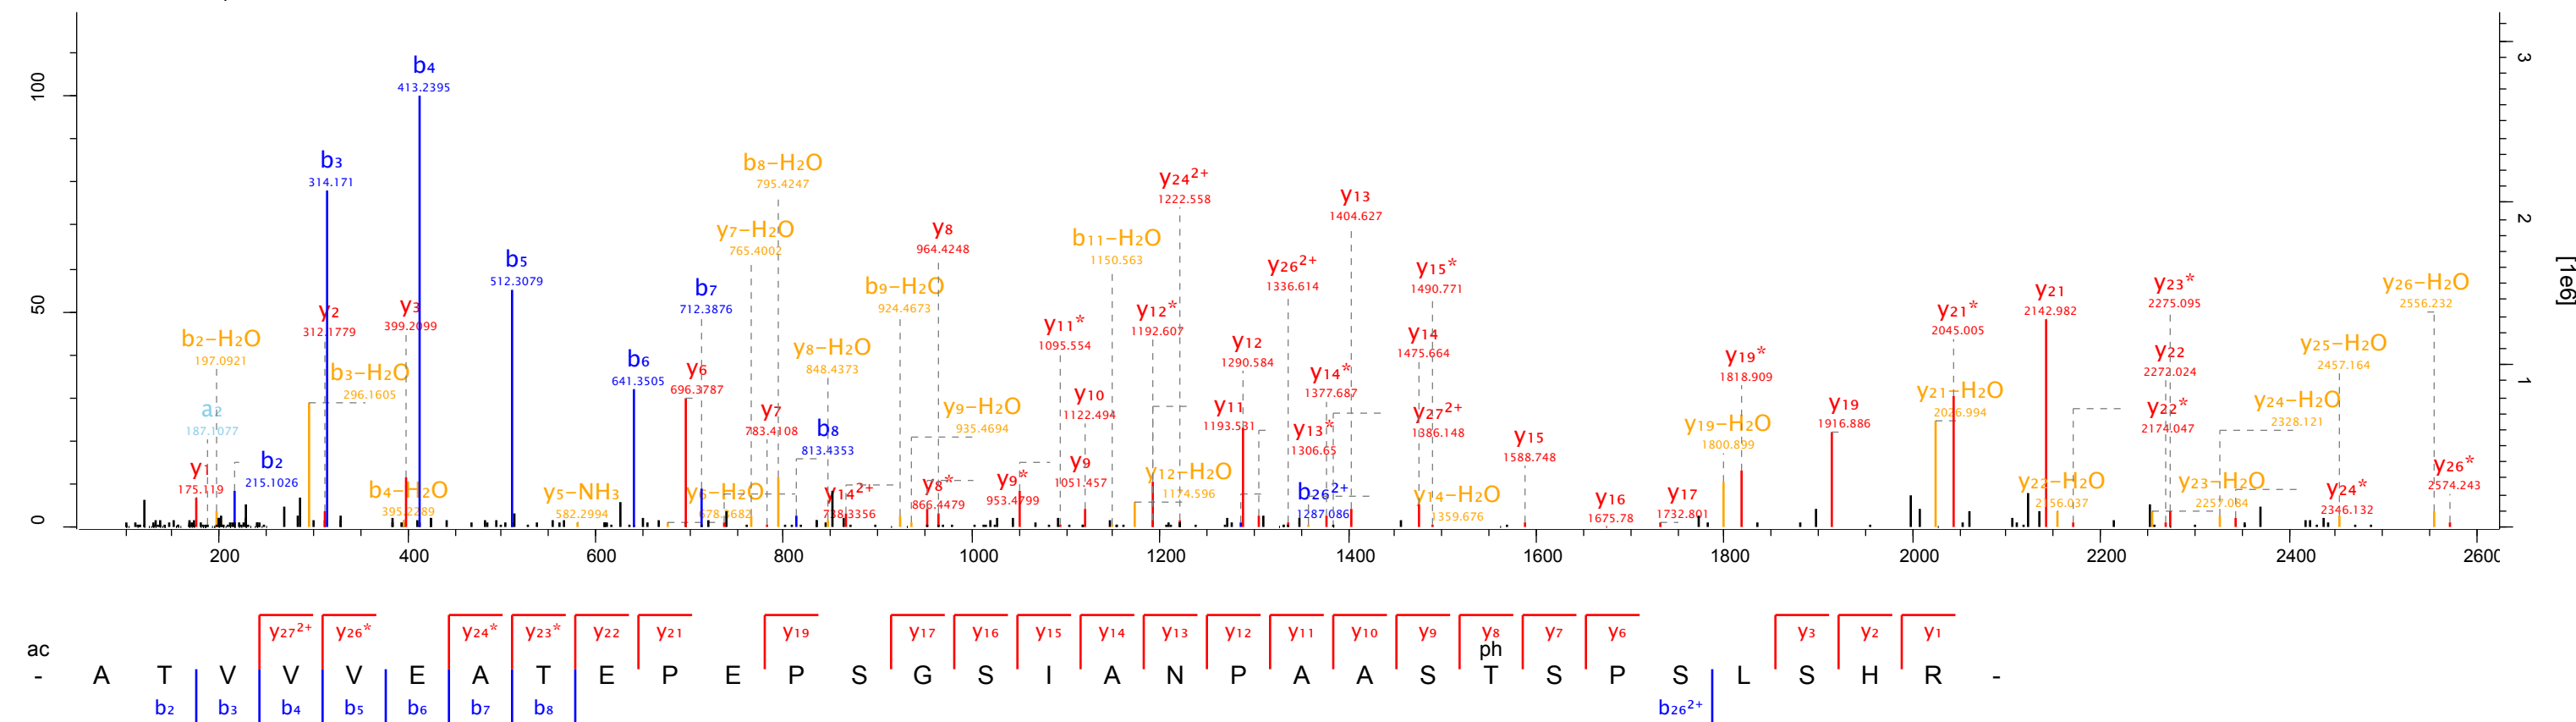

Raw file 20150814\_A375SR\_Phospho\_BR2\_04 Scan 21886 Method FTMS; HCD Score 291.03 m/z 1000.45 Gene names USP16

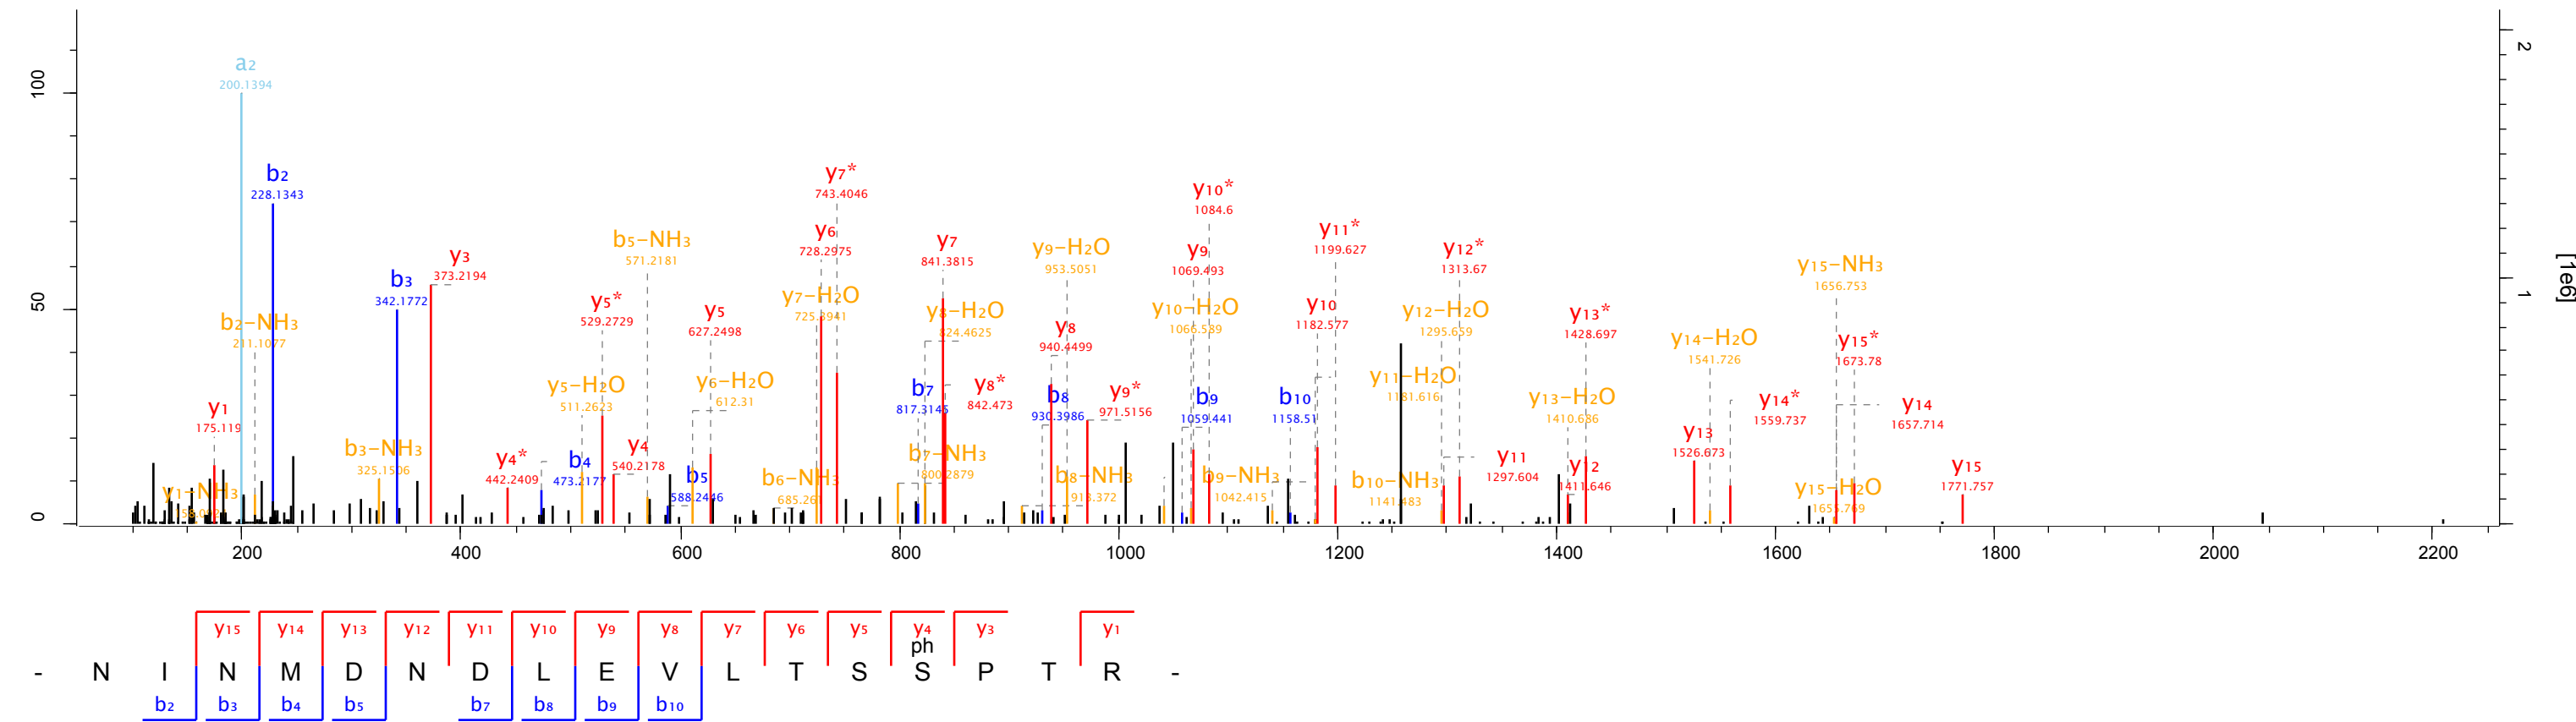

Raw file: 20150814\_A375SR\_Phospho\_BR2\_04  
 Scan: 21996 Method: FTMS; HCD Score: 232.32 m/z: 1190.04 Gene names: AKAP13

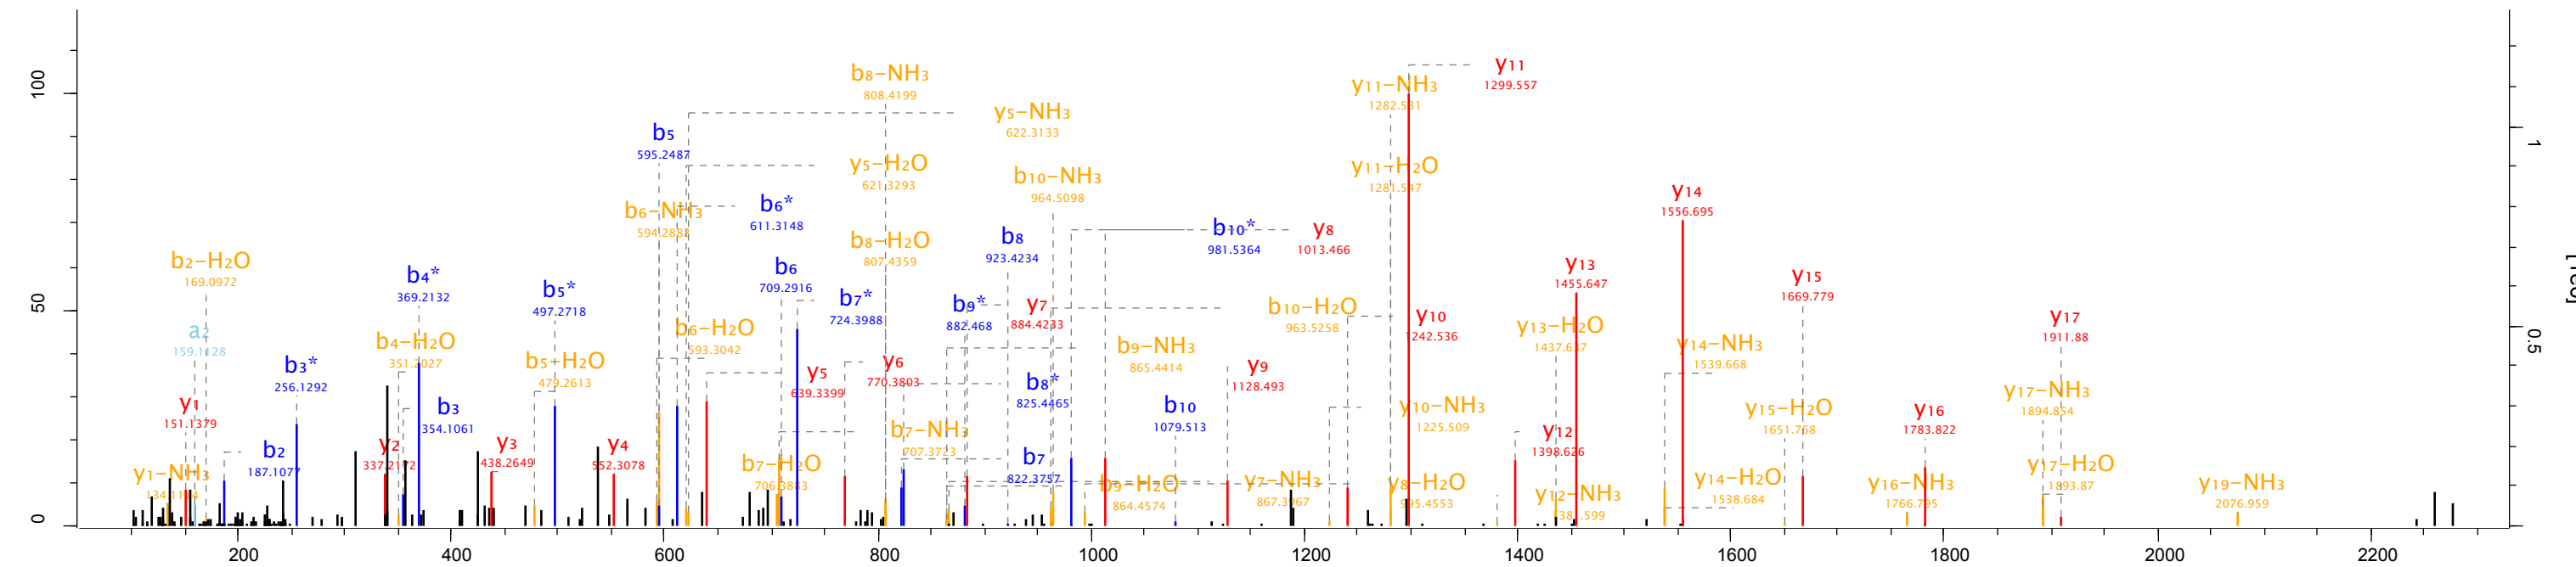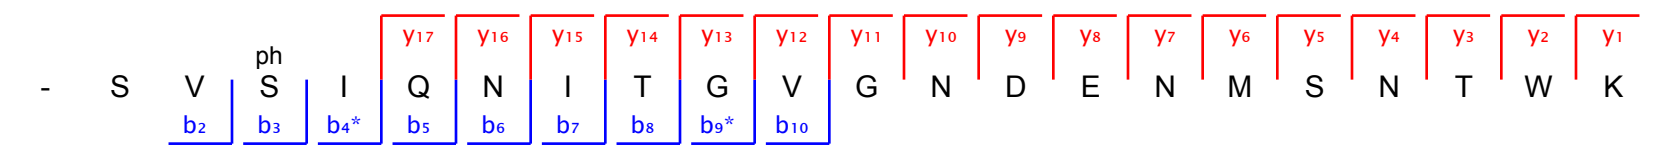

Raw file: 20150814\_A375SR\_Phospho\_BR2\_04  
 Scan: 22156 Method: FTMS; HCD Score: 166.21 m/z: 633.65 Gene names: MYC

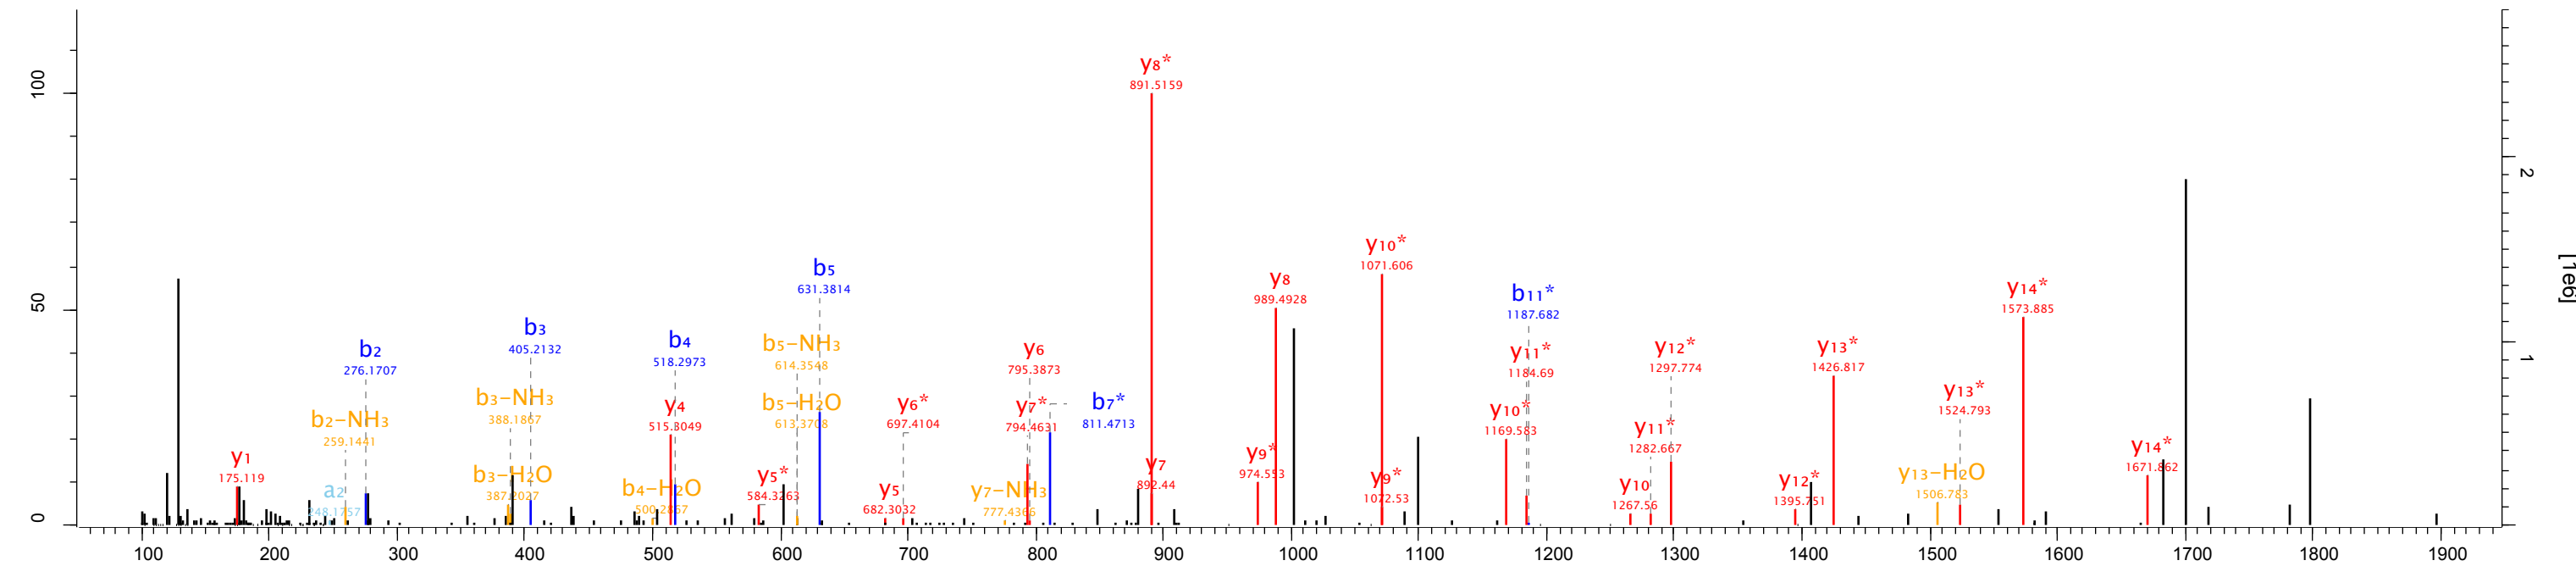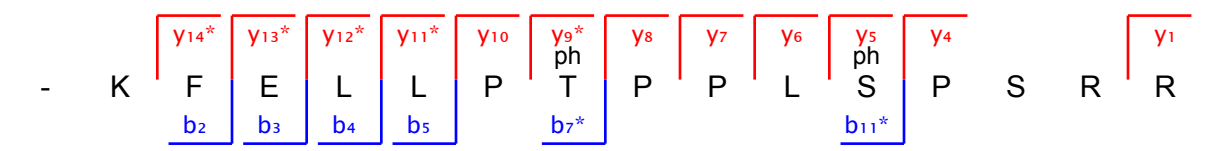

Raw file: 20150814\_A375SR\_Phospho\_BR2\_04  
 Scan: 22306 Method: FTMS; HCD Score: 188.43 m/z: 1021.92 Gene names: DIXDC1

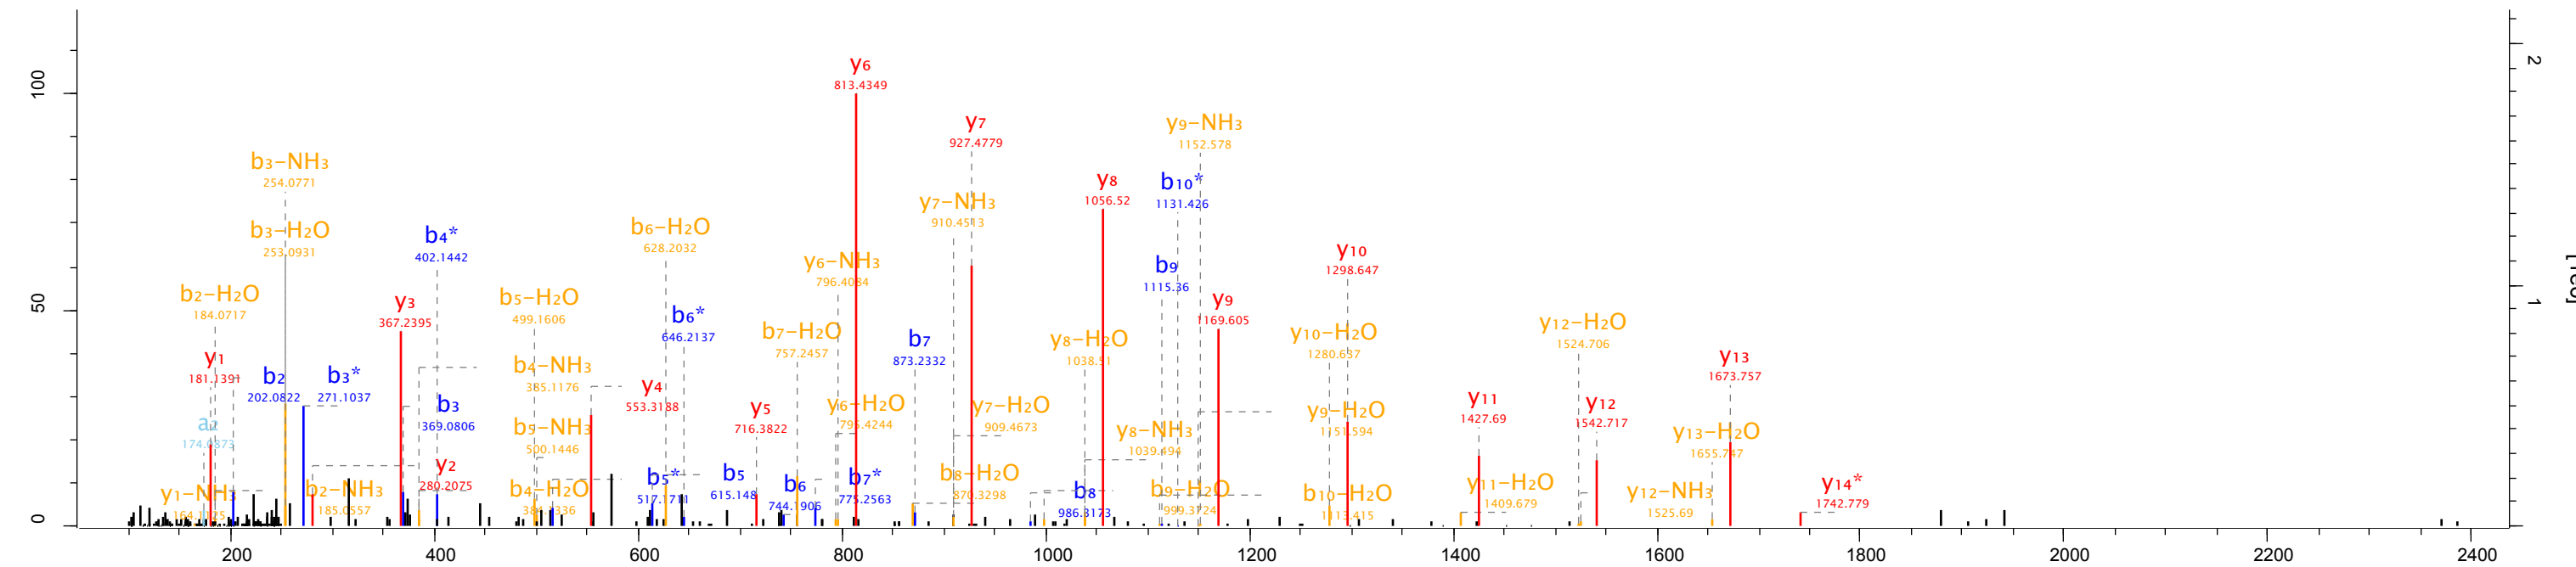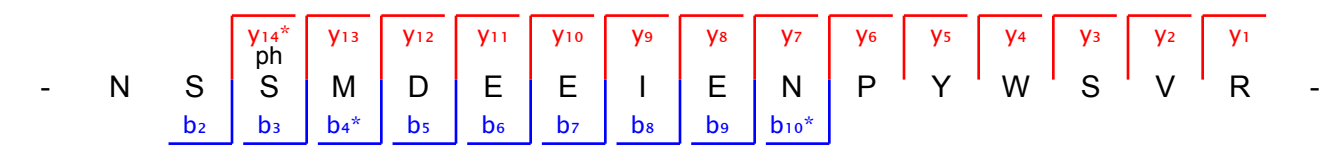

Raw file: 20150814\_A375SR\_Phospho\_BR2\_04  
 Scan: 22476 Method: FTMS; HCD Score: 67.76 m/z: 996.94 Gene names: PRKAB2

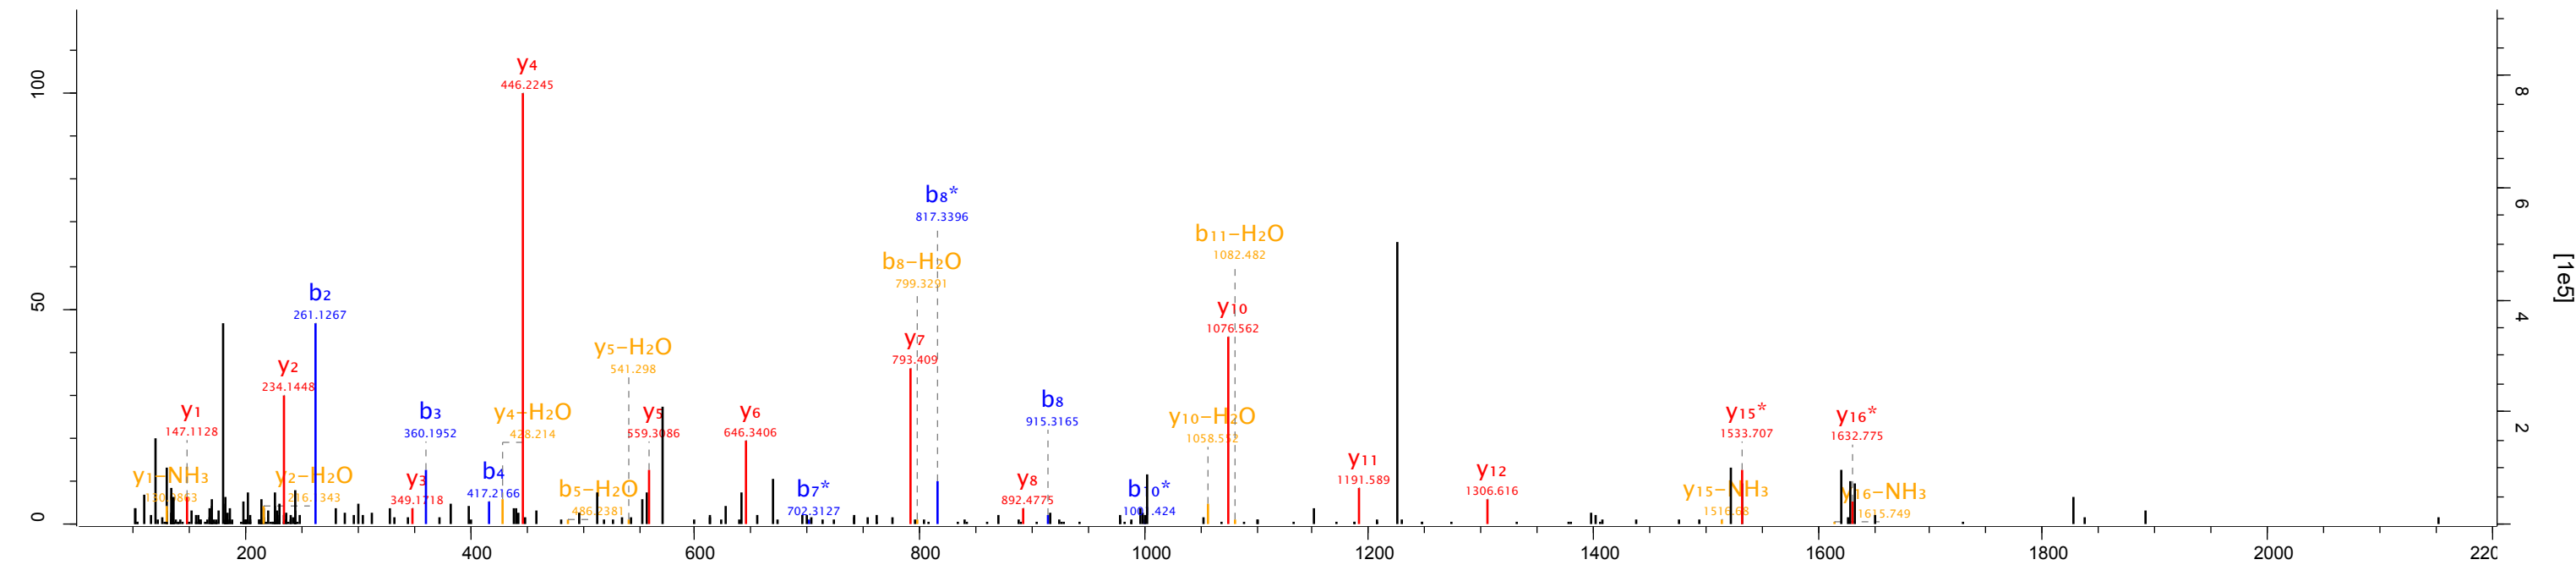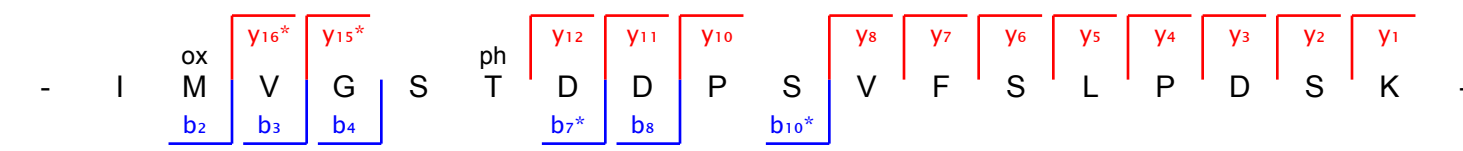



Raw file: 20150814\_A375SR\_Phospho\_BR2\_04  
 Scan: 22576 Method: FTMS; HCD Score: 210.21 m/z: 1071.82 Gene names: BCAR3

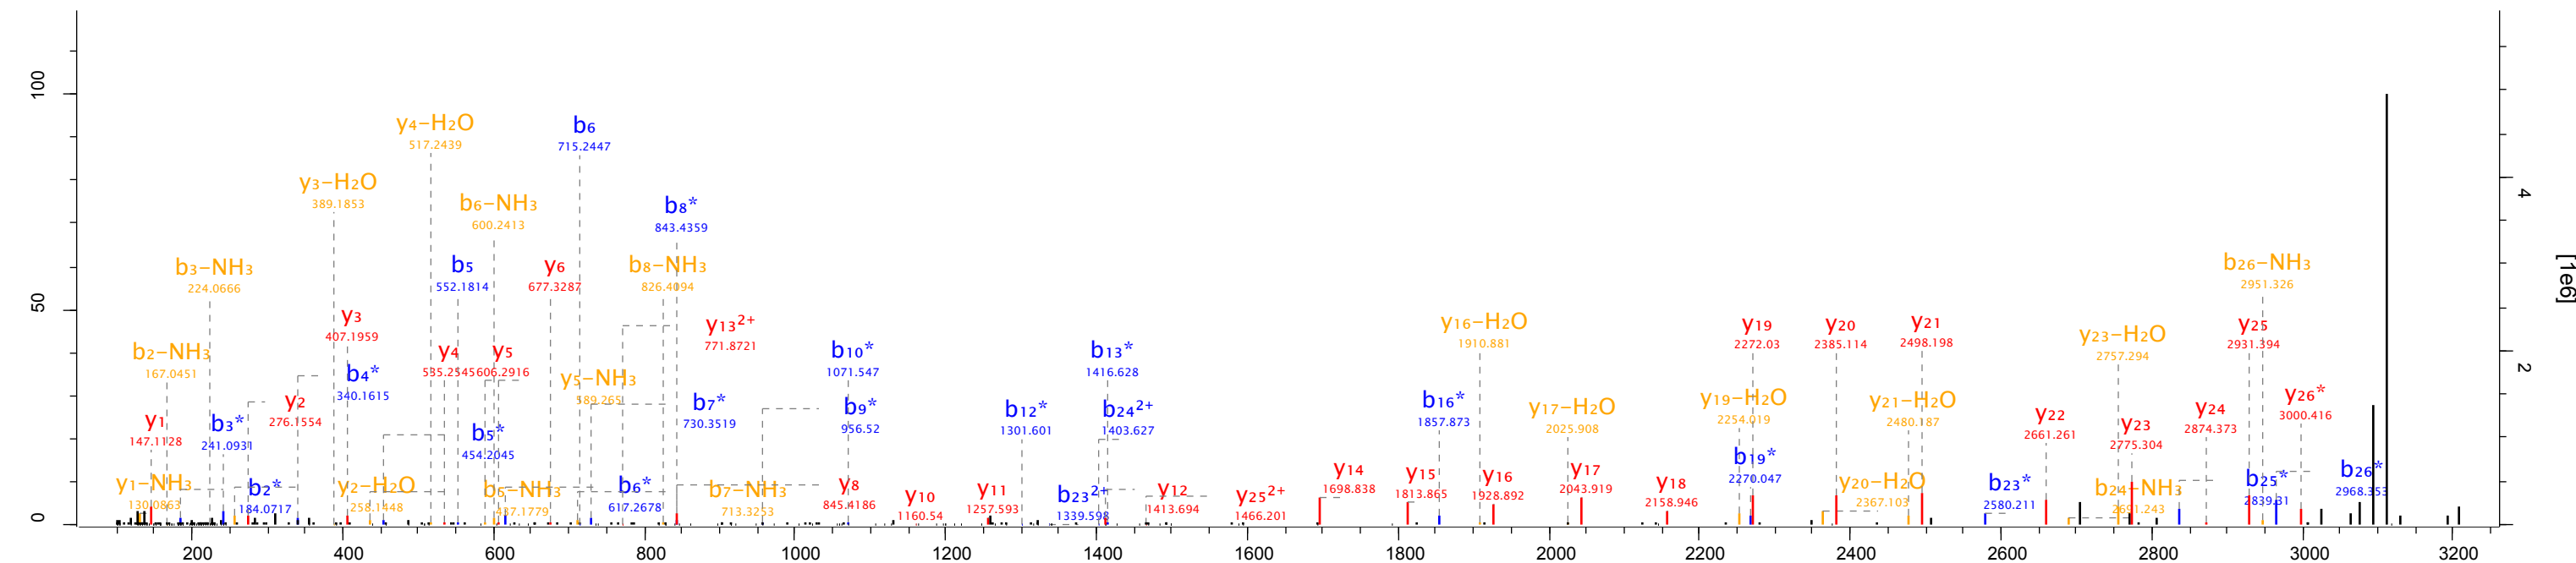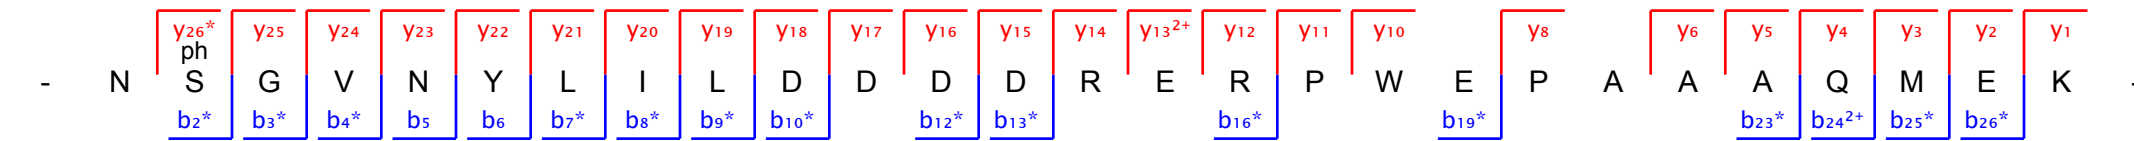

Raw file: 20150814\_A375SR\_Phospho\_BR2\_04  
 Scan: 22606 Method: FTMS; HCD Score: 108.69 m/z: 802.7 Gene names: PLEKHA5

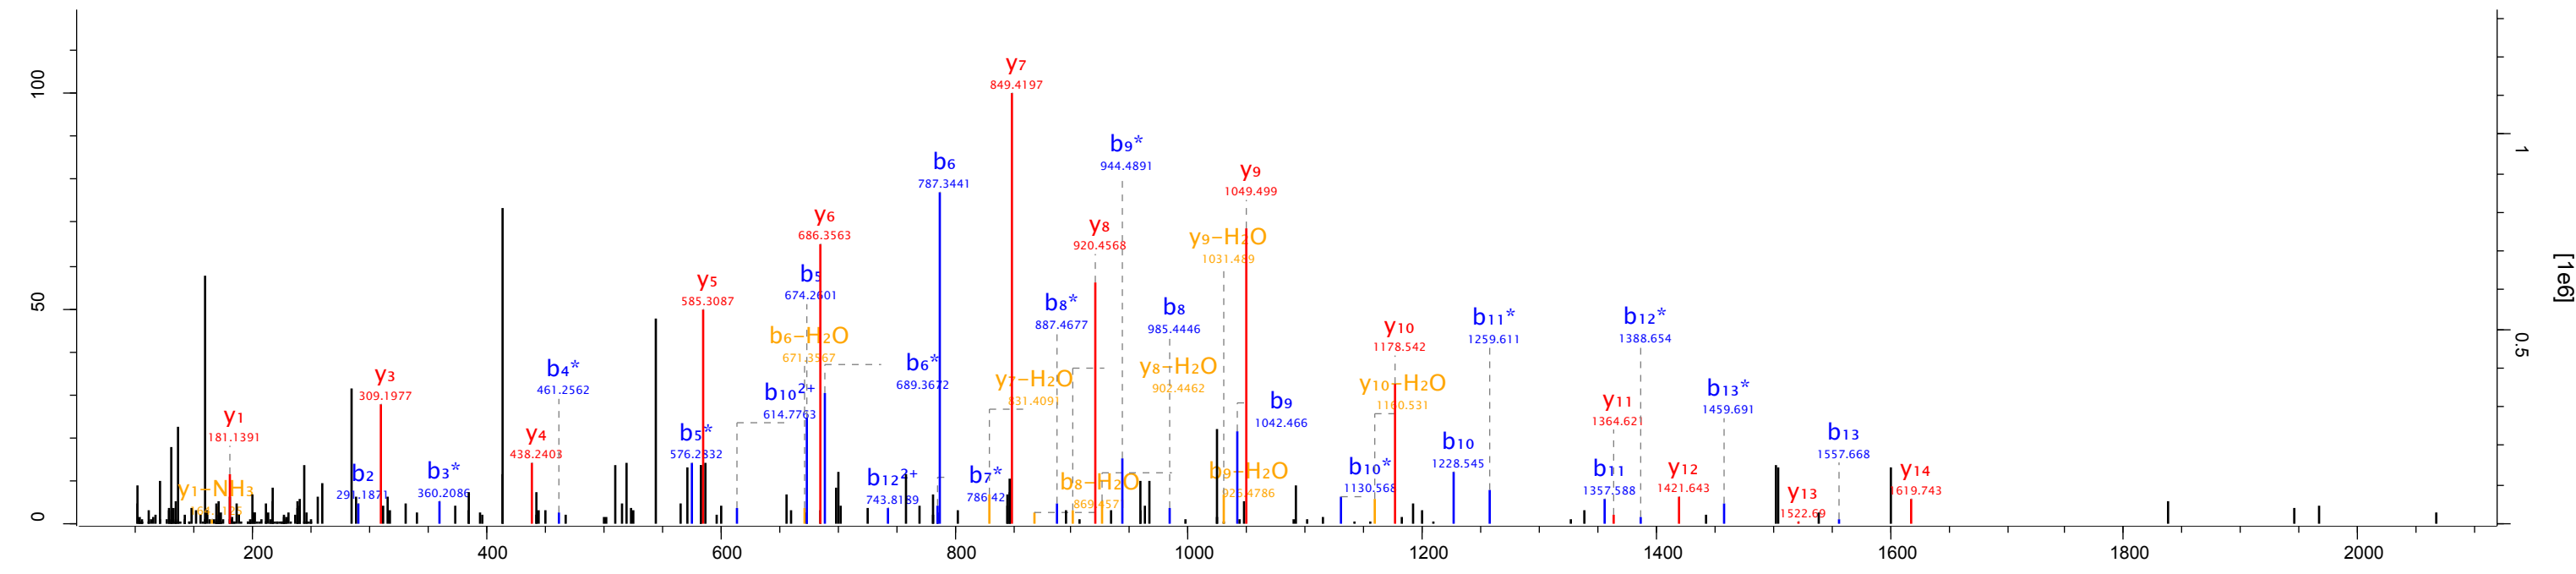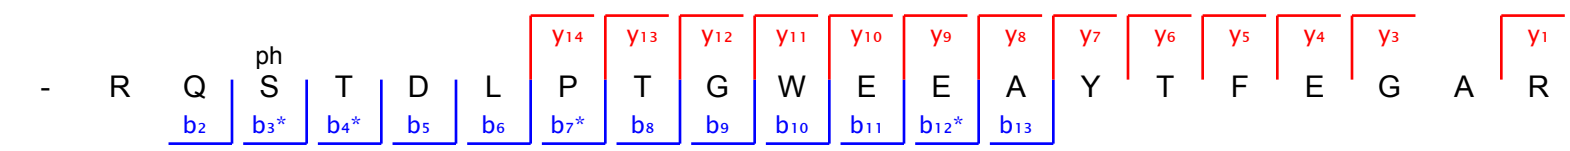

Raw file 20150814\_A375SR\_Phospho\_BR2\_04 Scan 22696 Method FTMS; HCD Score 76.96 m/z 1125.97 Gene names RNF113A

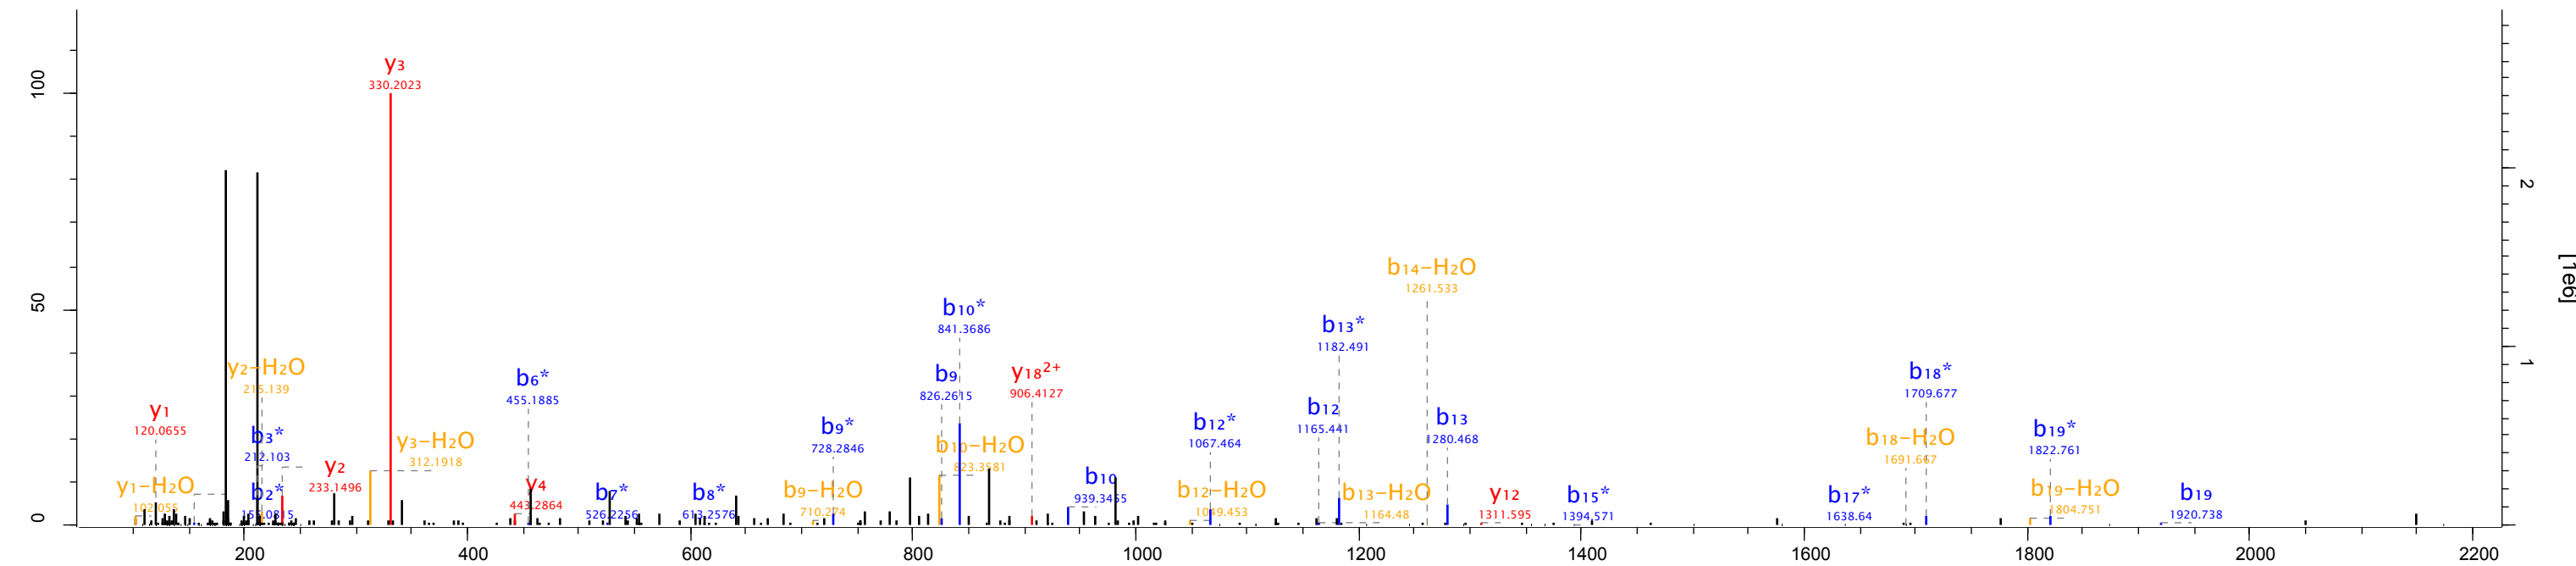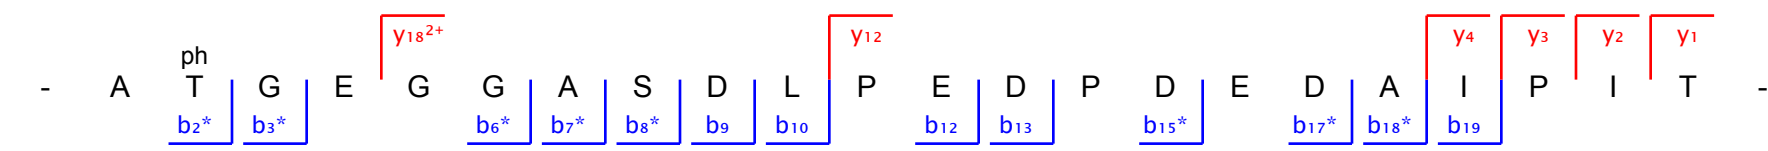

Raw file 20150814\_A375SR\_Phospho\_BR2\_04 Scan 22816 Method FTMS; HCD Score 140.38 m/z 982.09 Gene names FUBP3

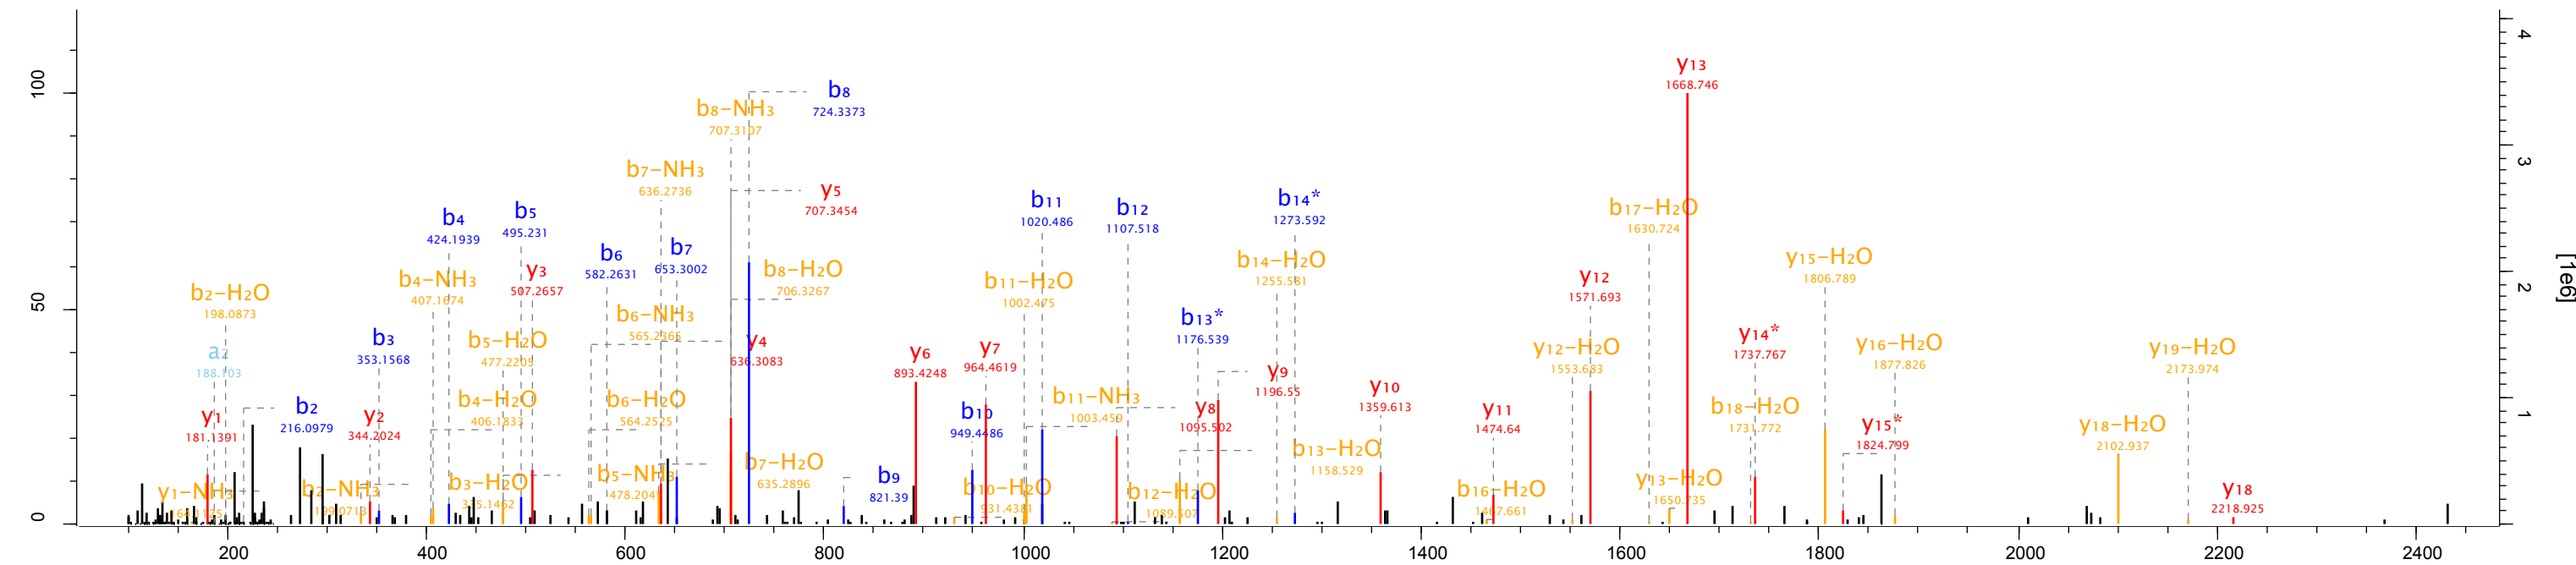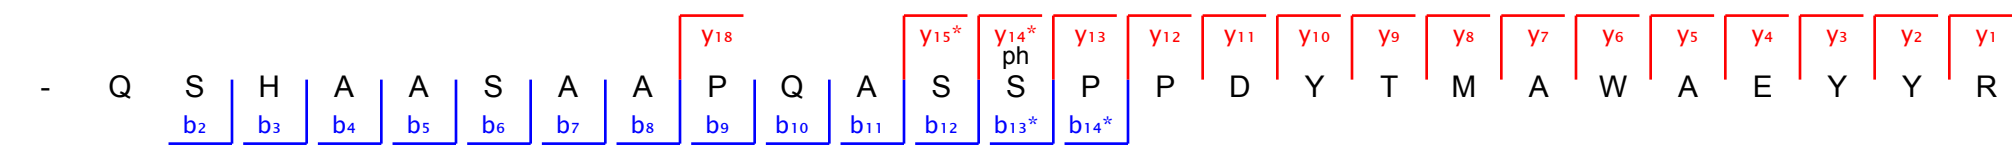

Raw file  
20150814\_A375SR\_Phospho\_BR2\_04

Scan 23026 Method FTMS; HCD Score 133.4 m/z 937.42 Gene names AFTPH

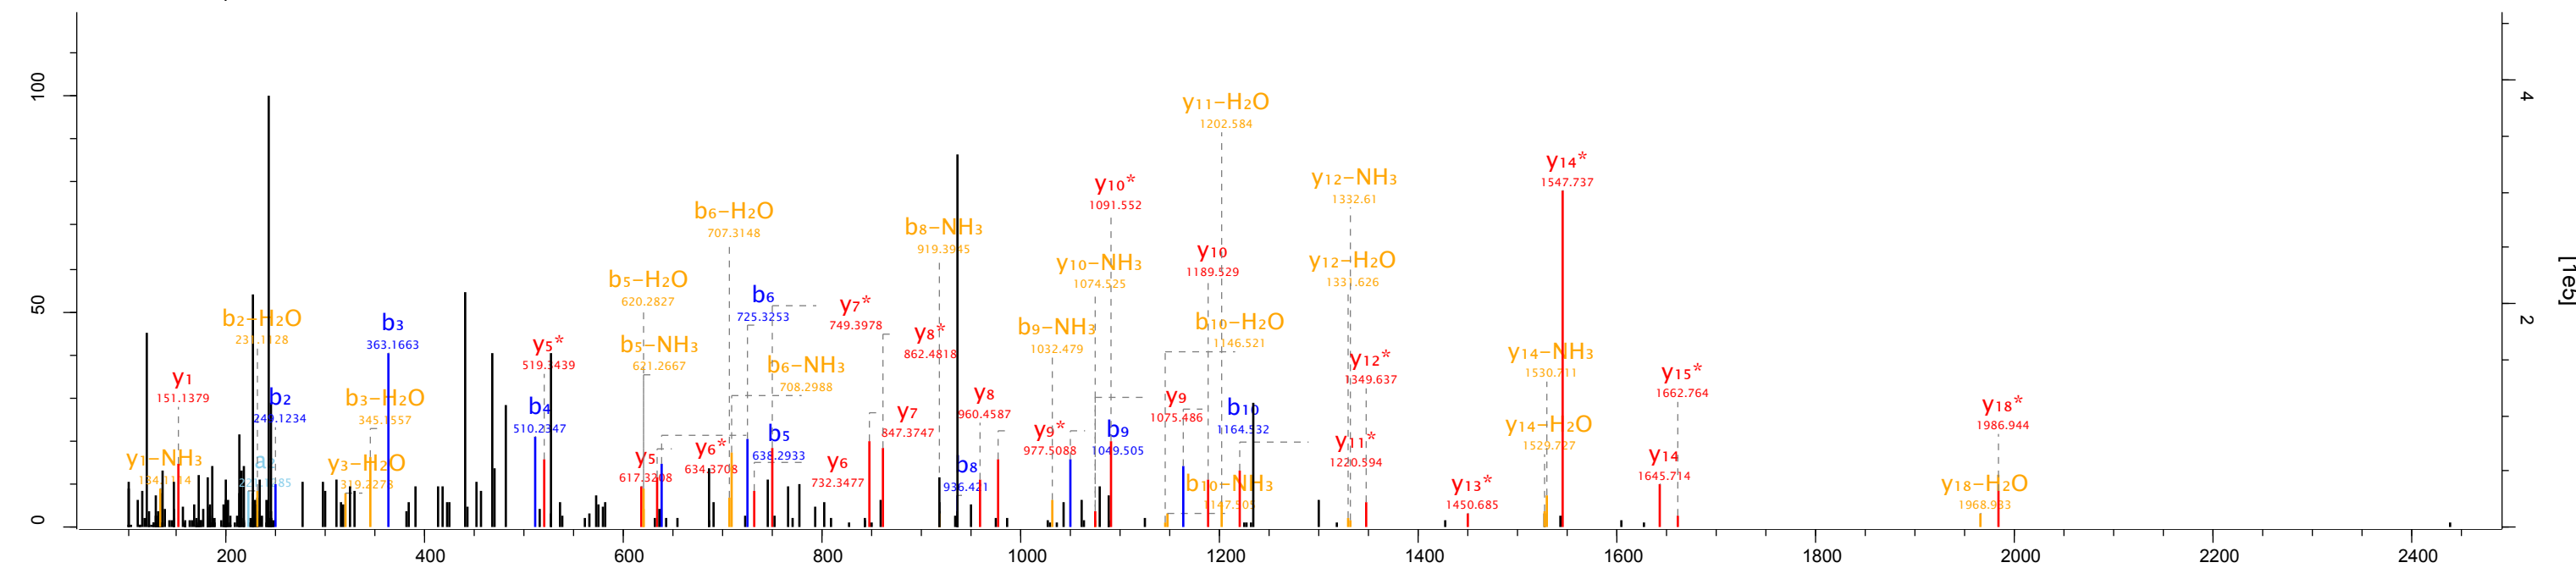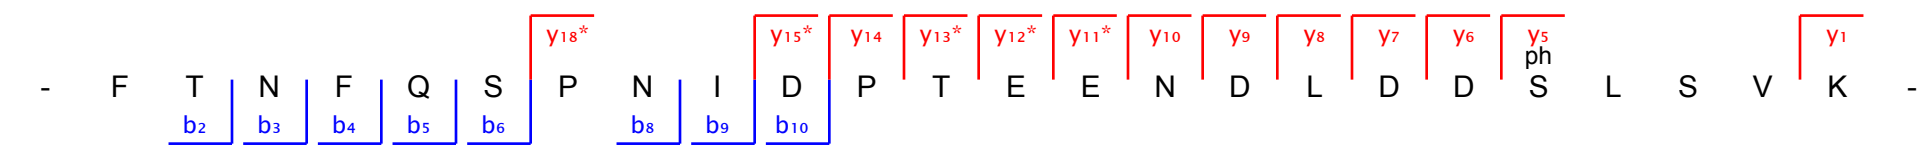

Raw file: 20150814\_A375SR\_Phospho\_BR2\_04  
 Scan: 23326 Method: FTMS; HCD Score: 161.8 m/z: 744.85 Gene names: SIK2

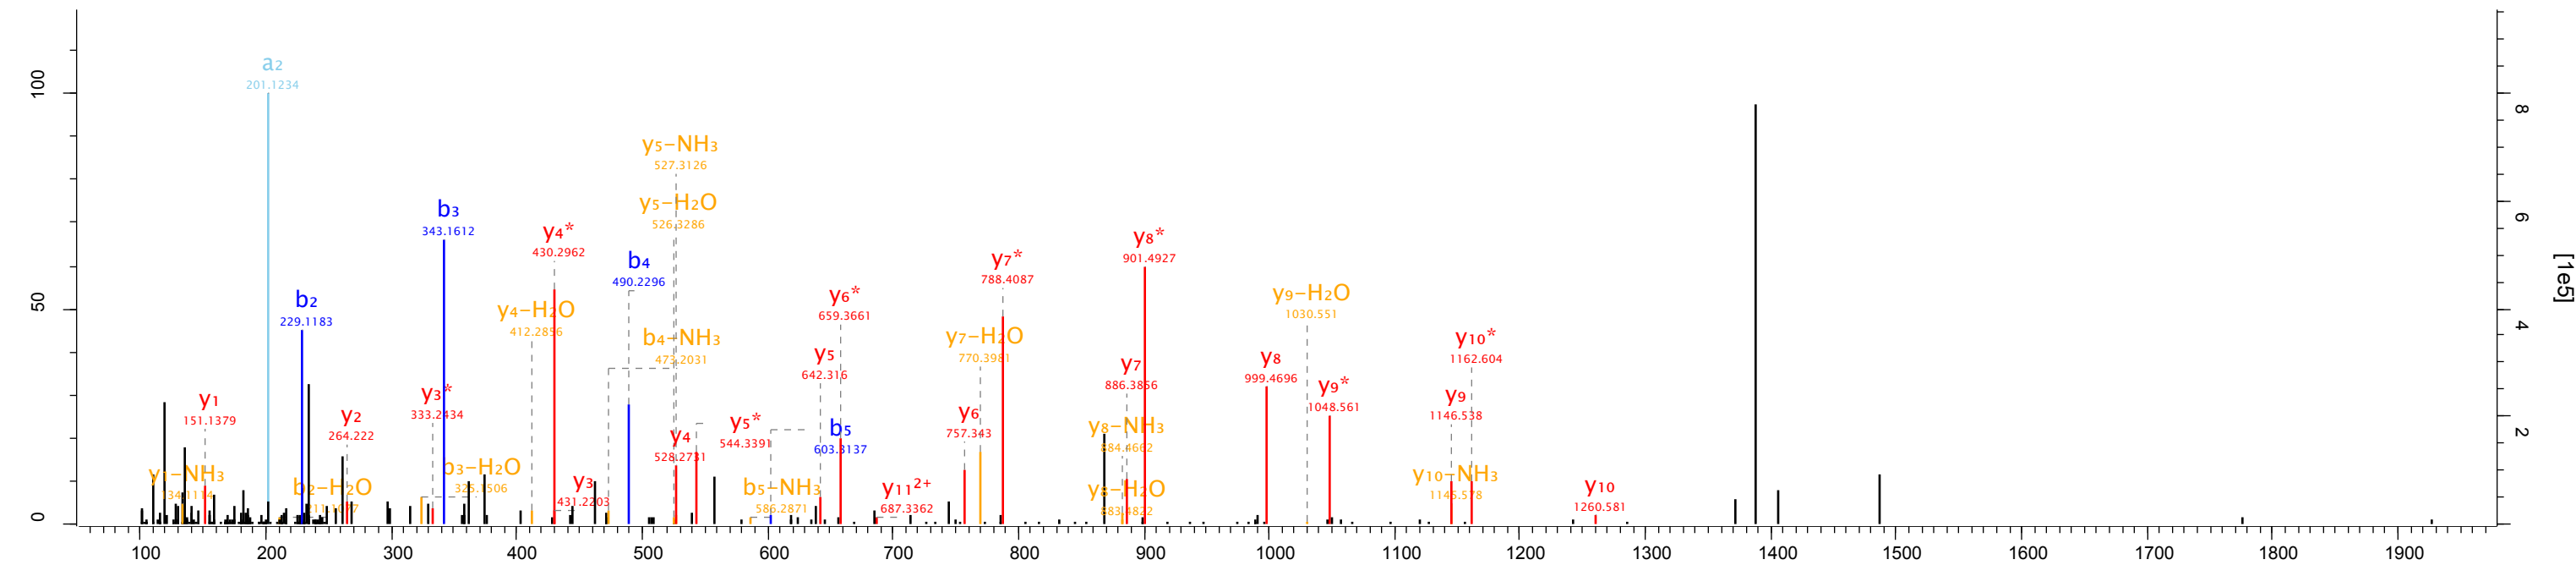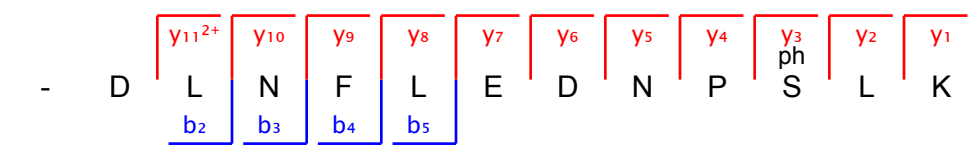

Raw file 20150814\_A375SR\_Phospho\_BR2\_04 Scan 23386 Method FTMS; HCD Score 126.63 m/z 611.99 Gene names ERBB2IP

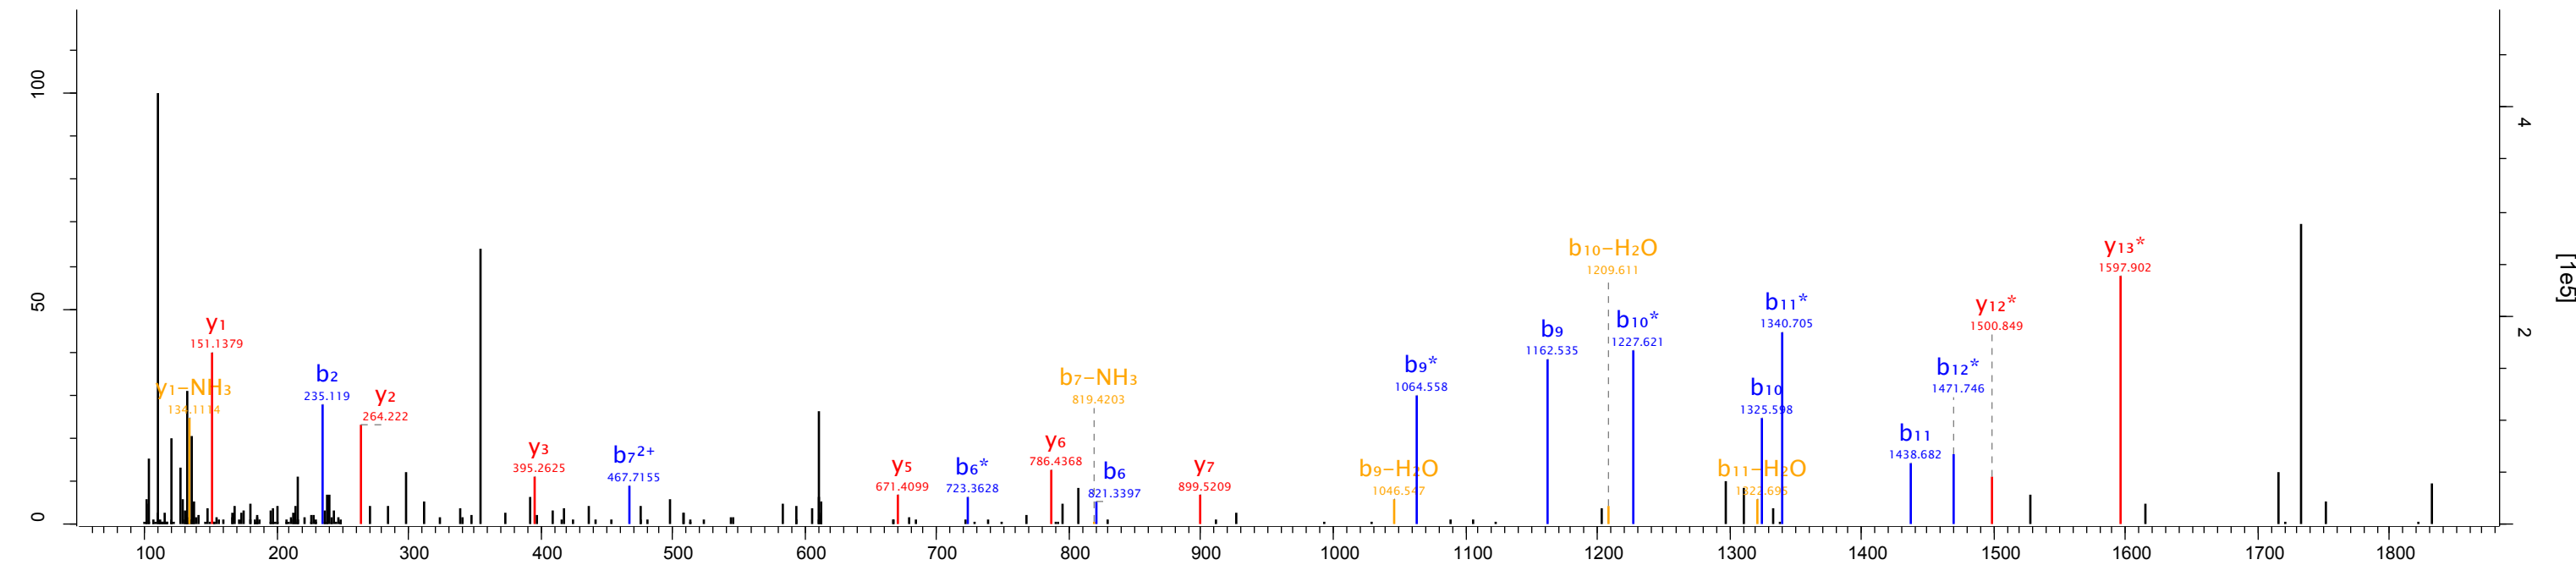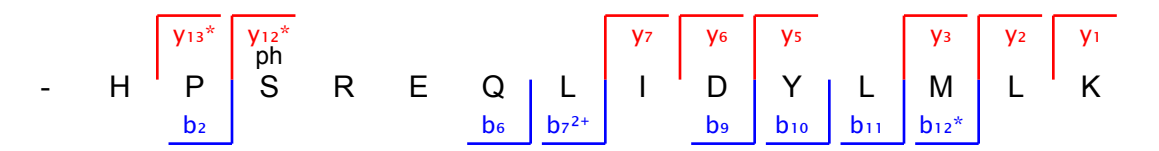

Raw file Scan Method Score m/z Gene names  
 20150814\_A375SR\_Phospho\_BR2\_04 23686 FTMS; HCD 116.9 695.79 MIER3

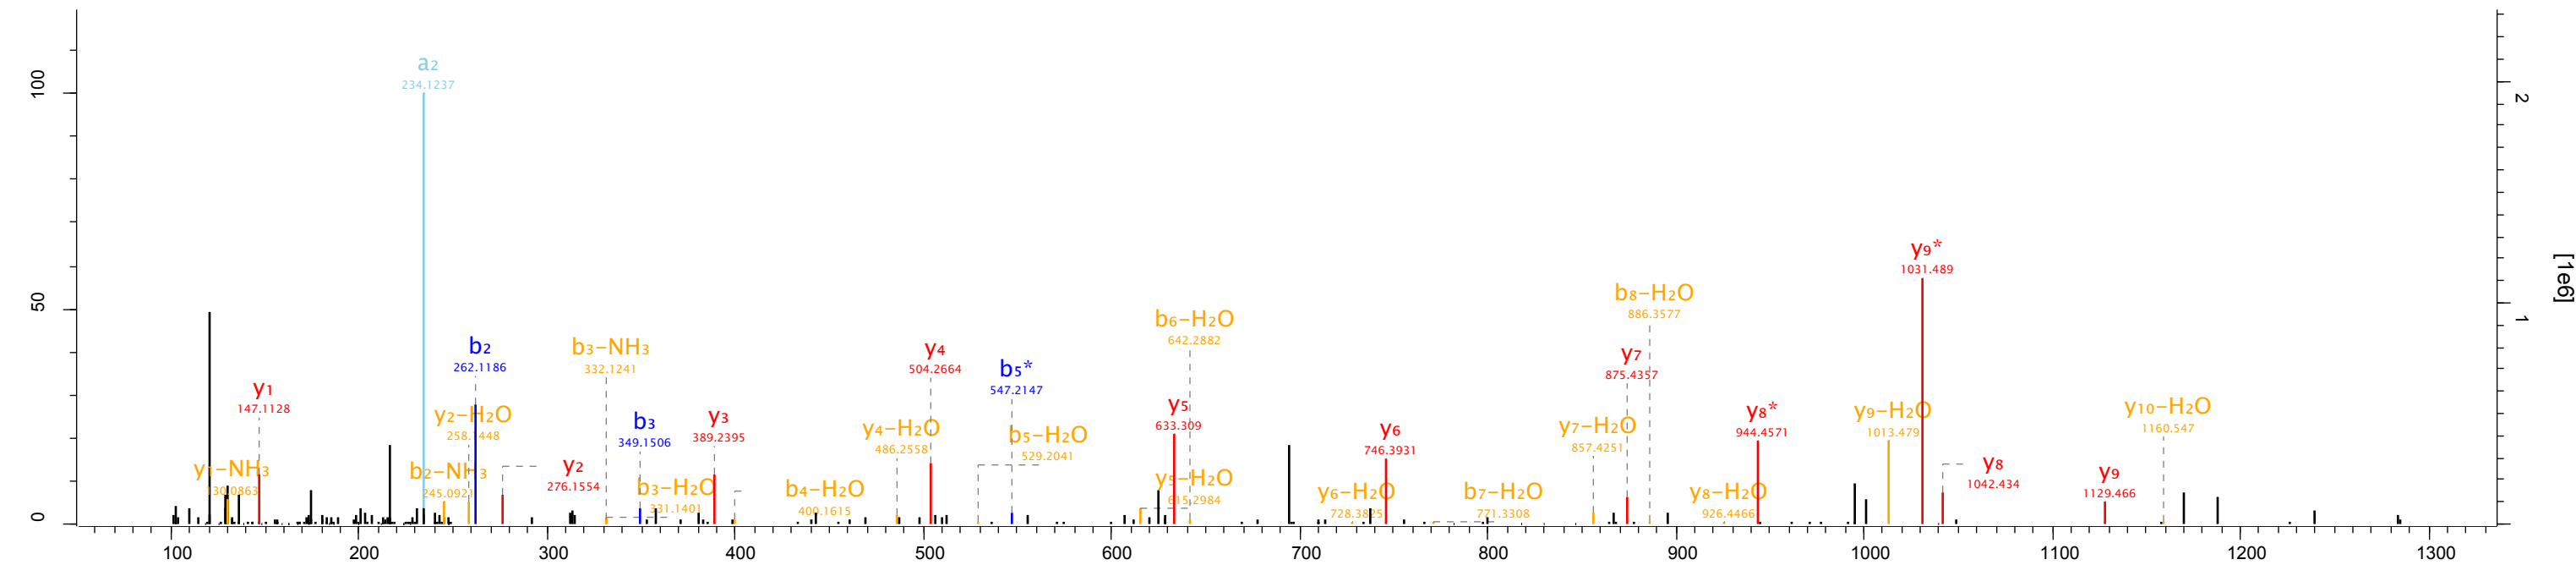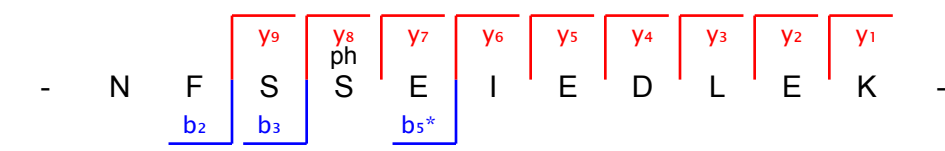



Raw file 20150814\_A375SR\_Phospho\_BR2\_04 Scan 23826 Method FTMS; HCD Score 166.65 m/z 980.97 Gene names TFDP2

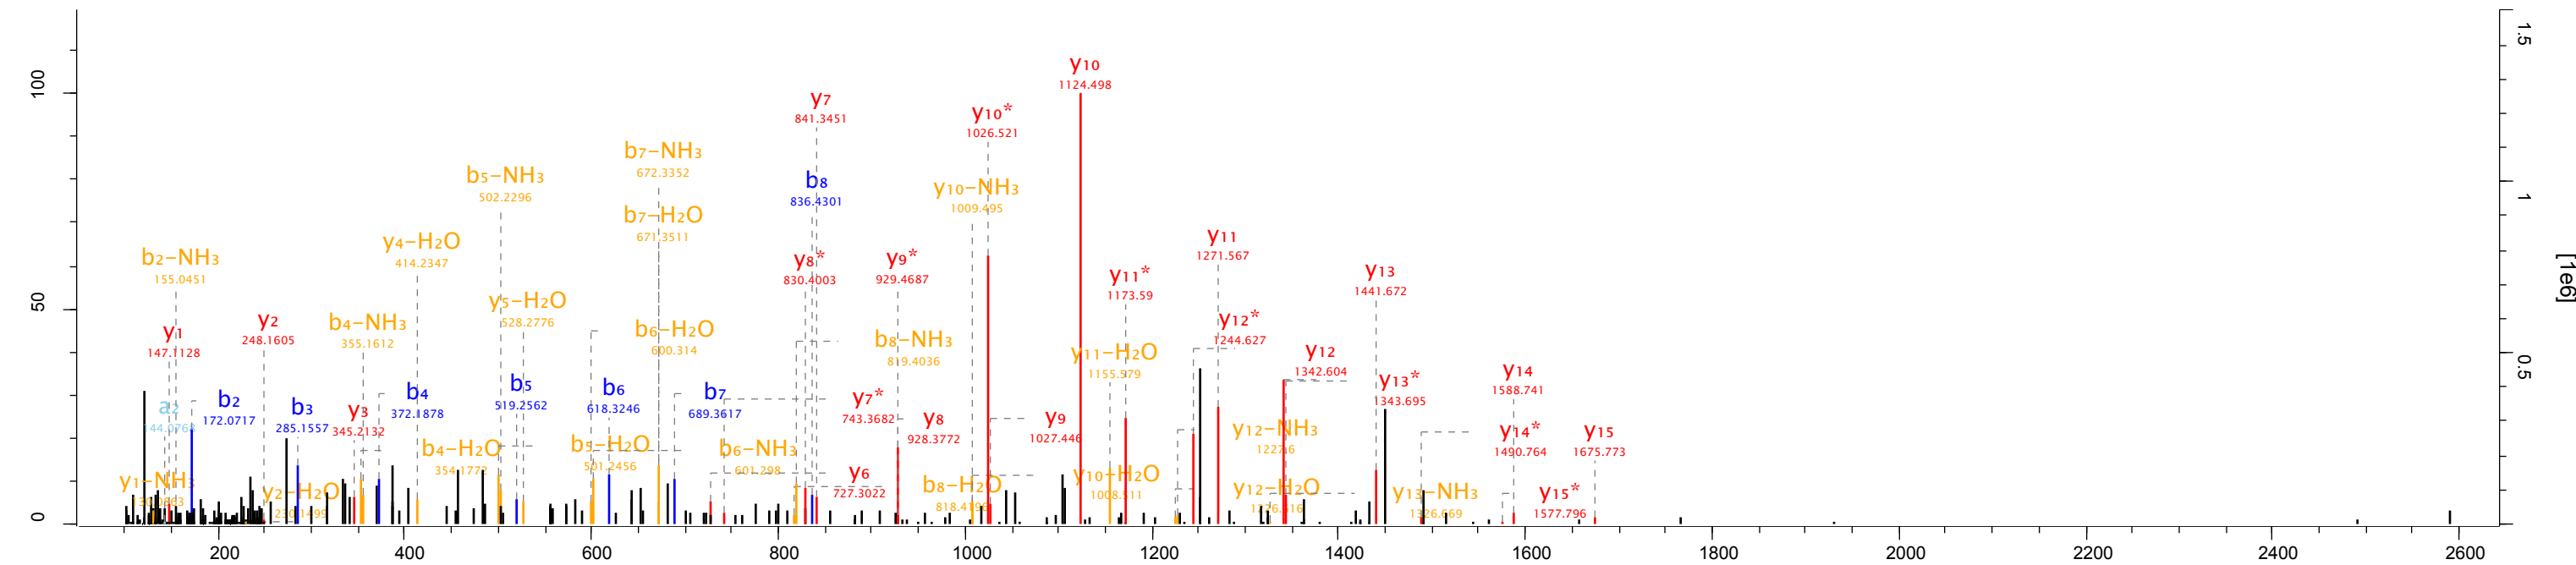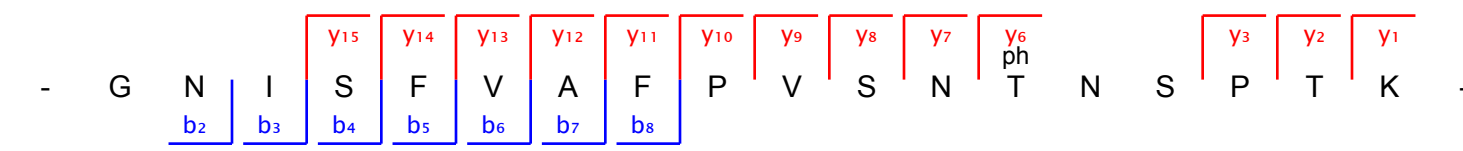

Raw file 20150814\_A375SR\_Phospho\_BR2\_04 Scan 24016 Method FTMS; HCD Score 74.88 m/z 891.74 Gene names GOLGB1

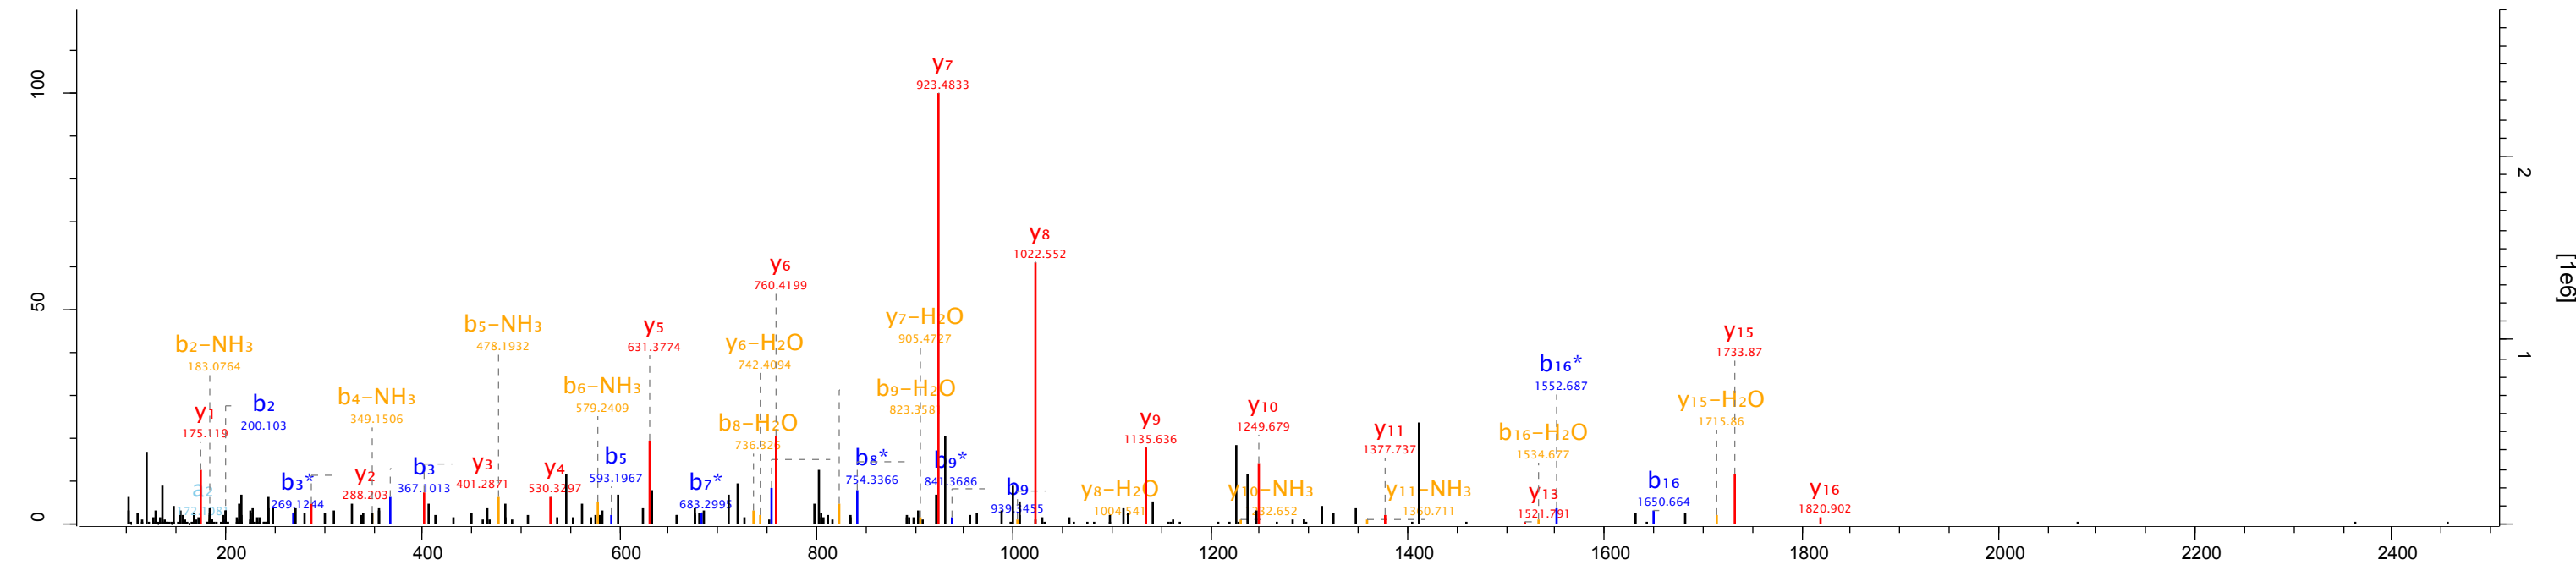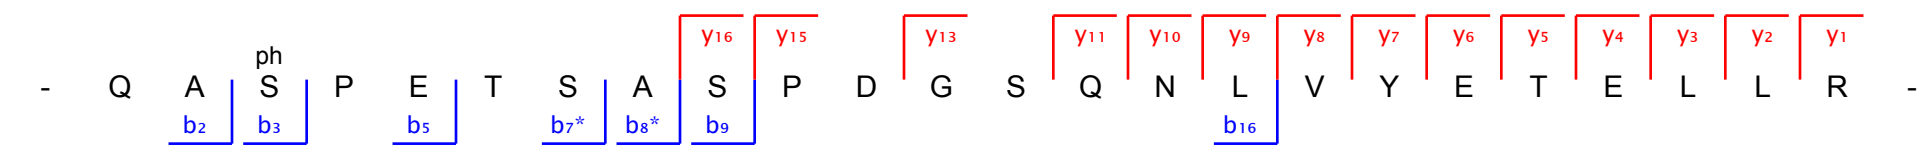

Raw file: 20150814\_A375SR\_Phospho\_BR2\_04  
 Scan: 24176 Method: FTMS; HCD Score: 191.18 m/z: 777.35 Gene names: RELB

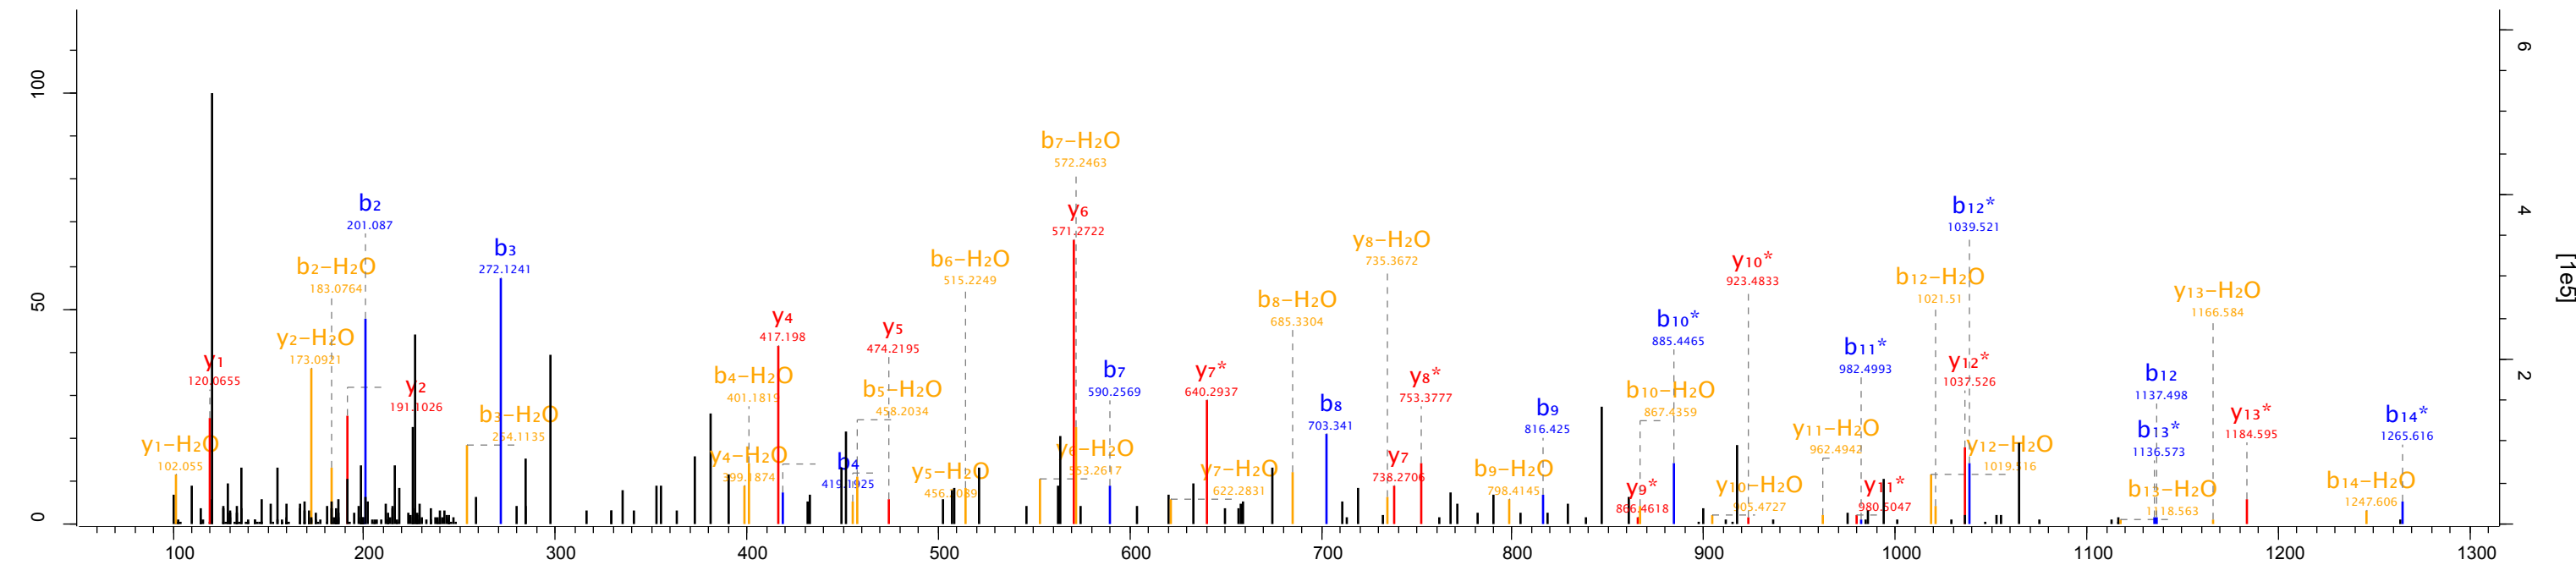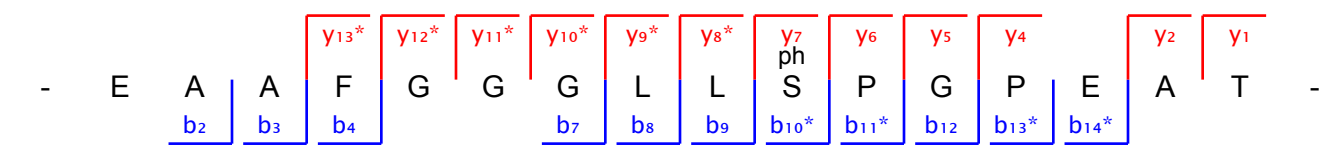

Raw file: 20150814\_A375SR\_Phospho\_BR2\_04  
 Scan: 24926 Method: FTMS; HCD Score: 54.56 m/z: 973.48 Gene names: NRIP1

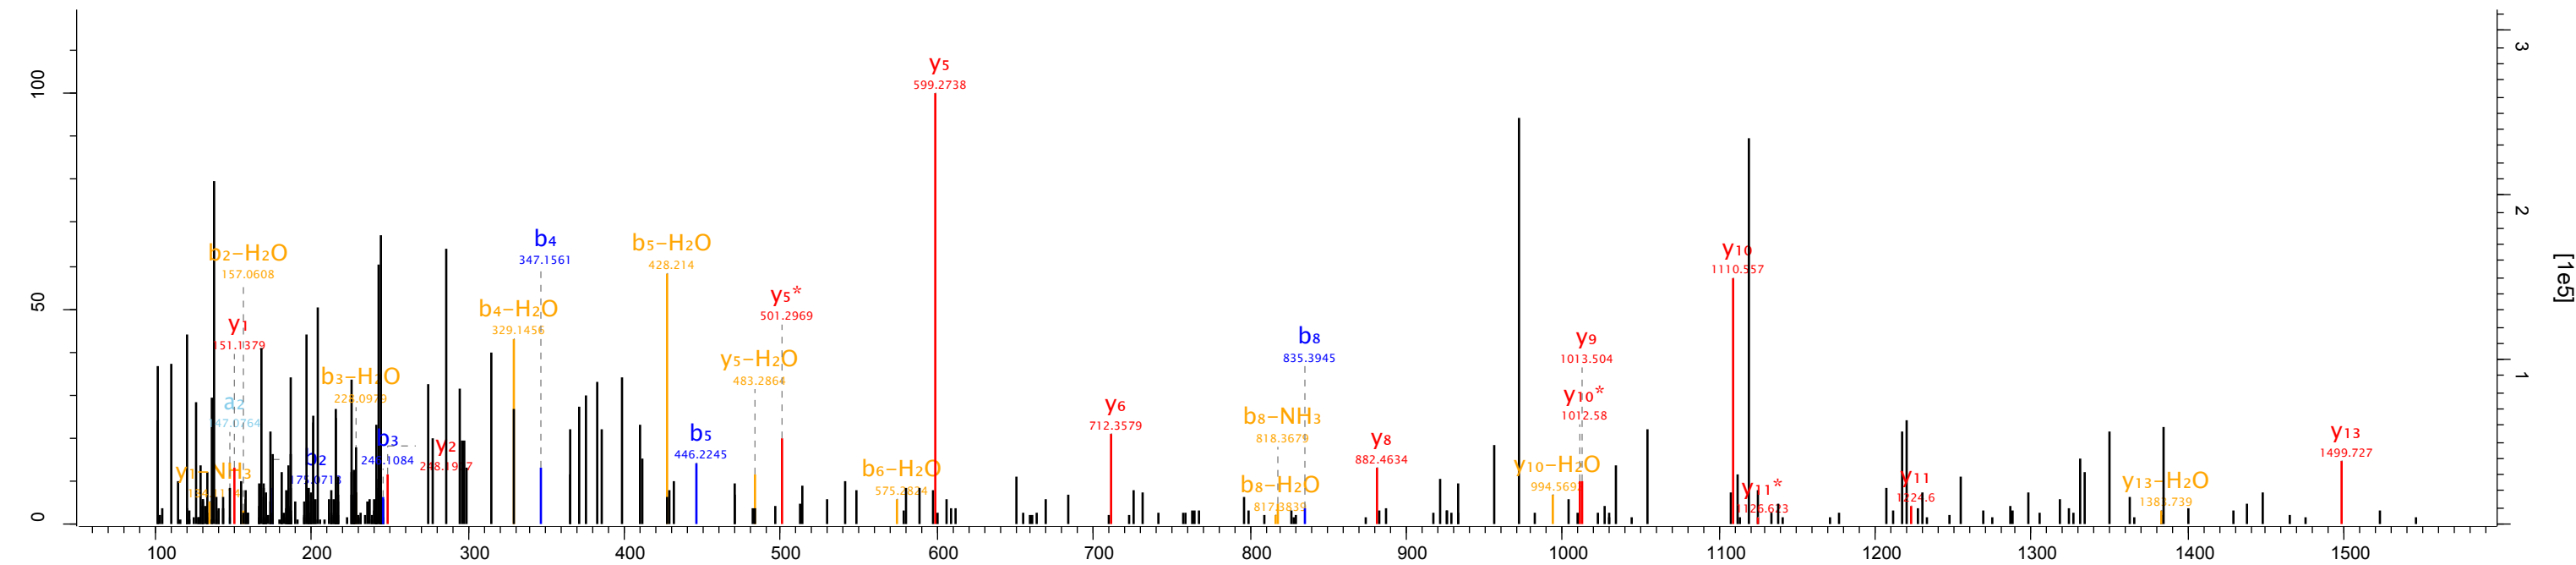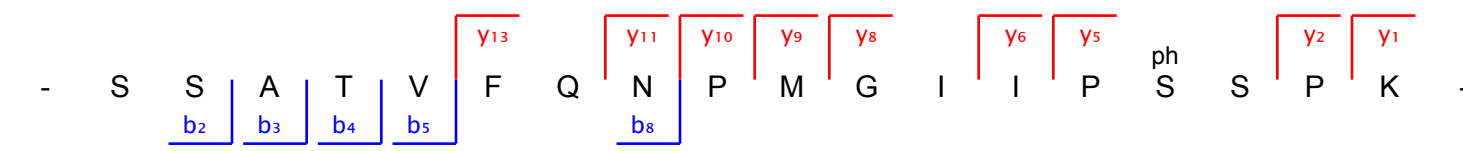

Raw file: 20150814\_A375SR\_Phospho\_BR2\_04  
 Scan: 25026 Method: FTMS; HCD Score: 143.47 m/z: 1077.16 Gene names: PTPN12

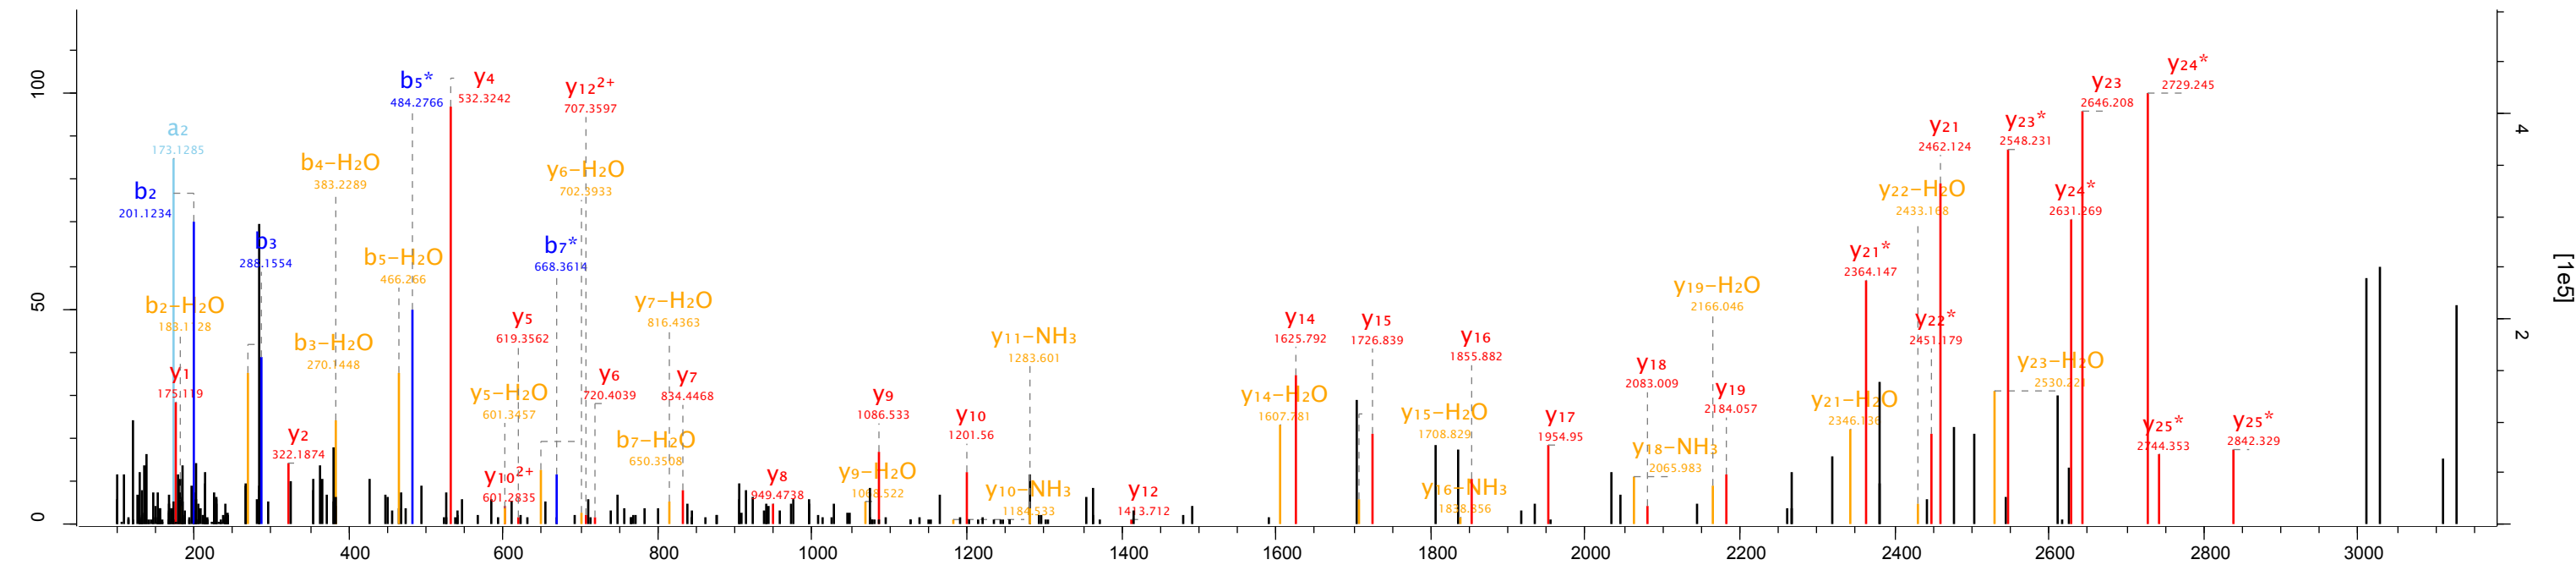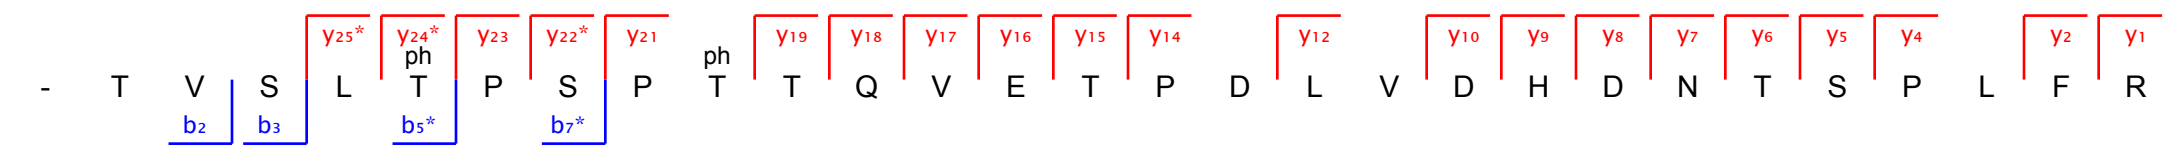

Raw file 20150814\_A375SR\_Phospho\_BR2\_04 Scan 25246 Method FTMS; HCD Score 144.57 m/z 945.44 Gene names PLEC

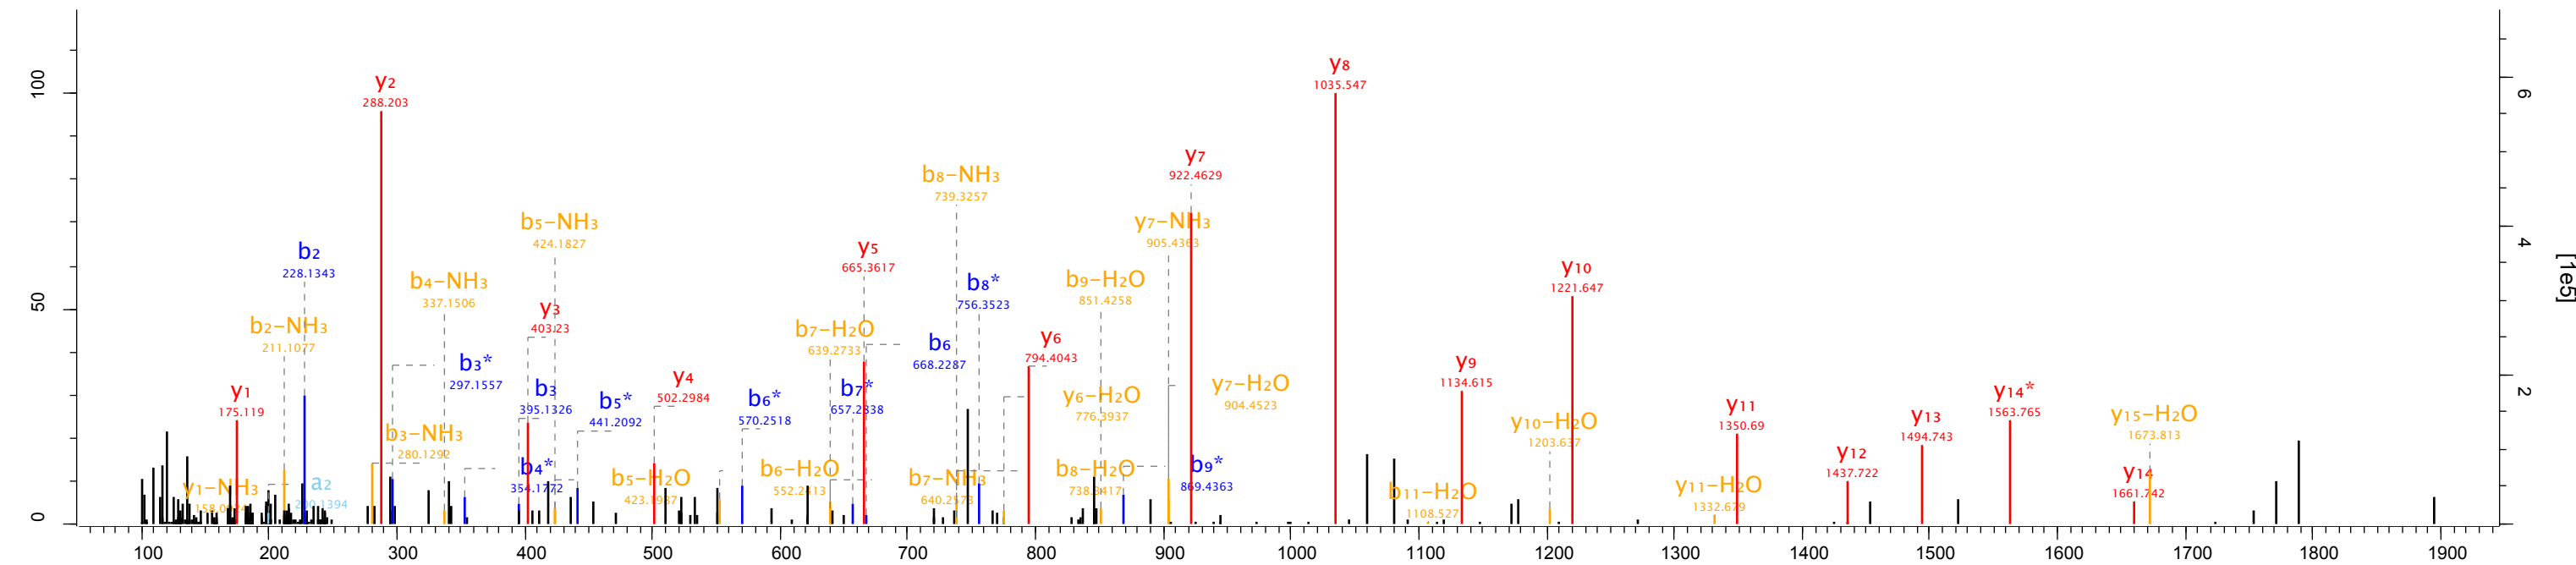

- V Q ph G S E S V I Q E Y V D L R -

b2 b3 b4\* b5\* b6 b7\* b8\* b9\*

Raw file: 20150814\_A375SR\_Phospho\_BR2\_04  
 Scan: 25566 Method: FTMS; HCD Score: 183.49 m/z: 1021.5 Gene names: GRIPAP1

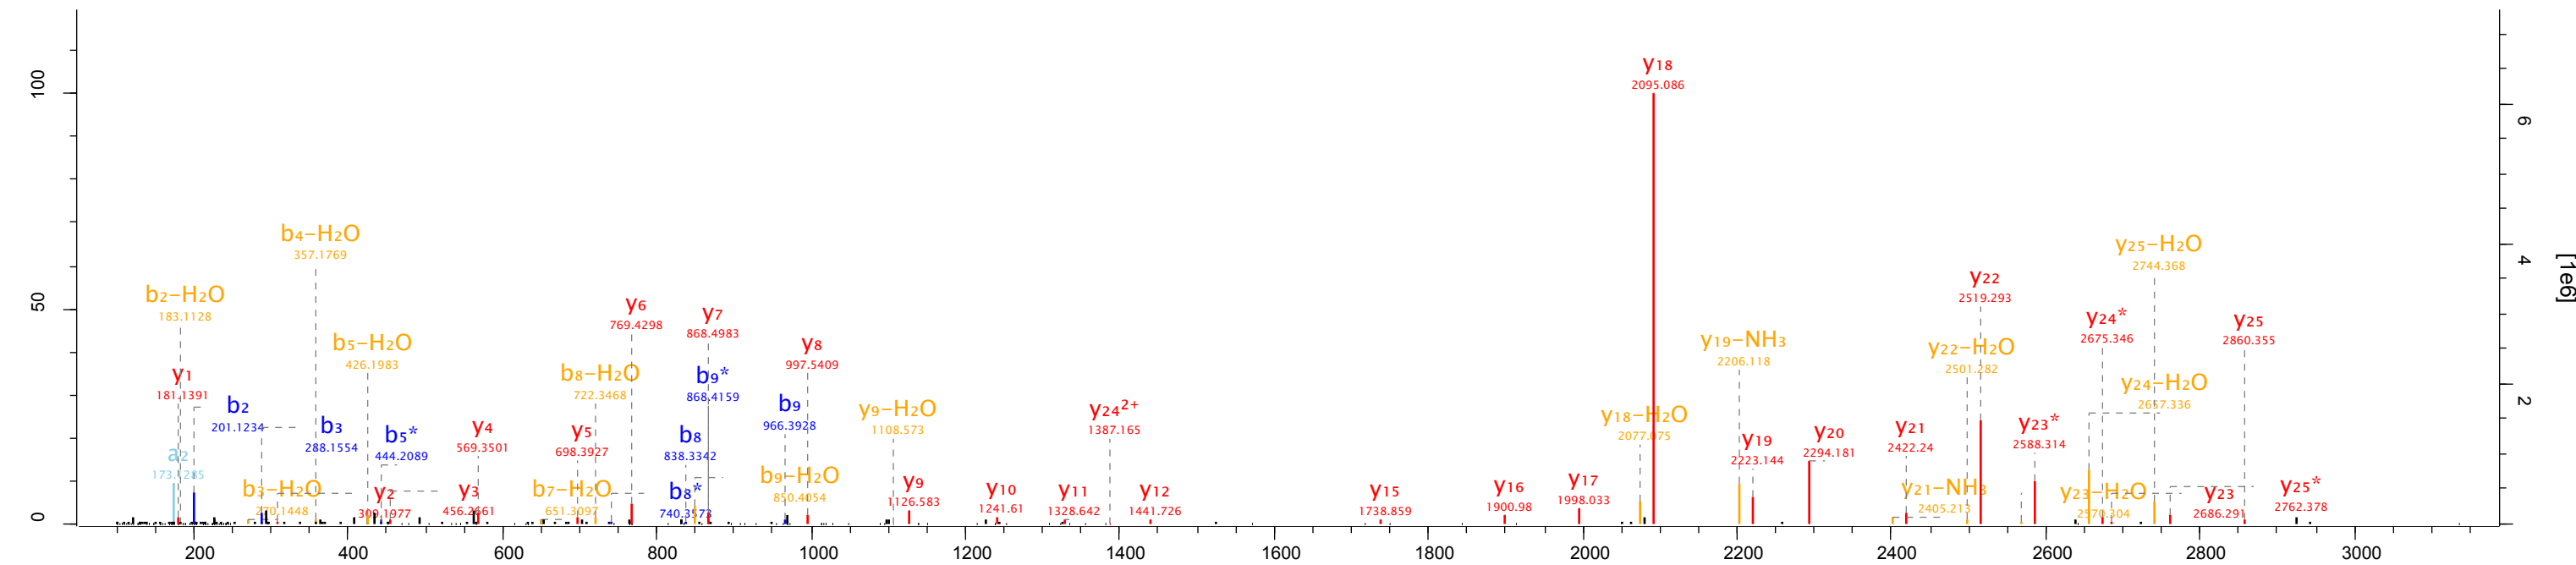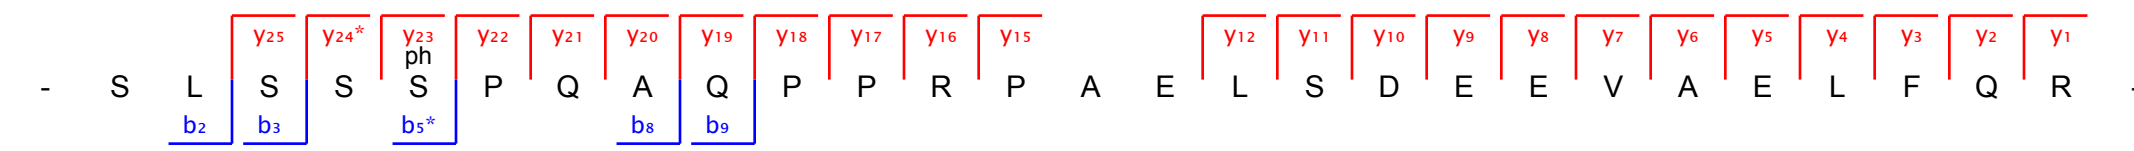

Raw file  
 20150814\_A375SR\_Phospho\_BR2\_04  
 Scan 25586 Method FTMS; HCD Score 223.15 m/z 1146.46 Gene names NOC2L

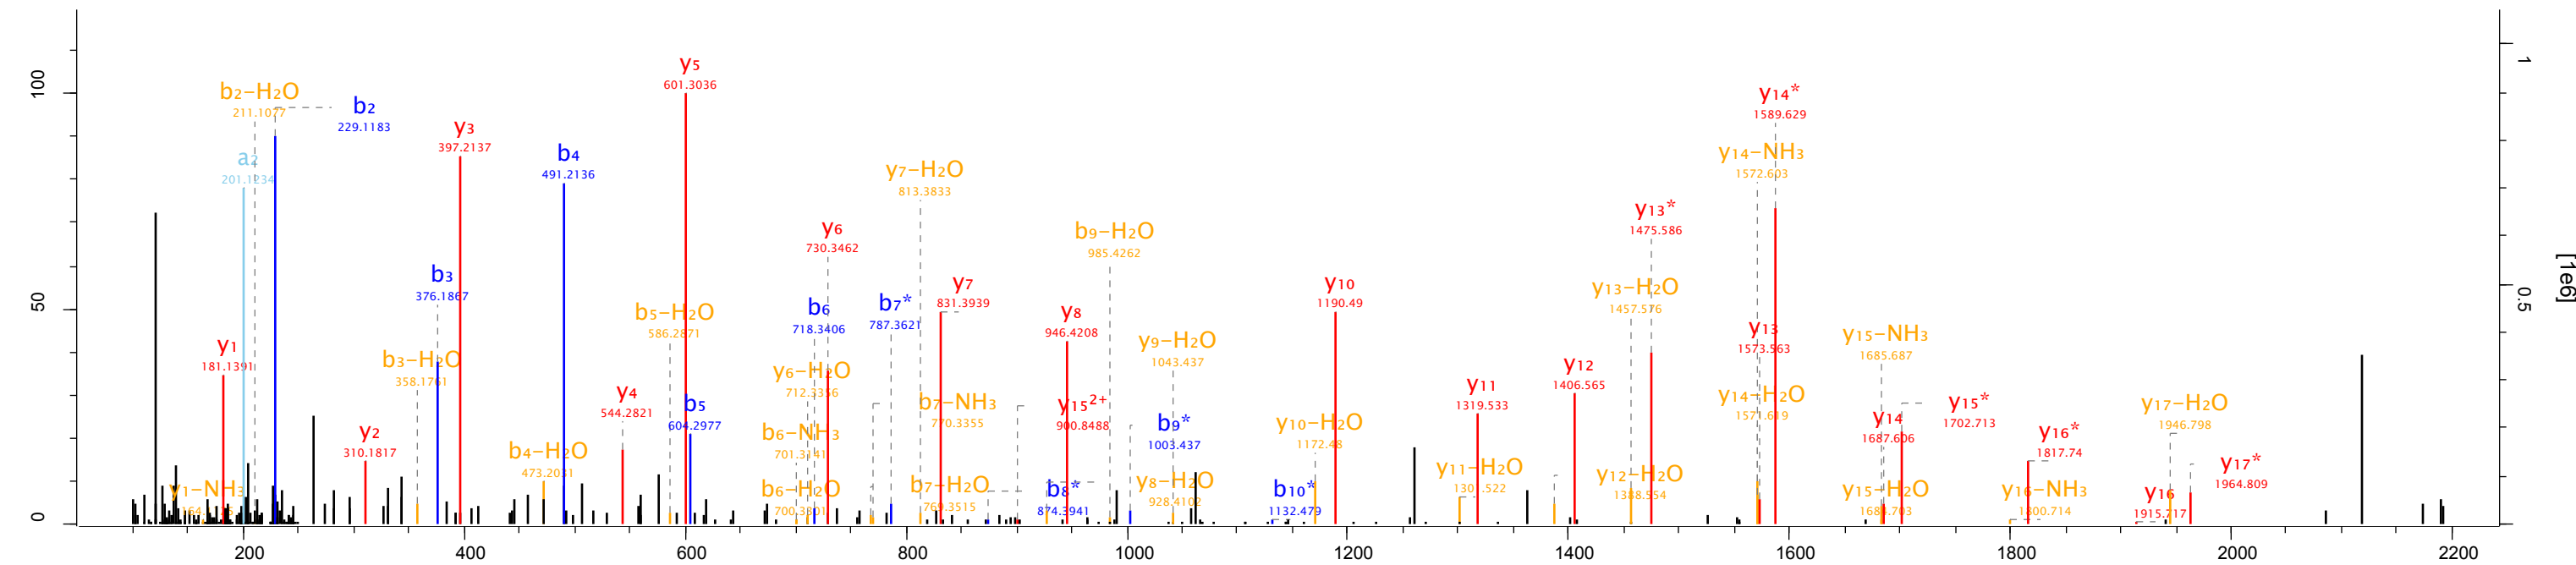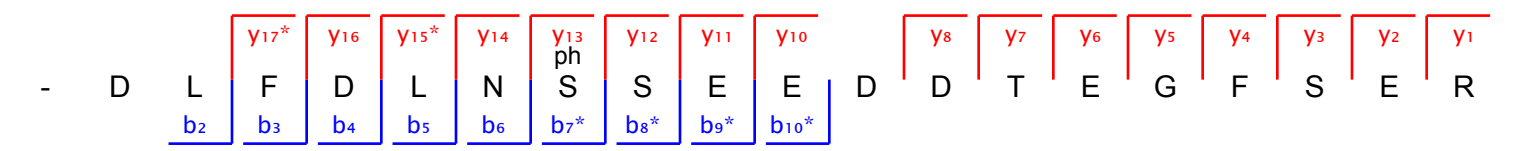





Raw file: 20150814\_A375SR\_Phospho\_BR2\_04  
 Scan: 25766 Method: FTMS; HCD Score: 97.47 m/z: 904.13 Gene names: CHD7

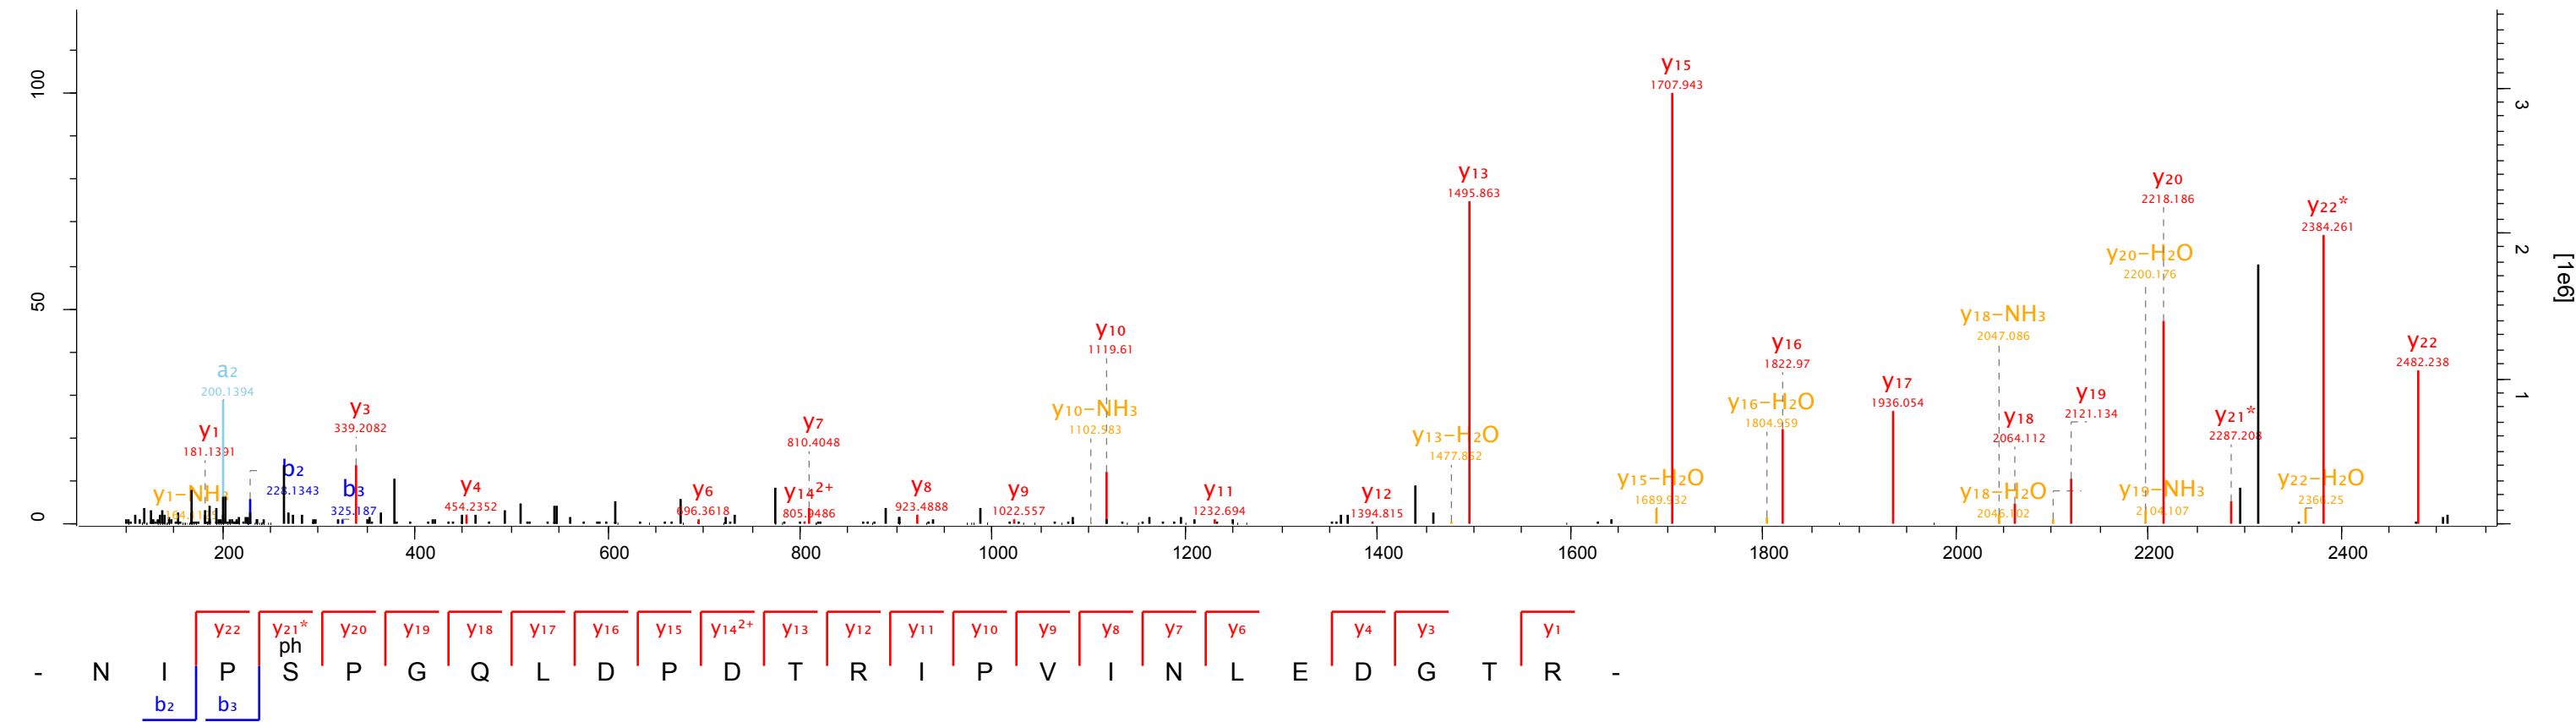

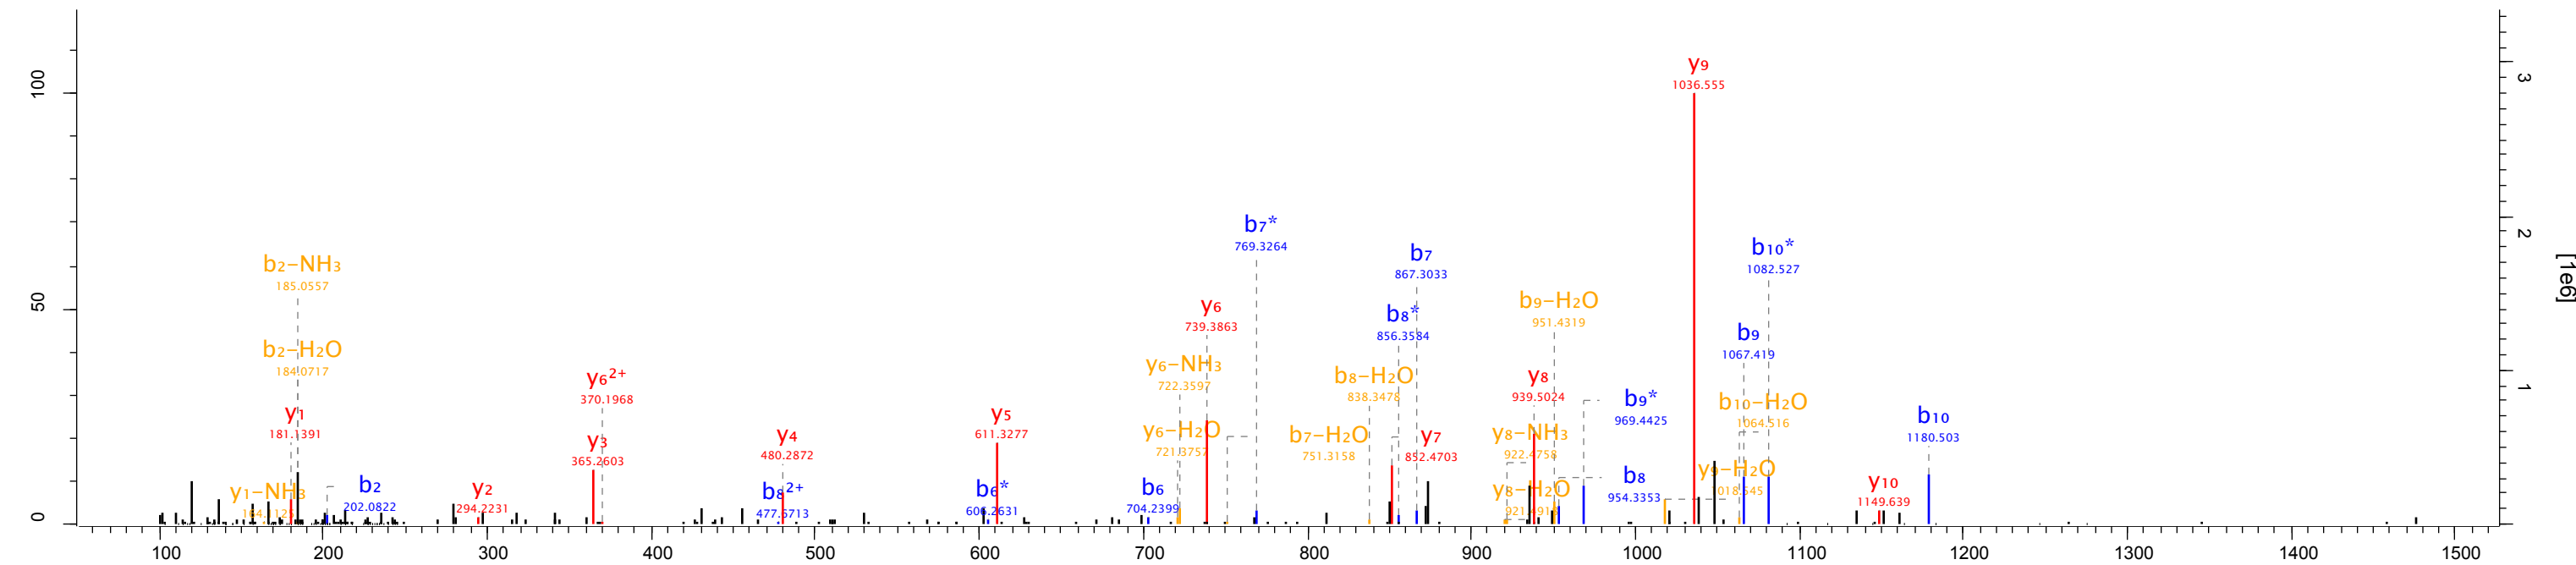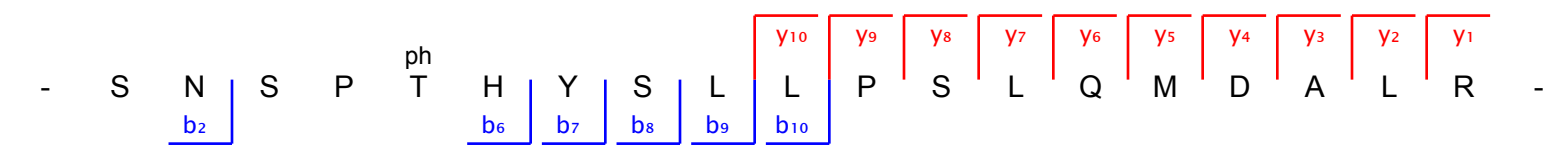

Raw file: 20150814\_A375SR\_Phospho\_BR2\_04  
 Scan: 25886 Method: FTMS; HCD Score: 99.56 m/z: 1362.28 Gene names: RUNX2

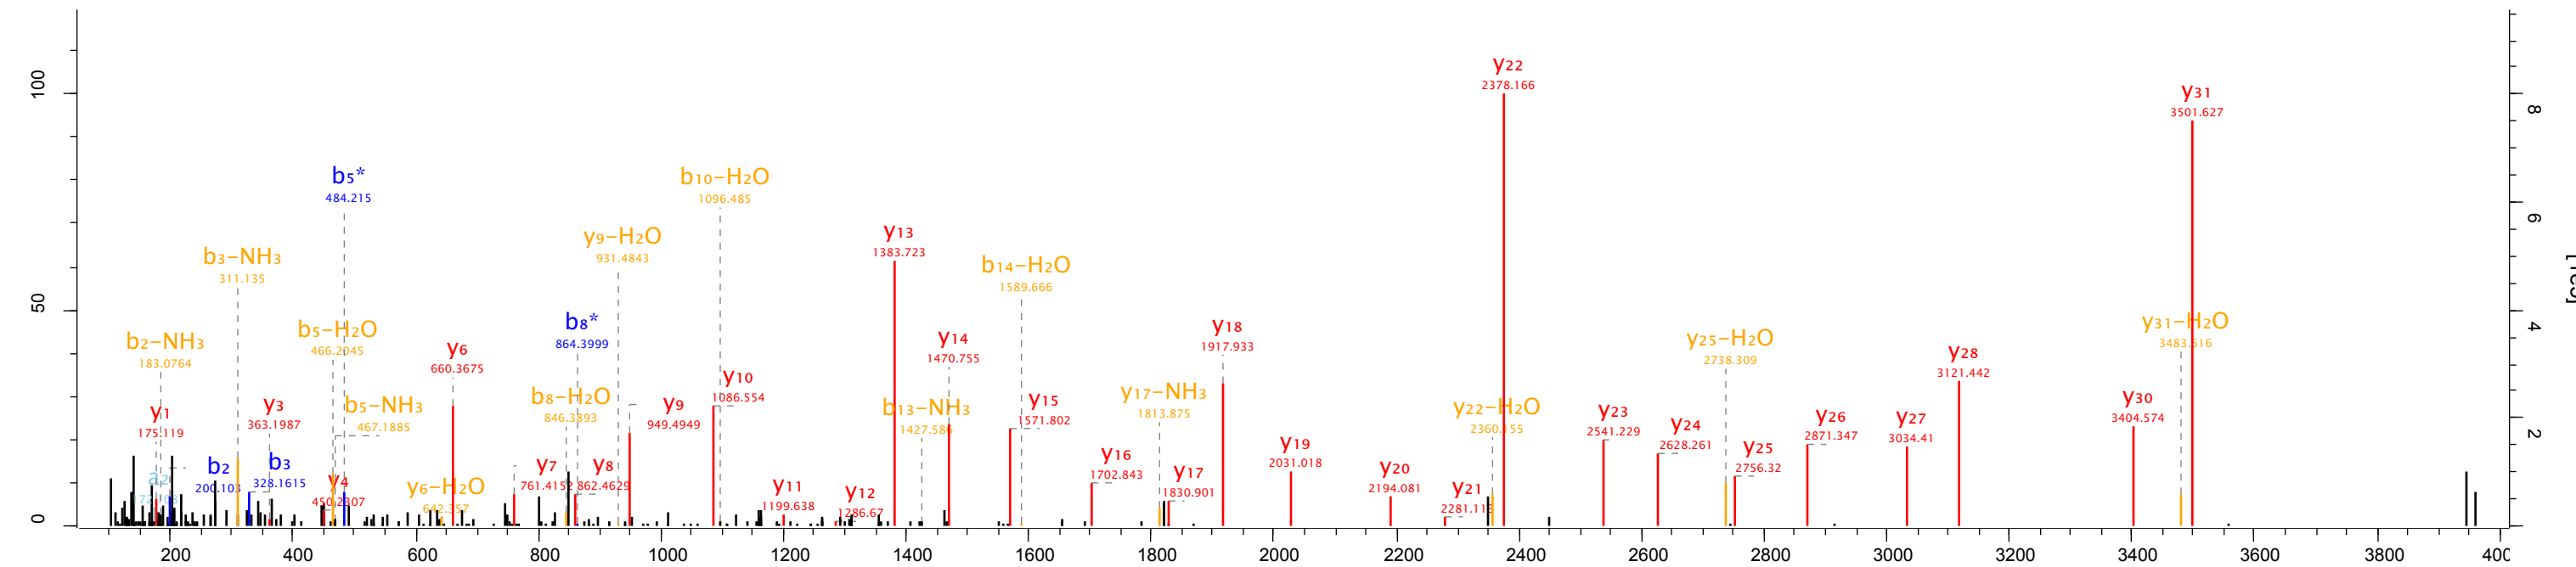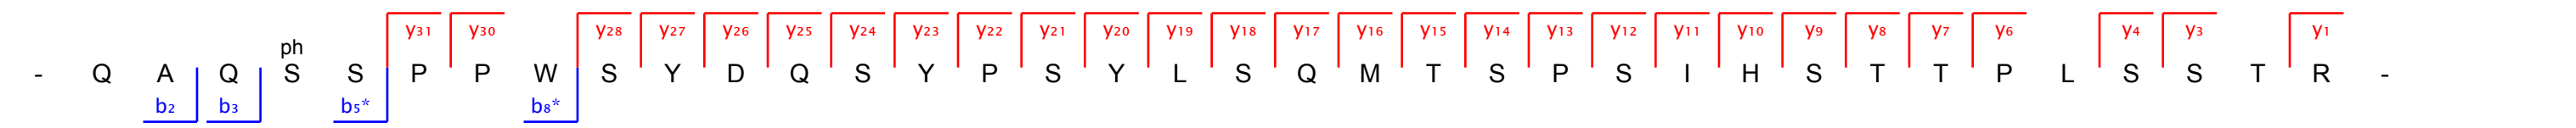

Raw file: 20150814\_A375SR\_Phospho\_BR2\_04  
 Scan: 25906 Method: FTMS; HCD Score: 125.83 m/z: 1222.54 Gene names: SRRM2

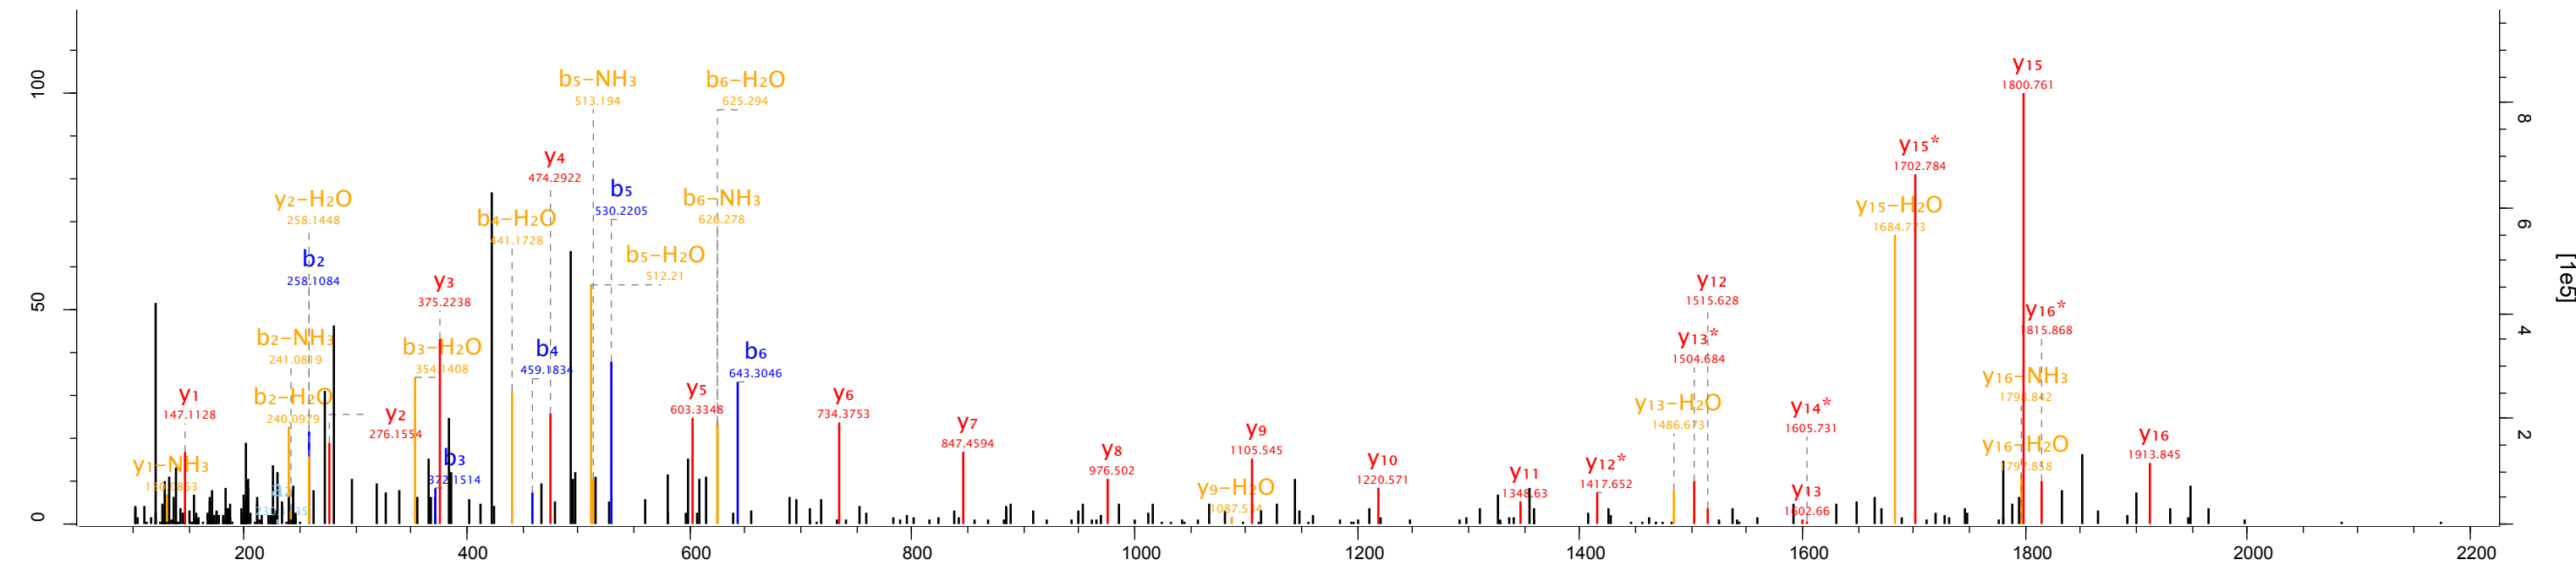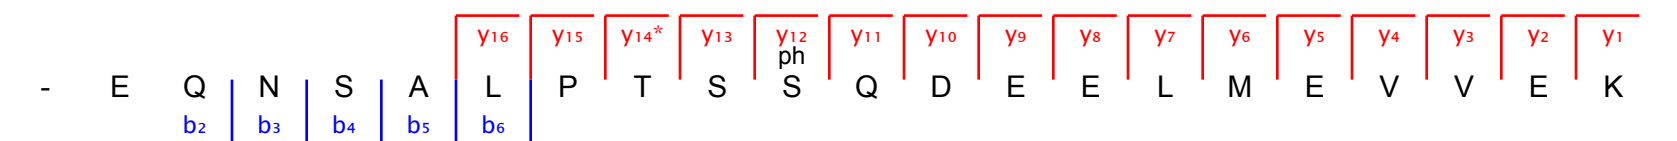

Raw file 20150814\_A375SR\_Phospho\_BR2\_04 Scan 25946 Method FTMS; HCD Score 169.7 m/z 945.39 Gene names ZCCHC6

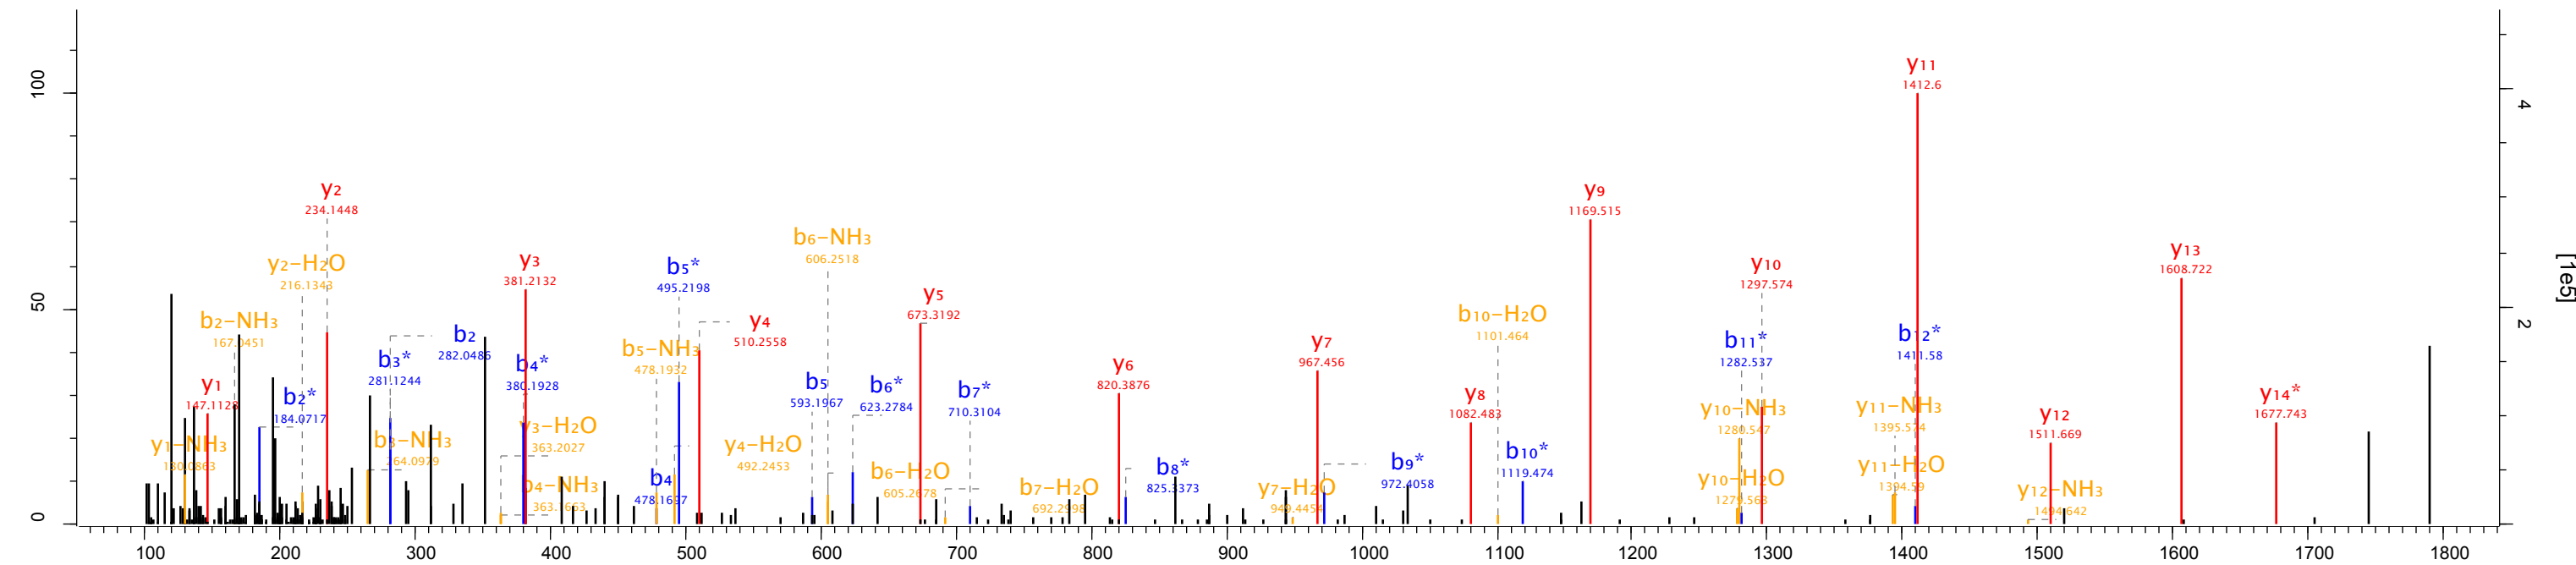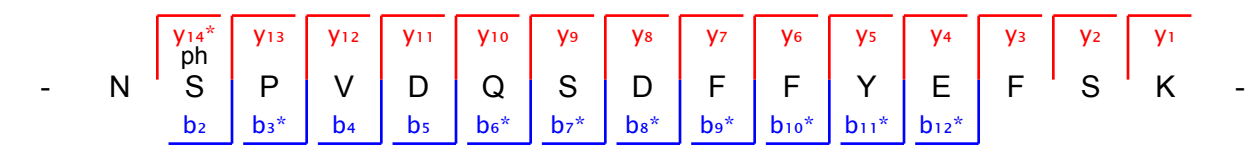

Raw file: 20150814\_A375SR\_Phospho\_BR2\_04  
 Scan: 2606 Method: FTMS; HCD Score: 137.93 m/z: 586.76 Gene names: SF3B1

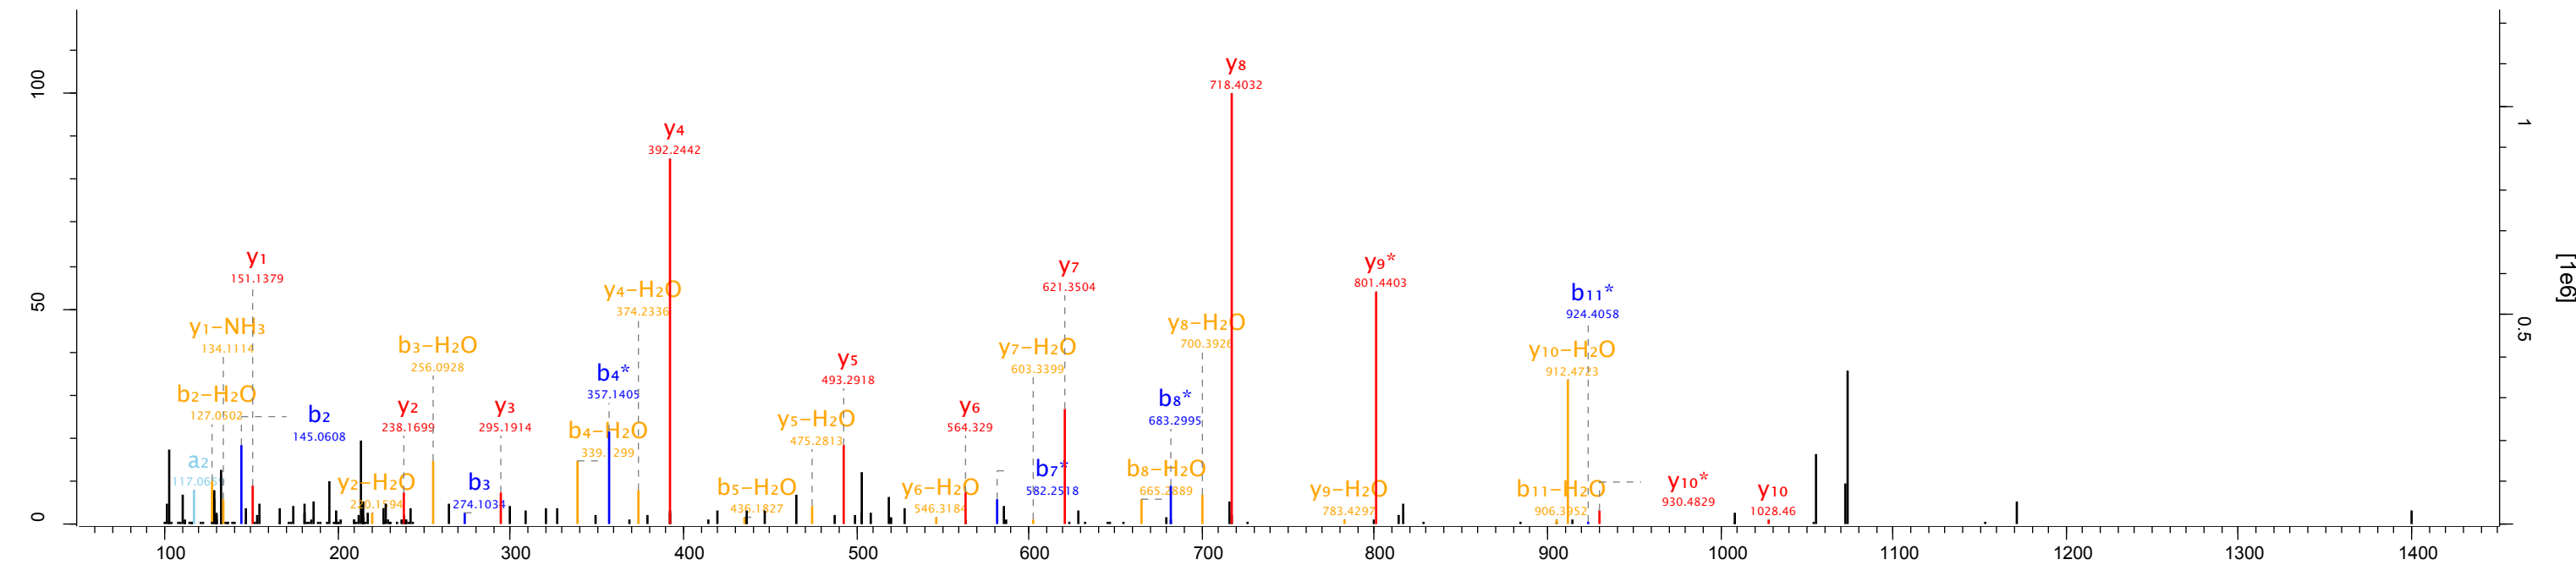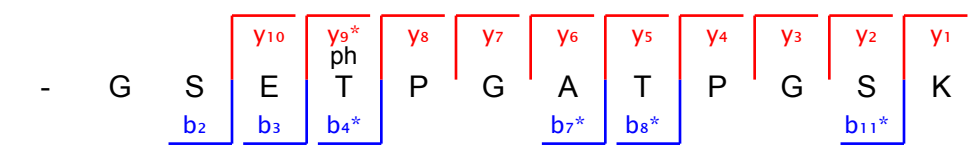

Raw file  
 20150814\_A375SR\_Phospho\_BR2\_04  
 Scan 26096 Method FTMS; HCD Score 108.3 m/z 769.36 Gene names KIF16B

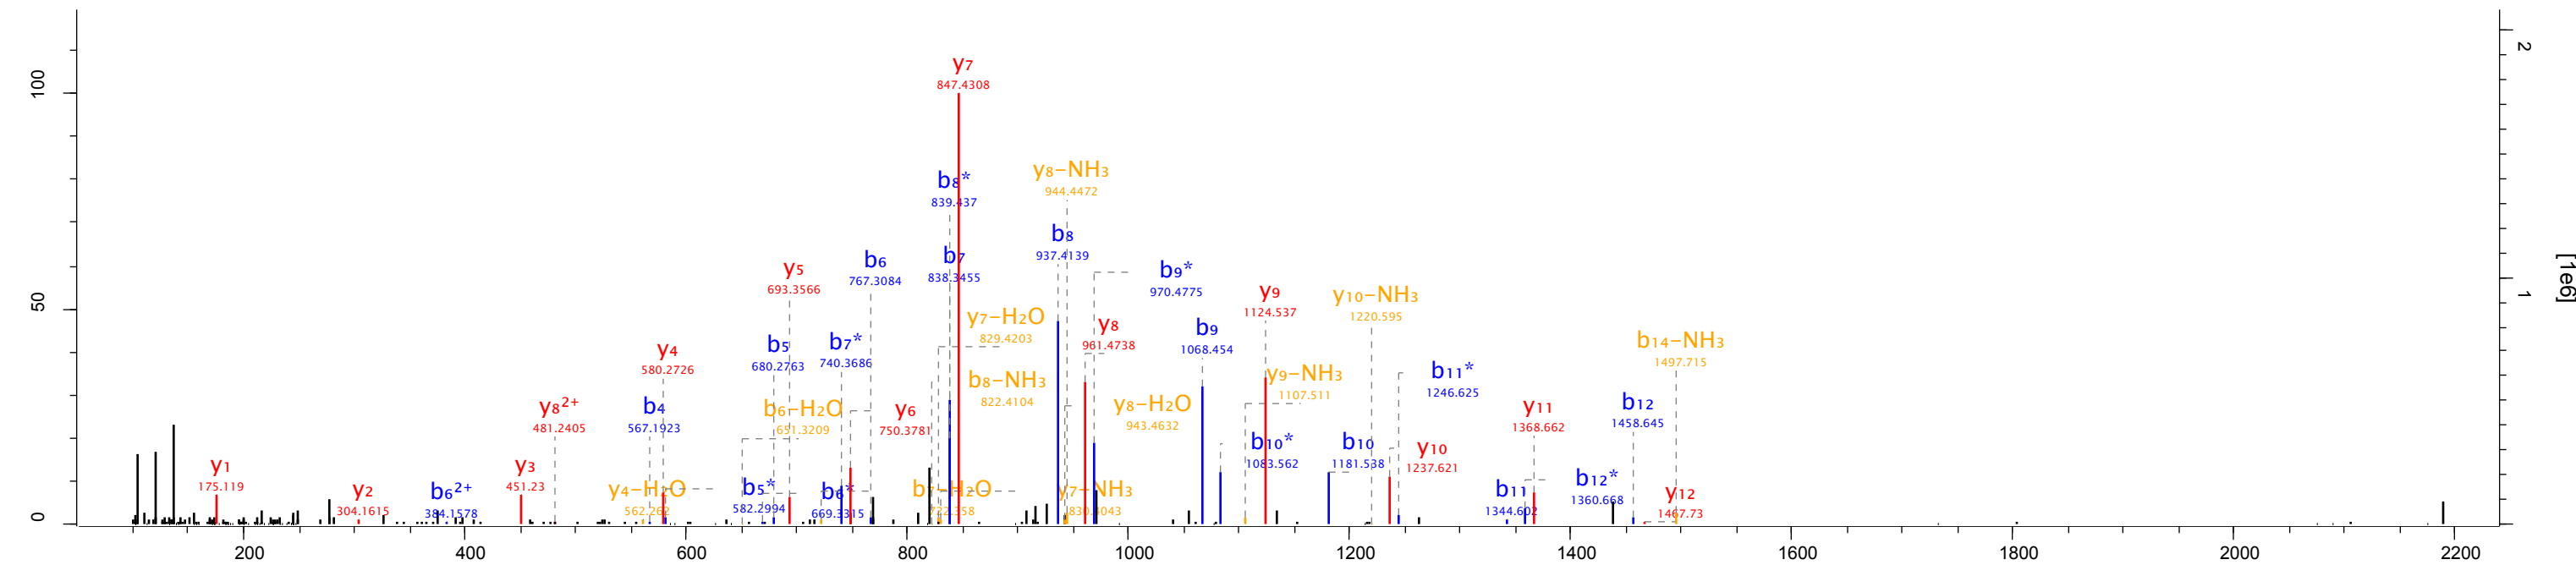

- S R E N L S A V M L Y N P G L E F E R -

Fragmentation mapping (b and y ions):

- b4: N
- b5: L
- b6: S
- b7: A
- b8: V
- b9: M
- b10: L
- b11: Y
- b12: N

Fragmentation mapping (y ions):

- y1: R
- y2: E
- y3: F
- y4: E
- y5: L
- y6: G
- y7: P
- y8: N
- y9: Y
- y10: L
- y11: M
- y12: V



Raw file 20150814\_A375SR\_Phospho\_BR2\_04 Scan 26606 Method FTMS; HCD Score 85.16 m/z 924.4 Gene names C19orf26;DOS

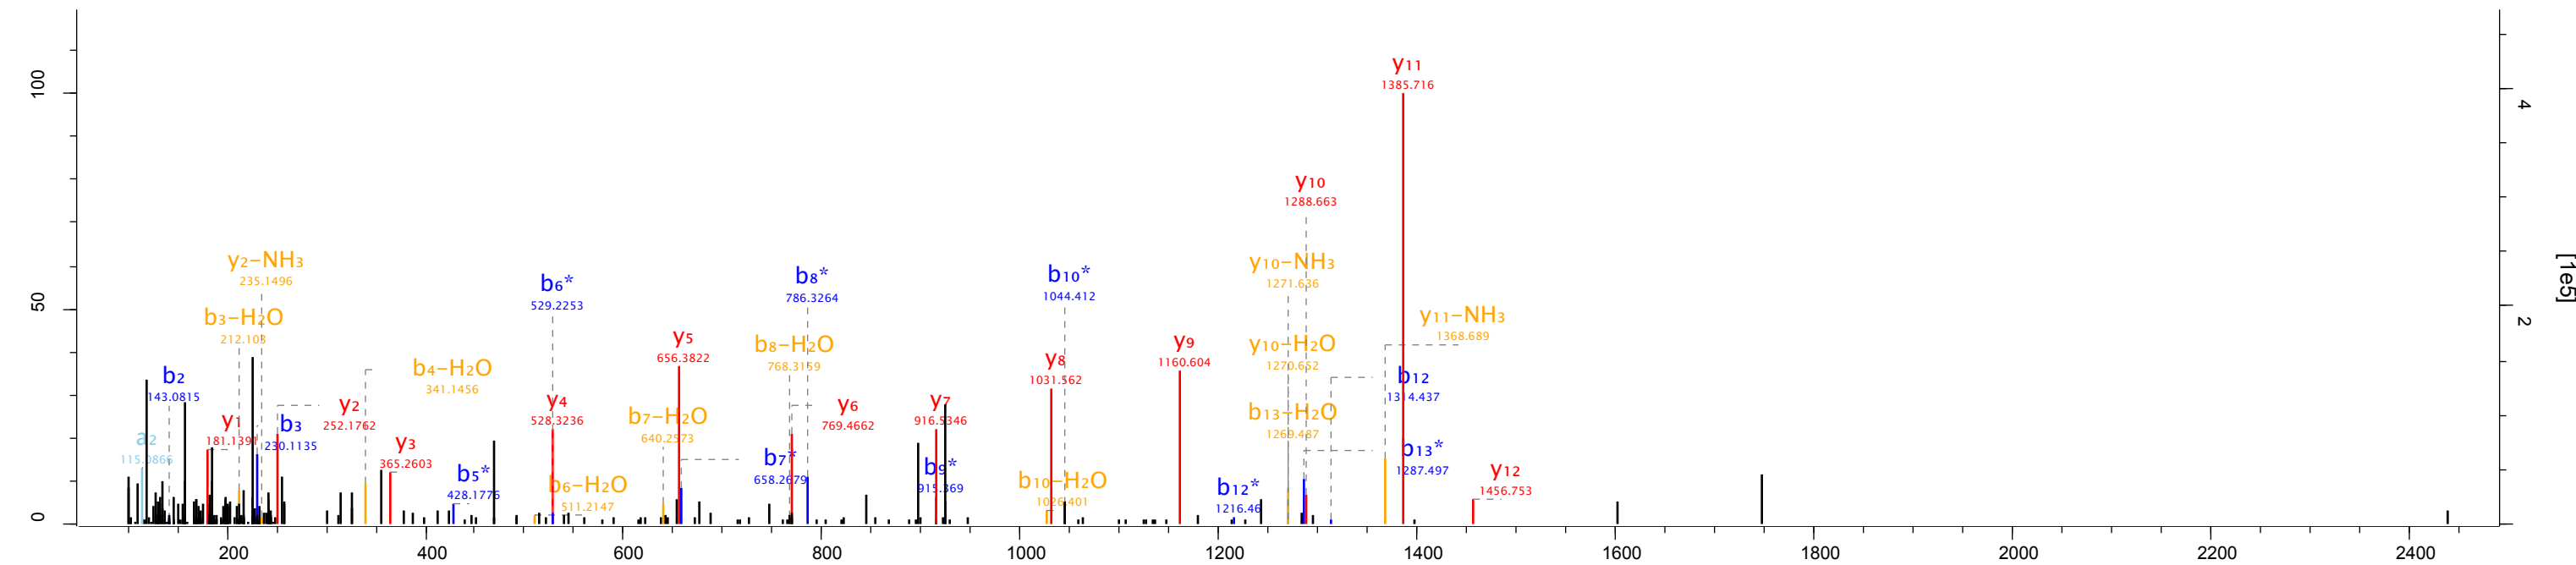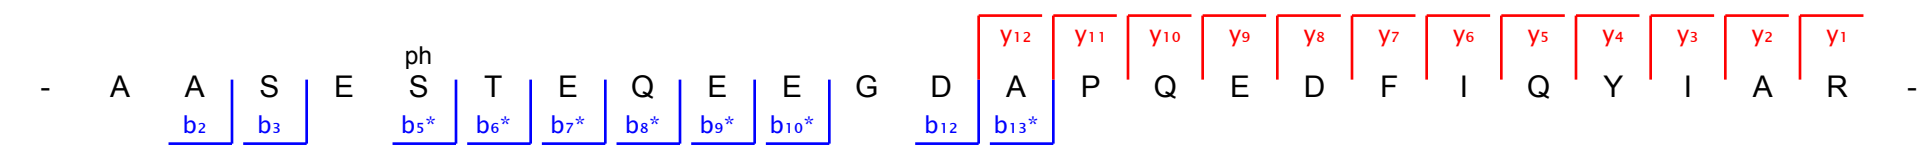

Raw file 20150814\_A375SR\_Phospho\_BR2\_04 Scan 27206 Method FTMS; HCD Score 249.1 m/z 1079.13 Gene names MYL6;PDE6H

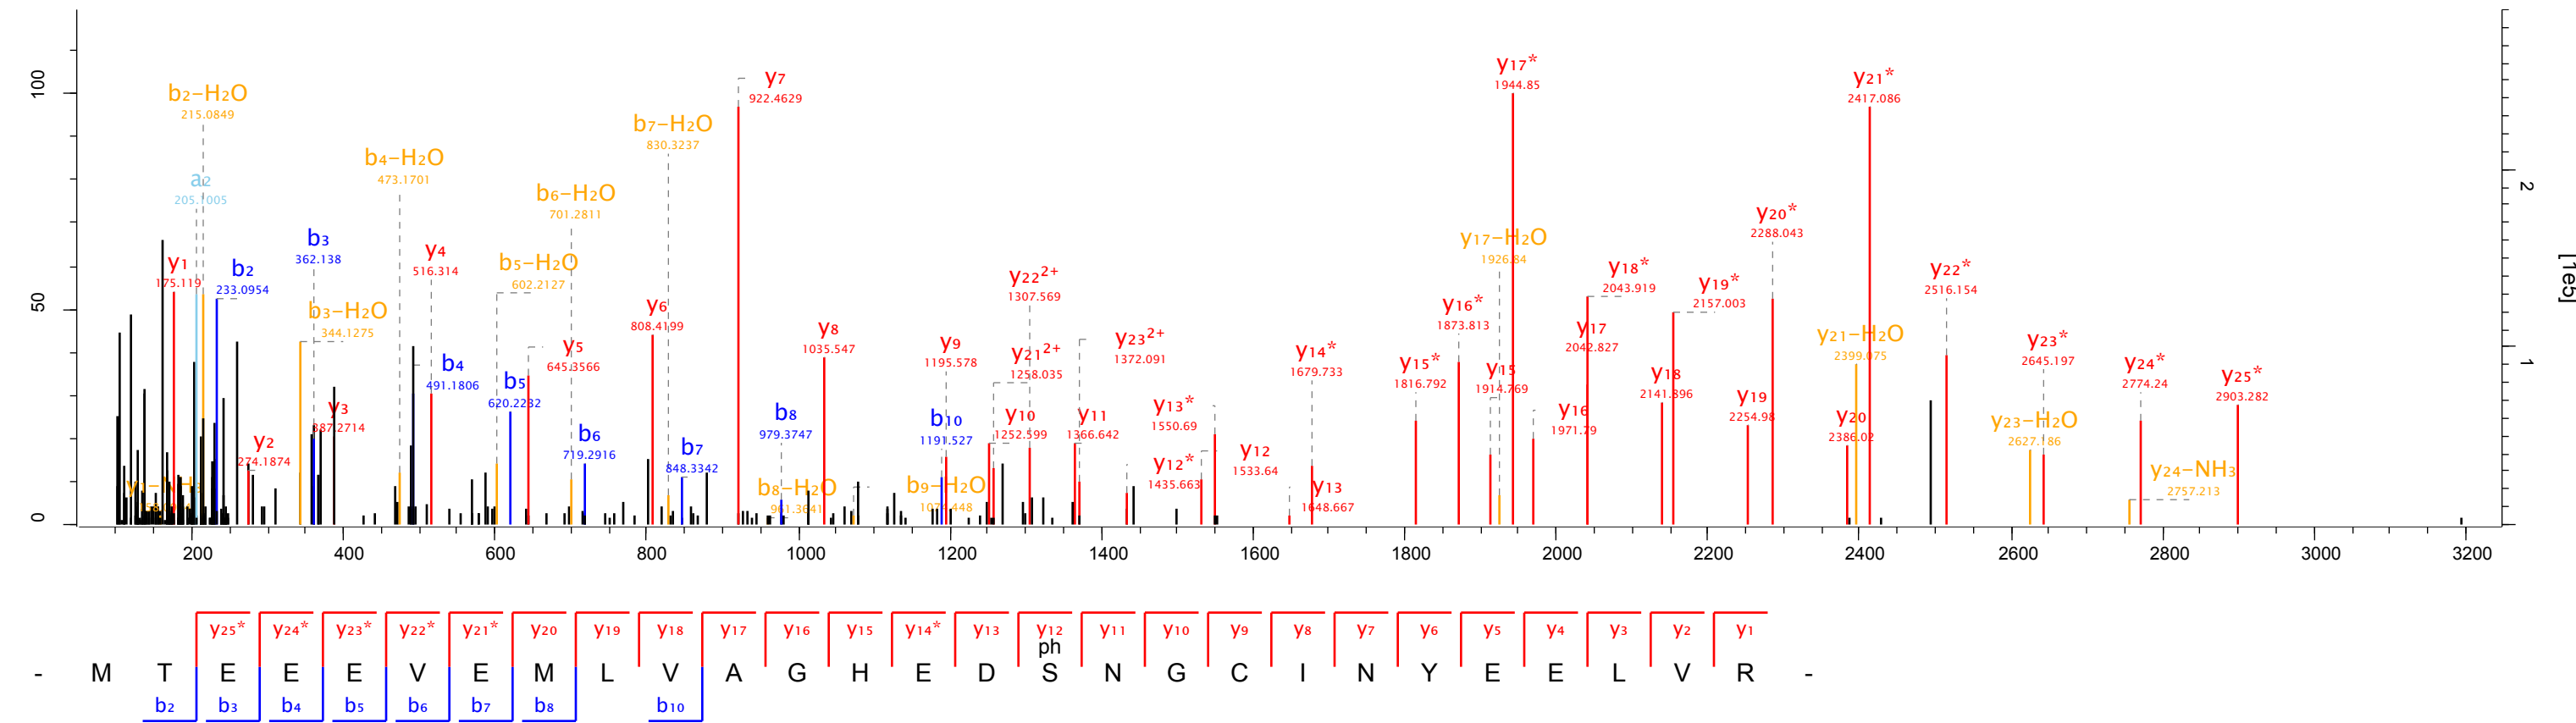

Raw file 20150814\_A375SR\_Phospho\_BR2\_04 Scan 27306 Method FTMS; HCD Score 111.73 m/z 889.41 Gene names TUBB6;TUBB3;TUBB;TUBB2B;TUBB4B;TUBB2A

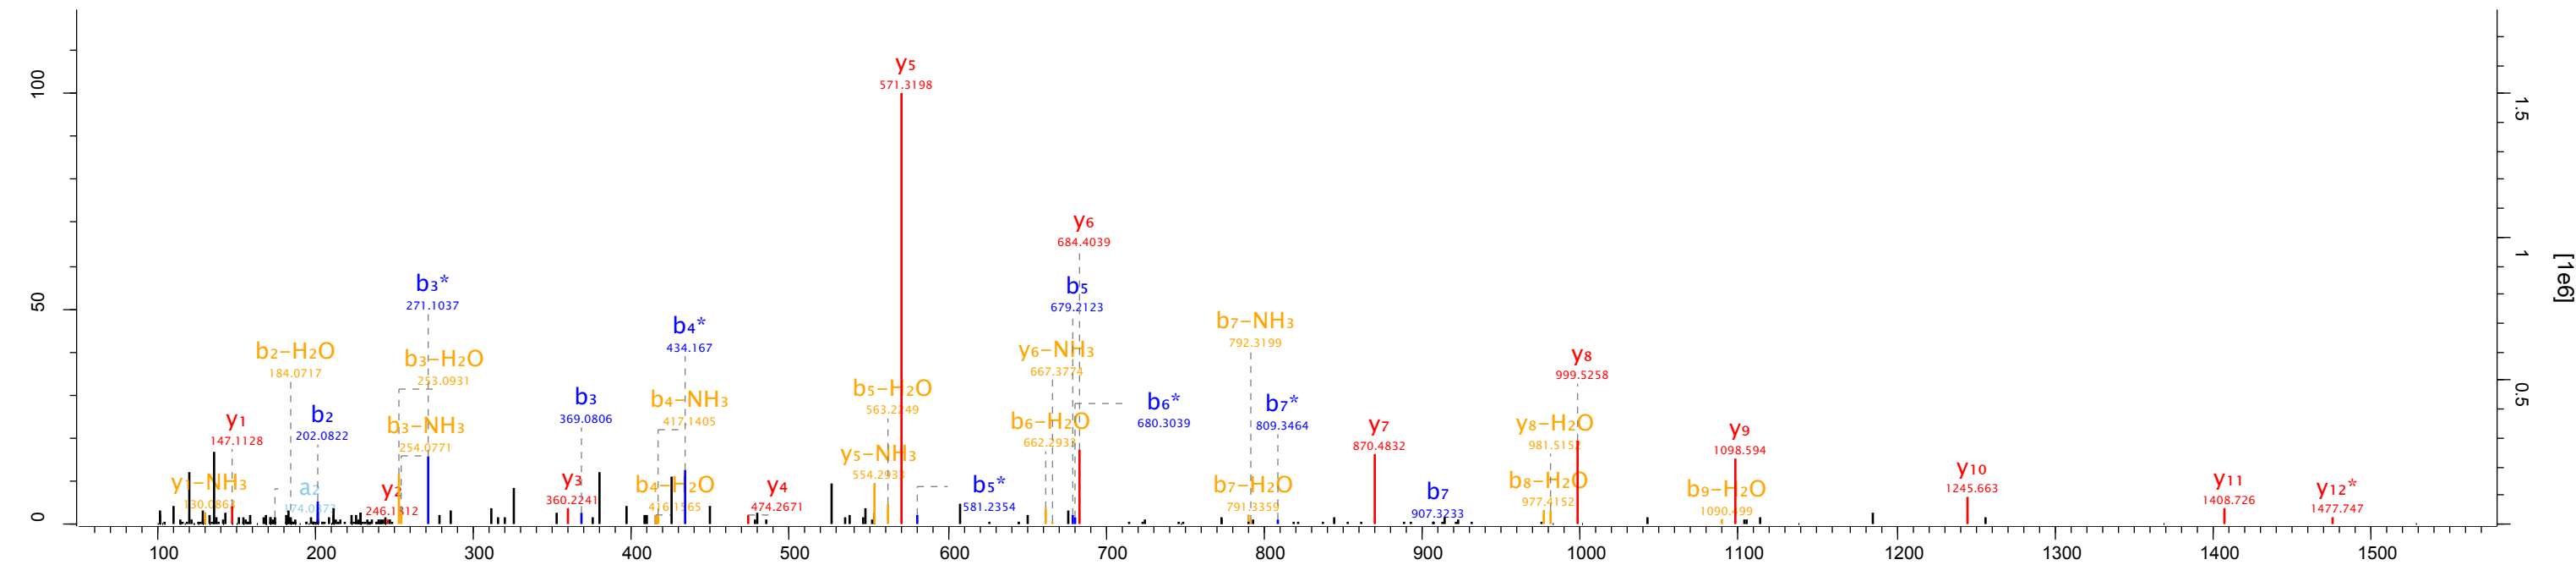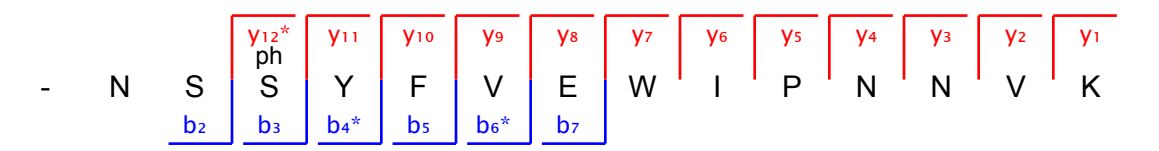

Raw file Scan Method Score m/z Gene names  
 20150814\_A375SR\_Phospho\_BR2\_04 27416 FTMS; HCD 209.3 1112.53 SMARCAD1

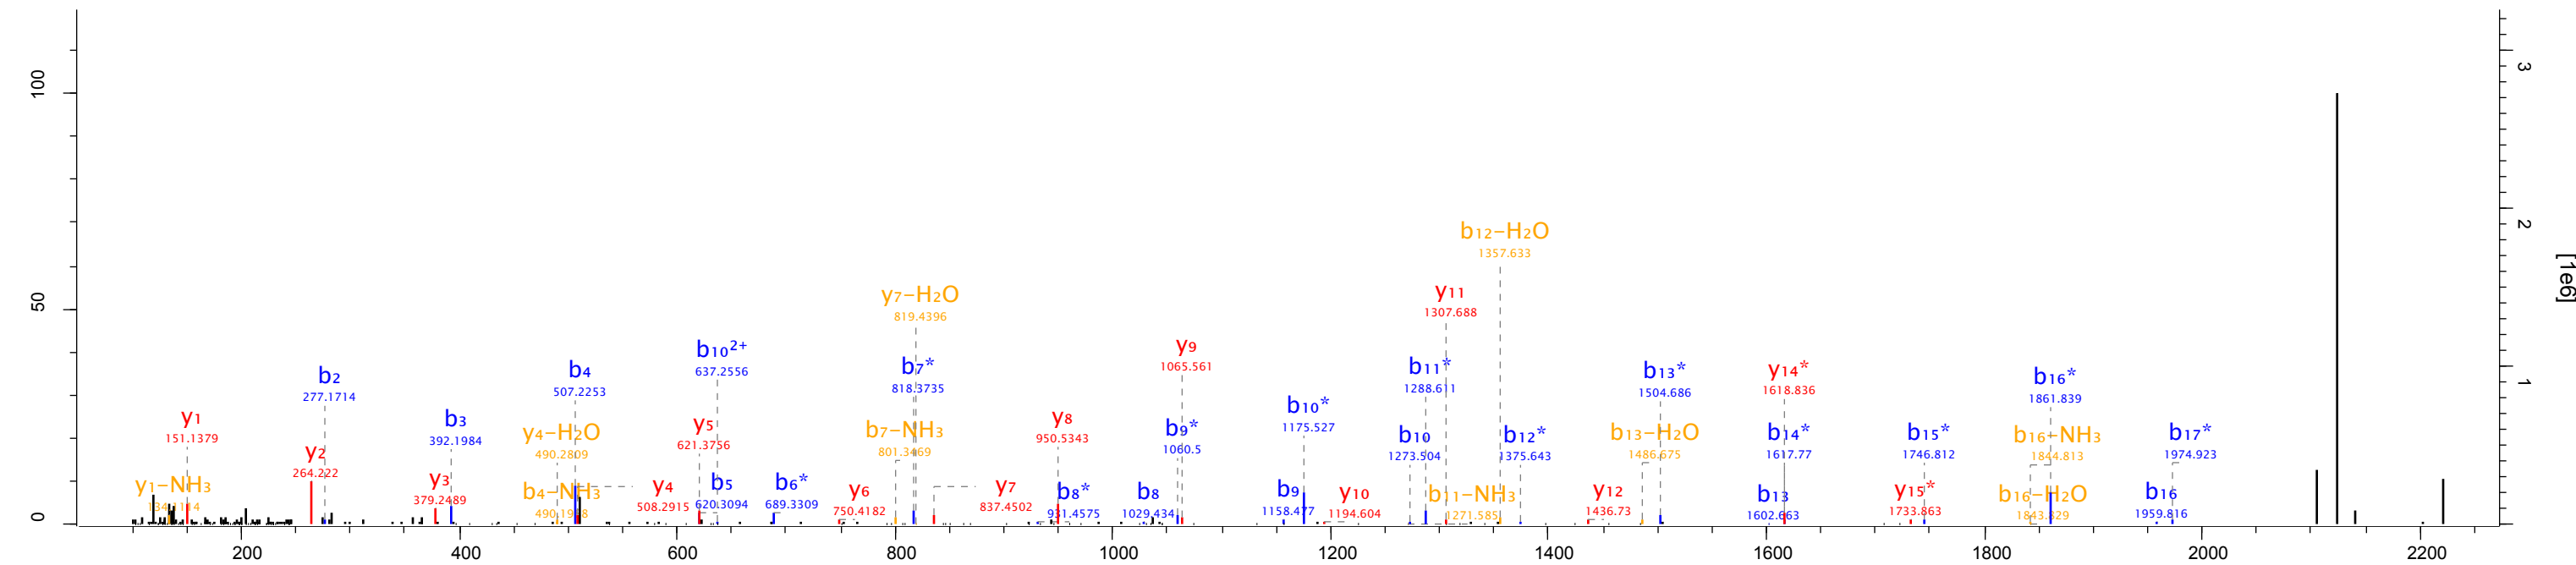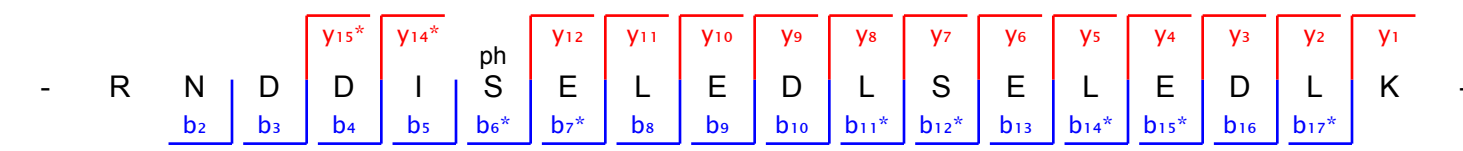

Raw file 20150814\_A375SR\_Phospho\_BR2\_04 Scan 27536 Method FTMS; HCD Score 66.47 m/z 849.71 Gene names CAST

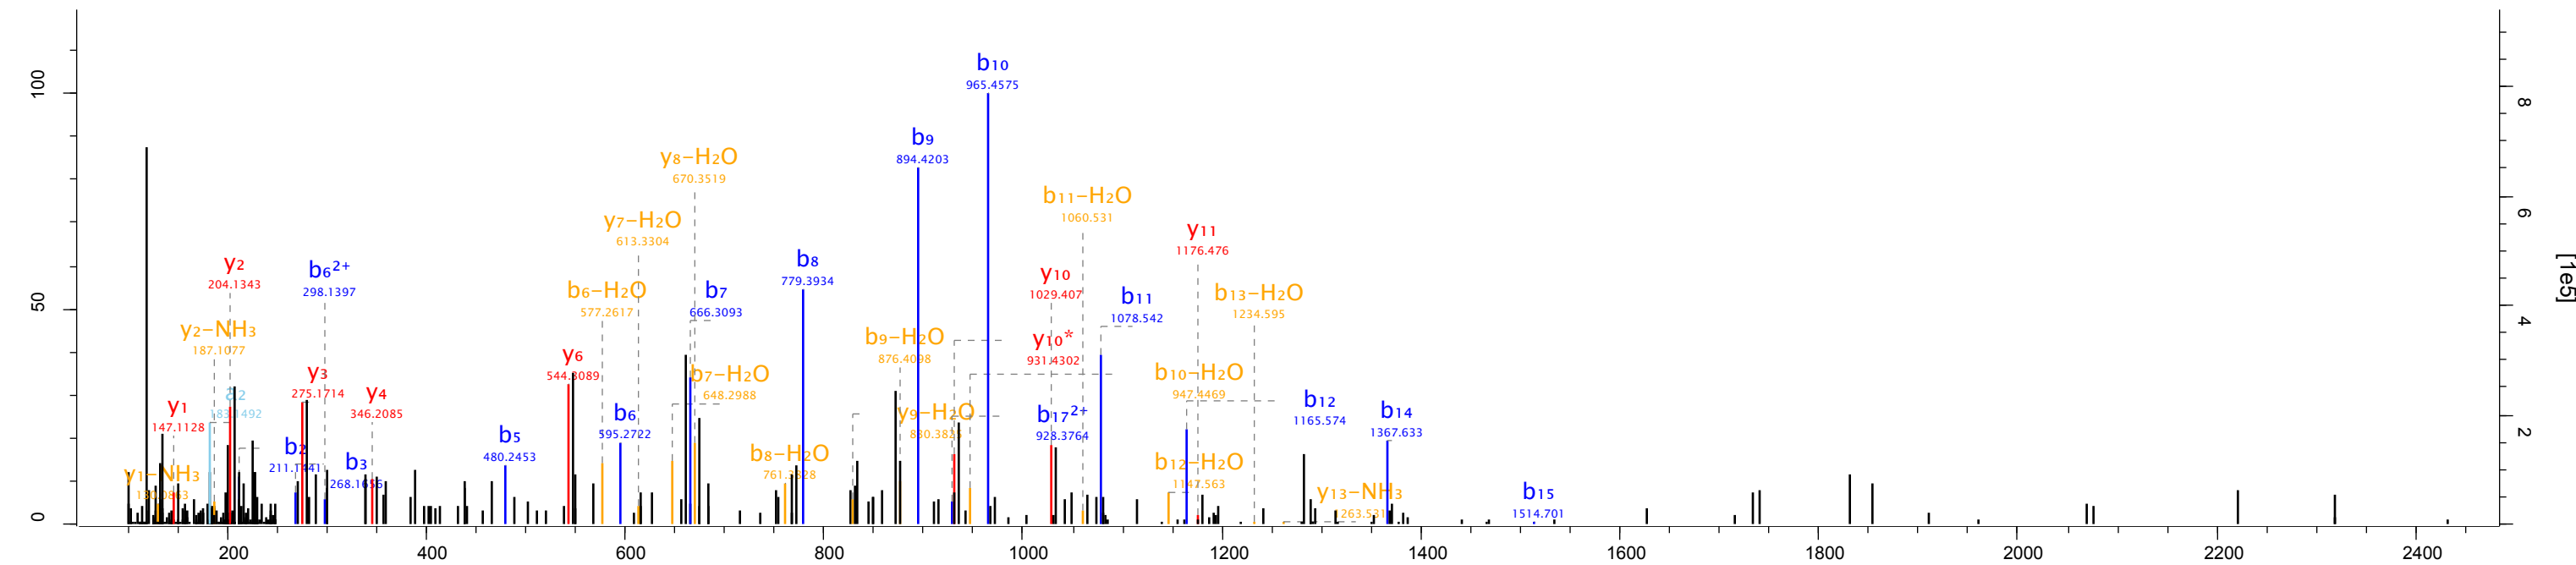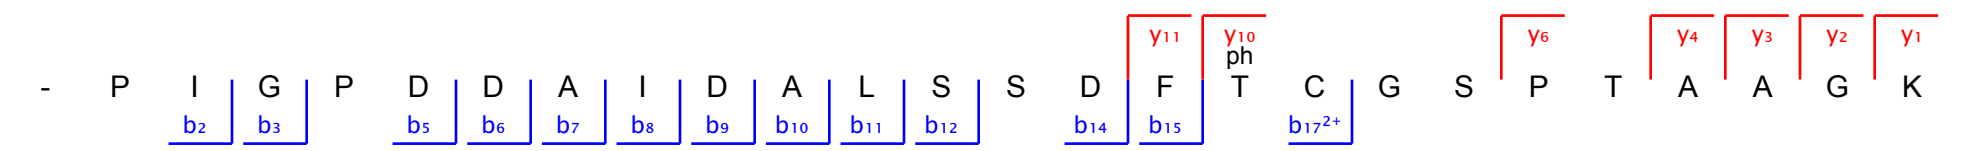

Raw file 20150814\_A375SR\_Phospho\_BR2\_04 Scan 27686 Method FTMS; HCD Score 56.77 m/z 987.48 Gene names SAMD4A

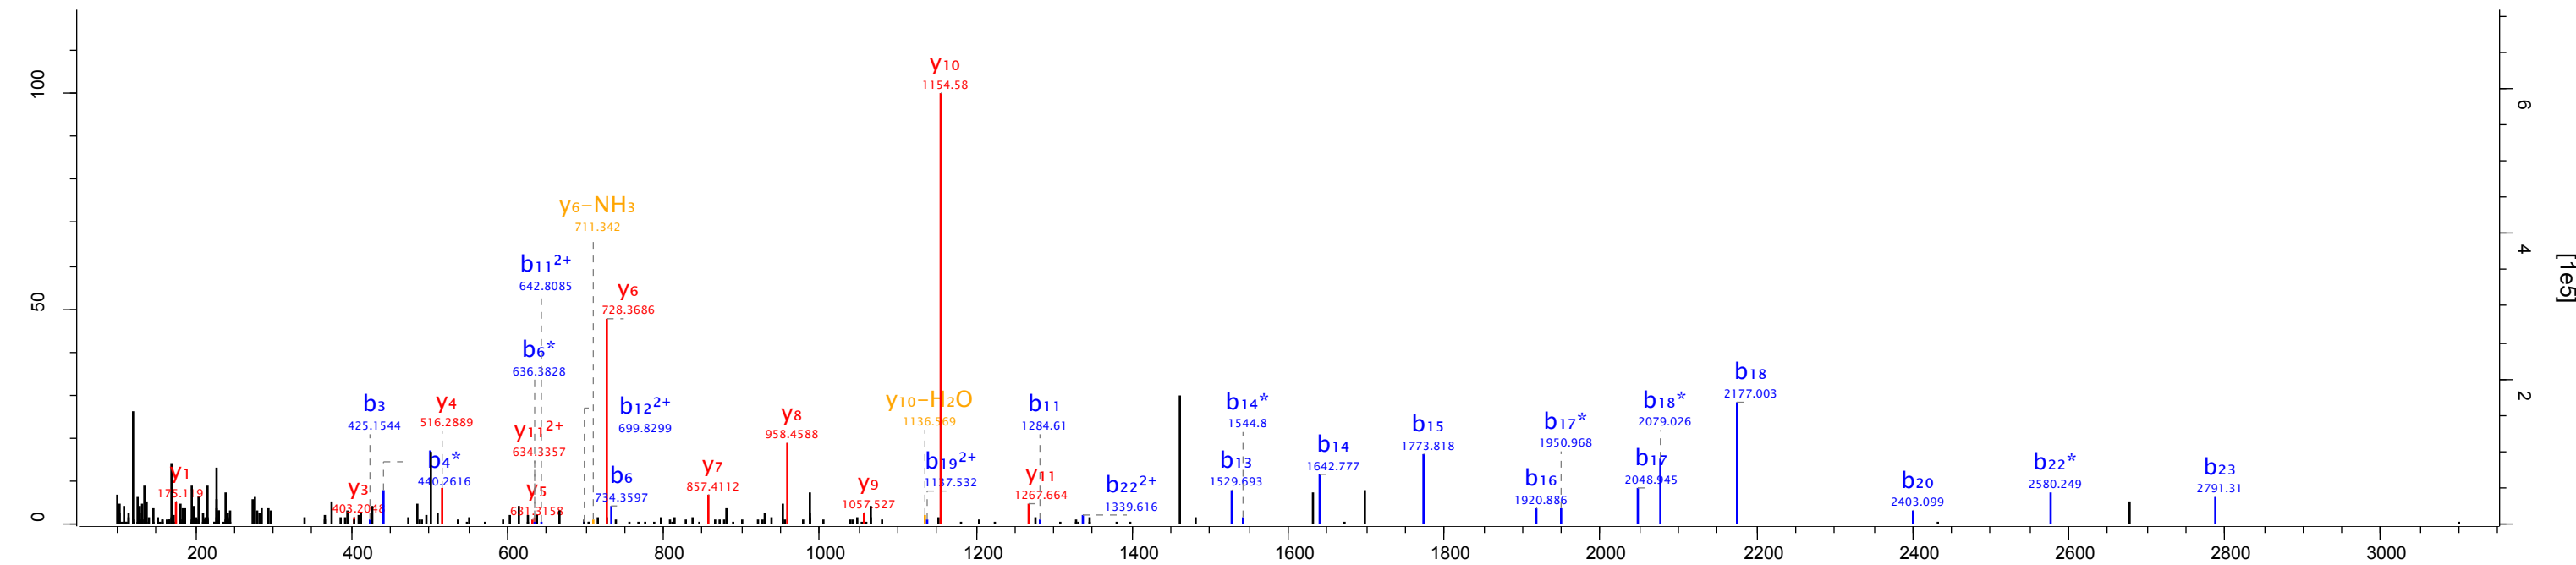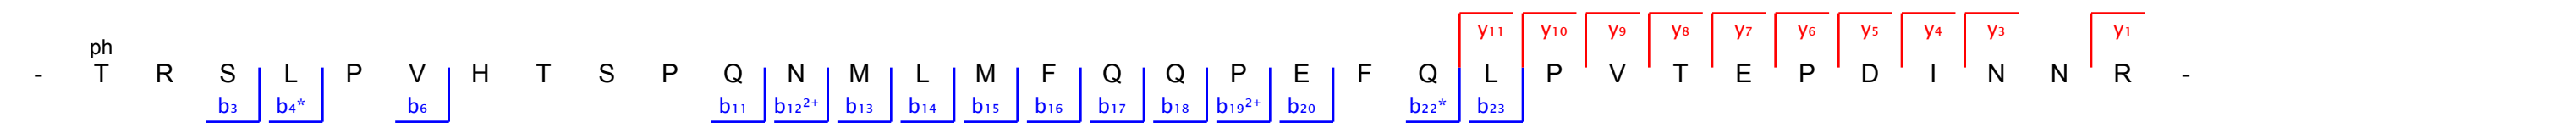

Raw file: 20150814\_A375SR\_Phospho\_BR2\_04  
 Scan: 27776 Method: FTMS; HCD Score: 117.7 m/z: 1251.62 Gene names: SCAF4

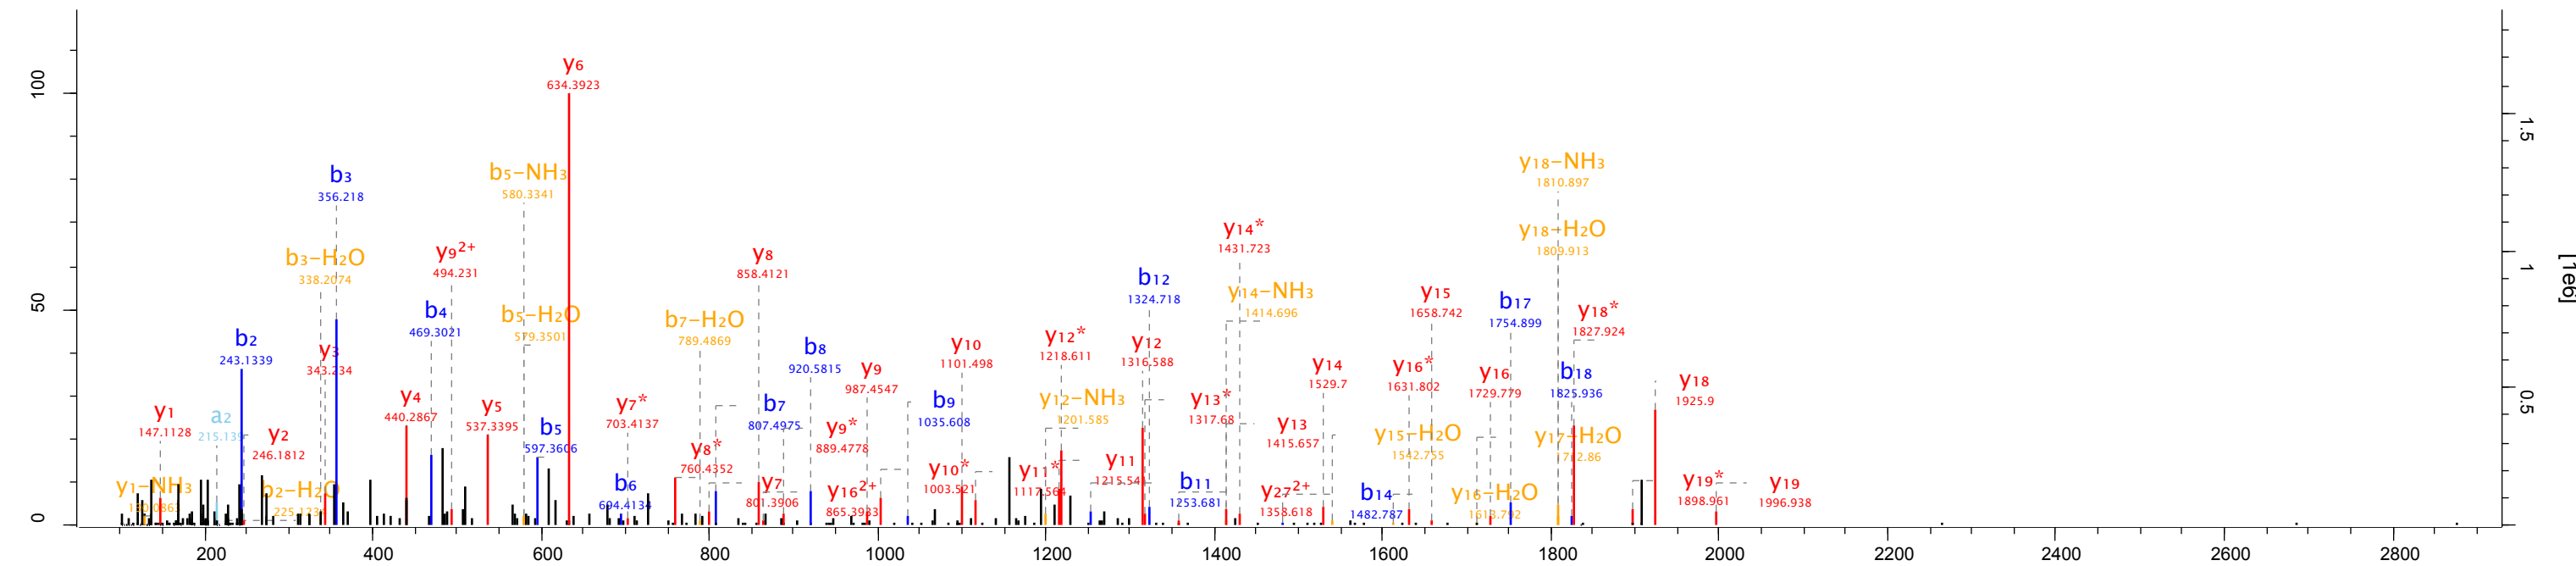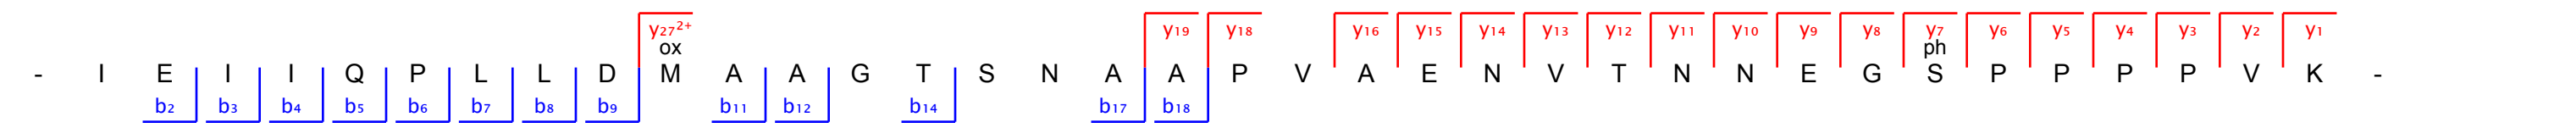

Raw file 20150814\_A375SR\_Phospho\_BR2\_04 Scan 27896 Method FTMS; HCD Score 61.96 m/z 980.45 Gene names BCL2L13

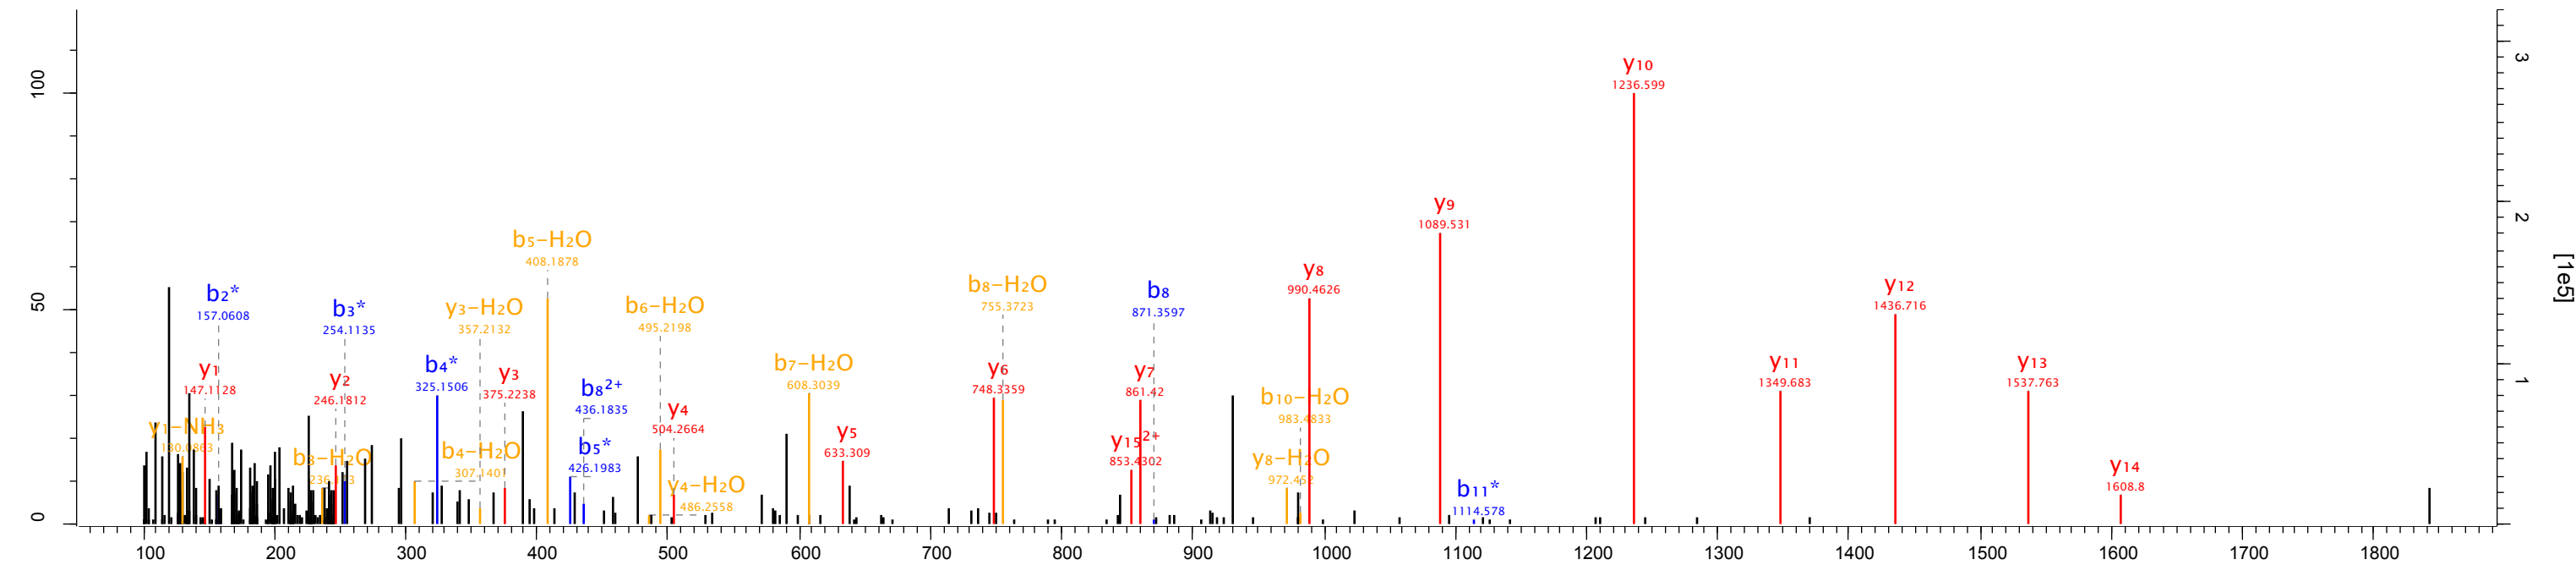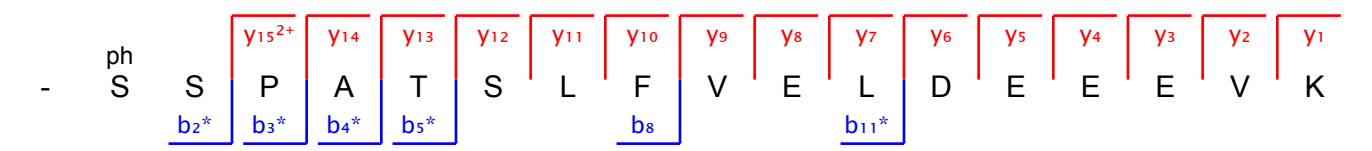



Raw file 20150814\_A375SR\_Phospho\_BR2\_04 Scan 27936 Method FTMS; HCD Score 129.59 m/z 1195.92 Gene names ZNF827

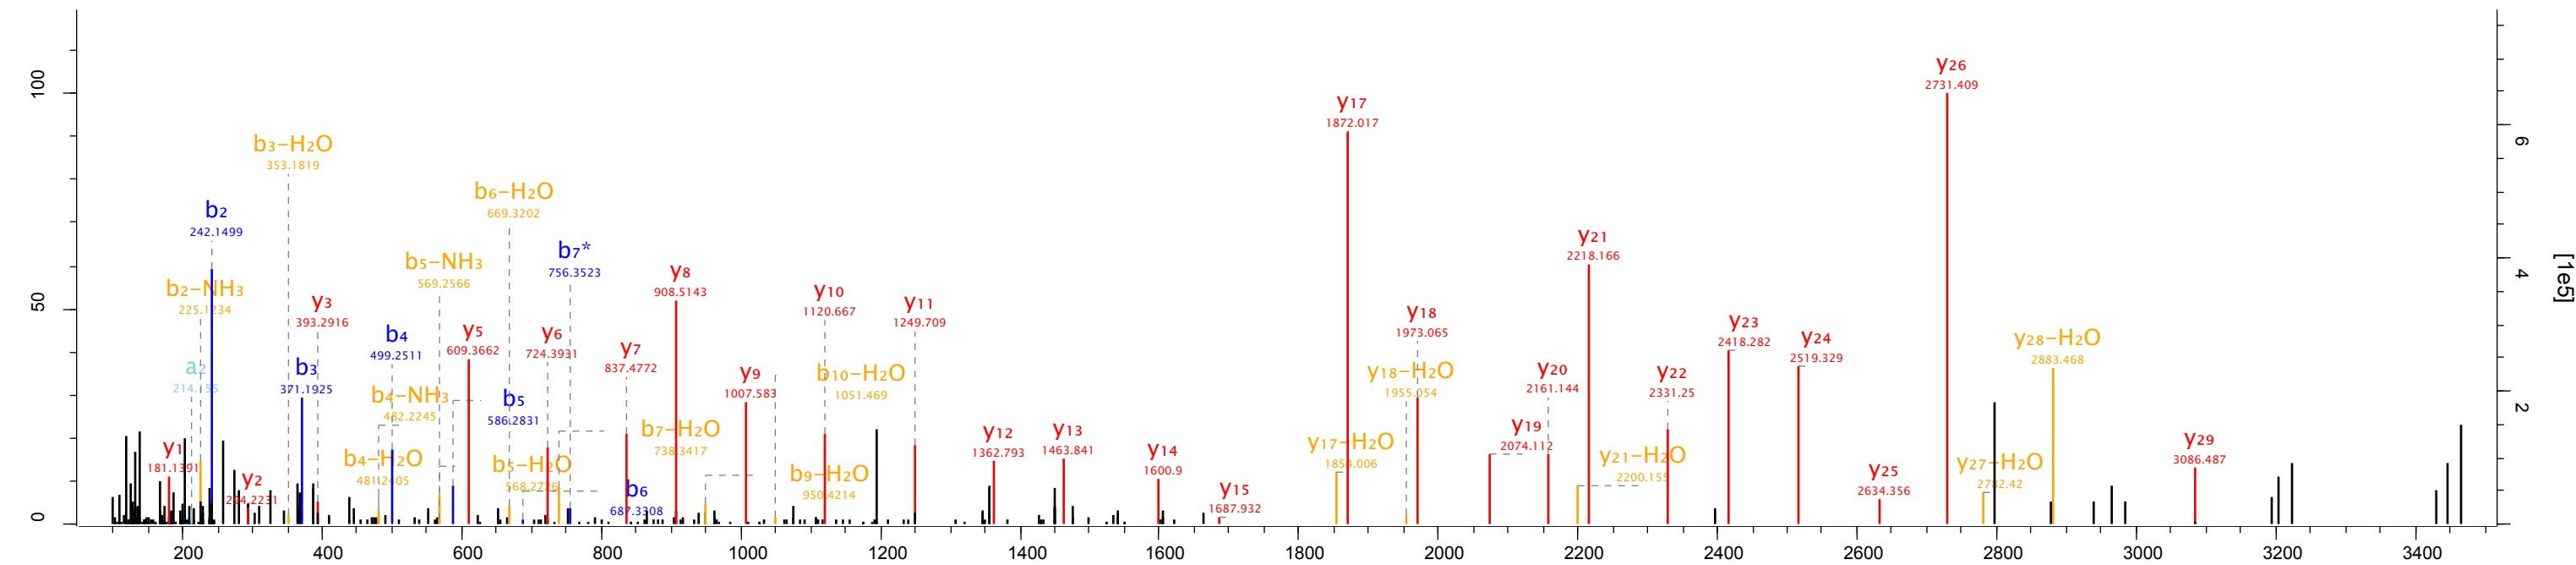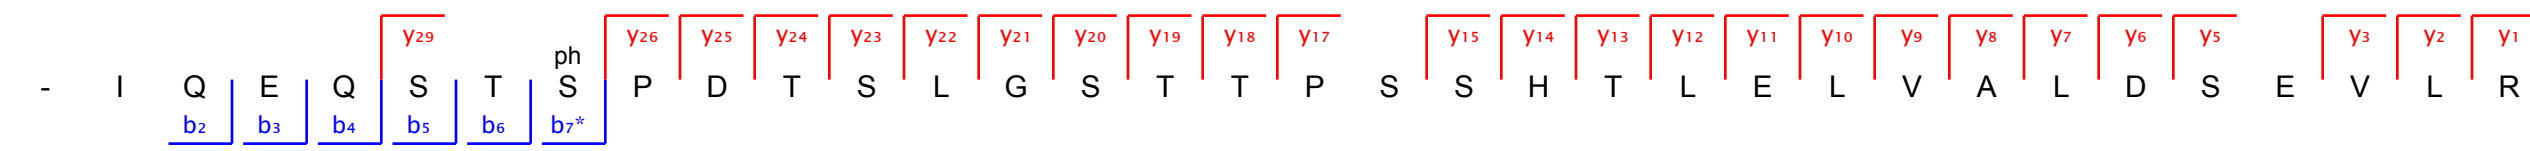

Raw file: 20150814\_A375SR\_Phospho\_BR2\_04  
 Scan: 28296 Method: FTMS; HCD Score: 218.11 m/z: 1149.51 Gene names: FAM21C;FAM21D;FAM21A

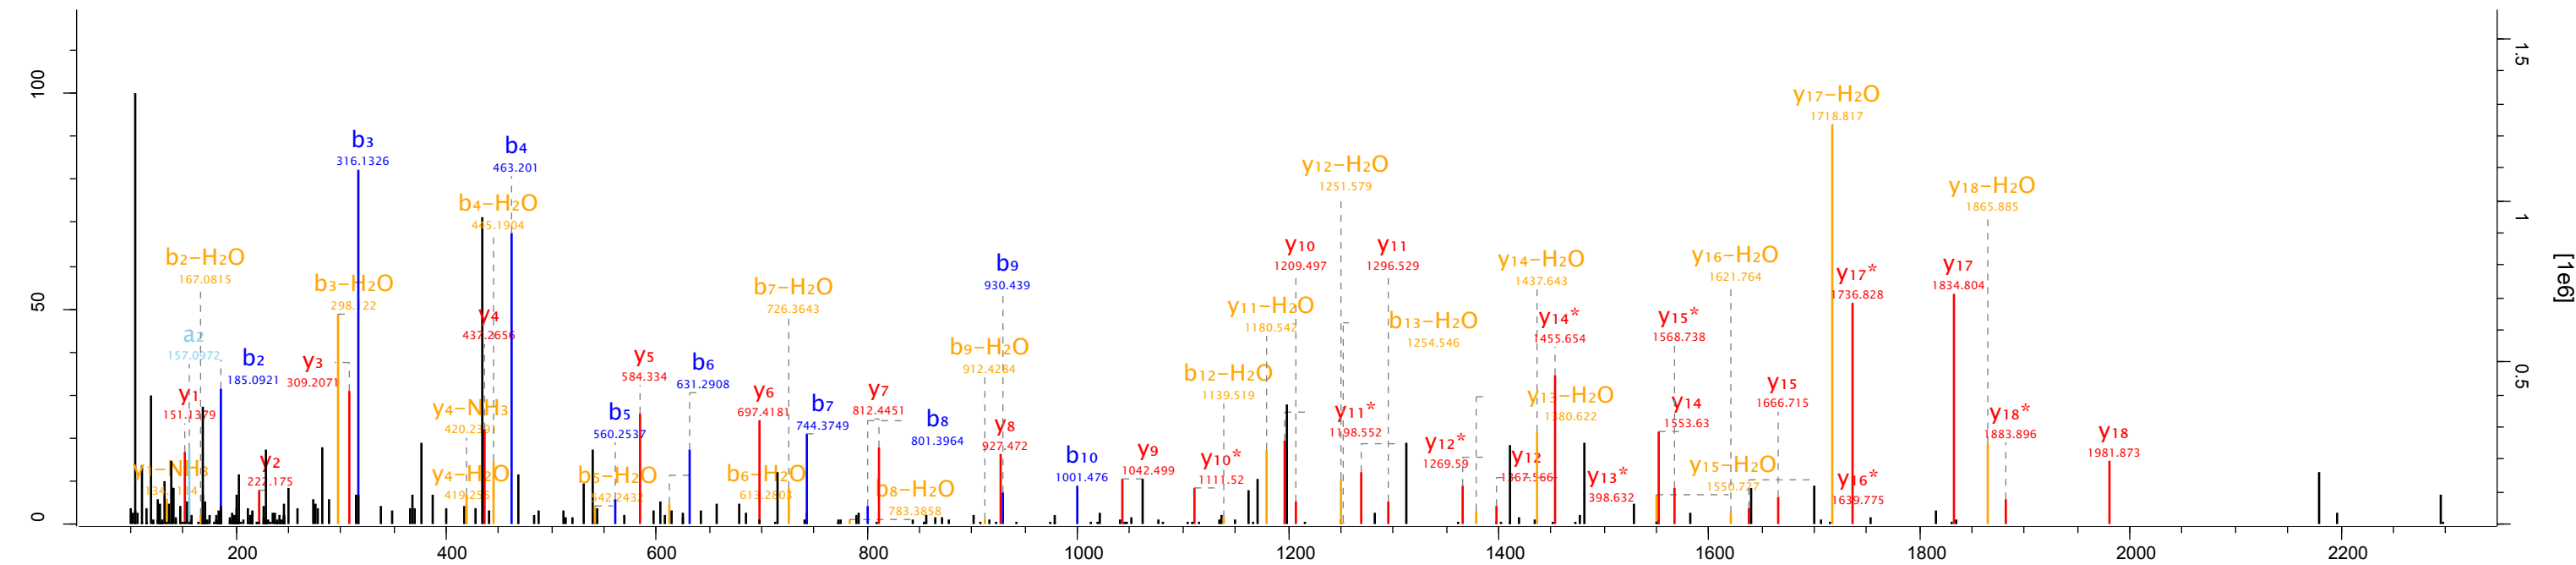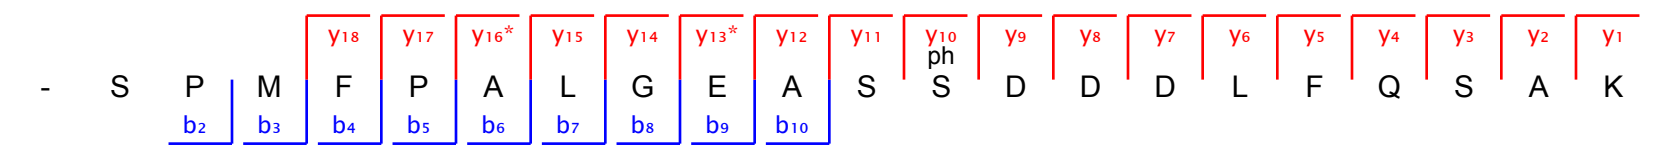

Raw file: 20150814\_A375SR\_Phospho\_BR2\_04  
 Scan: 28386 Method: FTMS; HCD Score: 218.98 m/z: 1223.07 Gene names: AMOTL2

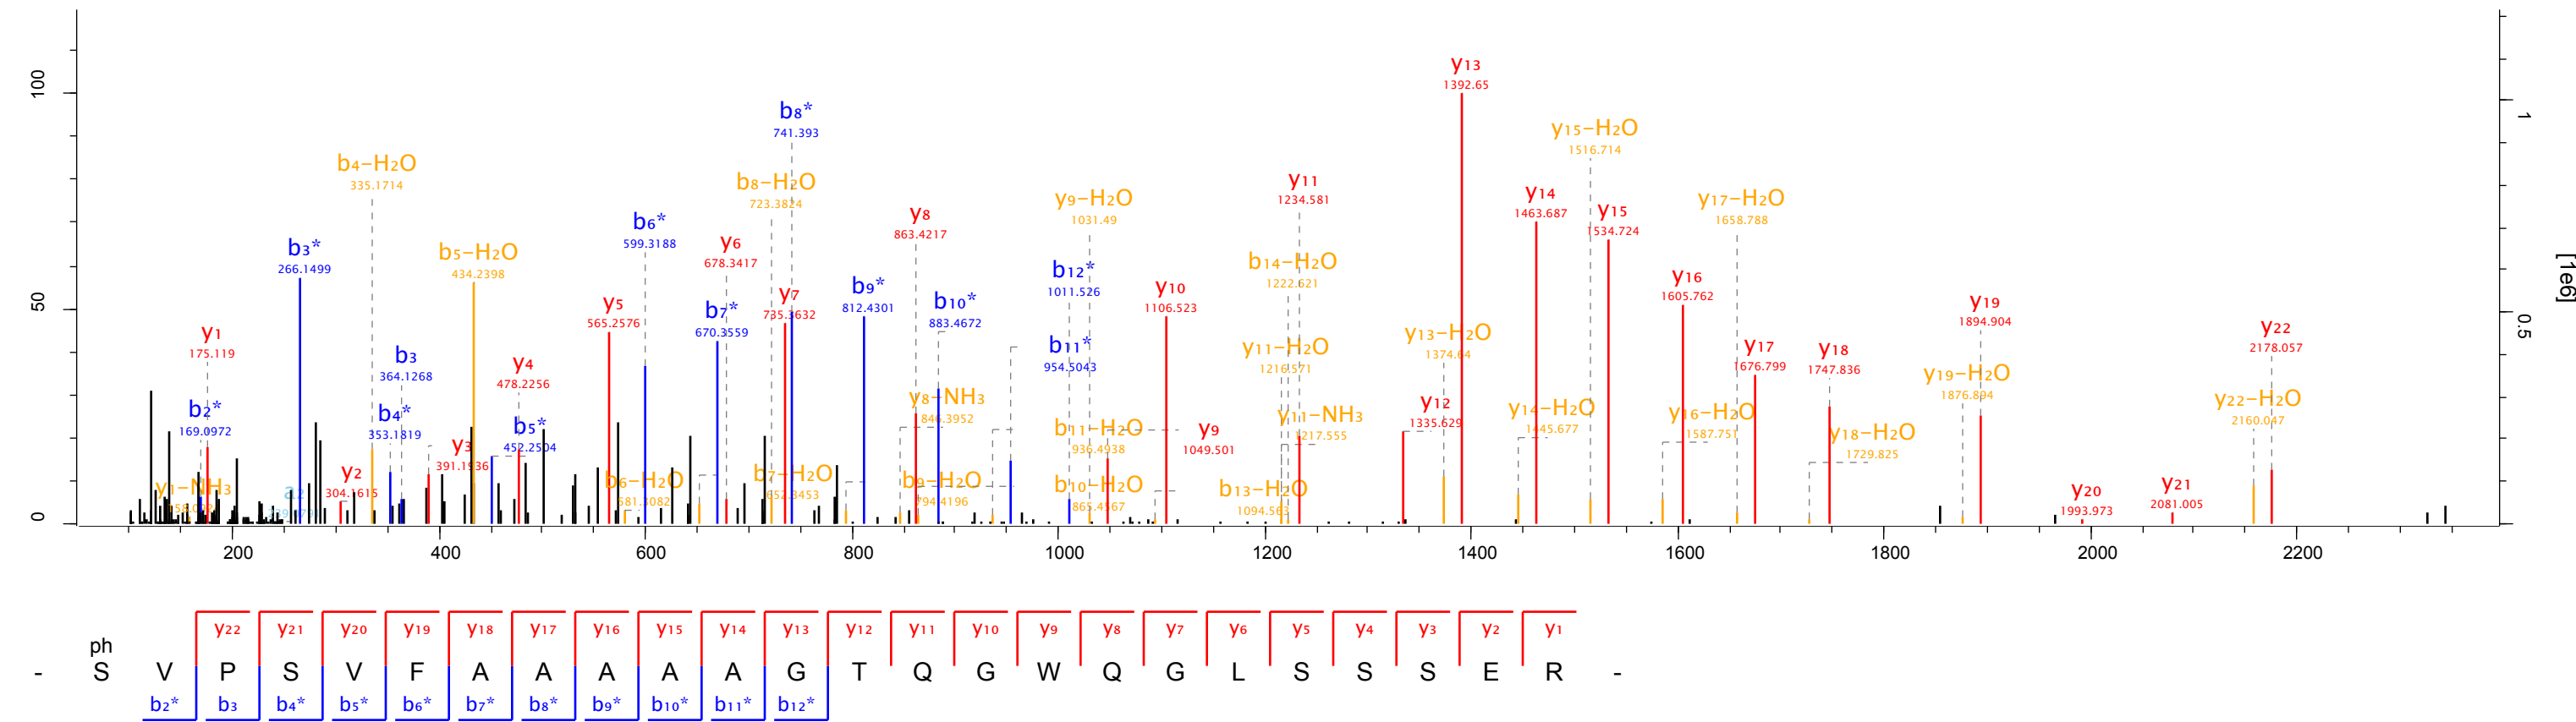

Raw file  
20150814\_A375SR\_Phospho\_BR2\_04

Scan 28636 Method FTMS; HCD Score 234.3 m/z 1109 Gene names YWHAZ

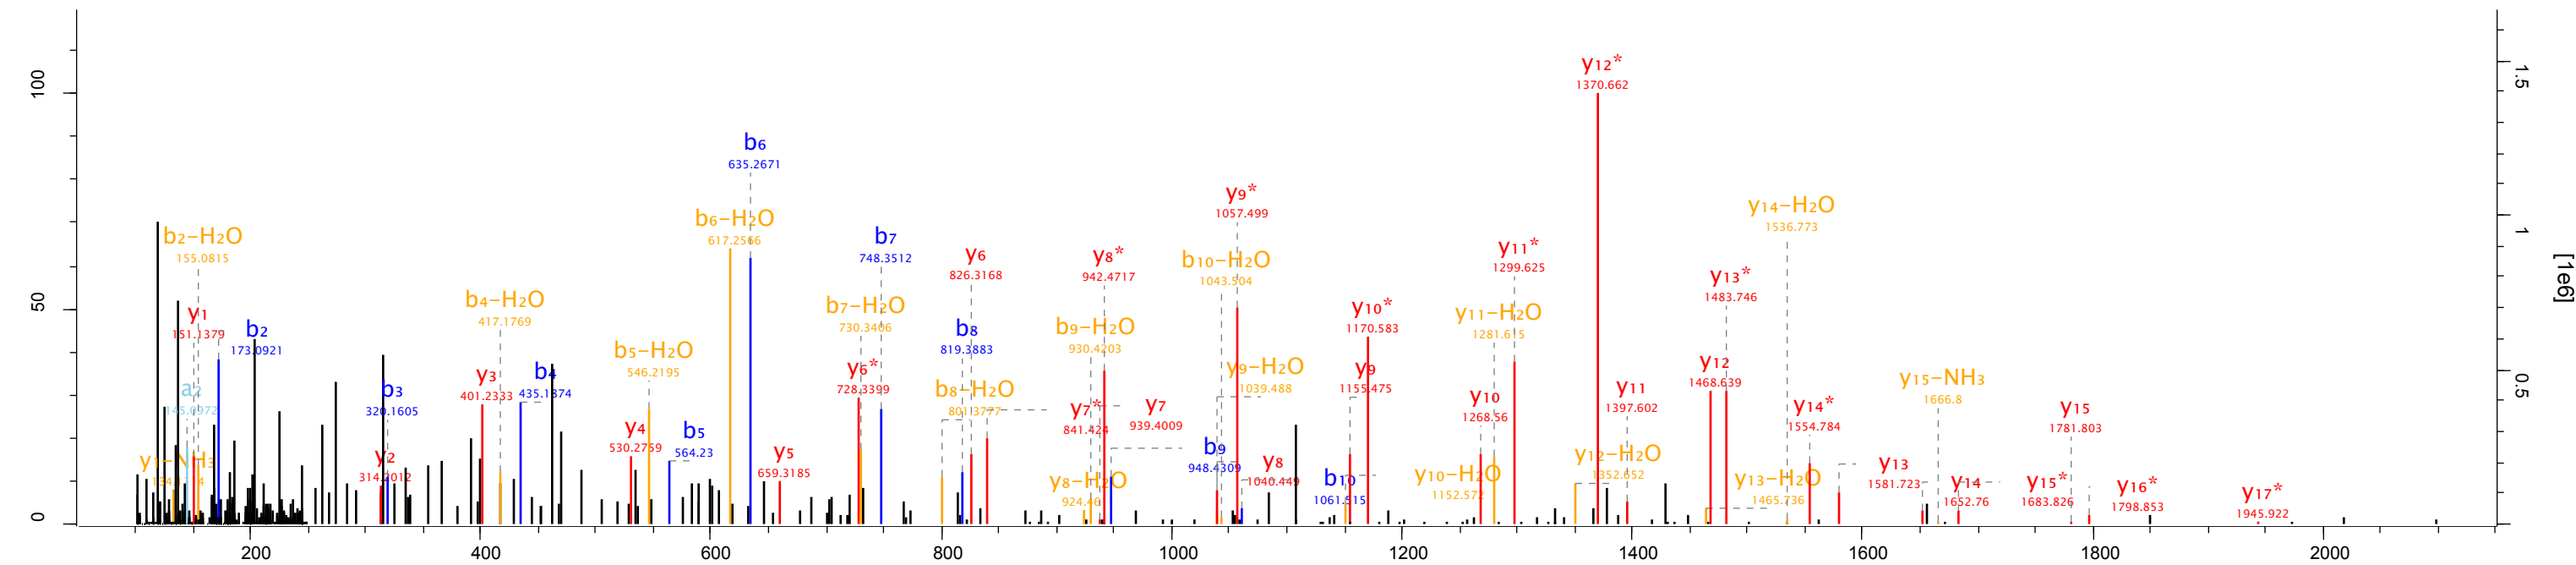

- T A F D E A I A E L D T L S E E S Y K -  
b2 b3 b4 b5 b6 b7 b8 b9 b10

Raw file  
20150814\_A375SR\_Phospho\_BR2\_04

Scan 28726 Method FTMS; HCD Score 209.74 m/z 704.37 Gene names WDR62

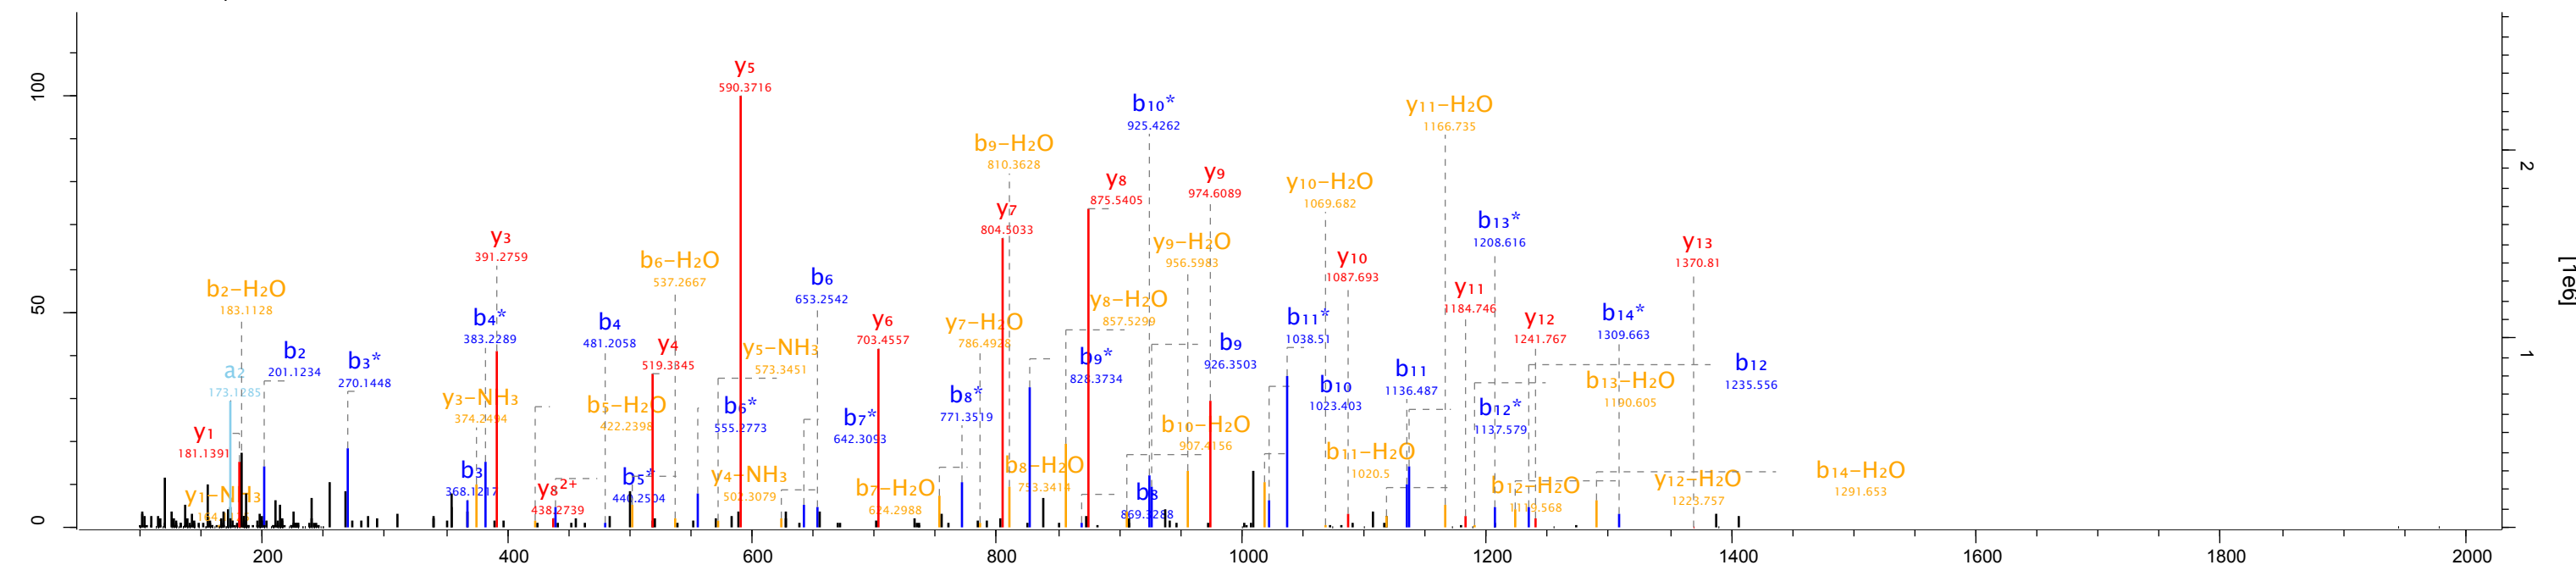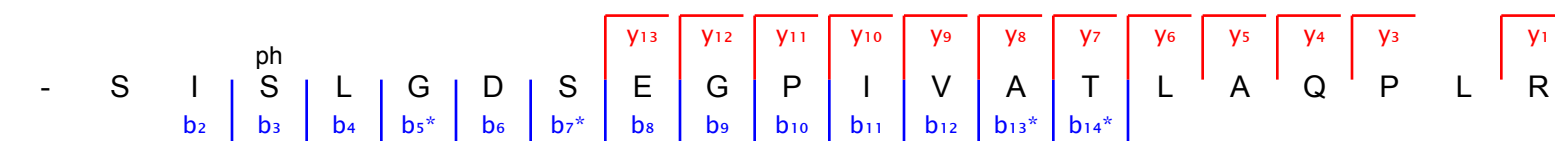

Raw file: 20150814\_A375SR\_Phospho\_BR2\_04  
 Scan: 28836 Method: FTMS; HCD Score: 190.46 m/z: 825.94 Gene names: VIM

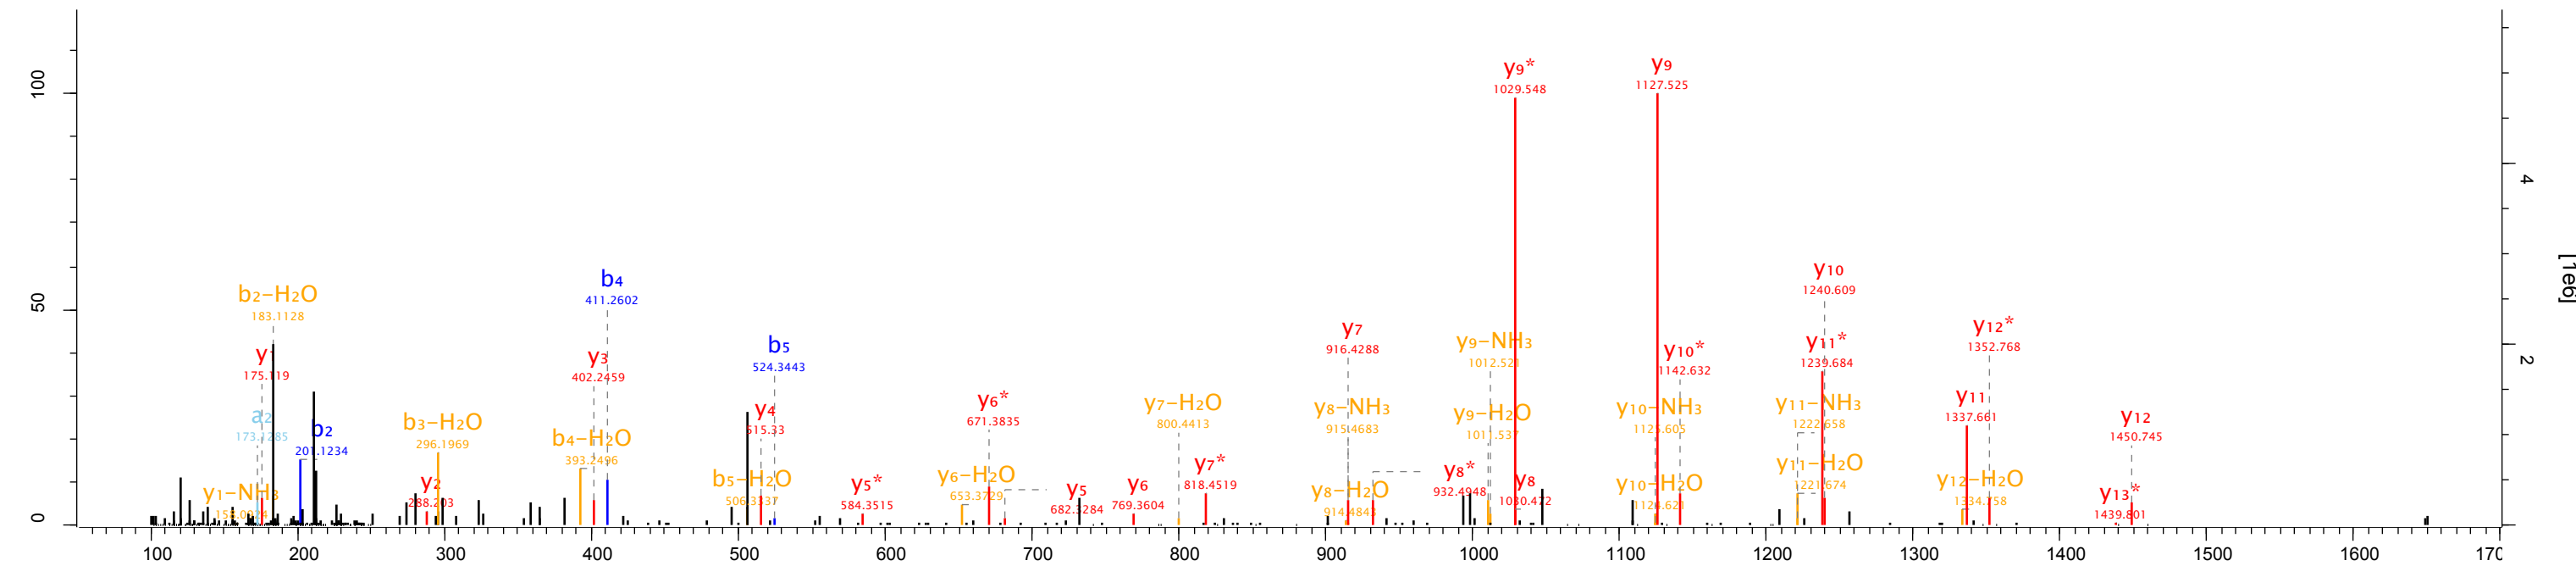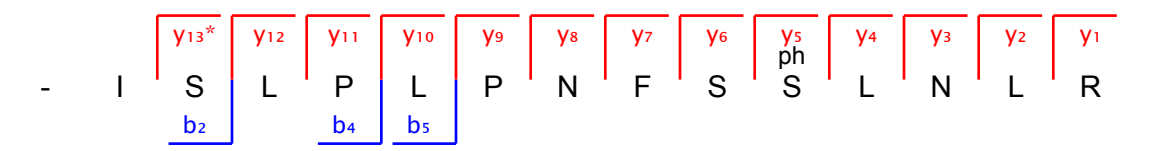

Raw file 20150814\_A375SR\_Phospho\_BR2\_04 Scan 3066 Method FTMS; HCD Score 47.54 m/z 600.93 Gene names ATXN2L

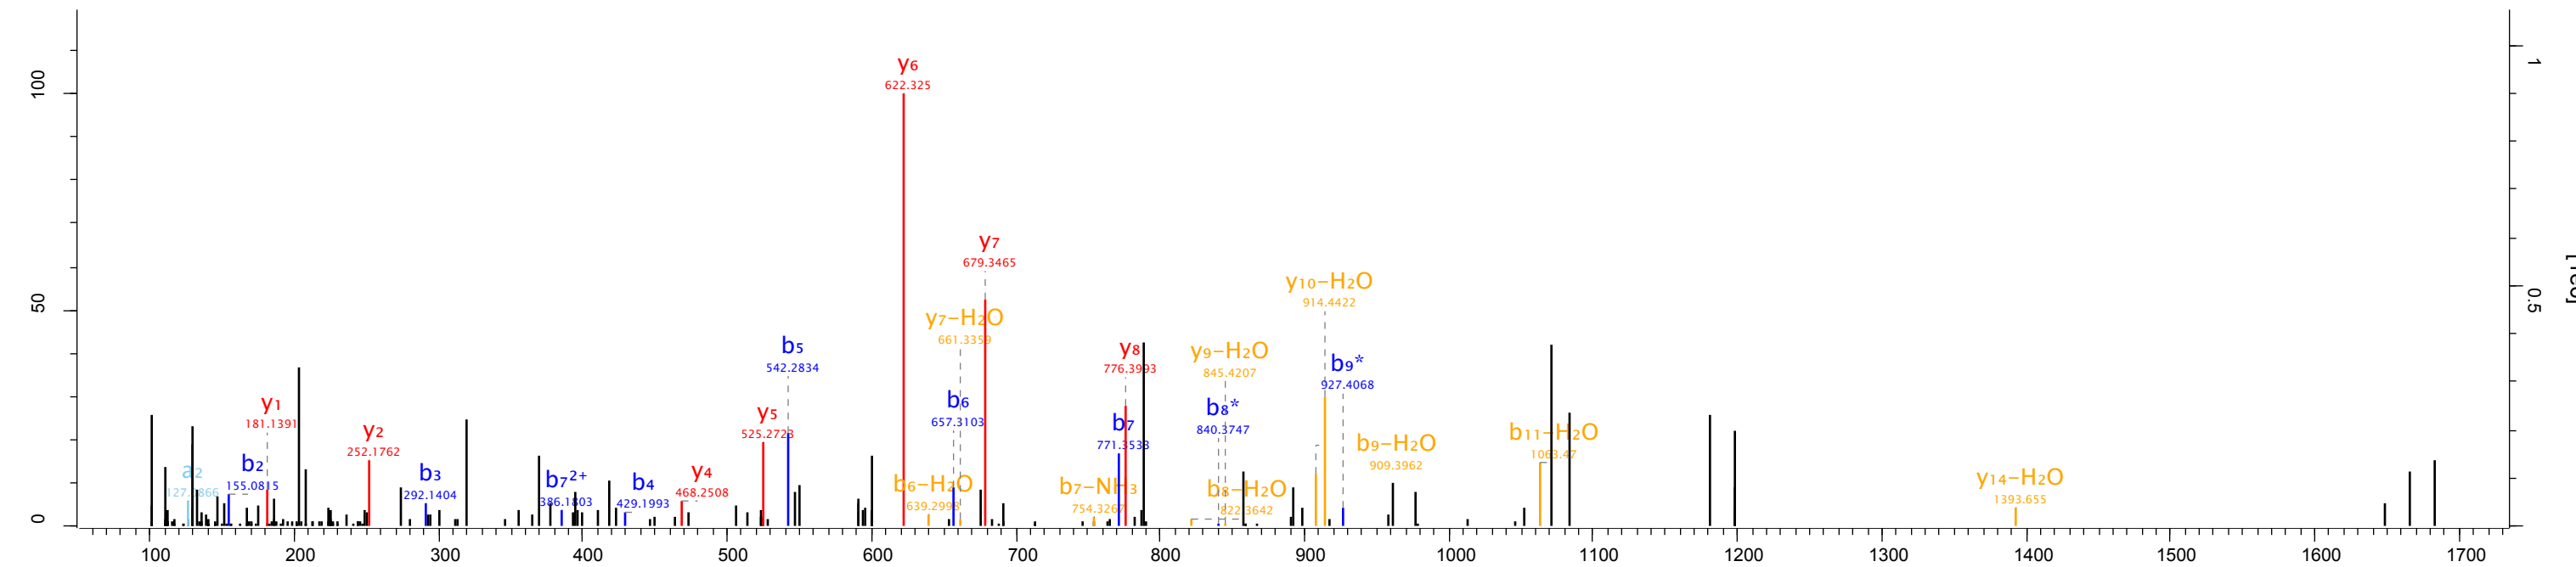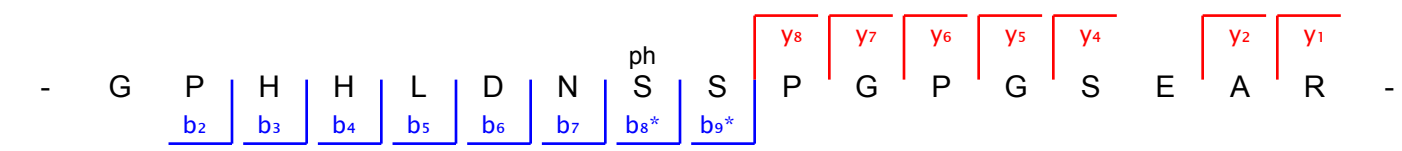

Raw file: 20150814\_A375SR\_Phospho\_BR2\_04  
 Scan: 3236 Method: FTMS; HCD Score: 138.2 m/z: 529.7 Gene names: SRRM2

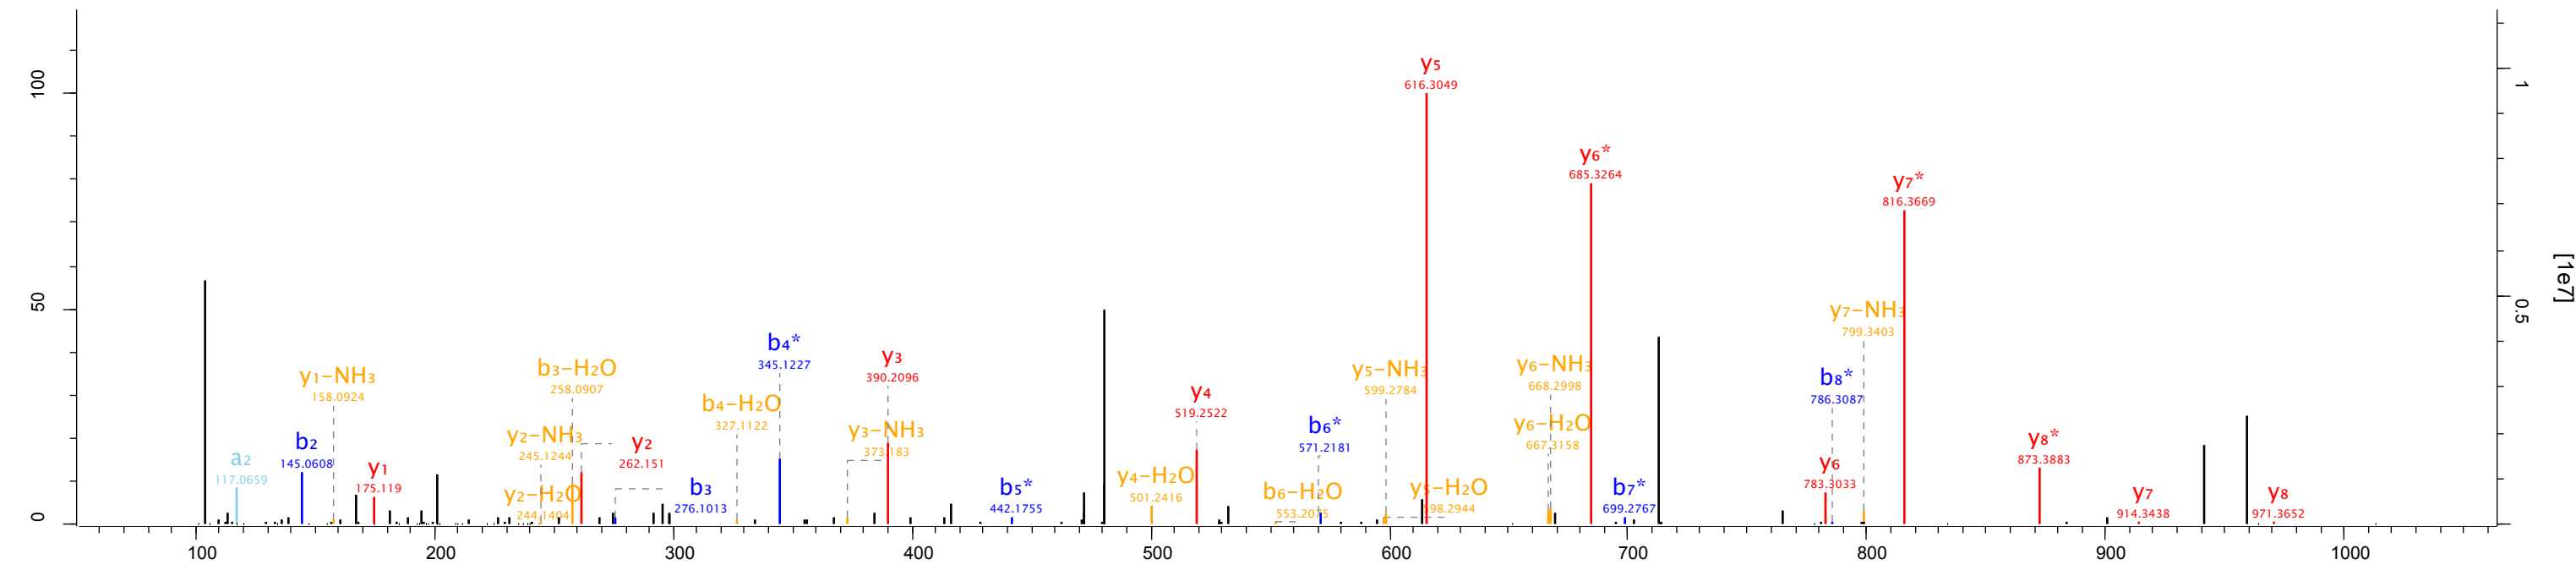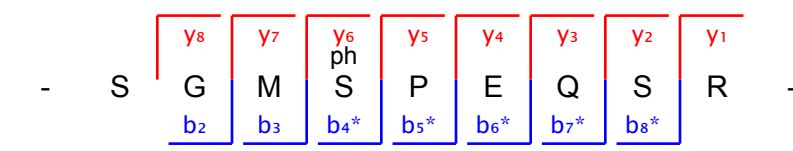



20150814\_A375SR\_Phospho\_BR2\_04 3476 FTMS; HCD 166.46 640.29 PBX2

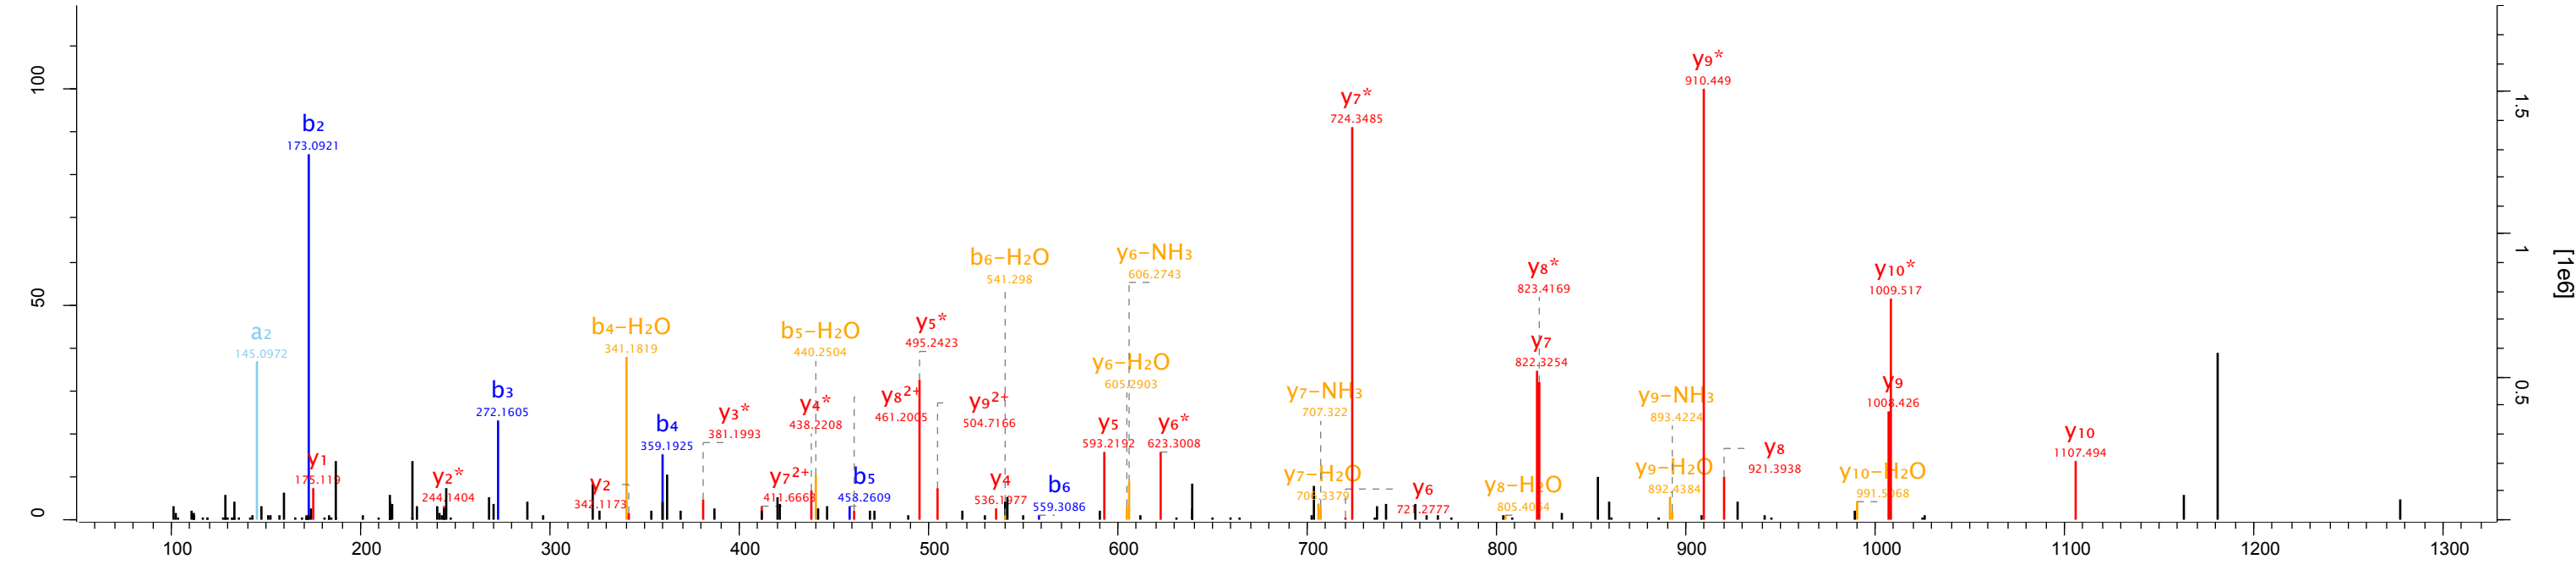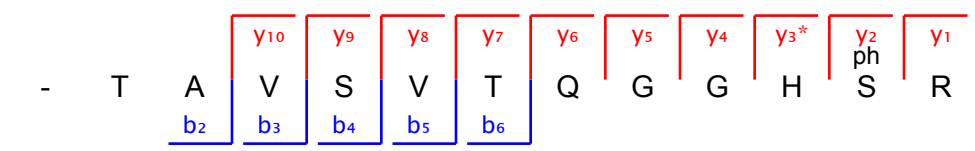

Raw file 20150814\_A375SR\_Phospho\_BR2\_04 Scan 4136 Method FTMS; HCD Score 46.95 m/z 604.93 Gene names ARFIP2

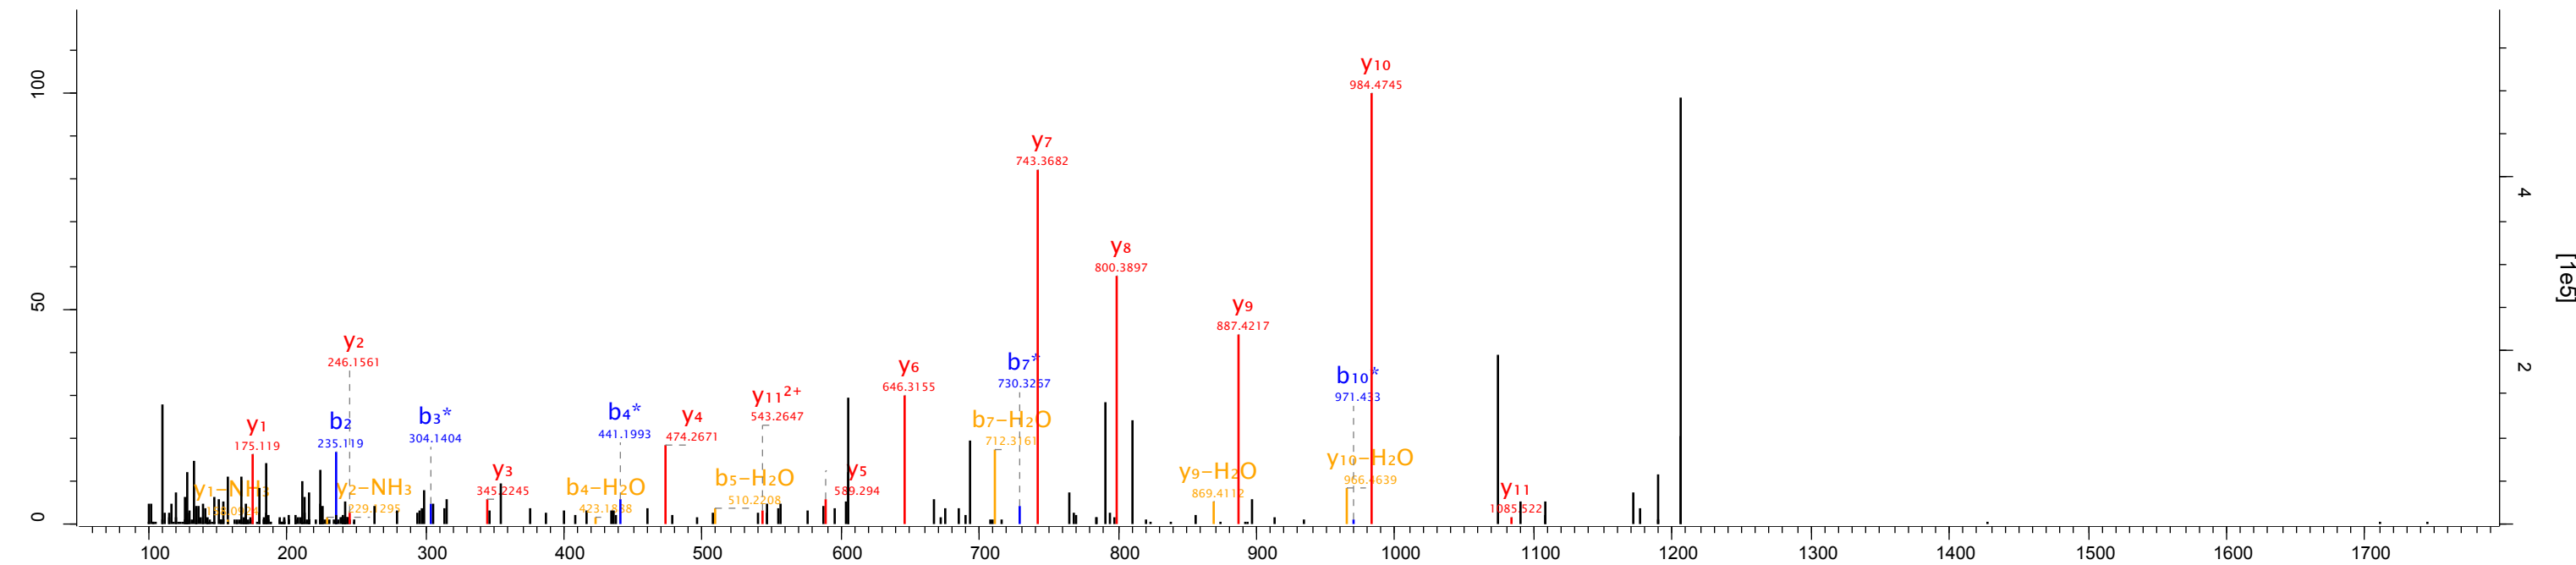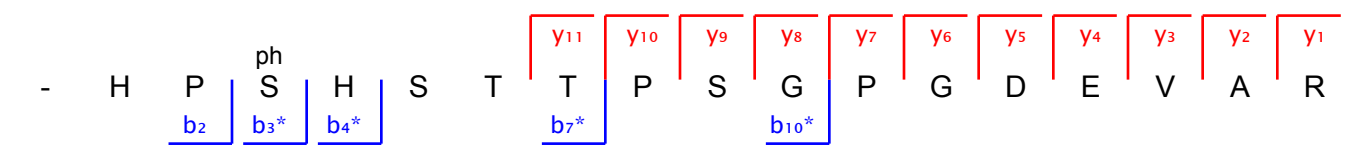

Raw file: 20150814\_A375SR\_Phospho\_BR2\_04  
 Scan: 4156 Method: FTMS; HCD Score: 98.57 m/z: 678.3 Gene names: LMNB2

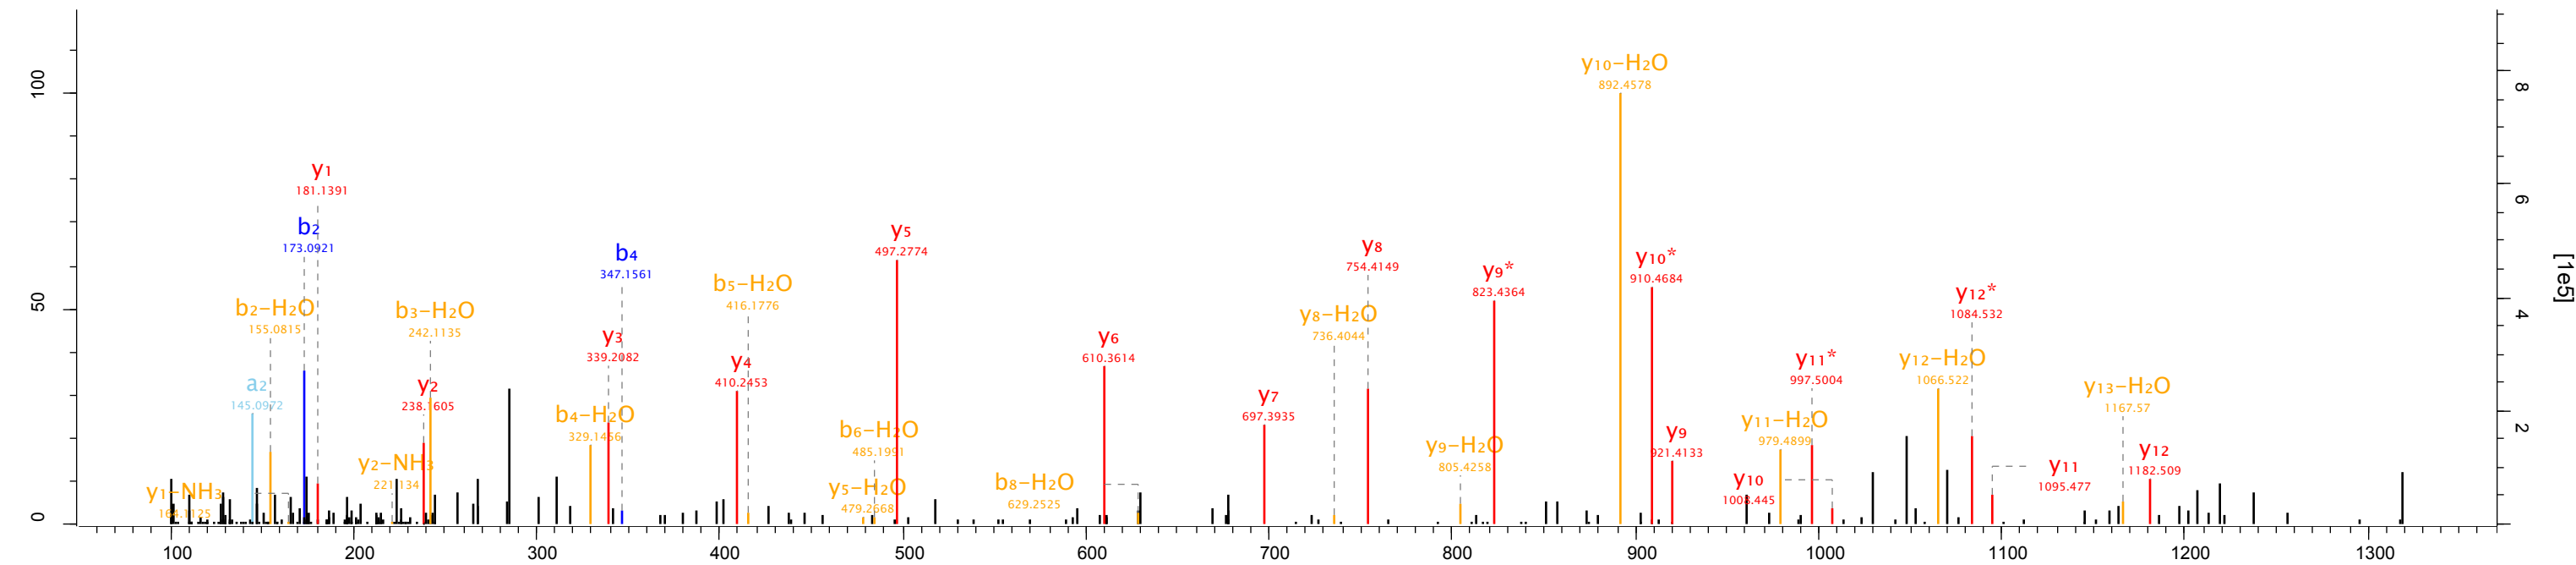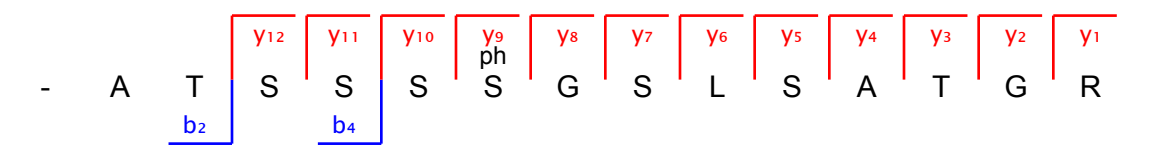

Raw file: 20150814\_A375SR\_Phospho\_BR2\_04  
 Scan: 5026 Method: FTMS; HCD Score: 109.48 m/z: 498.91 Gene names: RIF1

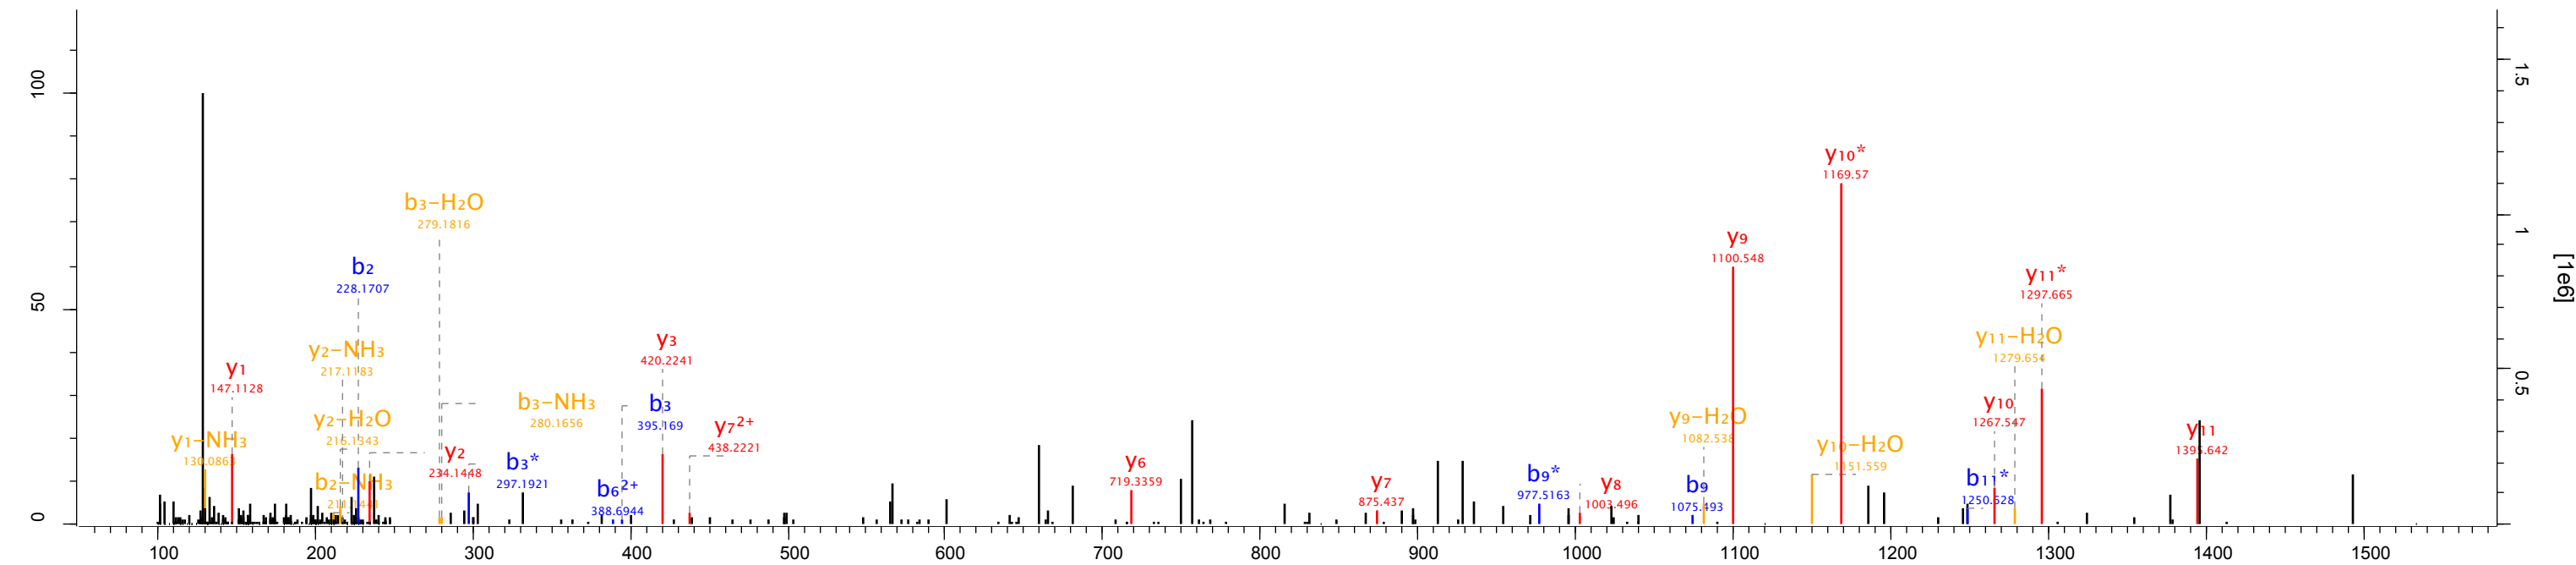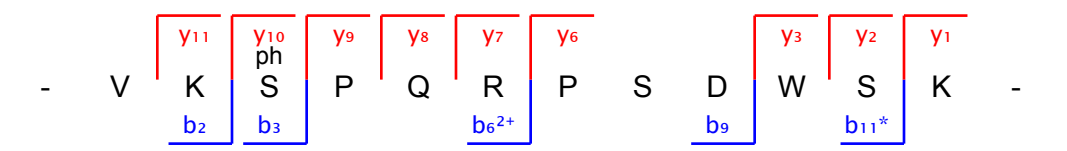

Raw file: 20150814\_A375SR\_Phospho\_BR2\_04  
 Scan: 5046 Method: FTMS; HCD Score: 163.91 m/z: 669.79 Gene names: DOCK4

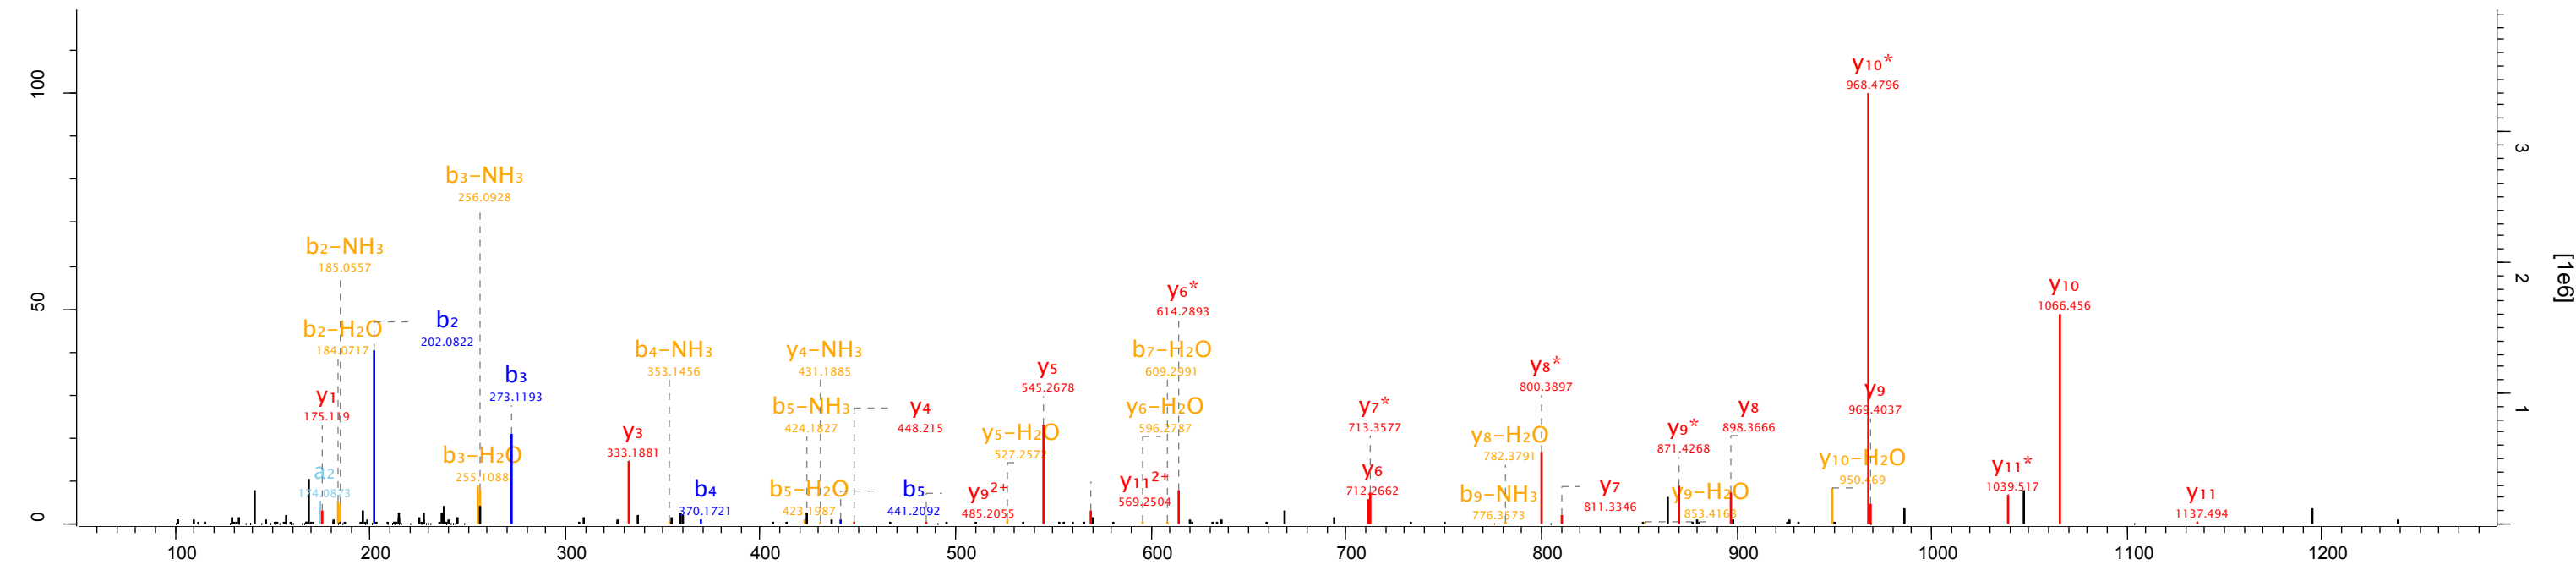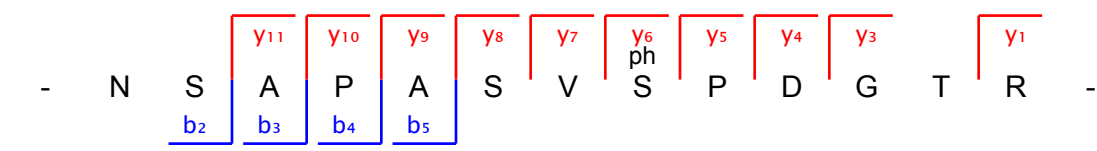

Raw file 20150814\_A375SR\_Phospho\_BR2\_04 Scan 5246 Method FTMS; HCD Score 150.27 m/z 784.85 Gene names RIF1

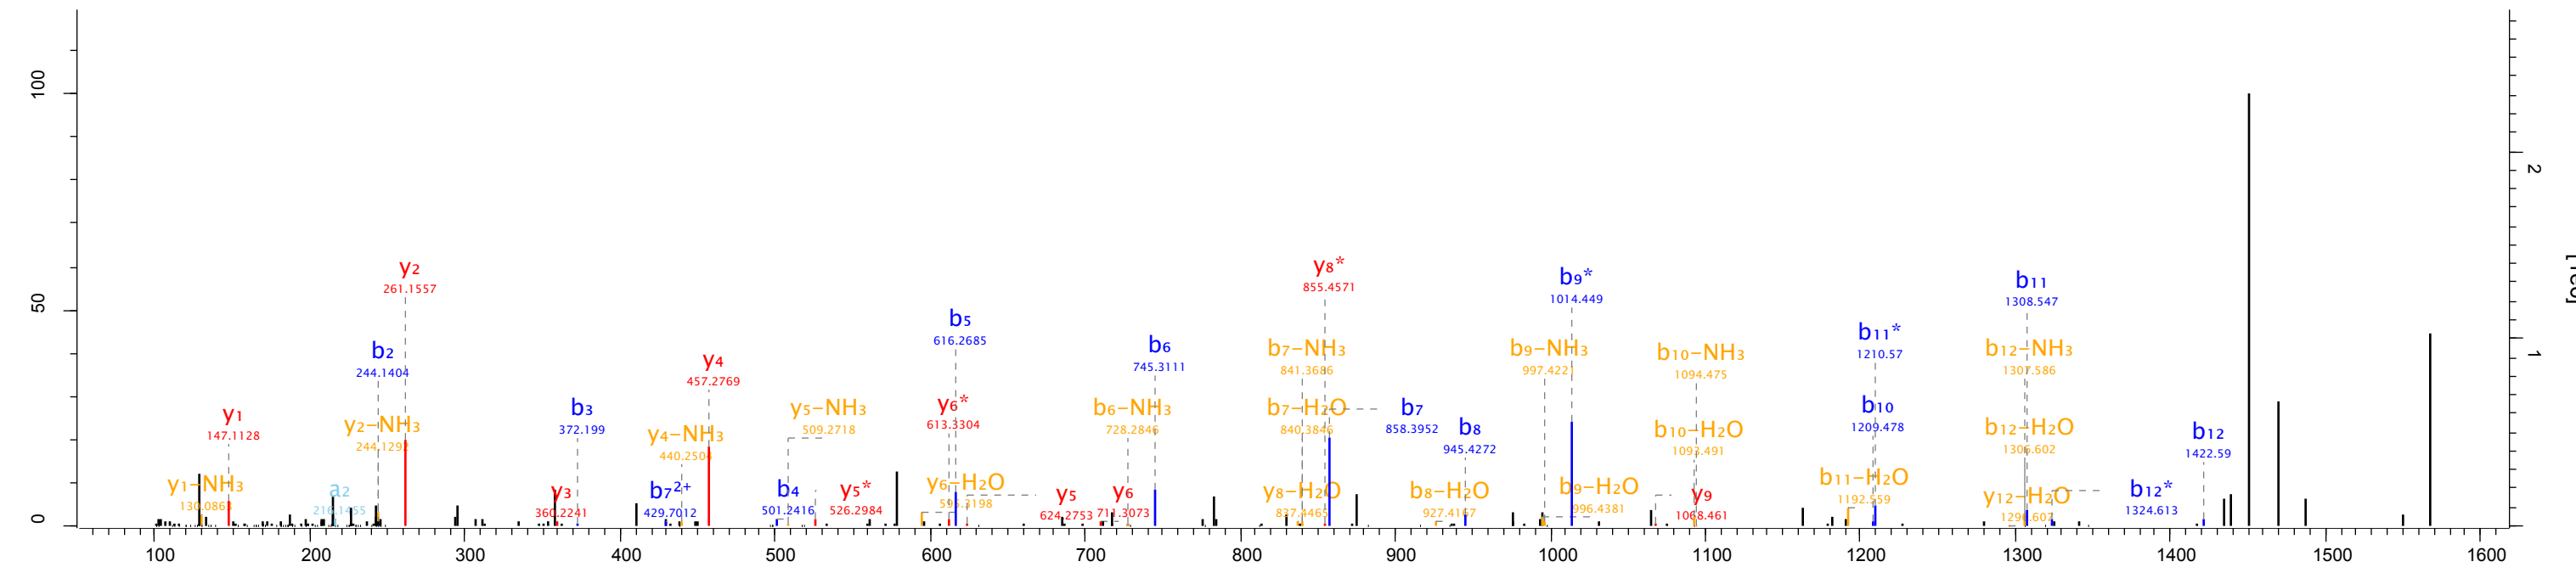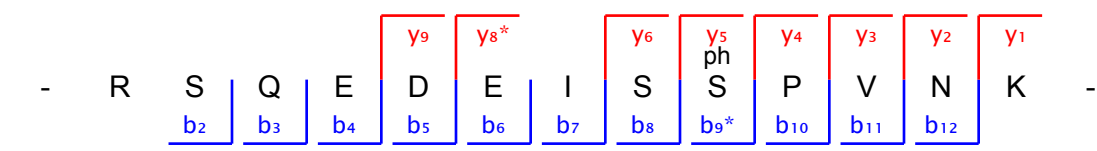

Raw file 20150814\_A375SR\_Phospho\_BR2\_04 Scan 5816 Method FTMS; HCD Score 108.32 m/z 993.94 Gene names C12orf45

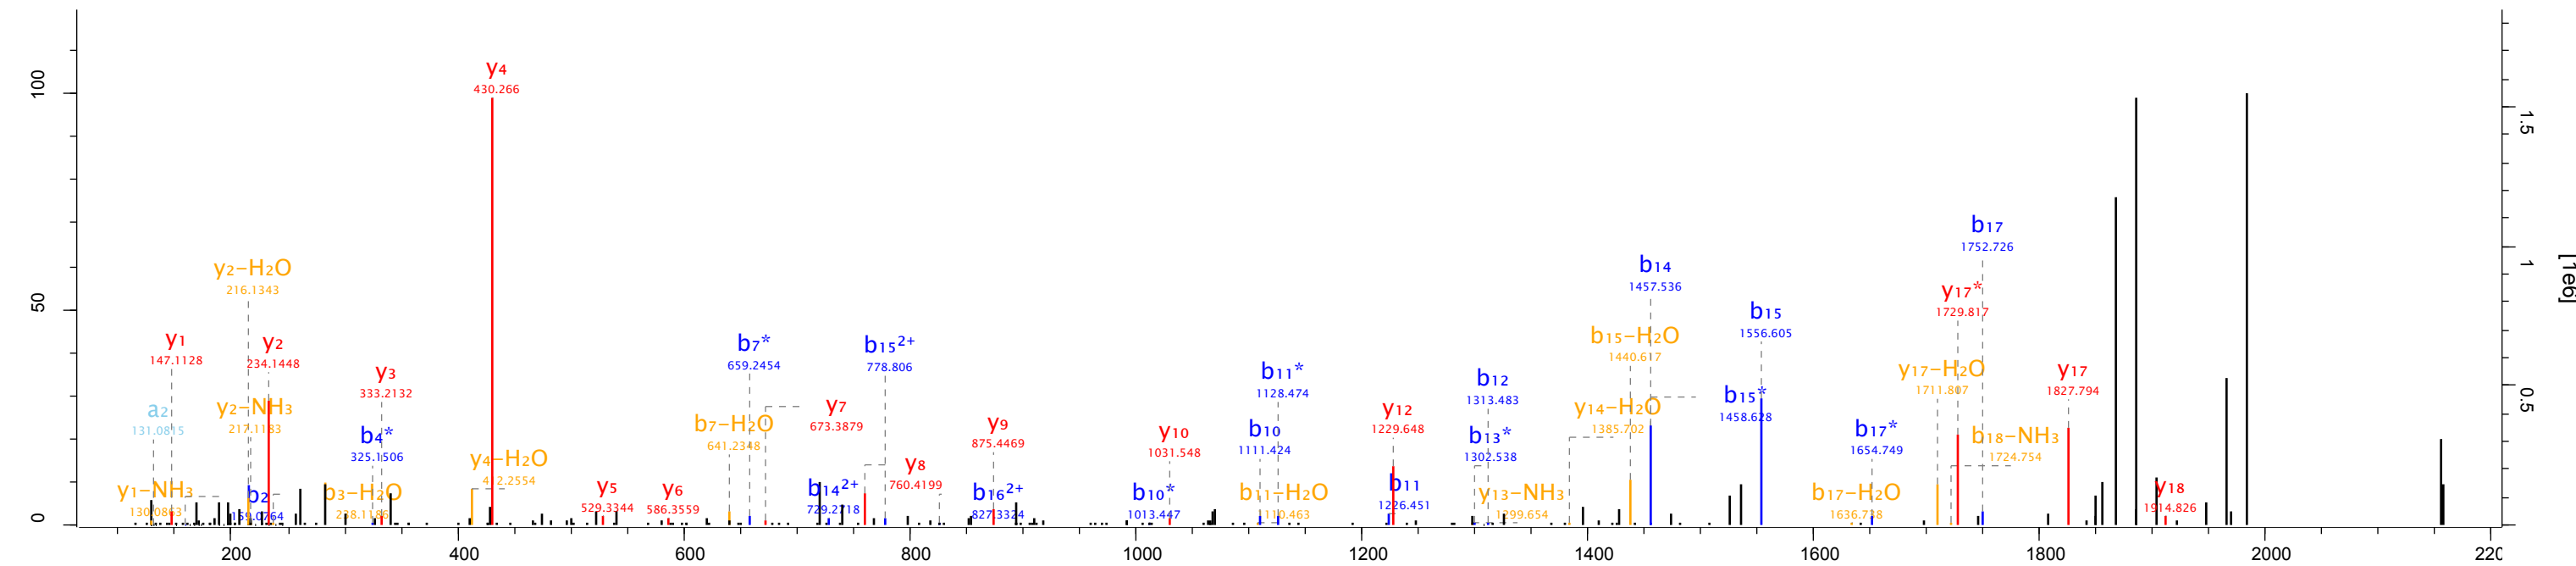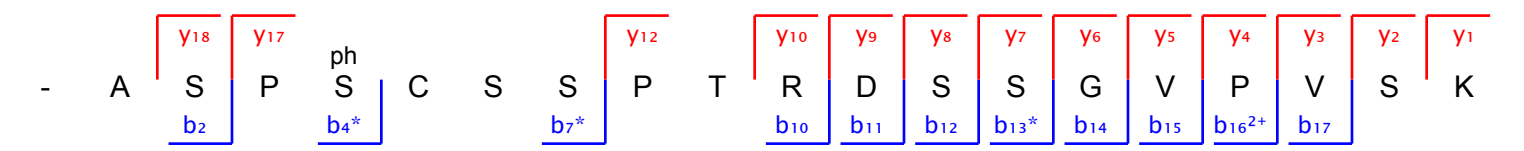

Raw file: 20150814\_A375SR\_Phospho\_BR2\_04  
 Scan: 5866 Method: FTMS; HCD Score: 126.32 m/z: 659.81 Gene names: NUP98

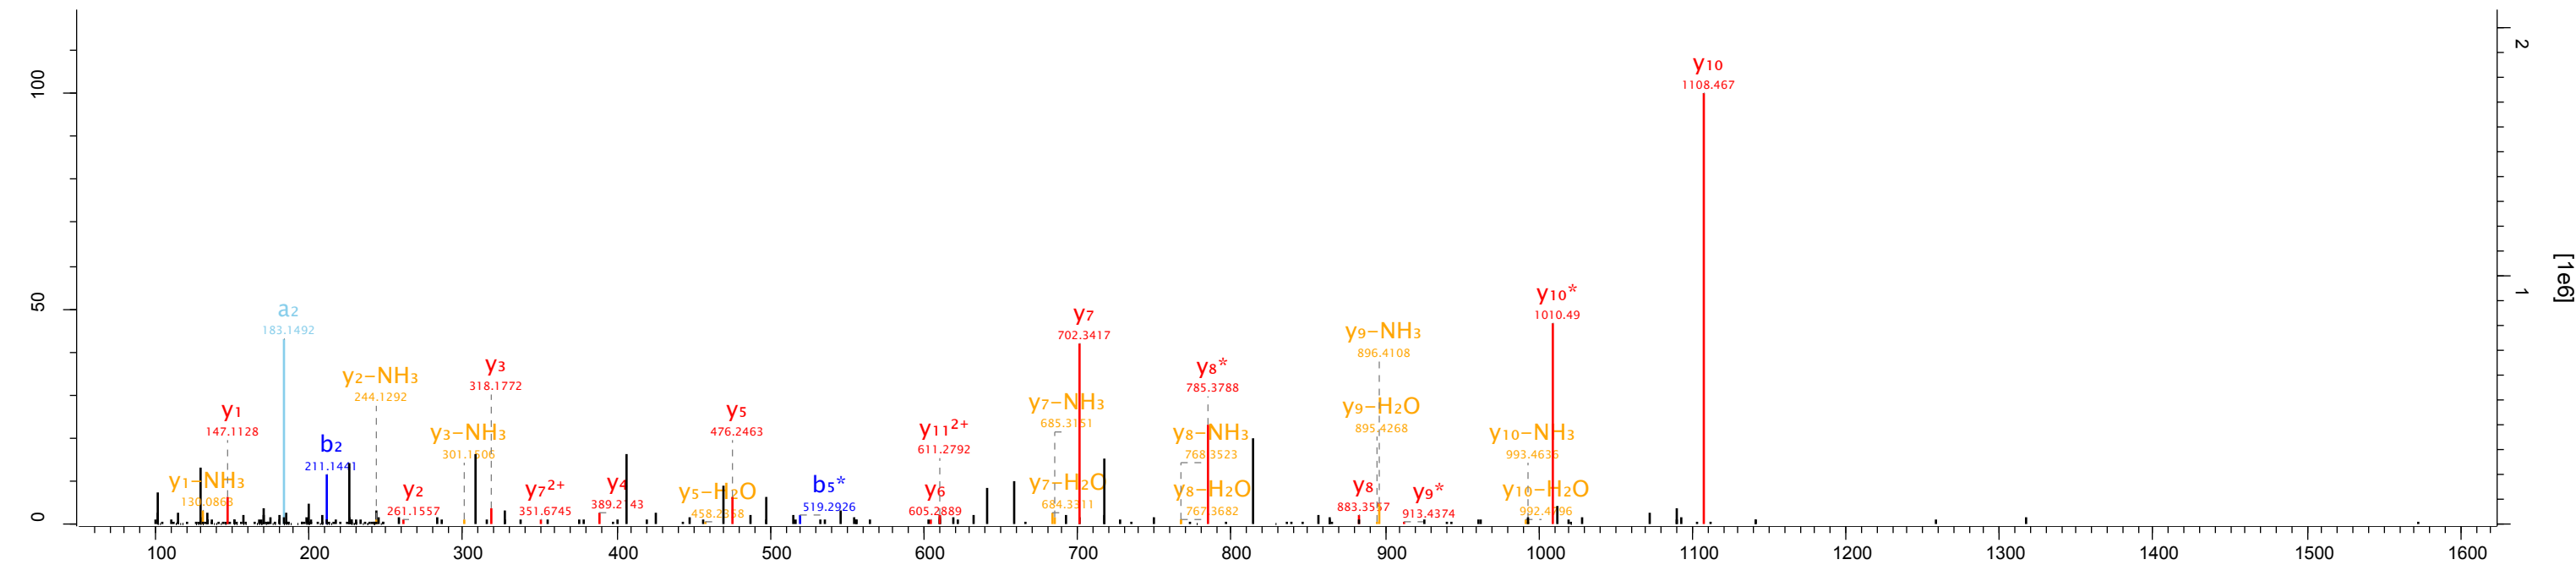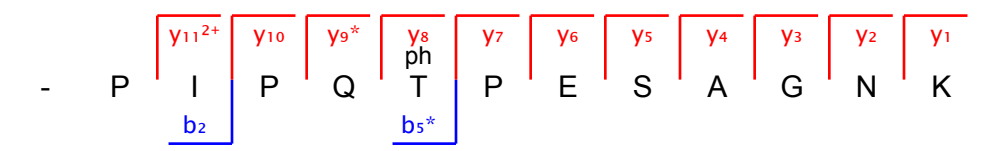



Raw file: 20150814\_A375SR\_Phospho\_BR2\_04  
 Scan: 6086 Method: FTMS; HCD Score: 249.41 m/z: 764.37 Gene names: MRGBP

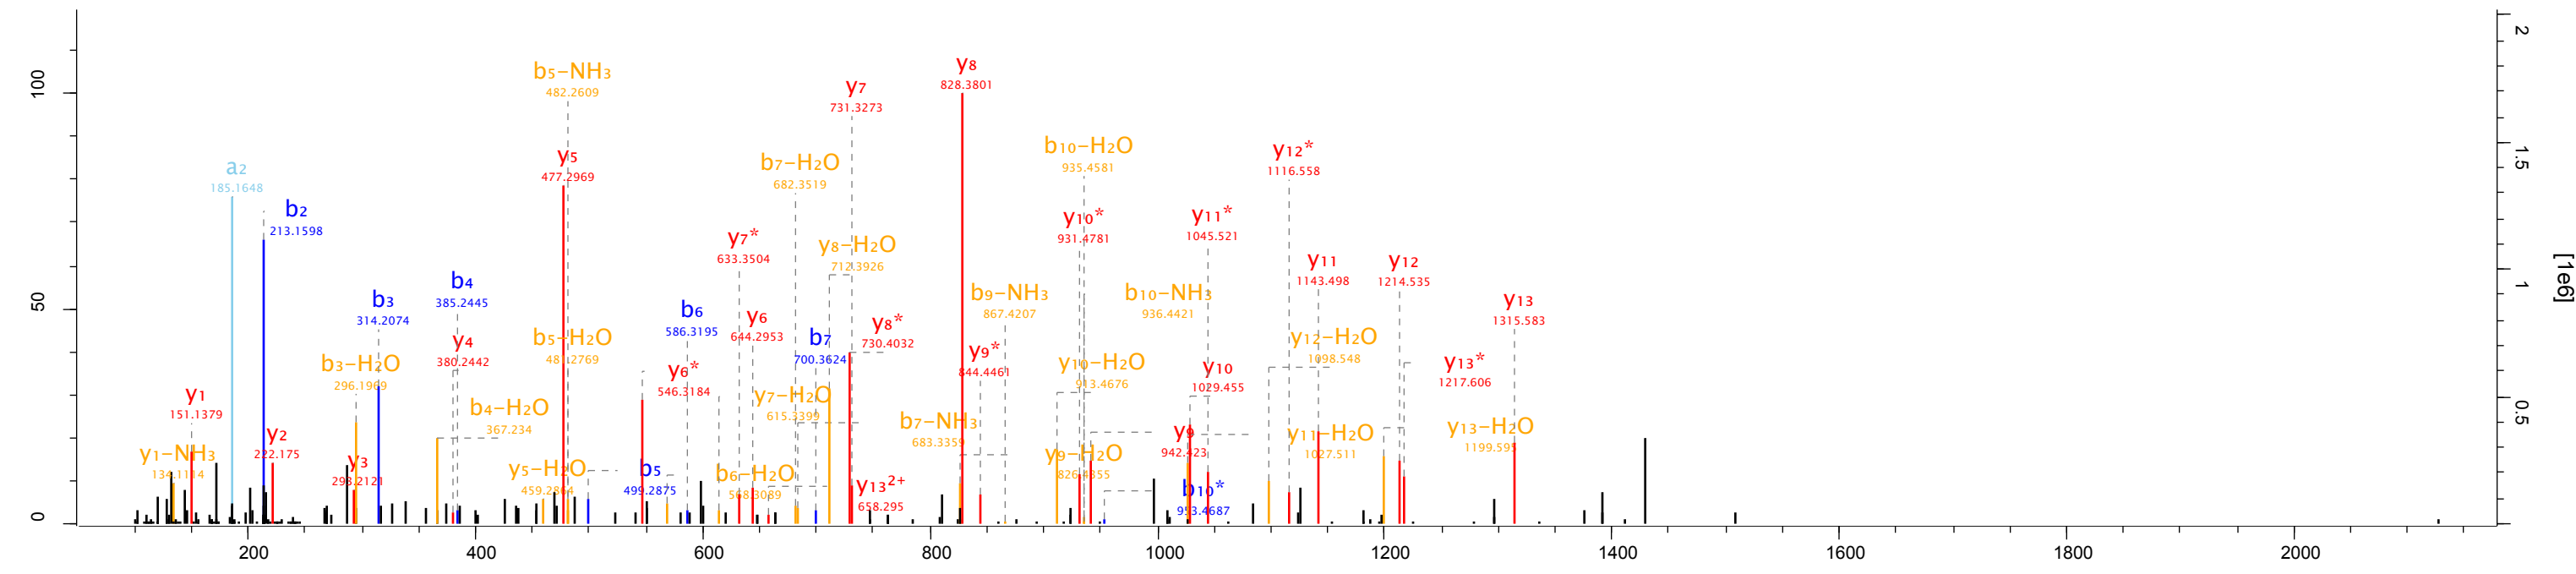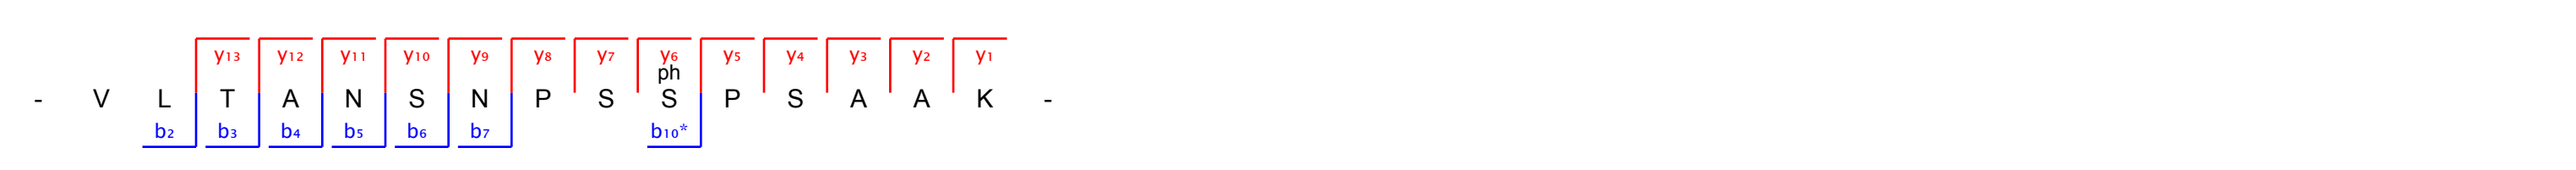

Raw file: 20150814\_A375SR\_Phospho\_BR2\_04  
 Scan: 6316 Method: FTMS; HCD Score: 332.56 m/z: 912.7 Gene names: PRPF3

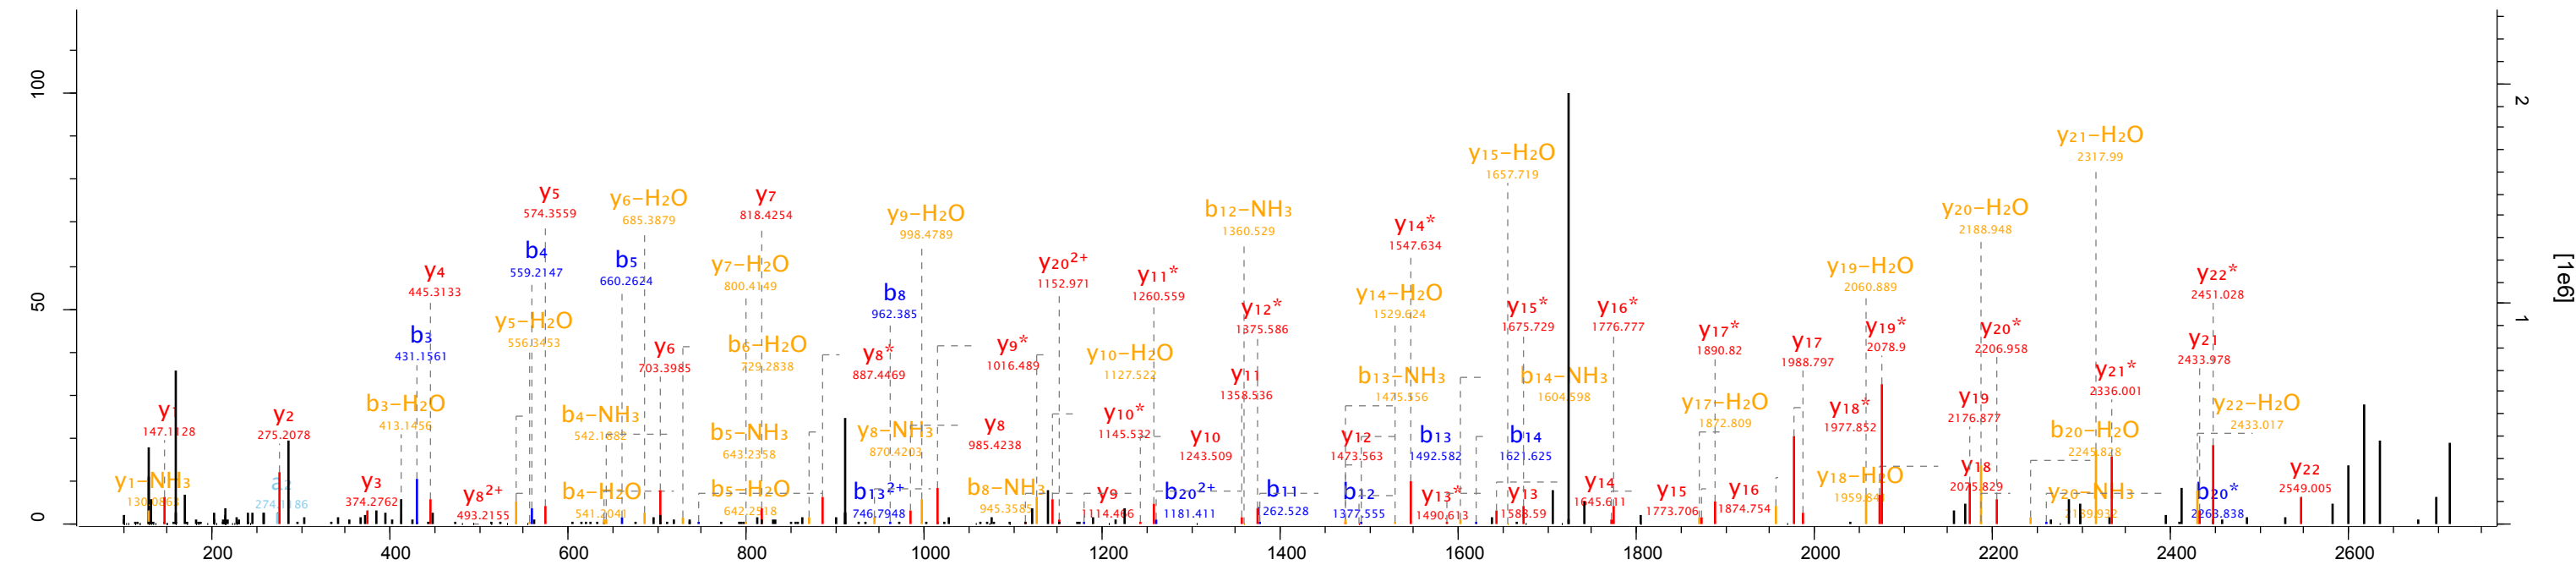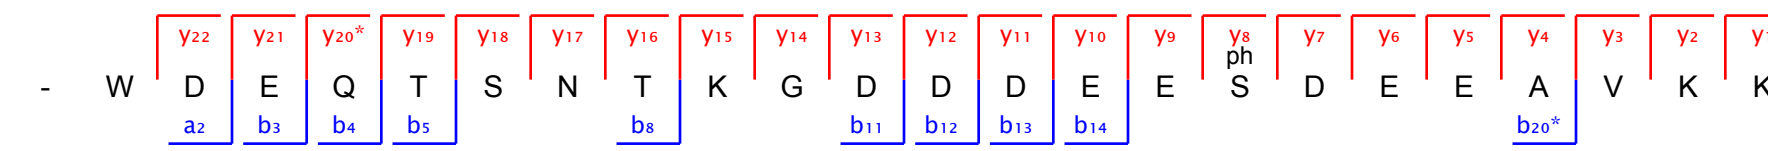

Raw file: 20150814\_A375SR\_Phospho\_BR2\_04  
 Scan: 6706 Method: FTMS; HCD Score: 62.65 m/z: 829.36 Gene names: HN1

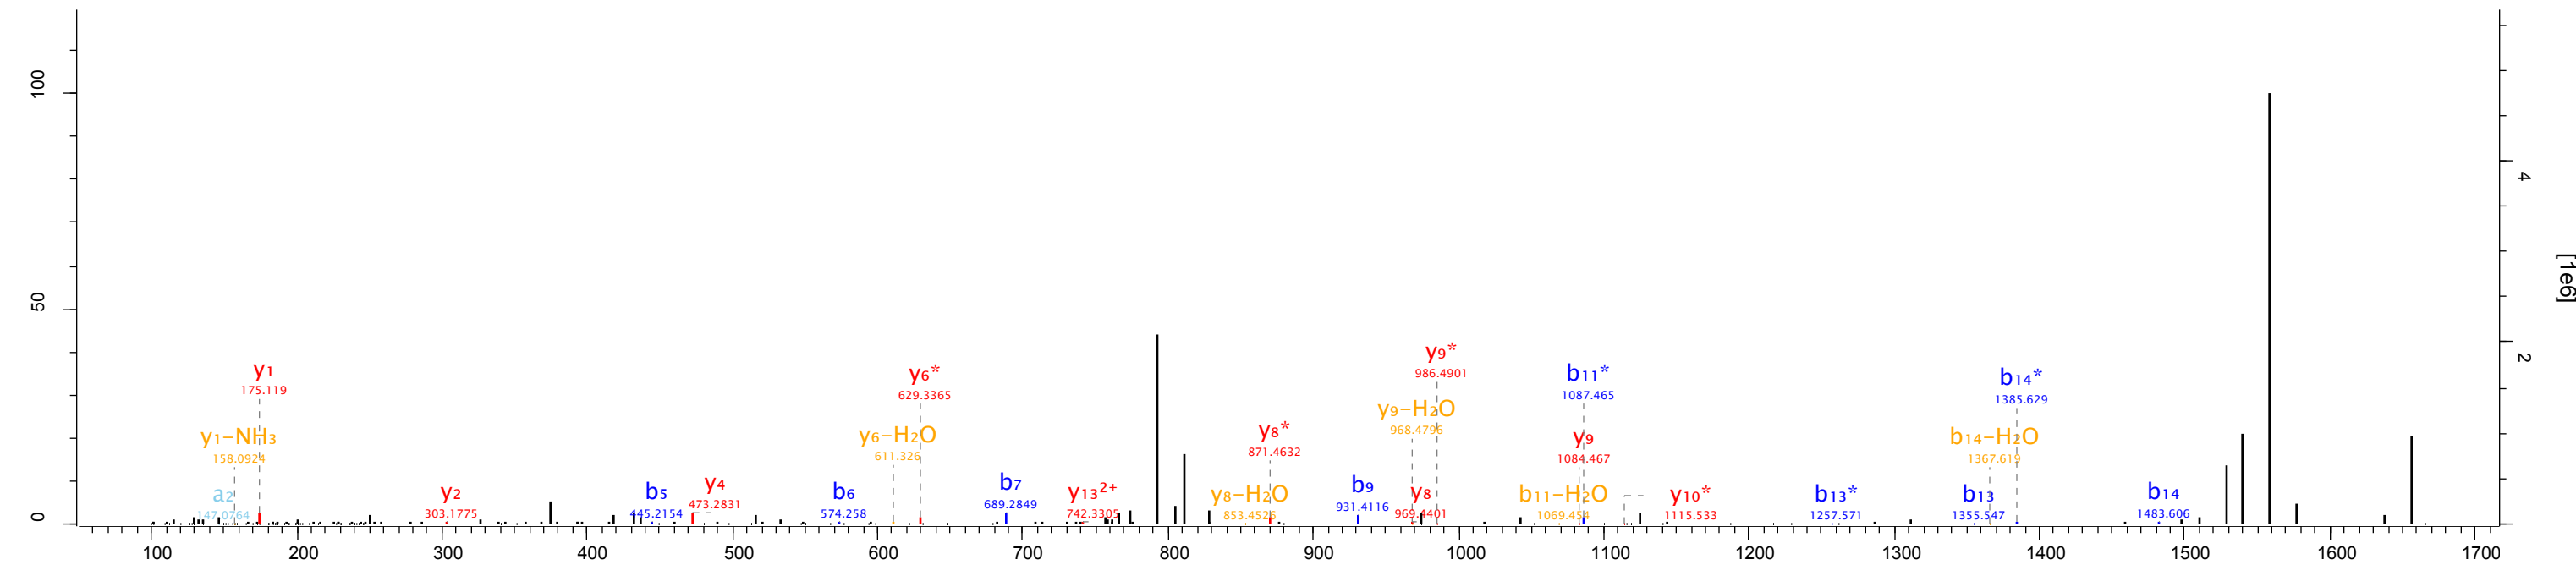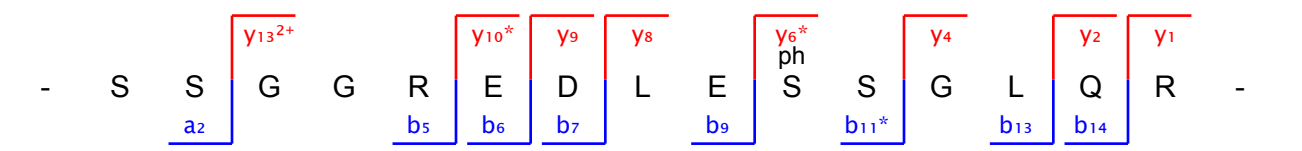

Raw file 20150814\_A375SR\_Phospho\_BR2\_04 Scan 6936 Method FTMS; HCD Score 260.03 m/z 925.89 Gene names PXN

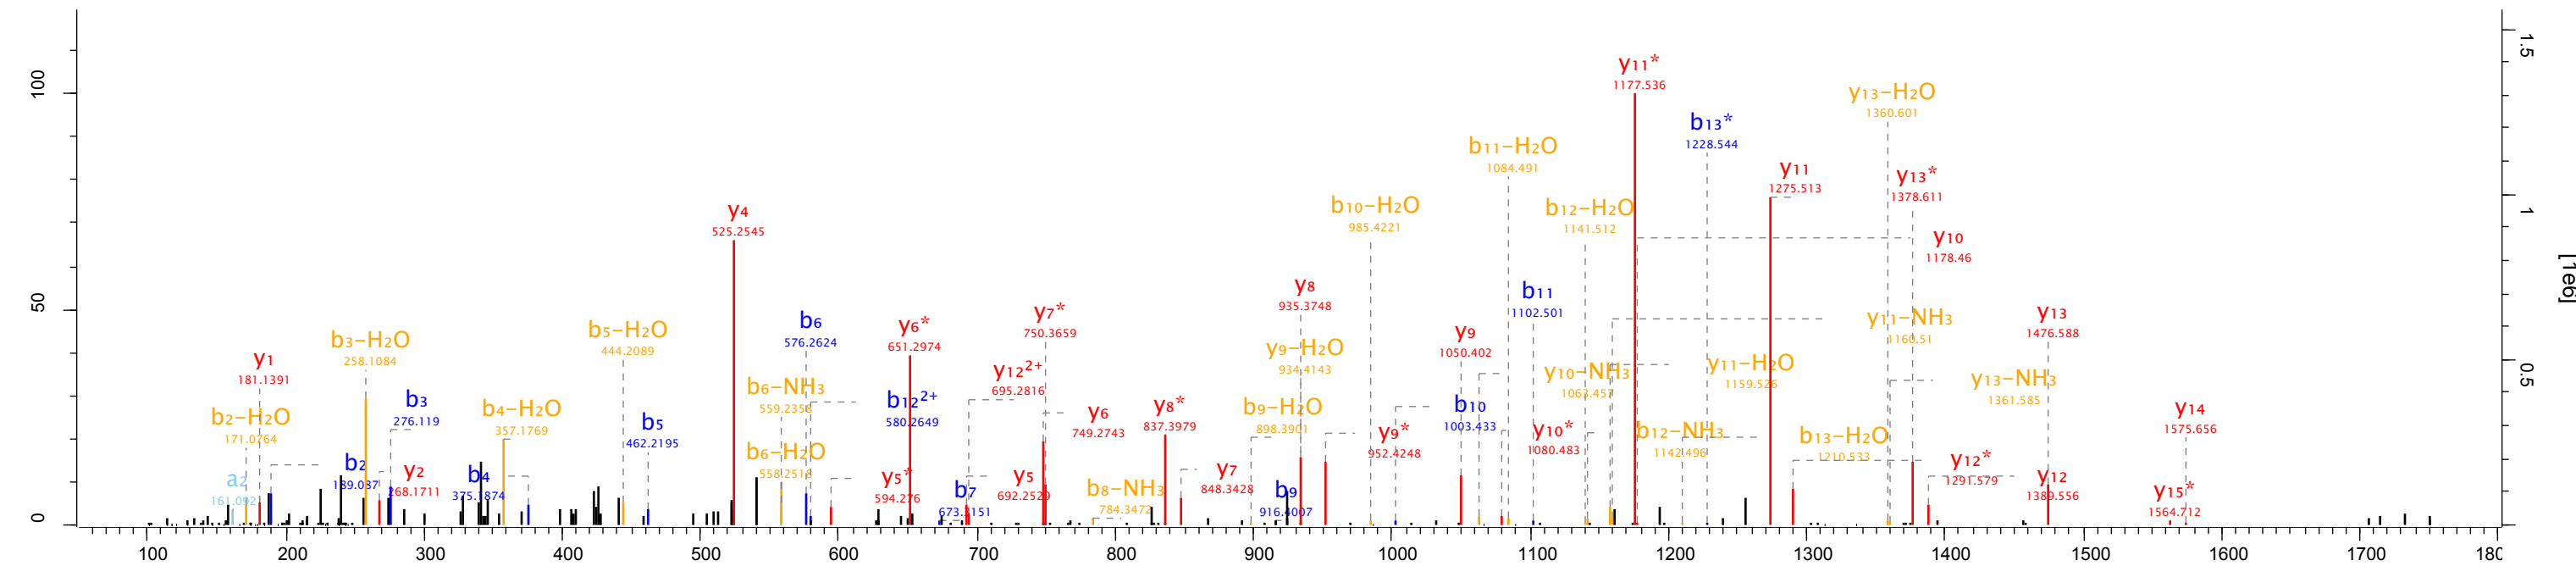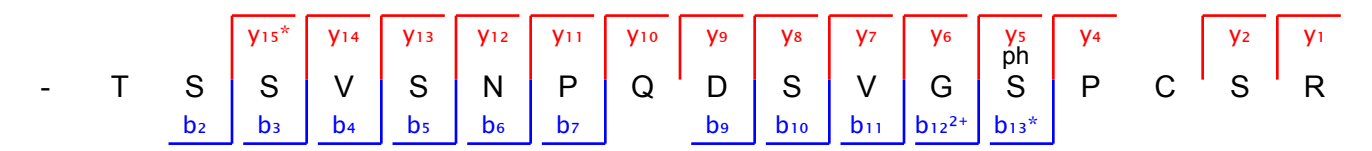

Raw file: 20150814\_A375SR\_Phospho\_BR2\_04  
 Scan: 7056 Method: FTMS; HCD Score: 74.39 m/z: 537.72 Gene names: PKP3

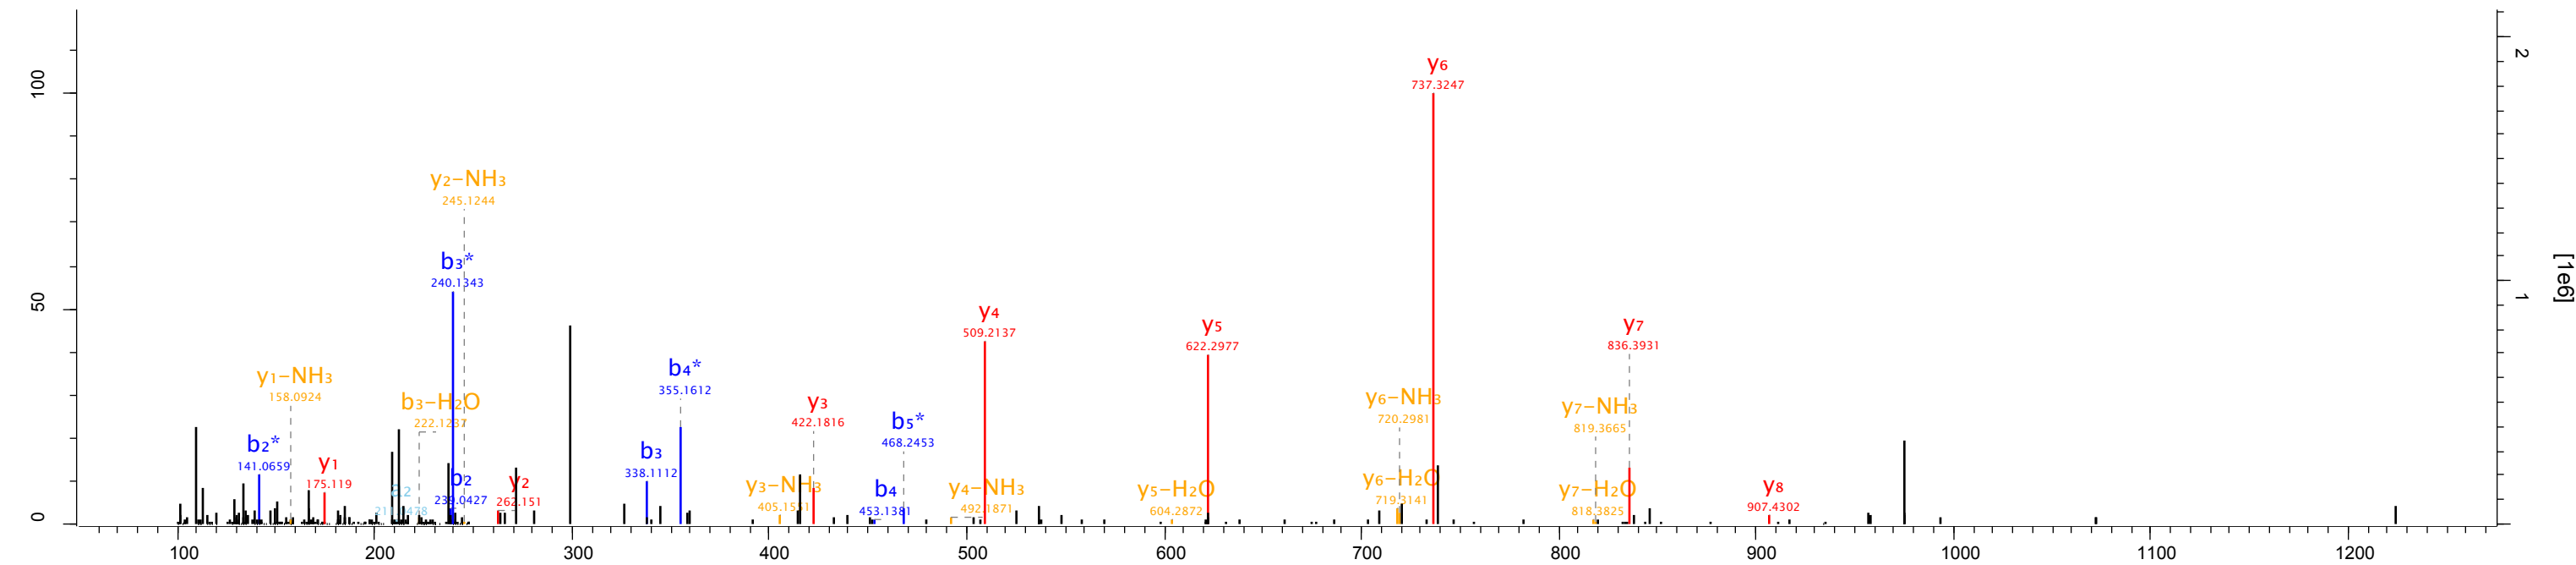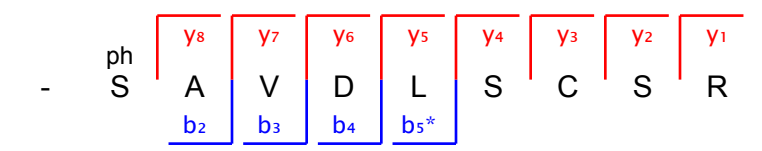

Raw file: 20150814\_A375SR\_Phospho\_BR2\_04  
 Scan: 7066 Method: FTMS; HCD Score: 49.17 m/z: 591.27 Gene names: CCNK

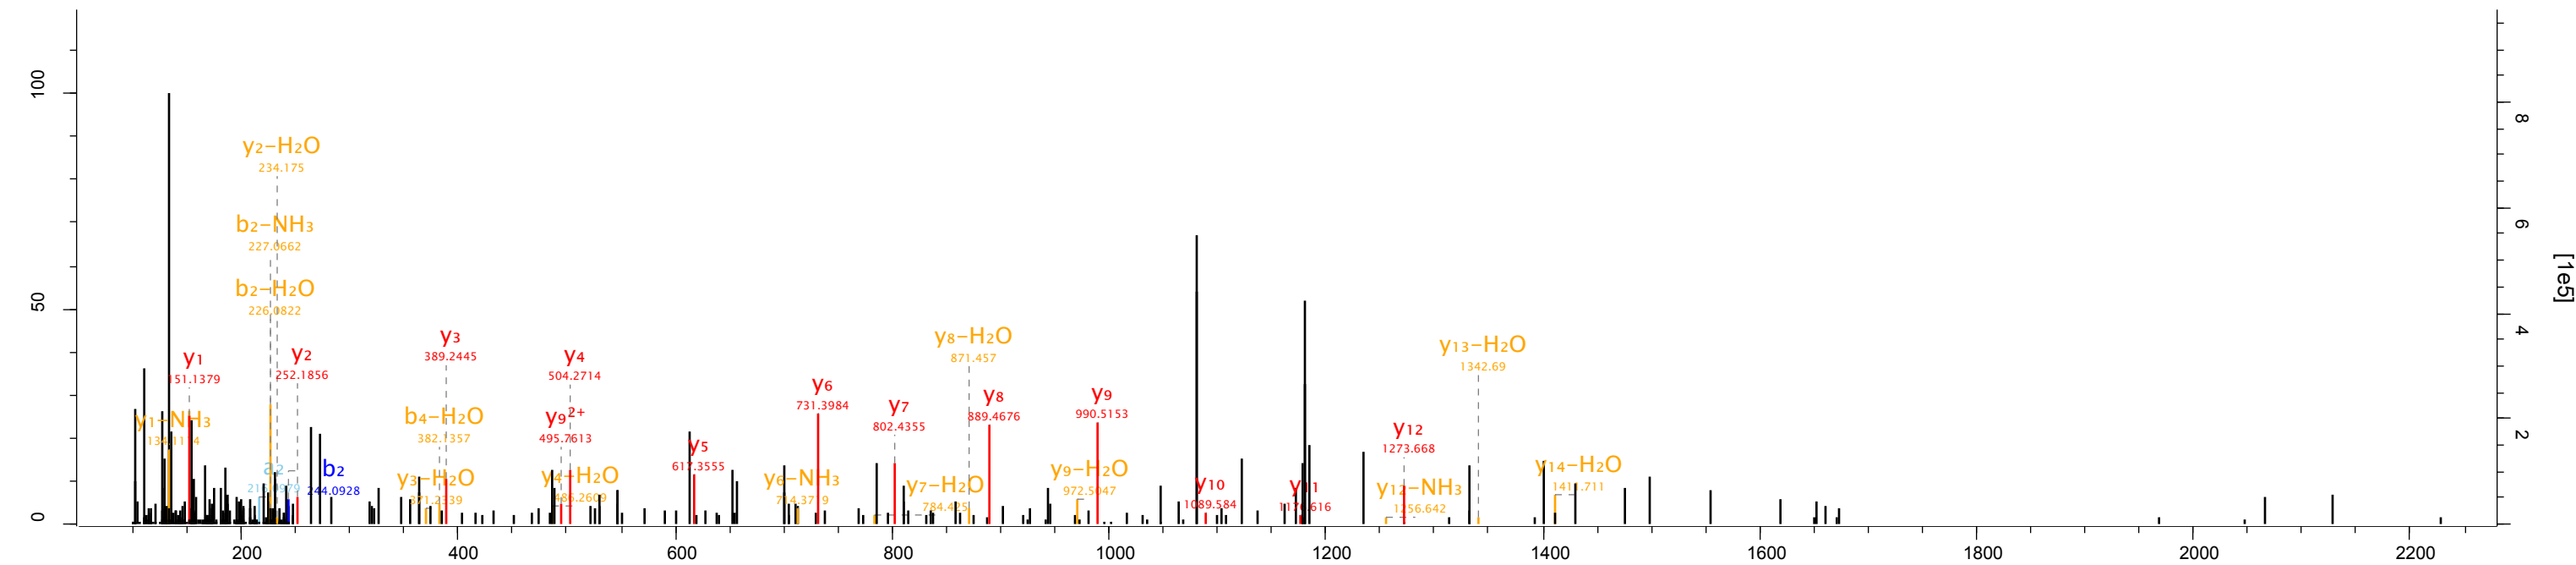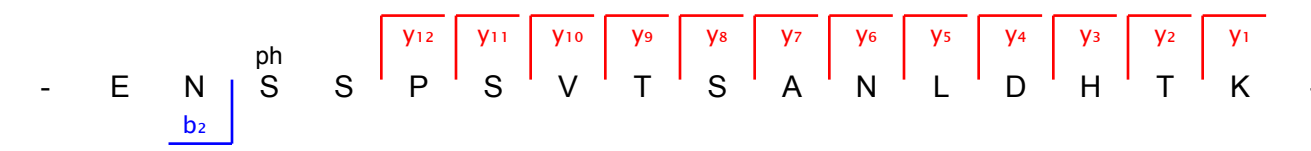

Raw file: 20150814\_A375SR\_Phospho\_BR2\_04  
 Scan: 7216 Method: FTMS; HCD Score: 58.02 m/z: 578.92 Gene names: EXOC2

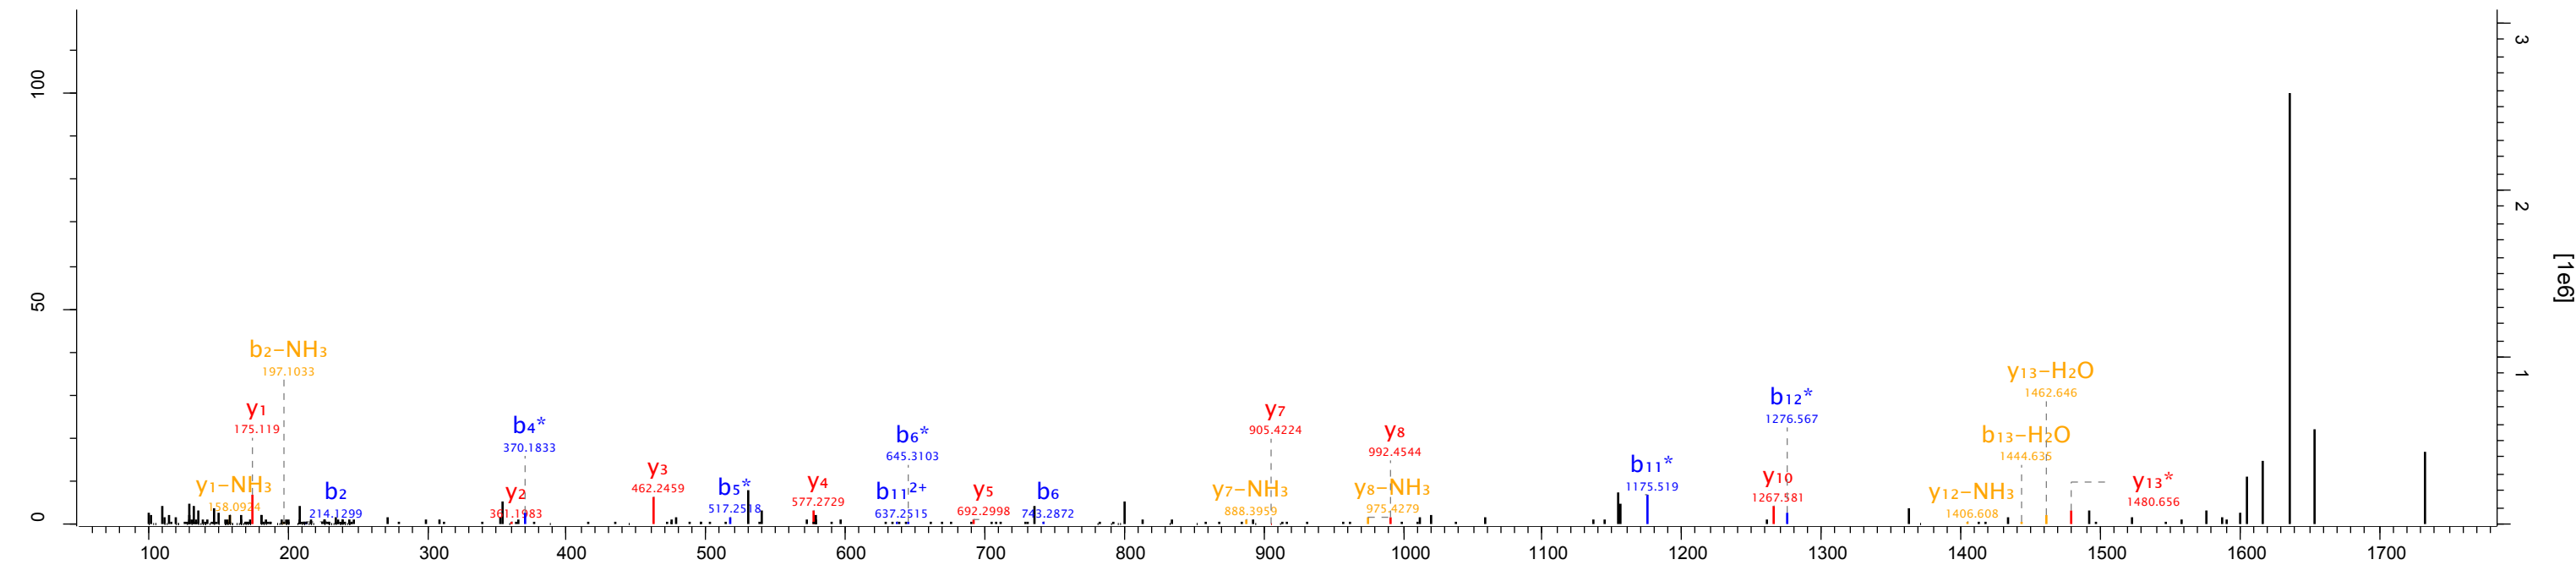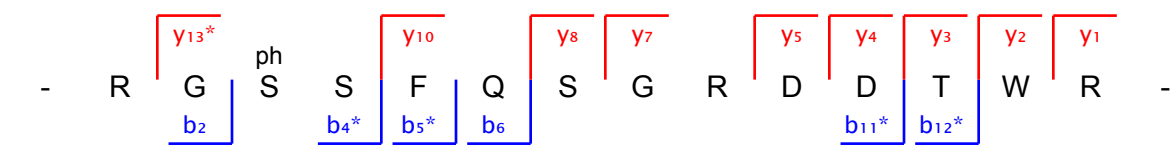

Raw file: 20150814\_A375SR\_Phospho\_BR2\_04  
 Scan: 7516 Method: FTMS; HCD Score: 98.39 m/z: 569.59 Gene names: LMO7

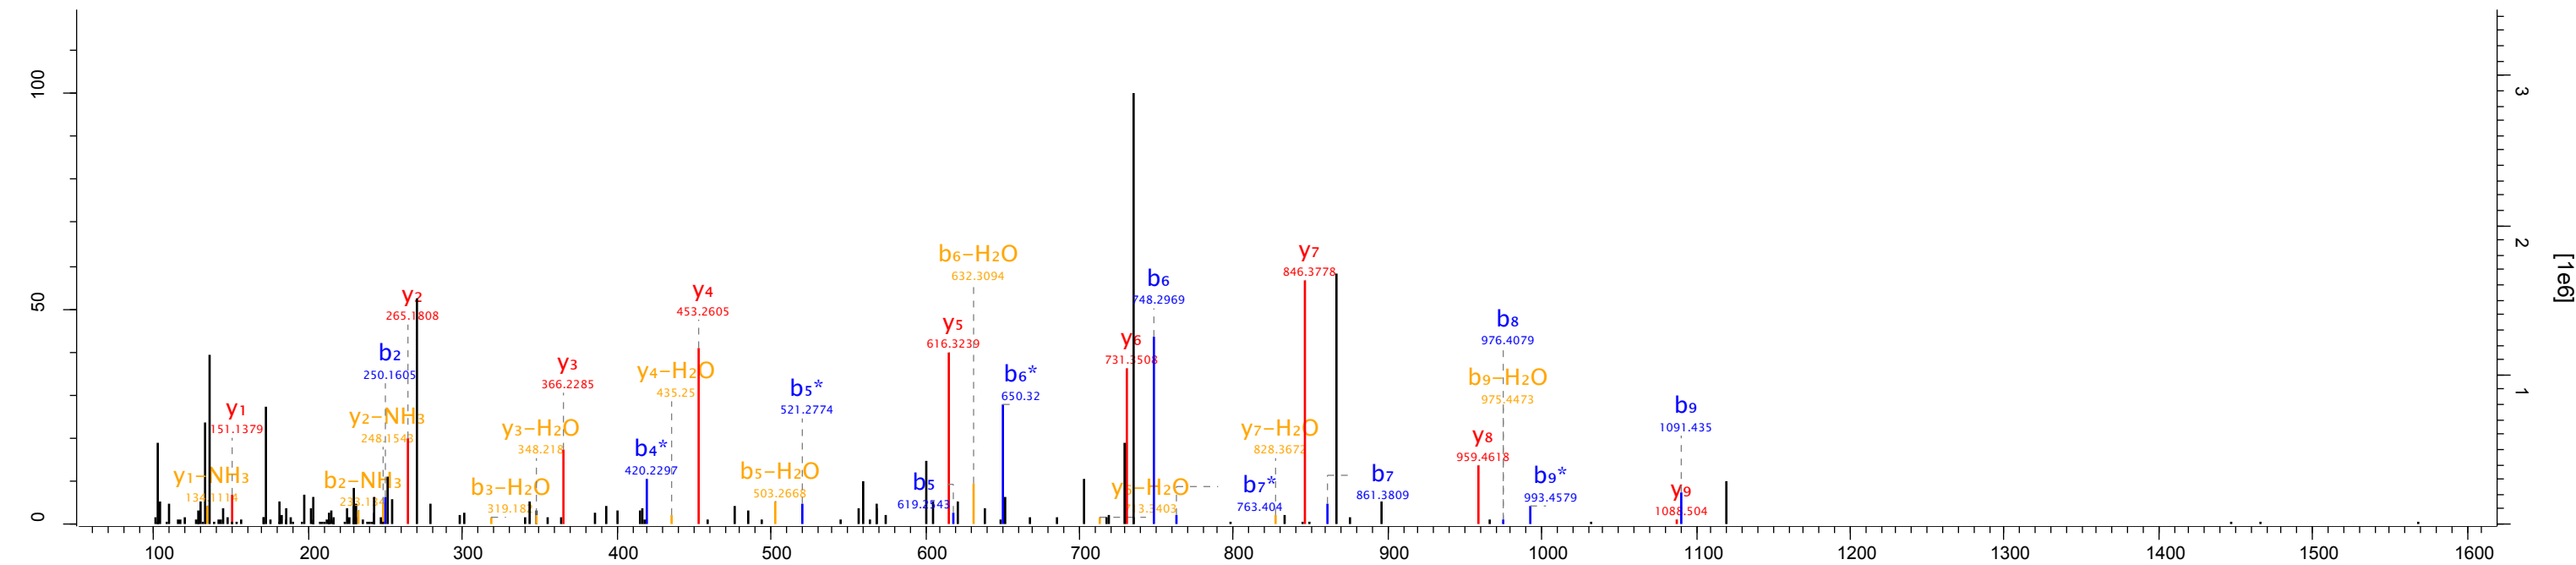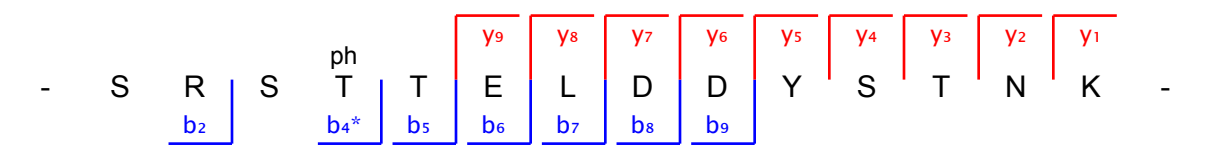



Raw file: 20150814\_A375SR\_Phospho\_BR2\_04  
 Scan: 7596 Method: FTMS; HCD Score: 78.1 m/z: 663.98 Gene names: MAP7D1

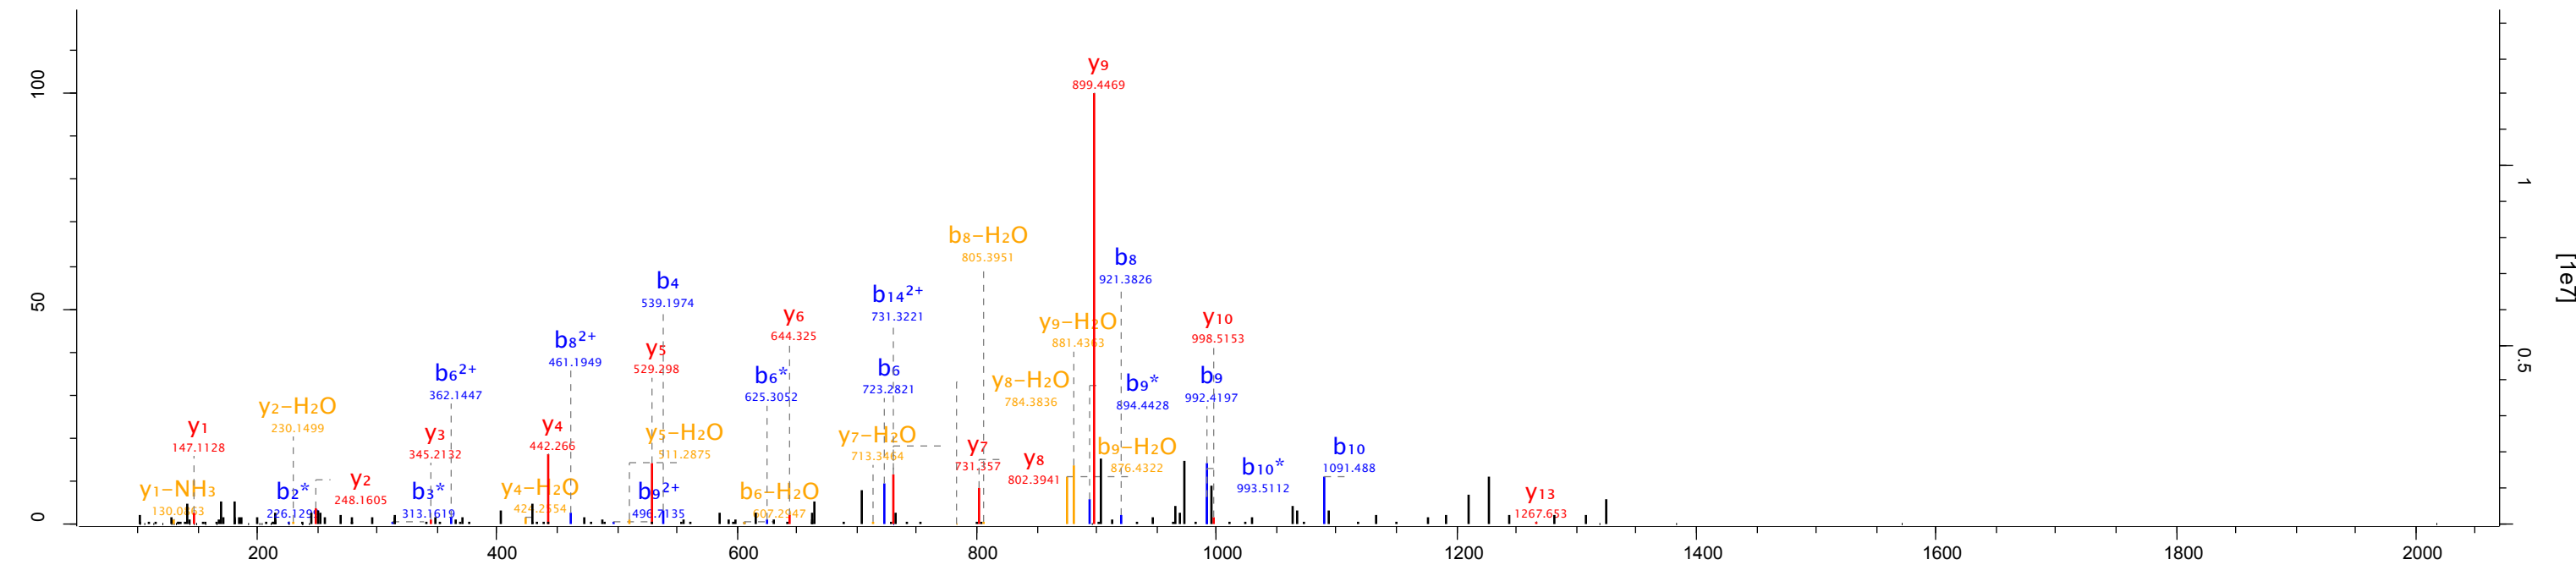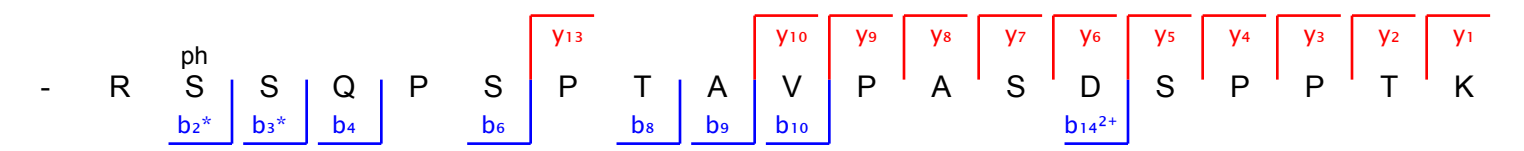

Raw file: 20150814\_A375SR\_Phospho\_BR2\_04  
 Scan: 7716 Method: FTMS; HCD Score: 120.76 m/z: 437.71 Gene names: LPIN1

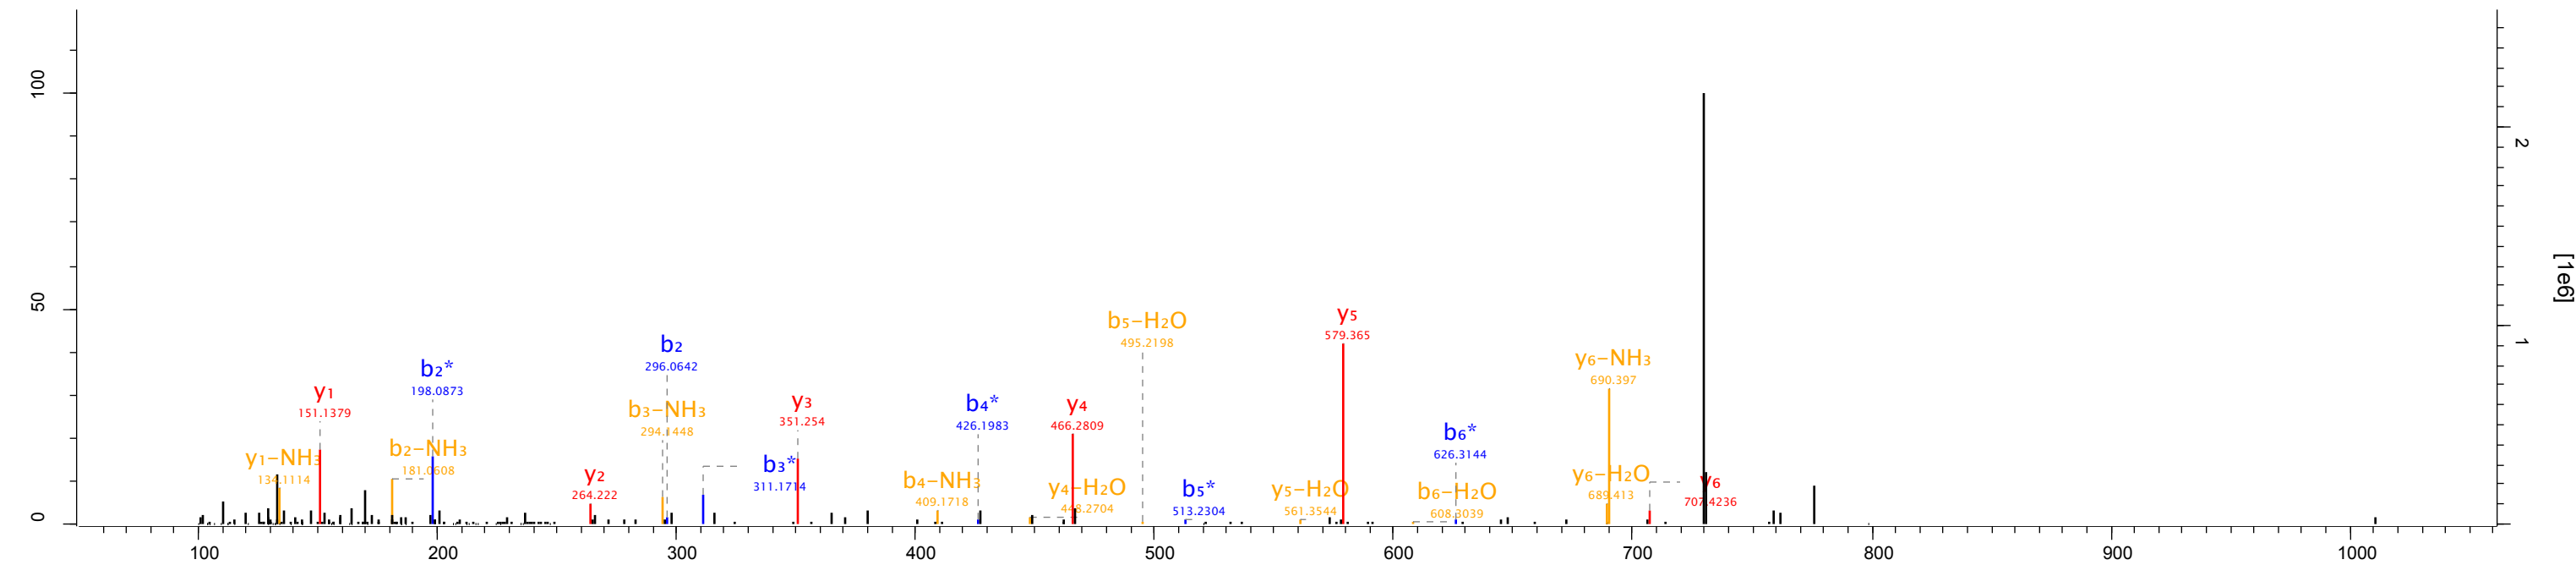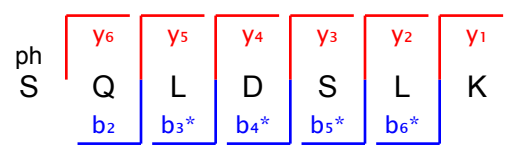

Raw file  
20150814\_A375SR\_Phospho\_BR2\_04

Scan 7796 Method FTMS; HCD Score 240.11 m/z 918.07 Gene names SMC4

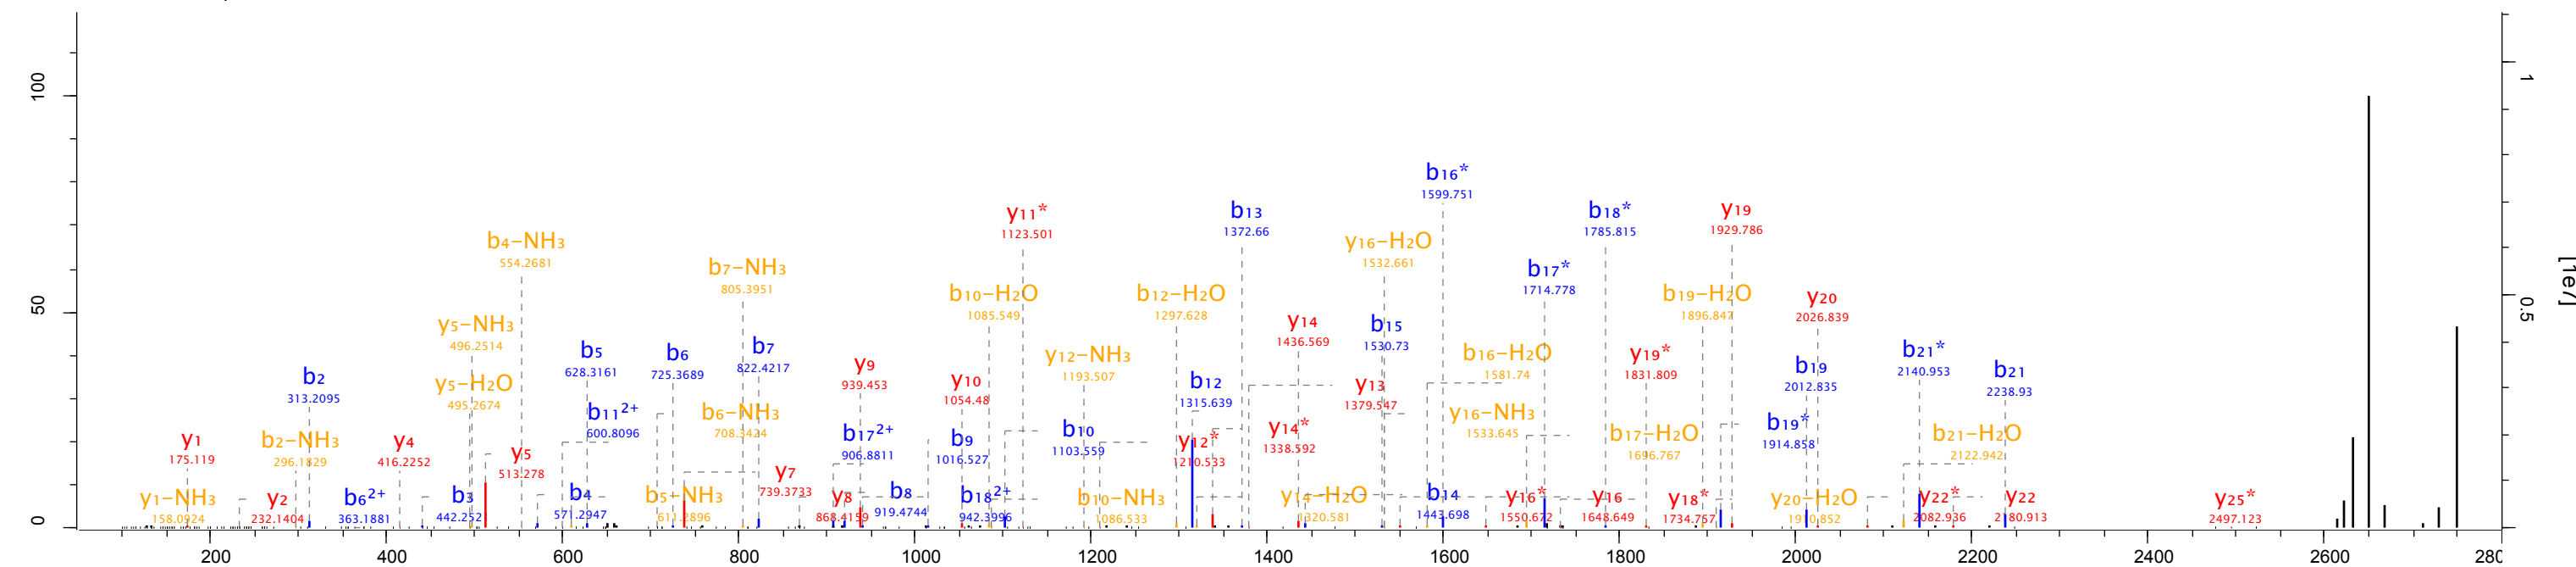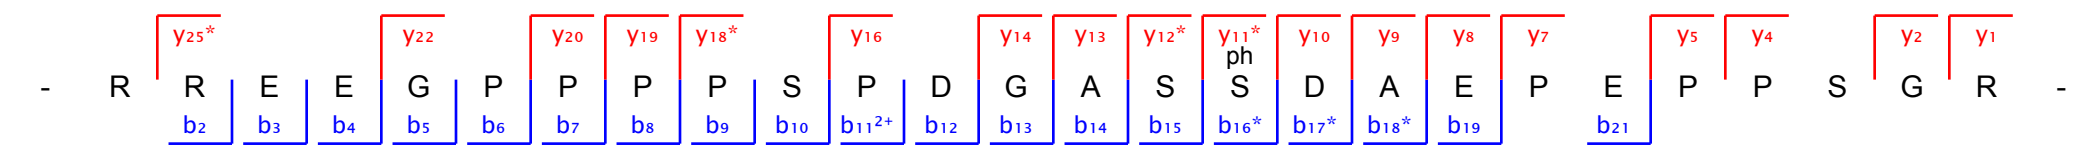

Raw file: 20150814\_A375SR\_Phospho\_BR2\_04  
 Scan: 8226 Method: FTMS; HCD Score: 90.71 m/z: 628.8 Gene names: BAIAP2L1

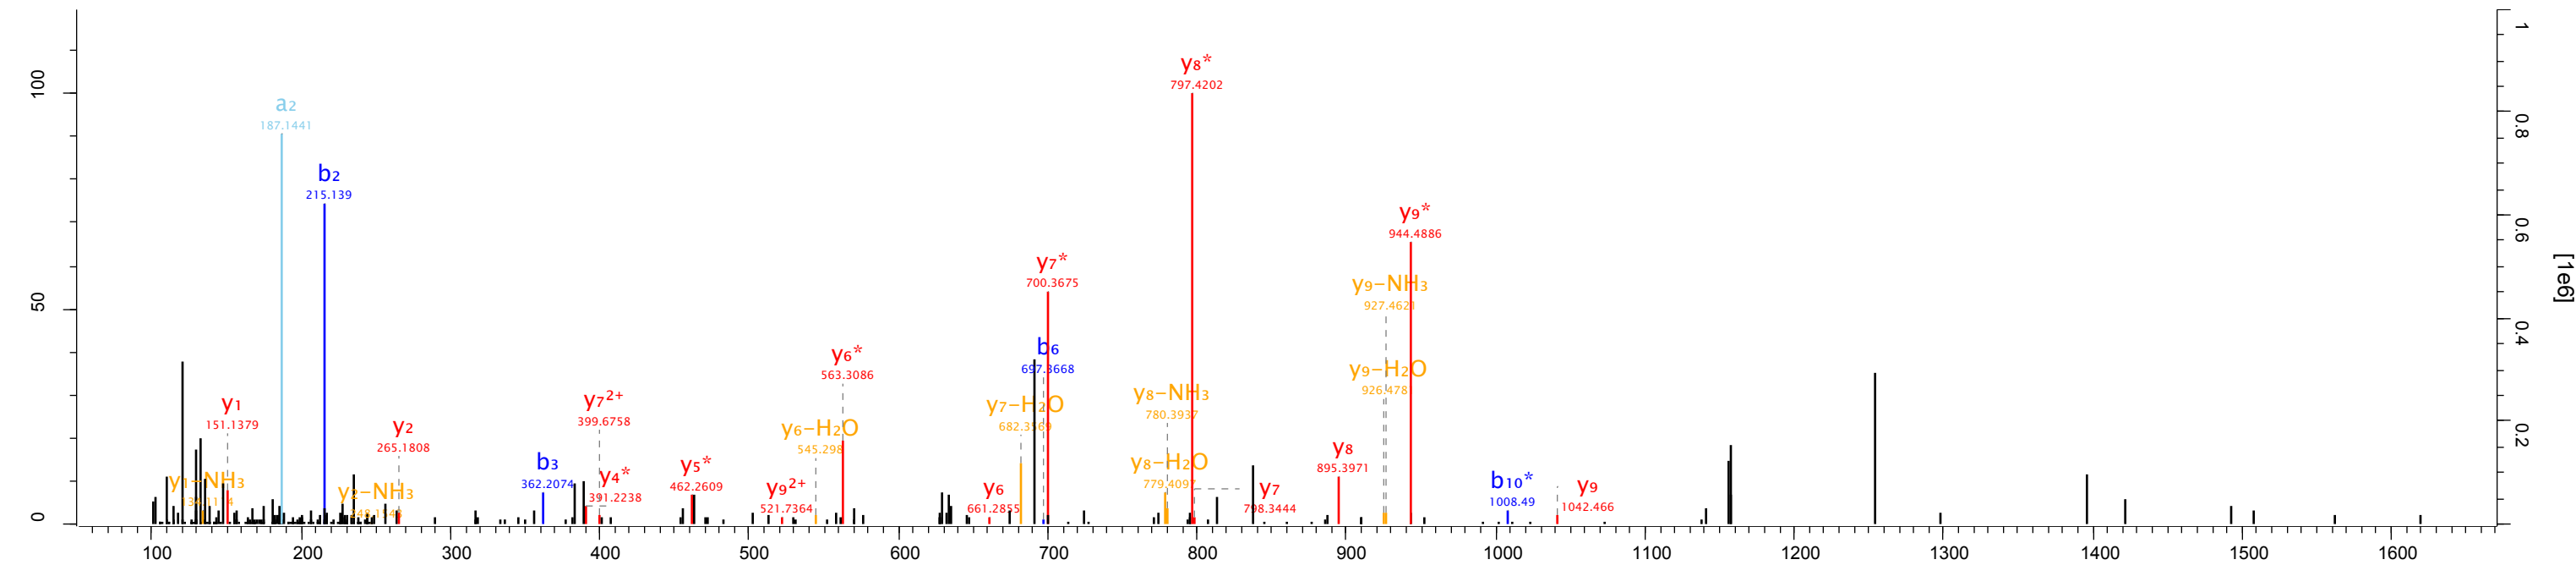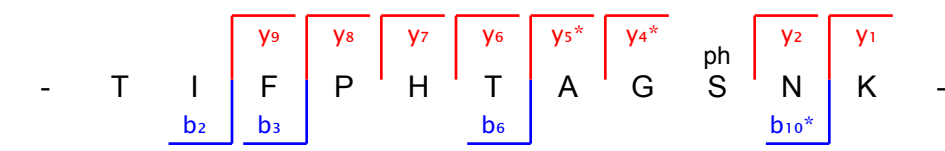

Raw file: 20150814\_A375SR\_Phospho\_BR2\_04  
 Scan: 8366 Method: FTMS; HCD Score: 138.02 m/z: 604.28 Gene names: MKL2

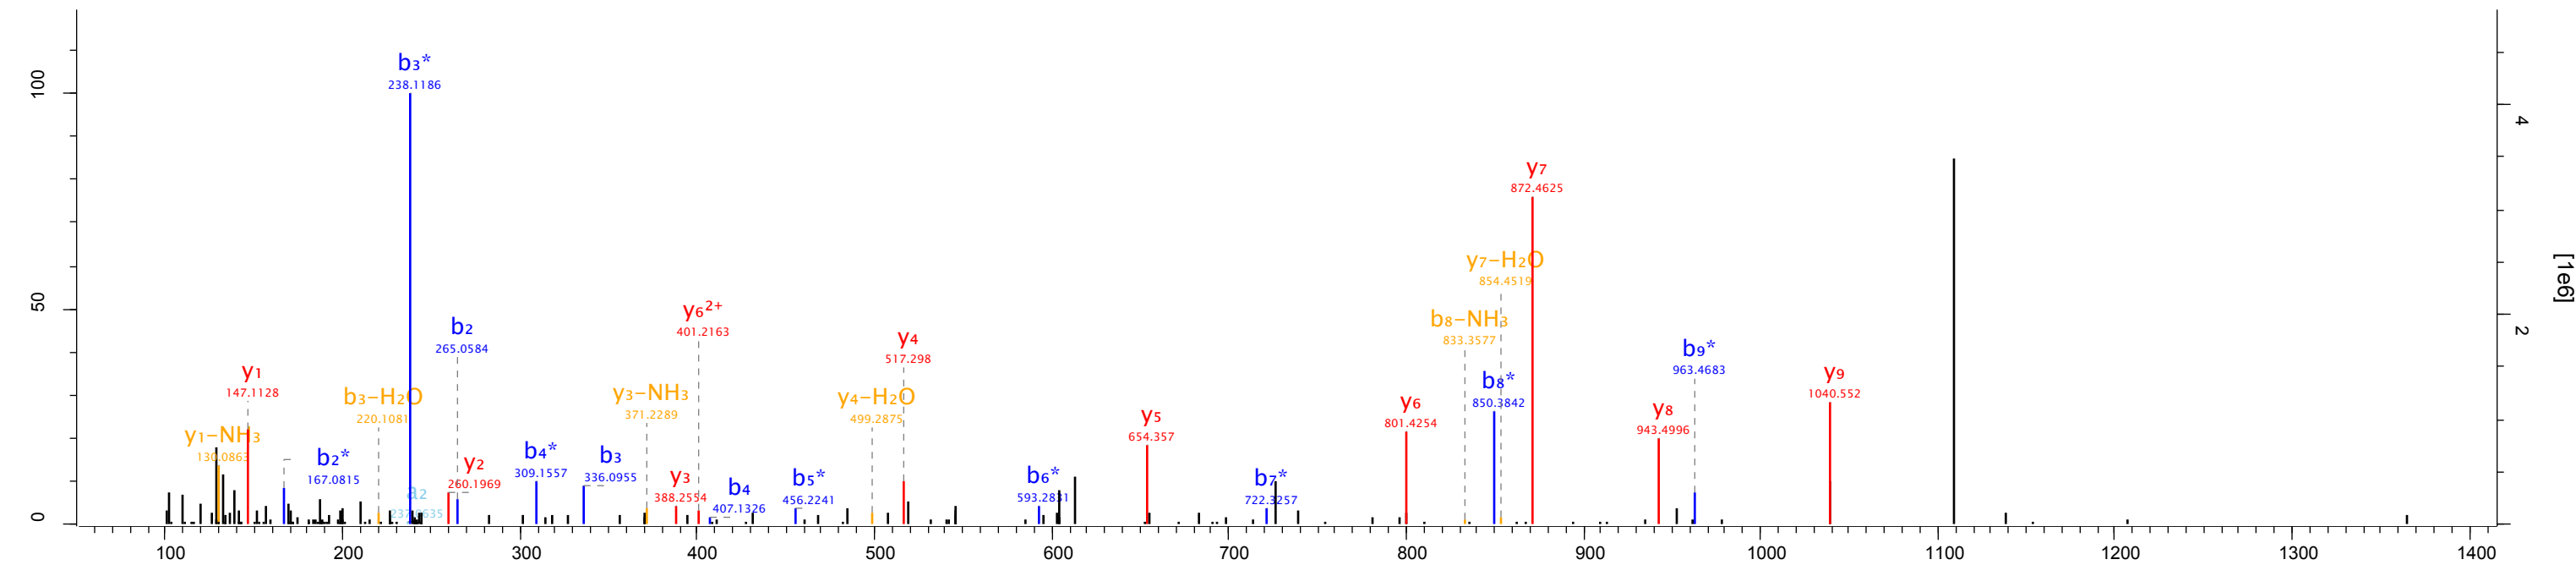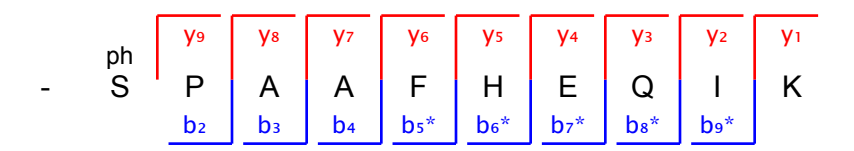

Raw file: 20150814\_A375SR\_Phospho\_BR2\_04  
 Scan: 8546 Method: FTMS; HCD Score: 223.15 m/z: 785.31 Gene names: APC

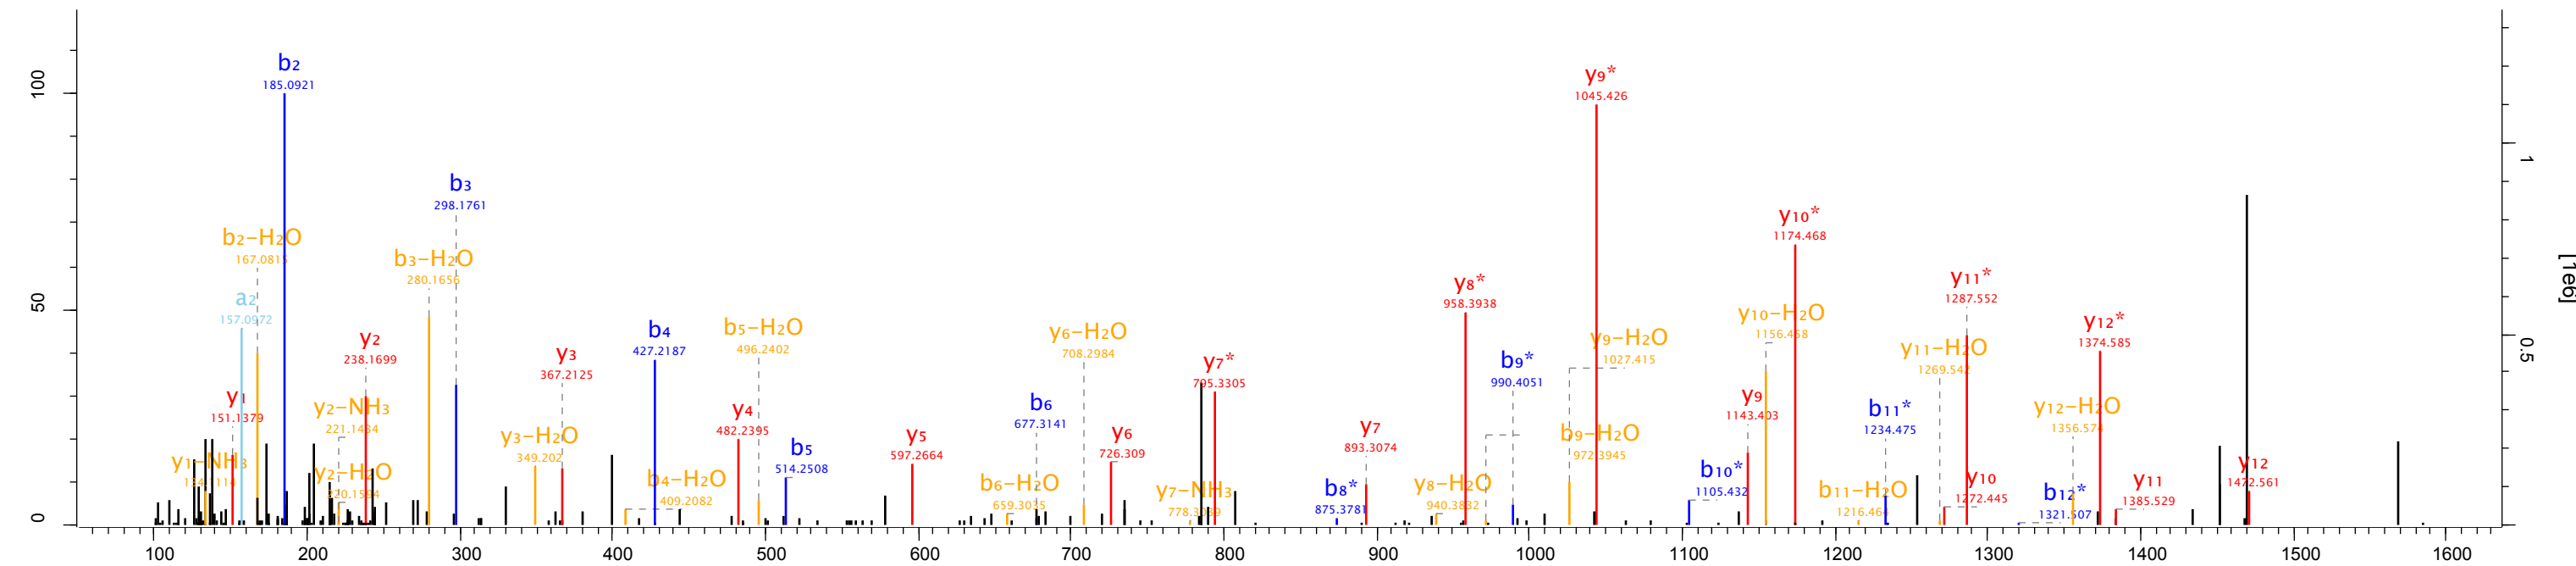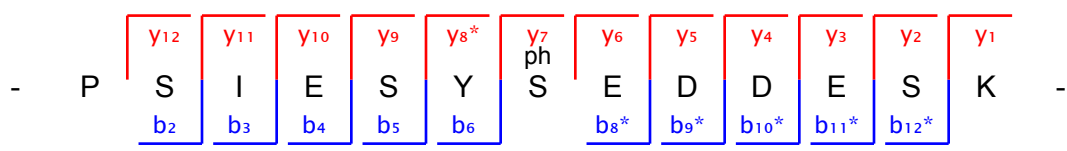

Raw file: 20150814\_A375SR\_Phospho\_BR2\_04  
 Scan: 8886 Method: FTMS; HCD Score: 133.88 m/z: 612.27 Gene names: EPS8L2

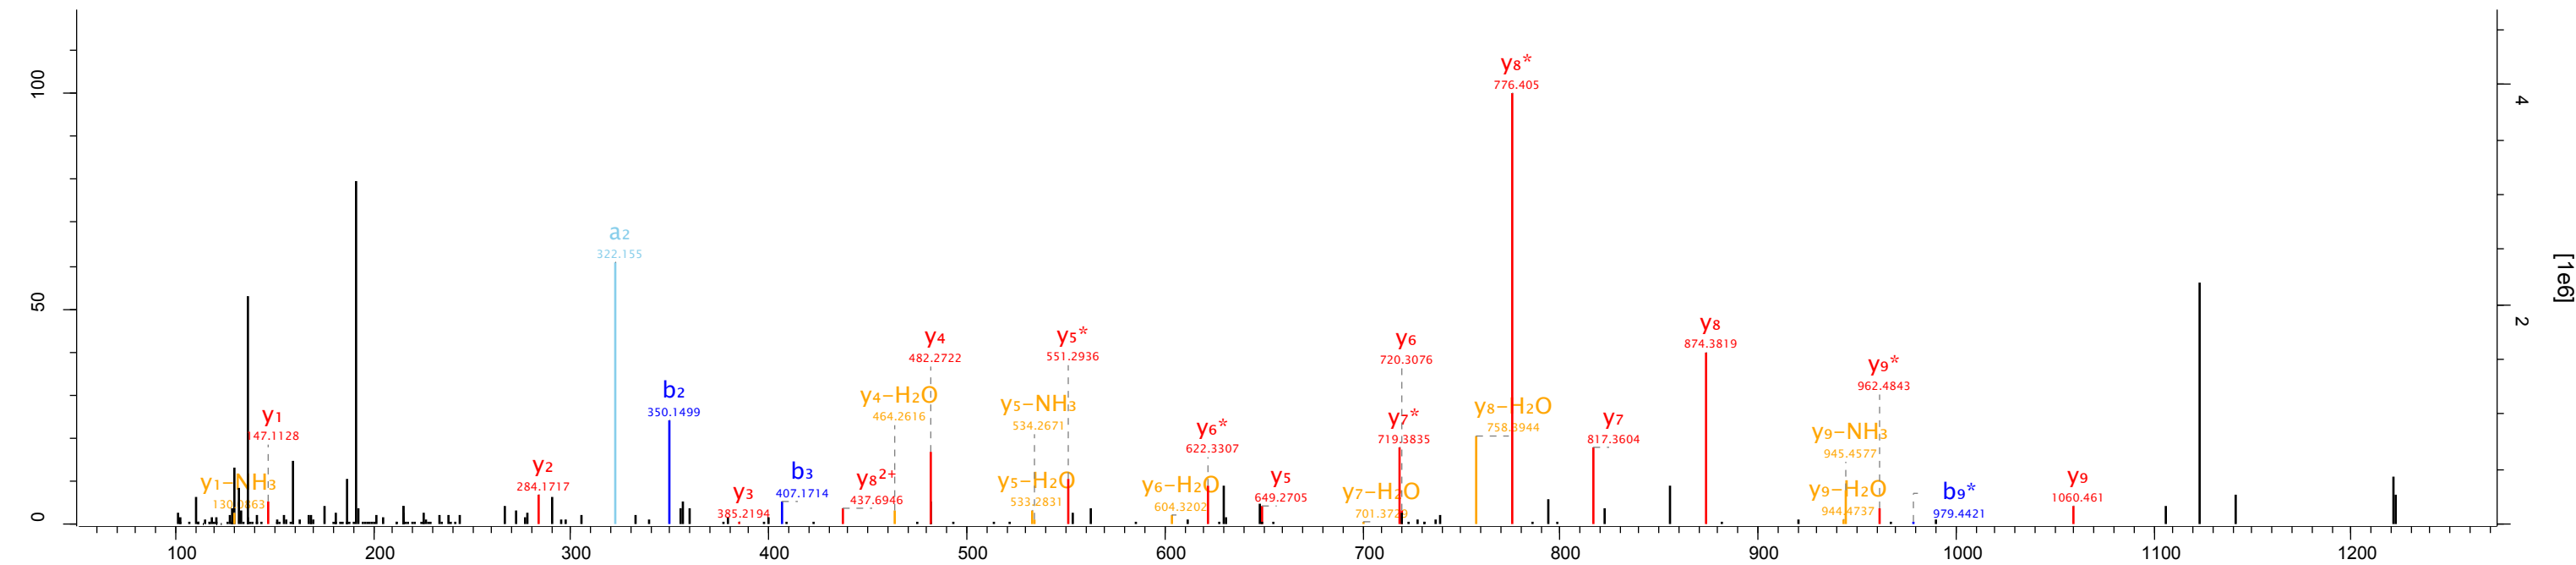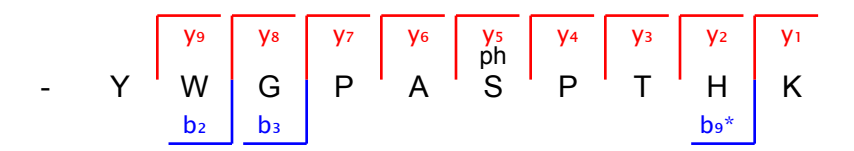

Raw file: 20150814\_A375SR\_Phospho\_BR2\_04  
 Scan: 9046 Method: FTMS; HCD Score: 208.49 m/z: 766.83 Gene names: LUZP1

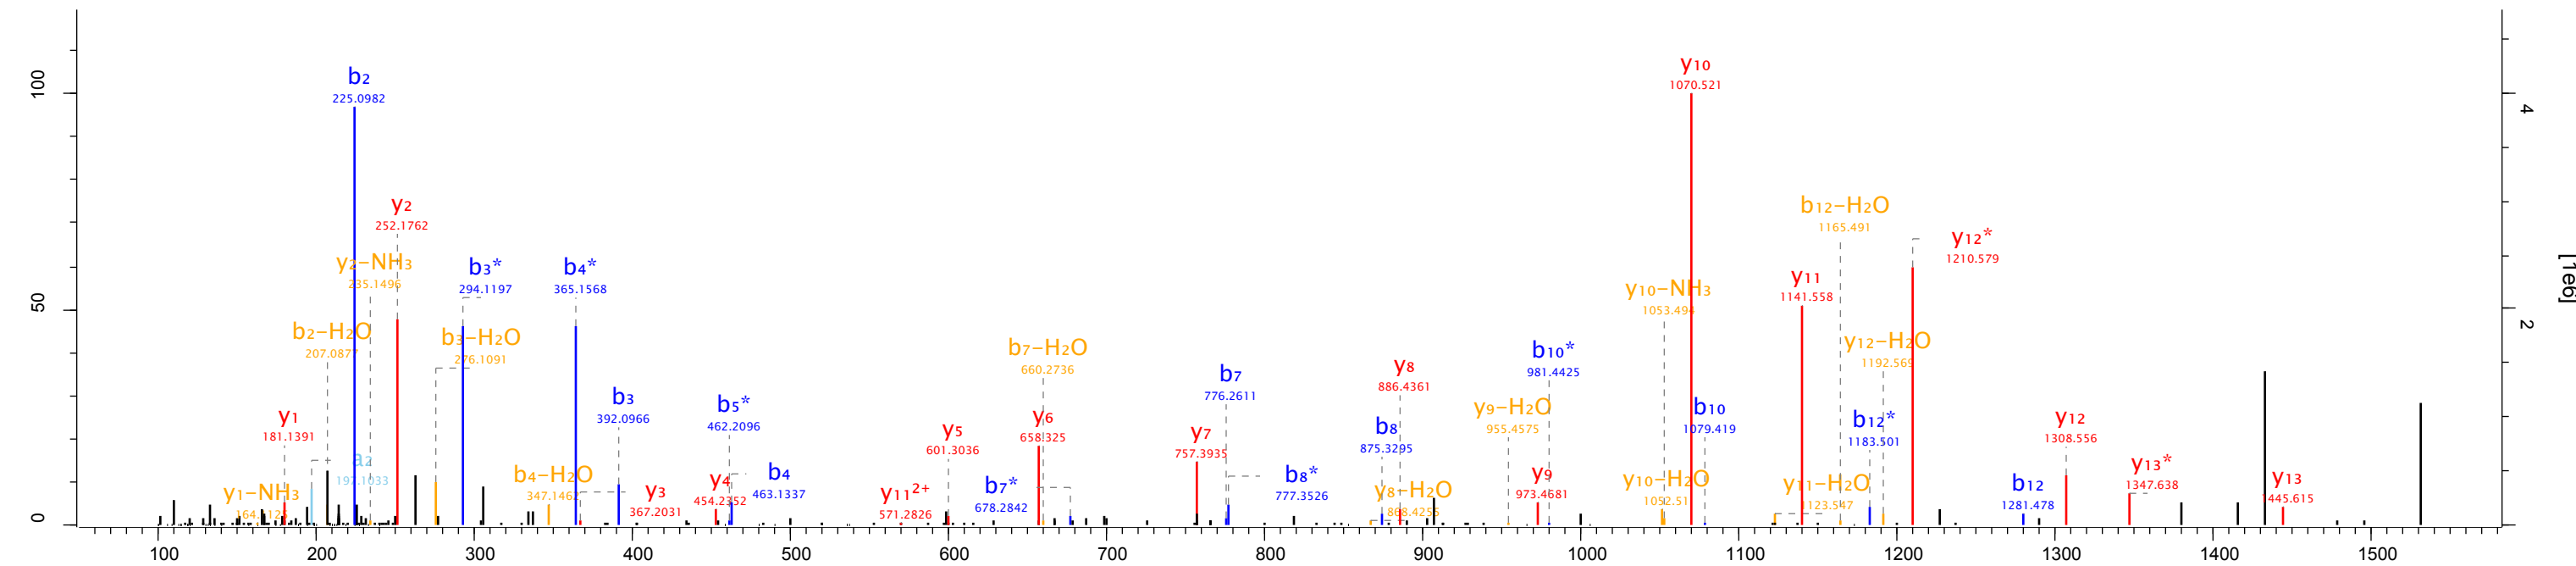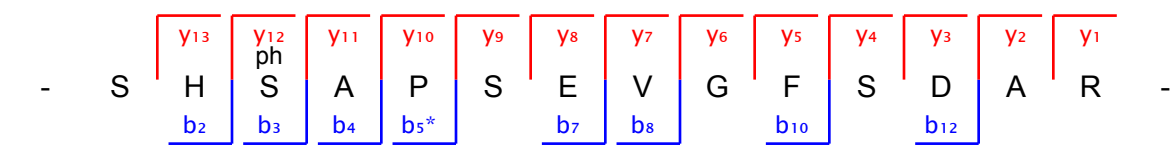



Raw file: 20150814\_A375SR\_Phospho\_BR2\_04  
 Scan: 9086 Method: FTMS; HCD Score: 328.81 m/z: 1335.02 Gene names: PWP1

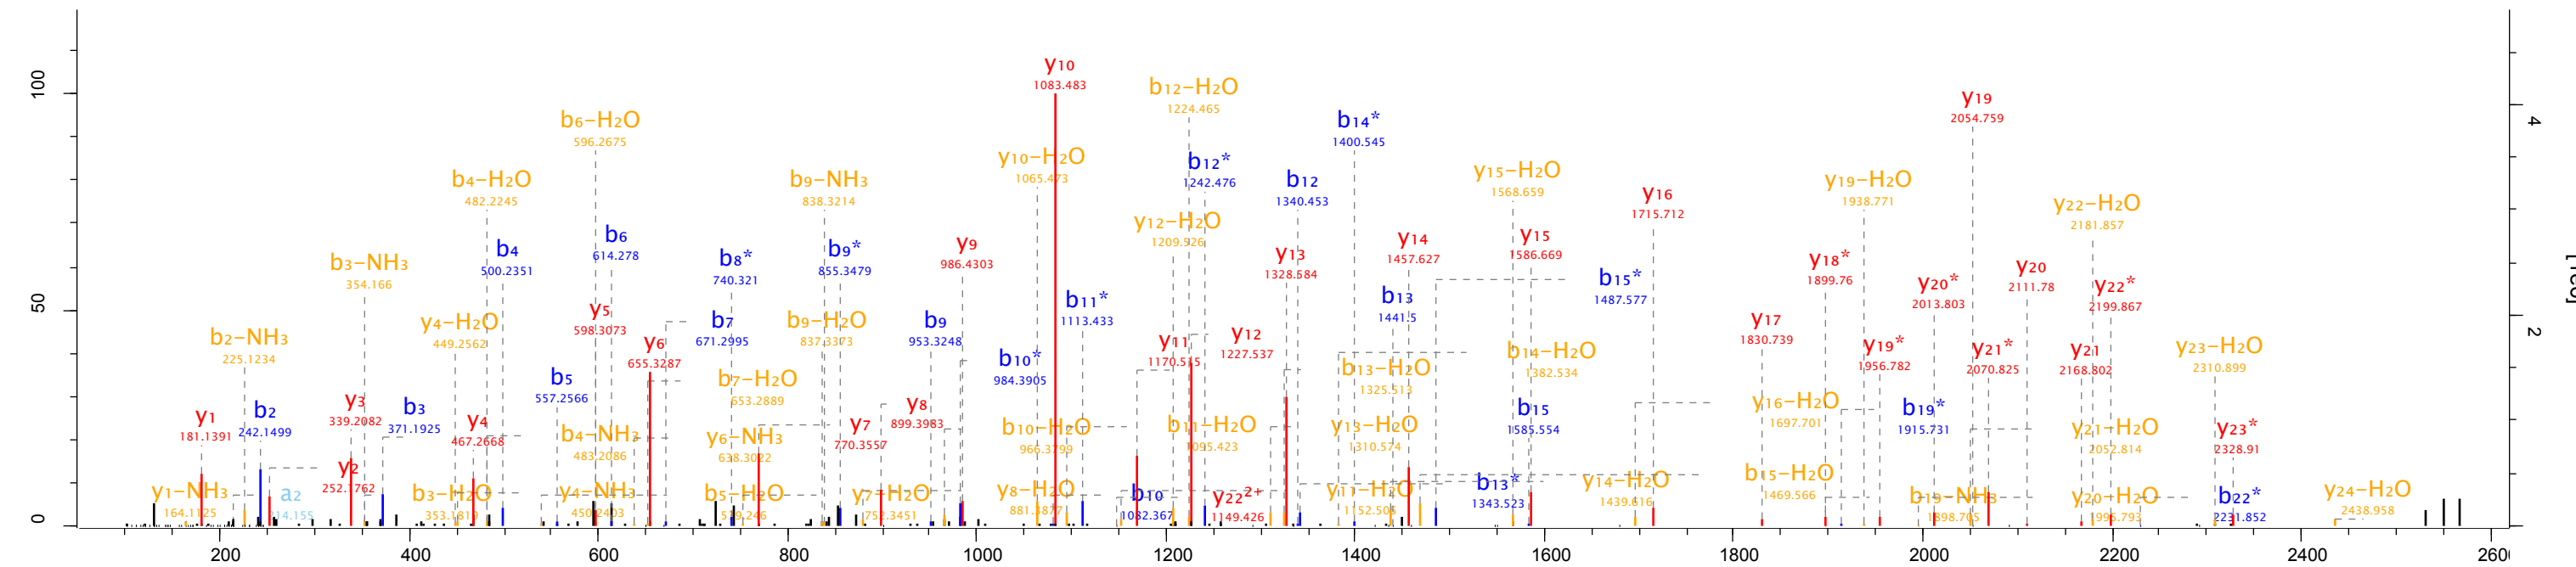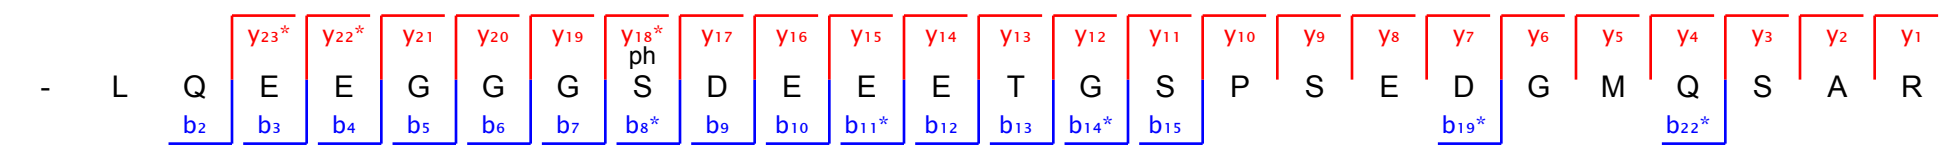

Raw file 20150814\_A375SR\_Phospho\_BR2\_04 Scan 9356 Method FTMS; HCD Score 234.24 m/z 643.28 Gene names NDE1

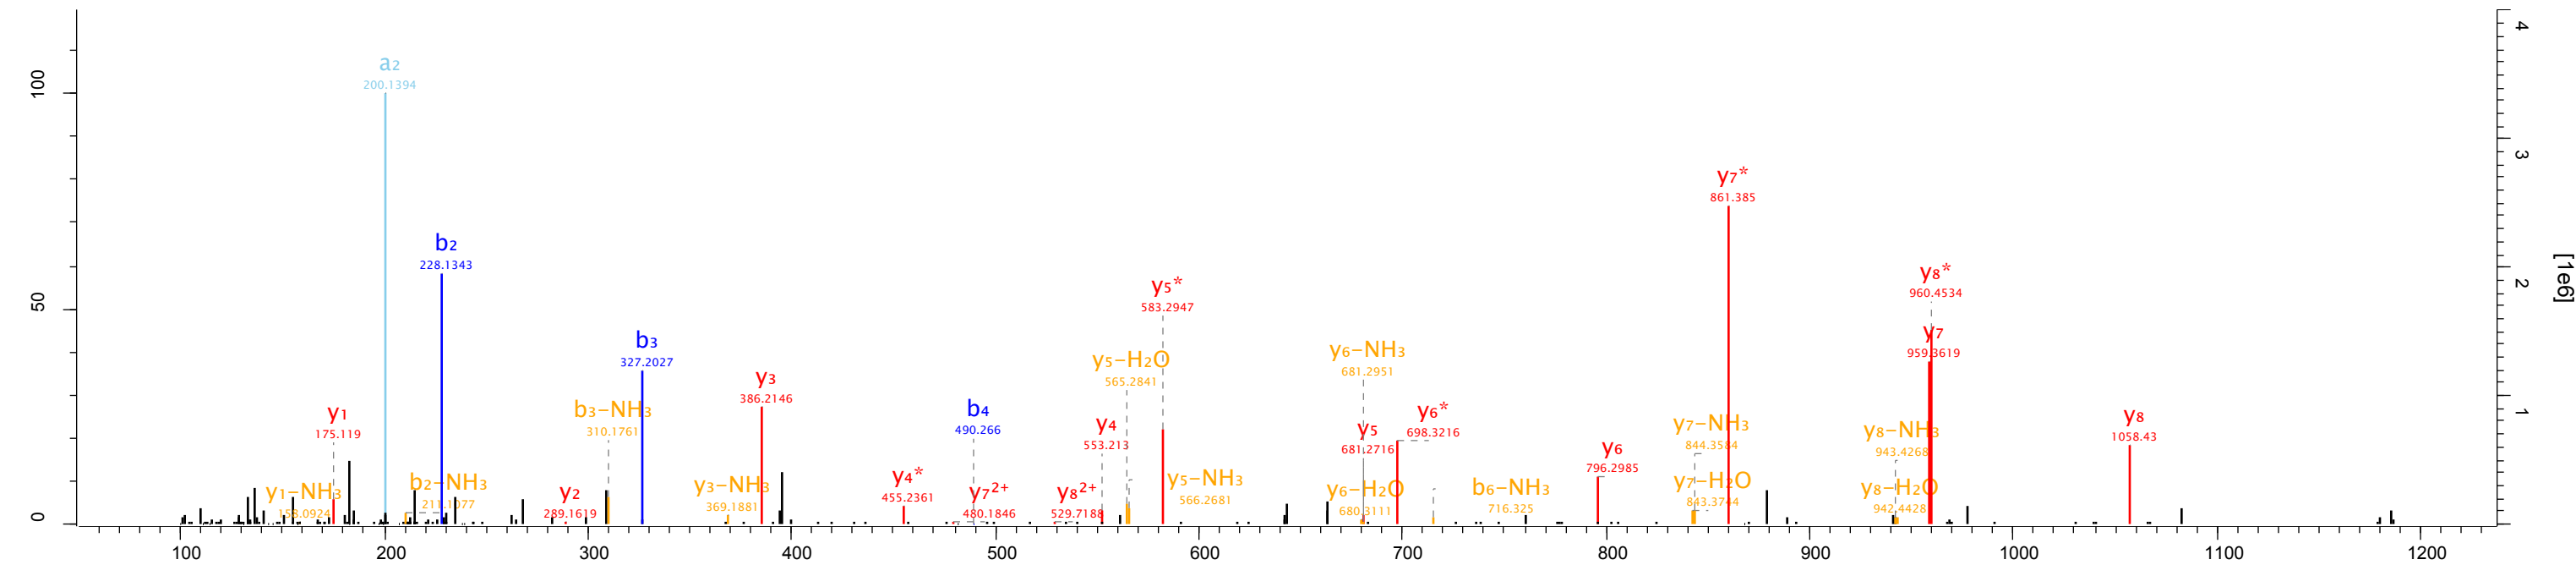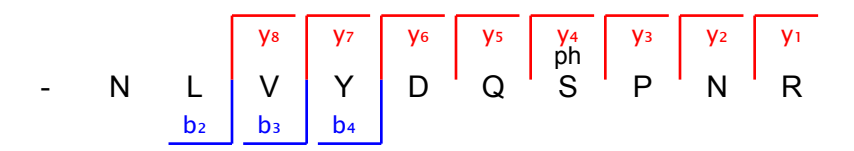

Raw file: 20150814\_A375SR\_Phospho\_BR2\_04  
 Scan: 9486 Method: FTMS; HCD Score: 119.05 m/z: 753.33 Gene names: CHEK1

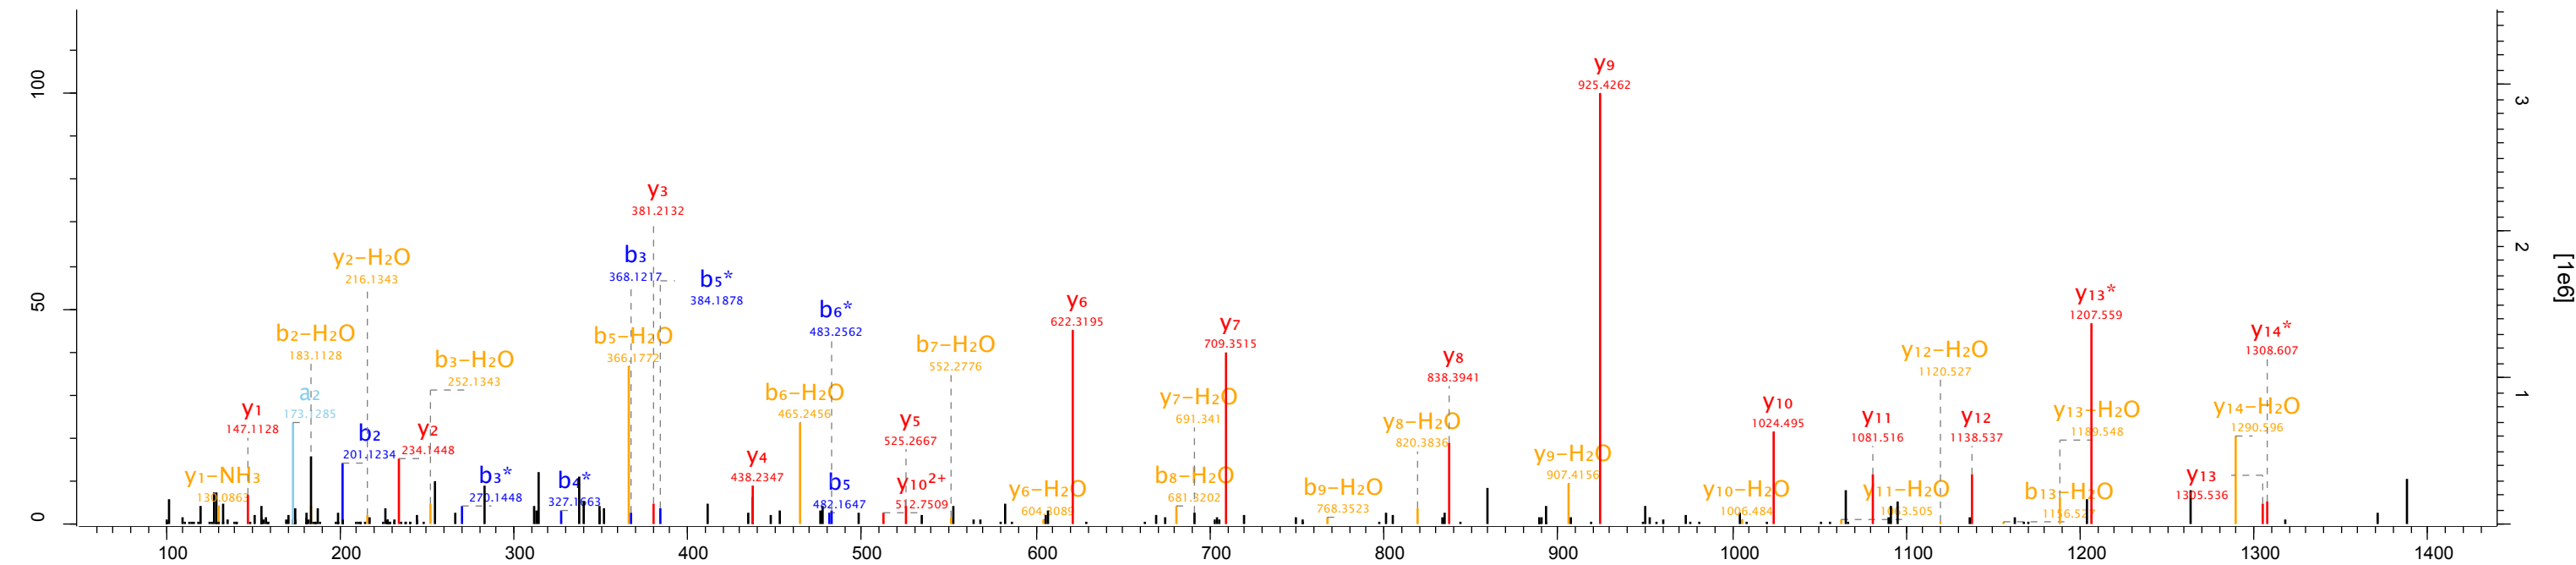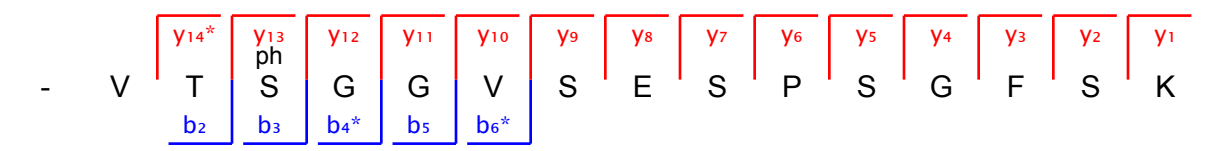

Raw file 20150814\_A375SR\_Phospho\_BR2\_04 Scan 9656 Method FTMS; HCD Score 136.1 m/z 657.32 Gene names SIPA1L1

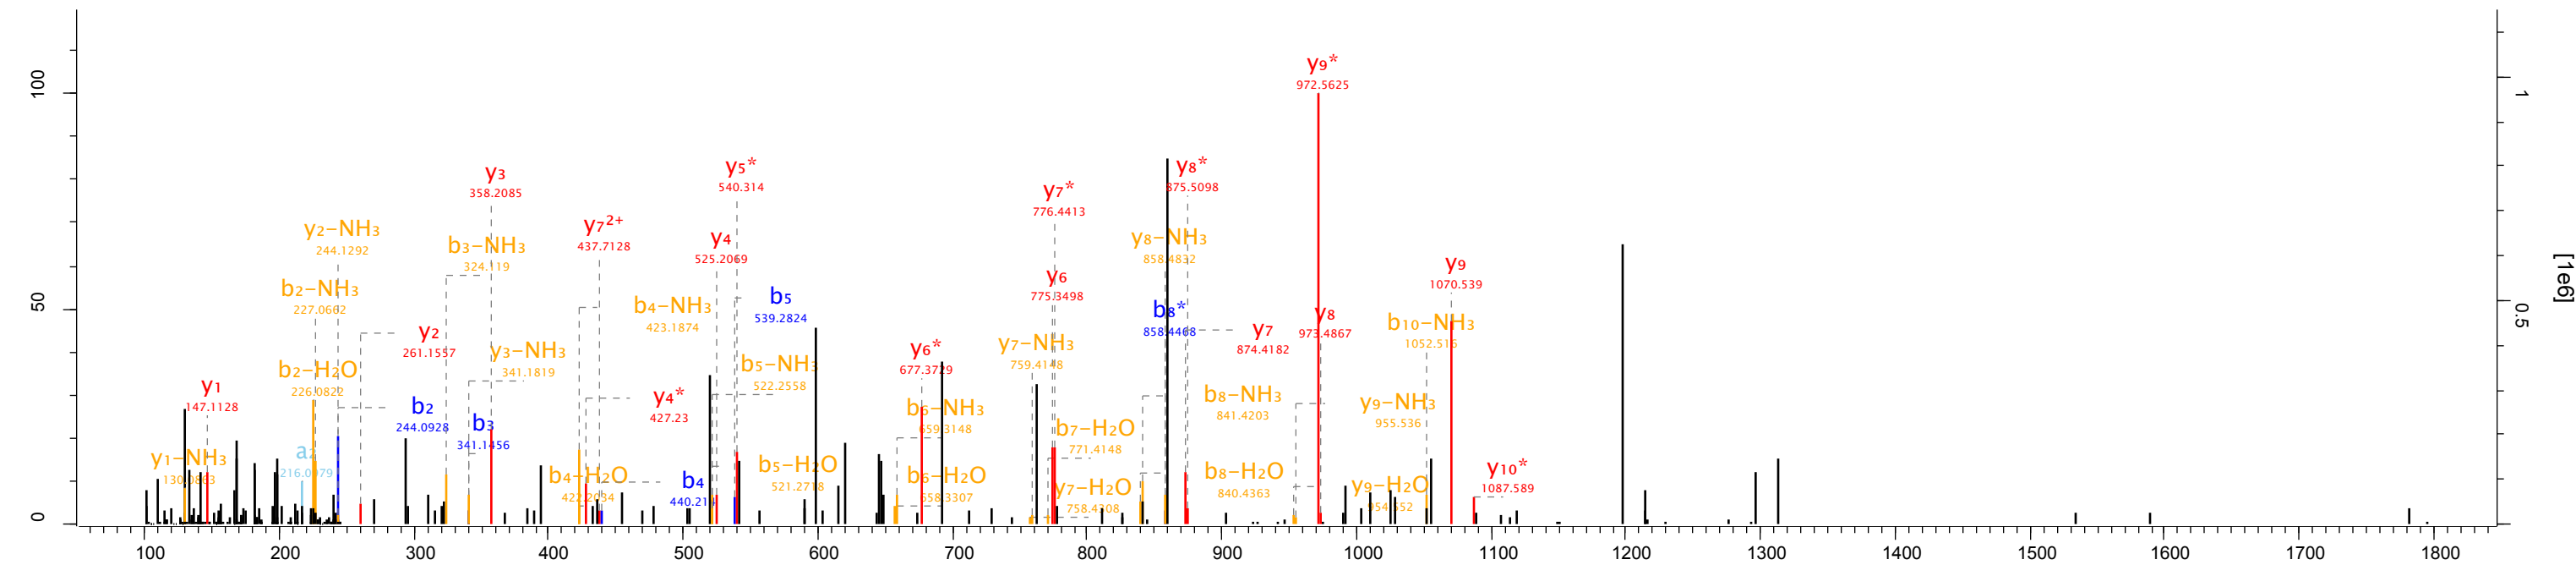

- Q y10\* y9 y8 y7 y6 y5\* y4 y3 y2 y1  
 D P V V H L S P N K -  
b2 b3 b4 b5 b8\*

Raw file: 20150814\_A375SR\_Phospho\_BR2\_04  
 Scan: 9786 Method: FTMS; HCD Score: 123.2 m/z: 492.23 Gene names: CD97

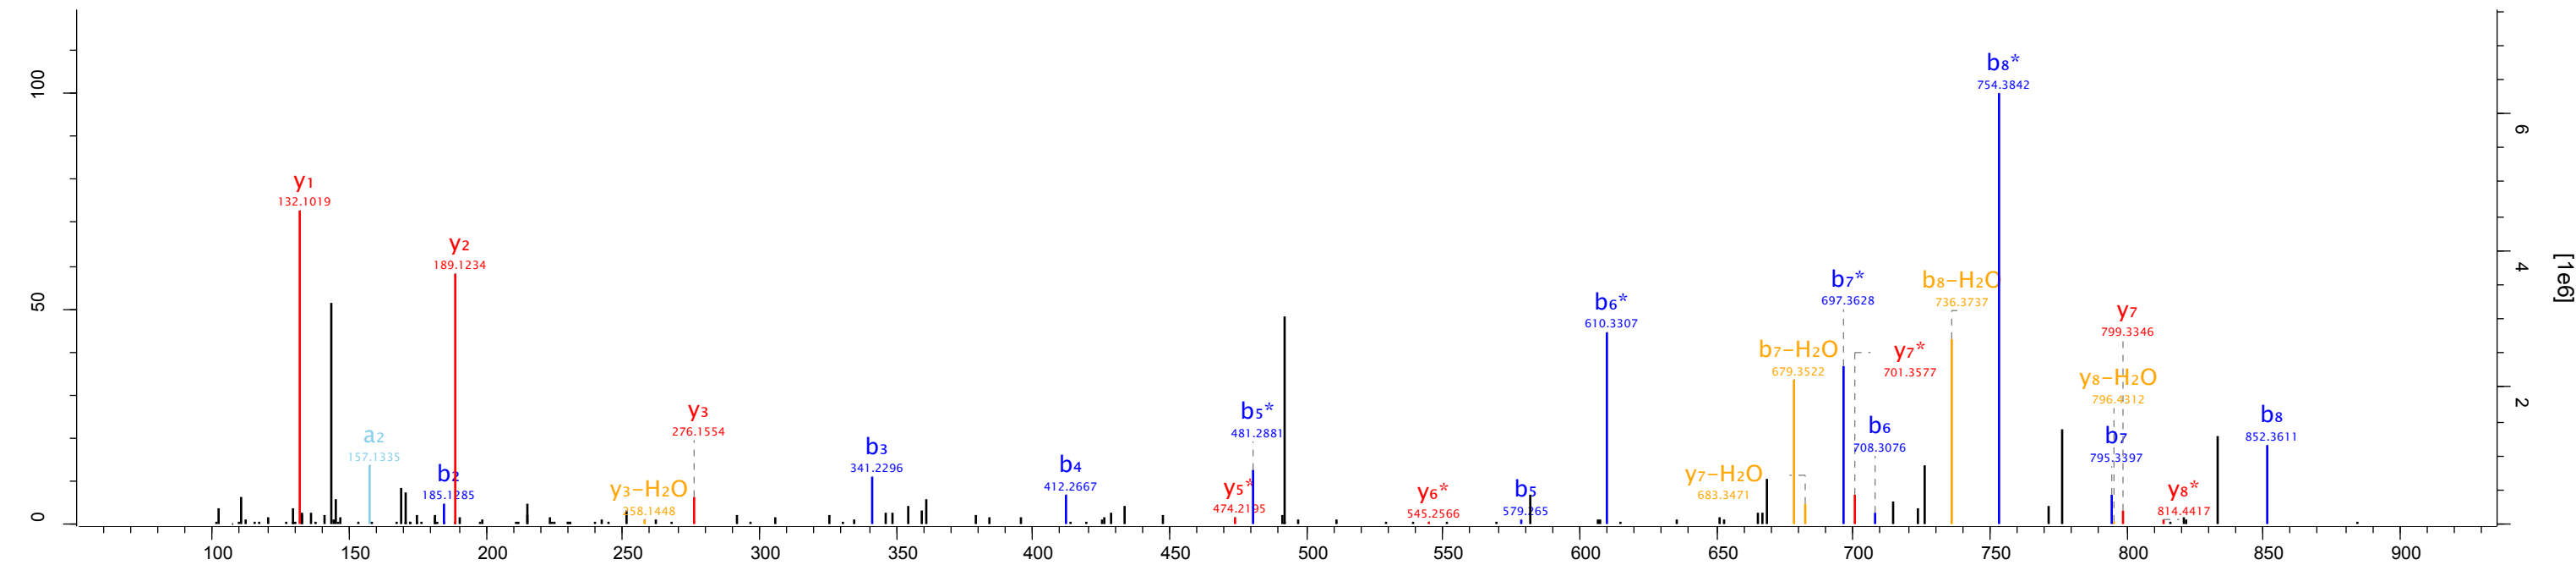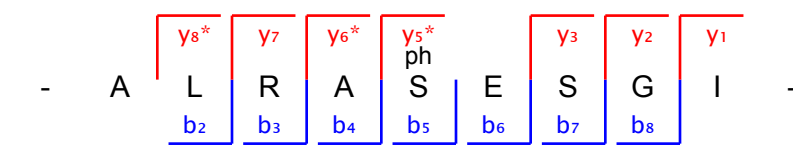

Raw file: 20150814\_A375SR\_Phospho\_BR2\_04  
 Scan: 9896 Method: FTMS; HCD Score: 246 m/z: 817.02 Gene names: CTNBL1

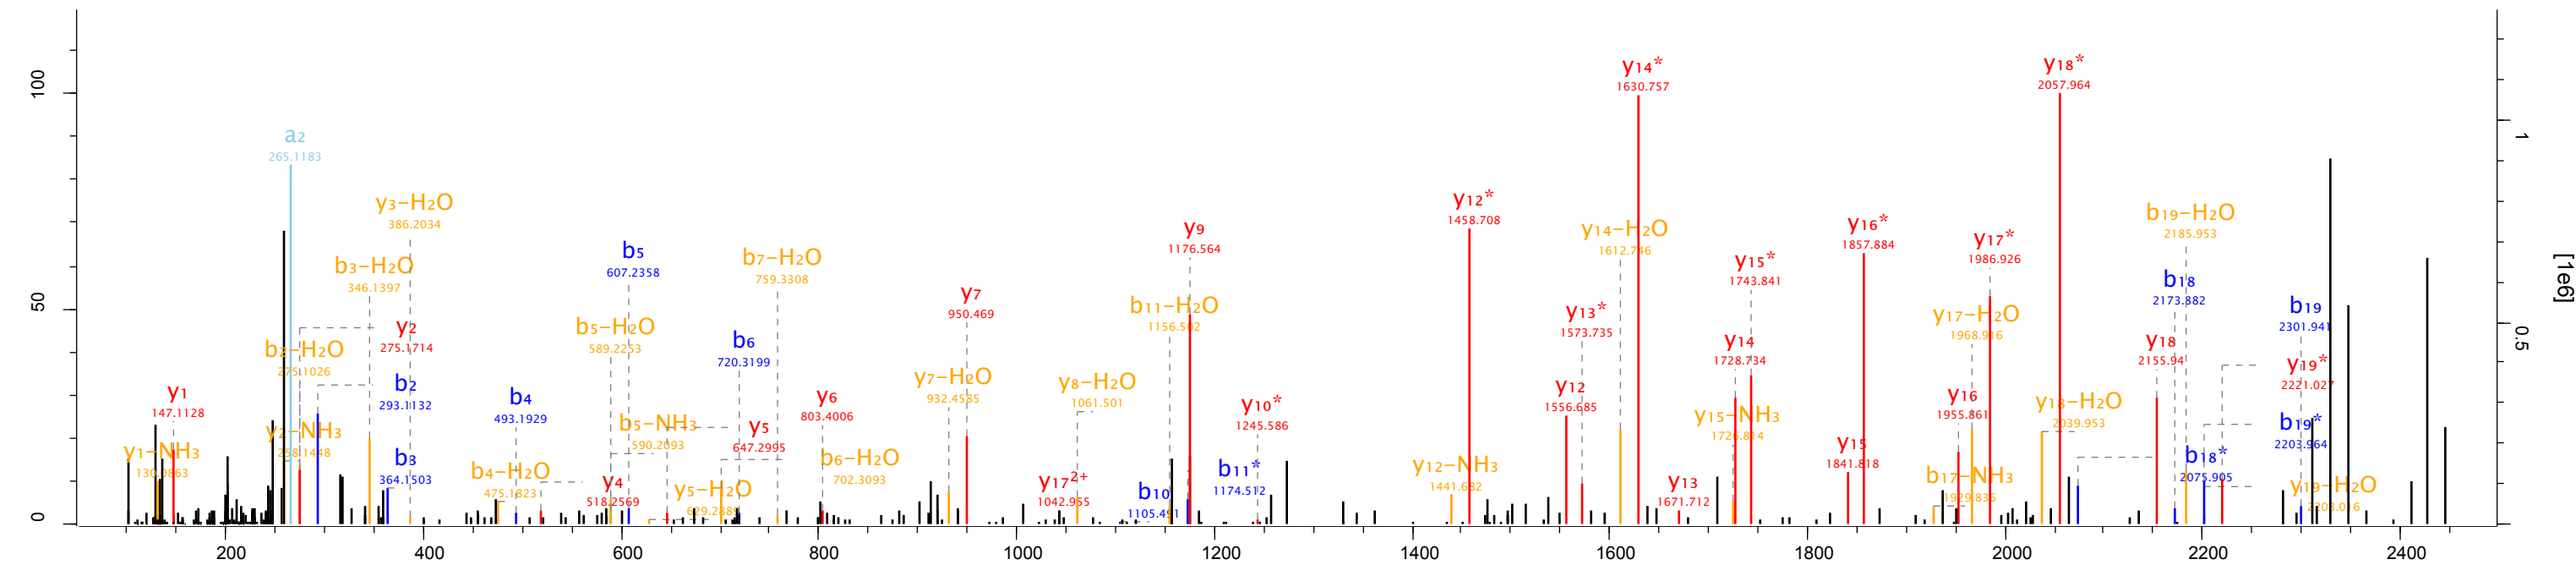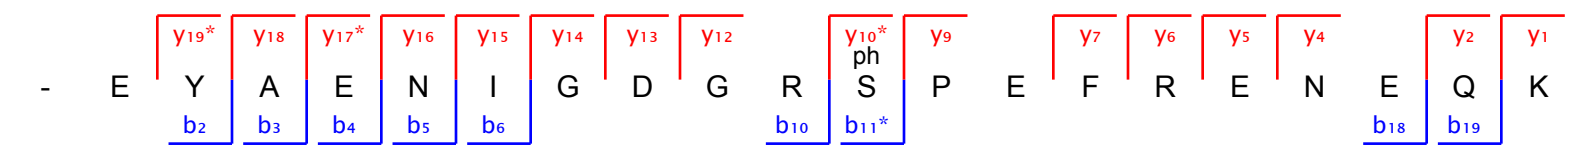

Raw file: 20150814\_A375SR\_Phospho\_BR2\_04  
 Scan: 9936 Method: FTMS; HCD Score: 194.24 m/z: 983.46 Gene names: DYNC1LI1

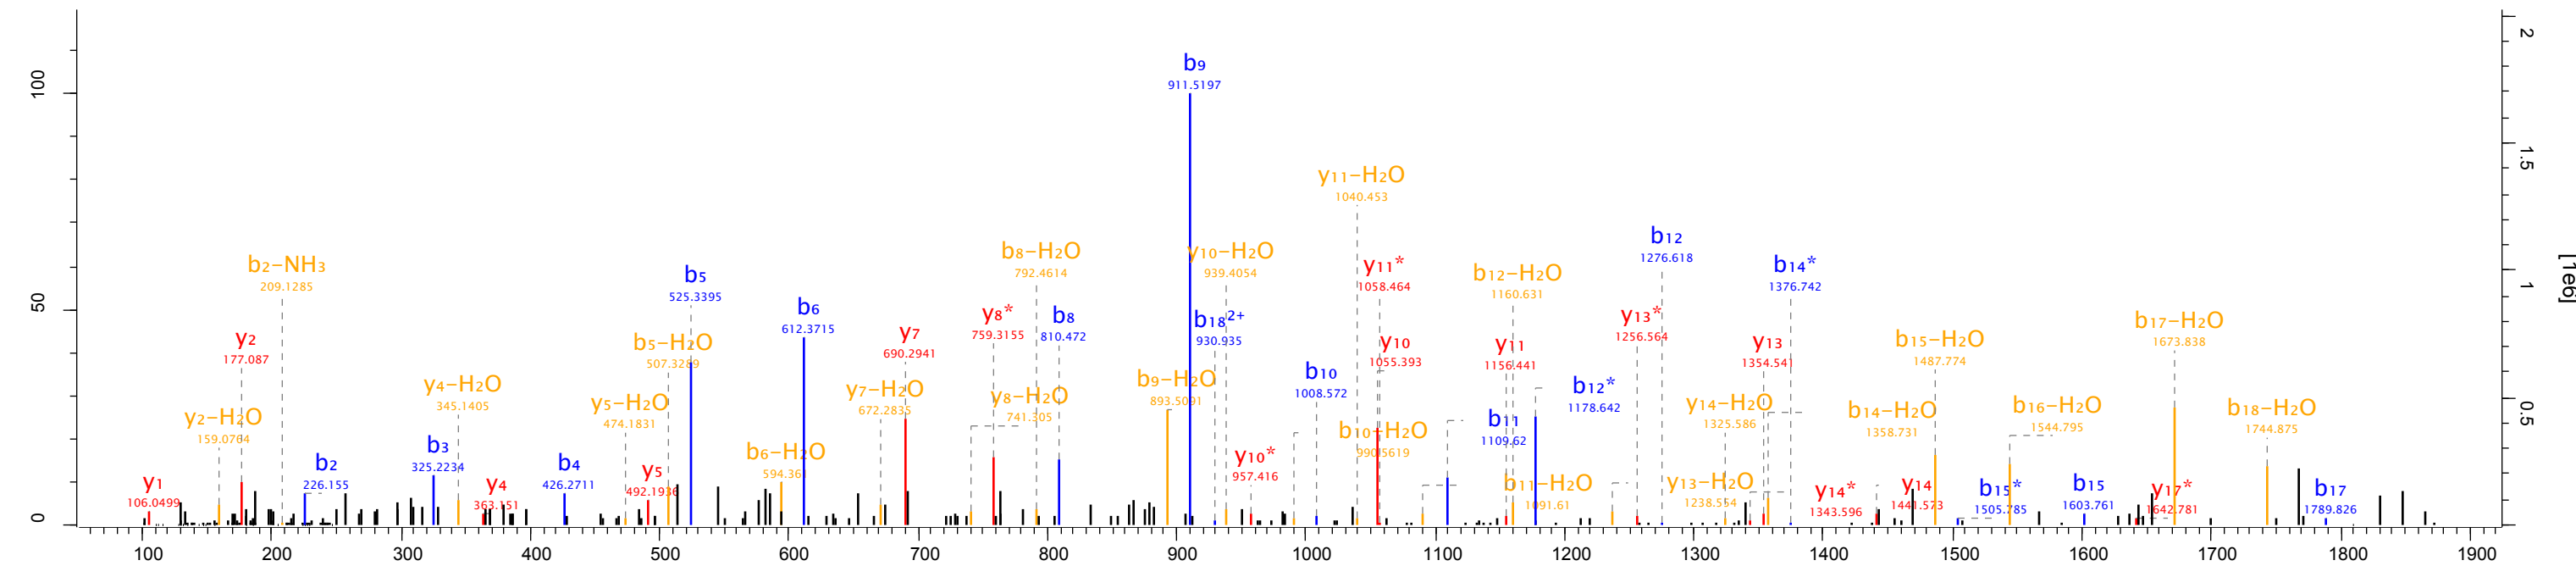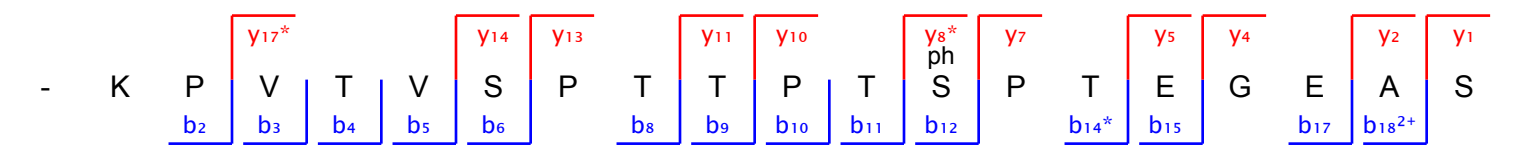

Raw file: 20150814\_A375SR\_Phospho\_BR2\_05  
 Scan: 10316 Method: FTMS; HCD Score: 122.96 m/z: 710.82 Gene names: CENPU;MLF1IP

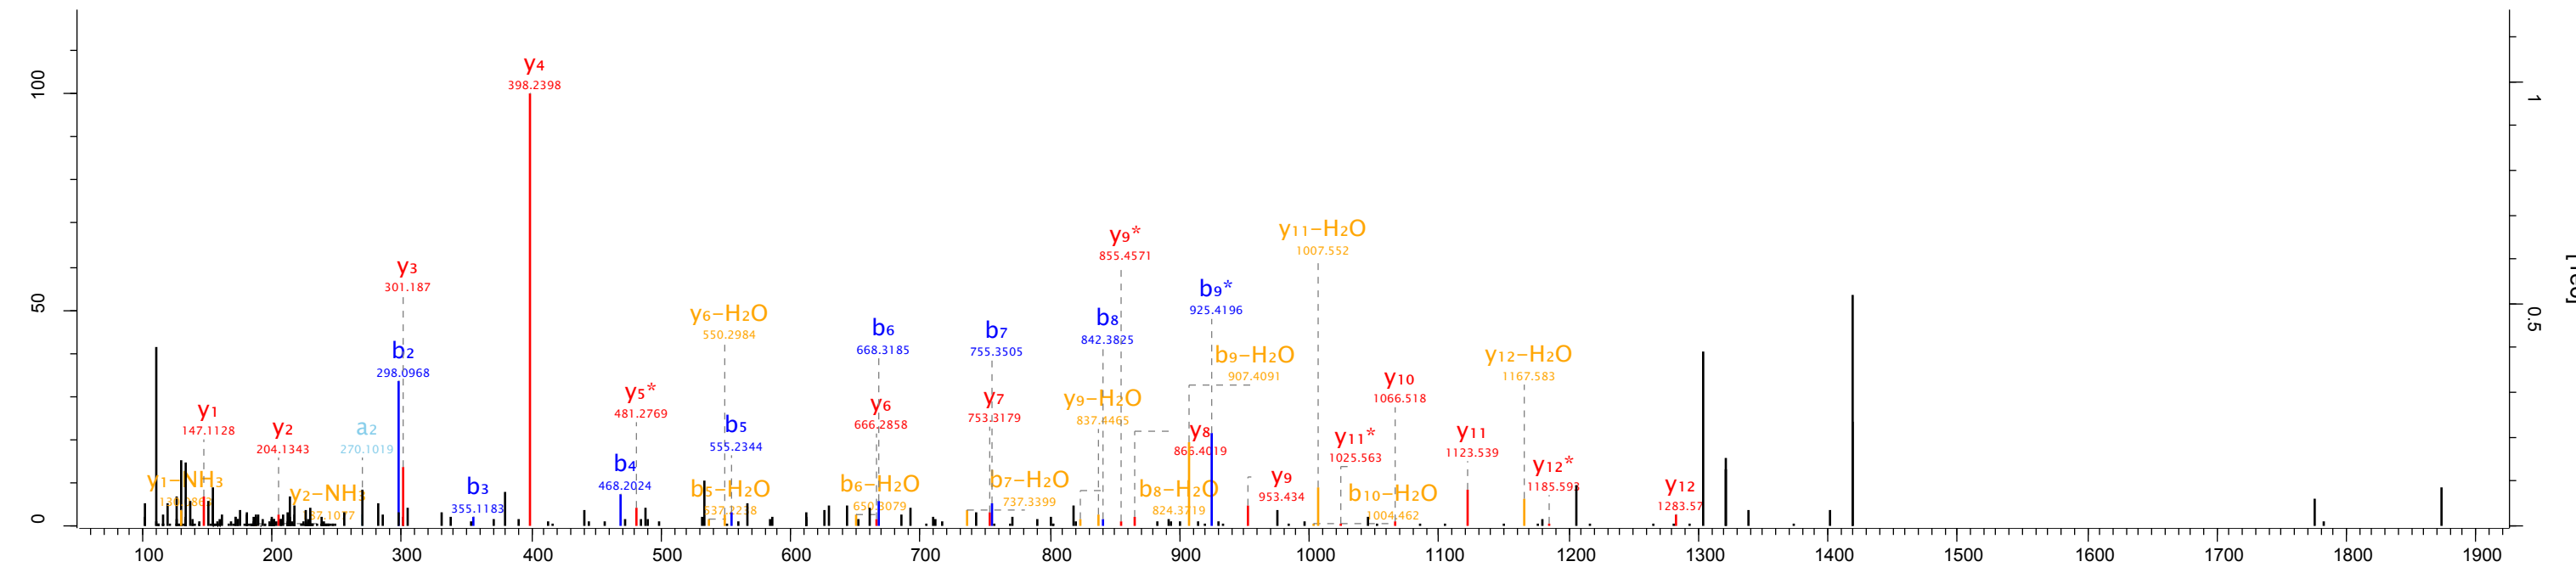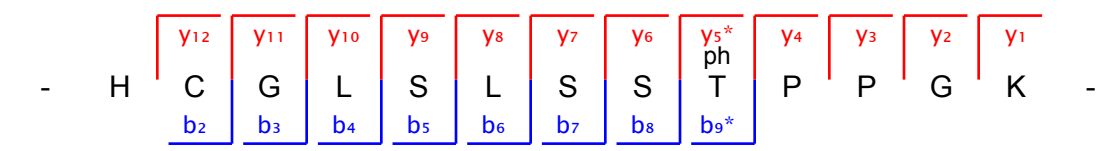



Raw file 20150814\_A375SR\_Phospho\_BR2\_05 Scan 10326 Method FTMS; HCD Score 145.1 m/z 685.29 Gene names SMARCA4

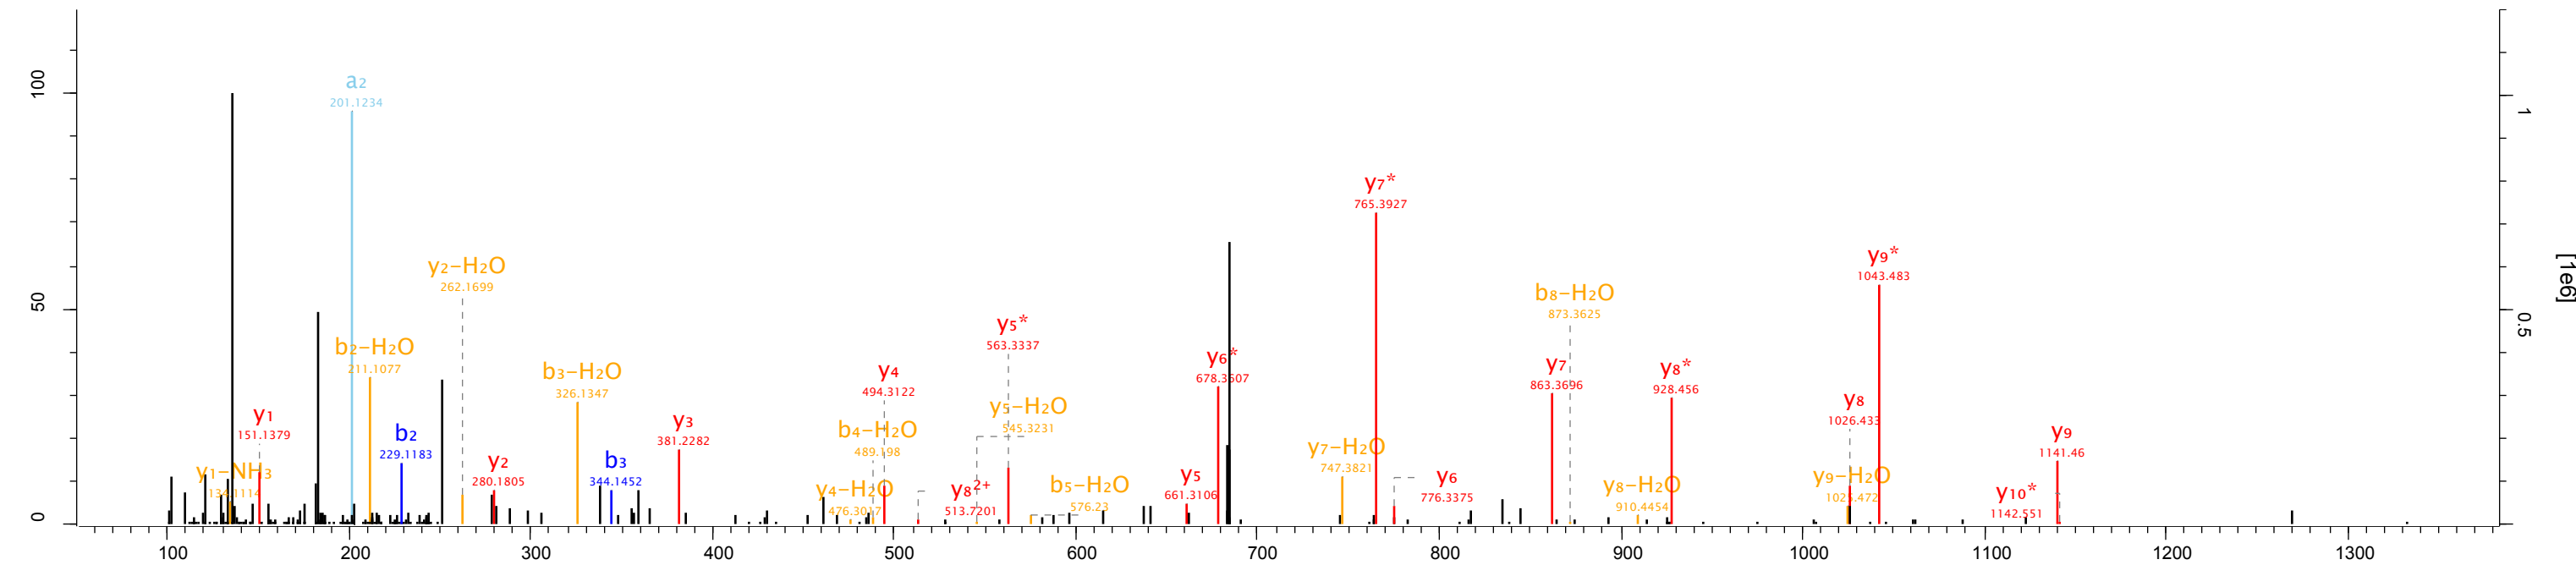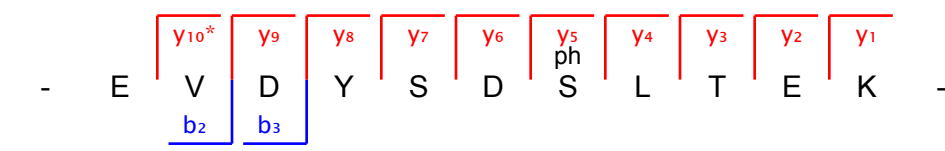

Raw file: 20150814\_A375SR\_Phospho\_BR2\_05  
 Scan: 10466 Method: FTMS; HCD Score: 52.07 m/z: 545.72 Gene names: ABLIM3

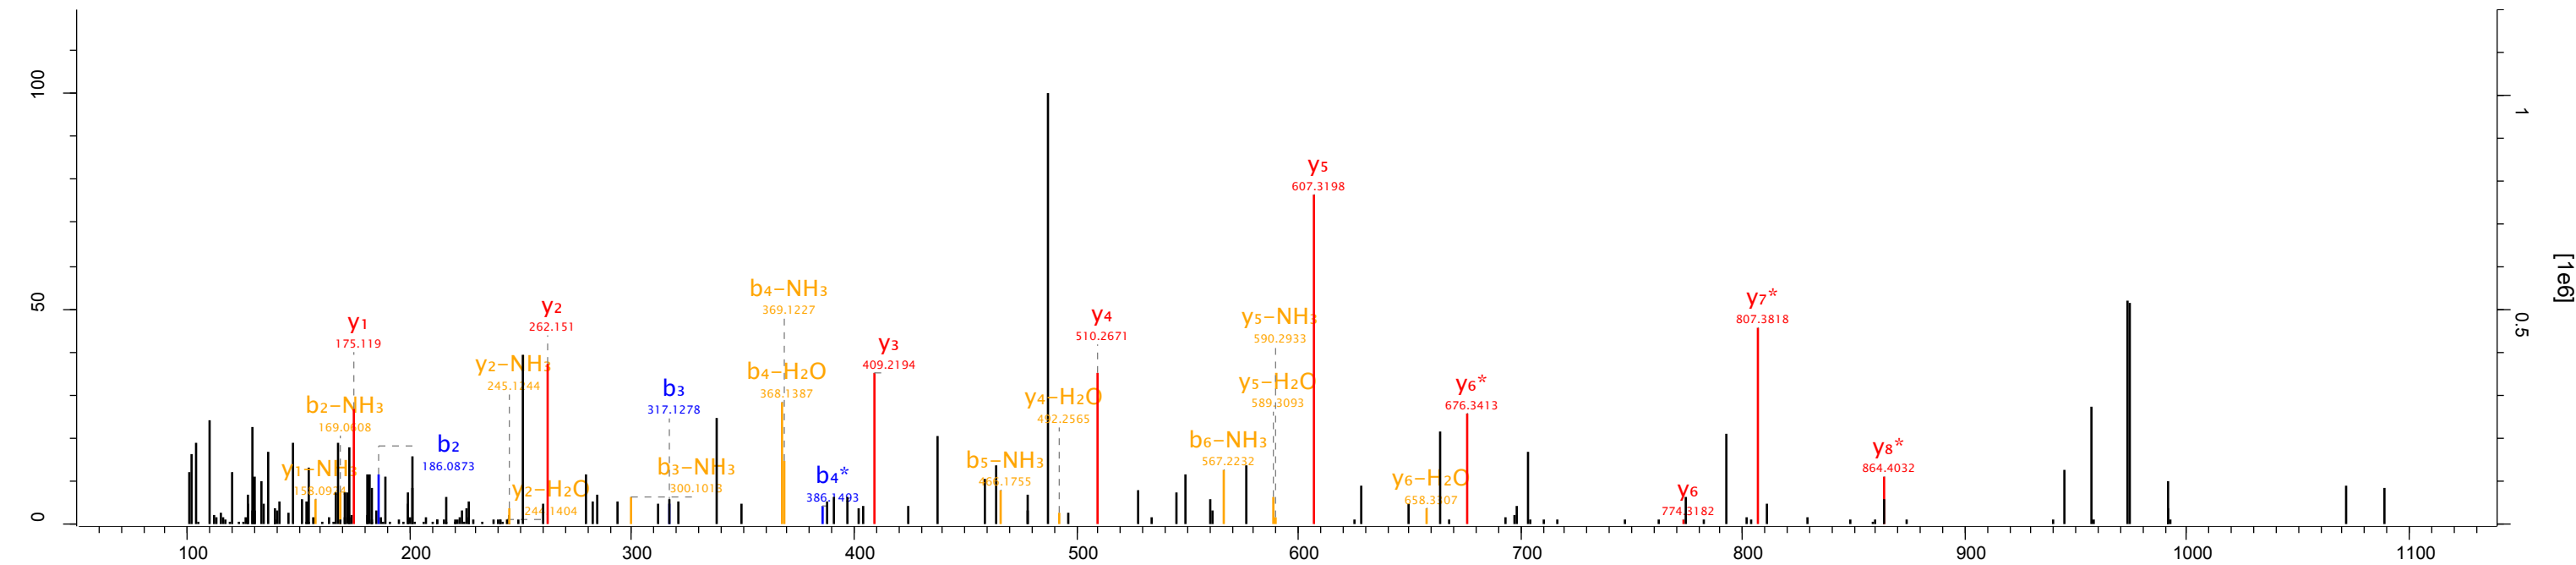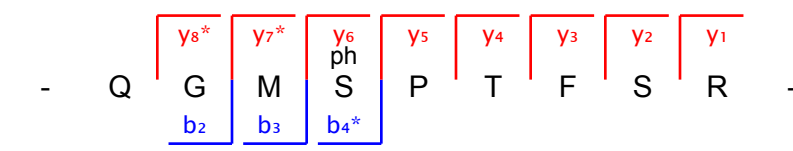

Raw file: 20150814\_A375SR\_Phospho\_BR2\_05  
 Scan: 10756 Method: FTMS; HCD Score: 150.9 m/z: 710.32 Gene names: KLC2

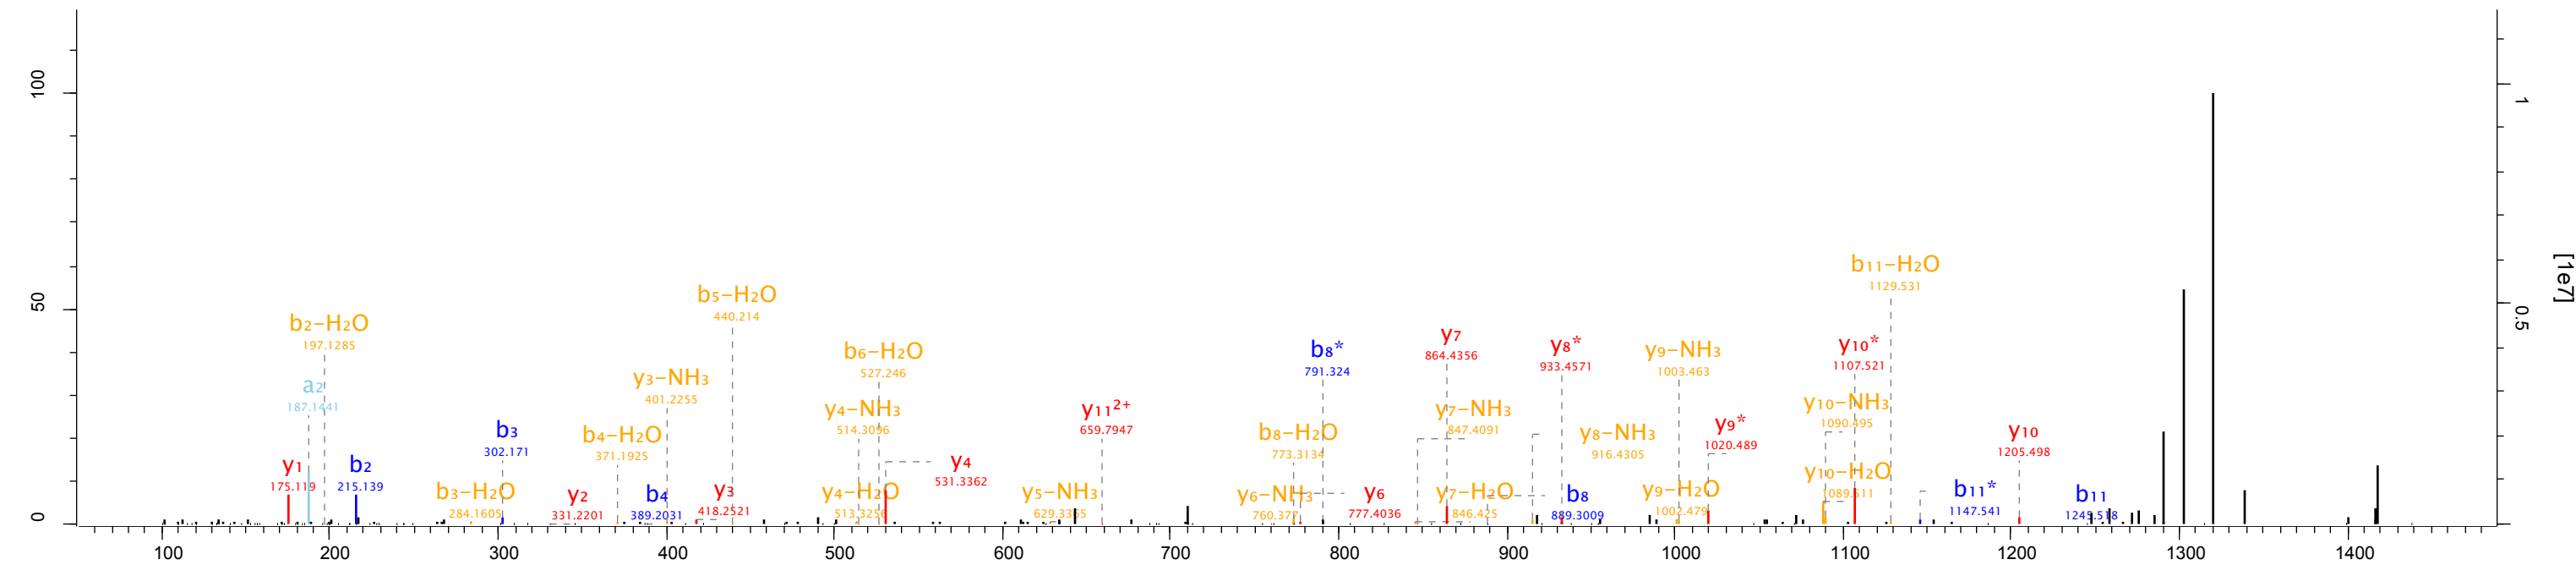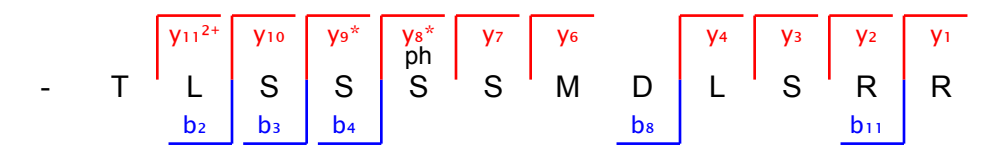

Raw file: 20150814\_A375SR\_Phospho\_BR2\_05  
 Scan: 10916 Method: FTMS; HCD Score: 103.44 m/z: 514.28 Gene names: CAD

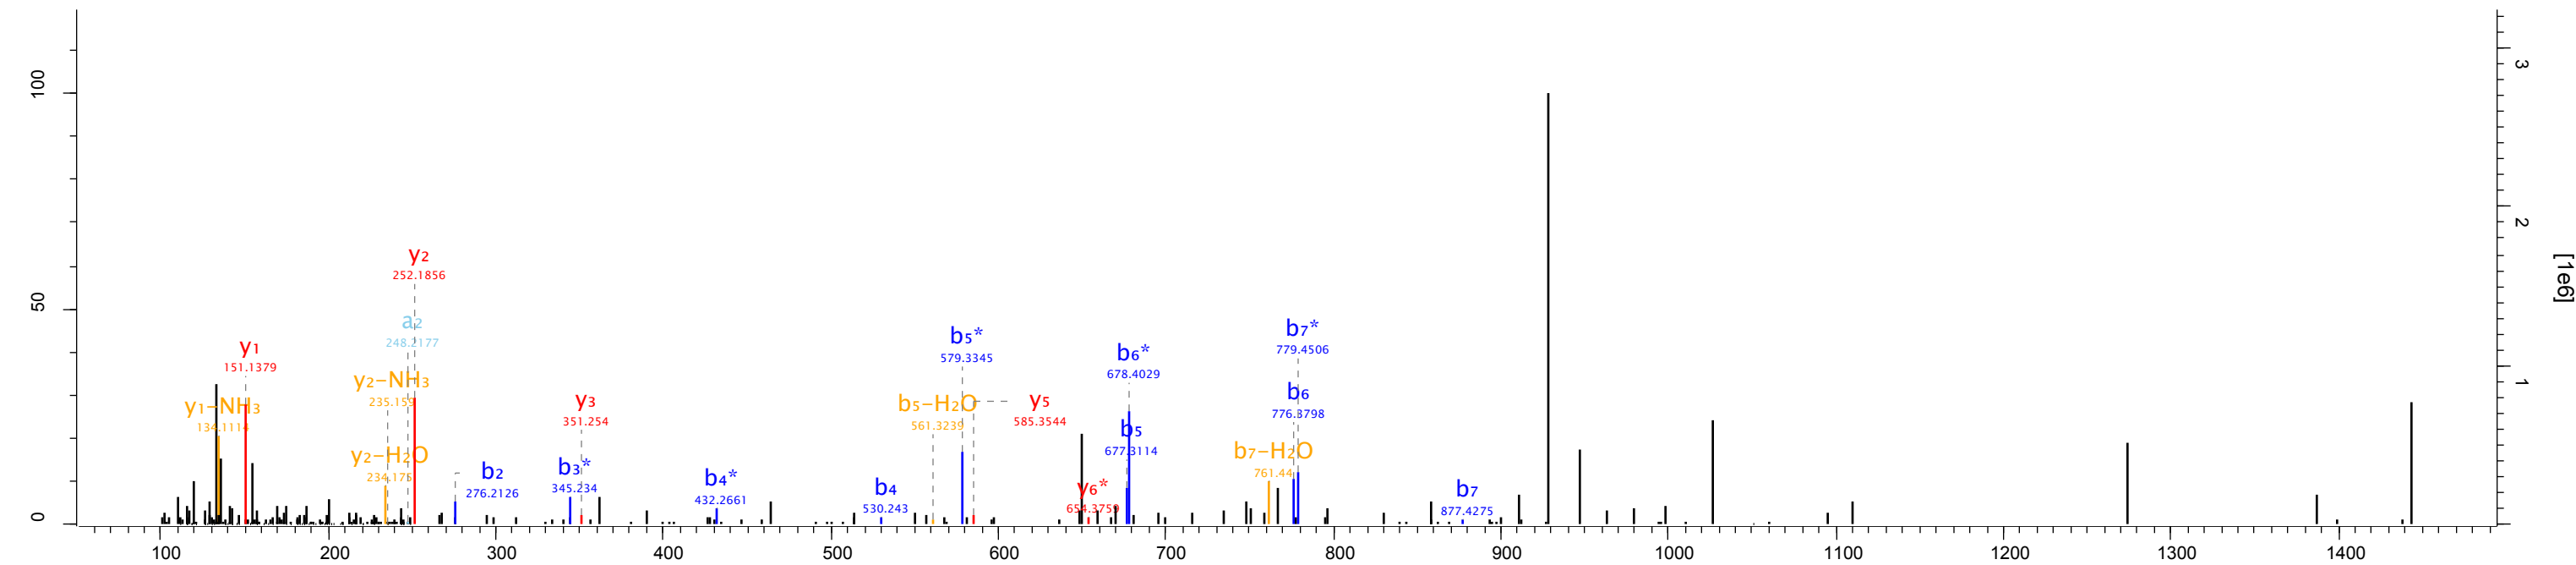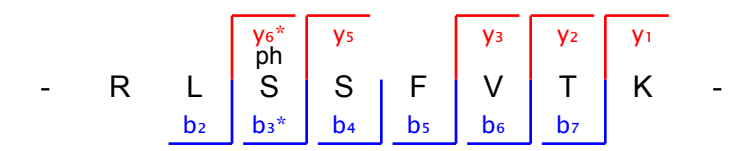

Raw file: 20150814\_A375SR\_Phospho\_BR2\_05  
 Scan: 11486 Method: FTMS; HCD Score: 88.1 m/z: 574.27 Gene names: ANKRD26

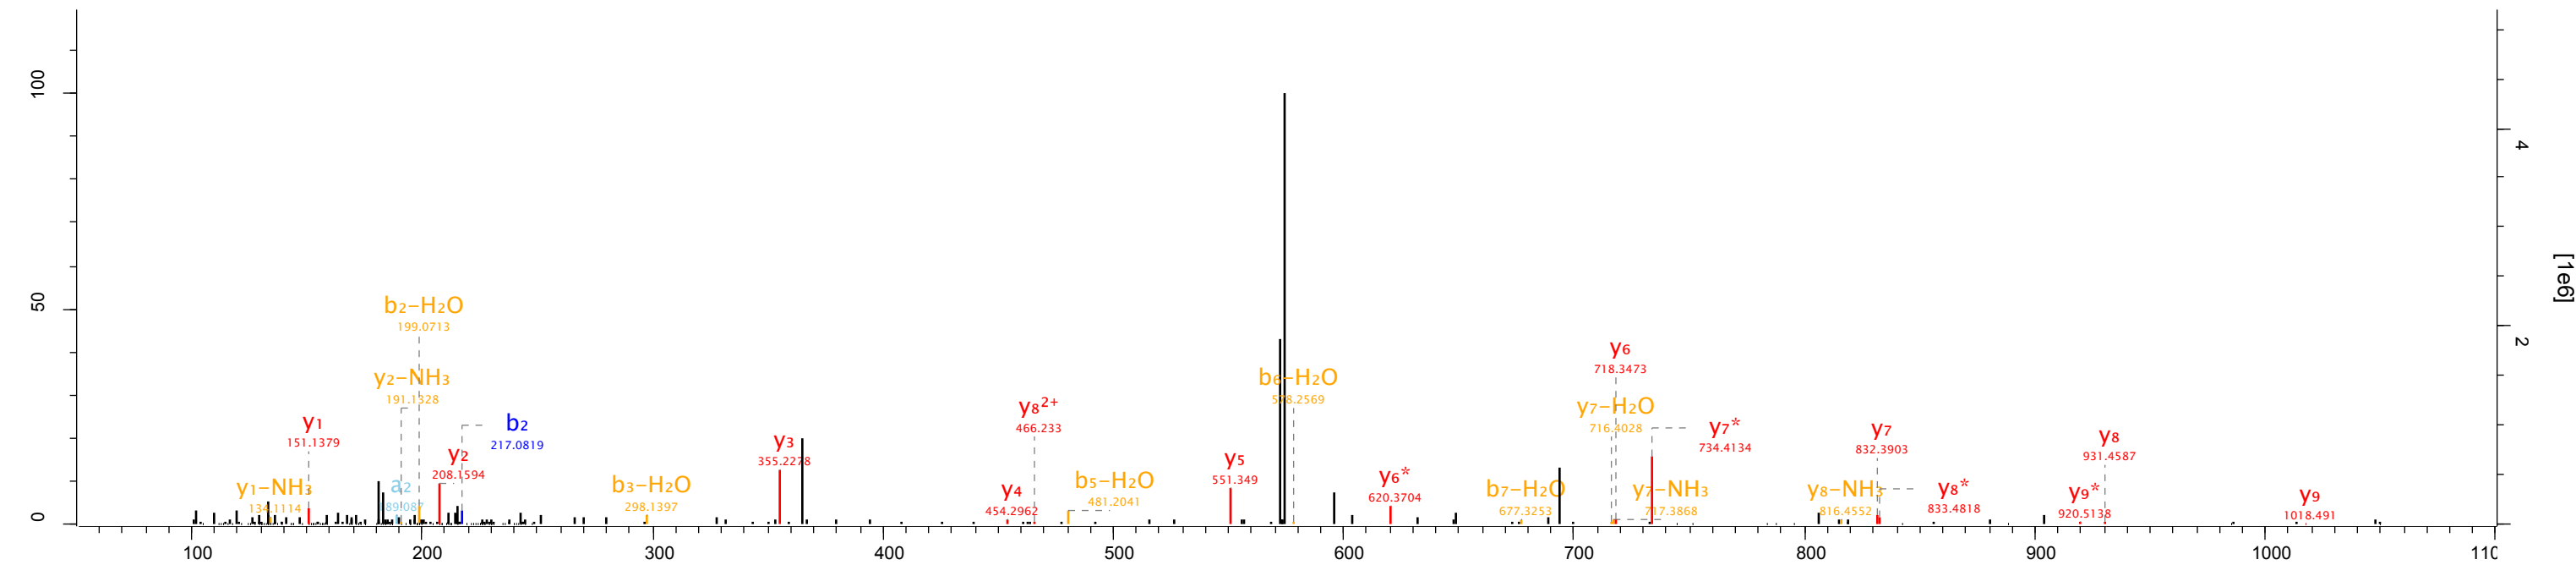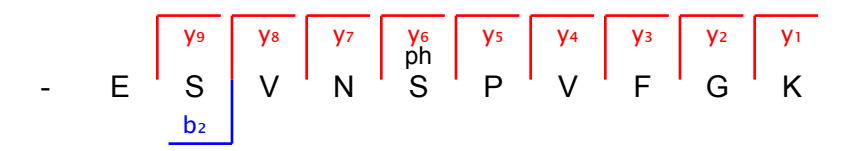

Raw file: 20150814\_A375SR\_Phospho\_BR2\_05  
 Scan: 11606 Method: FTMS; HCD Score: 159.95 m/z: 752.36 Gene names: ANKRD17

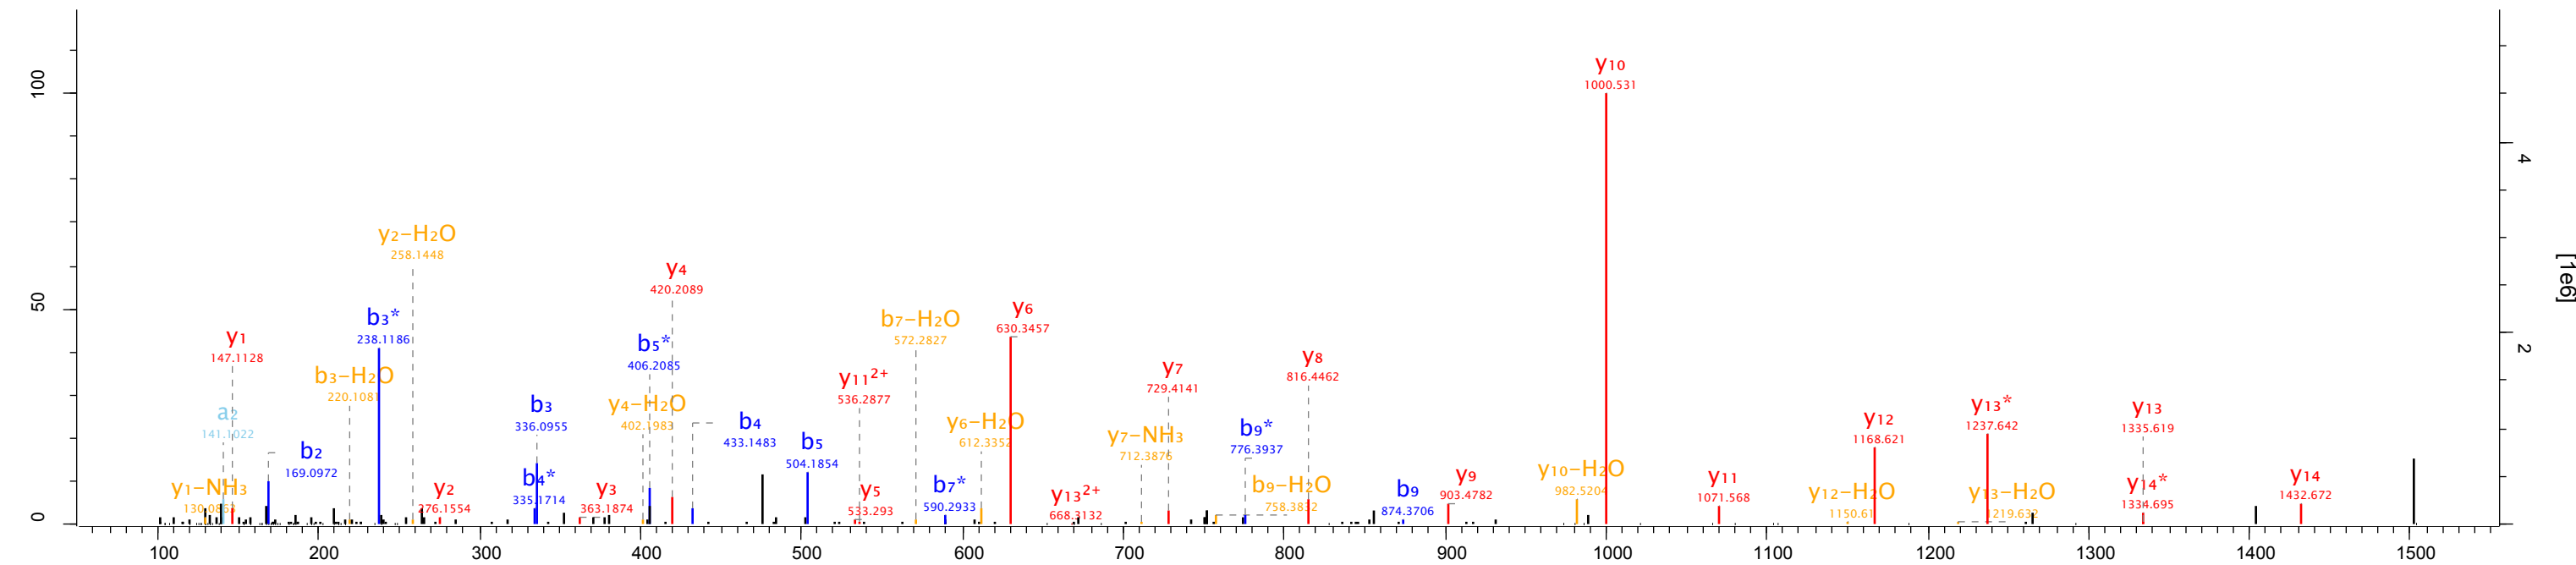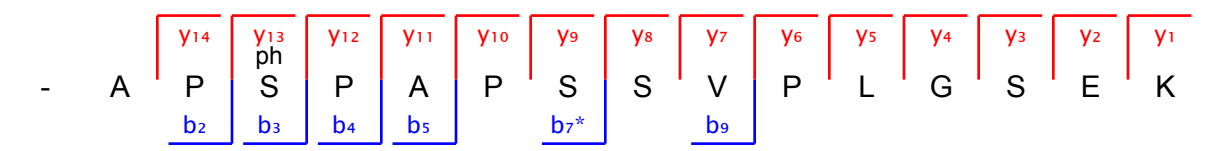

Raw file 20150814\_A375SR\_Phospho\_BR2\_05 Scan 11676 Method FTMS; HCD Score 188.9 m/z 714.85 Gene names NHS

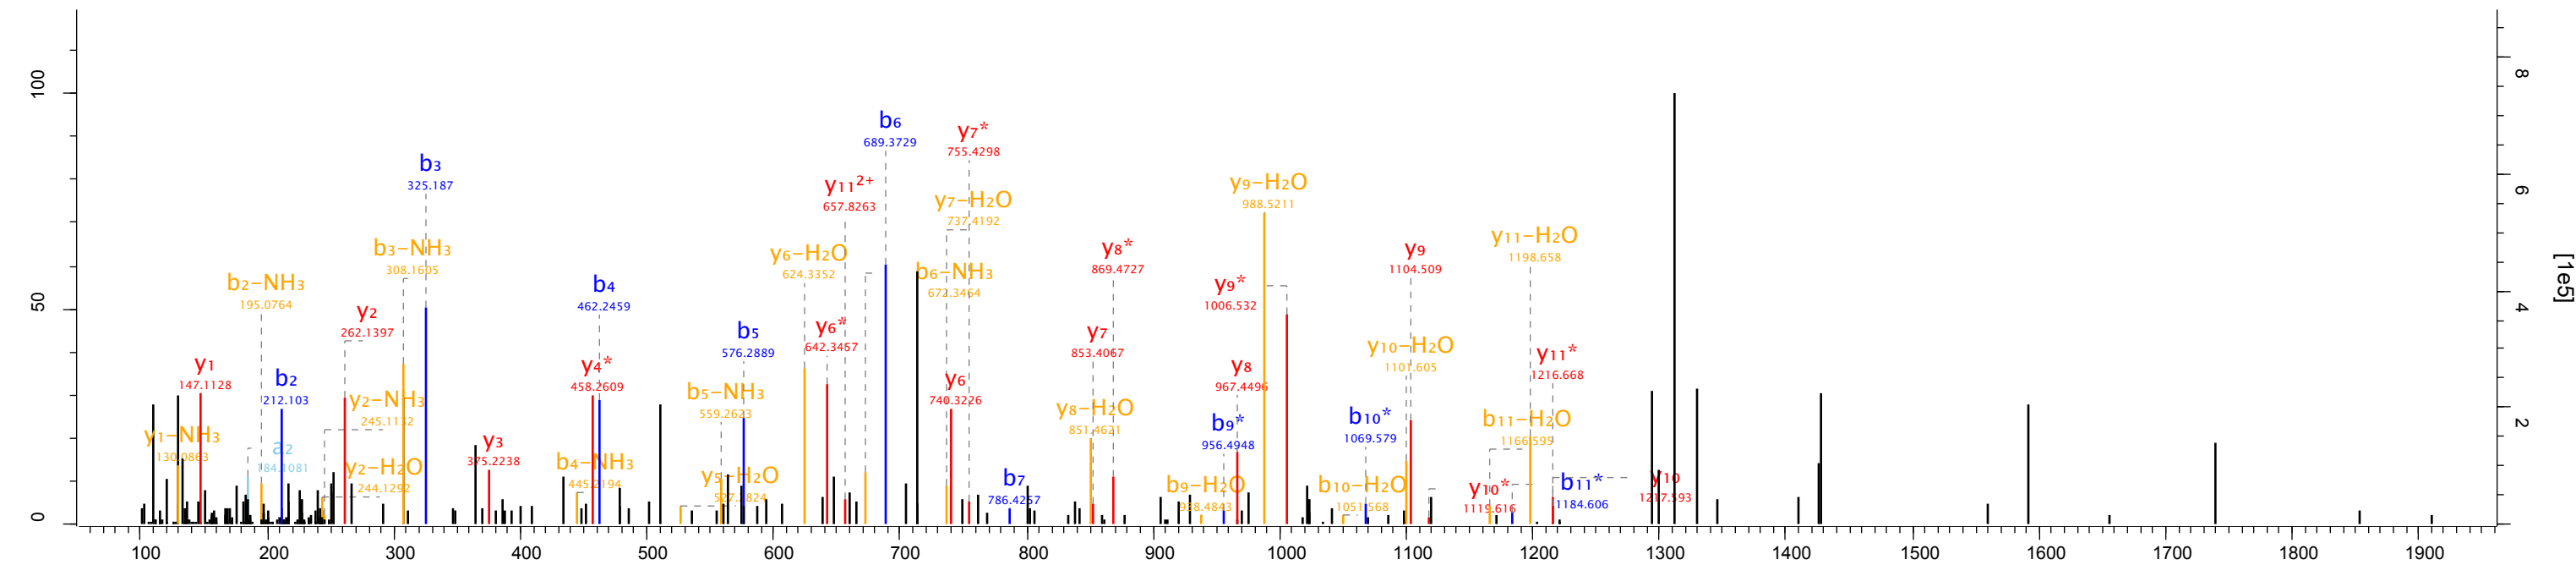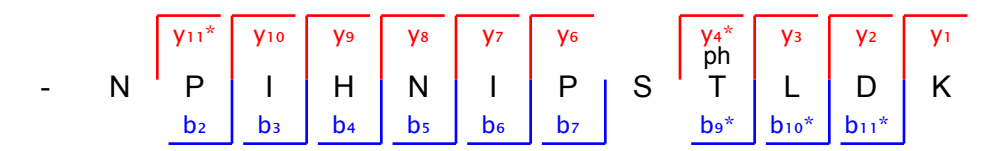

Raw file 20150814\_A375SR\_Phospho\_BR2\_05 Scan 11686 Method FTMS; HCD Score 105.25 m/z 574.77 Gene names DGCR14

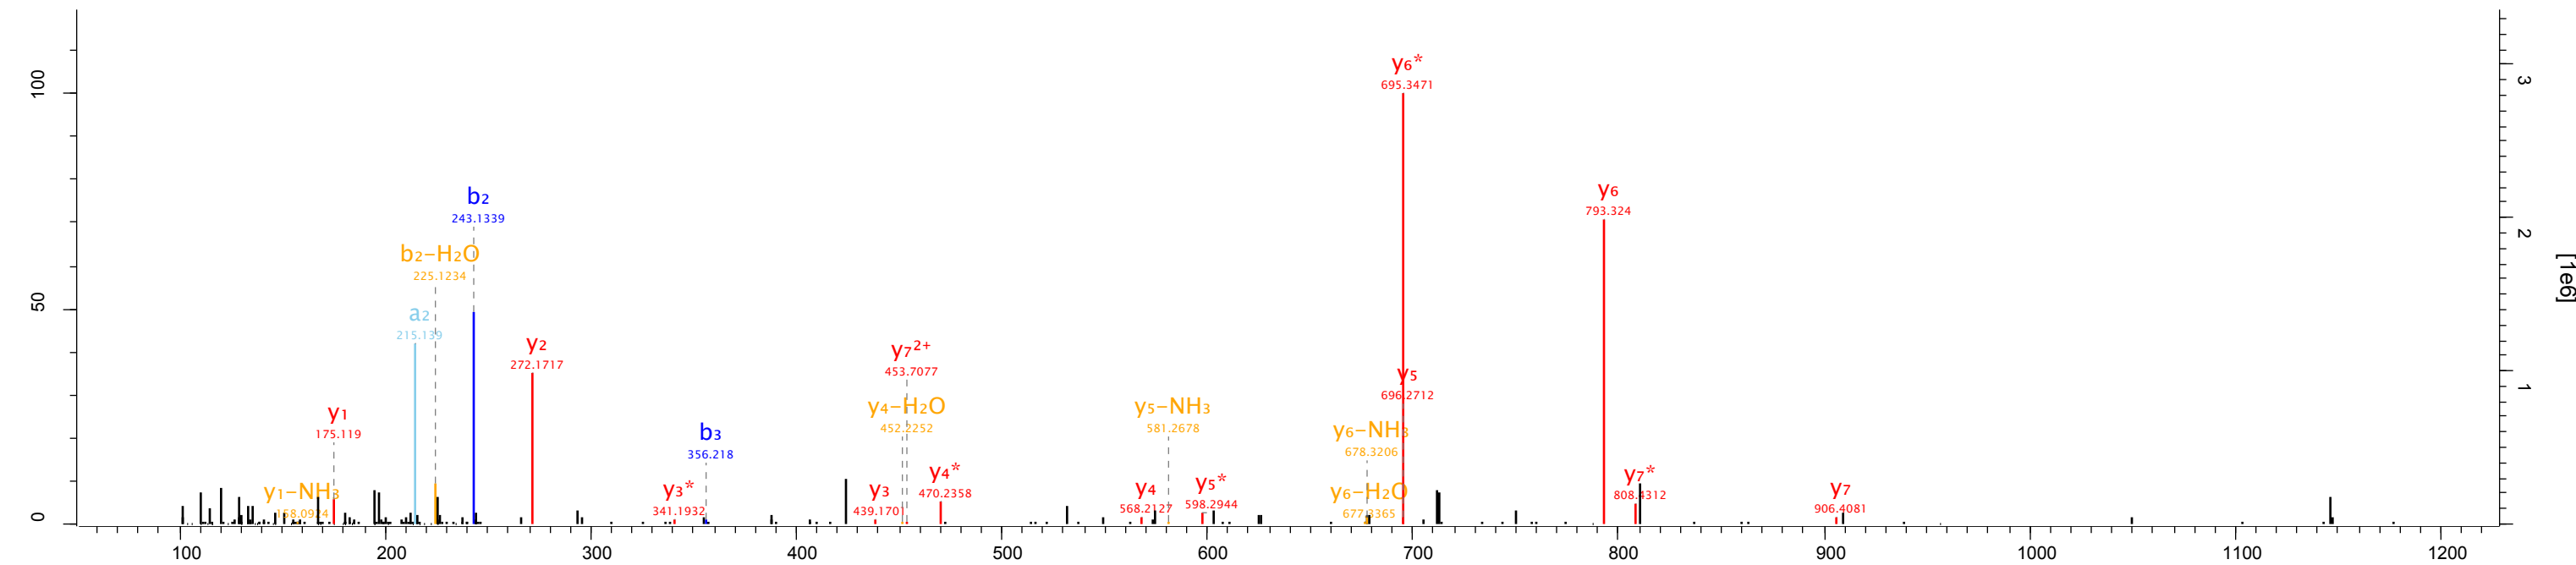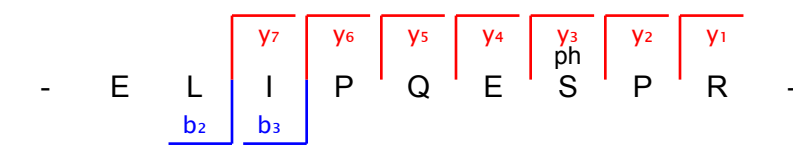



Raw file 20150814\_A375SR\_Phospho\_BR2\_05 Scan 11906 Method FTMS; HCD Score 218.46 m/z 805.94 Gene names NAA10

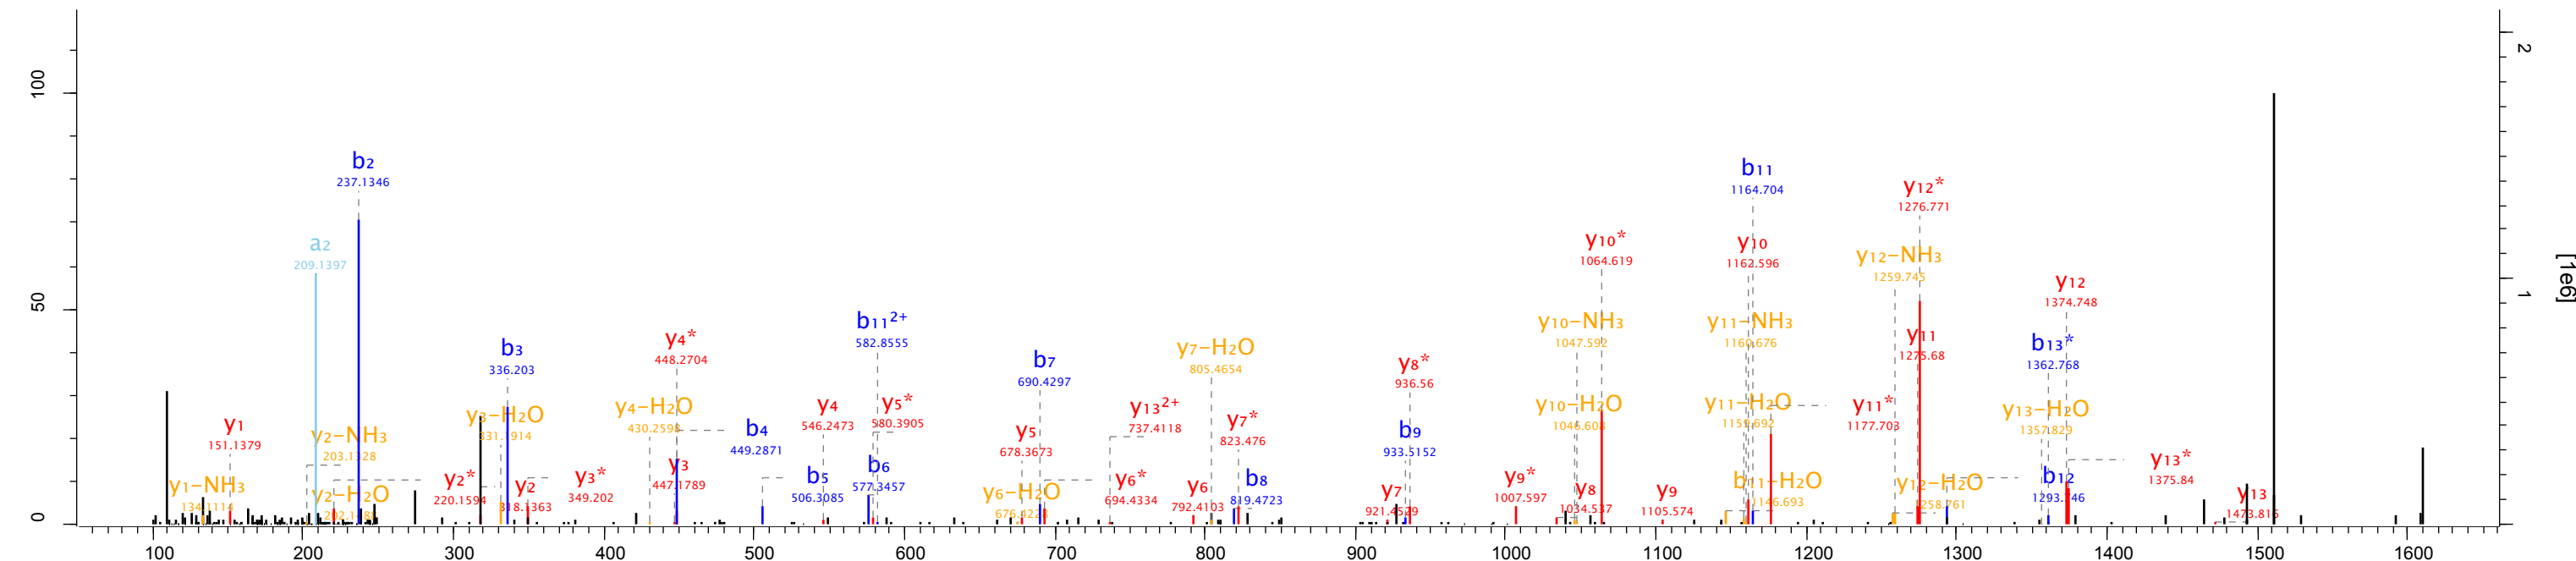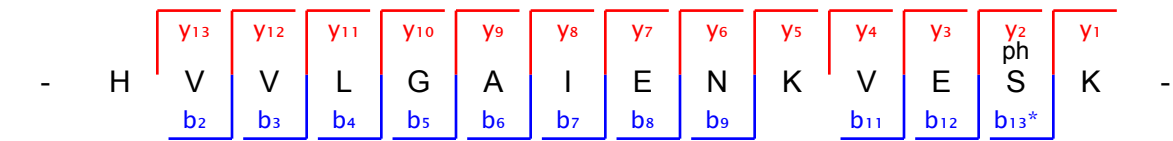

Raw file: 20150814\_A375SR\_Phospho\_BR2\_05  
 Scan: 12126 Method: FTMS; HCD Score: 89.91 m/z: 765.36 Gene names: ASAP1

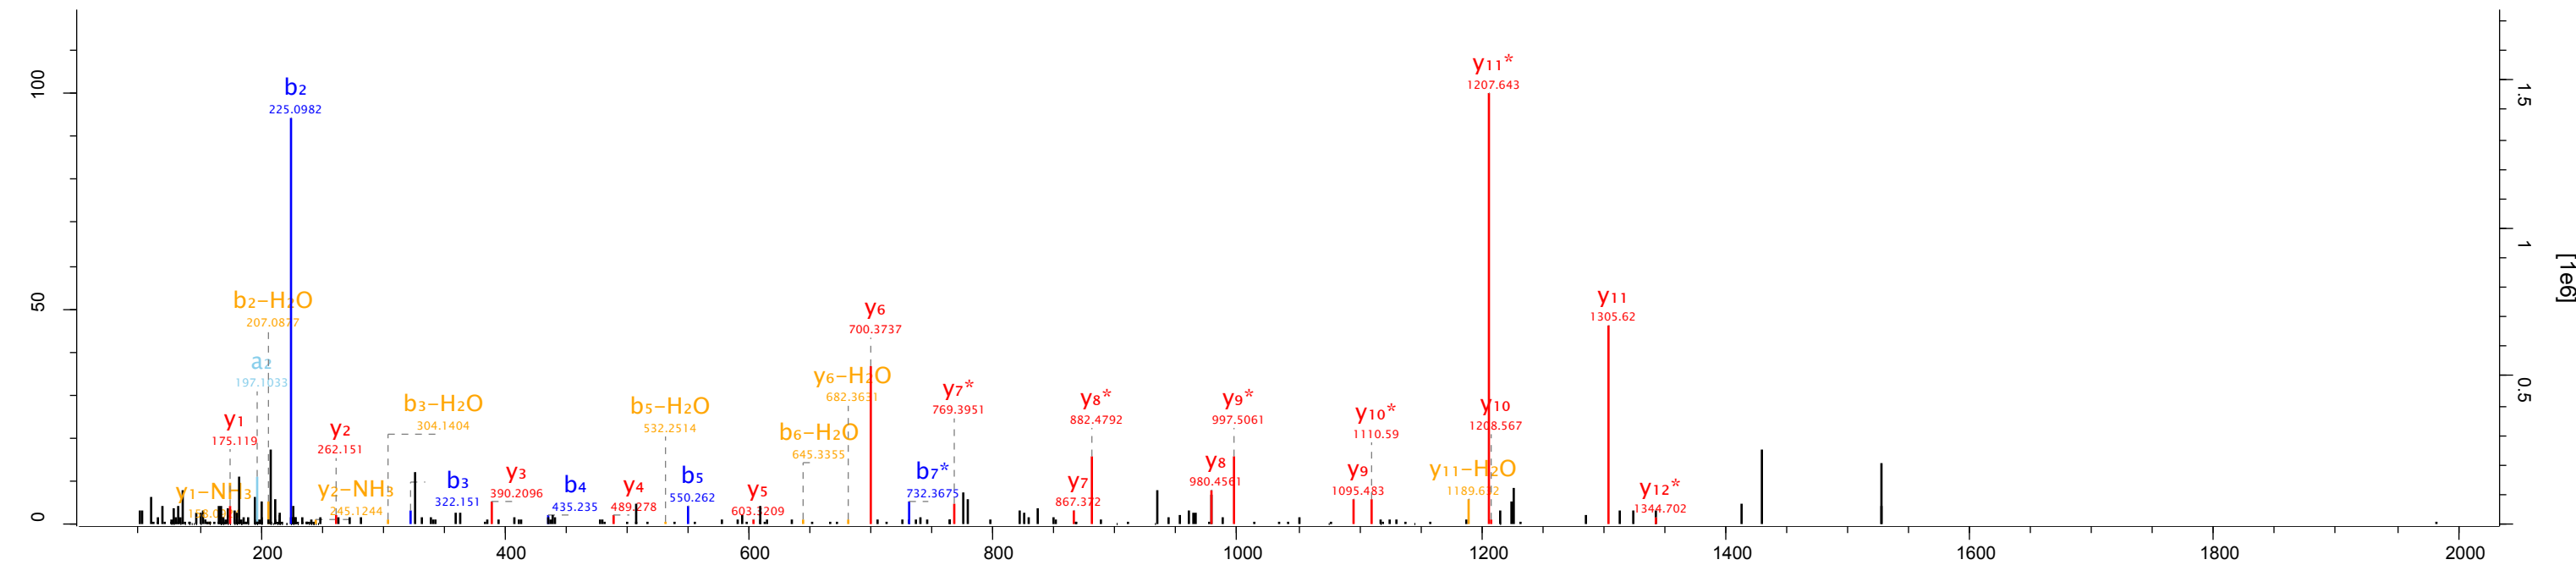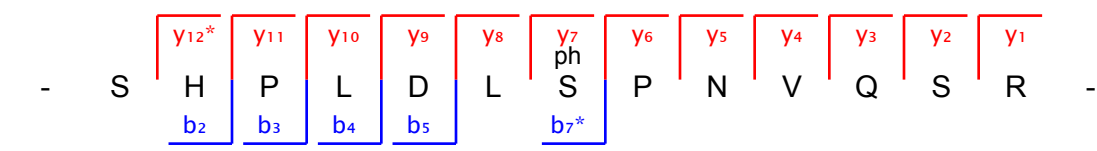

Raw file: 20150814\_A375SR\_Phospho\_BR2\_05  
 Scan: 1276 Method: FTMS; HCD Score: 83.23 m/z: 527.73 Gene names: NPM1

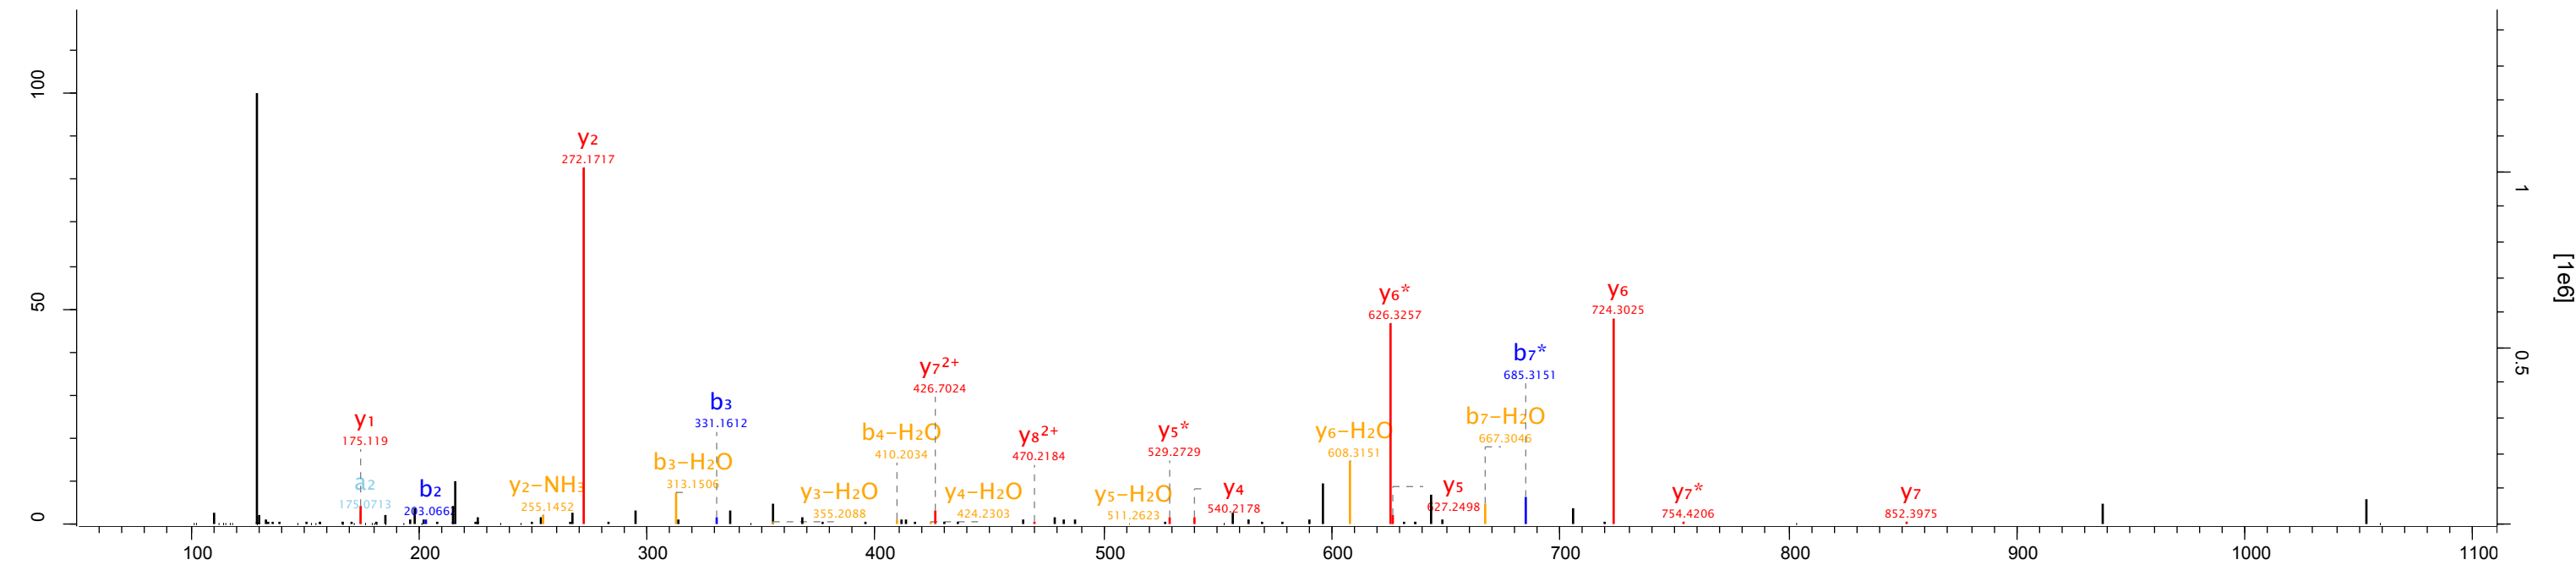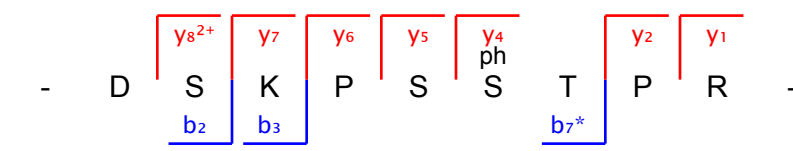

Raw file: 20150814\_A375SR\_Phospho\_BR2\_05  
 Scan: 13036 Method: FTMS; HCD Score: 245.18 m/z: 728.82 Gene names: RALGPS2

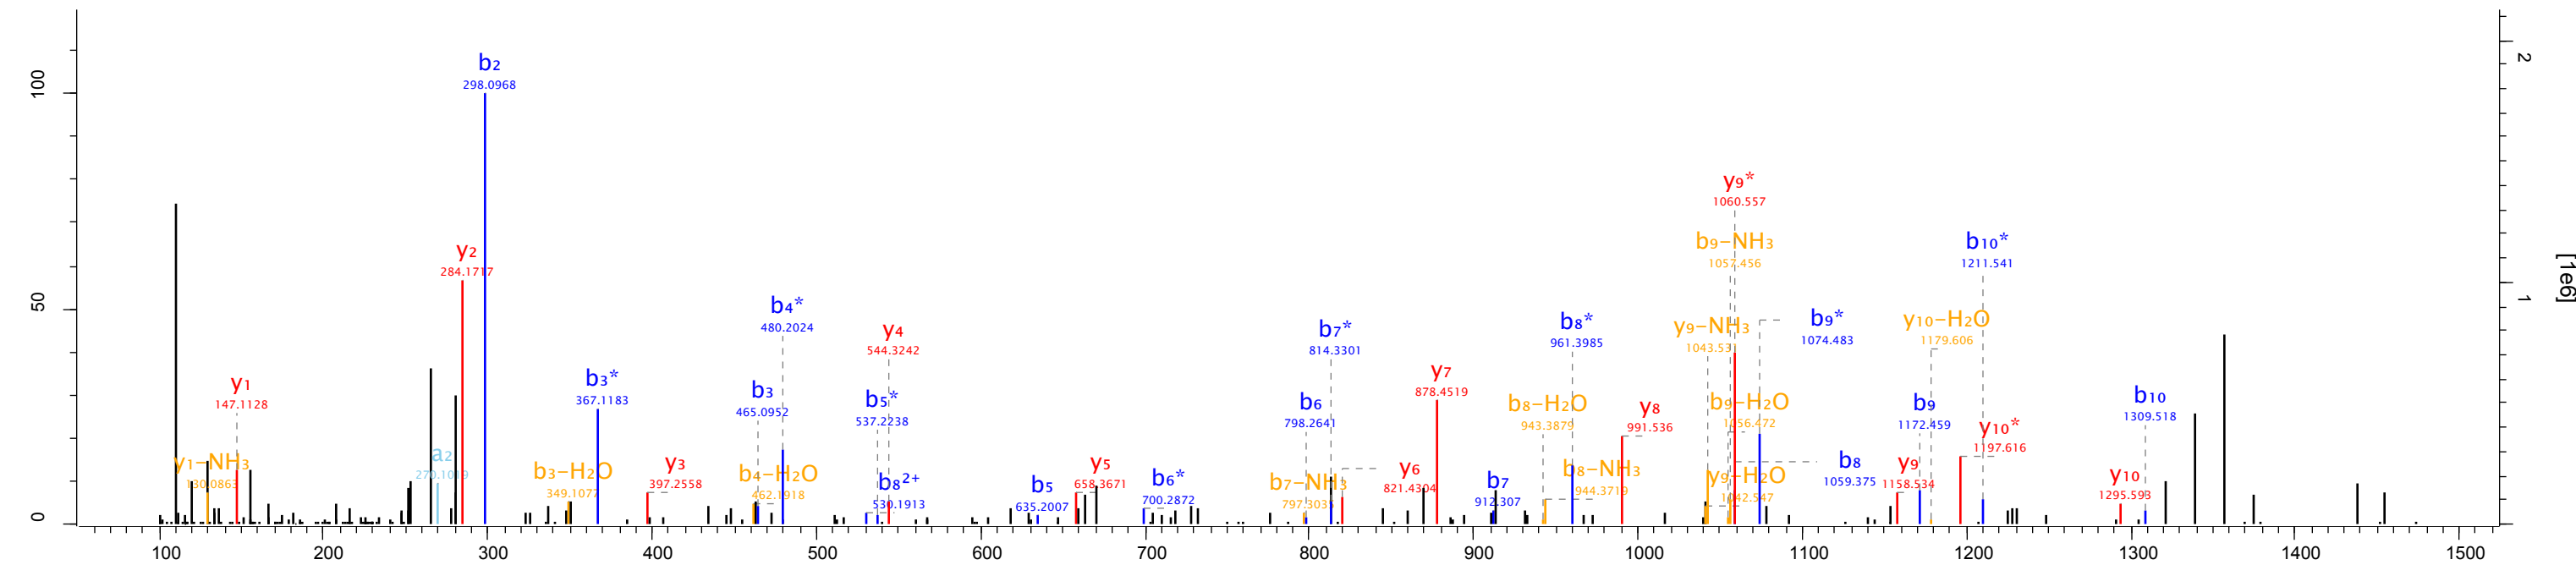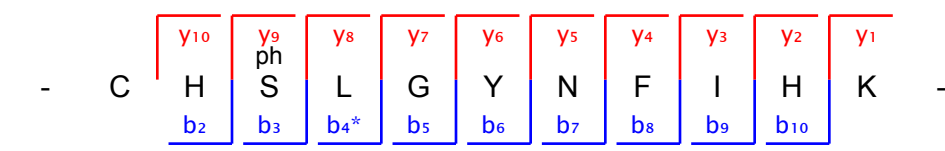

Raw file: 20150814\_A375SR\_Phospho\_BR2\_05  
 Scan: 13166 Method: FTMS; HCD Score: 98.3 m/z: 776.71 Gene names: U2SURP

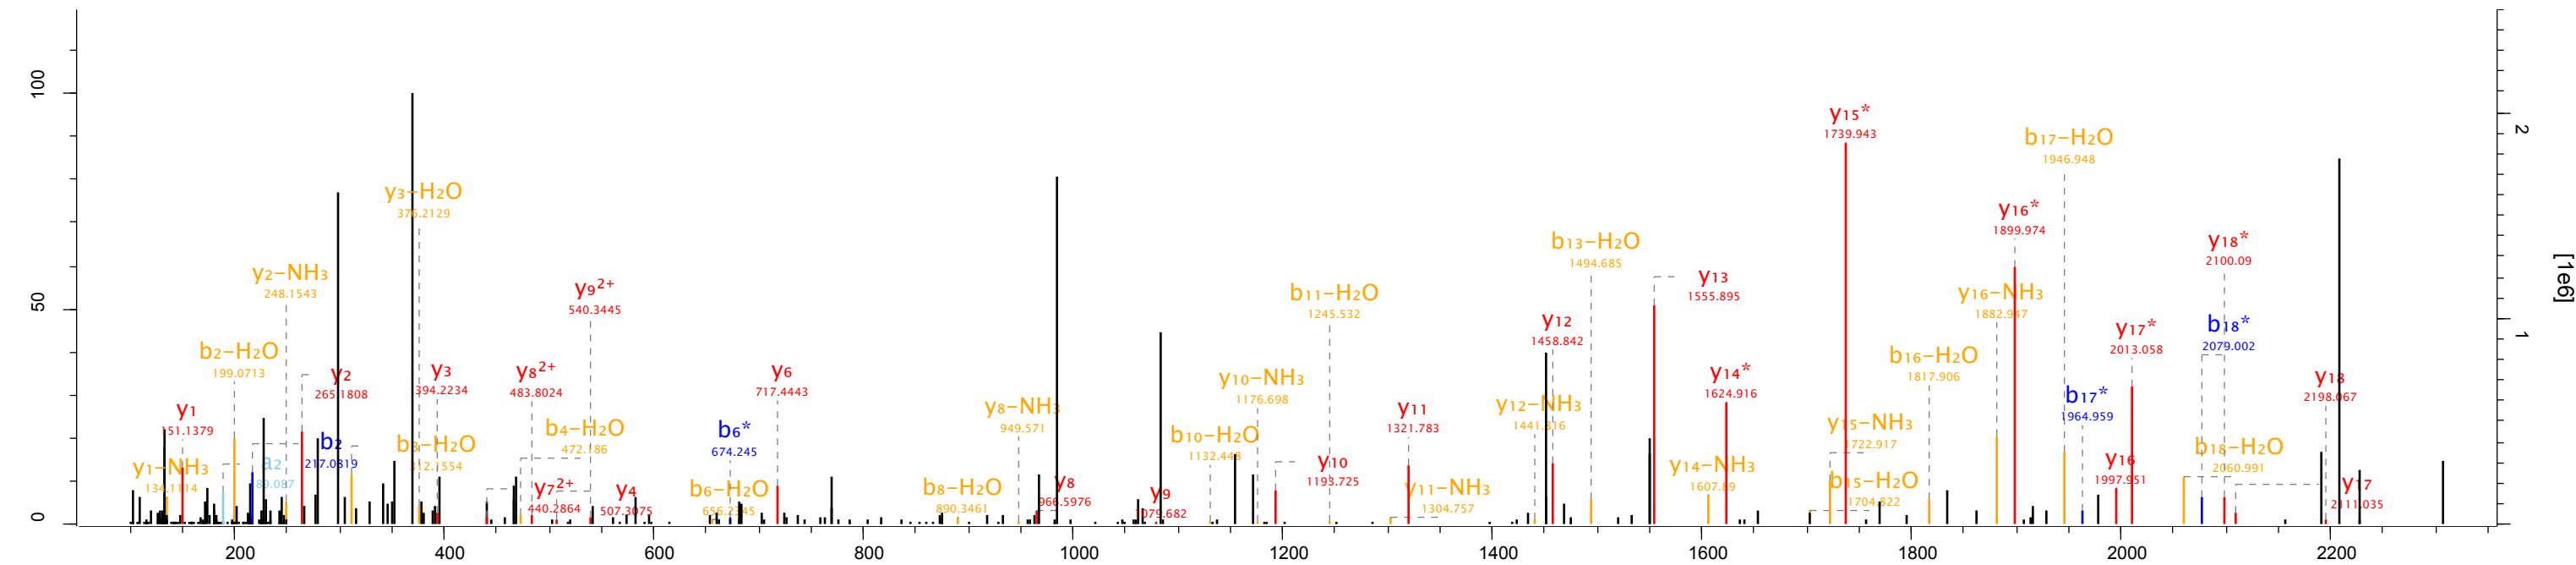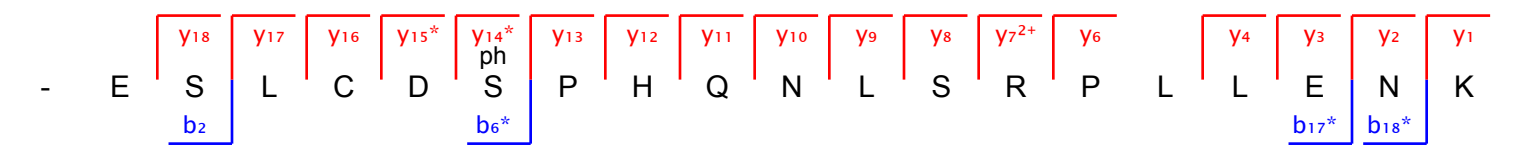

Raw file 20150814\_A375SR\_Phospho\_BR2\_05 Scan 14286 Method FTMS; HCD Score 73.14 m/z 774.36 Gene names HSD17B4

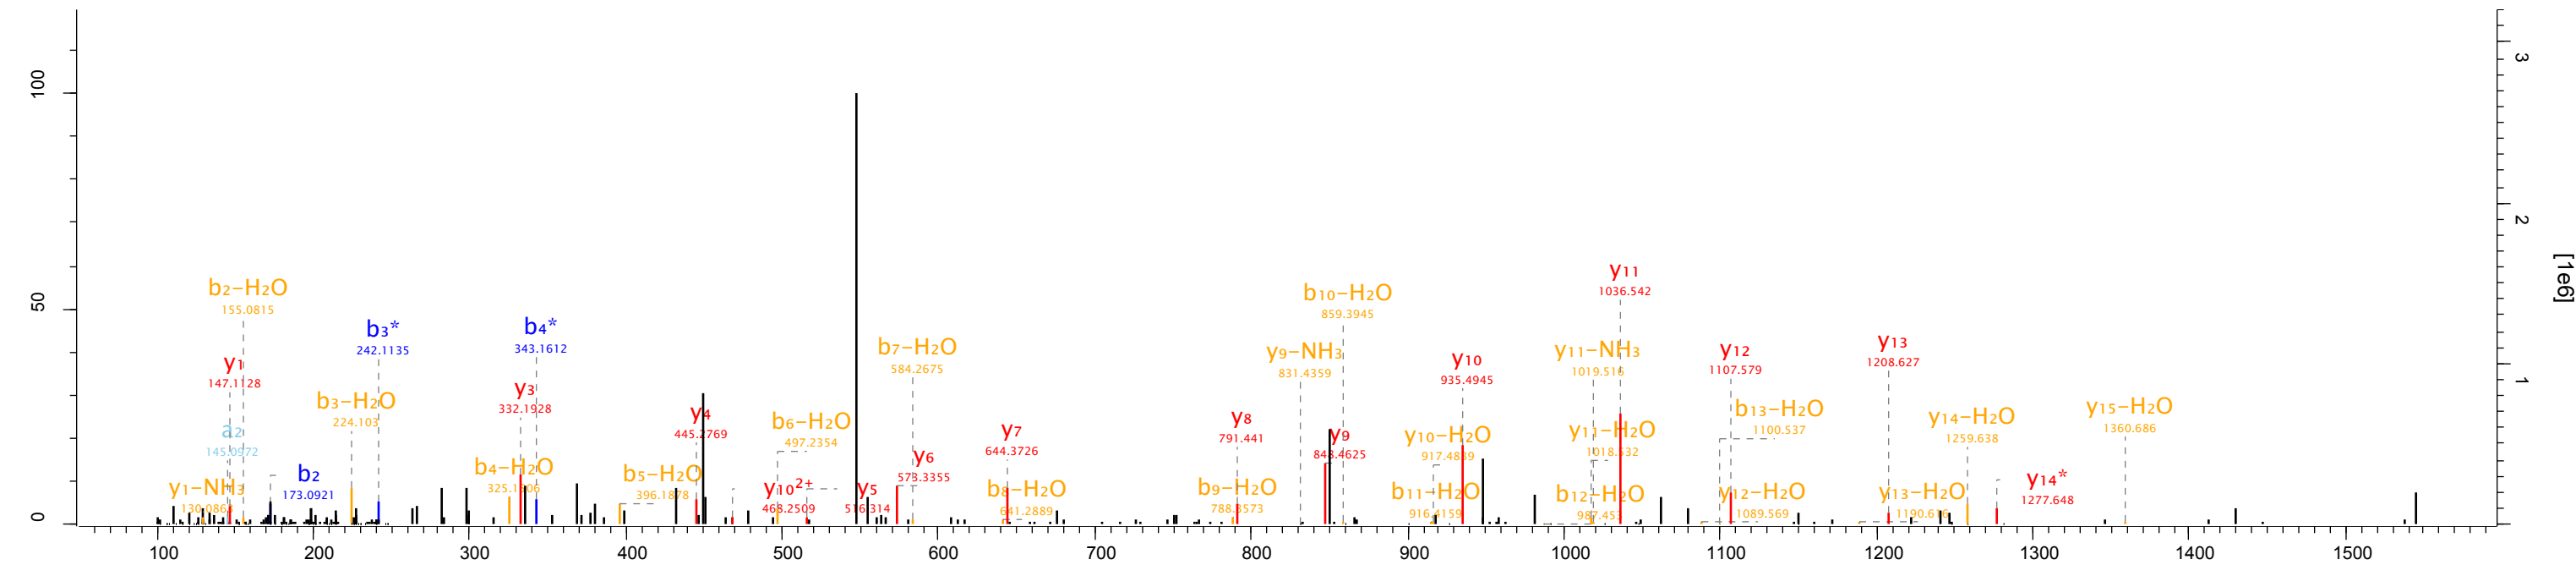

- A T S T A T S G F A G A I G Q K -

Fragmentation sites are indicated by brackets below the sequence:

- Red brackets: y<sub>14</sub>\* (ph), y<sub>13</sub>, y<sub>12</sub>, y<sub>11</sub>, y<sub>10</sub>, y<sub>9</sub>, y<sub>8</sub>, y<sub>7</sub>, y<sub>6</sub>, y<sub>5</sub>, y<sub>4</sub>, y<sub>3</sub>, y<sub>1</sub>
- Blue brackets: b<sub>2</sub>, b<sub>3</sub>\*, b<sub>4</sub>\*

Raw file: 20150814\_A375SR\_Phospho\_BR2\_05  
 Scan: 14906 Method: FTMS; HCD Score: 280.45 m/z: 1142.51 Gene names: KPNA3

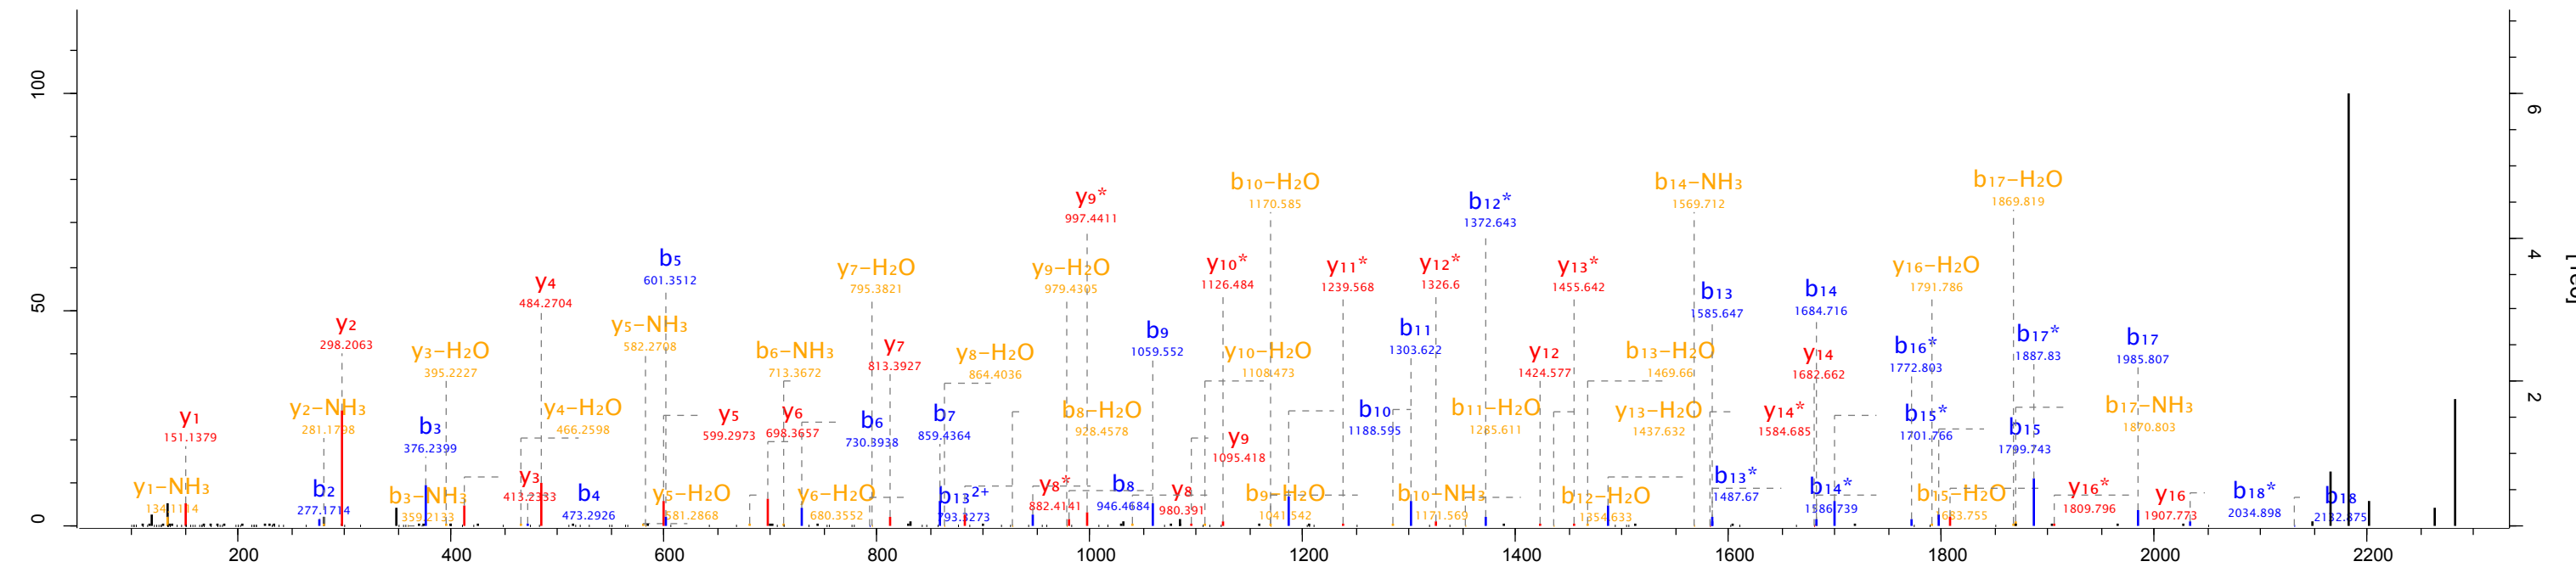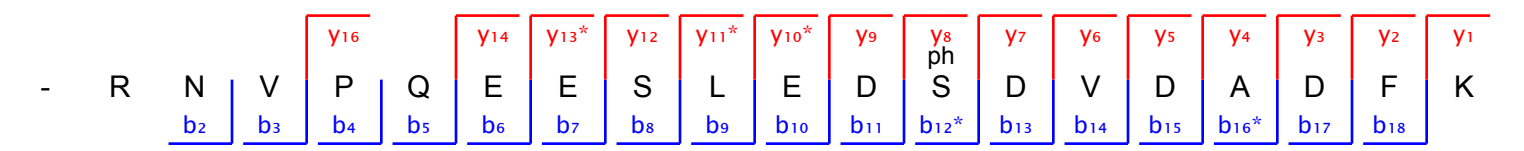

Raw file 20150814\_A375SR\_Phospho\_BR2\_05 Scan 14946 Method FTMS; HCD Score 148.01 m/z 898.44 Gene names NES

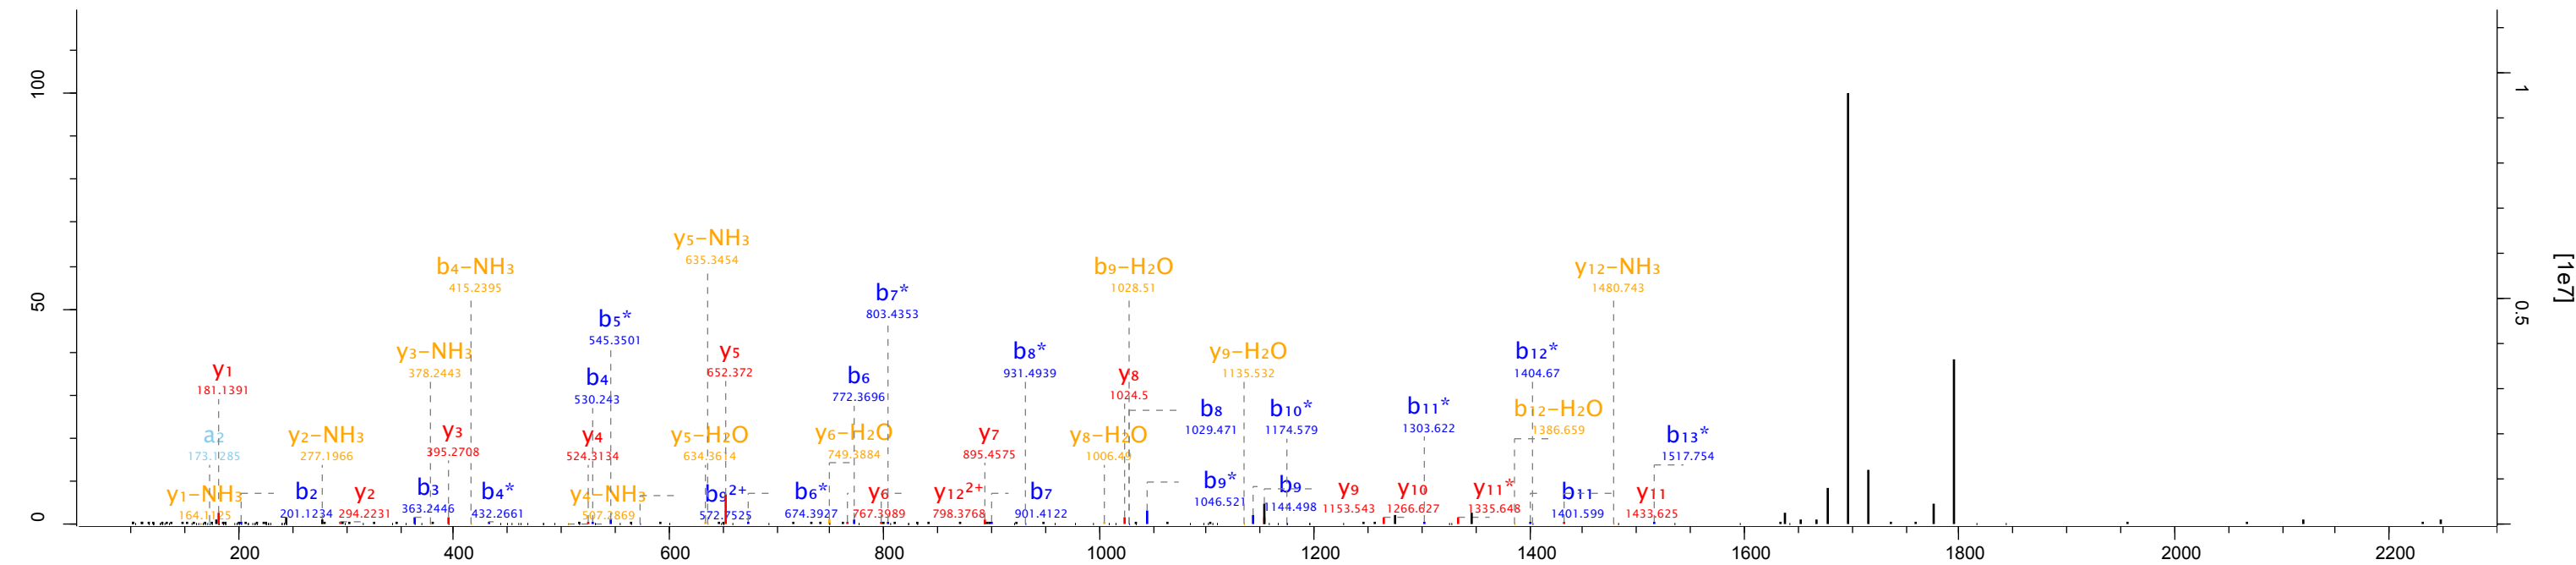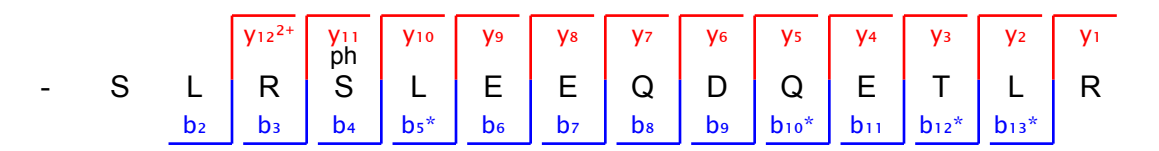



Raw file 20150814\_A375SR\_Phospho\_BR2\_05 Scan 15116 Method FTMS; HCD Score 164.74 m/z 763.85 Gene names EHMT2

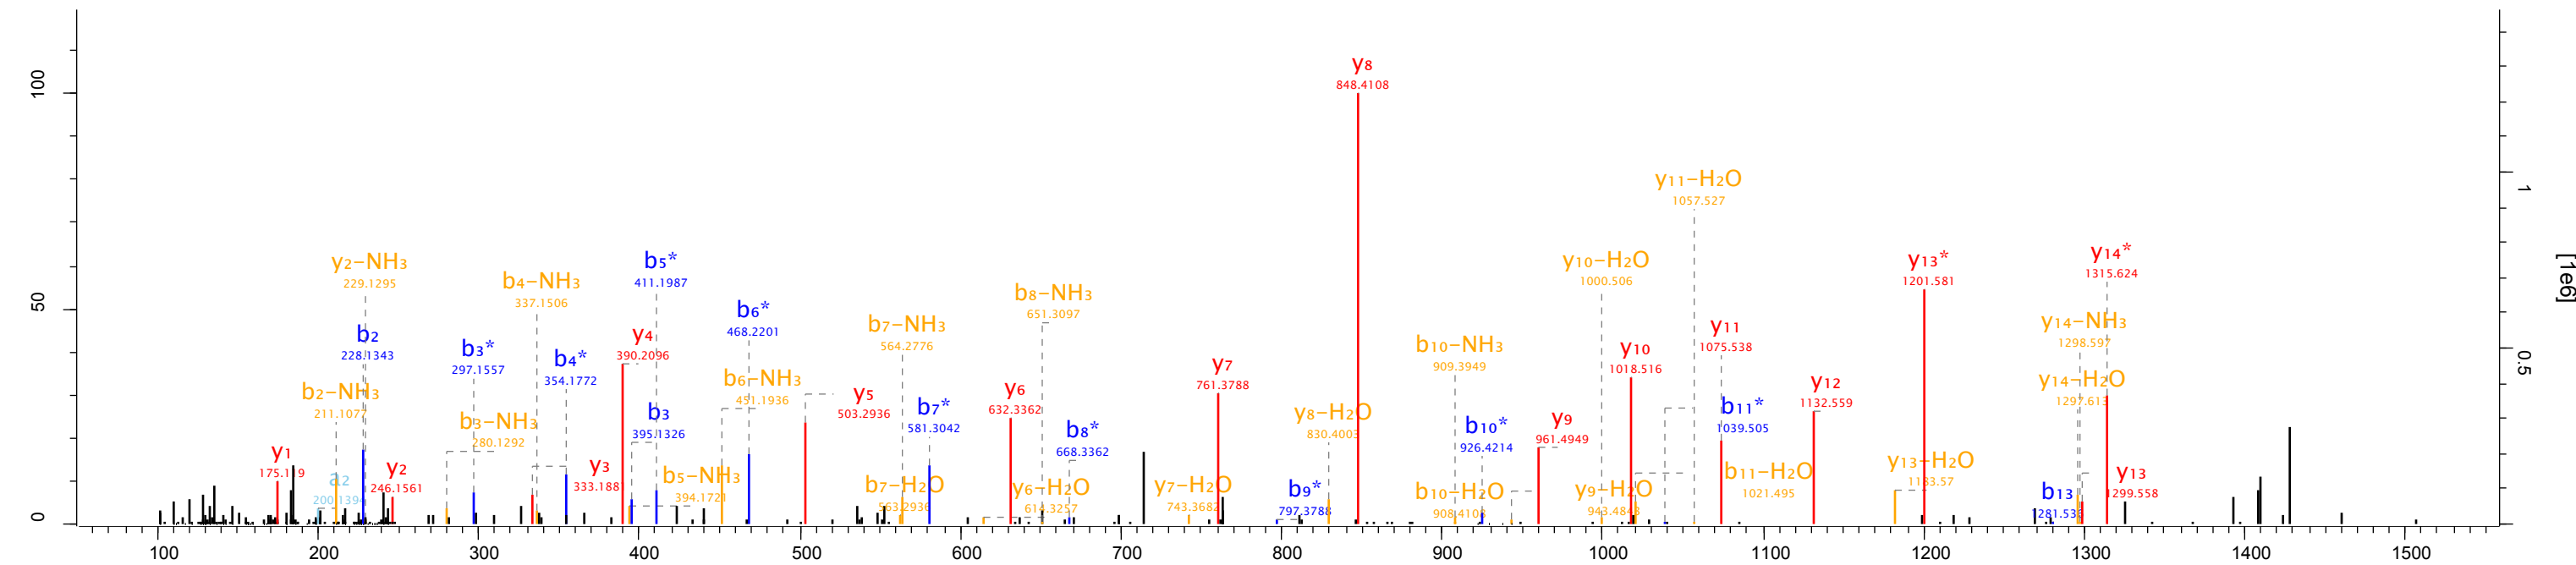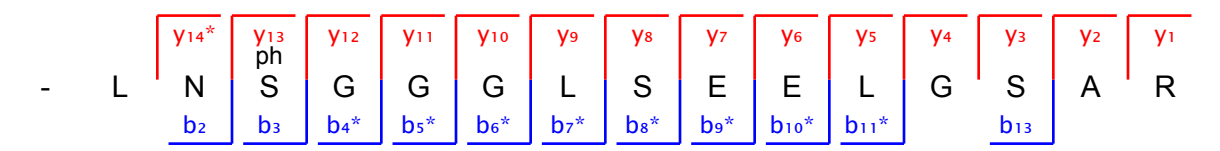

Raw file 20150814\_A375SR\_Phospho\_BR2\_05 Scan 15196 Method FTMS; HCD Score 199.41 m/z 962.87 Gene names CD44

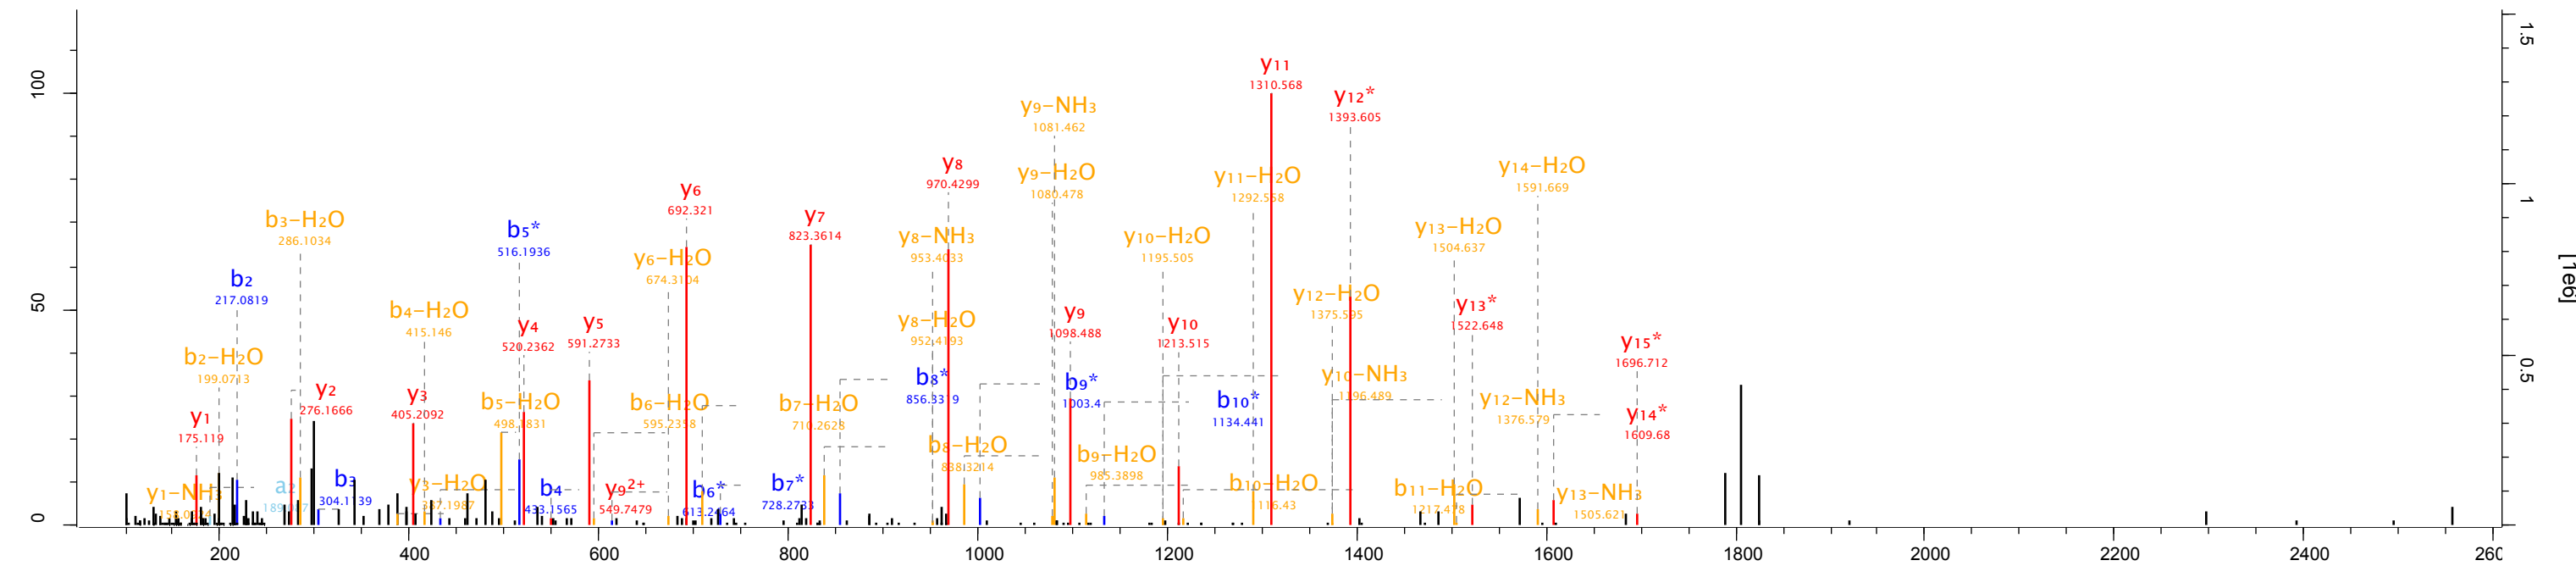

- E y15\* y14\* y13\* y12\*  
ph y11 y10 y9 y8 y7 y6 y5 y4 y3 y2 y1 -

b2 b3 b4 b5\* b6\* b7\* b8\* b9\* b10\* T A D E T R -

Raw file: 20150814\_A375SR\_Phospho\_BR2\_05  
 Scan: 15396 Method: FTMS; HCD Score: 266.74 m/z: 1023.95 Gene names: RMDN3

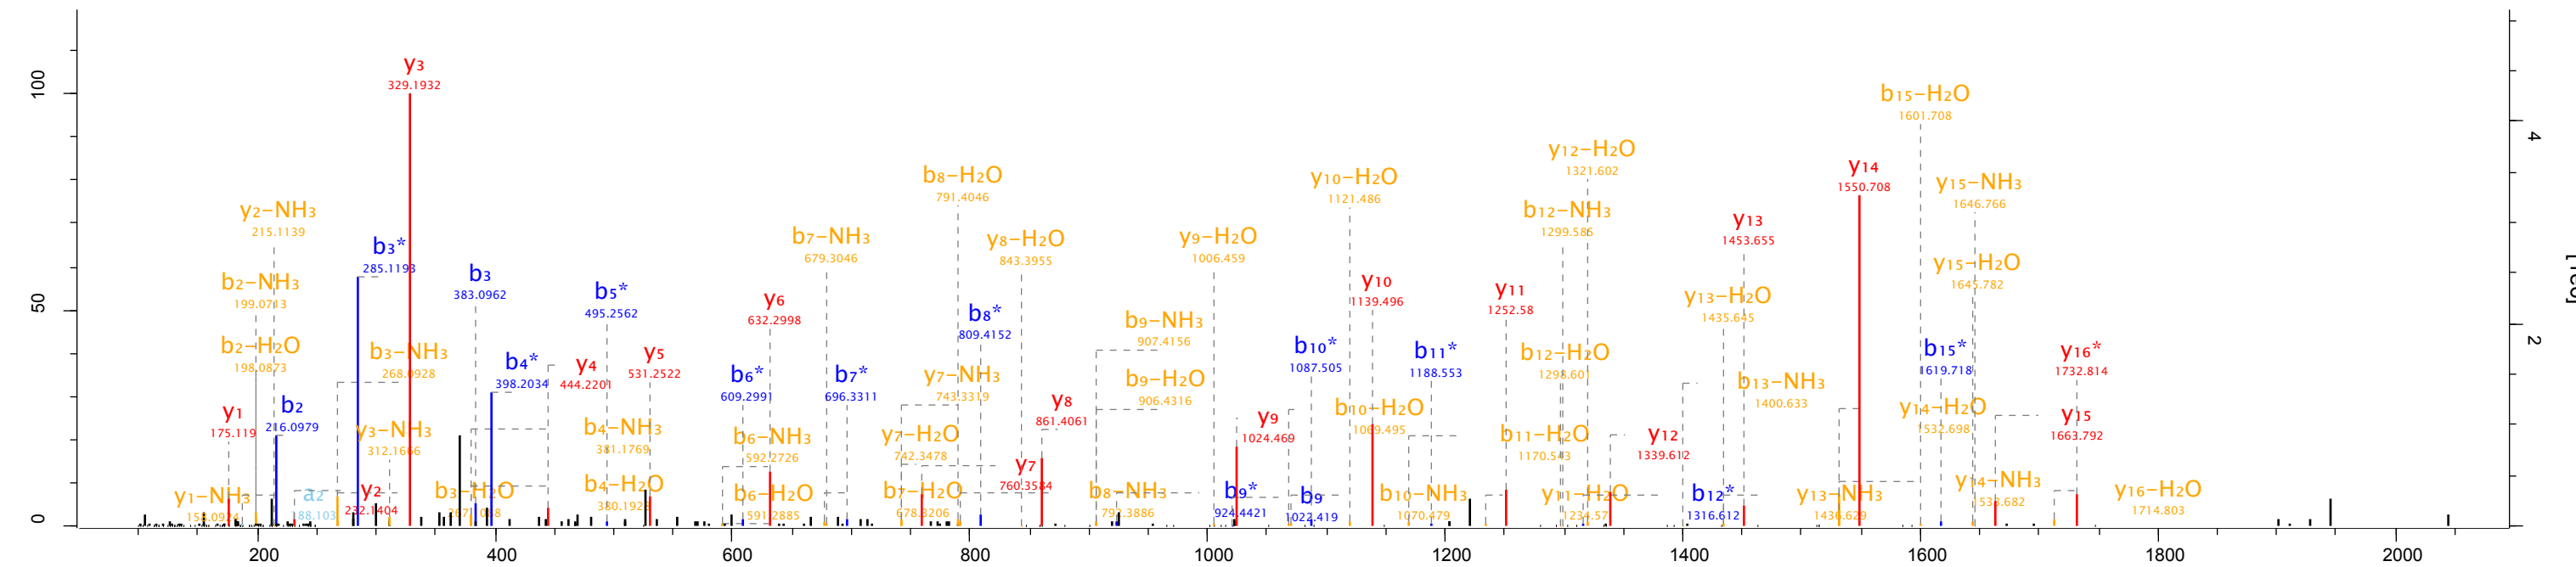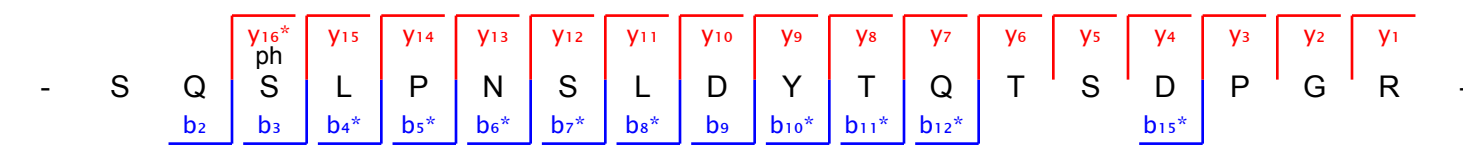

Raw file 20150814\_A375SR\_Phospho\_BR2\_05 Scan 15676 Method FTMS; HCD Score 184.78 m/z 836.42 Gene names NR2C2

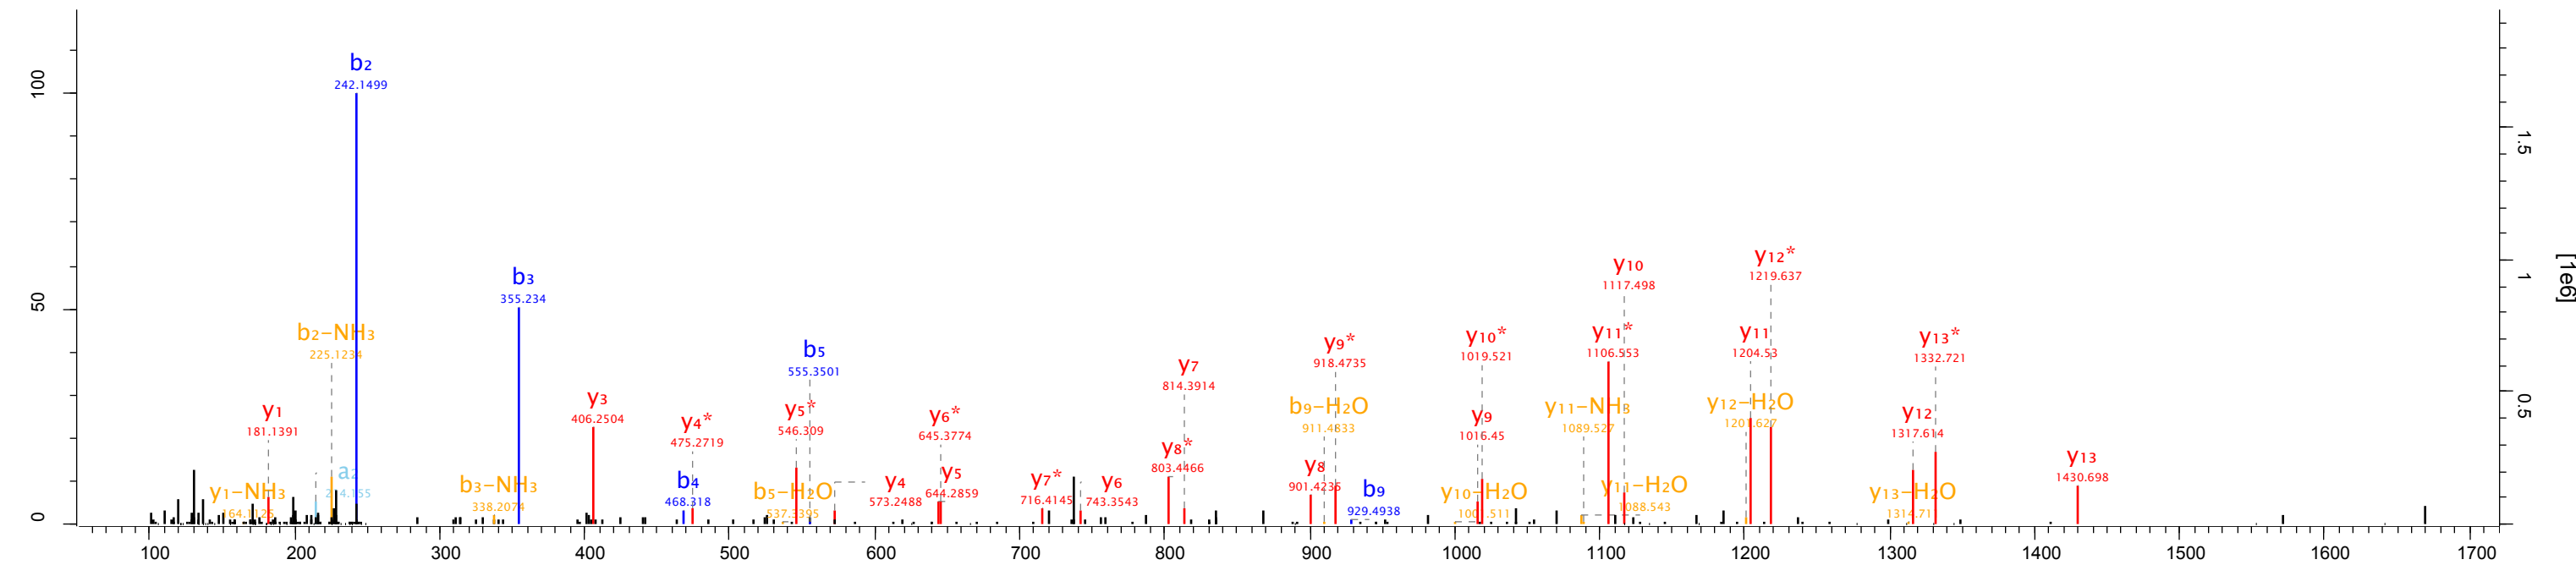

- I Q I I S T D S A V A S P Q R -

b<sub>2</sub>
b<sub>3</sub>
b<sub>4</sub>
b<sub>5</sub>
y<sub>13</sub>
y<sub>12</sub>
y<sub>11</sub>
y<sub>10</sub>
y<sub>9</sub>
y<sub>8</sub>
y<sub>7</sub>
y<sub>6</sub>
y<sub>5</sub>
y<sub>4</sub>
y<sub>3</sub>
y<sub>1</sub>

Raw file 20150814\_A375SR\_Phospho\_BR2\_05 Scan 15836 Method FTMS; HCD Score 170.92 m/z 918.99 Gene names NUP35

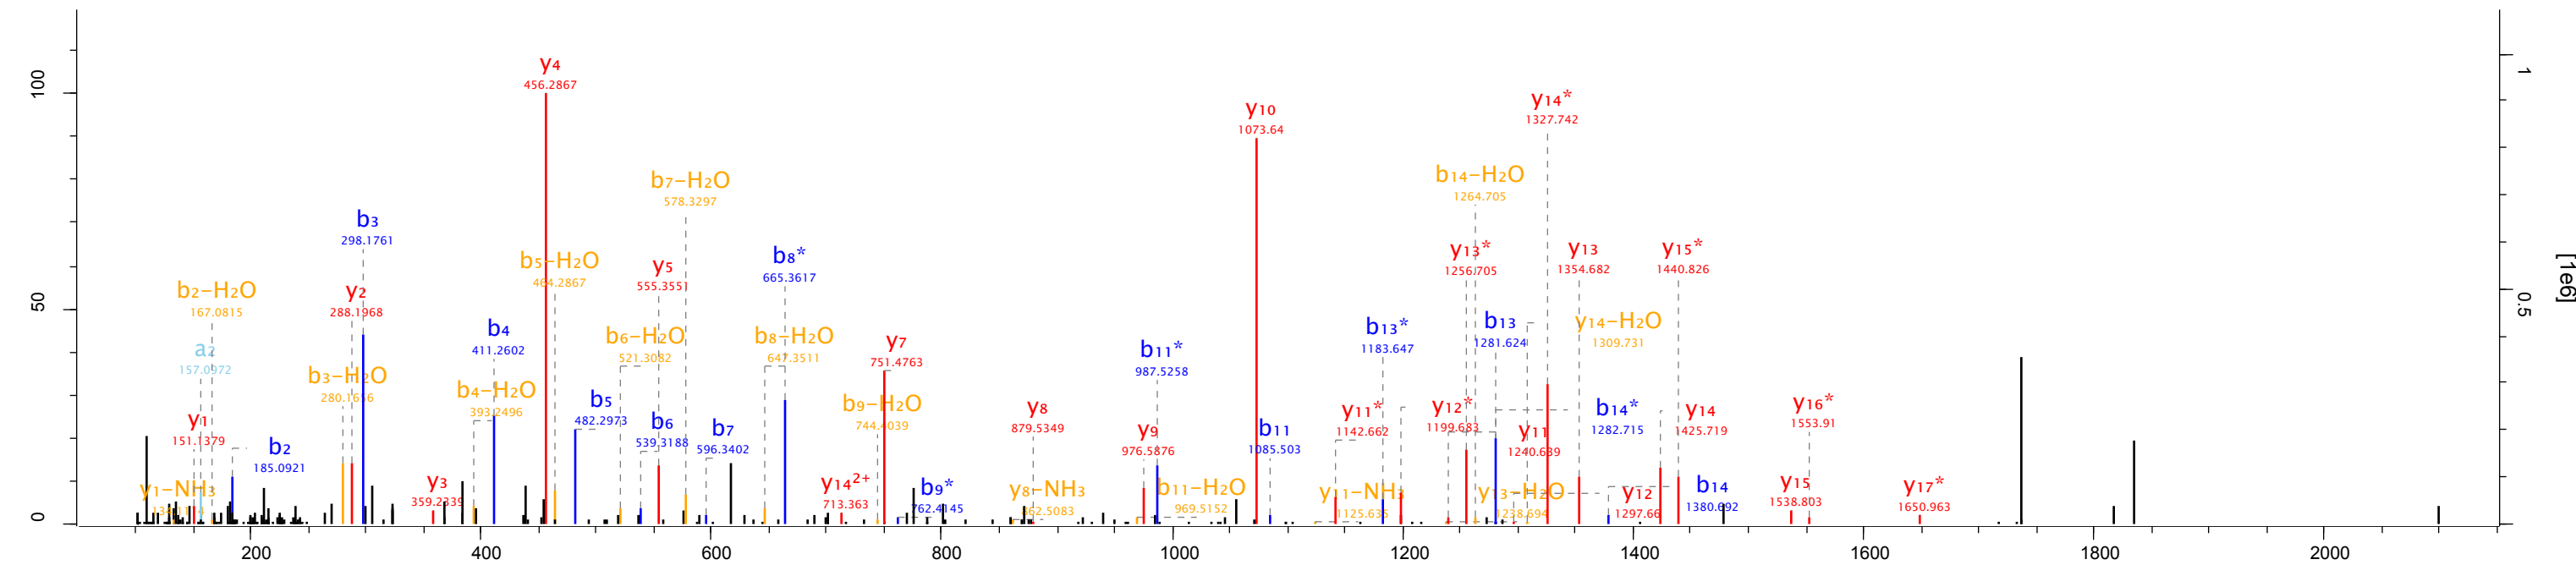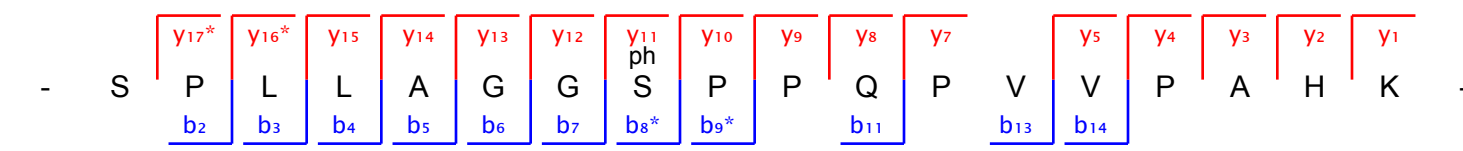

Raw file Scan Method Score m/z Gene names  
 20150814\_A375SR\_Phospho\_BR2\_05 16446 FTMS; HCD 62.62 601.28 AHNAK

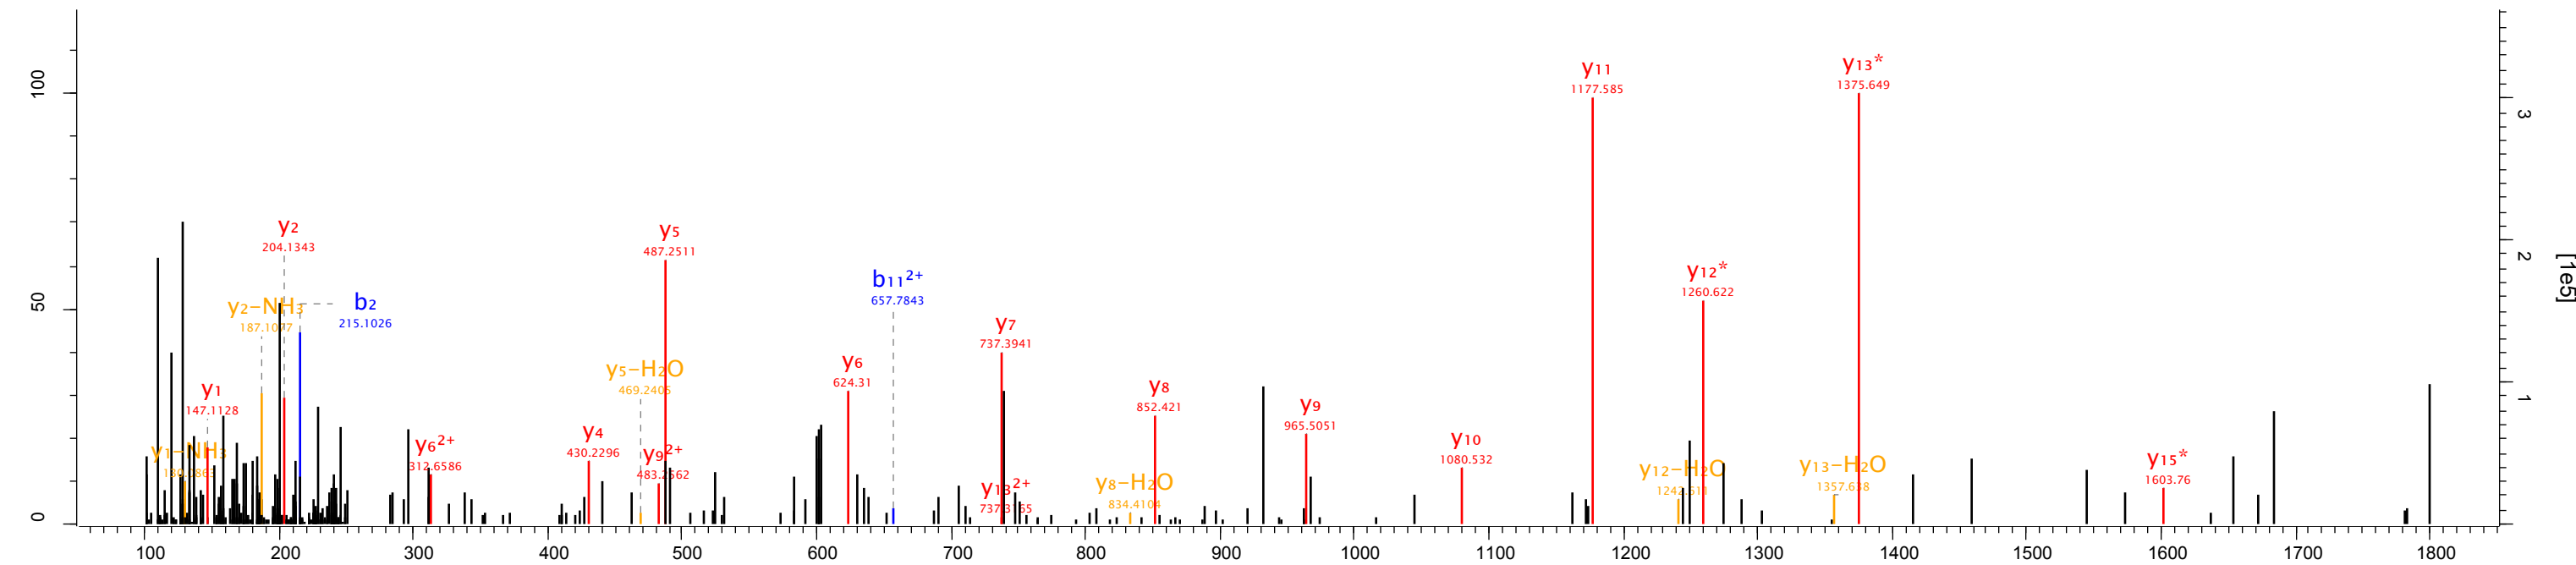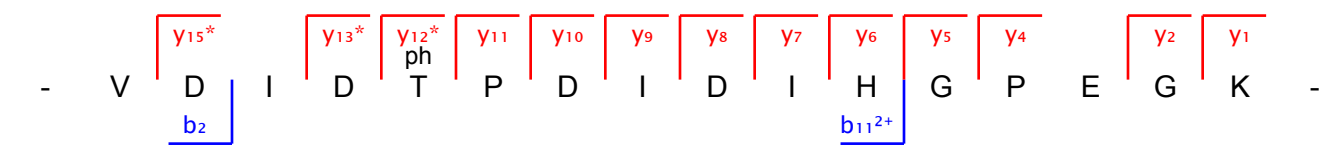

Raw file: 20150814\_A375SR\_Phospho\_BR2\_05  
 Scan: 17466 Method: FTMS; HCD Score: 135.3 m/z: 1047.49 Gene names: EIF5

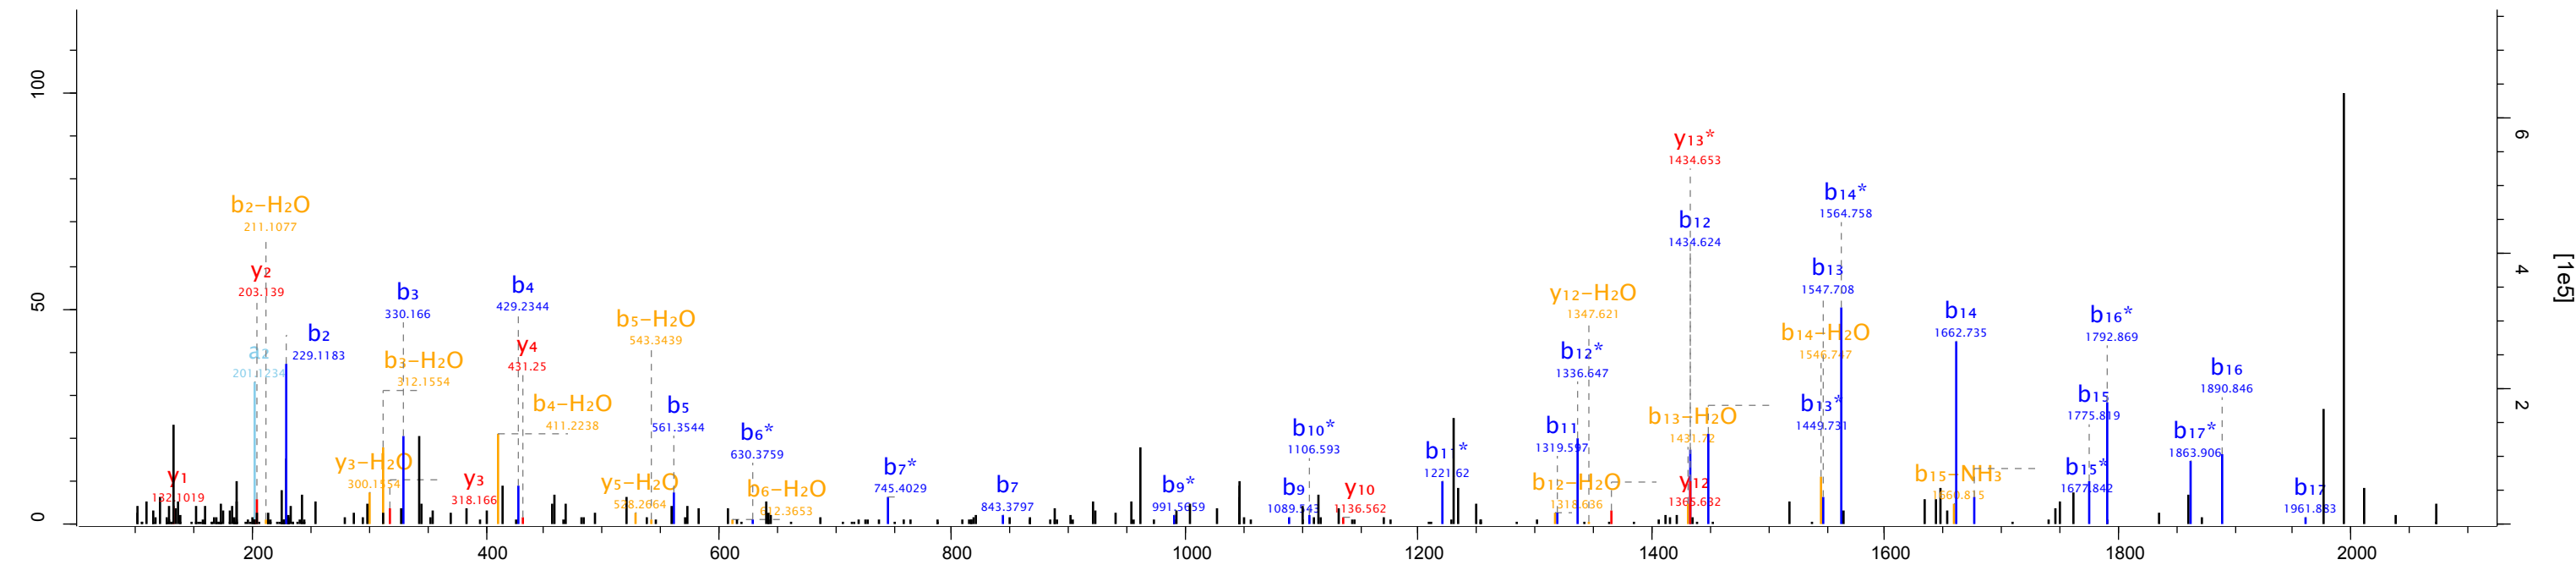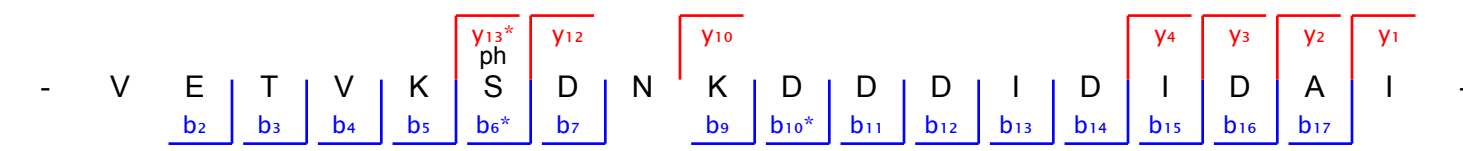

Raw file: 20150814\_A375SR\_Phospho\_BR2\_05  
 Scan: 17486 Method: FTMS; HCD Score: 139.46 m/z: 702.33 Gene names: GPATCH2

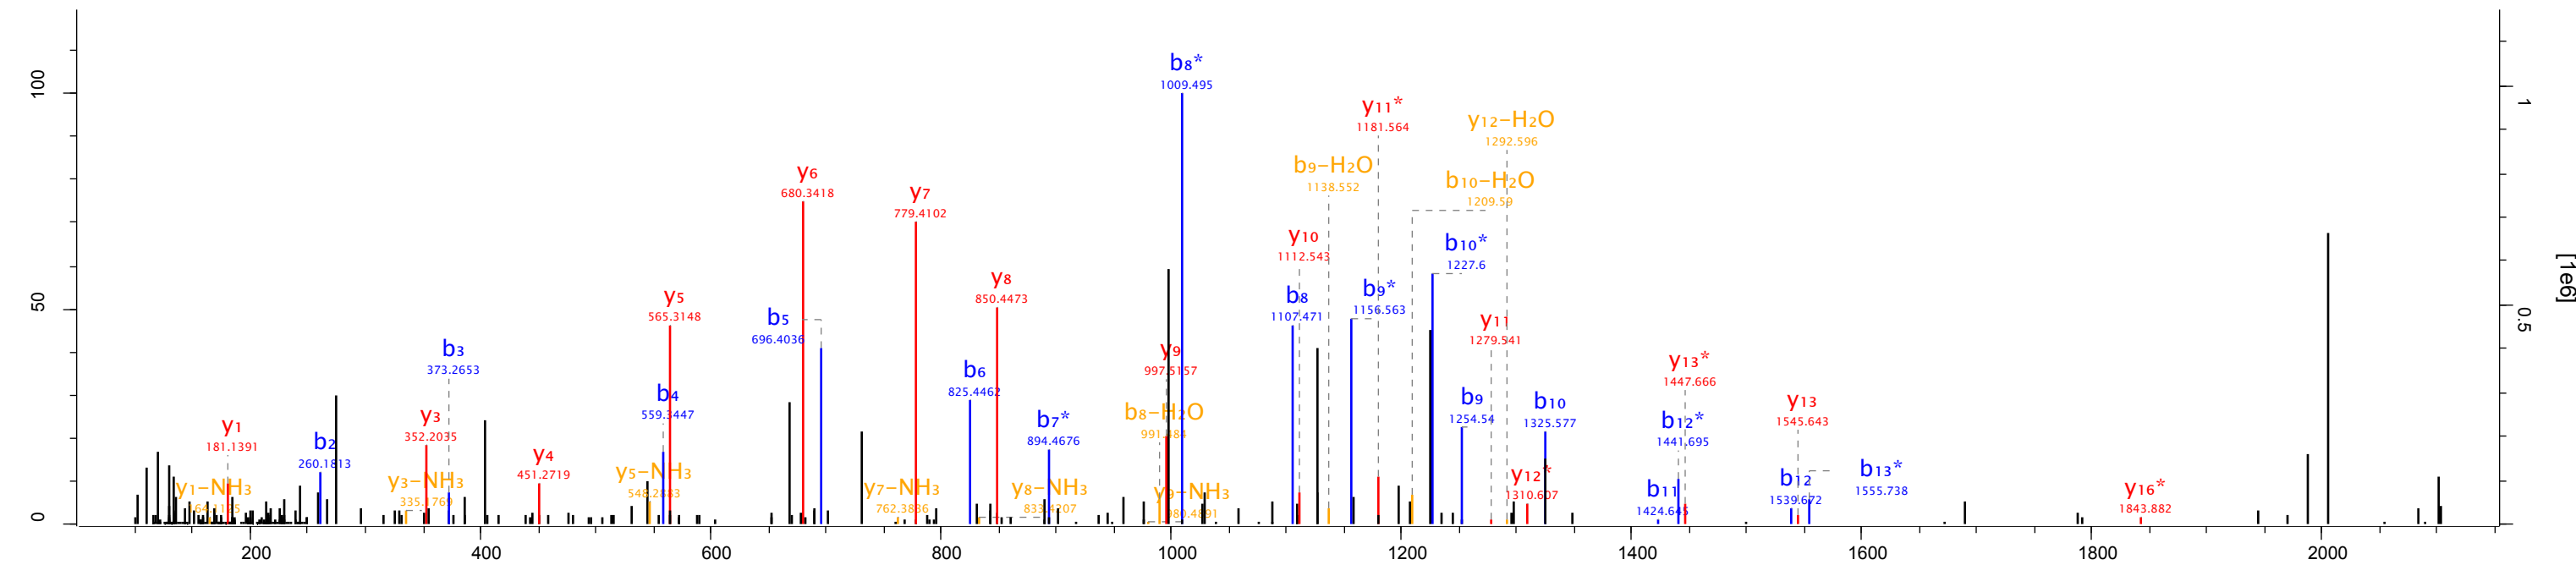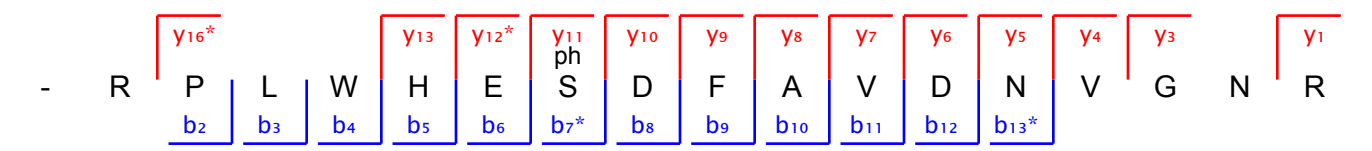



Raw file 20150814\_A375SR\_Phospho\_BR2\_05 Scan 17636 Method FTMS; HCD Score 74.97 m/z 590.8 Gene names CAMKK2;KIF18B

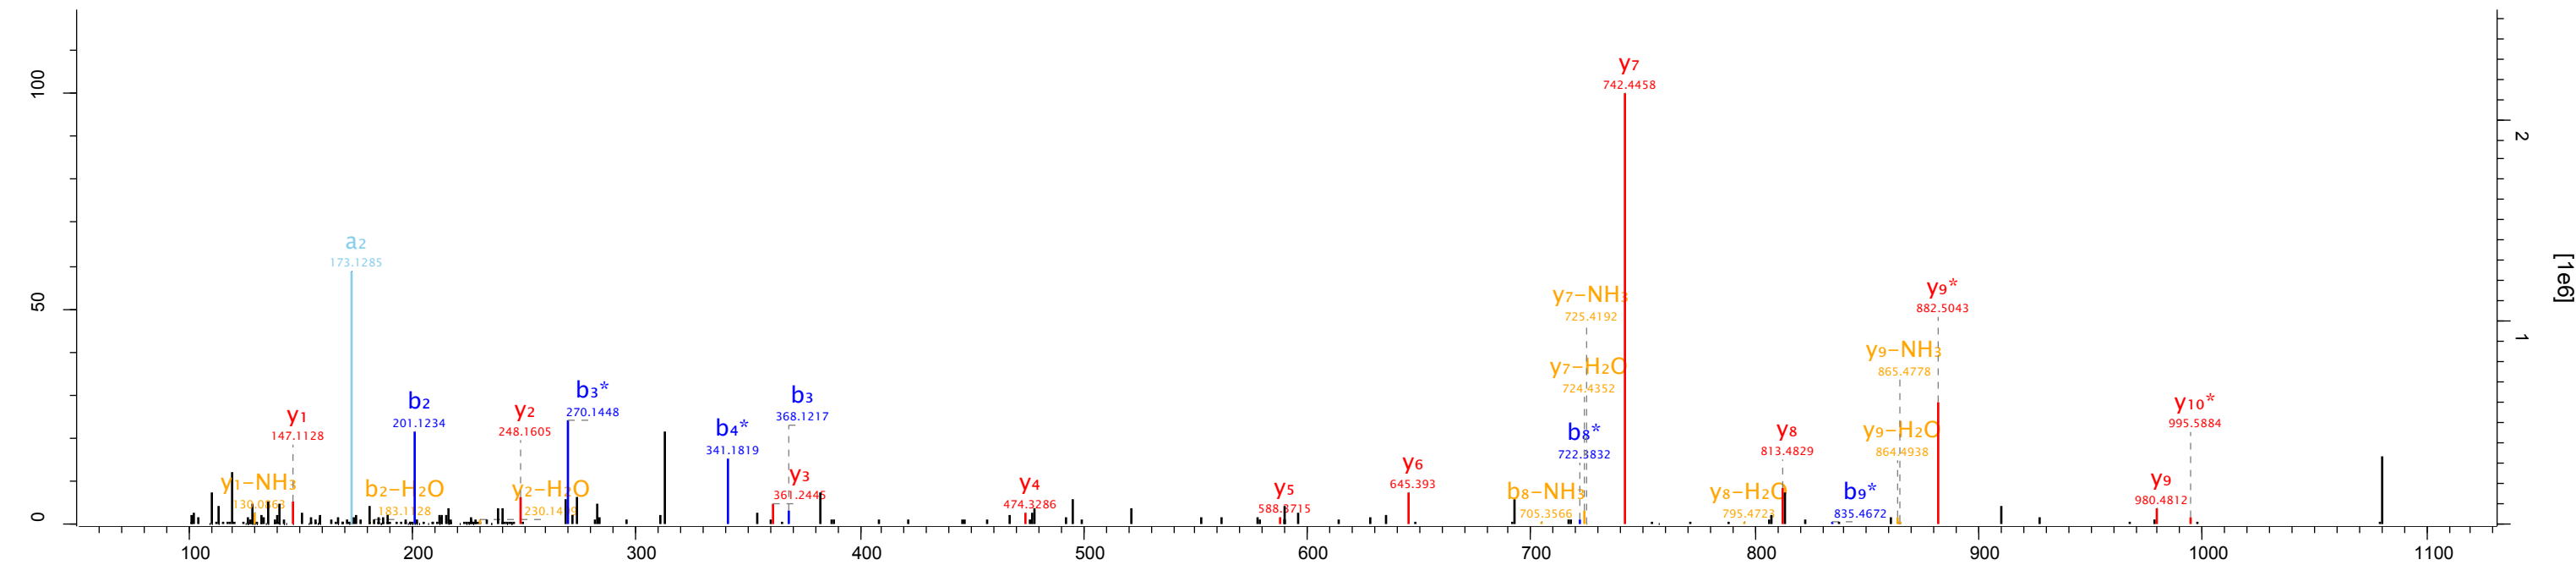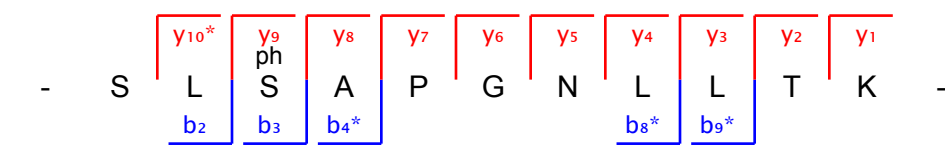

Raw file 20150814\_A375SR\_Phospho\_BR2\_05 Scan 18076 Method FTMS; HCD Score 107.65 m/z 751.66 Gene names RPS3

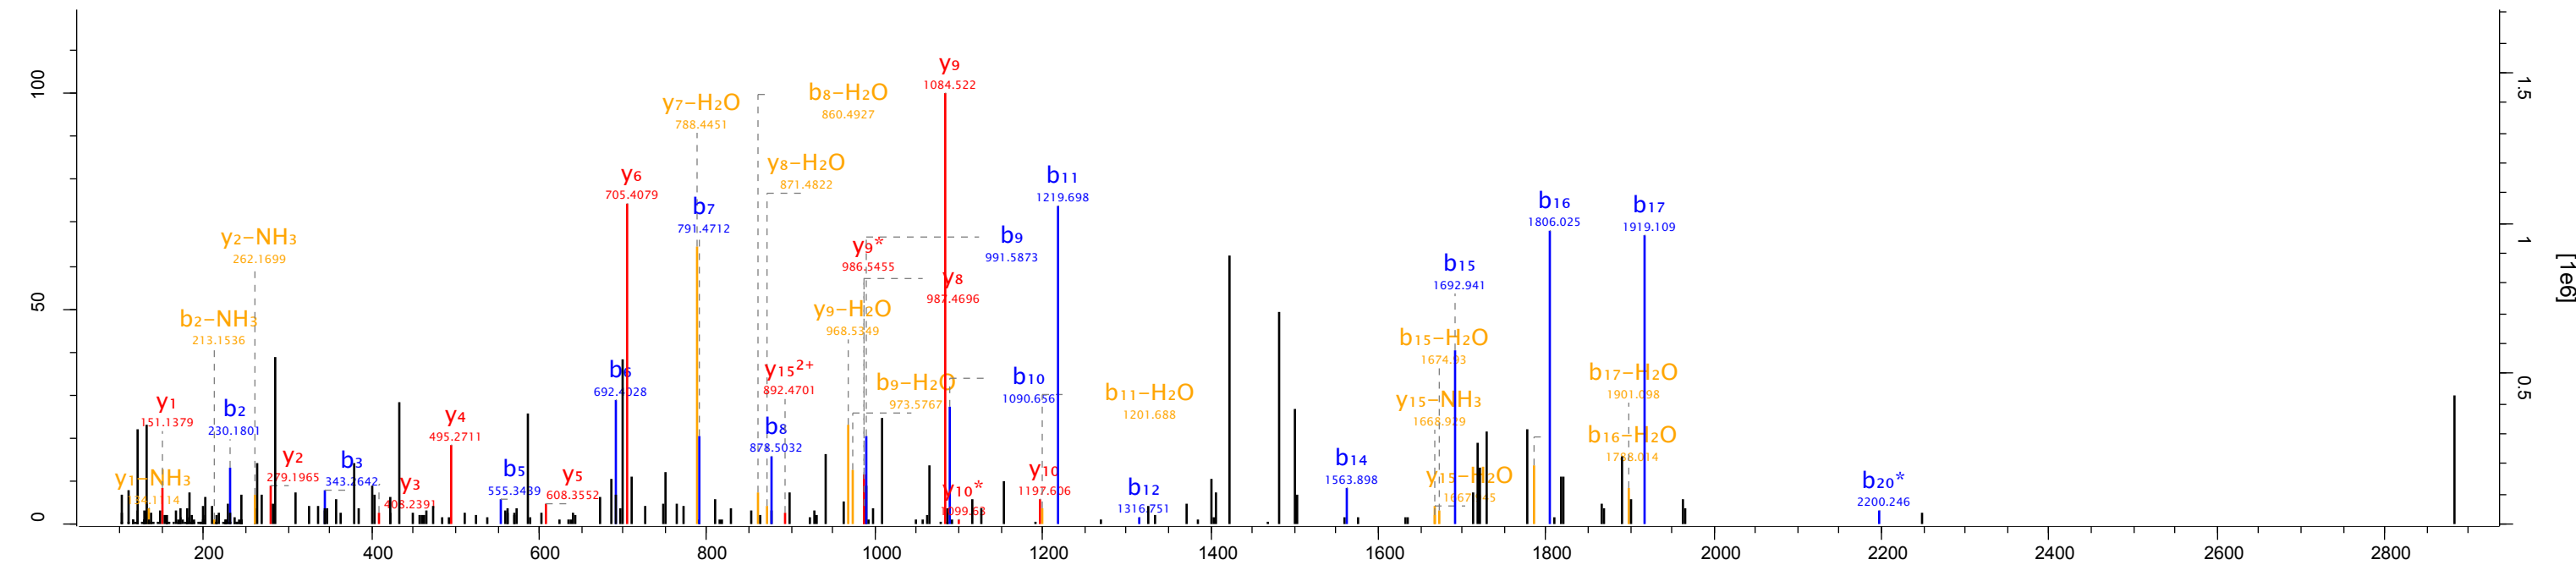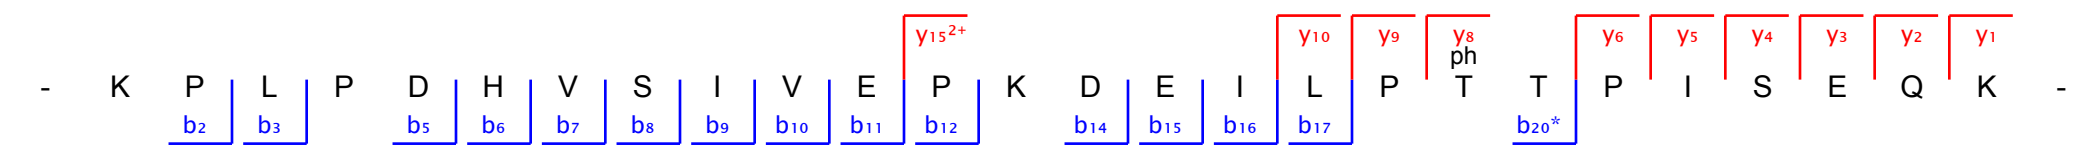

Raw file: 20150814\_A375SR\_Phospho\_BR2\_05  
 Scan: 18116 Method: FTMS; HCD Score: 156.08 m/z: 844.37 Gene names: PLCG1

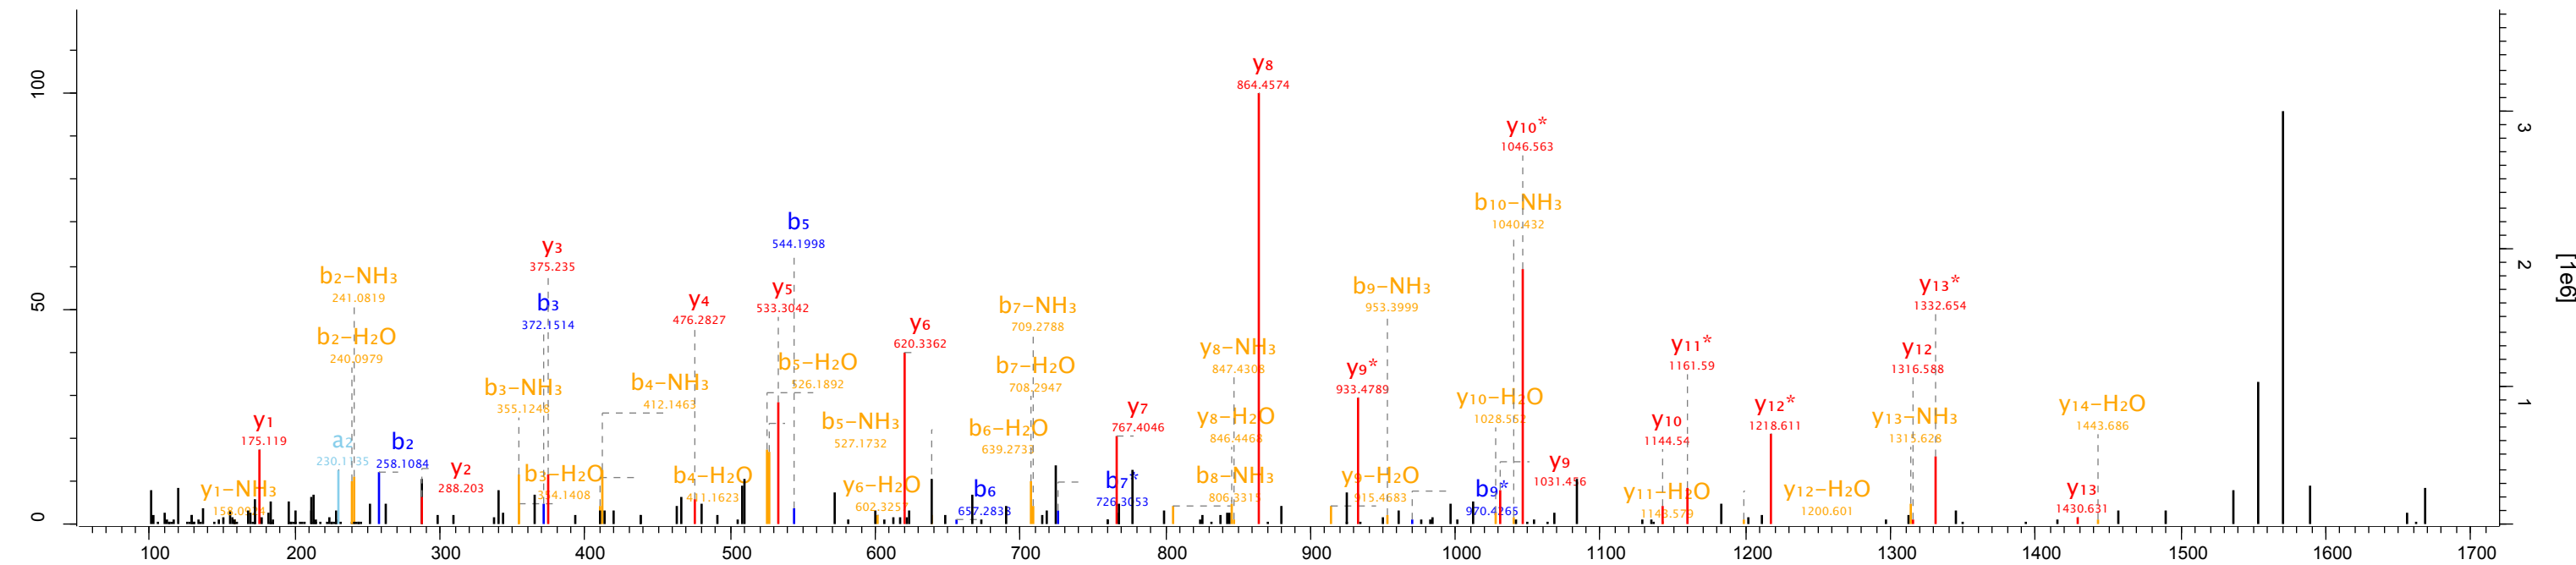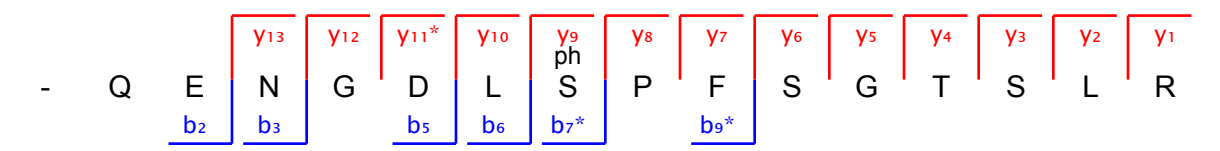

Raw file: 20150814\_A375SR\_Phospho\_BR2\_05  
 Scan: 18566 Method: FTMS; HCD Score: 189.07 m/z: 687.8 Gene names: CAMSAP2

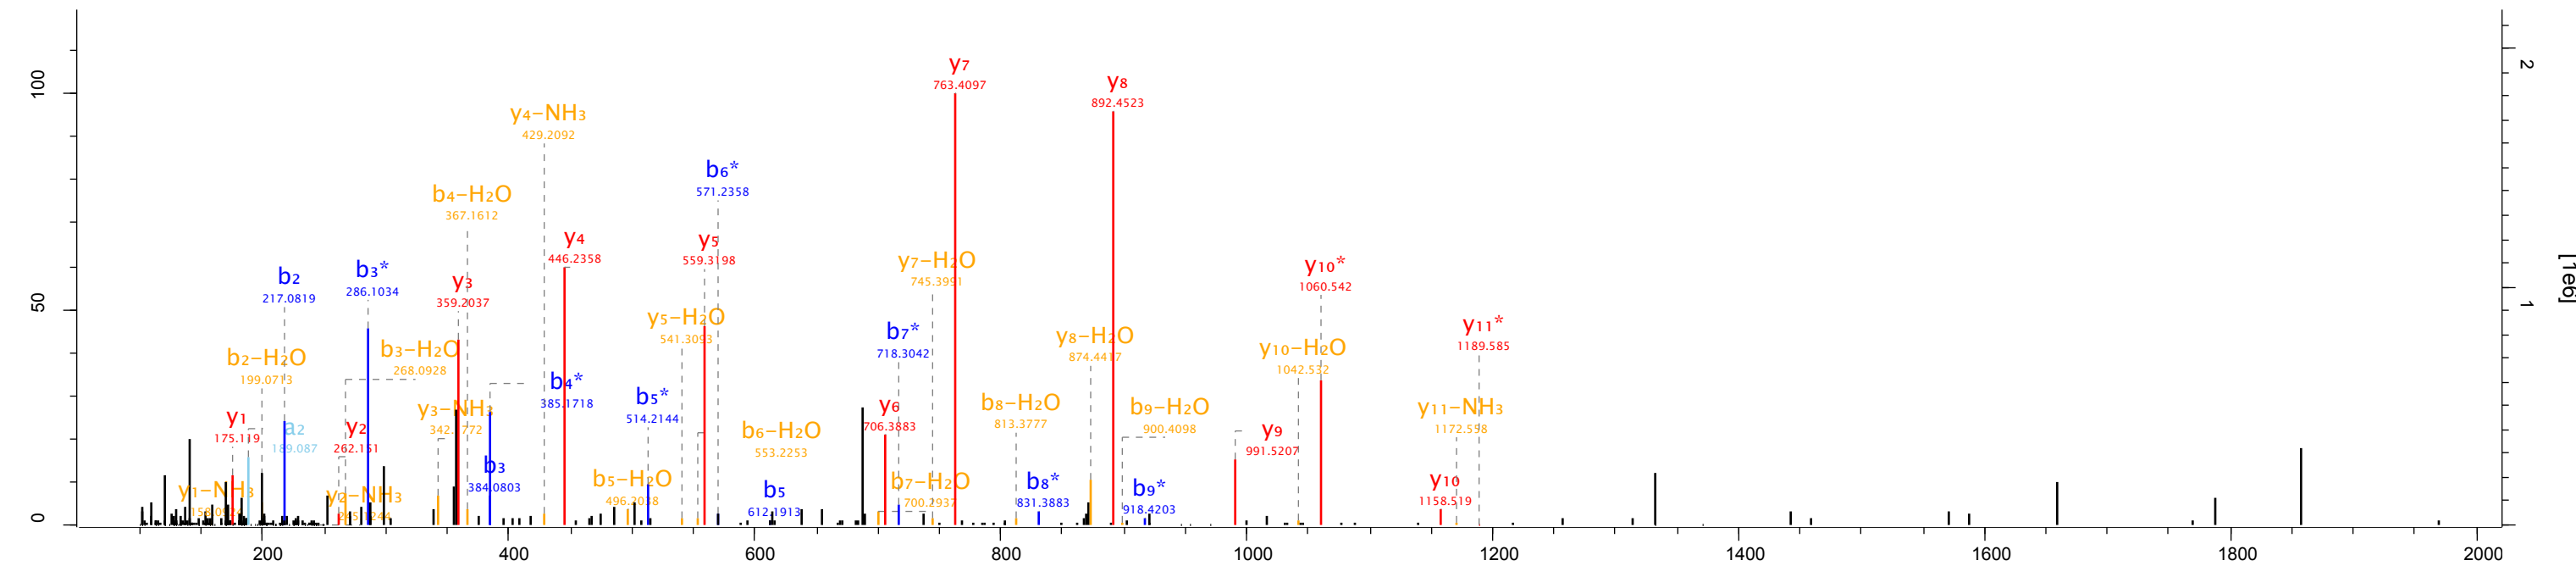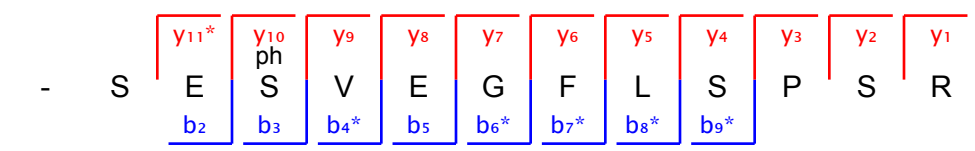

Raw file 20150814\_A375SR\_Phospho\_BR2\_05 Scan 18666 Method FTMS; HCD Score 107.15 m/z 829.73 Gene names CEP170

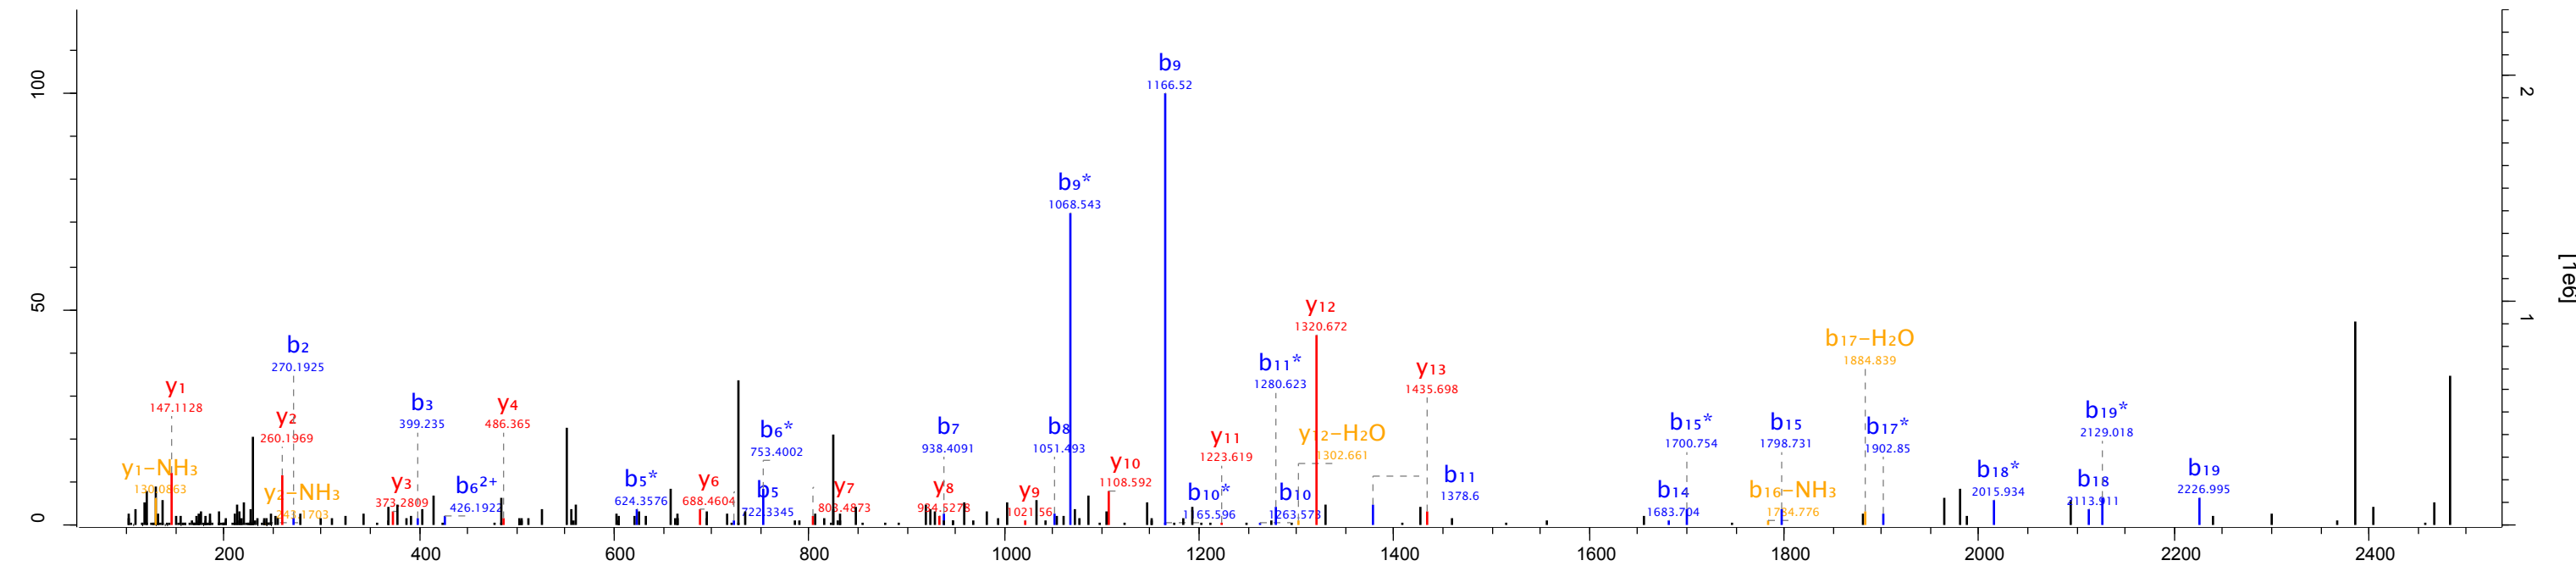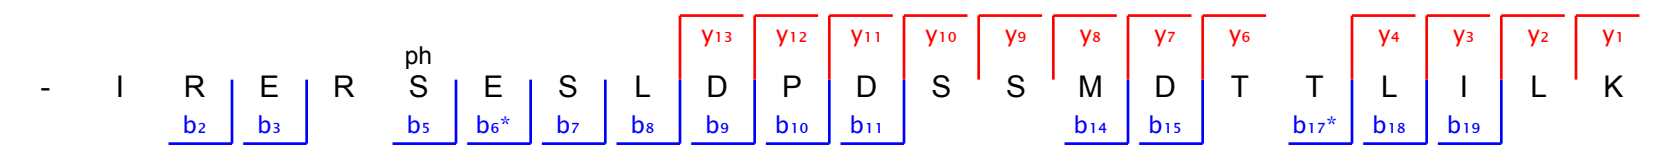

Raw file Scan Method Score m/z Gene names  
 20150814\_A375SR\_Phospho\_BR2\_05 19016 FTMS; HCD 130.27 863.44 ATG2B

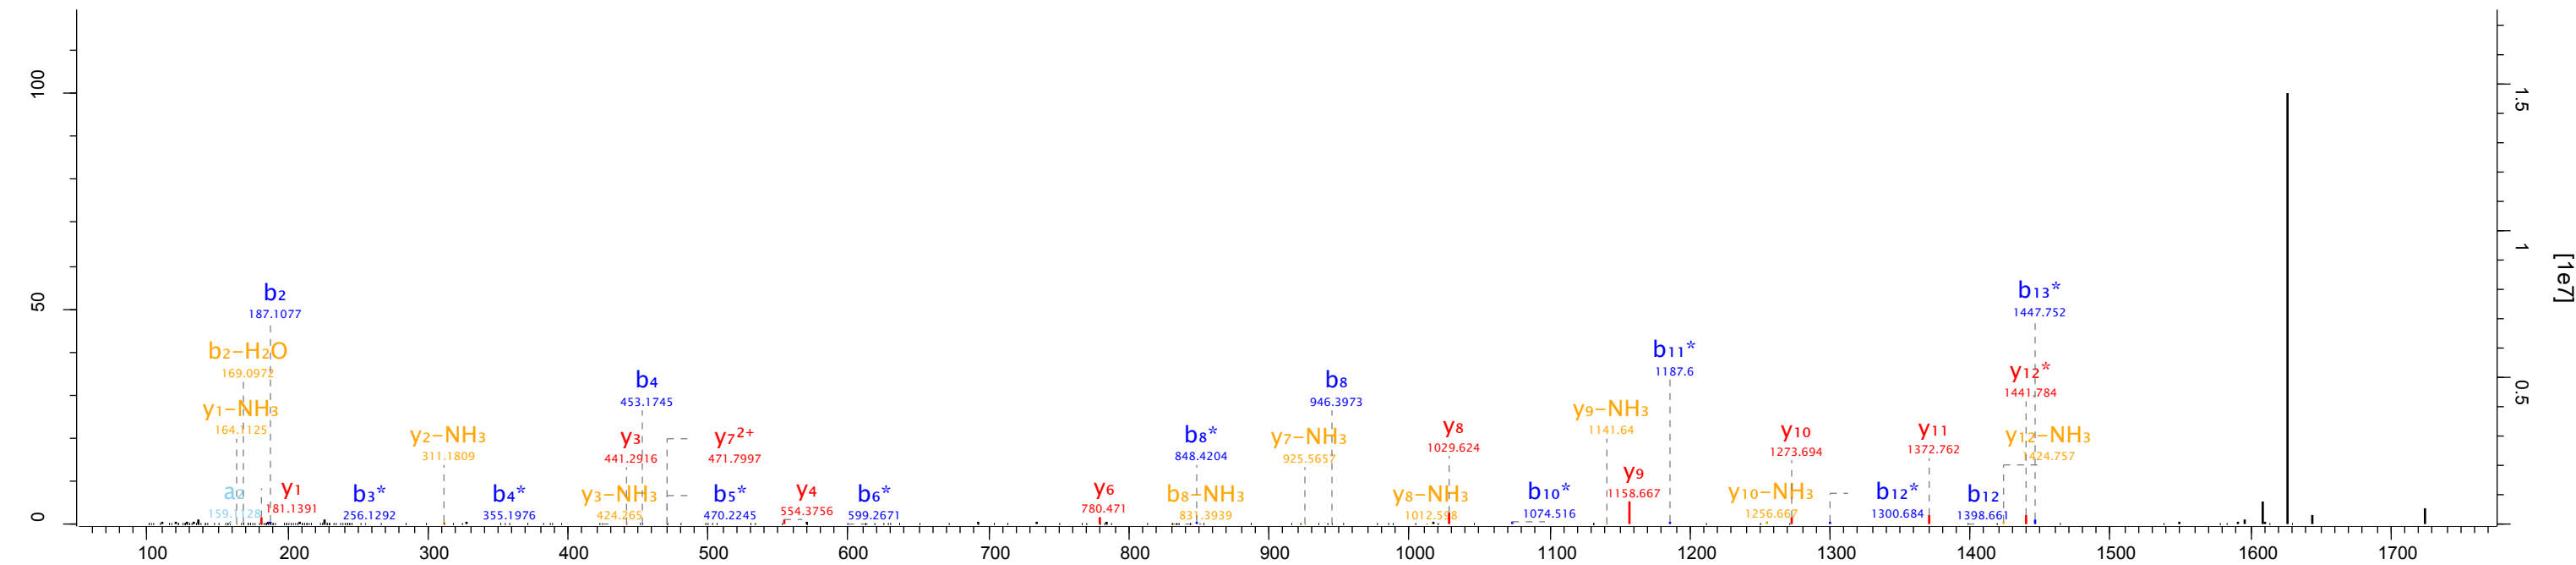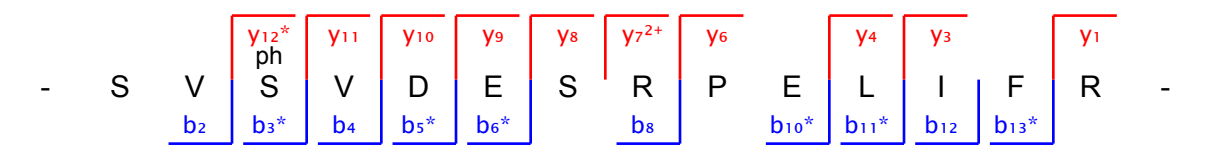

Raw file: 20150814\_A375SR\_Phospho\_BR2\_05  
 Scan: 19036 Method: FTMS; HCD Score: 91.34 m/z: 648.01 Gene names: KIAA1671

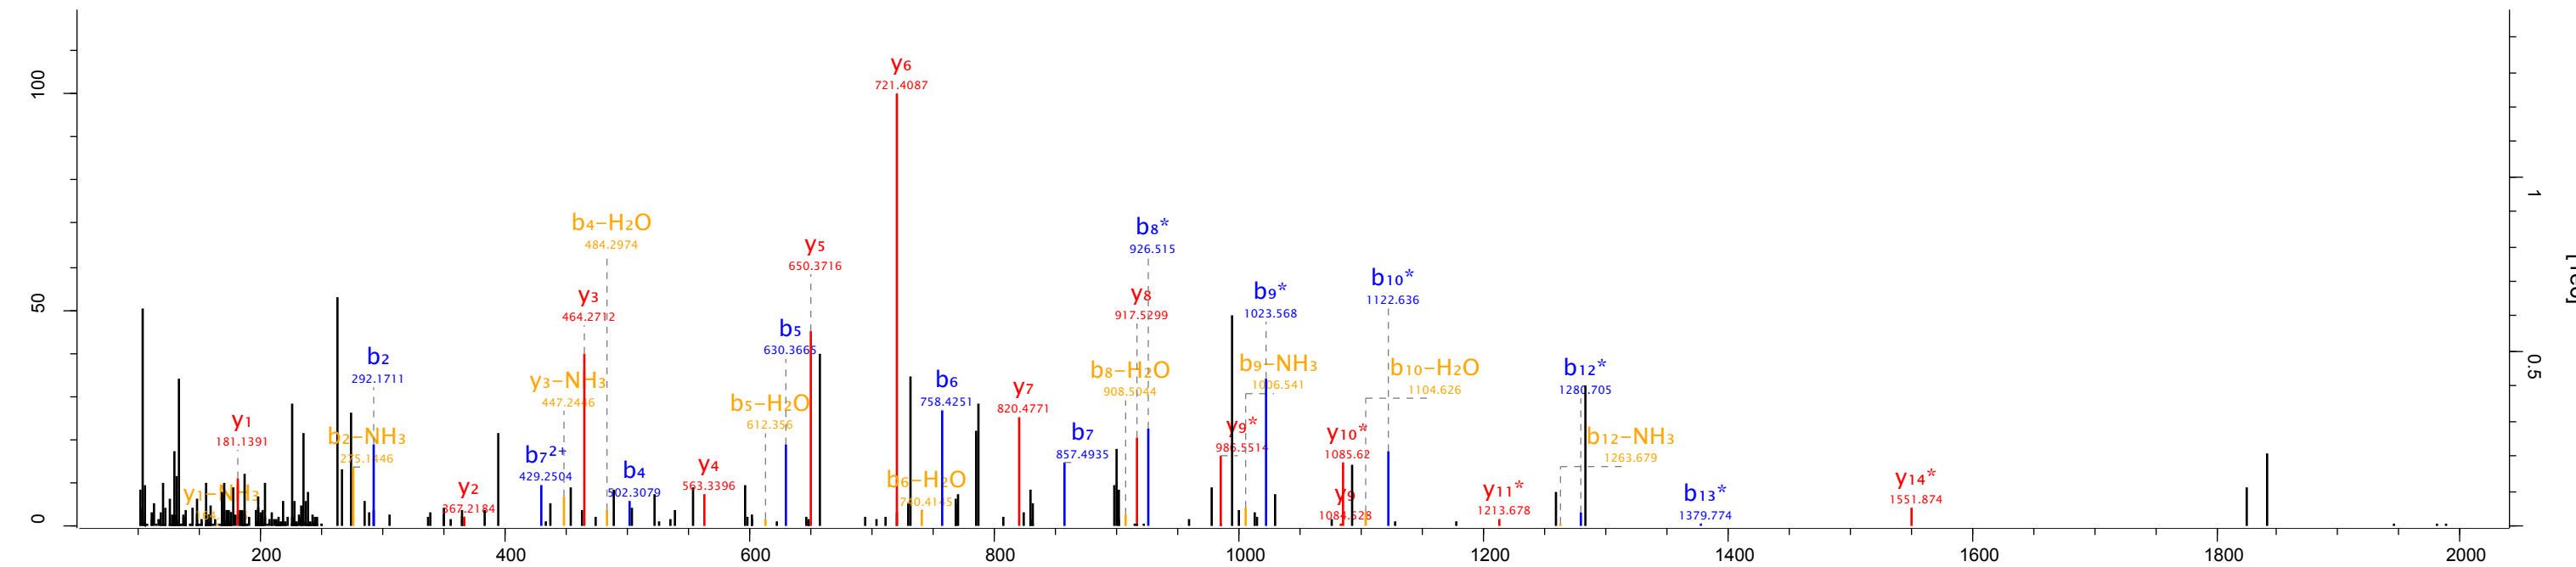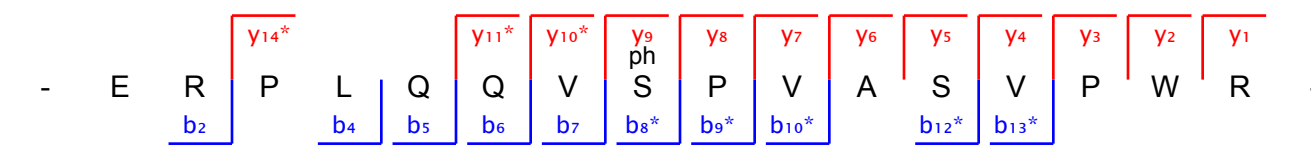

Raw file: 20150814\_A375SR\_Phospho\_BR2\_05  
 Scan: 19146 Method: FTMS; HCD Score: 176.44 m/z: 951.92 Gene names: SYNRC

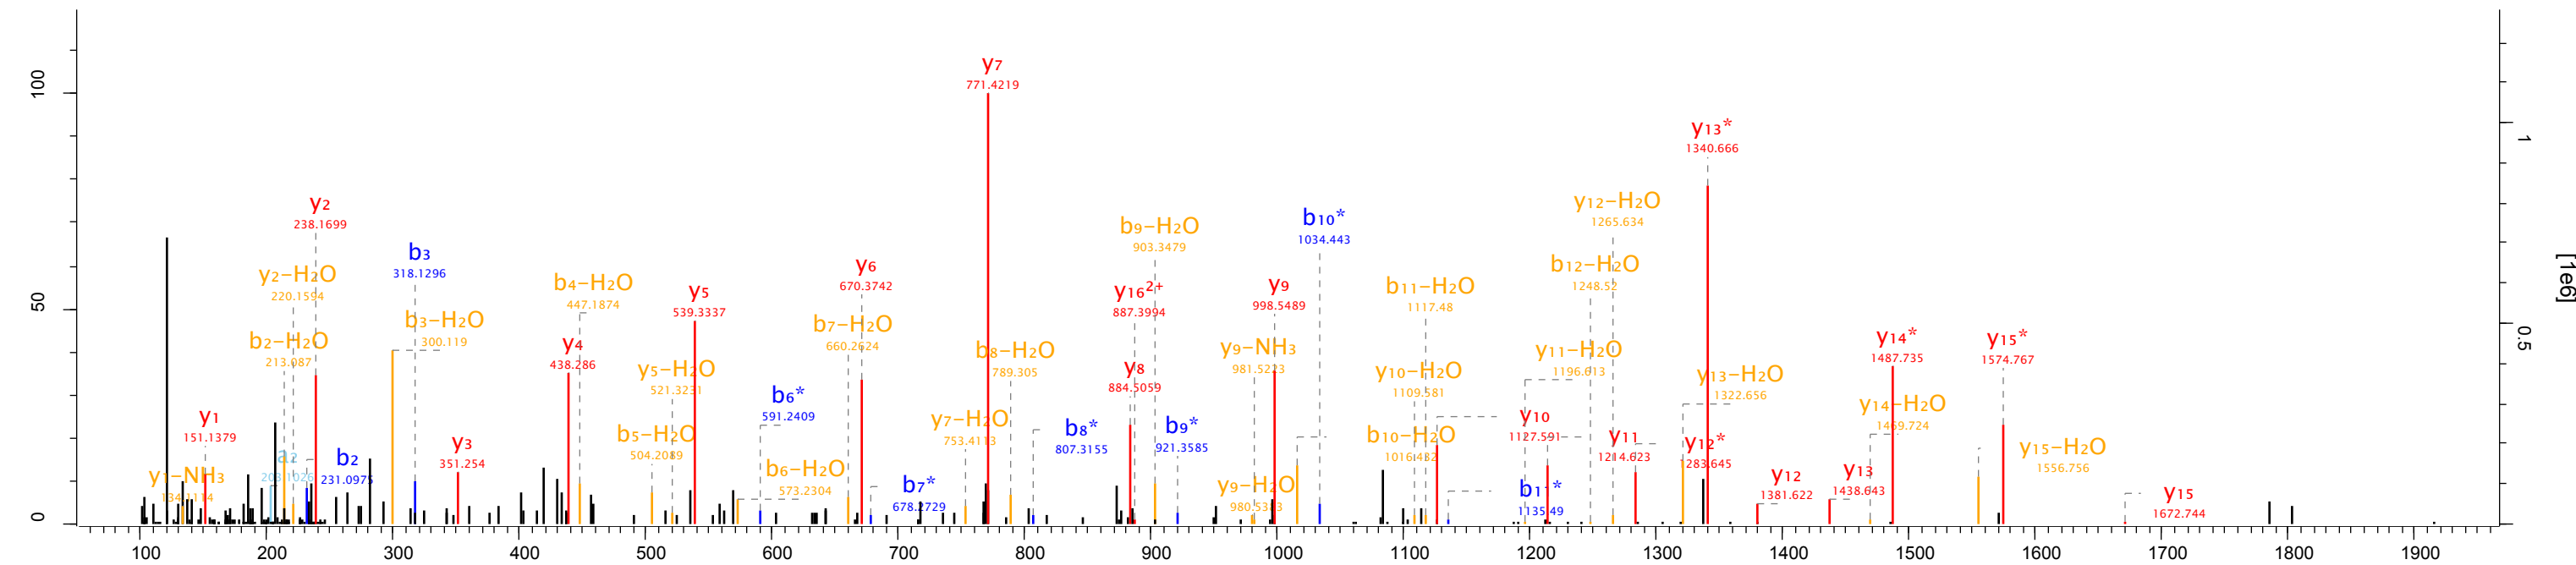

- E T S F G S S E N I T M T S L S K -

Fragmentation mapping (b-ions in blue, y-ions in red):

- b<sub>2</sub> (T)
- b<sub>3</sub> (S)
- b<sub>6</sub><sup>\*</sup> (S)
- b<sub>7</sub><sup>\*</sup> (S)
- b<sub>8</sub><sup>\*</sup> (E)
- b<sub>9</sub><sup>\*</sup> (N)
- b<sub>10</sub><sup>\*</sup> (I)
- b<sub>11</sub><sup>\*</sup> (T)
- y<sub>16</sub><sup>2+</sup> (T)
- y<sub>15</sub> (S)
- y<sub>14</sub><sup>\*</sup> (F)
- y<sub>13</sub> (G)
- y<sub>12</sub> (S)
- y<sub>11</sub> (S)
- y<sub>10</sub> (E)
- y<sub>9</sub> (N)
- y<sub>8</sub> (I)
- y<sub>7</sub> (T)
- y<sub>6</sub> (M)
- y<sub>5</sub> (T)
- y<sub>4</sub> (S)
- y<sub>3</sub> (L)
- y<sub>2</sub> (S)
- y<sub>1</sub> (K)



Raw file: 20150814\_A375SR\_Phospho\_BR2\_05  
 Scan: 1936 Method: FTMS; HCD Score: 111.93 m/z: 500.22 Gene names: HECTD1

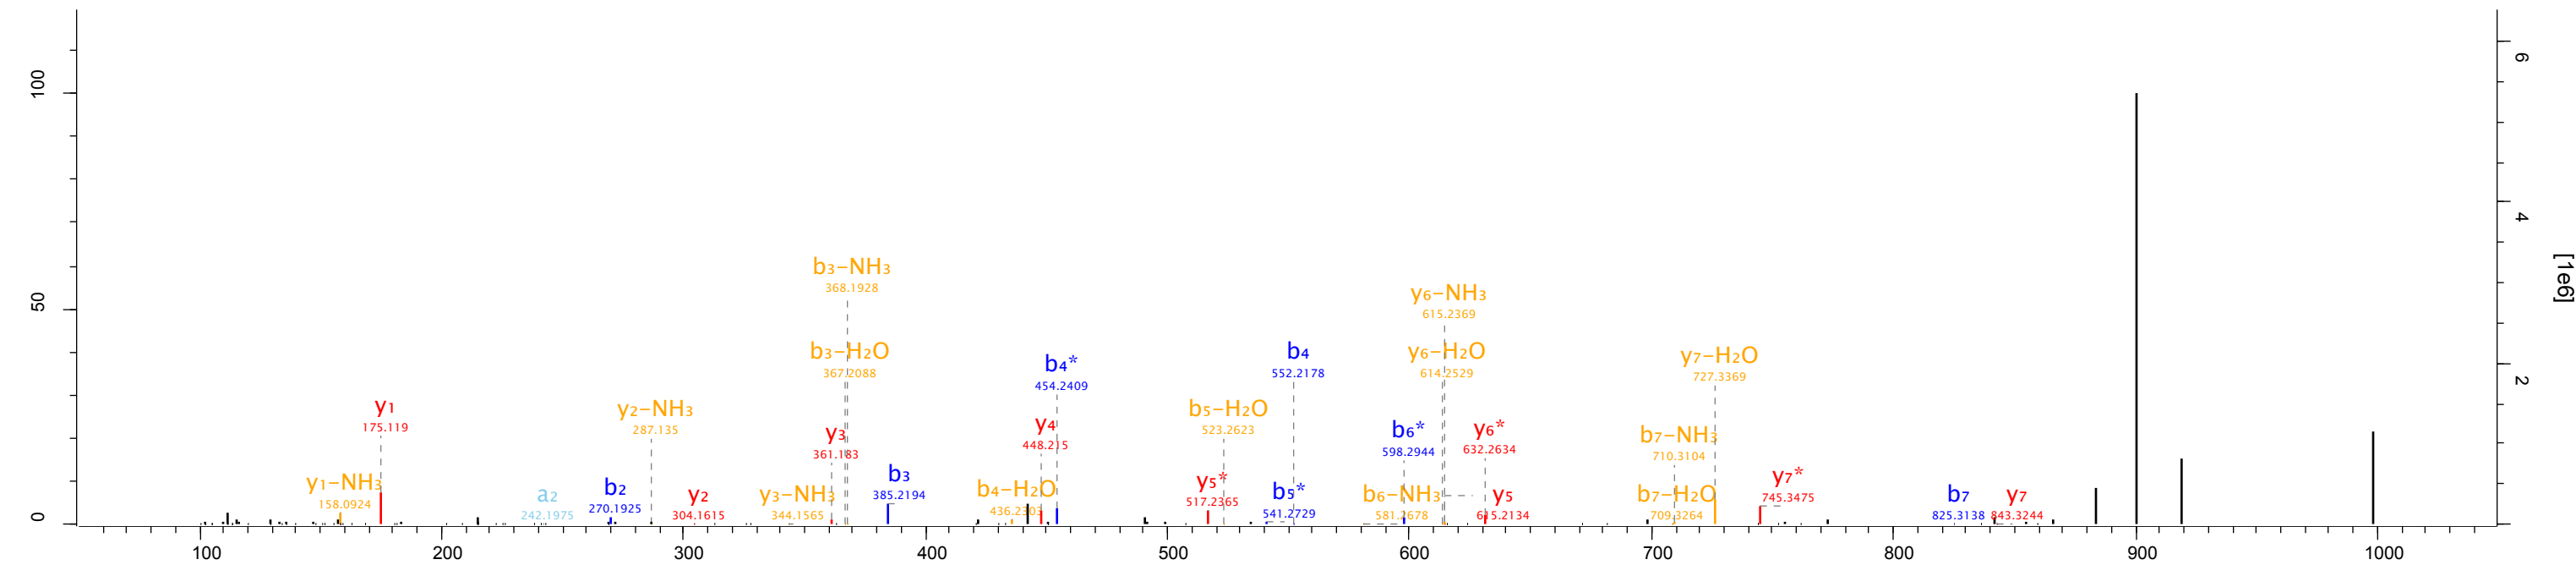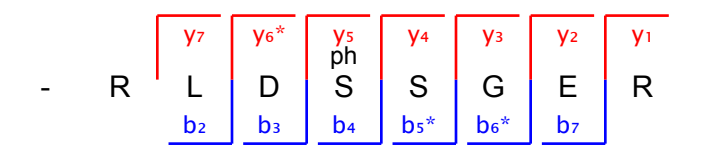

Raw file: 20150814\_A375SR\_Phospho\_BR2\_05  
 Scan: 19436 Method: FTMS; HCD Score: 175.77 m/z: 876.89 Gene names: PKP3

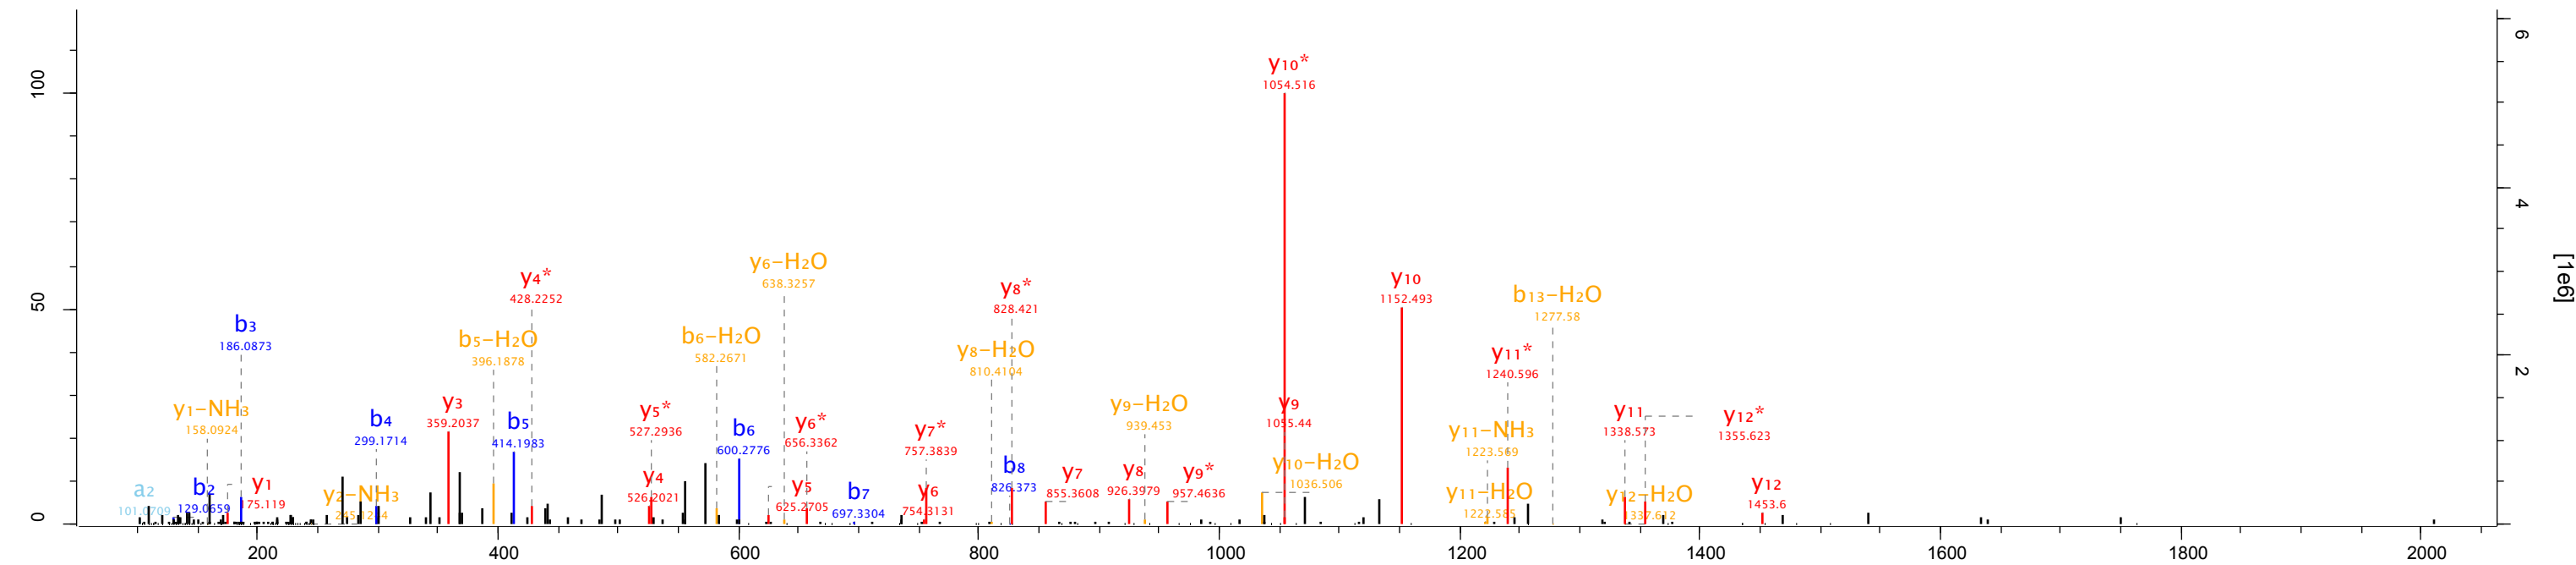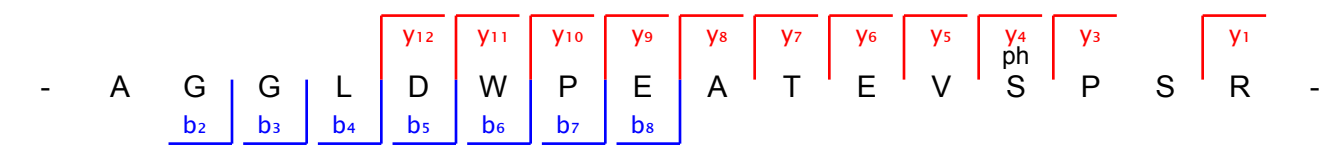

Raw file: 20150814\_A375SR\_Phospho\_BR2\_05  
 Scan: 19446 Method: FTMS; HCD Score: 151.49 m/z: 653.85 Gene names: HPS5

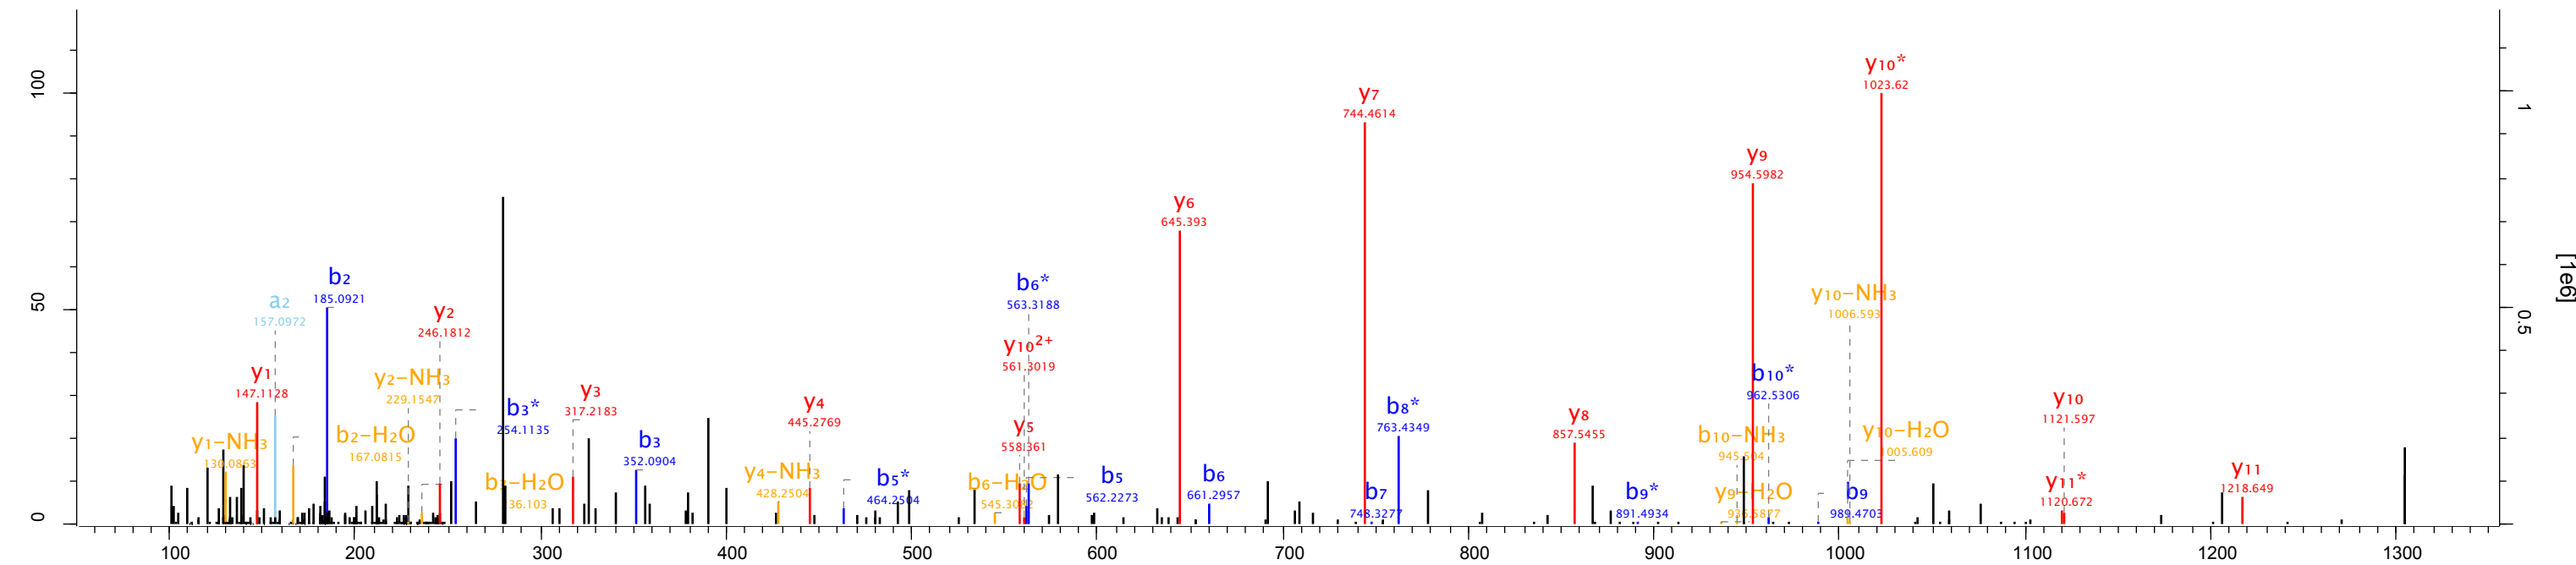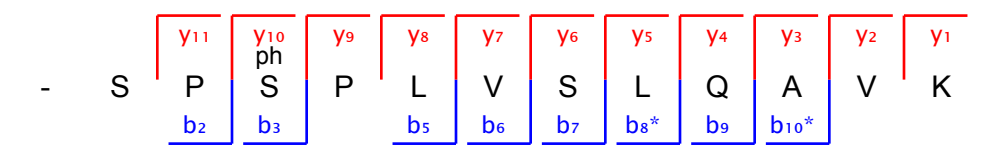

Raw file 20150814\_A375SR\_Phospho\_BR2\_05 Scan 19466 Method FTMS; HCD Score 211.89 m/z 846.38 Gene names RRAGC;RRAGD

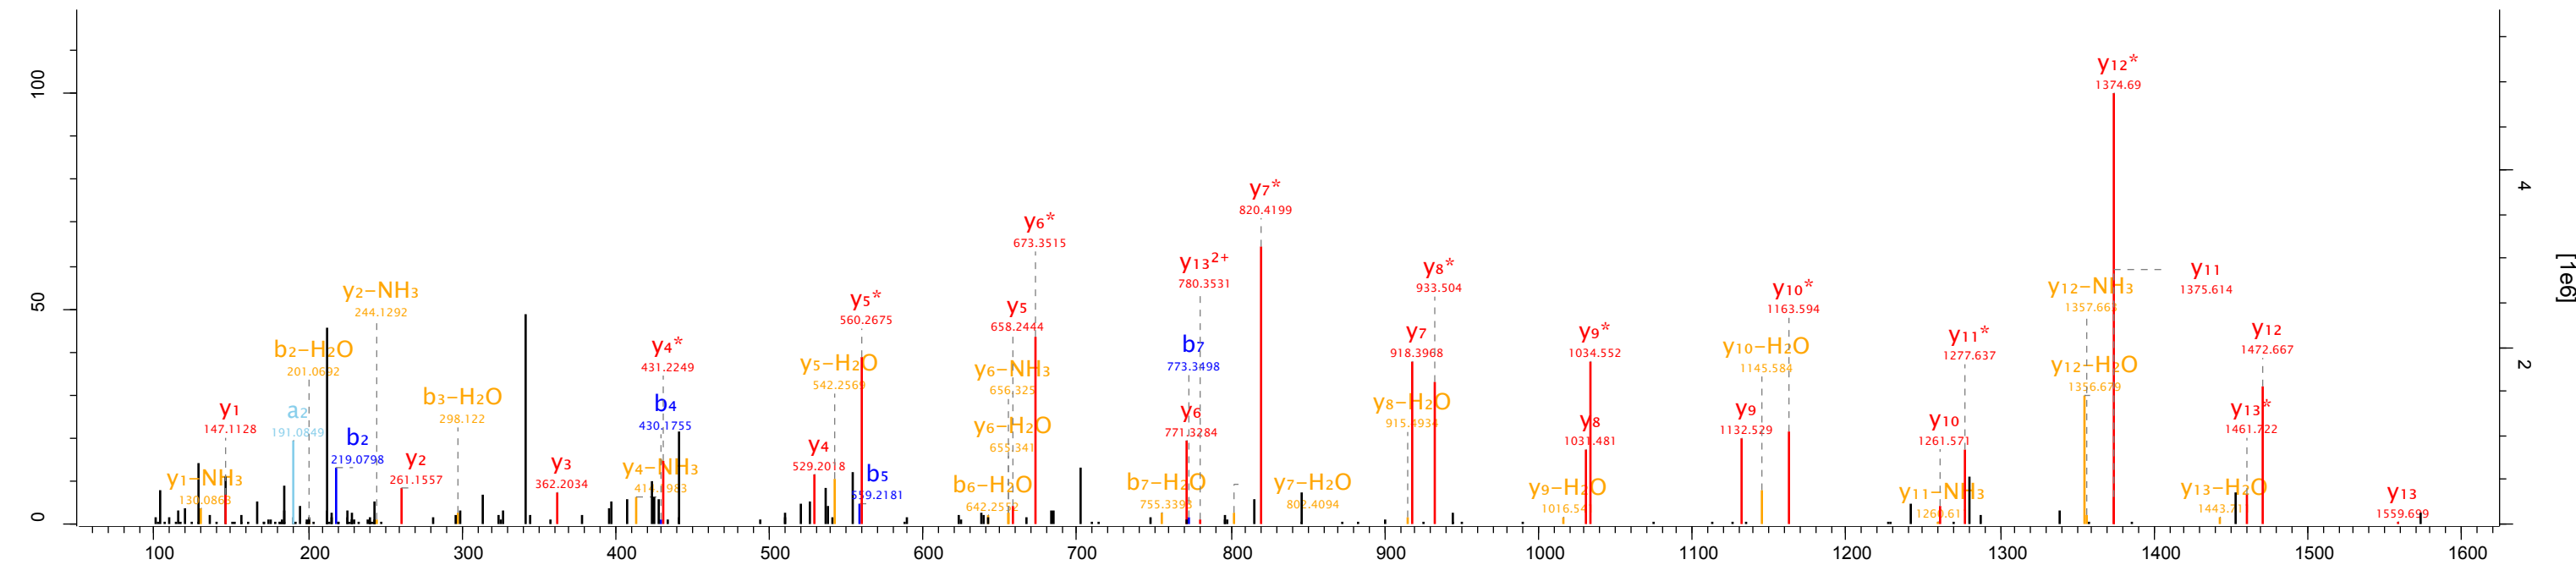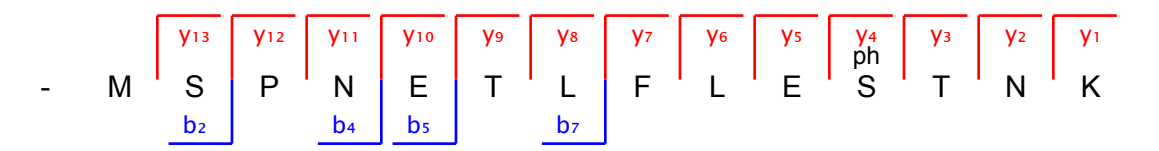

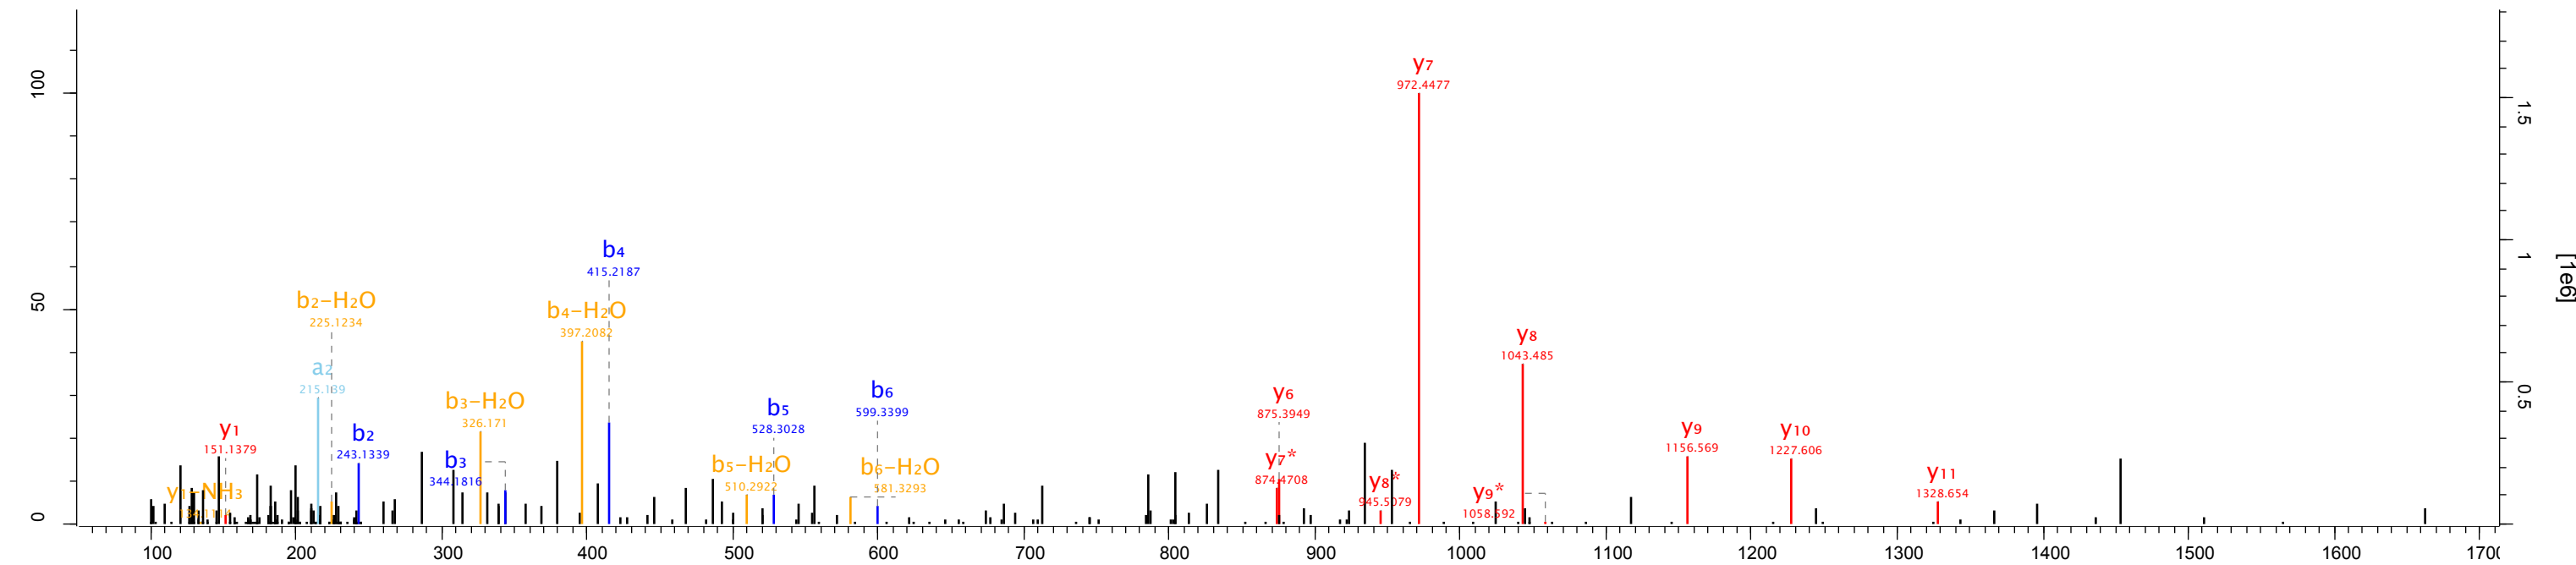

- E I T A L A P S ph T M K I K -

Fragmentation scheme diagram showing b and y ions for the peptide sequence: E I T A L A P S ph T M K I K -

Fragmentation sites are indicated by brackets below the sequence:

- b2 (under I)
- b3 (under T)
- b4 (under A)
- b5 (under L)
- b6 (under A)
- y1 (under K)
- y6 (under S)
- y7 (under P)
- y8 (under A)
- y9 (under L)
- y10 (under A)
- y11 (under T)

Raw file  
 20150814\_A375SR\_Phospho\_BR2\_05  
 Scan 20136 Method FTMS; HCD Score 80.63 m/z 627.33 Gene names XRCC6

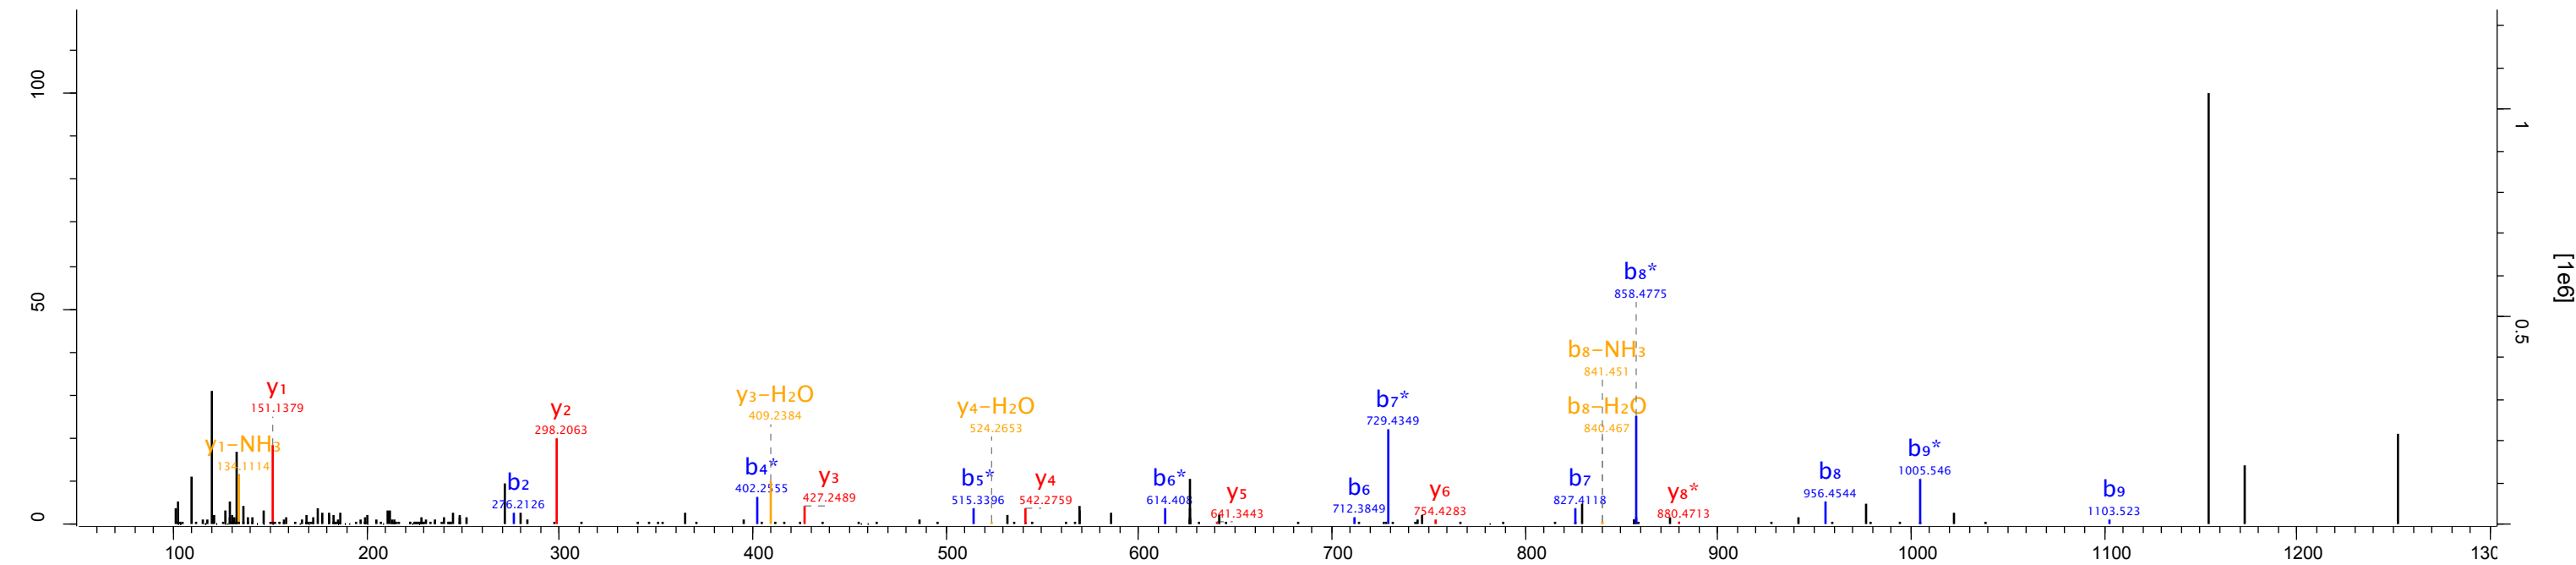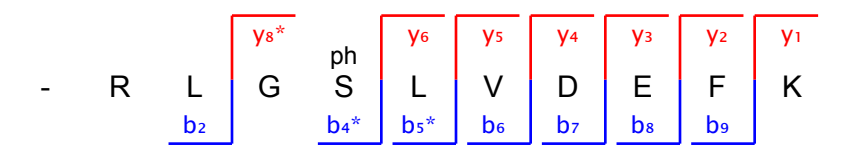

Raw file: 20150814\_A375SR\_Phospho\_BR2\_05  
 Scan: 20626 Method: FTMS; HCD Score: 233.46 m/z: 961.94 Gene names: SAFB2

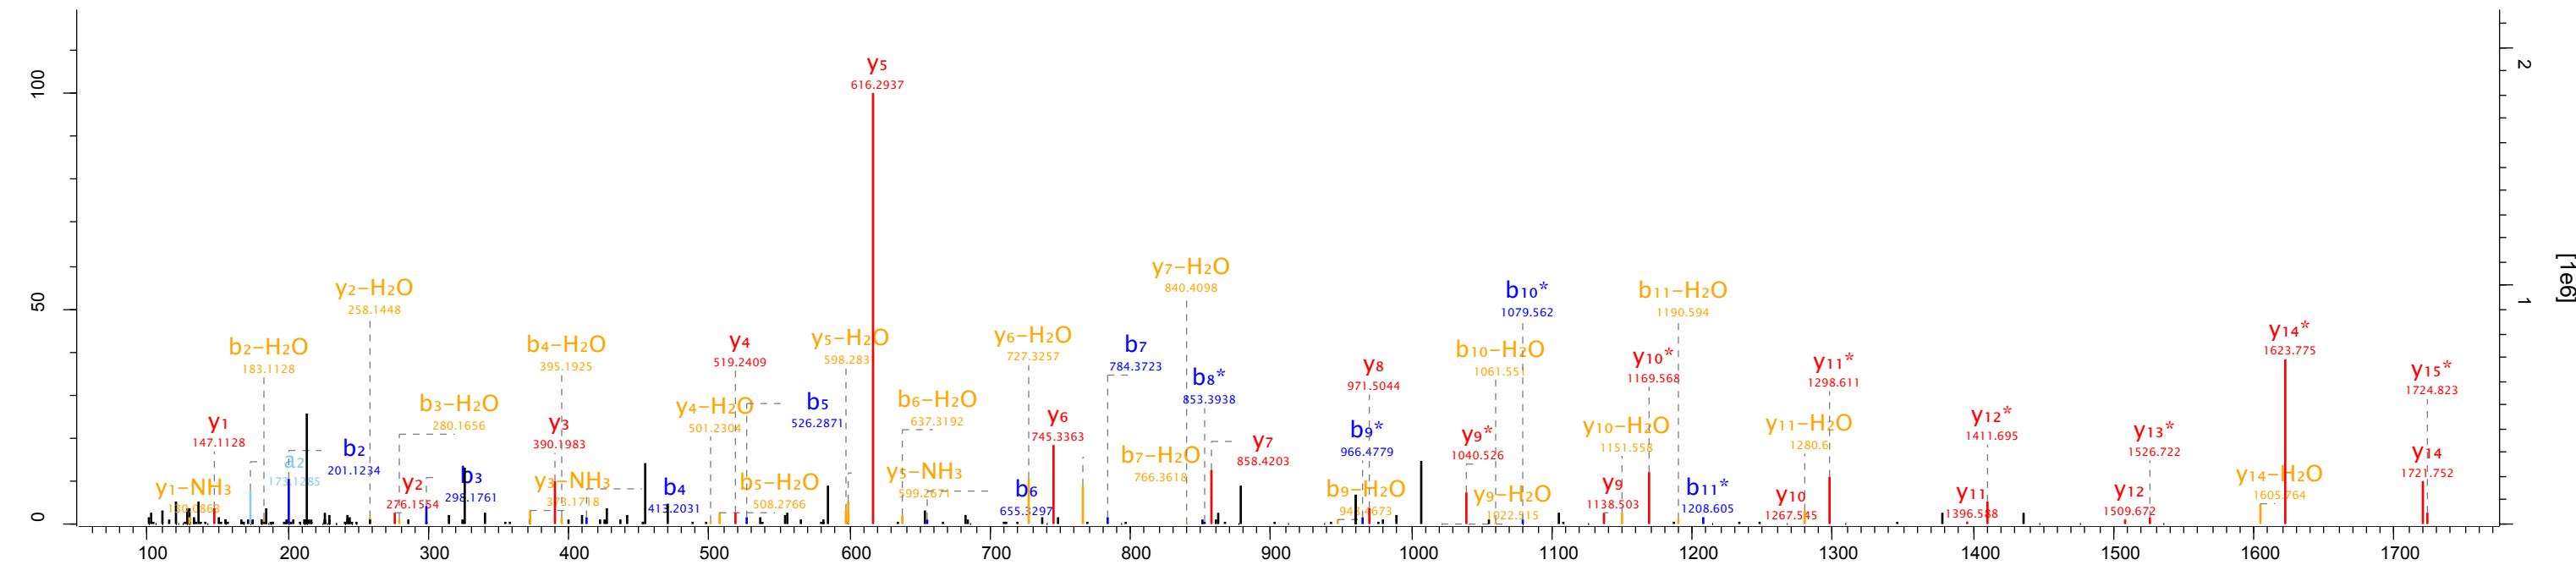

- V y15\* y14 y13\* y12 y11 y10 y9  
ph y8 y7 y6 y5 y4 y3 y2 y1 -

b2 b3 b4 b5 b6 b7 b8\* b9\* b10\* b11\*

Raw file: 20150814\_A375SR\_Phospho\_BR2\_05  
 Scan: 20836 Method: FTMS; HCD Score: 280.7 m/z: 1192.57 Gene names: EHD2

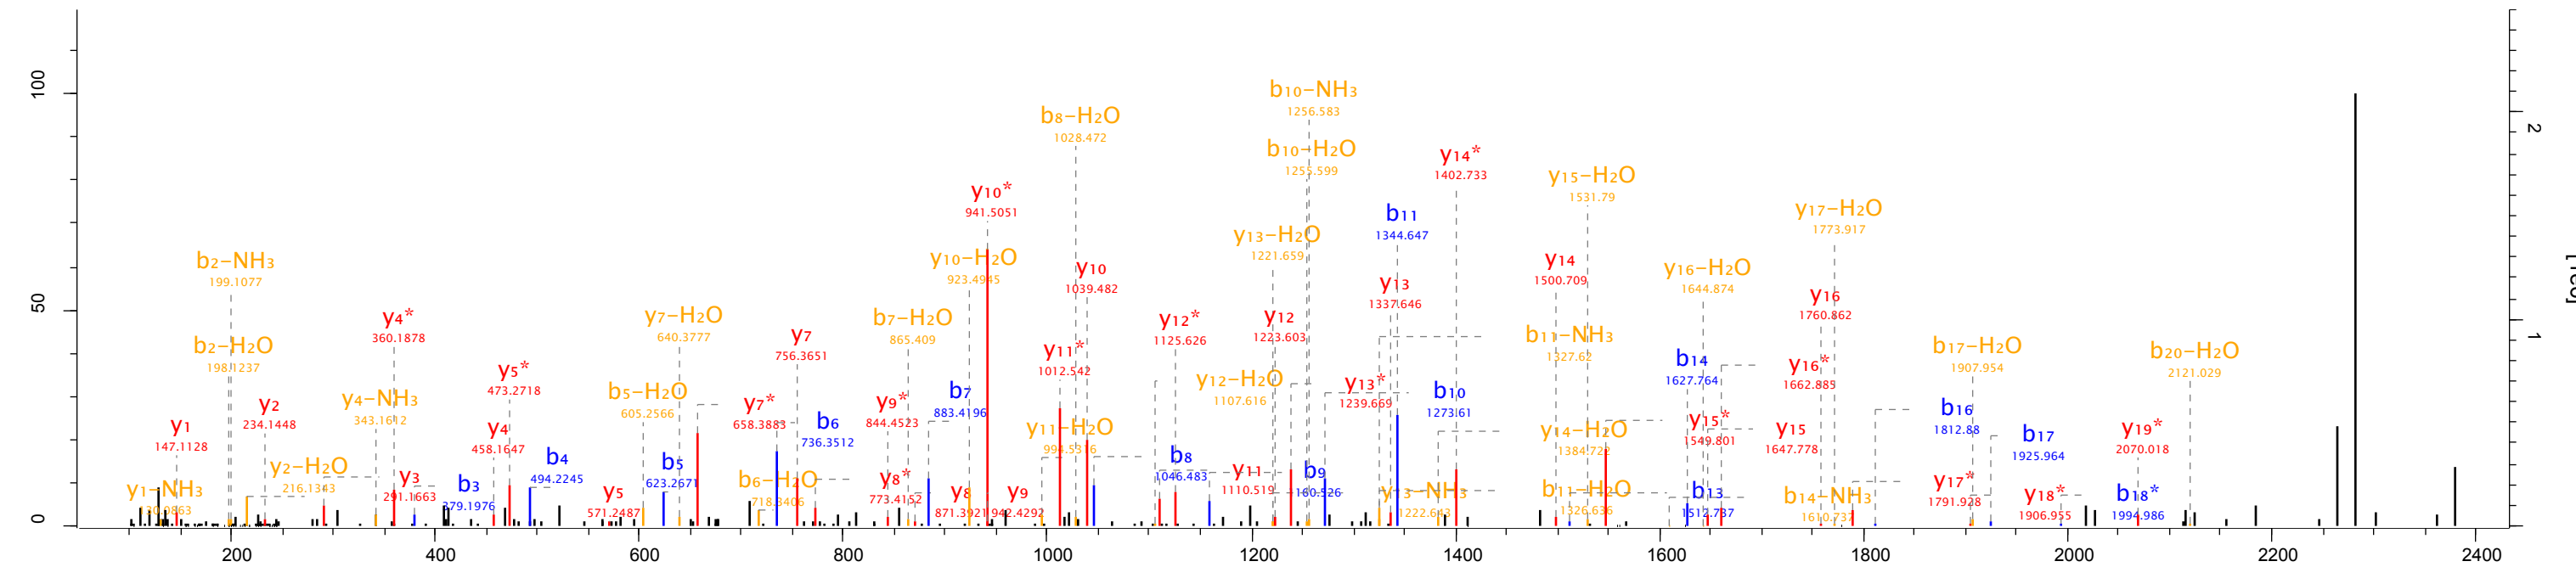

Sequence: - S K Y D E I F Y N L A P A D G K L S G S K -

Fragmentation sites (b ions): b<sub>3</sub>, b<sub>4</sub>, b<sub>5</sub>, b<sub>6</sub>, b<sub>7</sub>, b<sub>8</sub>, b<sub>9</sub>, b<sub>10</sub>, b<sub>11</sub>, b<sub>13</sub>, b<sub>14</sub>, b<sub>16</sub>, b<sub>17</sub>, b<sub>18</sub>\*

Fragmentation sites (y ions): y<sub>1</sub>, y<sub>2</sub>, y<sub>3</sub>, y<sub>4</sub>, y<sub>5</sub>, y<sub>7</sub>, y<sub>8</sub>, y<sub>9</sub>, y<sub>10</sub>, y<sub>11</sub>, y<sub>12</sub>, y<sub>13</sub>, y<sub>14</sub>, y<sub>15</sub>, y<sub>16</sub>, y<sub>17</sub>, y<sub>18</sub>, y<sub>19</sub>\*



Raw file: 20150814\_A375SR\_Phospho\_BR2\_05  
 Scan: 20996 Method: FTMS; HCD Score: 178.22 m/z: 766.89 Gene names: PSME4

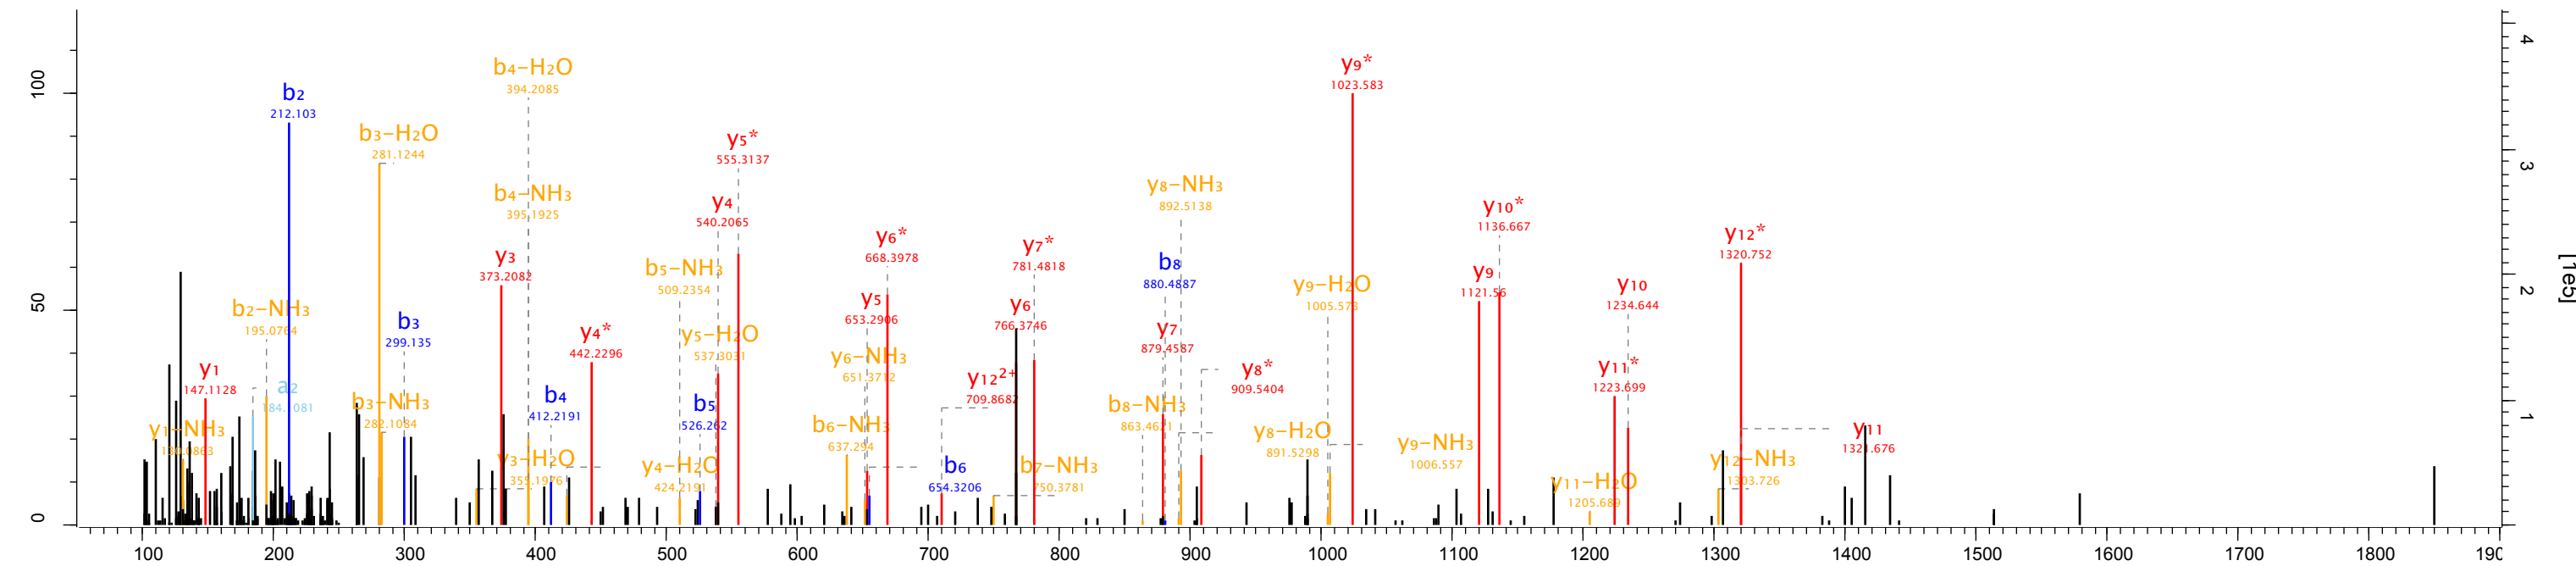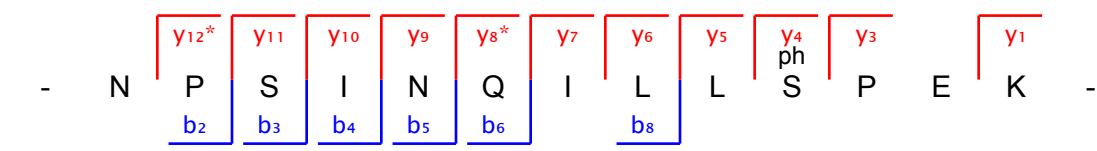

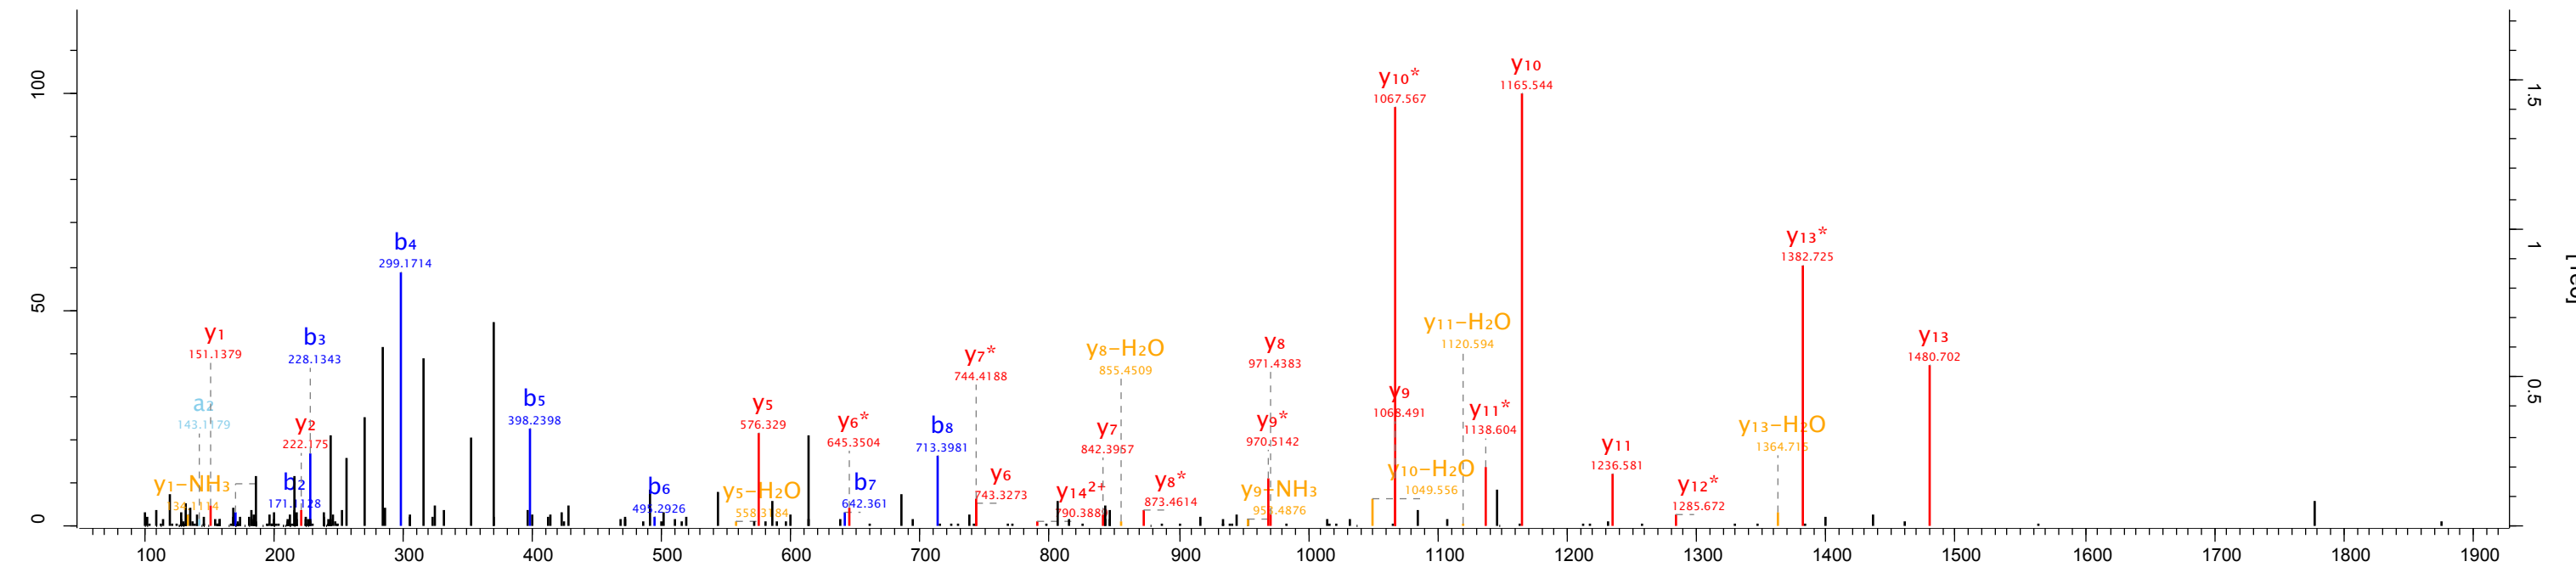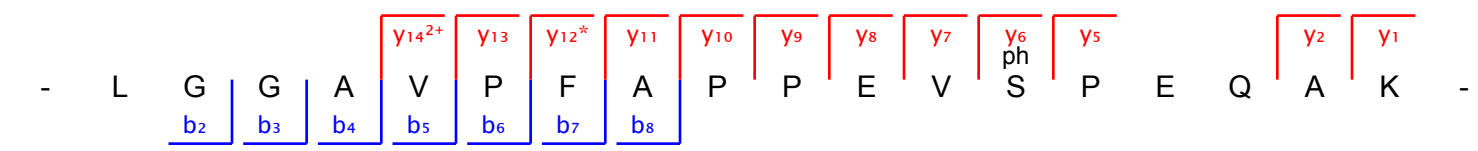

Raw file 20150814\_A375SR\_Phospho\_BR2\_05 Scan 21196 Method FTMS; HCD Score 122.29 m/z 836.86 Gene names RBMS2

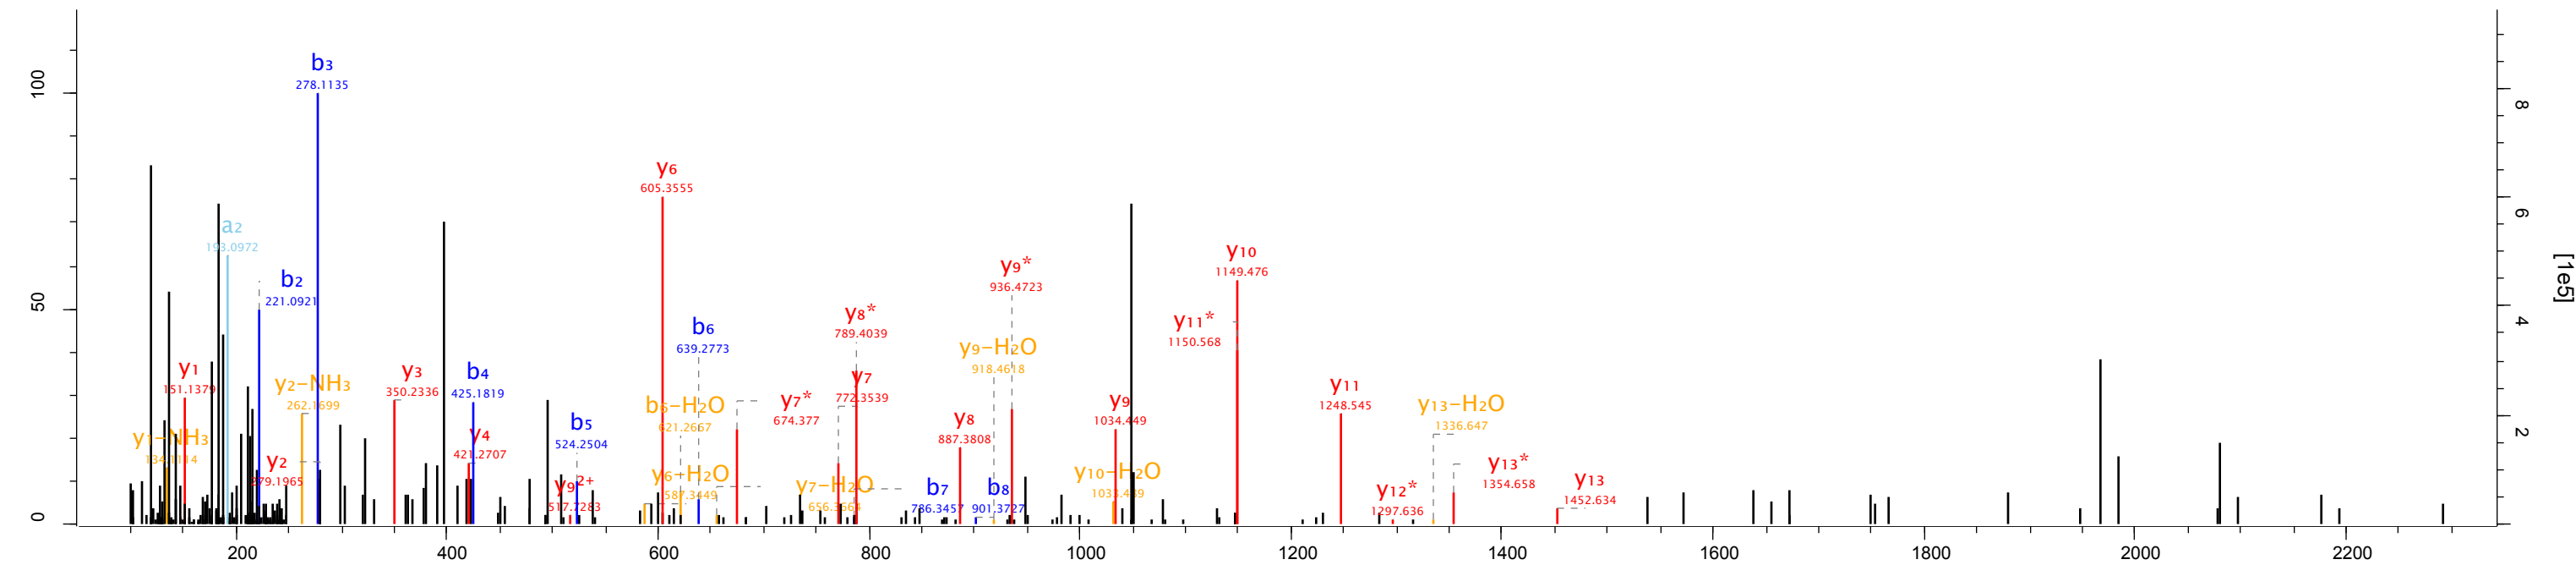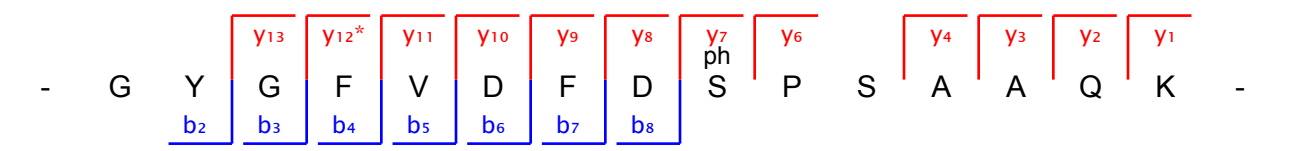

Raw file: 20150814\_A375SR\_Phospho\_BR2\_05  
 Scan: 21356 Method: FTMS; HCD Score: 153.82 m/z: 1152.01 Gene names: PTPN1

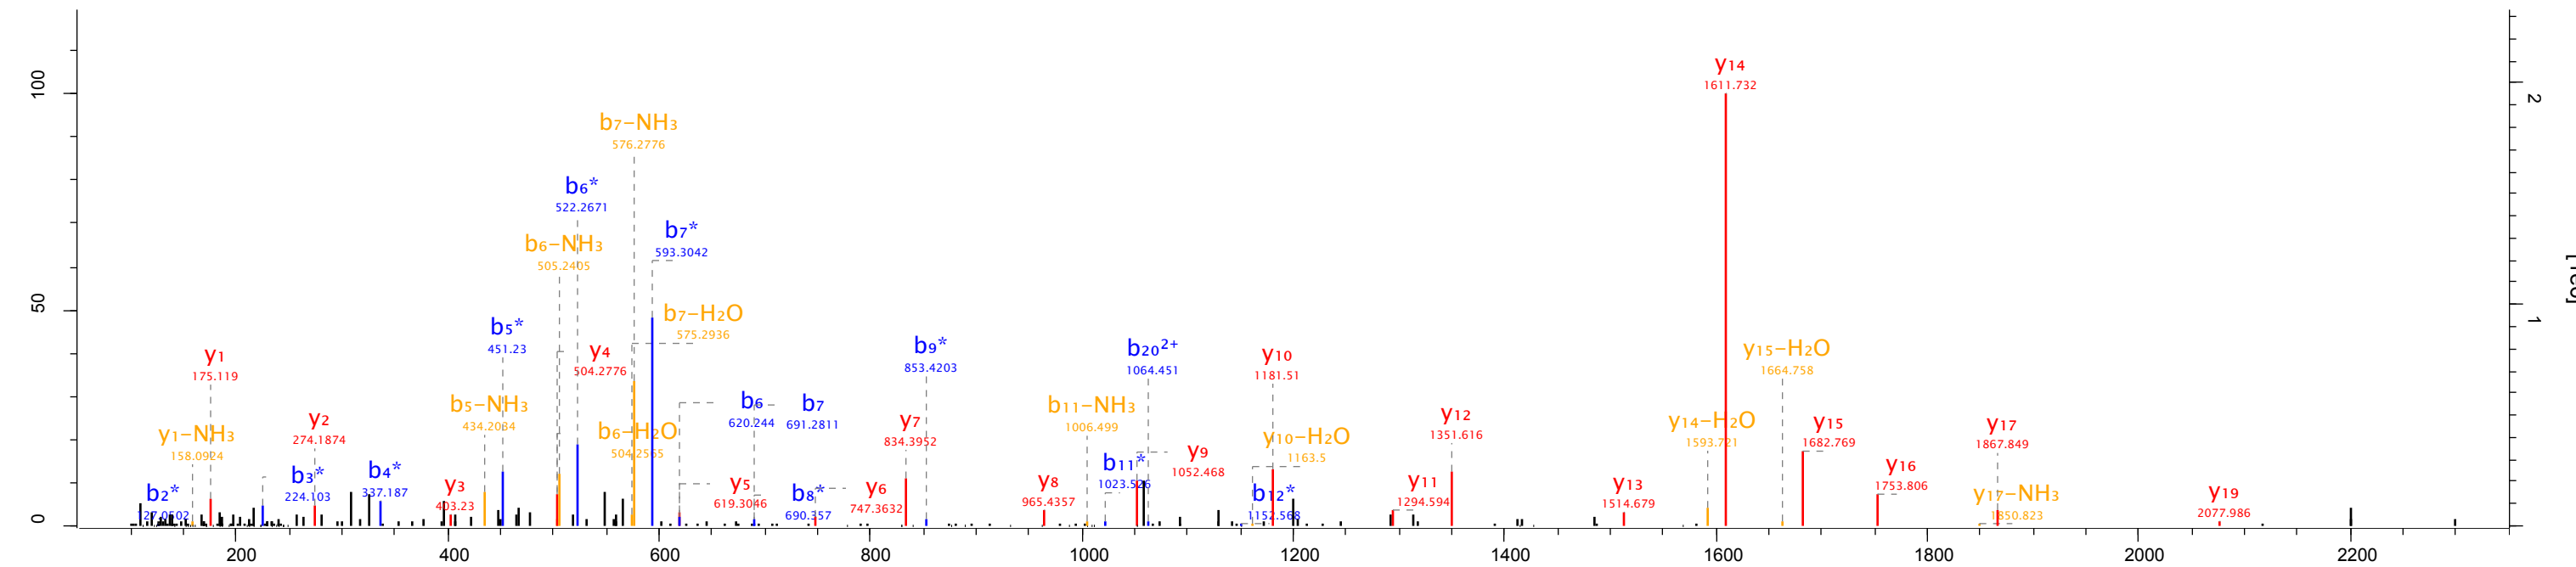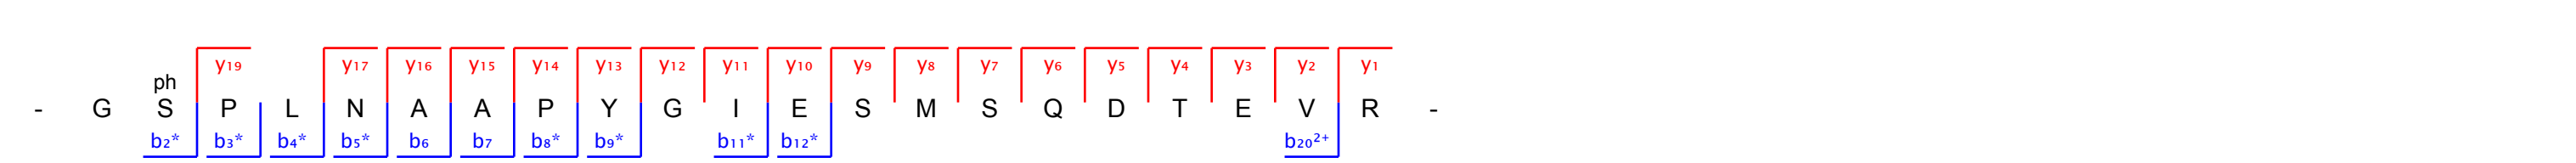

Raw file Scan Method Score m/z Gene names  
 20150814\_A375SR\_Phospho\_BR2\_05 21406 FTMS; HCD 161.68 825.37 VIM

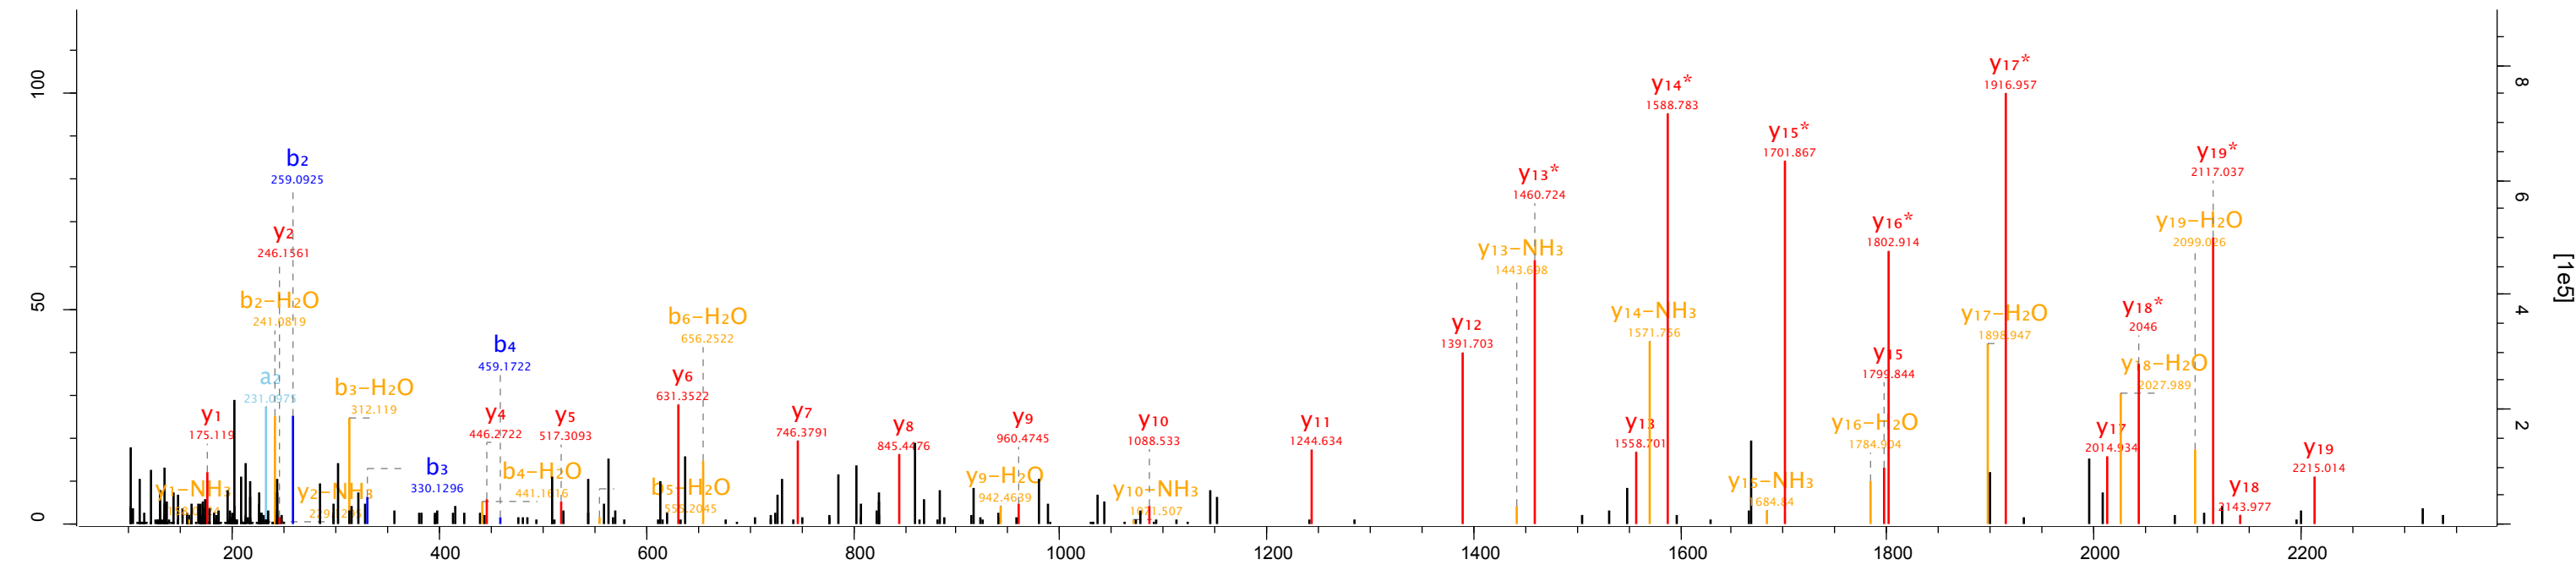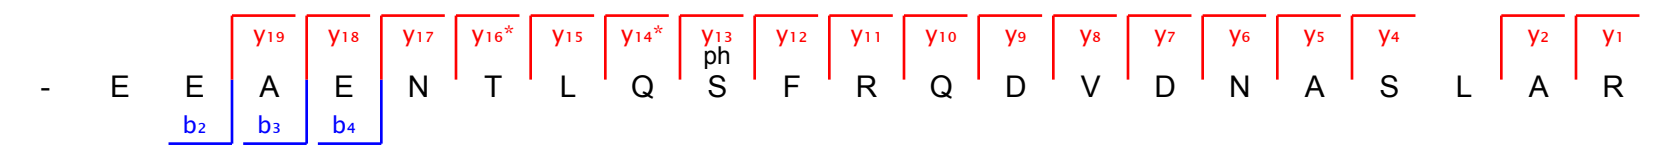

Raw file Scan Method Score m/z Gene names  
 20150814\_A375SR\_Phospho\_BR2\_05 21576 FTMS; HCD 135.69 827.93 RBBP6

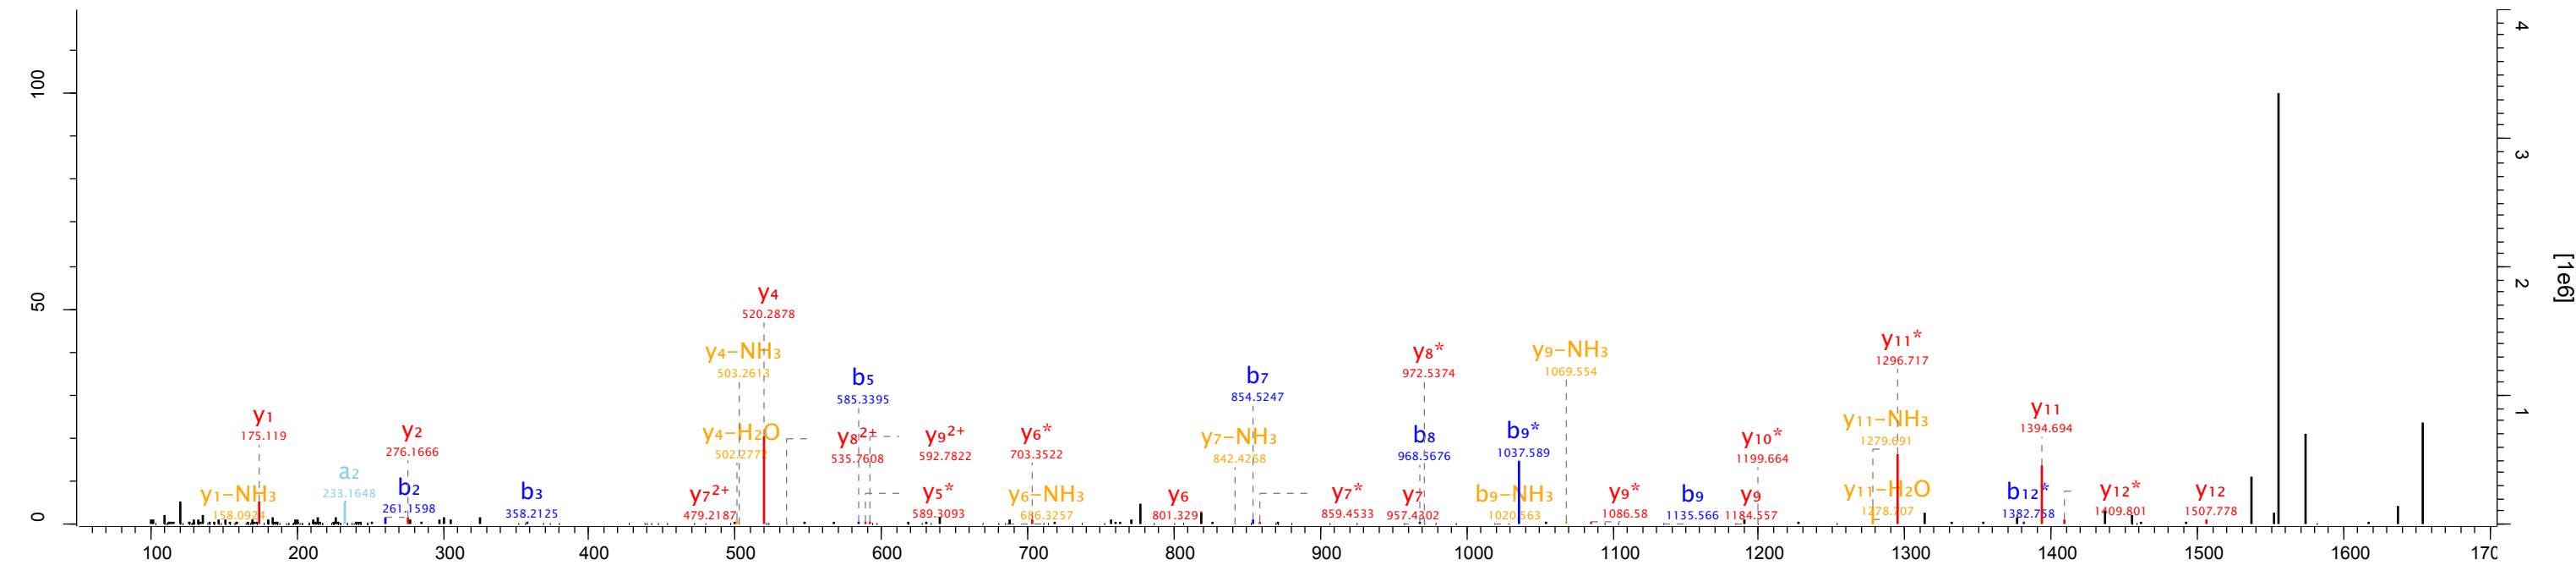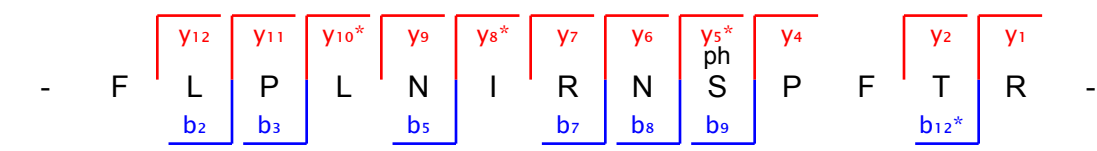

Raw file: 20150814\_A375SR\_Phospho\_BR2\_05  
 Scan: 21756 Method: FTMS; HCD Score: 276.73 m/z: 953.01 Gene names: GAB2

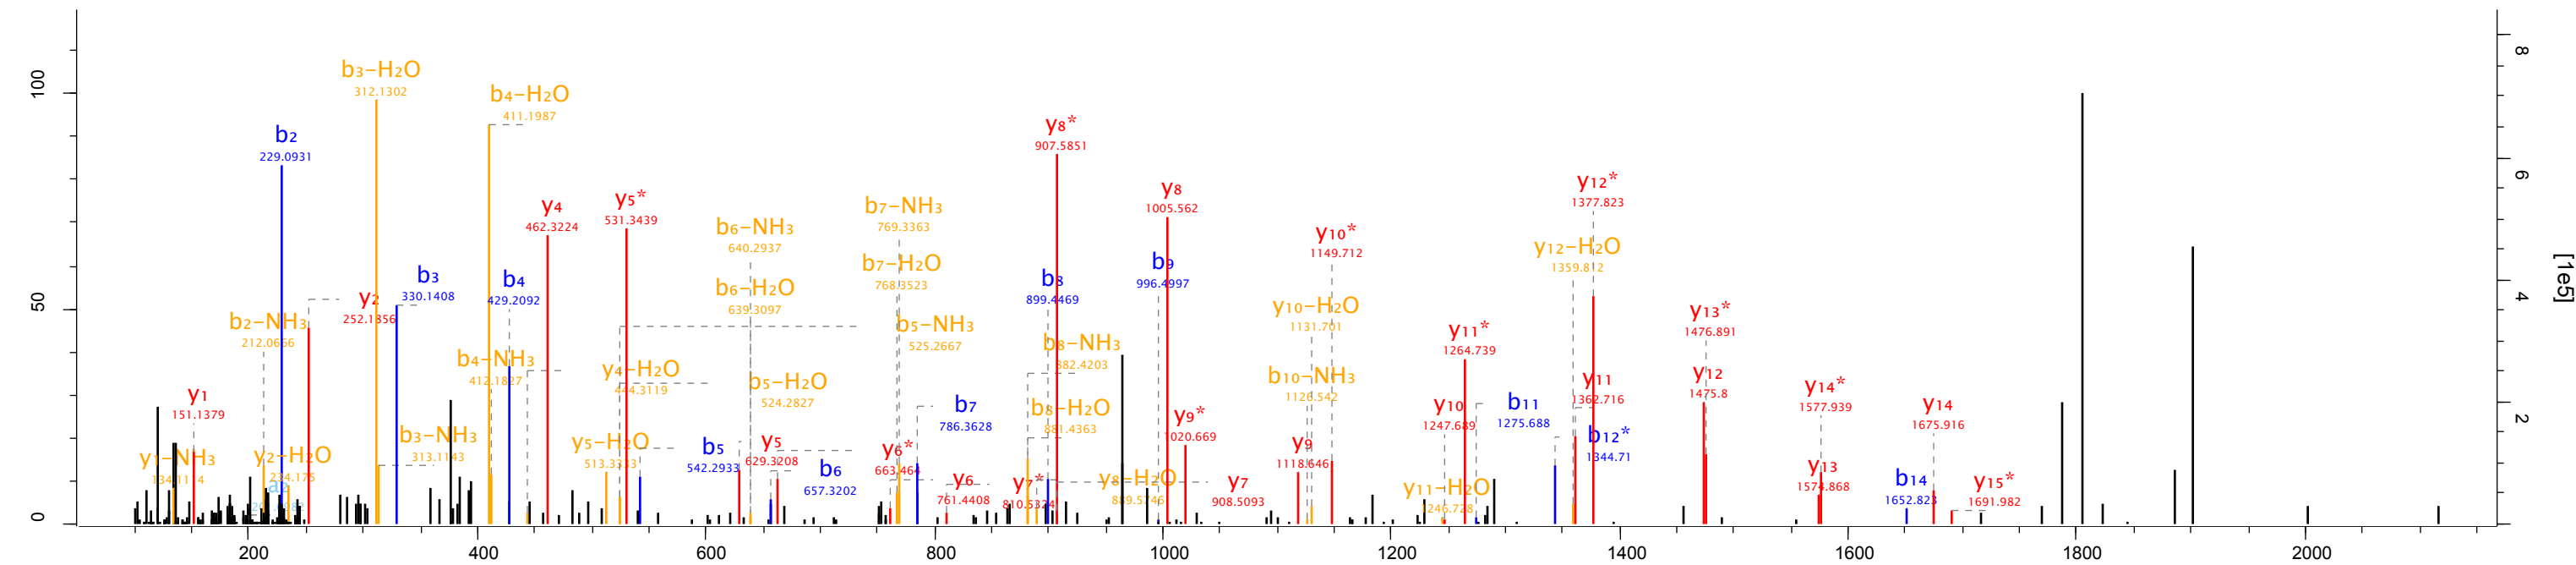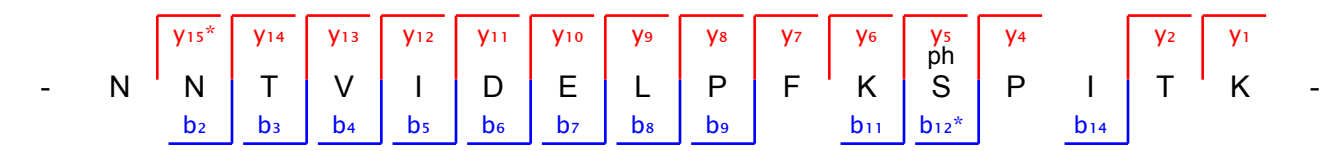

Raw file 20150814\_A375SR\_Phospho\_BR2\_05 Scan 21786 Method FTMS; HCD Score 114.76 m/z 700.65 Gene names LRCH3

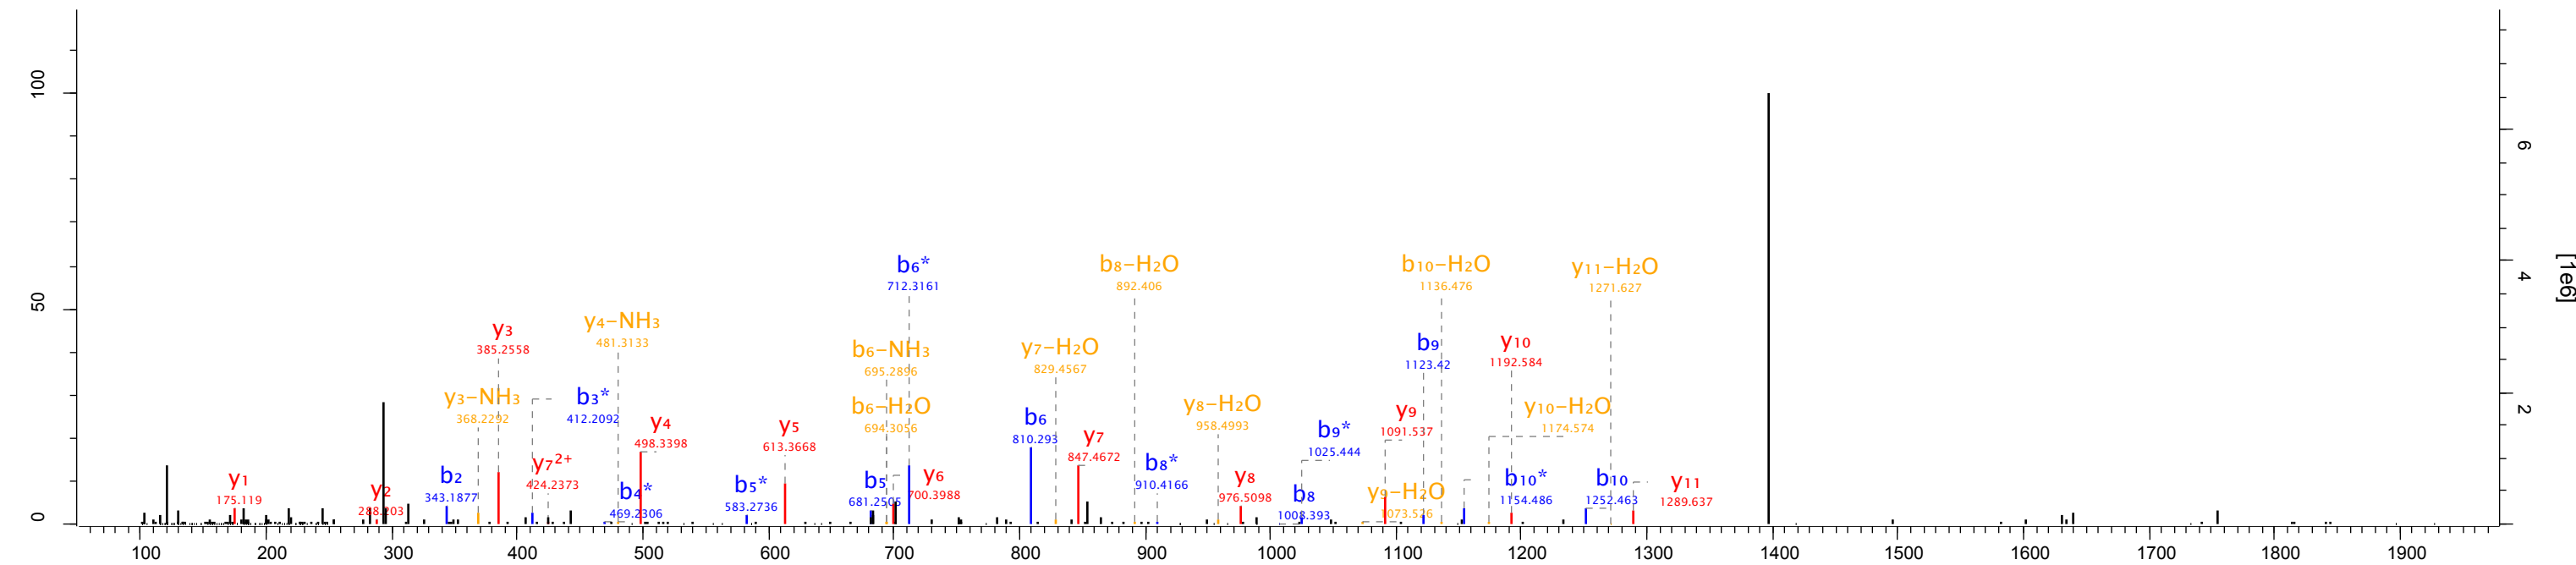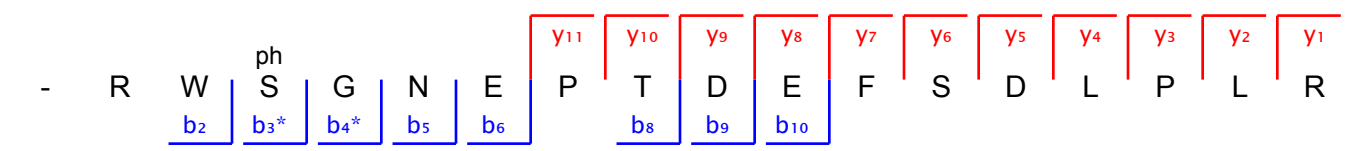



Raw file: 20150814\_A375SR\_Phospho\_BR2\_05  
 Scan: 2186 Method: FTMS; HCD Score: 68.36 m/z: 538.28 Gene names: TANC1

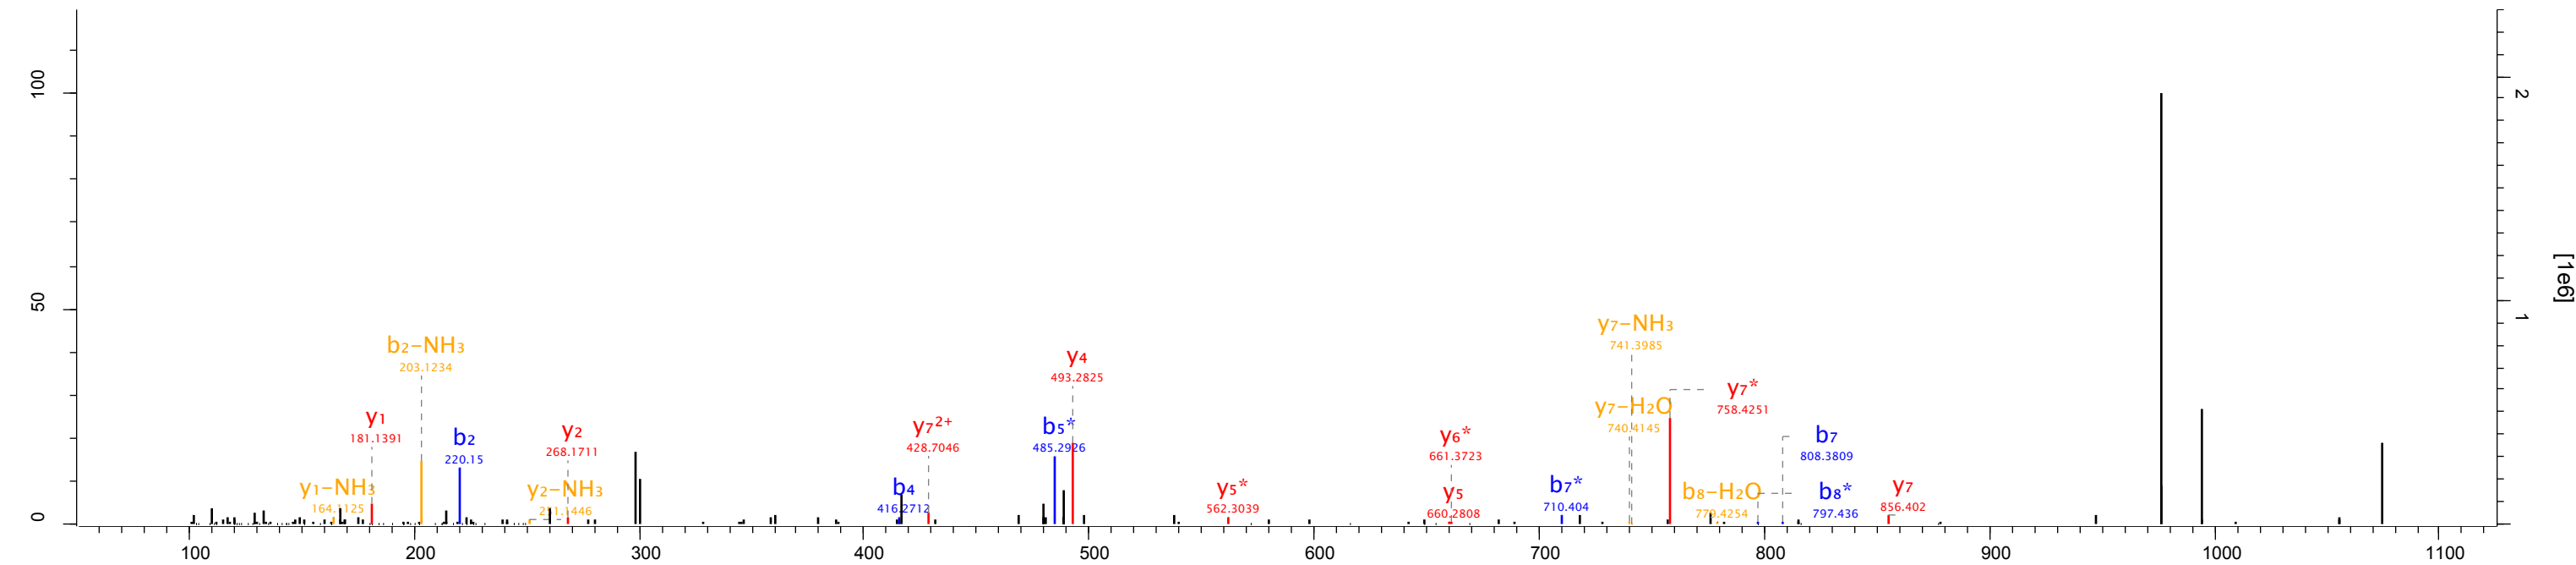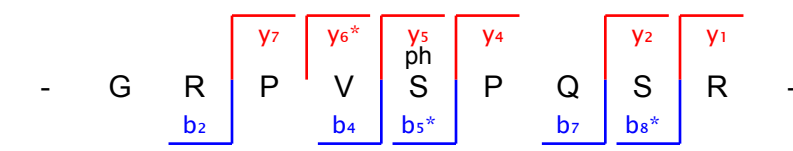

Raw file Scan Method Score m/z Gene names  
 20150814\_A375SR\_Phospho\_BR2\_05 21886 FTMS; HCD 98.51 833.41 DNMBP

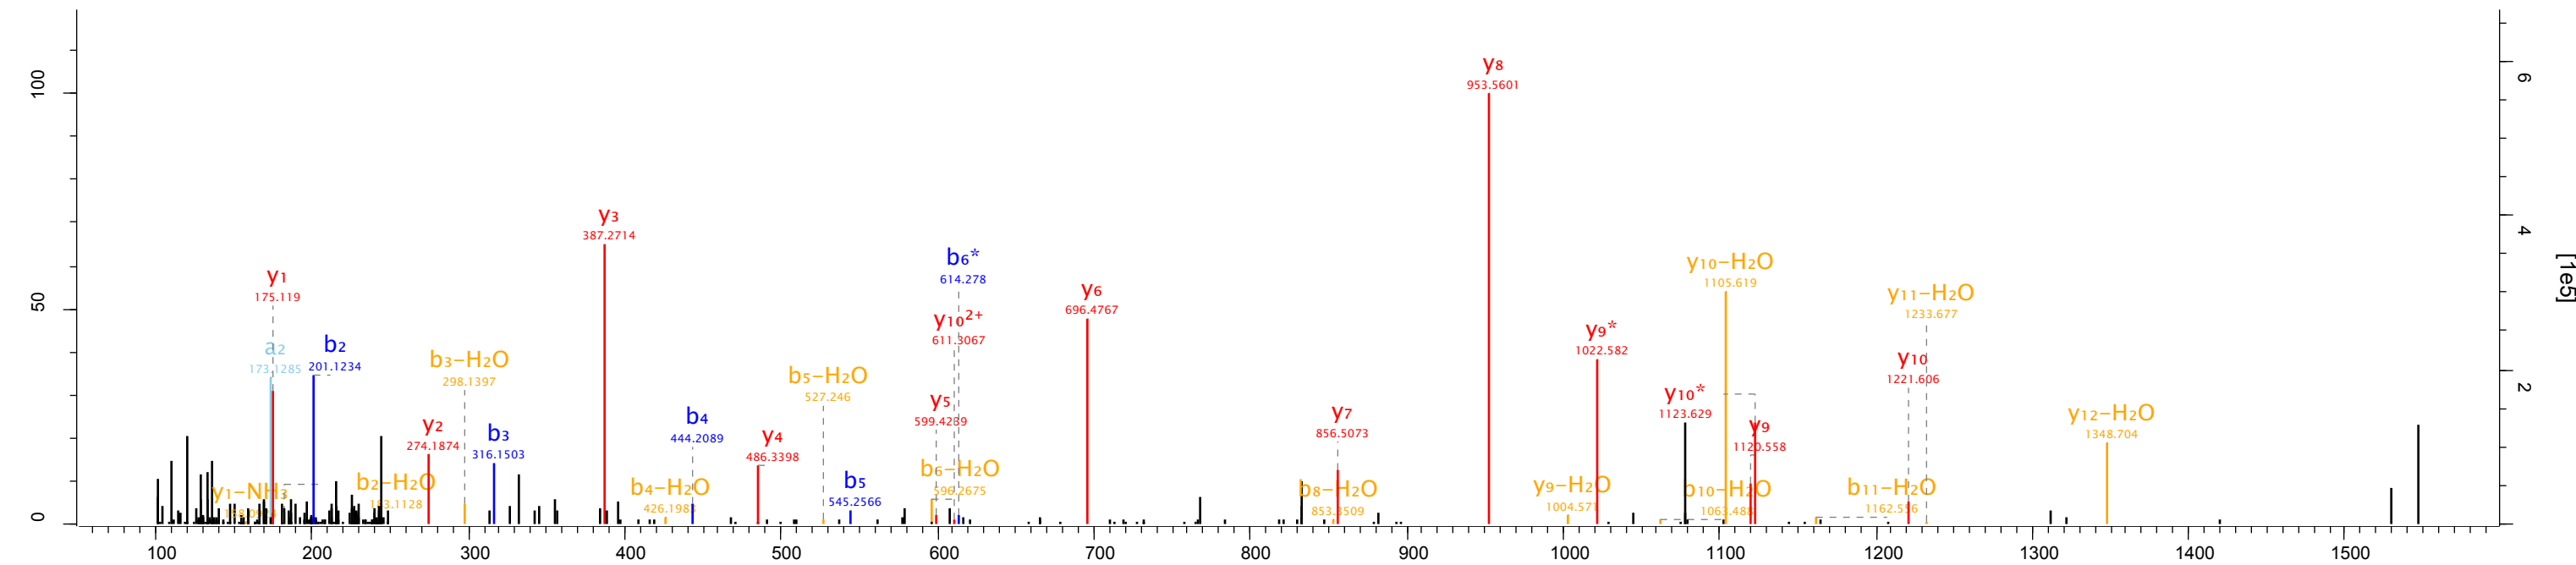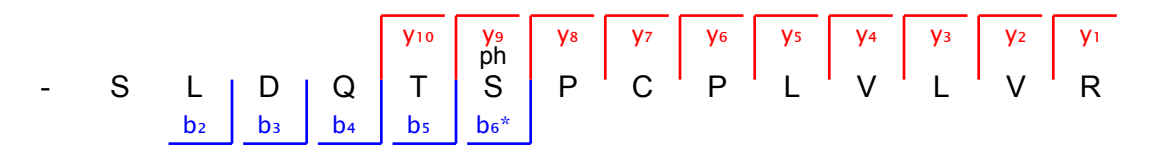

Raw file 20150814\_A375SR\_Phospho\_BR2\_05 Scan 22026 Method FTMS; HCD Score 275.69 m/z 785.37 Gene names AHNAK

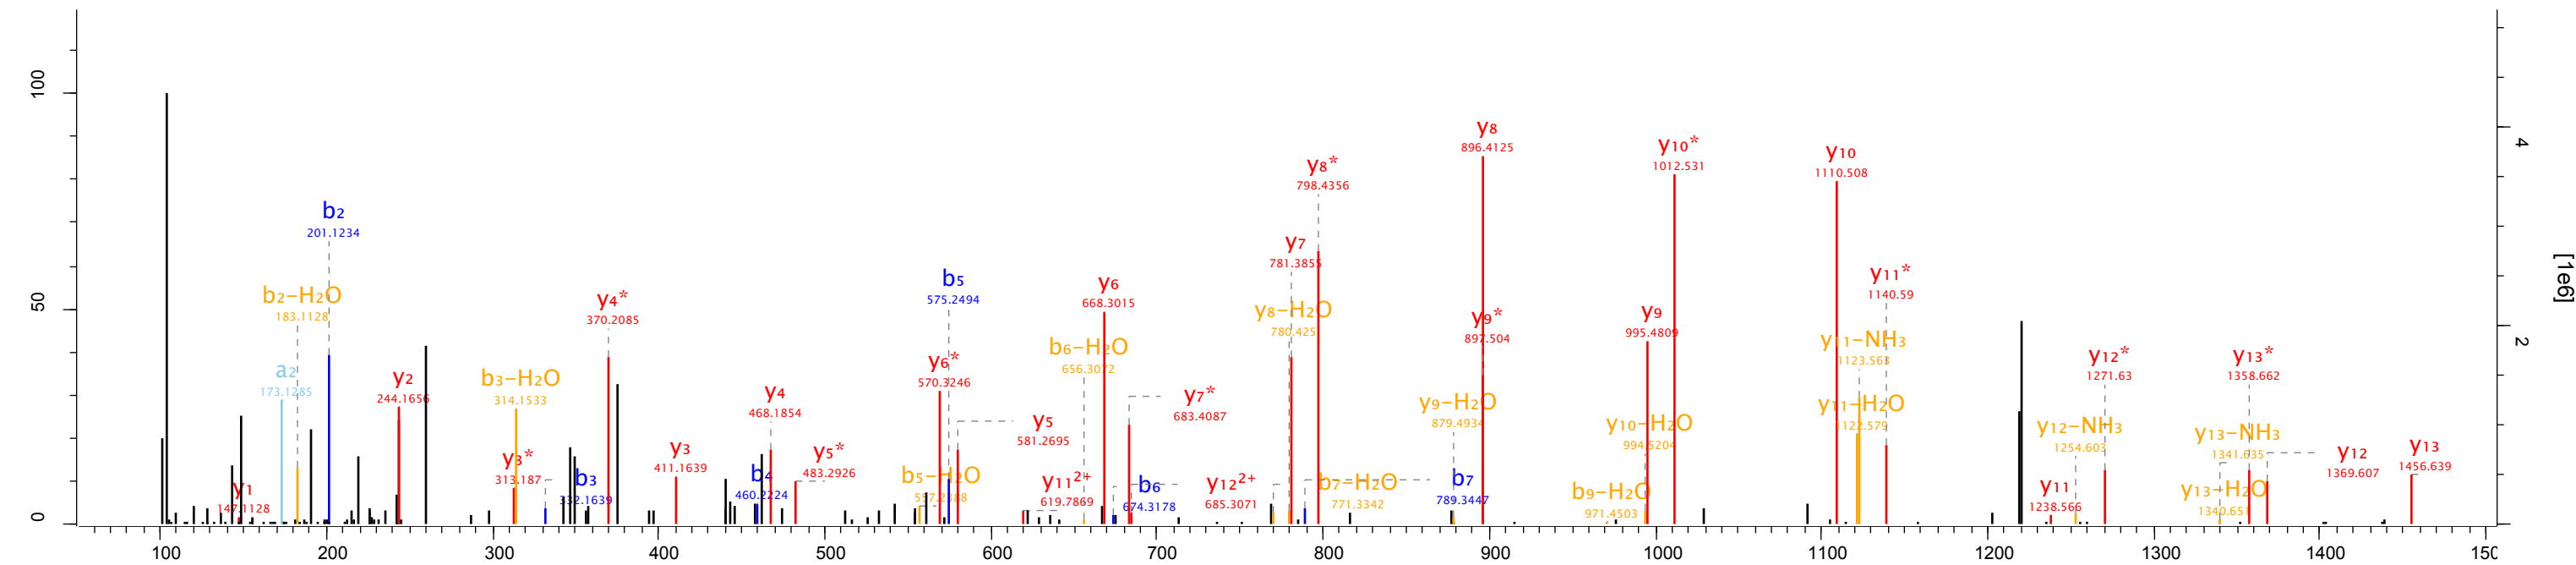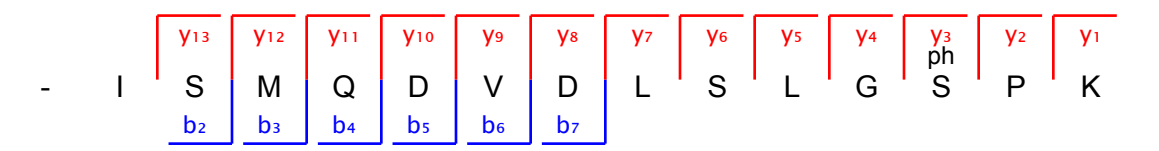

Raw file 20150814\_A375SR\_Phospho\_BR2\_05 Scan 22036 Method FTMS; HCD Score 98.68 m/z 643.84 Gene names LSR

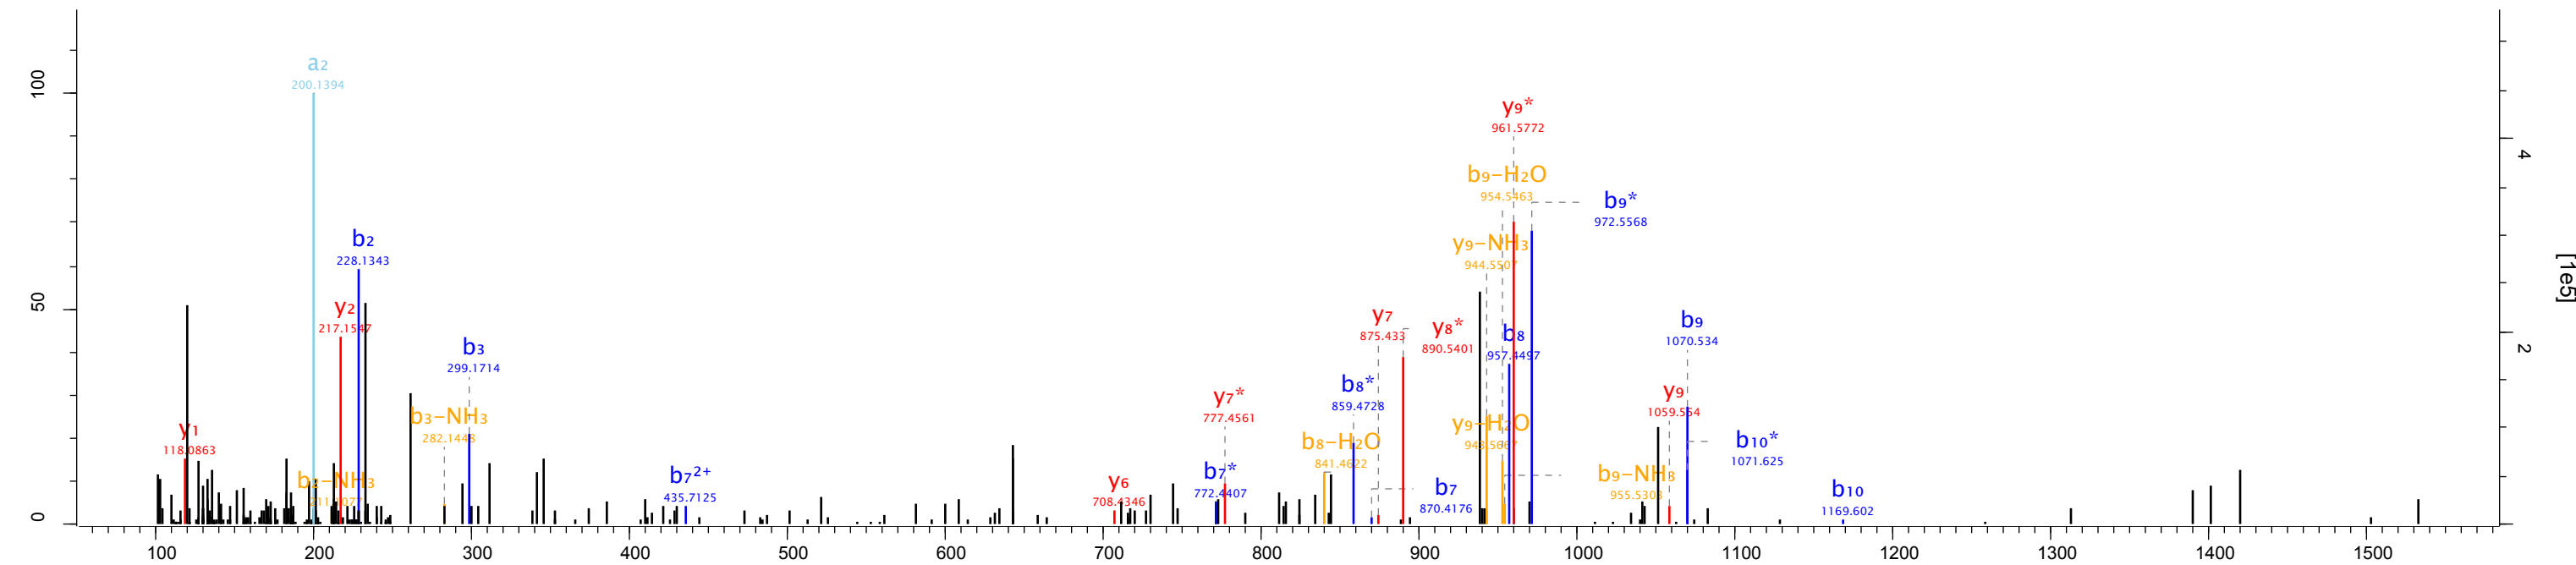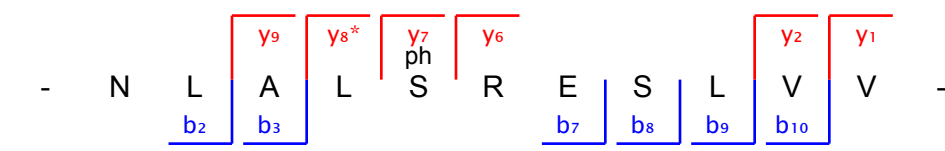

Raw file 20150814\_A375SR\_Phospho\_BR2\_05 Scan 22146 Method FTMS; HCD Score 82.67 m/z 730.37 Gene names ENTHD2

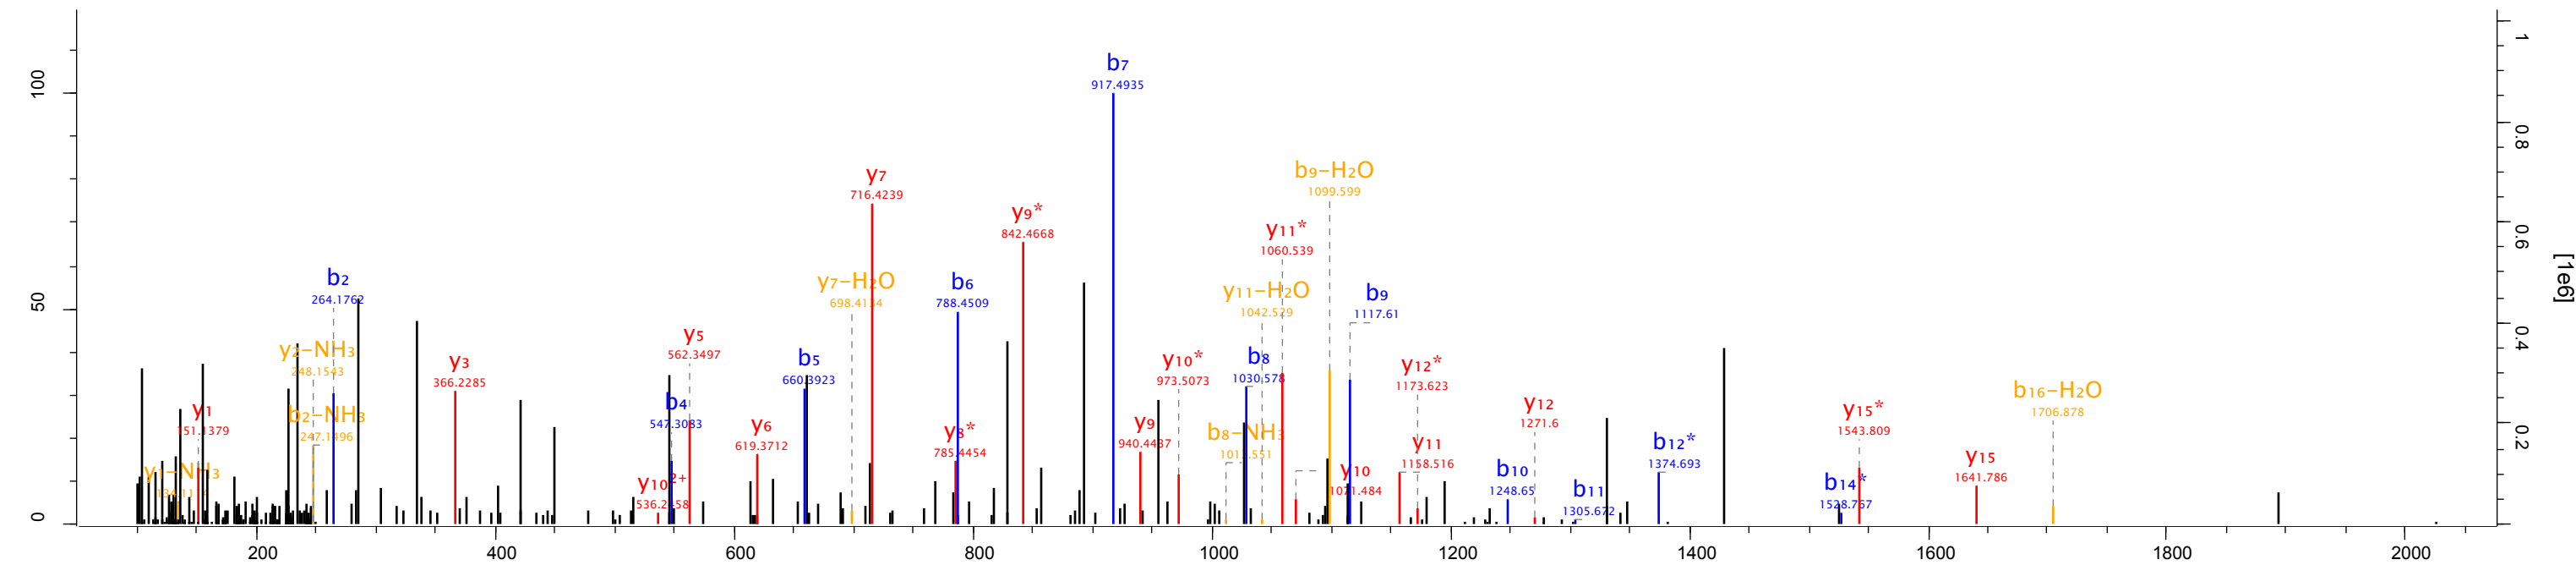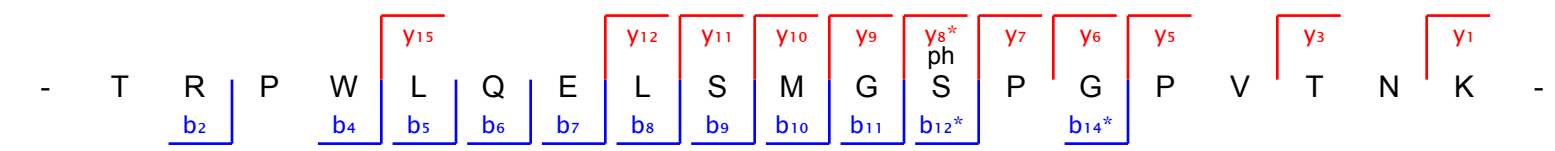

Raw file 20150814\_A375SR\_Phospho\_BR2\_05 Scan 22396 Method FTMS; HCD Score 95.2 m/z 711.31 Gene names MAP4K4

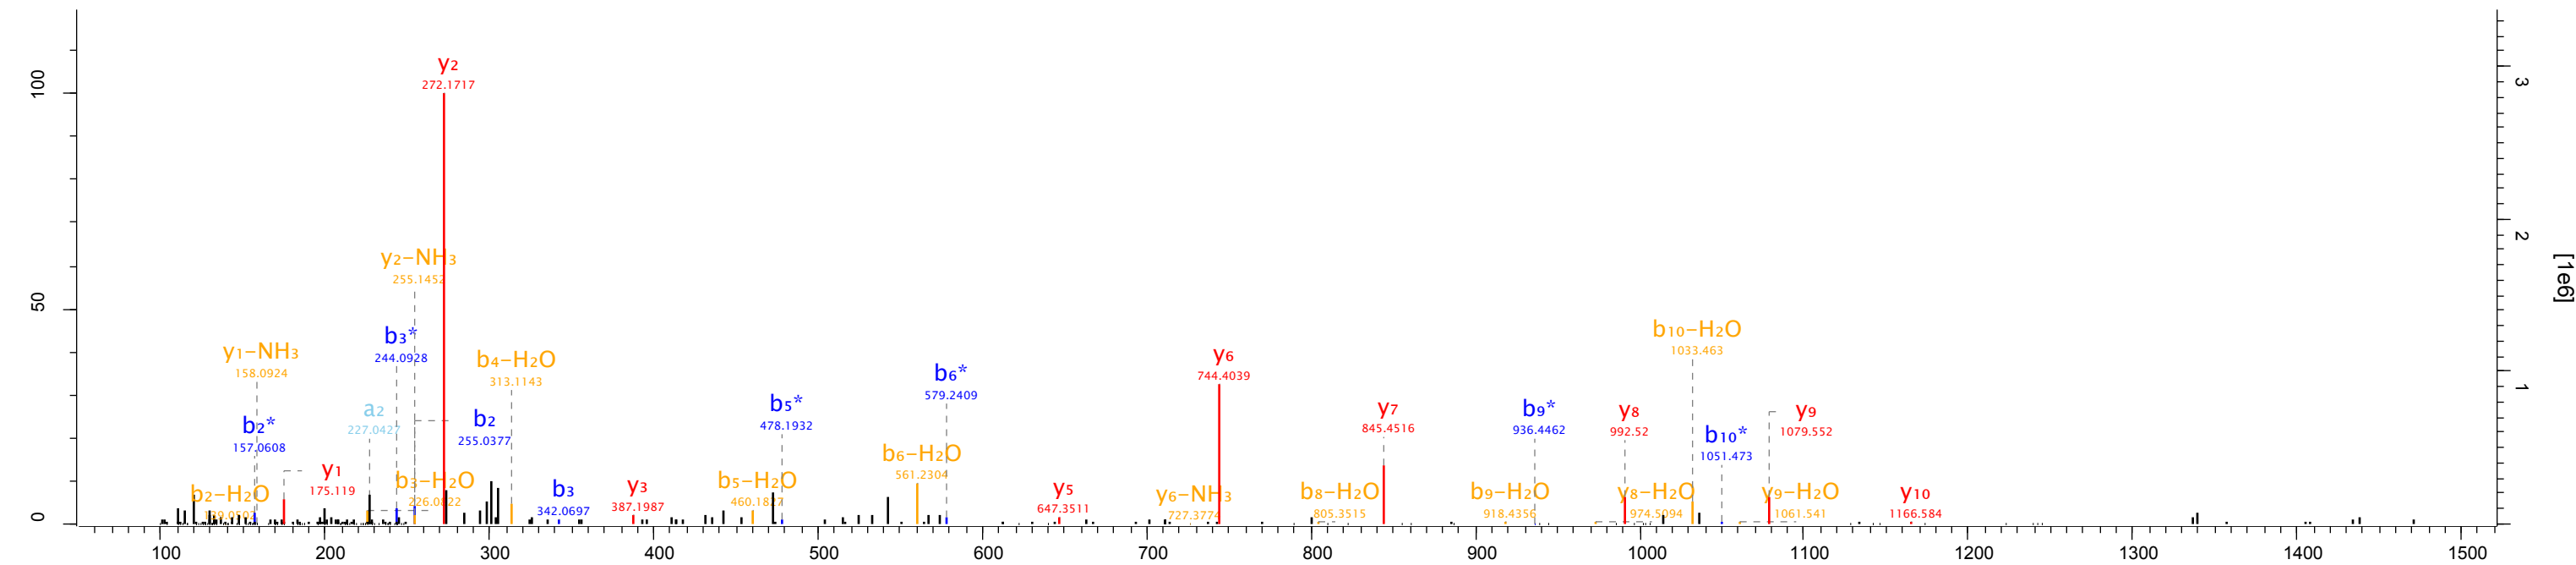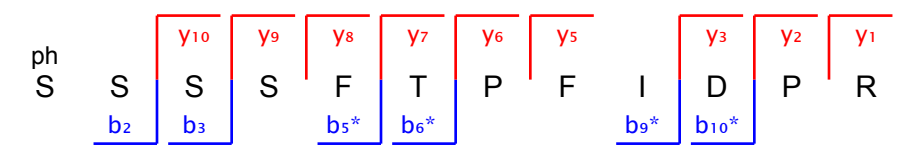

Raw file: 20150814\_A375SR\_Phospho\_BR2\_05  
 Scan: 22416 Method: FTMS; HCD Score: 107.34 m/z: 998.79 Gene names: RIOK2

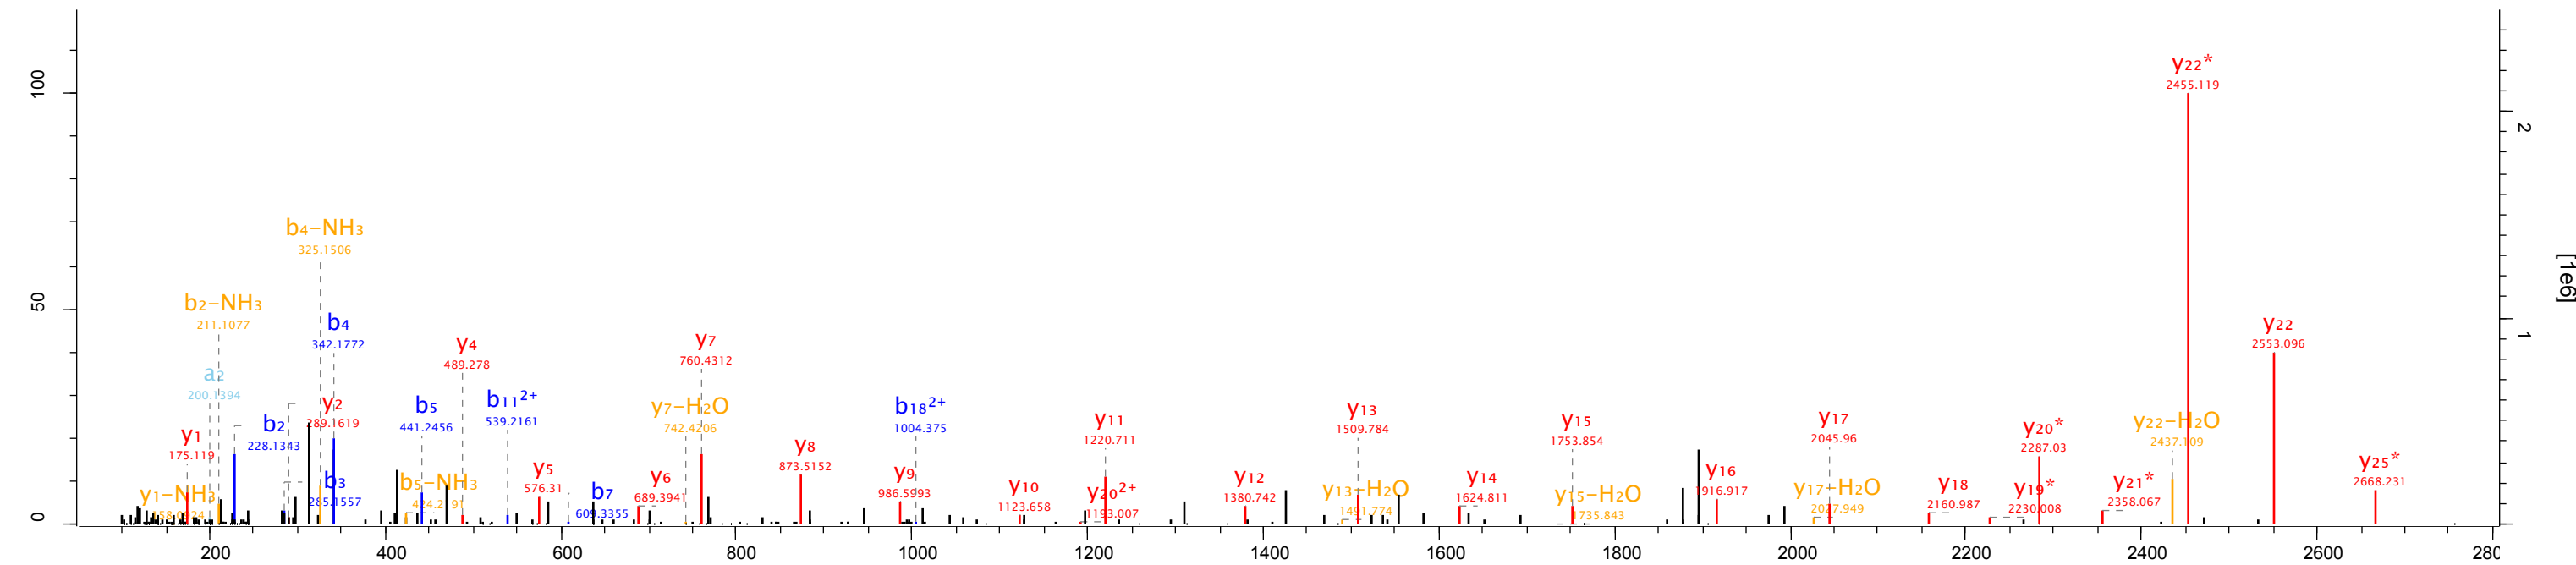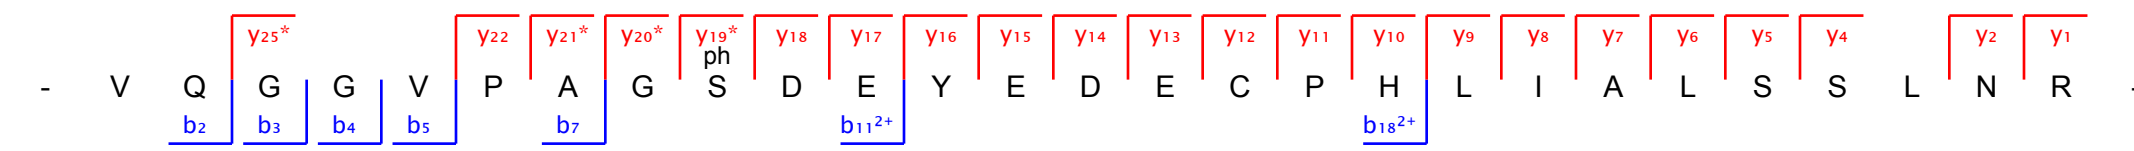

Raw file 20150814\_A375SR\_Phospho\_BR2\_05 Scan 22526 Method FTMS; HCD Score 140.96 m/z 990.45 Gene names SHC1

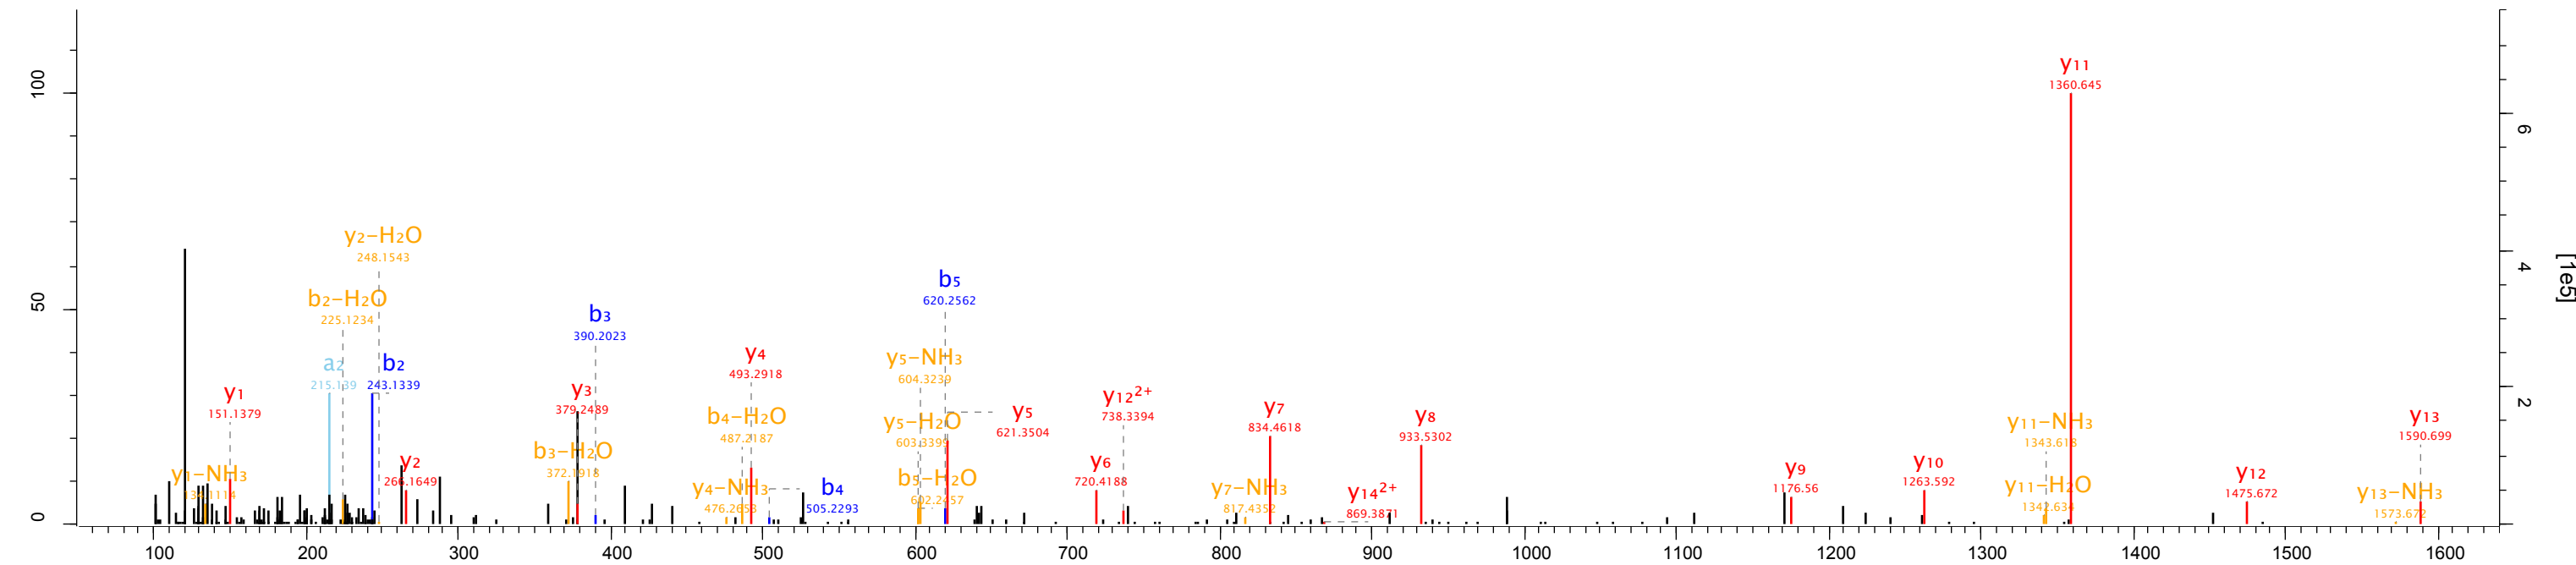

- E L F D D P S Y V N V Q N L D K -

Fragmentation sites are indicated by boxes below the sequence:

- Red boxes: y14<sup>2+</sup> (L), y13 (F), y12 (D), y11 (D), y10 (P), y9<sup>ph</sup> (Y), y8 (V), y7 (N), y6 (V), y5 (Q), y4 (N), y3 (L), y2 (D), y1 (K)
- Blue boxes: b2 (L), b3 (F), b4 (D), b5 (D)



Raw file  
20150814\_A375SR\_Phospho\_BR2\_05

Scan 22816 Method FTMS; HCD Score 267.41 m/z 979.92 Gene names HNRNPU

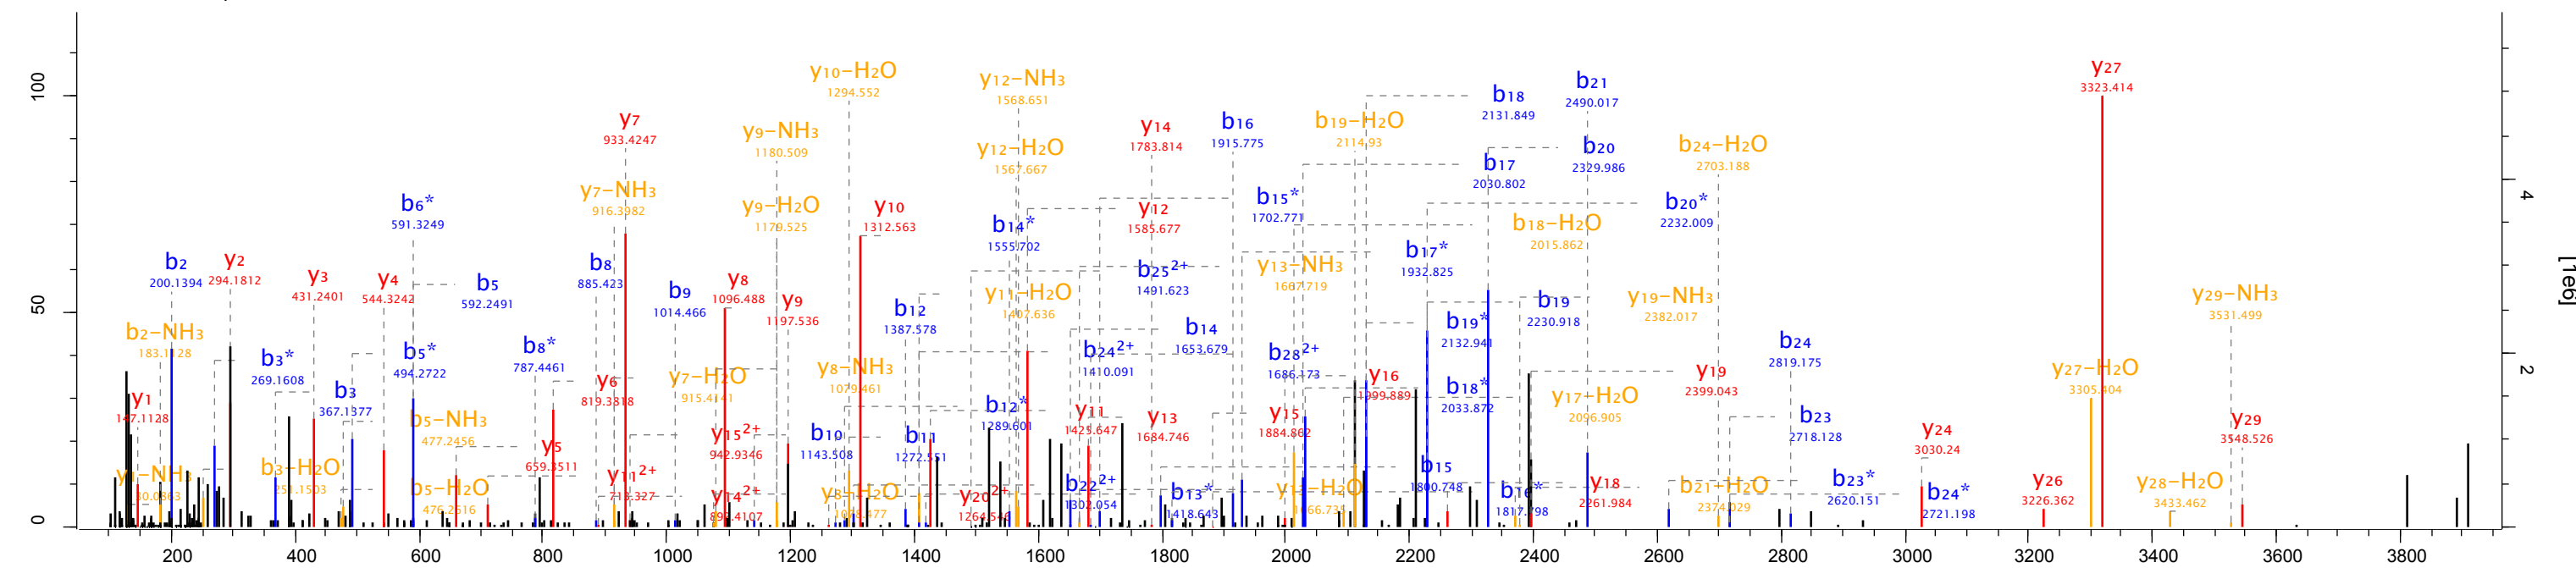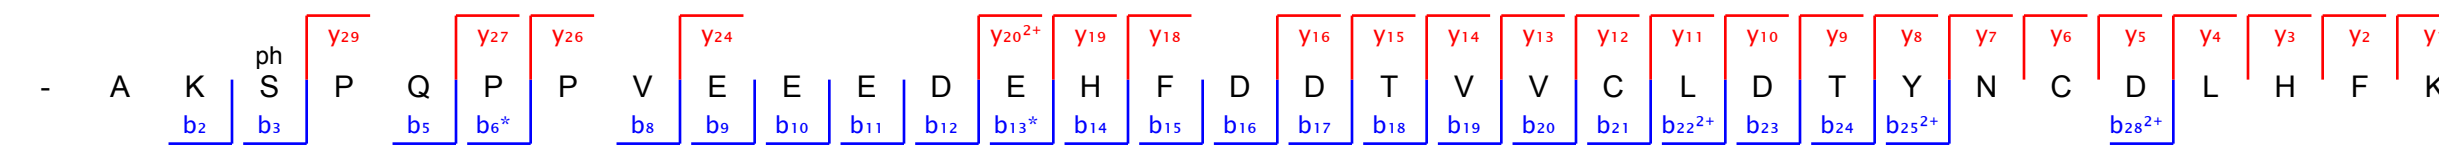

Raw file: 20150814\_A375SR\_Phospho\_BR2\_05  
 Scan: 23206 Method: FTMS; HCD Score: 87.21 m/z: 1012.92 Gene names: MGA

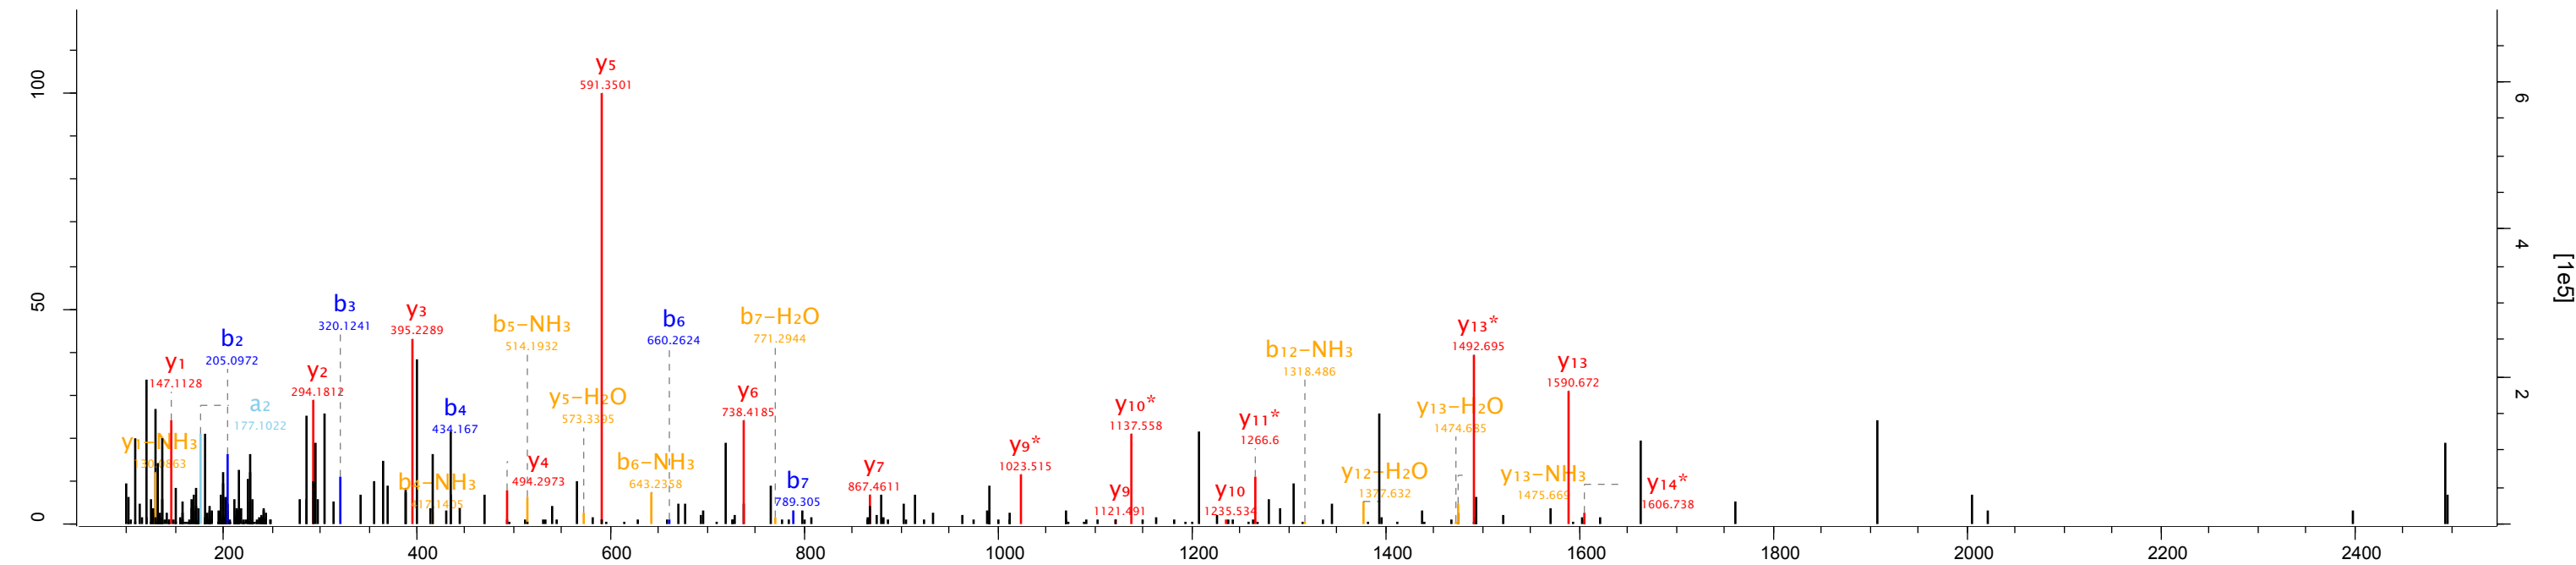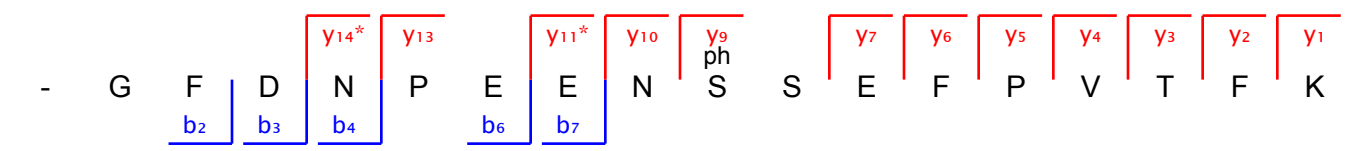

Raw file 20150814\_A375SR\_Phospho\_BR2\_05 Scan 23246 Method FTMS; HCD Score 200.85 m/z 959.4 Gene names TOP2B

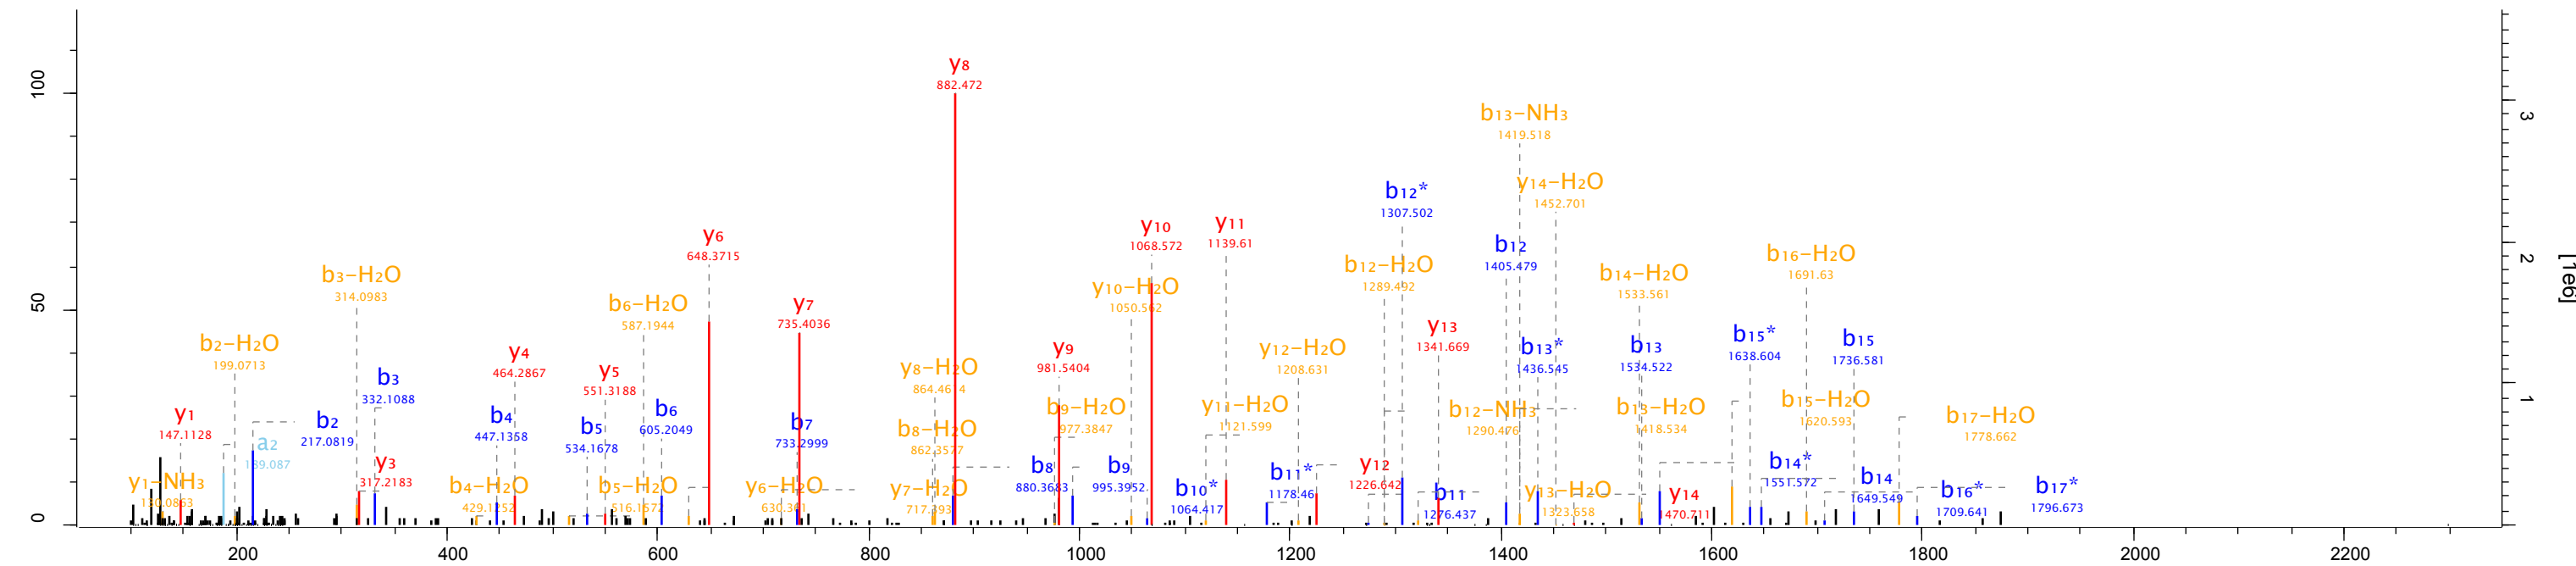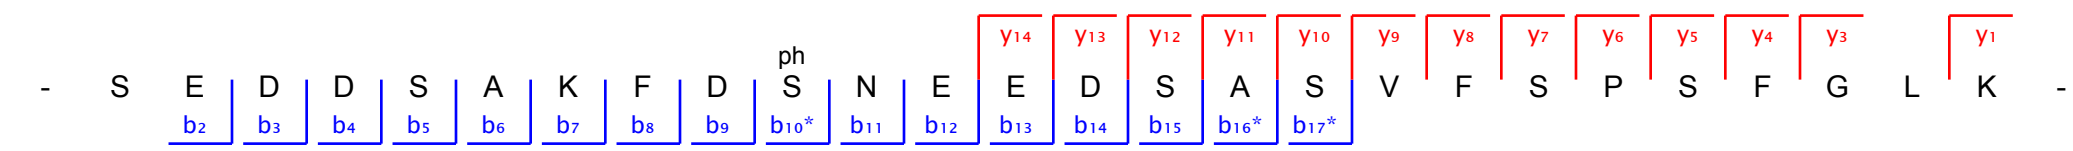

Raw file: 20150814\_A375SR\_Phospho\_BR2\_05  
 Scan: 23446 Method: FTMS; HCD Score: 118.16 m/z: 667.83 Gene names: R3HCC1

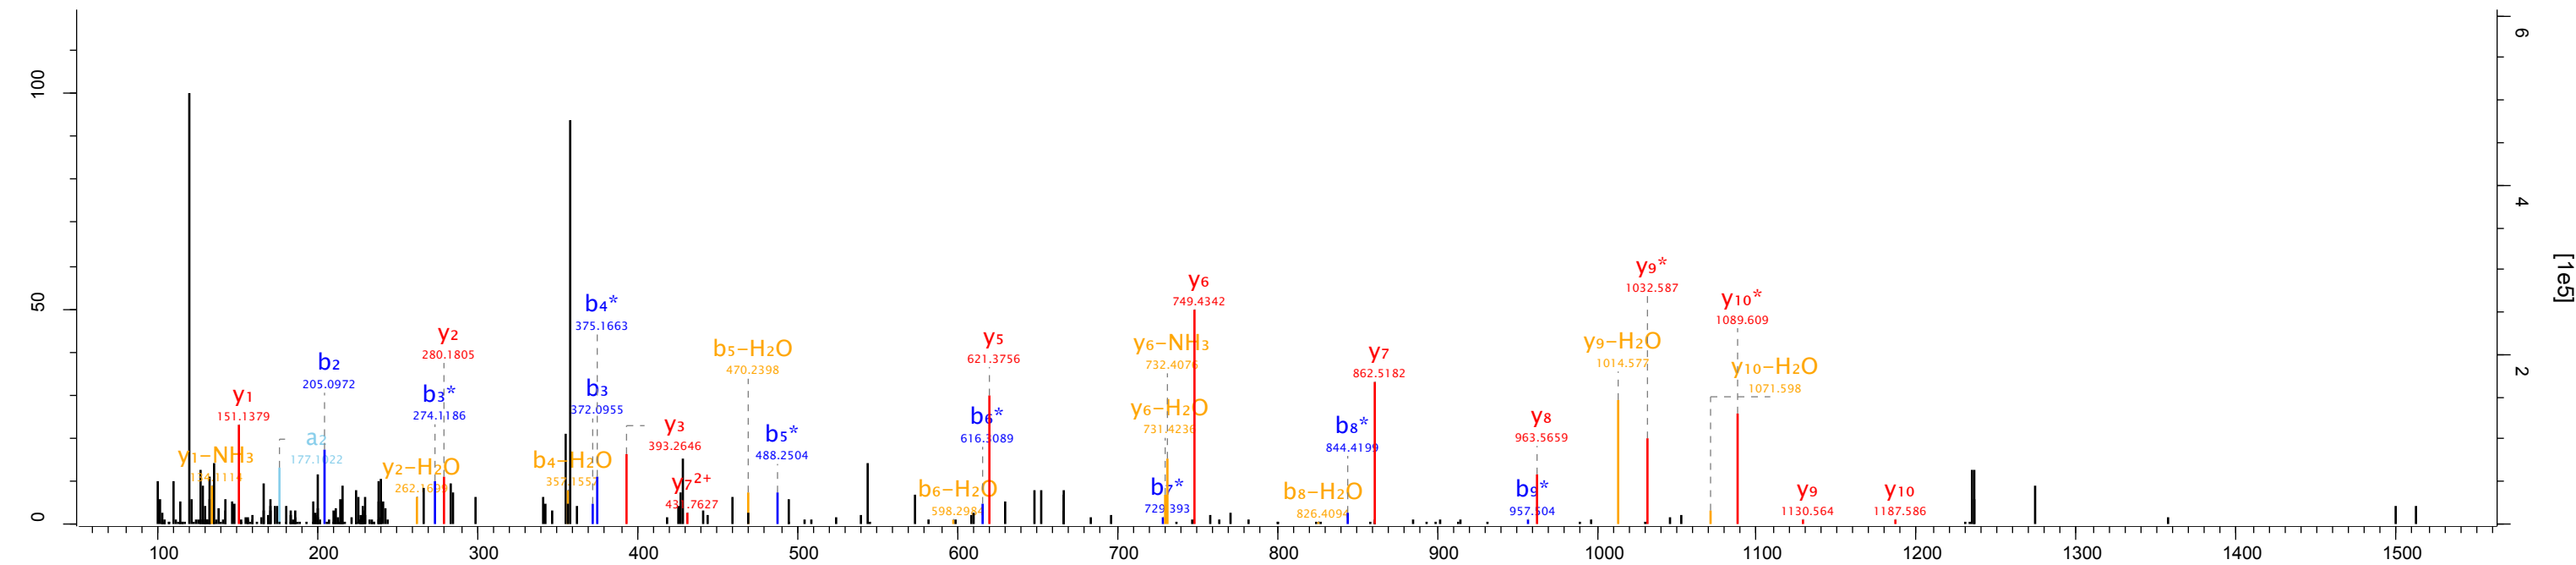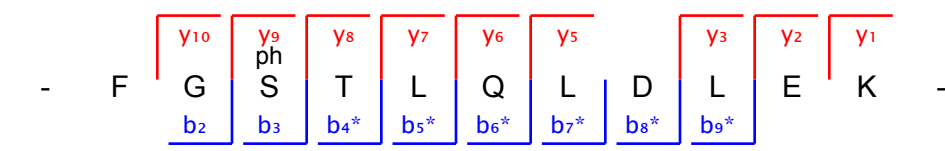

Raw file Scan Method Score m/z Gene names  
 20150814\_A375SR\_Phospho\_BR2\_05 23476 FTMS; HCD 108.32 836.37 CELF1

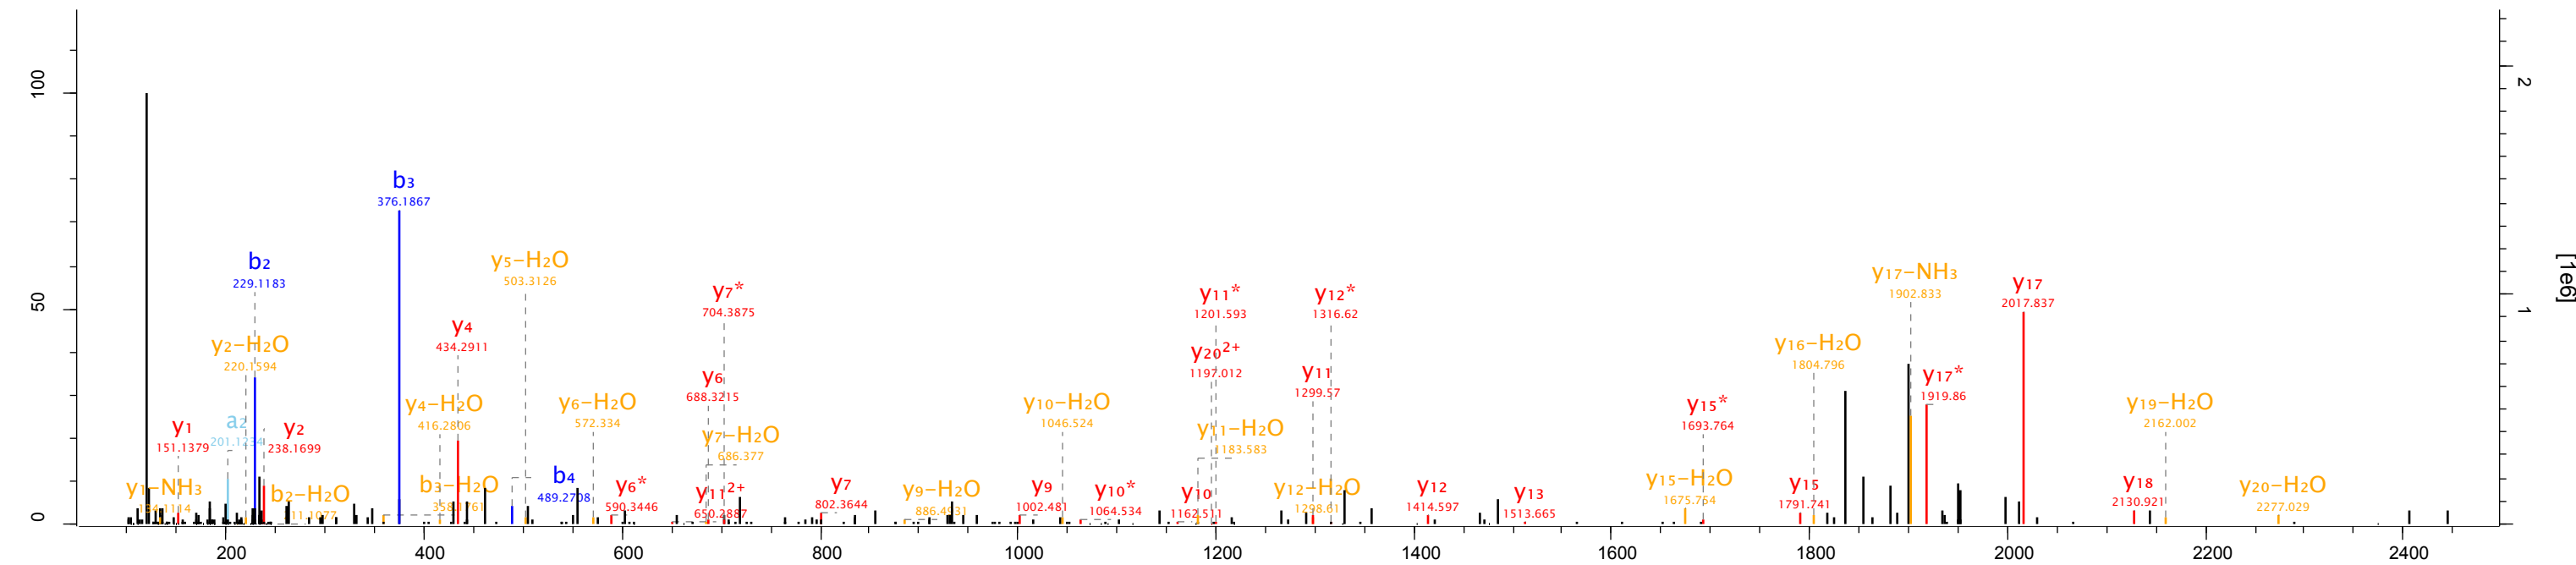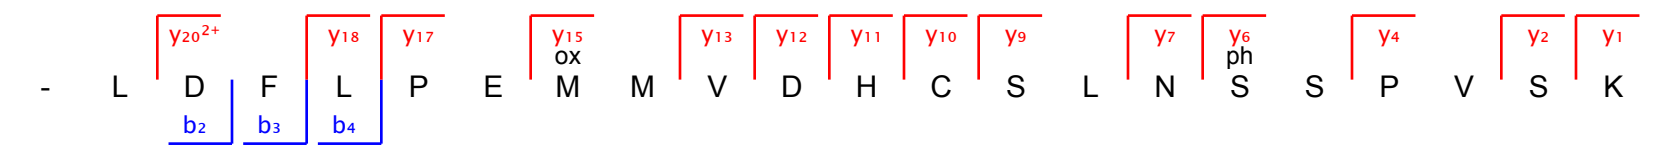

Raw file Scan Method Score m/z Gene names  
 20150814\_A375SR\_Phospho\_BR2\_05 23656 FTMS; HCD 218.12 803.33 ANKS1A

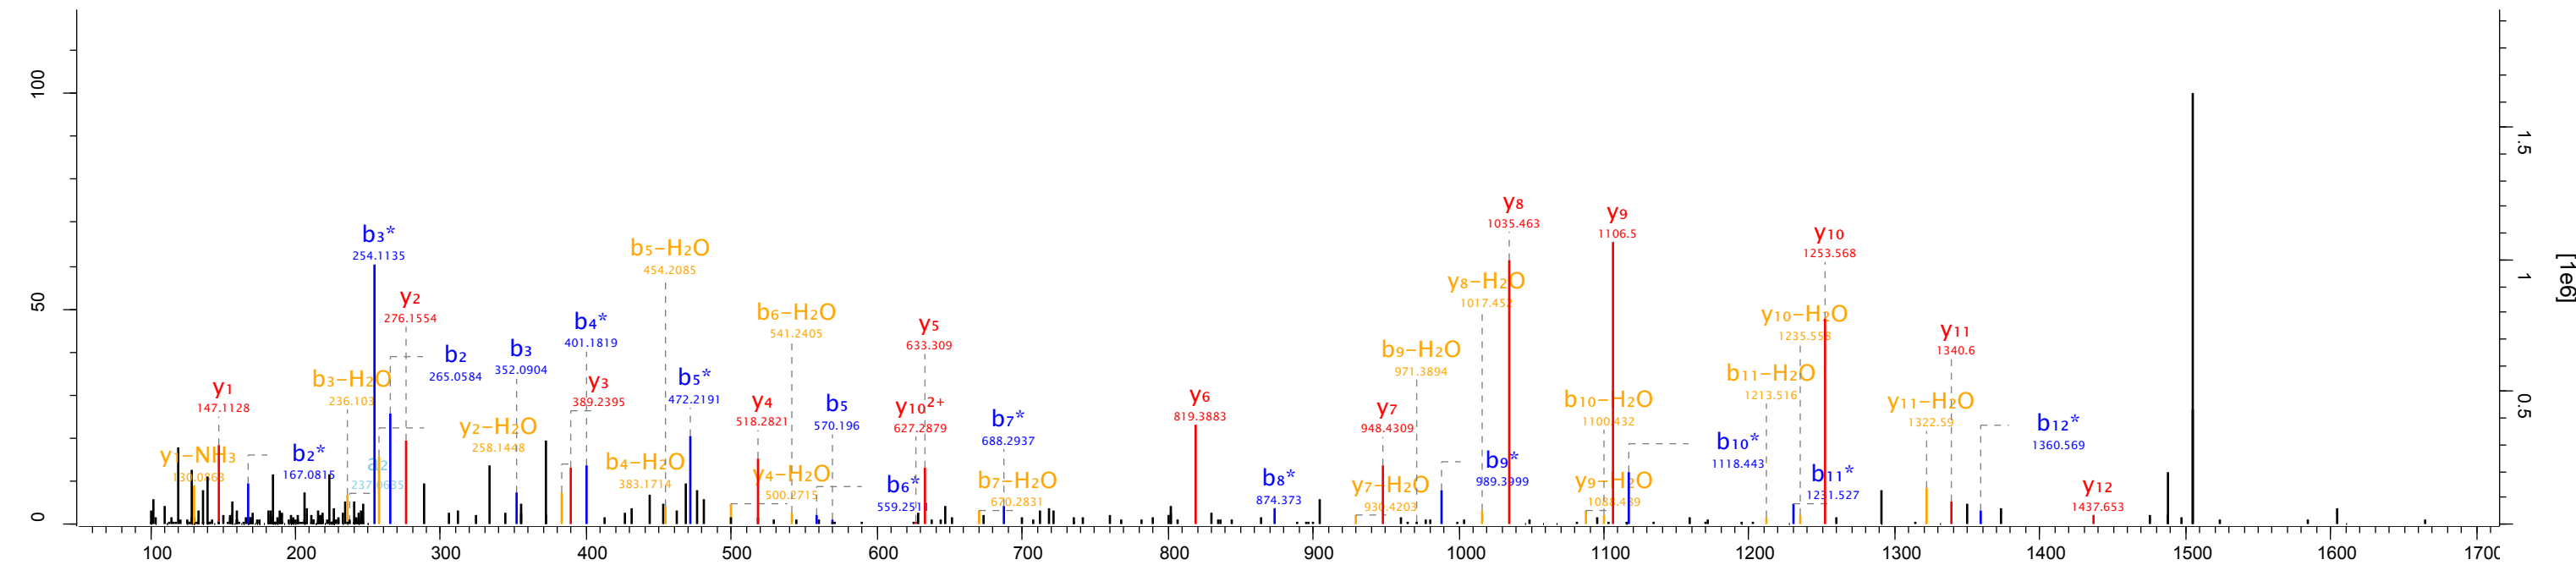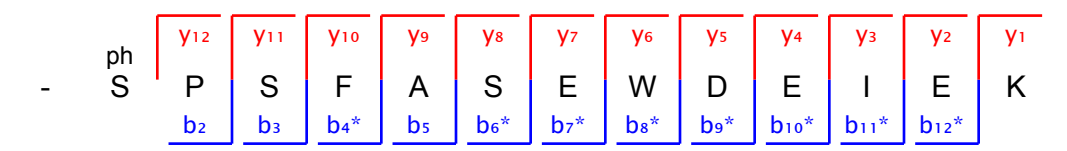

Raw file  
 20150814\_A375SR\_Phospho\_BR2\_05  
 Scan 23726 Method FTMS; HCD Score 125.23 m/z 933.42 Gene names ATF7IP

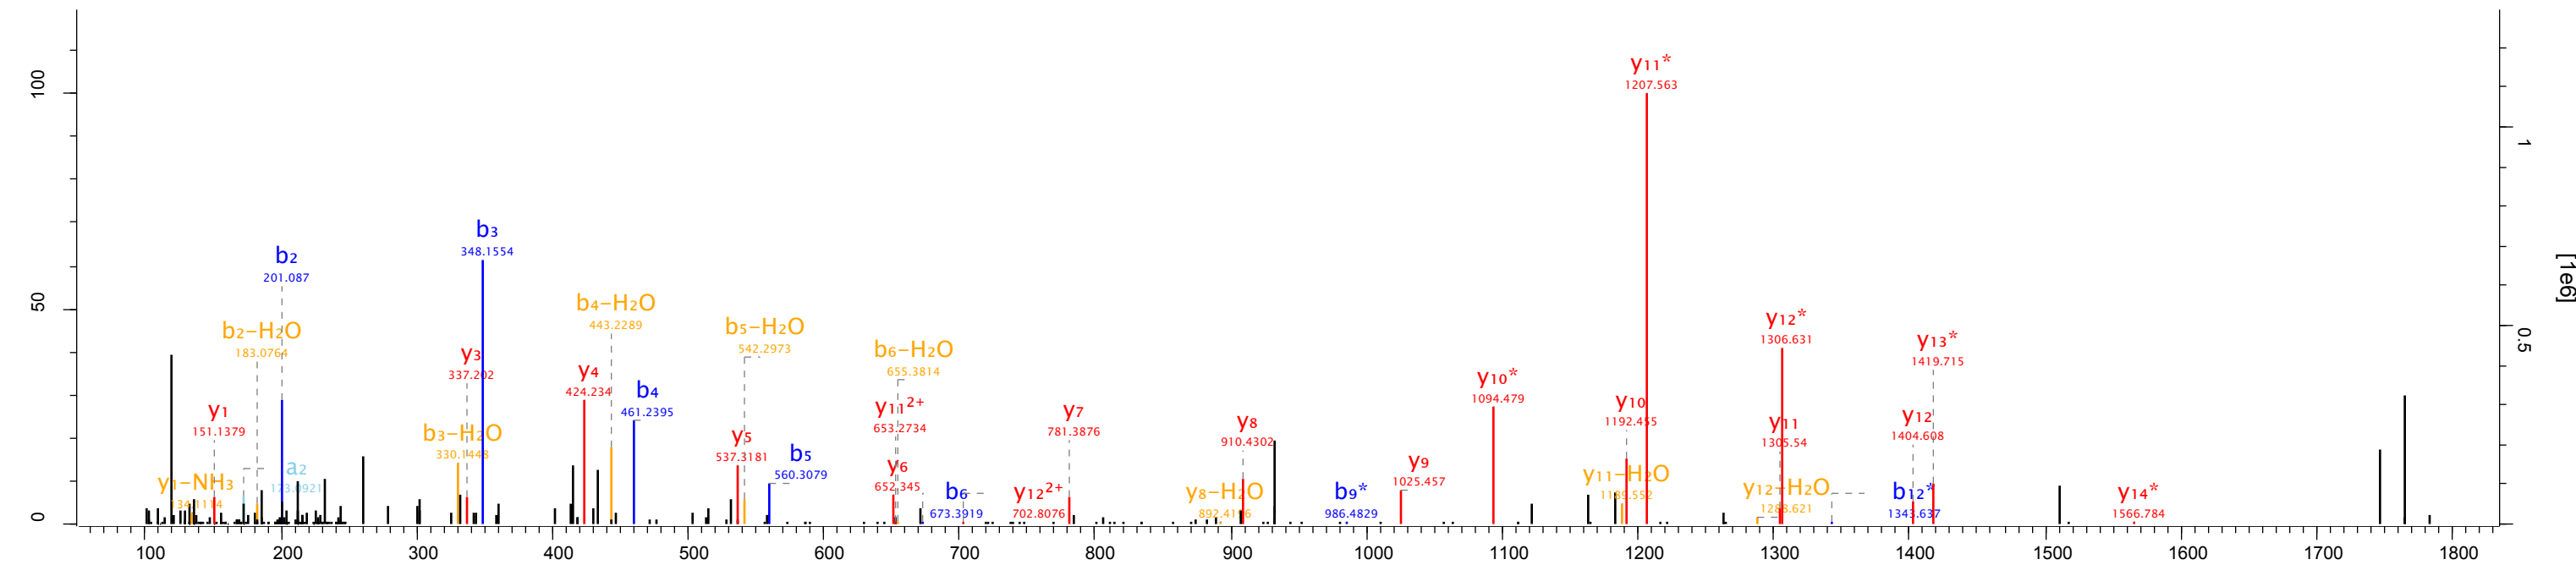

- E A F L V L S D E E D I S G E K -

Fragmentation sites are indicated by brackets below the sequence:

- Blue brackets (b ions): A-F, F-L, L-V, L-S, E-D, I-S
- Red brackets (y ions): F-L, L-V, L-S, D-E, E-D, I-S, S-G, G-E

Raw file 20150814\_A375SR\_Phospho\_BR2\_05 Scan 23866 Method FTMS; HCD Score 183.09 m/z 1060.5 Gene names STARD13

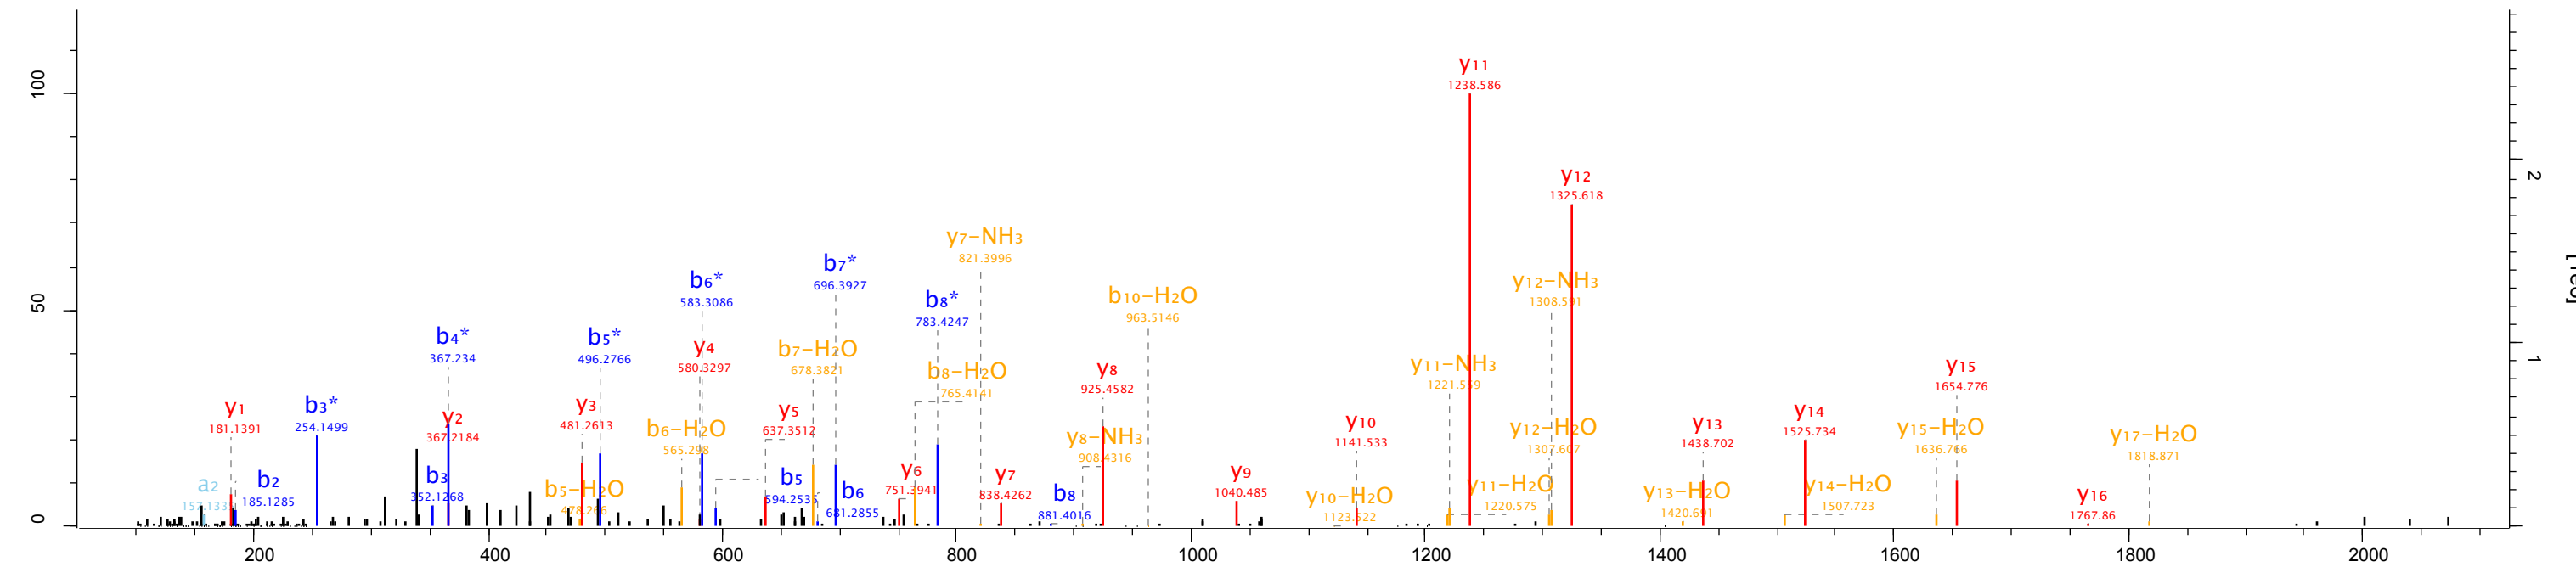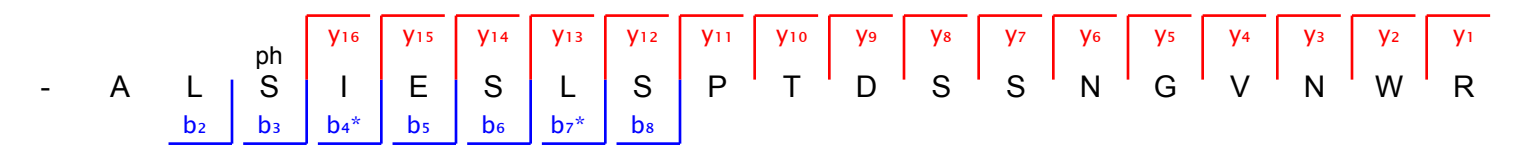



Raw file: 20150814\_A375SR\_Phospho\_BR2\_05  
 Scan: 24276 Method: FTMS; HCD Score: 150.49 m/z: 640.79 Gene names: TENC1

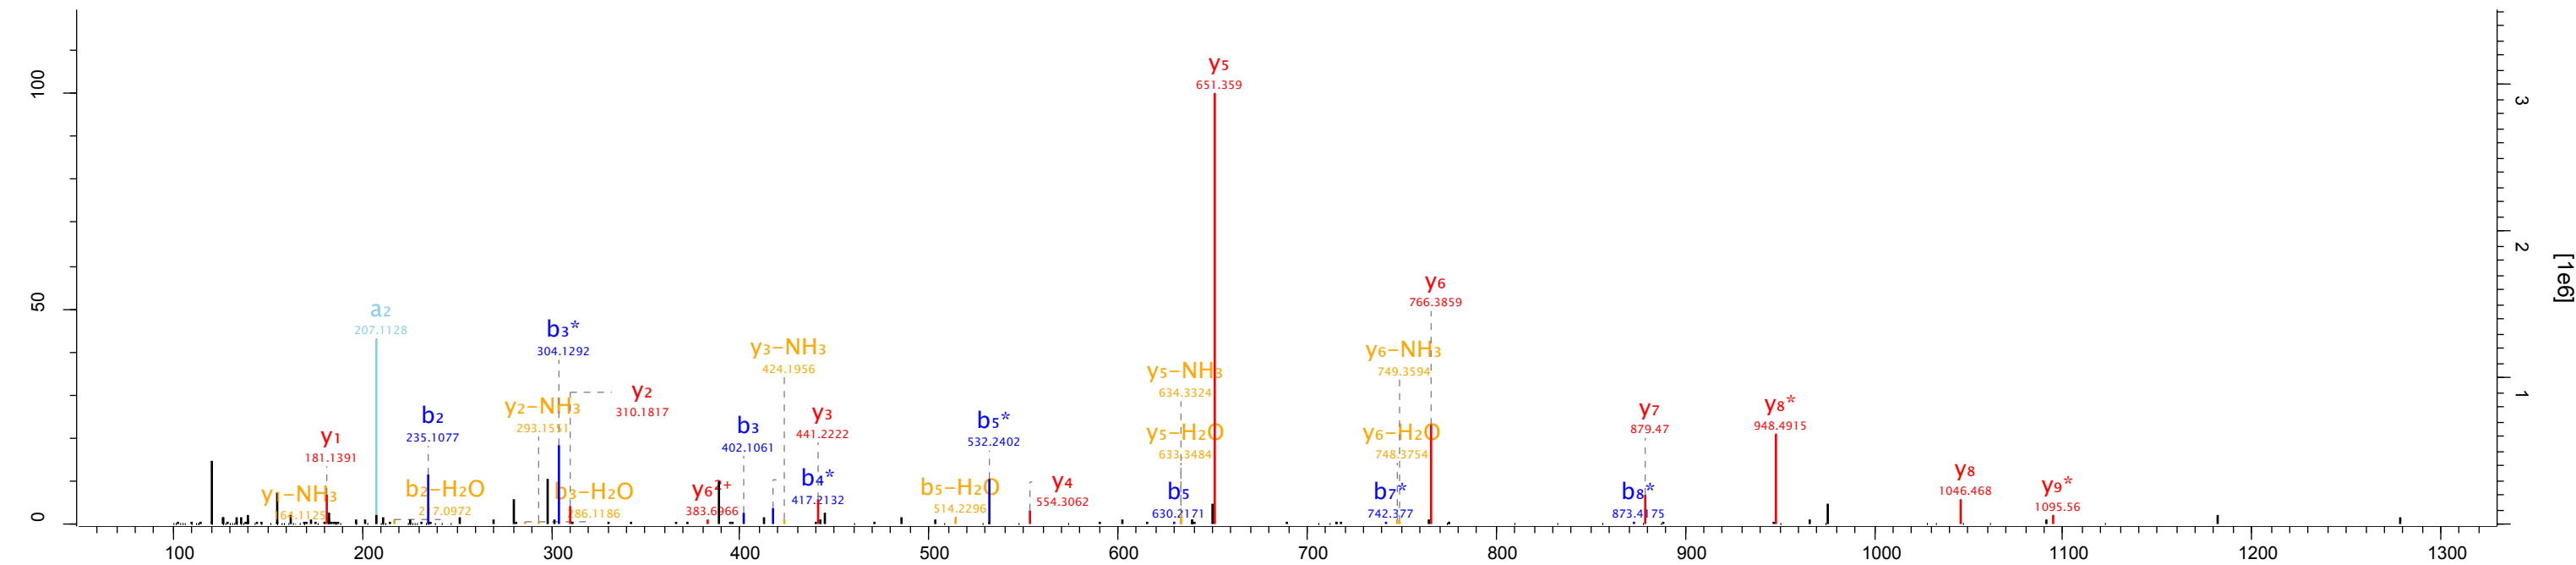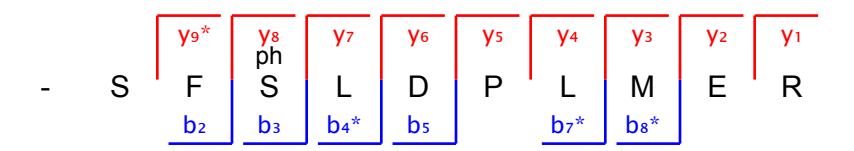

Raw file 20150814\_A375SR\_Phospho\_BR2\_05 Scan 24716 Method FTMS; HCD Score 242.44 m/z 1460.68 Gene names KRT18

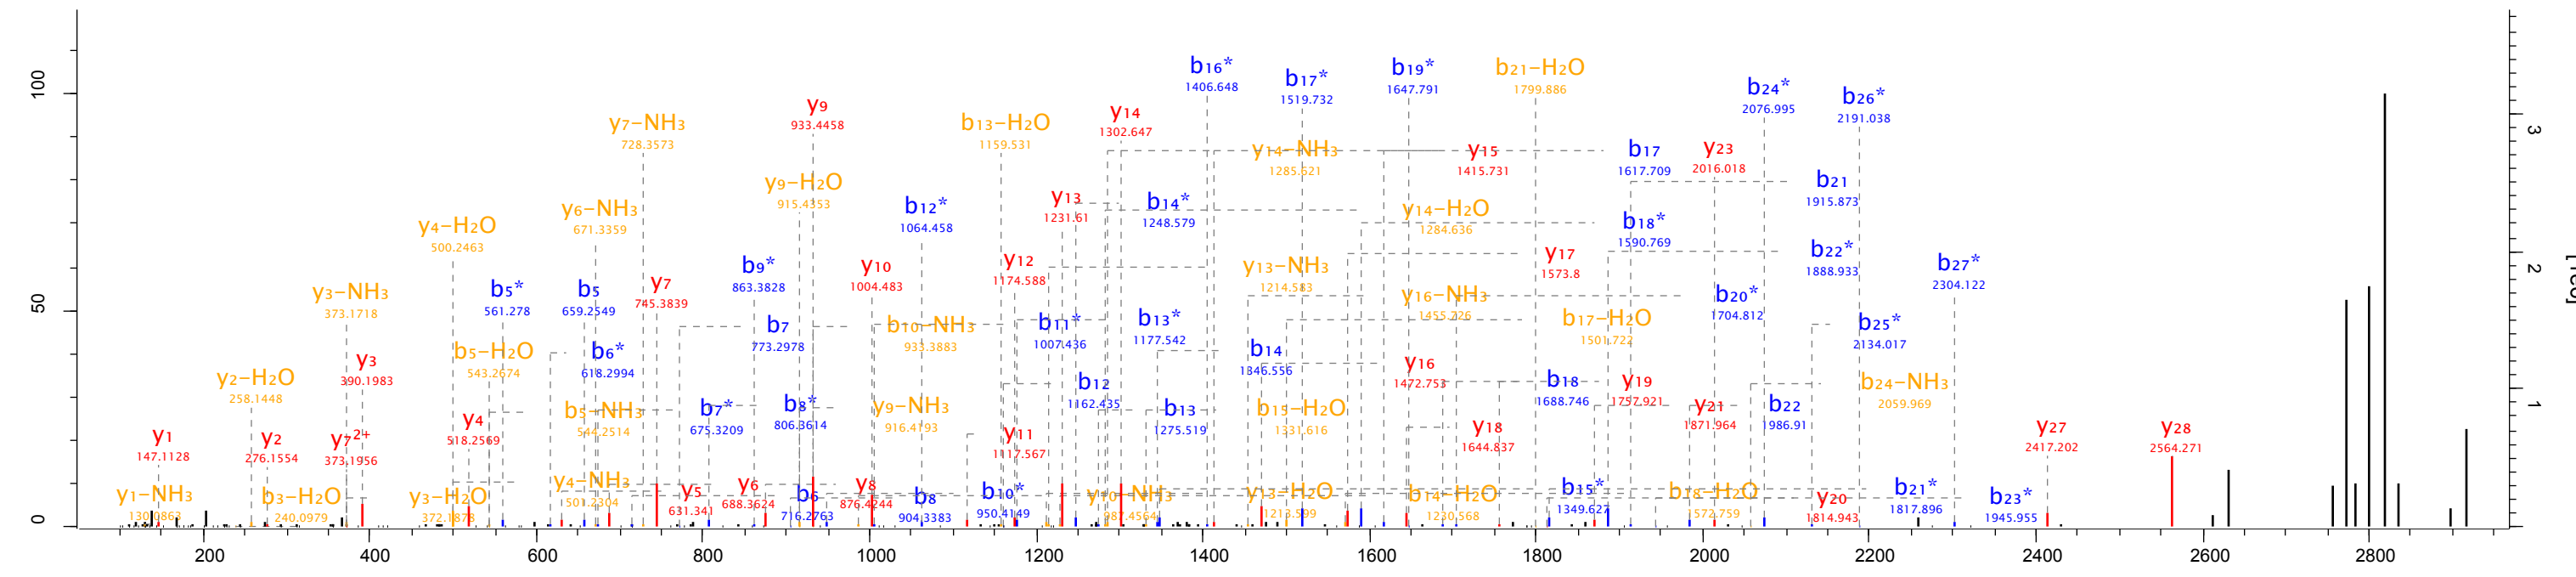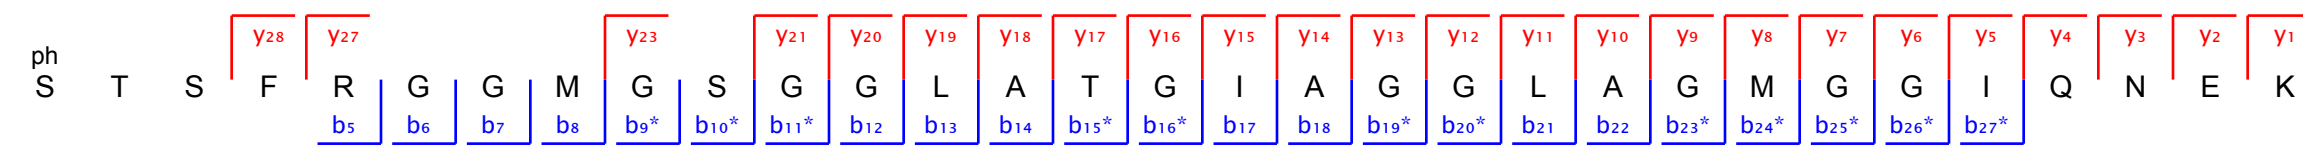

Raw file: 20150814\_A375SR\_Phospho\_BR2\_05  
 Scan: 24926 Method: FTMS; HCD Score: 334.57 m/z: 1054.51 Gene names: HNRNPUL2;HNRNPUL2-BSCL2

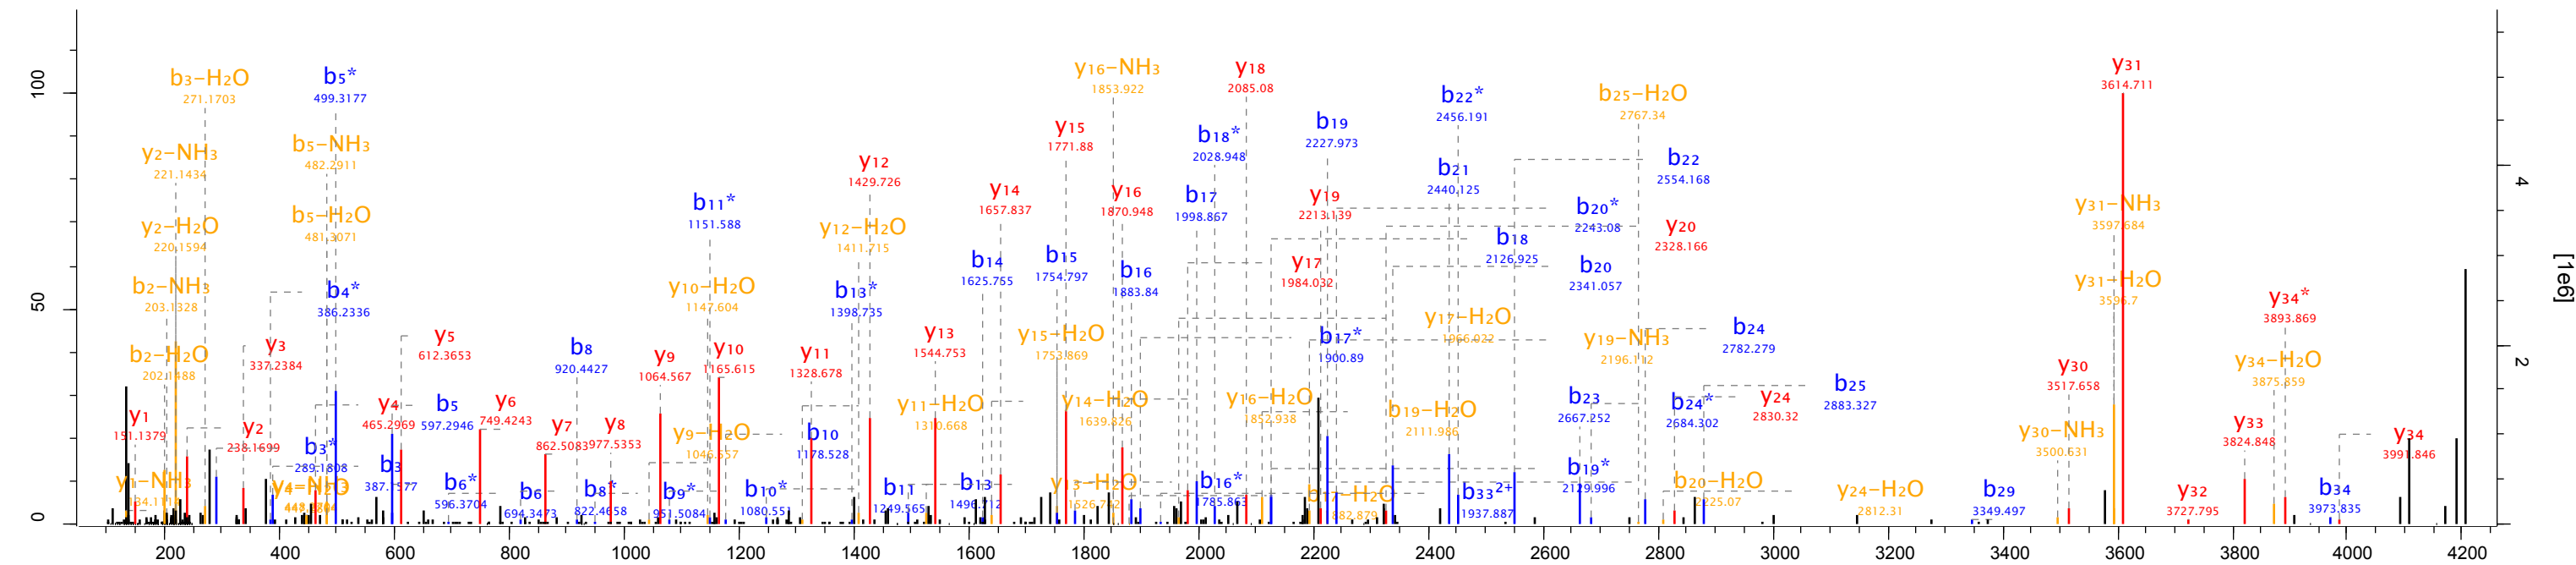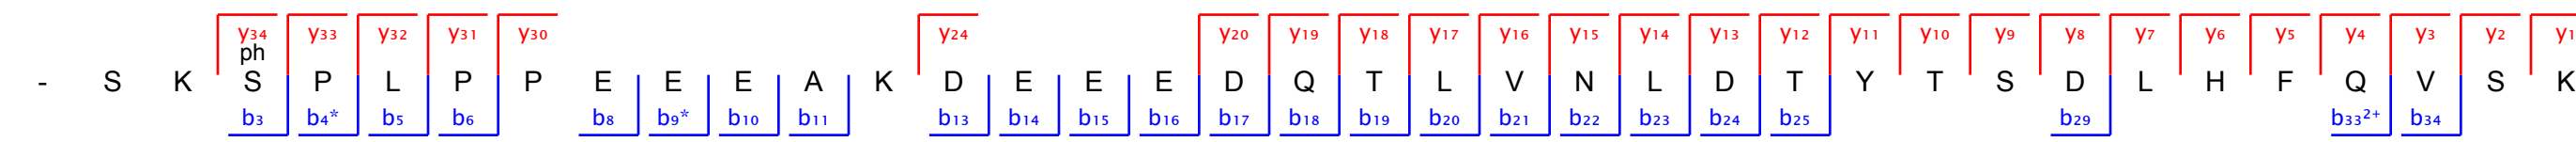

Raw file: 20150814\_A375SR\_Phospho\_BR2\_05  
 Scan: 25586 Method: FTMS; HCD Score: 148.1 m/z: 1193.01 Gene names: EXOC1

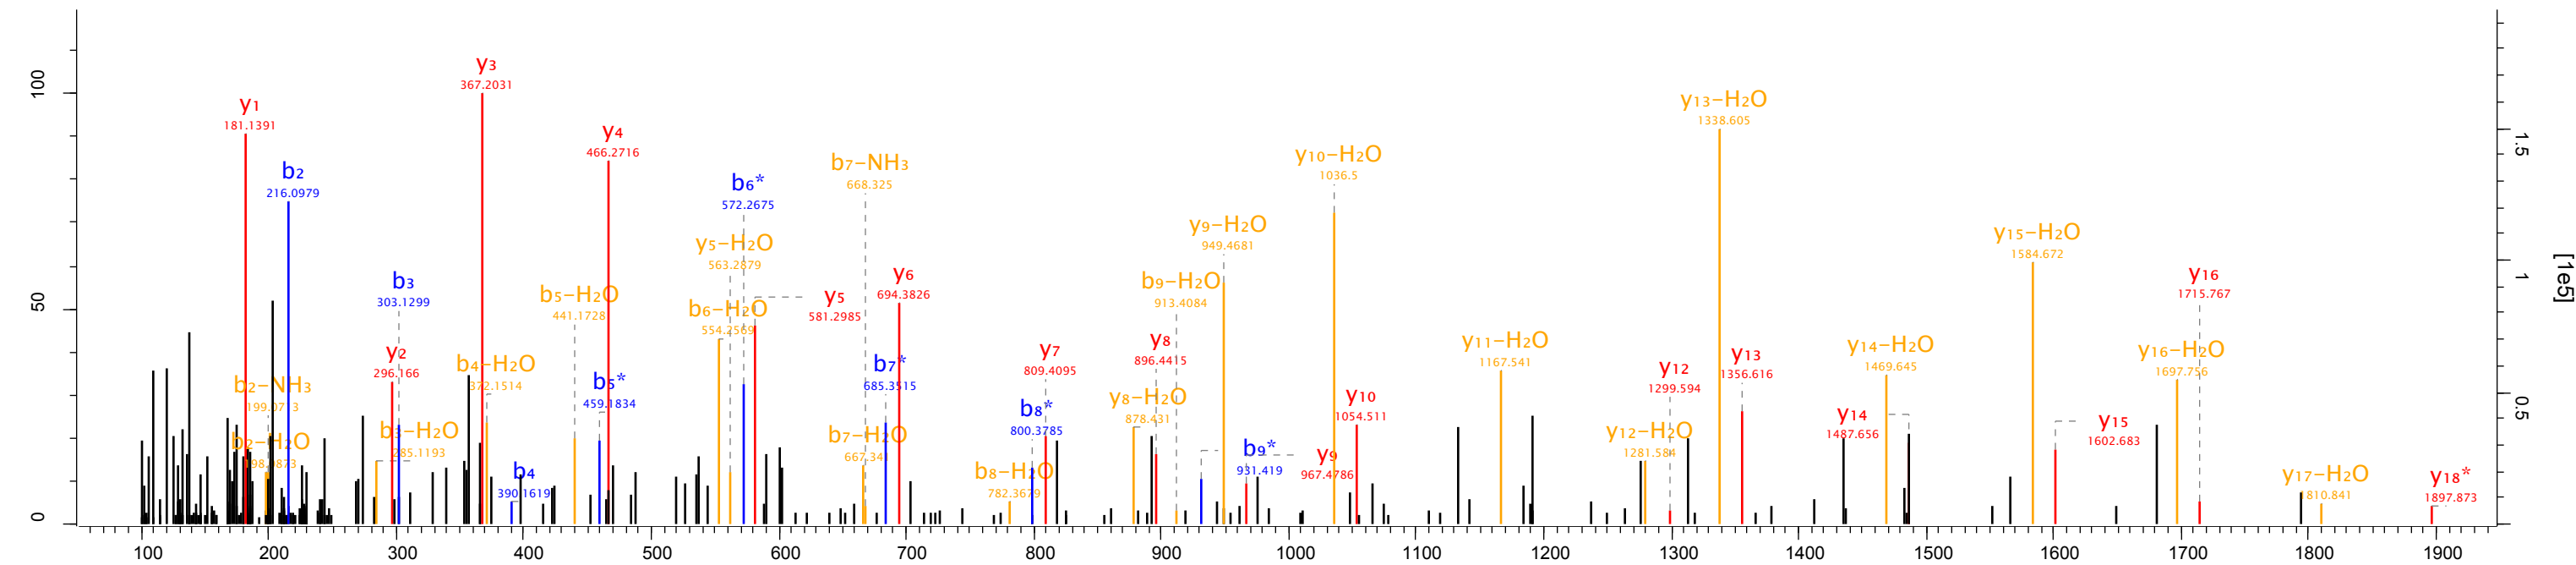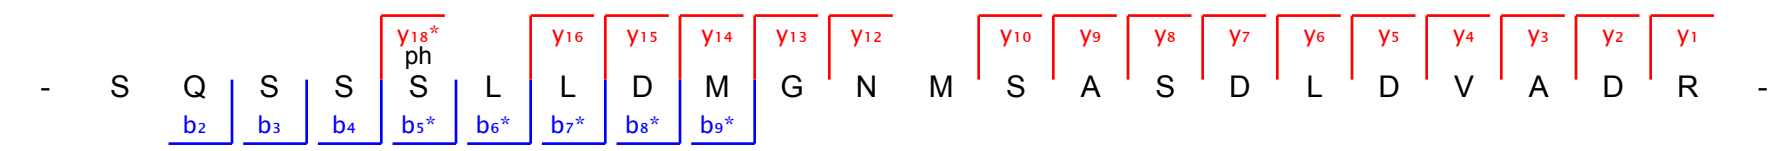

Raw file  
20150814\_A375SR\_Phospho\_BR2\_05

Scan 25906 Method FTMS; HCD Score 191.85 m/z 919.45 Gene names BRAF

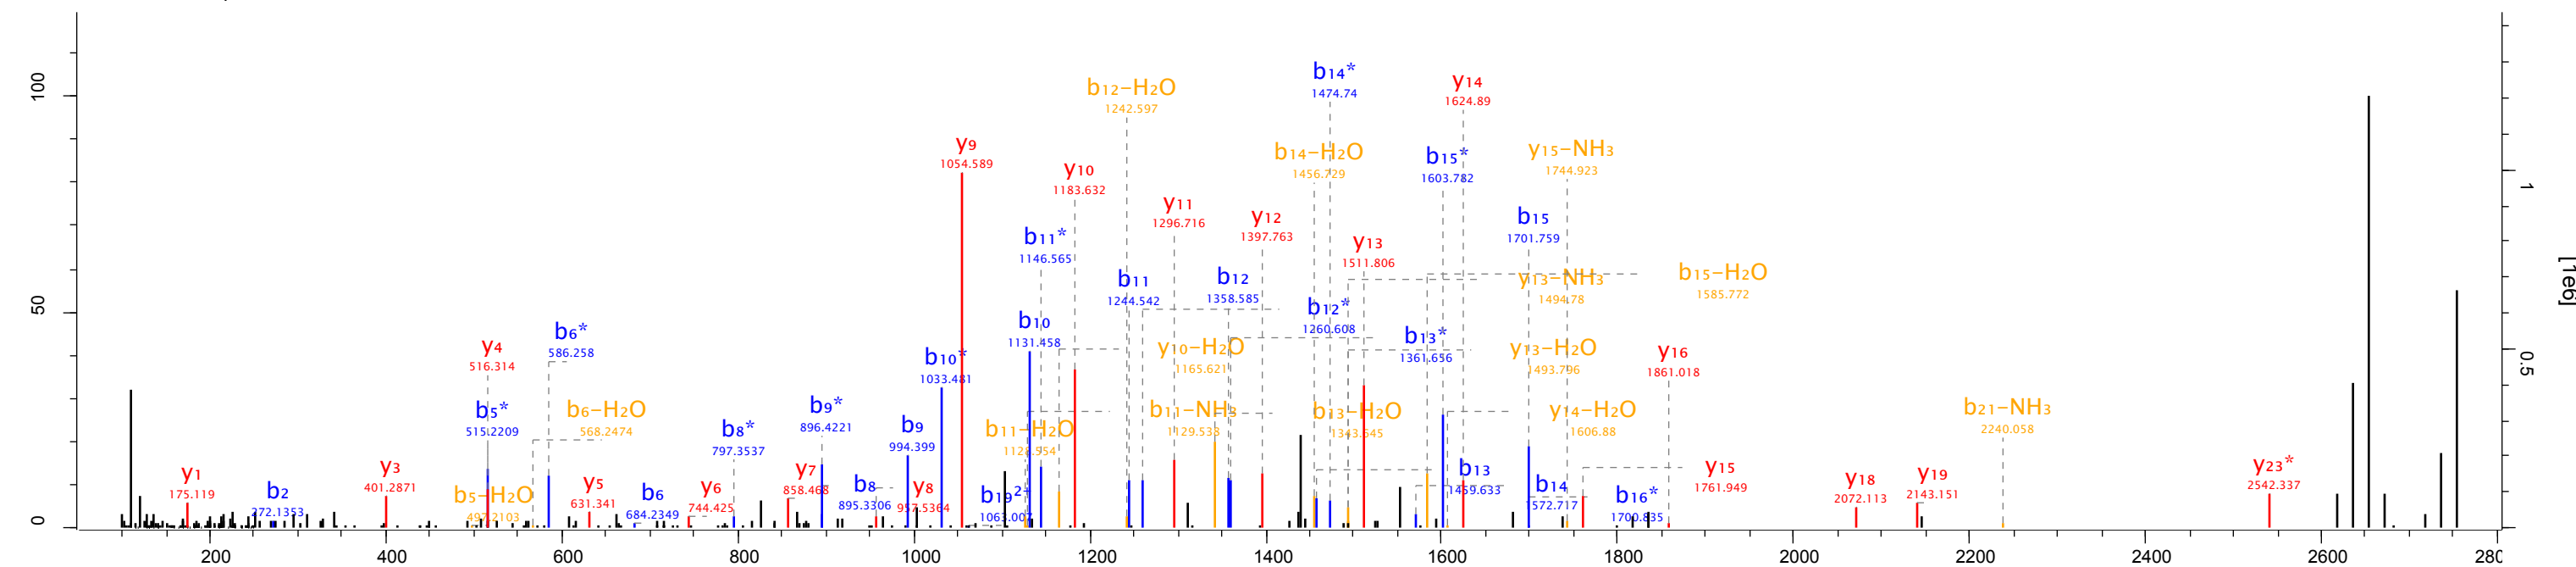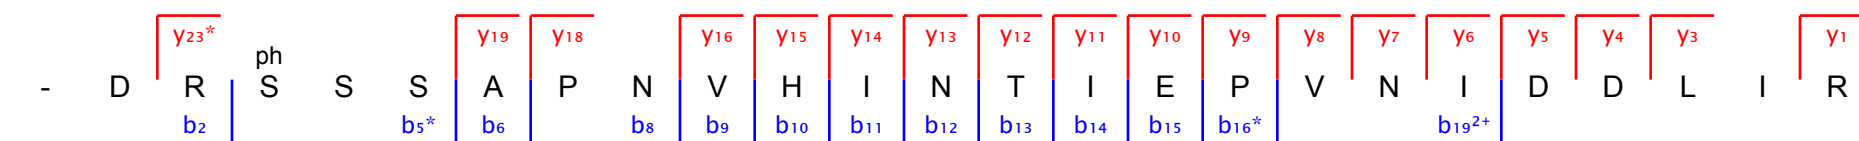

Raw file 20150814\_A375SR\_Phospho\_BR2\_05 Scan 25976 Method FTMS; HCD Score 113.67 m/z 631.79 Gene names NT5C

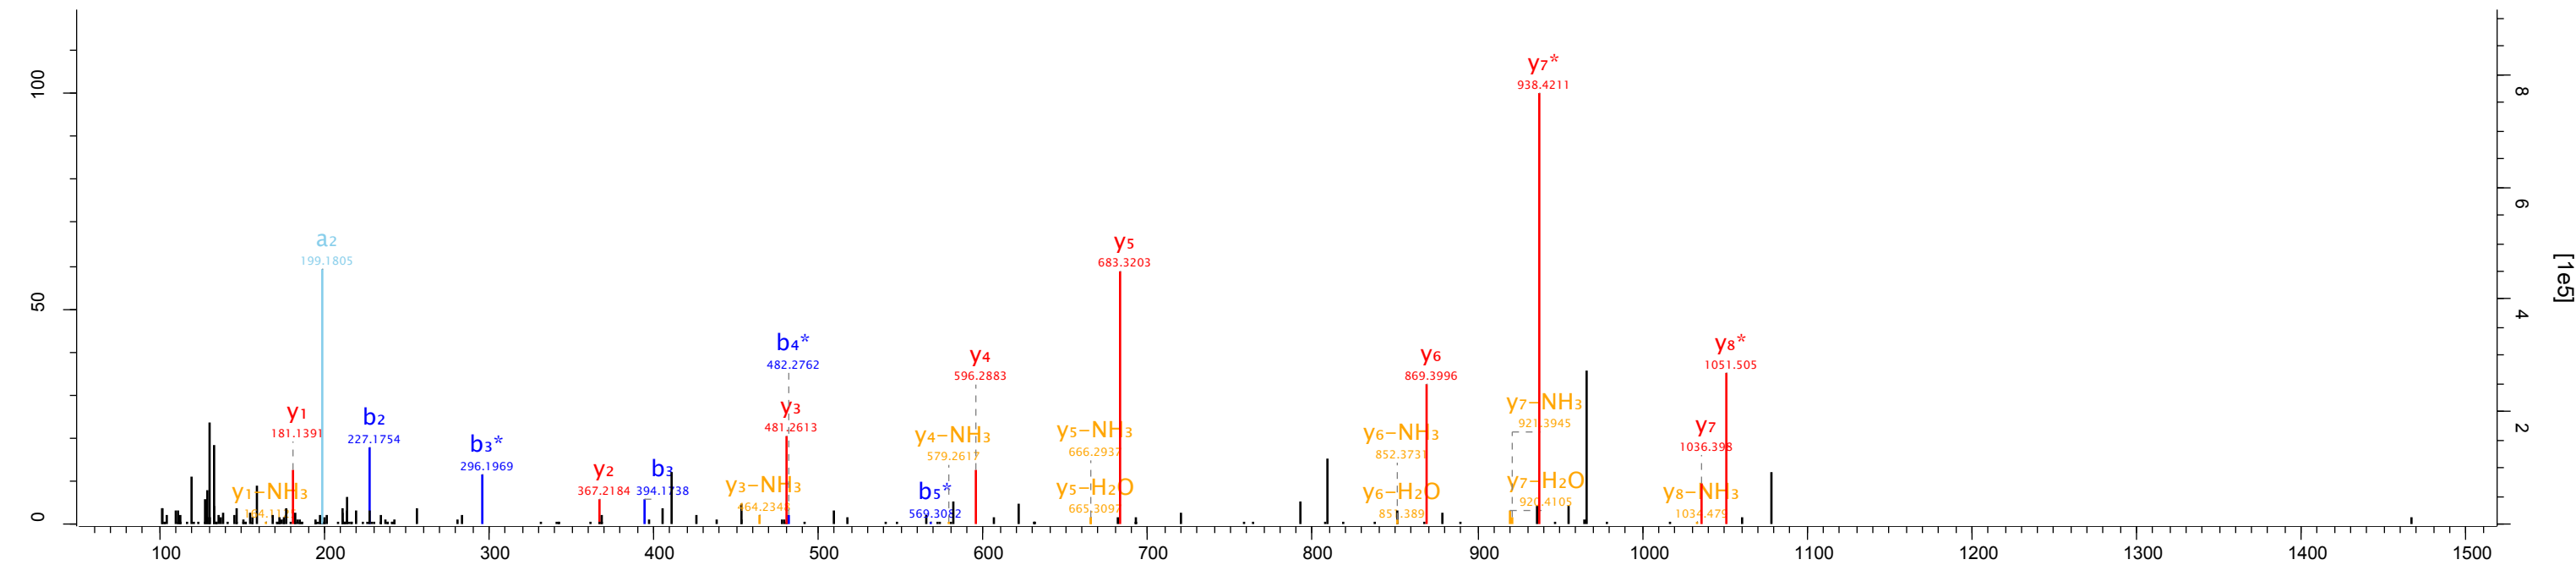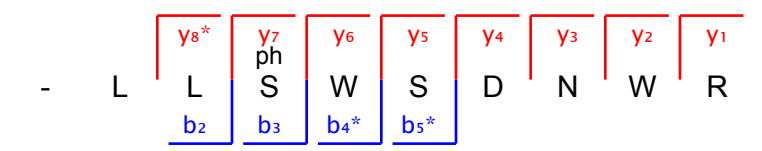

Raw file: 20150814\_A375SR\_Phospho\_BR2\_05  
 Scan: 26666 Method: FTMS; HCD Score: 83 m/z: 850.82 Gene names: KCTD15

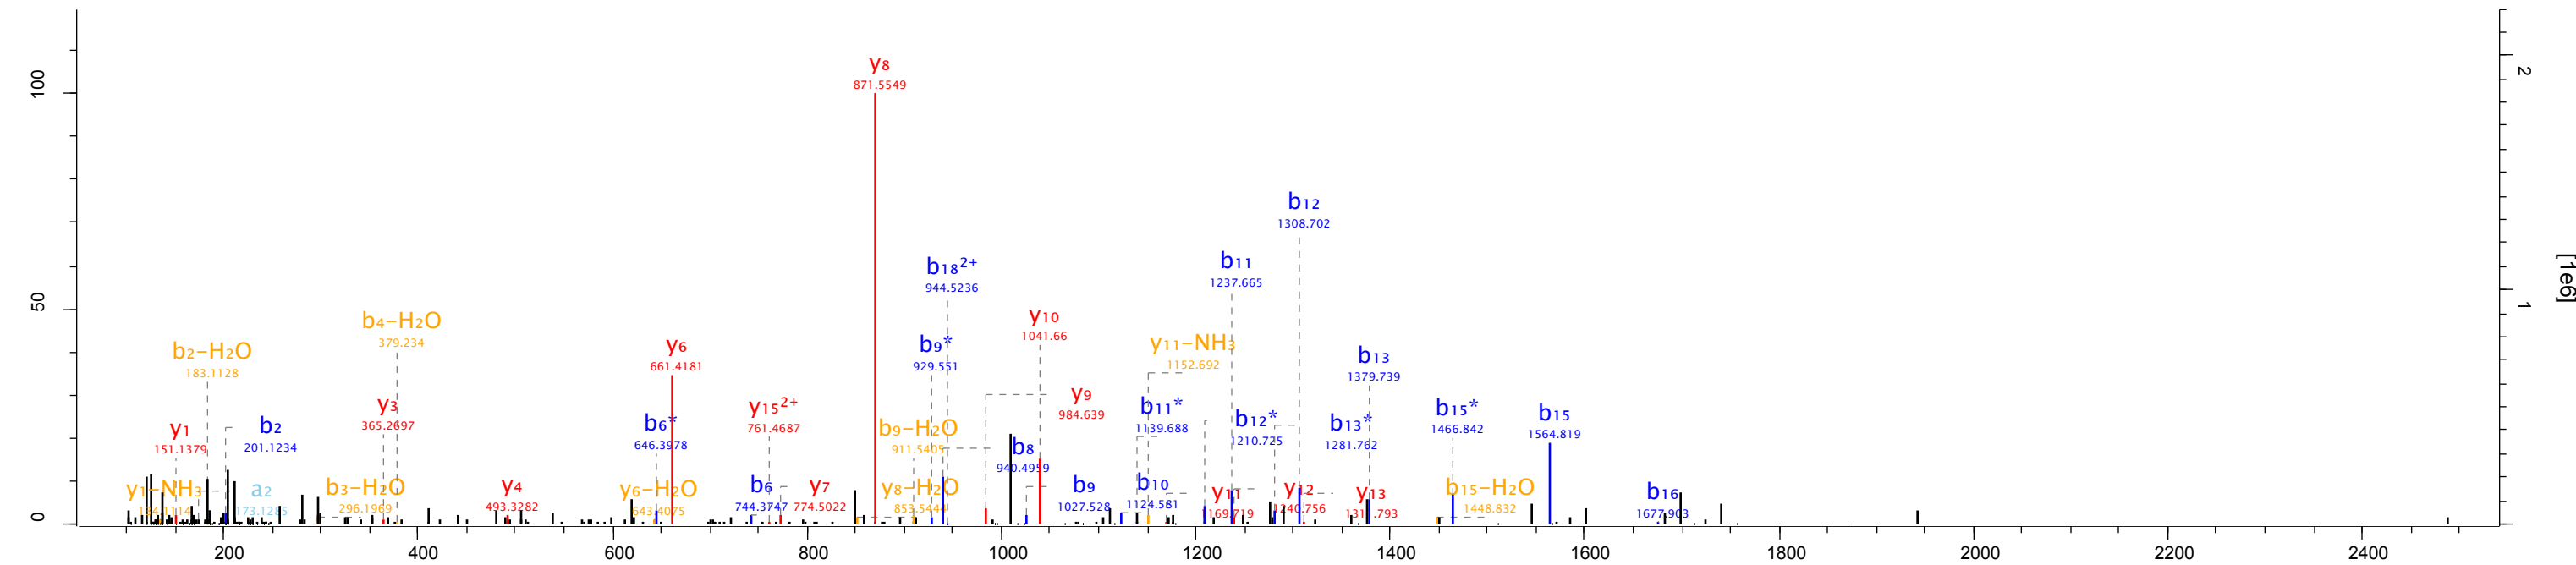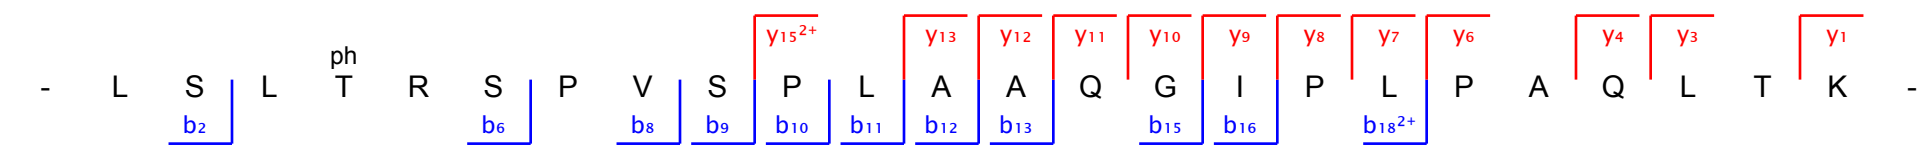

Raw file: 20150814\_A375SR\_Phospho\_BR2\_05  
 Scan: 26816 Method: FTMS; HCD Score: 151.6 m/z: 1097.98 Gene names: PCNT

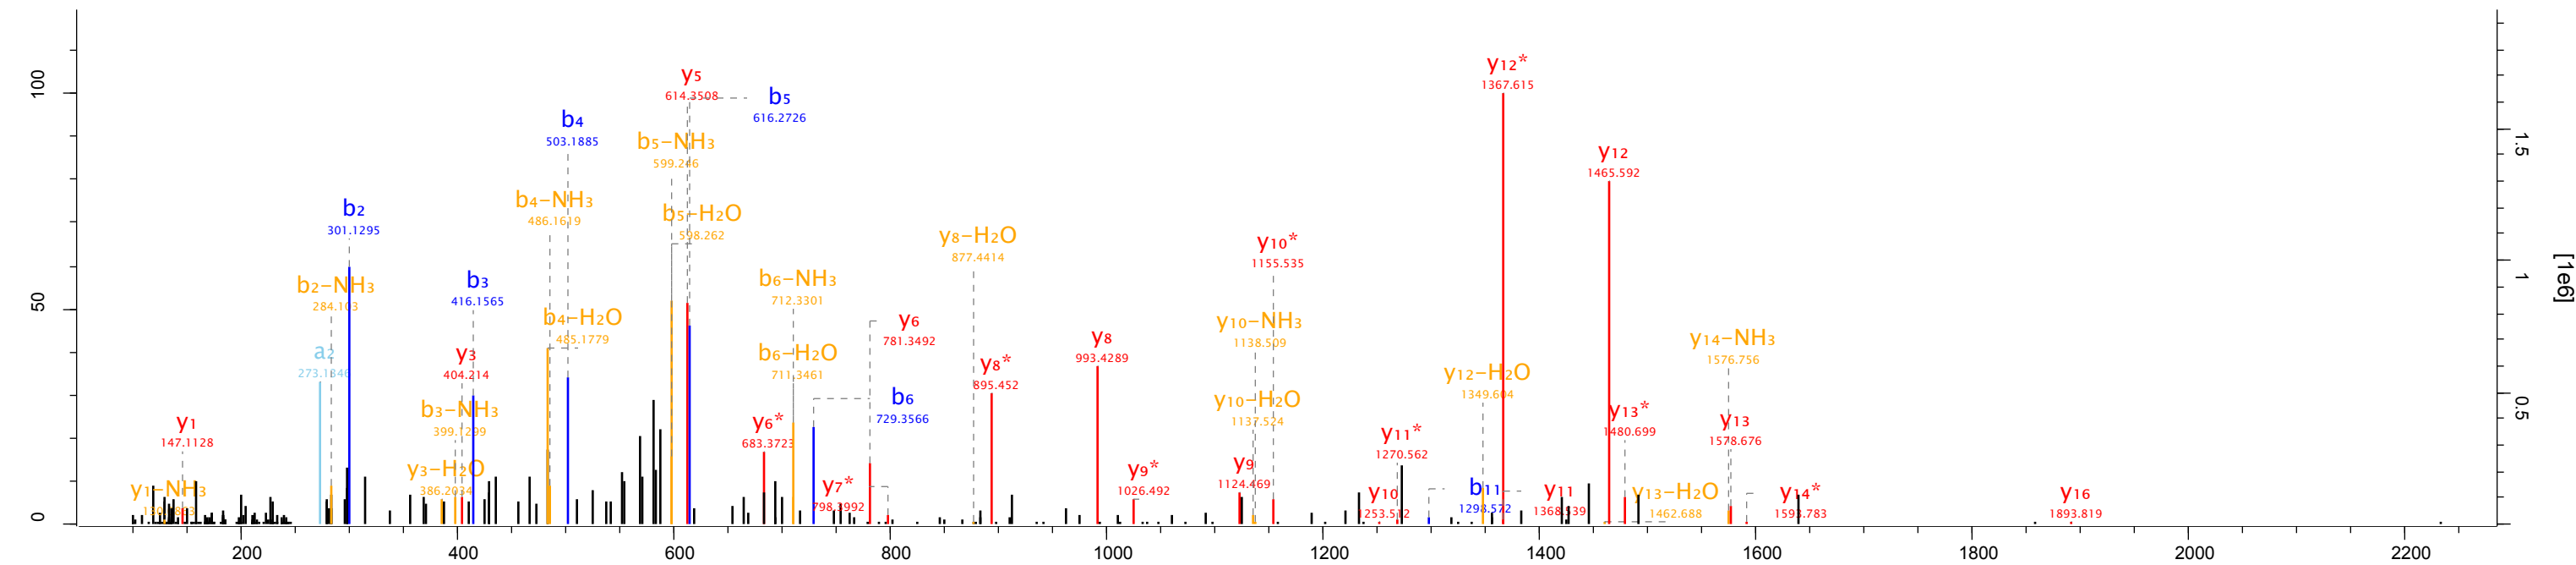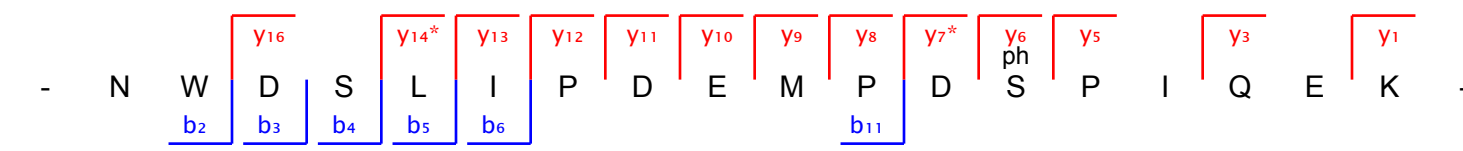



Raw file 20150814\_A375SR\_Phospho\_BR2\_05 Scan 26846 Method FTMS; HCD Score 56.05 m/z 900.72 Gene names SLK

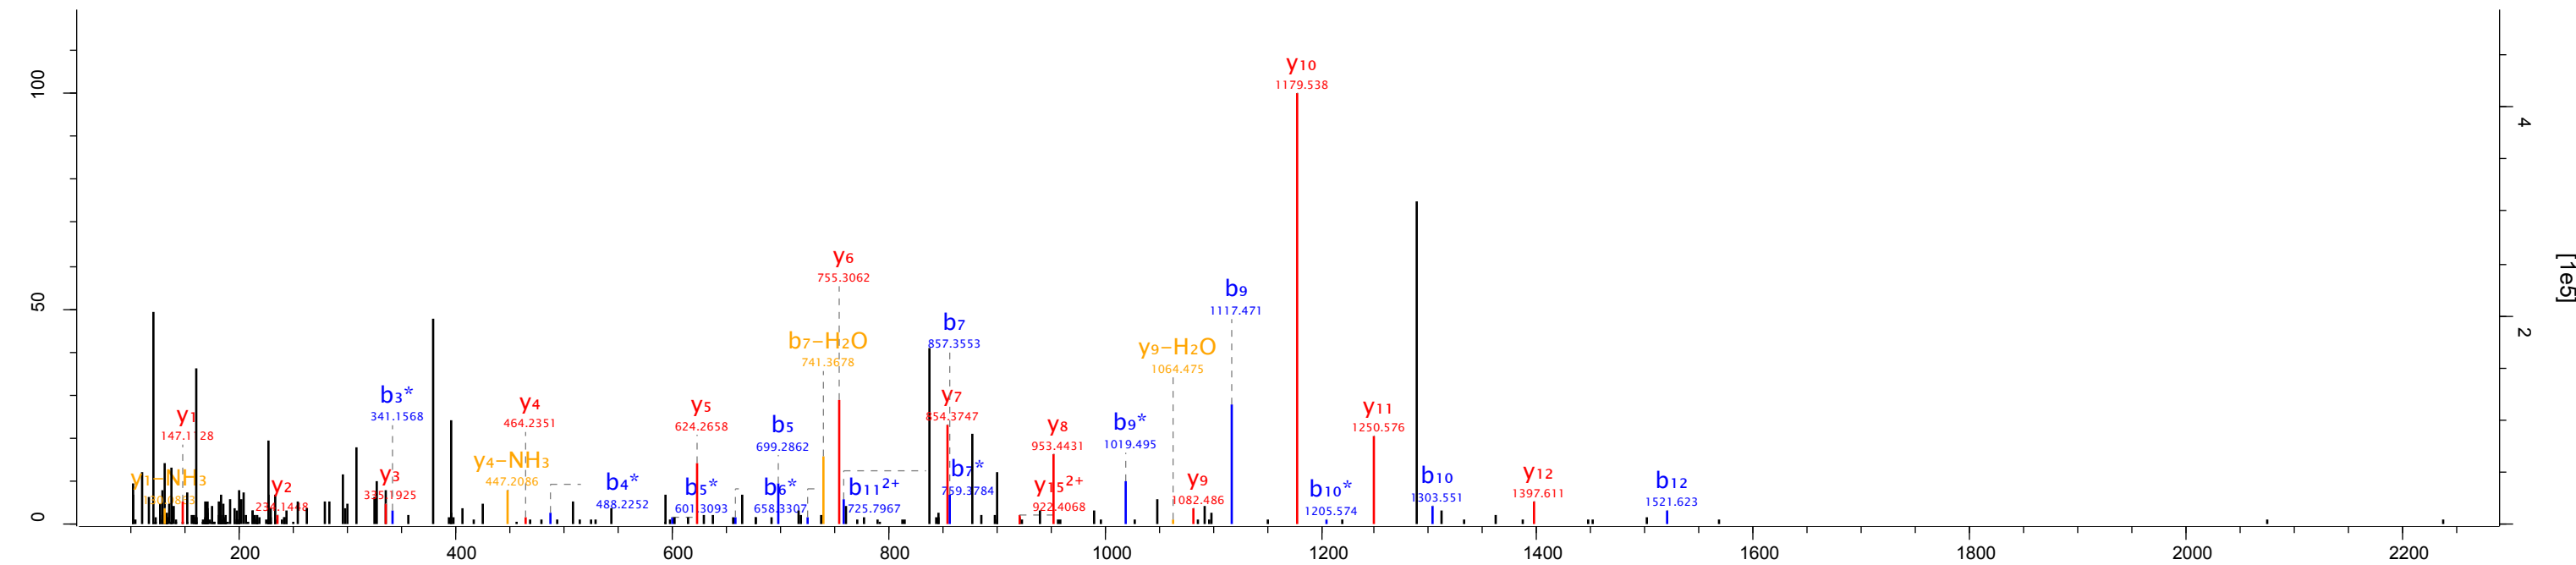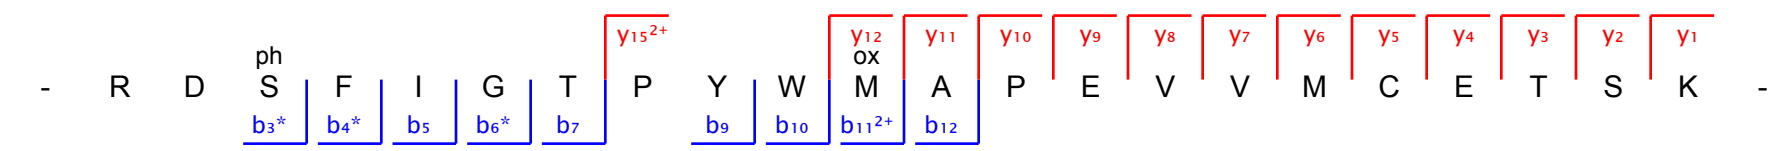

Raw file: 20150814\_A375SR\_Phospho\_BR2\_05  
 Scan: 2696 Method: FTMS; HCD Score: 104.94 m/z: 528.76 Gene names: NOLC1

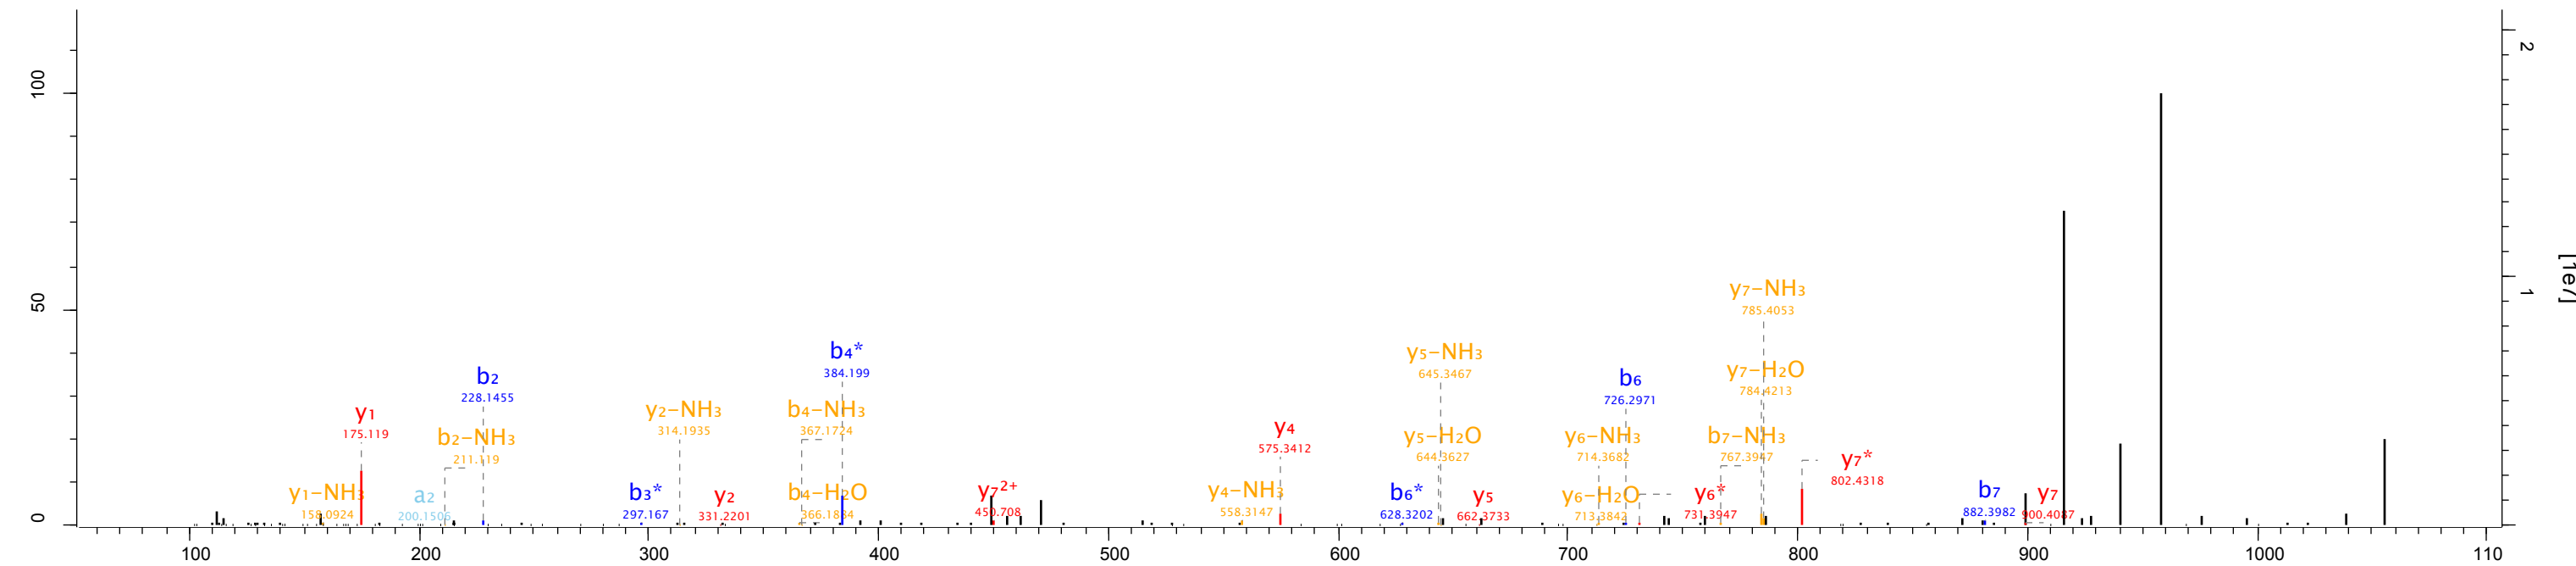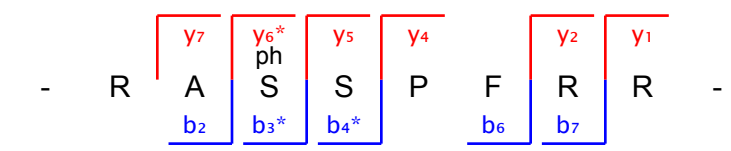

Raw file 20150814\_A375SR\_Phospho\_BR2\_05 Scan 28056 Method FTMS; HCD Score 65.88 m/z 912.8 Gene names ARHGEF26

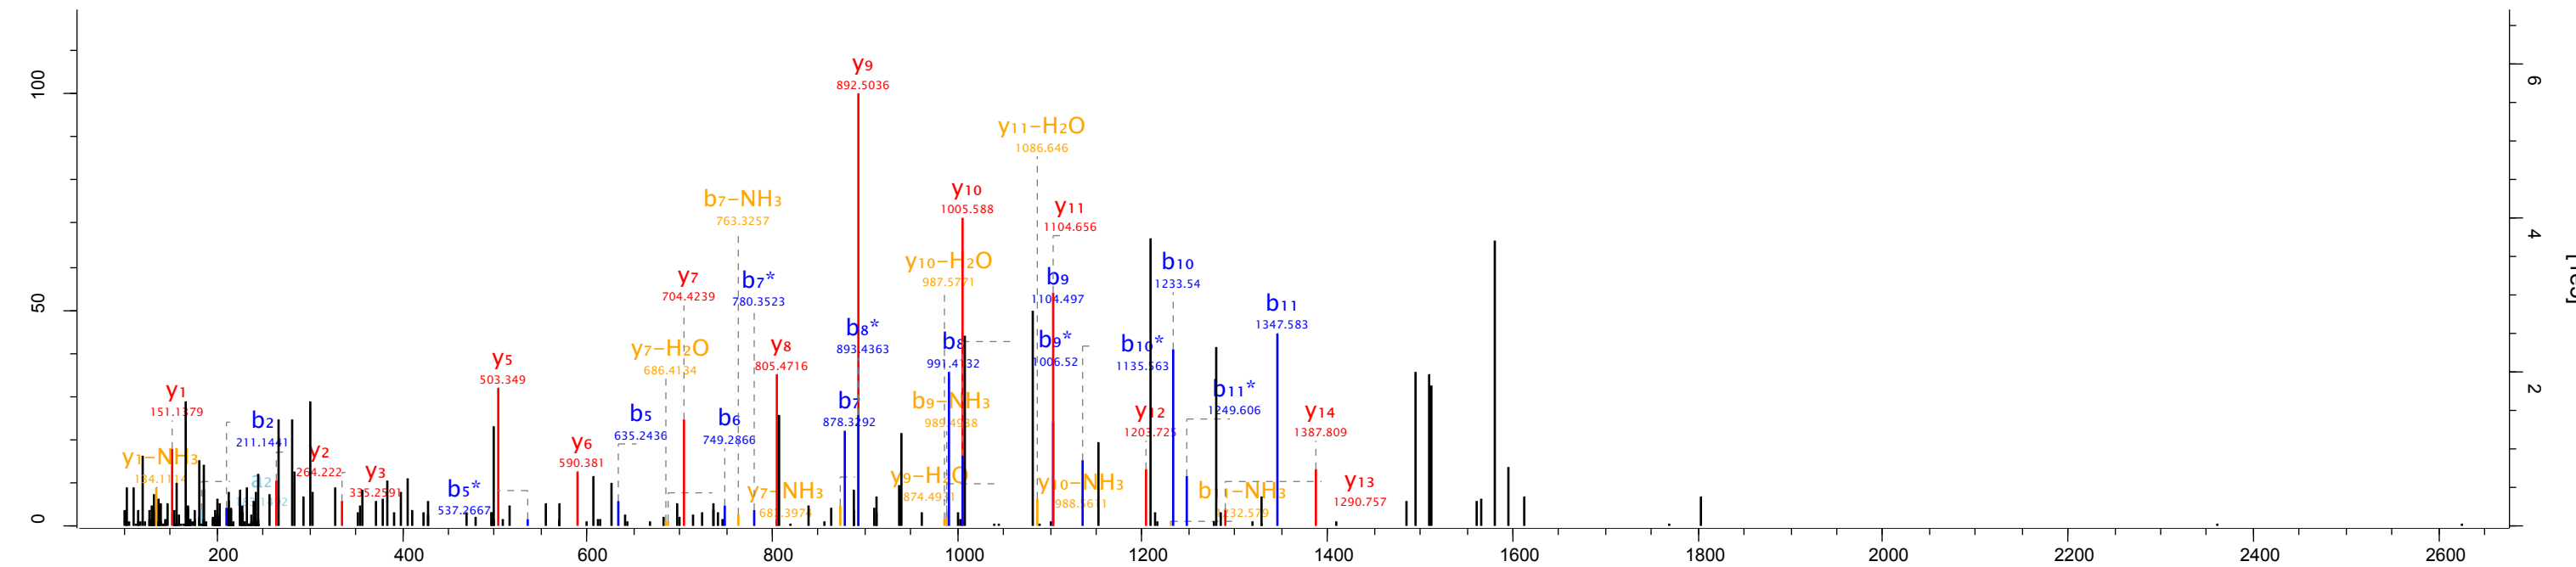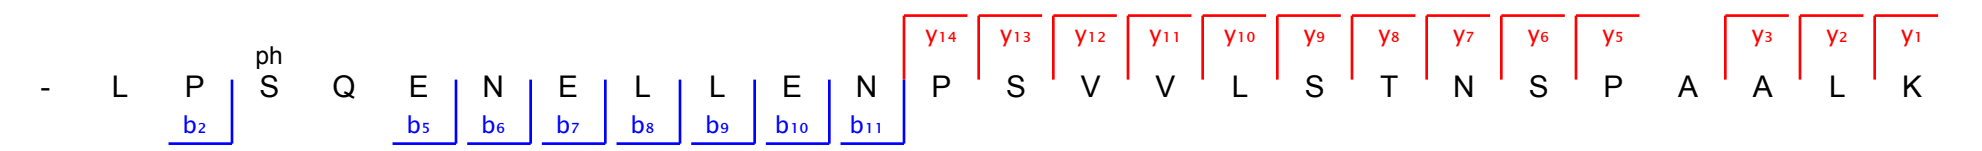

Raw file 20150814\_A375SR\_Phospho\_BR2\_05 Scan 28136 Method FTMS; HCD Score 157.14 m/z 1005.97 Gene names RRN3

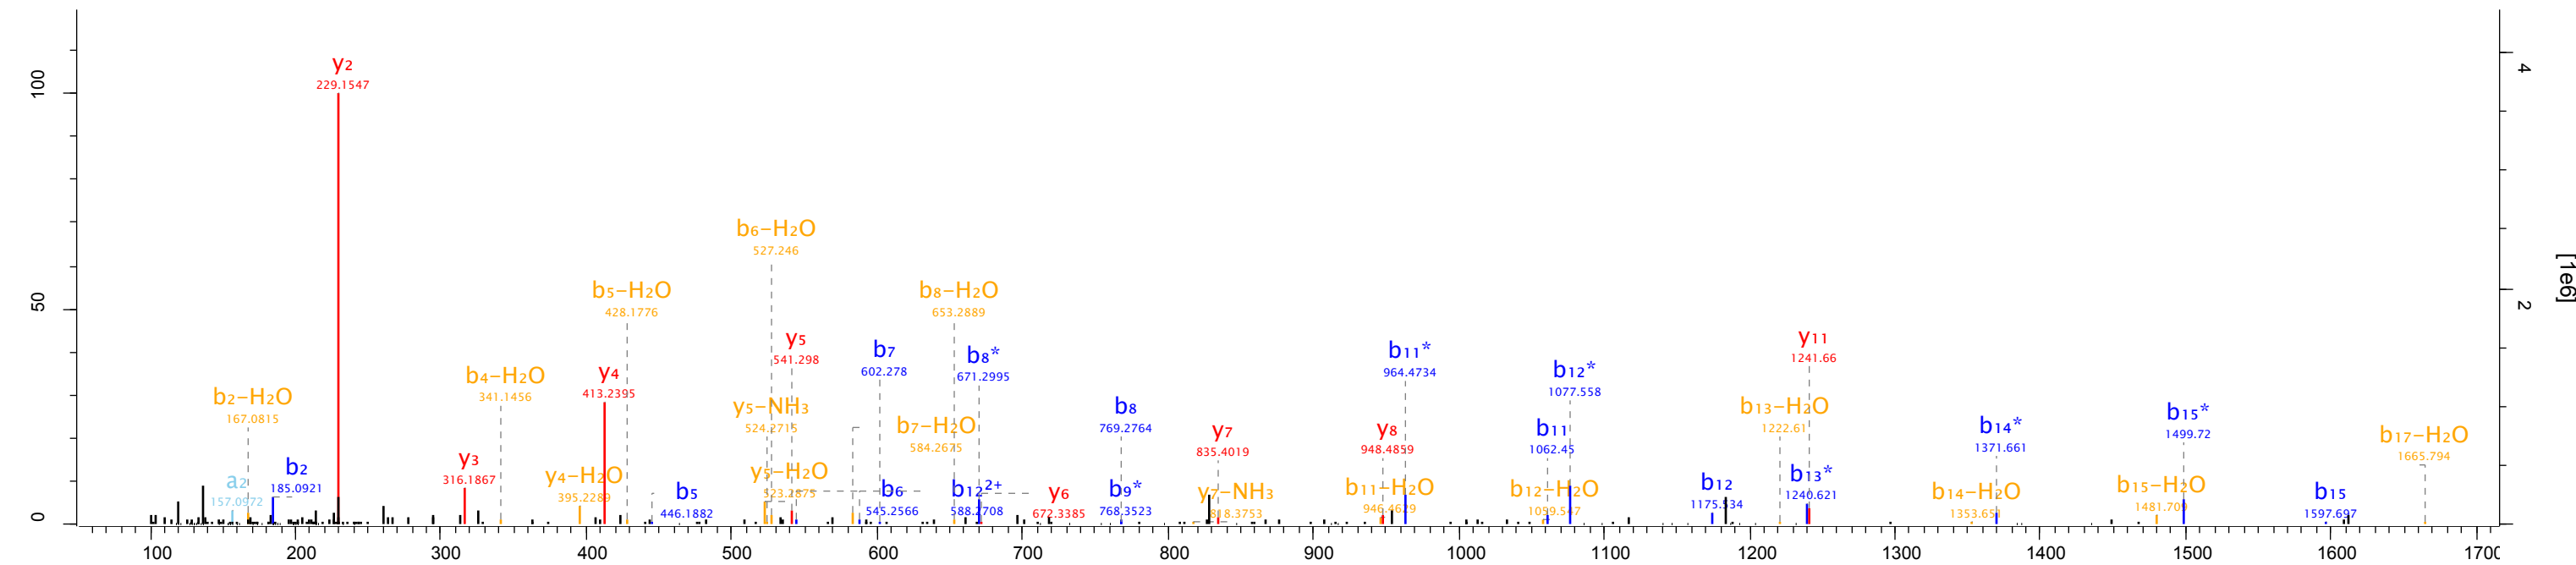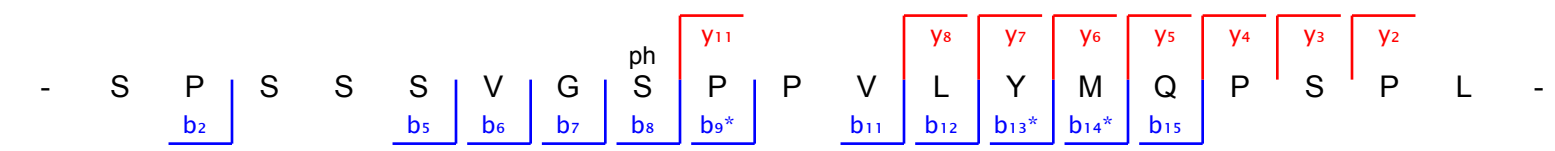

Raw file 20150814\_A375SR\_Phospho\_BR2\_05 Scan 28216 Method FTMS; HCD Score 194.82 m/z 1092.51 Gene names FOSL1

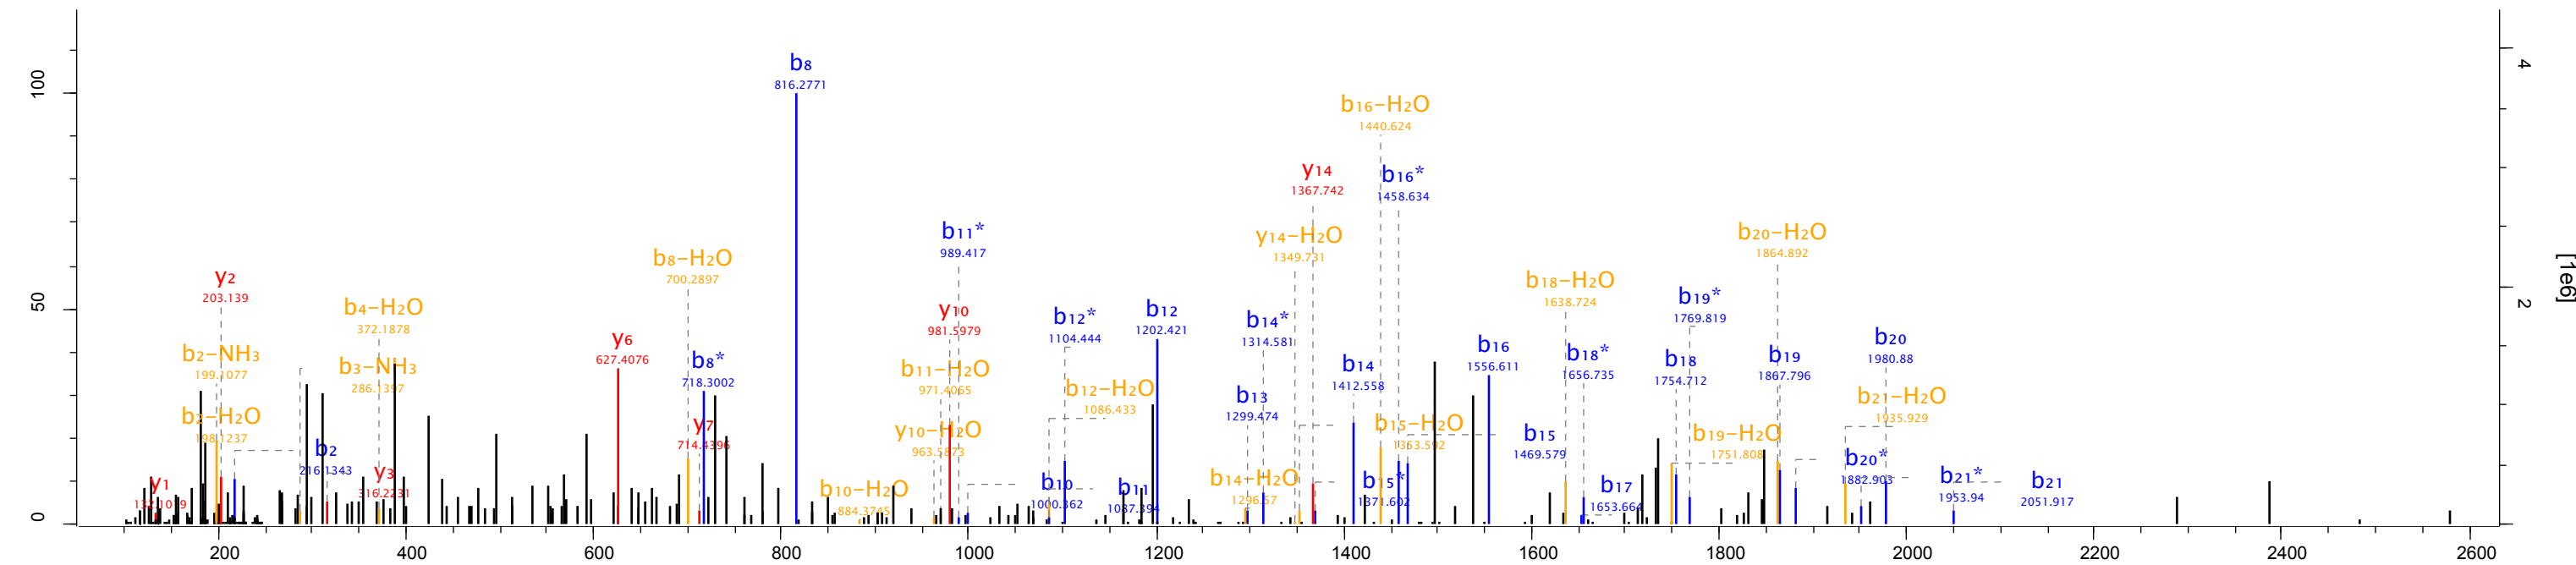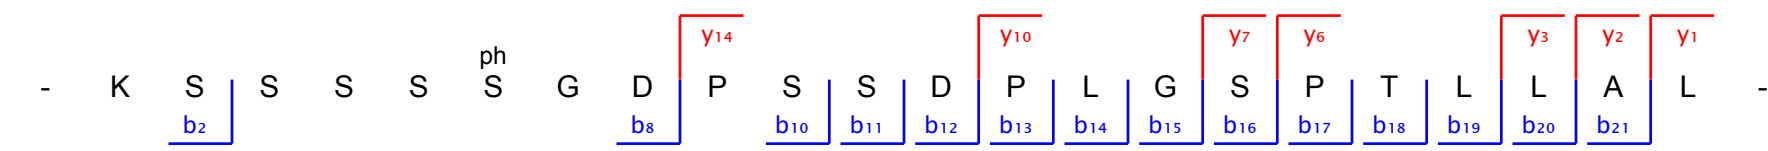

Raw file: 20150814\_A375SR\_Phospho\_BR2\_05  
 Scan: 2846 Method: FTMS; HCD Score: 70.34 m/z: 490.73 Gene names: FBXO42

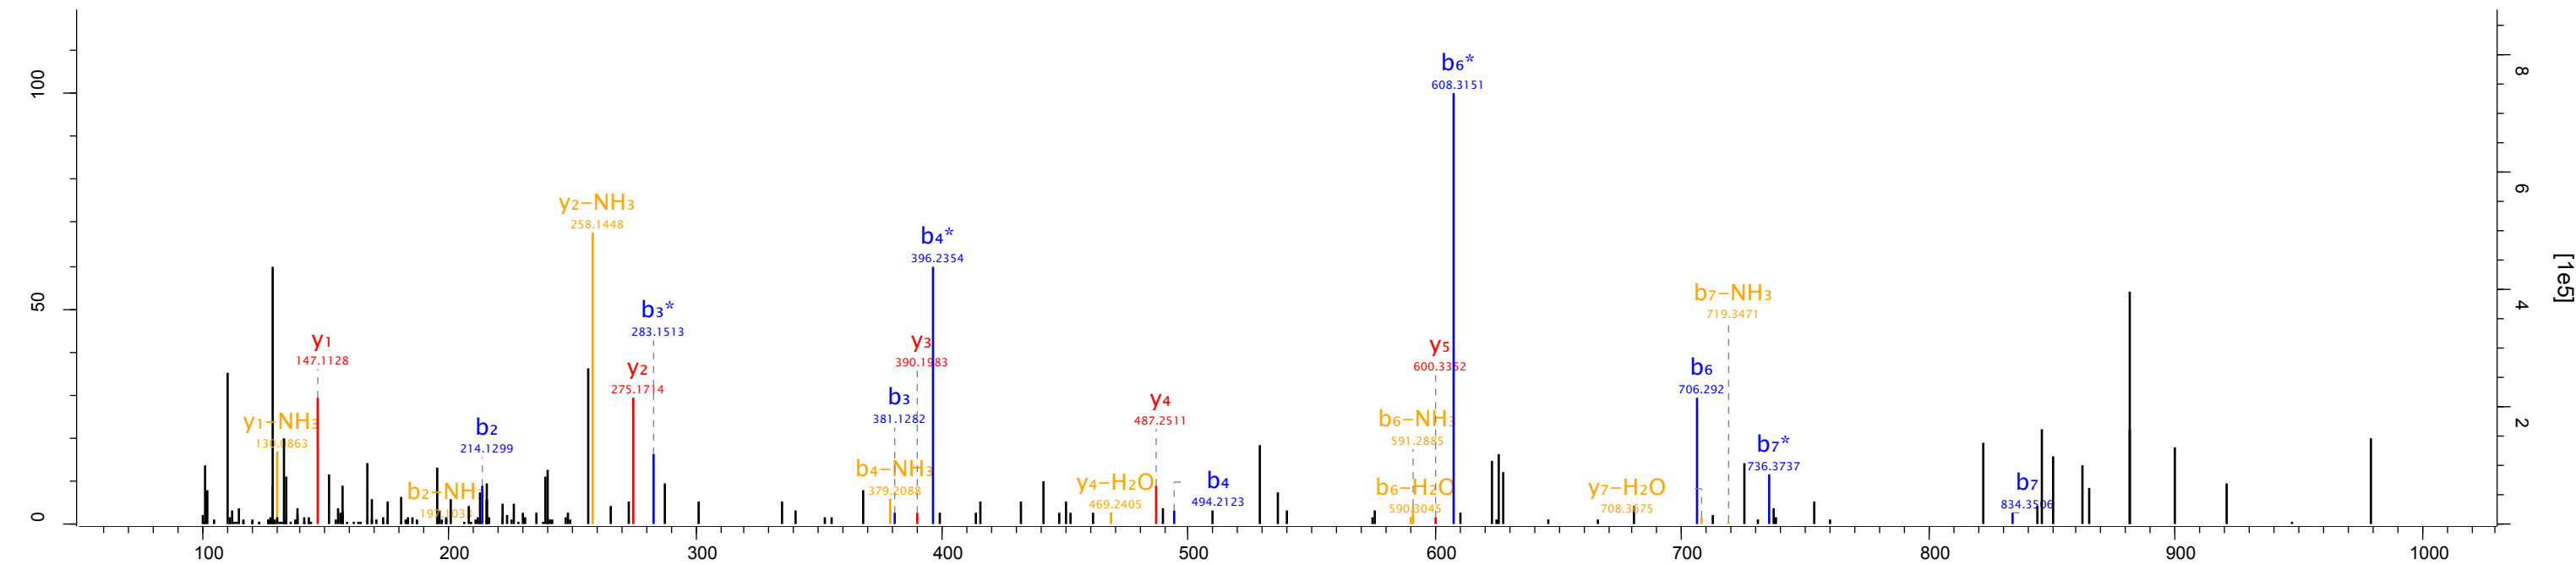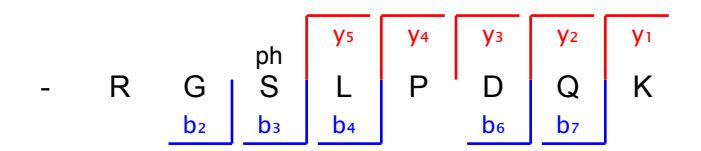

Raw file: 20150814\_A375SR\_Phospho\_BR2\_05  
 Scan: 28766 Method: FTMS; HCD Score: 155.95 m/z: 821.04 Gene names: MAP2K1;MAP2K2

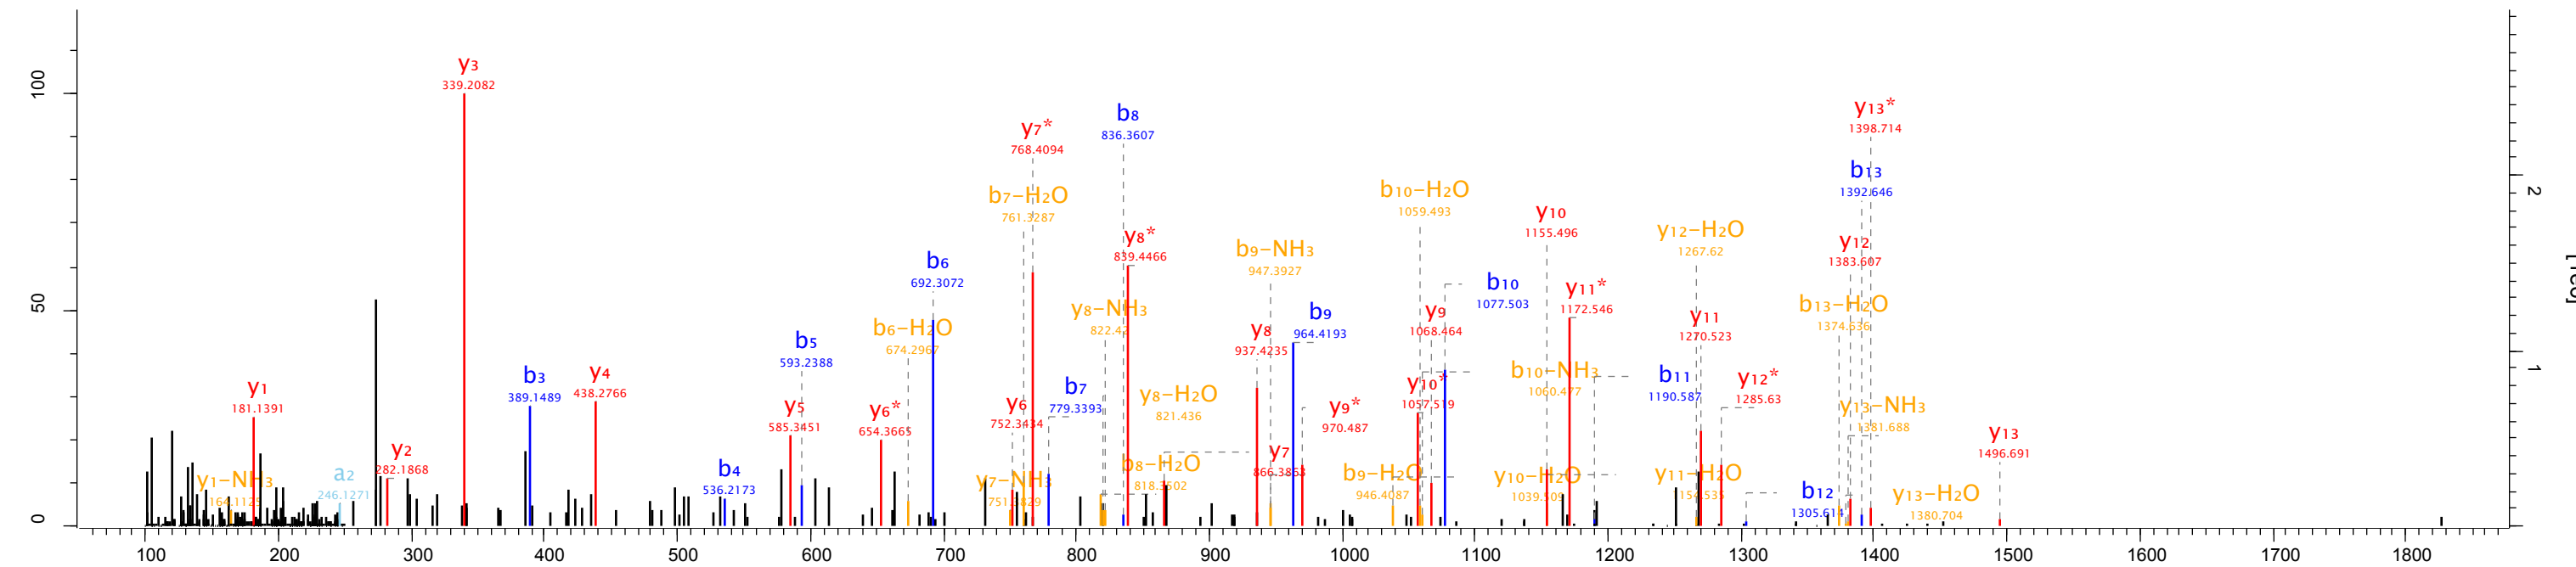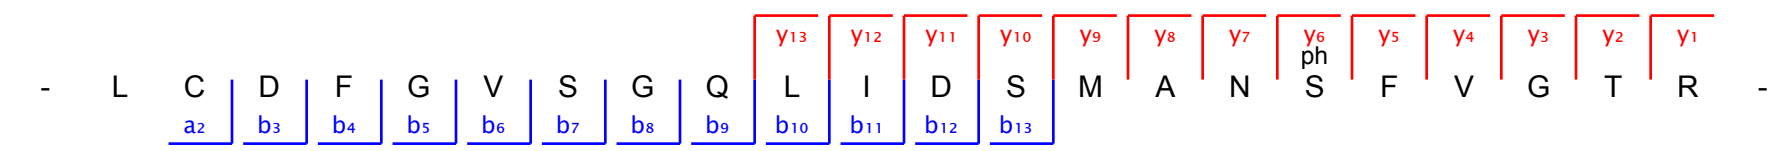

Raw file 20150814\_A375SR\_Phospho\_BR2\_05 Scan 28836 Method FTMS; HCD Score 62.05 m/z 852.04 Gene names TNKS1BP1

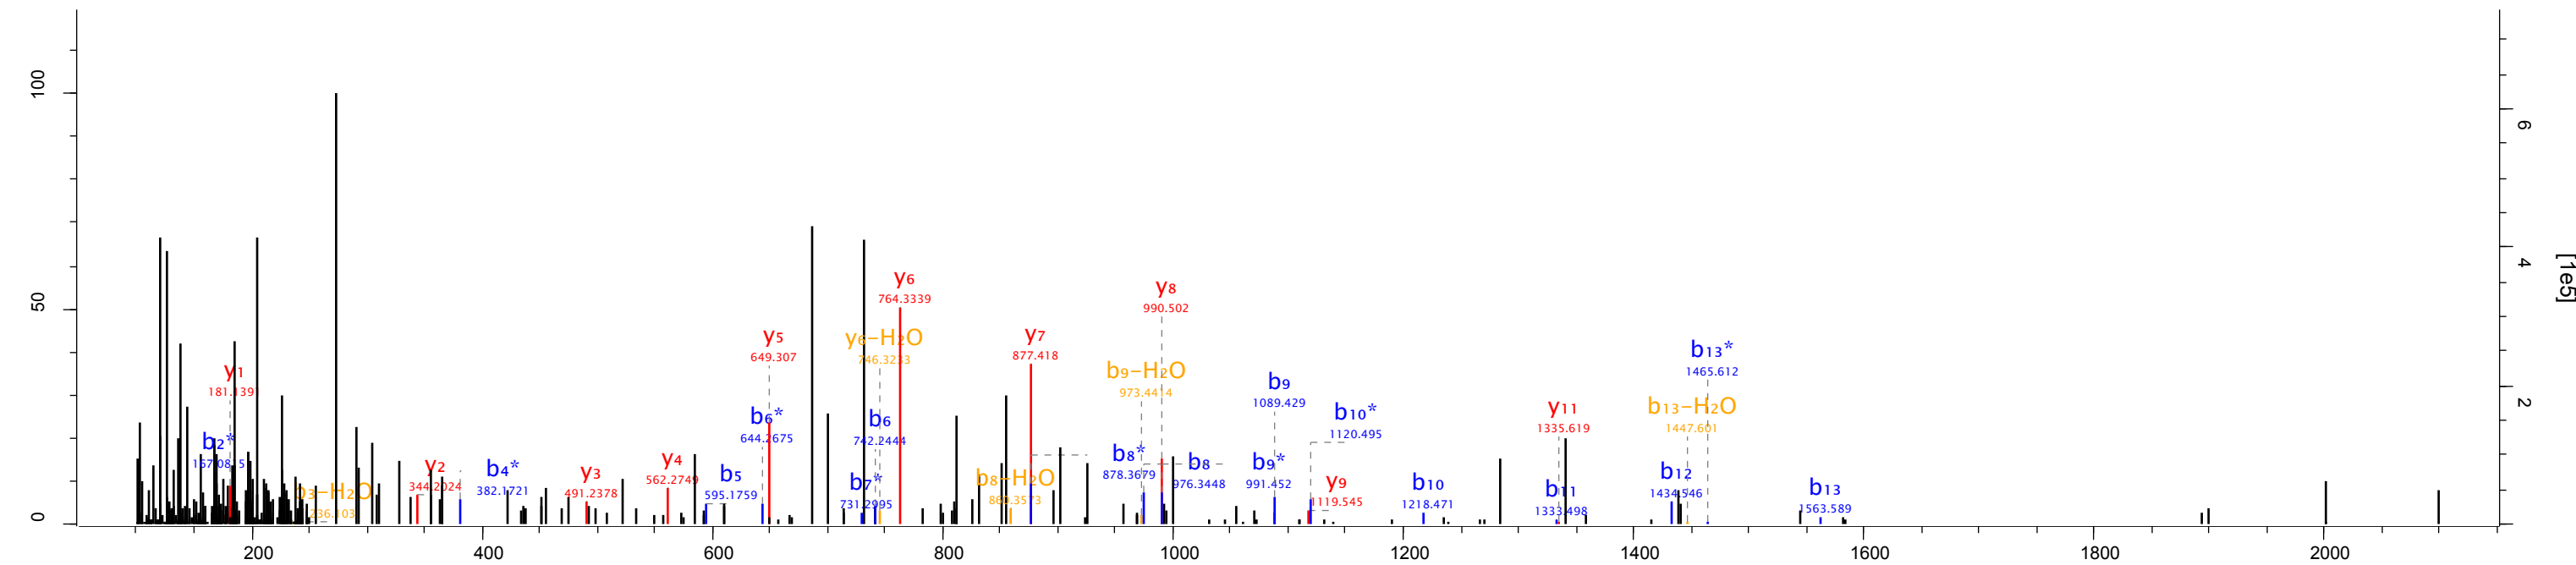

ph  
 - S P S Q D F S F I E D T E I L D S A M Y R -  
 b<sub>2</sub>\* b<sub>4</sub>\* b<sub>5</sub> b<sub>6</sub> b<sub>7</sub>\* b<sub>8</sub> b<sub>9</sub> b<sub>10</sub> b<sub>11</sub> b<sub>12</sub> b<sub>13</sub> y<sub>11</sub> y<sub>9</sub> y<sub>8</sub> y<sub>7</sub> y<sub>6</sub> y<sub>5</sub> y<sub>4</sub> y<sub>3</sub>OX y<sub>2</sub> y<sub>1</sub>



Raw file 20150814\_A375SR\_Phospho\_BR2\_05 Scan 28876 Method FTMS; HCD Score 43.09 m/z 683.3 Gene names YAP1

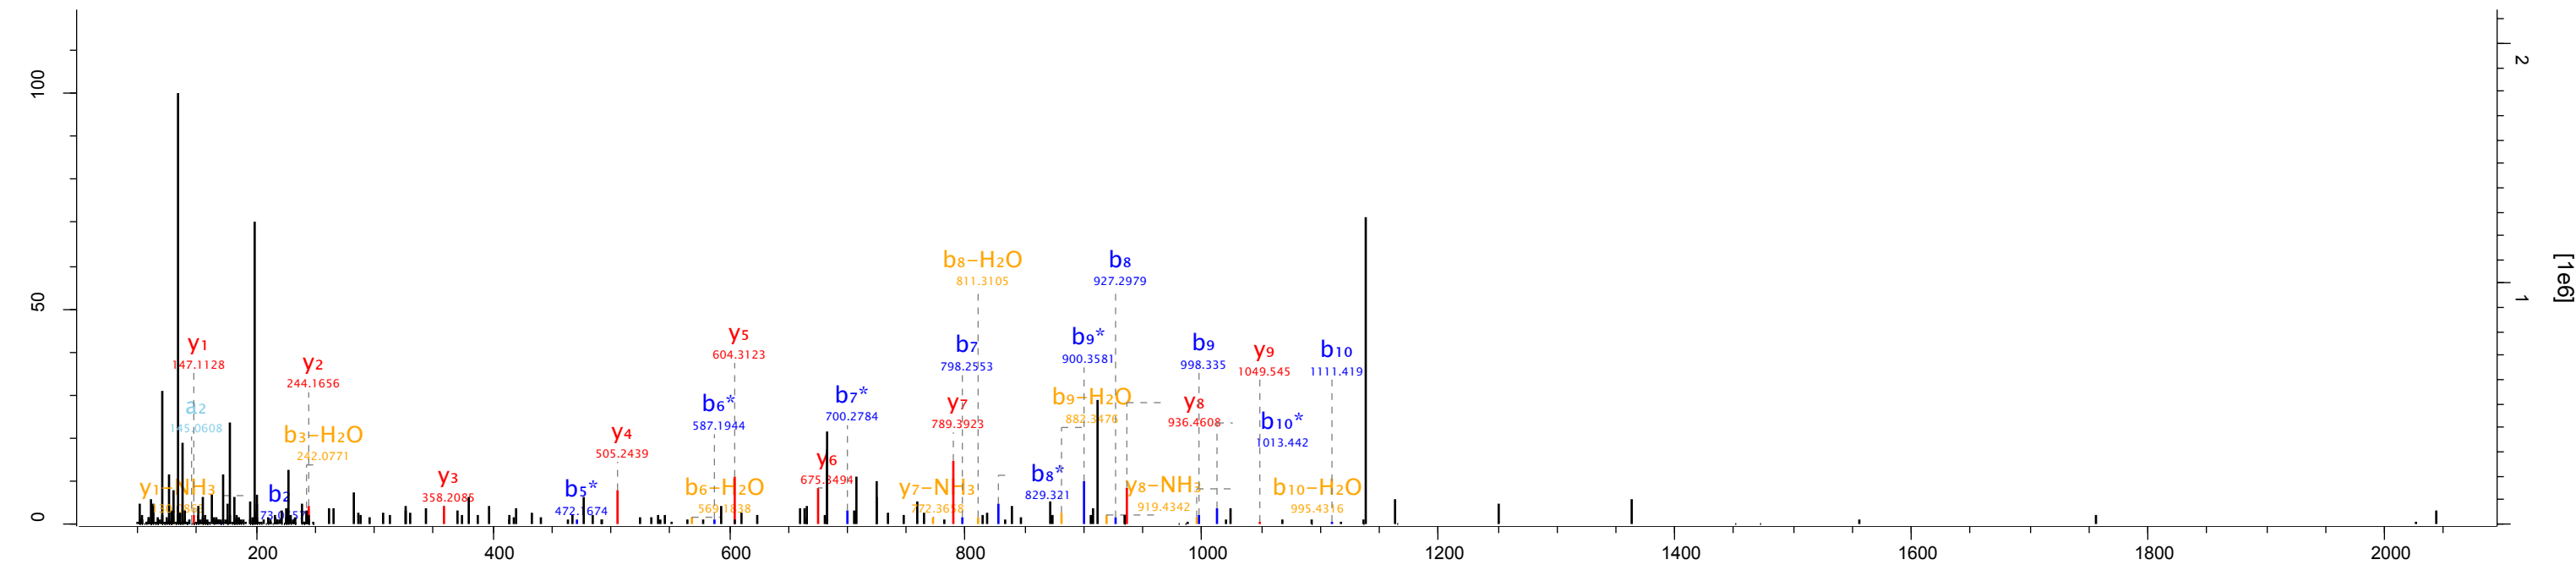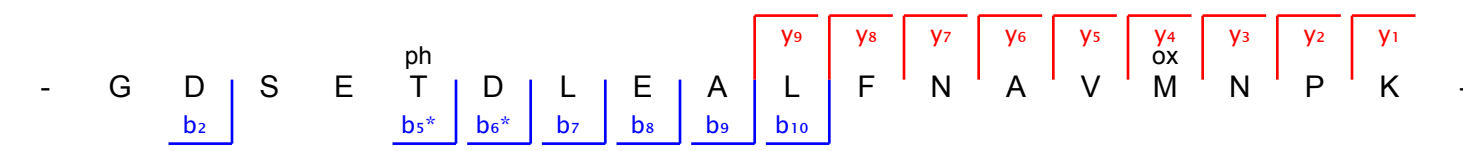

Raw file: 20150814\_A375SR\_Phospho\_BR2\_05  
 Scan: 3076 Method: FTMS; HCD Score: 133.52 m/z: 713.35 Gene names: DPYSL2

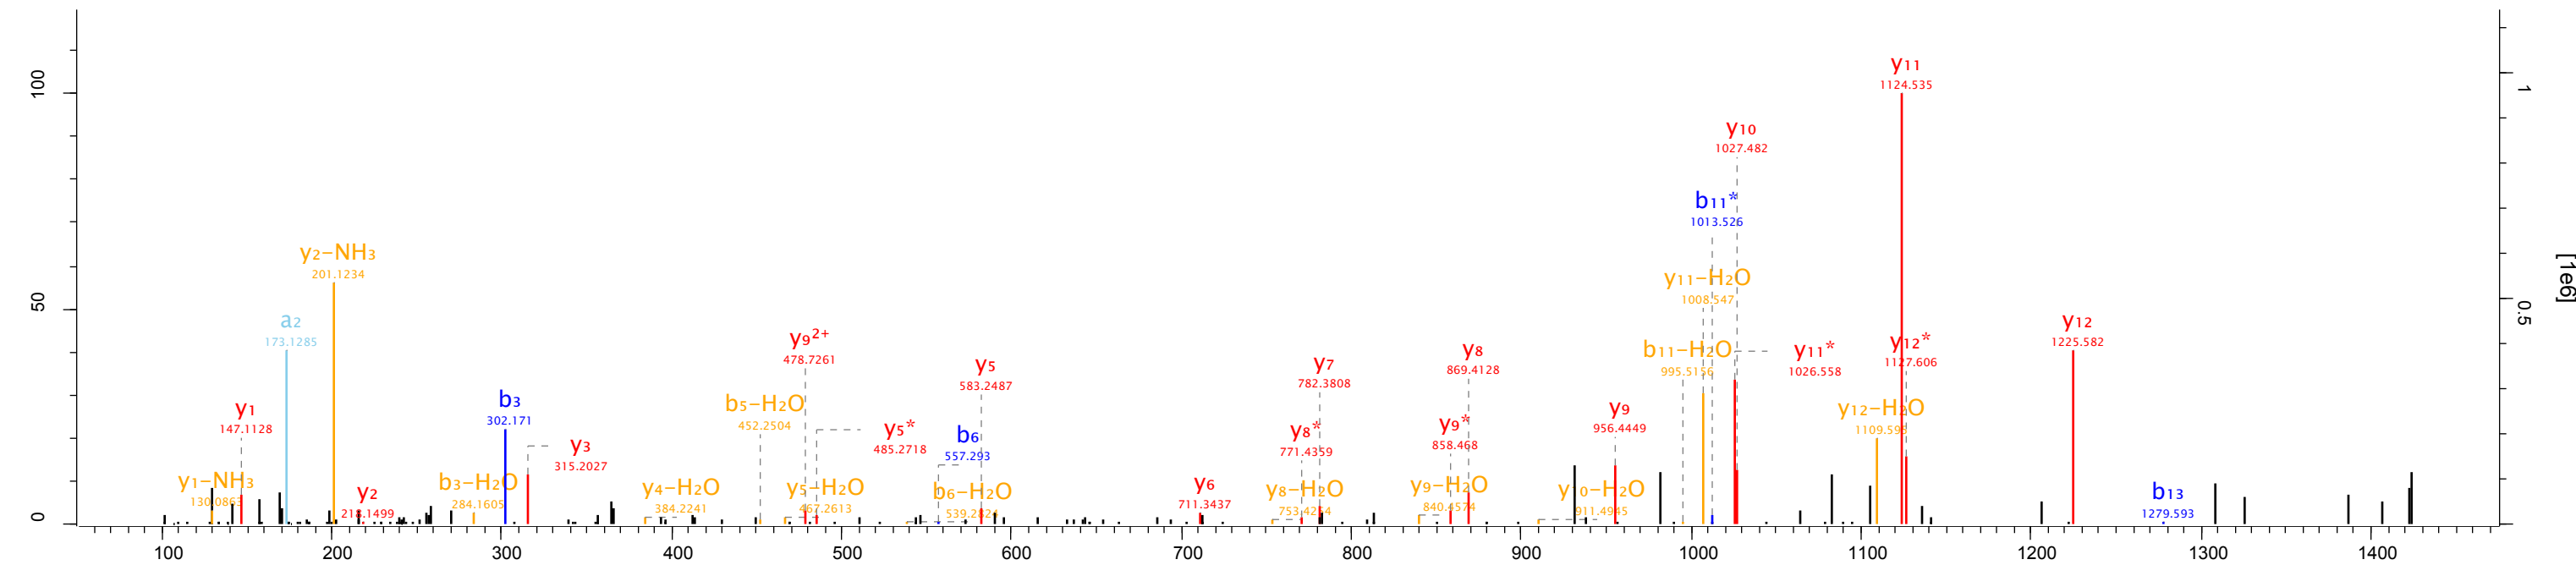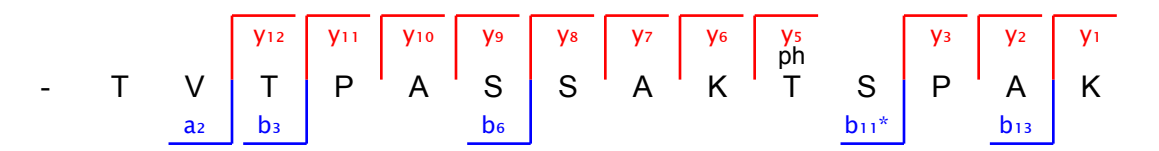

Raw file: 20150814\_A375SR\_Phospho\_BR2\_05  
 Scan: 3326 Method: FTMS; HCD Score: 105.65 m/z: 559.73 Gene names: PLCG1

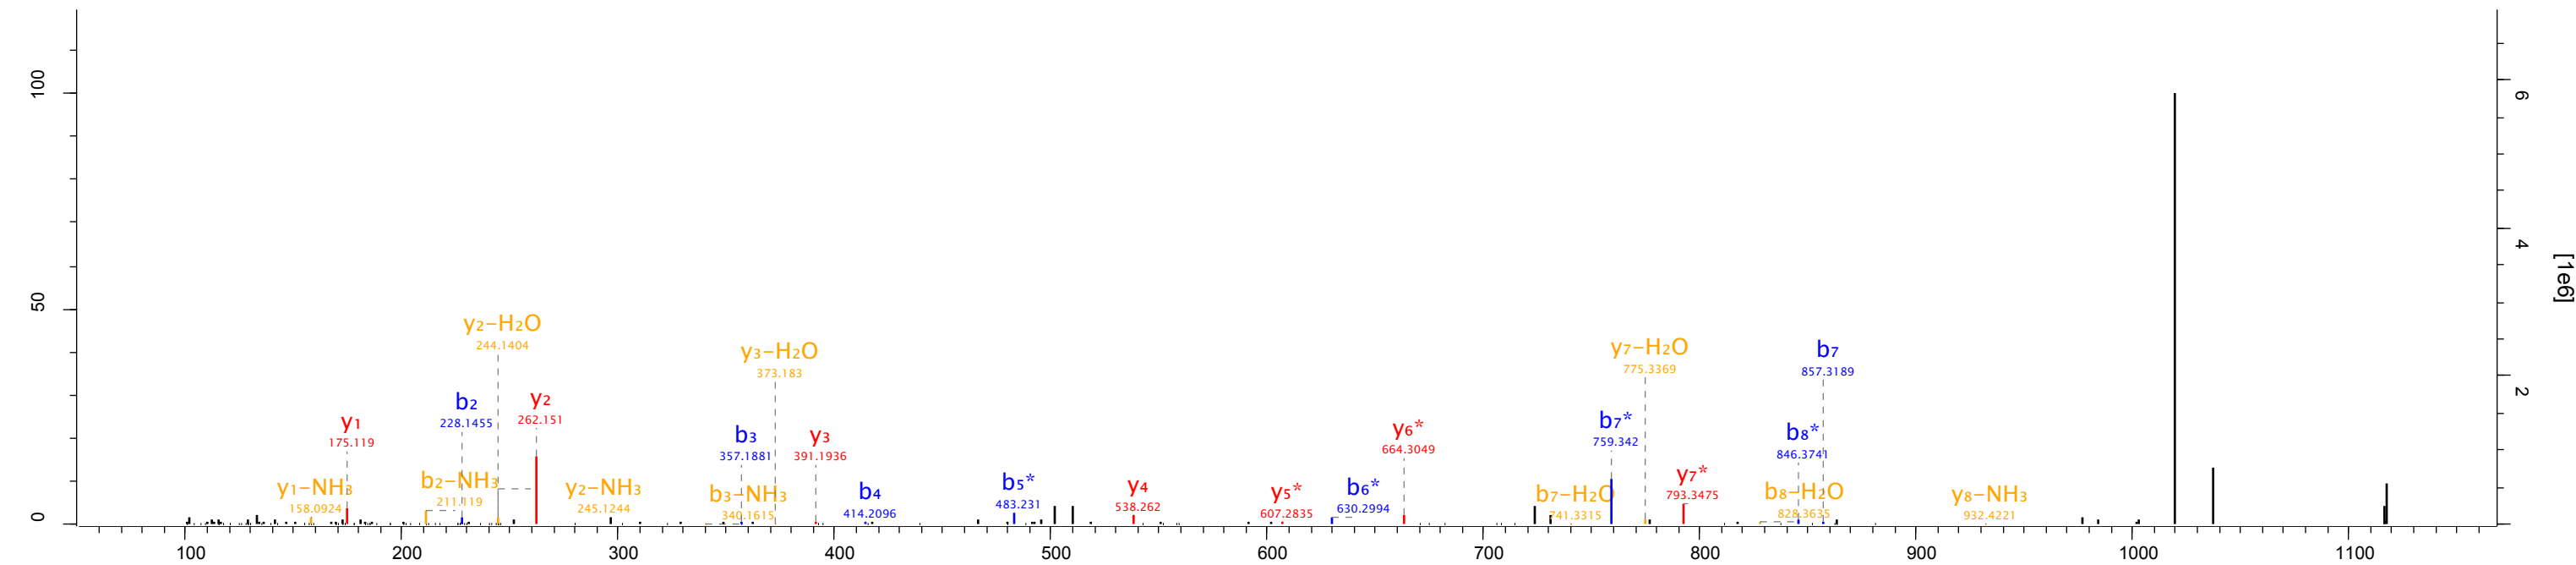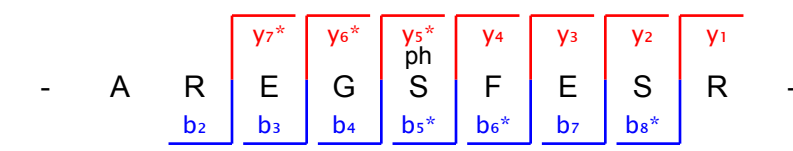

Raw file: 20150814\_A375SR\_Phospho\_BR2\_05  
 Scan: 3726 Method: FTMS; HCD Score: 263.03 m/z: 723.36 Gene names: CC2D1A

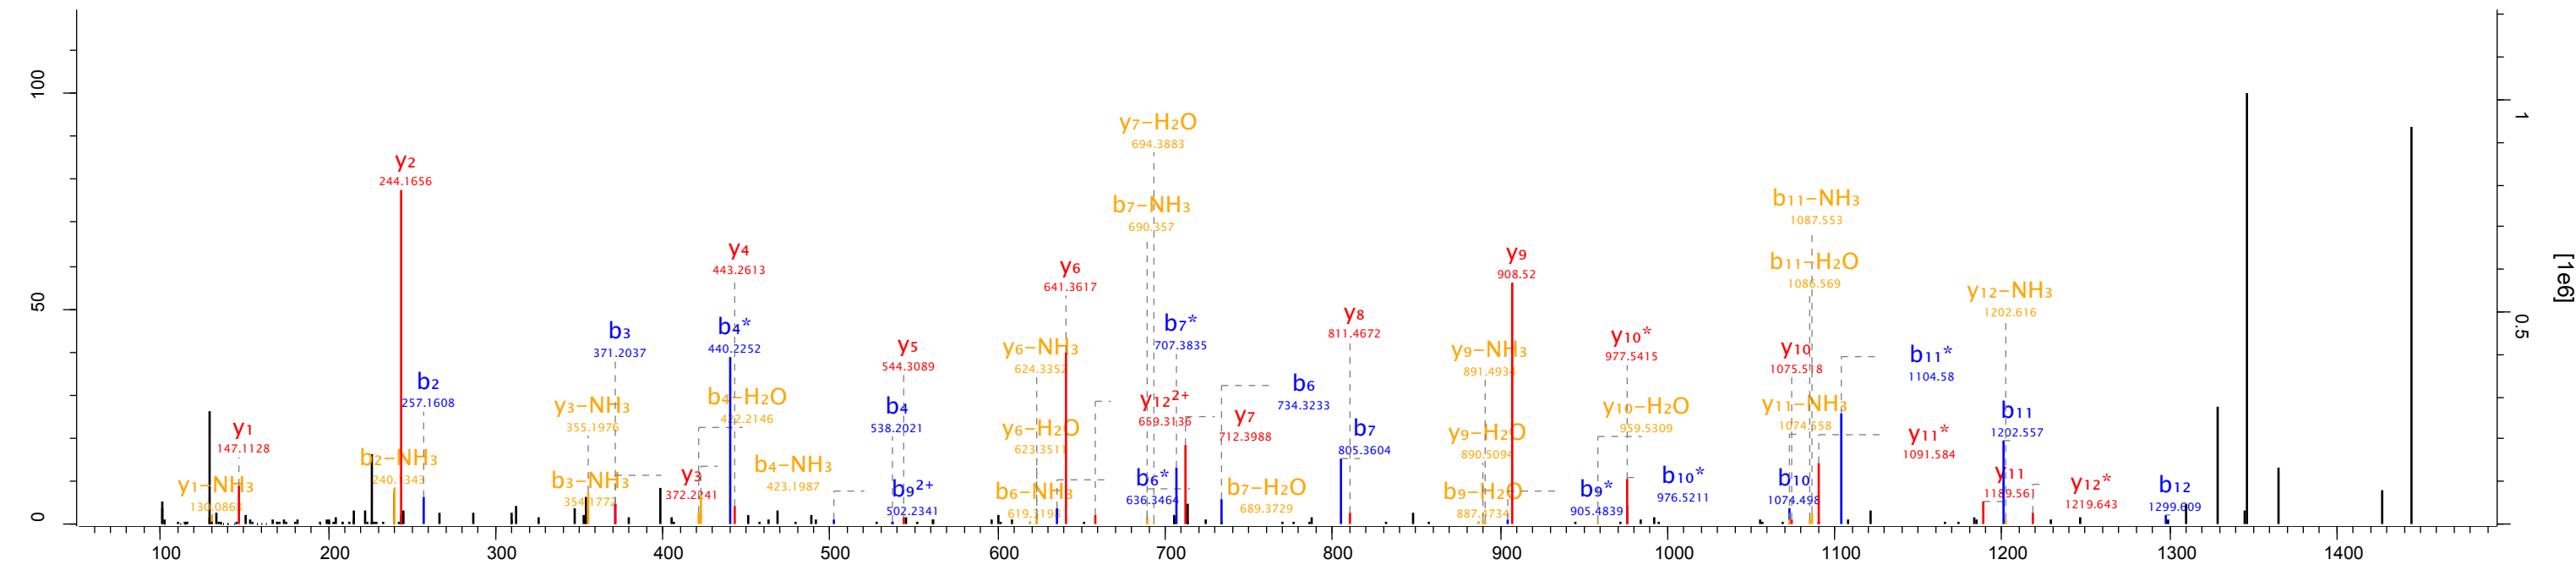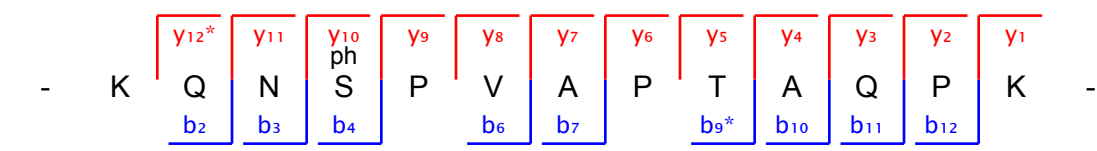

Raw file: 20150814\_A375SR\_Phospho\_BR2\_05  
 Scan: 3946 Method: FTMS; HCD Score: 239.31 m/z: 665.26 Gene names: AHNAK2

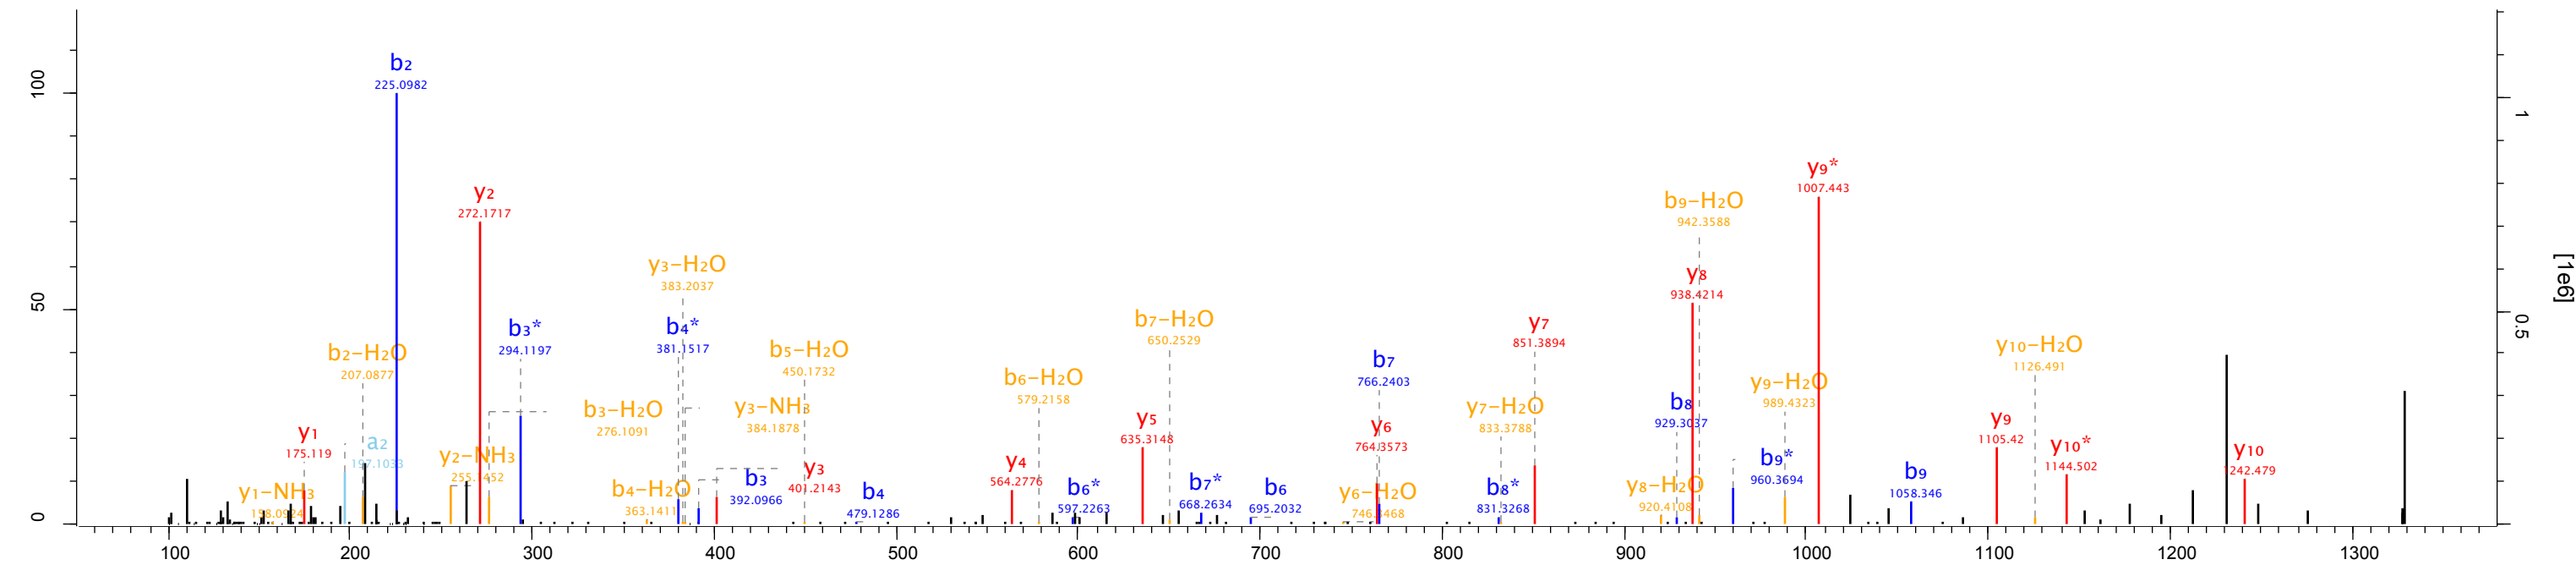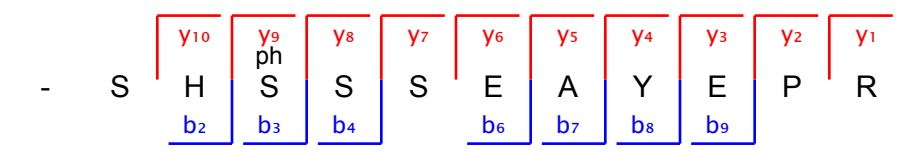

Raw file: 20150814\_A375SR\_Phospho\_BR2\_05  
 Scan: 4126 Method: FTMS; HCD Score: 127.57 m/z: 695.77 Gene names: SGTB

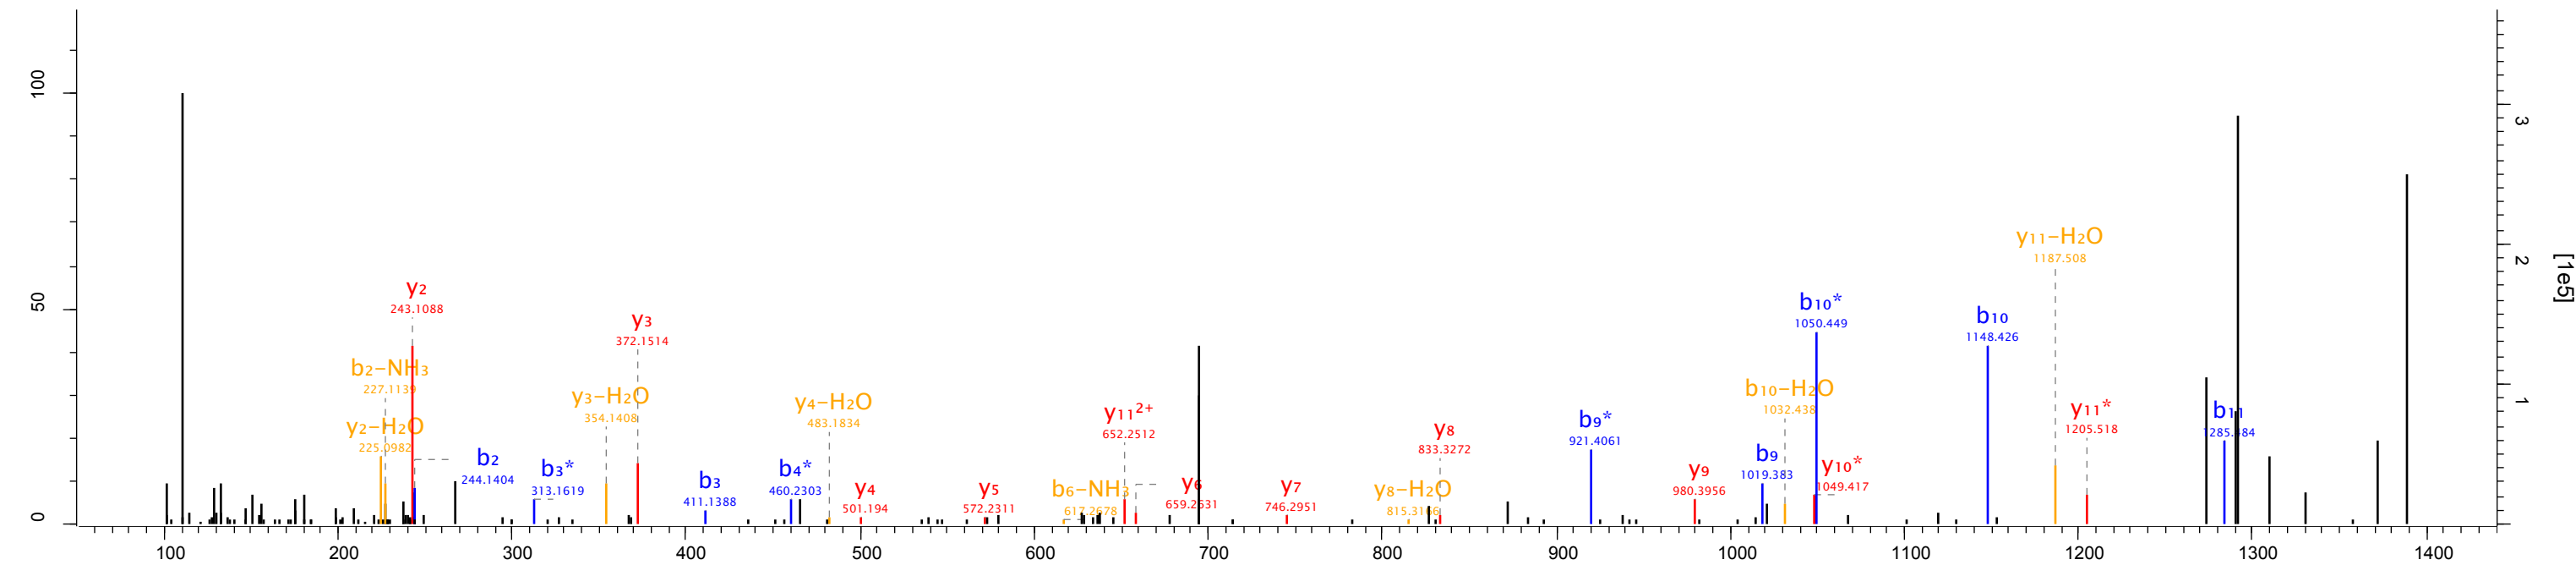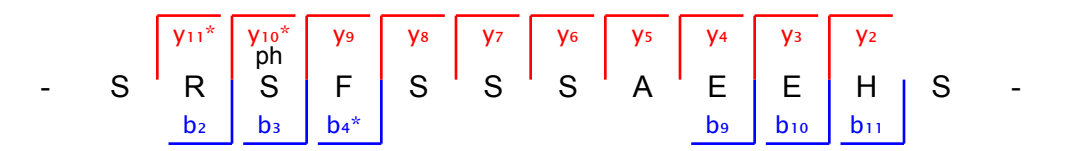

Raw file: 20150814\_A375SR\_Phospho\_BR2\_05  
 Scan: 6196 Method: FTMS; HCD Score: 156.79 m/z: 691.02 Gene names: KIF5B

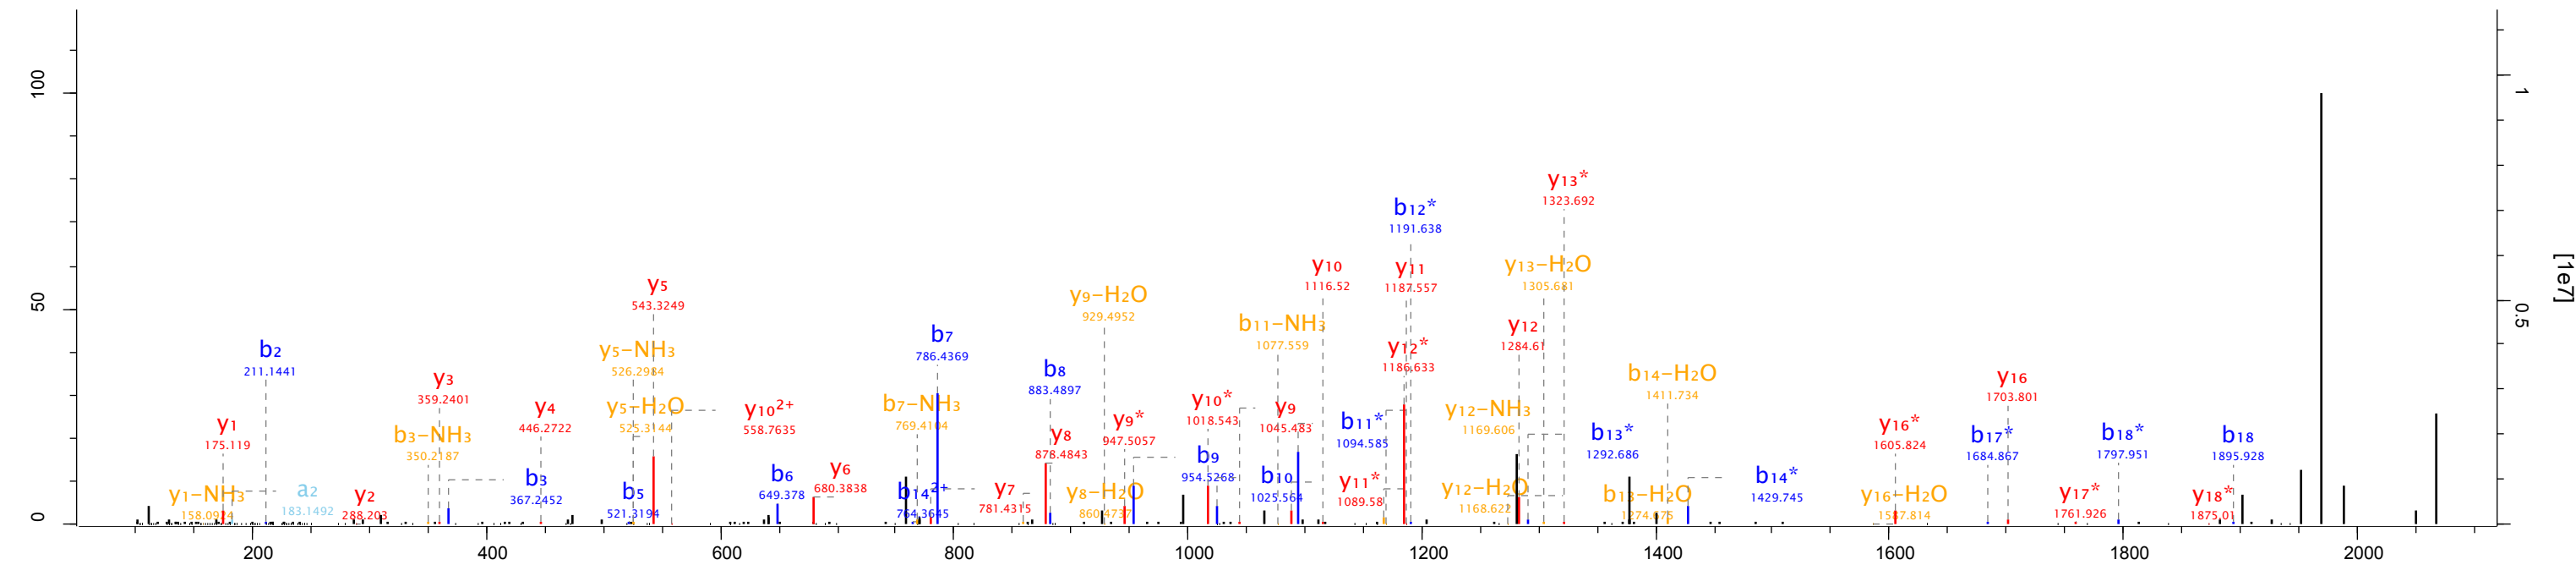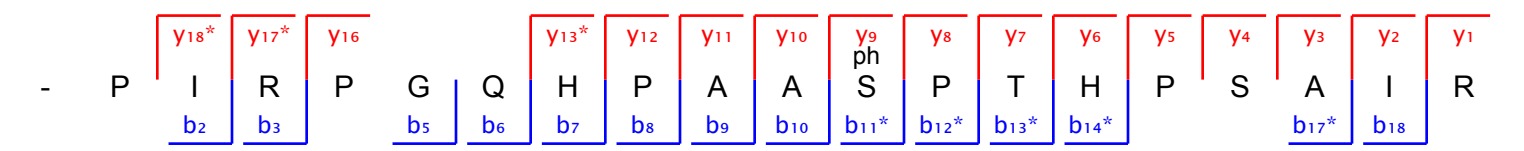

Raw file: 20150814\_A375SR\_Phospho\_BR2\_05  
 Scan: 6746 Method: FTMS; HCD Score: 88.1 m/z: 555.26 Gene names: SRRM2

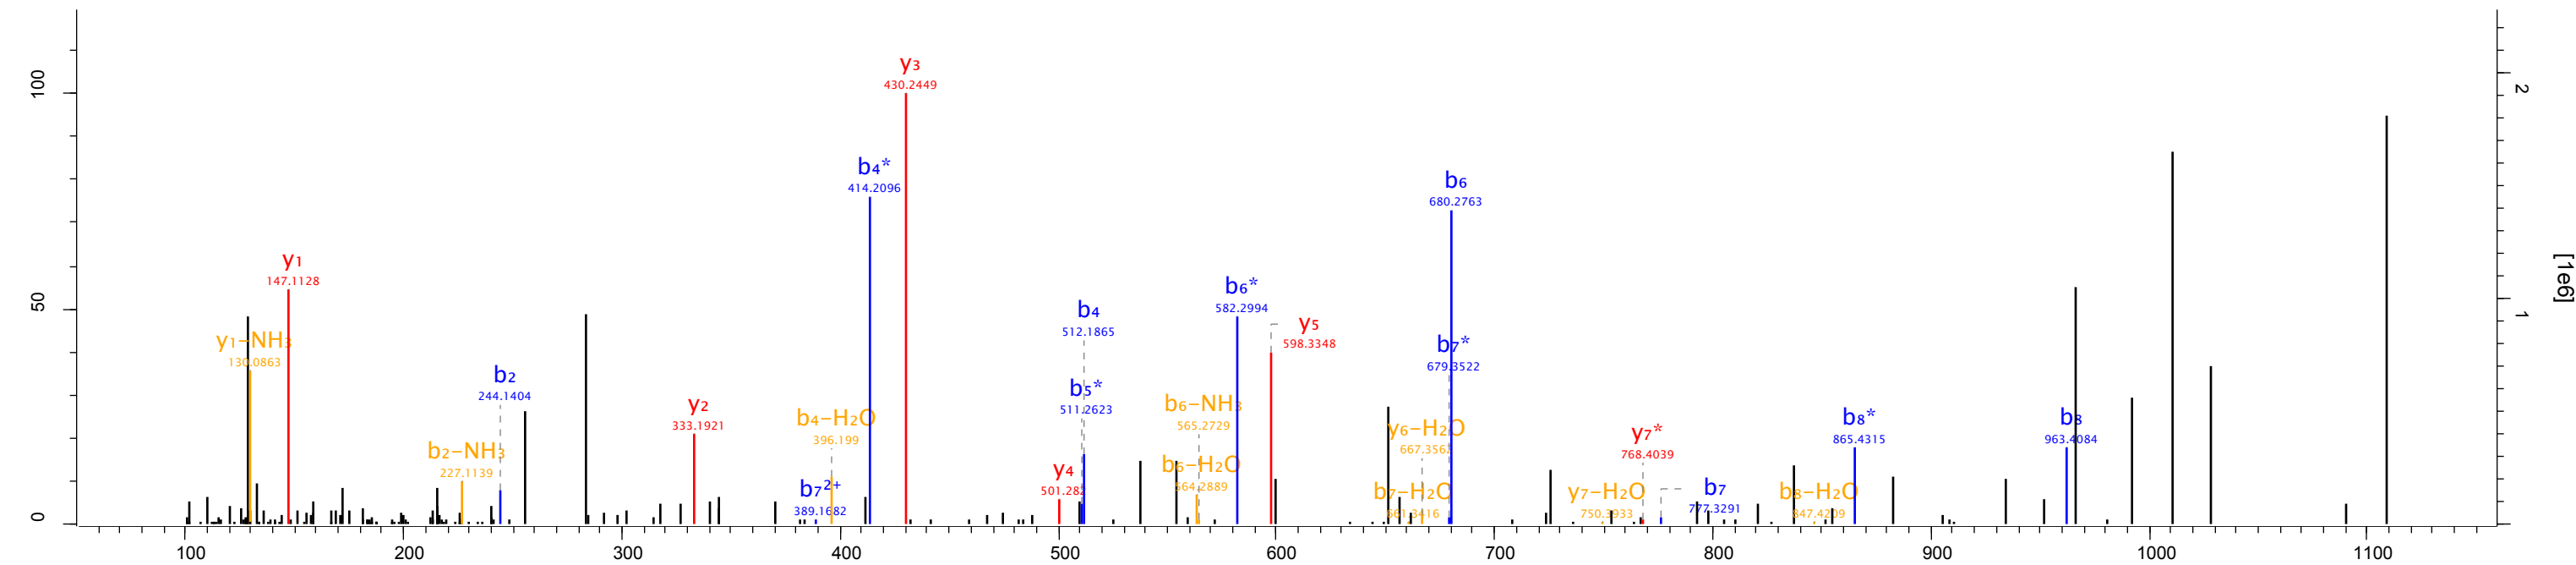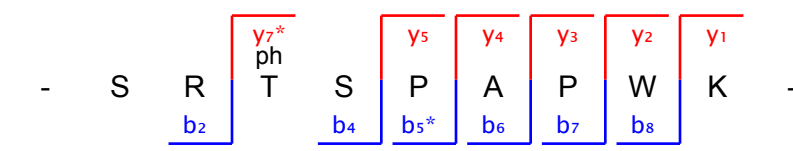



Raw file: 20150814\_A375SR\_Phospho\_BR2\_05  
 Scan: 7066 Method: FTMS; HCD Score: 172.74 m/z: 793.38 Gene names: CDK12

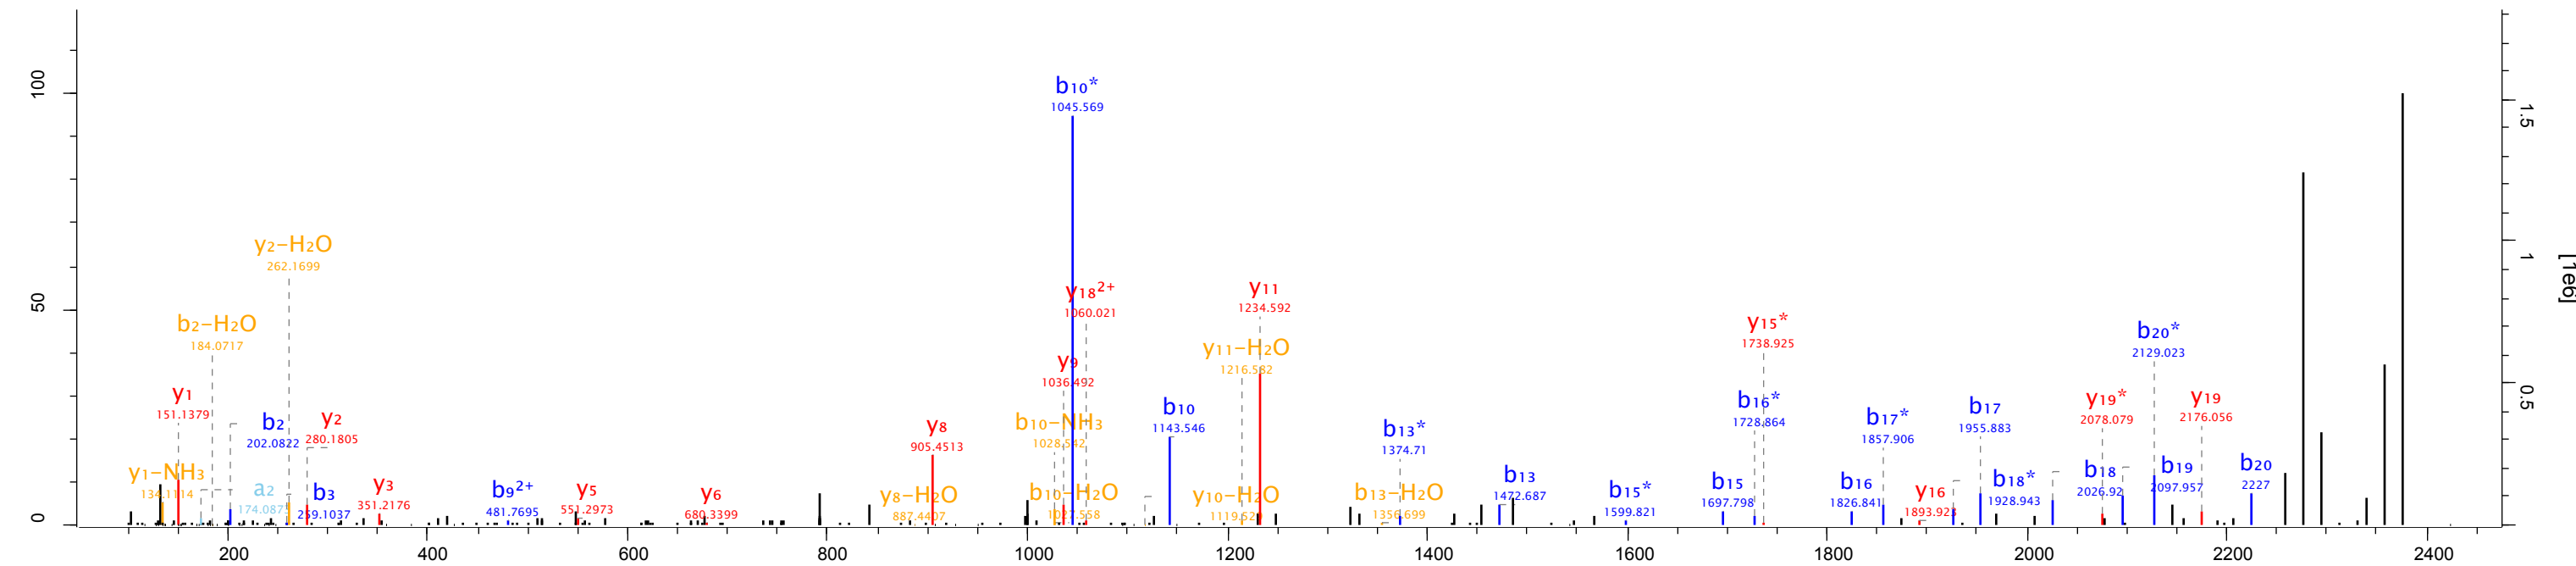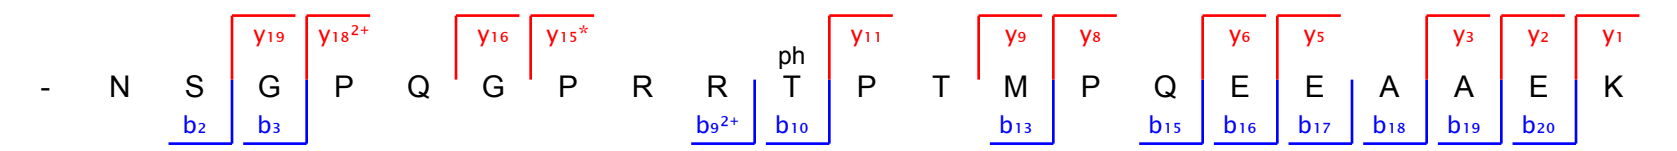

Raw file: 20150814\_A375SR\_Phospho\_BR2\_05  
 Scan: 8716 Method: FTMS; HCD Score: 221.58 m/z: 881.93 Gene names: ZNF532

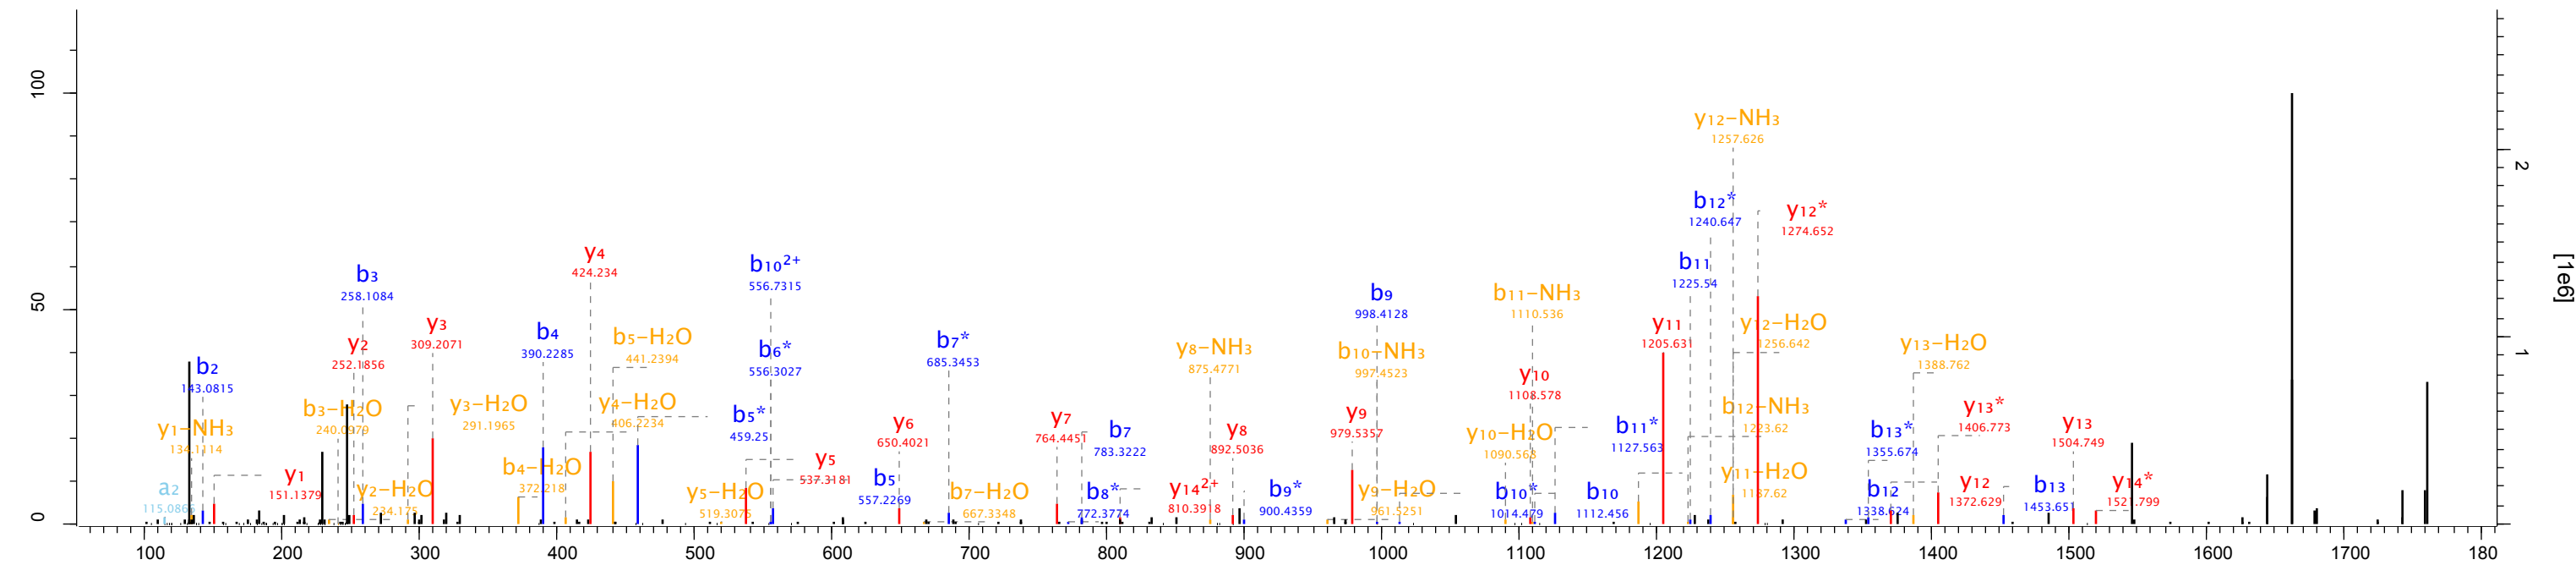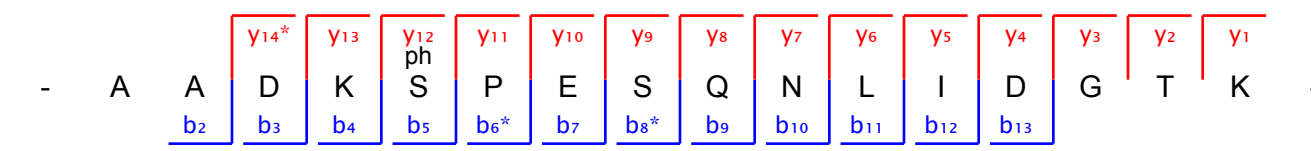

Raw file: 20150814\_A375SR\_Phospho\_BR2\_05  
 Scan: 8836 Method: FTMS; HCD Score: 57.66 m/z: 686.85 Gene names: RAB11FIP2

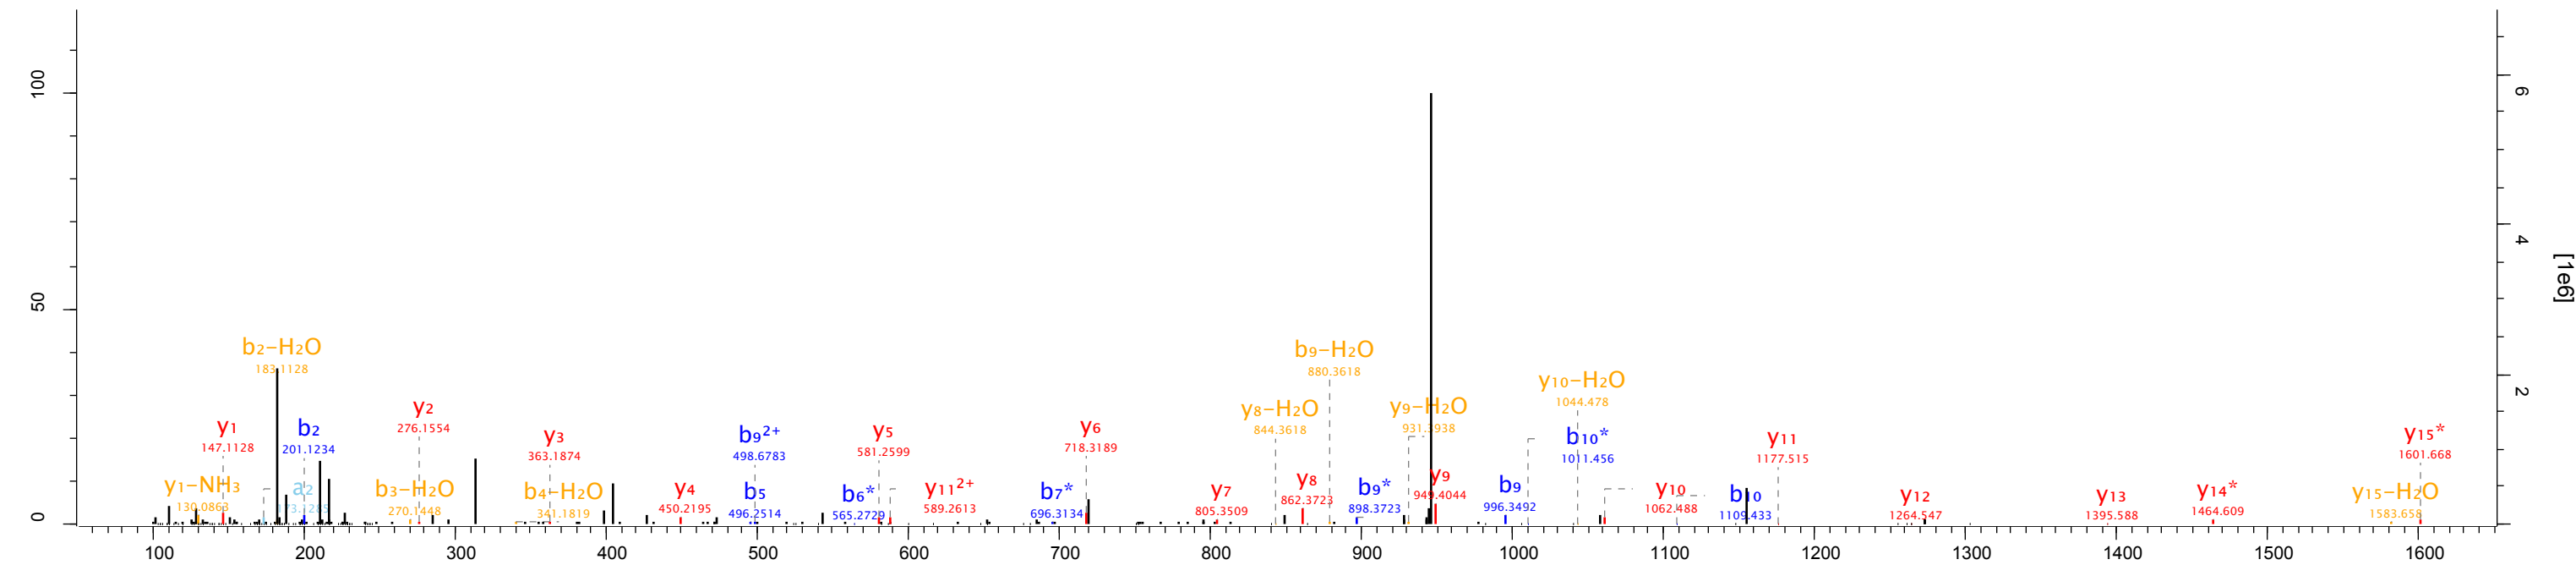

- L S S A H S D L S G S H M S S E K -  
 (b2) (b5) (b6\*) (b7\*) (b9) (b10)

Raw file: 20150814\_A375SR\_Phospho\_BR2\_05  
 Scan: 9276 Method: FTMS; HCD Score: 101.8 m/z: 694.81 Gene names: TSC2

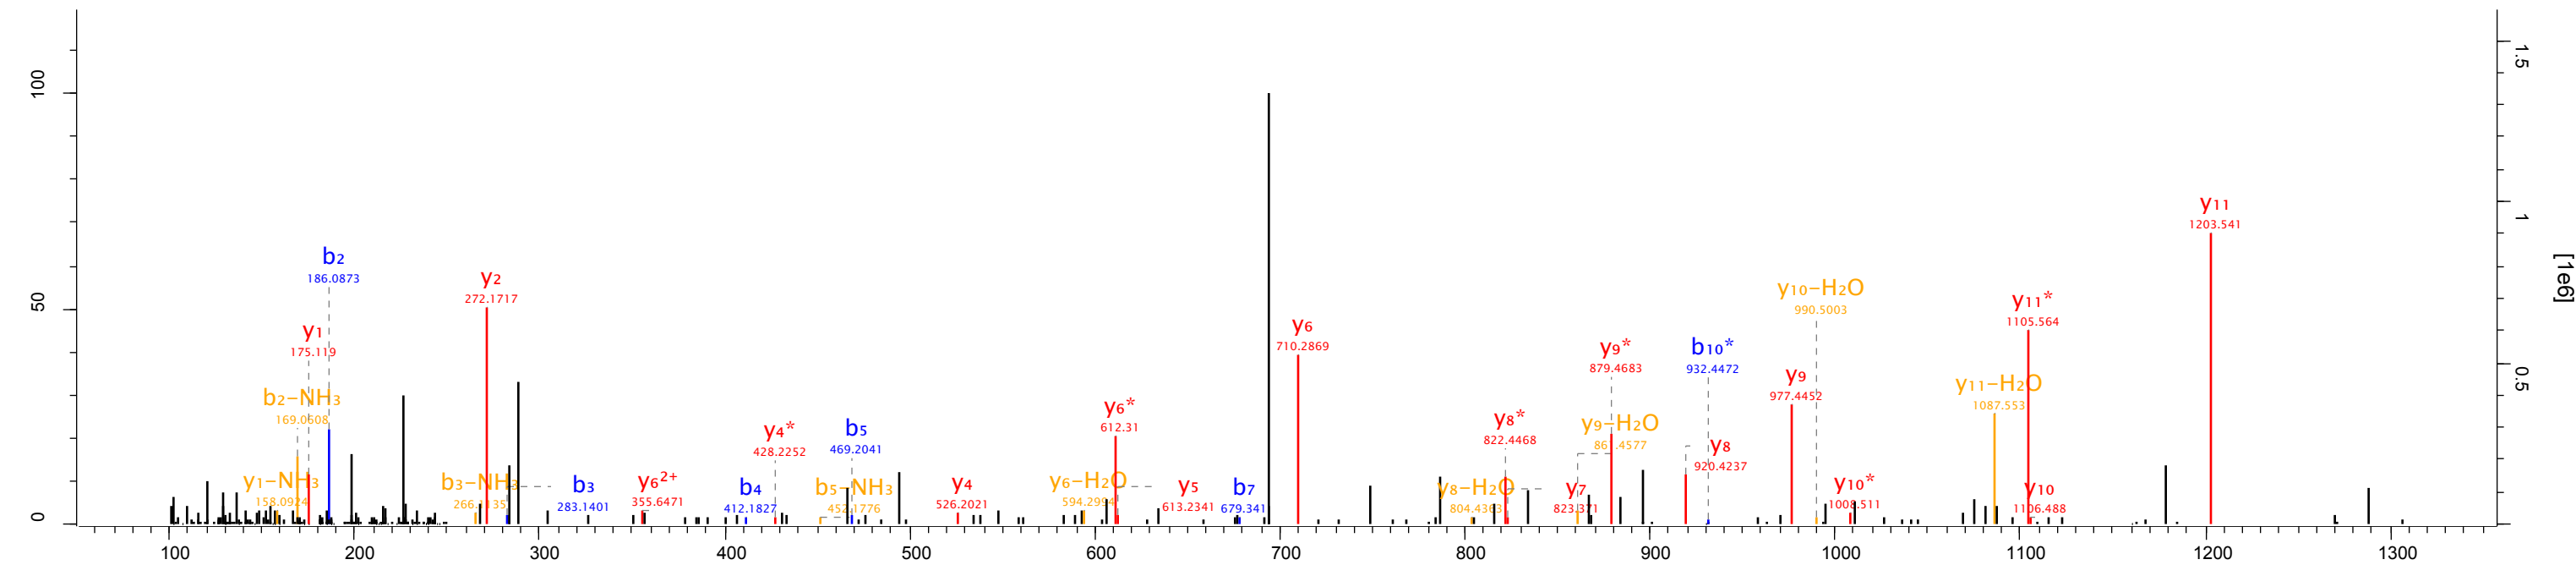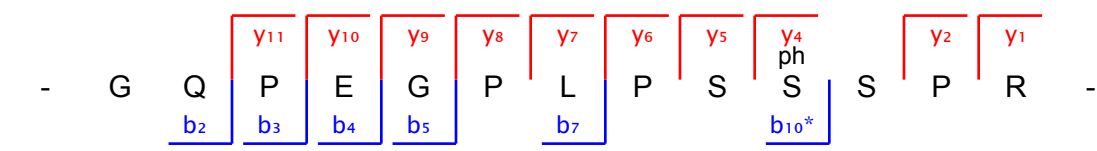

Raw file 20150814\_A375SR\_Phospho\_BR2\_05 Scan 9286 Method FTMS; HCD Score 98.9 m/z 602.79 Gene names LMNB2

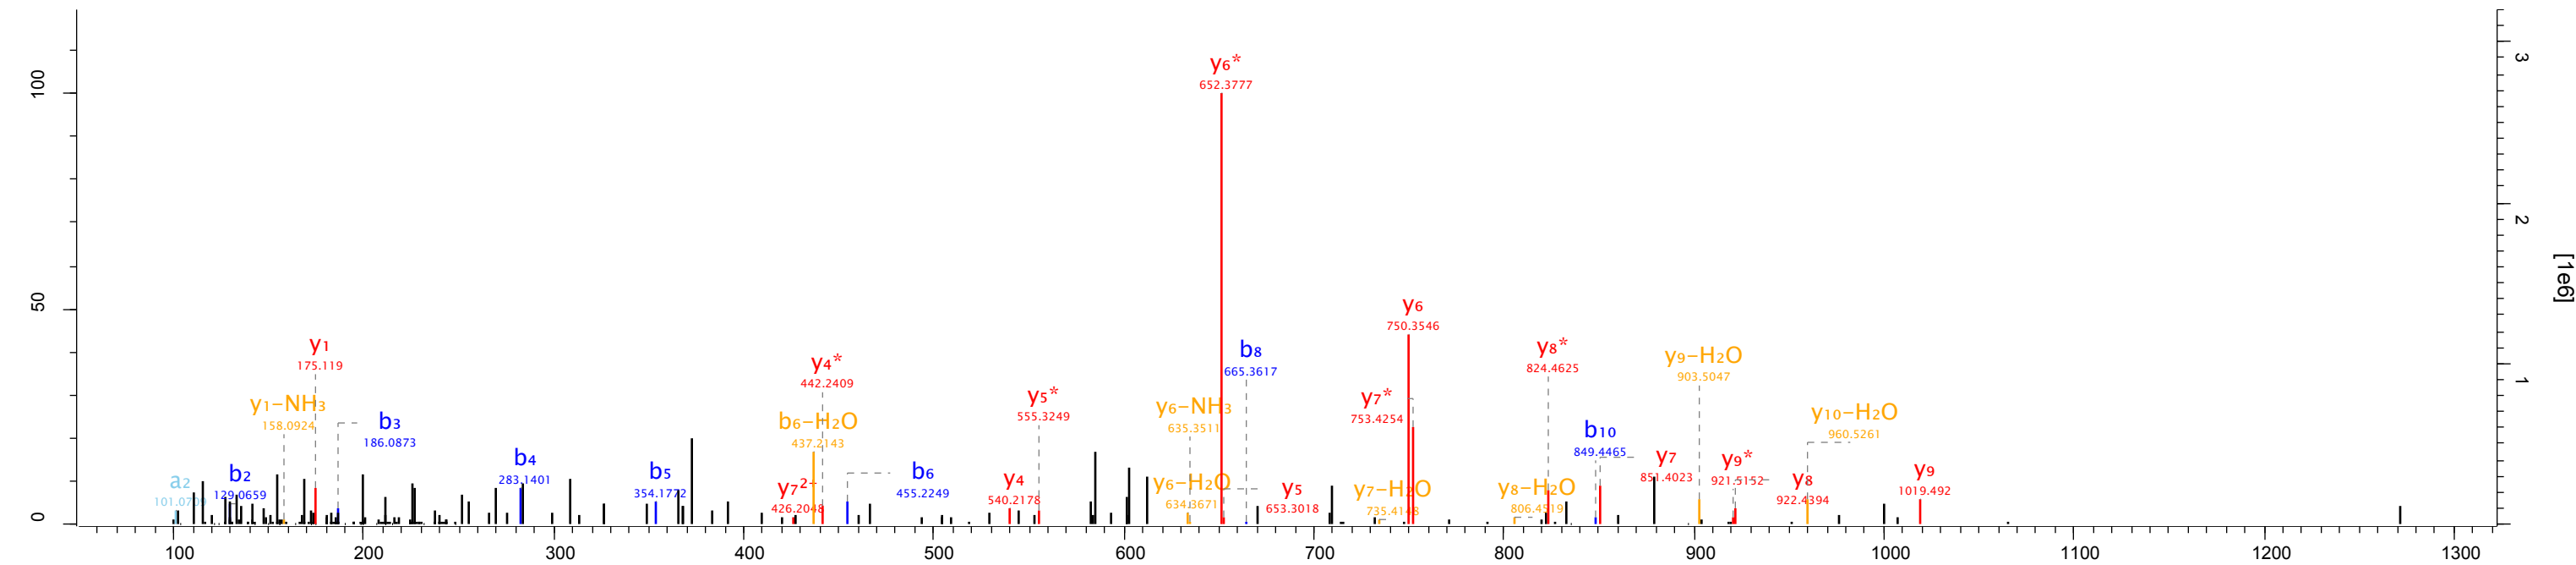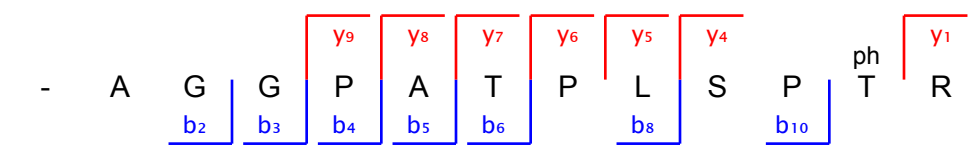

Raw file: 20150814\_A375SR\_Phospho\_BR2\_05  
 Scan: 9296 Method: FTMS; HCD Score: 100.02 m/z: 413.21 Gene names: DEK

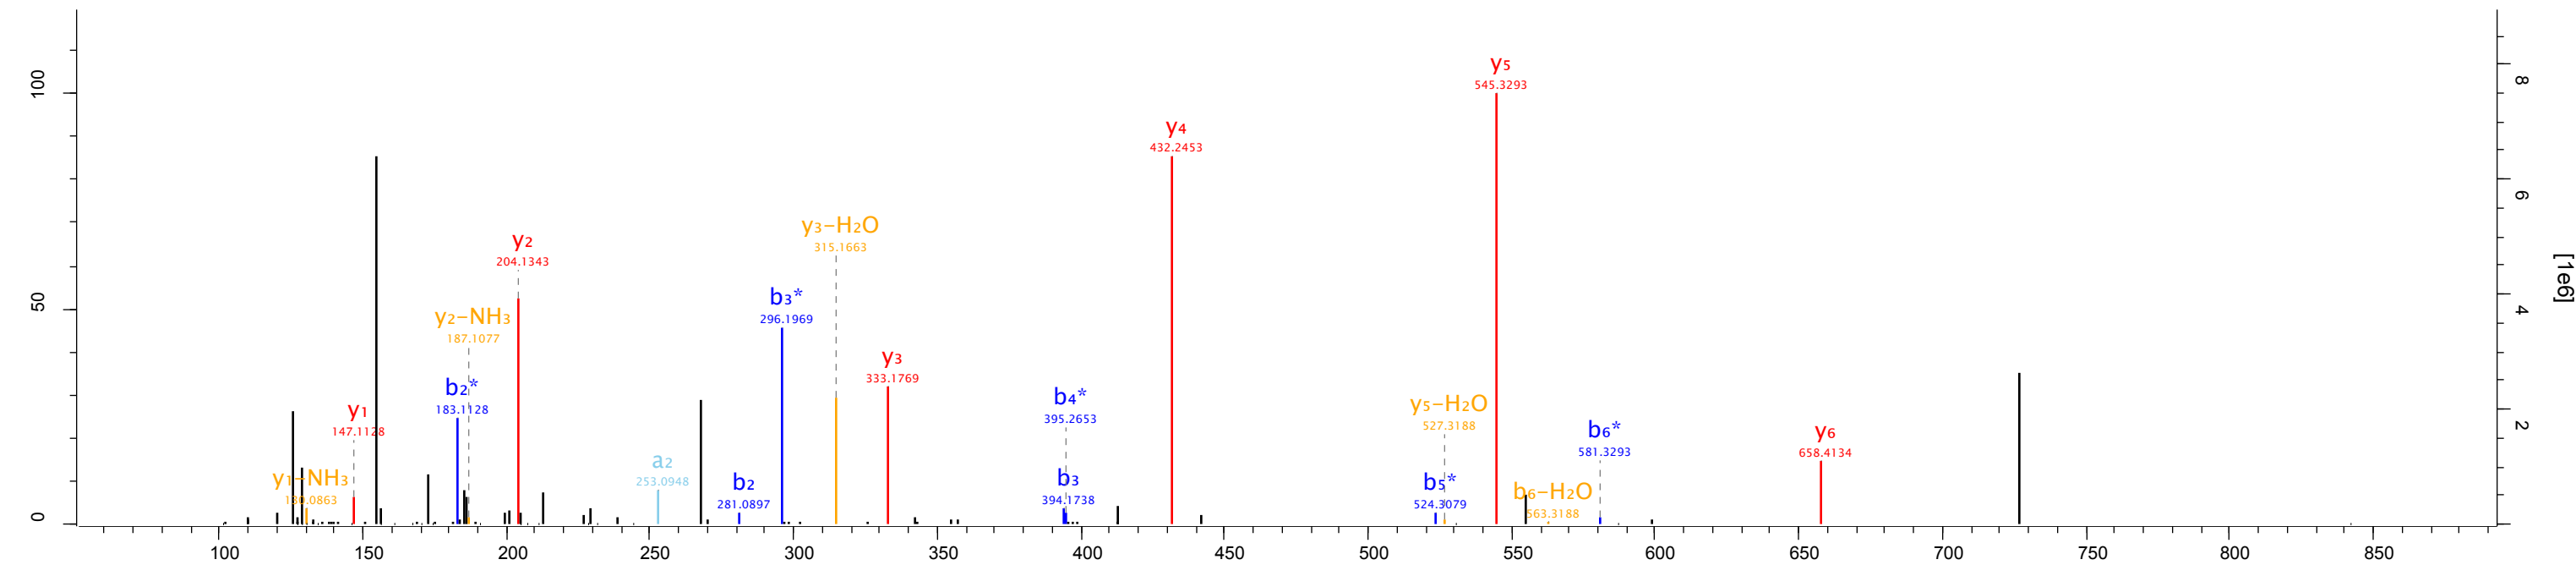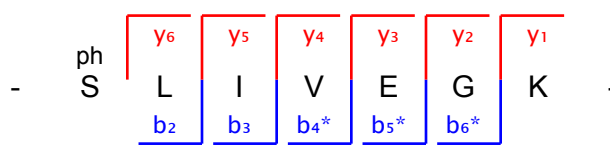

Raw file: 20150814\_A375SR\_Phospho\_BR2\_05  
 Scan: 9396 Method: FTMS; HCD Score: 187.47 m/z: 791.87 Gene names: MICALL1

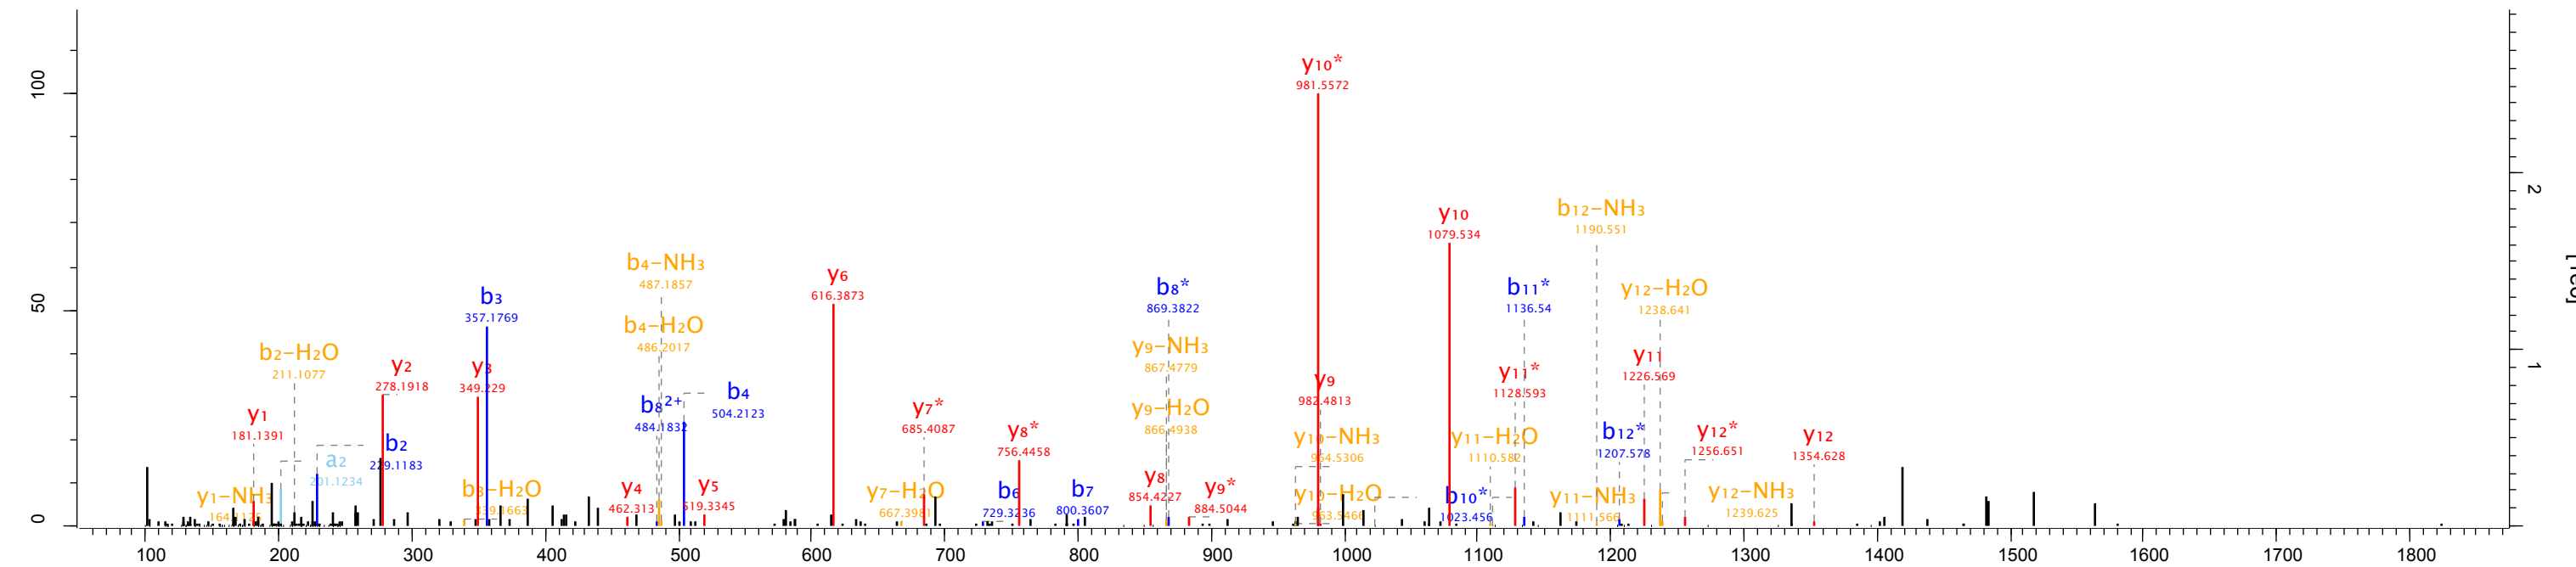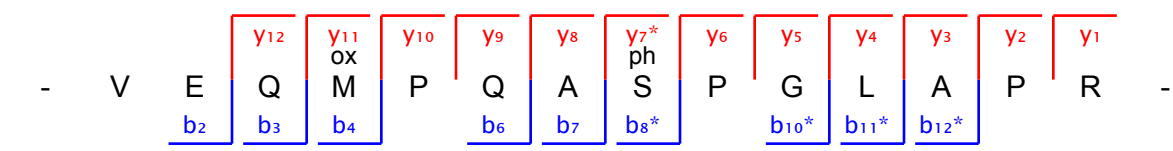

Raw file: 20150814\_A375SR\_Phospho\_BR2\_05  
 Scan: 9486 Method: FTMS; HCD Score: 205.65 m/z: 922.92 Gene names: TFPT

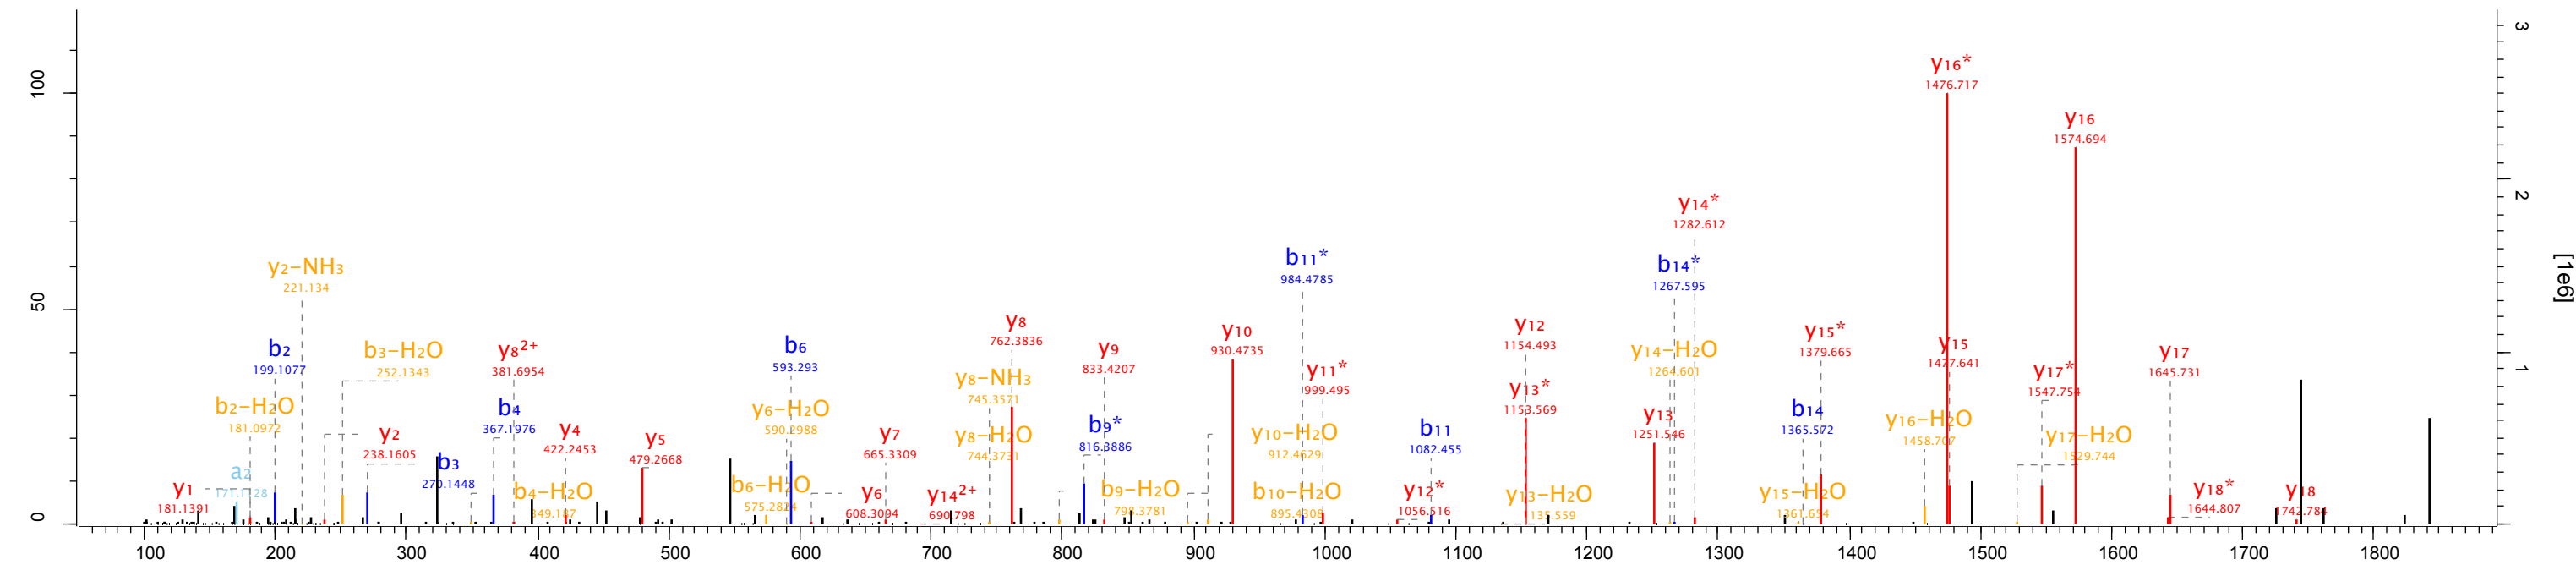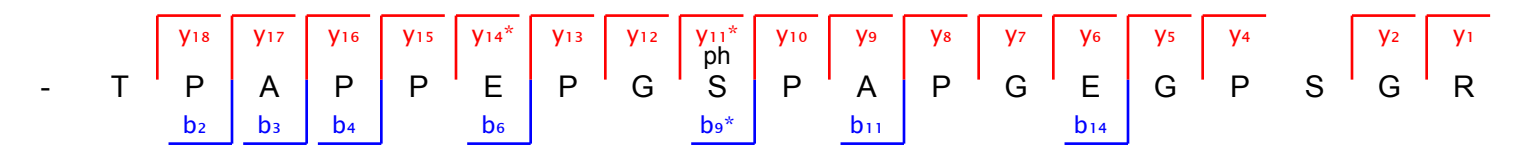



Raw file: 20150814\_A375SR\_Phospho\_BR2\_05  
 Scan: 9826 Method: FTMS; HCD Score: 205.26 m/z: 810.36 Gene names: PXN

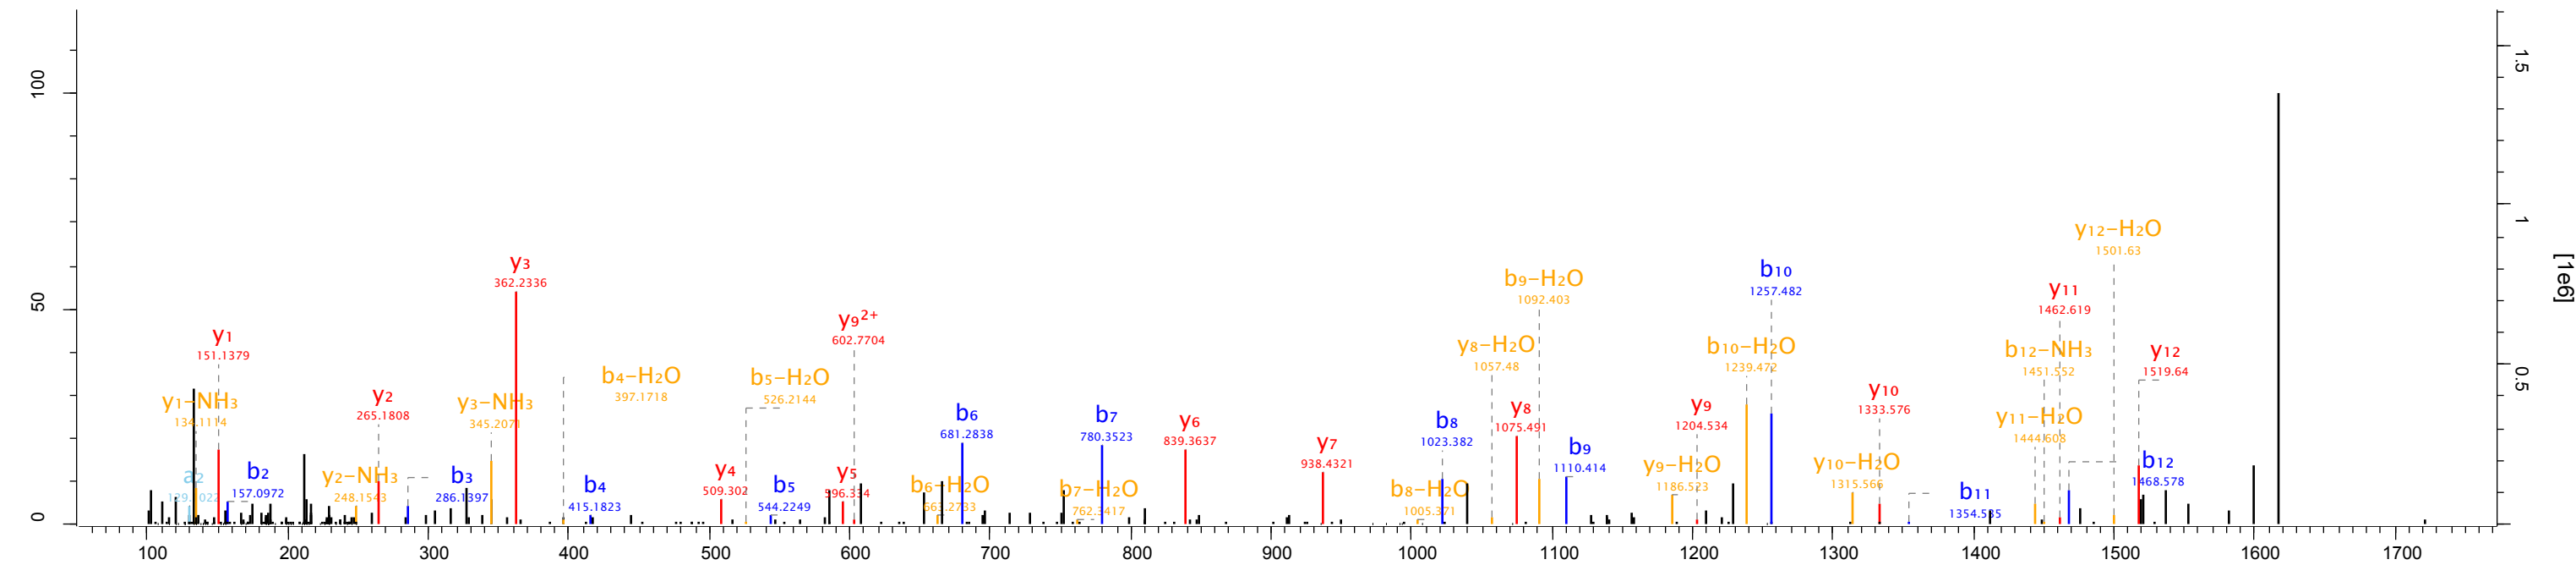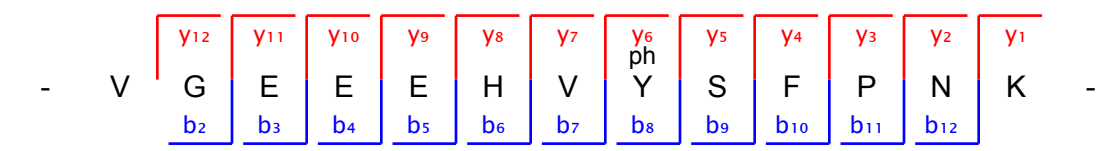

Raw file: 20150814\_A375SR\_Phospho\_BR2\_05  
 Scan: 9946 Method: FTMS; HCD Score: 220.17 m/z: 694.99 Gene names: DSN1

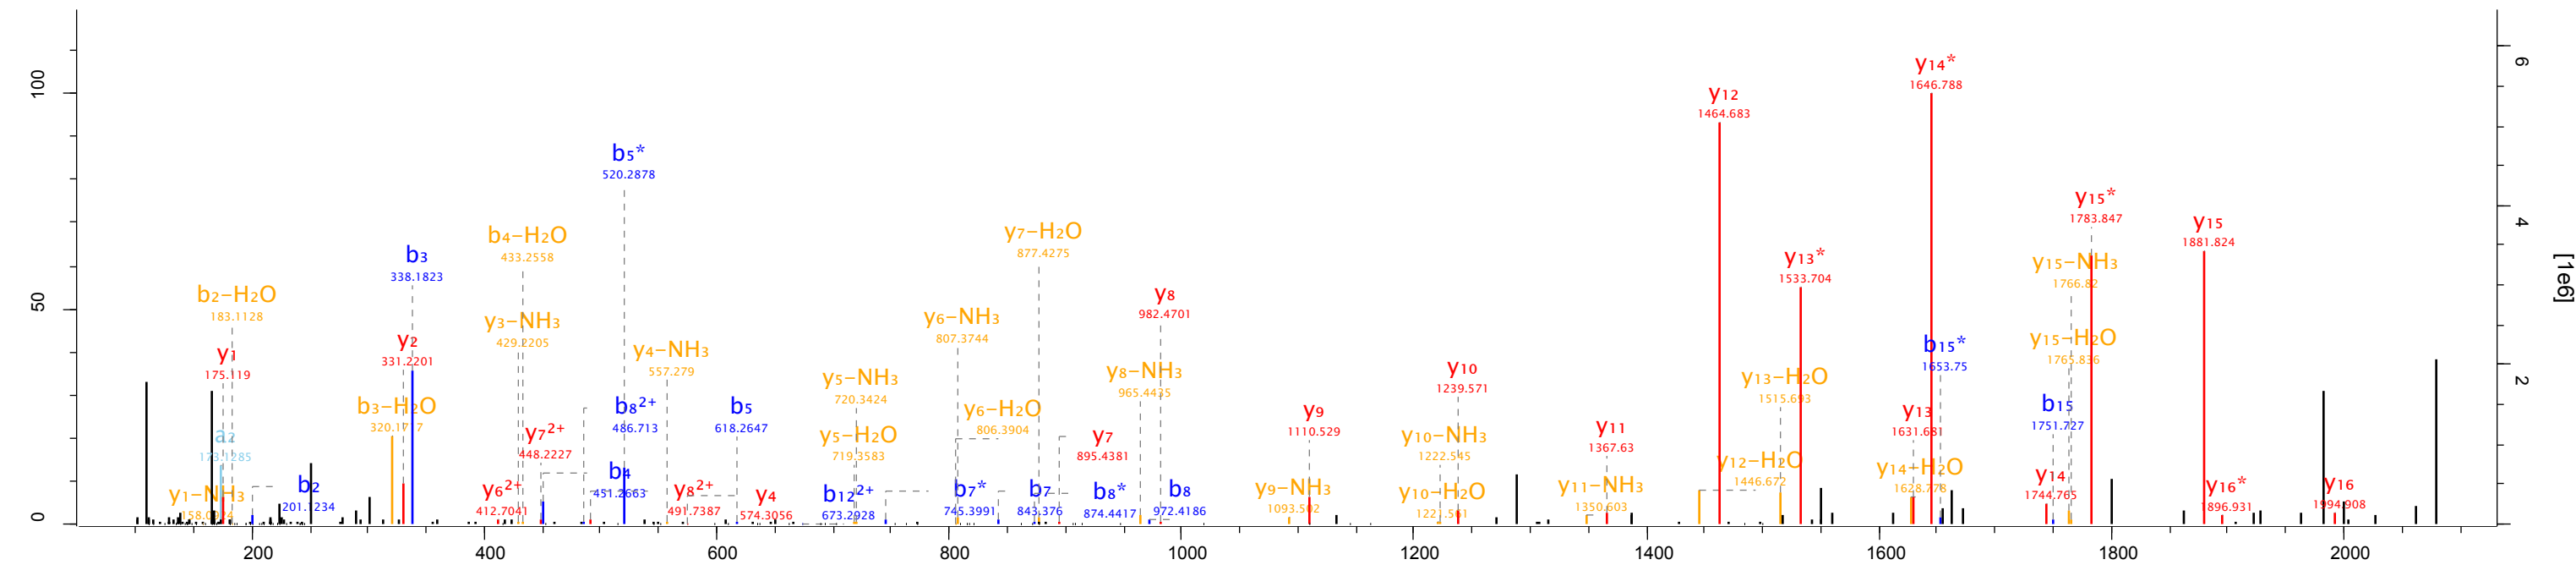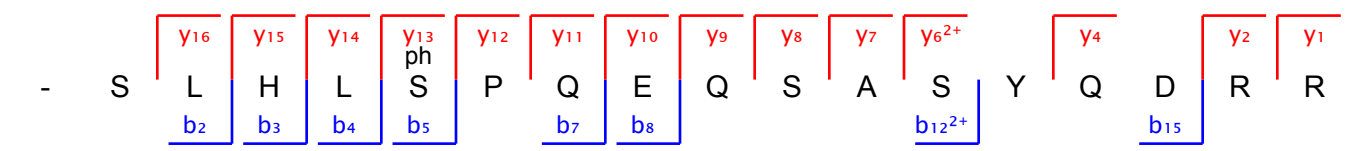

Raw file: 20150814\_A375SR\_Phospho\_BR2\_06  
 Scan: 10496 Method: FTMS; HCD Score: 57.37 m/z: 680.26 Gene names: SIK3

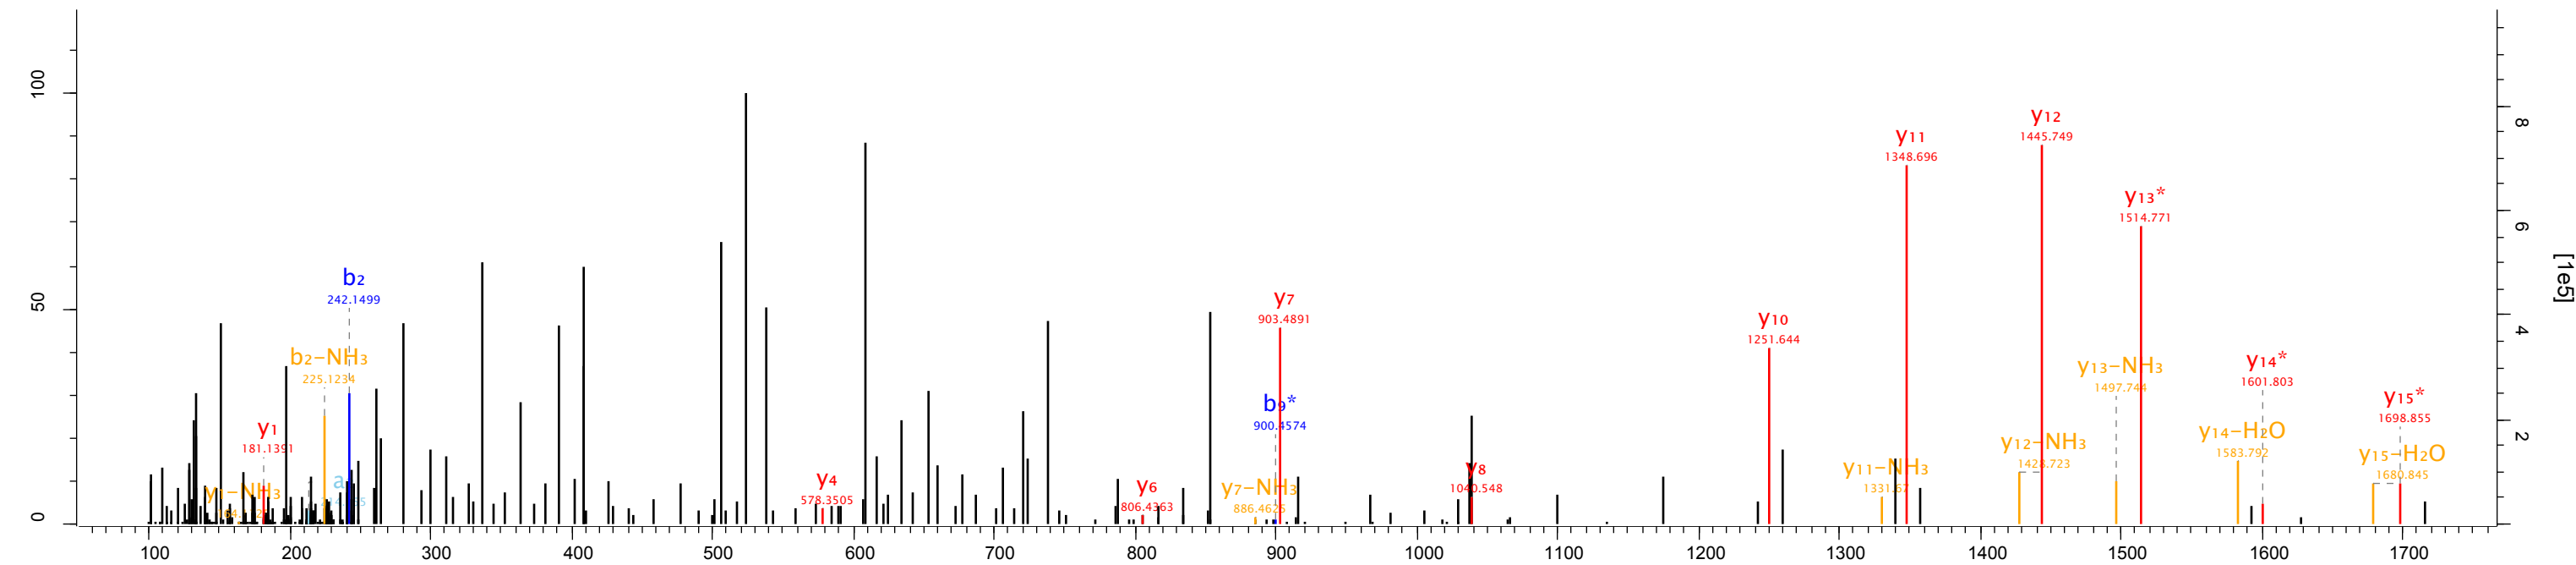

Protein sequence: - I Q P S S P P P N H P N N H L F R -

Fragmentation sites are indicated by brackets below the sequence:

- Red brackets above the sequence indicate y-series ions: y15\* (above P), y14\* (above S), y13\* (above S), y12 (above P), y11 (above P), y10 (above P), y8 (above H), y7 (above P), y6 (above N), y4 (above H), y1 (above R).
- Blue brackets below the sequence indicate b-series ions: b2 (below Q), b9\* (below N).

Raw file 20150814\_A375SR\_Phospho\_BR2\_06 Scan 10866 Method FTMS; HCD Score 197.67 m/z 741.35 Gene names NOP2

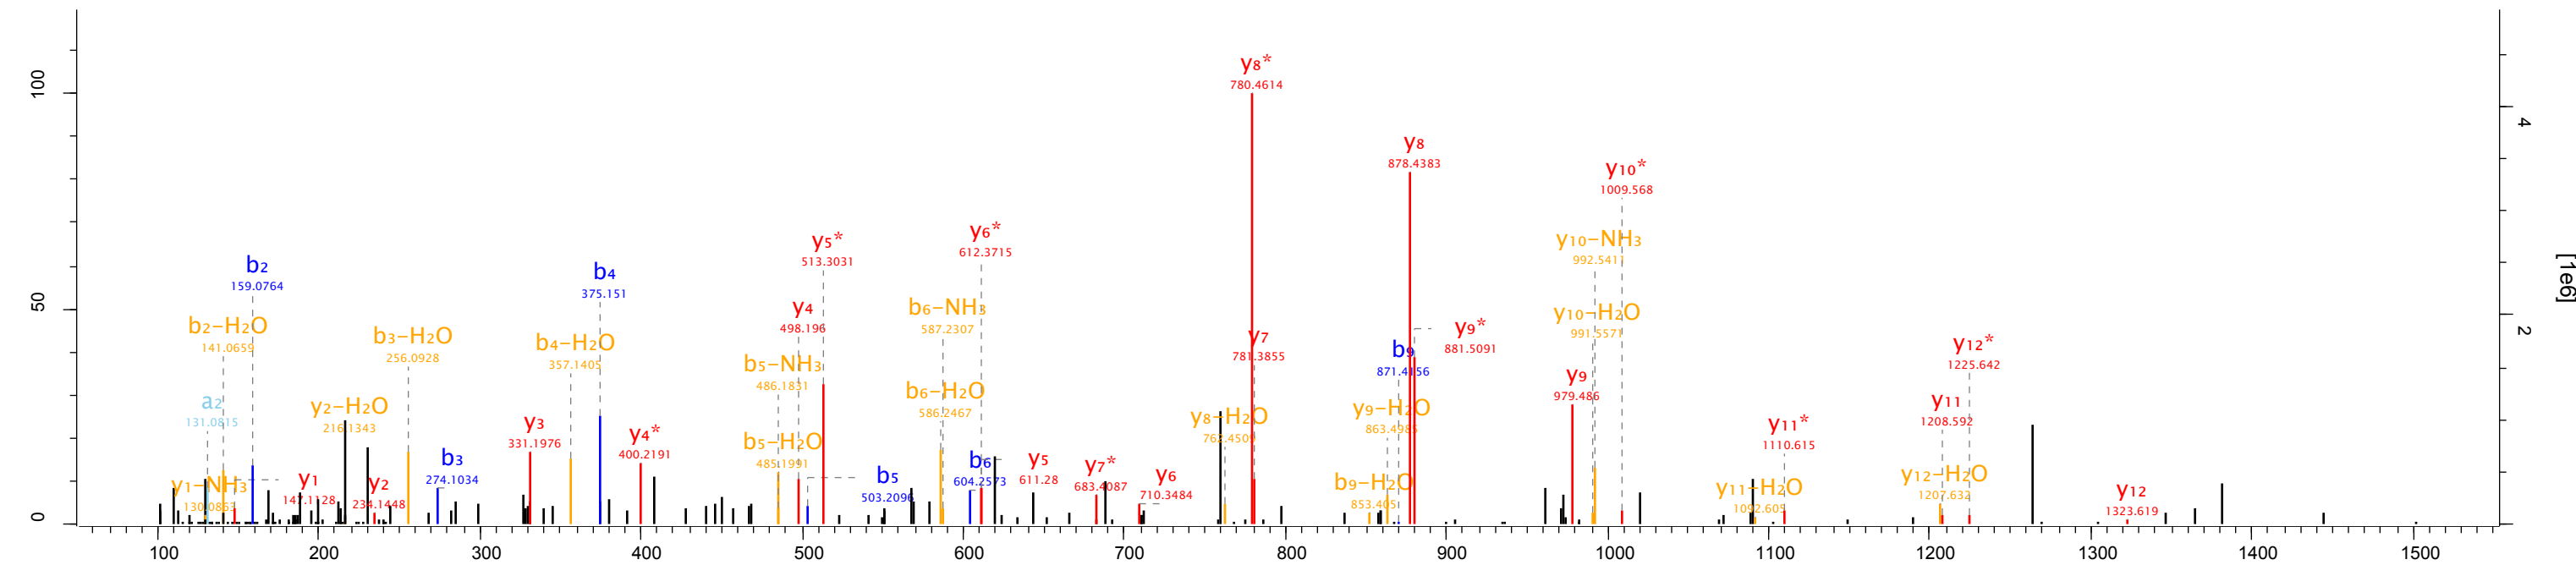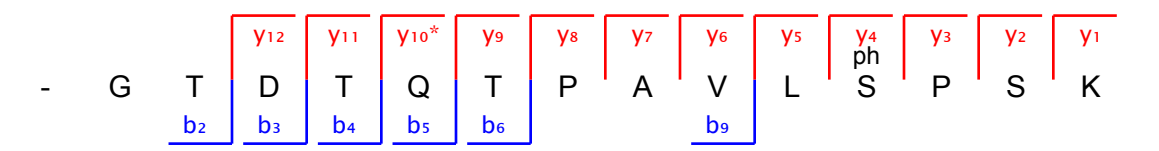

Raw file 20150814\_A375SR\_Phospho\_BR2\_06 Scan 11086 Method FTMS; HCD Score 166.9 m/z 736.84 Gene names KIAA1429

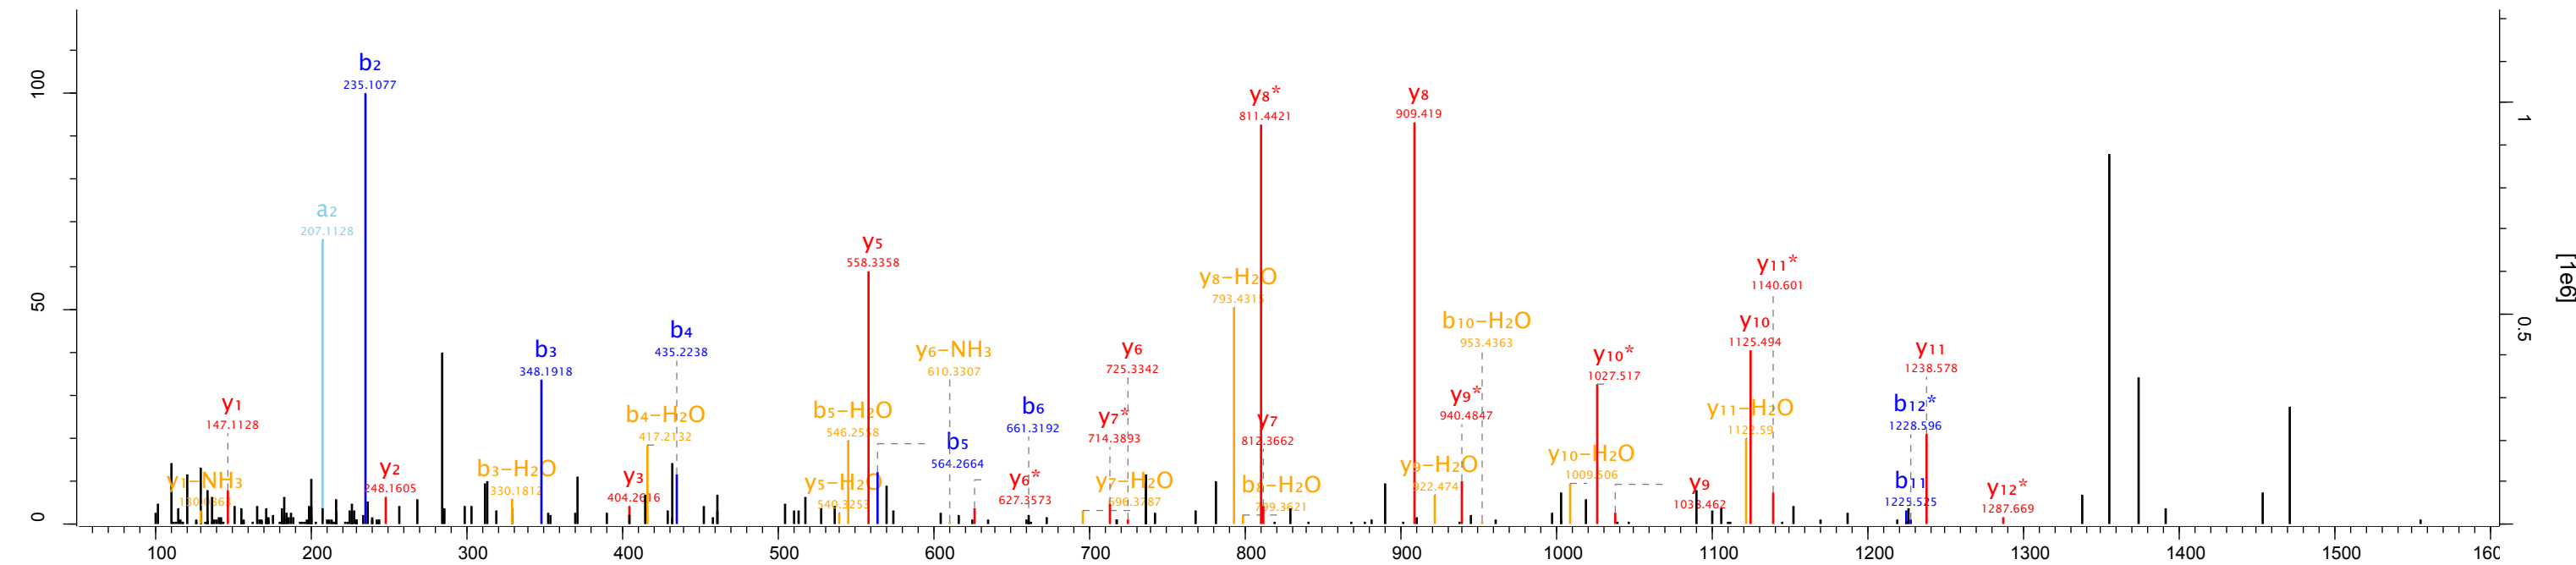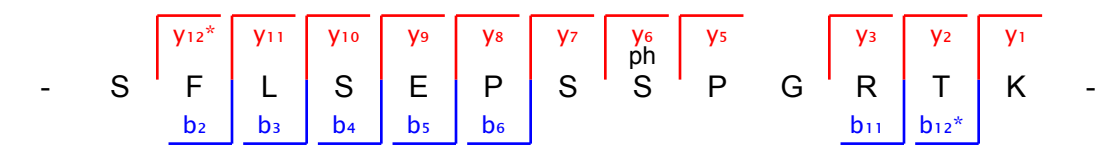

Raw file Scan Method Score m/z Gene names  
 20150814\_A375SR\_Phospho\_BR2\_06 12266 FTMS; HCD 315.44 818.88 HEATR6

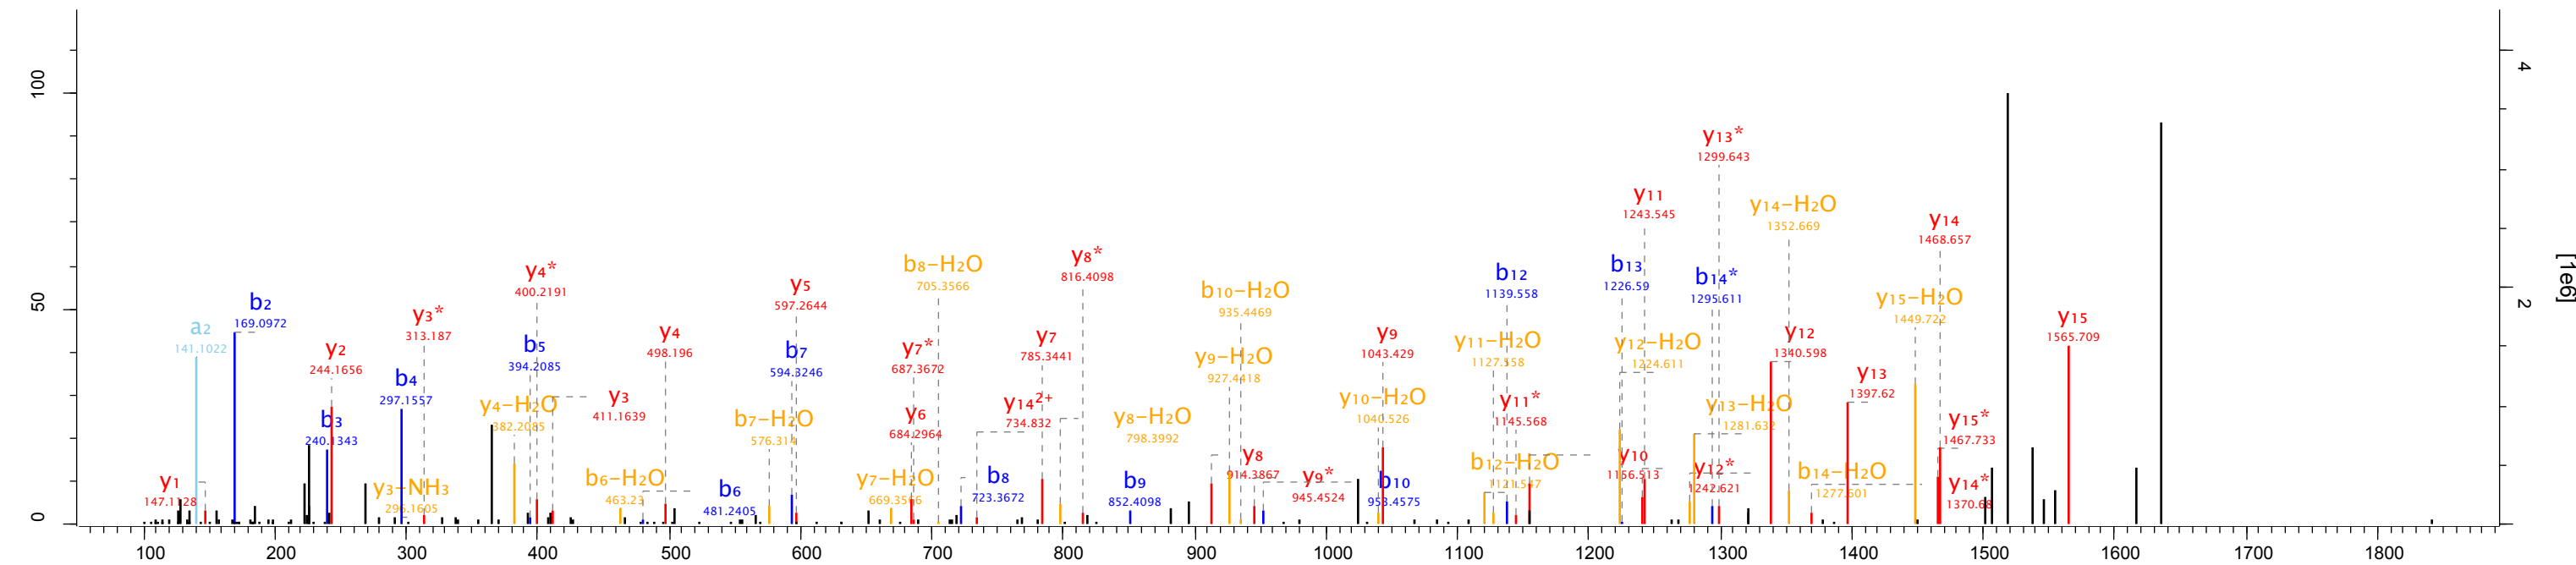

- A P A G P S L E E T S V S S P K -

b<sub>2</sub> b<sub>3</sub> b<sub>4</sub> b<sub>5</sub> b<sub>6</sub> b<sub>7</sub> b<sub>8</sub> b<sub>9</sub> b<sub>10</sub> b<sub>12</sub> b<sub>13</sub> b<sub>14</sub><sup>\*</sup>

y<sub>15</sub> y<sub>14</sub> y<sub>13</sub> y<sub>12</sub> y<sub>11</sub> y<sub>10</sub> y<sub>9</sub> y<sub>8</sub> y<sub>7</sub> y<sub>6</sub> y<sub>5</sub> y<sub>4</sub> y<sub>3</sub> ph S y<sub>2</sub> y<sub>1</sub>

Raw file: 20150814\_A375SR\_Phospho\_BR2\_06  
 Scan: 12986 Method: FTMS; HCD Score: 97.69 m/z: 851.41 Gene names: SNX17

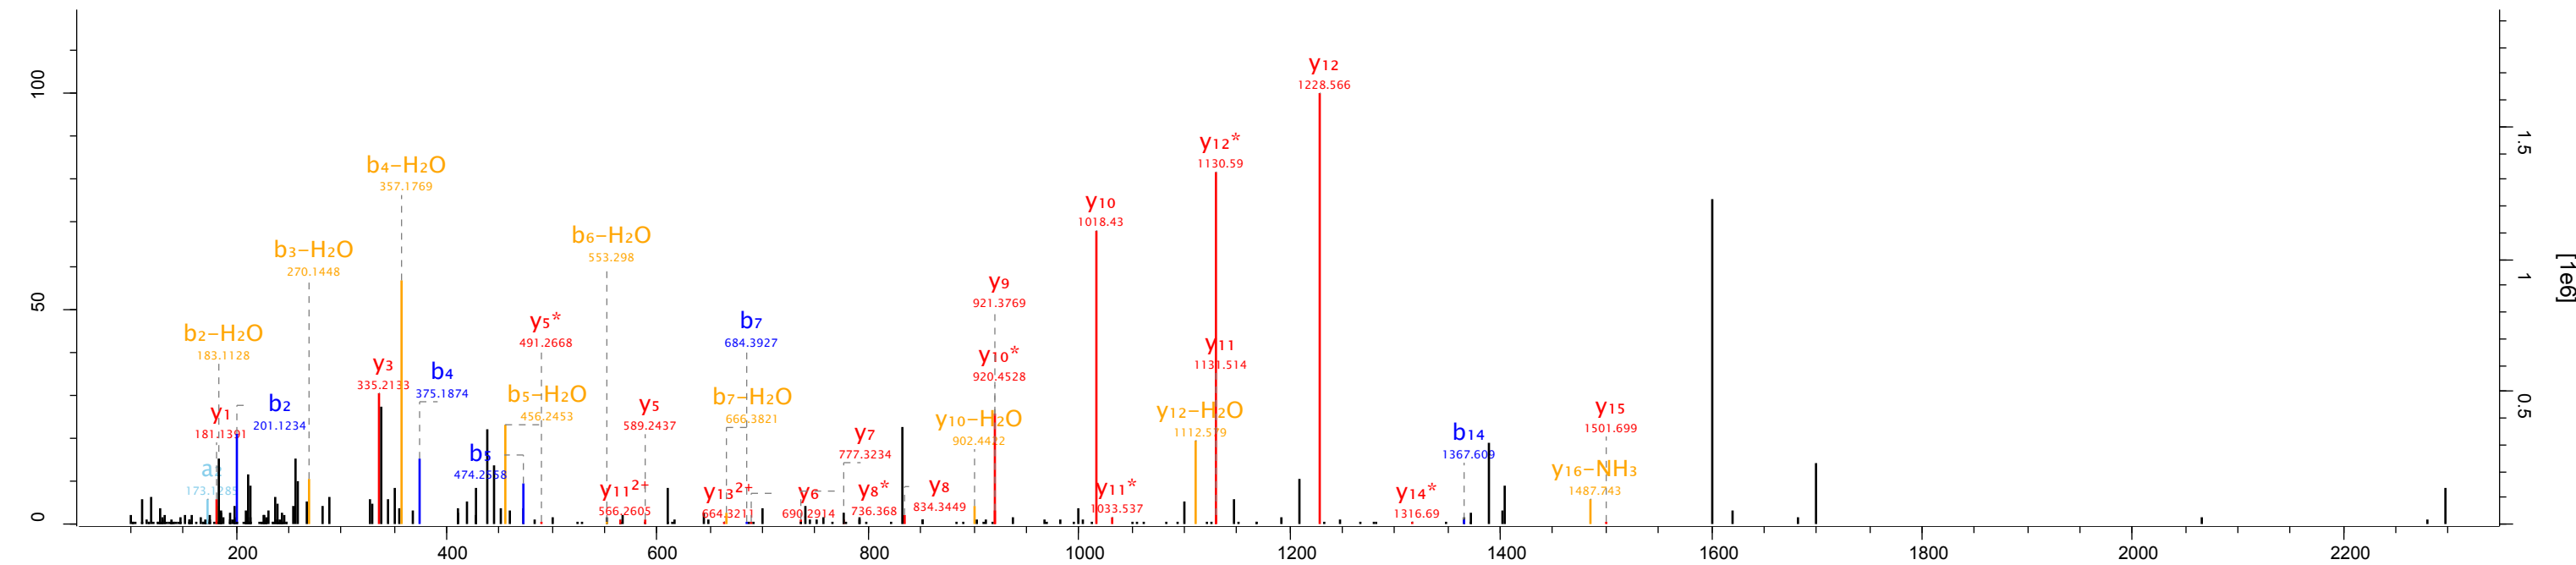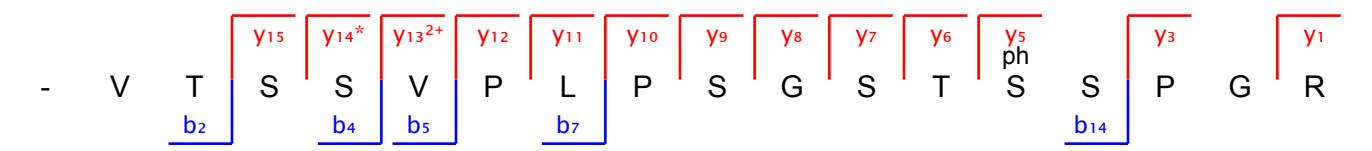

Raw file 20150814\_A375SR\_Phospho\_BR2\_06 Scan 13046 Method FTMS; HCD Score 73.27 m/z 636.8 Gene names TFAP4

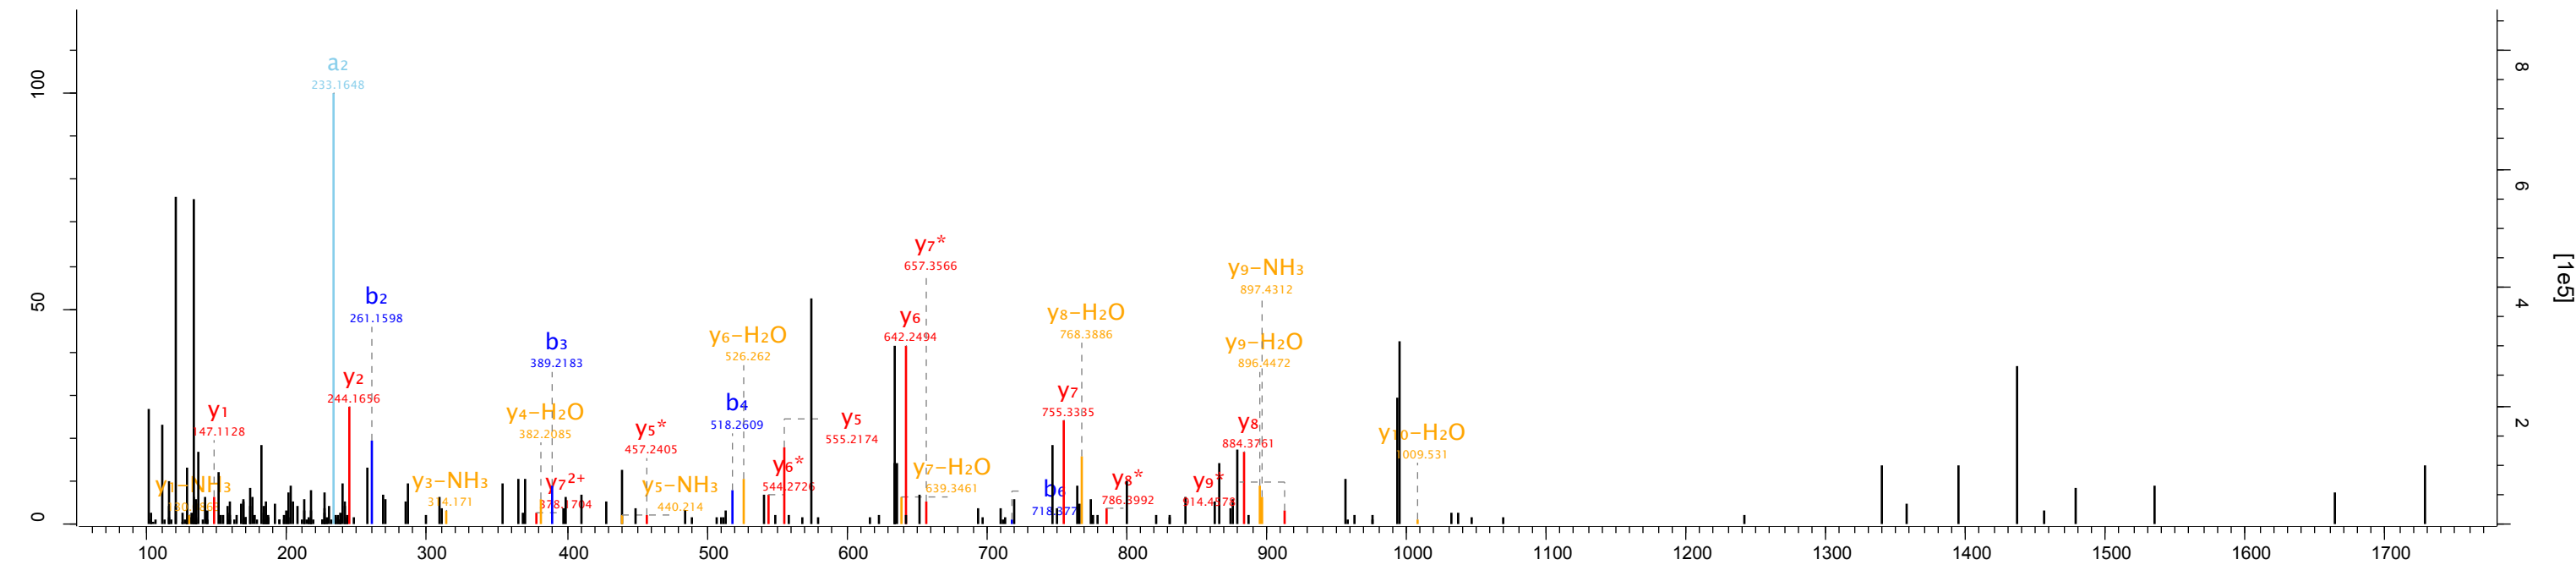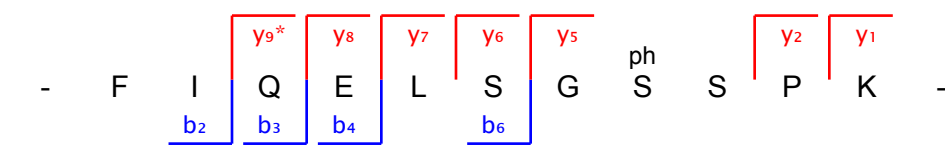



Raw file 20150814\_A375SR\_Phospho\_BR2\_06 Scan 13646 Method FTMS; HCD Score 203.33 m/z 1102.5 Gene names PNKP

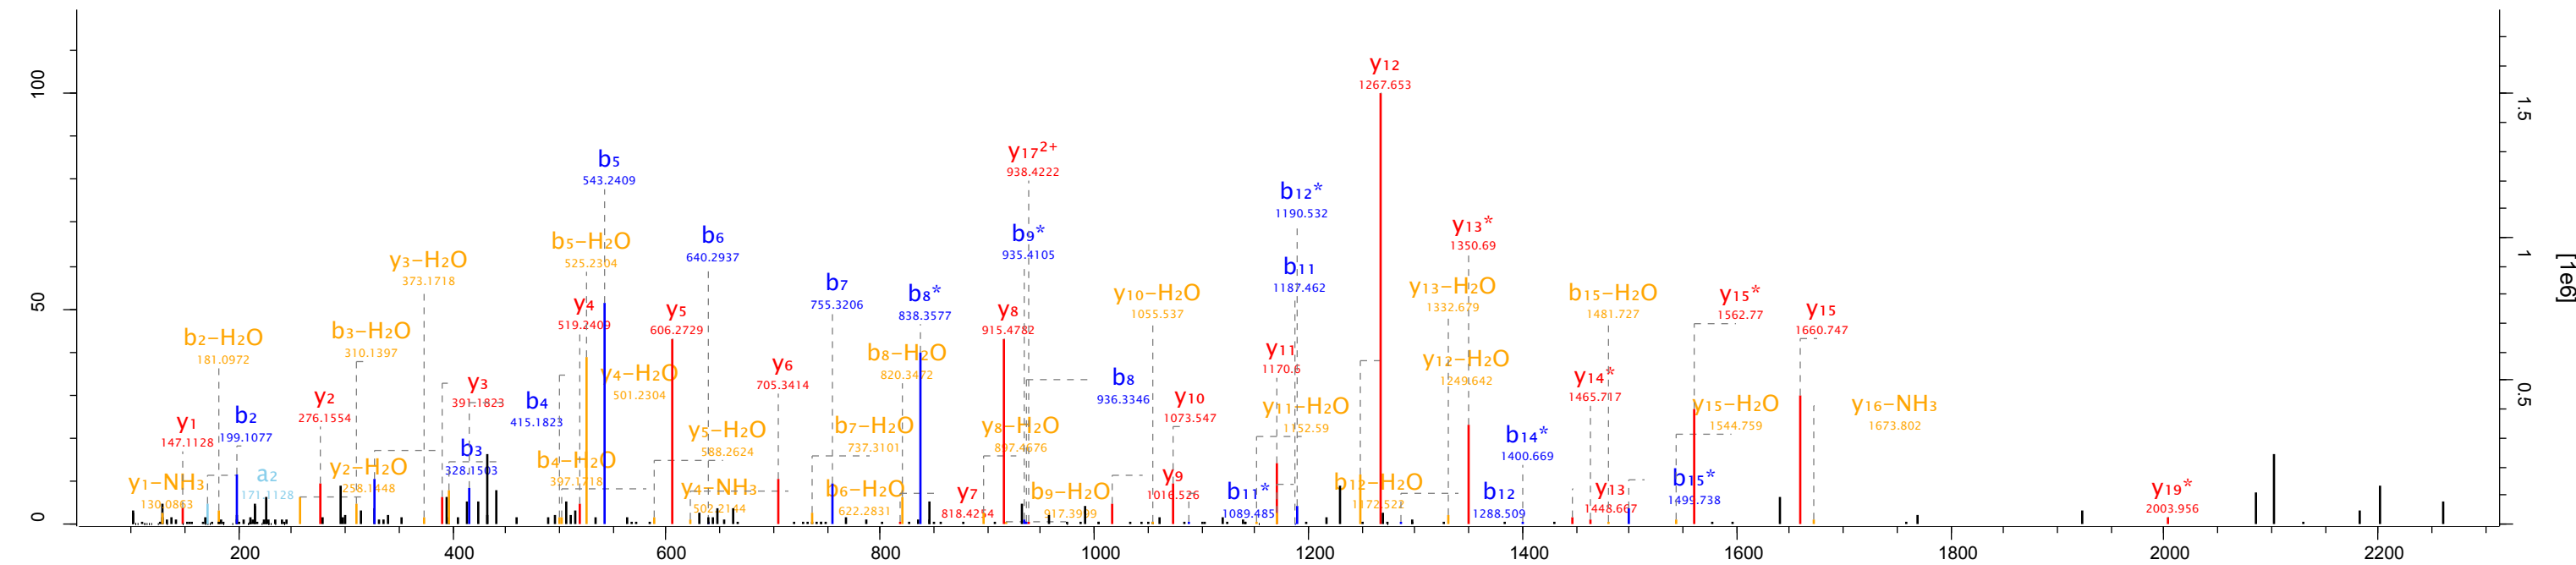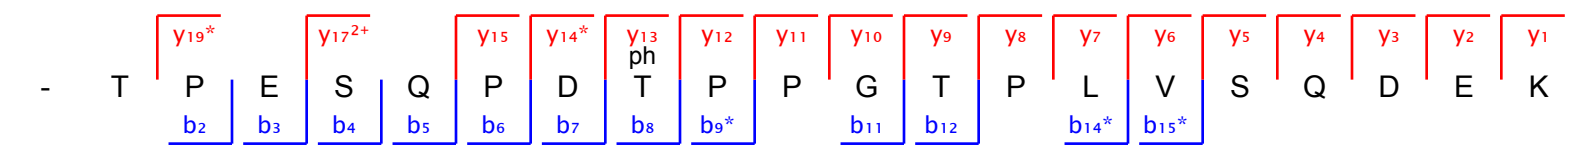

Raw file: 20150814\_A375SR\_Phospho\_BR2\_06  
 Scan: 14646 Method: FTMS; HCD Score: 244.04 m/z: 1034.04 Gene names: PAK4

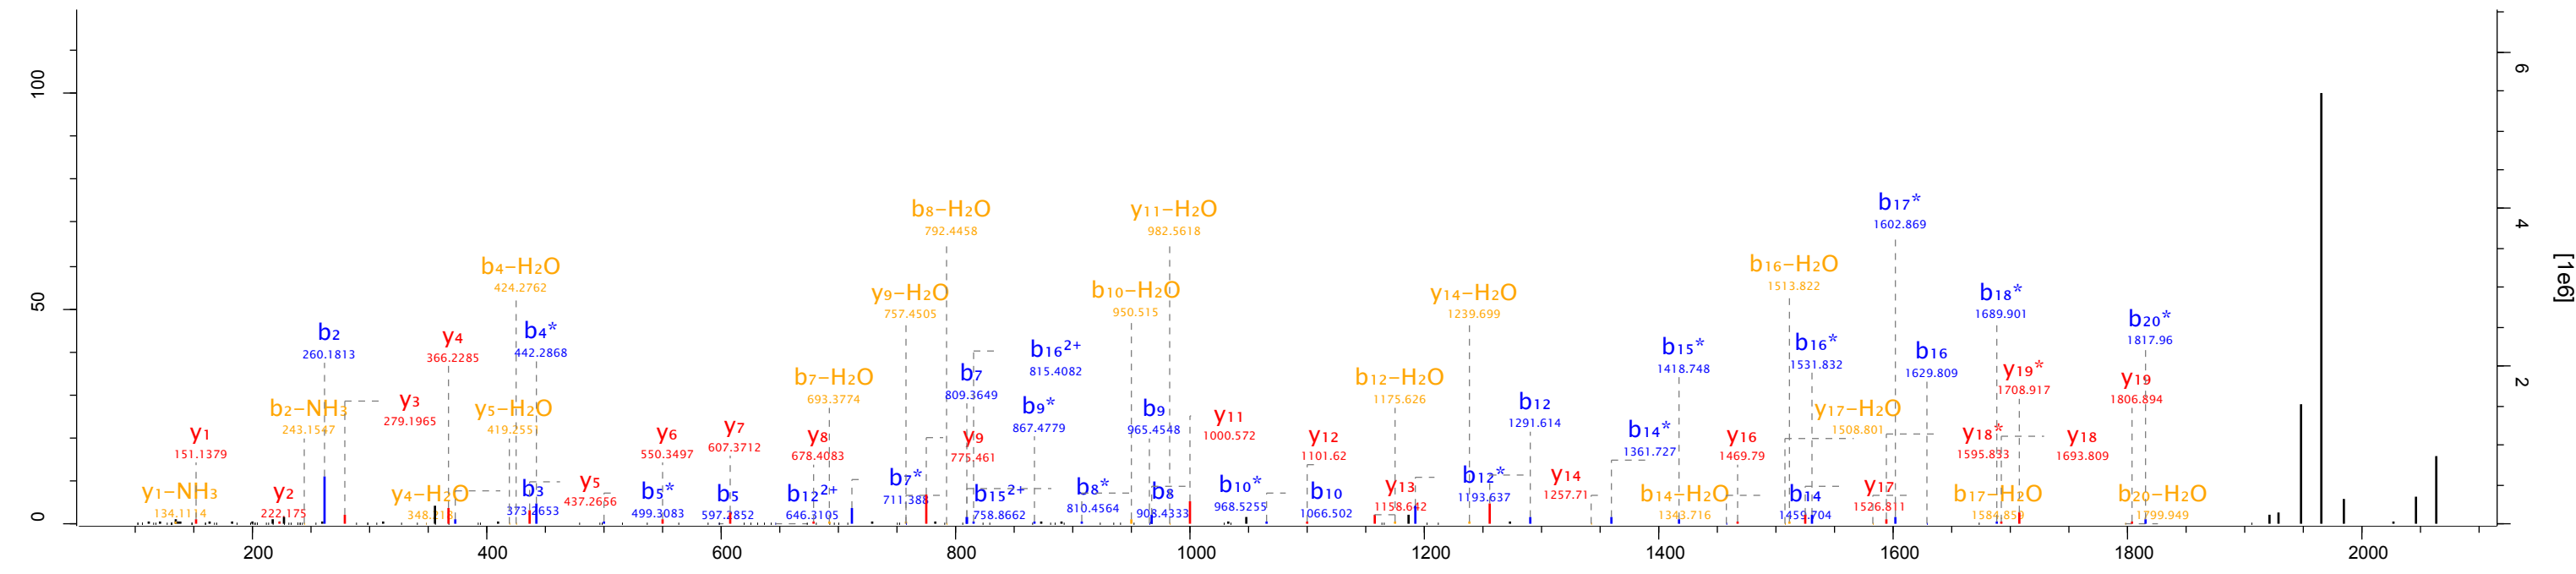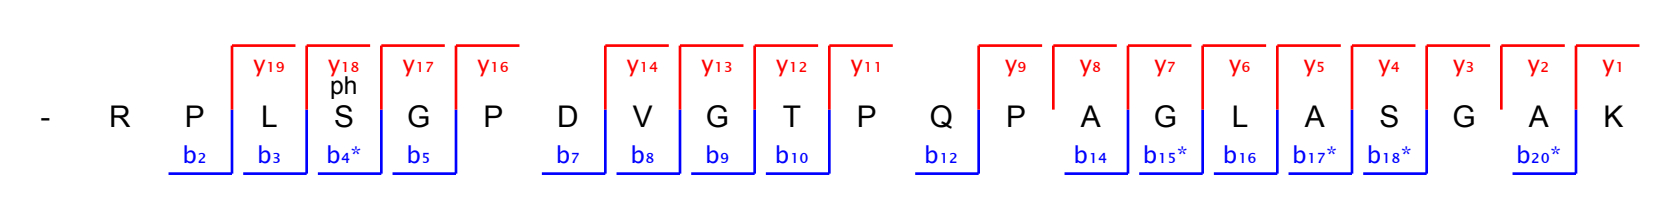

Raw file: 20150814\_A375SR\_Phospho\_BR2\_06  
 Scan: 14786 Method: FTMS; HCD Score: 111.72 m/z: 625.34 Gene names: BCLAF1

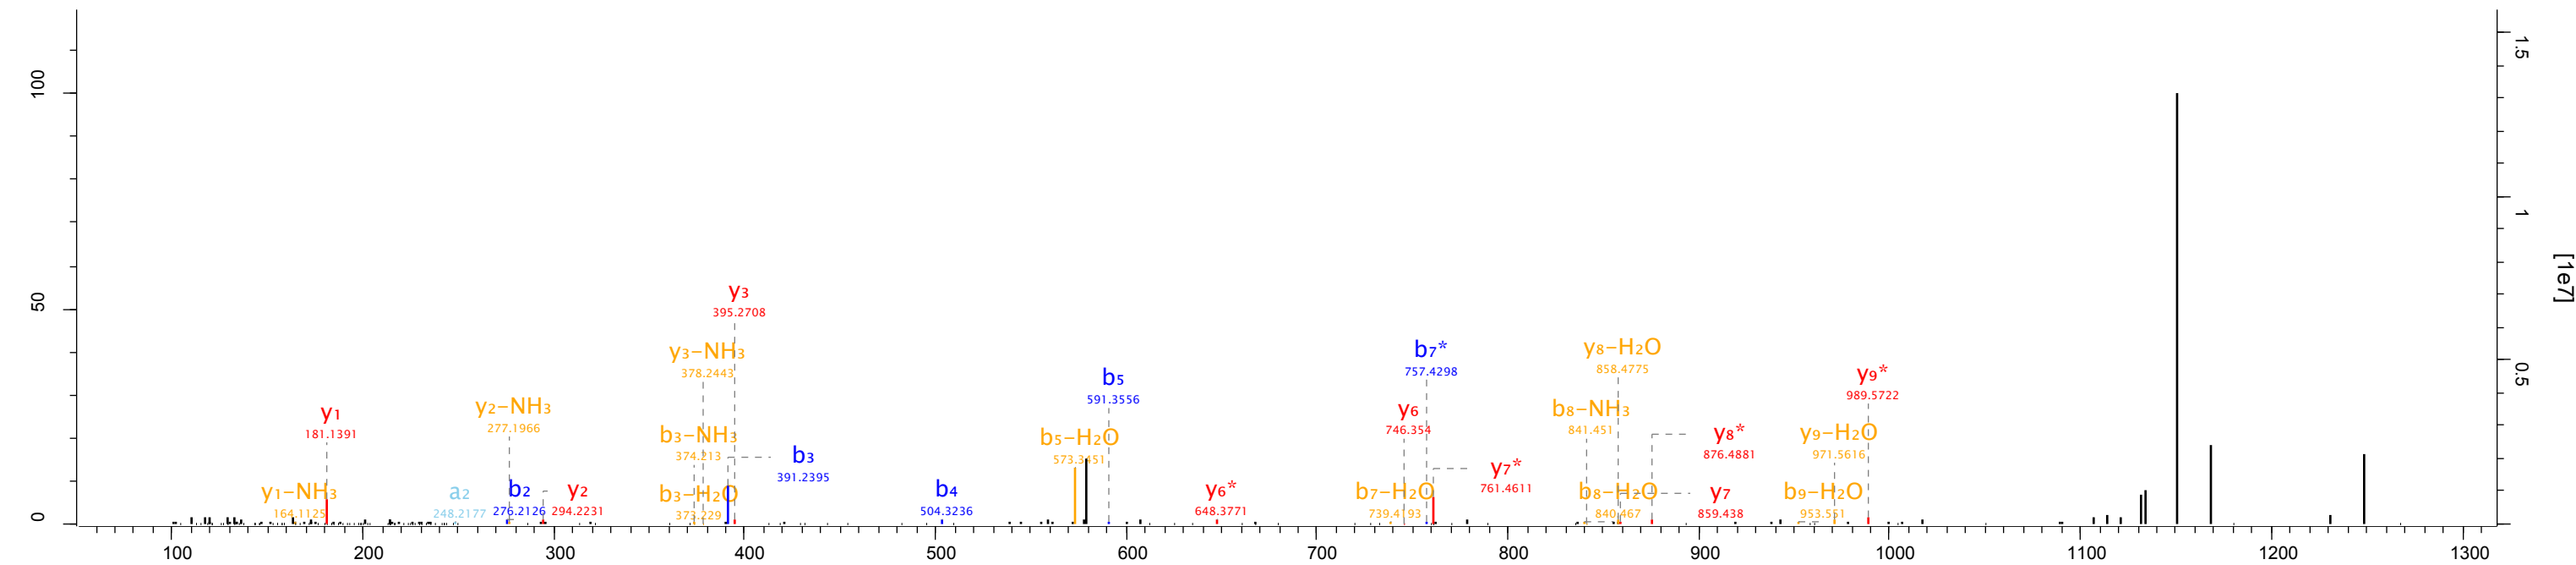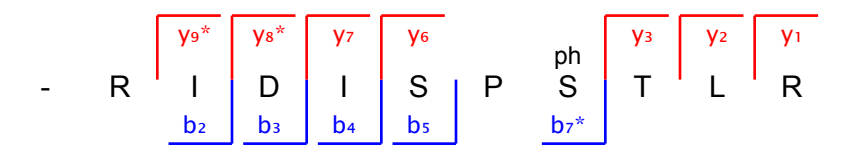

Raw file: 20150814\_A375SR\_Phospho\_BR2\_06  
 Scan: 14866 Method: FTMS; HCD Score: 187.63 m/z: 725.84 Gene names: ARHGEF2

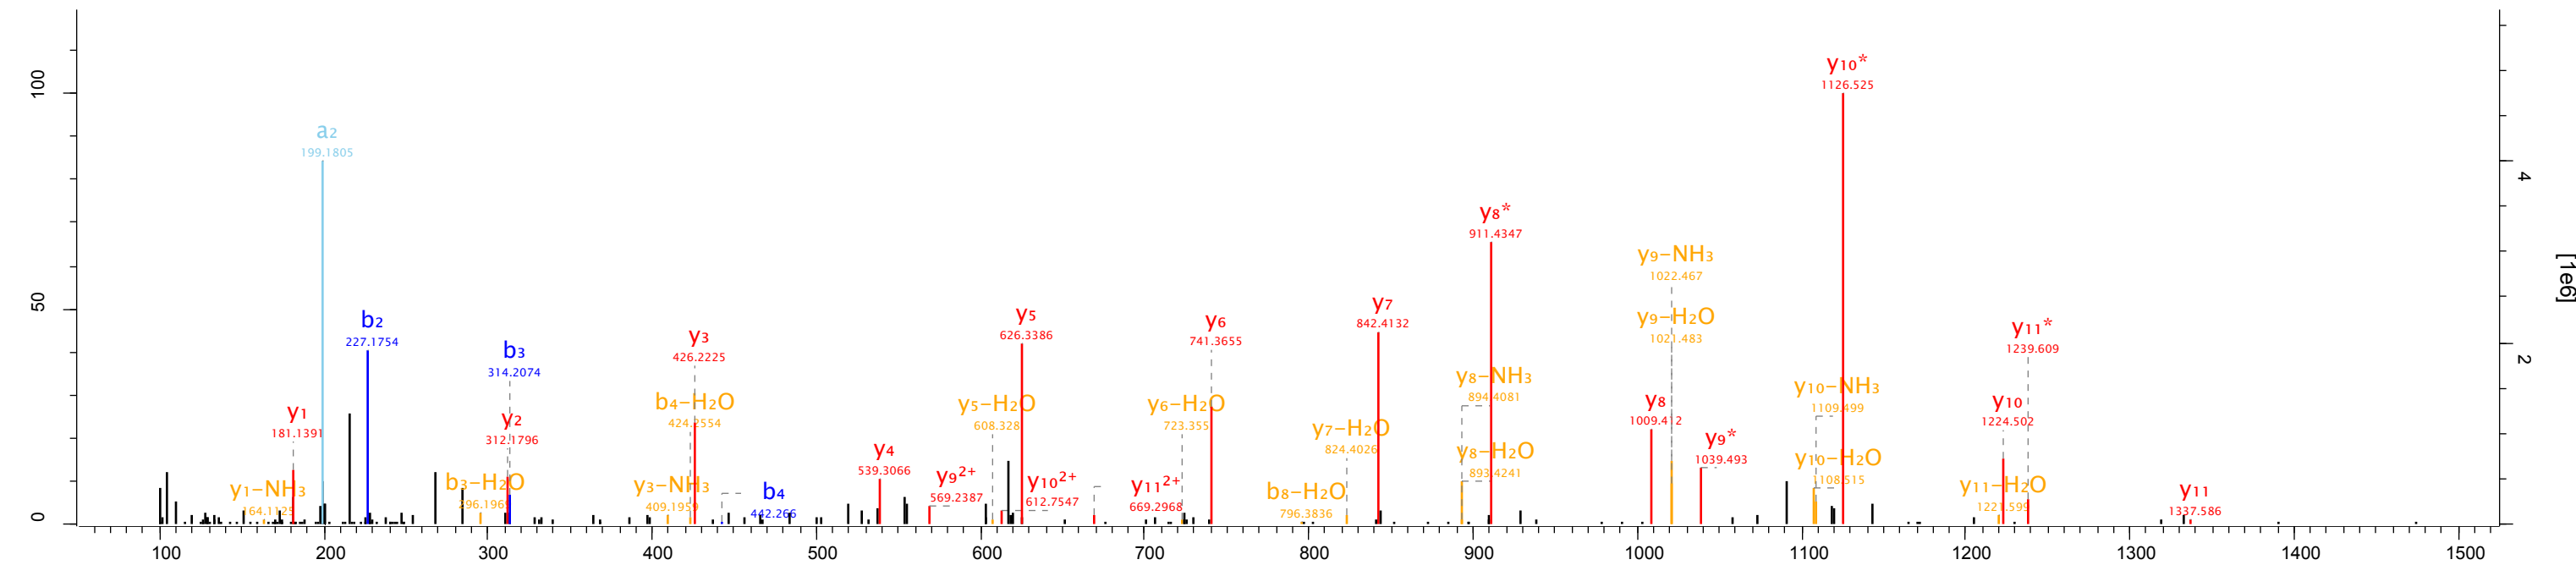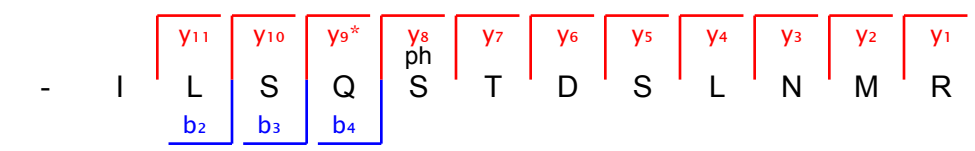

Raw file 20150814\_A375SR\_Phospho\_BR2\_06 Scan 15206 Method FTMS; HCD Score 72.68 m/z 604.79 Gene names MGA

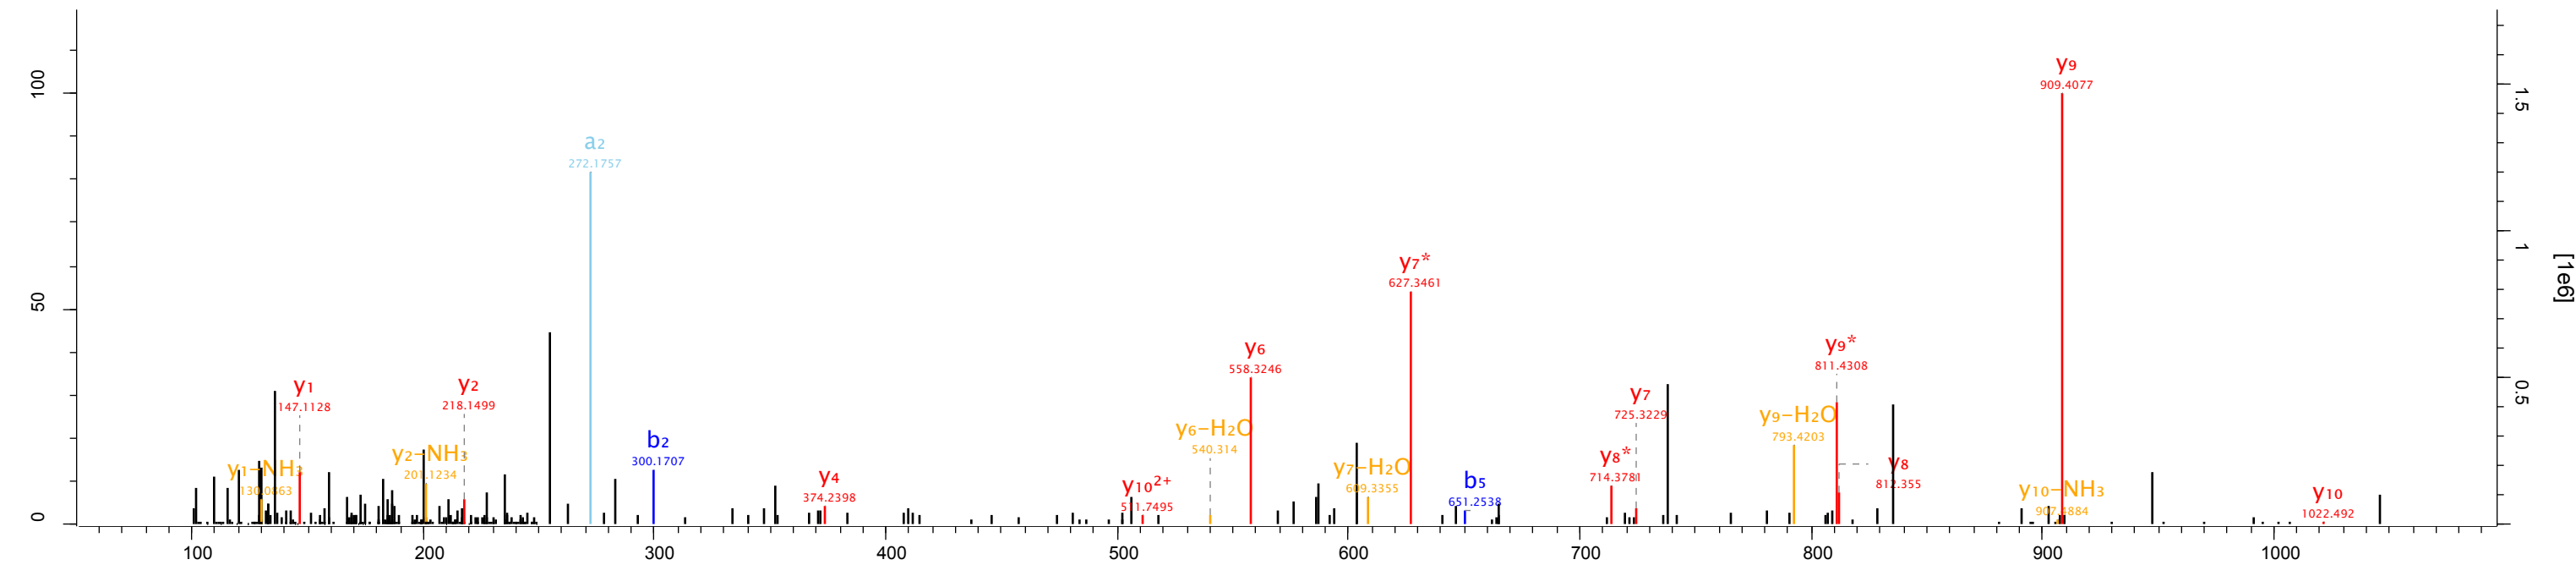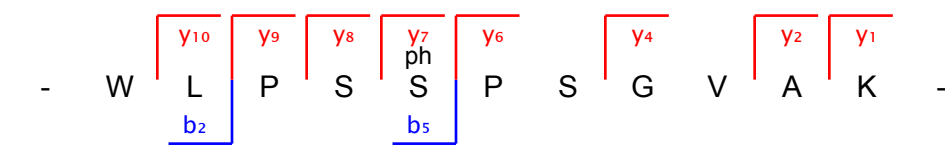

Raw file: 20150814\_A375SR\_Phospho\_BR2\_06  
 Scan: 15216 Method: FTMS; HCD Score: 109.5 m/z: 887.89 Gene names: RANBP3;ZNF8

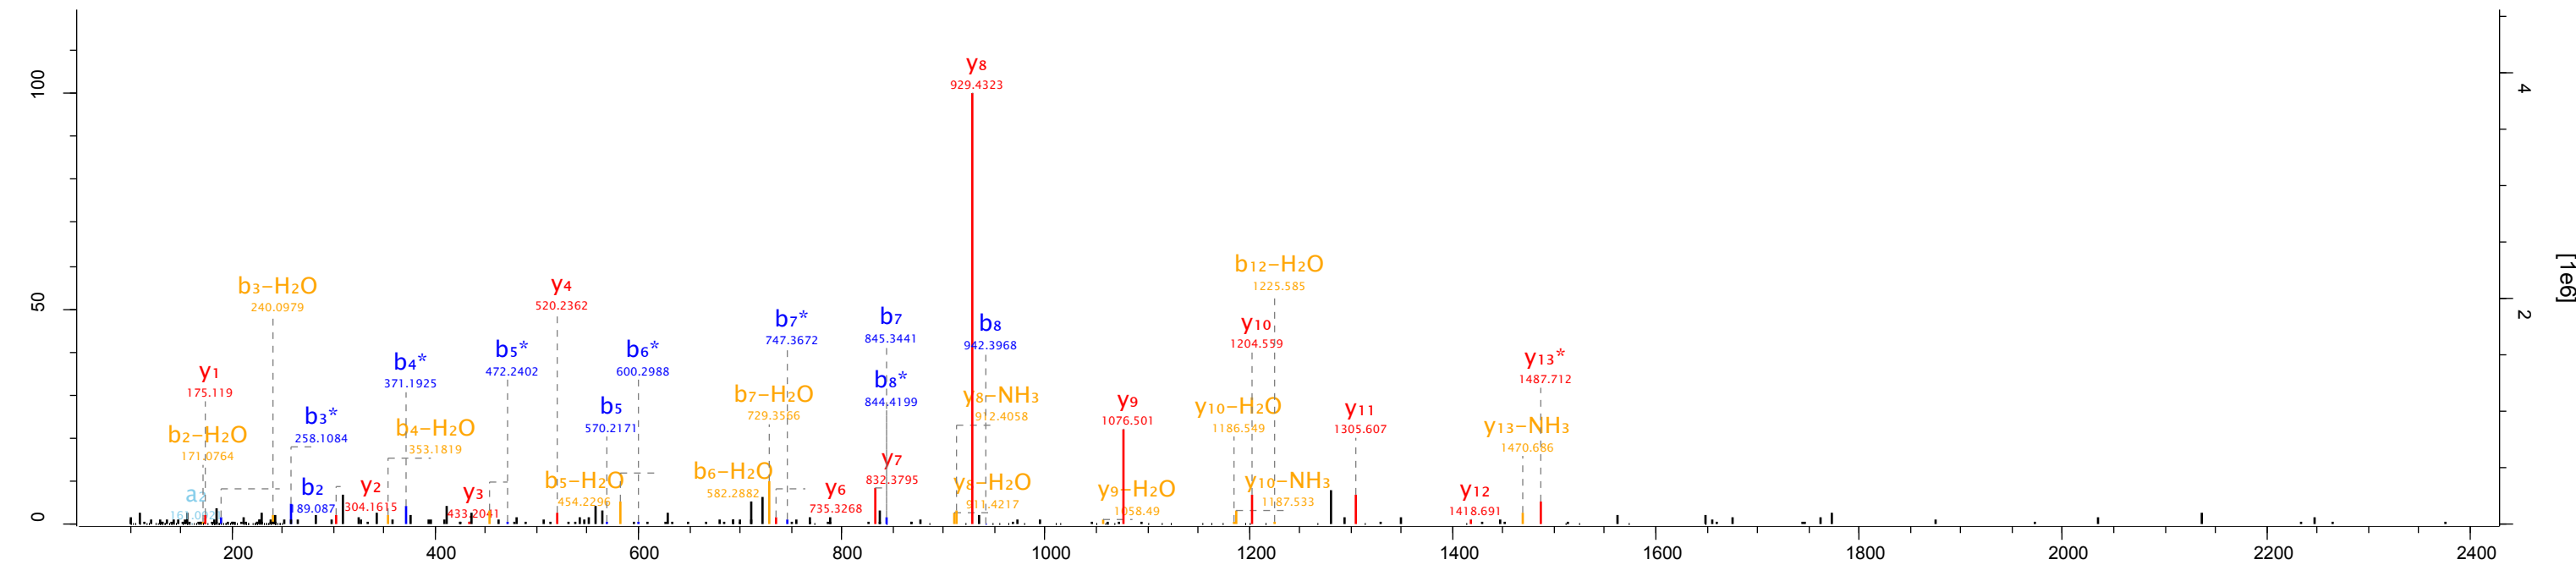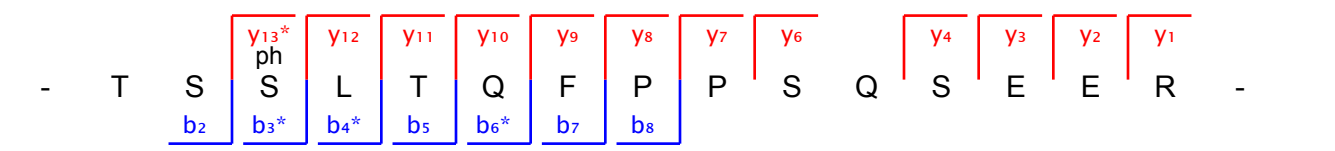

Raw file 20150814\_A375SR\_Phospho\_BR2\_06 Scan 15826 Method FTMS; HCD Score 172.82 m/z 788.4 Gene names RASAL2

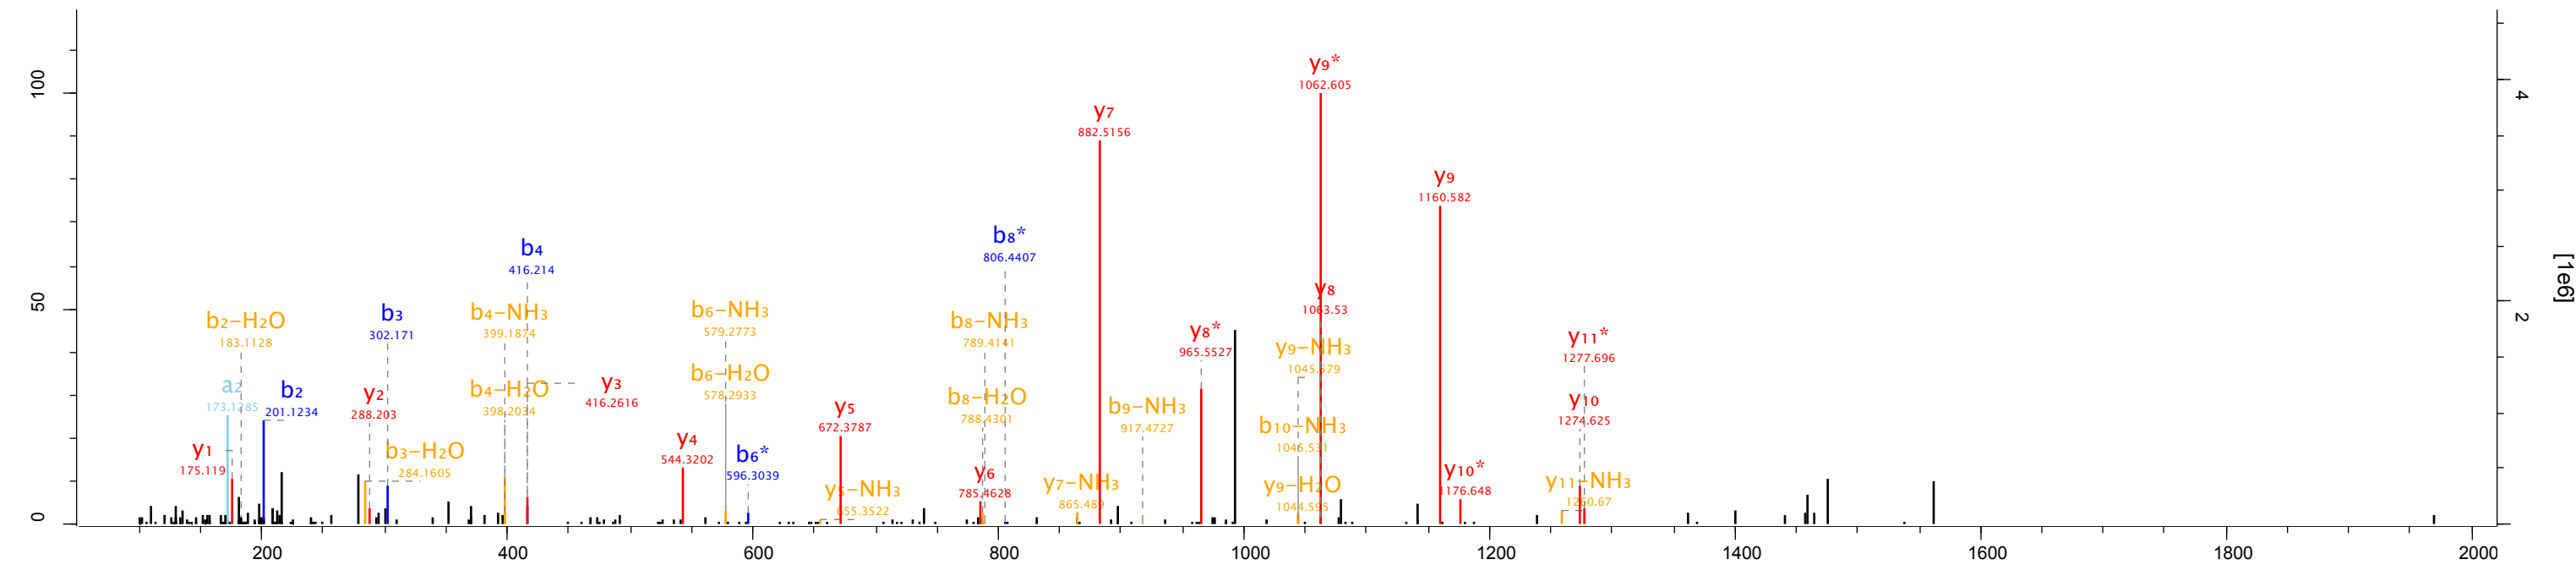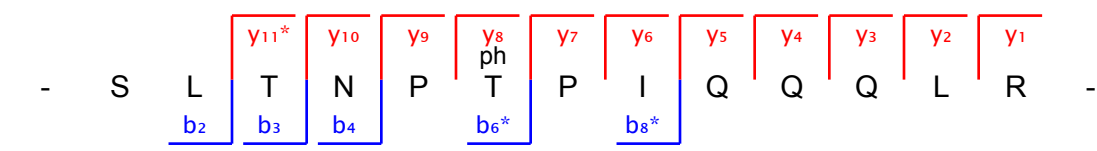

Raw file 20150814\_A375SR\_Phospho\_BR2\_06 Scan 16496 Method FTMS; HCD Score 119.78 m/z 983.48 Gene names TNKS1BP1

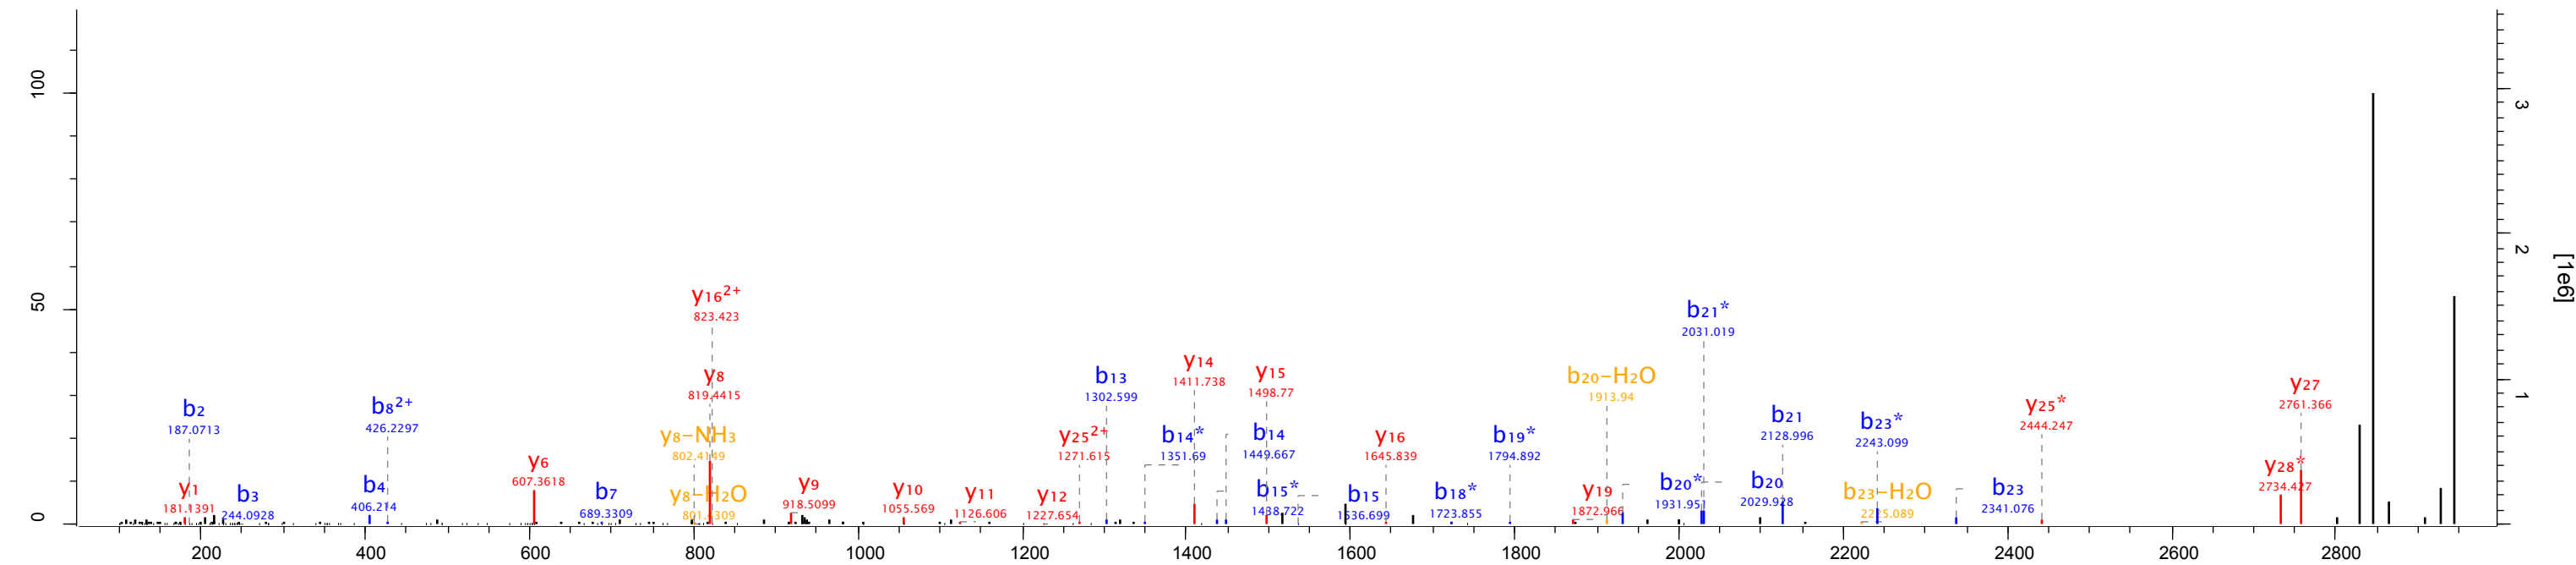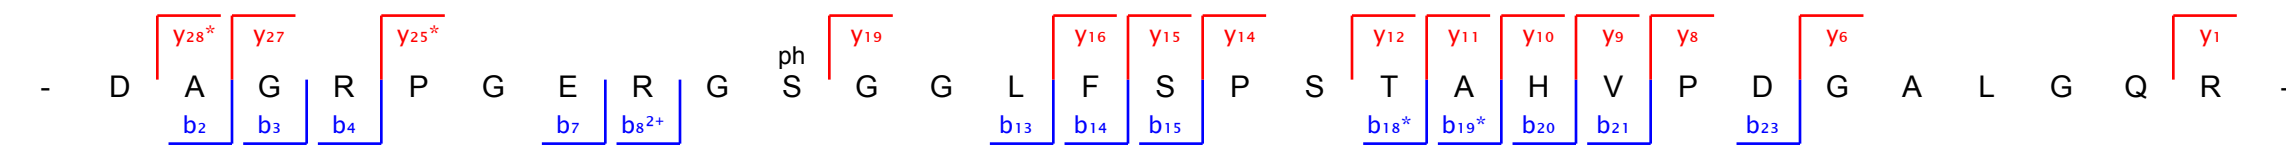



Raw file Scan Method Score m/z Gene names  
 20150814\_A375SR\_Phospho\_BR2\_06 16826 FTMS; HCD 136.27 573.75 SRRM2

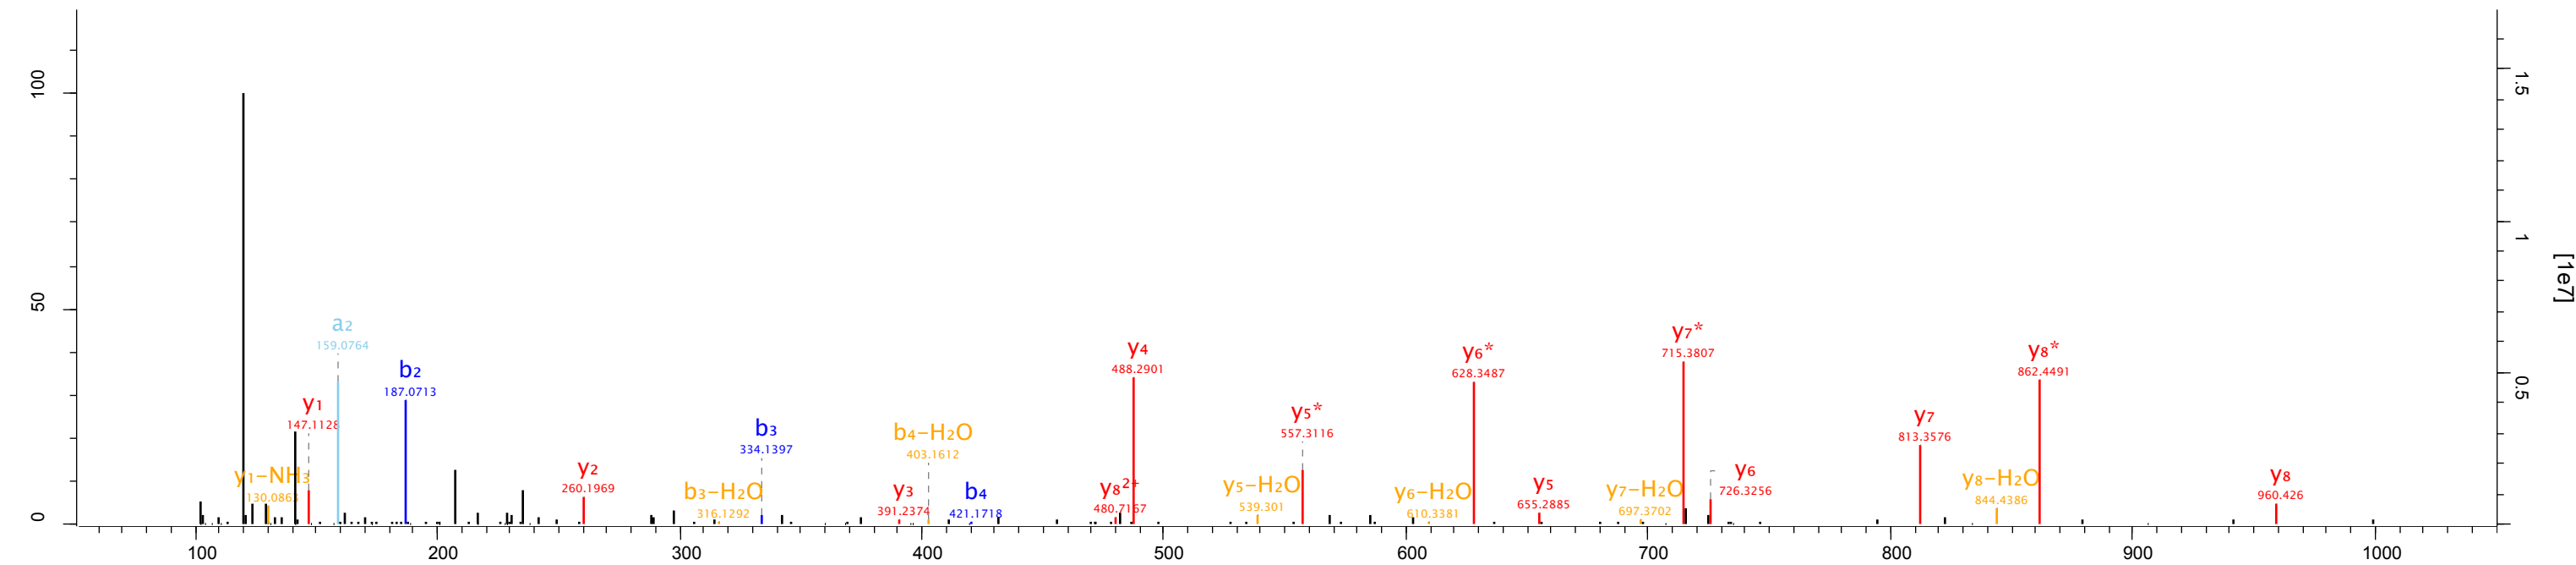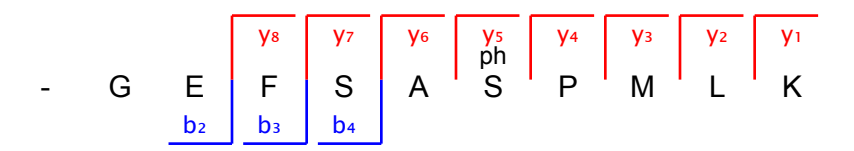

Raw file: 20150814\_A375SR\_Phospho\_BR2\_06  
 Scan: 17406 Method: FTMS; HCD Score: 179.55 m/z: 1172.54 Gene names: SLC9A3R2

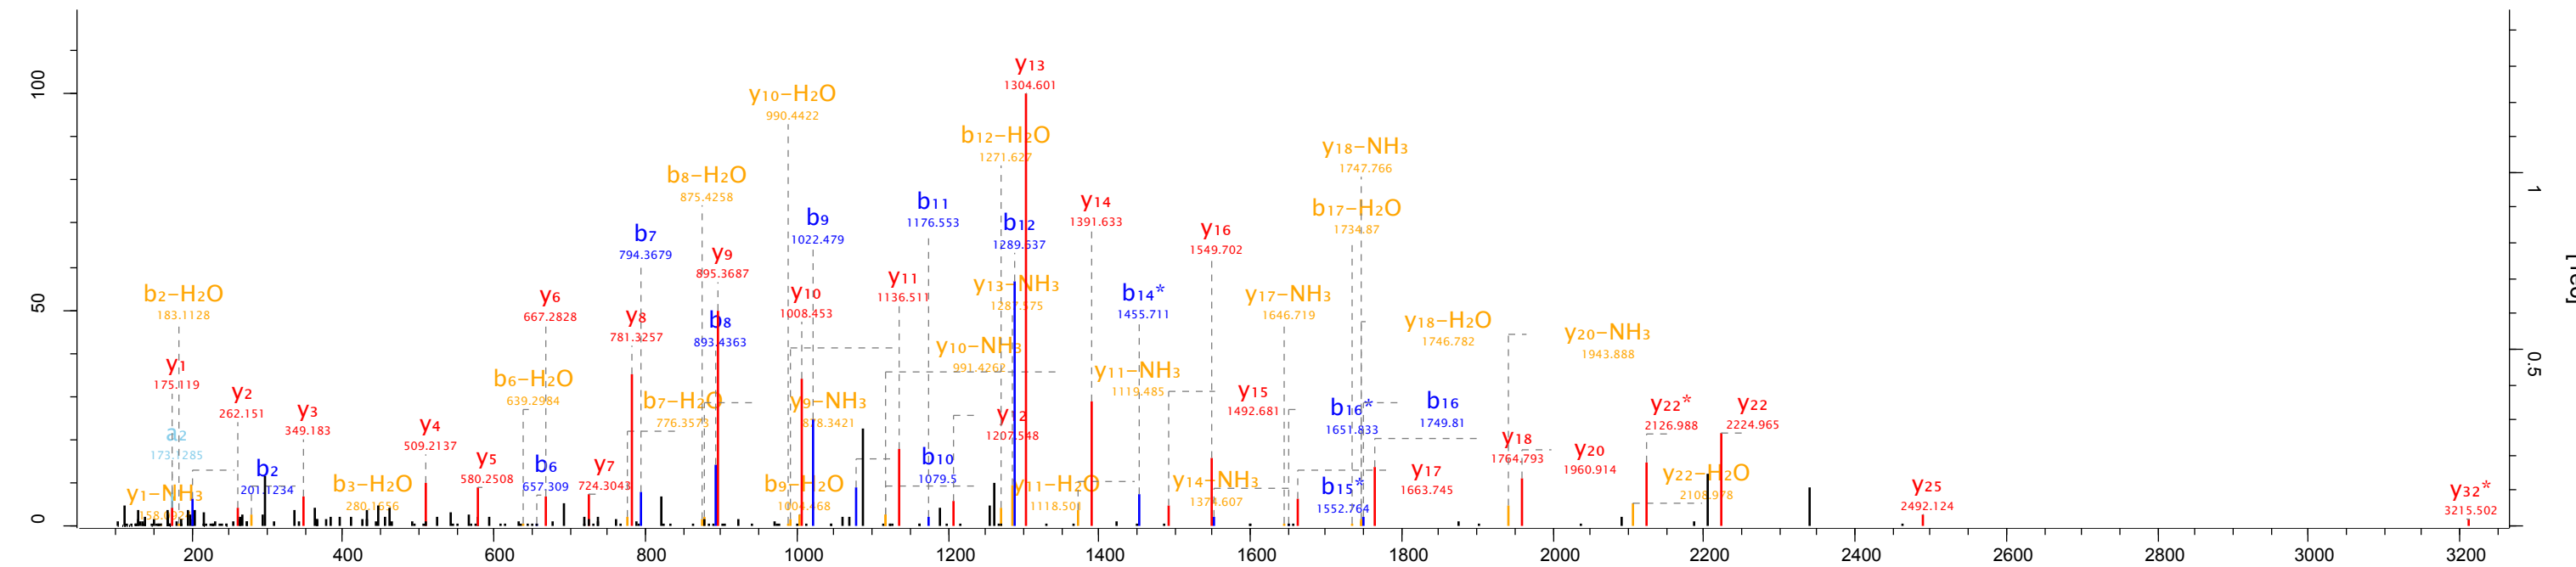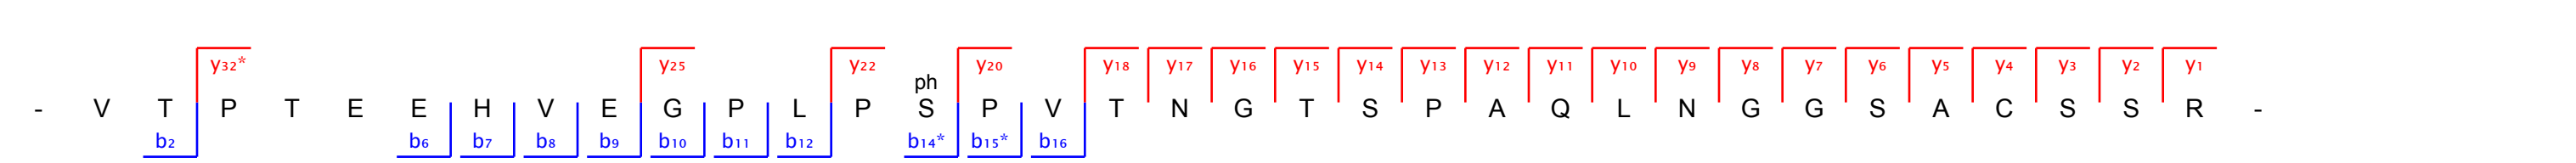

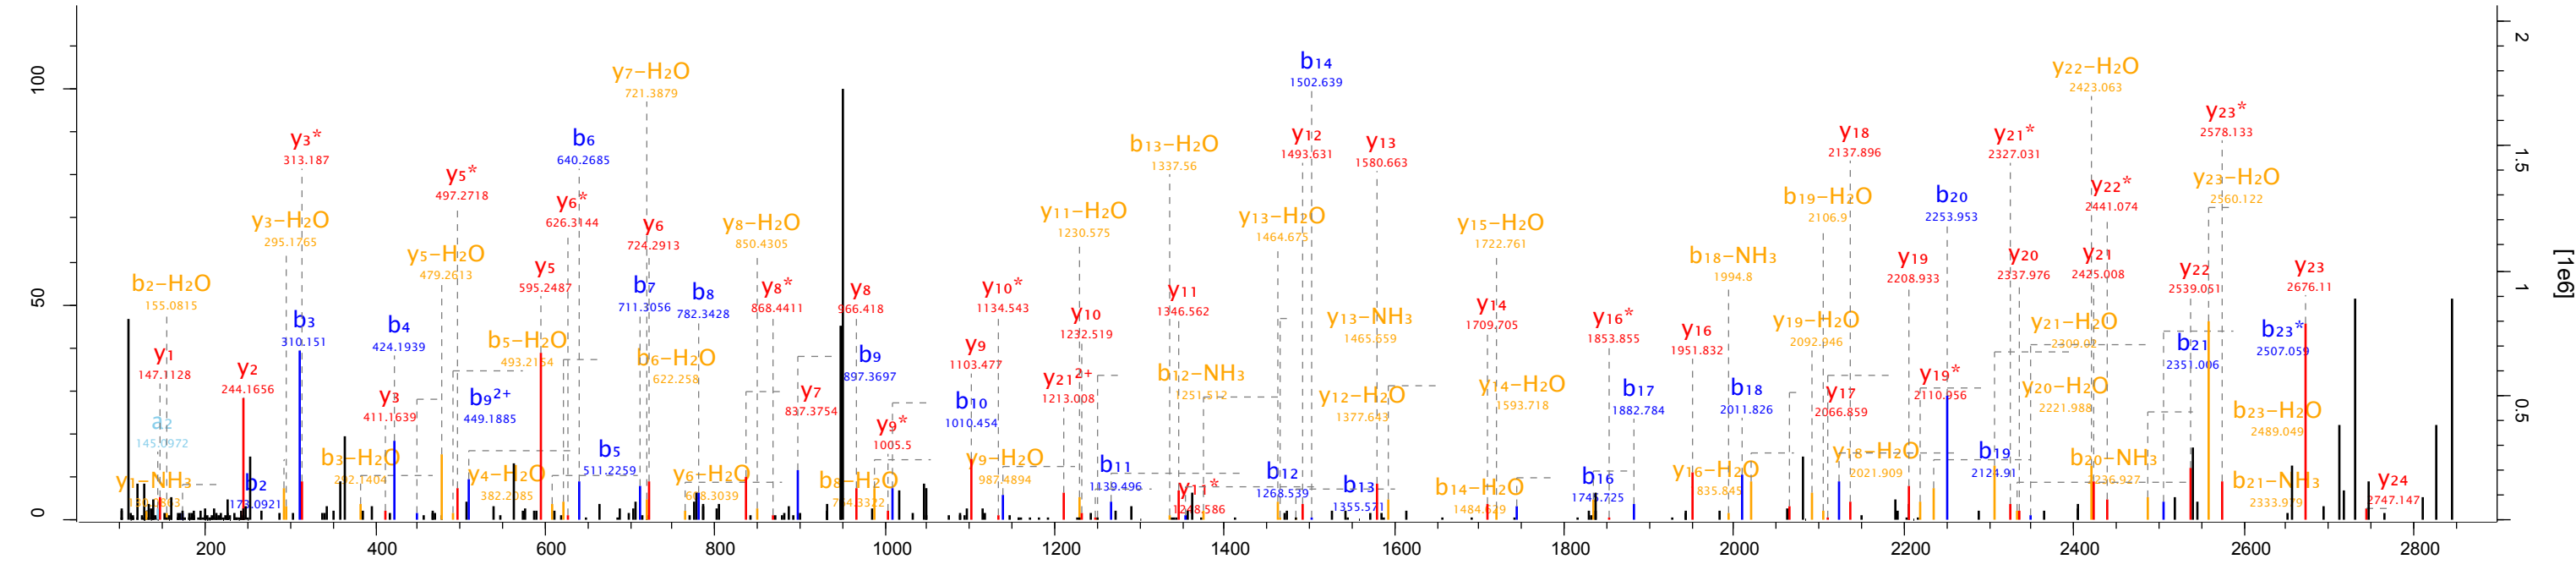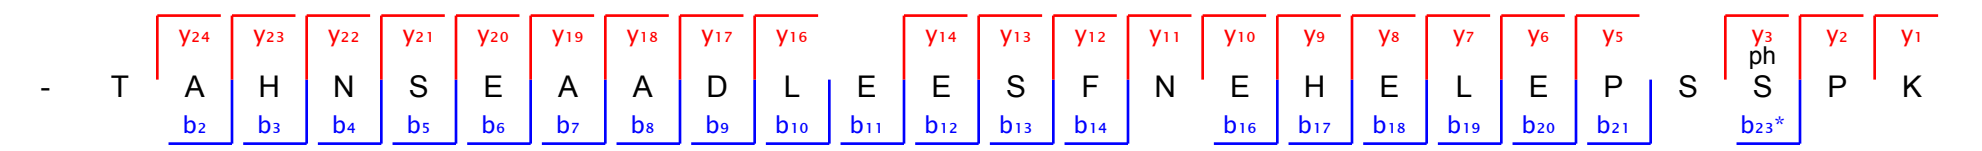

Raw file 20150814\_A375SR\_Phospho\_BR2\_06 Scan 17796 Method FTMS; HCD Score 135.09 m/z 807.35 Gene names ZNF655

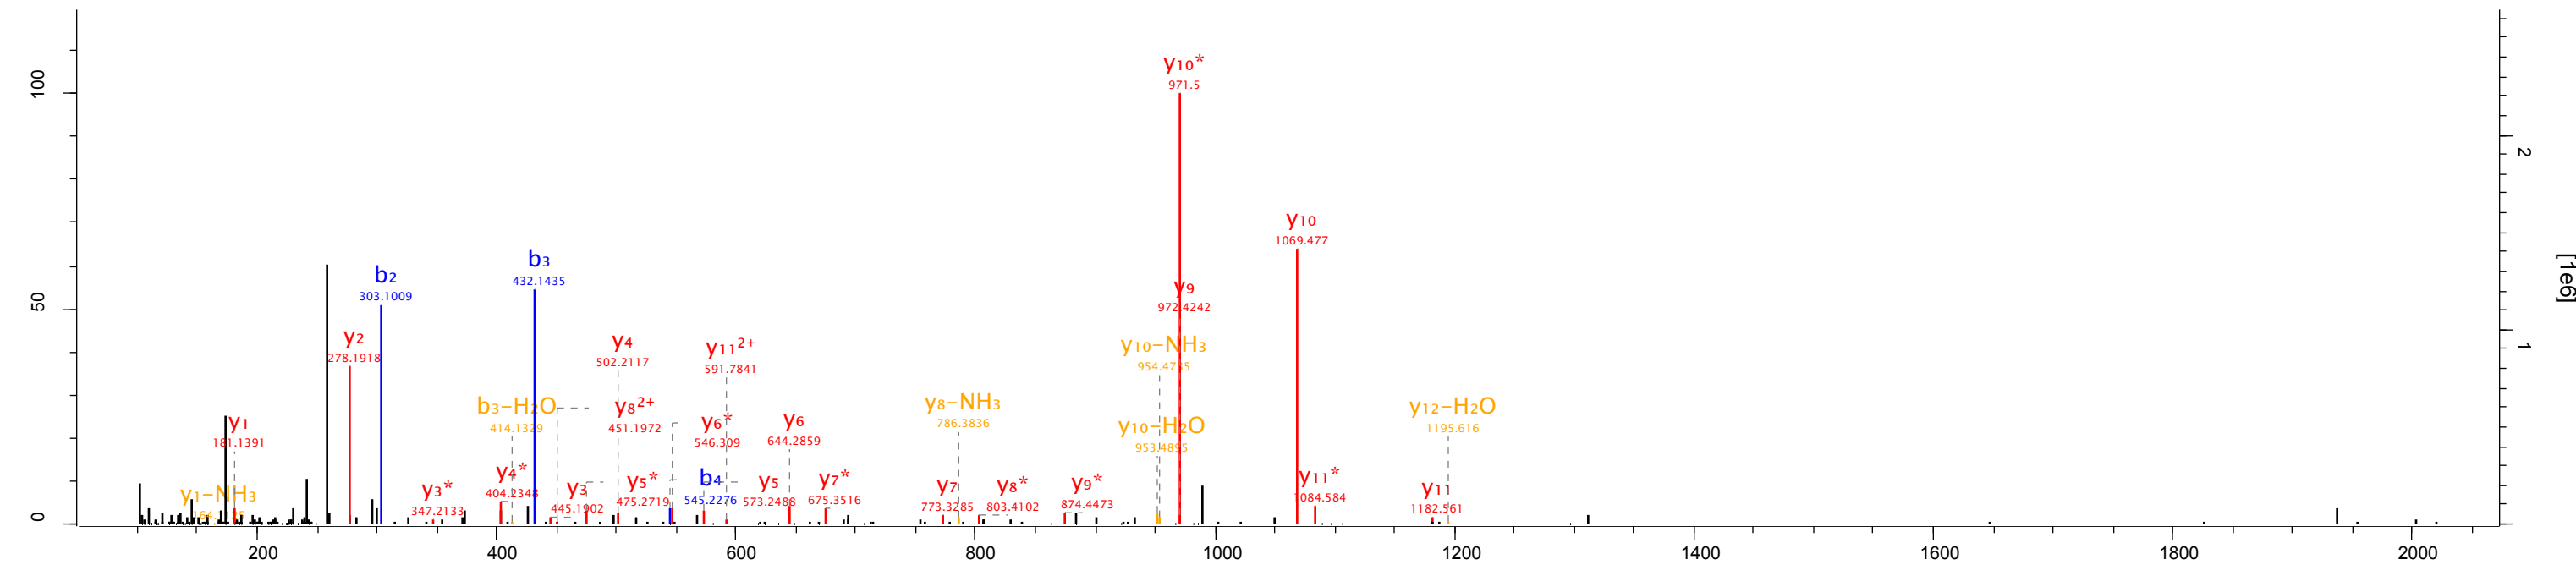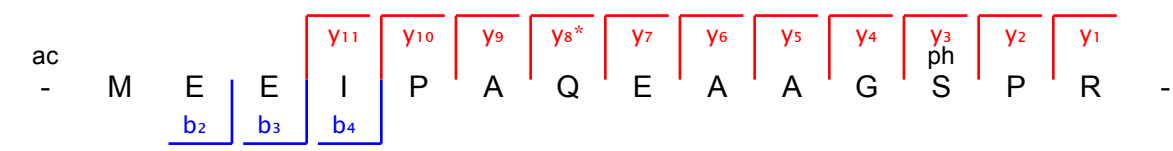

Raw file: 20150814\_A375SR\_Phospho\_BR2\_06  
 Scan: 17806 Method: FTMS; HCD Score: 109.91 m/z: 863.44 Gene names: SCML2

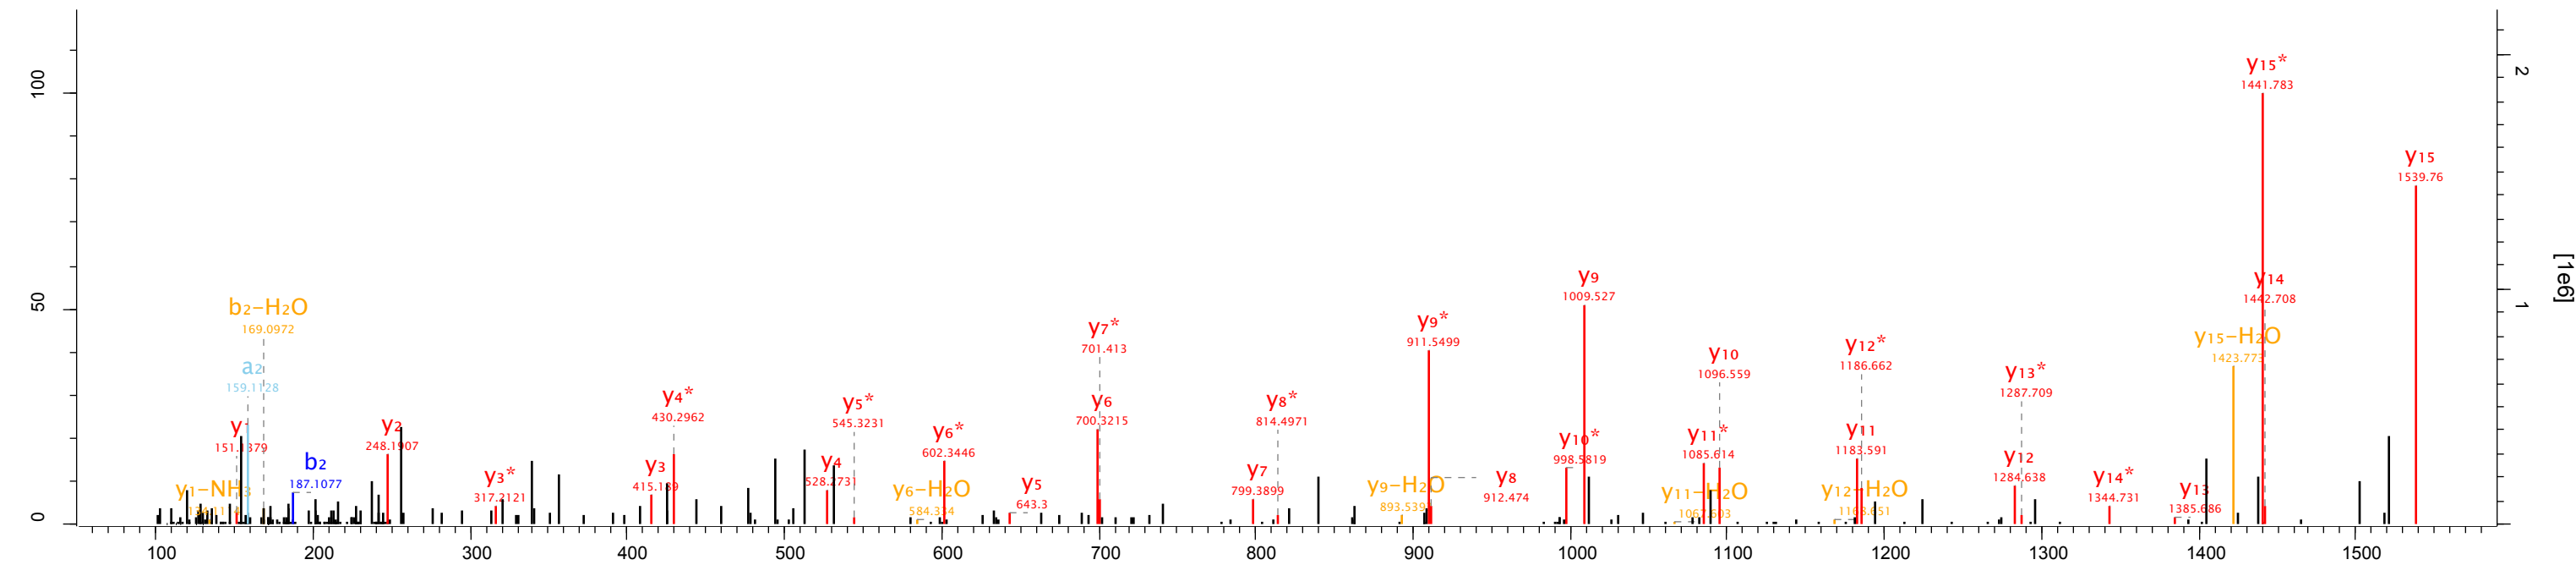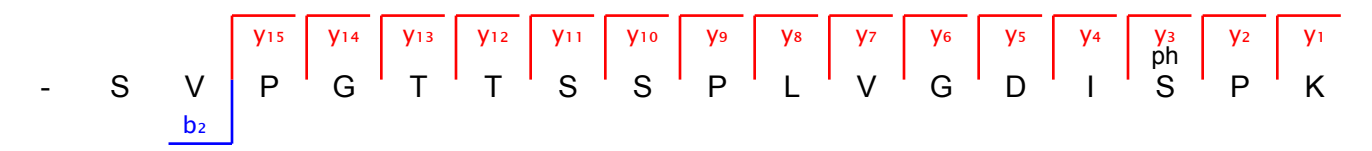

Raw file: 20150814\_A375SR\_Phospho\_BR2\_06  
 Scan: 18246 Method: FTMS; HCD Score: 110.12 m/z: 800.38 Gene names: EPB41L5

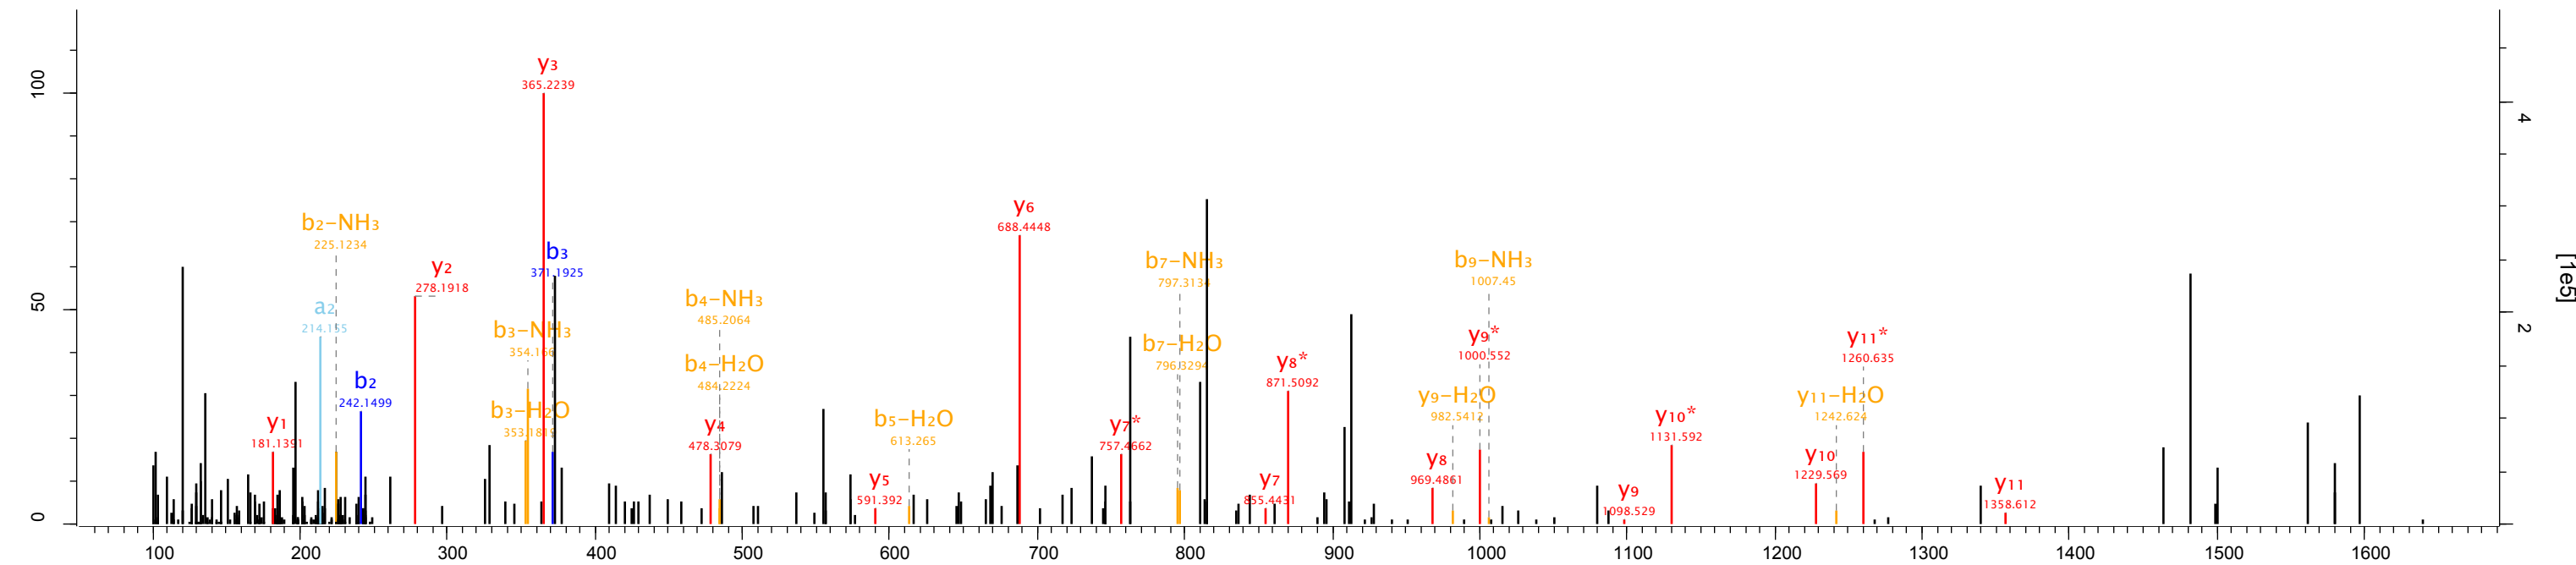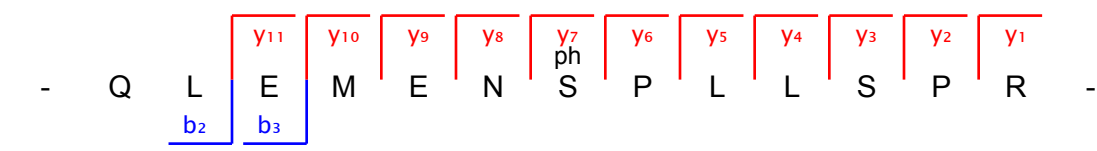

Raw file: 20150814\_A375SR\_Phospho\_BR2\_06  
 Scan: 18616 Method: FTMS; HCD Score: 106.57 m/z: 916.9 Gene names: LPIN1

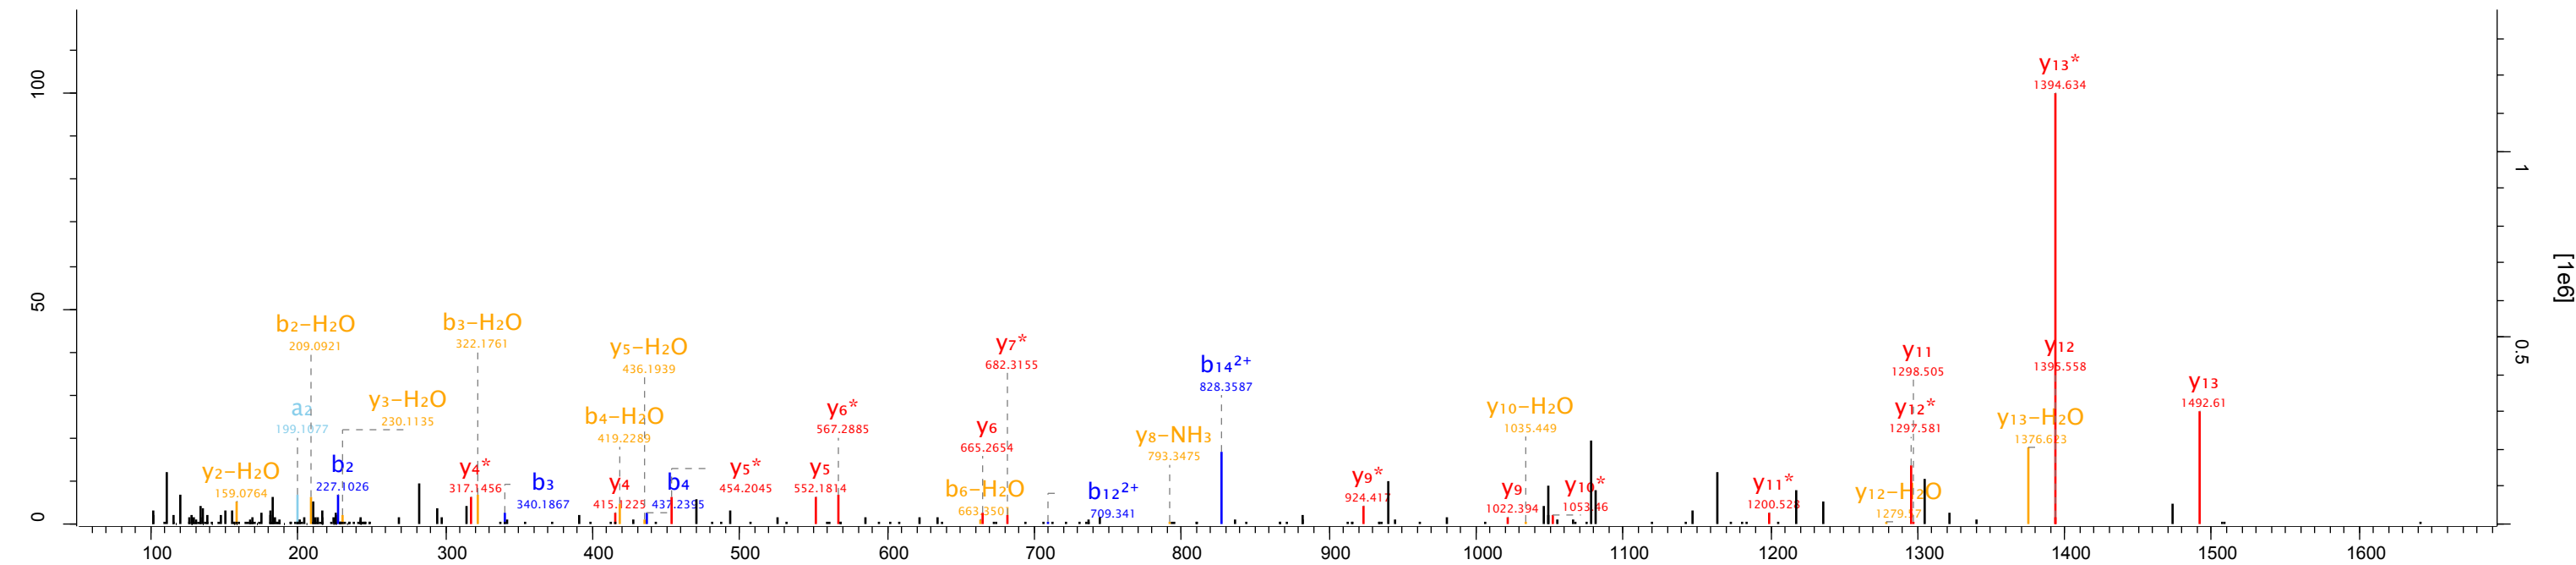

Sequence: - E P L P P F E N Q D I H S A S A -

Fragmentation sites (b-ions): b2 (P), b3 (LP), b4 (LPP), b12<sup>2+</sup> (IH), b14<sup>2+</sup> (SA)

Fragmentation sites (y-ions): y9 (N), y10\* (EN), y11 (FP), y12 (LPP), y13 (LPP)

Fragmentation sites (charge state ions): y7\* (D), y6 (DI), y5 (DIH), y4<sup>ph</sup> (DIHS)

Raw file 20150814\_A375SR\_Phospho\_BR2\_06 Scan 18956 Method FTMS; HCD Score 100.07 m/z 853.39 Gene names FTSJ3

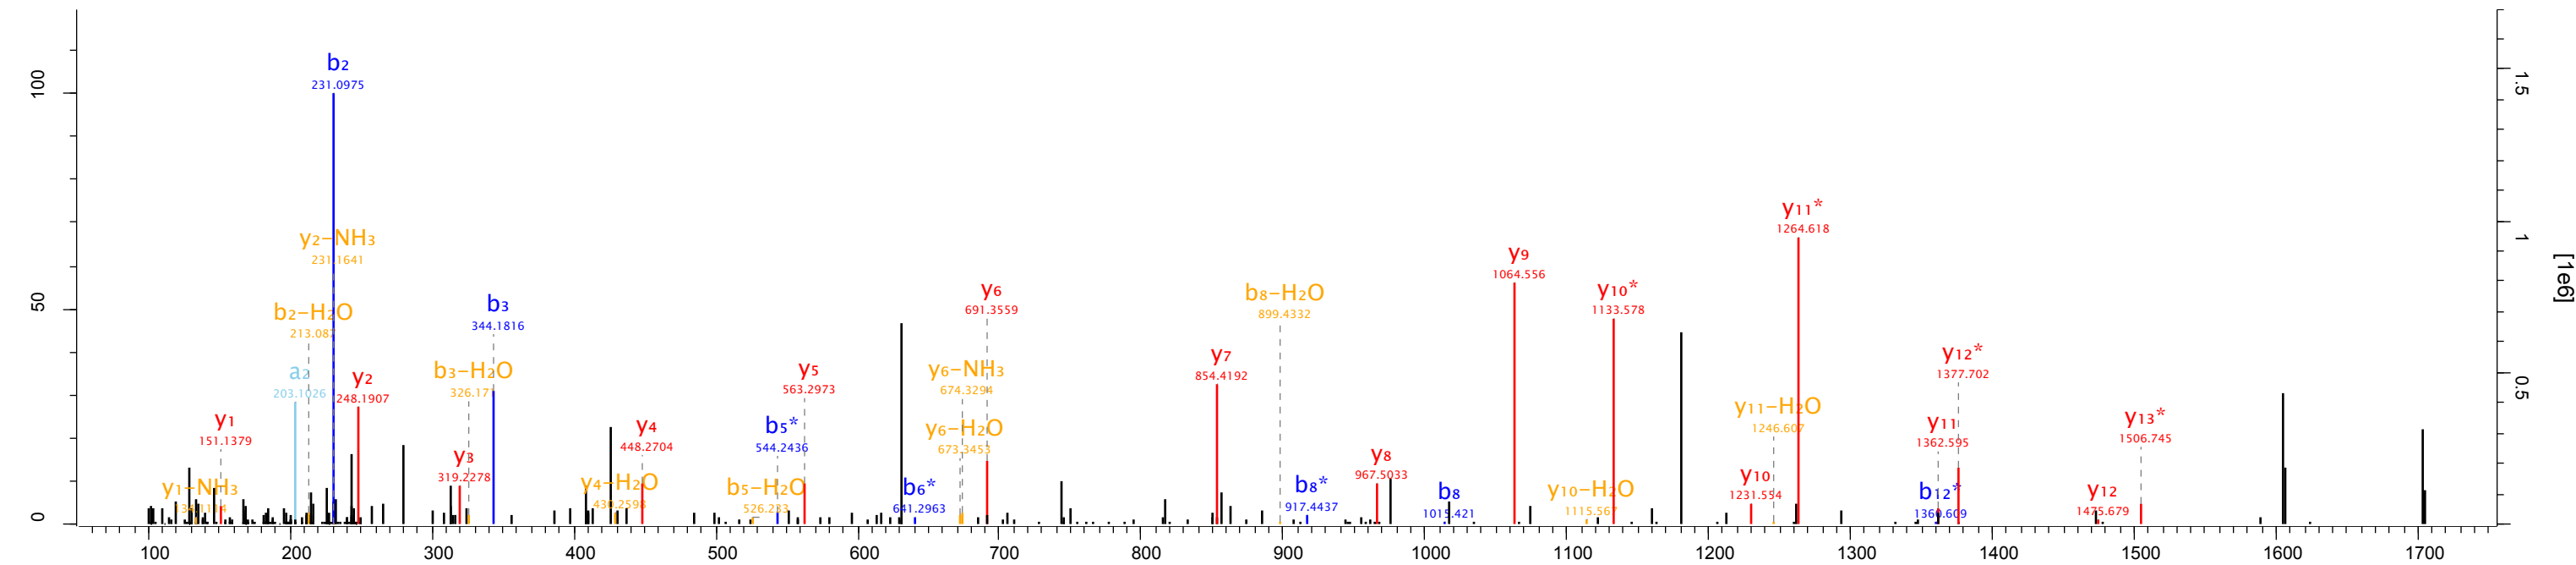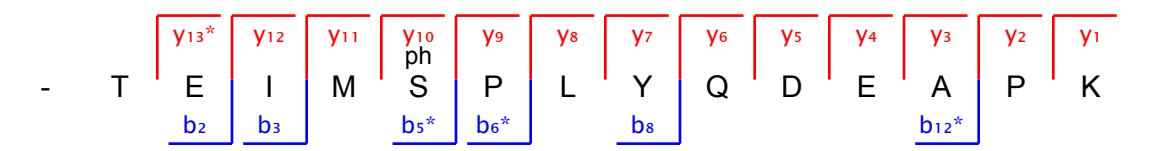



Raw file: 20150814\_A375SR\_Phospho\_BR2\_06  
 Scan: 21006 Method: FTMS; HCD Score: 114.71 m/z: 1136.84 Gene names: DNTTIP2

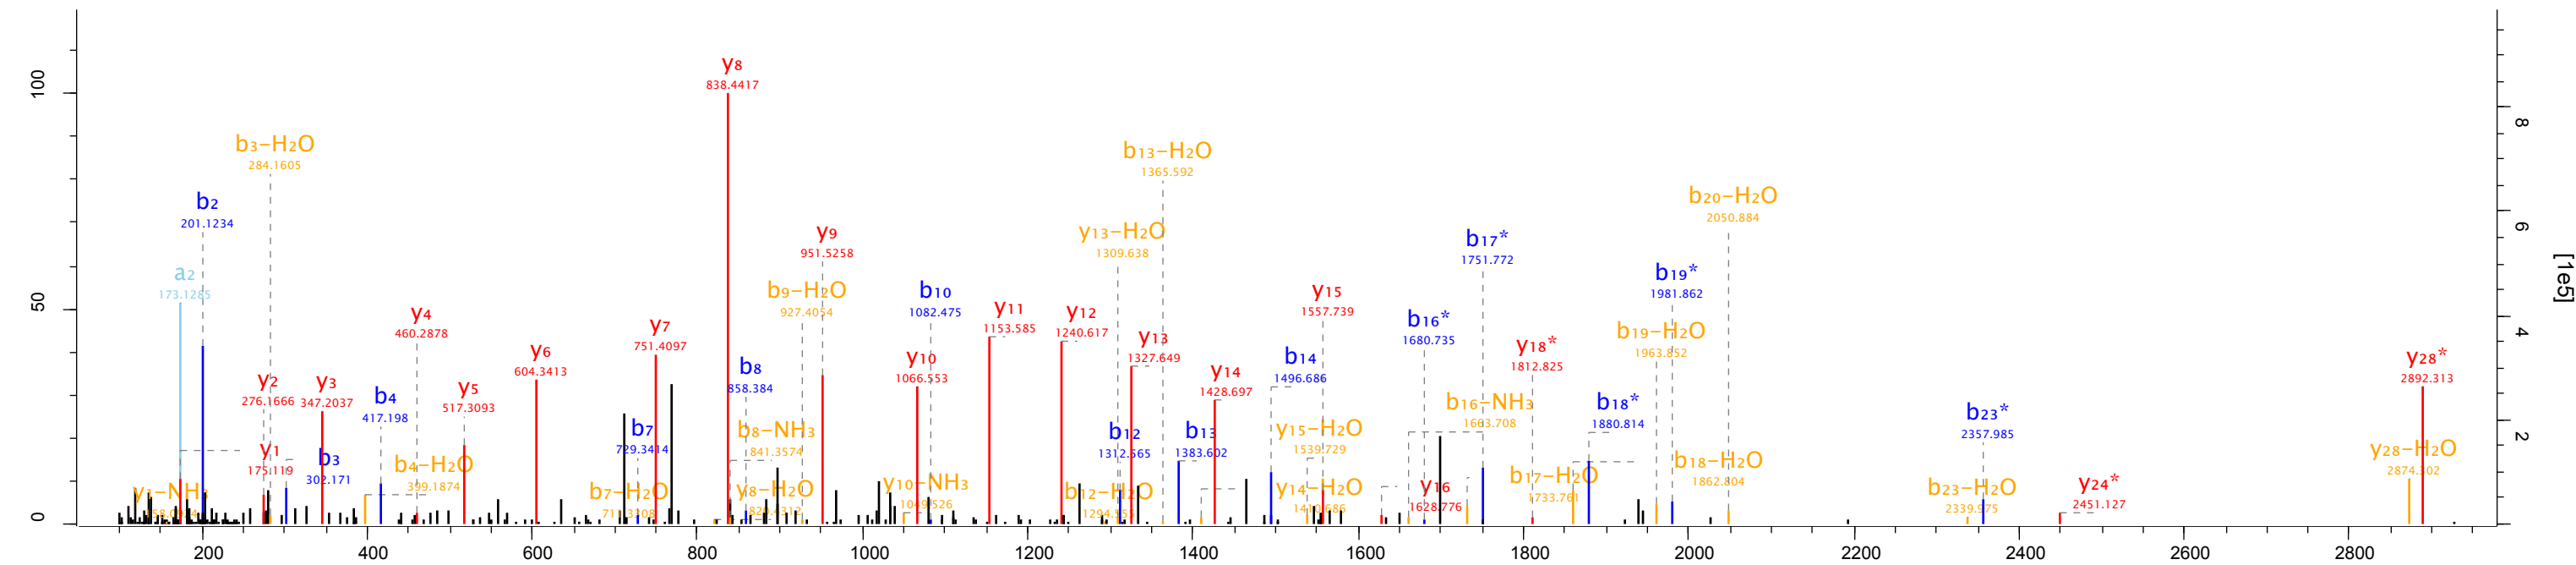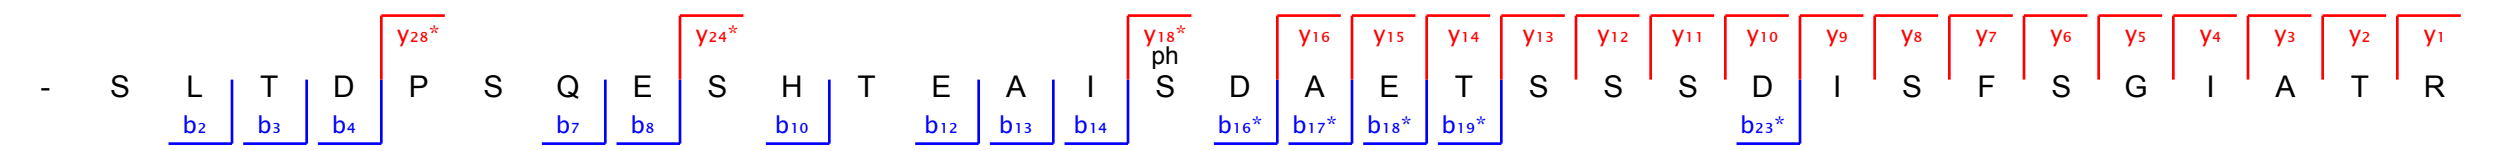

Raw file: 20150814\_A375SR\_Phospho\_BR2\_06  
 Scan: 21656 Method: FTMS; HCD Score: 91.6 m/z: 911.5 Gene names: STK10

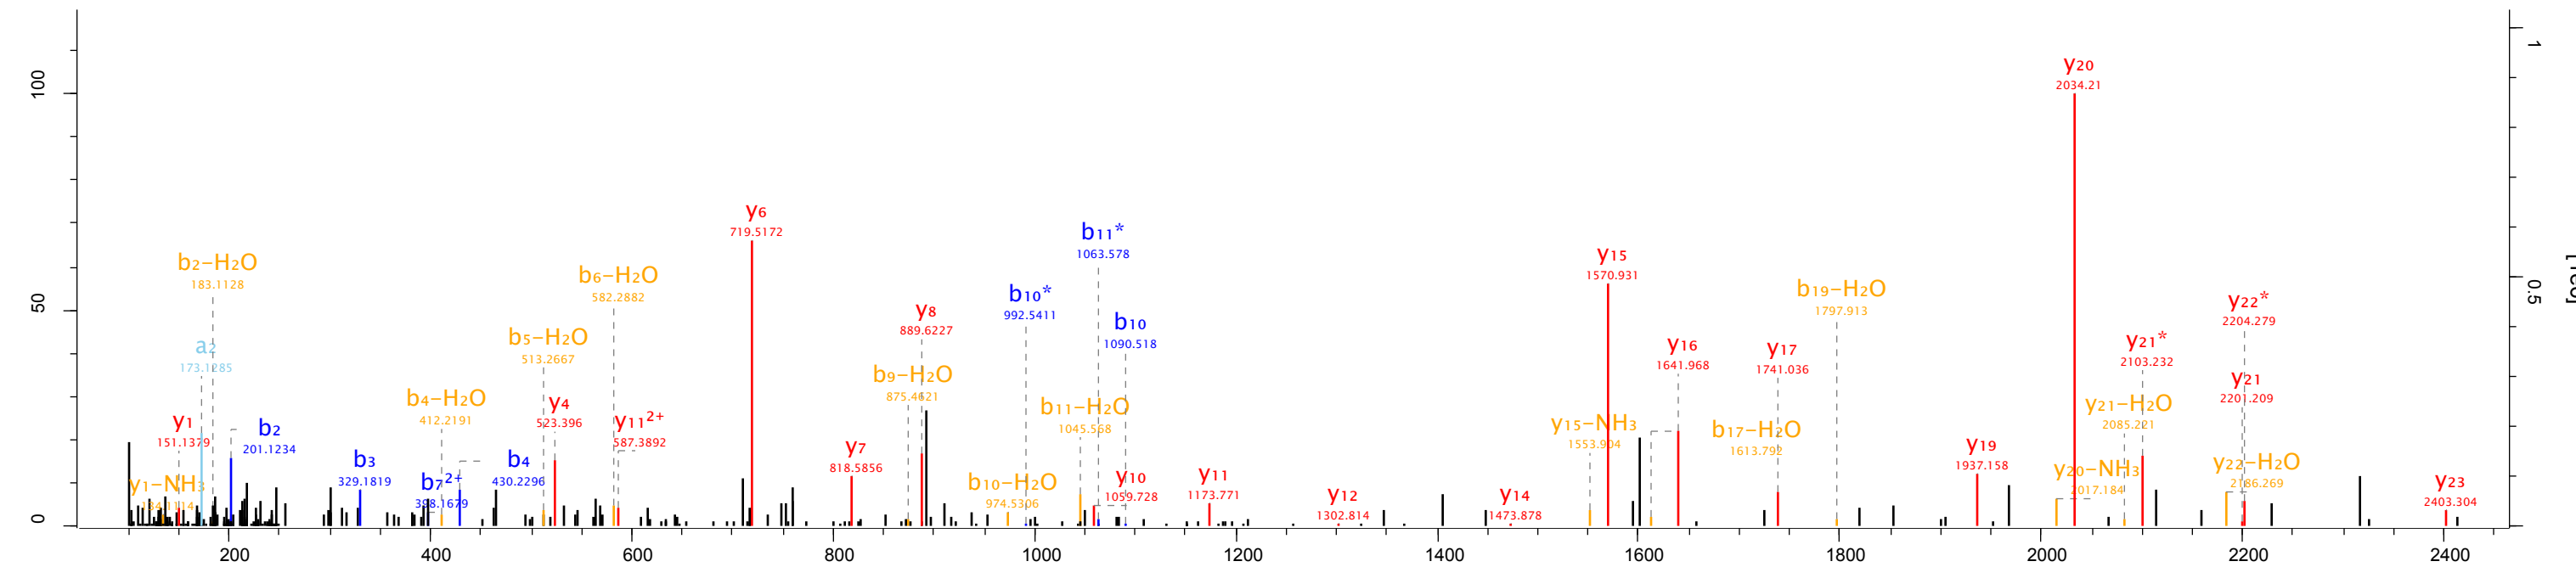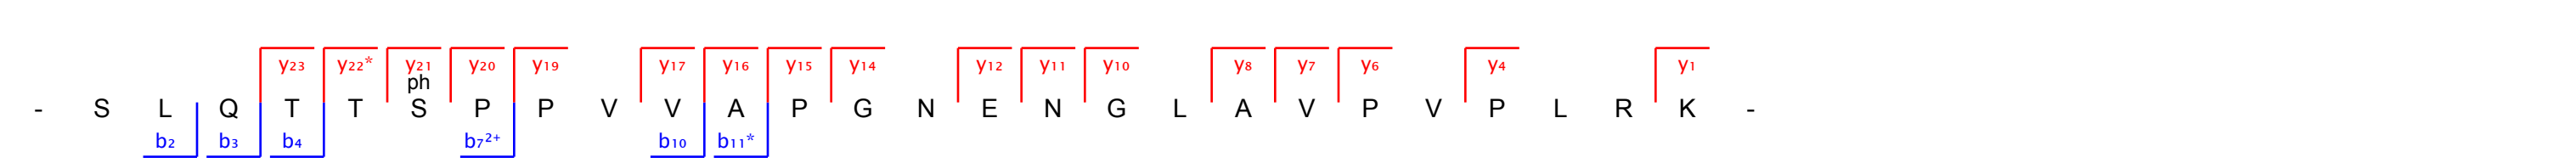

Raw file: 20150814\_A375SR\_Phospho\_BR2\_06  
 Scan: 21696 Method: FTMS; HCD Score: 137.66 m/z: 1042.16 Gene names: ARHGEF1

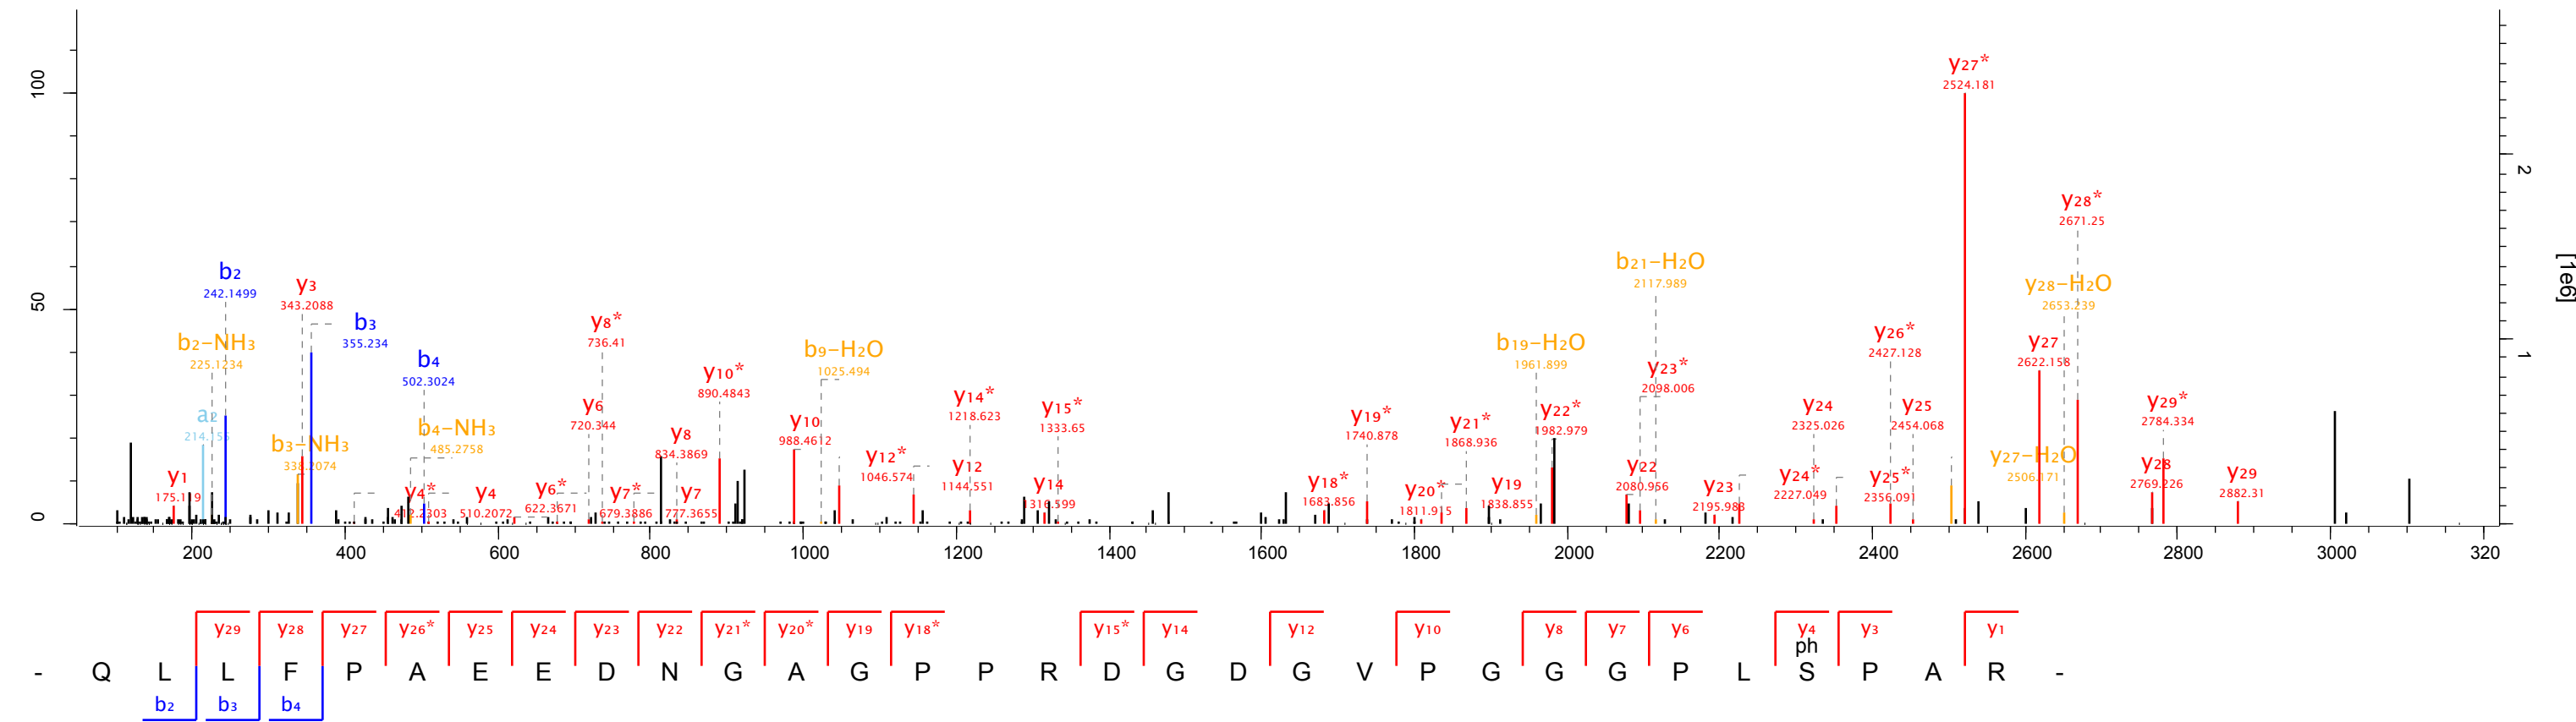

Raw file  
20150814\_A375SR\_Phospho\_BR2\_06

Scan 21776 Method FTMS; HCD Score 212.86 m/z 761.36 Gene names EIF4G1

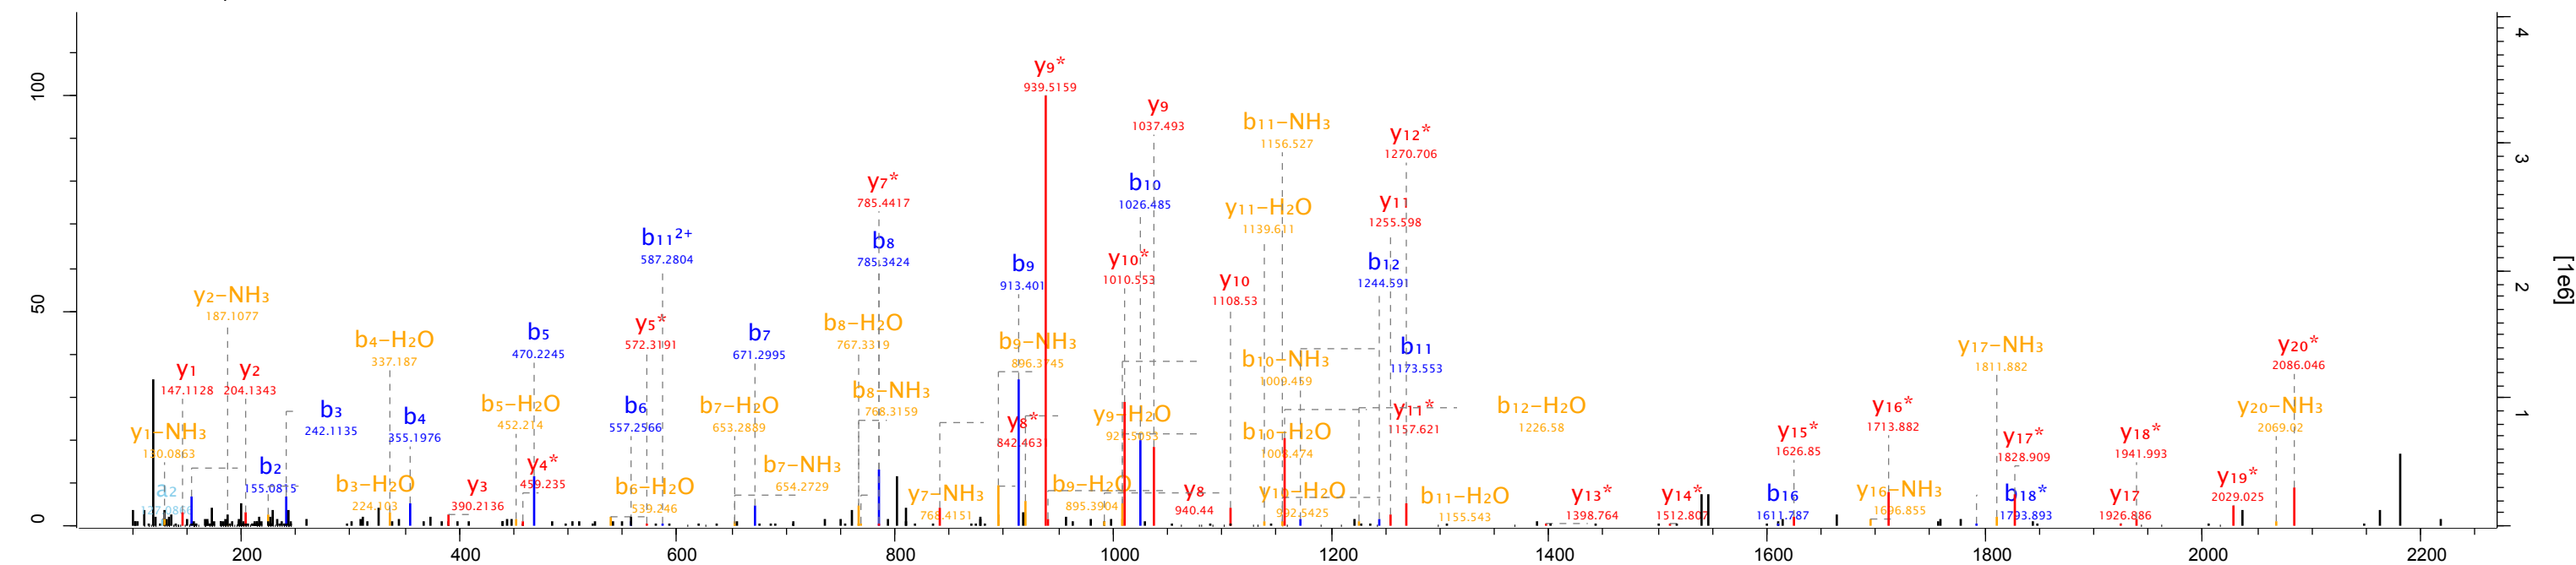

- P G S I D S N N Q L F A P G G R L S W G K -  
b2 b3 b4 b5 b6 b7 b8 b9 b10 b11 b12 b16 b18\*

Raw file 20150814\_A375SR\_Phospho\_BR2\_06 Scan 22606 Method FTMS; HCD Score 139.22 m/z 1089.56

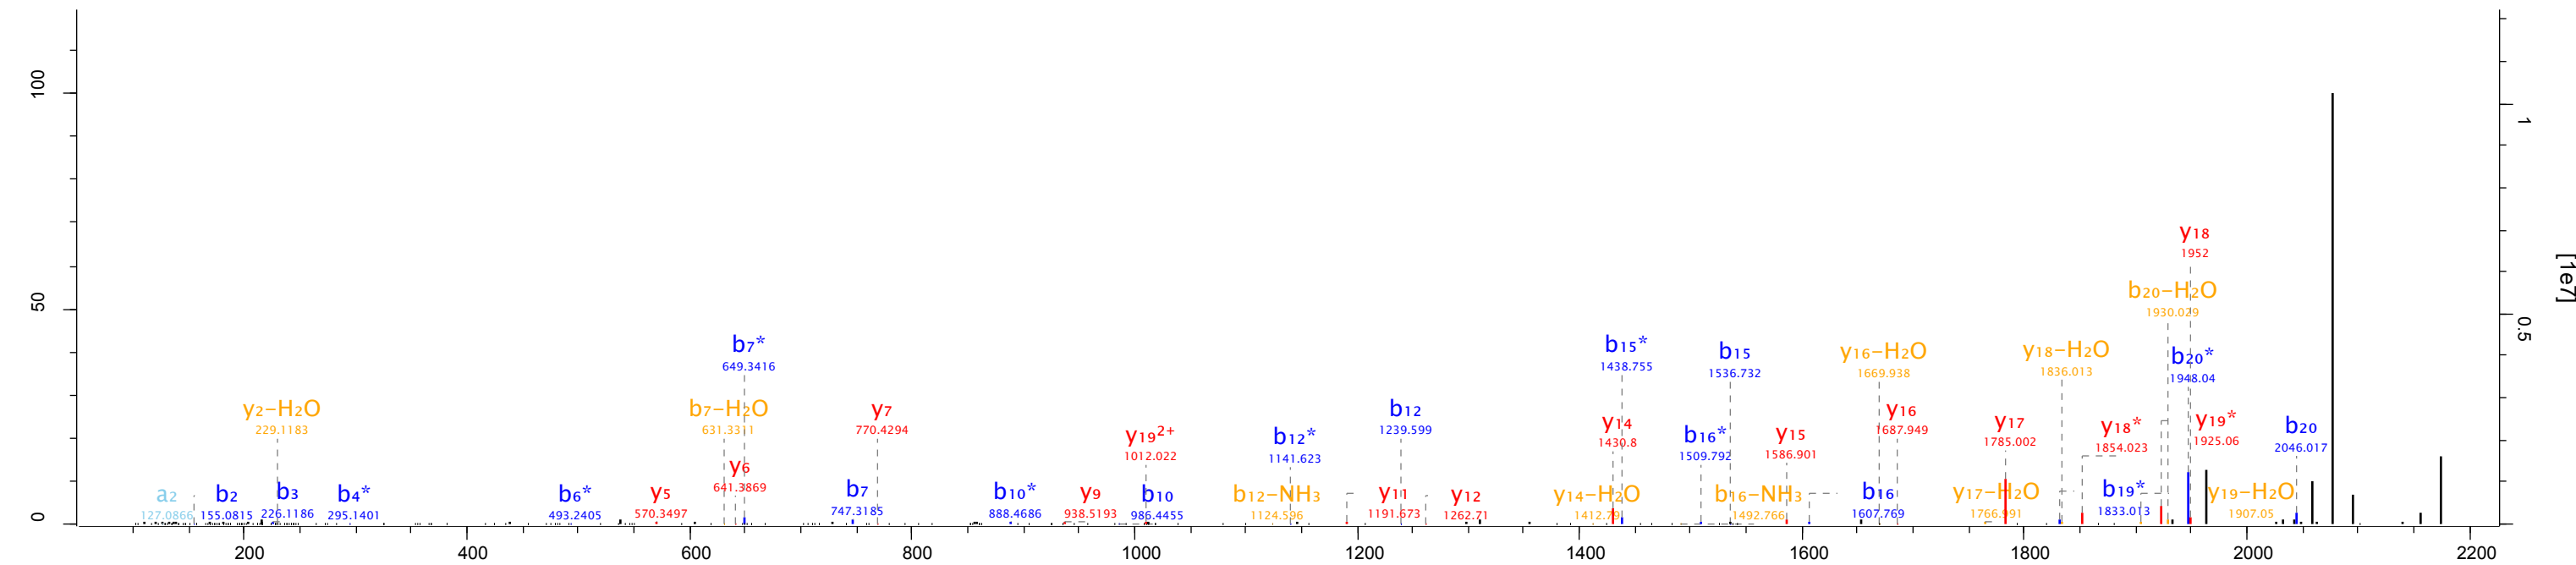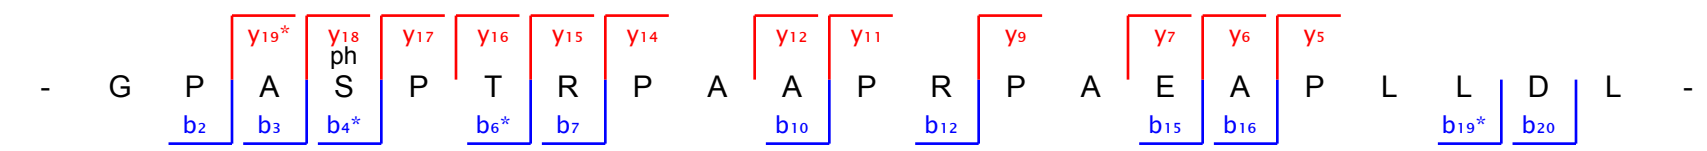

Raw file: 20150814\_A375SR\_Phospho\_BR2\_06  
 Scan: 23346  
 Method: FTMS; HCD  
 Score: 40.86  
 m/z: 1050.46  
 Gene names: SCRIB

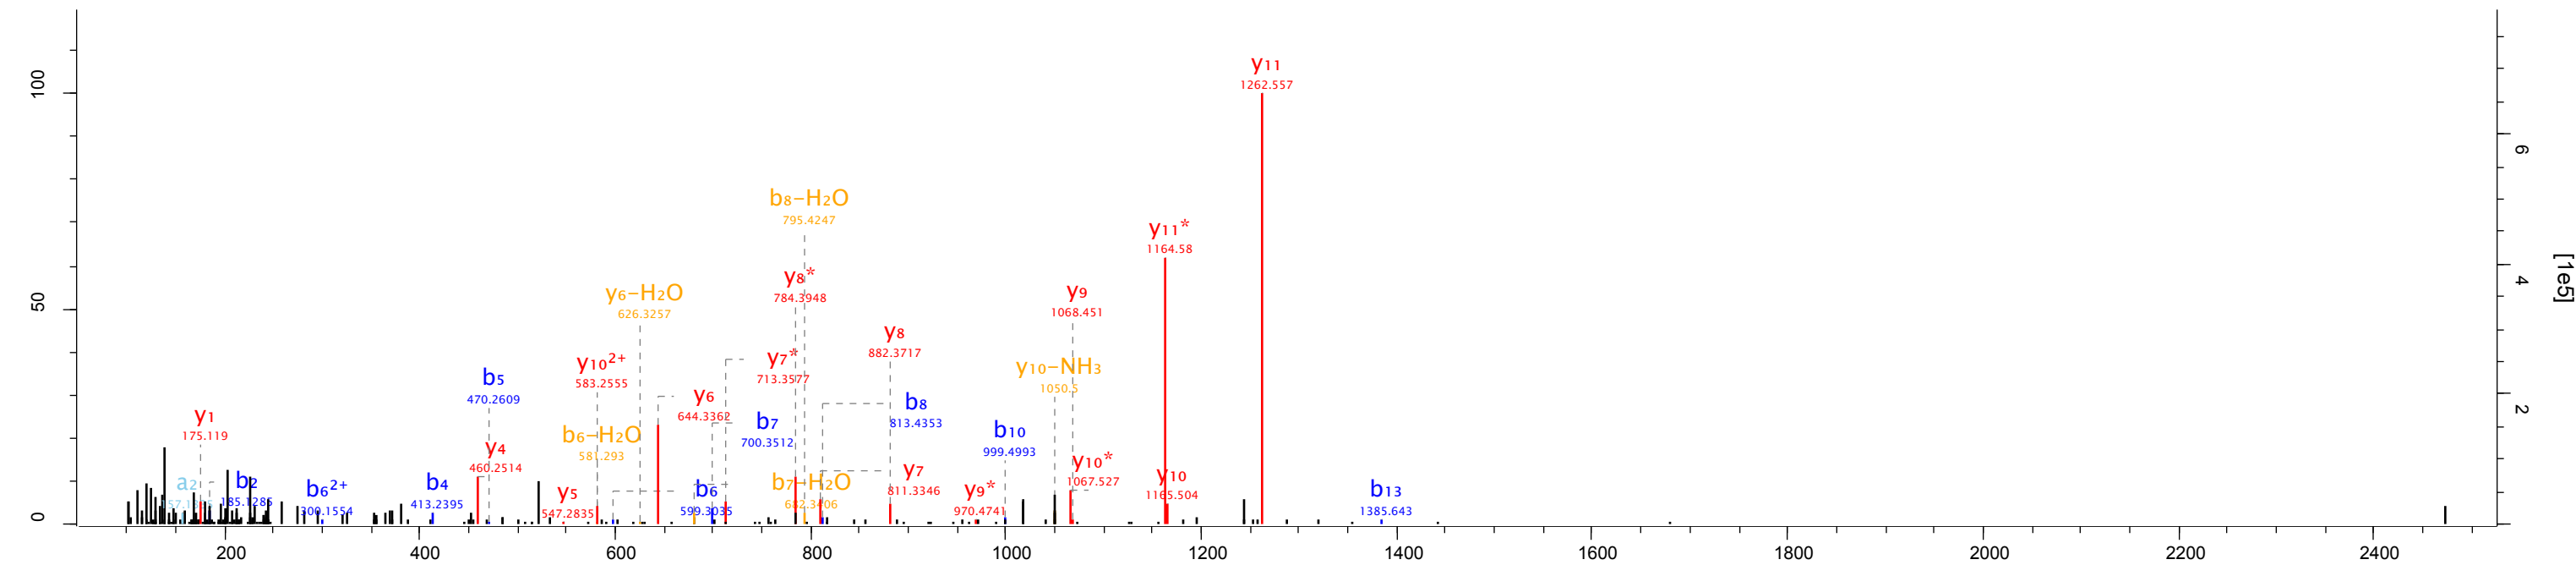

- L A L D G E T L G E E E Q E D E Q P P W A S P S P T S R -  
 (Blue boxes under A, D, G, E, T, L, G, E, Q, S, P, S, P, R)  
 (Red boxes above P, P, W, A, S, P, S, P, R)

Raw file  
 20150814\_A375SR\_Phospho\_BR2\_06  
 Scan 23766 Method FTMS; HCD Score 118.37 m/z 829.75 Gene names IRF2BP1

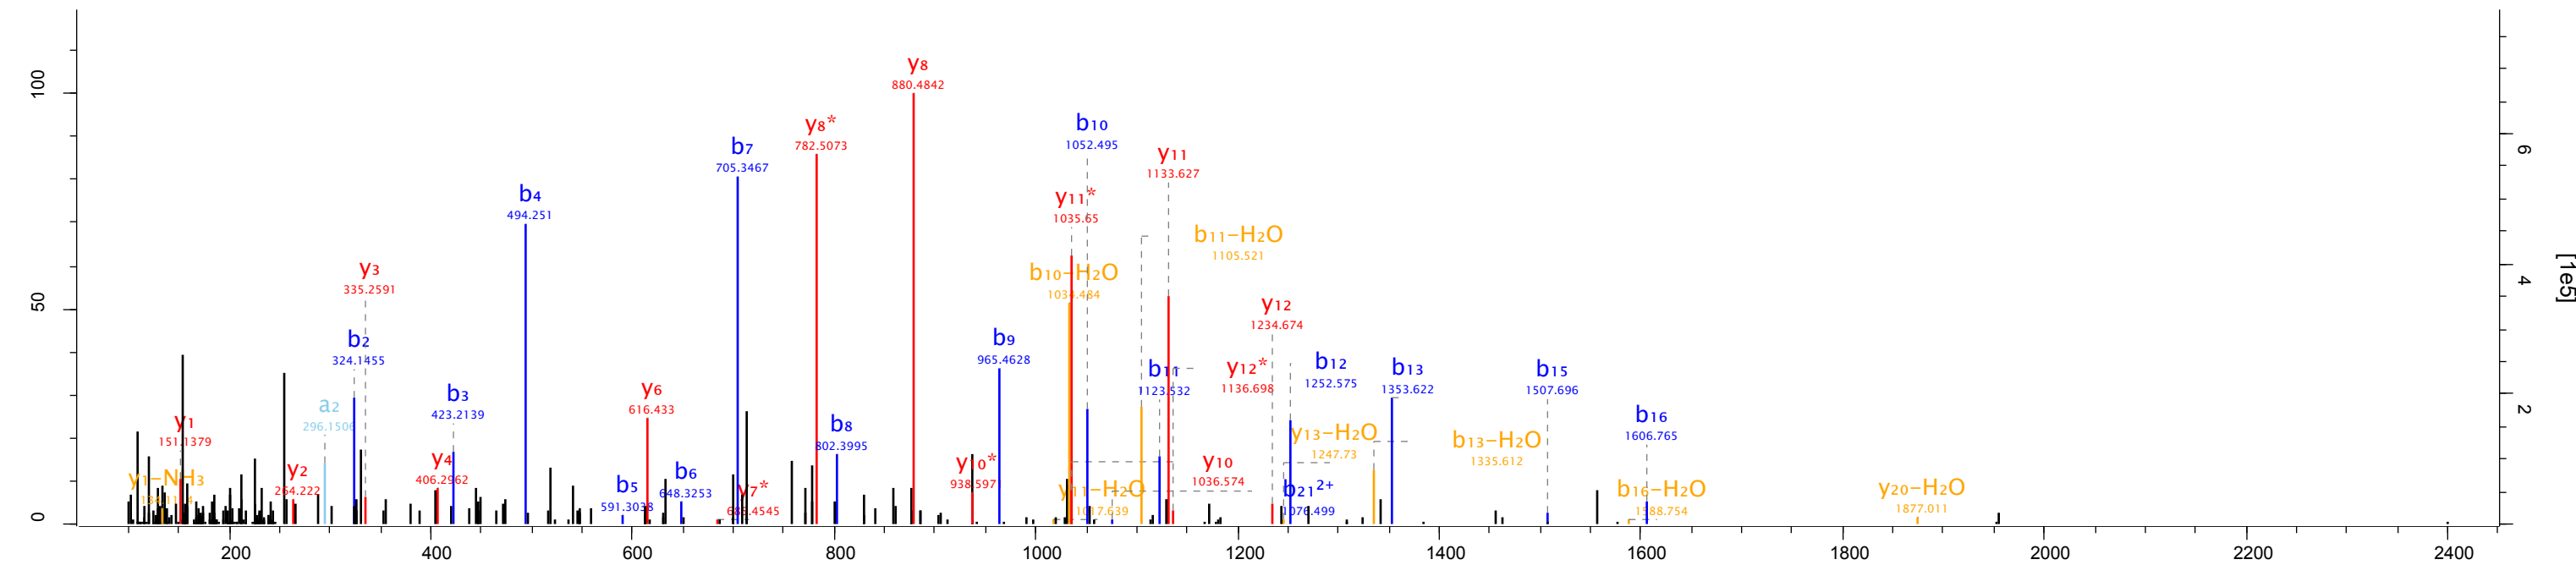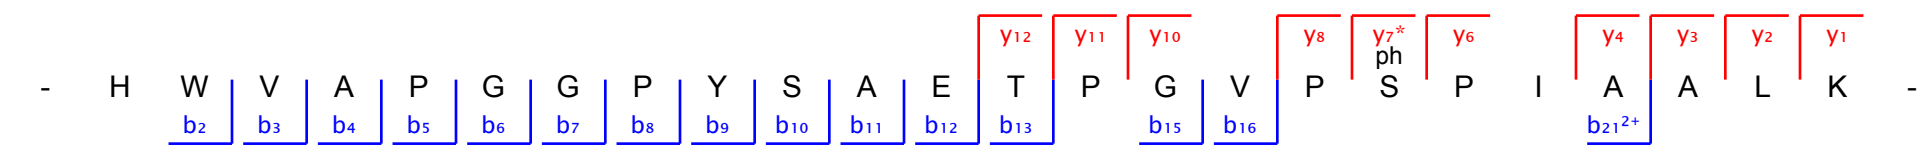

Raw file: 20150814\_A375SR\_Phospho\_BR2\_06  
 Scan: 24196 Method: FTMS; HCD Score: 246.67 m/z: 904.96 Gene names: AAK1

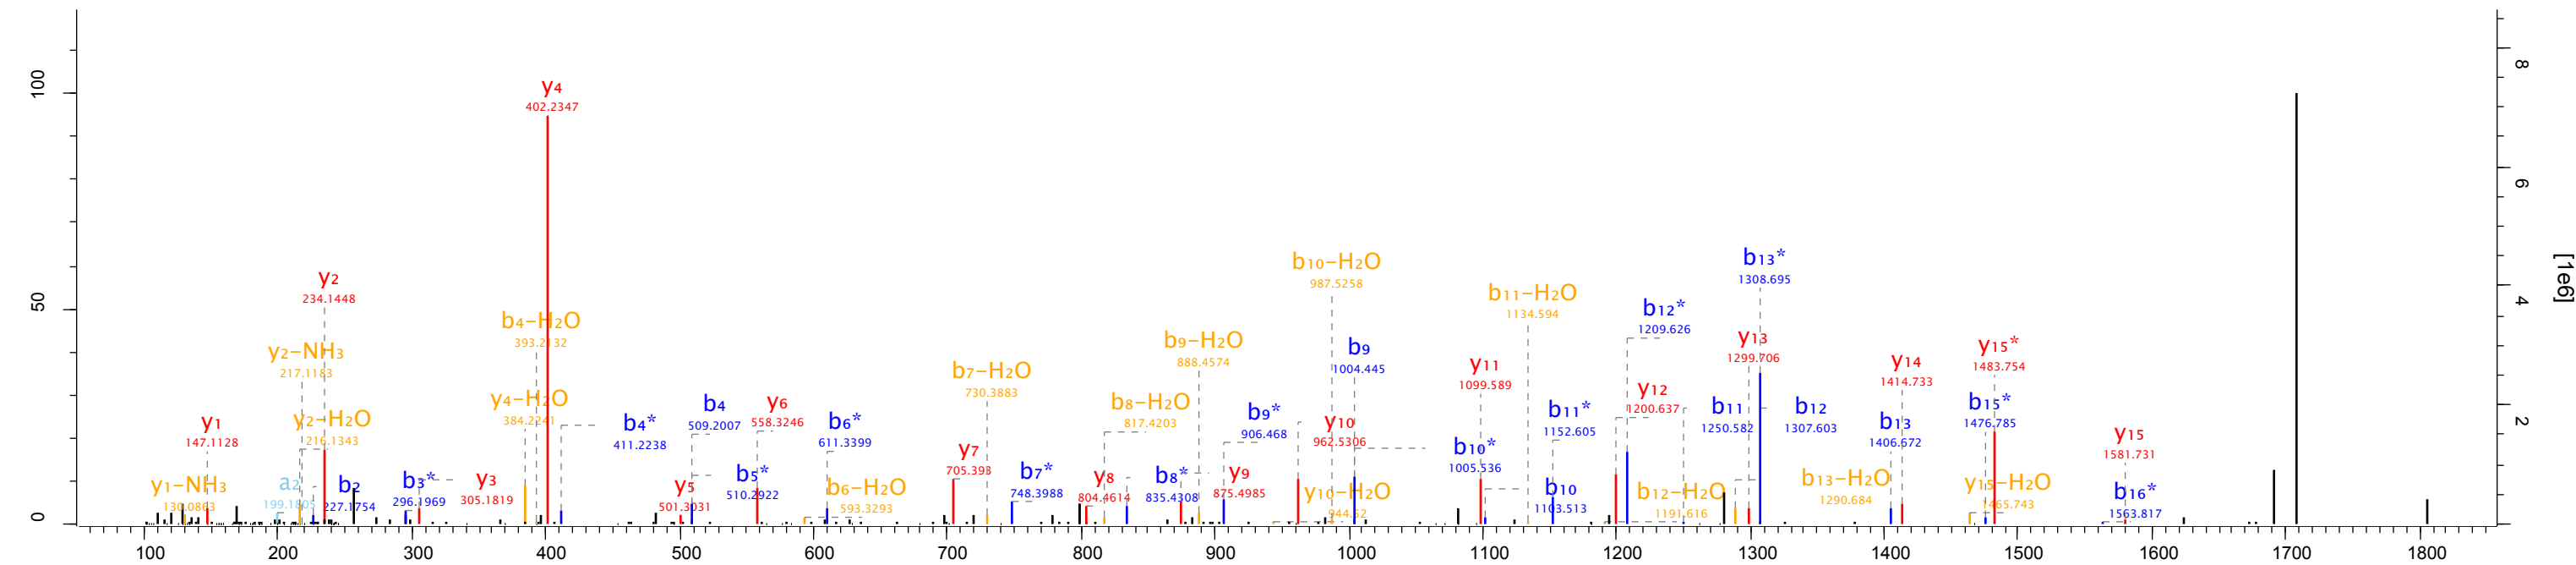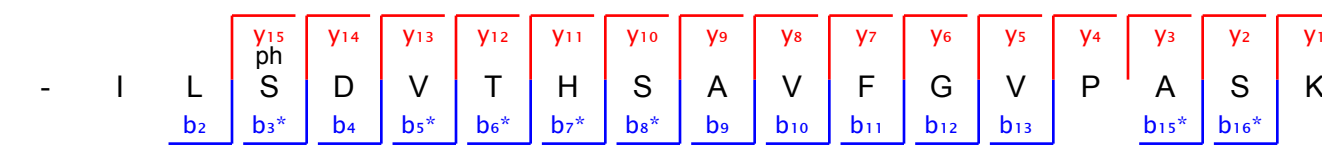



Raw file: 20150814\_A375SR\_Phospho\_BR2\_06  
 Scan: 24826 Method: FTMS; HCD Score: 118.81 m/z: 1292.67 Gene names: PCIF1

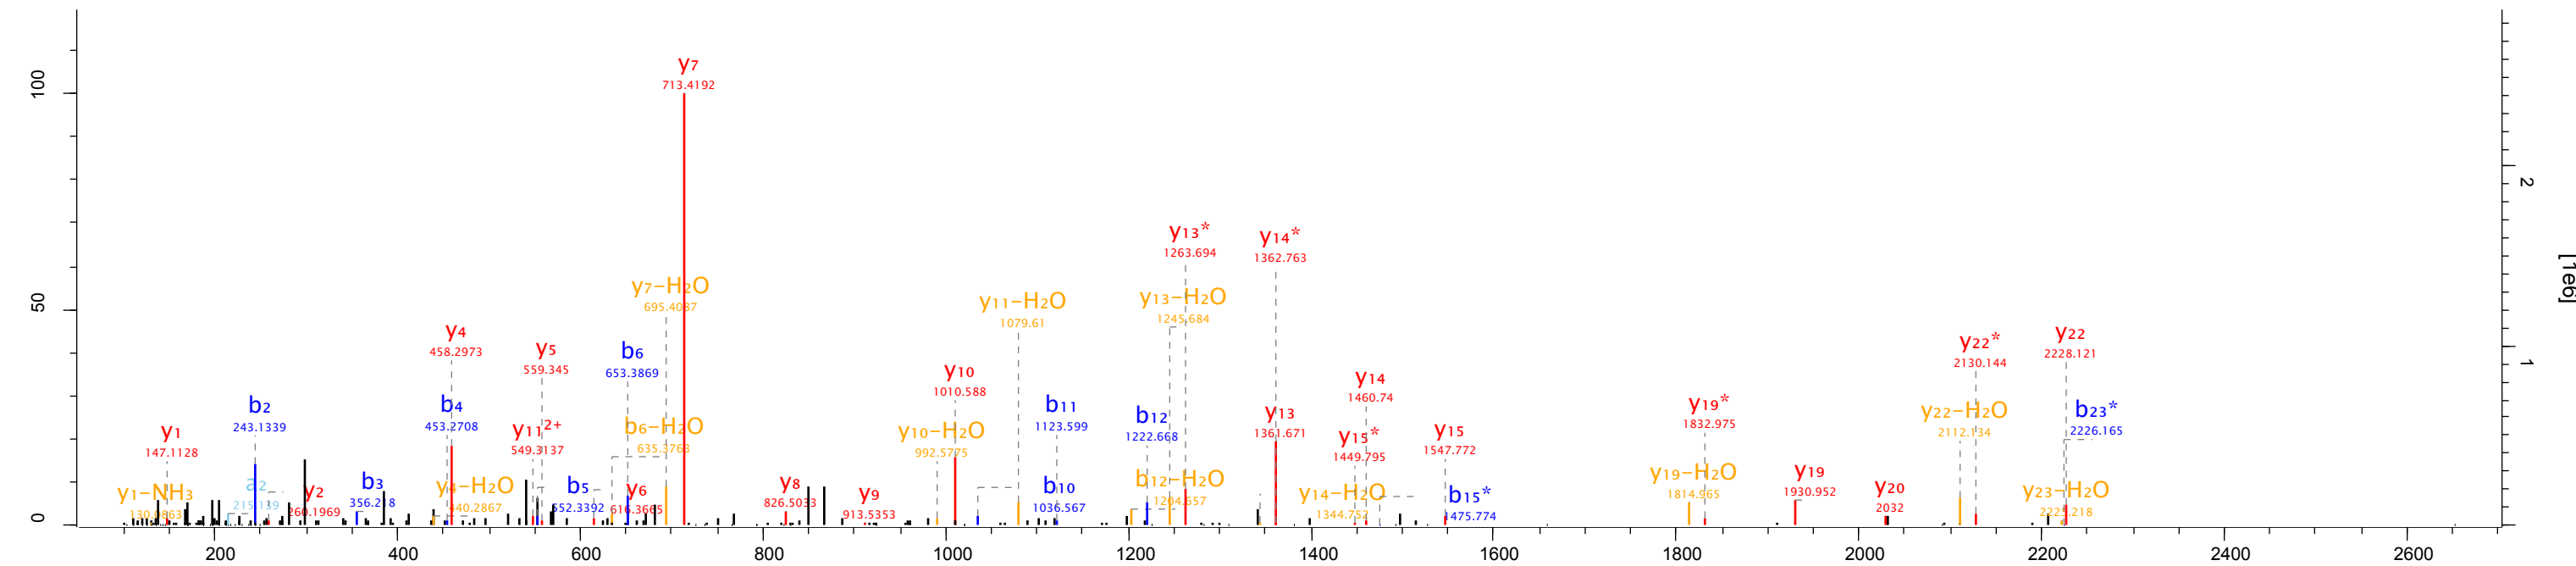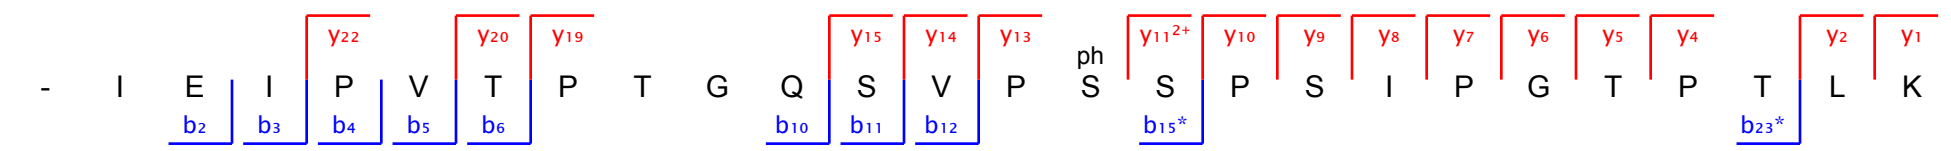

Raw file: 20150814\_A375SR\_Phospho\_BR2\_06  
 Scan: 2526 Method: FTMS; HCD Score: 83.18 m/z: 554.74 Gene names: VIM

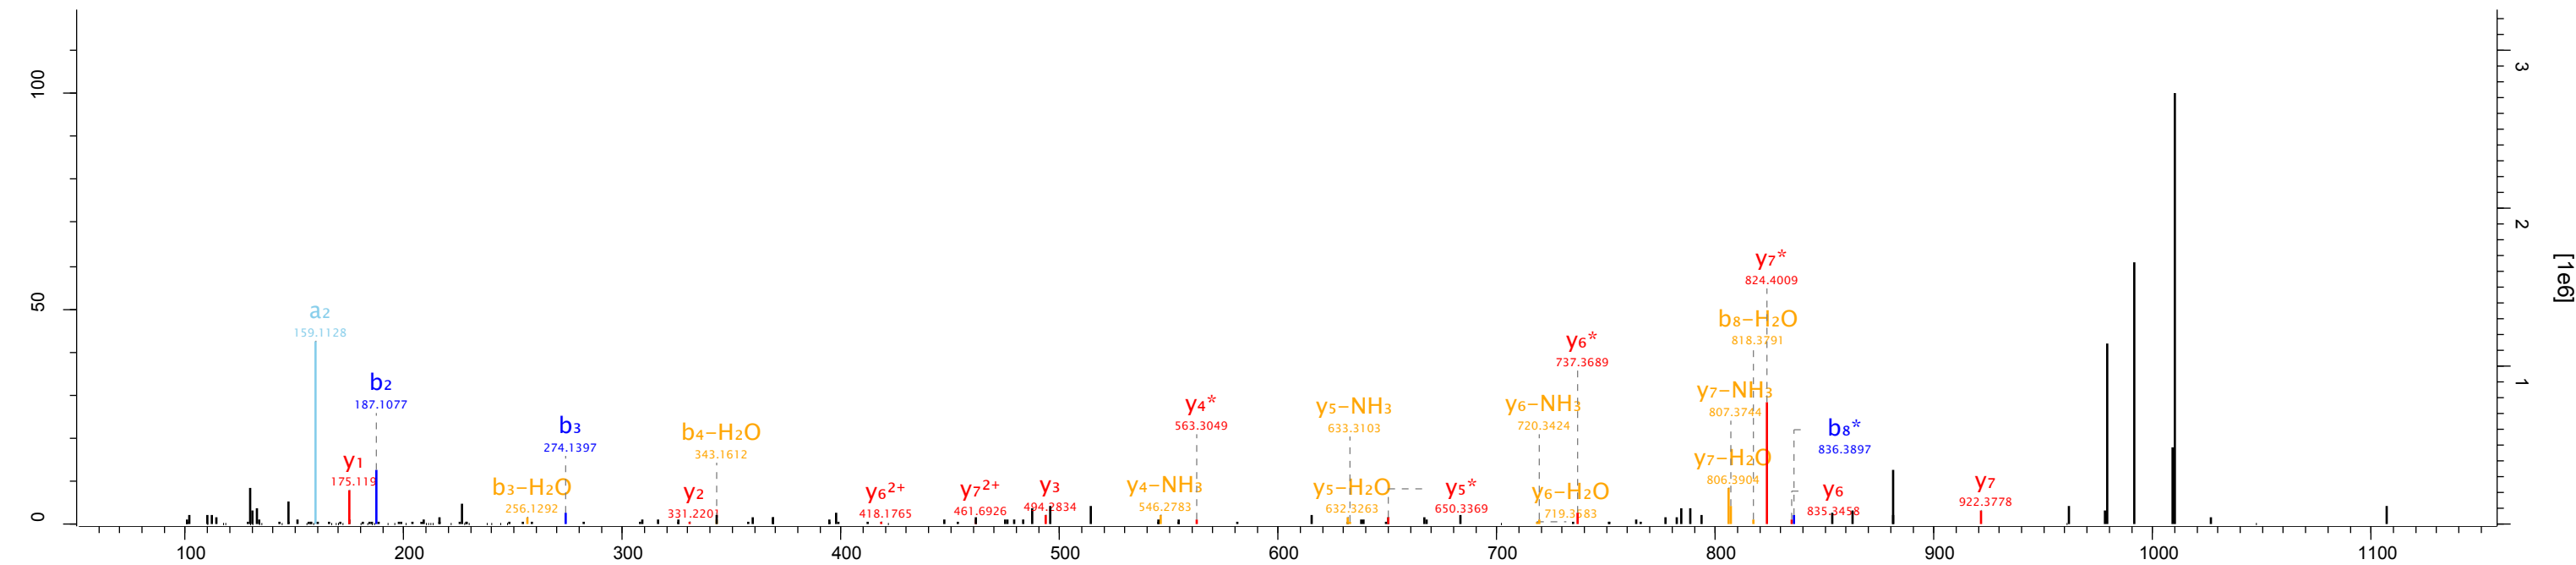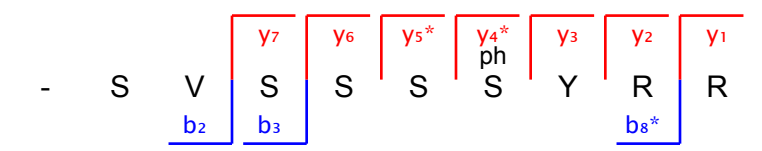

Raw file: 20150814\_A375SR\_Phospho\_BR2\_06  
 Scan: 25486 Method: FTMS; HCD Score: 51.03 m/z: 1092.15 Gene names: ARHGAP35

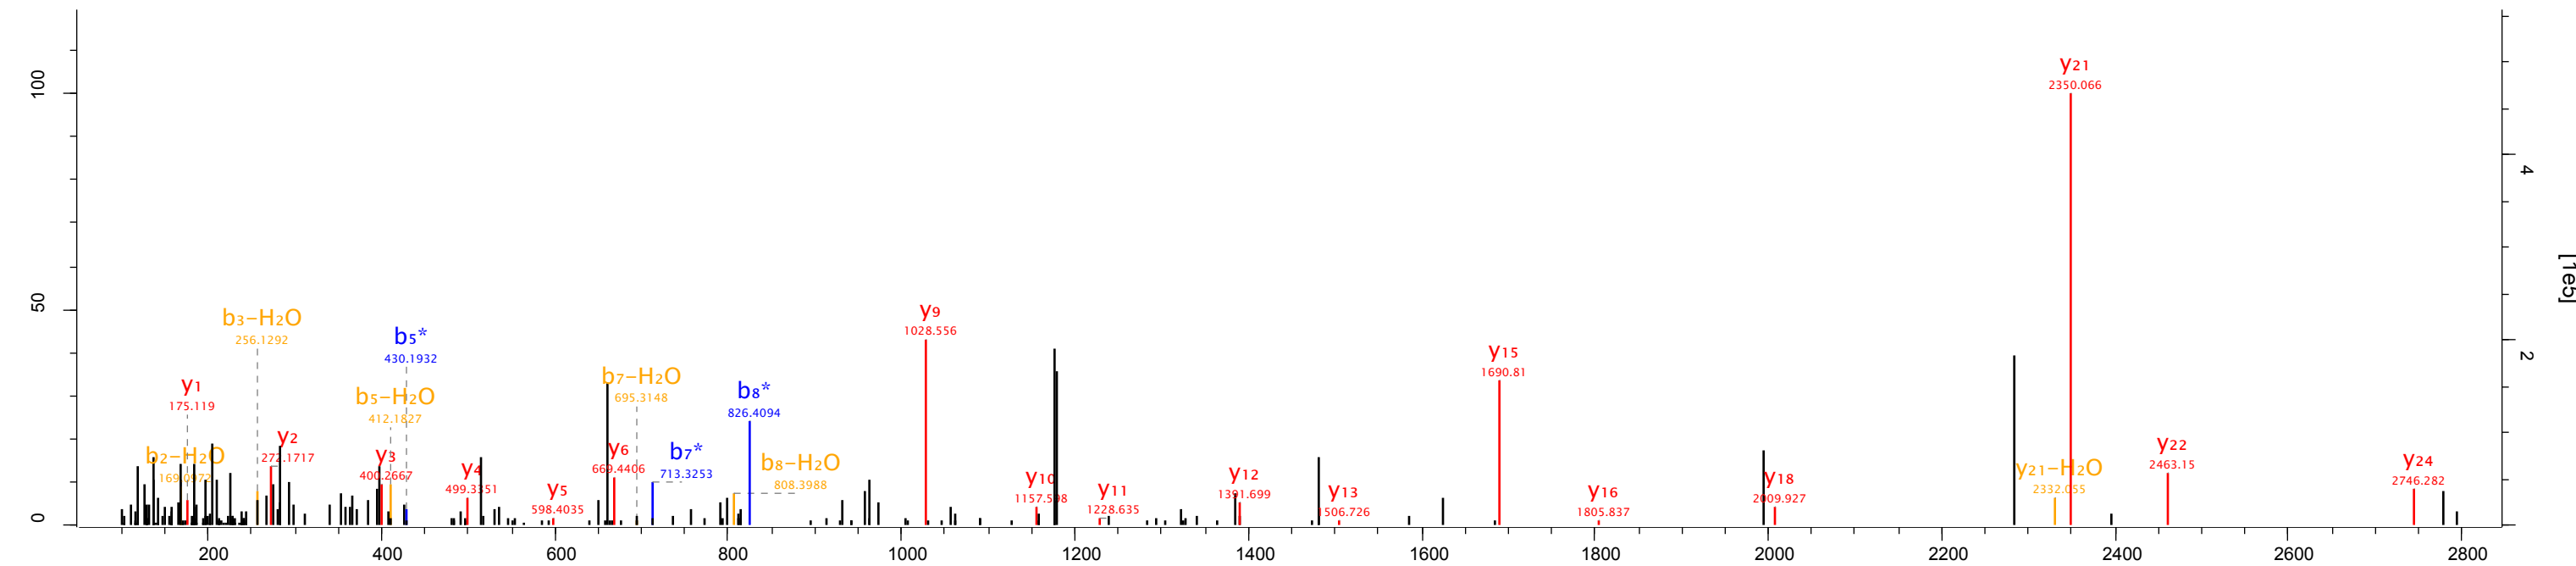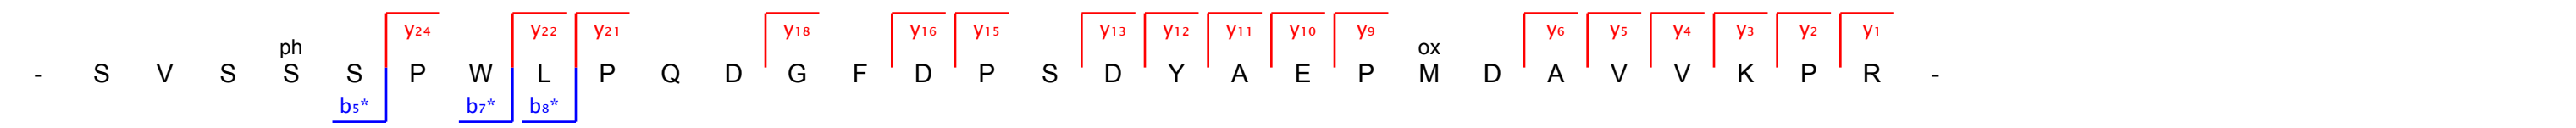

Raw file: 20150814\_A375SR\_Phospho\_BR2\_06  
 Scan: 25526 Method: FTMS; HCD Score: 70.99 m/z: 582.33 Gene names: CHTF18

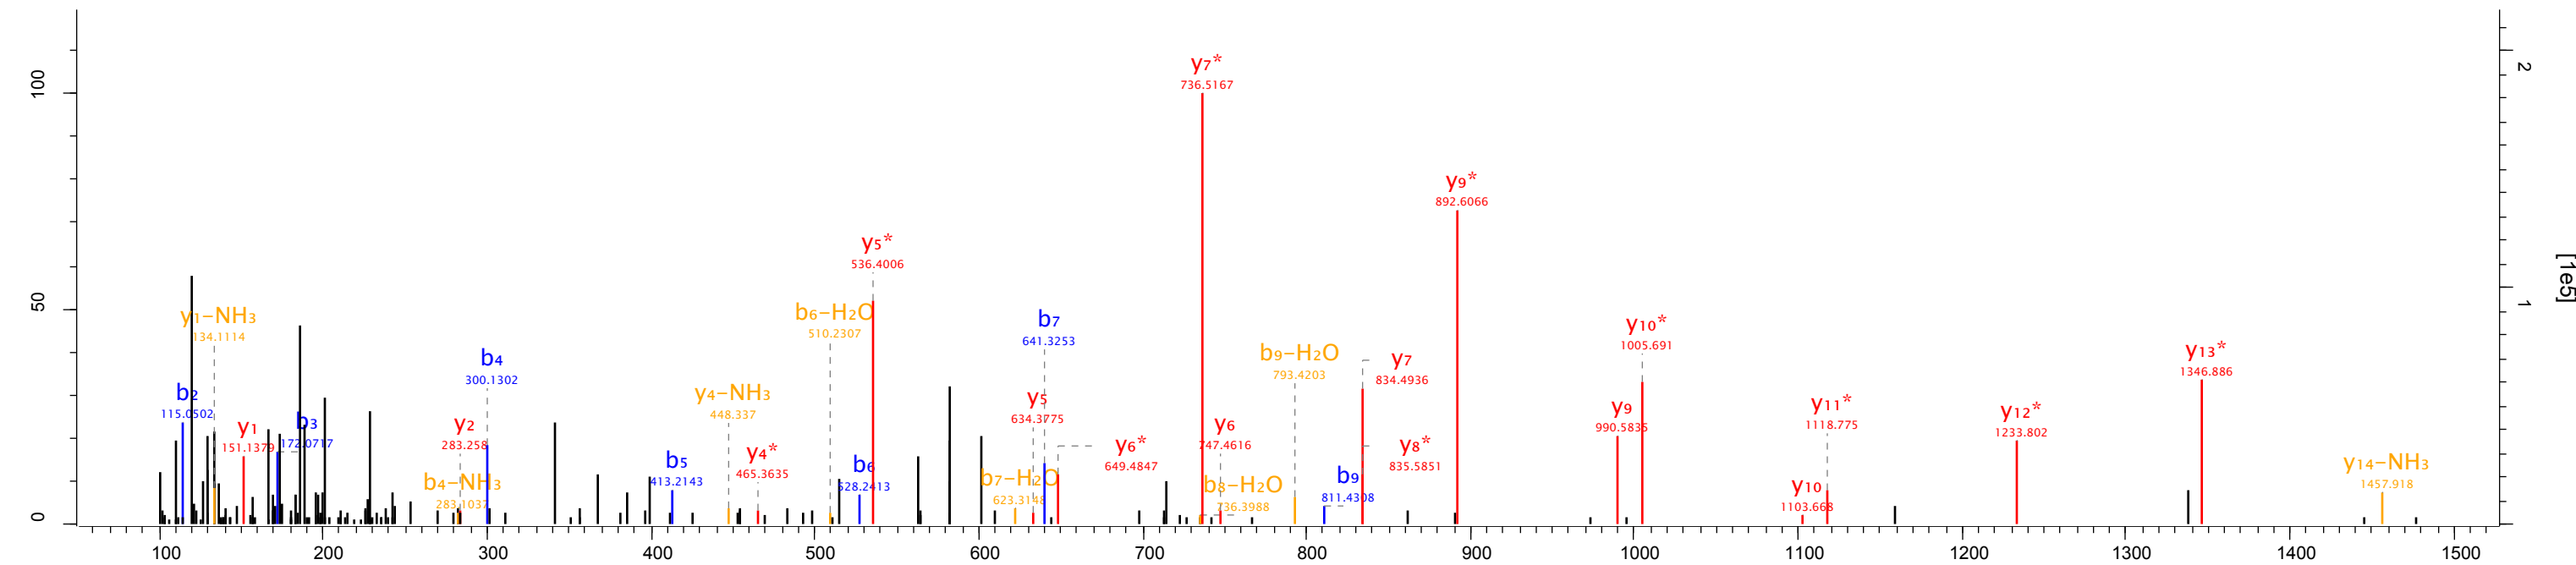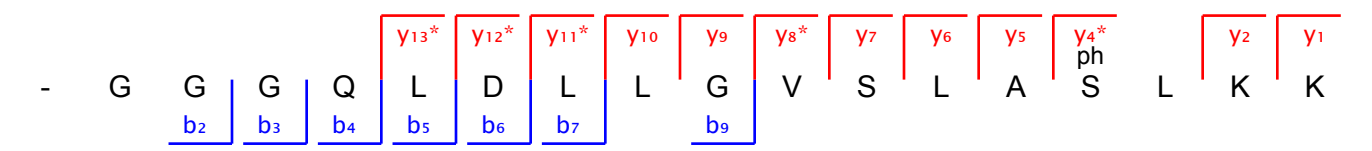

Raw file: 20150814\_A375SR\_Phospho\_BR2\_06  
 Scan: 25726 Method: FTMS; HCD Score: 43.16 m/z: 908.43 Gene names: SMAP2

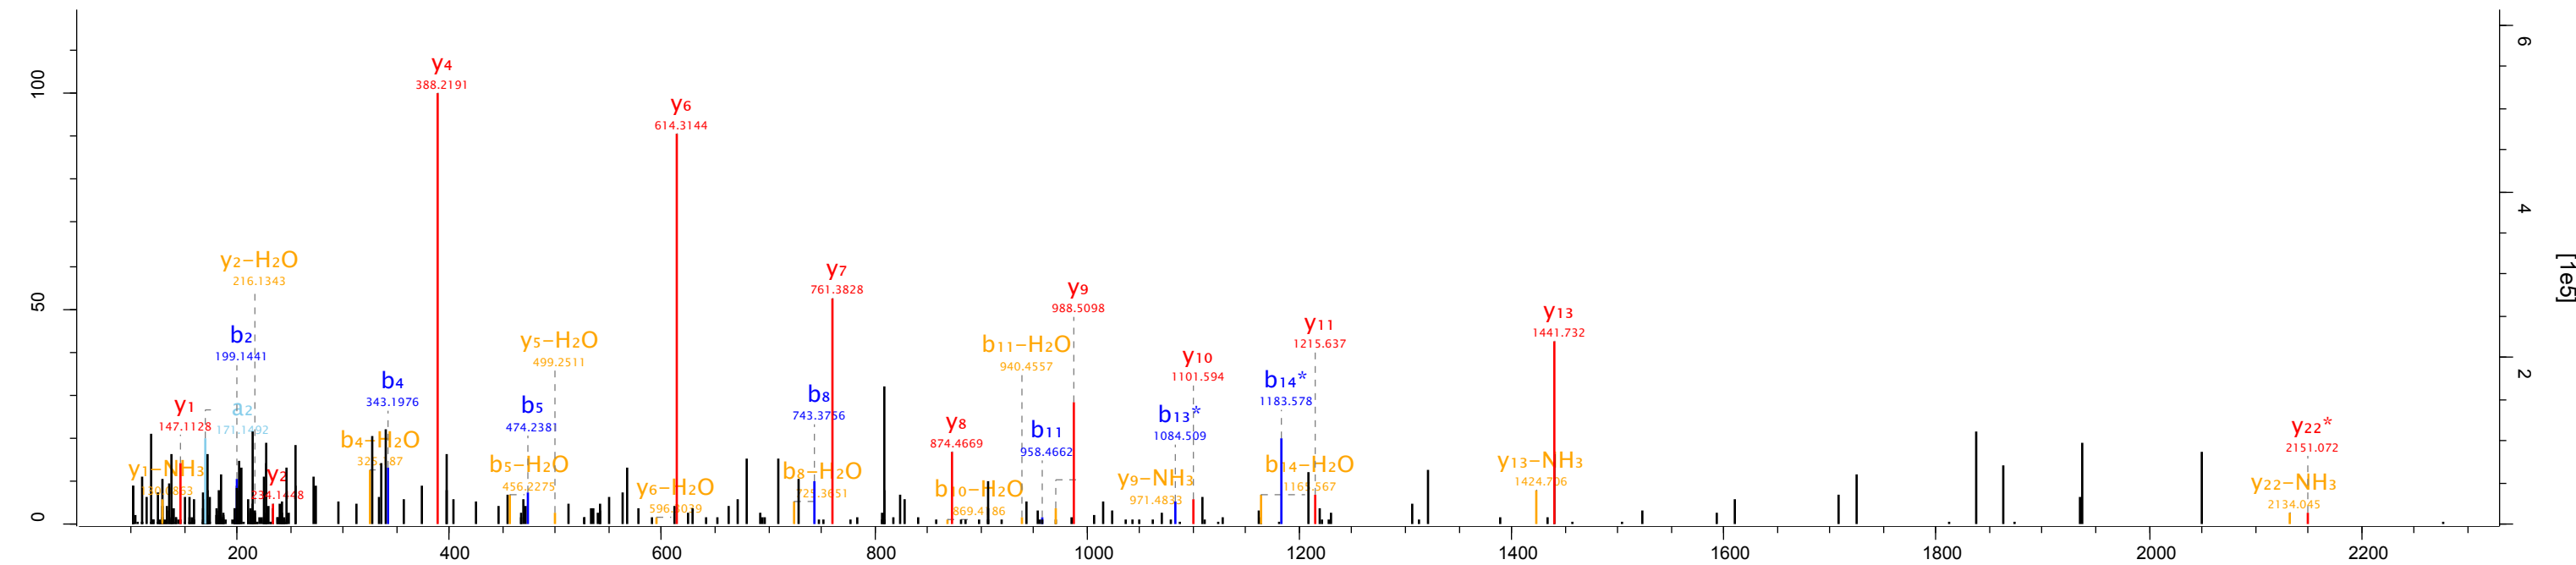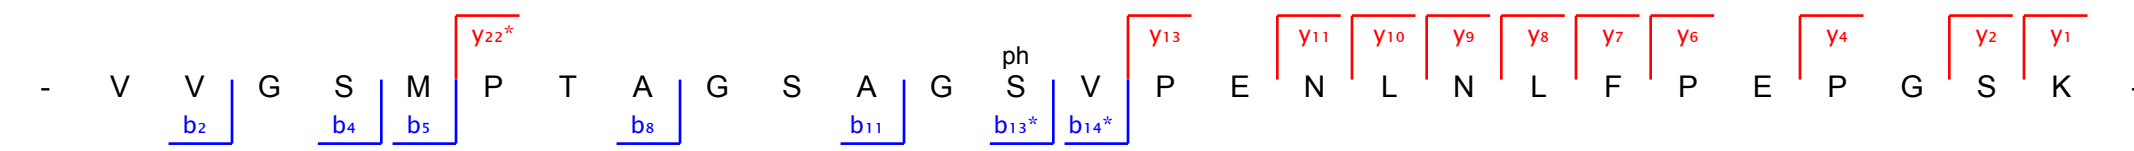

Raw file 20150814\_A375SR\_Phospho\_BR2\_06 Scan 25816 Method FTMS; HCD Score 144.83 m/z 1040.48 Gene names PUM1

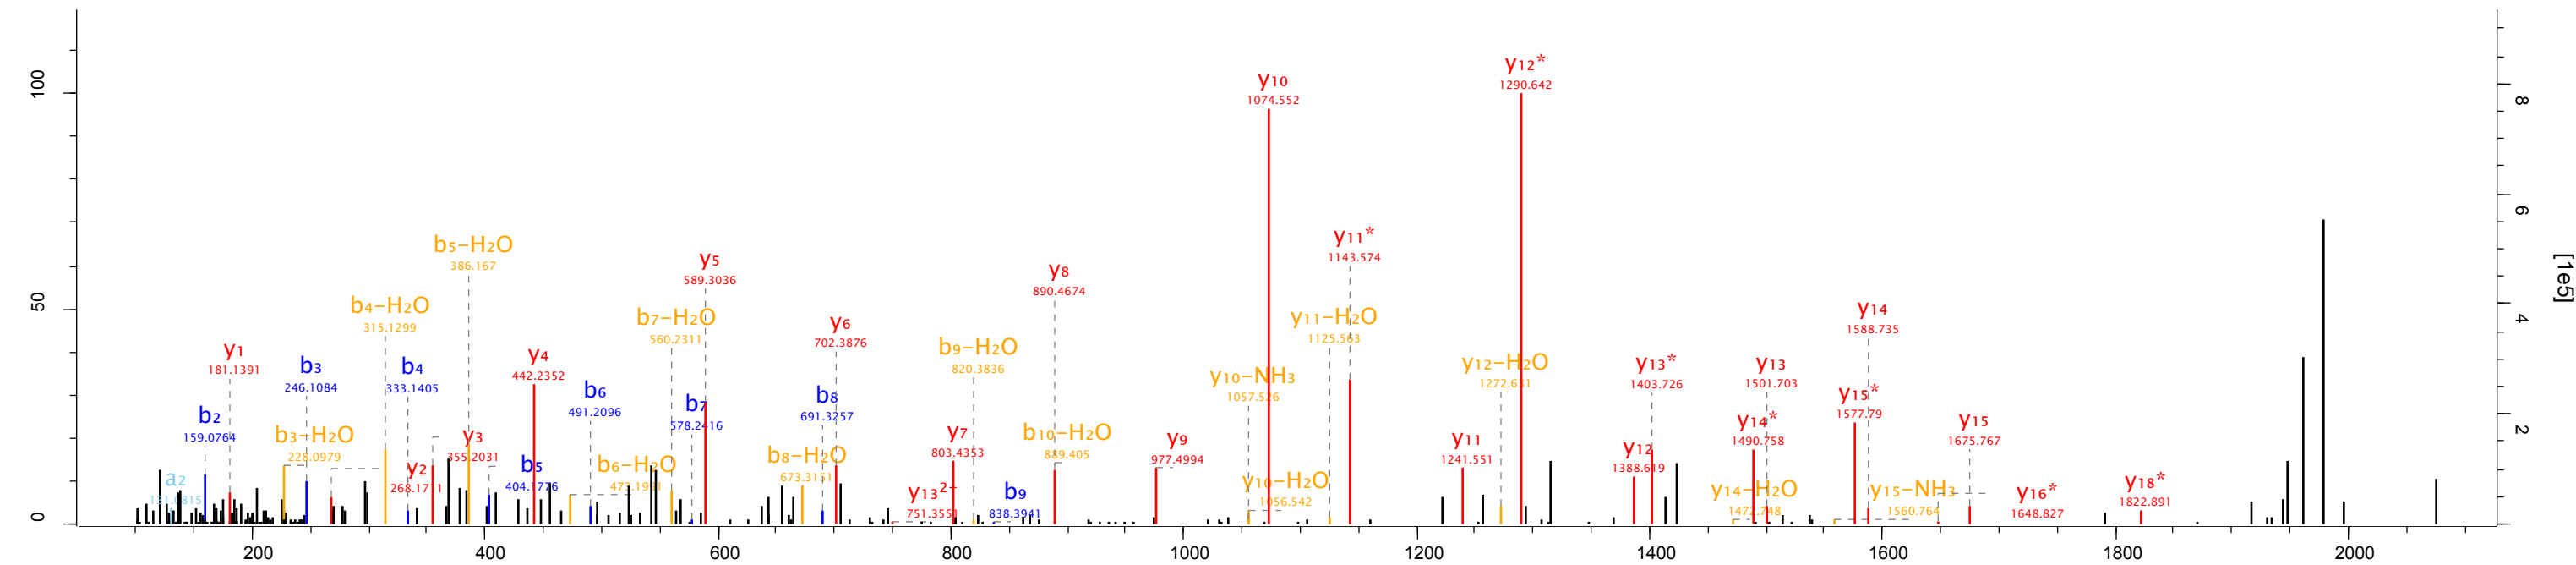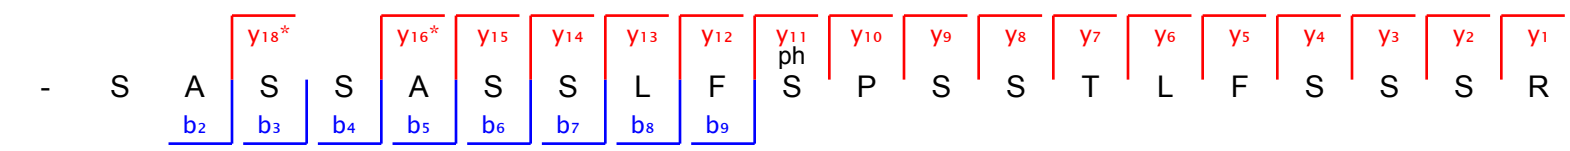

Raw file 20150814\_A375SR\_Phospho\_BR2\_06 Scan 26446 Method FTMS; HCD Score 92.91 m/z 985.98 Gene names NES

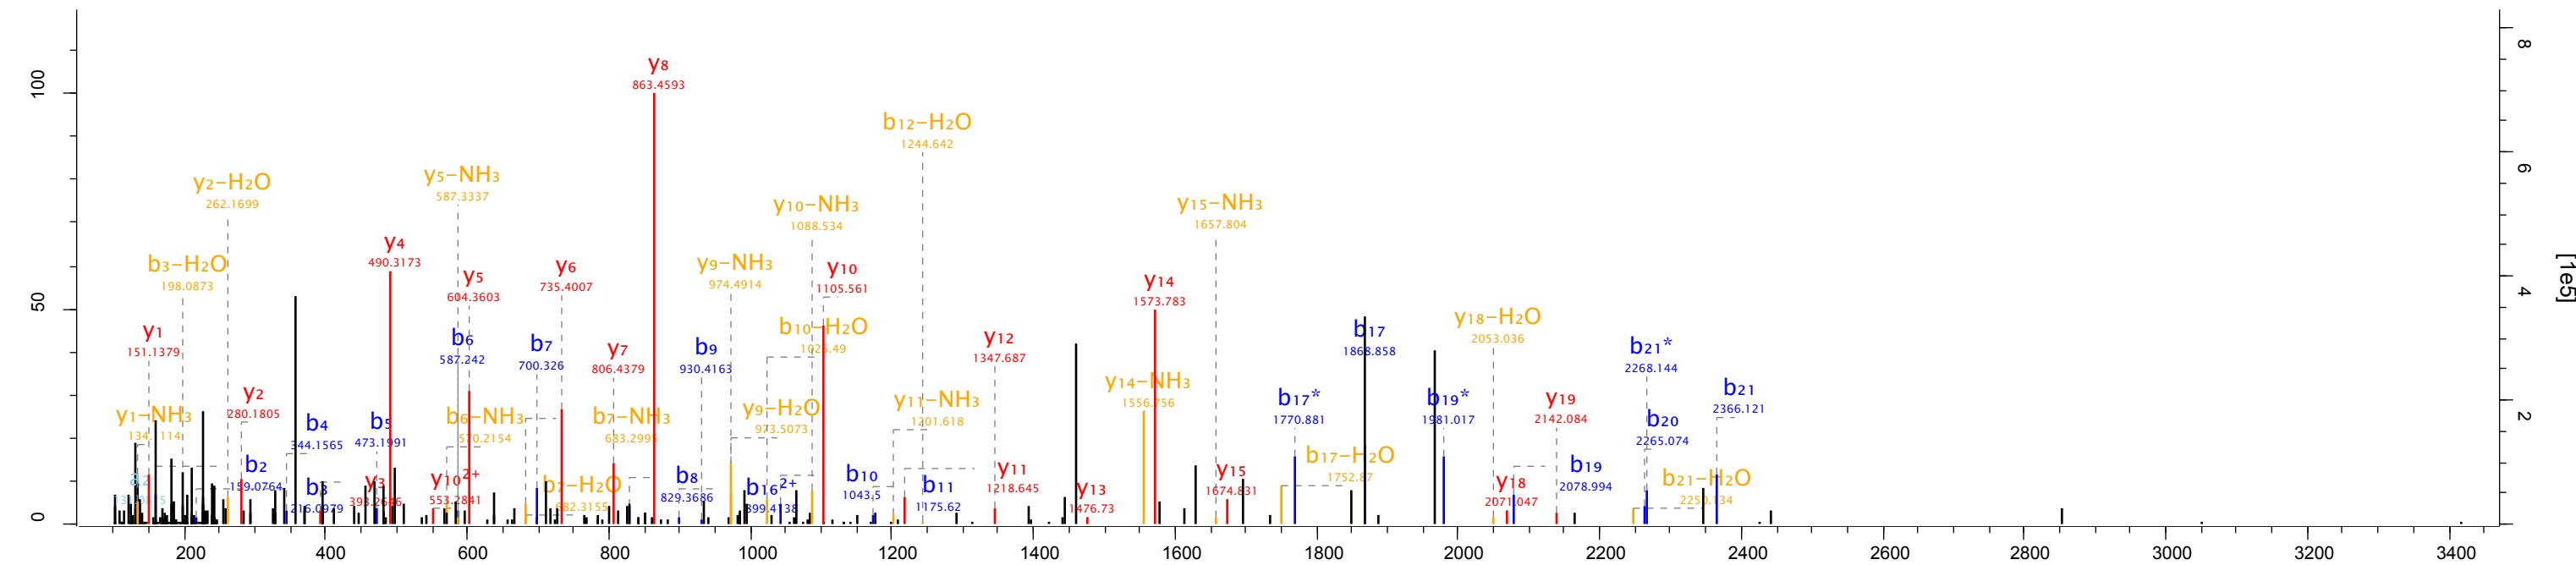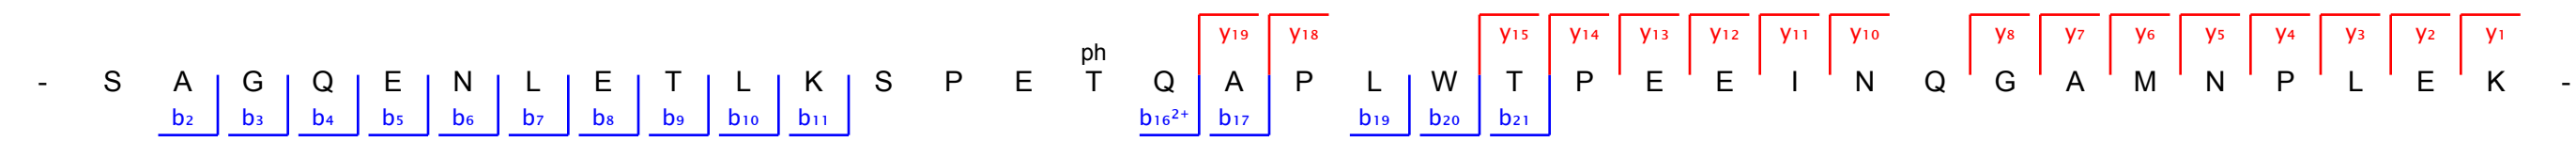

Raw file Scan Method Score m/z Gene names  
 20150814\_A375SR\_Phospho\_BR2\_06 26456 FTMS; HCD 120.9 756.89 CCDC102A

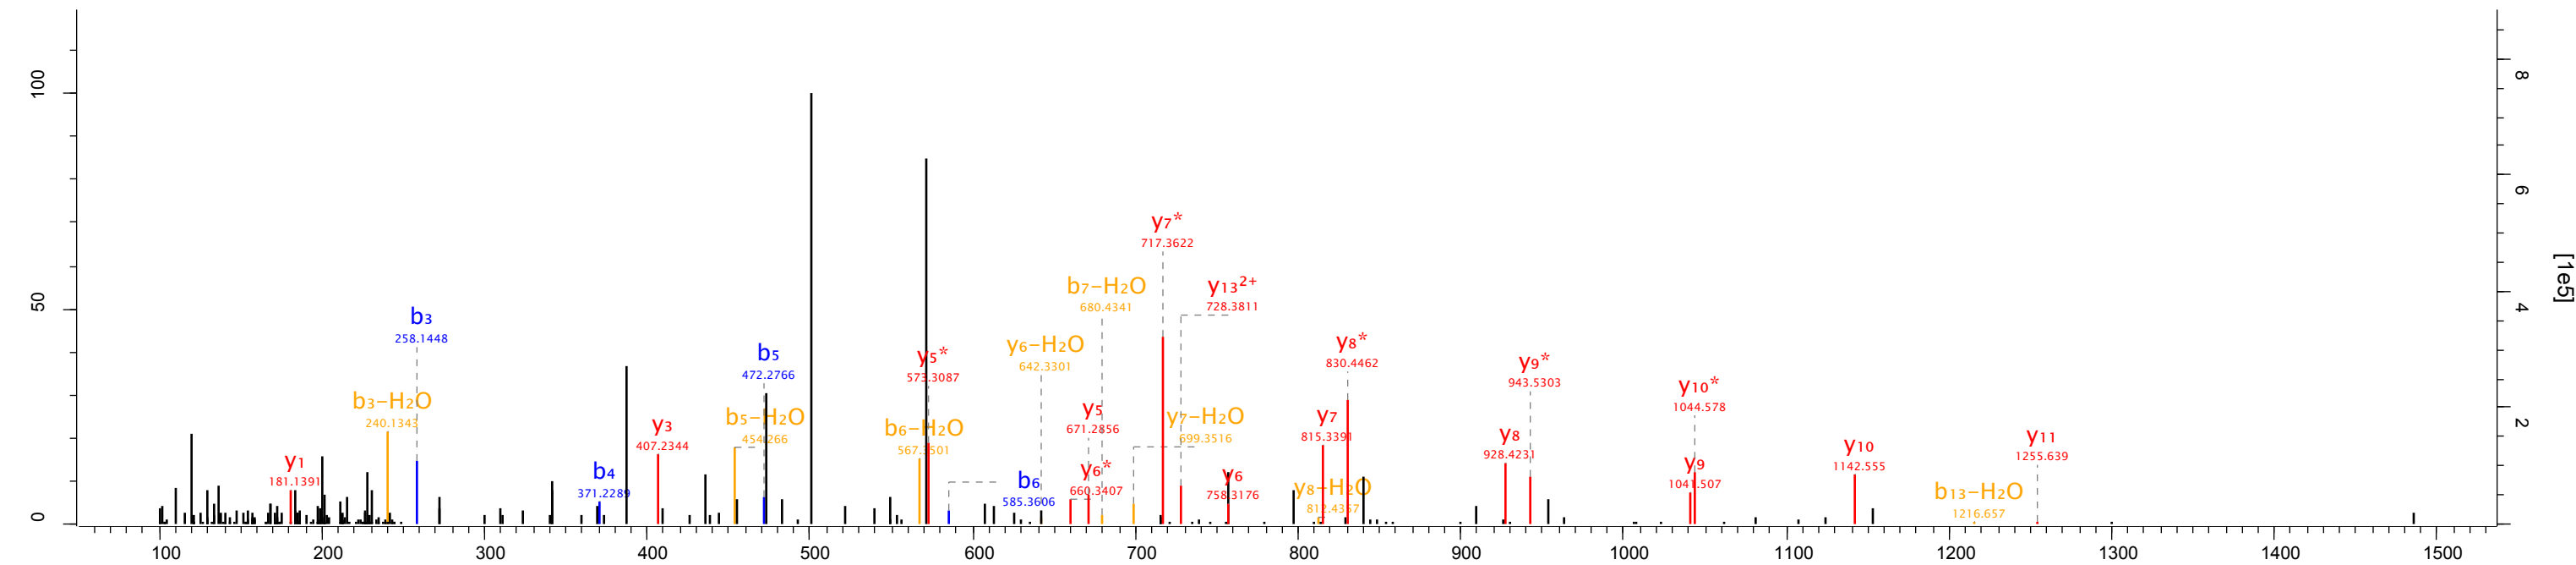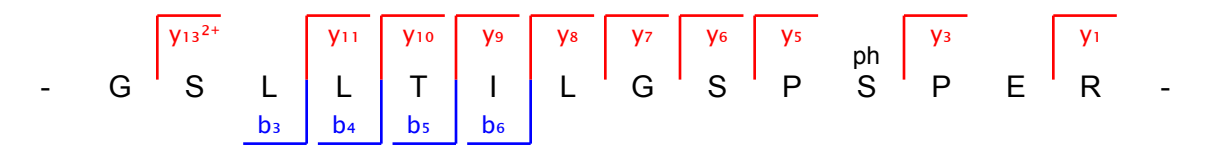



Raw file: 20150814\_A375SR\_Phospho\_BR2\_06  
 Scan: 26606 Method: FTMS; HCD Score: 41.91 m/z: 1028.17 Gene names: SGK223

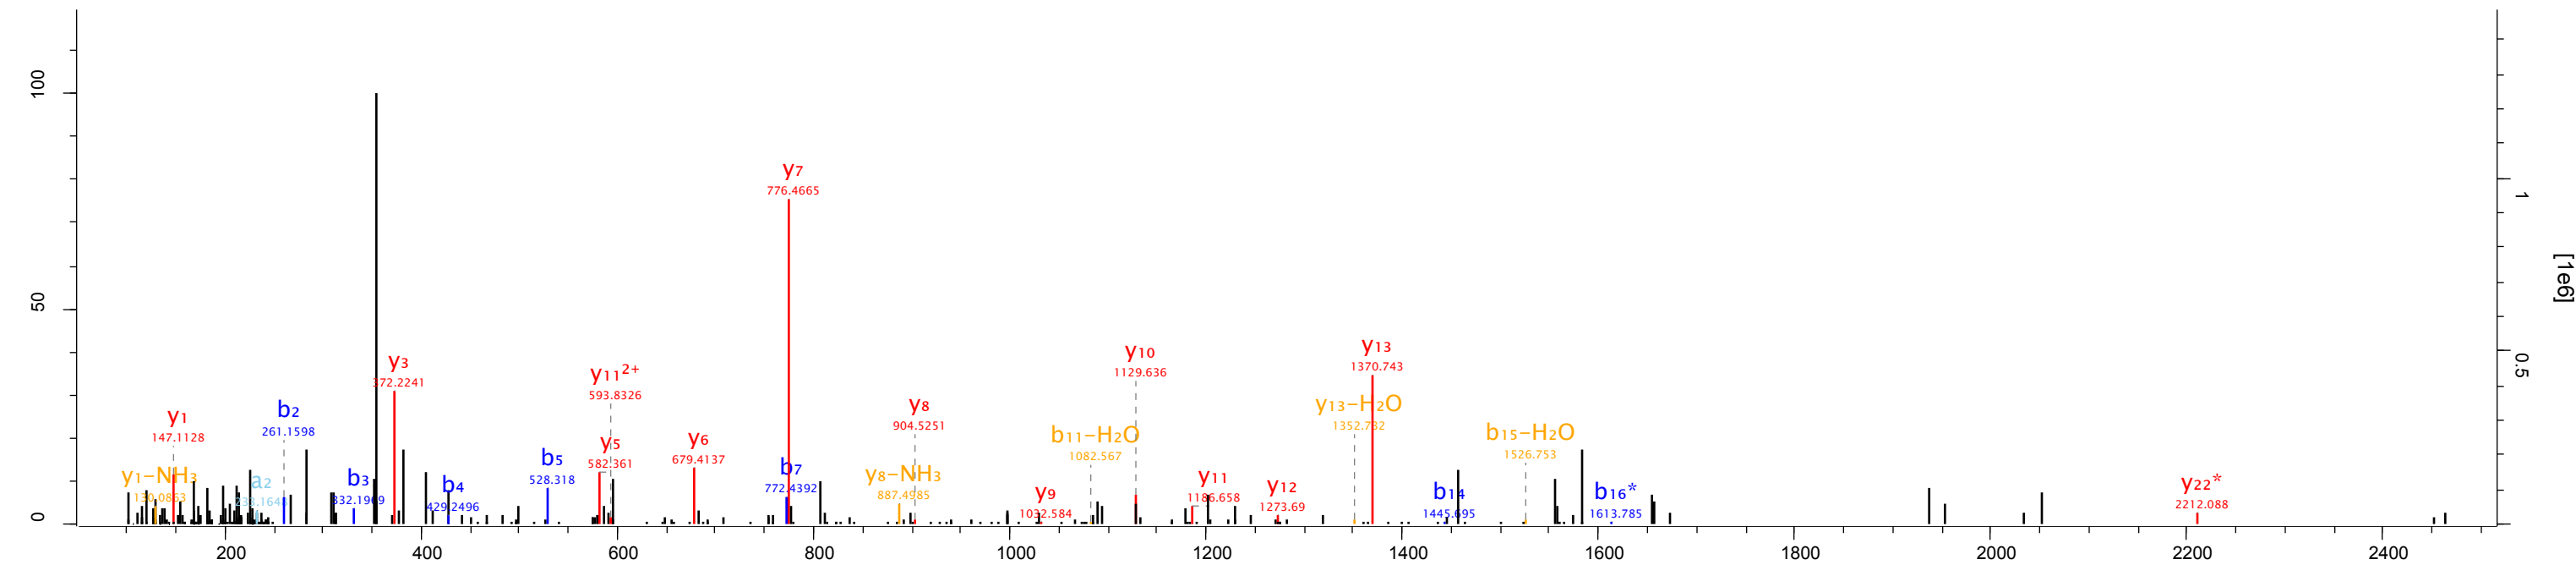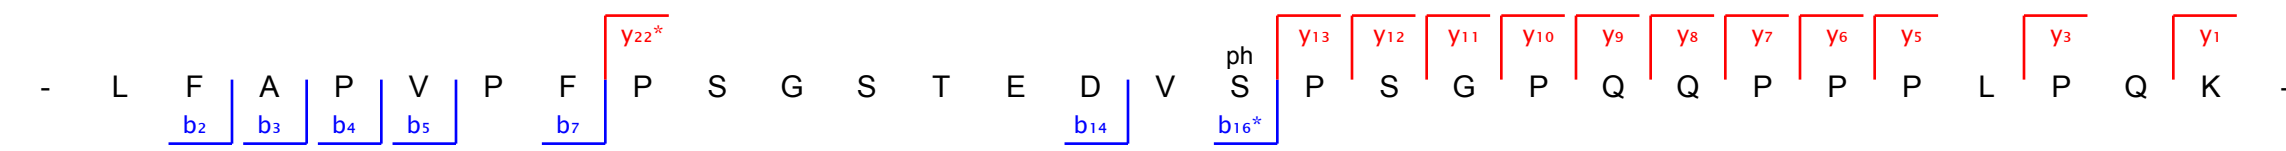

Raw file Scan Method Score m/z Gene names  
 20150814\_A375SR\_Phospho\_BR2\_06 26696 FTMS; HCD 166.57 1066.55 SYNRG

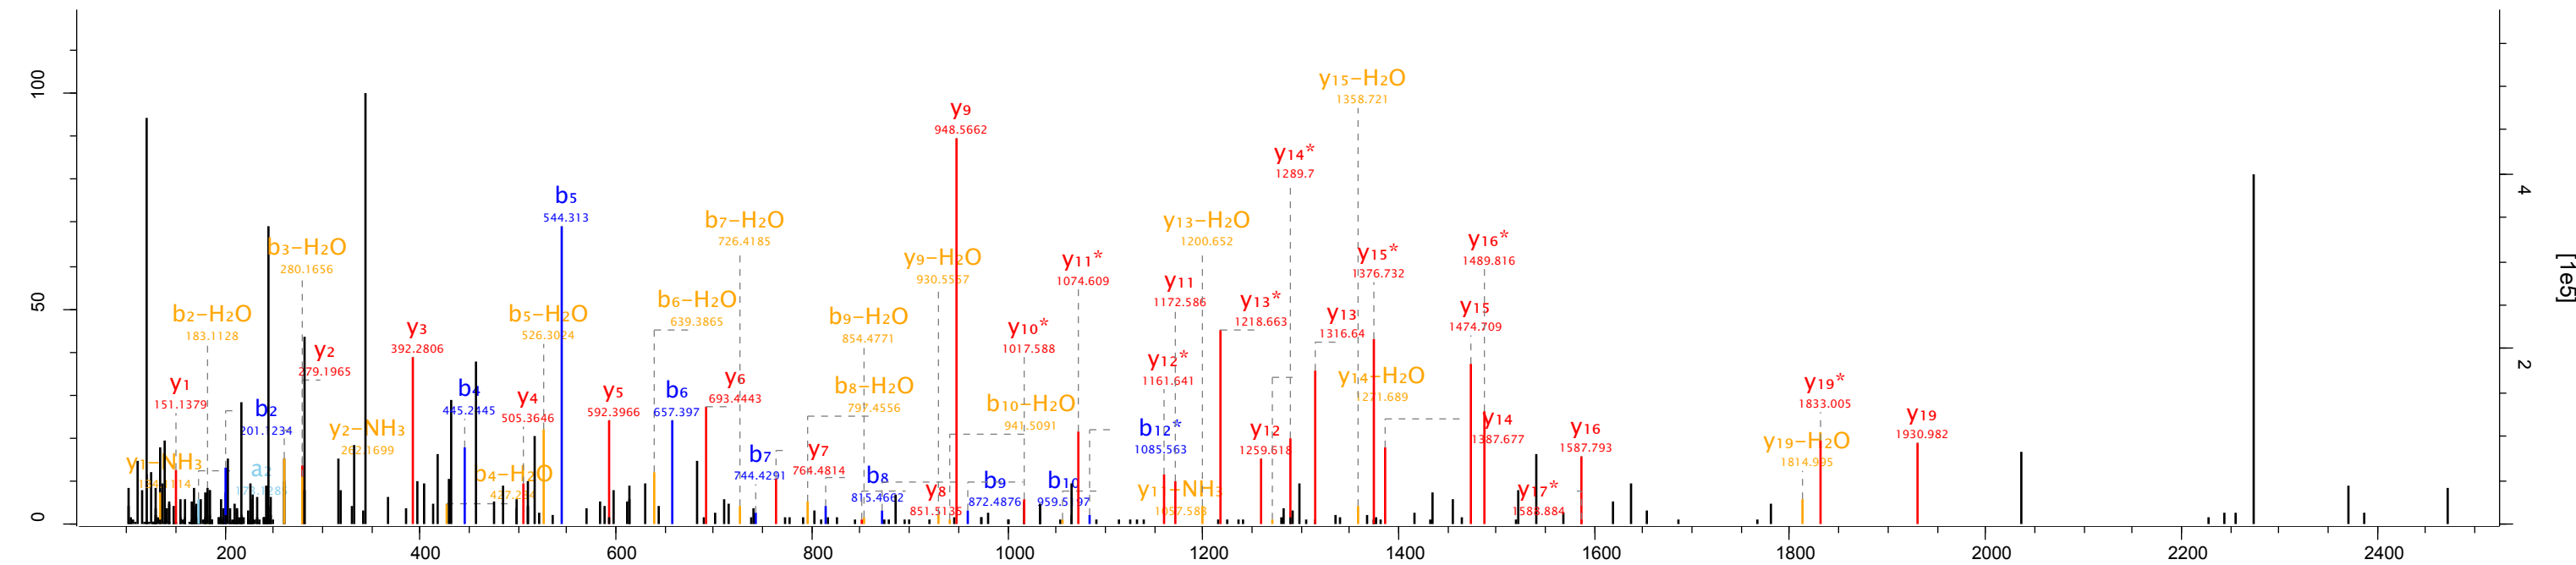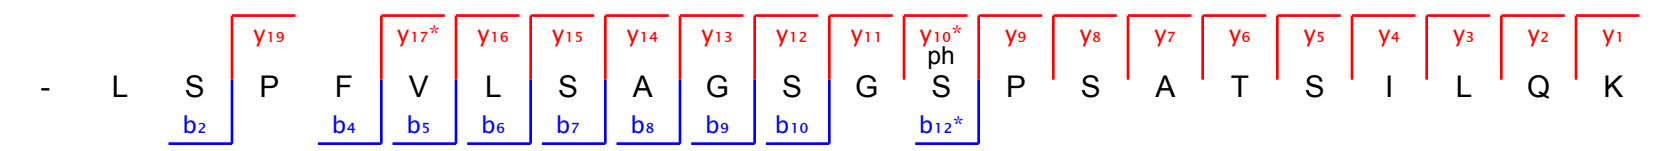

Raw file: 20150814\_A375SR\_Phospho\_BR2\_06  
 Scan: 27526 Method: FTMS; HCD Score: 42.06 m/z: 961.42 Gene names: EIF4ENIF1

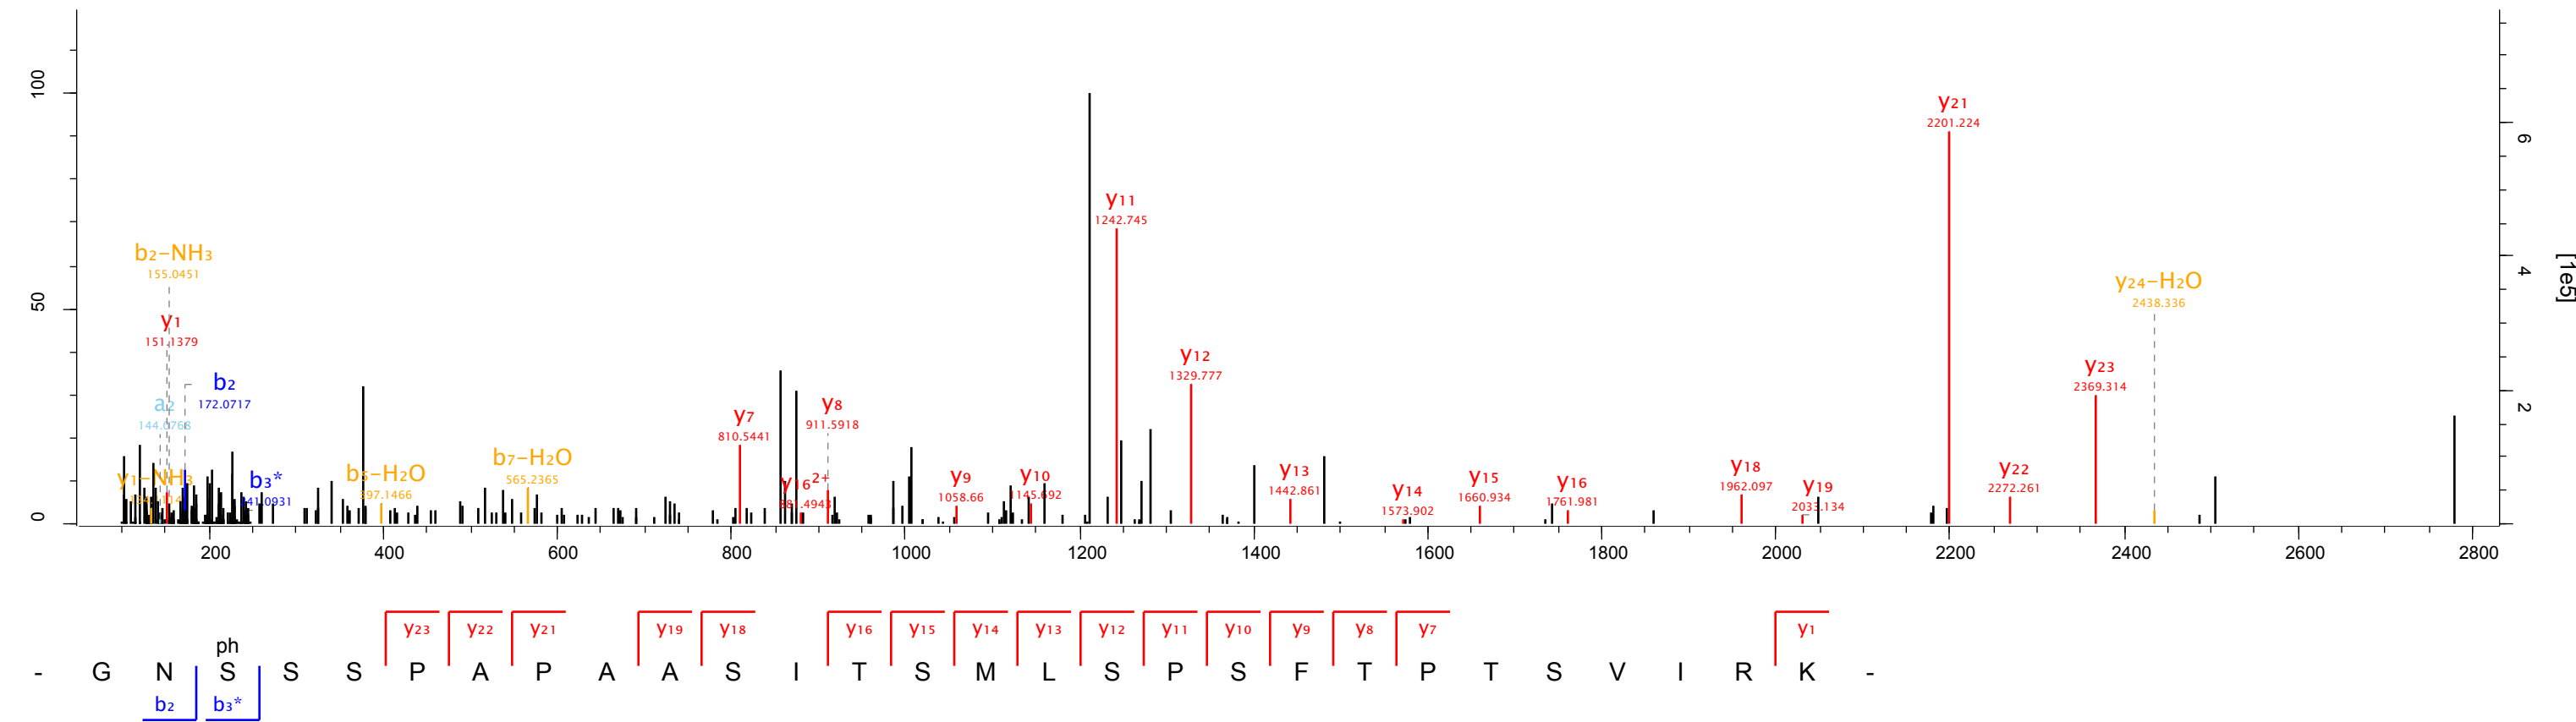

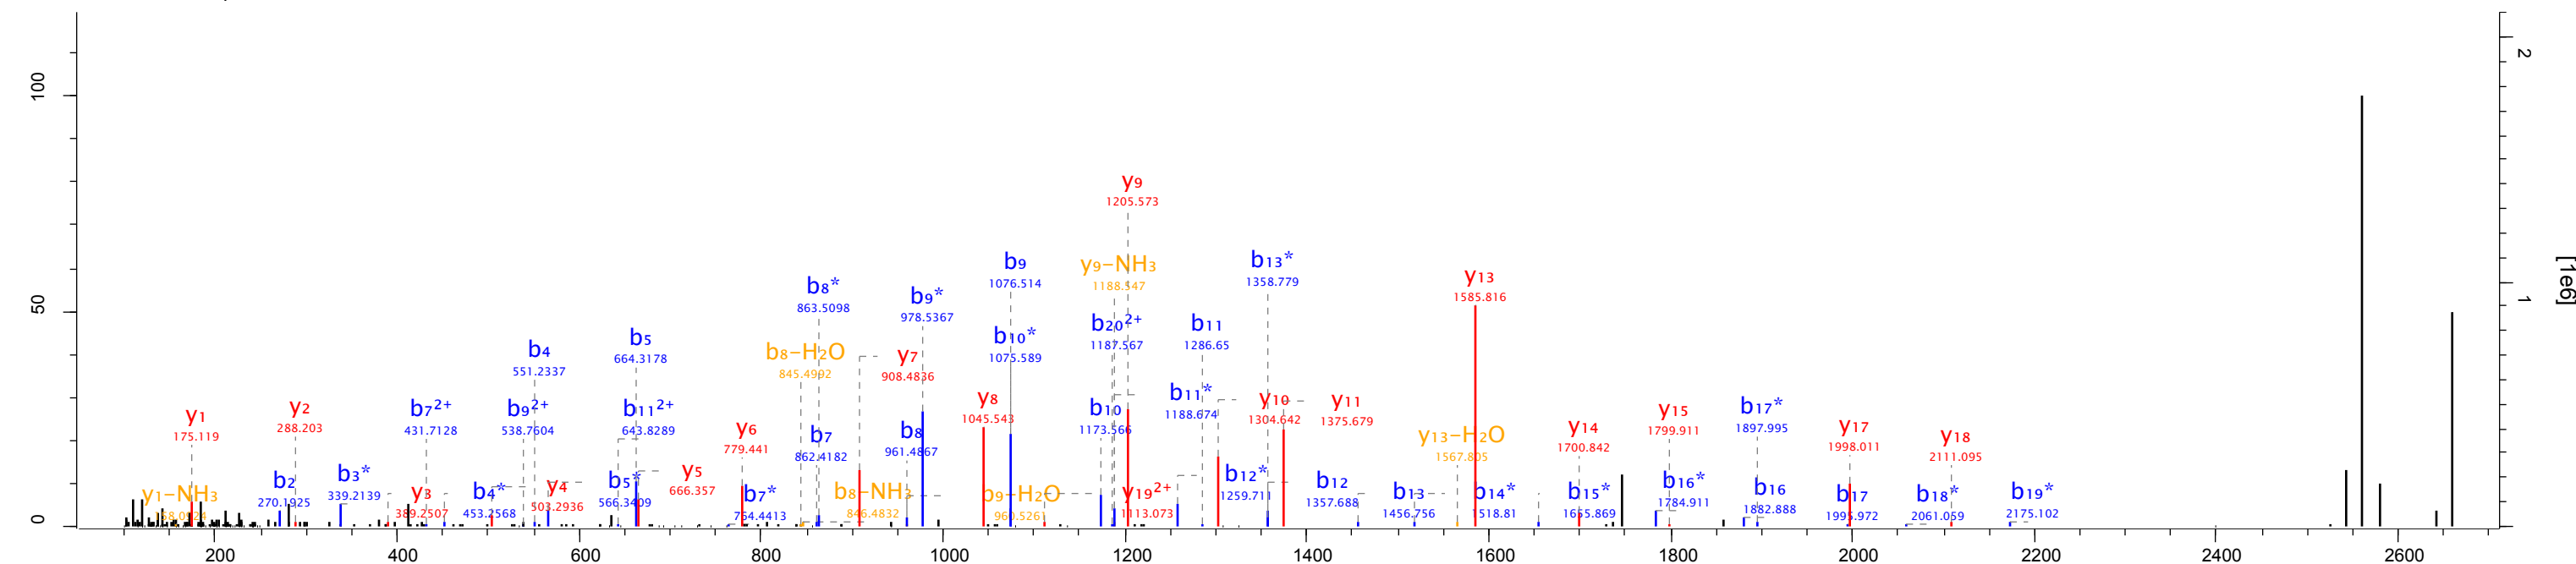

- R L S ph N L P T V D P I A V C H E L Y N T I R -

b<sub>2</sub> b<sub>3</sub>\* b<sub>4</sub> b<sub>5</sub> b<sub>7</sub> b<sub>8</sub> b<sub>9</sub> b<sub>10</sub> b<sub>11</sub> b<sub>12</sub> b<sub>13</sub> b<sub>14</sub>\* b<sub>15</sub>\* b<sub>16</sub> b<sub>17</sub> b<sub>18</sub>\* b<sub>19</sub>\* b<sub>20</sub><sup>2+</sup> y<sub>1</sub> y<sub>2</sub> y<sub>3</sub> y<sub>4</sub> y<sub>5</sub> y<sub>6</sub> y<sub>7</sub> y<sub>8</sub> y<sub>9</sub> y<sub>10</sub> y<sub>11</sub> y<sub>13</sub> y<sub>14</sub> y<sub>15</sub> y<sub>17</sub> y<sub>18</sub> y<sub>19</sub><sup>2+</sup>

Raw file  
20150814\_A375SR\_Phospho\_BR2\_06

Scan 28126 Method FTMS; HCD Score 84.29 m/z 974.8 Gene names FASN

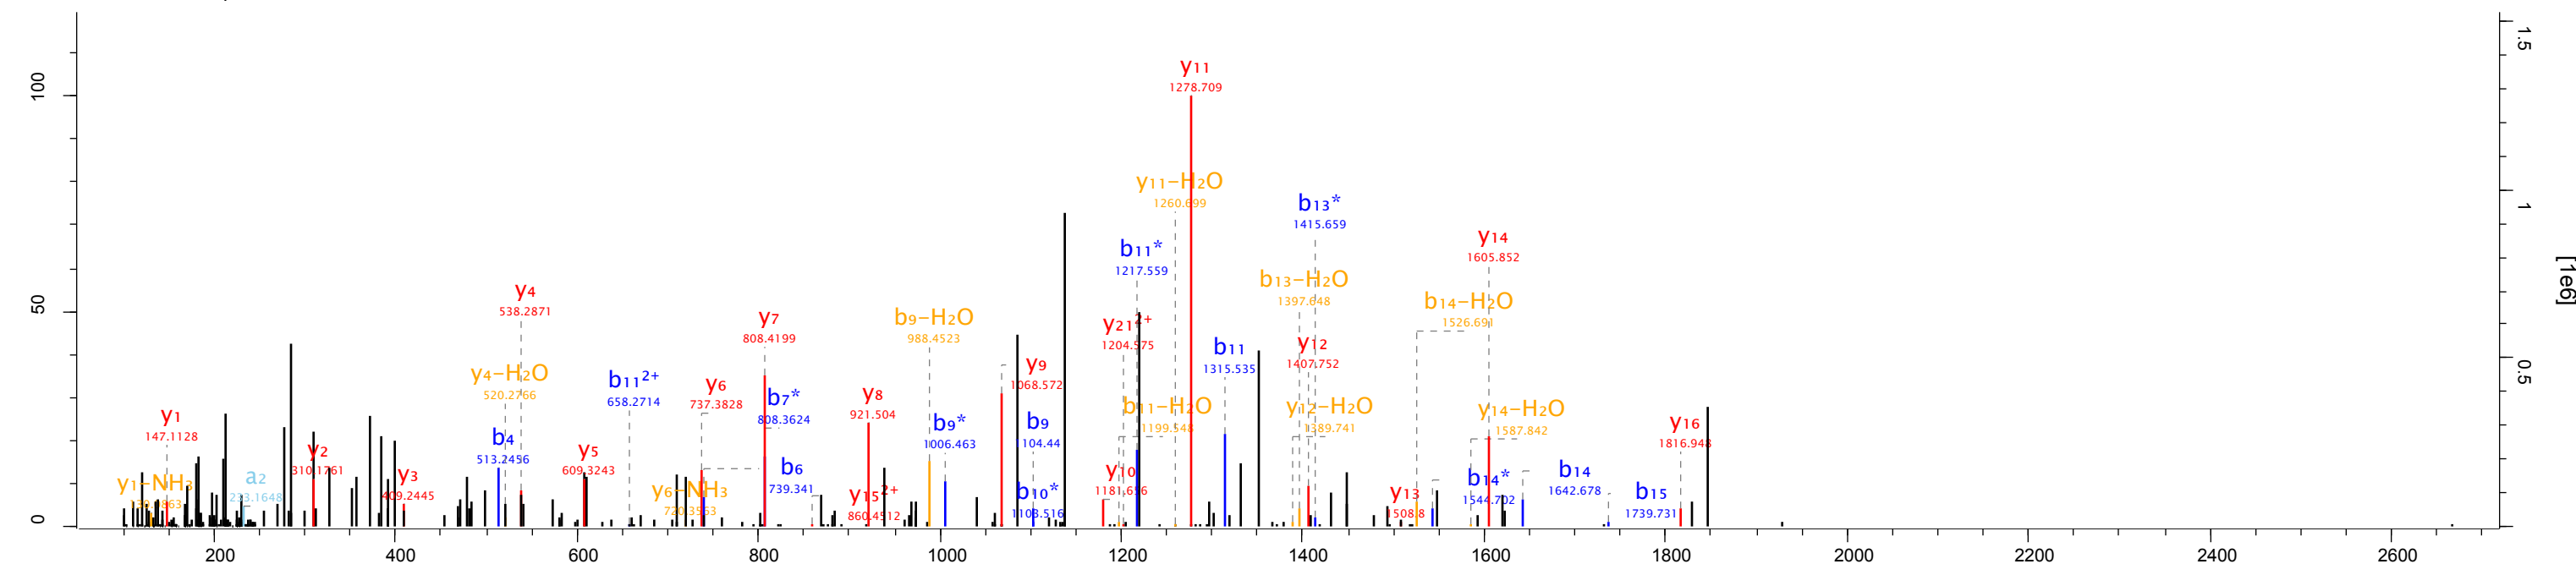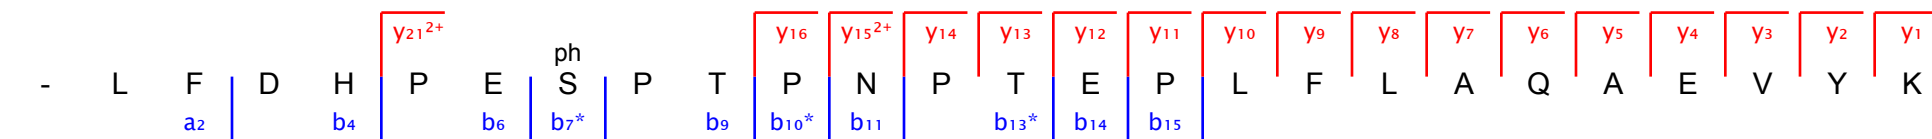

Raw file 20150814\_A375SR\_Phospho\_BR2\_06 Scan 3596 Method FTMS; HCD Score 116.41 m/z 493.23 Gene names ZNF217

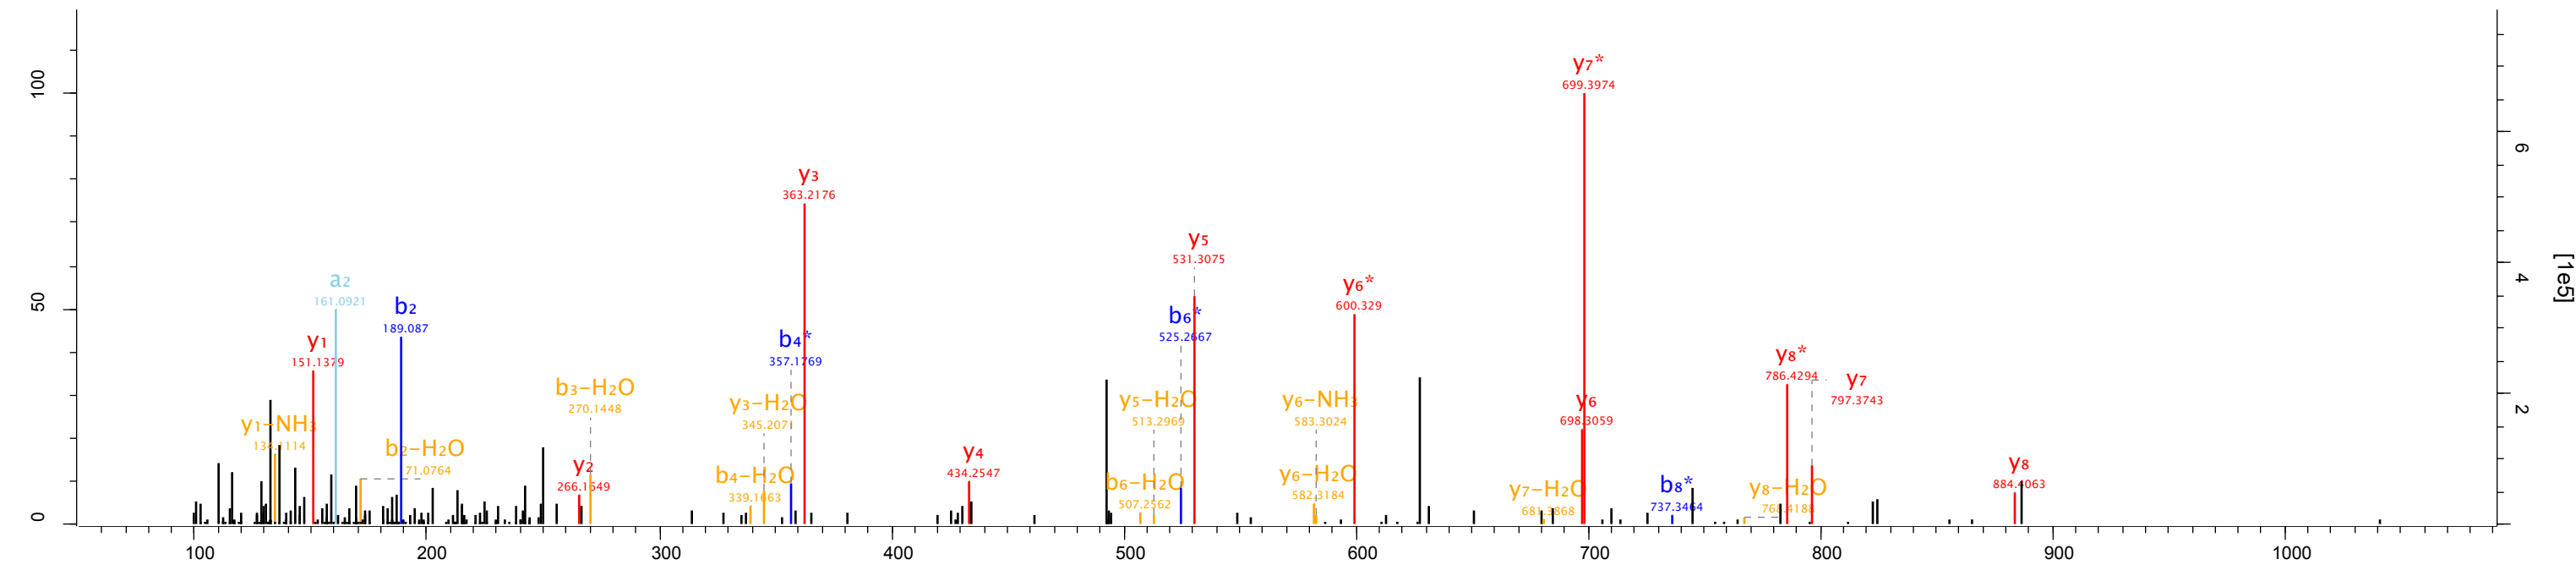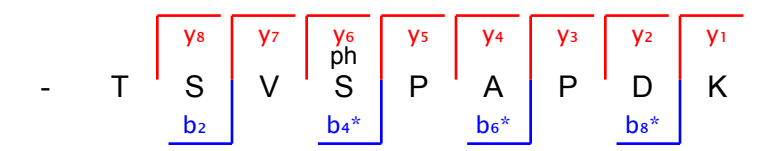

Raw file: 20150814\_A375SR\_Phospho\_BR2\_06  
 Scan: 4716 Method: FTMS; HCD Score: 81.71 m/z: 503.24 Gene names: BTRC

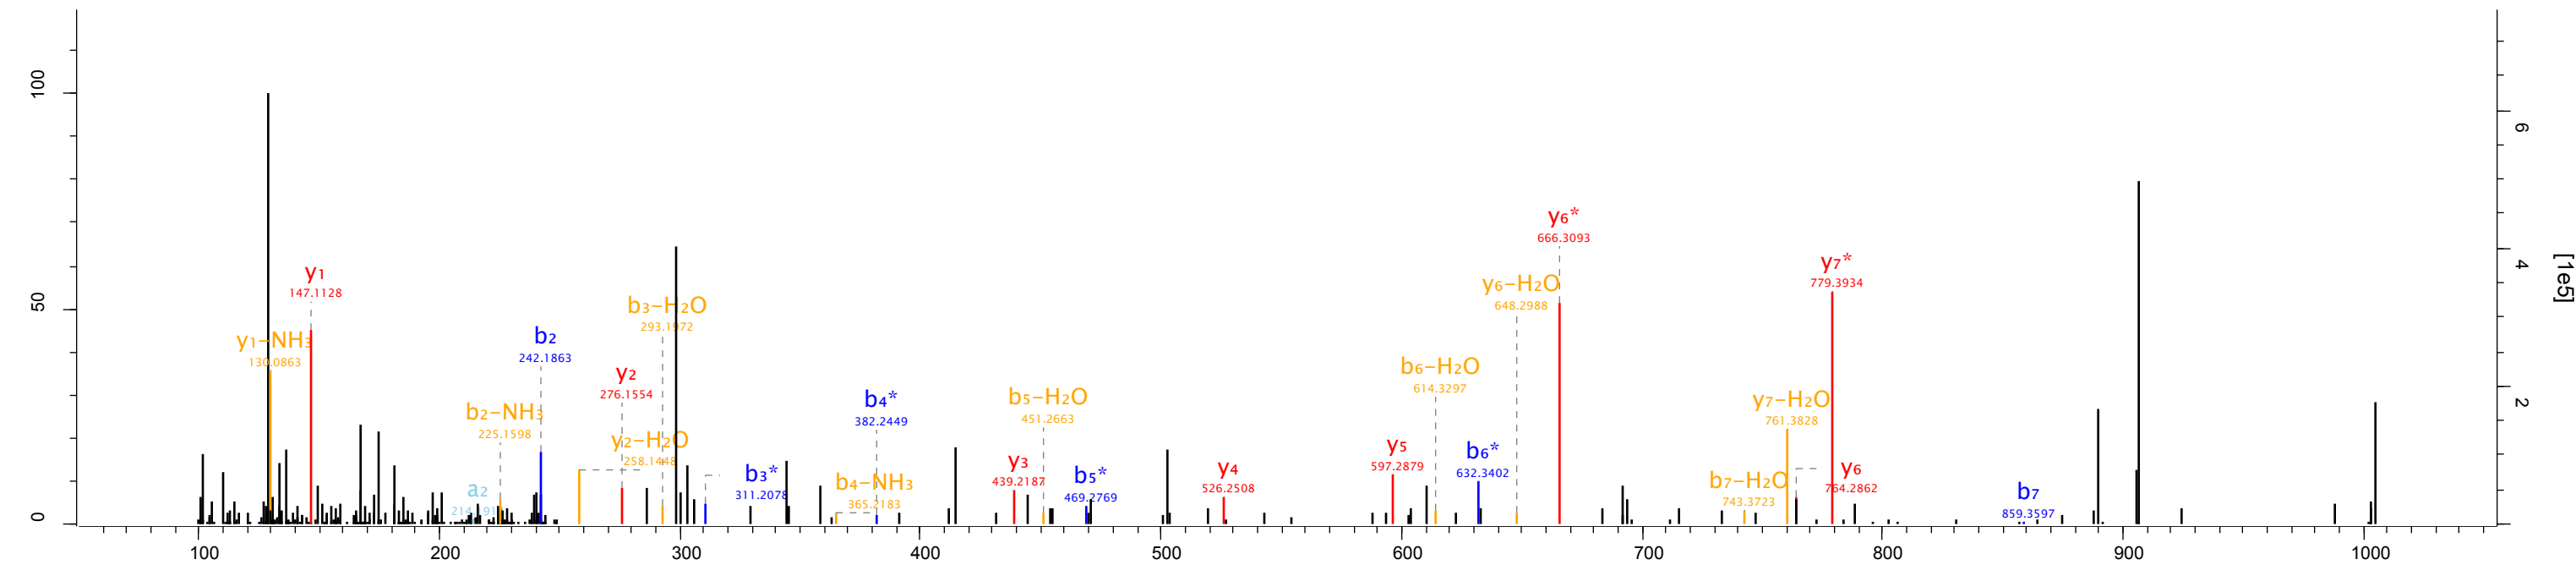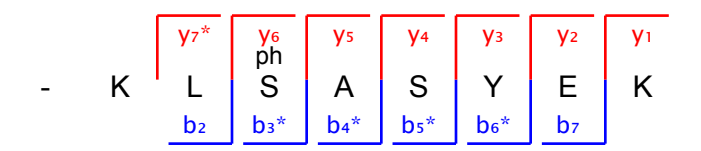

Raw file: 20150814\_A375SR\_Phospho\_BR2\_06  
 Scan: 4806 Method: FTMS; HCD Score: 100.22 m/z: 589.31 Gene names: SASH1

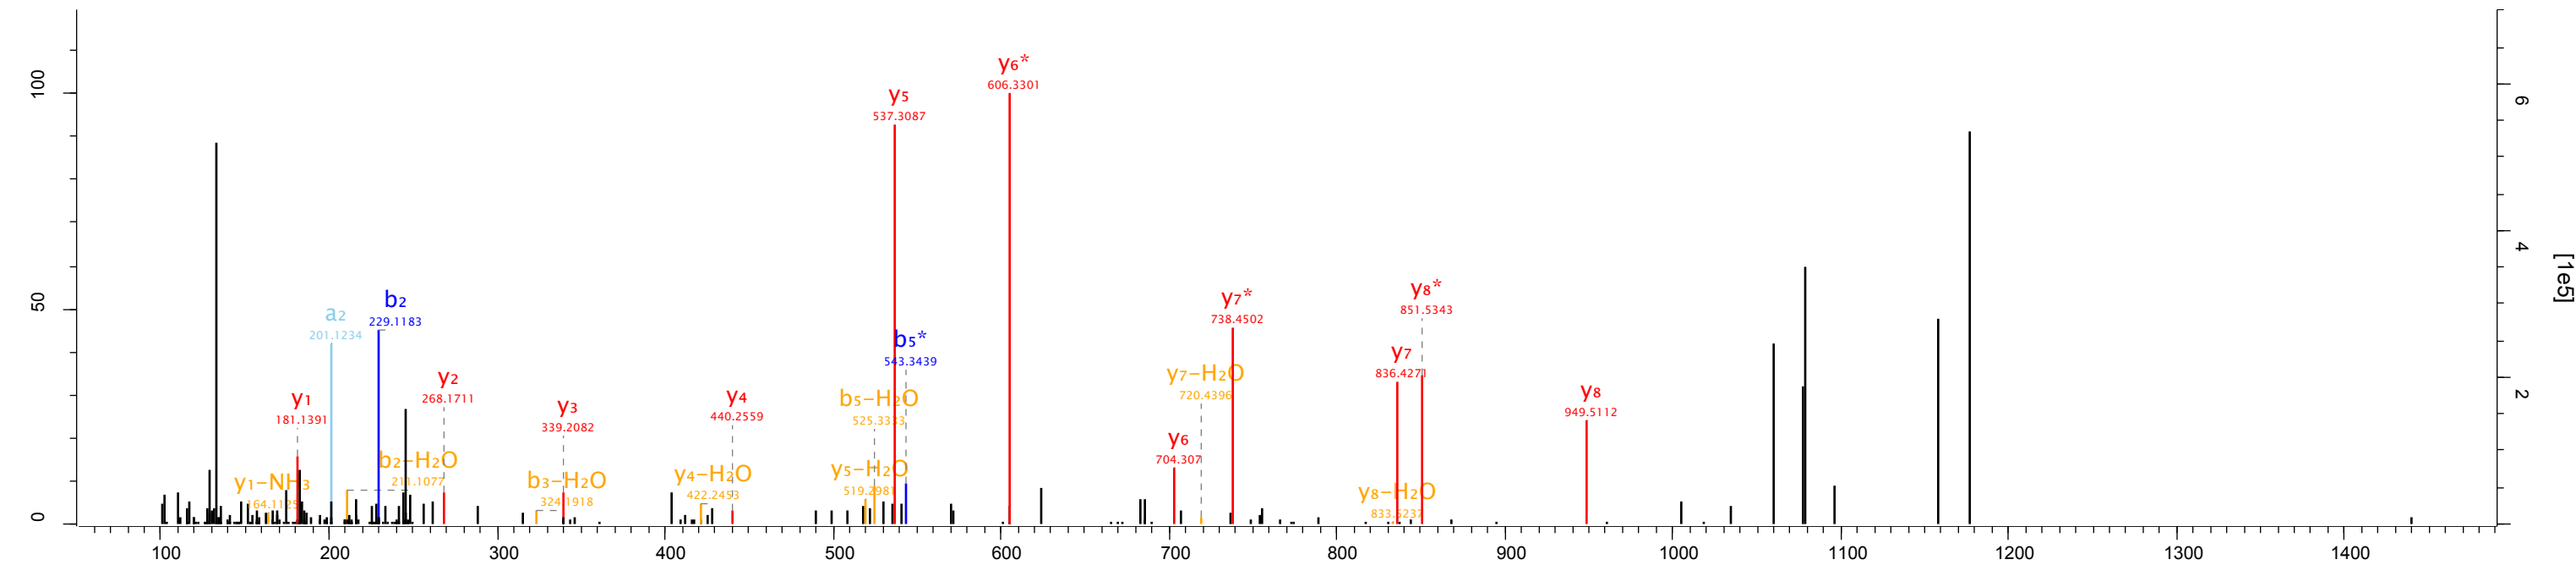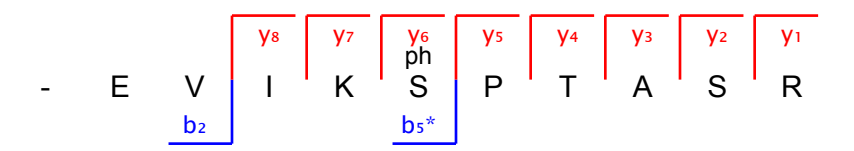



Raw file: 20150814\_A375SR\_Phospho\_BR2\_06  
 Scan: 4916 Method: FTMS; HCD Score: 160.21 m/z: 714.82 Gene names: MARCKS

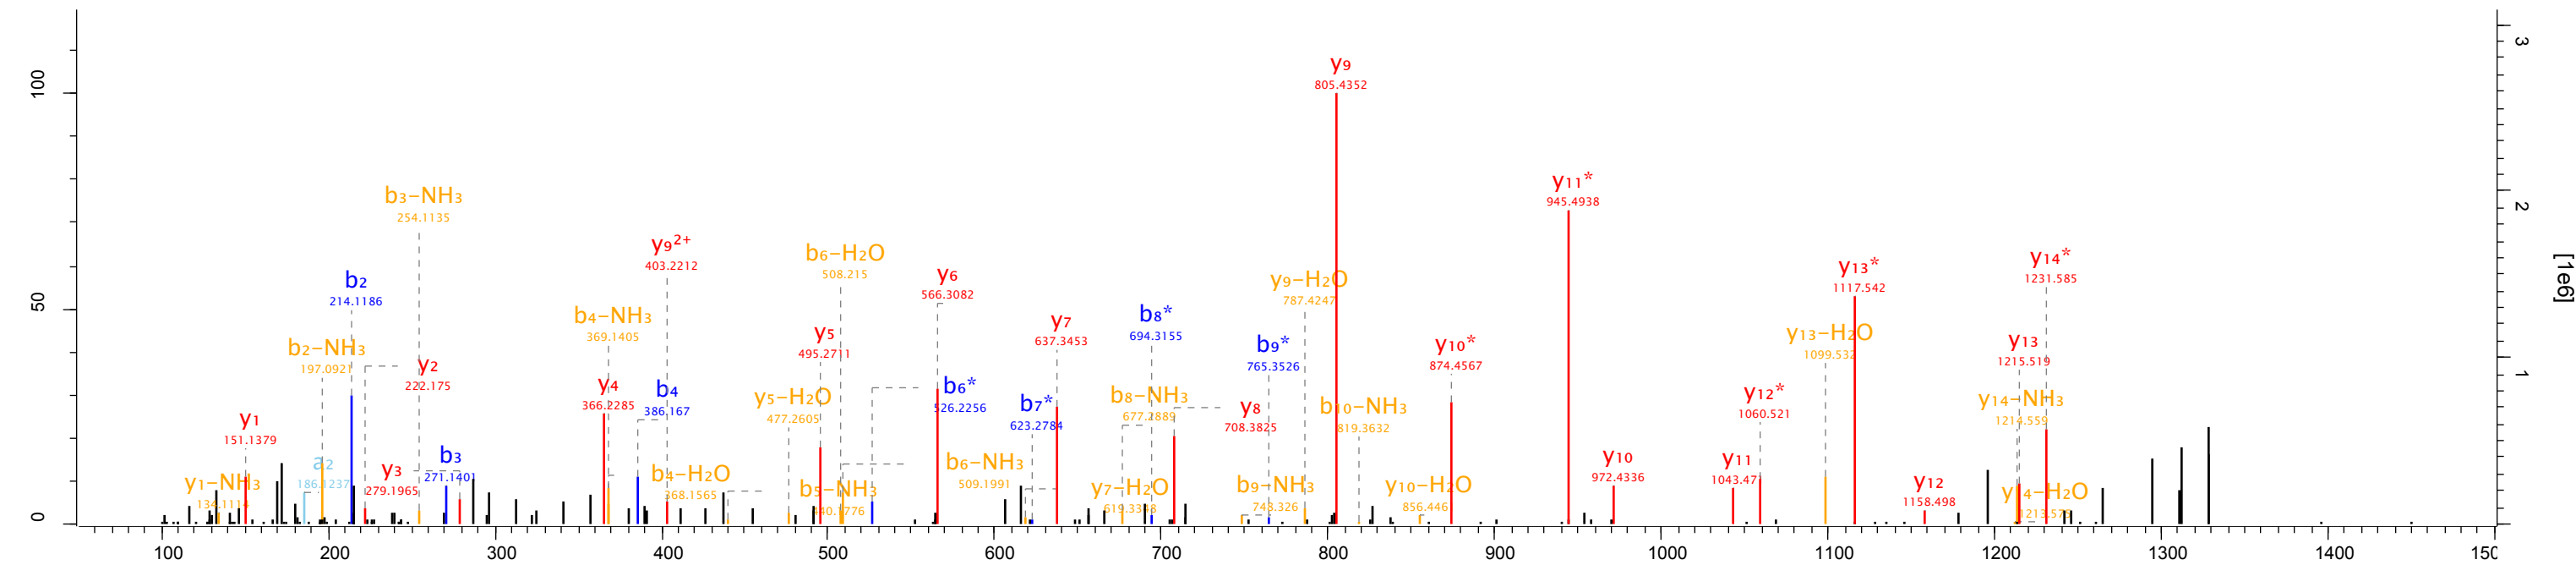

Raw file: 20150814\_A375SR\_Phospho\_BR2\_06  
 Scan: 5606 Method: FTMS; HCD Score: 125.92 m/z: 858.39 Gene names: BCL9

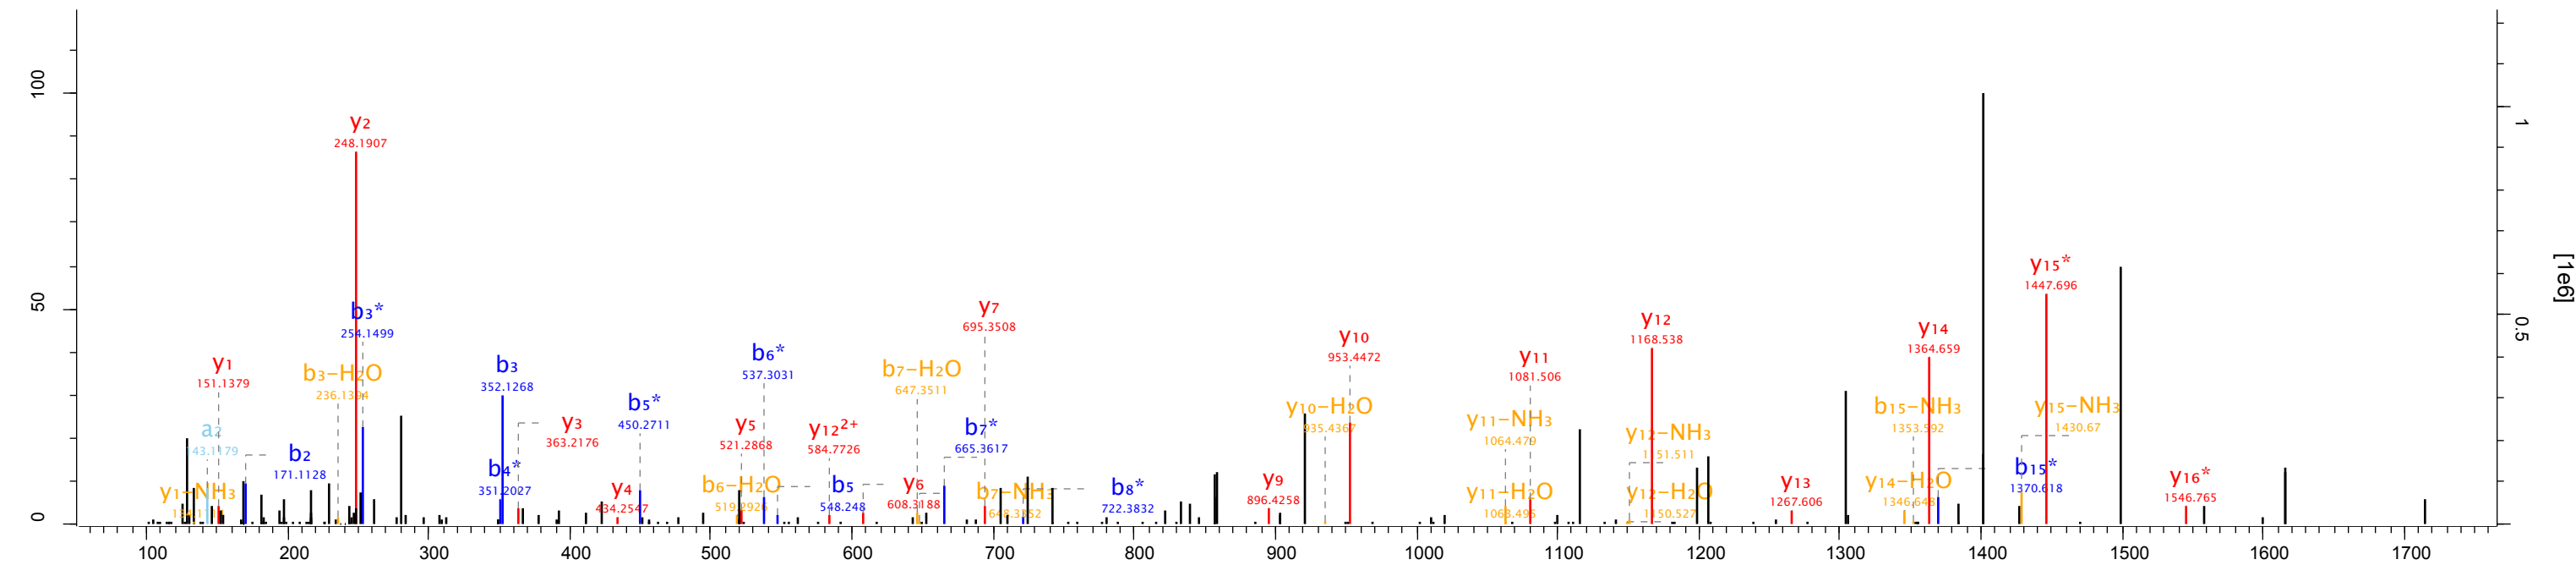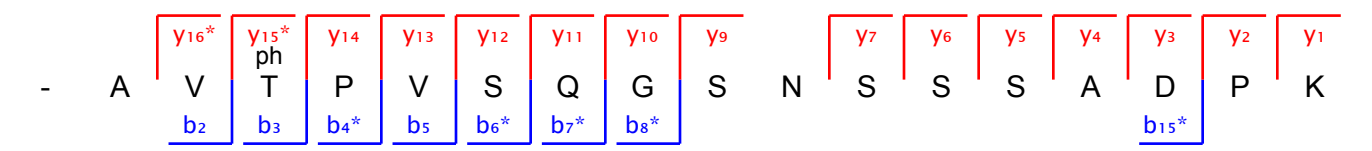

Raw file: 20150814\_A375SR\_Phospho\_BR2\_06  
 Scan: 6566 Method: FTMS; HCD Score: 75.02 m/z: 403.45 Gene names: CDC2L1;CDK11B;CDK11A

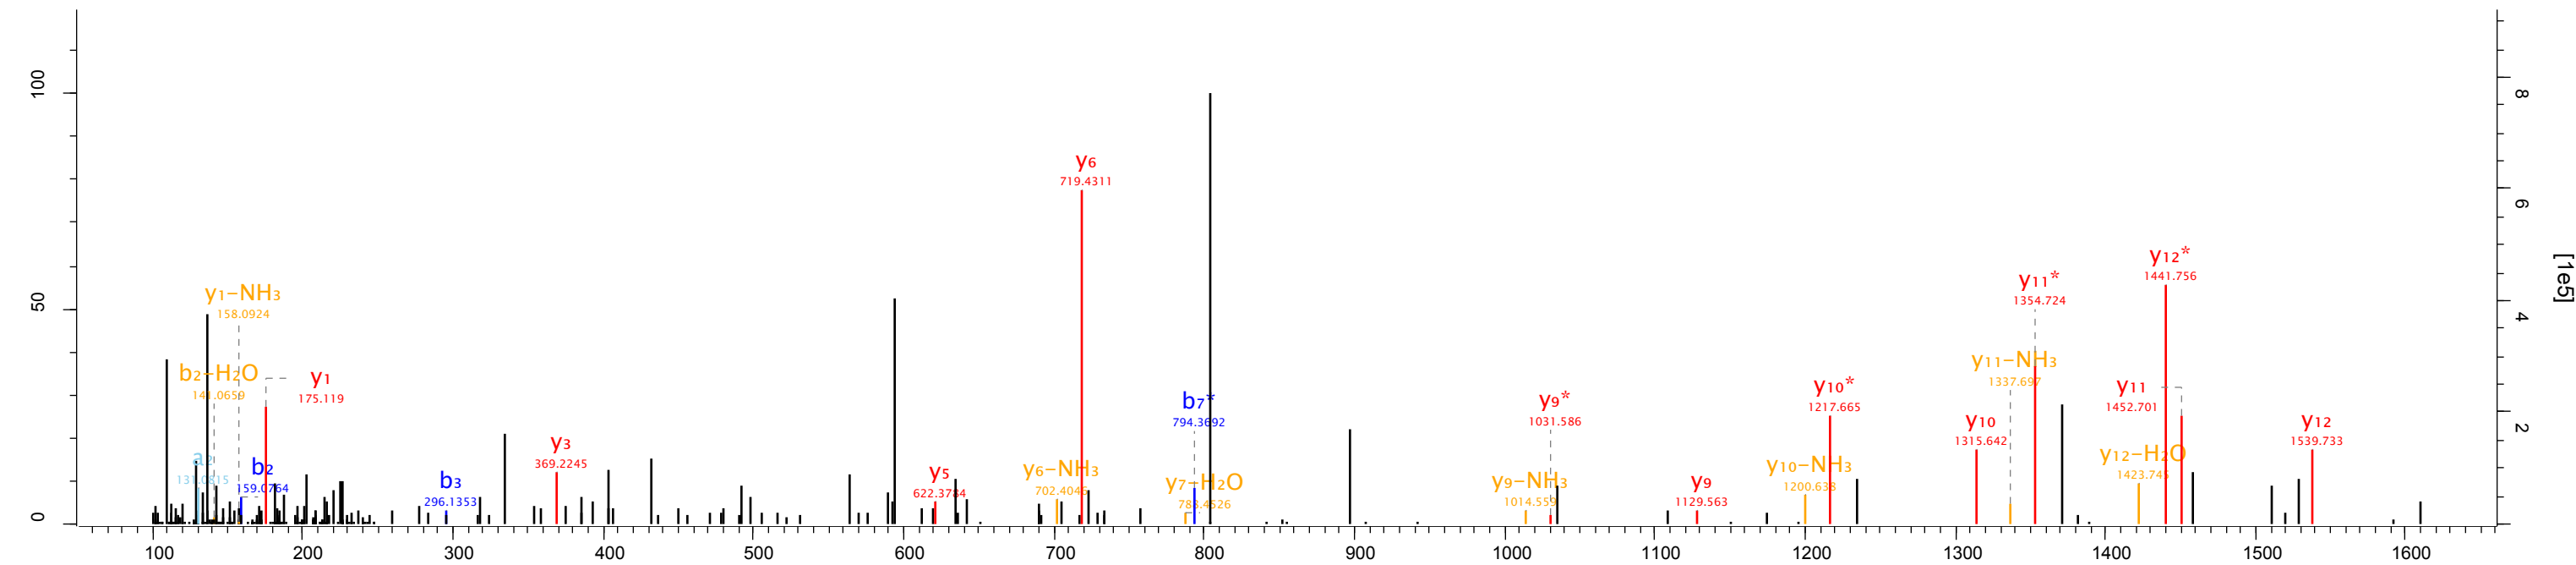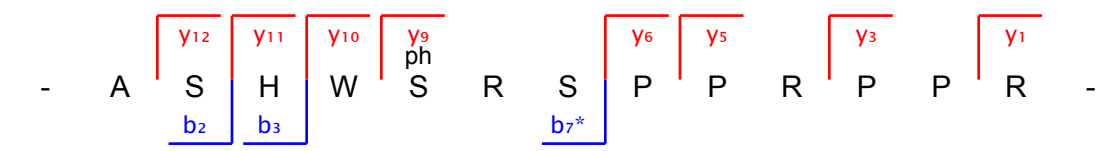

Raw file: 20150814\_A375SR\_Phospho\_BR2\_06  
 Scan: 6956 Method: FTMS; HCD Score: 131.06 m/z: 522.77 Gene names: MSH6

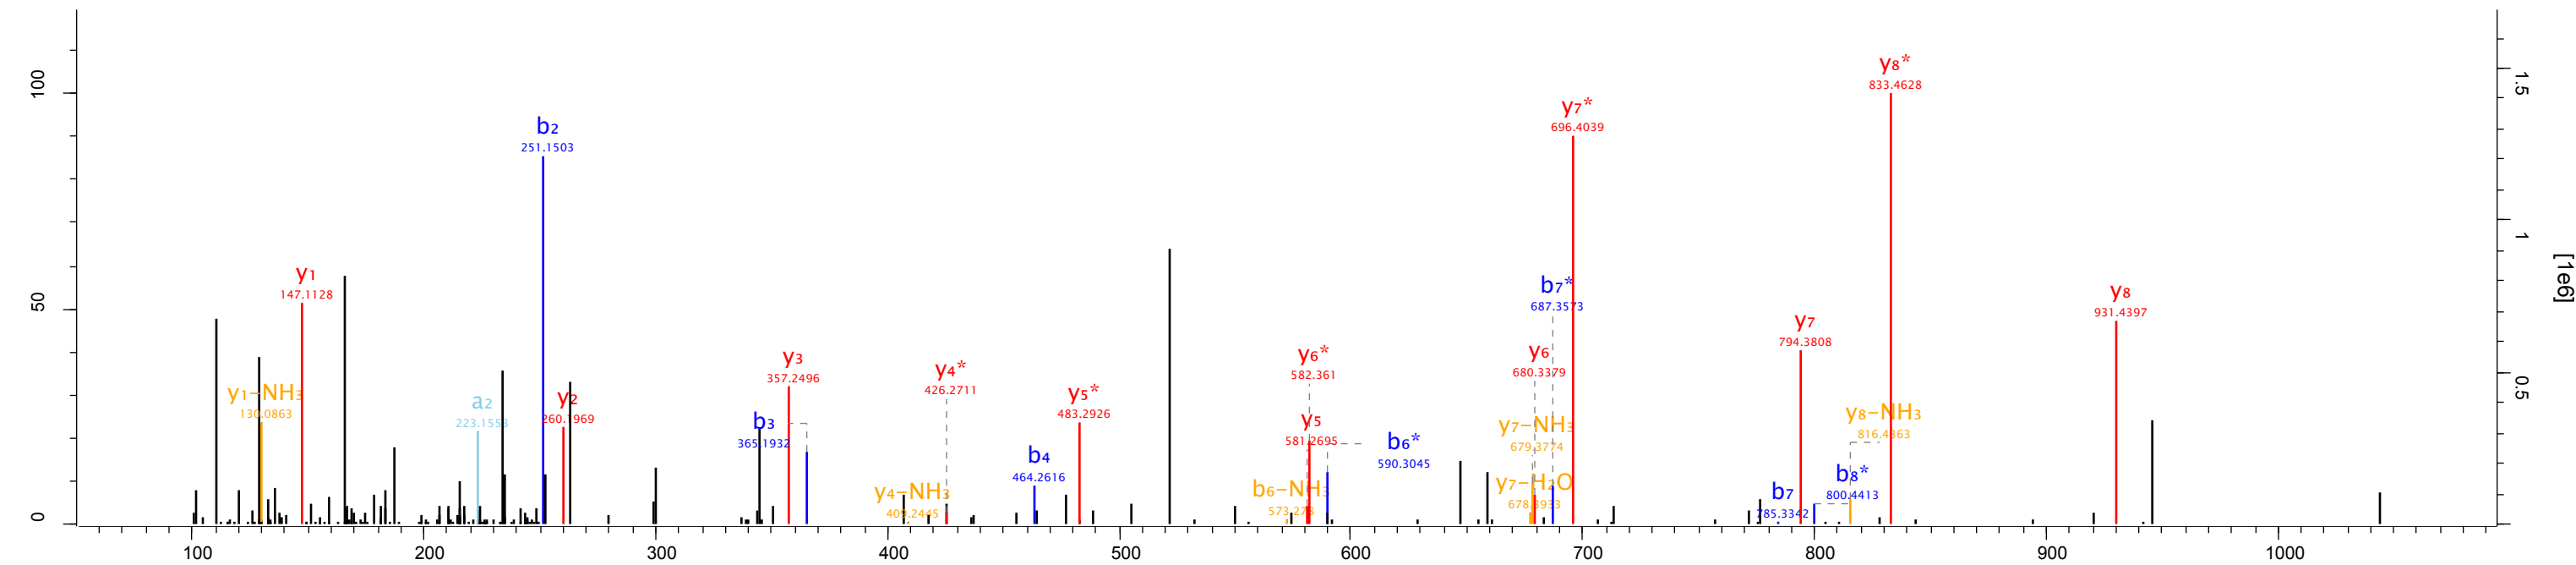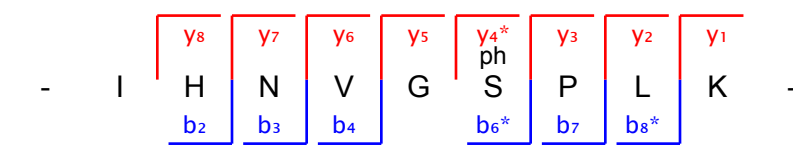

Raw file: 20150814\_A375SR\_Phospho\_BR2\_06  
 Scan: 8706 Method: FTMS; HCD Score: 180.17 m/z: 628.25 Gene names: SPAG9

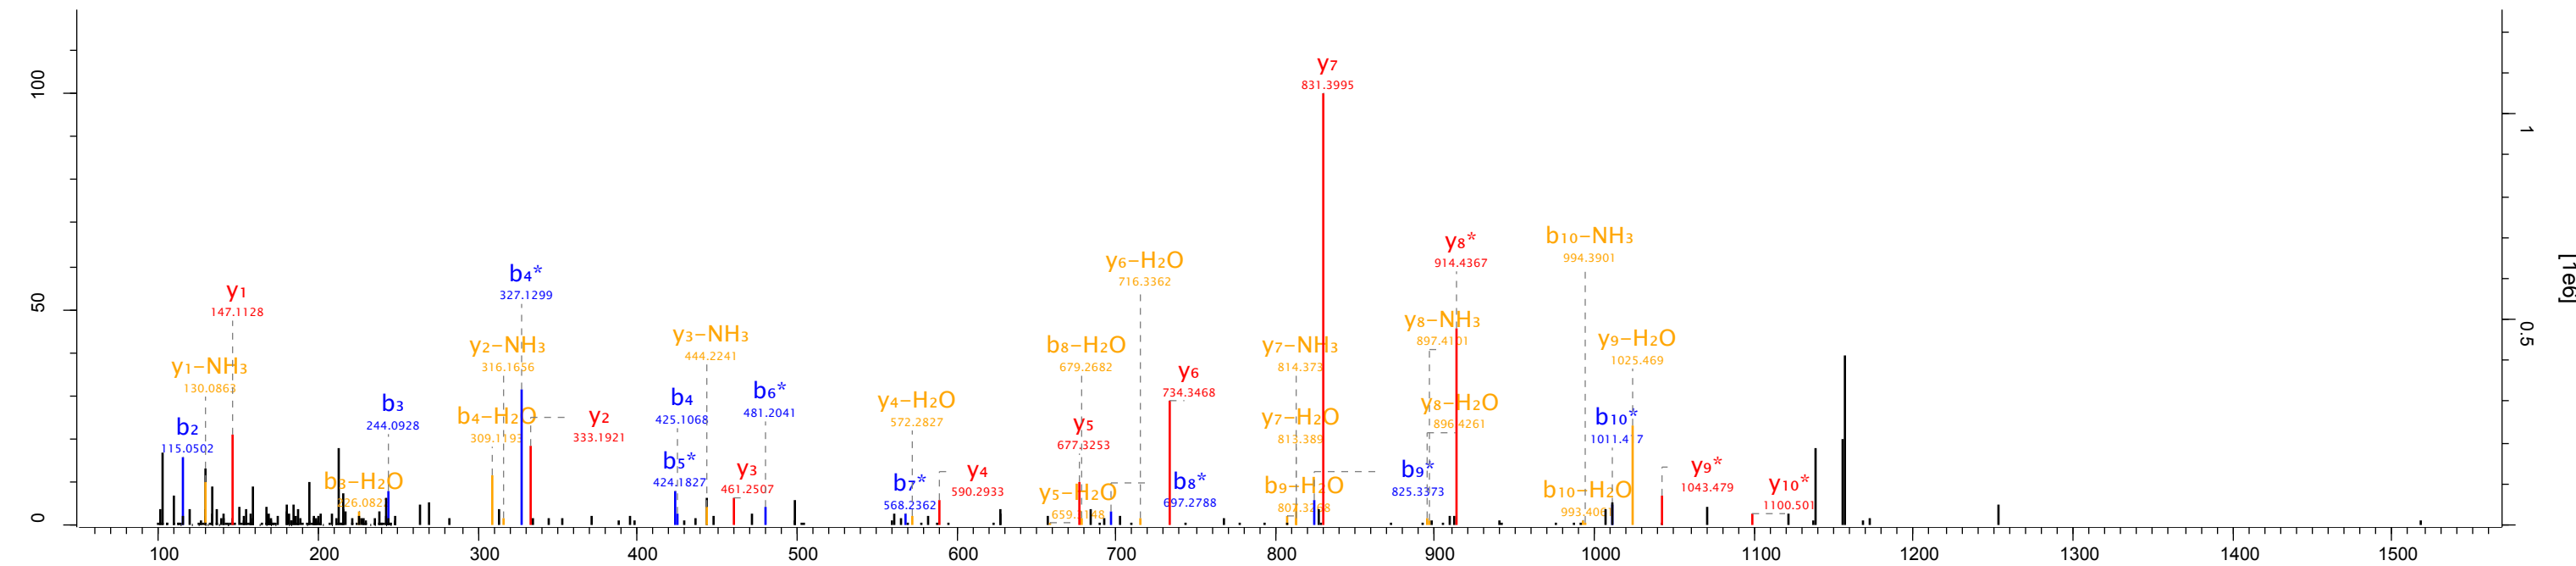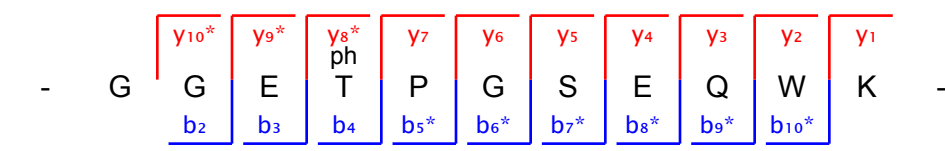

Raw file: 20150814\_A375SR\_Phospho\_BR2\_06  
 Scan: 8856 Method: FTMS; HCD Score: 194.77 m/z: 896.89 Gene names: DDX21

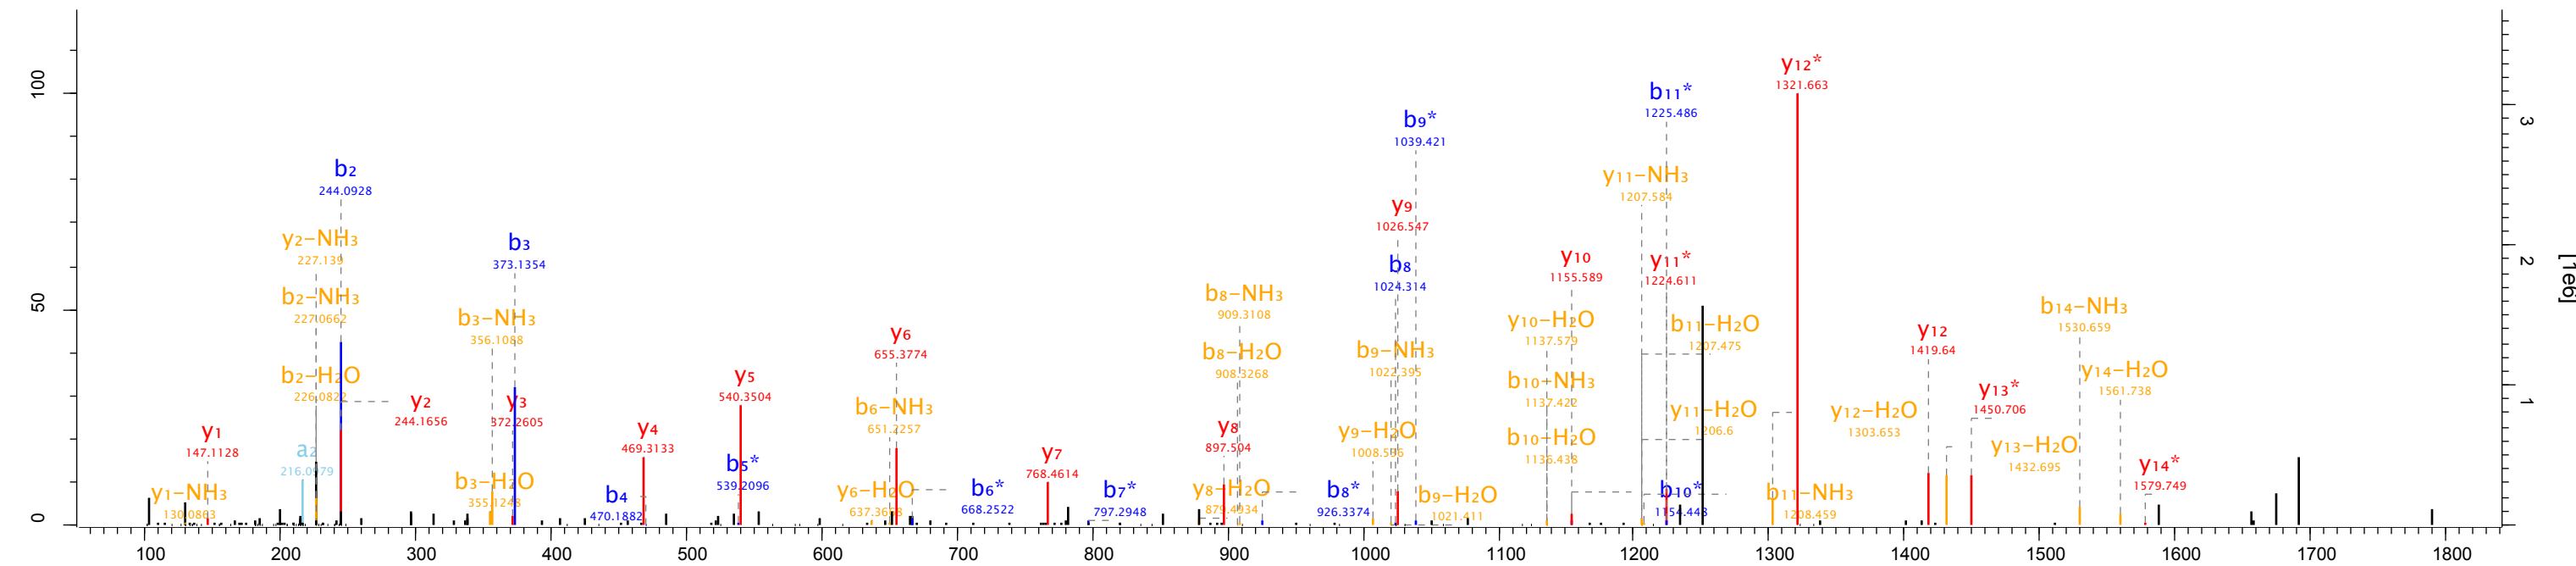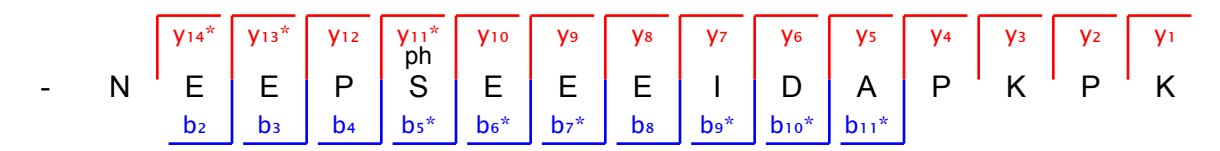

Raw file: 20150814\_A375SR\_Phospho\_BR2\_06  
 Scan: 9636 Method: FTMS; HCD Score: 166.92 m/z: 723.33 Gene names: PKN1

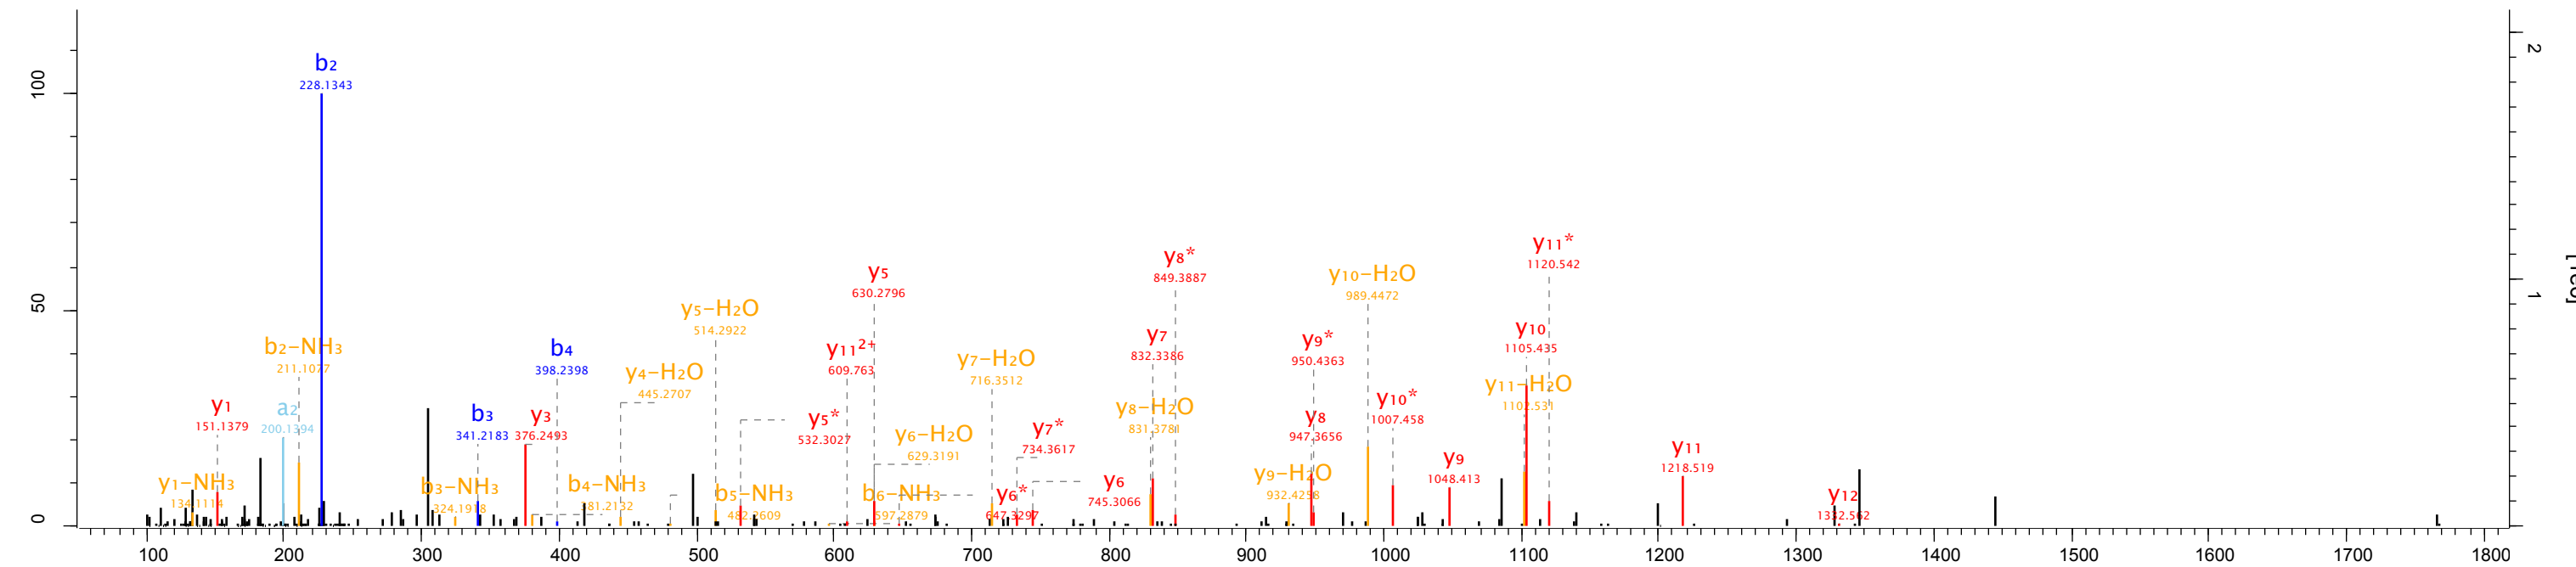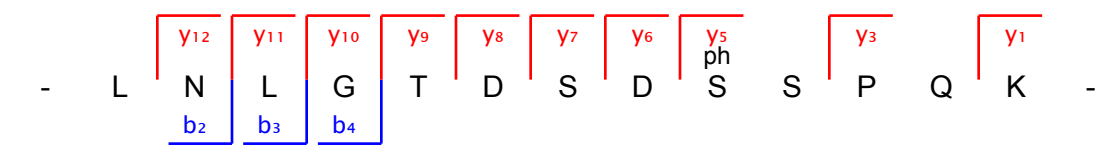

Raw file: 20150814\_A375SR\_Phospho\_BR2\_06  
 Scan: 9806 Method: FTMS; HCD Score: 154.34 m/z: 853.87 Gene names: GIT2

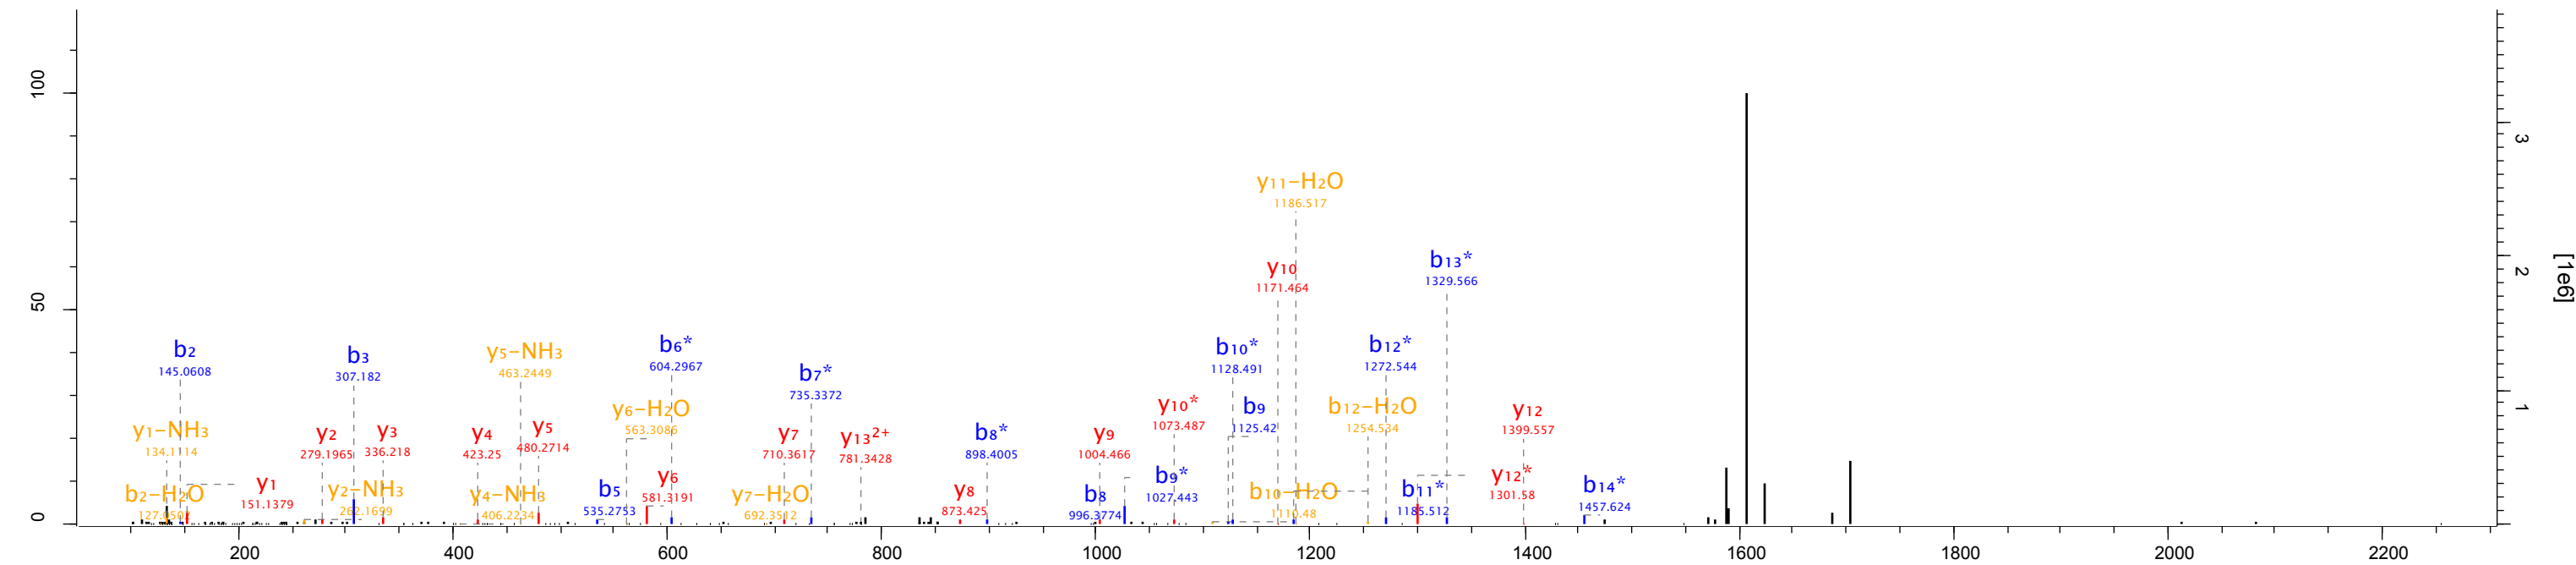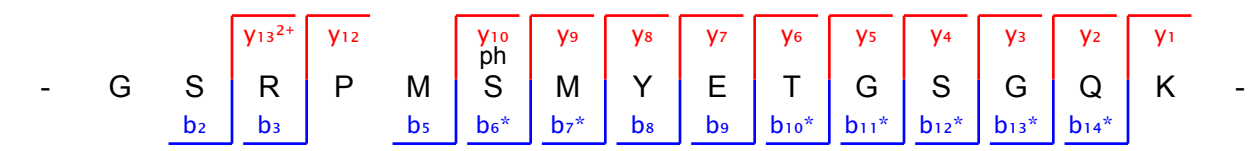



Raw file  
 20150814\_A375SR\_Phospho\_BR2\_07  
 Scan 10116 Method FTMS; HCD Score 59.26 m/z 646.3 Gene names EPS8L2

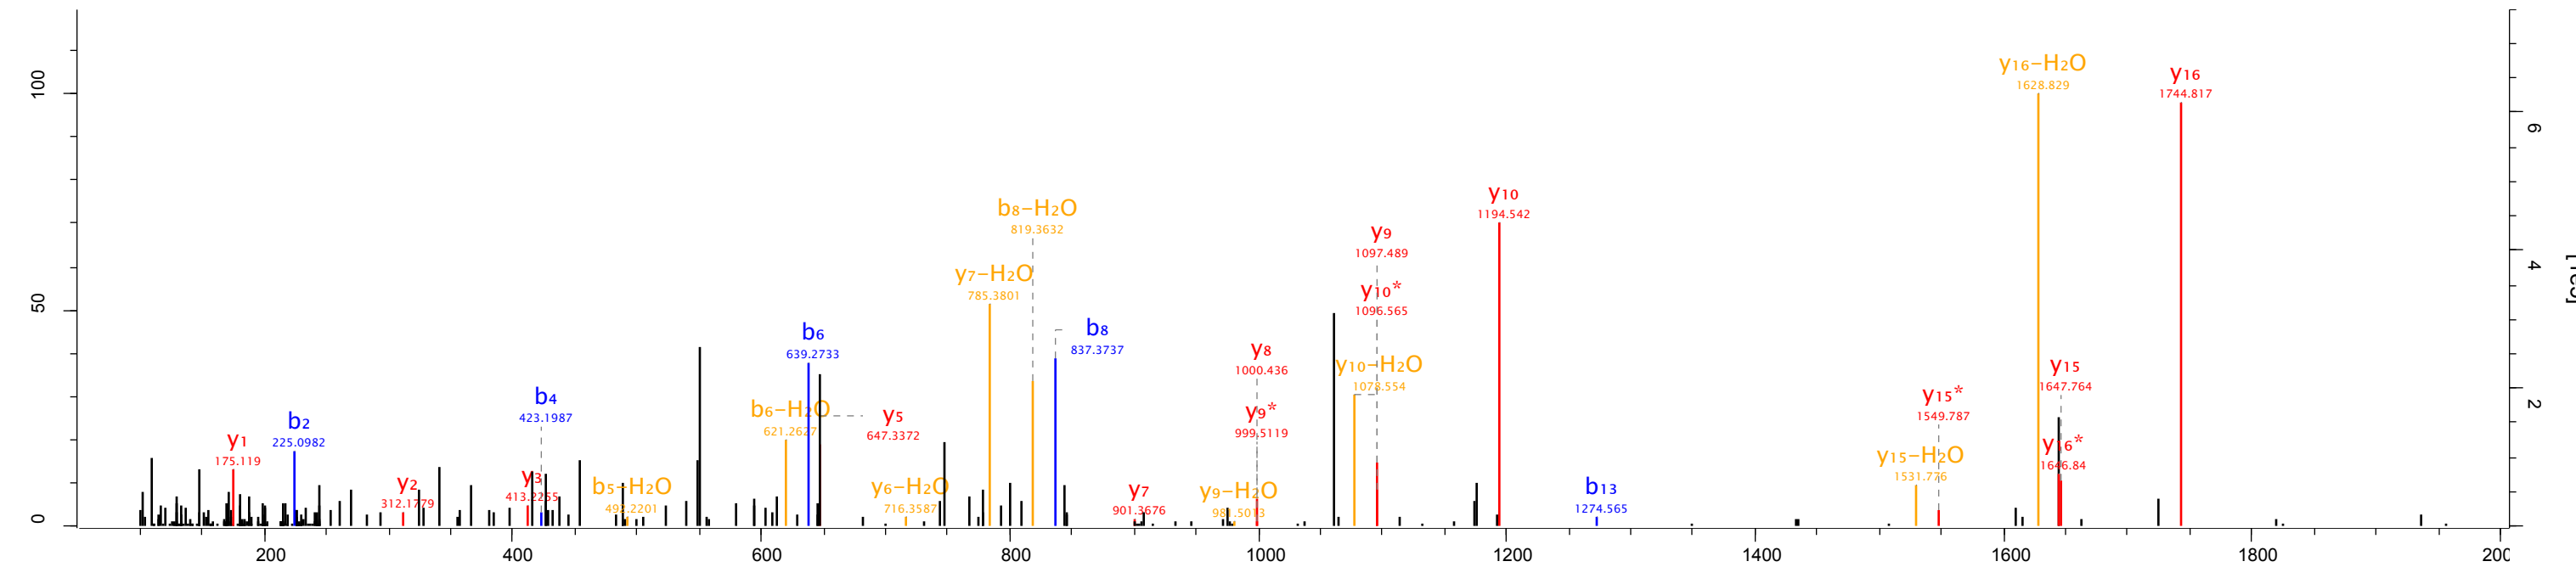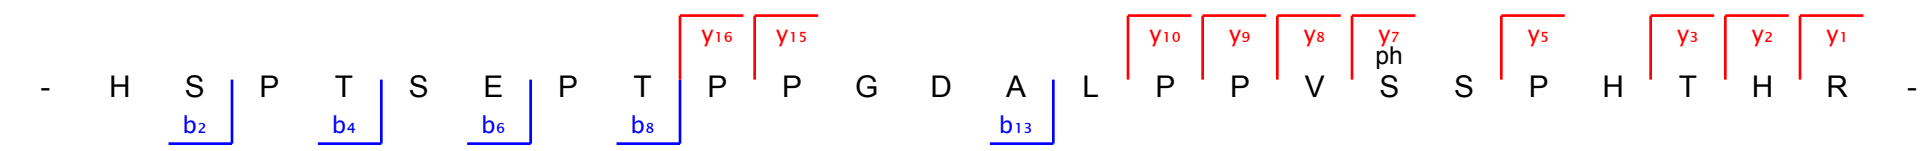

Raw file 20150814\_A375SR\_Phospho\_BR2\_07 Scan 10696 Method FTMS; HCD Score 81.41 m/z 741.02 Gene names RREB1

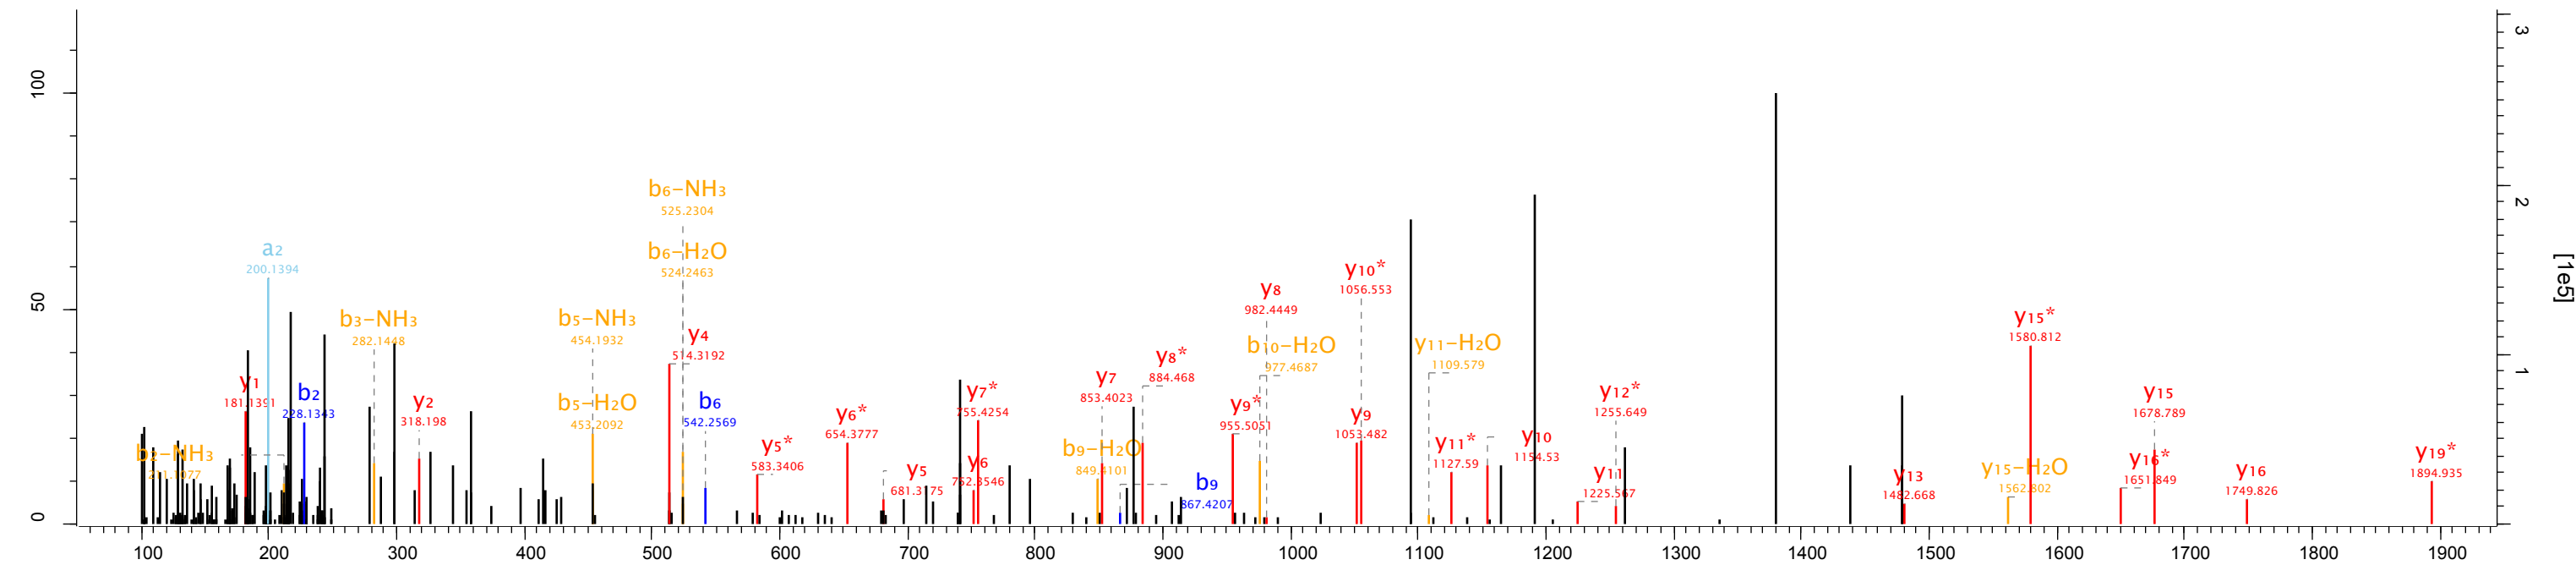

- Q V A G D A P V E Q A T A S P V H R -  
 b2 b6 b9 y19\* y16 y15 y13 y12\* y11 y10 y9 y8 y7 y6 y5 ph y4 y2 y1

Raw file: 20150814\_A375SR\_Phospho\_BR2\_07  
 Scan: 10776 Method: FTMS; HCD Score: 131.17 m/z: 660.28 Gene names: CARHSP1

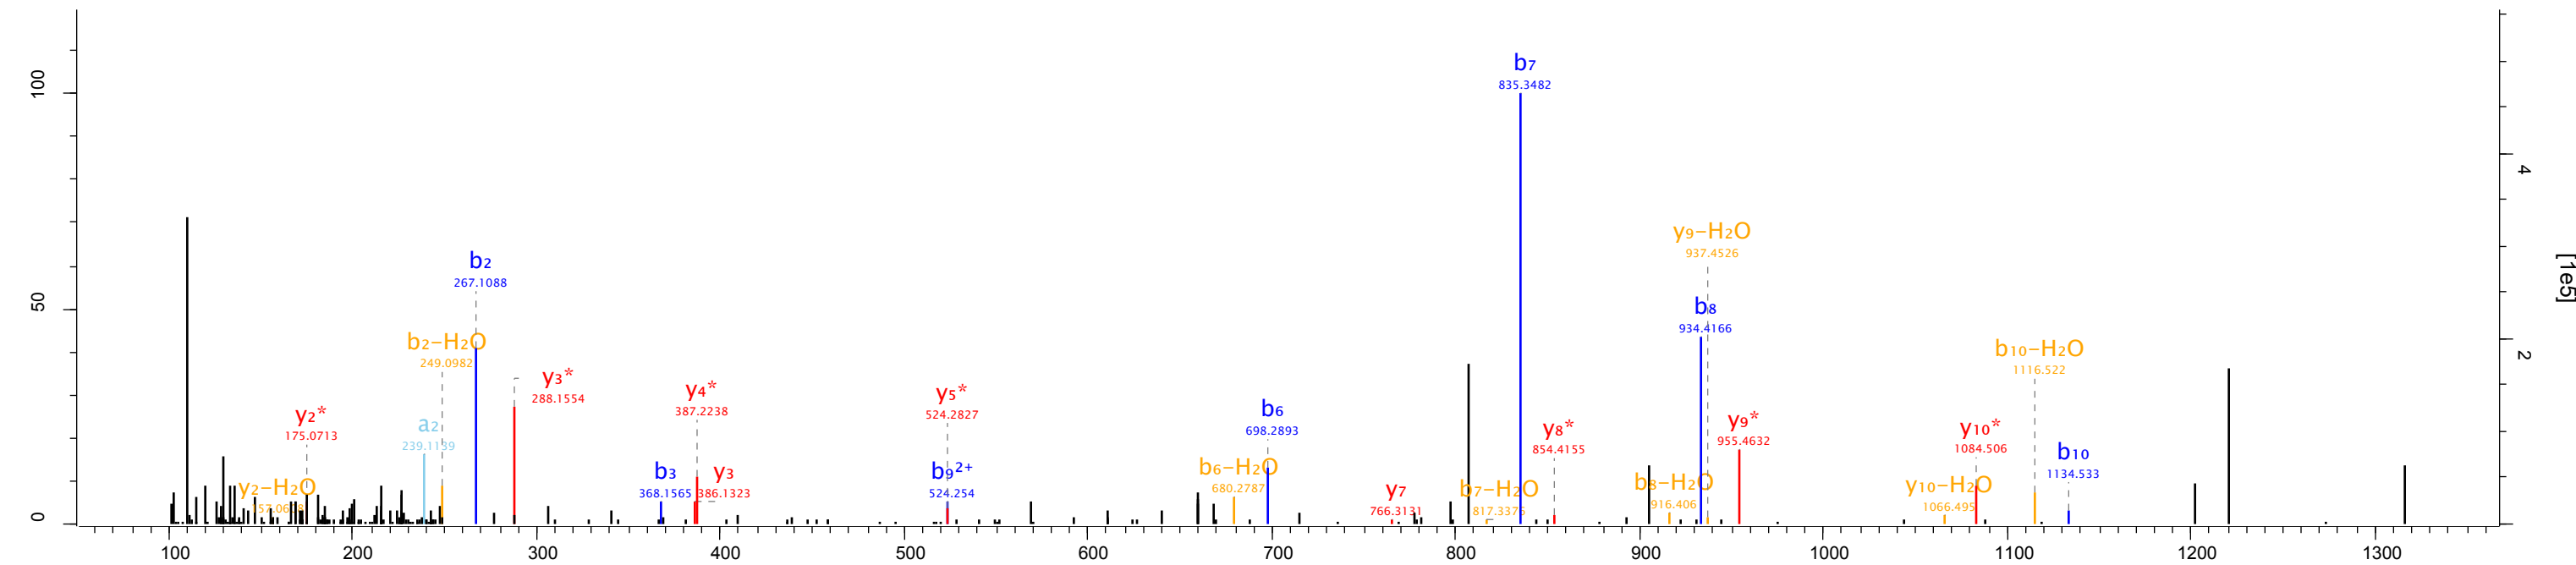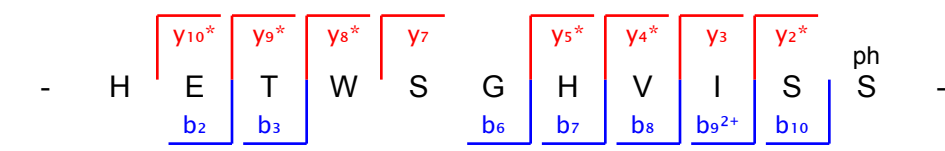

Raw file 20150814\_A375SR\_Phospho\_BR2\_07 Scan 13176 Method FTMS; HCD Score 120.66 m/z 962.42 Gene names SUPT6H

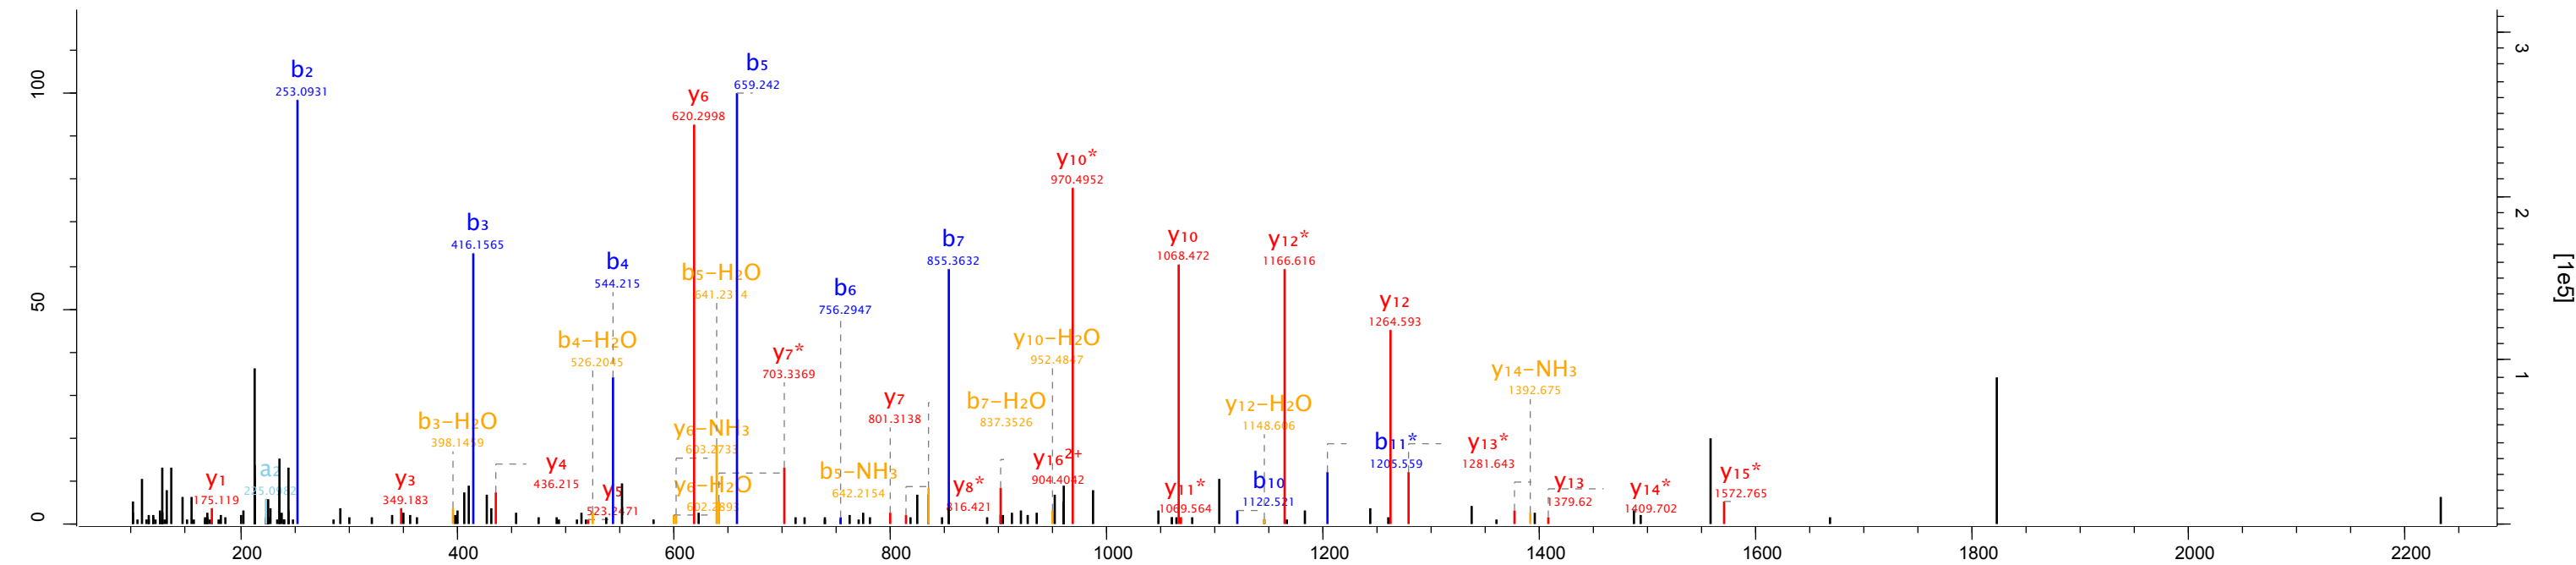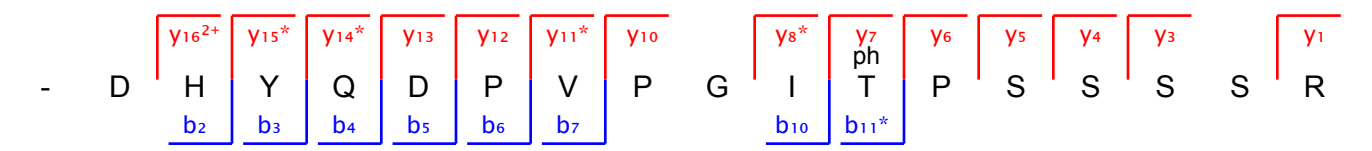

Raw file 20150814\_A375SR\_Phospho\_BR2\_07 Scan 14416 Method FTMS; HCD Score 48.62 m/z 643.96 Gene names NFAT5

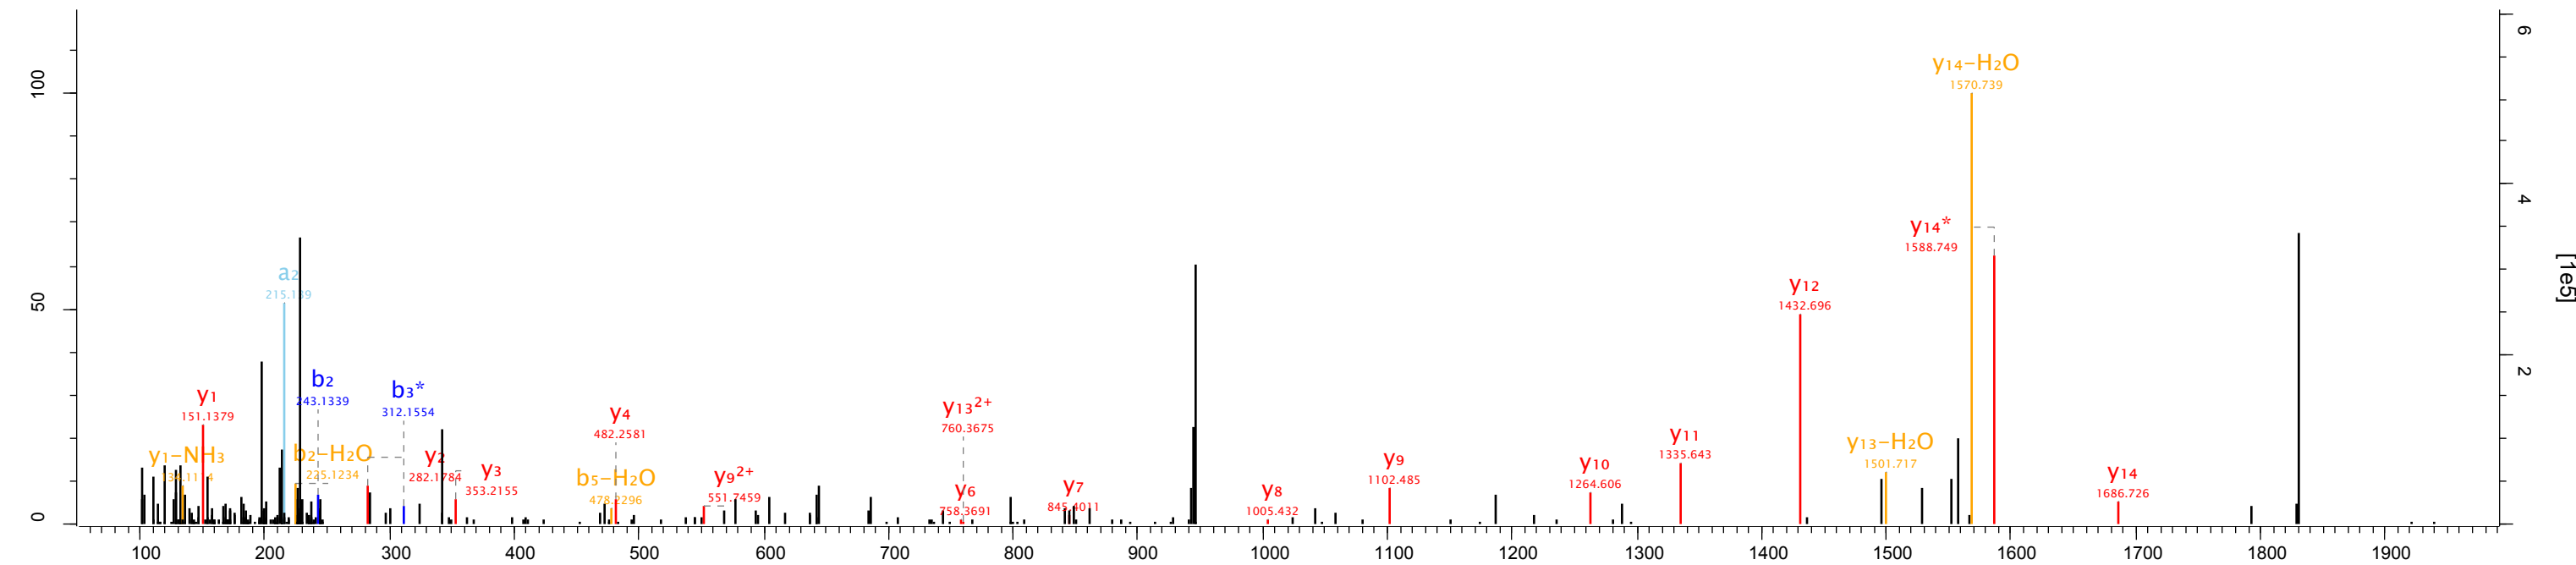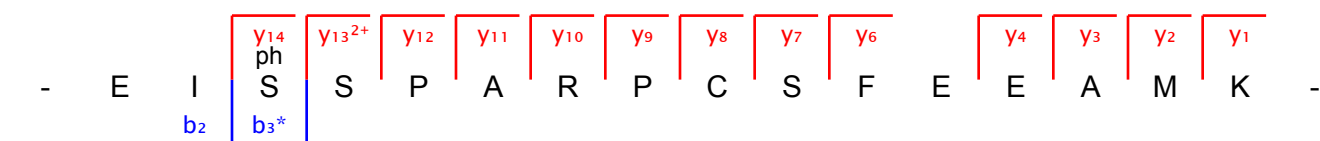

Raw file 20150814\_A375SR\_Phospho\_BR2\_07 Scan 14956 Method FTMS; HCD Score 92.54 m/z 651.8 Gene names SH2B3;BZRAP1

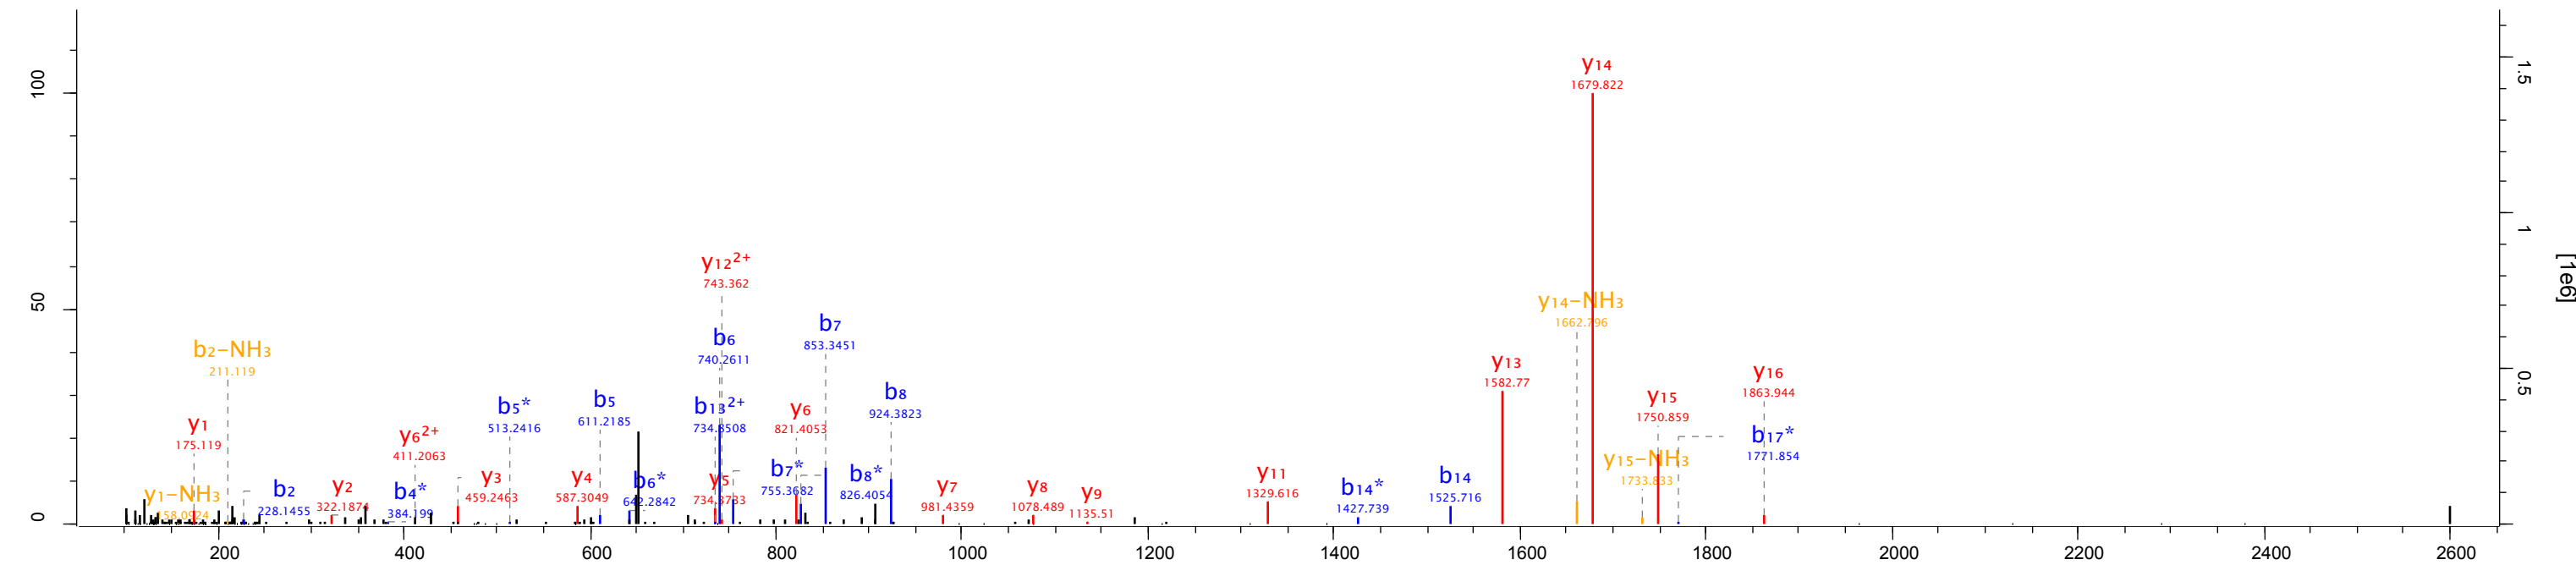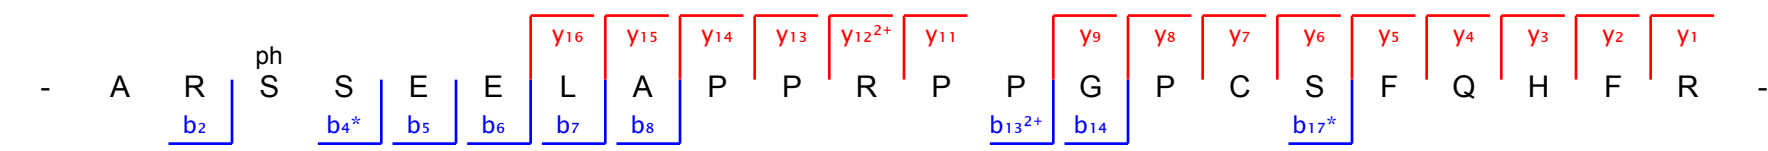

Raw file 20150814\_A375SR\_Phospho\_BR2\_07 Scan 16436 Method FTMS; HCD Score 83.69 m/z 598.82 Gene names IFT22

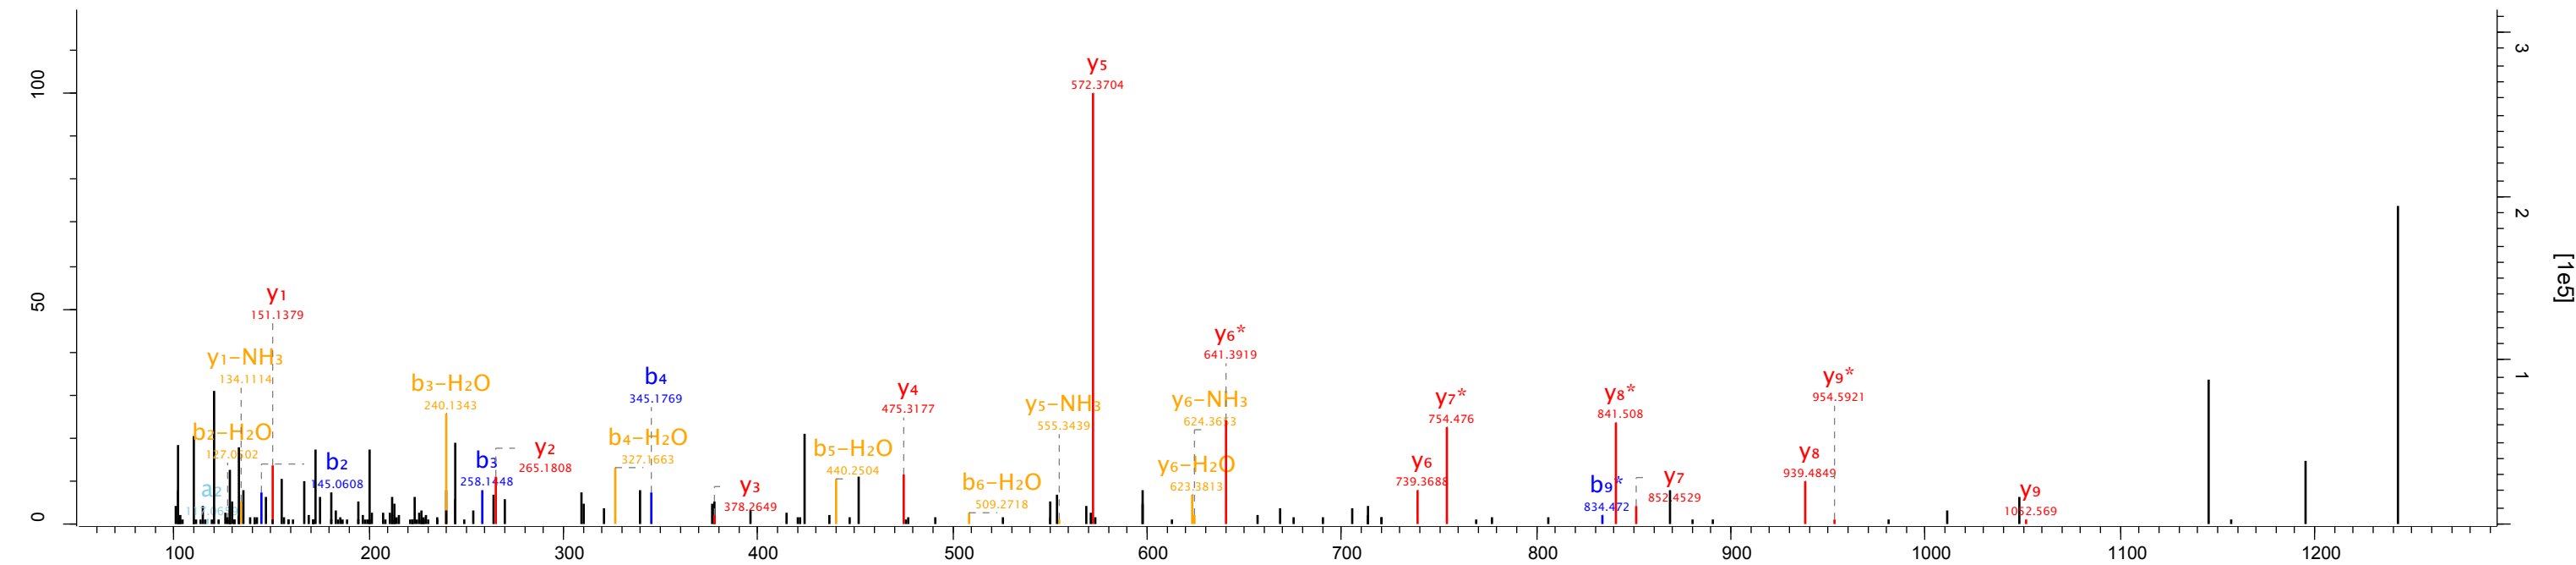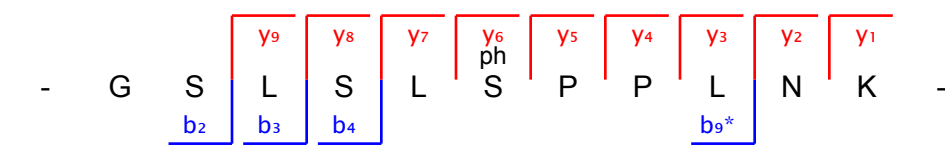

Raw file Scan Method Score m/z Gene names  
 20150814\_A375SR\_Phospho\_BR2\_07 19126 FTMS; HCD 149.47 846.38 RRAGC;RRAGD

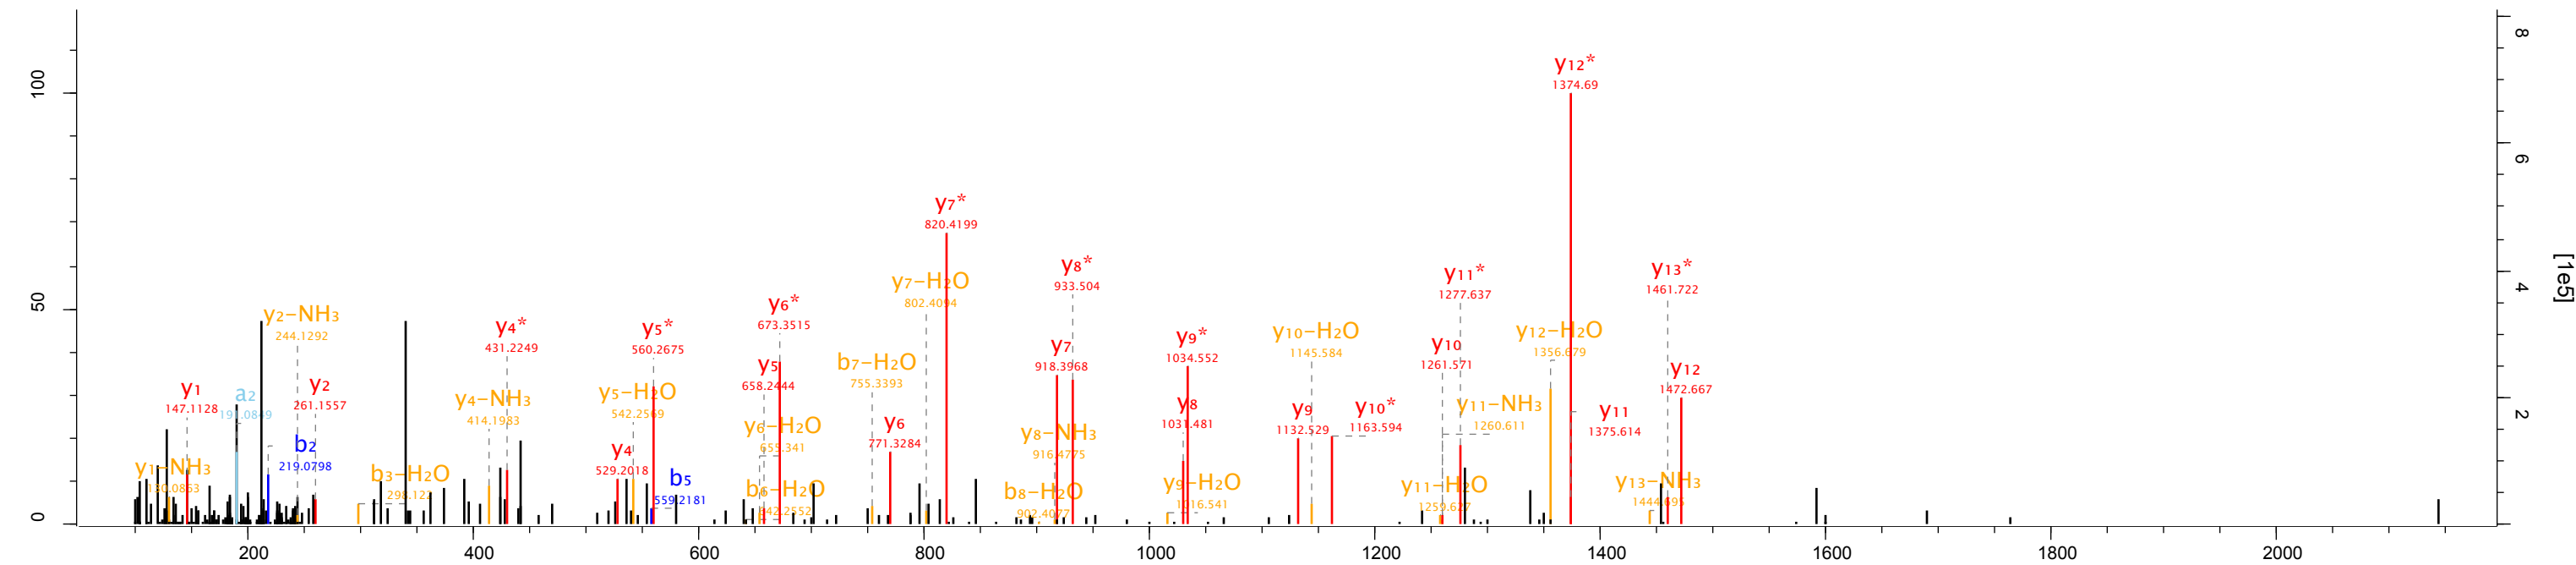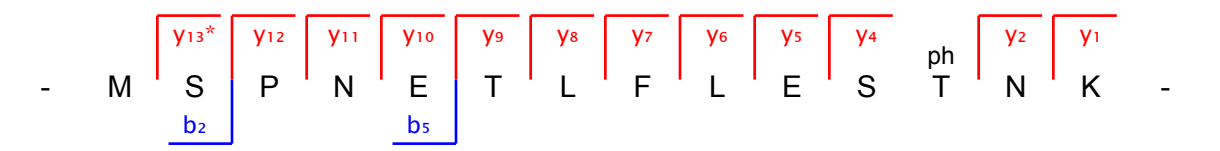



Raw file 20150814\_A375SR\_Phospho\_BR2\_07 Scan 25226 Method FTMS; HCD Score 46.41 m/z 1060.8 Gene names JUND

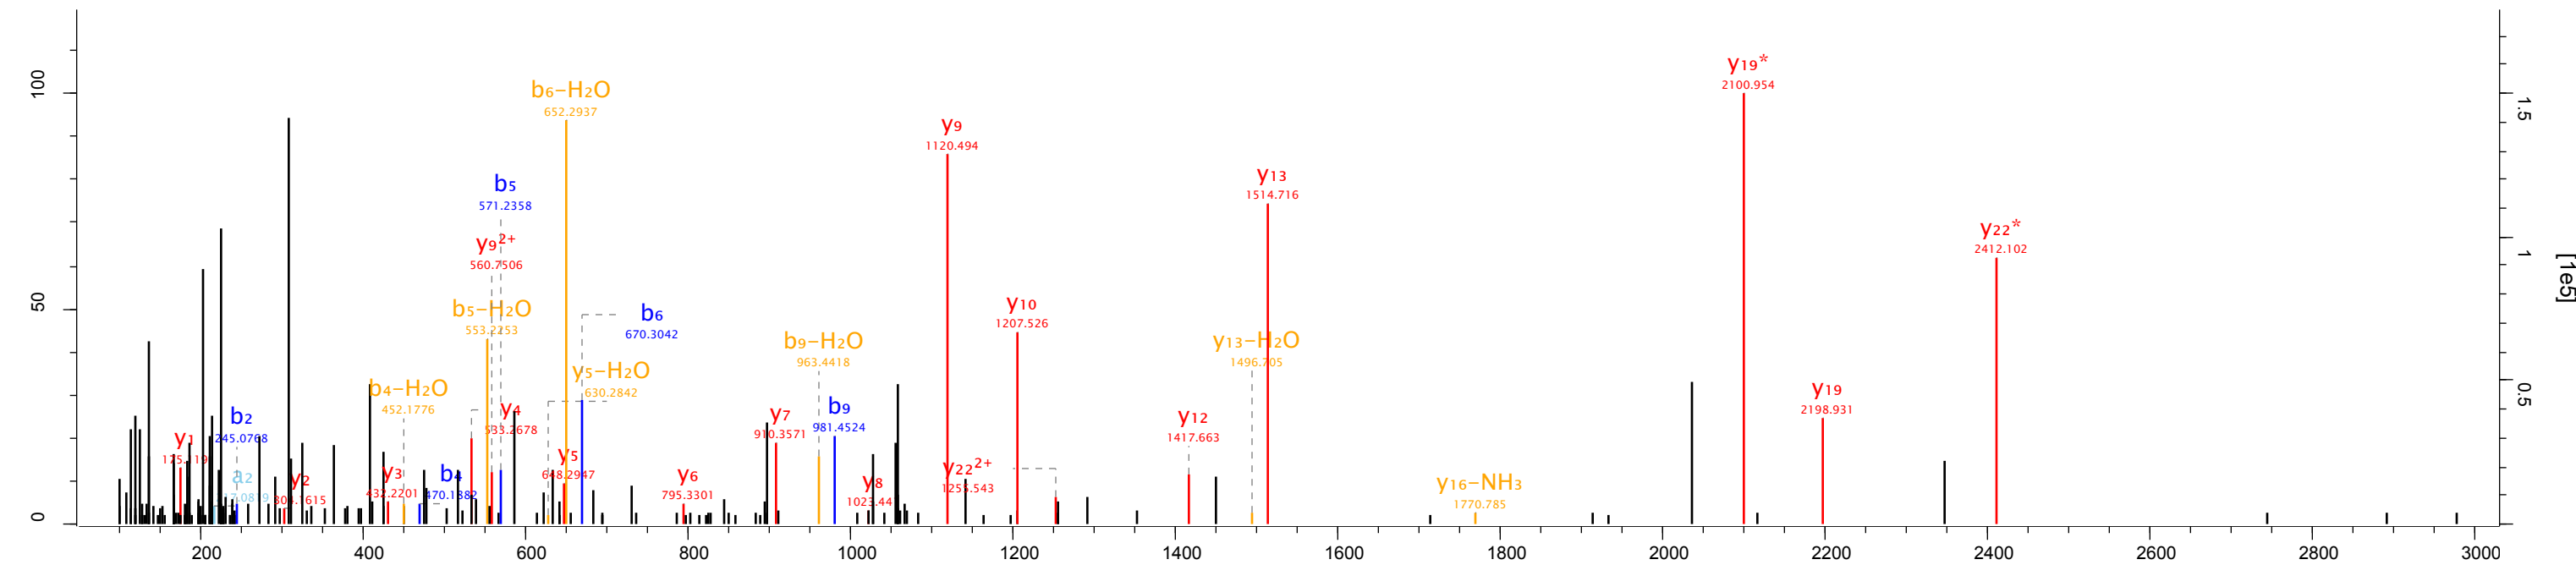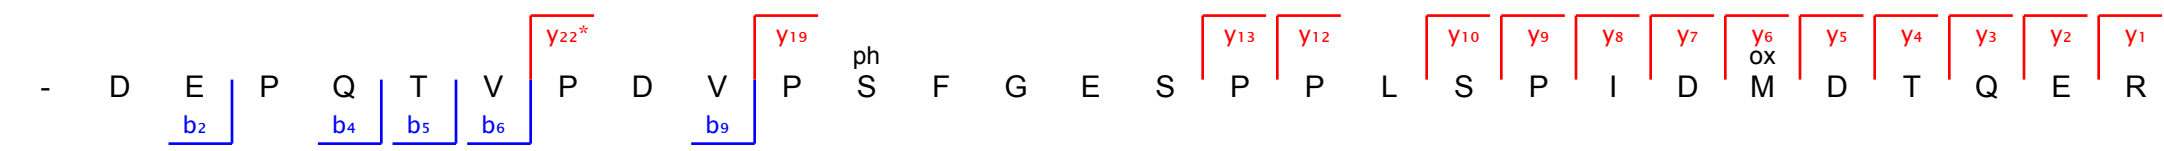

Raw file: 20150814\_A375SR\_Phospho\_BR2\_07  
 Scan: 26576 Method: FTMS; HCD Score: 66.72 m/z: 1079.51 Gene names: BOD1L1

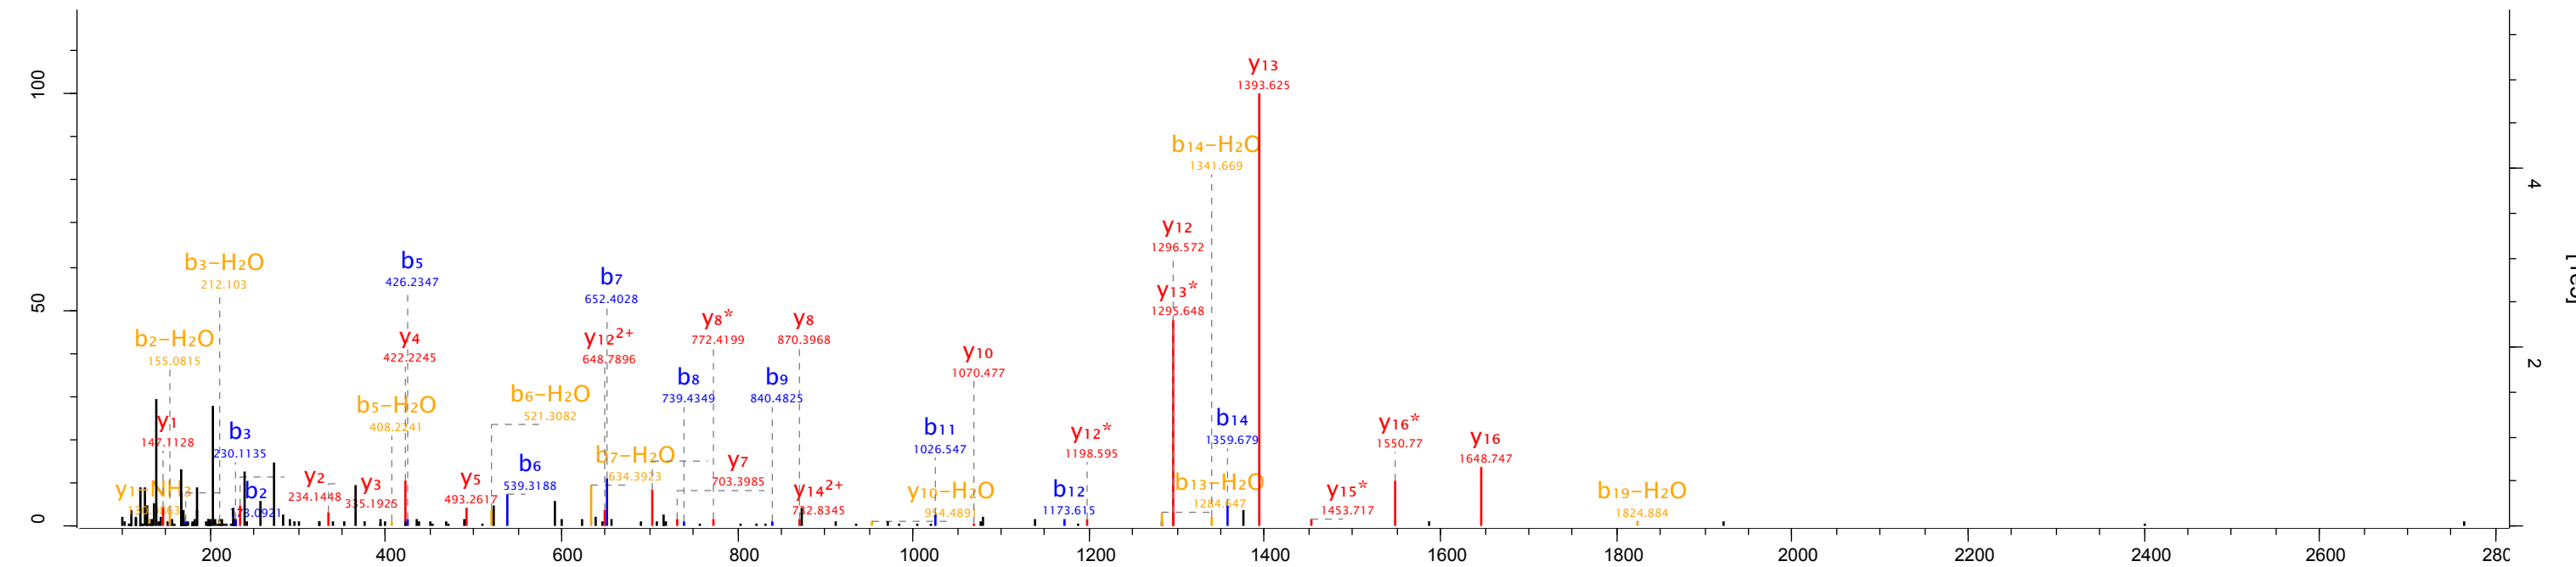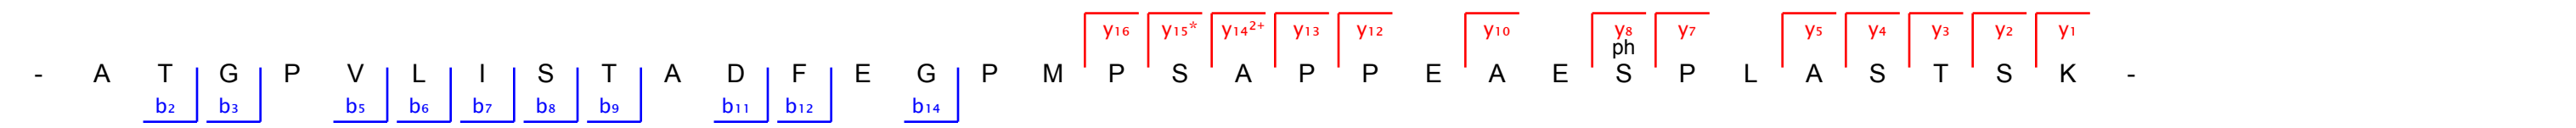

Raw file 20150814\_A375SR\_Phospho\_BR2\_07 Scan 2716 Method FTMS; HCD Score 98.18 m/z 865.34 Gene names PCGF6

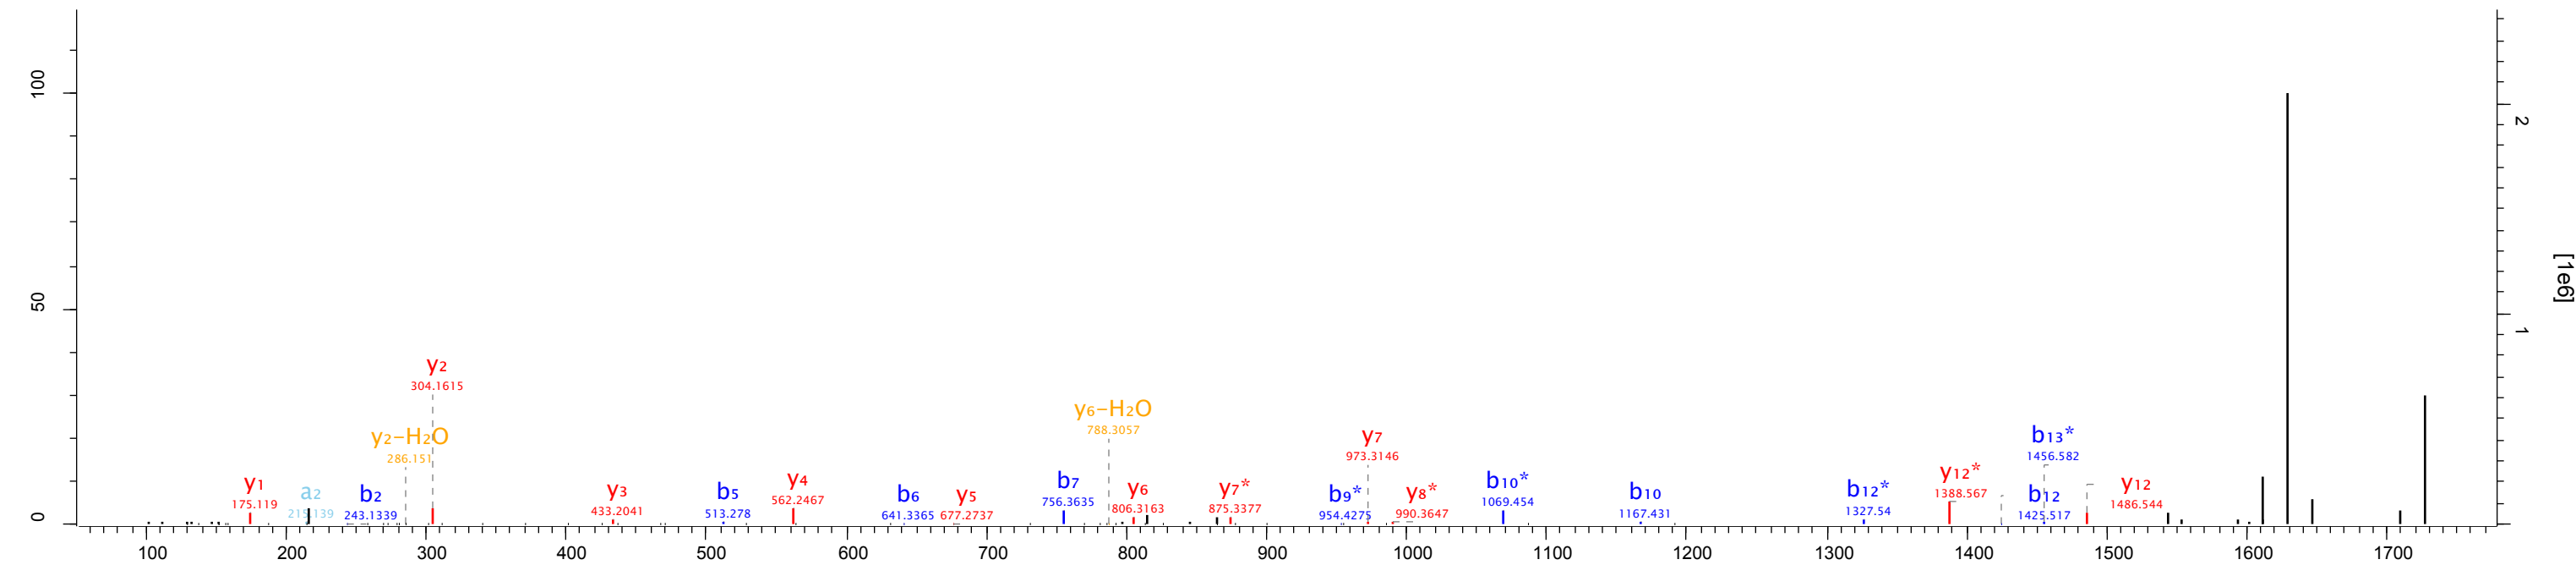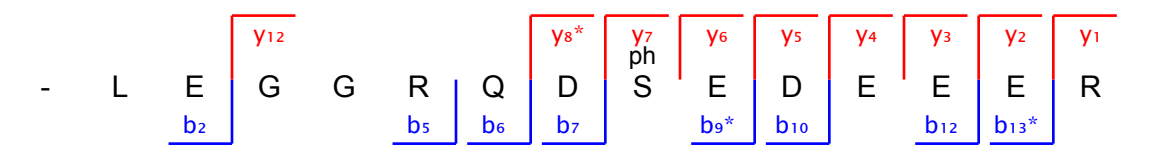

Raw file: 20150814\_A375SR\_Phospho\_BR2\_07  
 Scan: 3076 Method: FTMS; HCD Score: 417.07 m/z: 1065.96 Gene names: HSP90AA1

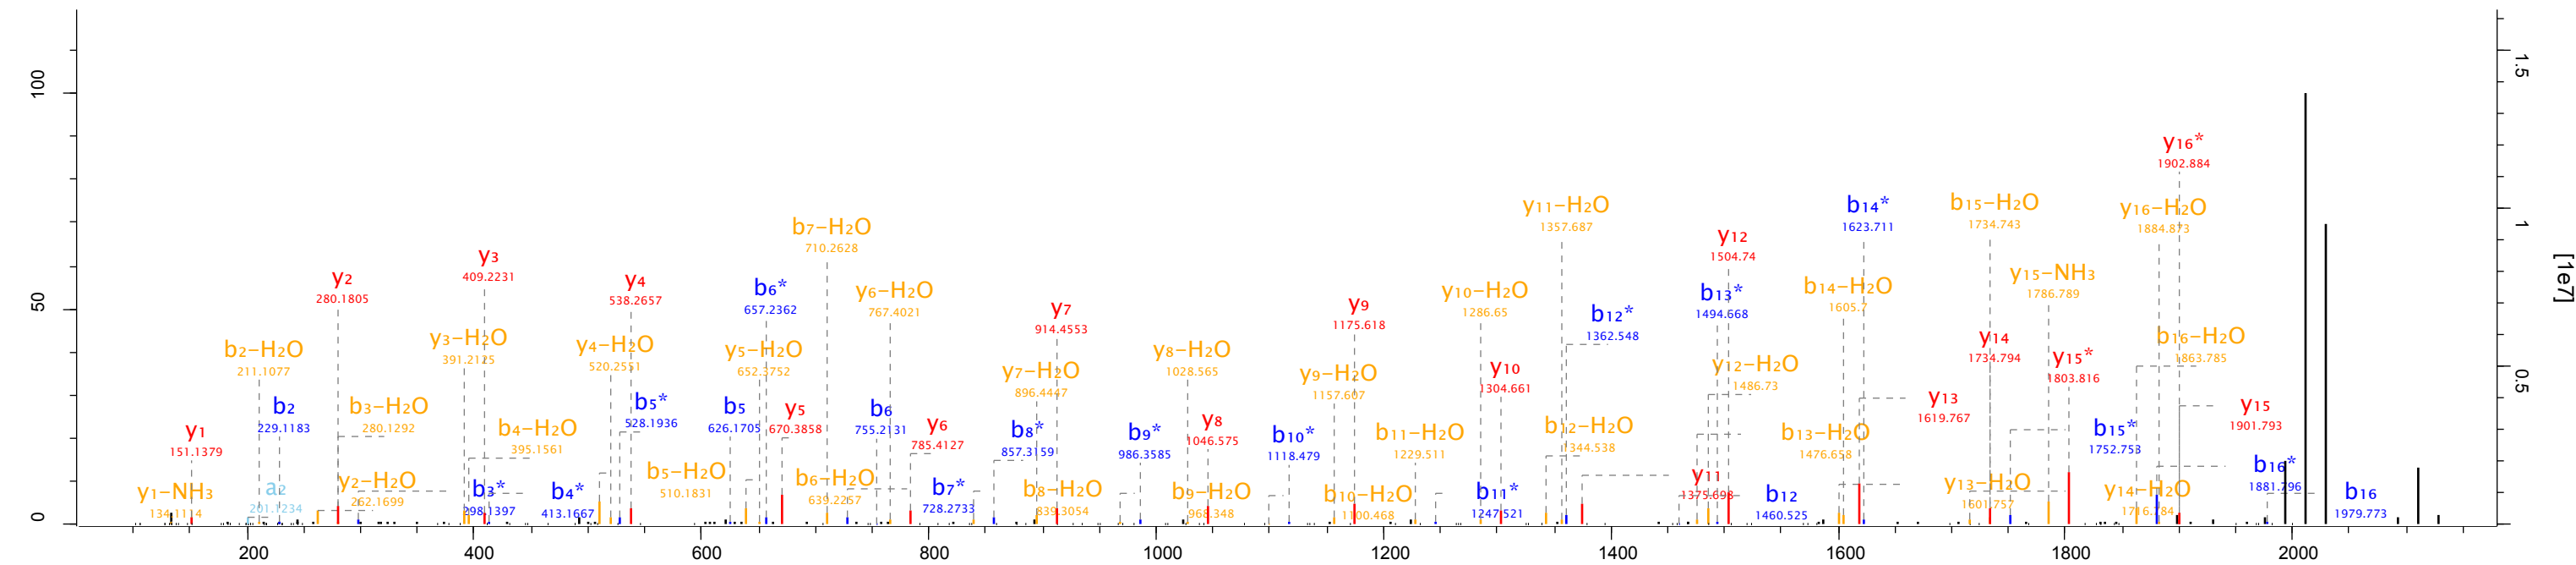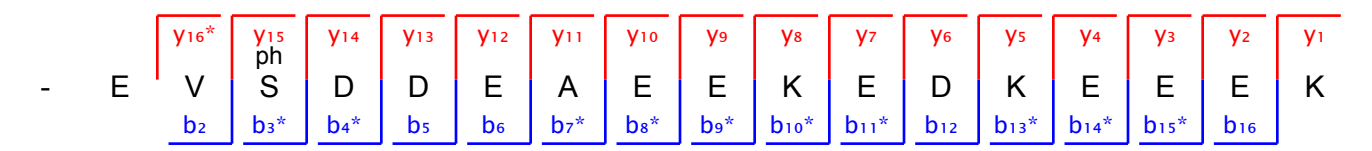

Raw file 20150814\_A375SR\_Phospho\_BR2\_07 Scan 3266 Method FTMS; HCD Score 69.33 m/z 549.95 Gene names BAIAP2L2

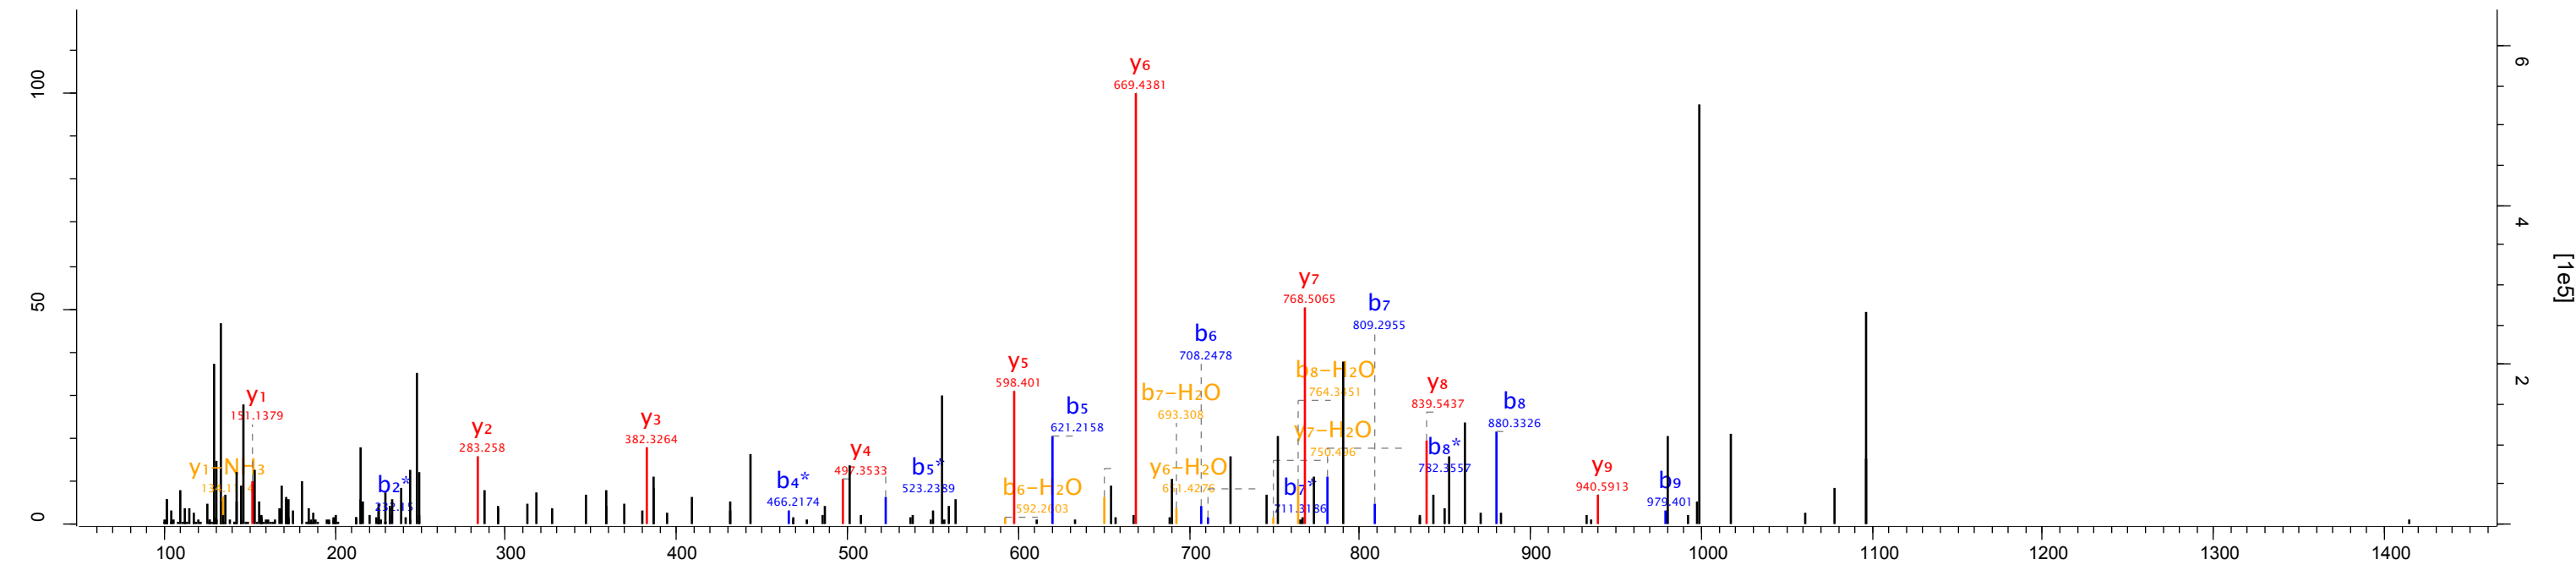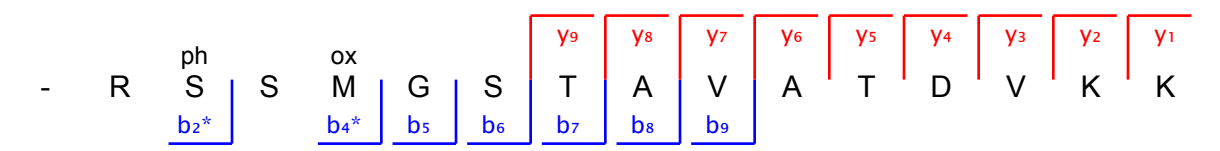

Raw file: 20150814\_A375SR\_Phospho\_BR2\_07  
 Scan: 3356 Method: FTMS; HCD Score: 146.2 m/z: 708.82 Gene names: PACRGL

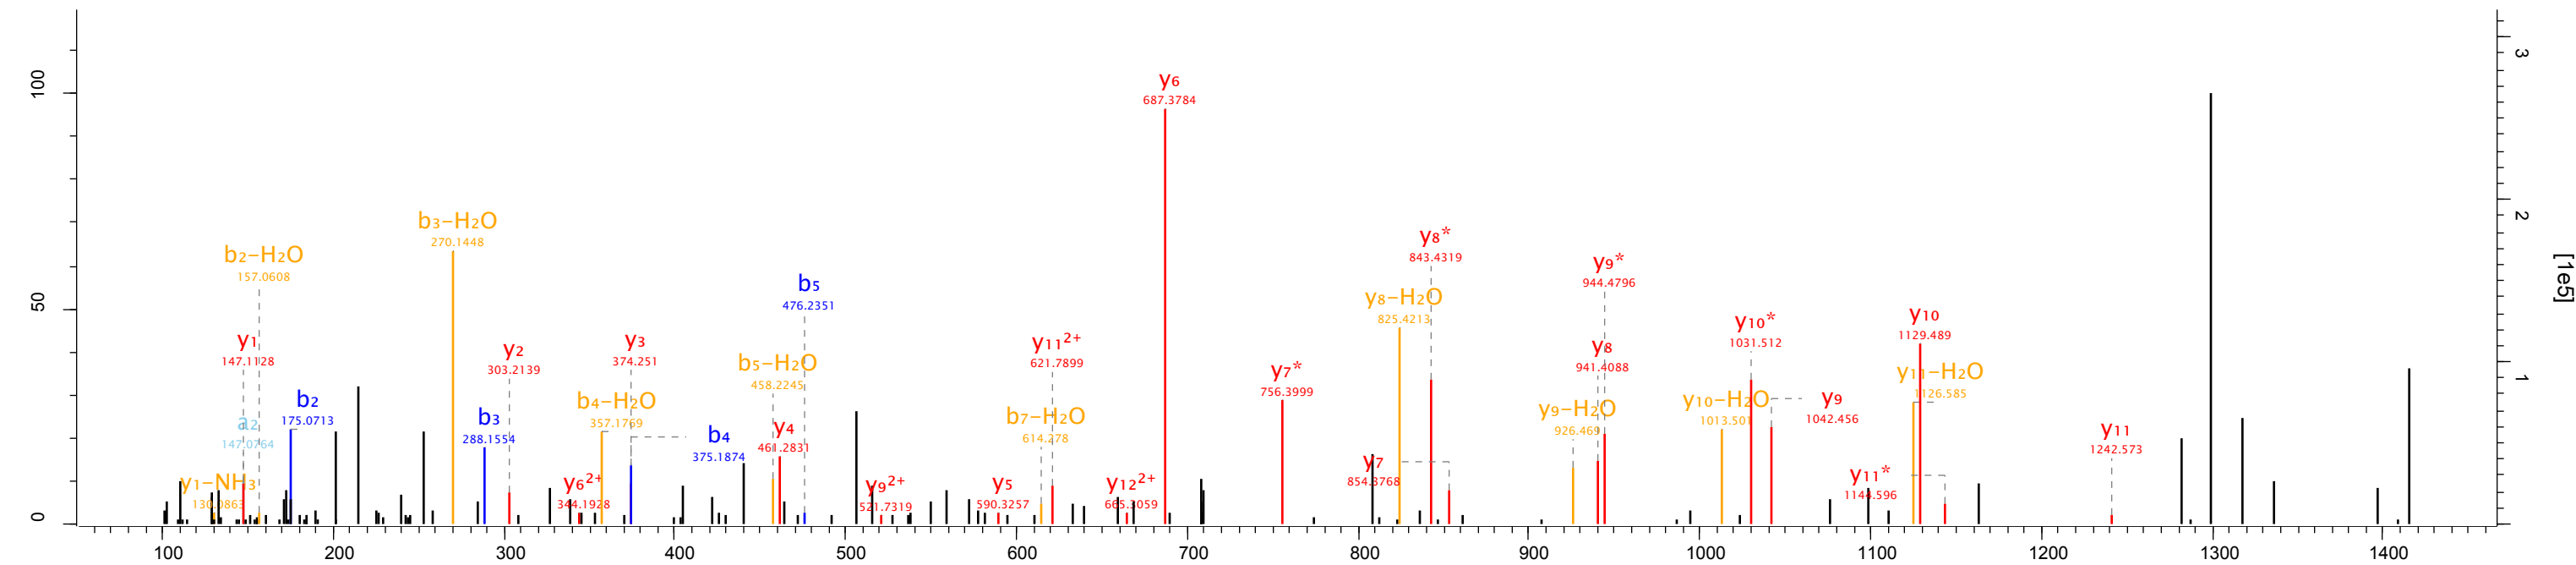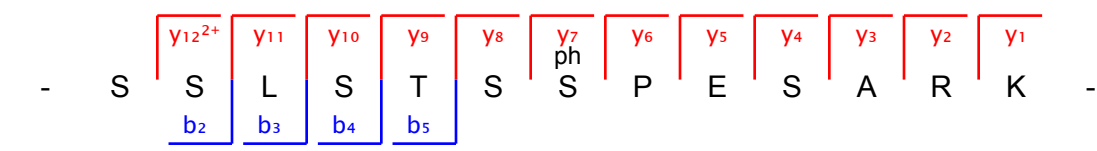

Raw file 20150814\_A375SR\_Phospho\_BR2\_07 Scan 3656 Method FTMS; HCD Score 78.85 m/z 666.8 Gene names TBC1D1

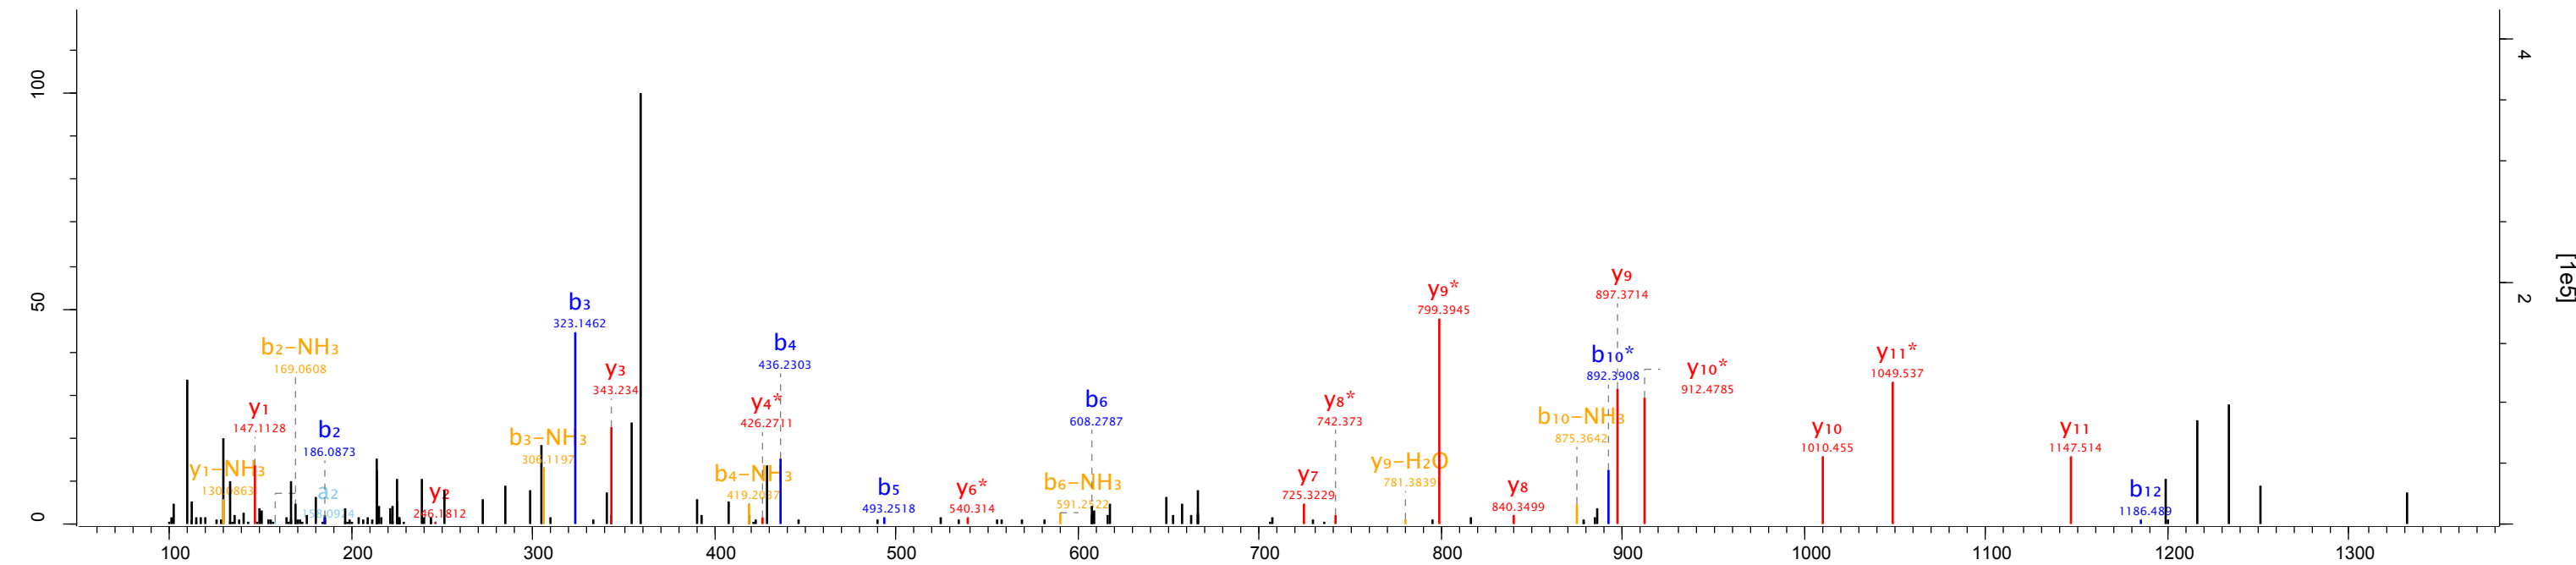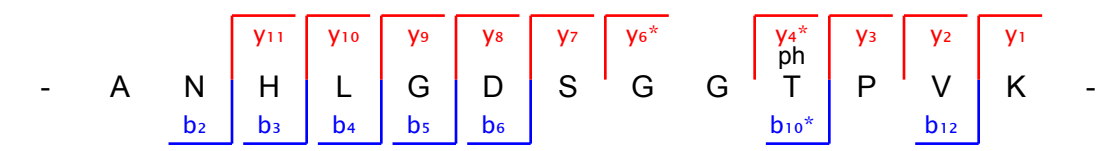

Raw file: 20150814\_A375SR\_Phospho\_BR2\_07  
 Scan: 4956 Method: FTMS; HCD Score: 51.09 m/z: 757.68 Gene names: EIF4B

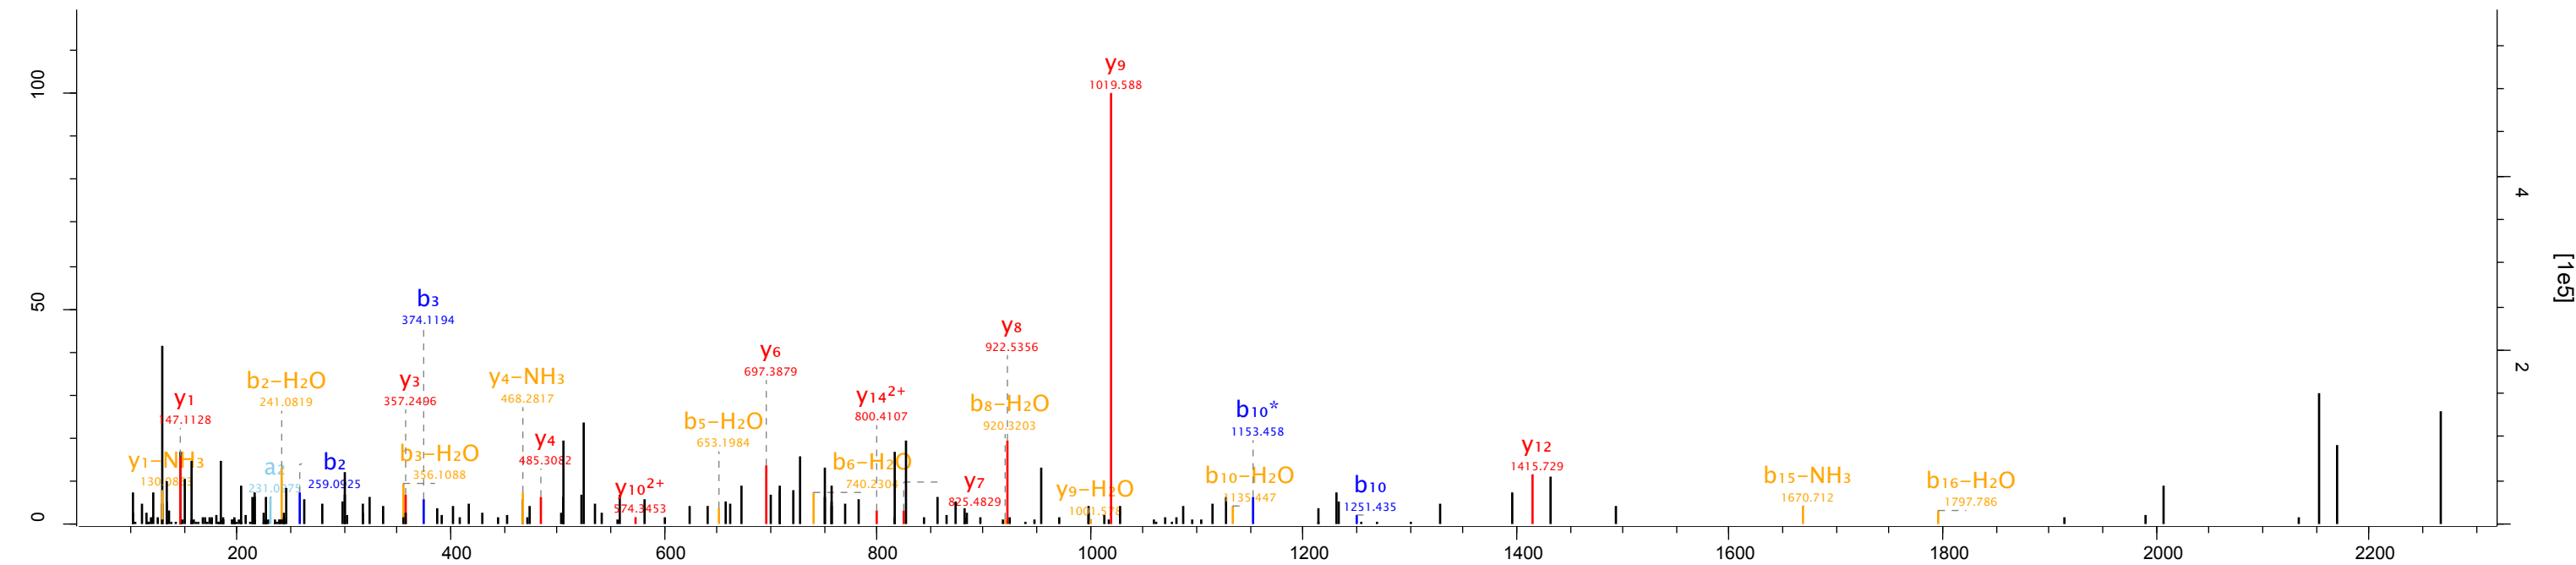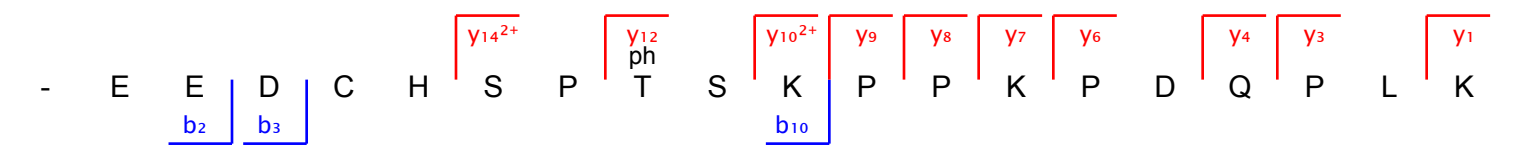



Raw file: 20150814\_A375SR\_Phospho\_BR2\_07  
 Scan: 6216 Method: FTMS; HCD Score: 95.07 m/z: 502.57 Gene names: CEP170

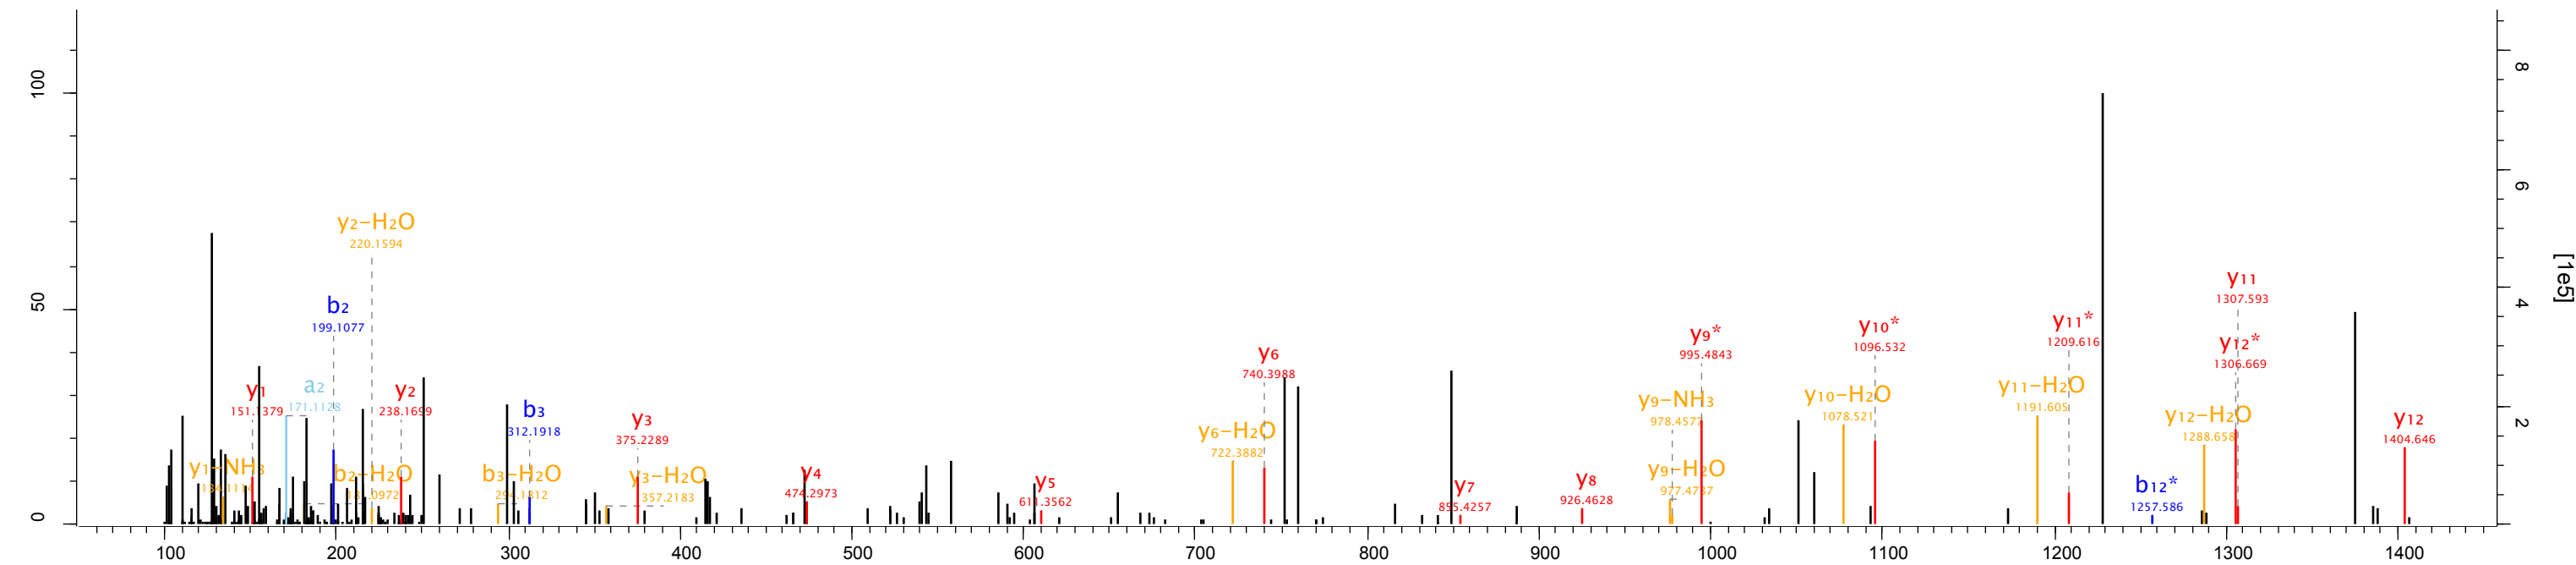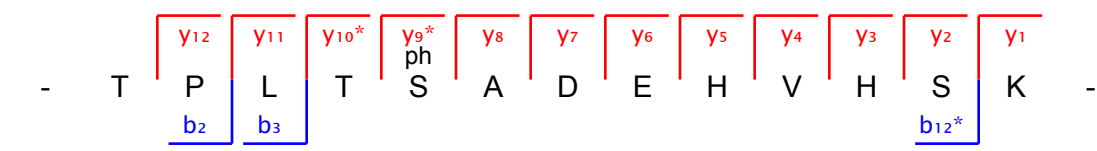

Raw file 20150814\_A375SR\_Phospho\_BR2\_07 Scan 9116 Method FTMS; HCD Score 96.46 m/z 641.82 Gene names STIM2

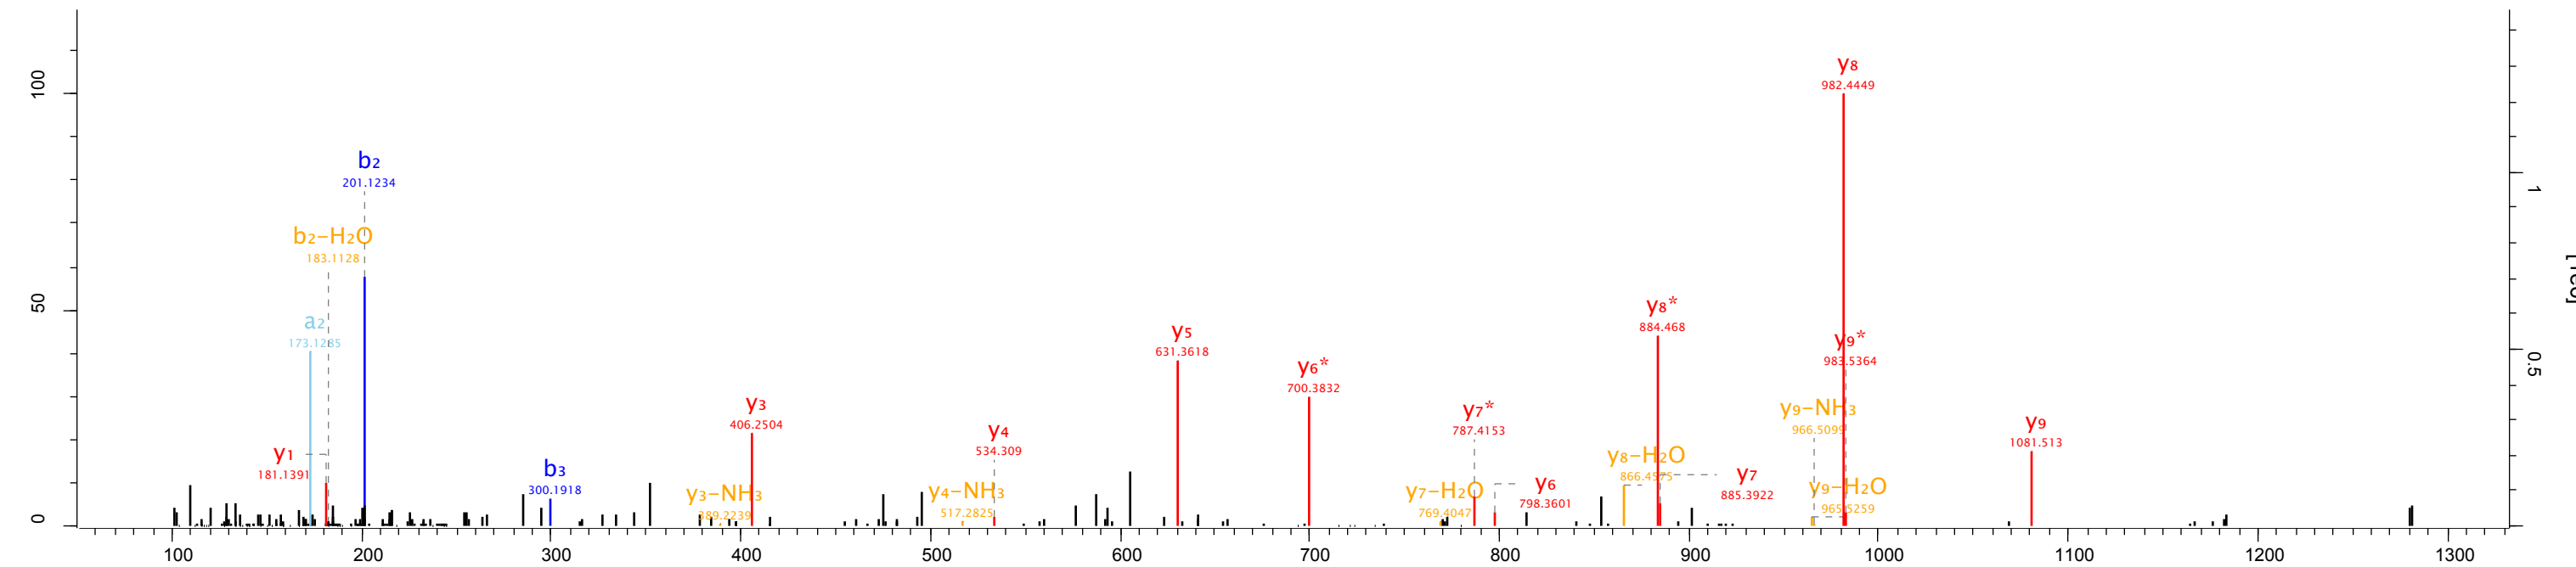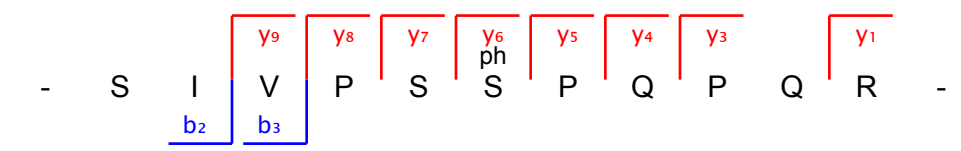

Raw file: 20150814\_A375SR\_Phospho\_BR2\_07  
 Scan: 9296 Method: FTMS; HCD Score: 231.93 m/z: 921.98 Gene names: MINK1

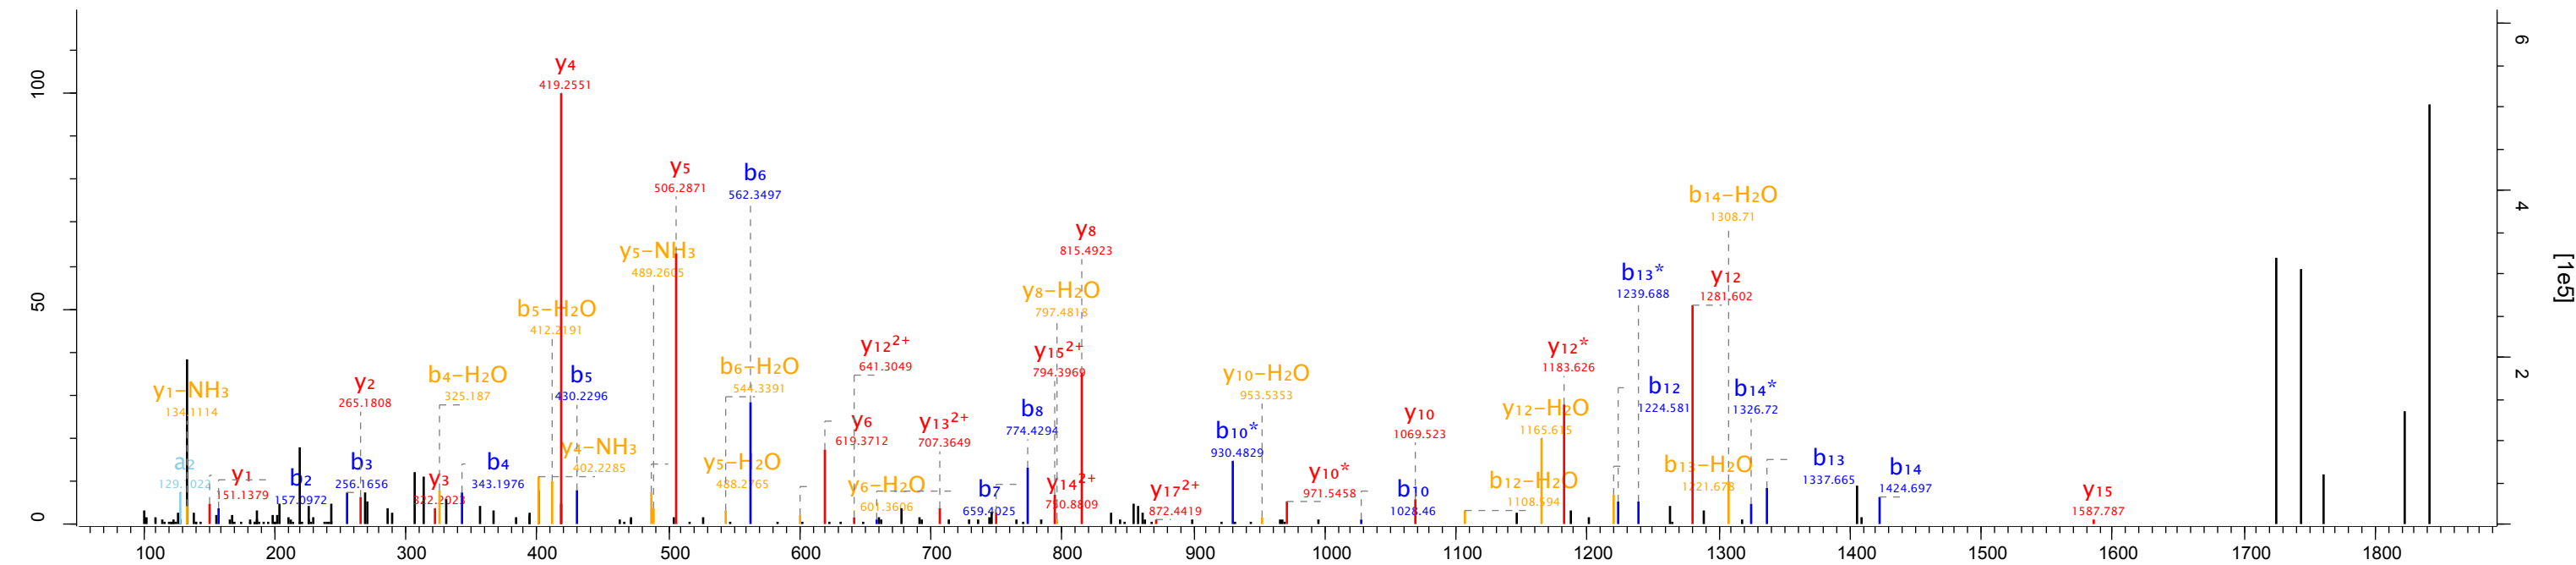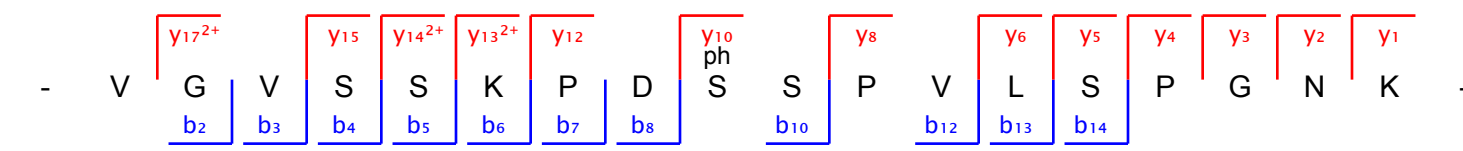

Raw file 20150814\_A375SR\_Phospho\_BR2\_08 Scan 10646 Method FTMS; HCD Score 134.98 m/z 508.24 Gene names NPM1

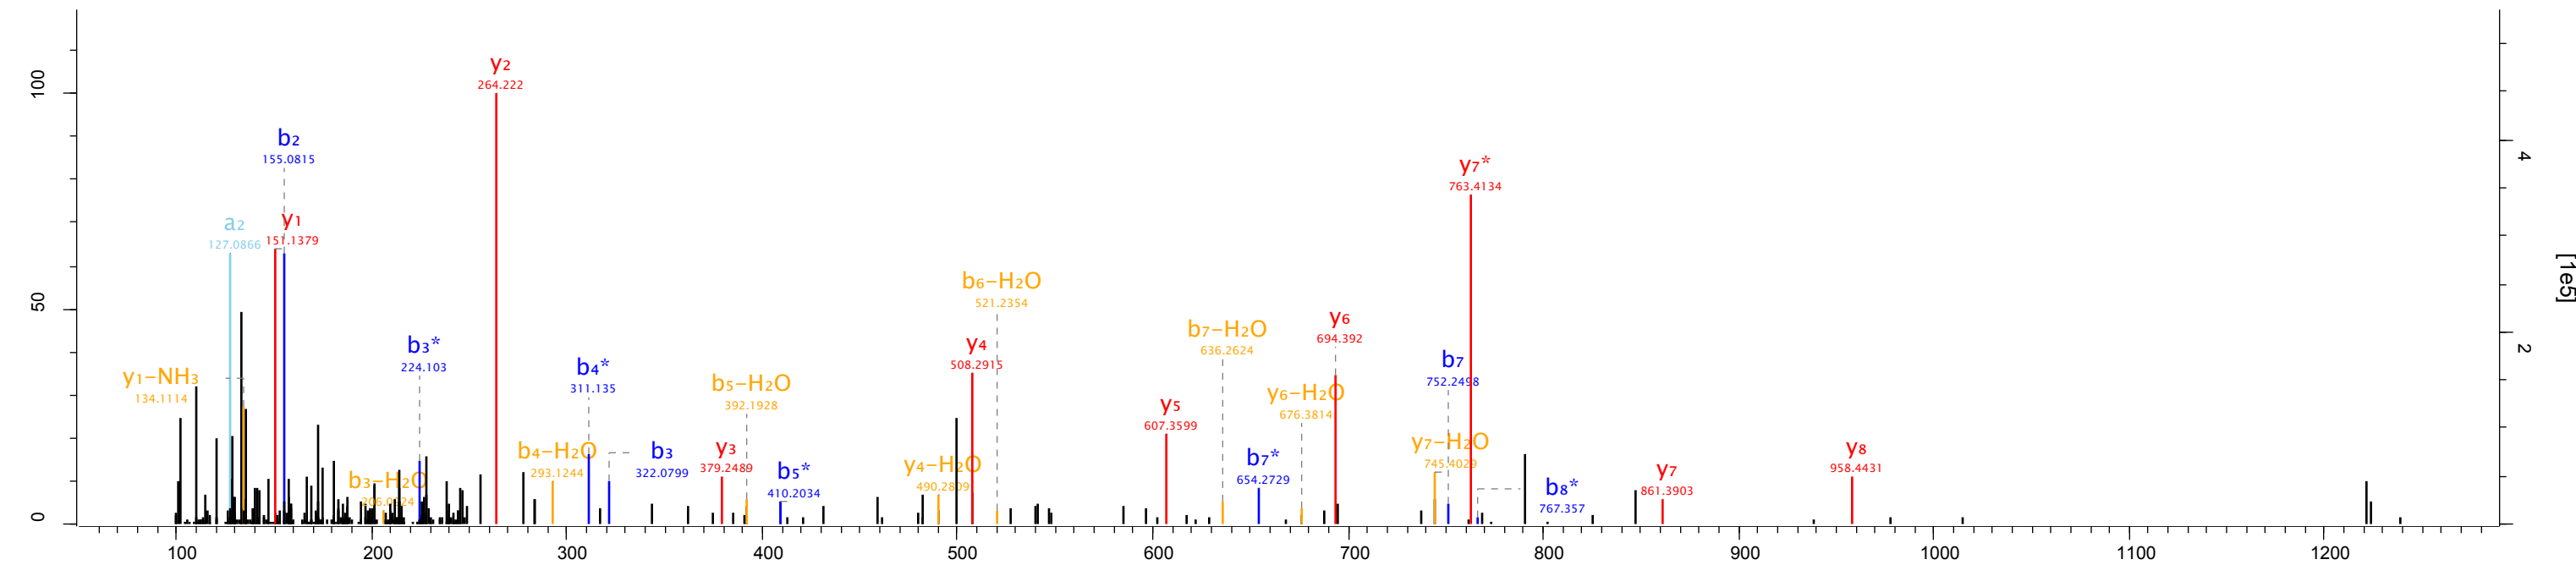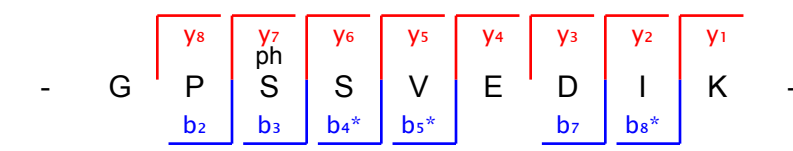

Raw file 20150814\_A375SR\_Phospho\_BR2\_08 Scan 11146 Method FTMS; HCD Score 175.39 m/z 872.36 Gene names FAM134A

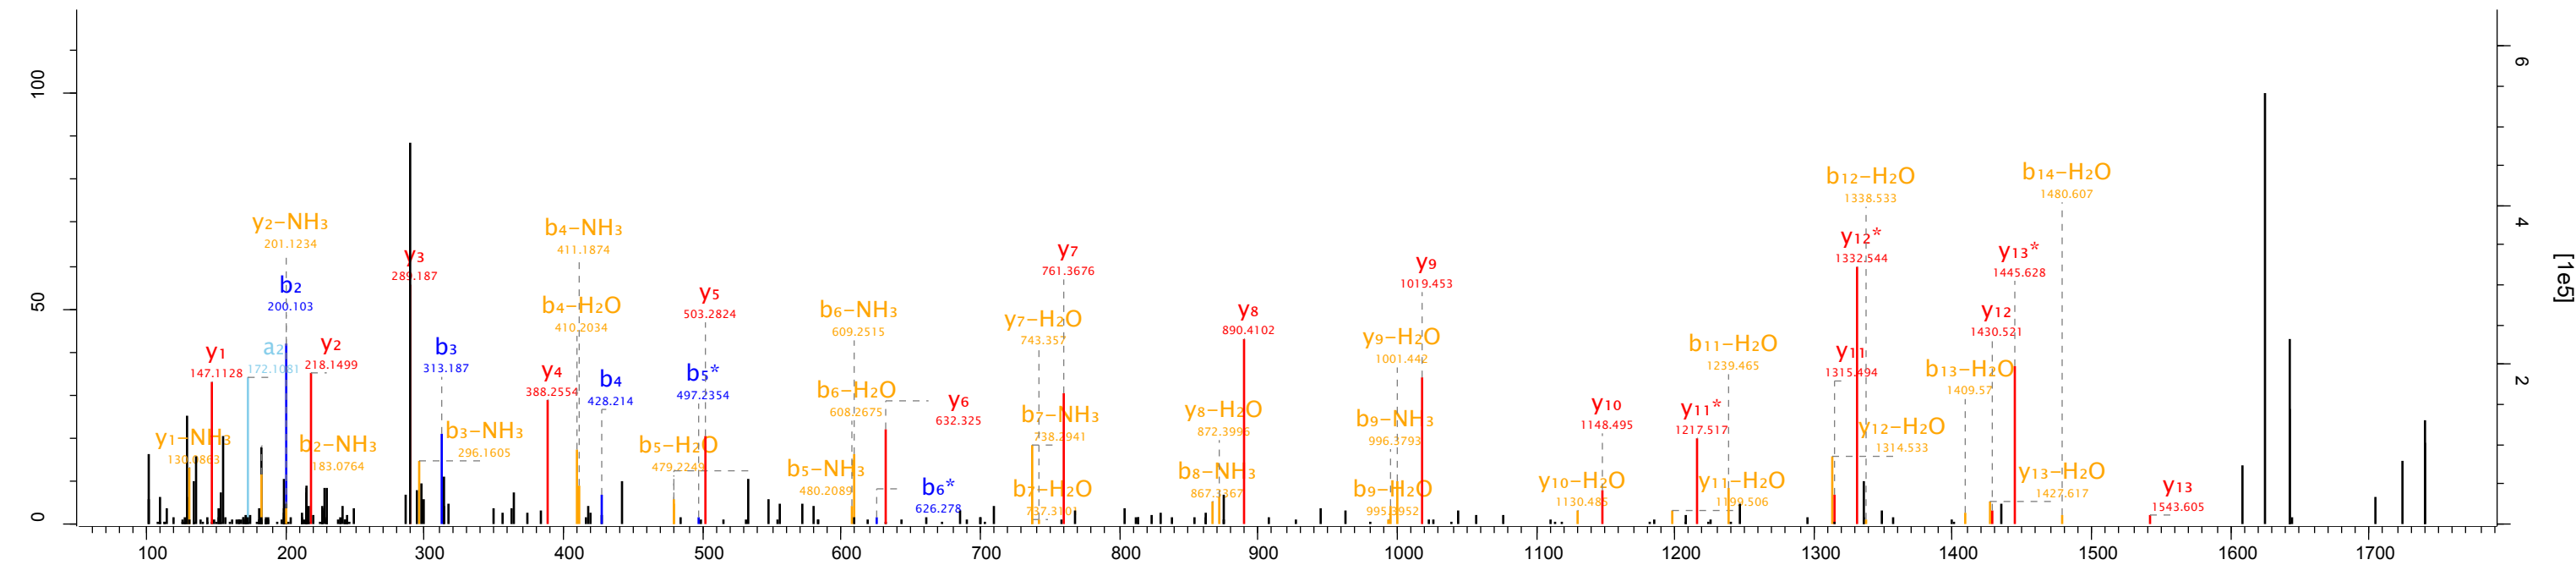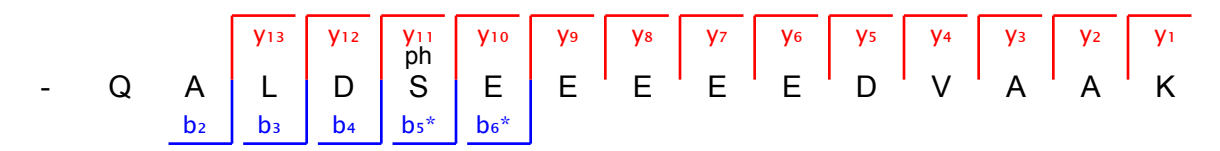

Raw file 20150814\_A375SR\_Phospho\_BR2\_08 Scan 12566 Method FTMS; HCD Score 135.09 m/z 857.91 Gene names EAF1

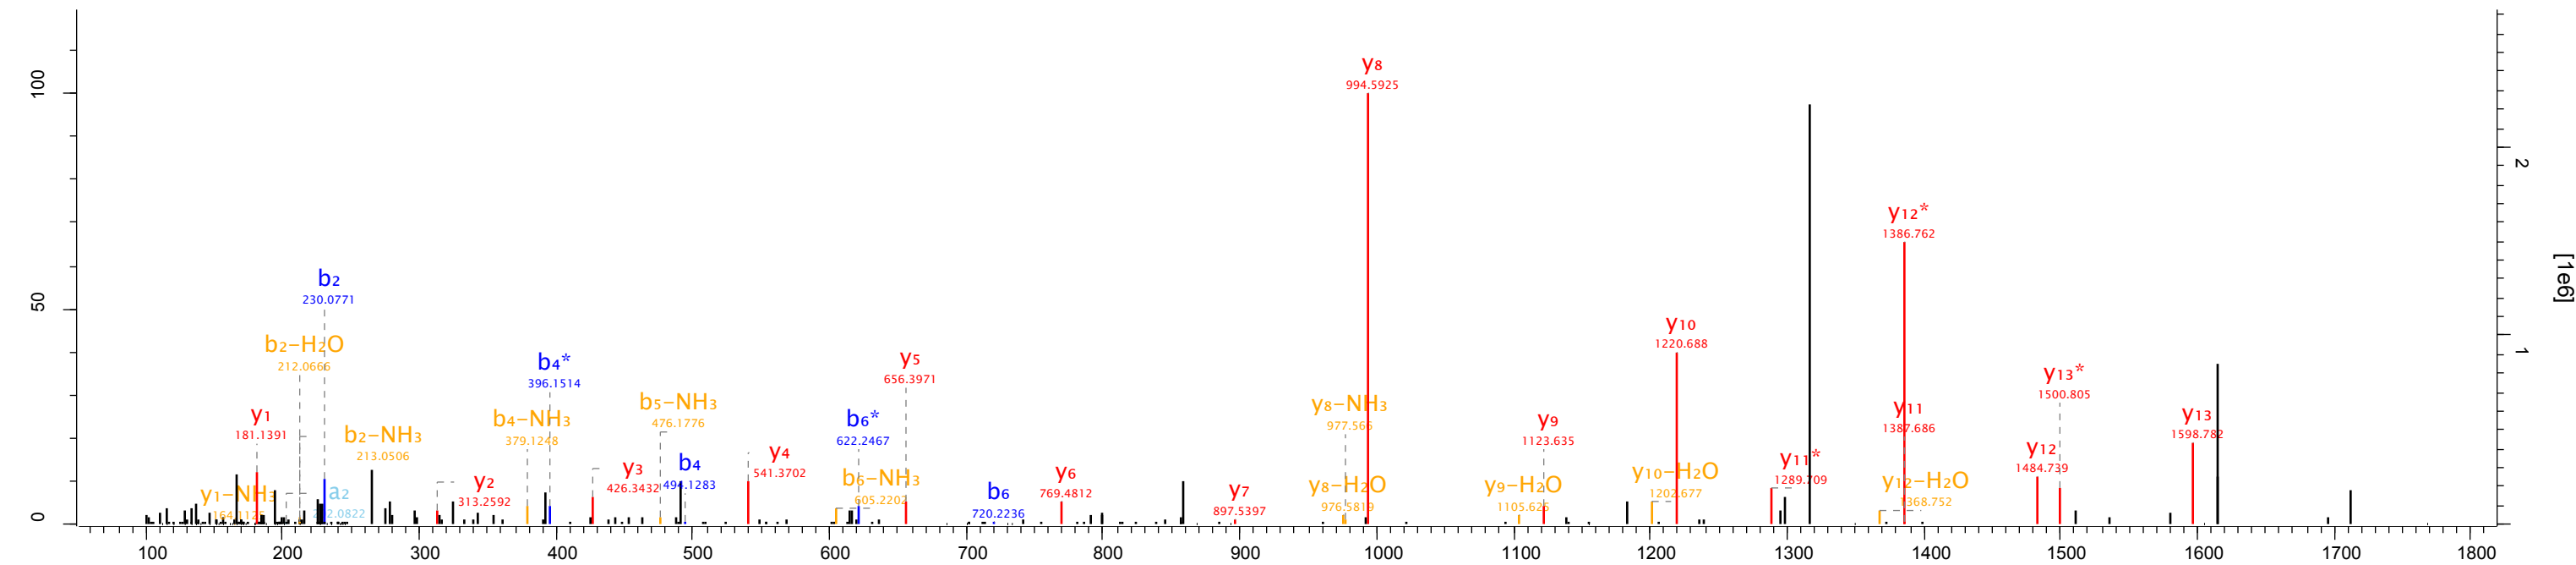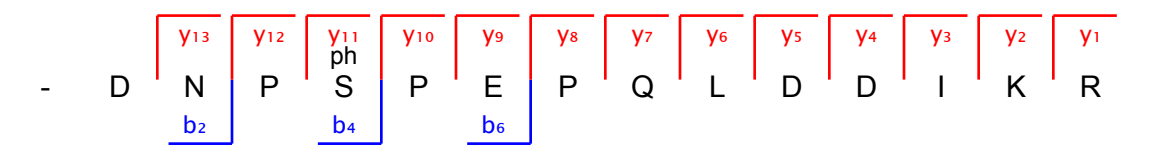

Raw file 20150814\_A375SR\_Phospho\_BR2\_08 Scan 12726 Method FTMS; HCD Score 81.36 m/z 779.39 Gene names ASPSCR1

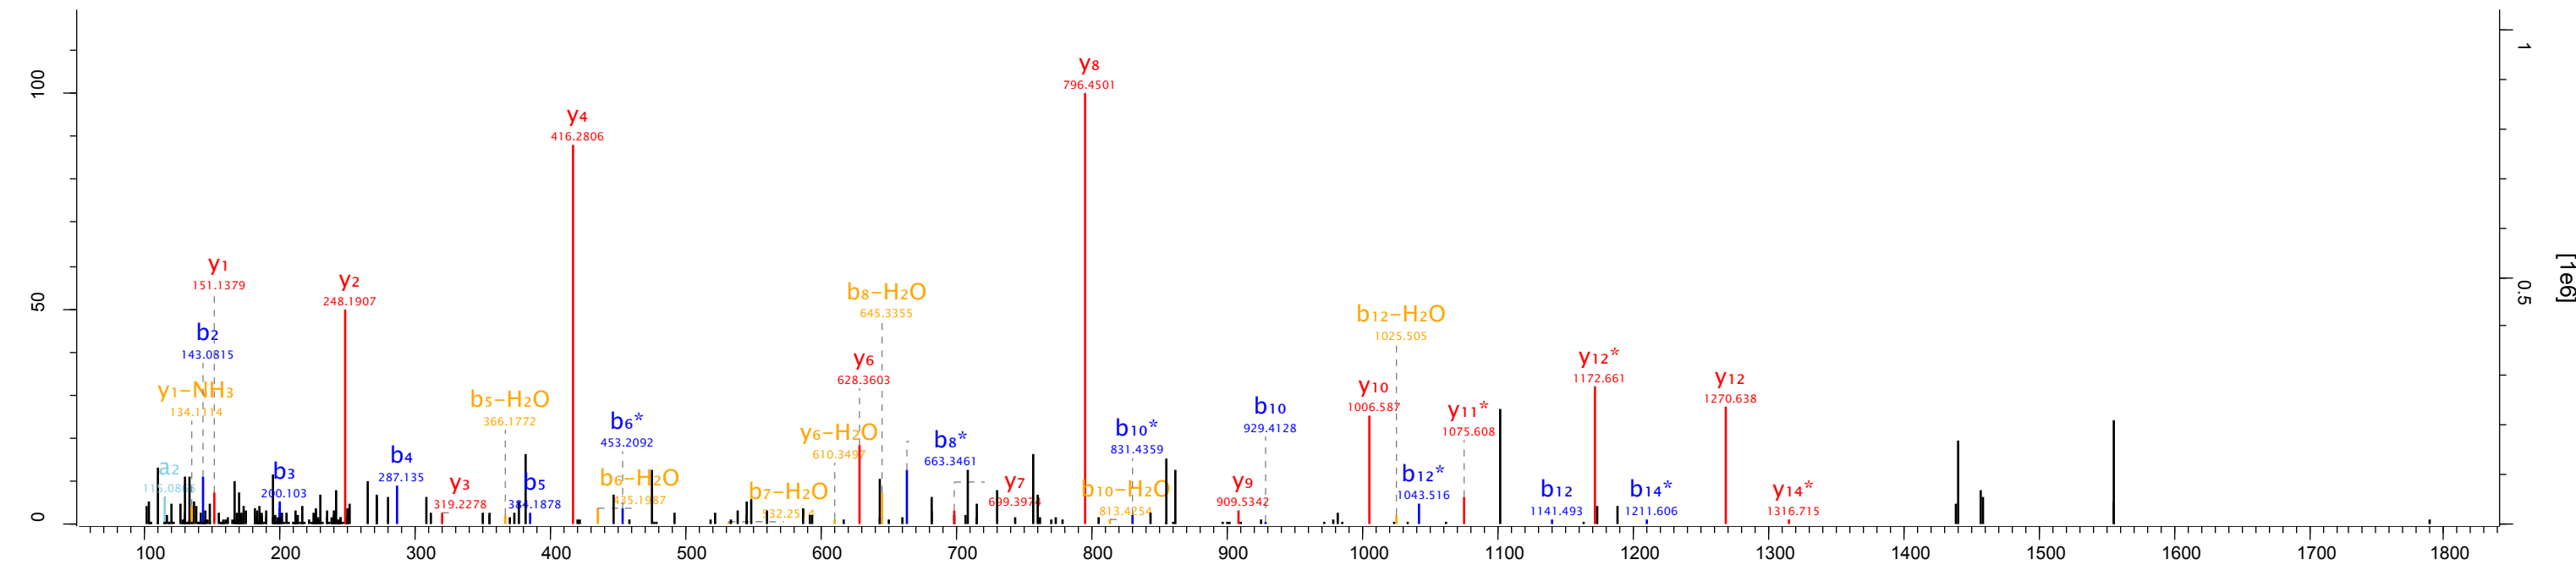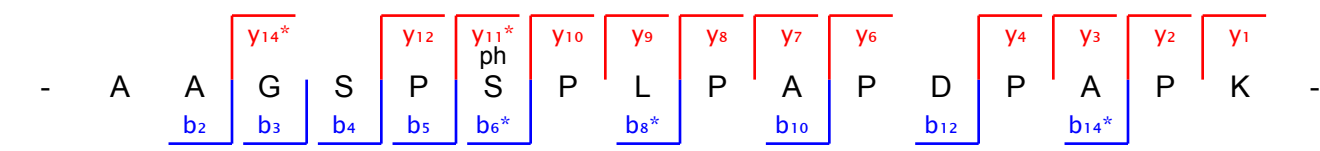

Raw file 20150814\_A375SR\_Phospho\_BR2\_08 Scan 13666 Method FTMS; HCD Score 196.11 m/z 918.42 Gene names PLEC

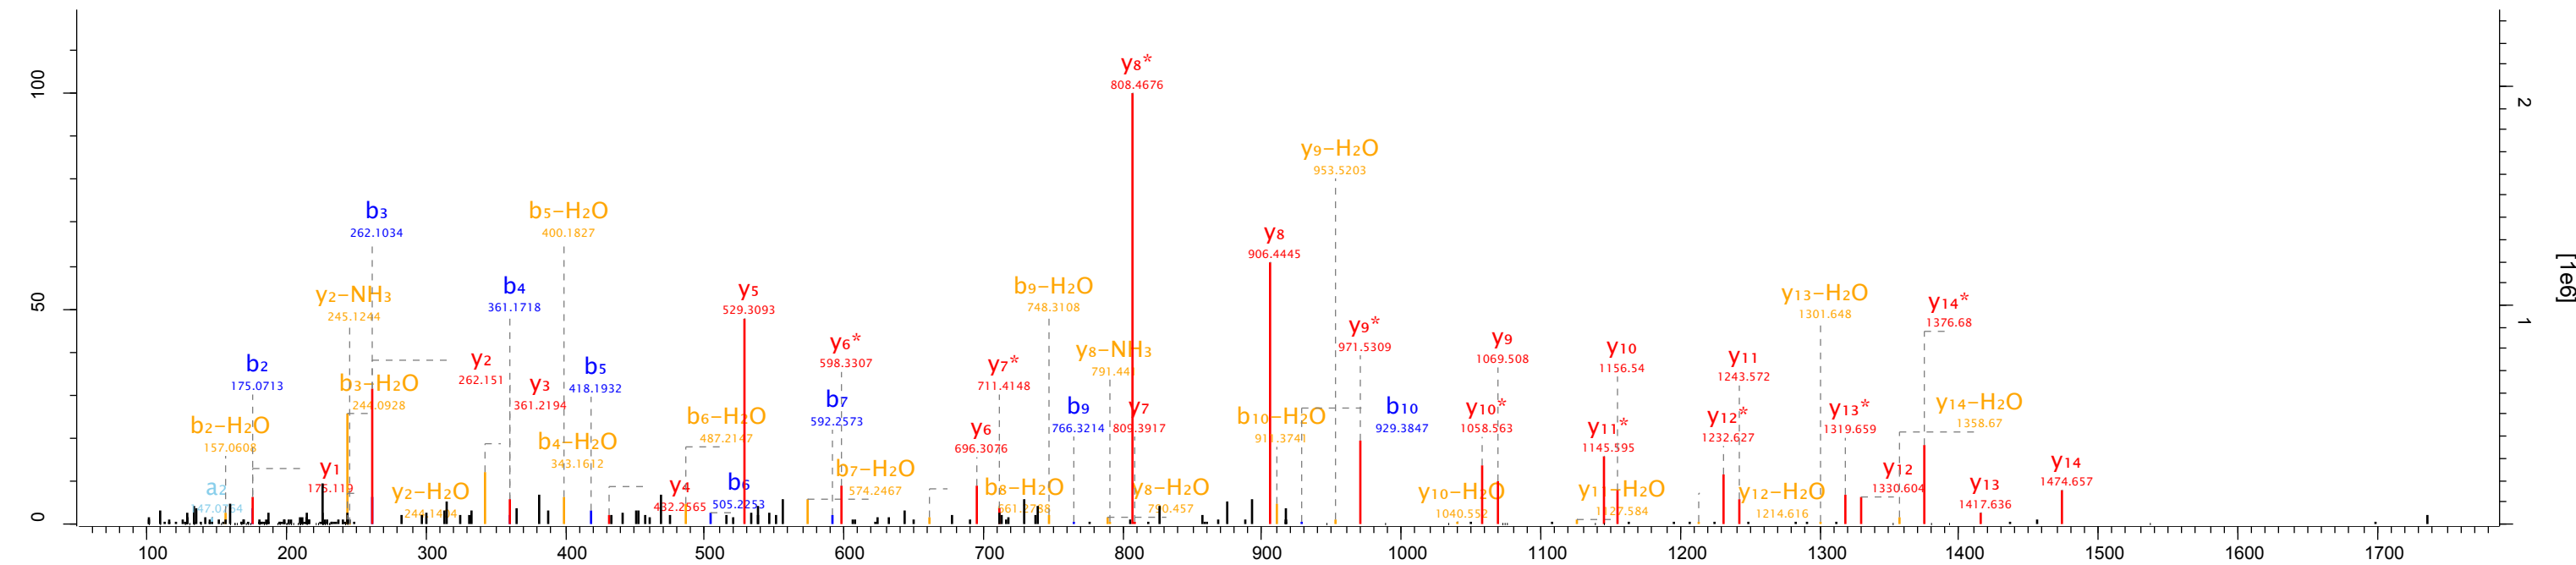

- S S S V G S S S S S Y P I S P A V S R -

Fragmentation mapping (b and y ions):

- b<sub>2</sub> (S)
- b<sub>3</sub> (S)
- b<sub>4</sub> (V)
- b<sub>5</sub> (G)
- b<sub>6</sub> (S)
- b<sub>7</sub> (S)
- b<sub>9</sub> (S)
- b<sub>10</sub> (Y)
- y<sub>1</sub> (R)
- y<sub>2</sub> (S)
- y<sub>3</sub> (V)
- y<sub>4</sub> (A)
- y<sub>5</sub> (P)
- y<sub>6</sub> (S)
- y<sub>7</sub> (I)
- y<sub>8</sub> (P)
- y<sub>9</sub> (Y)
- y<sub>10</sub> (S)
- y<sub>11</sub> (S)
- y<sub>12</sub> (S)
- y<sub>13</sub> (S)
- y<sub>14</sub> (G)



Raw file: 20150814\_A375SR\_Phospho\_BR2\_08  
 Scan: 13776 Method: FTMS; HCD Score: 96.82 m/z: 558.24 Gene names: FAF1

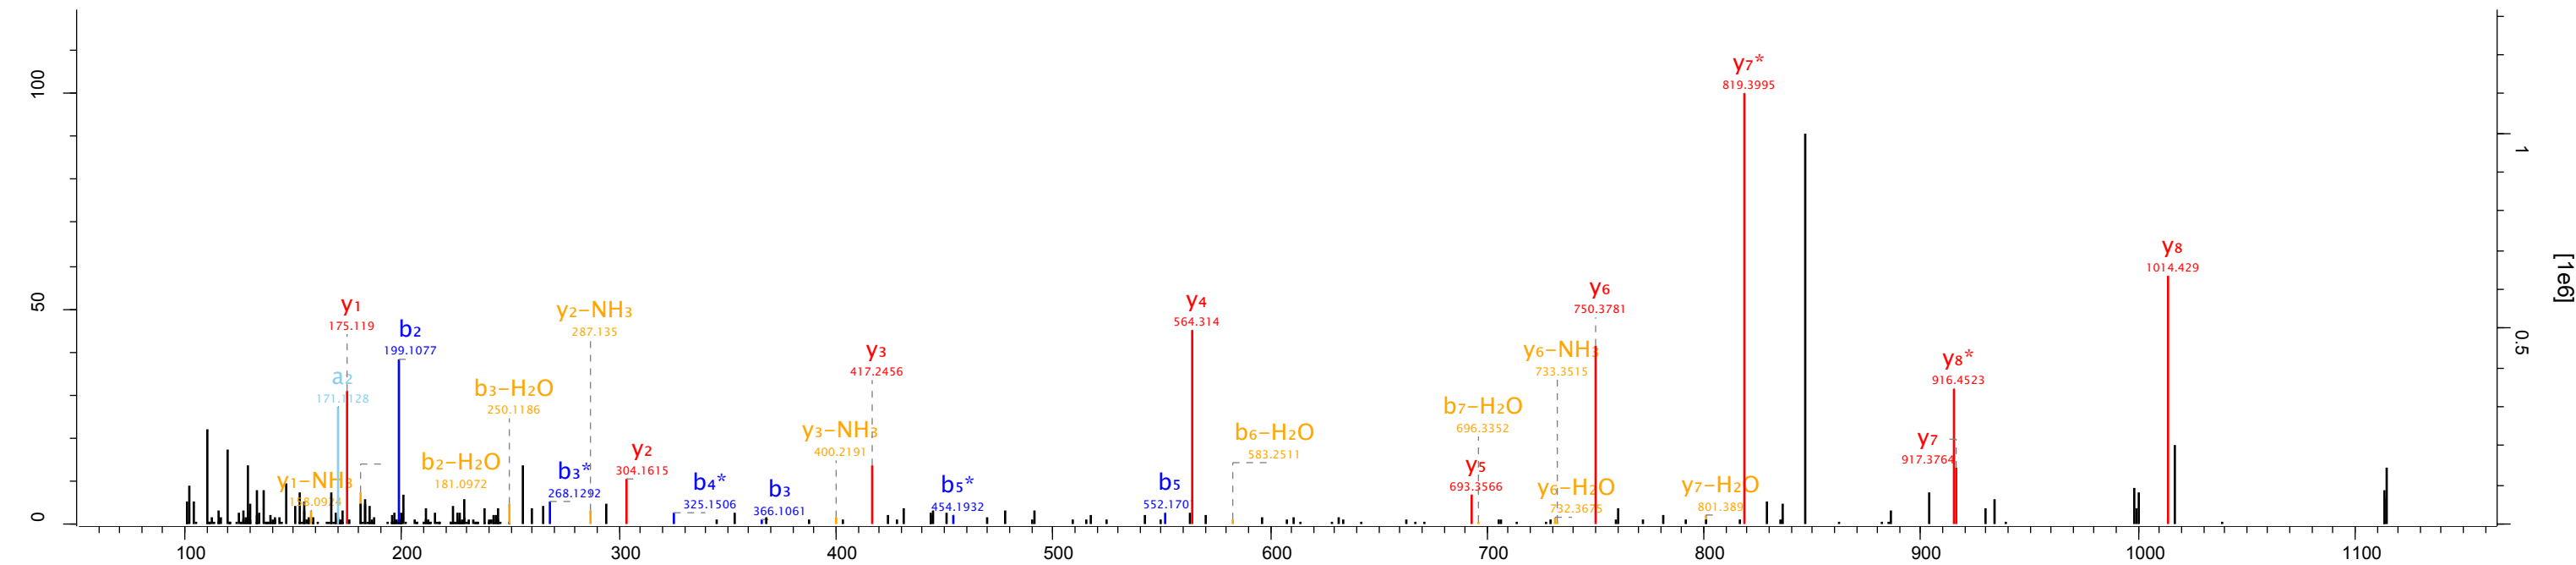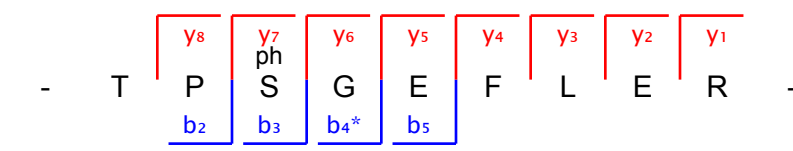

Raw file: 20150814\_A375SR\_Phospho\_BR2\_08  
 Scan: 13926 Method: FTMS; HCD Score: 54.25 m/z: 791.37 Gene names: FUBP3

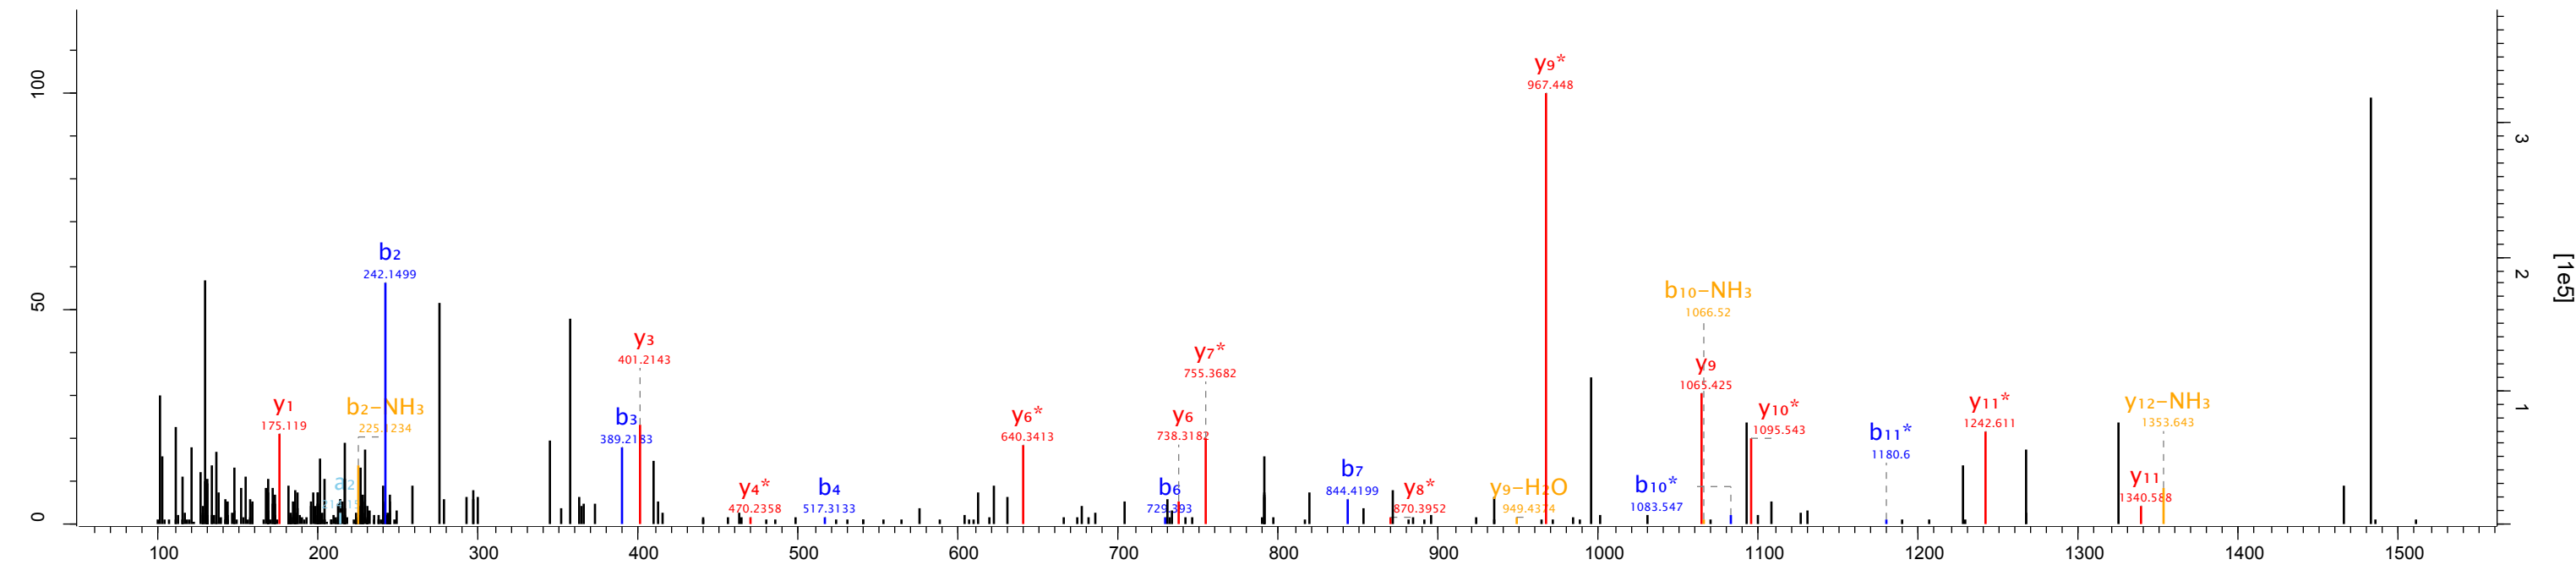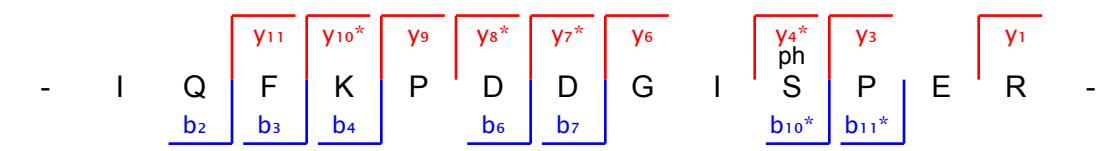

Raw file: 20150814\_A375SR\_Phospho\_BR2\_08  
 Scan: 16816 Method: FTMS; HCD Score: 140.57 m/z: 1093.51 Gene names: GATAD2B

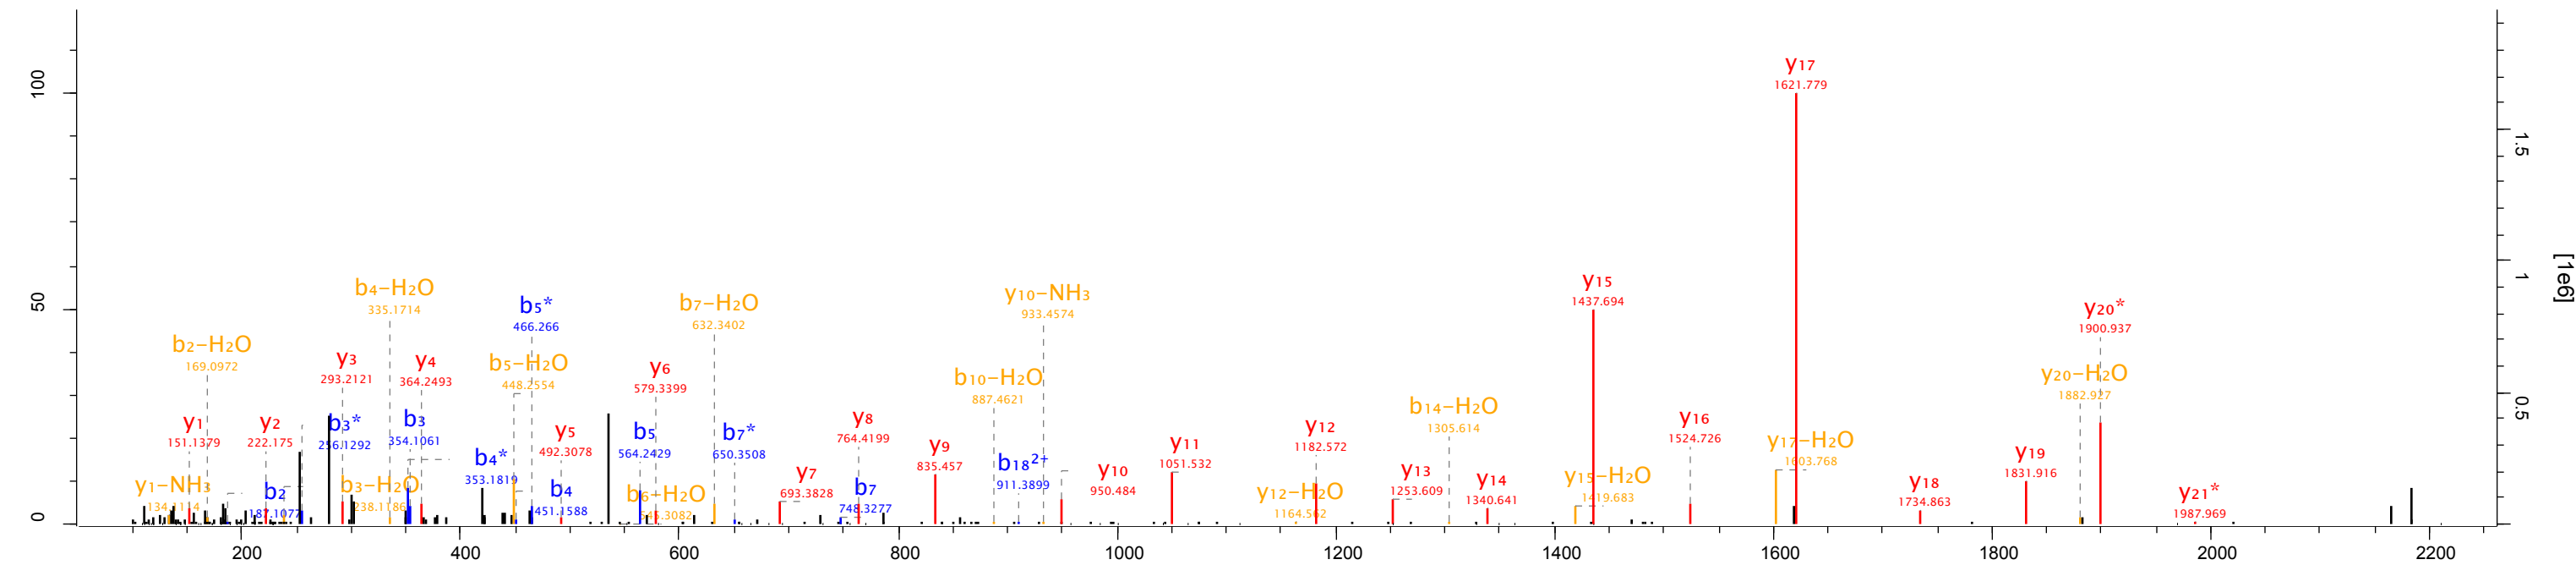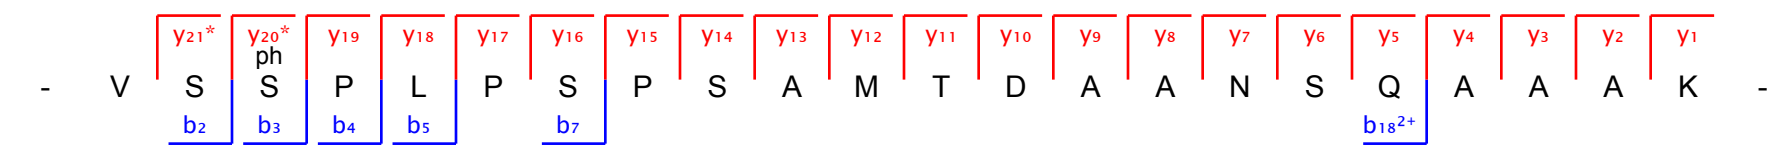

Raw file 20150814\_A375SR\_Phospho\_BR2\_08 Scan 17216 Method FTMS; HCD Score 276.2 m/z 833.68 Gene names MXRA7

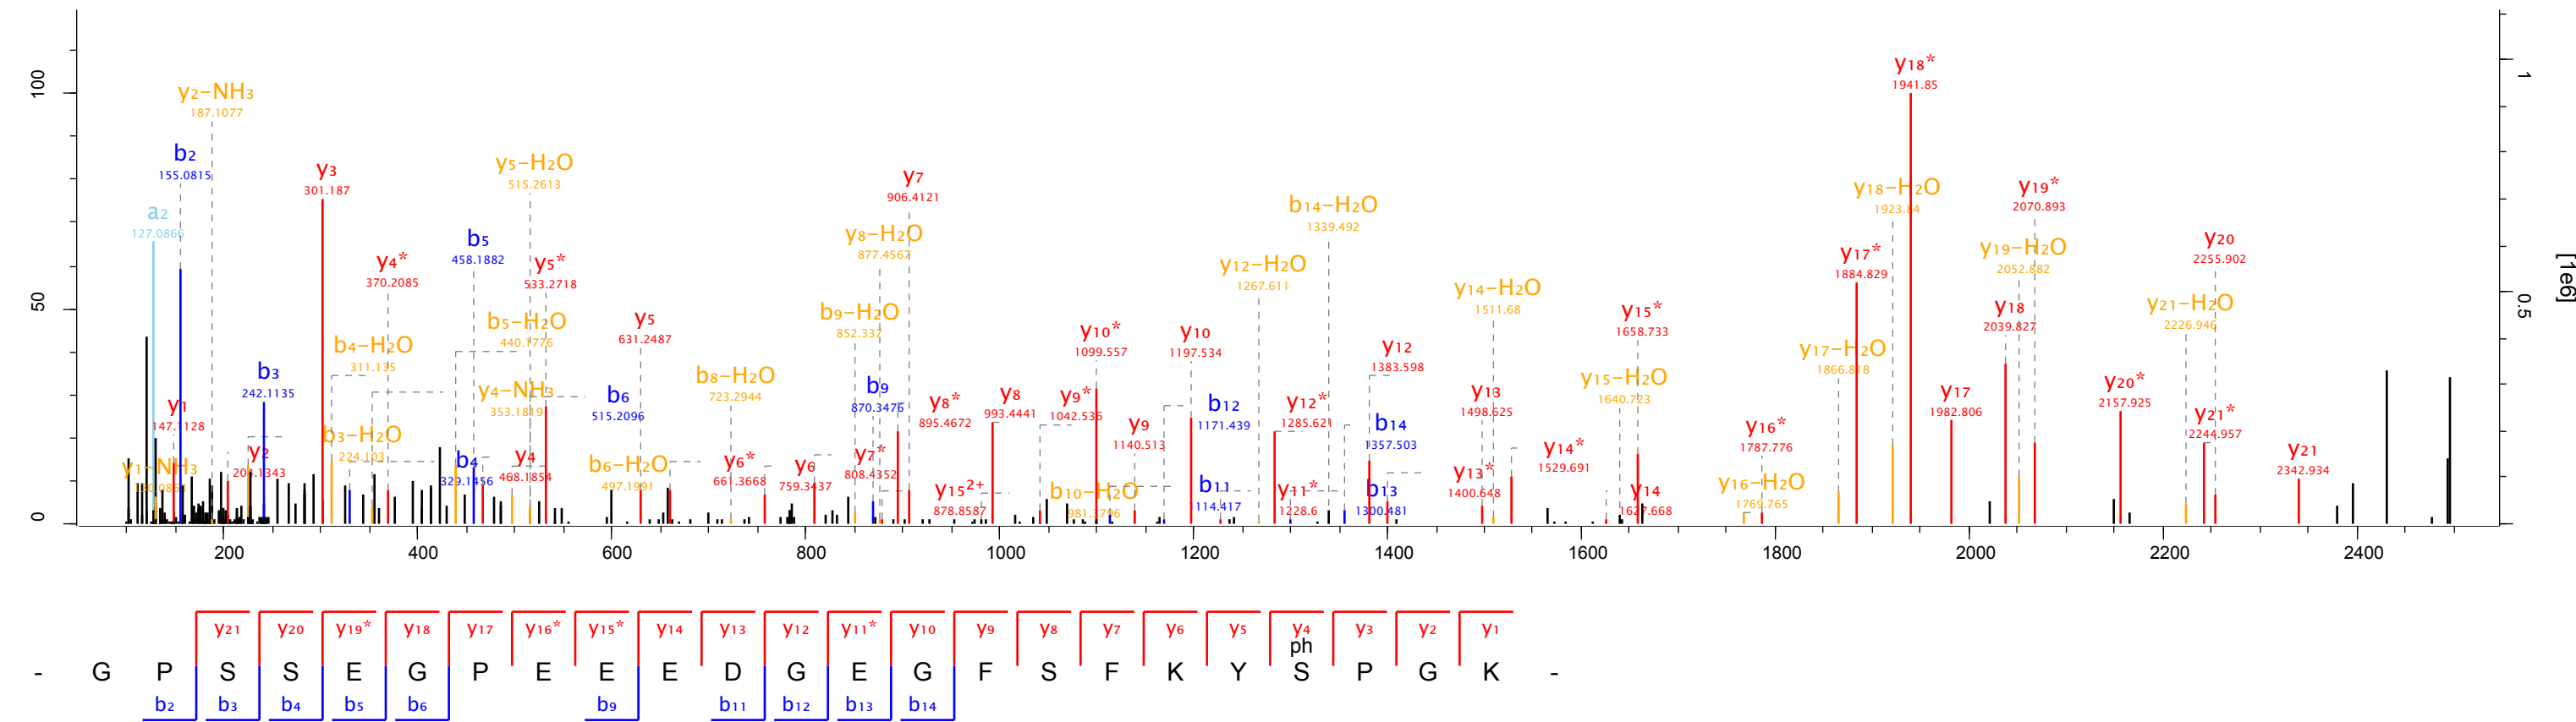

Raw file: 20150814\_A375SR\_Phospho\_BR2\_08  
 Scan: 17496 Method: FTMS; HCD Score: 76.16 m/z: 800.75 Gene names: FAM208B

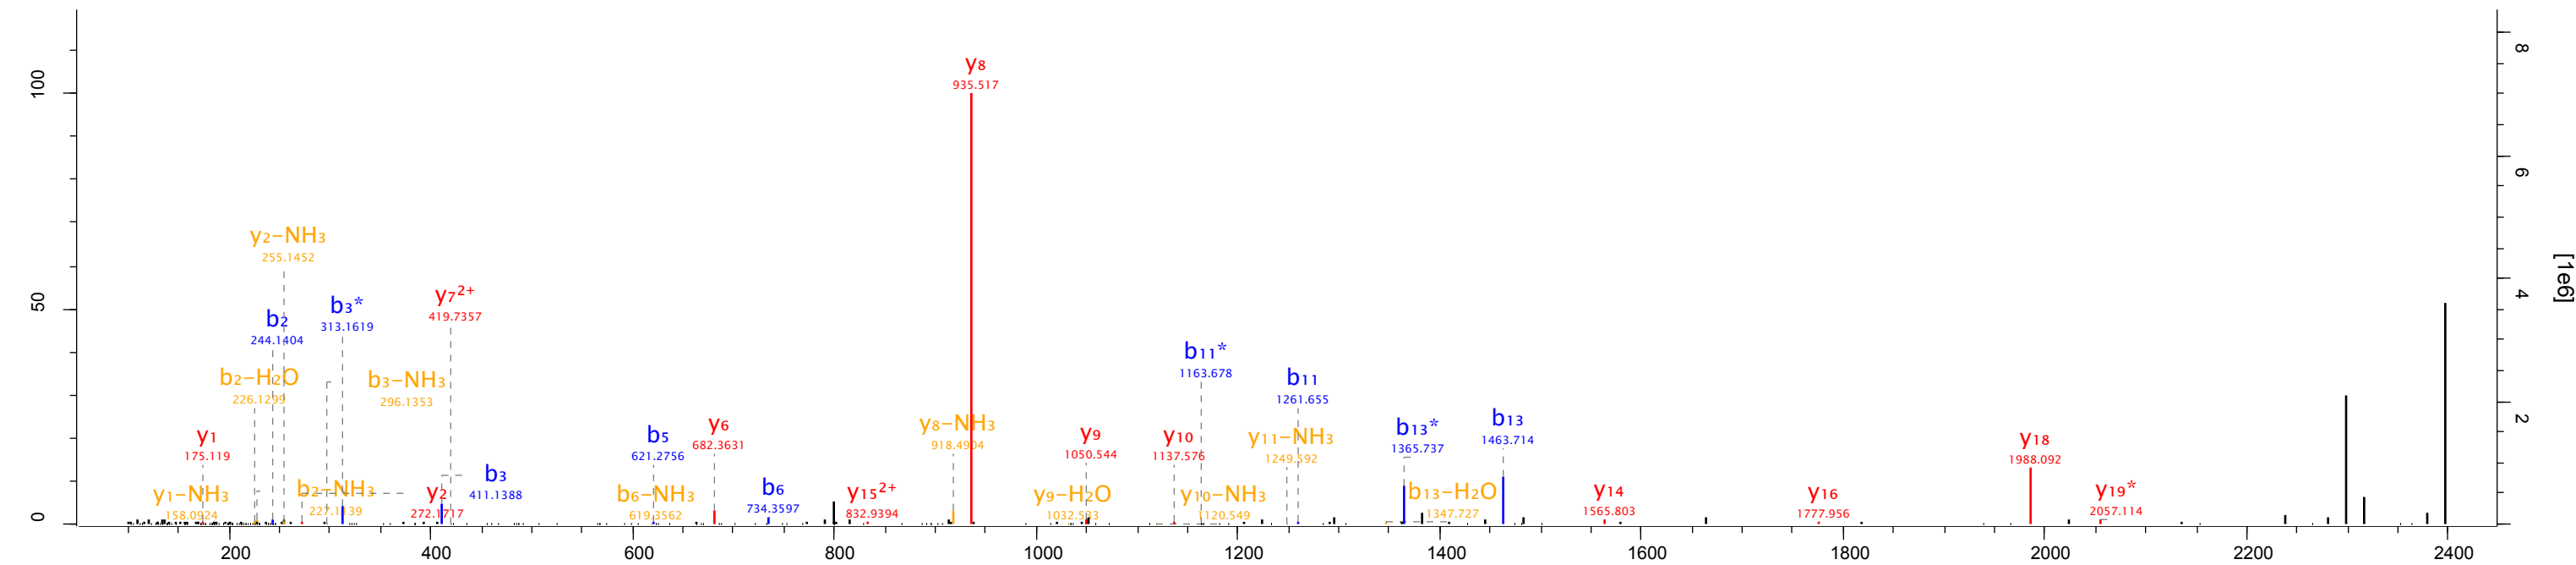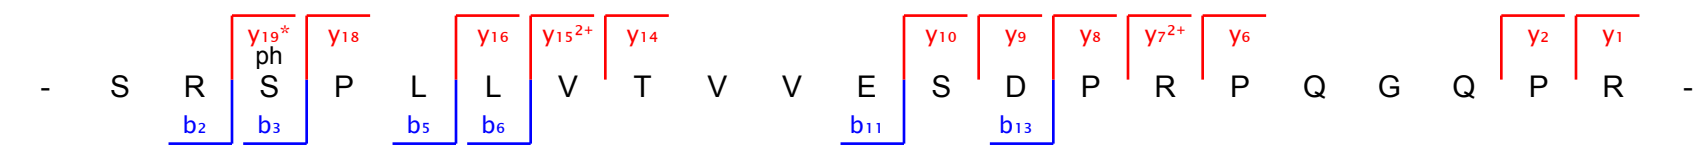

Raw file: 20150814\_A375SR\_Phospho\_BR2\_08  
 Scan: 17536 Method: FTMS; HCD Score: 158.76 m/z: 433.23 Gene names: MAP1S

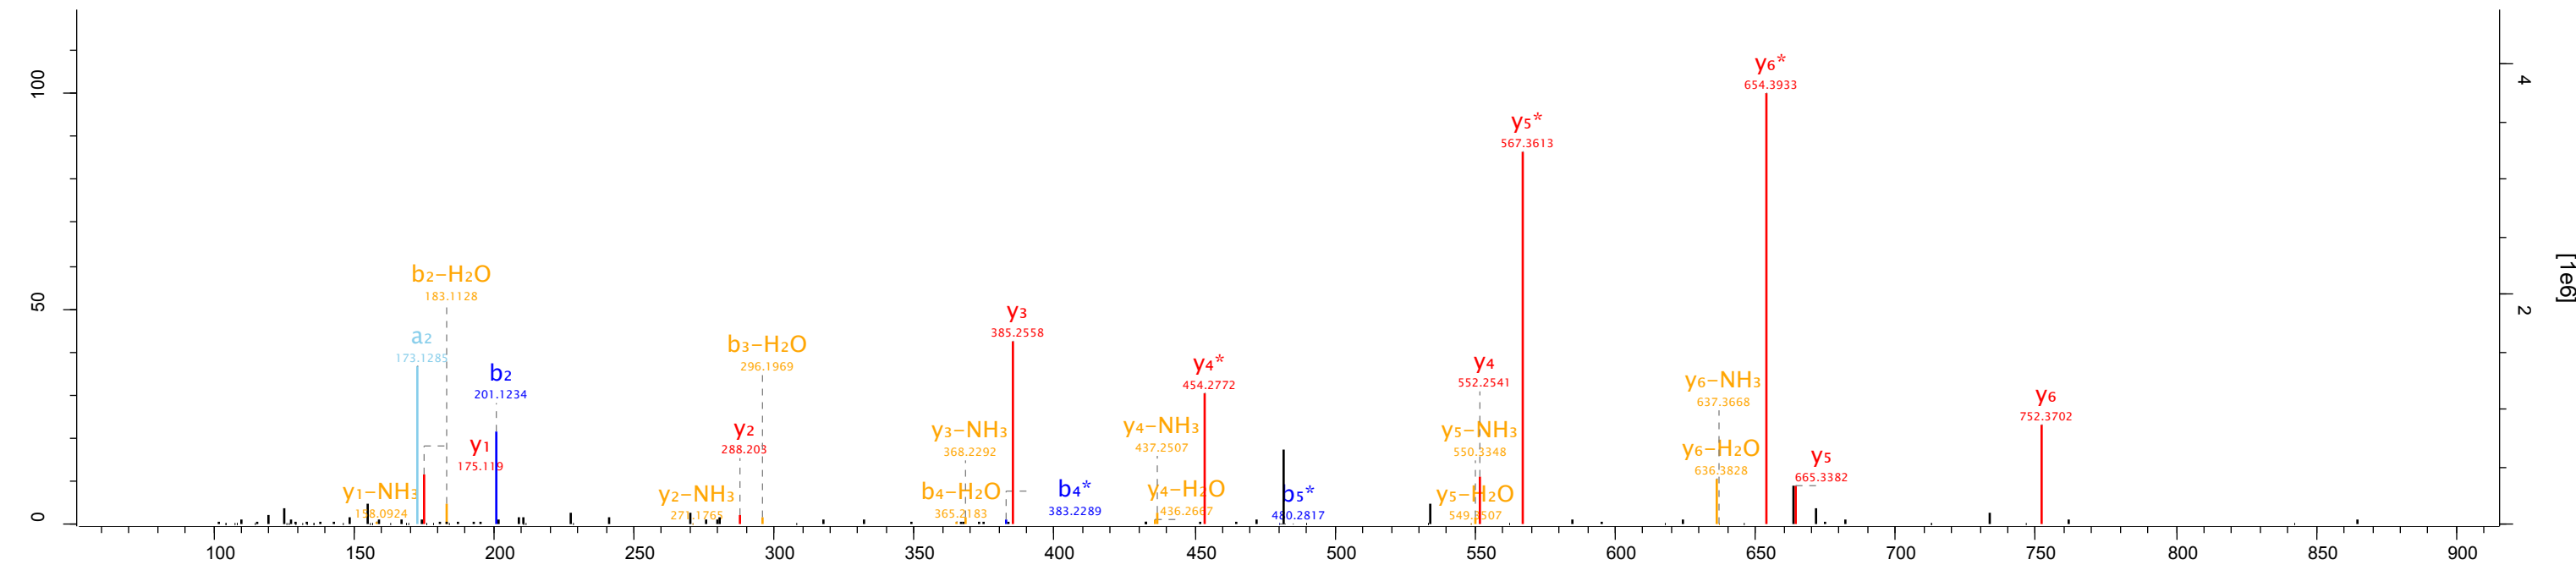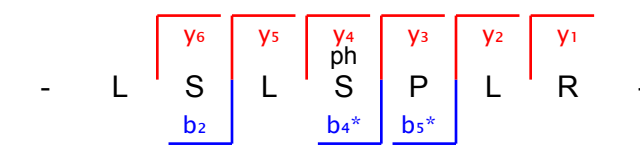

Raw file: 20150814\_A375SR\_Phospho\_BR2\_08  
 Scan: 17606 Method: FTMS; HCD Score: 164.28 m/z: 950.4 Gene names: PHF6

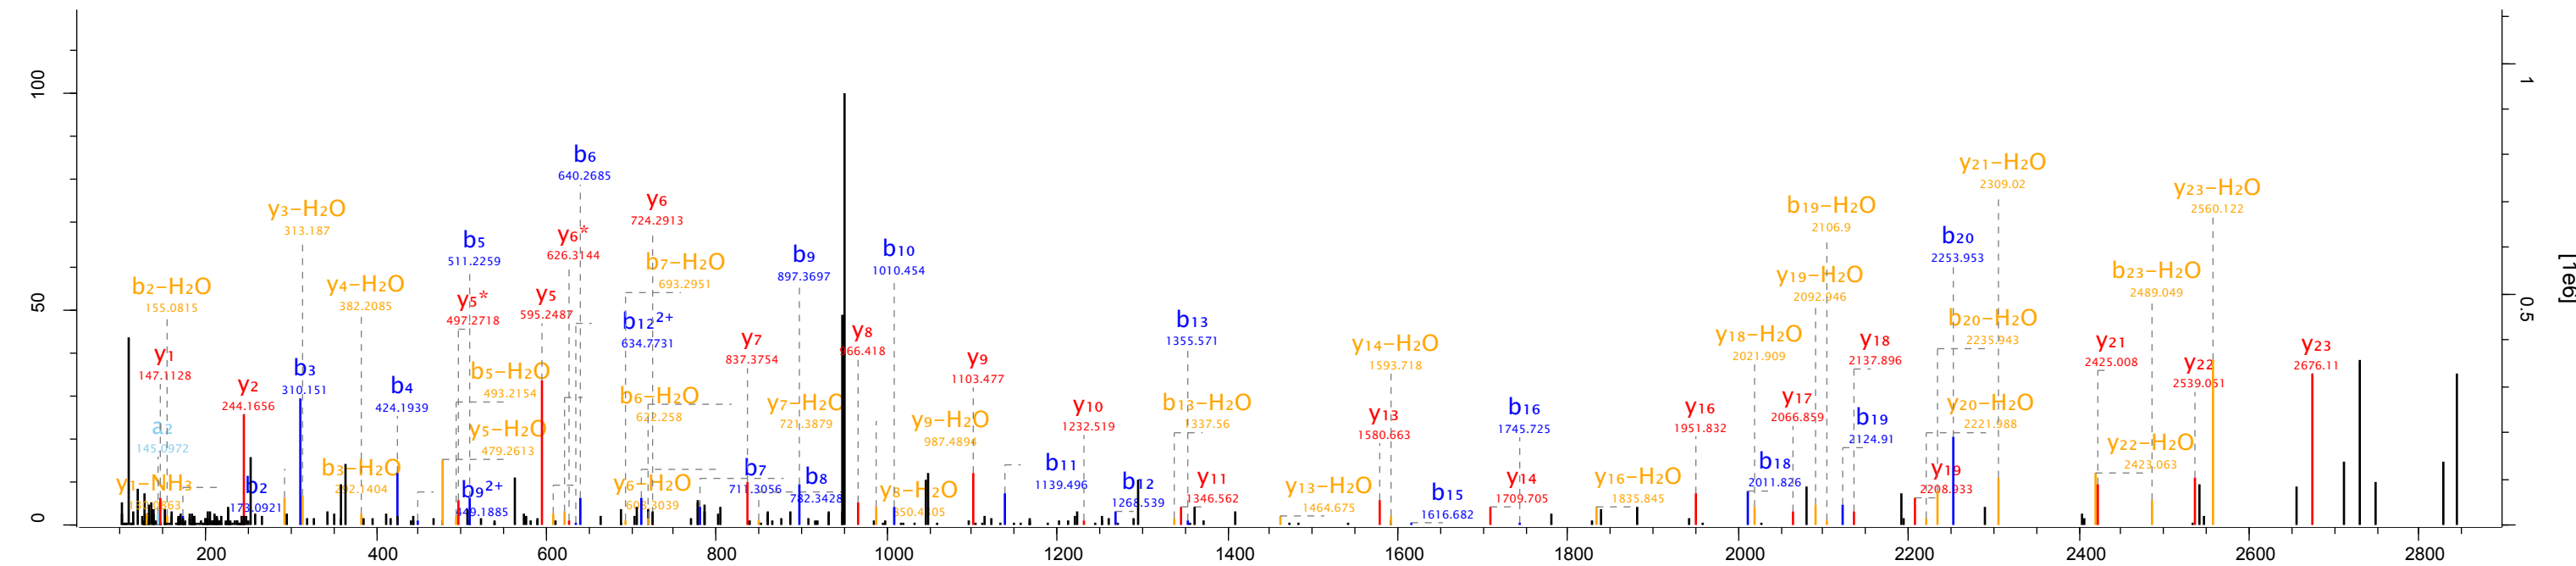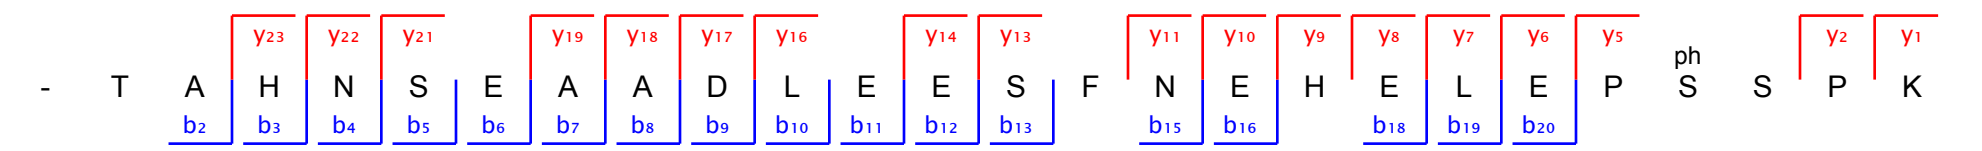

Raw file 20150814\_A375SR\_Phospho\_BR2\_08 Scan 19346 Method FTMS; HCD Score 99.97 m/z 1000.77 Gene names PRKACA

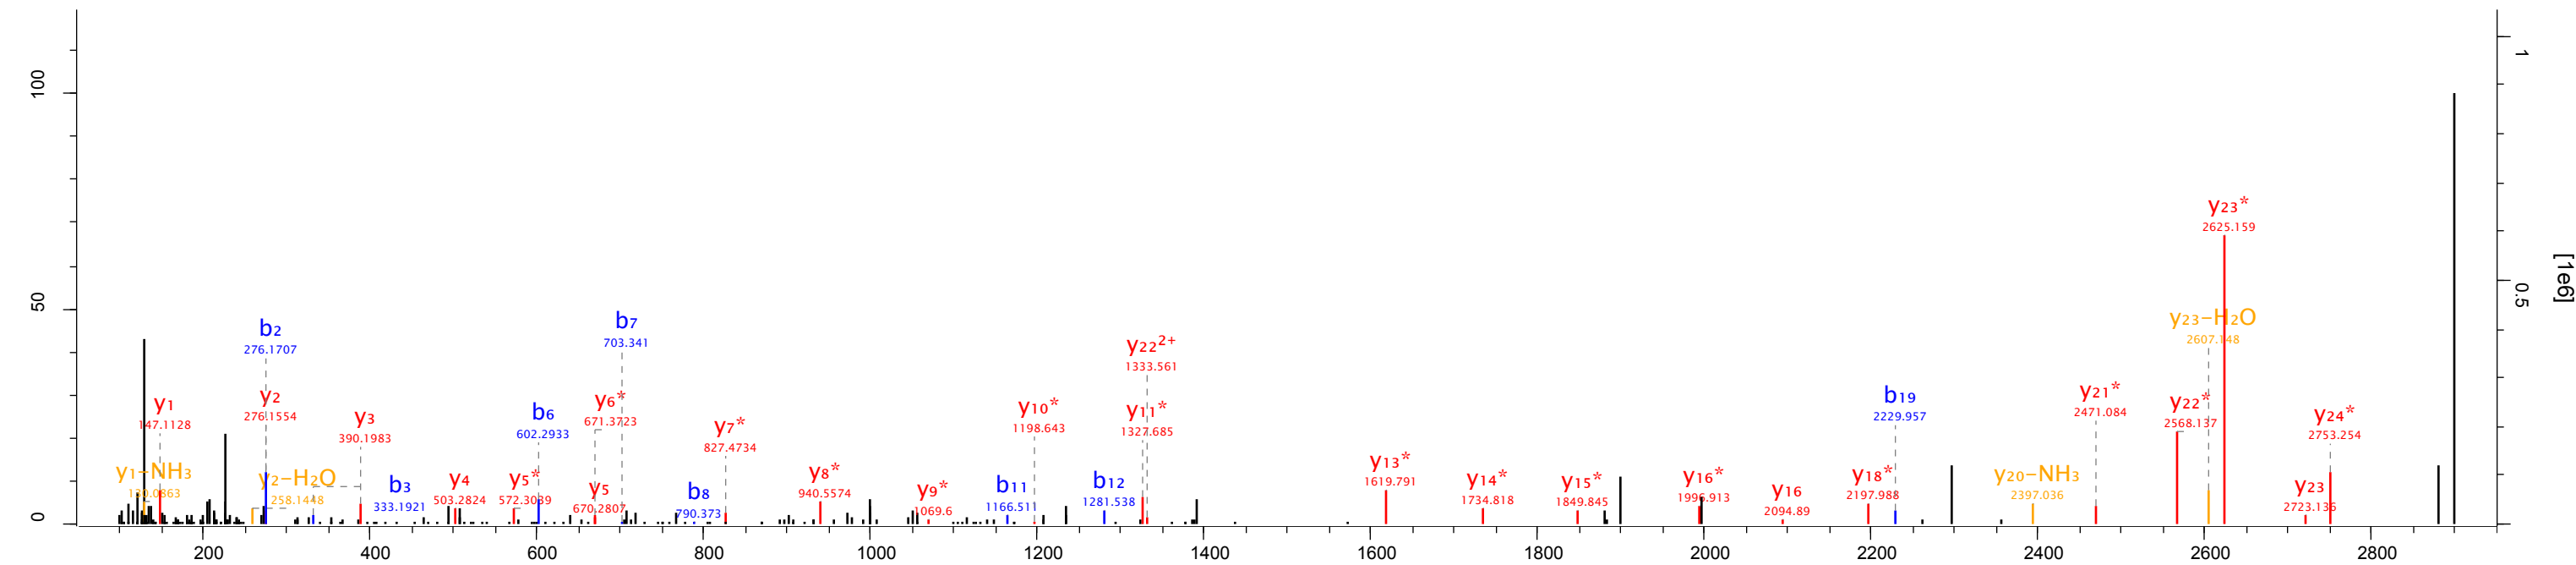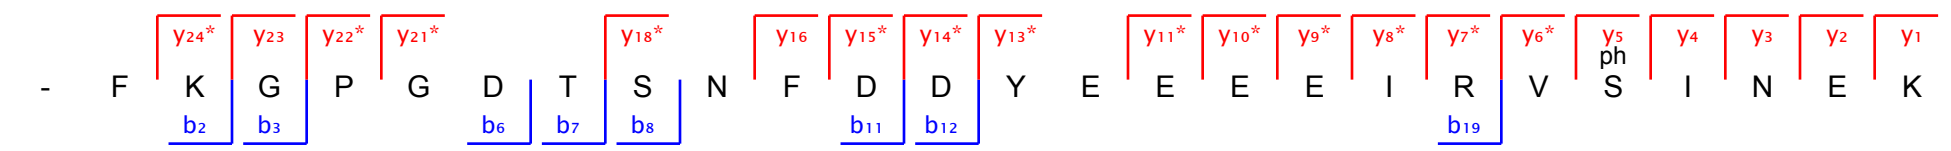



Raw file 20150814\_A375SR\_Phospho\_BR2\_08 Scan 19706 Method FTMS; HCD Score 60.55 m/z 572.3 Gene names SIK2

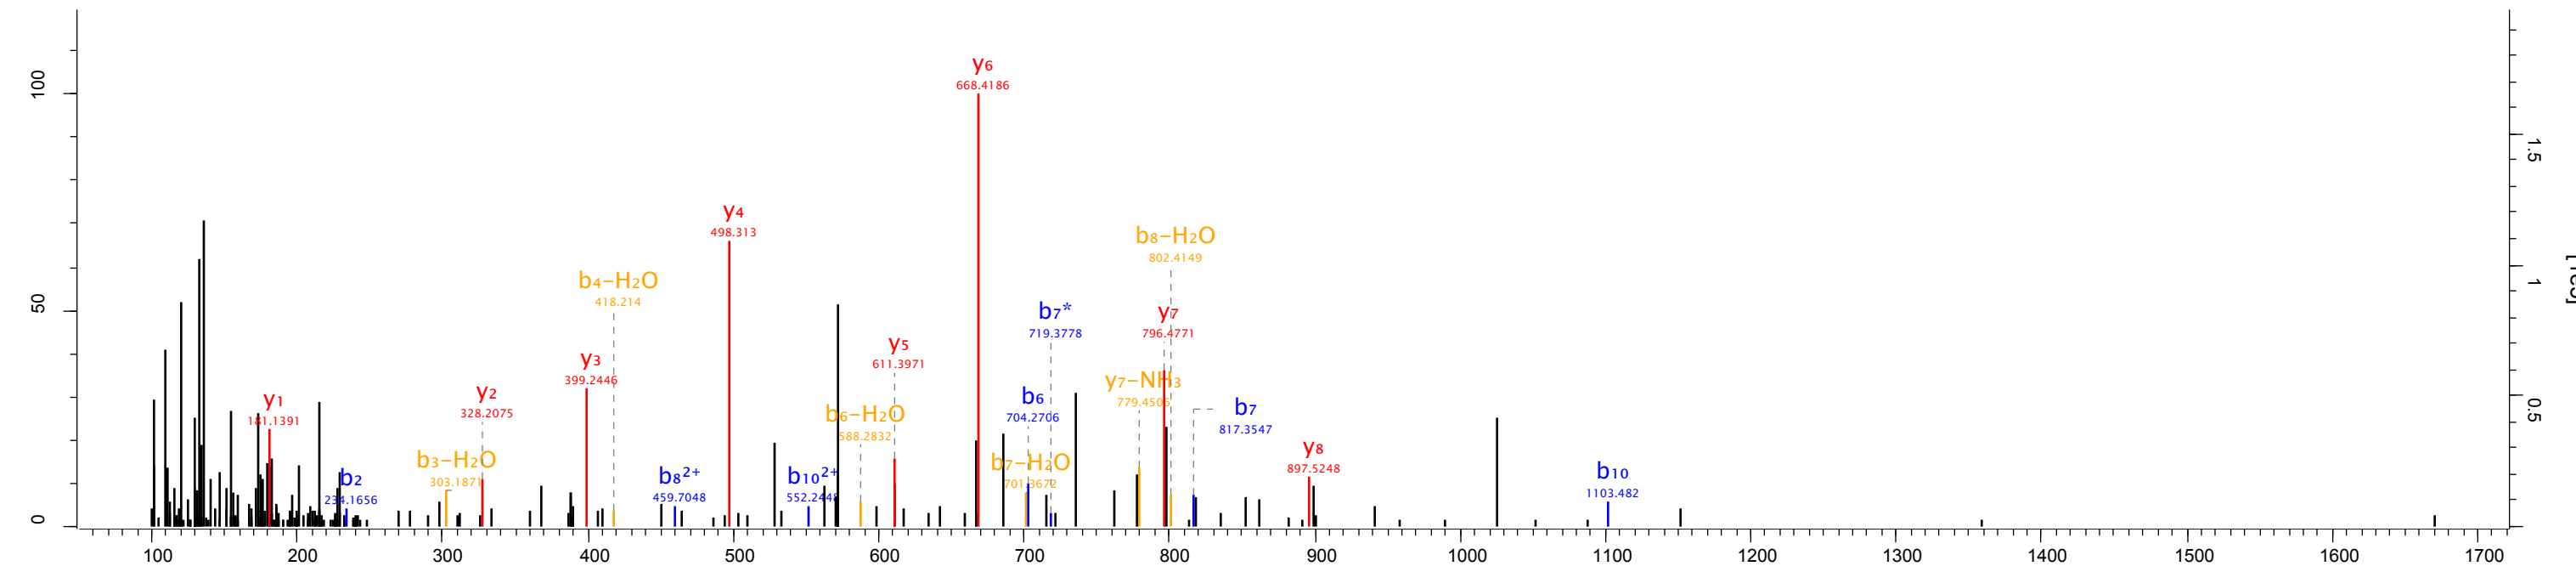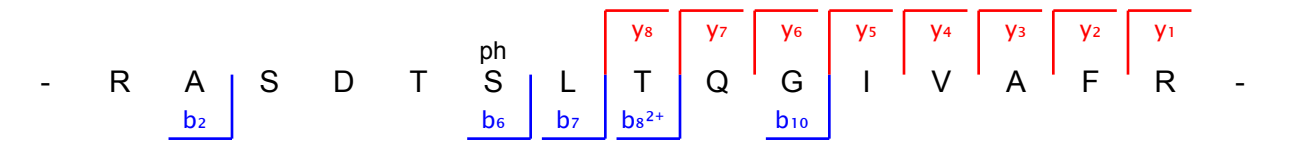

Raw file: 20150814\_A375SR\_Phospho\_BR2\_08  
 Scan: 20196 Method: FTMS; HCD Score: 72.08 m/z: 847.4 Gene names: MICAL1

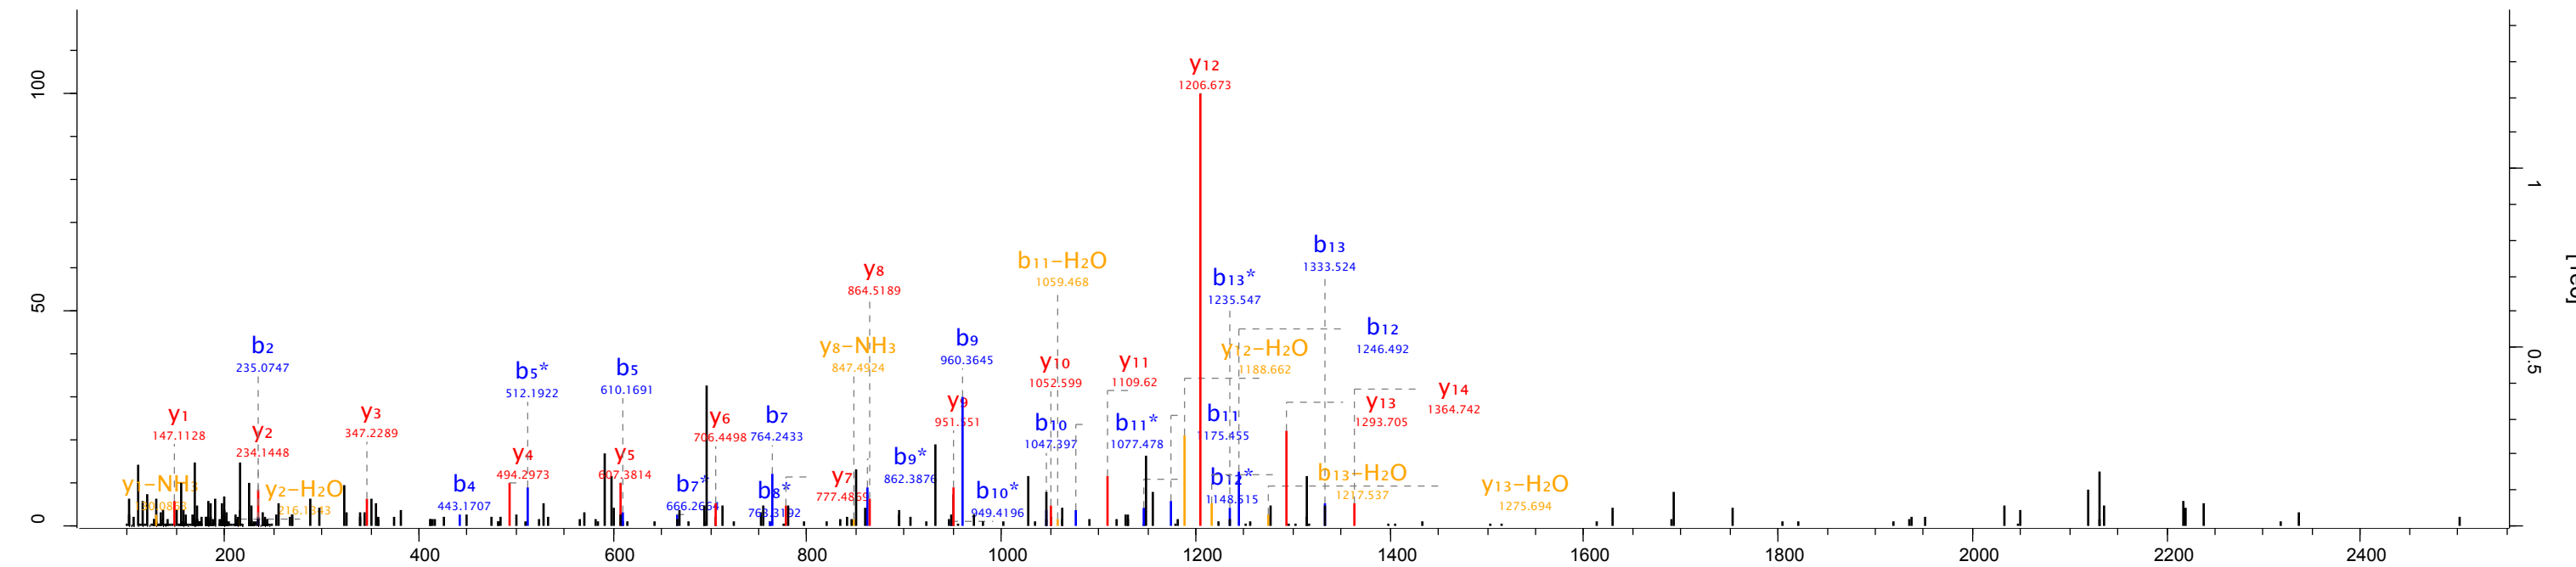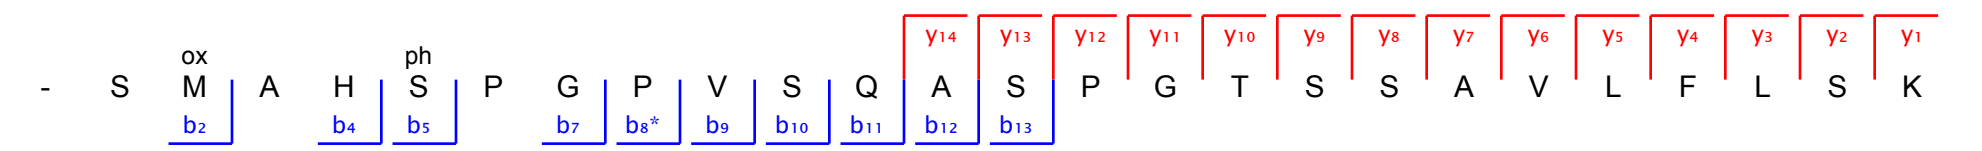

Raw file: 20150814\_A375SR\_Phospho\_BR2\_08  
 Scan: 20596 Method: FTMS; HCD Score: 66.88 m/z: 1167.53 Gene names: EIF4EBP1

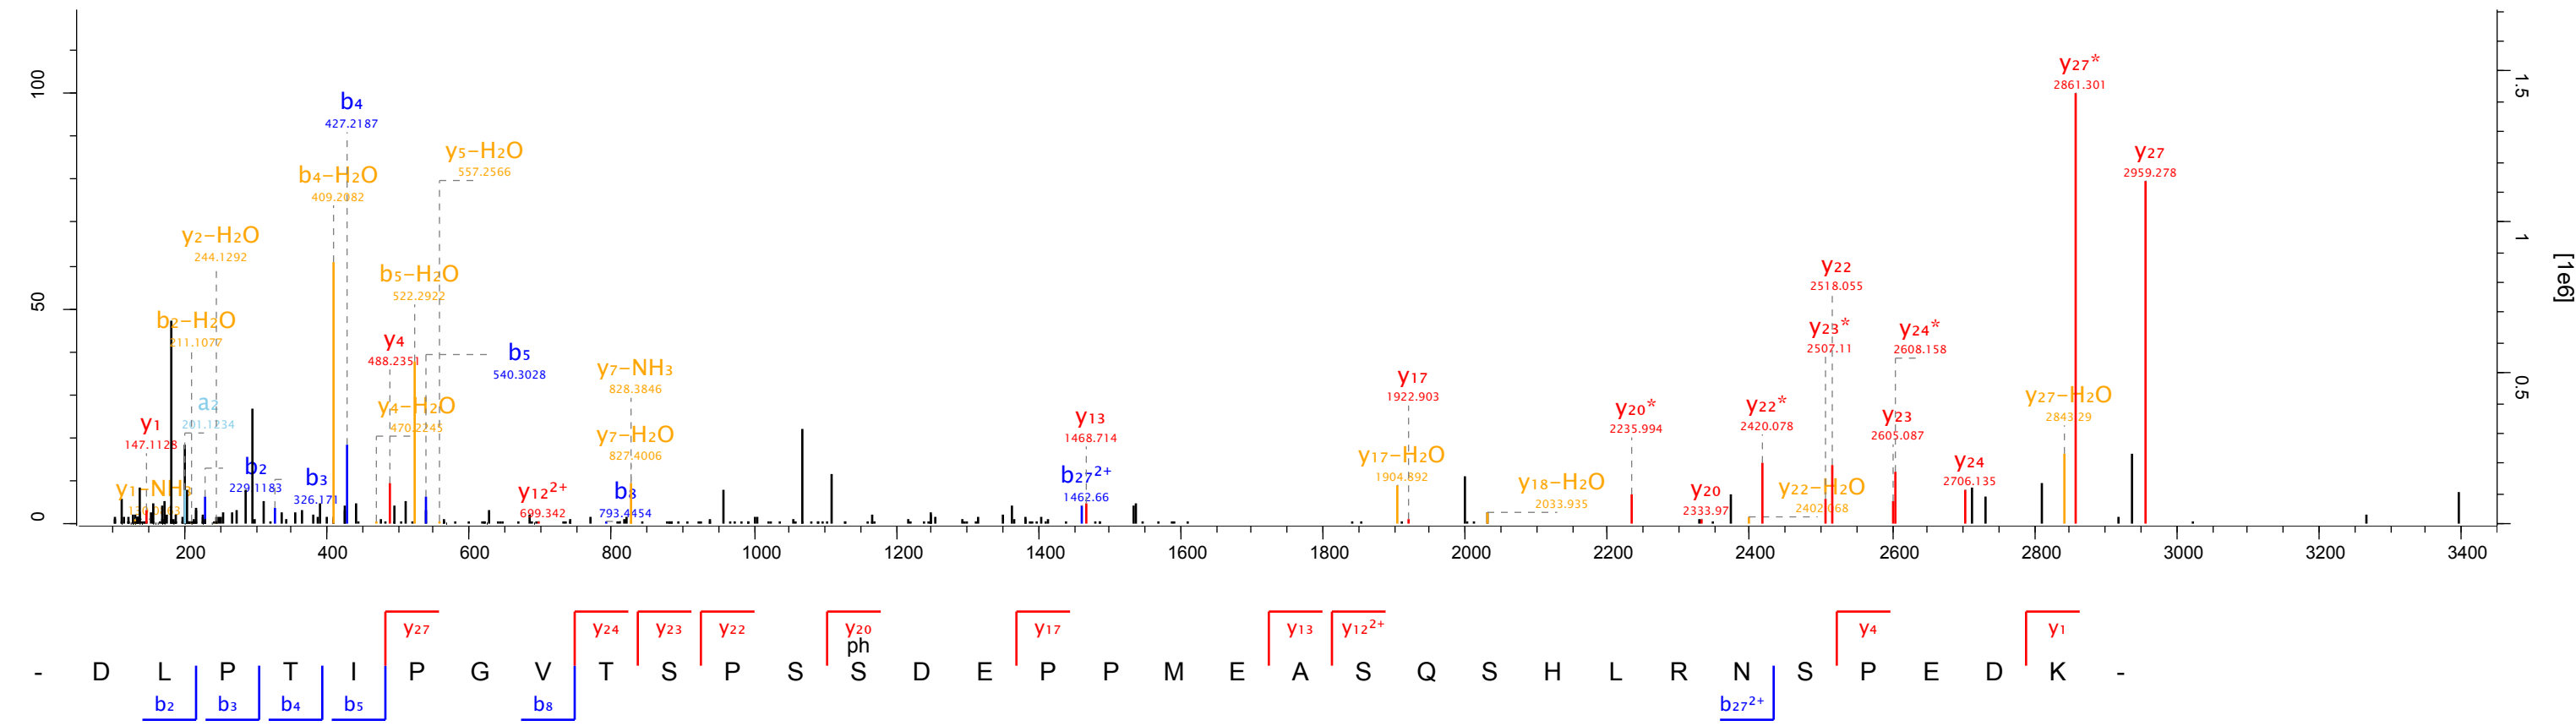

Raw file 20150814\_A375SR\_Phospho\_BR2\_08 Scan 21096 Method FTMS; HCD Score 96.5 m/z 817.09 Gene names DOCK5

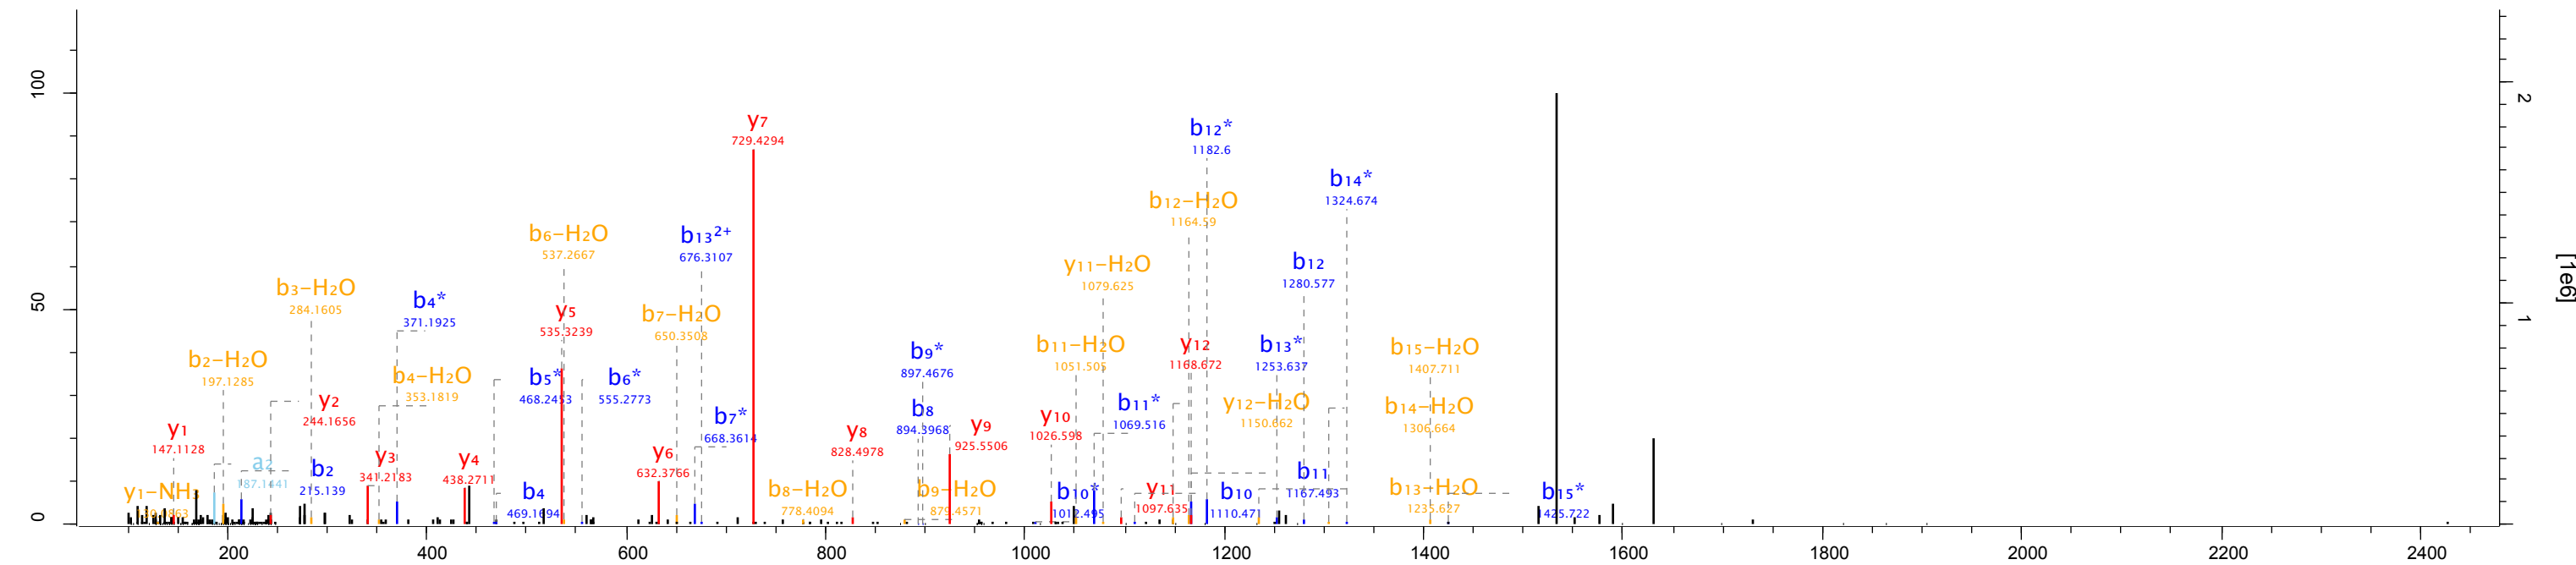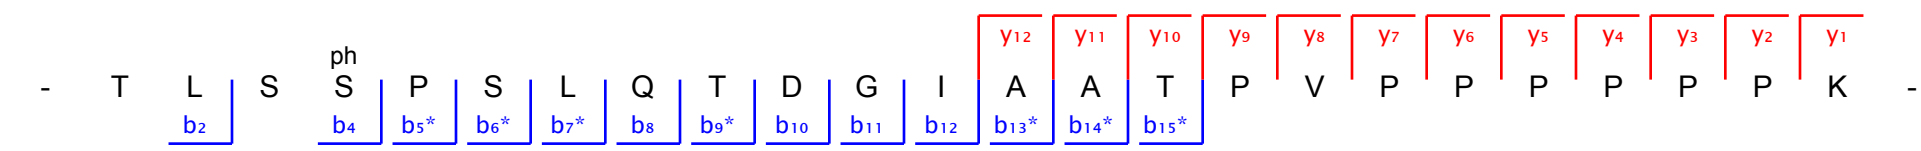

Raw file 20150814\_A375SR\_Phospho\_BR2\_08 Scan 21506 Method FTMS; HCD Score 137.9 m/z 858.45 Gene names GLYAT;BICD1

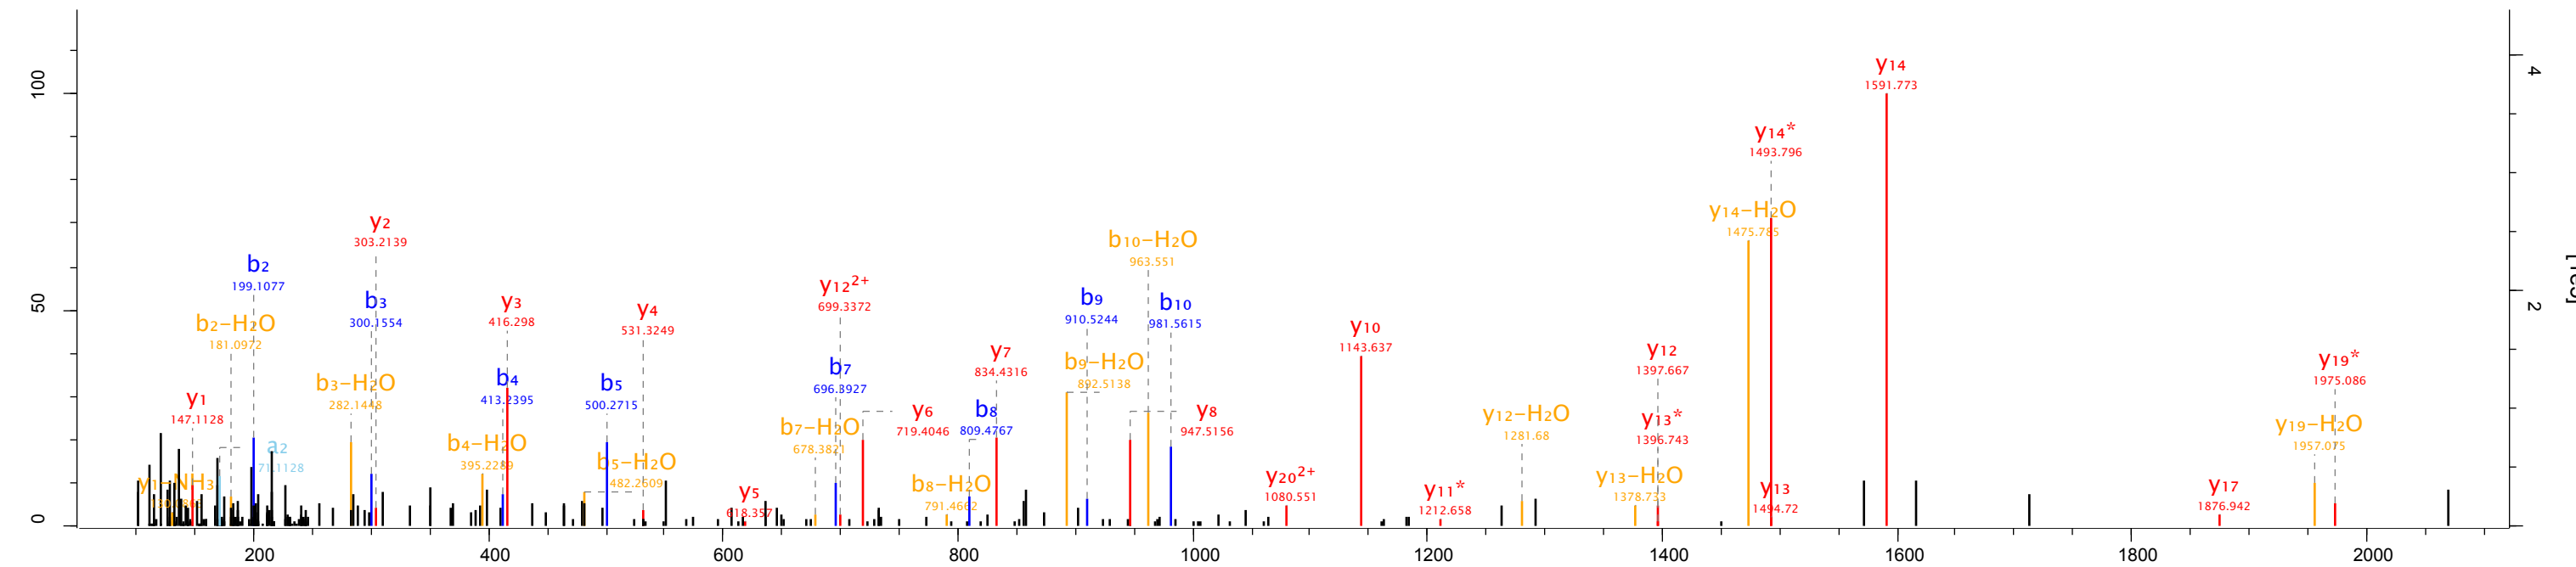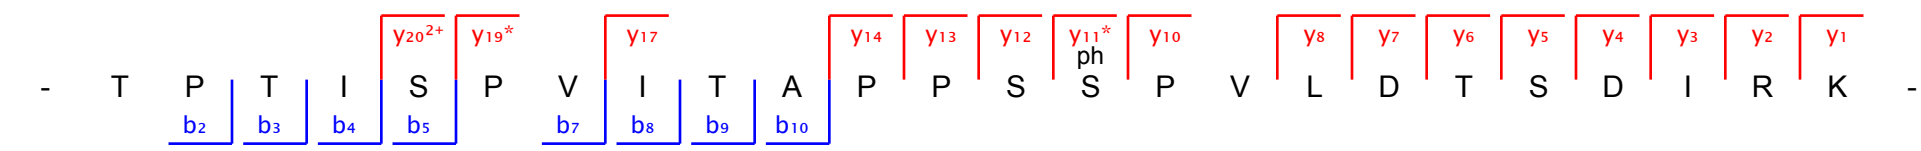

Raw file 20150814\_A375SR\_Phospho\_BR2\_08 Scan 22246 Method FTMS; HCD Score 191.4 m/z 921.79 Gene names NUMB

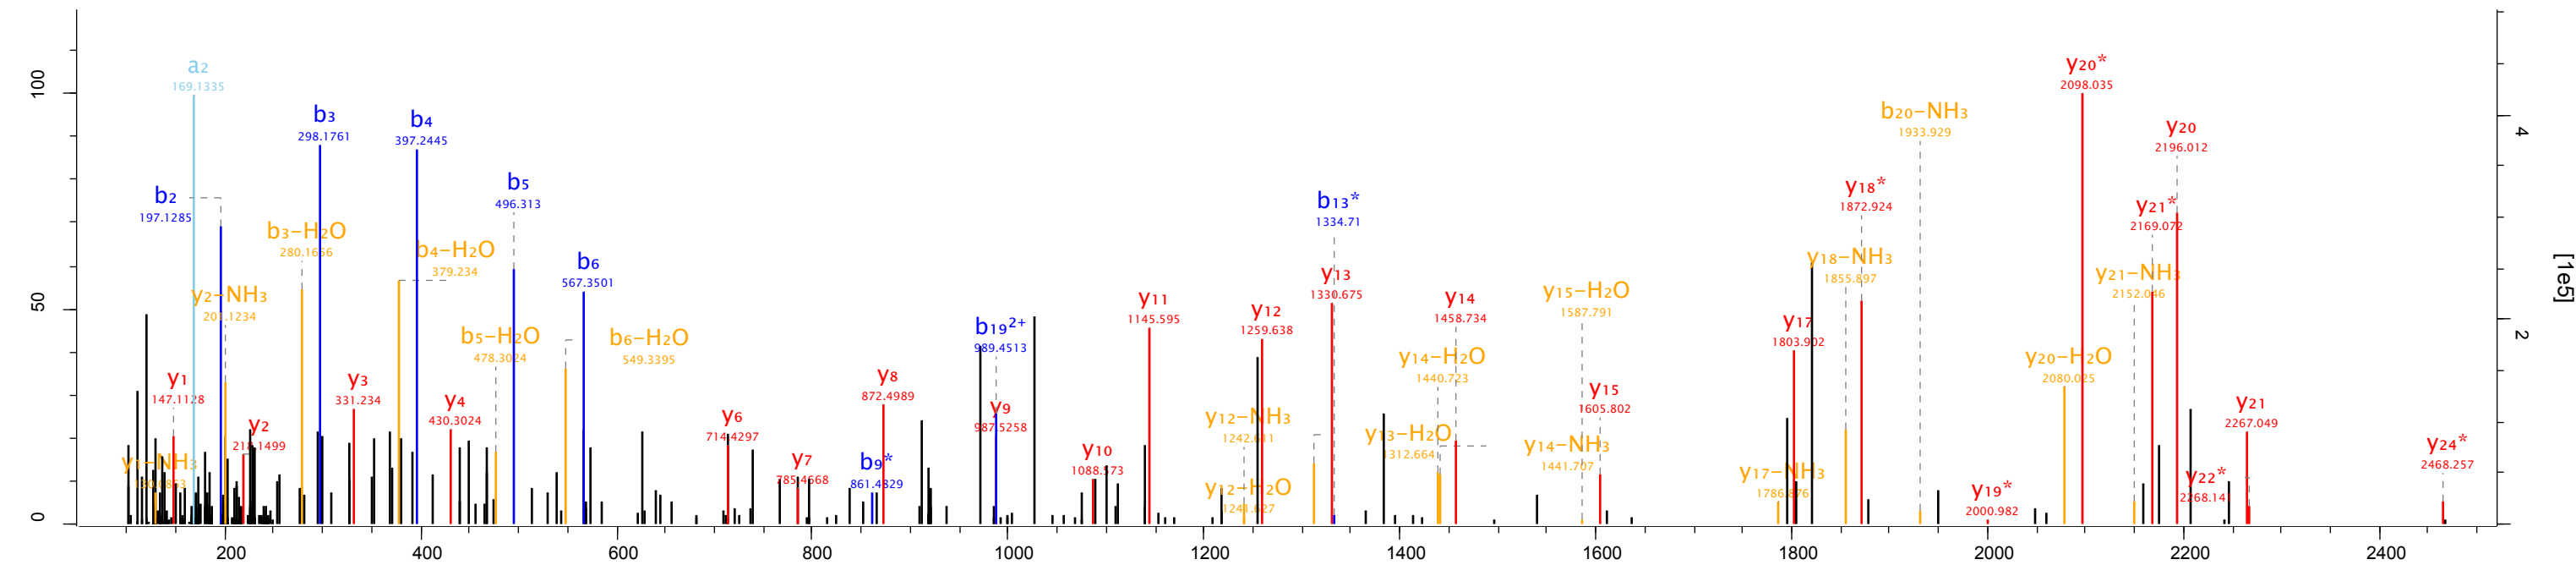

- P V T V V A P Q S P T F Q A N G T D S A F H V L A K -

b<sub>2</sub>
b<sub>3</sub>
b<sub>4</sub>
b<sub>5</sub>
b<sub>6</sub>
b<sub>9</sub><sup>\*</sup>
b<sub>13</sub><sup>\*</sup>
b<sub>19</sub><sup>2+</sup>

y<sub>24</sub><sup>\*</sup>
y<sub>22</sub><sup>\*</sup>
y<sub>21</sub>
y<sub>20</sub>
y<sub>19</sub><sup>\*</sup>
y<sub>18</sub><sup>\*</sup>
y<sub>17</sub>
y<sub>15</sub>
y<sub>14</sub>
y<sub>13</sub>
y<sub>12</sub>
y<sub>11</sub>
y<sub>10</sub>
y<sub>9</sub>
y<sub>8</sub>
y<sub>7</sub>
y<sub>6</sub>
y<sub>4</sub>
y<sub>3</sub>
y<sub>2</sub>
y<sub>1</sub>

Raw file: 20150814\_A375SR\_Phospho\_BR2\_08  
 Scan: 22326 Method: FTMS; HCD Score: 87.74 m/z: 798.39 Gene names: PHLDB2

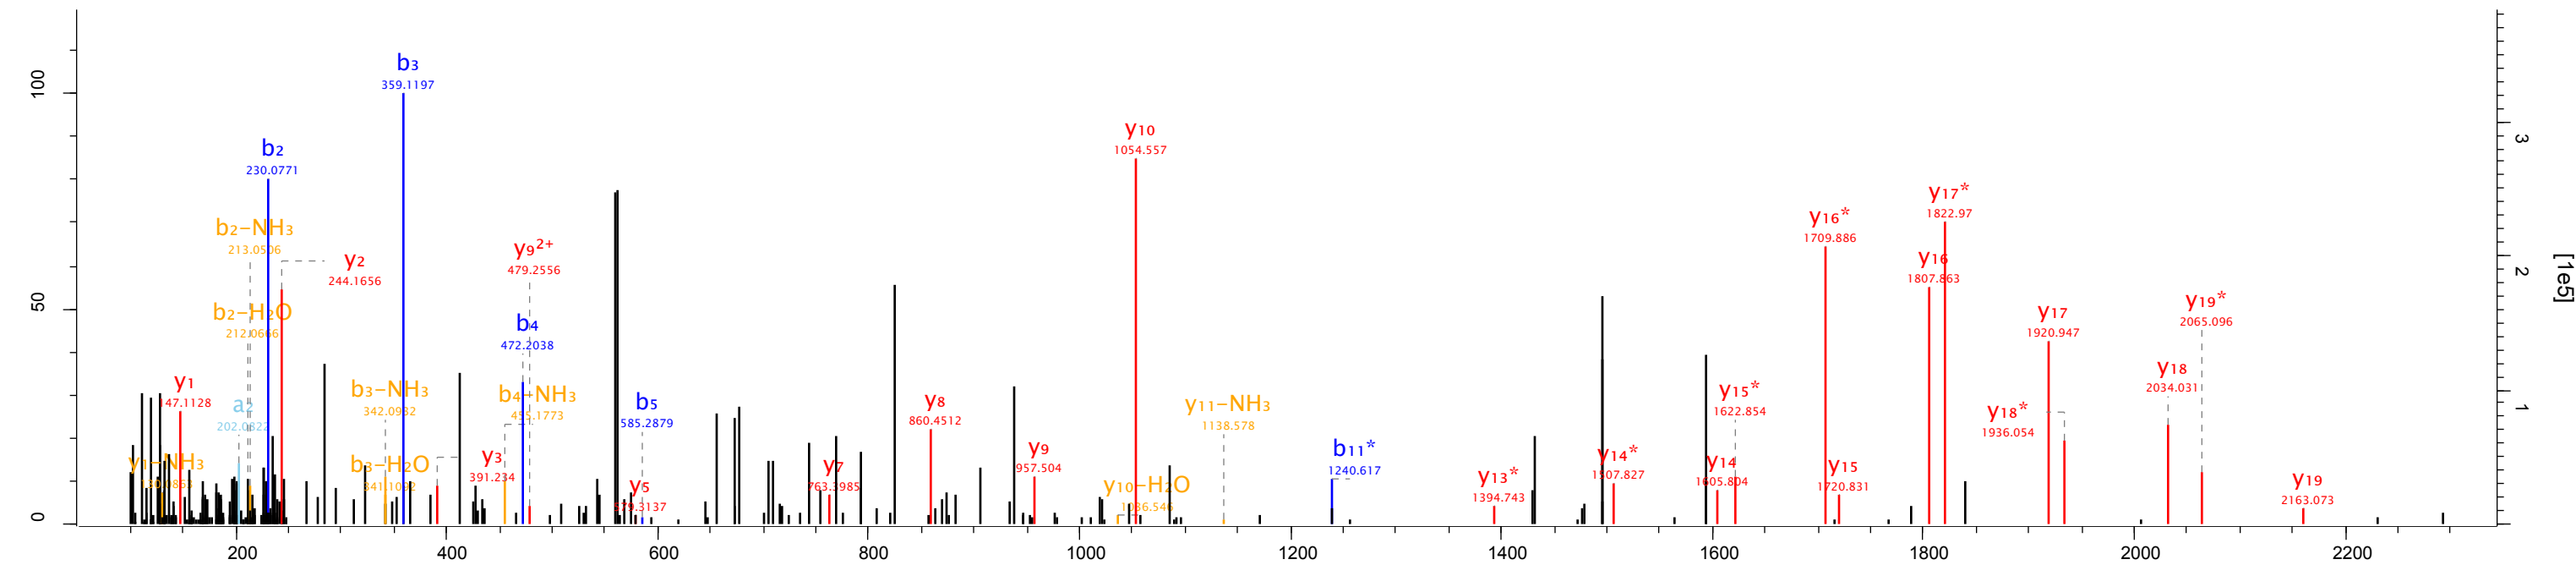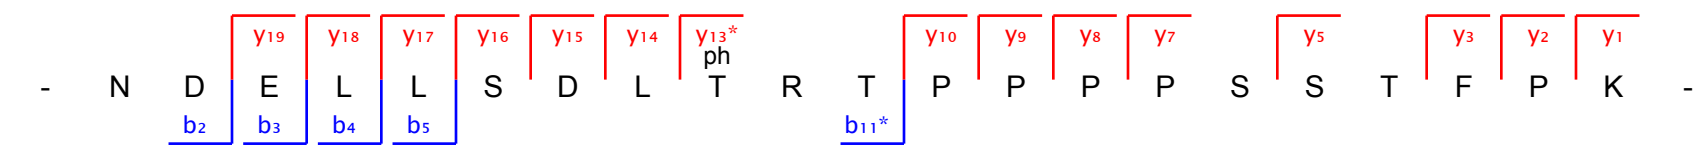

Raw file: 20150814\_A375SR\_Phospho\_BR2\_08  
 Scan: 2286 Method: FTMS; HCD Score: 56.57 m/z: 467.87 Gene names: CXorf23

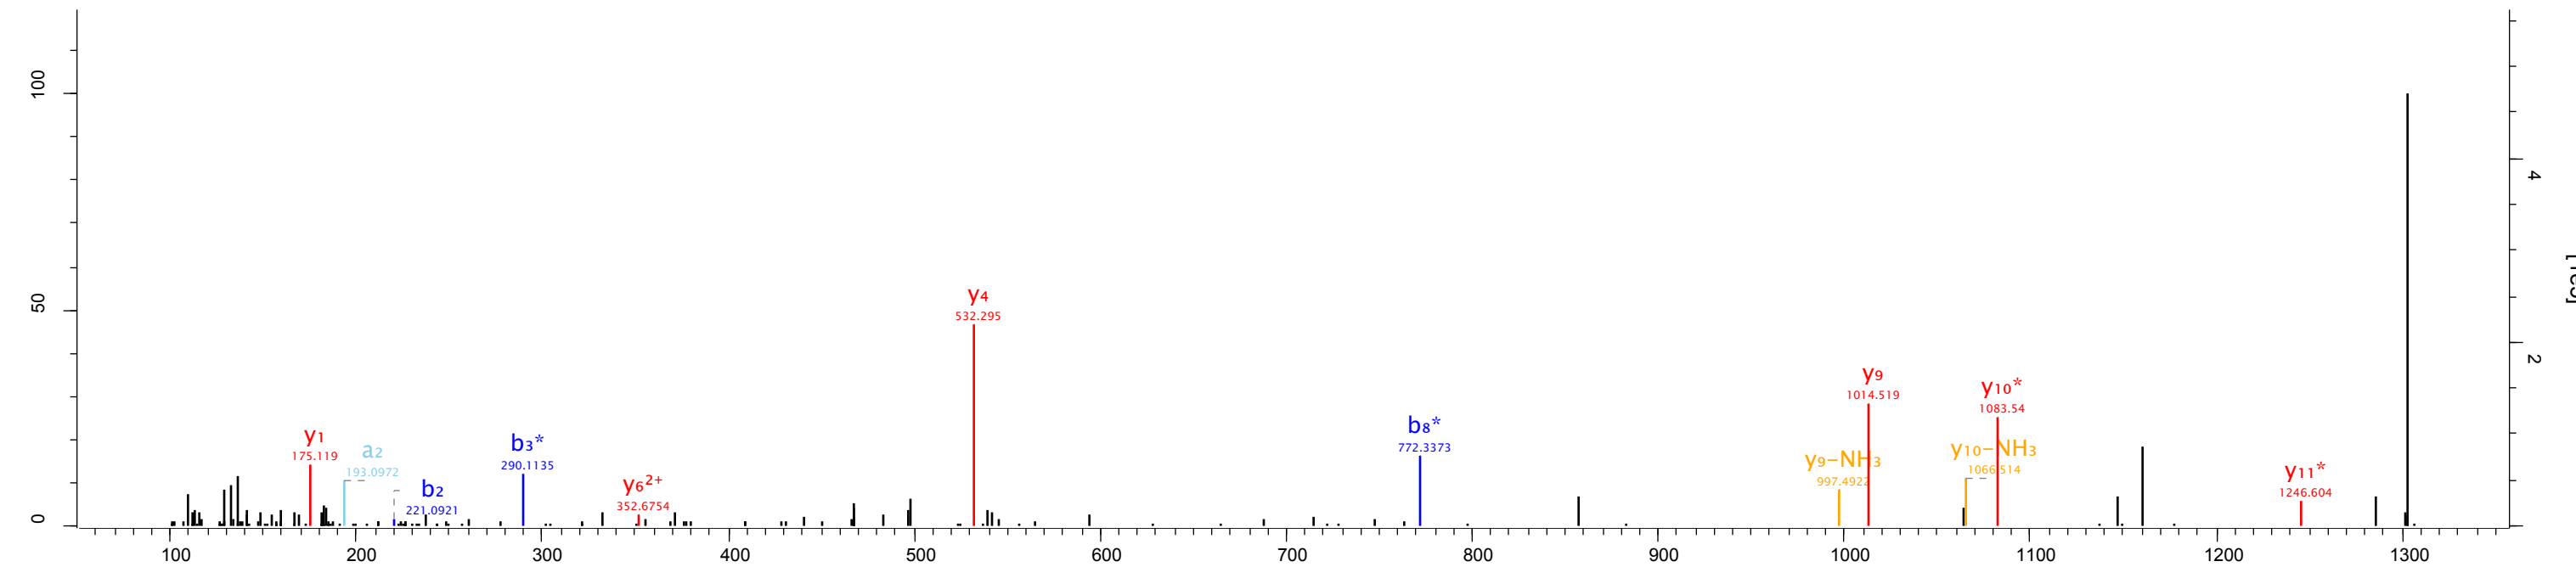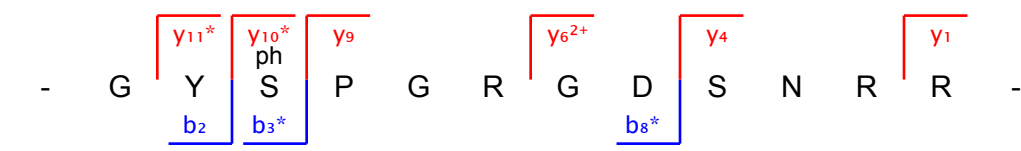



Raw file: 20150814\_A375SR\_Phospho\_BR2\_08  
 Scan: 2466 Method: FTMS; HCD Score: 97.8 m/z: 423.22 Gene names: TRIM3

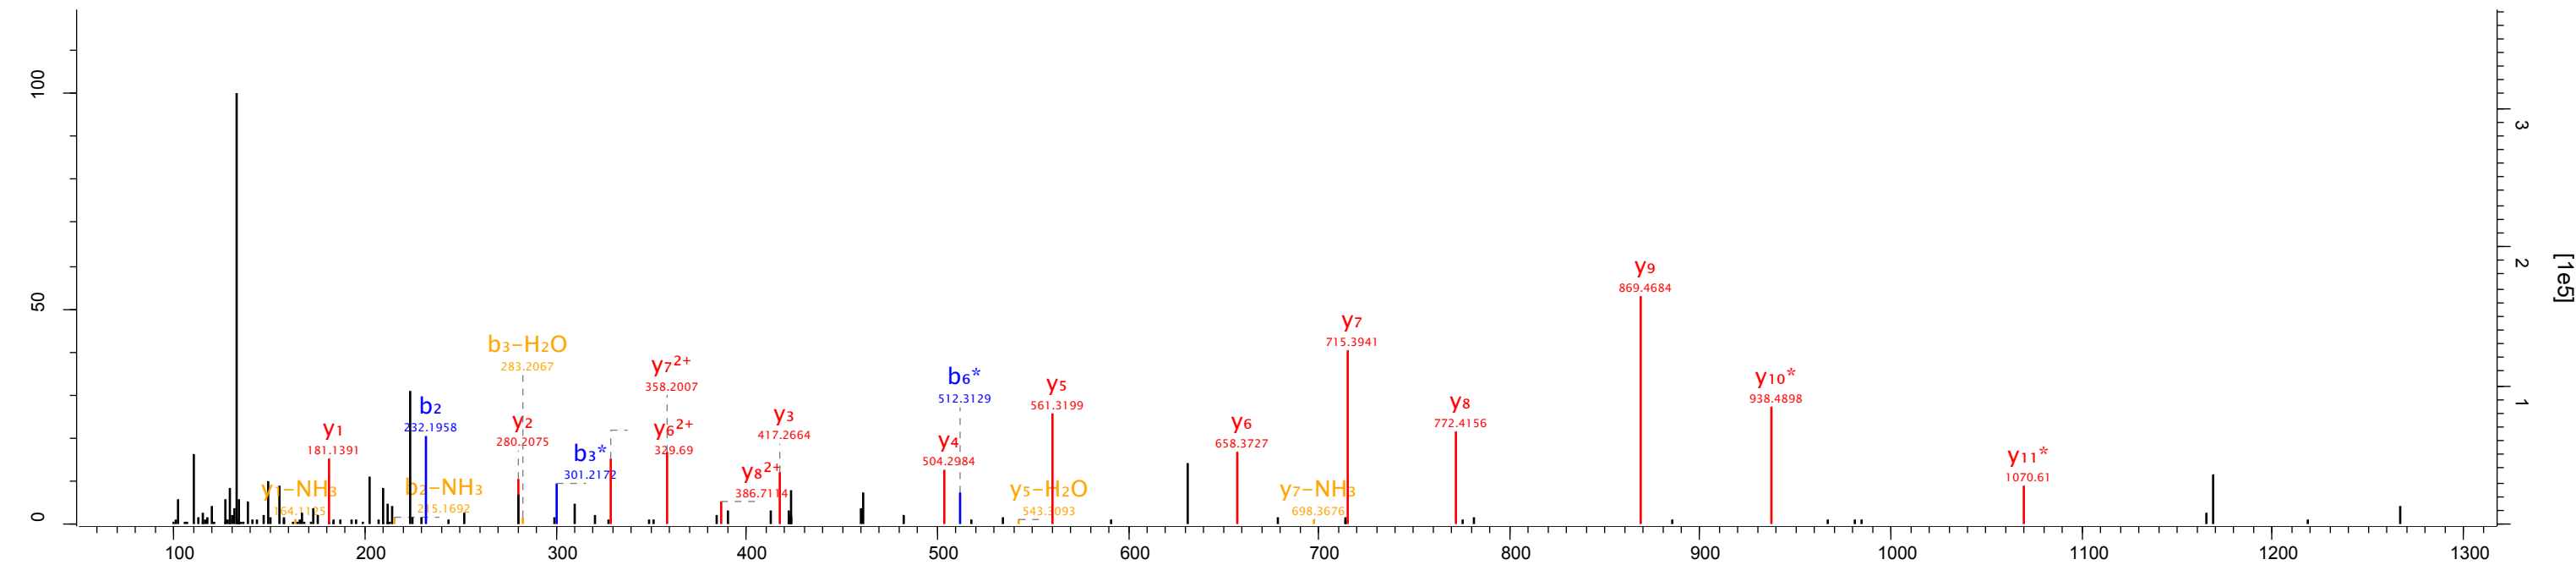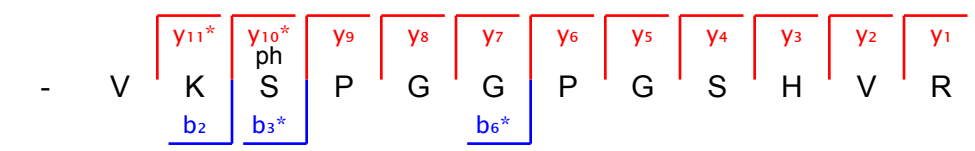

Raw file  
20150814\_A375SR\_Phospho\_BR2\_08

Scan 24836 Method FTMS; HCD Score 66.23 m/z 1017.96 Gene names EIF4G2

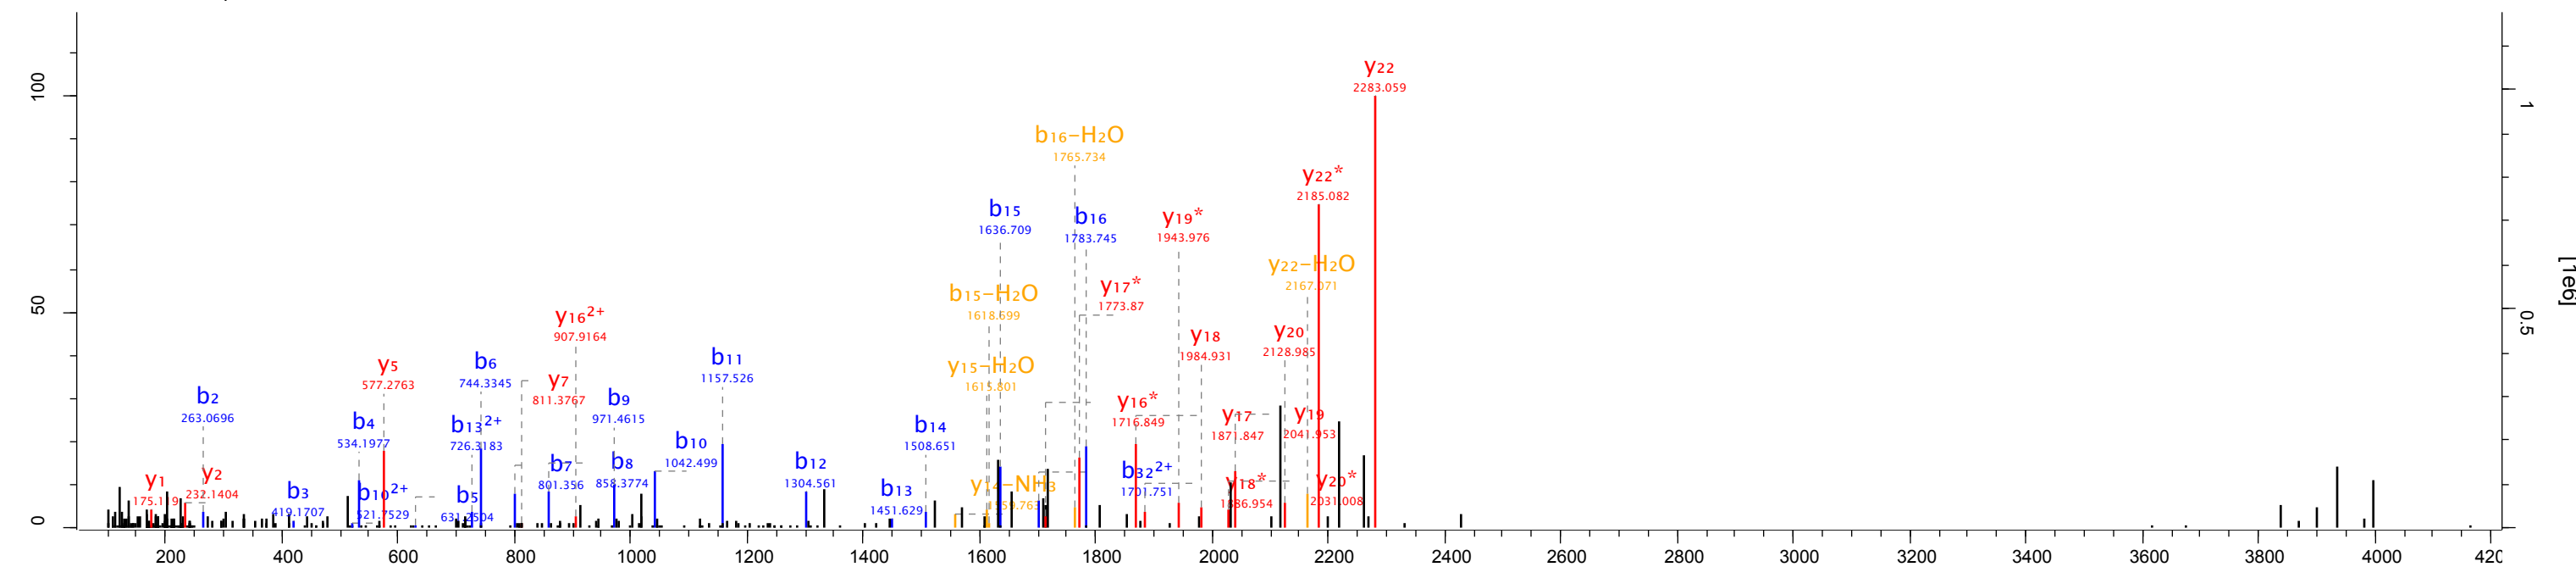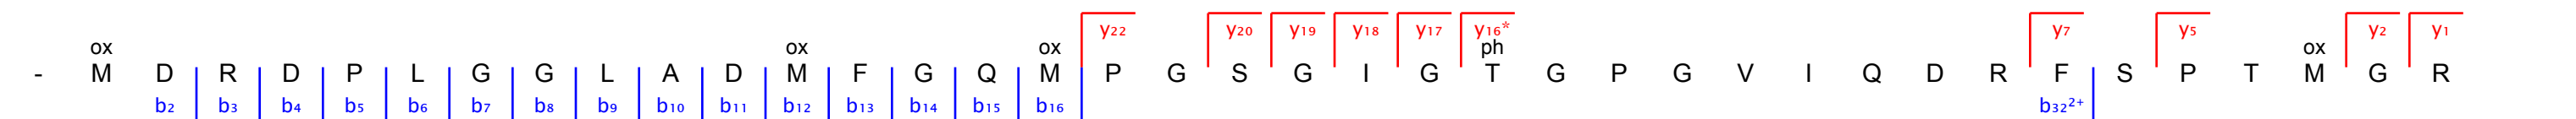

Raw file 20150814\_A375SR\_Phospho\_BR2\_08 Scan 27006 Method FTMS; HCD Score 64.22 m/z 1039.51 Gene names PCBP2

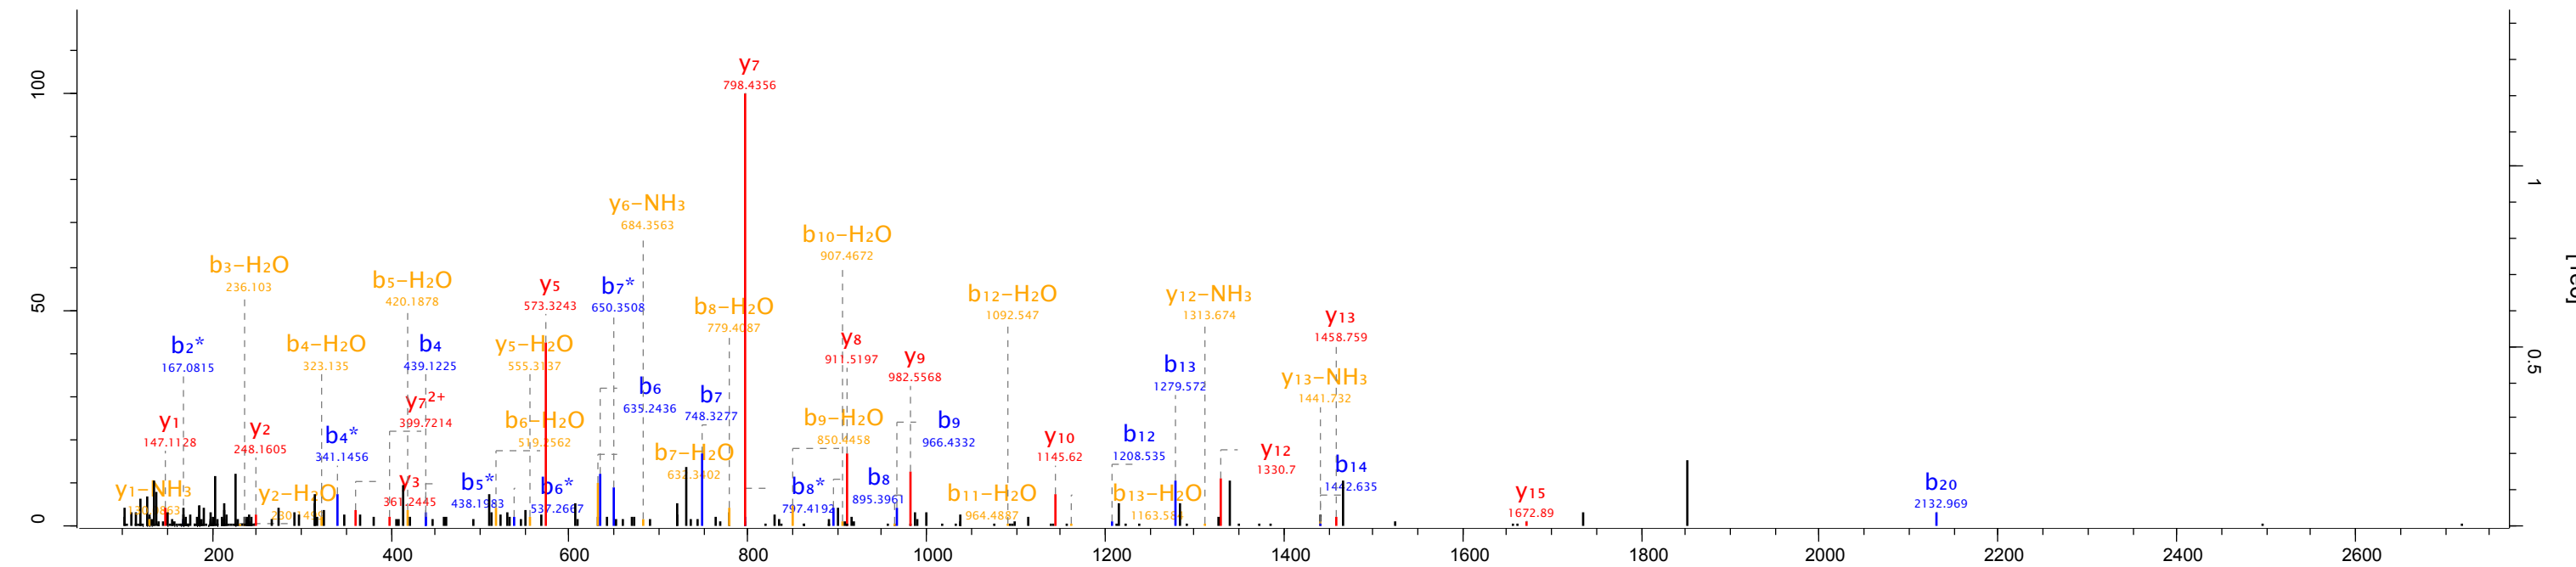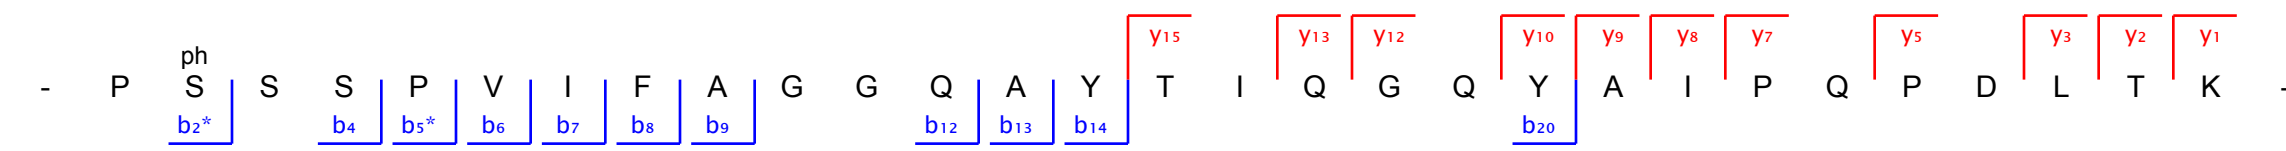

Raw file: 20150814\_A375SR\_Phospho\_BR2\_08  
 Scan: 3066 Method: FTMS; HCD Score: 52.84 m/z: 560.76 Gene names: PHLDB1

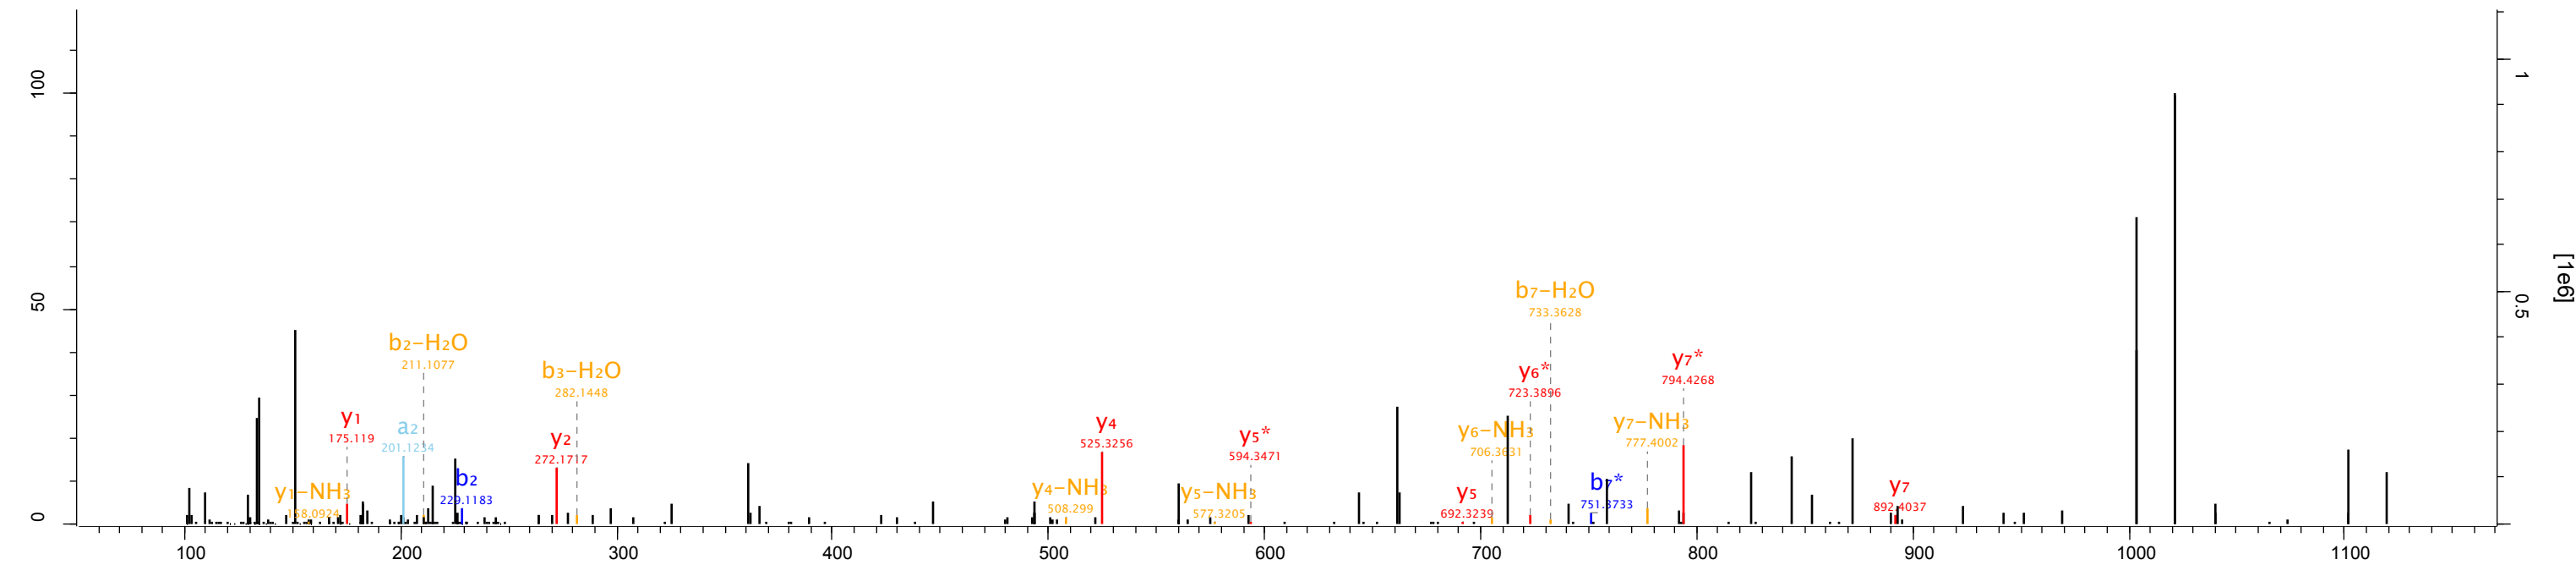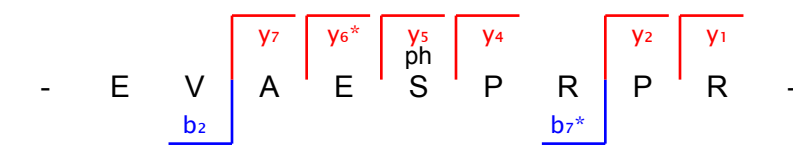

Raw file 20150814\_A375SR\_Phospho\_BR2\_08 Scan 3496 Method FTMS; HCD Score 72.29 m/z 499.24 Gene names PTRF

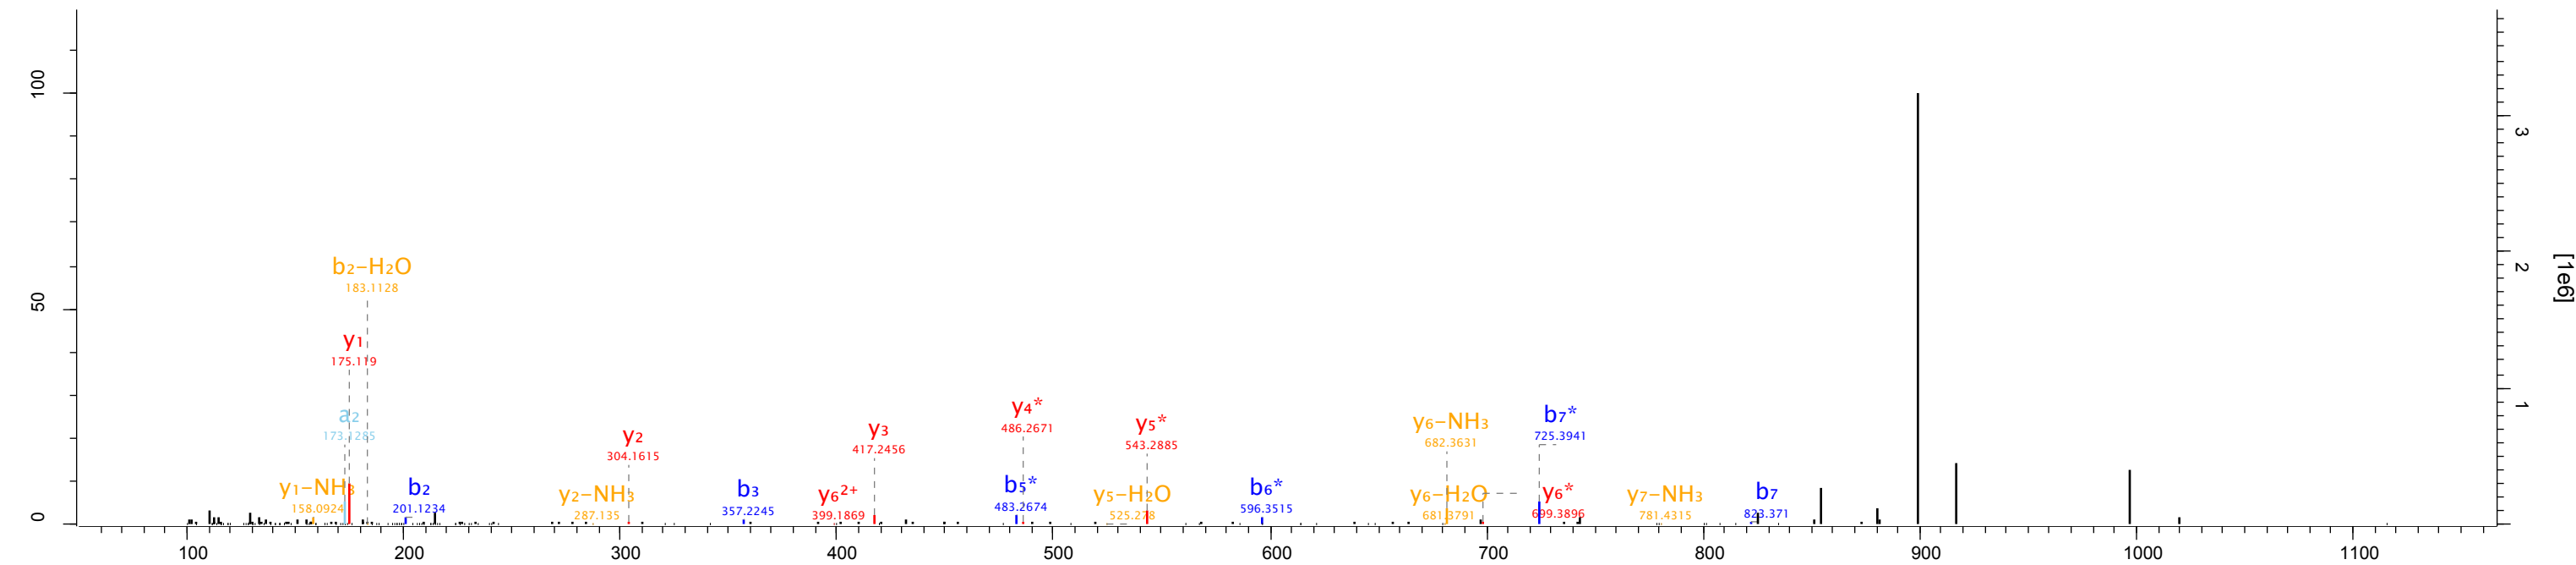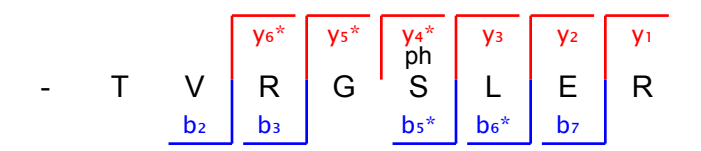

Raw file: 20150814\_A375SR\_Phospho\_BR2\_08  
 Scan: 3936 Method: FTMS; HCD Score: 106.39 m/z: 606.95 Gene names: MMTAG2

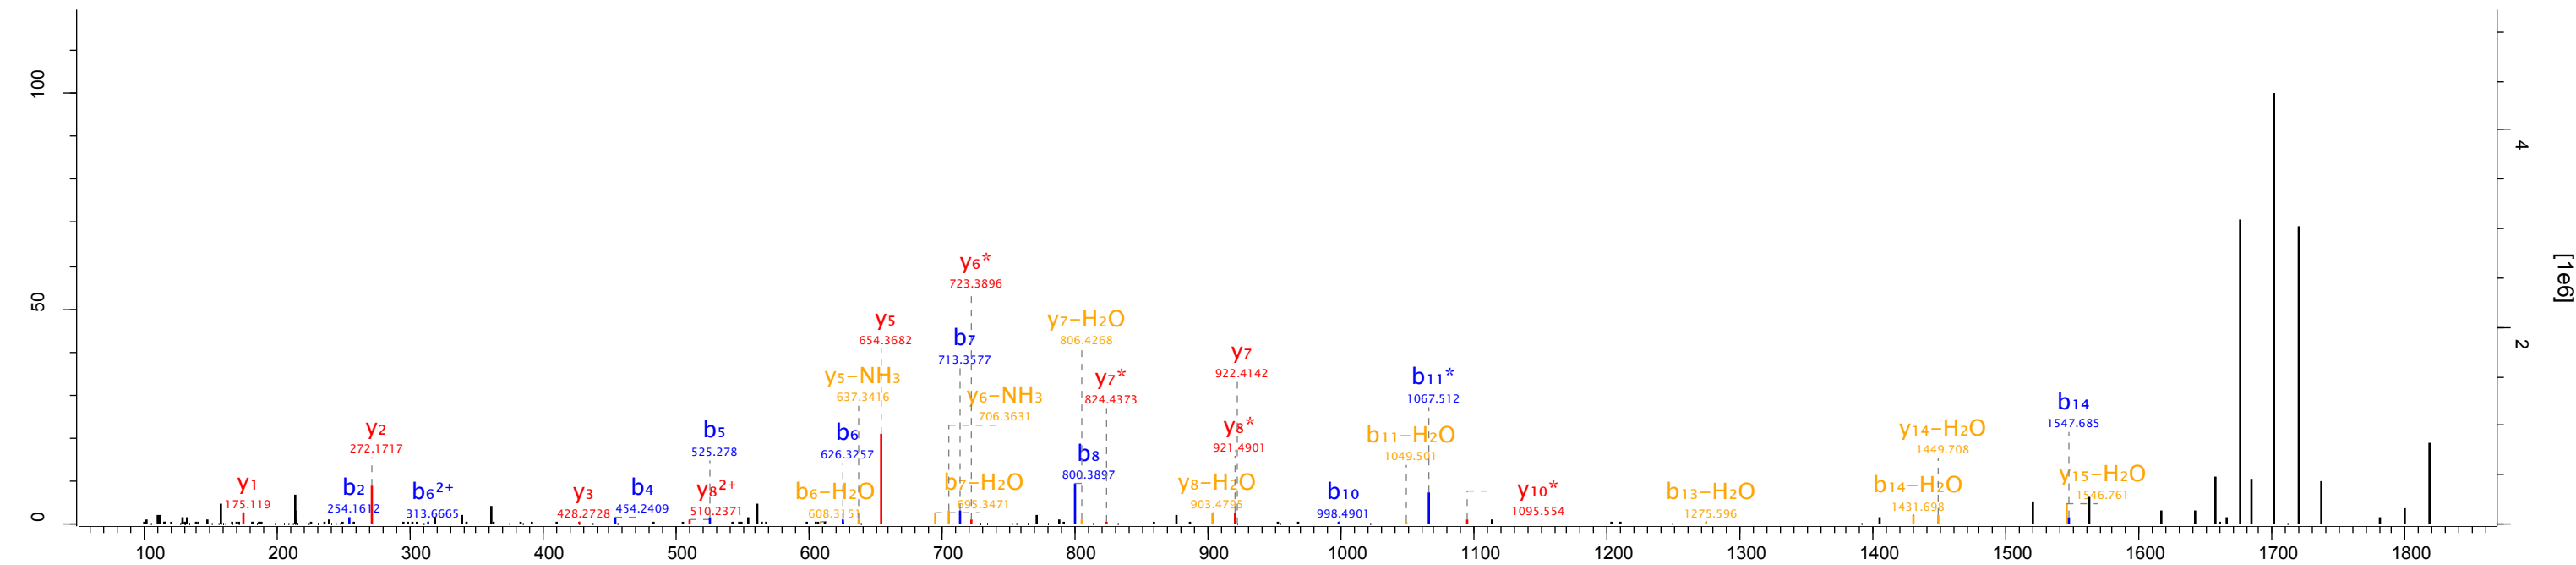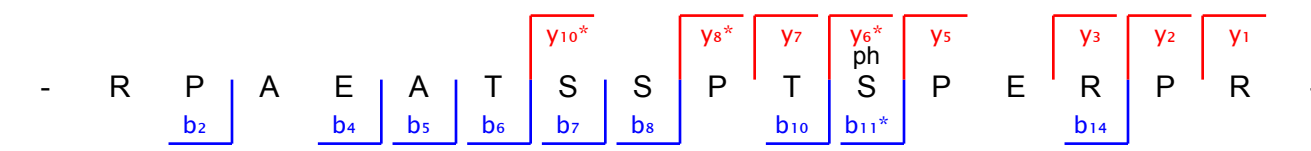

Raw file: 20150814\_A375SR\_Phospho\_BR2\_08  
 Scan: 3976 Method: FTMS; HCD Score: 107.75 m/z: 713.84 Gene names: PACRGL

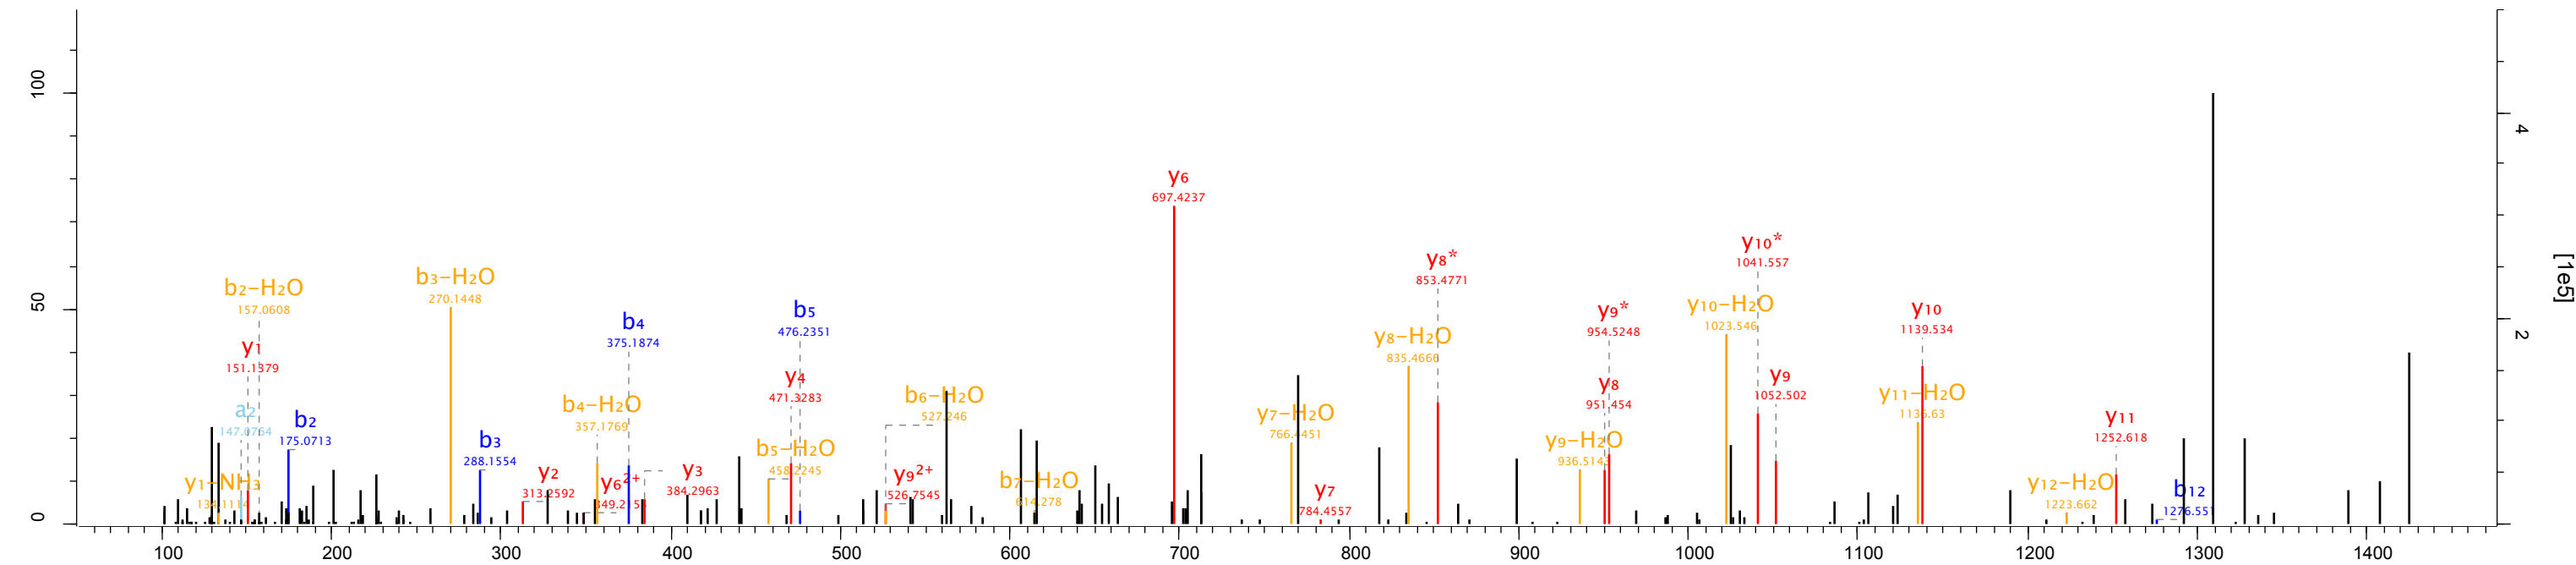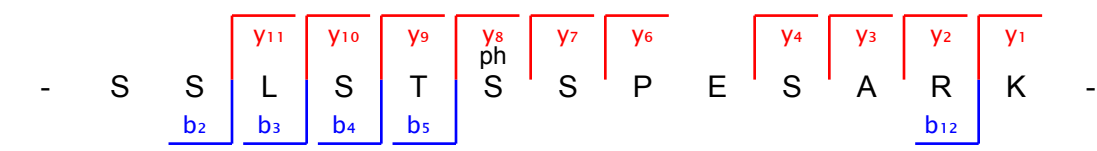

Raw file: 20150814\_A375SR\_Phospho\_BR2\_08  
 Scan: 5566 Method: FTMS; HCD Score: 121.01 m/z: 807.34 Gene names: ATXN2

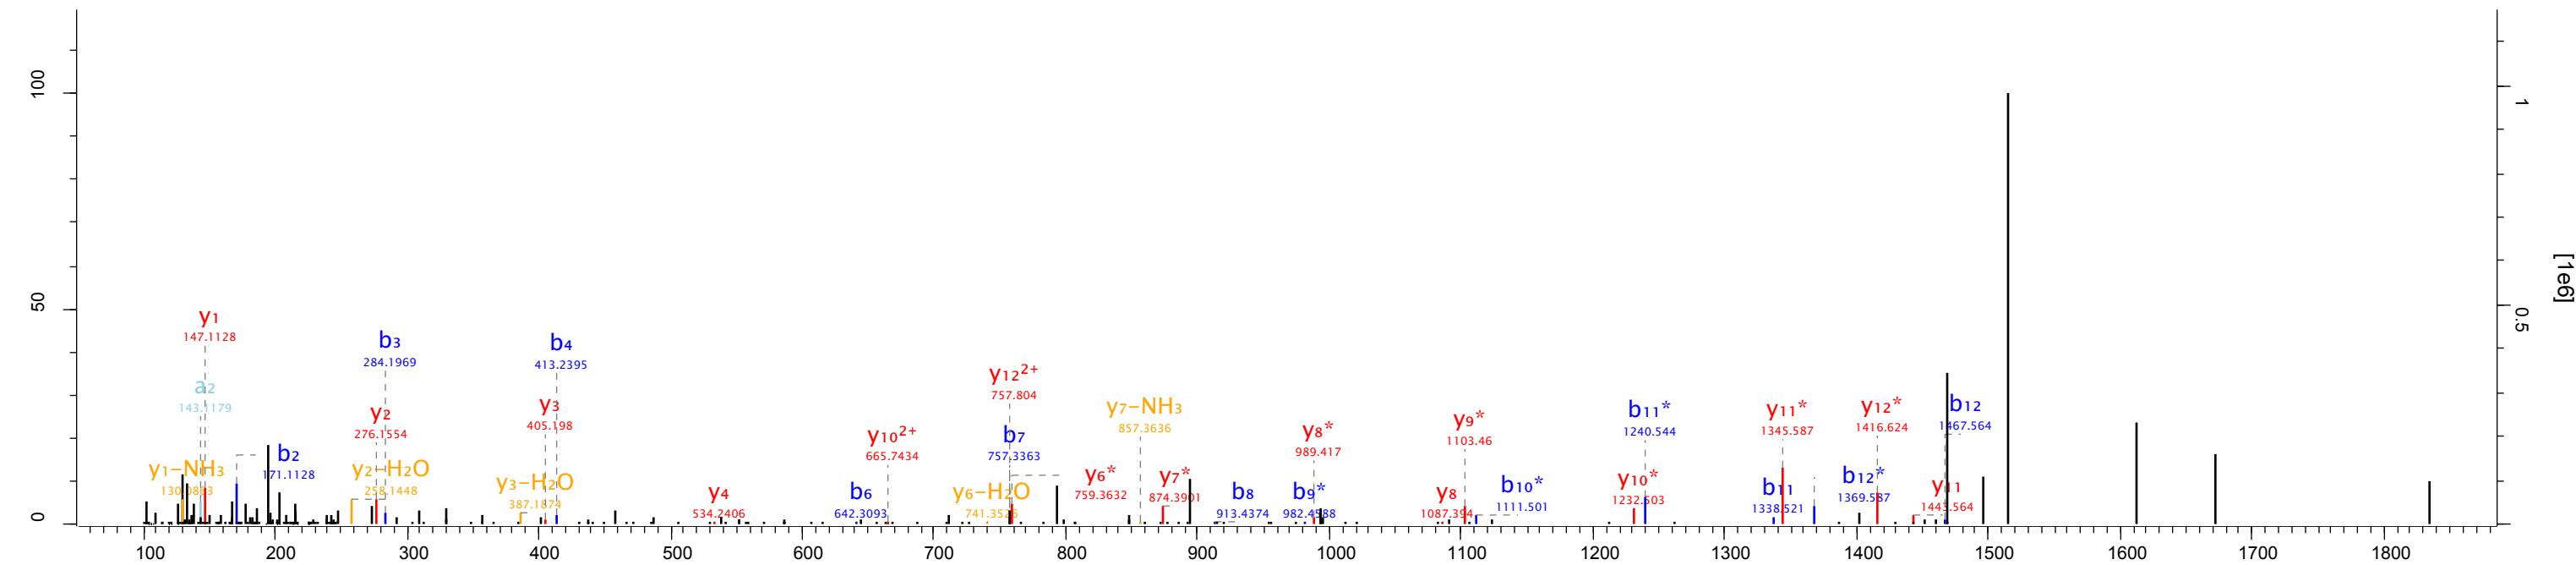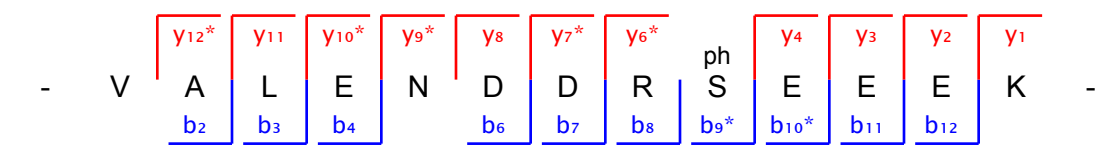



Raw file: 20150814\_A375SR\_Phospho\_BR2\_08  
 Scan: 5976 Method: FTMS; HCD Score: 262.54 m/z: 754.87 Gene names: SRFBP1

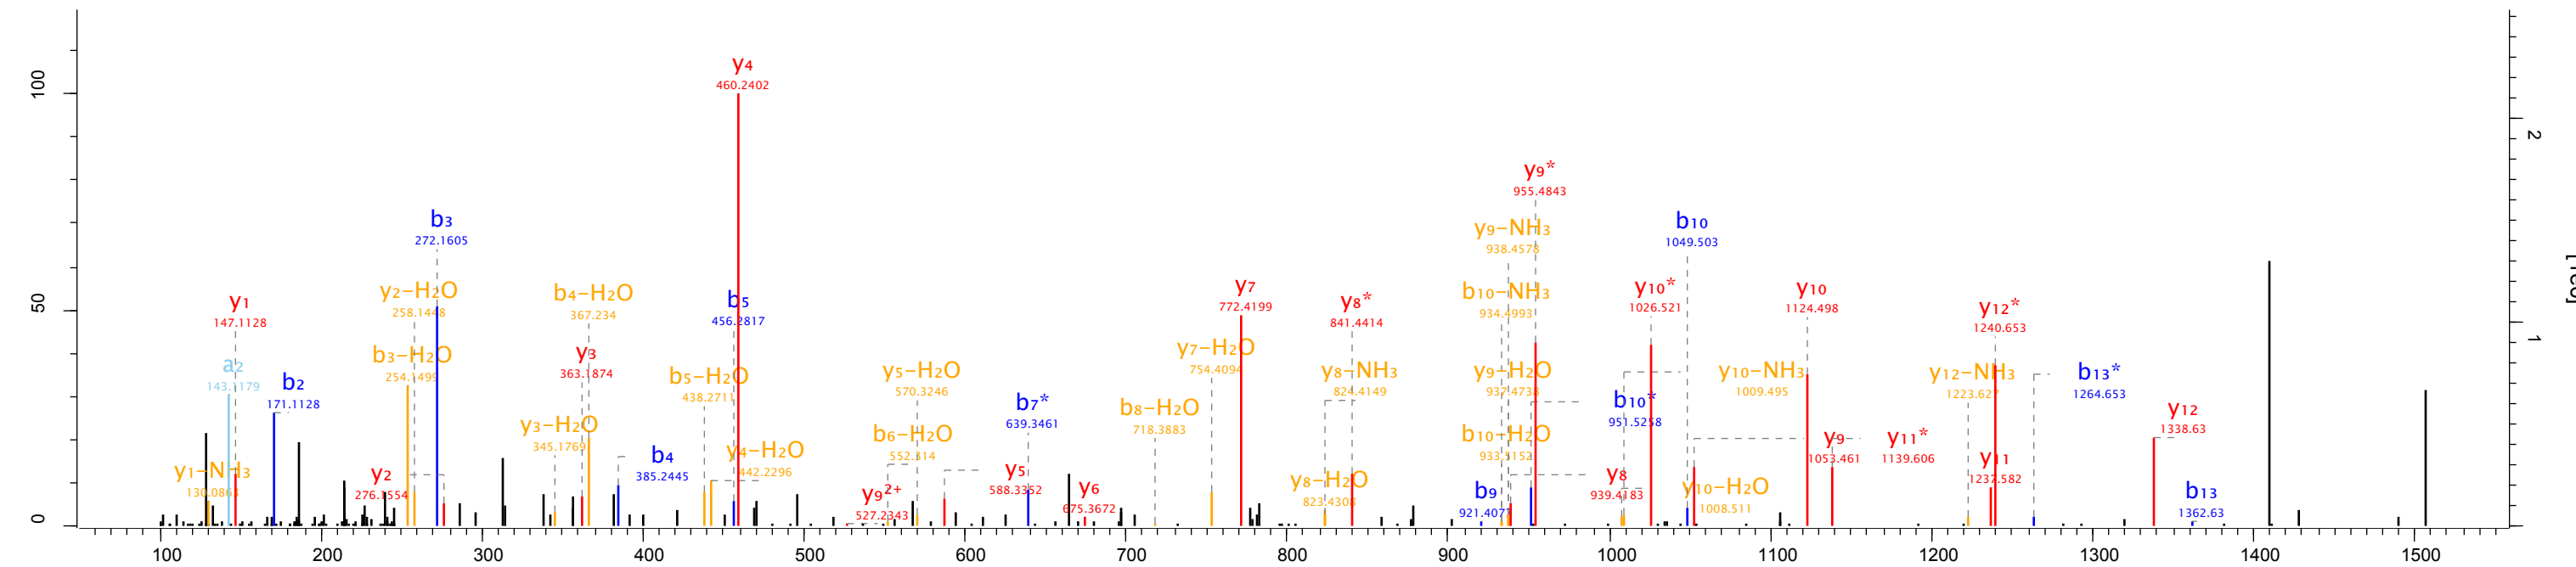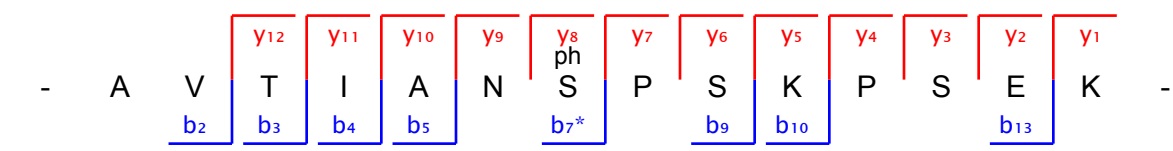

Raw file: 20150814\_A375SR\_Phospho\_BR2\_08  
 Scan: 8526 Method: FTMS; HCD Score: 174.15 m/z: 934.89 Gene names: CAMK2D

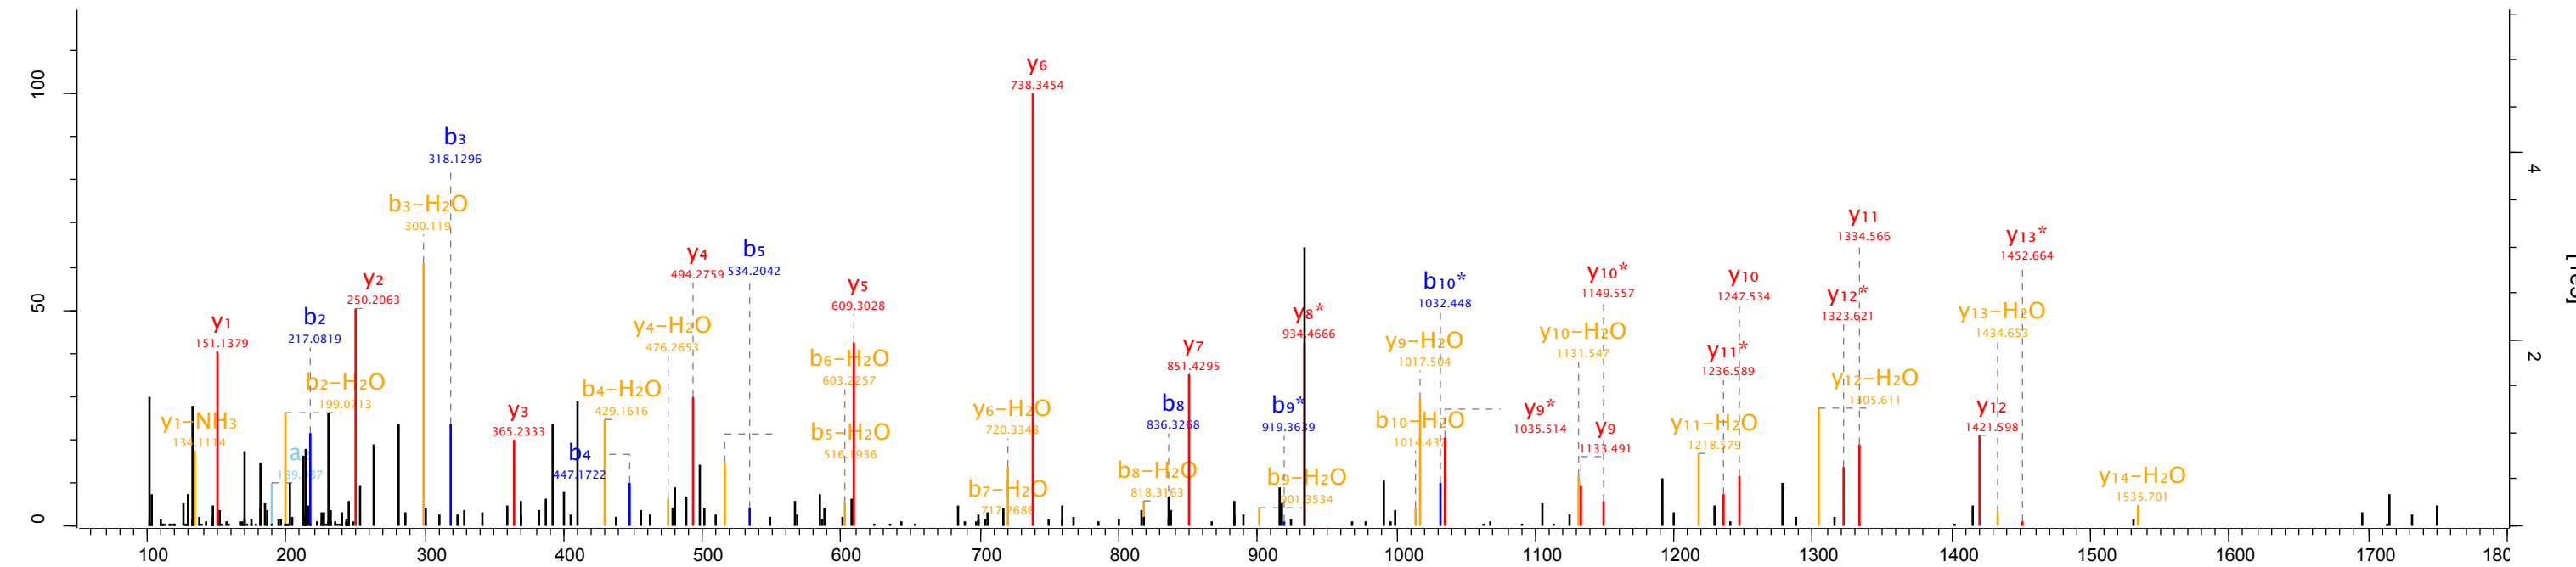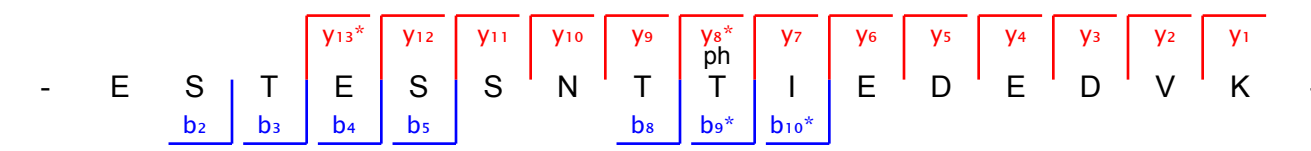

Raw file: 20150814\_A375SR\_Phospho\_BR2\_08  
 Scan: 8886 Method: FTMS; HCD Score: 215.43 m/z: 996.51 Gene names: LIMA1;TRMT1

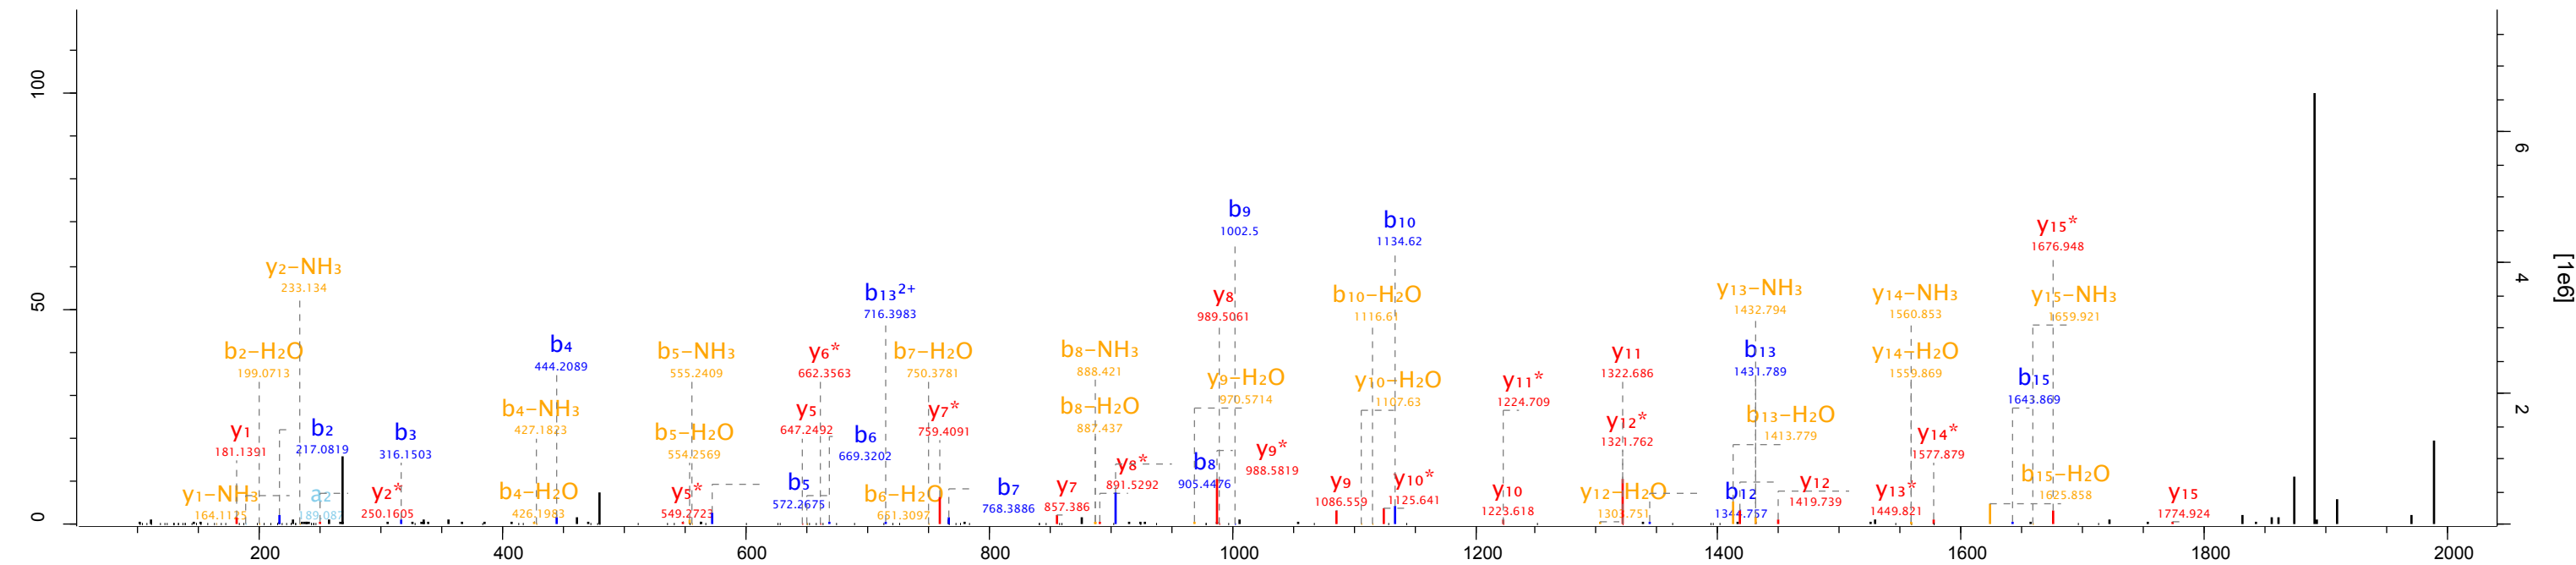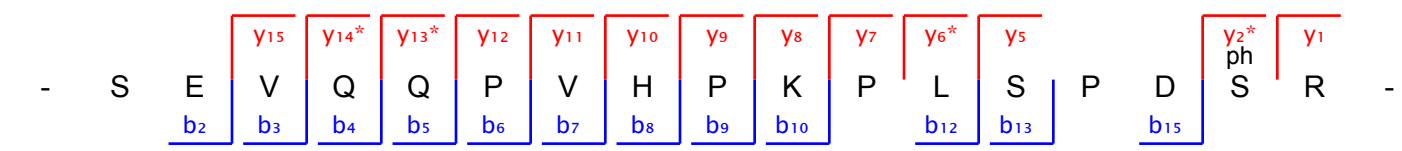

Raw file: 20150814\_A375SR\_Phospho\_BR2\_09  
 Scan: 10596 Method: FTMS; HCD Score: 41.58 m/z: 697.82 Gene names: PSMD2

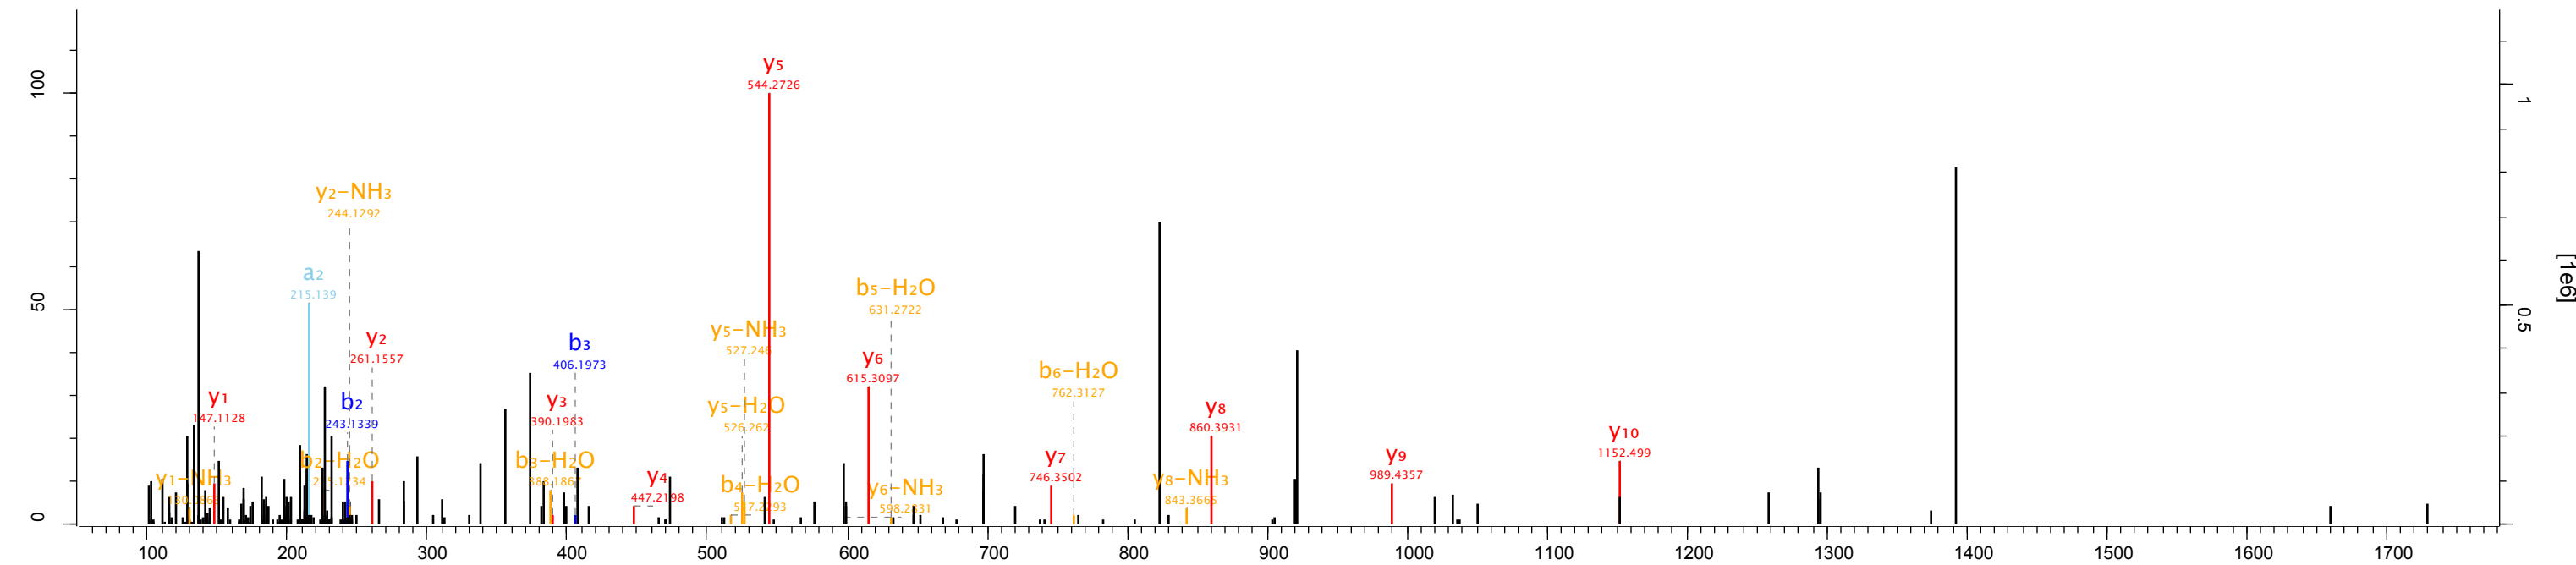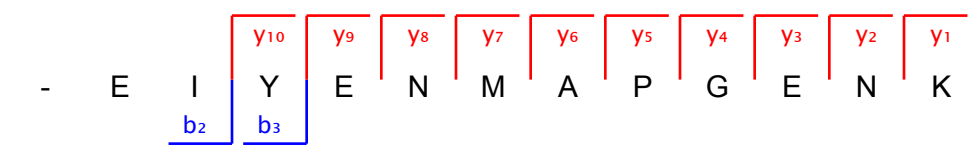

Raw file: 20150814\_A375SR\_Phospho\_BR2\_09  
 Scan: 11346 Method: FTMS; HCD Score: 58.02 m/z: 531.6 Gene names: BAT3;BAG6

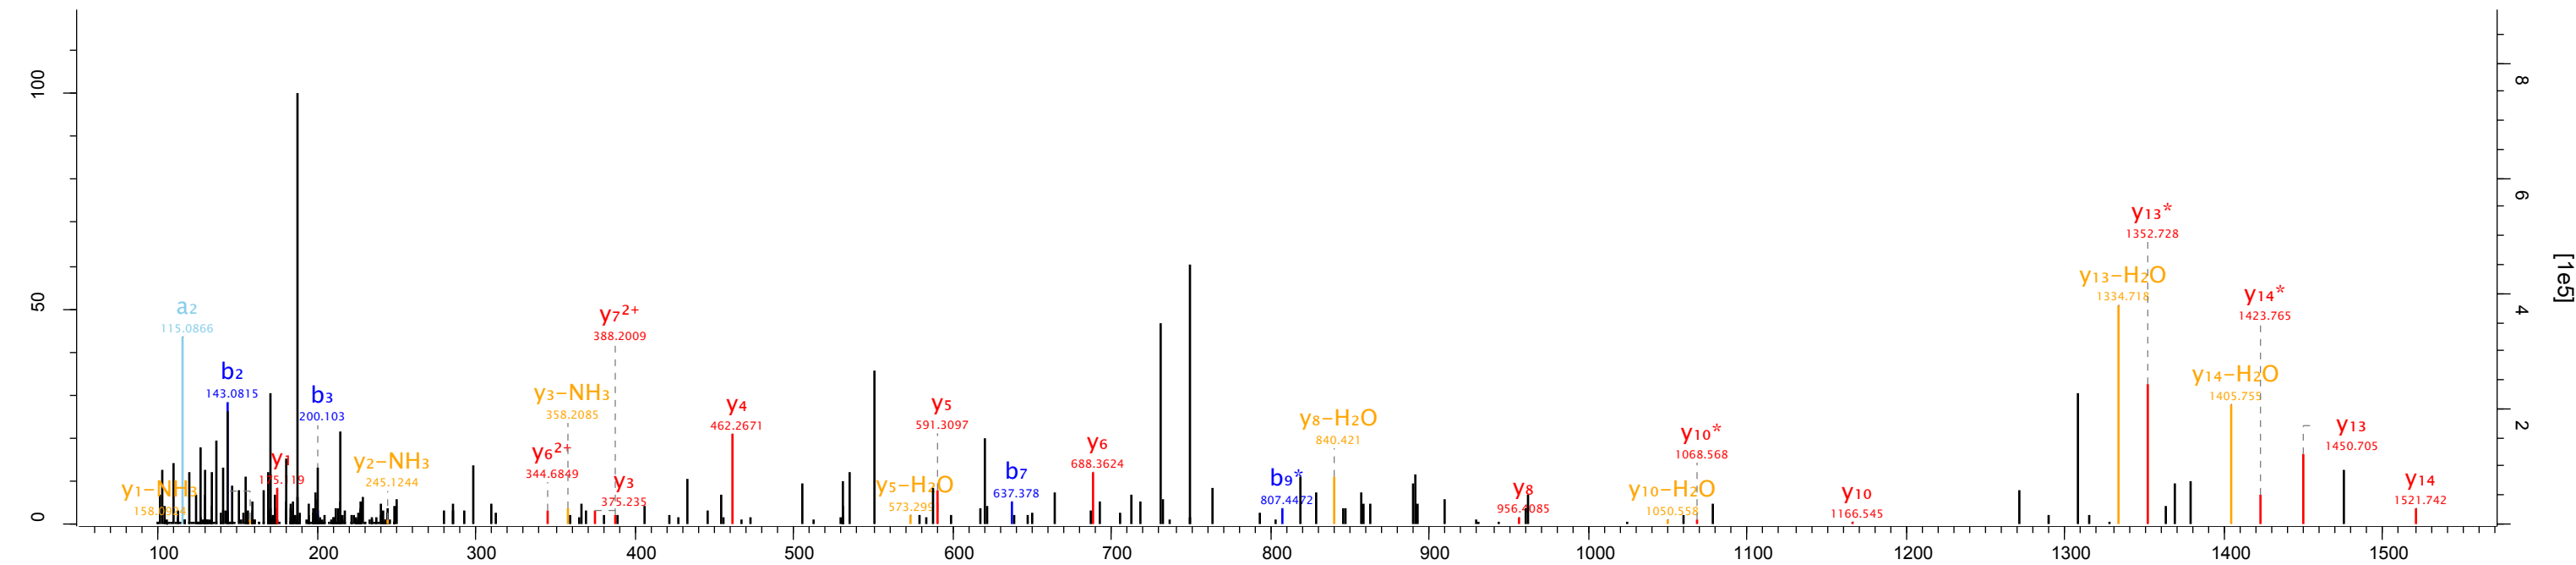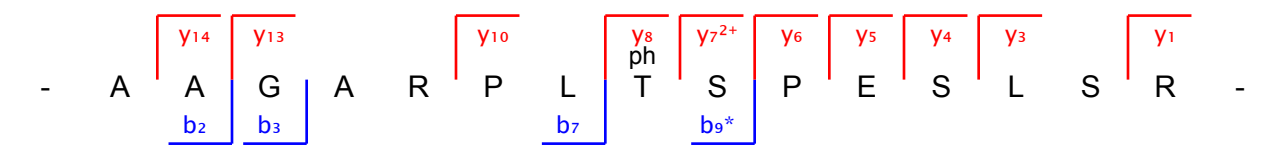

Raw file 20150814\_A375SR\_Phospho\_BR2\_09 Scan 11716 Method FTMS; HCD Score 124.42 m/z 422.89 Gene names AHNAK

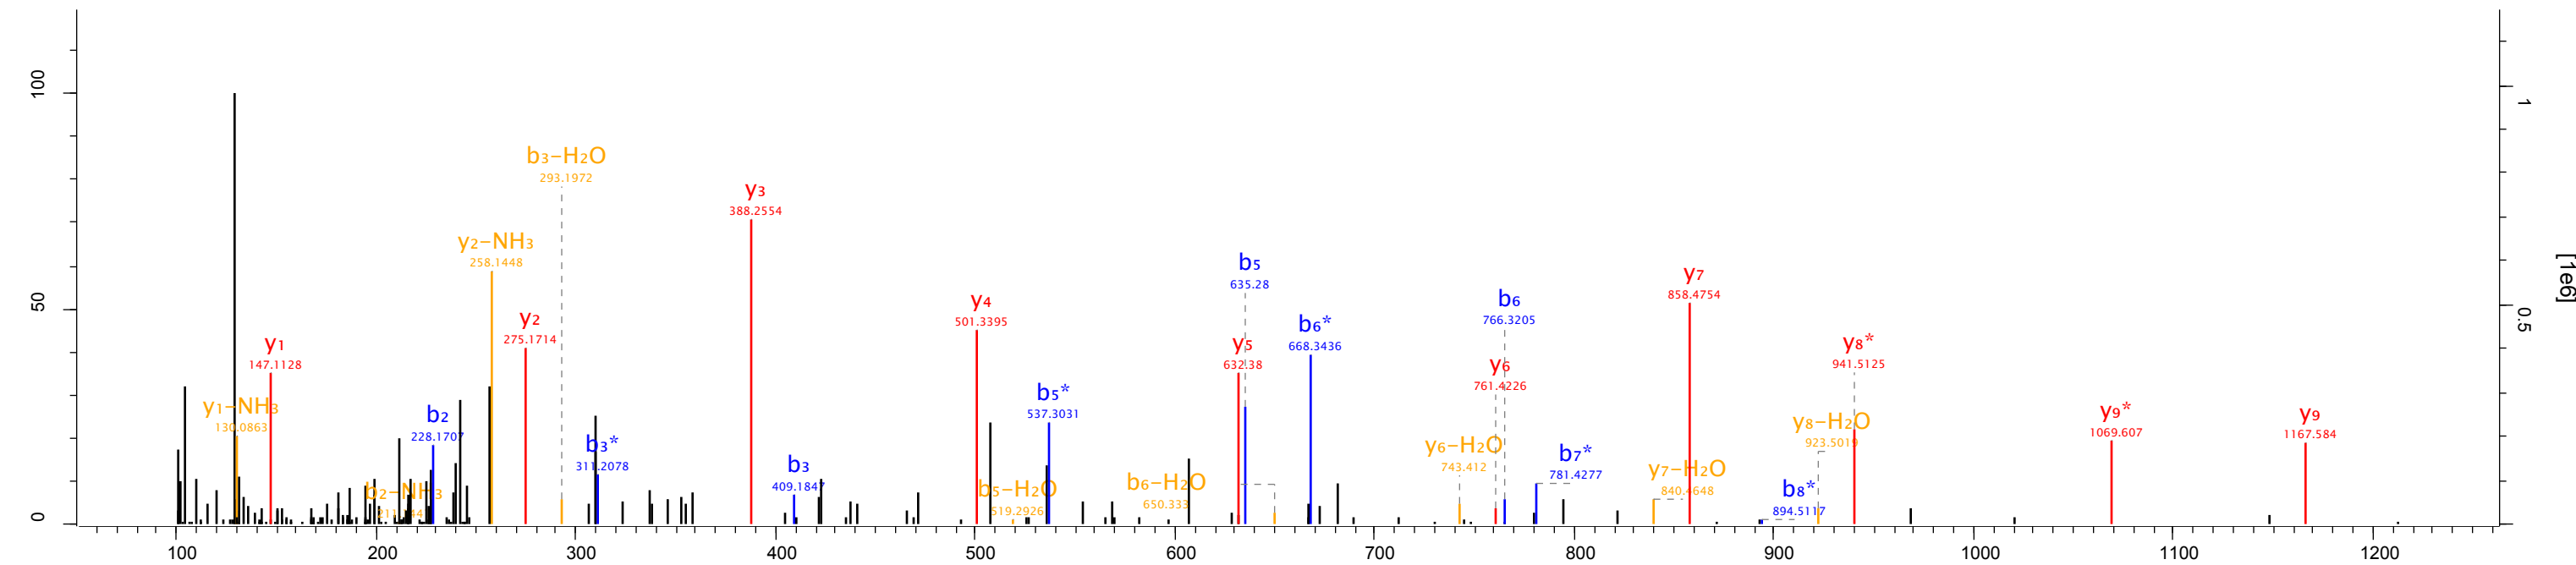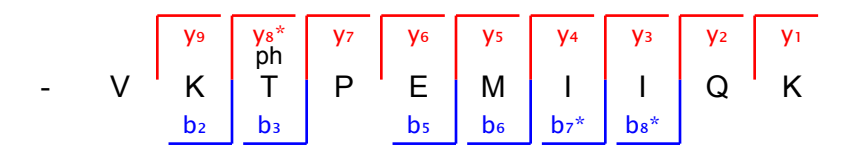

Raw file: 20150814\_A375SR\_Phospho\_BR2\_09  
 Scan: 1236 Method: FTMS; HCD Score: 66.27 m/z: 357.53 Gene names: CRKL

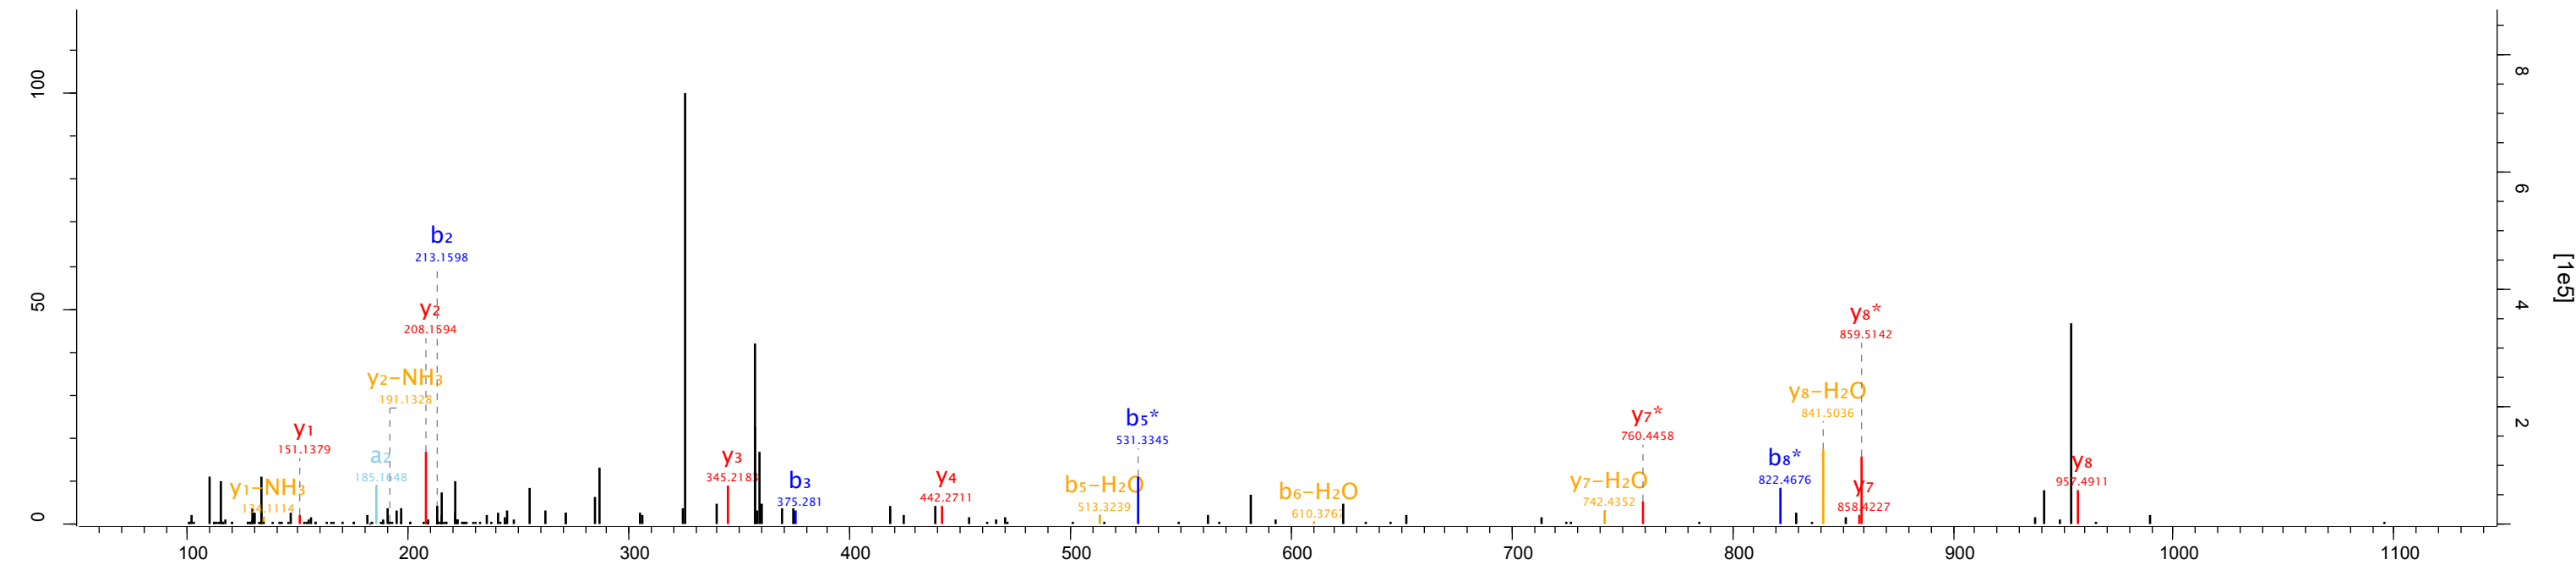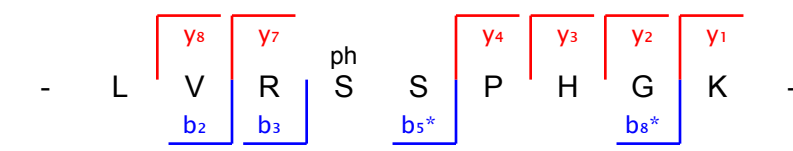

Raw file 20150814\_A375SR\_Phospho\_BR2\_09 Scan 12826 Method FTMS; HCD Score 139.08 m/z 592.28 Gene names TJP1

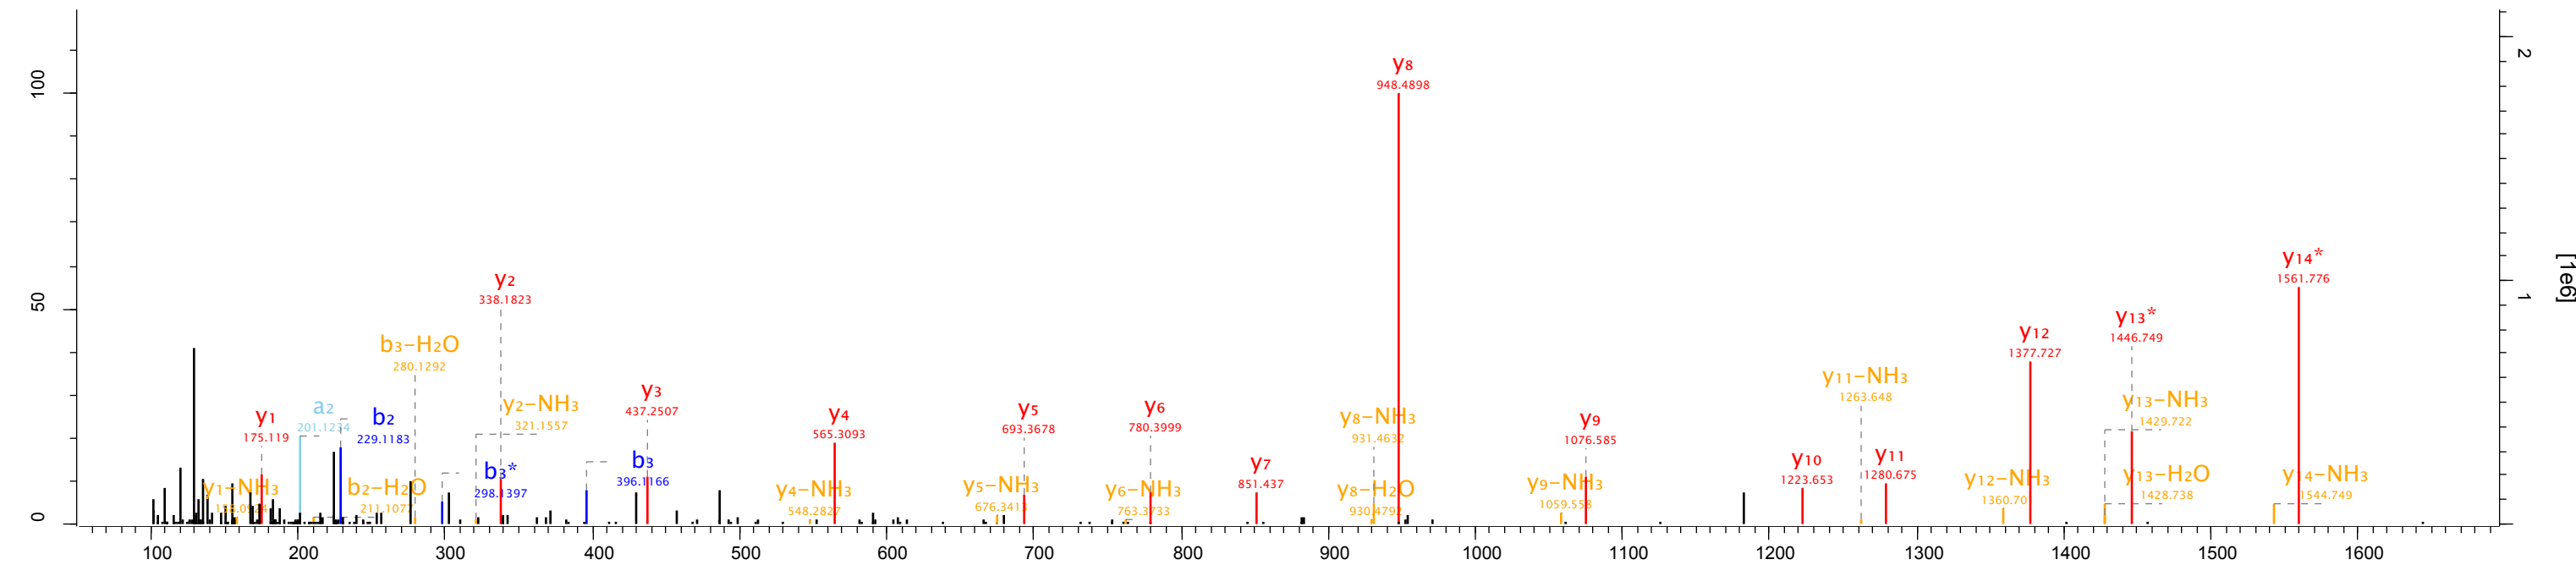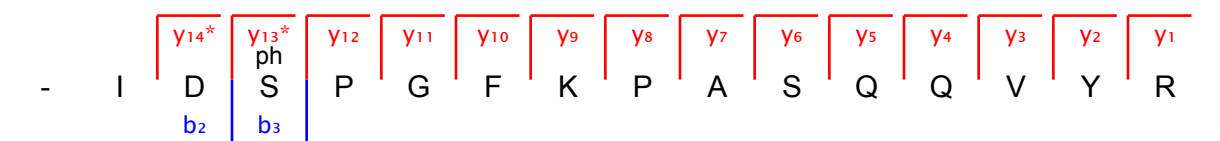



Raw file  
 20150814\_A375SR\_Phospho\_BR2\_09  
 Scan 14466 Method FTMS; HCD Score 316.04 m/z 1085.5 Gene names PGM3

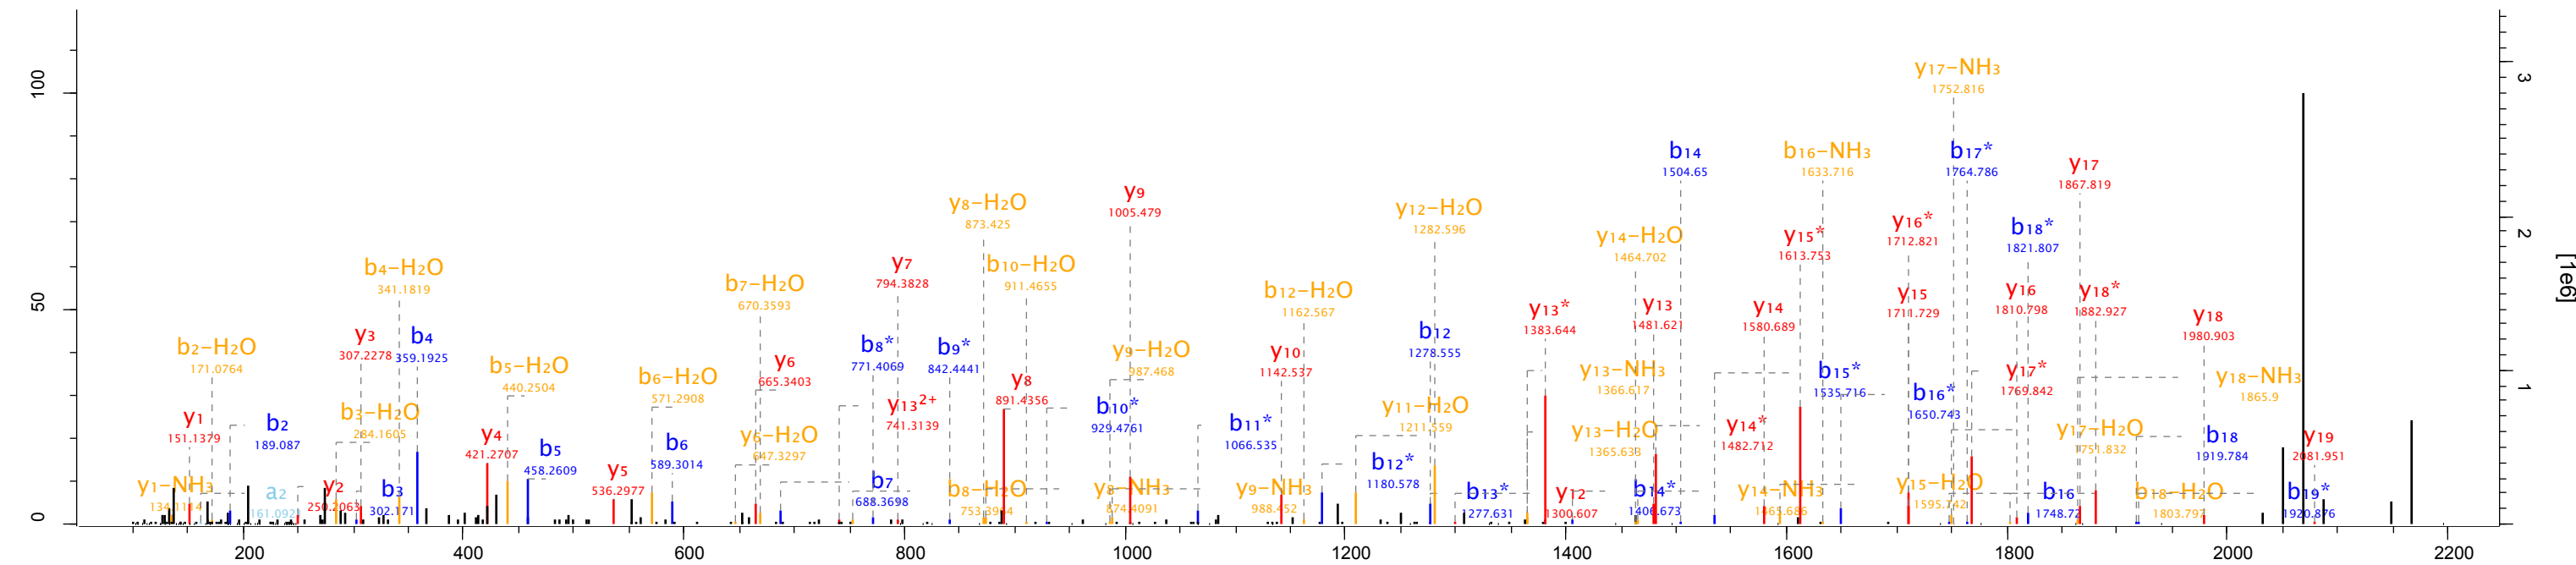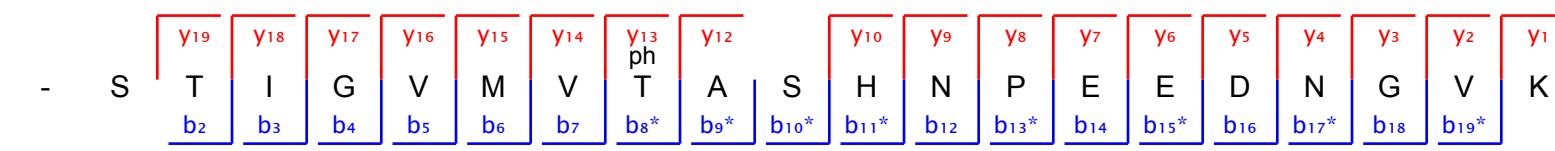

Raw file 20150814\_A375SR\_Phospho\_BR2\_09 Scan 17786 Method FTMS; HCD Score 64.26 m/z 596.63 Gene names MKNK2

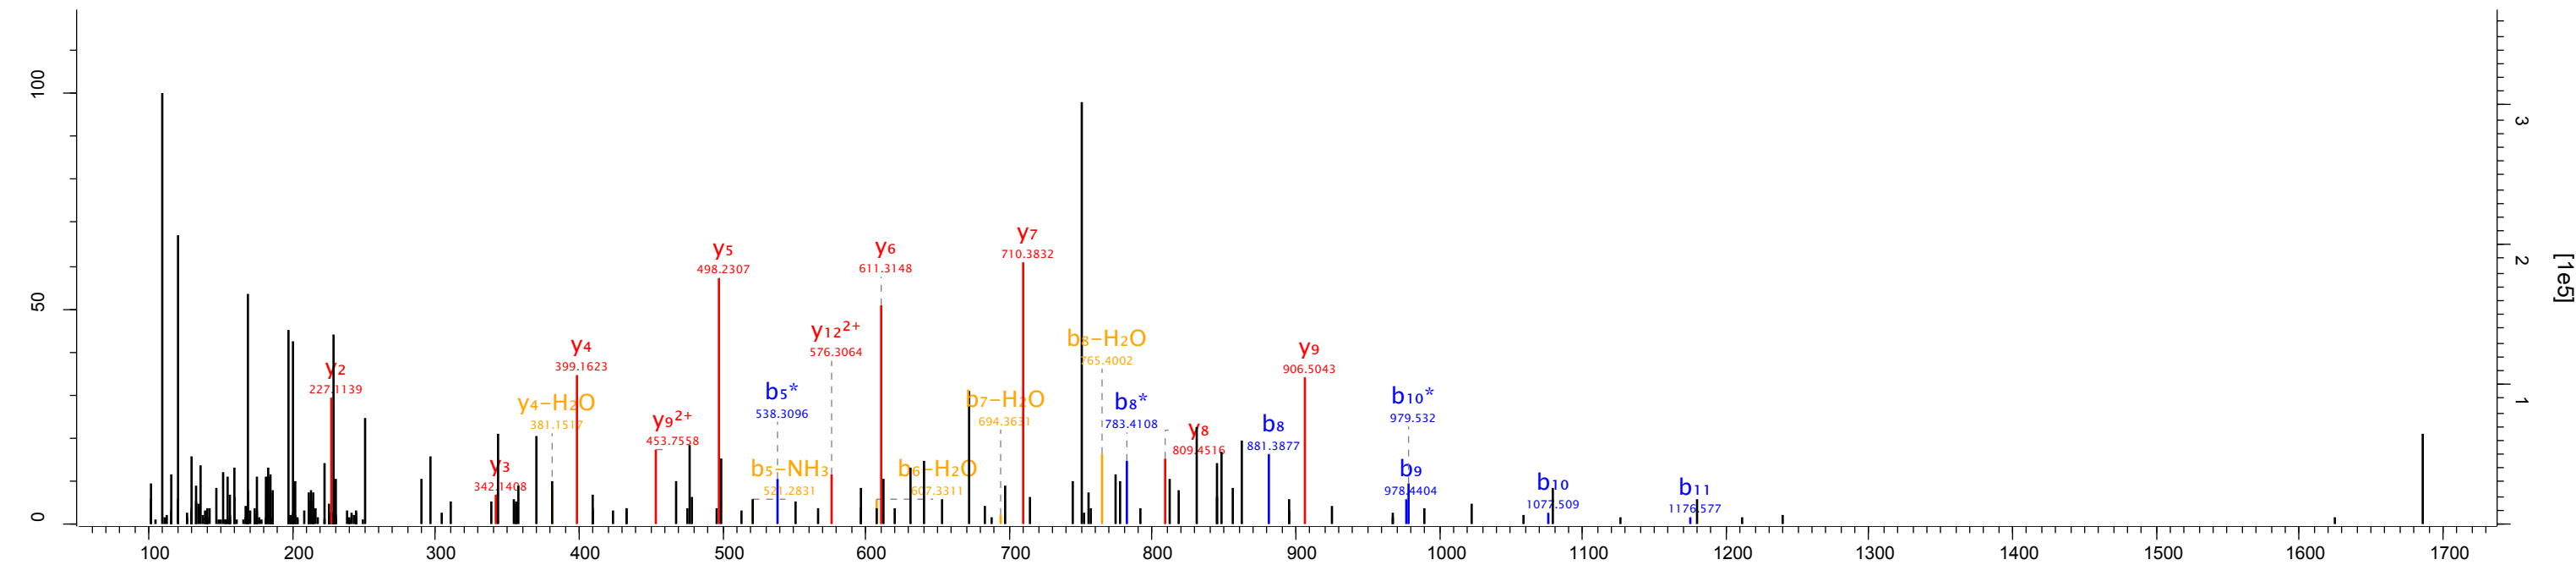

- Q R A S L S S A P V V L V G D H A -

b<sub>5</sub>\*
y<sub>12</sub><sup>2+</sup>
b<sub>8</sub>
y<sub>9</sub>
b<sub>9</sub>
y<sub>8</sub>
b<sub>10</sub>
y<sub>7</sub>
b<sub>11</sub>
y<sub>6</sub>
y<sub>5</sub>
y<sub>4</sub>
y<sub>3</sub>
y<sub>2</sub>

Raw file: 20150814\_A375SR\_Phospho\_BR2\_09  
 Scan: 18946 Method: FTMS; HCD Score: 163.12 m/z: 545.77 Gene names: KIF1B;KIF1Bbeta

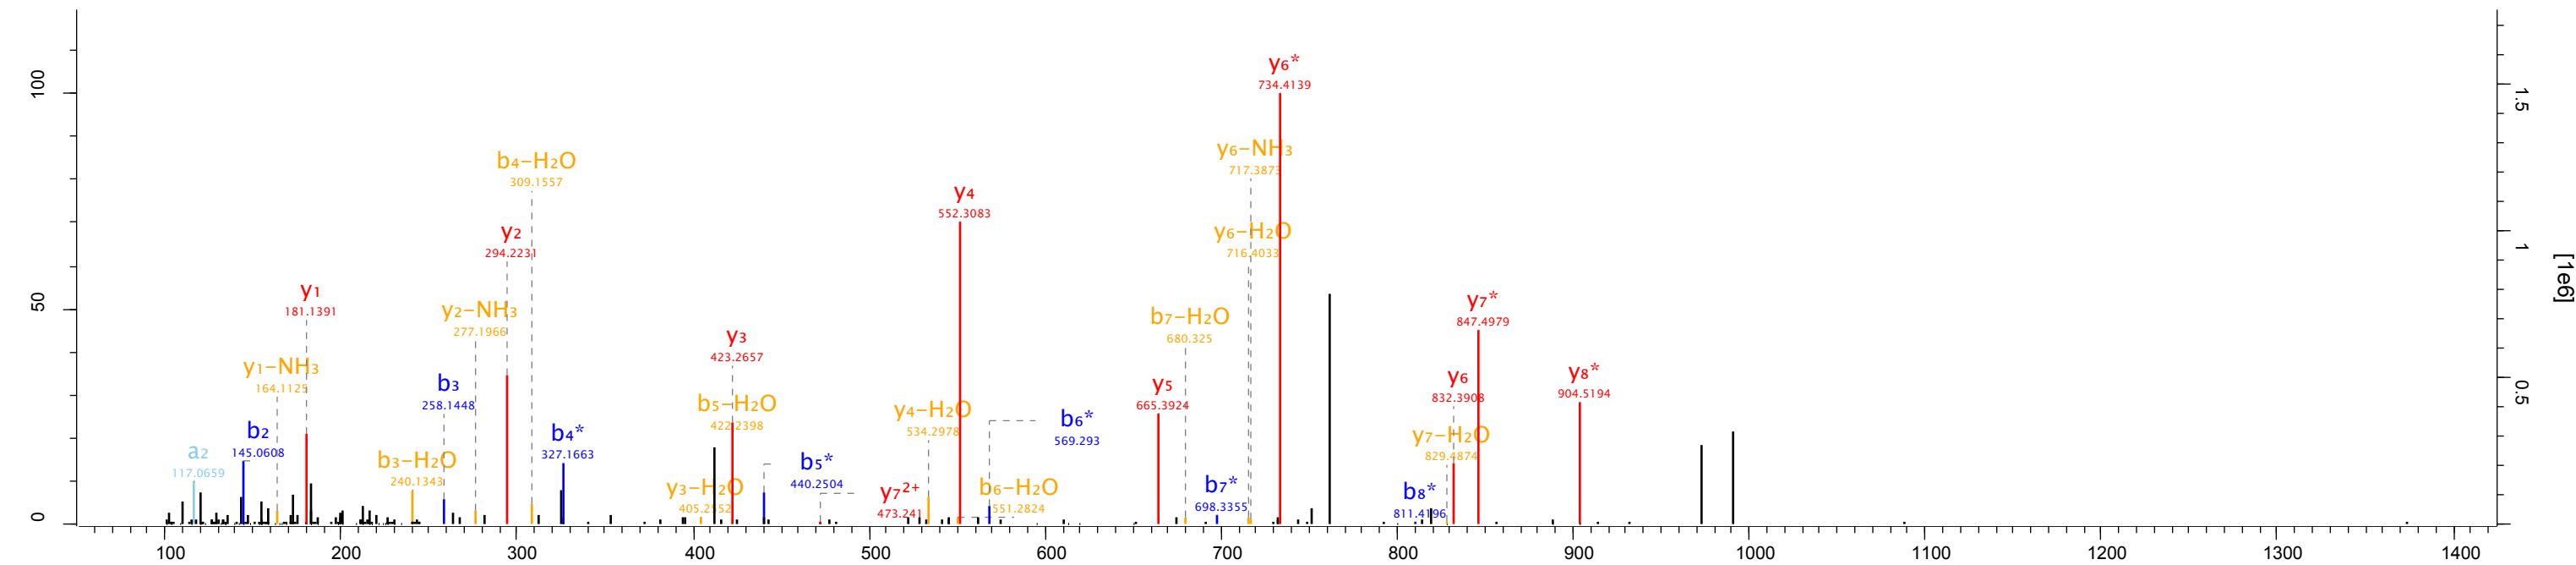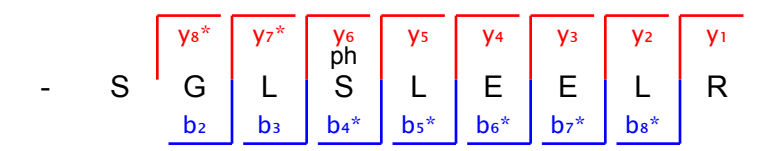

Raw file: 20150814\_A375SR\_Phospho\_BR2\_09  
 Scan: 19296 Method: FTMS; HCD Score: 188.49 m/z: 696.37 Gene names: RBCK1

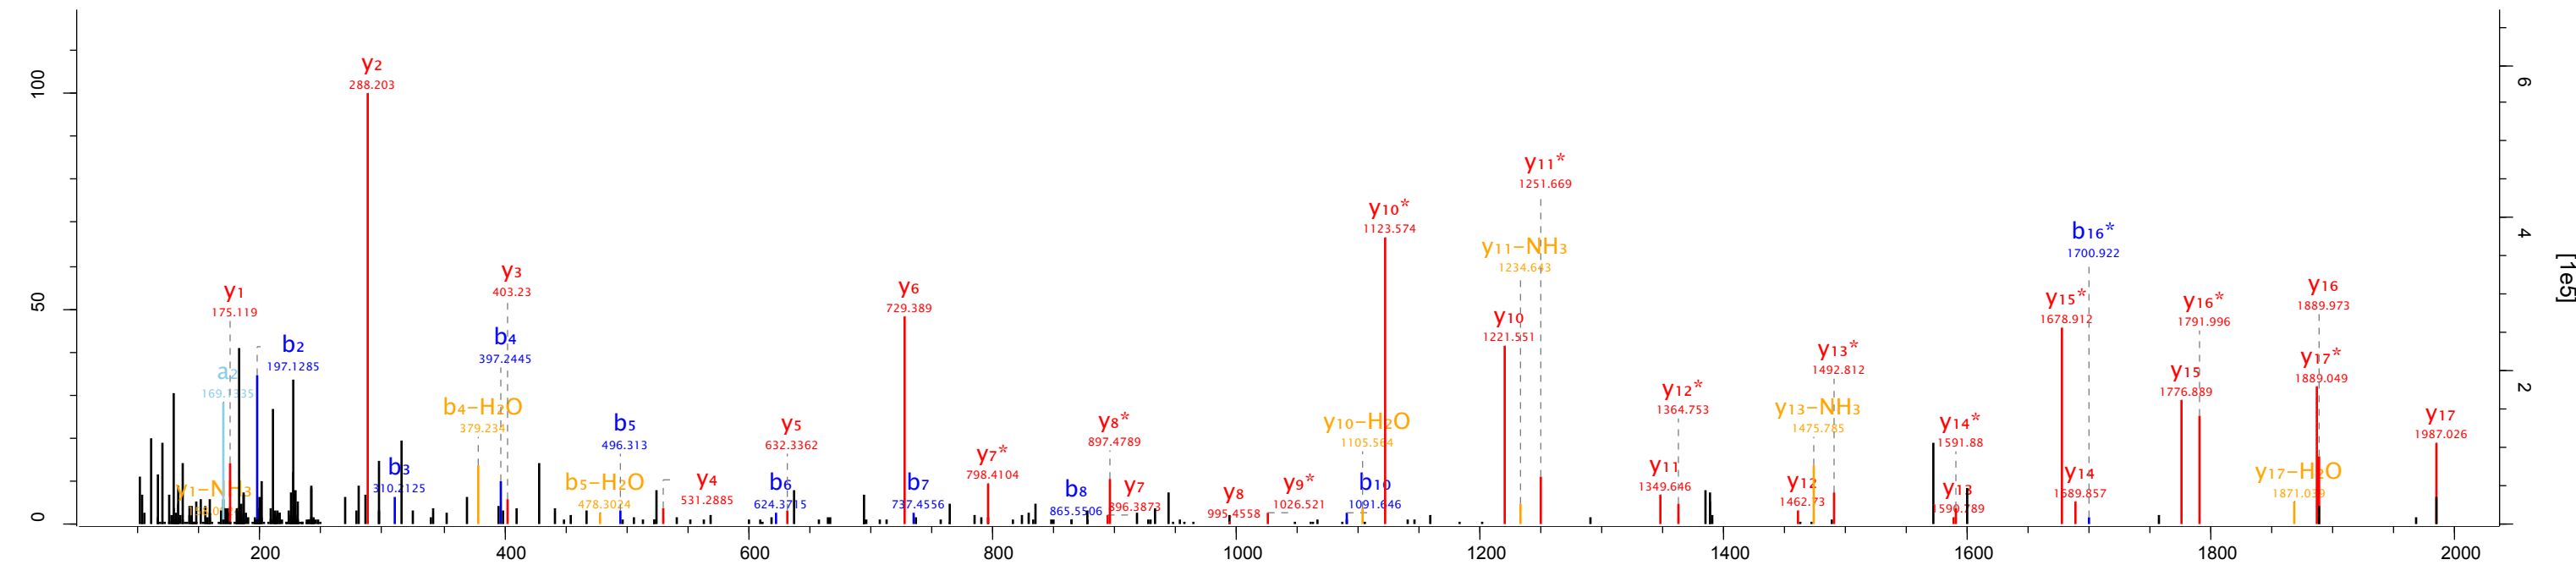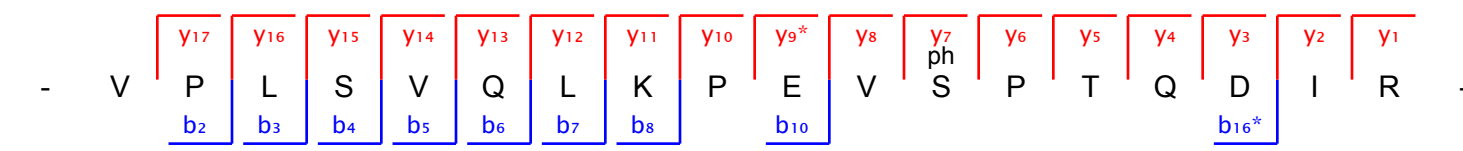

Raw file 20150814\_A375SR\_Phospho\_BR2\_09 Scan 19346 Method FTMS; HCD Score 83.6 m/z 628.01 Gene names NECAP2

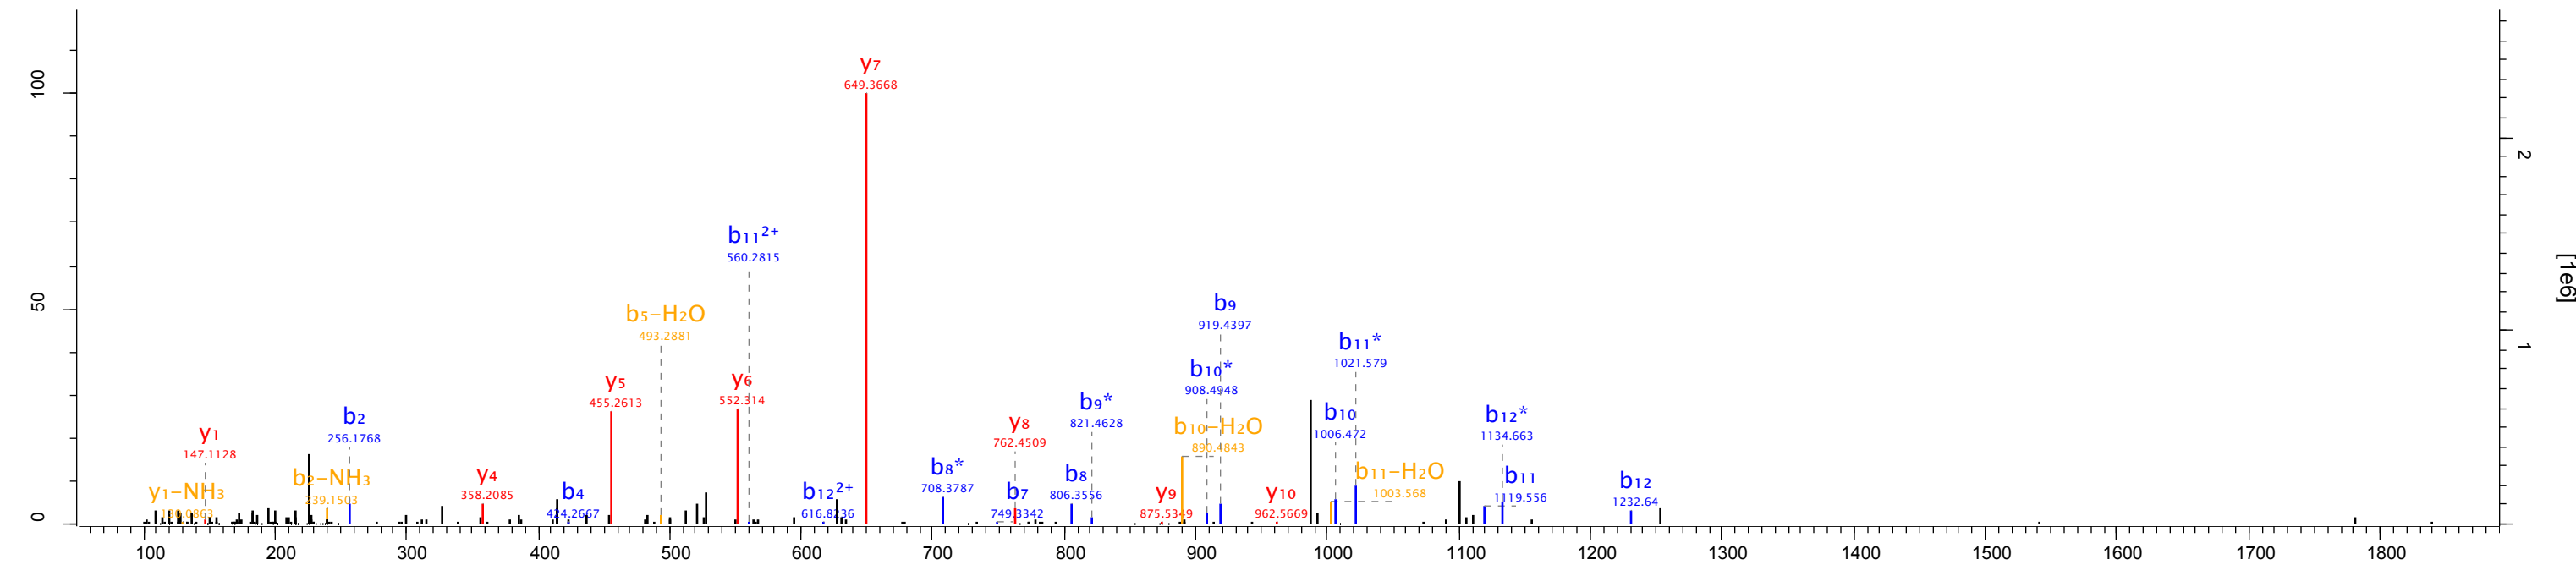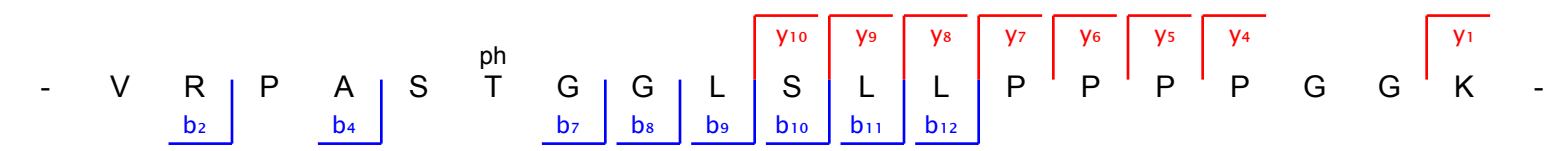

Raw file 20150814\_A375SR\_Phospho\_BR2\_09 Scan 19606 Method FTMS; HCD Score 194.06 m/z 1074.54 Gene names ZMYND8

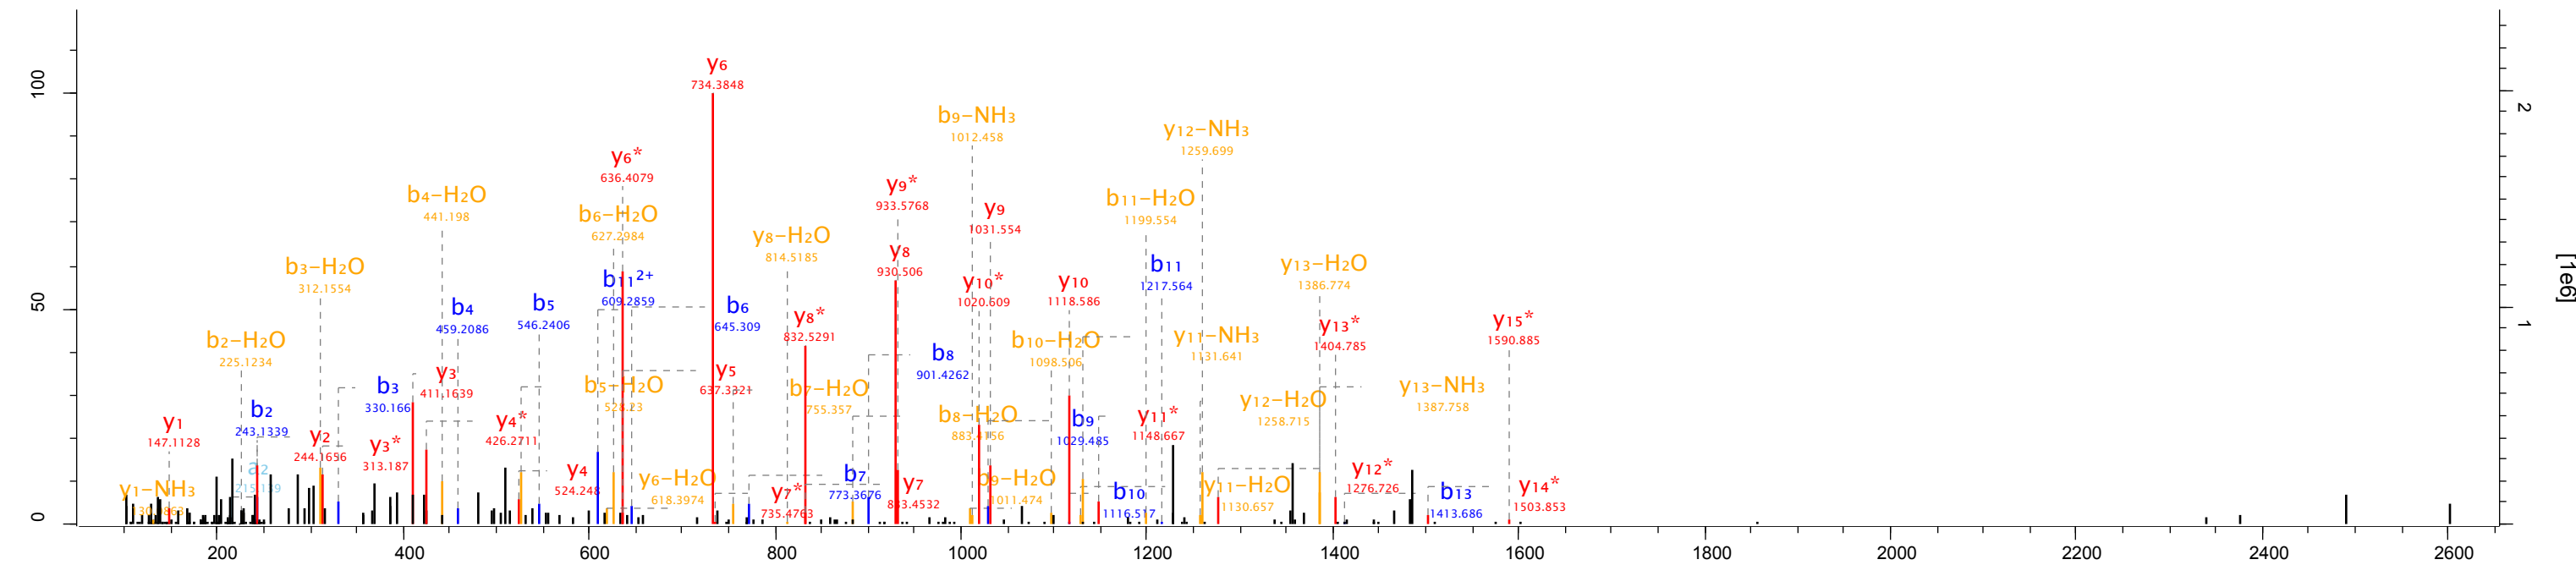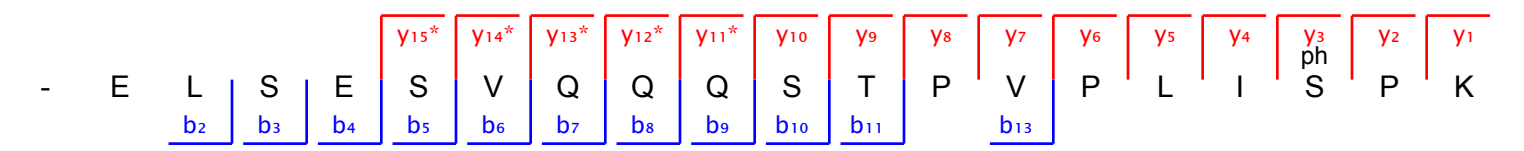

Raw file: 20150814\_A375SR\_Phospho\_BR2\_09  
 Scan: 20196 Method: FTMS; HCD Score: 178.5 m/z: 1170.89 Gene names: TJP1

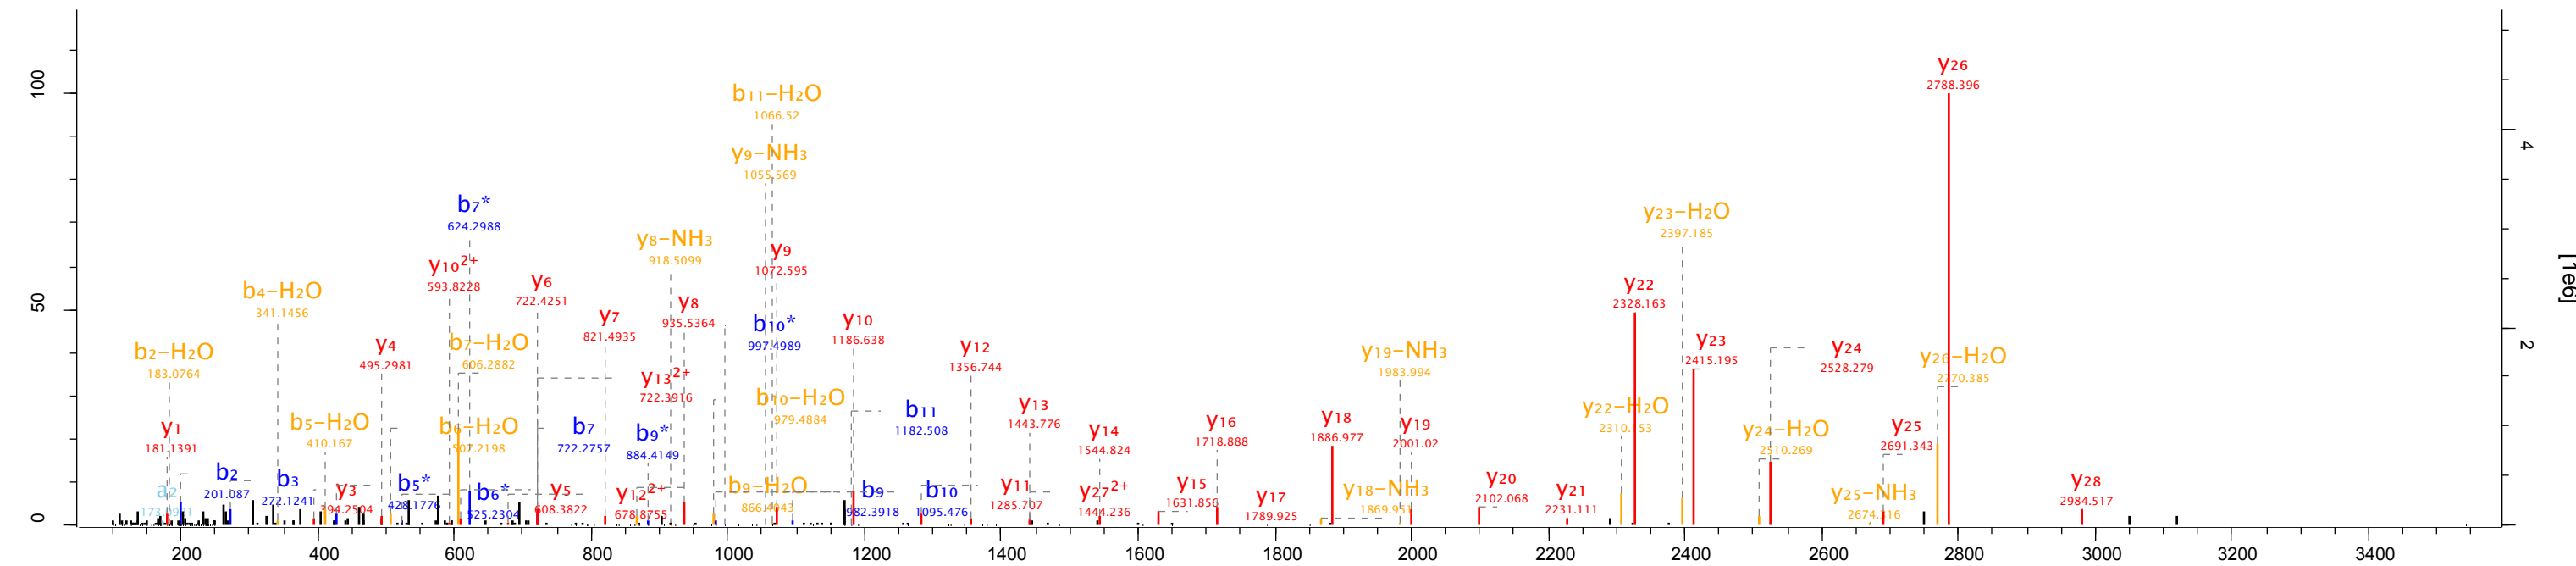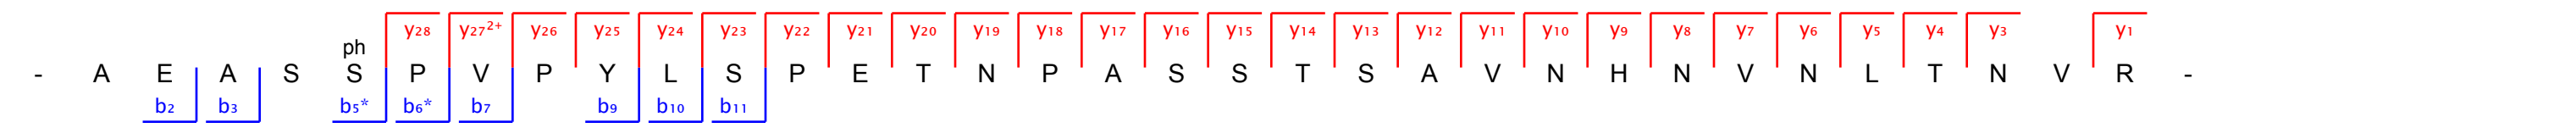

Raw file 20150814\_A375SR\_Phospho\_BR2\_09 Scan 20776 Method FTMS; HCD Score 205.02 m/z 623.98 Gene names EPHA2

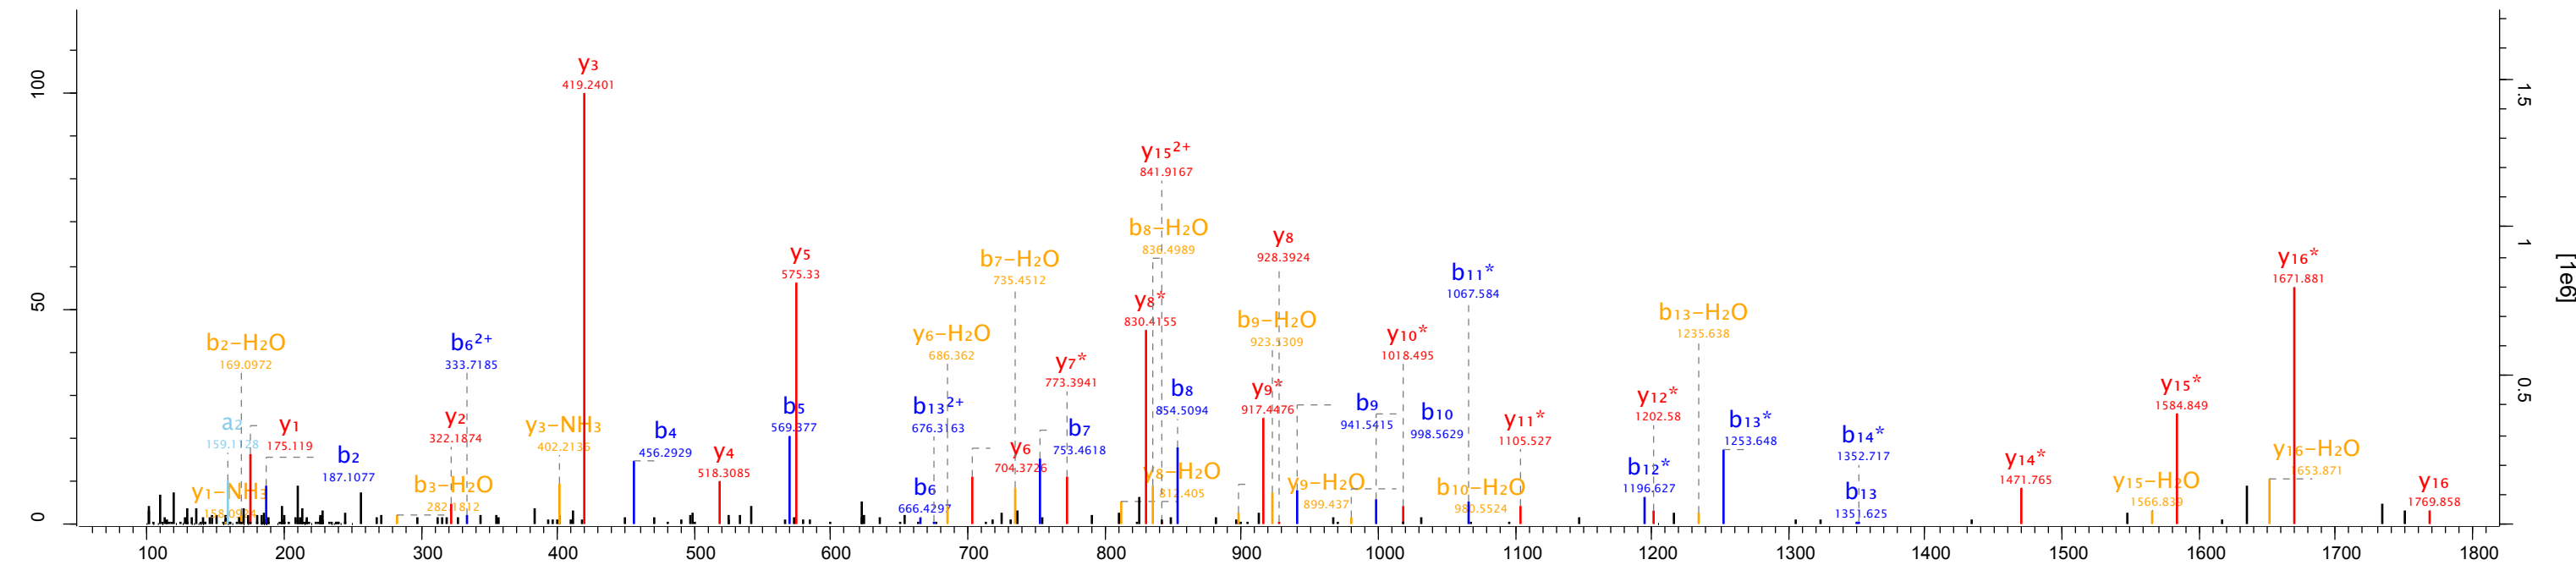

- V S I R L P S T S G S E G V P F R -

Fragmentation mapping (b and y ions):

- b<sub>2</sub> (S)
- b<sub>4</sub> (R)
- b<sub>5</sub> (L)
- b<sub>6</sub> (P)
- b<sub>7</sub> (S)
- b<sub>8</sub> (T)
- b<sub>9</sub> (S)
- b<sub>10</sub> (G)
- b<sub>11</sub>\* (S)
- b<sub>12</sub>\* (E)
- b<sub>13</sub> (G)
- b<sub>14</sub>\* (V)

Fragmentation mapping (y ions):

- y<sub>1</sub> (R)
- y<sub>2</sub> (F)
- y<sub>3</sub> (P)
- y<sub>4</sub> (V)
- y<sub>5</sub> (G)
- y<sub>6</sub> (E)
- y<sub>7</sub>\* (S)
- y<sub>8</sub> (G)
- y<sub>9</sub>\* (S)
- y<sub>10</sub>\* (T)
- y<sub>11</sub>\* (S)
- y<sub>12</sub>\* (P)
- y<sub>14</sub>\* (F)
- y<sub>15</sub>\* (G)
- y<sub>16</sub> (R)



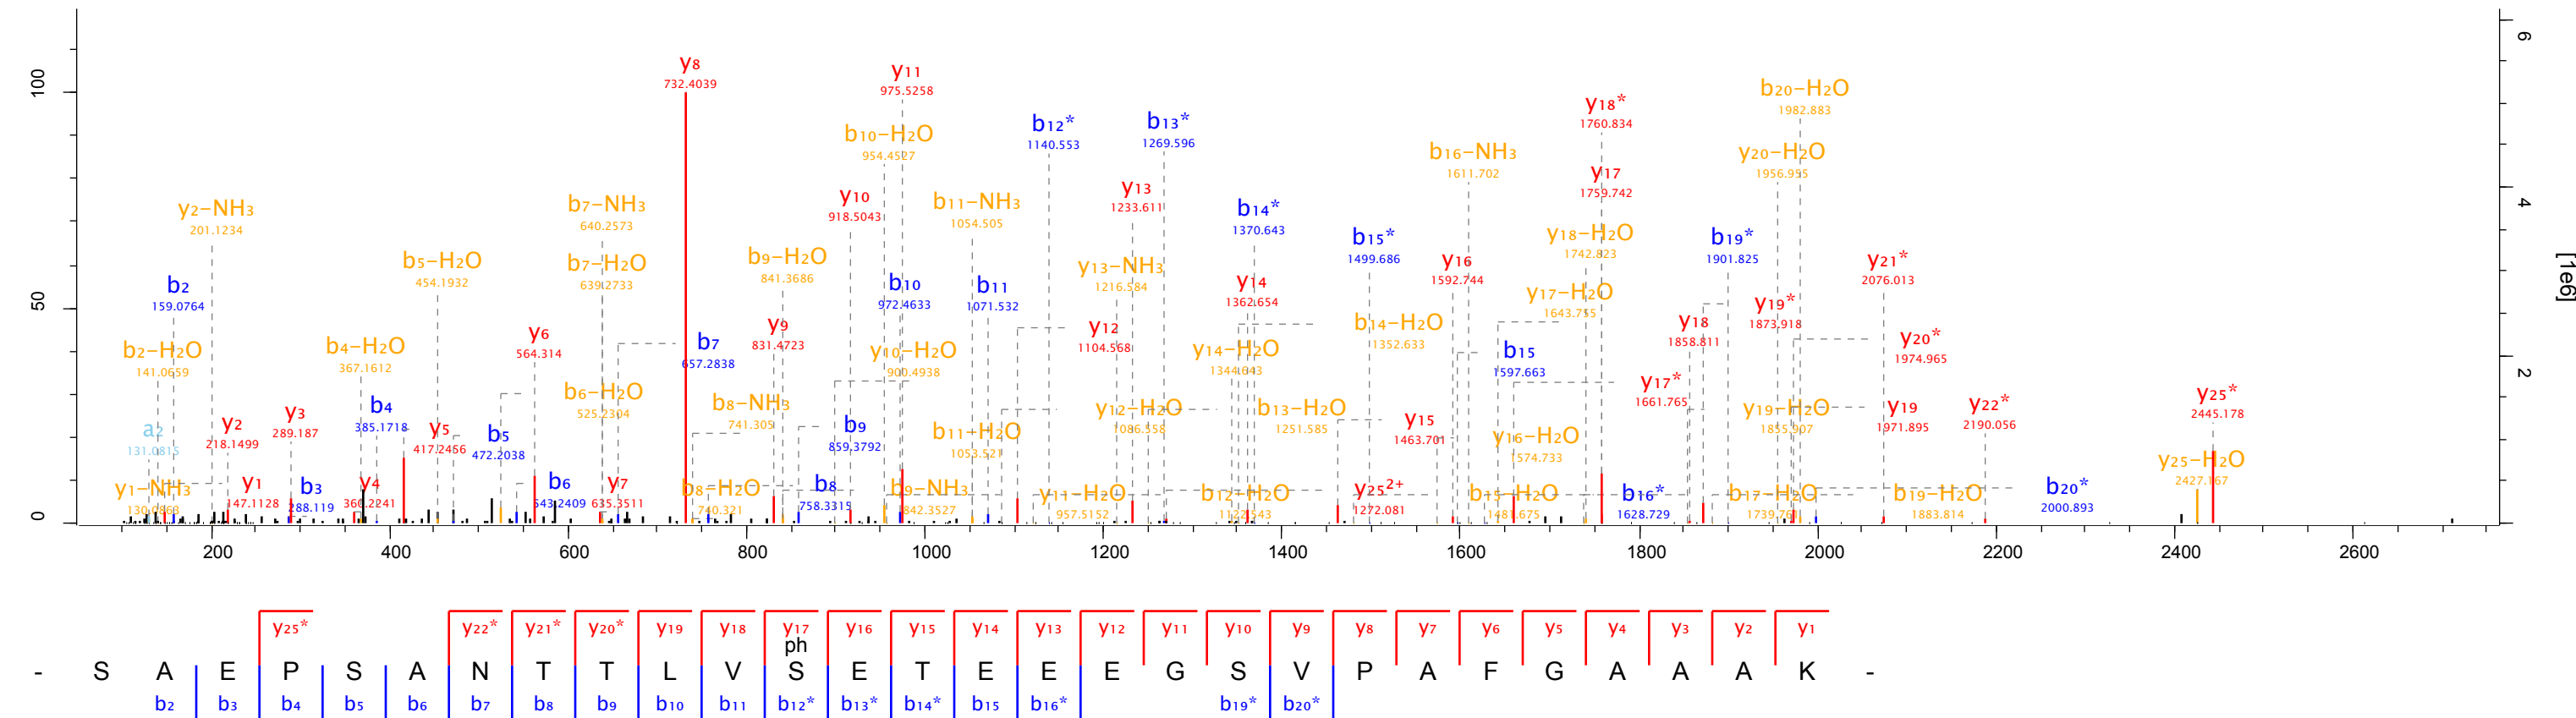

Raw file 20150814\_A375SR\_Phospho\_BR2\_09 Scan 2206 Method FTMS; HCD Score 46.88 m/z 524.74 Gene names RALBP1

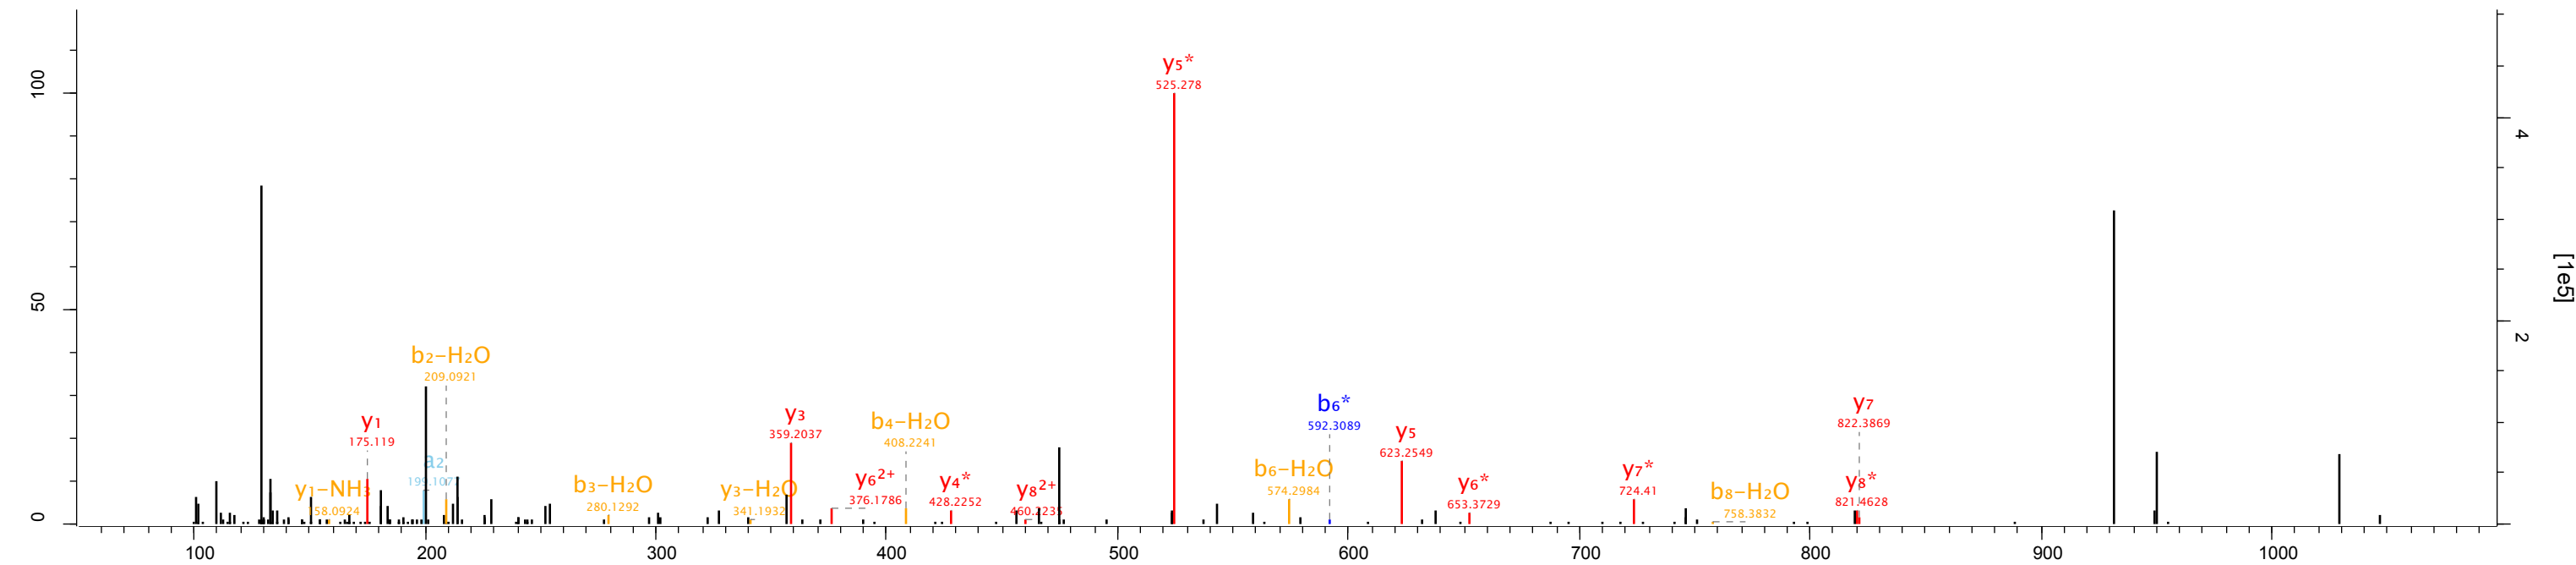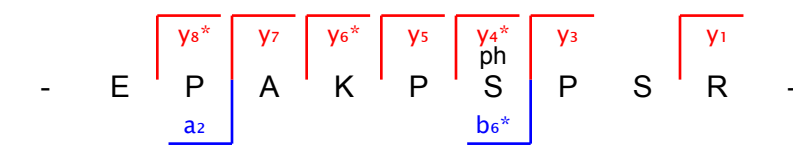

Raw file  
20150814\_A375SR\_Phospho\_BR2\_09

Scan 23426 Method FTMS; HCD Score 100.7 m/z 960.78 Gene names SPTBN1

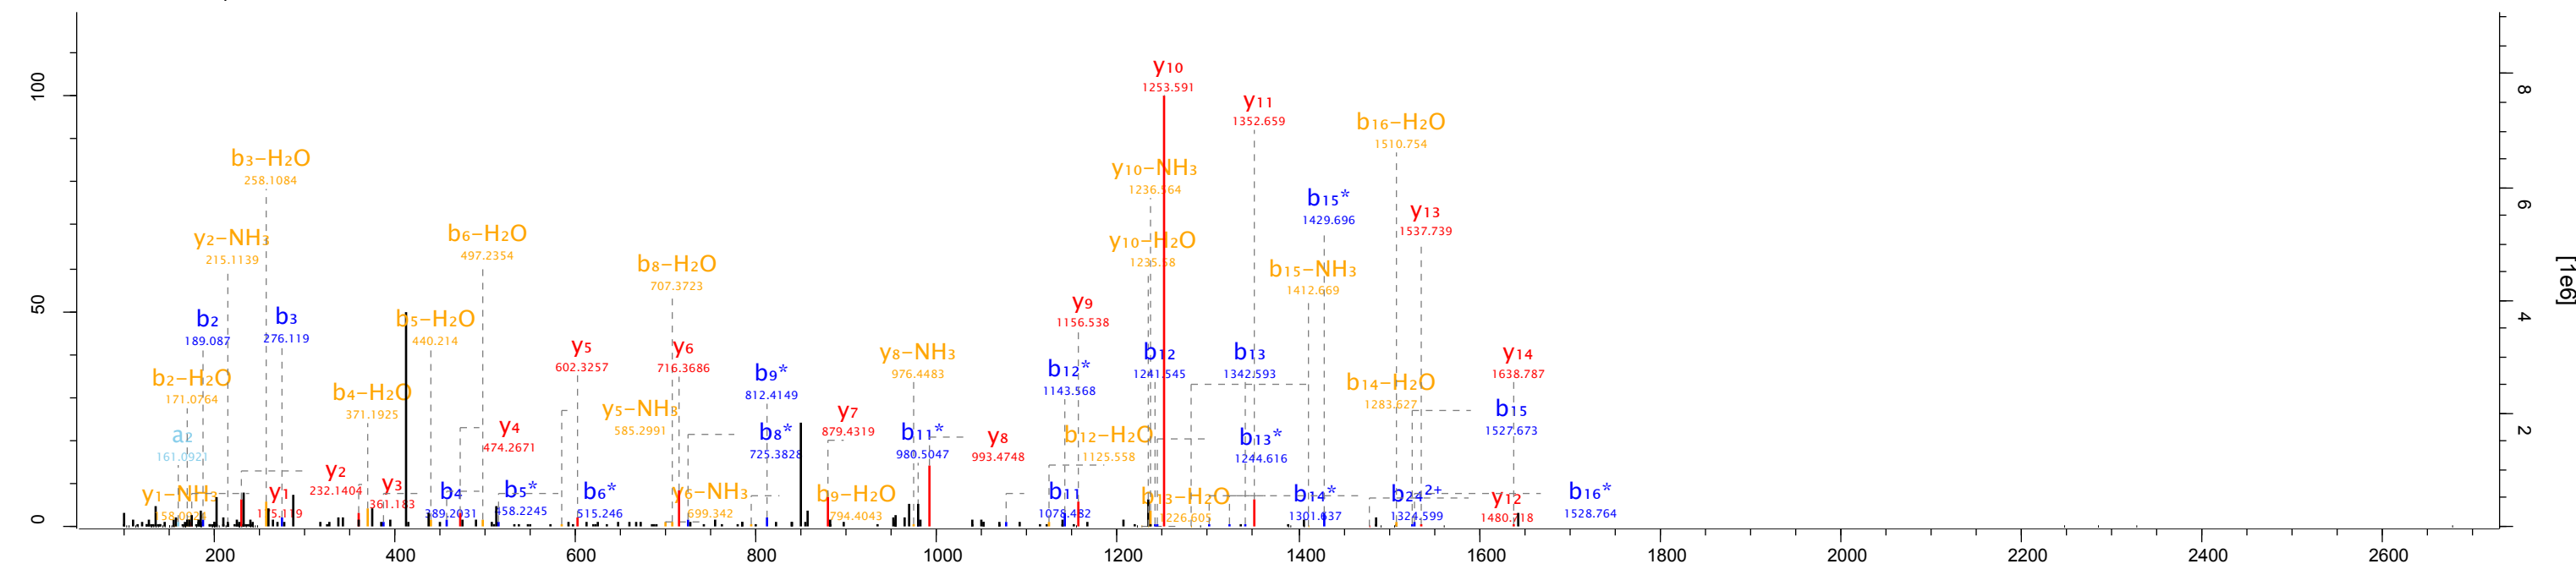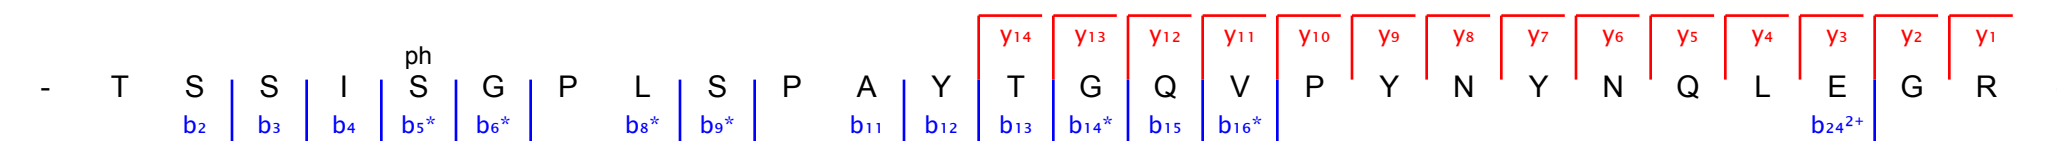

Raw file: 20150814\_A375SR\_Phospho\_BR2\_09  
 Scan: 23576 Method: FTMS; HCD Score: 109.62 m/z: 966.48 Gene names: LRCH4

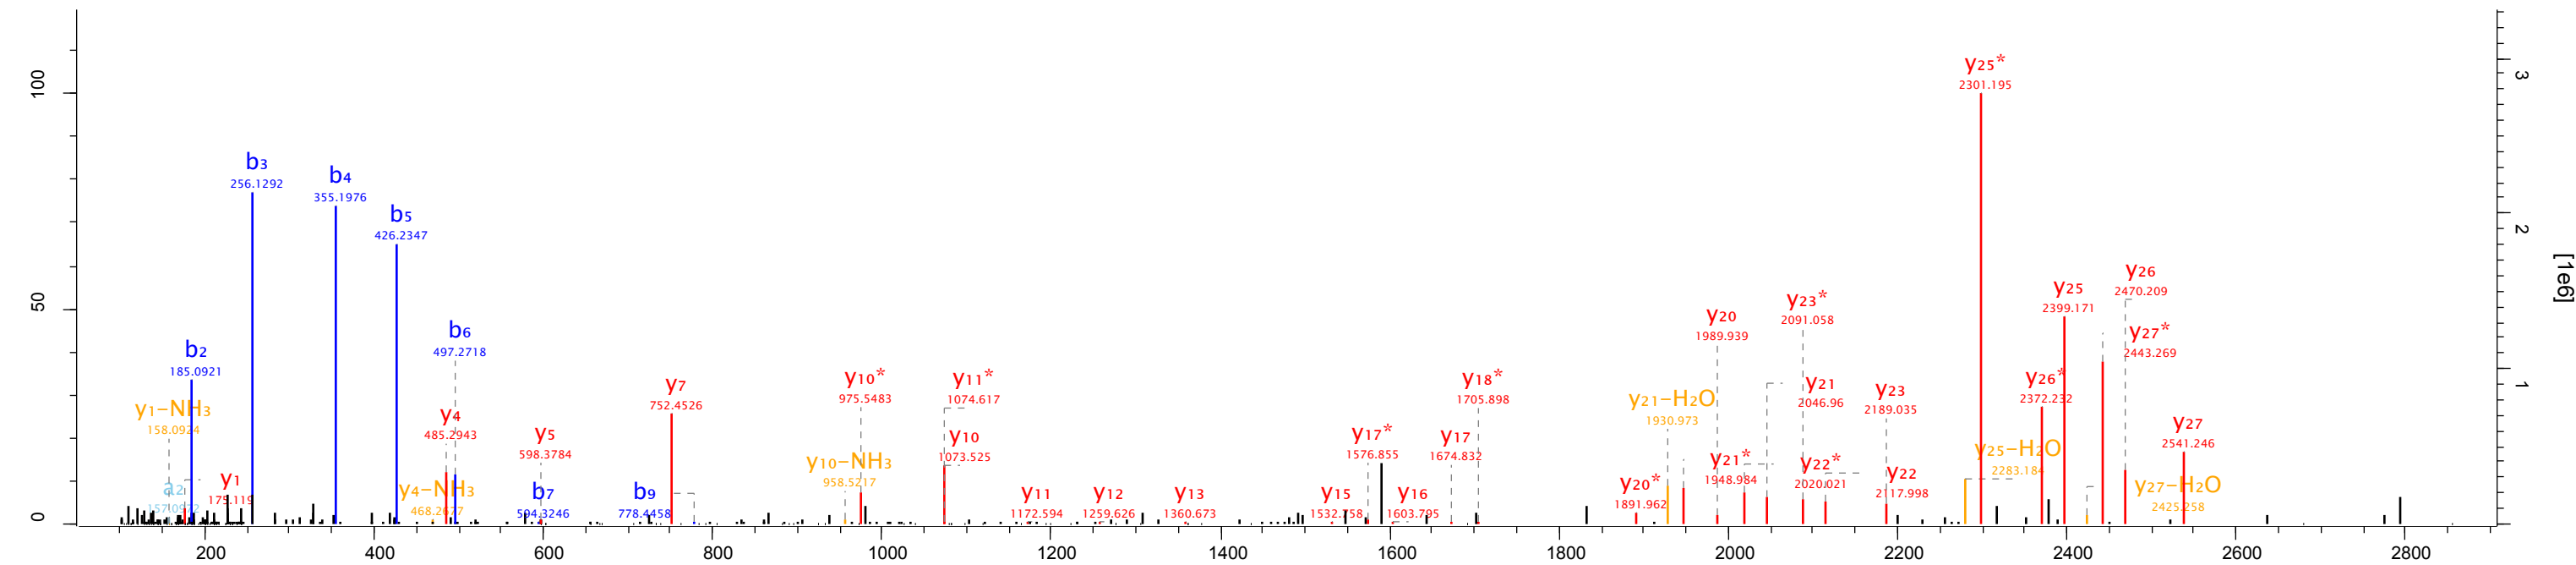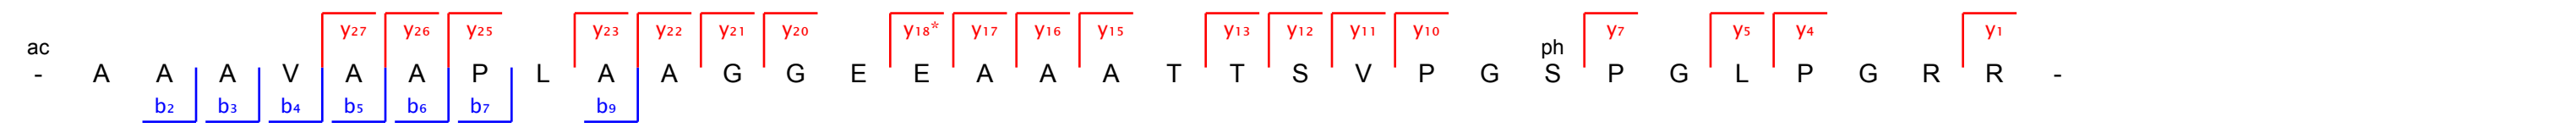

Raw file 20150814\_A375SR\_Phospho\_BR2\_09 Scan 24476 Method FTMS; HCD Score 83.06 m/z 720.34 Gene names HAUS6

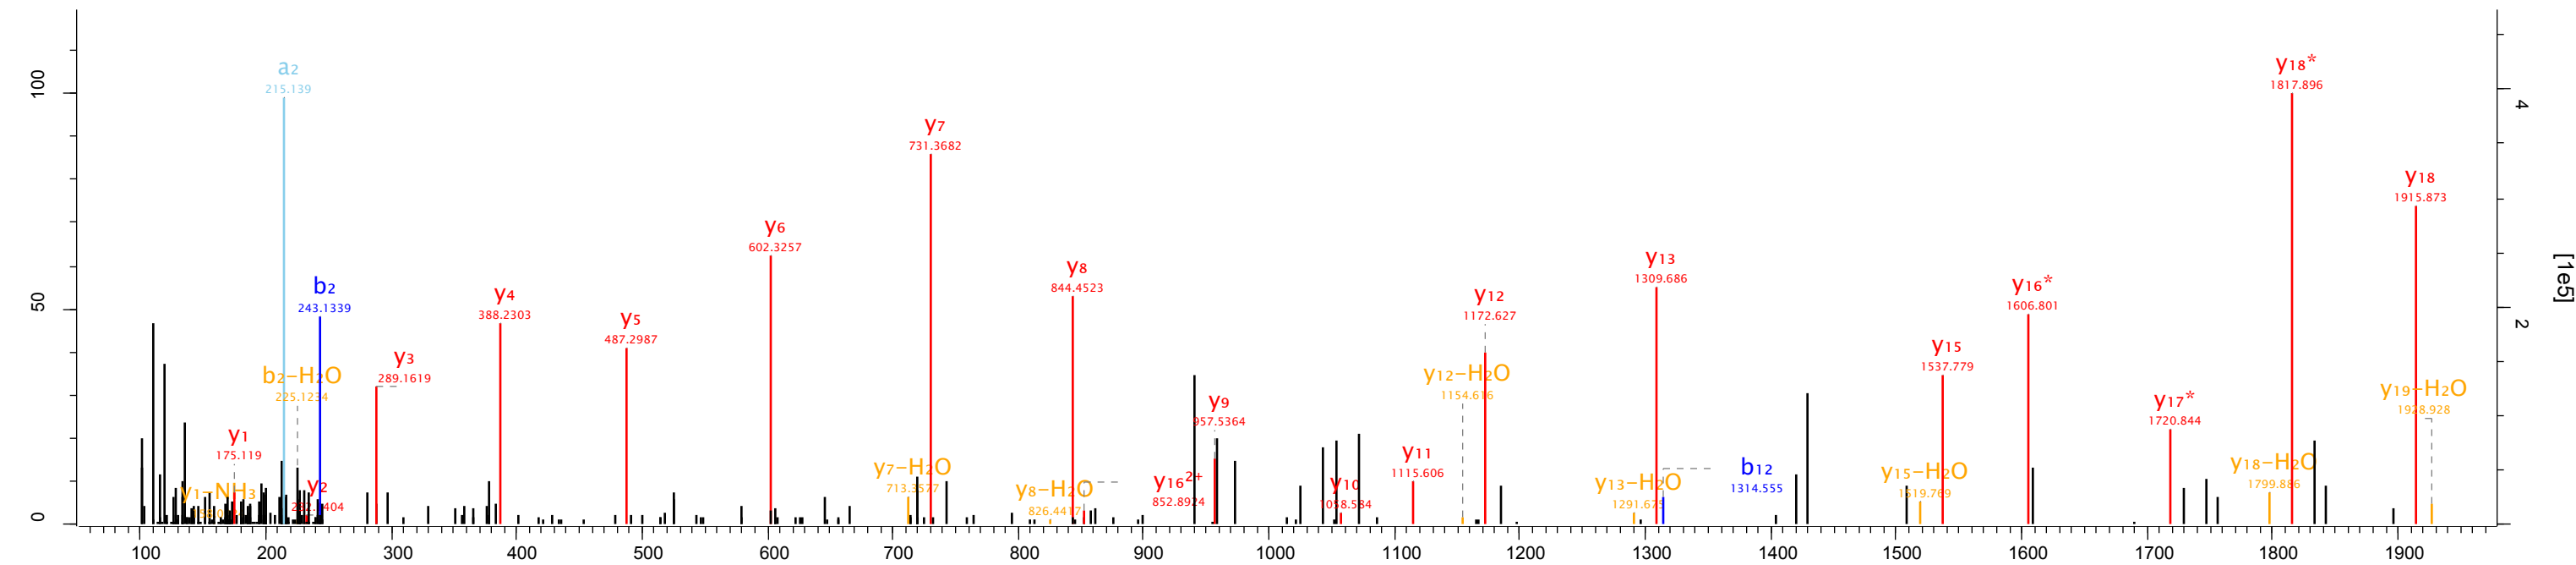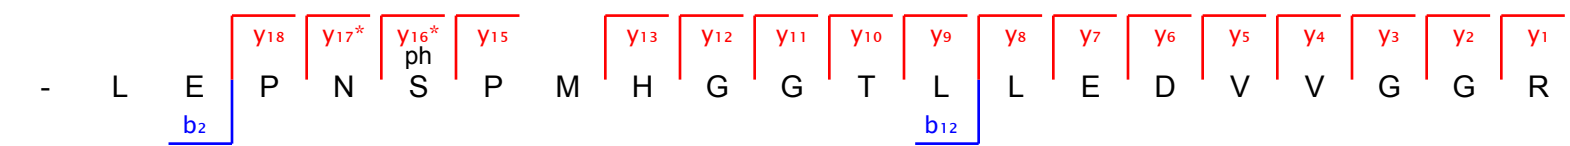

Raw file 20150814\_A375SR\_Phospho\_BR2\_09 Scan 25476 Method FTMS; HCD Score 81.02 m/z 660.68 Gene names PHF2

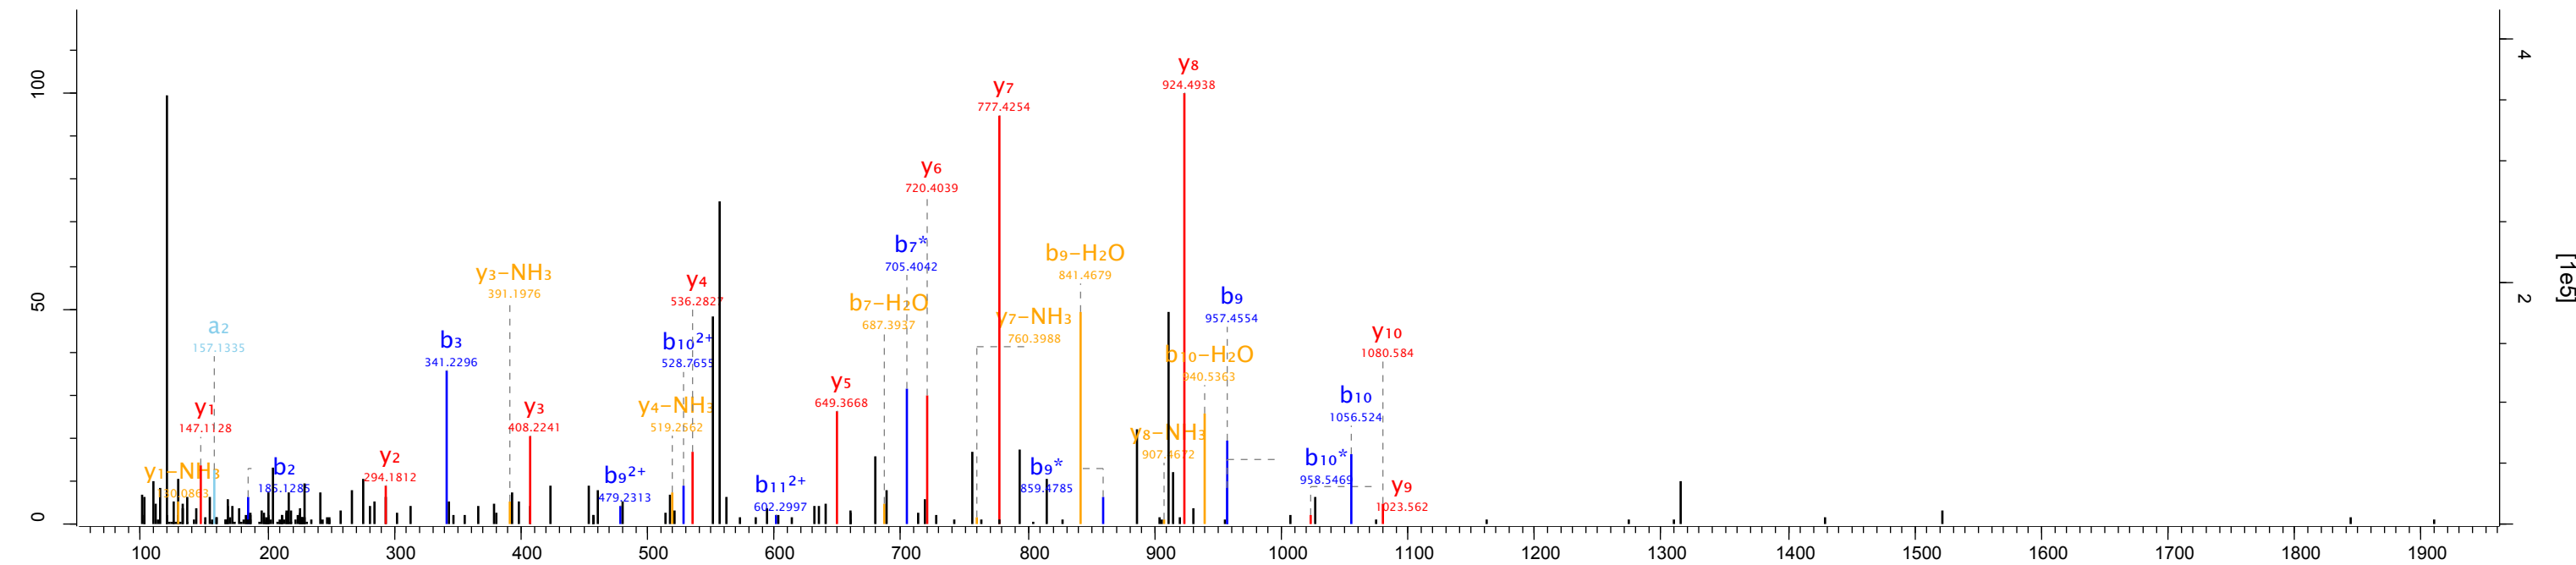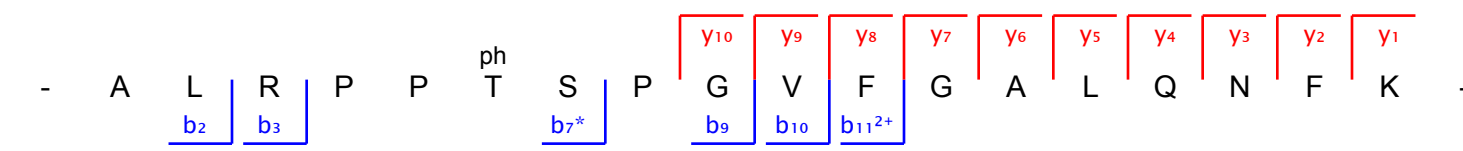

Raw file 20150814\_A375SR\_Phospho\_BR2\_09 Scan 26186 Method FTMS; HCD Score 135.91 m/z 898.76 Gene names CNTROB

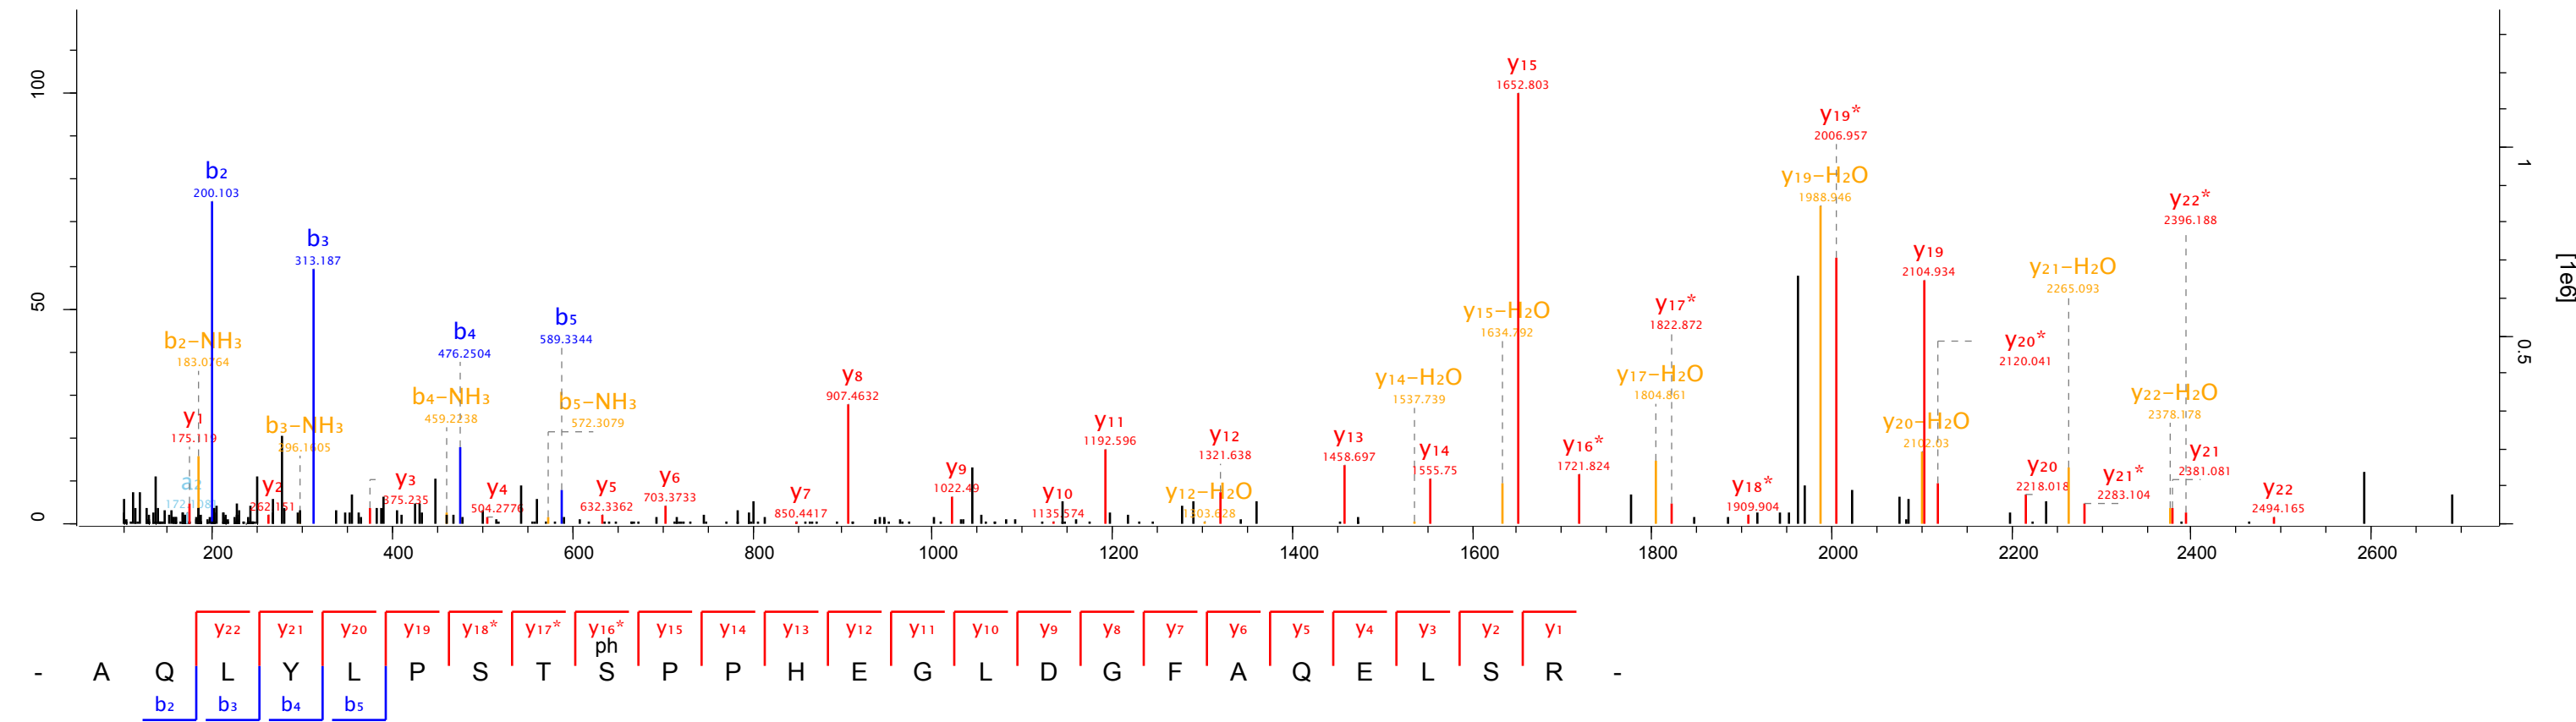

Raw file  
 20150814\_A375SR\_Phospho\_BR2\_09  
 Scan 27036 Method FTMS; HCD Score 82.13 m/z 977.45 Gene names TRIOBP

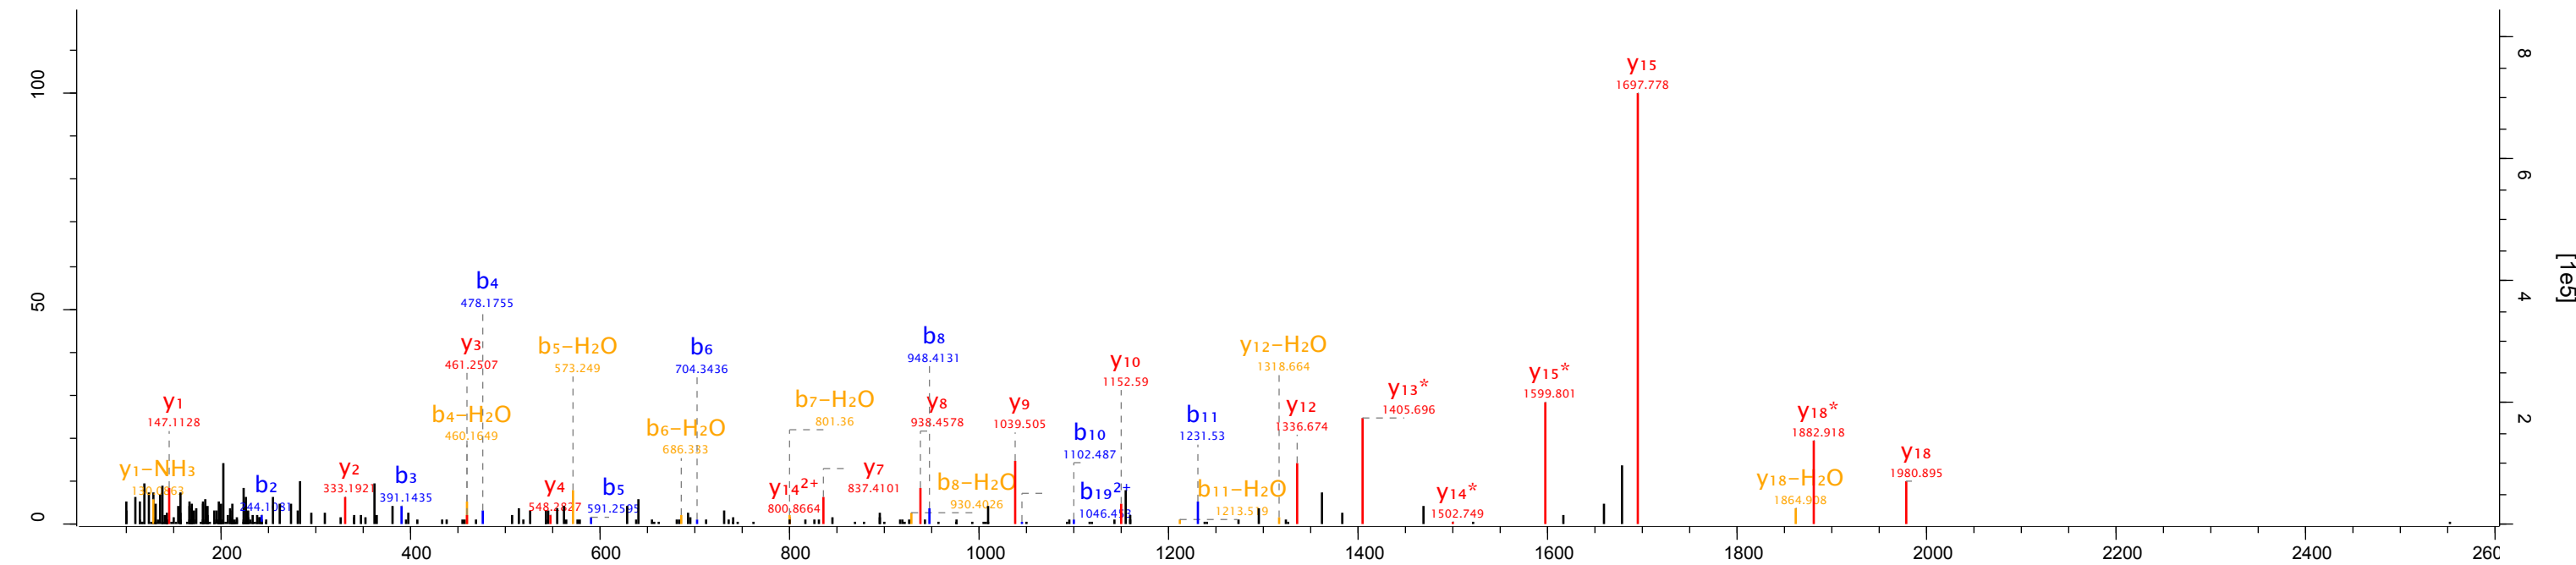

- G W M<sup>ox</sup> S I L D E P G E P P S<sup>ph</sup> P S L T T T S T S Q W K -

Fragmentation mapping (b and y ions):

- b2: W
- b3: M<sup>ox</sup>
- b4: S
- b5: I
- b6: L
- b8: E
- b10: G
- b11: E
- b19<sup>2+</sup>: P
- y1: K
- y2: W
- y3: Q
- y4: S
- y7: T
- y8: T
- y9: T
- y10: L
- y12: P
- y13<sup>\*</sup>: S<sup>ph</sup>
- y14<sup>\*</sup>: P
- y15: P
- y18: S



Raw file: 20150814\_A375SR\_Phospho\_BR2\_09  
 Scan: 27096 Method: FTMS; HCD Score: 93.58 m/z: 715.33 Gene names: PDE1C

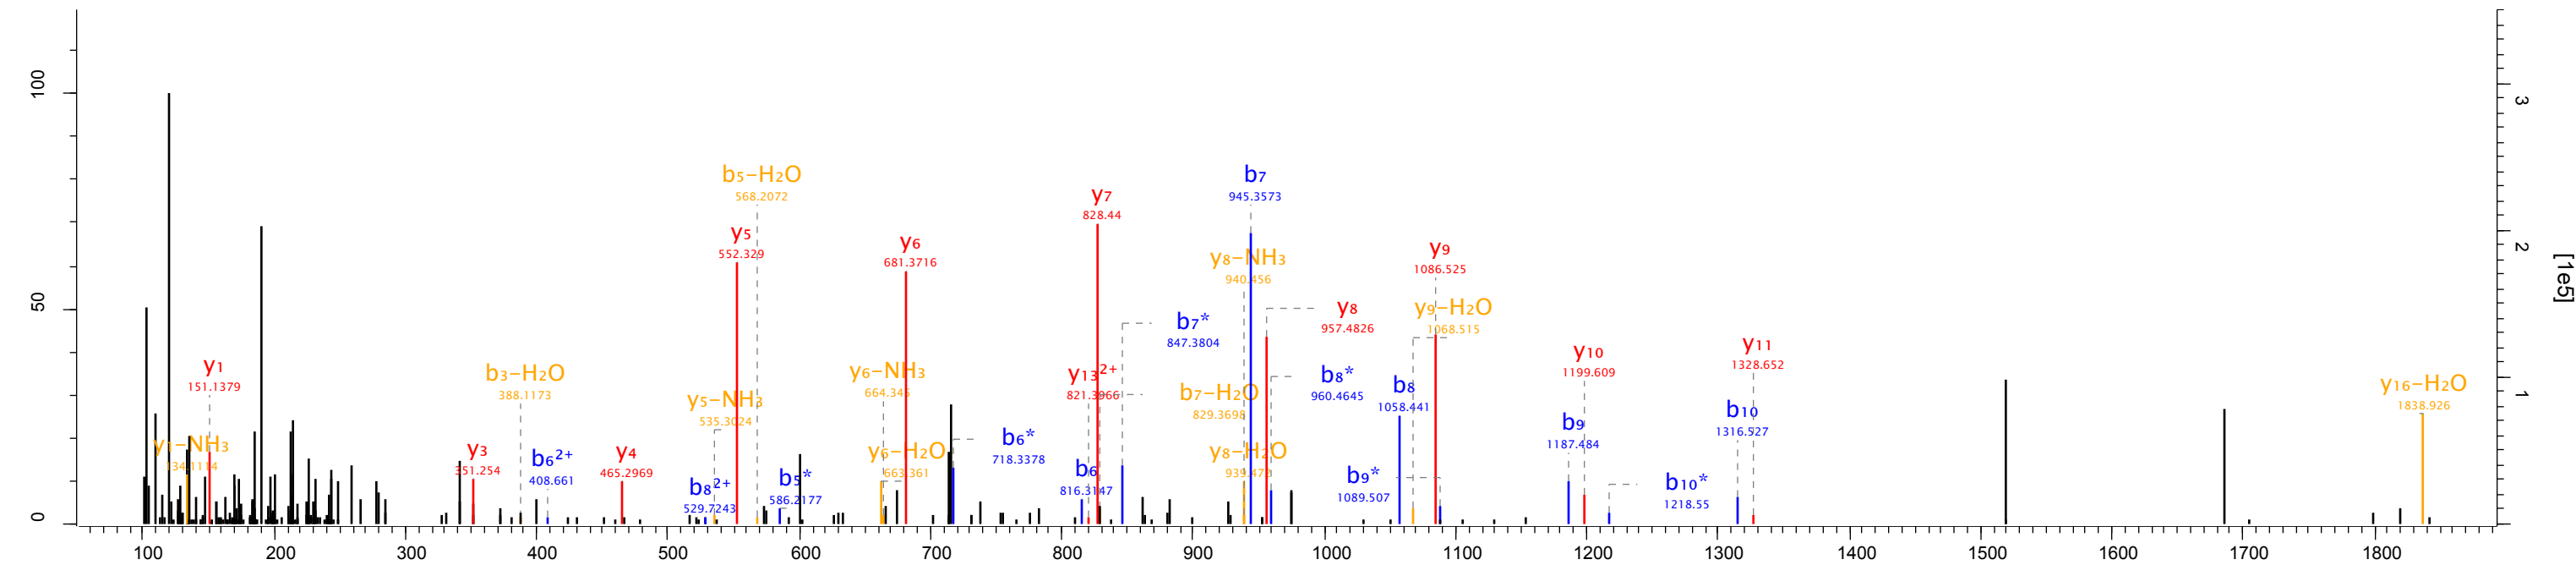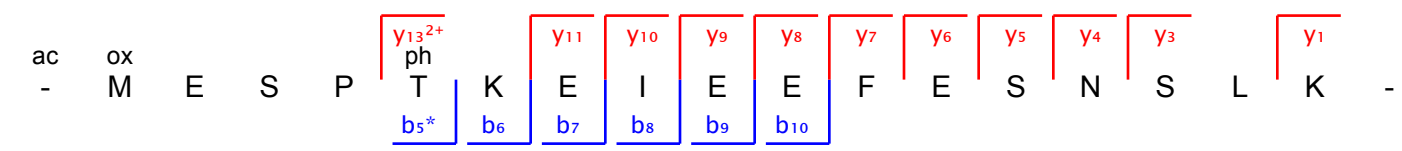

Raw file: 20150814\_A375SR\_Phospho\_BR2\_09  
 Scan: 28546 Method: FTMS; HCD Score: 306.11 m/z: 685.32 Gene names: LARPI

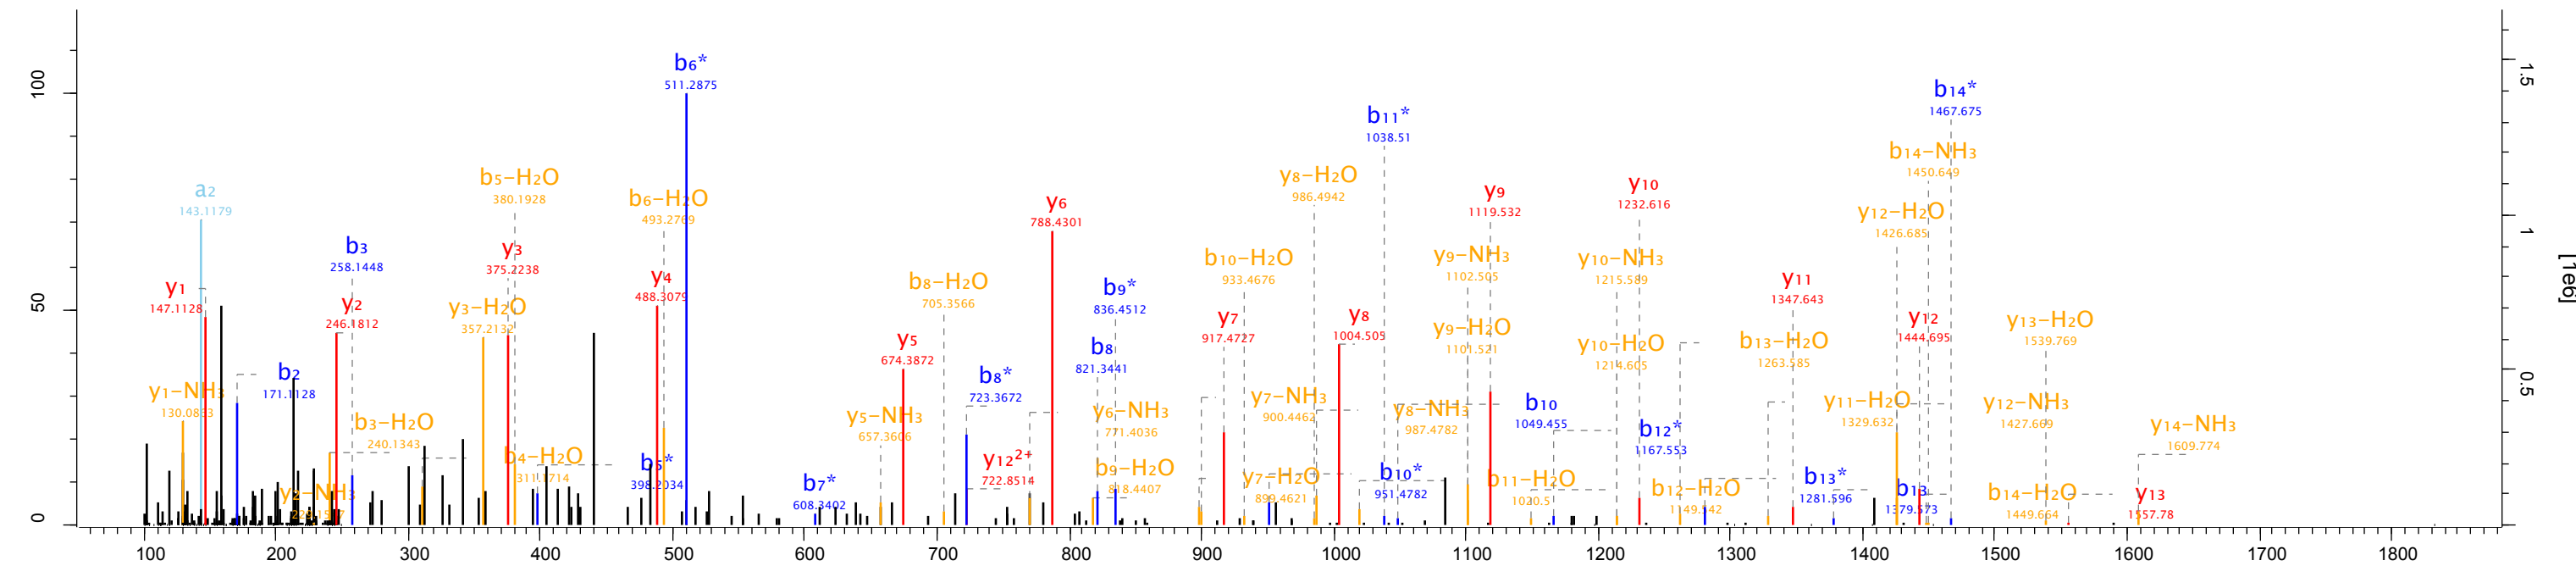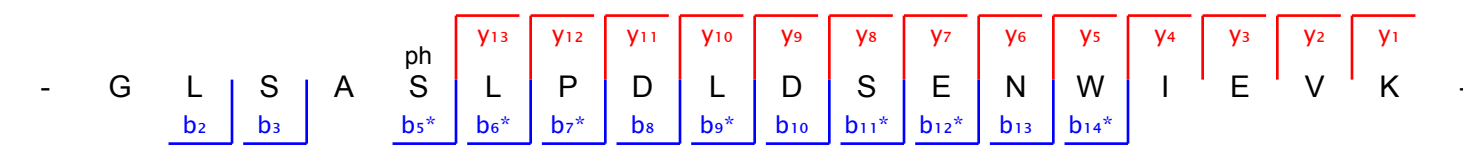

Raw file: 20150814\_A375SR\_Phospho\_BR2\_09  
 Scan: 3246 Method: FTMS; HCD Score: 168.47 m/z: 711.82 Gene names: USP39

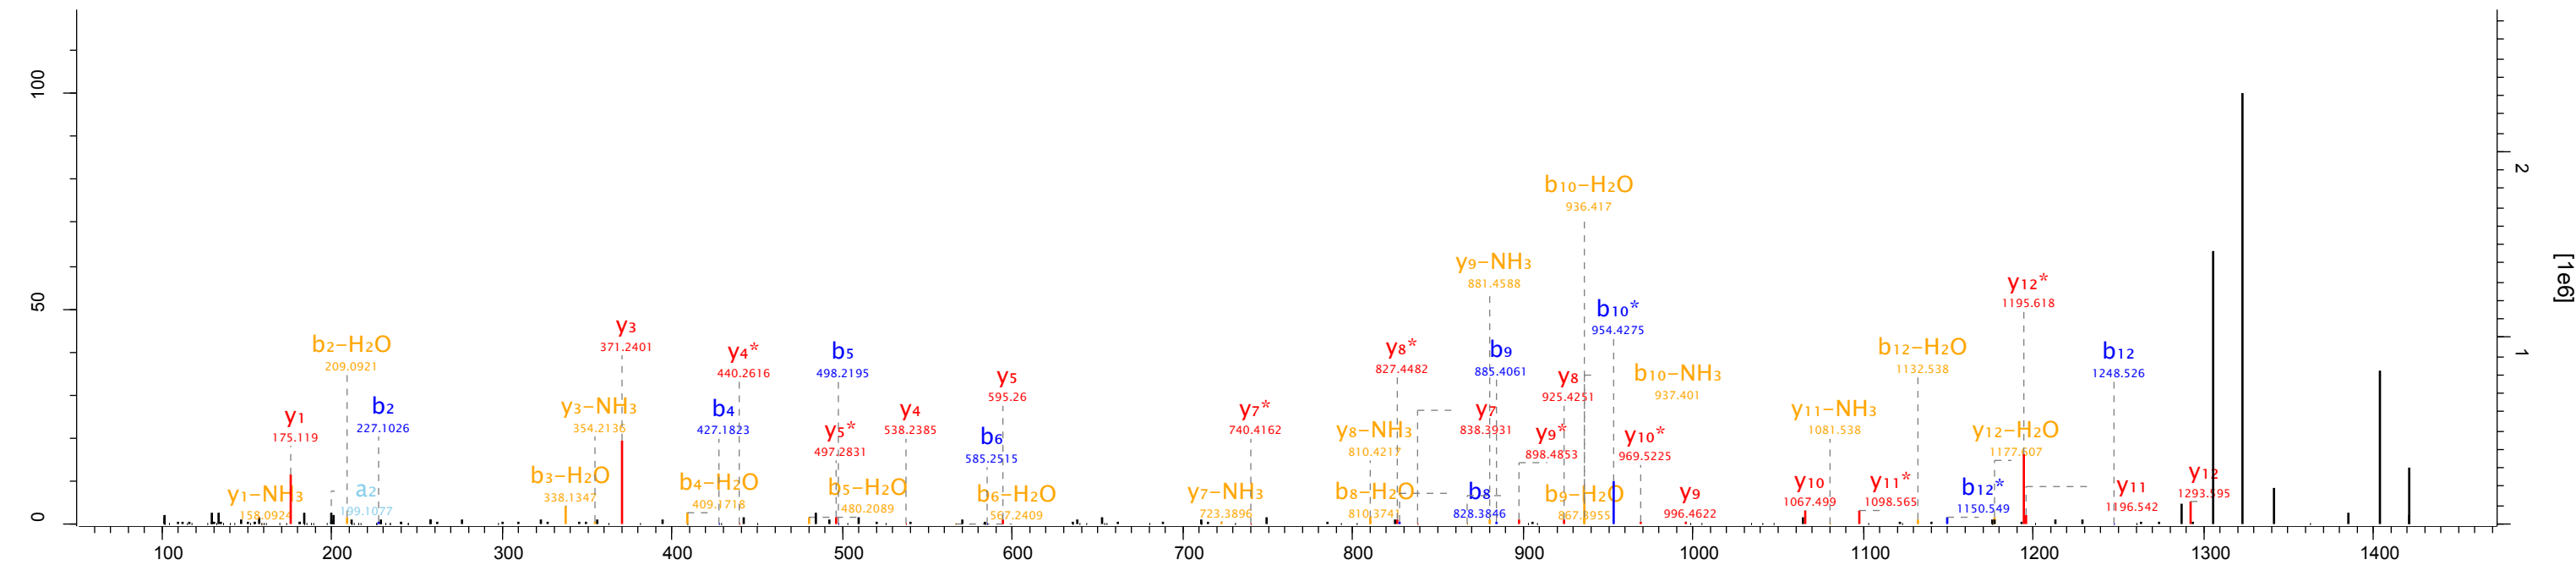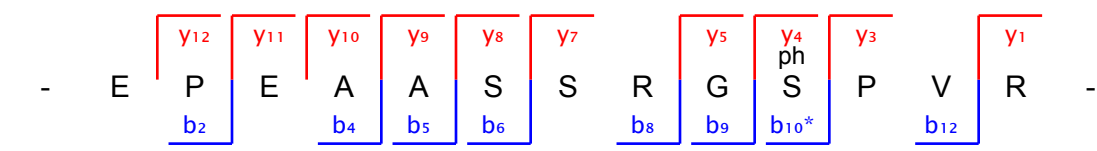

Raw file: 20150814\_A375SR\_Phospho\_BR2\_09  
 Scan: 4246 Method: FTMS; HCD Score: 102.29 m/z: 754.85 Gene names: SRGAP2;SRGAP2B

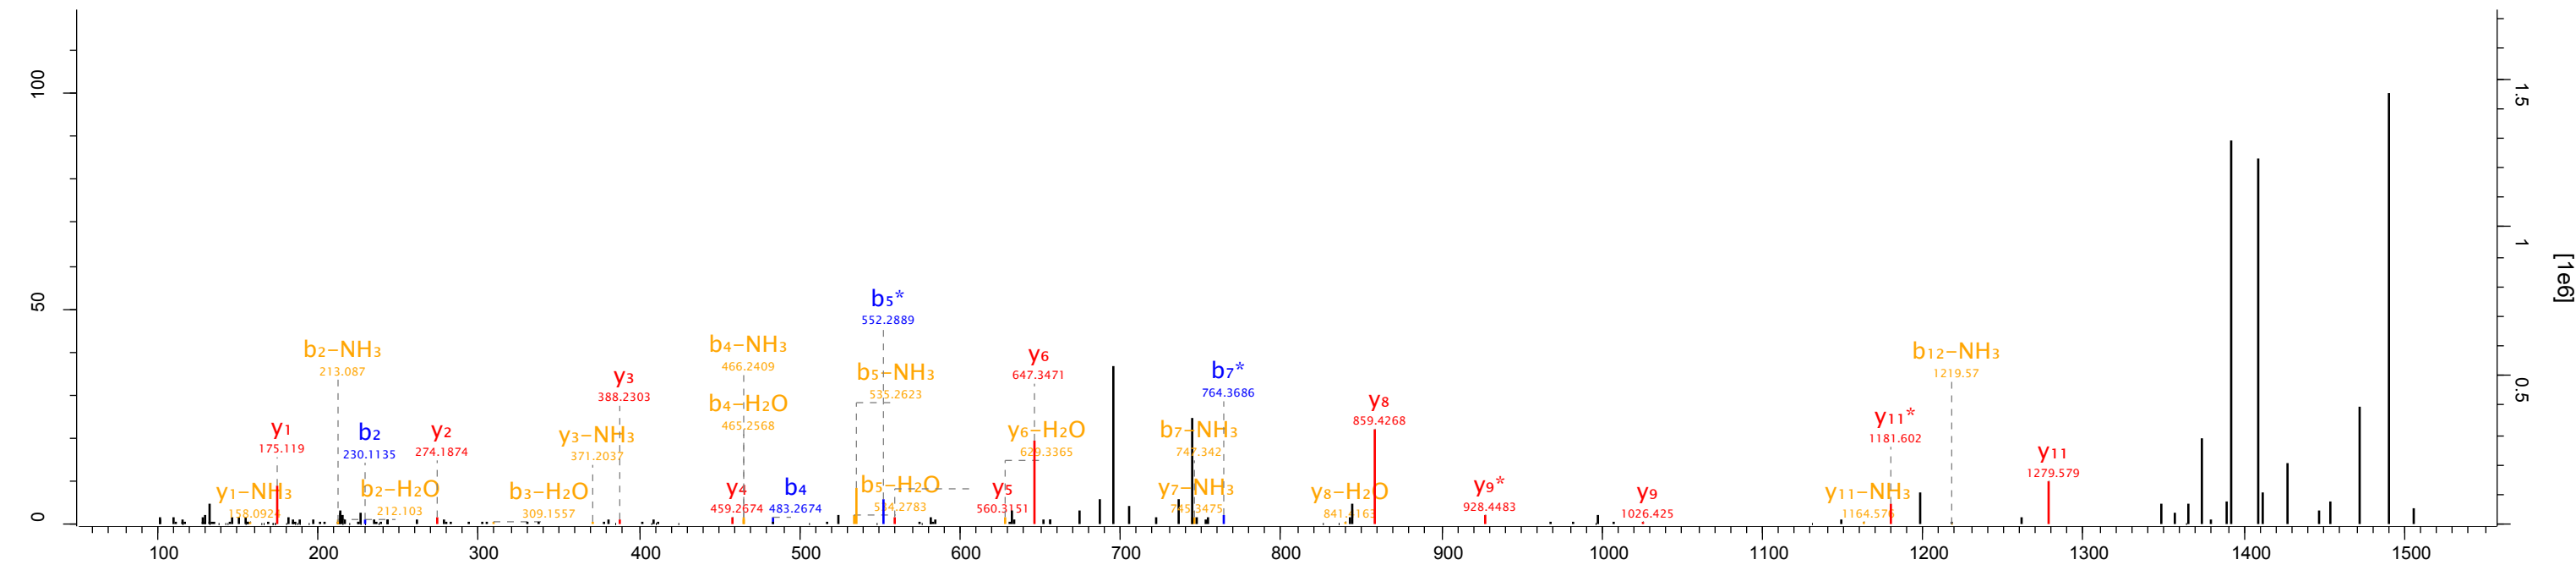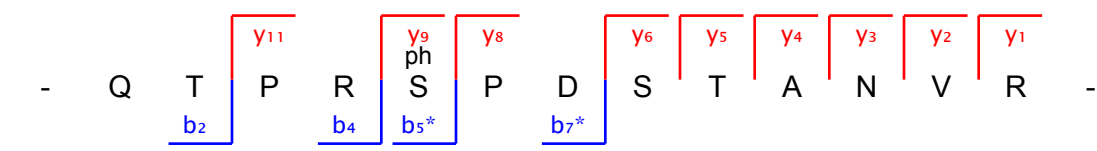

Raw file: 20150814\_A375SR\_Phospho\_BR2\_09  
 Scan: 4786 Method: FTMS; HCD Score: 144.15 m/z: 618.31 Gene names: MAP7D1

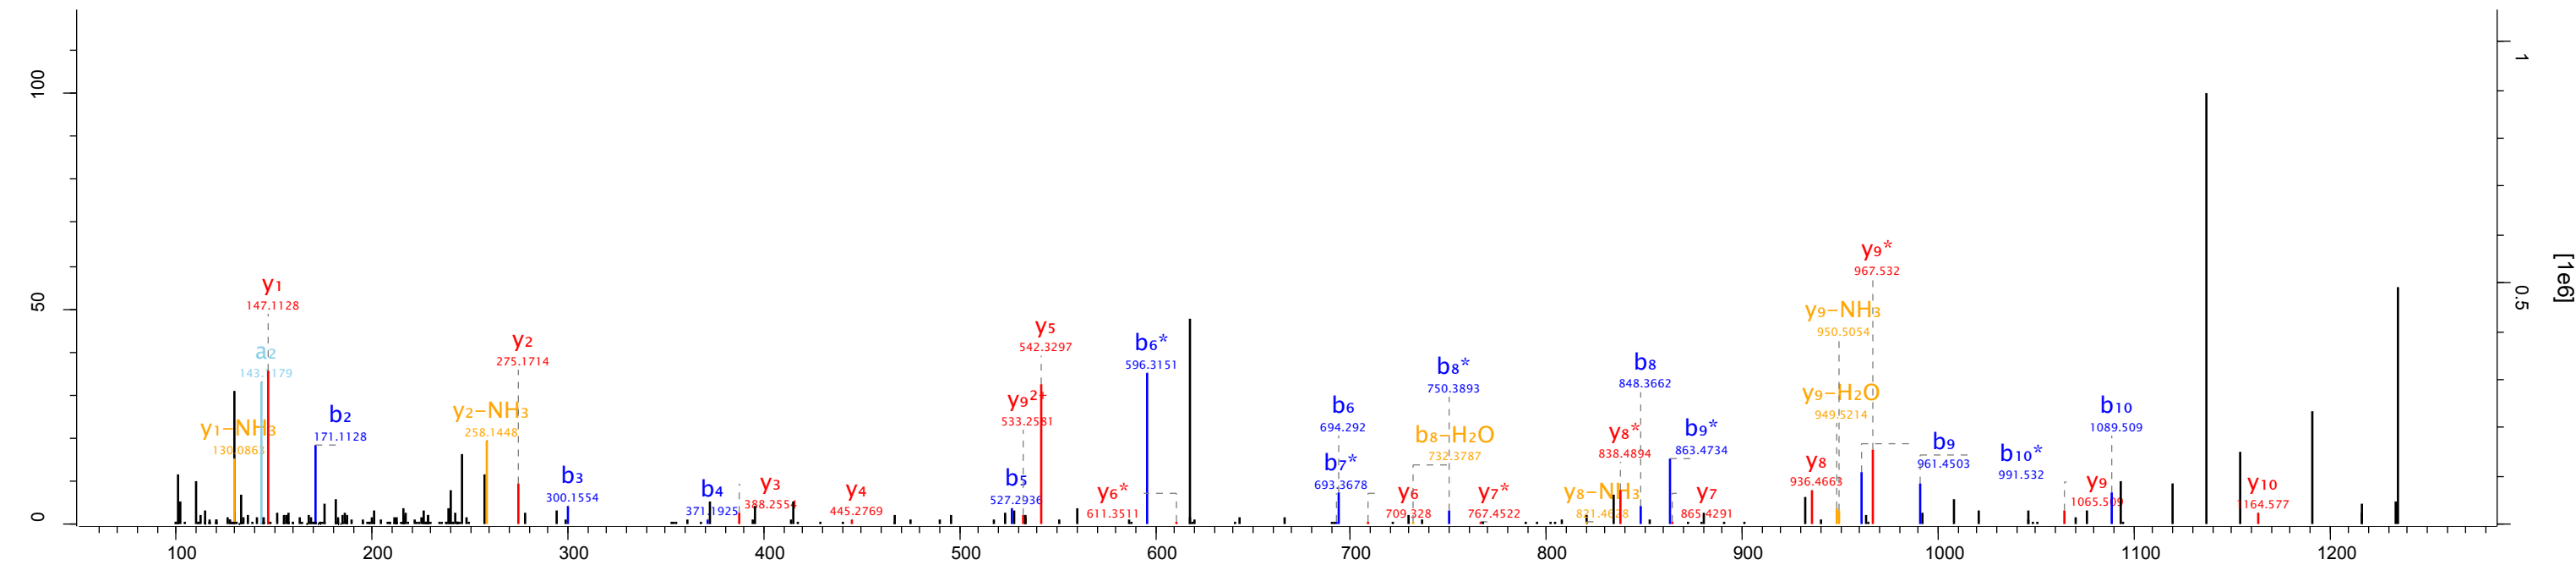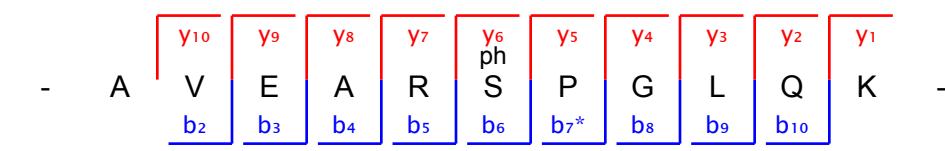

Raw file: 20150814\_A375SR\_Phospho\_BR2\_09  
 Scan: 4926 Method: FTMS; HCD Score: 126.63 m/z: 432.87 Gene names: GIGYF2

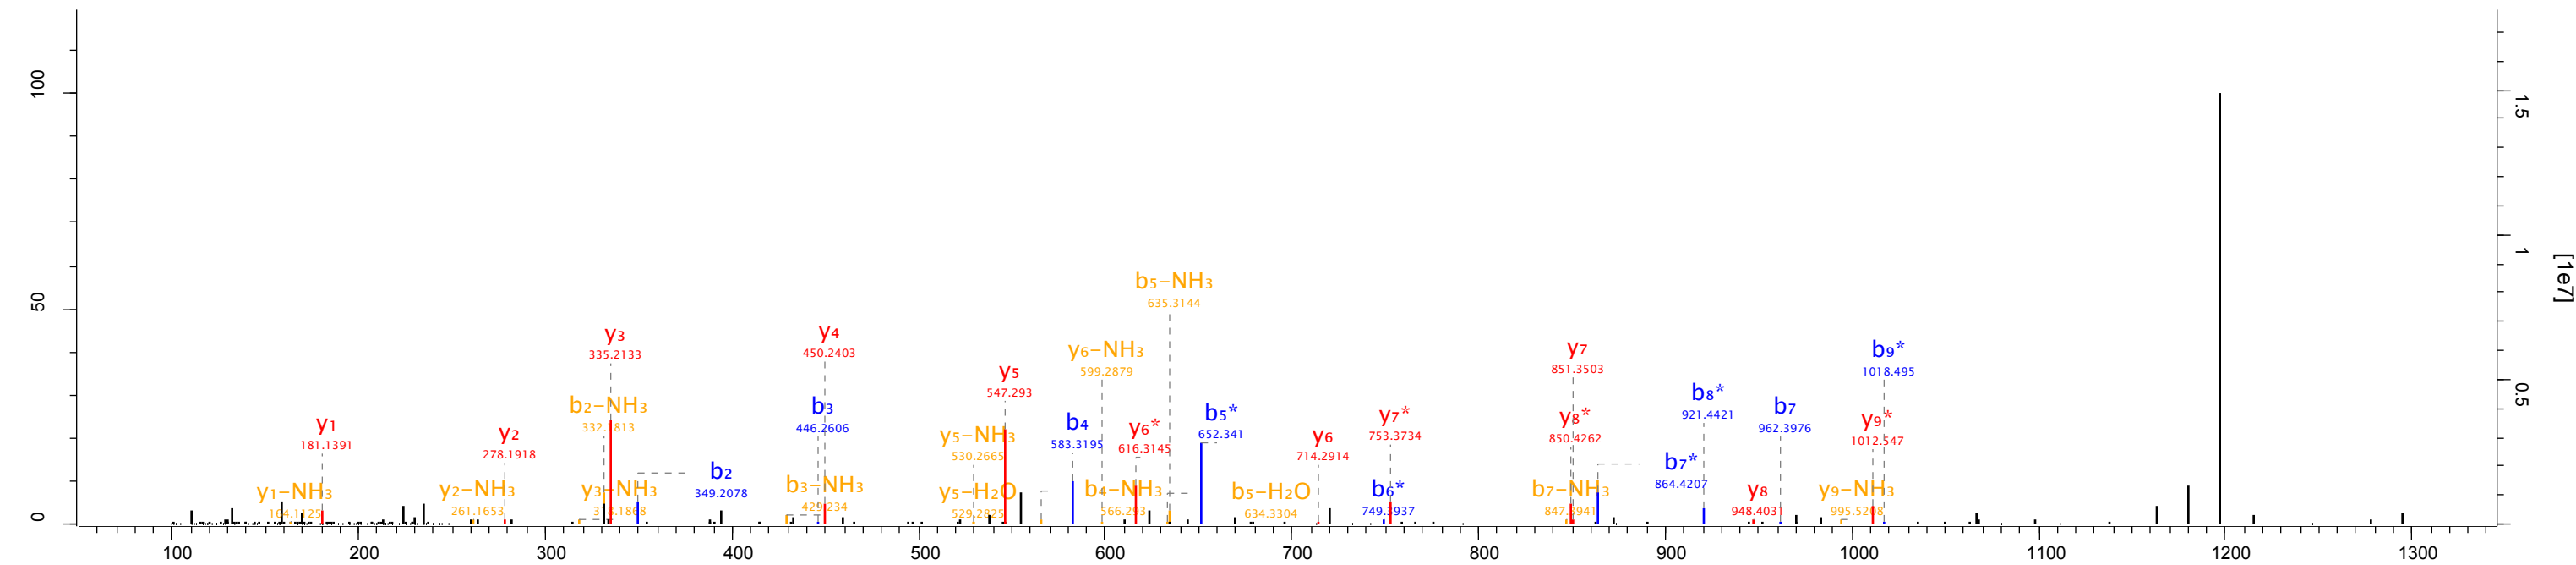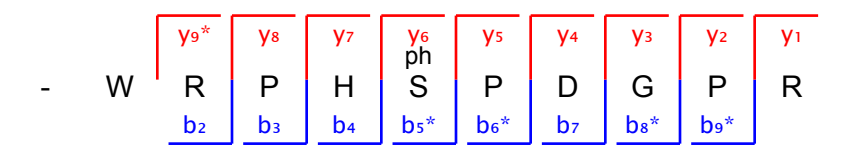

Raw file Scan Method Score m/z Gene names  
 20150814\_A375SR\_Phospho\_BR2\_09 6766 FTMS; HCD 139.43 433.72 PPP1R10

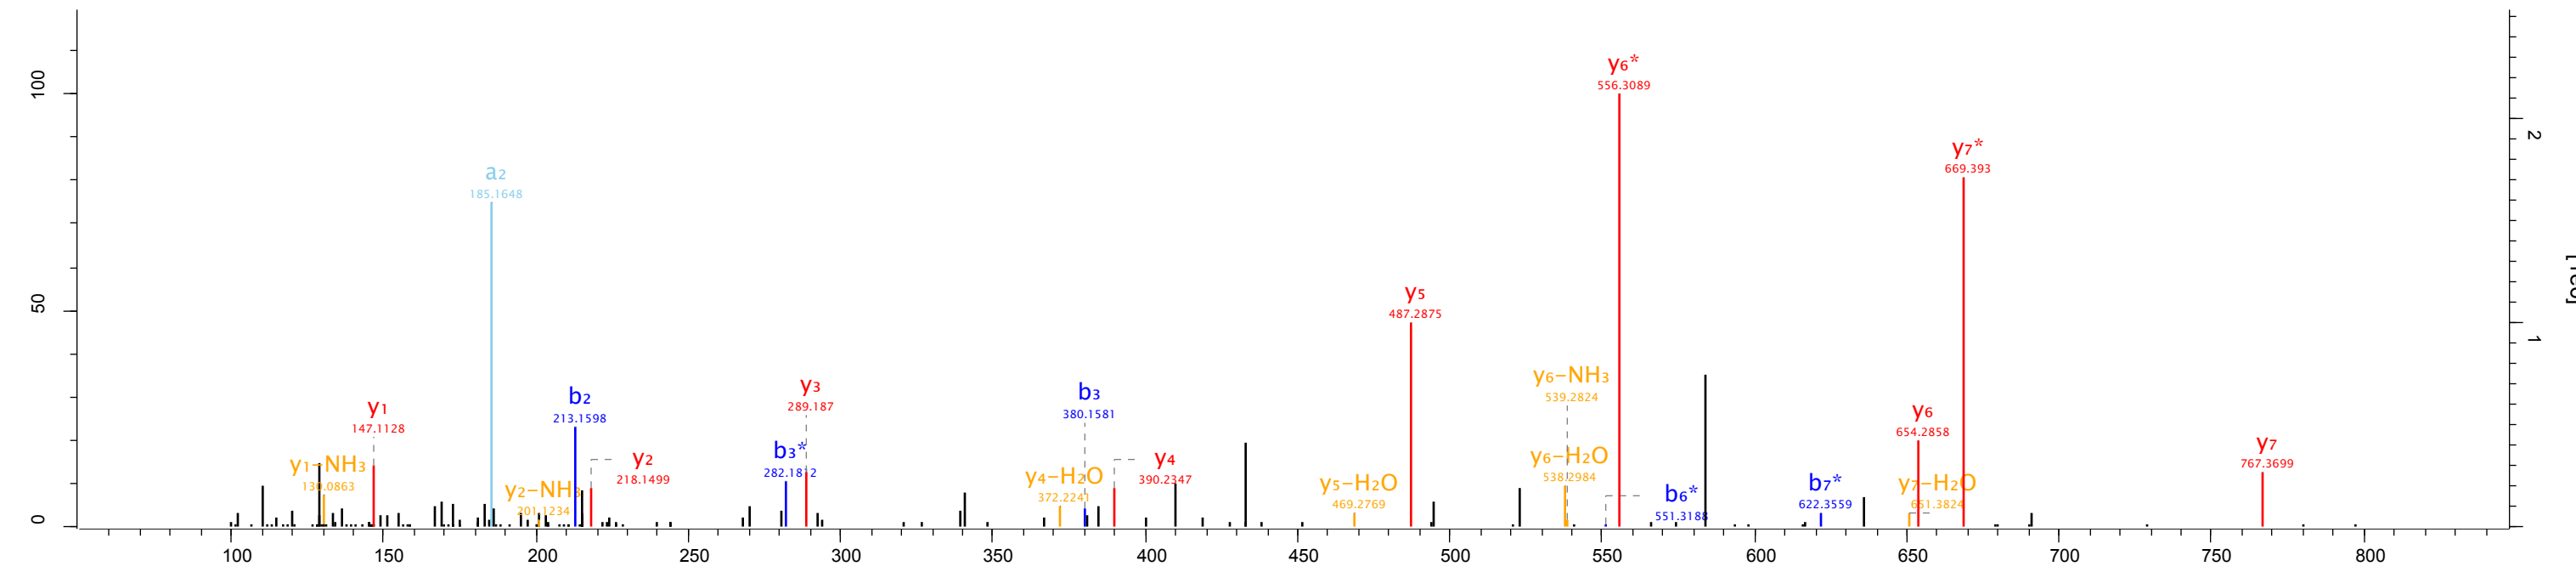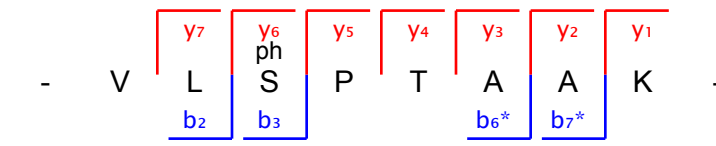

Raw file: 20150814\_A375SR\_Phospho\_BR2\_09  
 Scan: 9996 Method: FTMS; HCD Score: 231.86 m/z: 787.44 Gene names: SRRM1

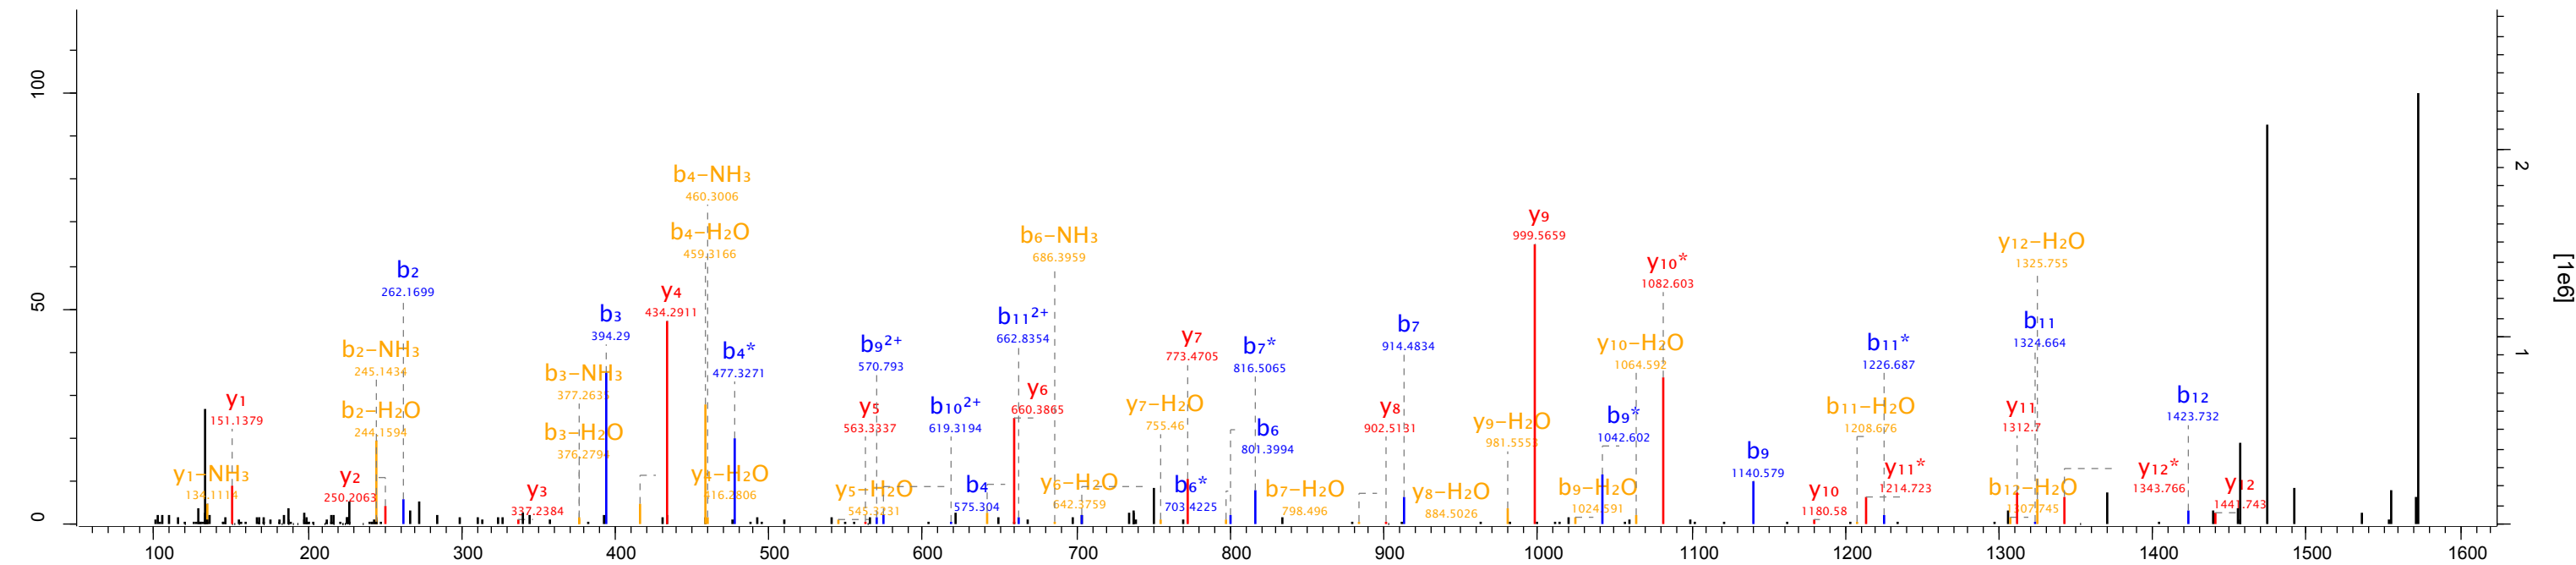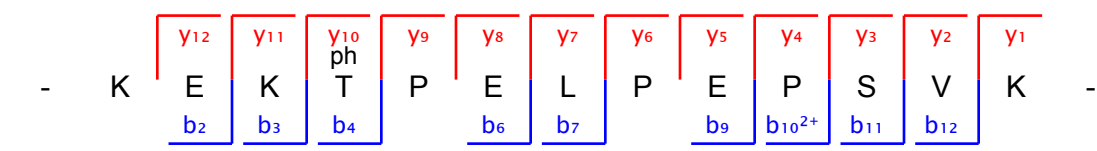



Raw file 20150814\_A375SR\_Phospho\_BR2\_02 Scan 10257 Method FTMS; HCD Score 111.96 m/z 854.31 Gene names TBC1D9B

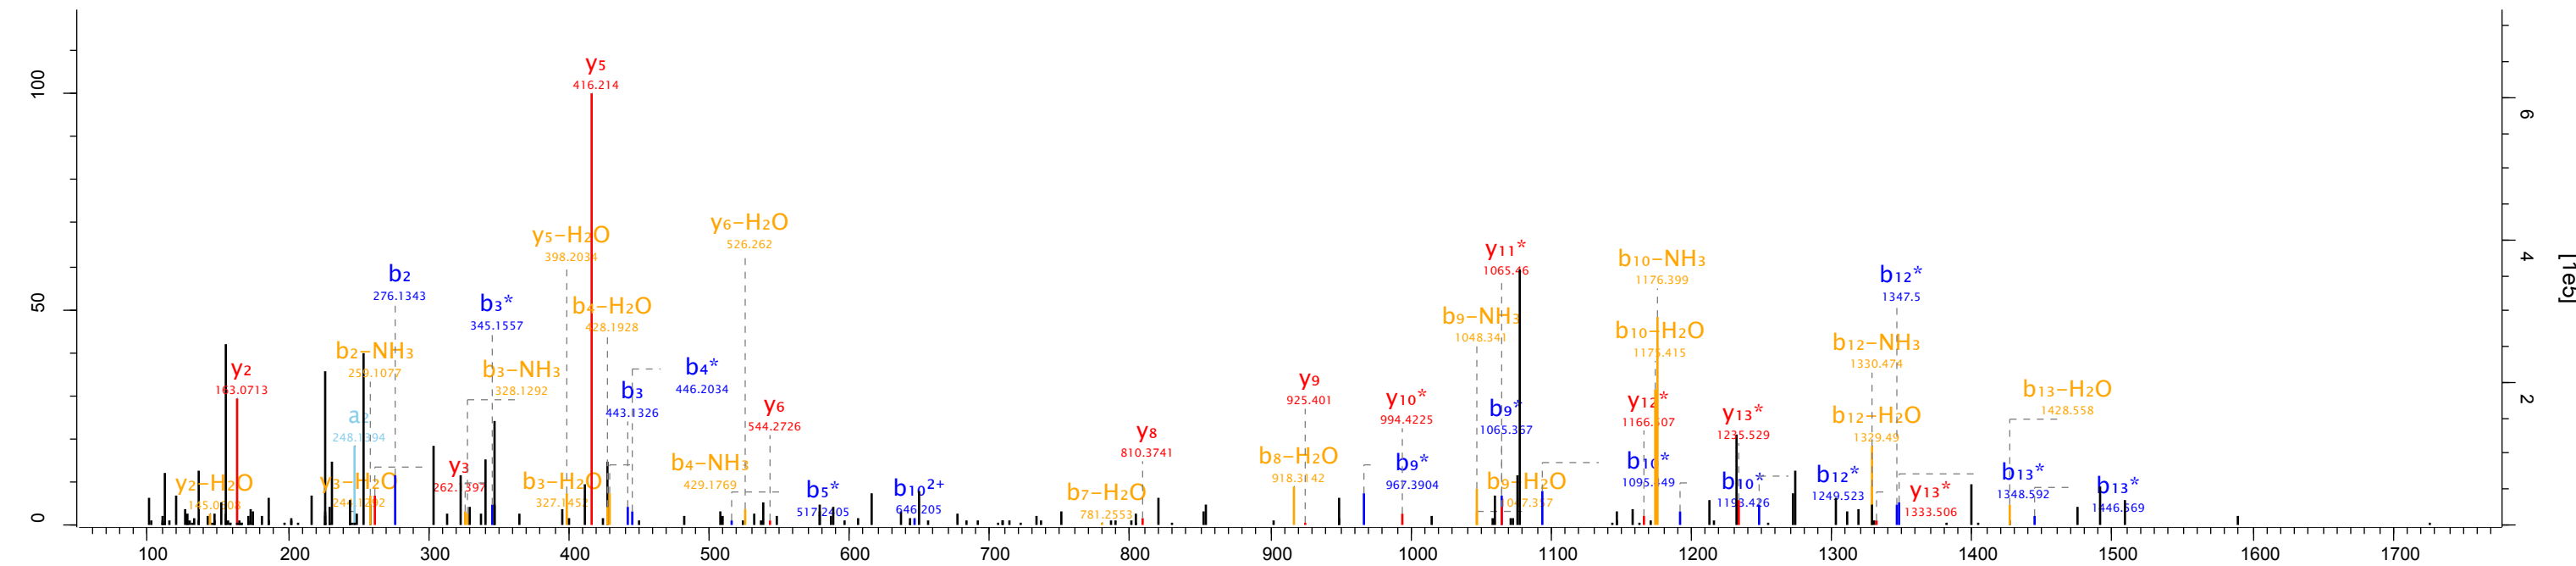

- Q F S T A S D H E Q P G V S G -  
 b<sub>2</sub> b<sub>3</sub> b<sub>4</sub>\* b<sub>5</sub>\* b<sub>9</sub>\* b<sub>10</sub>\* b<sub>12</sub>\* b<sub>13</sub>\* y<sub>13</sub>\* y<sub>12</sub>\* y<sub>11</sub>\* y<sub>10</sub>\* y<sub>9</sub> y<sub>8</sub> y<sub>6</sub> y<sub>5</sub> y<sub>3</sub> y<sub>2</sub>

Raw file: 20150814\_A375SR\_Phospho\_BR2\_02  
 Scan: 10617  
 Method: FTMS; HCD  
 Score: 117.03  
 m/z: 1047.96  
 Gene names: EPS15L1; SPATA22

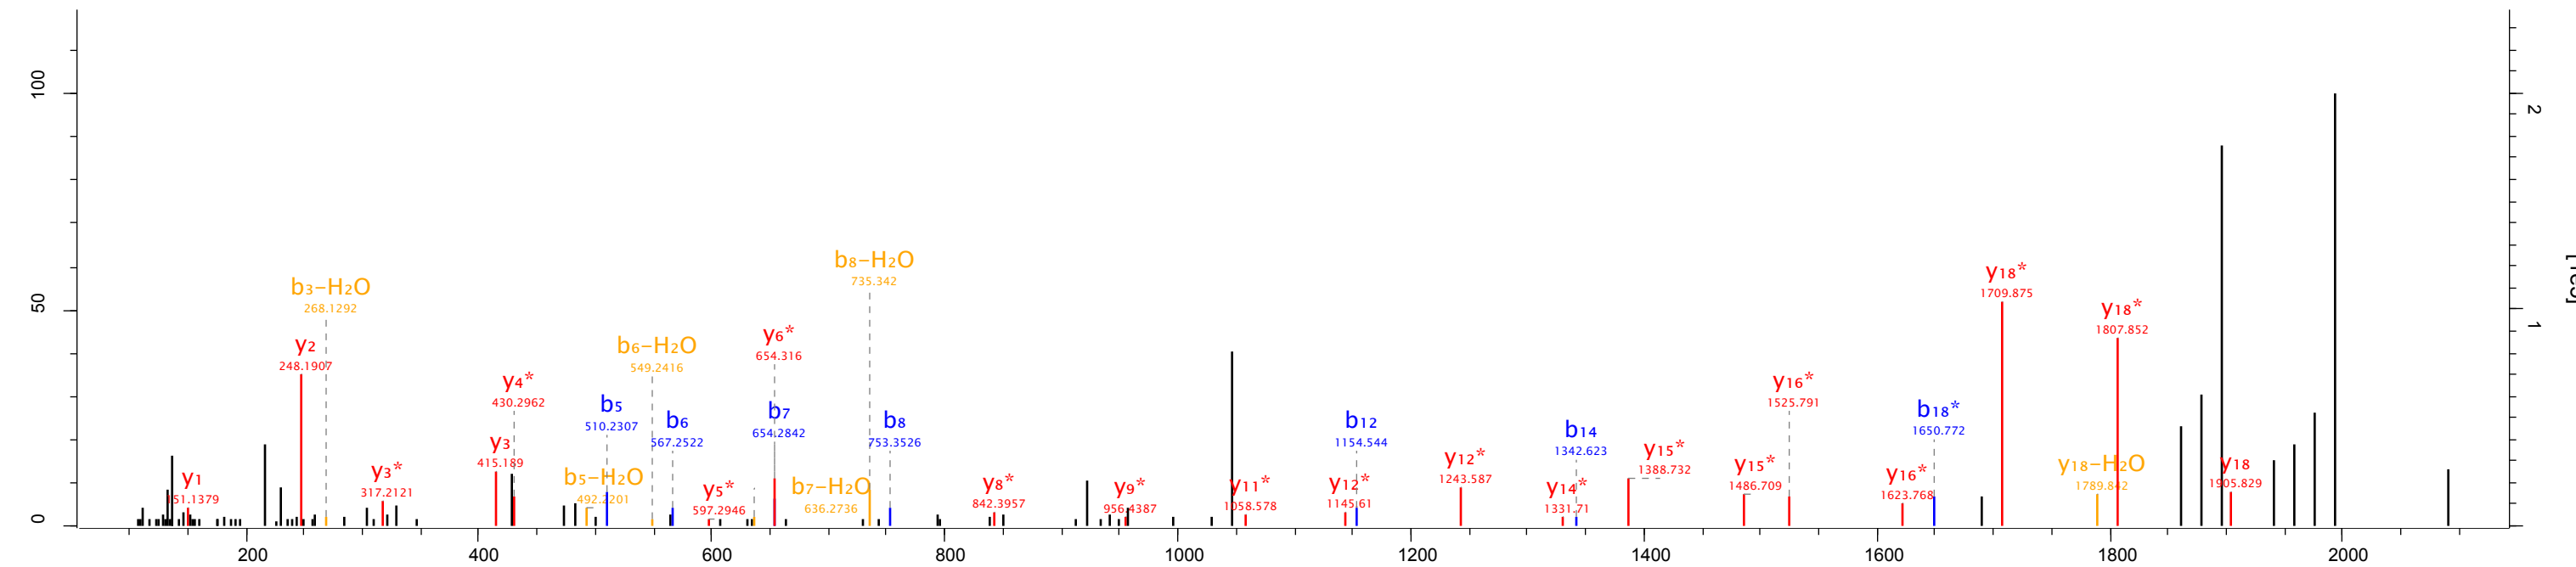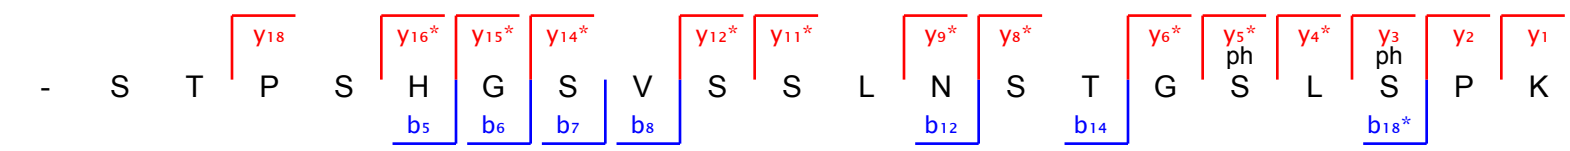

Raw file: 20150814\_A375SR\_Phospho\_BR2\_02  
 Scan: 10987 Method: FTMS; HCD Score: 98.34 m/z: 601.2 Gene names: TAF2

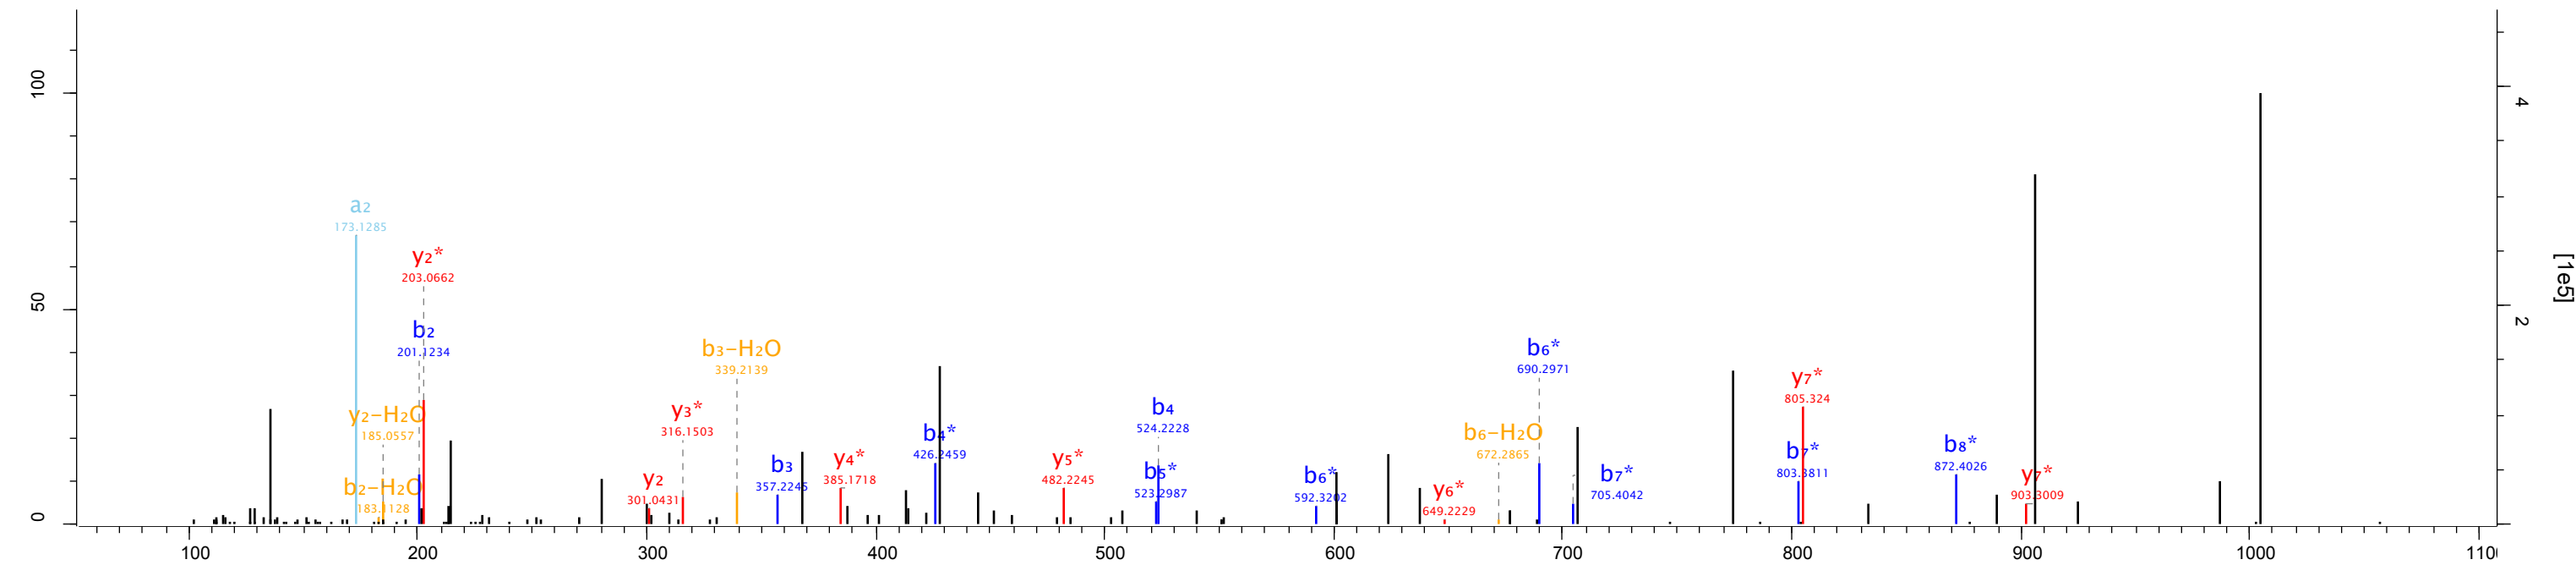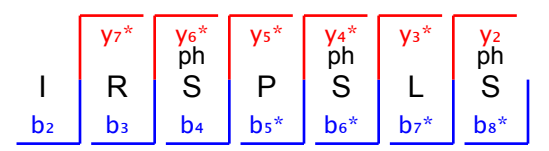

Raw file  
 20150814\_A375SR\_Phospho\_BR2\_02  
 Scan 11087 Method FTMS; HCD Score 80.21 m/z 906.37 Gene names RAD23A

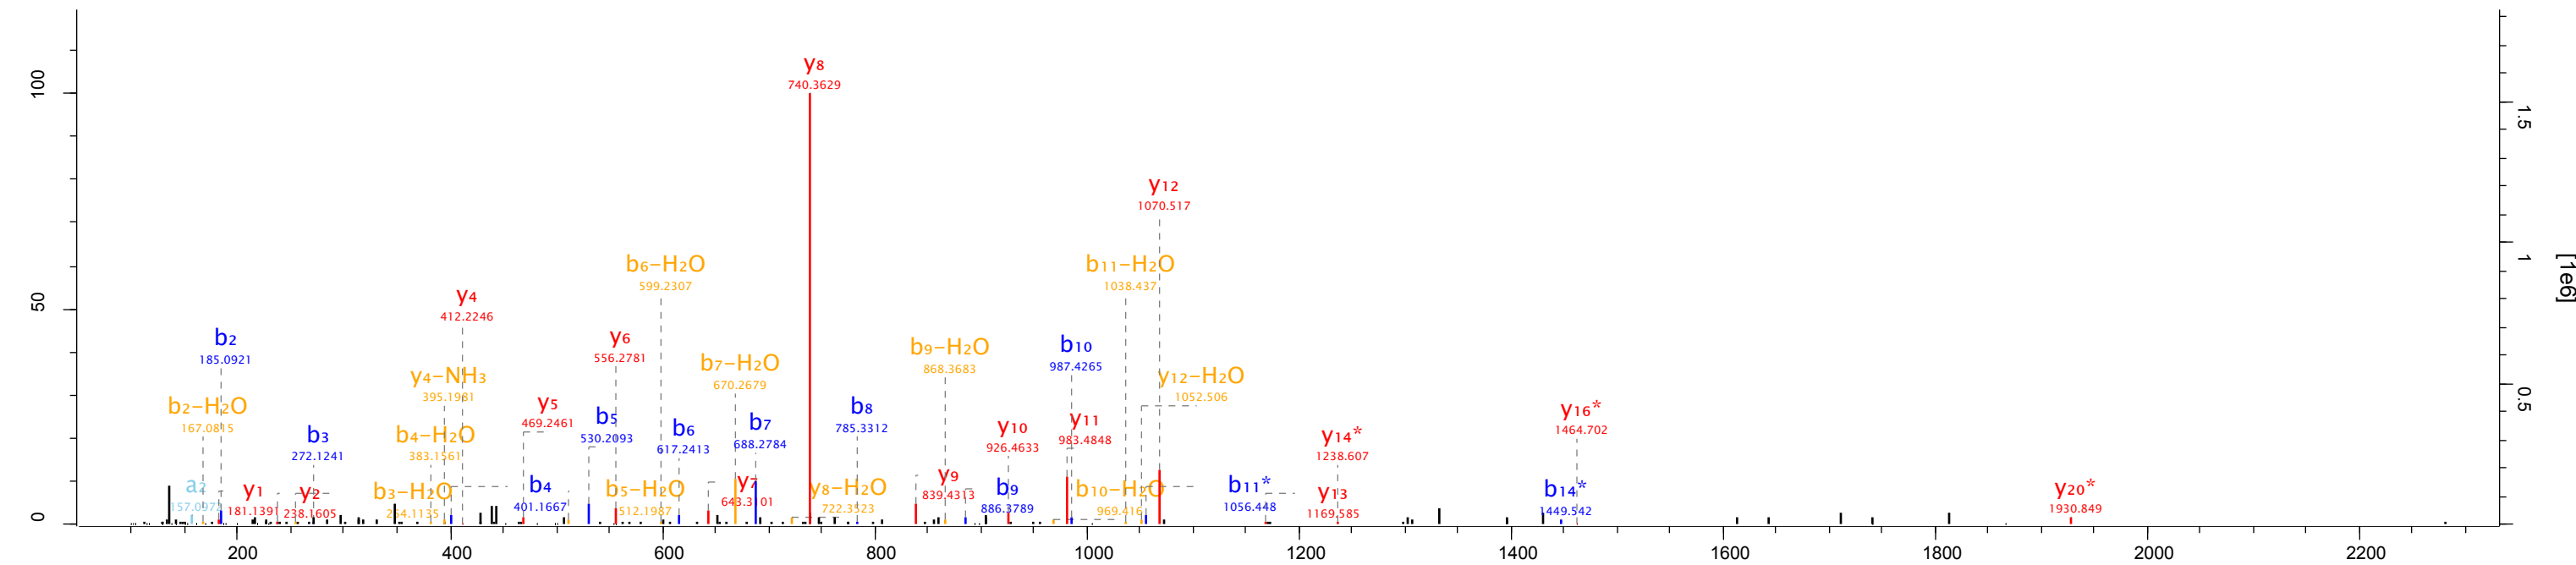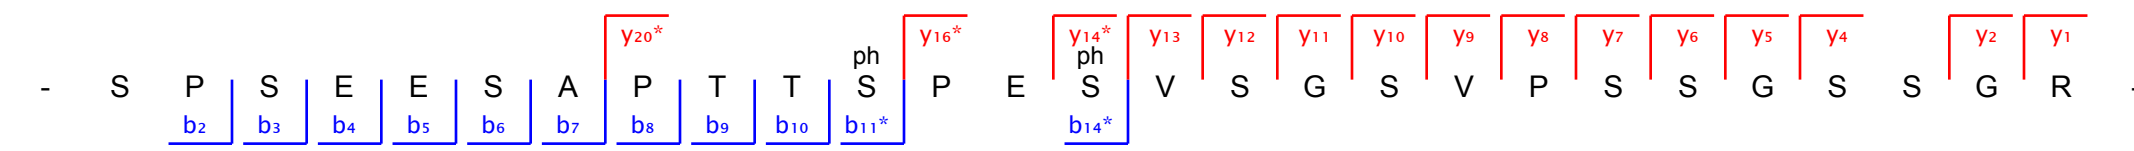

Raw file: 20150814\_A375SR\_Phospho\_BR2\_02  
 Scan: 11277 Method: FTMS; HCD Score: 62.7 m/z: 1147.92 Gene names: ARHGAP35

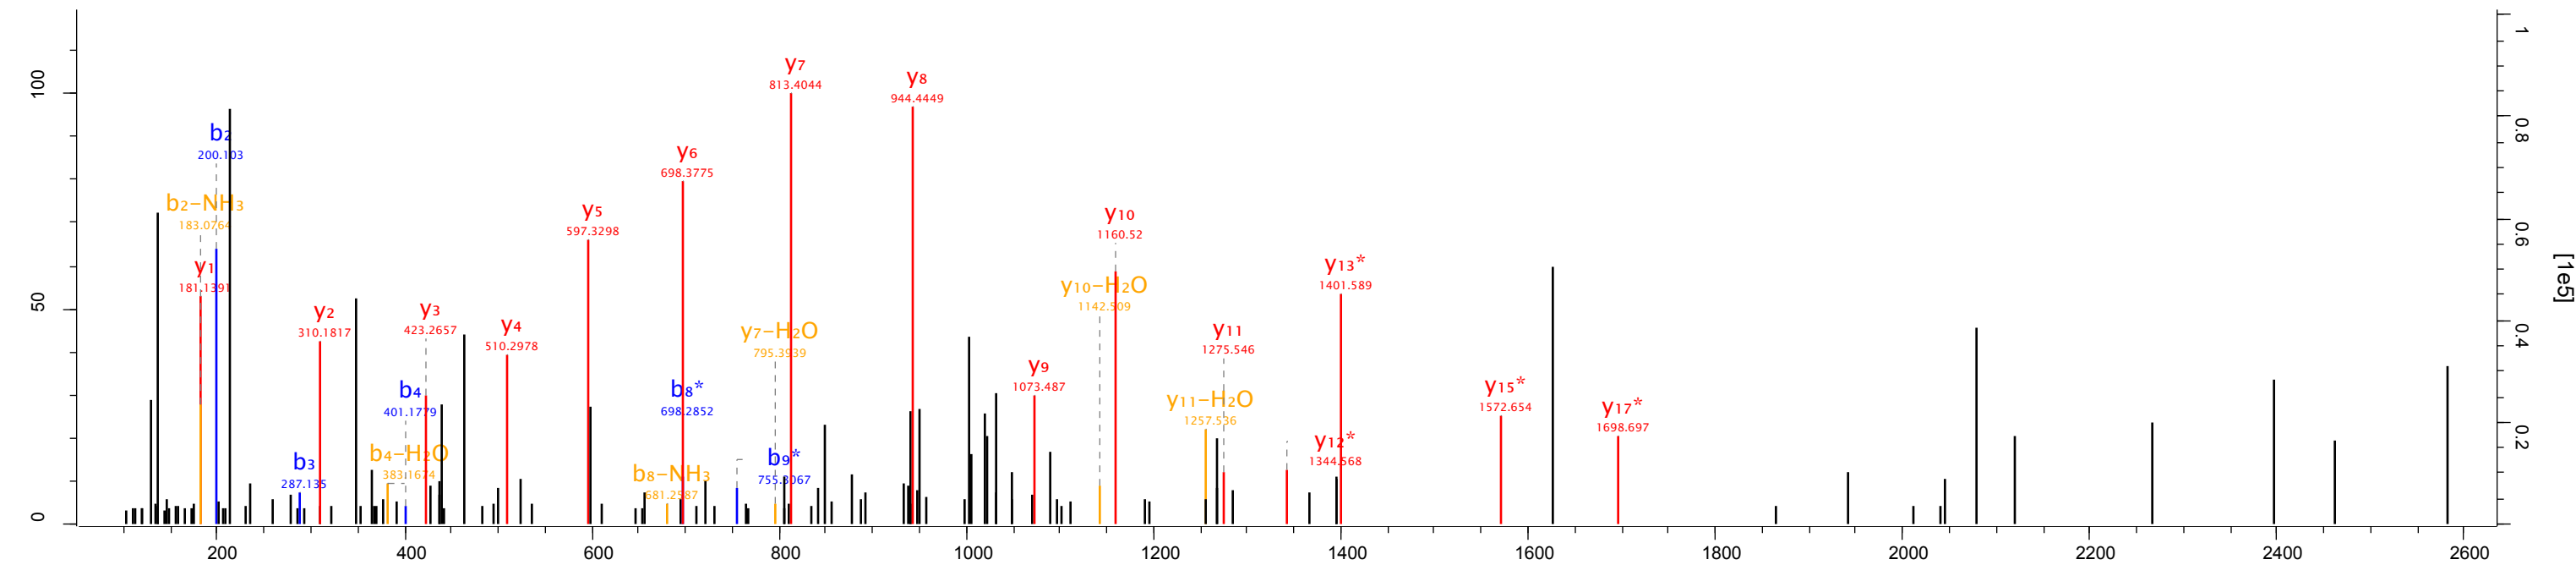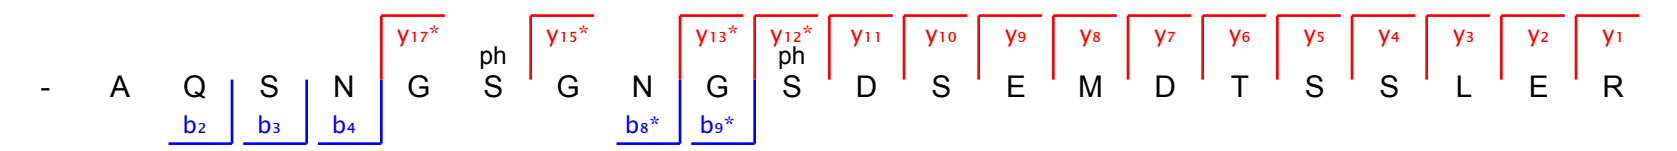

Raw file 20150814\_A375SR\_Phospho\_BR2\_02 Scan 11377 Method FTMS; HCD Score 99.87 m/z 815.34 Gene names UTP18

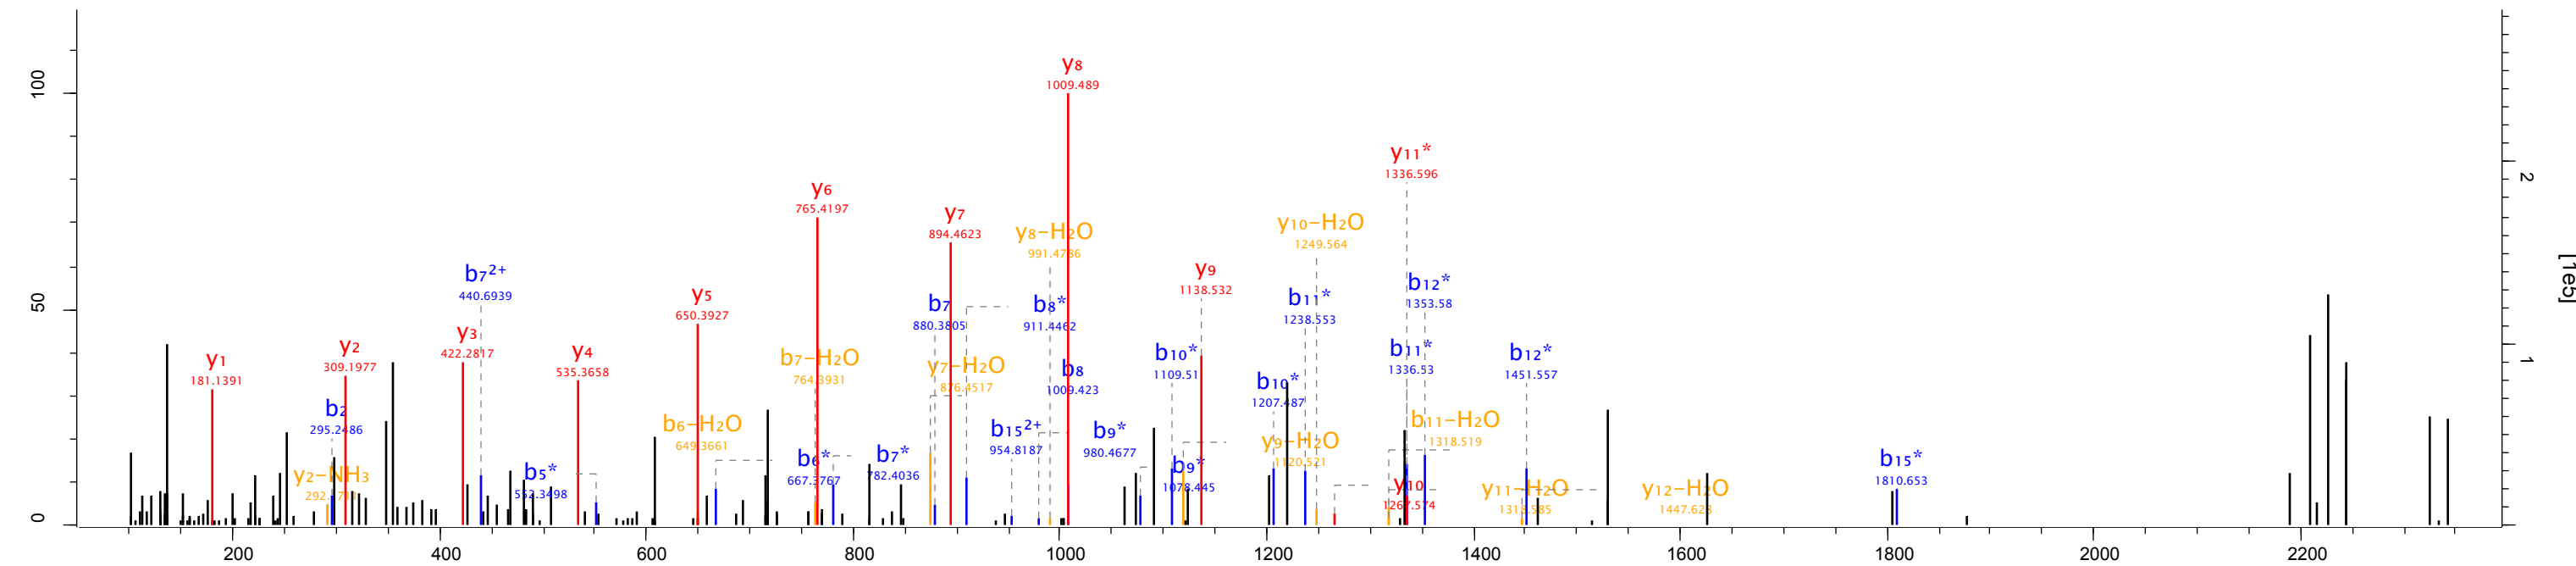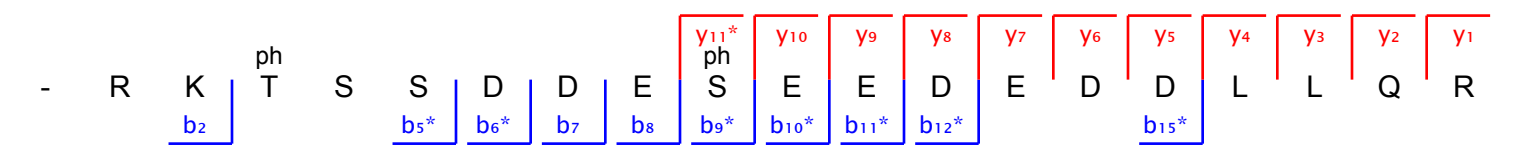

Raw file 20150814\_A375SR\_Phospho\_BR2\_02 Scan 11557 Method FTMS; HCD Score 46.07 m/z 918.86 Gene names DTL

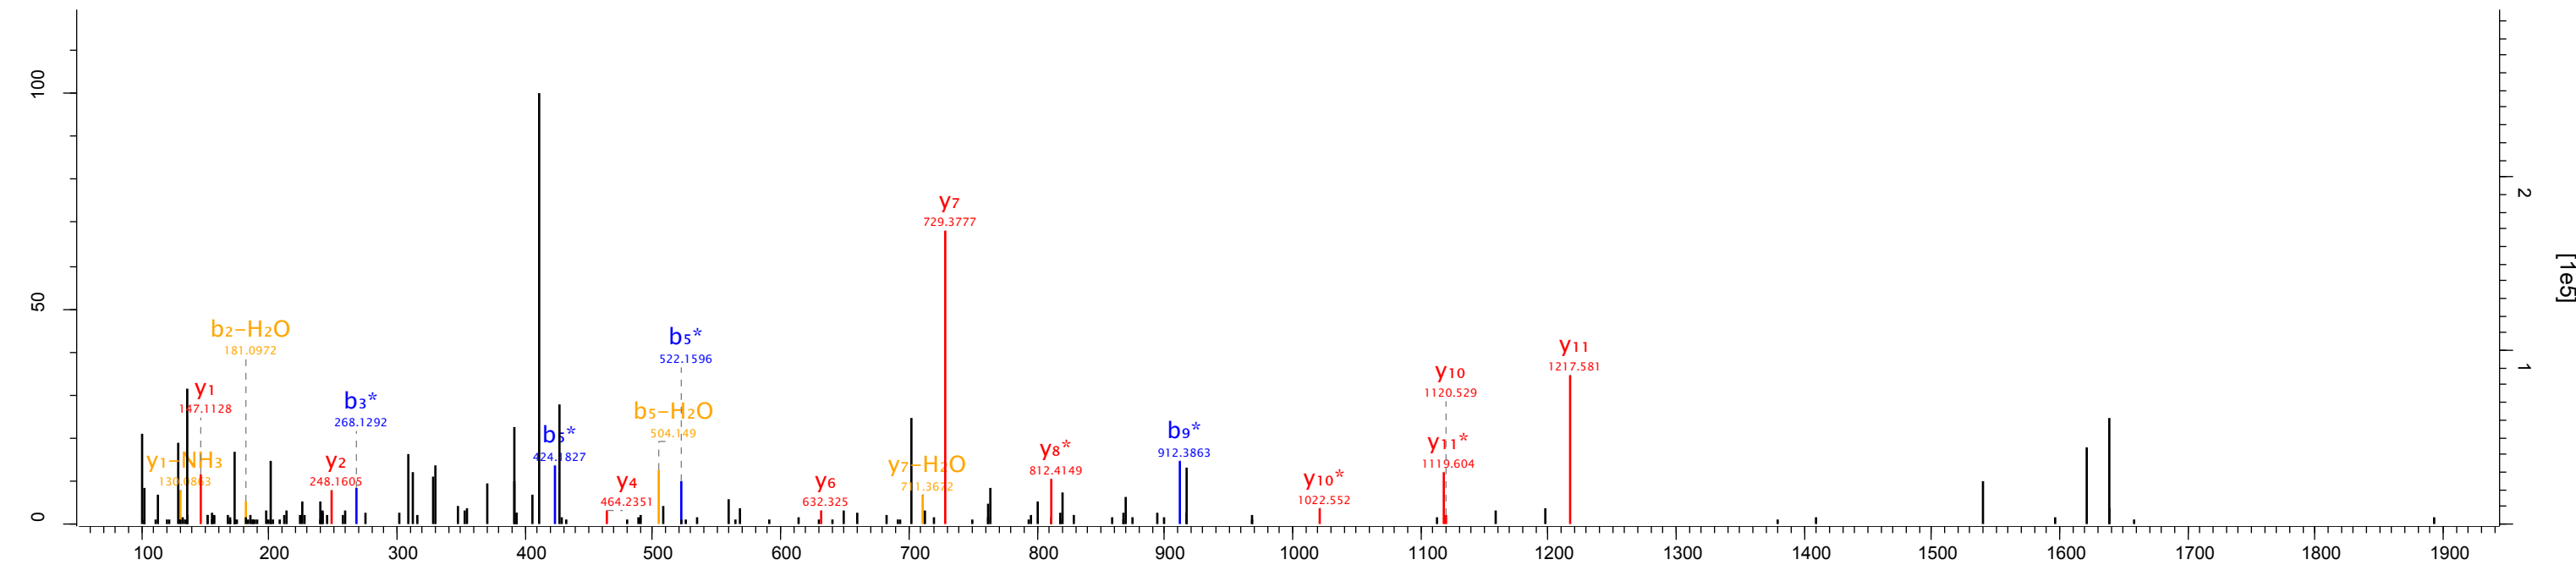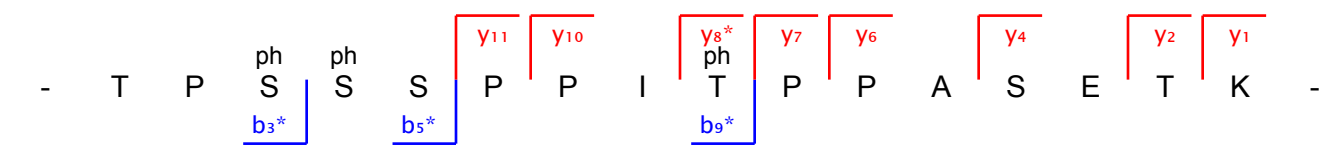

Raw file 20150814\_A375SR\_Phospho\_BR2\_02 Scan 12377 Method FTMS; HCD Score 119.5 m/z 884.32 Gene names POLR2A

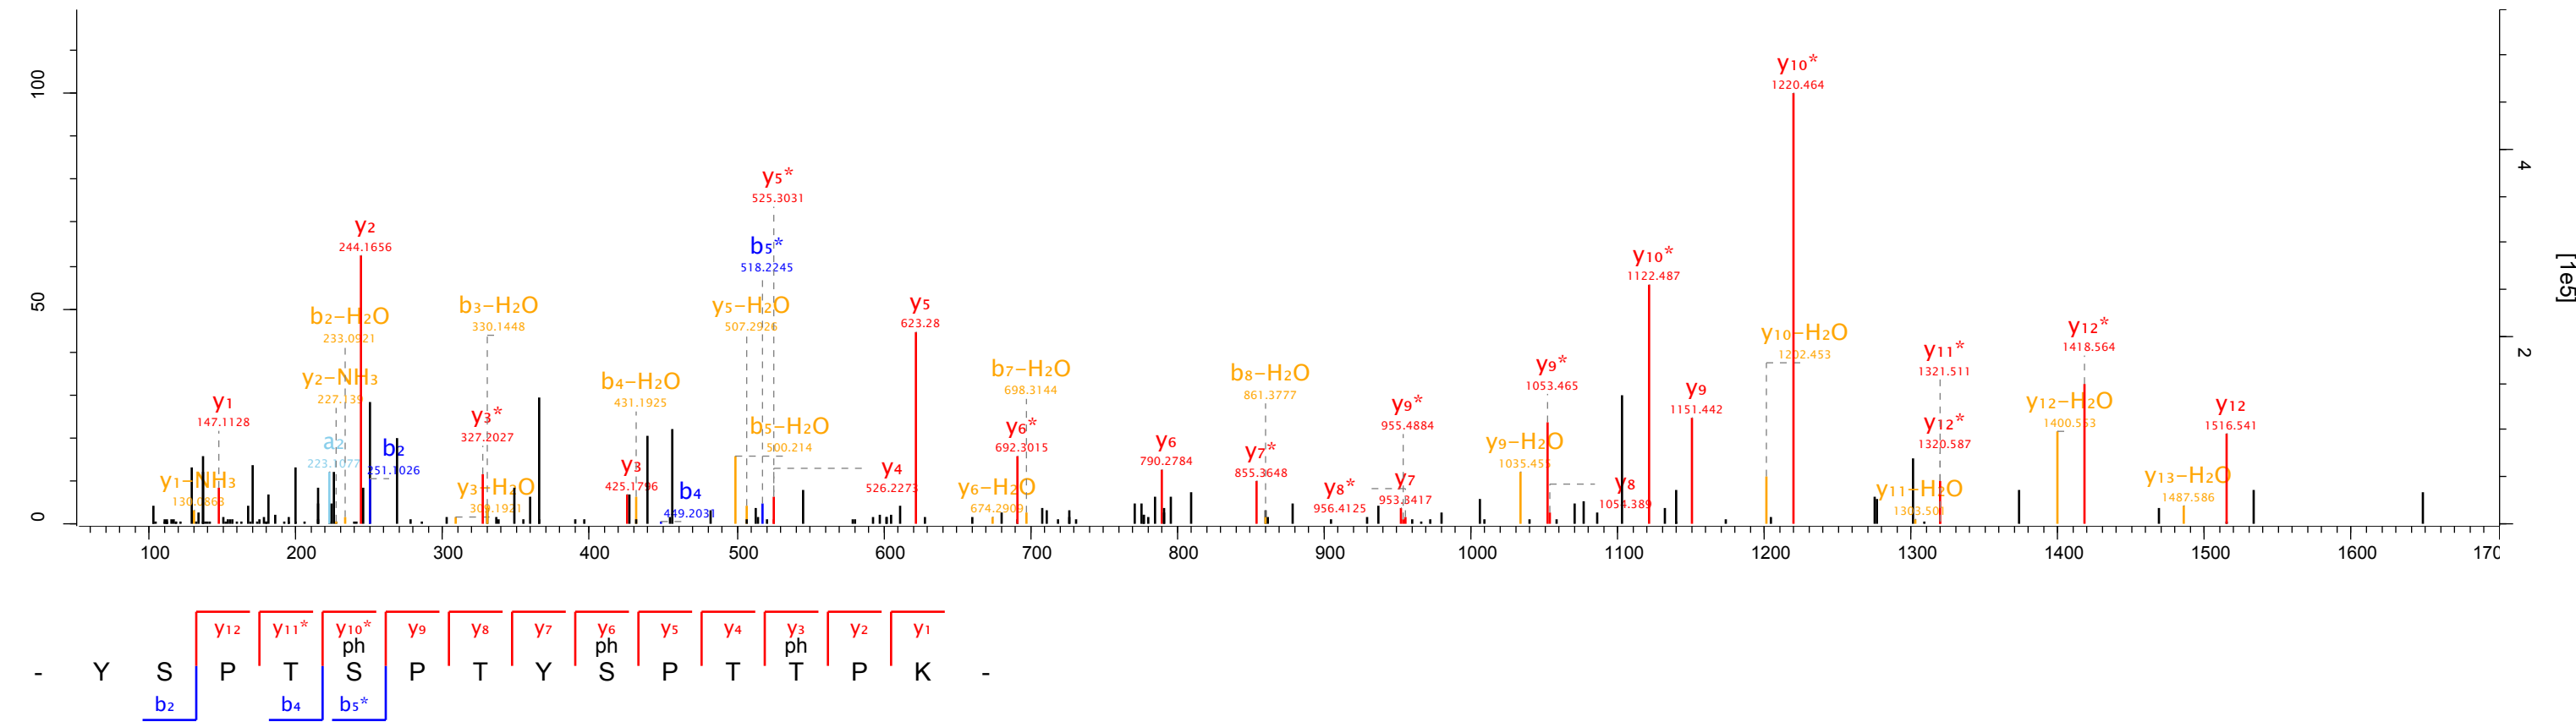



Raw file: 20150814\_A375SR\_Phospho\_BR2\_02  
 Scan: 12617  
 Method: FTMS; HCD  
 Score: 69.07  
 m/z: 1014.92  
 Gene names: DBN1

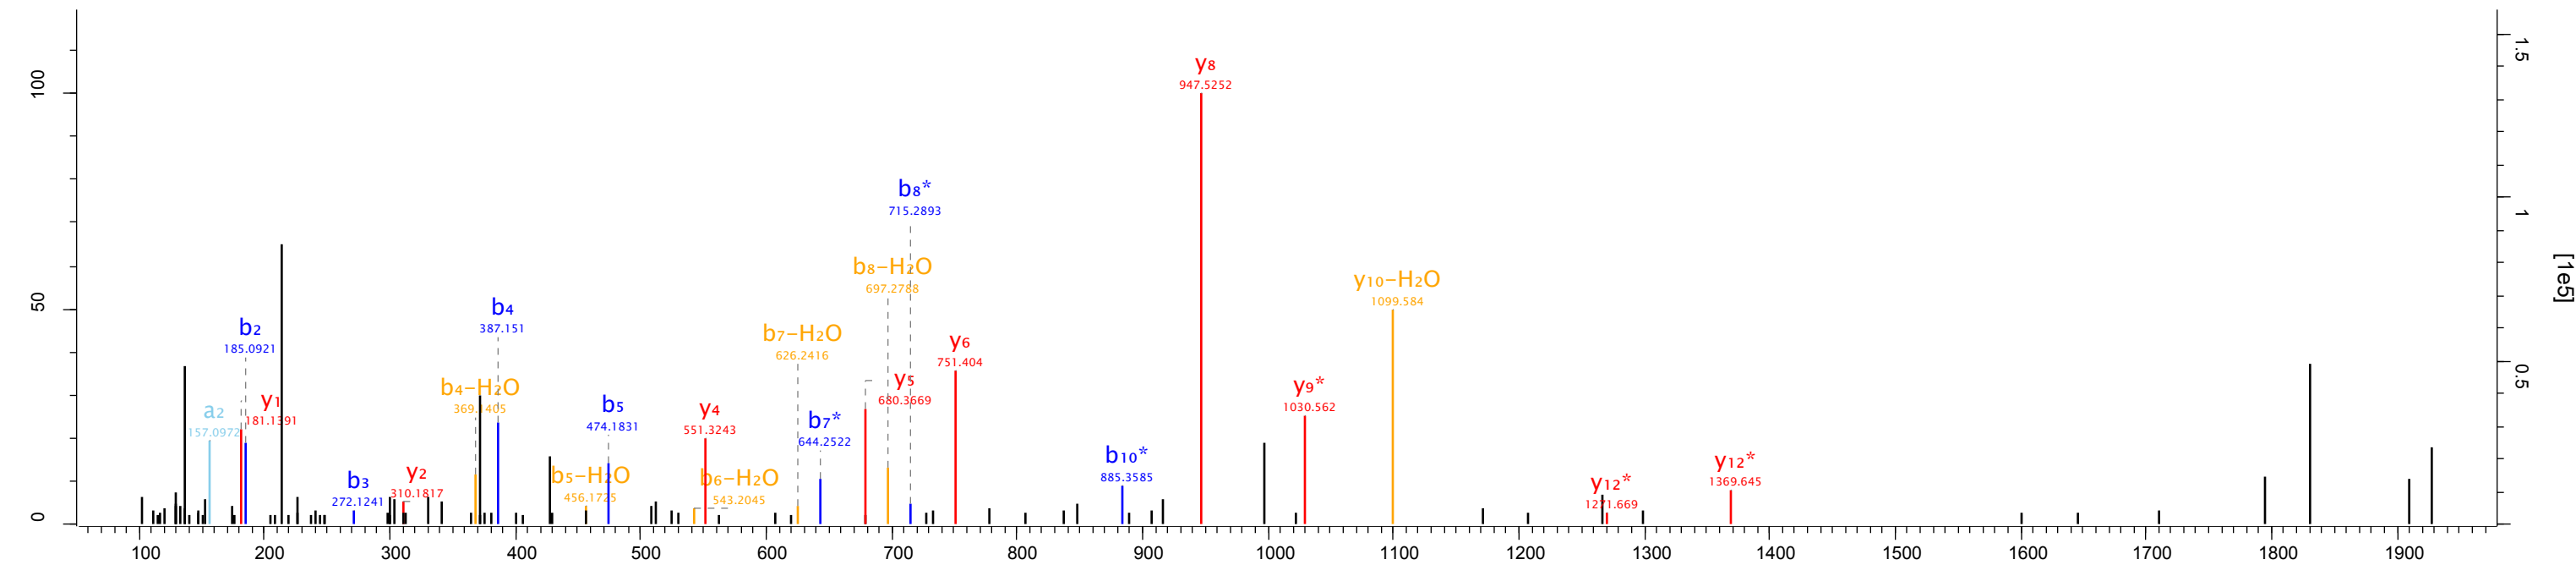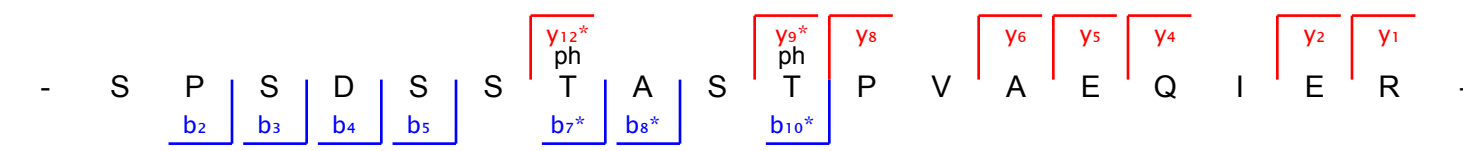

Raw file: 20150814\_A375SR\_Phospho\_BR2\_02  
 Scan: 12647 Method: FTMS; HCD Score: 68.29 m/z: 1024.88 Gene names: NUDT11;NUDT10

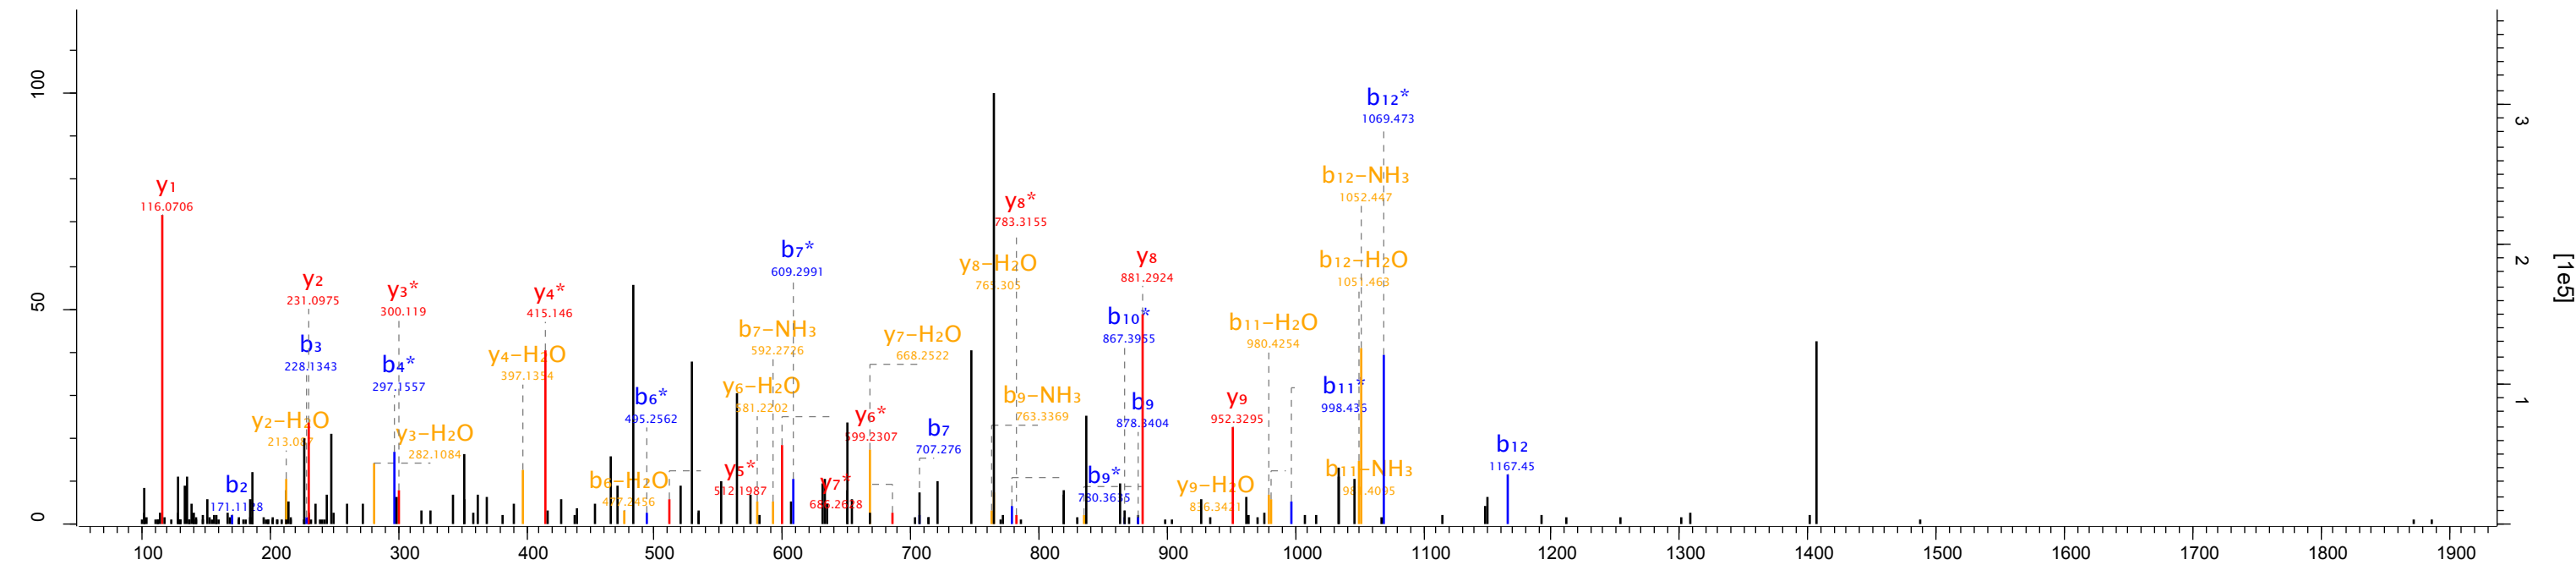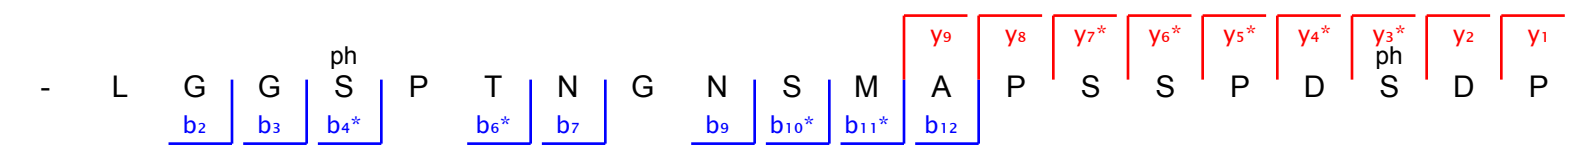

Raw file 20150814\_A375SR\_Phospho\_BR2\_02 Scan 12877 Method FTMS; HCD Score 149.52 m/z 1266.5 Gene names RALBP1

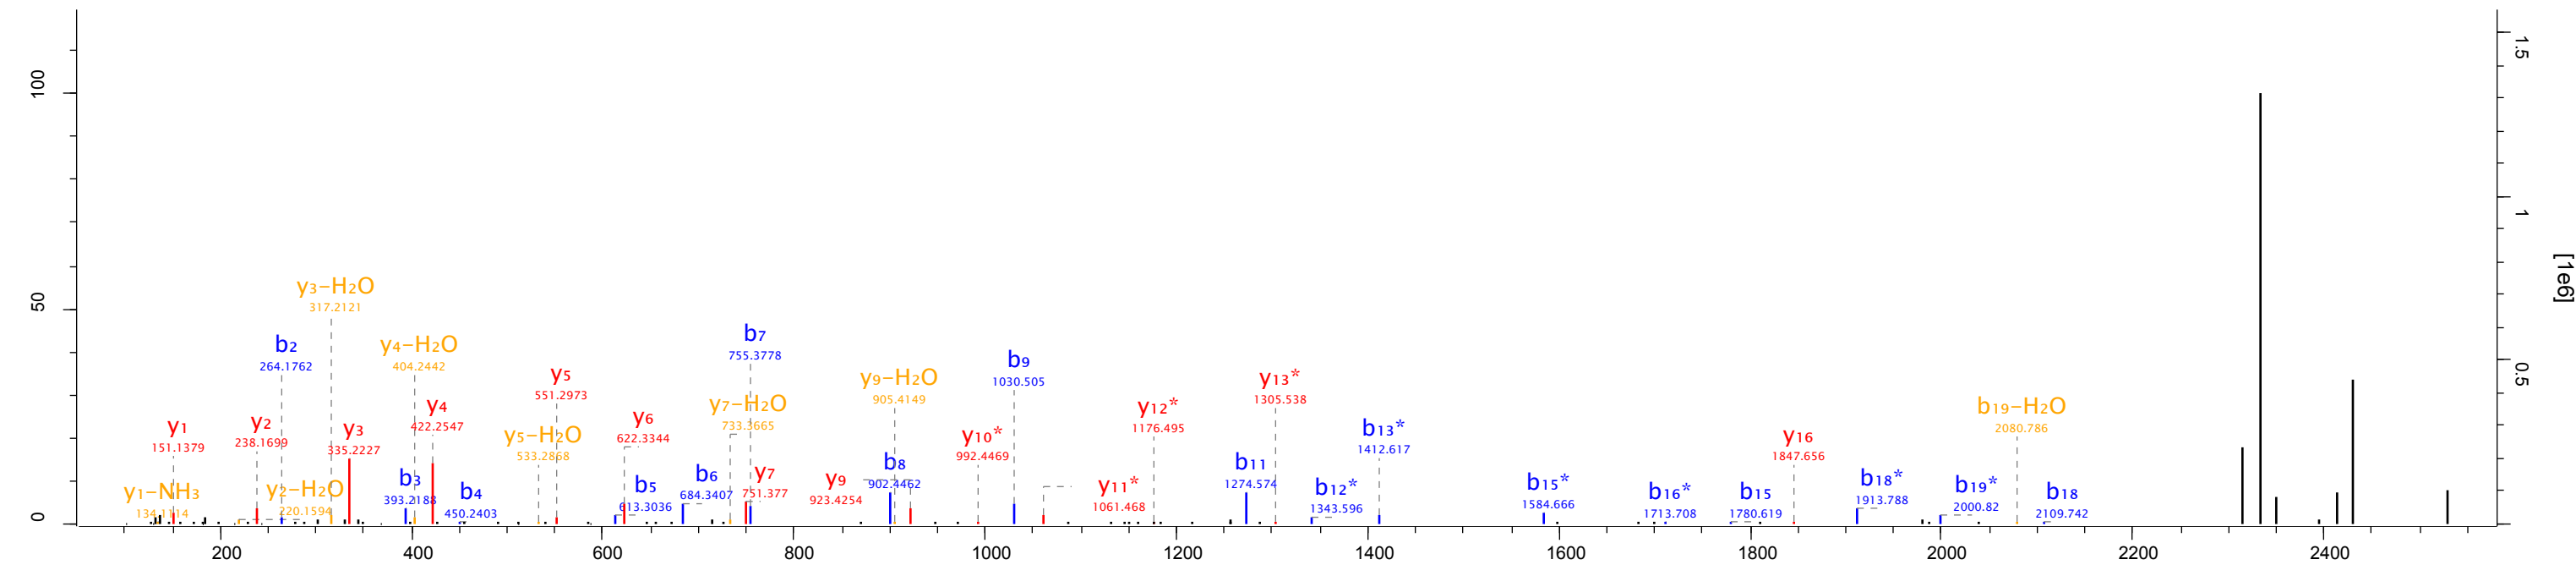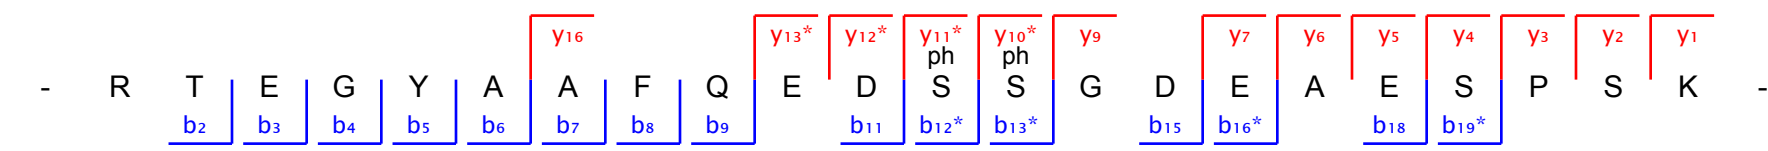

Raw file 20150814\_A375SR\_Phospho\_BR2\_02 Scan 14097 Method FTMS; HCD Score 208.58 m/z 1183 Gene names KANSL3

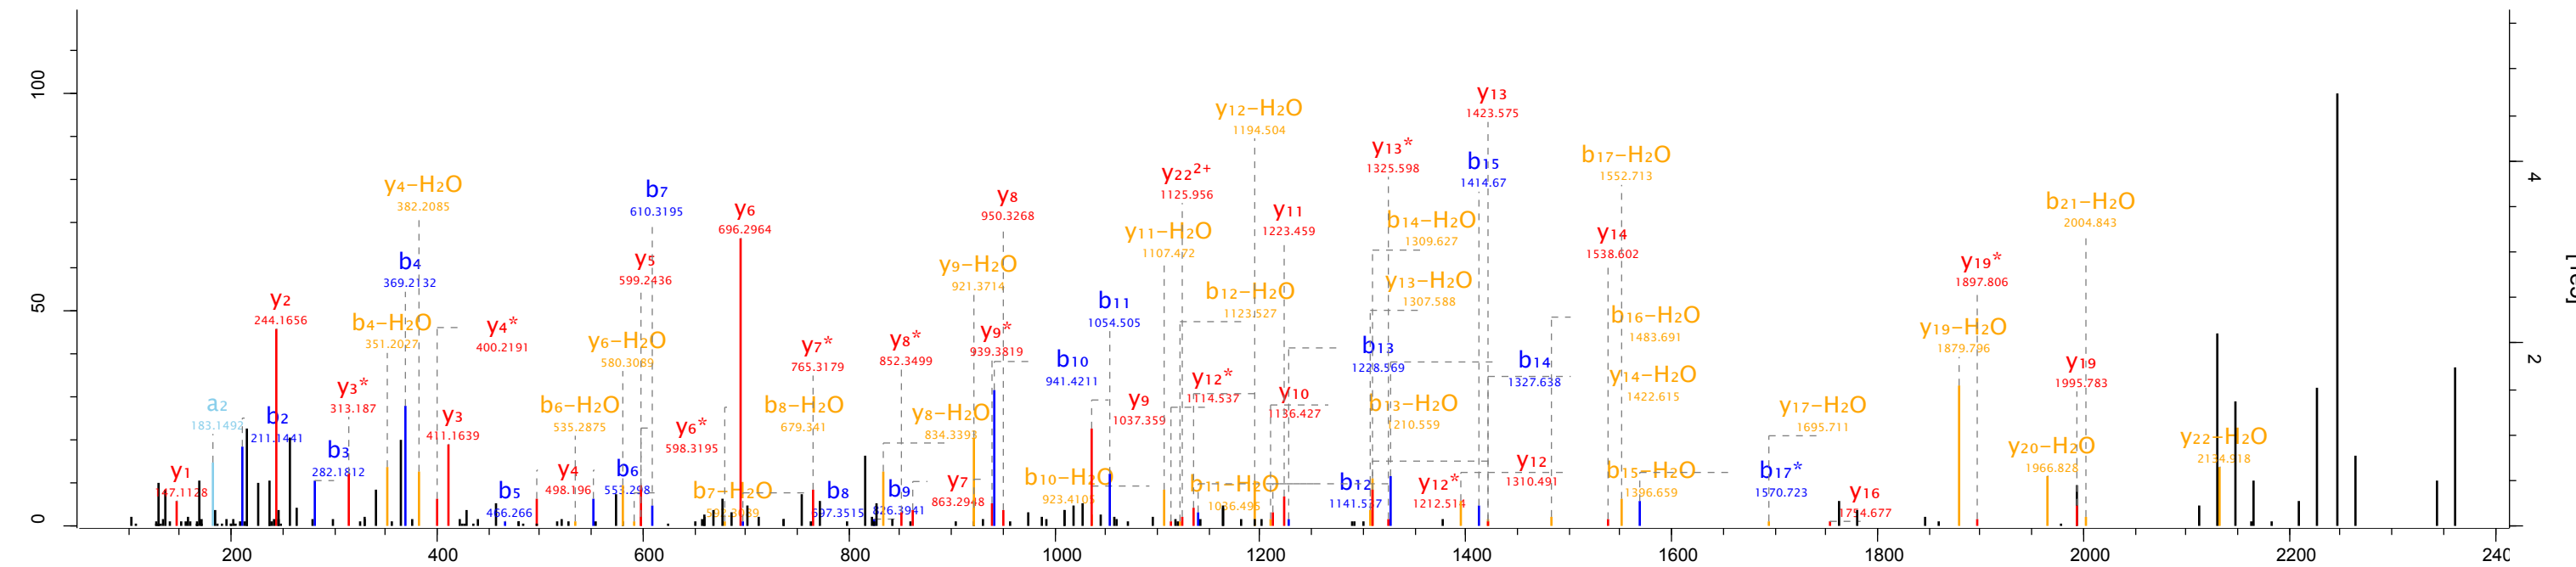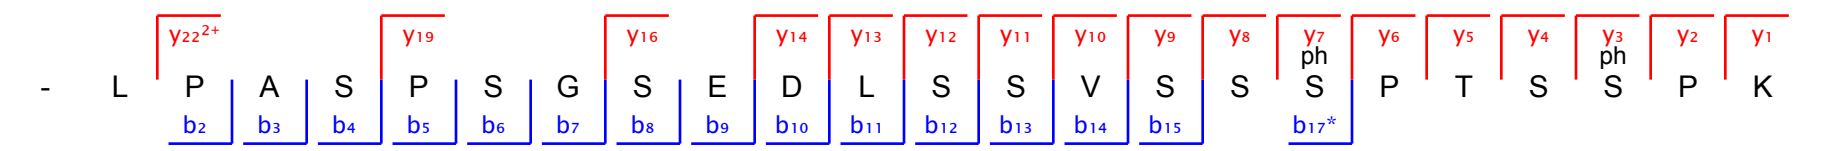

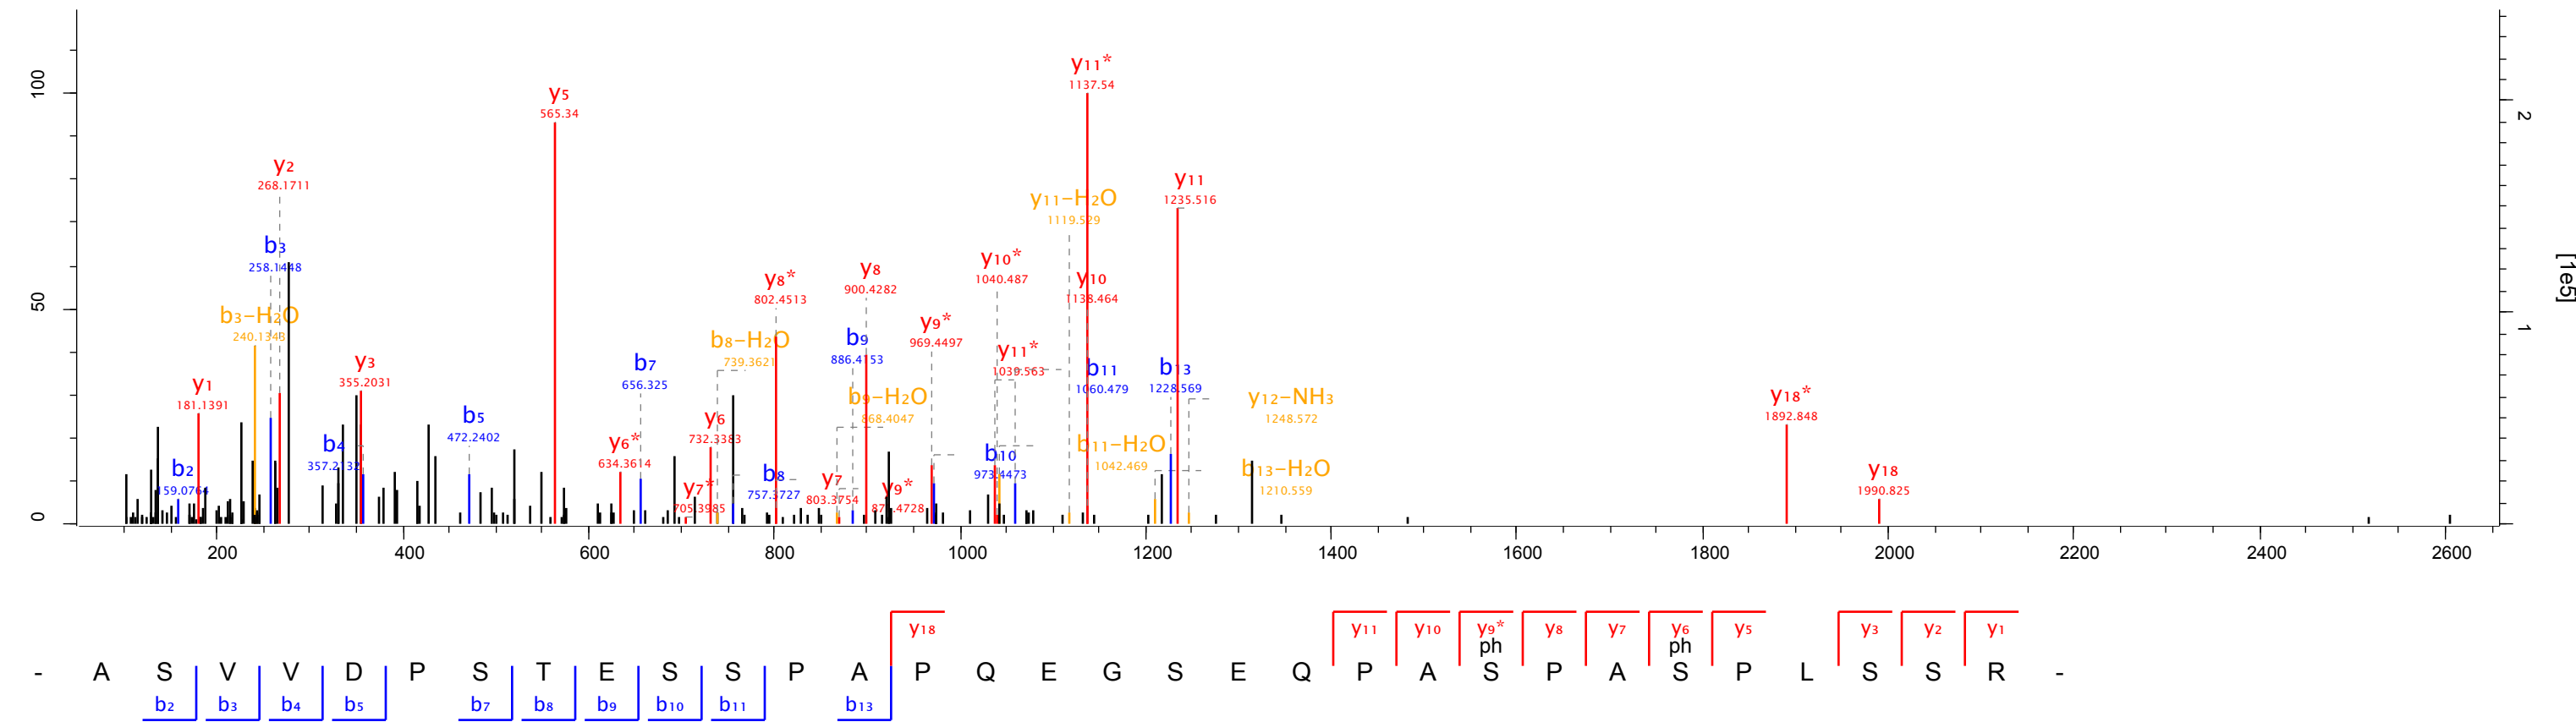

Raw file: 20150814\_A375SR\_Phospho\_BR2\_02  
 Scan: 15007 Method: FTMS; HCD Score: 147.35 m/z: 1388.47 Gene names: YBX3

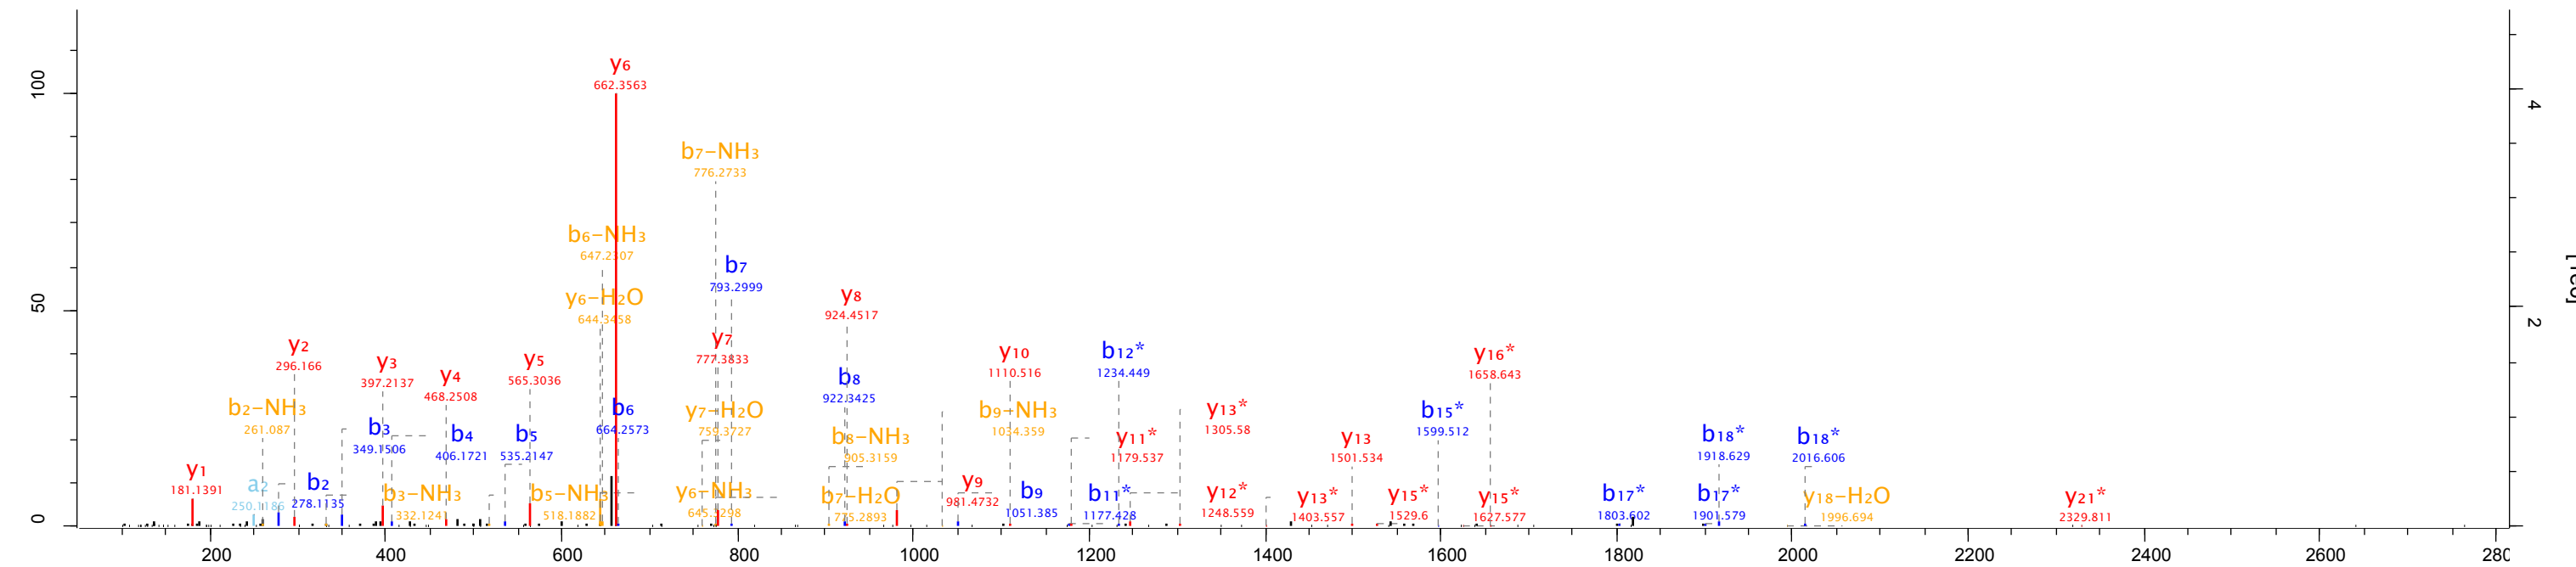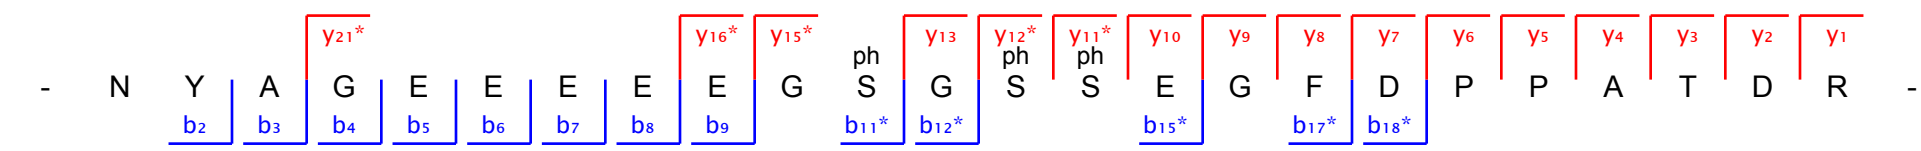

Raw file 20150814\_A375SR\_Phospho\_BR2\_02 Scan 15497 Method FTMS; HCD Score 106.67 m/z 1073.9 Gene names MET

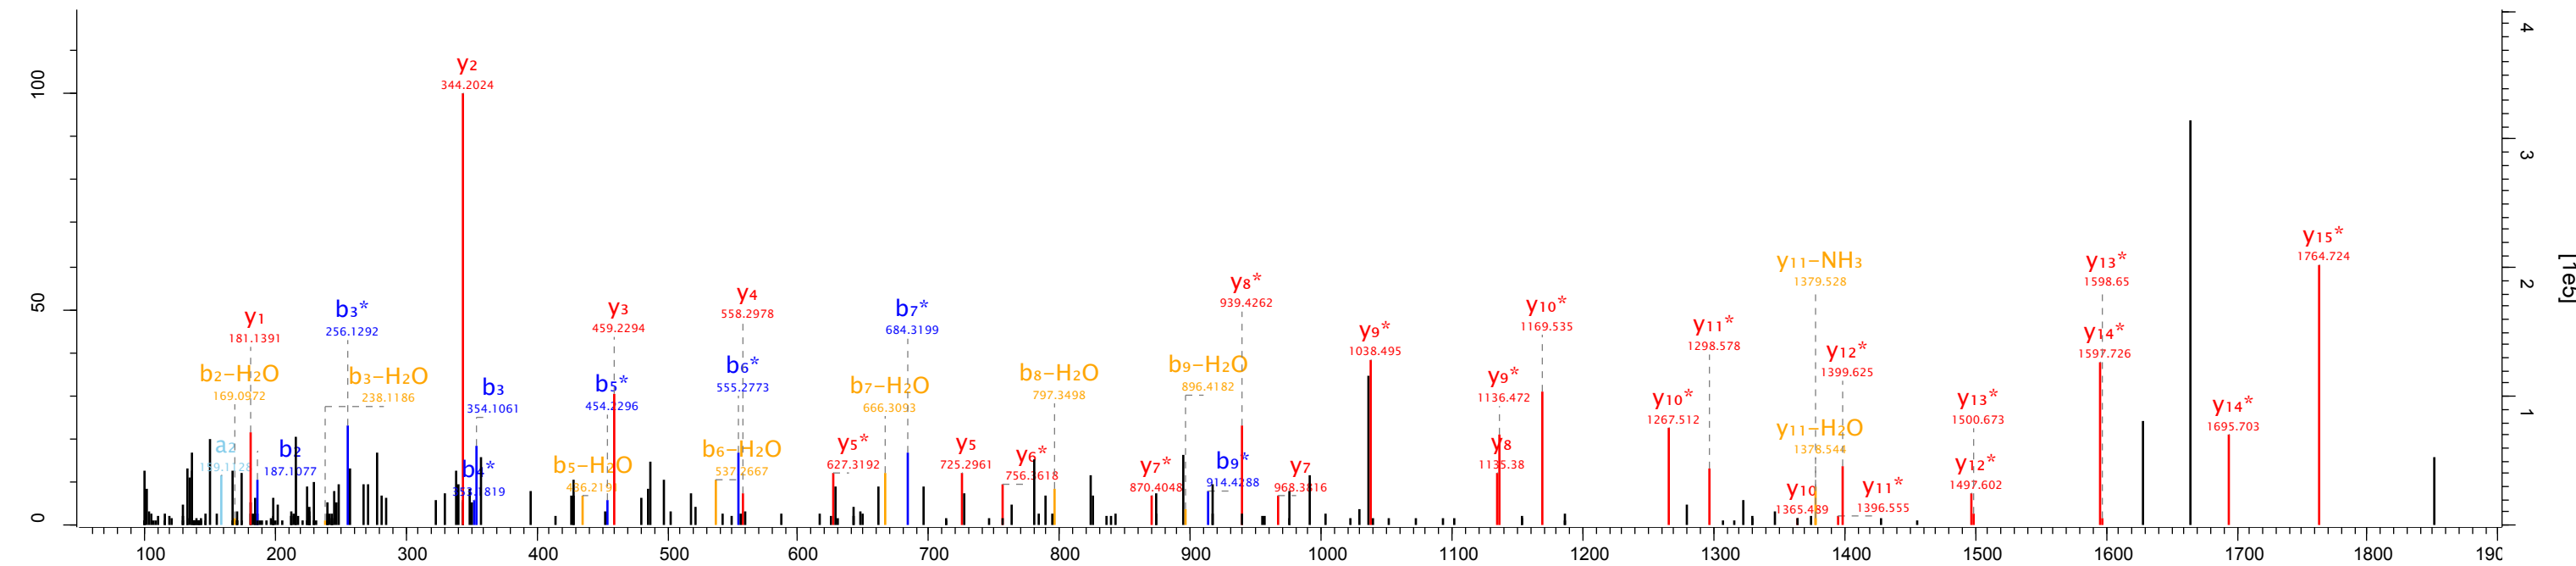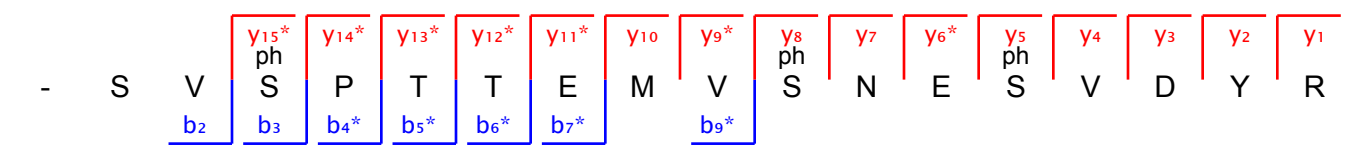

Raw file 20150814\_A375SR\_Phospho\_BR2\_02 Scan 16397 Method FTMS; HCD Score 128.08 m/z 975.09 Gene names UBE4B

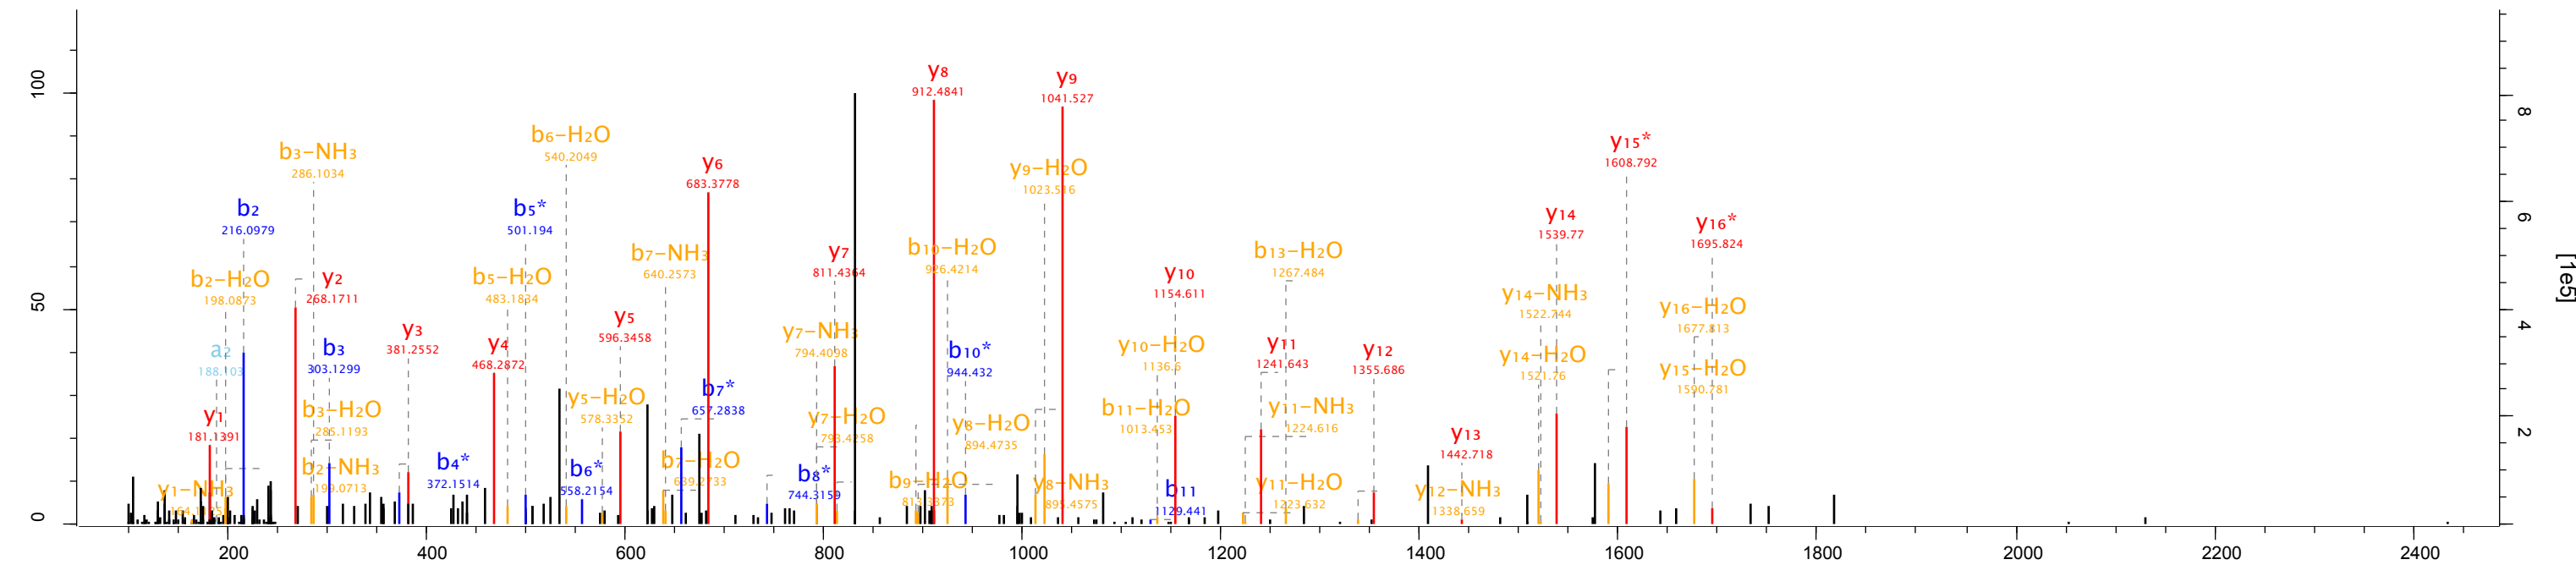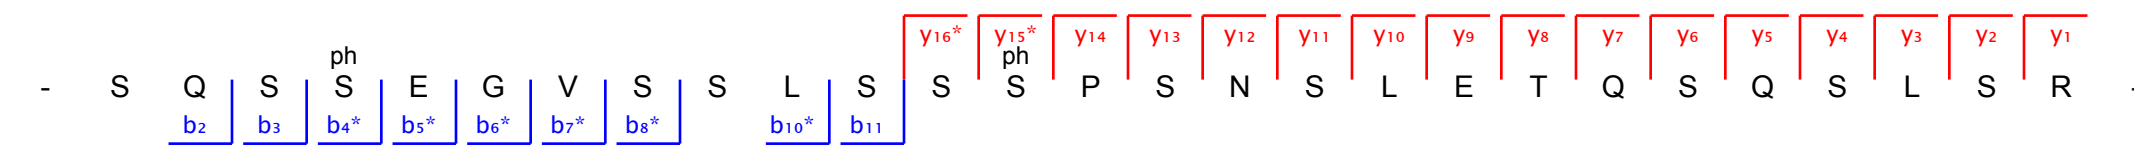



Raw file 20150814\_A375SR\_Phospho\_BR2\_02 Scan 18017 Method FTMS; HCD Score 63.35 m/z 1095.47 Gene names ESRRA

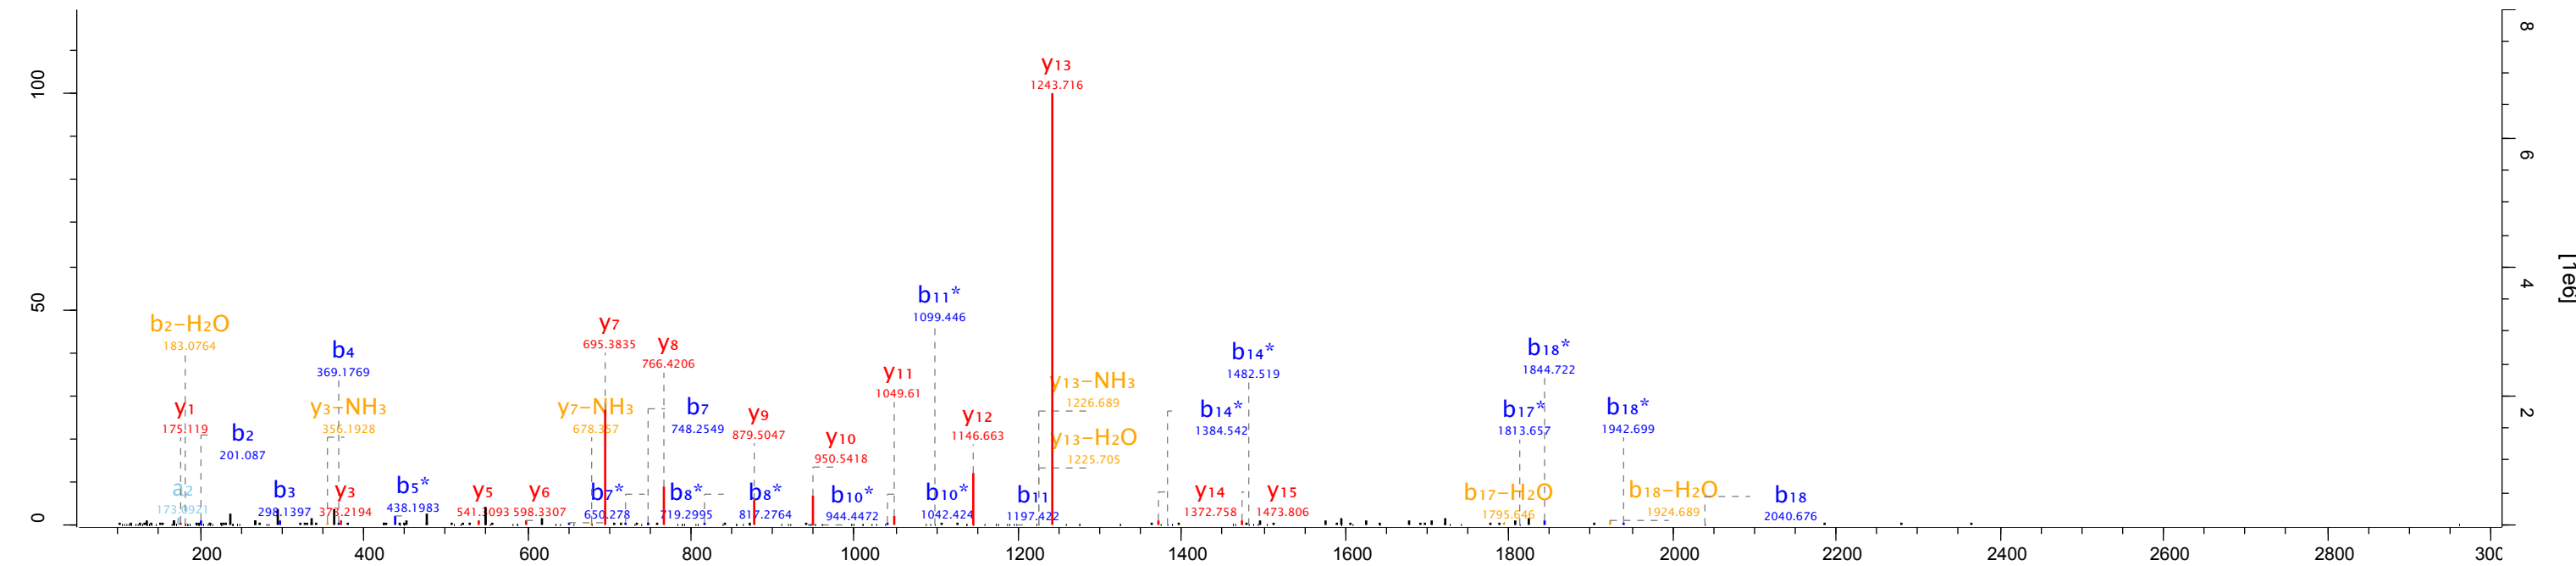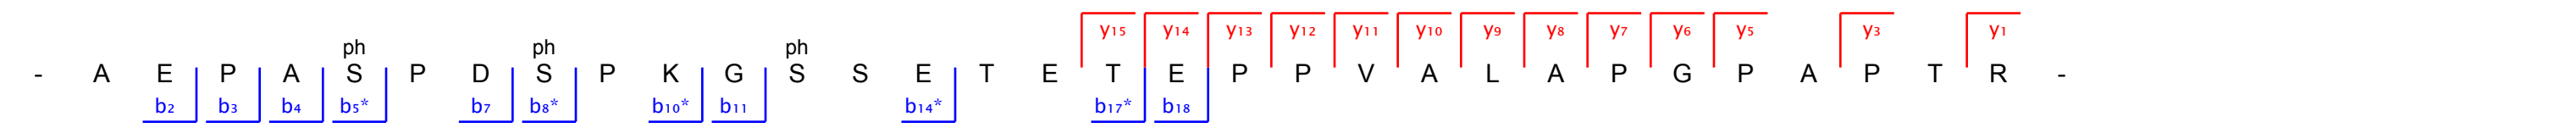

Raw file: 20150814\_A375SR\_Phospho\_BR2\_02  
 Scan: 18807 Method: FTMS; HCD Score: 77.63 m/z: 1029.11 Gene names: NCOA7

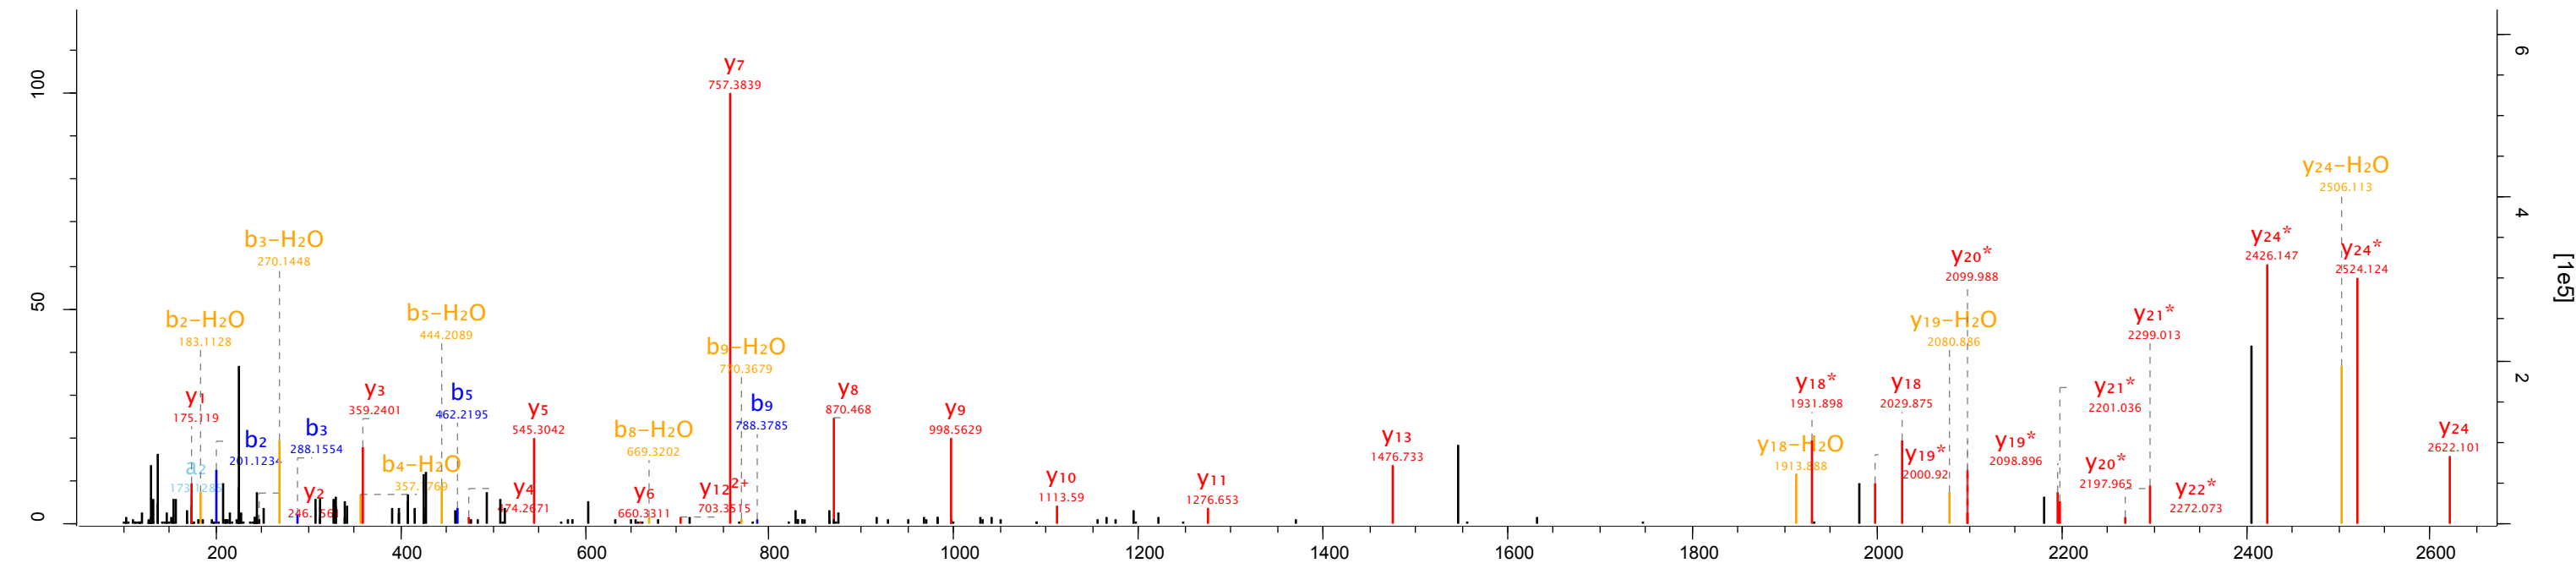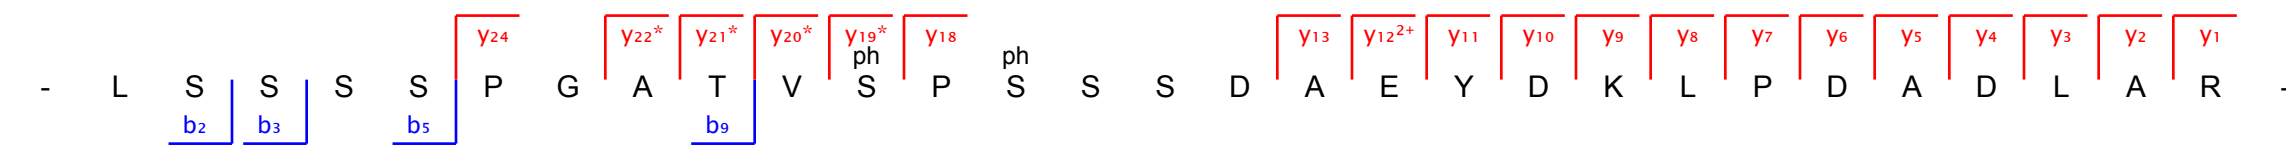

Raw file 20150814\_A375SR\_Phospho\_BR2\_02 Scan 20517 Method FTMS; HCD Score 144.78 m/z 1129.83 Gene names SMARCA4

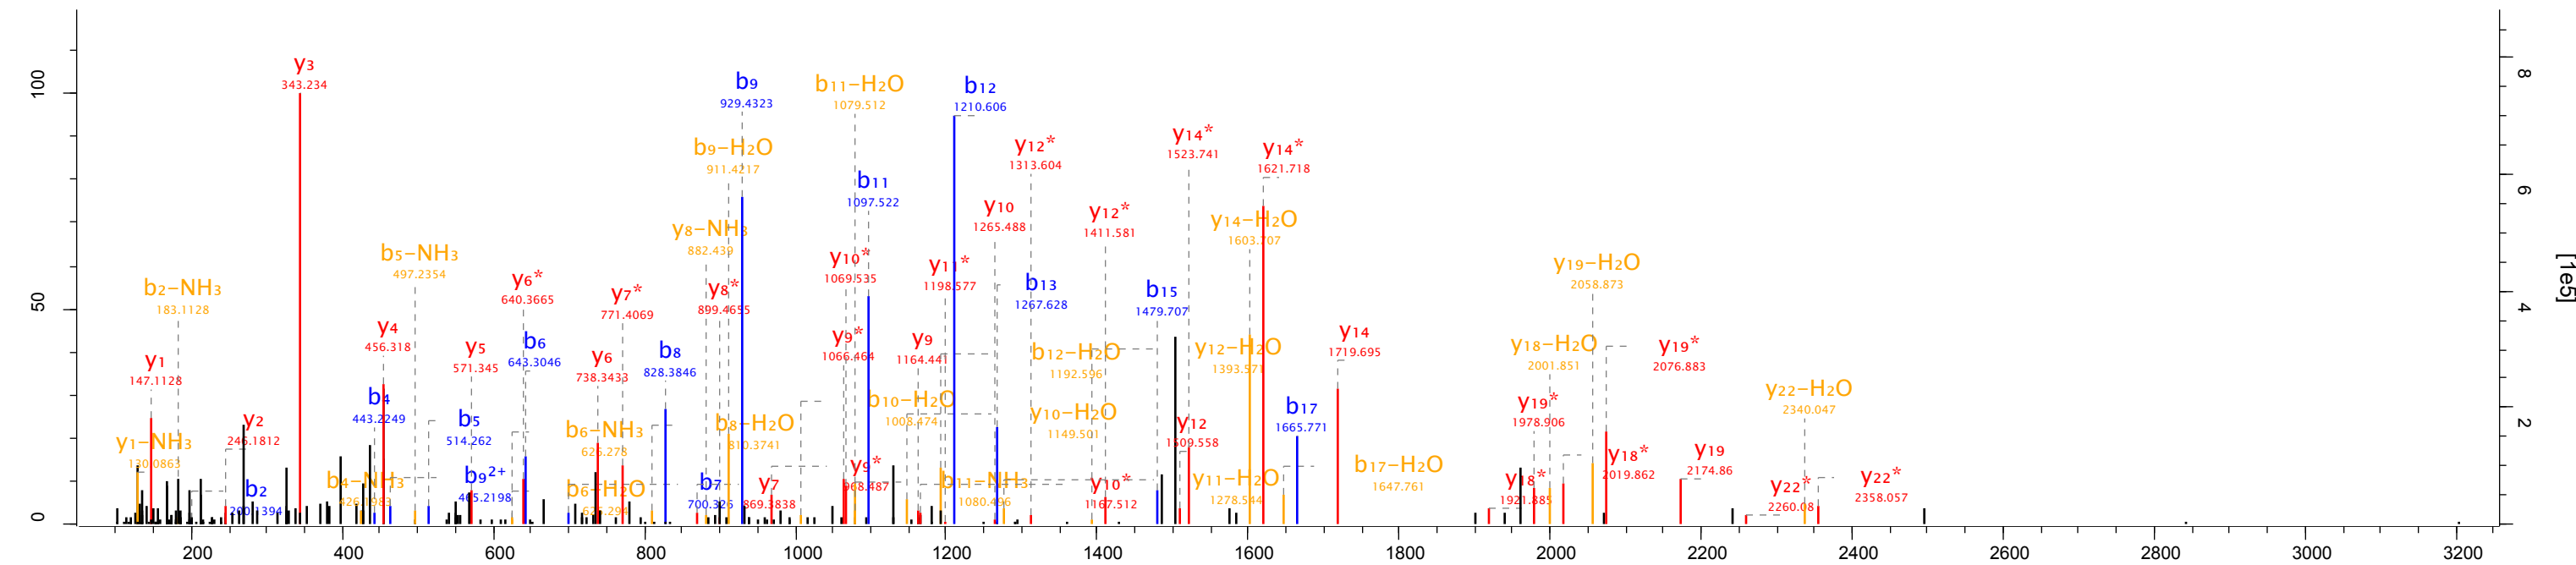

- K A E N A E G Q T P A I G P D G E P L D E T S Q M S D L P V K -

b<sub>2</sub>
b<sub>4</sub>
b<sub>5</sub>
b<sub>6</sub>
b<sub>7</sub>
b<sub>8</sub>
b<sub>9</sub>
b<sub>11</sub>
b<sub>12</sub>
b<sub>13</sub>
b<sub>15</sub>
b<sub>17</sub>
y<sub>22</sub>\*
y<sub>19</sub>
y<sub>18</sub>\*
y<sub>14</sub>
y<sub>12</sub>
y<sub>11</sub>\*
y<sub>10</sub>
y<sub>9</sub>ph
y<sub>8</sub>\*
y<sub>7</sub>
y<sub>6</sub>ph
y<sub>5</sub>
y<sub>4</sub>
y<sub>3</sub>
y<sub>2</sub>
y<sub>1</sub>

Raw file: 20150814\_A375SR\_Phospho\_BR2\_02  
 Scan: 22327 Method: FTMS; HCD Score: 93.26 m/z: 970.9 Gene names: HELZ

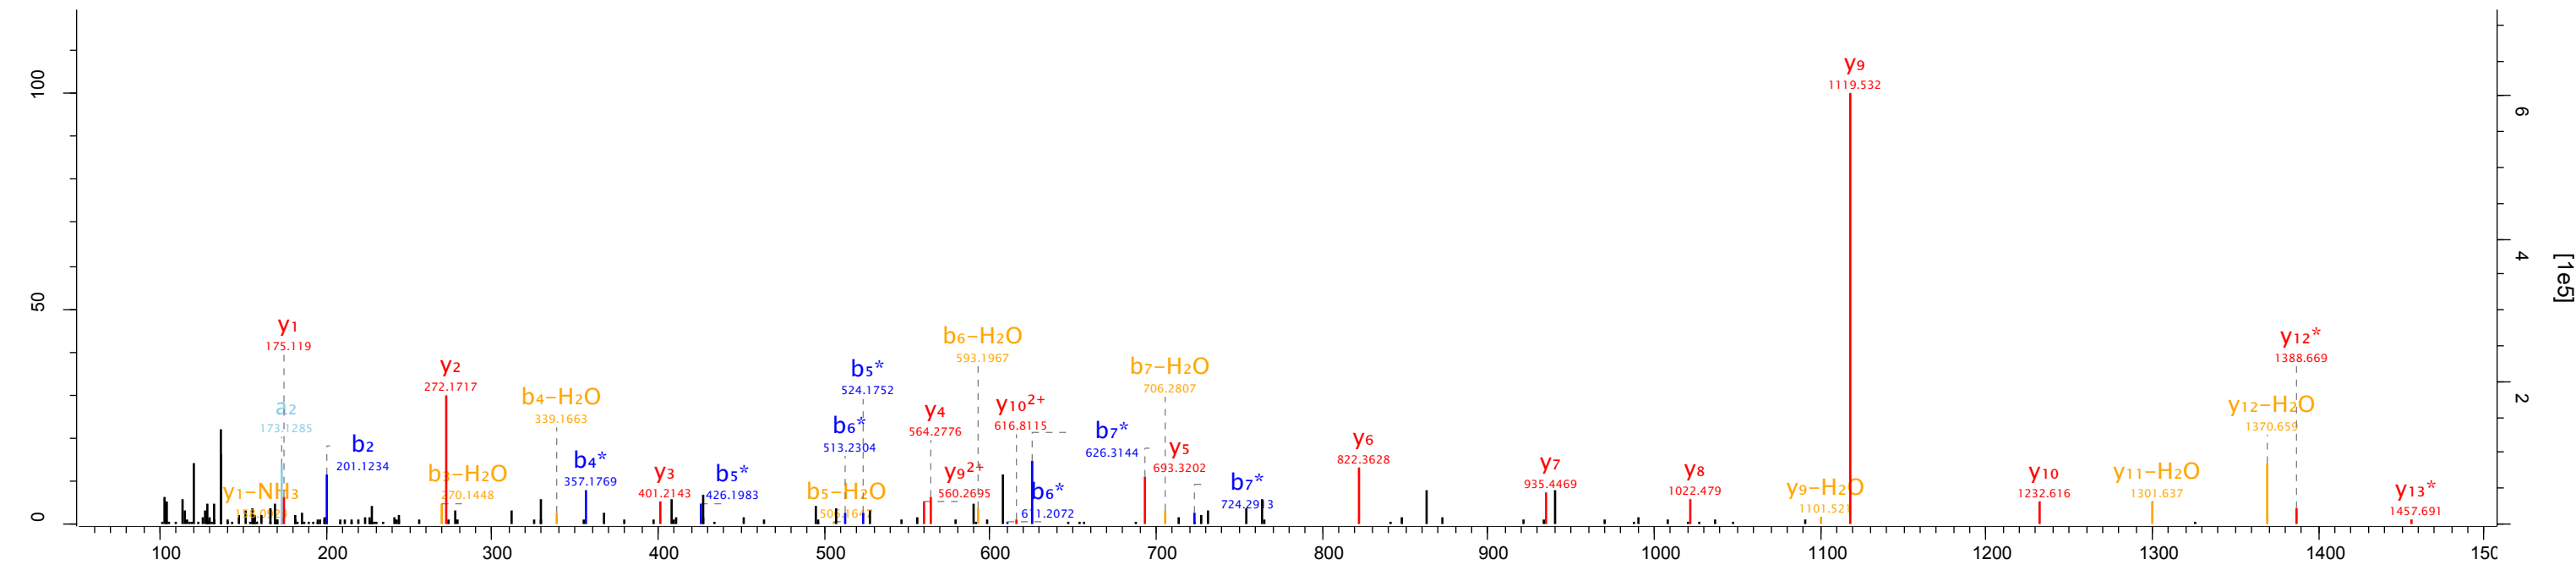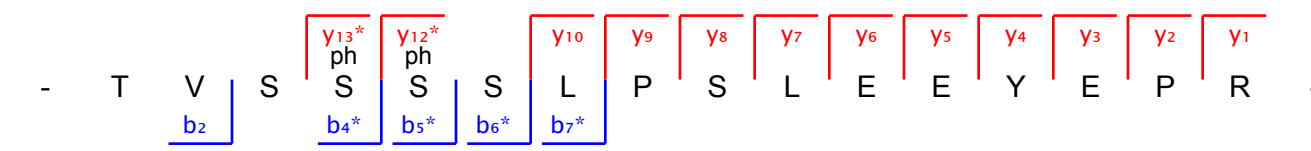

Raw file: 20150814\_A375SR\_Phospho\_BR2\_02  
 Scan: 2457 Method: FTMS; HCD Score: 58.37 m/z: 915.38 Gene names: NOC2L

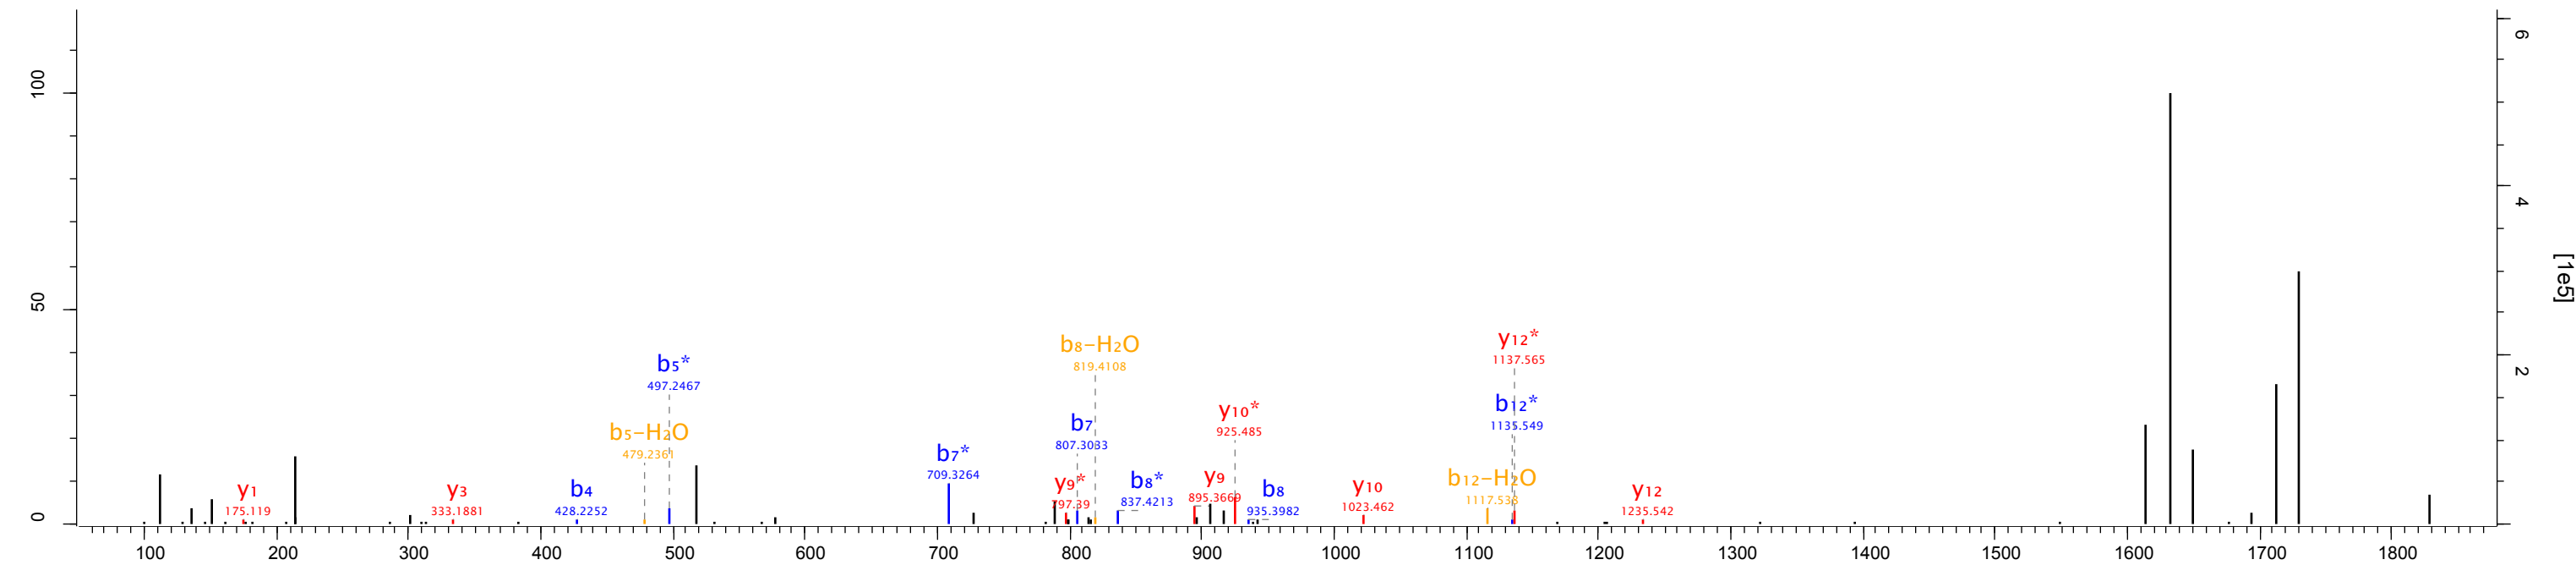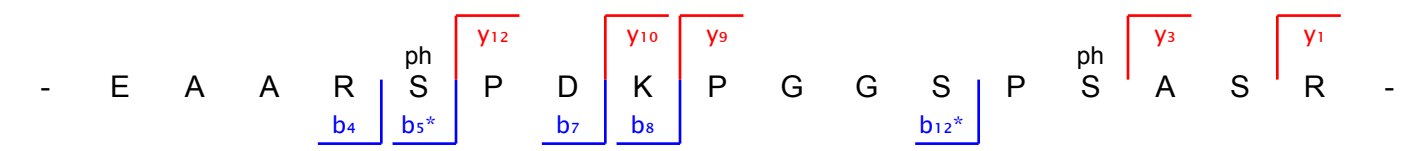

Raw file: 20150814\_A375SR\_Phospho\_BR2\_02  
 Scan: 2707 Method: FTMS; HCD Score: 79.7 m/z: 548.2 Gene names: SRRM2

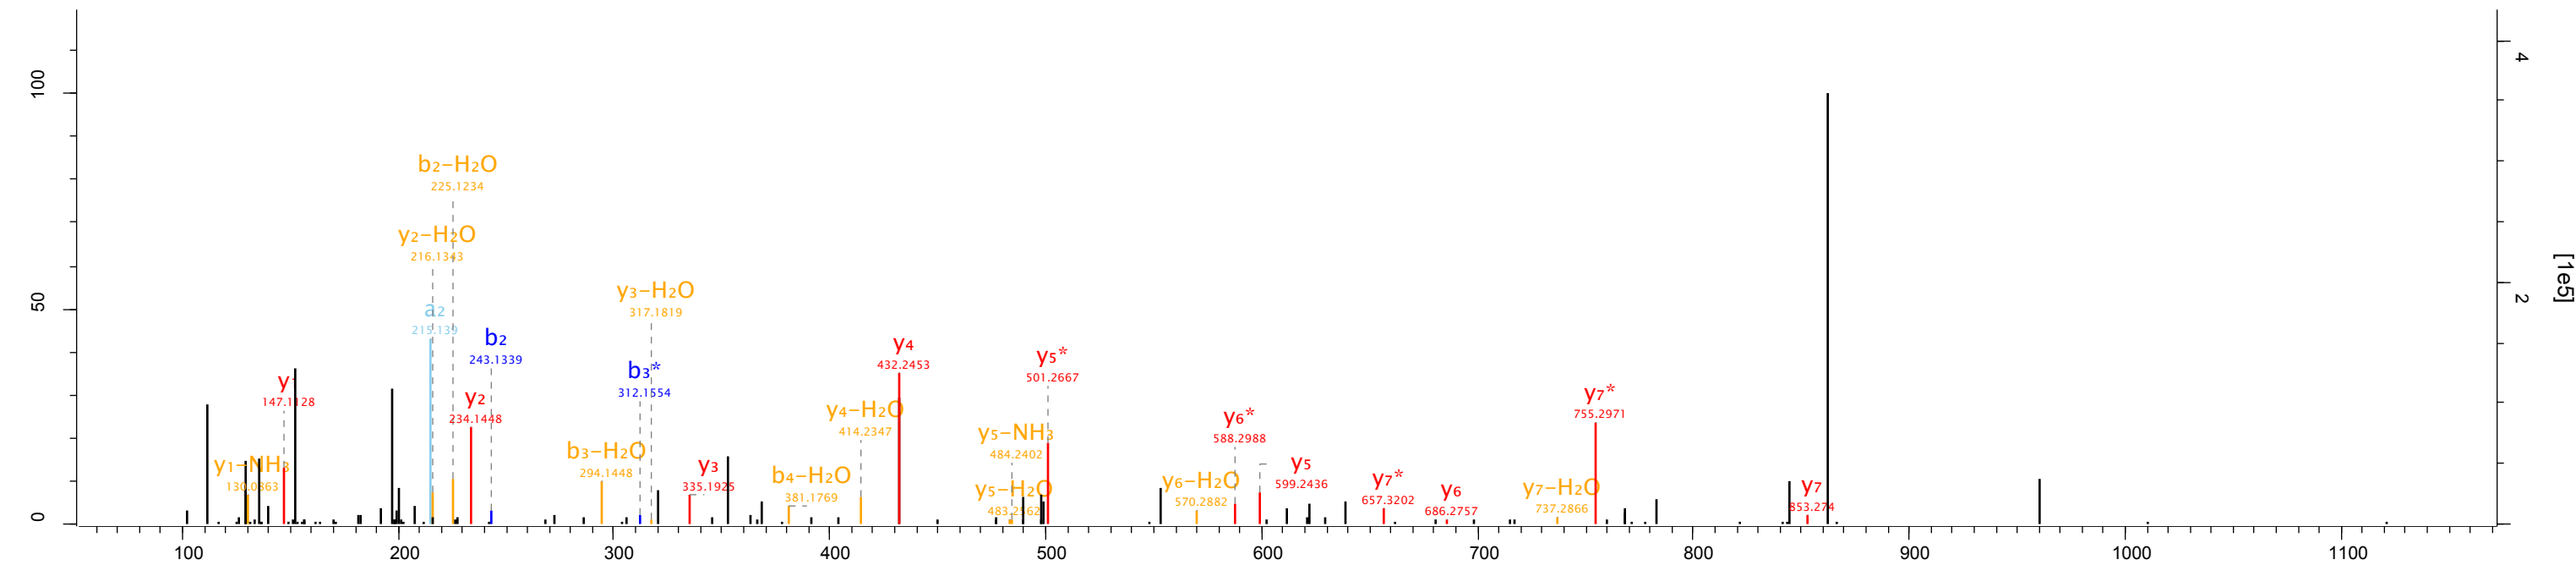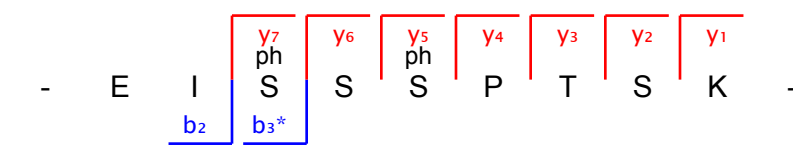

Raw file: 20150814\_A375SR\_Phospho\_BR2\_02  
 Scan: 27467 Method: FTMS; HCD Score: 80.73 m/z: 1307.47 Gene names: MAK16

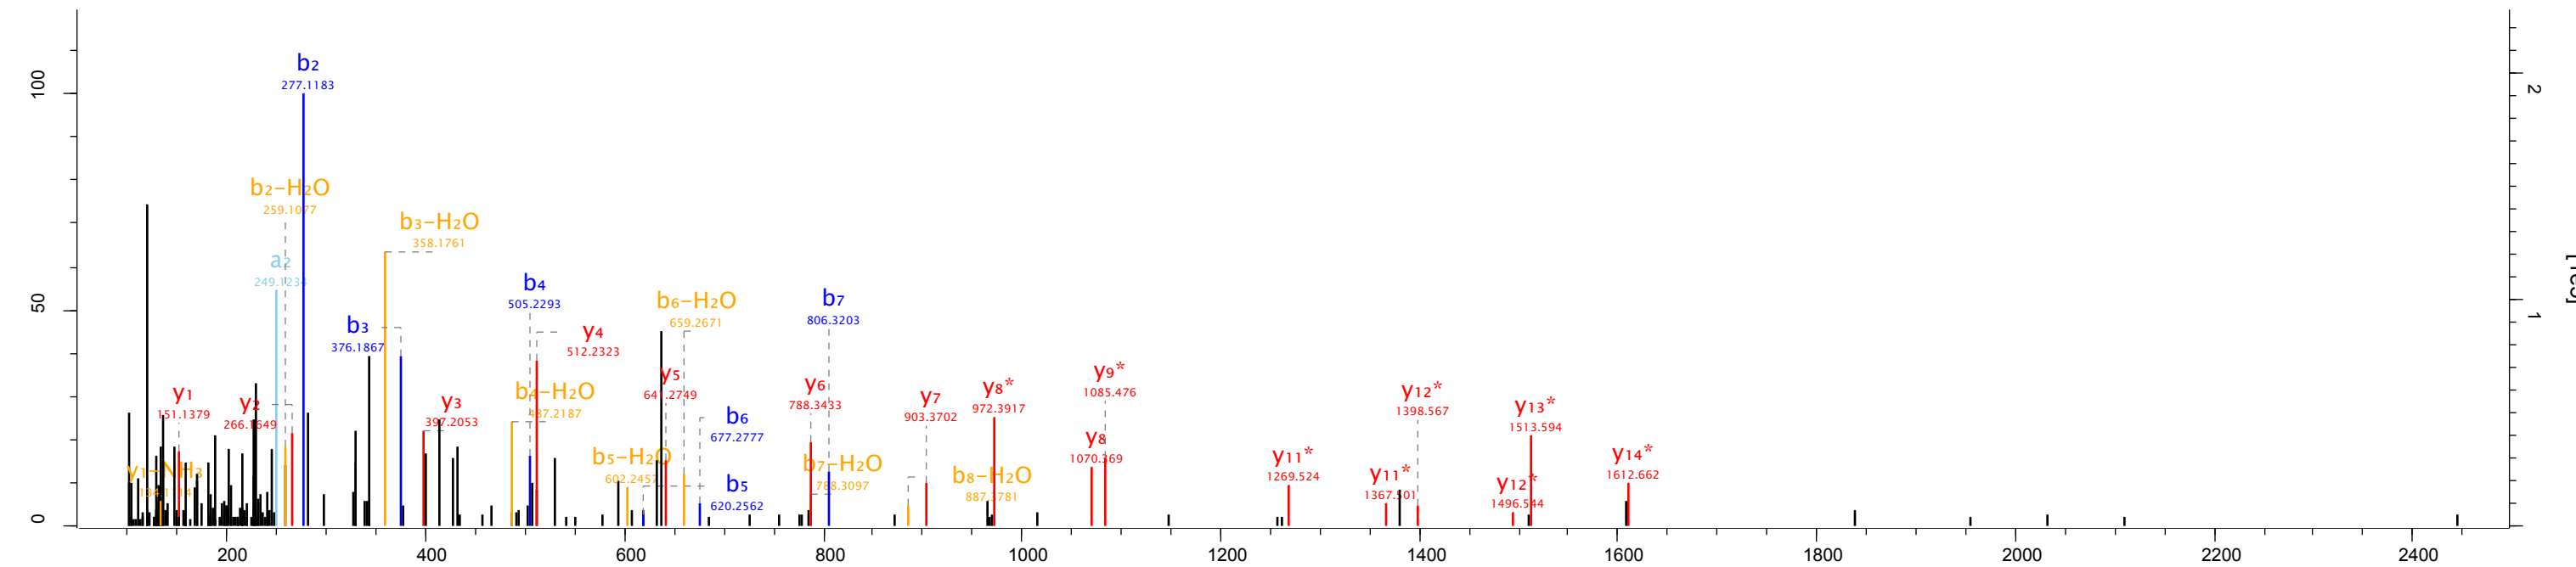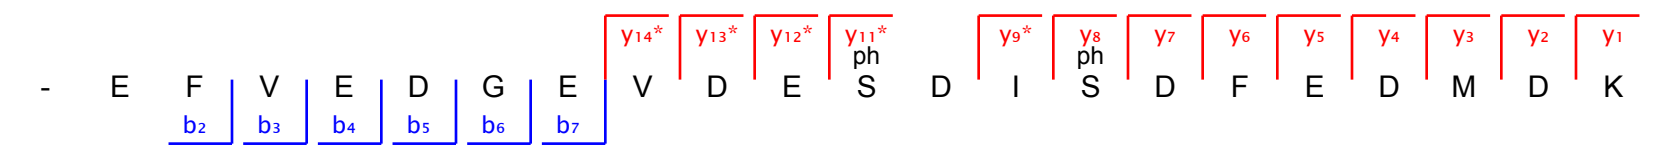

Raw file 20150814\_A375SR\_Phospho\_BR2\_02 Scan 3777 Method FTMS; HCD Score 40.97 m/z 734.82 Gene names NSUN5;NSUN5P2;NSUN5P1

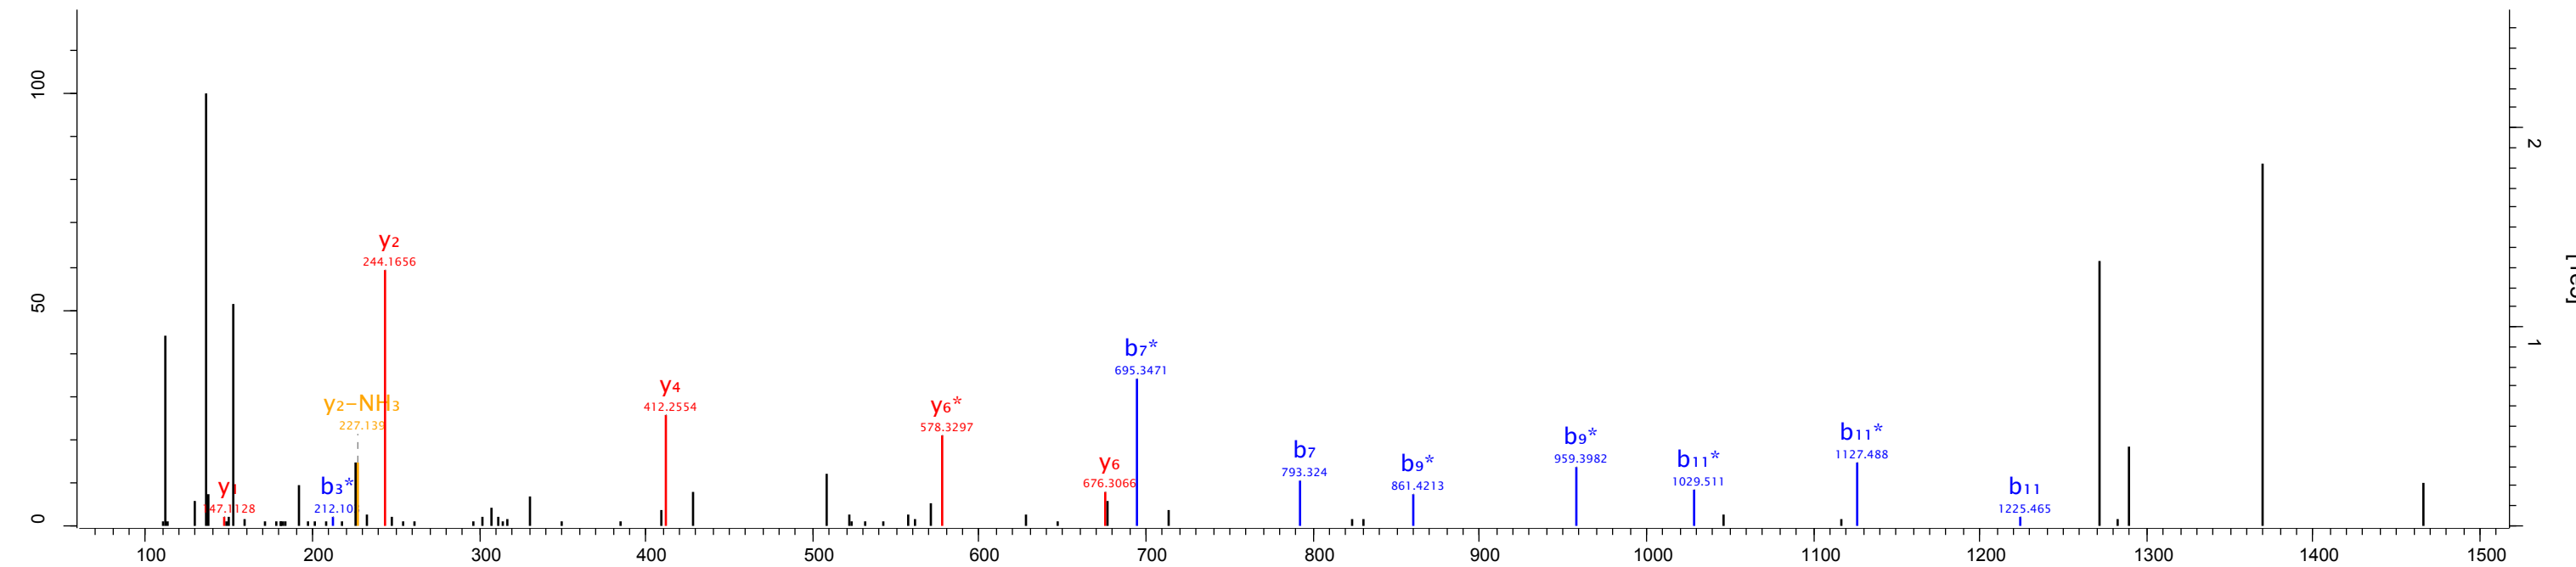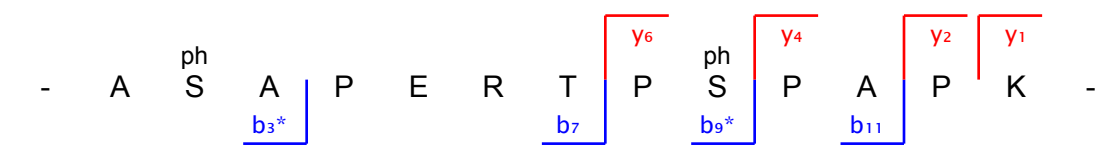



Raw file: 20150814\_A375SR\_Phospho\_BR2\_02  
 Scan: 4267 Method: FTMS; HCD Score: 220.43 m/z: 741.25 Gene names: IWS1

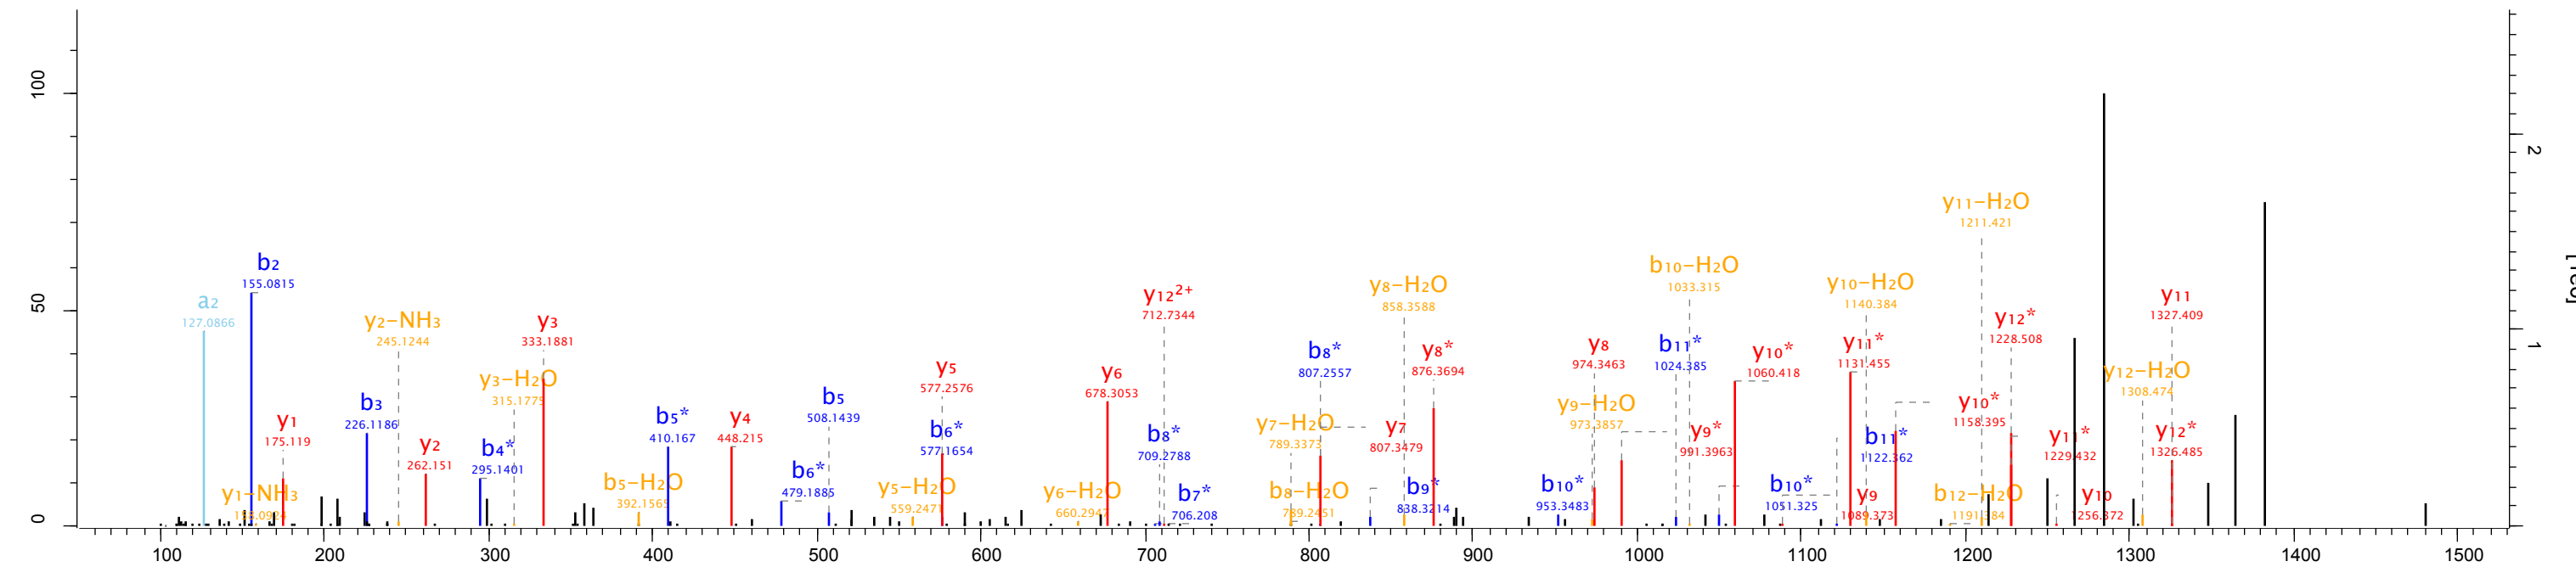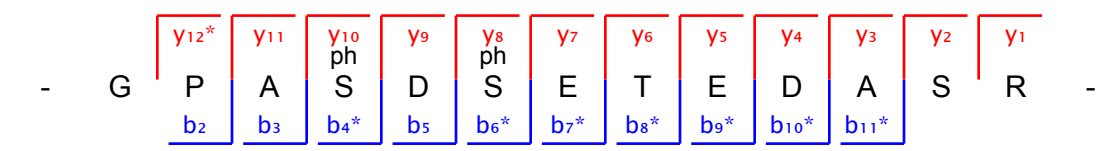

Raw file Scan Method Score m/z Gene names  
 20150814\_A375SR\_Phospho\_BR2\_02 4437 FTMS; HCD 178.85 1087.85 ATG9A

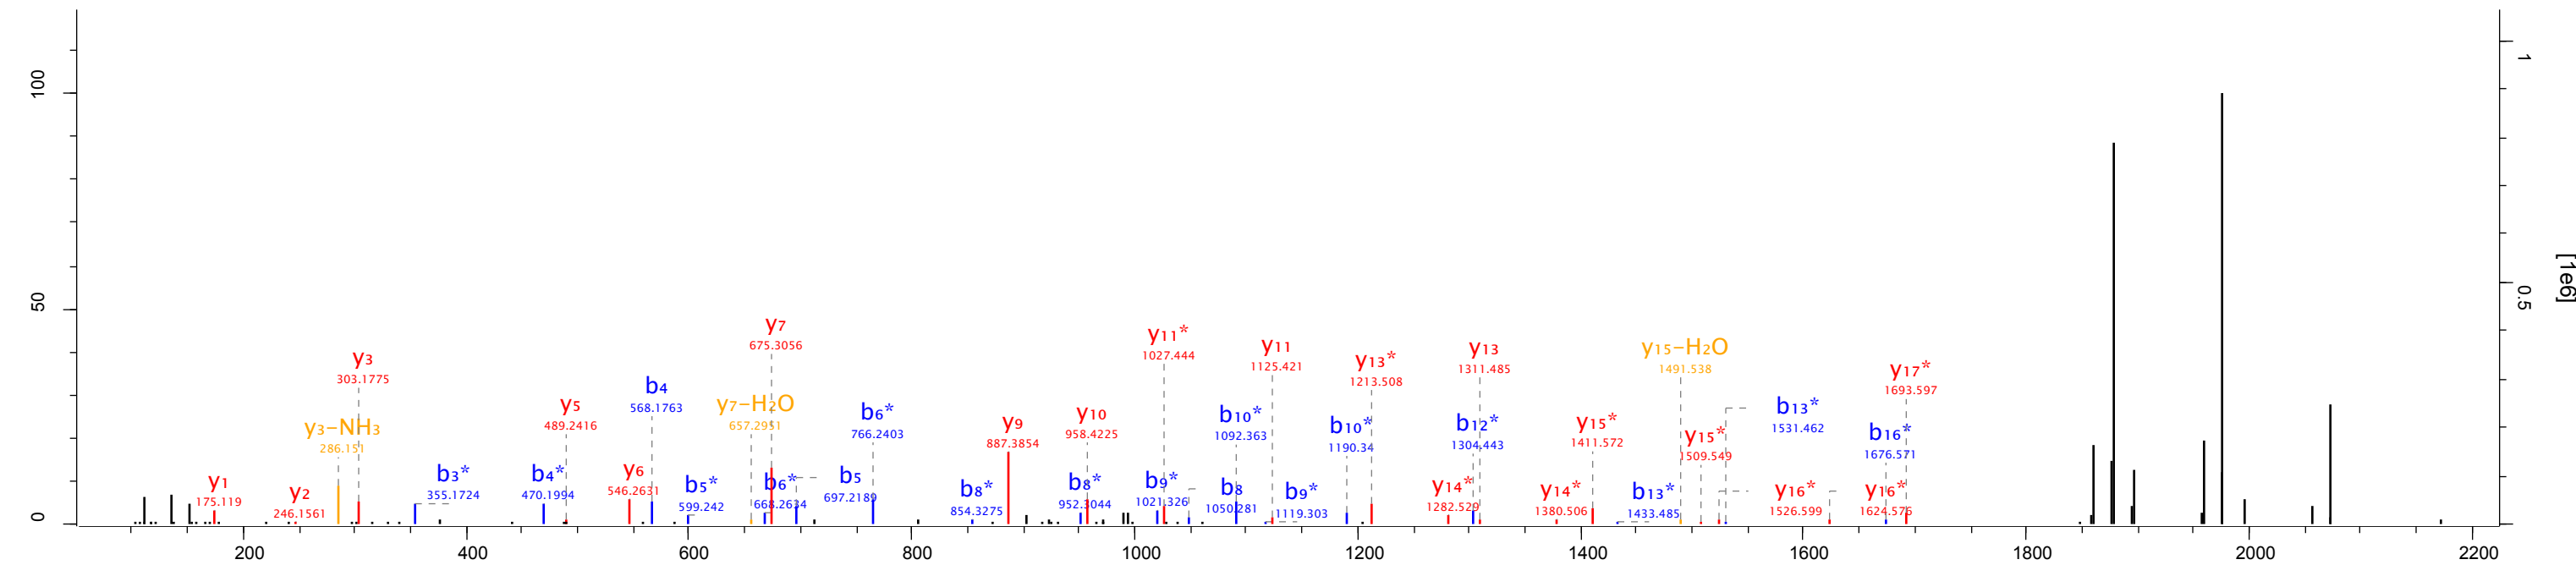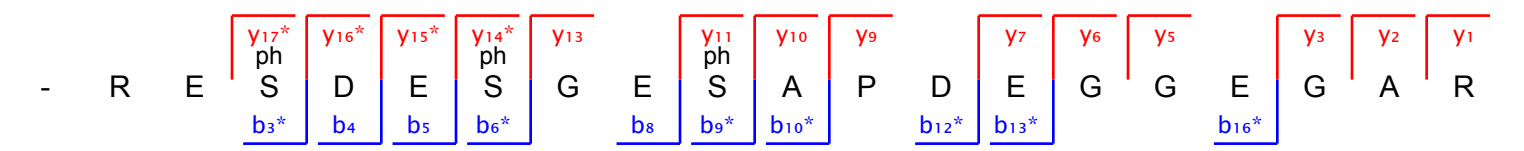

Raw file: 20150814\_A375SR\_Phospho\_BR2\_02  
 Scan: 4917 Method: FTMS; HCD Score: 50.01 m/z: 905.37 Gene names: UBAP2L

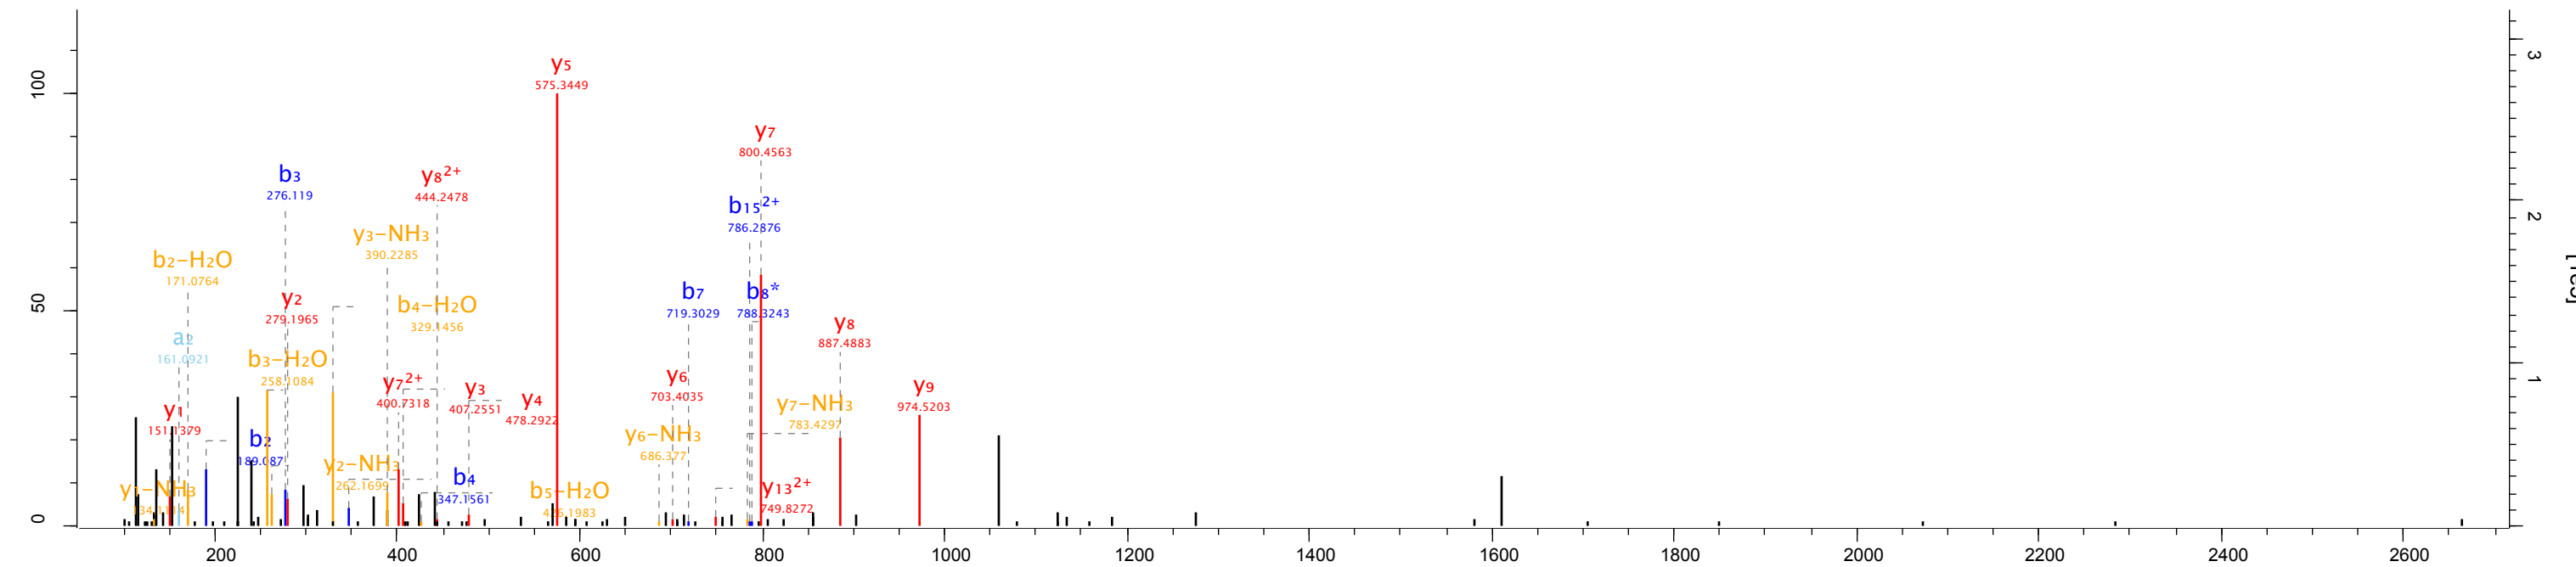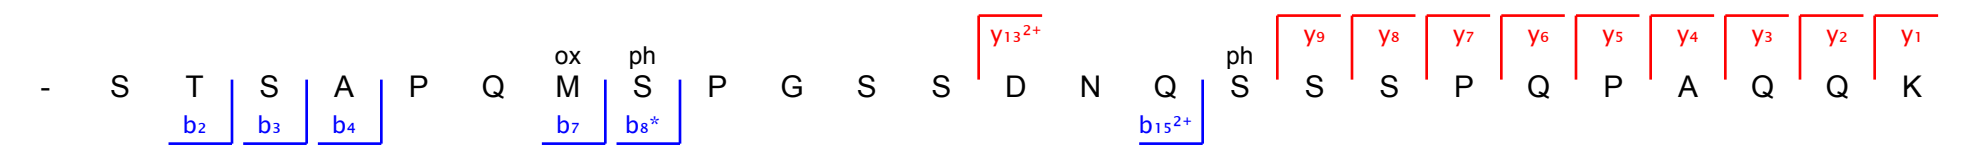

Raw file: 20150814\_A375SR\_Phospho\_BR2\_02  
 Scan: 4977 Method: FTMS; HCD Score: 89.46 m/z: 886.32 Gene names: GBF1

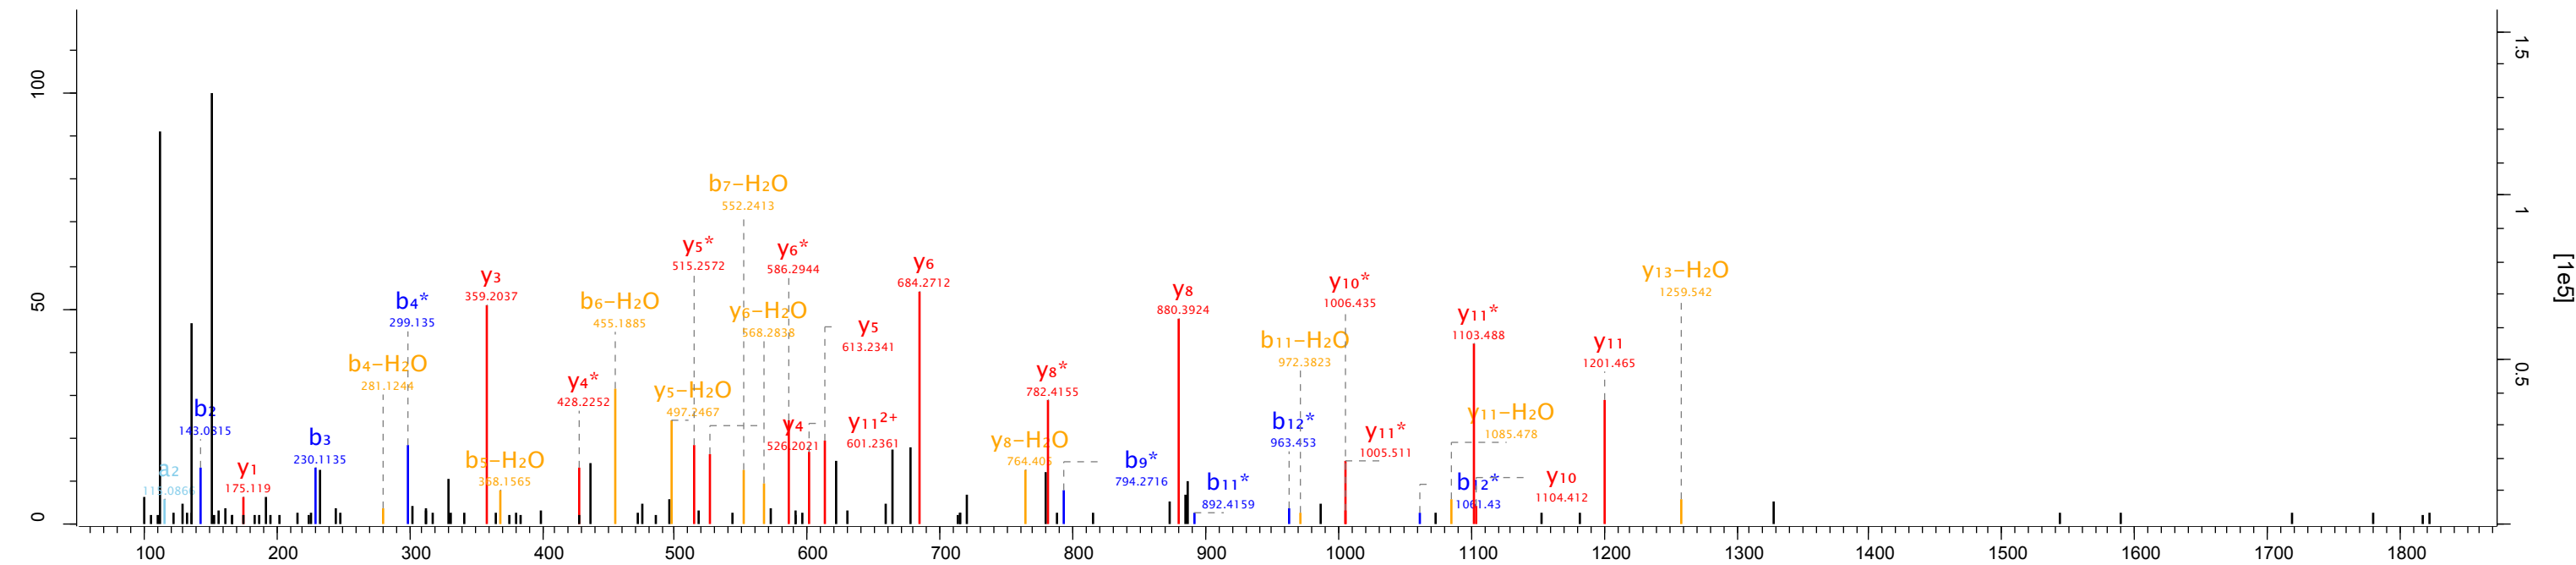

- A A S S ph S S P G ph S P V A S S ph S P S R -

Fragmentation scheme showing b and y series labels below the amino acid sequence. Blue boxes highlight b2, b3, b4\* under the first three residues (A, A, S). Blue boxes highlight b9\* under the 10th residue (ph), b11\* under the 11th residue (S), and b12\* under the 12th residue (P). Red boxes highlight y11 and y10 under the 7th residue (P), y8 under the 11th residue (S), y6 under the 12th residue (P), y5 under the 13th residue (S), y4 and ph under the 14th residue (S), y3 under the 15th residue (P), and y1 under the 17th residue (R).

Raw file: 20150814\_A375SR\_Phospho\_BR2\_02  
 Scan: 5317 Method: FTMS; HCD Score: 71.99 m/z: 800.3 Gene names: PNMAL1

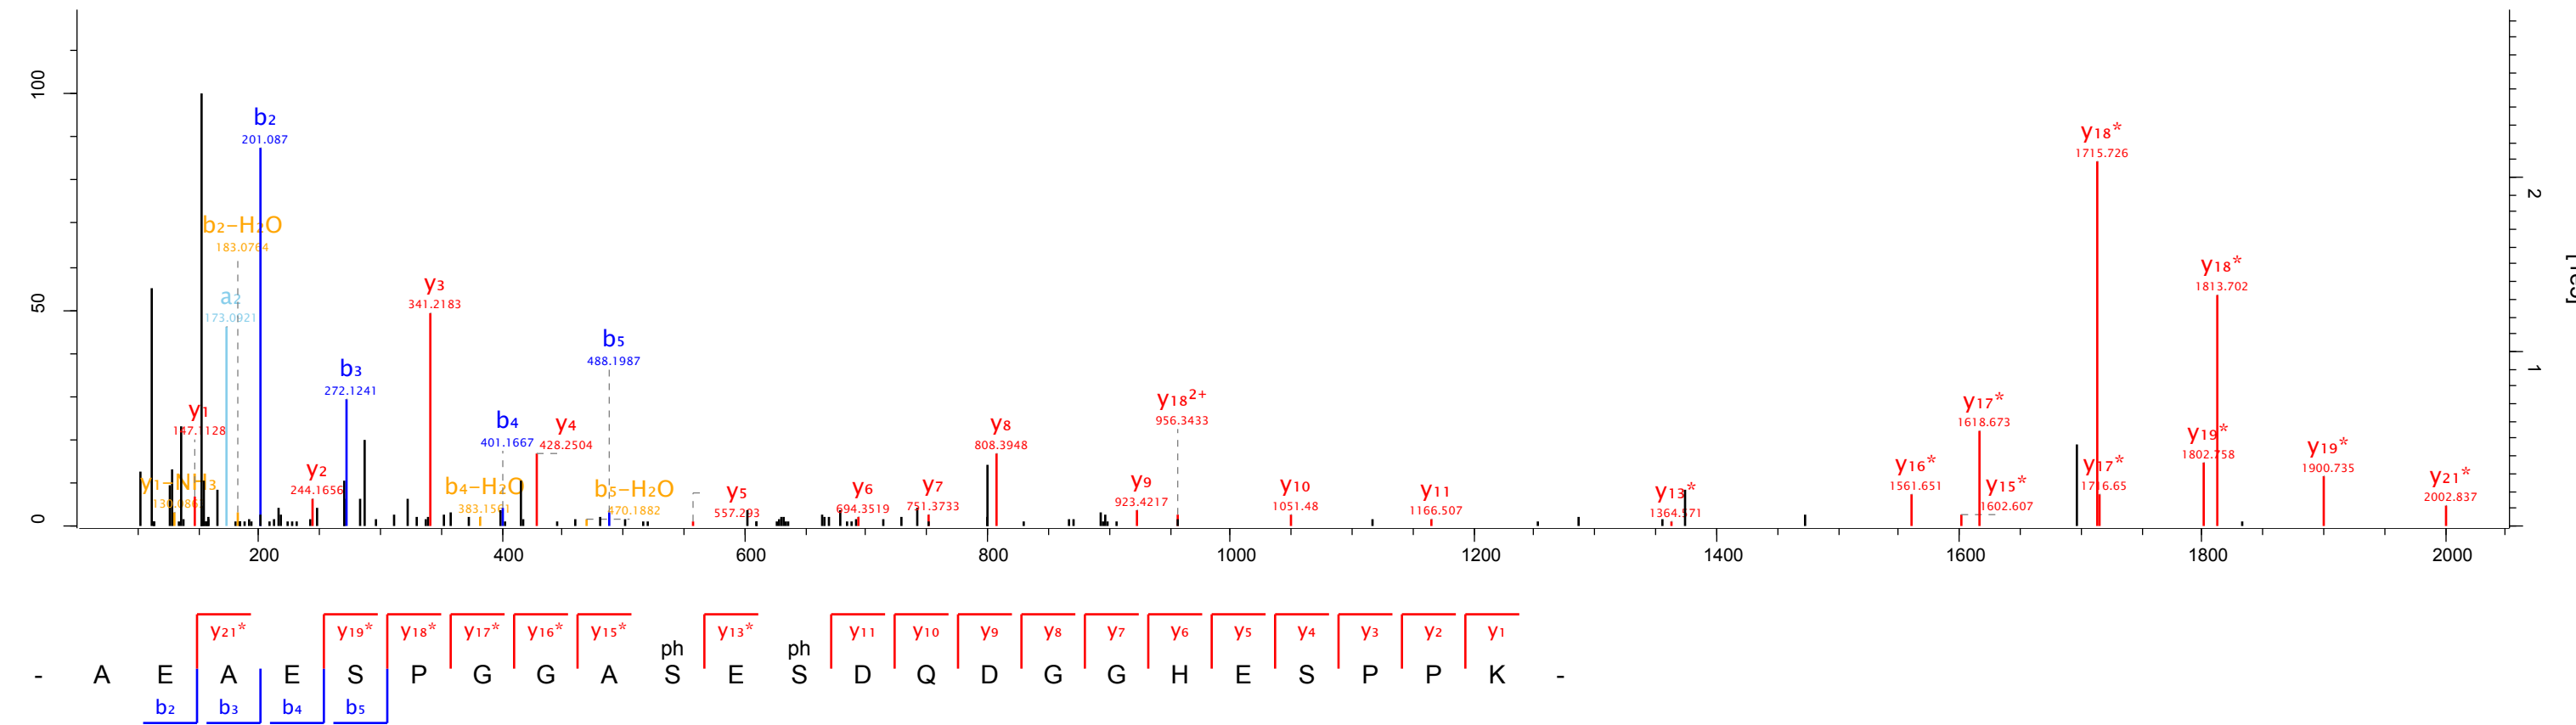

Raw file: 20150814\_A375SR\_Phospho\_BR2\_02  
 Scan: 5847 Method: FTMS; HCD Score: 93.18 m/z: 756.95 Gene names: HIRIP3

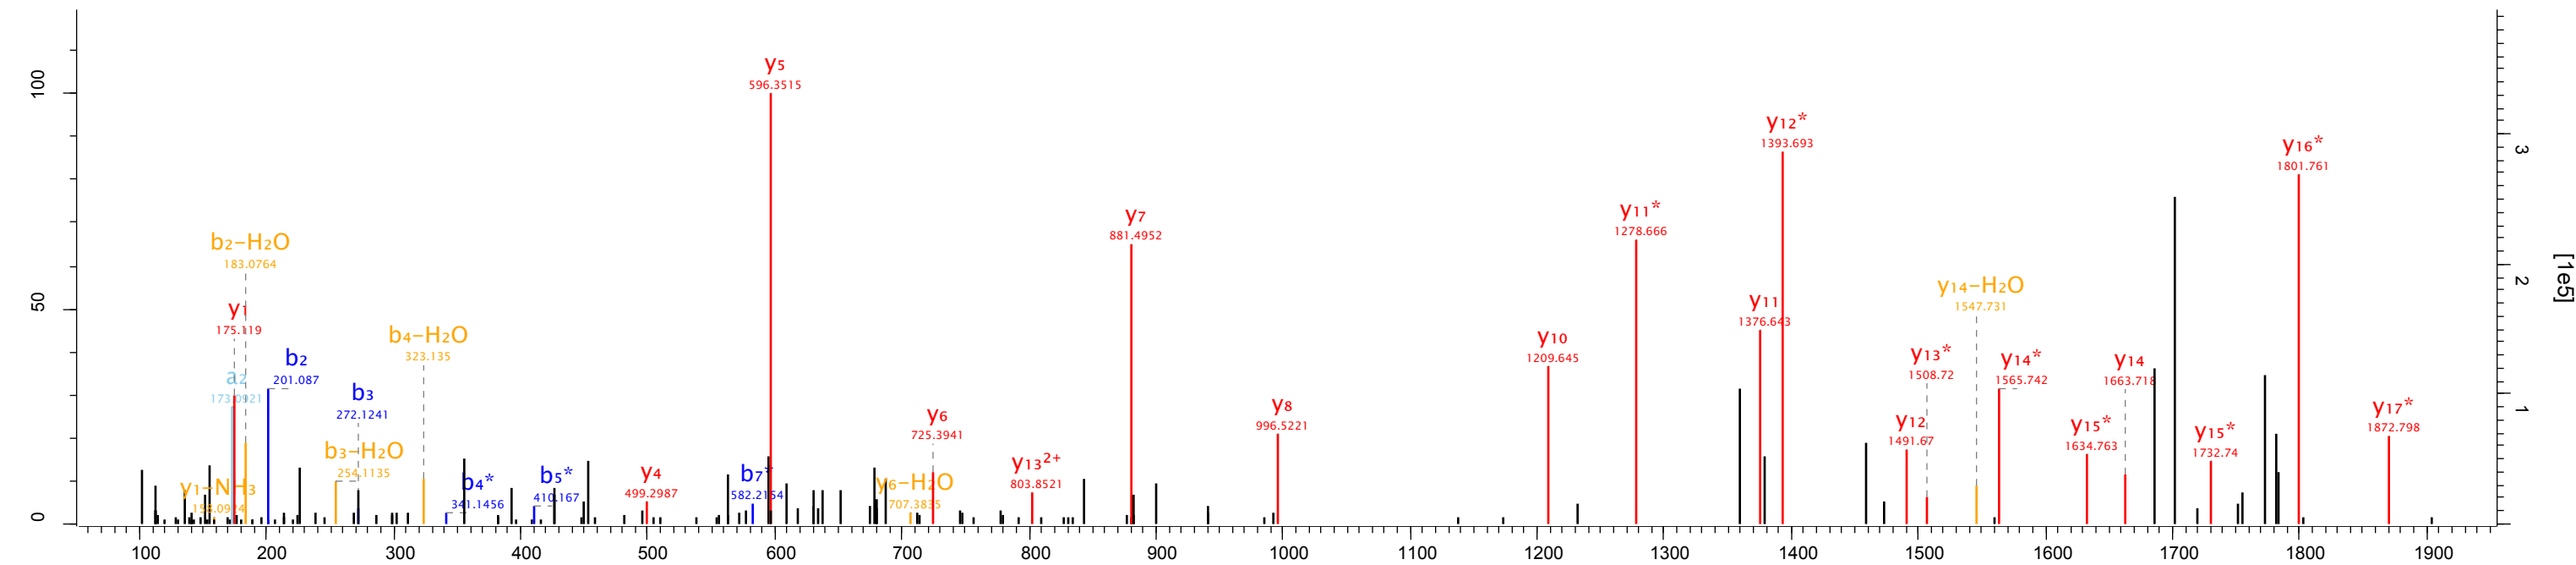

Sequence: - E A A A S S G D D S G R D R E P P V Q R -

Fragmentation mapping (b and y ions):

- b2: A
- b3: A
- b4\*: S
- b5\*: S
- b7\*: D
- y1: R
- y4: P
- y5: P
- y6: E
- y7: R
- y8: D
- y10: G
- y11: S
- y12: D
- y13\*: S
- y14: G
- y15\*: S
- y16\*: S
- y17\*: A

Raw file: 20150814\_A375SR\_Phospho\_BR2\_02  
 Scan: 6167 Method: FTMS; HCD Score: 158.41 m/z: 650.27 Gene names: ADD2

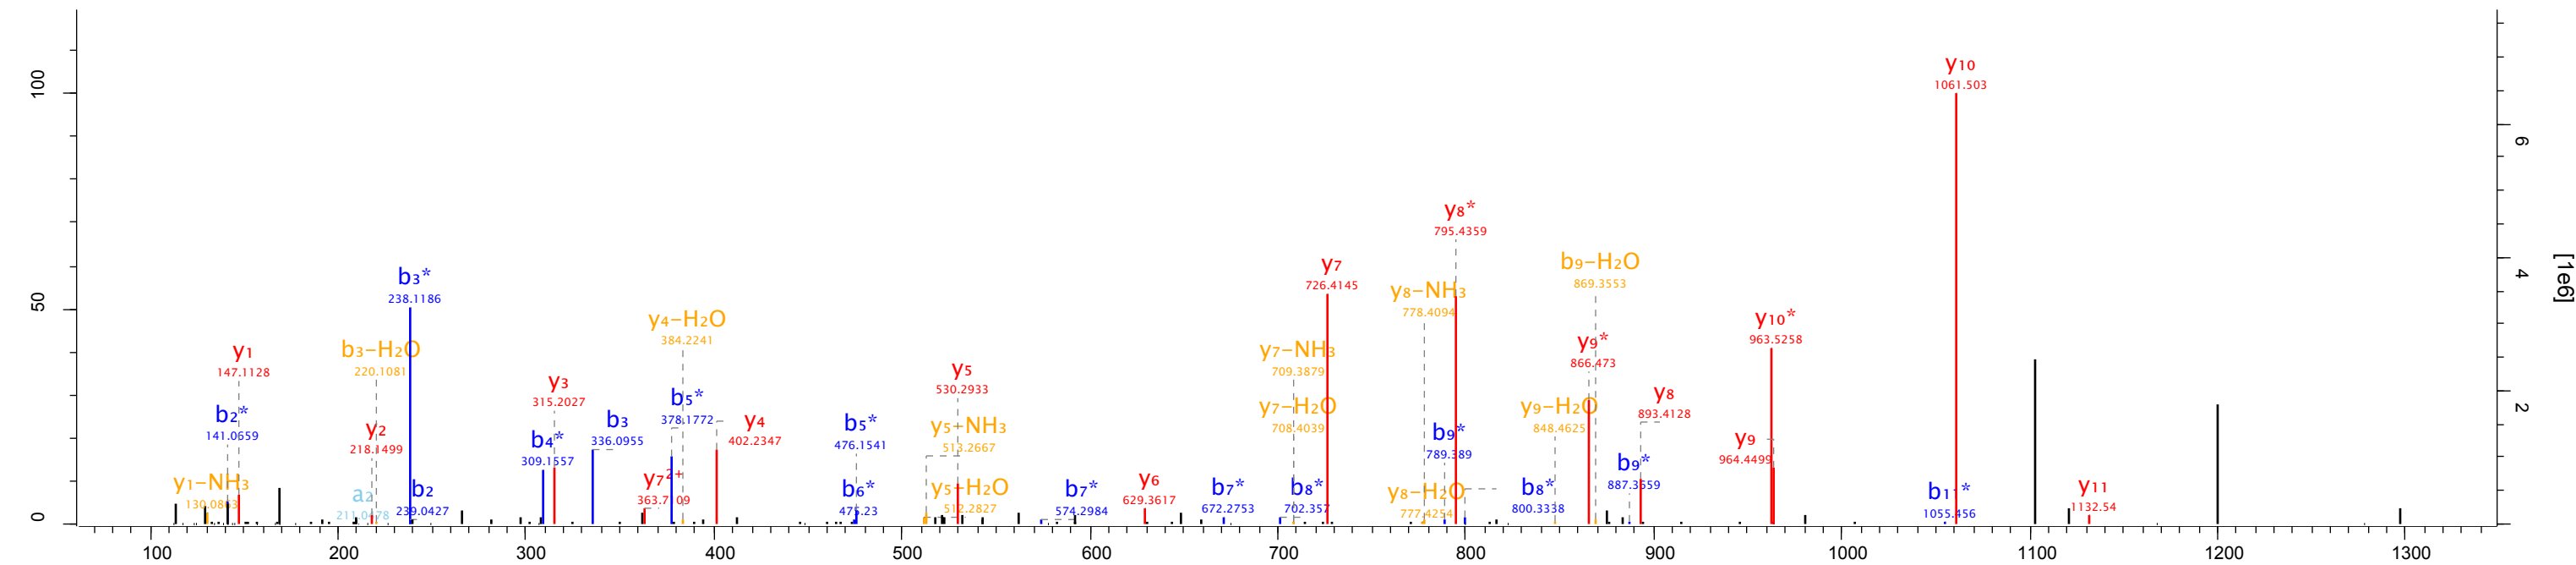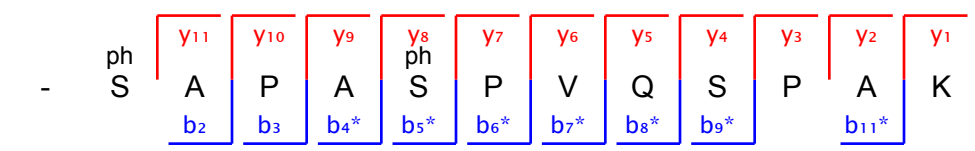

Raw file 20150814\_A375SR\_Phospho\_BR2\_02 Scan 6197 Method FTMS; HCD Score 92.15 m/z 582.72 Gene names MCM2

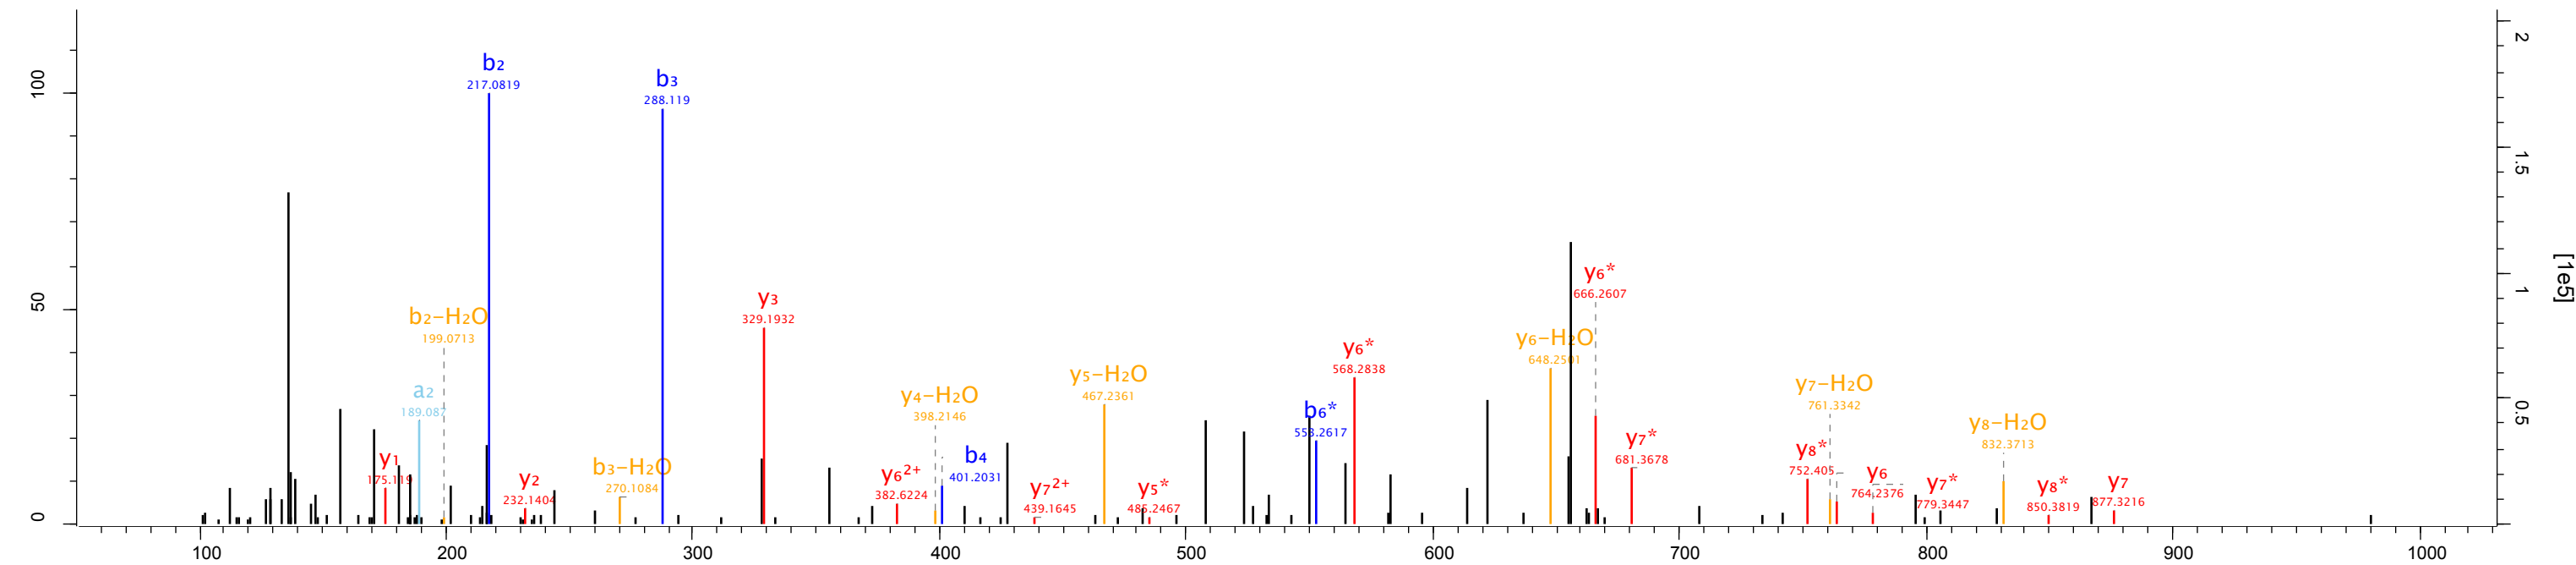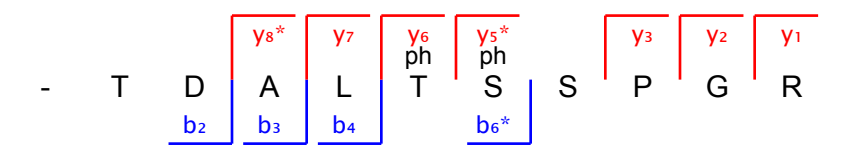



Raw file 20150814\_A375SR\_Phospho\_BR2\_02 Scan 6877 Method FTMS; HCD Score 98.77 m/z 978.37 Gene names PDS5B

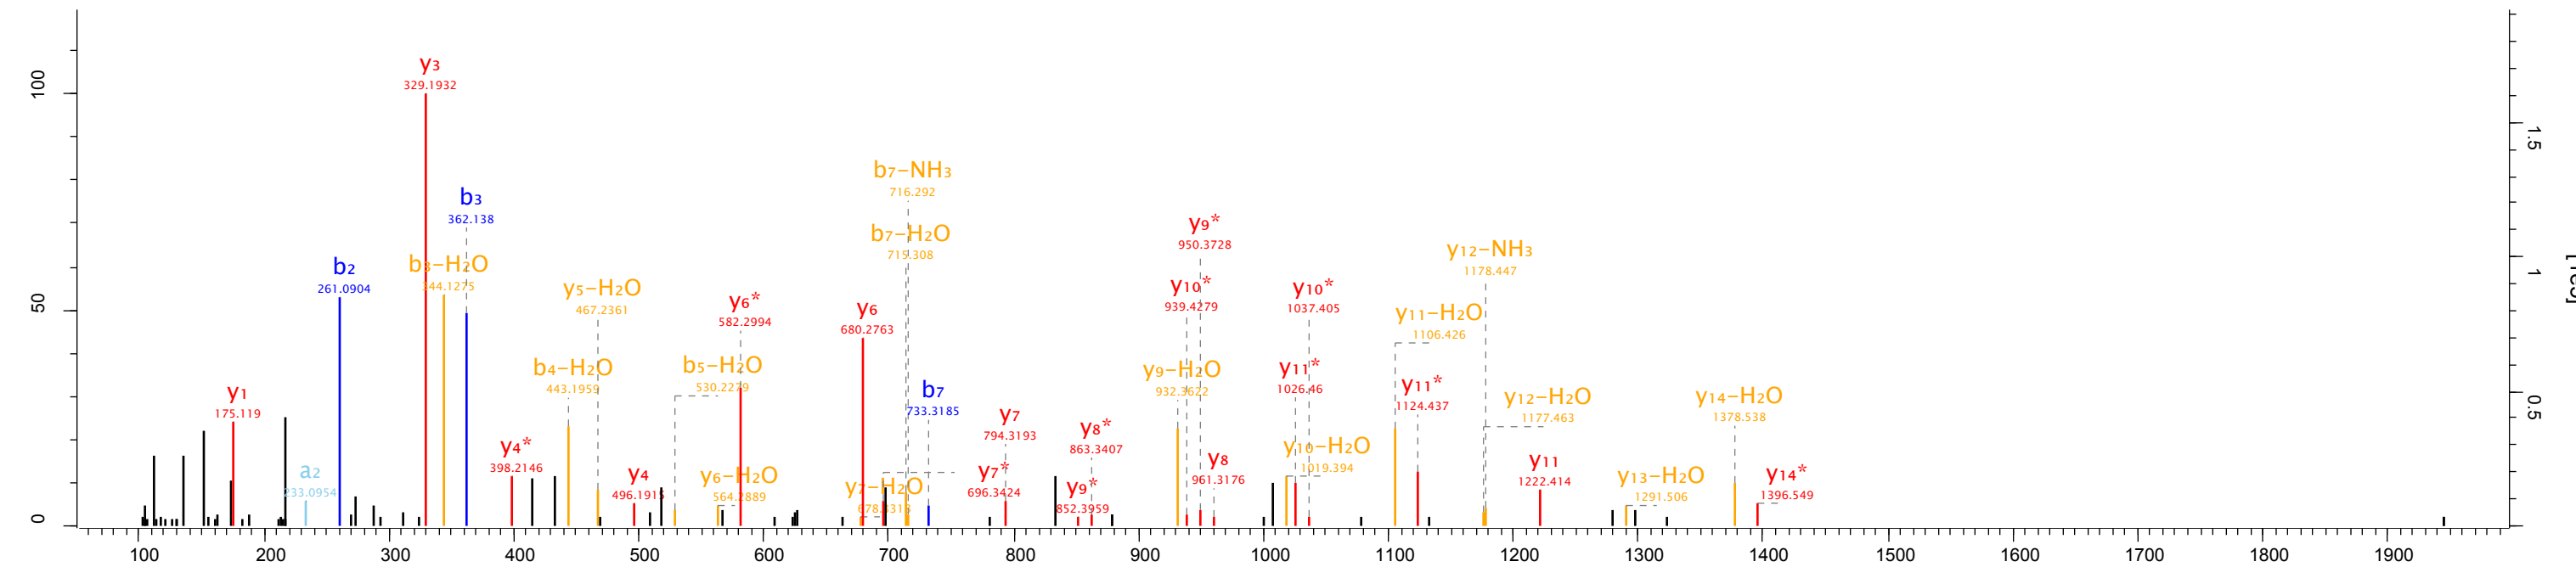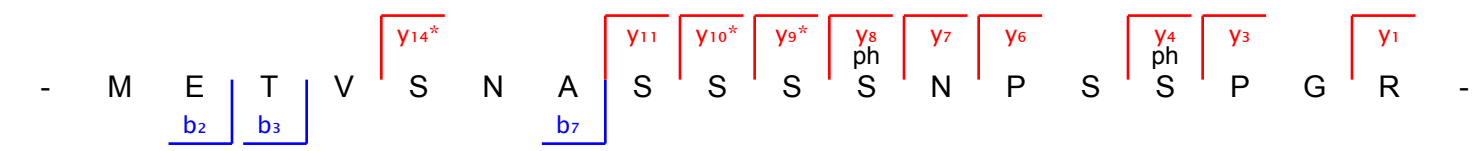

Raw file 20150814\_A375SR\_Phospho\_BR2\_02 Scan 7377 Method FTMS; HCD Score 62.7 m/z 940.39 Gene names RGL3

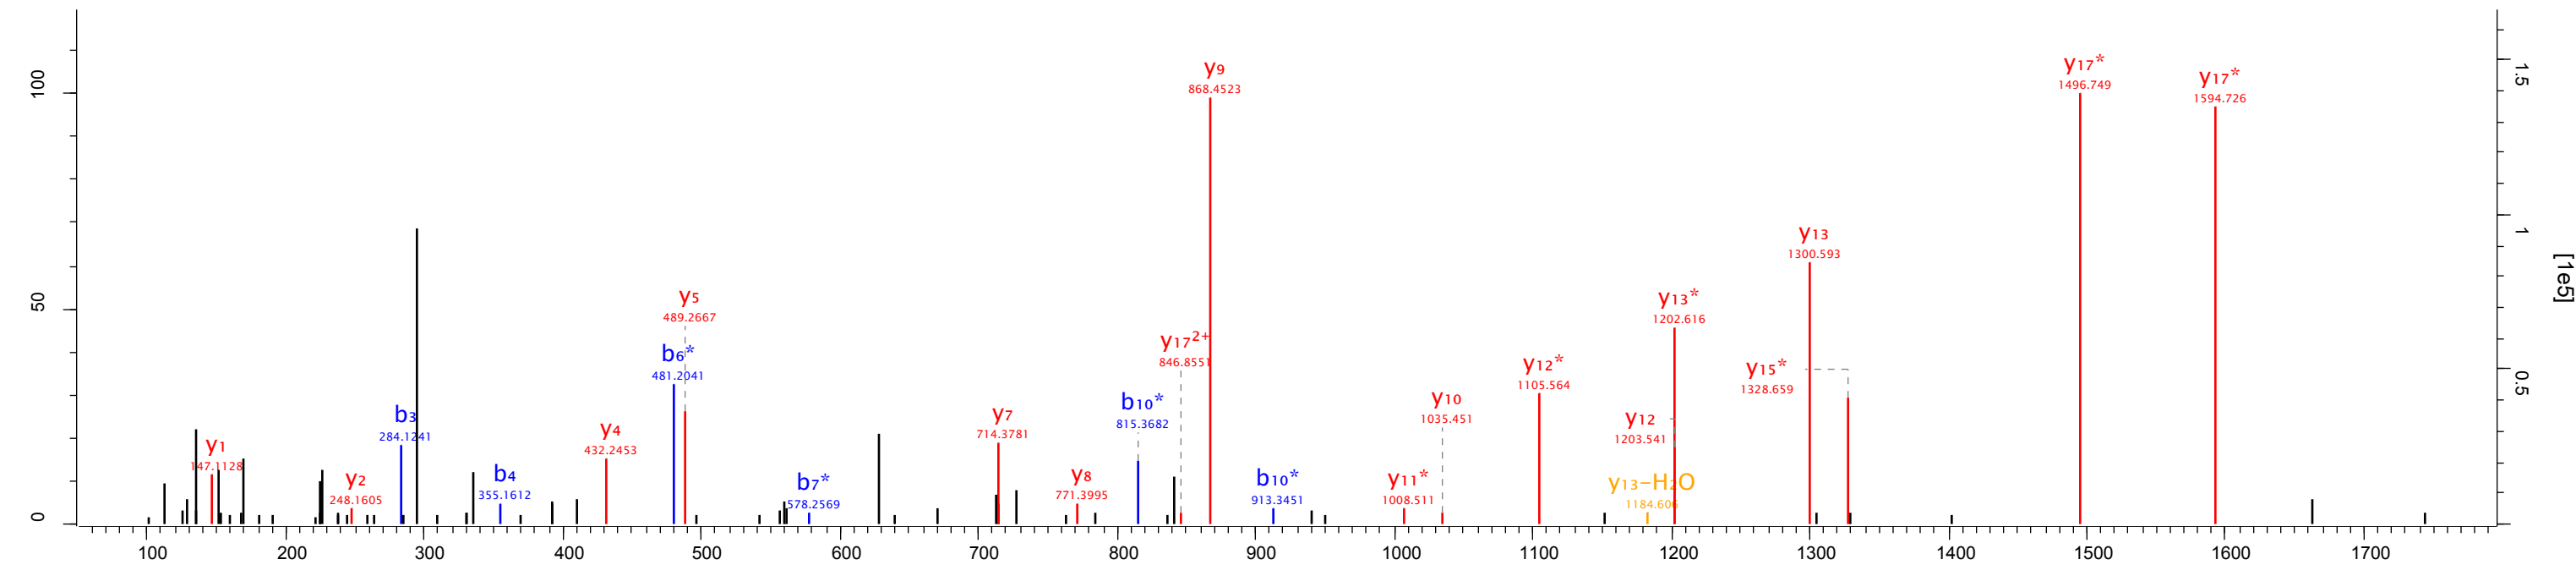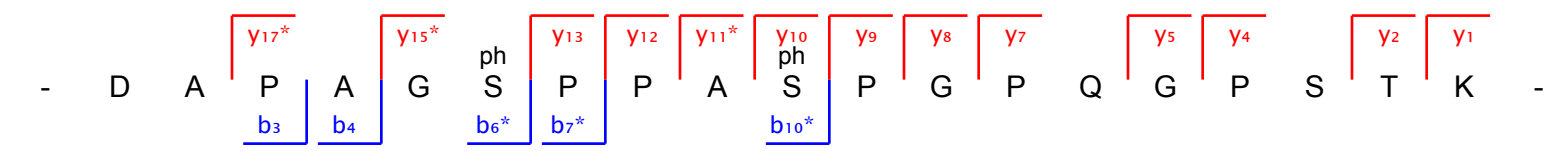

Raw file: 20150814\_A375SR\_Phospho\_BR2\_02  
 Scan: 7457 Method: FTMS; HCD Score: 73.69 m/z: 857.84 Gene names: ABL2

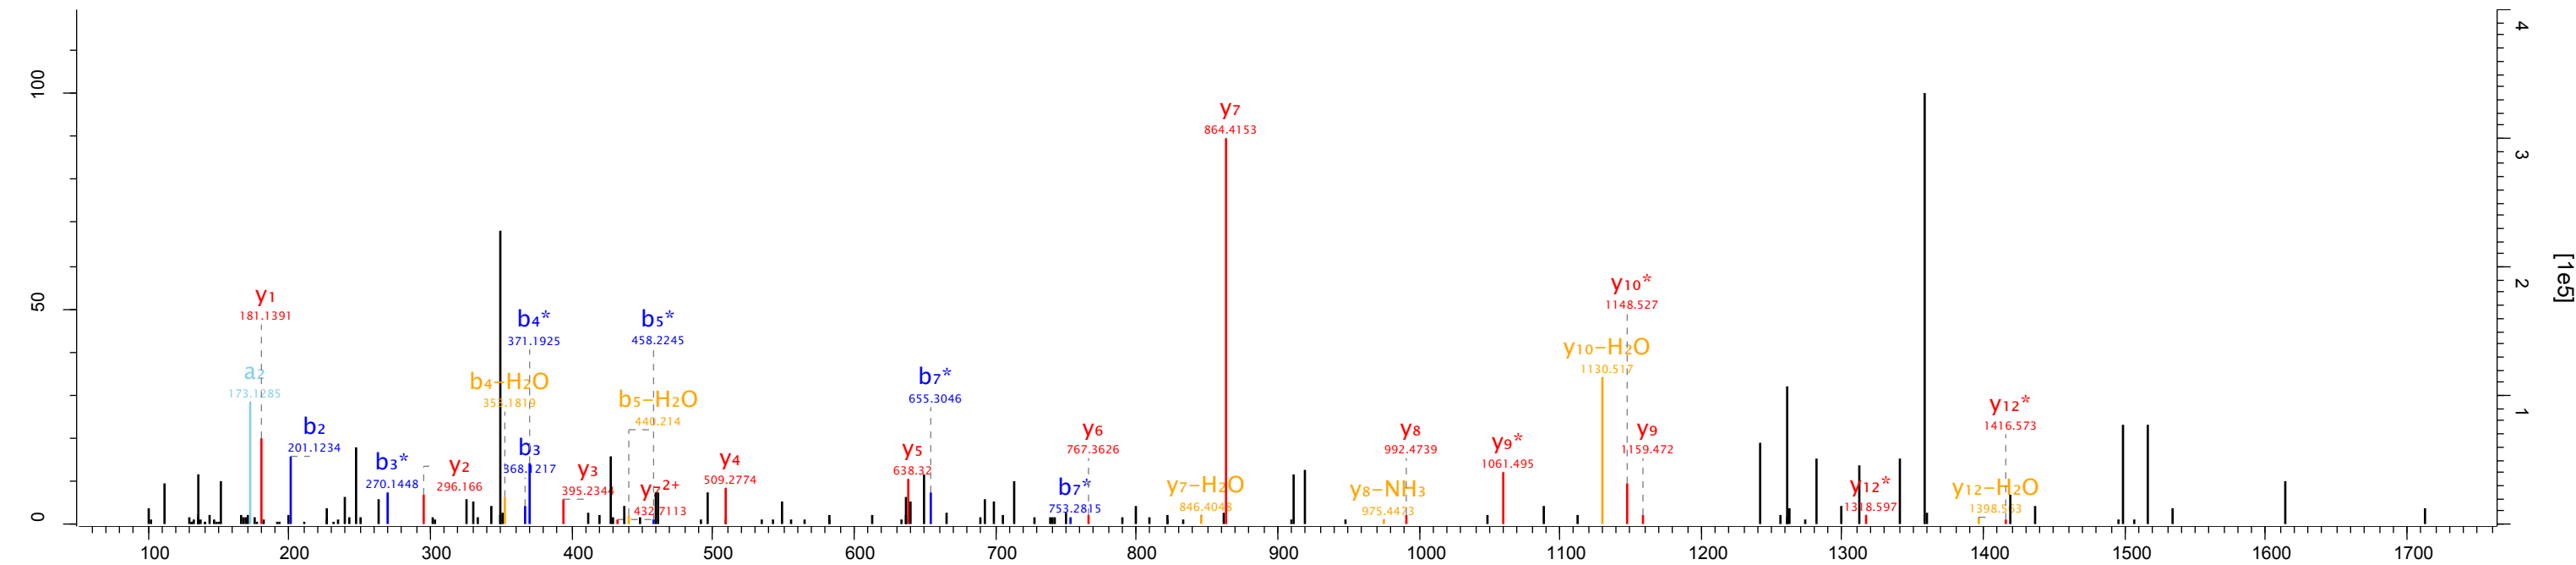

Protein sequence: - T V S T S Q P E E N V D R -

Fragmentation sites (b ions): b2 (V), b3 (S), b4\* (T), b5\* (S), b7\* (Q)

Fragmentation sites (y ions): y1 (R), y2 (D), y3 (V), y4 (N), y5 (E), y6 (E), y7 (P), y8 (Q), y9 (S), y10\* (S), y12\* (S)

Raw file: 20150814\_A375SR\_Phospho\_BR2\_02  
 Scan: 7487 Method: FTMS; HCD Score: 82.09 m/z: 1045.95 Gene names: GTF2F1

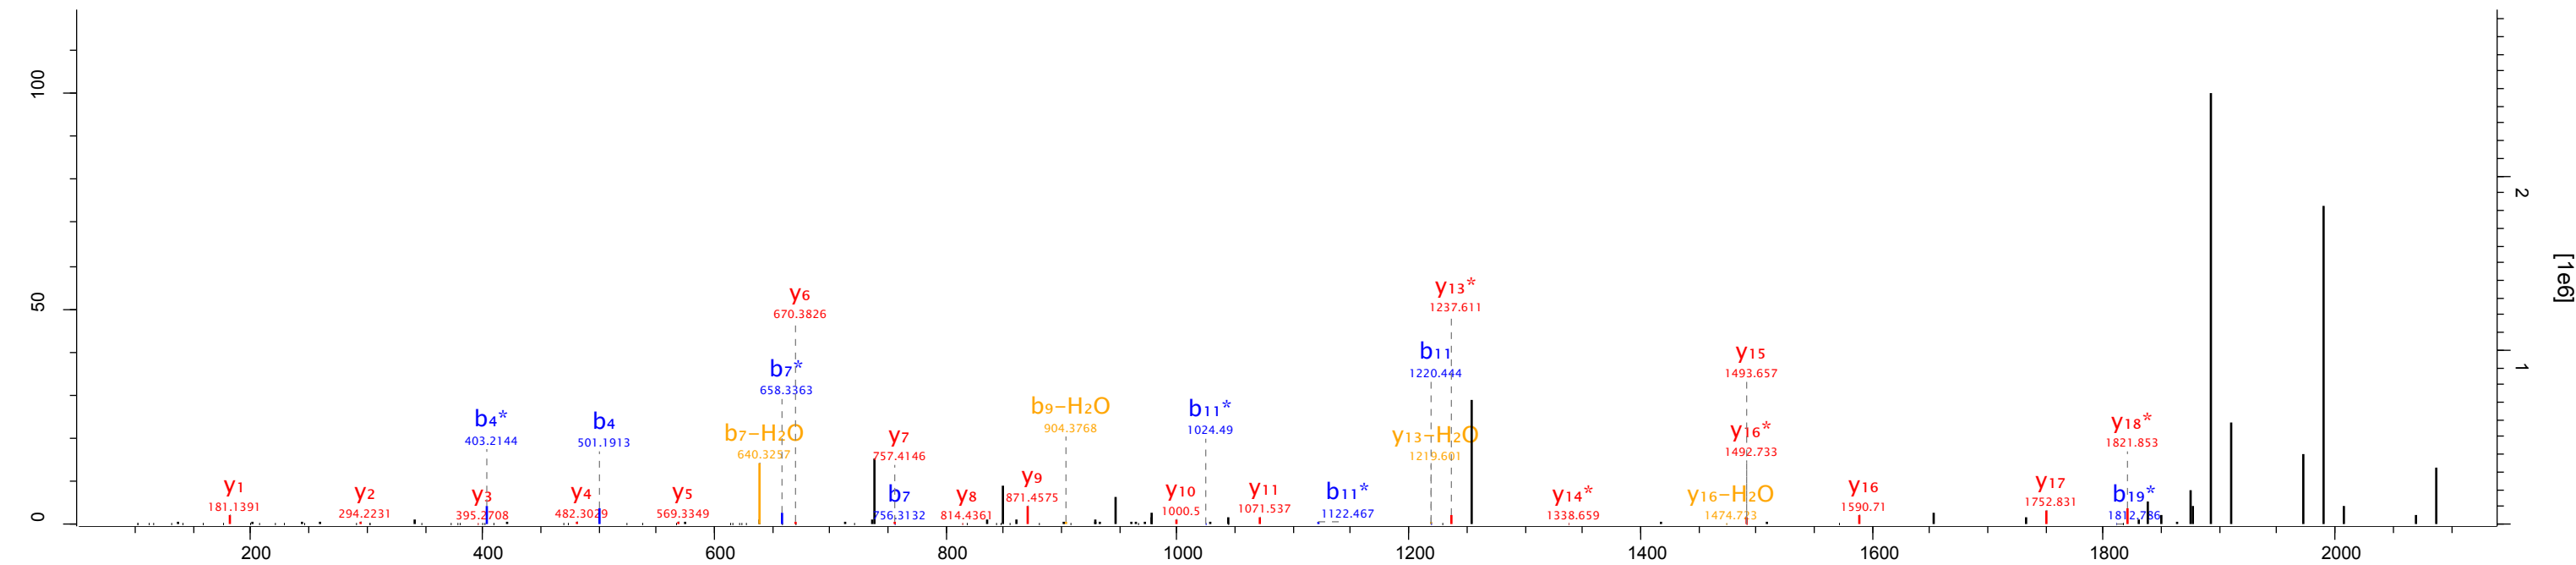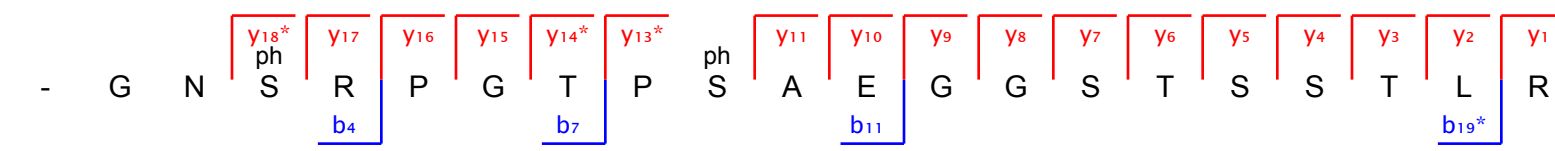

Raw file: 20150814\_A375SR\_Phospho\_BR2\_02  
 Scan: 7597 Method: FTMS; HCD Score: 116.38 m/z: 1195.38 Gene names: WDR55

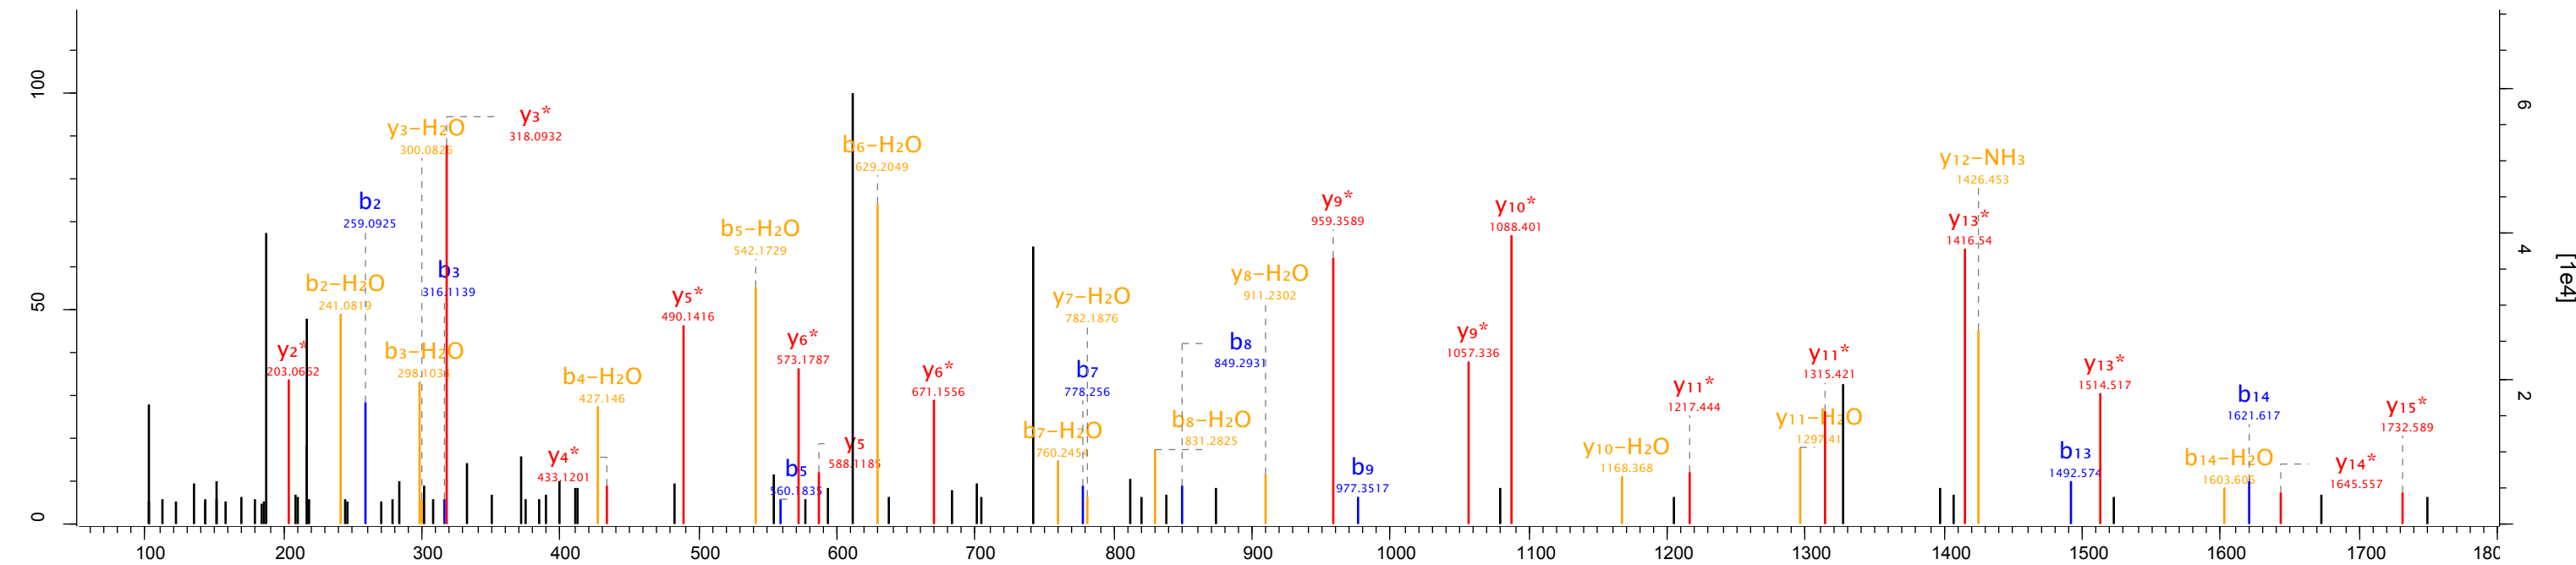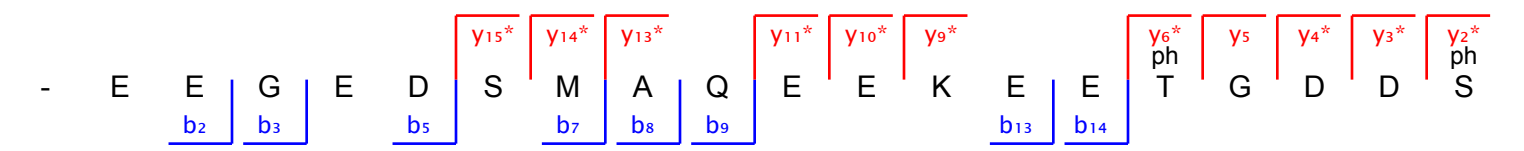

Raw file  
20150814\_A375SR\_Phospho\_BR2\_02

Scan 8157 Method FTMS; HCD Score 42.91 m/z 704.21 Gene names ZMYM4

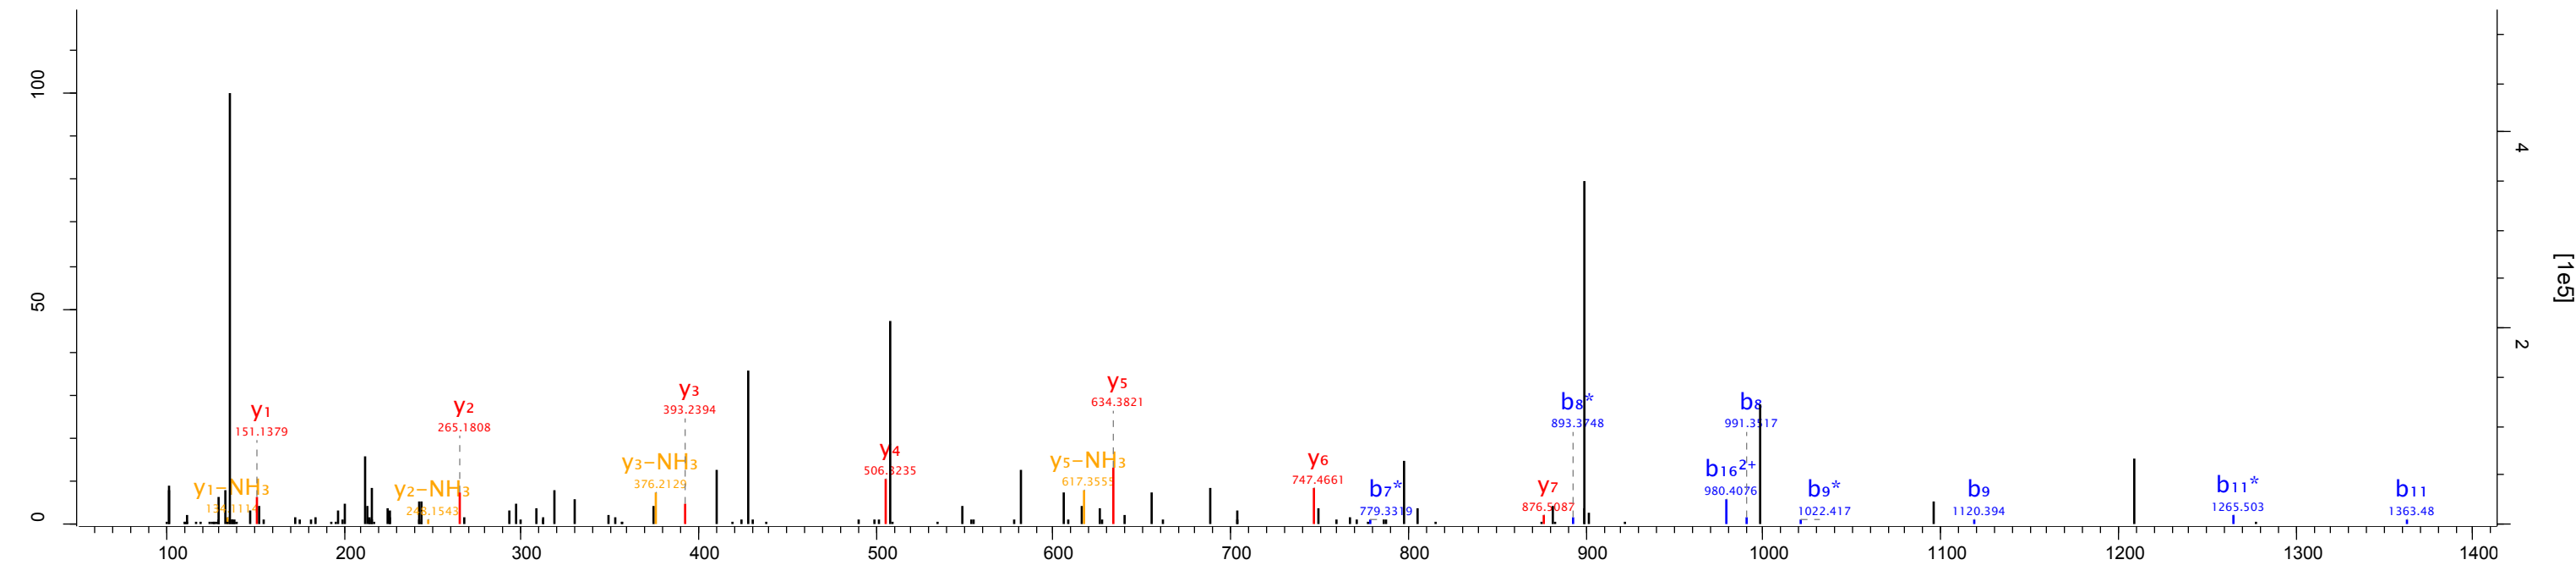

- V T Q H E S D N E N E I Q I Q N K -

ph

b7\* b8 b9 b11 b16<sup>2+</sup> y1 y2 y3 y4 y5 y6 y7

Raw file: 20150814\_A375SR\_Phospho\_BR2\_02  
 Scan: 8377 Method: FTMS; HCD Score: 158.92 m/z: 761.32 Gene names: PEAK1

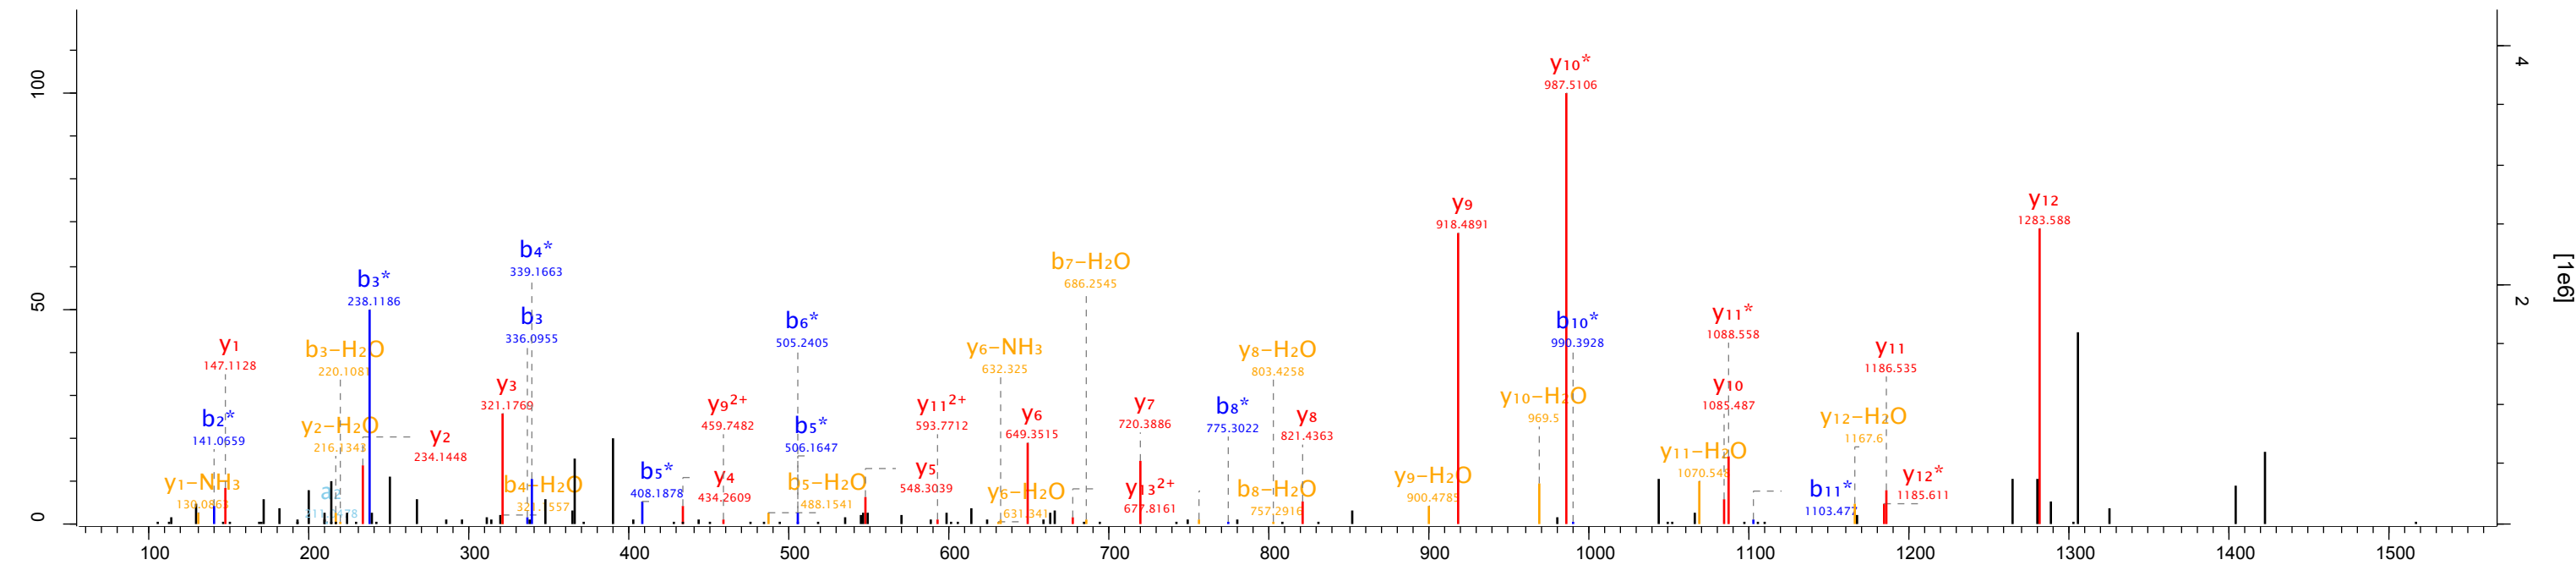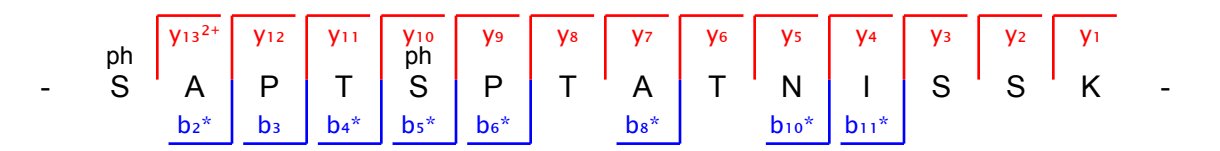

Raw file: 20150814\_A375SR\_Phospho\_BR2\_02  
 Scan: 8467 Method: FTMS; HCD Score: 77.97 m/z: 577.94 Gene names: HNRNPA1

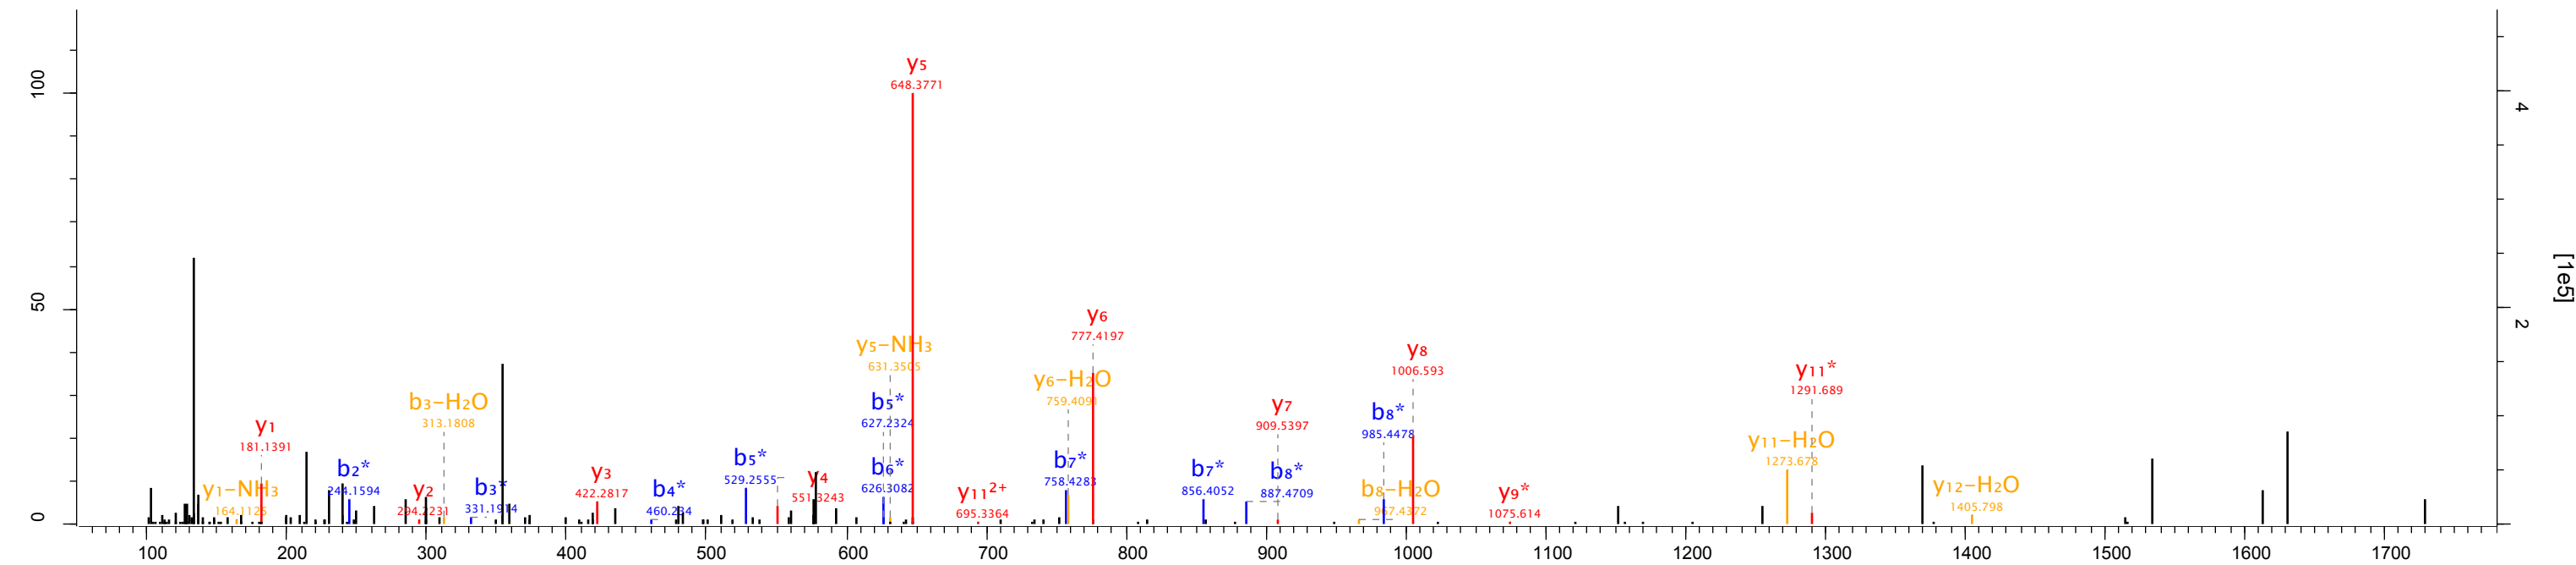

ac - ph S K S E S P K E P E Q L R -

b2\* b3\* b4\* b5\* b6\* b7\* b8\*

y11\* y9\* y8 y7 y6 y5 y4 y3 y2 y1



Raw file 20150814\_A375SR\_Phospho\_BR2\_02 Scan 8947 Method FTMS; HCD Score 80.28 m/z 806.84 Gene names TMF1

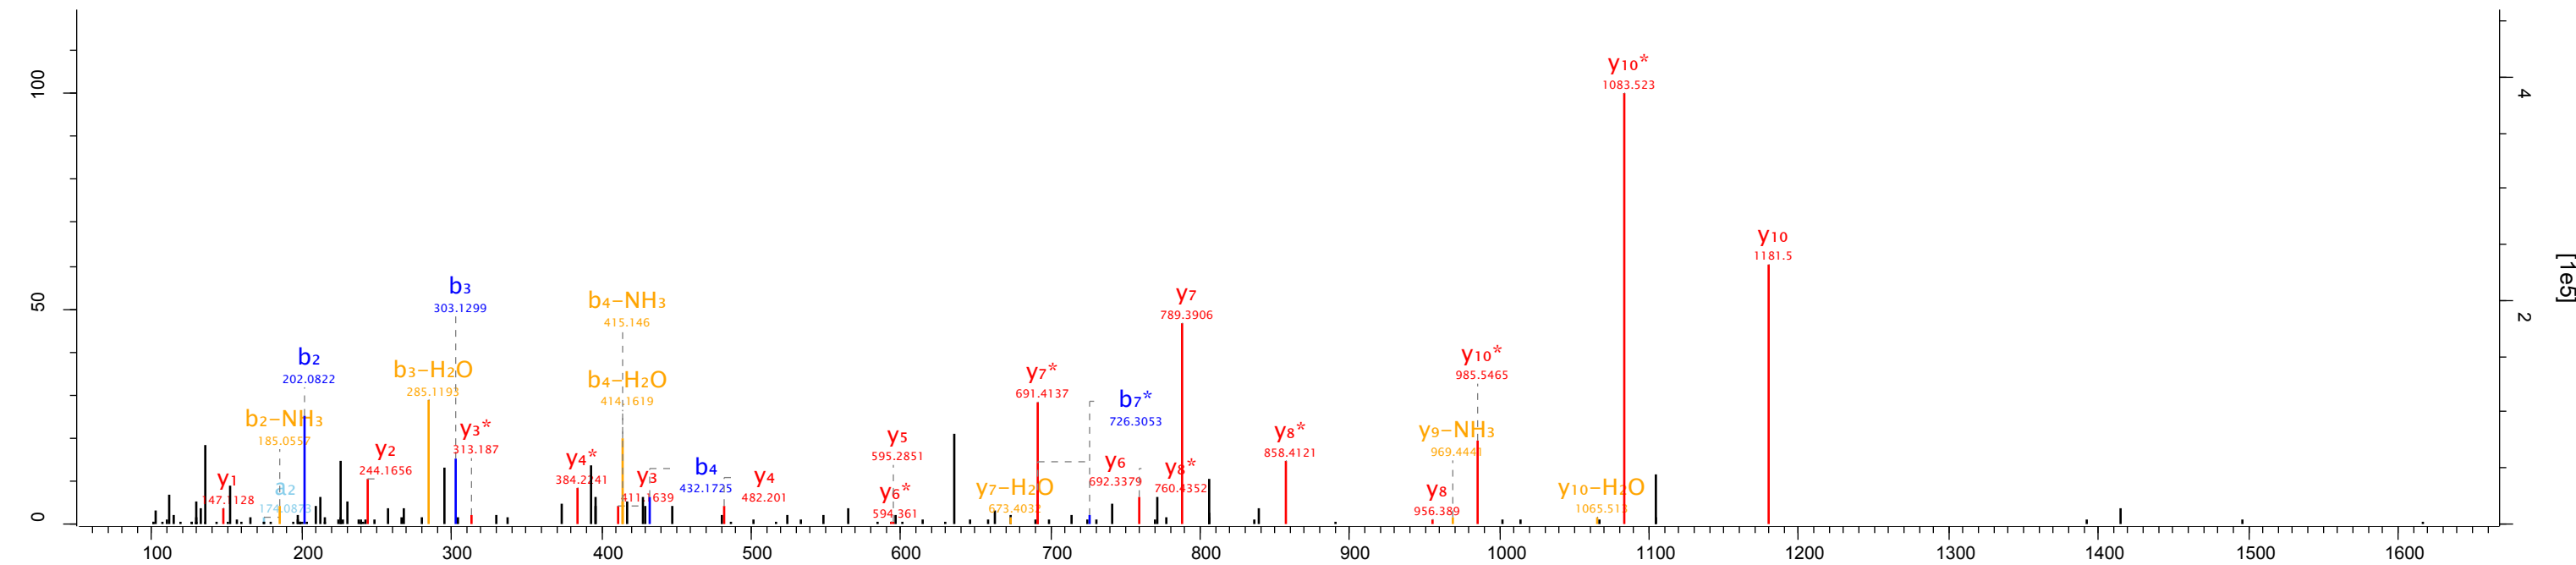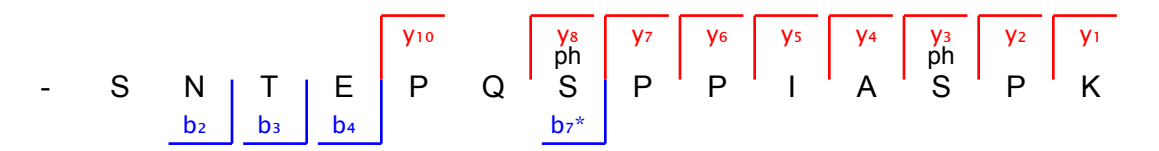

Raw file 20150814\_A375SR\_Phospho\_BR2\_03 Scan 10127 Method FTMS; HCD Score 138.24 m/z 679.32 Gene names PHLDB2

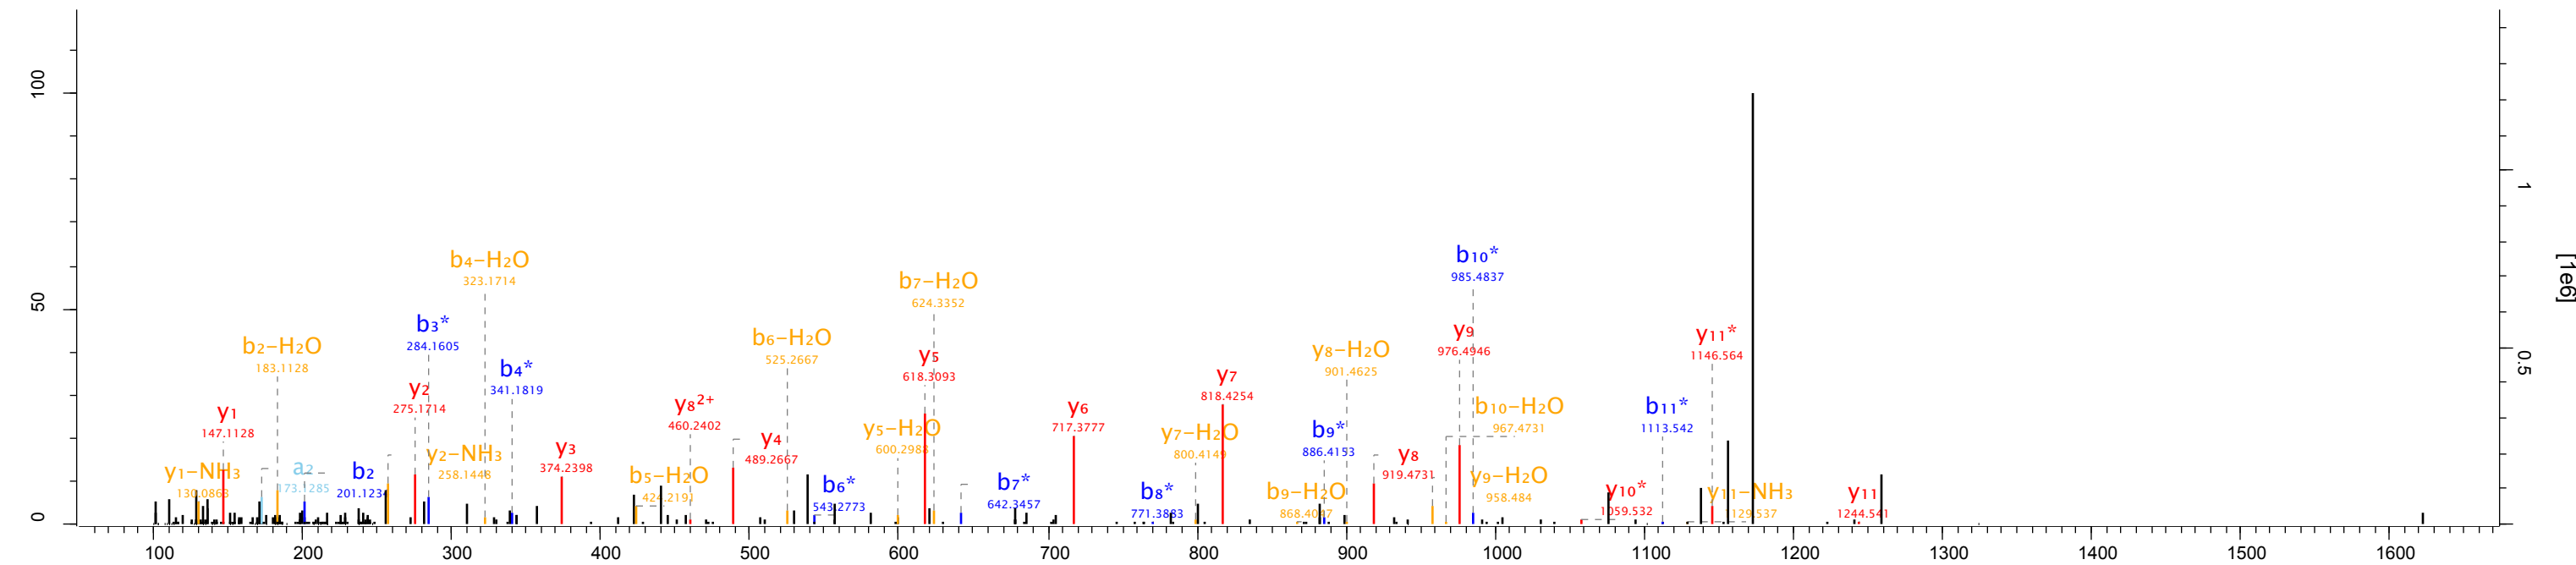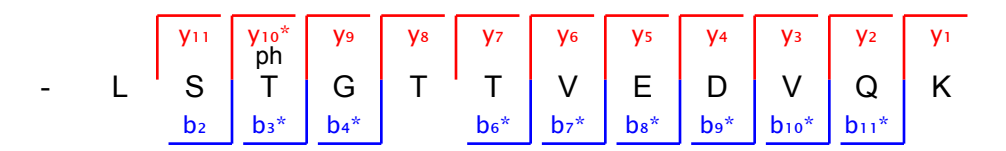

Raw file: 20150814\_A375SR\_Phospho\_BR2\_03  
 Scan: 10167 Method: FTMS; HCD Score: 158.74 m/z: 1047.96 Gene names: EPS15L1;SPATA22

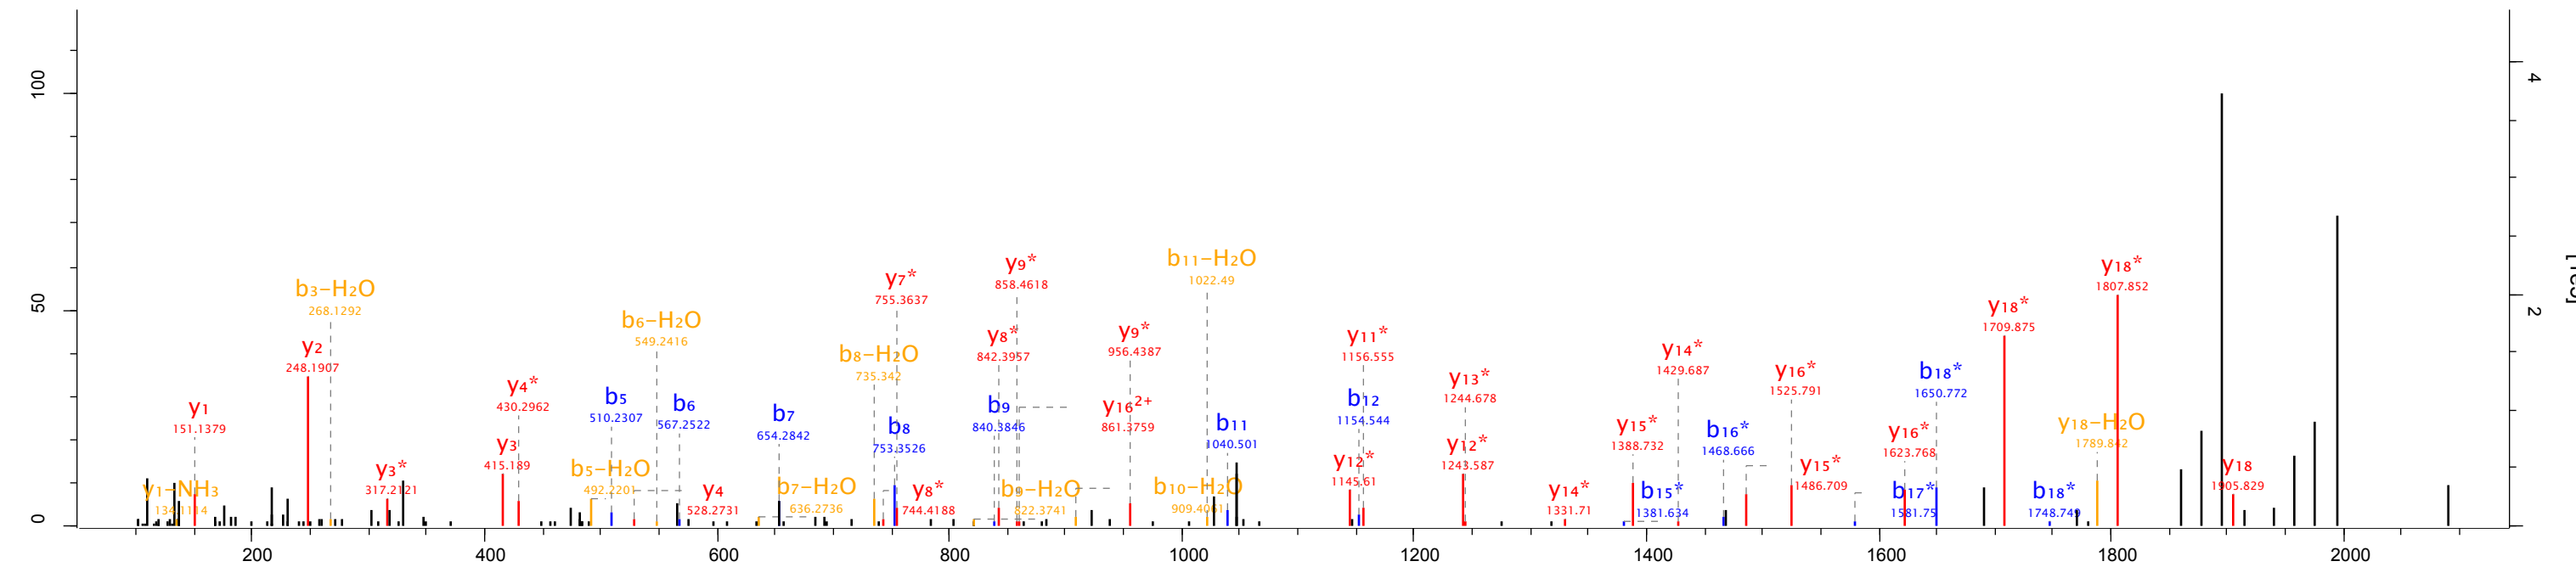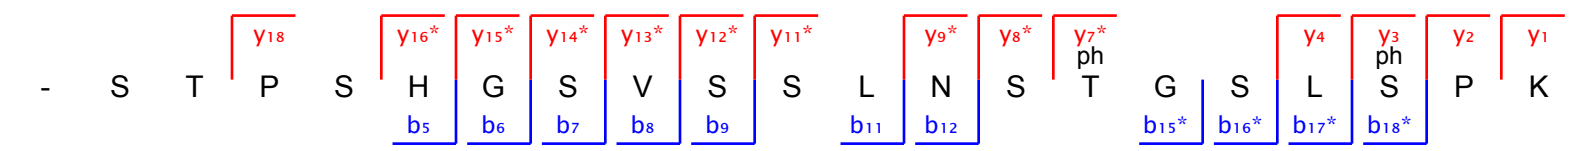

Raw file 20150814\_A375SR\_Phospho\_BR2\_03 Scan 10177 Method FTMS; HCD Score 139.04 m/z 923.35 Gene names SPEN

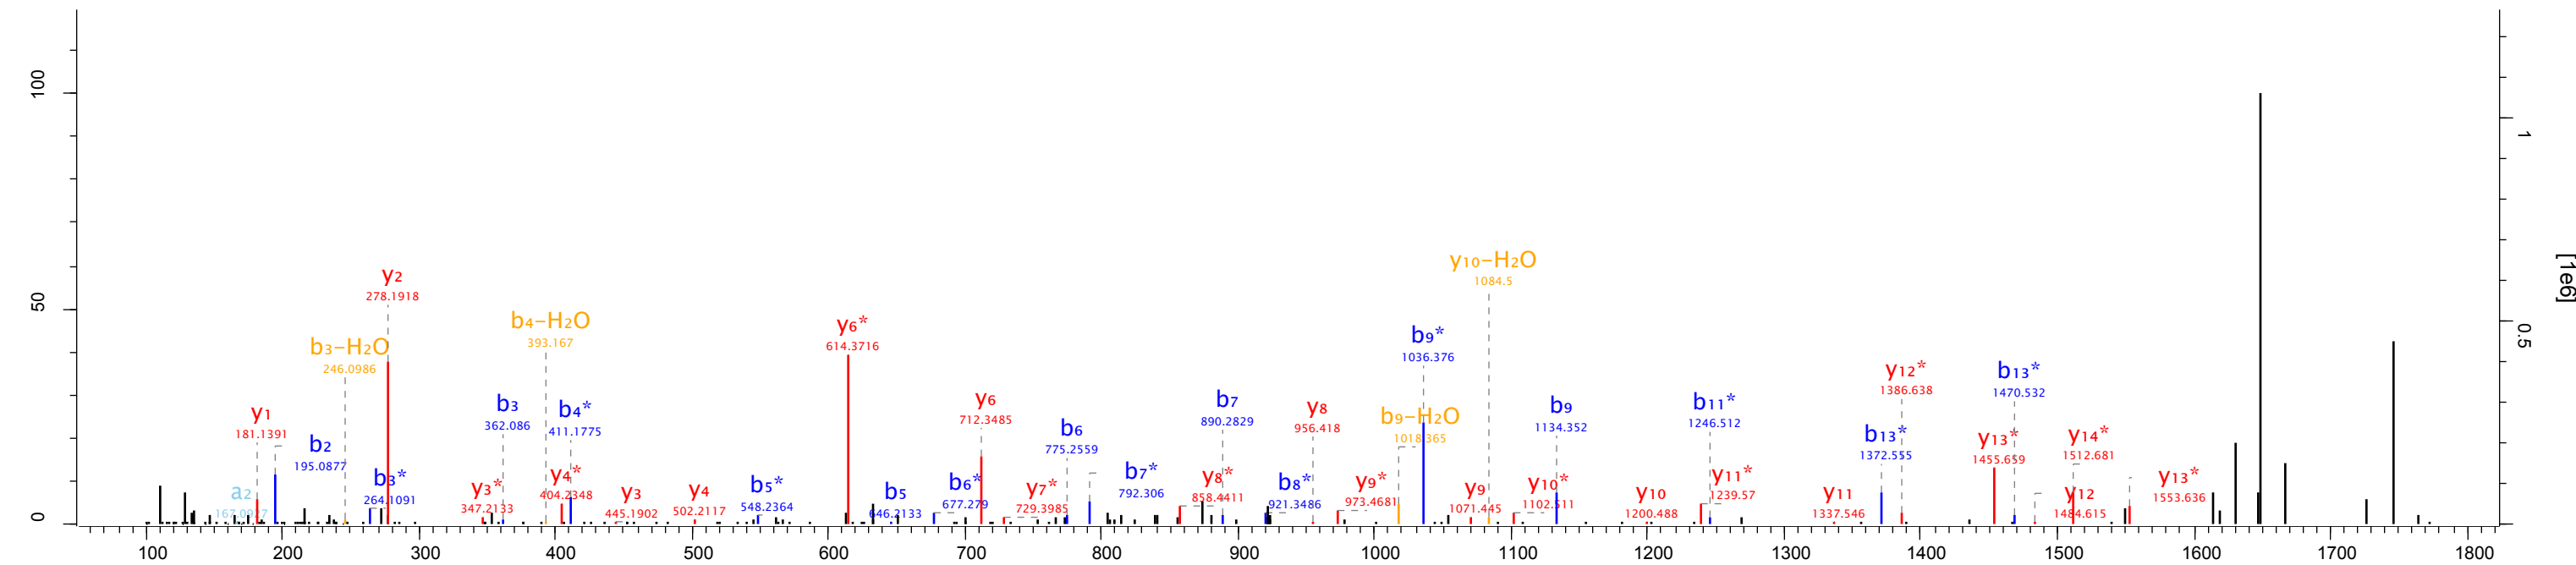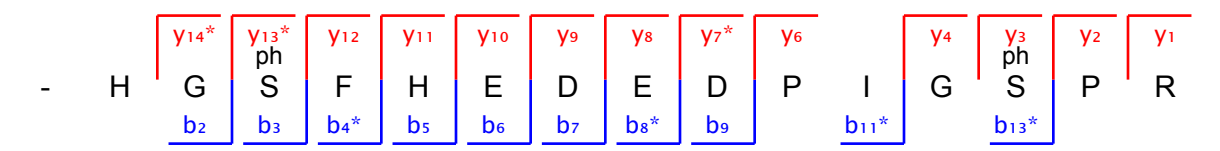

Raw file 20150814\_A375SR\_Phospho\_BR2\_03 Scan 10357 Method FTMS; HCD Score 67.07 m/z 944.04 Gene names PHF10

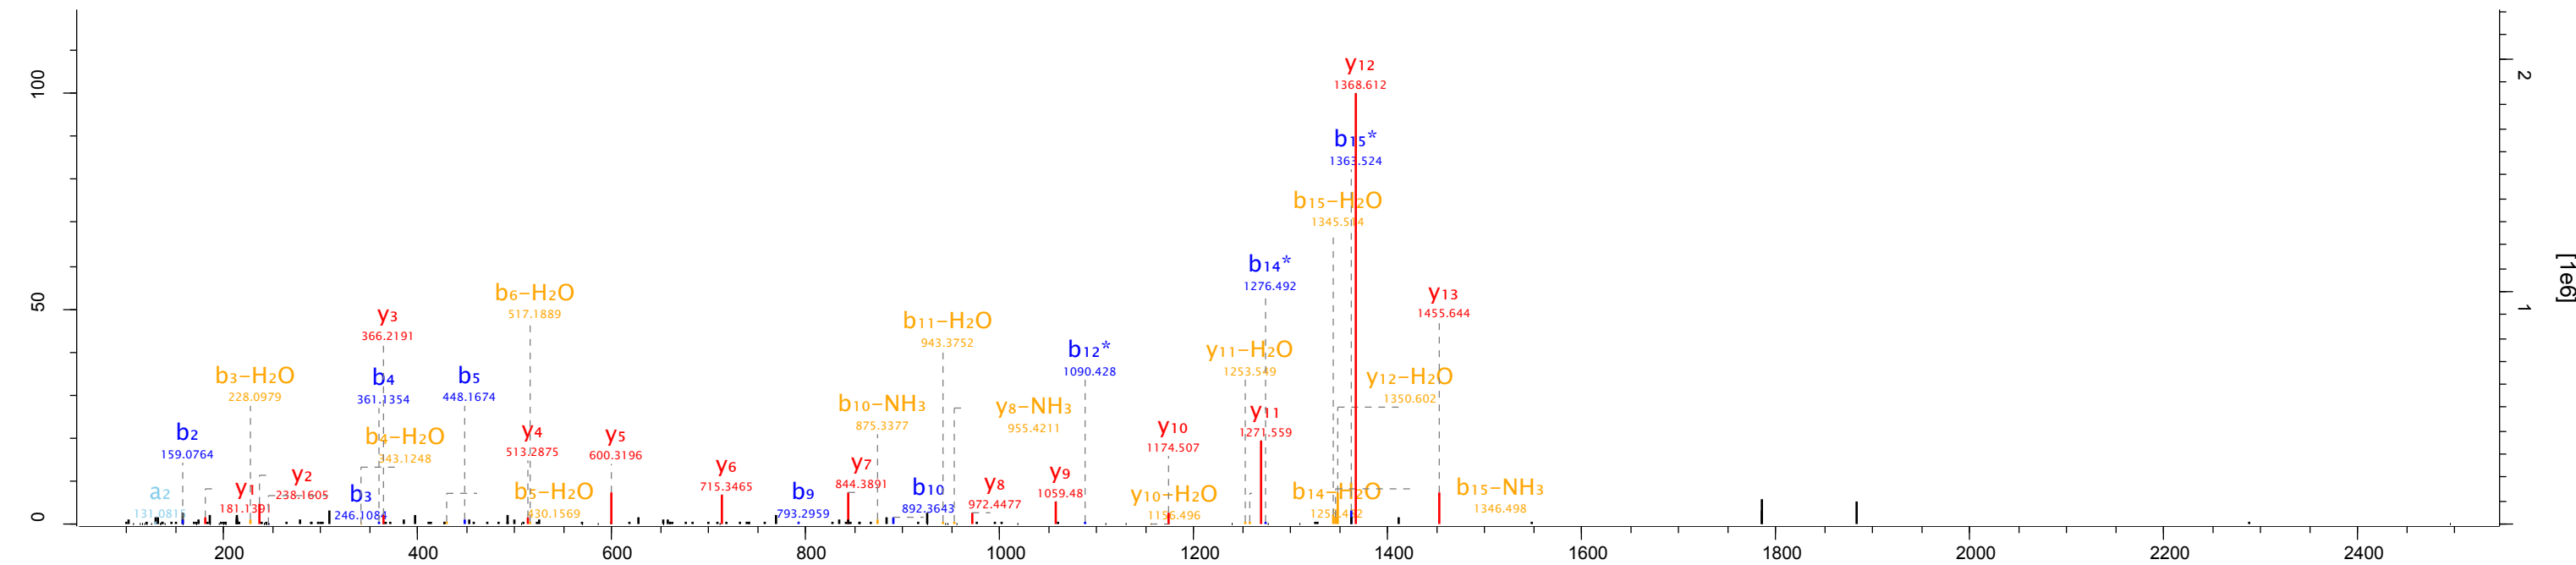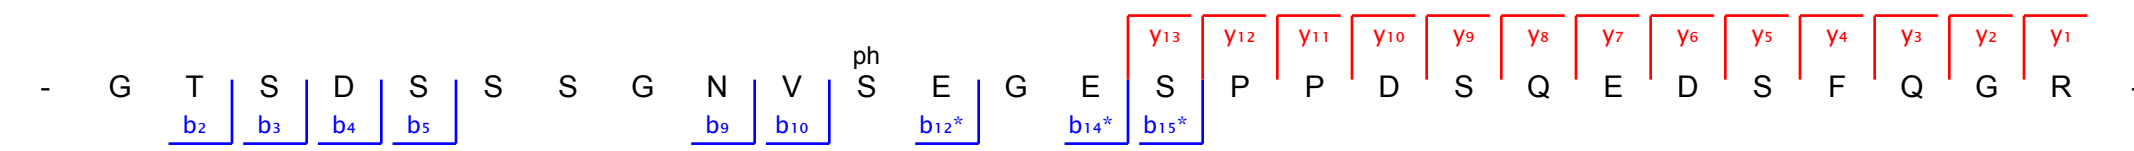

Raw file: 20150814\_A375SR\_Phospho\_BR2\_03  
 Scan: 10507 Method: FTMS; HCD Score: 153.94 m/z: 648.8 Gene names: PANK2

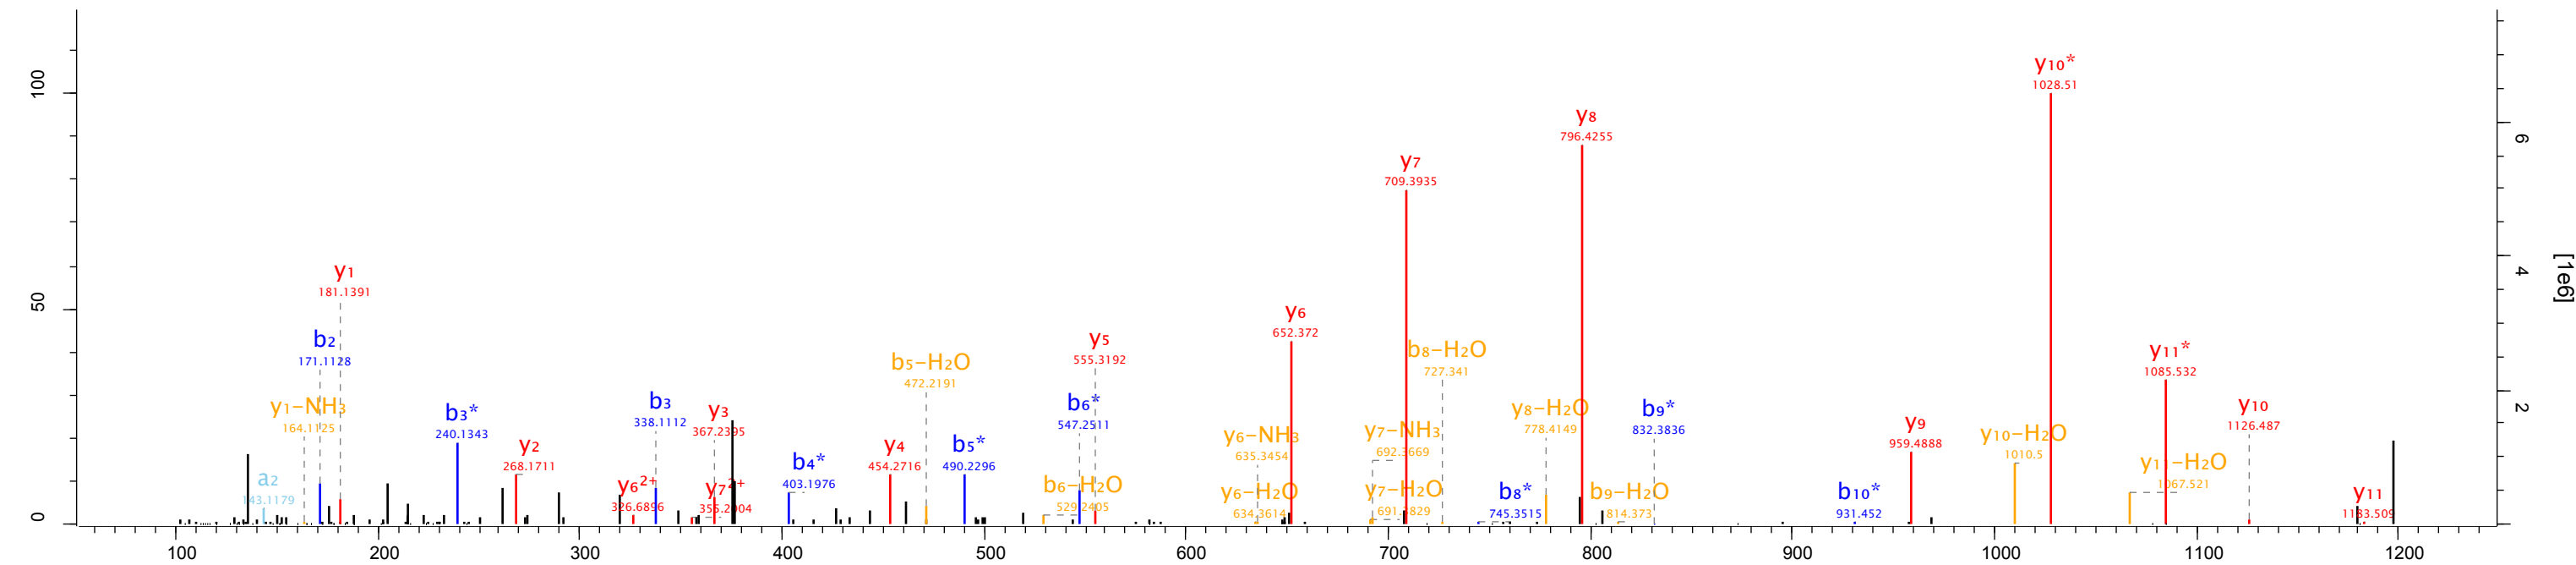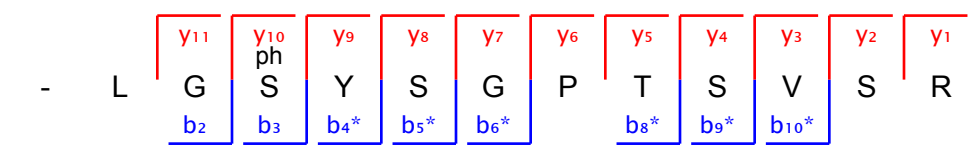

Raw file 20150814\_A375SR\_Phospho\_BR2\_03 Scan 10577 Method FTMS; HCD Score 45.82 m/z 555.24 Gene names ARID1A

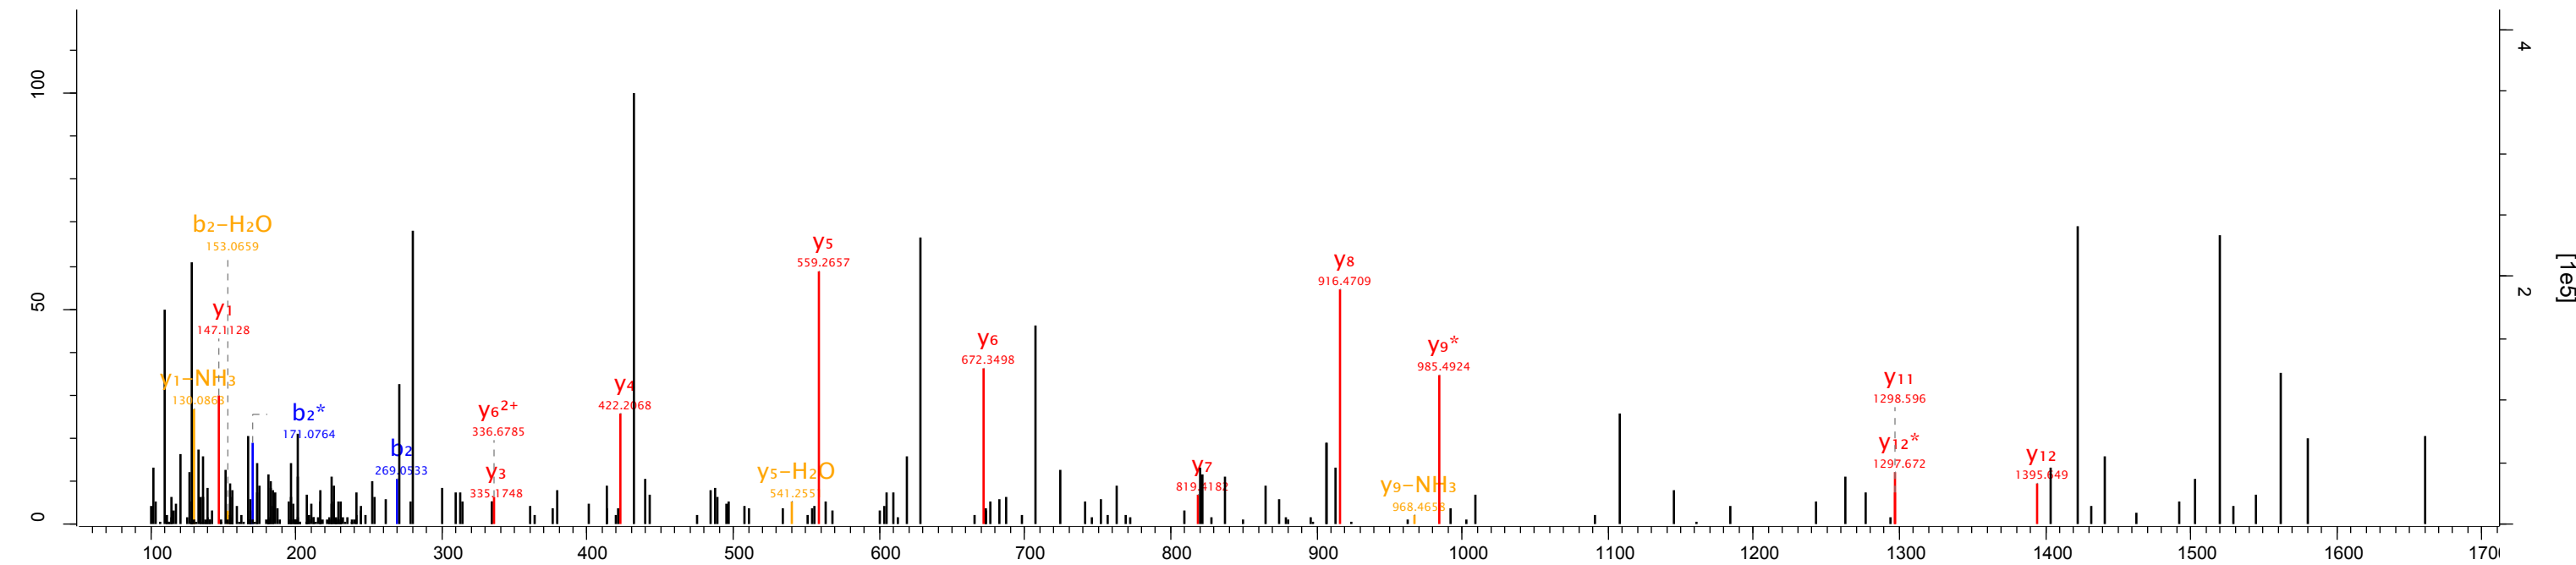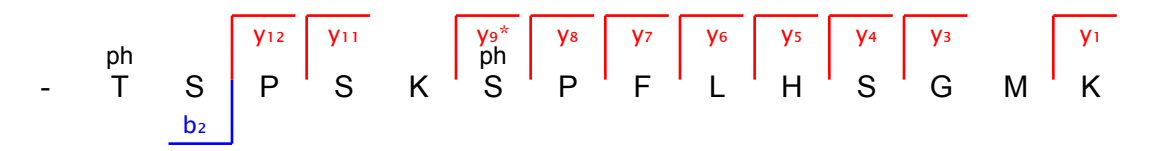

Raw file: 20150814\_A375SR\_Phospho\_BR2\_03  
 Scan: 10617 Method: FTMS; HCD Score: 106.42 m/z: 639.79 Gene names: EPB41L2

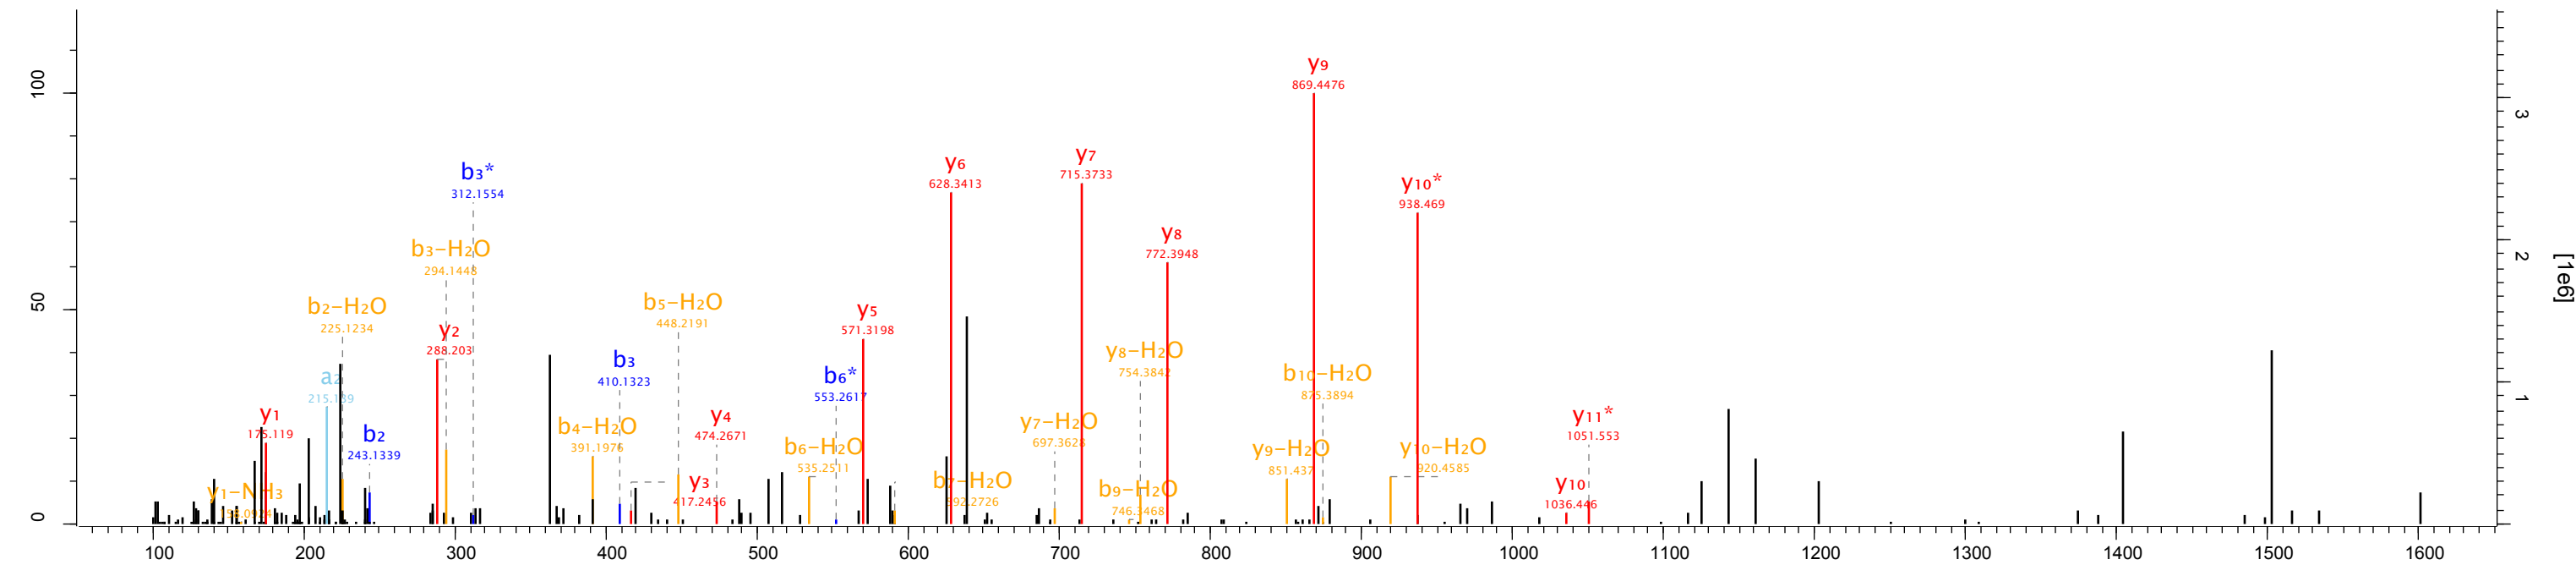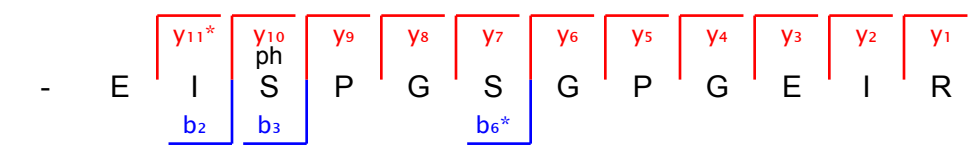



Raw file: 20150814\_A375SR\_Phospho\_BR2\_03  
 Scan: 10967 Method: FTMS; HCD Score: 180.76 m/z: 933.85 Gene names: ARFGAP1

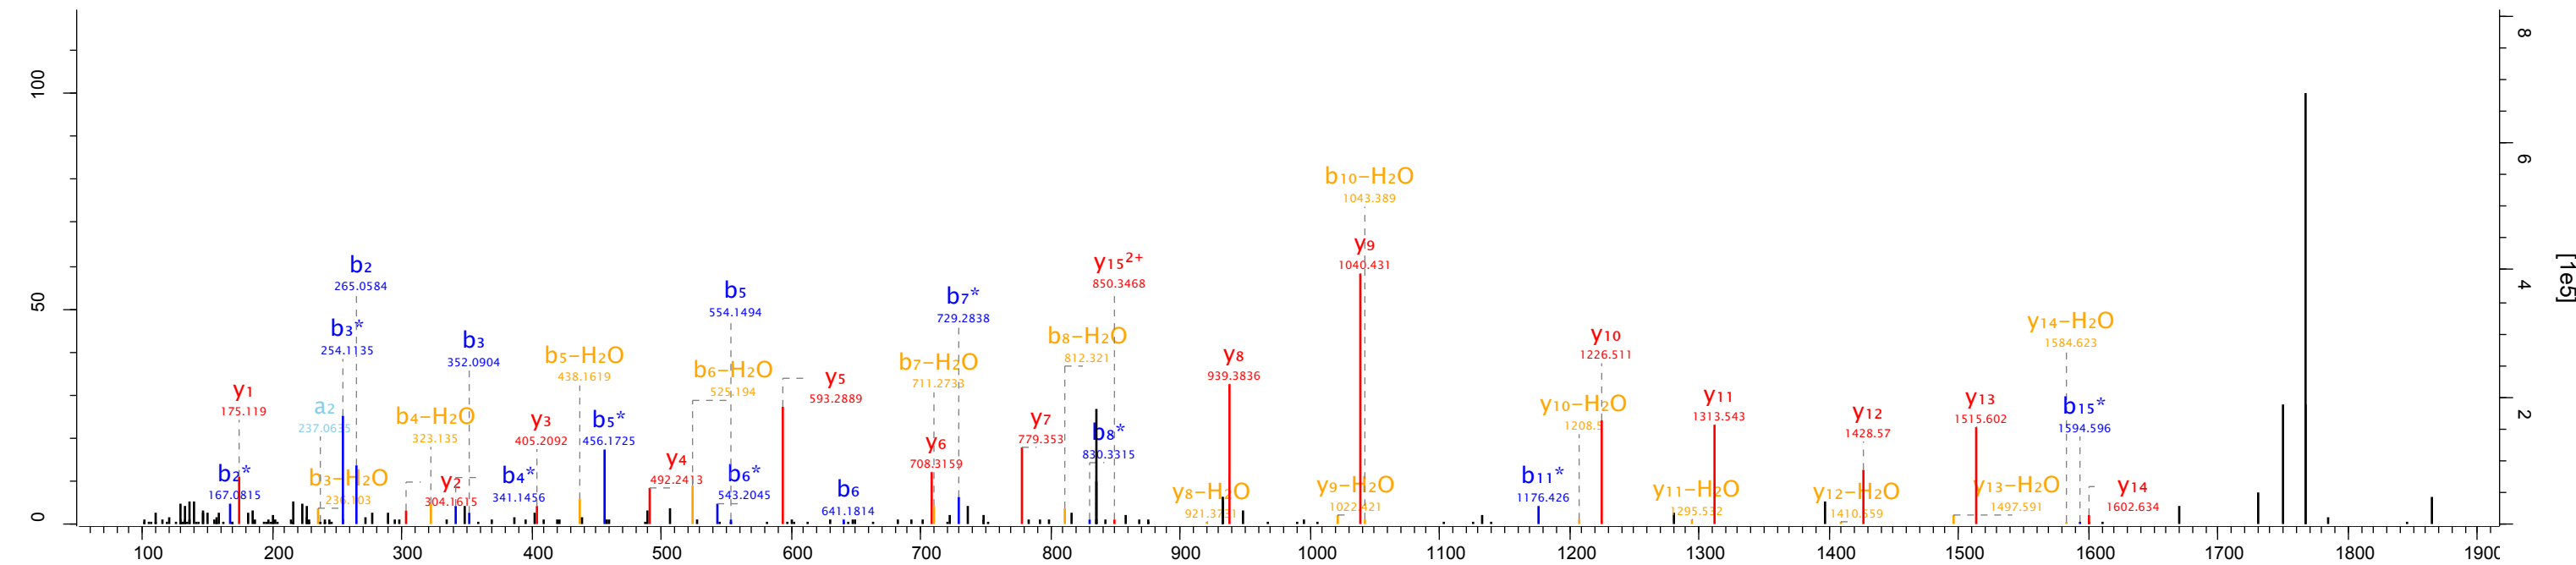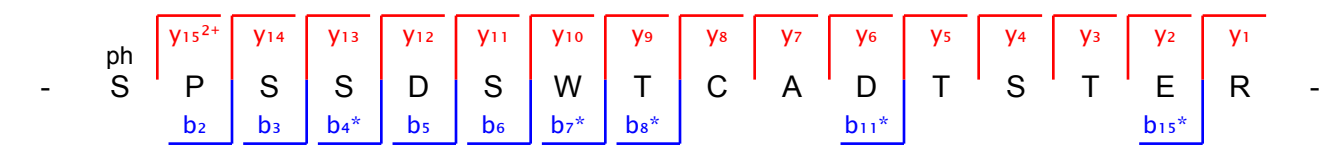

Raw file: 20150814\_A375SR\_Phospho\_BR2\_03  
 Scan: 11047 Method: FTMS; HCD Score: 130.82 m/z: 893.9 Gene names: TAF3

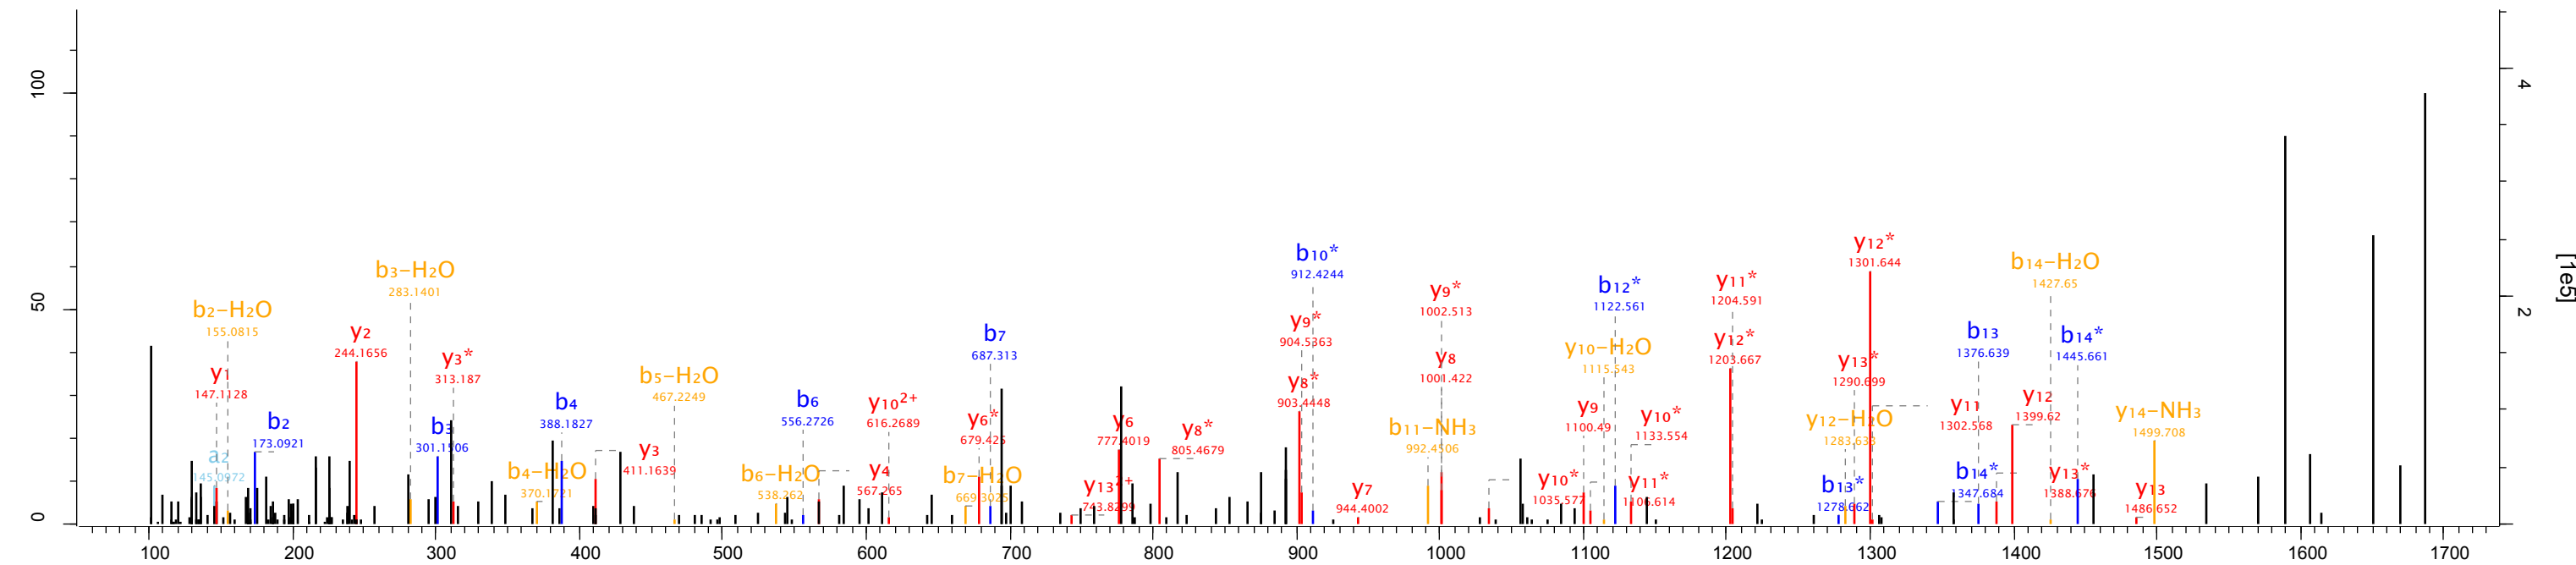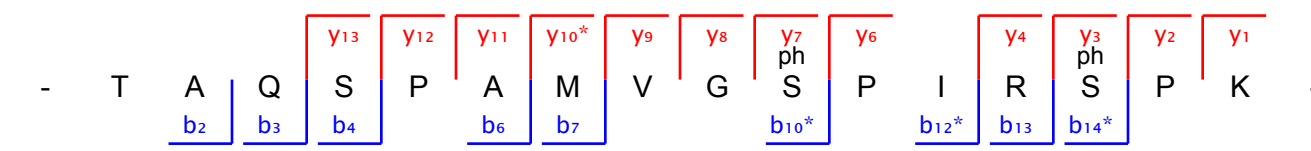

Raw file 20150814\_A375SR\_Phospho\_BR2\_03 Scan 11117 Method FTMS; HCD Score 104.94 m/z 689.31 Gene names OGFR

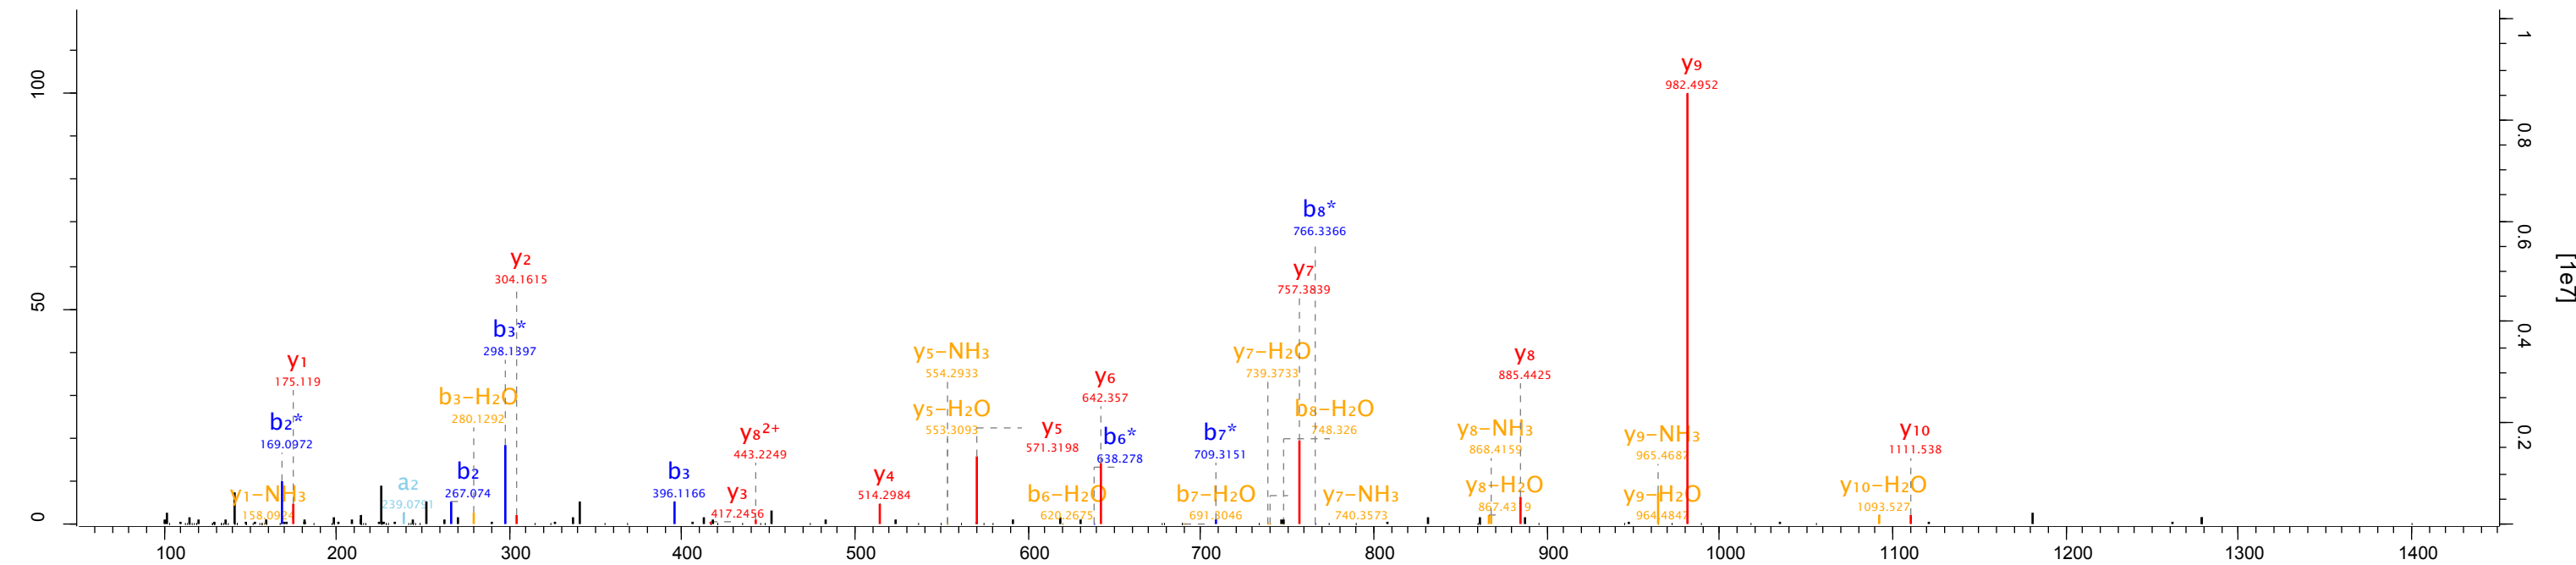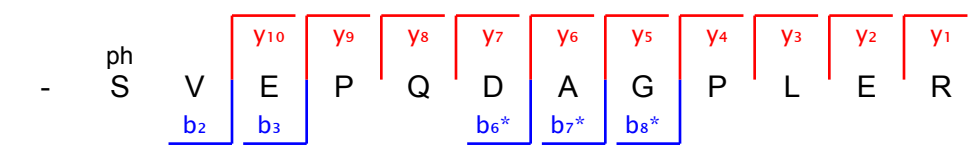

Raw file Scan Method Score m/z Gene names  
 20150814\_A375SR\_Phospho\_BR2\_03 11227 FTMS; HCD 120.74 836.83 POLR2A

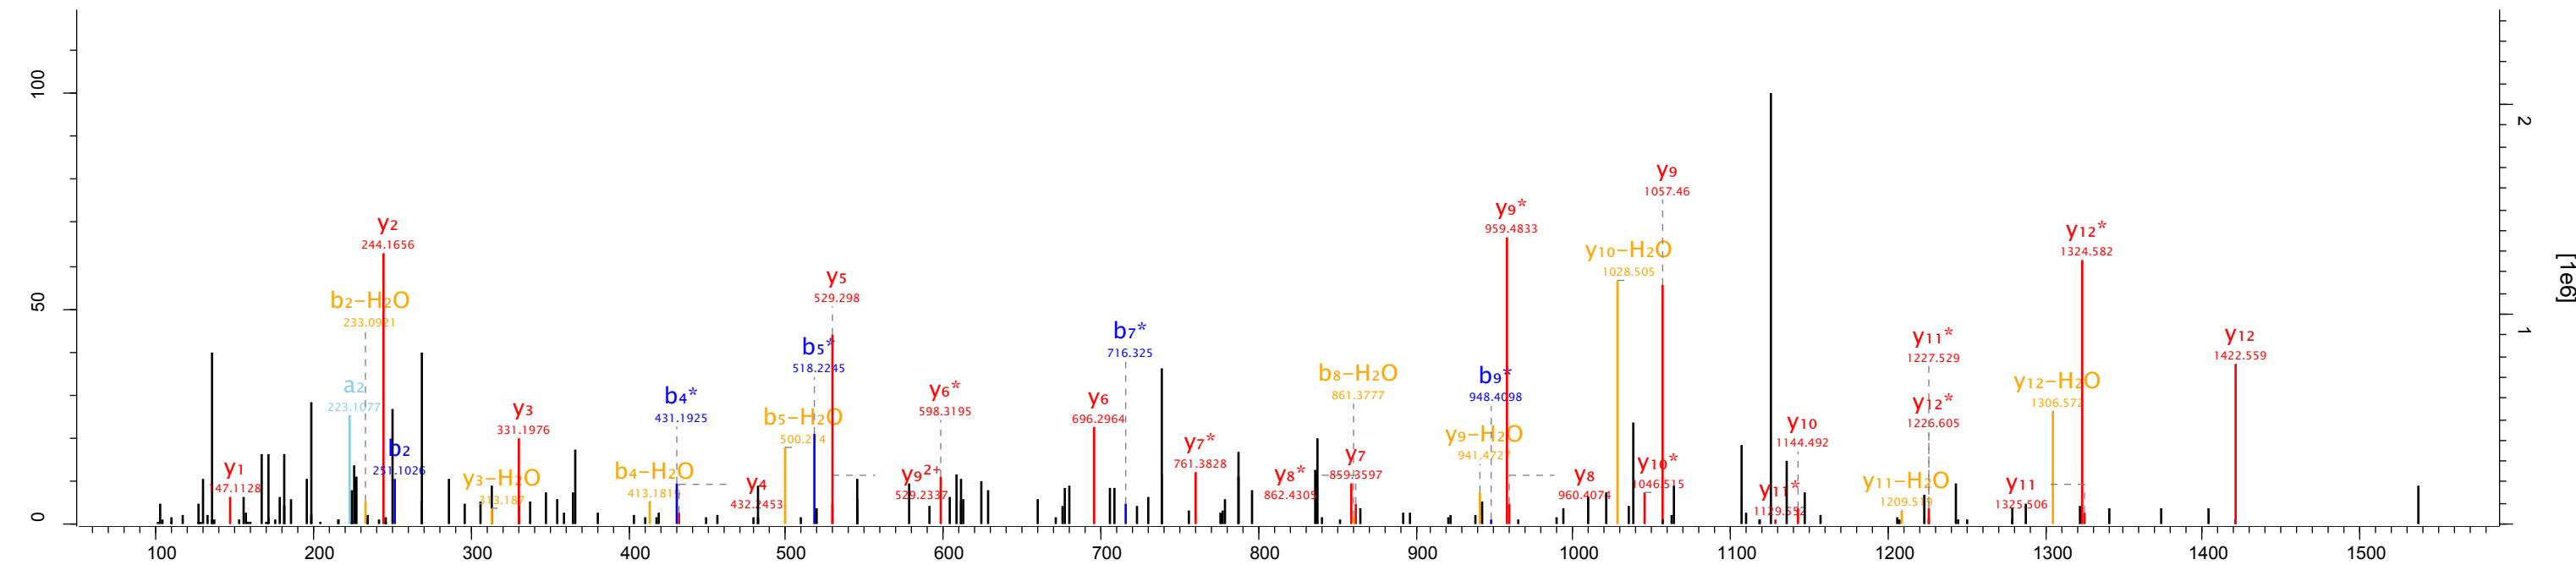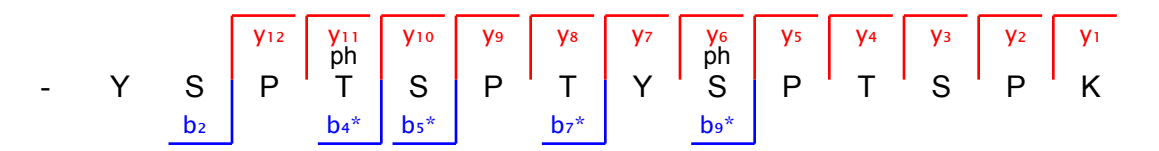

Raw file: 20150814\_A375SR\_Phospho\_BR2\_03  
 Scan: 11267 Method: FTMS; HCD Score: 159.98 m/z: 726.33 Gene names: BANF1

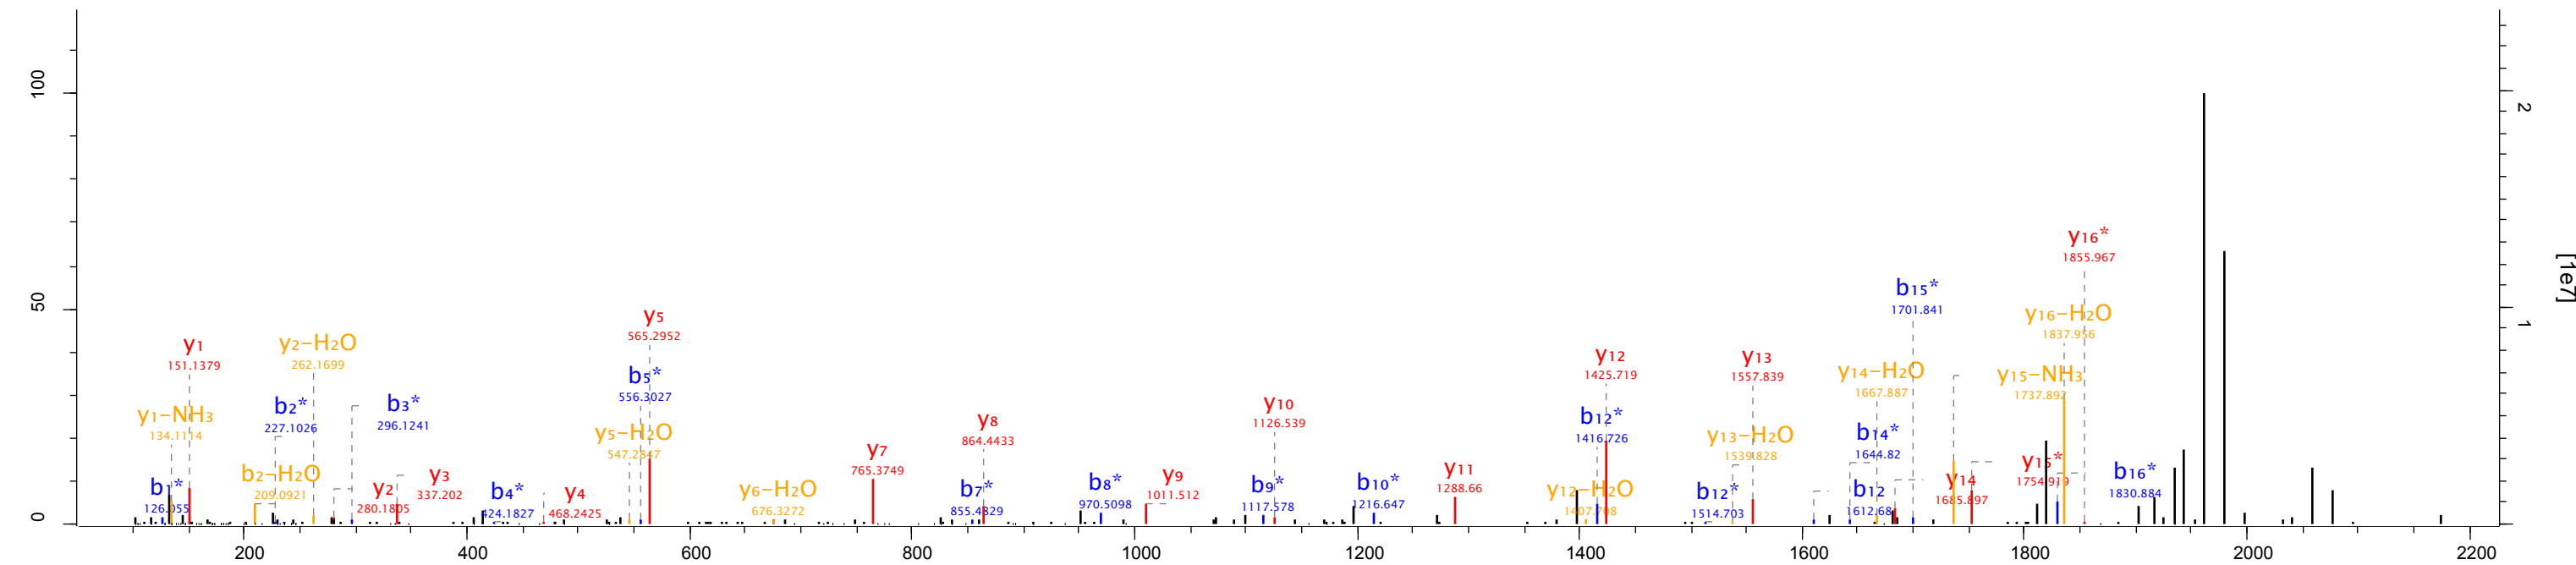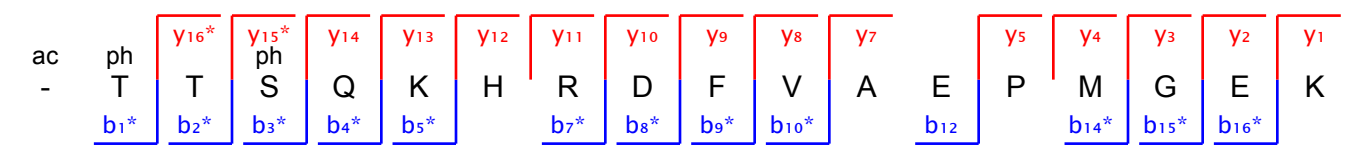

Raw file: 20150814\_A375SR\_Phospho\_BR2\_03  
 Scan: 11667 Method: FTMS; HCD Score: 114.31 m/z: 659.74 Gene names: C2CD5

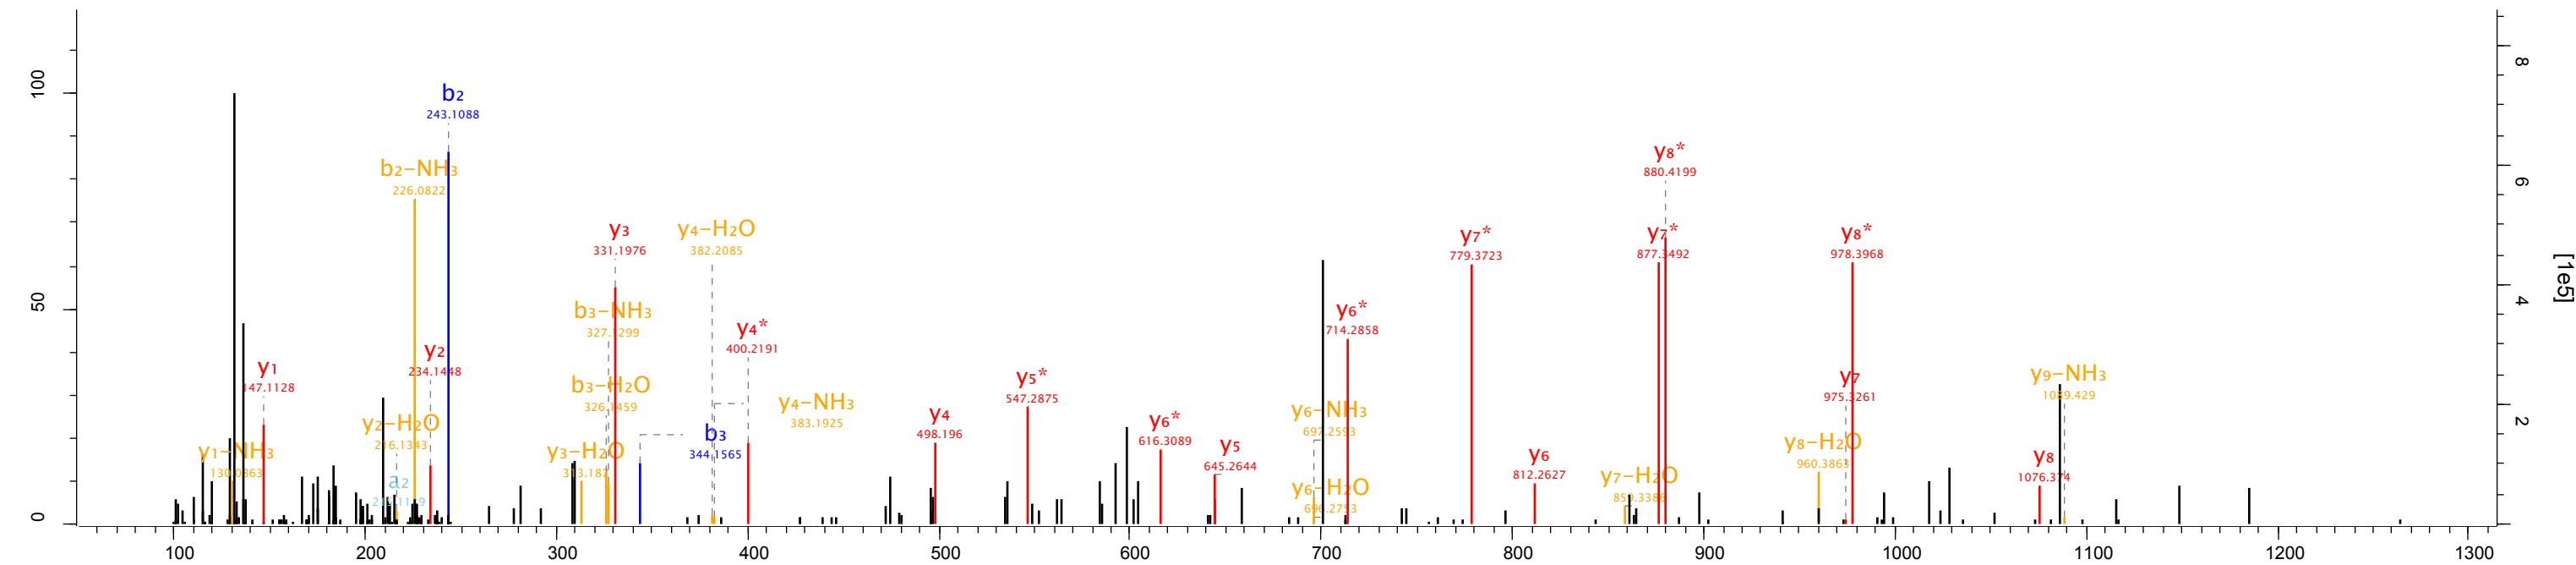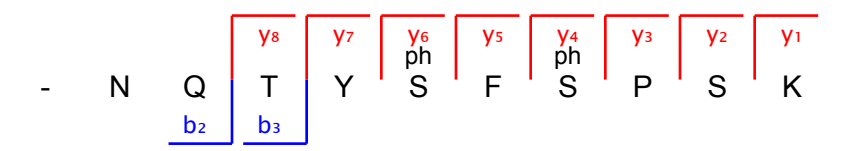

Raw file 20150814\_A375SR\_Phospho\_BR2\_03 Scan 11767 Method FTMS; HCD Score 70.57 m/z 984.89 Gene names NUDT11;NUDT10

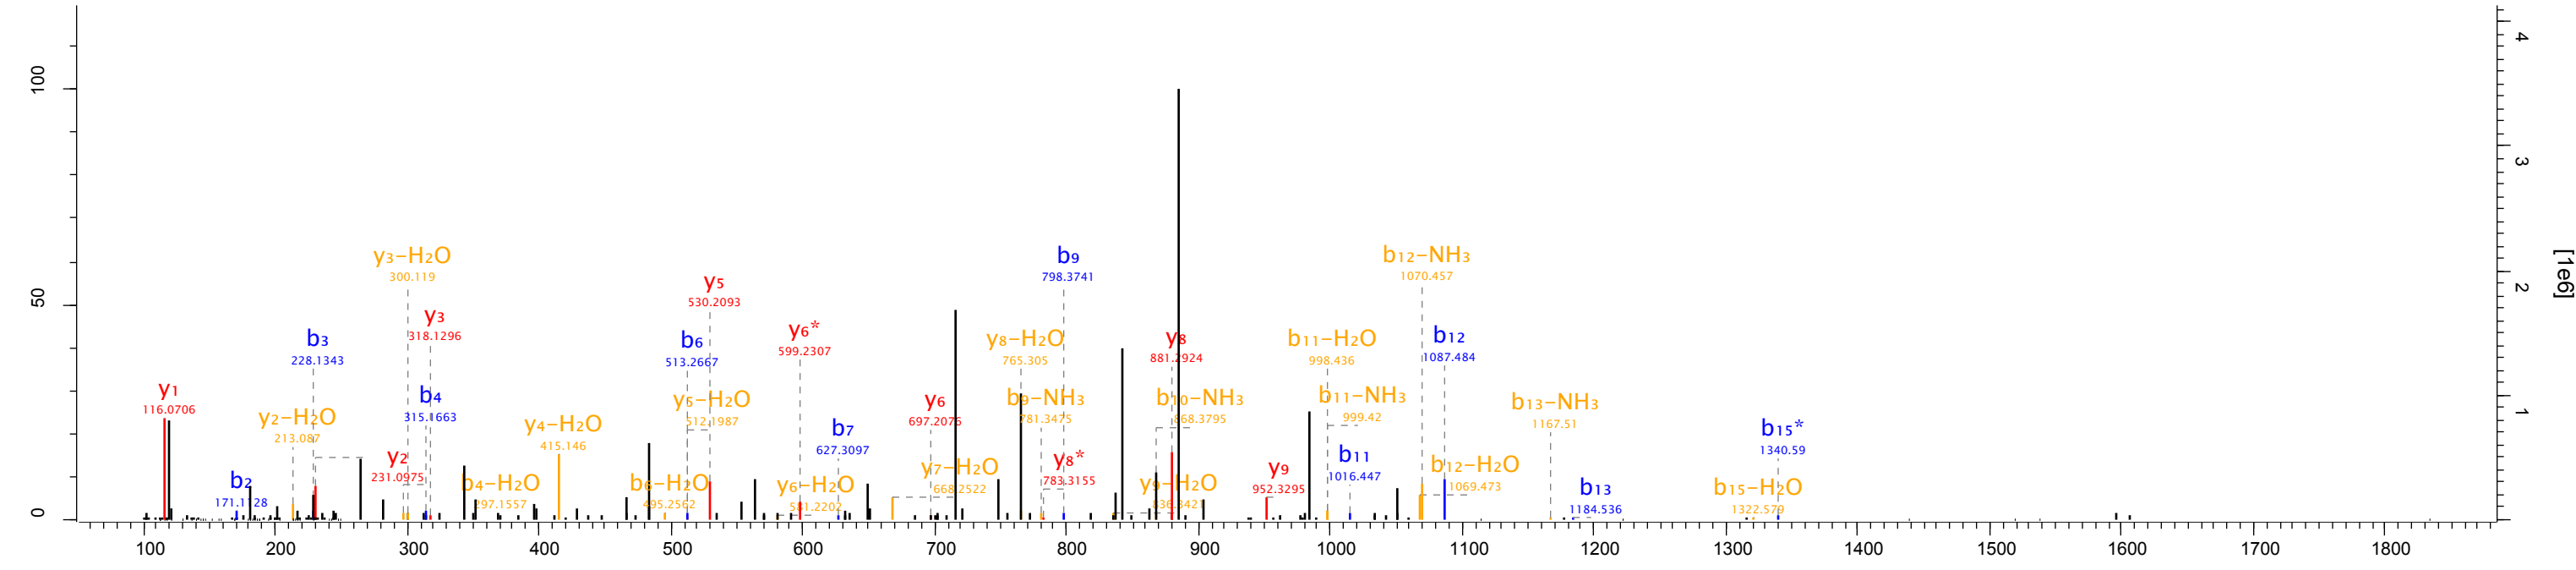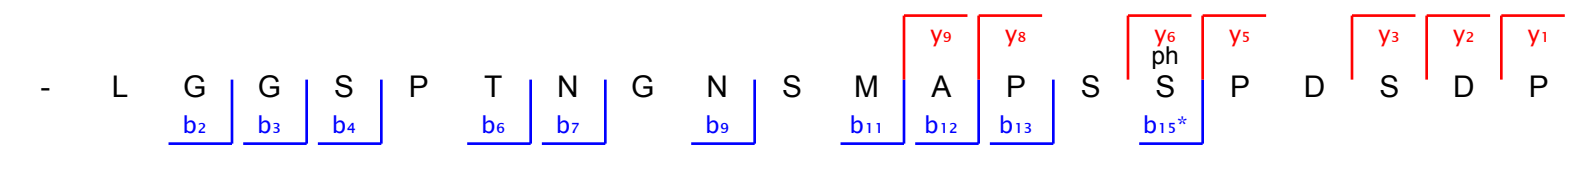

Raw file: 20150814\_A375SR\_Phospho\_BR2\_03  
 Scan: 12127 Method: FTMS; HCD Score: 92.22 m/z: 938.84 Gene names: FIP1L1

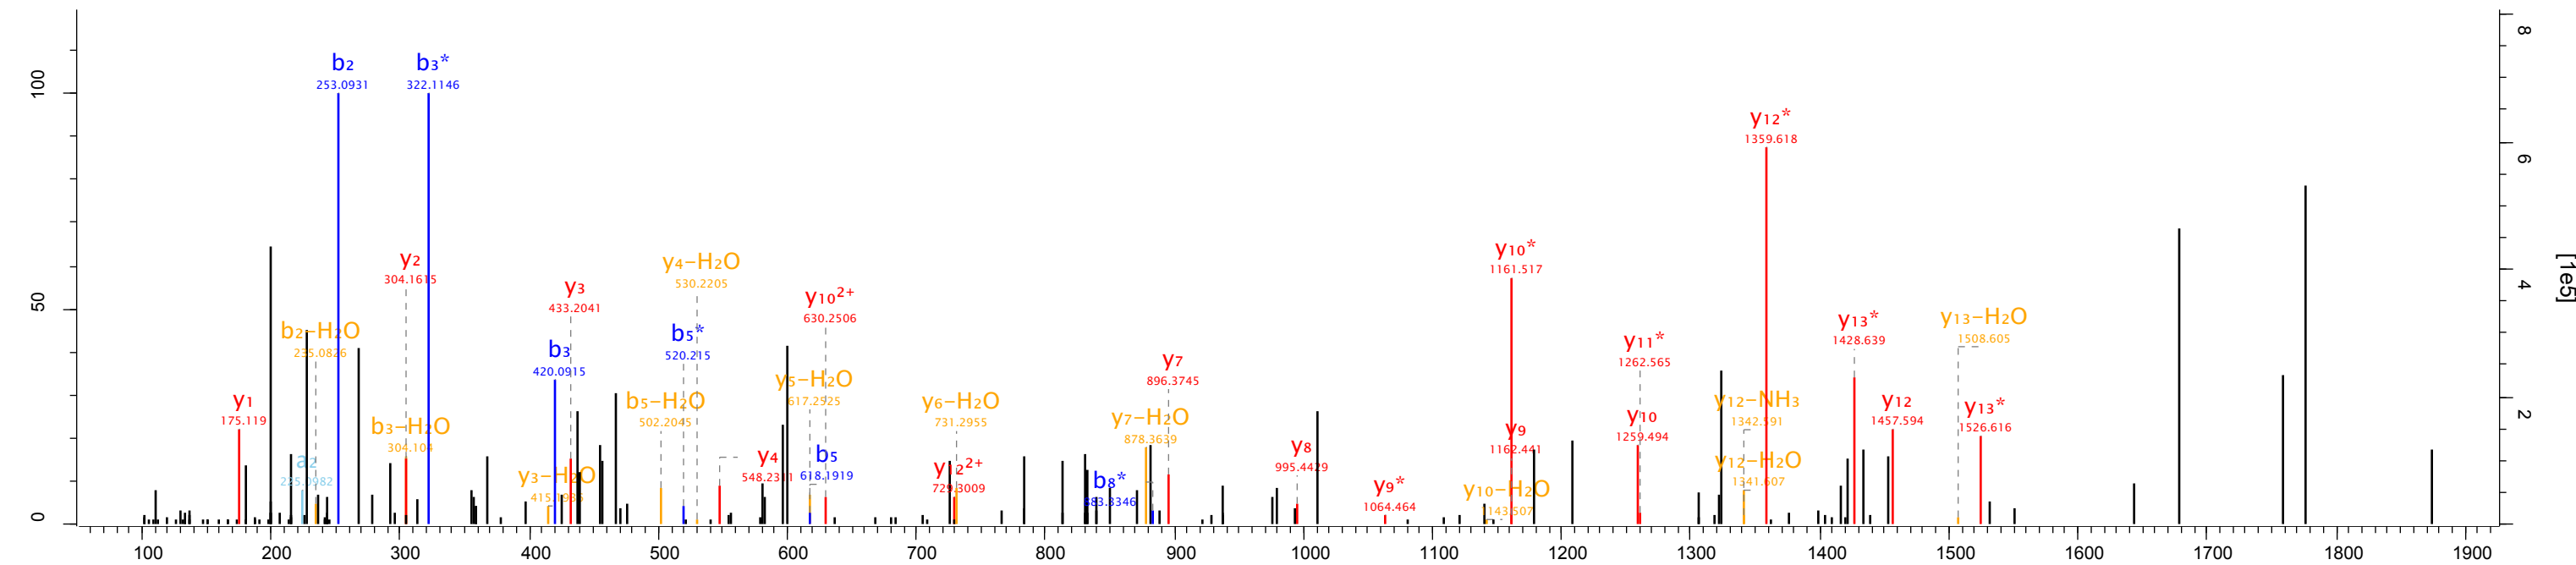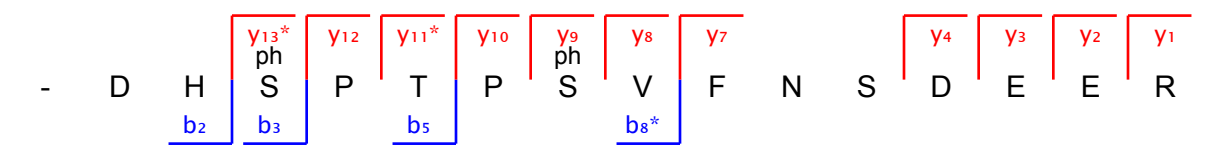



Raw file 20150814\_A375SR\_Phospho\_BR2\_03 Scan 12267 Method FTMS; HCD Score 171.9 m/z 984.89 Gene names NUDT11;NUDT10

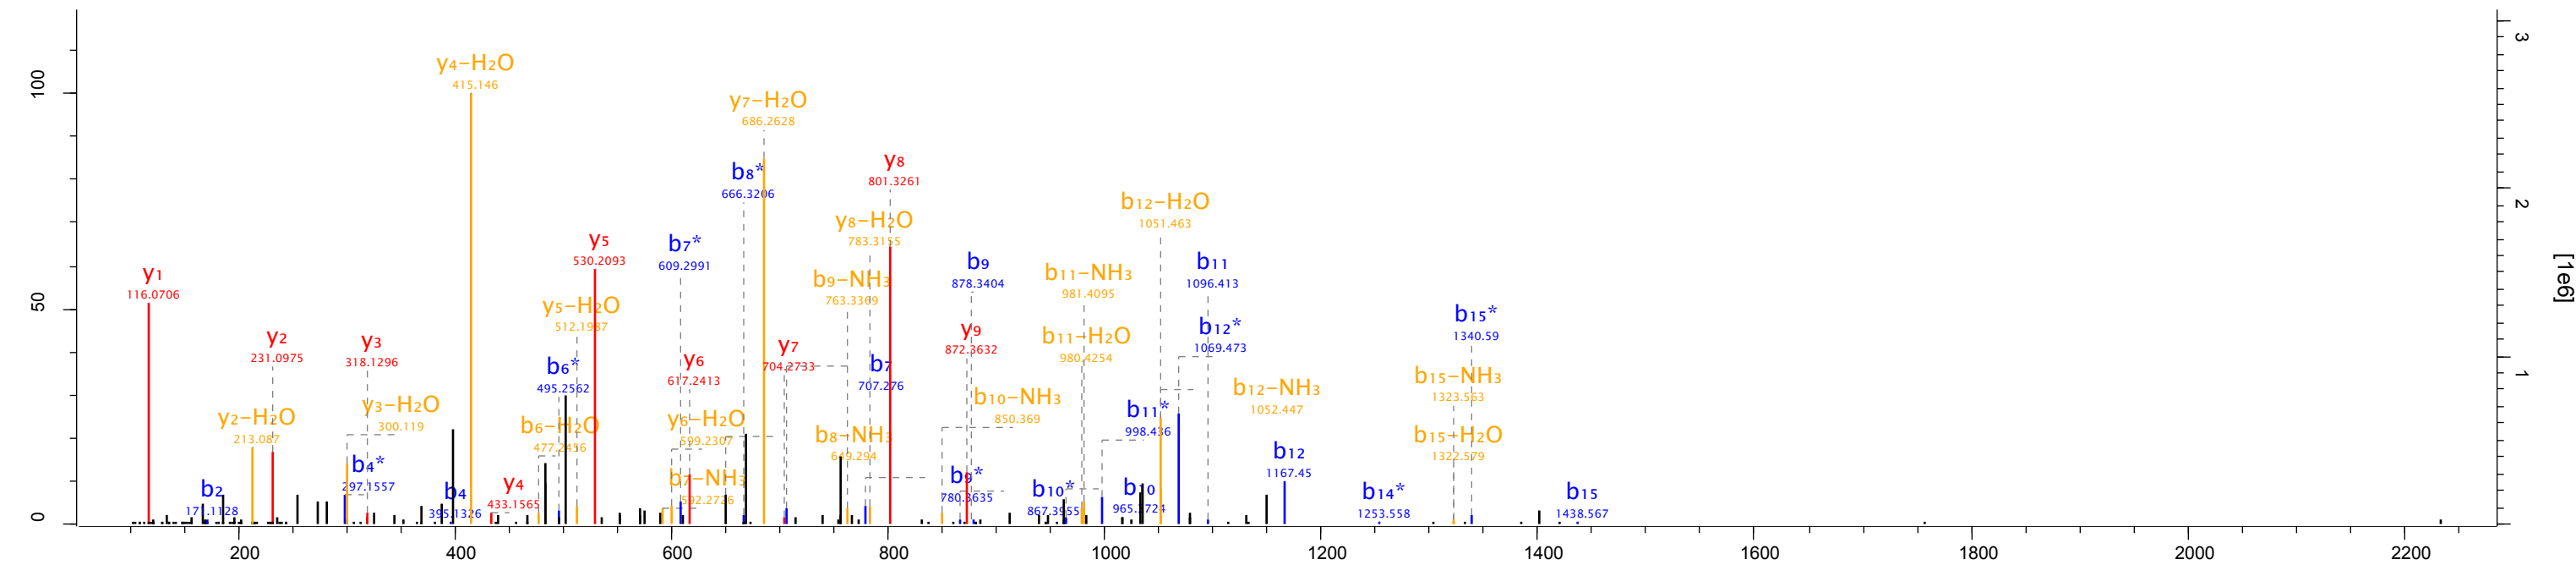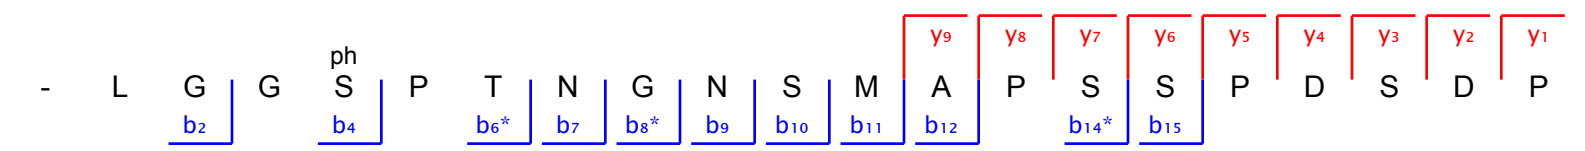

Raw file 20150814\_A375SR\_Phospho\_BR2\_03 Scan 12307 Method FTMS; HCD Score 94.37 m/z 665.26 Gene names CCP110

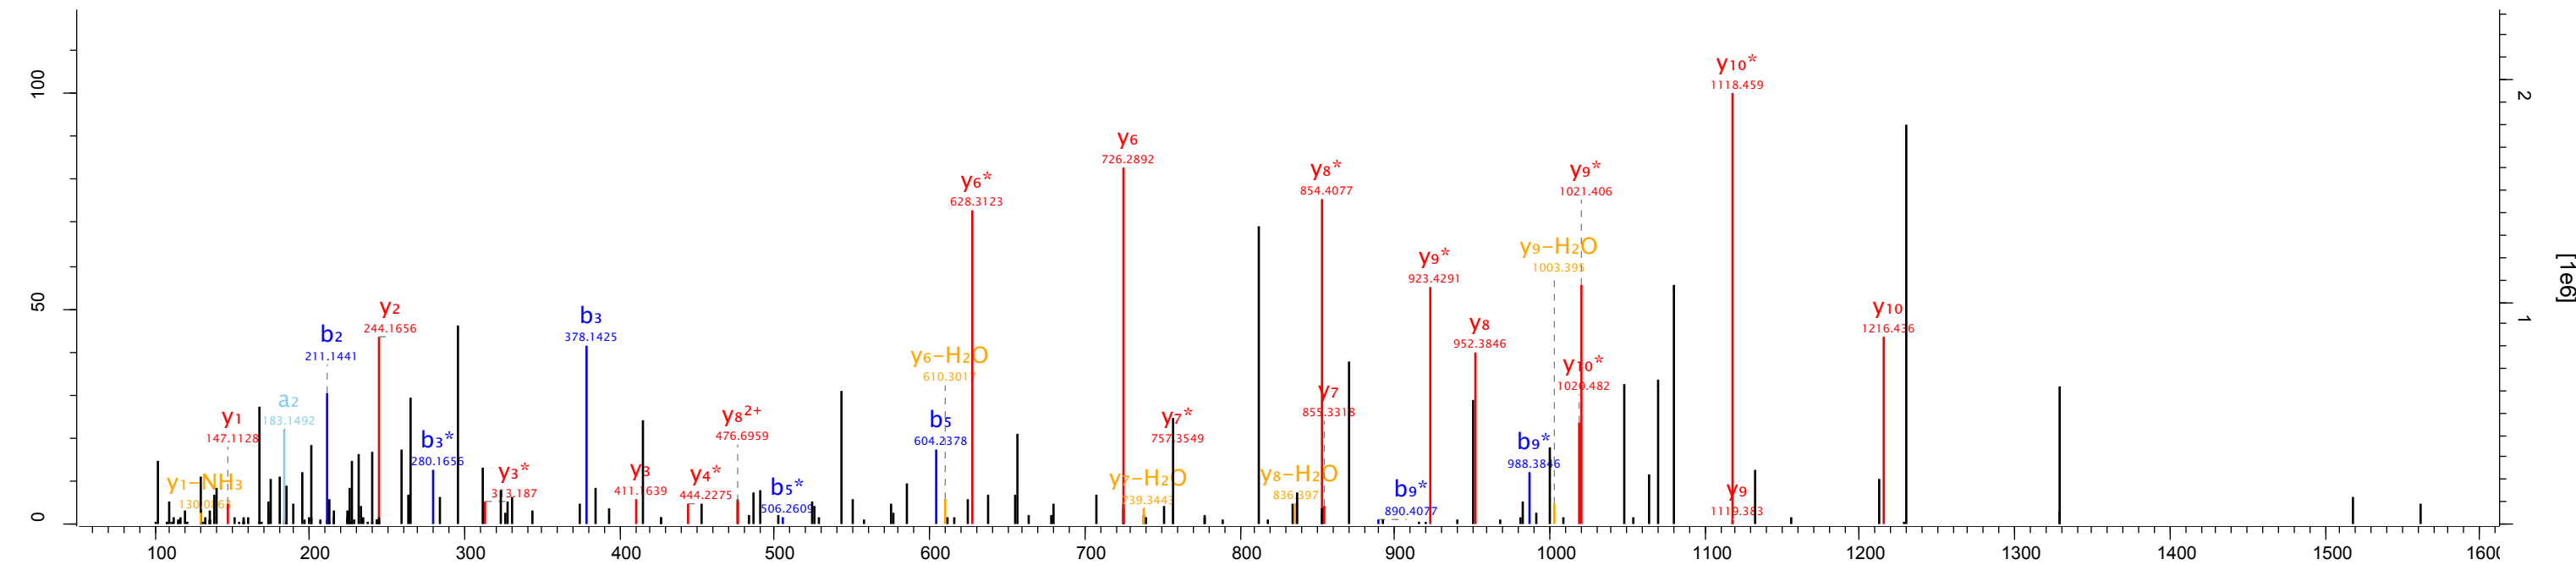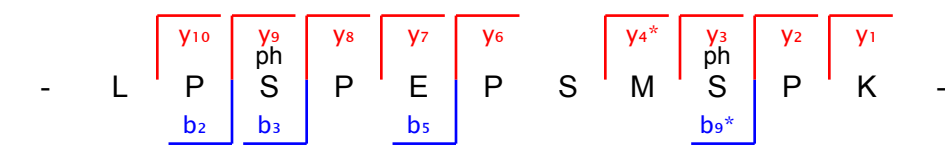

Raw file: 20150814\_A375SR\_Phospho\_BR2\_03  
 Scan: 12487 Method: FTMS; HCD Score: 122.39 m/z: 615.79 Gene names: FOSL2

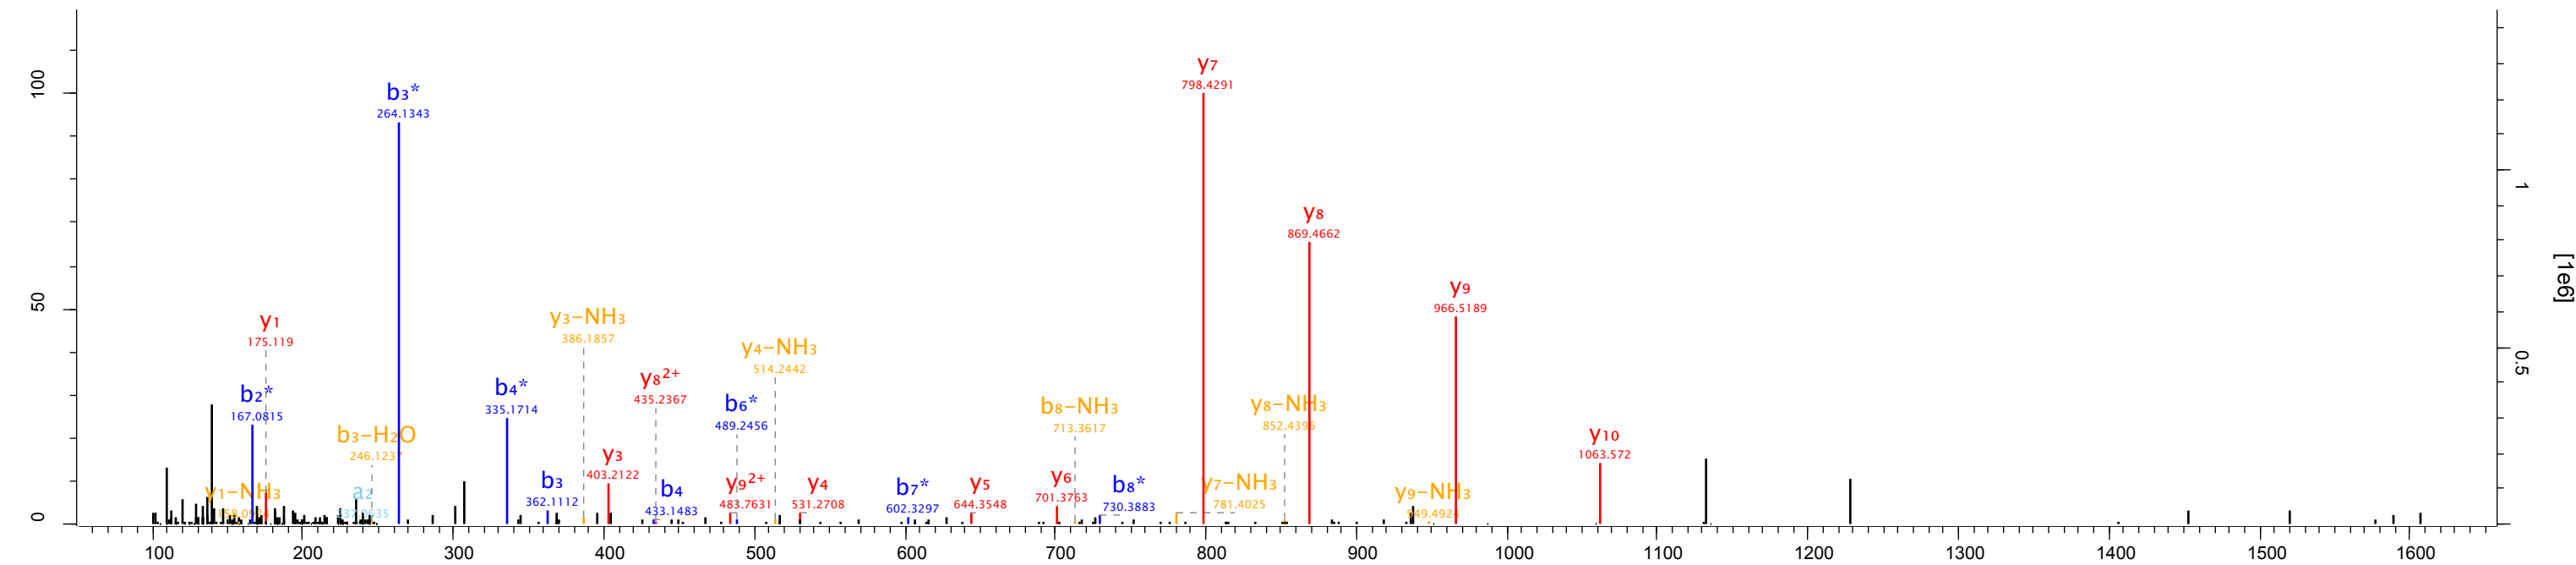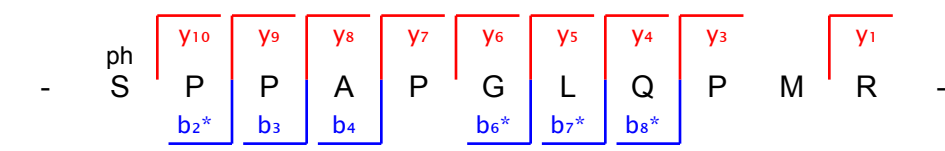

Raw file 20150814\_A375SR\_Phospho\_BR2\_03 Scan 12667 Method FTMS; HCD Score 124.69 m/z 926.8 Gene names PDCL

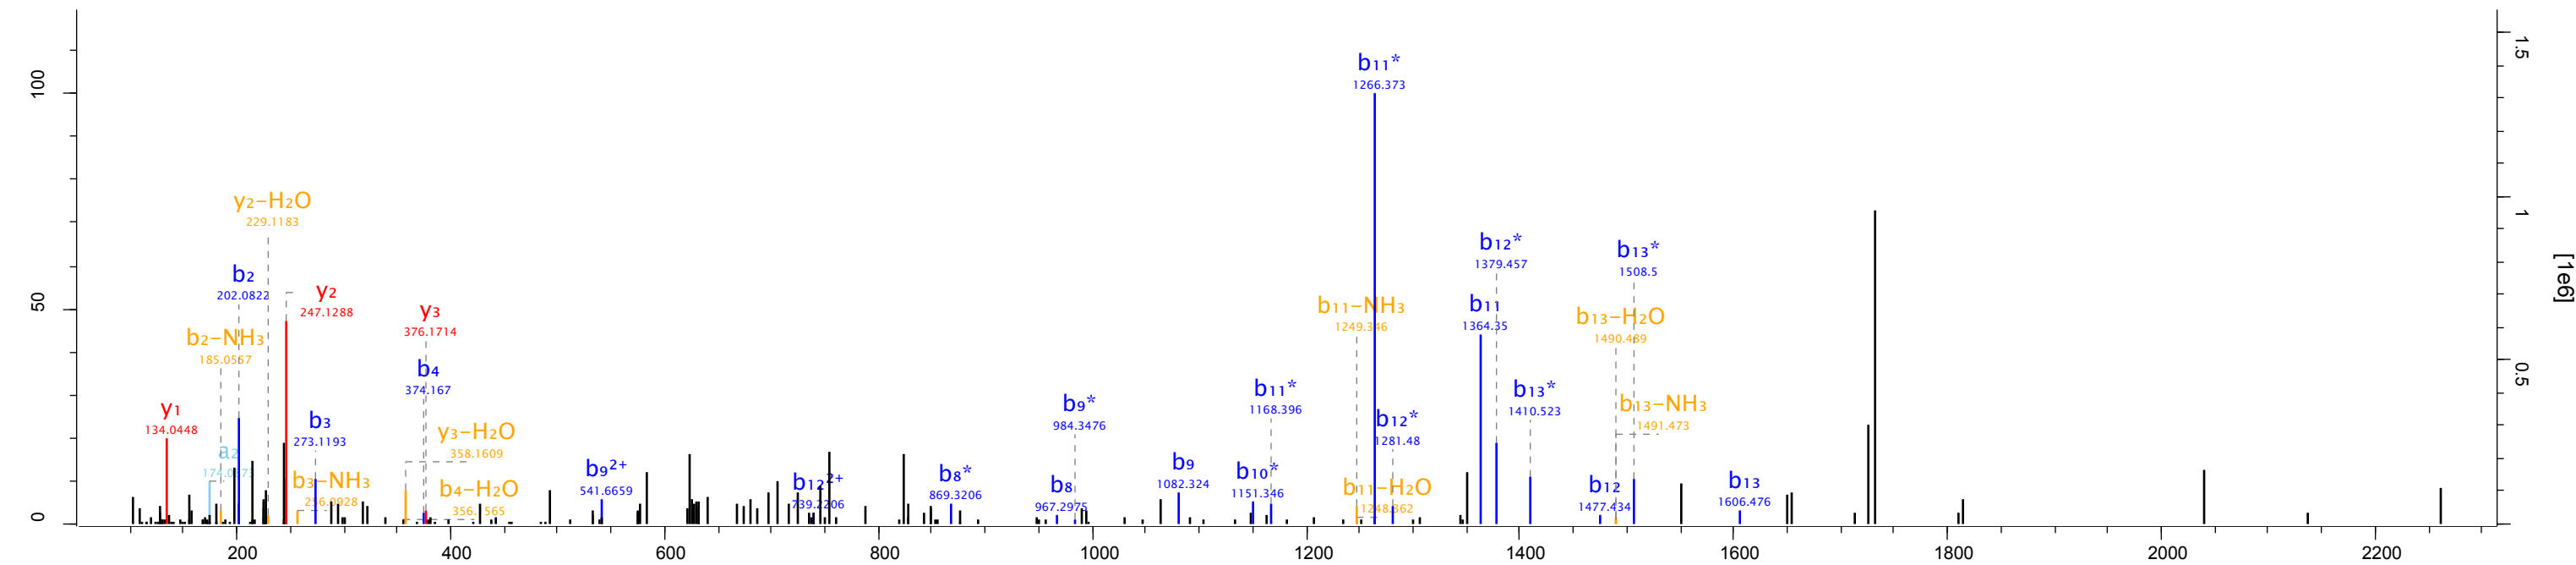

- N S A T C H S E D S D L E I D -

b<sub>2</sub>
b<sub>3</sub>
b<sub>4</sub>
b<sub>8</sub>
b<sub>9</sub>
b<sub>10</sub>\*
b<sub>11</sub>
b<sub>12</sub>
b<sub>13</sub>
y<sub>3</sub>
y<sub>2</sub>
y<sub>1</sub>

Raw file: 20150814\_A375SR\_Phospho\_BR2\_03  
 Scan: 12937 Method: FTMS; HCD Score: 125.31 m/z: 937.91 Gene names: SMG1

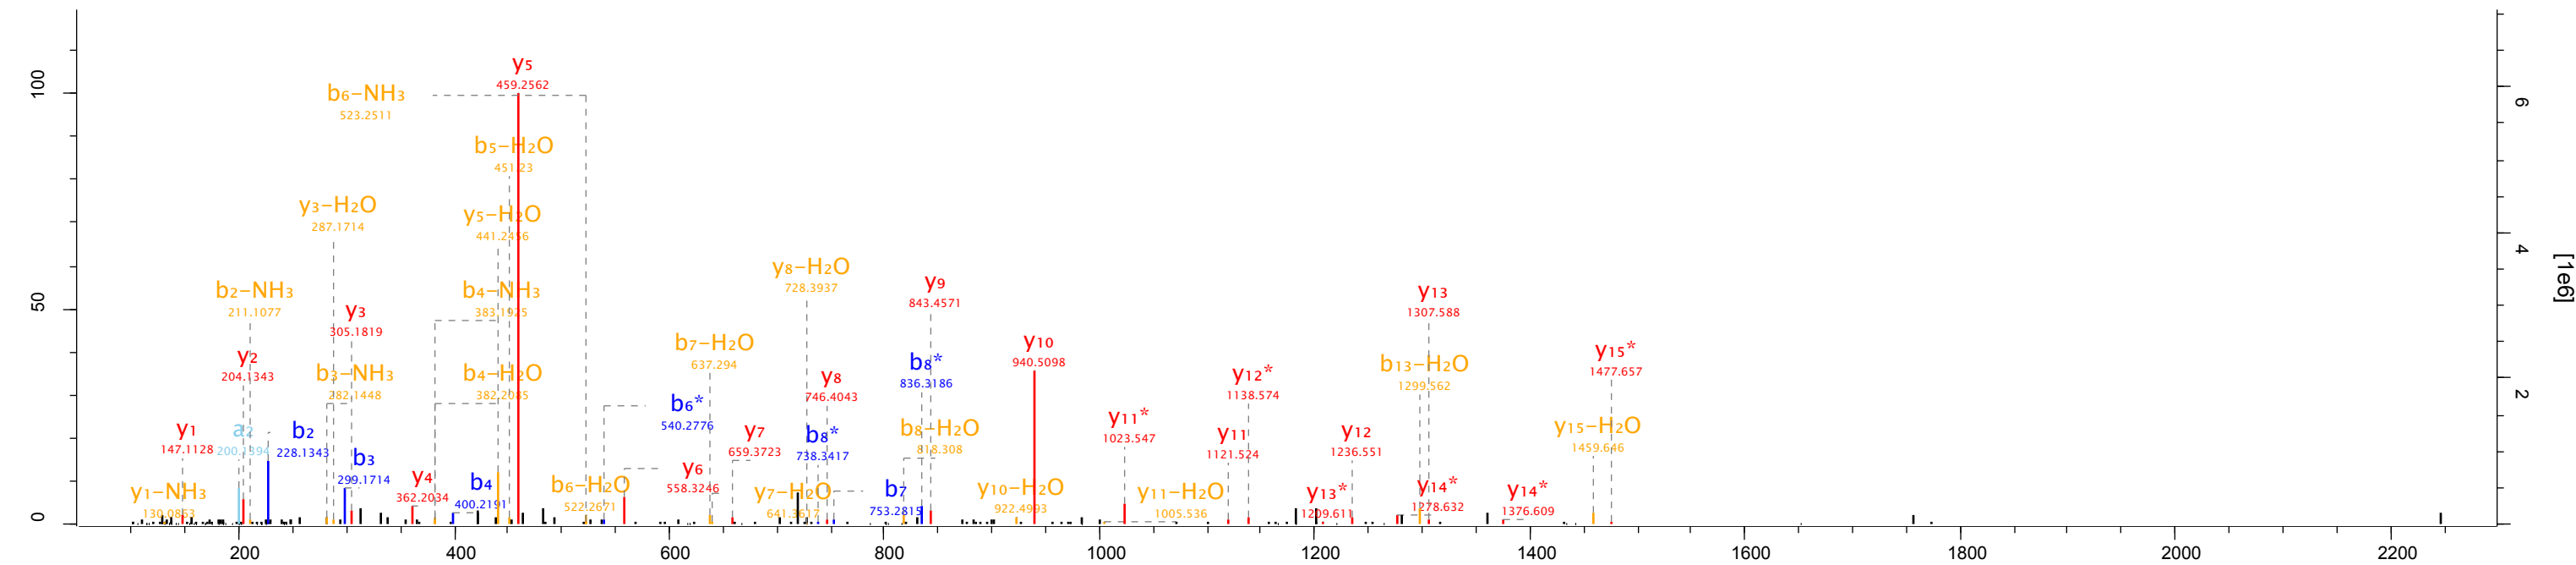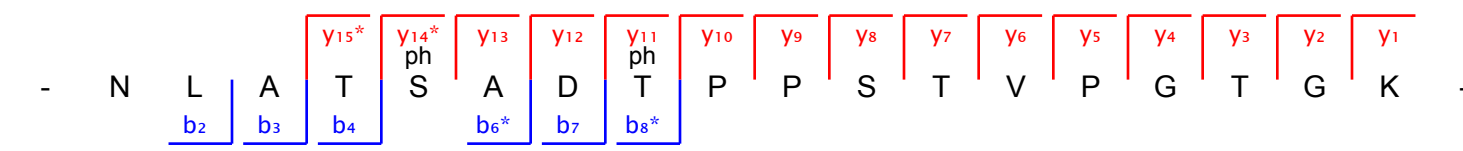

Raw file 20150814\_A375SR\_Phospho\_BR2\_03 Scan 13007 Method FTMS; HCD Score 138.66 m/z 789.37 Gene names SH3PXD2A

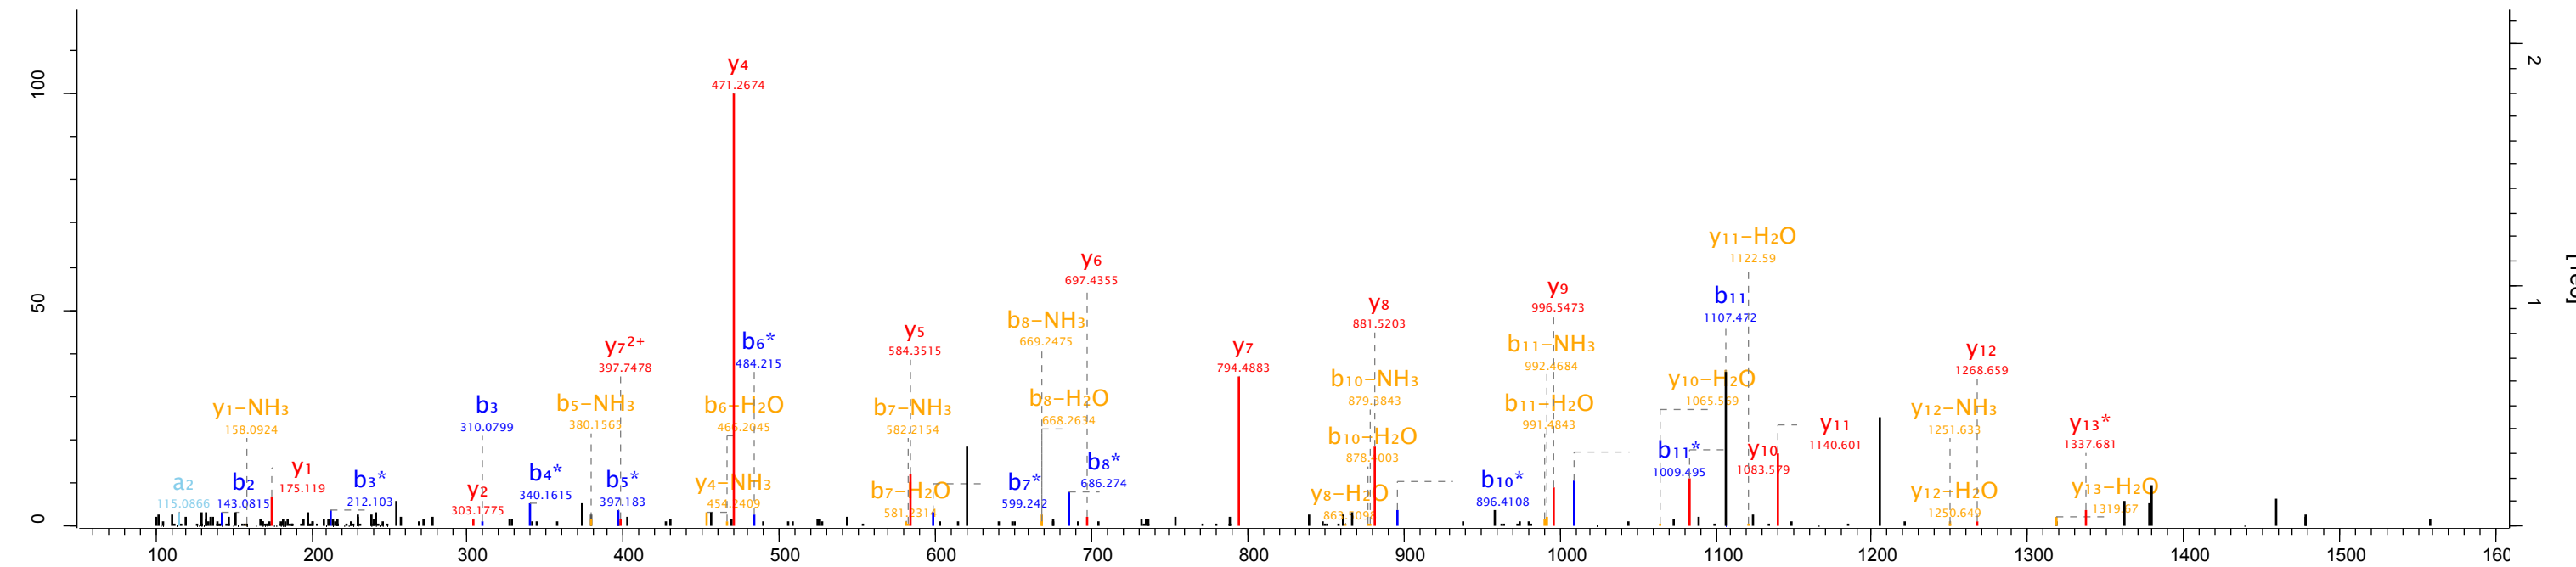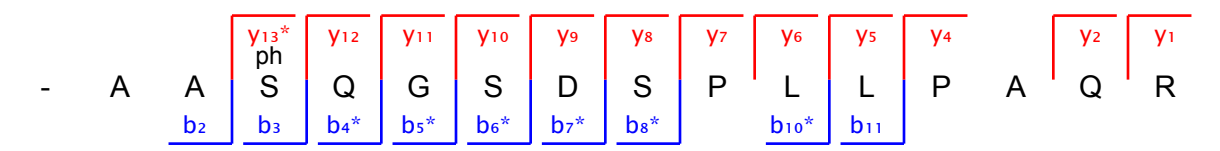

Raw file 20150814\_A375SR\_Phospho\_BR2\_03 Scan 13517 Method FTMS; HCD Score 195.86 m/z 900.85 Gene names NAA10

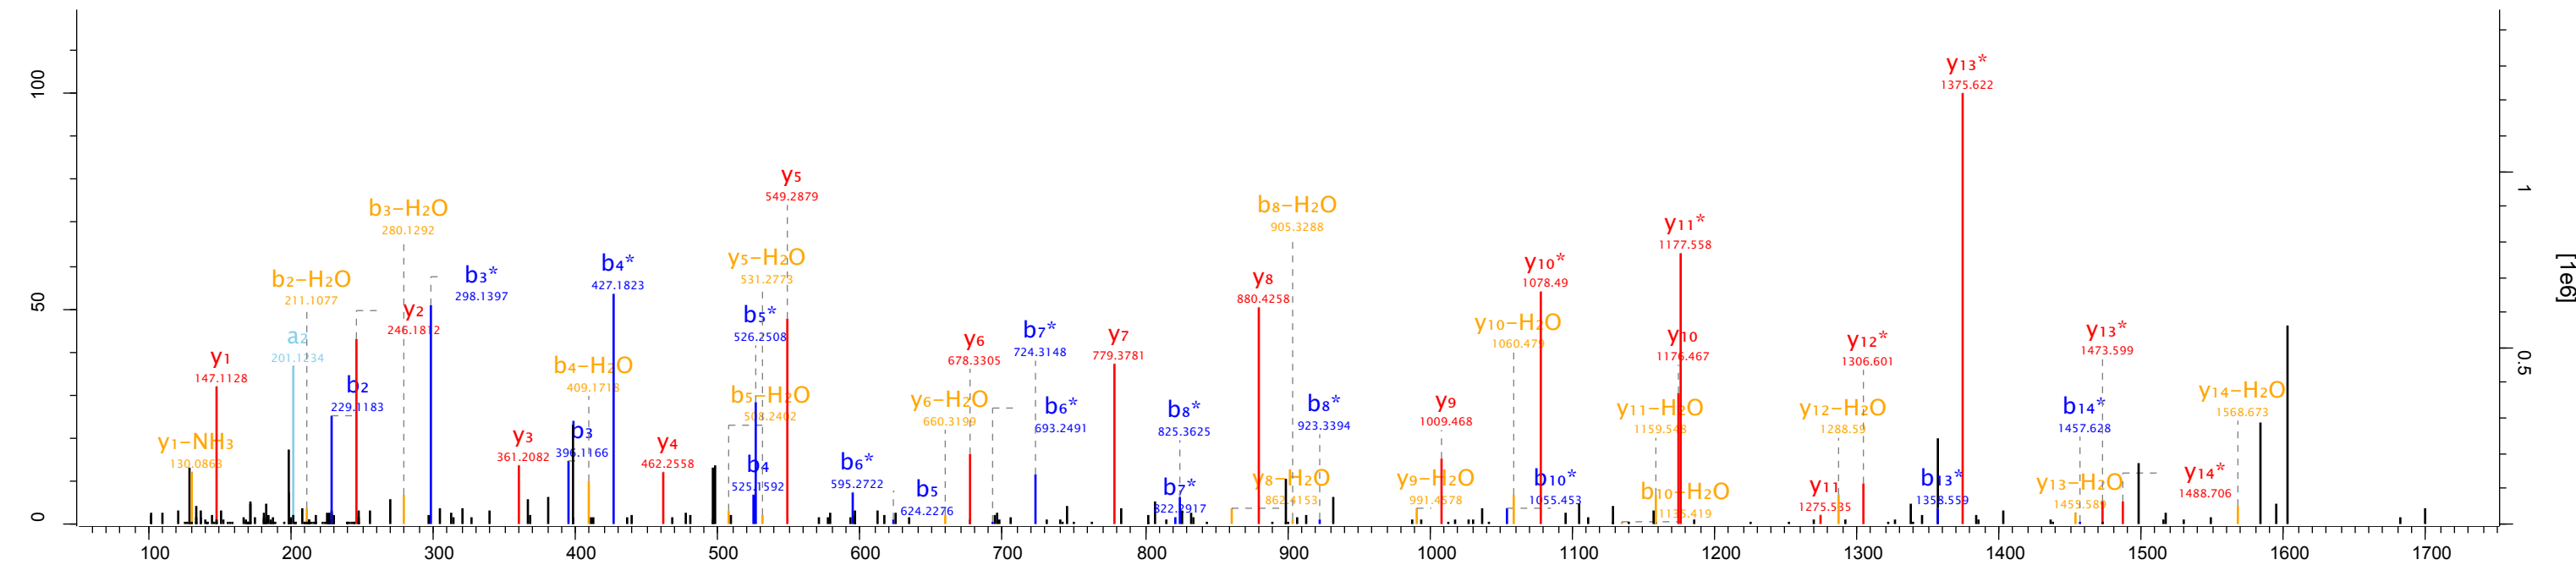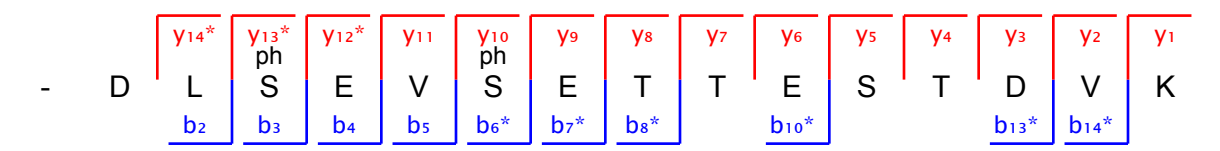

Raw file  
 20150814\_A375SR\_Phospho\_BR2\_03  
 Scan 13927 Method FTMS; HCD Score 57.53 m/z 700.29 Gene names TANC2

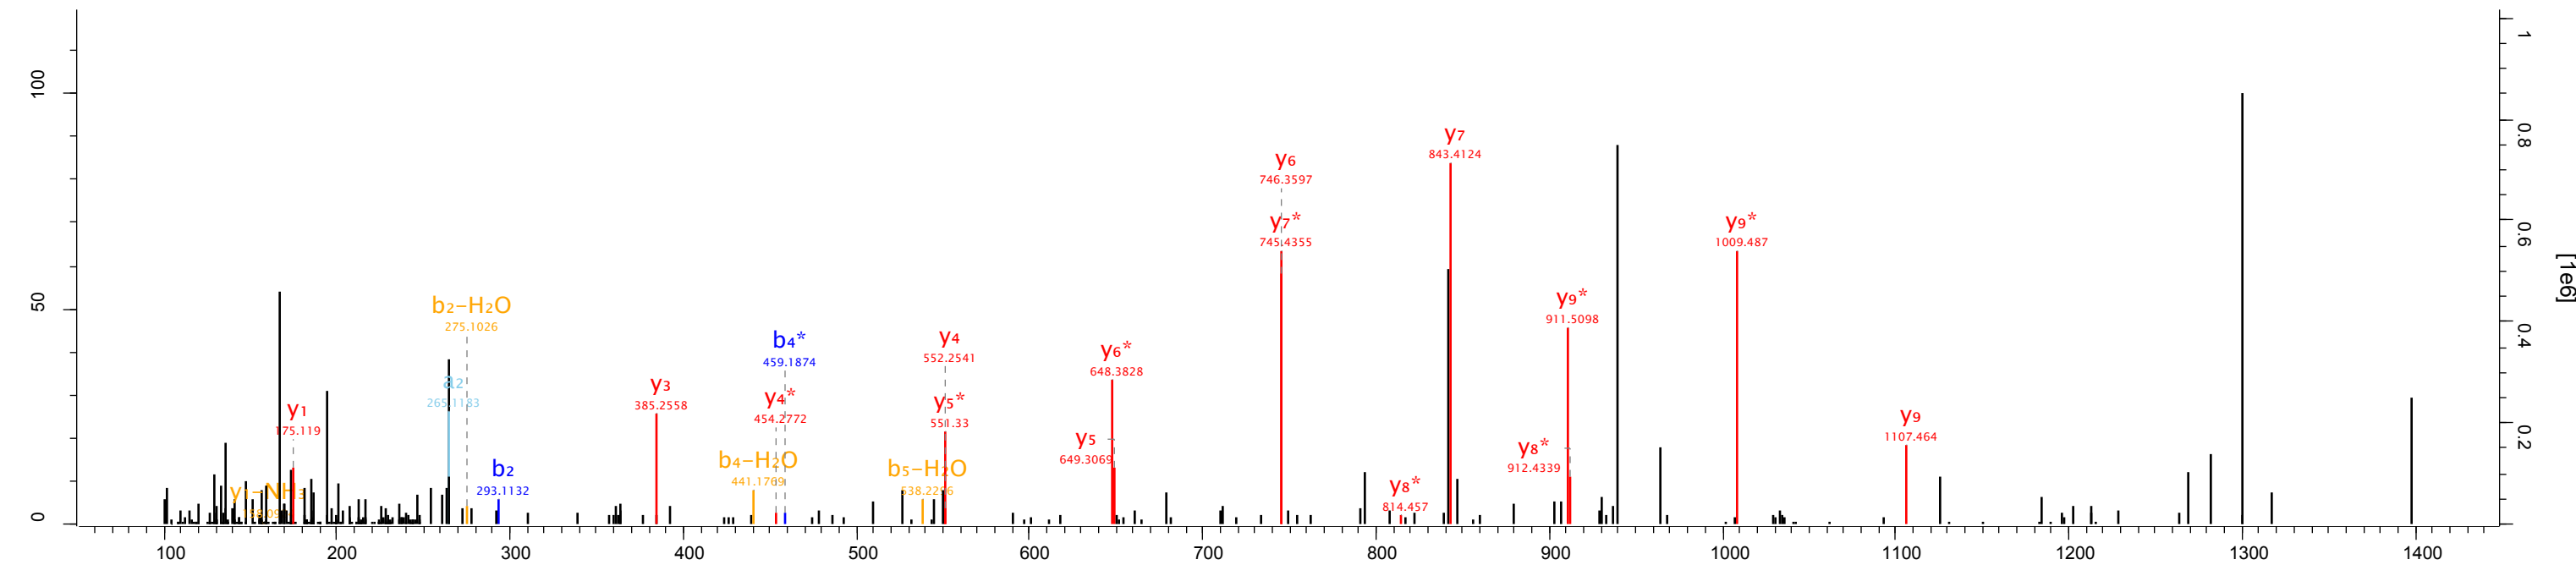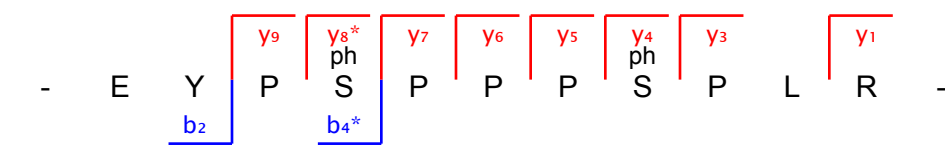



Raw file 20150814\_A375SR\_Phospho\_BR2\_03 Scan 14007 Method FTMS; HCD Score 90.3 m/z 1014.1 Gene names INCENP

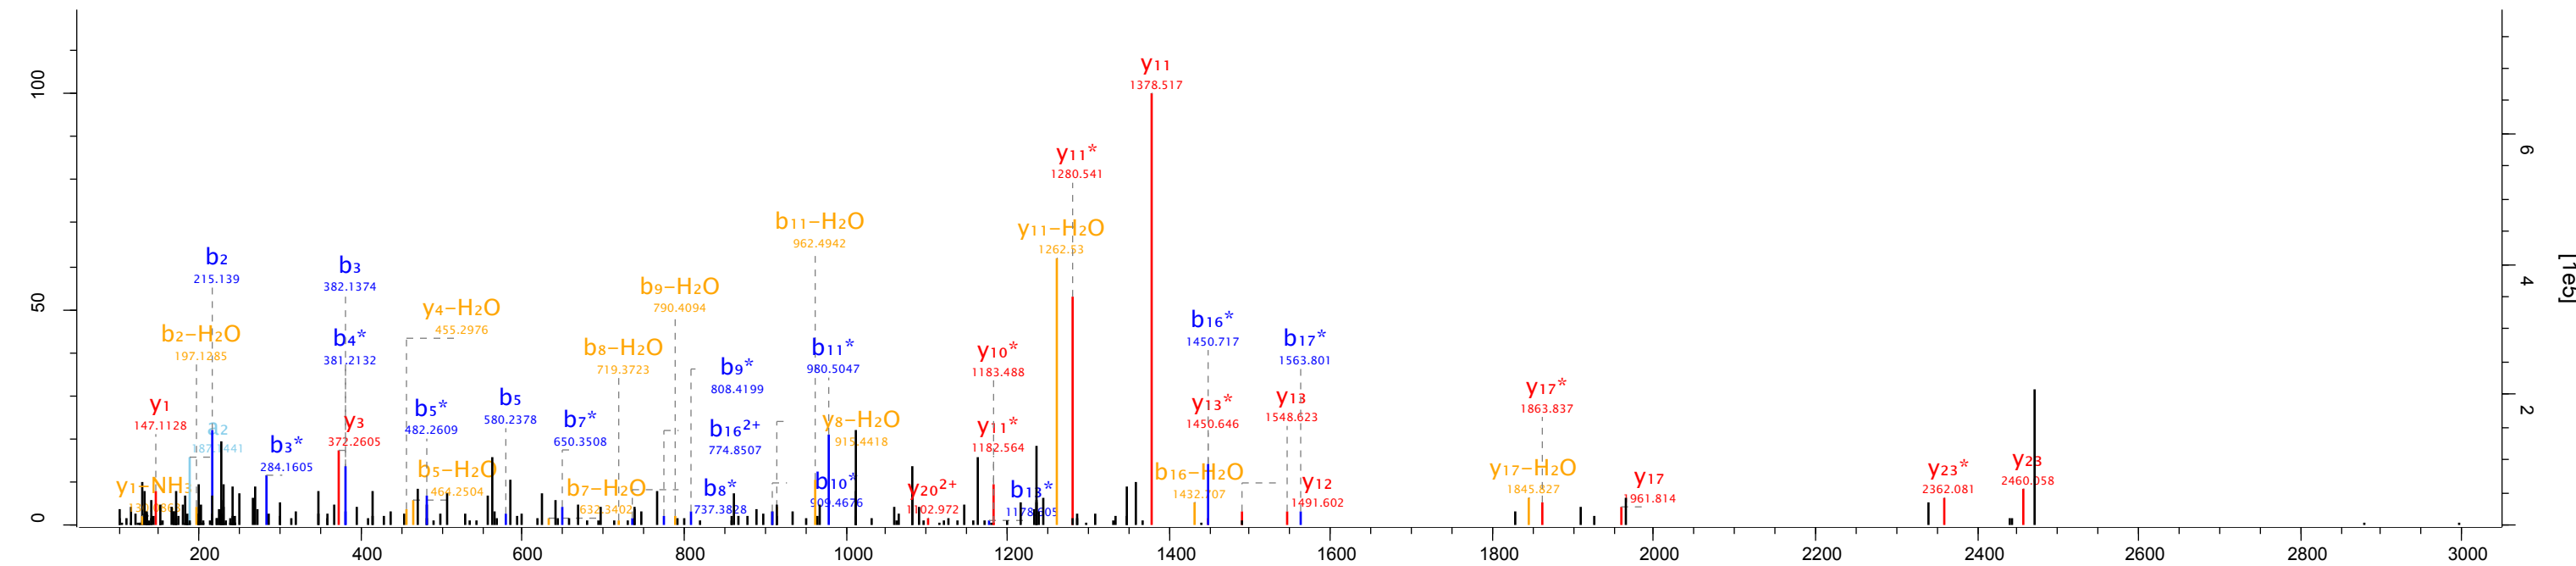

- T L S P T P A S A T A P T S Q G I P T S D E E S T P K K -

Fragmentation sites are indicated by brackets below the sequence:

- Blue brackets (b ions): b<sub>2</sub> (L), b<sub>3</sub> (S), b<sub>4</sub>\* (P), b<sub>5</sub> (T), b<sub>7</sub>\* (A), b<sub>8</sub>\* (S), b<sub>9</sub>\* (A), b<sub>10</sub>\* (T), b<sub>11</sub>\* (A), b<sub>13</sub>\* (T), b<sub>16</sub>\* (G), b<sub>17</sub>\* (I)
- Red brackets (y ions): y<sub>23</sub> (P), y<sub>20</sub><sup>2+</sup> (A), y<sub>17</sub> (P), y<sub>13</sub> (G), y<sub>12</sub> (I), y<sub>11</sub> (P), y<sub>10</sub>\* (T), y<sub>3</sub> (T), y<sub>1</sub> (K)

Raw file: 20150814\_A375SR\_Phospho\_BR2\_03  
 Scan: 14067 Method: FTMS; HCD Score: 328.7 m/z: 837.99 Gene names: MAP1B

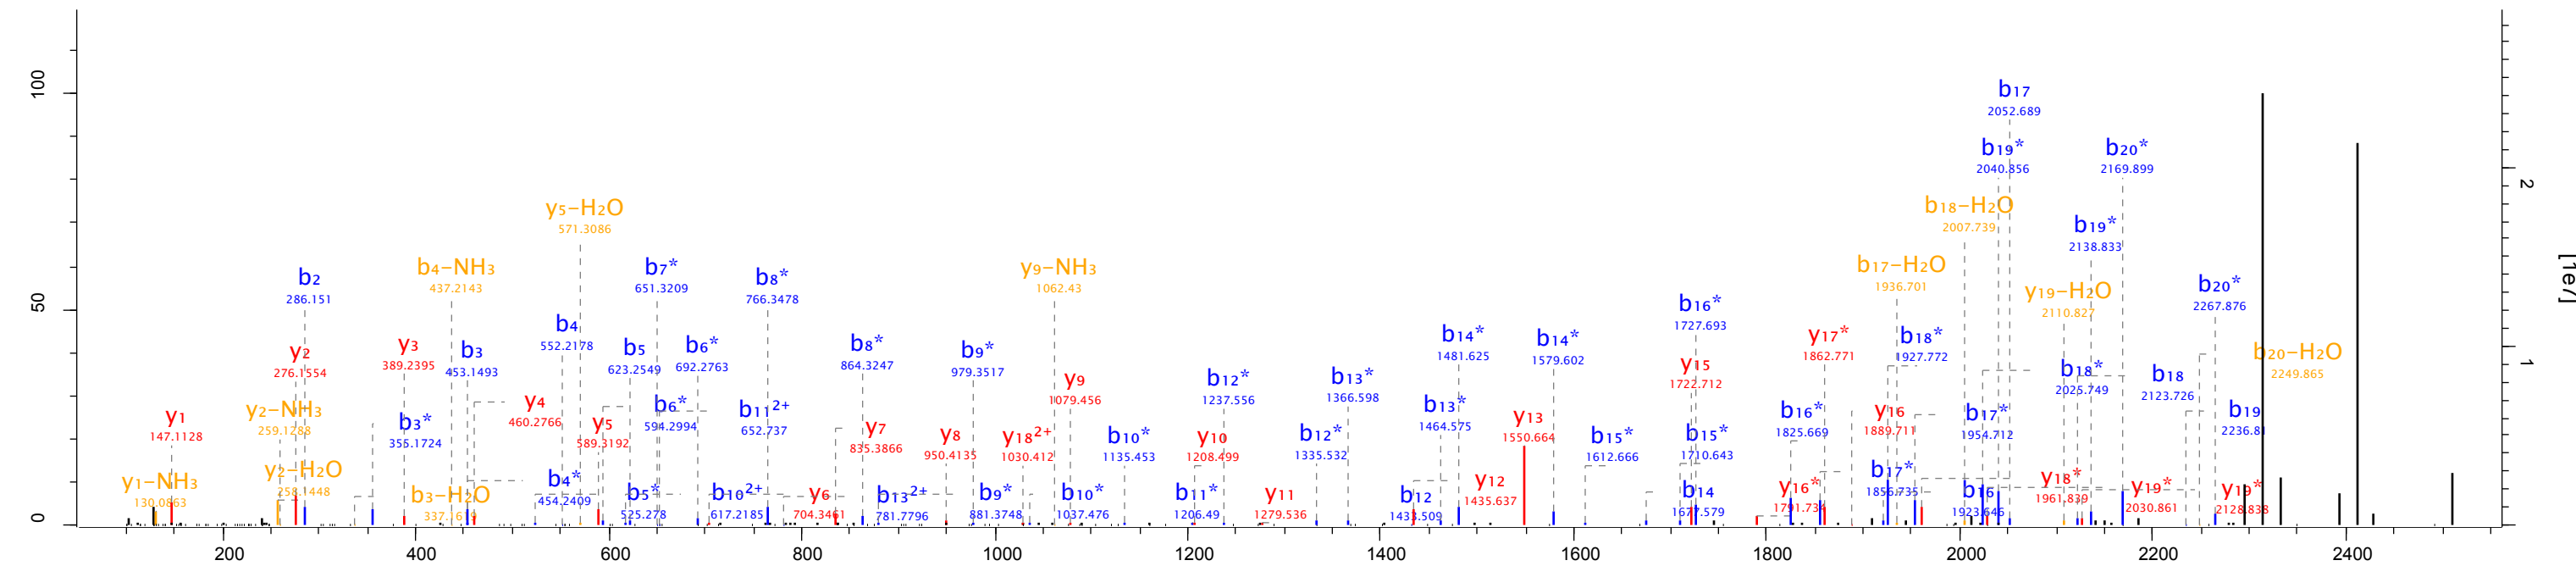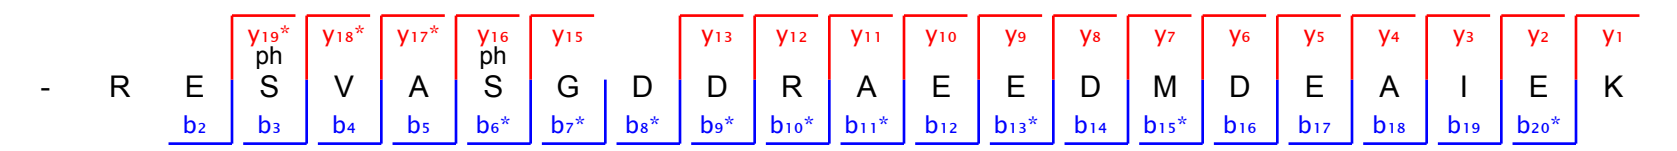

Raw file: 20150814\_A375SR\_Phospho\_BR2\_03  
 Scan: 14107  
 Method: FTMS; HCD  
 Score: 153.81  
 m/z: 787.78  
 Gene names: SORT1

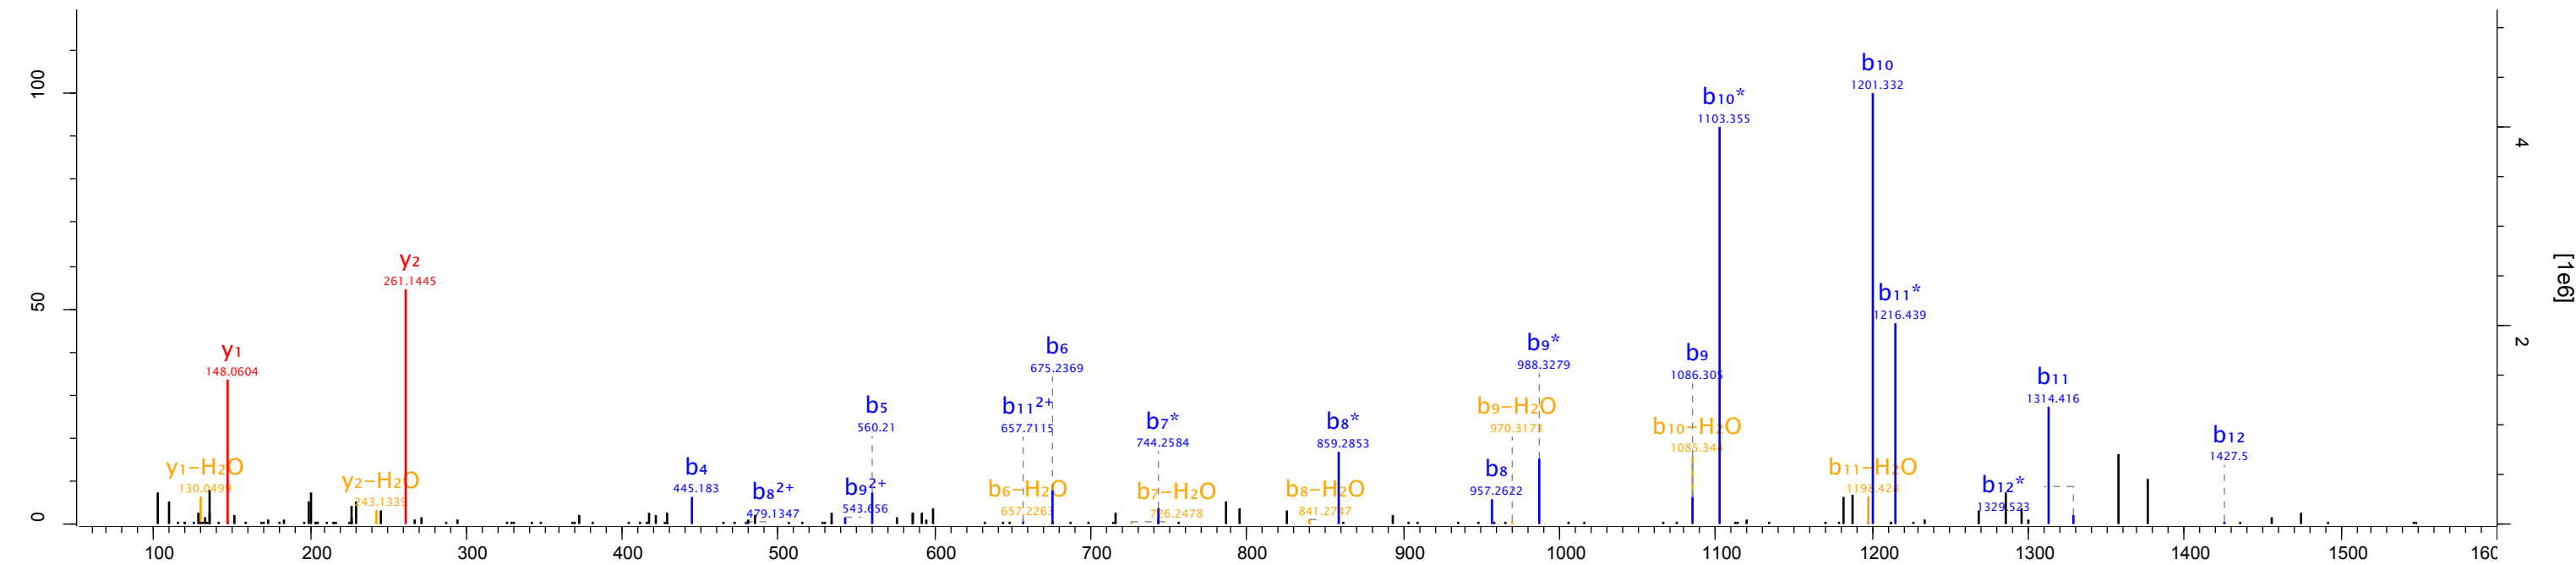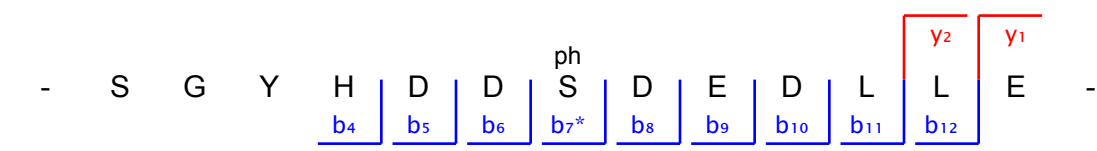

Raw file 20150814\_A375SR\_Phospho\_BR2\_03 Scan 15077 Method FTMS; HCD Score 107.5 m/z 762.33 Gene names EPS8

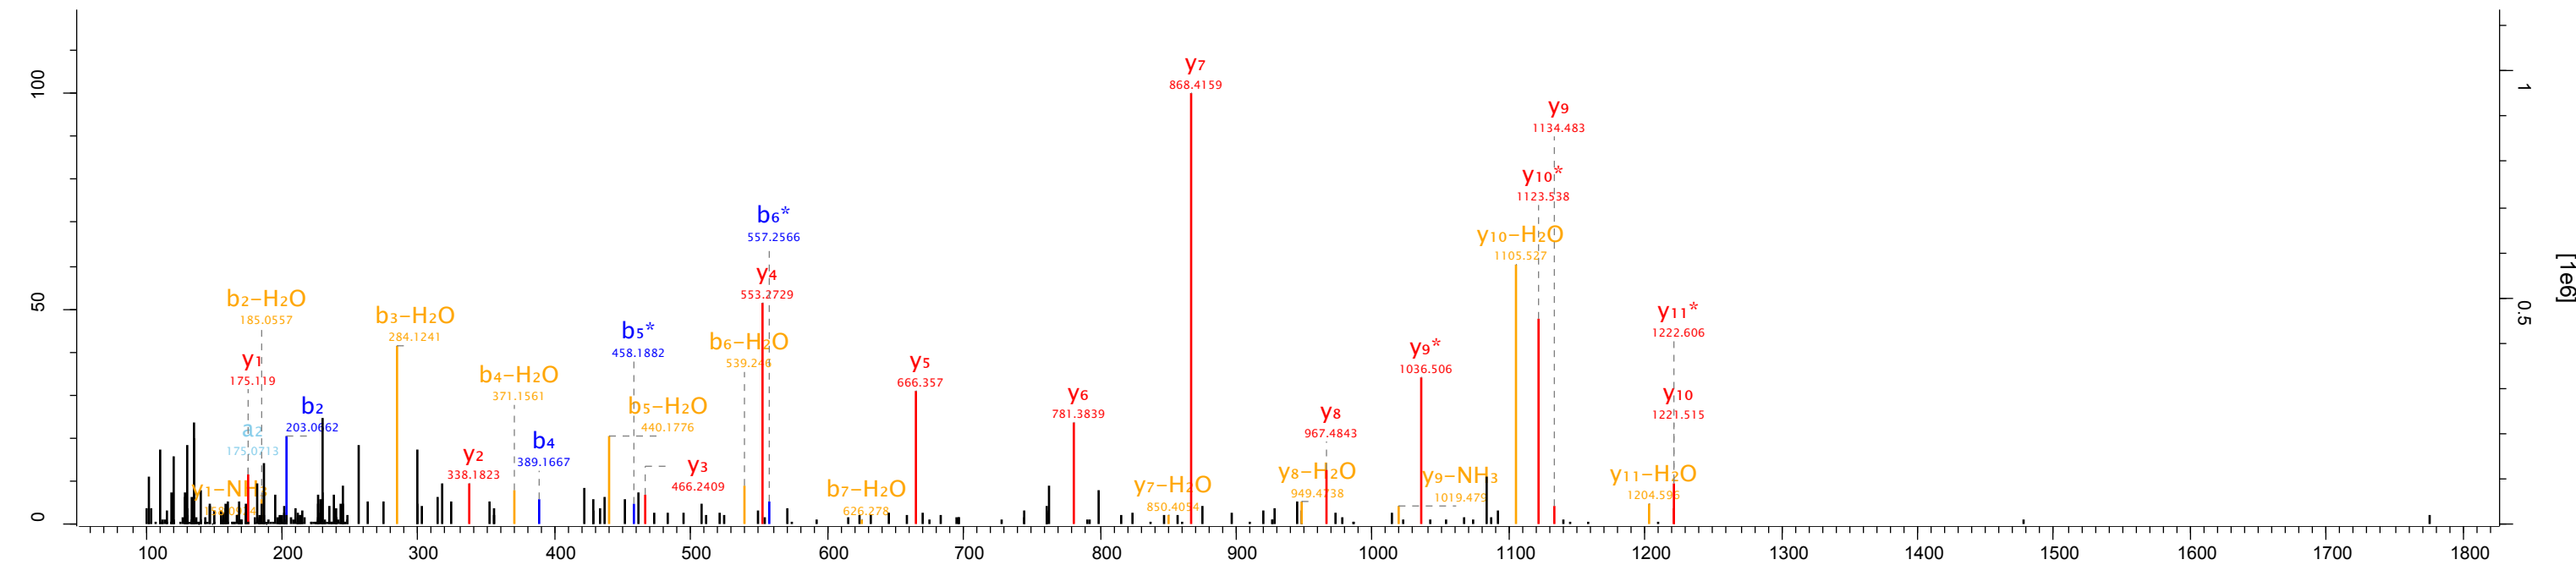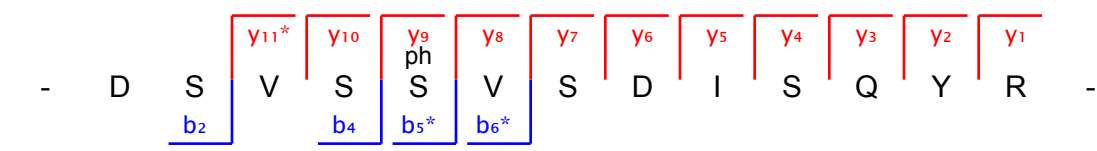

Raw file: 20150814\_A375SR\_Phospho\_BR2\_03  
 Scan: 15637 Method: FTMS; HCD Score: 418.34 m/z: 1286 Gene names: SURF2

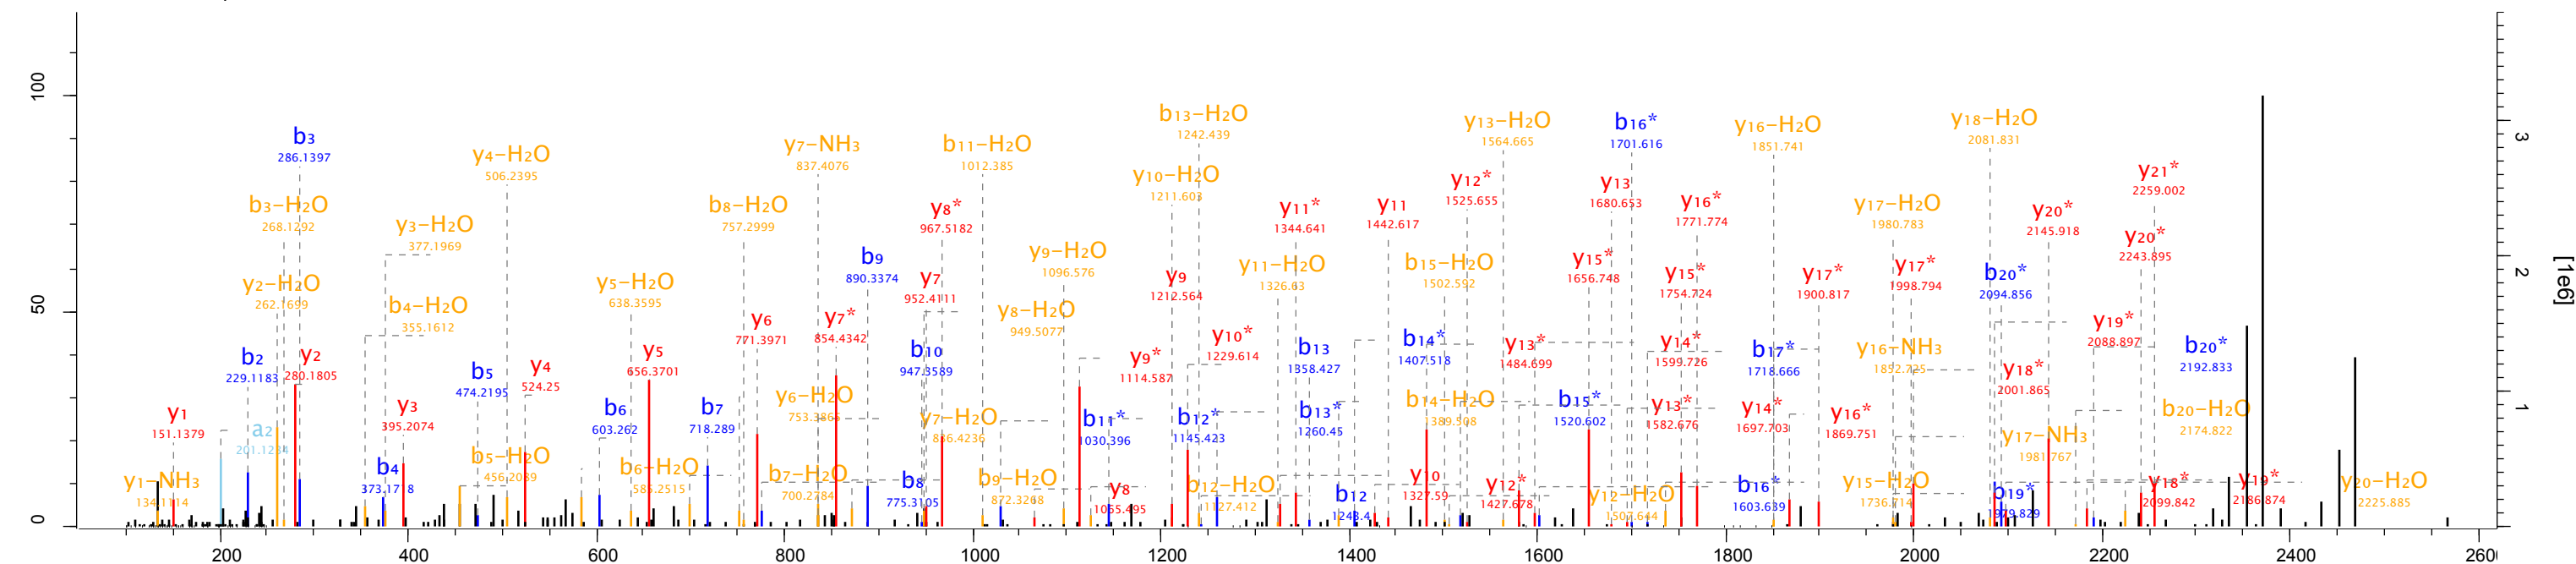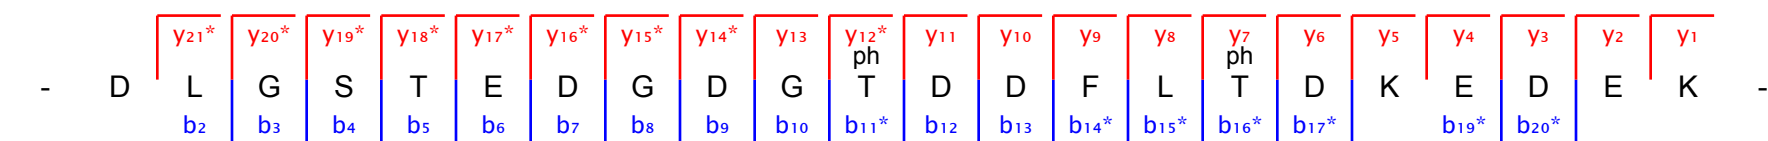

Raw file: 20150814\_A375SR\_Phospho\_BR2\_03  
 Scan: 15927 Method: FTMS; HCD Score: 352.87 m/z: 1149.95 Gene names: MDN1

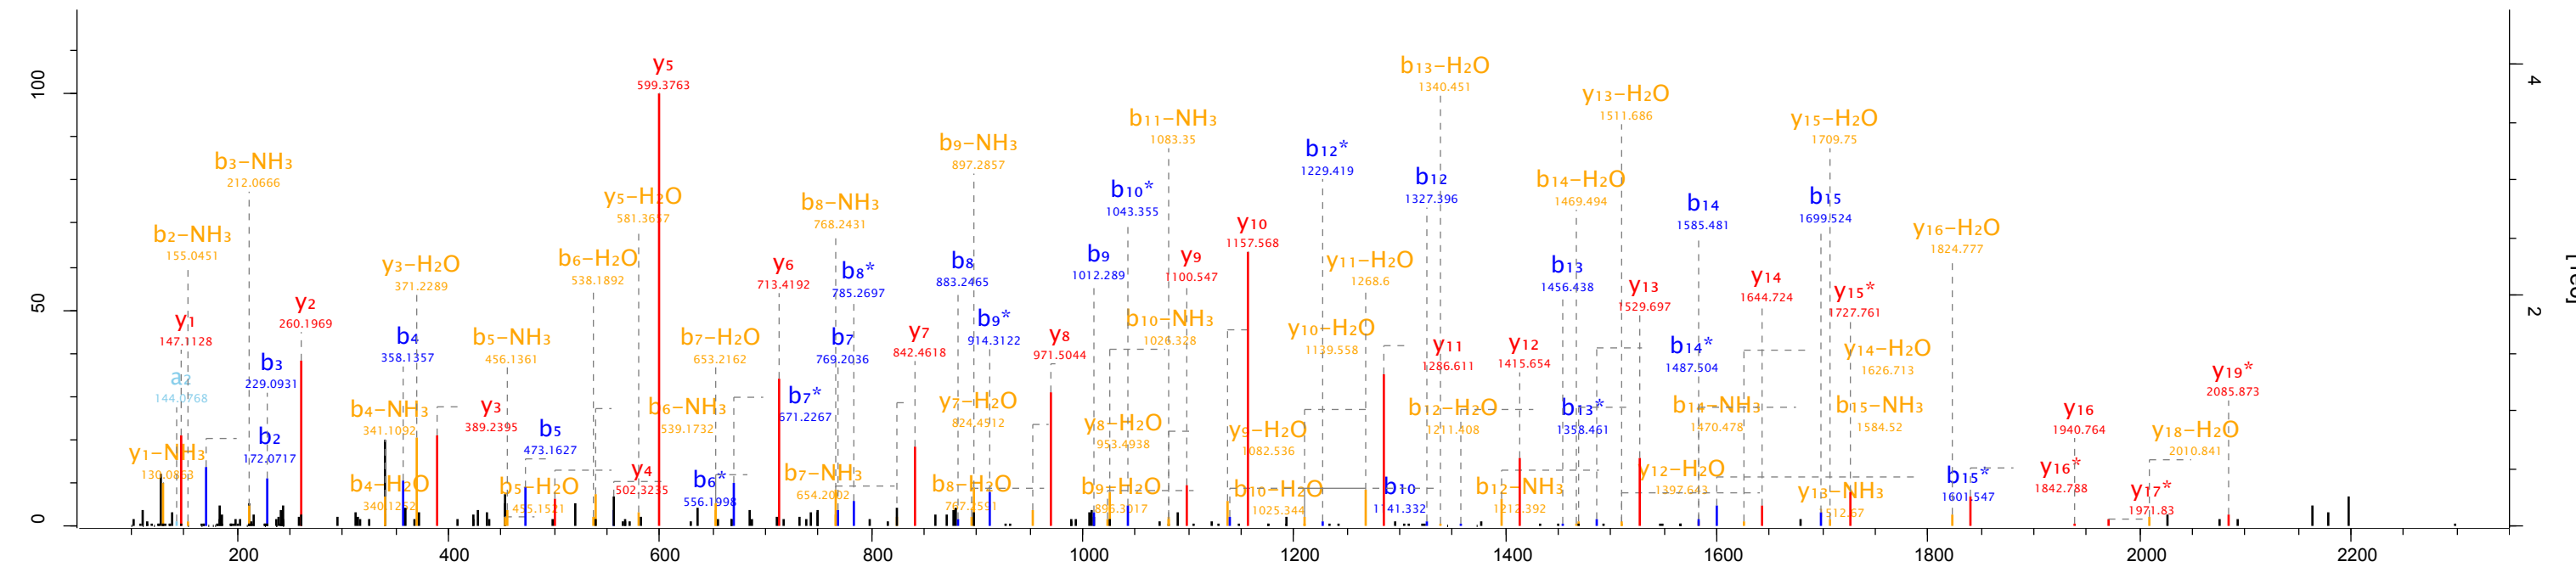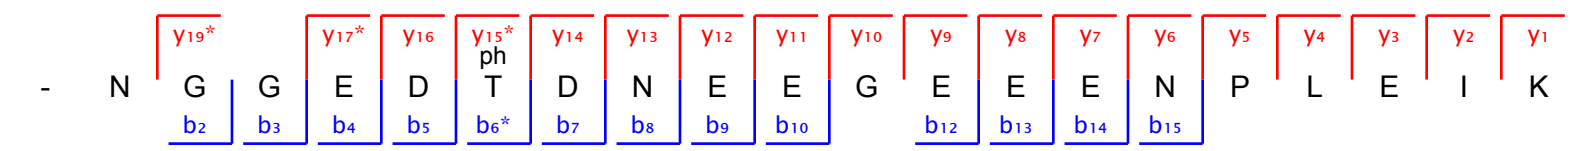

Raw file 20150814\_A375SR\_Phospho\_BR2\_03 Scan 15947 Method FTMS; HCD Score 78.43 m/z 972.42 Gene names KLC2

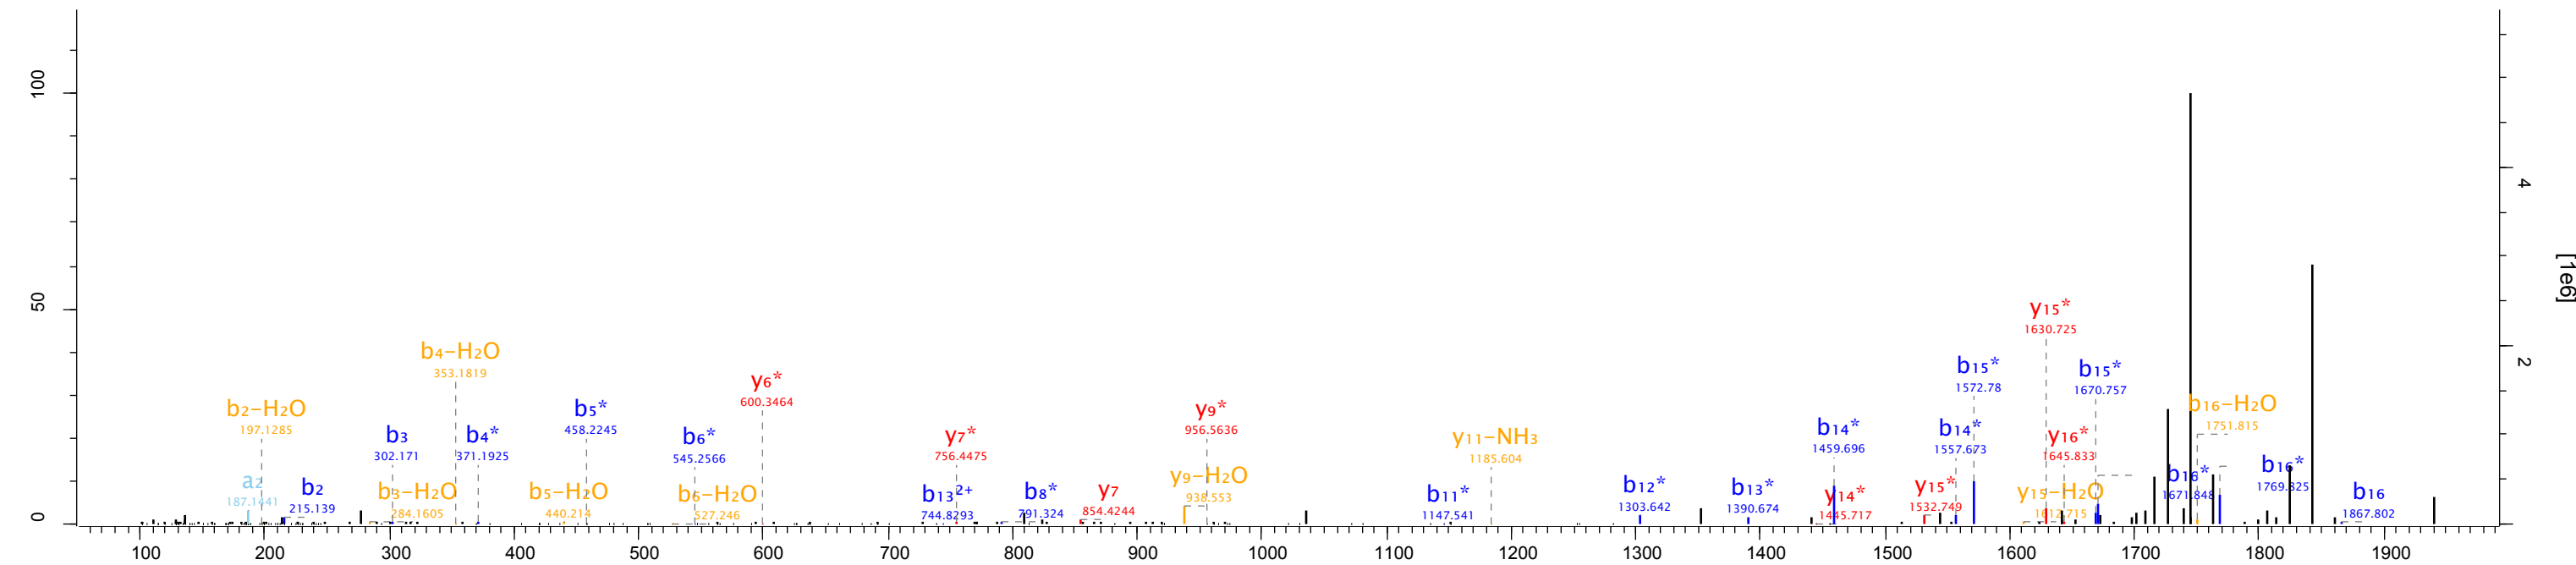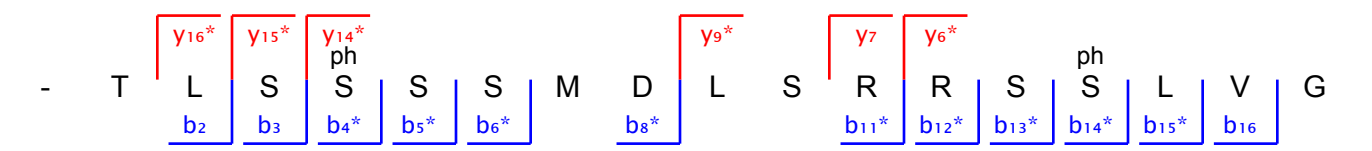

Raw file: 20150814\_A375SR\_Phospho\_BR2\_03  
 Scan: 16147  
 Method: FTMS; HCD  
 Score: 402.08  
 m/z: 1317.53  
 Gene names: PRKAR2A

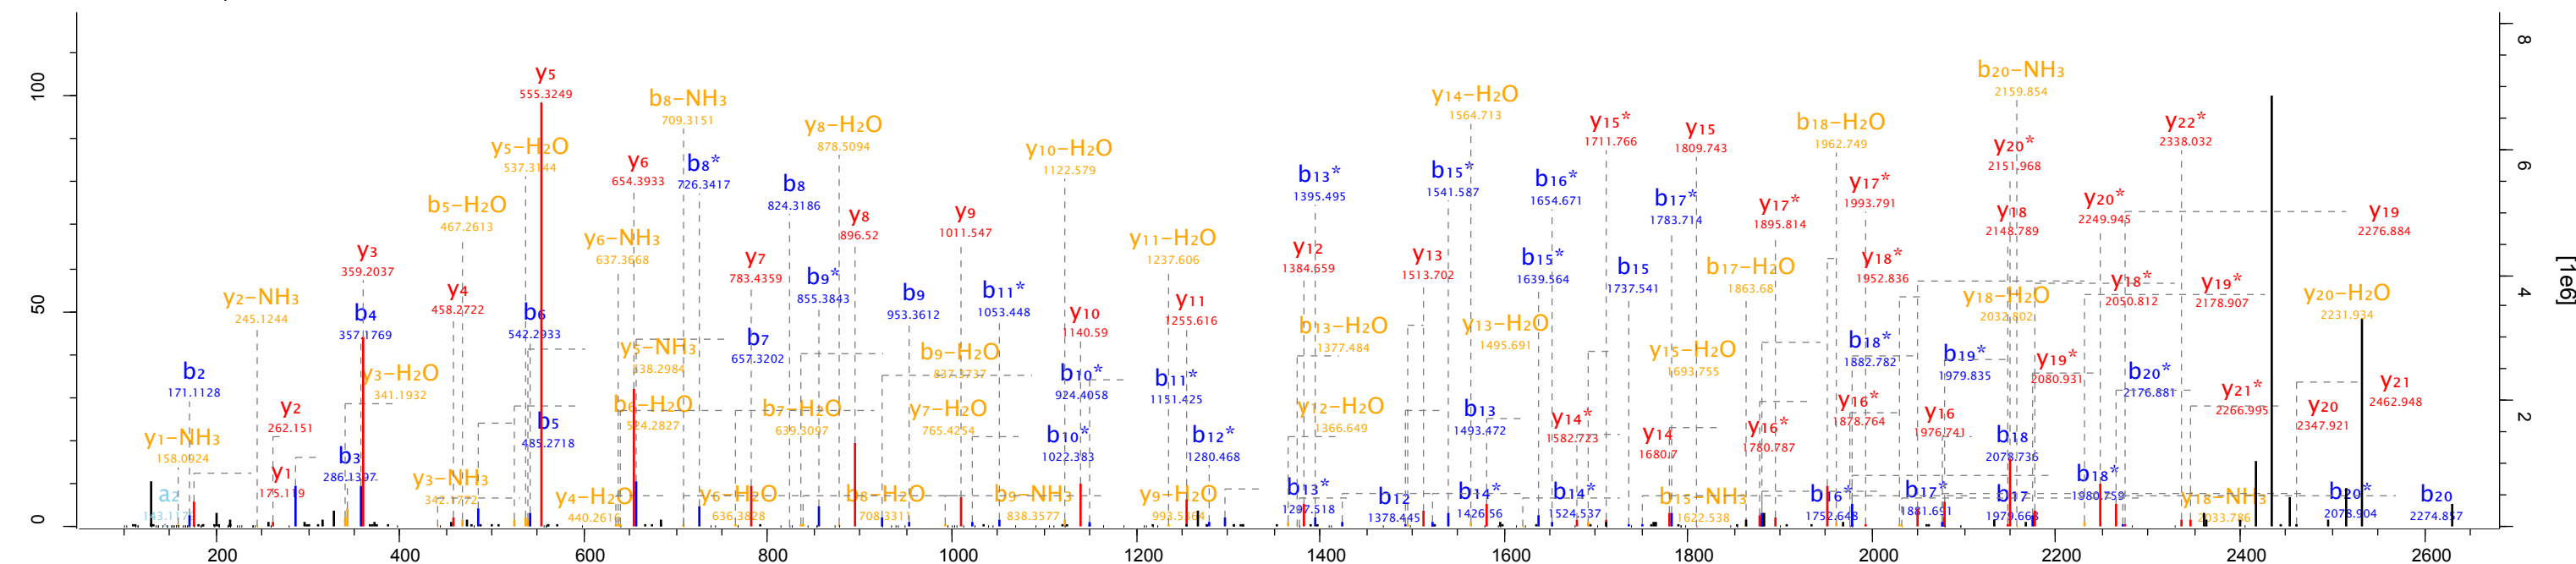

- V y22\* y21 y20 y19 y18 y17\* y16 ph y15 y14 ph y13 y12 y11 y10 y9 y8 y7 y6 y5 y4 y3 y2 y1 -  
b2 b3 b4 b5 b6 b7 b8 b9 b10\* b11\* b12 b13 b14\* b15 b16\* b17 b18 b19\* b20



Raw file 20150814\_A375SR\_Phospho\_BR2\_03 Scan 16457 Method FTMS; HCD Score 102.92 m/z 936.41 Gene names PPP1R13L

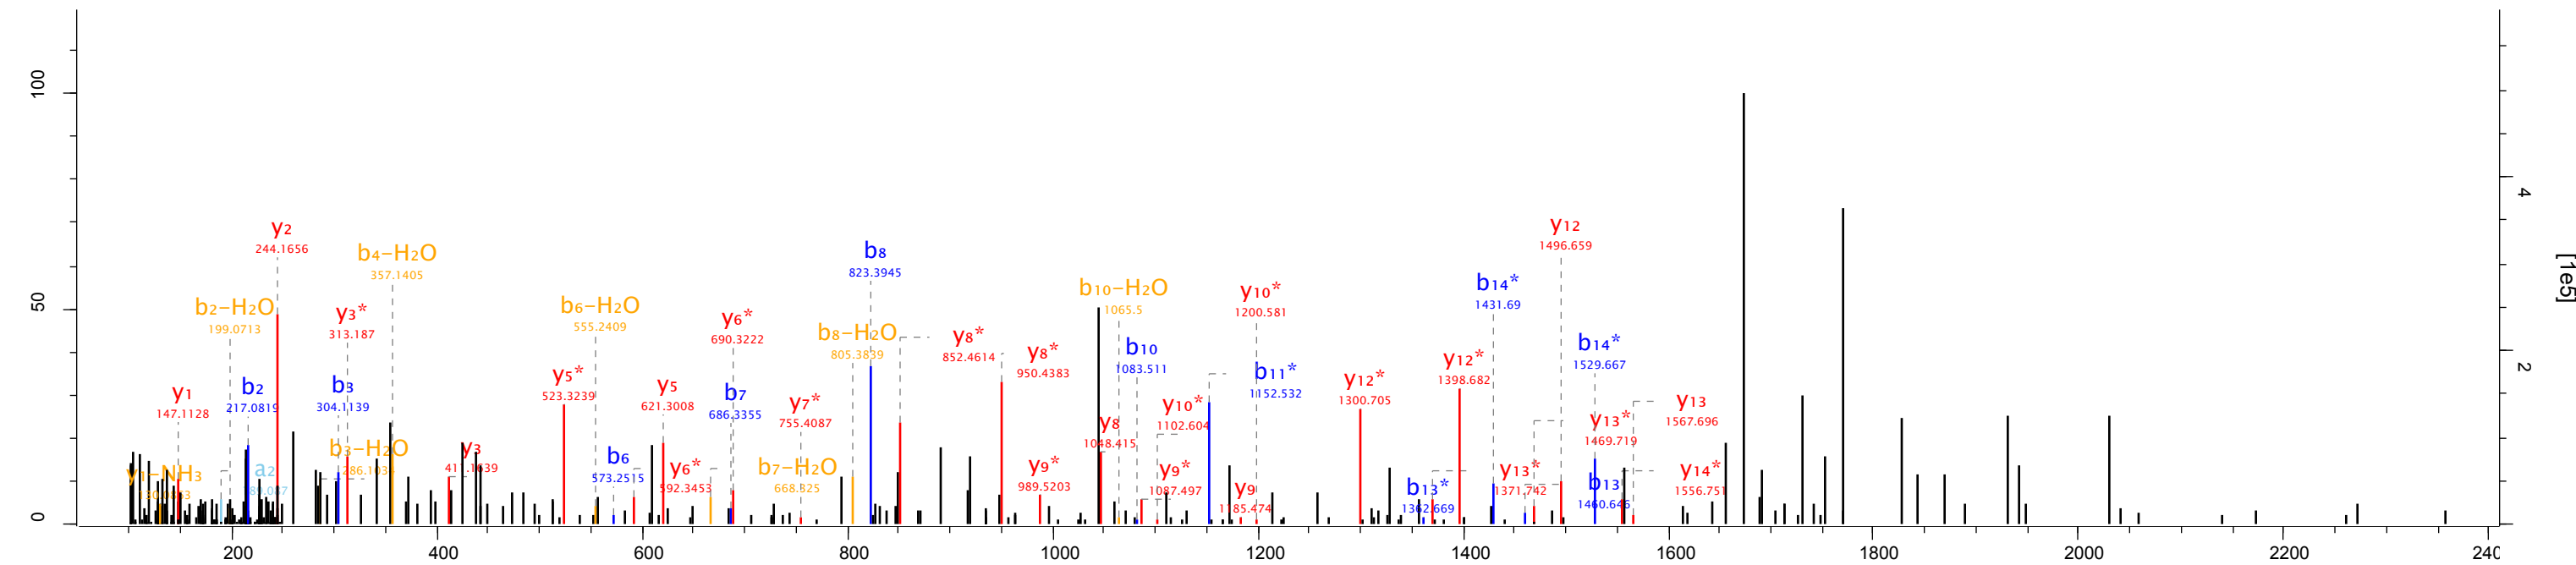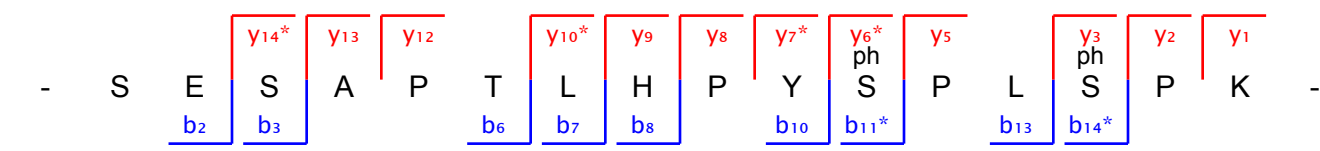

Raw file 20150814\_A375SR\_Phospho\_BR2\_03 Scan 16647 Method FTMS; HCD Score 153 m/z 628.79 Gene names TMCC1;DKFZp686H13261

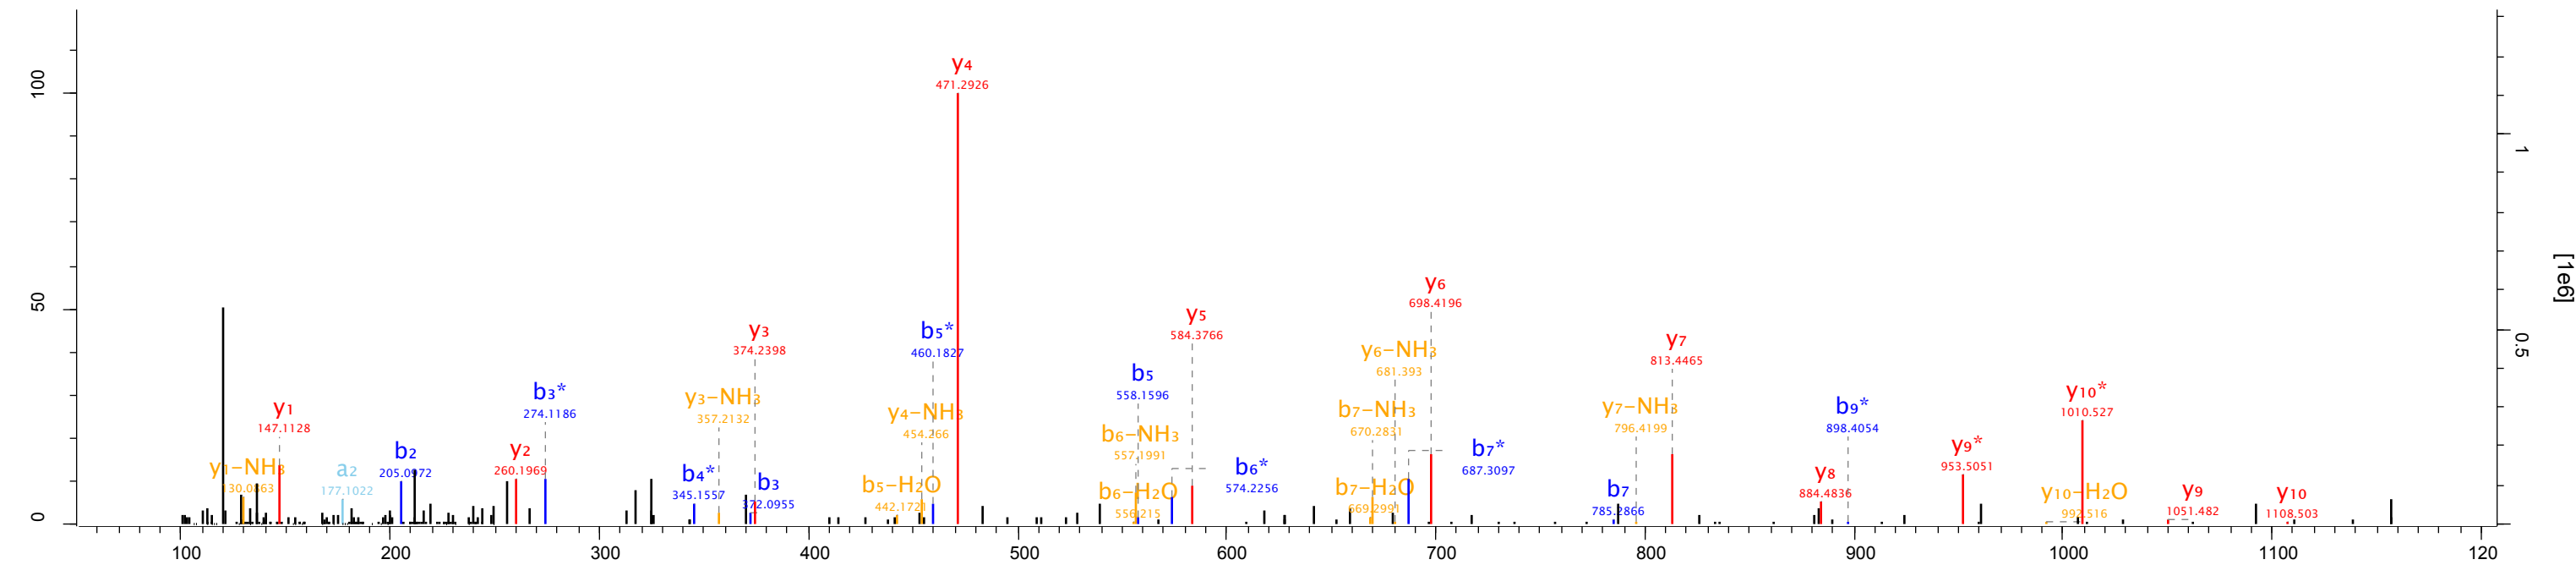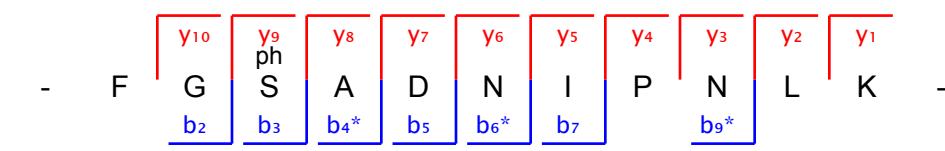

Raw file 20150814\_A375SR\_Phospho\_BR2\_03 Scan 16857 Method FTMS; HCD Score 164.2 m/z 622.31 Gene names AGAP1

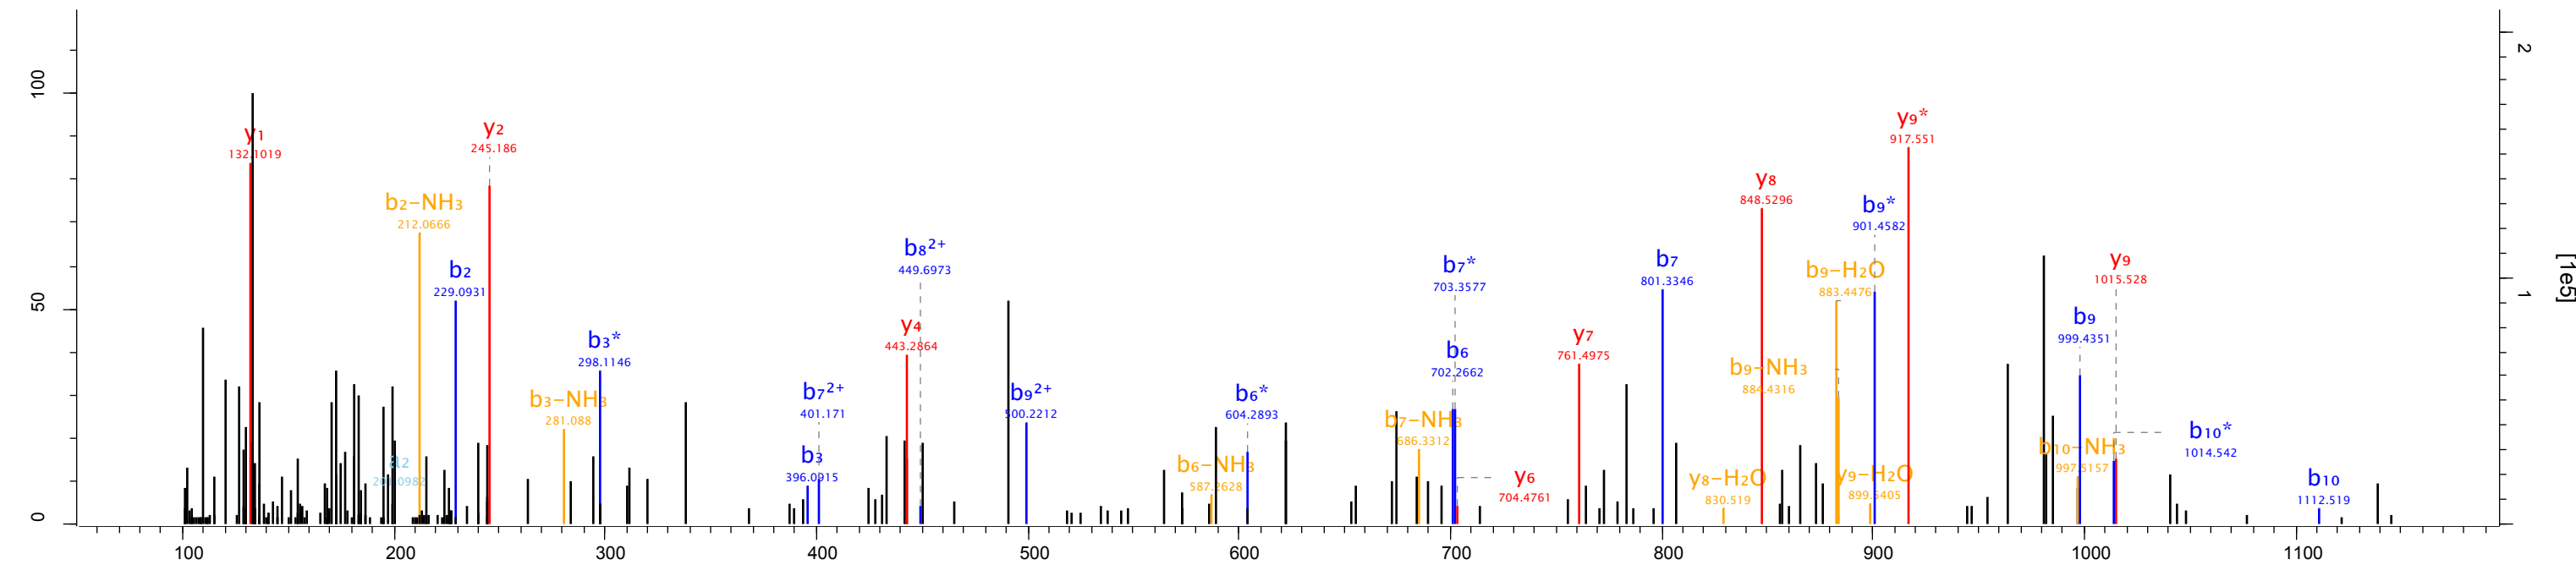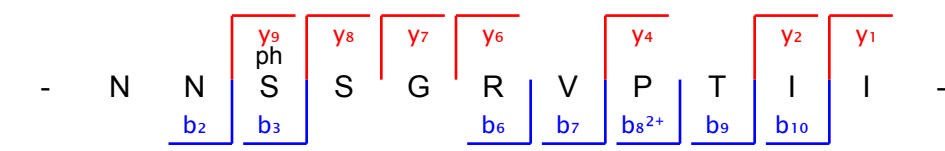

Raw file: 20150814\_A375SR\_Phospho\_BR2\_03  
 Scan: 17067 Method: FTMS; HCD Score: 217.48 m/z: 1144 Gene names: CHAMP1

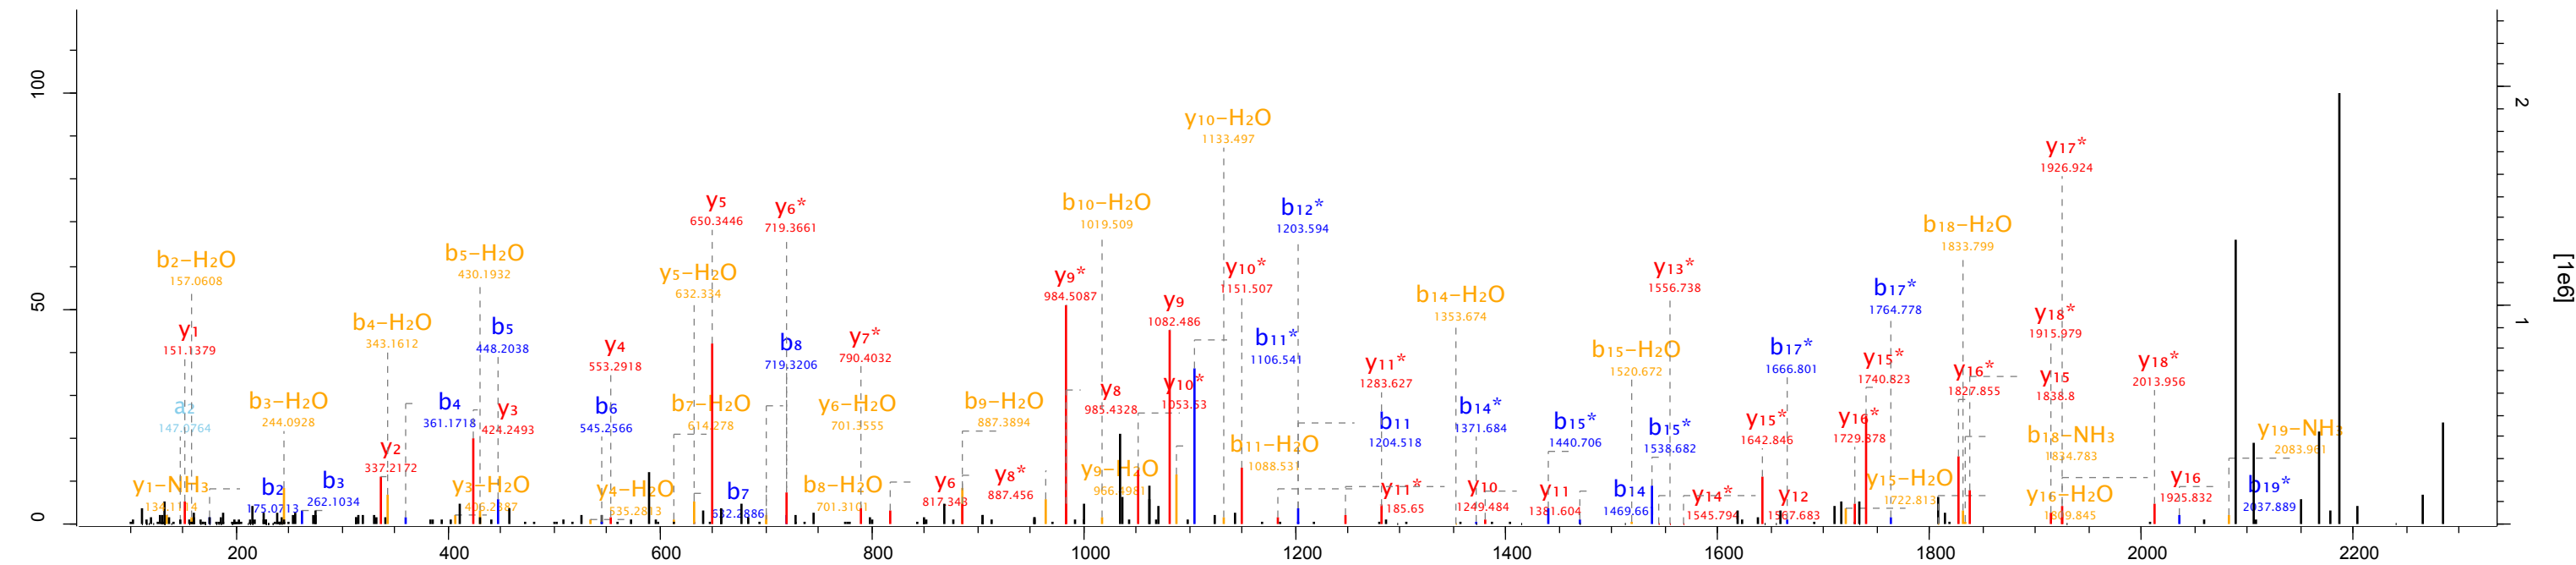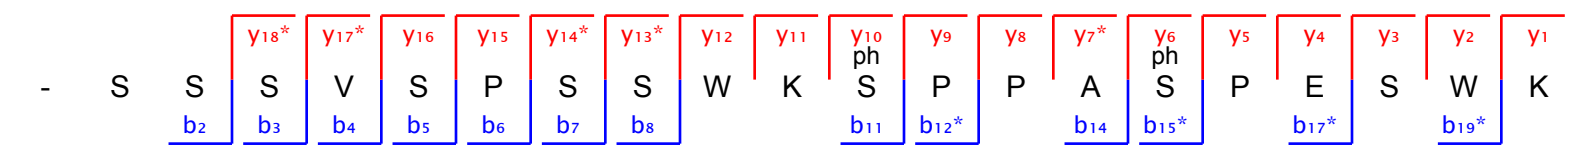

Raw file 20150814\_A375SR\_Phospho\_BR2\_03 Scan 17107 Method FTMS; HCD Score 246.9 m/z 1023.5 Gene names APPL1

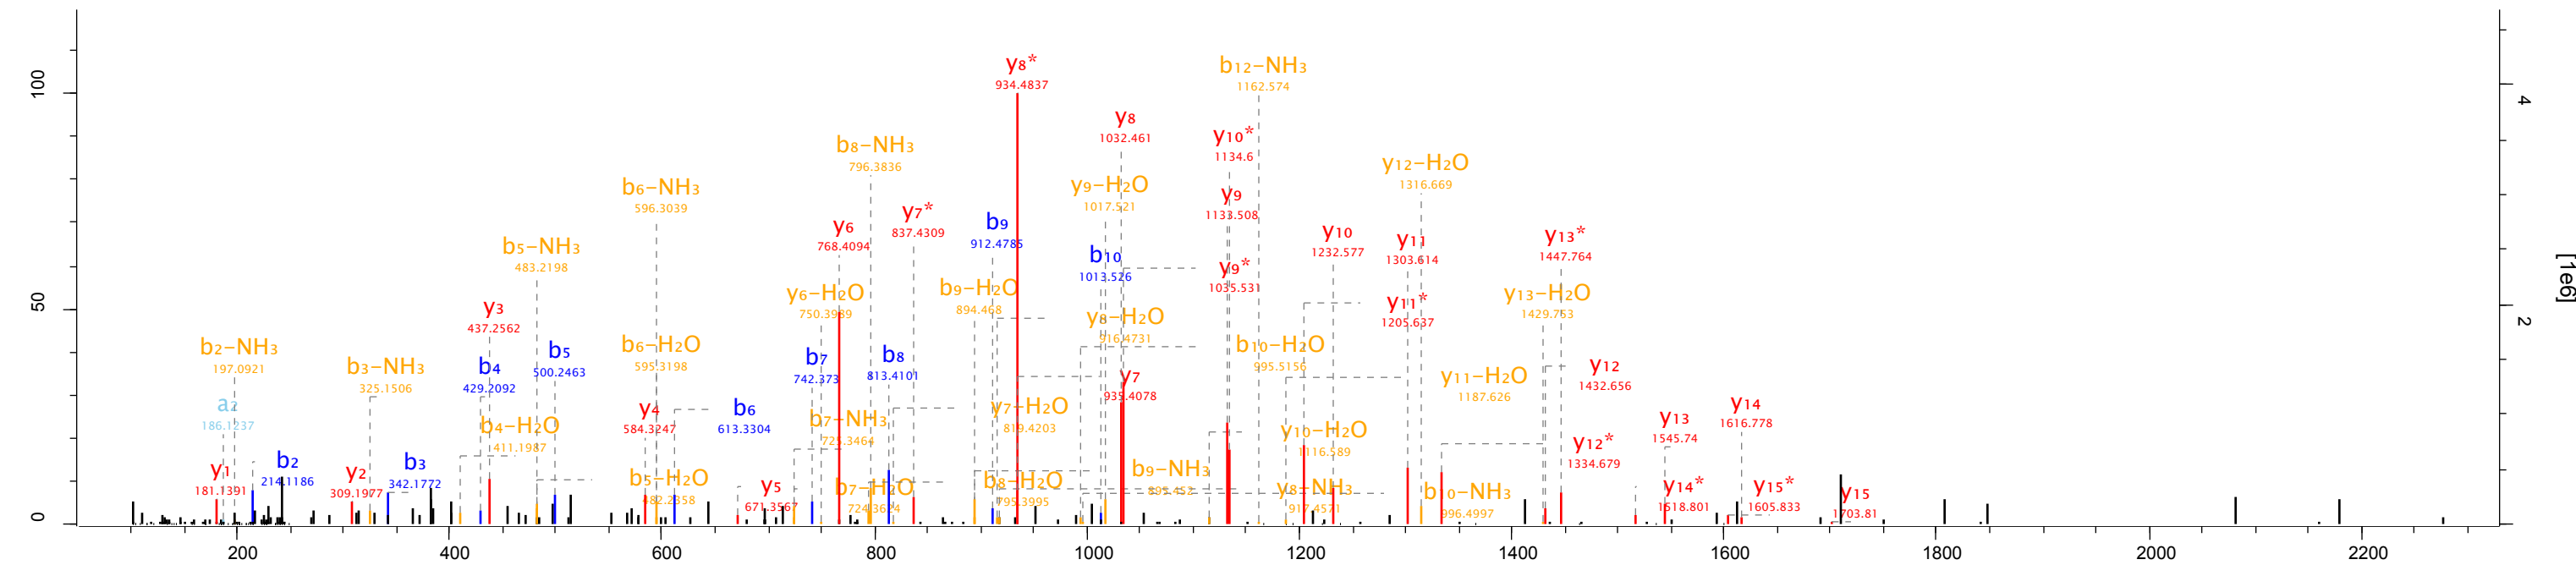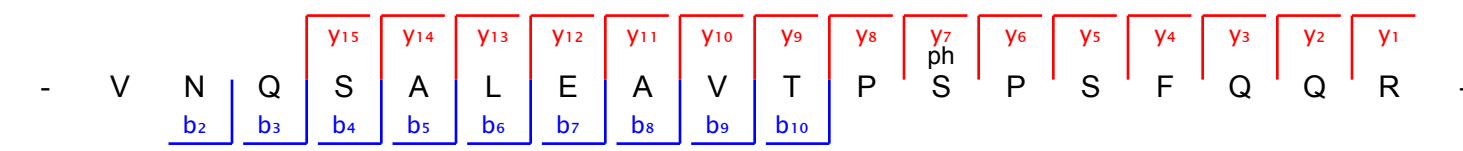

Raw file 20150814\_A375SR\_Phospho\_BR2\_03 Scan 17247 Method FTMS; HCD Score 103.41 m/z 1011.45 Gene names MAP1B

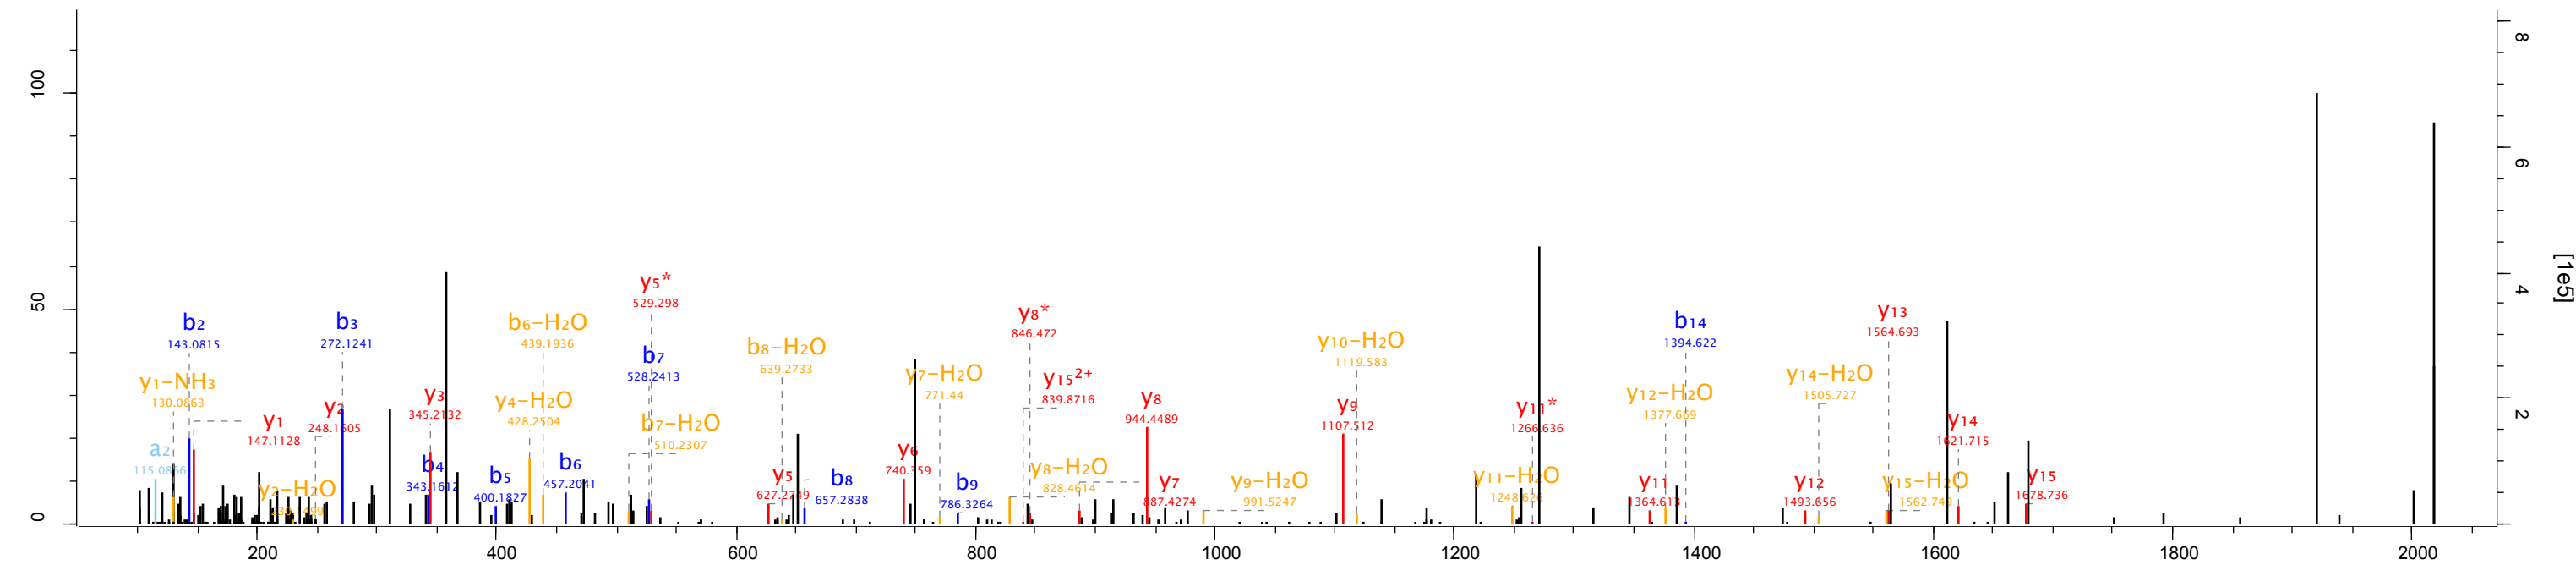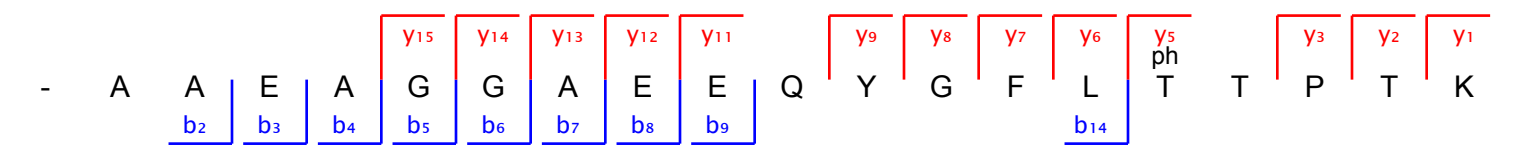

Raw file 20150814\_A375SR\_Phospho\_BR2\_03 Scan 17267 Method FTMS; HCD Score 145.34 m/z 856.42 Gene names ENAH

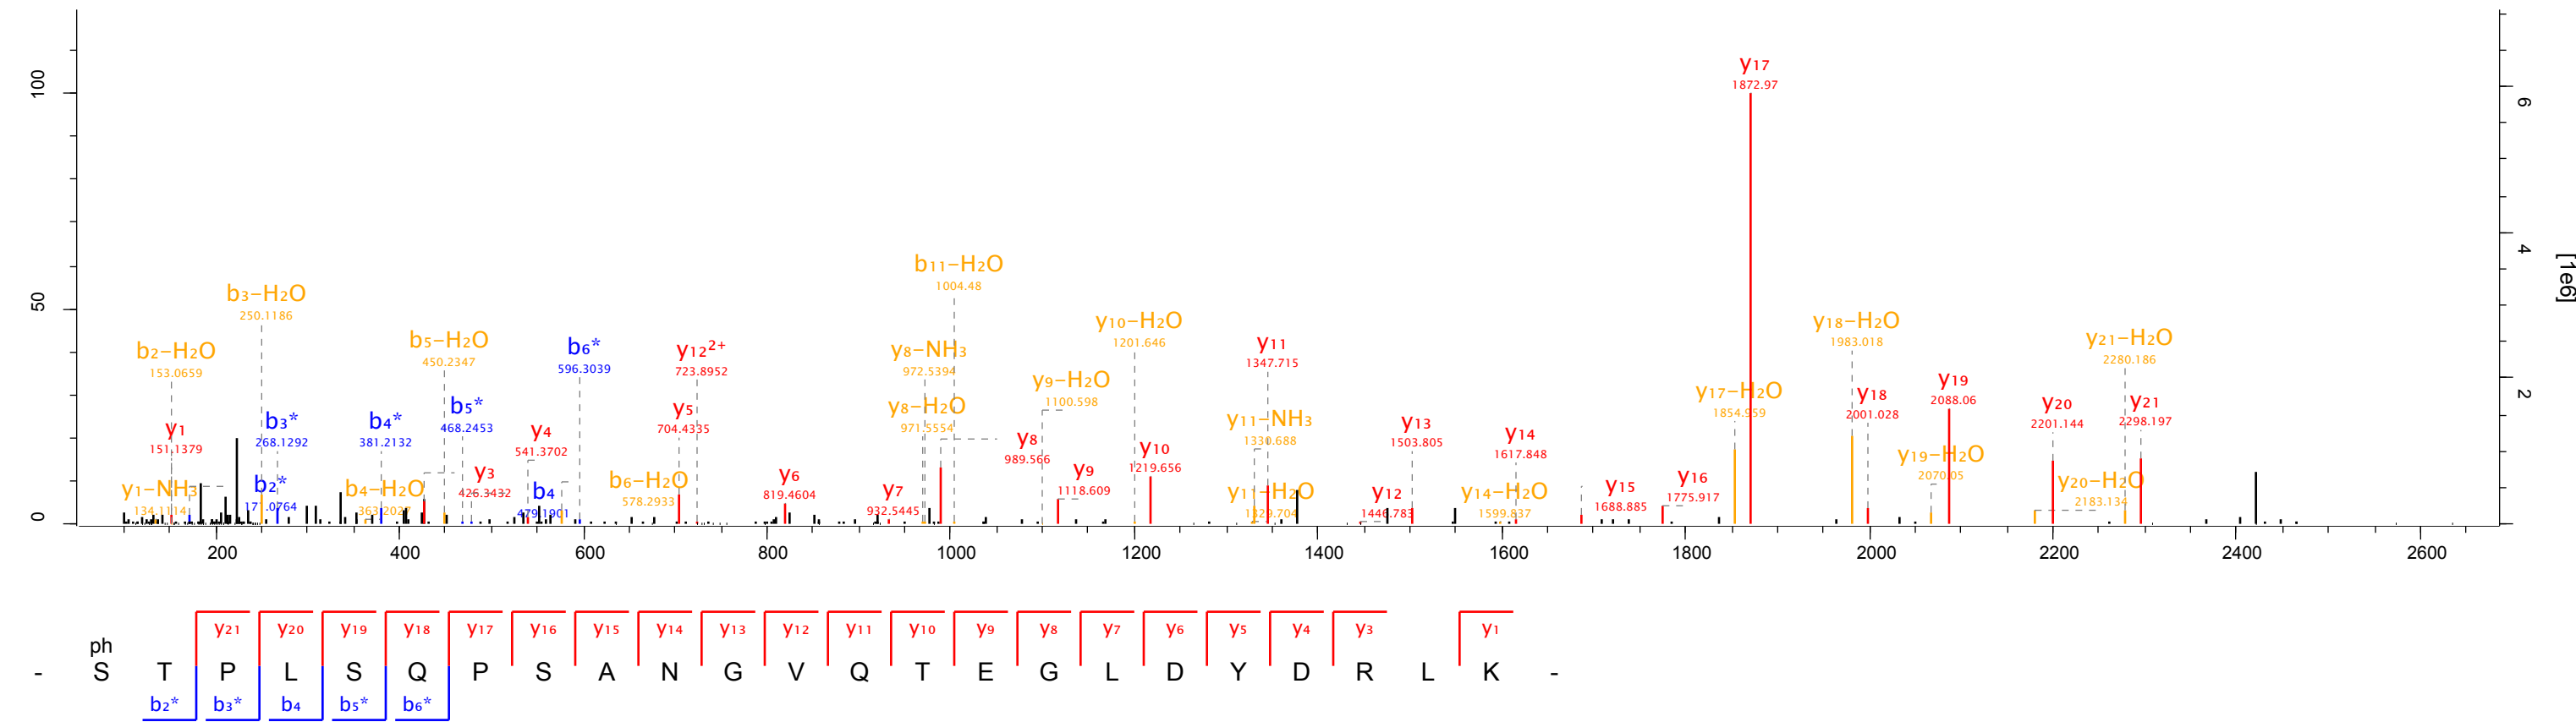

Raw file 20150814\_A375SR\_Phospho\_BR2\_03 Scan 17327 Method FTMS; HCD Score 118.24 m/z 615.3 Gene names SOX13

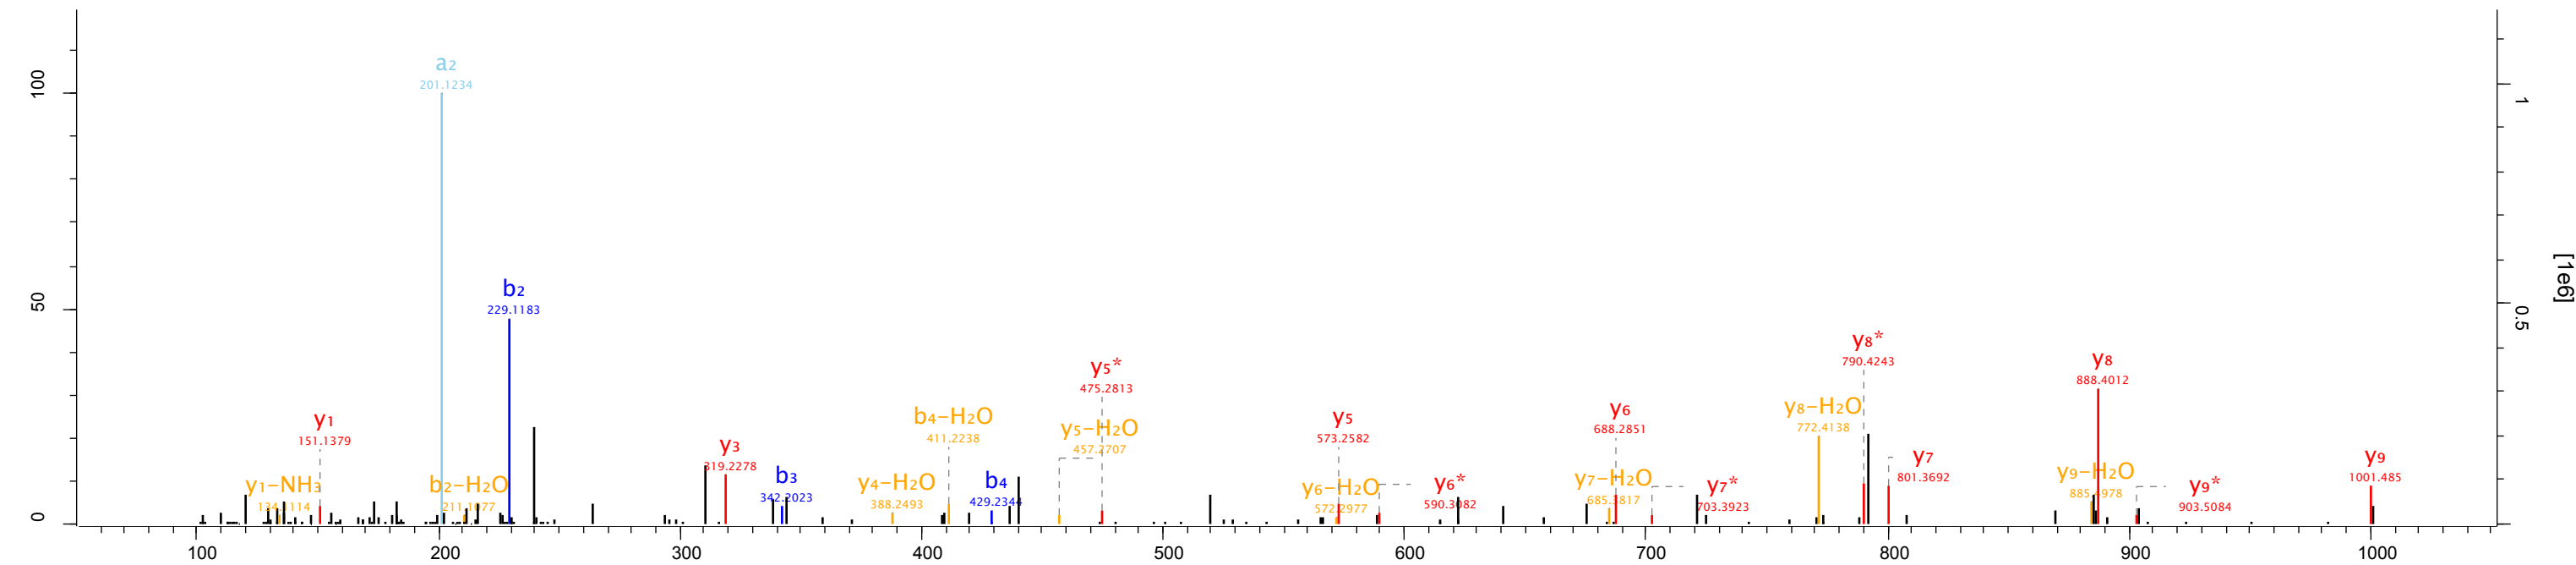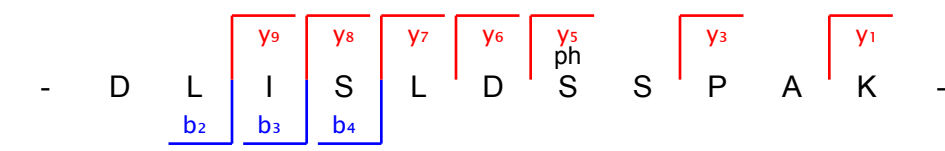



Raw file 20150814\_A375SR\_Phospho\_BR2\_03 Scan 17387 Method FTMS; HCD Score 129.75 m/z 831.87 Gene names FAM53C

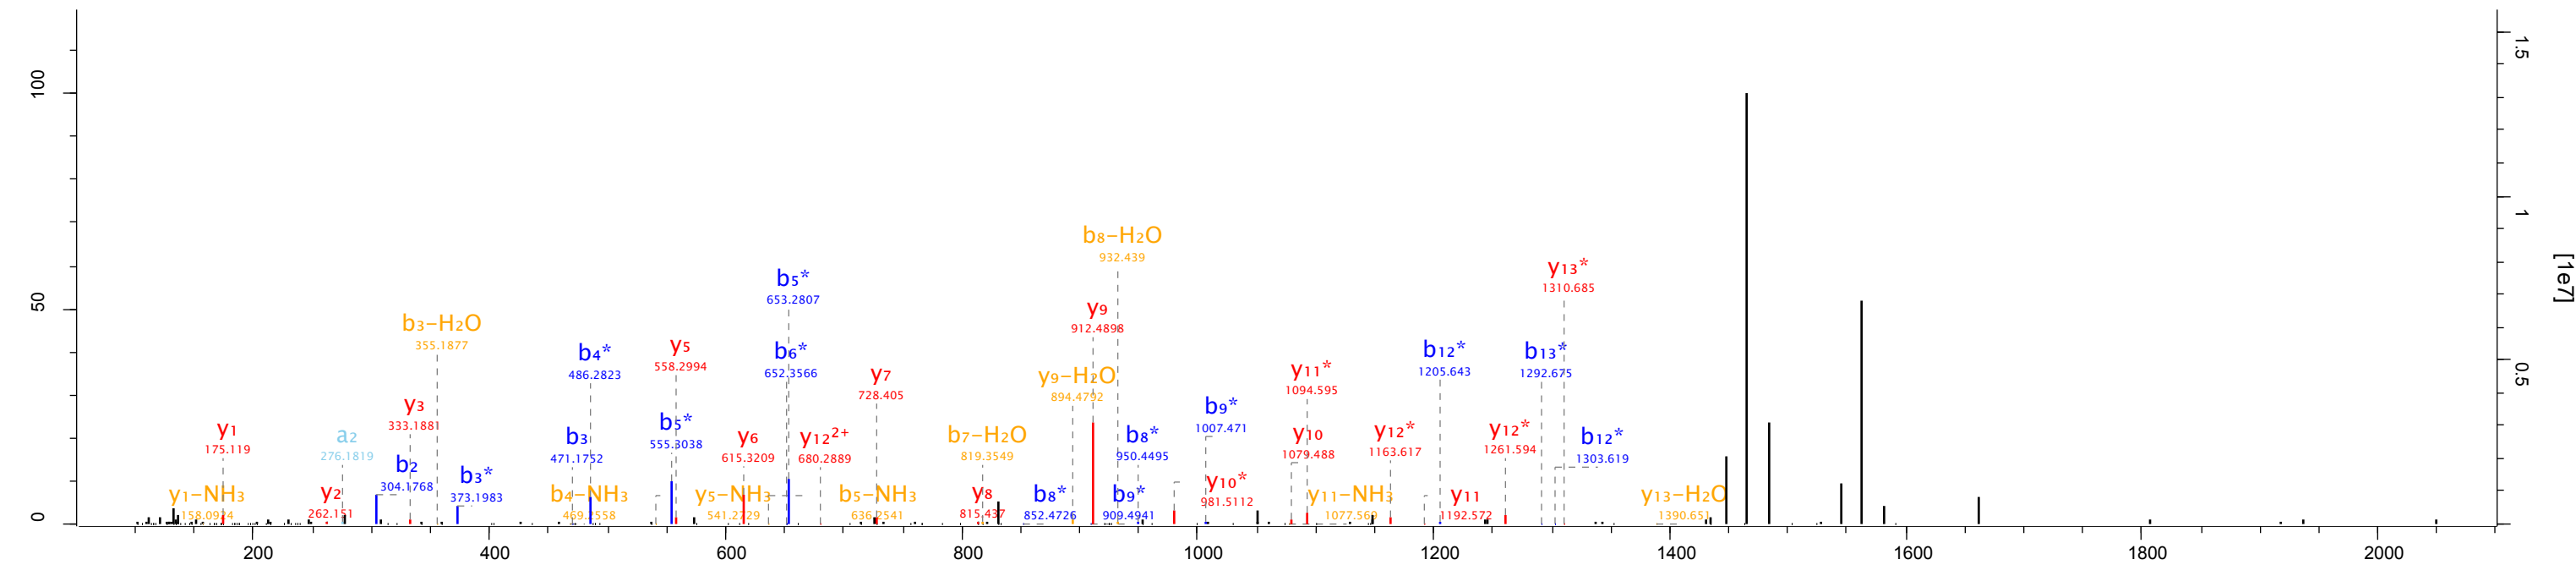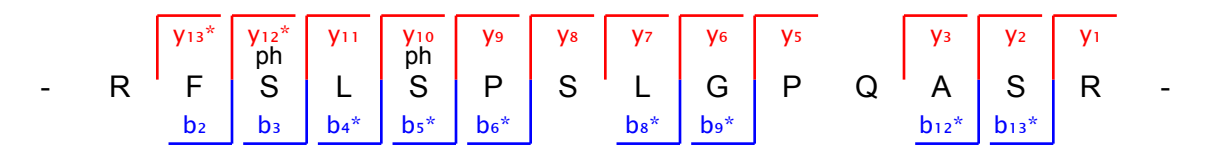

Raw file: 20150814\_A375SR\_Phospho\_BR2\_03  
 Scan: 1757 Method: FTMS; HCD Score: 53.36 m/z: 622.77 Gene names: ABCC1

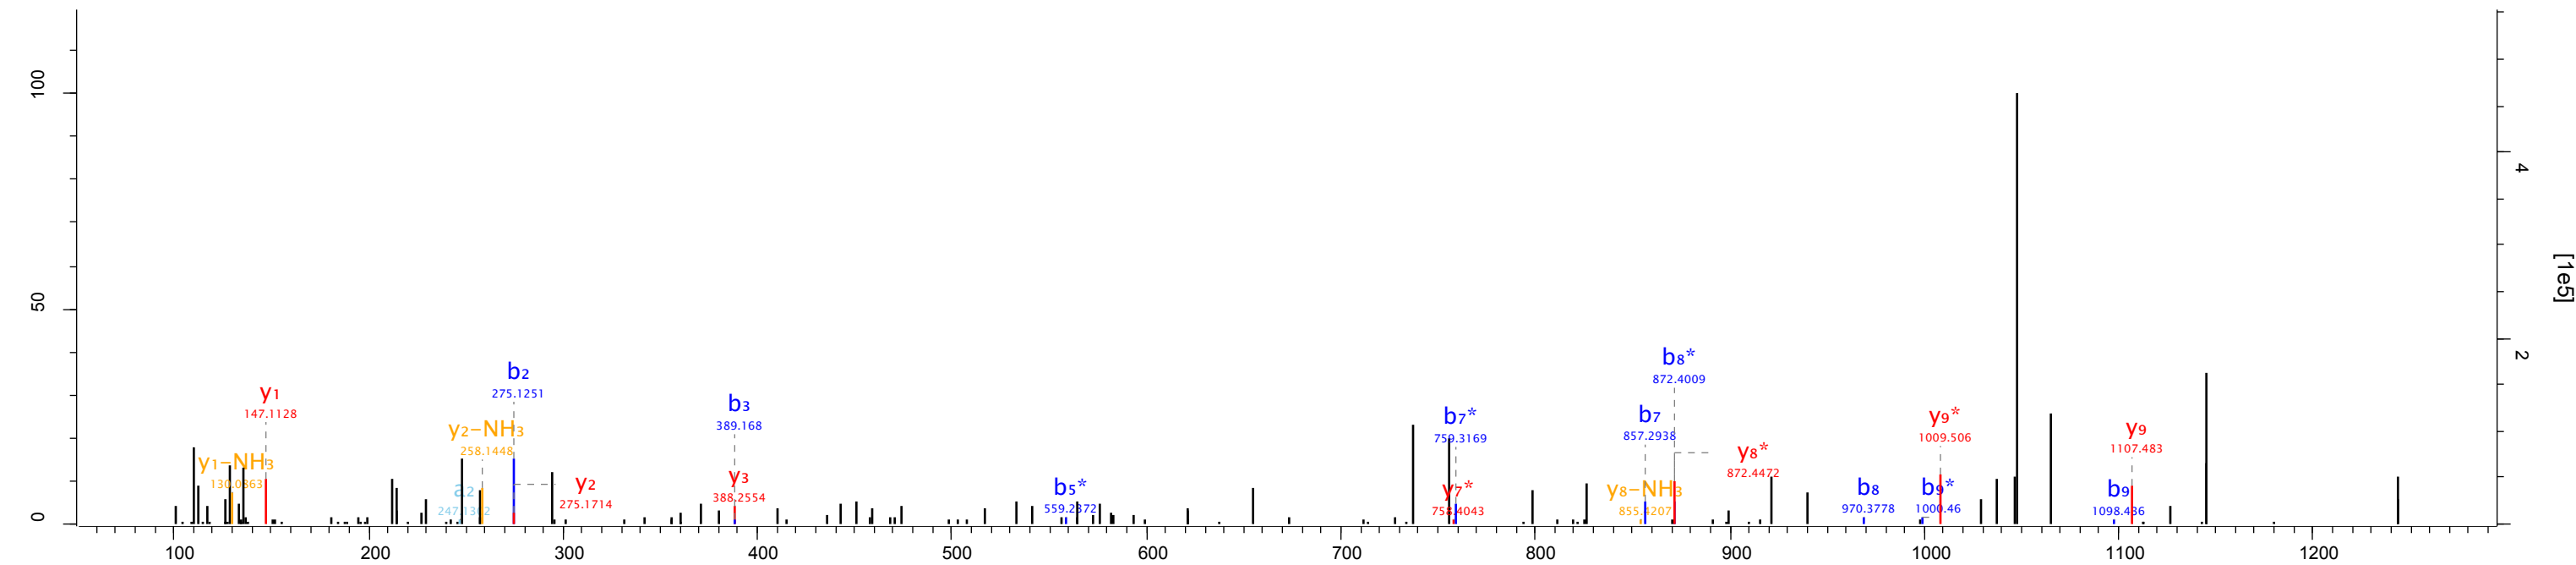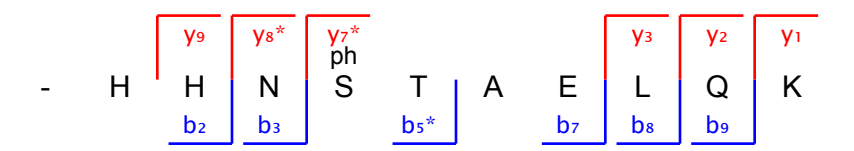

Raw file 20150814\_A375SR\_Phospho\_BR2\_03 Scan 17977 Method FTMS; HCD Score 53.26 m/z 994.4 Gene names RAF1

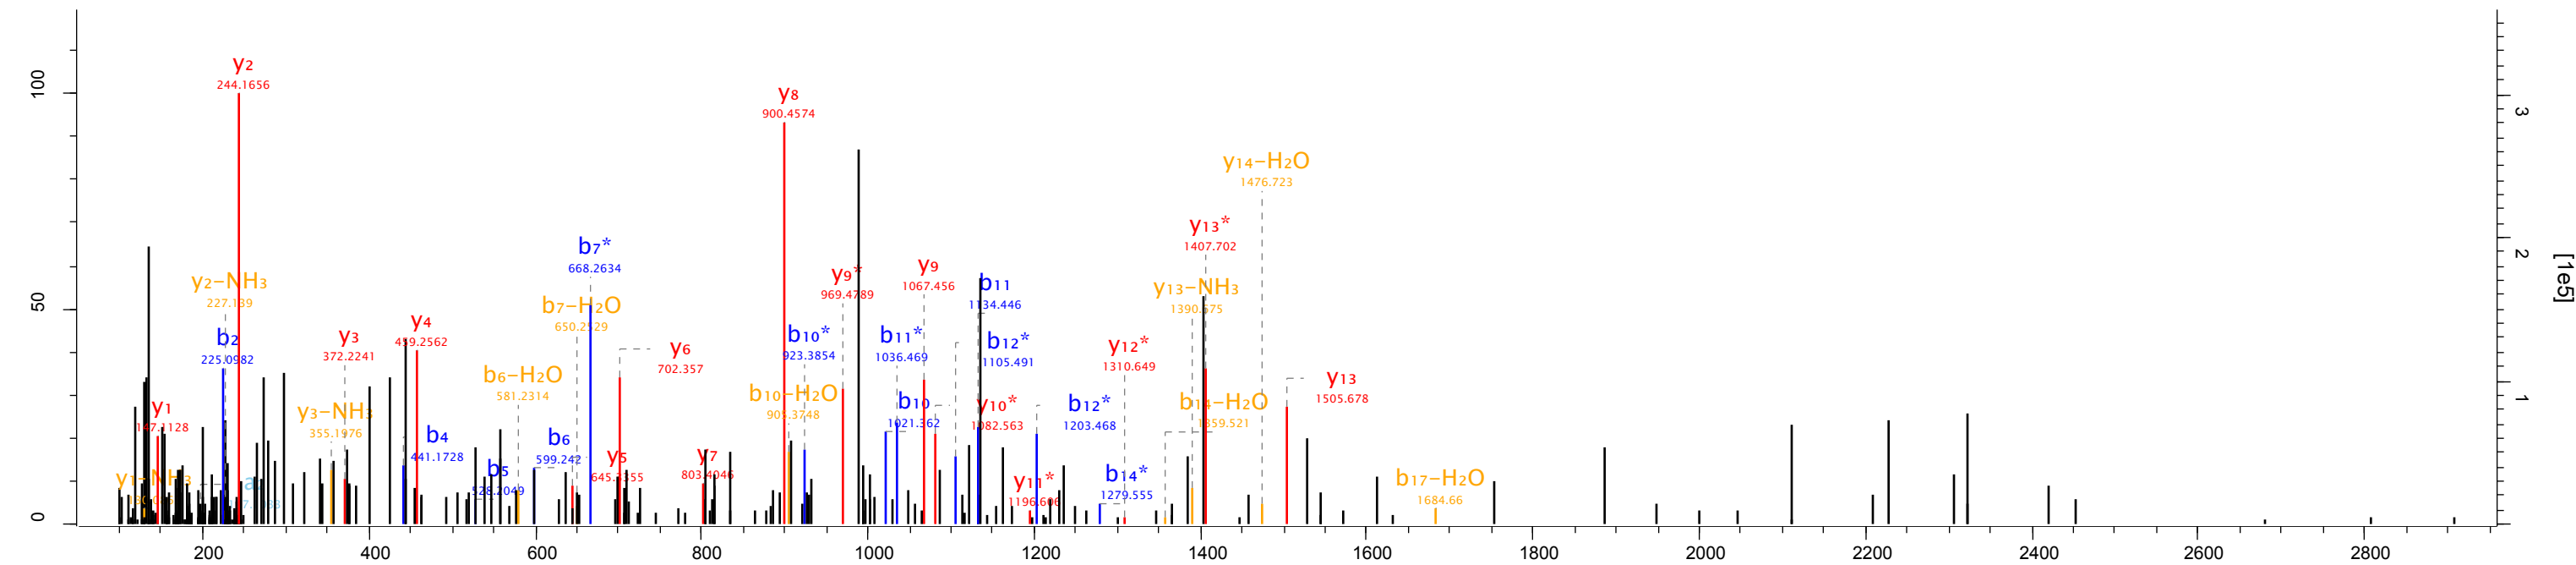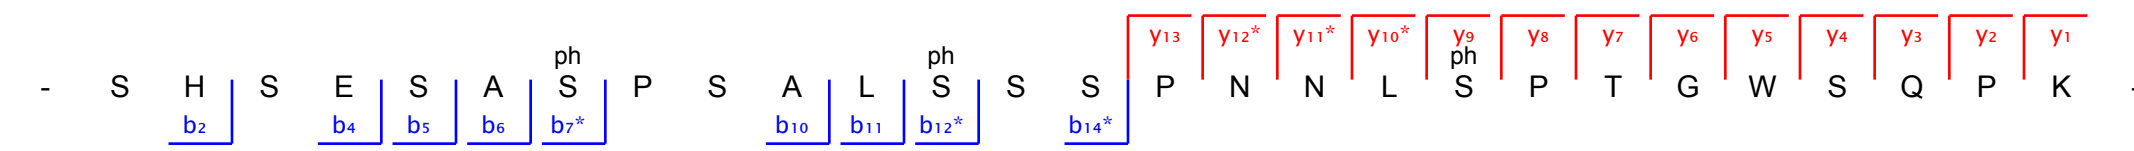

Raw file: 20150814\_A375SR\_Phospho\_BR2\_03  
 Scan: 18217 Method: FTMS; HCD Score: 73.06 m/z: 781.8 Gene names: PI4K2A

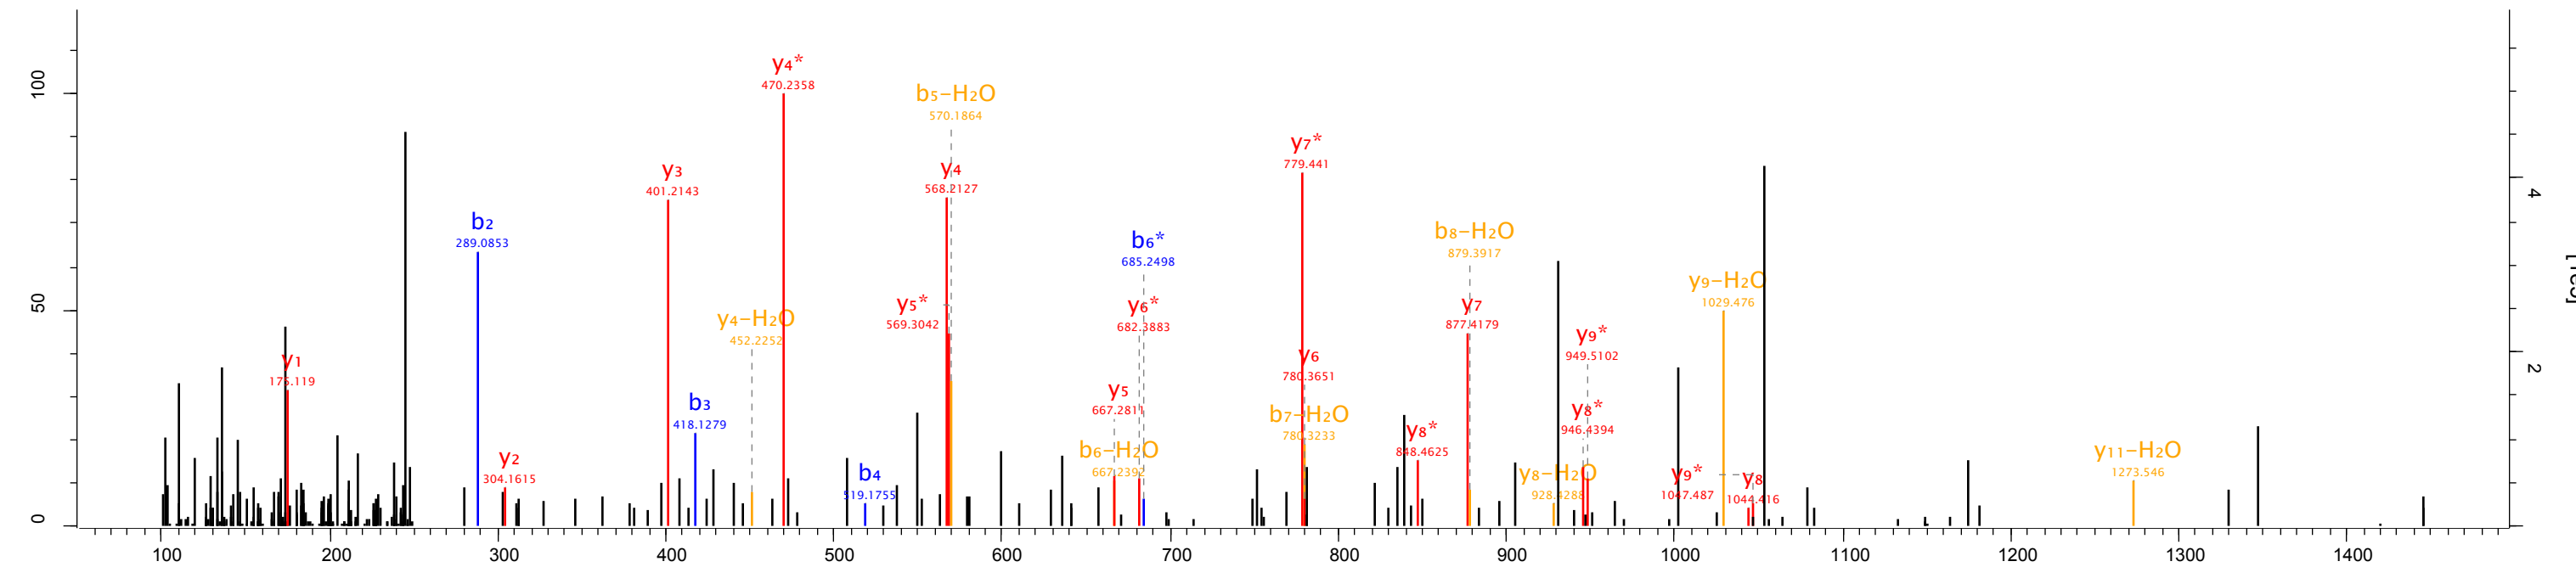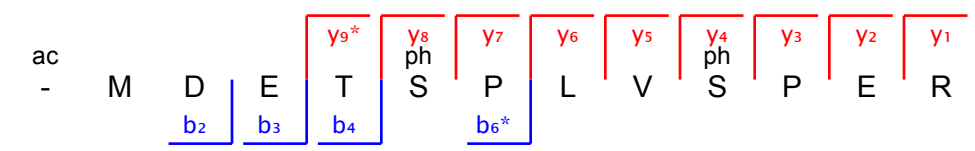

Raw file: 20150814\_A375SR\_Phospho\_BR2\_03  
 Scan: 18567 Method: FTMS; HCD Score: 92.26 m/z: 869.89 Gene names: FAM53C

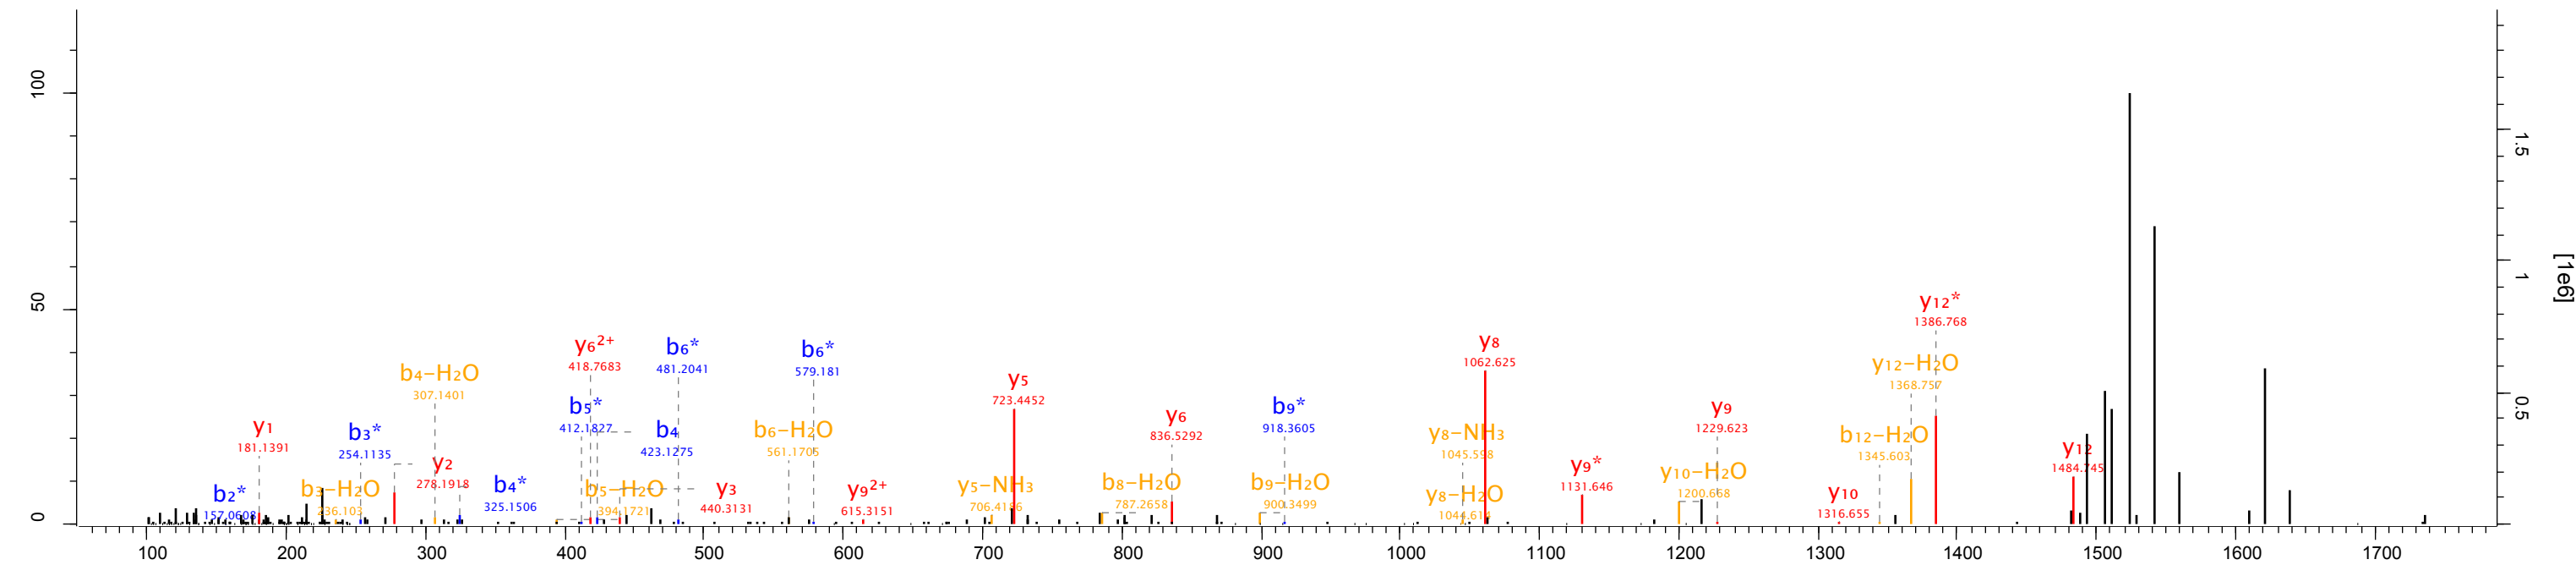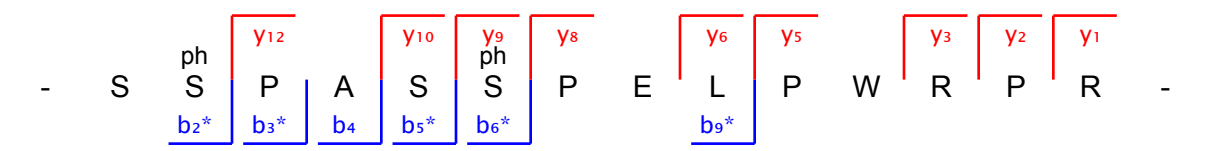

Raw file 20150814\_A375SR\_Phospho\_BR2\_03 Scan 18857 Method FTMS; HCD Score 126.91 m/z 880.92 Gene names EPB41L2

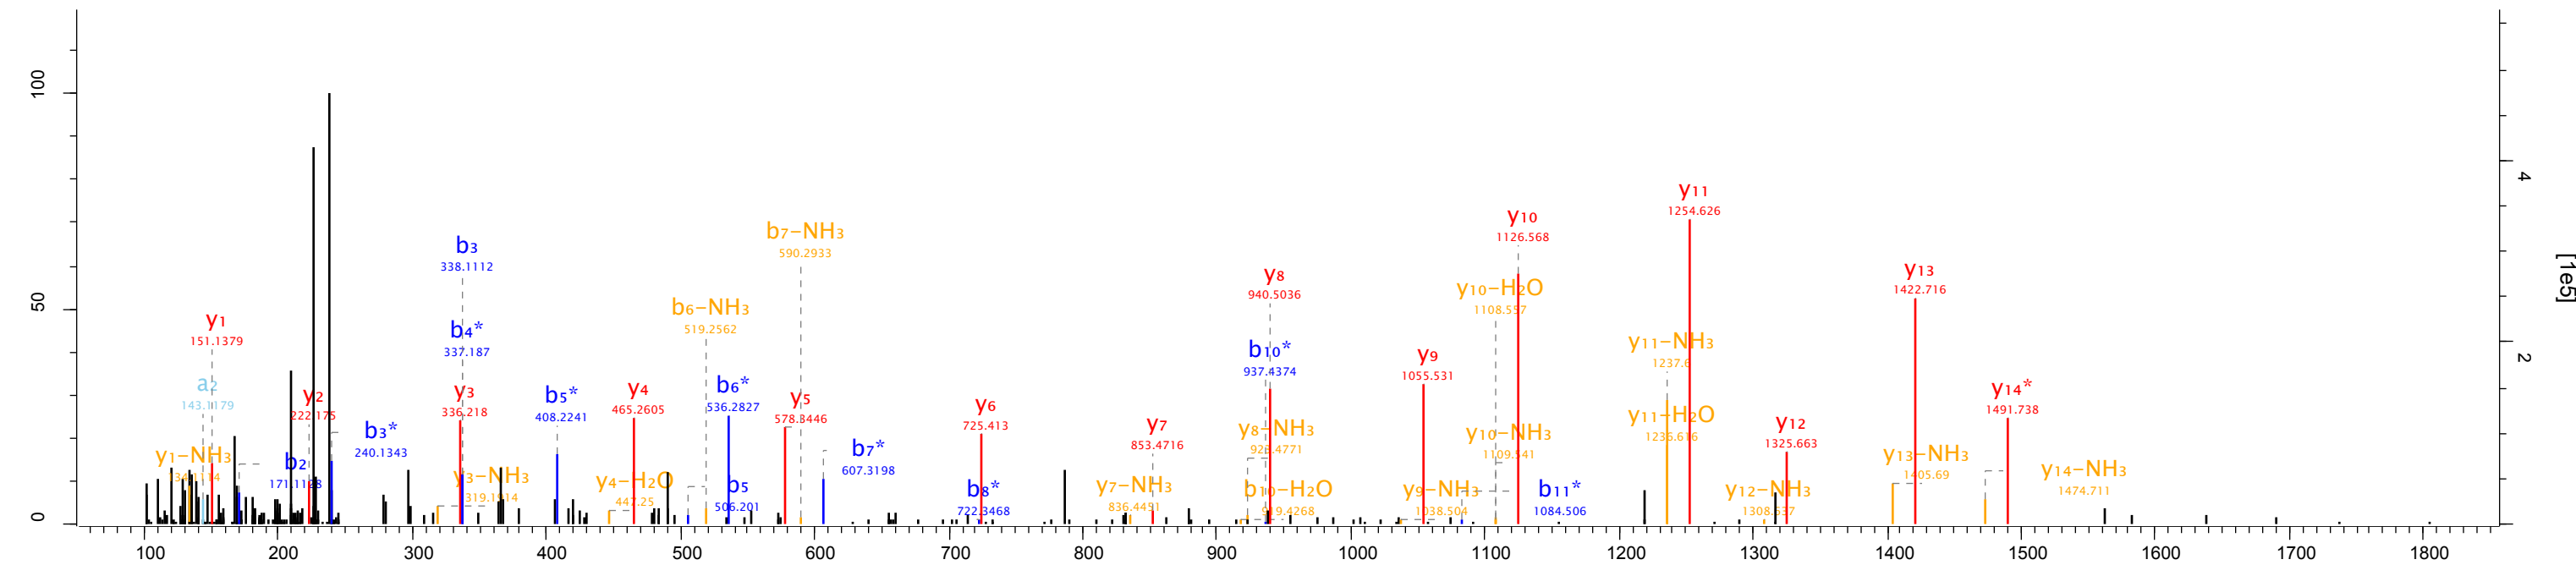

- G L S P A Q D S Q F L E N A K -

Peptide sequence: LSPAQD S Q F L E N A K

Fragmentation sites (b and y ions) are indicated by boxes below the sequence:

- b<sub>2</sub> (L)
- b<sub>3</sub> (S)
- b<sub>4</sub>\*
- b<sub>5</sub>
- b<sub>6</sub>\*
- b<sub>7</sub>\*
- b<sub>8</sub>\*
- b<sub>10</sub>\*
- b<sub>11</sub>\*

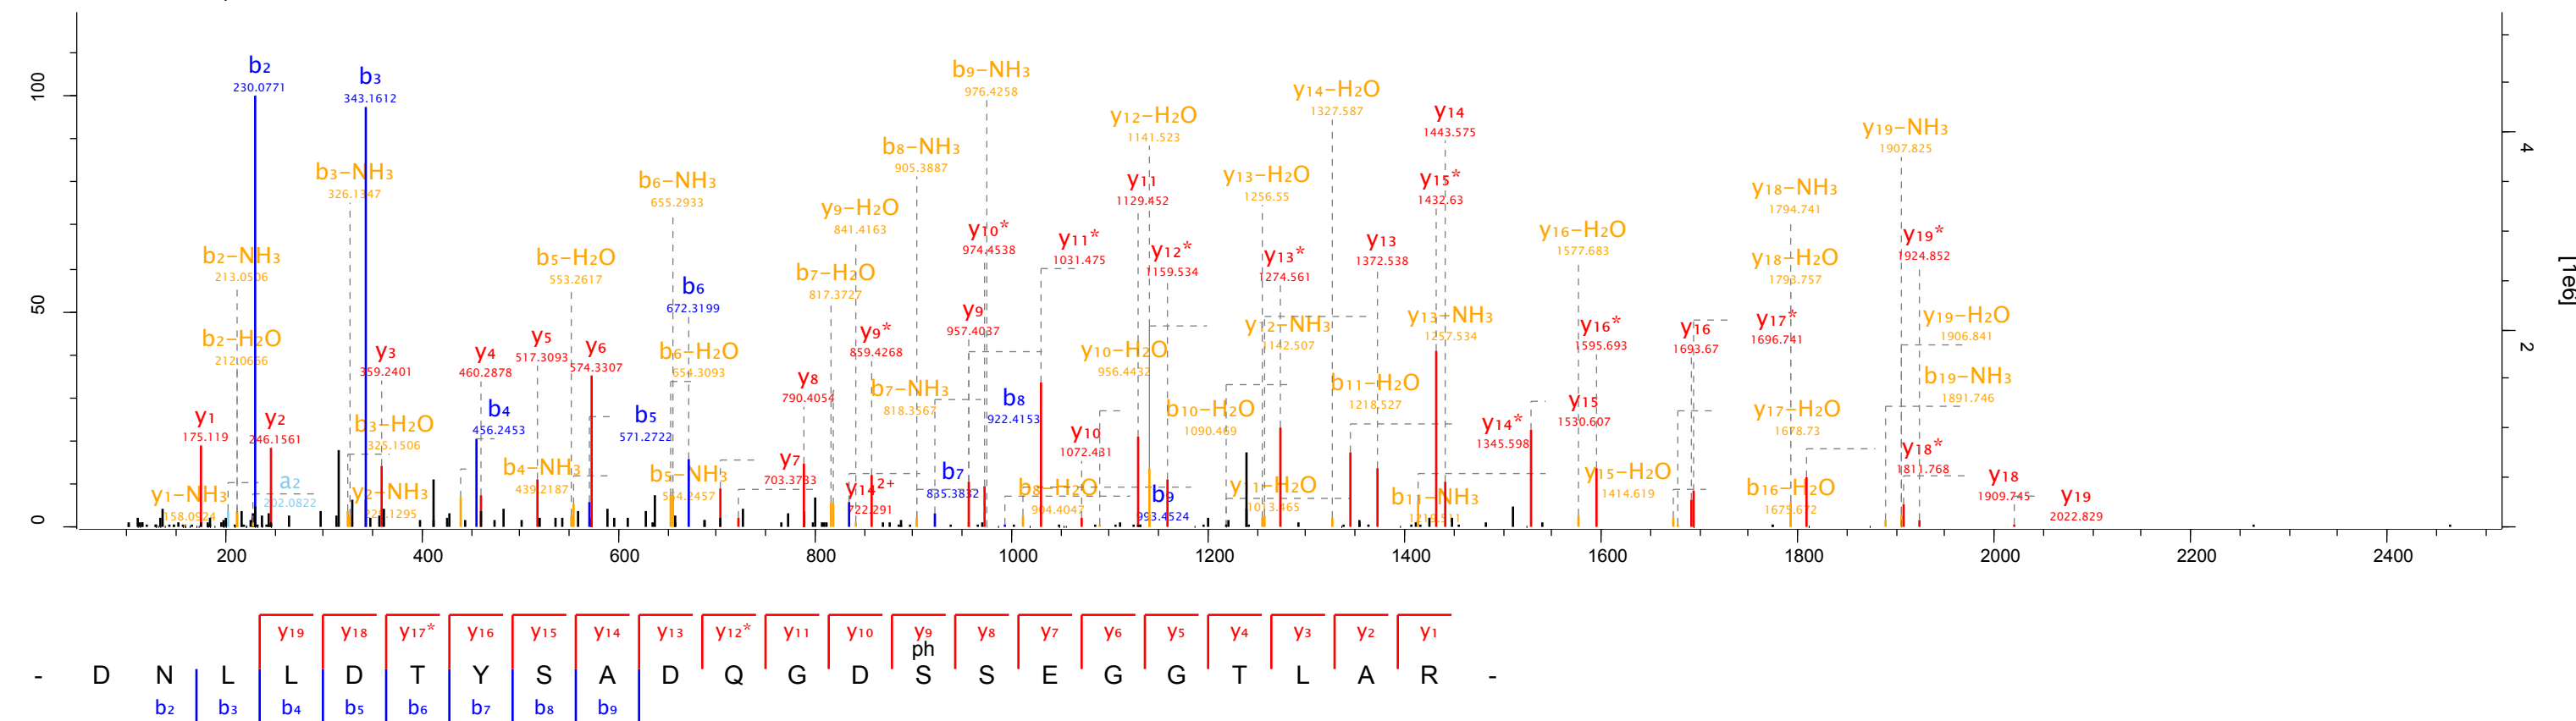

Raw file: 20150814\_A375SR\_Phospho\_BR2\_03  
 Scan: 19097 Method: FTMS; HCD Score: 103.14 m/z: 662.32 Gene names: PLEC

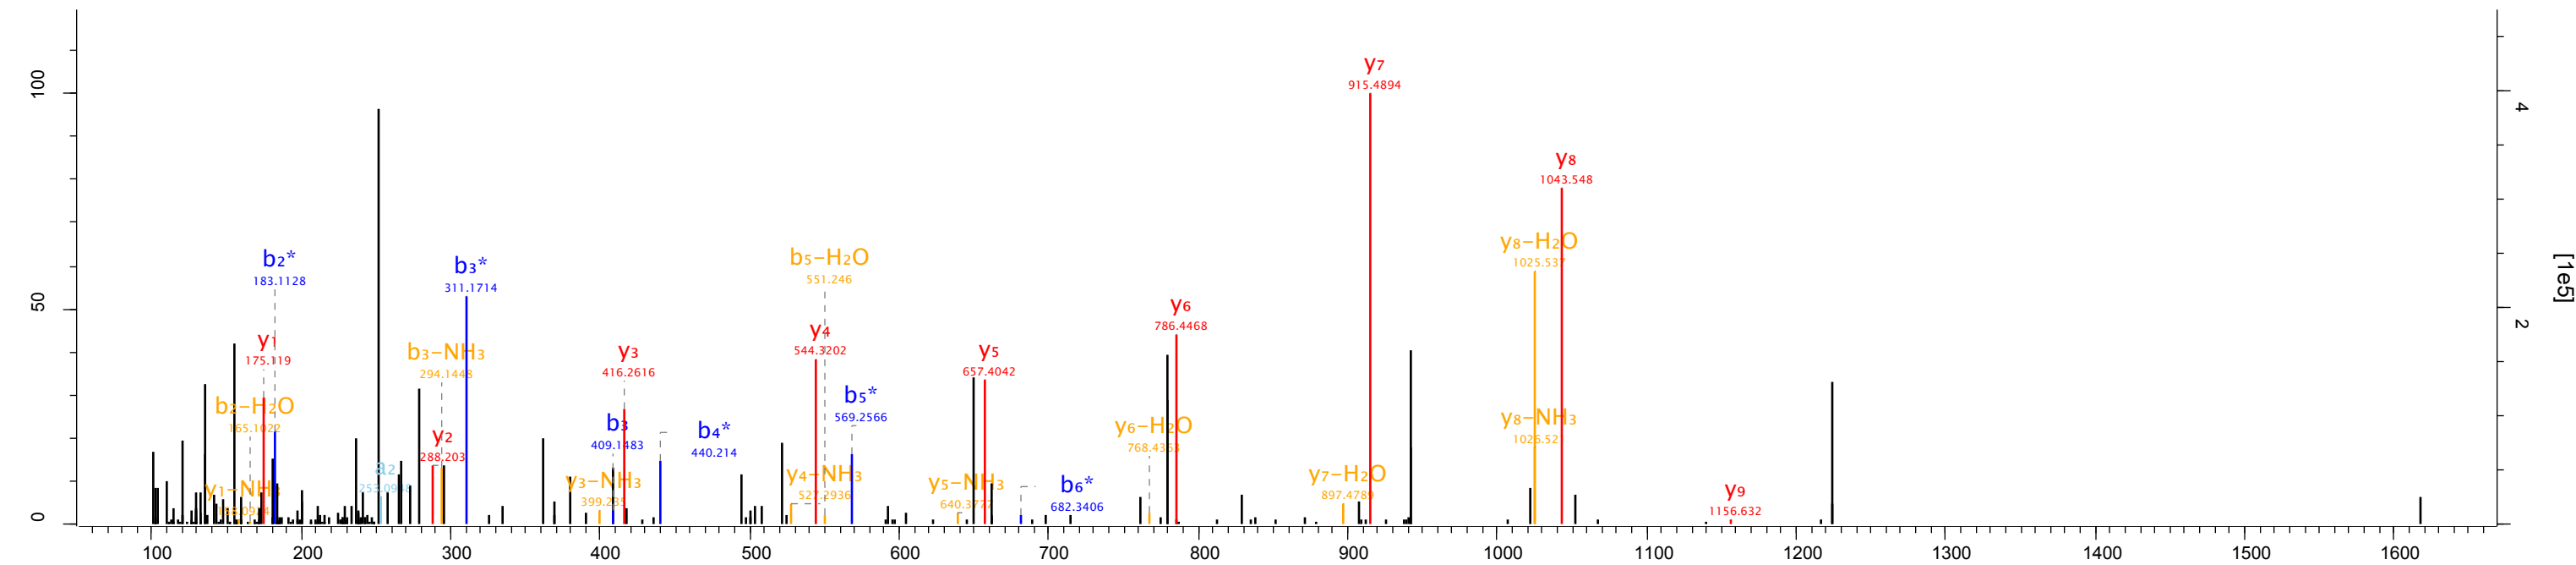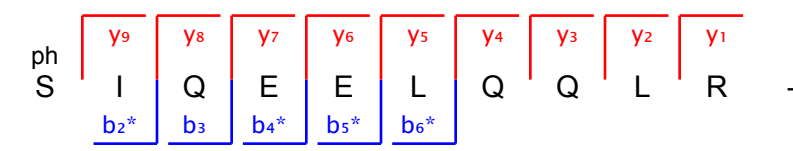



Raw file 20150814\_A375SR\_Phospho\_BR2\_03 Scan 19197 Method FTMS; HCD Score 69.2 m/z 653.74 Gene names ZC3H4

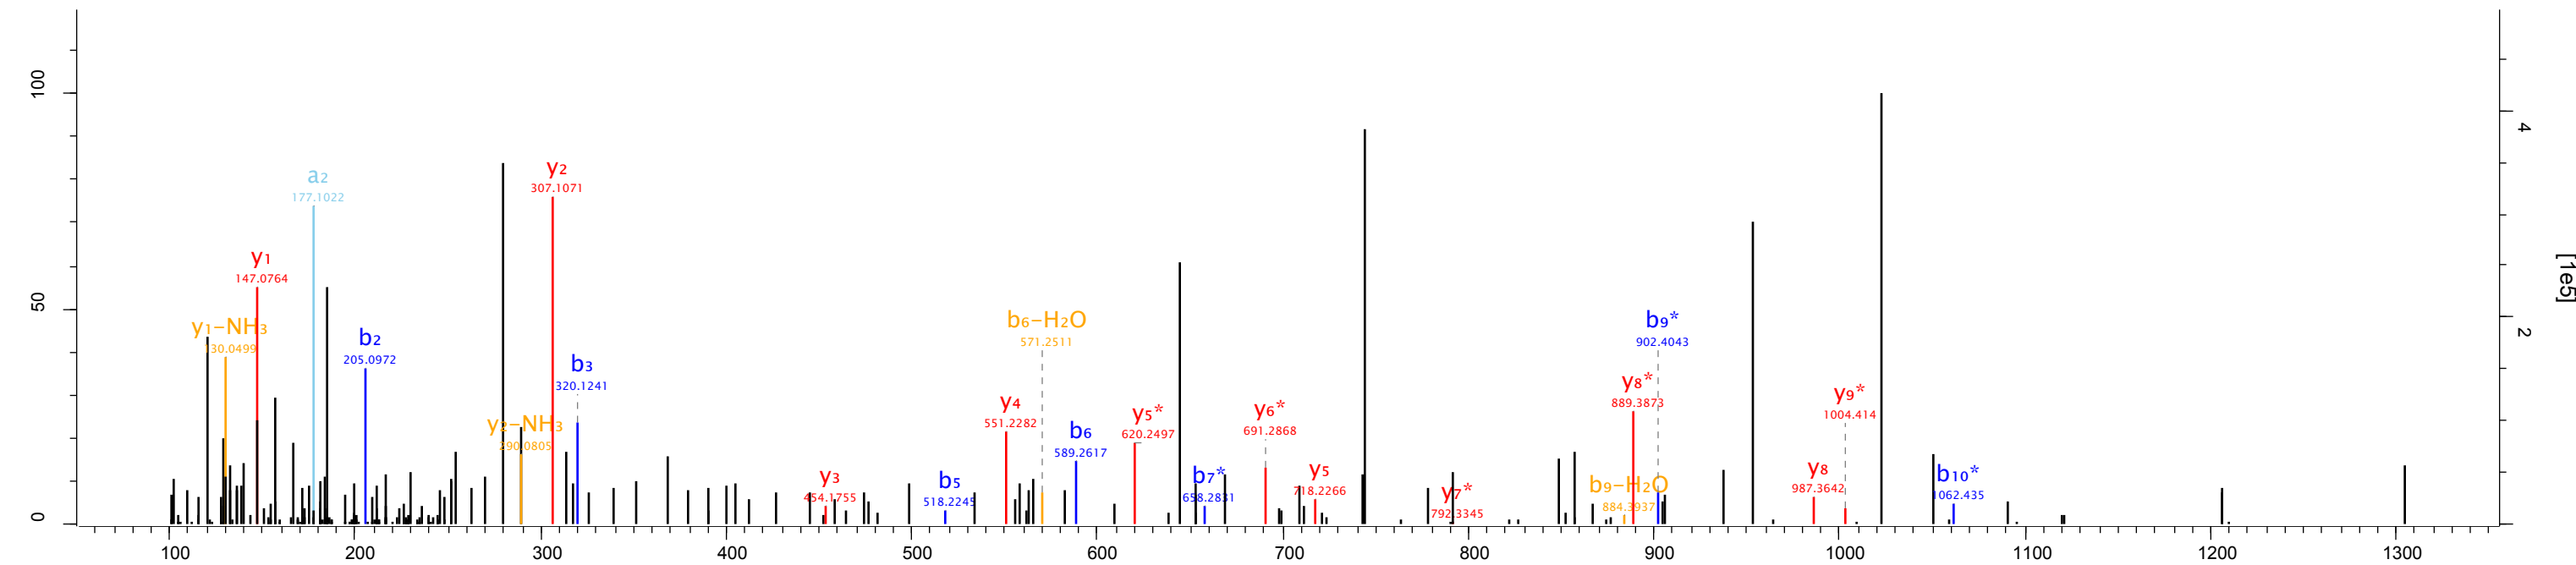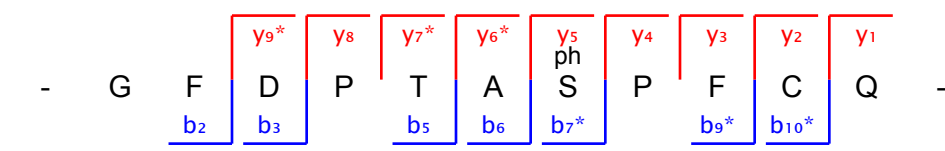

Raw file: 20150814\_A375SR\_Phospho\_BR2\_03  
 Scan: 19327 Method: FTMS; HCD Score: 123.6 m/z: 641.29 Gene names: LIMCH1

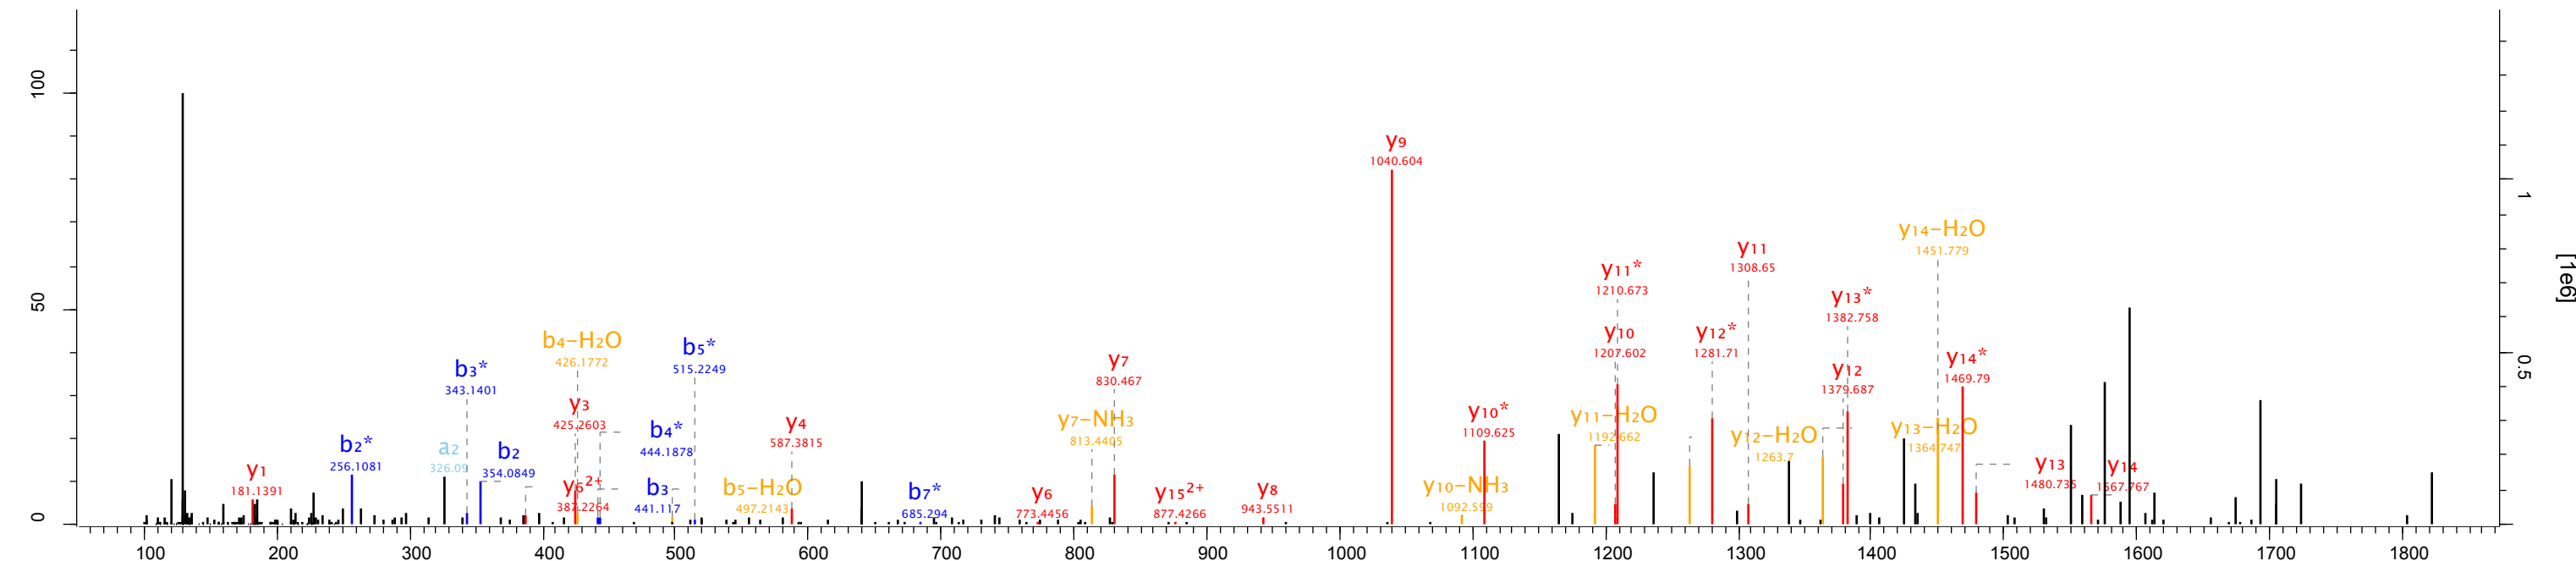

Sequence: W S T A T S P L G G E R P F R -

Fragmentation mapping (phospho site S):

- W (b<sub>2</sub>)
- S (b<sub>3</sub>)
- T (b<sub>4</sub><sup>\*</sup>)
- A (b<sub>5</sub><sup>\*</sup>)
- T
- S (b<sub>7</sub><sup>\*</sup>)
- P
- L
- G
- G
- E
- R
- P
- F
- R

Raw file: 20150814\_A375SR\_Phospho\_BR2\_03  
 Scan: 19417 Method: FTMS; HCD Score: 59.92 m/z: 805.39 Gene names: RBM17

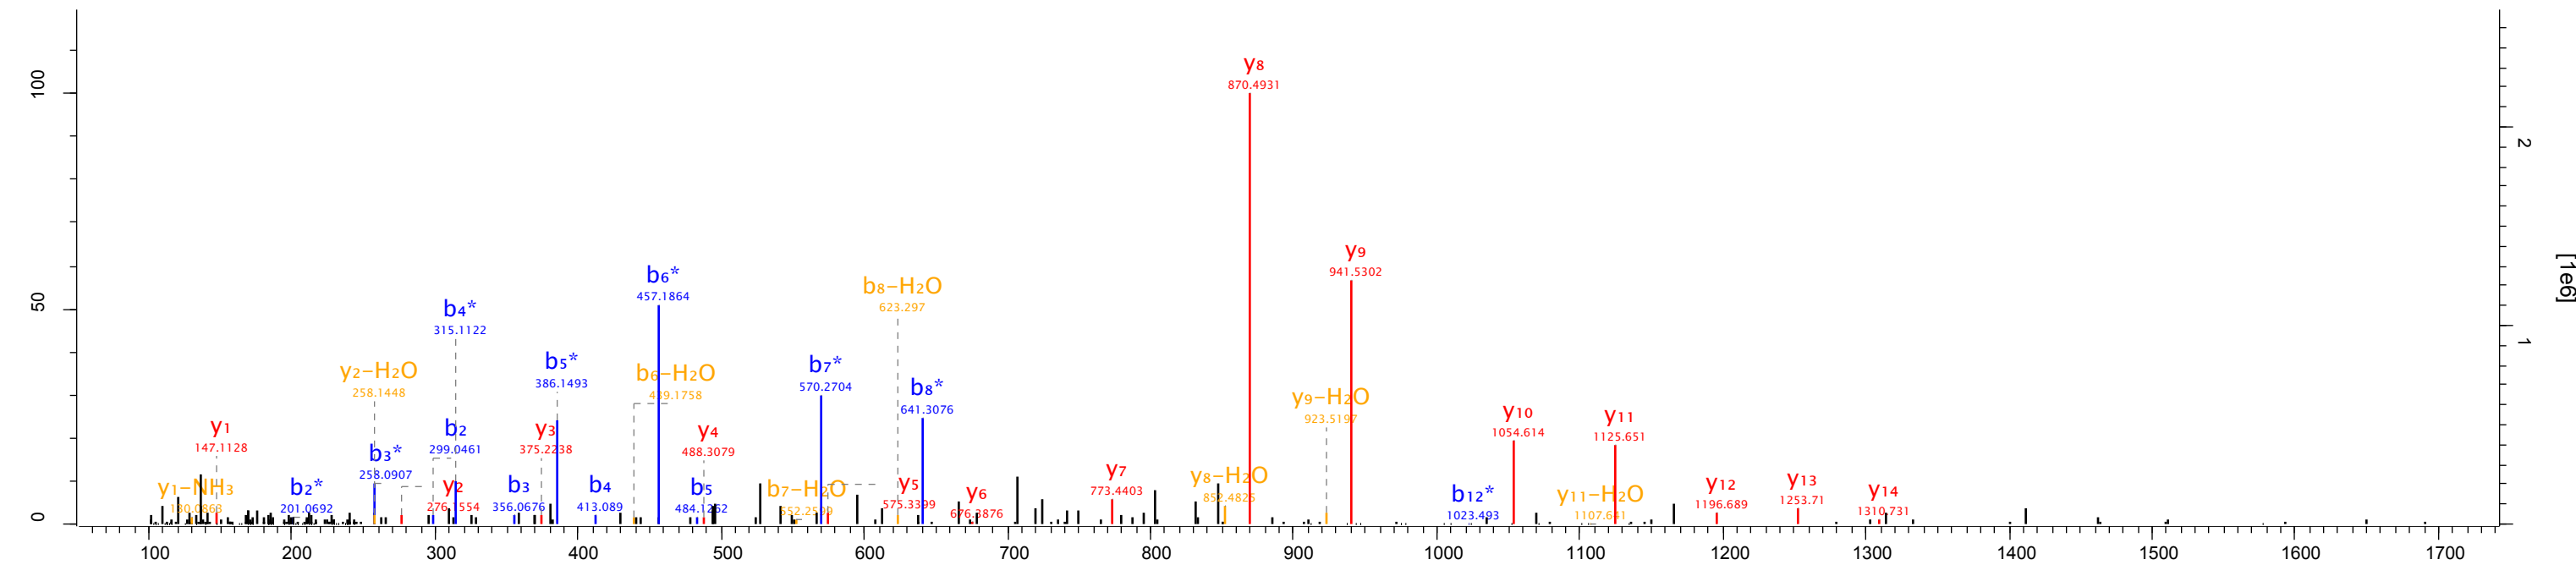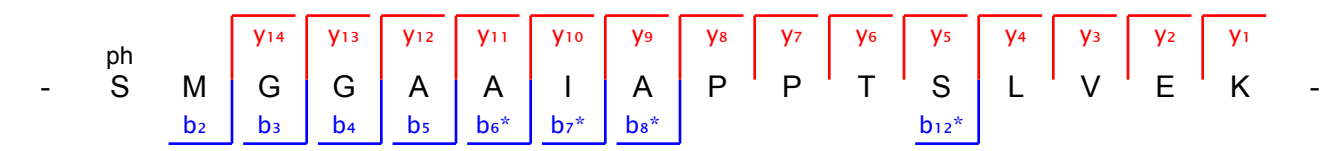

Raw file  
 20150814\_A375SR\_Phospho\_BR2\_03  
 Scan 19557 Method FTMS; HCD Score 127.71 m/z 621.25 Gene names PAK2

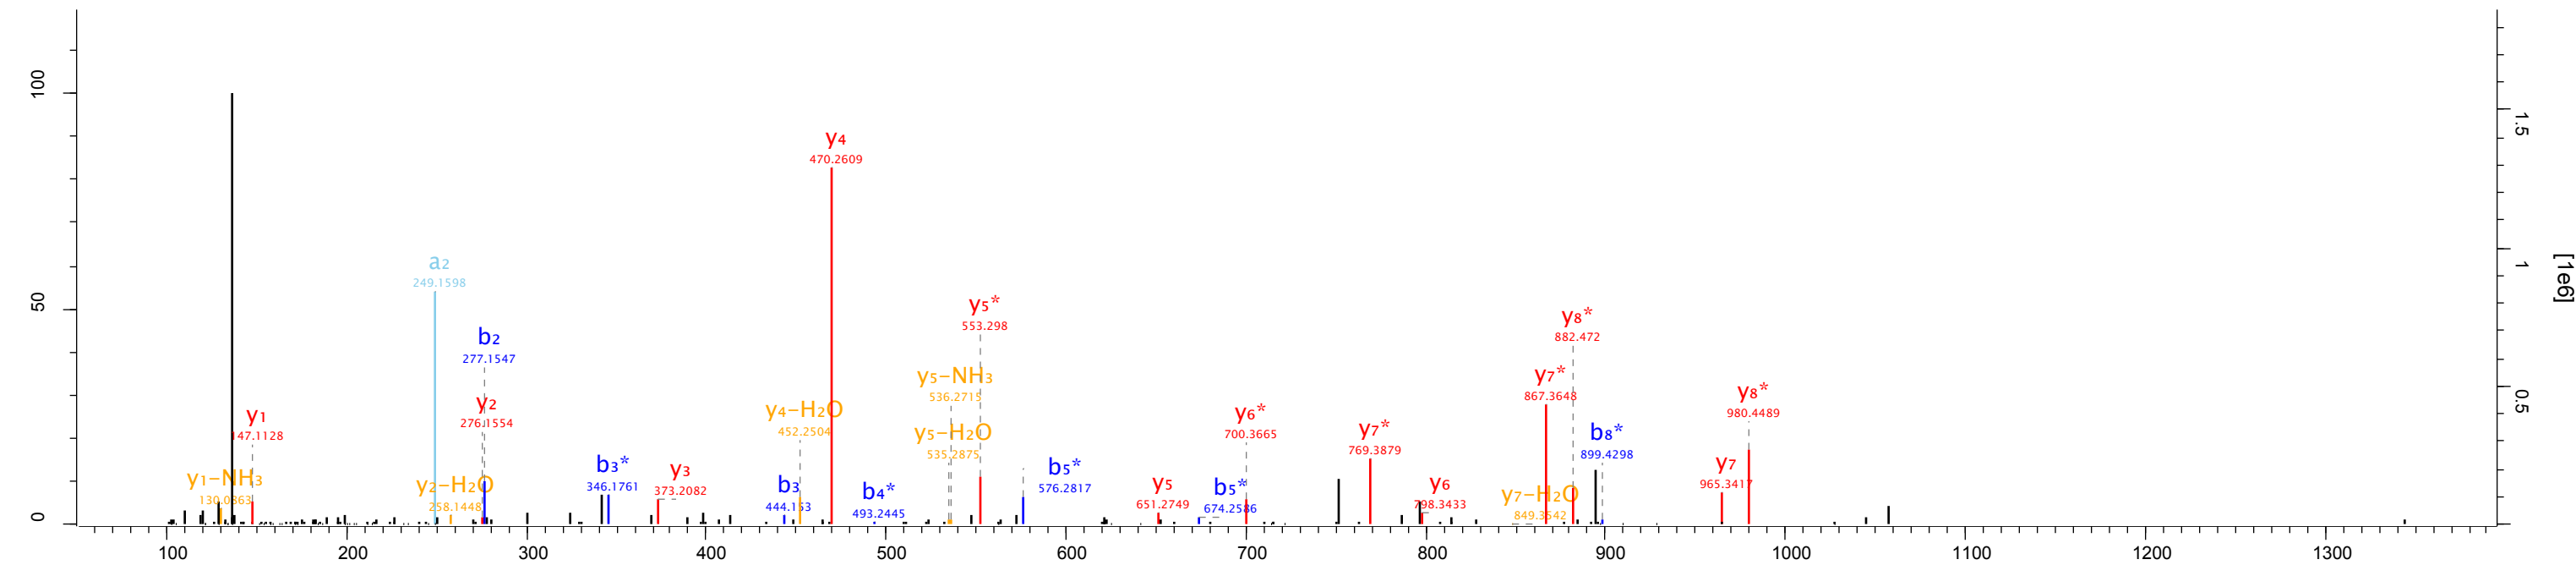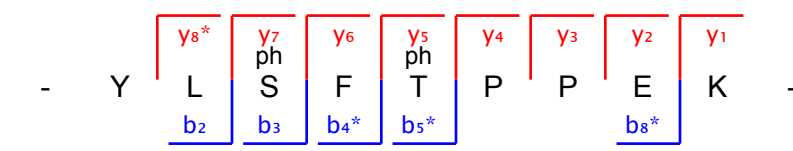

Raw file: 20150814\_A375SR\_Phospho\_BR2\_03  
 Scan: 19697 Method: FTMS; HCD Score: 168 m/z: 712.83 Gene names: RB1CC1

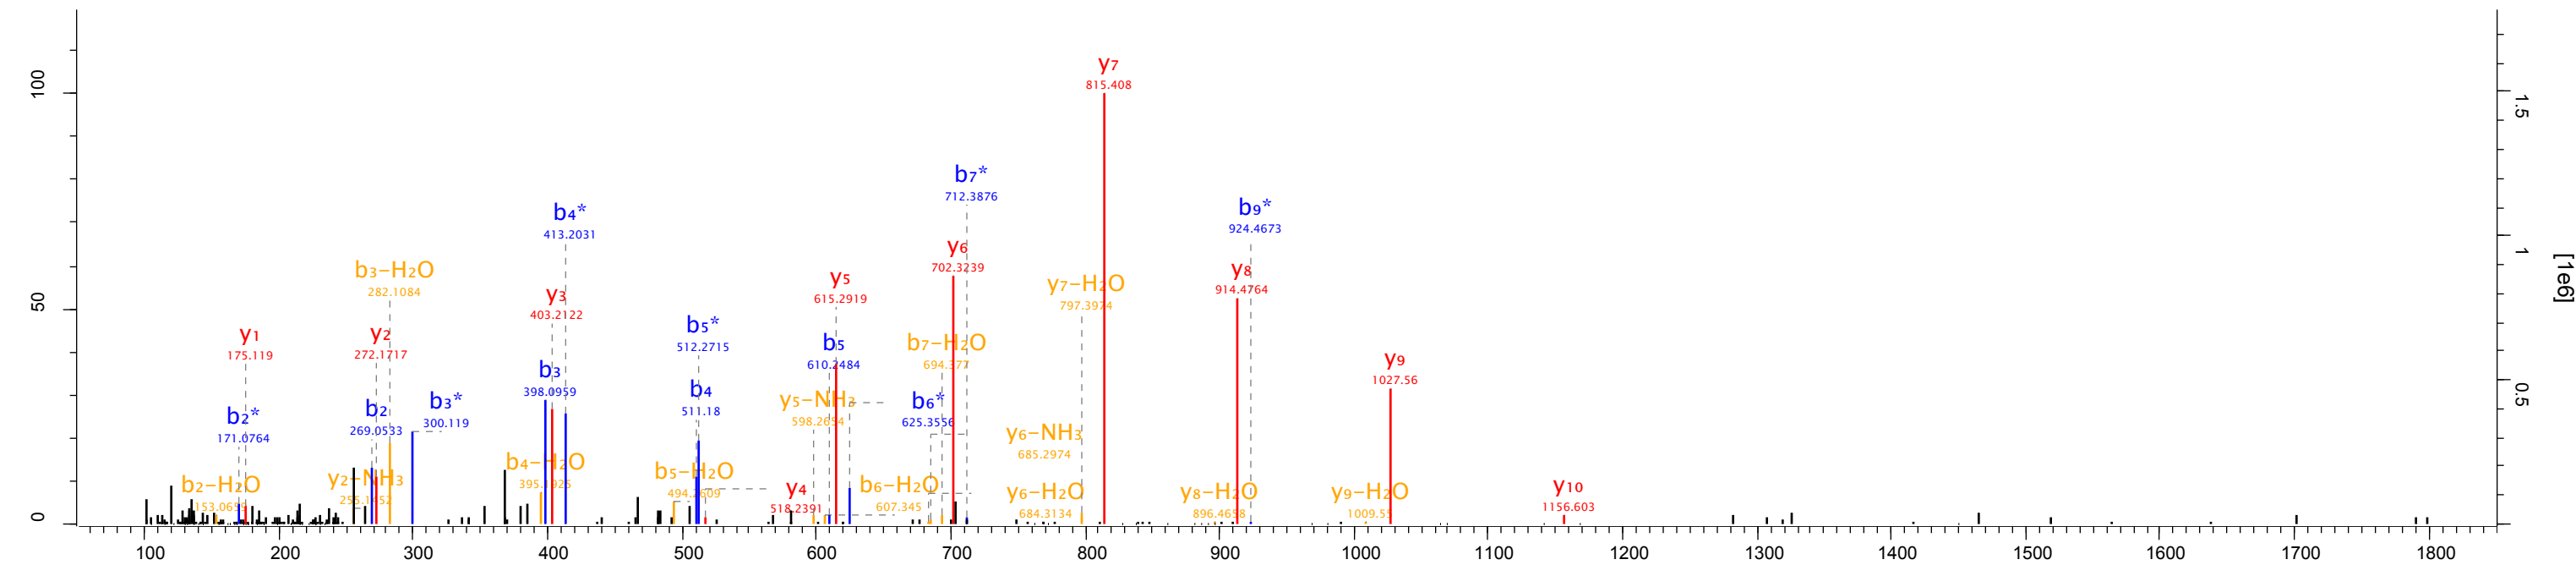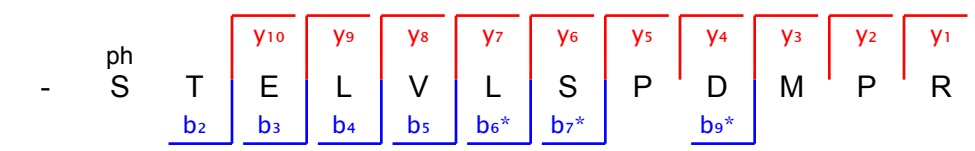

Raw file: 20150814\_A375SR\_Phospho\_BR2\_03  
 Scan: 19957 Method: FTMS; HCD Score: 95.42 m/z: 633.83 Gene names: NHSL1

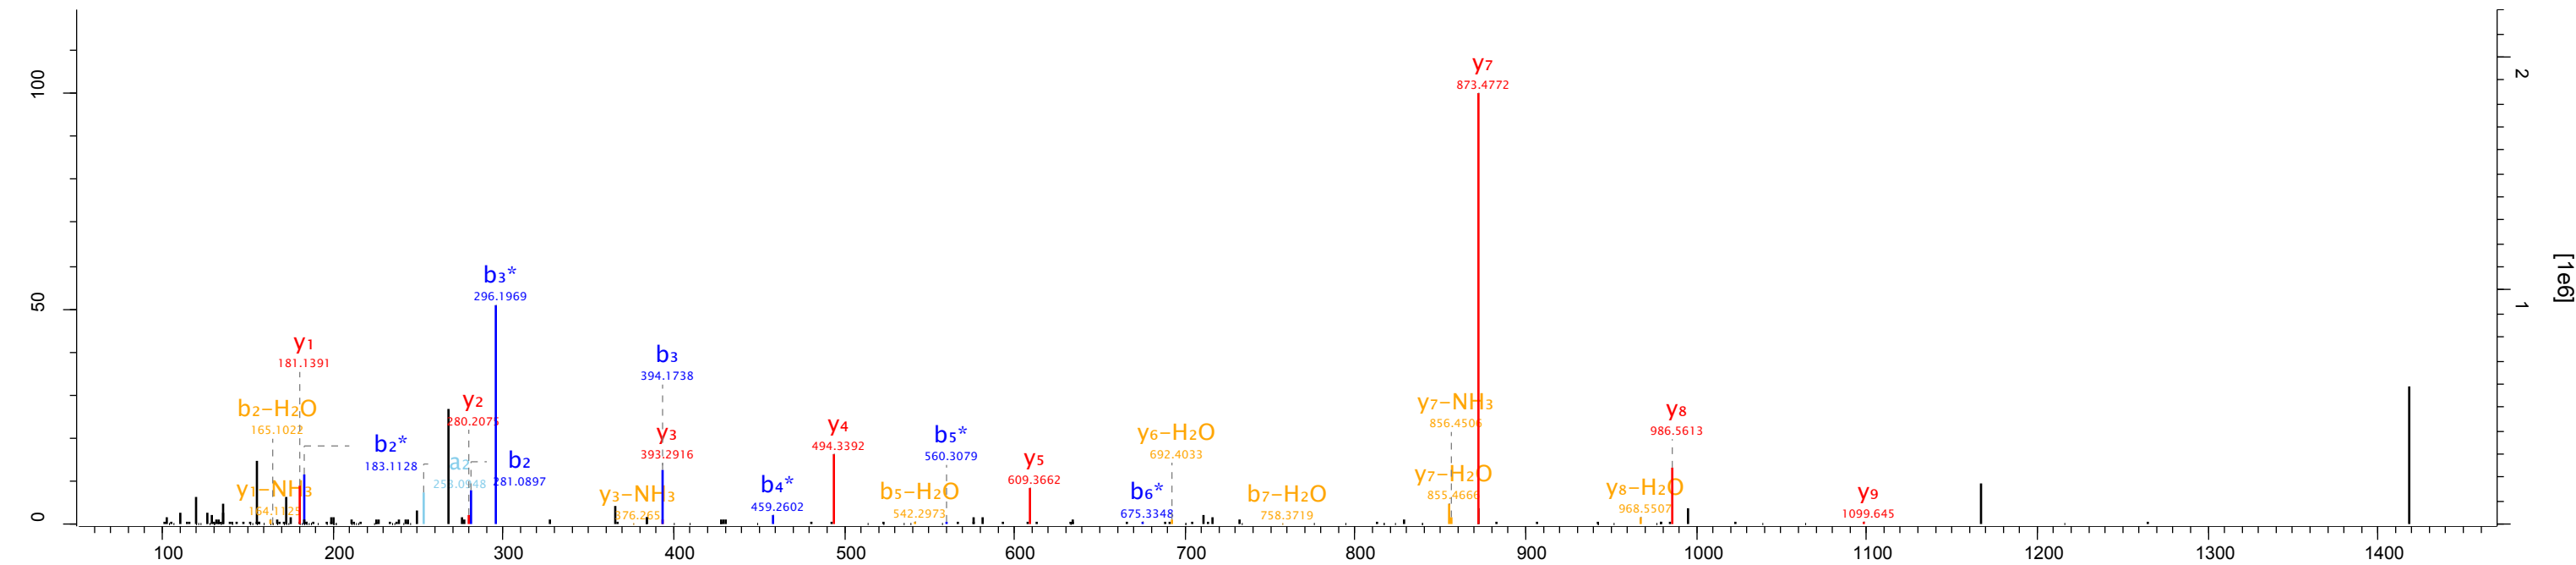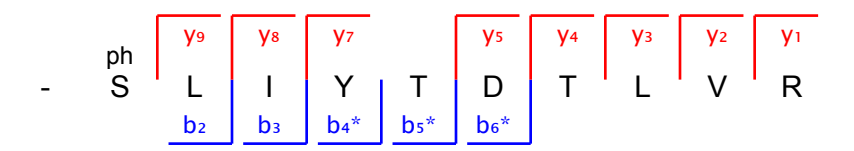

Raw file 20150814\_A375SR\_Phospho\_BR2\_03 Scan 20167 Method FTMS; HCD Score 189.79 m/z 1013.11 Gene names SHB

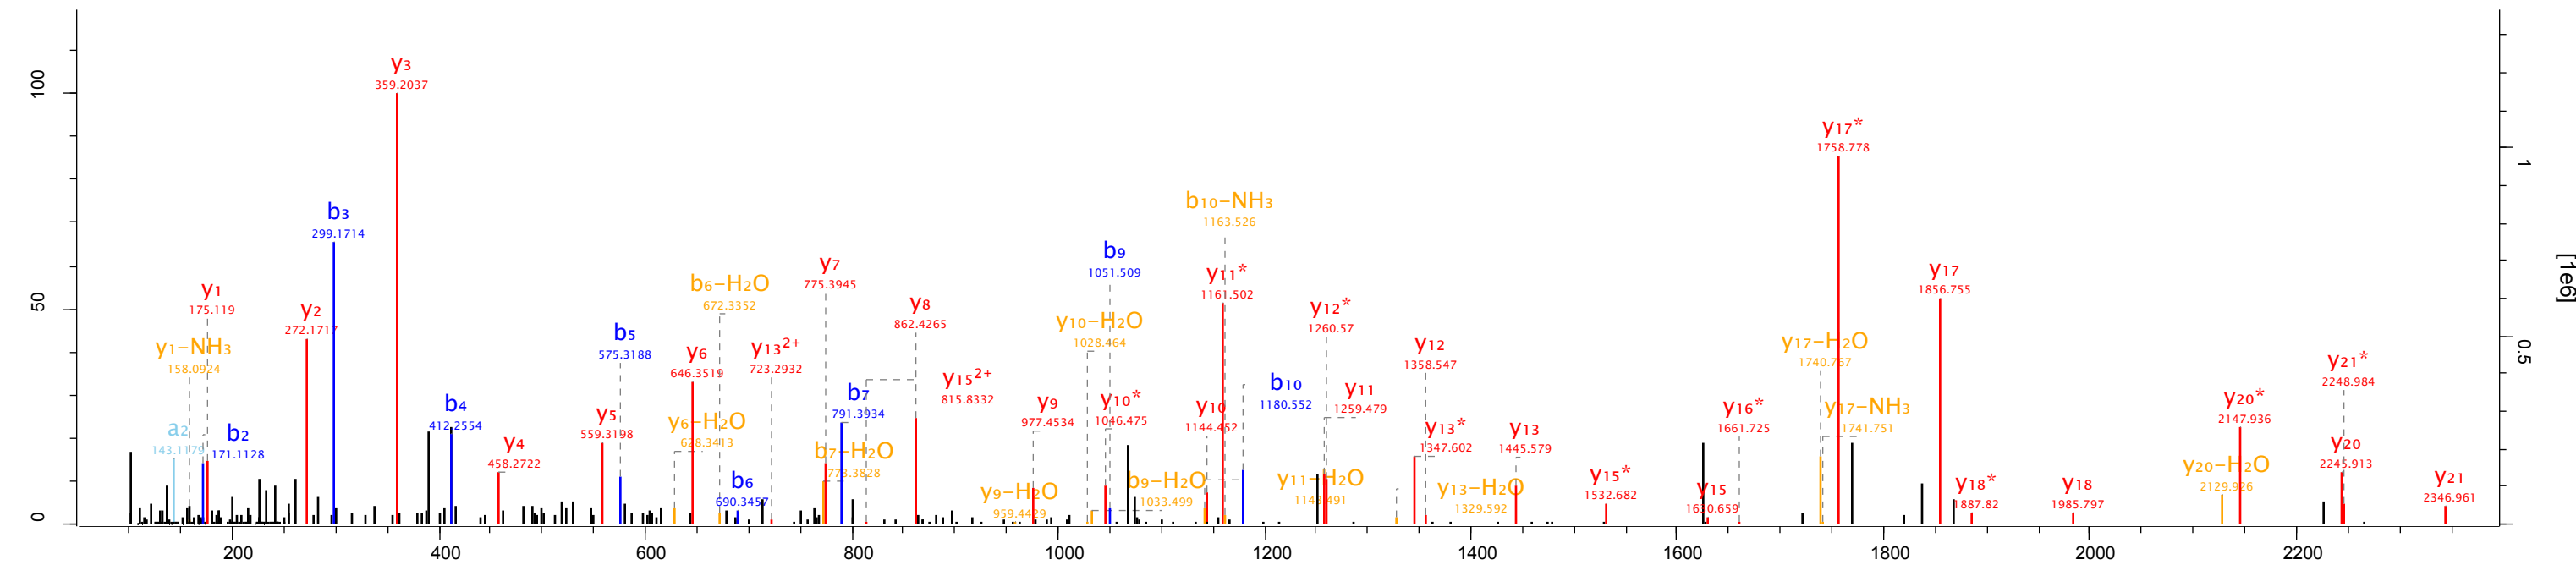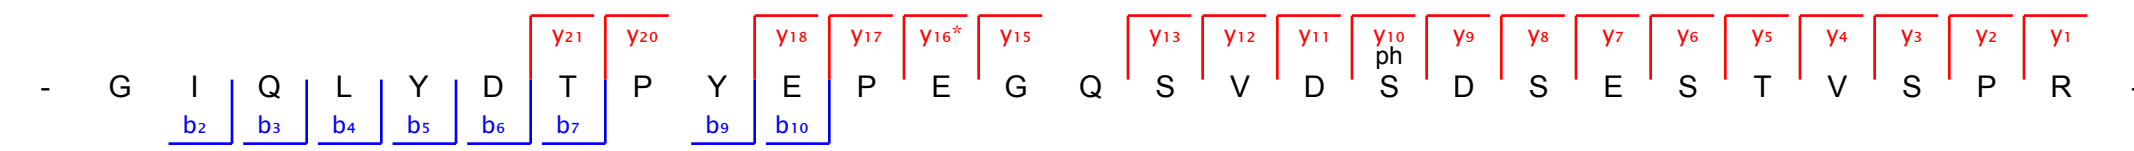

Raw file 20150814\_A375SR\_Phospho\_BR2\_03 Scan 20447 Method FTMS; HCD Score 99.34 m/z 481.26 Gene names LGALS1

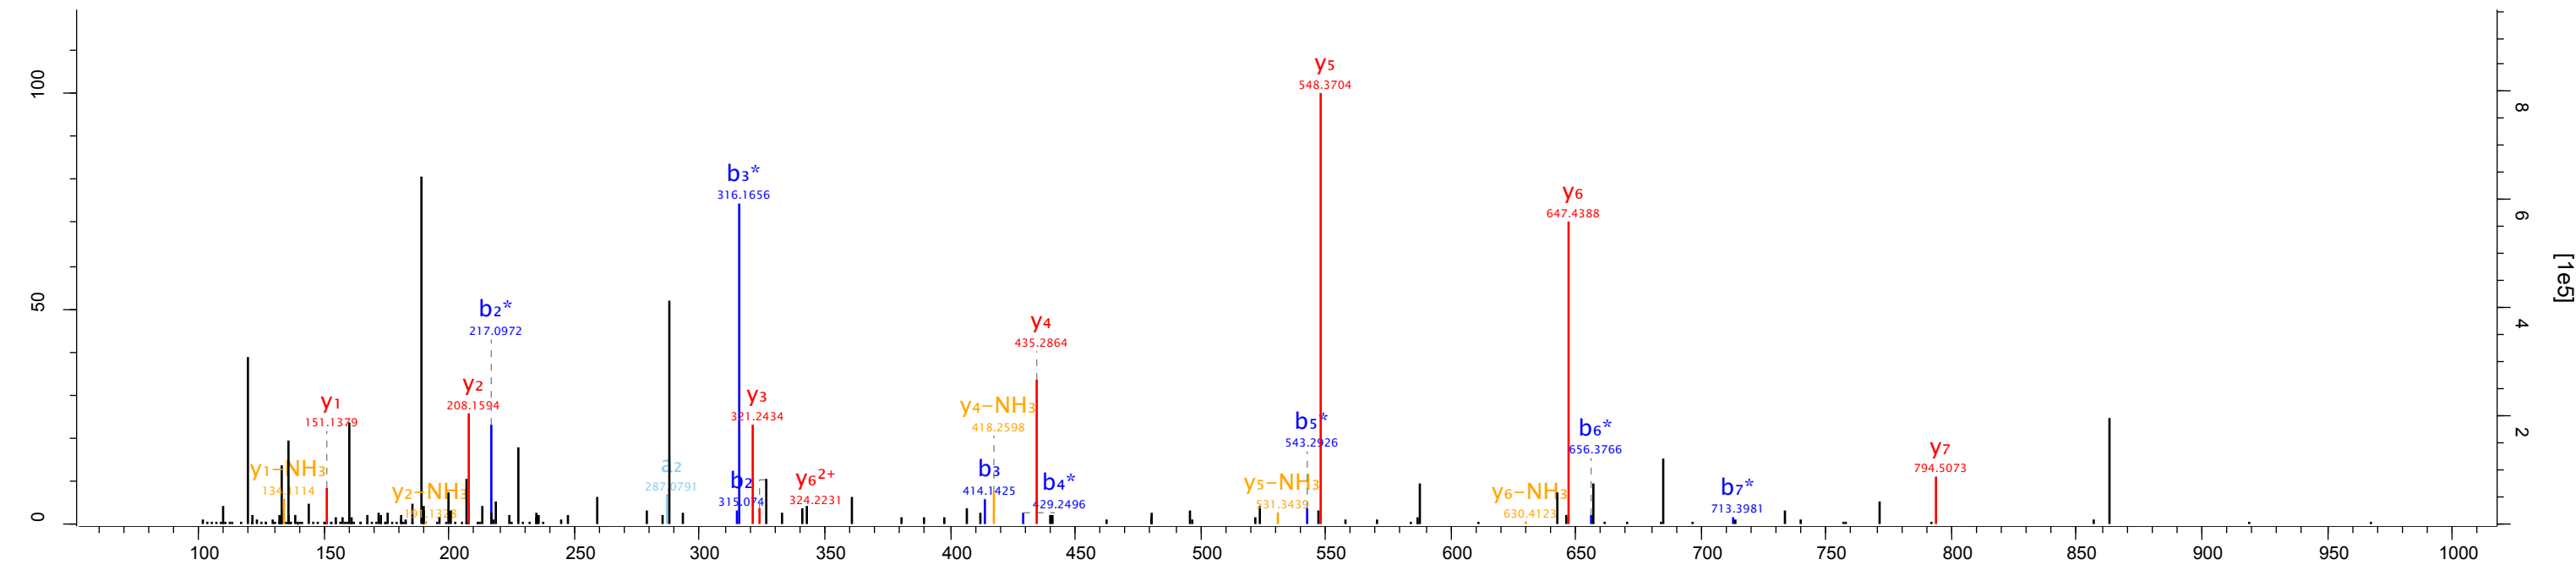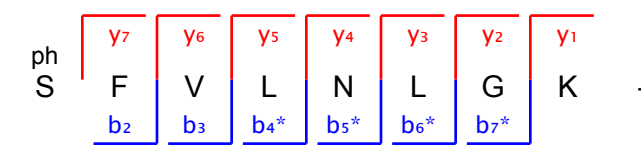



Raw file: 20150814\_A375SR\_Phospho\_BR2\_03  
 Scan: 21097 Method: FTMS; HCD Score: 170.14 m/z: 1024.51 Gene names: INPP5F

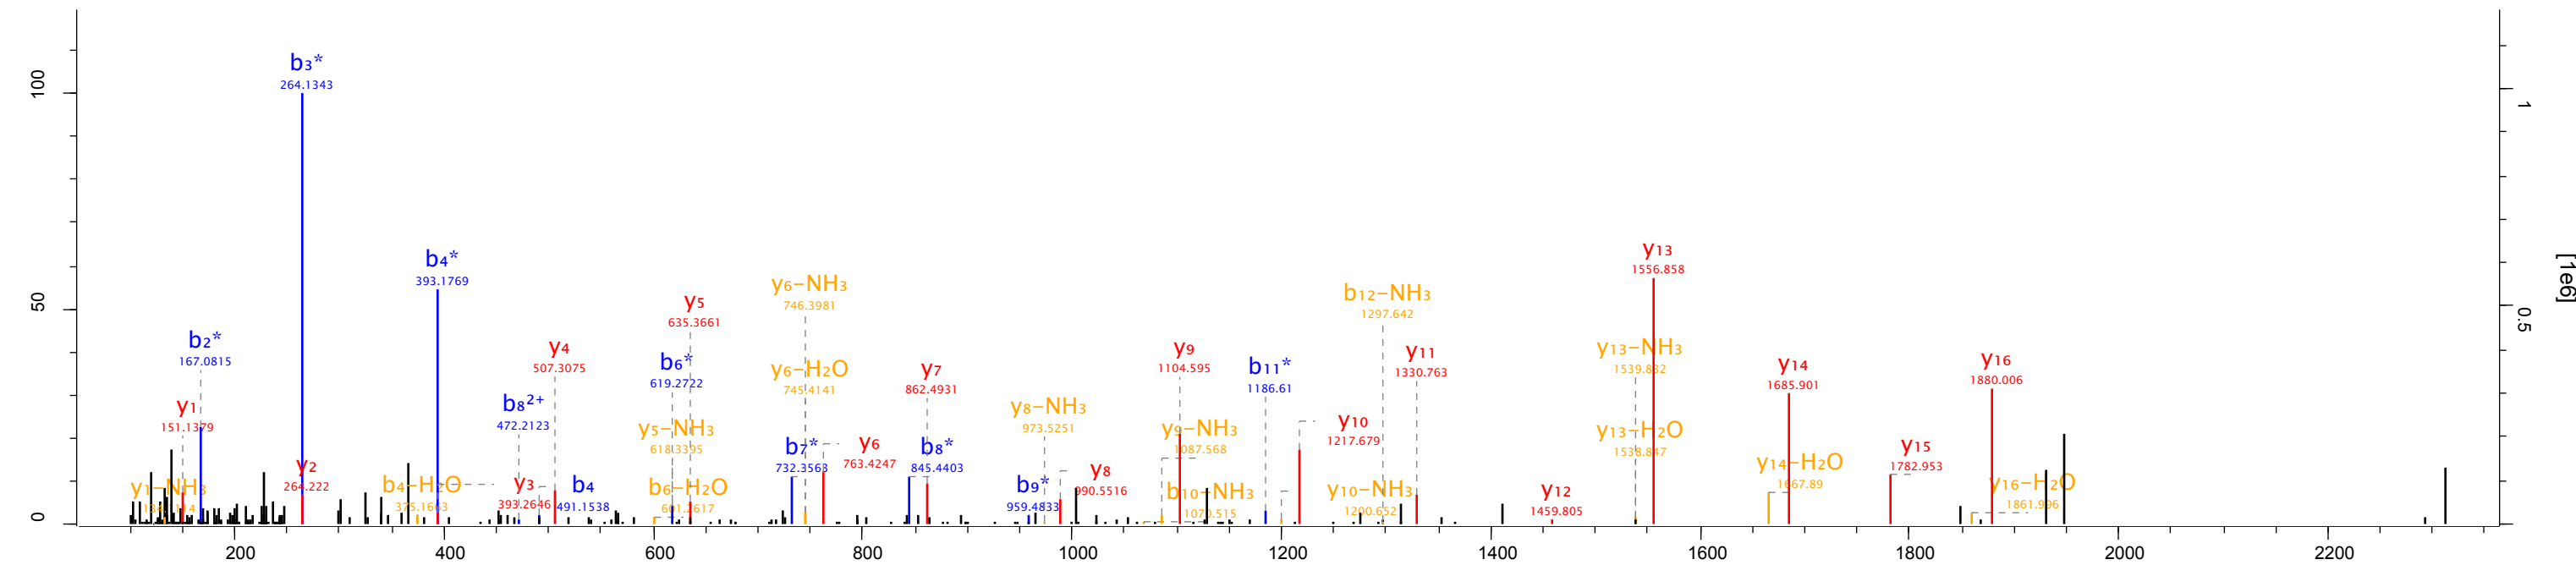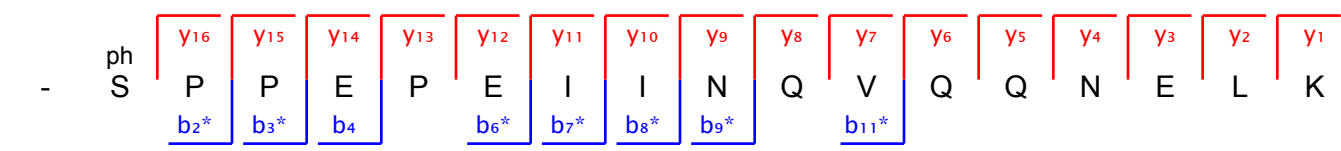

Raw file: 20150814\_A375SR\_Phospho\_BR2\_03  
 Scan: 21157 Method: FTMS; HCD Score: 99.95 m/z: 1106.89 Gene names: TEAD1

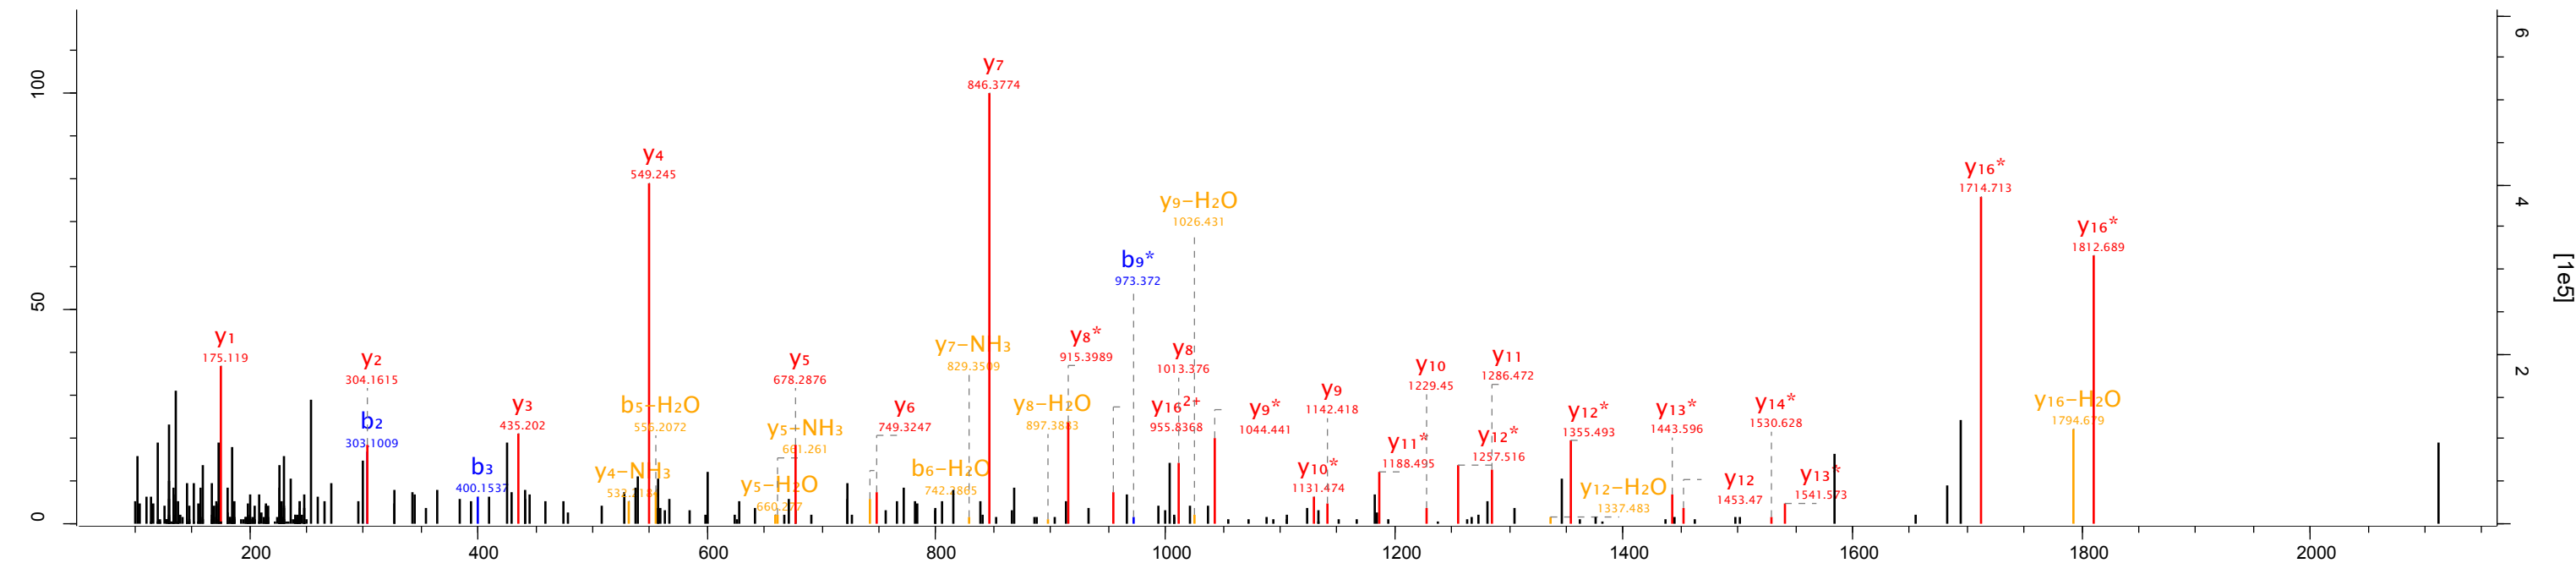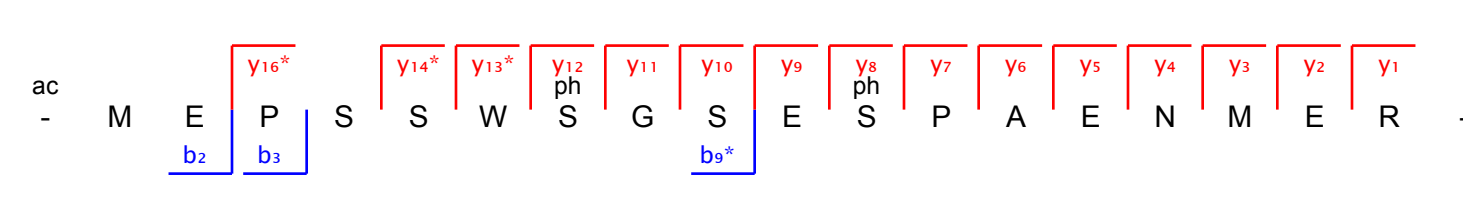

Raw file: 20150814\_A375SR\_Phospho\_BR2\_03  
 Scan: 21397 Method: FTMS; HCD Score: 226.99 m/z: 690.64 Gene names: RALBP1

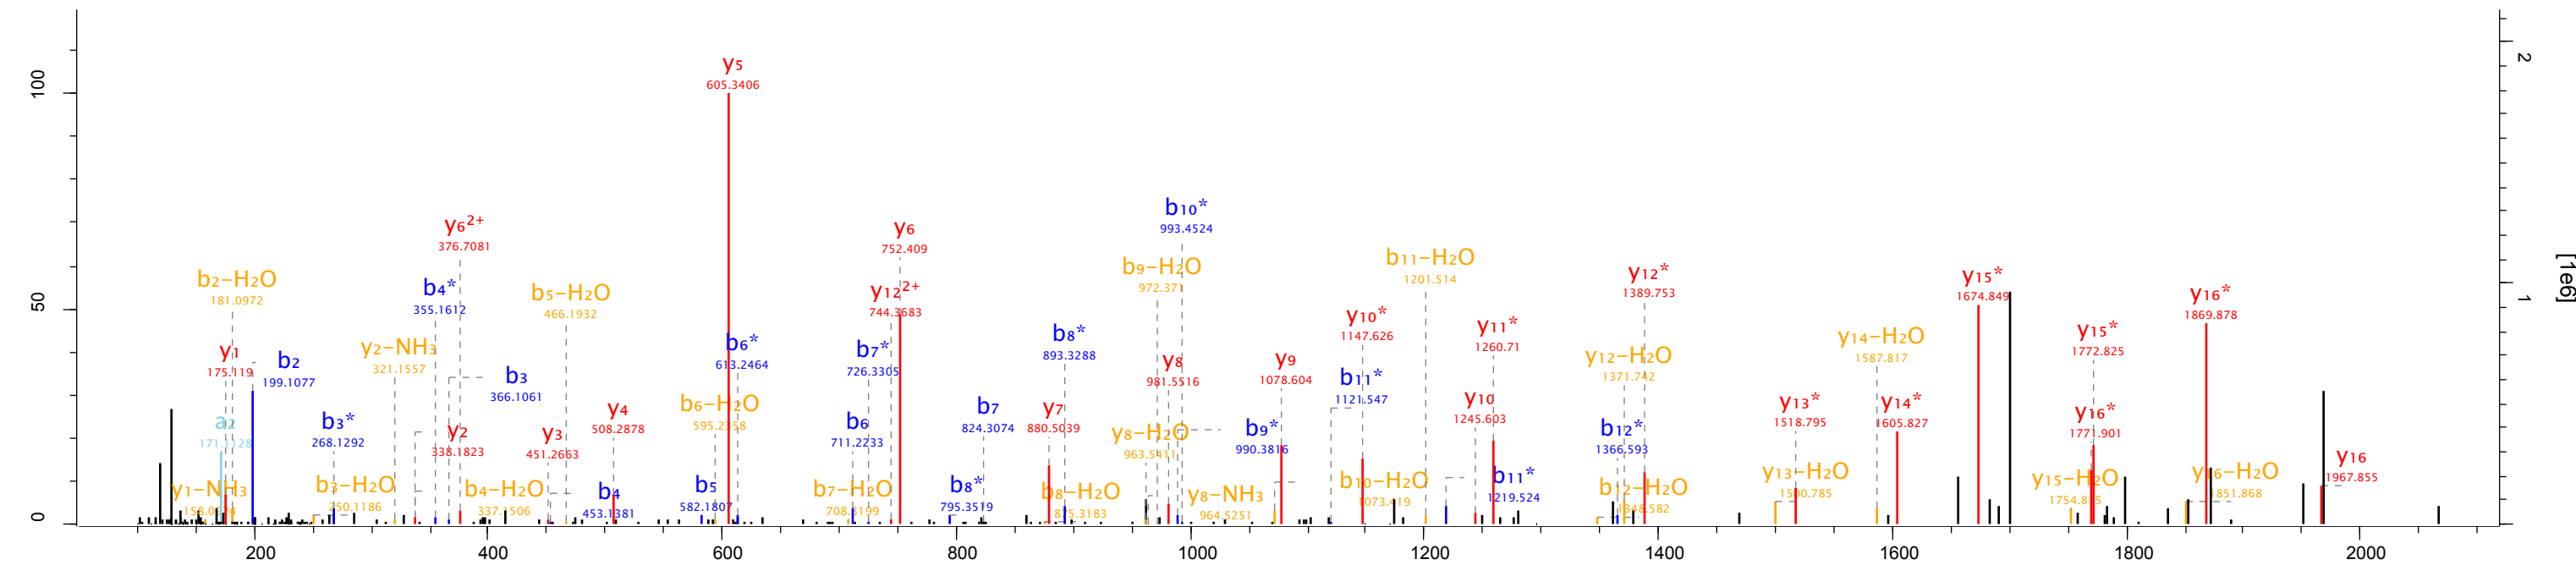

- T -  
 P S S E E I S P T K F P G L Y R -  
 b<sub>2</sub> b<sub>3</sub> b<sub>4</sub> b<sub>5</sub> b<sub>6</sub> b<sub>7</sub> b<sub>8</sub>\* b<sub>9</sub>\* b<sub>10</sub>\* b<sub>11</sub>\* b<sub>12</sub>\*

Raw file 20150814\_A375SR\_Phospho\_BR2\_03 Scan 21447 Method FTMS; HCD Score 110.26 m/z 878.44 Gene names RAPH1

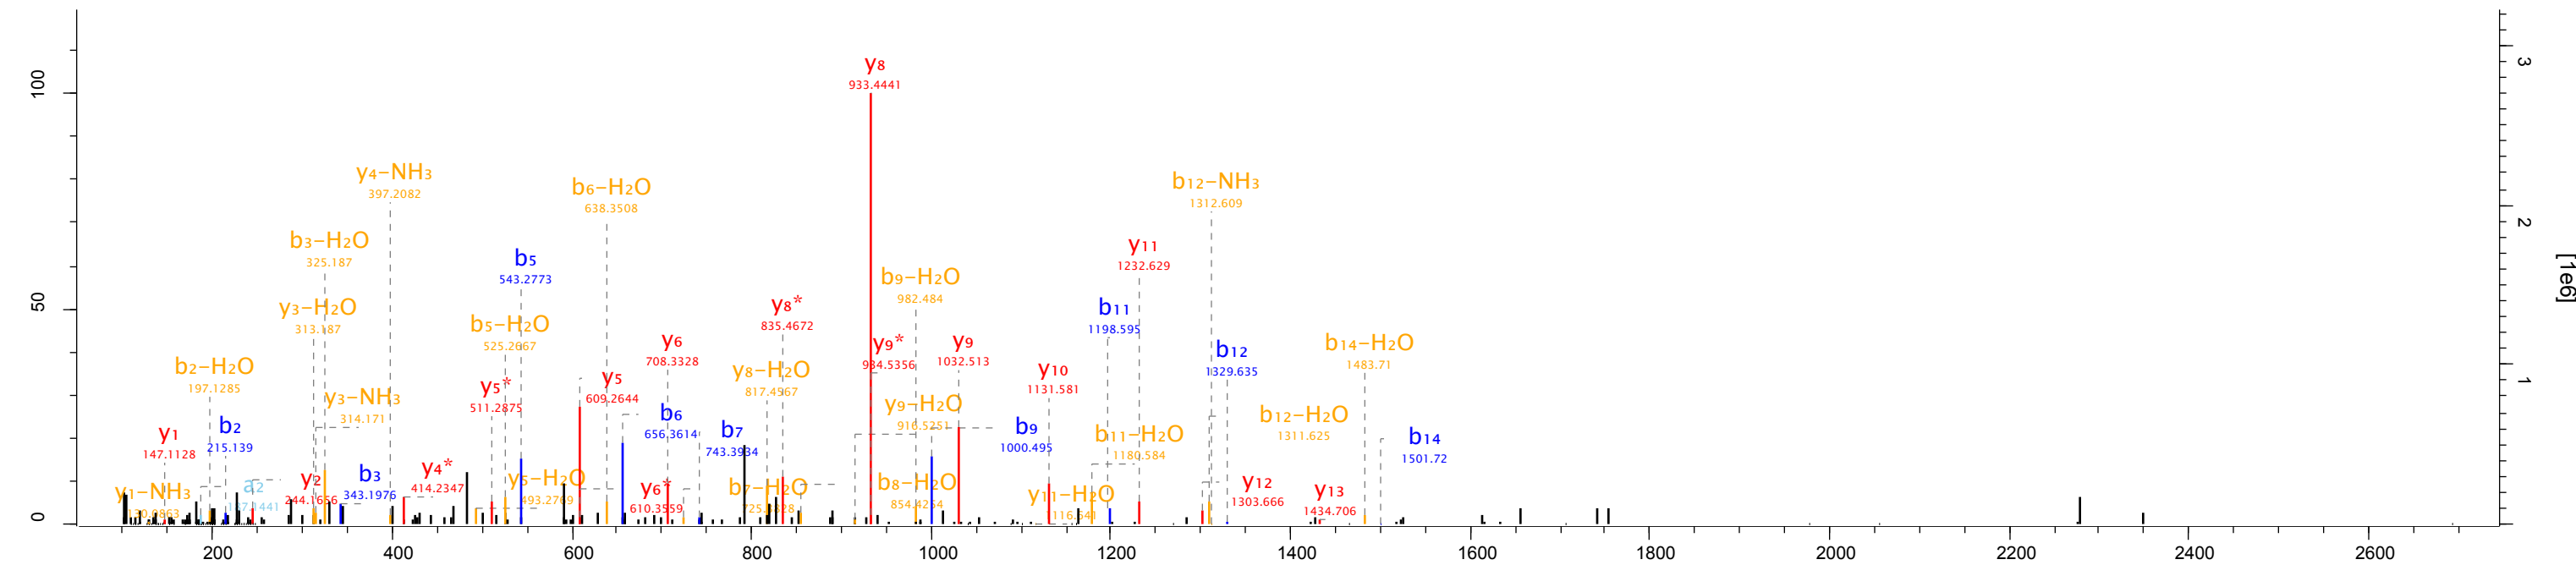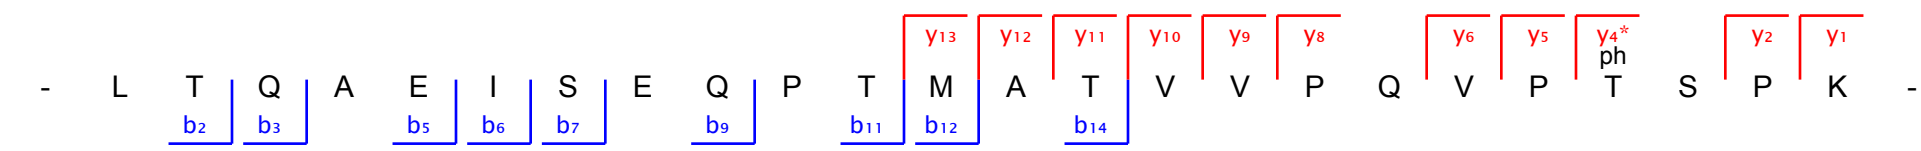

Raw file 20150814\_A375SR\_Phospho\_BR2\_03 Scan 21557 Method FTMS; HCD Score 306.16 m/z 1220.01 Gene names CLTA

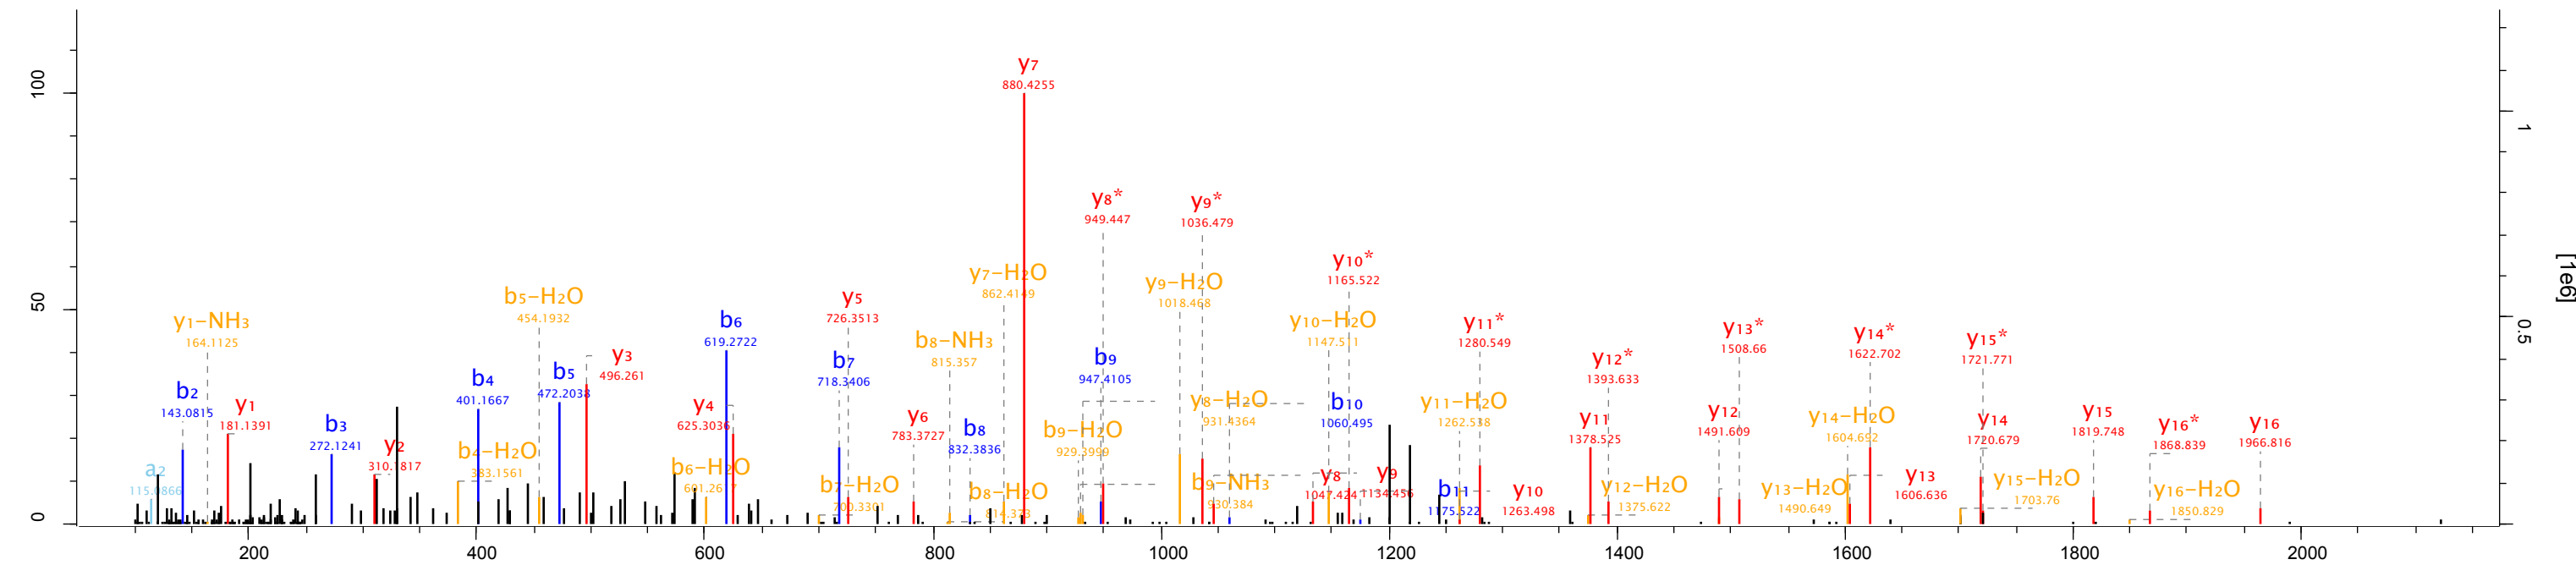

- A A E E A F V N D I D E S S P G T E W E R -

b<sub>2</sub>
b<sub>3</sub>
b<sub>4</sub>
b<sub>5</sub>
b<sub>6</sub>
b<sub>7</sub>
b<sub>8</sub>
b<sub>9</sub>
b<sub>10</sub>
b<sub>11</sub>
y<sub>16</sub>
y<sub>15</sub>
y<sub>14</sub>
y<sub>13</sub>
y<sub>12</sub>
y<sub>11</sub>
y<sub>10</sub>
y<sub>9</sub>
y<sub>8</sub>ph
y<sub>7</sub>
y<sub>6</sub>
y<sub>5</sub>
y<sub>4</sub>
y<sub>3</sub>
y<sub>2</sub>
y<sub>1</sub>

Raw file Scan Method Score m/z Gene names  
 20150814\_A375SR\_Phospho\_BR2\_03 21887 FTMS; HCD 196.06 847.08 FCHO2

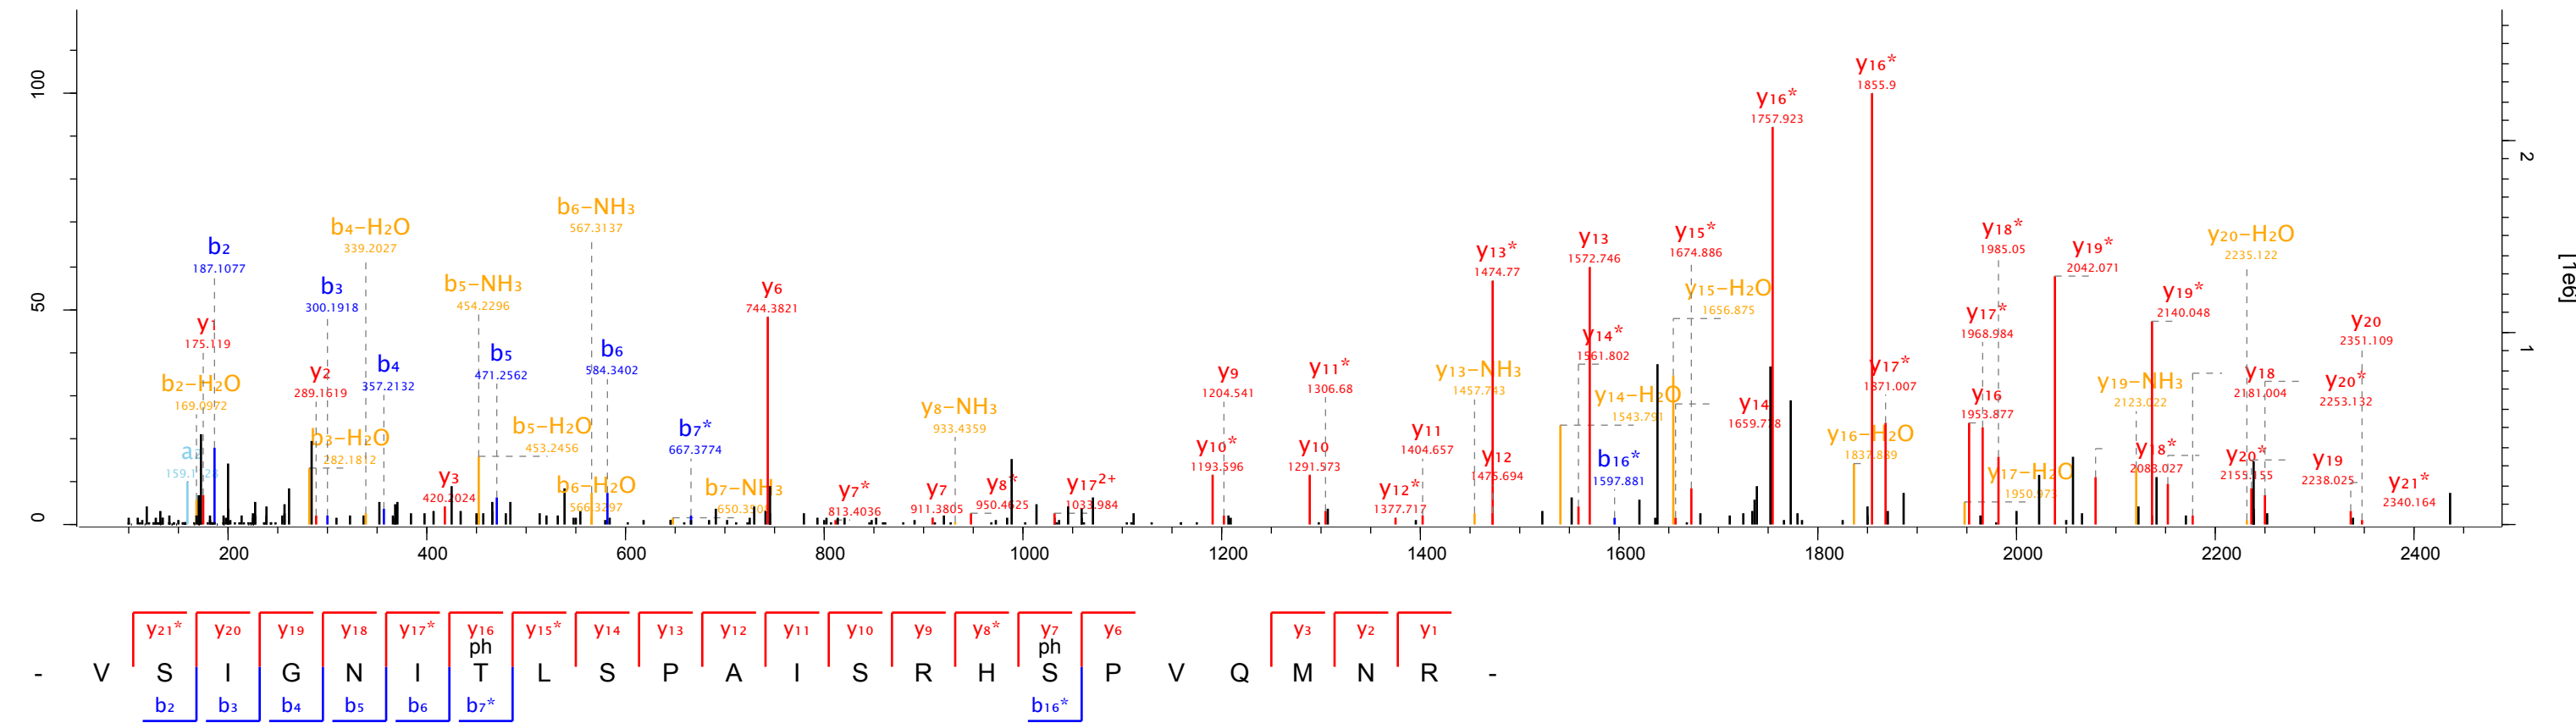

Raw file 20150814\_A375SR\_Phospho\_BR2\_03 Scan 22327 Method FTMS; HCD Score 123.08 m/z 846.82 Gene names KIAA1143

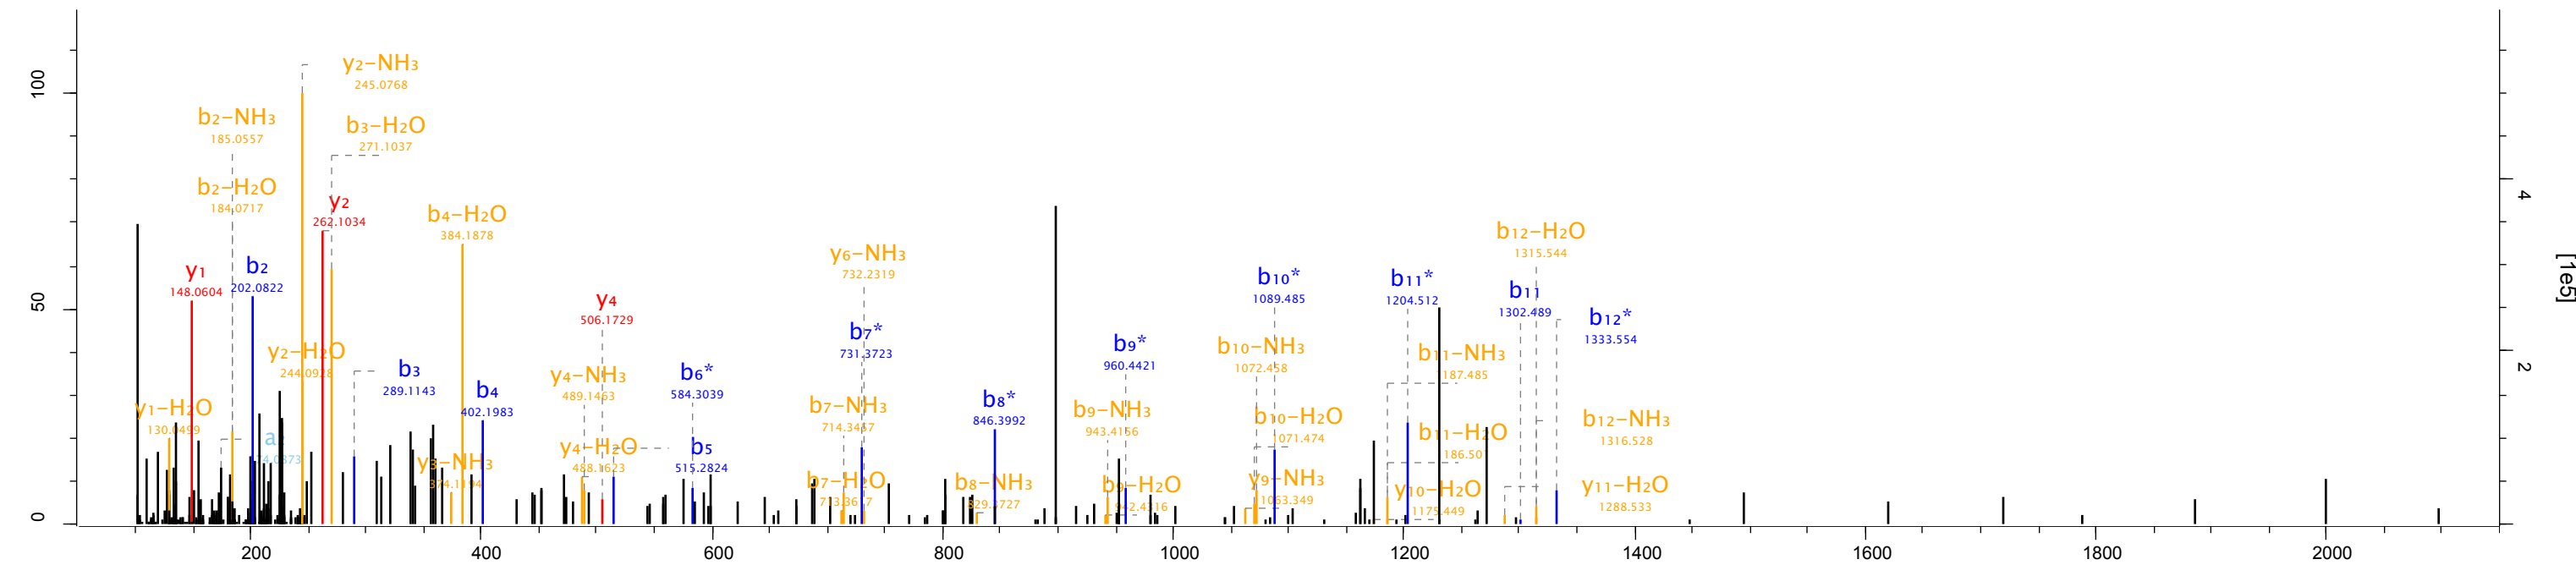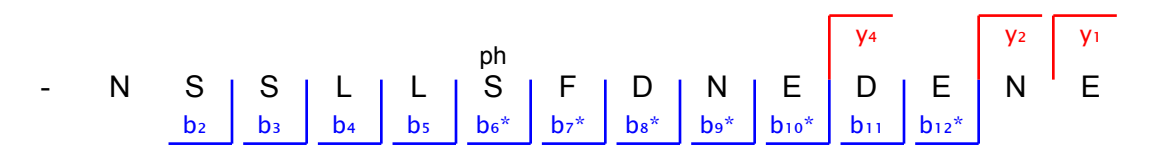

Raw file 20150814\_A375SR\_Phospho\_BR2\_03 Scan 22457 Method FTMS; HCD Score 198.26 m/z 899.7 Gene names ATP2B1

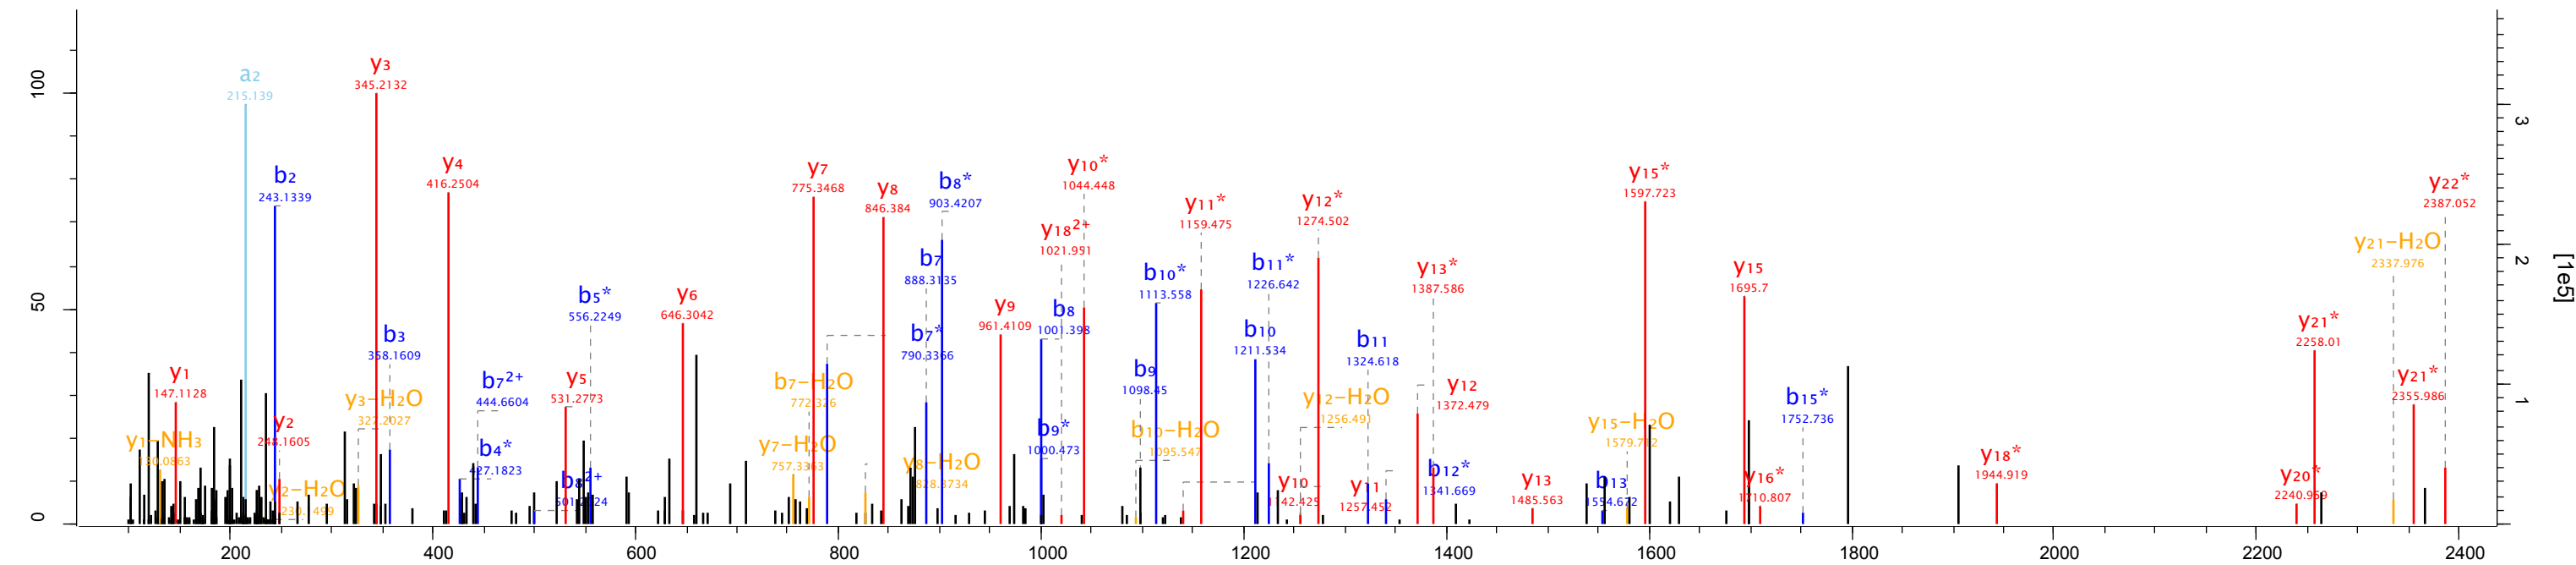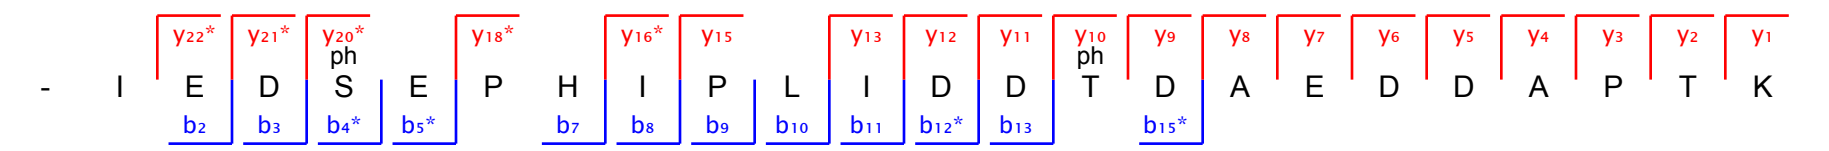



Raw file 20150814\_A375SR\_Phospho\_BR2\_03 Scan 22607 Method FTMS; HCD Score 47.69 m/z 625.95 Gene names TTC4

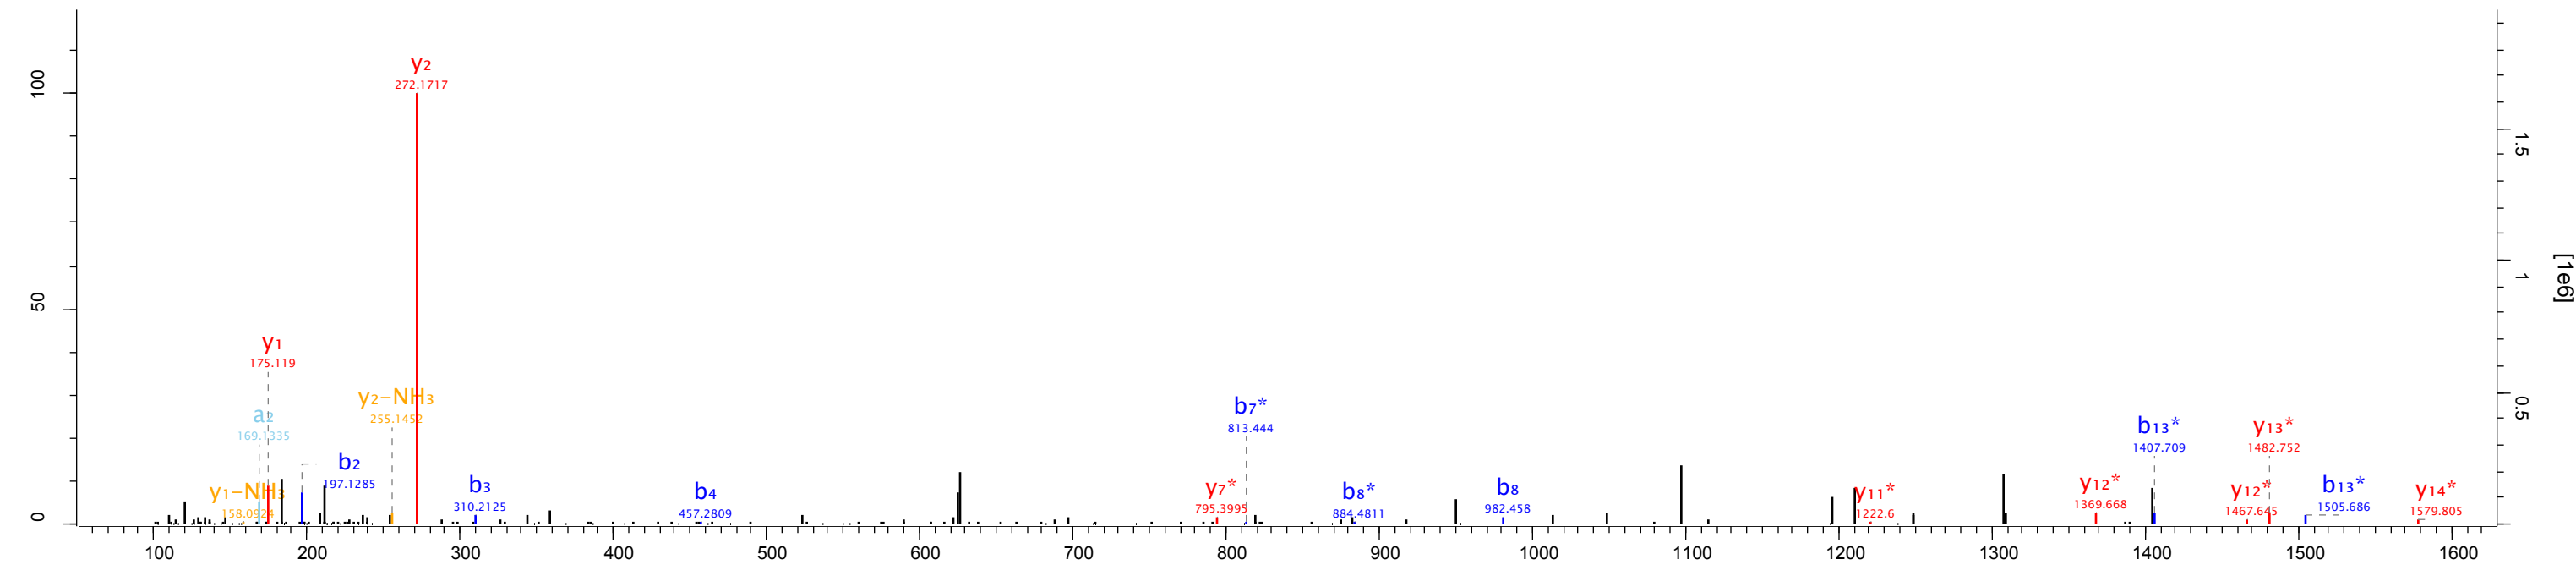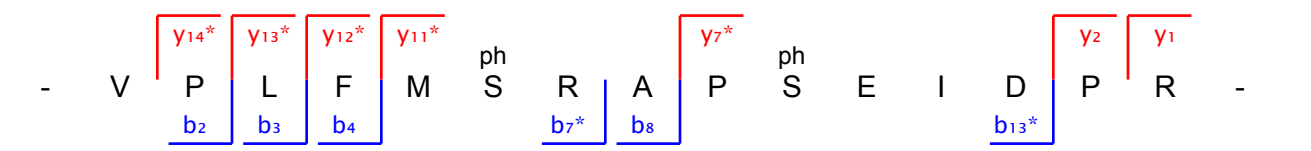

Raw file 20150814\_A375SR\_Phospho\_BR2\_03 Scan 22677 Method FTMS; HCD Score 43.44 m/z 1013.09 Gene names USP11

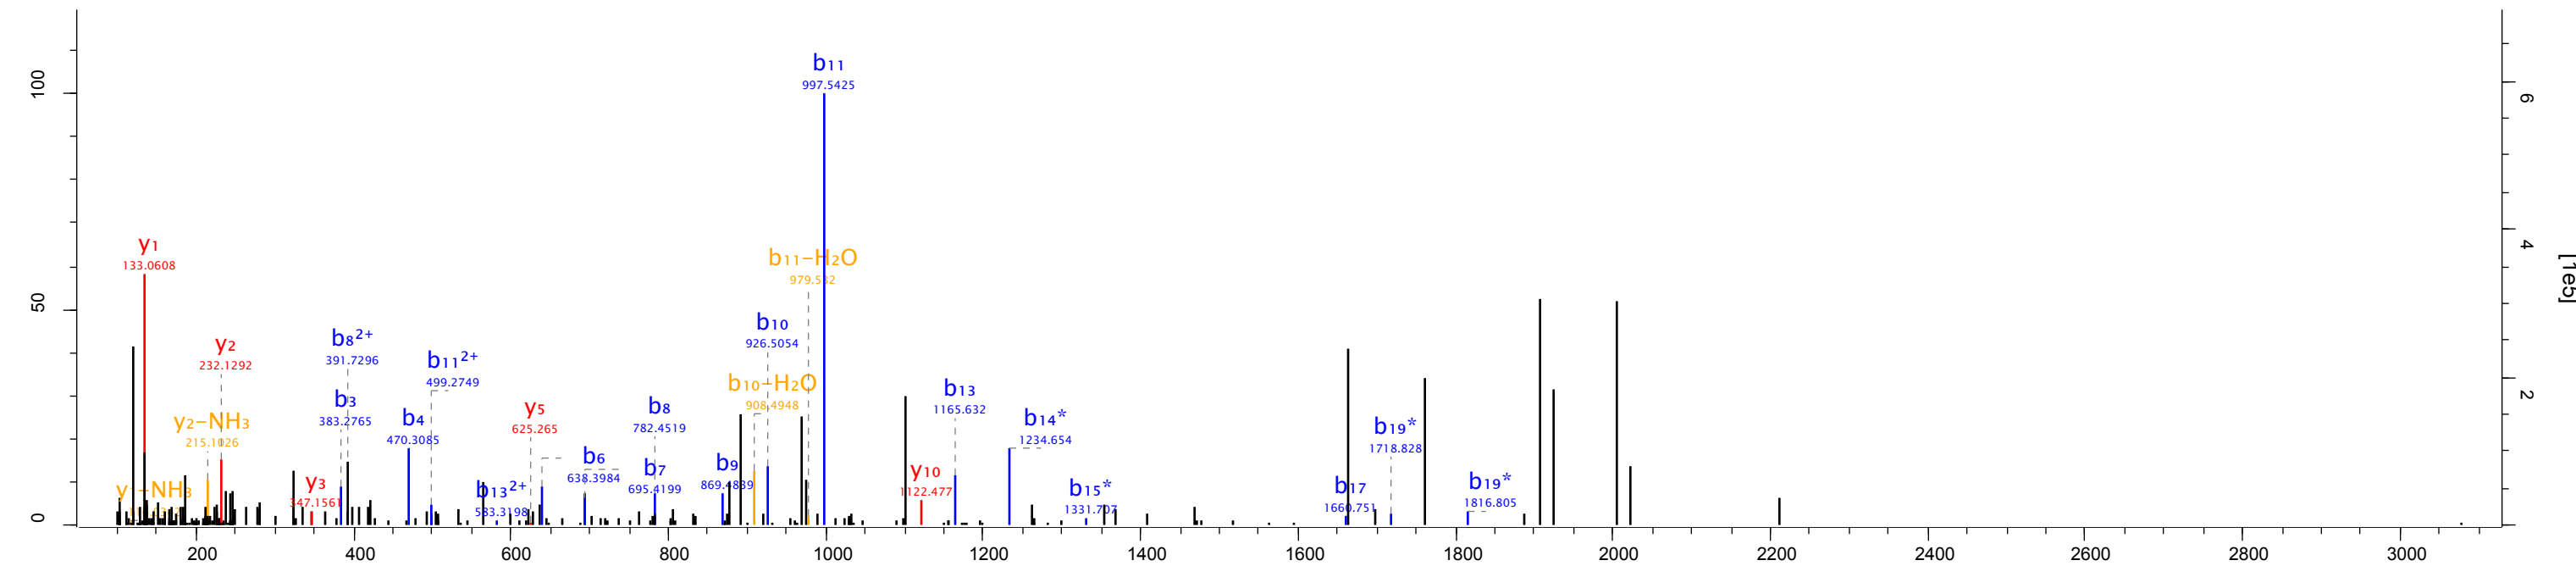

- R L L S P A G S S G A P A S P A C S S P P S S E F M D V N -

Fragmentation mapping (b and y ions) is shown below the sequence:

- b3: L-L
- b4: L-S
- b6: A-G
- b7: G-S
- b8: S-S
- b9: S-G
- b10: G-A
- b11: A-P
- b13: A-S
- b14\*: S-P
- b15\*: P-A
- b17: C-S
- b19\*: S-S
- y10: S-P
- y5: E-F
- y3: M-D
- y2: D-V
- y1: V-N

Raw file 20150814\_A375SR\_Phospho\_BR2\_03 Scan 22807 Method FTMS; HCD Score 92.03 m/z 846.87 Gene names GIT1

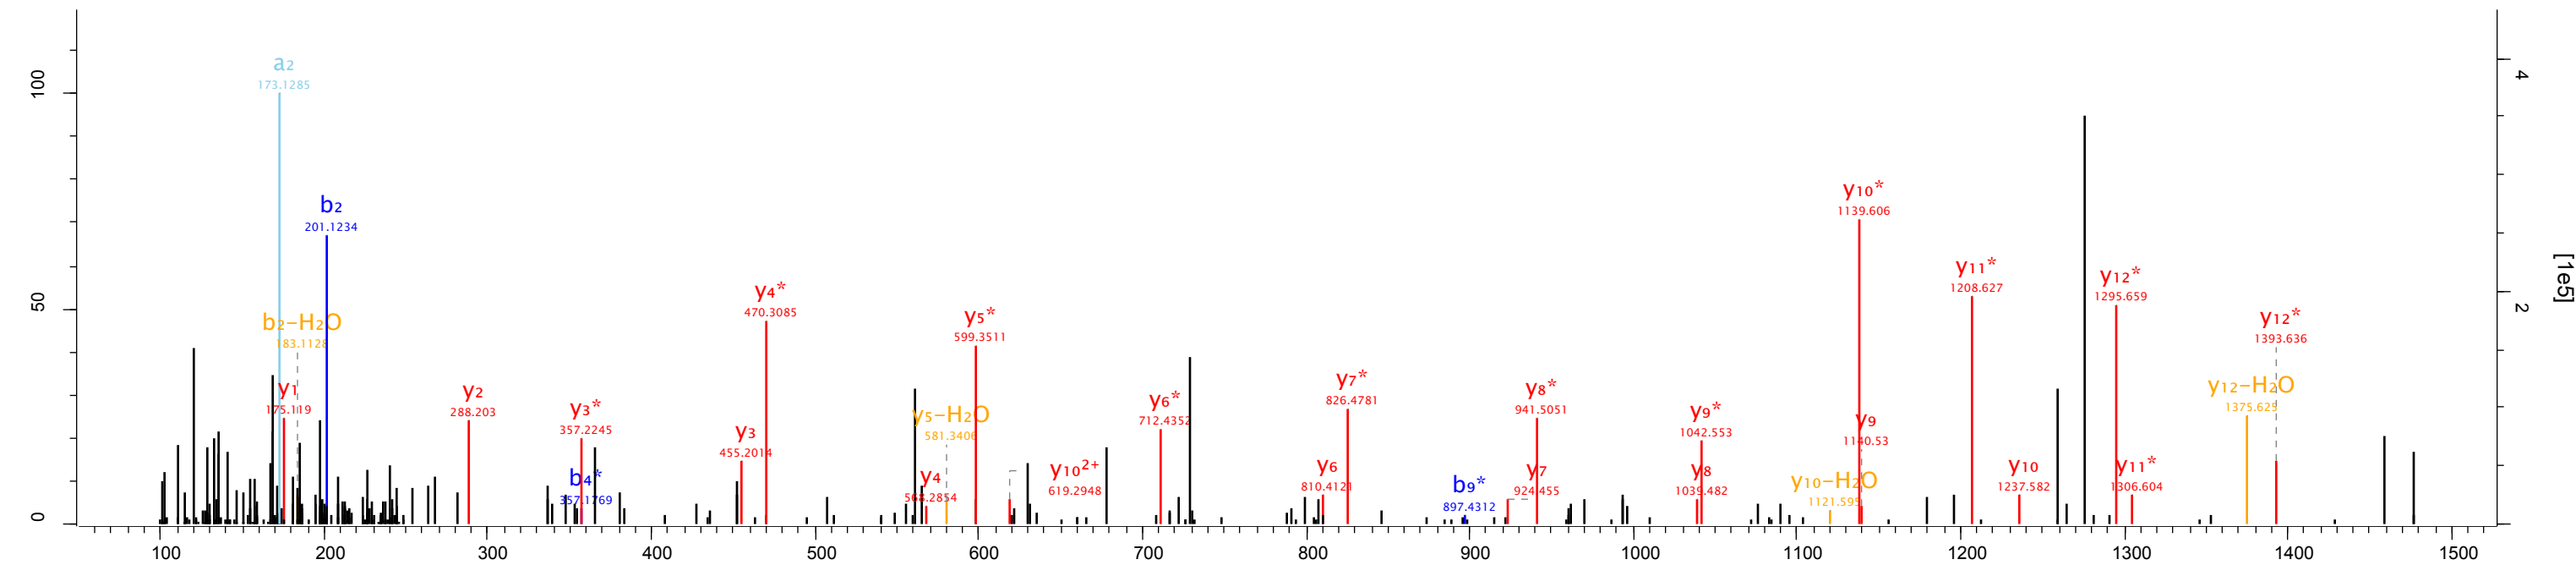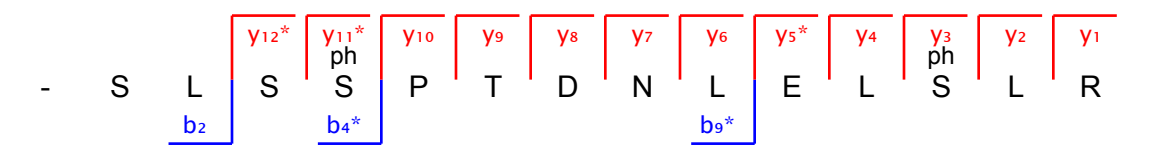

Raw file: 20150814\_A375SR\_Phospho\_BR2\_03  
 Scan: 23137 Method: FTMS; HCD Score: 81.2 m/z: 763.02 Gene names: SCRIB

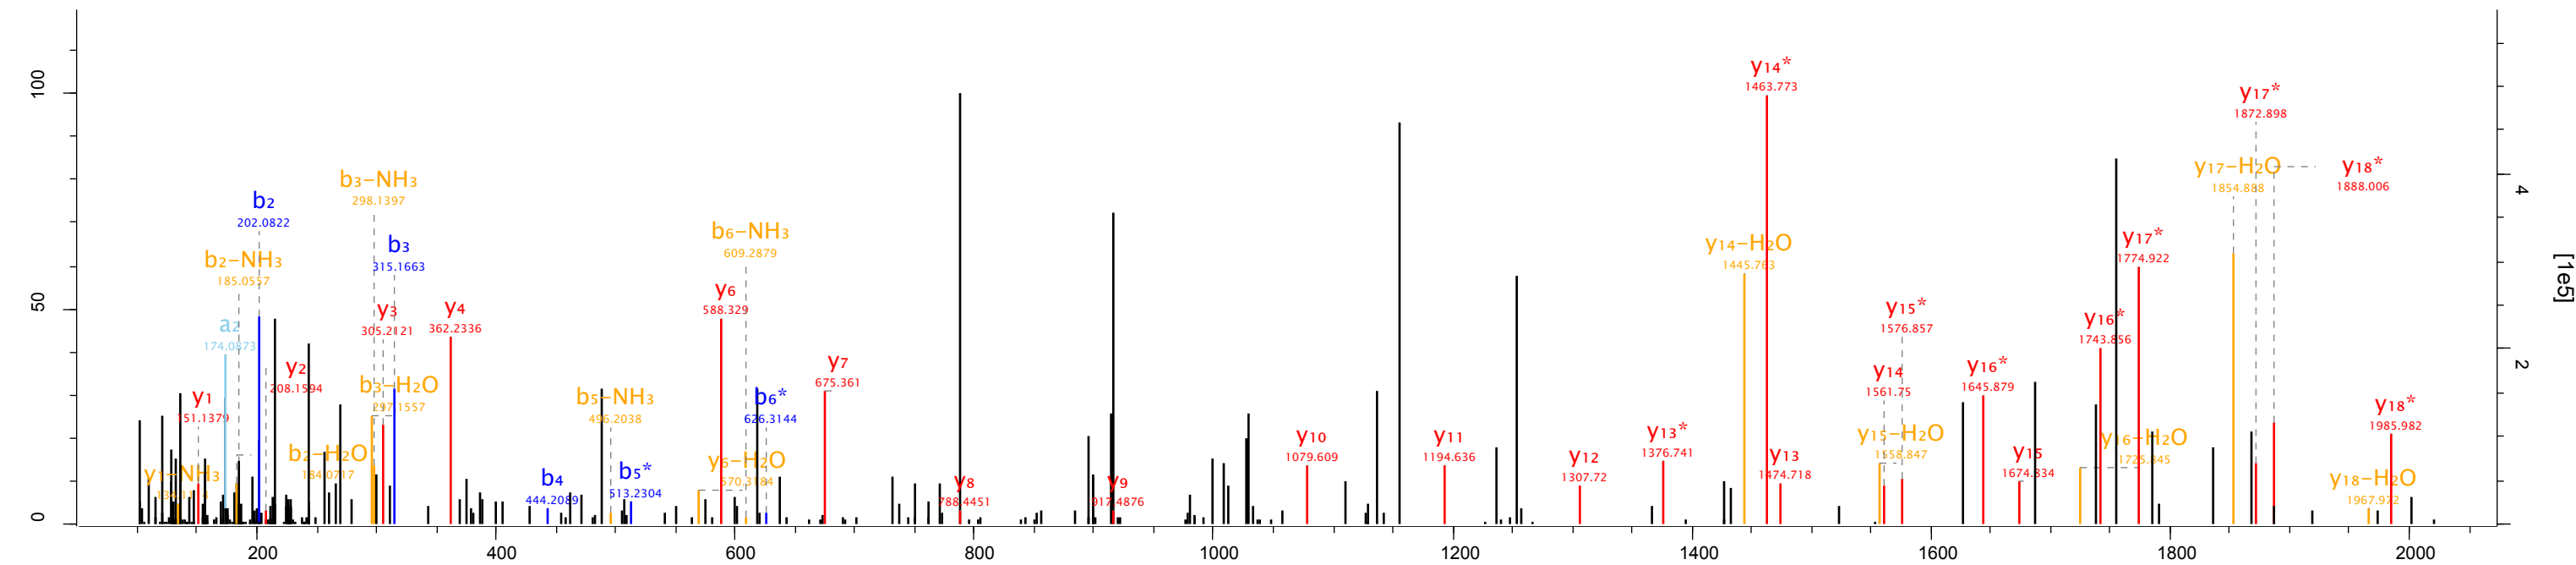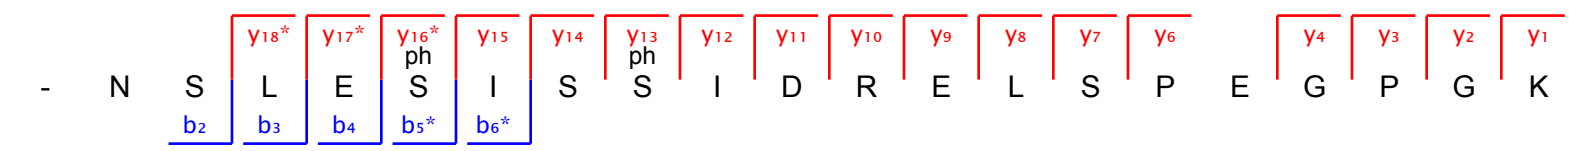

Raw file: 20150814\_A375SR\_Phospho\_BR2\_03  
 Scan: 23277 Method: FTMS; HCD Score: 193.16 m/z: 1028.17 Gene names: FOXK1

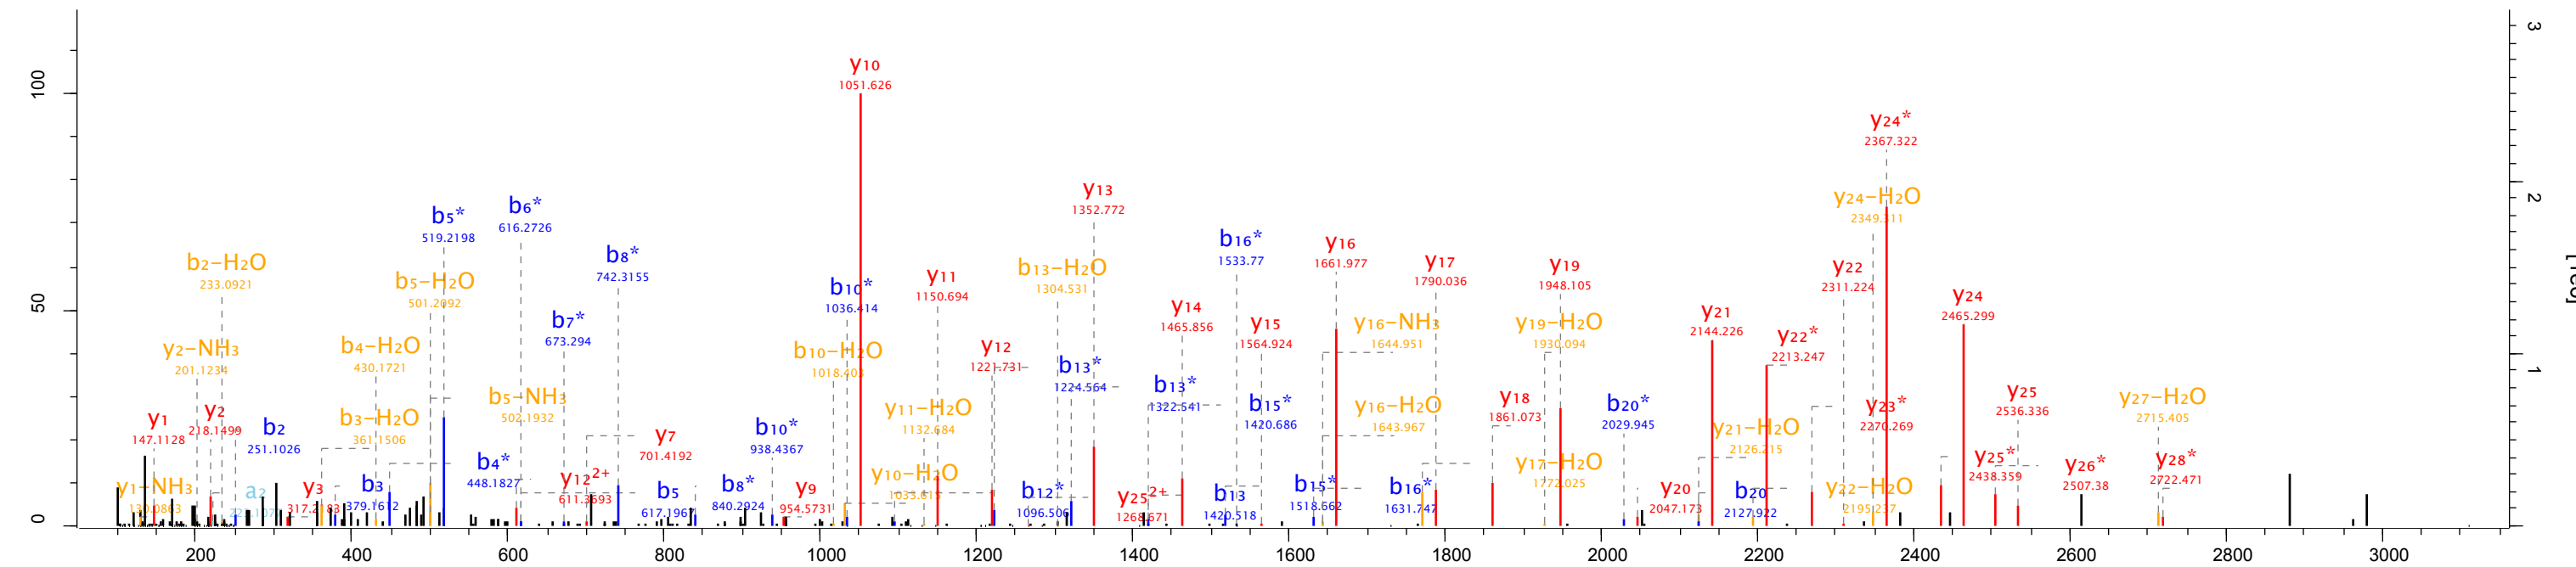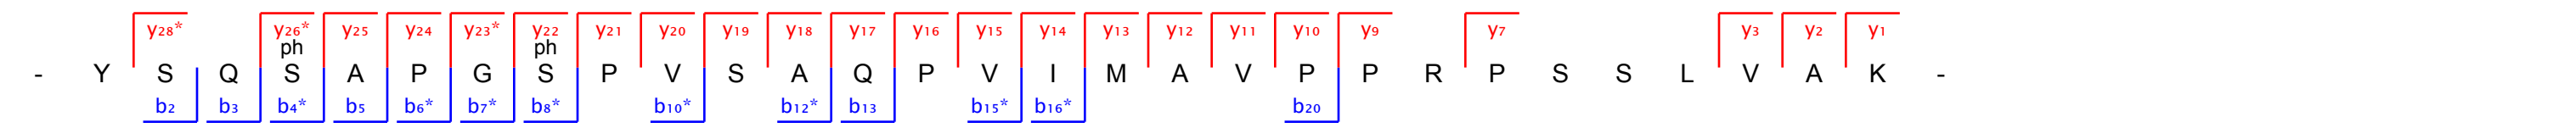

Raw file: 20150814\_A375SR\_Phospho\_BR2\_03  
 Scan: 23327 Method: FTMS; HCD Score: 100.97 m/z: 864.89 Gene names: TNKS1BP1

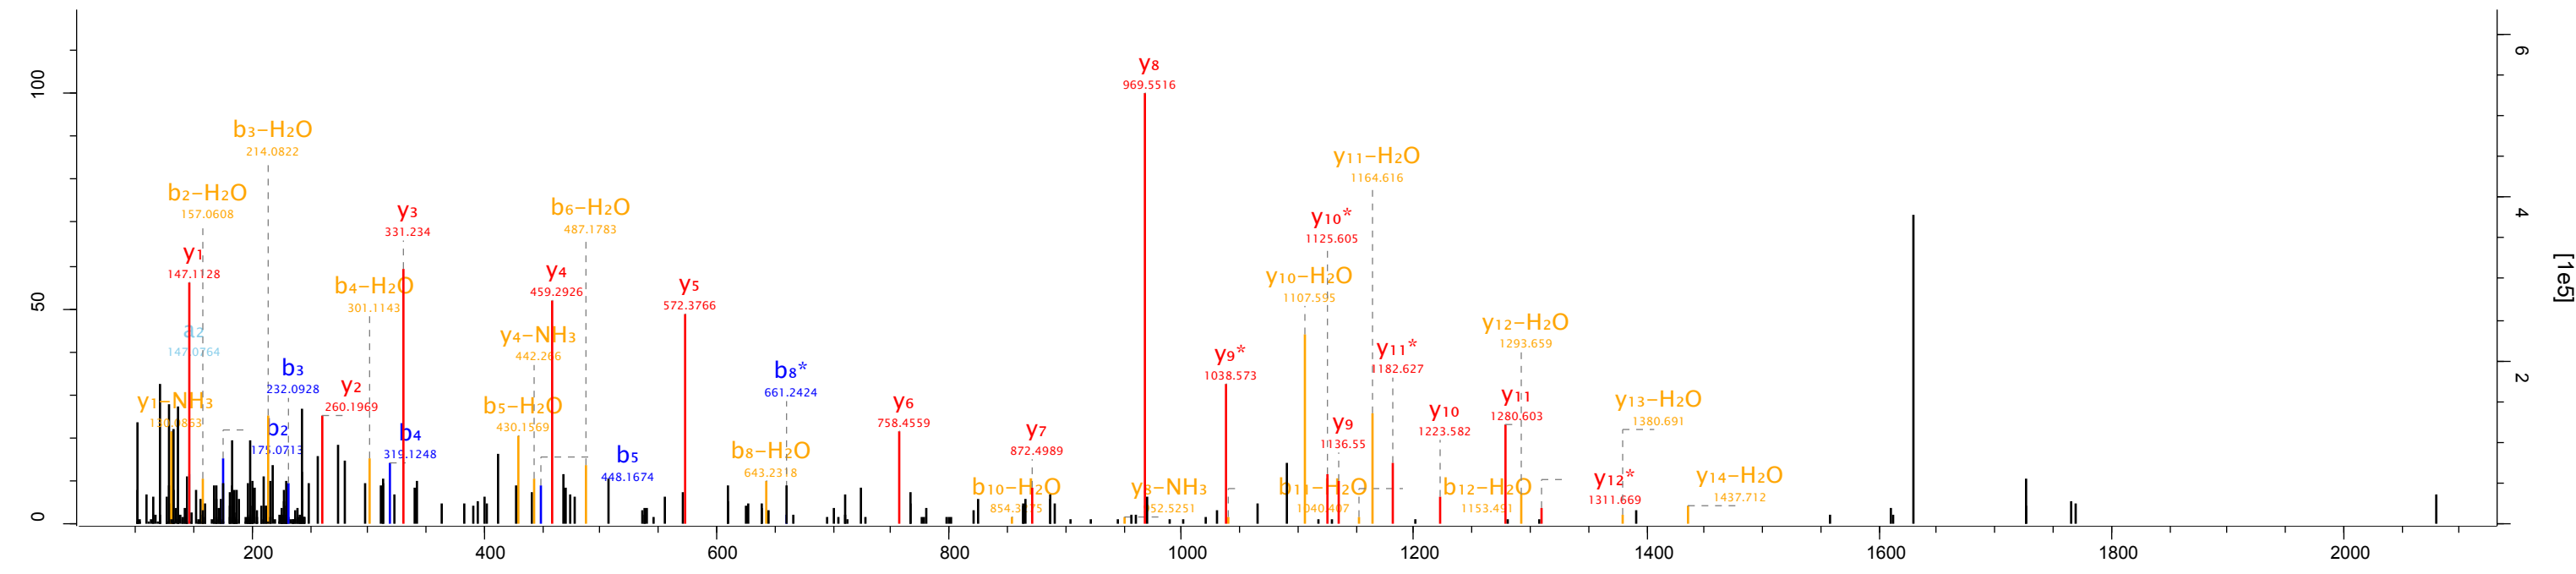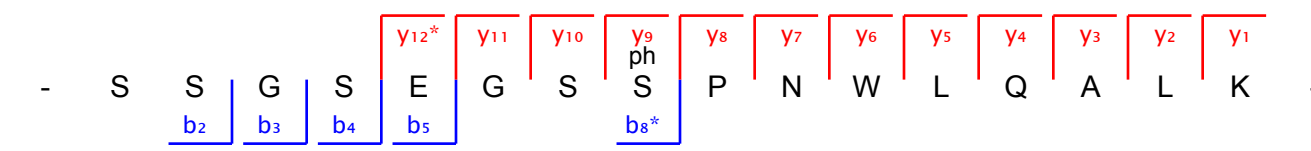

Raw file: 20150814\_A375SR\_Phospho\_BR2\_03  
 Scan: 23407  
 Method: FTMS; HCD  
 Score: 138.82  
 m/z: 1186.07  
 Gene names: SUPT6H

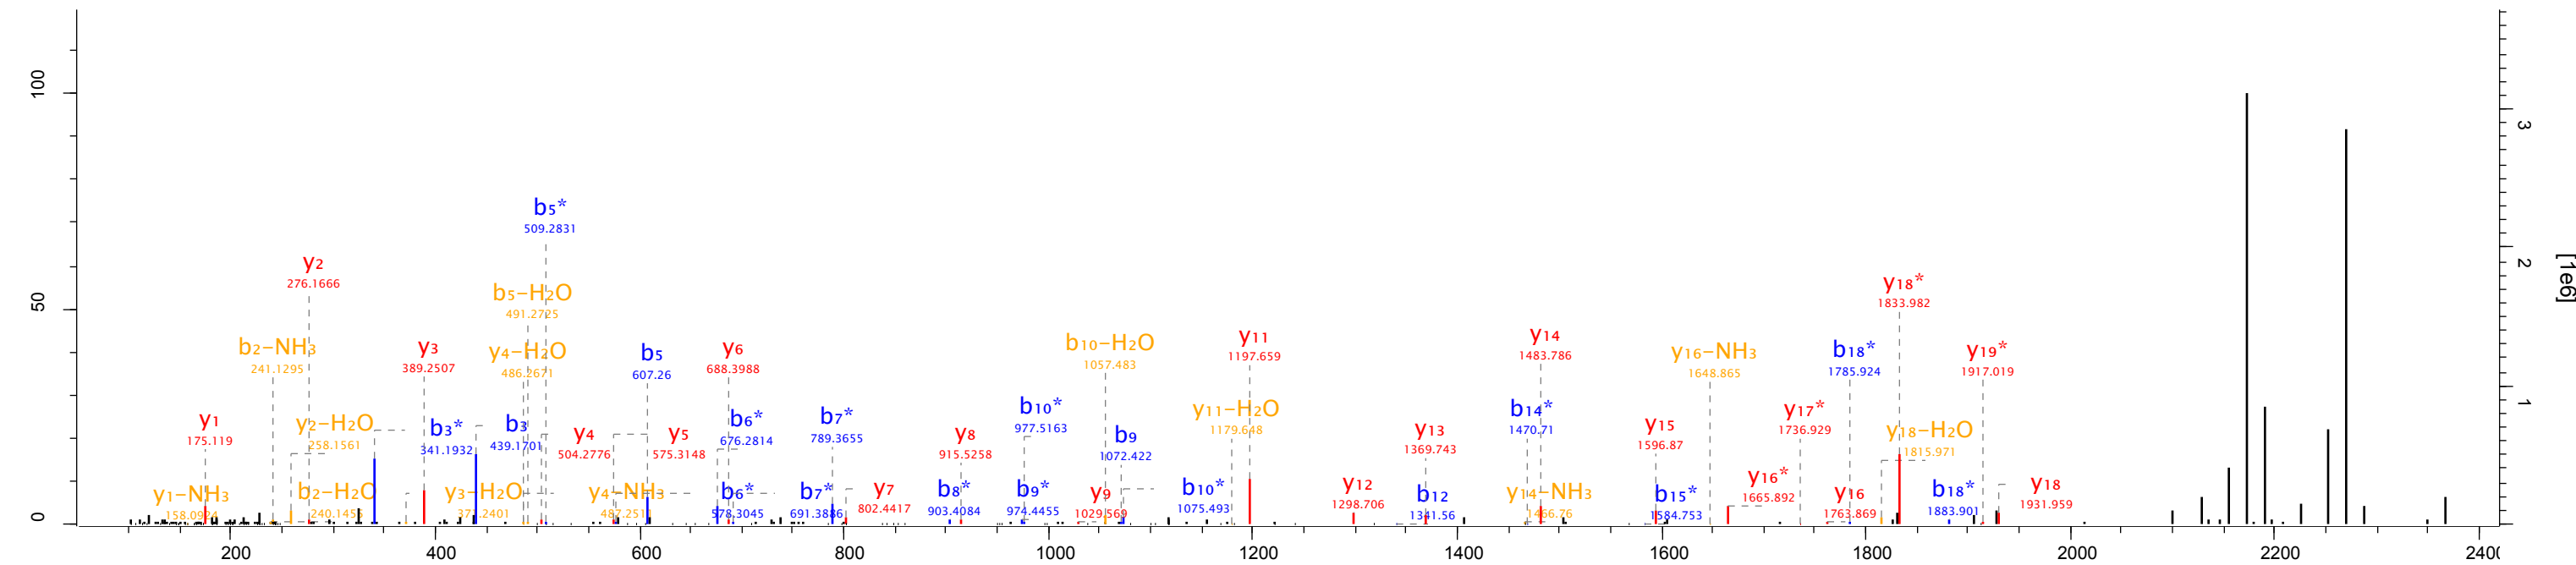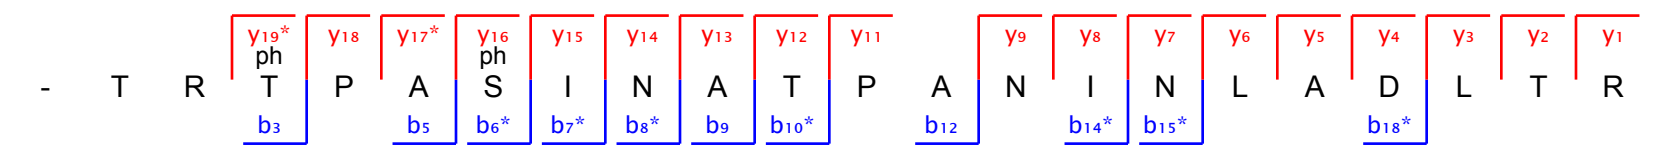

Raw file  
20150814\_A375SR\_Phospho\_BR2\_03

Scan 23537 Method FTMS; HCD Score 266.95 m/z 1496.15 Gene names CIR1

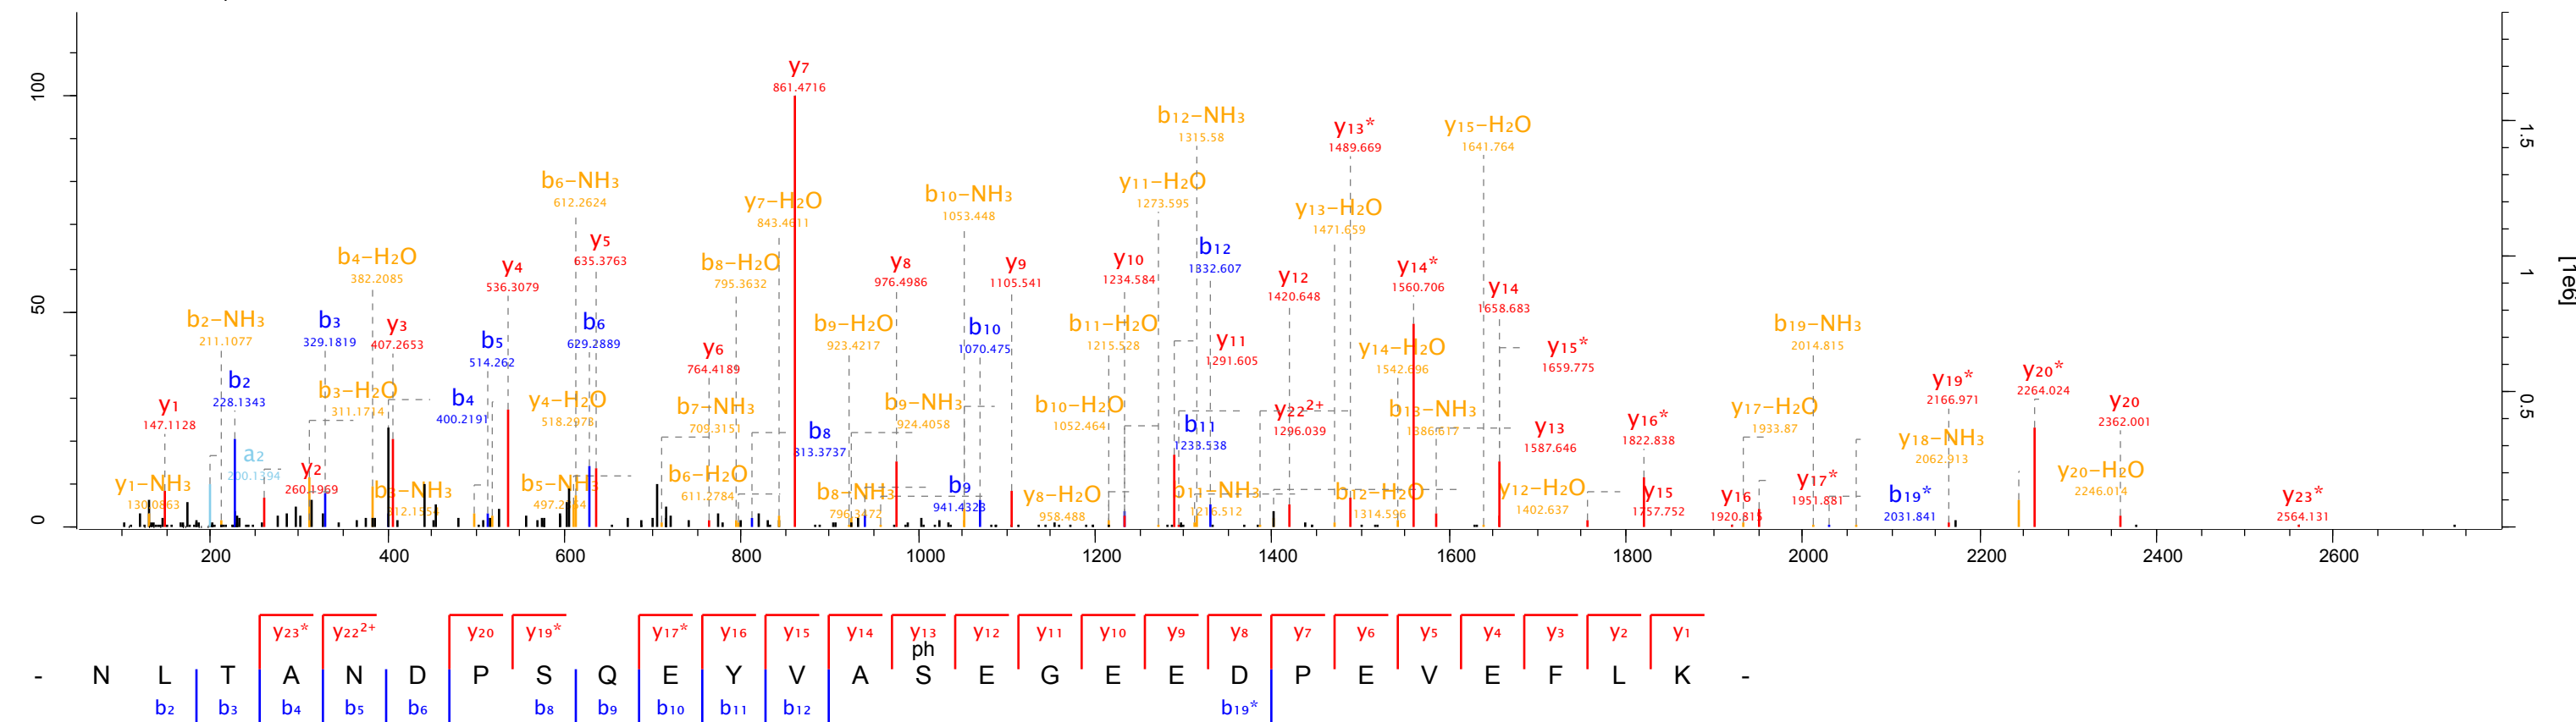



Raw file 20150814\_A375SR\_Phospho\_BR2\_03 Scan 23657 Method FTMS; HCD Score 125.77 m/z 1003.44 Gene names PHF21A

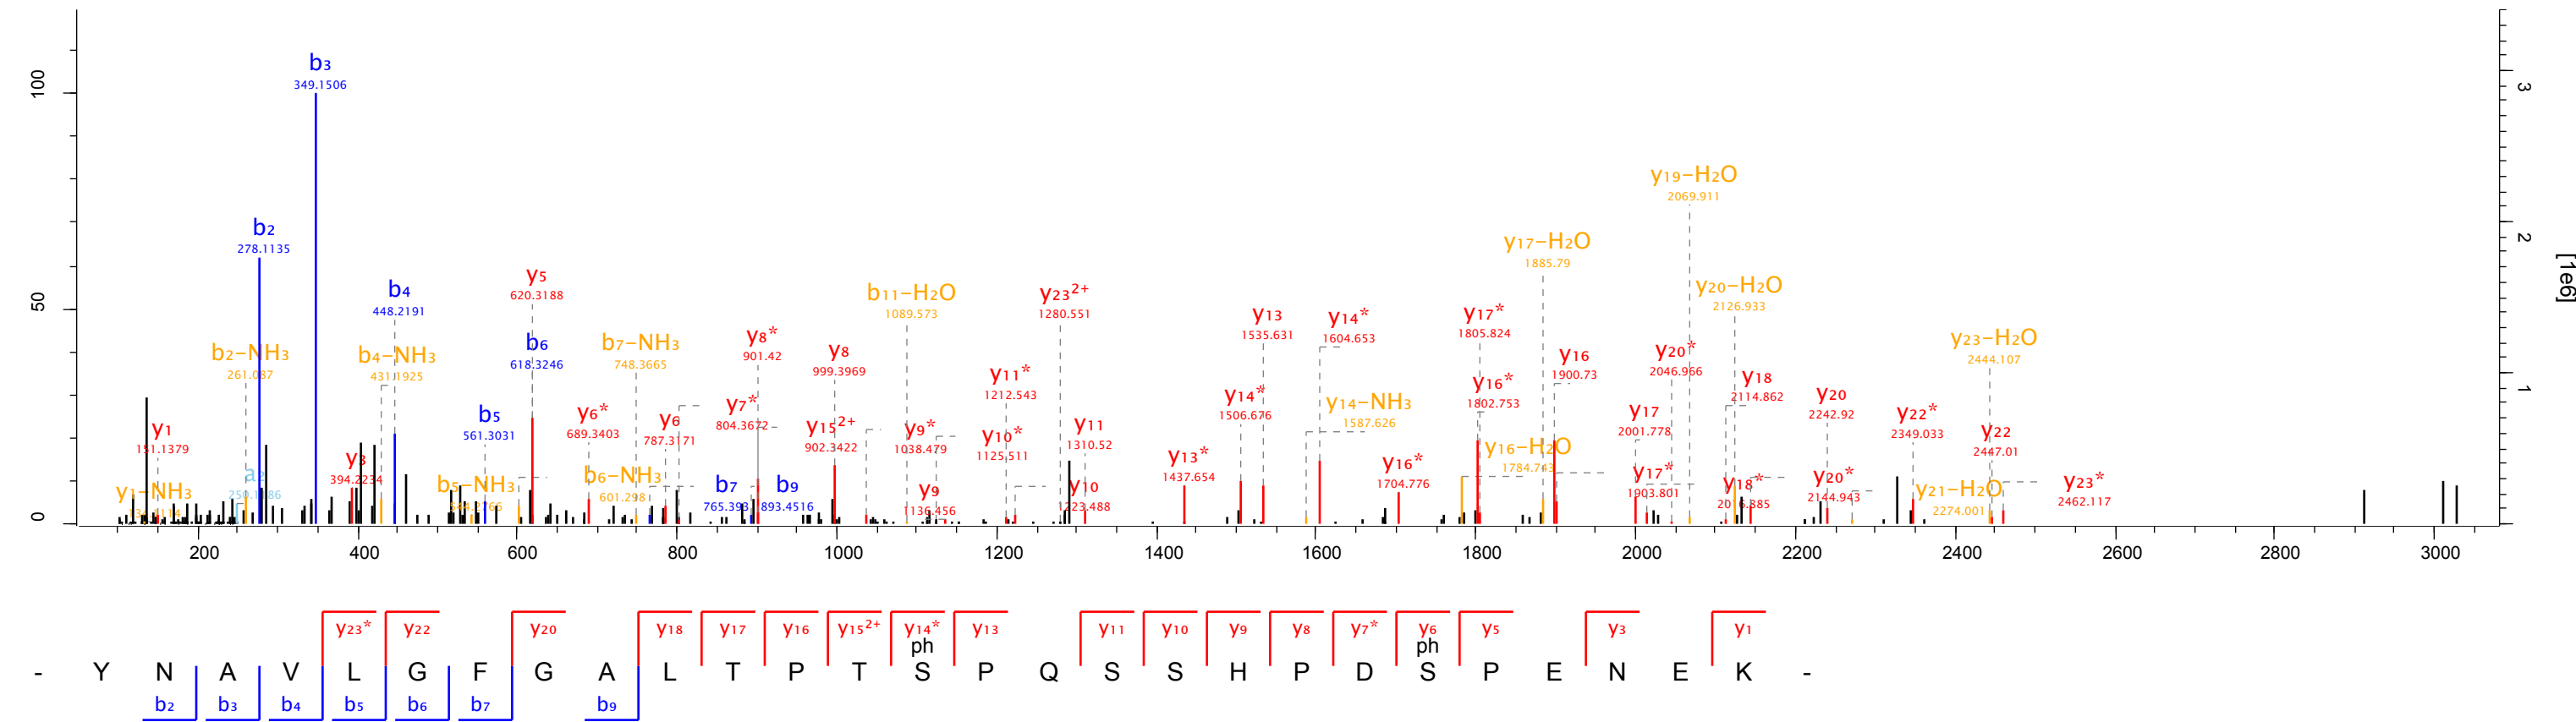

Raw file: 20150814\_A375SR\_Phospho\_BR2\_03  
 Scan: 2387 Method: FTMS; HCD Score: 127.42 m/z: 696.96 Gene names: BICD2

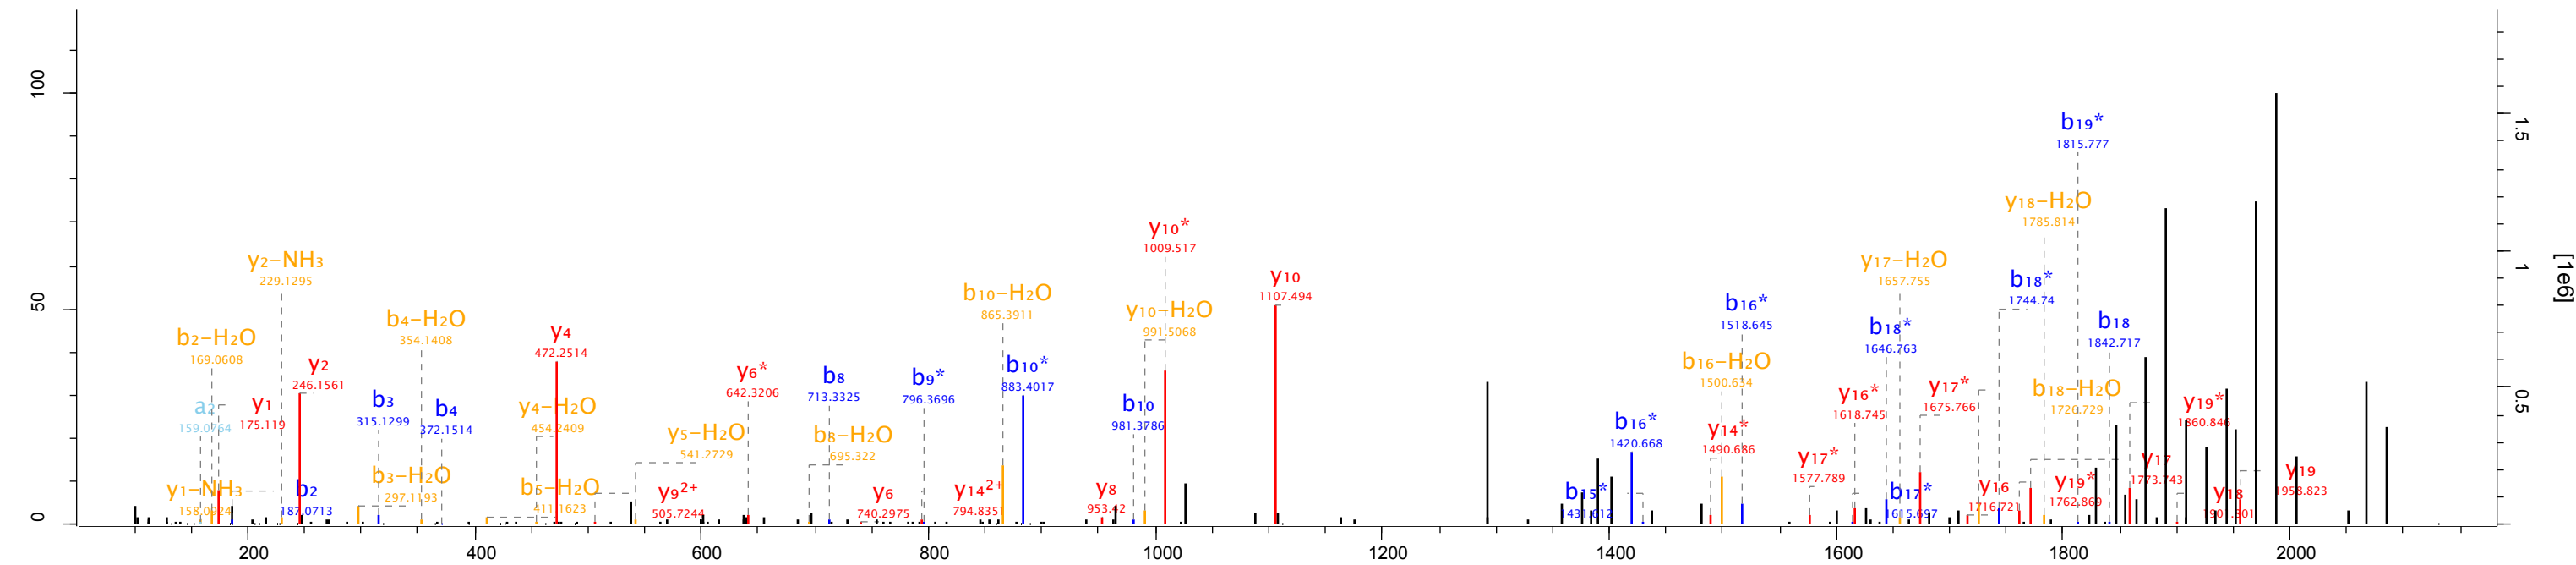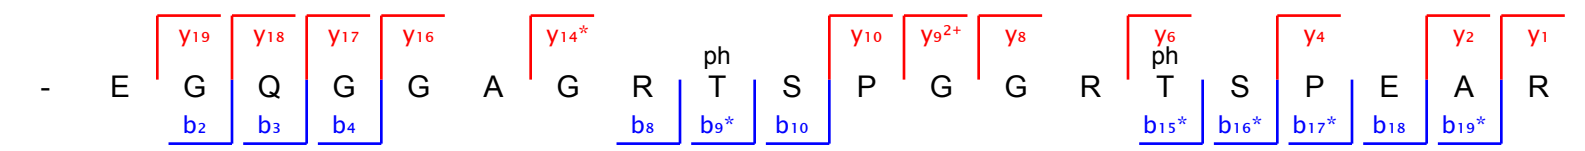

Raw file: 20150814\_A375SR\_Phospho\_BR2\_03  
 Scan: 24267 Method: FTMS; HCD Score: 87.67 m/z: 838.29 Gene names: EIF2S2

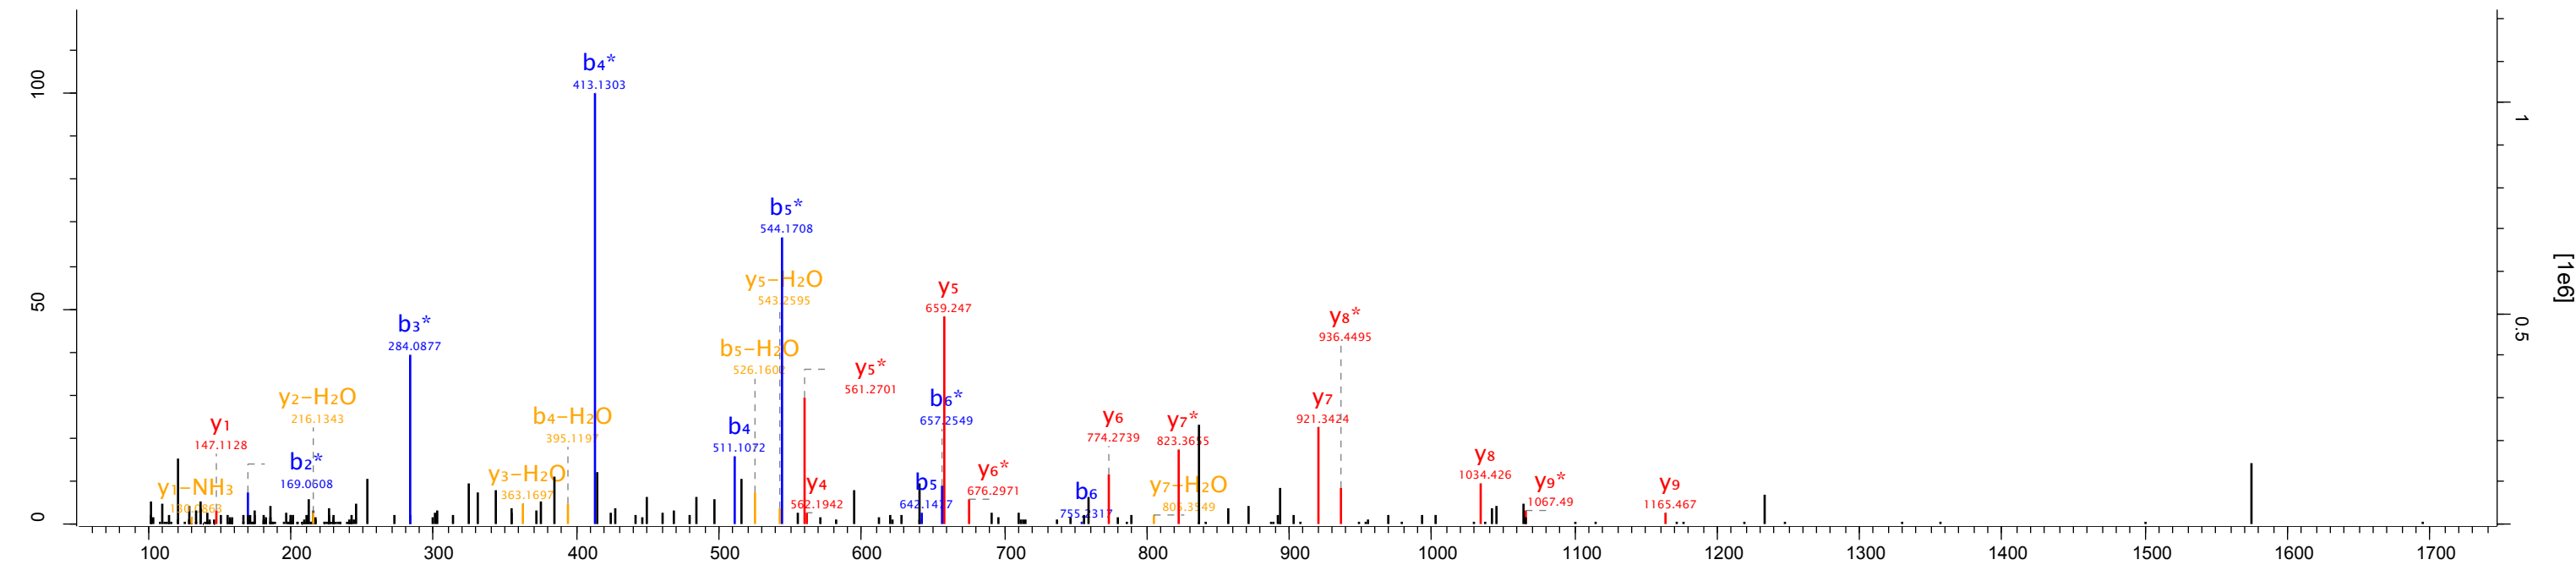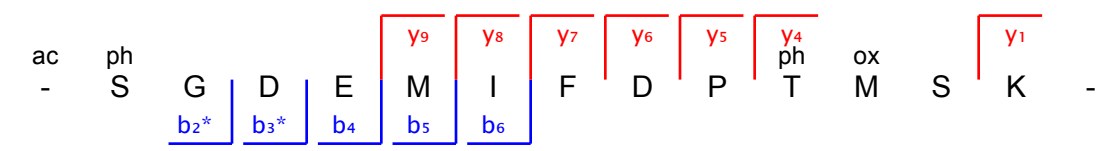

Raw file: 20150814\_A375SR\_Phospho\_BR2\_03  
 Scan: 24777 Method: FTMS; HCD Score: 109.87 m/z: 853.35 Gene names: C17orf75

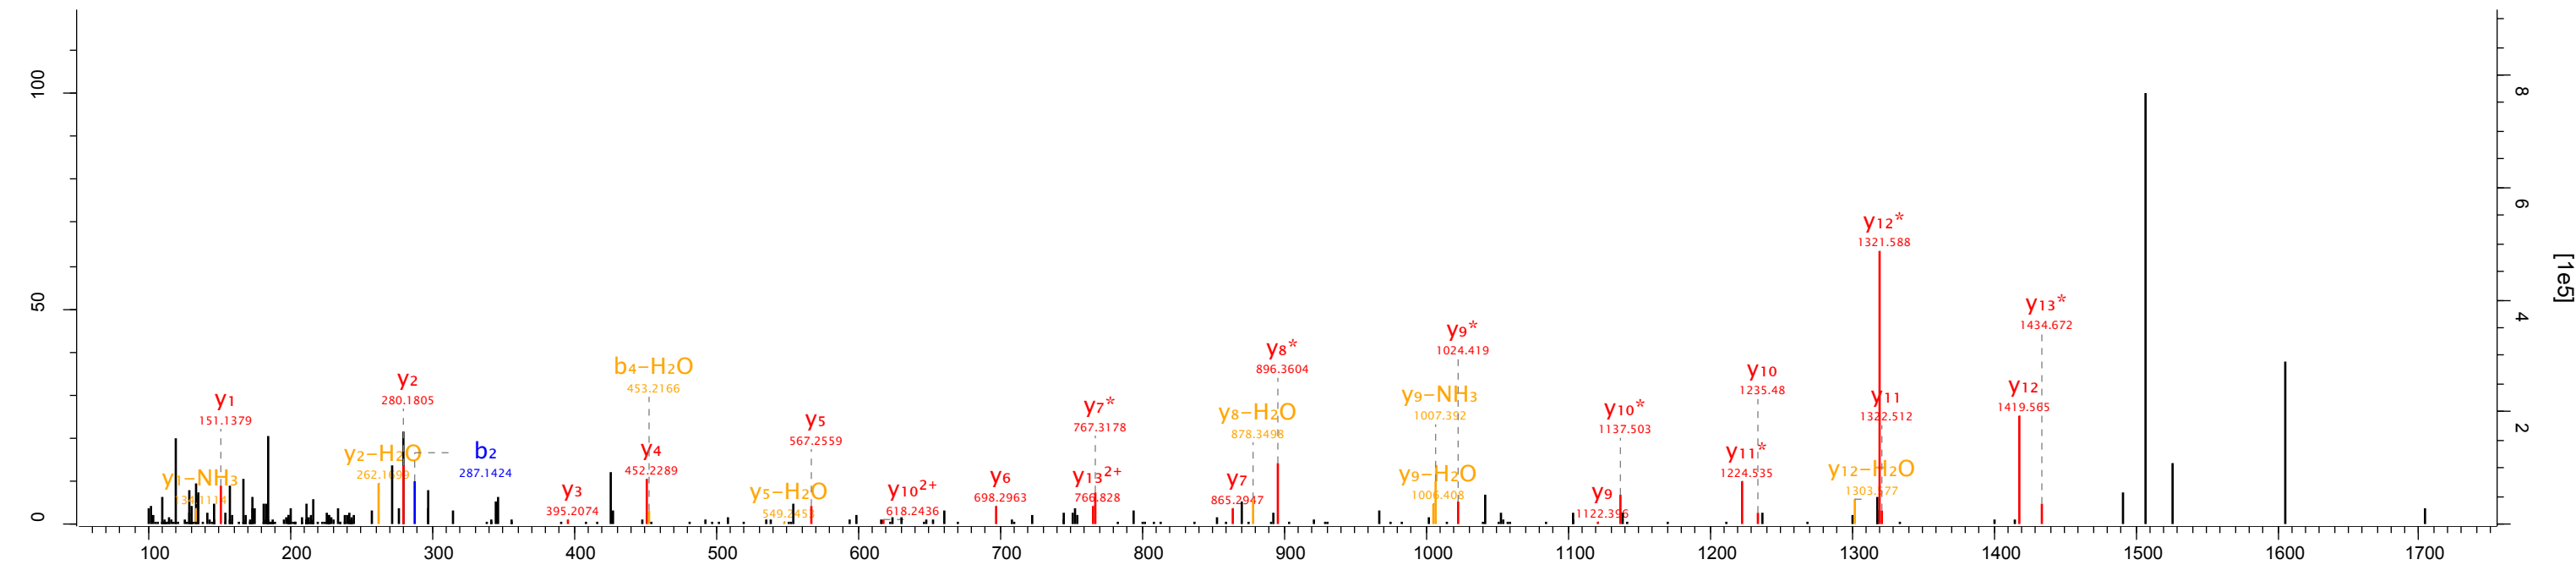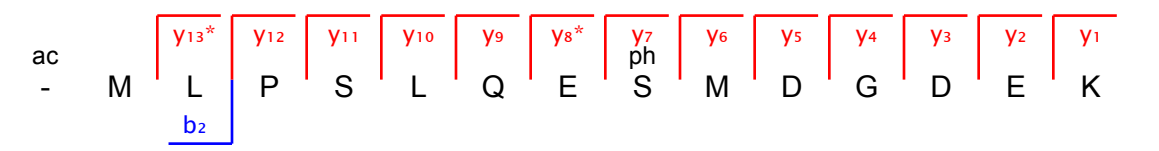

Raw file Scan Method Score m/z Gene names  
 20150814\_A375SR\_Phospho\_BR2\_03 25057 FTMS; HCD 125.26 897.39 ATG9A

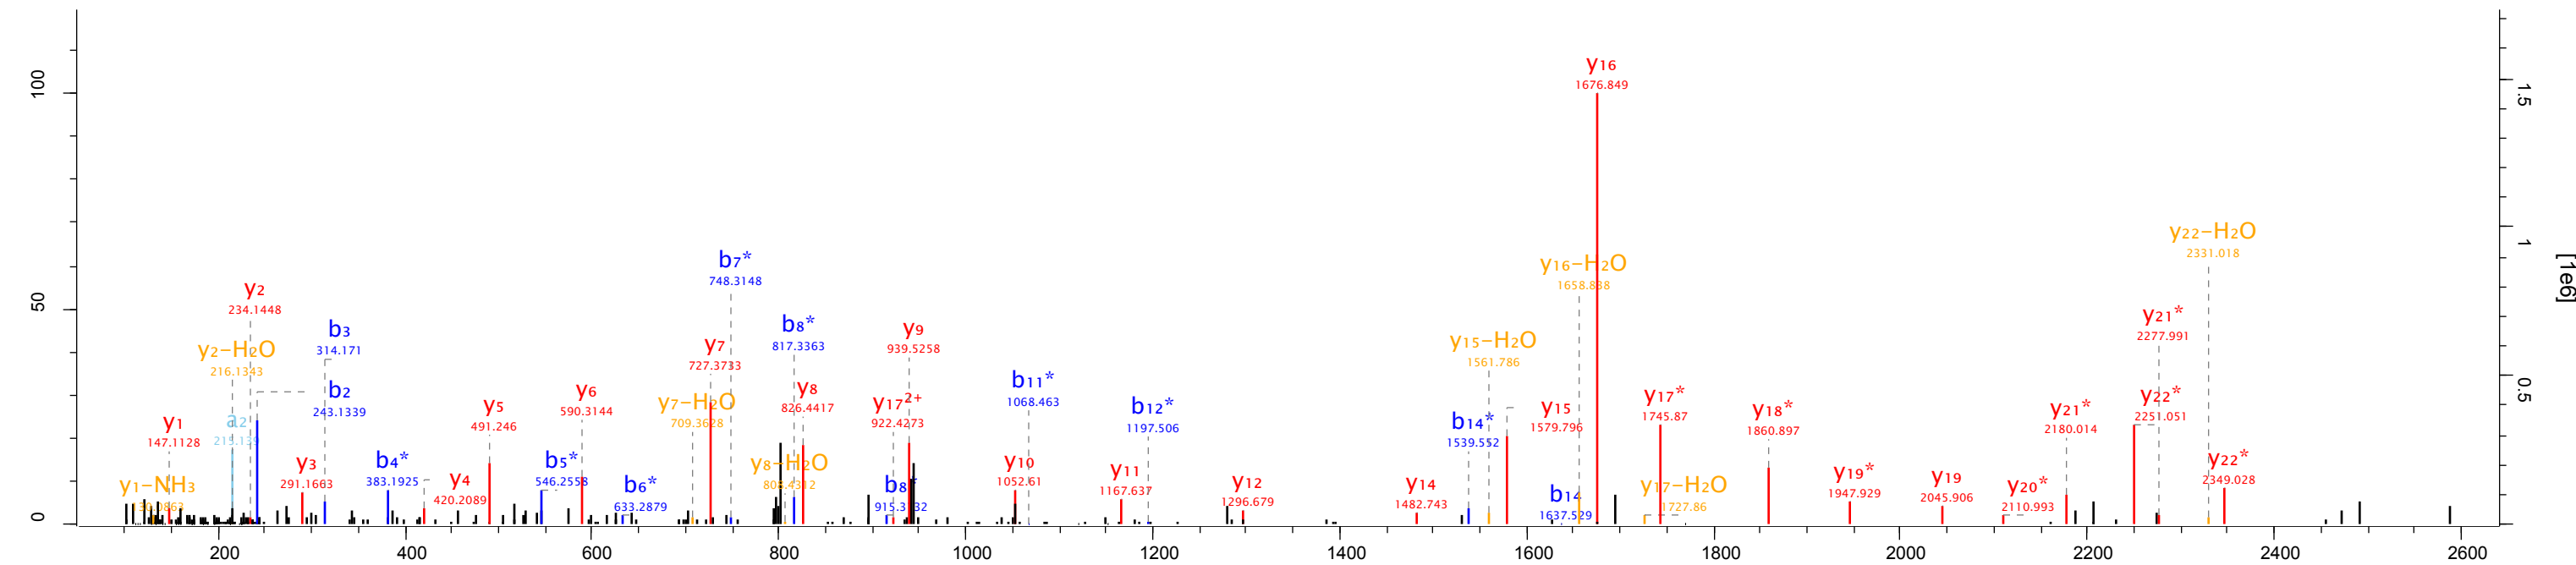

- L E A S Y S D S P P G E E D L L V H V A E G S K -

Fragmentation mapping (b and y ions):

- b2: E
- b3: A
- b4\*: ph
- b5\*: Y
- b6\*: S
- b7\*: D
- b8\*: S
- b11\*: G
- b12\*: E
- b14: D

Fragmentation mapping (y ions):

- y1: K
- y2: S
- y3: G
- y4: E
- y5: A
- y6: V
- y7: H
- y8: V
- y9: L
- y10: L
- y11: D
- y12: E
- y14: G
- y15: P
- y16: P
- y17\*: S
- y18\*: D
- y19\*: S
- y20\*: Y
- y21\*: ph
- y22\*: S

Raw file: 20150814\_A375SR\_Phospho\_BR2\_03  
 Scan: 25077 Method: FTMS; HCD Score: 133.61 m/z: 1148.07 Gene names: FARP2

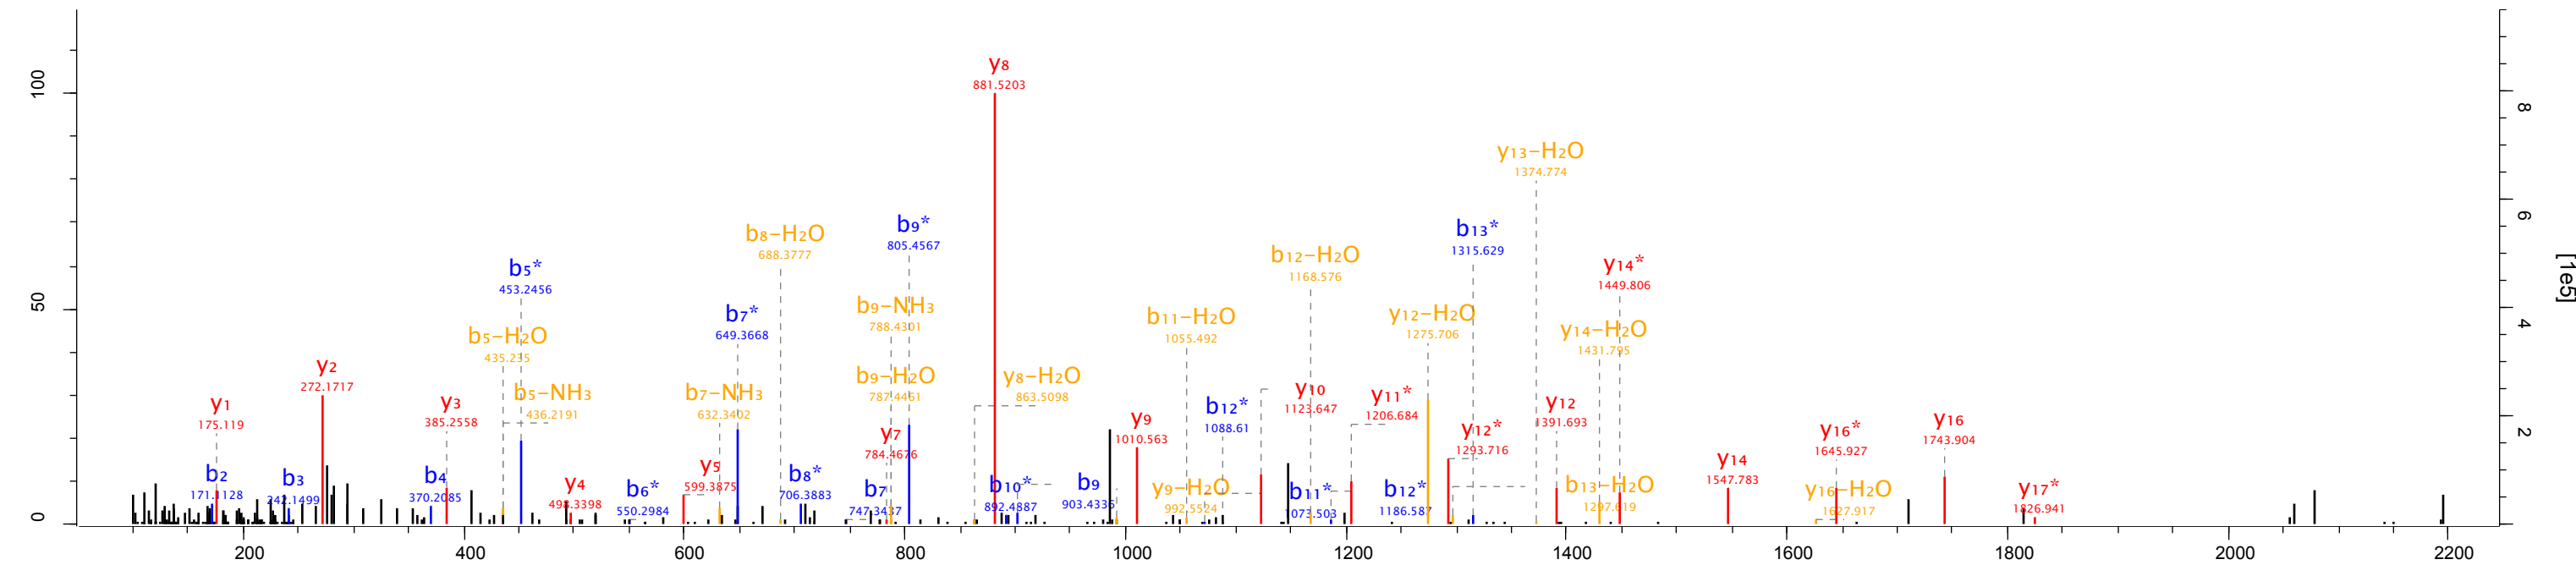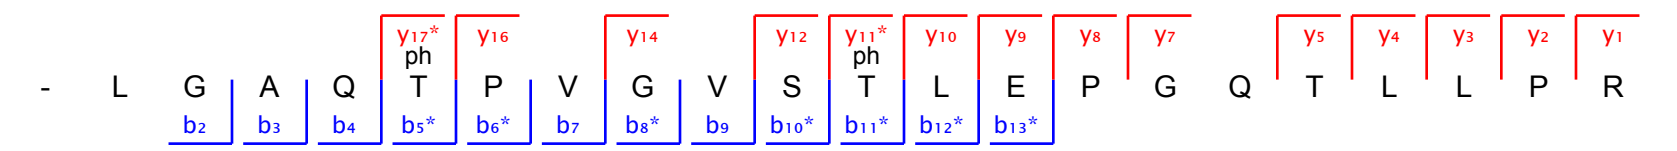

Raw file 20150814\_A375SR\_Phospho\_BR2\_03 Scan 25157 Method FTMS; HCD Score 226.33 m/z 1173.52 Gene names RBMS2

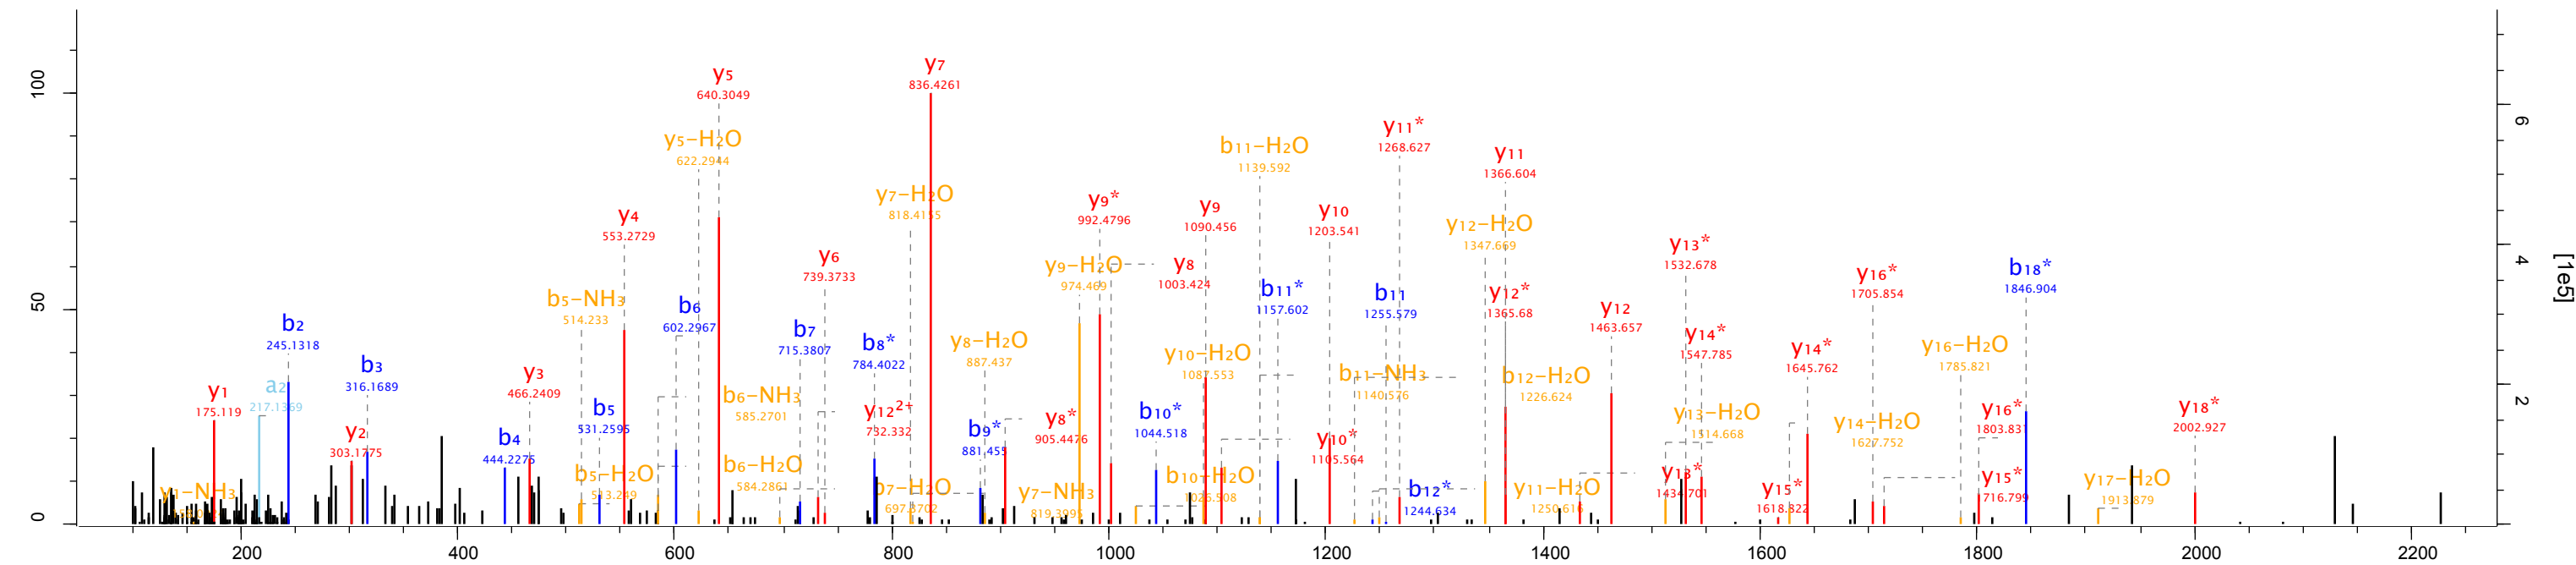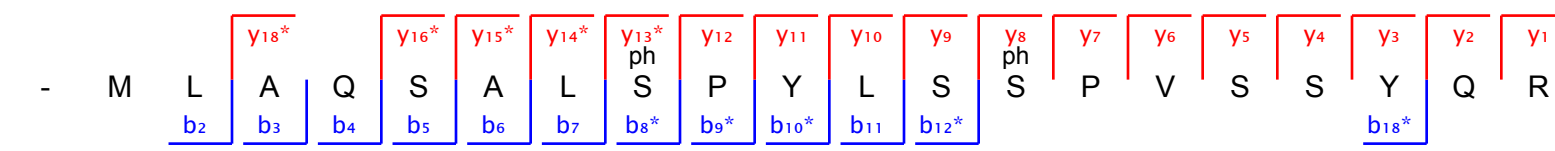

Raw file: 20150814\_A375SR\_Phospho\_BR2\_03  
 Scan: 25187 Method: FTMS; HCD Score: 206.58 m/z: 1078.83 Gene names: PTPN12

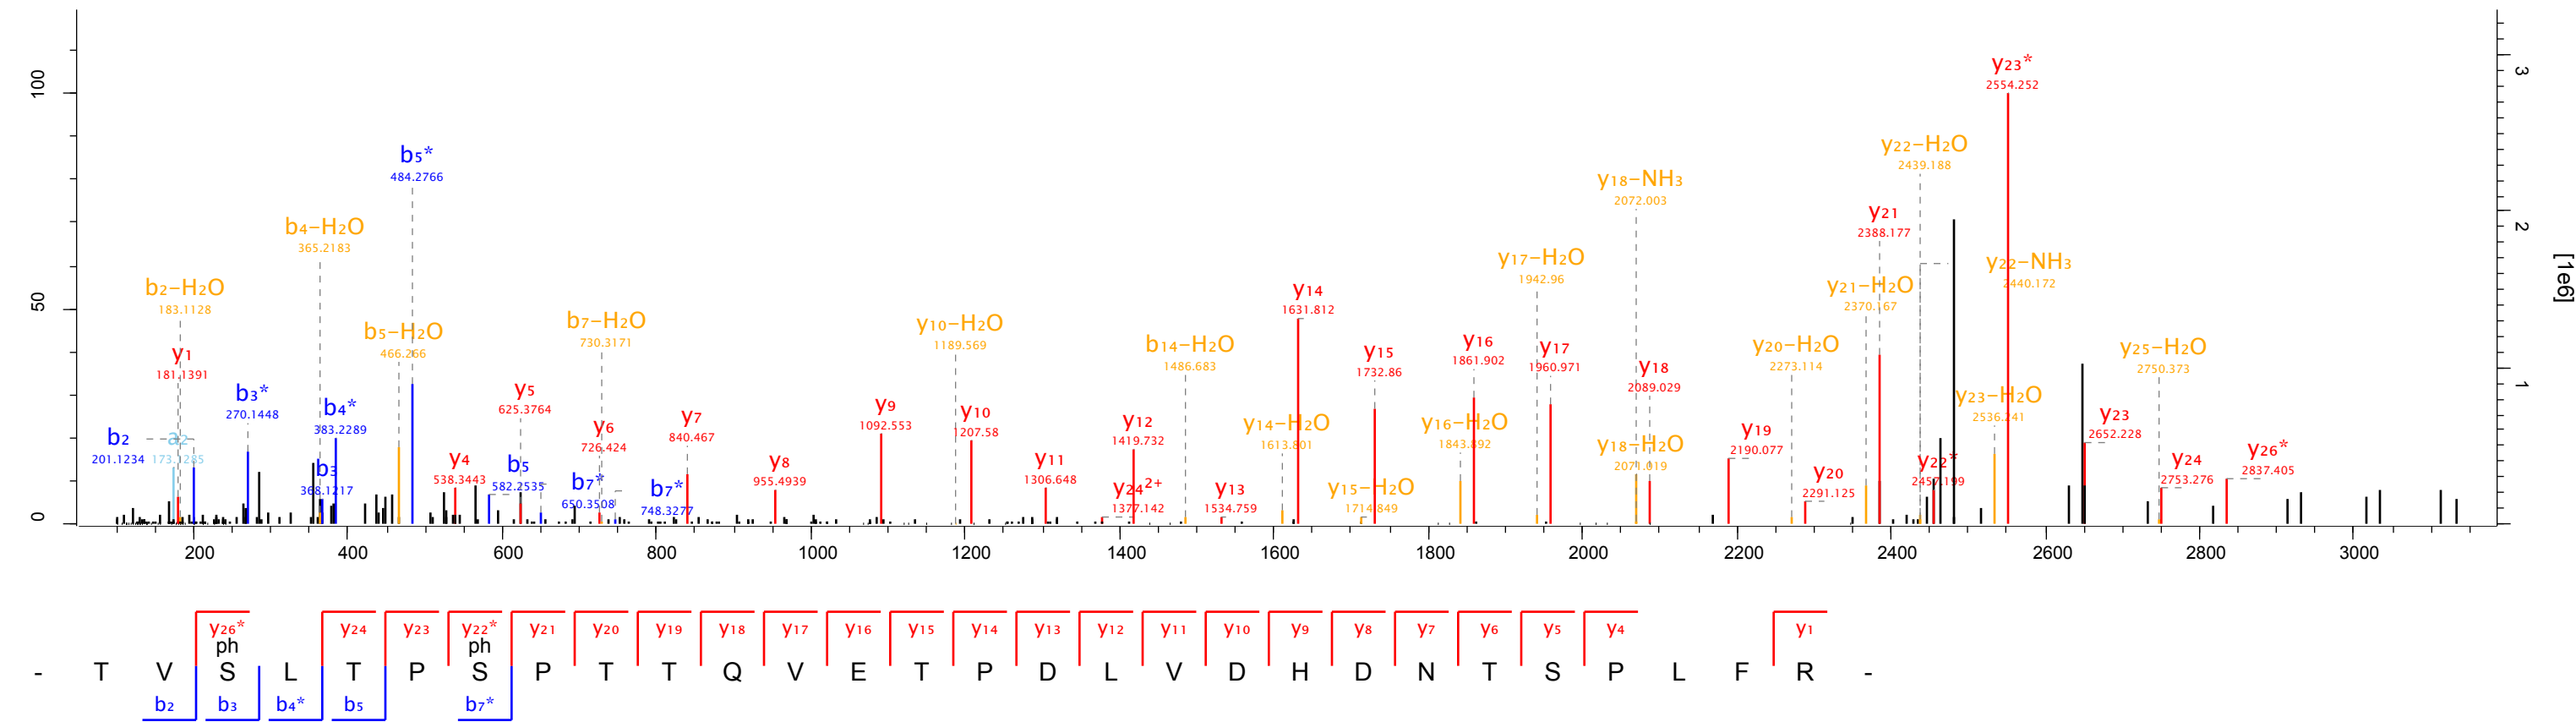



Raw file: 20150814\_A375SR\_Phospho\_BR2\_03  
 Scan: 25317 Method: FTMS; HCD Score: 228.46 m/z: 843.37 Gene names: CDC2L1;CDK11B;CDK11A

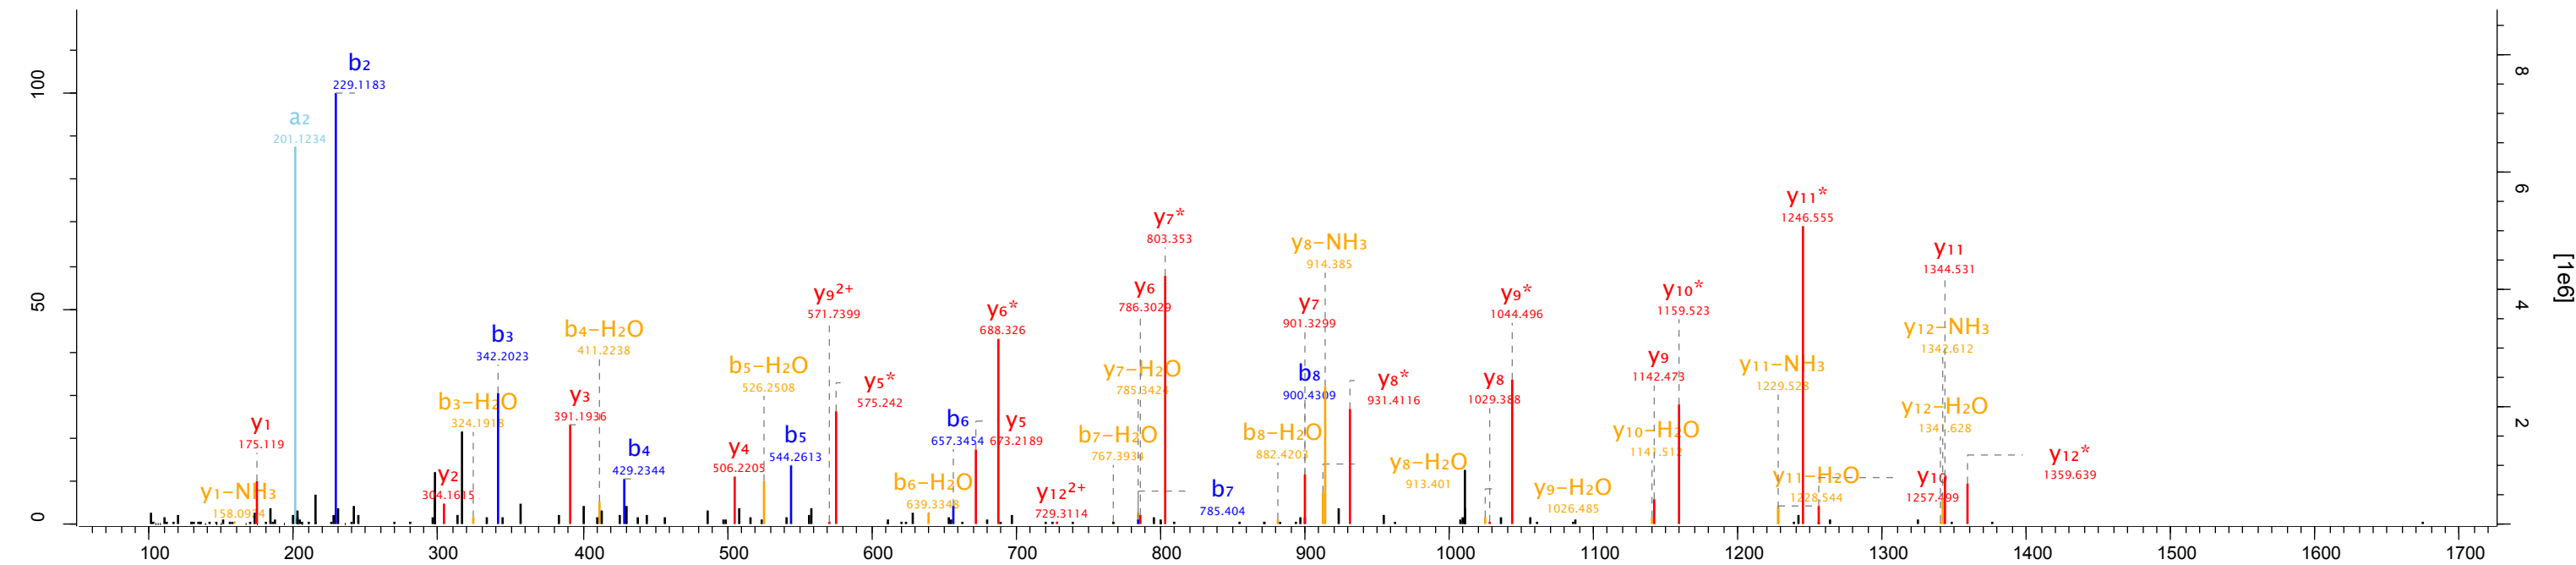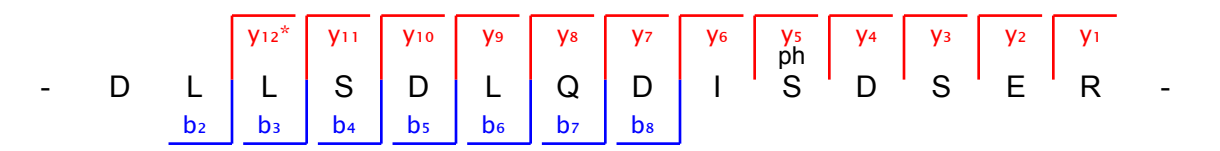

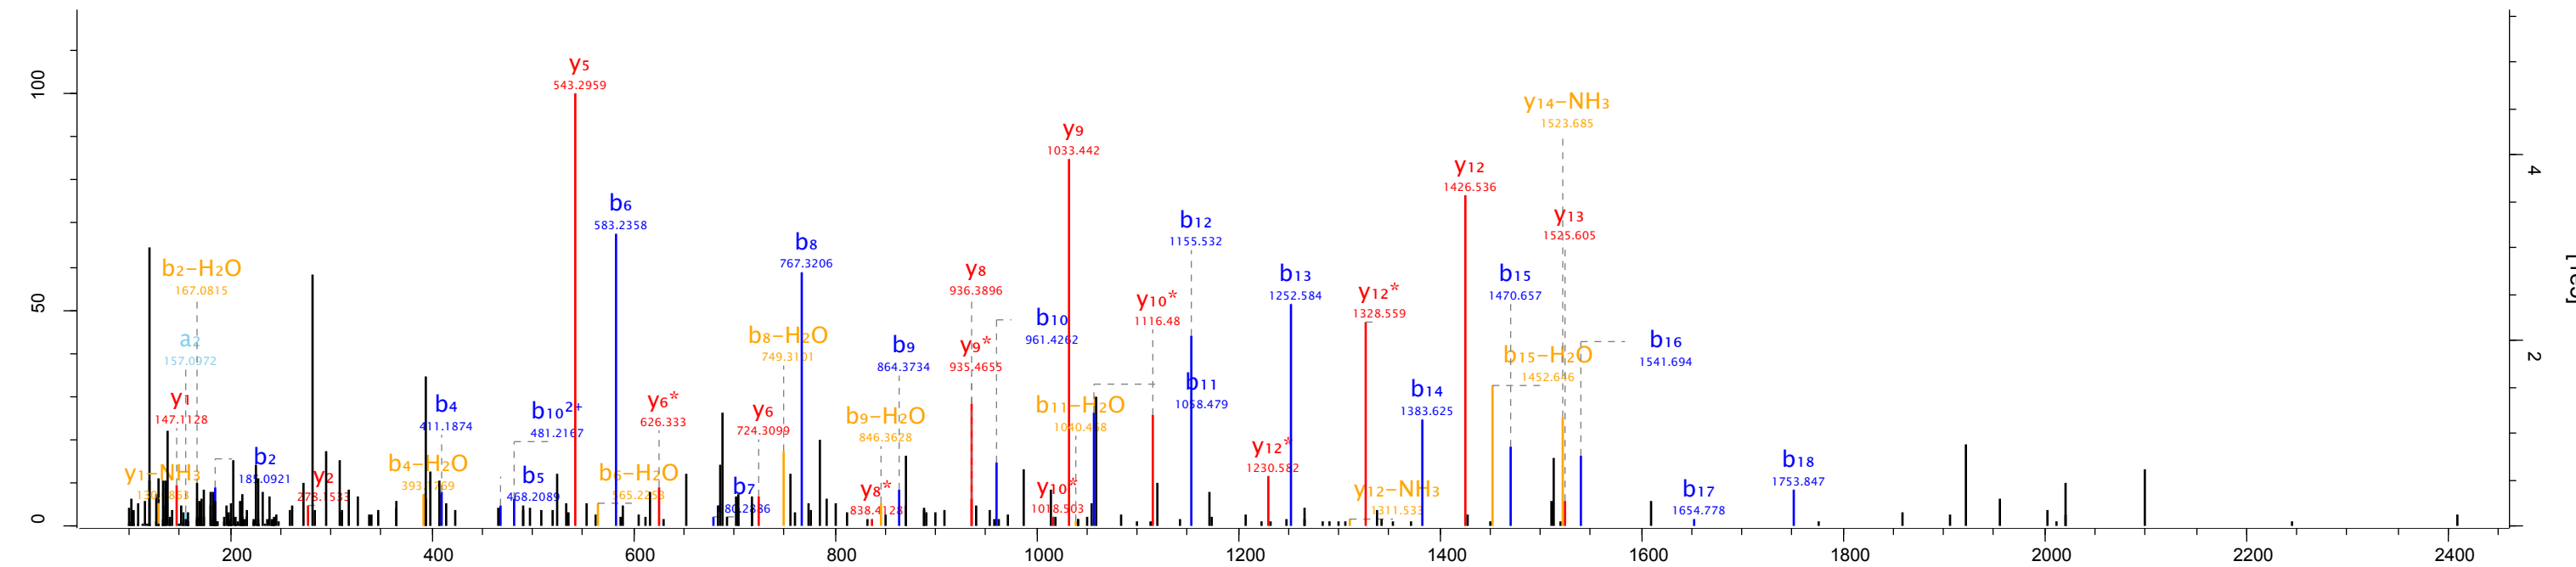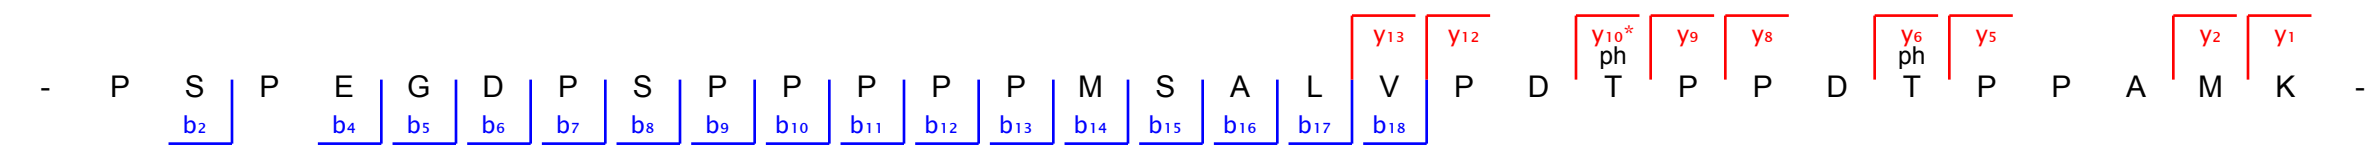

Raw file 20150814\_A375SR\_Phospho\_BR2\_03 Scan 25547 Method FTMS; HCD Score 177.89 m/z 1162.6 Gene names CD3EAP

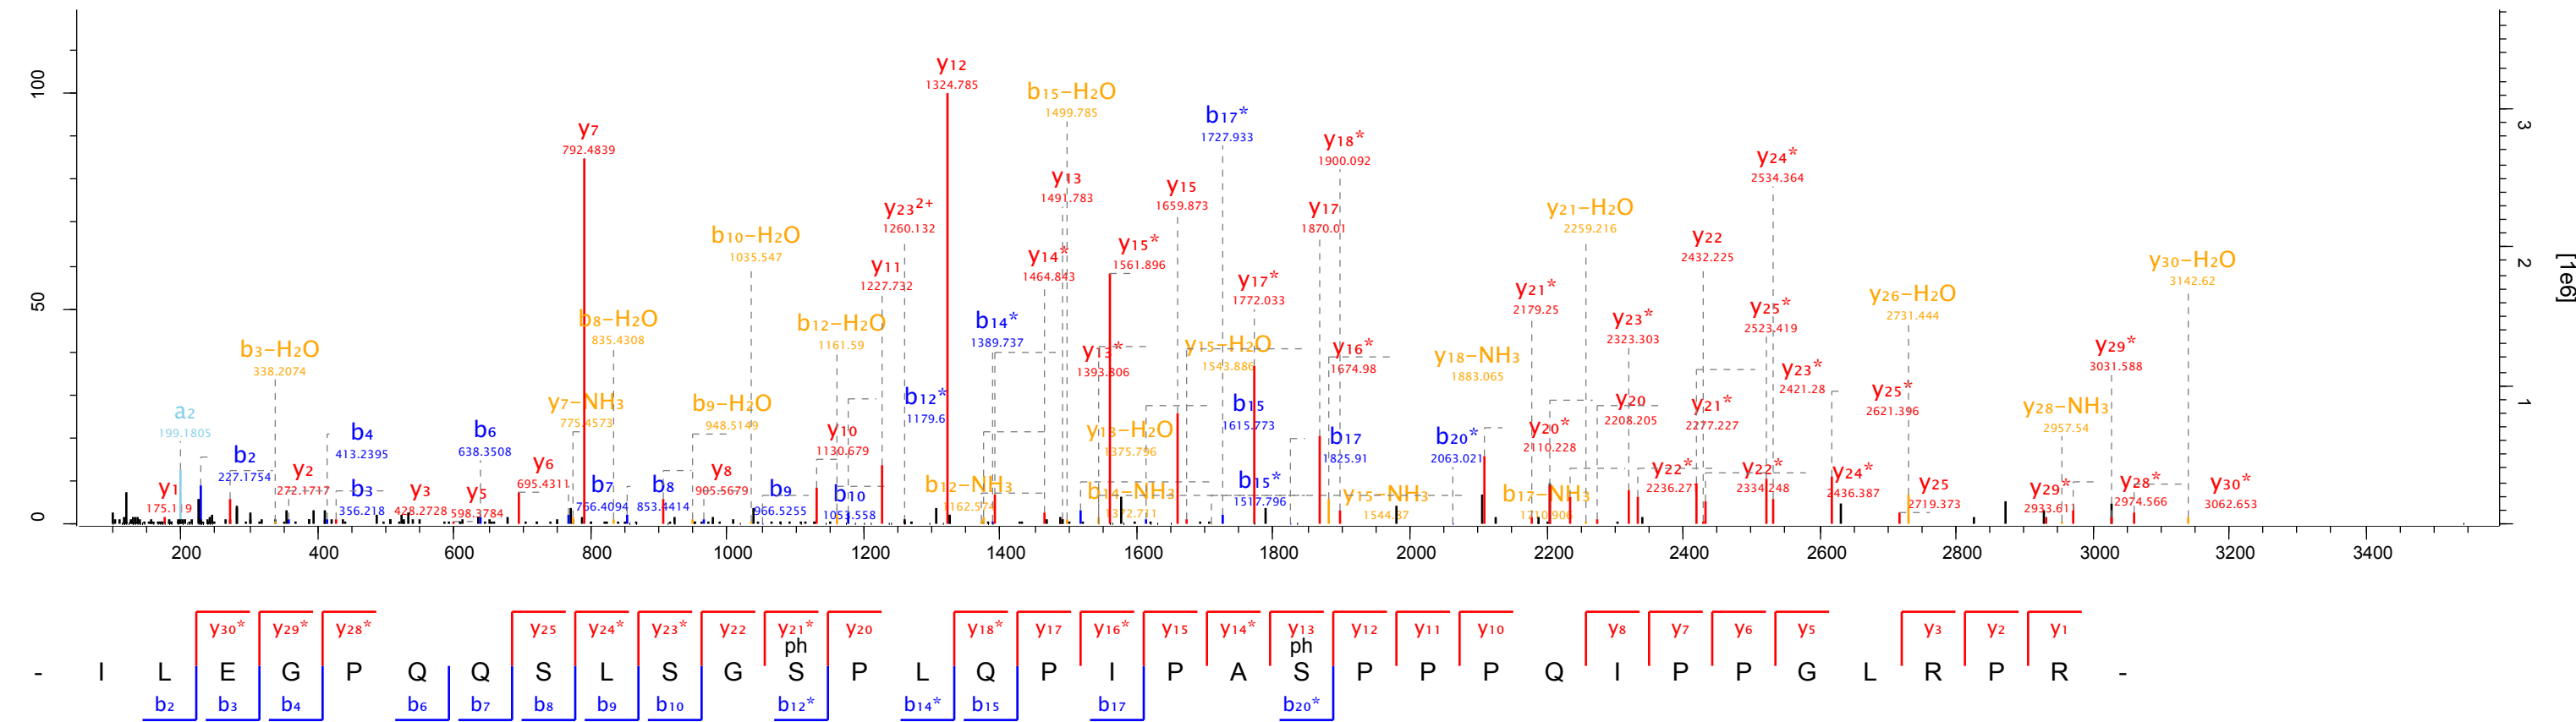

Raw file: 20150814\_A375SR\_Phospho\_BR2\_03  
 Scan: 25897 Method: FTMS; HCD Score: 79.95 m/z: 910.07 Gene names: POM121C

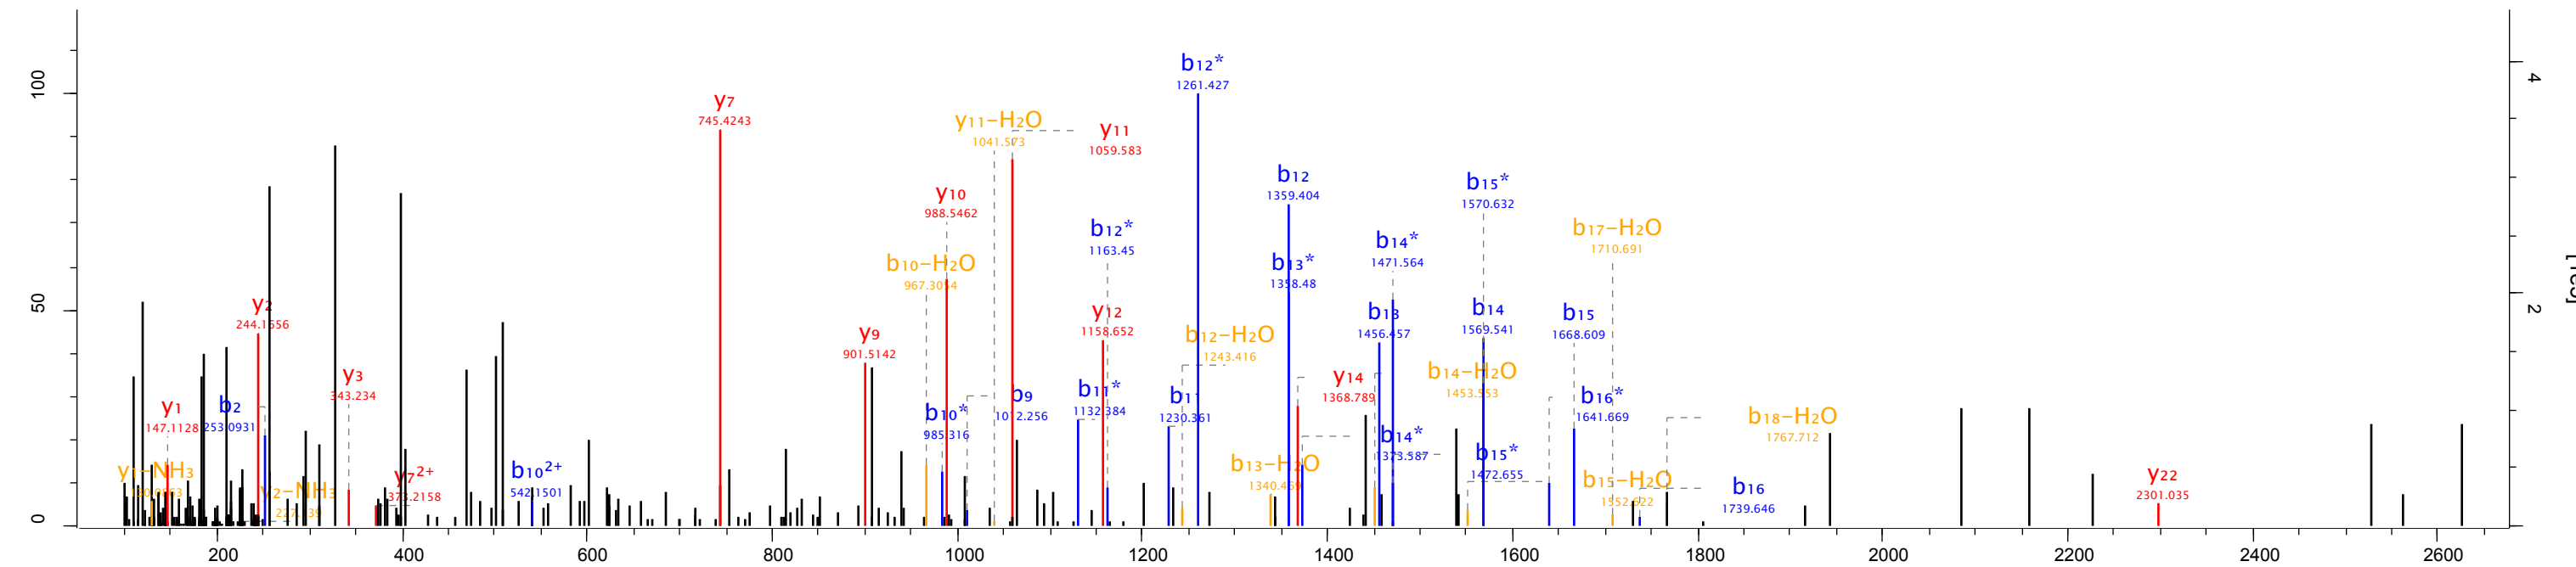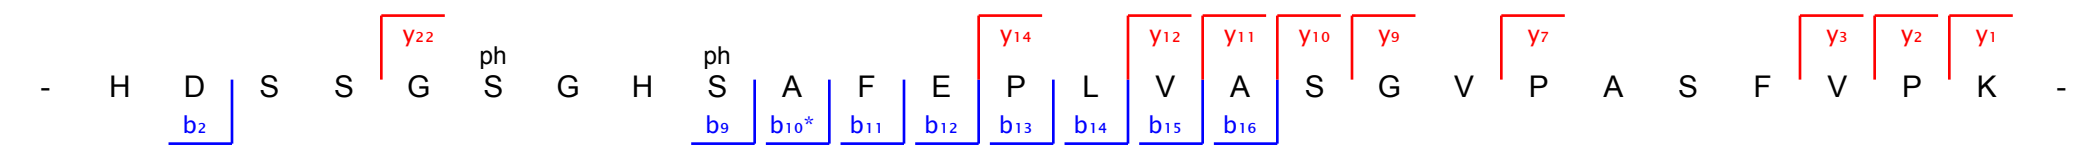

Raw file  
 20150814\_A375SR\_Phospho\_BR2\_03  
 Scan 26097 Method FTMS; HCD Score 117.22 m/z 942.42 Gene names KRT18

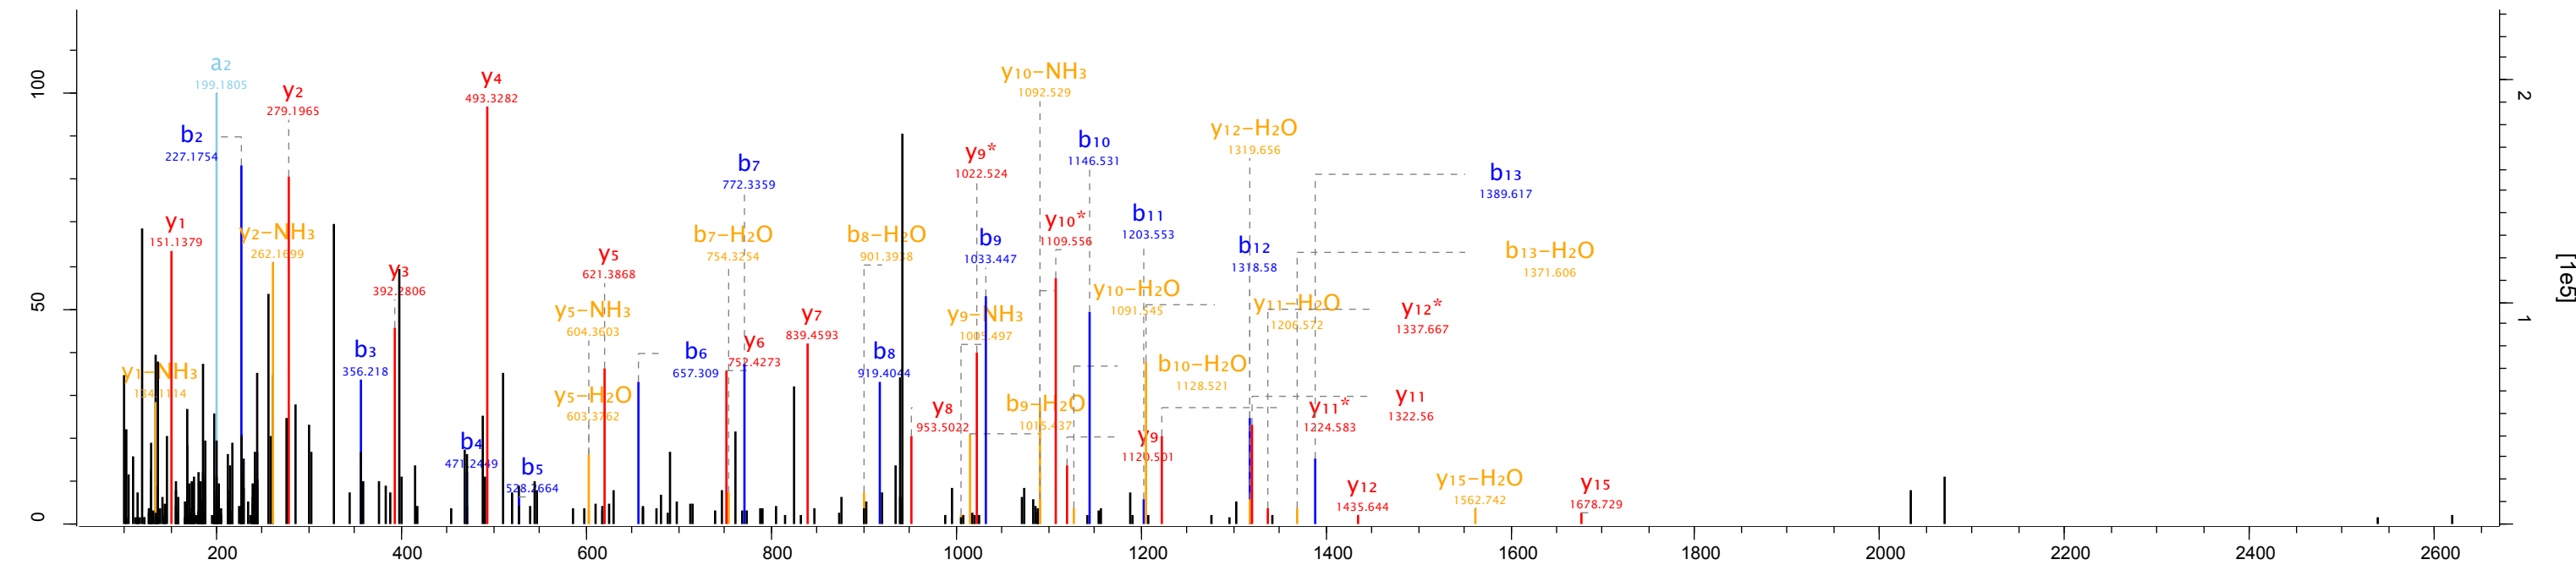

- L L E D G E D F N L G D A L D S S N S M Q T I Q K -

Fragmentation mapping (b-ions in blue, y-ions in red):

- b2: L
- b3: L
- b4: E
- b5: D
- b6: G
- b7: E
- b8: D
- b9: F
- b10: N
- b11: L
- b12: G
- b13: D
- y1: K
- y2: Q
- y3: I
- y4: T
- y5: Q
- y6: M
- y7: S
- y8: N
- y9: S
- y10\*: S
- y11: D
- y12: L
- y15: A

Raw file: 20150814\_A375SR\_Phospho\_BR2\_03  
 Scan: 26107 Method: FTMS; HCD Score: 56.99 m/z: 1011.78 Gene names: BRPF1

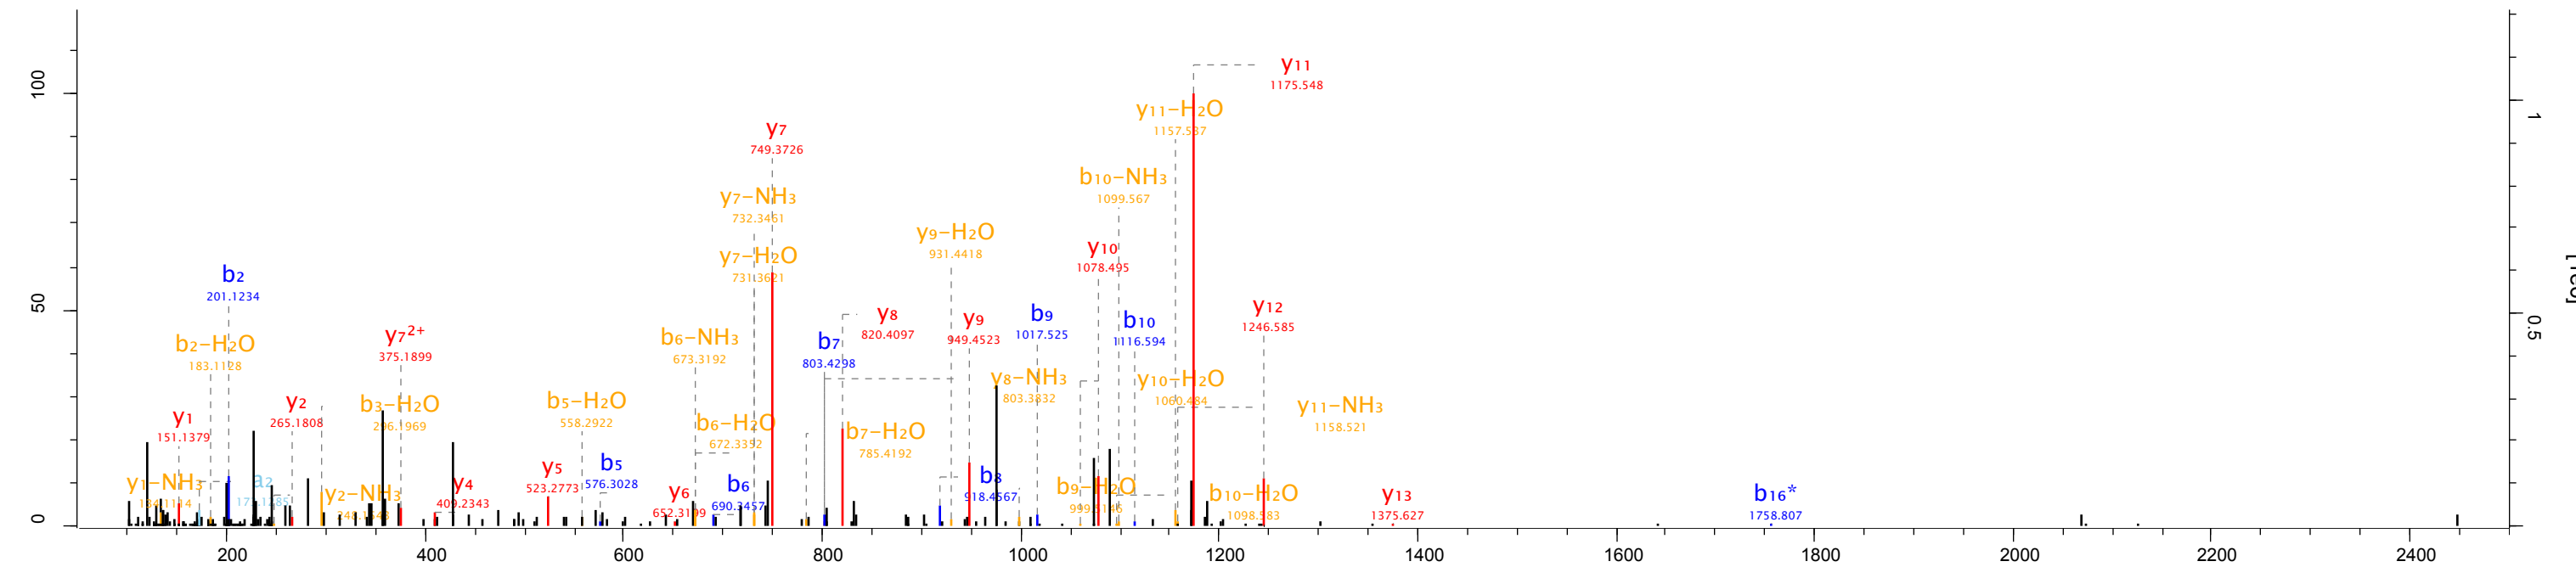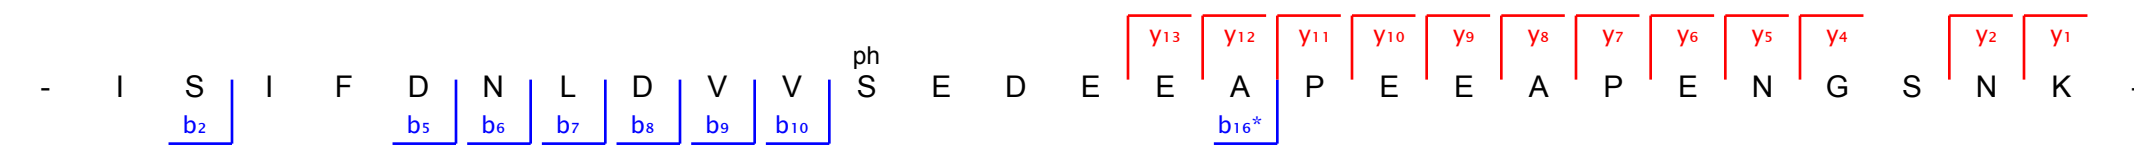

Raw file: 20150814\_A375SR\_Phospho\_BR2\_03  
 Scan: 26357 Method: FTMS; HCD Score: 235.6 m/z: 1504.64 Gene names: TFPT

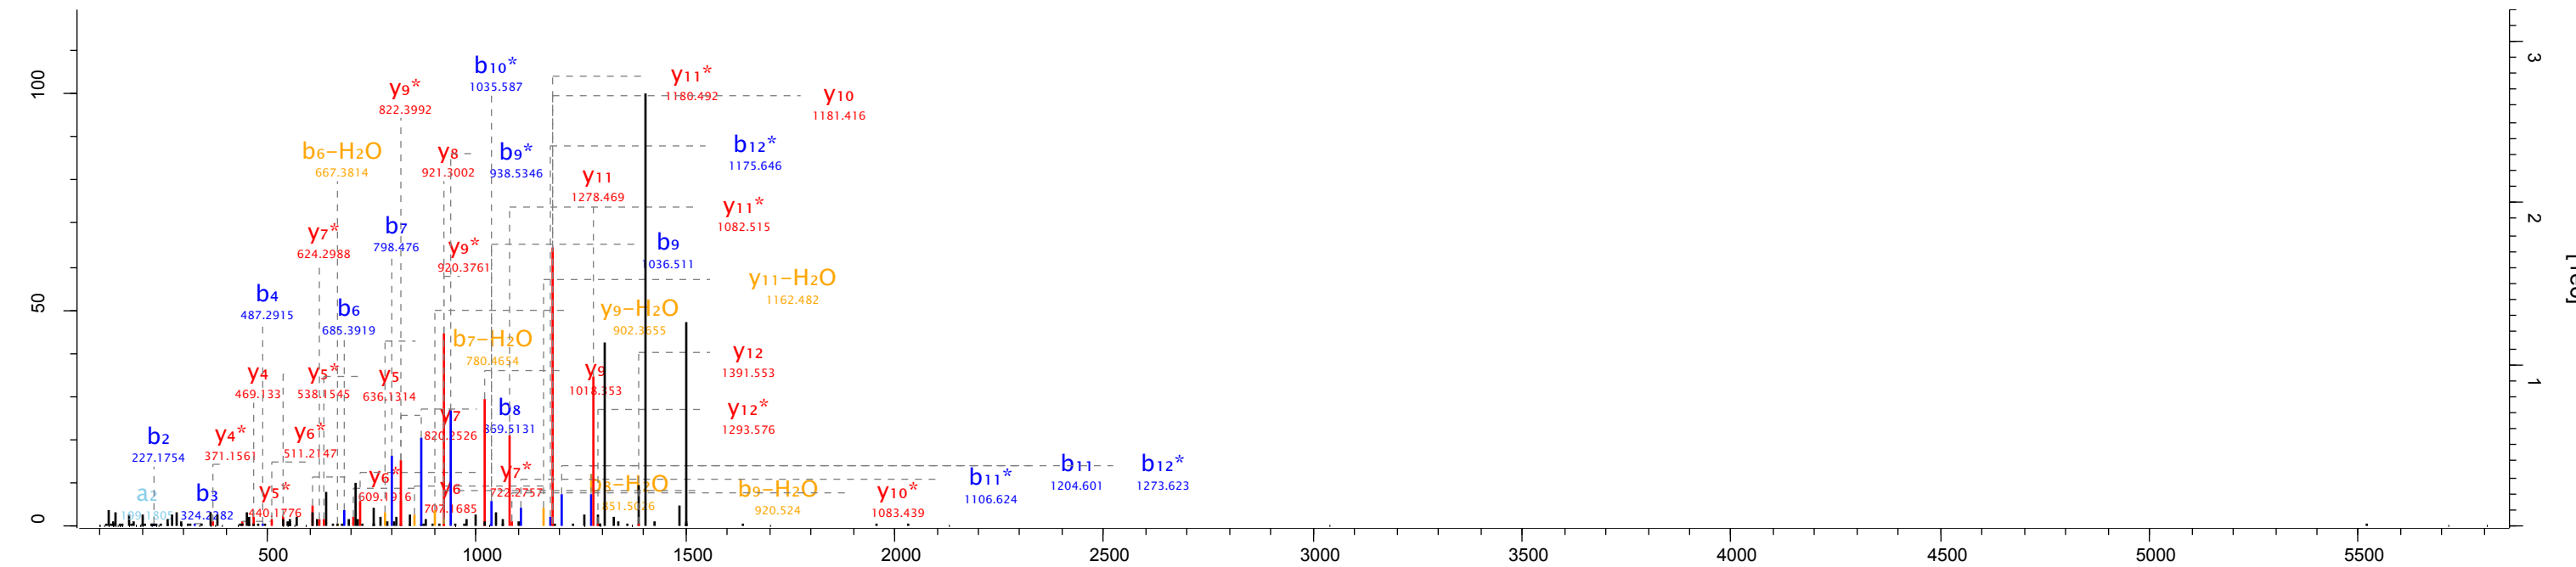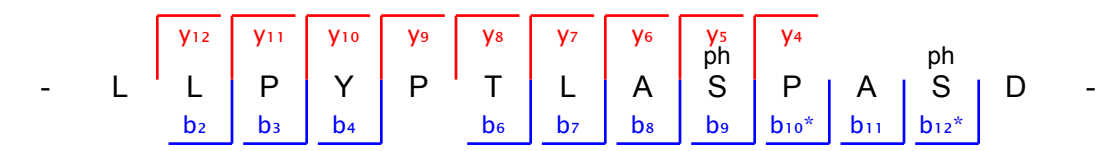

Raw file 20150814\_A375SR\_Phospho\_BR2\_03 Scan 26397 Method FTMS; HCD Score 104.29 m/z 913.76 Gene names EP400;EP400NL

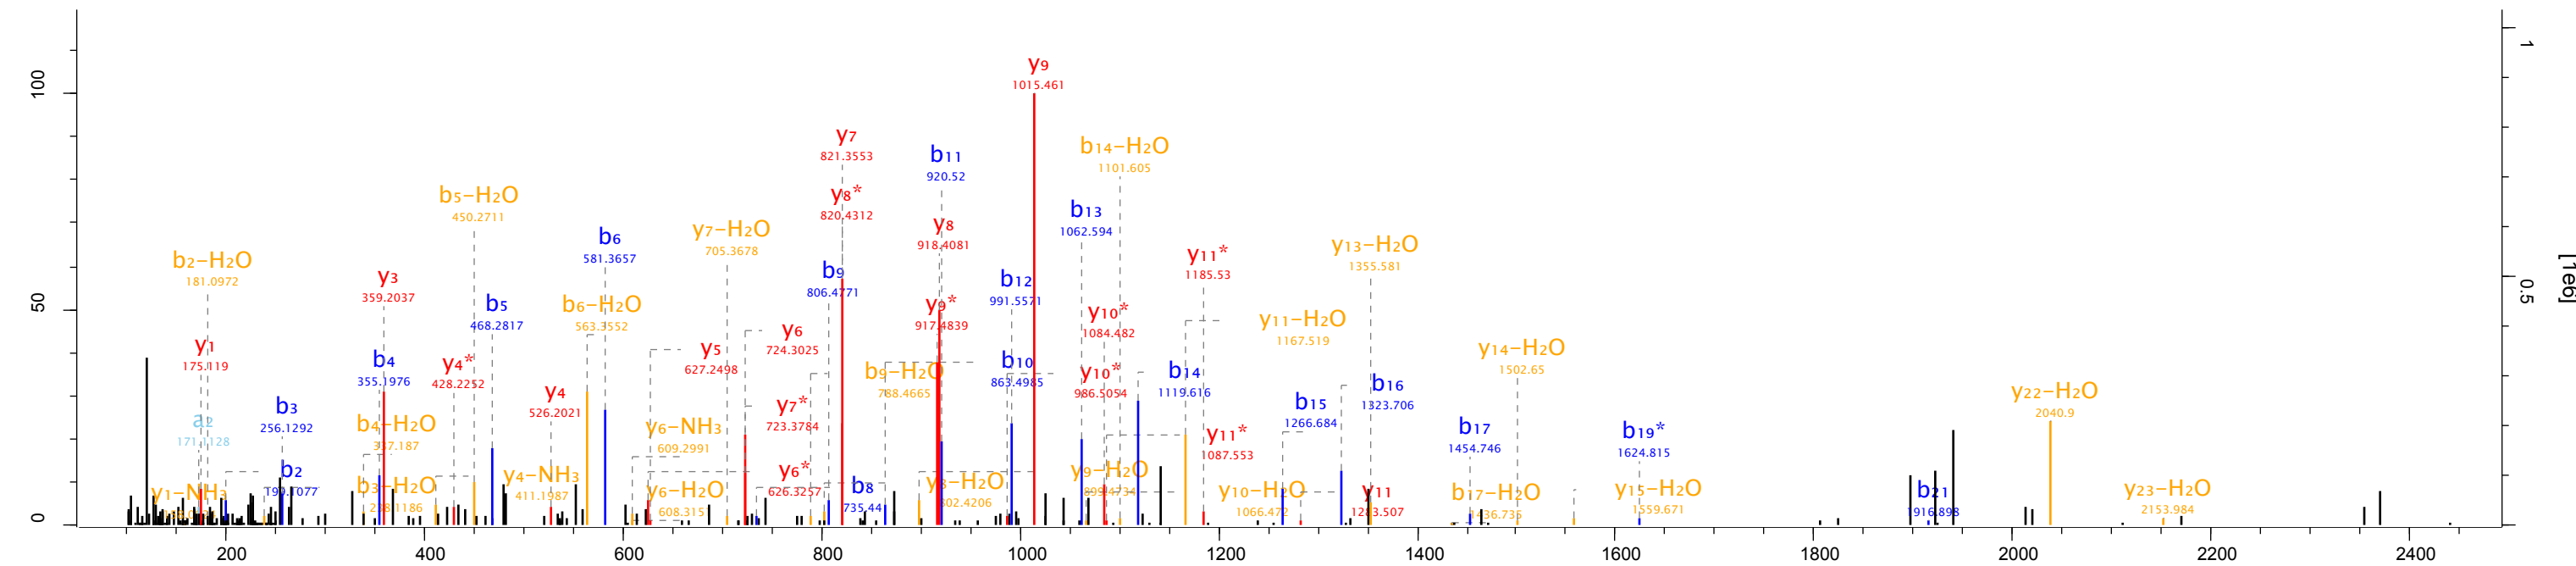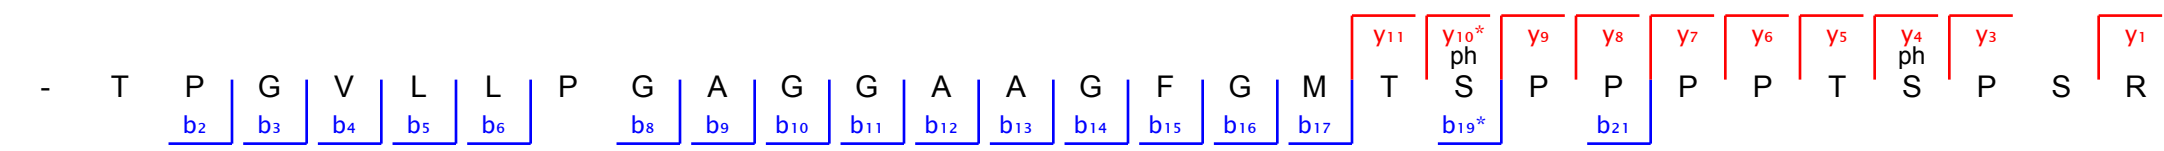



Raw file 20150814\_A375SR\_Phospho\_BR2\_03 Scan 26547 Method FTMS; HCD Score 188.2 m/z 1079.79 Gene names FAM21C;FAM21A

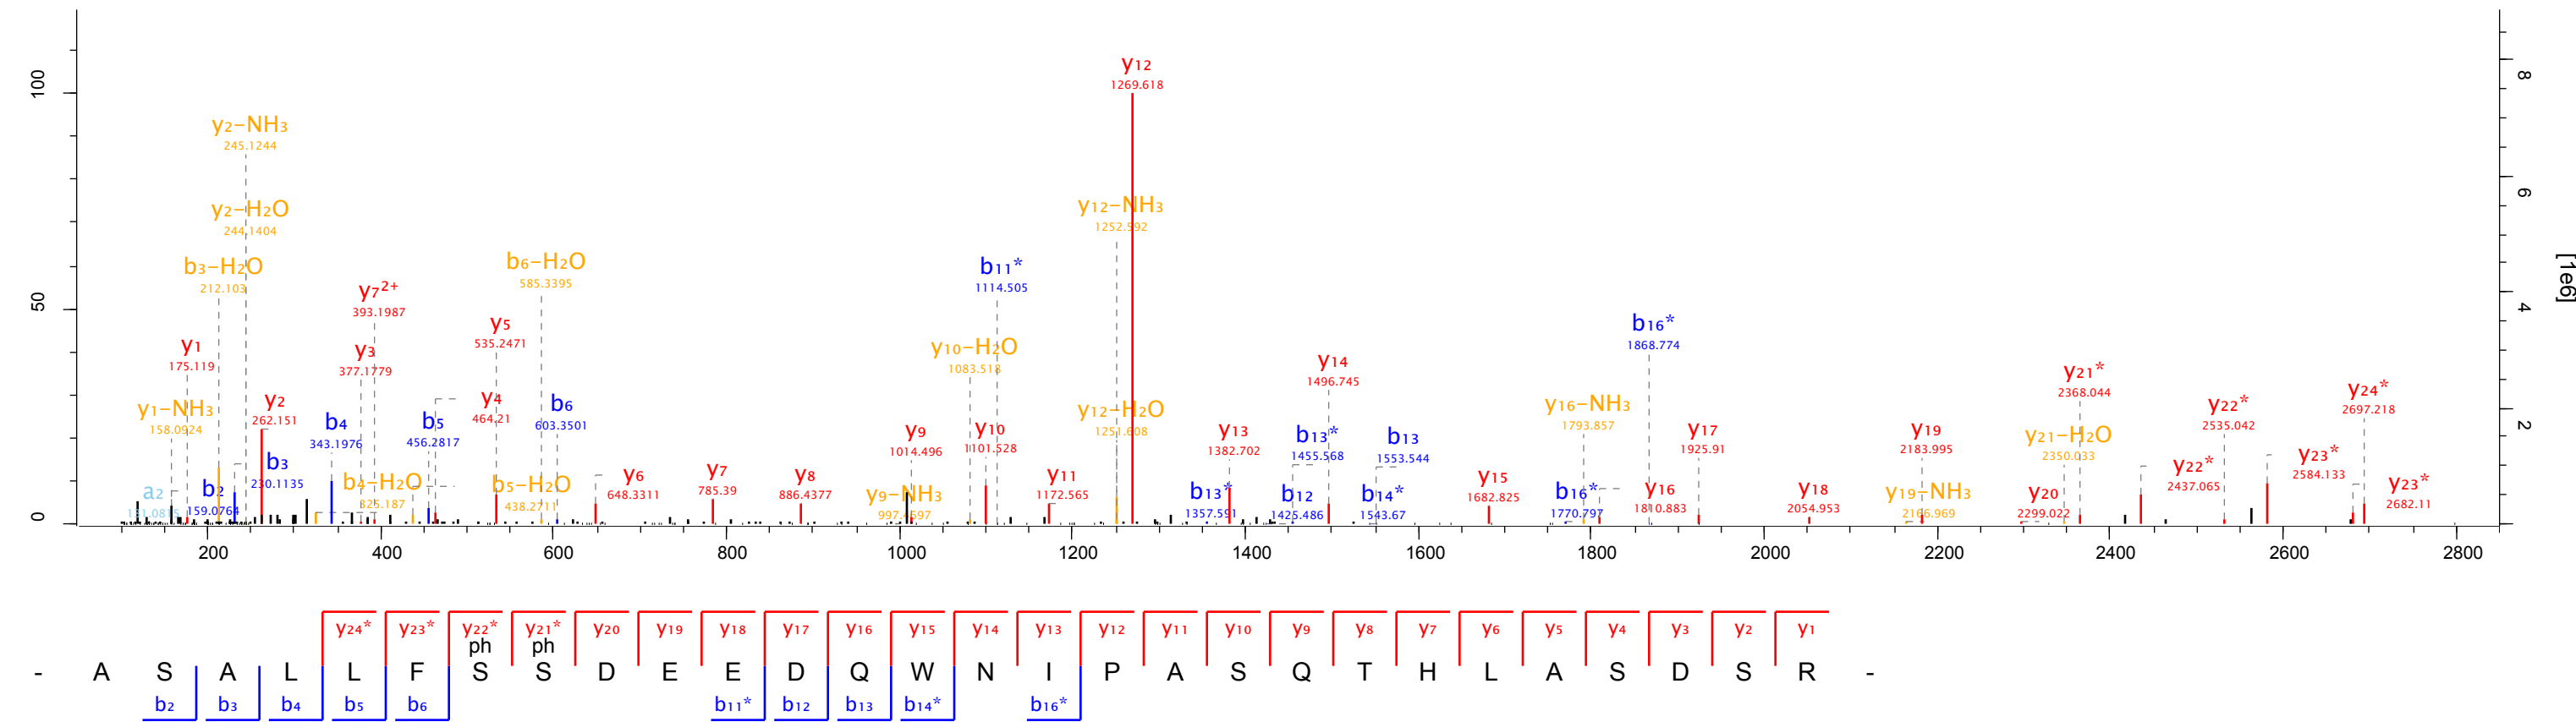

Raw file: 20150814\_A375SR\_Phospho\_BR2\_03  
 Scan: 26627 Method: FTMS; HCD Score: 68.95 m/z: 842.81 Gene names: ANKS1A

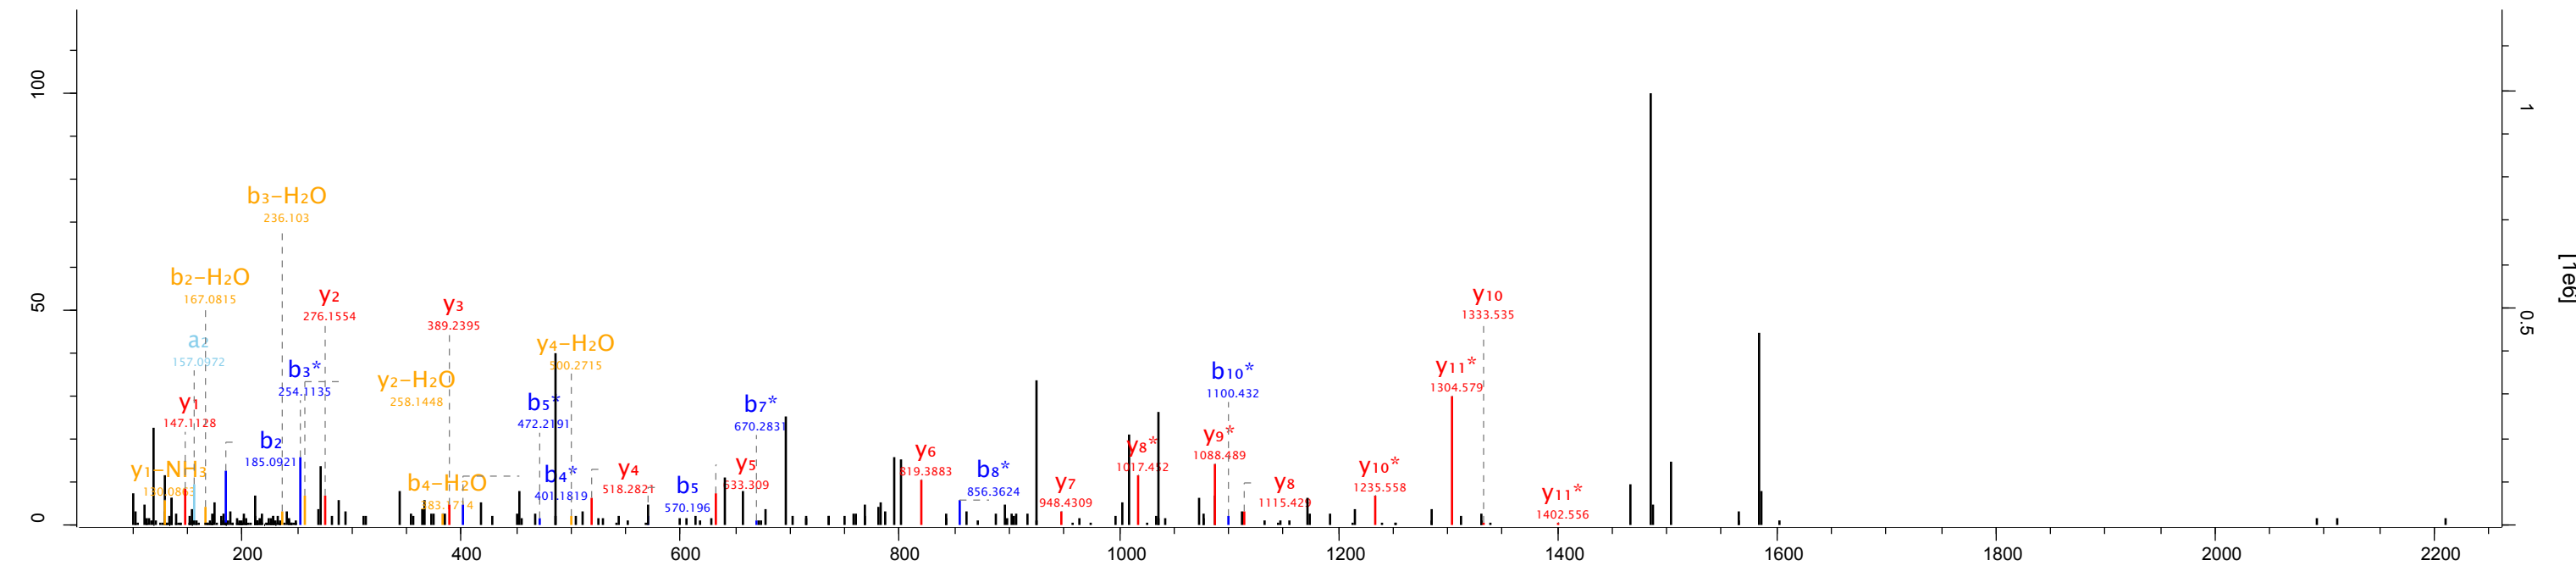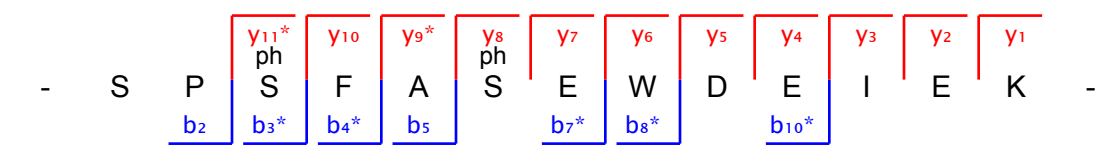

Raw file: 20150814\_A375SR\_Phospho\_BR2\_03  
 Scan: 26727 Method: FTMS; HCD Score: 149.2 m/z: 1238.97 Gene names: NFIX

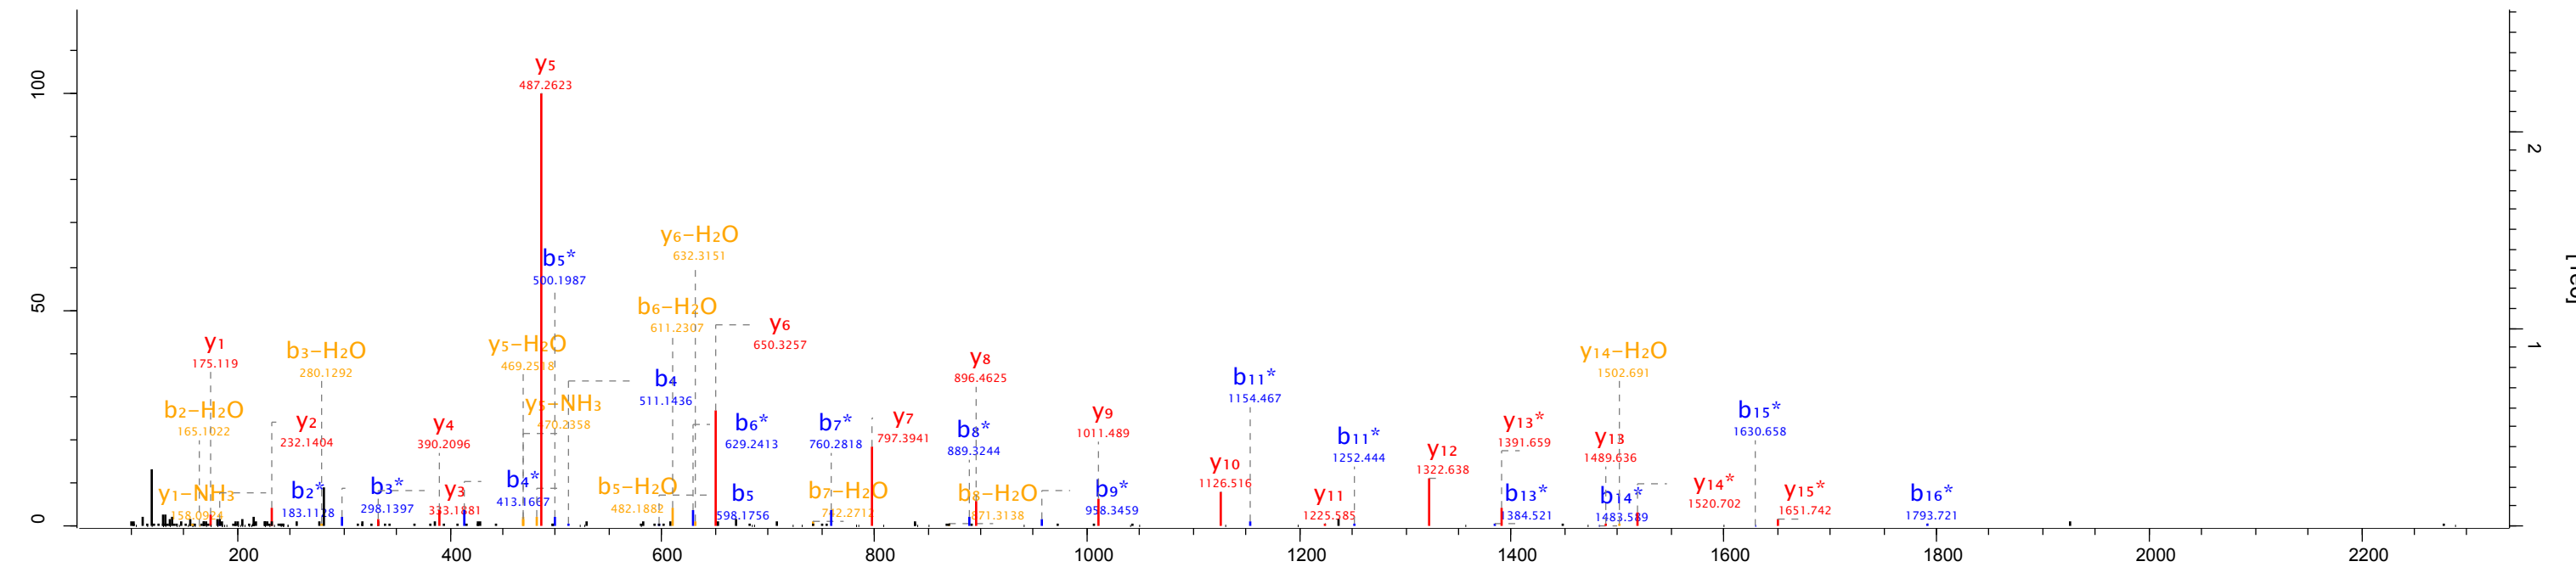

Sequence: I D D S E M E S P V D D V F Y P G T G R -

Fragmentation sites (b ions): b2\*, b3\*, b4, b5, b6\*, b7\*, b8\*, b9\*, b11\*, b13\*, b14\*, b15\*, b16\*

Fragmentation sites (y ions): y1, y2, y3, y4, y5, y6, y7, y8, y9, y10, y11, y12, y13, y14, y15\*

Raw file 20150814\_A375SR\_Phospho\_BR2\_03 Scan 26837 Method FTMS; HCD Score 76.16 m/z 925.07 Gene names KLC1

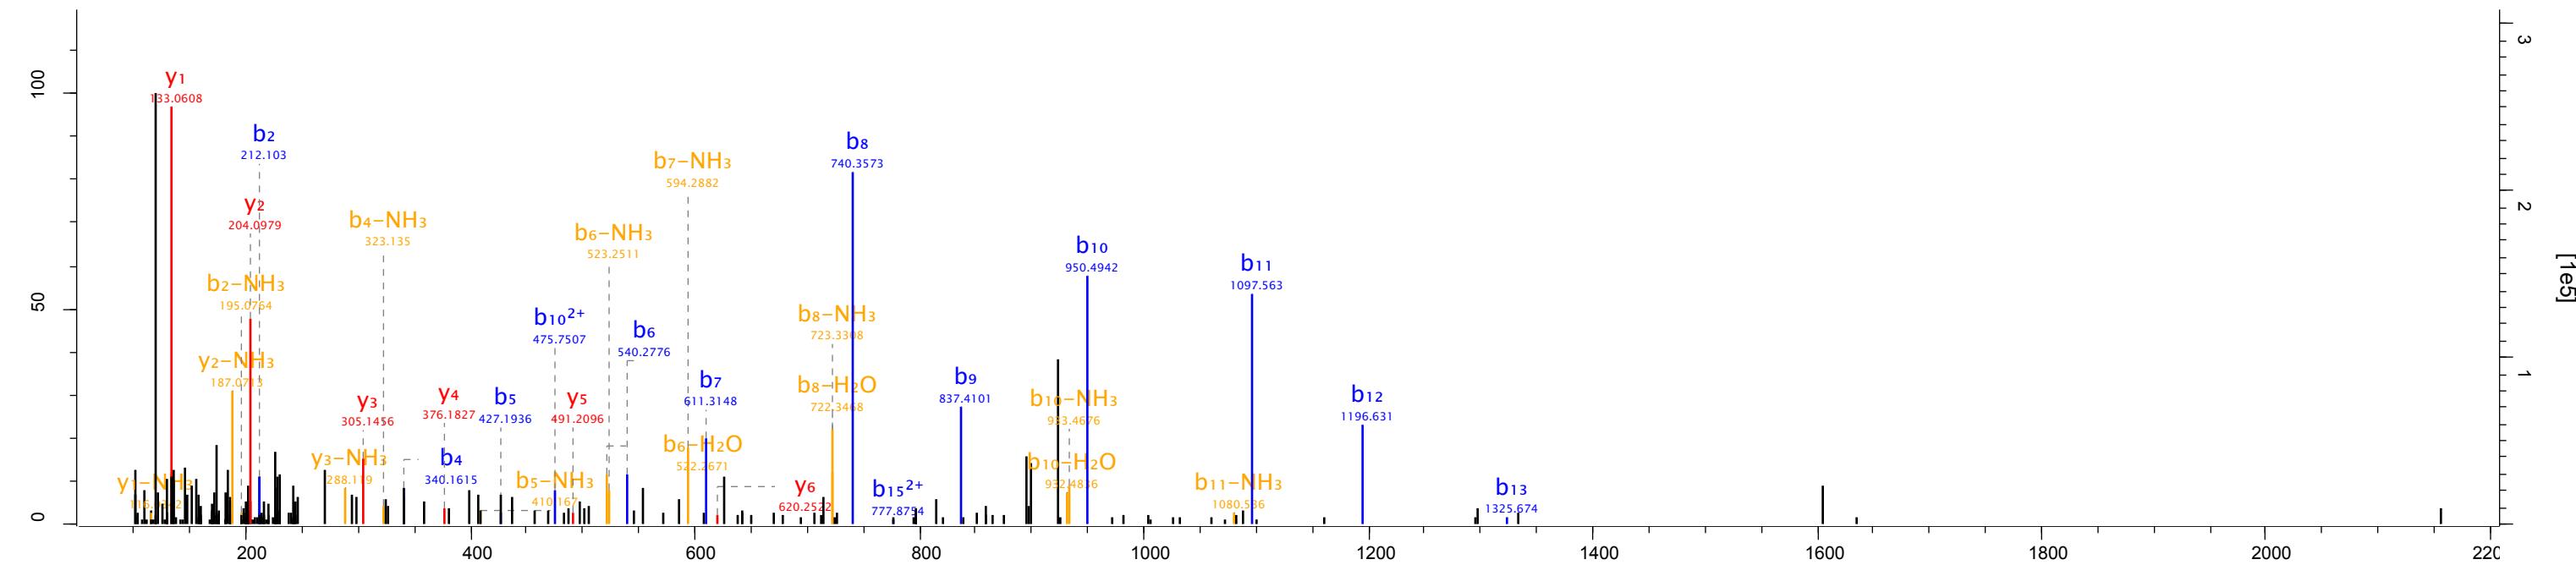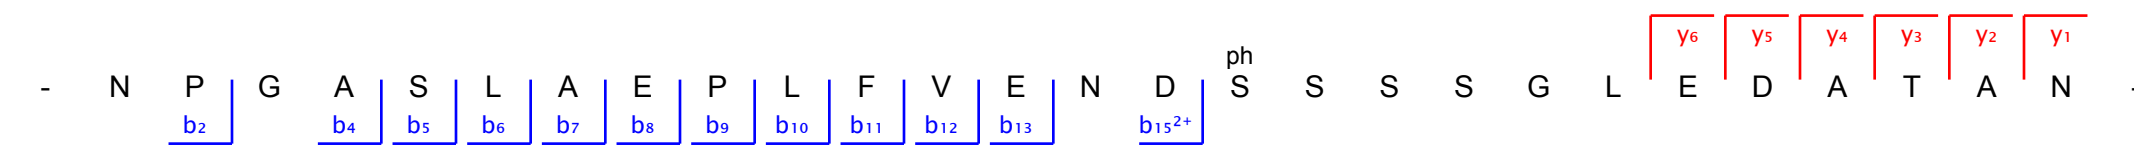

Raw file 20150814\_A375SR\_Phospho\_BR2\_03 Scan 2697 Method FTMS; HCD Score 79.89 m/z 521.75 Gene names IQSEC1

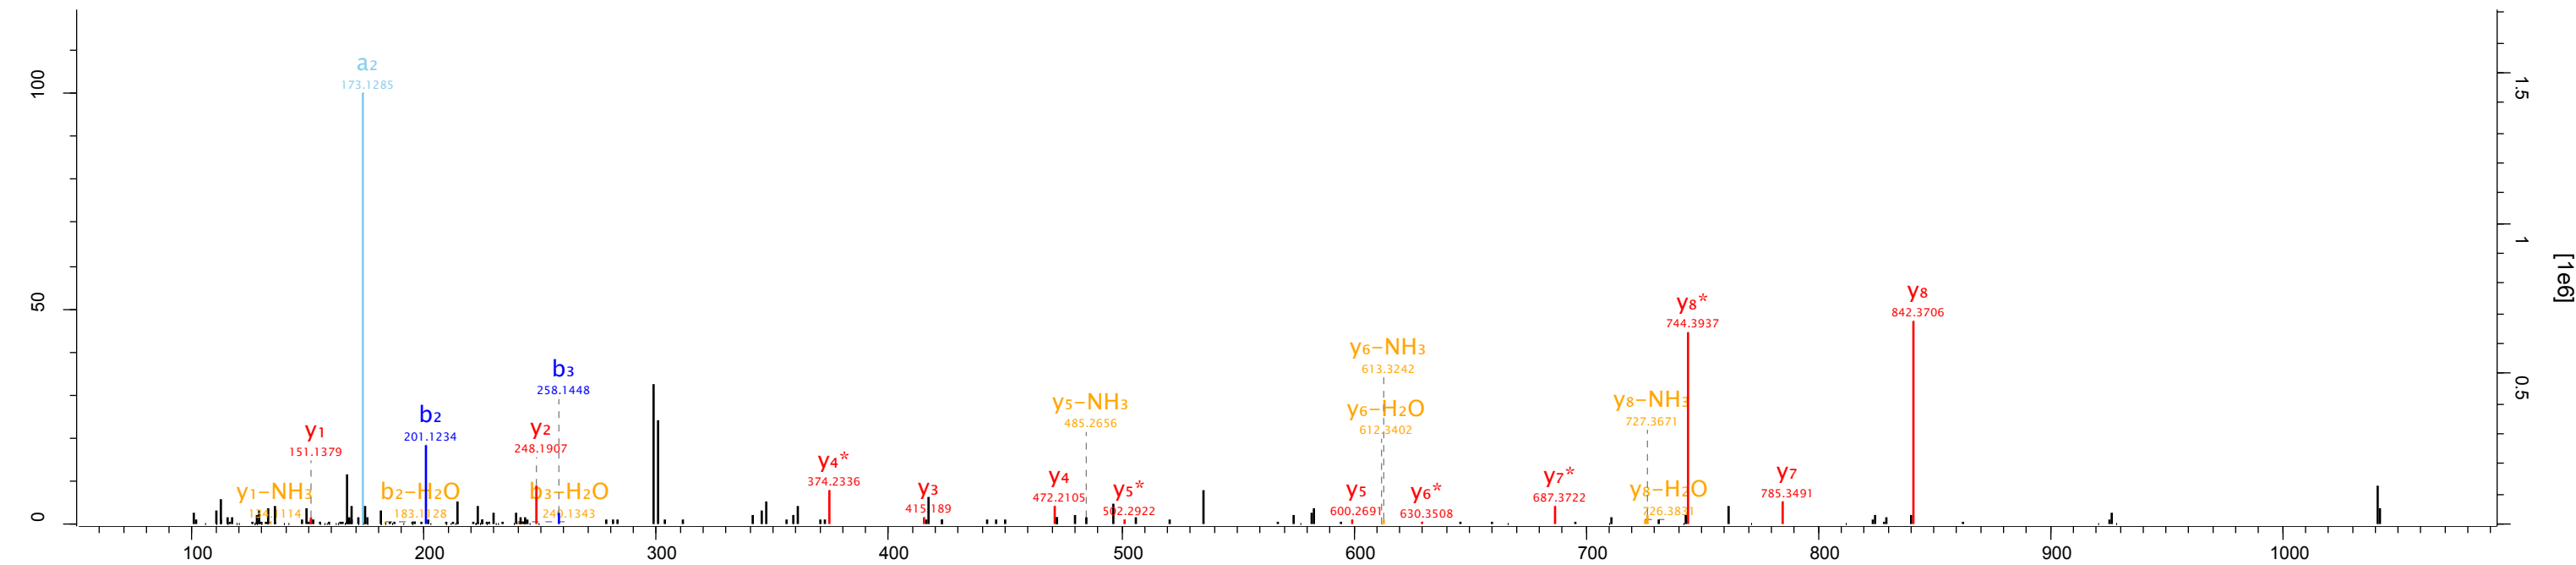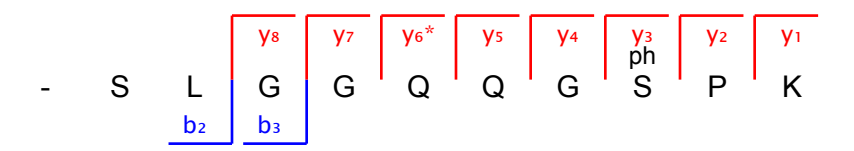

Raw file: 20150814\_A375SR\_Phospho\_BR2\_03  
 Scan: 26987 Method: FTMS; HCD Score: 164.2 m/z: 720.35 Gene names: TBC1D4

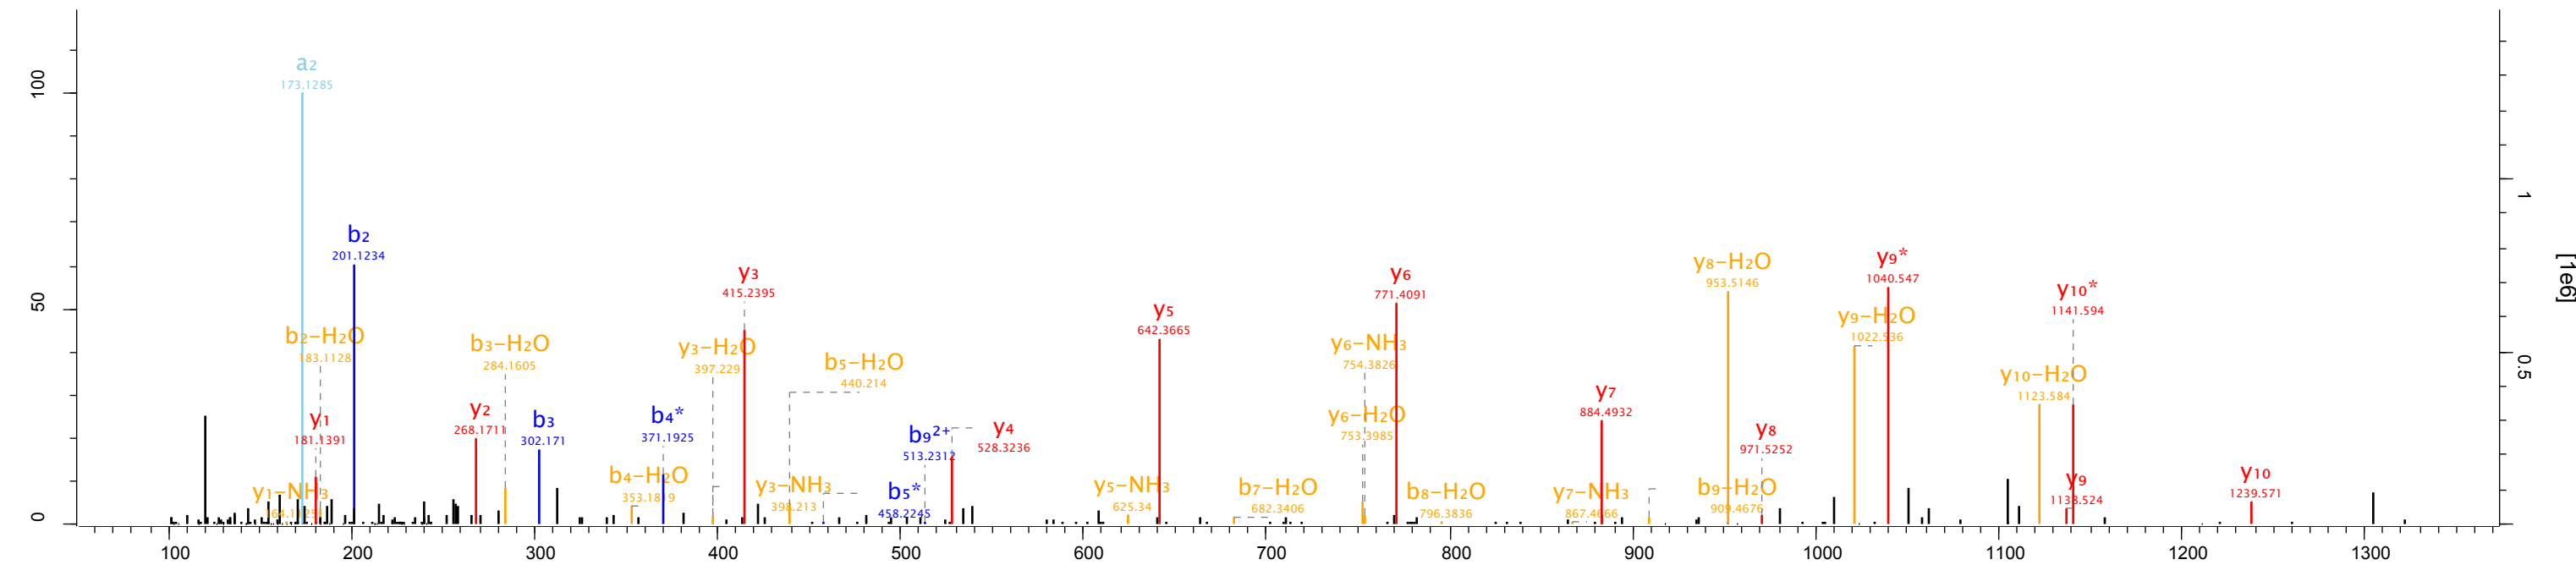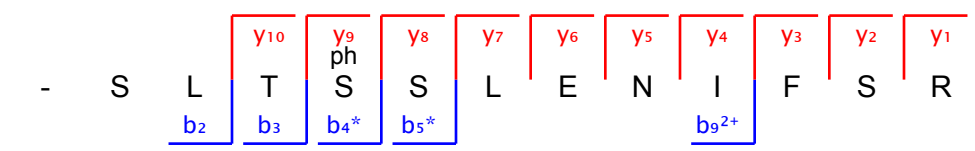

Raw file: 20150814\_A375SR\_Phospho\_BR2\_03  
 Scan: 27037 Method: FTMS; HCD Score: 41.46 m/z: 1156.49 Gene names: FTSJ1

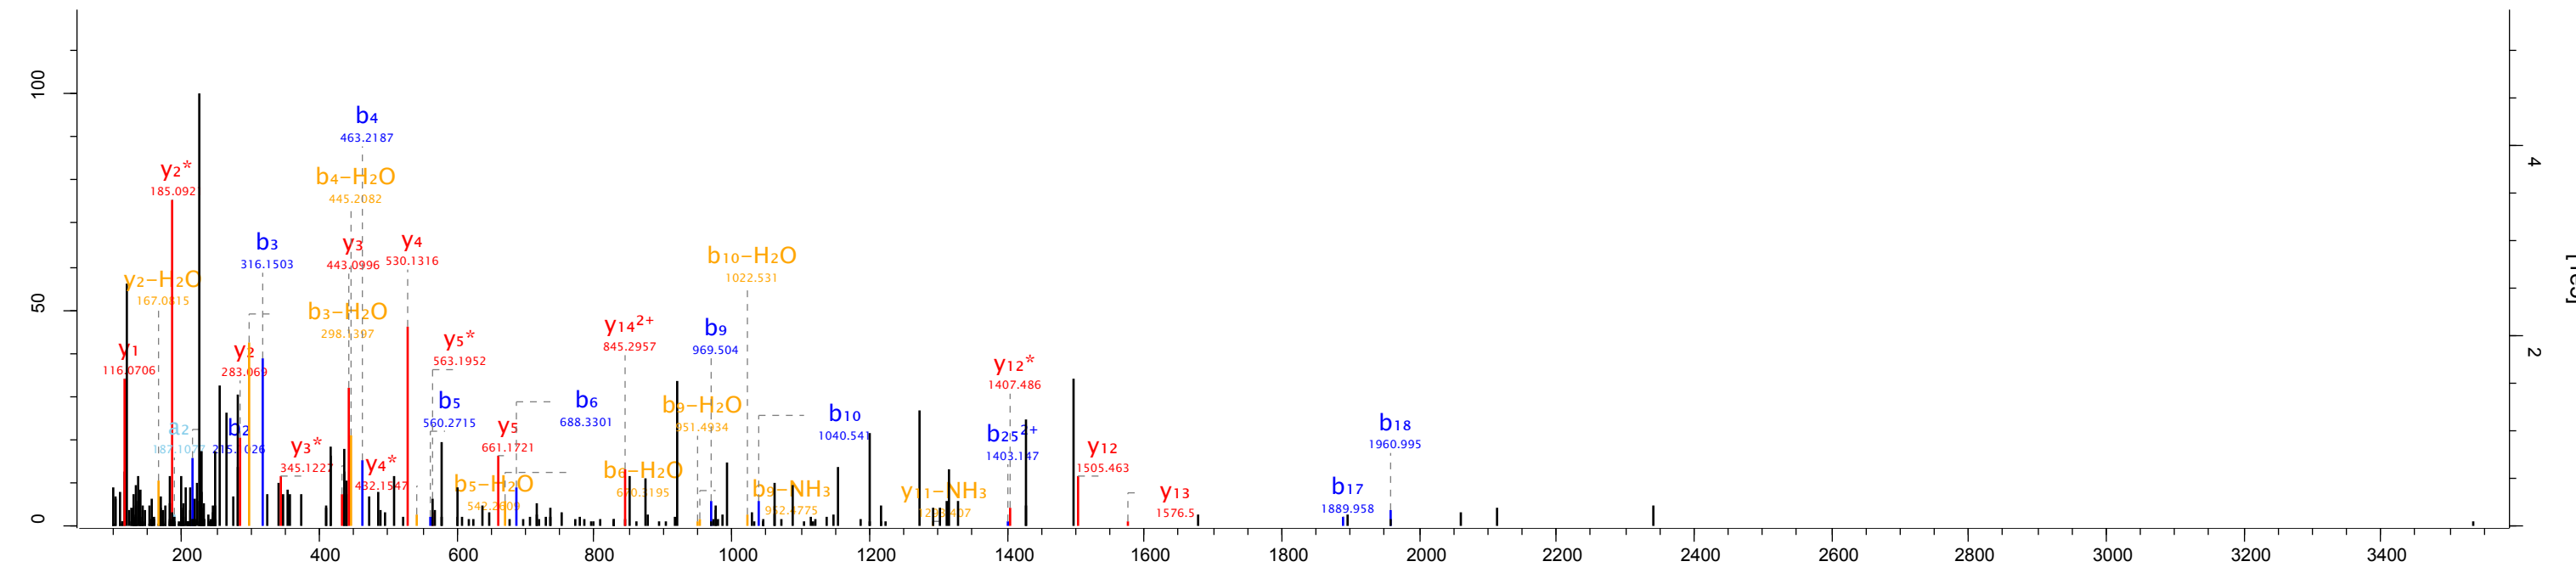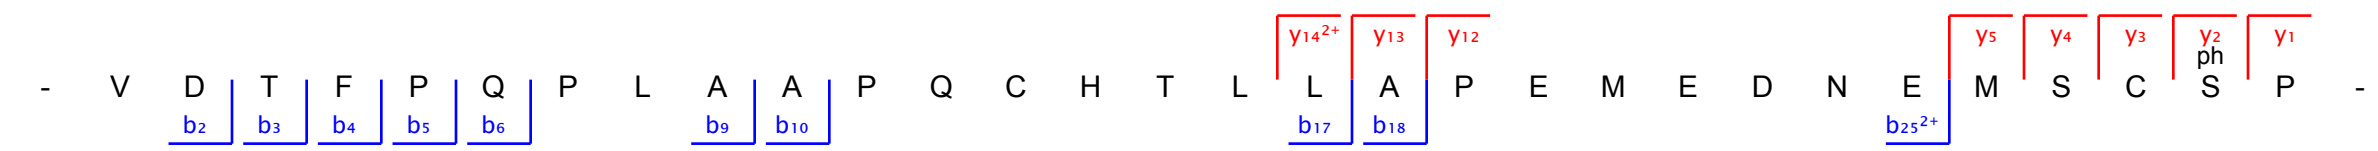

Raw file 20150814\_A375SR\_Phospho\_BR2\_03 Scan 27127 Method FTMS; HCD Score 214.82 m/z 918.87 Gene names EIF2S2

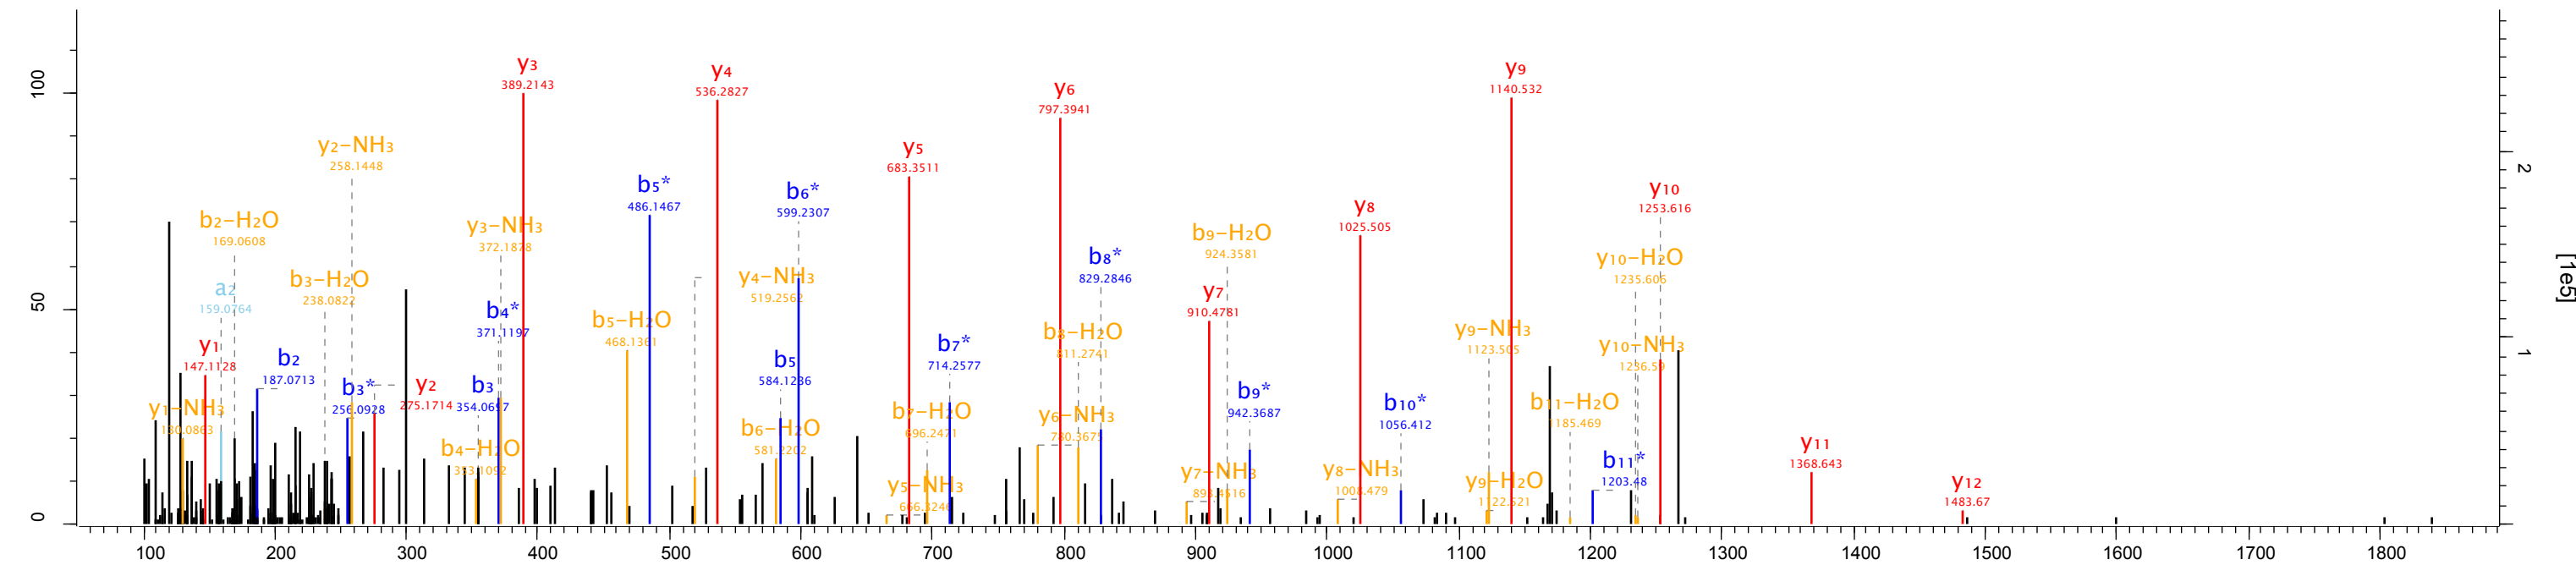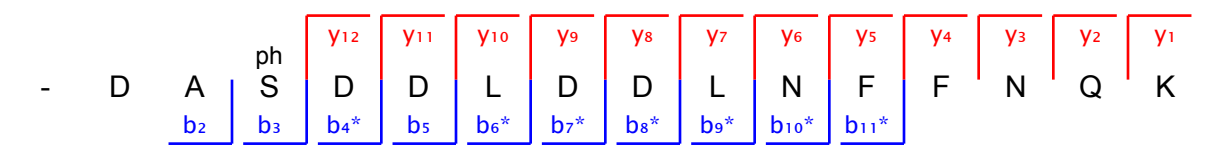



Raw file 20150814\_A375SR\_Phospho\_BR2\_03 Scan 27557 Method FTMS; HCD Score 83.25 m/z 1413.59 Gene names HSP90AA1

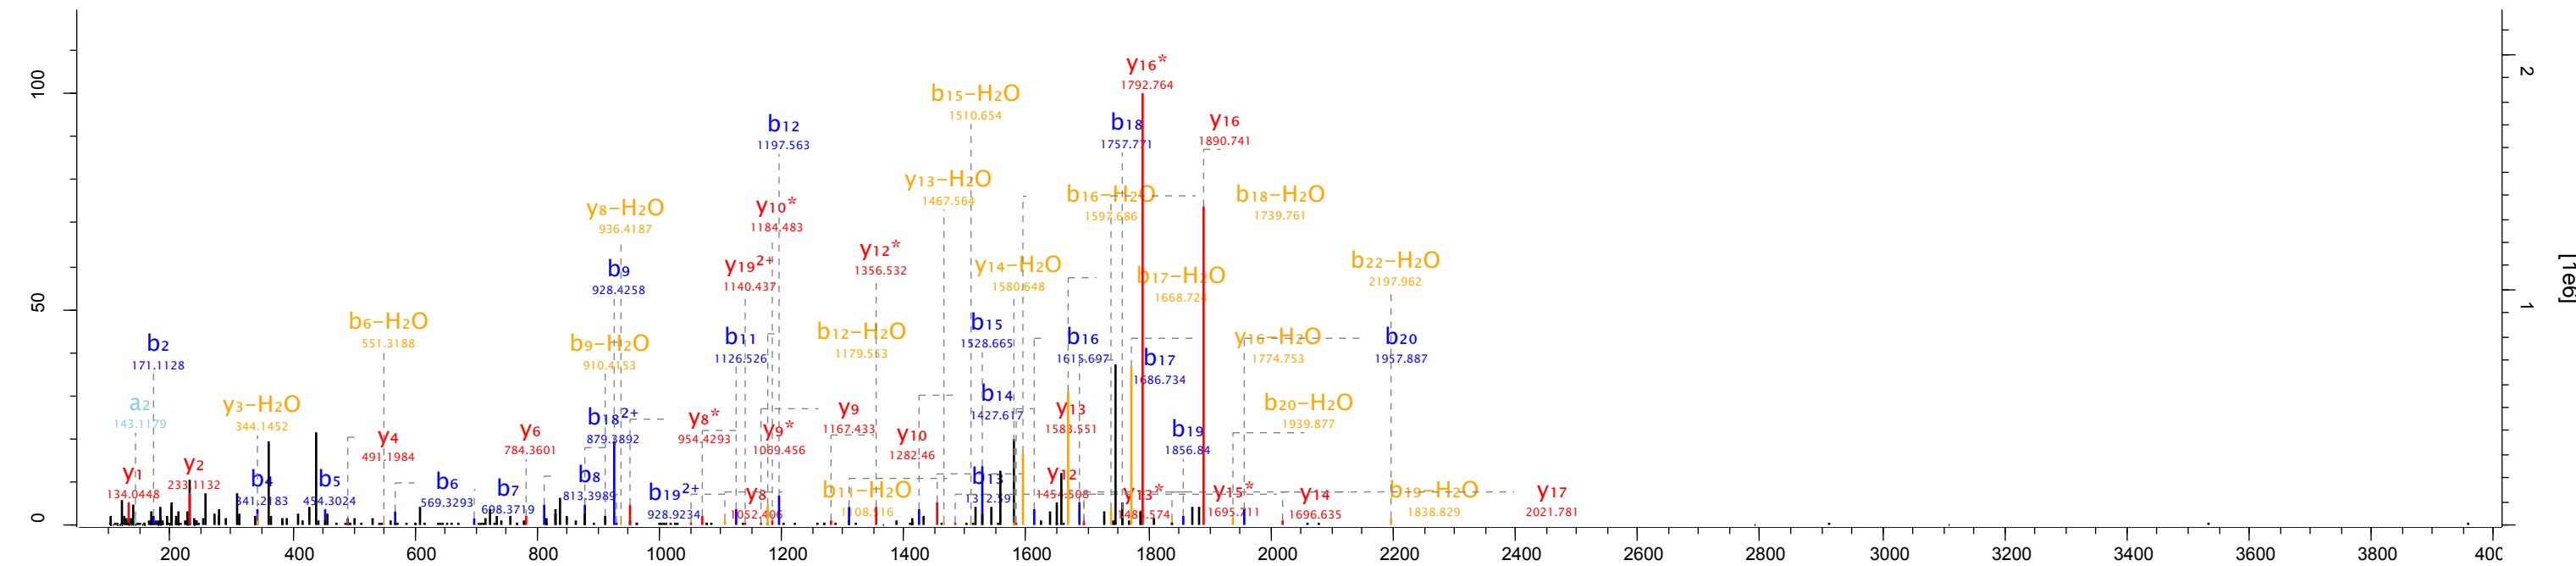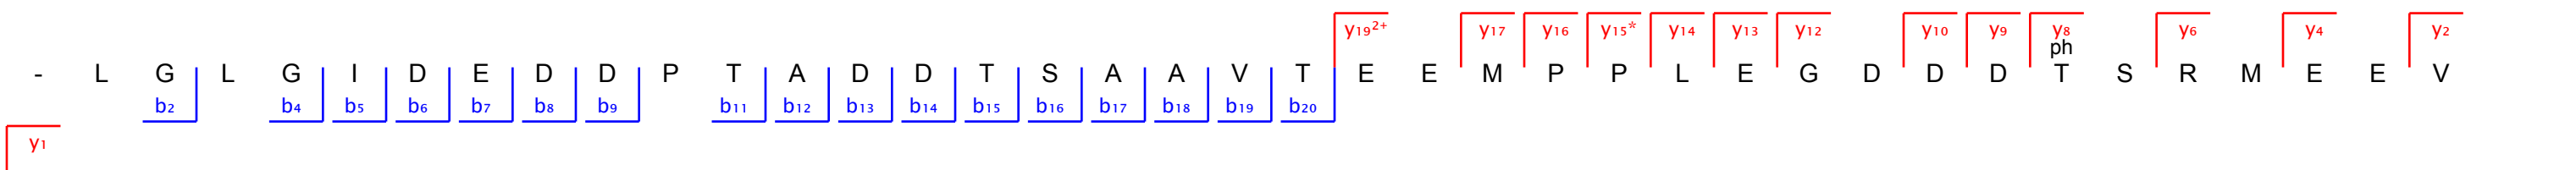

Raw file: 20150814\_A375SR\_Phospho\_BR2\_03  
 Scan: 27867 Method: FTMS; HCD Score: 186.74 m/z: 796.87 Gene names: BCL11A

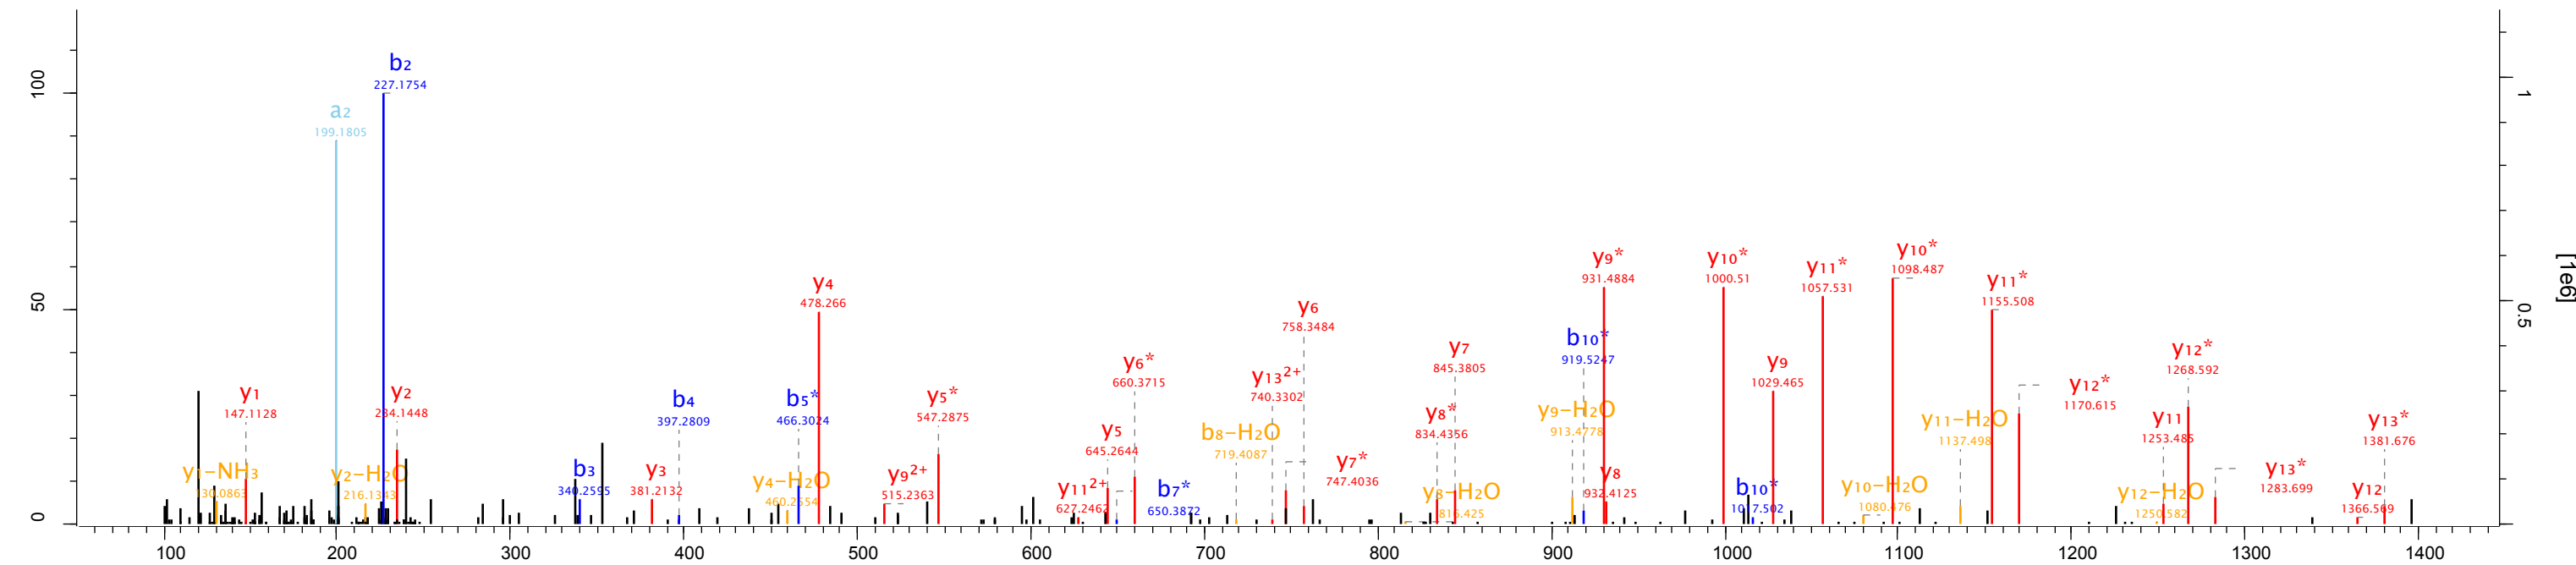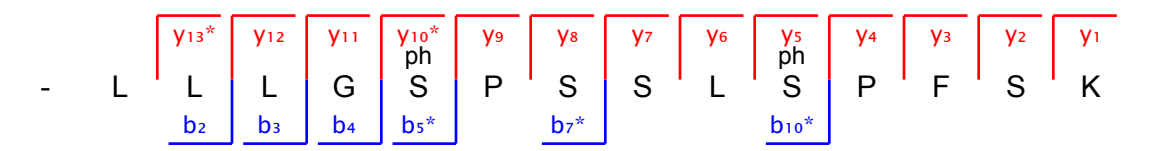

Raw file 20150814\_A375SR\_Phospho\_BR2\_03 Scan 27987 Method FTMS; HCD Score 107.49 m/z 1045.45 Gene names RRN3

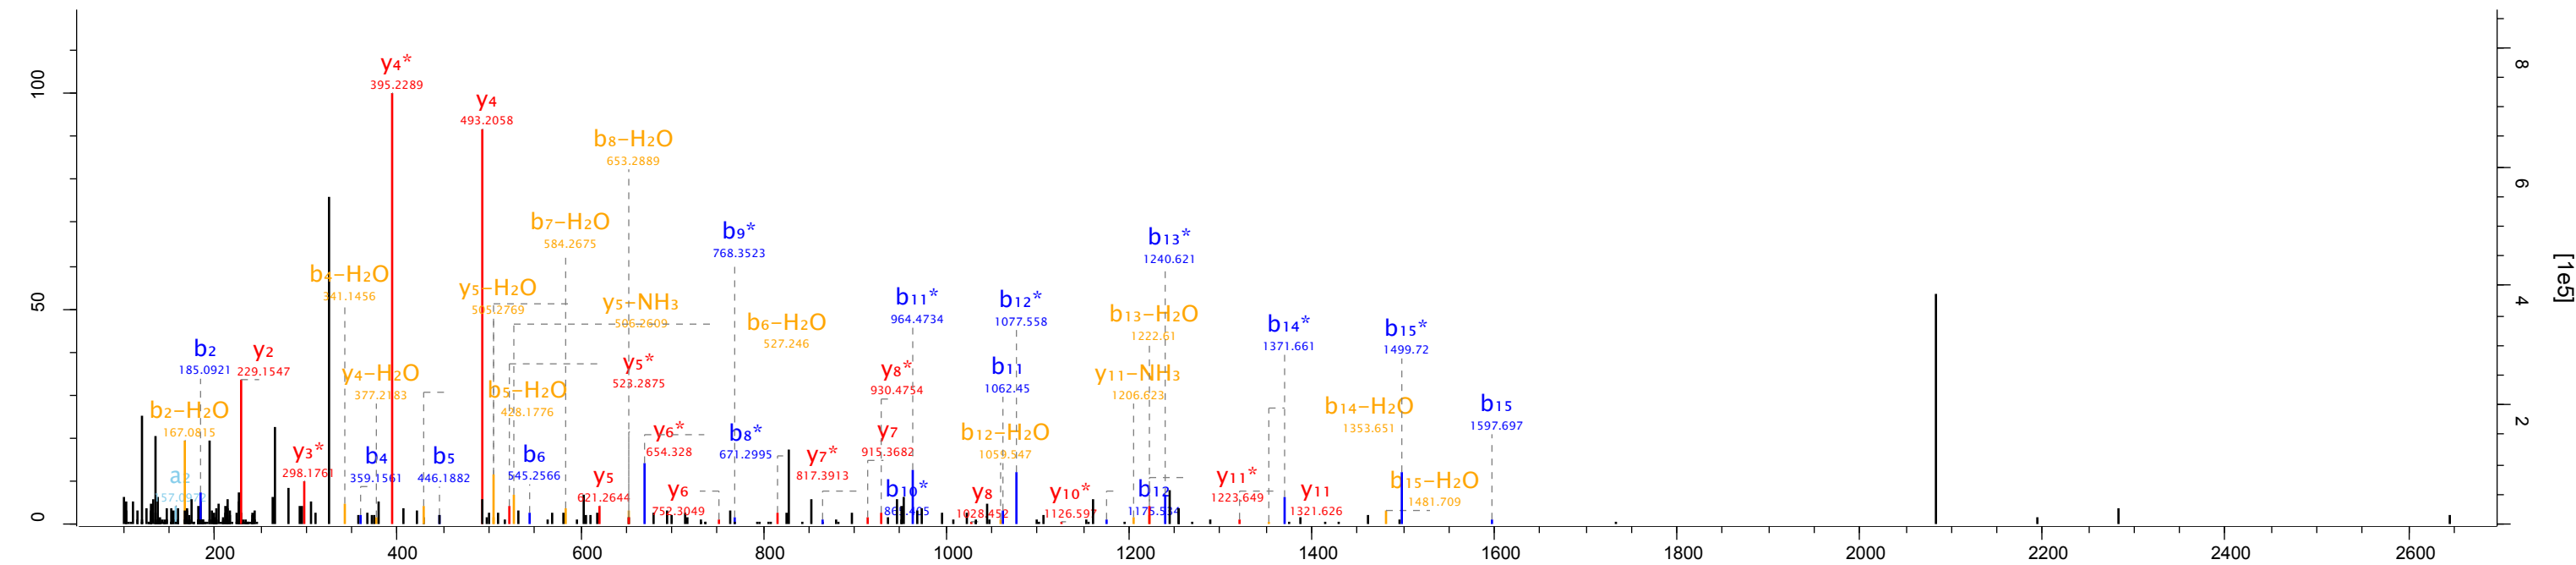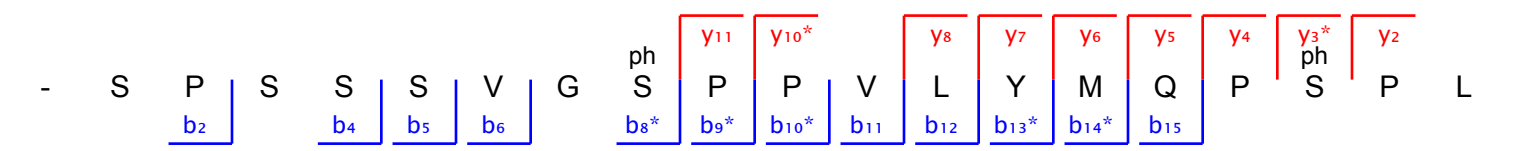

Raw file 20150814\_A375SR\_Phospho\_BR2\_03 Scan 28017 Method FTMS; HCD Score 142.18 m/z 1087.47 Gene names TRIO

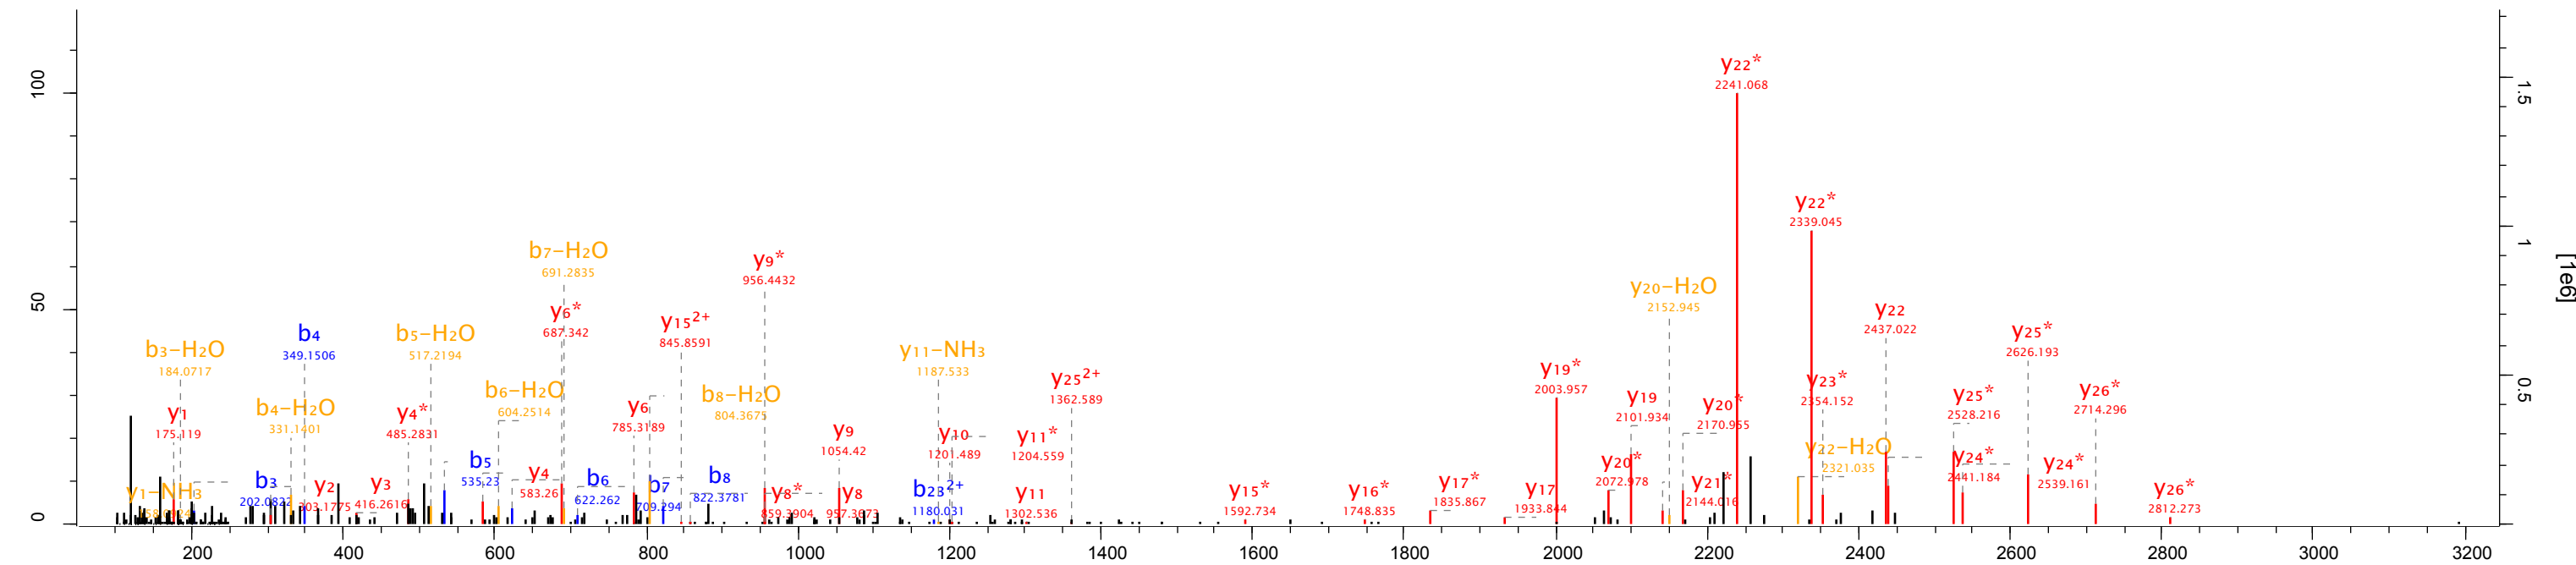

- G G S F W S S I P A S R P G S F T F P G D S D S L Q R -

Fragmentation labels below the sequence:

- Blue boxes: b3, b4, b5, b6, b7, b8, b23<sup>2+</sup>
- Red boxes: y26\*, y25\*, y24\*, y23\*, y22, y21\*, y20\*<sub>ph</sub>, y19, y17, y16\*, y15\*, y11, y10, y9, y8, y6, y4<sub>ph</sub>, y3, y2, y1

Raw file  
 20150814\_A375SR\_Phospho\_BR2\_03  
 Scan 28197 Method FTMS; HCD Score 69.96 m/z 959.8 Gene names EHBPI

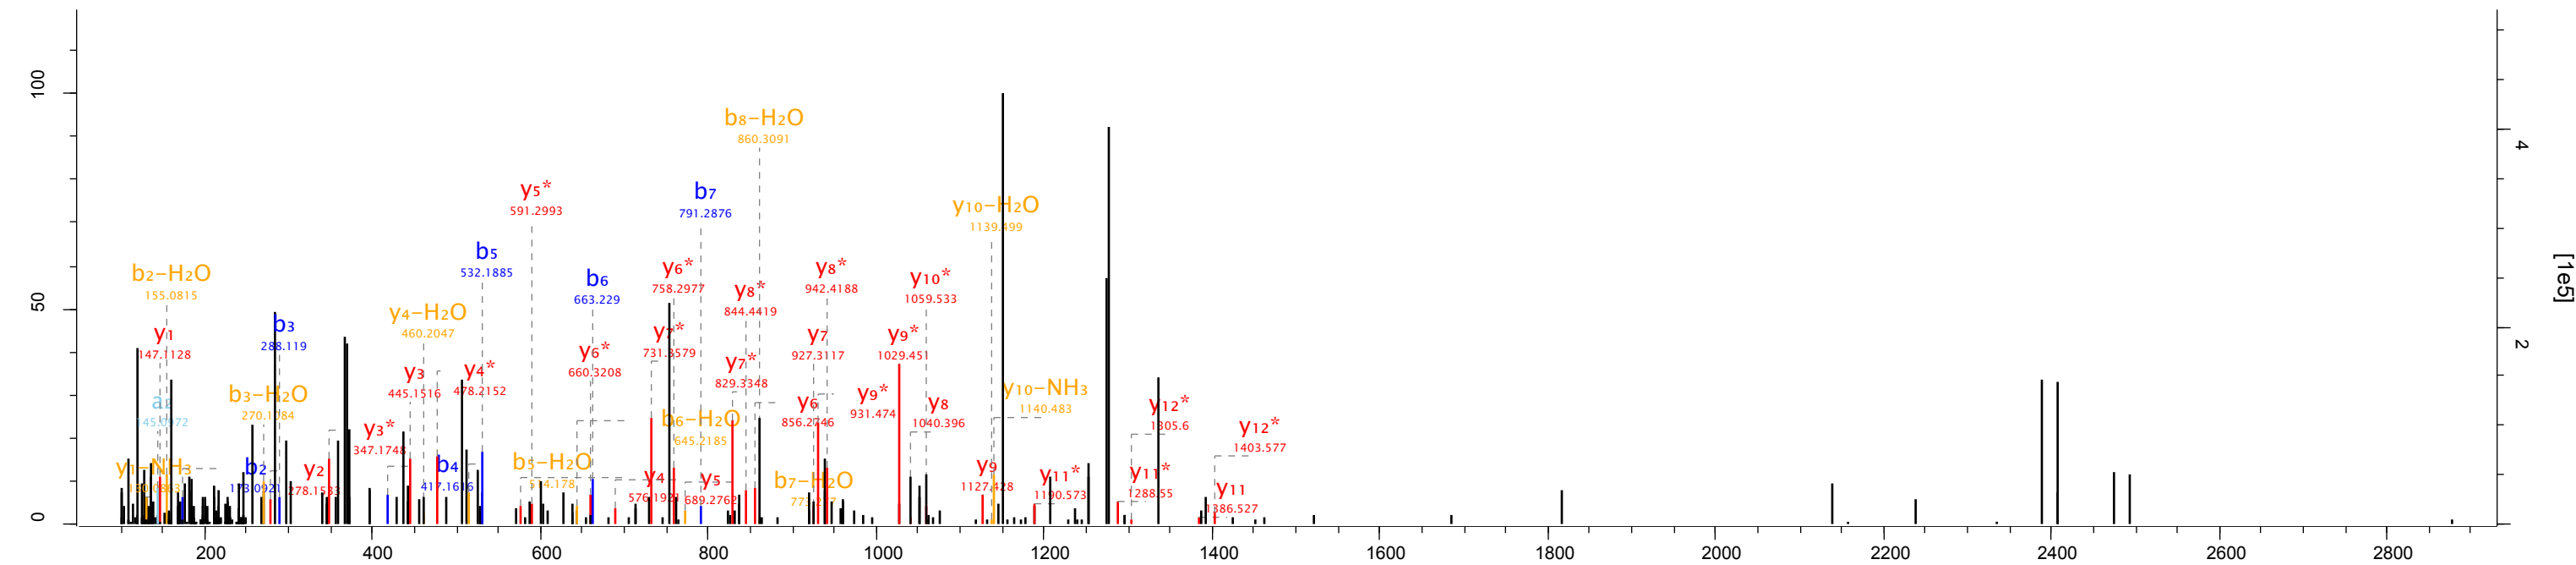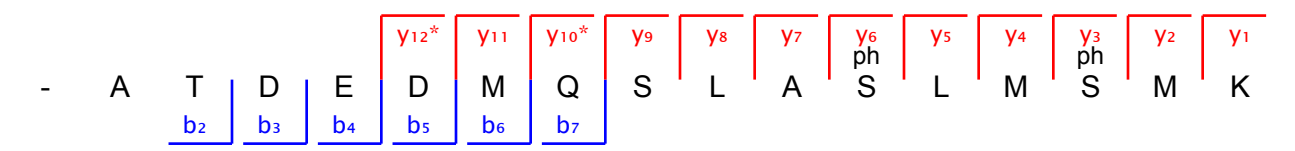

Raw file: 20150814\_A375SR\_Phospho\_BR2\_03  
 Scan: 28247 Method: FTMS; HCD Score: 49.36 m/z: 1123.06 Gene names: RBM33

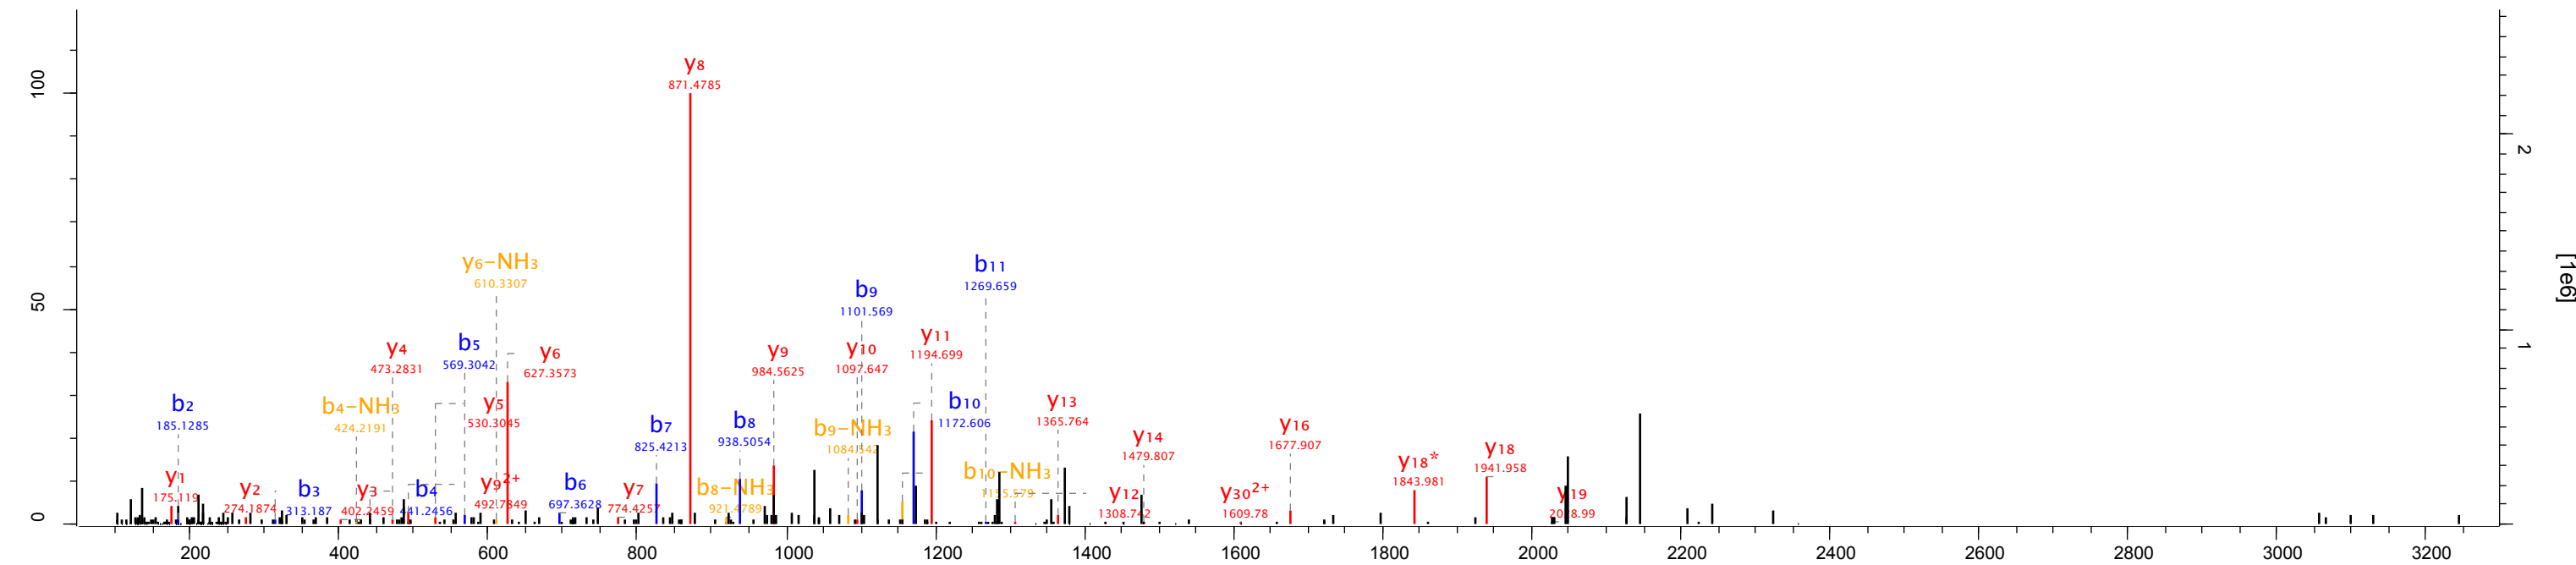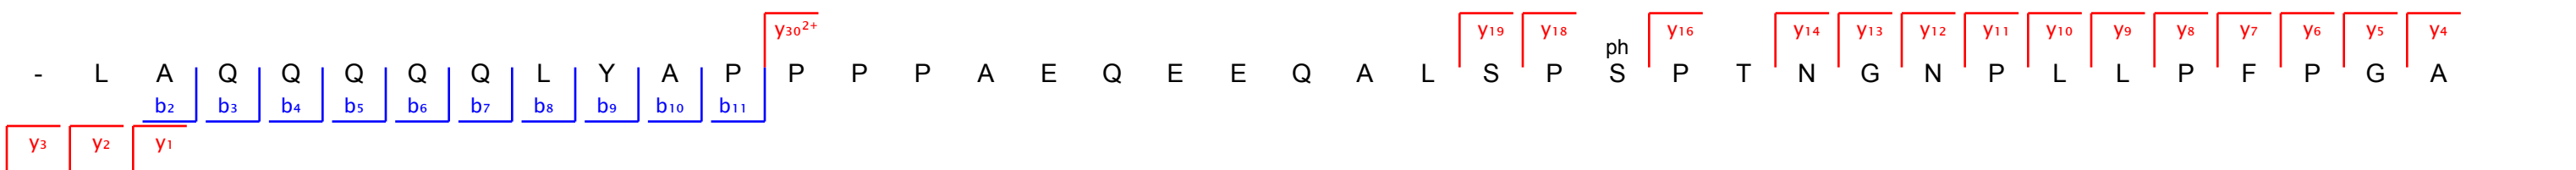

Raw file 20150814\_A375SR\_Phospho\_BR2\_03 Scan 28307 Method FTMS; HCD Score 164.35 m/z 1000.99 Gene names NUP133

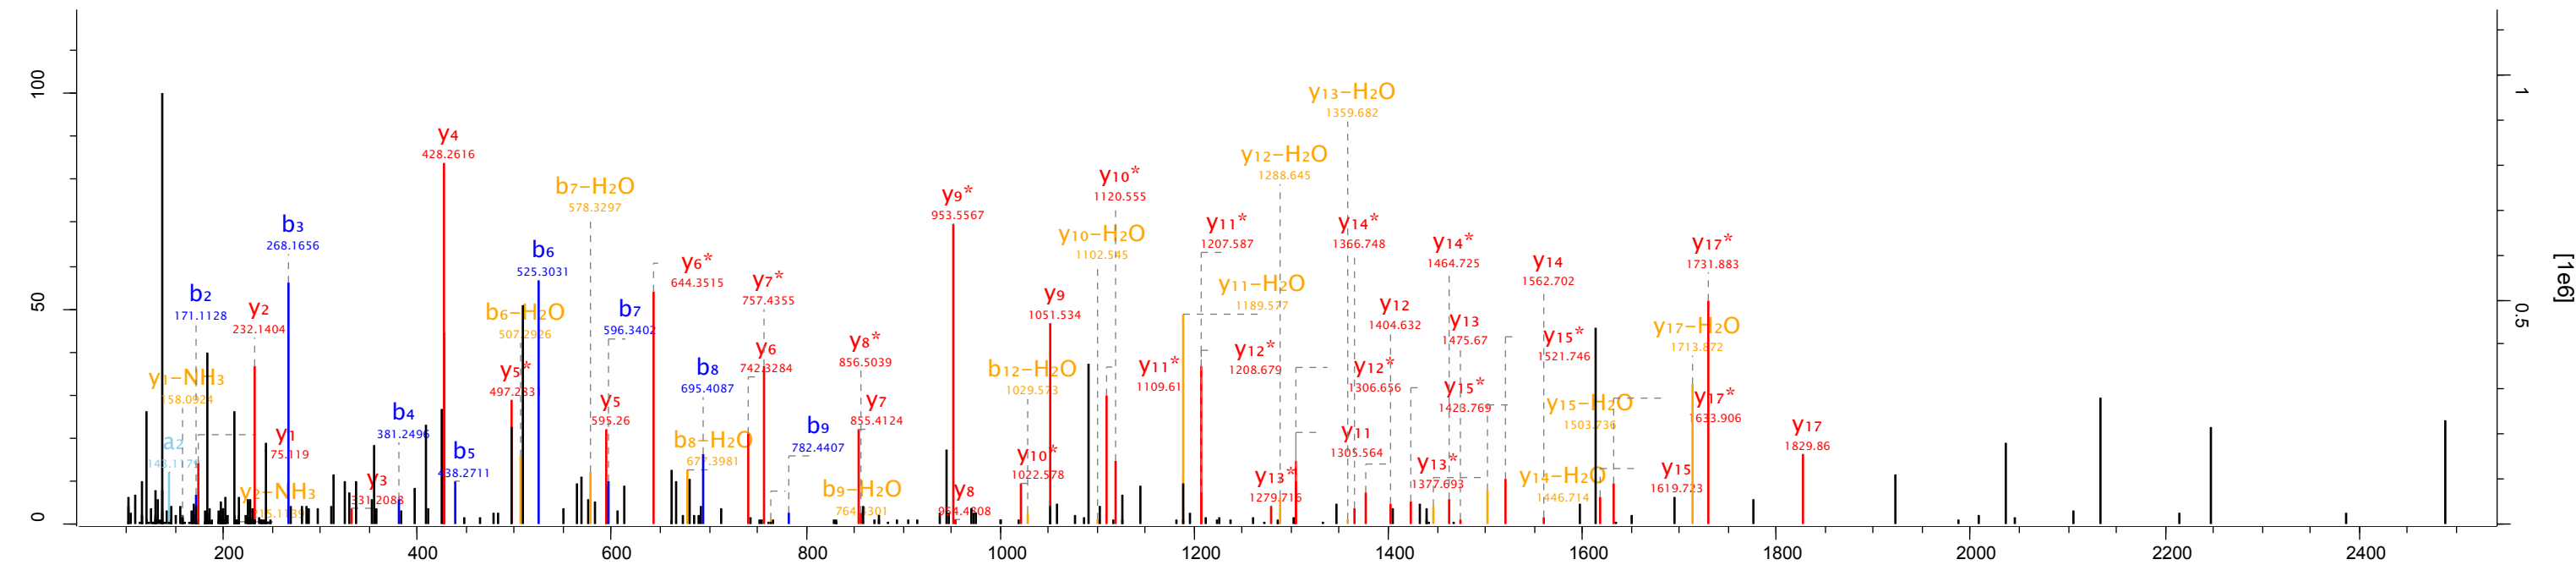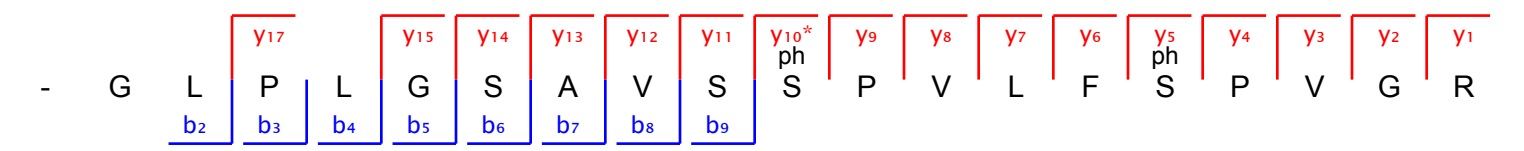

Raw file 20150814\_A375SR\_Phospho\_BR2\_03 Scan 28357 Method FTMS; HCD Score 83.83 m/z 861.72 Gene names CRTC2

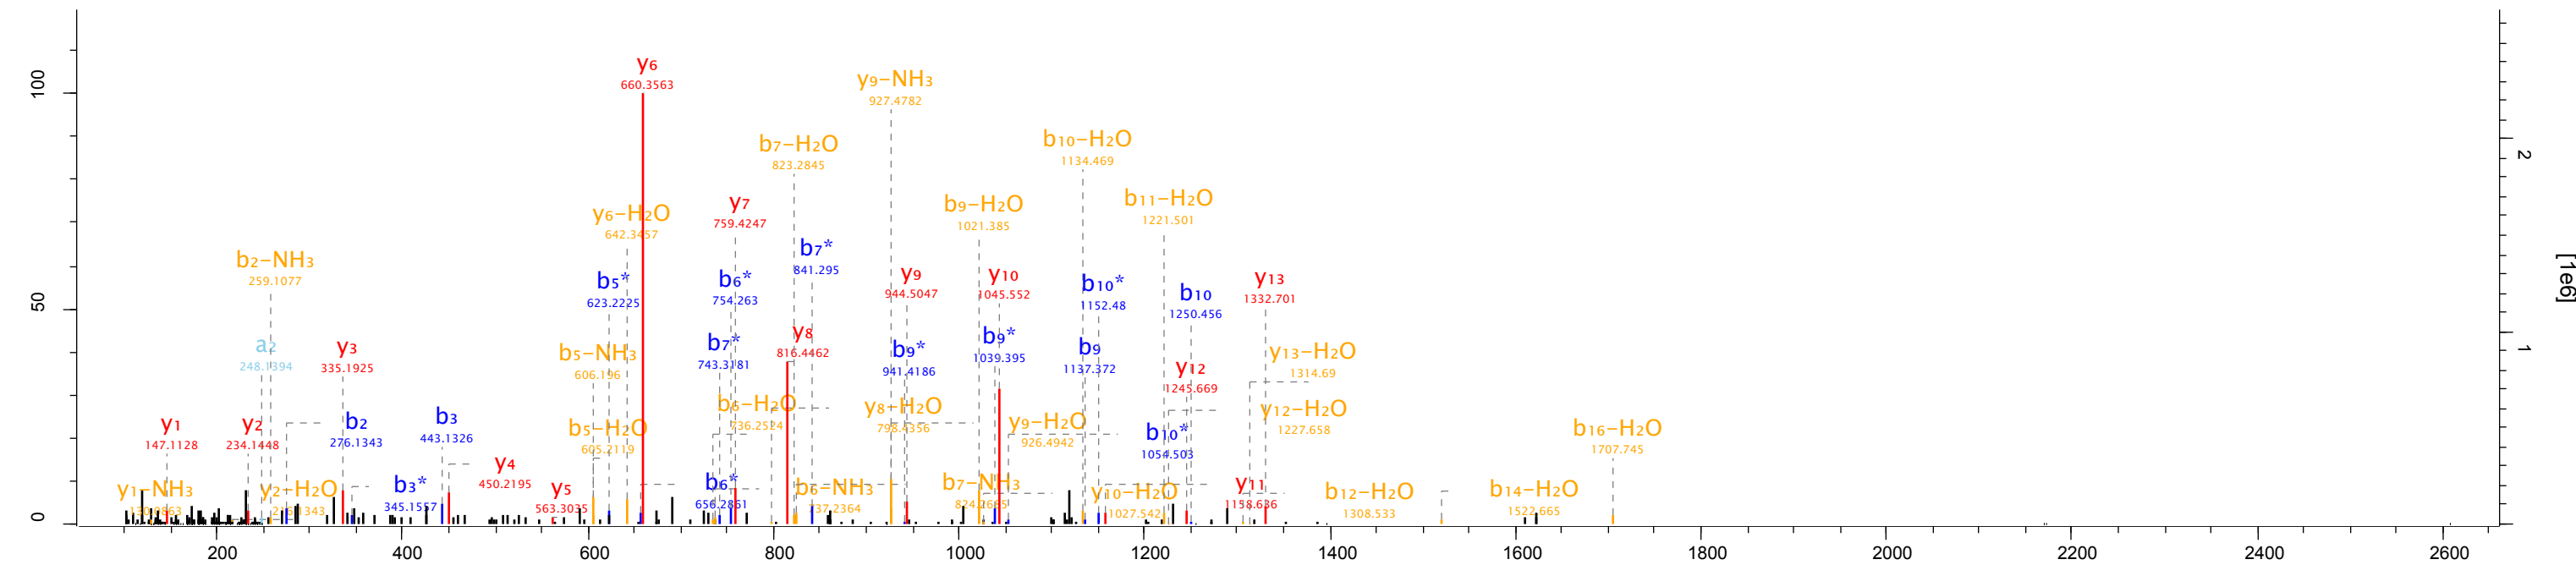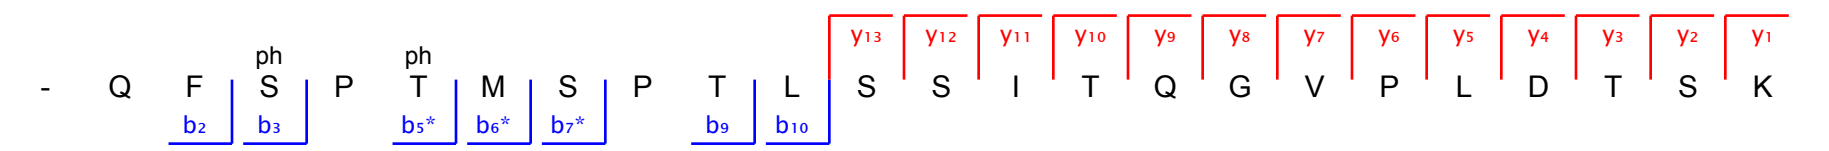



Raw file: 20150814\_A375SR\_Phospho\_BR2\_03  
 Scan: 28437 Method: FTMS; HCD Score: 135.7 m/z: 1014.78 Gene names: DCAF8

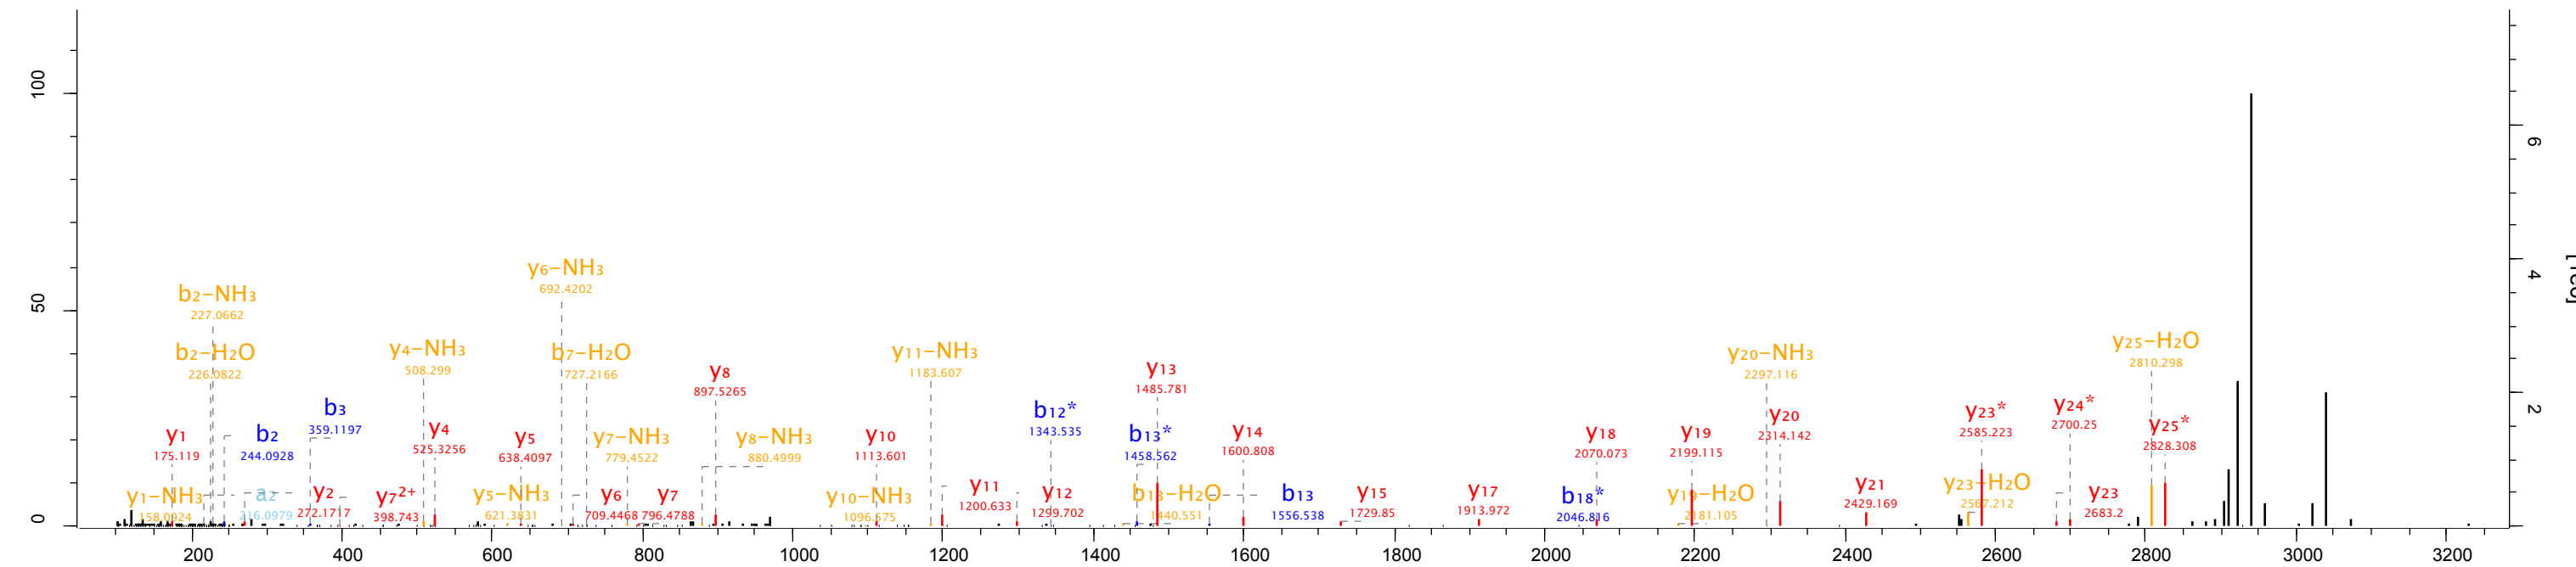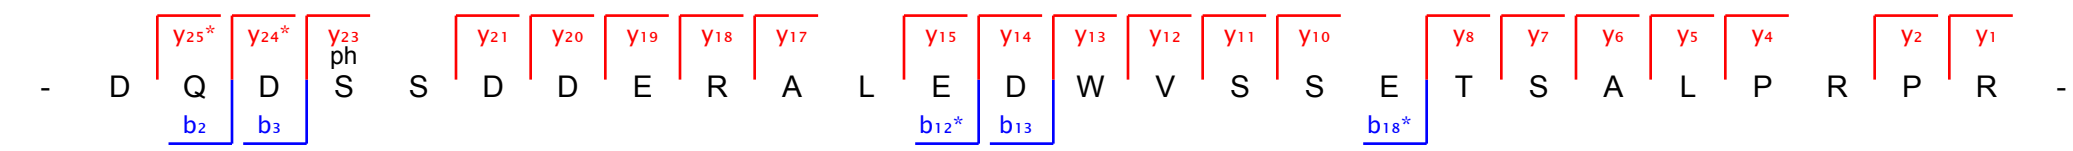

Raw file: 20150814\_A375SR\_Phospho\_BR2\_03  
 Scan: 28597 Method: FTMS; HCD Score: 307.64 m/z: 1205 Gene names: SLC20A1

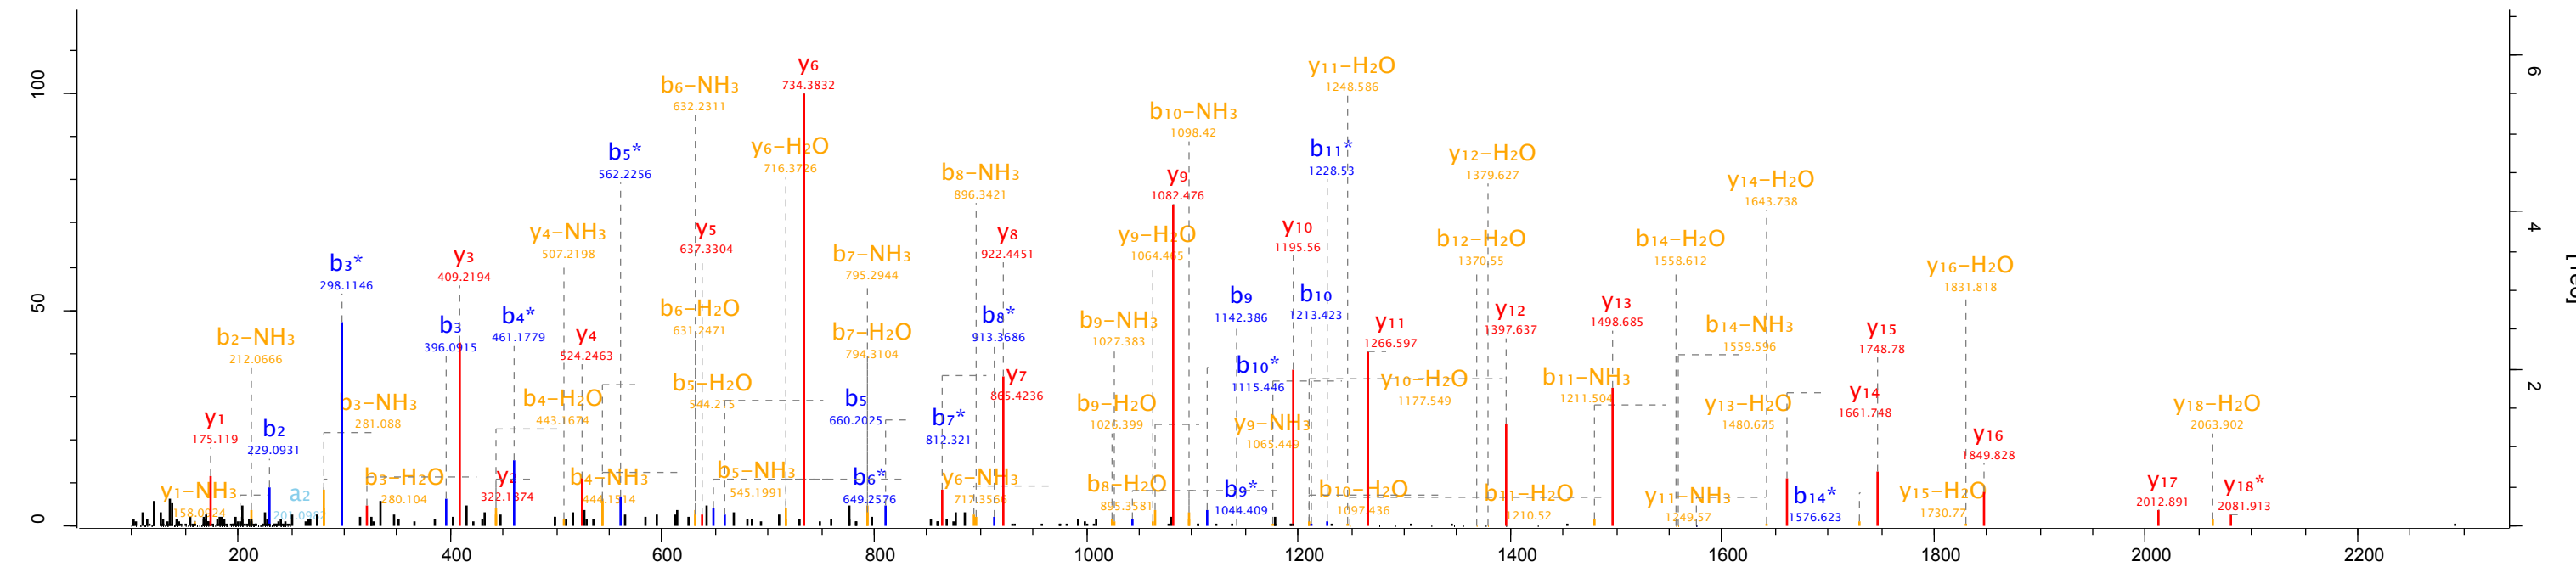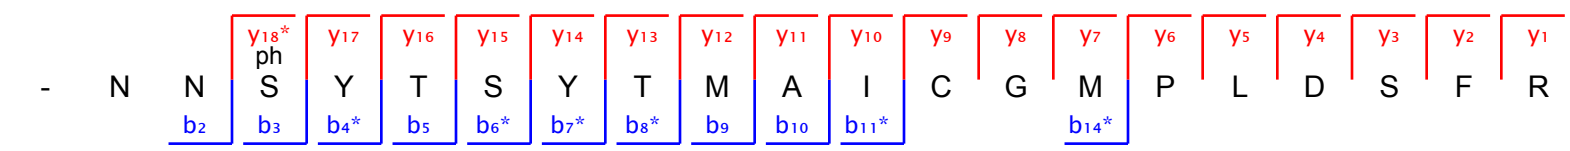

Raw file: 20150814\_A375SR\_Phospho\_BR2\_03  
 Scan: 3127 Method: FTMS; HCD Score: 311.76 m/z: 802.84 Gene names: NDNL2

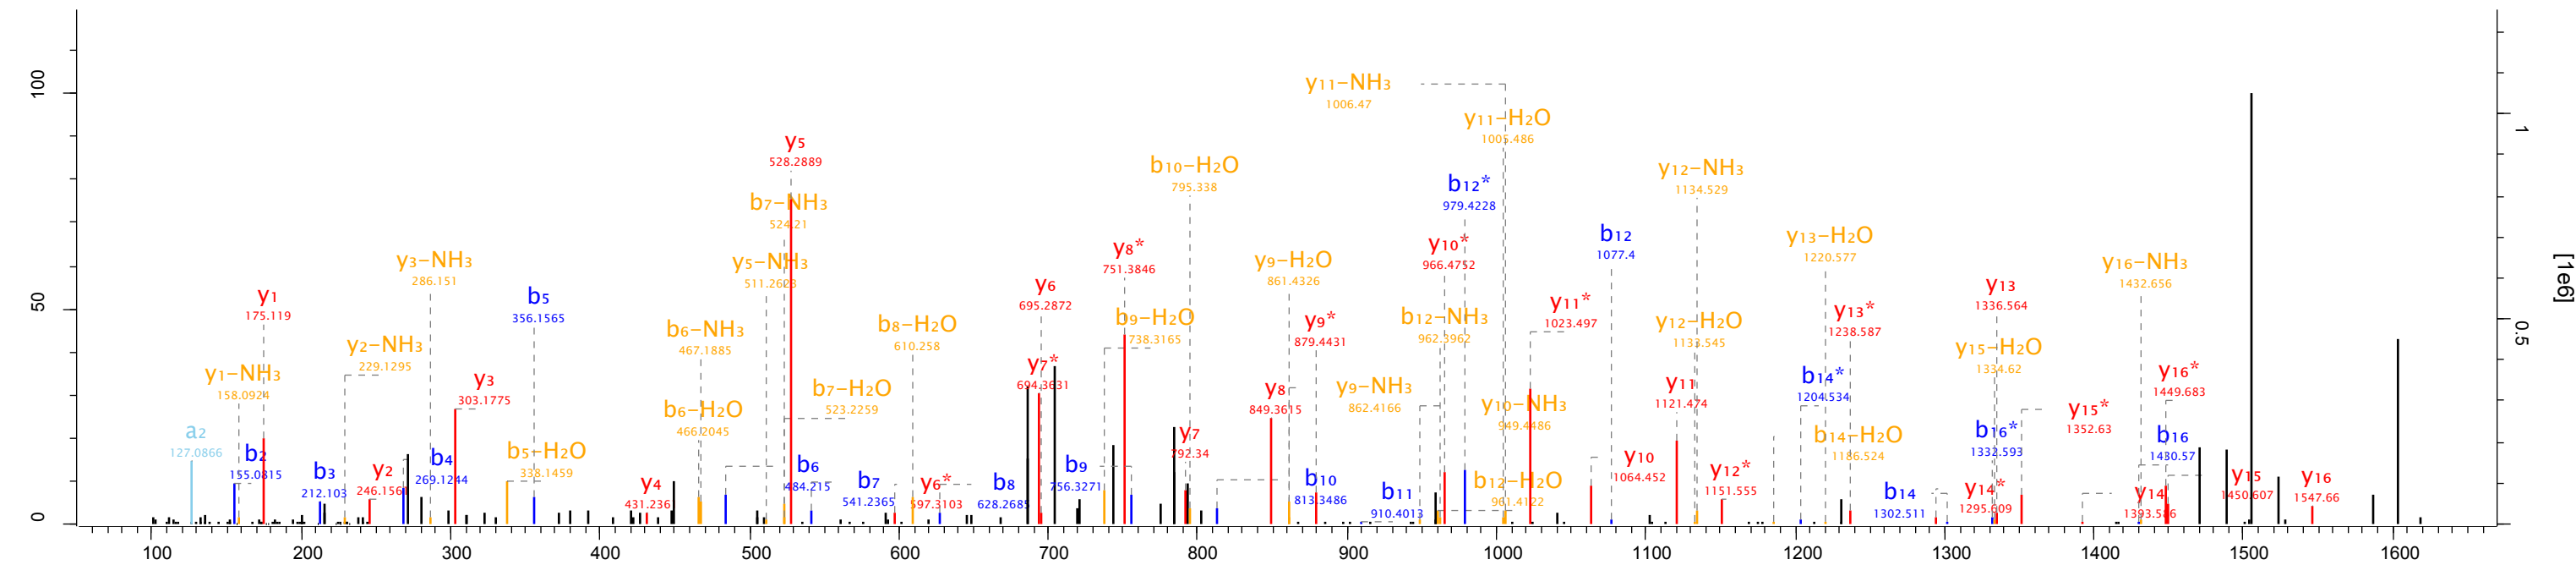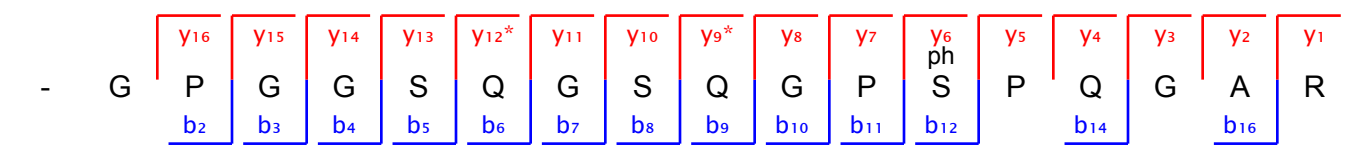

Raw file: 20150814\_A375SR\_Phospho\_BR2\_03  
 Scan: 3237 Method: FTMS; HCD Score: 124.21 m/z: 691.9 Gene names: GCFC2

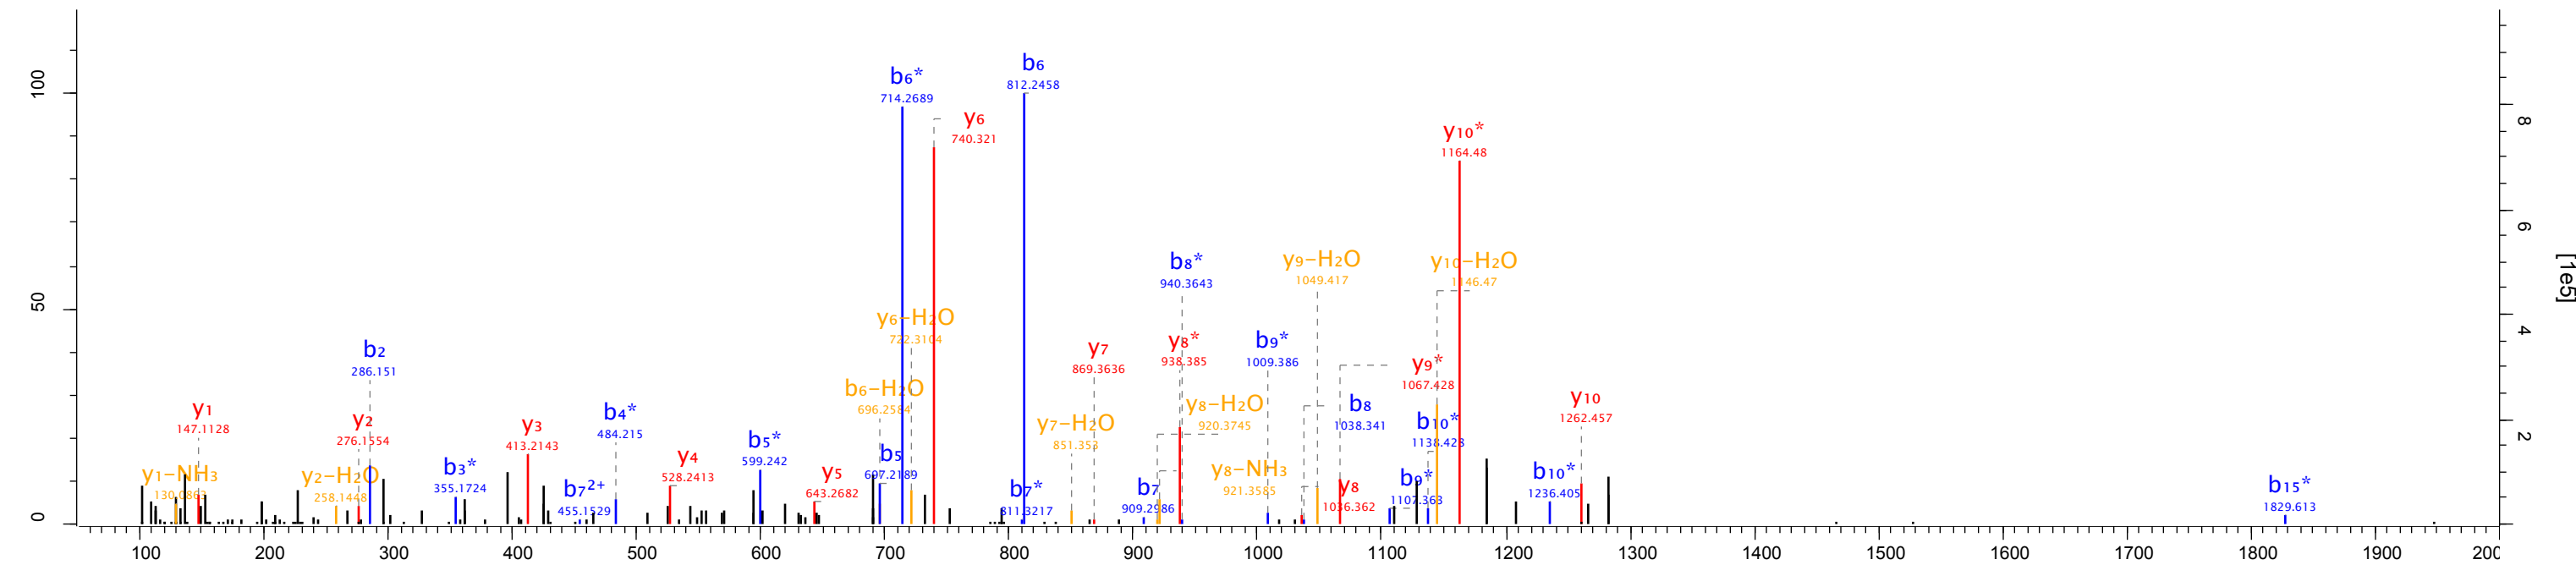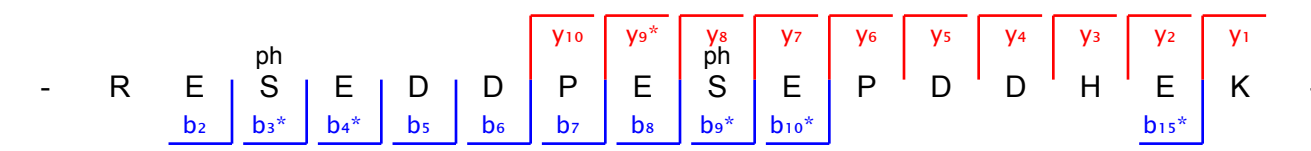

Raw file: 20150814\_A375SR\_Phospho\_BR2\_03  
 Scan: 3397 Method: FTMS; HCD Score: 76.65 m/z: 709.79 Gene names: SRSF8

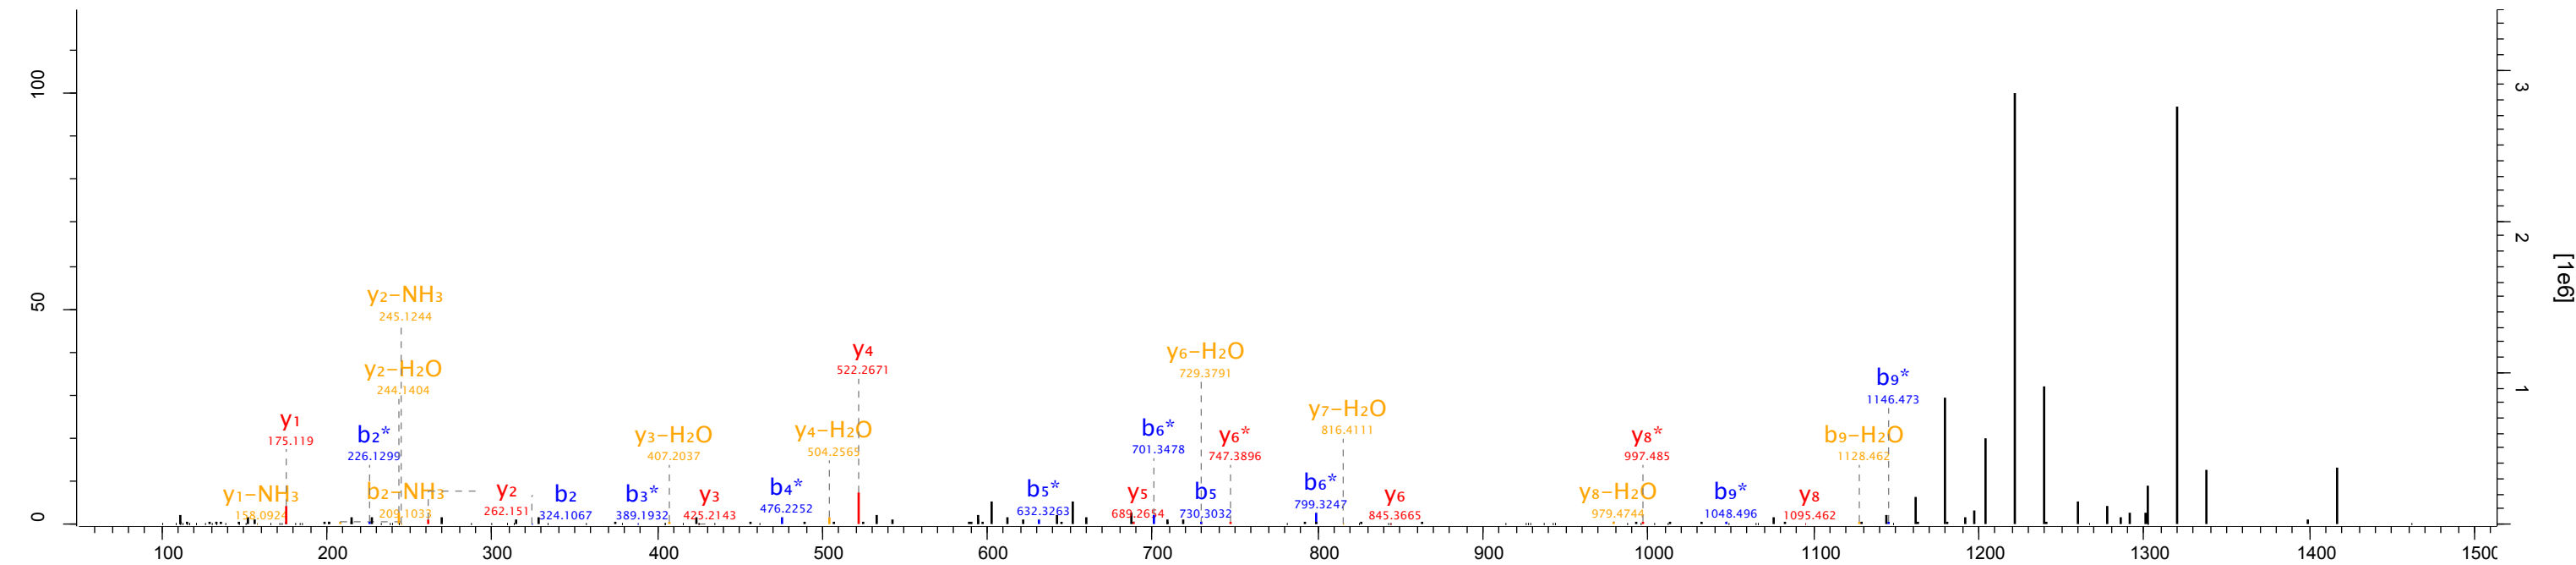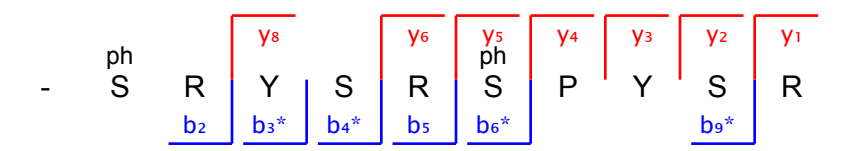

Raw file: 20150814\_A375SR\_Phospho\_BR2\_03  
 Scan: 3617 Method: FTMS; HCD Score: 156.02 m/z: 667.99 Gene names: SRRM2

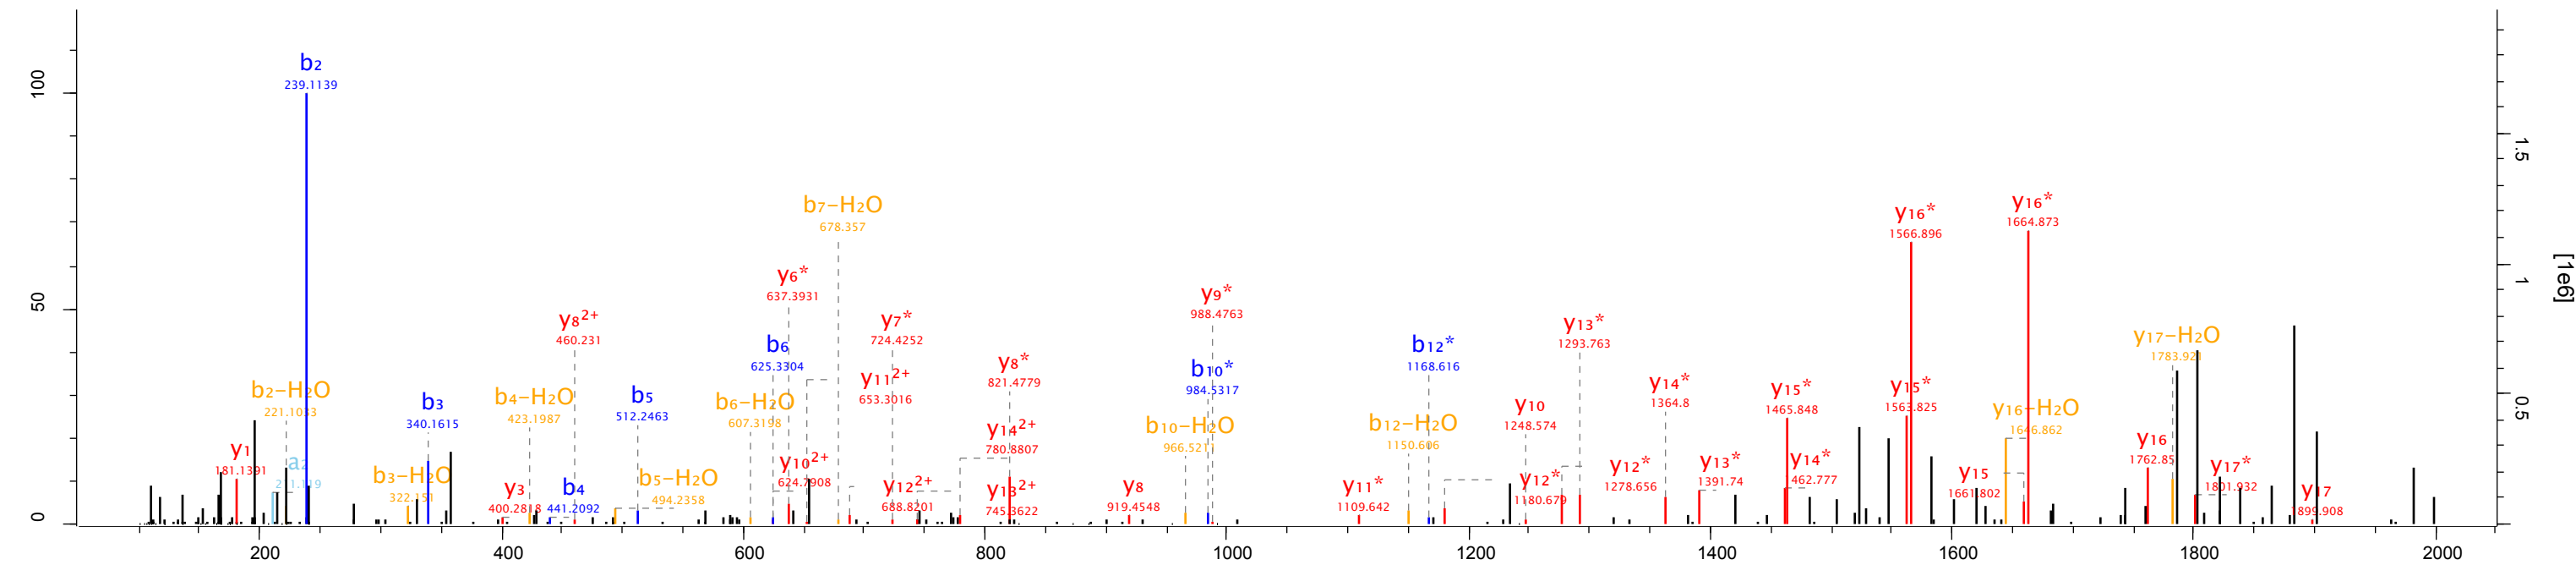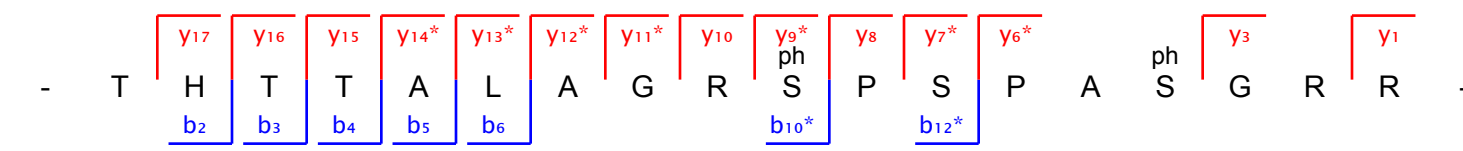

Raw file Scan Method Score m/z Gene names

20150814\_A375SR\_Phospho\_BR2\_03 3797 FTMS; HCD 132.05 620.79 MCM2

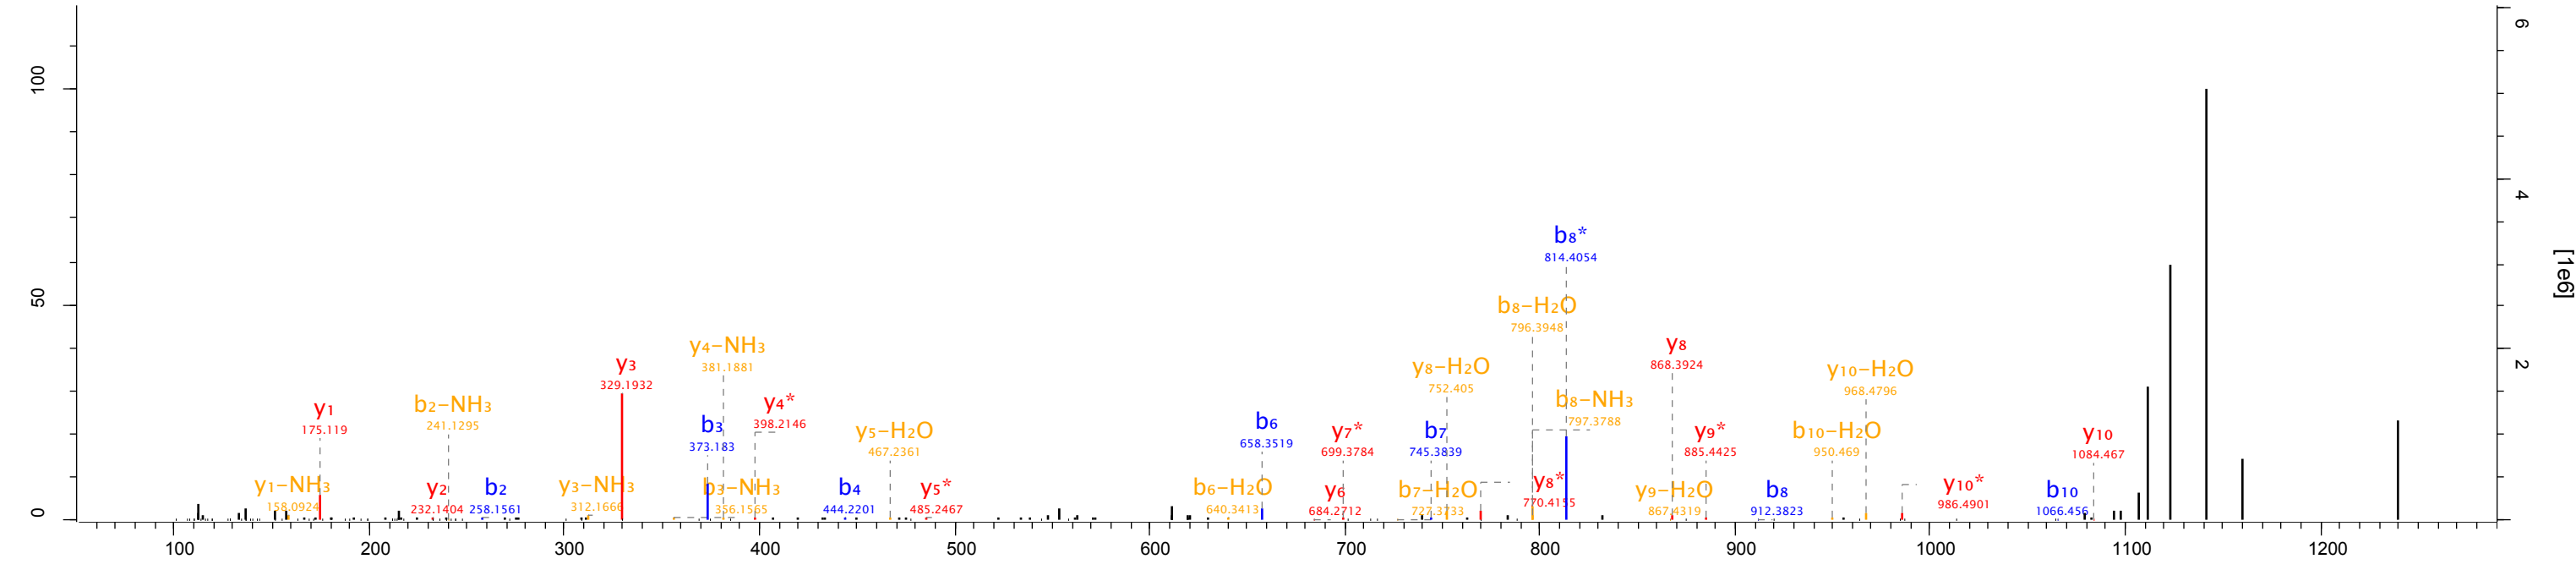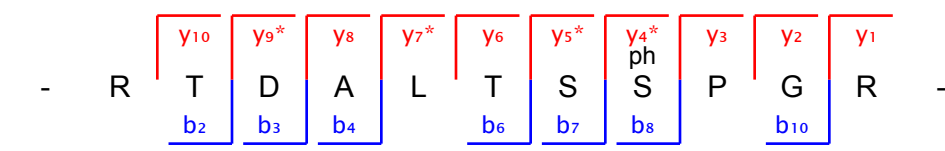

Raw file 20150814\_A375SR\_Phospho\_BR2\_03 Scan 3807 Method FTMS; HCD Score 273.18 m/z 1023.88 Gene names LEO1

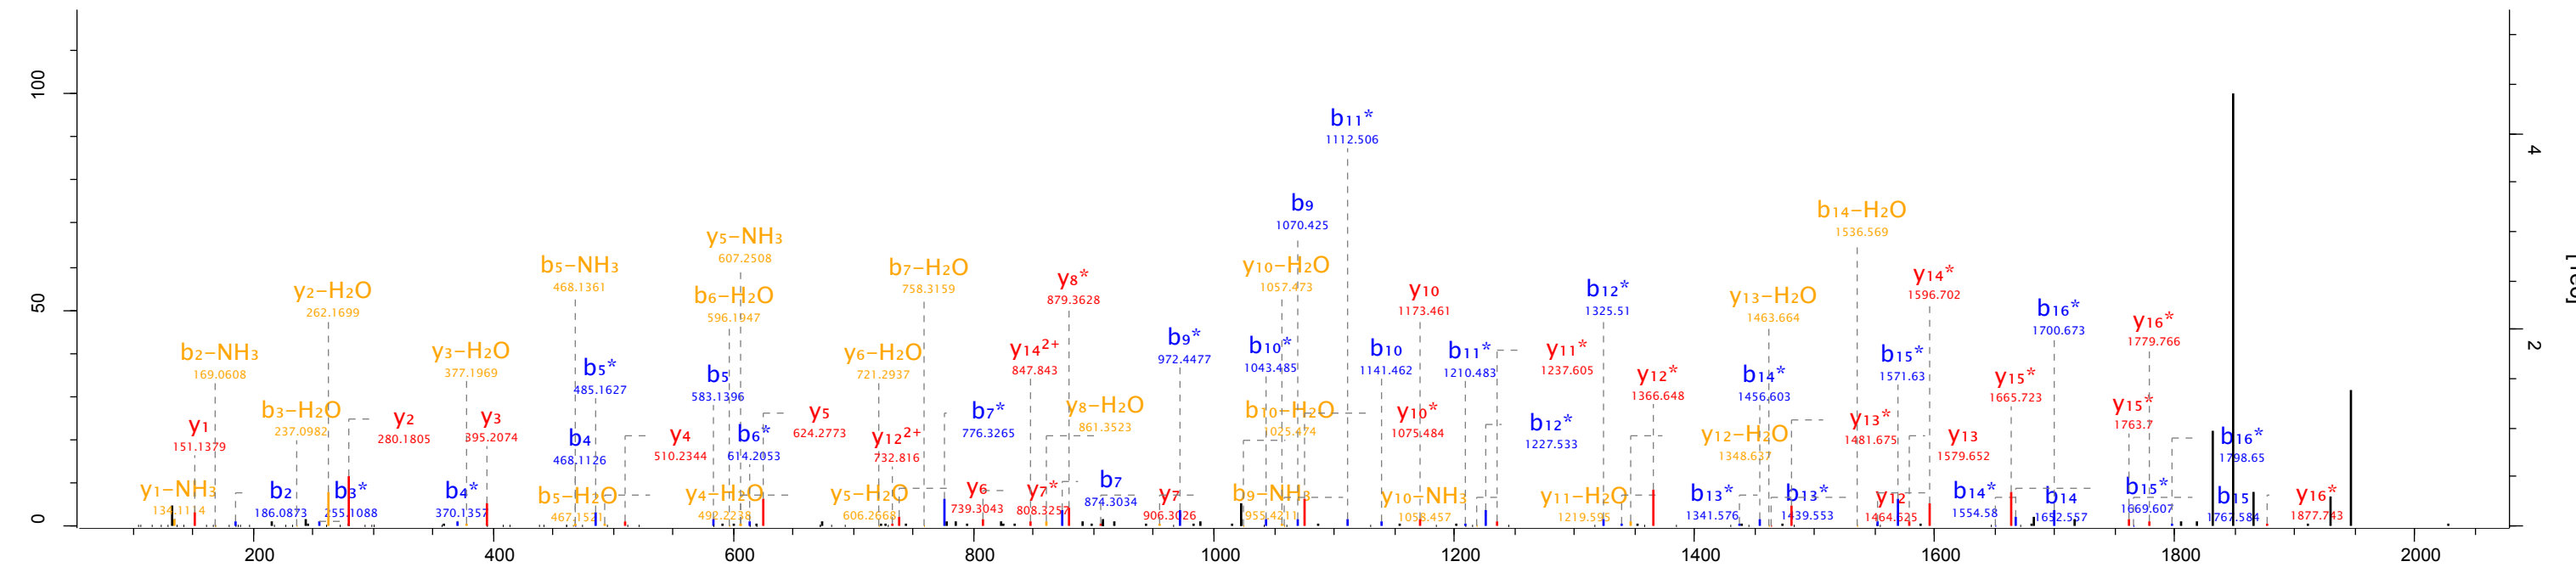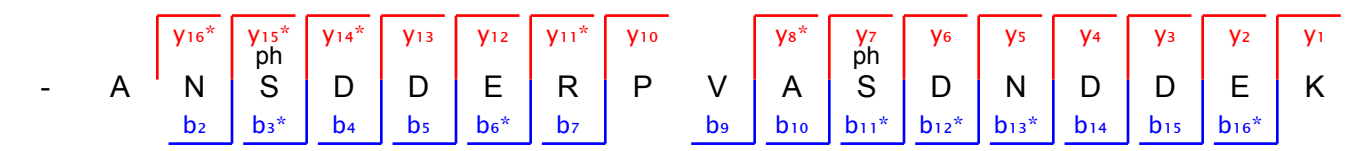



Raw file: 20150814\_A375SR\_Phospho\_BR2\_03  
 Scan: 3837 Method: FTMS; HCD Score: 101.05 m/z: 572.92 Gene names: SLC38A1

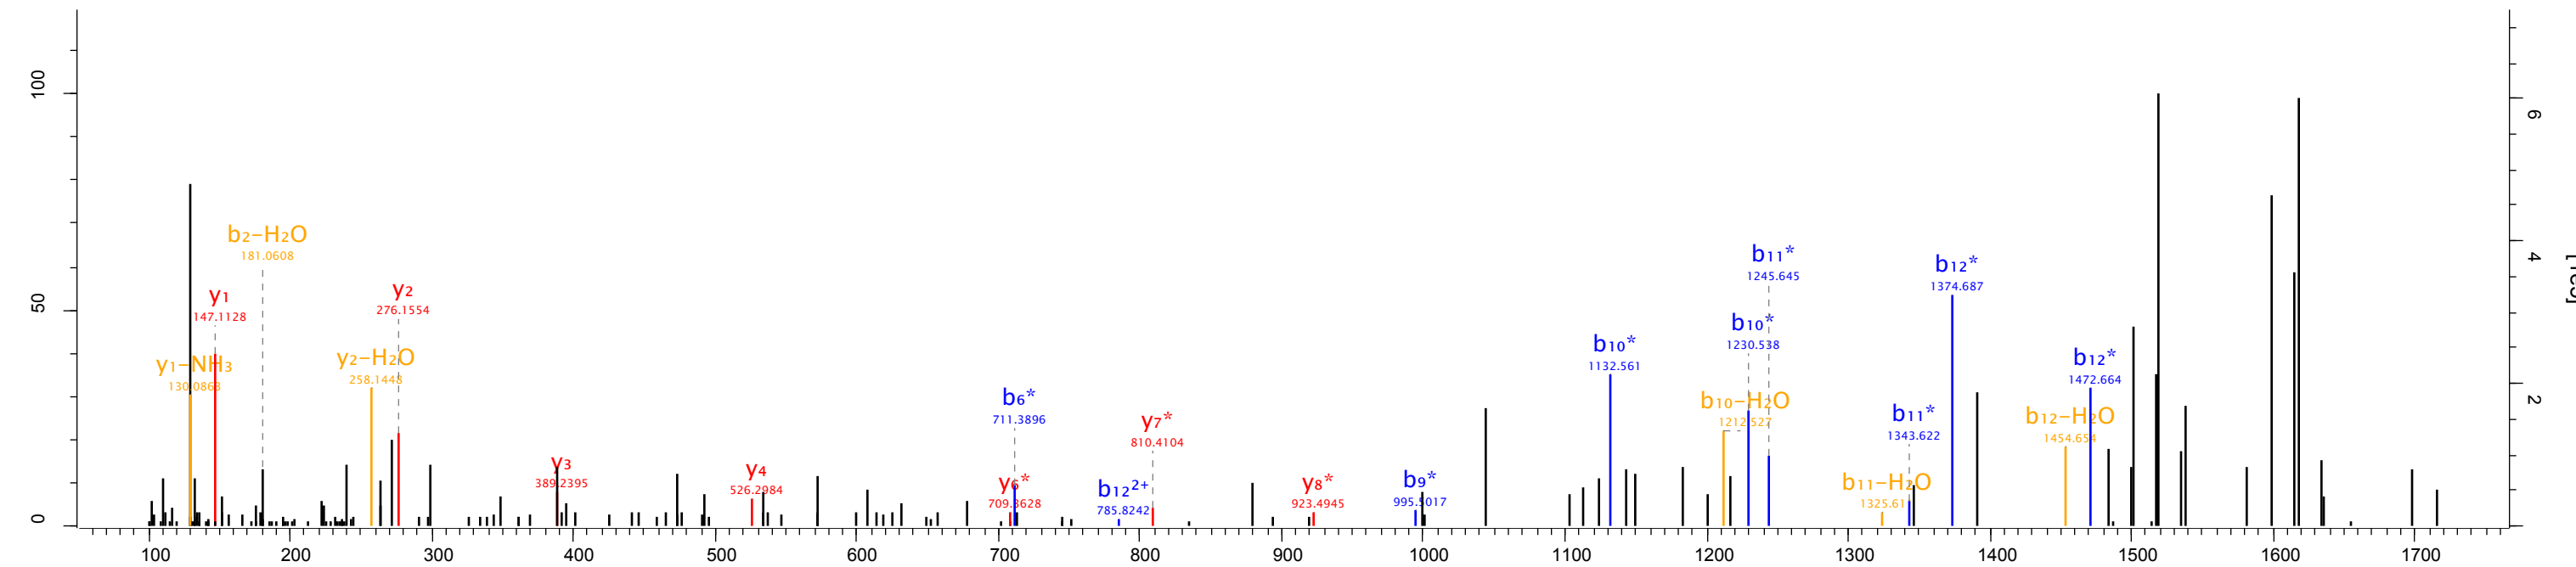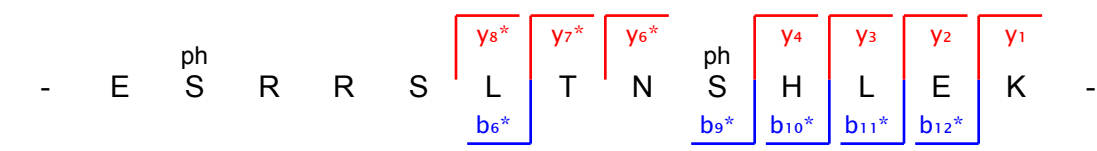

Raw file: 20150814\_A375SR\_Phospho\_BR2\_03  
 Scan: 3947 Method: FTMS; HCD Score: 95.5 m/z: 493.73 Gene names: MSH6

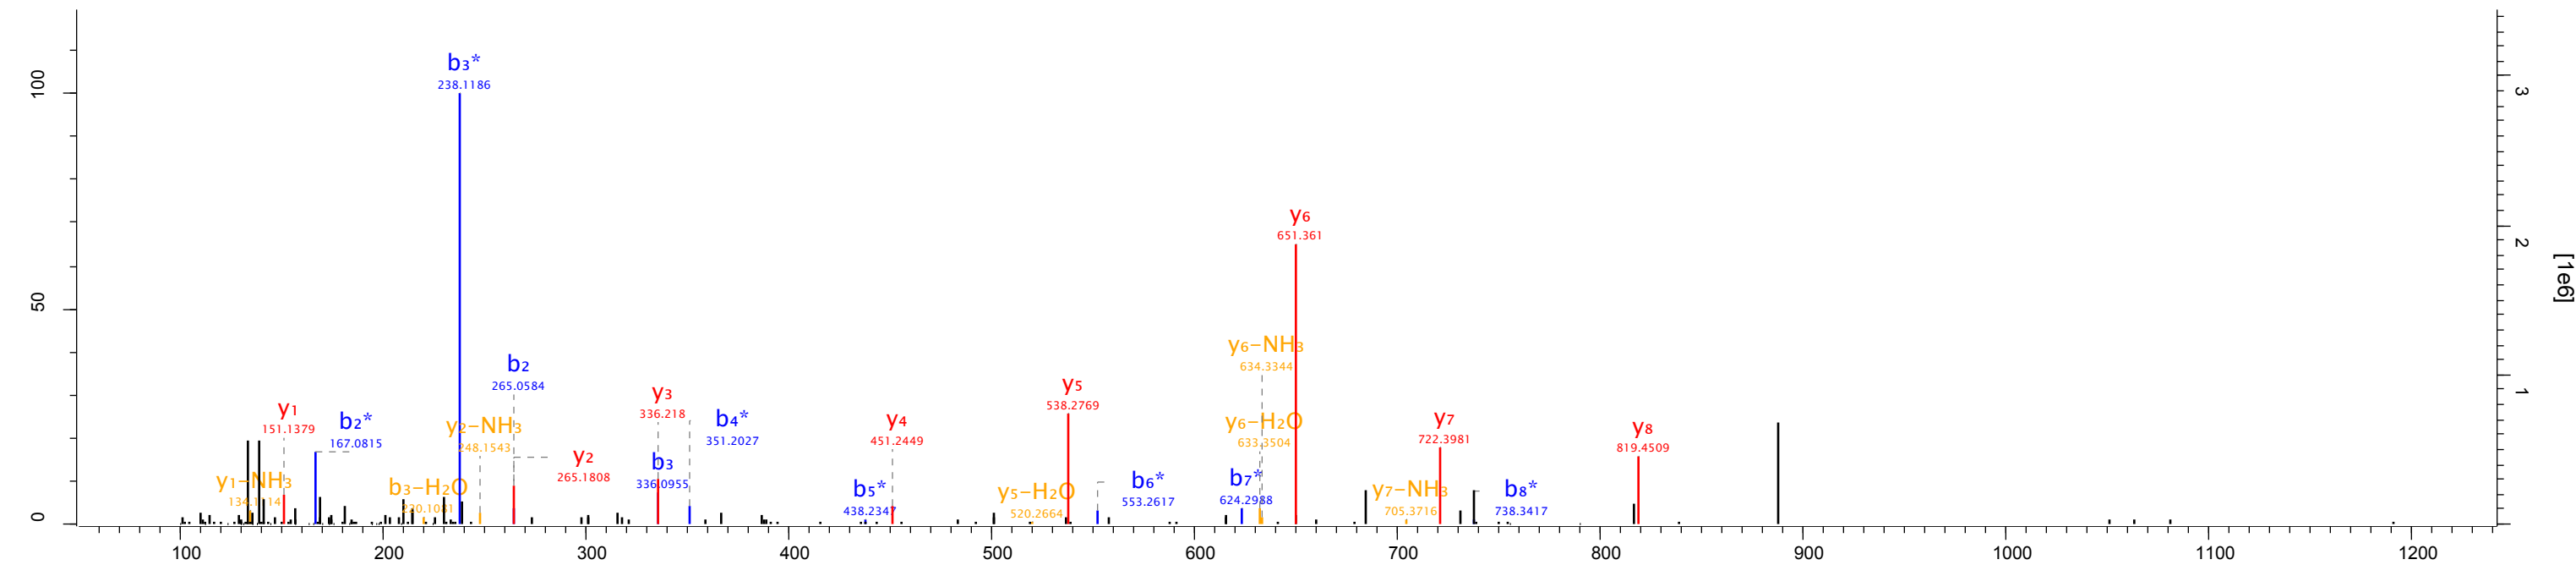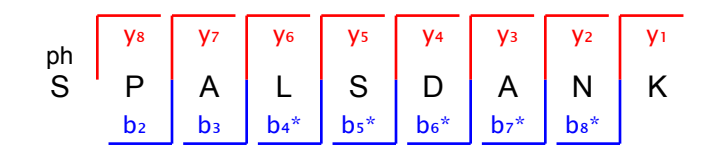

Raw file: 20150814\_A375SR\_Phospho\_BR2\_03  
 Scan: 4027 Method: FTMS; HCD Score: 137.58 m/z: 546.74 Gene names: CDC42EP4

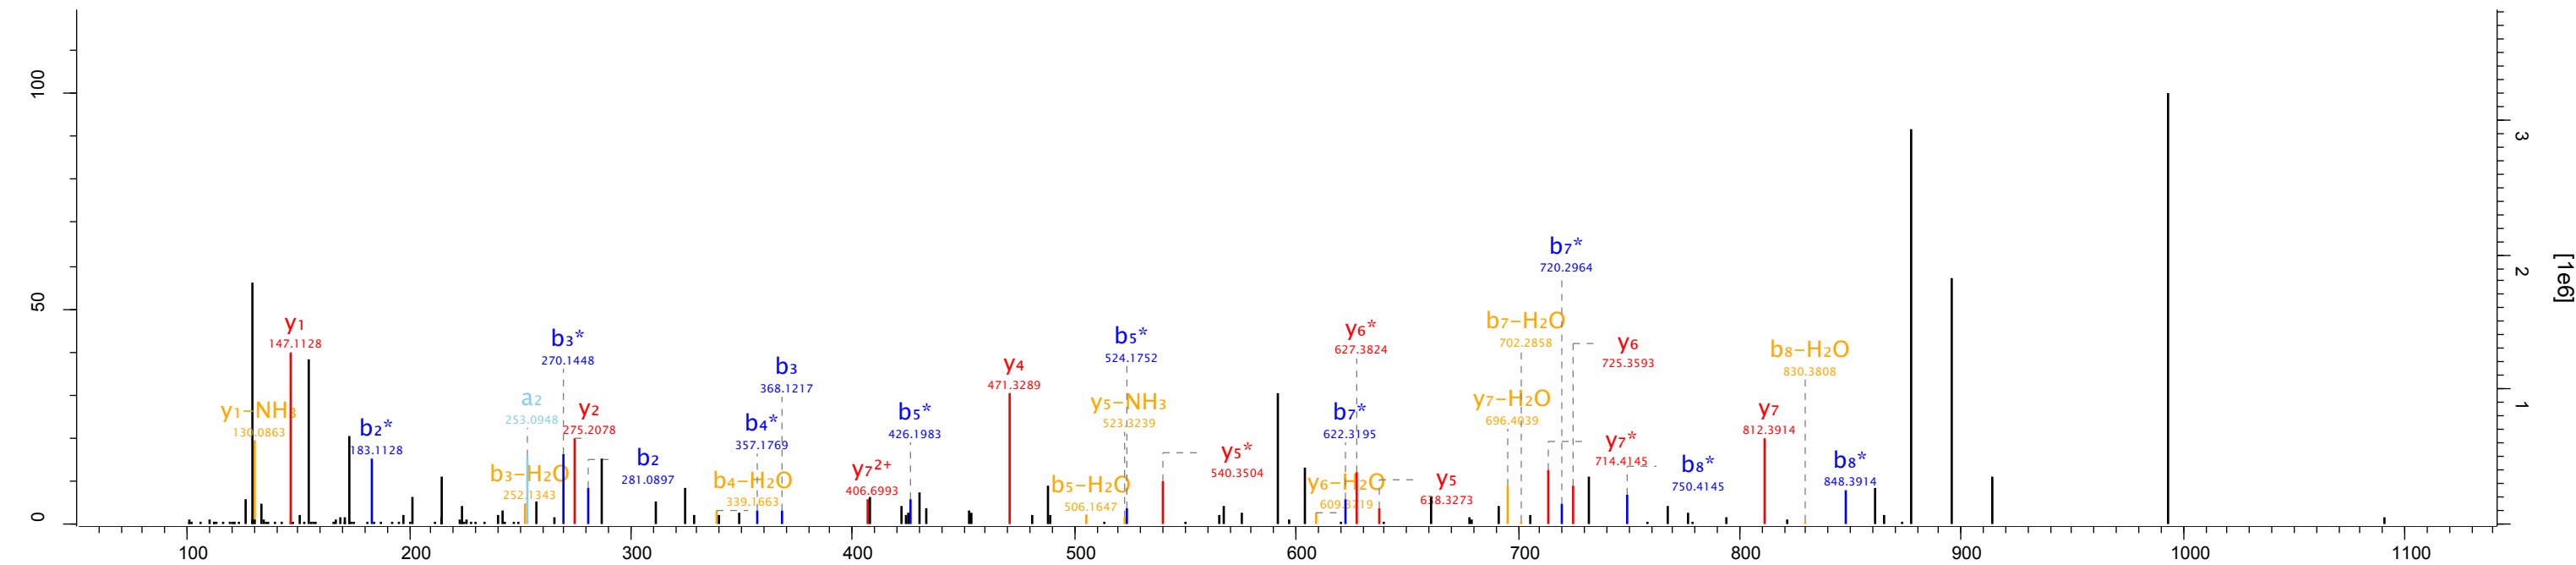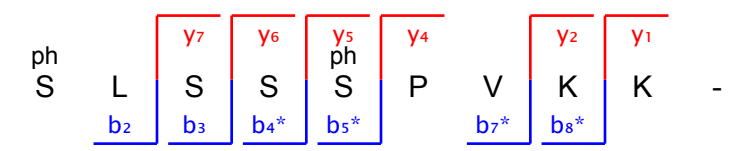

Raw file: 20150814\_A375SR\_Phospho\_BR2\_03  
 Scan: 4477 Method: FTMS; HCD Score: 51.01 m/z: 438.86 Gene names: SRRM2

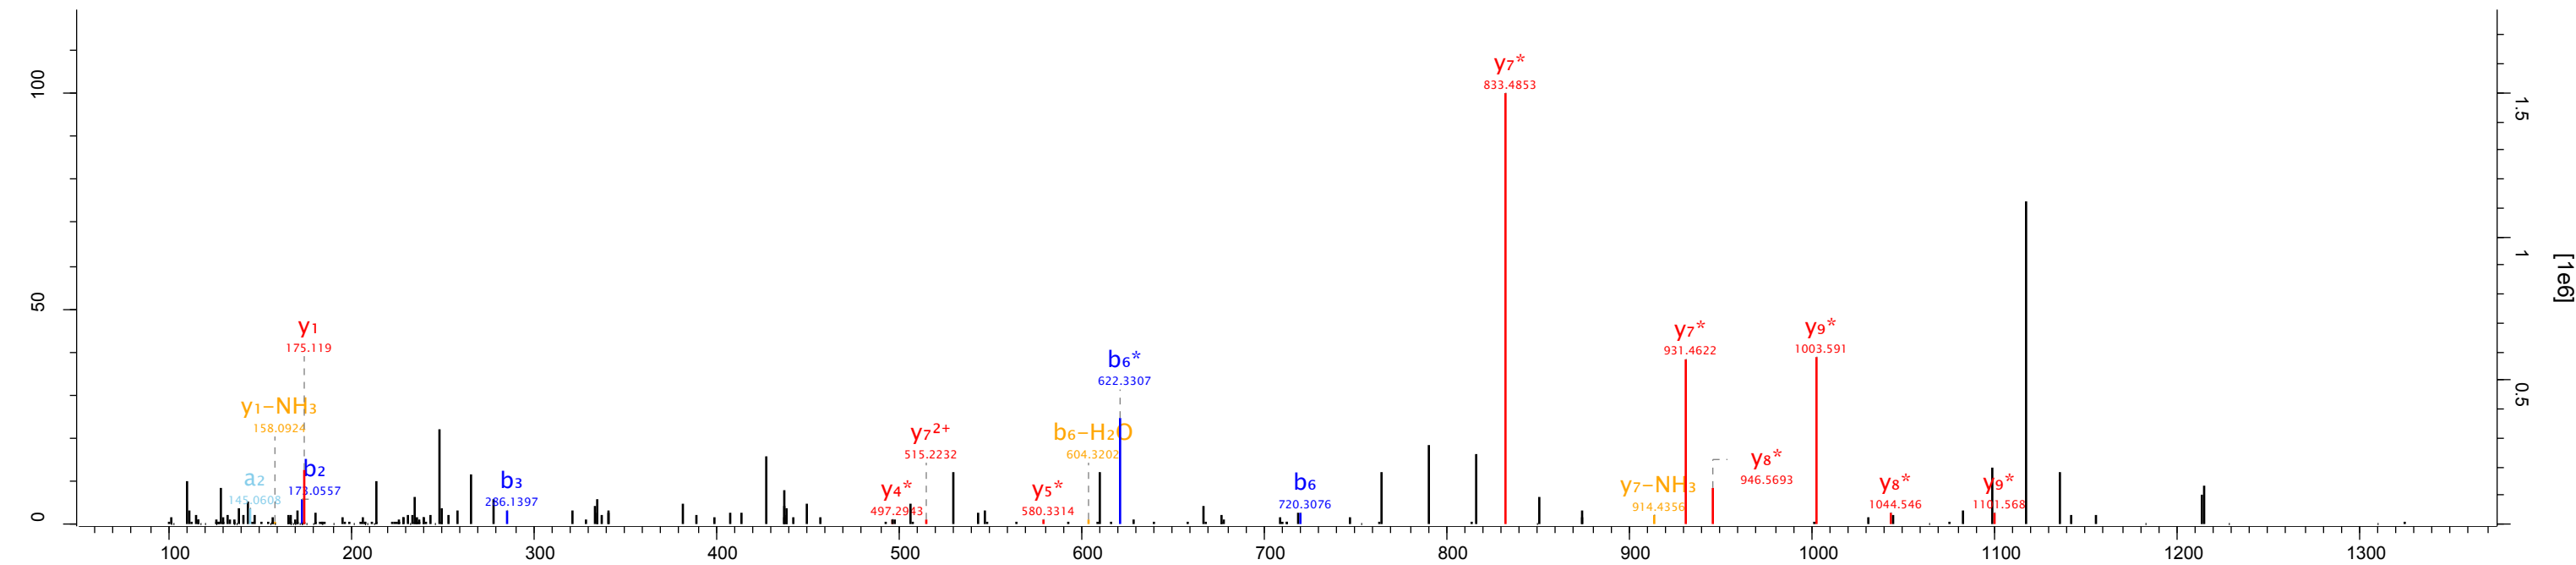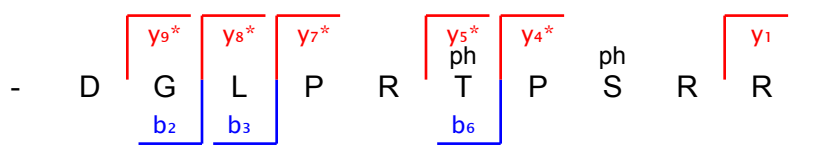

Raw file: 20150814\_A375SR\_Phospho\_BR2\_03  
 Scan: 4717 Method: FTMS; HCD Score: 139.2 m/z: 809.83 Gene names: CLIP2

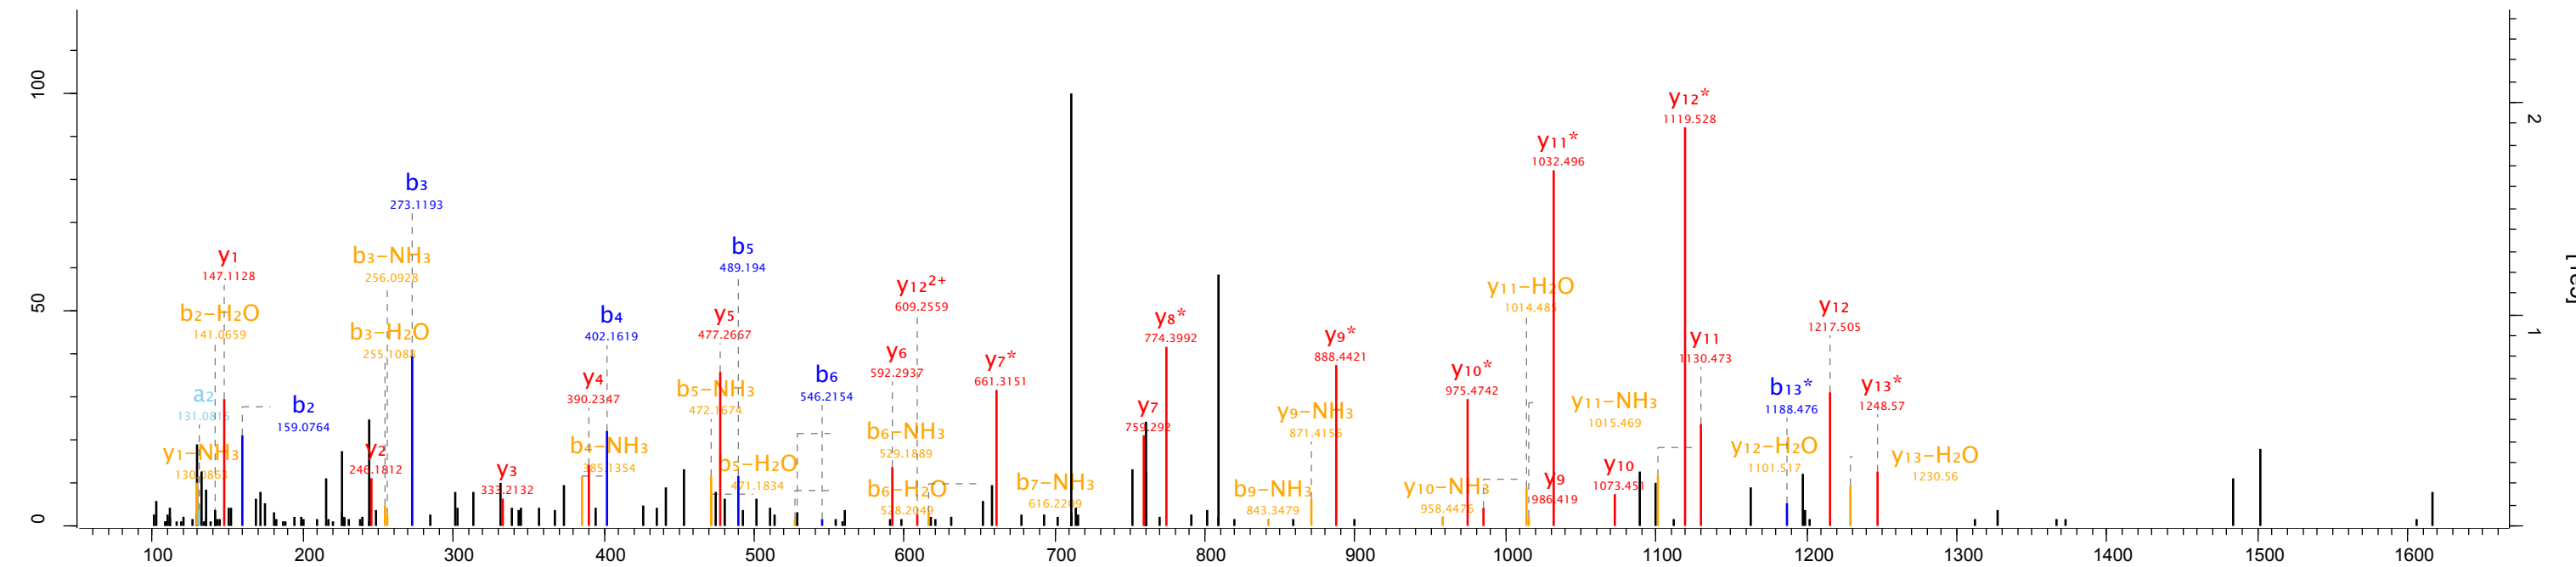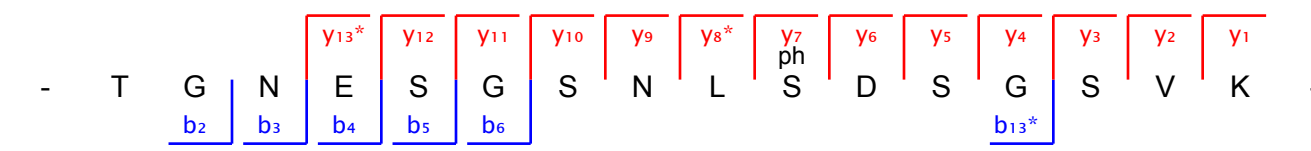

Raw file 20150814\_A375SR\_Phospho\_BR2\_03 Scan 5057 Method FTMS; HCD Score 77.06 m/z 393.85 Gene names SON

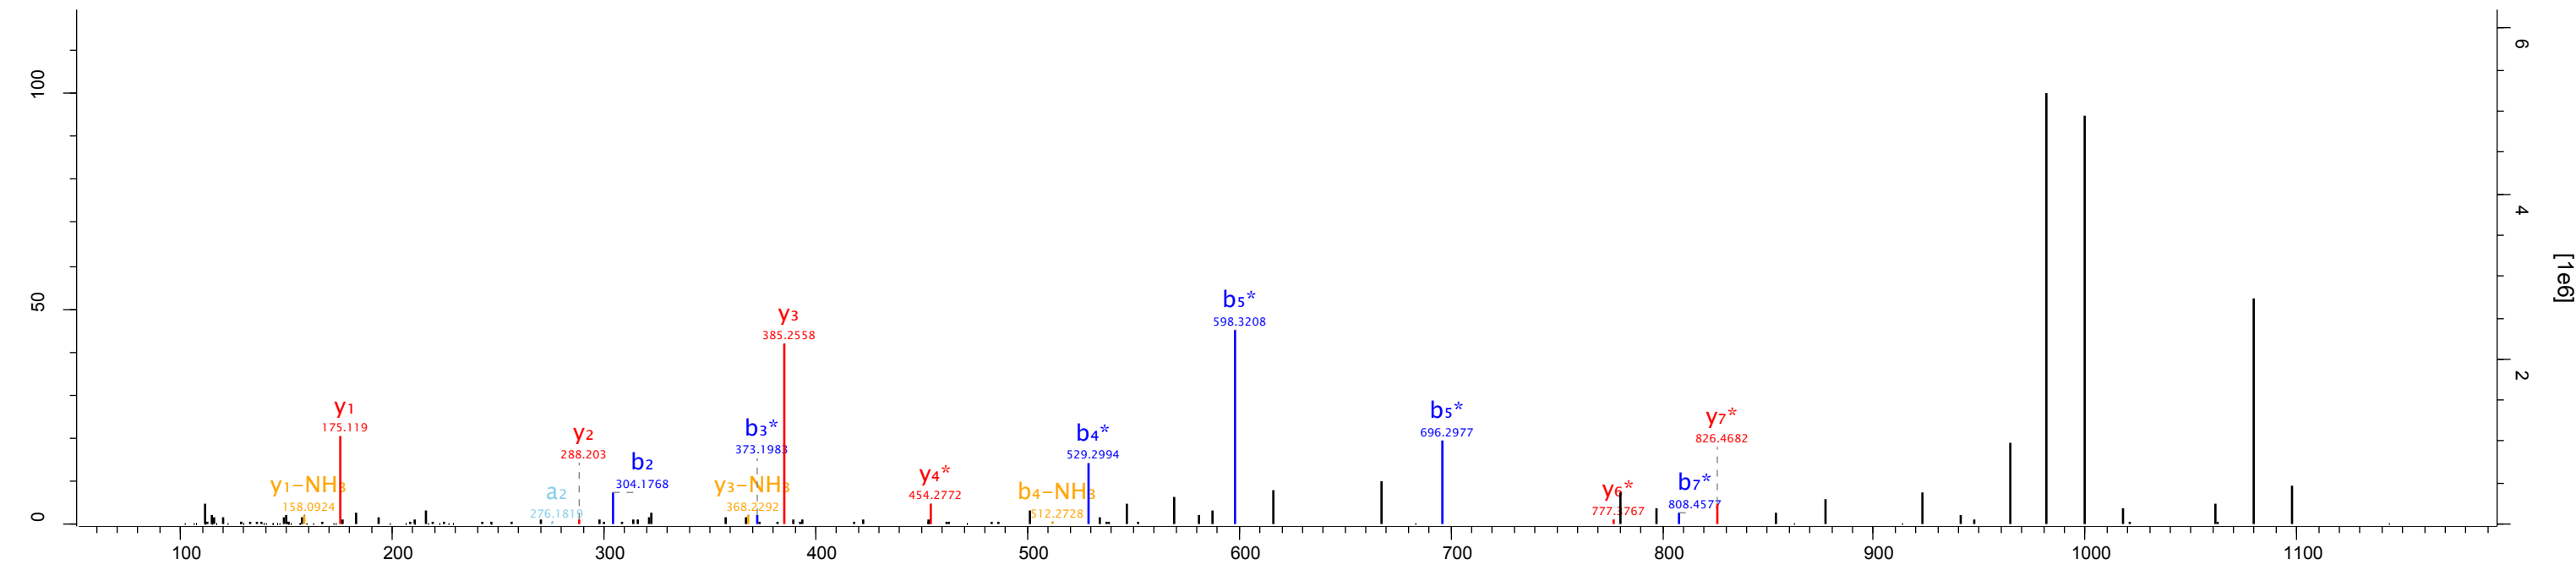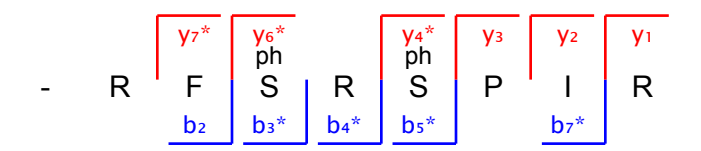

Raw file: 20150814\_A375SR\_Phospho\_BR2\_03  
 Scan: 5117 Method: FTMS; HCD Score: 145 m/z: 613.78 Gene names: GNG12

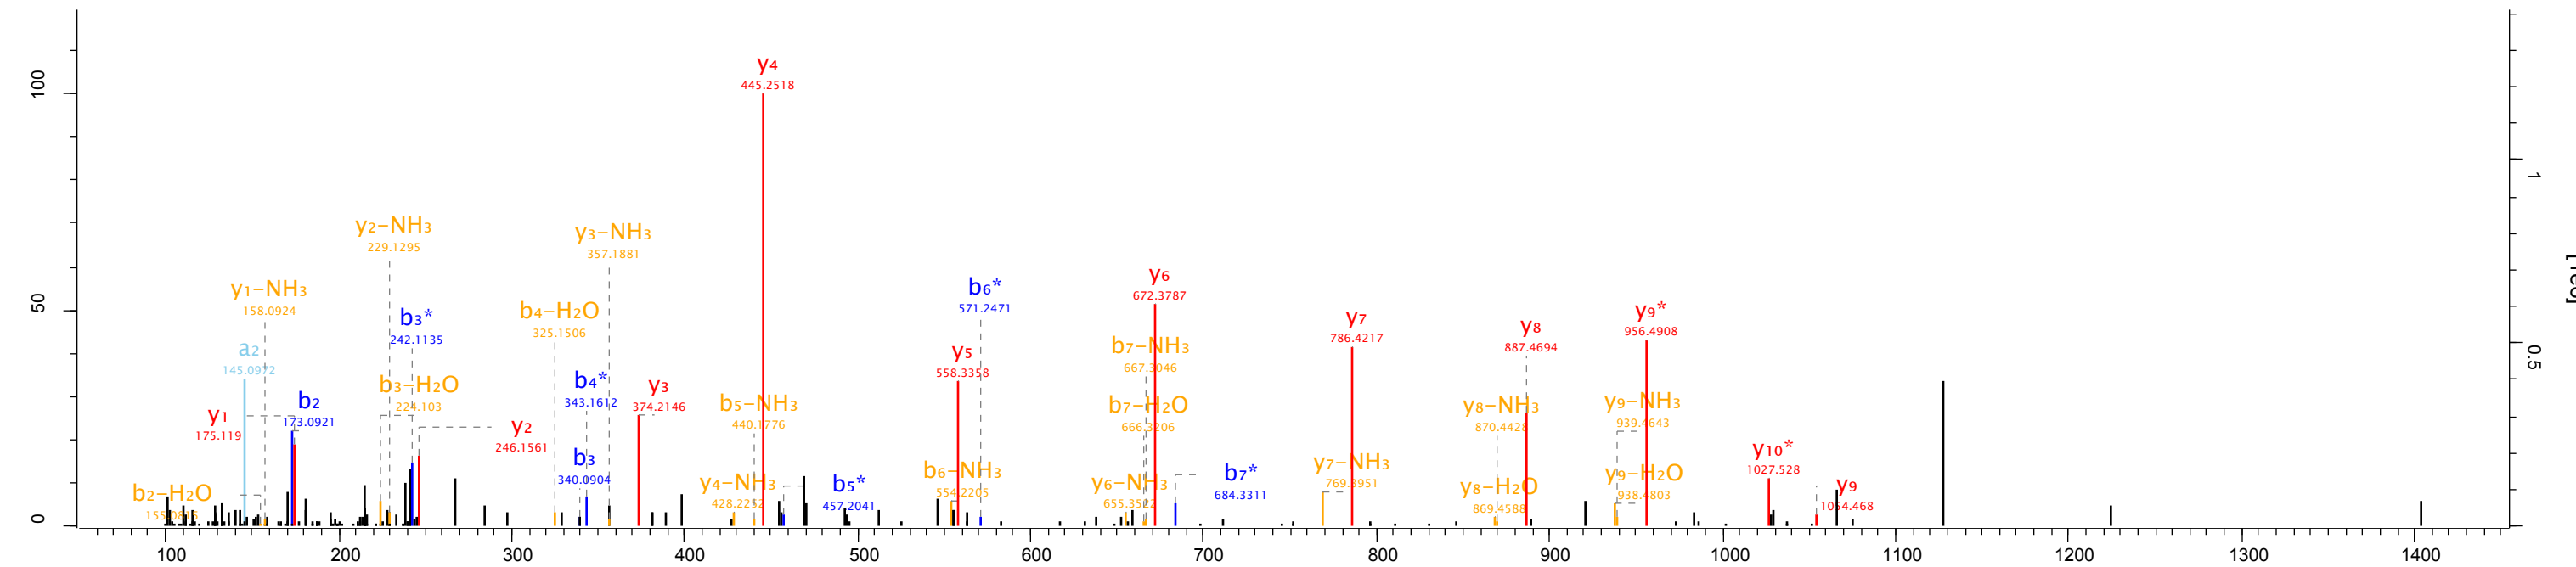

- T A S T N N I A Q A R -  
 b2 b3 b4\* b5\* b6\* b7\*

Raw file 20150814\_A375SR\_Phospho\_BR2\_03 Scan 5197 Method FTMS; HCD Score 275.02 m/z 949.34 Gene names HSP90AB1;HSP90AB2P

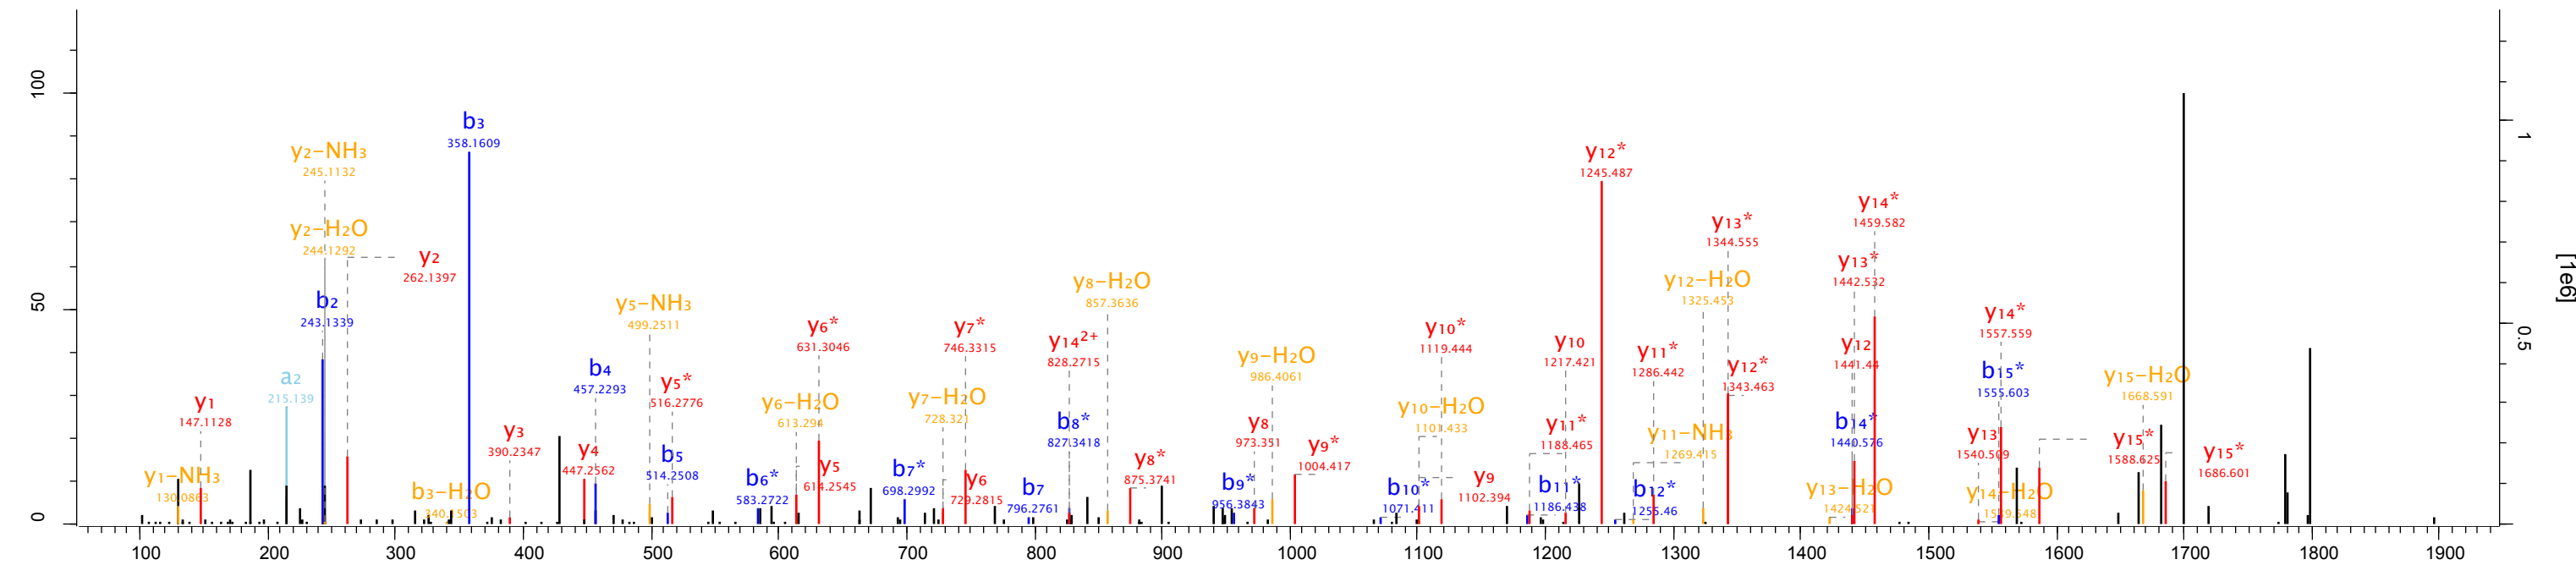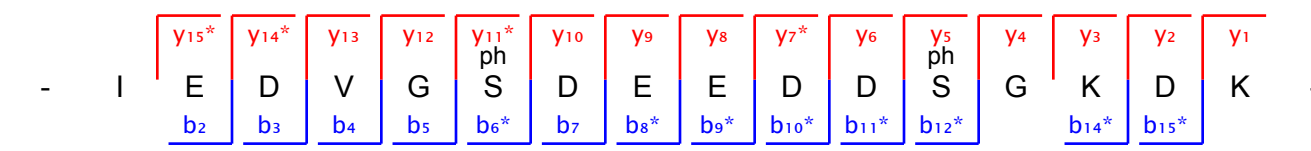



Raw file: 20150814\_A375SR\_Phospho\_BR2\_03  
 Scan: 5257 Method: FTMS; HCD Score: 193.17 m/z: 857.37 Gene names: JADE3

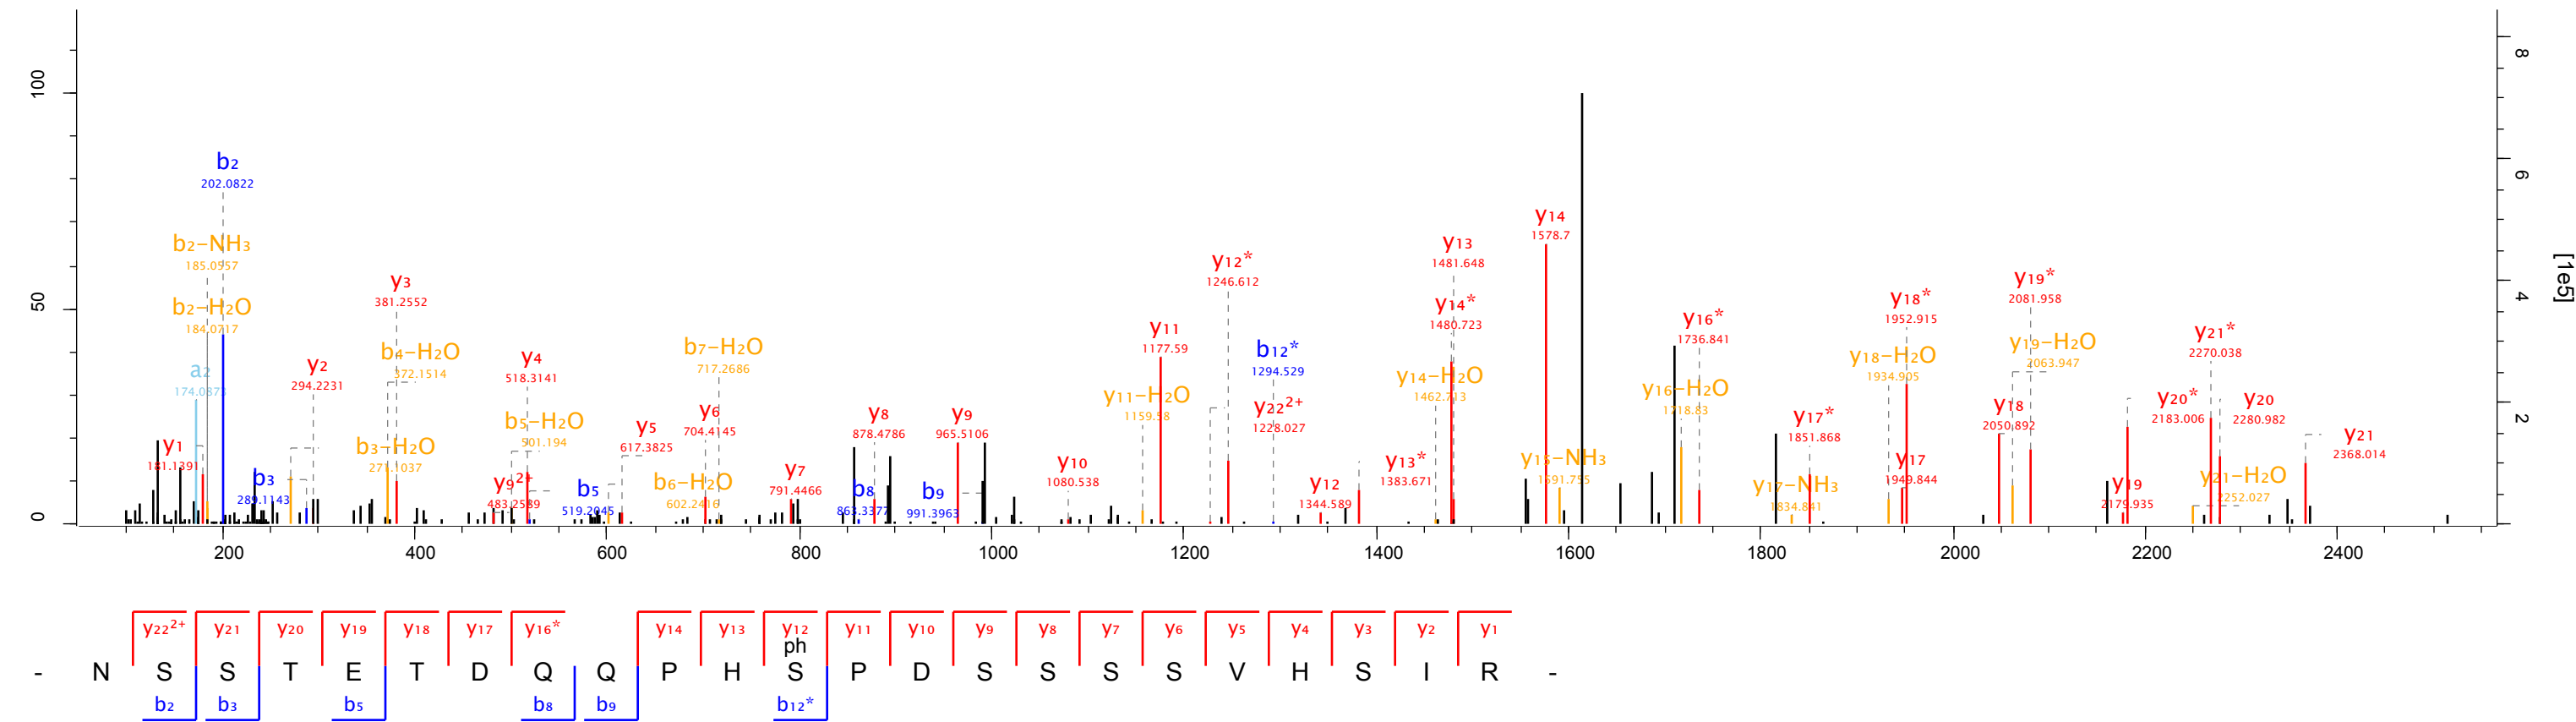

Raw file  
 20150814\_A375SR\_Phospho\_BR2\_03  
 Scan 5627 Method FTMS; HCD Score 139.71 m/z 684.78 Gene names BRAP

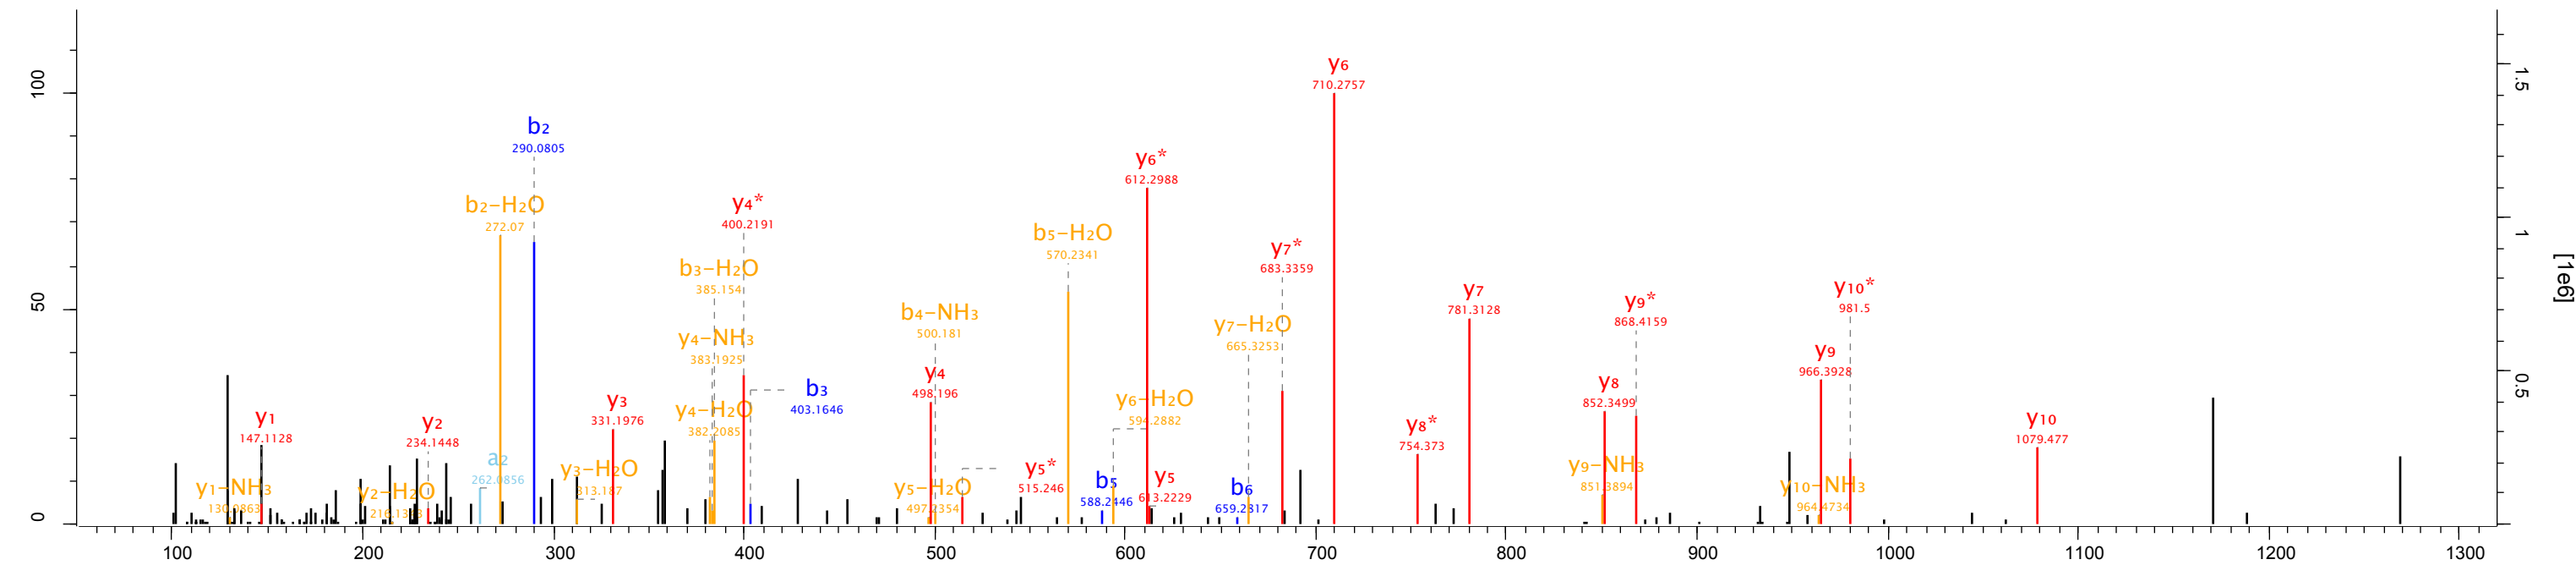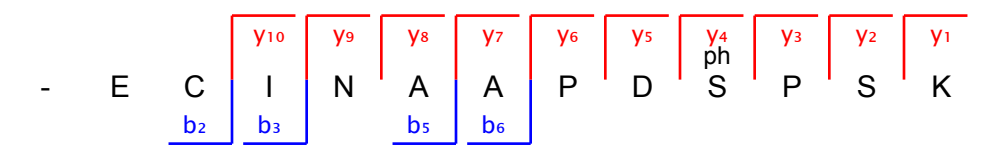

Raw file: 20150814\_A375SR\_Phospho\_BR2\_03  
 Scan: 5717 Method: FTMS; HCD Score: 200.97 m/z: 1082.95 Gene names: LARP7

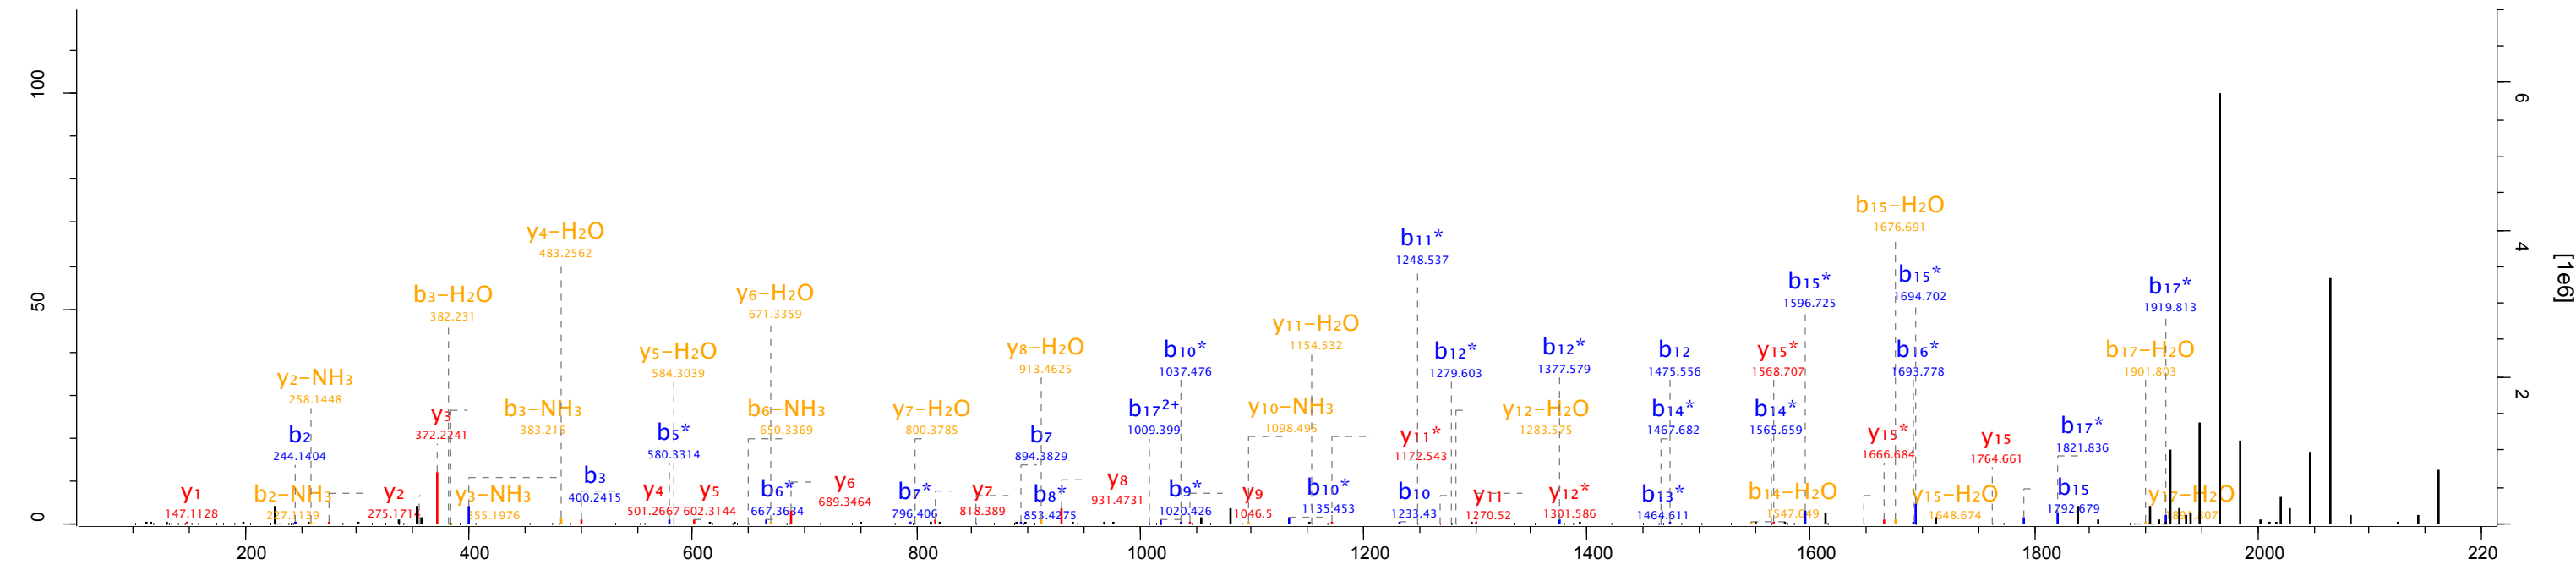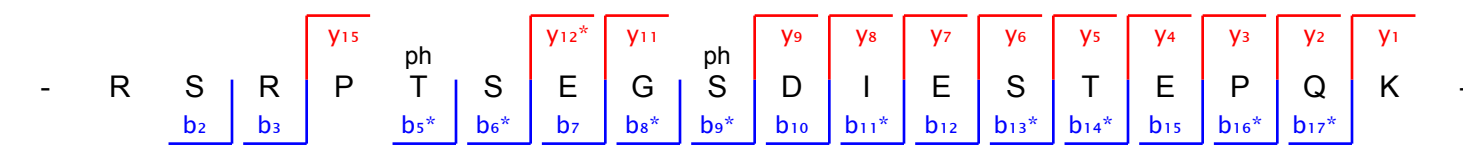

Raw file 20150814\_A375SR\_Phospho\_BR2\_03 Scan 6047 Method FTMS; HCD Score 120.41 m/z 838.36 Gene names NAB2

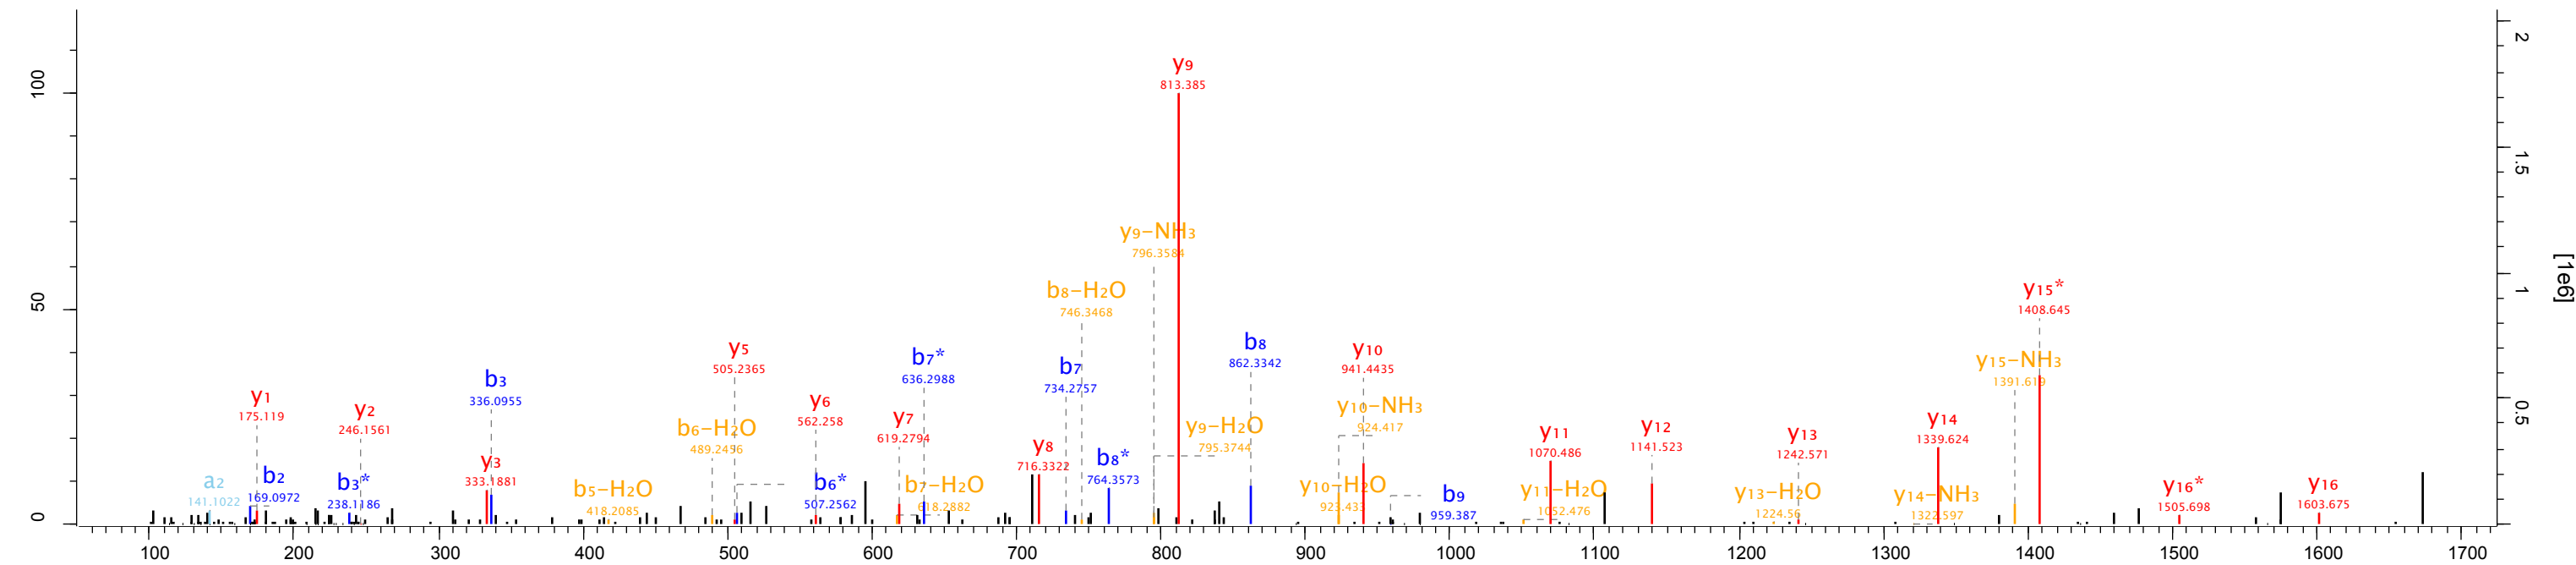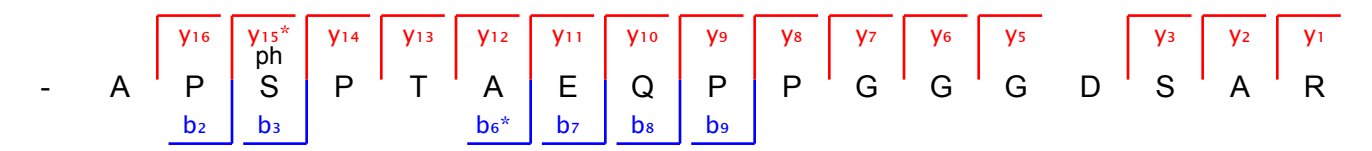

Raw file: 20150814\_A375SR\_Phospho\_BR2\_03  
 Scan: 6057 Method: FTMS; HCD Score: 104.3 m/z: 529.23 Gene names: SRRM2

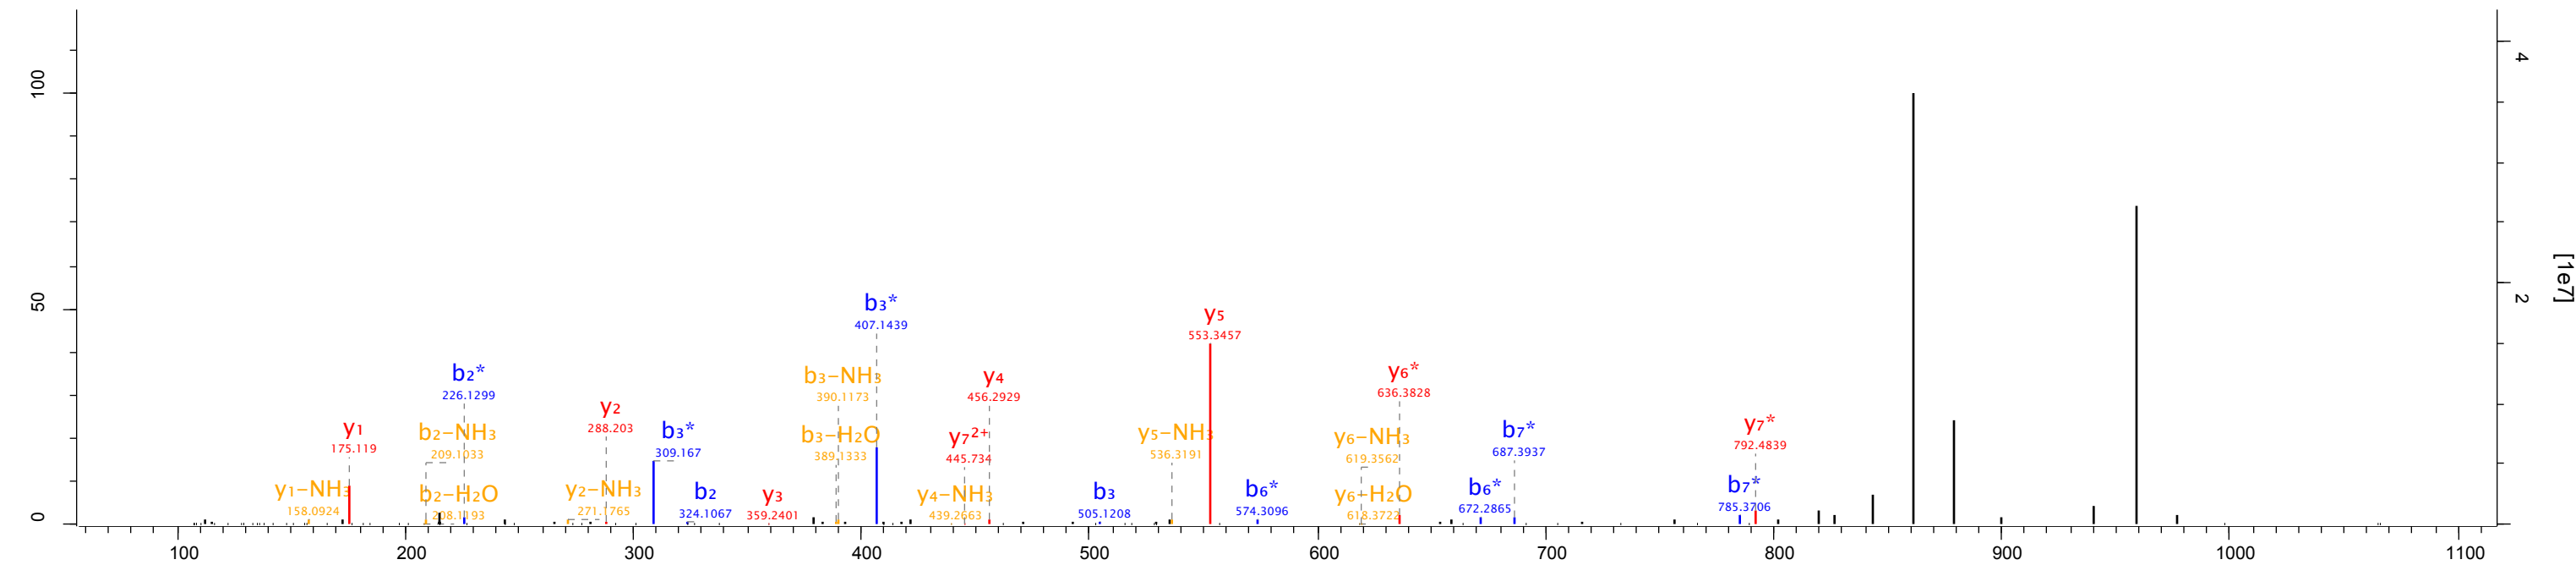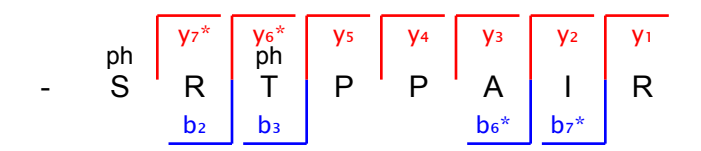

Raw file 20150814\_A375SR\_Phospho\_BR2\_03 Scan 6167 Method FTMS; HCD Score 228.36 m/z 924.88 Gene names PI4K2A

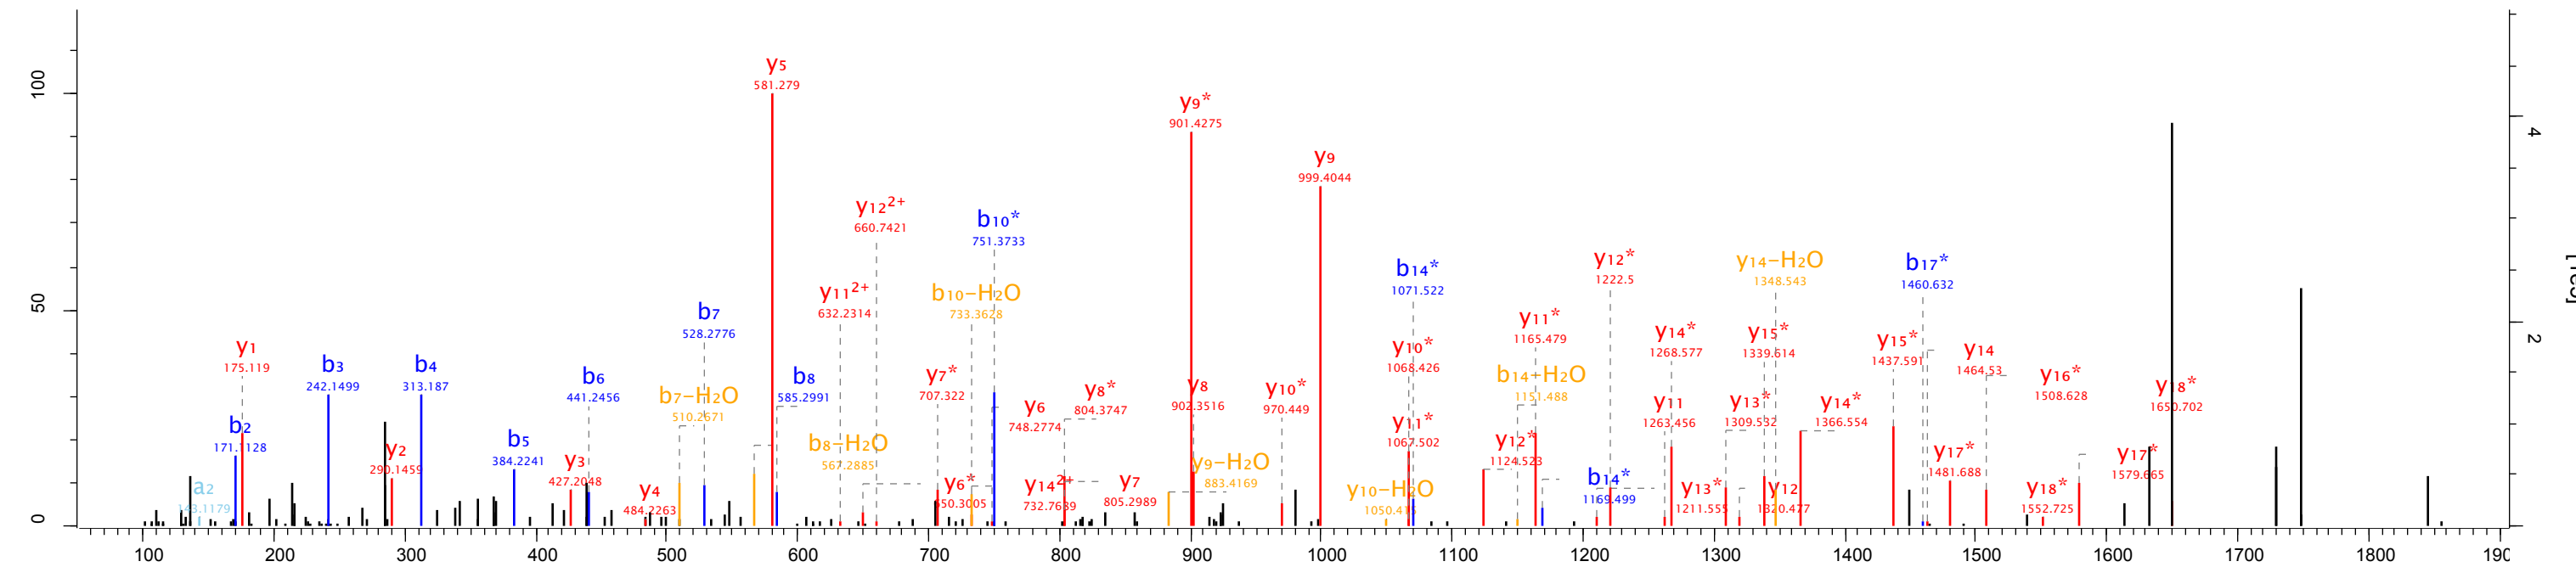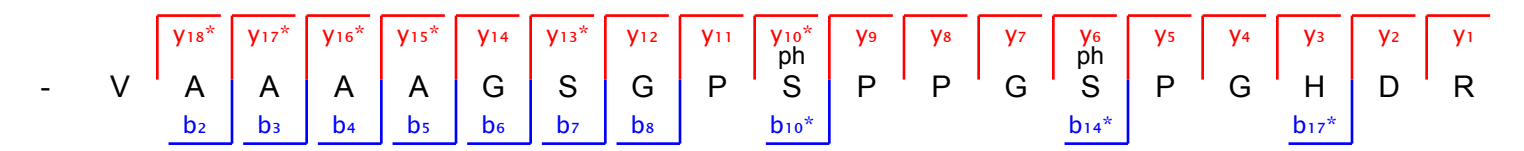

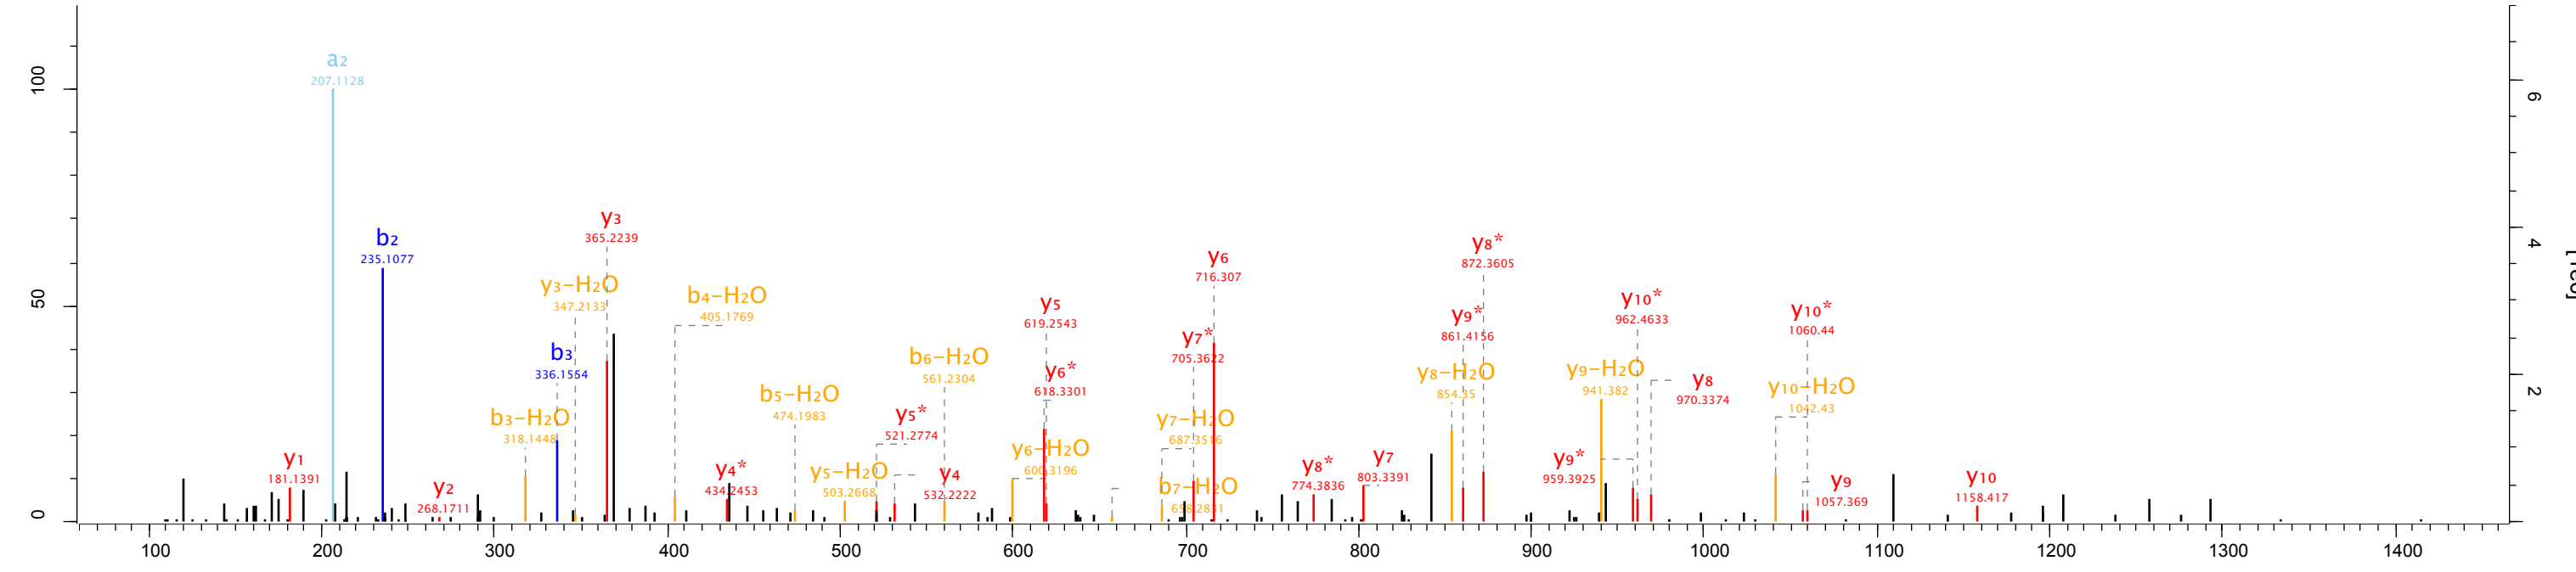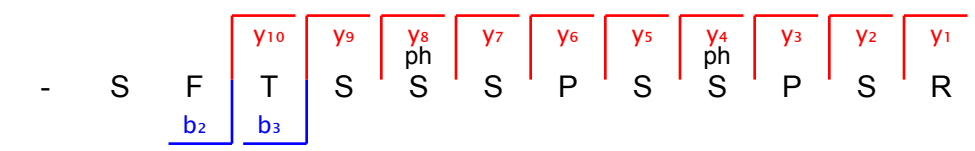

Raw file 20150814\_A375SR\_Phospho\_BR2\_03 Scan 6247 Method FTMS; HCD Score 139.2 m/z 930.35 Gene names COPS3

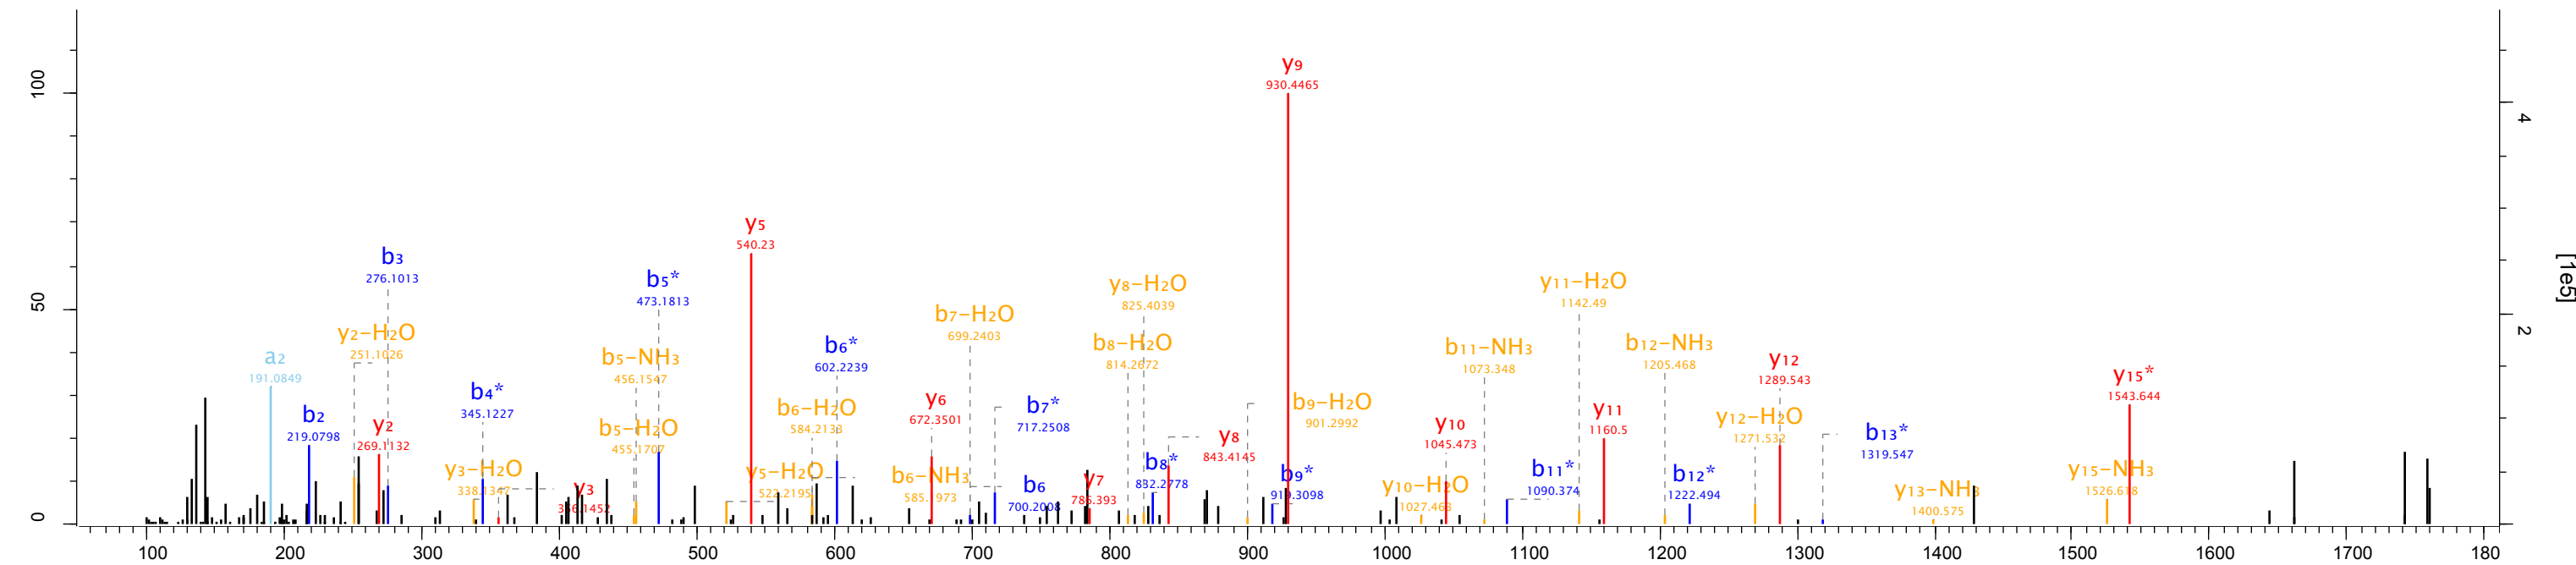

- S M G S Q E D D S G N K P S S Y S -

b<sub>2</sub>
b<sub>3</sub>
b<sub>4</sub><sup>\*</sup>
b<sub>5</sub><sup>\*</sup>
b<sub>6</sub>
b<sub>7</sub><sup>\*</sup>
b<sub>8</sub><sup>\*</sup>
b<sub>9</sub><sup>\*</sup>
b<sub>11</sub><sup>\*</sup>
b<sub>12</sub><sup>\*</sup>
b<sub>13</sub><sup>\*</sup>
y<sub>15</sub><sup>\*</sup>
y<sub>12</sub>
y<sub>11</sub>
y<sub>10</sub>
y<sub>9</sub>
y<sub>8</sub>
y<sub>7</sub>
y<sub>6</sub>
y<sub>5</sub>
y<sub>3</sub>
y<sub>2</sub>



Raw file: 20150814\_A375SR\_Phospho\_BR2\_03  
 Scan: 6257 Method: FTMS; HCD Score: 149.17 m/z: 471.21 Gene names: ERCC6L

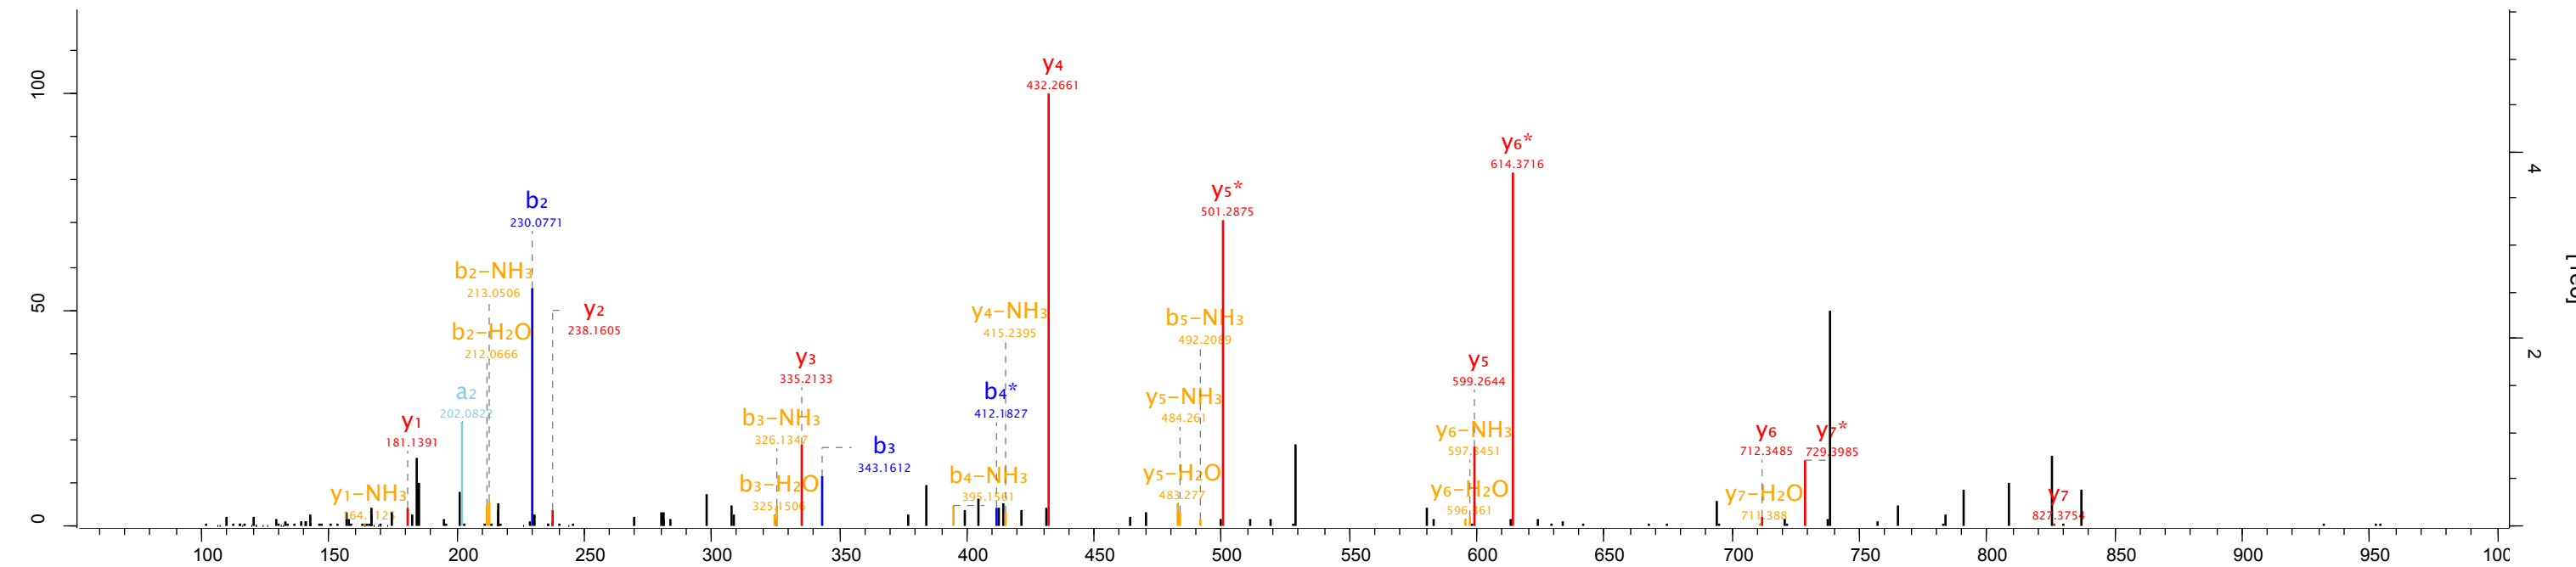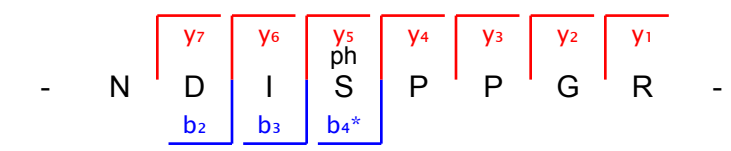

Raw file: 20150814\_A375SR\_Phospho\_BR2\_03  
 Scan: 6697 Method: FTMS; HCD Score: 80.1 m/z: 492.56 Gene names: CDK13

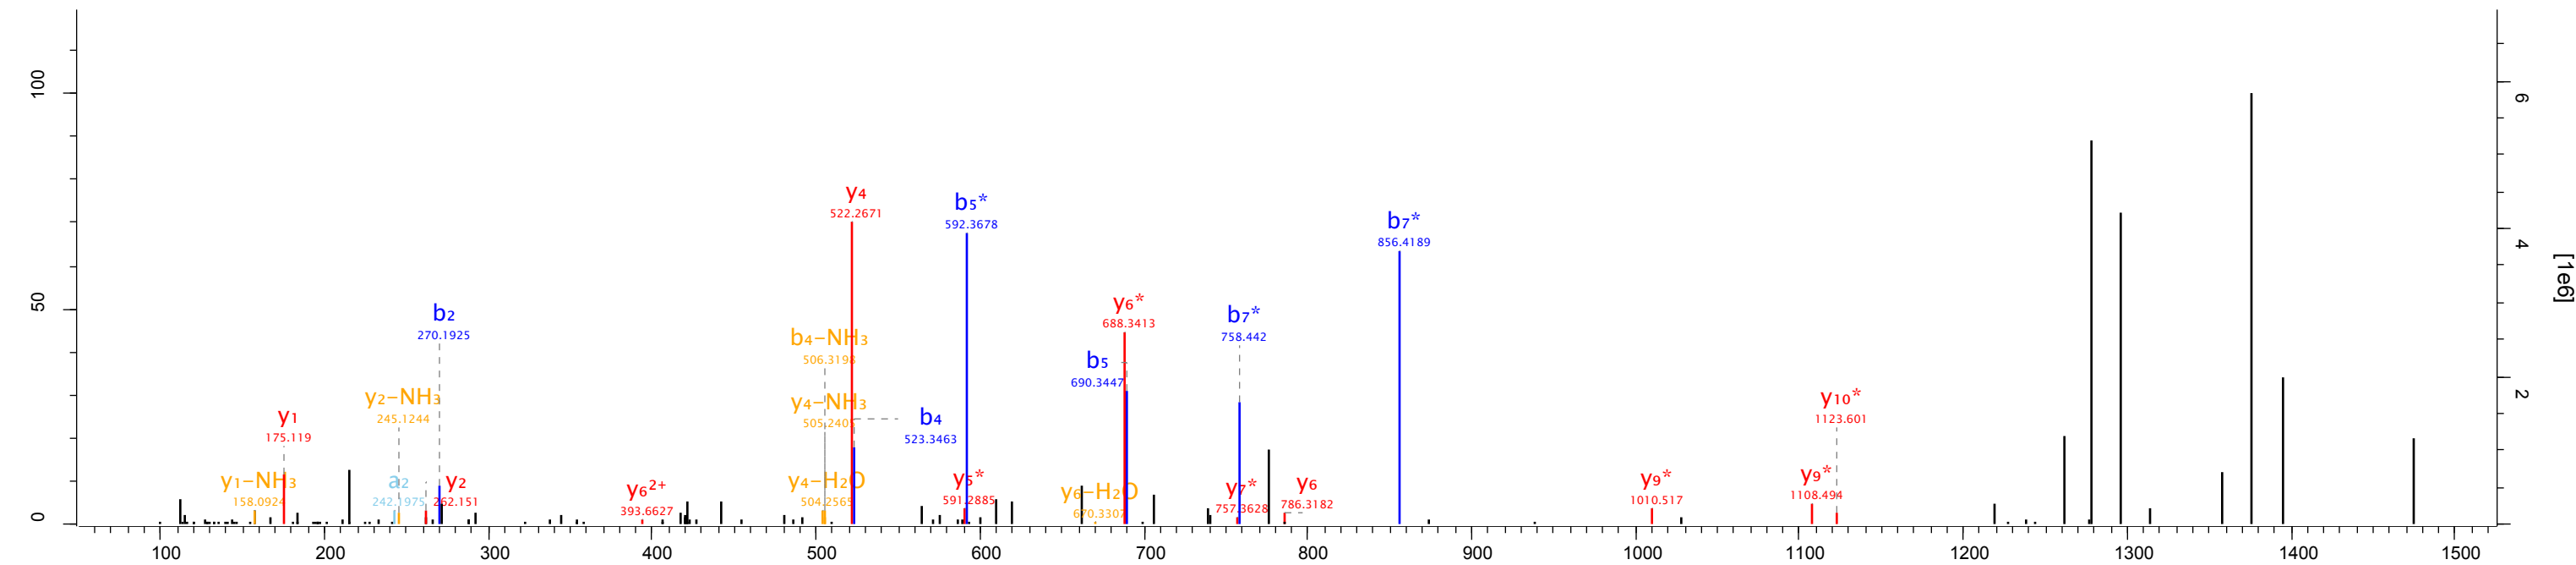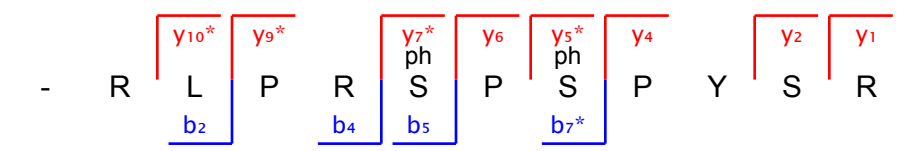

Raw file: 20150814\_A375SR\_Phospho\_BR2\_03  
 Scan: 6967 Method: FTMS; HCD Score: 124.31 m/z: 908.05 Gene names: RAD23B

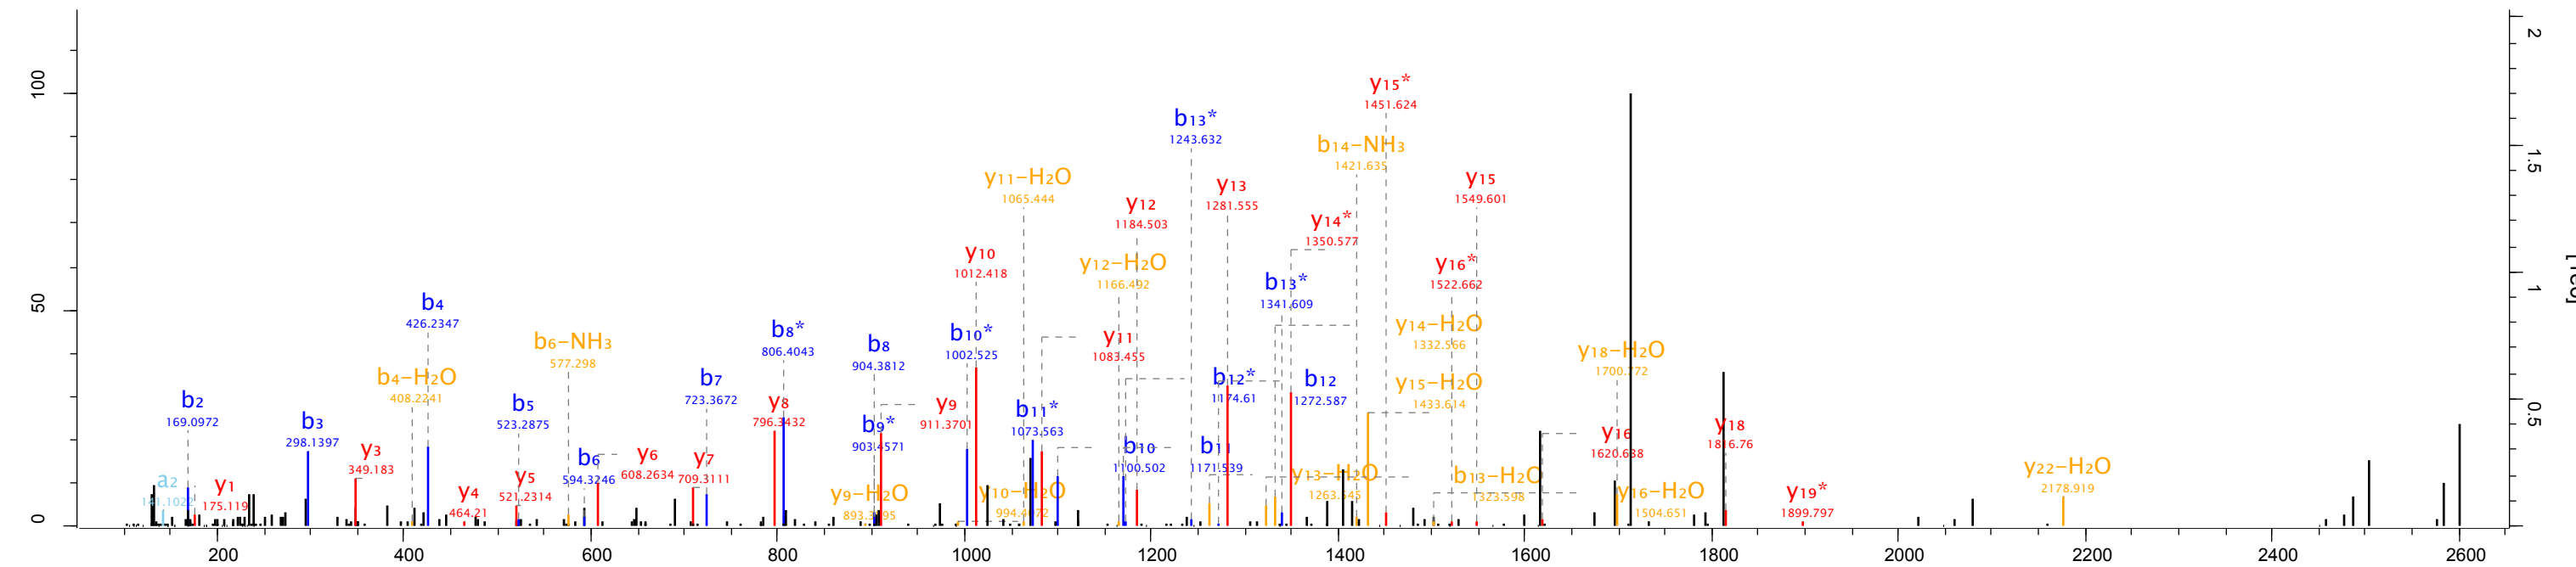

Protein sequence: P A E K P A E T P V A T S P T A T D S T S G D S S R -

Fragmentation mapping (b and y ions):

- b<sub>2</sub> (A), b<sub>3</sub> (E), b<sub>4</sub> (K), b<sub>5</sub> (P), b<sub>6</sub> (A), b<sub>7</sub> (E), b<sub>8</sub> (T), b<sub>9</sub>\* (P), b<sub>10</sub> (V), b<sub>11</sub> (A), b<sub>12</sub> (T), b<sub>13</sub>\* (S)
- y<sub>19</sub>\* (T), y<sub>18</sub> (P), y<sub>16</sub> (A), y<sub>15</sub> (T), y<sub>14</sub>\* (S), y<sub>13</sub> (P), y<sub>12</sub> (T), y<sub>11</sub> (A), y<sub>10</sub> (T), y<sub>9</sub> (D), y<sub>8</sub> (S), y<sub>7</sub> (T), y<sub>6</sub> (S), y<sub>5</sub> (G), y<sub>4</sub> (D), y<sub>3</sub> (S), y<sub>1</sub> (R)

Raw file: 20150814\_A375SR\_Phospho\_BR2\_03  
 Scan: 7337 Method: FTMS; HCD Score: 83.77 m/z: 495.23 Gene names: SORBS2

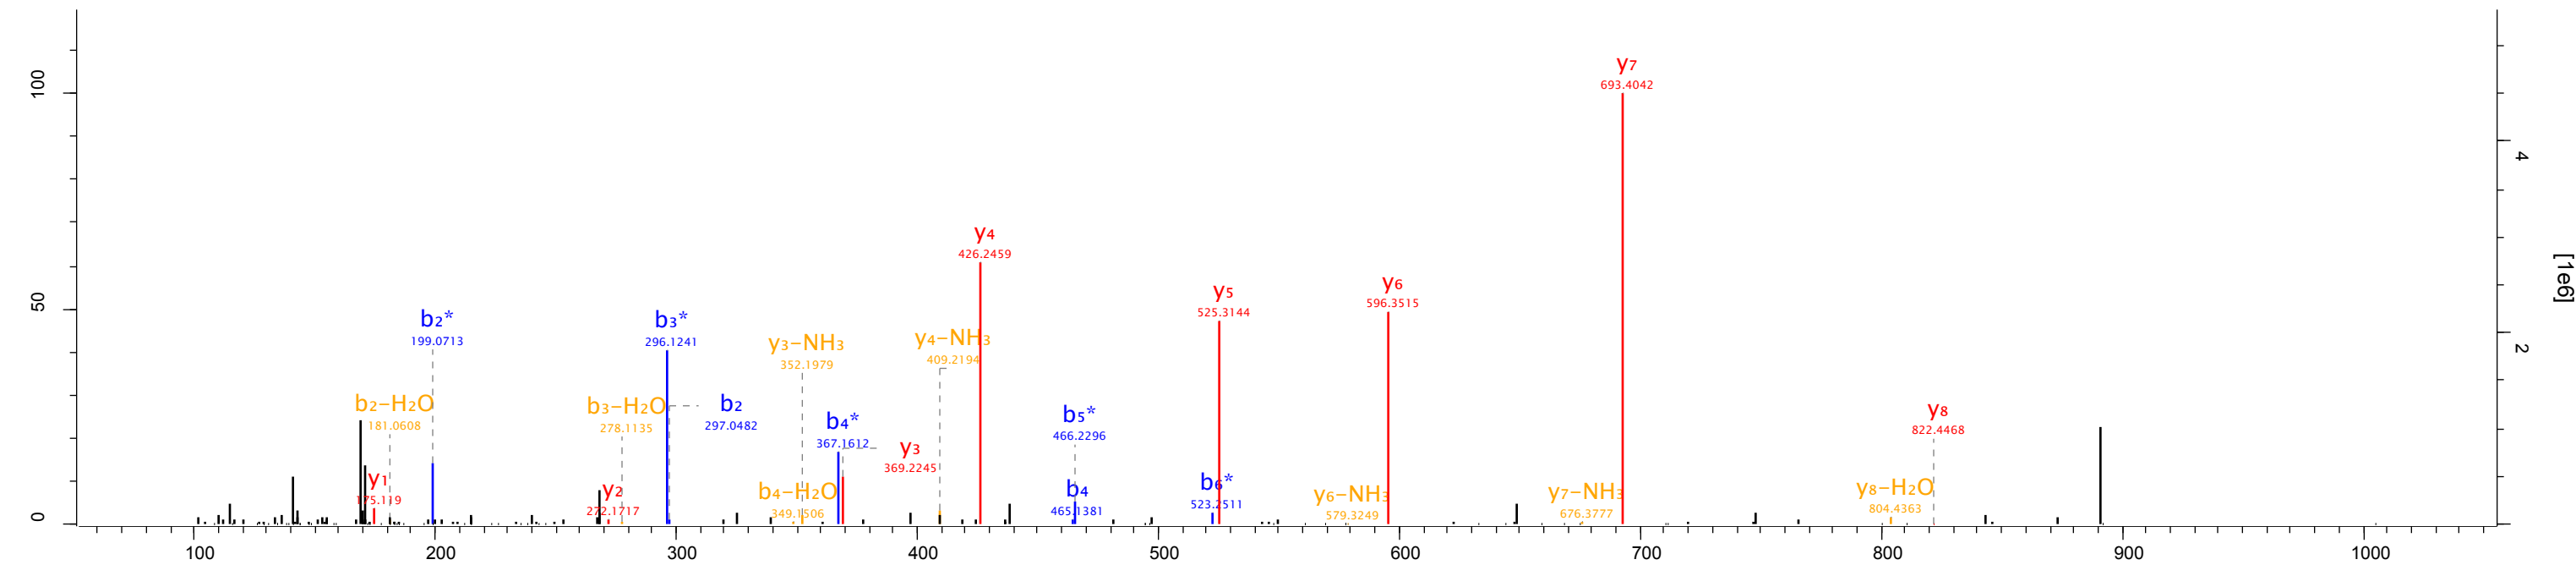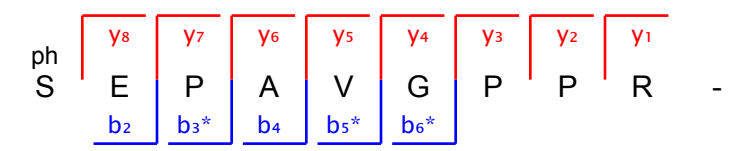

Raw file 20150814\_A375SR\_Phospho\_BR2\_03 Scan 7447 Method FTMS; HCD Score 55.2 m/z 580.77 Gene names WRNIP1

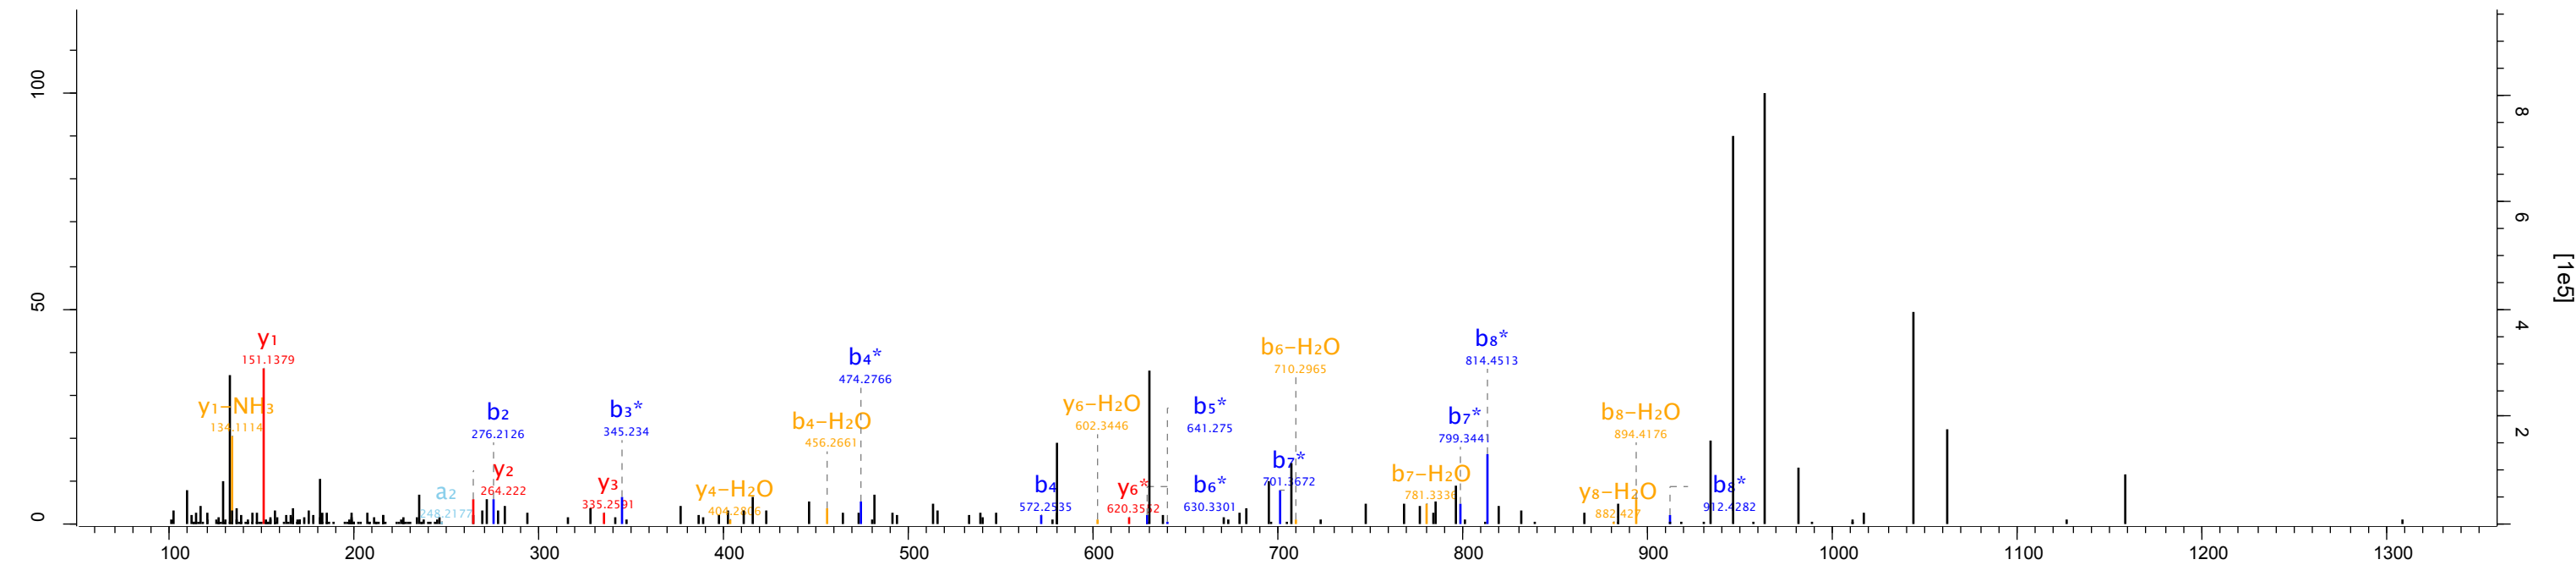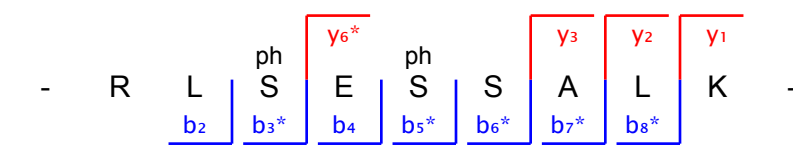

Raw file: 20150814\_A375SR\_Phospho\_BR2\_03  
 Scan: 7607 Method: FTMS; HCD Score: 71.47 m/z: 744.81 Gene names: TNKS1BP1

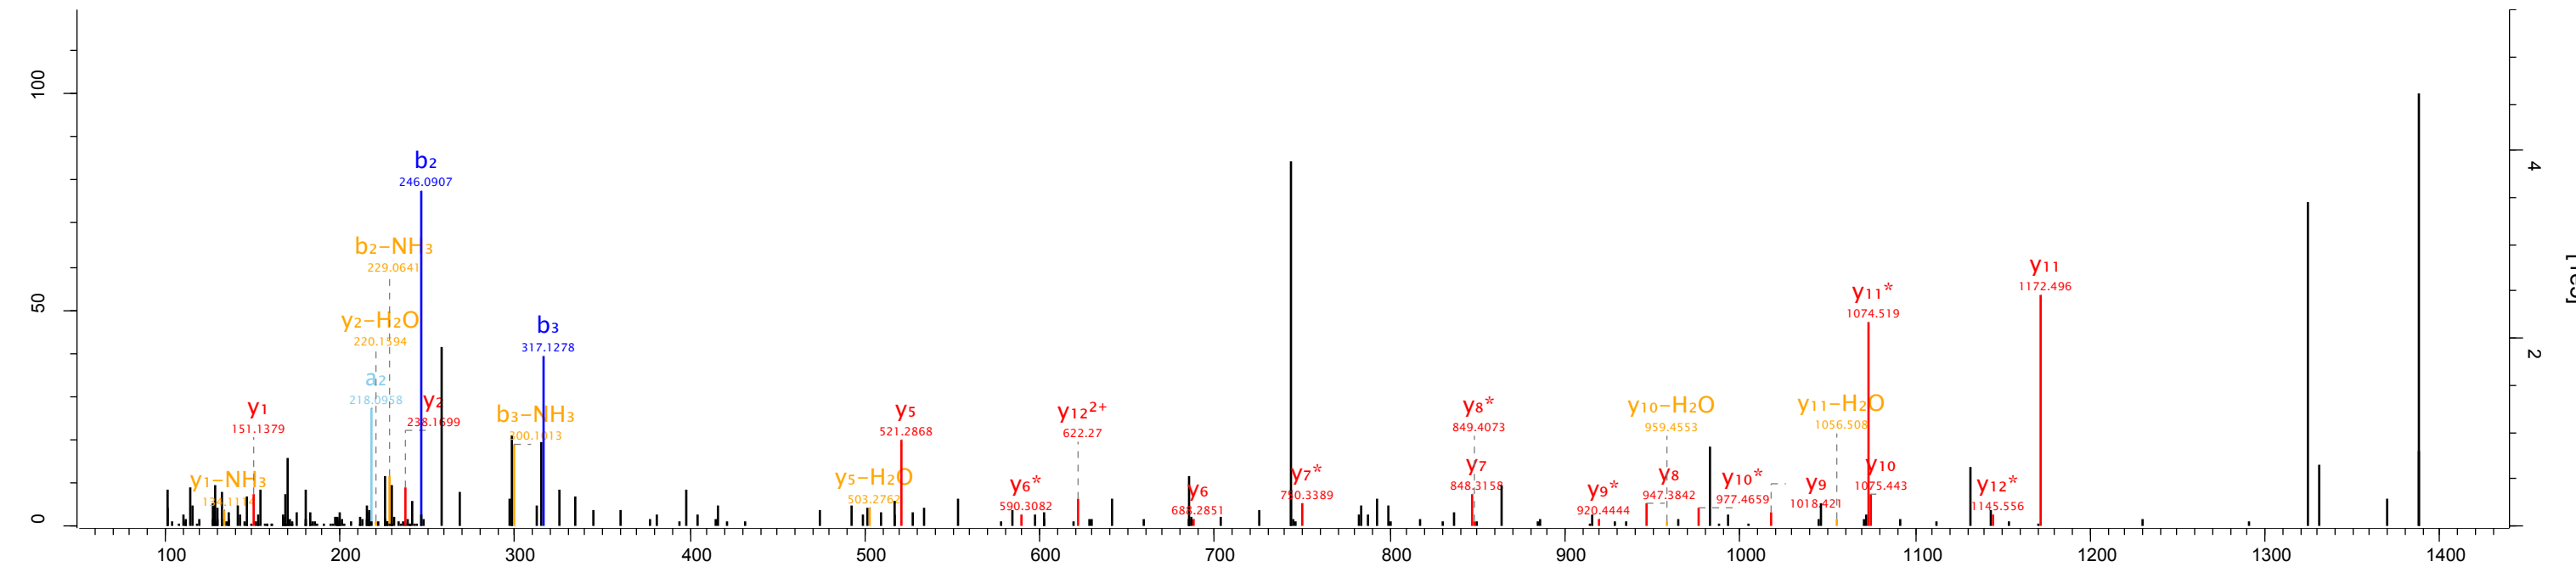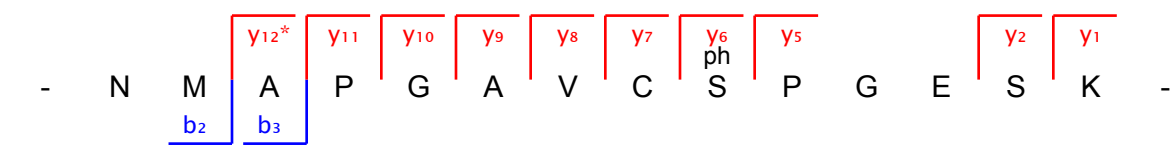

Raw file 20150814\_A375SR\_Phospho\_BR2\_03 Scan 8037 Method FTMS; HCD Score 120.92 m/z 612.75 Gene names EI24

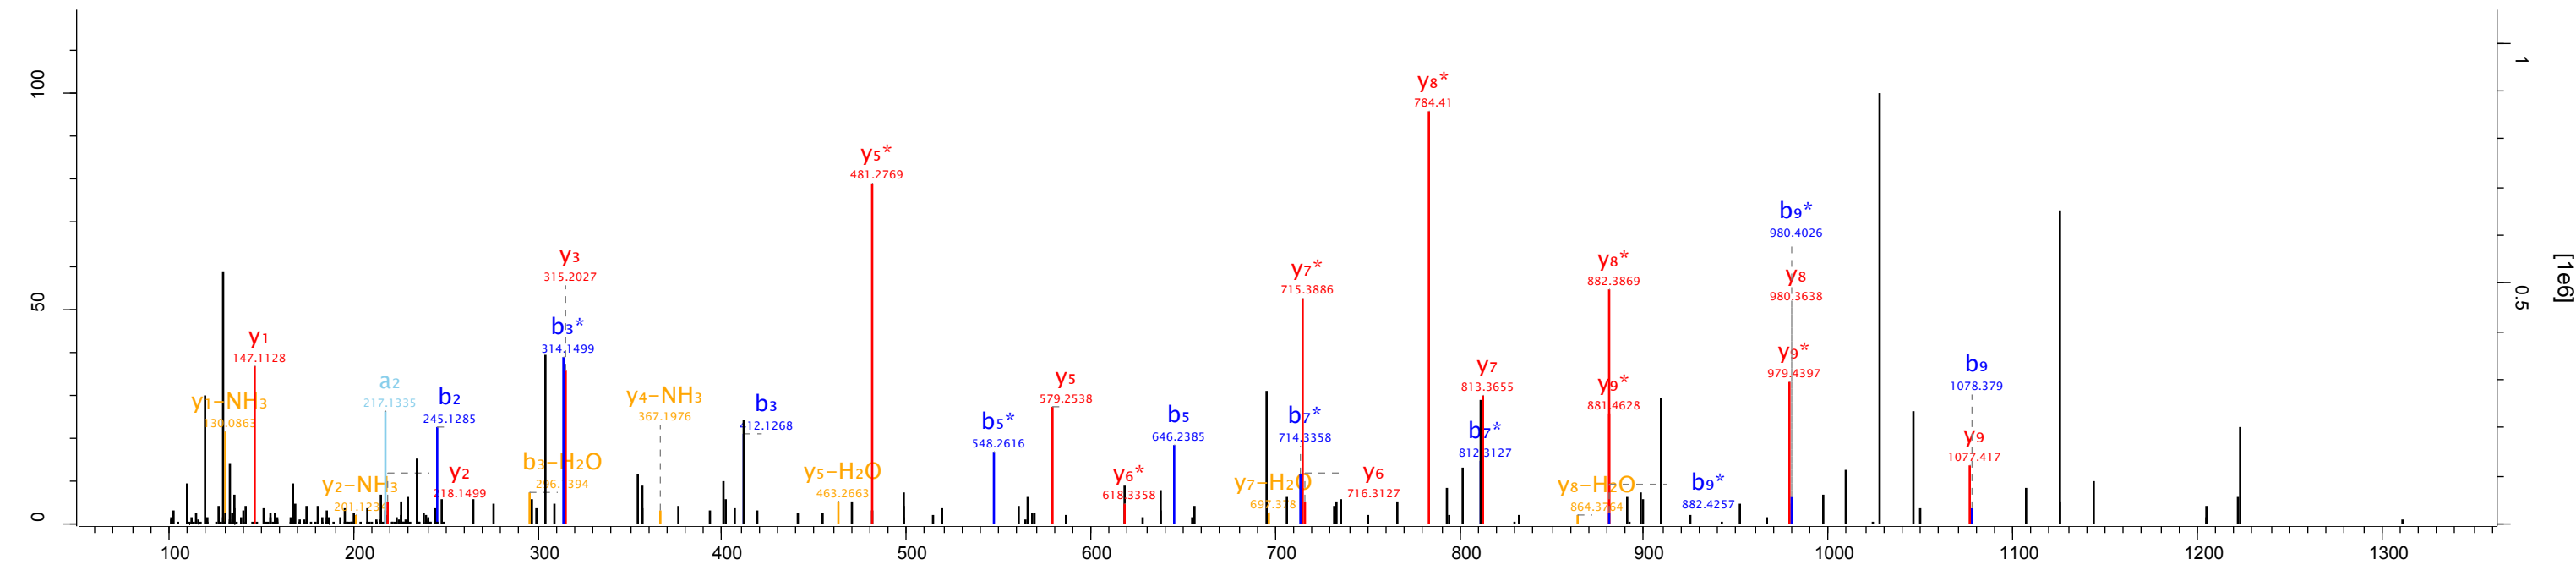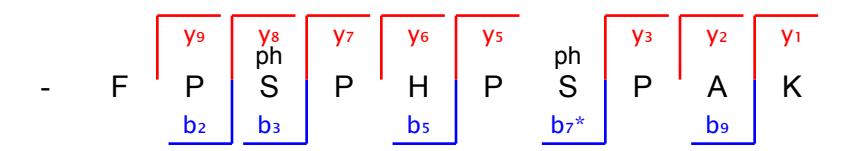

Raw file: 20150814\_A375SR\_Phospho\_BR2\_03  
 Scan: 8137 Method: FTMS; HCD Score: 76.36 m/z: 531.74 Gene names: TPX2

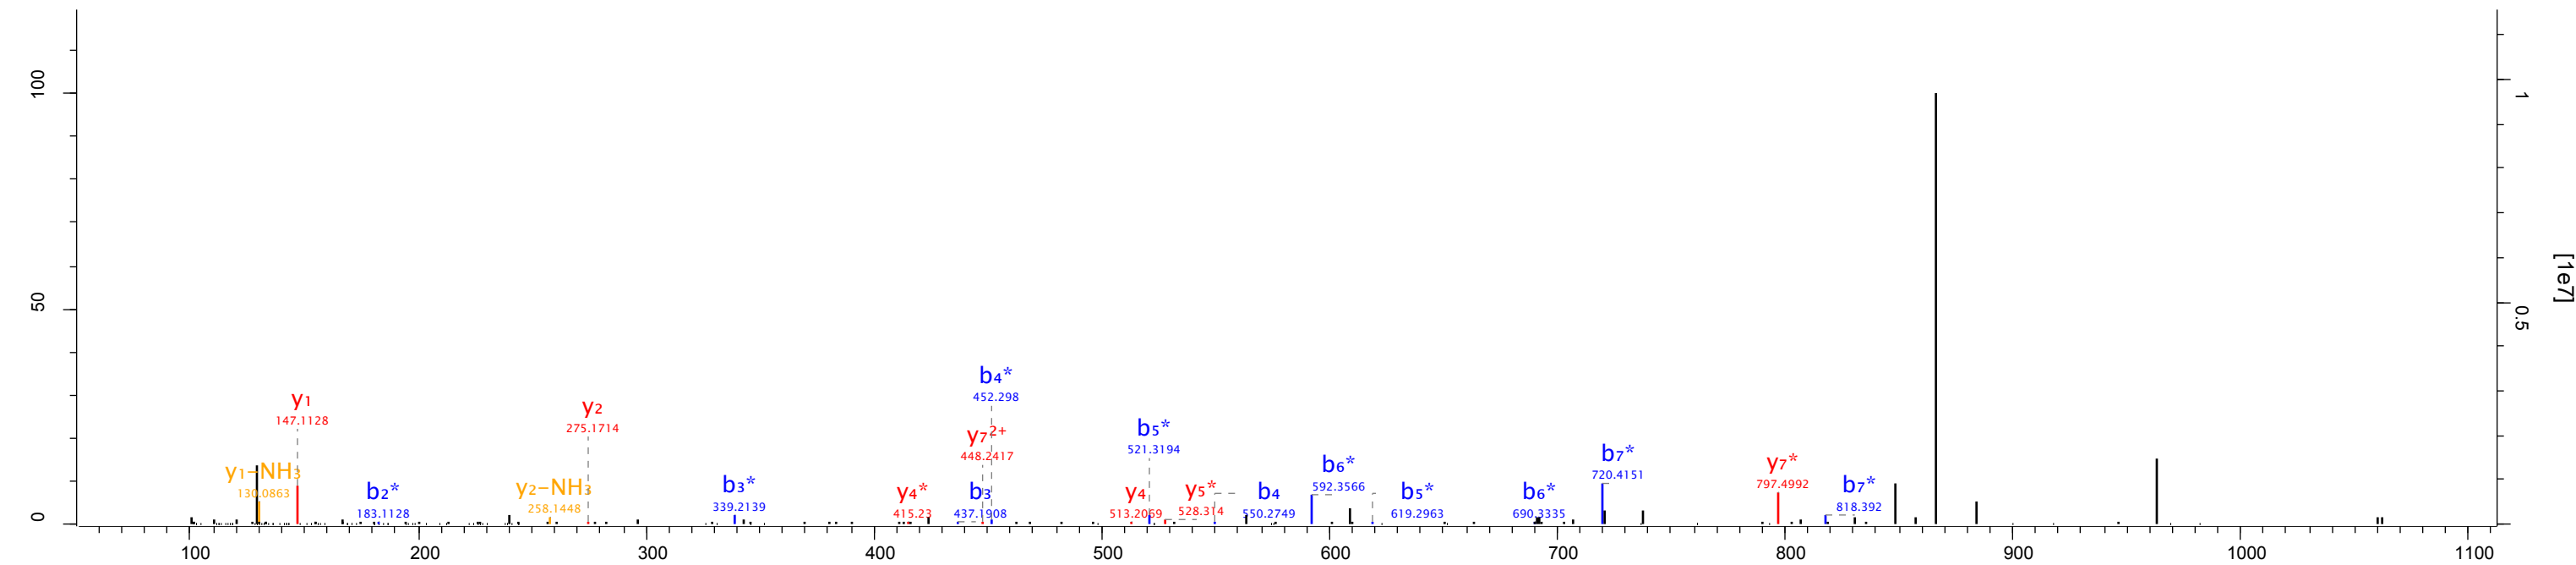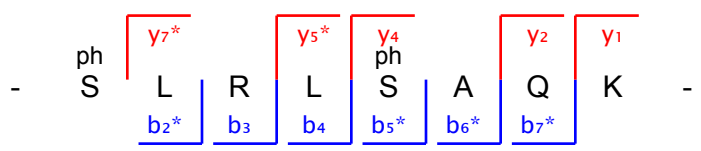



Raw file 20150814\_A375SR\_Phospho\_BR2\_03 Scan 8217 Method FTMS; HCD Score 94.72 m/z 597.75 Gene names BRPF3

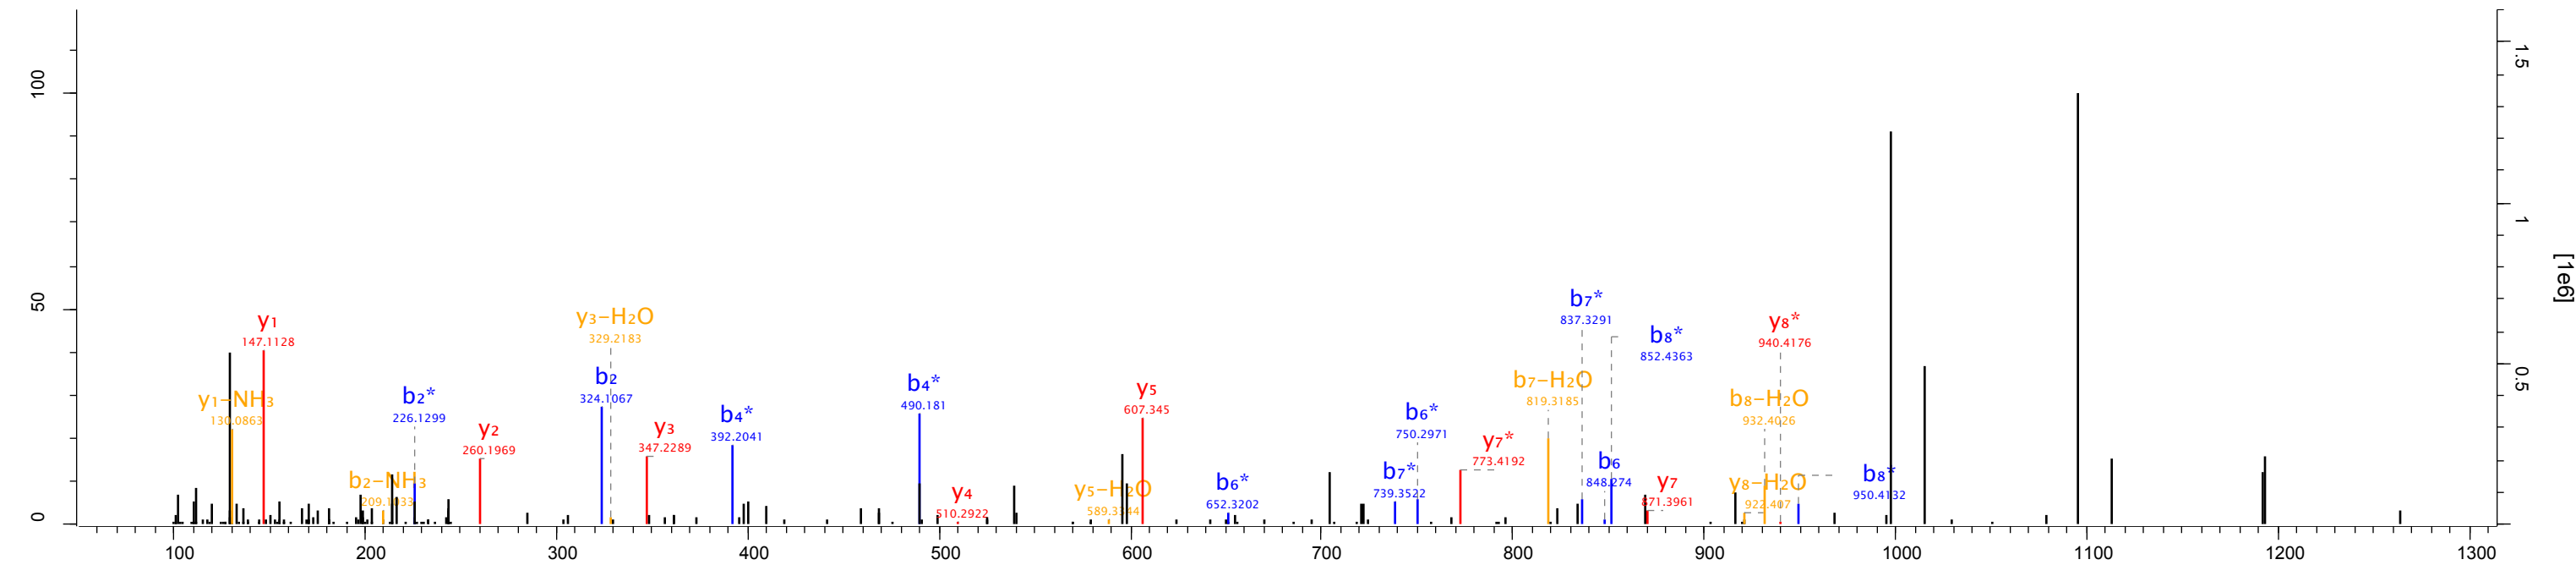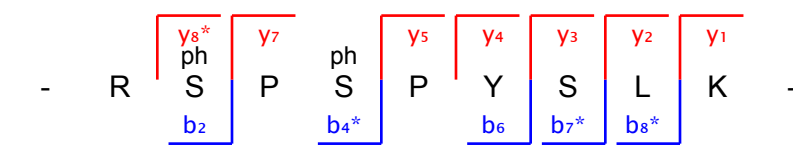

Raw file: 20150814\_A375SR\_Phospho\_BR2\_03  
 Scan: 8237 Method: FTMS; HCD Score: 132.31 m/z: 682.29 Gene names: MAP1B

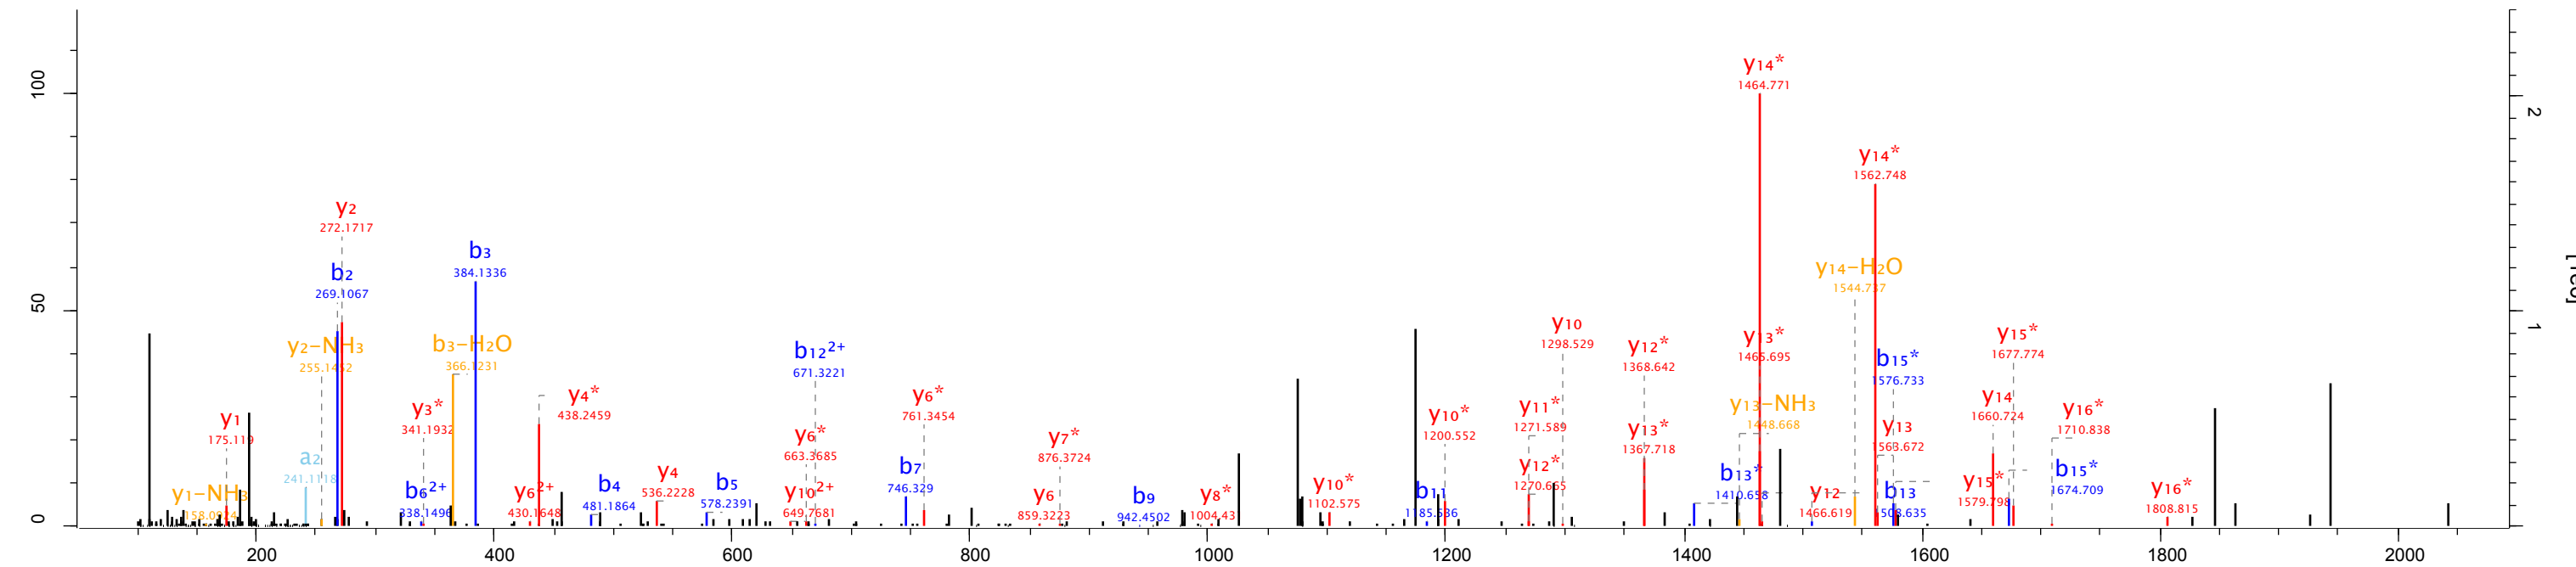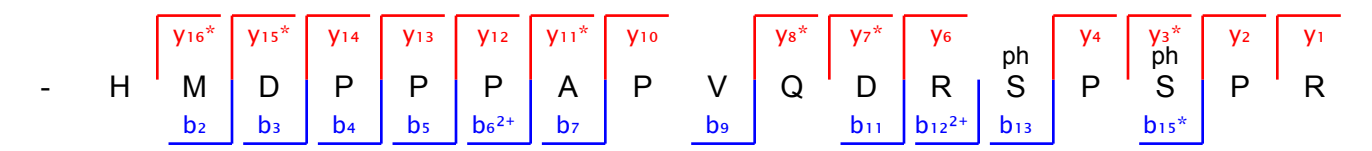

Raw file  
20150814\_A375SR\_Phospho\_BR2\_03

Scan 8317 Method FTMS; HCD Score 260.49 m/z 853.38 Gene names AFF4

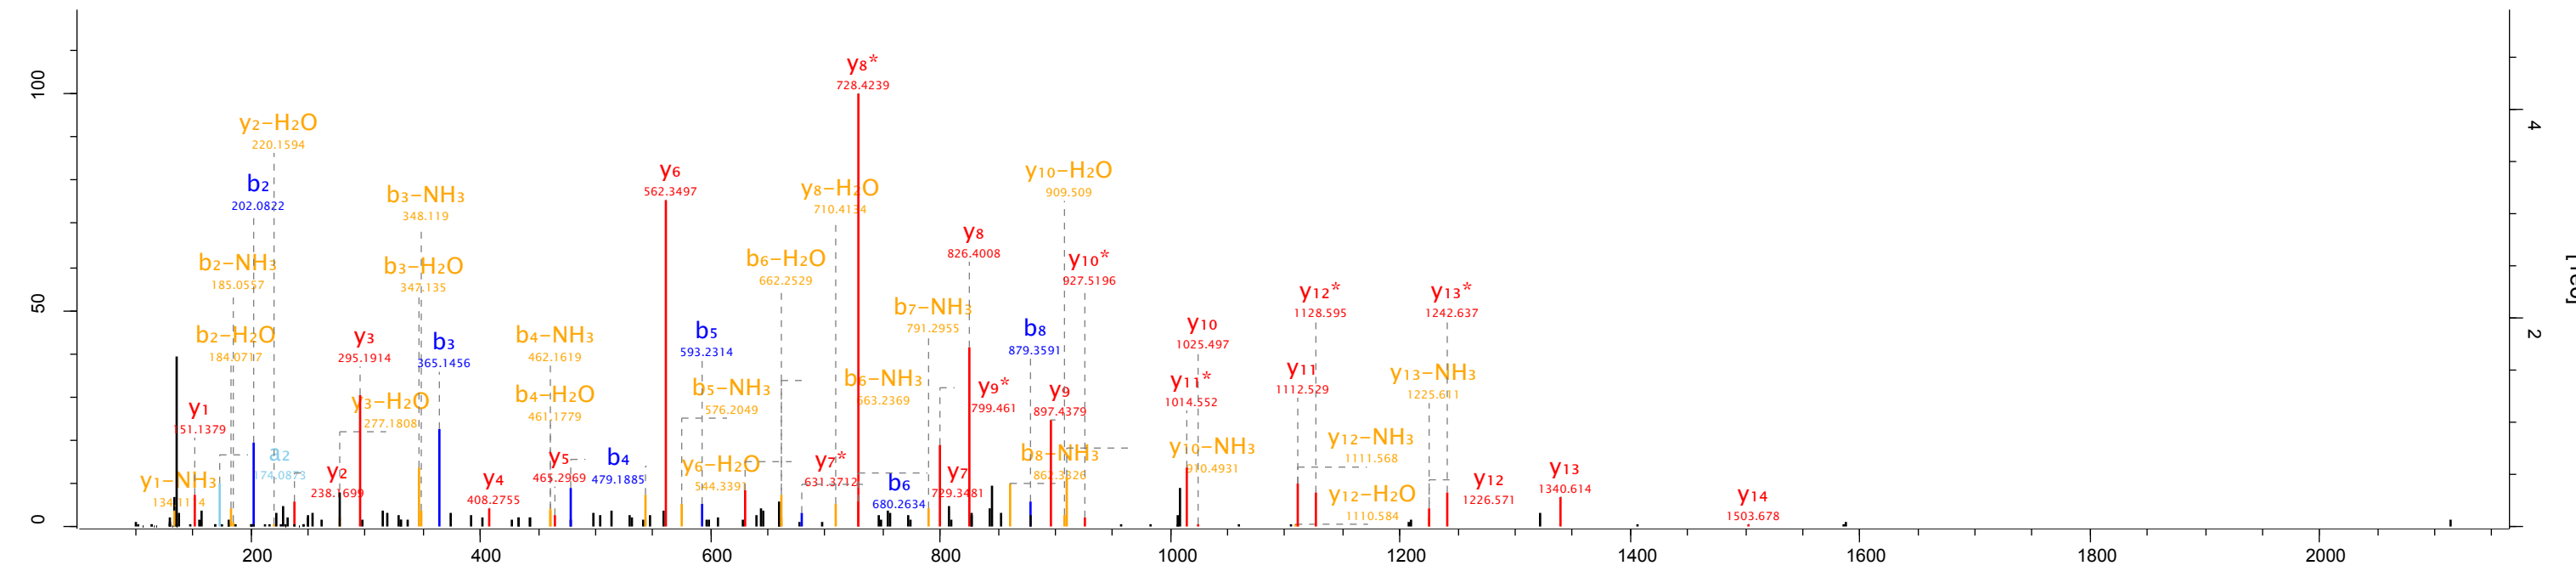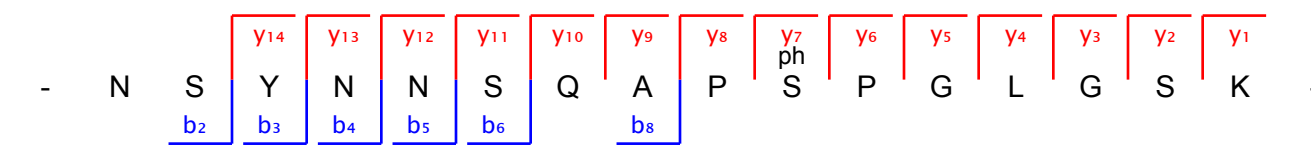

Raw file: 20150814\_A375SR\_Phospho\_BR2\_03  
 Scan: 8407 Method: FTMS; HCD Score: 162.47 m/z: 1246.98 Gene names: HDAC2

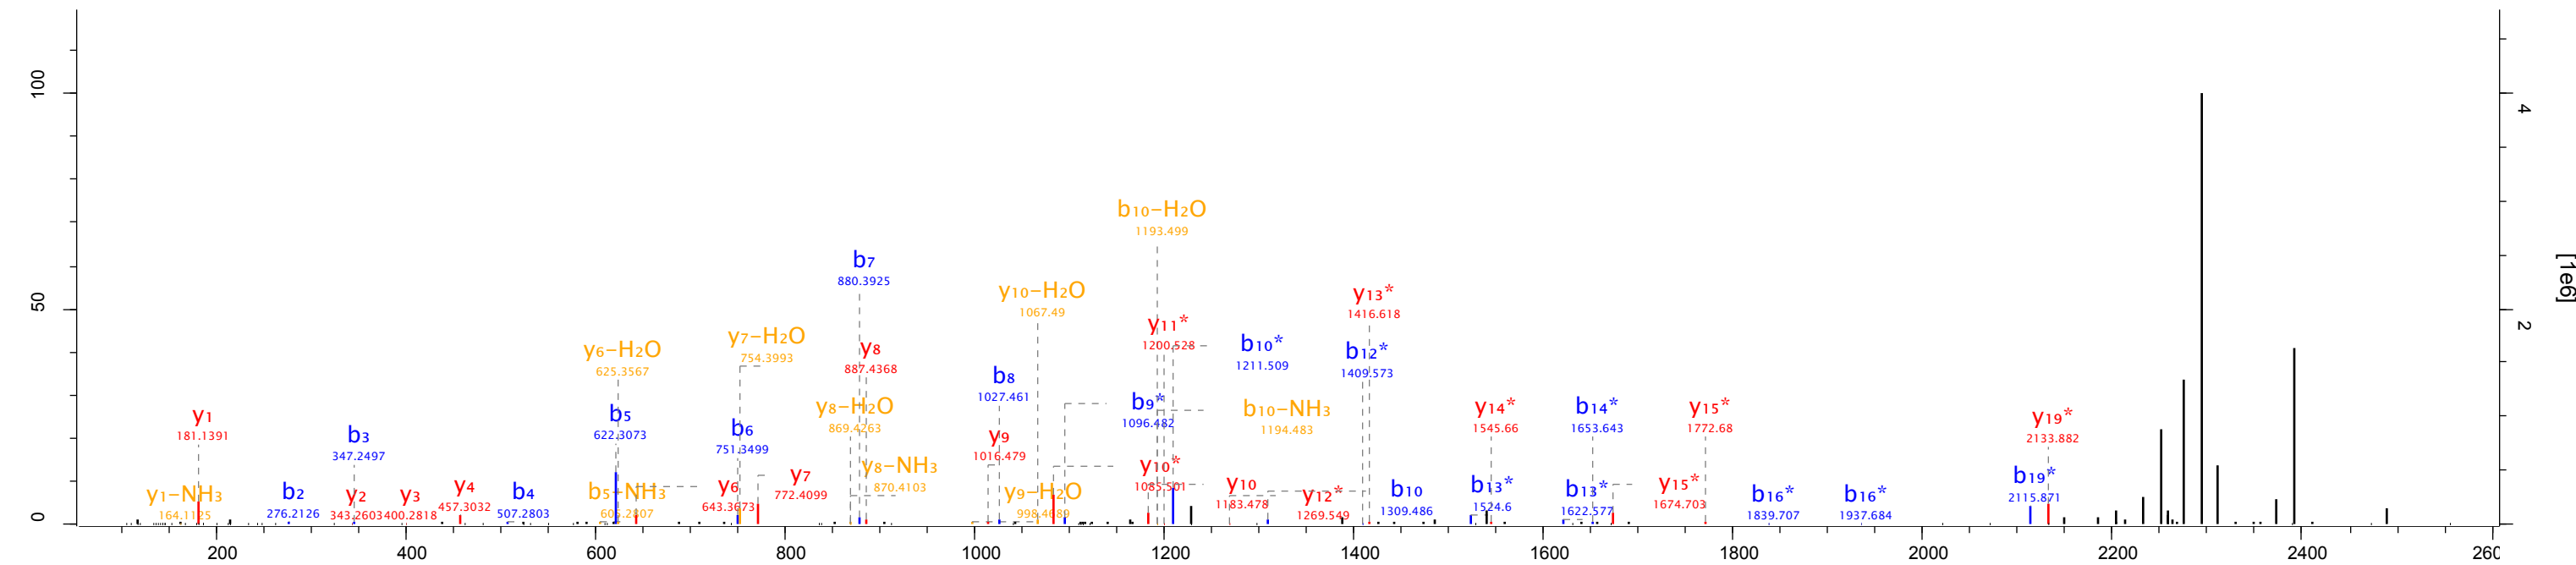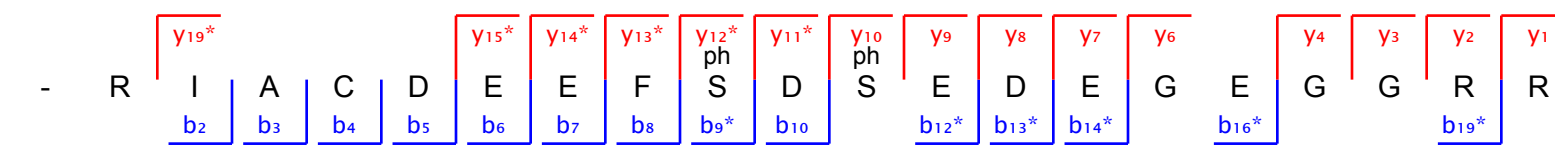

Raw file: 20150814\_A375SR\_Phospho\_BR2\_03  
 Scan: 9017 Method: FTMS; HCD Score: 119.46 m/z: 759.32 Gene names: EYA4

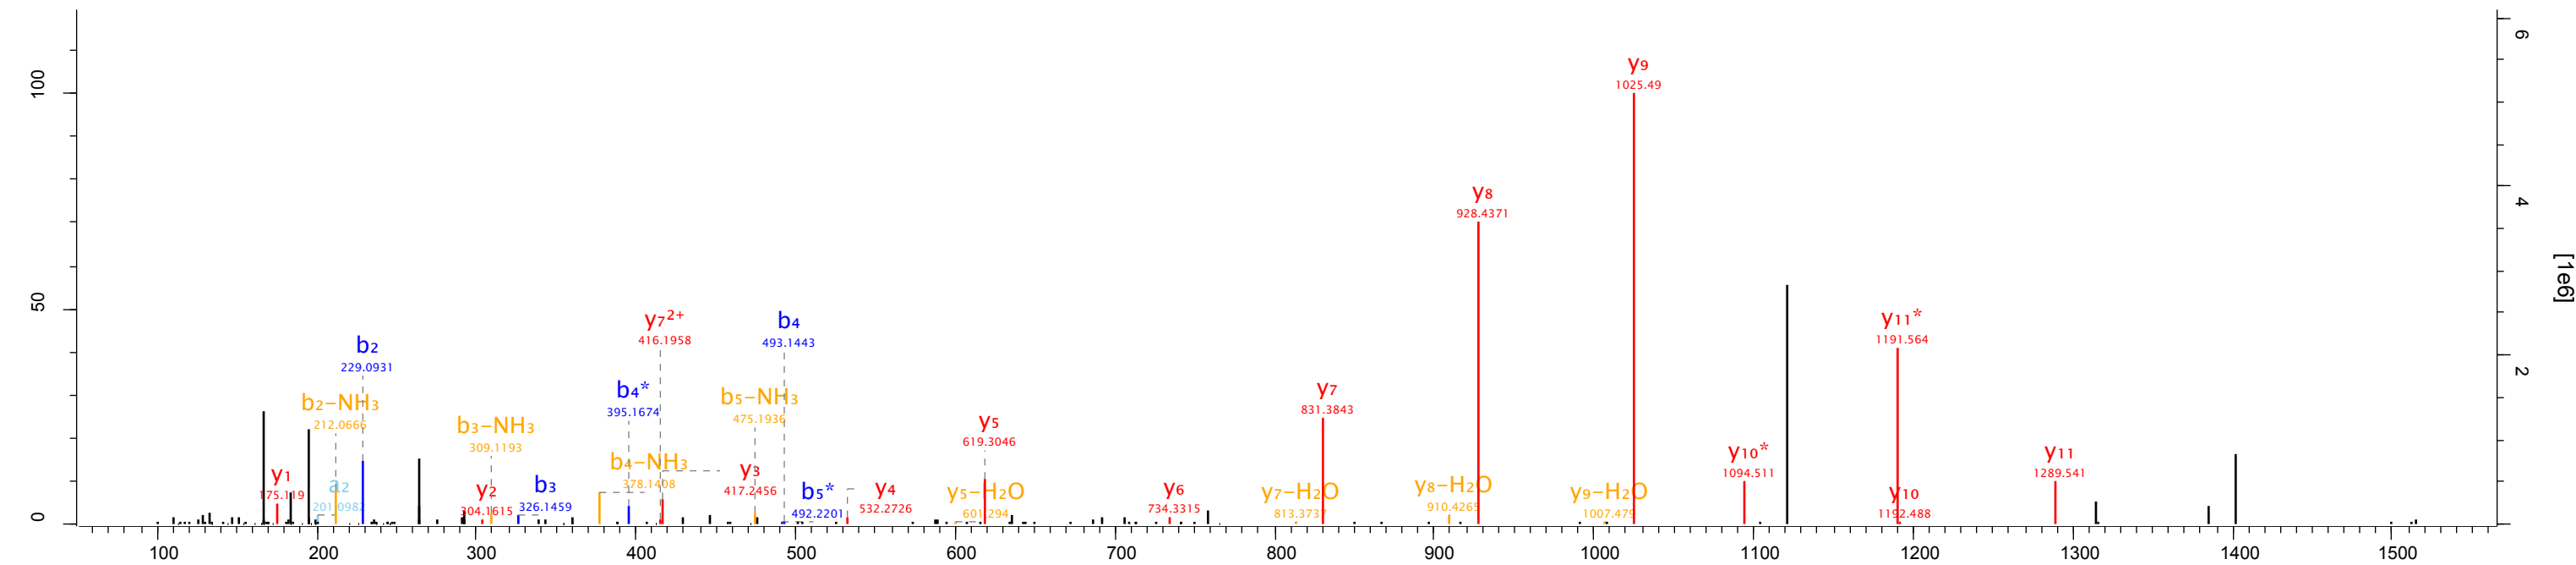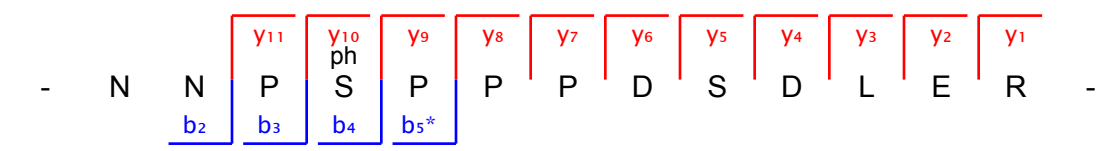

Raw file: 20150814\_A375SR\_Phospho\_BR2\_03  
 Scan: 9067 Method: FTMS; HCD Score: 210.34 m/z: 916.4 Gene names: PCM1

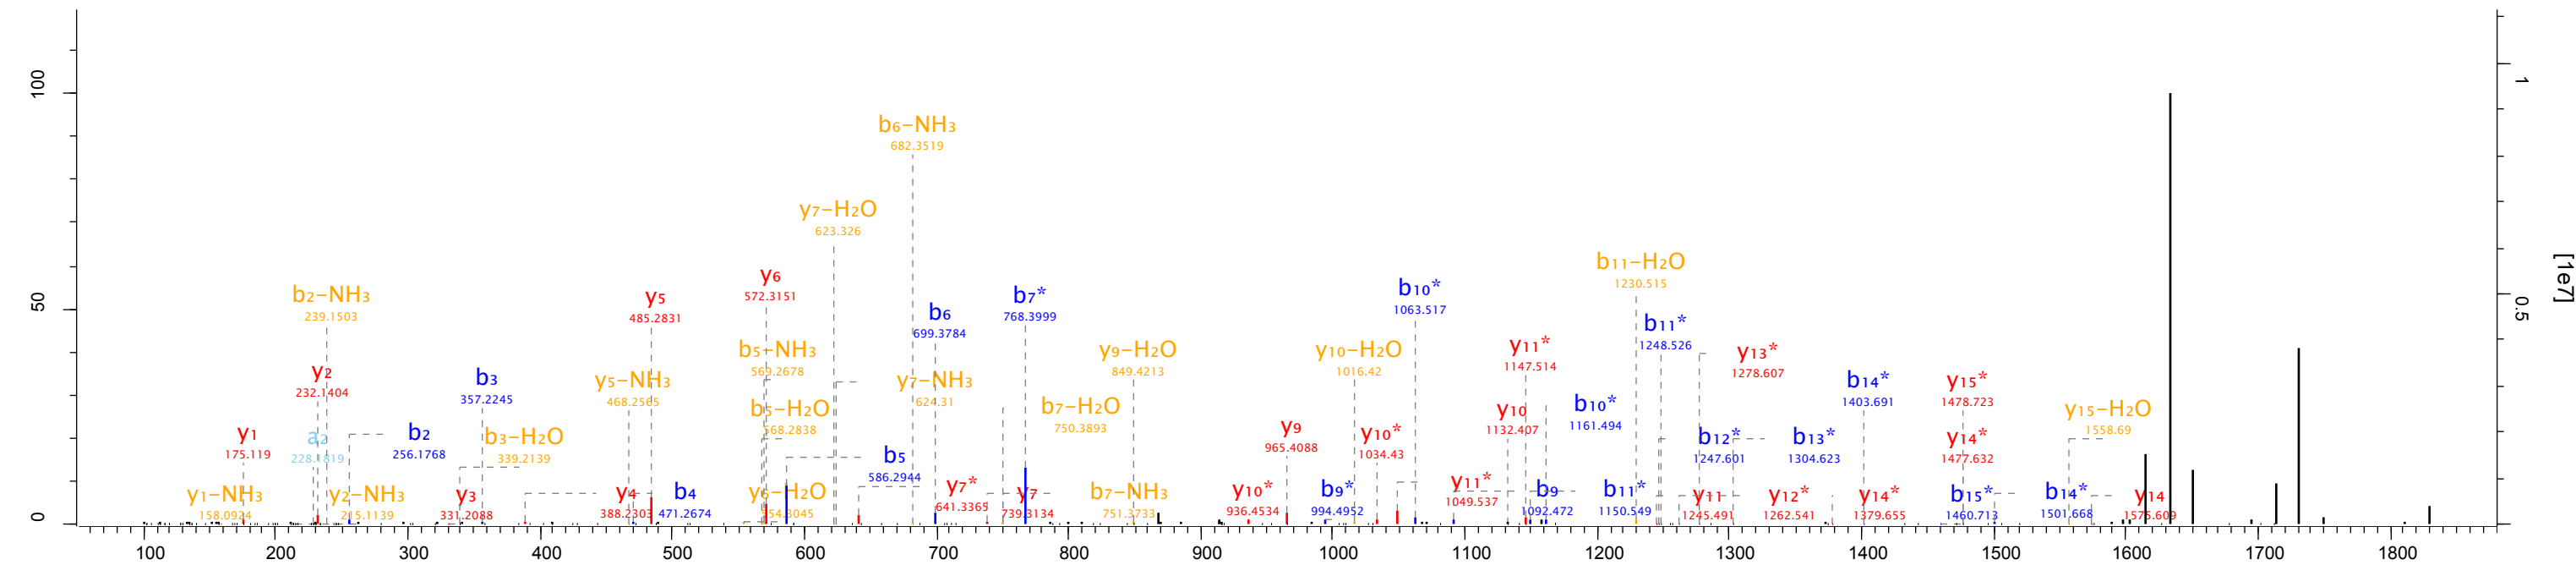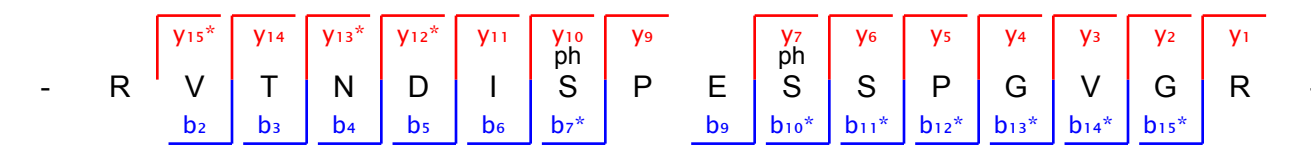

Raw file: 20150814\_A375SR\_Phospho\_BR2\_03  
 Scan: 9117 Method: FTMS; HCD Score: 95.93 m/z: 676.64 Gene names: SCAF11

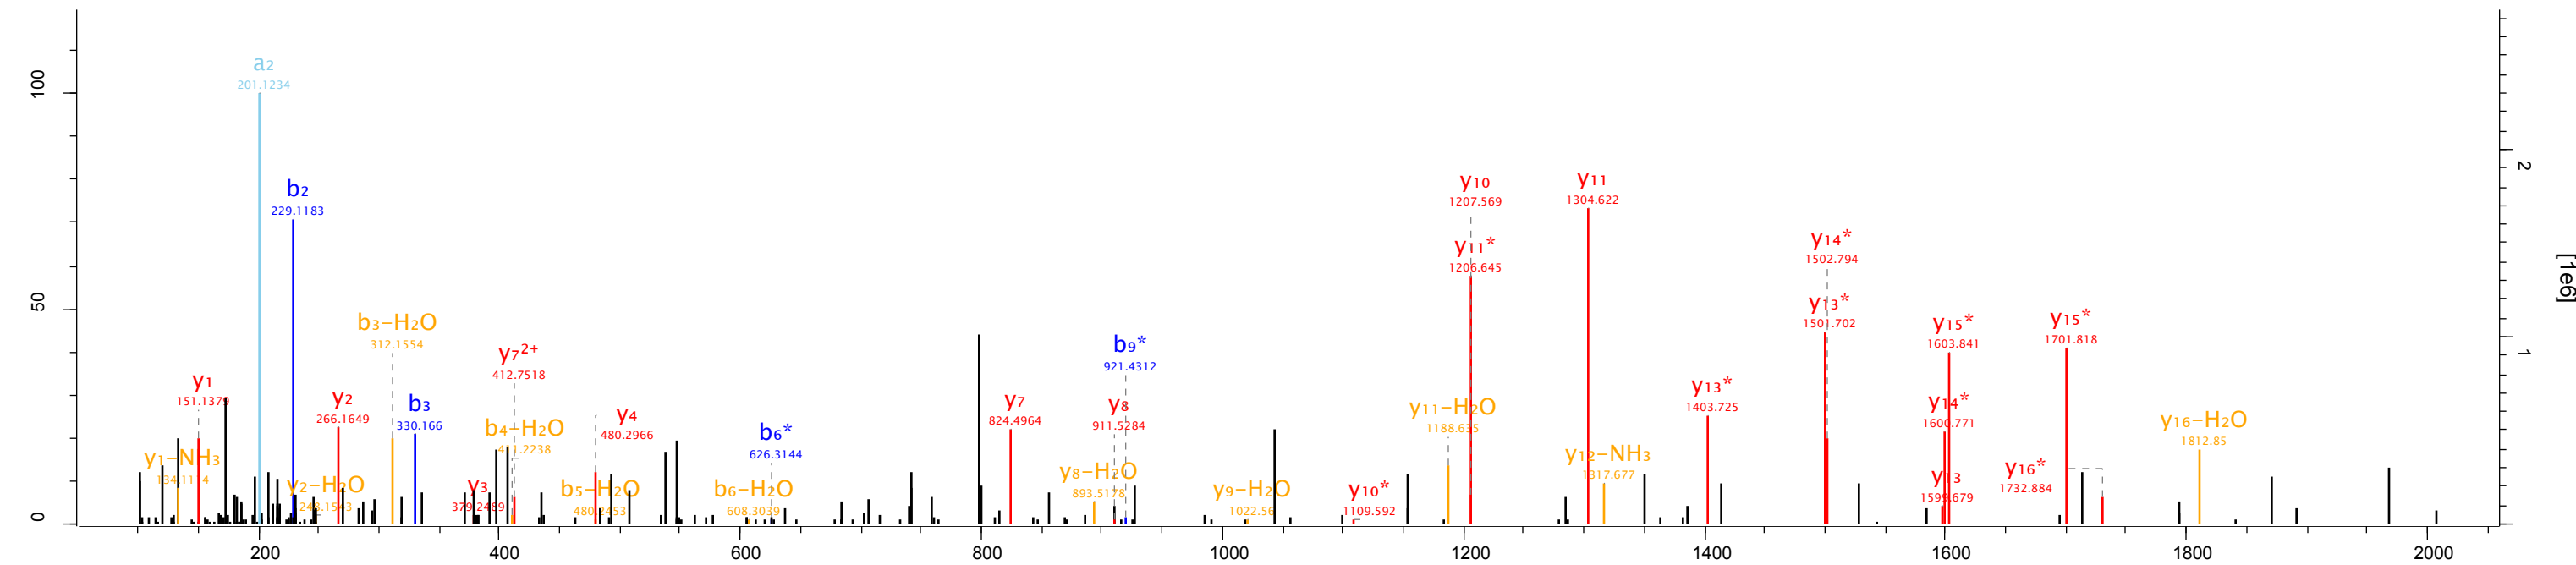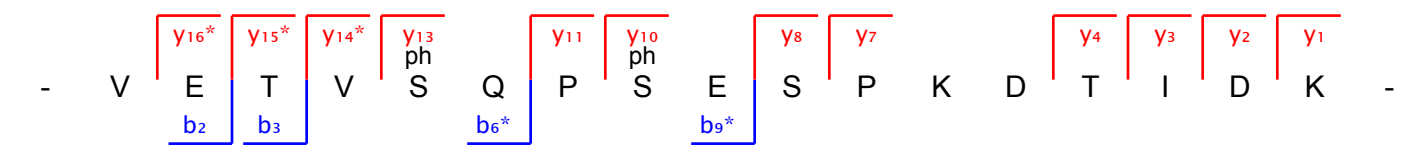

Raw file: 20150814\_A375SR\_Phospho\_BR2\_03  
 Scan: 9147 Method: FTMS; HCD Score: 191.24 m/z: 869.4 Gene names: KIDINS220

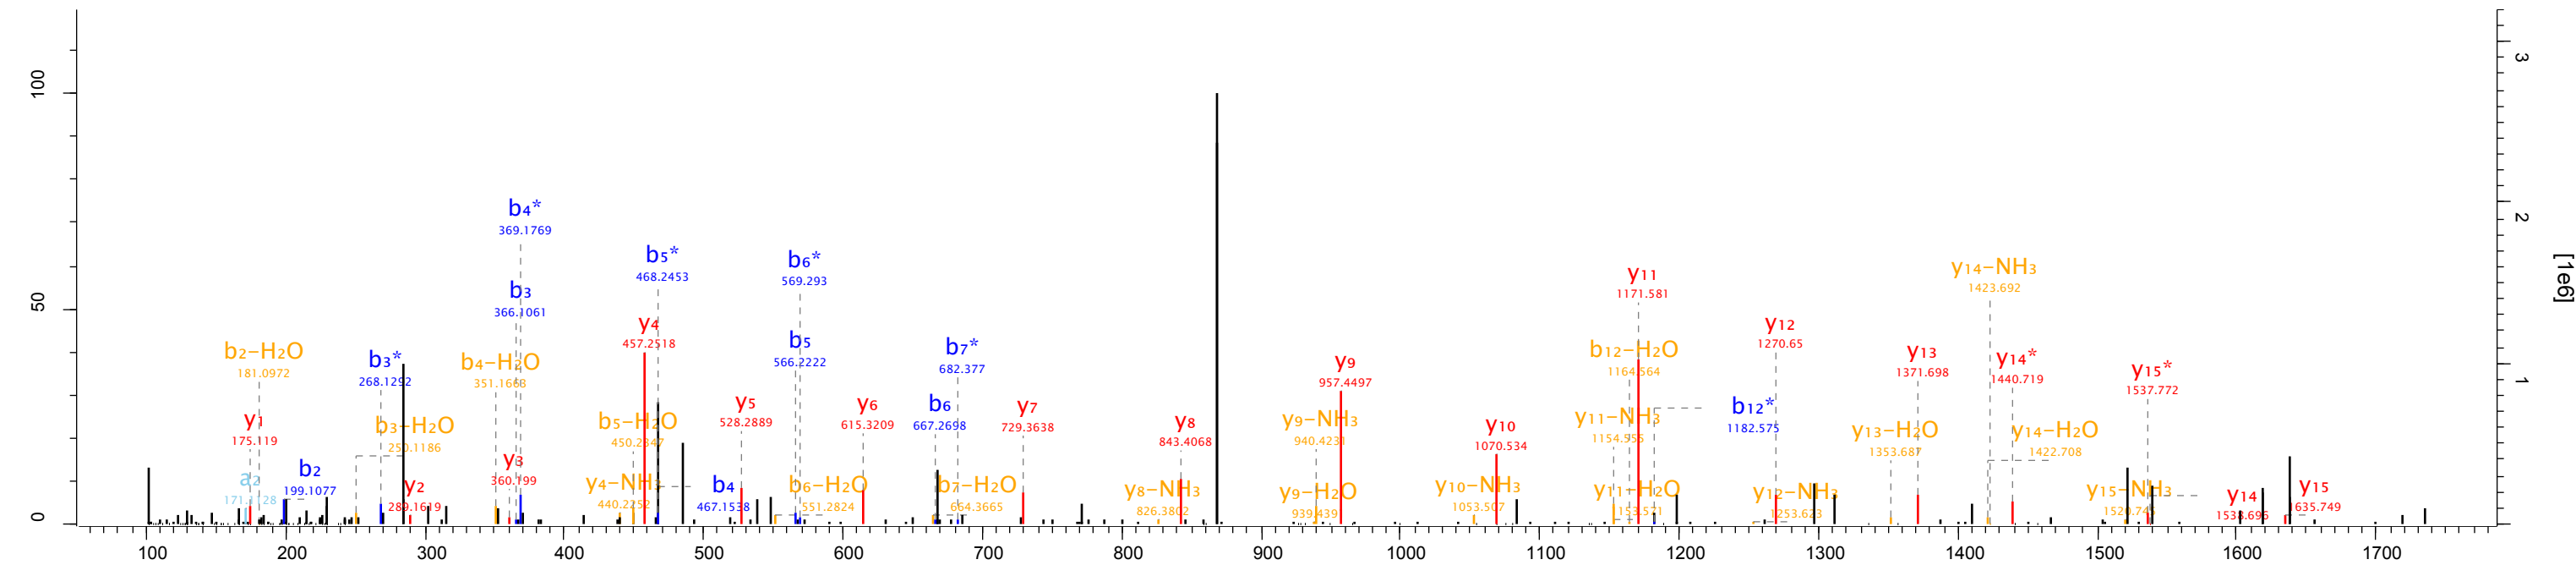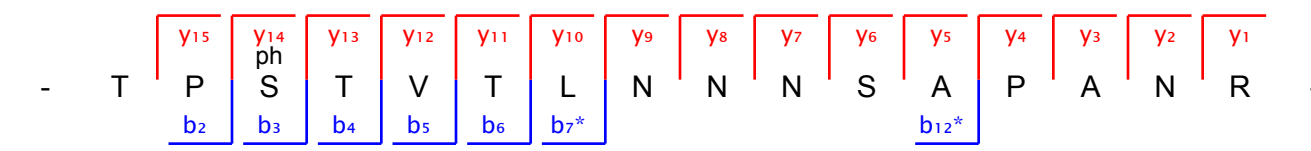



Raw file: 20150814\_A375SR\_Phospho\_BR2\_03  
 Scan: 9387 Method: FTMS; HCD Score: 150.13 m/z: 901.89 Gene names: DENND1A

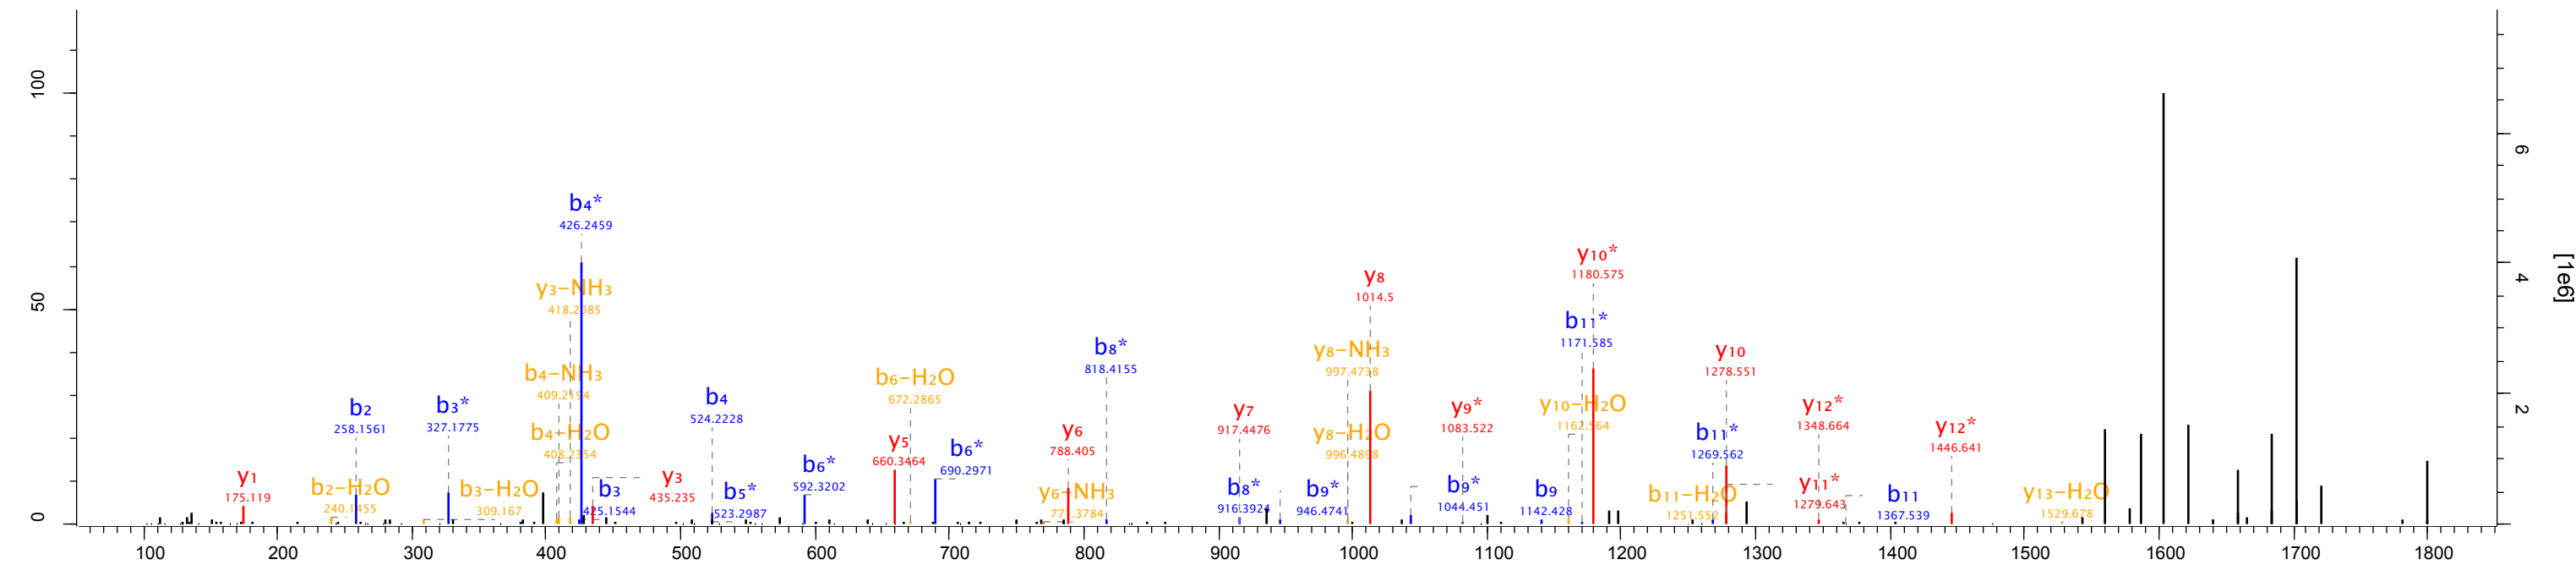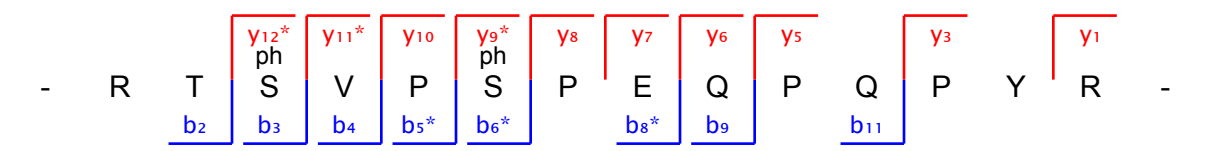

Raw file: 20150814\_A375SR\_Phospho\_BR2\_03  
 Scan: 9417 Method: FTMS; HCD Score: 116.99 m/z: 748.82 Gene names: ARHGEF1

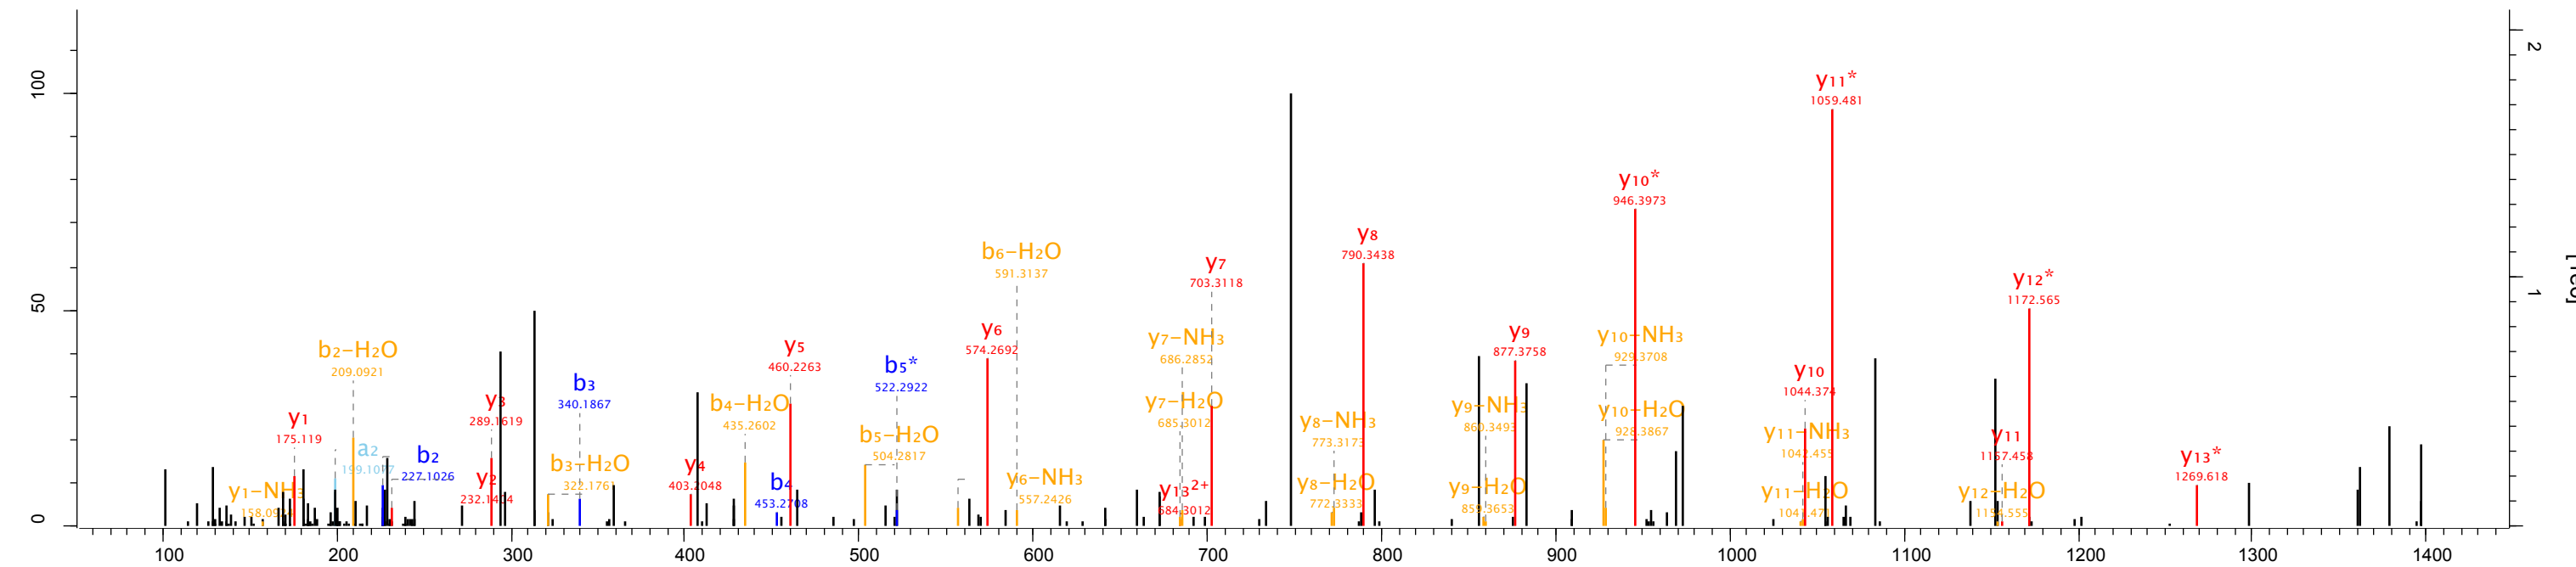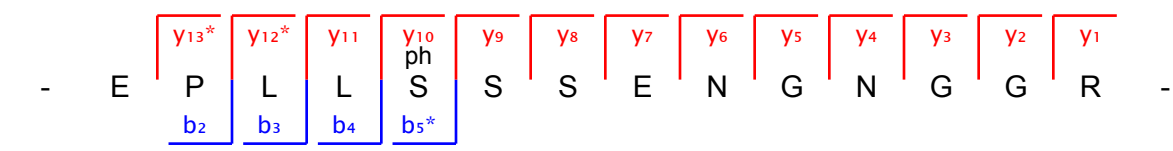

Raw file 20150814\_A375SR\_Phospho\_BR2\_03 Scan 9437 Method FTMS; HCD Score 90.73 m/z 744.72 Gene names ZEB2

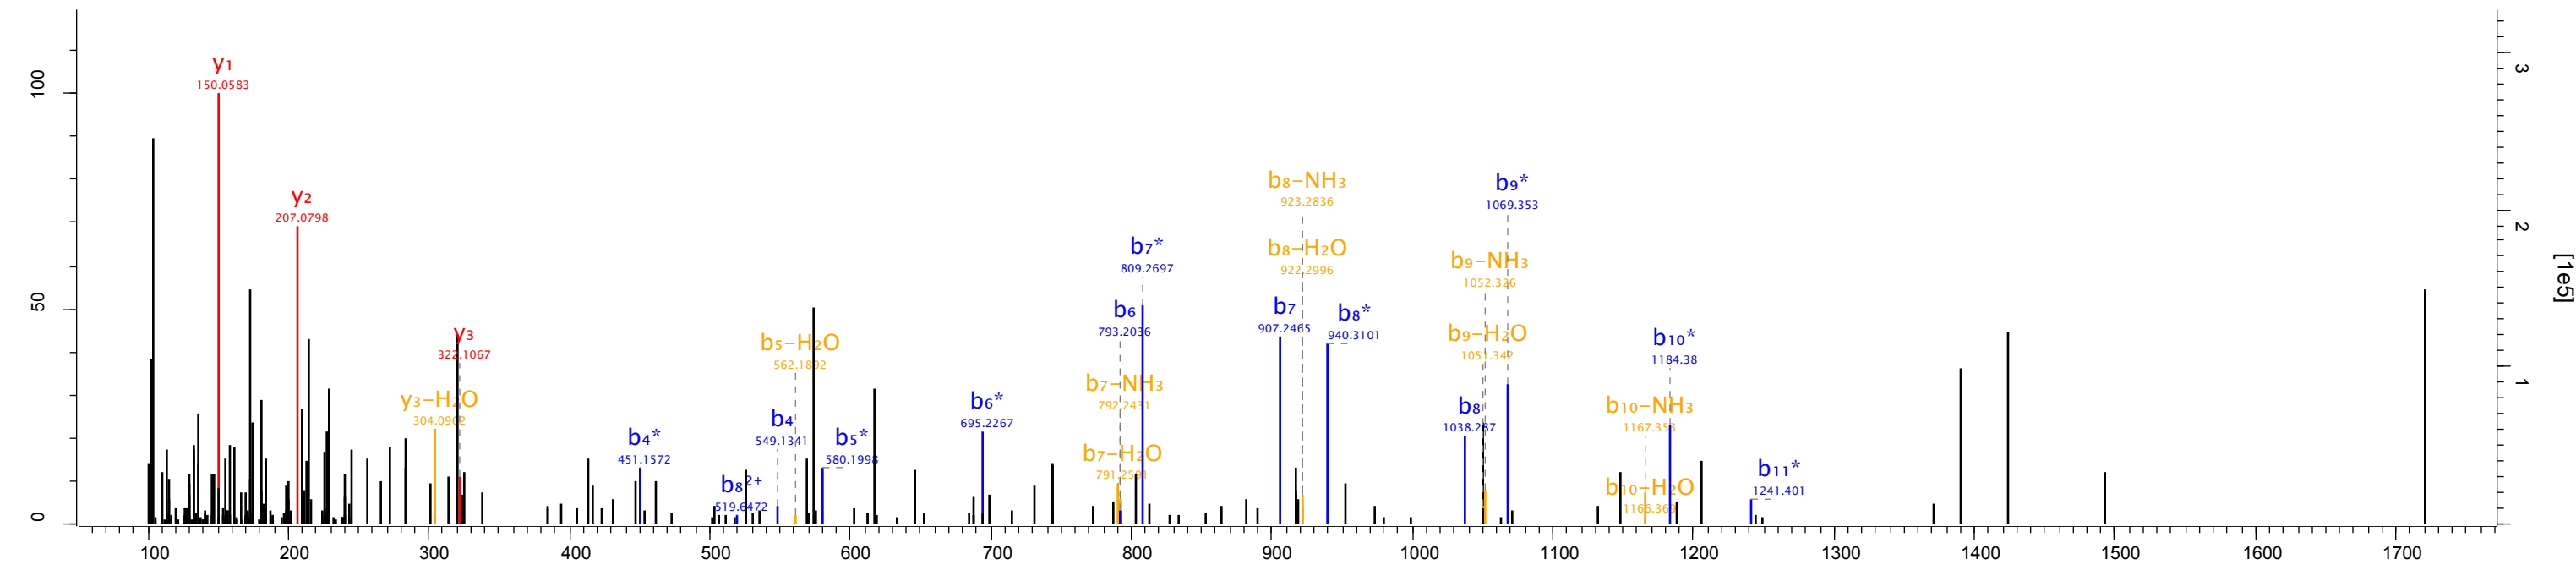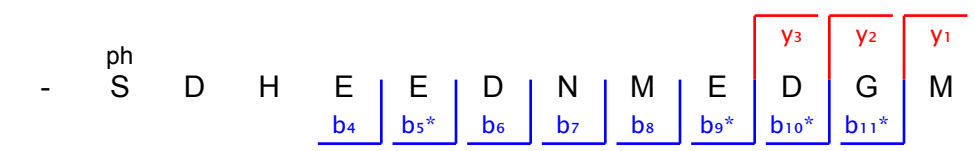

Raw file: 20150814\_A375SR\_Phospho\_BR2\_03  
 Scan: 9517 Method: FTMS; HCD Score: 80.32 m/z: 562.26 Gene names: FUNDC2

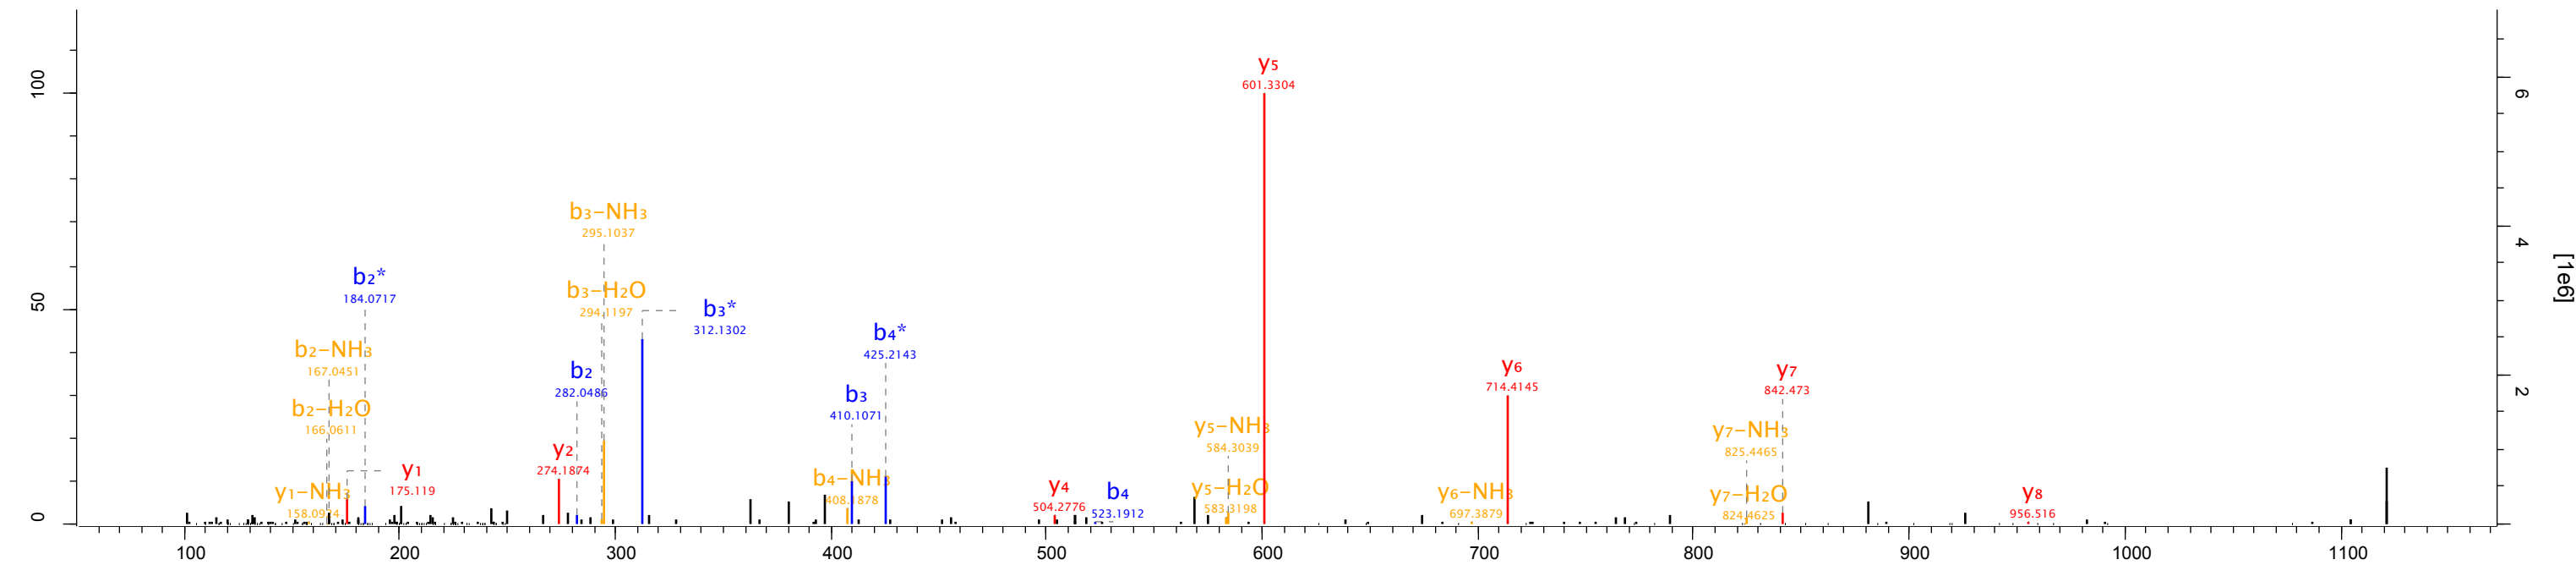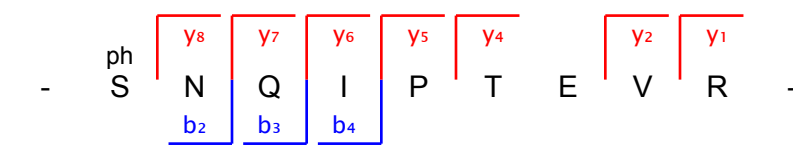

Raw file: 20150814\_A375SR\_Phospho\_BR2\_03  
 Scan: 9627 Method: FTMS; HCD Score: 159.75 m/z: 1401.63 Gene names: LMNA

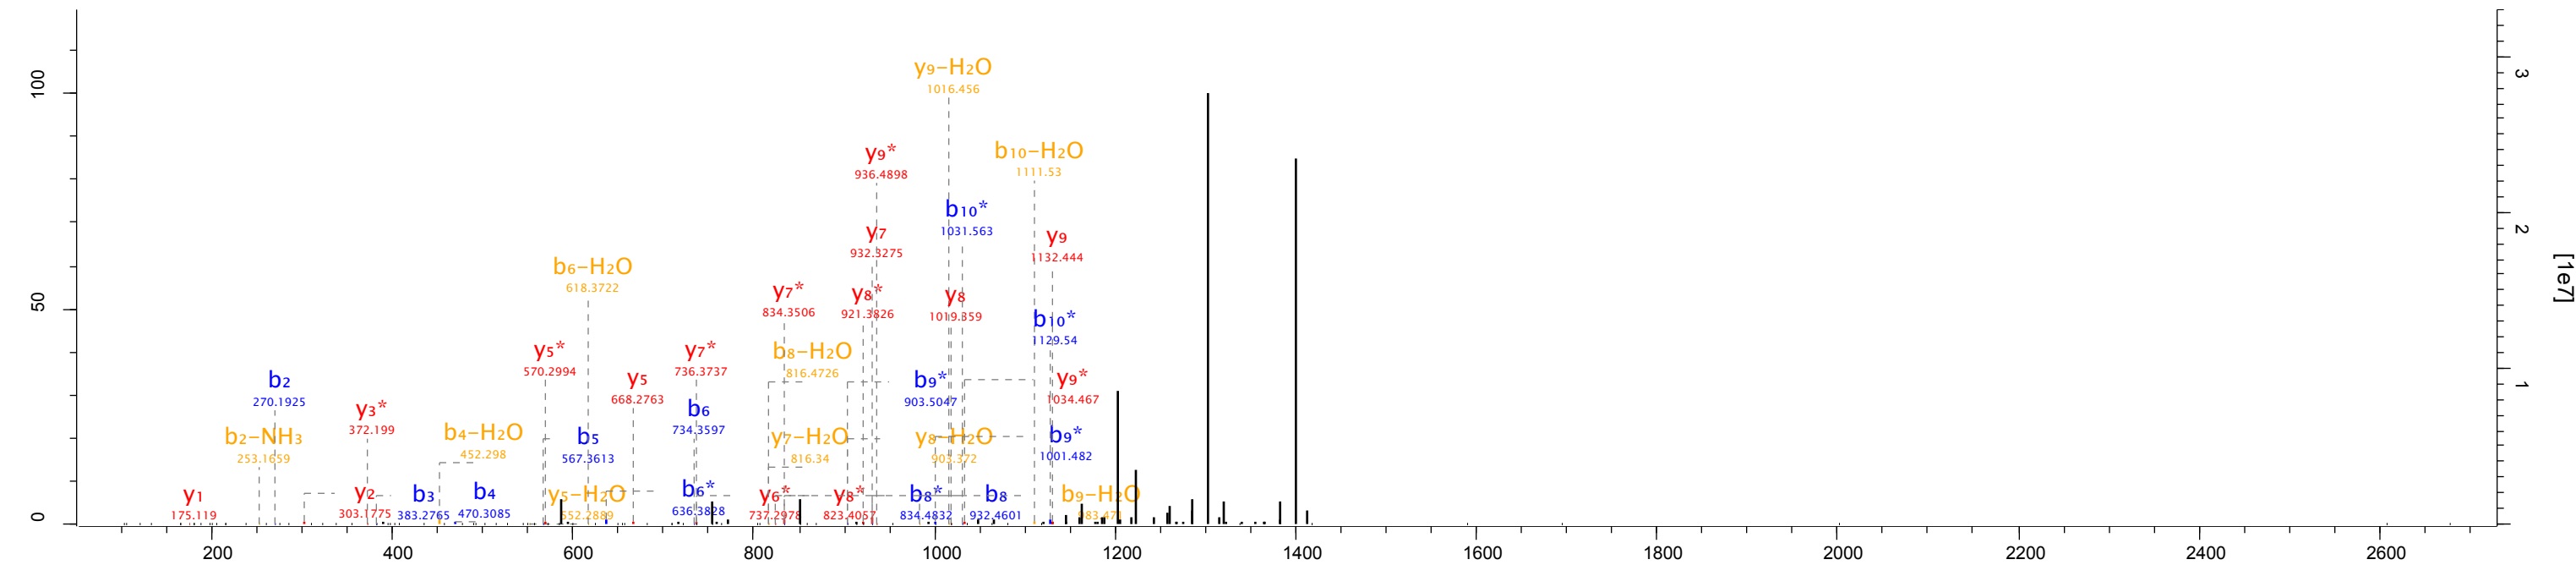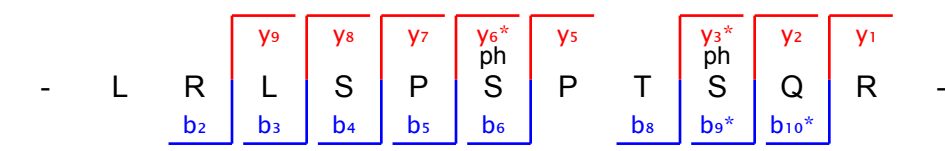

Raw file: 20150814\_A375SR\_Phospho\_BR2\_03  
 Scan: 9697 Method: FTMS; HCD Score: 89.51 m/z: 559.23 Gene names: MAP1A

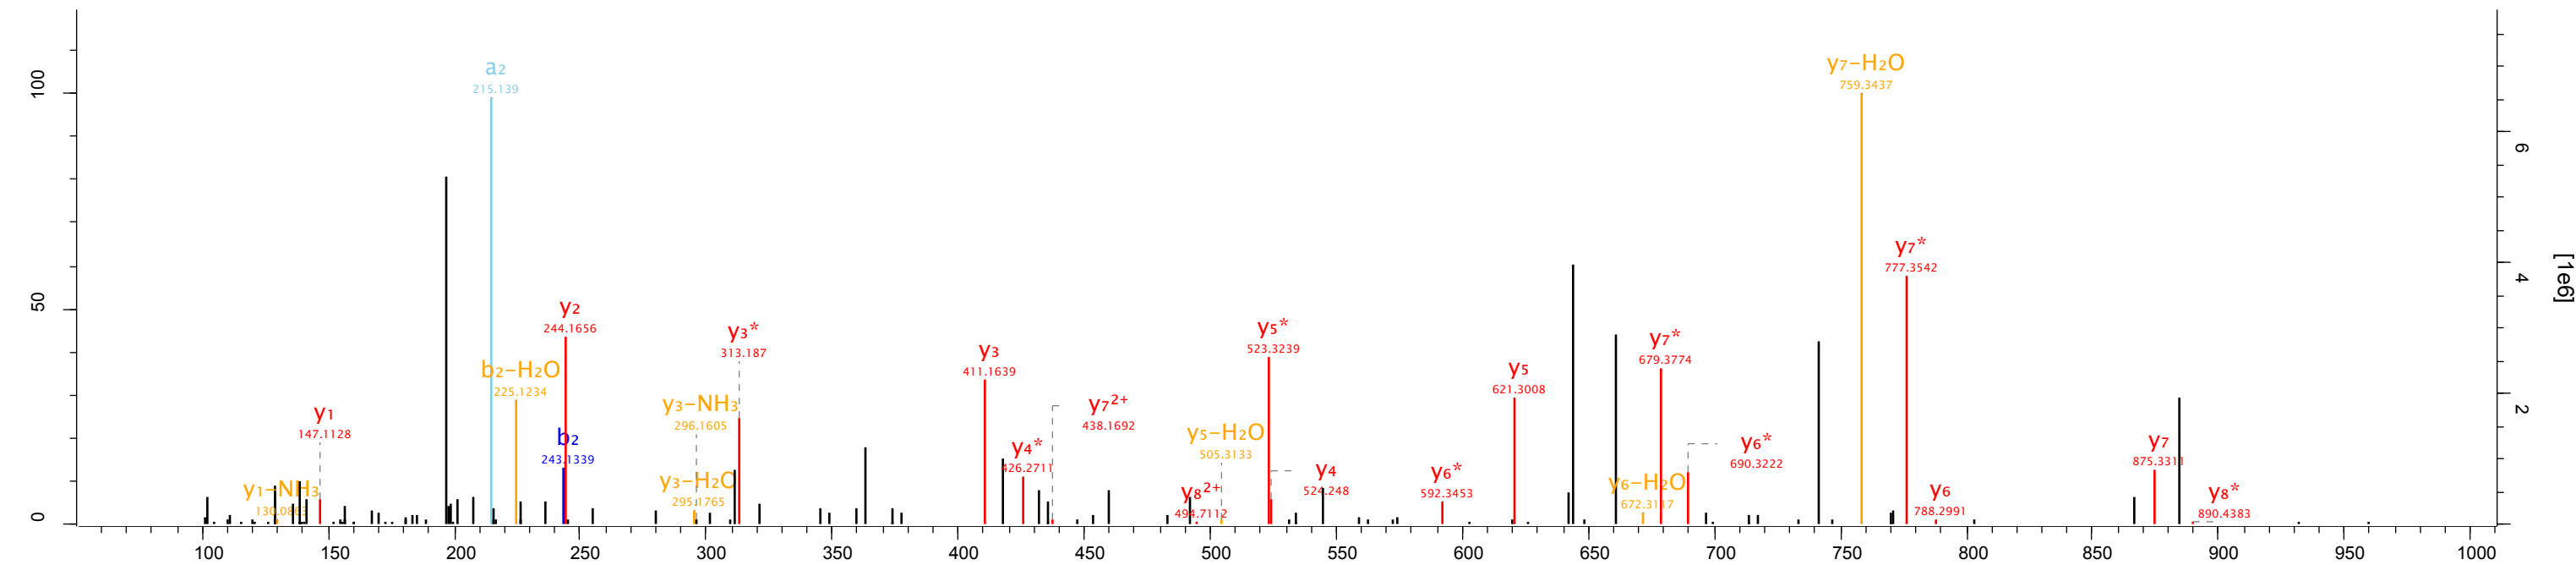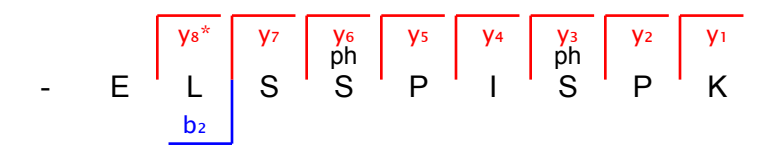

Raw file 20150814\_A375SR\_Phospho\_BR2\_04 Scan 10167 Method FTMS; HCD Score 131.25 m/z 556.62 Gene names ABL2

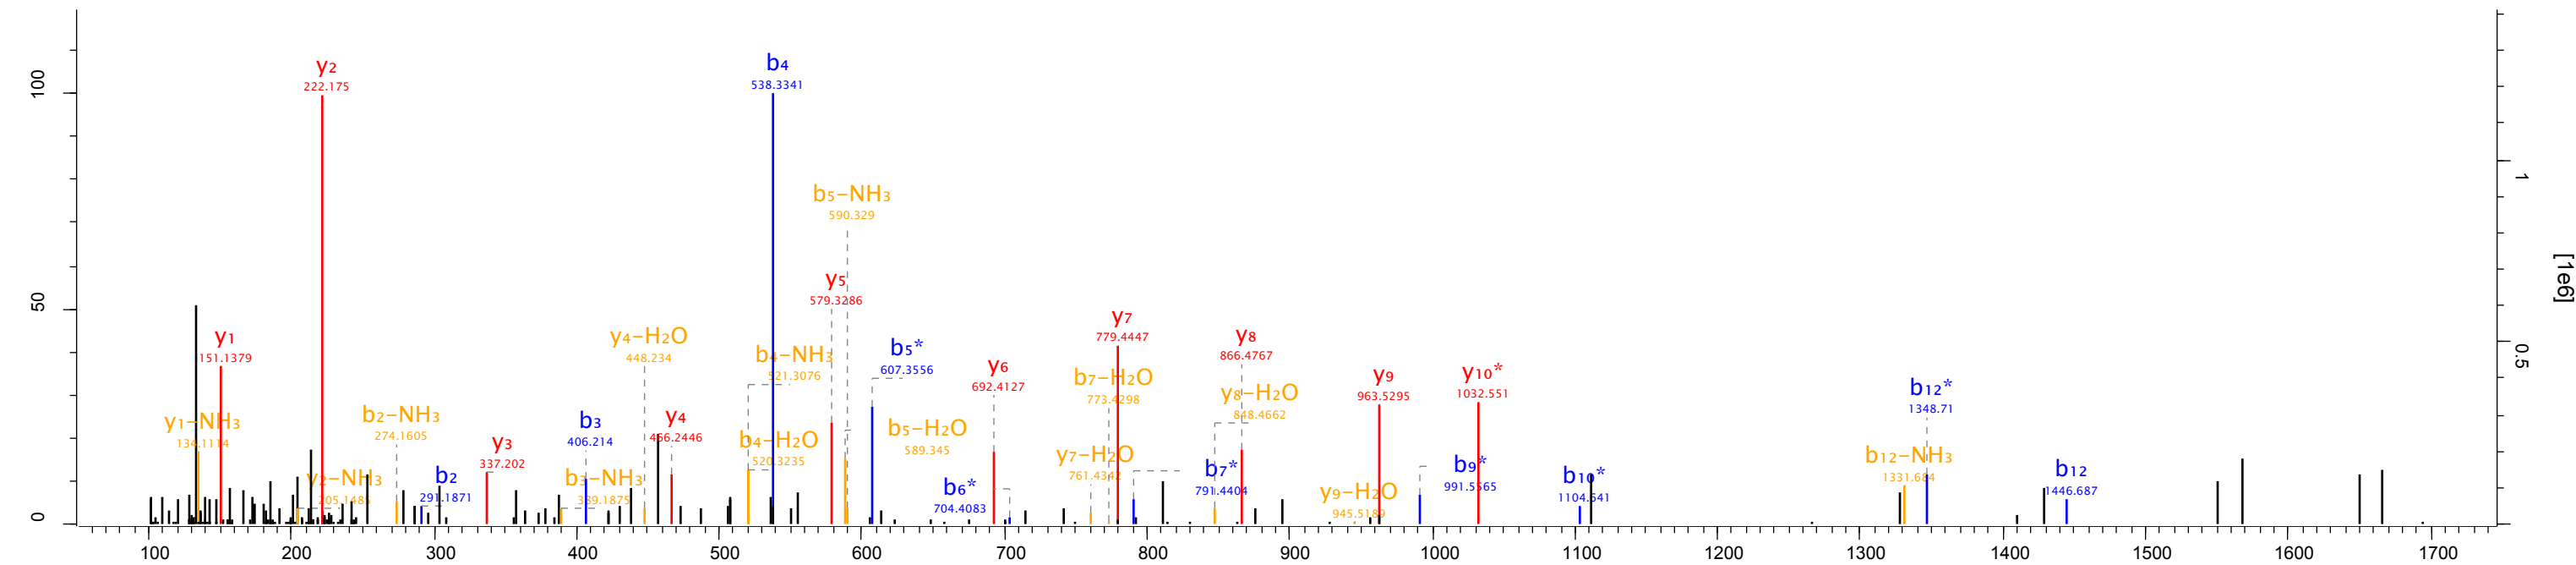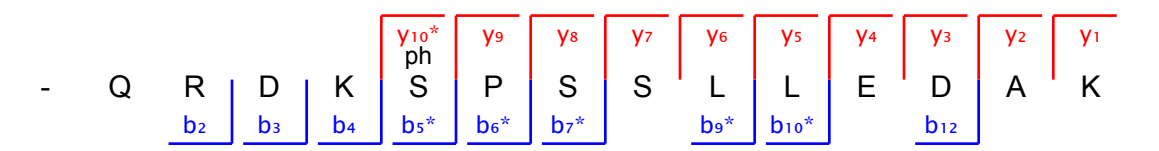

Raw file: 20150814\_A375SR\_Phospho\_BR2\_04  
 Scan: 10507 Method: FTMS; HCD Score: 146.18 m/z: 714.82 Gene names: LYN

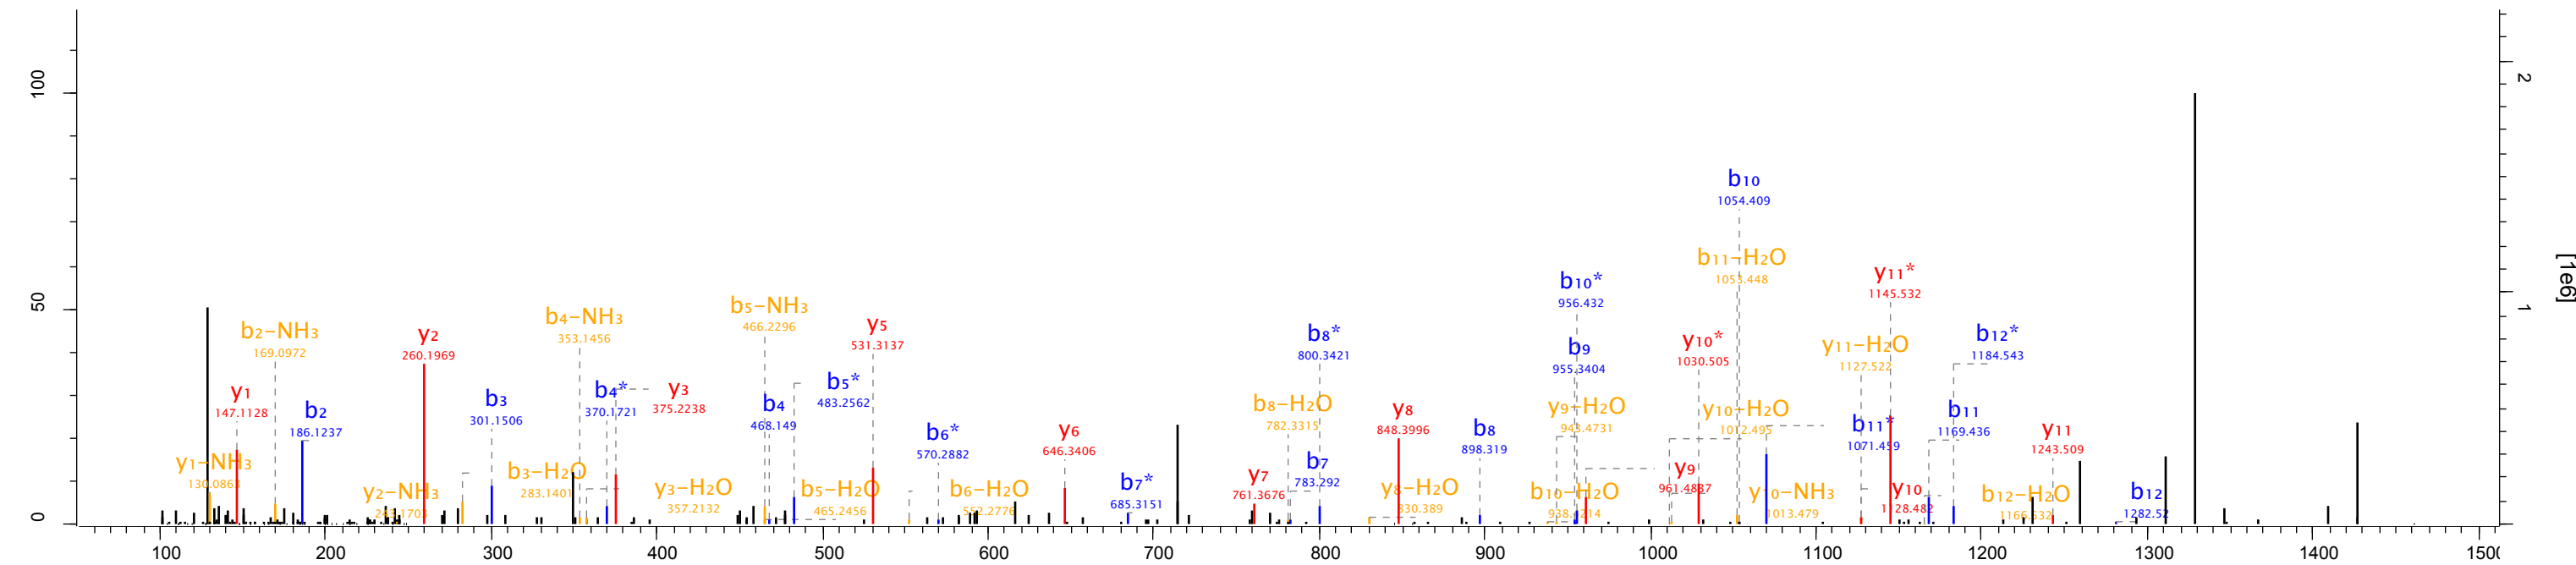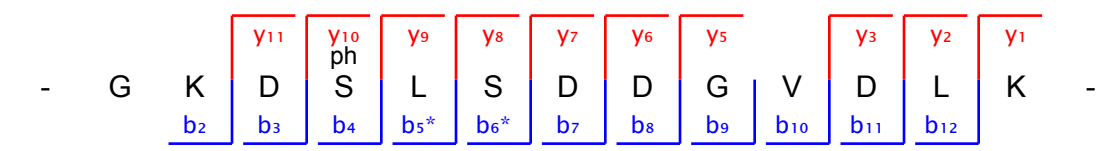



Raw file: 20150814\_A375SR\_Phospho\_BR2\_04  
 Scan: 10637 Method: FTMS; HCD Score: 302.66 m/z: 824.4 Gene names: ZFP36L2

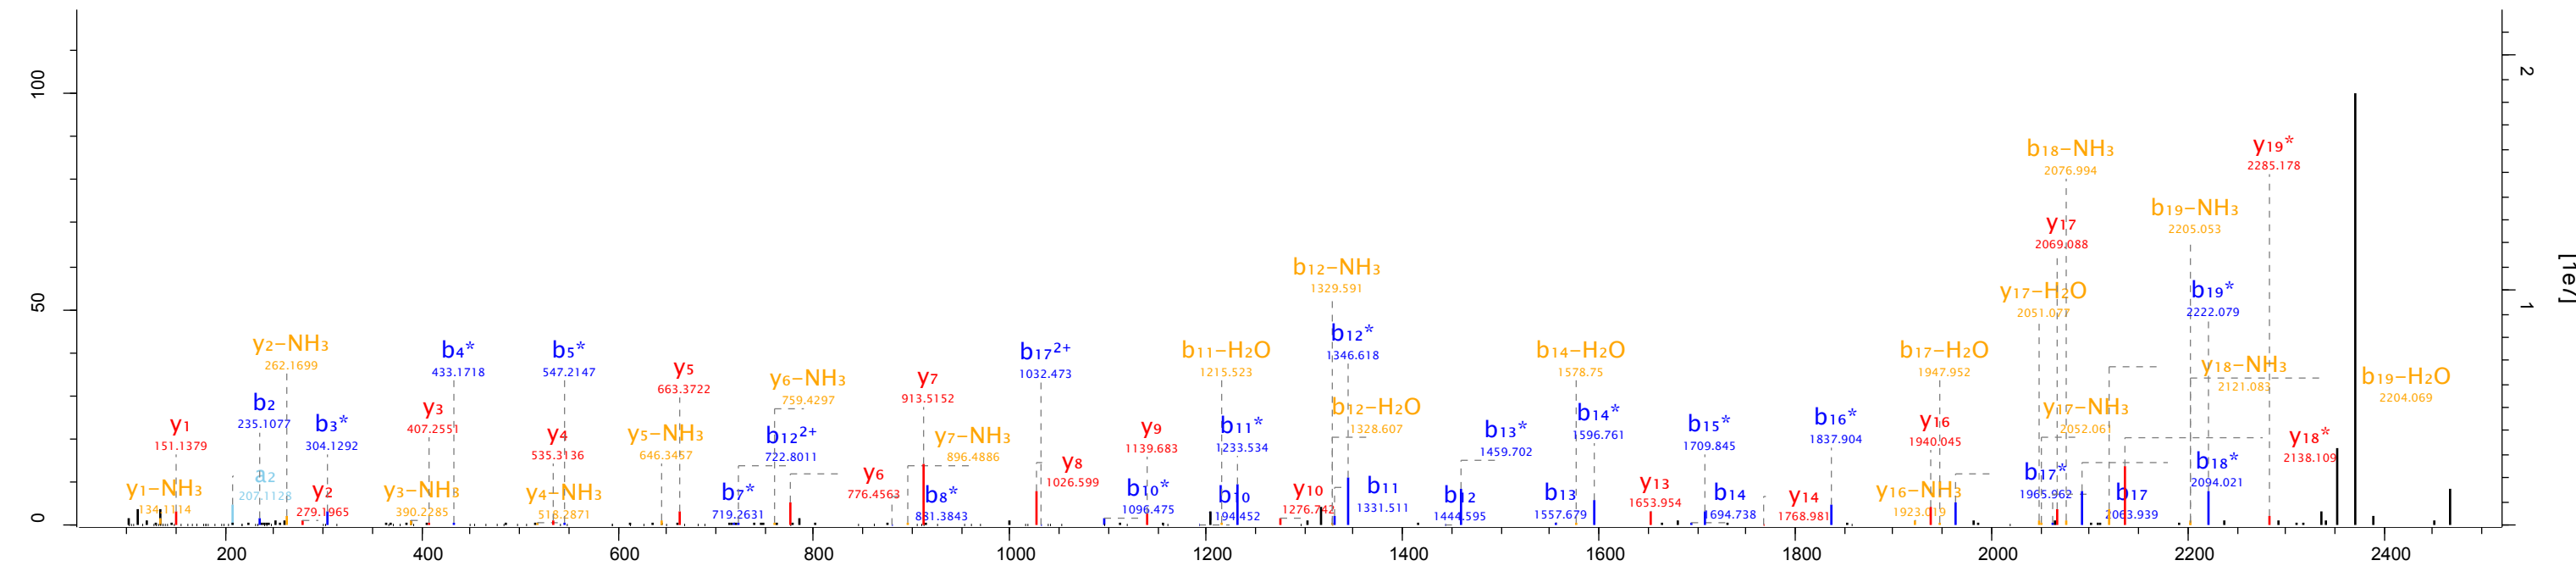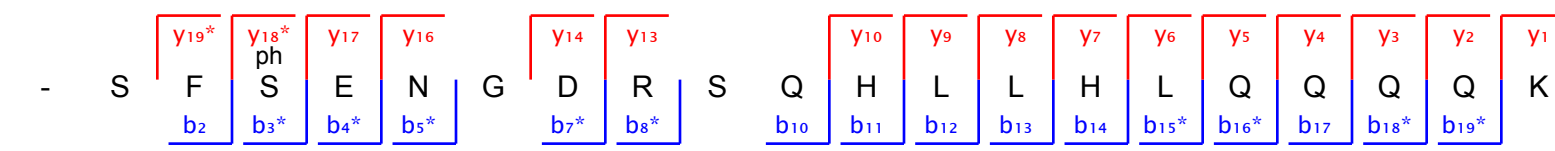

Raw file Scan Method Score m/z Gene names  
 20150814\_A375SR\_Phospho\_BR2\_04 10797 FTMS; HCD 63.69 591.97 TJAP1

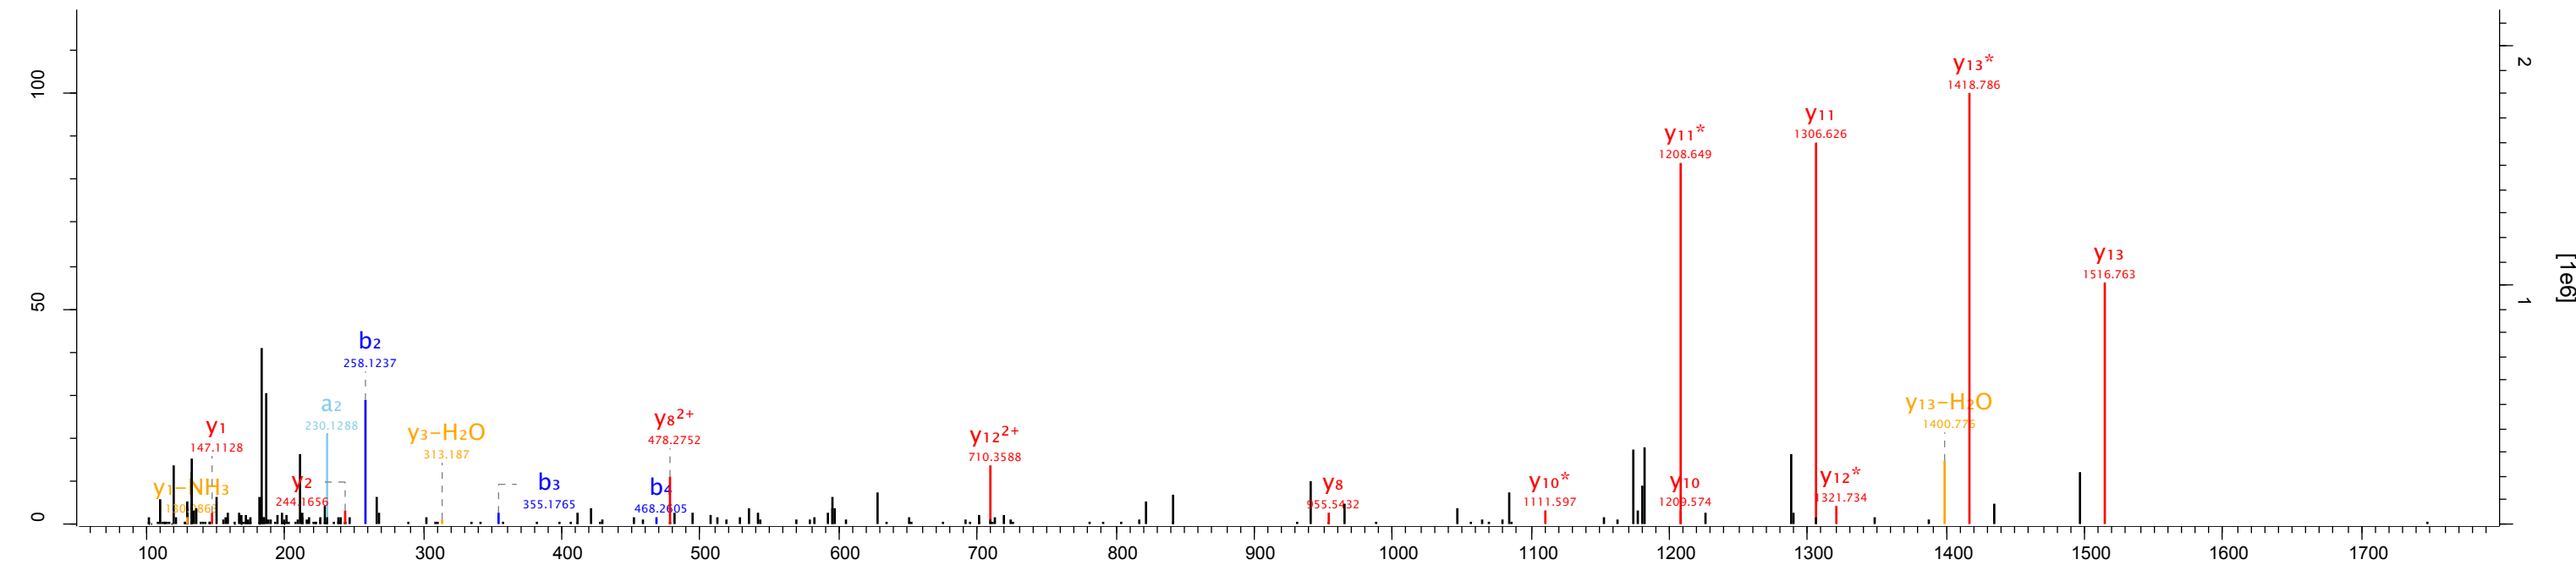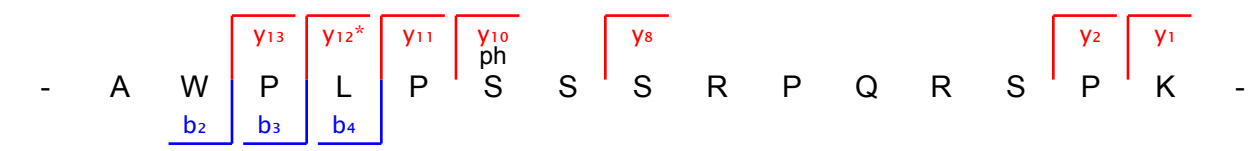

Raw file 20150814\_A375SR\_Phospho\_BR2\_04 Scan 11117 Method FTMS; HCD Score 136.3 m/z 556.79 Gene names RRP1B

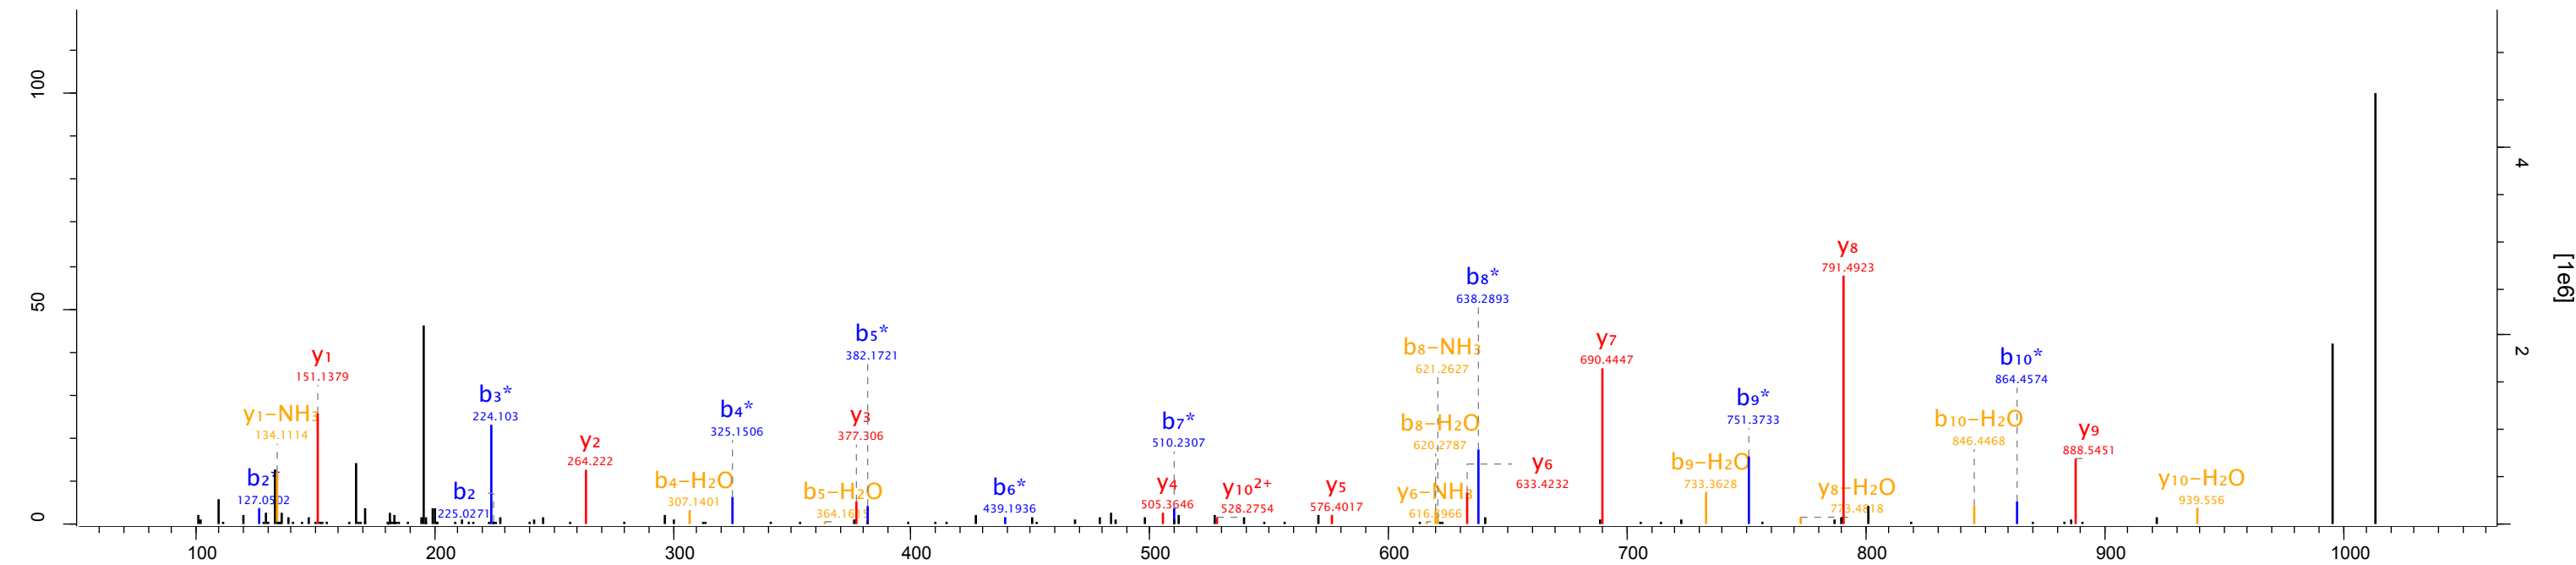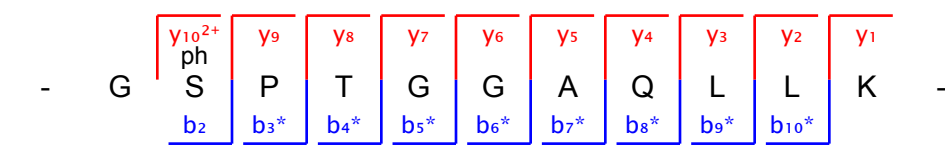

Raw file: 20150814\_A375SR\_Phospho\_BR2\_04  
 Scan: 11187 Method: FTMS; HCD Score: 231.89 m/z: 1019.45 Gene names: NEDD4L

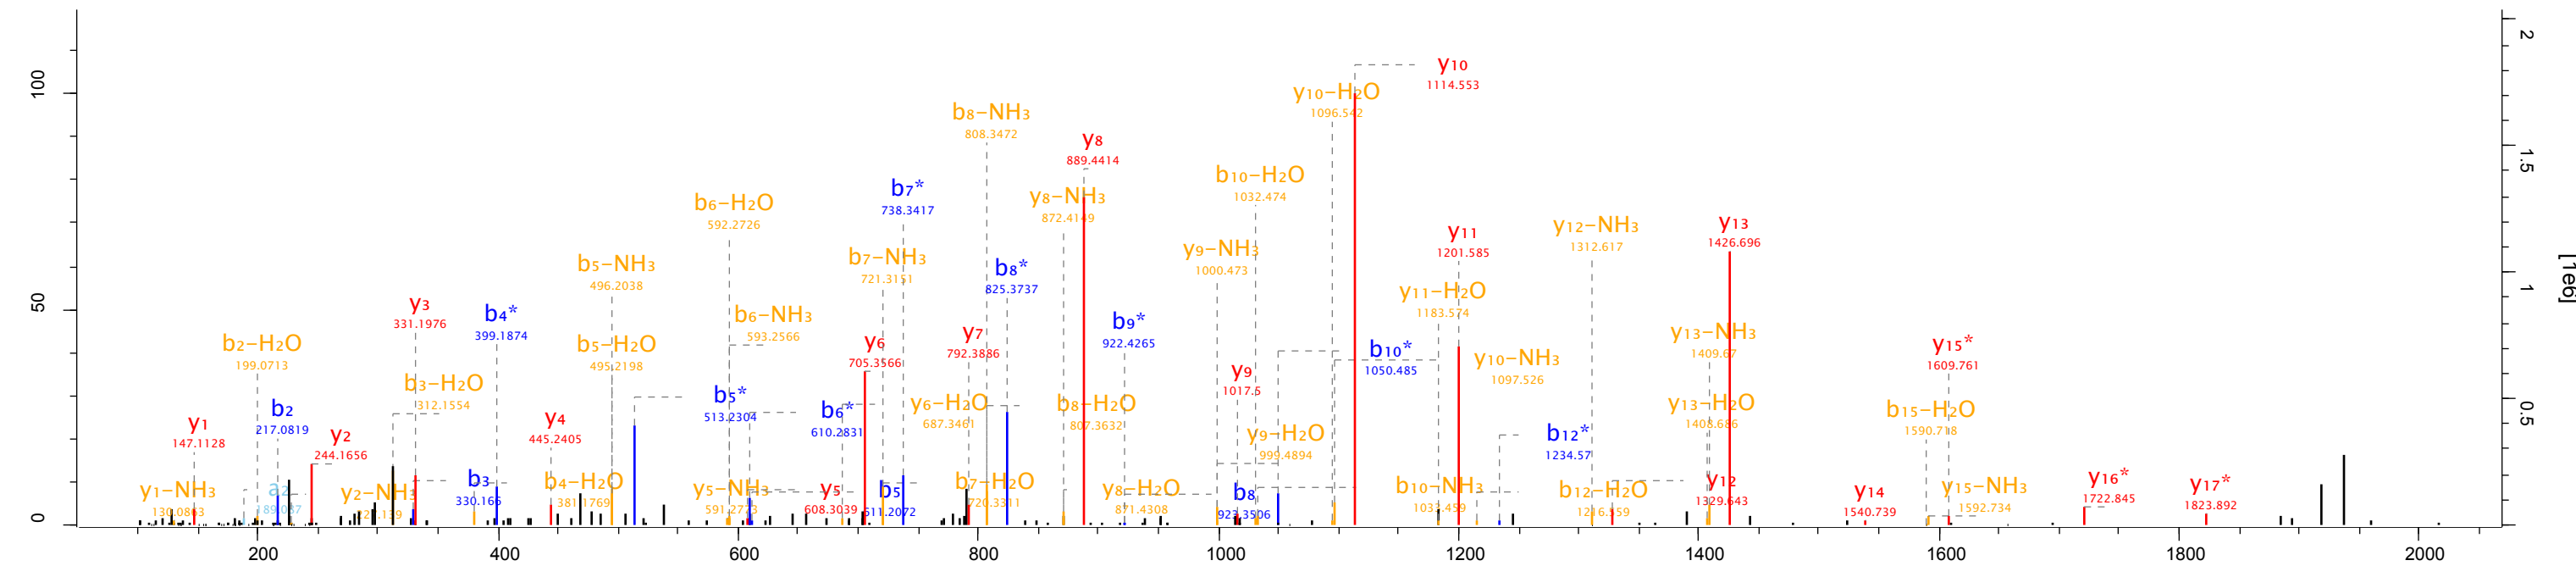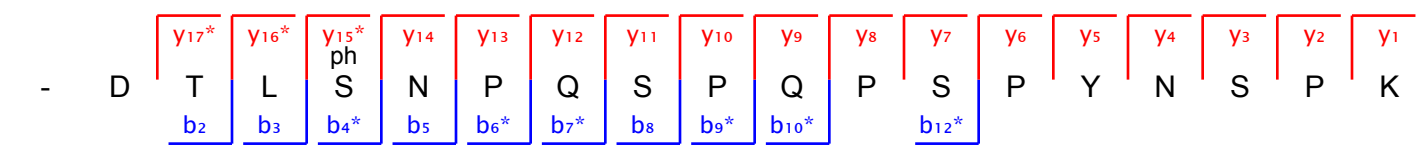

Raw file: 20150814\_A375SR\_Phospho\_BR2\_04  
 Scan: 11267 Method: FTMS; HCD Score: 237.5 m/z: 888.36 Gene names: COMMD3-BMI1;BMI1

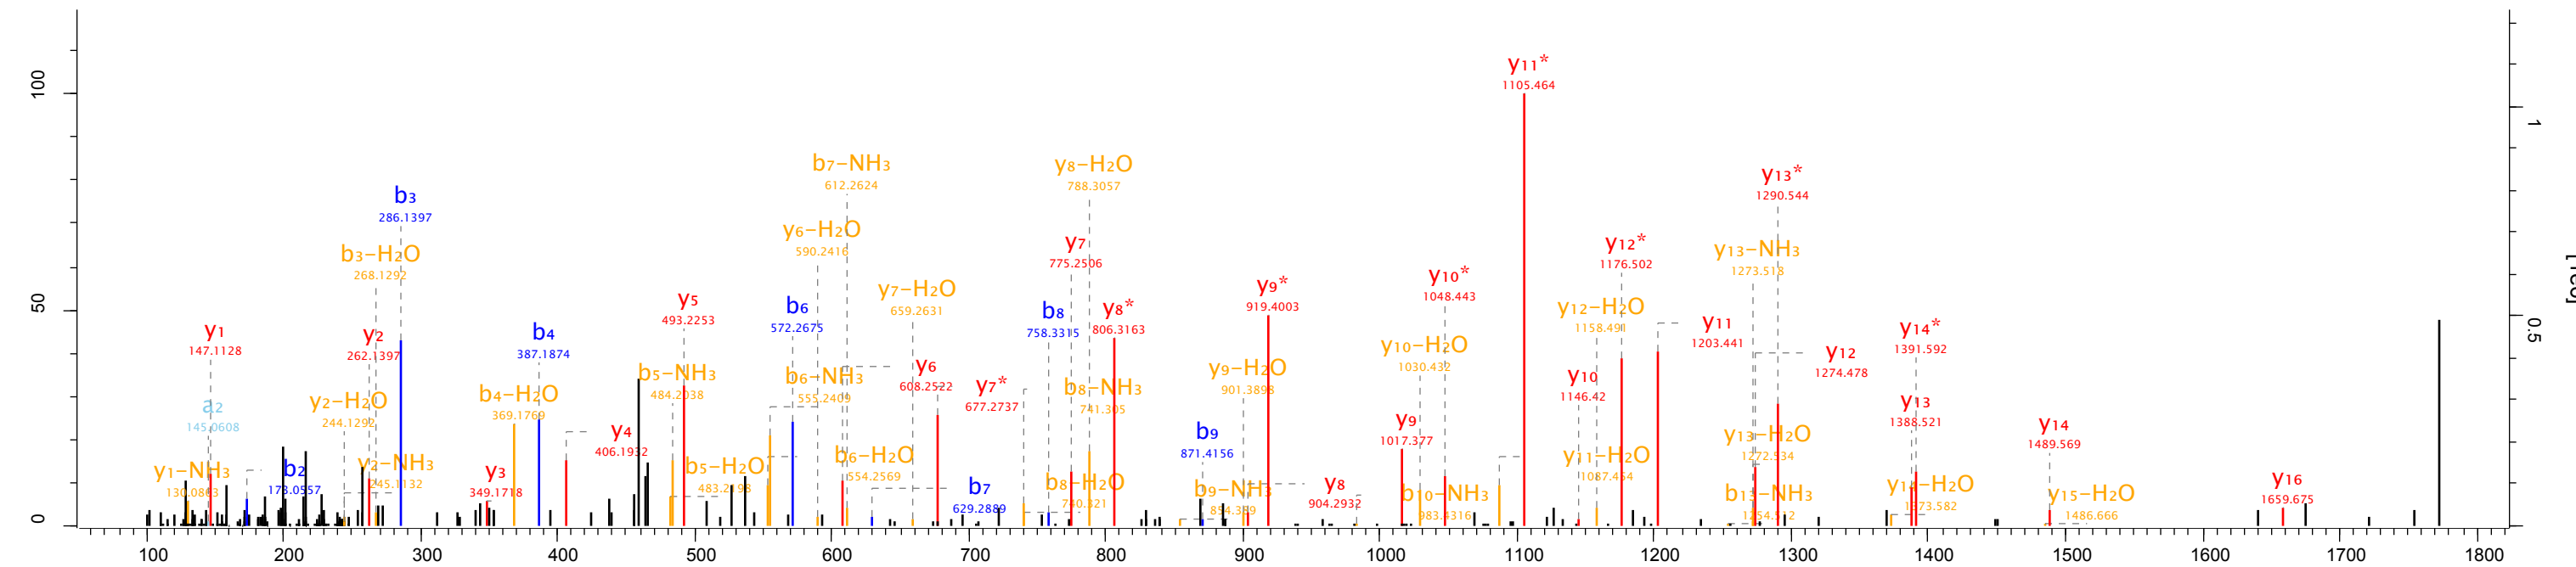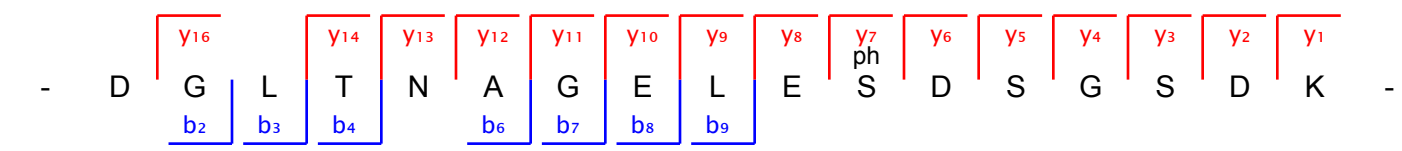

Raw file: 20150814\_A375SR\_Phospho\_BR2\_04  
 Scan: 11807 Method: FTMS; HCD Score: 79.41 m/z: 798.02 Gene names: TRA2B

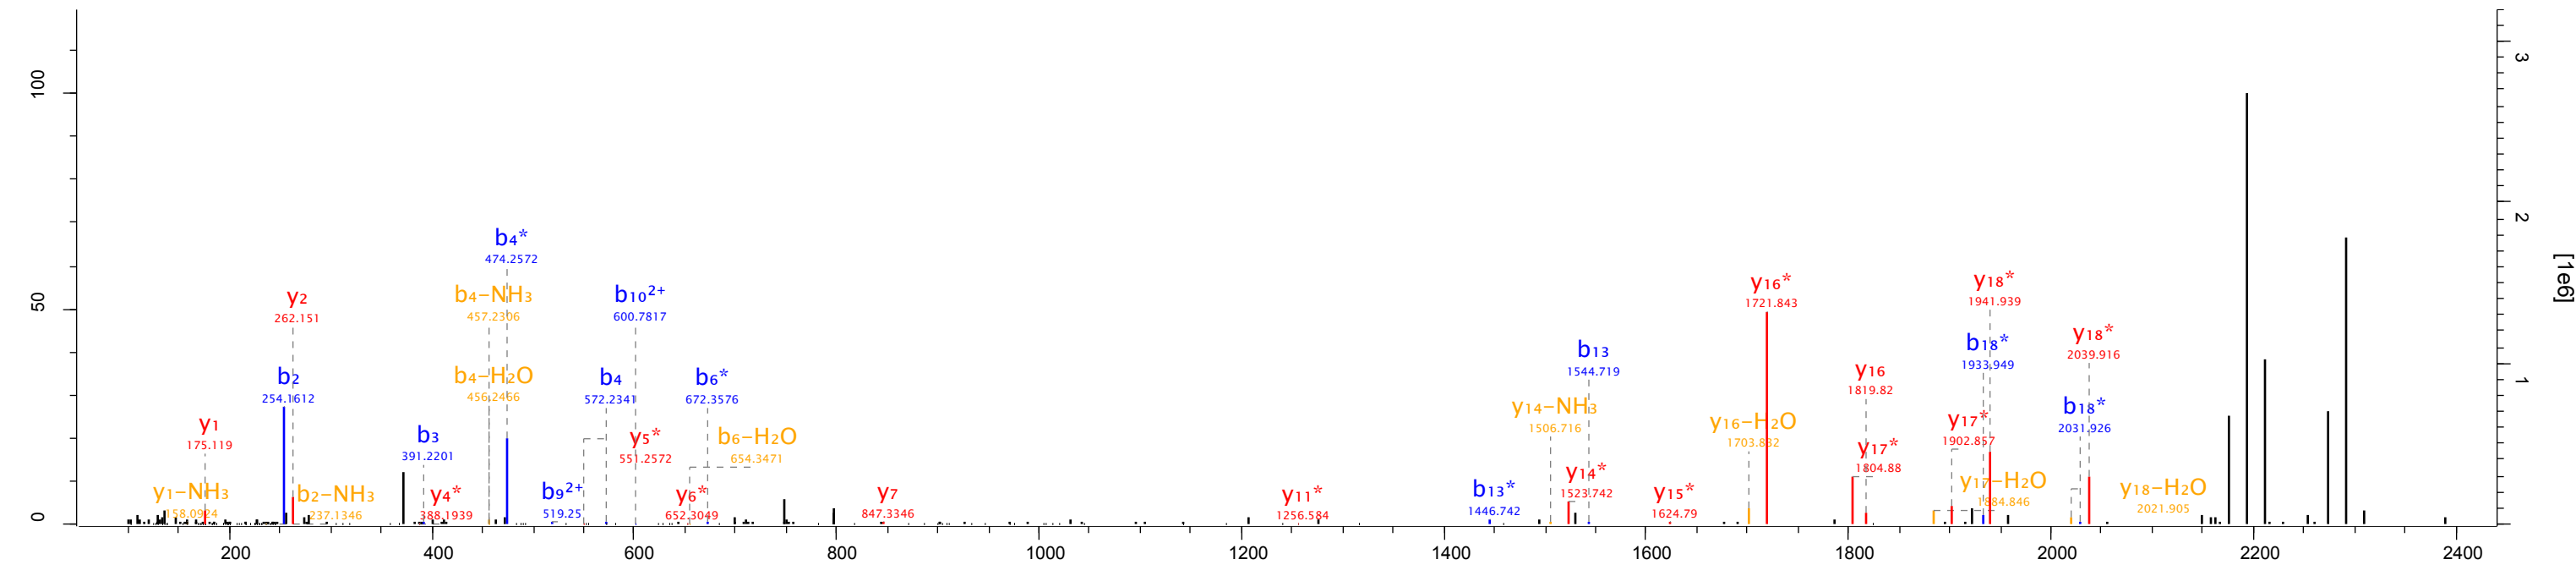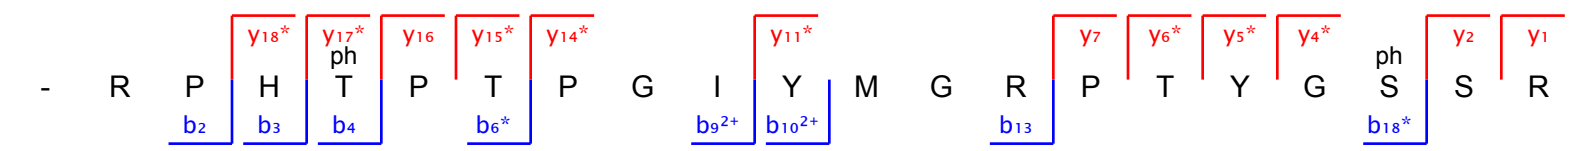

Raw file: 20150814\_A375SR\_Phospho\_BR2\_04  
 Scan: 12007  
 Method: FTMS; HCD  
 Score: 335.51  
 m/z: 1152.5  
 Gene names: TNKS1BP1

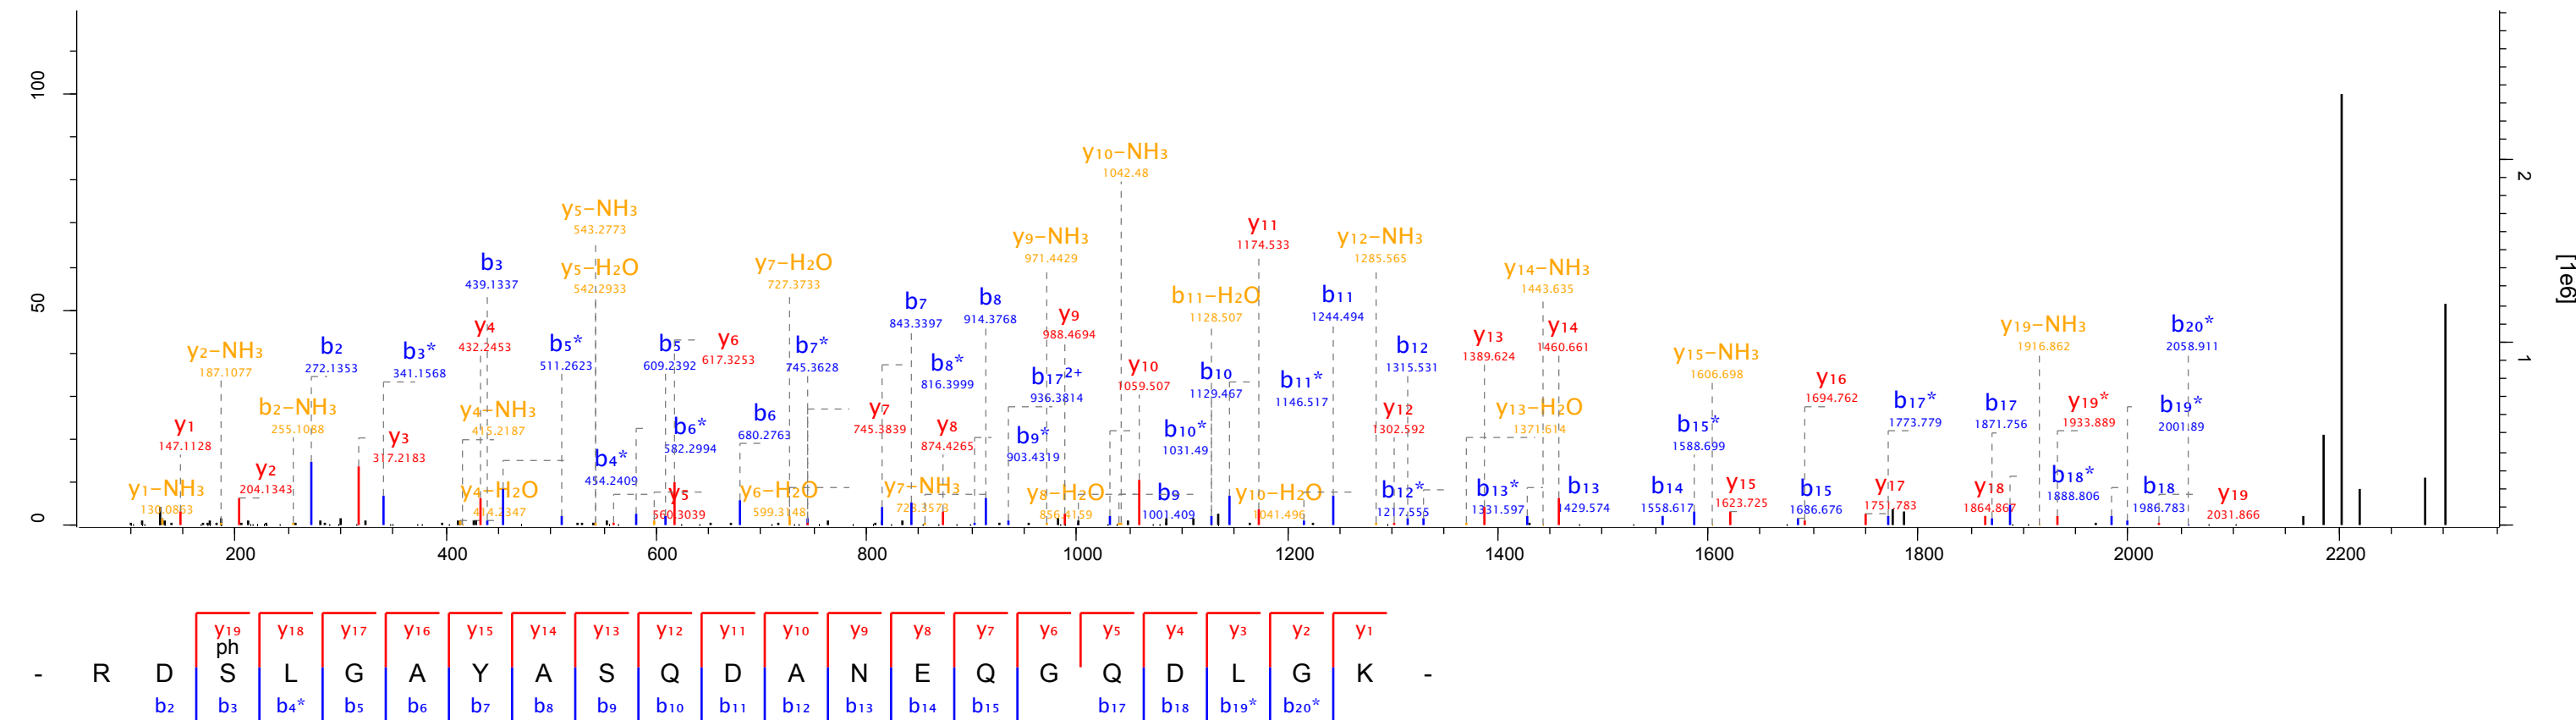

Raw file 20150814\_A375SR\_Phospho\_BR2\_04 Scan 12517 Method FTMS; HCD Score 102.5 m/z 580.28 Gene names SOS1

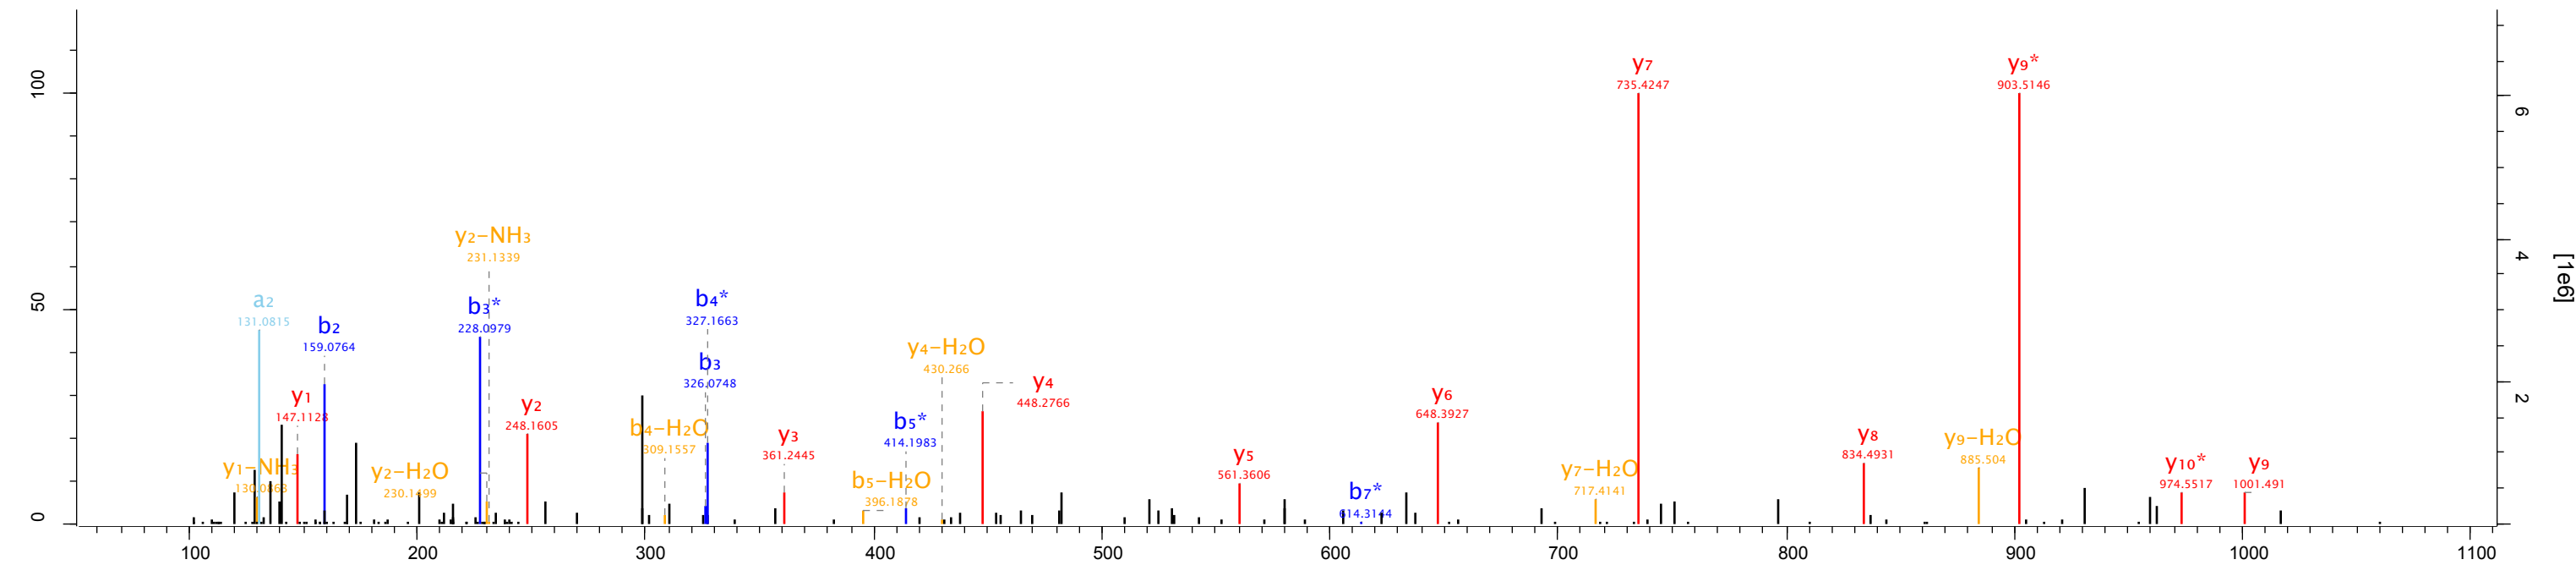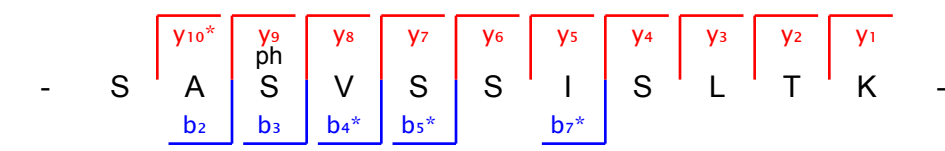



Raw file: 20150814\_A375SR\_Phospho\_BR2\_04  
 Scan: 12547 Method: FTMS; HCD Score: 267.24 m/z: 1164.05 Gene names: ZYX

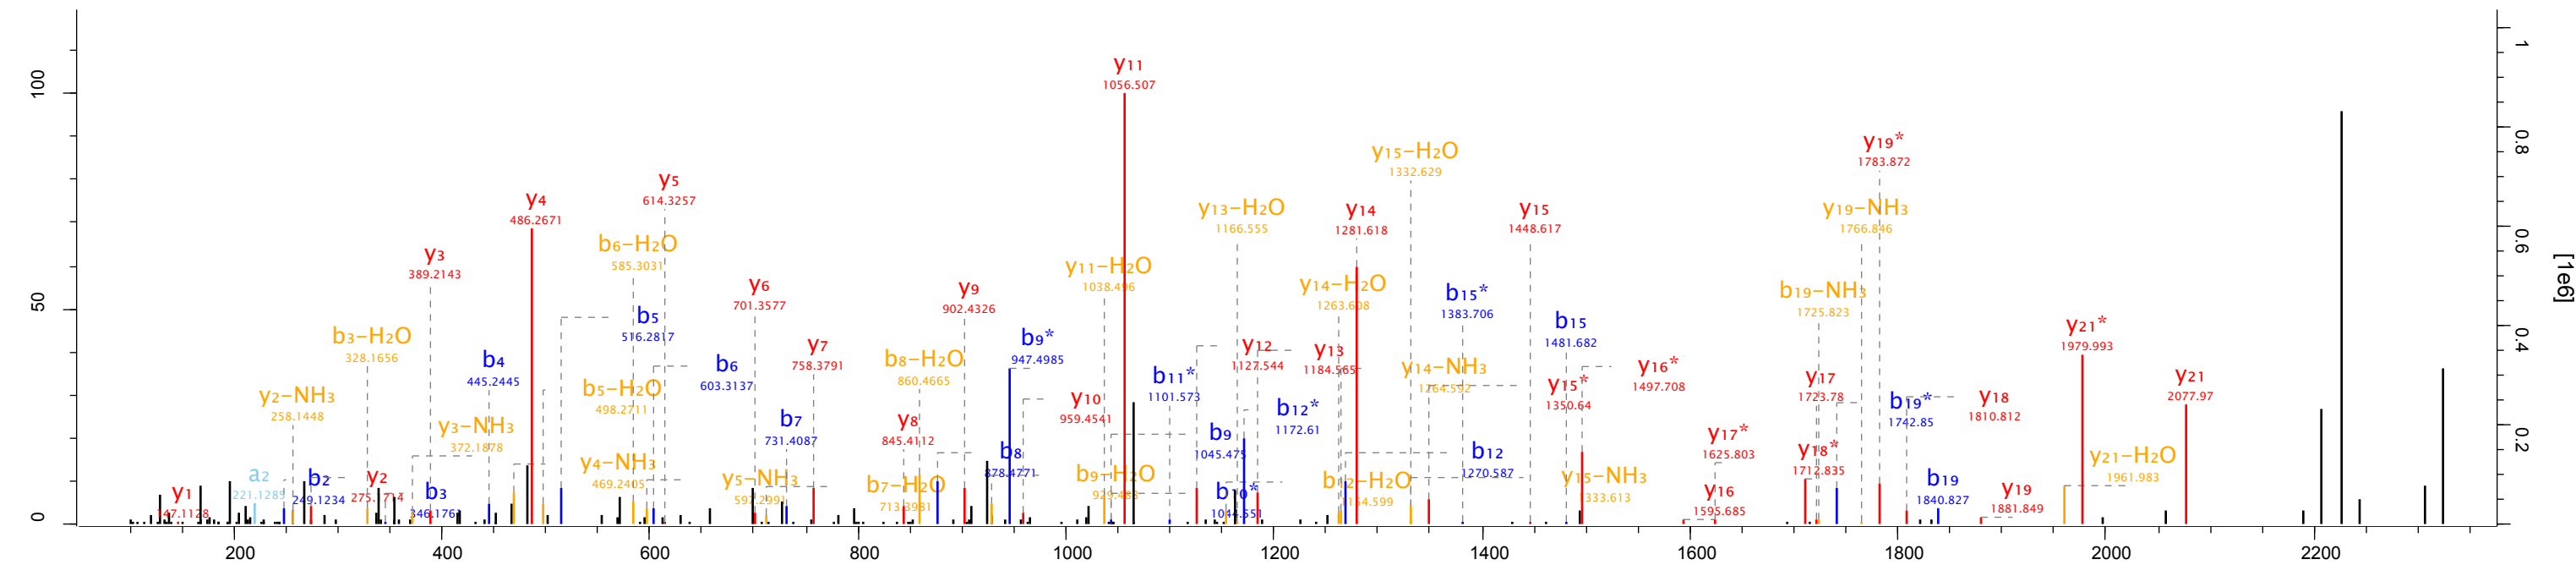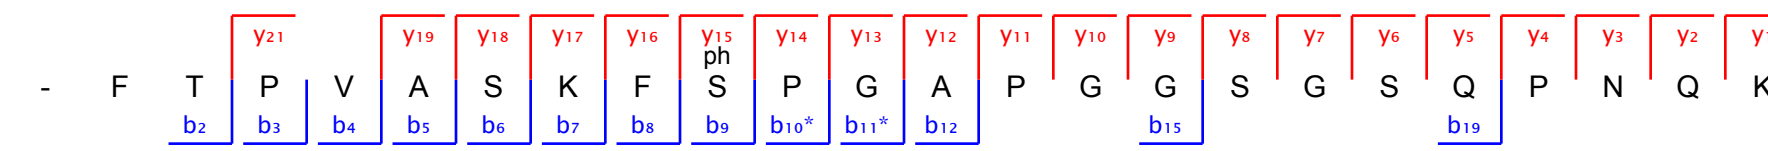

Raw file  
20150814\_A375SR\_Phospho\_BR2\_04

Scan 12847 Method FTMS; HCD Score 230.29 m/z 830.89 Gene names RPS10;RPS10P5

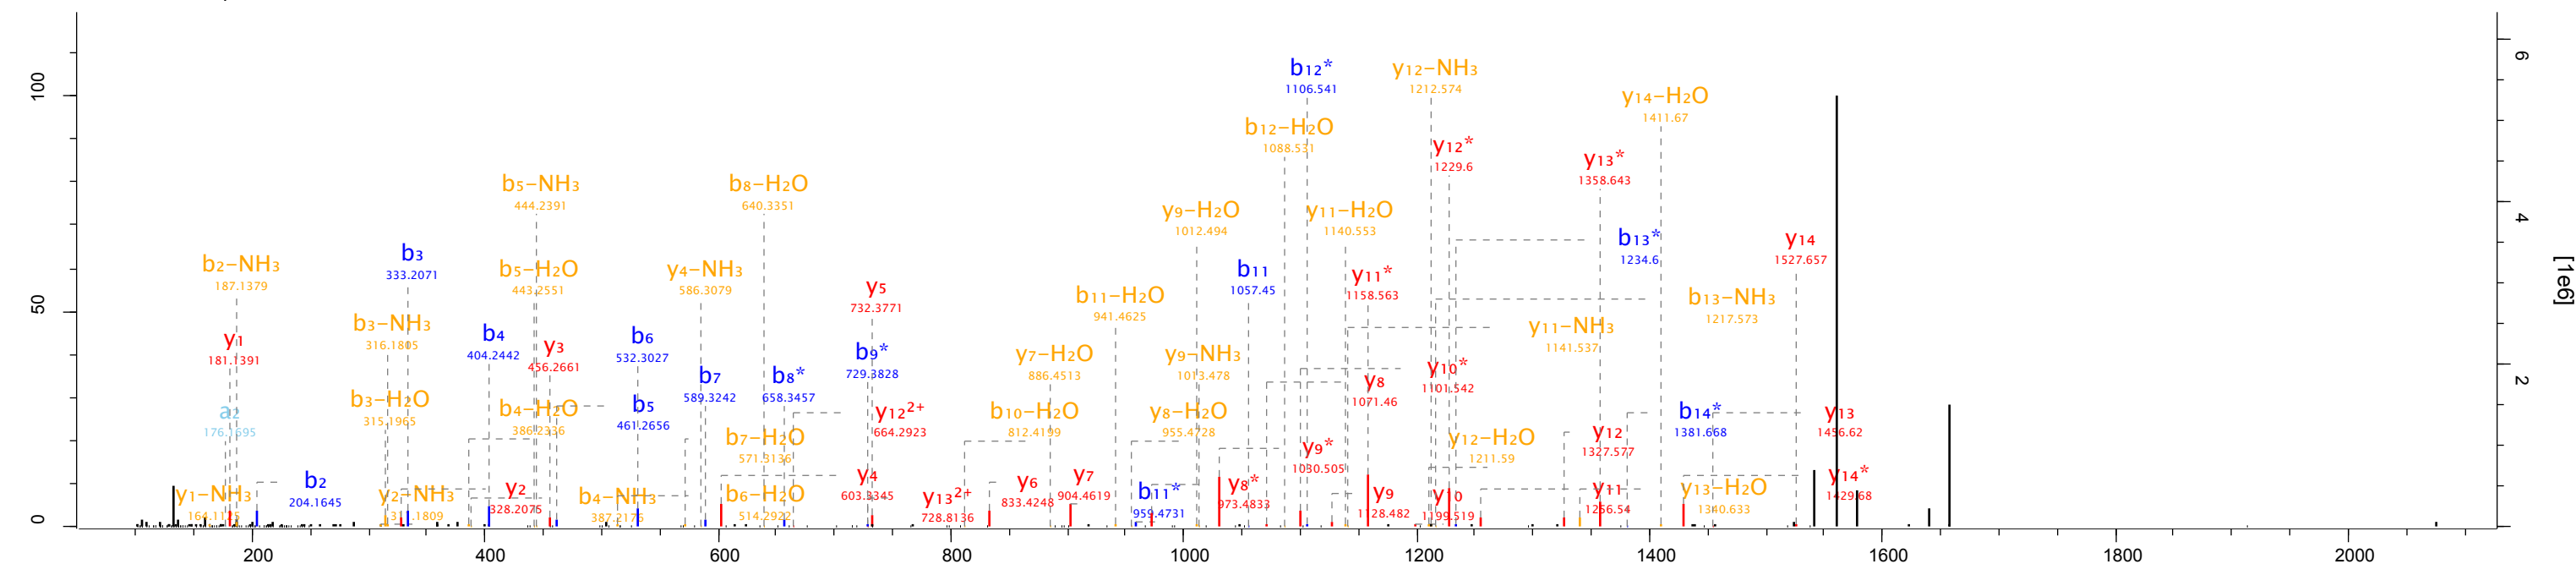

- K A E A G A G S A T E F Q F R -

Peptide sequence: A E A G A G S A T E F Q F R

Fragmentation sites (b and y ions) are indicated by boxes below the sequence:

- b<sub>2</sub> (under A)
- b<sub>3</sub> (under E)
- b<sub>4</sub> (under A)
- b<sub>5</sub> (under G)
- b<sub>6</sub> (under A)
- b<sub>7</sub> (under G)
- b<sub>8</sub>\*
- b<sub>9</sub>\*
- b<sub>11</sub> (under E)
- b<sub>12</sub>\*
- b<sub>13</sub>\*
- b<sub>14</sub>\*

Raw file 20150814\_A375SR\_Phospho\_BR2\_04 Scan 13167 Method FTMS; HCD Score 326.92 m/z 833.73 Gene names TNKS1BP1

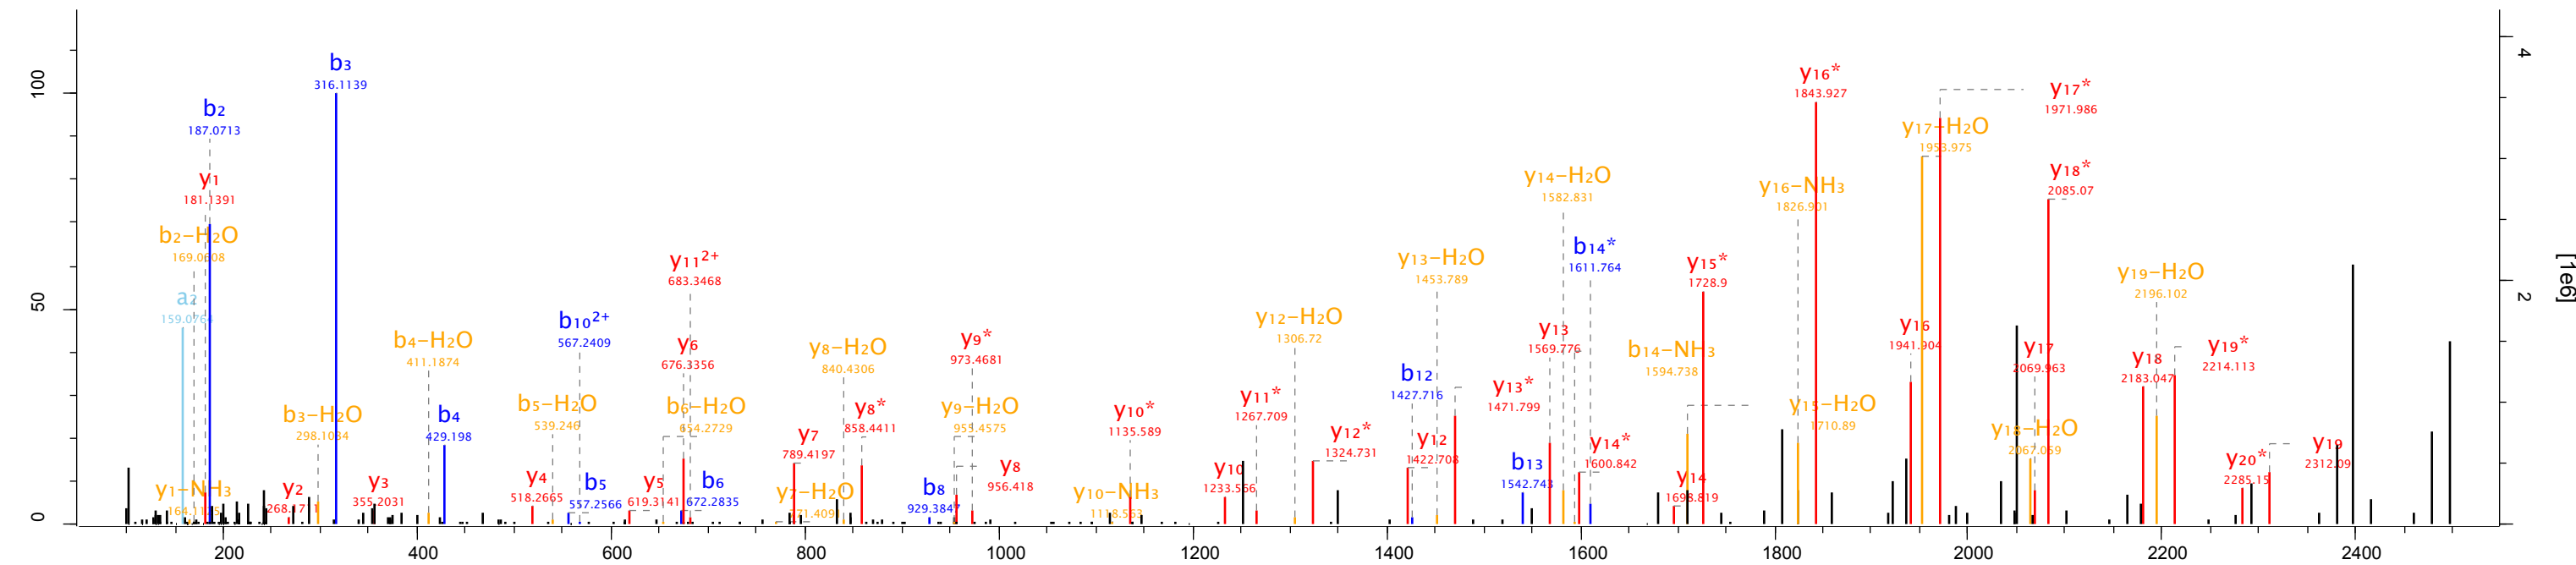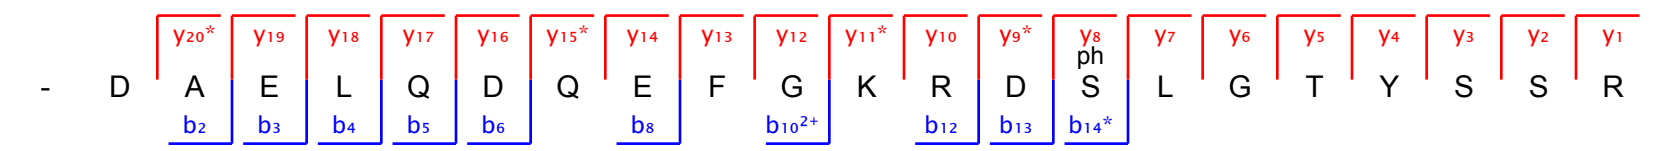

Raw file 20150814\_A375SR\_Phospho\_BR2\_04 Scan 13287 Method FTMS; HCD Score 286.28 m/z 922.42 Gene names PAK2

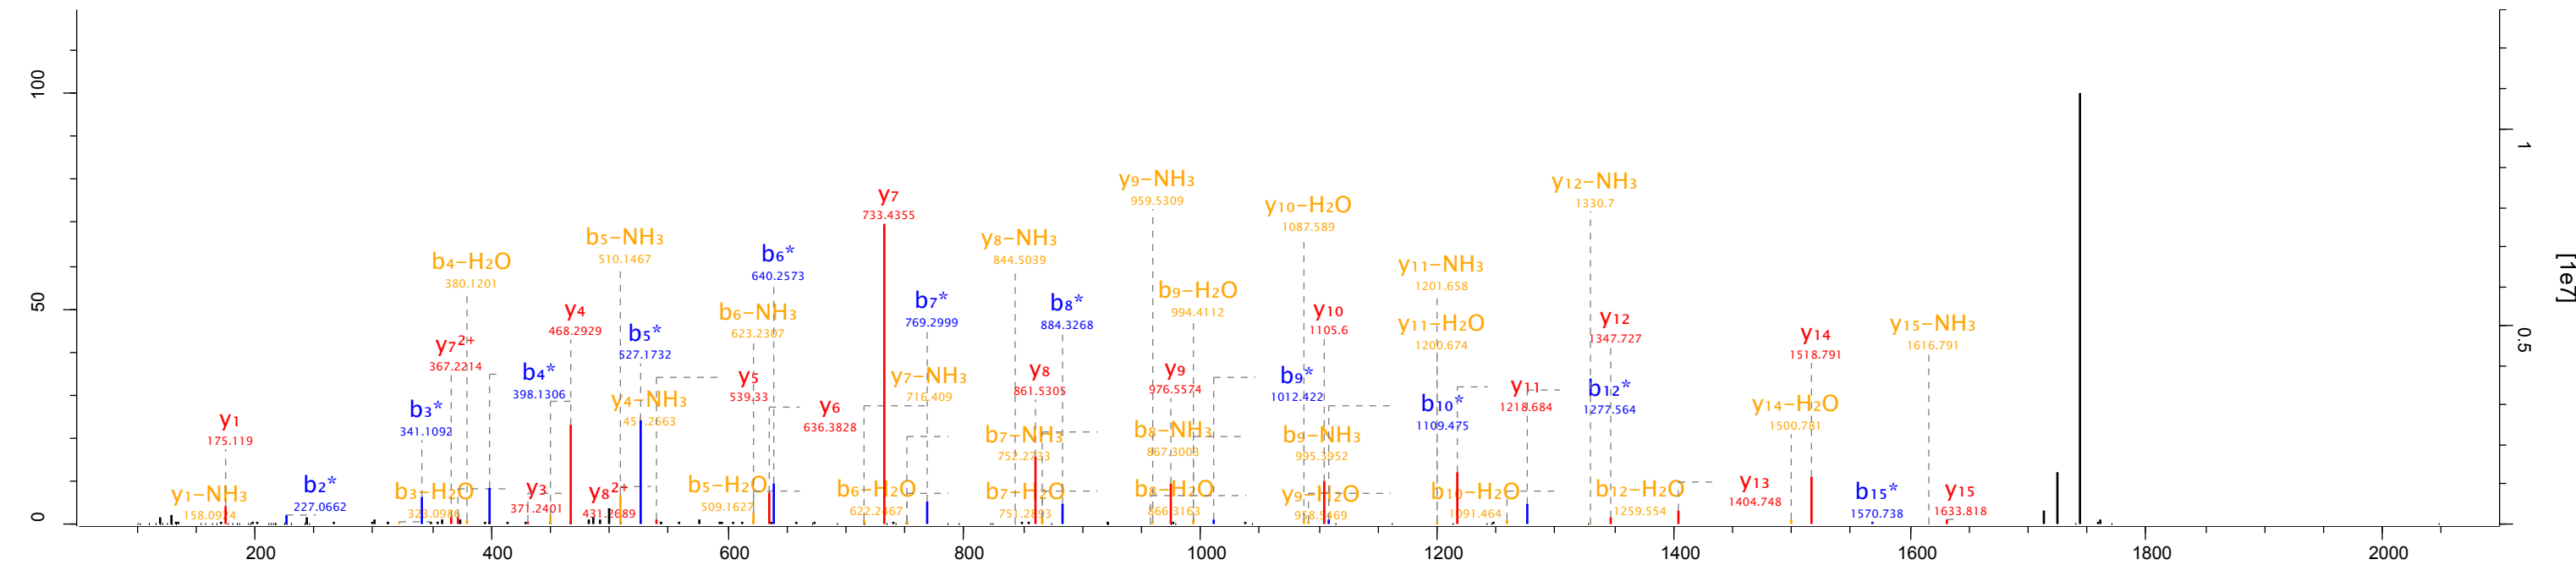

ac - pH S

|                  |                  |                  |                  |                  |                  |                  |                  |                   |                |                   |                |                |                   |
|------------------|------------------|------------------|------------------|------------------|------------------|------------------|------------------|-------------------|----------------|-------------------|----------------|----------------|-------------------|
| y <sub>15</sub>  | y <sub>14</sub>  | y <sub>13</sub>  | y <sub>12</sub>  | y <sub>11</sub>  | y <sub>10</sub>  | y <sub>9</sub>   | y <sub>8</sub>   | y <sub>7</sub>    | y <sub>6</sub> | y <sub>5</sub>    | y <sub>4</sub> | y <sub>3</sub> | y <sub>1</sub>    |
| D                | N                | G                | E                | L                | E                | D                | K                | P                 | P              | A                 | P              | P              | V                 |
| b <sub>2</sub> * | b <sub>3</sub> * | b <sub>4</sub> * | b <sub>5</sub> * | b <sub>6</sub> * | b <sub>7</sub> * | b <sub>8</sub> * | b <sub>9</sub> * | b <sub>10</sub> * |                | b <sub>12</sub> * |                |                | b <sub>15</sub> * |

Raw file 20150814\_A375SR\_Phospho\_BR2\_04 Scan 13527 Method FTMS; HCD Score 77.24 m/z 744.79 Gene names CHM

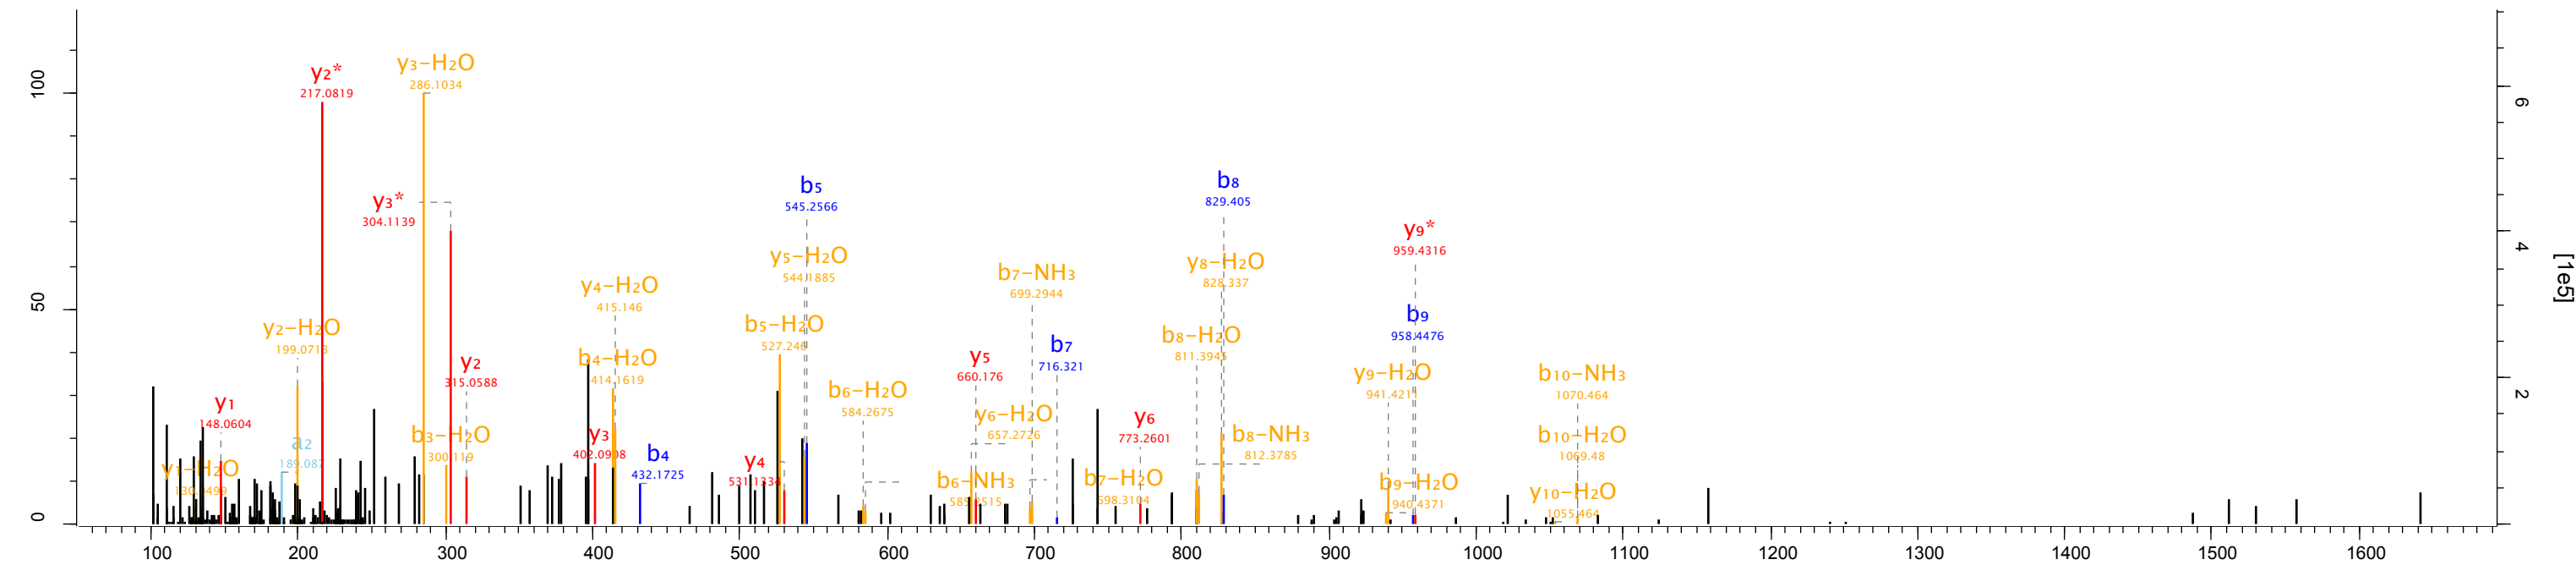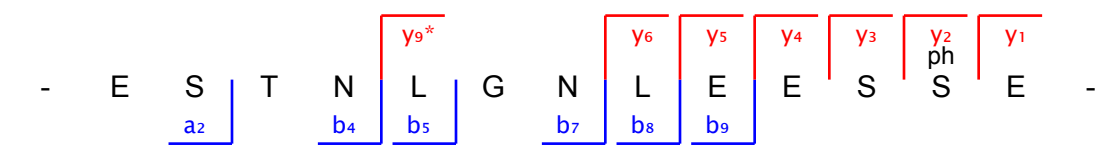

Raw file  
 20150814\_A375SR\_Phospho\_BR2\_04  
 Scan 13587 Method FTMS; HCD Score 55.05 m/z 992 Gene names LYSDM1

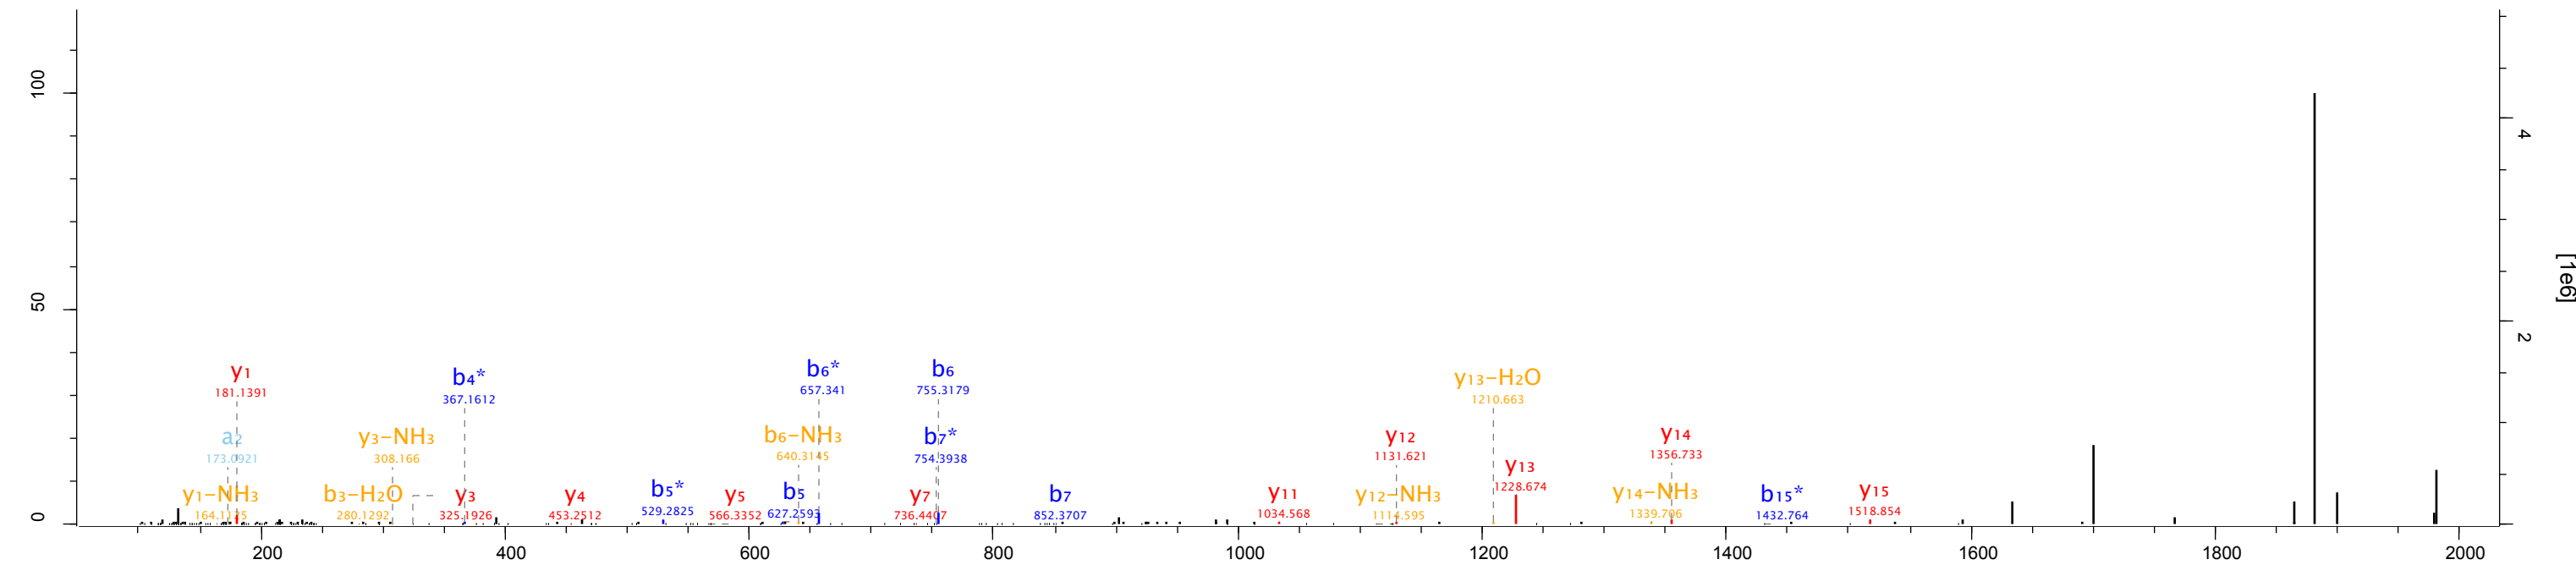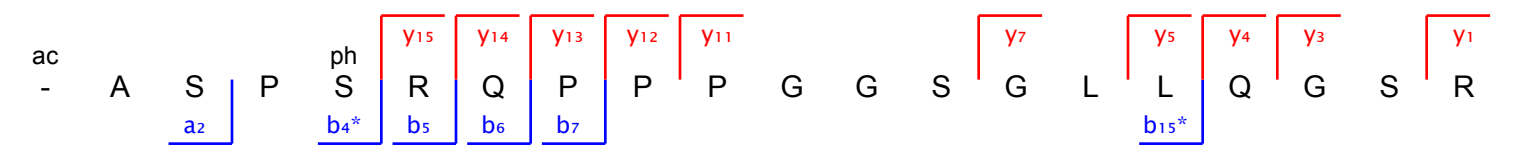

Raw file 20150814\_A375SR\_Phospho\_BR2\_04 Scan 14187 Method FTMS; HCD Score 130.56 m/z 926.89 Gene names EPC2

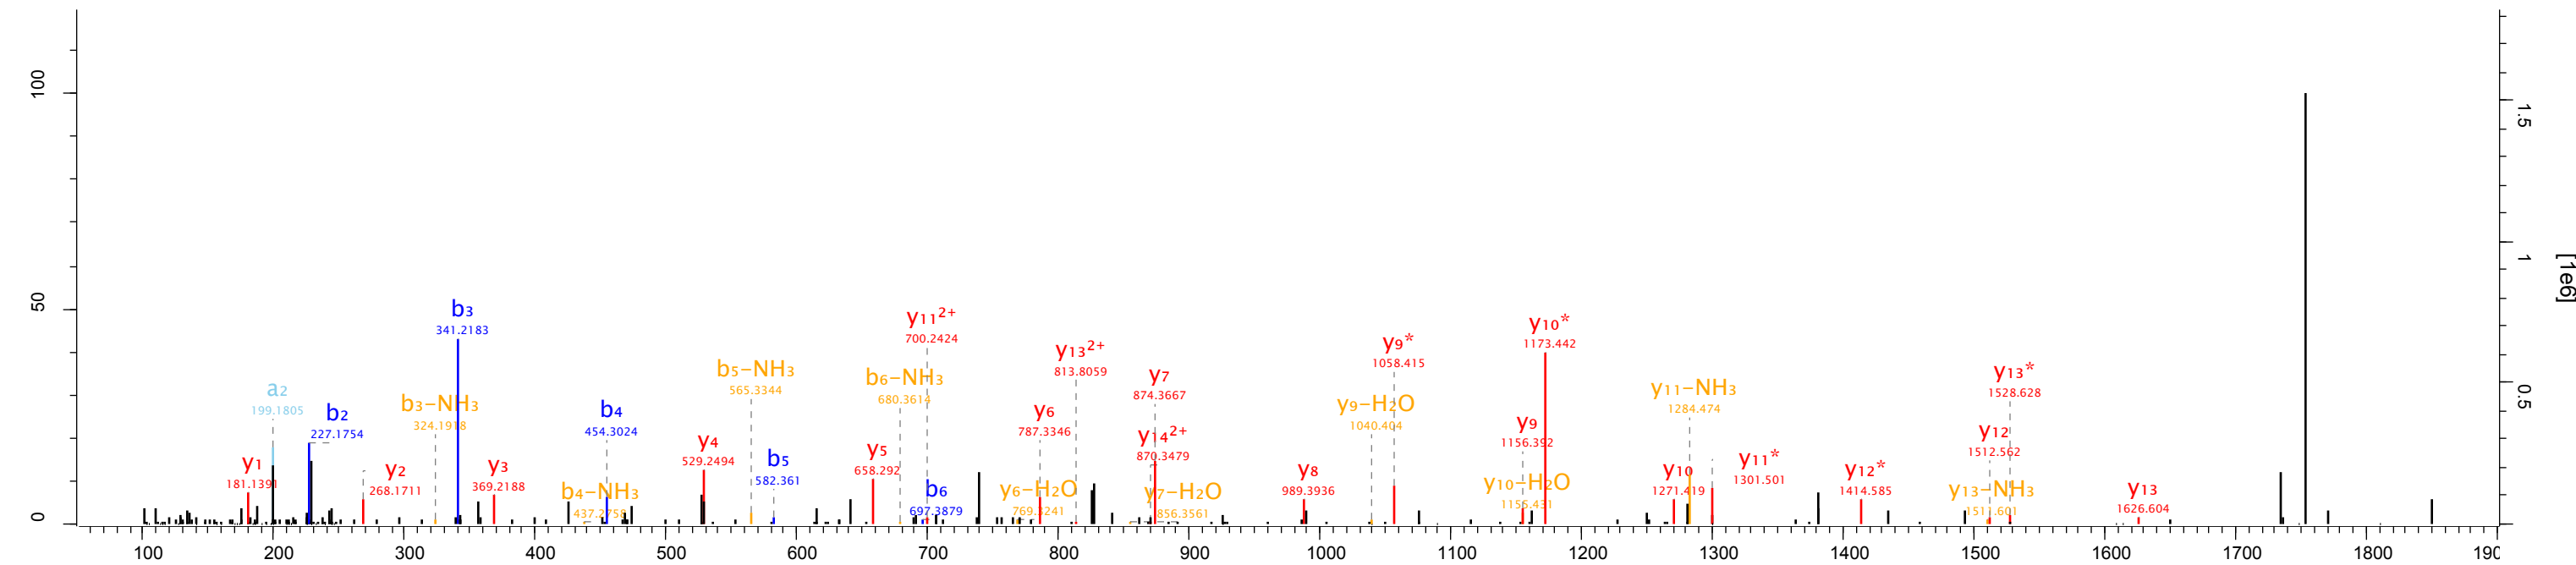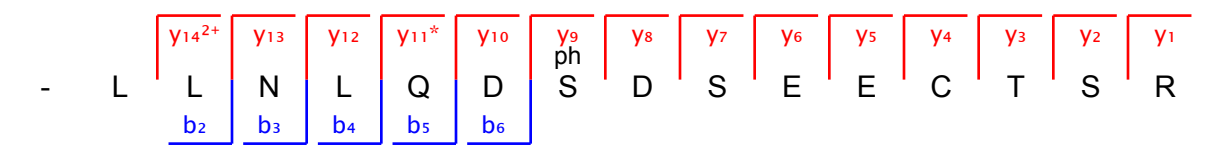

Raw file: 20150814\_A375SR\_Phospho\_BR2\_04  
 Scan: 14667 Method: FTMS; HCD Score: 185.86 m/z: 722.84 Gene names: CTDSPL2

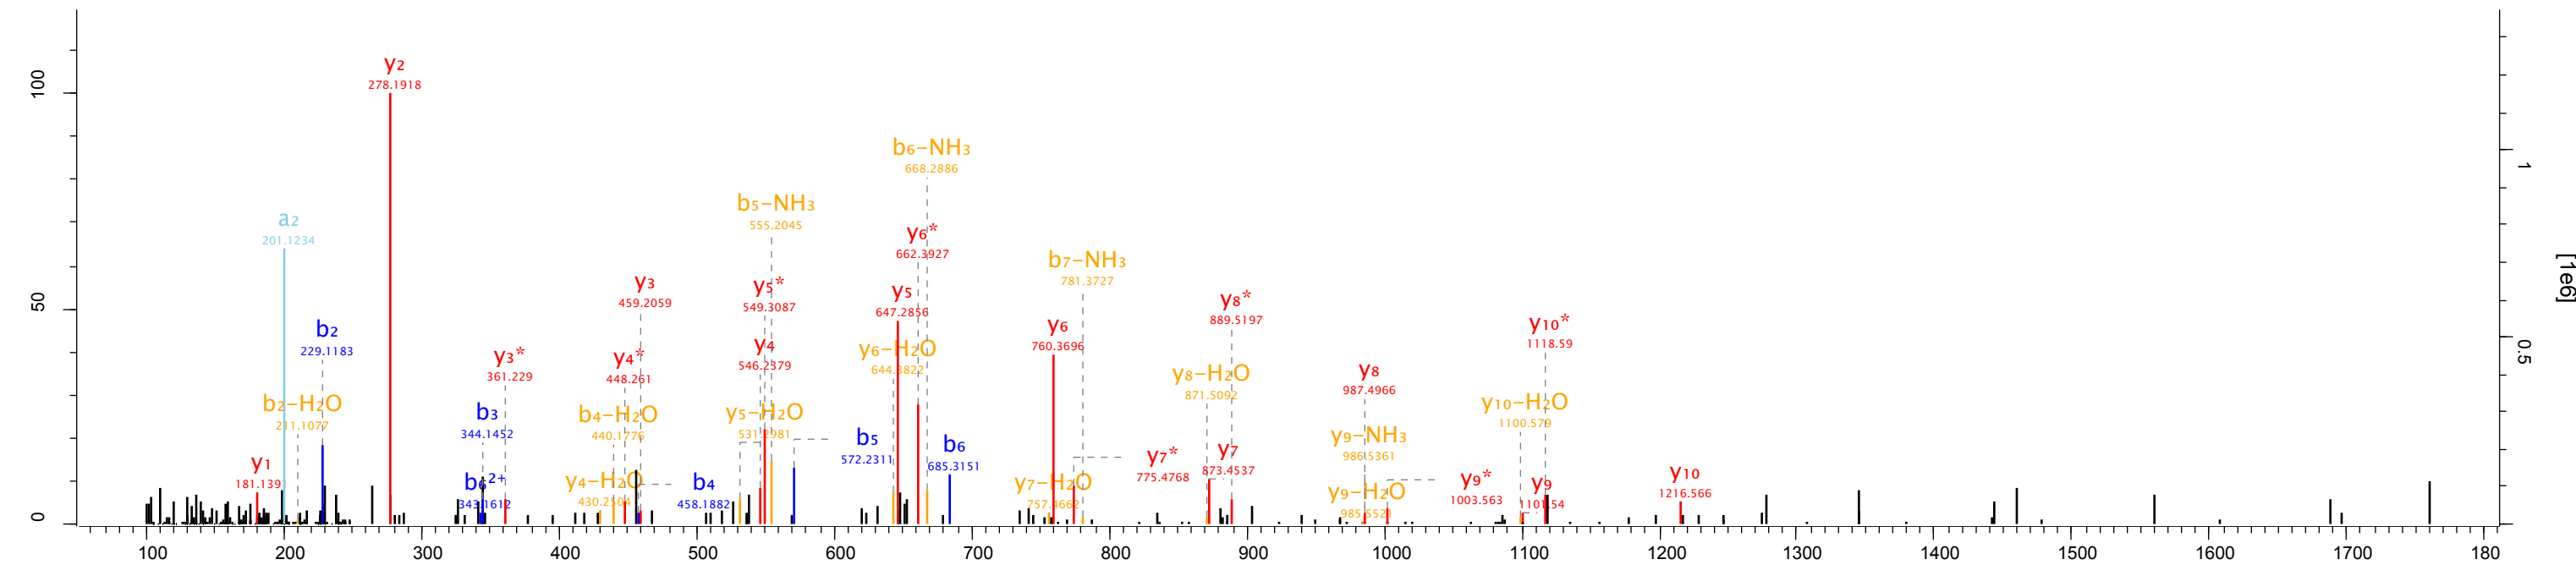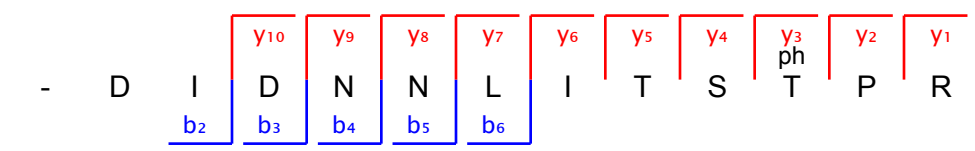



Raw file: 20150814\_A375SR\_Phospho\_BR2\_04  
 Scan: 14707  
 Method: FTMS; HCD  
 Score: 340.6  
 m/z: 1420.1  
 Gene names: GBF1

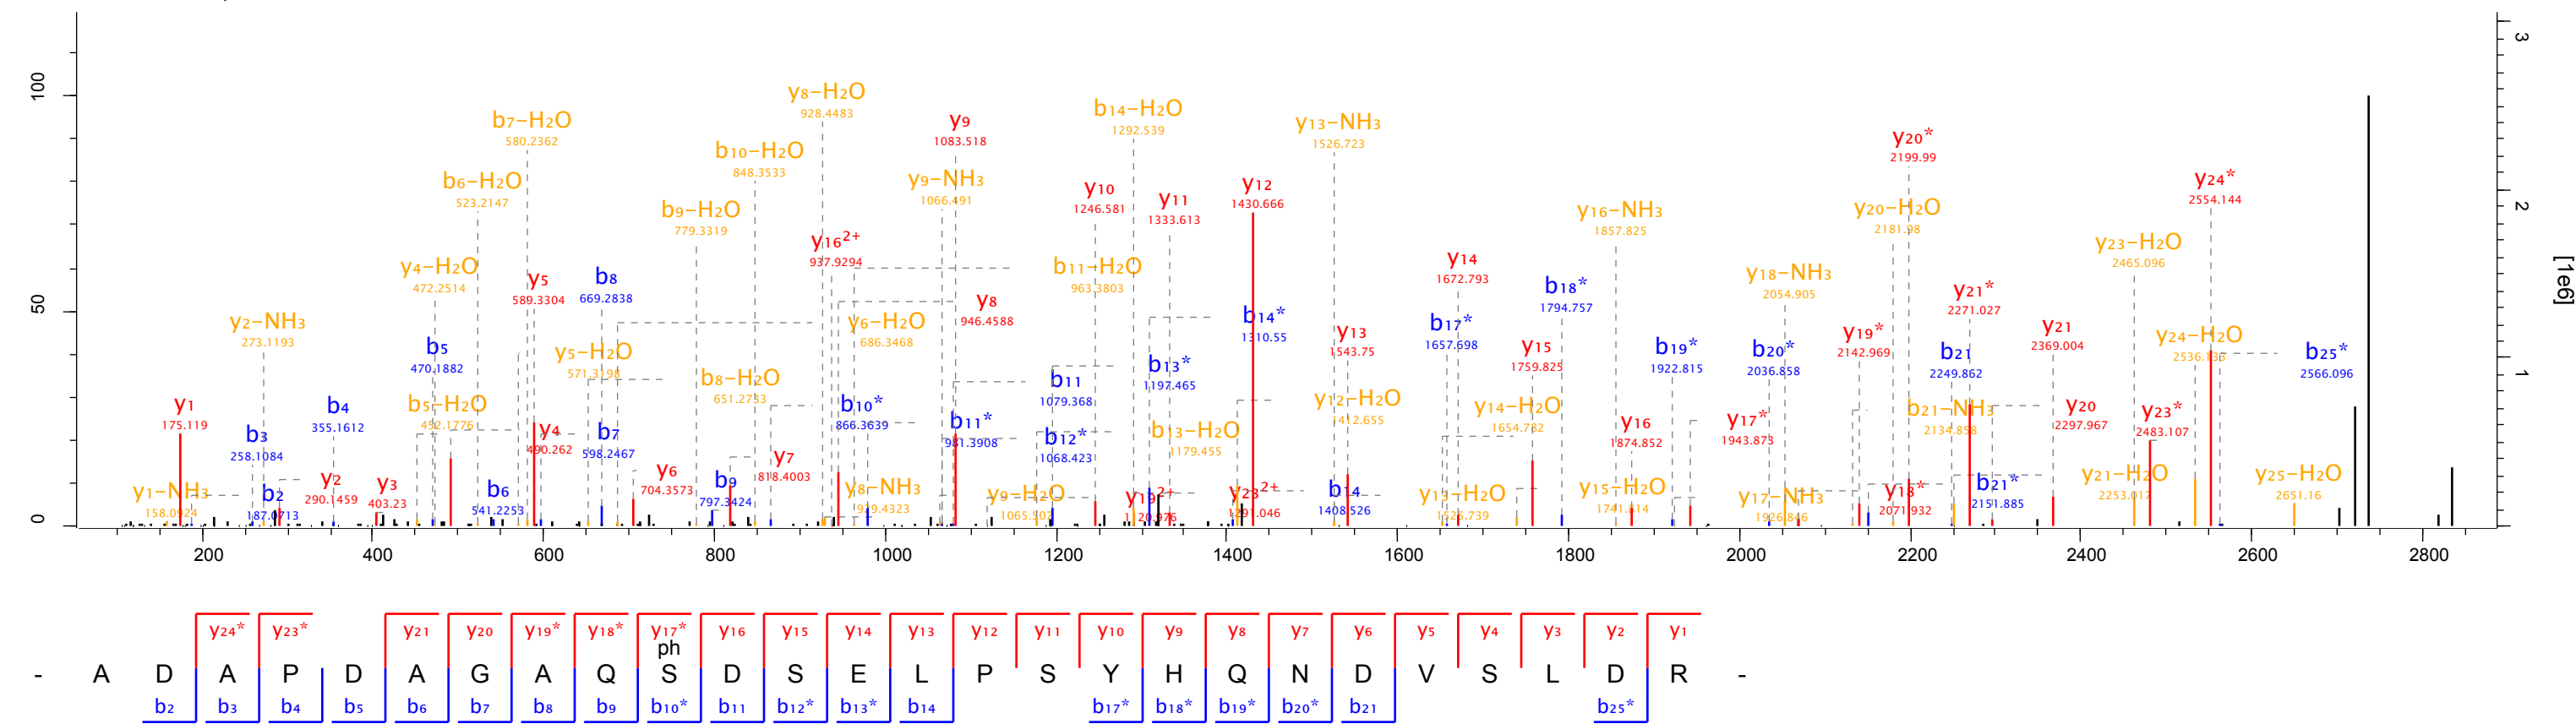

Raw file: 20150814\_A375SR\_Phospho\_BR2\_04  
 Scan: 15237 Method: FTMS; HCD Score: 114.72 m/z: 573.78 Gene names: MLLT4

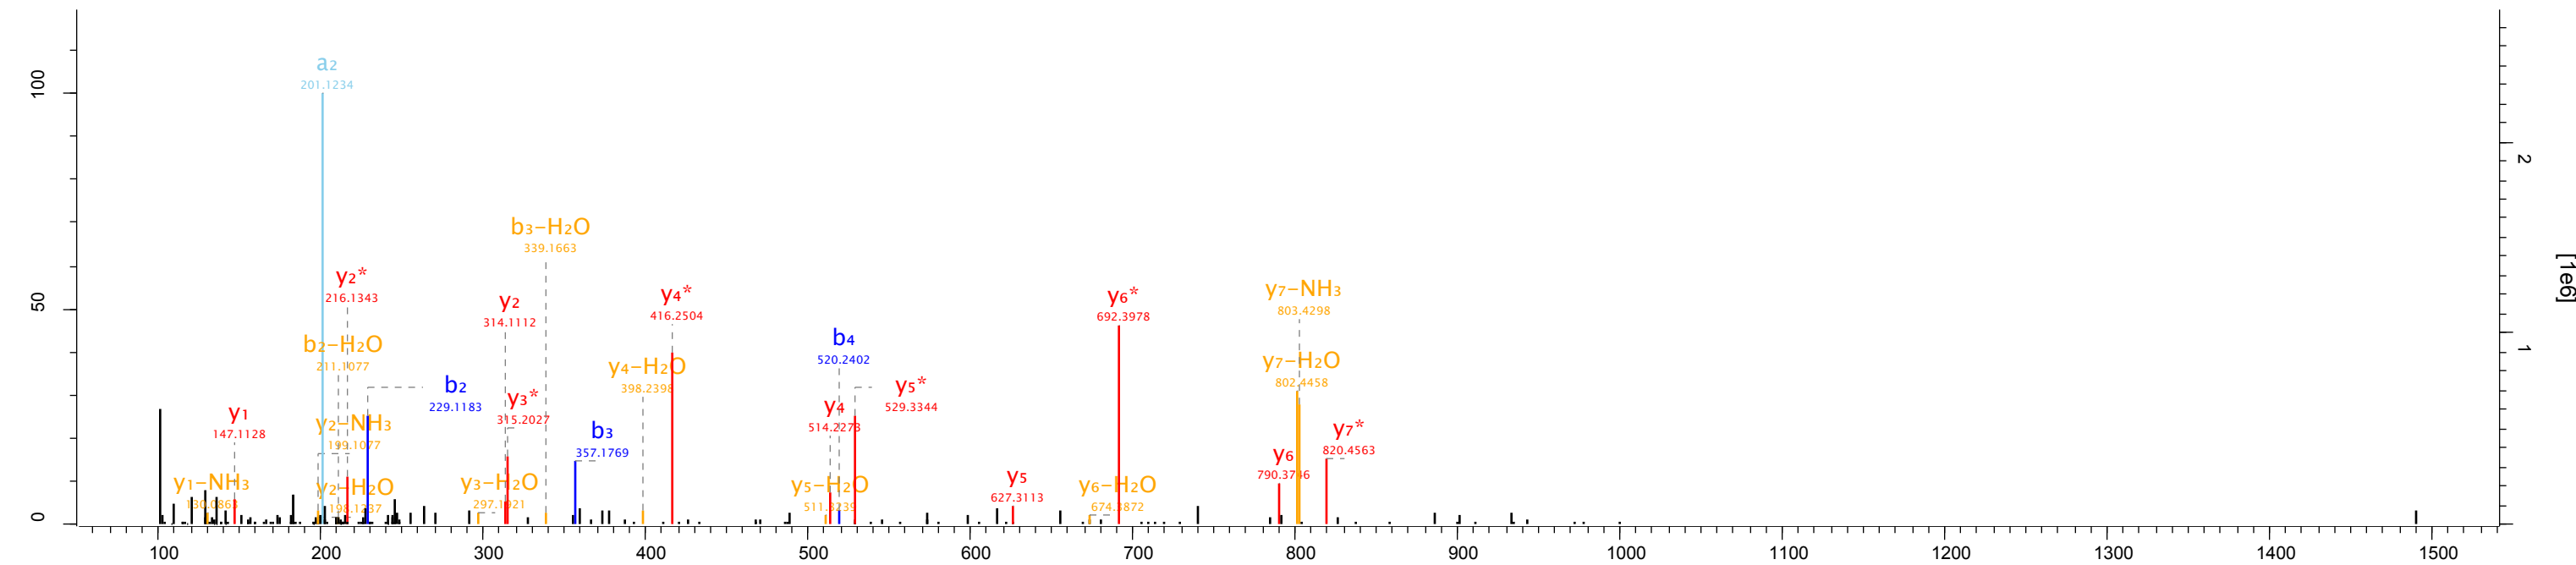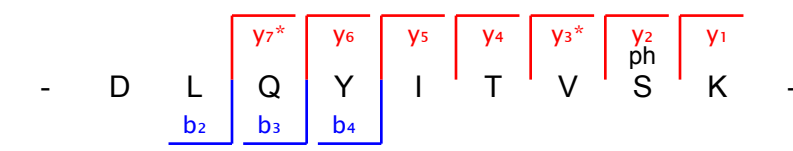

Raw file: 20150814\_A375SR\_Phospho\_BR2\_04  
 Scan: 15347  
 Method: FTMS; HCD  
 Score: 102.98  
 m/z: 622.62  
 Gene names: NFIC

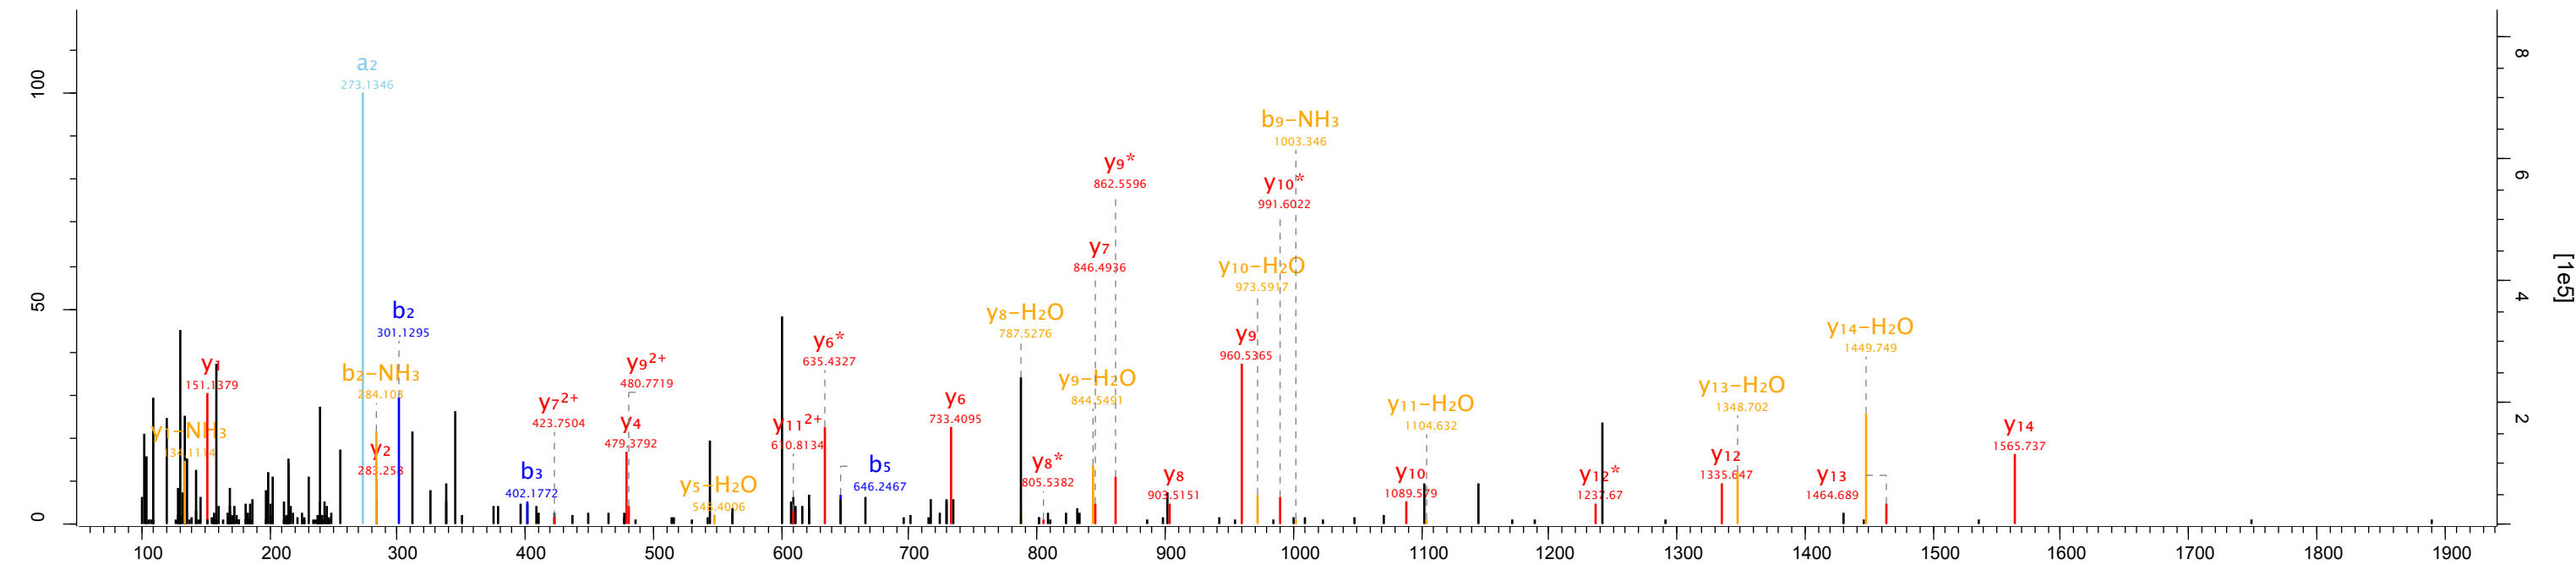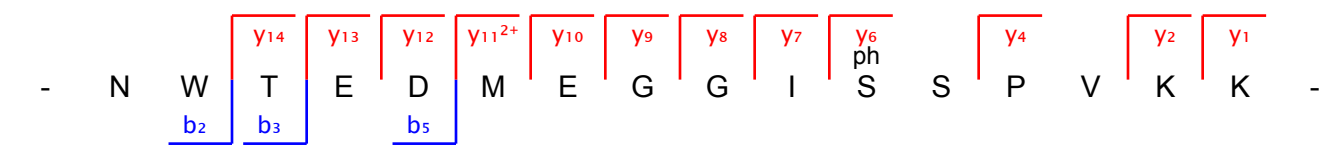

Raw file: 20150814\_A375SR\_Phospho\_BR2\_04  
 Scan: 1587 Method: FTMS; HCD Score: 59.8 m/z: 560.74 Gene names: CEP170

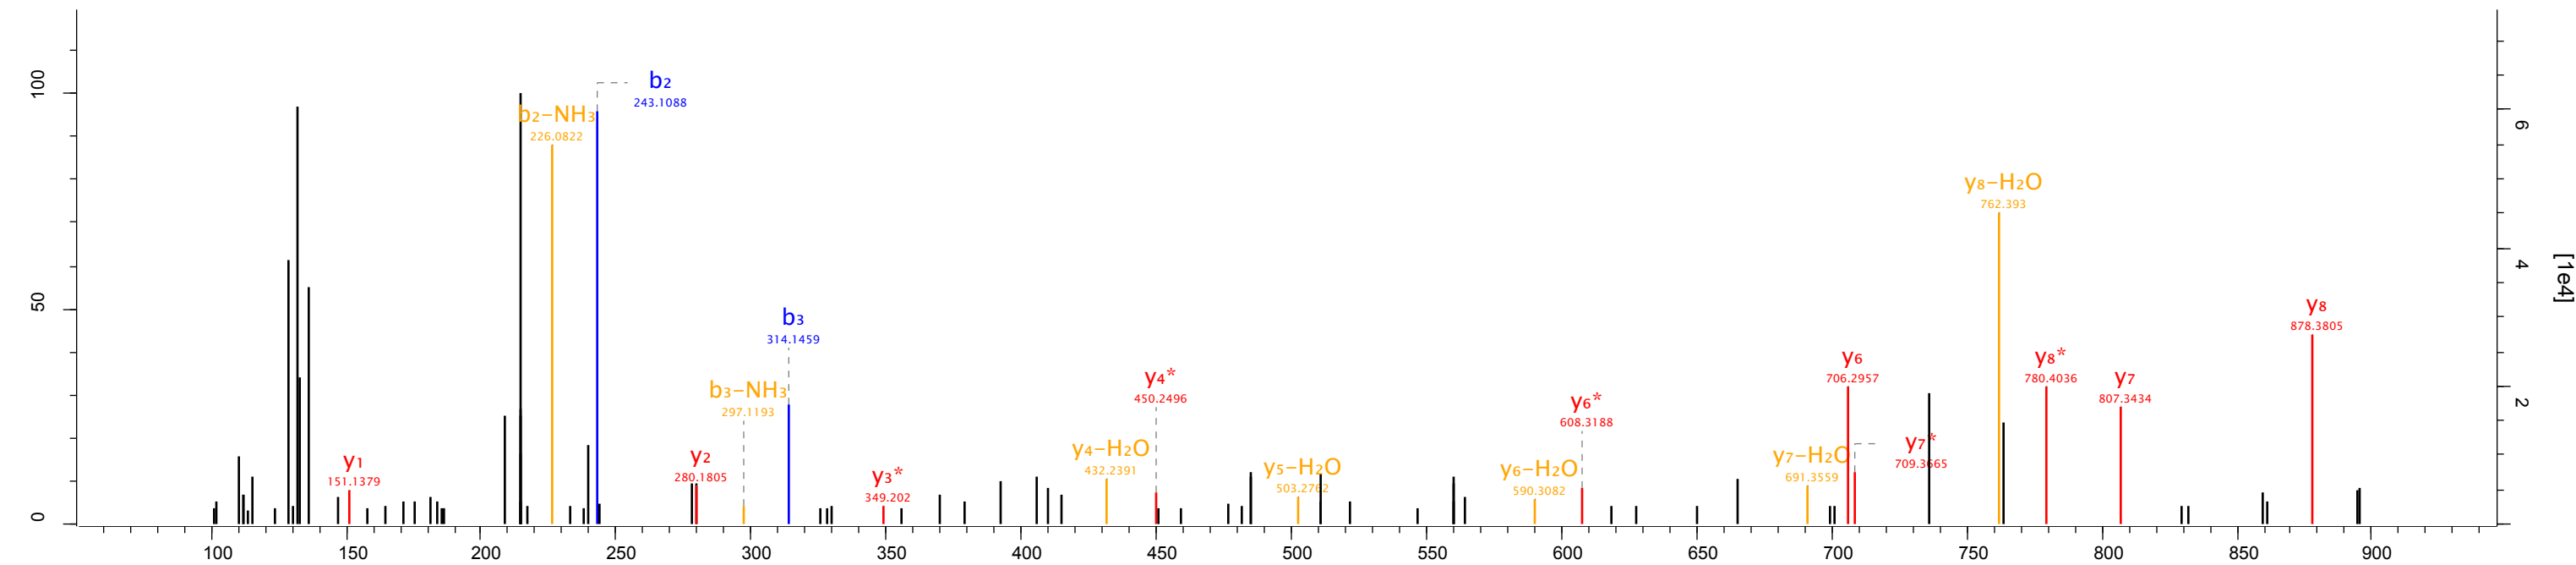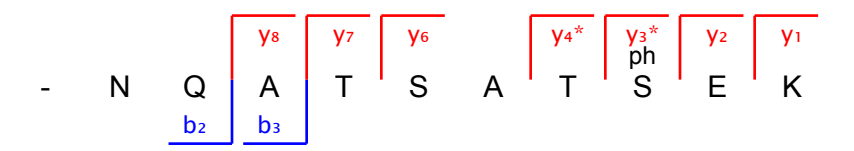

Raw file: 20150814\_A375SR\_Phospho\_BR2\_04  
 Scan: 15907 Method: FTMS; HCD Score: 187.98 m/z: 886.02 Gene names: STRN

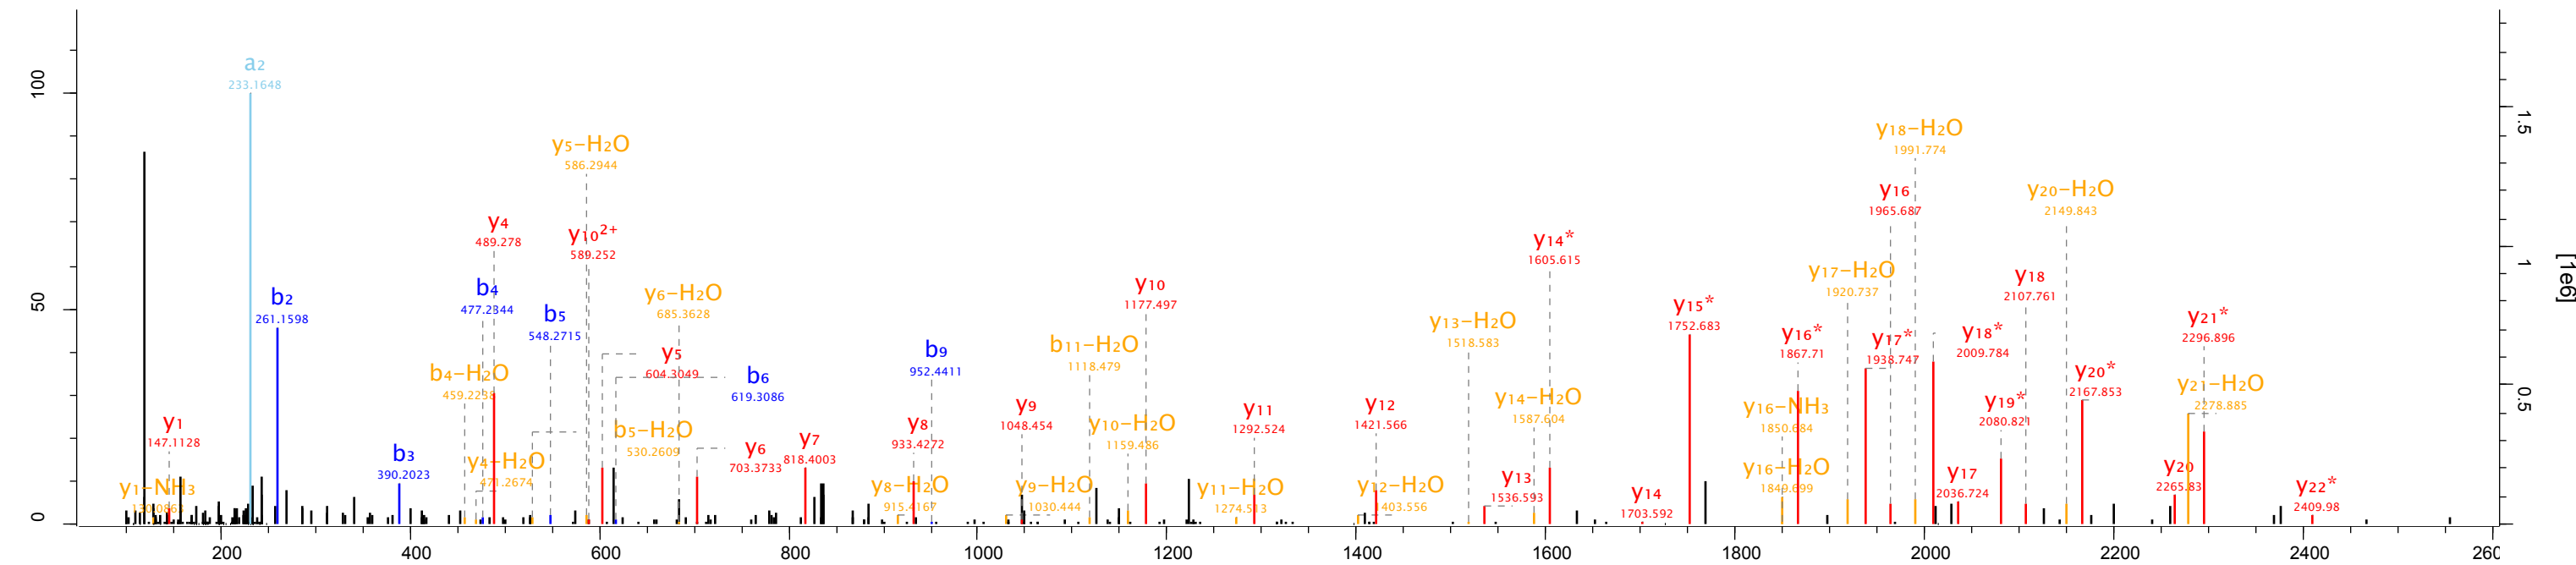

- F L E S A A A D F S D E D D D V D G R E K -

b<sub>2</sub>
b<sub>3</sub>
b<sub>4</sub>
b<sub>5</sub>
b<sub>6</sub>
b<sub>9</sub>
y<sub>1</sub>
y<sub>4</sub>
y<sub>5</sub>
y<sub>6</sub>
y<sub>7</sub>
y<sub>8</sub>
y<sub>9</sub>
y<sub>10</sub>
y<sub>11</sub>
y<sub>12</sub>
y<sub>13</sub>
y<sub>14</sub>
y<sub>15</sub>\*
y<sub>16</sub>
y<sub>17</sub>
y<sub>18</sub>
y<sub>19</sub>\*
y<sub>20</sub>
y<sub>21</sub>\*
y<sub>22</sub>\*

Raw file 20150814\_A375SR\_Phospho\_BR2\_04 Scan 15967 Method FTMS; HCD Score 149.97 m/z 818.85 Gene names LMO7

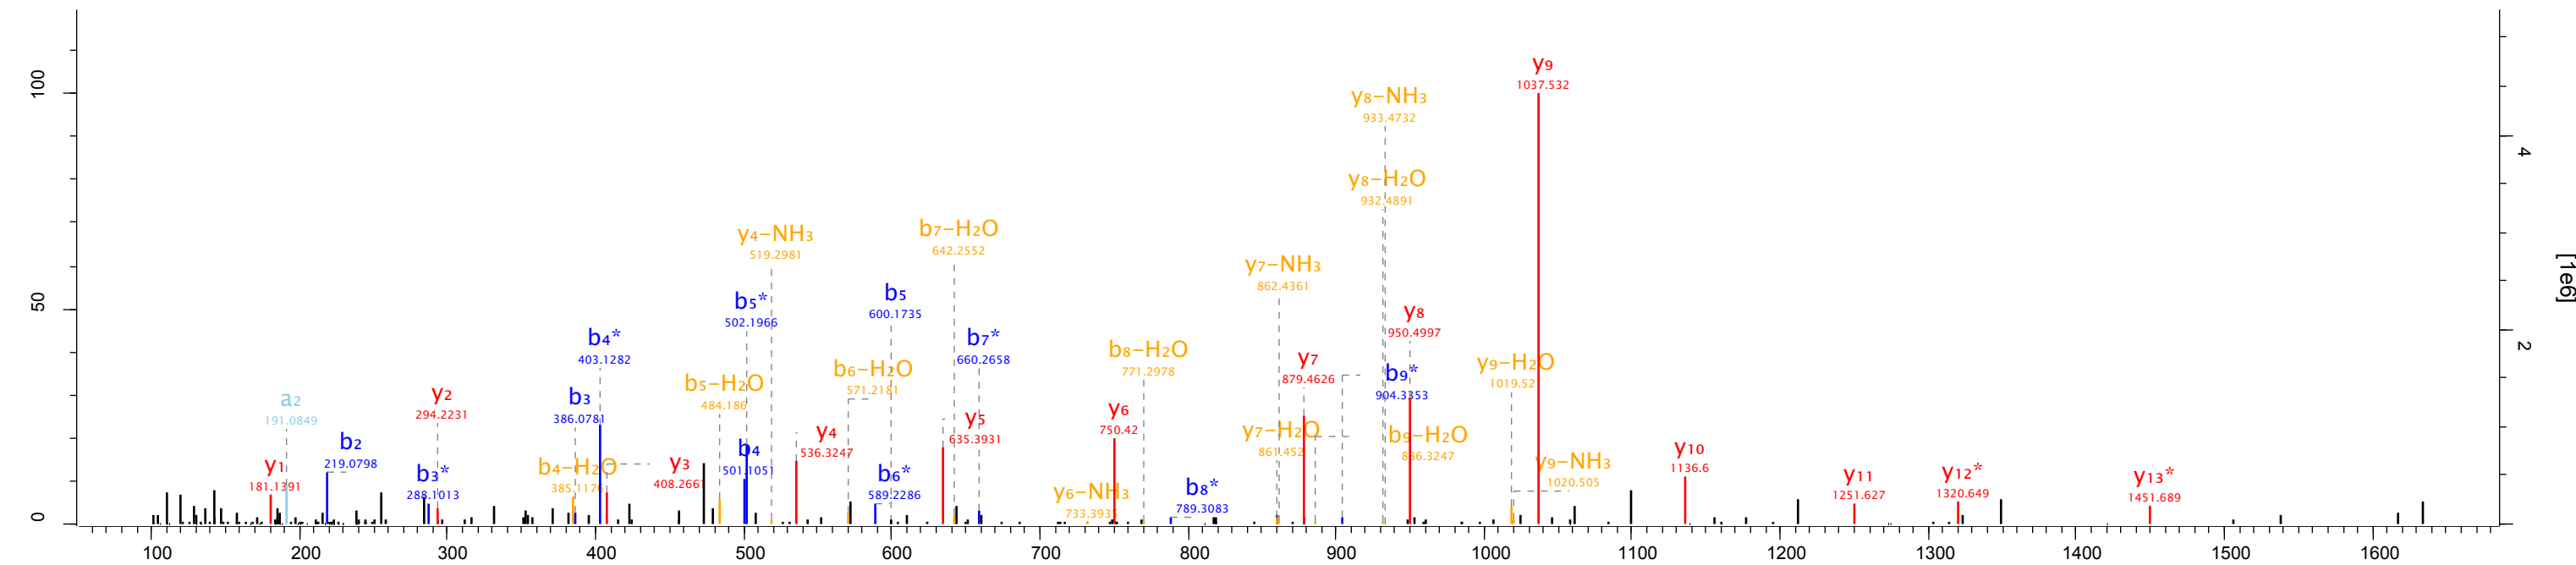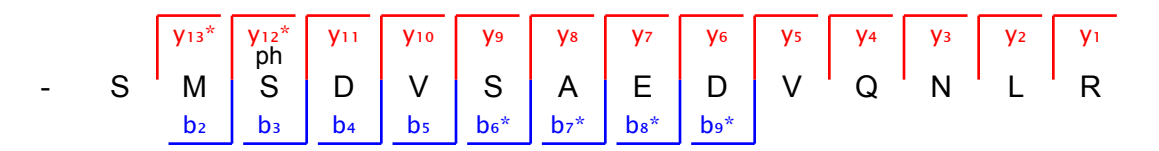

Raw file: 20150814\_A375SR\_Phospho\_BR2\_04  
 Scan: 16427 Method: FTMS; HCD Score: 113.47 m/z: 782.38 Gene names: WDR62

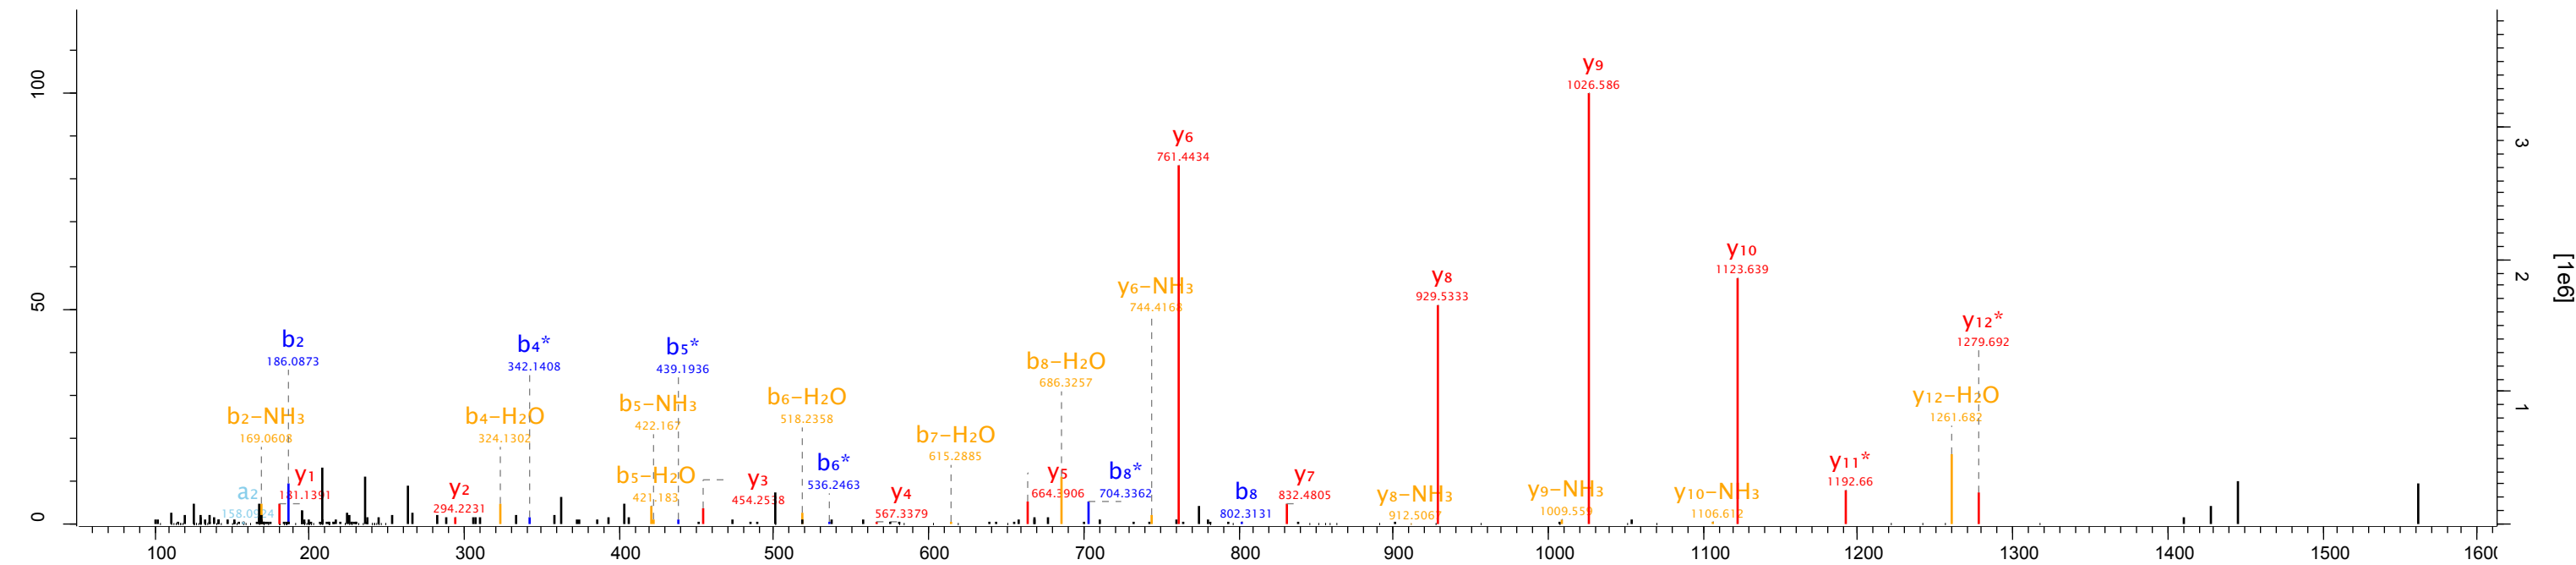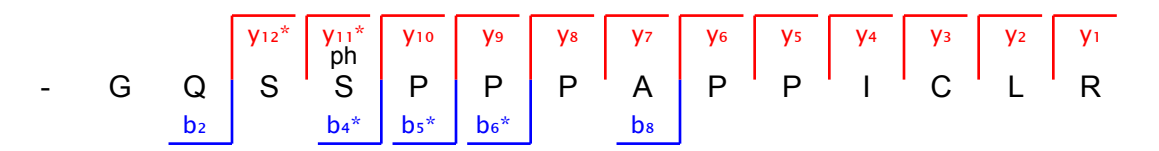

Raw file 20150814\_A375SR\_Phospho\_BR2\_04 Scan 16527 Method FTMS; HCD Score 271.6 m/z 1299.02 Gene names RANBP2

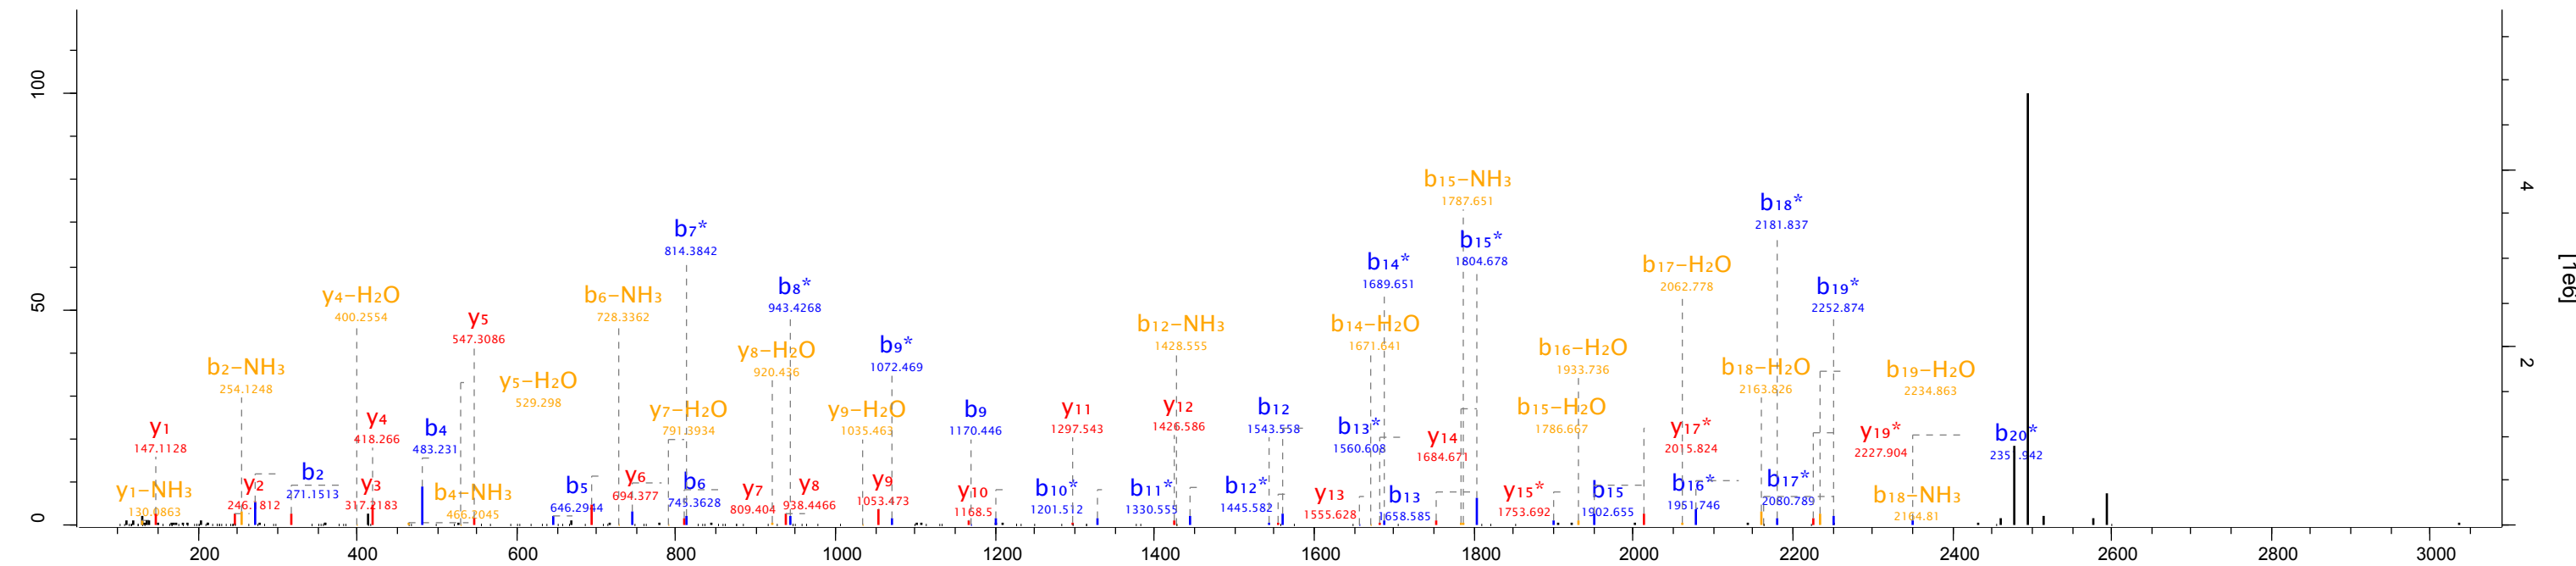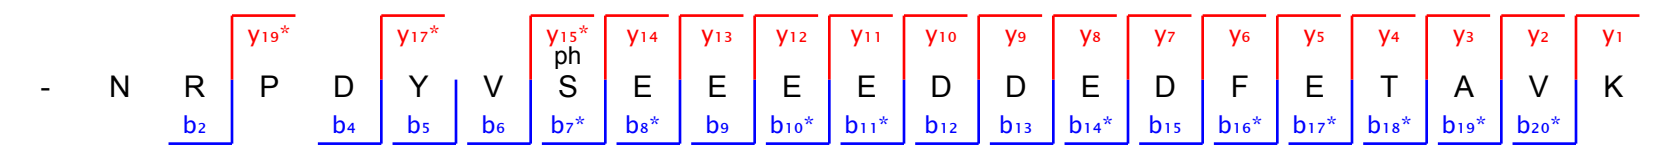



Raw file: 20150814\_A375SR\_Phospho\_BR2\_04  
 Scan: 16557 Method: FTMS; HCD Score: 228.58 m/z: 861.91 Gene names: PEBP1

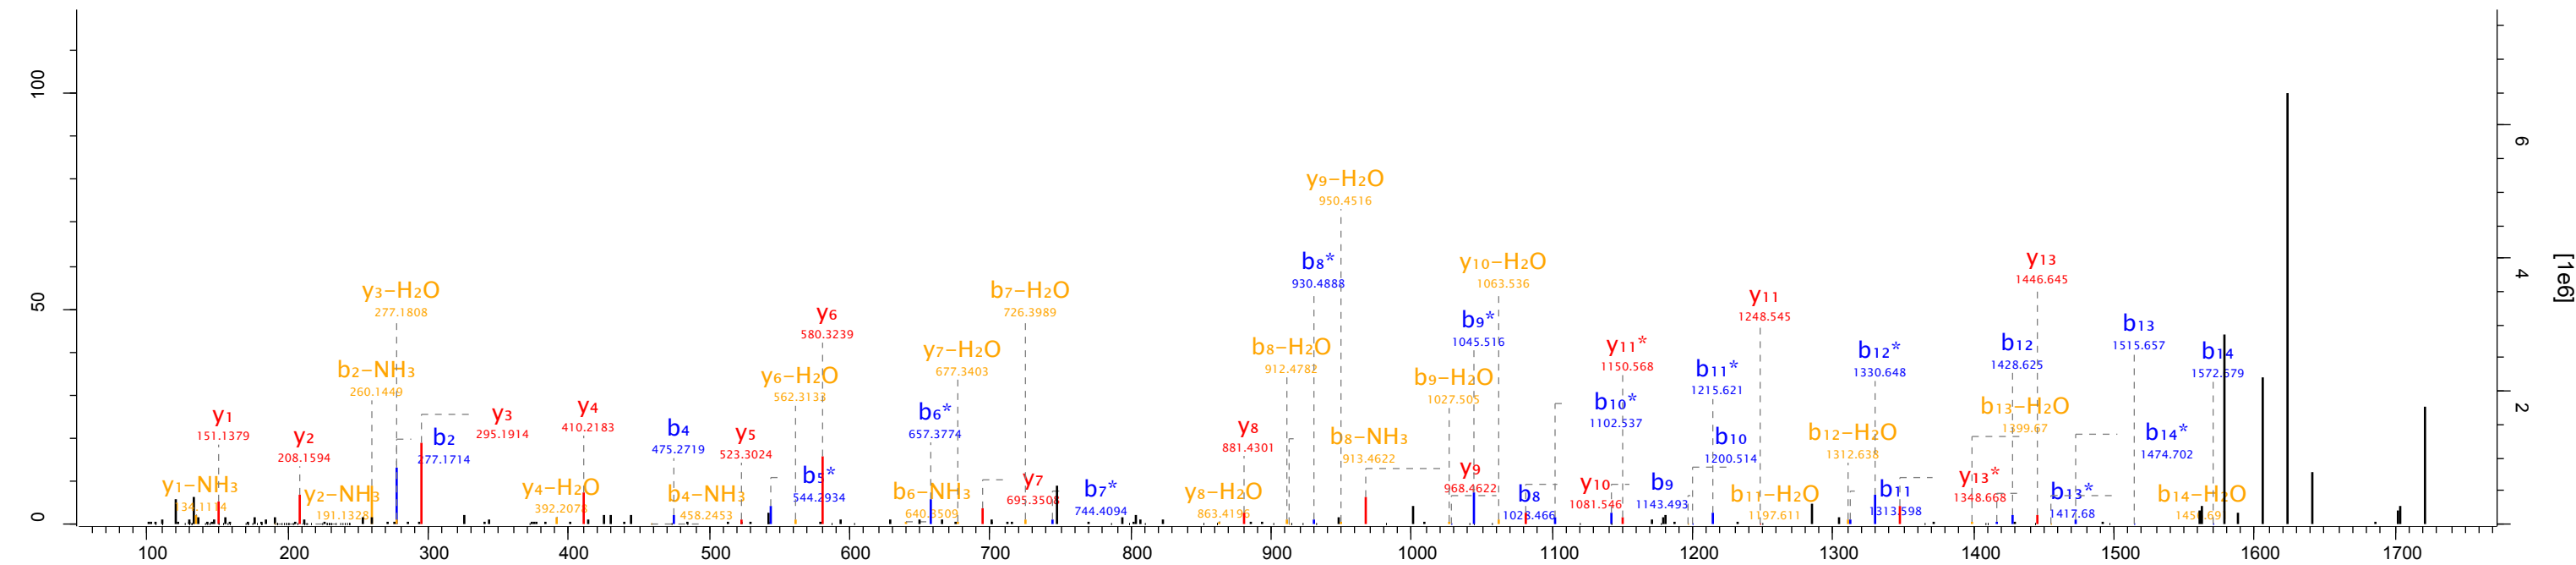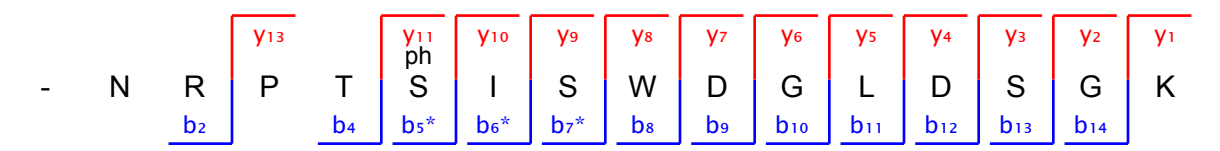

Raw file: 20150814\_A375SR\_Phospho\_BR2\_04  
 Scan: 16567 Method: FTMS; HCD Score: 68.41 m/z: 738.82 Gene names: CEP350

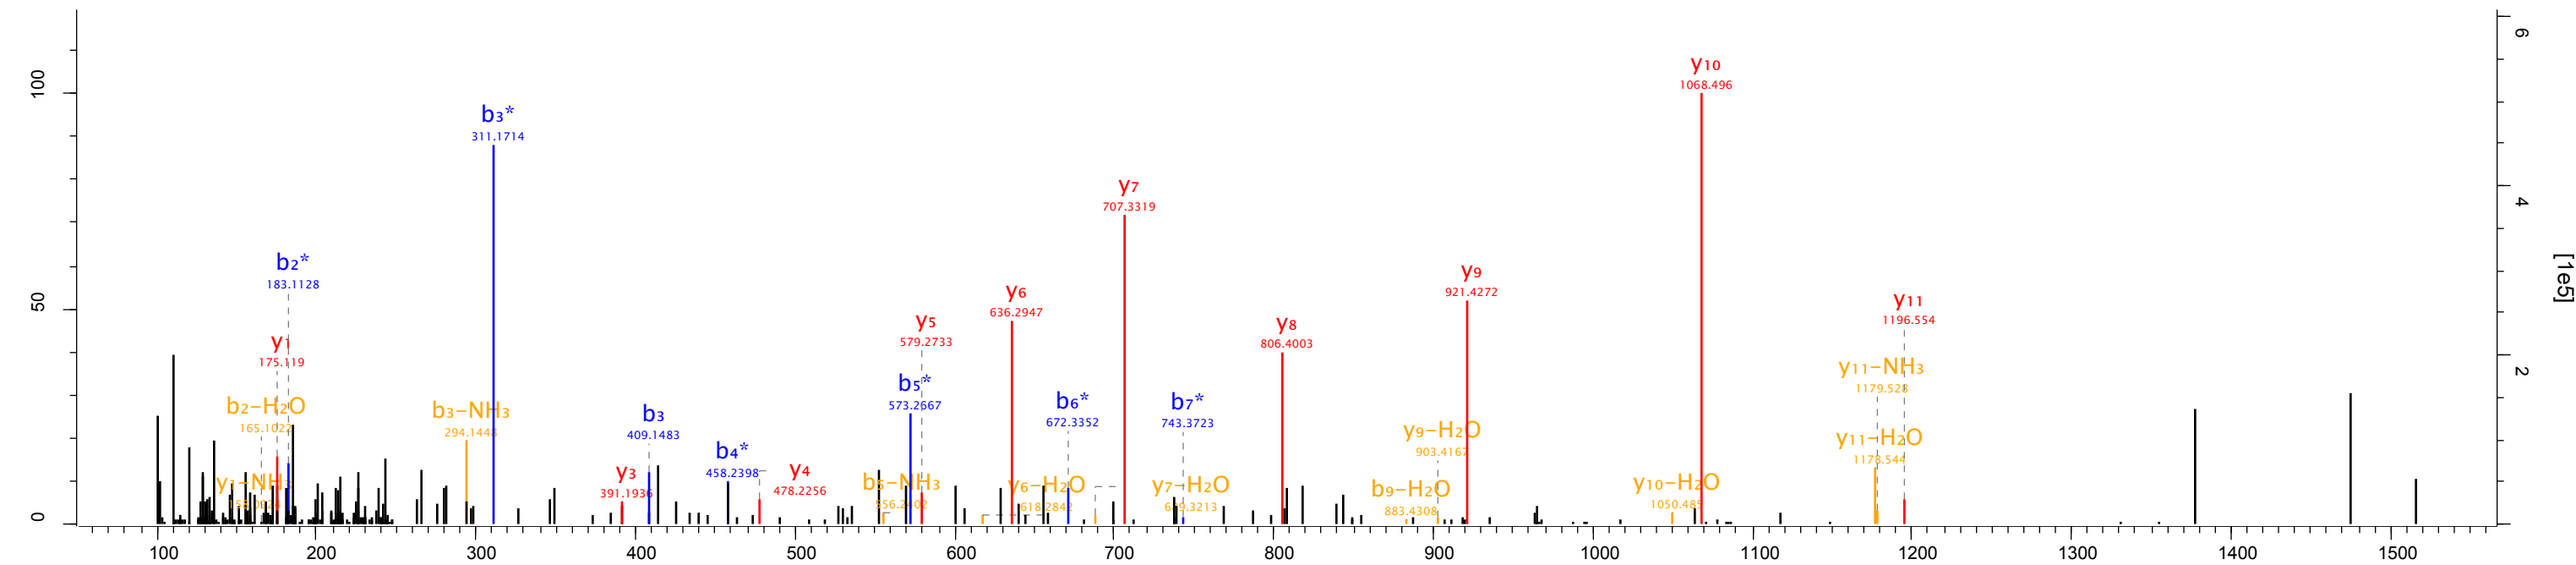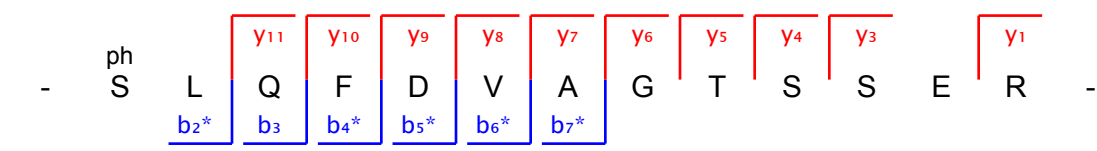

Raw file: 20150814\_A375SR\_Phospho\_BR2\_04  
 Scan: 17087  
 Method: FTMS; HCD  
 Score: 458.4  
 m/z: 1336.55  
 Gene names: SMAP;C11orf58

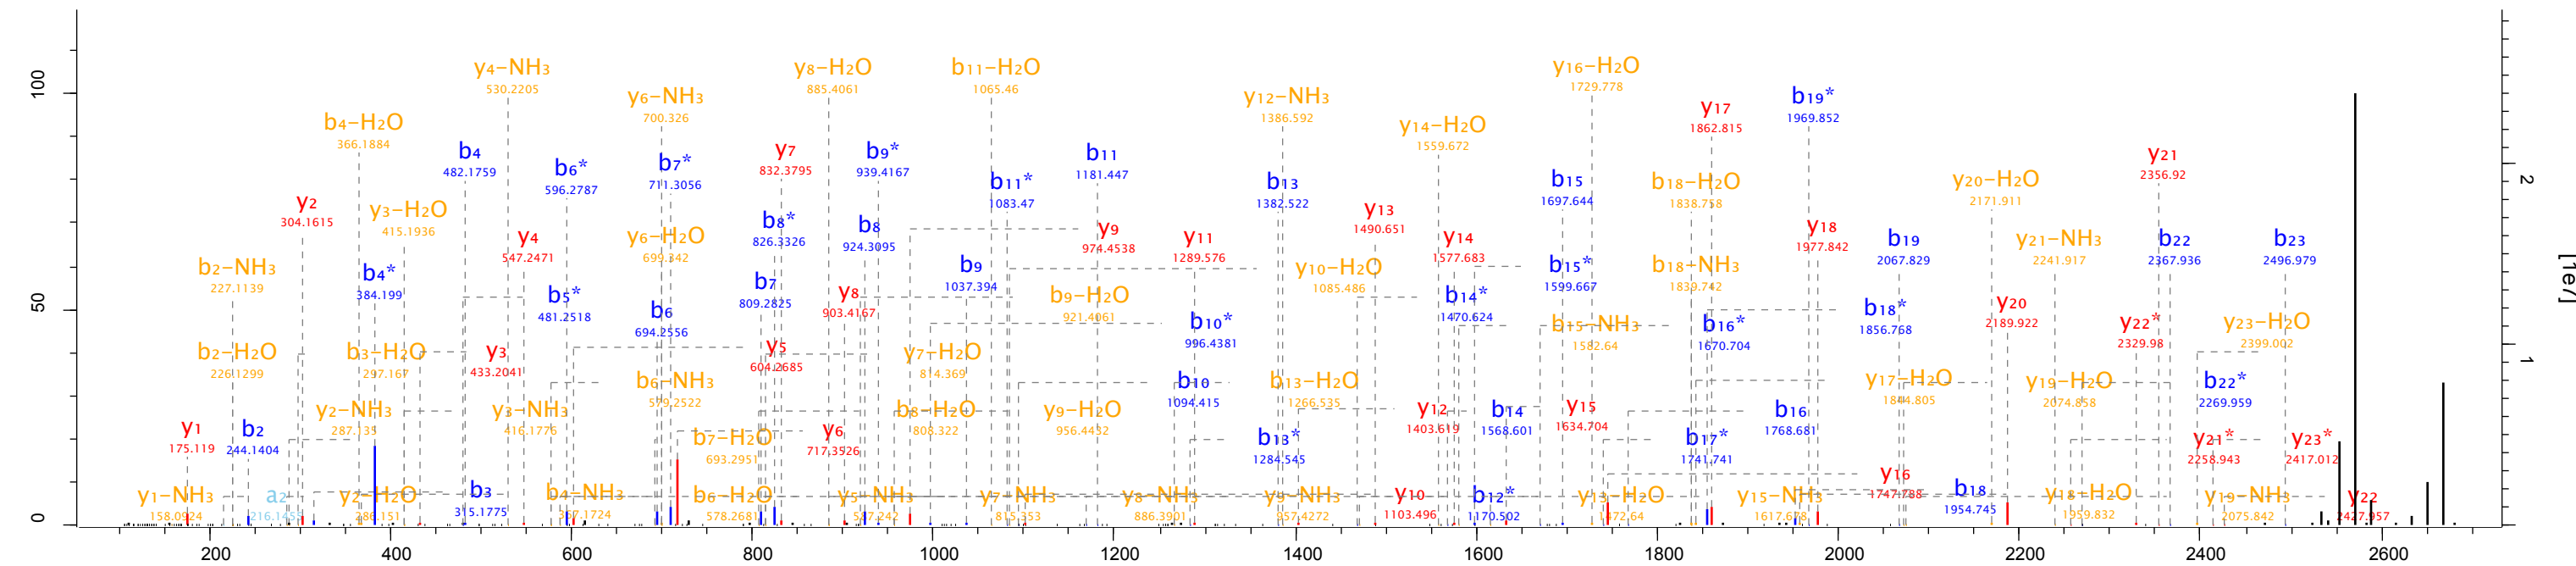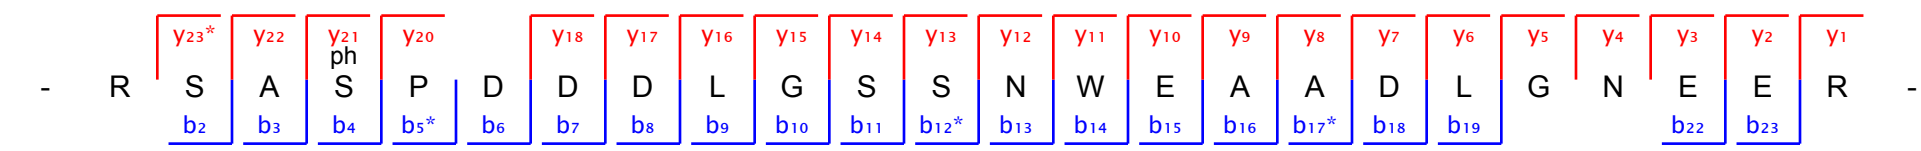

Raw file: 20150814\_A375SR\_Phospho\_BR2\_04  
 Scan: 1727 Method: FTMS; HCD Score: 65.23 m/z: 728.3 Gene names: WWTR1

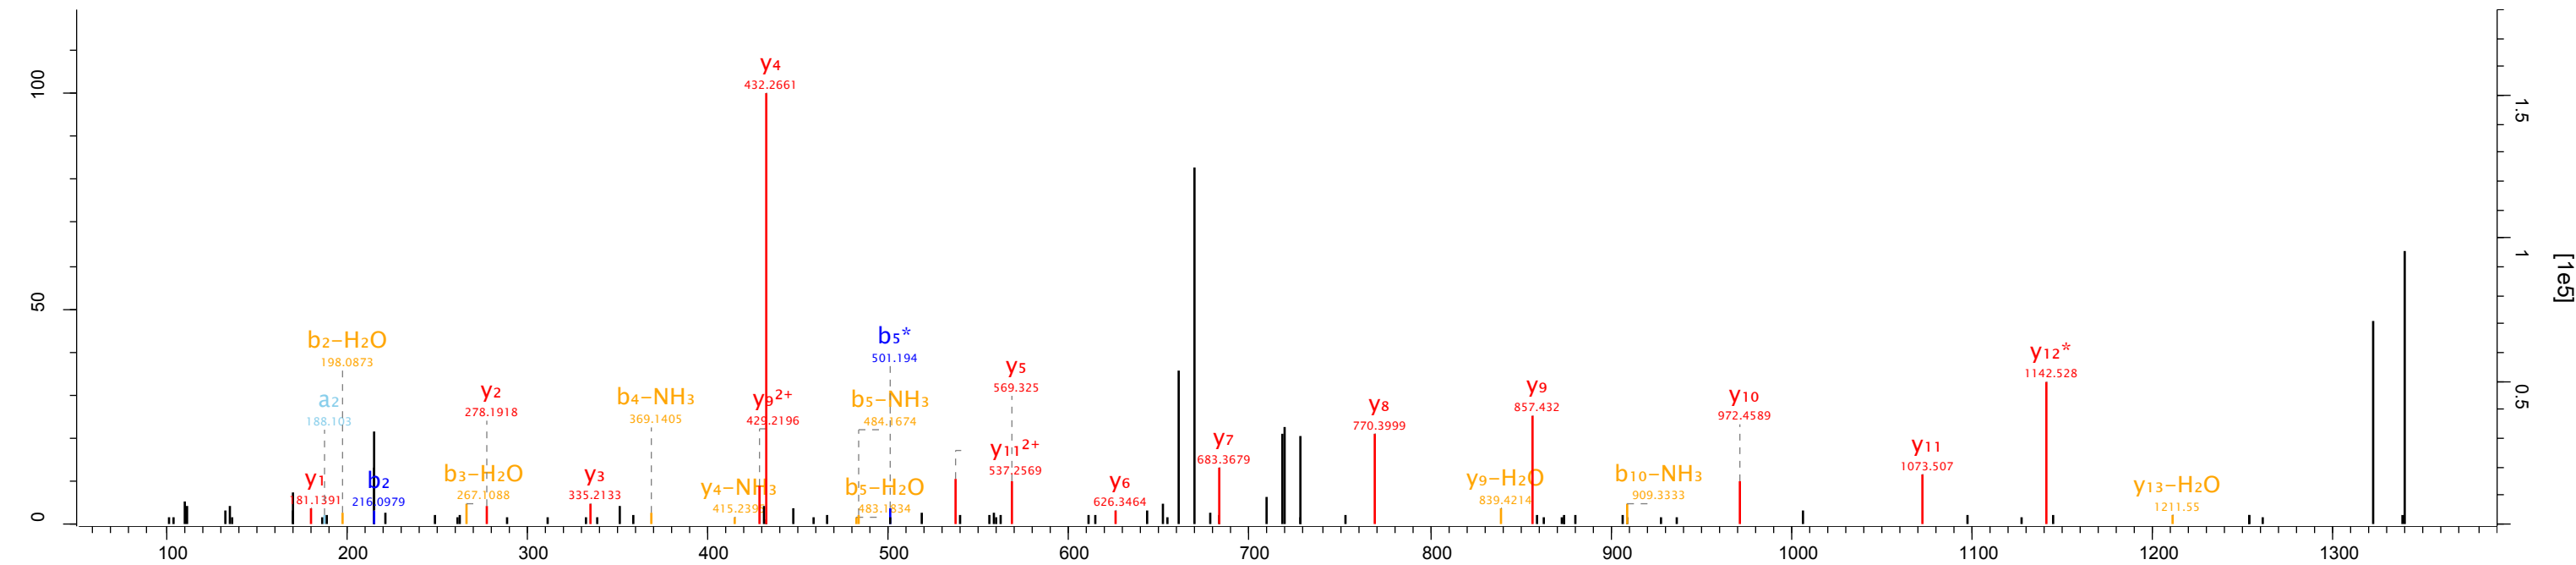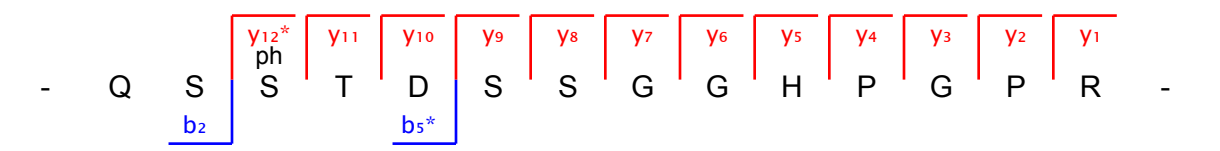

Raw file: 20150814\_A375SR\_Phospho\_BR2\_04  
 Scan: 1757 Method: FTMS; HCD Score: 122.63 m/z: 748.83 Gene names: TJP2

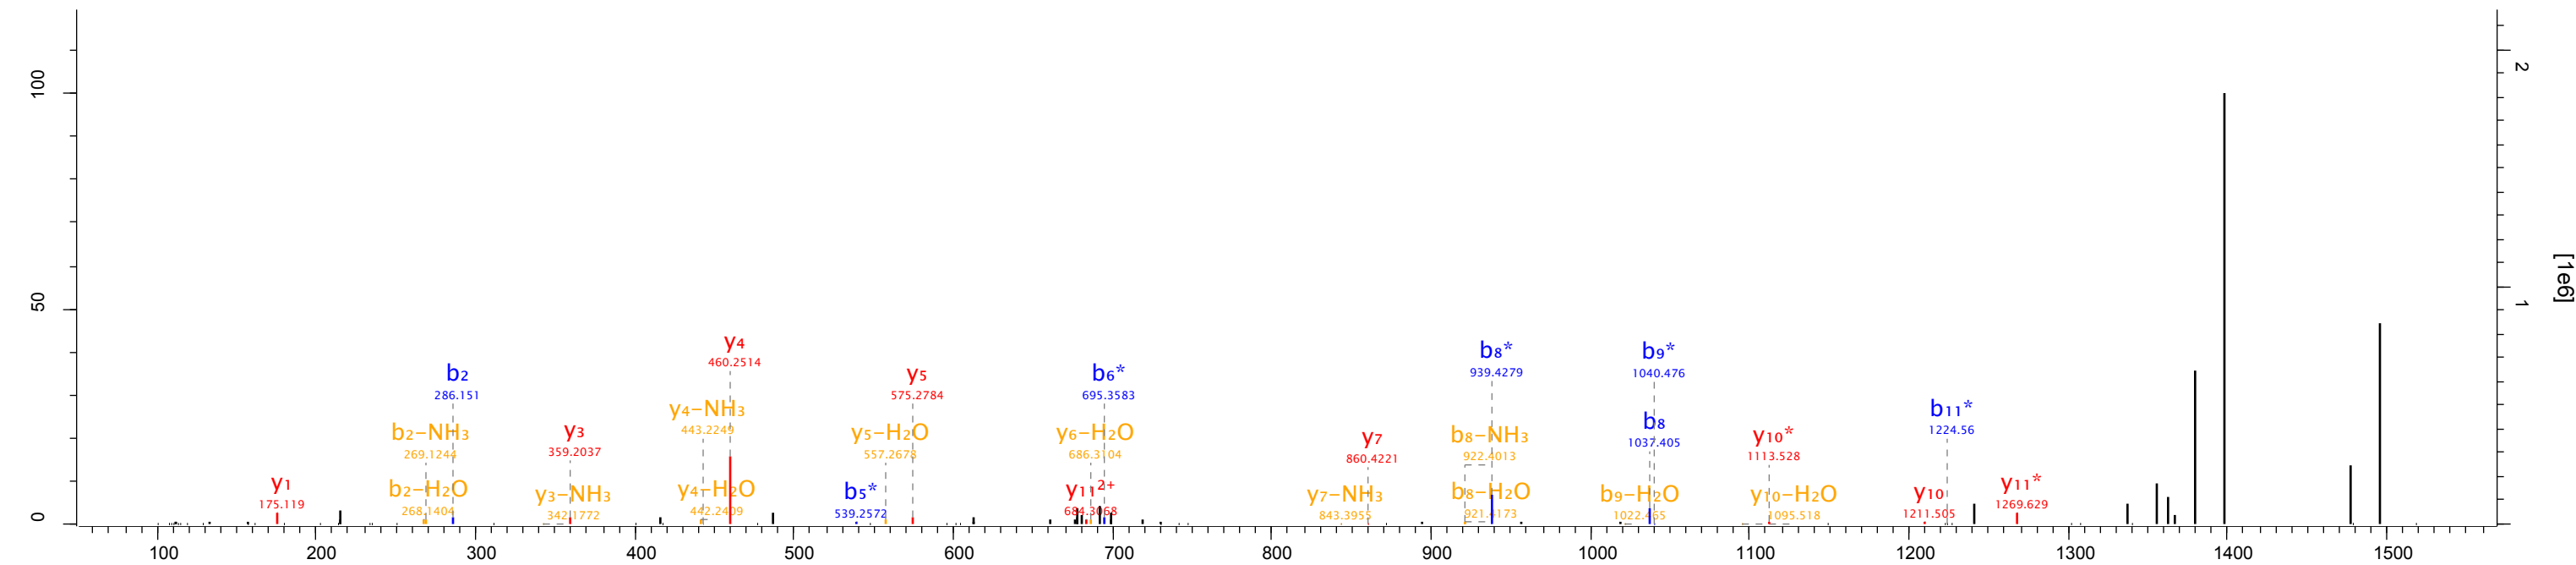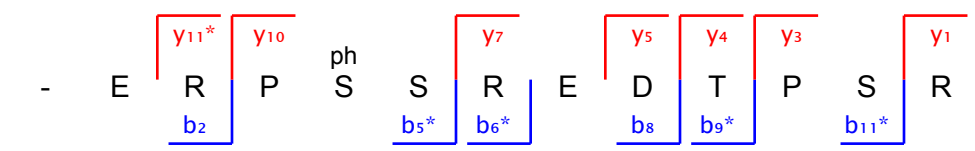

Raw file: 20150814\_A375SR\_Phospho\_BR2\_04  
 Scan: 17697 Method: FTMS; HCD Score: 311.4 m/z: 1109.42 Gene names: BYSL

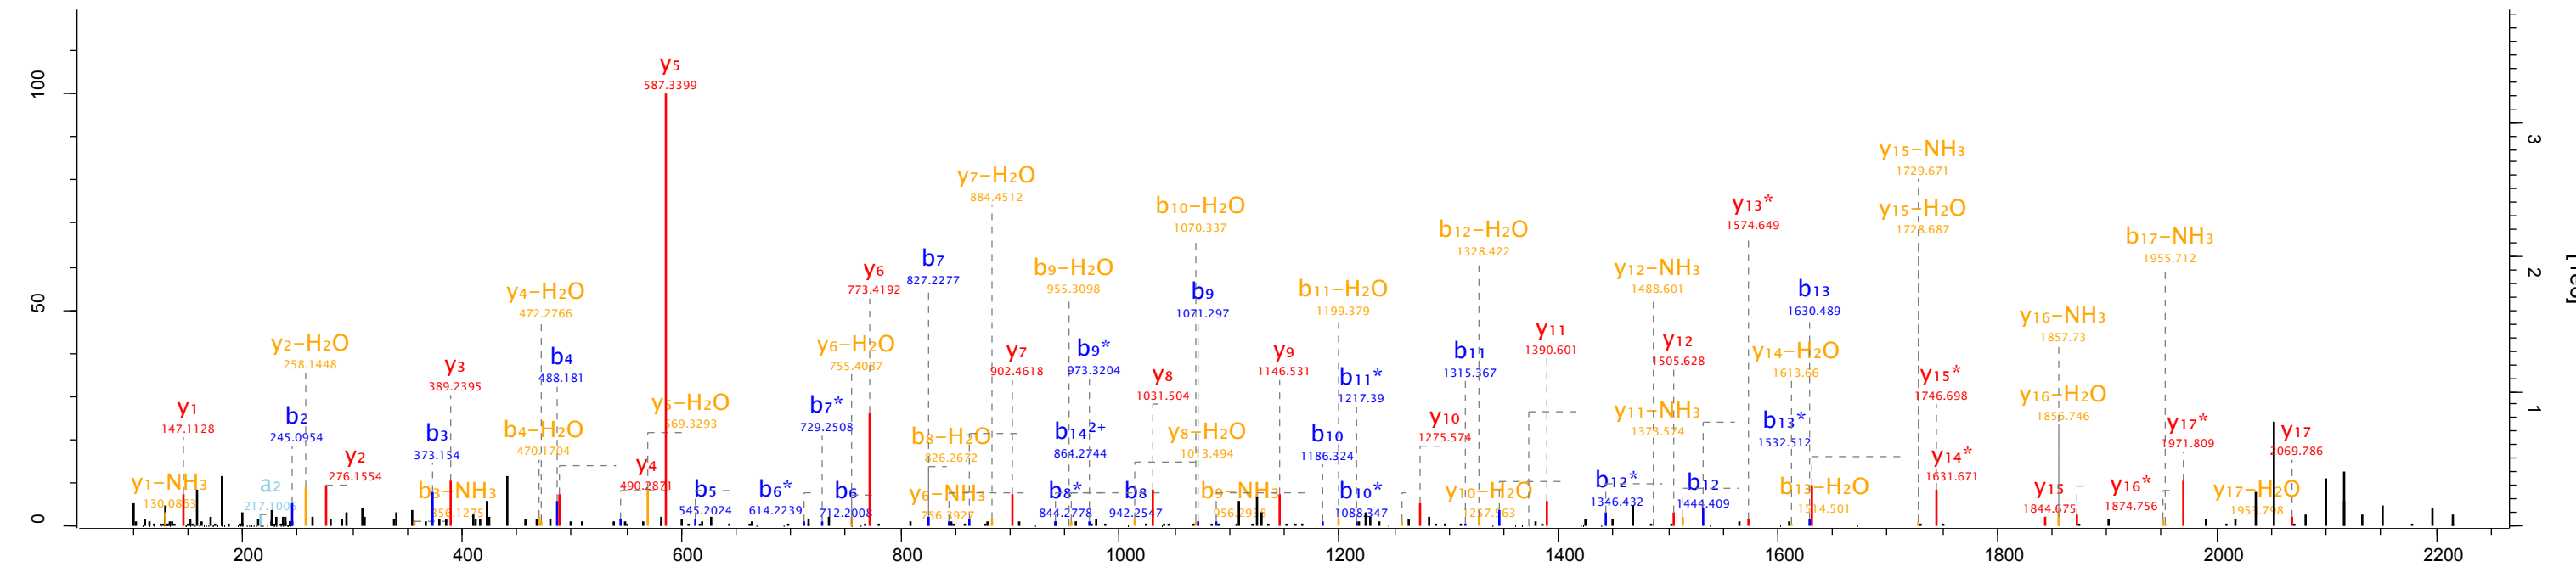

ox M  
 - P Q D G S D D E D E W P T L E K -  
 b<sub>2</sub> b<sub>3</sub> b<sub>4</sub> b<sub>5</sub> b<sub>6</sub> b<sub>7</sub> b<sub>8</sub> b<sub>9</sub> b<sub>10</sub> b<sub>11</sub> b<sub>12</sub> b<sub>13</sub> b<sub>14</sub><sup>2+</sup>

Raw file 20150814\_A375SR\_Phospho\_BR2\_04 Scan 17797 Method FTMS; HCD Score 133.44 m/z 517.21 Gene names SAGE1

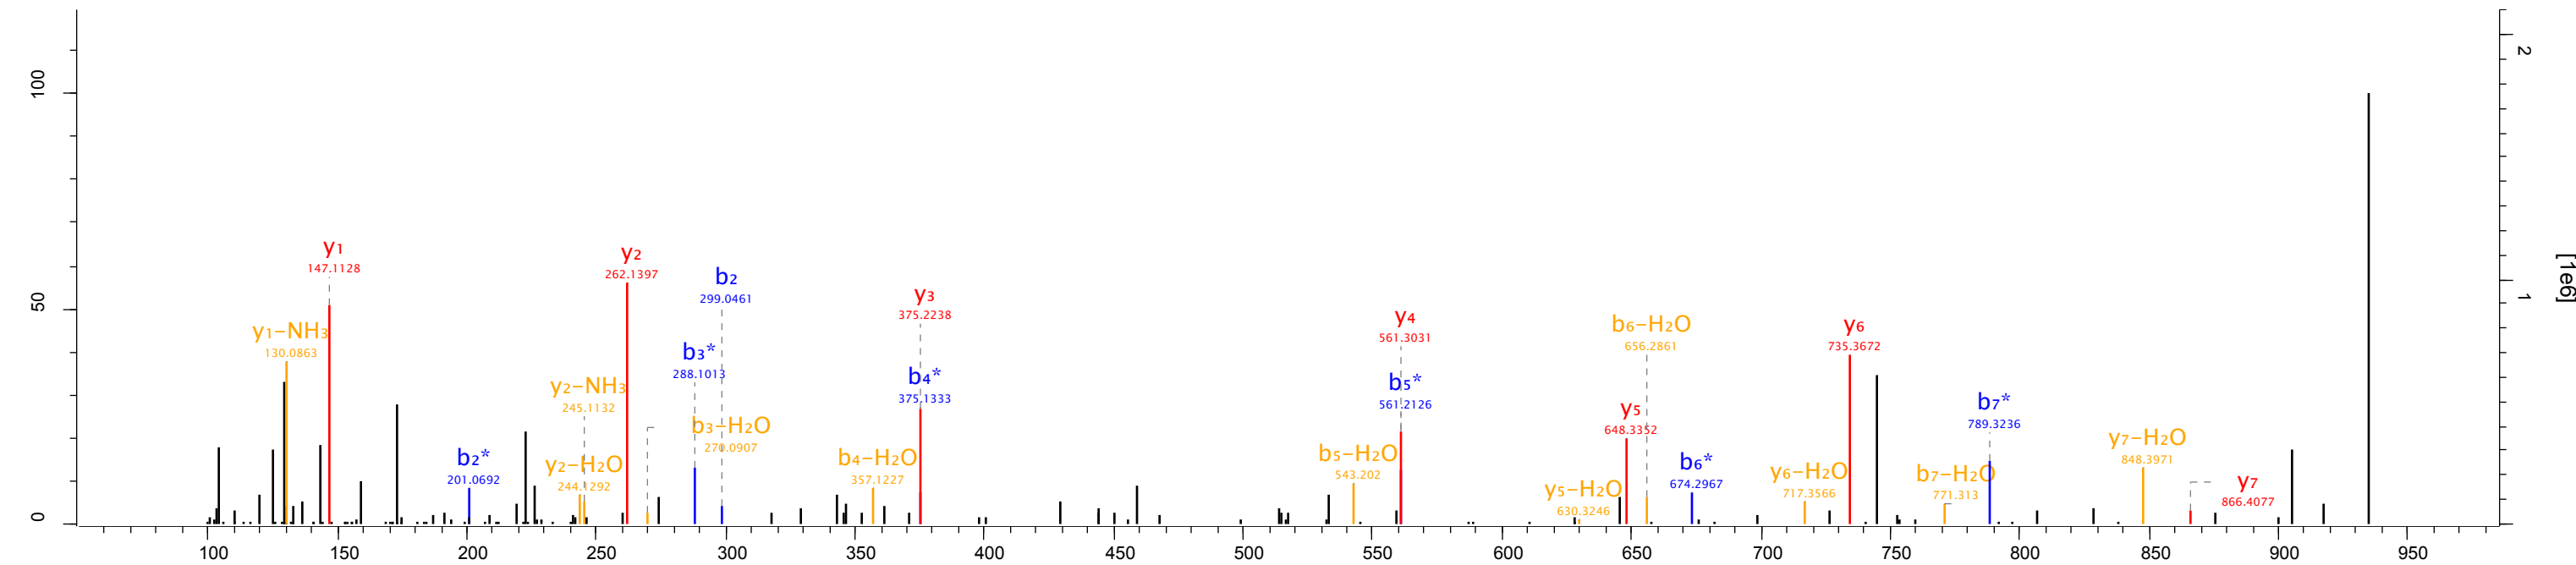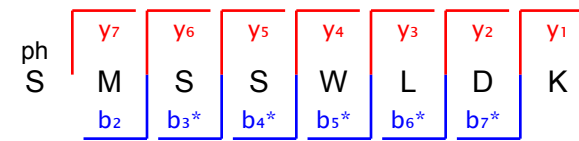

Raw file: 20150814\_A375SR\_Phospho\_BR2\_04  
 Scan: 17807 Method: FTMS; HCD Score: 110.22 m/z: 658.31 Gene names: ZFP36

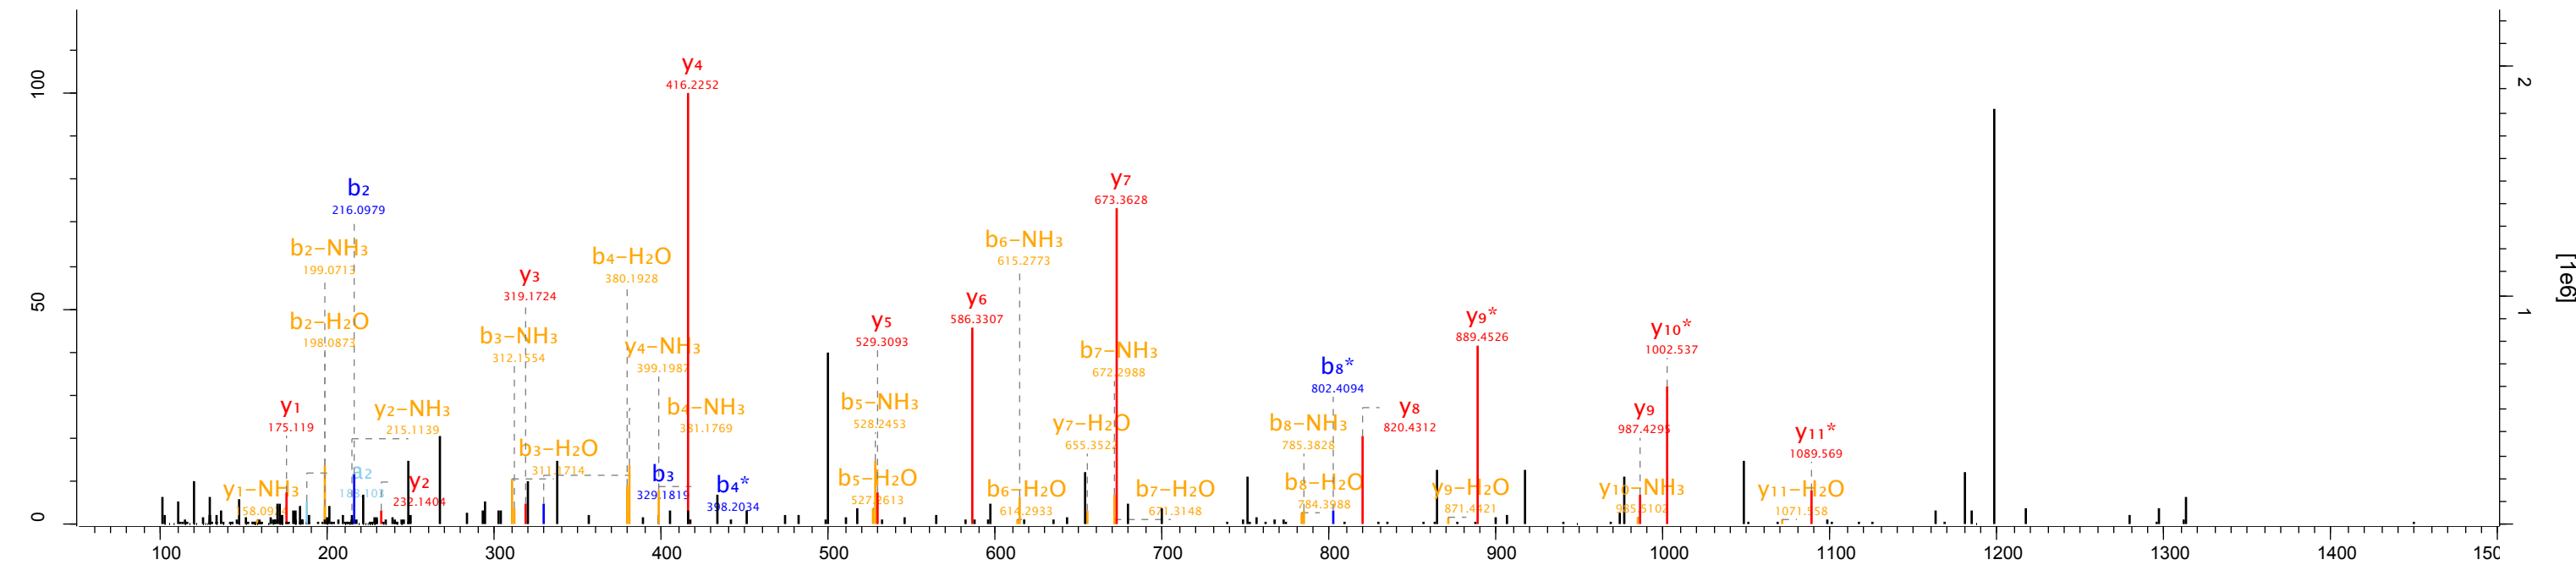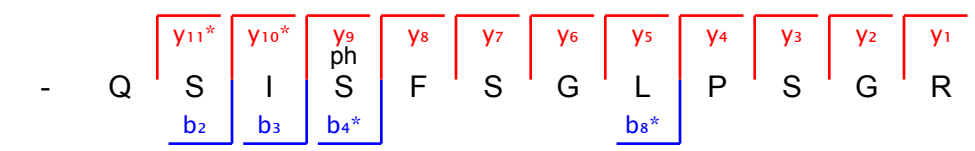



Raw file: 20150814\_A375SR\_Phospho\_BR2\_04  
 Scan: 18337 Method: FTMS; HCD Score: 182.56 m/z: 1373.56 Gene names: MAGEA4

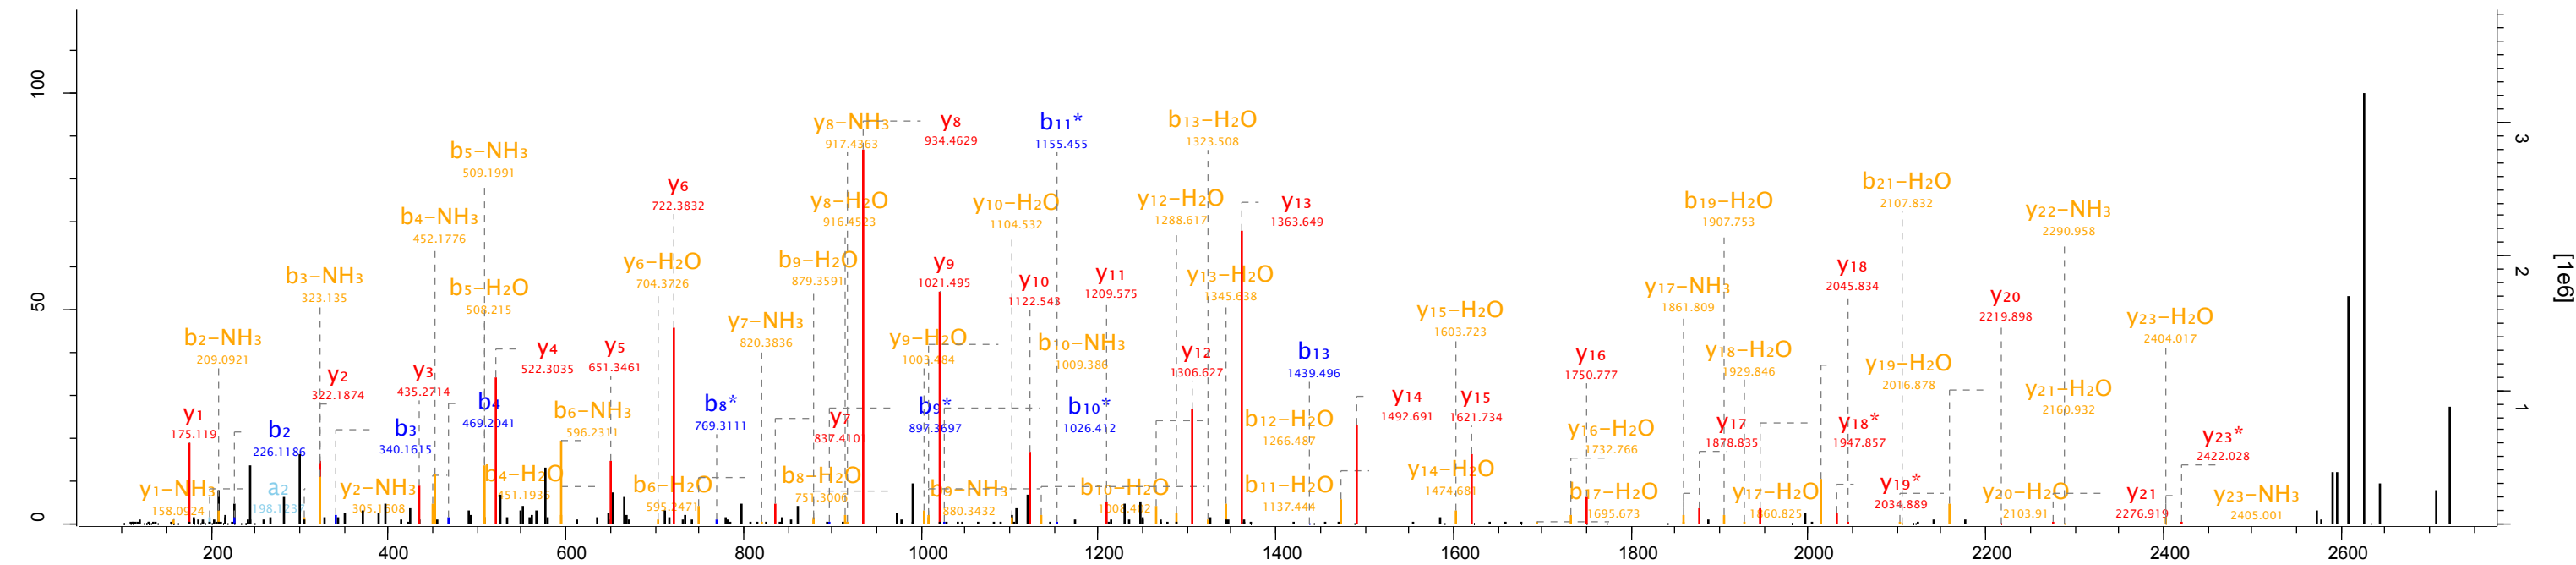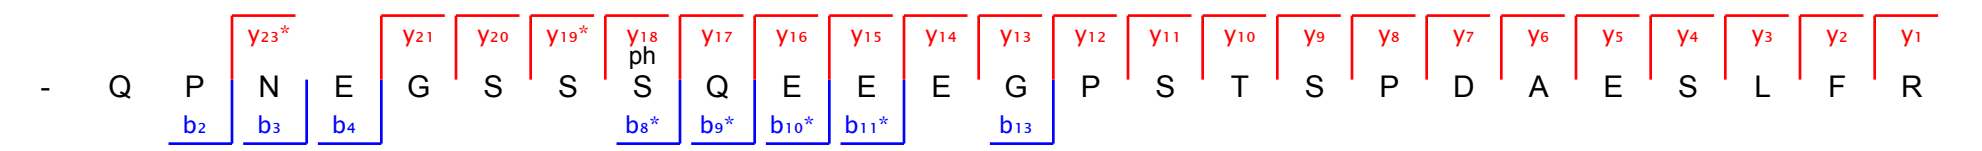

Raw file: 20150814\_A375SR\_Phospho\_BR2\_04  
 Scan: 18597 Method: FTMS; HCD Score: 149.71 m/z: 887.96 Gene names: LMO7

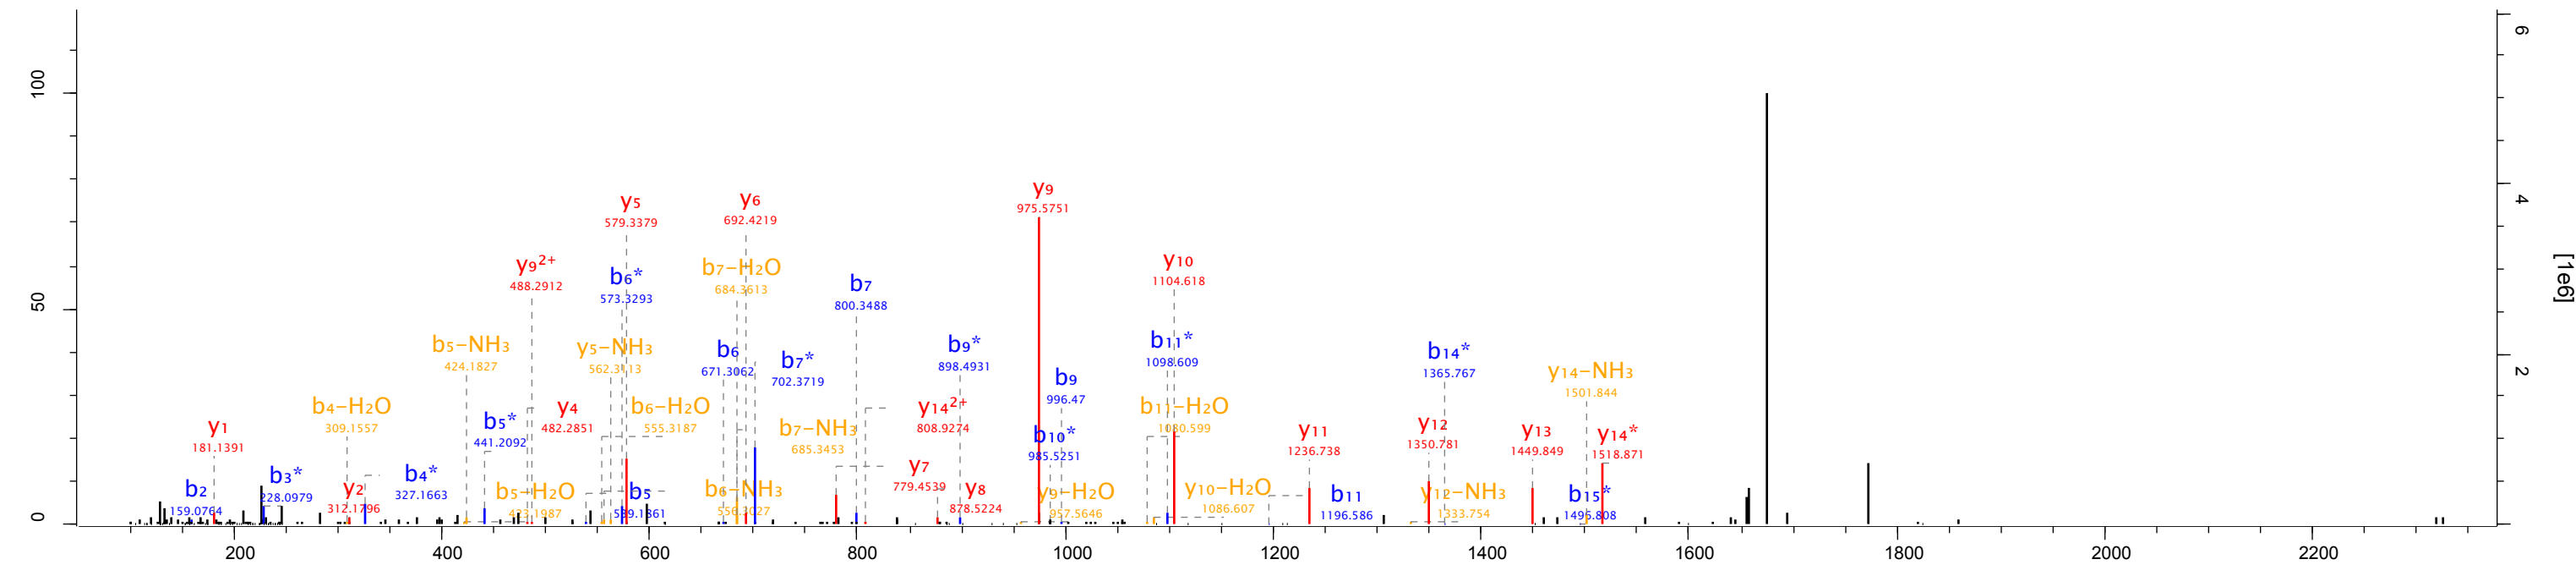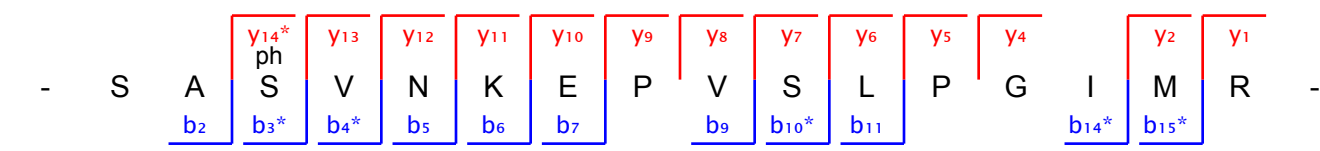

Raw file: 20150814\_A375SR\_Phospho\_BR2\_04  
 Scan: 18607 Method: FTMS; HCD Score: 220.79 m/z: 944.44 Gene names: ABCC2

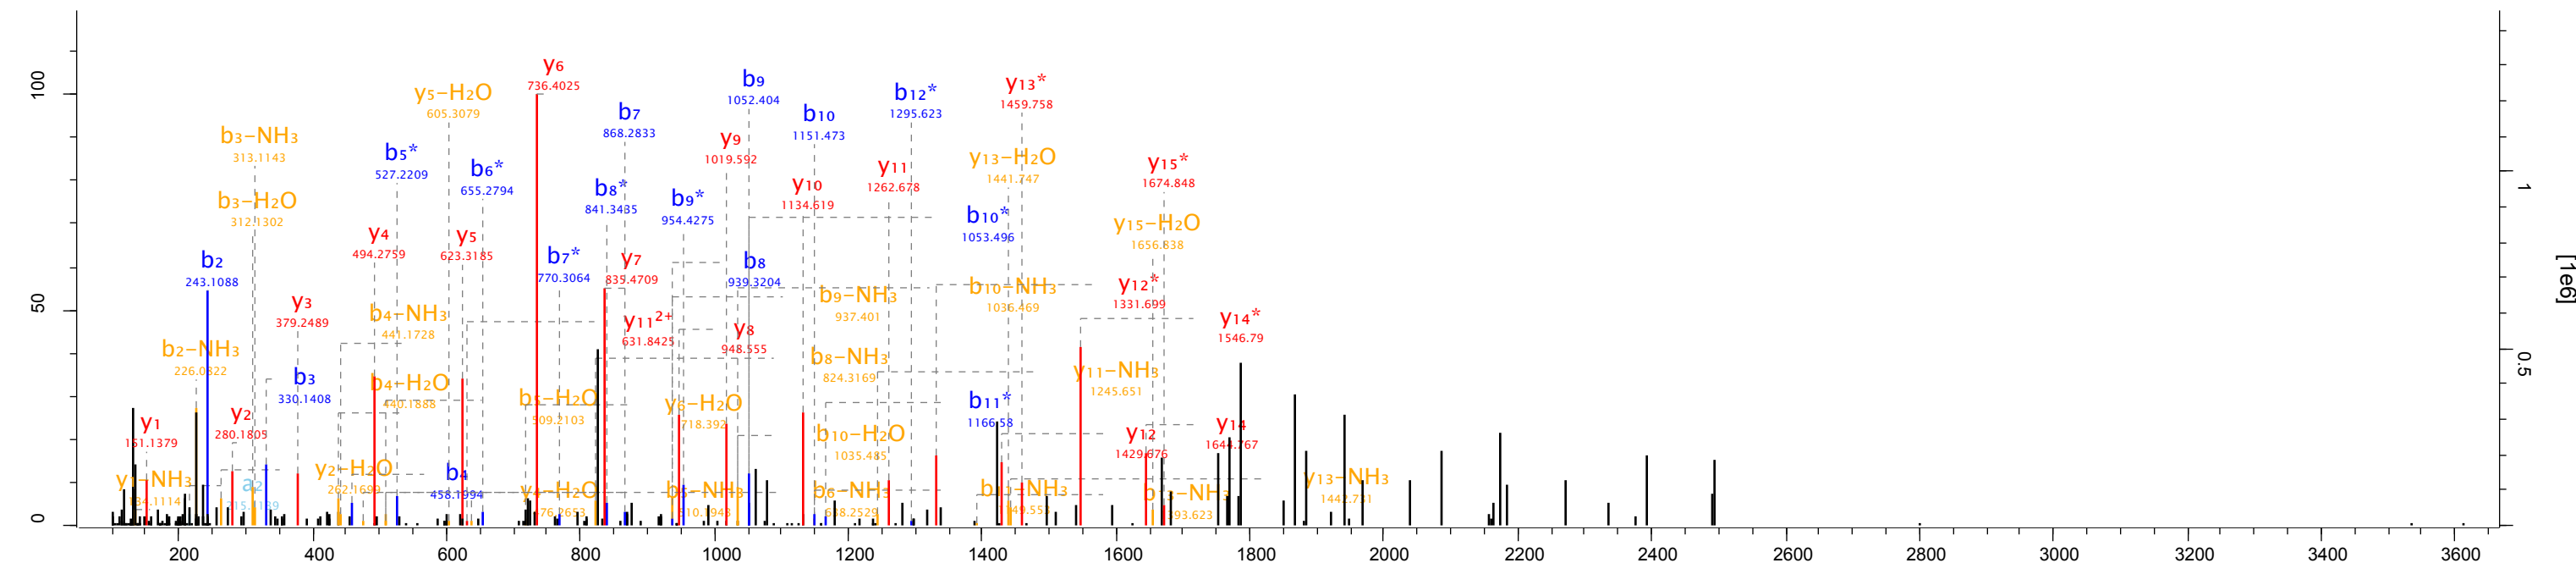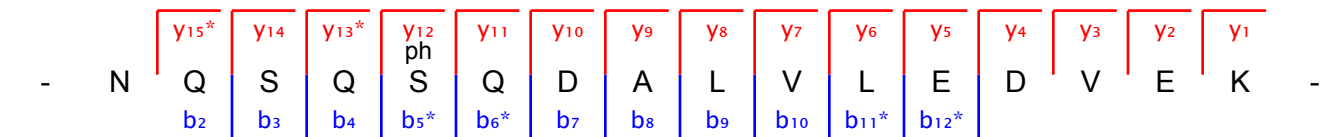

Raw file: 20150814\_A375SR\_Phospho\_BR2\_04  
 Scan: 18637 Method: FTMS; HCD Score: 134.68 m/z: 633.3 Gene names: CNKSR2

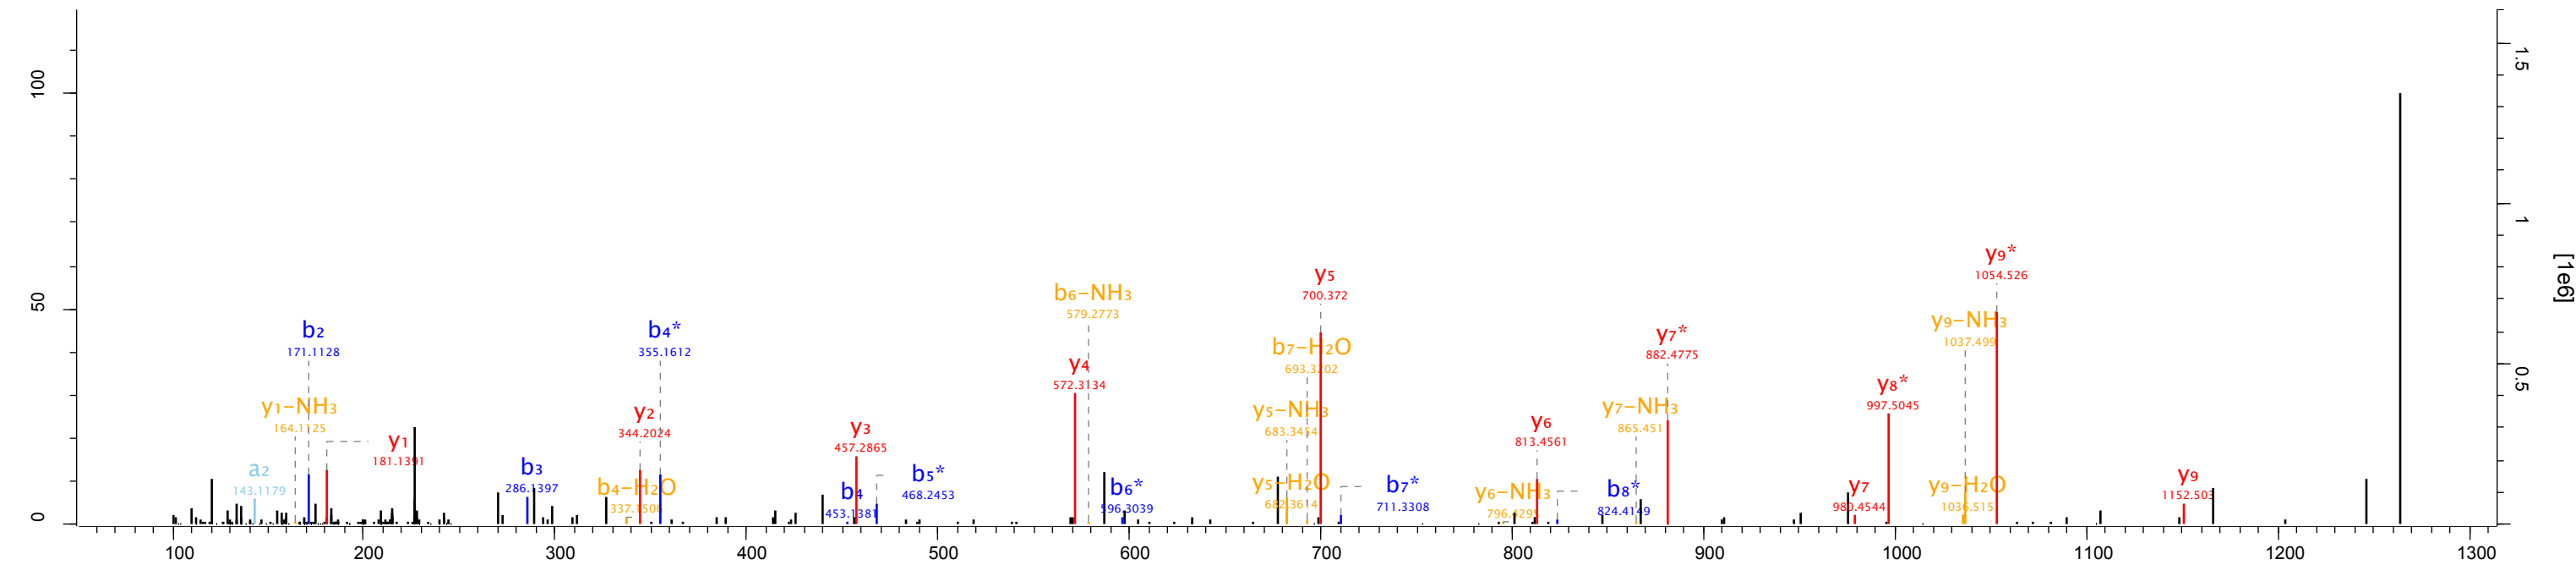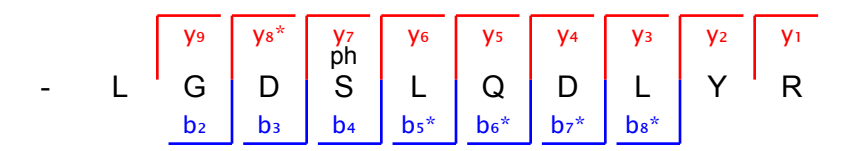

Raw file: 20150814\_A375SR\_Phospho\_BR2\_04  
 Scan: 18887 Method: FTMS; HCD Score: 168.96 m/z: 713.34 Gene names: PHC3

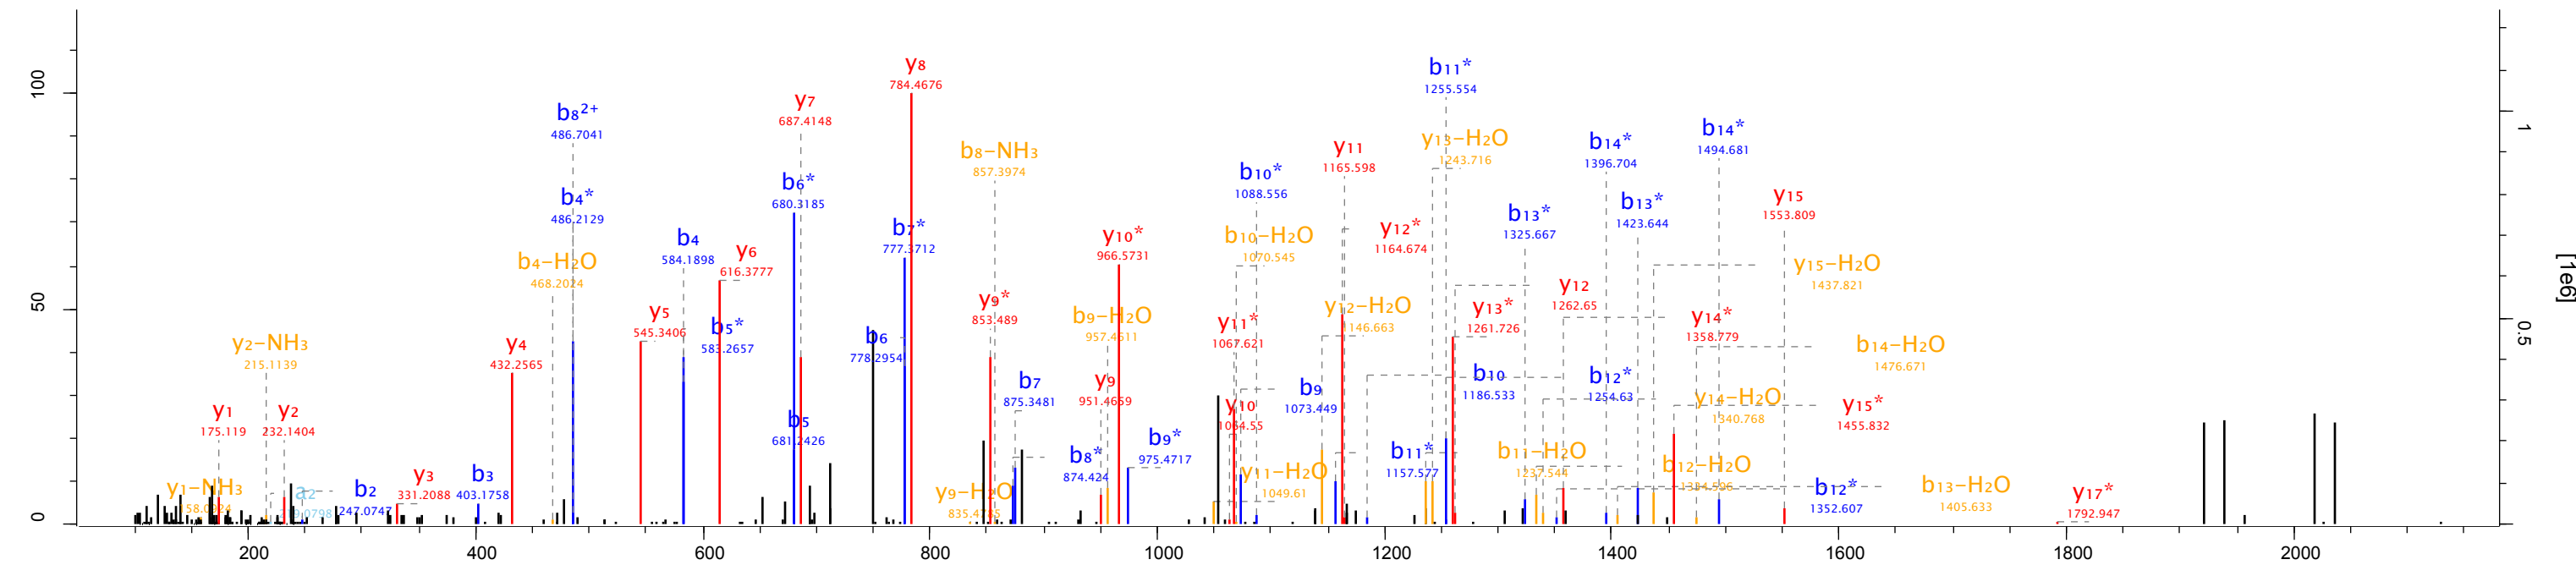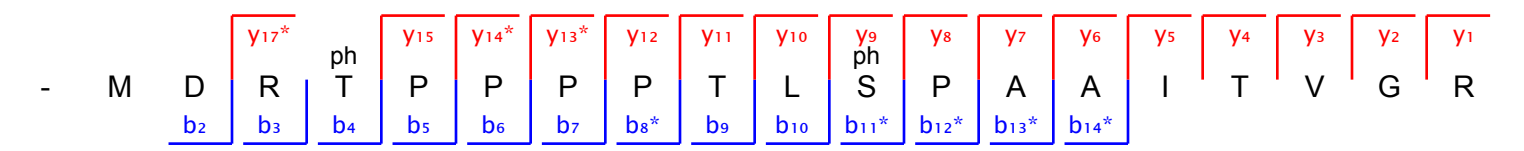

Raw file 20150814\_A375SR\_Phospho\_BR2\_04 Scan 19077 Method FTMS; HCD Score 71.93 m/z 775.86 Gene names DARS2

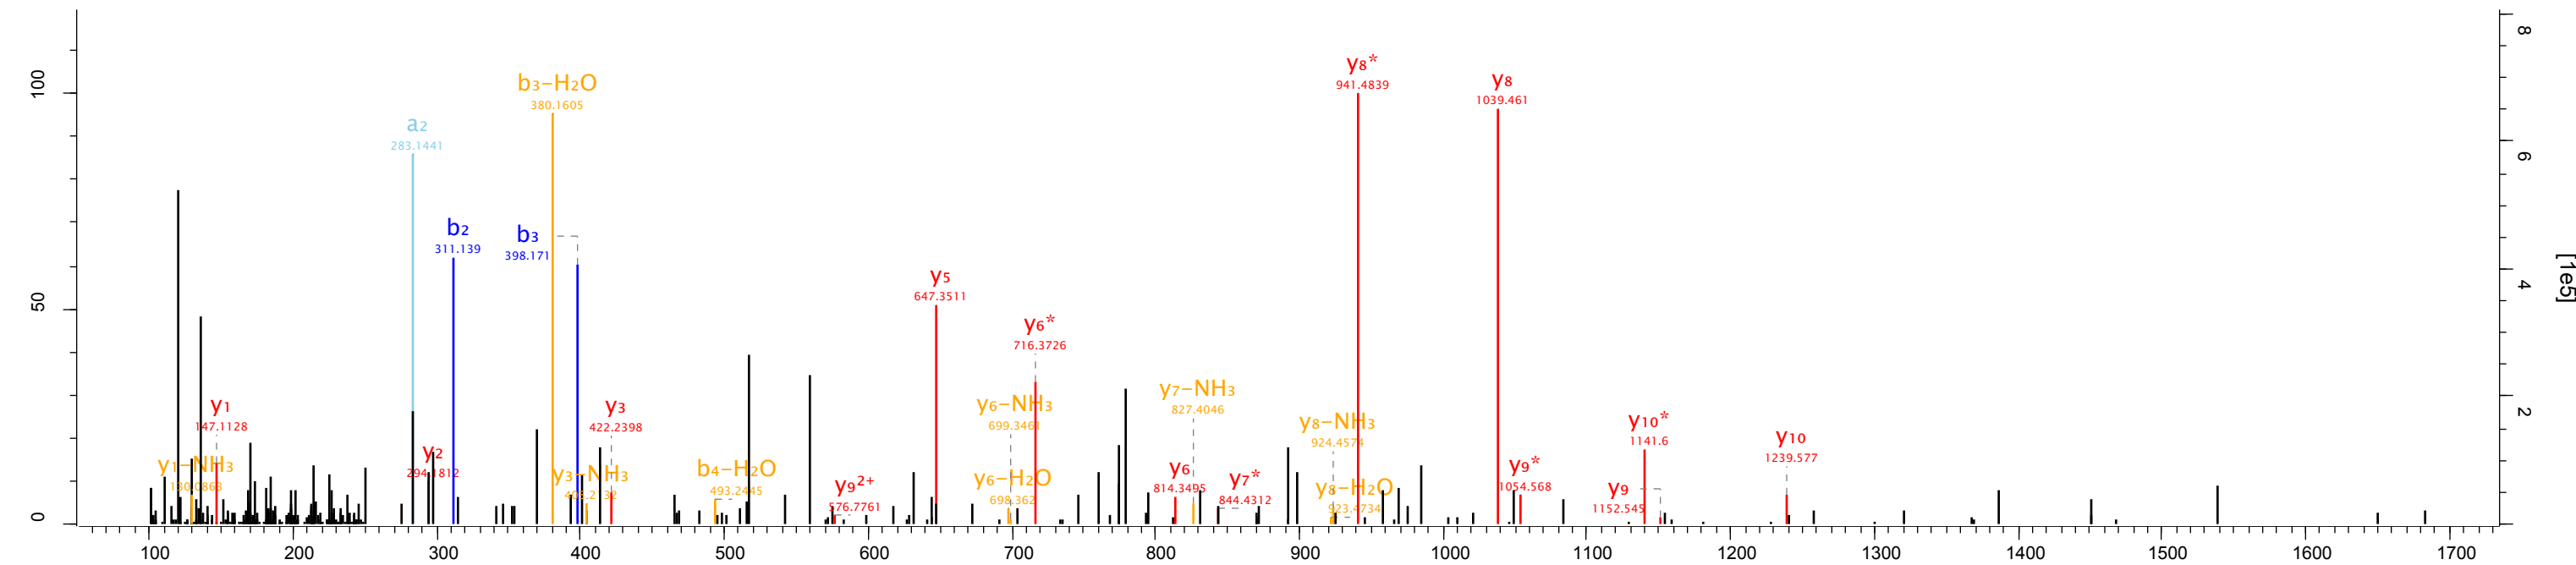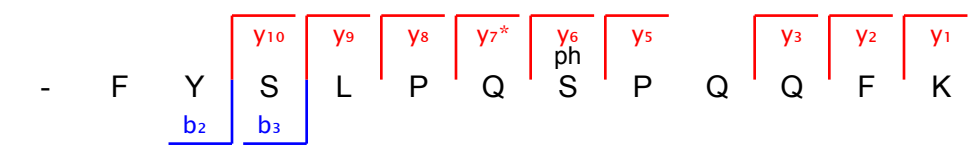

Raw file 20150814\_A375SR\_Phospho\_BR2\_04 Scan 19137 Method FTMS; HCD Score 119.94 m/z 653.63 Gene names NUP98

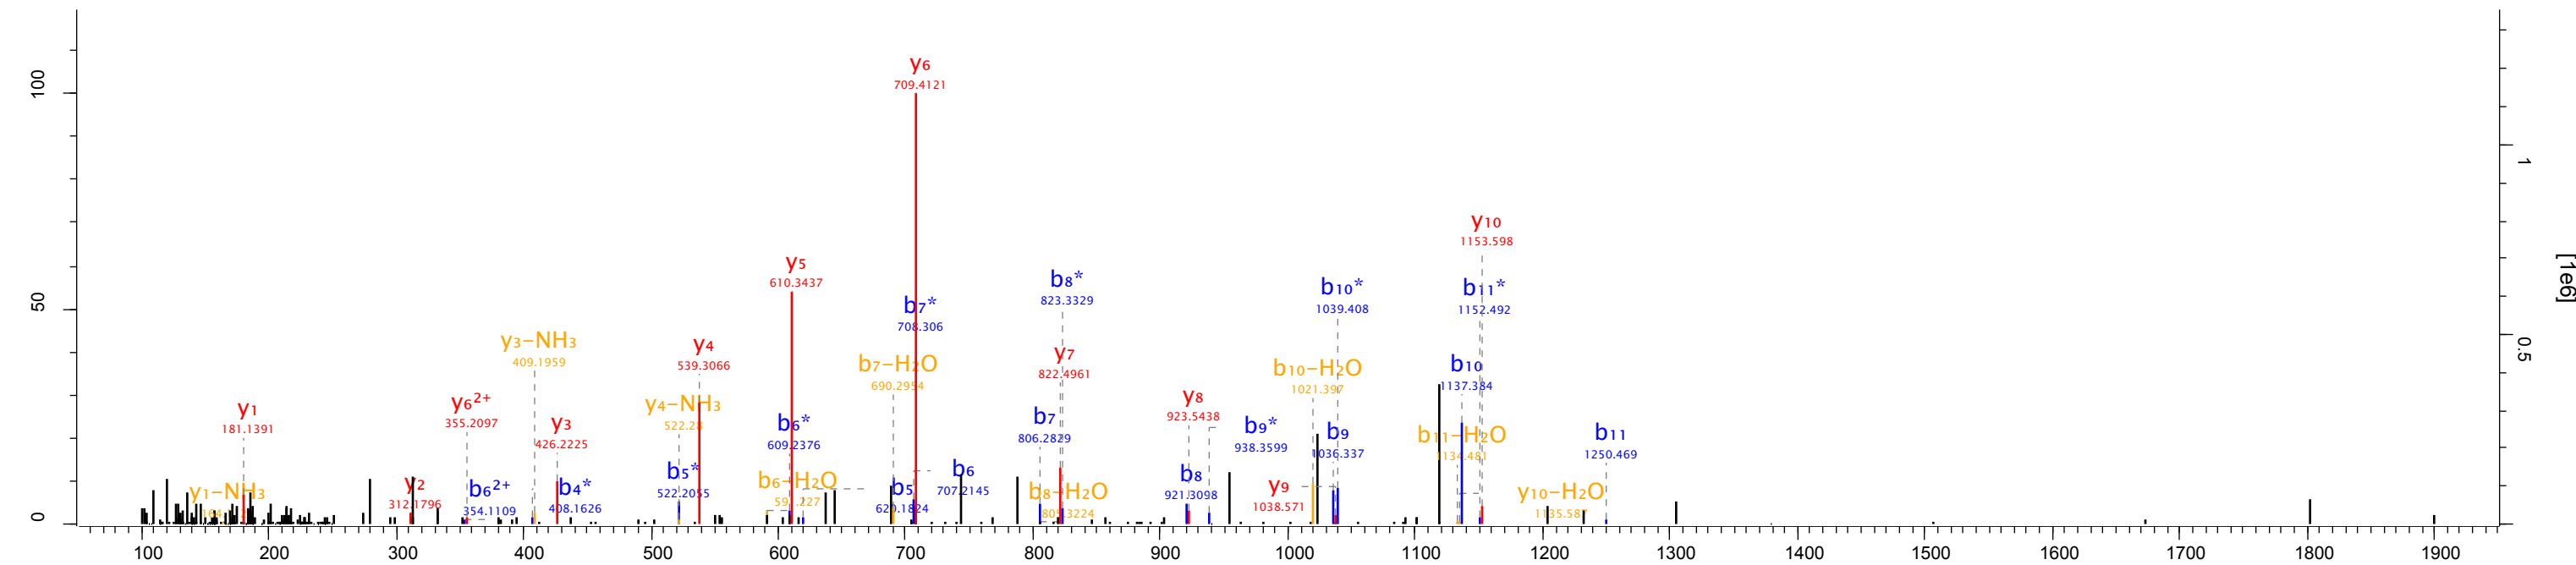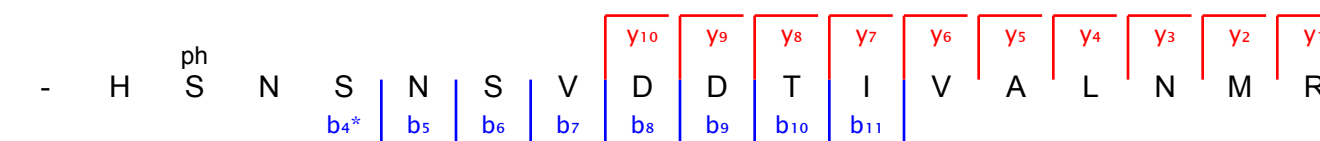

Raw file: 20150814\_A375SR\_Phospho\_BR2\_04  
 Scan: 19217 Method: FTMS; HCD Score: 262.15 m/z: 1098.96 Gene names: ARID1A

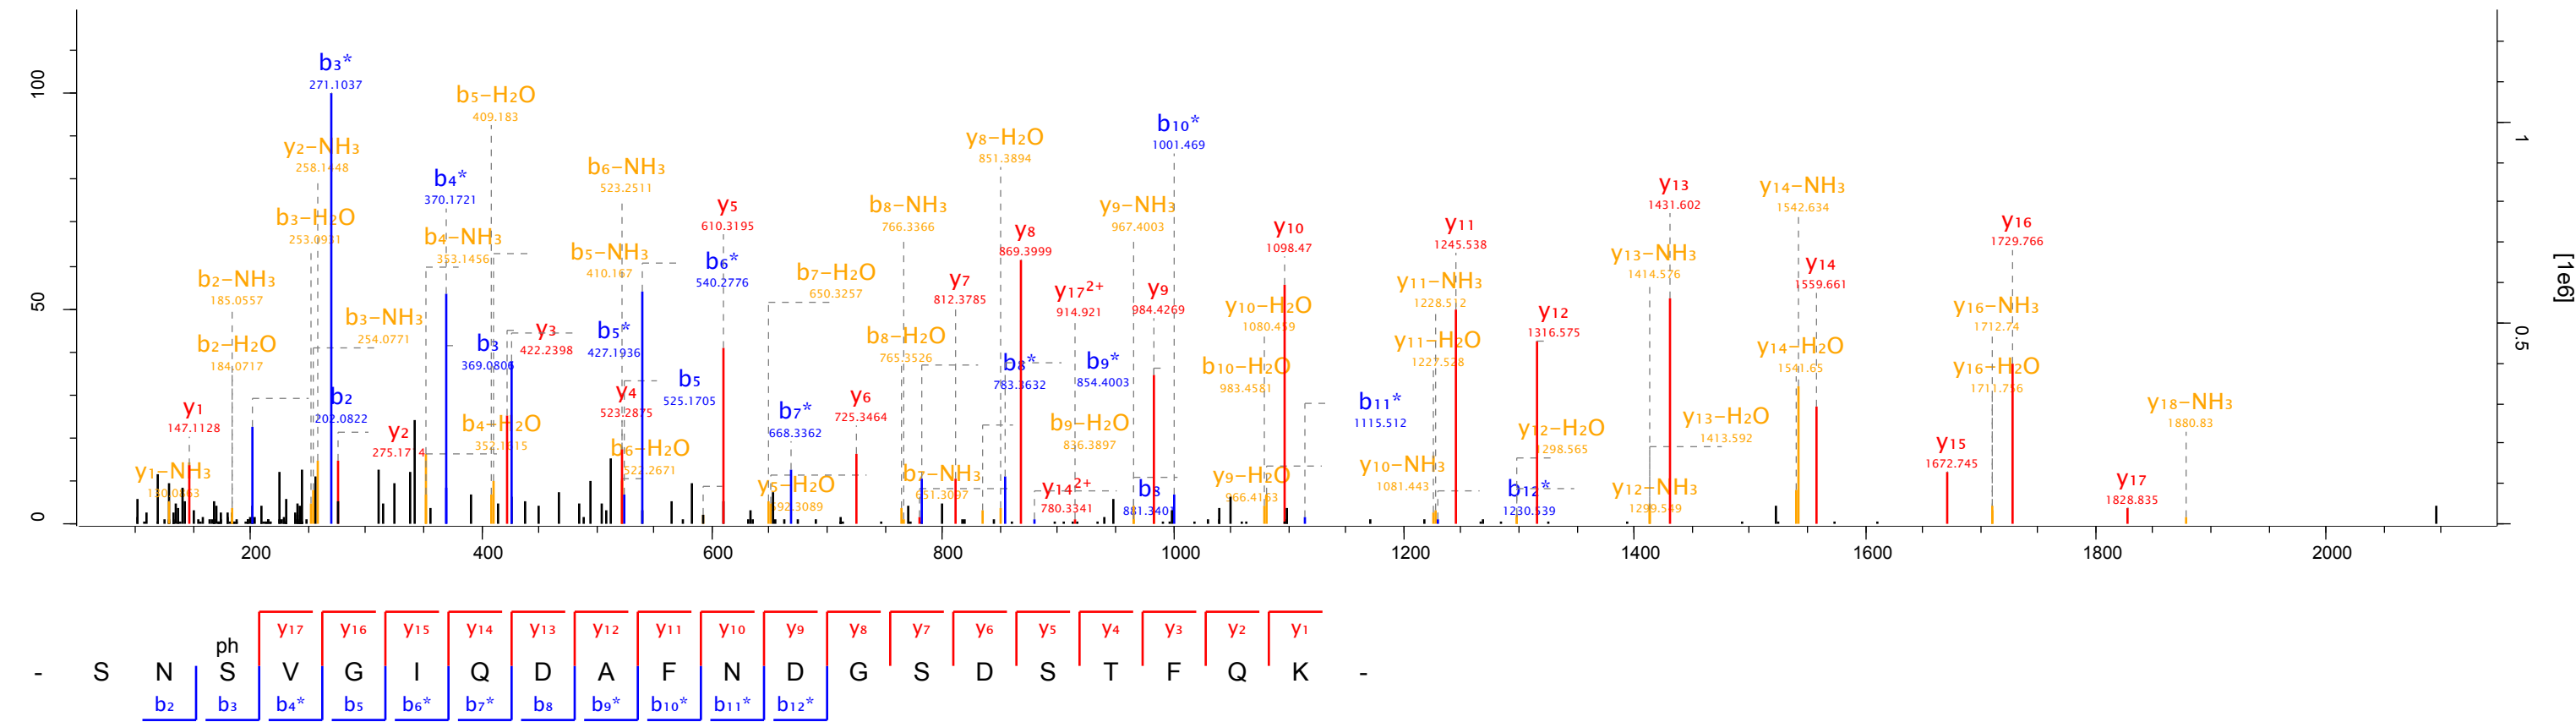



Raw file 20150814\_A375SR\_Phospho\_BR2\_04 Scan 19377 Method FTMS; HCD Score 227.64 m/z 812.94 Gene names NSFL1C

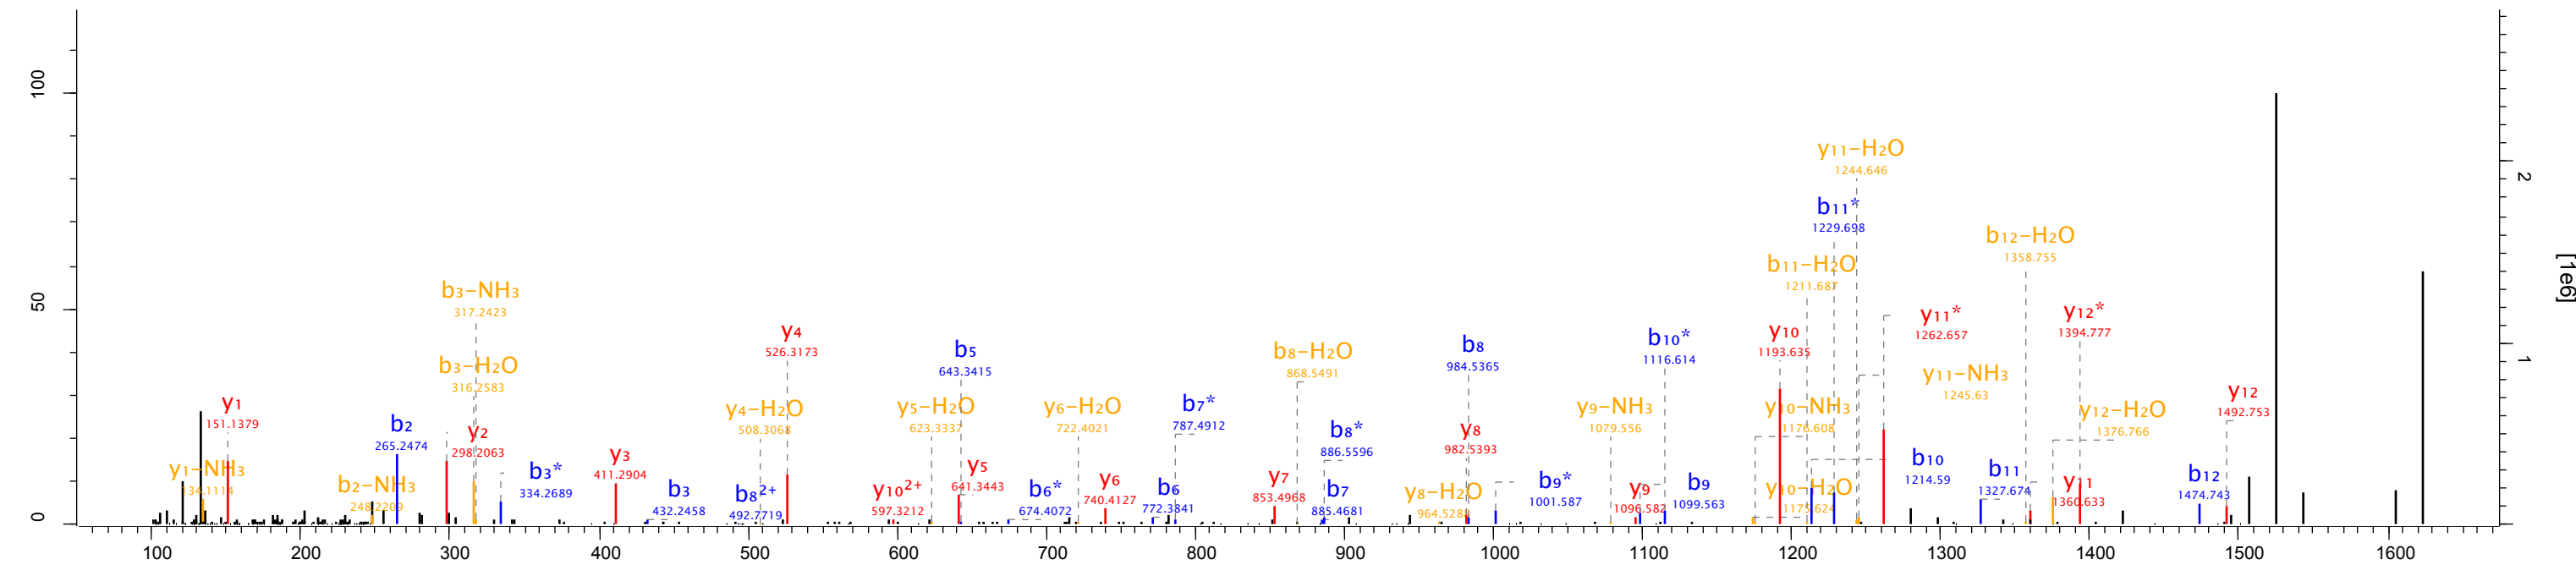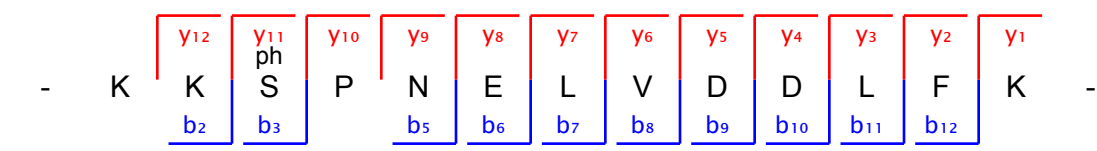

Raw file 20150814\_A375SR\_Phospho\_BR2\_04 Scan 19447 Method FTMS; HCD Score 81.35 m/z 555.61 Gene names CDC25B

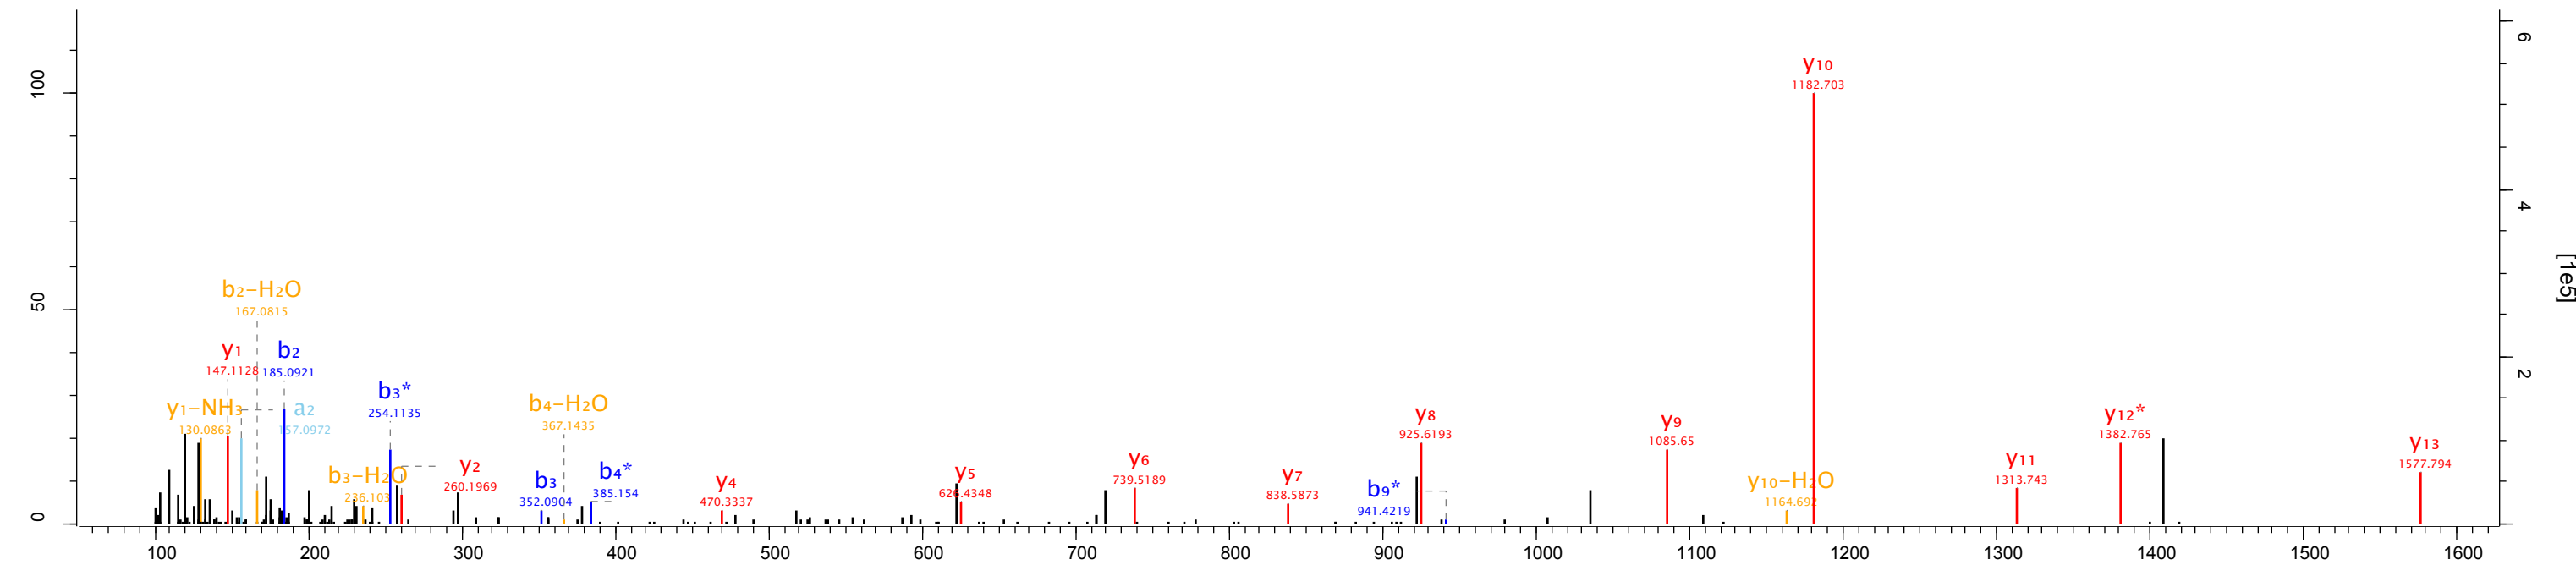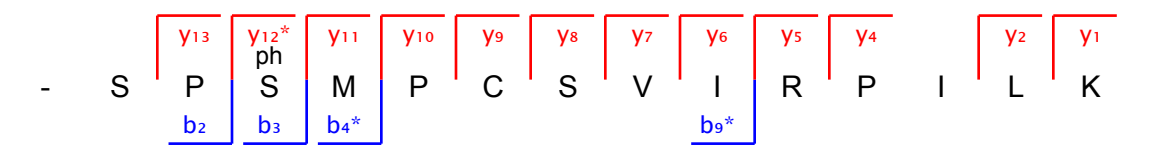

Raw file: 20150814\_A375SR\_Phospho\_BR2\_04  
 Scan: 19487 Method: FTMS; HCD Score: 99.81 m/z: 787.34 Gene names: HMGXB4

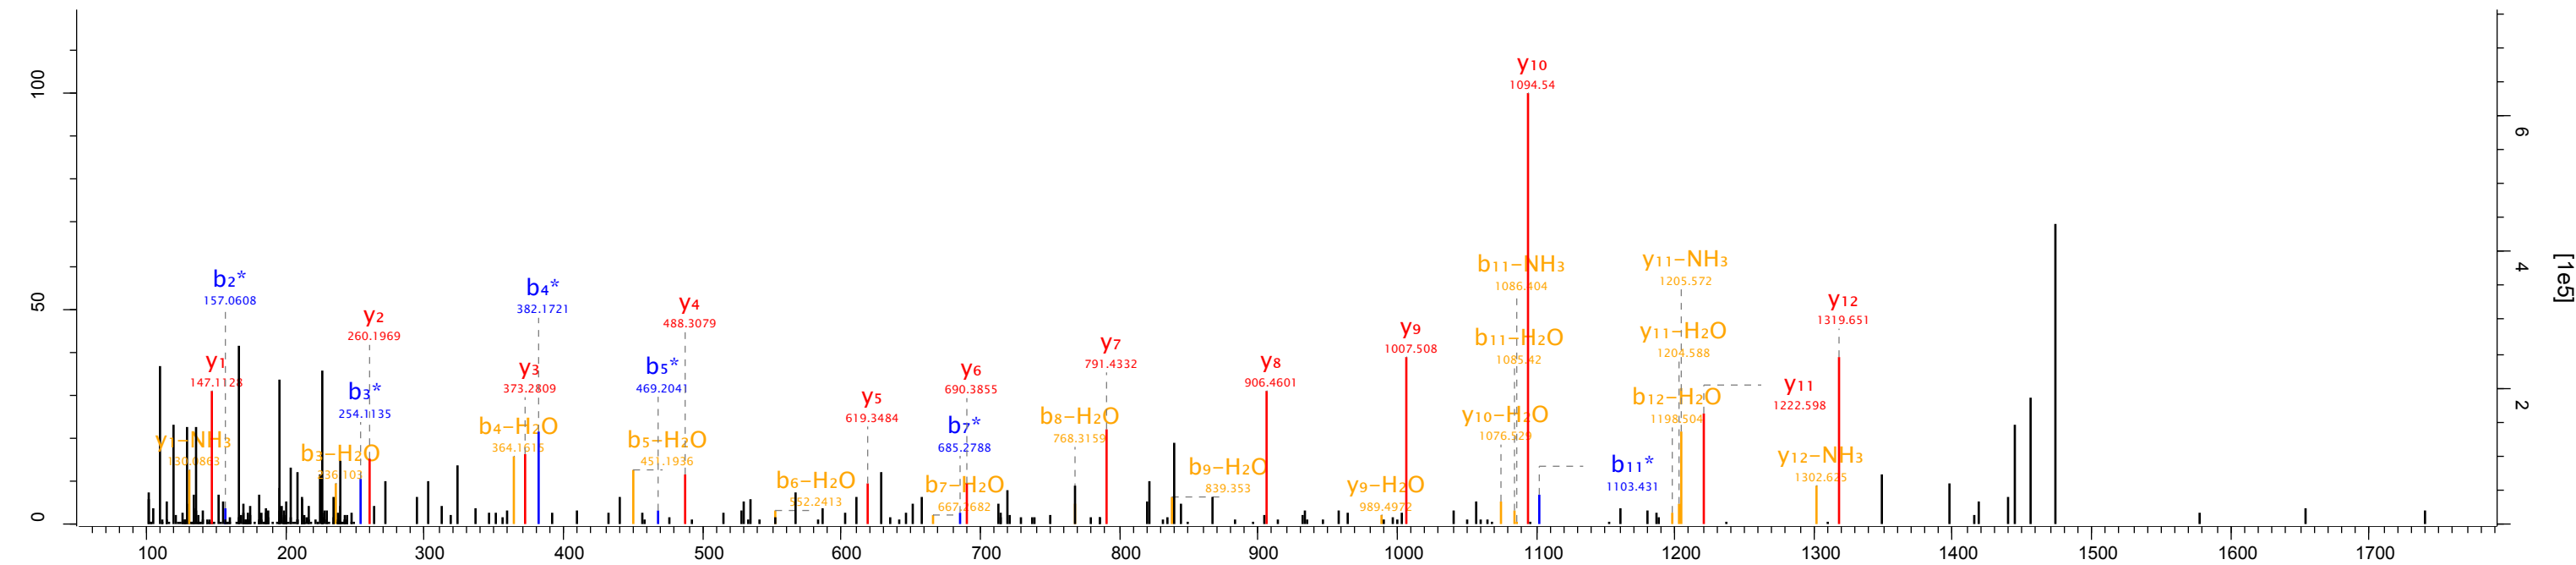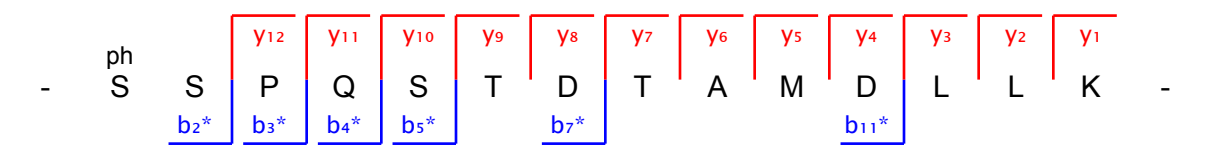

Raw file: 20150814\_A375SR\_Phospho\_BR2\_04  
 Scan: 19757 Method: FTMS; HCD Score: 117.17 m/z: 1170.9 Gene names: TJP1

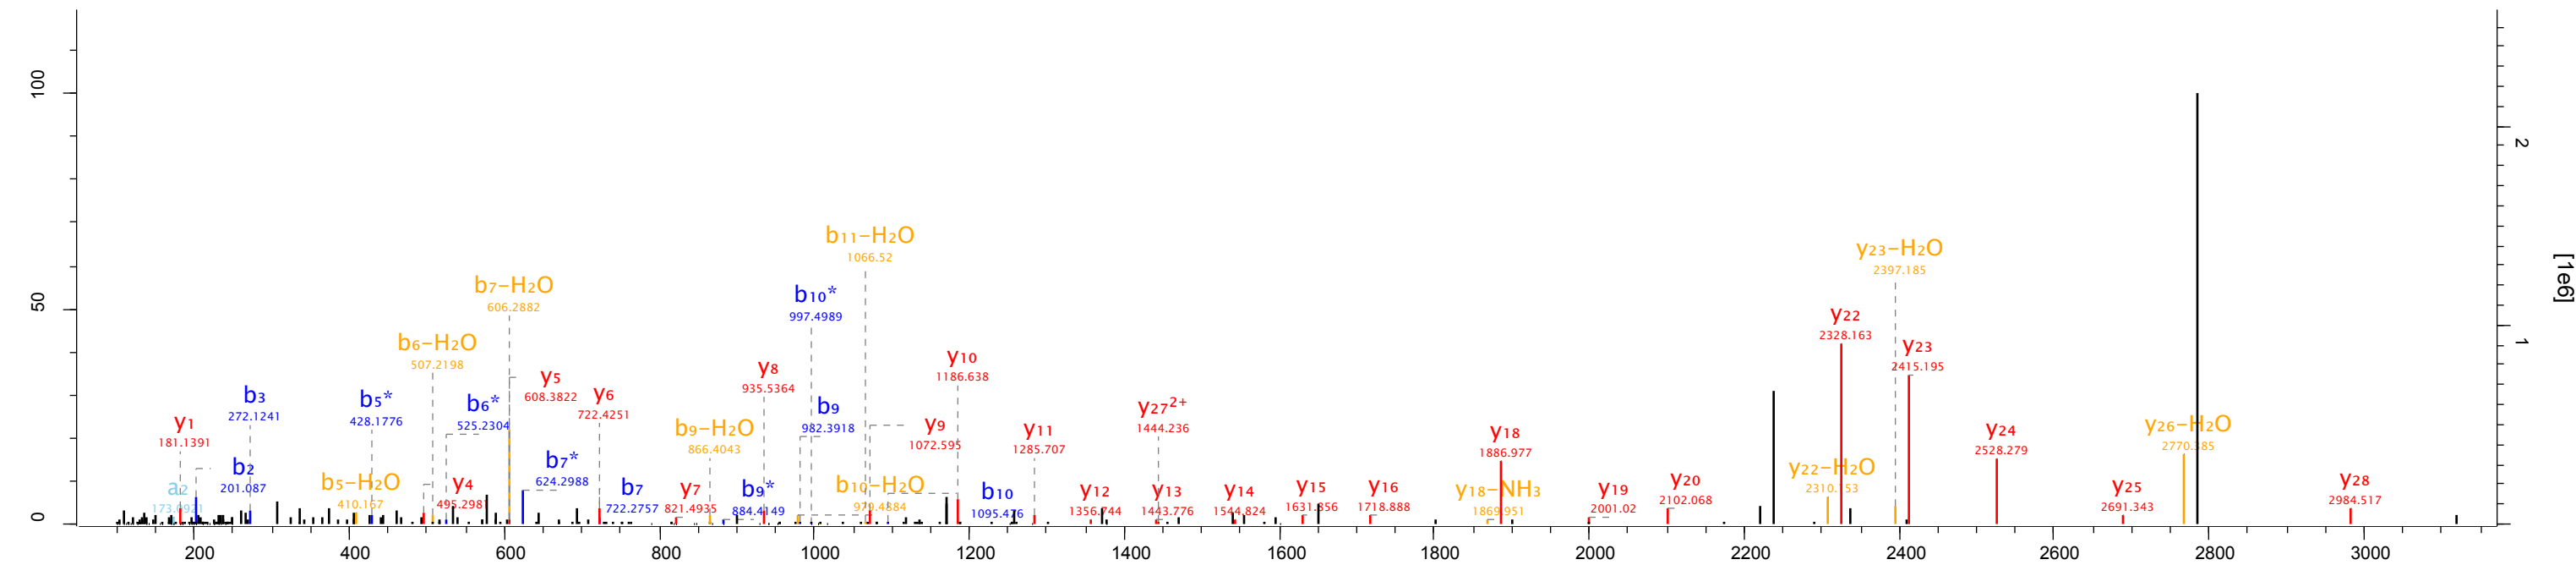

- A E A S S P V P Y L S P E T N P A S S T S A V N H N V N L T N V R -

ph

b<sub>2</sub> b<sub>3</sub> b<sub>5</sub>\* b<sub>6</sub>\* b<sub>7</sub> b<sub>9</sub> b<sub>10</sub> y<sub>1</sub> y<sub>4</sub> y<sub>5</sub> y<sub>6</sub> y<sub>7</sub> y<sub>8</sub> y<sub>9</sub> y<sub>10</sub> y<sub>11</sub> y<sub>12</sub> y<sub>13</sub> y<sub>14</sub> y<sub>15</sub> y<sub>16</sub> y<sub>18</sub> y<sub>19</sub> y<sub>20</sub> y<sub>22</sub> y<sub>23</sub> y<sub>24</sub> y<sub>25</sub> y<sub>27</sub><sup>2+</sup> y<sub>28</sub>

Raw file: 20150814\_A375SR\_Phospho\_BR2\_04  
 Scan: 20357 Method: FTMS; HCD Score: 158.61 m/z: 806.75 Gene names: PPP1R35

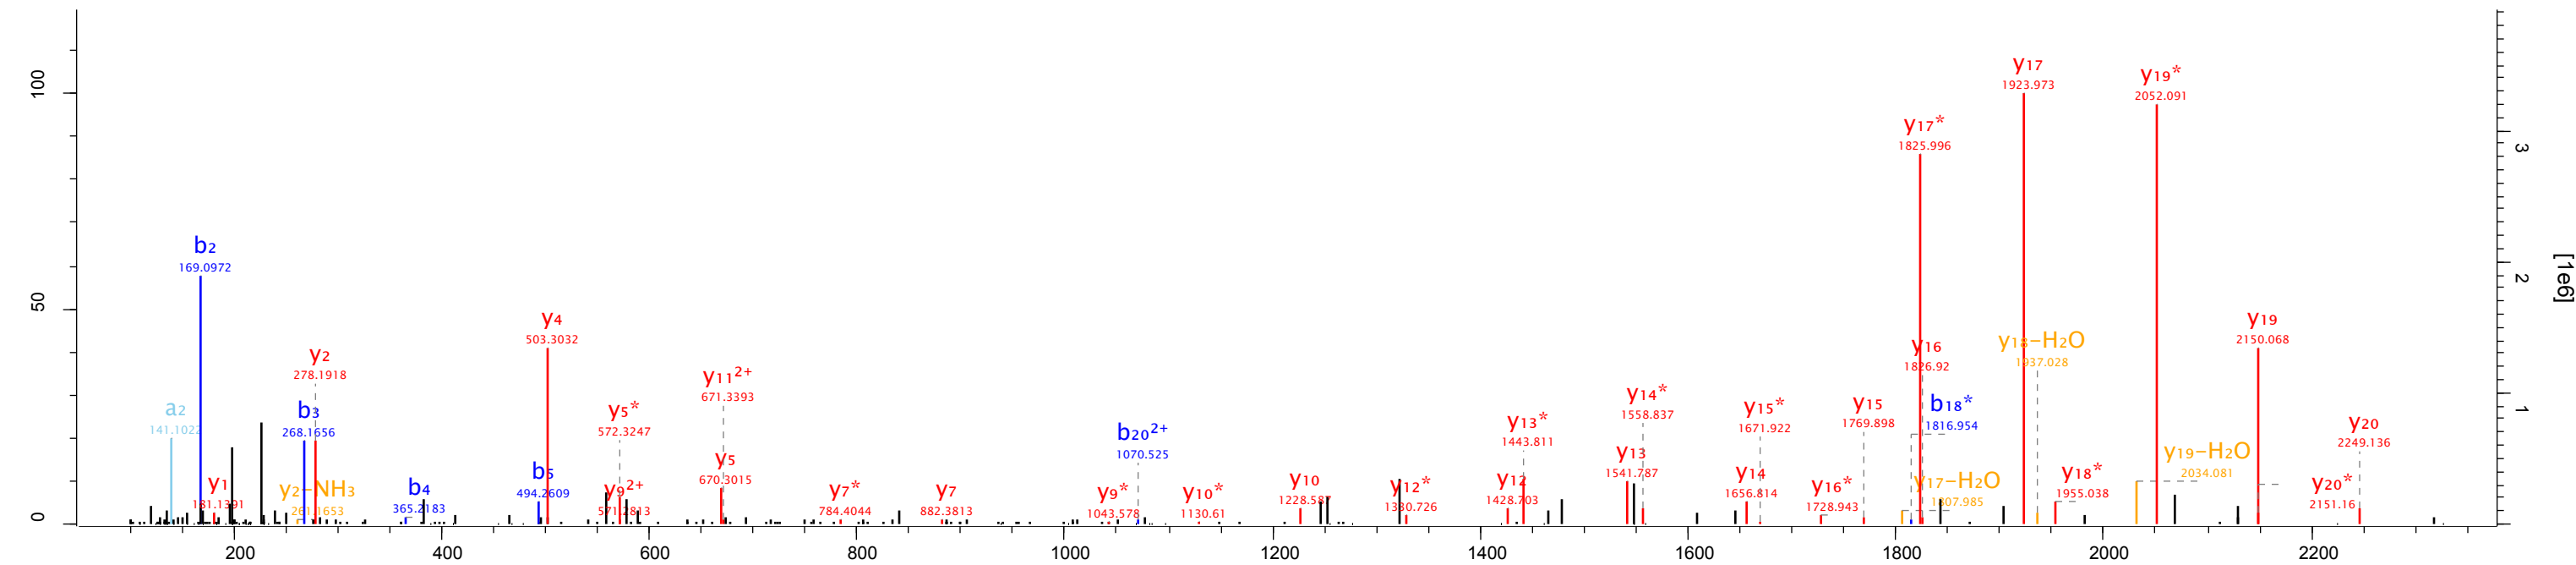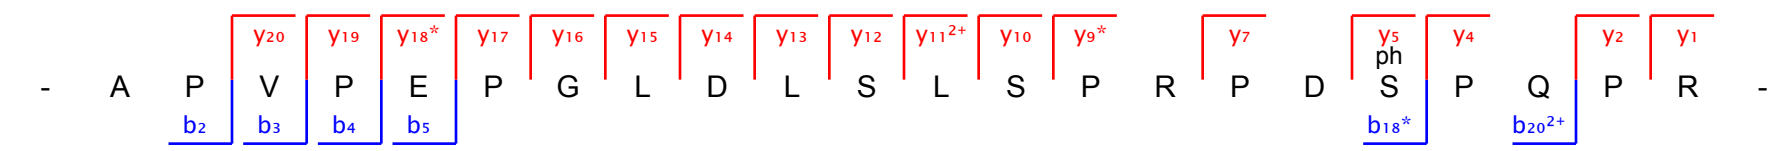

Raw file: 20150814\_A375SR\_Phospho\_BR2\_04  
 Scan: 20377 Method: FTMS; HCD Score: 162.08 m/z: 1102.82 Gene names: GAPVD1

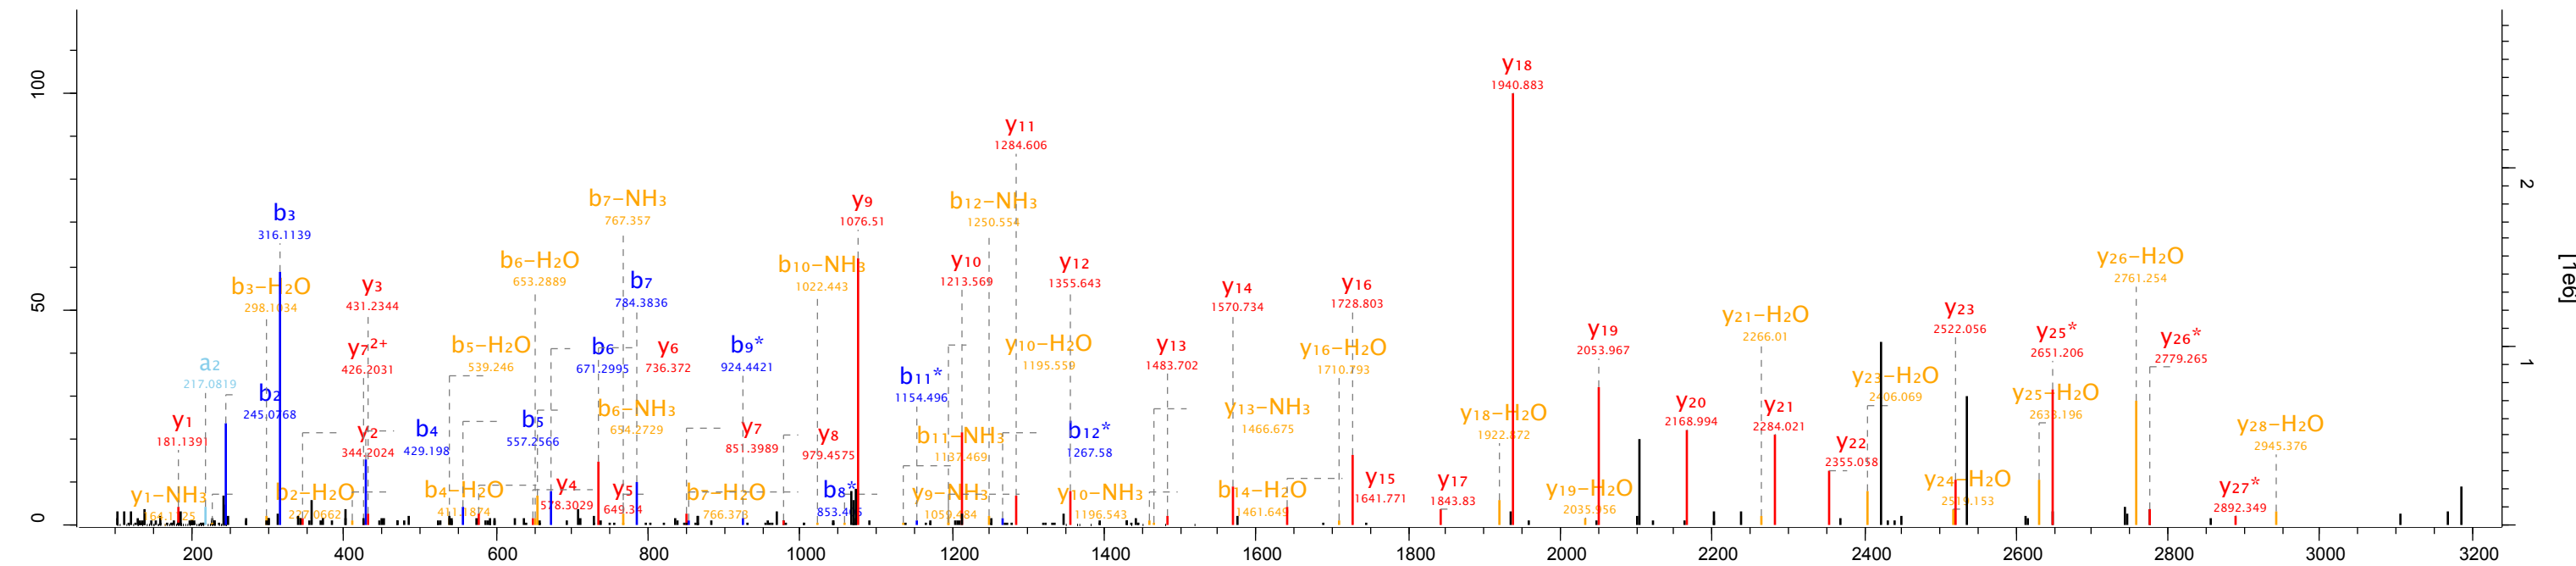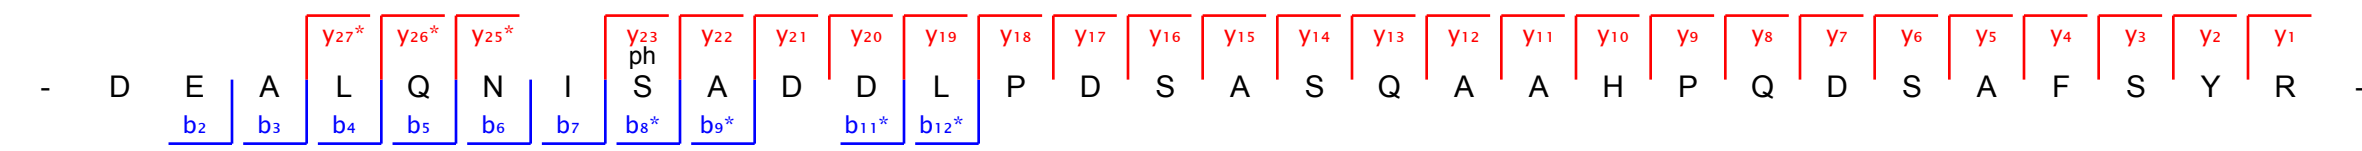

Raw file: 20150814\_A375SR\_Phospho\_BR2\_04  
 Scan: 20817  
 Method: FTMS; HCD  
 Score: 64.06  
 m/z: 1011.81  
 Gene names: ARHGAP29

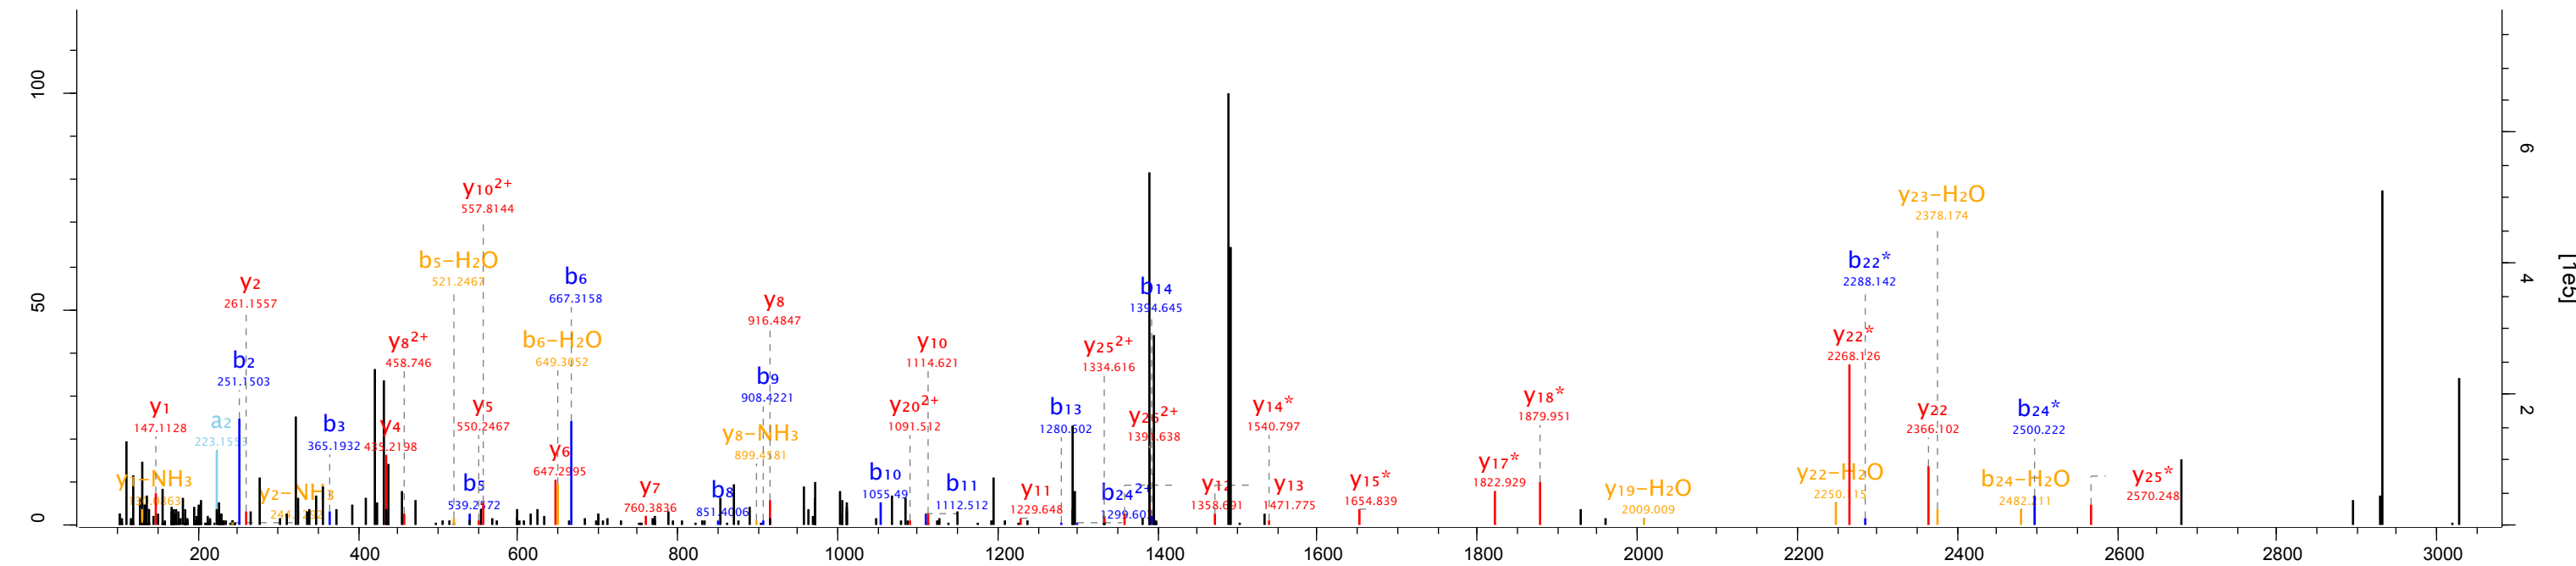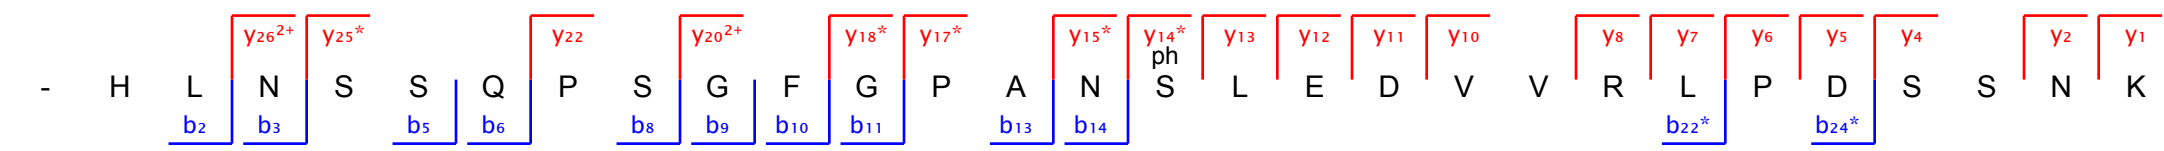

Raw file  
20150814\_A375SR\_Phospho\_BR2\_04

Scan 20977 Method FTMS; HCD Score 357.96 m/z 1223.04 Gene names CTR9

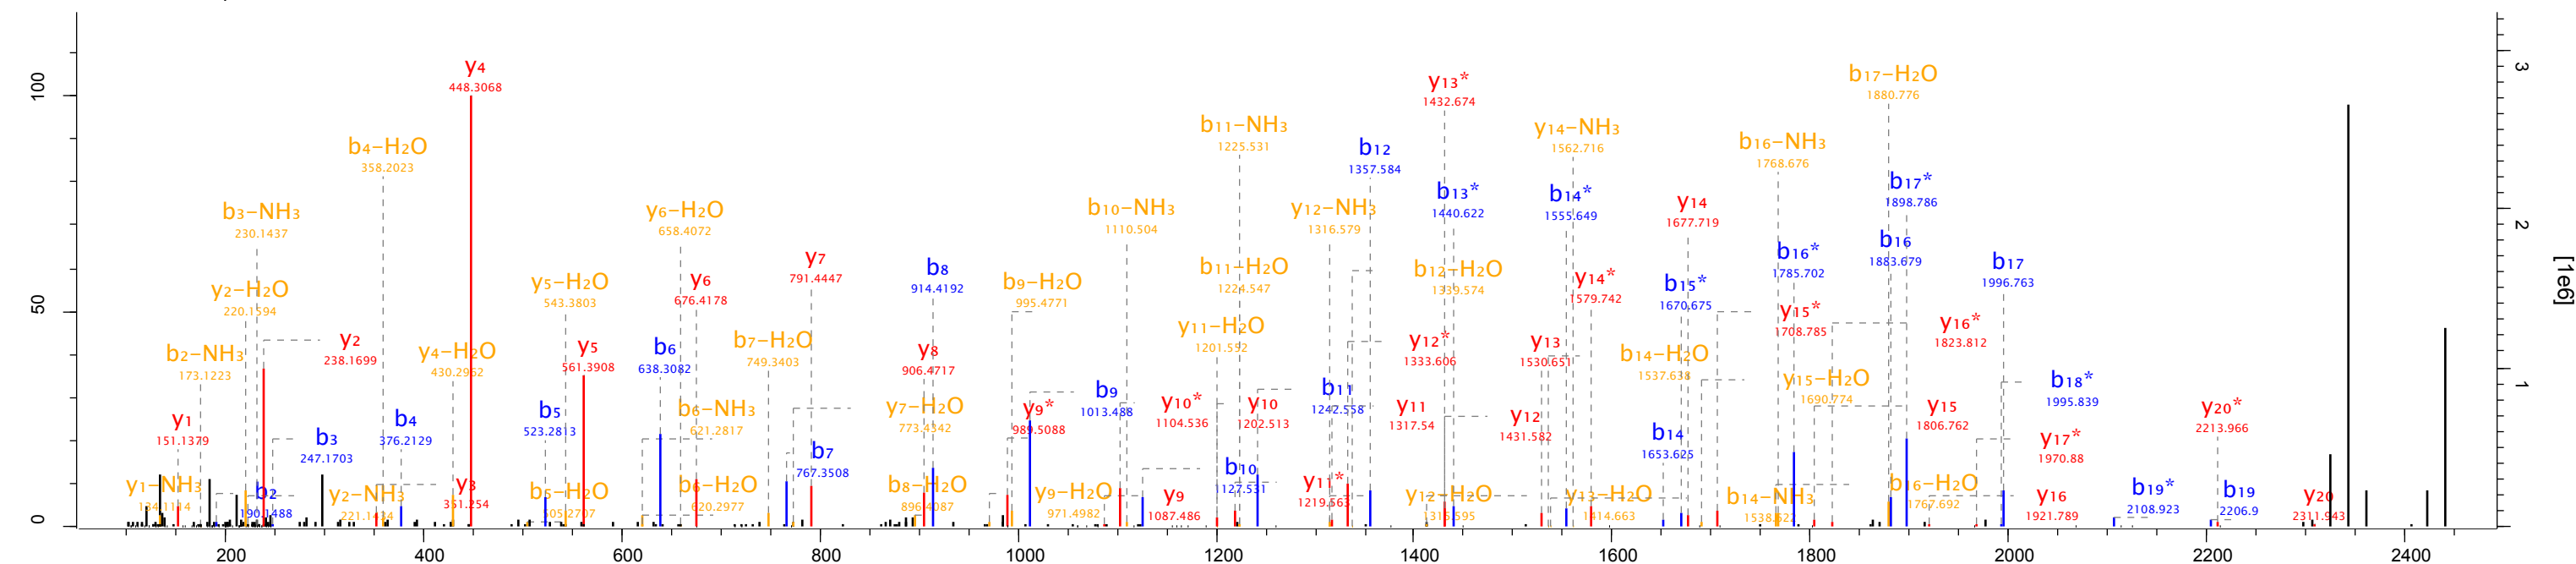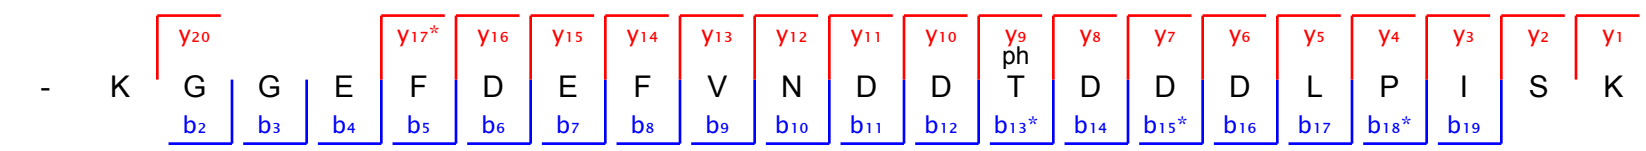



Raw file 20150814\_A375SR\_Phospho\_BR2\_04 Scan 21057 Method FTMS; HCD Score 143.17 m/z 677.01 Gene names LYST

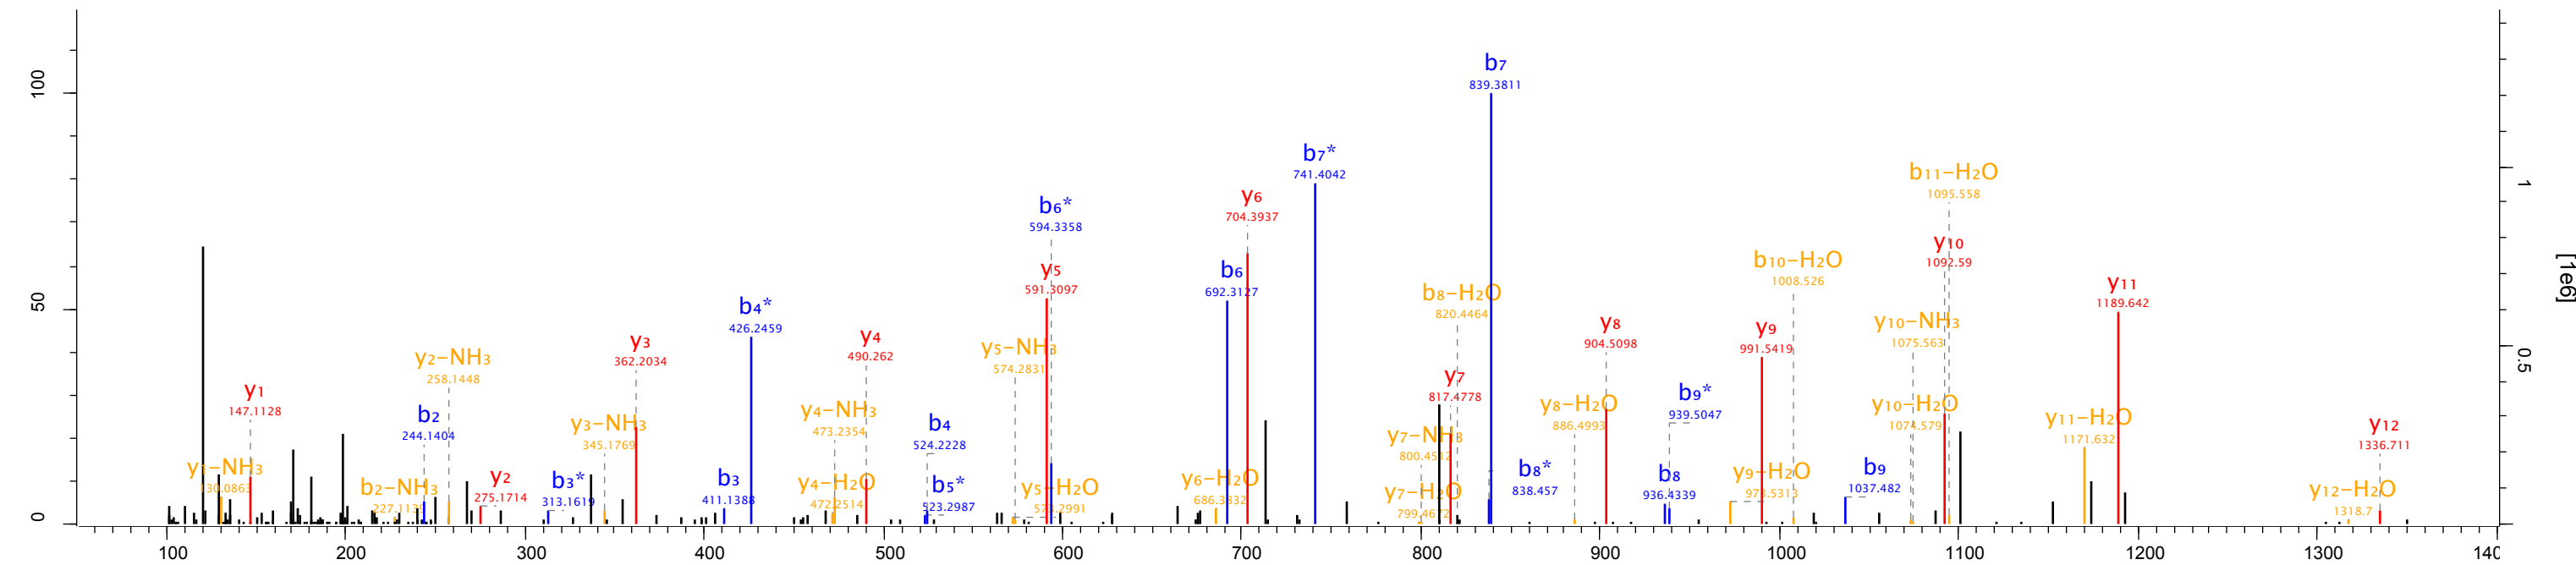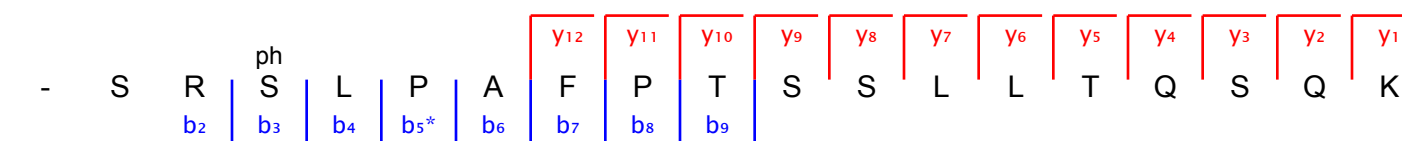

Raw file 20150814\_A375SR\_Phospho\_BR2\_04 Scan 21137 Method FTMS; HCD Score 102.03 m/z 783.33 Gene names VAMP5

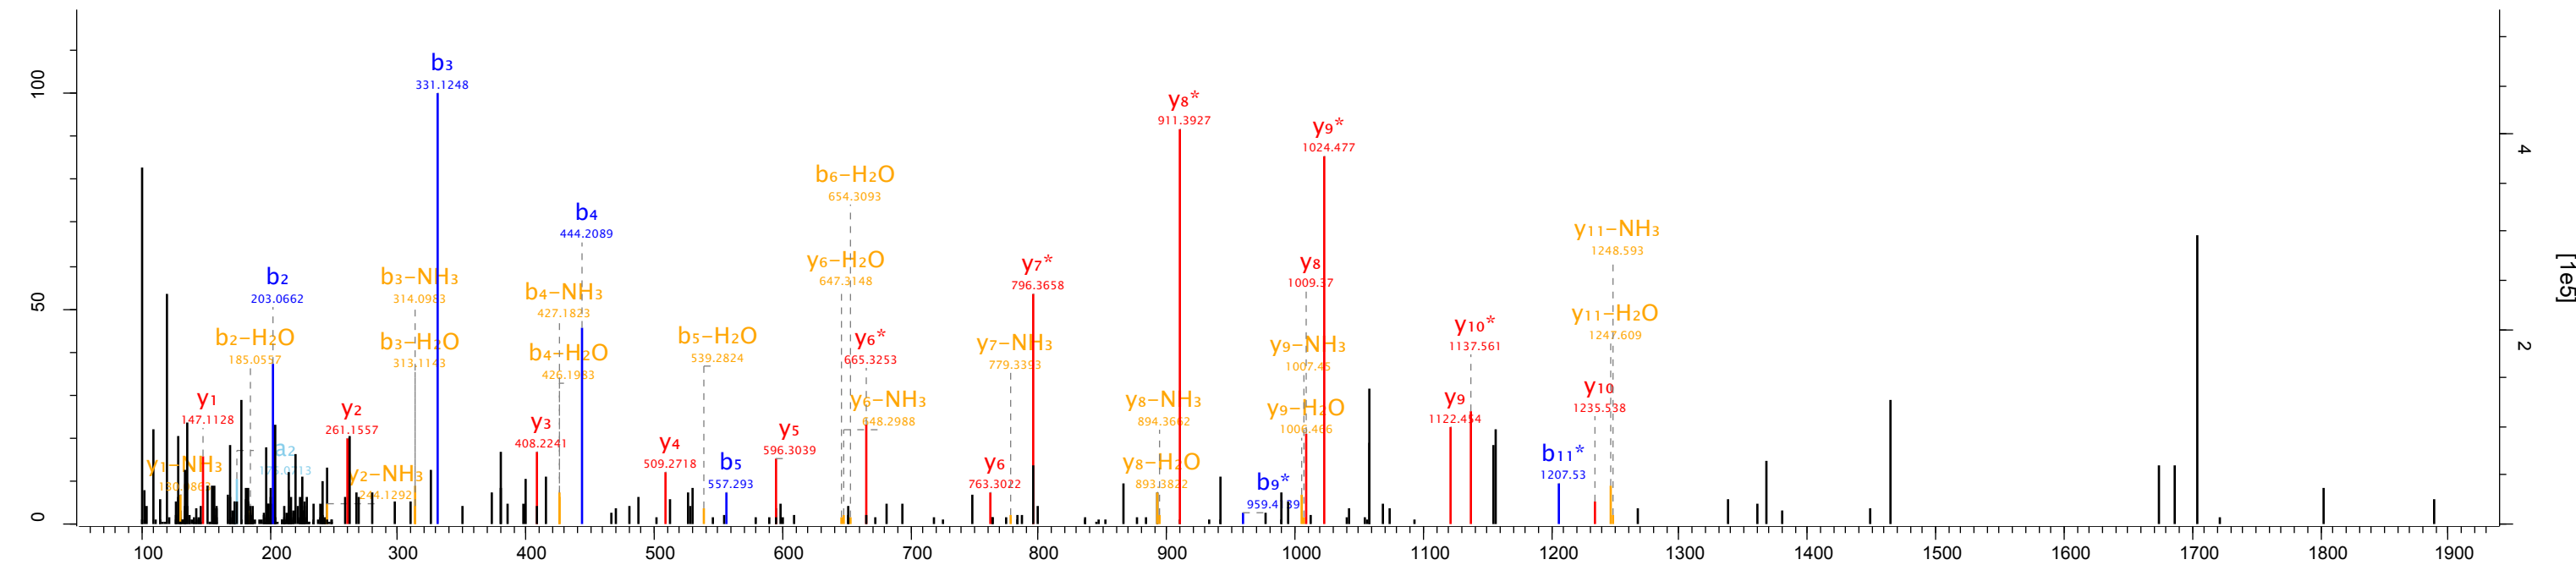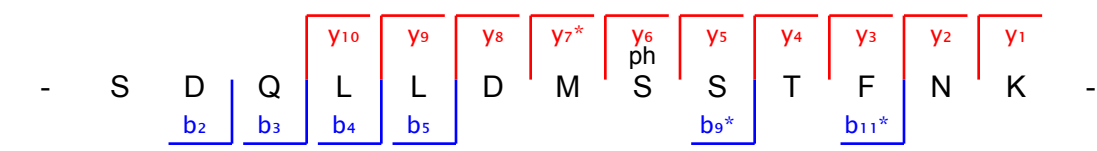

Raw file 20150814\_A375SR\_Phospho\_BR2\_04 Scan 21397 Method FTMS; HCD Score 112.57 m/z 764.38 Gene names EIF4G1

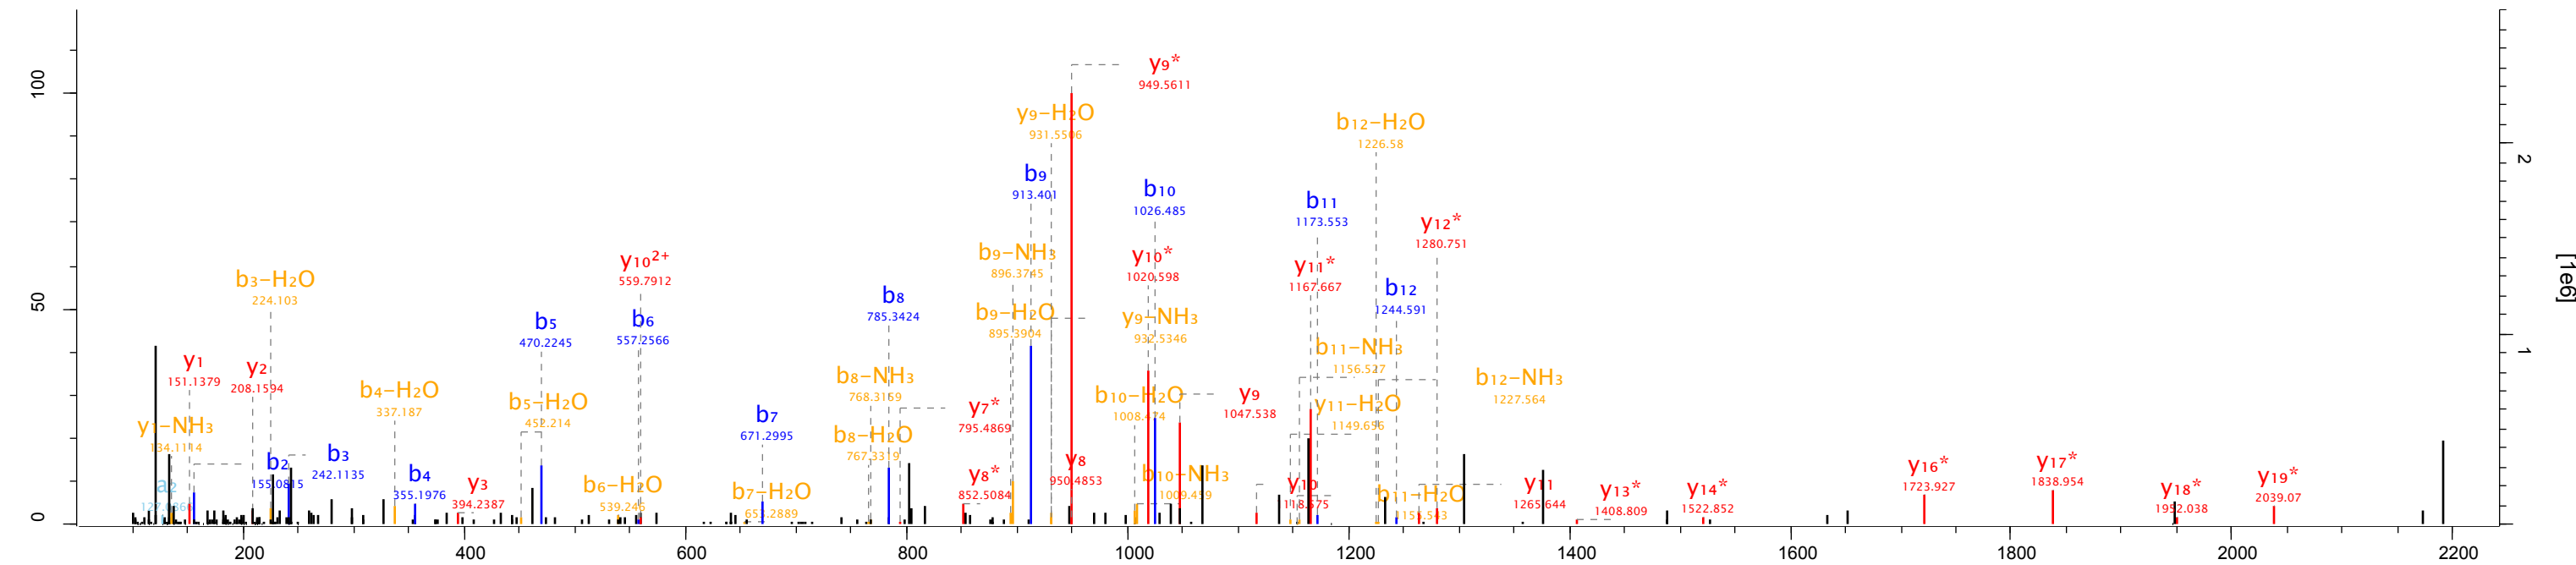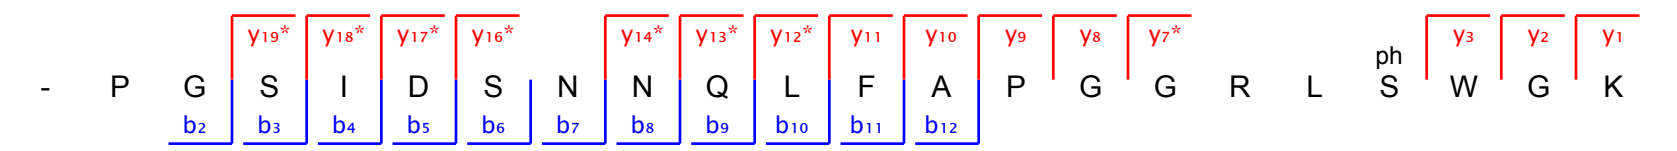

Raw file 20150814\_A375SR\_Phospho\_BR2\_04 Scan 21477 Method FTMS; HCD Score 60.29 m/z 881.08 Gene names BAIAP2;CCDC43

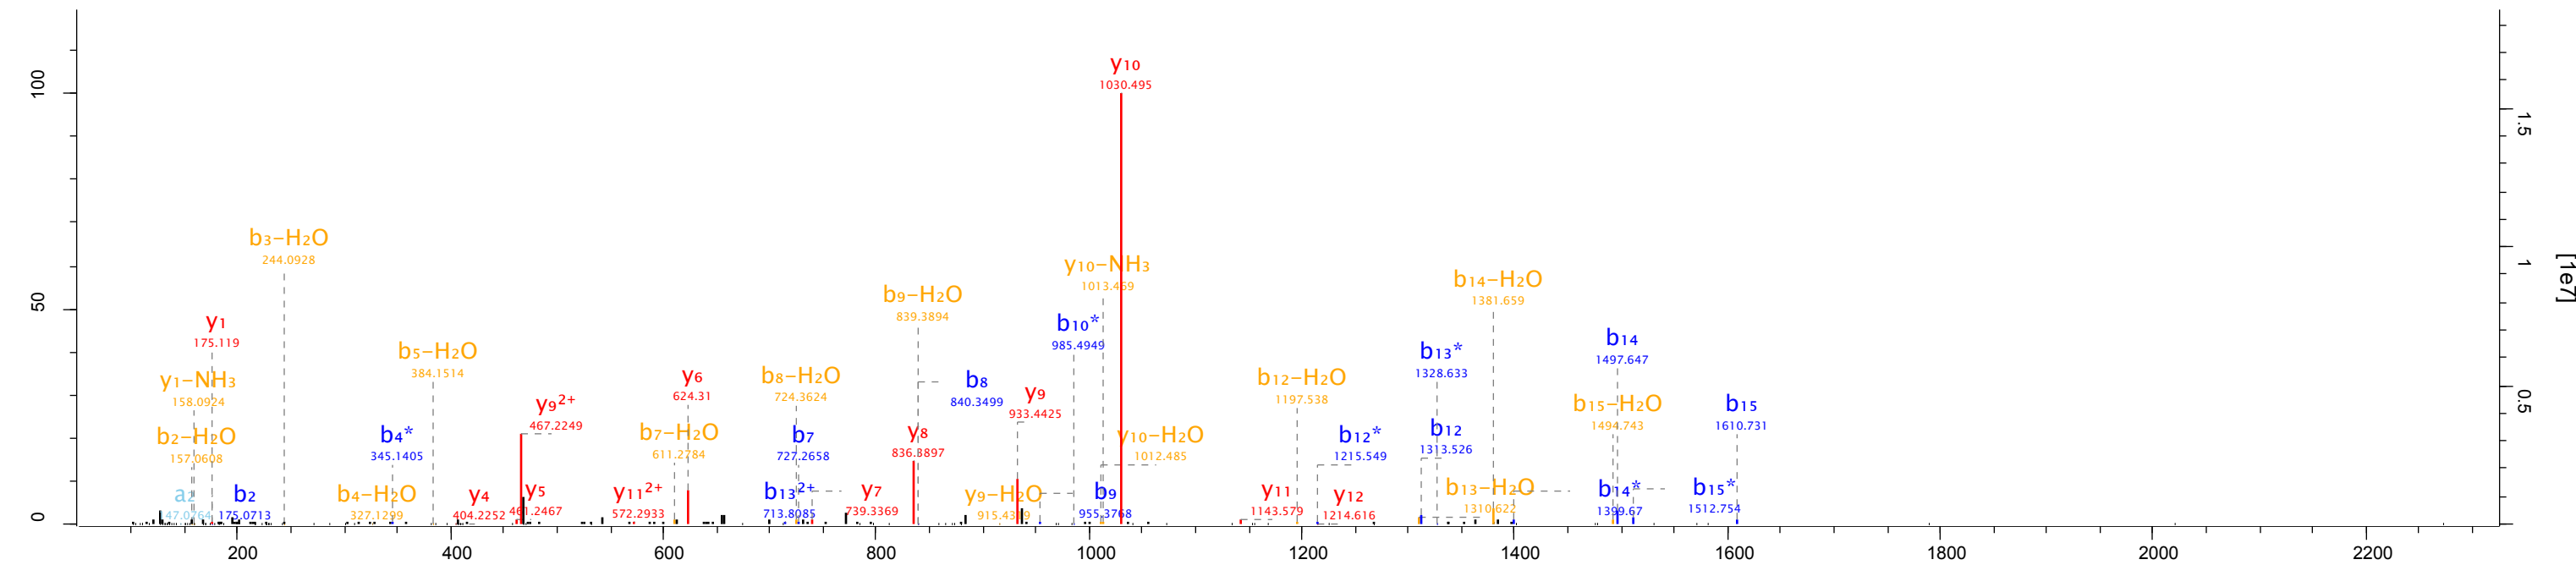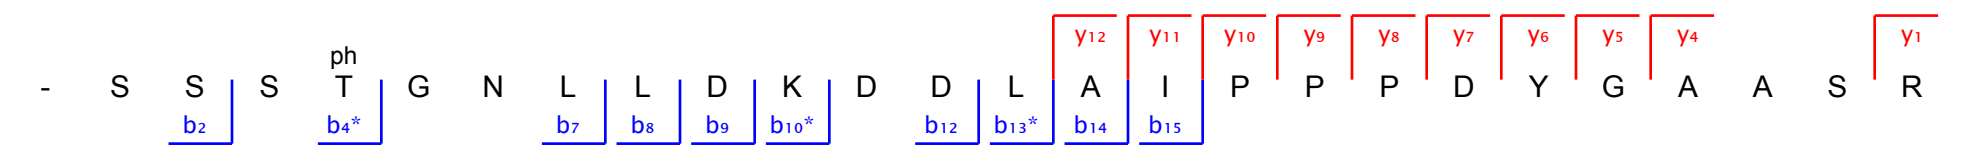

Raw file 20150814\_A375SR\_Phospho\_BR2\_04 Scan 21527 Method FTMS; HCD Score 222.69 m/z 1412.58 Gene names MAP1B

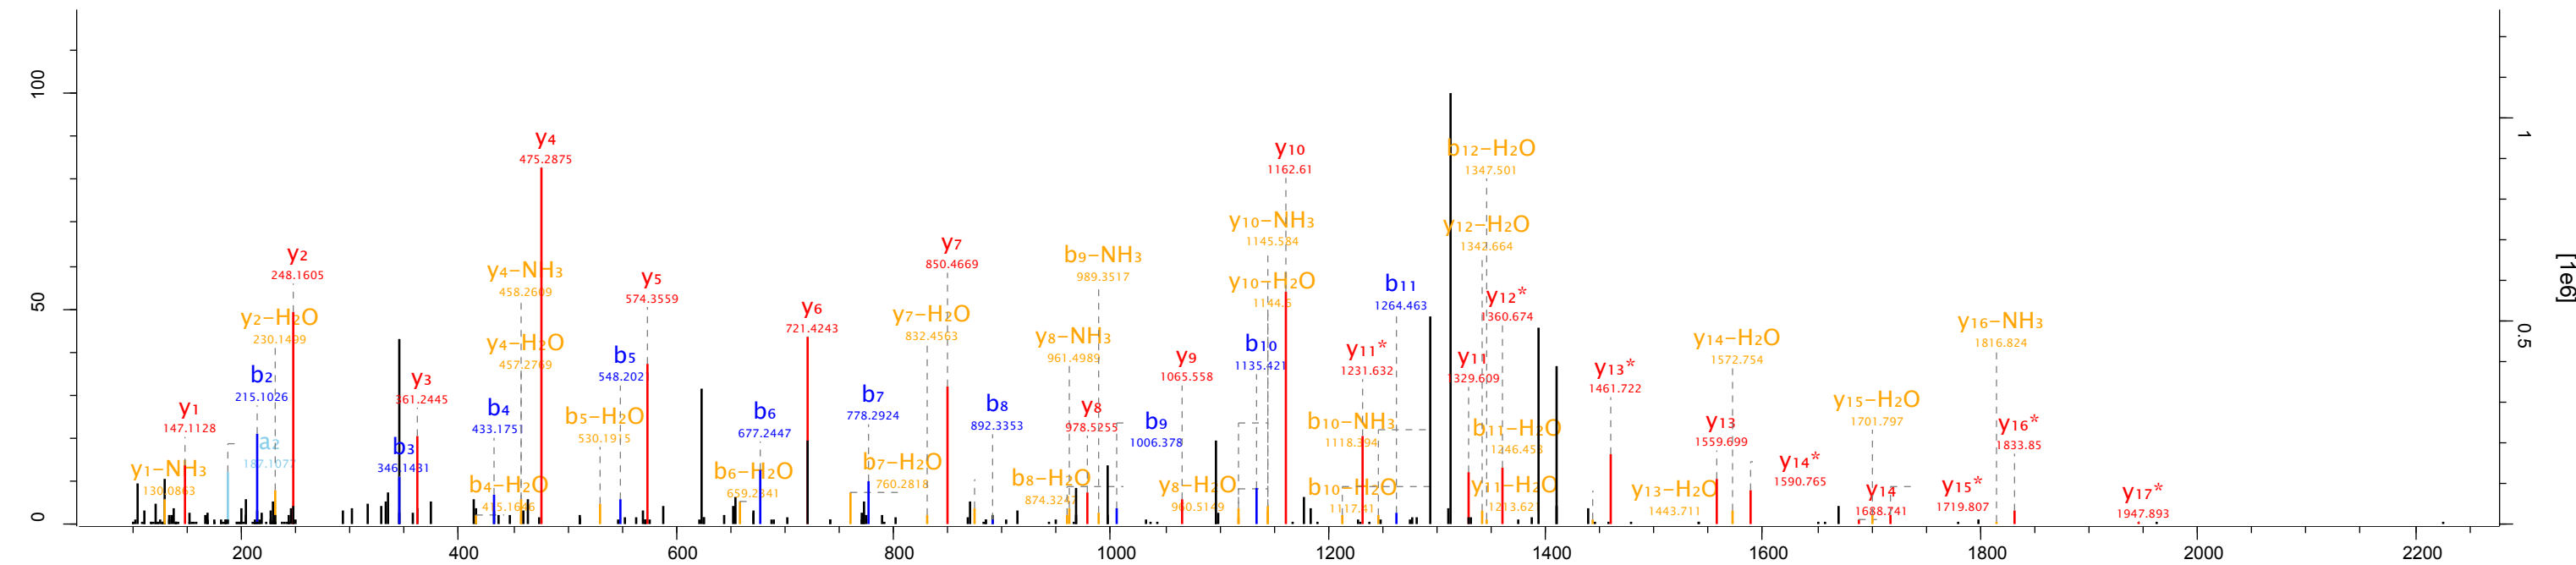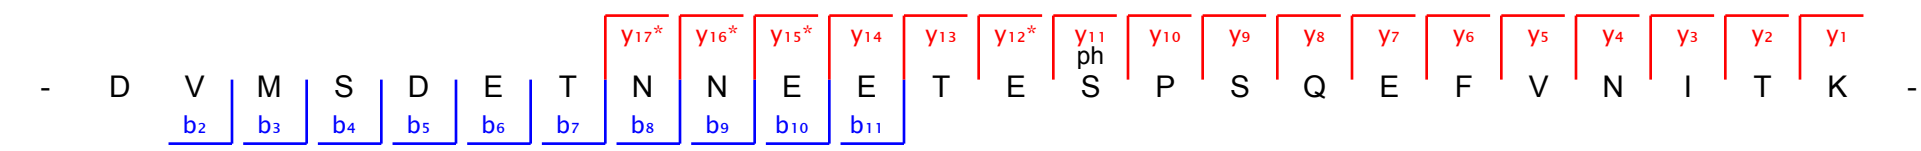

Raw file: 20150814\_A375SR\_Phospho\_BR2\_04  
 Scan: 22417 Method: FTMS; HCD Score: 223.71 m/z: 1009.79 Gene names: KAT6A

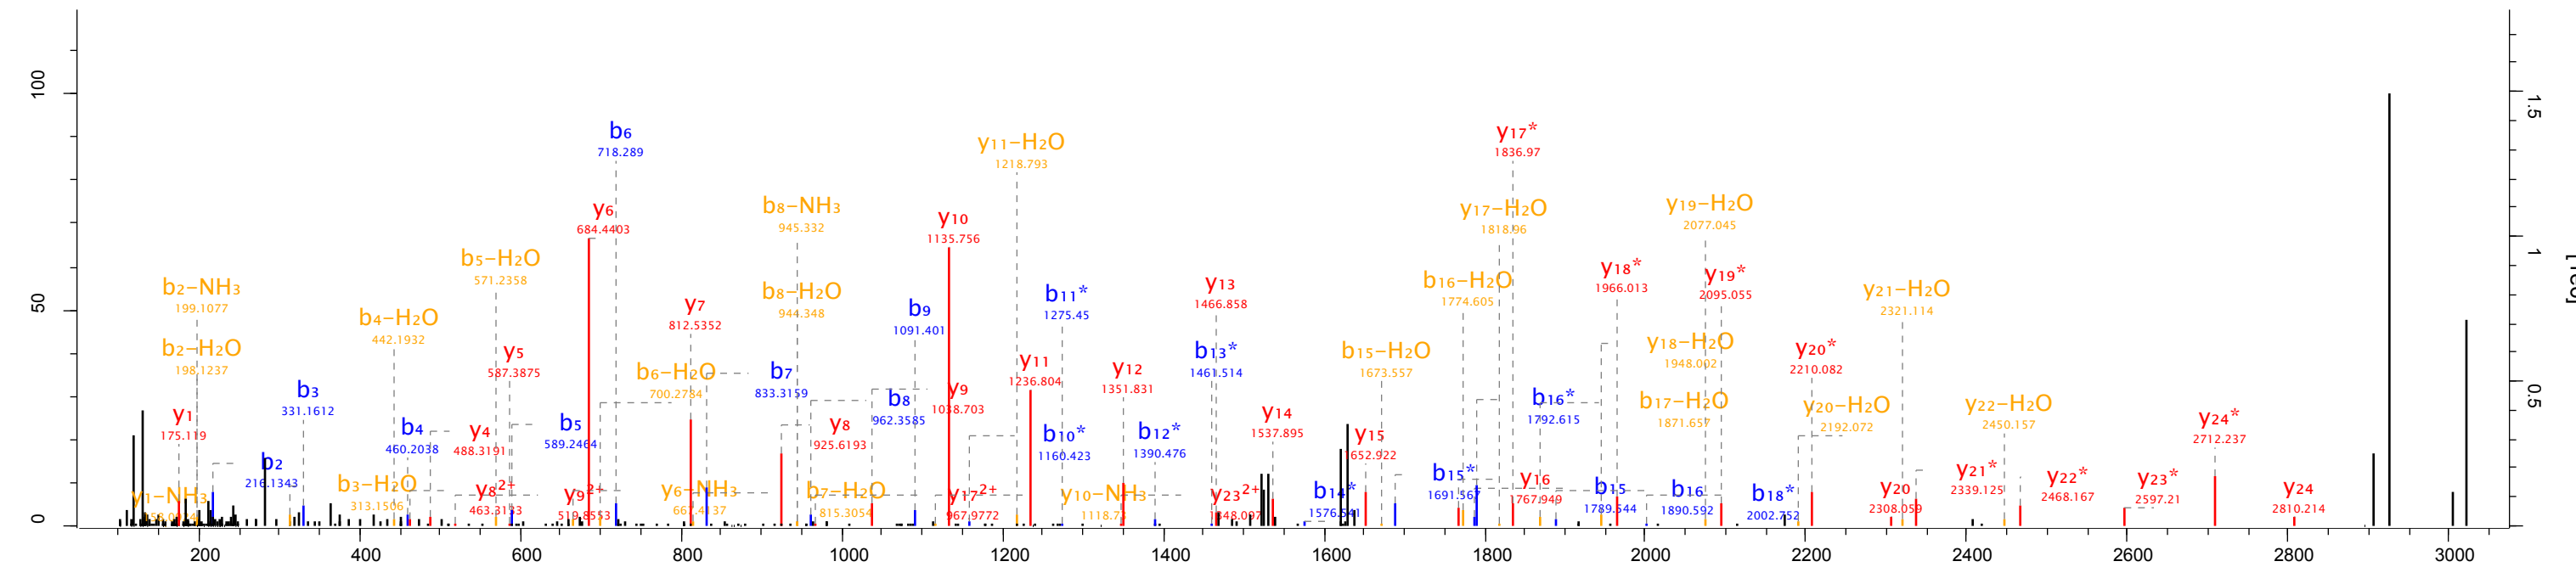

- S K D E E E D E E S D D A D D T P I L K P V S L L R -

Fragmentation mapping (b and y ions) is shown below the sequence:

- b2: K
- b3: D
- b4: E
- b5: E
- b6: E
- b7: D
- b8: E
- b9: E
- b10\*: S
- b11\*: D
- b12\*: D
- b13\*: A
- b14\*: D
- b15: D
- b16: T
- b18\*: P
- y1: R
- y4: S
- y5: V
- y6: P
- y7: K
- y8: L
- y9: I
- y10: P
- y11: T
- y12: D
- y13: D
- y14: A
- y15: D
- y16: S
- y17\*: S
- y18\*: E
- y19\*: E
- y20: D
- y21\*: E
- y22\*: E
- y23\*: E
- y24: K

Raw file: 20150814\_A375SR\_Phospho\_BR2\_04  
 Scan: 22437 Method: FTMS; HCD Score: 101.25 m/z: 949.99 Gene names: RAPH1

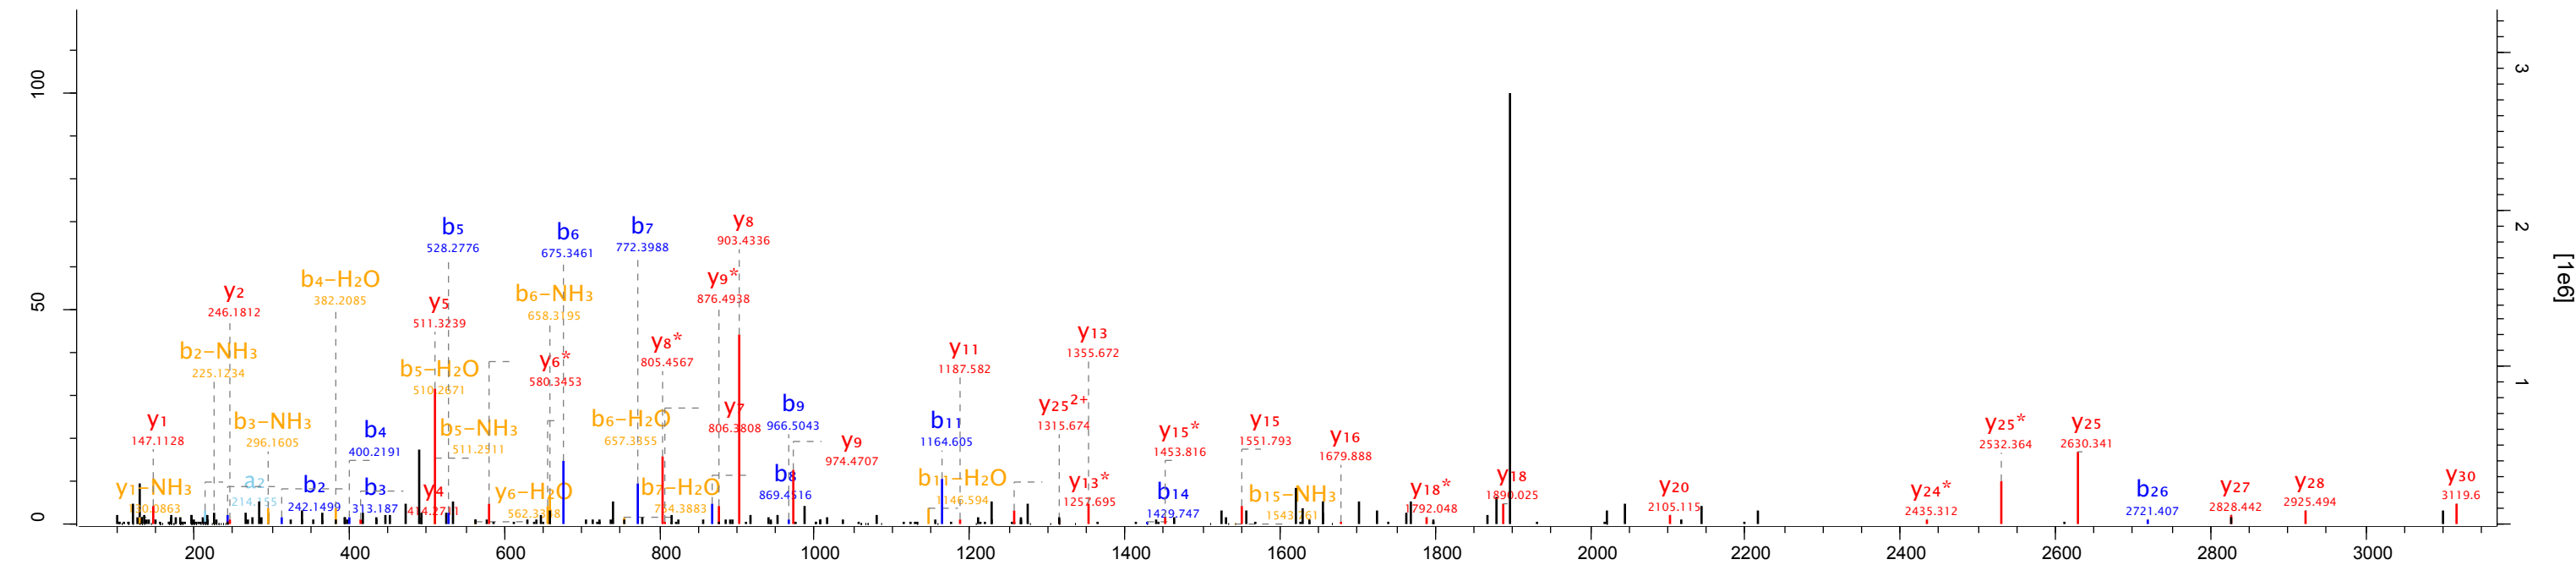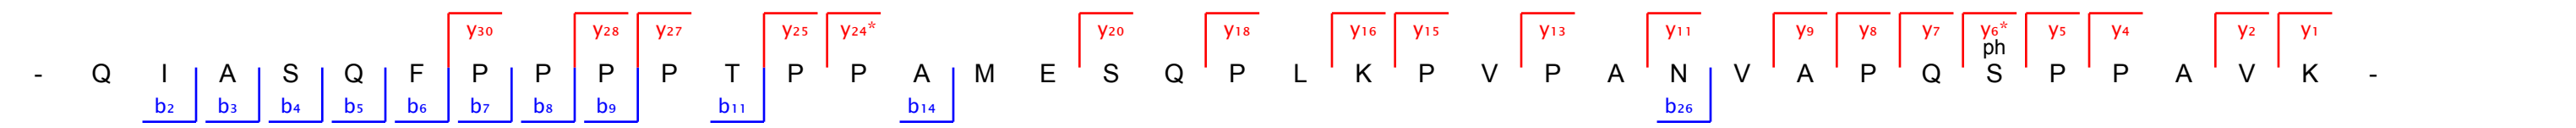

Raw file: 20150814\_A375SR\_Phospho\_BR2\_04  
 Scan: 2247 Method: FTMS; HCD Score: 153.7 m/z: 426.71 Gene names: AHNAK

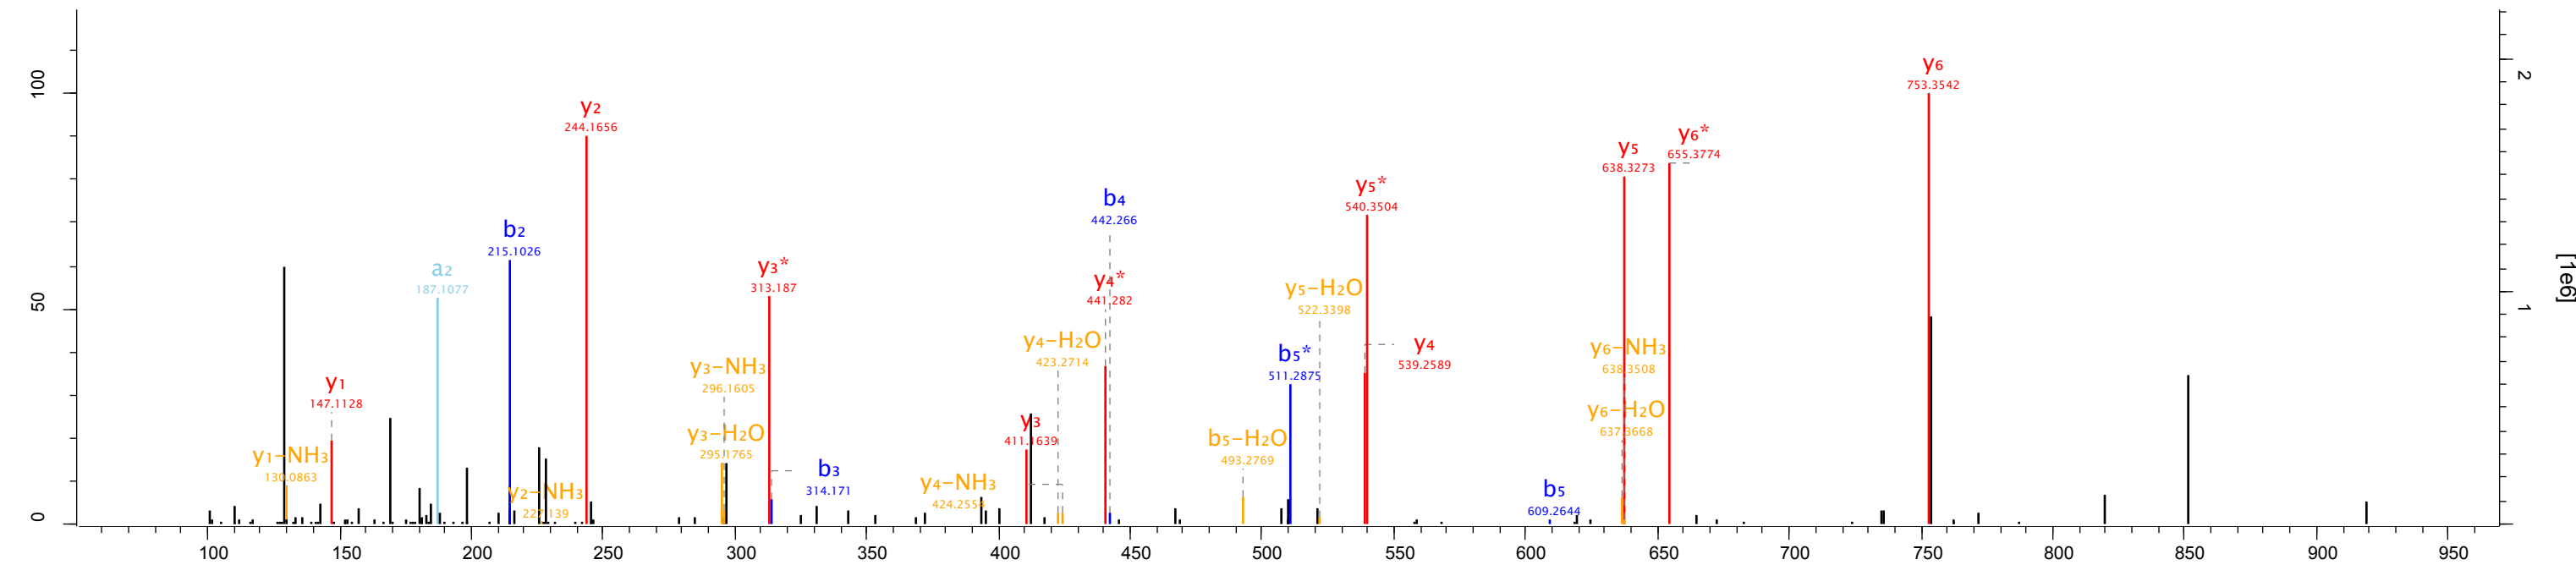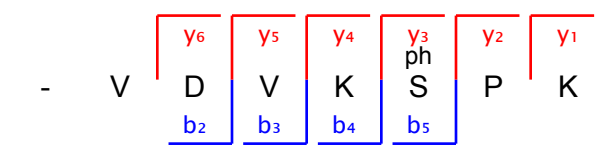



Raw file: 20150814\_A375SR\_Phospho\_BR2\_04  
 Scan: 23257 Method: FTMS; HCD Score: 163.72 m/z: 1083.98 Gene names: BCLAF1

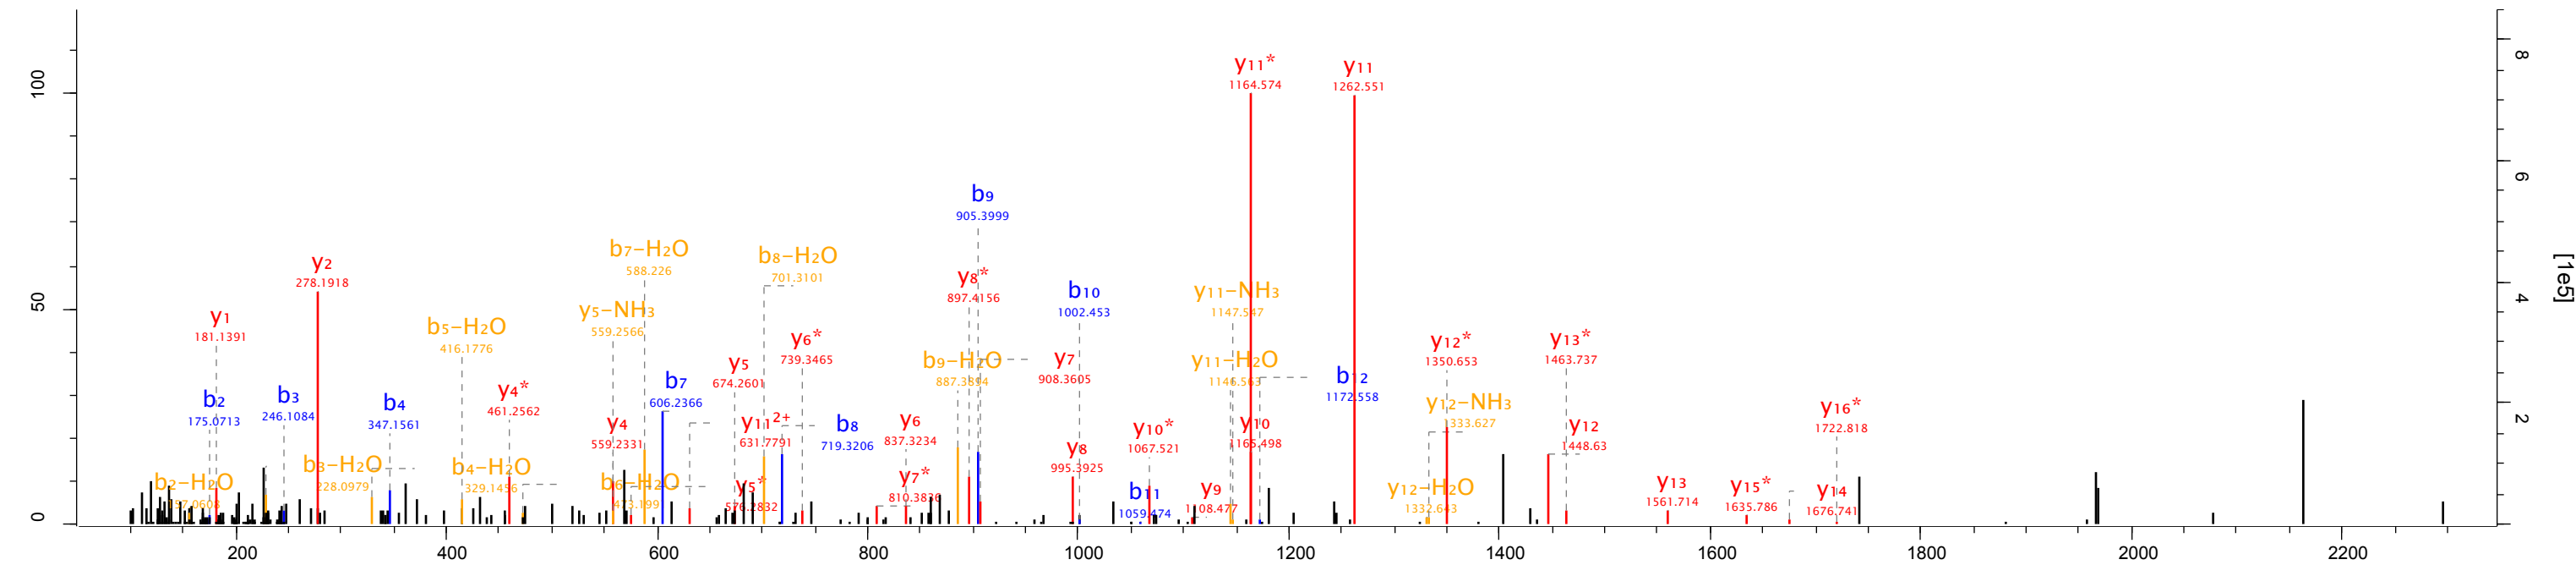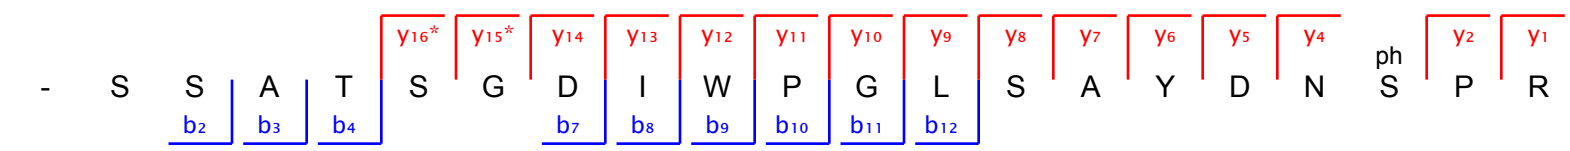

Raw file: 20150814\_A375SR\_Phospho\_BR2\_04  
 Scan: 23497 Method: FTMS; HCD Score: 84.17 m/z: 1260.91 Gene names: NUP214

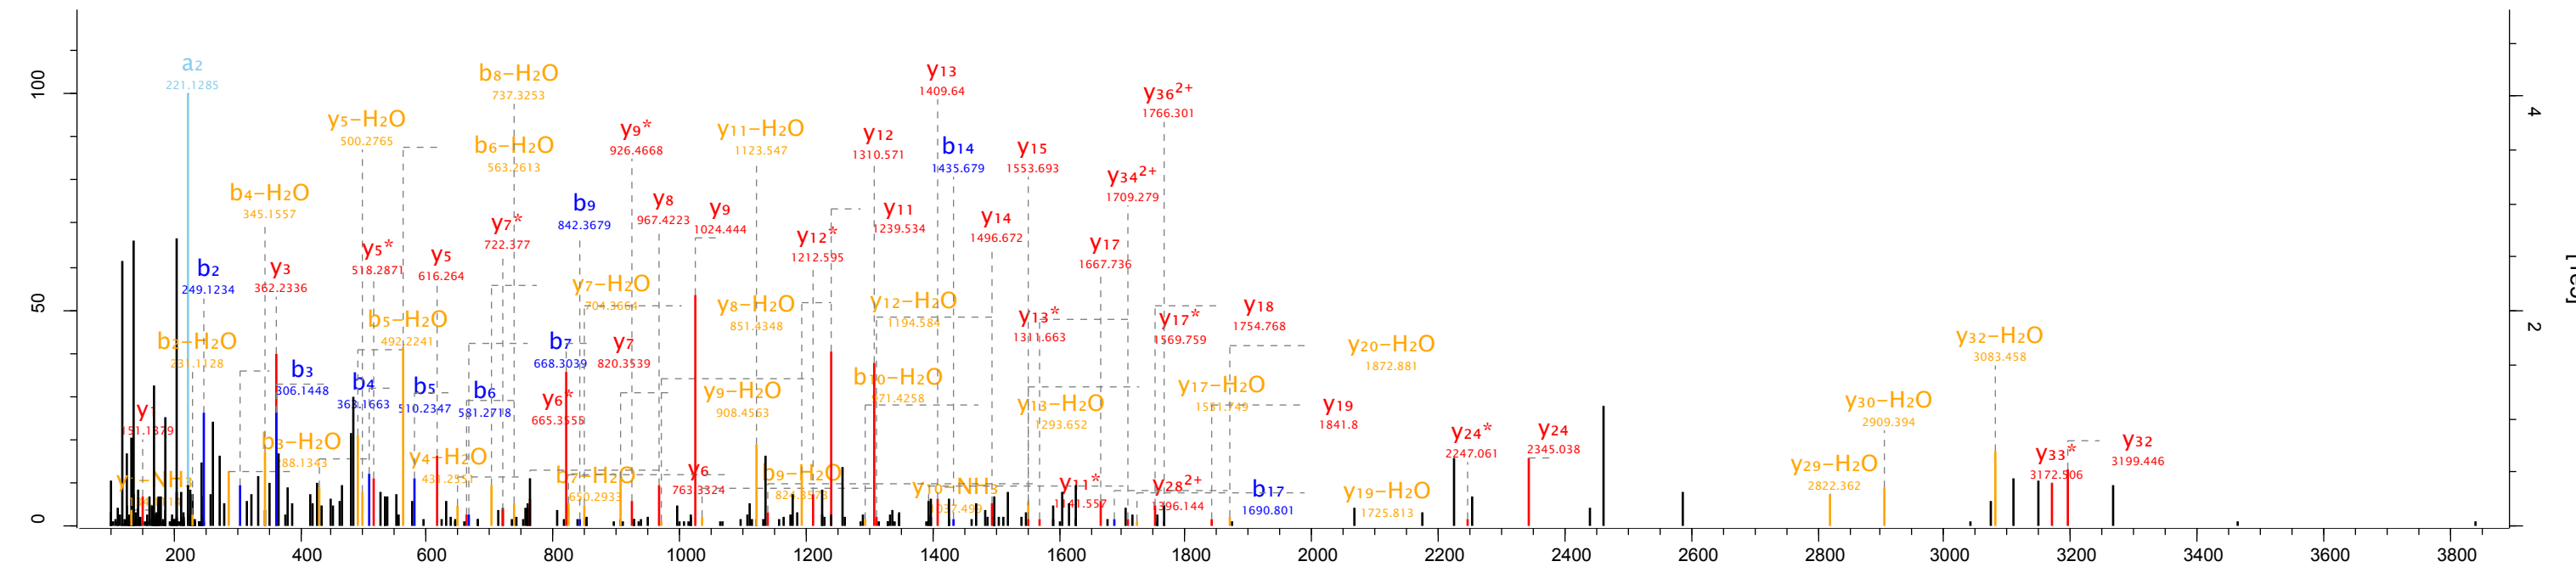

- T F G G F A S S S F G E Q K P T G T F S S G G G S V A S Q G F G F S S P N K

Fragmentation mapping (b and y ions) is shown below the sequence:

- b ions (blue boxes):** b<sub>2</sub> (F), b<sub>3</sub> (G), b<sub>4</sub> (G), b<sub>5</sub> (F), b<sub>6</sub> (A), b<sub>7</sub> (S), b<sub>9</sub> (S), b<sub>14</sub> (K), b<sub>17</sub> (G)
- y ions (red boxes):** y<sub>36</sub><sup>2+</sup> (G), y<sub>34</sub><sup>2+</sup> (F), y<sub>33</sub><sup>\*</sup> (A), y<sub>32</sub> (S), y<sub>28</sub><sup>2+</sup> (G), y<sub>24</sub> (P), y<sub>19</sub> (S), y<sub>18</sub> (S), y<sub>17</sub> (G), y<sub>15</sub> (G), y<sub>14</sub> (S), y<sub>13</sub> (V), y<sub>12</sub> (A), y<sub>11</sub> (S), y<sub>9</sub> (G), y<sub>8</sub> (F), y<sub>7</sub> (G), y<sub>6</sub> (F), y<sub>5</sub> (S), y<sub>3</sub> (P), y<sub>1</sub> (K)

Raw file  
20150814\_A375SR\_Phospho\_BR2\_04

Scan 23567 Method FTMS; HCD Score 323.41 m/z 1353.53 Gene names SIN3A

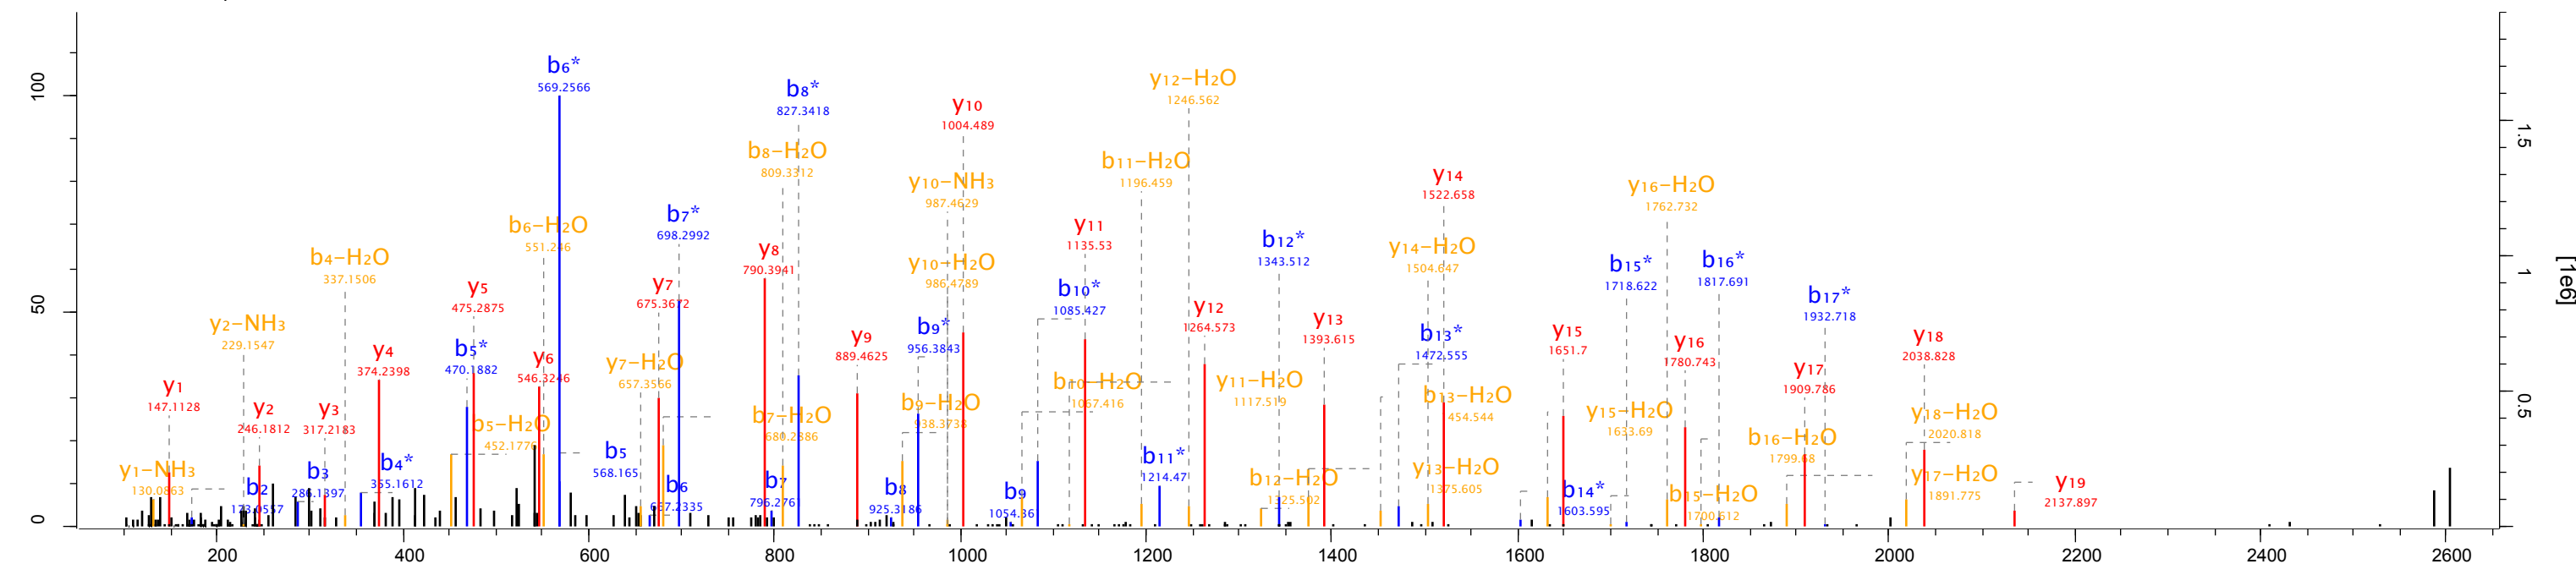

- G D L S D V E E E E E E E M D V D E A T G A V K -  
          b2 b3 b4\* b5 b6 b7 b8 b9 b10\* b11\* b12\* b13\* b14\* b15\* b16\* b17\*

Raw file 20150814\_A375SR\_Phospho\_BR2\_04 Scan 23737 Method FTMS; HCD Score 114.63 m/z 679.69 Gene names CDK17

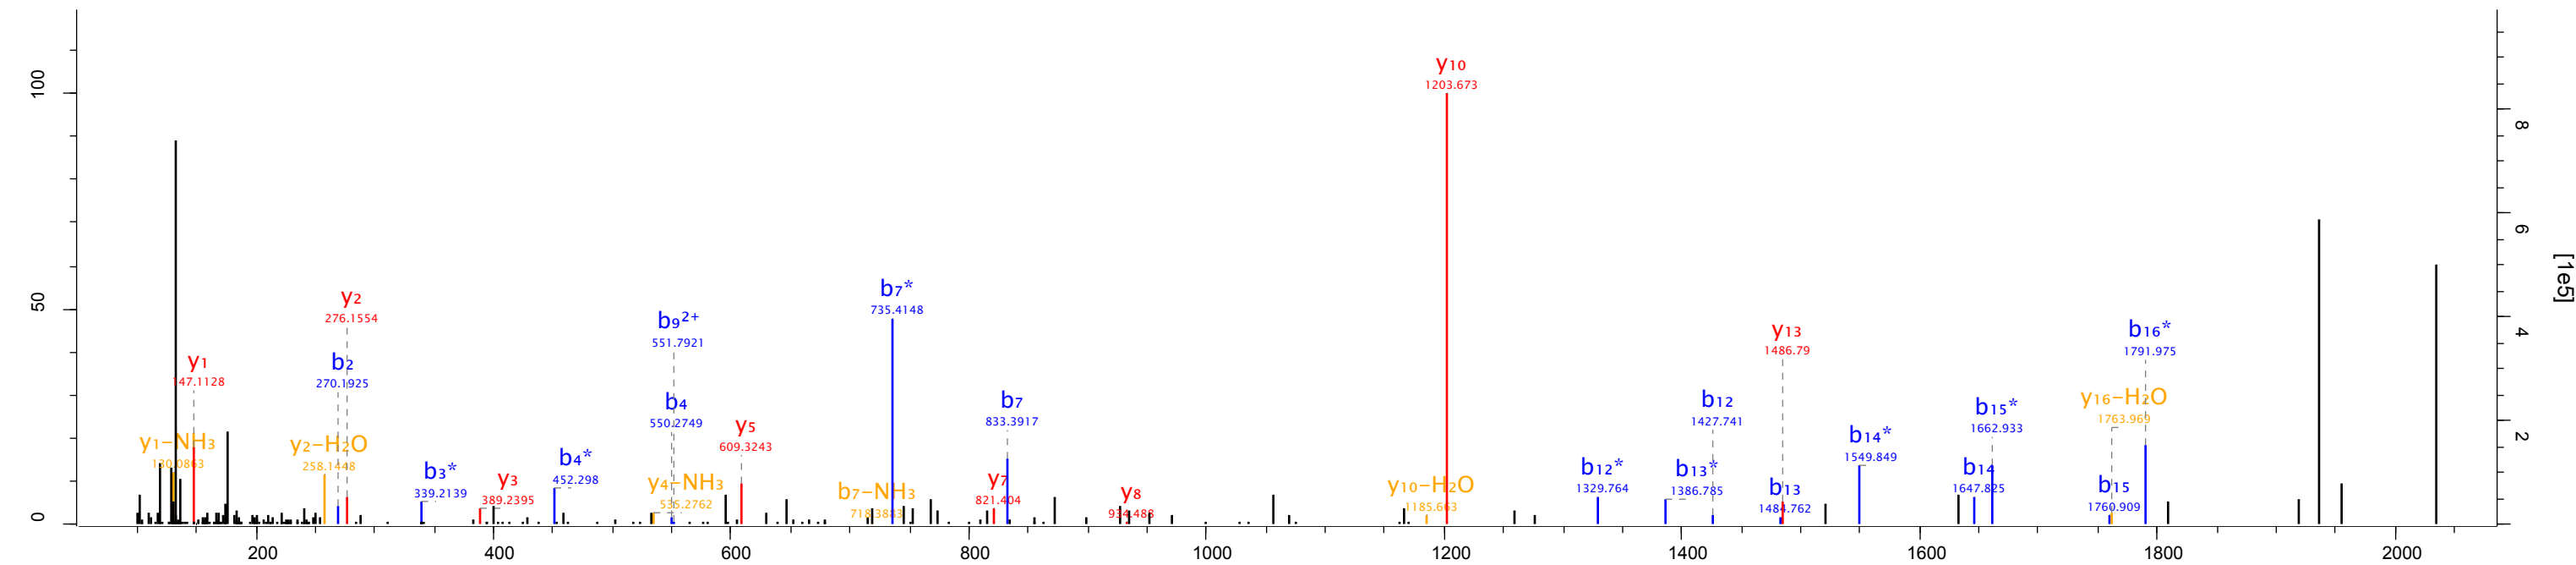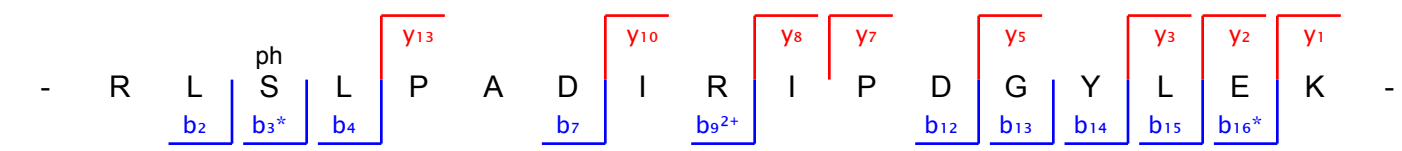

Raw file  
20150814\_A375SR\_Phospho\_BR2\_04

Scan 23817 Method FTMS; HCD Score 223.26 m/z 938.45 Gene names RAVR1

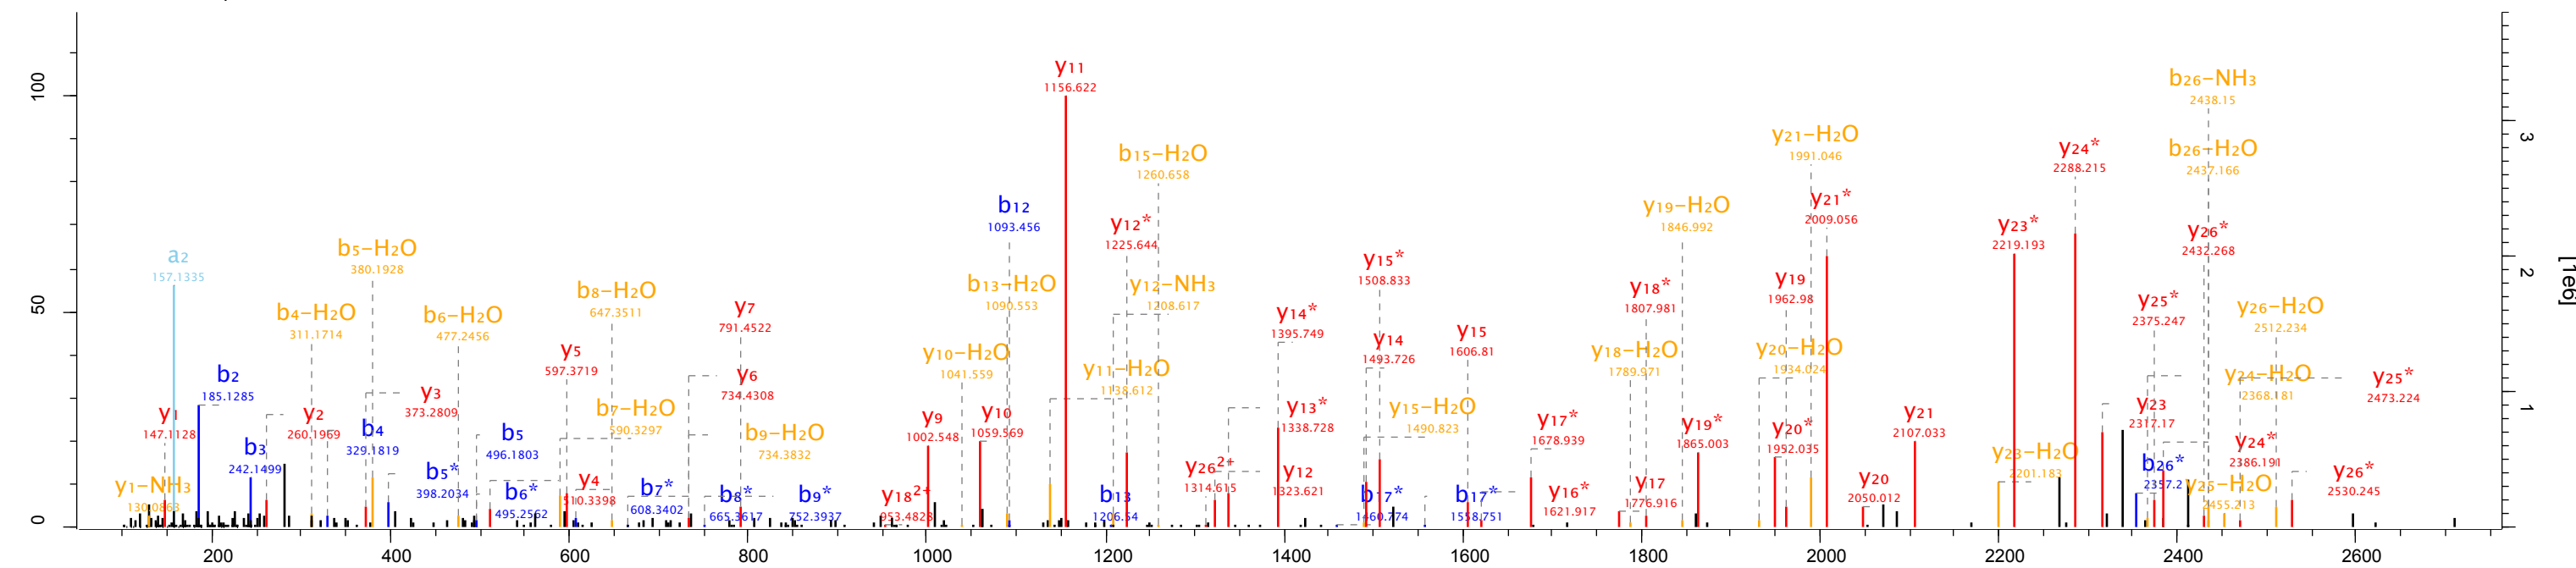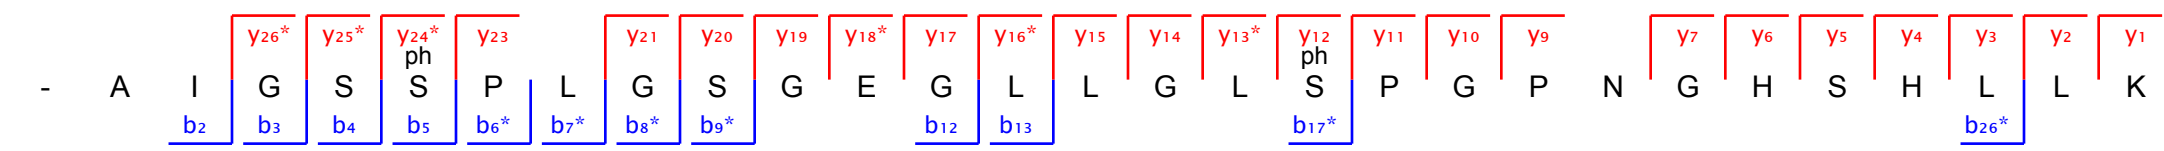

Raw file  
20150814\_A375SR\_Phospho\_BR2\_04

Scan 2387 Method FTMS; HCD Score 251.74 m/z 1009.92 Gene names IWS1

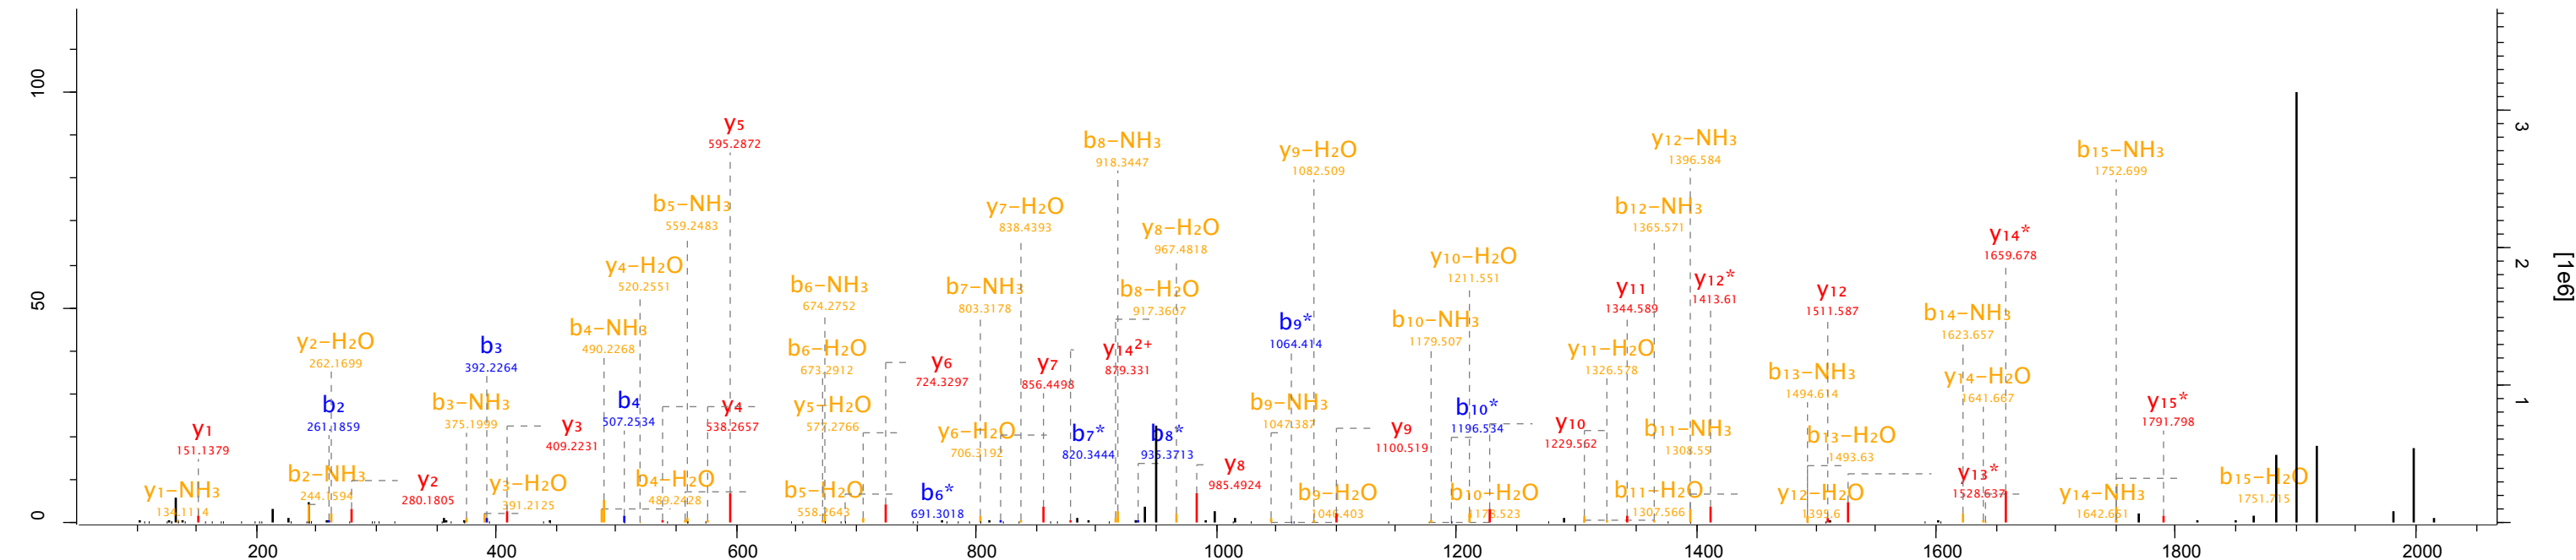

- Q K M D S D E D E K E G E E E K -

Fragmentation labels below the sequence:

- Red boxes: y15\*, y14\*, y13\*, y12<sup>ph</sup>, y11, y10, y9, y8, y7, y6, y5, y4, y3, y2, y1
- Blue boxes: b2, b3, b4, b6\*, b7\*, b8\*, b9\*, b10\*

Raw file Scan Method Score m/z Gene names  
 20150814\_A375SR\_Phospho\_BR2\_04 24417 FTMS; HCD 269.16 1460.68 KRT18

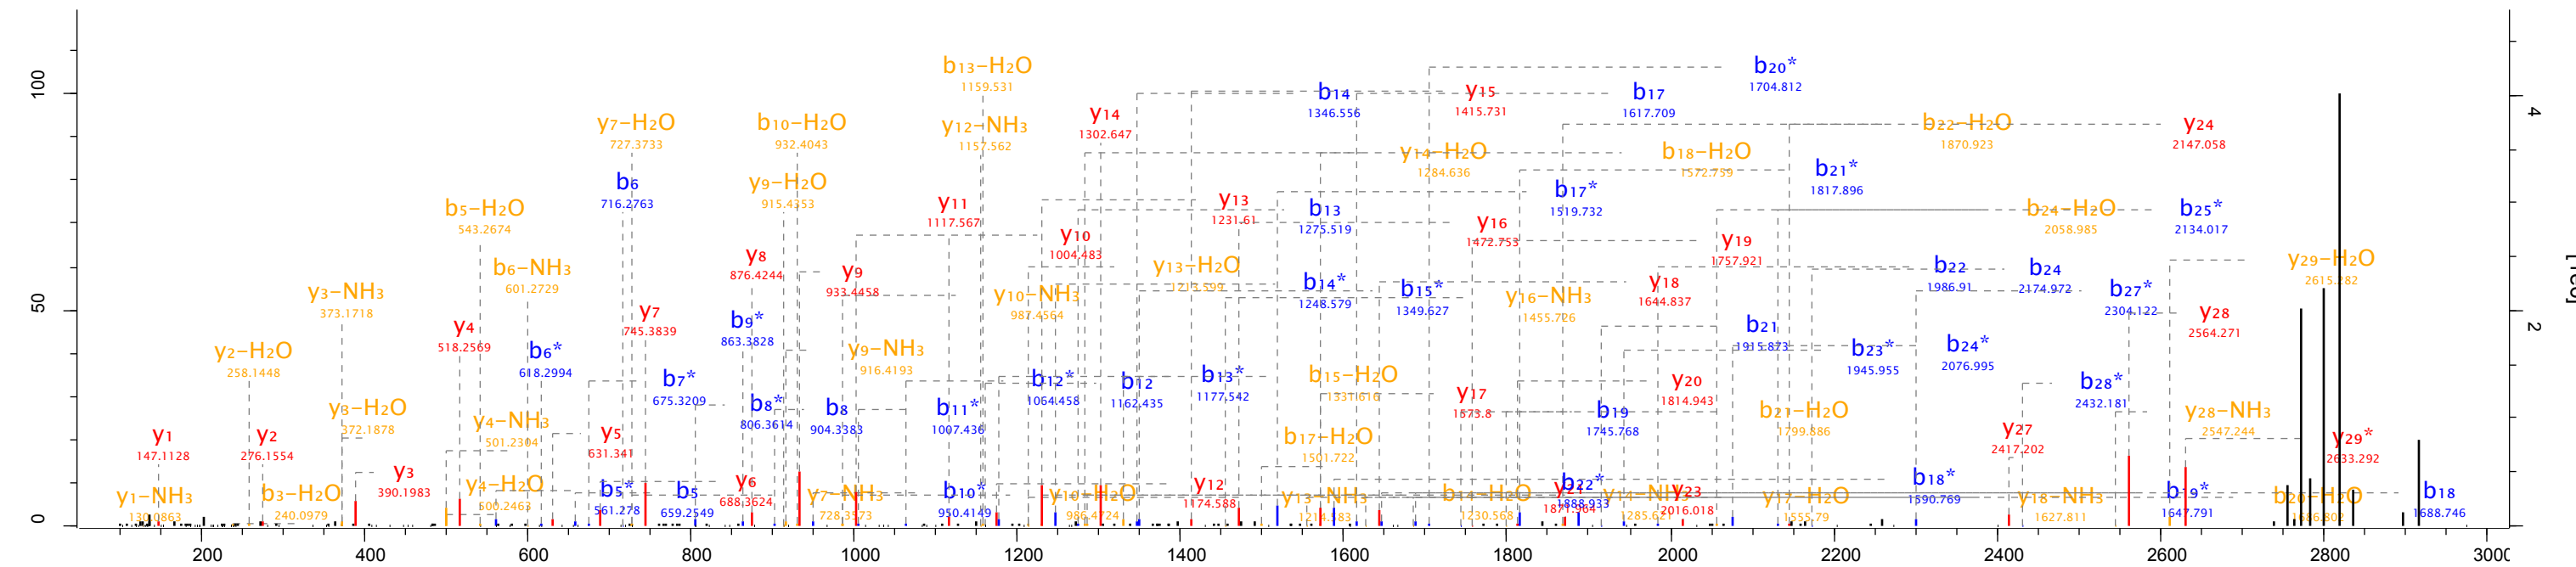

- S T <sup>y29\*</sup>ph S <sup>y28</sup> F <sup>y27</sup> R <sup>y24</sup> G <sup>y23</sup> G M <sup>y21</sup> G <sup>y20</sup> S G <sup>y19</sup> G <sup>y18</sup> L <sup>y17</sup> A <sup>y16</sup> T G <sup>y15</sup> I <sup>y14</sup> A <sup>y13</sup> G <sup>y12</sup> G <sup>y11</sup> L <sup>y10</sup> A <sup>y9</sup> G <sup>y8</sup> M <sup>y7</sup> G <sup>y6</sup> G <sup>y5</sup> I <sup>y4</sup> Q <sup>y3</sup> N <sup>y2</sup> E <sup>y1</sup> K -

<sup>b5</sup> <sup>b6</sup> <sup>b7\*</sup> <sup>b8</sup> <sup>b9\*</sup> <sup>b10\*</sup> <sup>b11\*</sup> <sup>b12</sup> <sup>b13</sup> <sup>b14</sup> <sup>b15\*</sup> <sup>b17</sup> <sup>b18</sup> <sup>b19</sup> <sup>b20\*</sup> <sup>b21</sup> <sup>b22</sup> <sup>b23\*</sup> <sup>b24</sup> <sup>b25\*</sup> <sup>b27\*</sup> <sup>b28\*</sup>

Raw file: 20150814\_A375SR\_Phospho\_BR2\_04  
 Scan: 25707 Method: FTMS; HCD Score: 279.67 m/z: 1088.01 Gene names: RBM12B

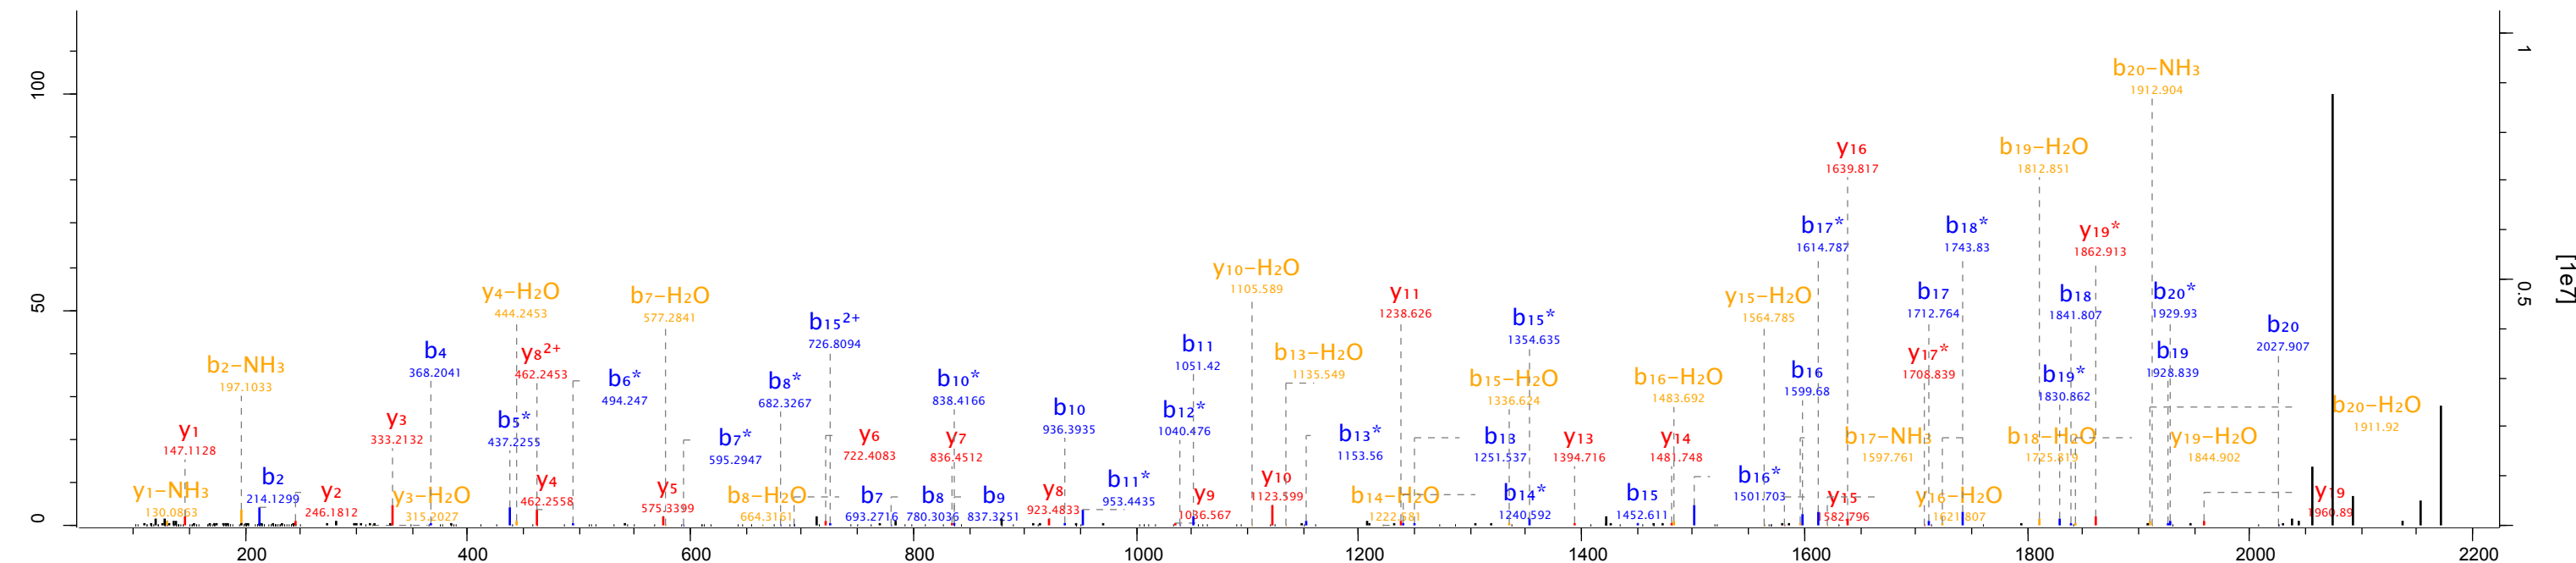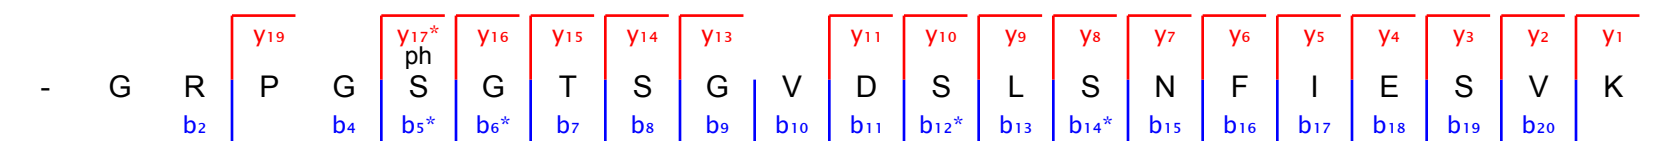



Raw file  
20150814\_A375SR\_Phospho\_BR2\_04

Scan 26057 Method FTMS; HCD Score 95.2 m/z 982.43 Gene names TUSC2

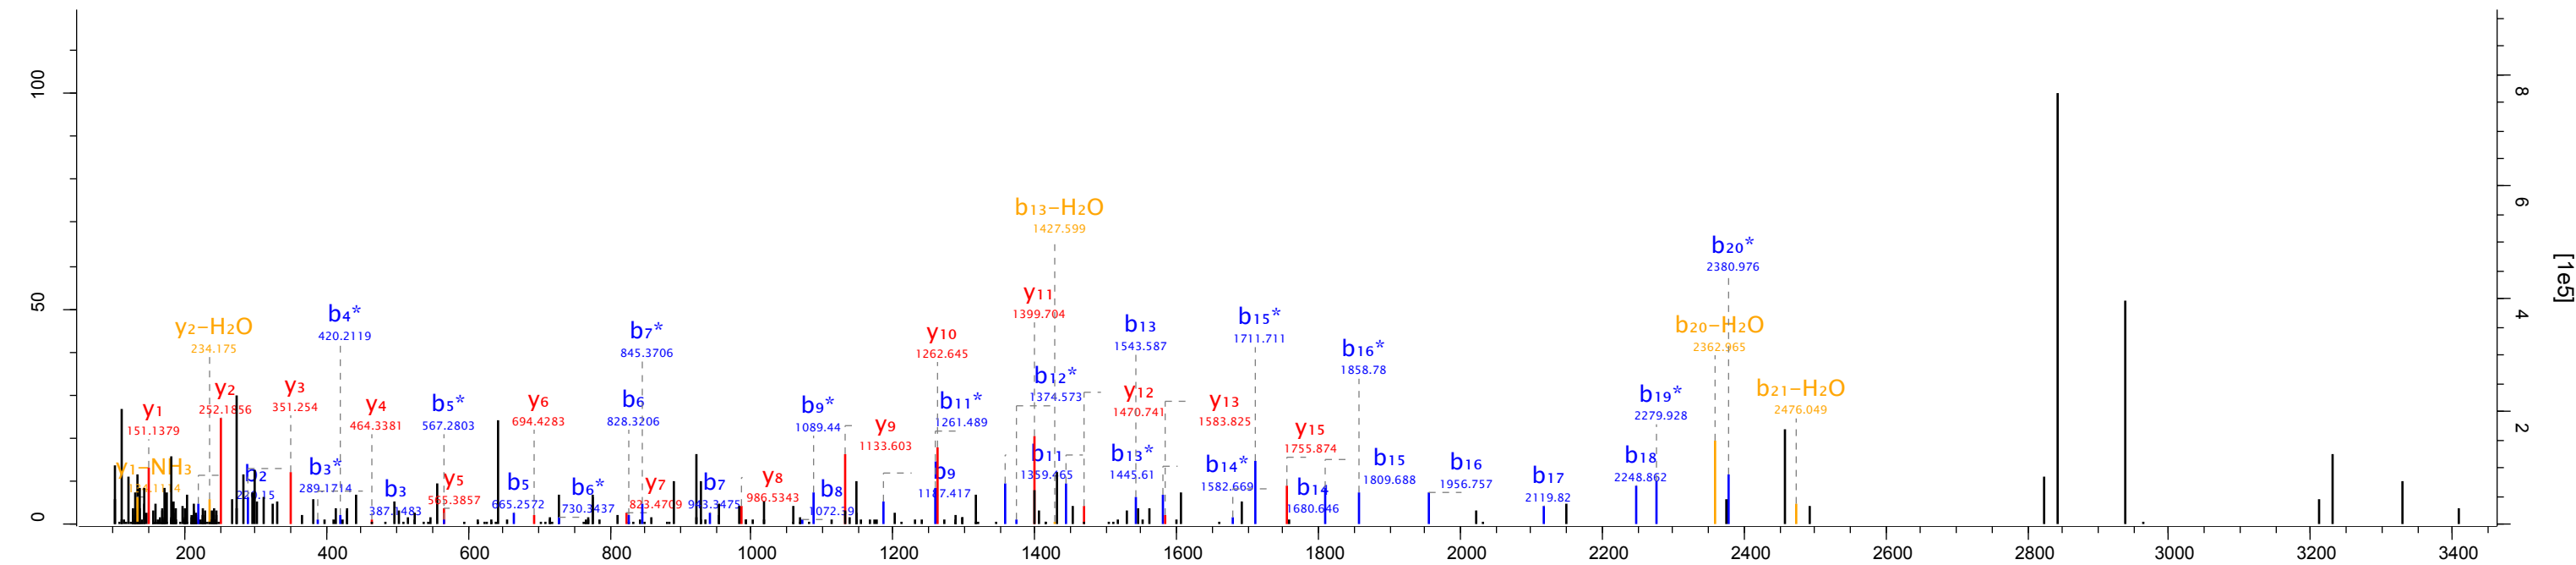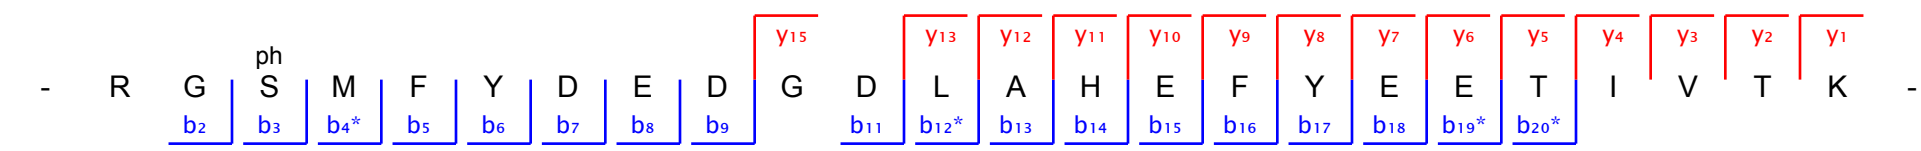

Raw file: 20150814\_A375SR\_Phospho\_BR2\_04  
 Scan: 26507 Method: FTMS; HCD Score: 163.61 m/z: 1284.06 Gene names: EIF2S2

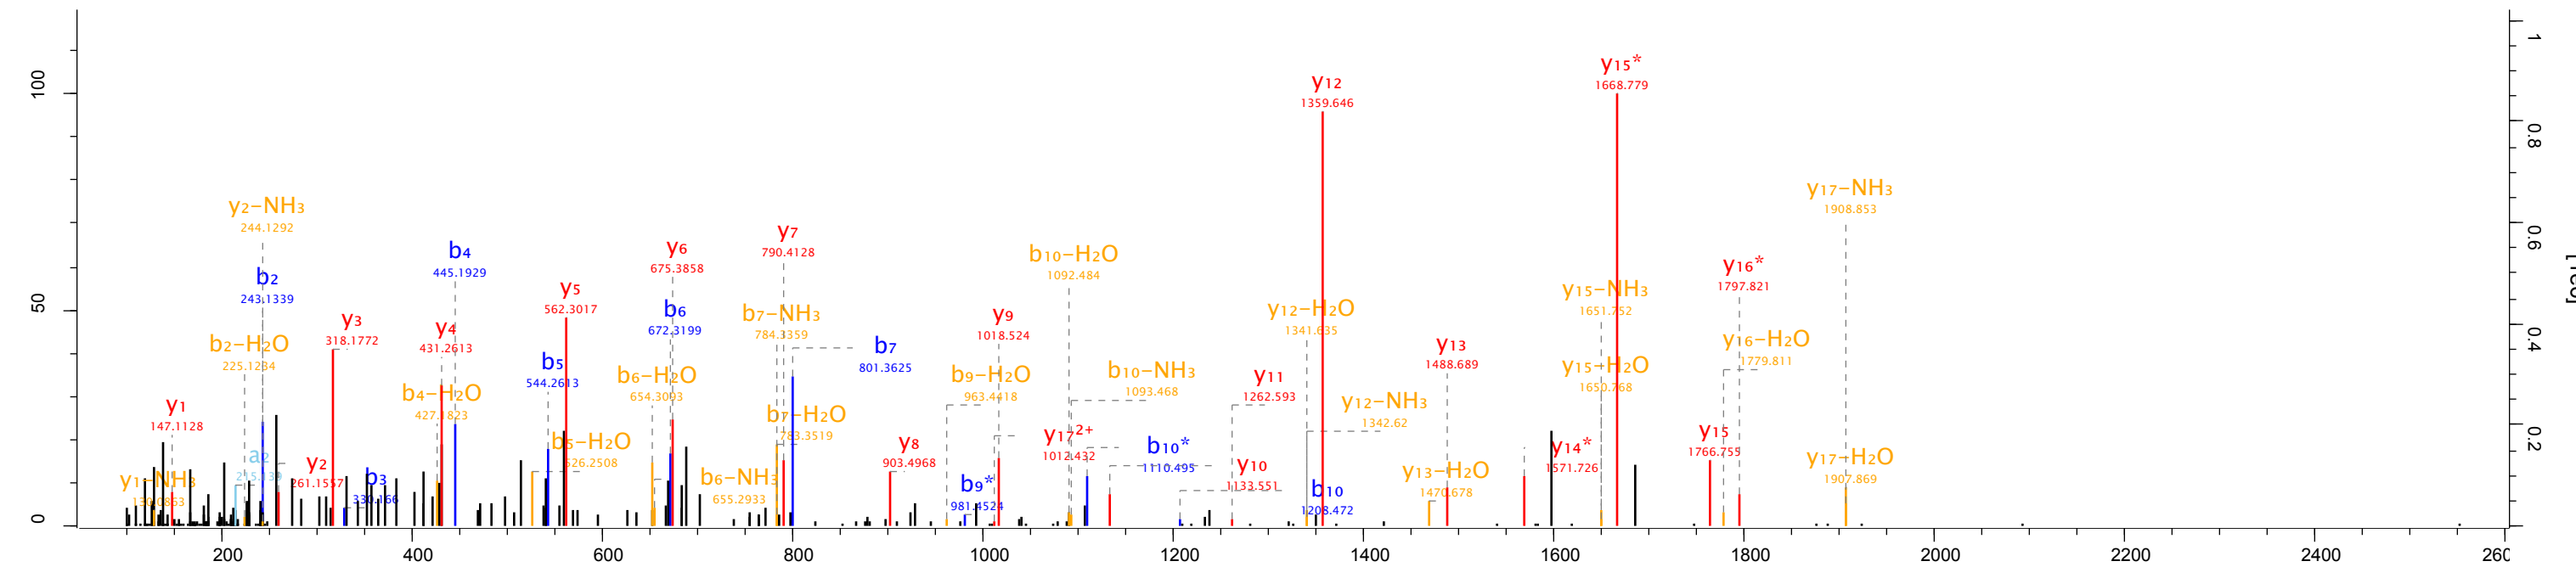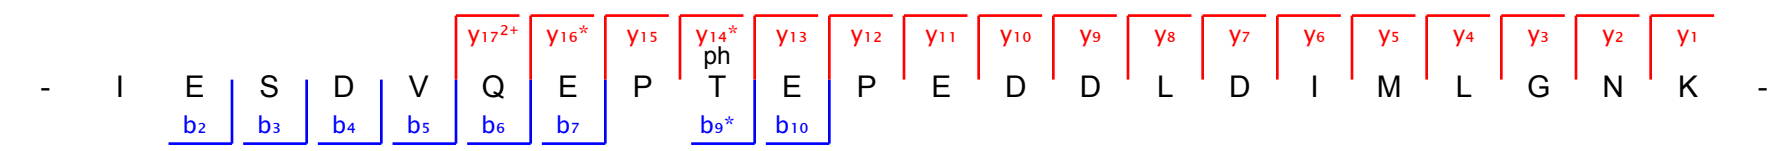

Raw file  
20150814\_A375SR\_Phospho\_BR2\_04

Scan 26877 Method FTMS; HCD Score 277.98 m/z 1439.11 Gene names PRCC

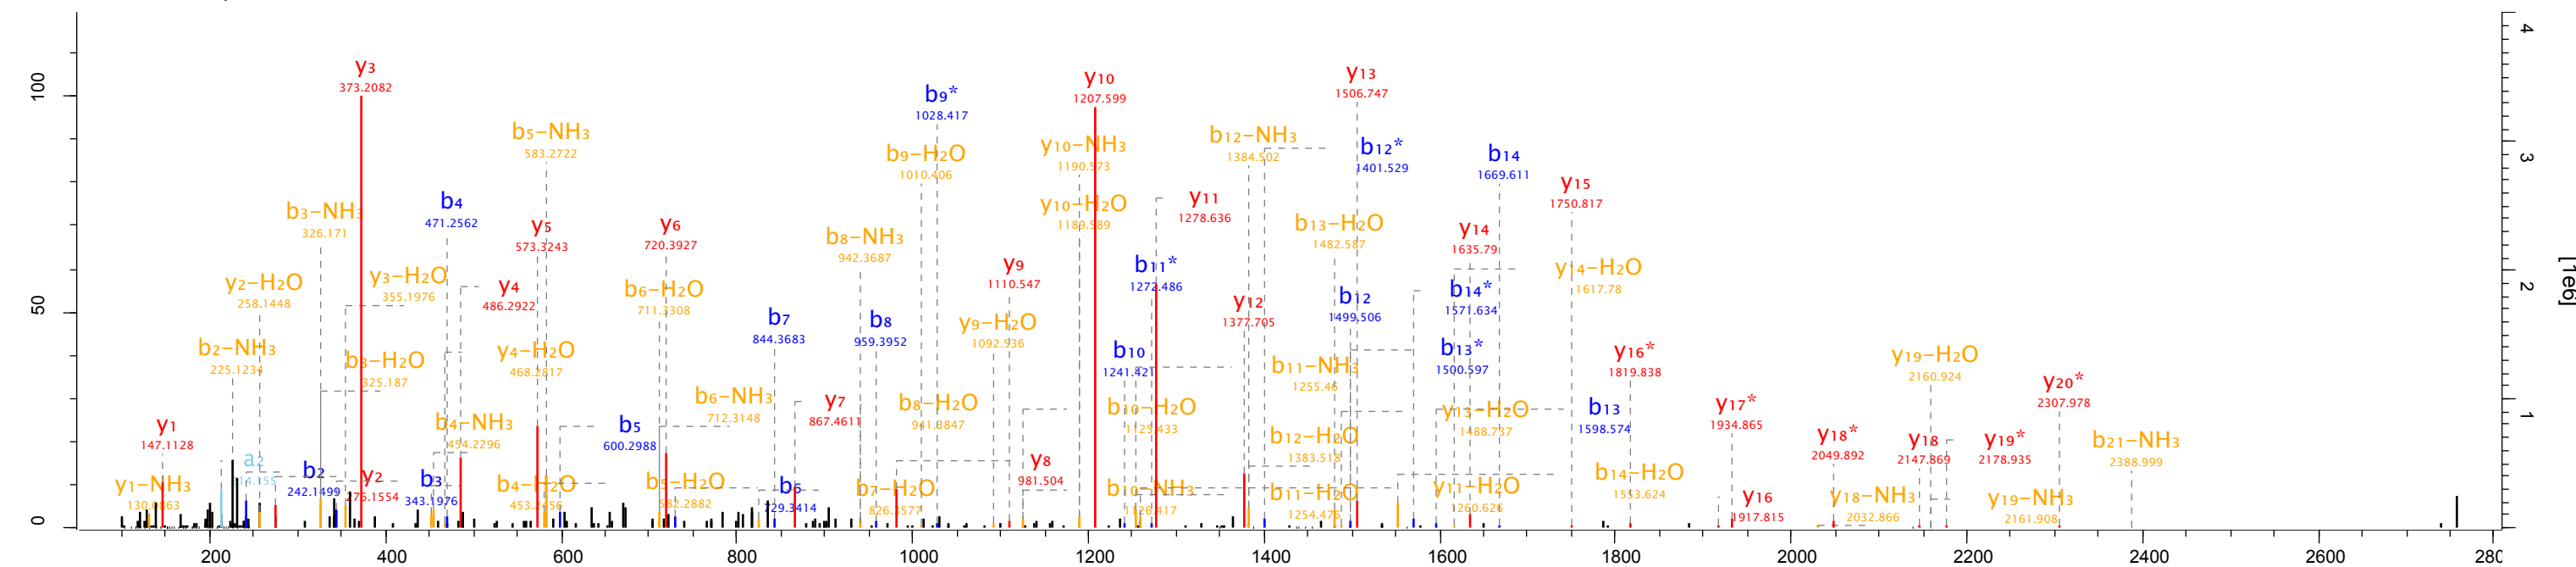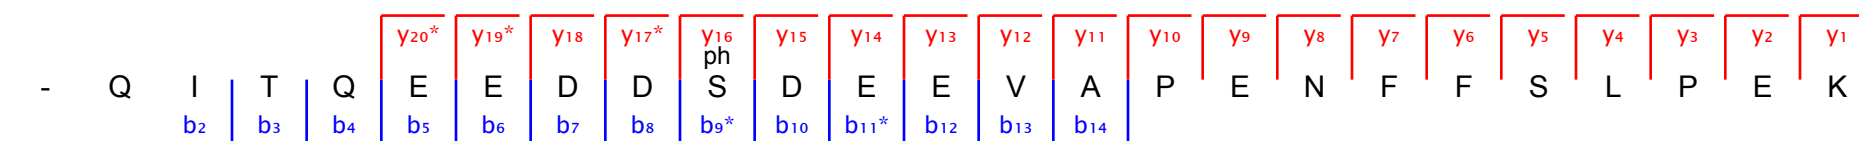



Raw file  
20150814\_A375SR\_Phospho\_BR2\_04

Scan 27637 Method FTMS; HCD Score 70.71 m/z 1098.11 Gene names OSBP

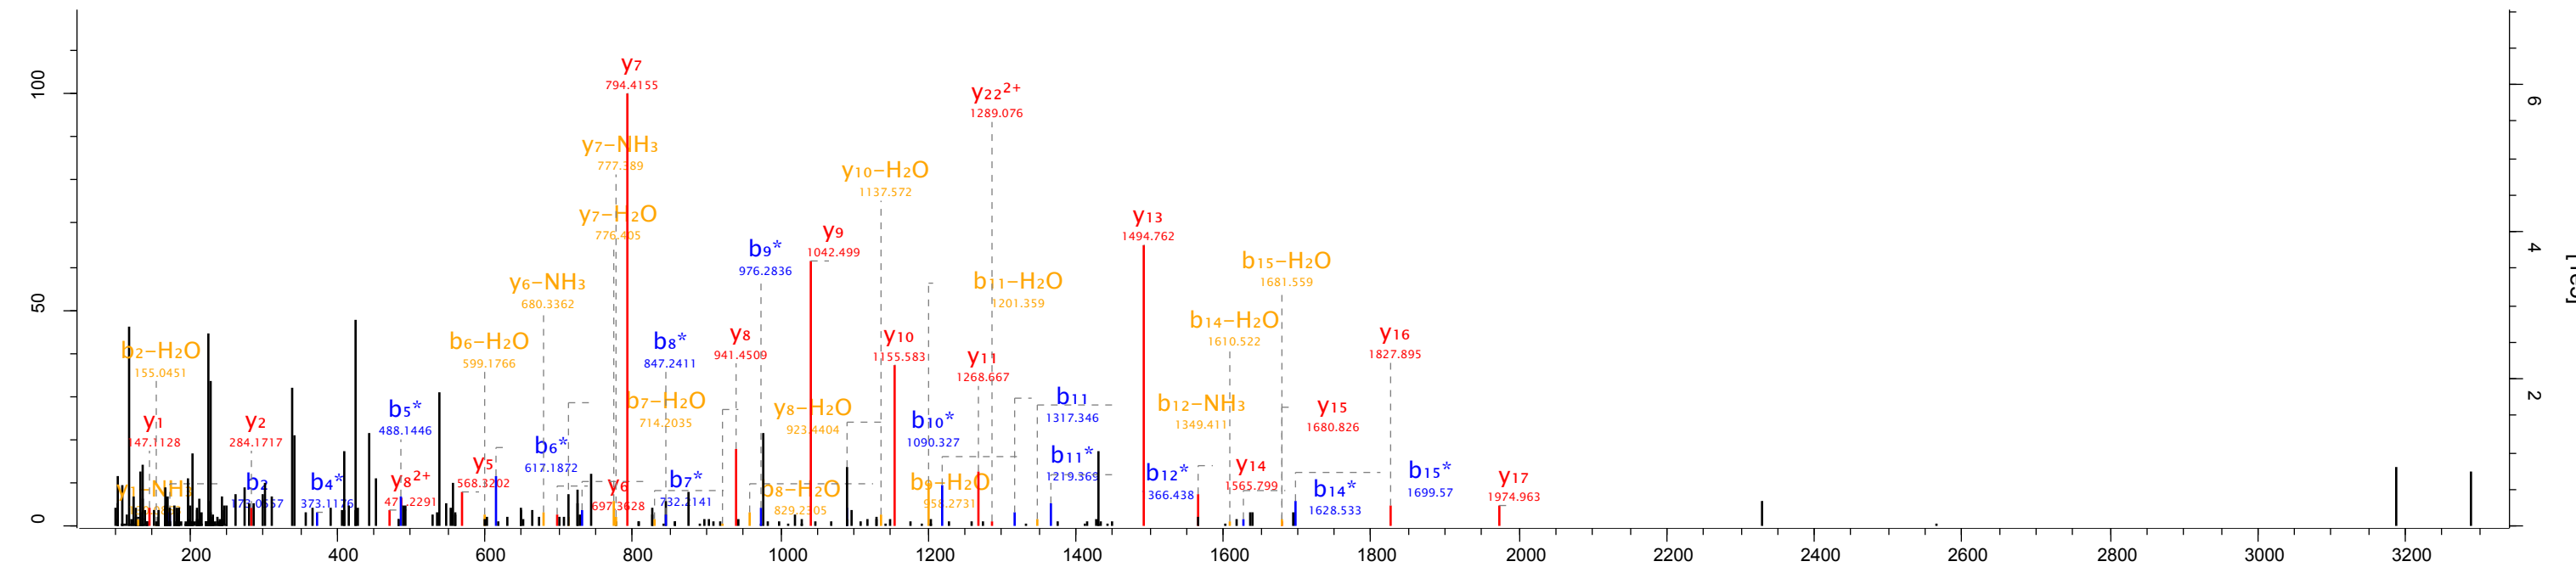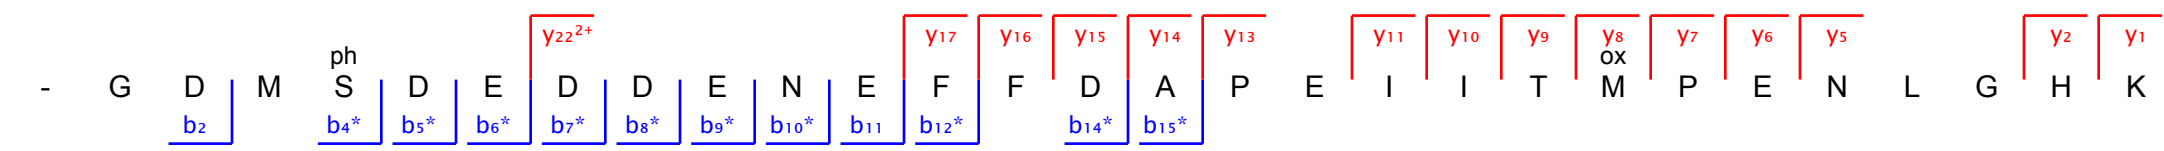

Raw file: 20150814\_A375SR\_Phospho\_BR2\_04  
 Scan: 27657 Method: FTMS; HCD Score: 84.79 m/z: 1413.93 Gene names: HSP90AA1

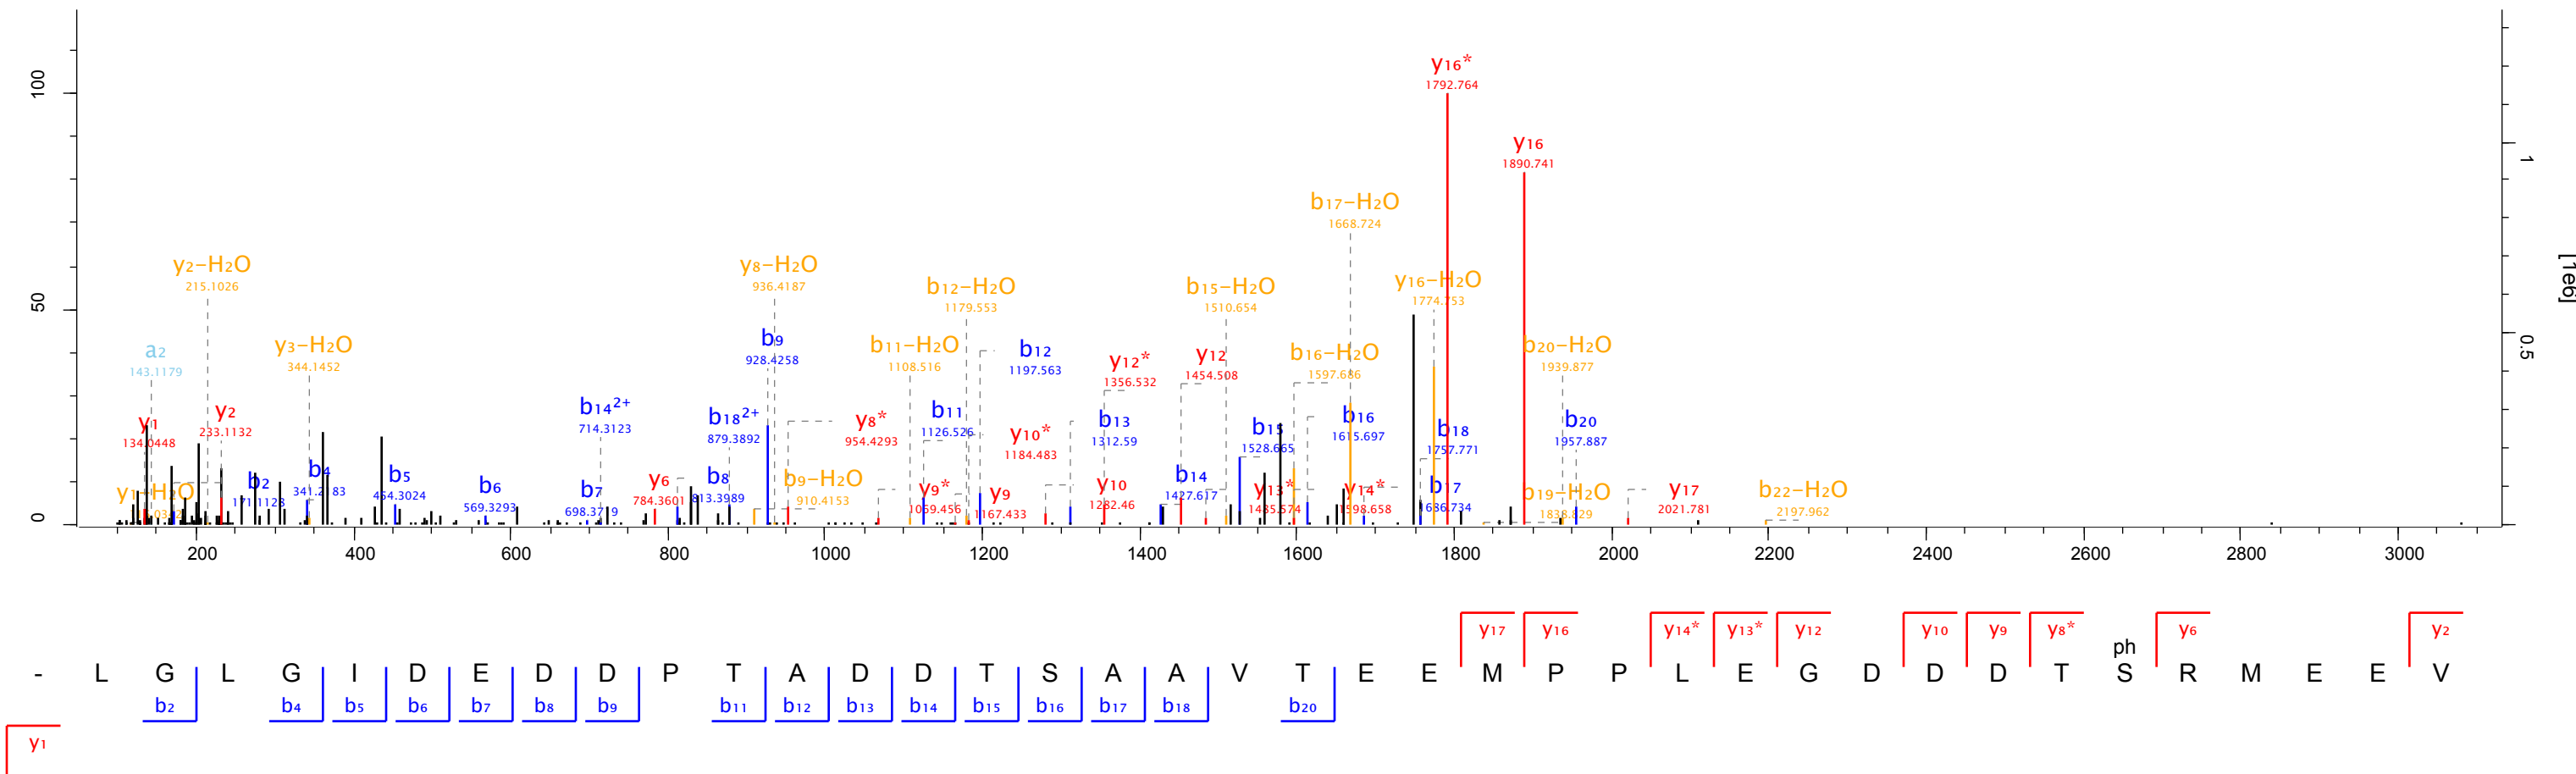

Raw file 20150814\_A375SR\_Phospho\_BR2\_04 Scan 2767 Method FTMS; HCD Score 103.31 m/z 872.9 Gene names DNMT3A

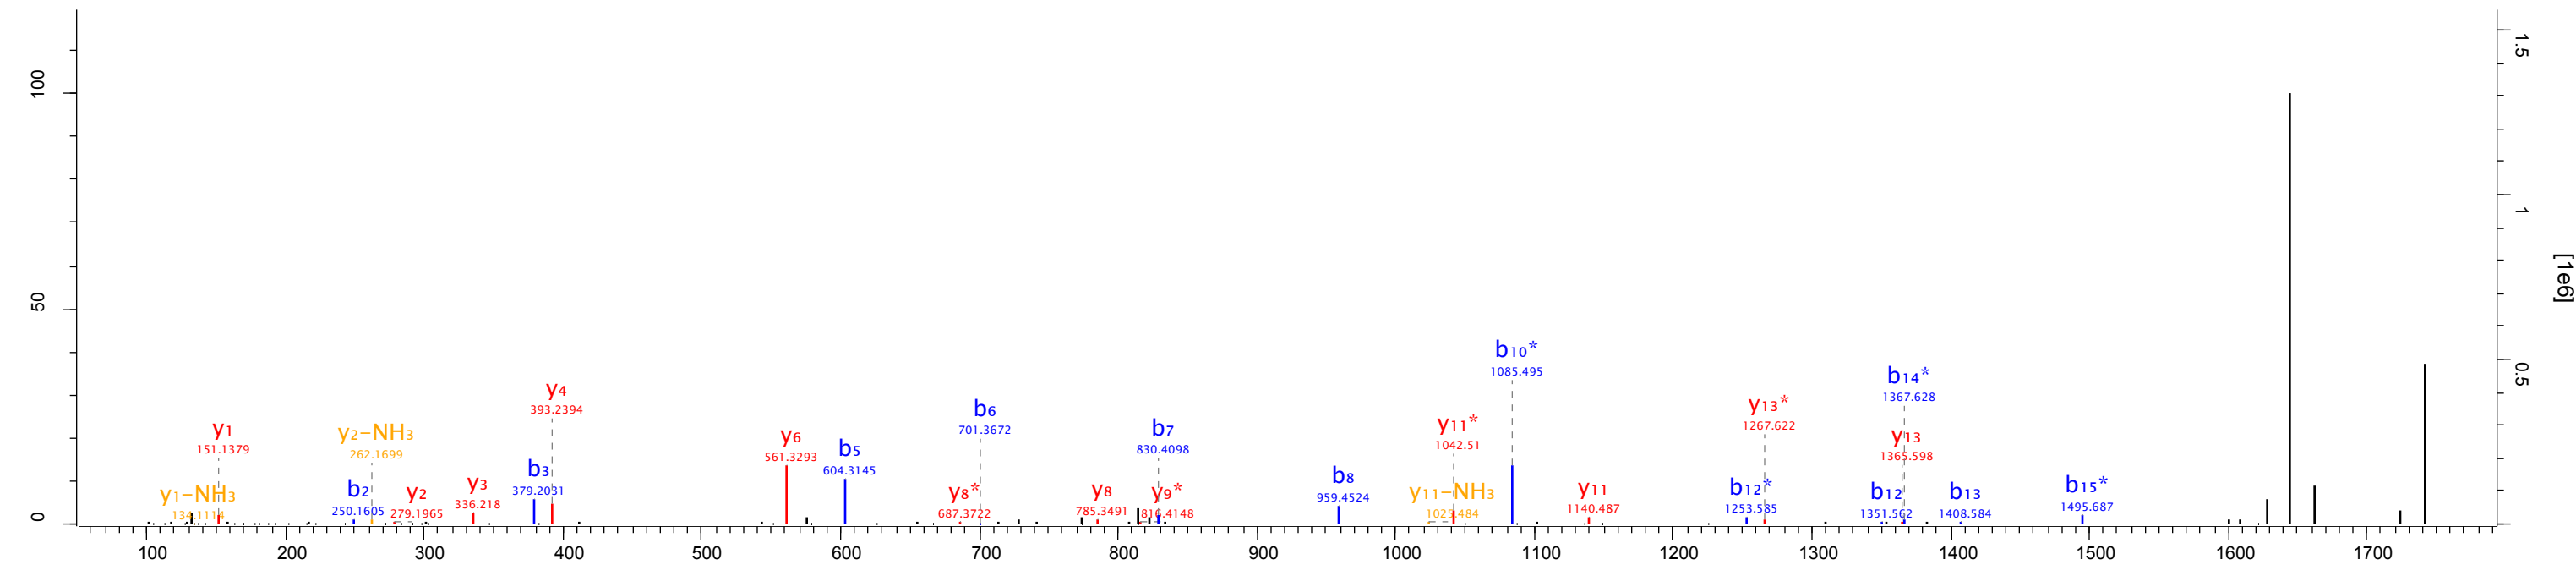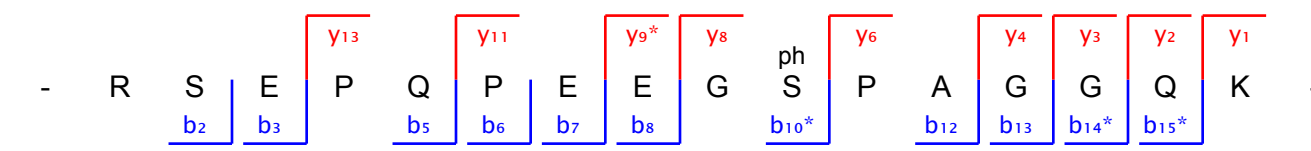

Raw file 20150814\_A375SR\_Phospho\_BR2\_04 Scan 28297 Method FTMS; HCD Score 186.19 m/z 850.92 Gene names LUZP1

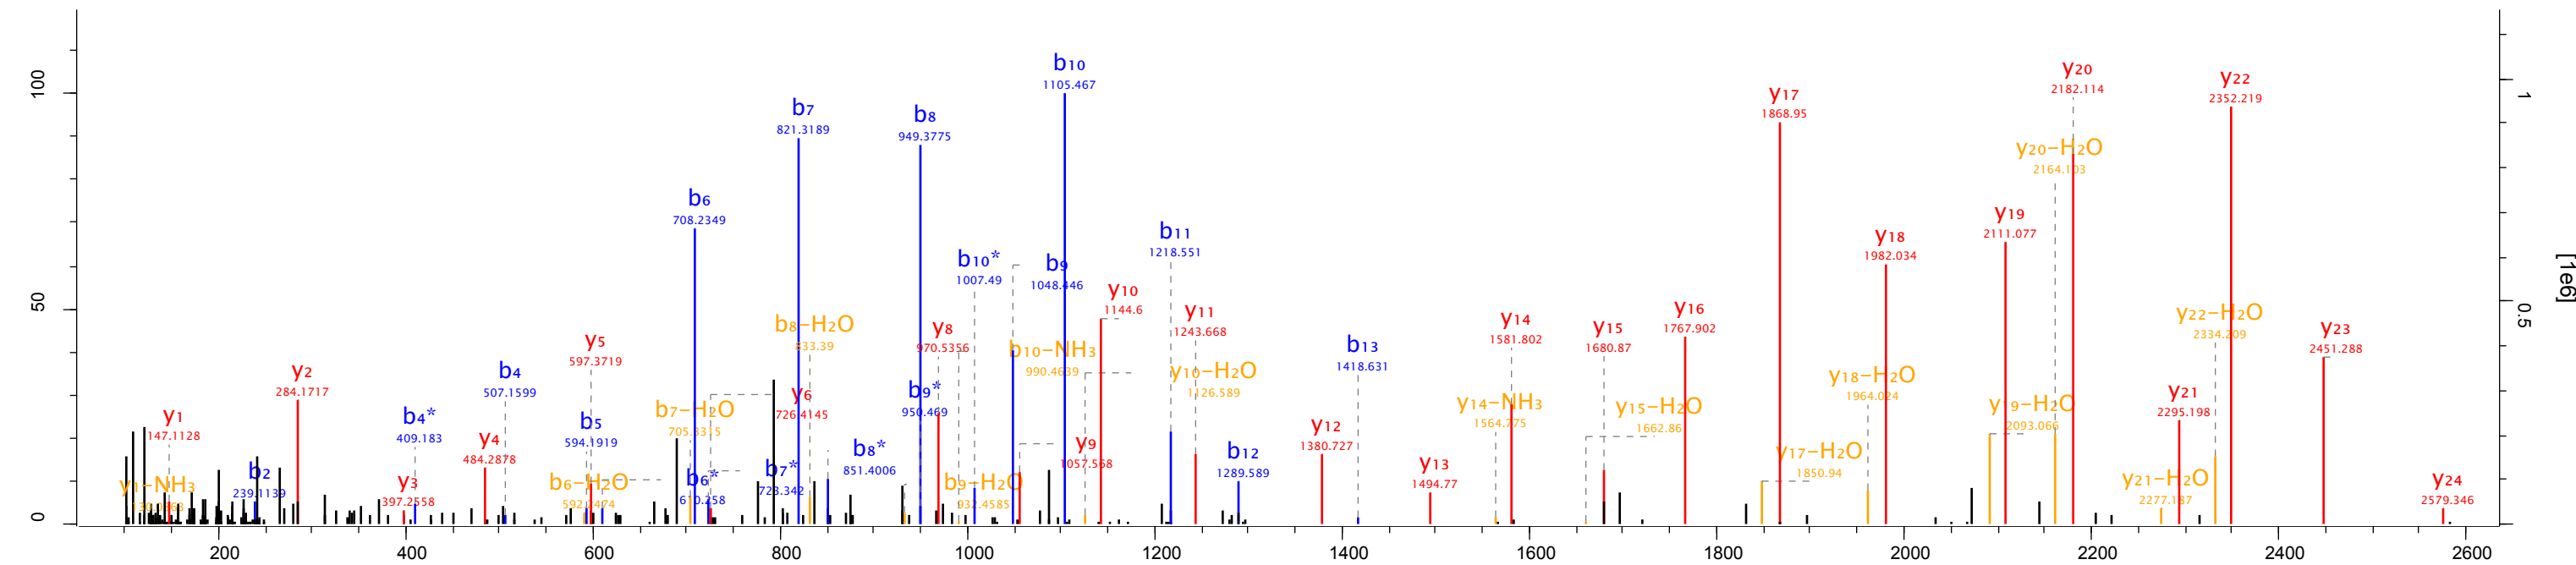

- H T S ph T S N I Q V G L A E L T S V S N H V S S P F E L S I H K -

Fragmentation sites are indicated by boxes below the sequence:

- Blue boxes: b<sub>2</sub> (T), b<sub>4</sub> (T), b<sub>5</sub> (S), b<sub>6</sub> (N), b<sub>7</sub> (I), b<sub>8</sub> (Q), b<sub>9</sub> (V), b<sub>10</sub> (G), b<sub>11</sub> (L), b<sub>12</sub> (A), b<sub>13</sub> (E)
- Red boxes: y<sub>1</sub> (K), y<sub>2</sub> (I), y<sub>3</sub> (S), y<sub>4</sub> (L), y<sub>5</sub> (E), y<sub>6</sub> (F), y<sub>8</sub> (P), y<sub>9</sub> (S), y<sub>10</sub> (S), y<sub>11</sub> (V), y<sub>12</sub> (H), y<sub>13</sub> (N), y<sub>14</sub> (S), y<sub>15</sub> (V), y<sub>16</sub> (S), y<sub>17</sub> (T), y<sub>18</sub> (L), y<sub>19</sub> (E), y<sub>20</sub> (A), y<sub>21</sub> (L), y<sub>22</sub> (G), y<sub>23</sub> (V), y<sub>24</sub> (Q)



Raw file 20150814\_A375SR\_Phospho\_BR2\_04 Scan 28387 Method FTMS; HCD Score 117.83 m/z 954.76 Gene names FAM21A

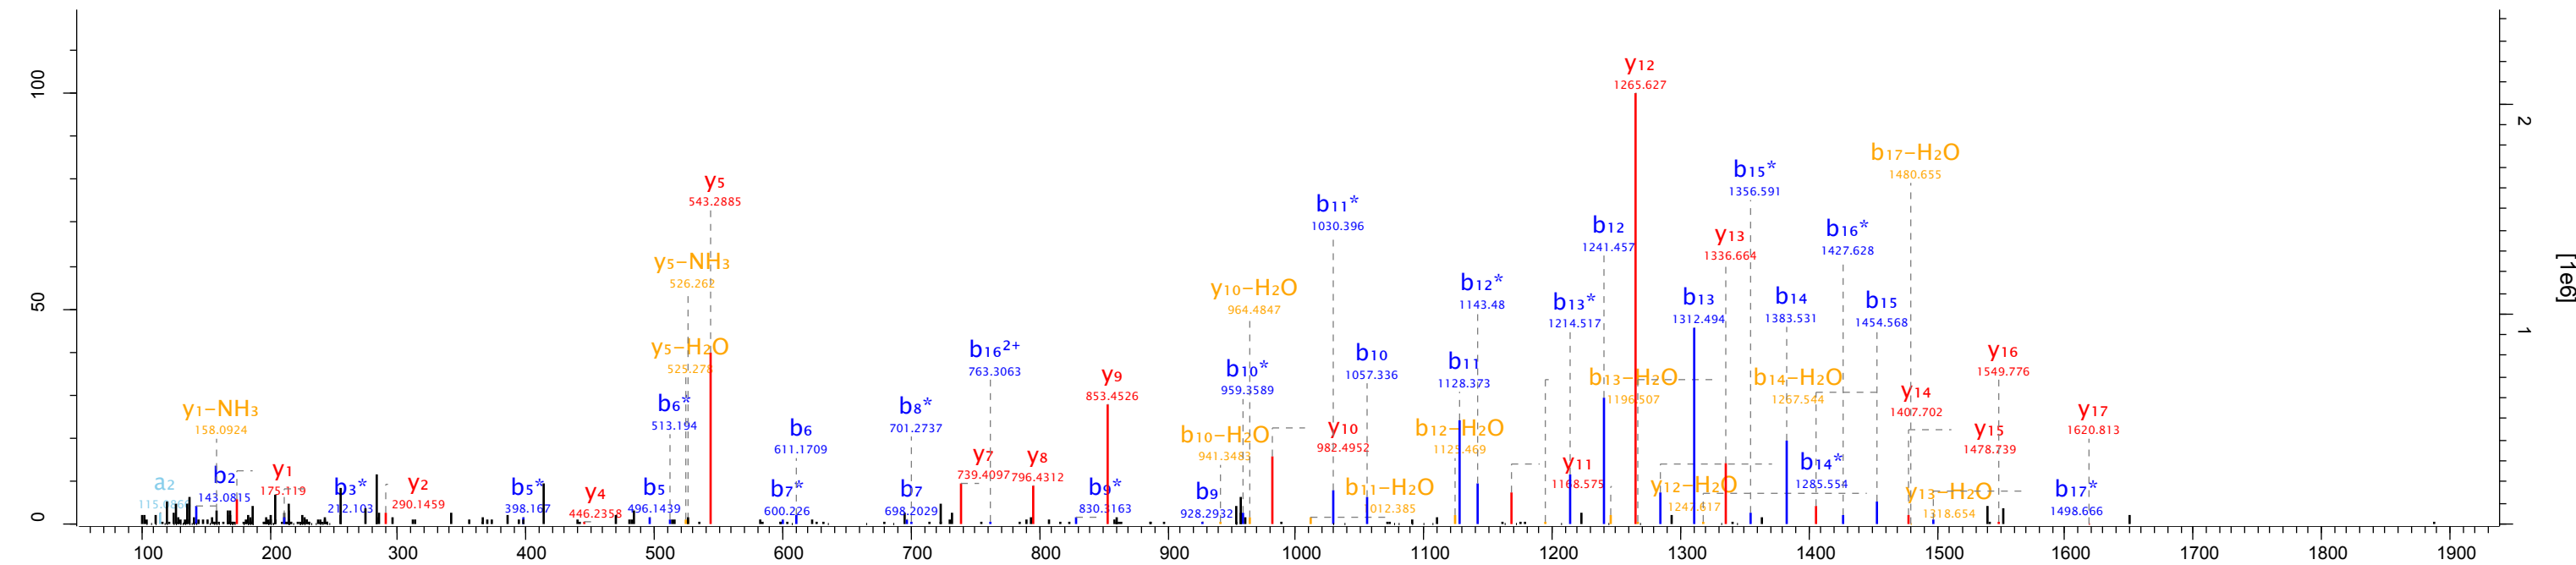

- A A S ph G E D S T E E A L A A A A A P W E G G P V P G V D R -

b<sub>2</sub>
b<sub>3</sub>\*
b<sub>5</sub>
b<sub>6</sub>
b<sub>7</sub>
b<sub>8</sub>\*
b<sub>9</sub>
b<sub>10</sub>
b<sub>11</sub>
b<sub>12</sub>
b<sub>13</sub>
b<sub>14</sub>
b<sub>15</sub>
b<sub>16</sub>\*
b<sub>17</sub>\*
y<sub>17</sub>
y<sub>16</sub>
y<sub>15</sub>
y<sub>14</sub>
y<sub>13</sub>
y<sub>12</sub>
y<sub>11</sub>
y<sub>10</sub>
y<sub>9</sub>
y<sub>8</sub>
y<sub>7</sub>
y<sub>5</sub>
y<sub>4</sub>
y<sub>2</sub>
y<sub>1</sub>

Raw file 20150814\_A375SR\_Phospho\_BR2\_04 Scan 28707 Method FTMS; HCD Score 265.31 m/z 1235.51 Gene names NAP1L1

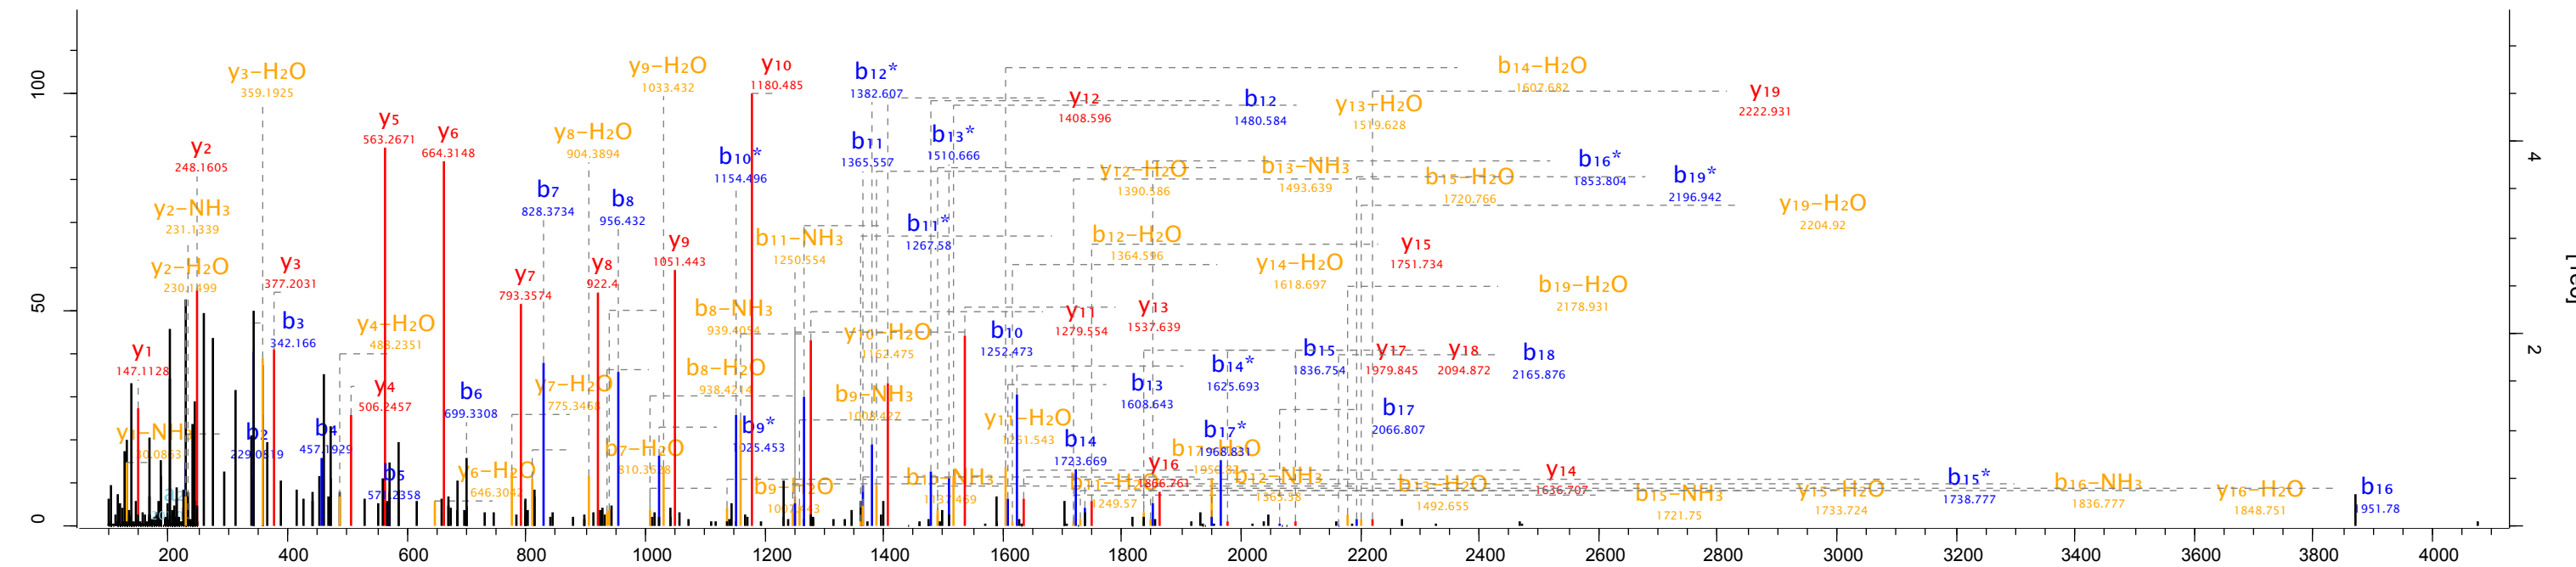

ac - A D I D N K E Q S E L D Q D L D D V E E V E E E E T G E E T K -

Fragmentation mapping: b<sub>2</sub> (D), b<sub>3</sub> (I), b<sub>4</sub> (D), b<sub>5</sub> (N), b<sub>6</sub> (K), b<sub>7</sub> (E), b<sub>8</sub> (Q), b<sub>9</sub><sup>\*</sup> (S), b<sub>10</sub> (E), b<sub>11</sub> (L), b<sub>12</sub> (D), b<sub>13</sub> (Q), b<sub>14</sub> (D), b<sub>15</sub> (L), b<sub>16</sub> (D), b<sub>17</sub> (D), b<sub>18</sub> (V), b<sub>19</sub><sup>\*</sup> (E). Red boxes highlight residues Q, D, L, D, D, V, E, E, V, E, E, E, T, G, E, E, T, K.

Raw file 20150814\_A375SR\_Phospho\_BR2\_04 Scan 28787 Method FTMS; HCD Score 184.84 m/z 671.01 Gene names NUMA1

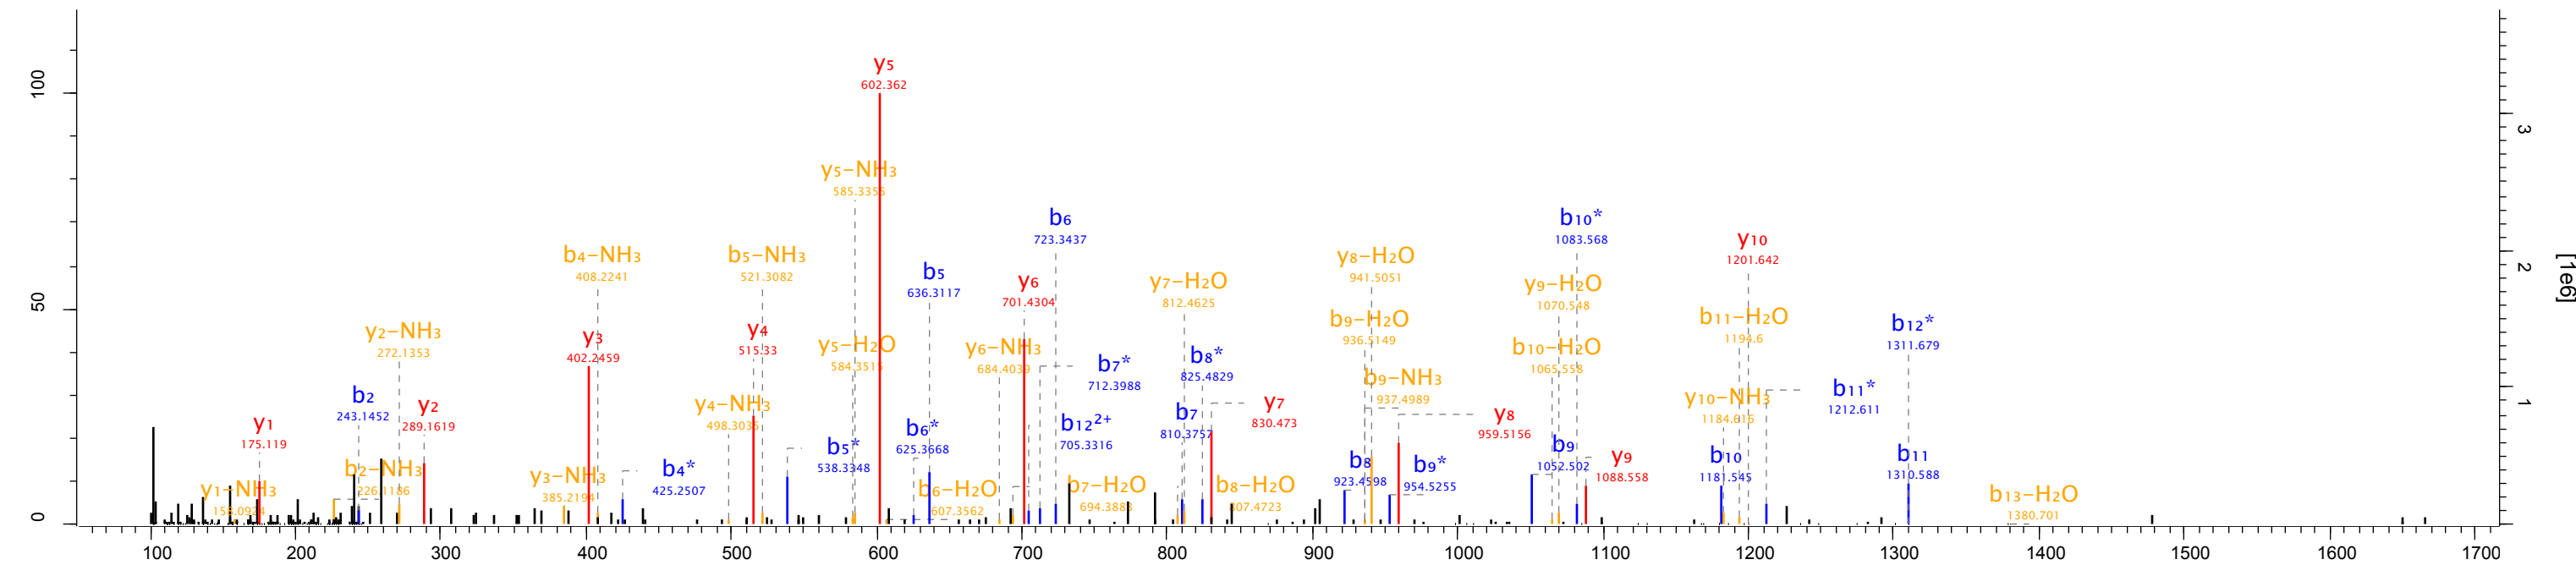

- K N S L I S S L E E E V S I L N R -

ph

b<sub>2</sub> b<sub>4</sub>\* b<sub>5</sub> b<sub>6</sub> b<sub>7</sub> b<sub>8</sub> b<sub>9</sub> b<sub>10</sub> b<sub>11</sub> b<sub>12</sub>\*

y<sub>1</sub> y<sub>2</sub> y<sub>3</sub> y<sub>4</sub> y<sub>5</sub> y<sub>6</sub> y<sub>7</sub> y<sub>8</sub> y<sub>9</sub> y<sub>10</sub>

Raw file Scan Method Score m/z Gene names  
 20150814\_A375SR\_Phospho\_BR2\_04 28957 FTMS; HCD 189.27 981.82 SHROOM1

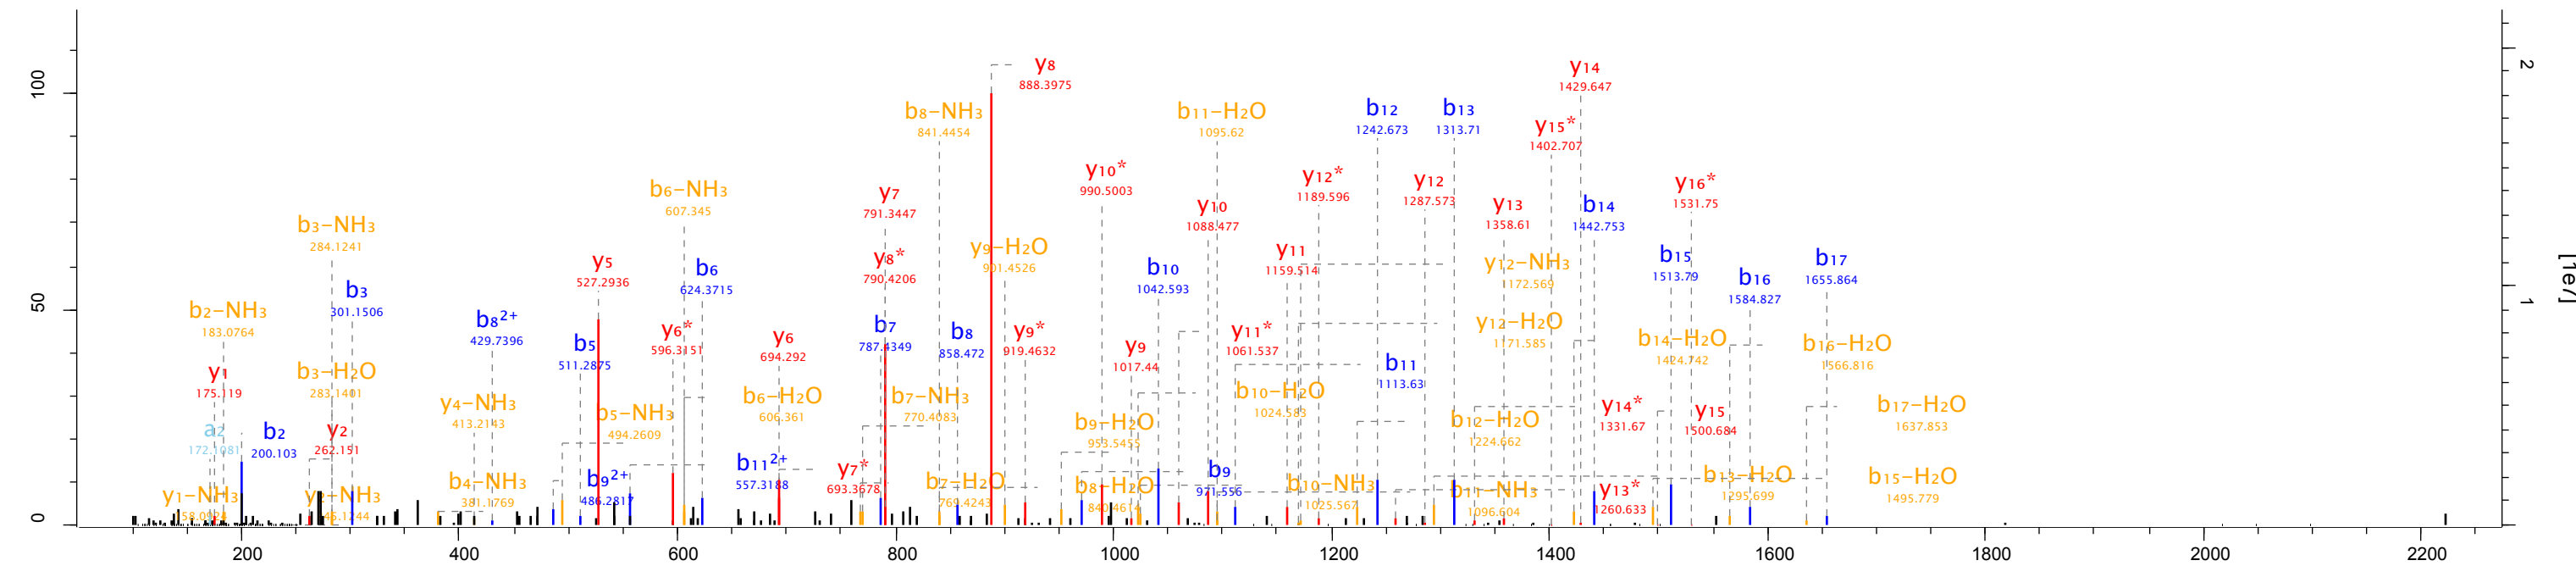

- Q A T P L L Y A L A A E A E A A A Q A A E P P S P P A S R -

b<sub>2</sub>
b<sub>3</sub>
b<sub>5</sub>
b<sub>6</sub>
b<sub>7</sub>
b<sub>8</sub>
b<sub>9</sub>
b<sub>10</sub>
b<sub>11</sub>
b<sub>12</sub>
b<sub>13</sub>
b<sub>14</sub>
b<sub>15</sub>
b<sub>16</sub>
b<sub>17</sub>
y<sub>16</sub>\*
y<sub>15</sub>
y<sub>14</sub>
y<sub>13</sub>
y<sub>12</sub>
y<sub>11</sub>
y<sub>10</sub>
y<sub>9</sub>
y<sub>8</sub>
y<sub>7</sub>
y<sub>6</sub>ph
y<sub>5</sub>
y<sub>2</sub>
y<sub>1</sub>

Raw file Scan Method Score m/z Gene names  
 20150814\_A375SR\_Phospho\_BR2\_04 3597 FTMS; HCD 110.47 457.22 NCOA3

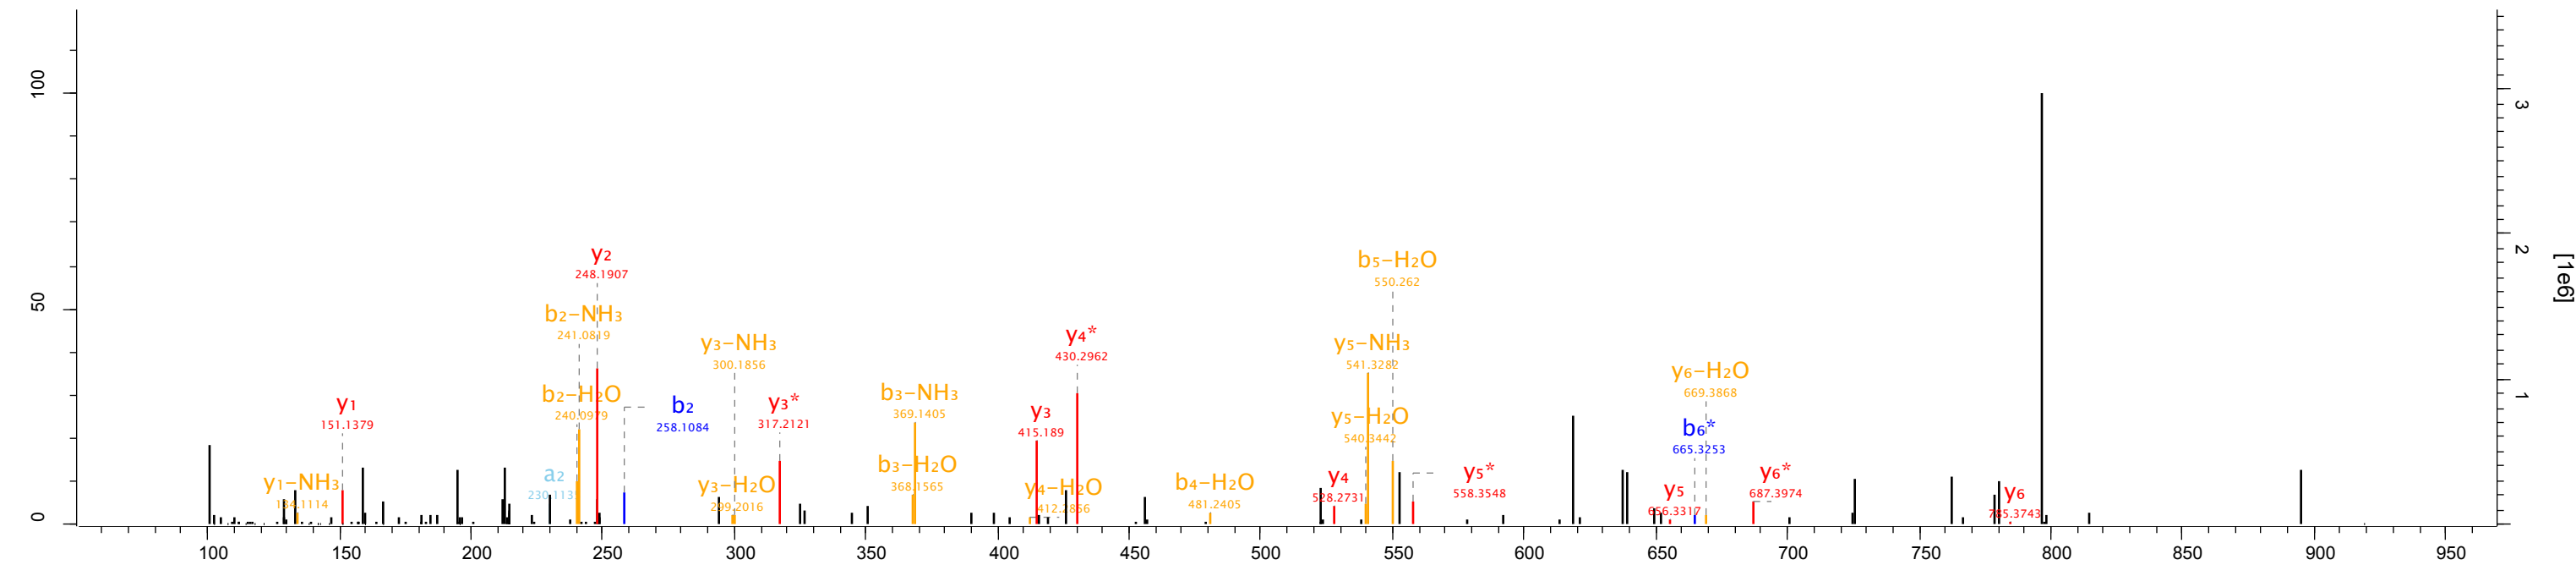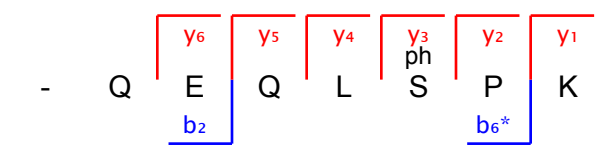

Raw file: 20150814\_A375SR\_Phospho\_BR2\_04  
 Scan: 3707 Method: FTMS; HCD Score: 103.9 m/z: 618.93 Gene names: DIDO1

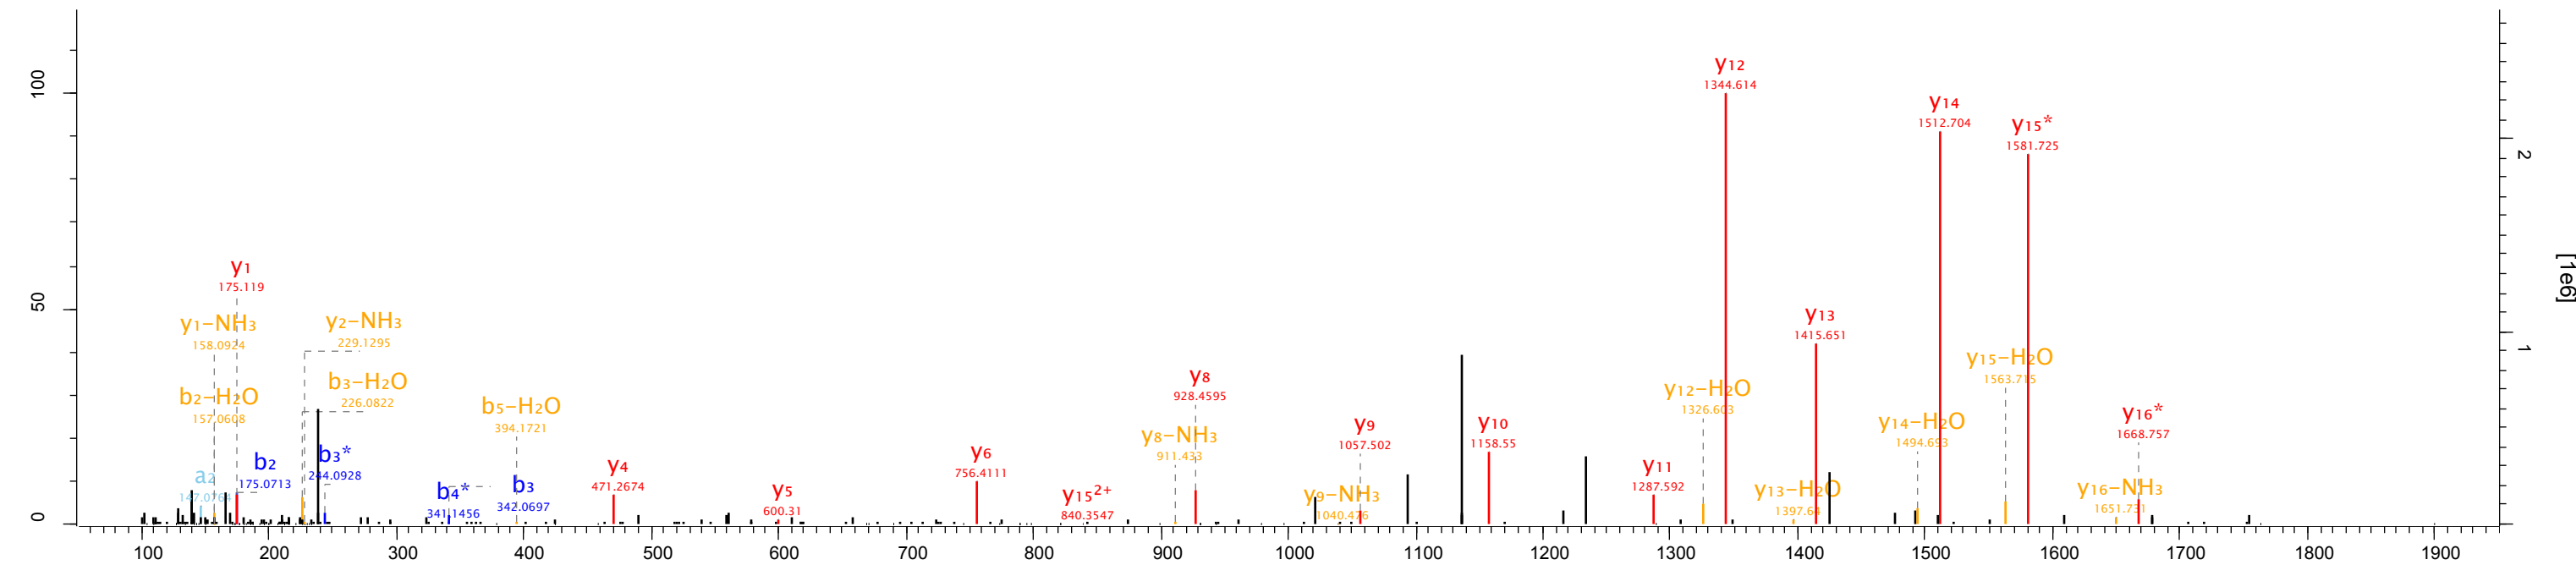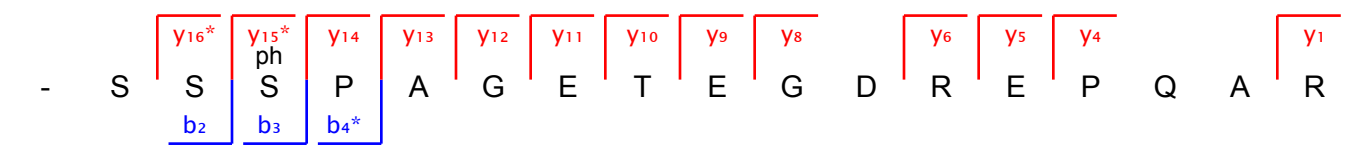

Raw file: 20150814\_A375SR\_Phospho\_BR2\_04  
 Scan: 4127 Method: FTMS; HCD Score: 154.82 m/z: 642.26 Gene names: SORBS2

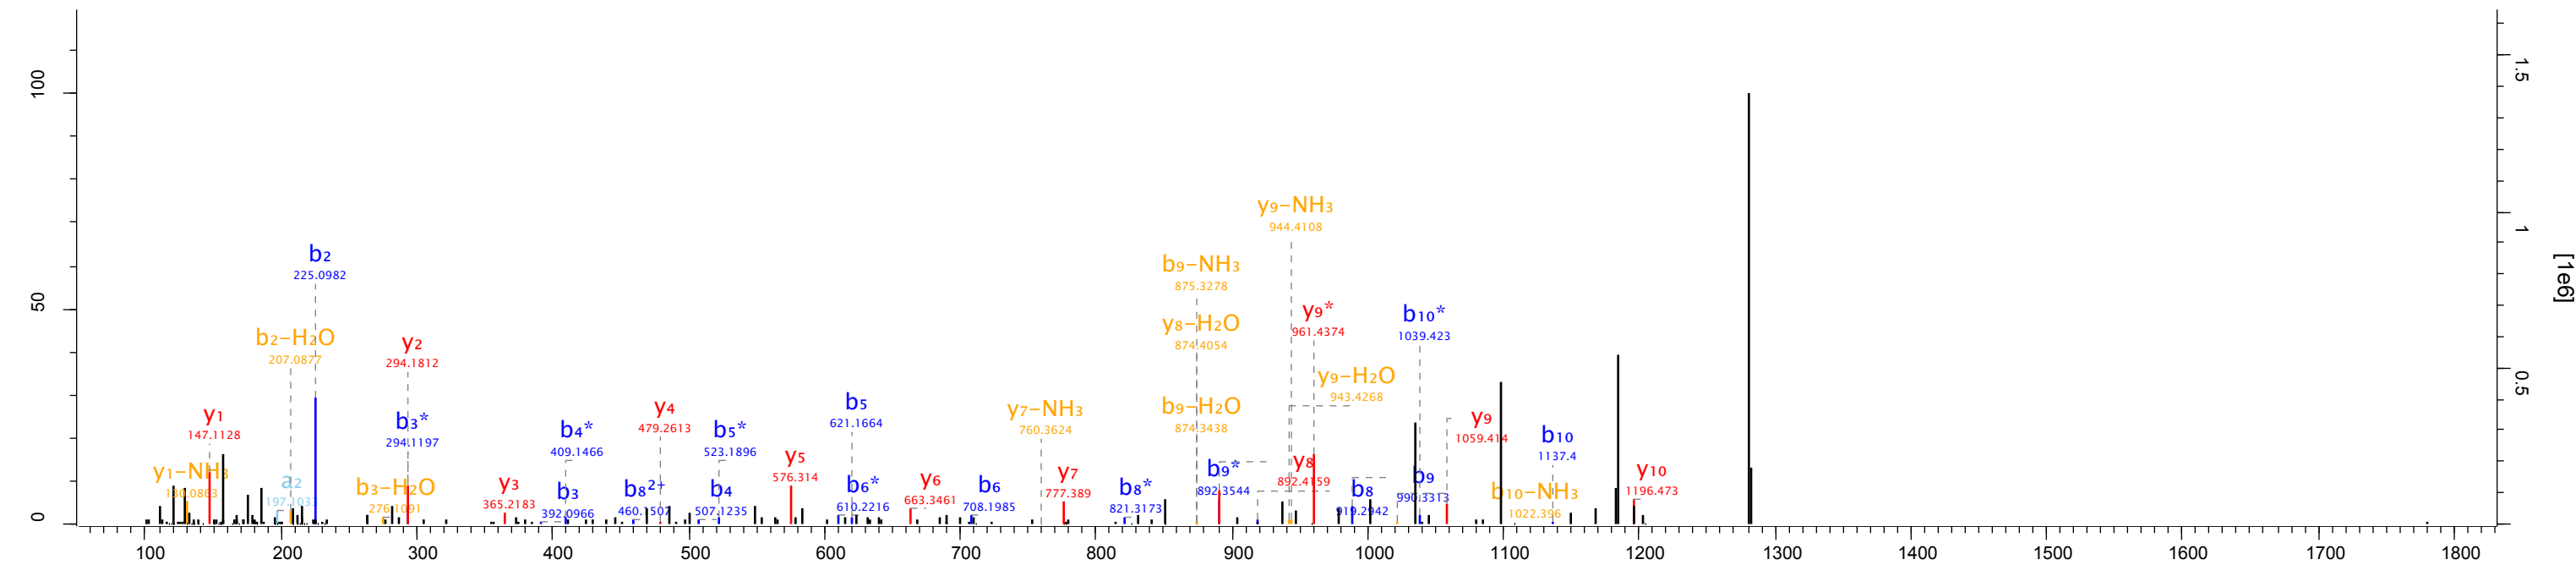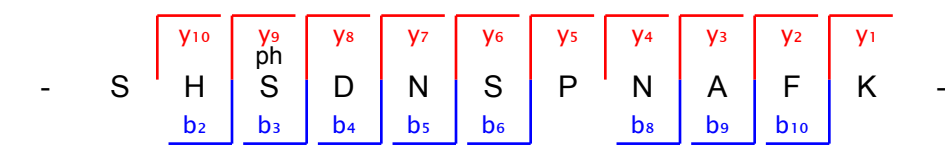

Raw file: 20150814\_A375SR\_Phospho\_BR2\_04  
 Scan: 4637 Method: FTMS; HCD Score: 183.23 m/z: 656.78 Gene names: BPTF

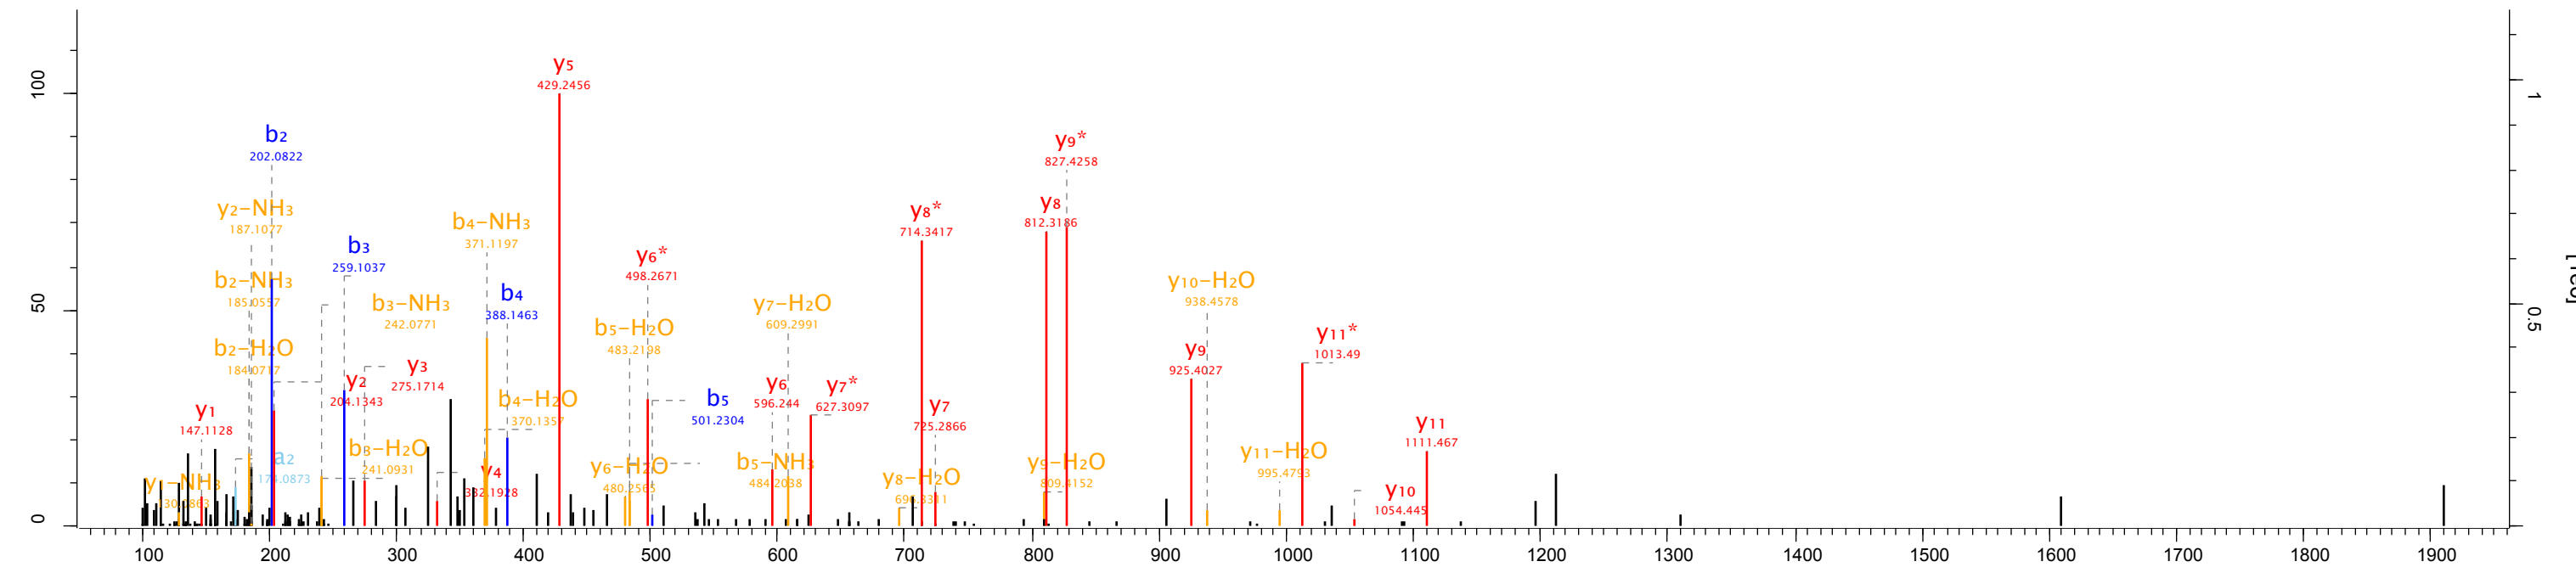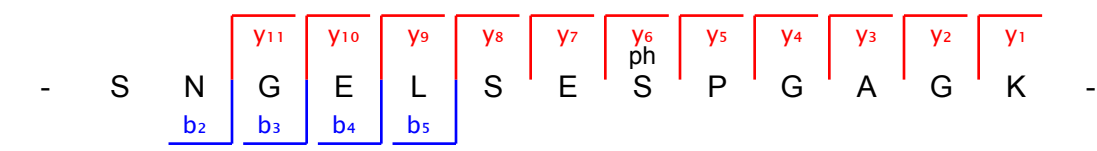



Raw file: 20150814\_A375SR\_Phospho\_BR2\_04  
 Scan: 4827 Method: FTMS; HCD Score: 167.05 m/z: 862.38 Gene names: BRD4

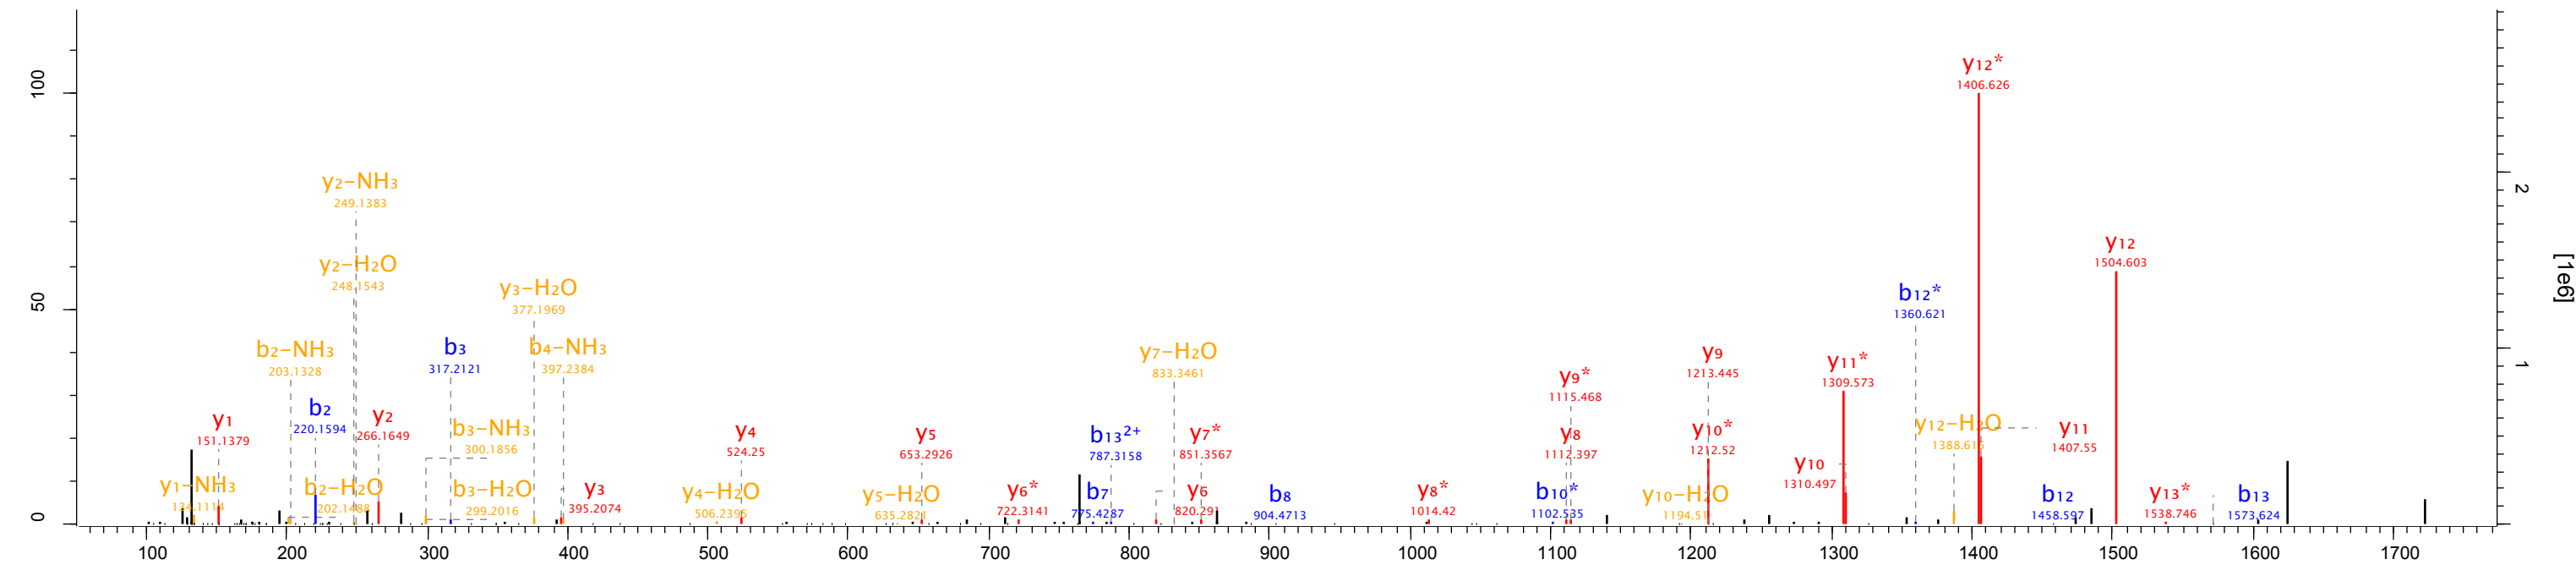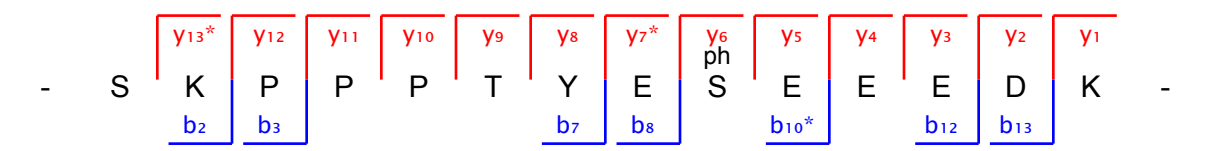

Raw file: 20150814\_A375SR\_Phospho\_BR2\_04  
 Scan: 4947 Method: FTMS; HCD Score: 109.15 m/z: 528.27 Gene names: SH3PXD2A

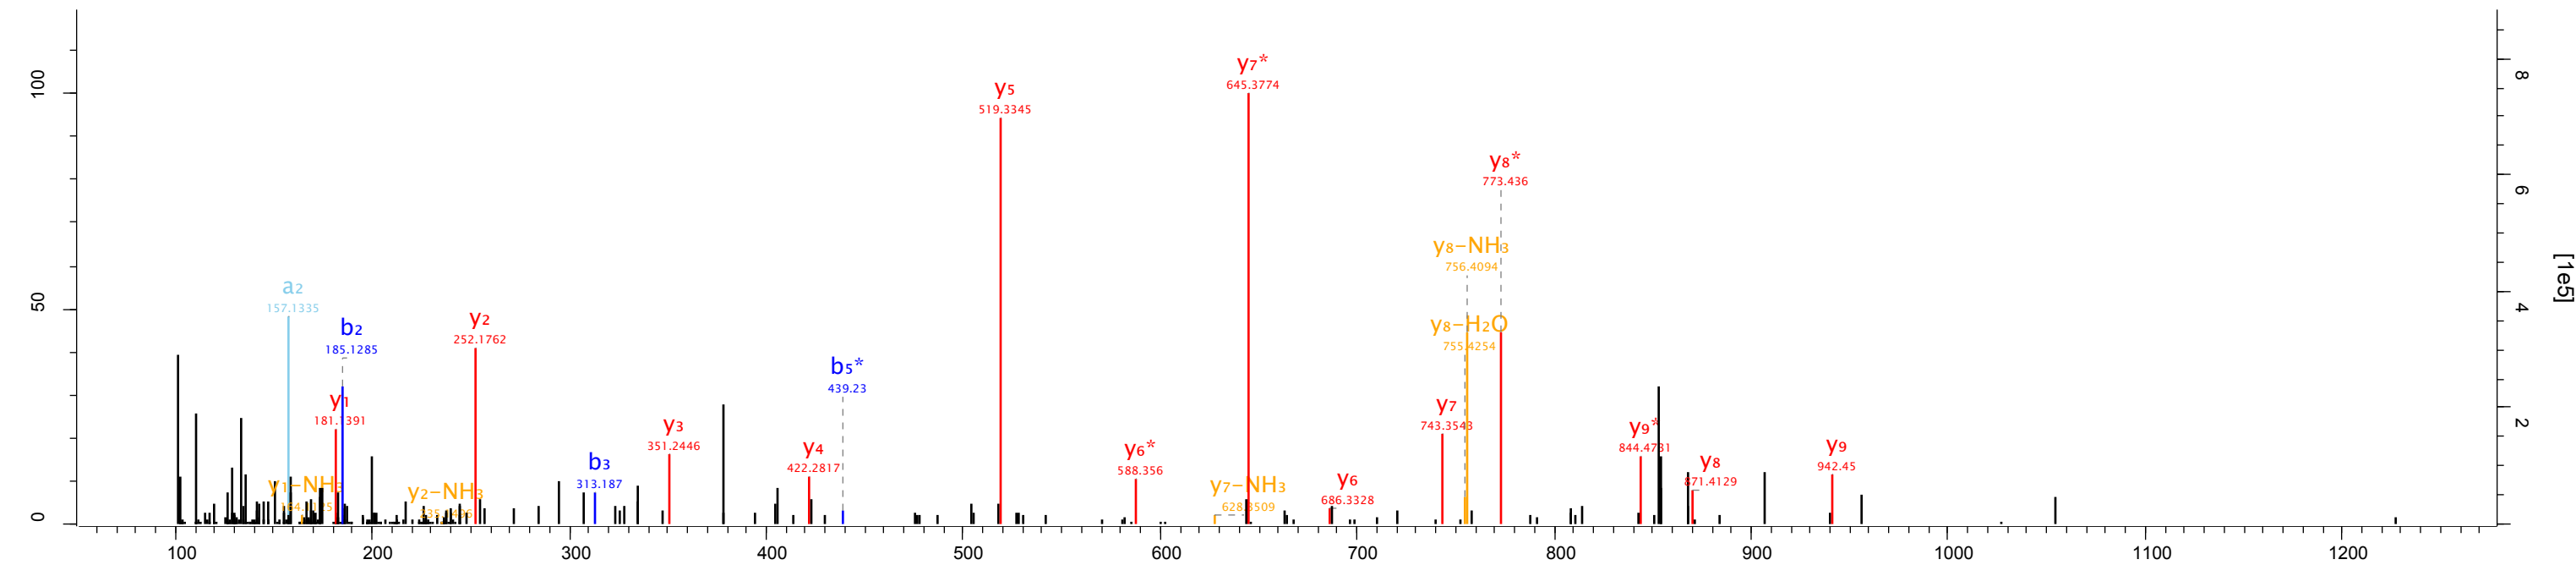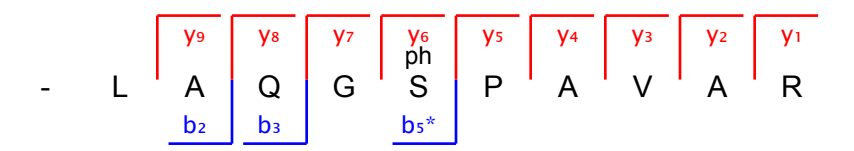

Raw file: 20150814\_A375SR\_Phospho\_BR2\_04  
 Scan: 5747 Method: FTMS; HCD Score: 191.14 m/z: 927.42 Gene names: TNS3

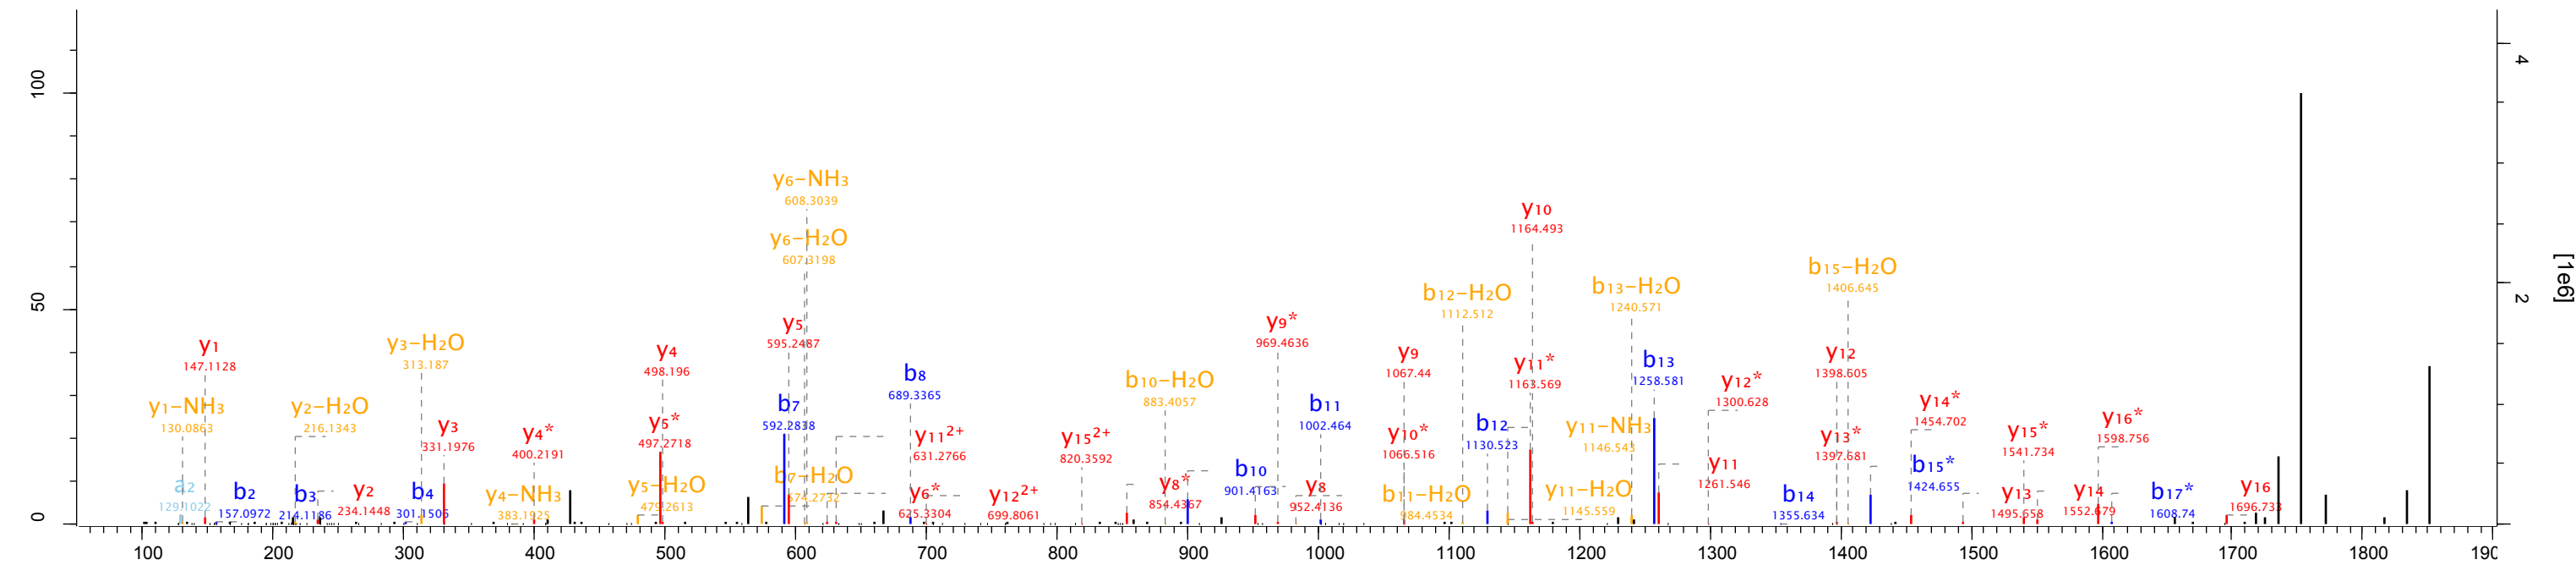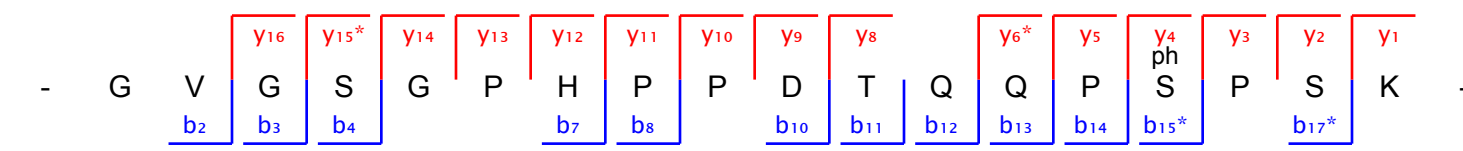

Raw file: 20150814\_A375SR\_Phospho\_BR2\_04  
 Scan: 5957 Method: FTMS; HCD Score: 173.31 m/z: 759.88 Gene names: NCAPH2

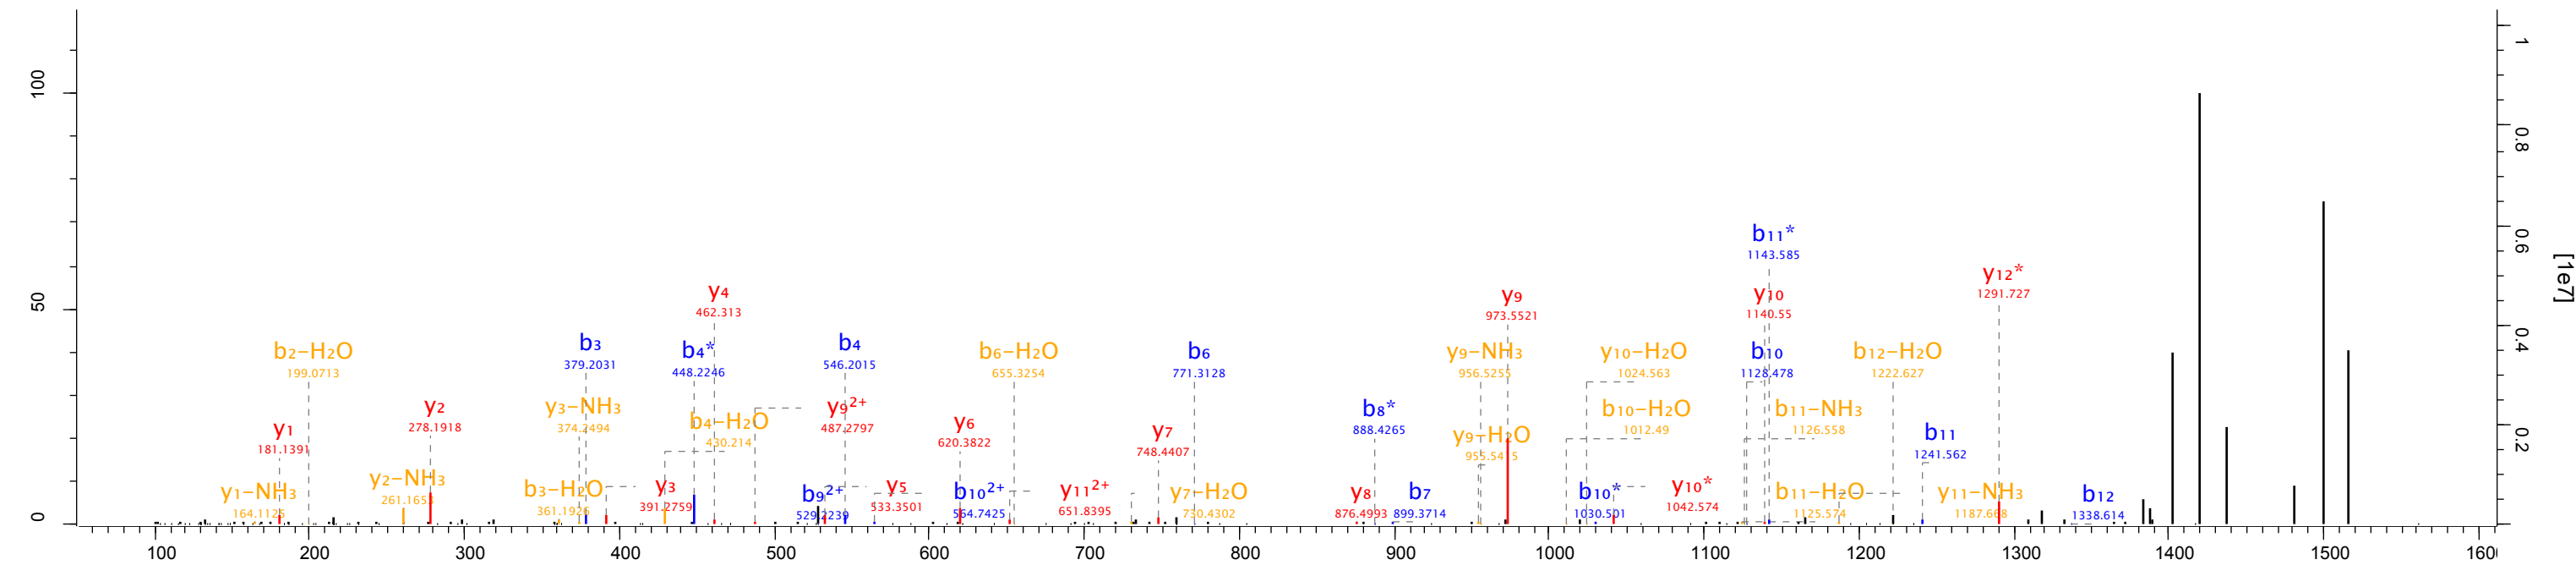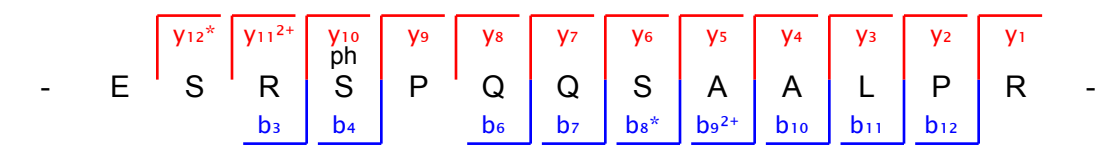

Raw file: 20150814\_A375SR\_Phospho\_BR2\_04  
 Scan: 5967 Method: FTMS; HCD Score: 205.78 m/z: 670.96 Gene names: TCF12

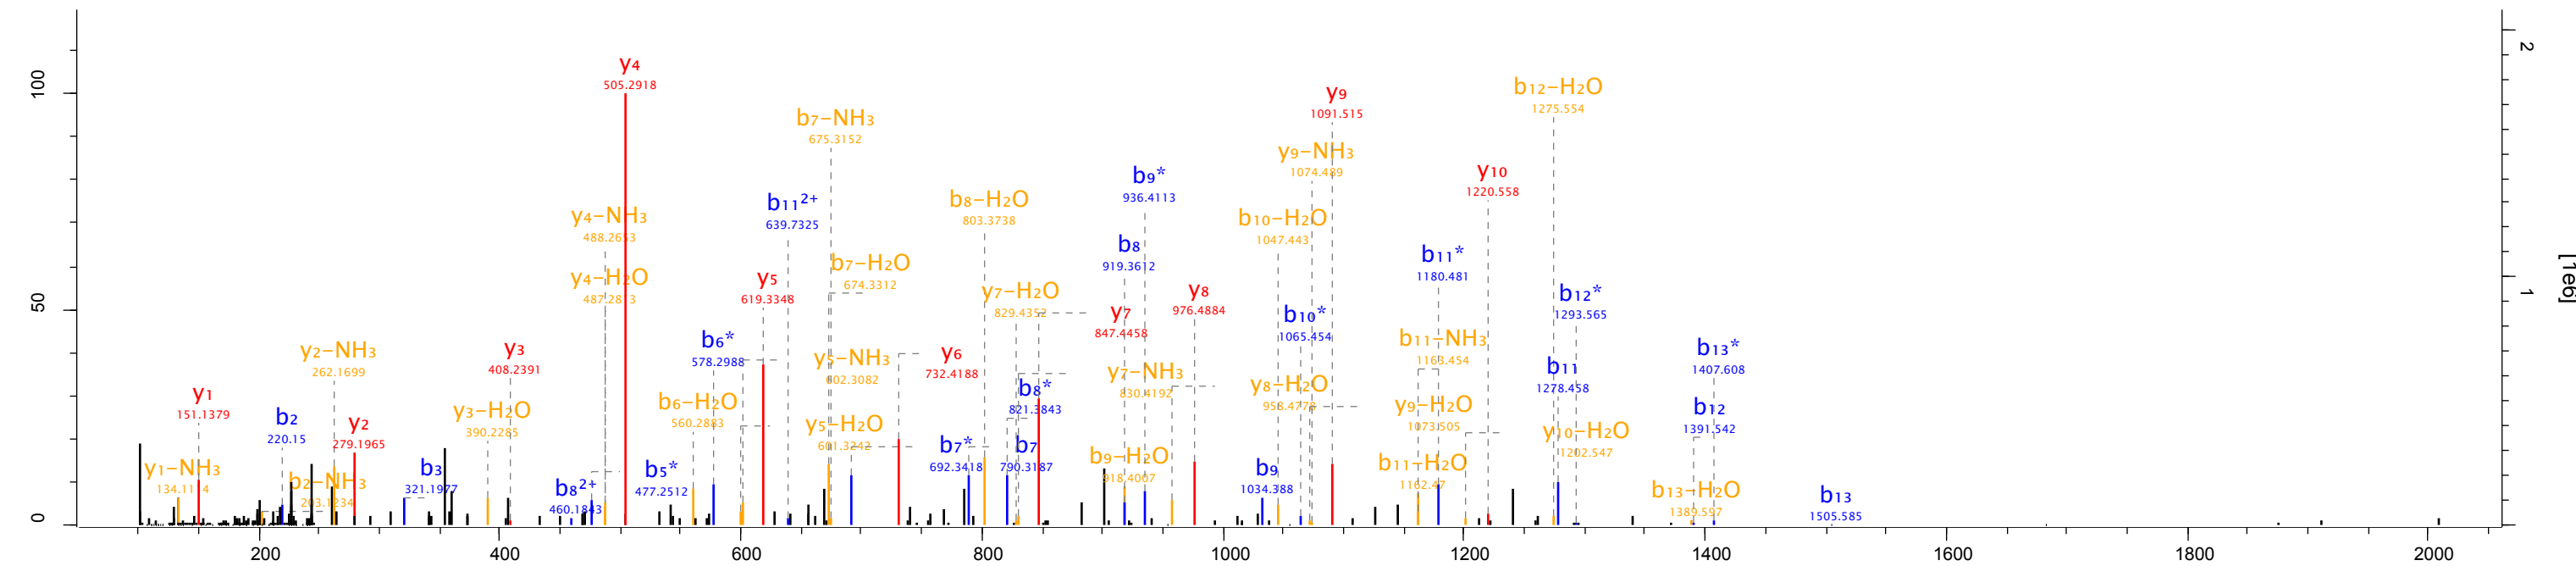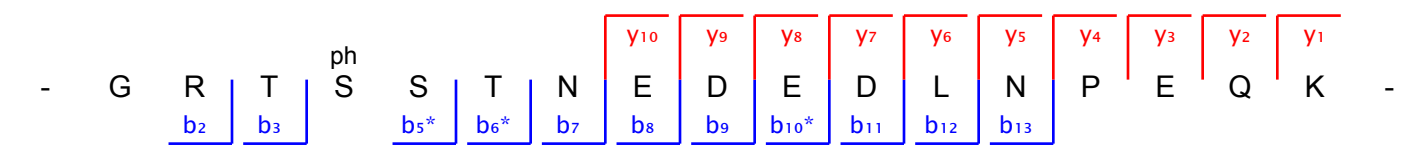

Raw file: 20150814\_A375SR\_Phospho\_BR2\_04  
 Scan: 6717 Method: FTMS; HCD Score: 168.45 m/z: 664.81 Gene names: PPP1R12A

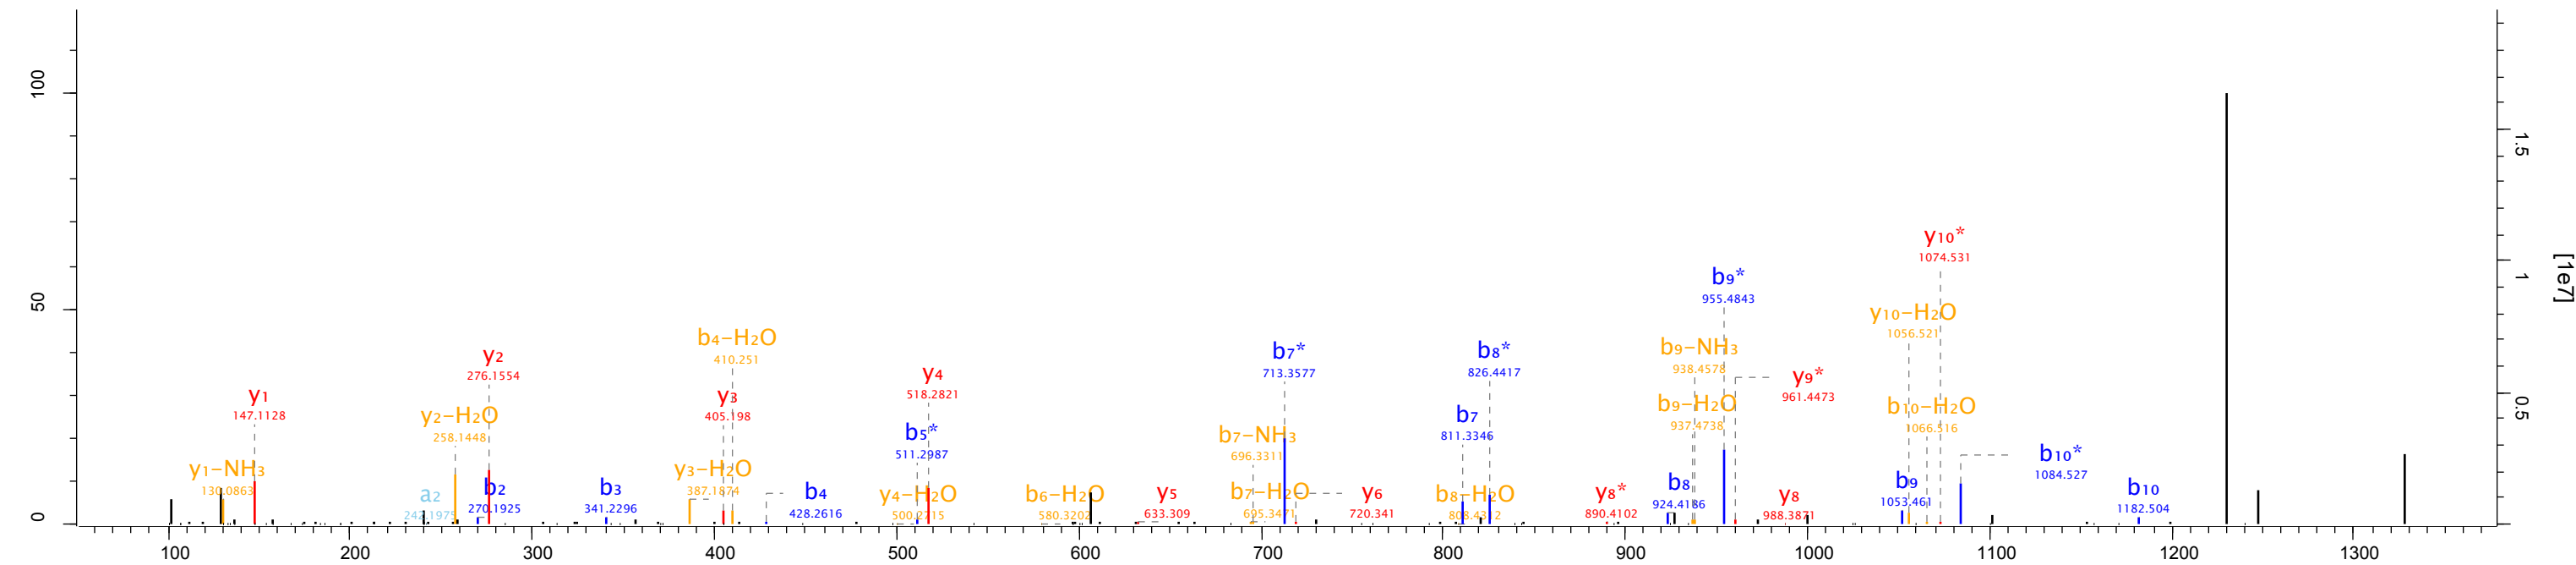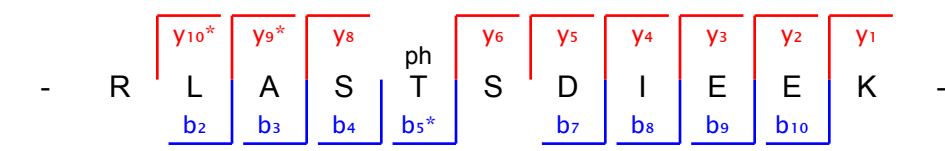

Raw file: 20150814\_A375SR\_Phospho\_BR2\_04  
 Scan: 6767 Method: FTMS; HCD Score: 156.96 m/z: 784.31 Gene names: ZCCHC6

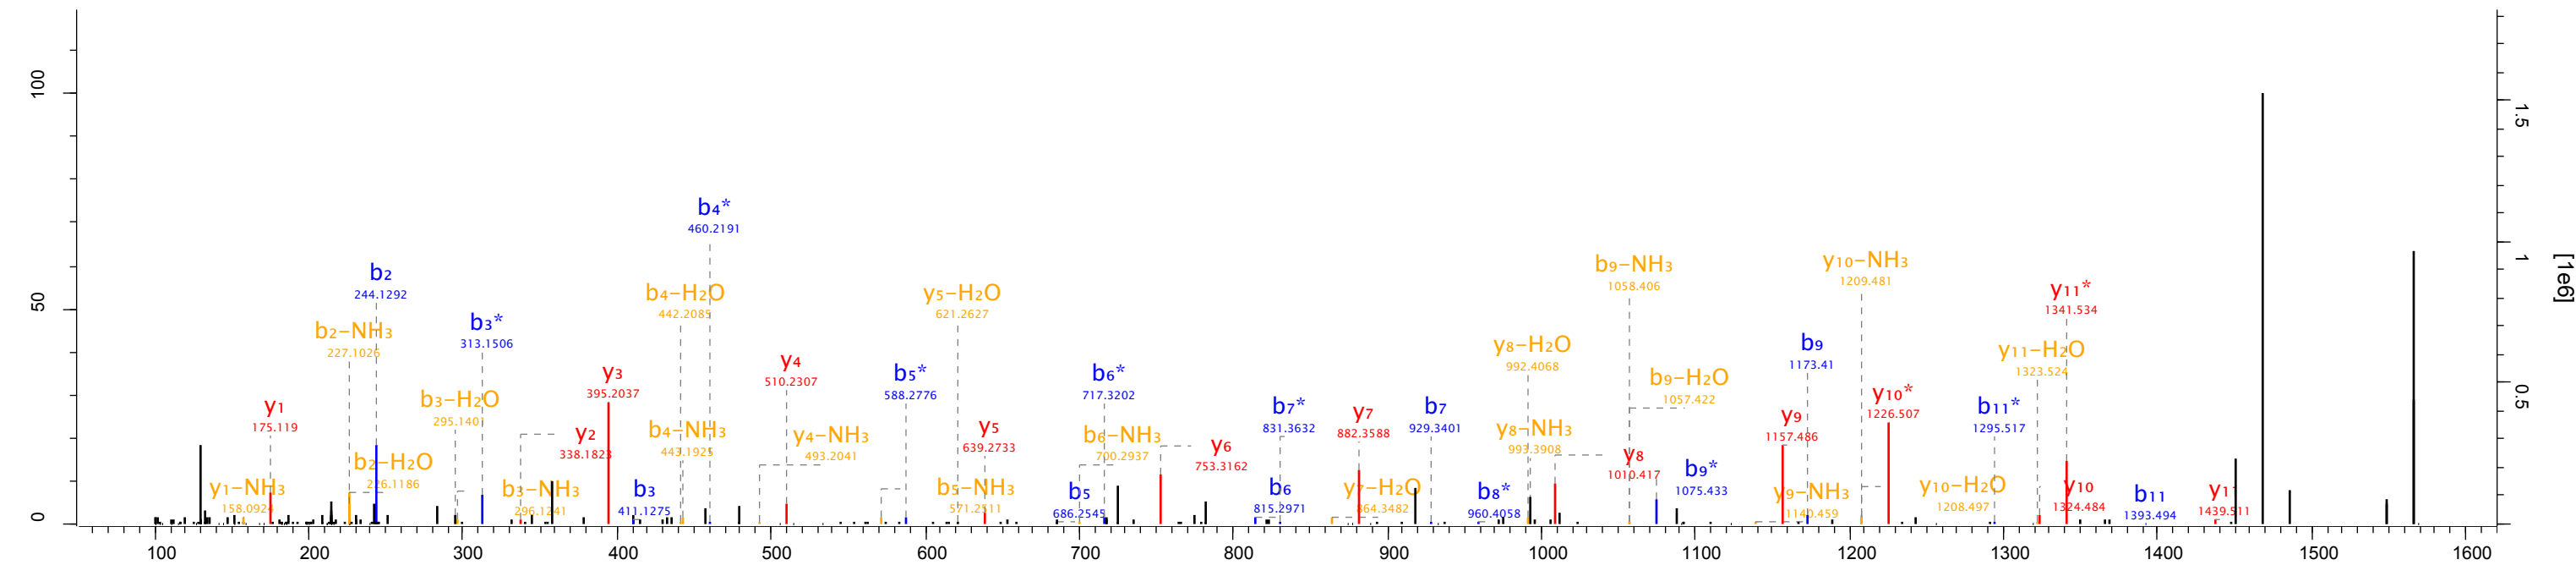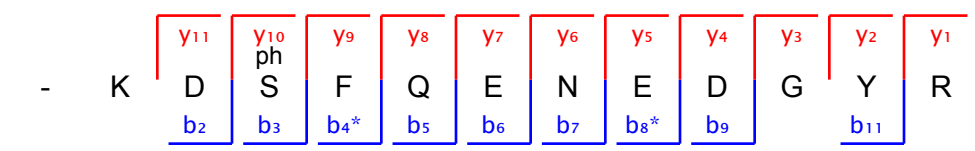

Raw file: 20150814\_A375SR\_Phospho\_BR2\_04  
 Scan: 6997 Method: FTMS; HCD Score: 249.85 m/z: 714.98 Gene names: PLEKHF1

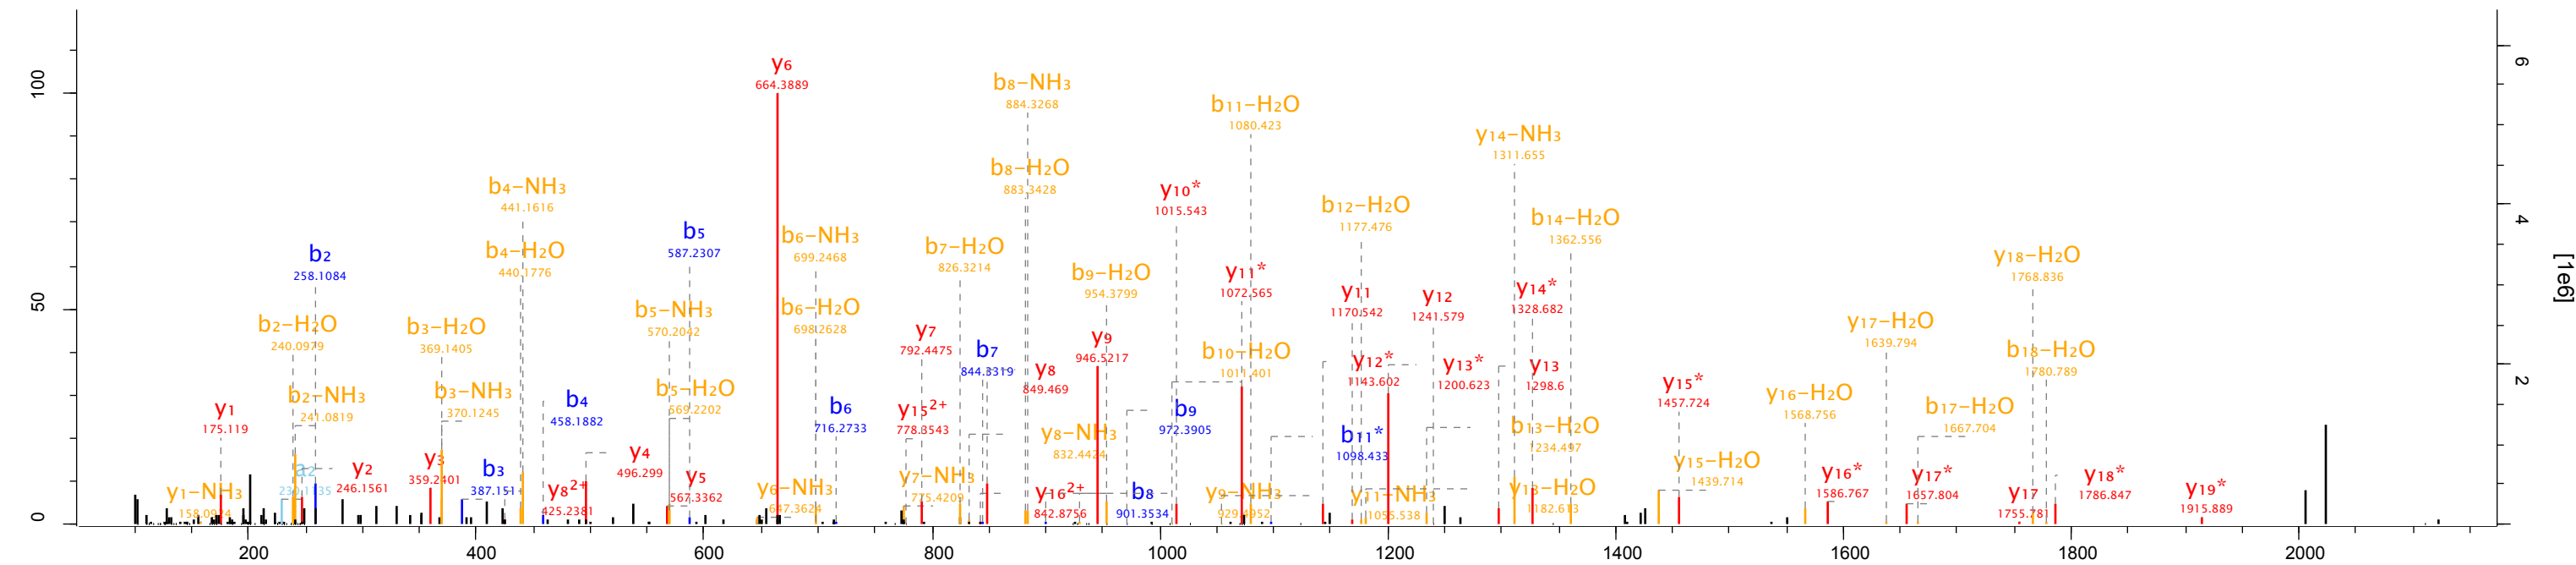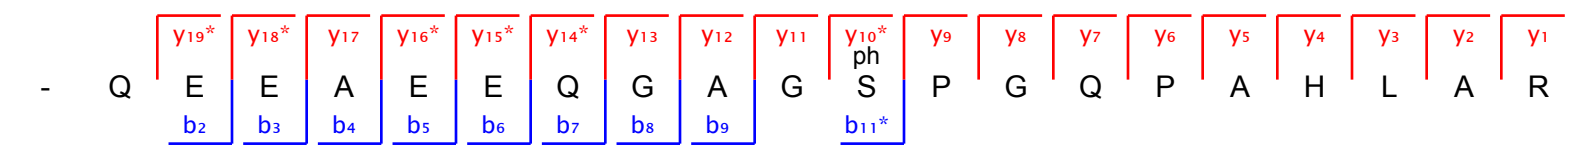



Raw file: 20150814\_A375SR\_Phospho\_BR2\_04  
 Scan: 7027 Method: FTMS; HCD Score: 146.72 m/z: 853.91 Gene names: IRF2BPL

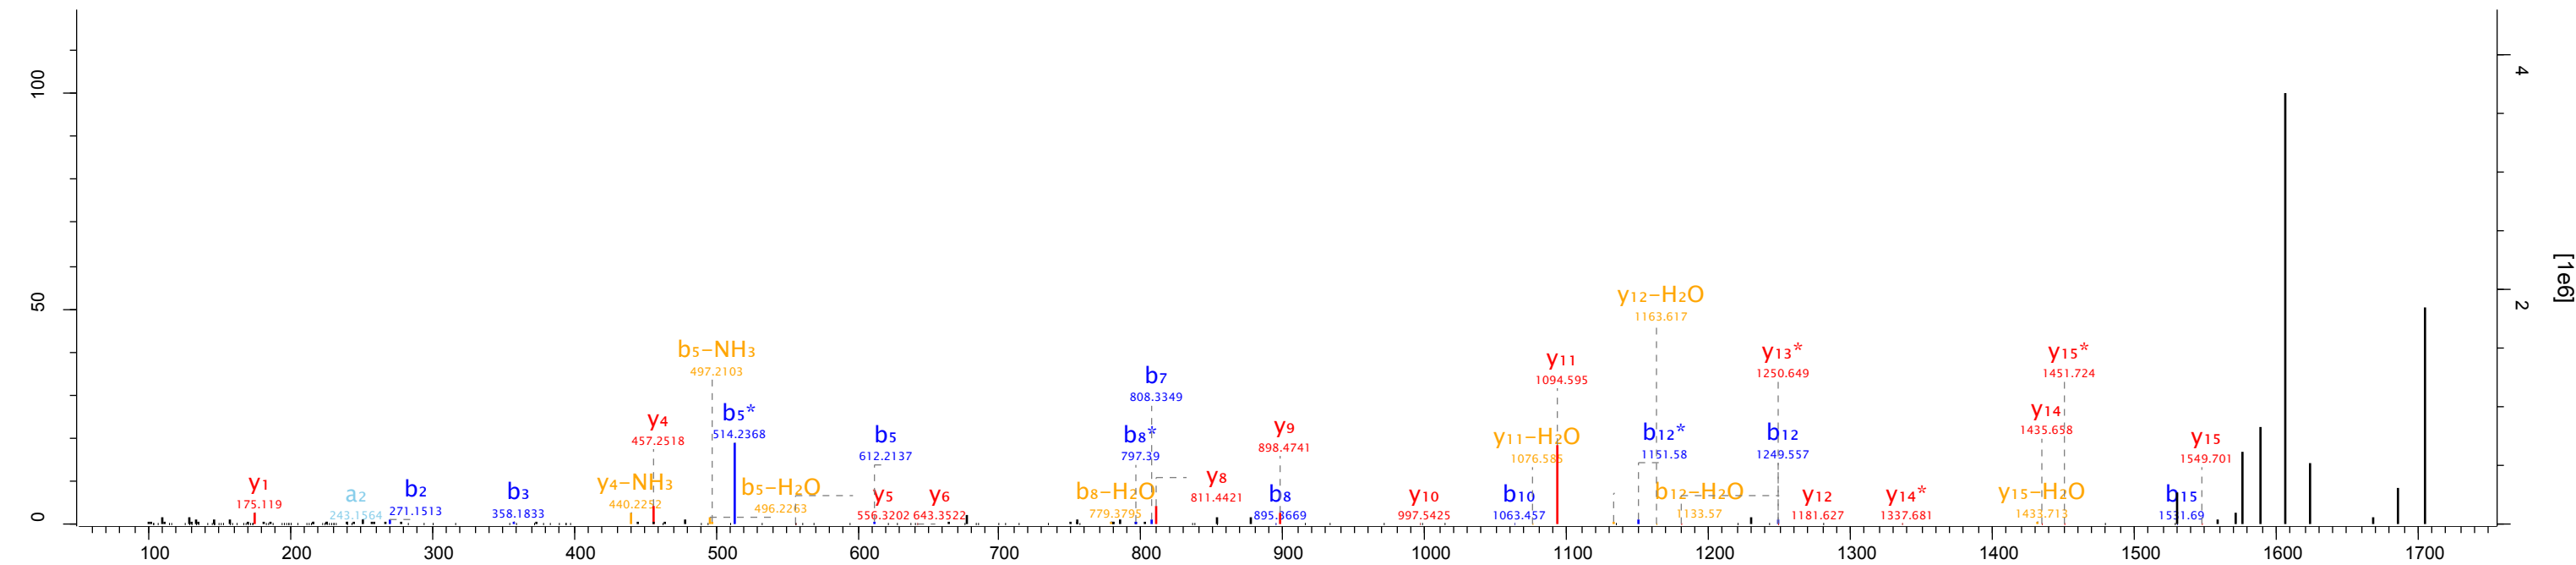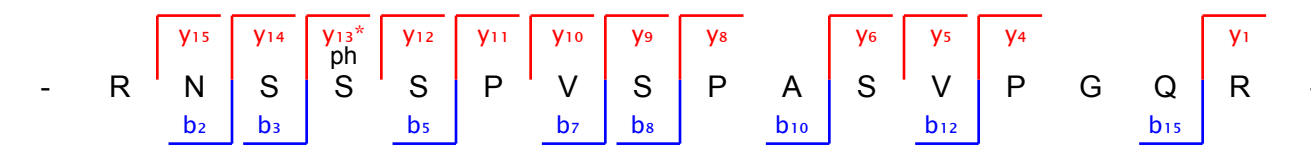

Raw file: 20150814\_A375SR\_Phospho\_BR2\_04  
 Scan: 8127 Method: FTMS; HCD Score: 163.82 m/z: 745.3 Gene names: CTNND1

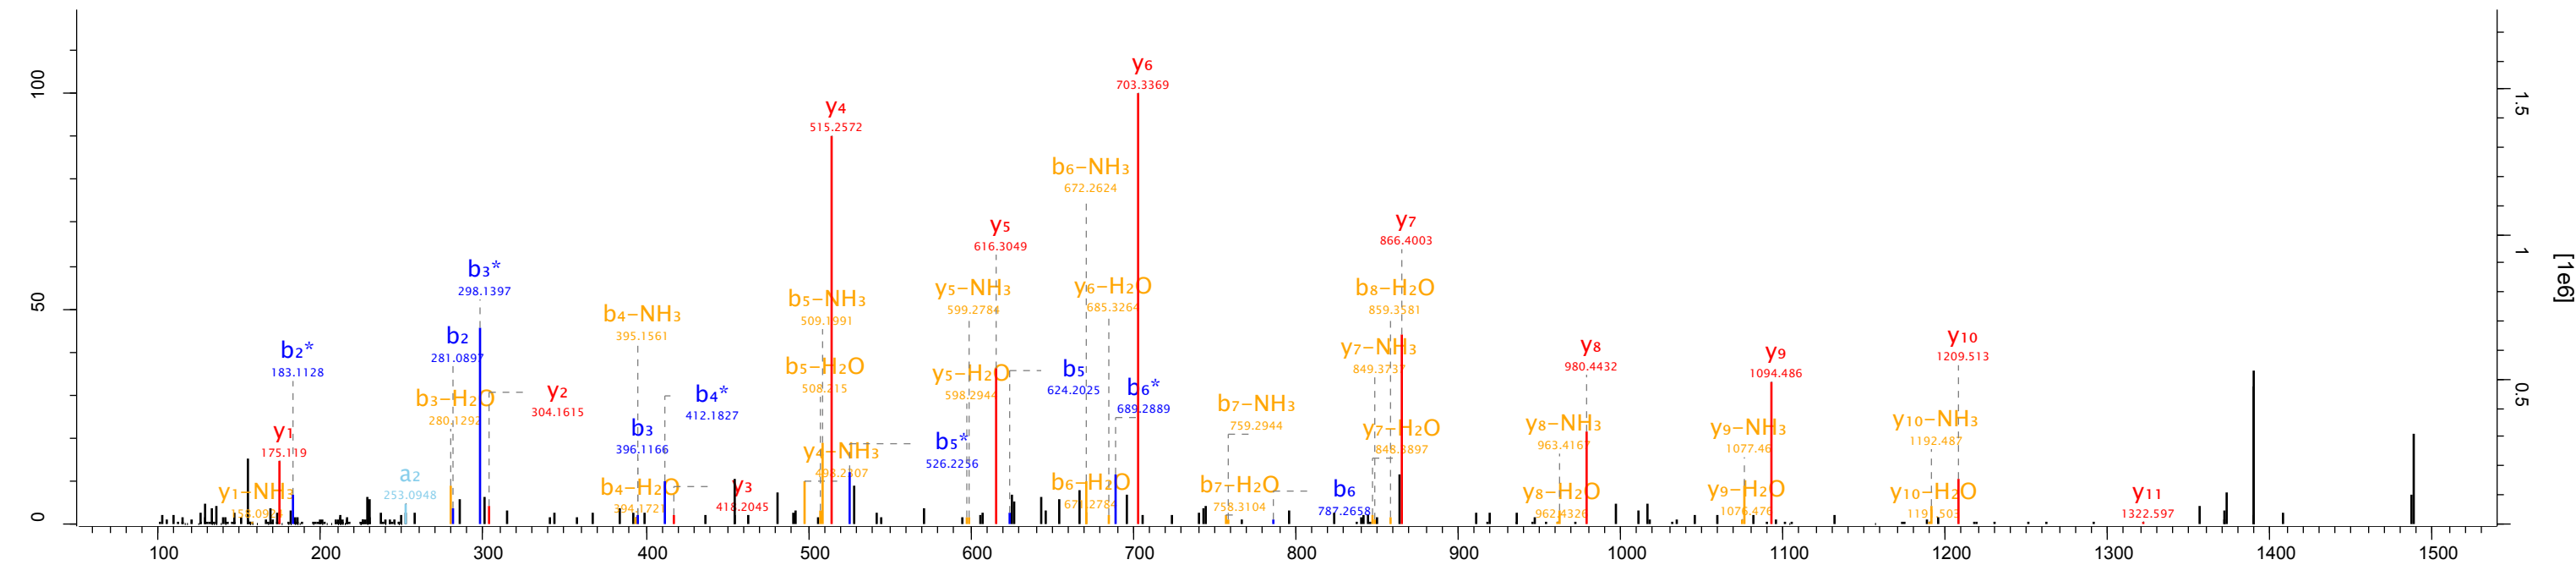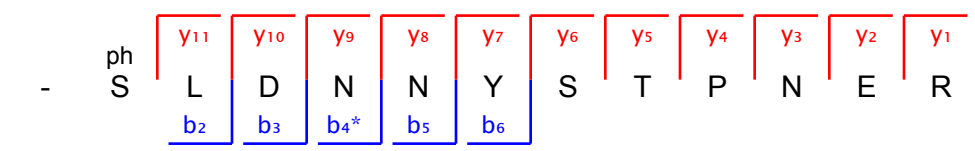

Raw file 20150814\_A375SR\_Phospho\_BR2\_04 Scan 8237 Method FTMS; HCD Score 99.28 m/z 553.23 Gene names NAV3

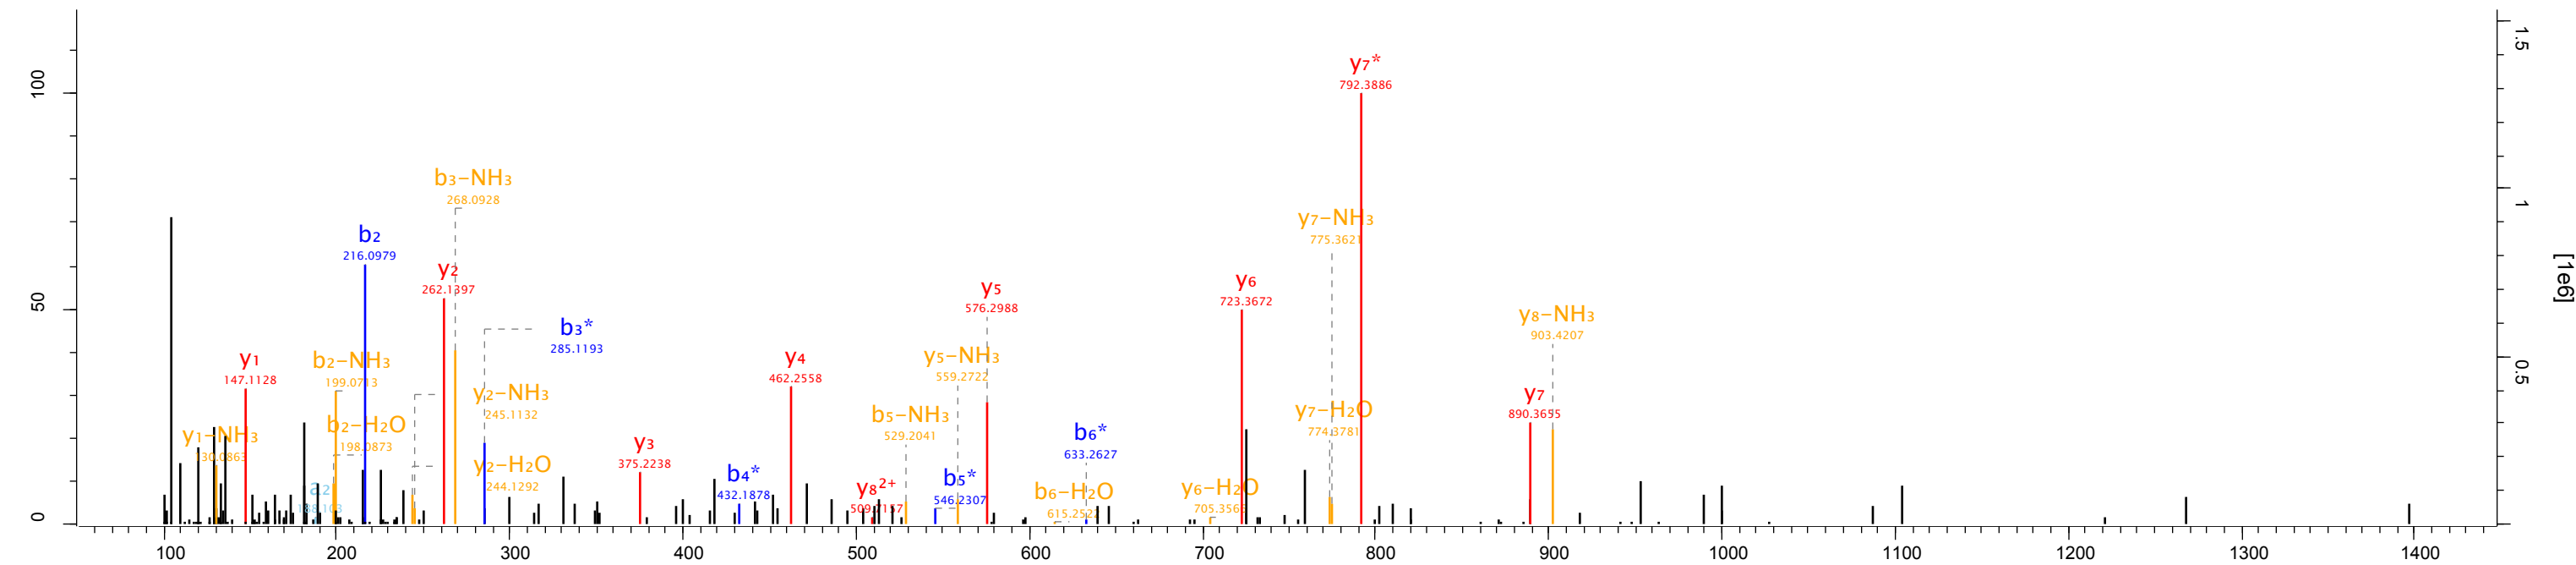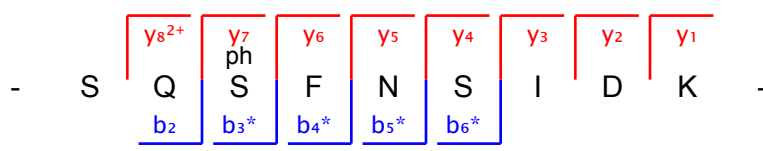

Raw file: 20150814\_A375SR\_Phospho\_BR2\_04  
 Scan: 8367 Method: FTMS; HCD Score: 162.53 m/z: 814.33 Gene names: TBC1D9B

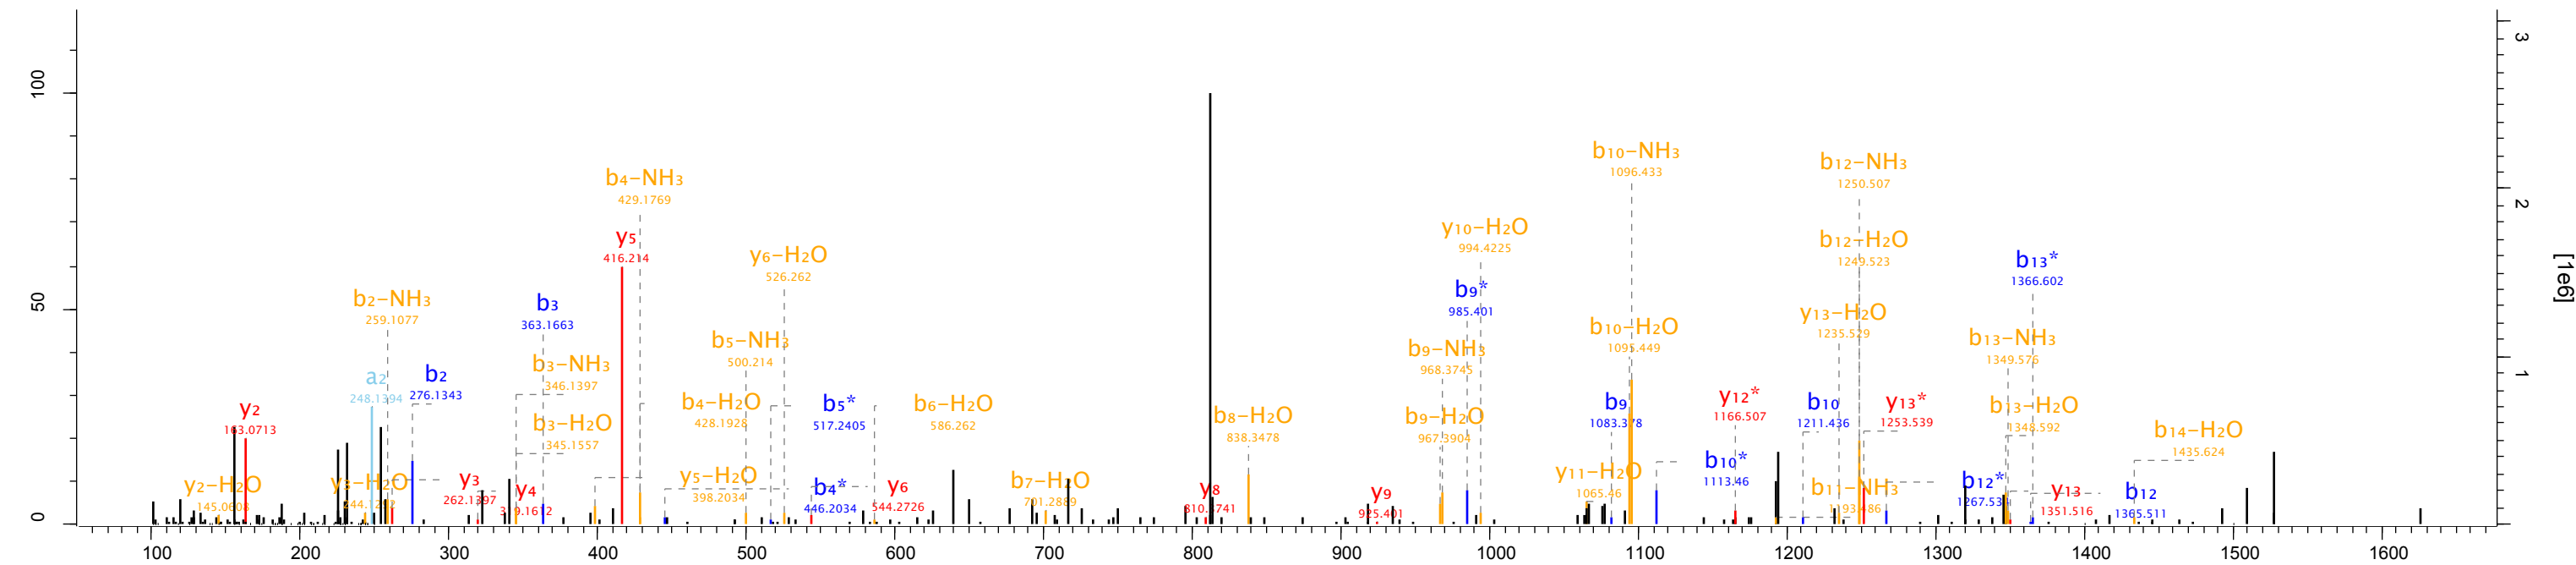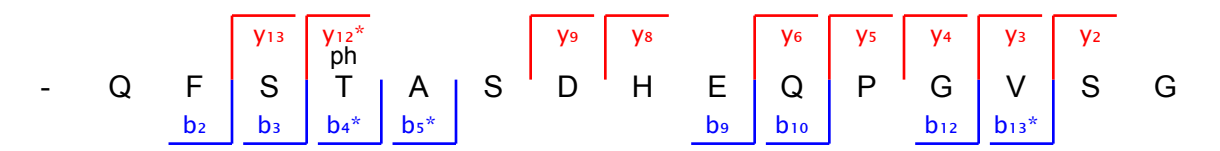

Raw file: 20150814\_A375SR\_Phospho\_BR2\_04  
 Scan: 8507 Method: FTMS; HCD Score: 234.62 m/z: 904.9 Gene names: CLASP2

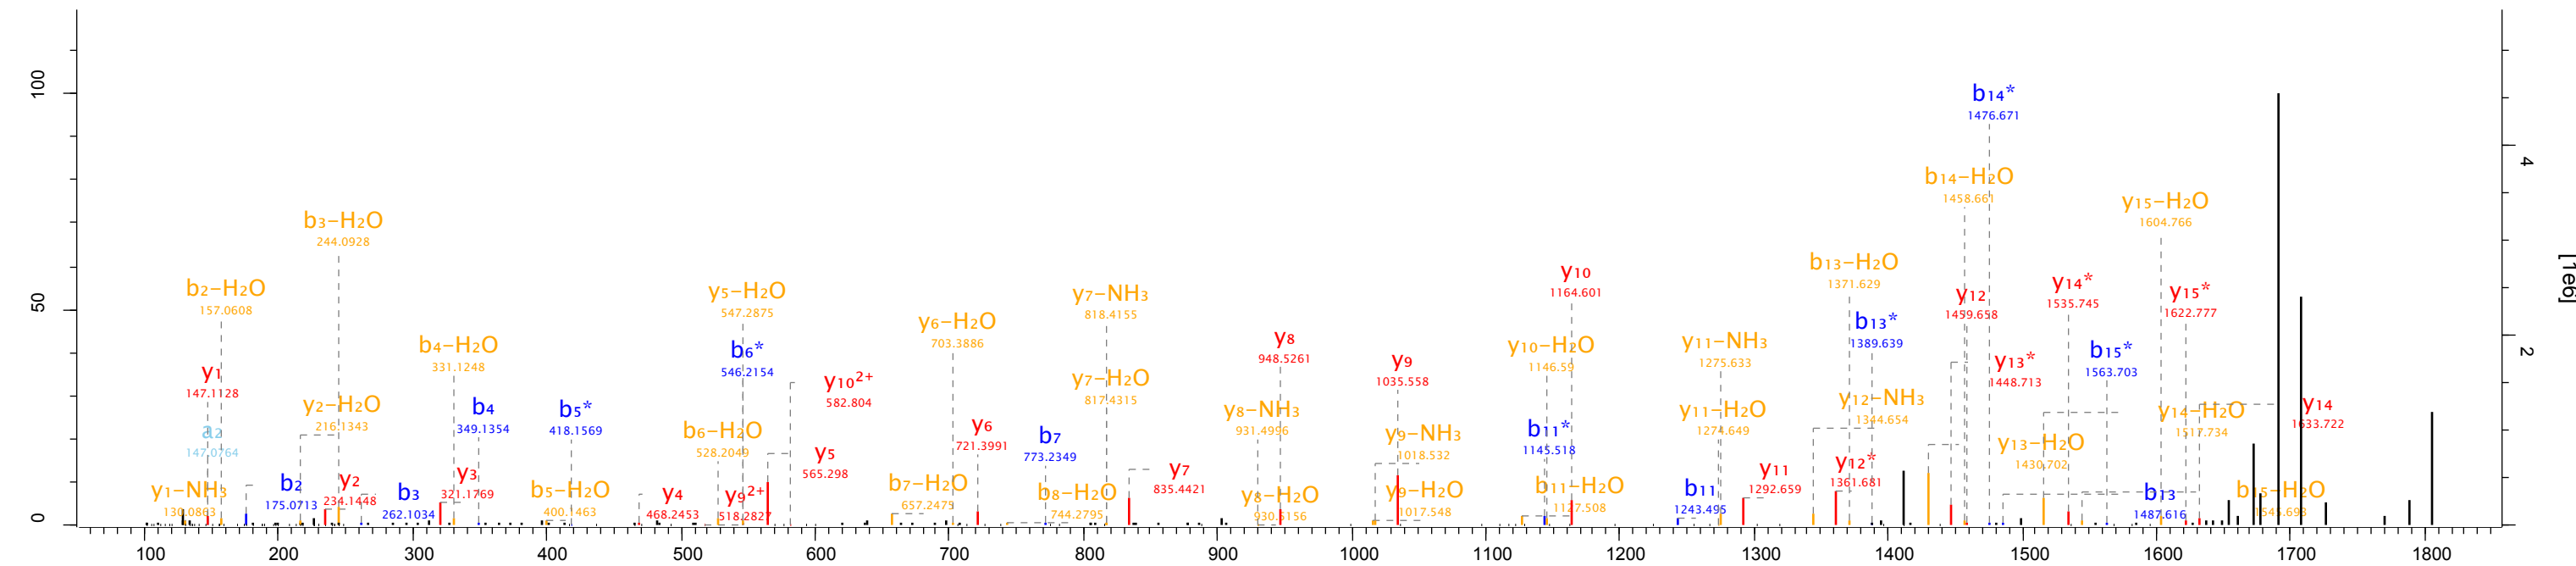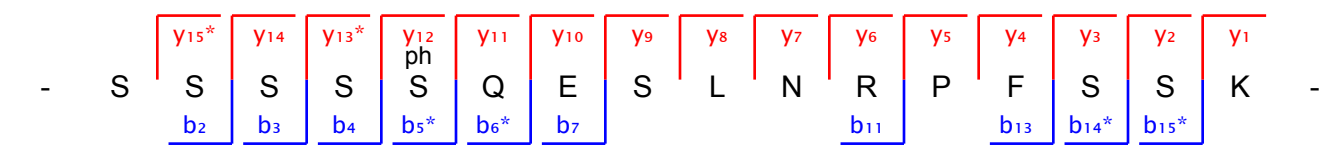

Raw file: 20150814\_A375SR\_Phospho\_BR2\_04  
 Scan: 8947 Method: FTMS; HCD Score: 82.92 m/z: 694.81 Gene names: TSC2

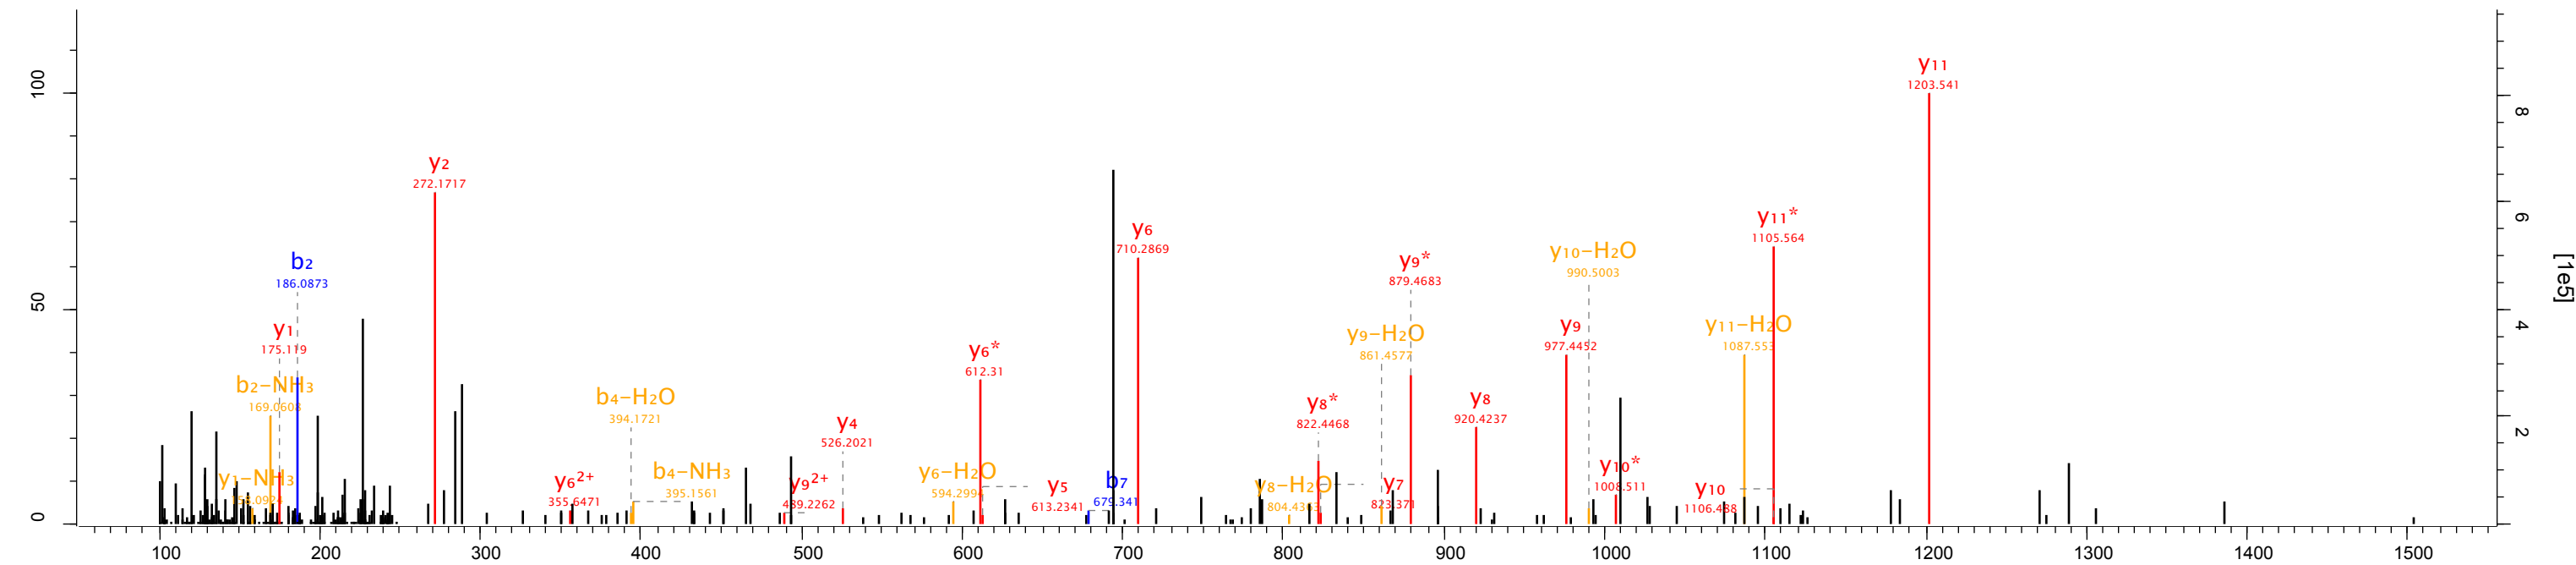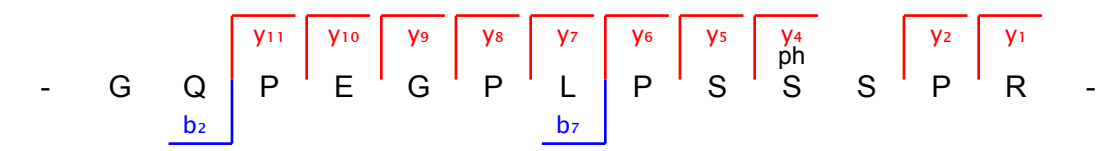

Raw file: 20150814\_A375SR\_Phospho\_BR2\_04  
 Scan: 9117 Method: FTMS; HCD Score: 122.01 m/z: 618.26 Gene names: CASC3

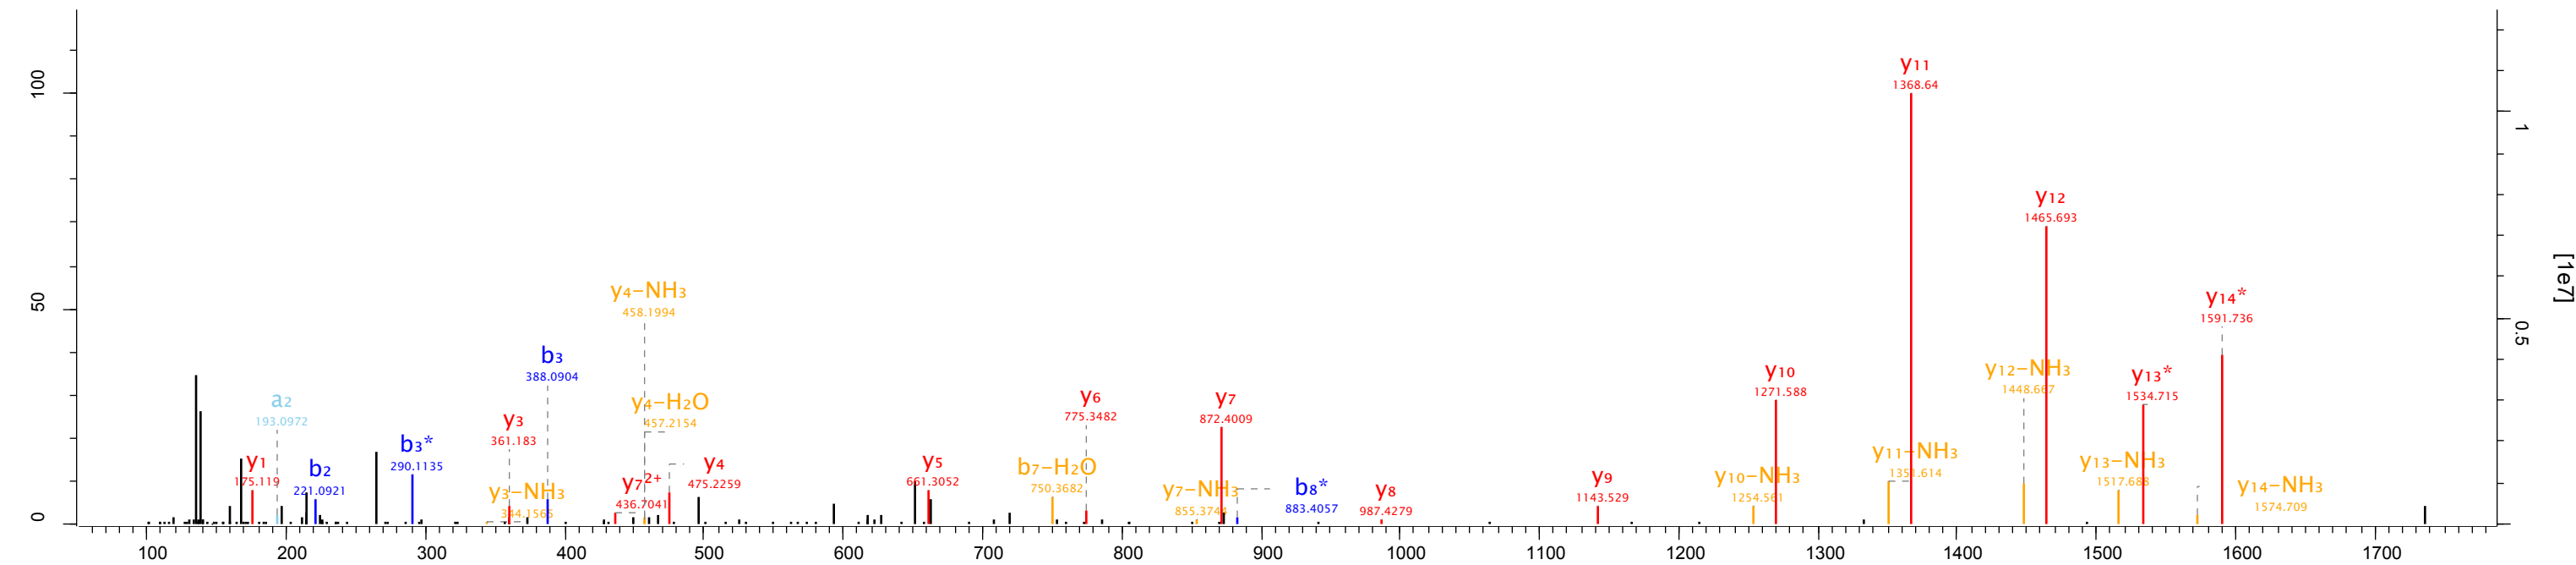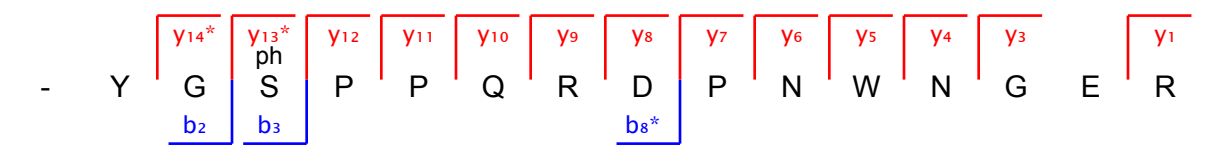

Raw file 20150814\_A375SR\_Phospho\_BR2\_04 Scan 9187 Method FTMS; HCD Score 57.79 m/z 639.79 Gene names KLF10

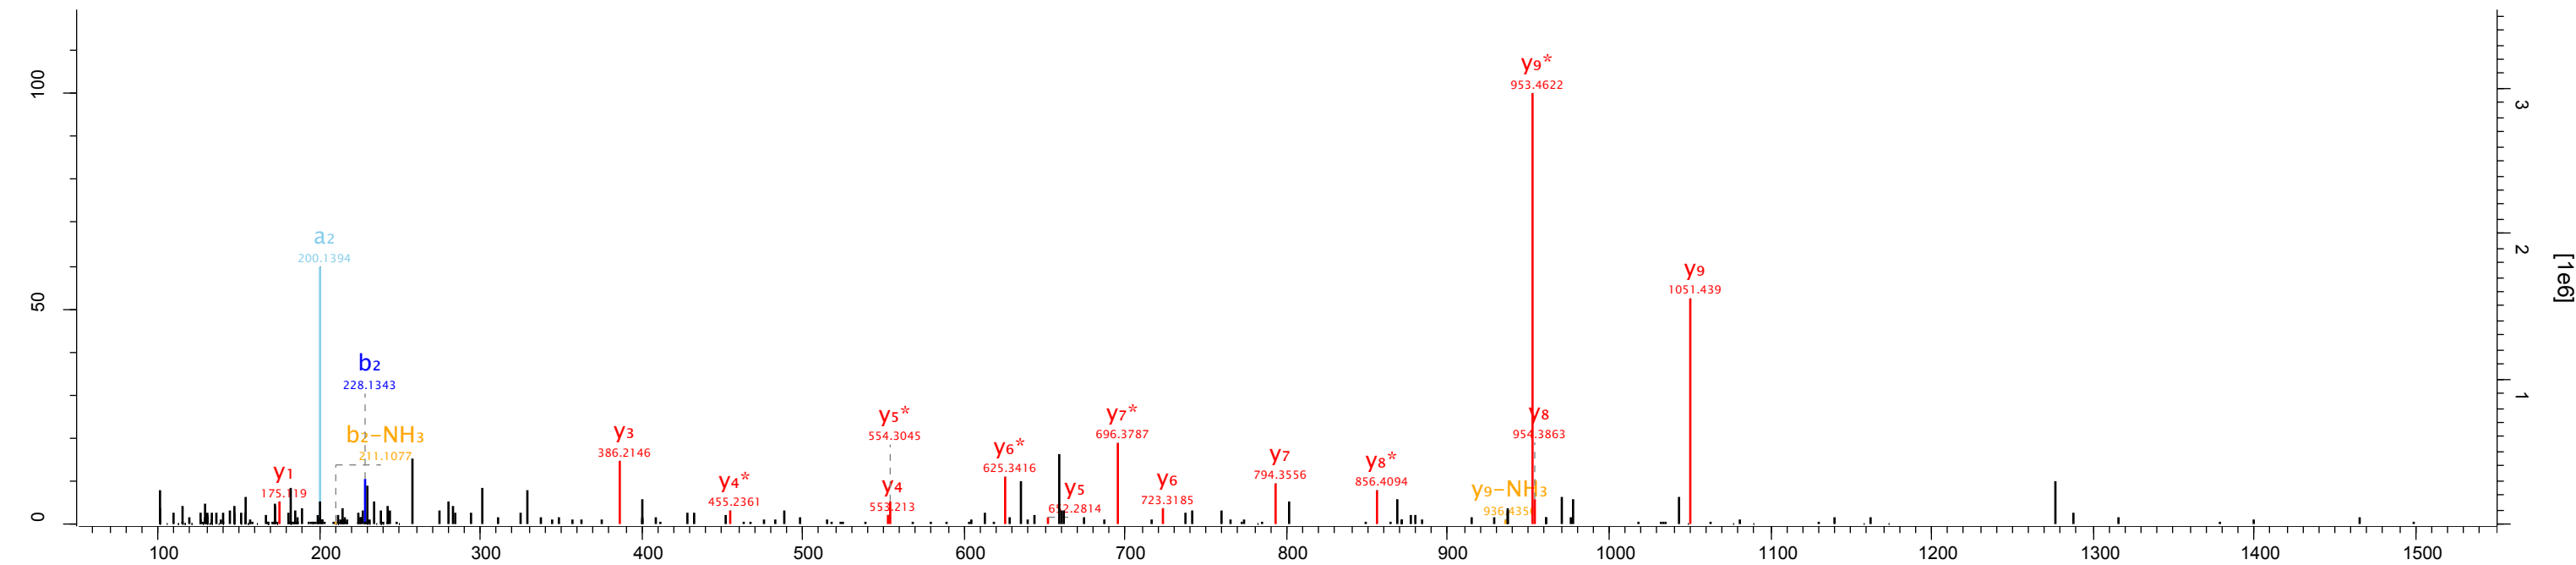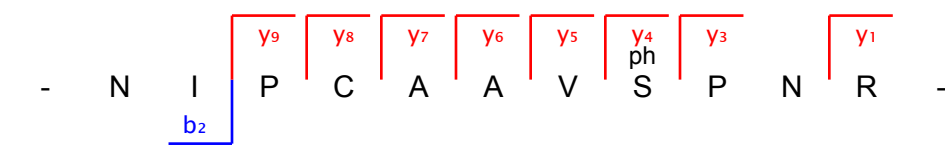



Raw file 20150814\_A375SR\_Phospho\_BR2\_04 Scan 9327 Method FTMS; HCD Score 50.95 m/z 591.78 Gene names LSM11

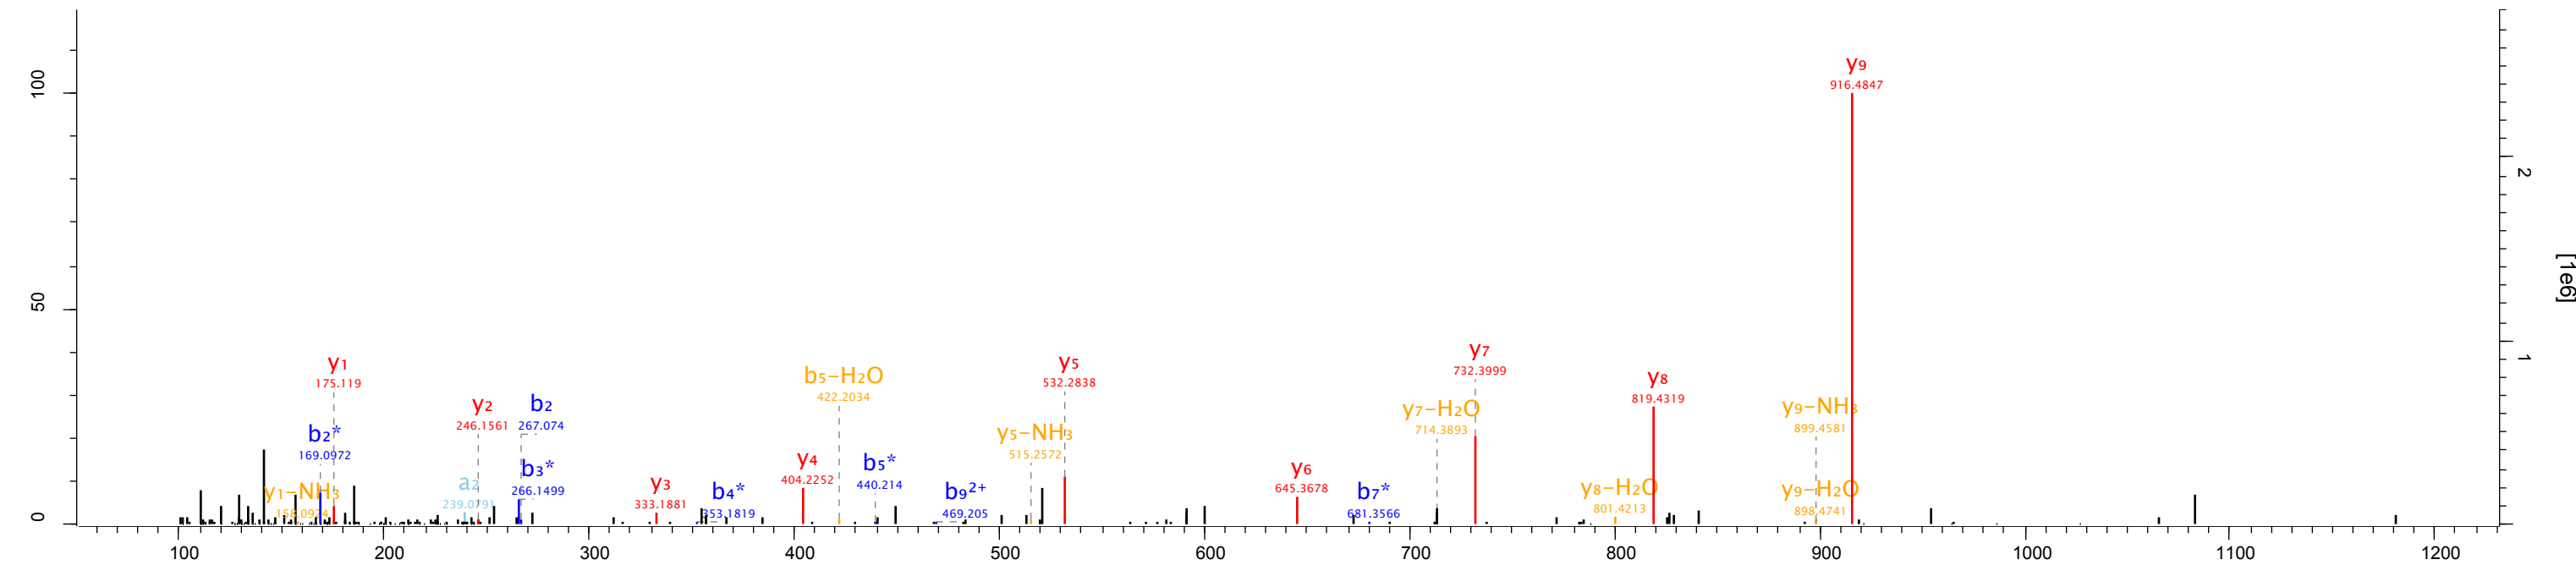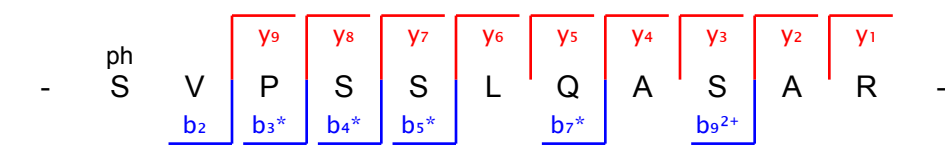

Raw file: 20150814\_A375SR\_Phospho\_BR2\_04  
 Scan: 9367 Method: FTMS; HCD Score: 343.17 m/z: 1007.98 Gene names: EPS15L1; SPATA22

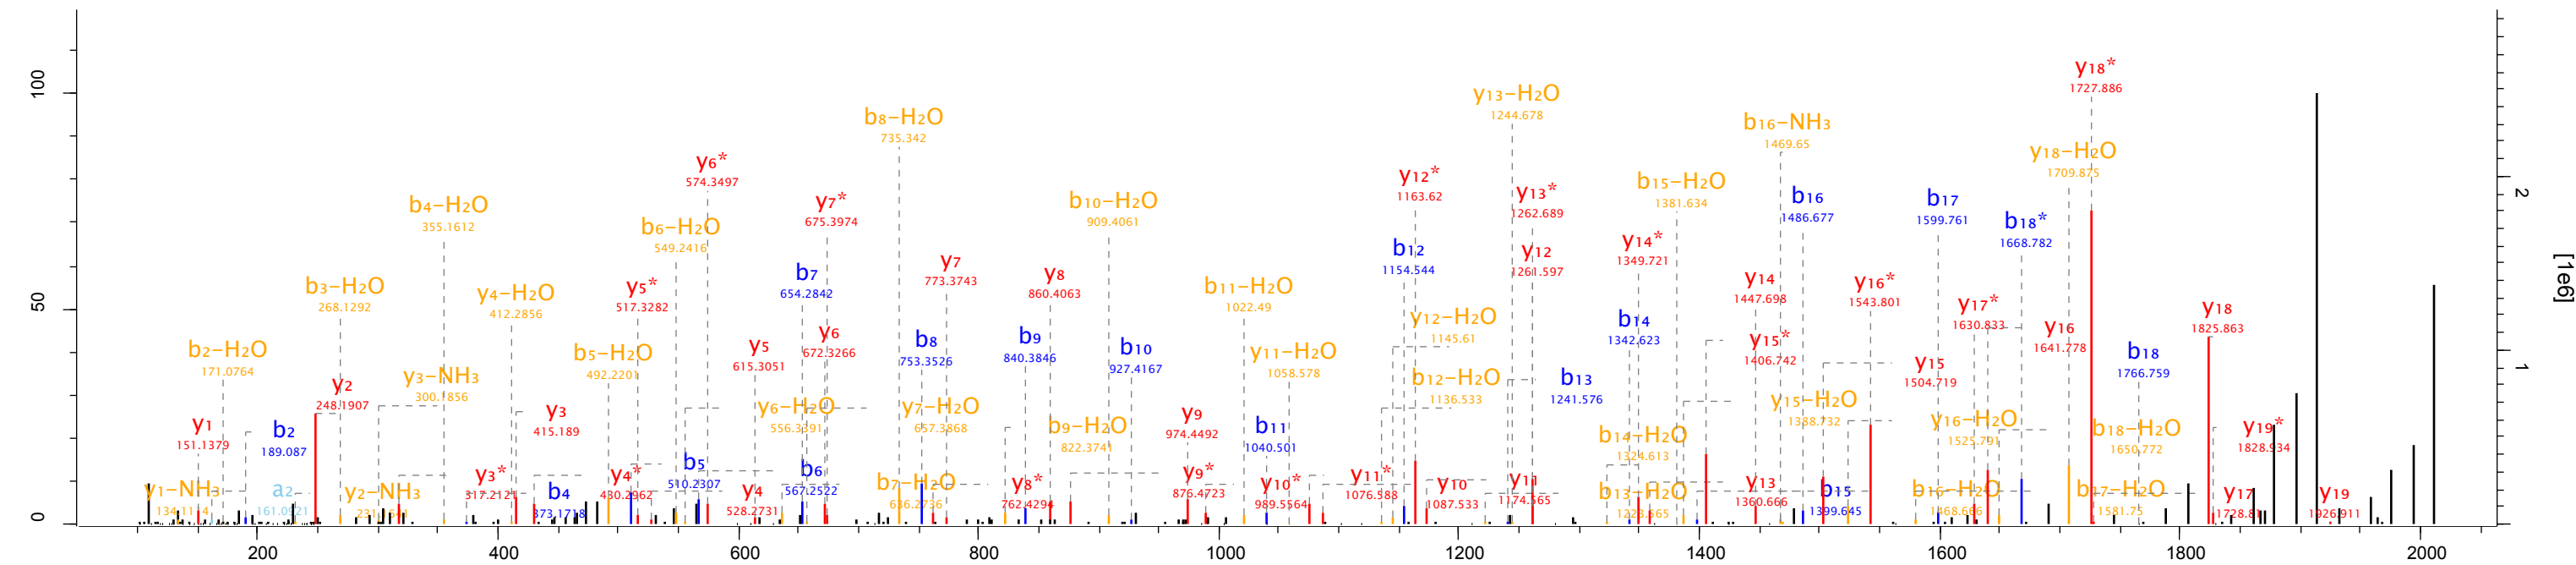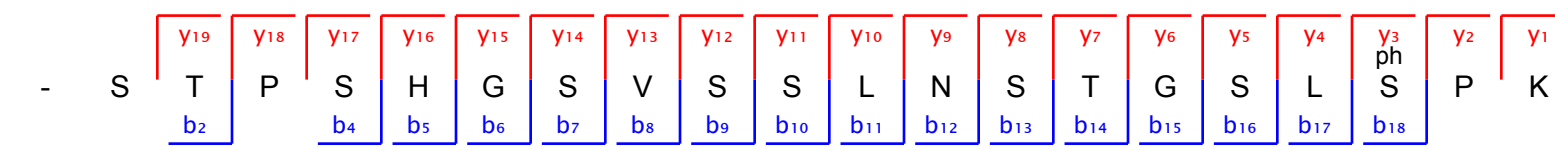

Raw file: 20150814\_A375SR\_Phospho\_BR2\_04  
 Scan: 9397 Method: FTMS; HCD Score: 86.65 m/z: 632.31 Gene names: XPO4

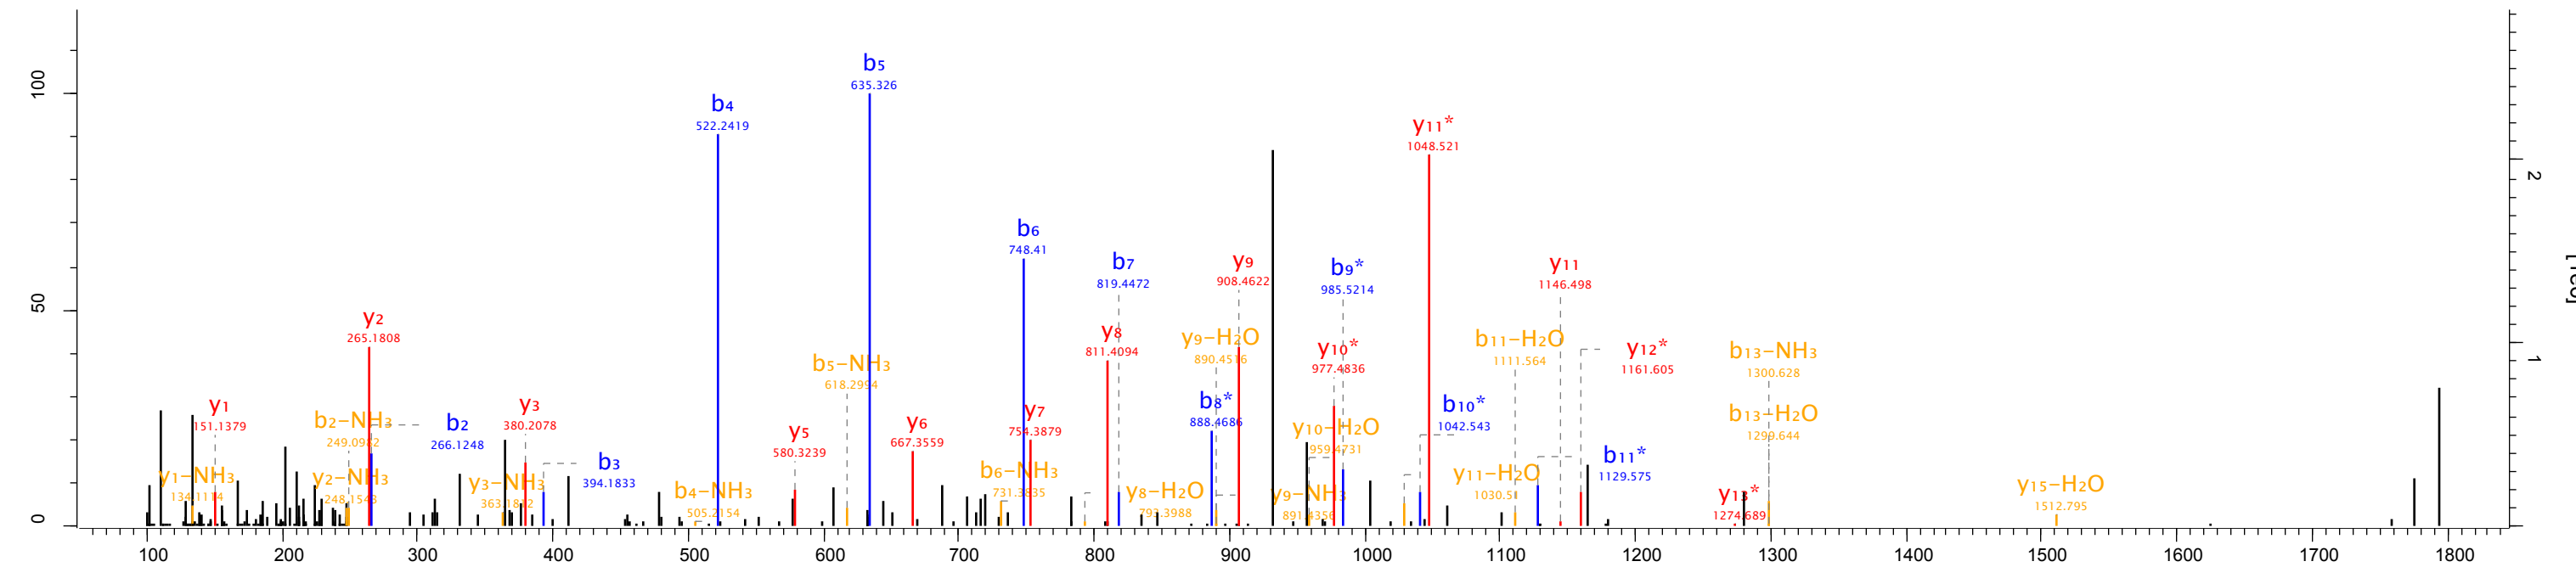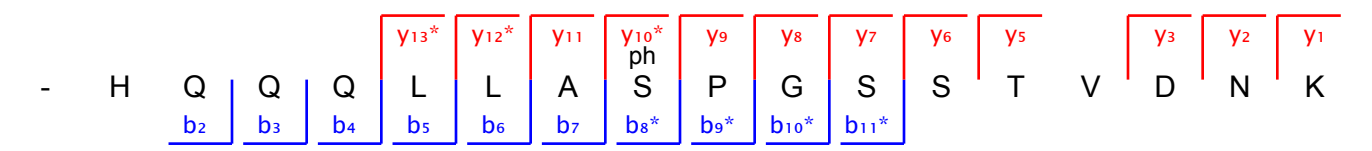

Raw file 20150814\_A375SR\_Phospho\_BR2\_05 Scan 10307 Method FTMS; HCD Score 104.21 m/z 747.3 Gene names SIN3A

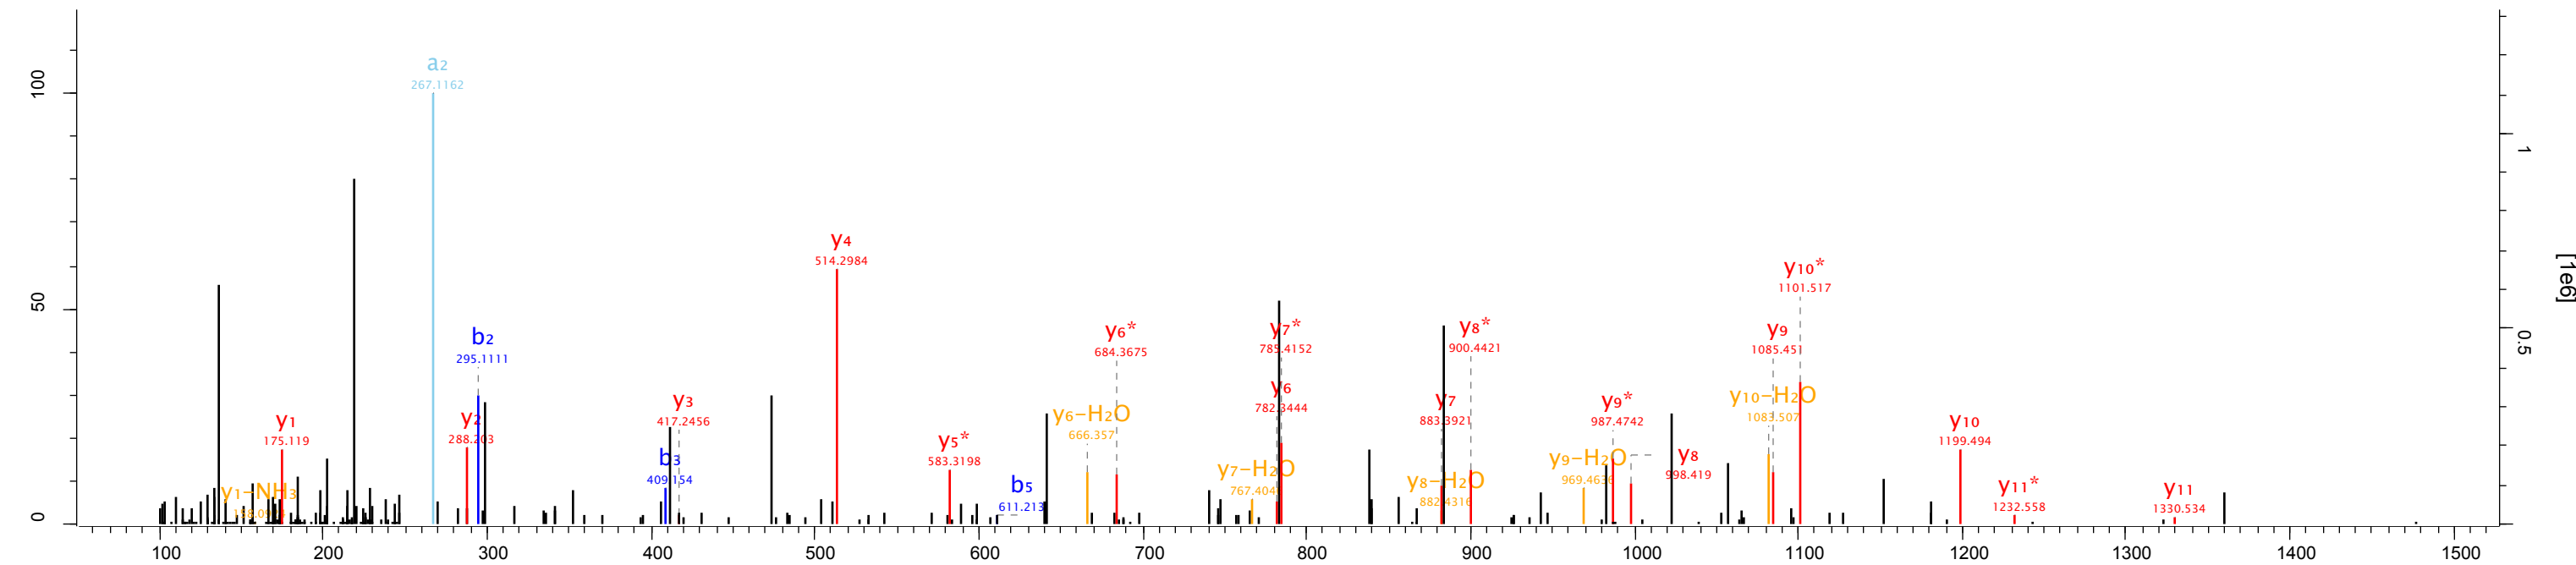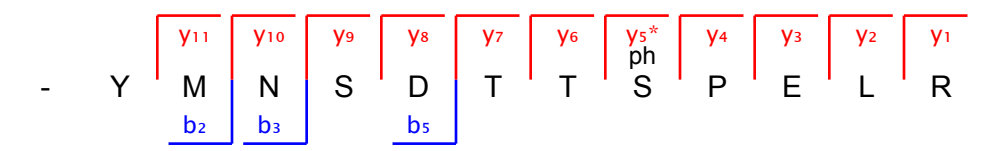

Raw file 20150814\_A375SR\_Phospho\_BR2\_05 Scan 10567 Method FTMS; HCD Score 113.4 m/z 566.94 Gene names ELAC2

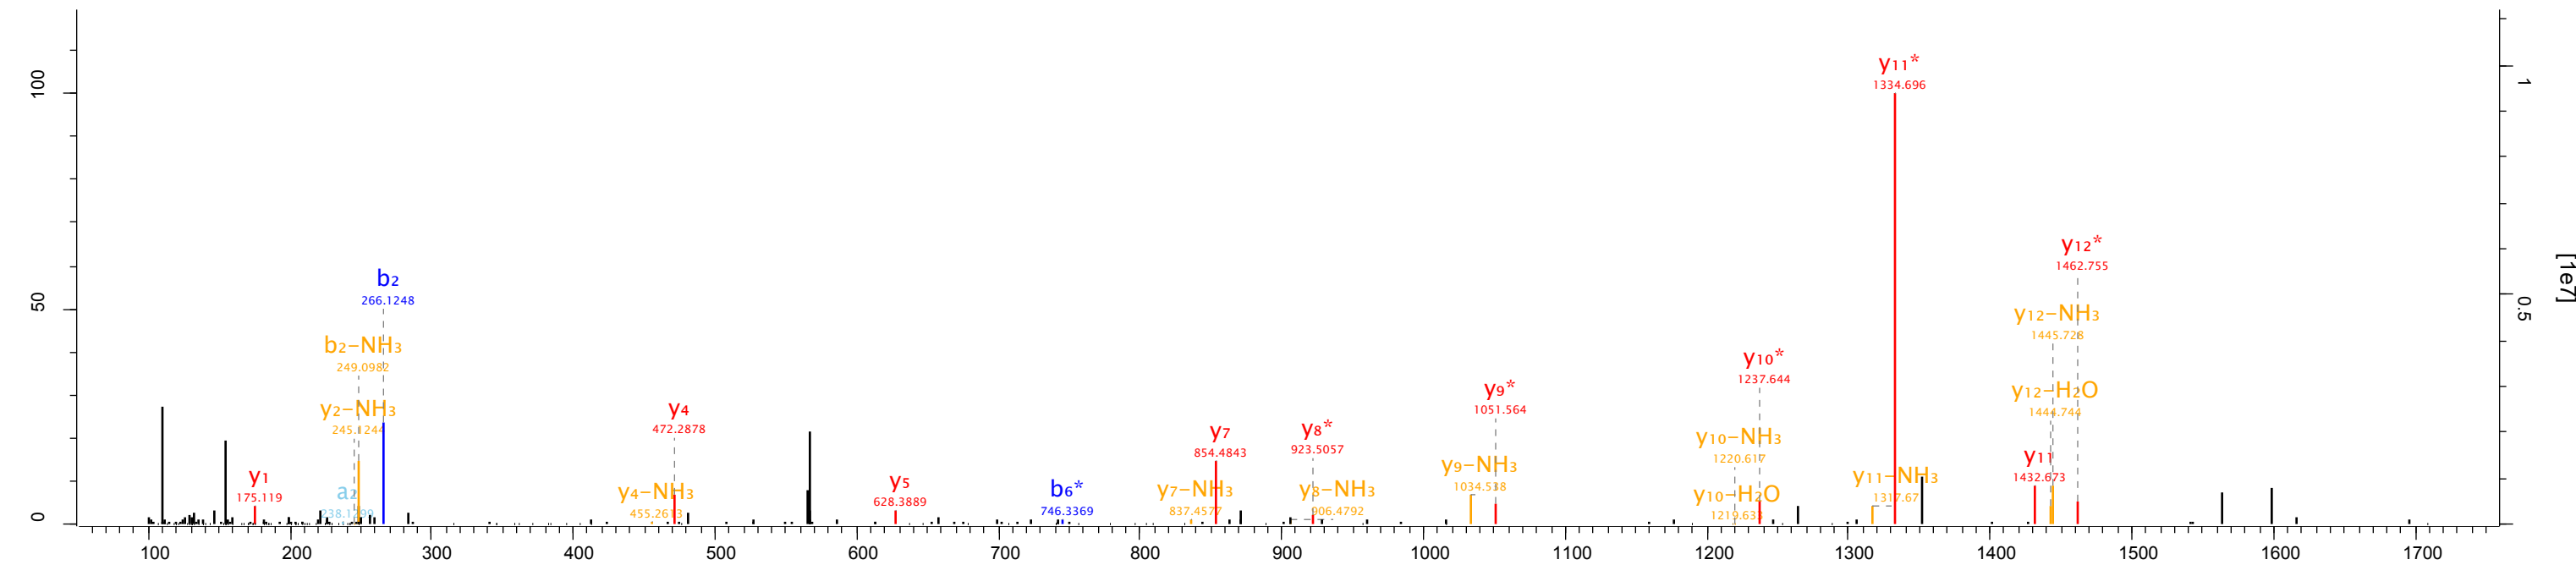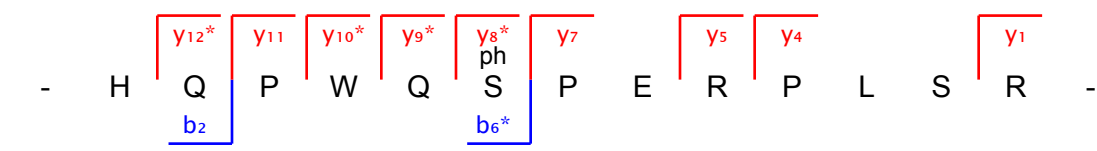

Raw file: 20150814\_A375SR\_Phospho\_BR2\_05  
 Scan: 10847  
 Method: FTMS; HCD  
 Score: 143.74  
 m/z: 850.39  
 Gene names: CTDSPL2

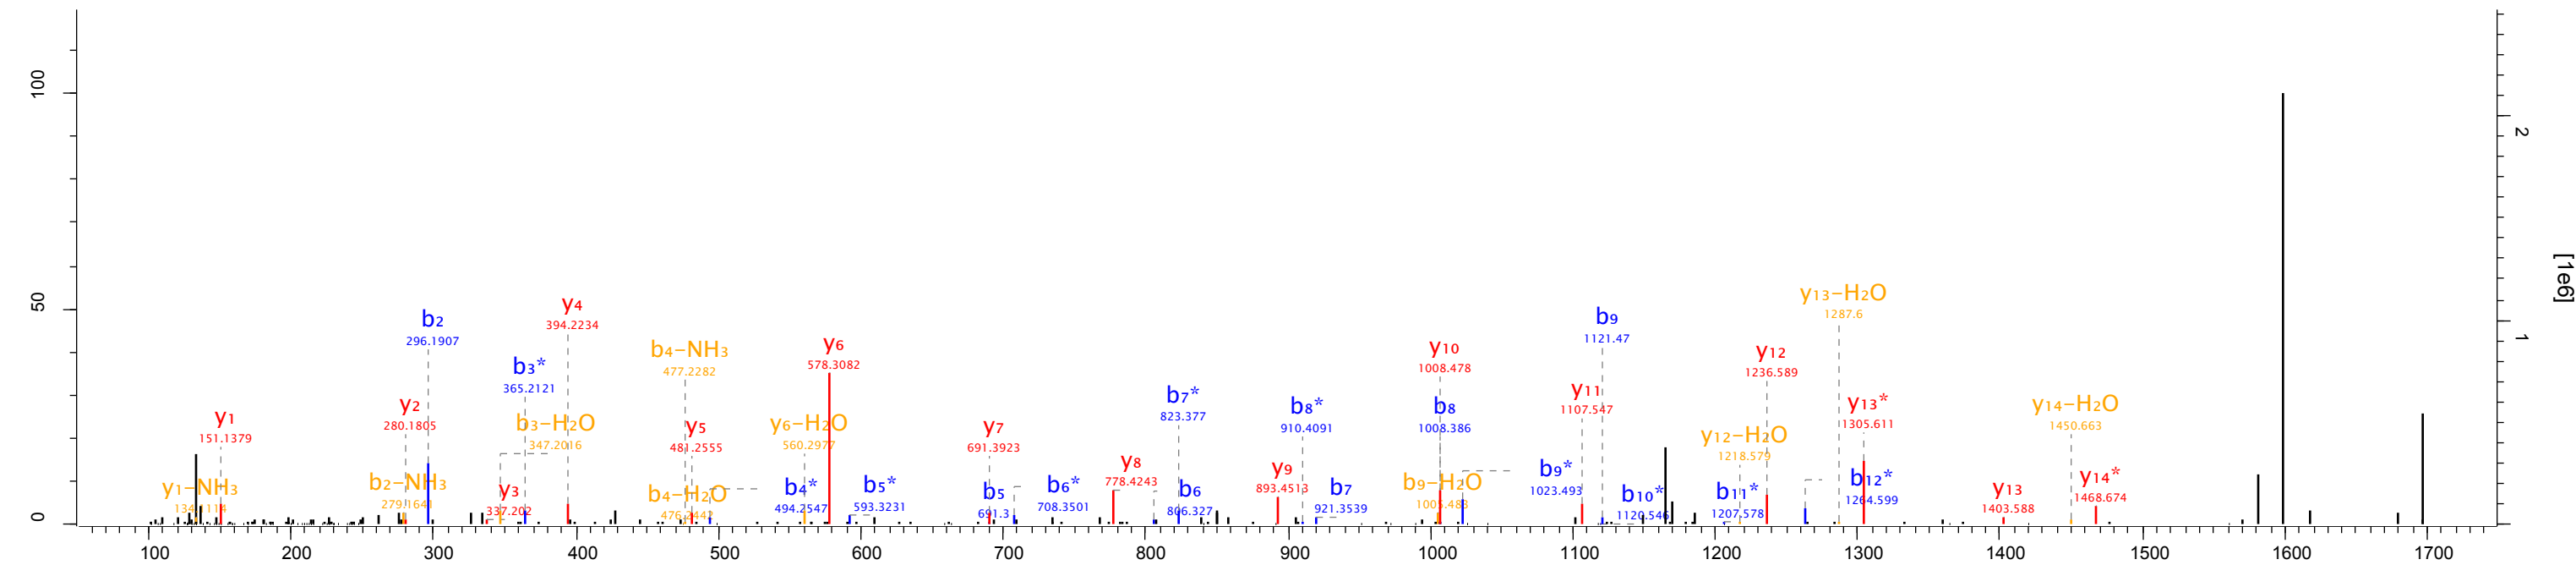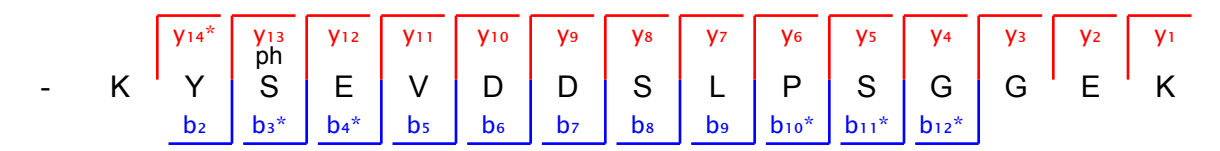

Raw file Scan Method Score m/z Gene names  
 20150814\_A375SR\_Phospho\_BR2\_05 11667 FTMS; HCD 263.49 798.36 SIPA1

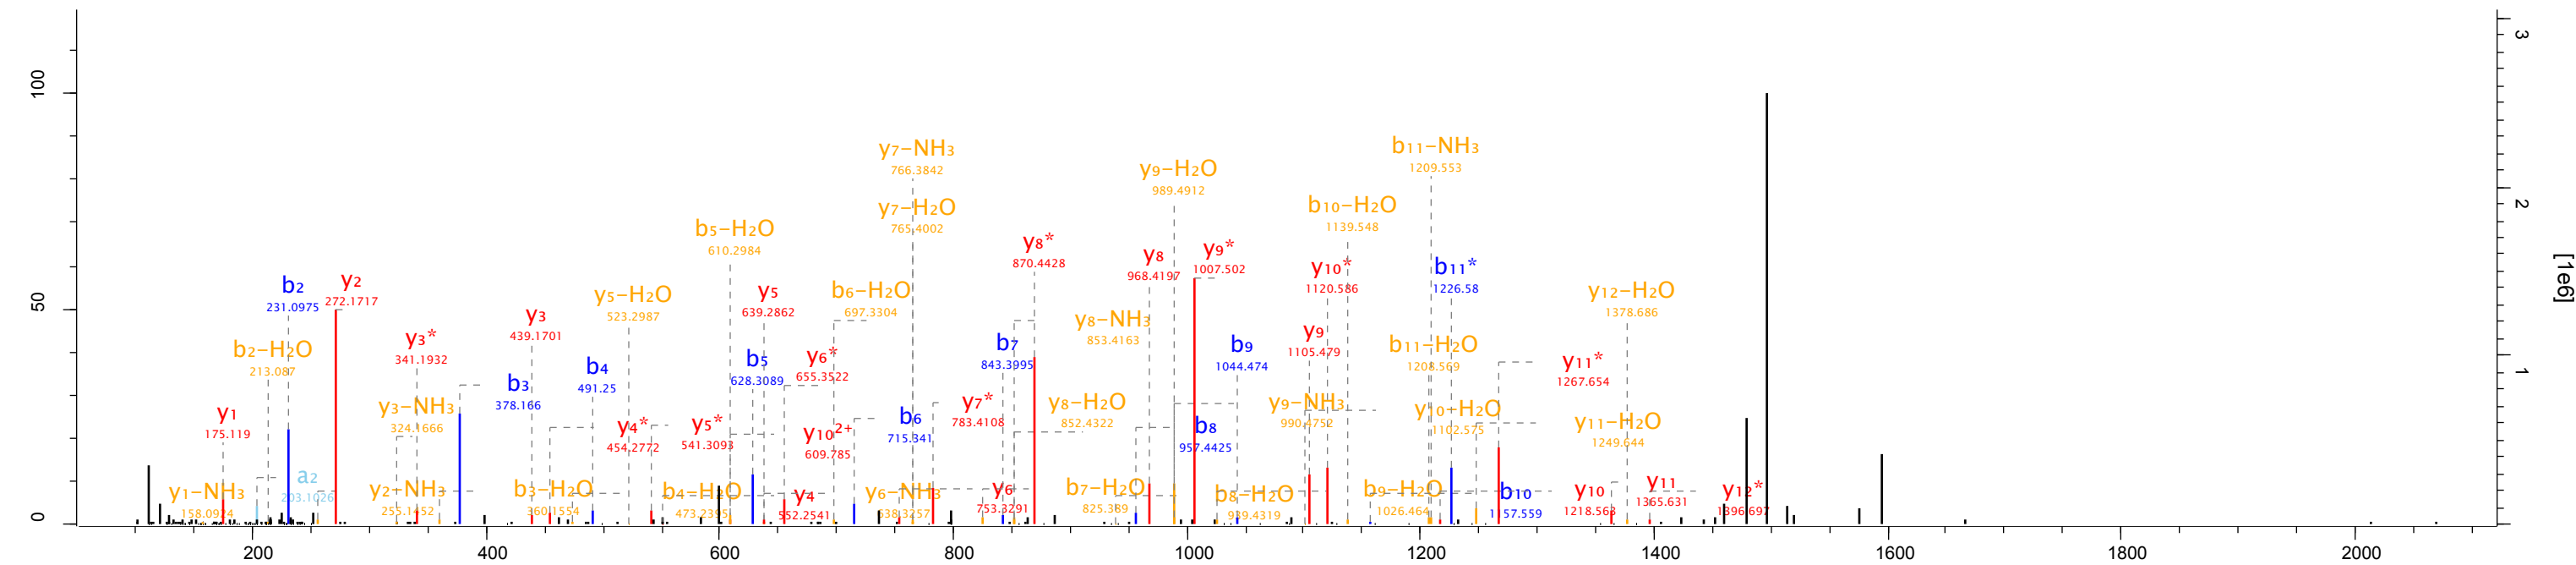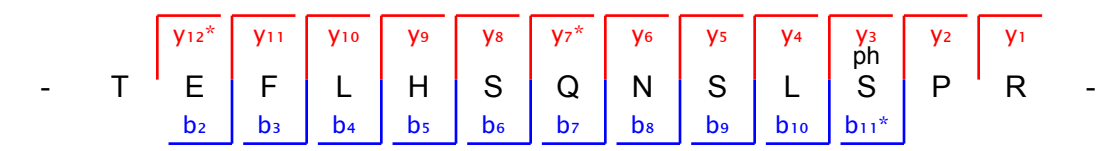

Raw file 20150814\_A375SR\_Phospho\_BR2\_05 Scan 11907 Method FTMS; HCD Score 104.26 m/z 700.99 Gene names DOCK7

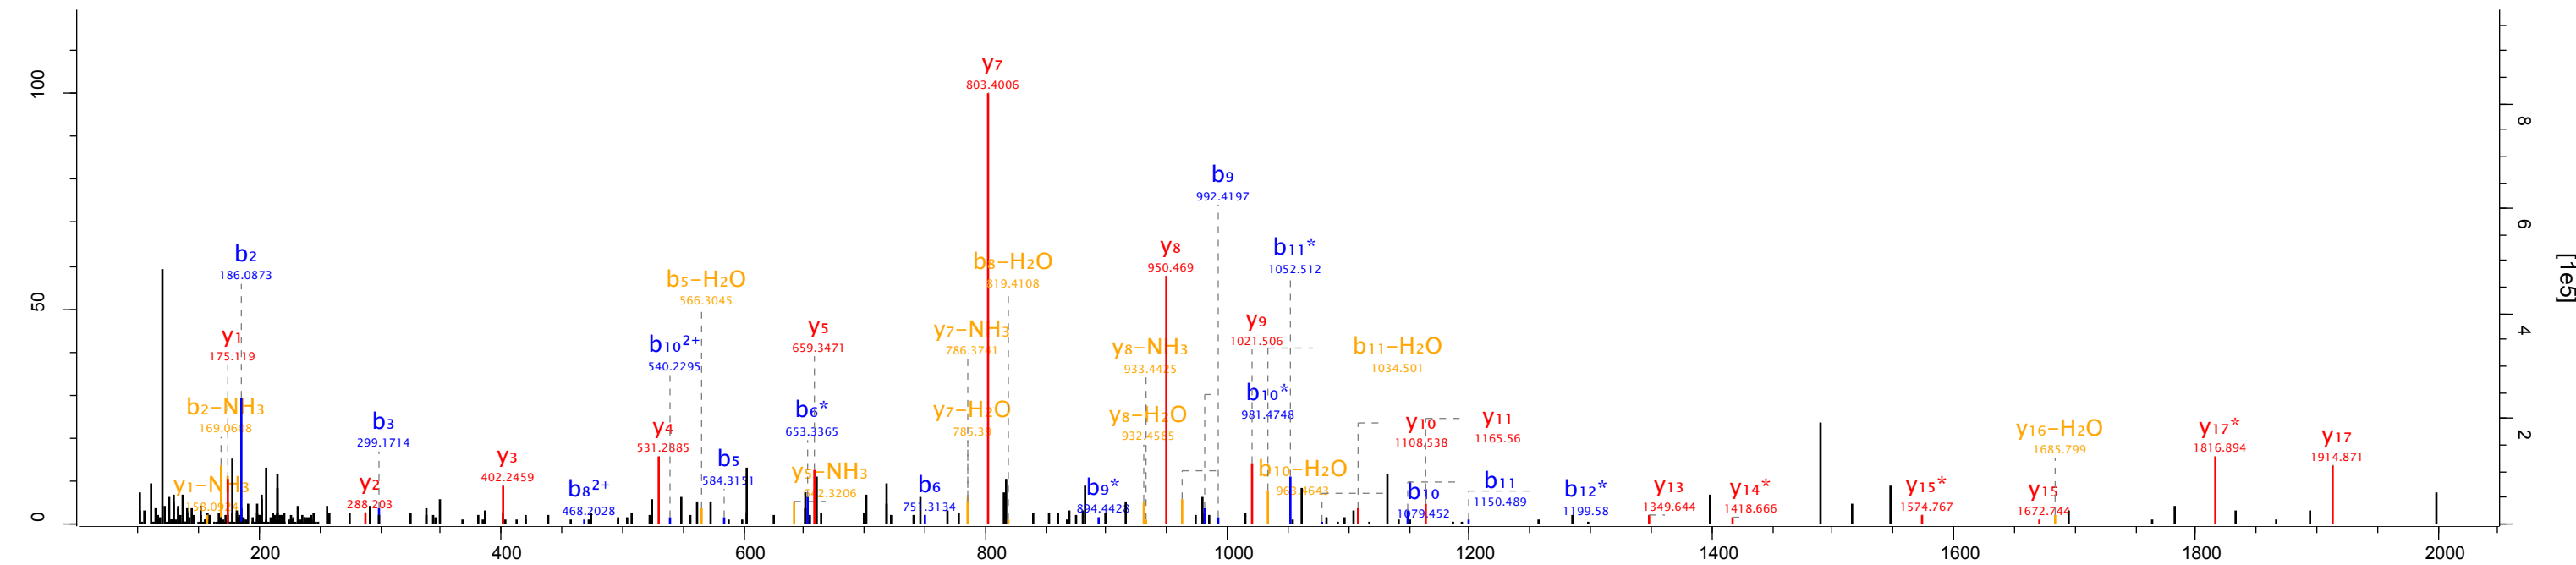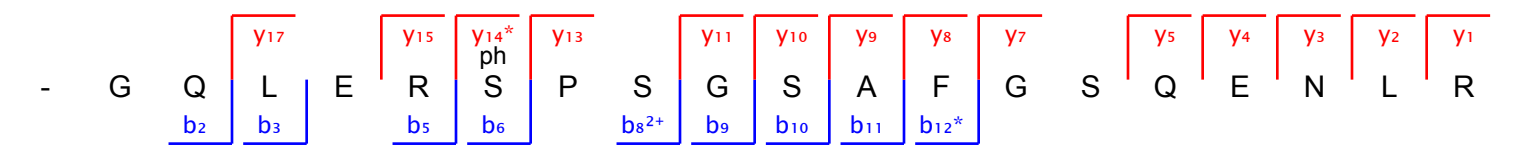



Raw file 20150814\_A375SR\_Phospho\_BR2\_05 Scan 11947 Method FTMS; HCD Score 240.46 m/z 949.39 Gene names SAE1

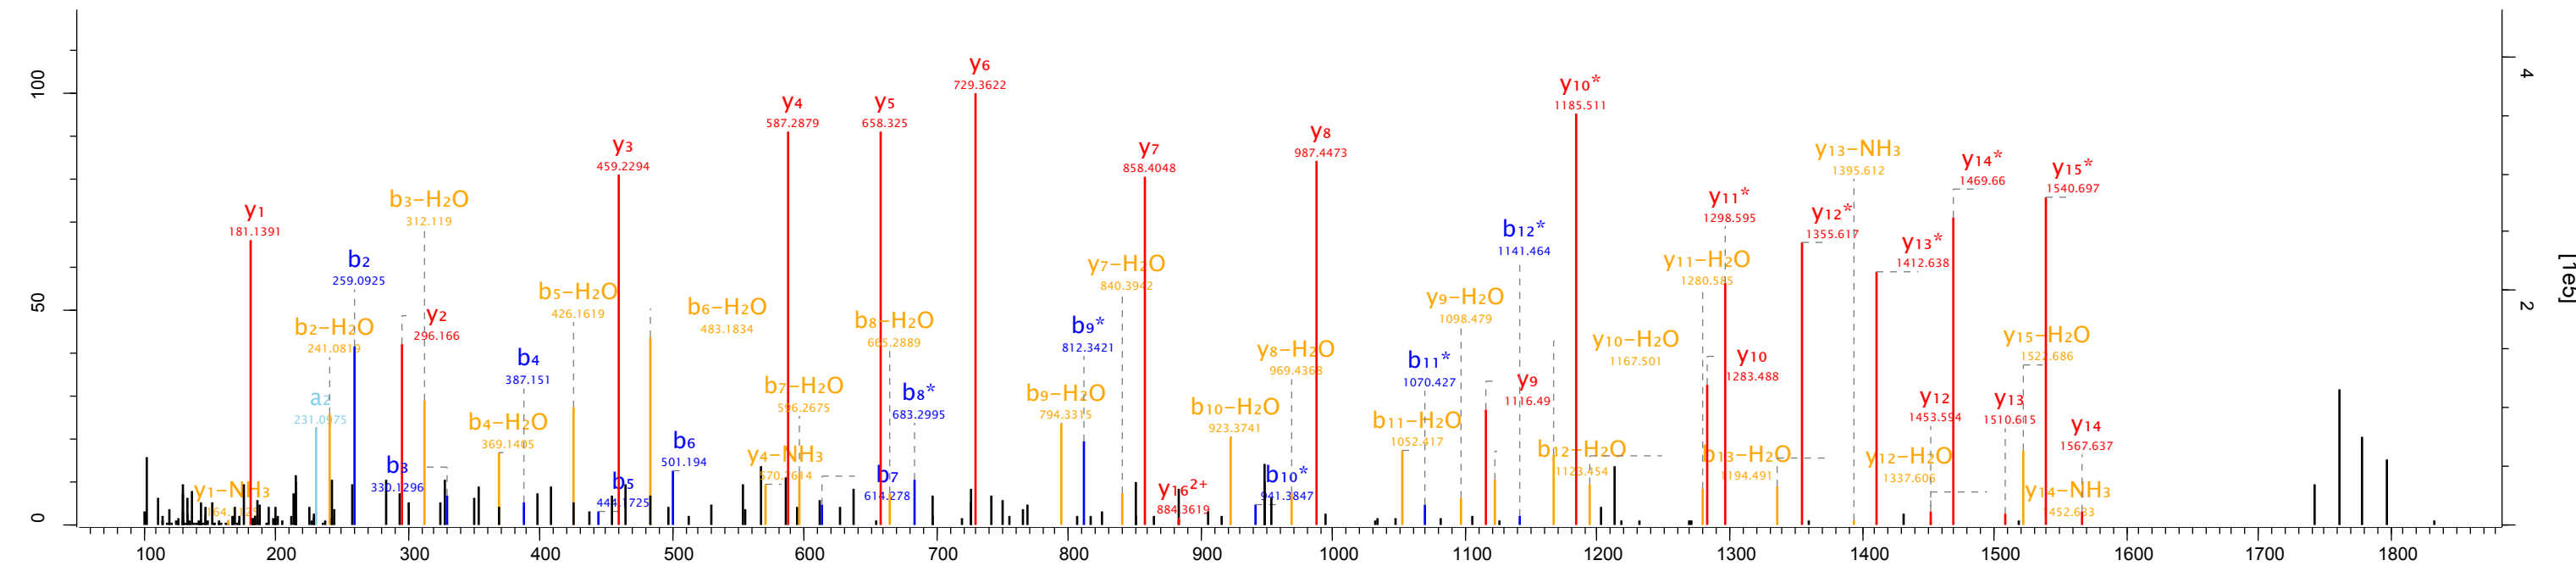

- E y16<sup>2+</sup> y15\* y14 y13 y12 y11\* y10  
ph y9 y8 y7 y6 y5 y4 y3 y2 y1 -

b2 b3 b4 b5 b6 b7 b8\* b9\* b10\* b11\* b12\*

Raw file 20150814\_A375SR\_Phospho\_BR2\_05 Scan 12177 Method FTMS; HCD Score 133.29 m/z 693.33 Gene names SVIL

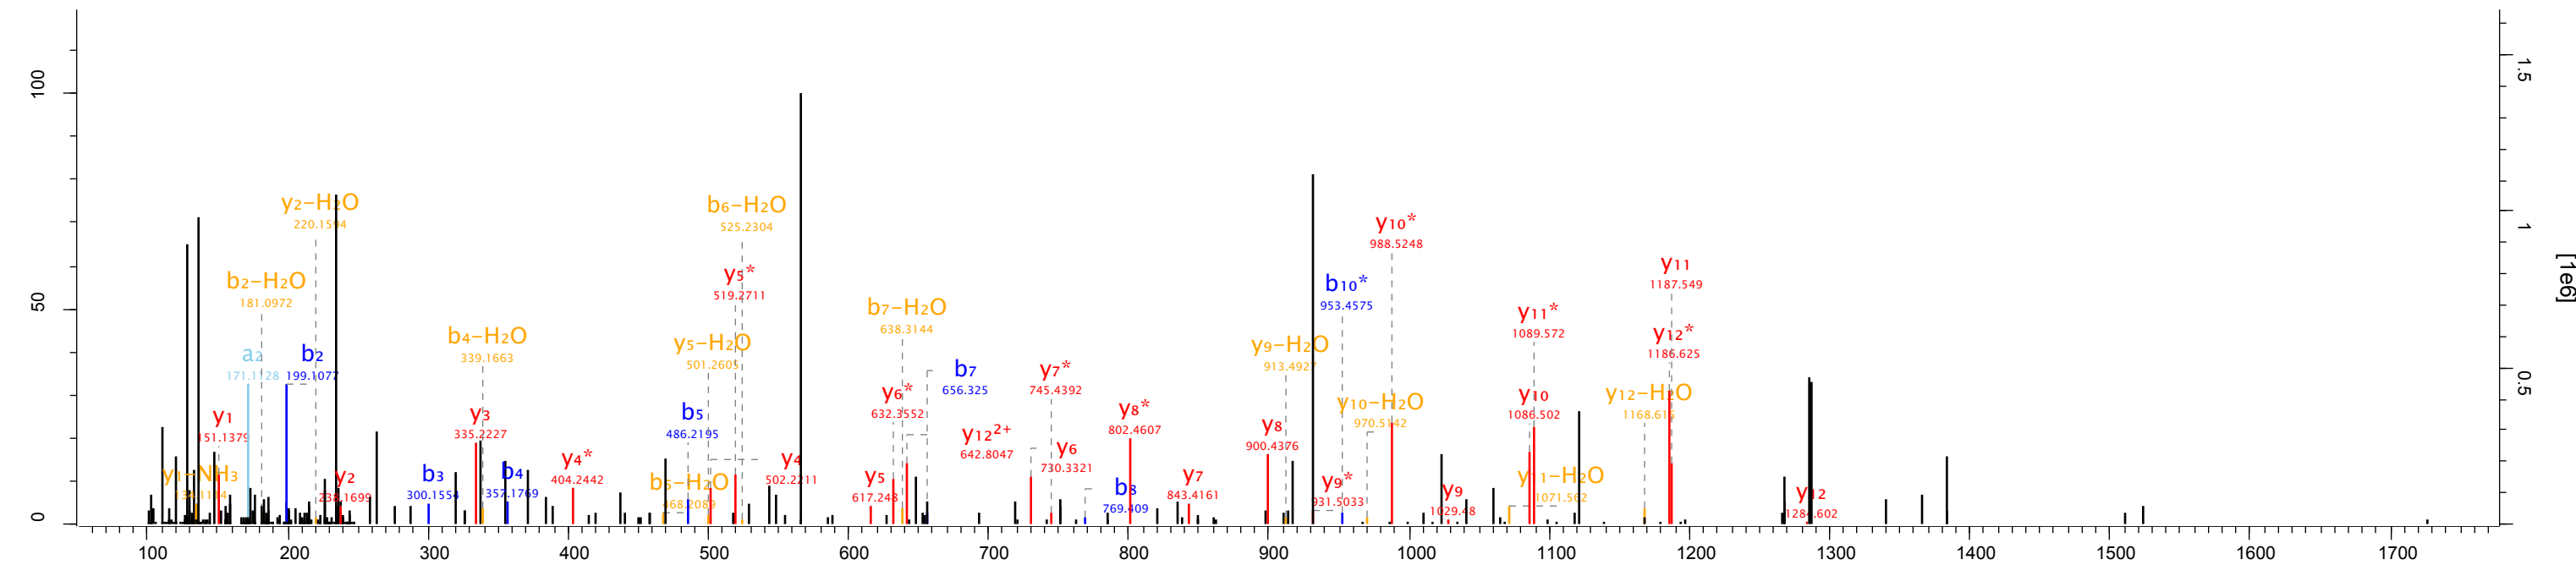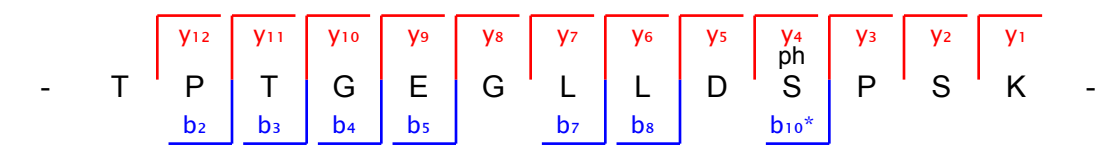

Raw file: 20150814\_A375SR\_Phospho\_BR2\_05  
 Scan: 12627 Method: FTMS; HCD Score: 76.57 m/z: 610.98 Gene names: SPACIA2;FAM122B

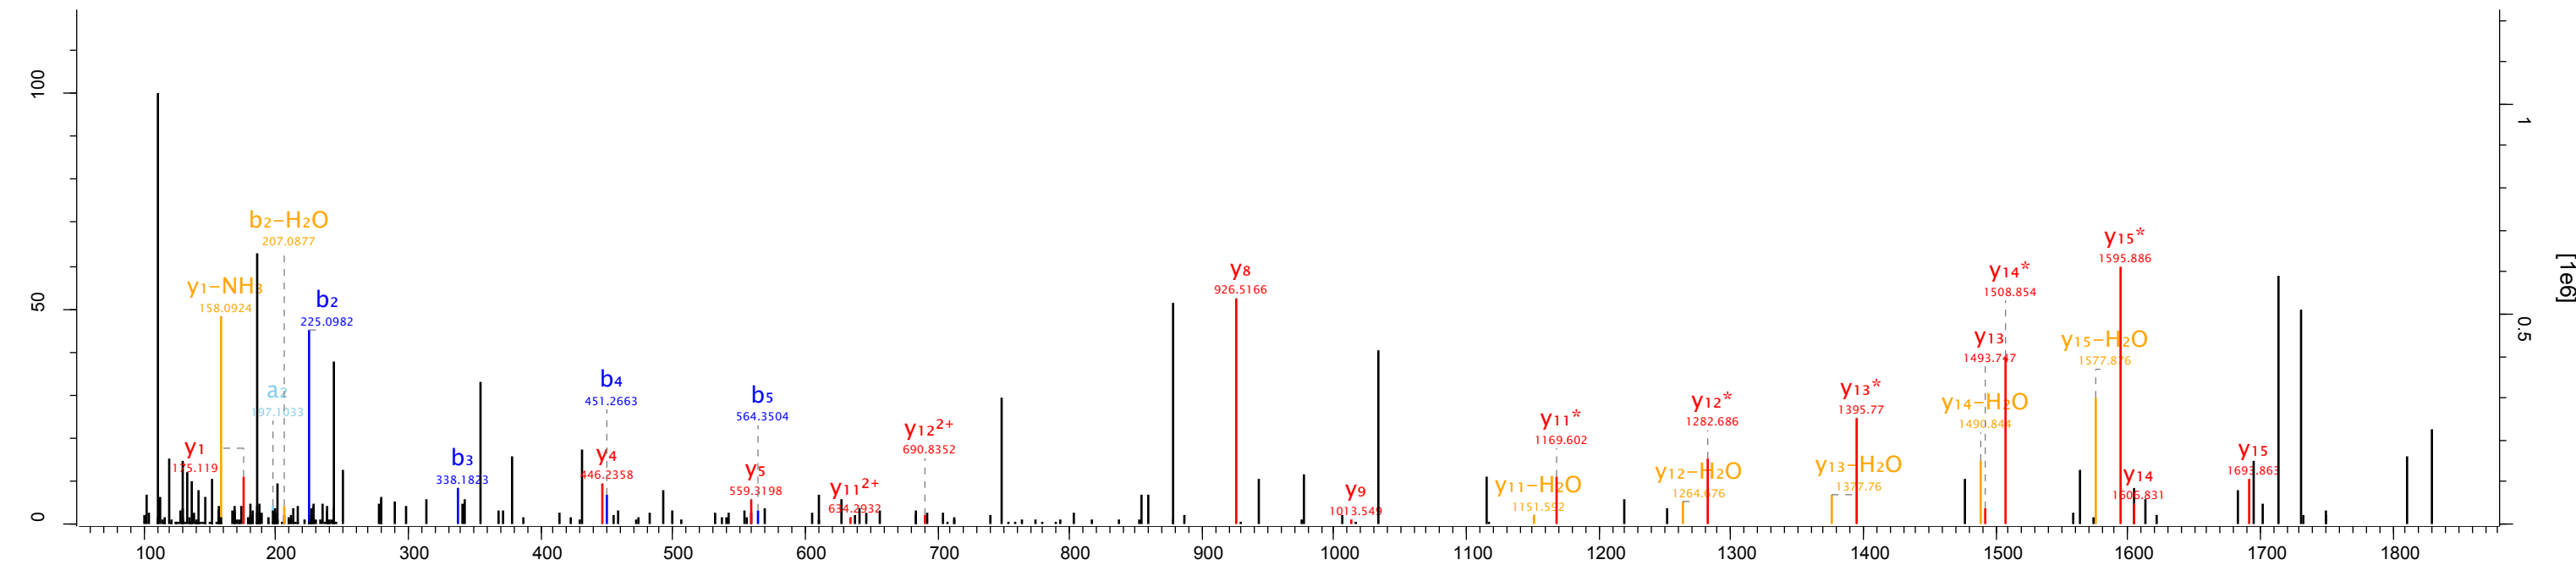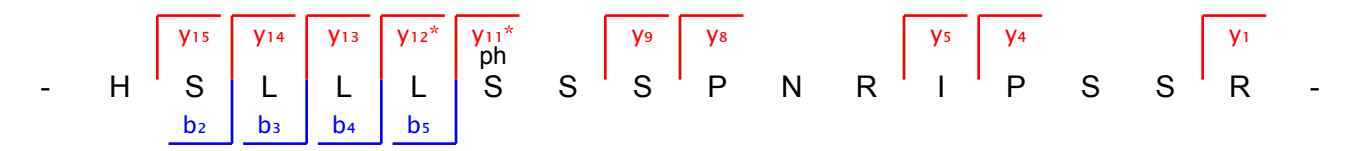

Raw file 20150814\_A375SR\_Phospho\_BR2\_05 Scan 12647 Method FTMS; HCD Score 88.22 m/z 636.8 Gene names TFAP4

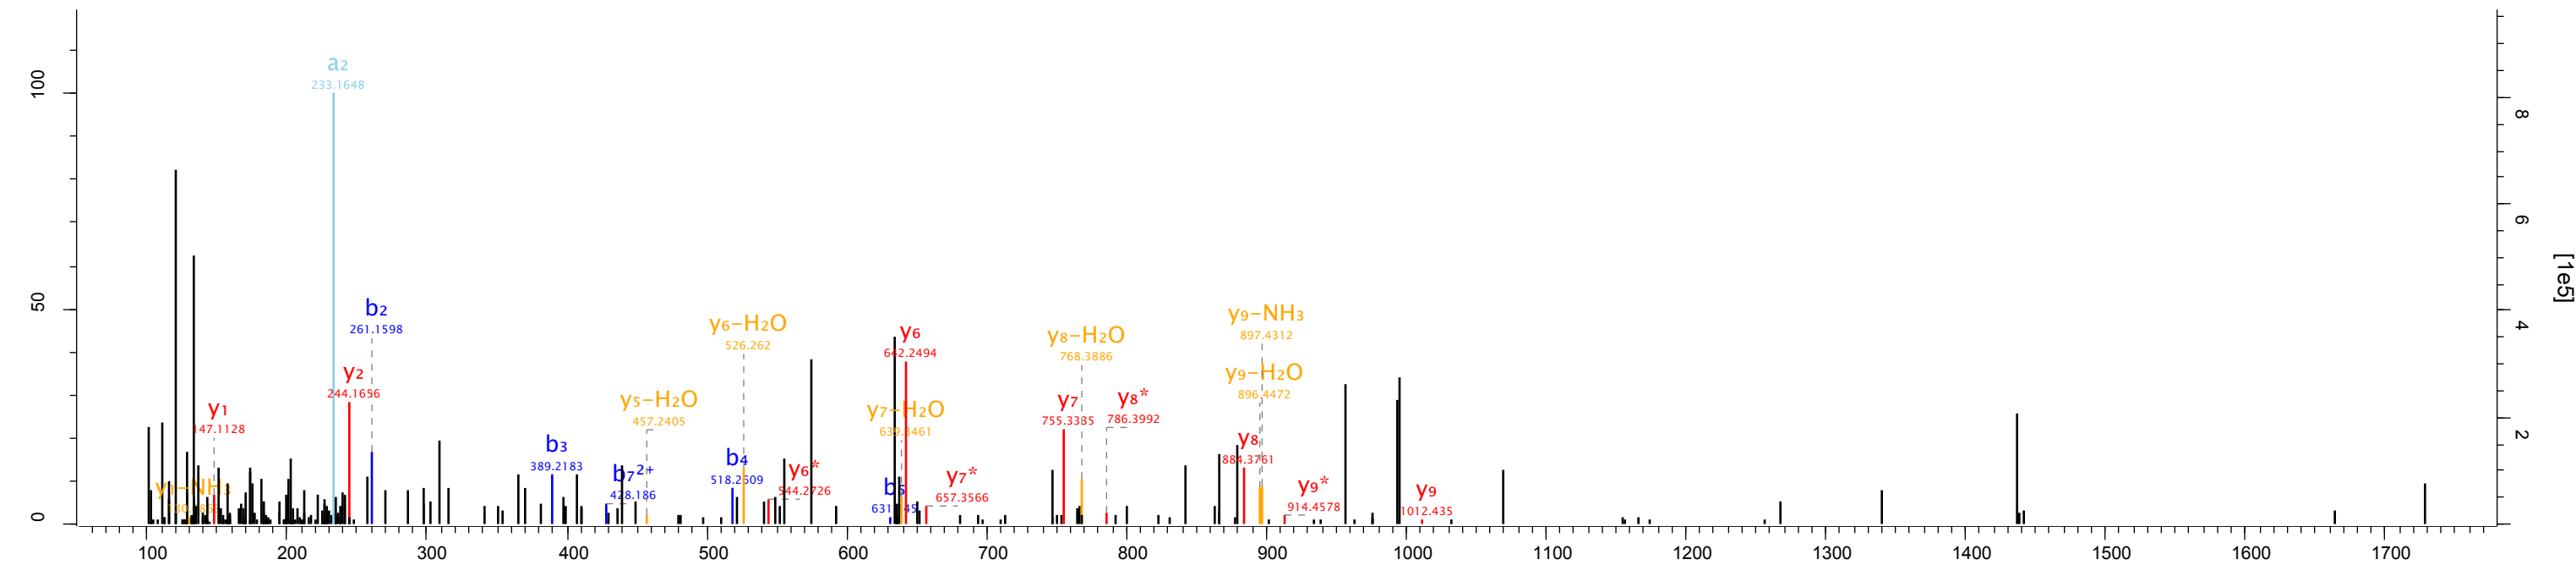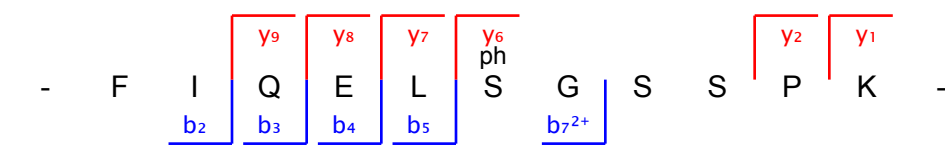

Raw file: 20150814\_A375SR\_Phospho\_BR2\_05  
 Scan: 12987 Method: FTMS; HCD Score: 106.58 m/z: 740.86 Gene names: FTSJ3

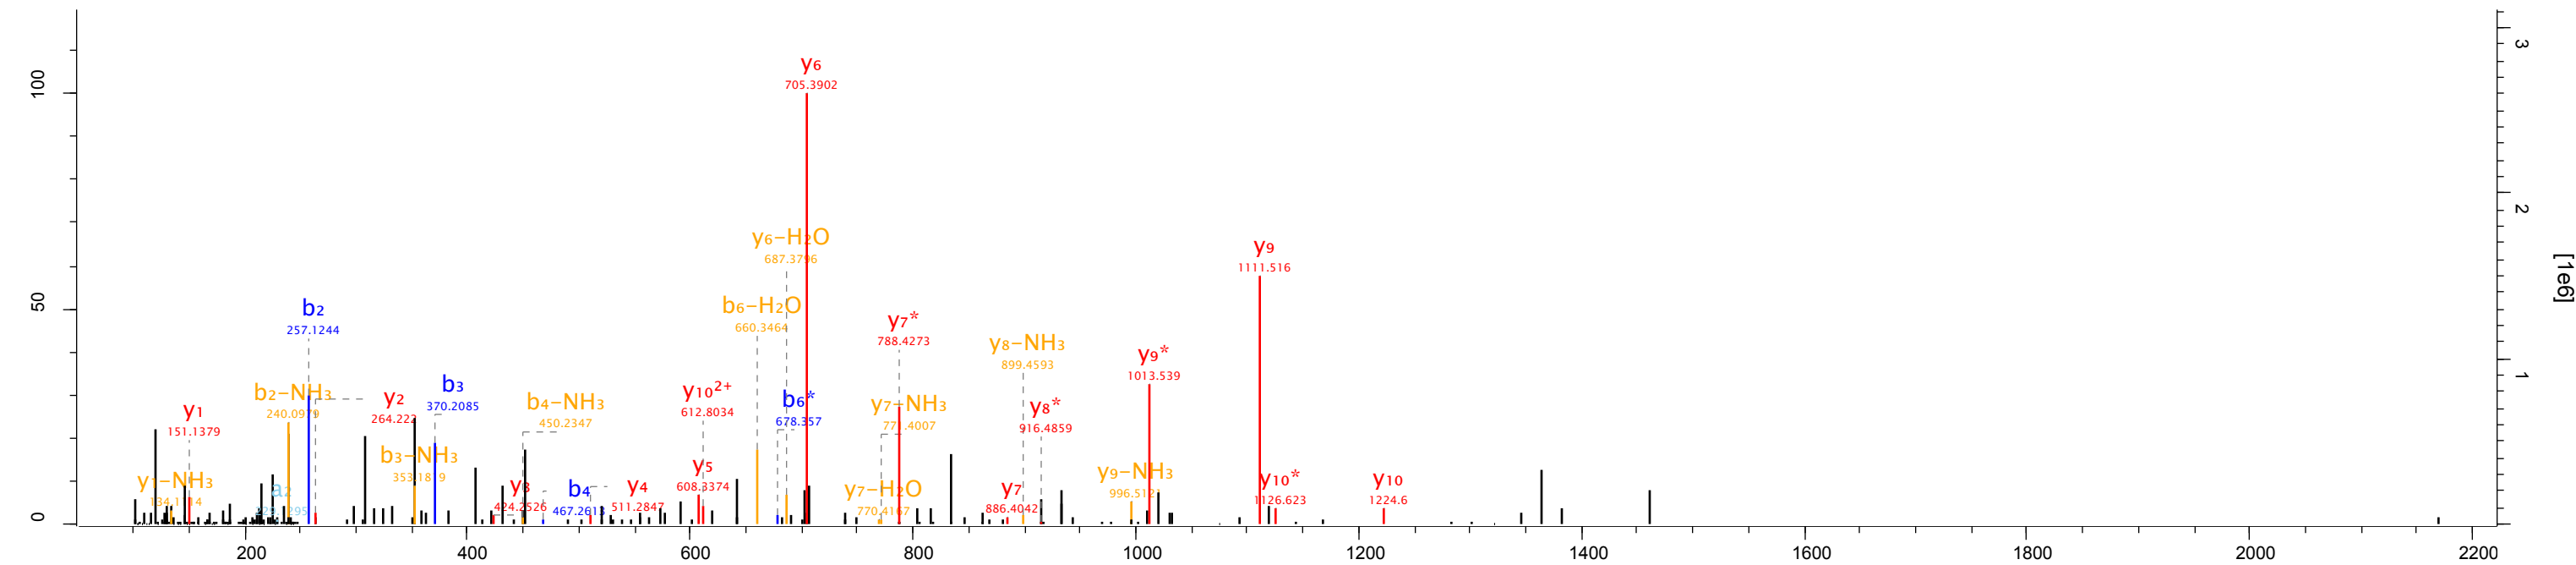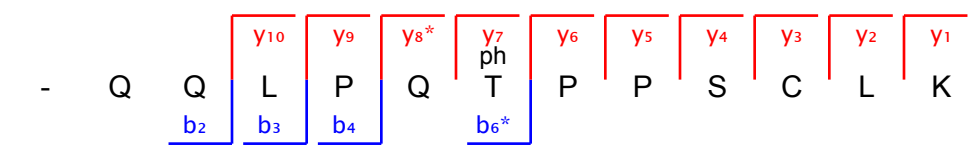

Raw file 20150814\_A375SR\_Phospho\_BR2\_05 Scan 13337 Method FTMS; HCD Score 156.98 m/z 664.83 Gene names ZFC3H1

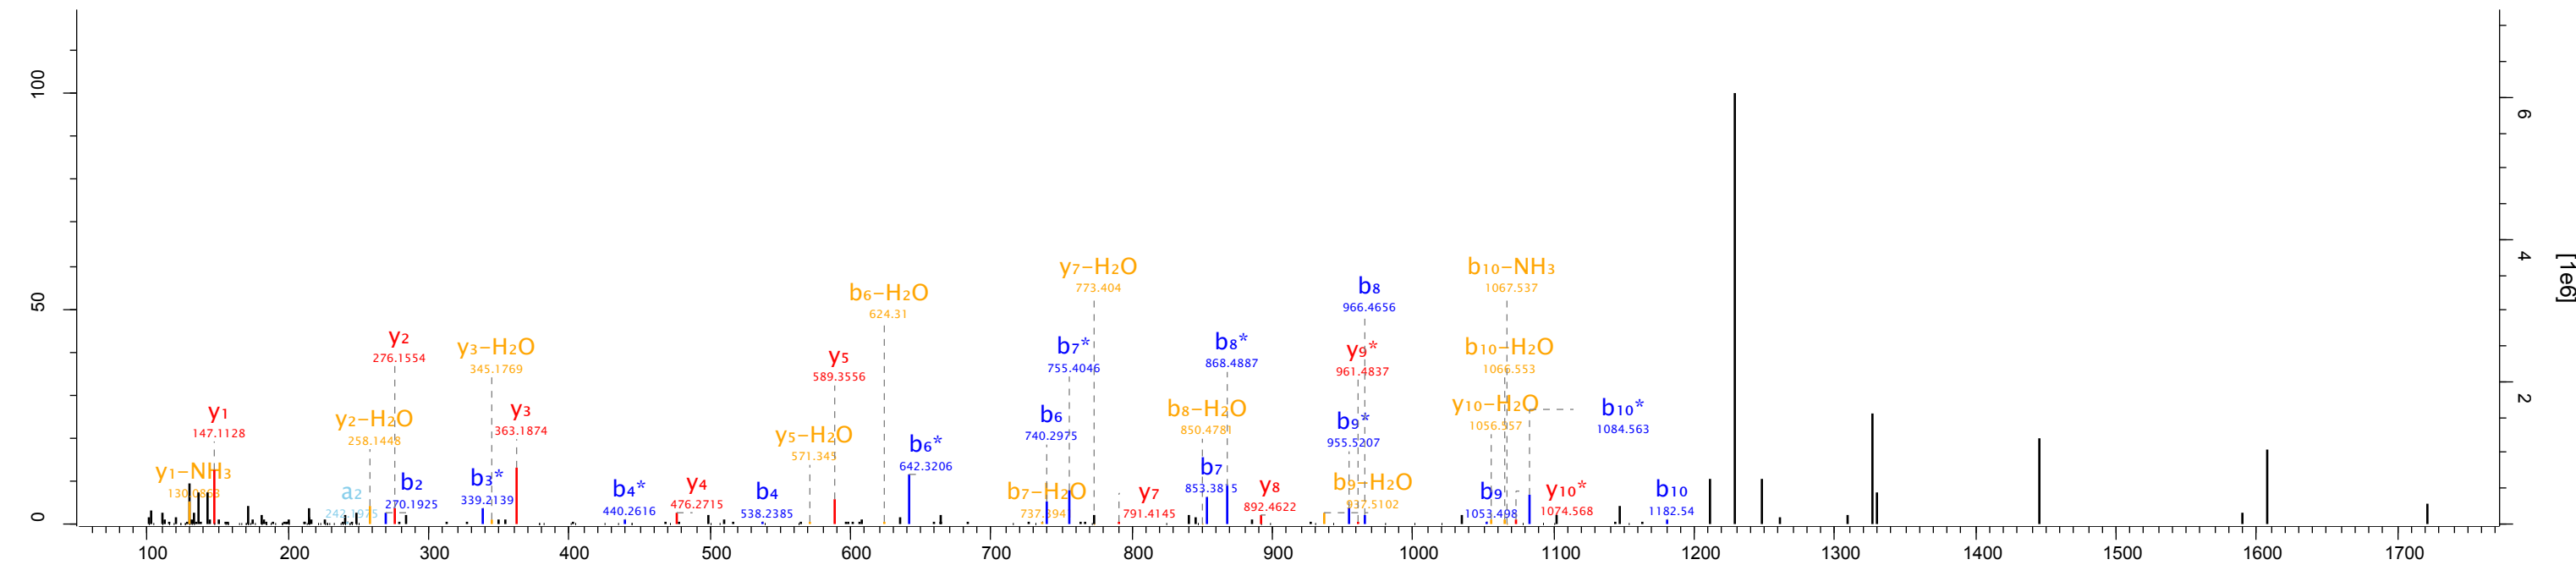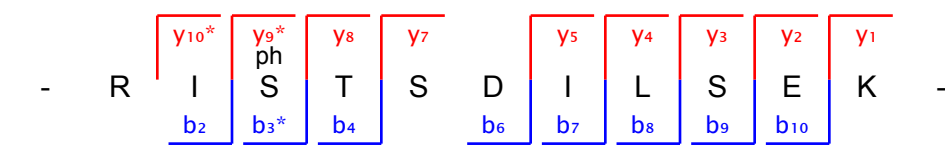

Raw file: 20150814\_A375SR\_Phospho\_BR2\_05  
 Scan: 1337 Method: FTMS; HCD Score: 101.38 m/z: 504.76 Gene names: SFSWAP

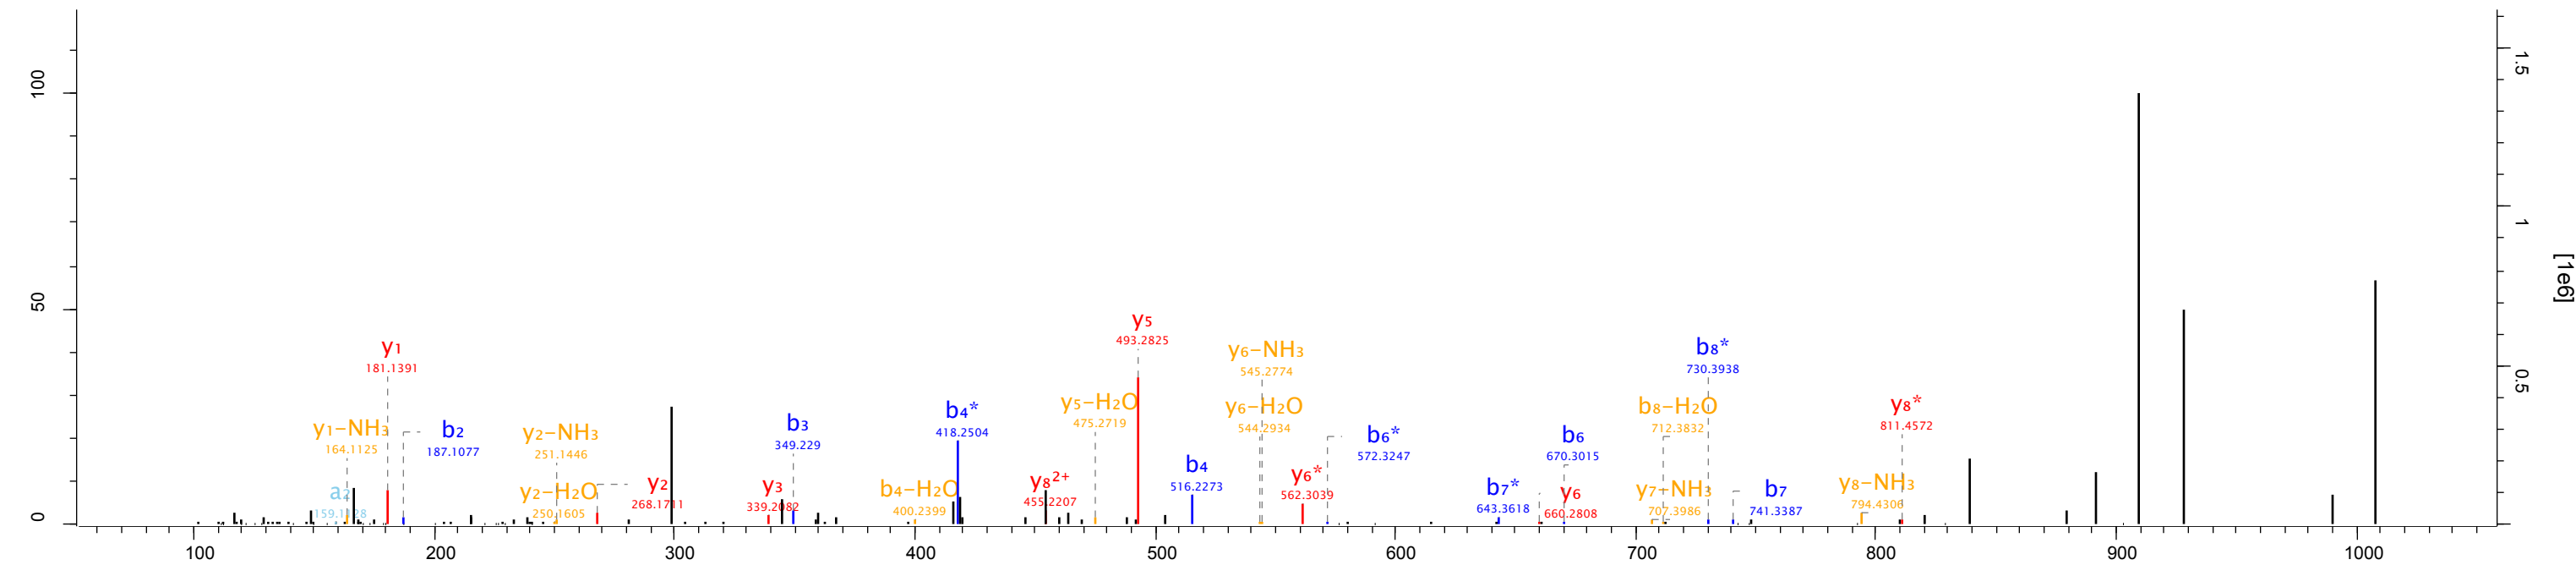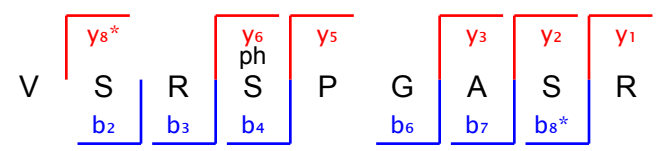

Raw file 20150814\_A375SR\_Phospho\_BR2\_05 Scan 13687 Method FTMS; HCD Score 110.74 m/z 916.89 Gene names PSIP1

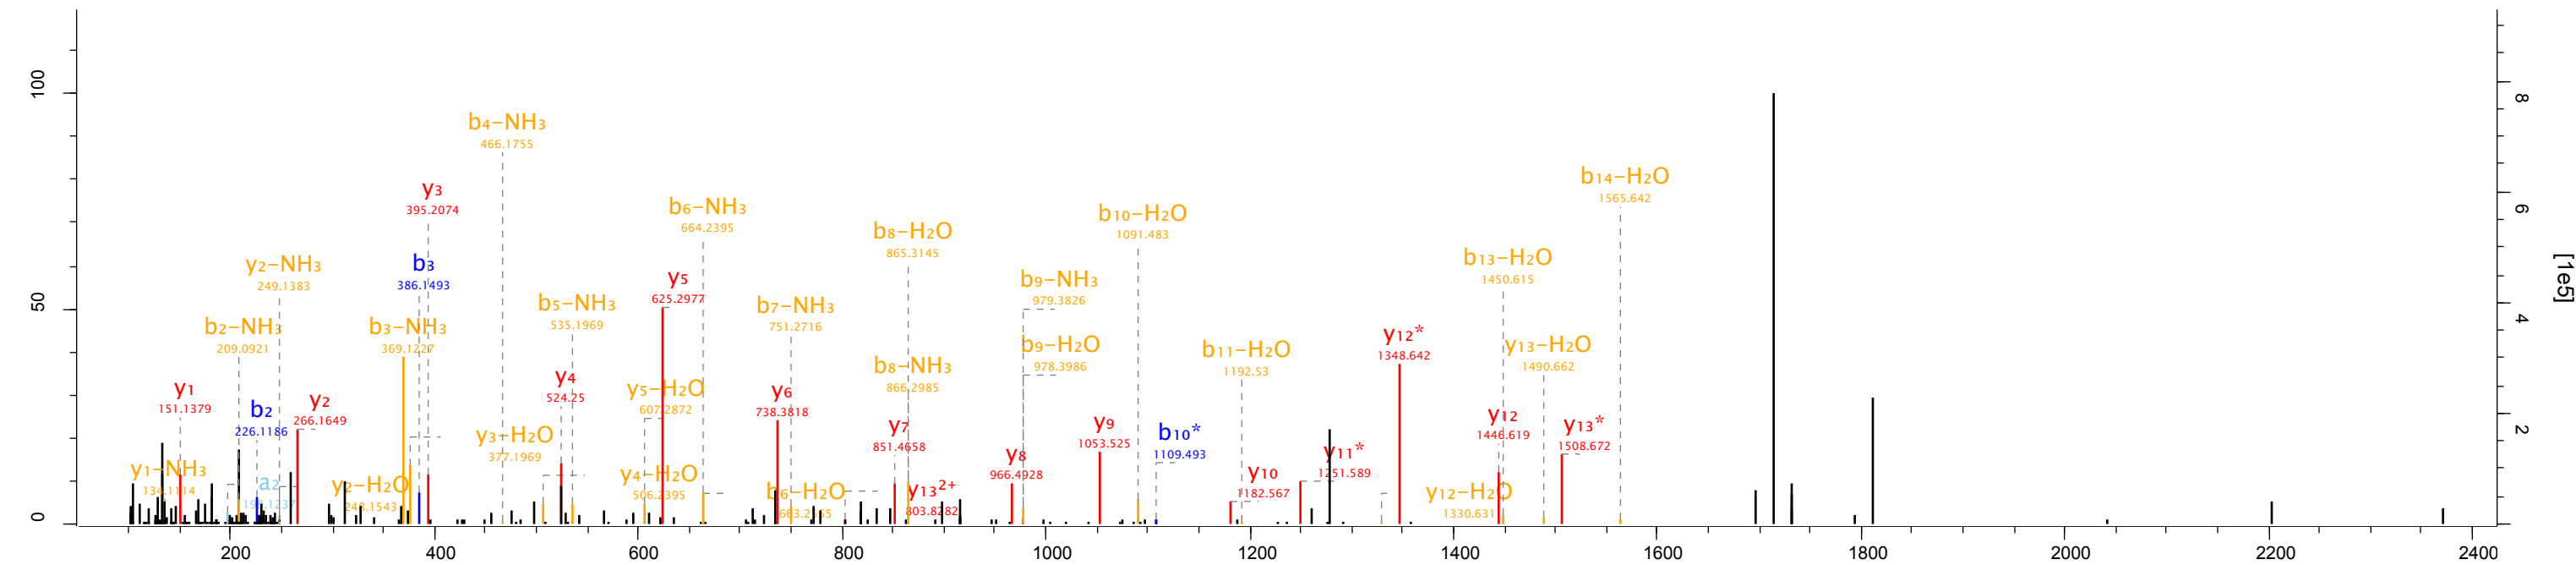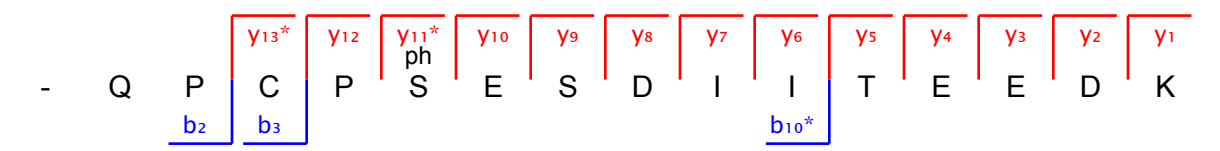



Raw file: 20150814\_A375SR\_Phospho\_BR2\_05  
 Scan: 13737 Method: FTMS; HCD Score: 209.43 m/z: 821.38 Gene names: TBC1D15

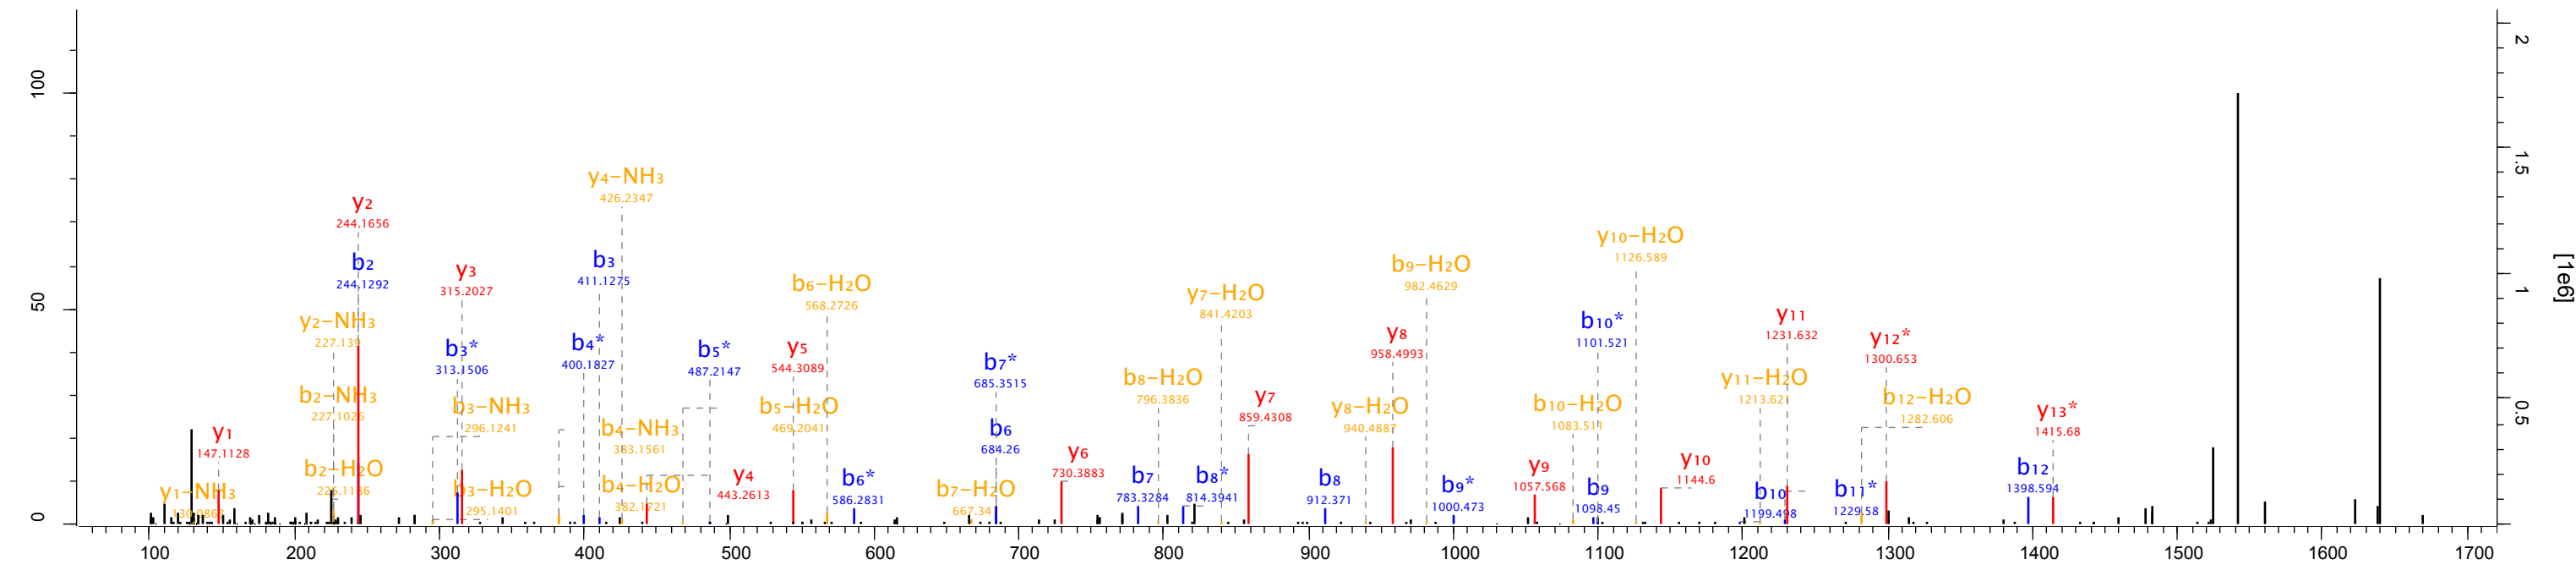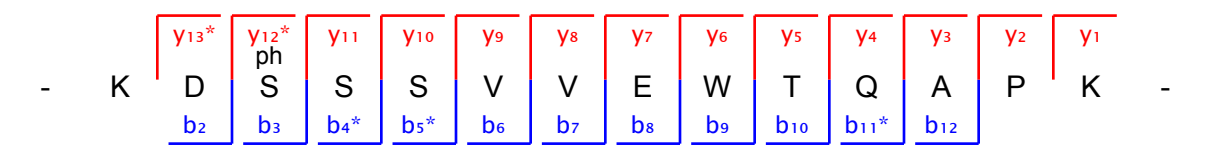

Raw file 20150814\_A375SR\_Phospho\_BR2\_05 Scan 14527 Method FTMS; HCD Score 176.39 m/z 839.37 Gene names MYCBP2

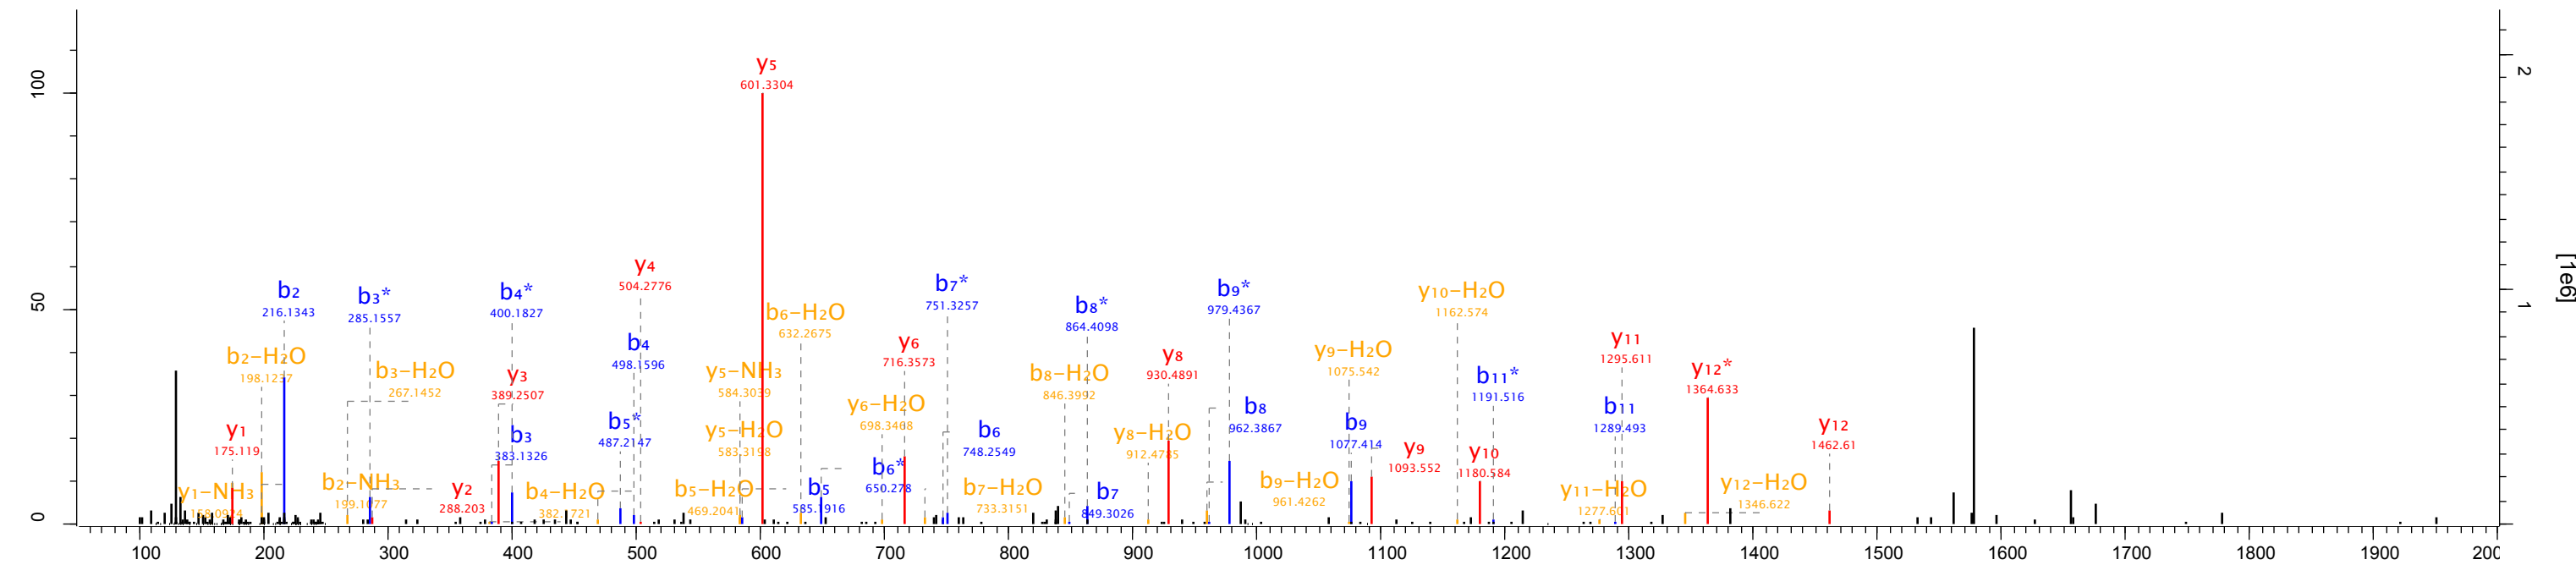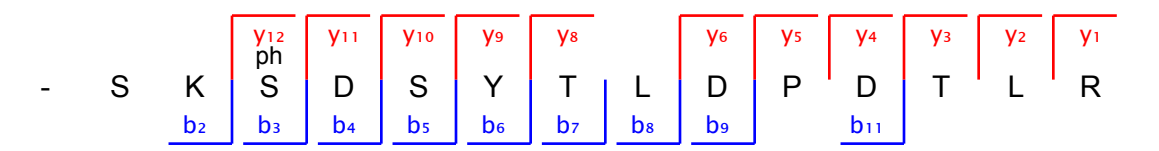

Raw file  
 20150814\_A375SR\_Phospho\_BR2\_05  
 Scan 14867 Method FTMS; HCD Score 146.75 m/z 767.38 Gene names CNP

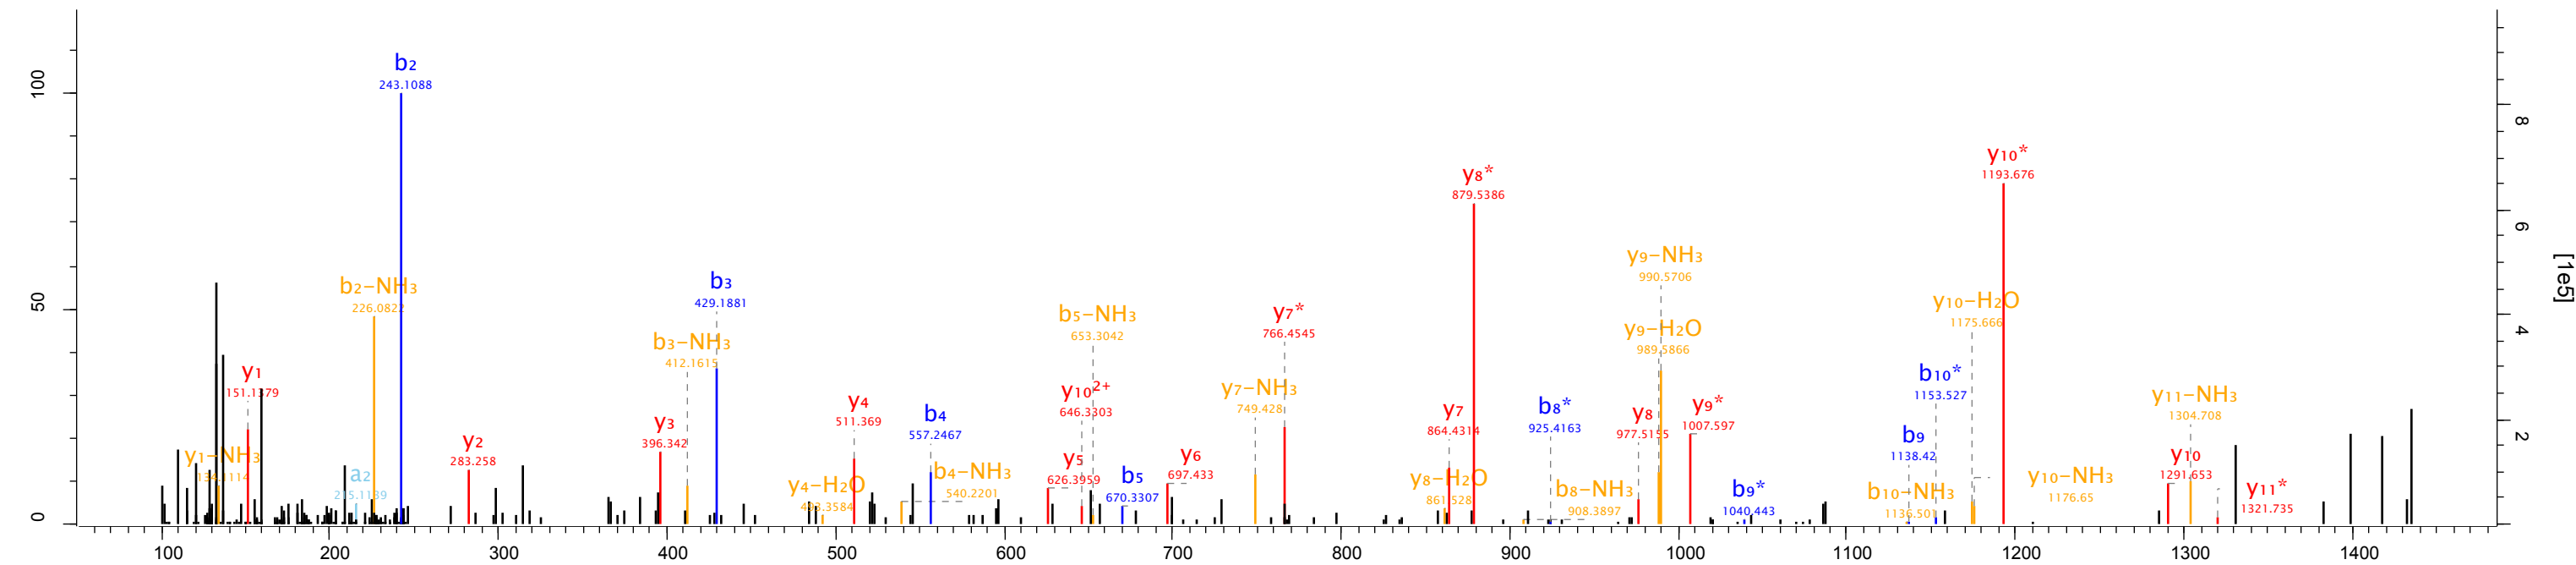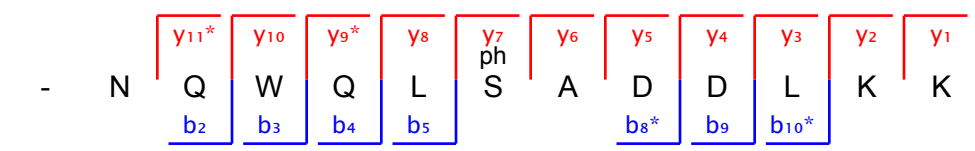

Raw file 20150814\_A375SR\_Phospho\_BR2\_05 Scan 14947 Method FTMS; HCD Score 227.2 m/z 1085.96 Gene names SYNM

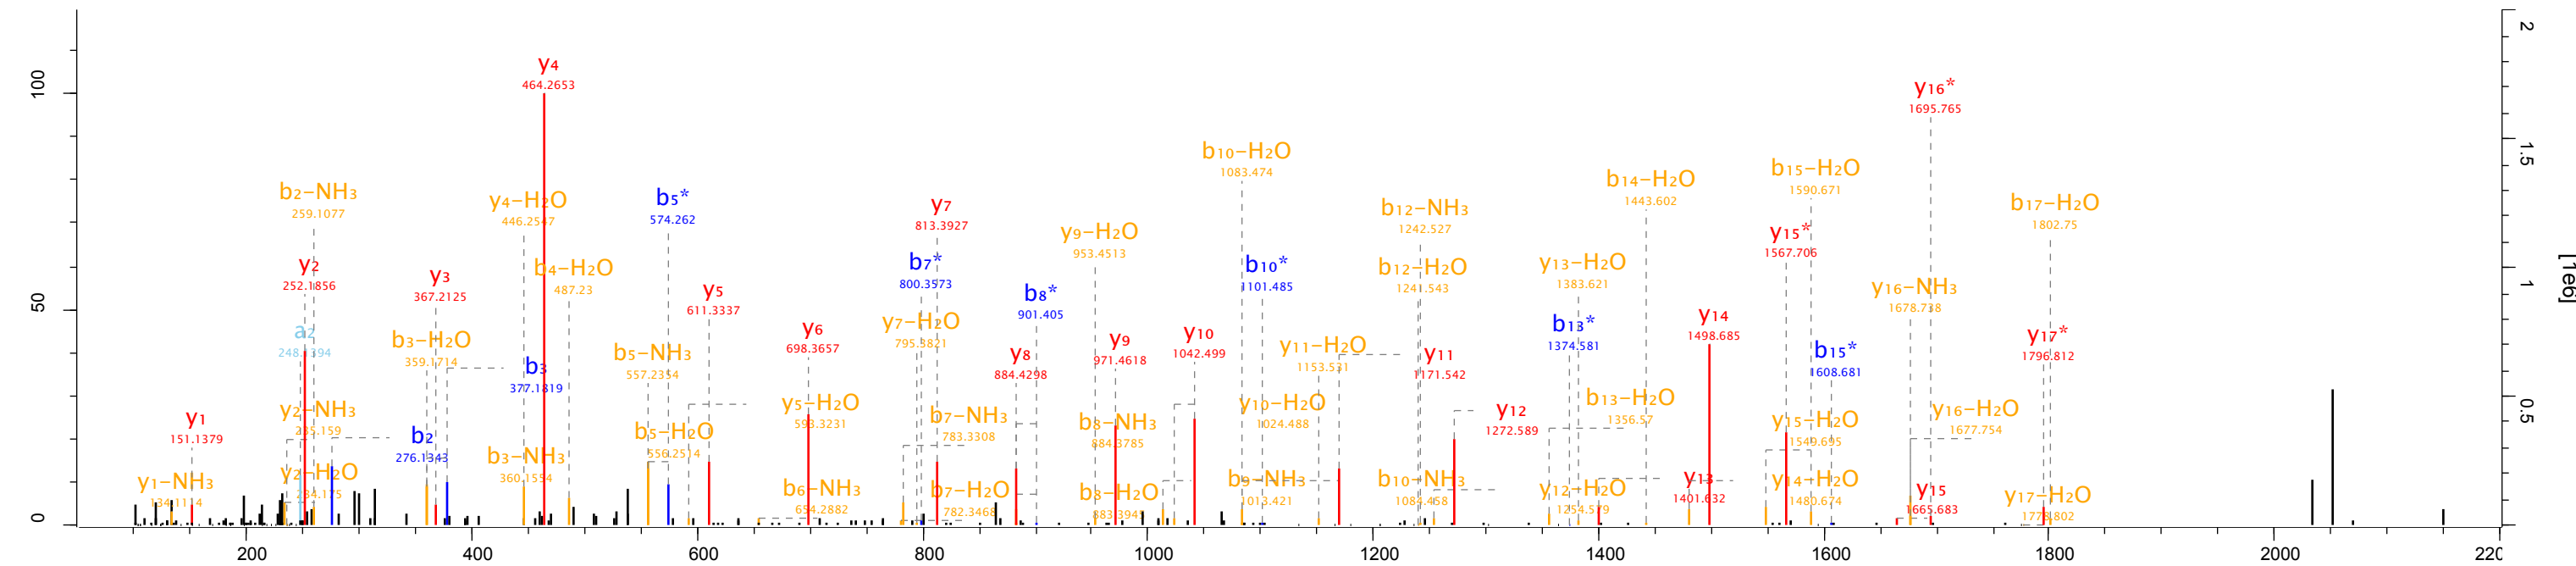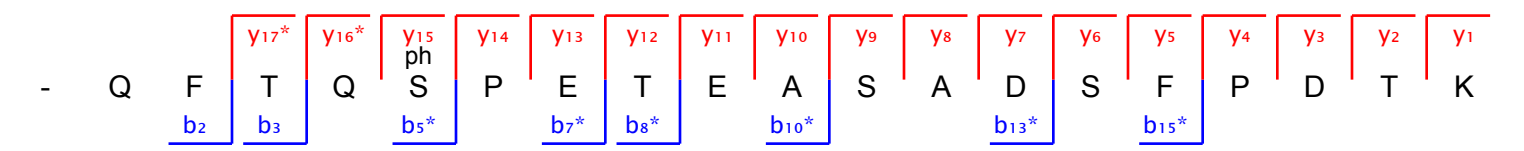

Raw file  
20150814\_A375SR\_Phospho\_BR2\_05

Scan 15137 Method FTMS; HCD Score 124.71 m/z 858.39 Gene names UBAP2

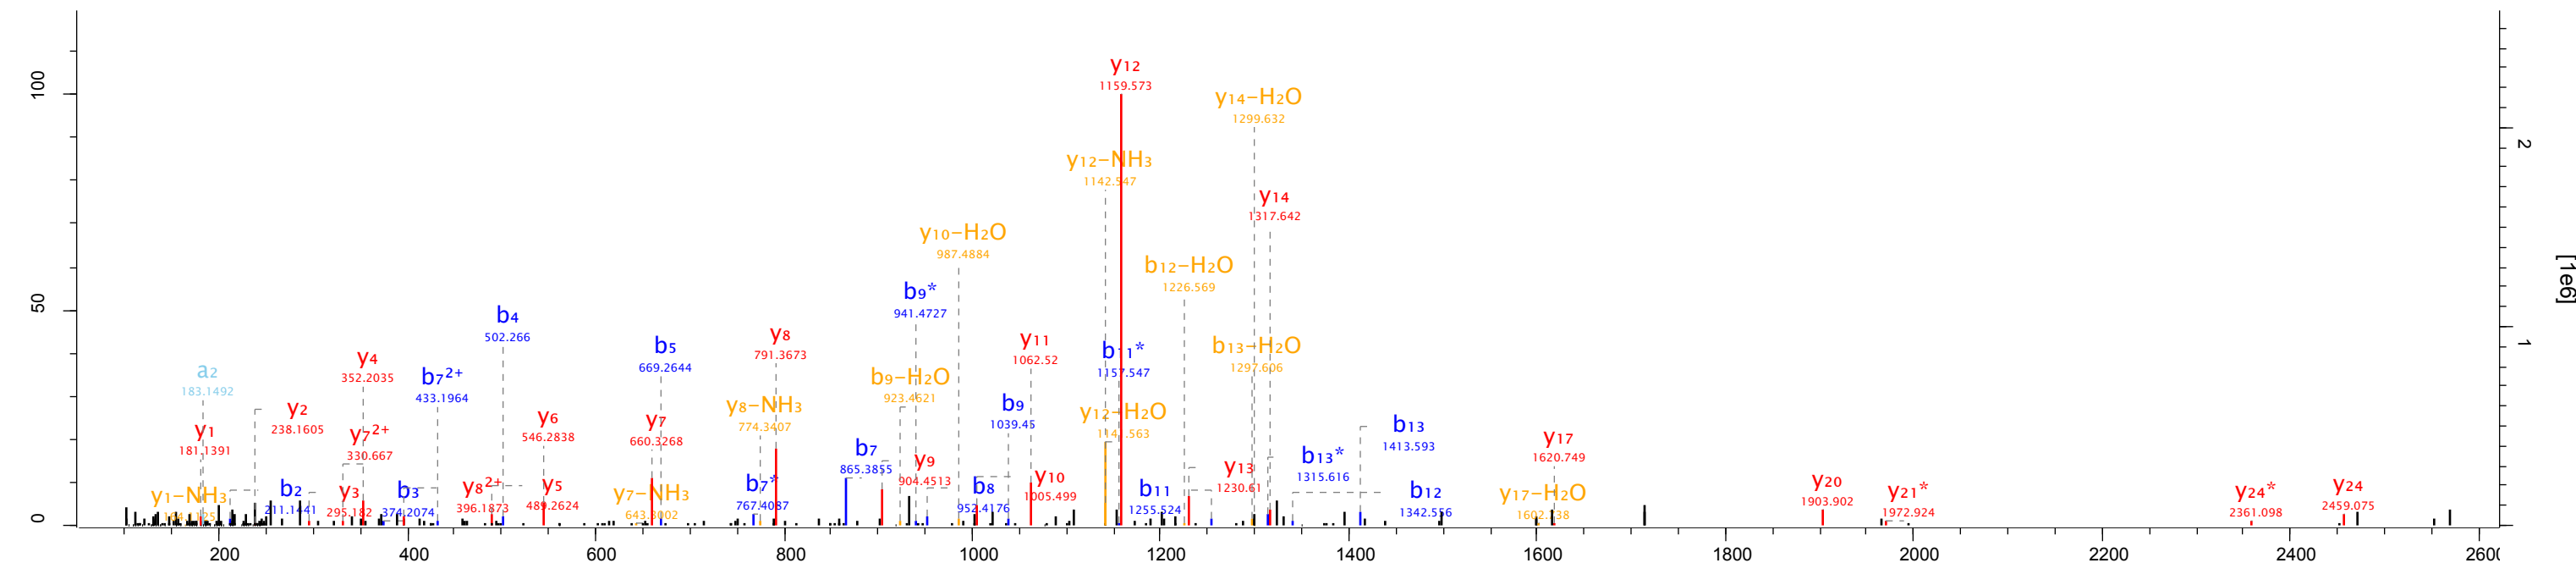

- I P Y Q P V S S E S A P G T I M N G H G G R -  
b<sub>2</sub> b<sub>3</sub> b<sub>4</sub> b<sub>5</sub> b<sub>7</sub> b<sub>8</sub> b<sub>9</sub> b<sub>11</sub> b<sub>12</sub> b<sub>13</sub> y<sub>1</sub> y<sub>2</sub> y<sub>3</sub> y<sub>4</sub> y<sub>5</sub> y<sub>6</sub> y<sub>7</sub> y<sub>8</sub> y<sub>9</sub> y<sub>10</sub> y<sub>11</sub> y<sub>12</sub> y<sub>13</sub> y<sub>14</sub> y<sub>17</sub> y<sub>20</sub> y<sub>21</sub>\* y<sub>24</sub>

Raw file: 20150814\_A375SR\_Phospho\_BR2\_05  
 Scan: 15547 Method: FTMS; HCD Score: 118.08 m/z: 719.31 Gene names: BUD13

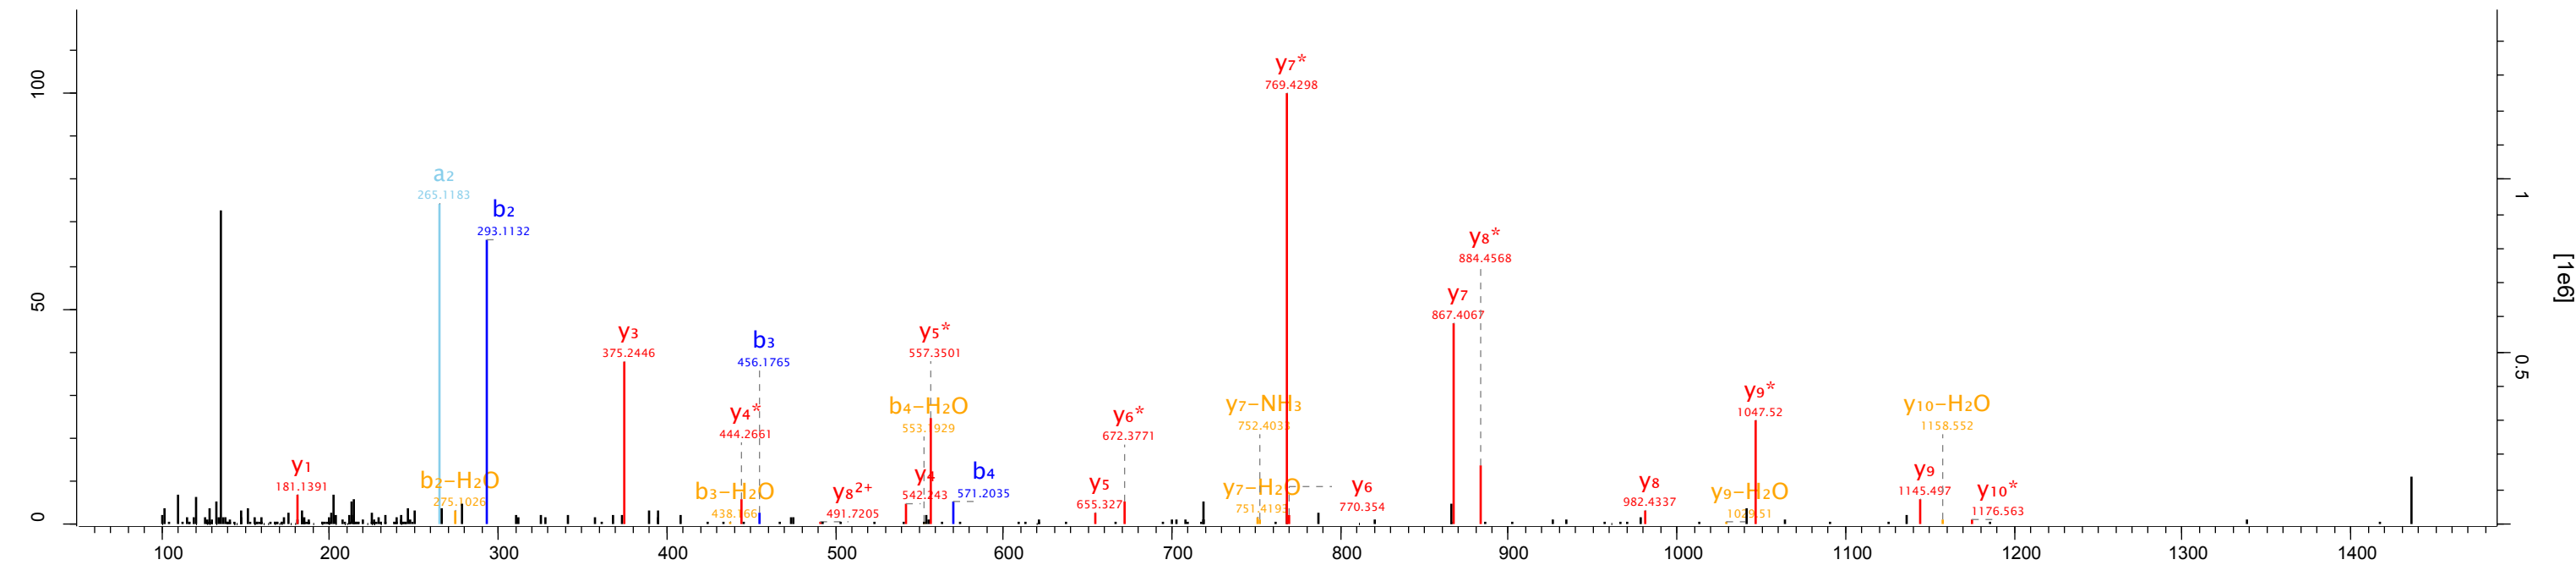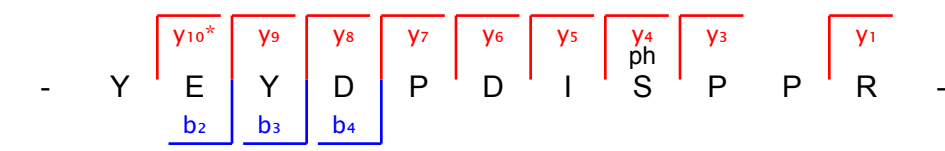

Raw file: 20150814\_A375SR\_Phospho\_BR2\_05  
 Scan: 15817 Method: FTMS; HCD Score: 162.73 m/z: 744.37 Gene names: SIK3

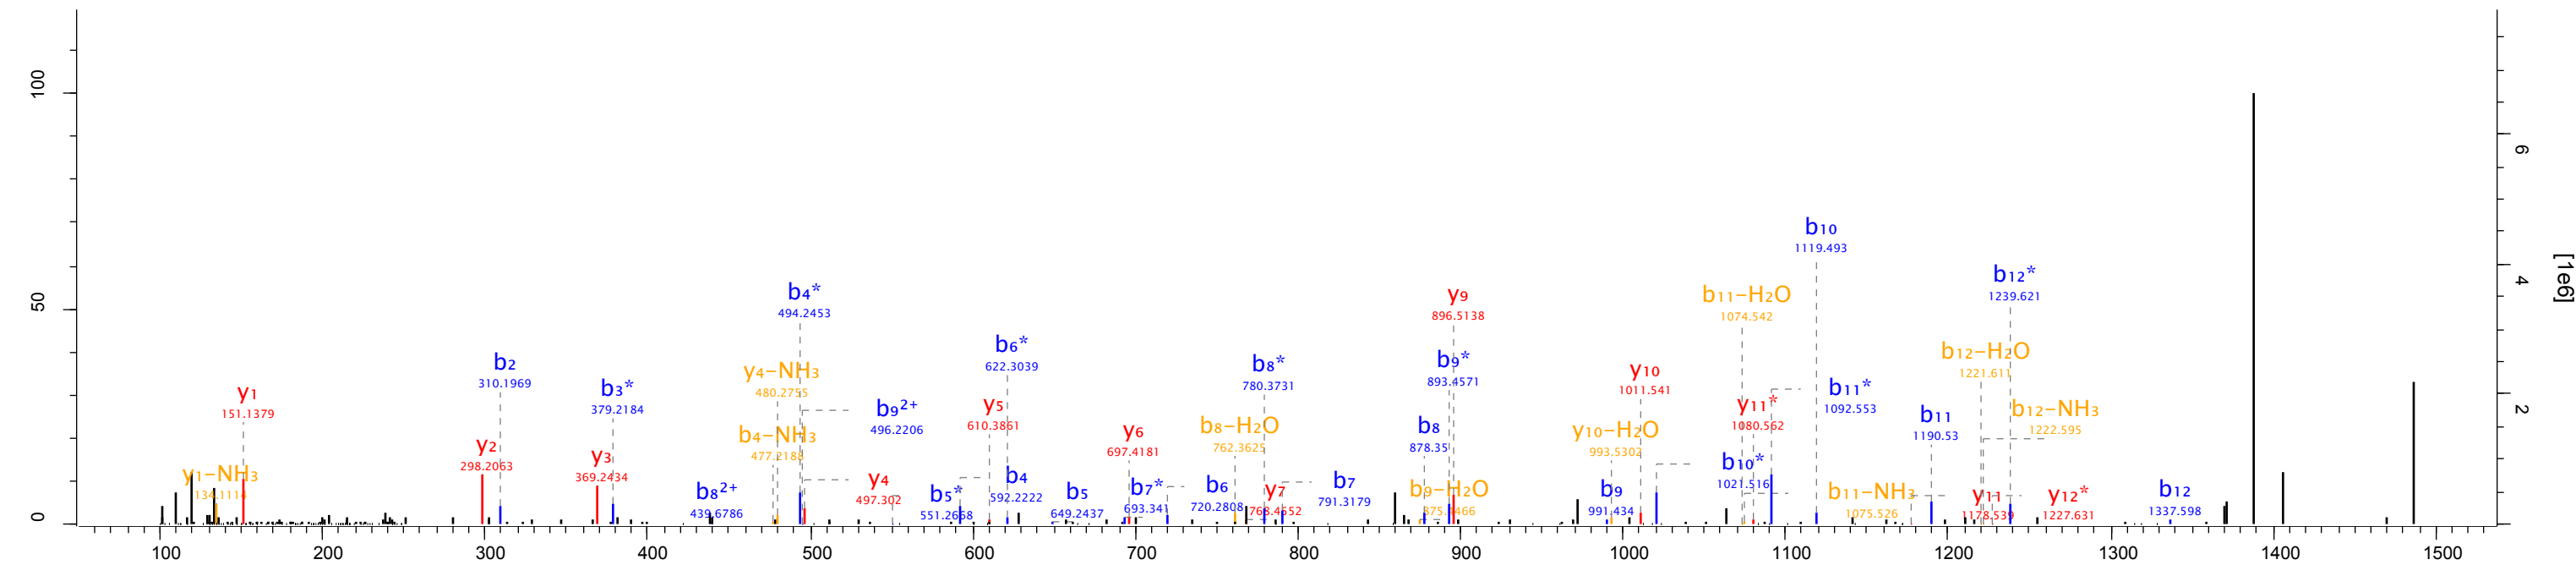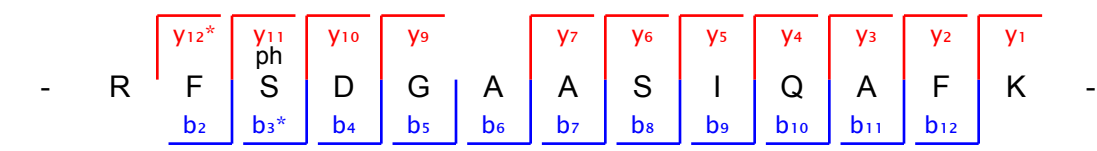

Raw file 20150814\_A375SR\_Phospho\_BR2\_05 Scan 17127 Method FTMS; HCD Score 127.97 m/z 583.97 Gene names PRKCD

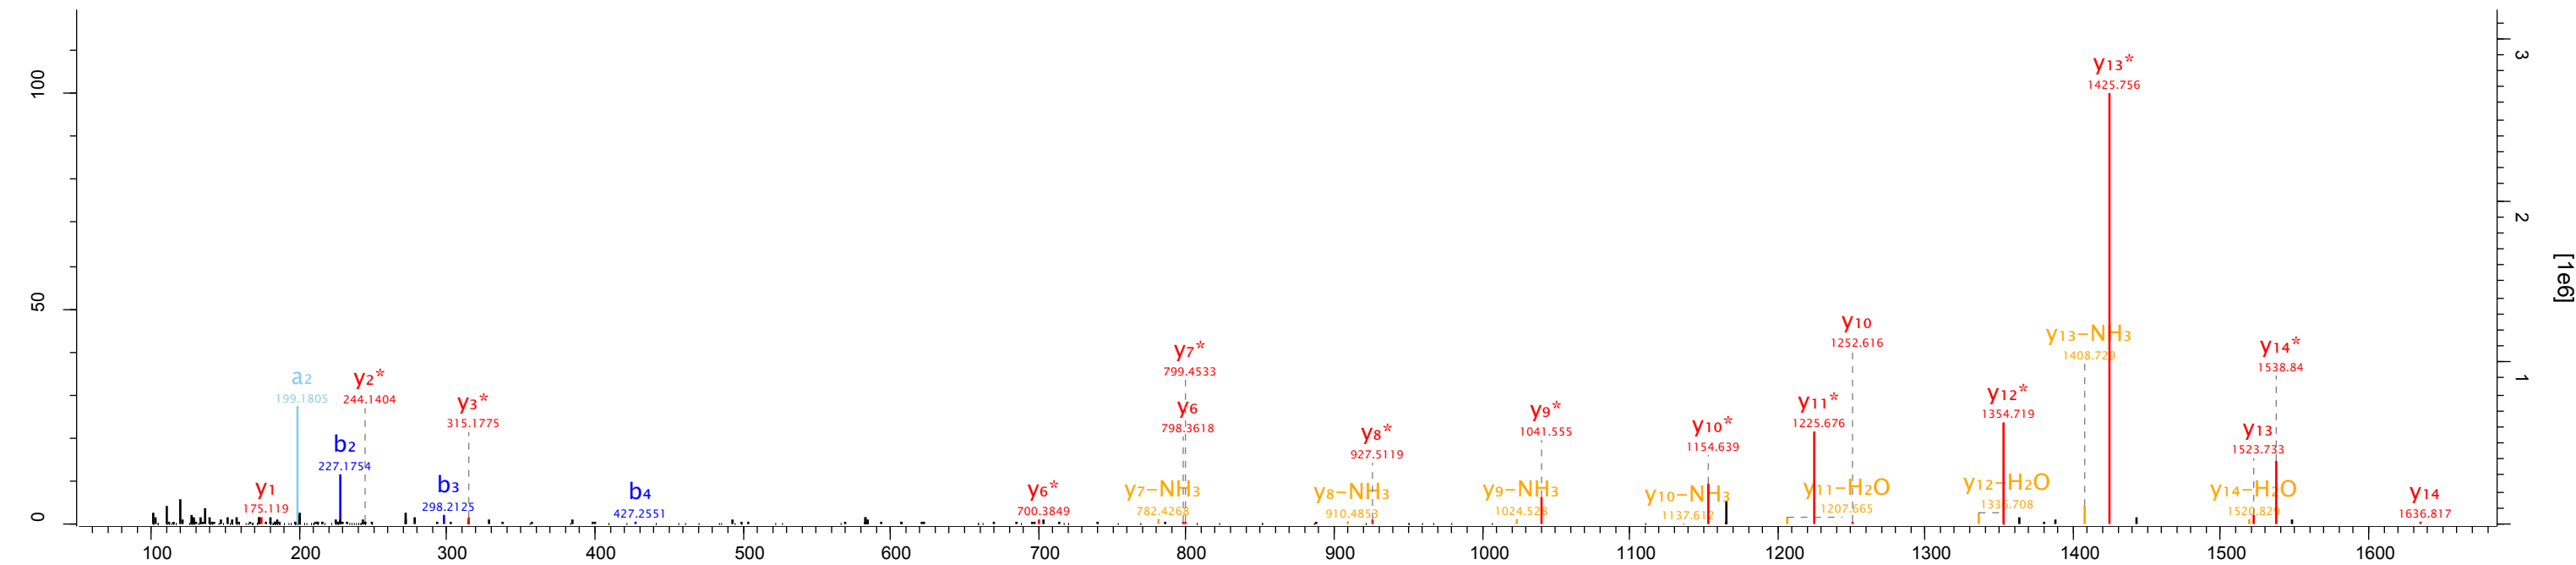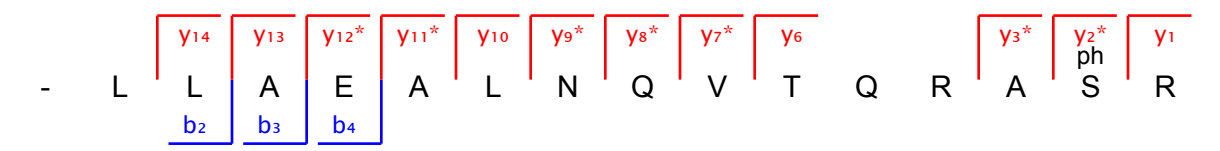



Raw file Scan Method Score m/z Gene names  
 20150814\_A375SR\_Phospho\_BR2\_05 17377 FTMS; HCD 151.41 834.86 DNPPI

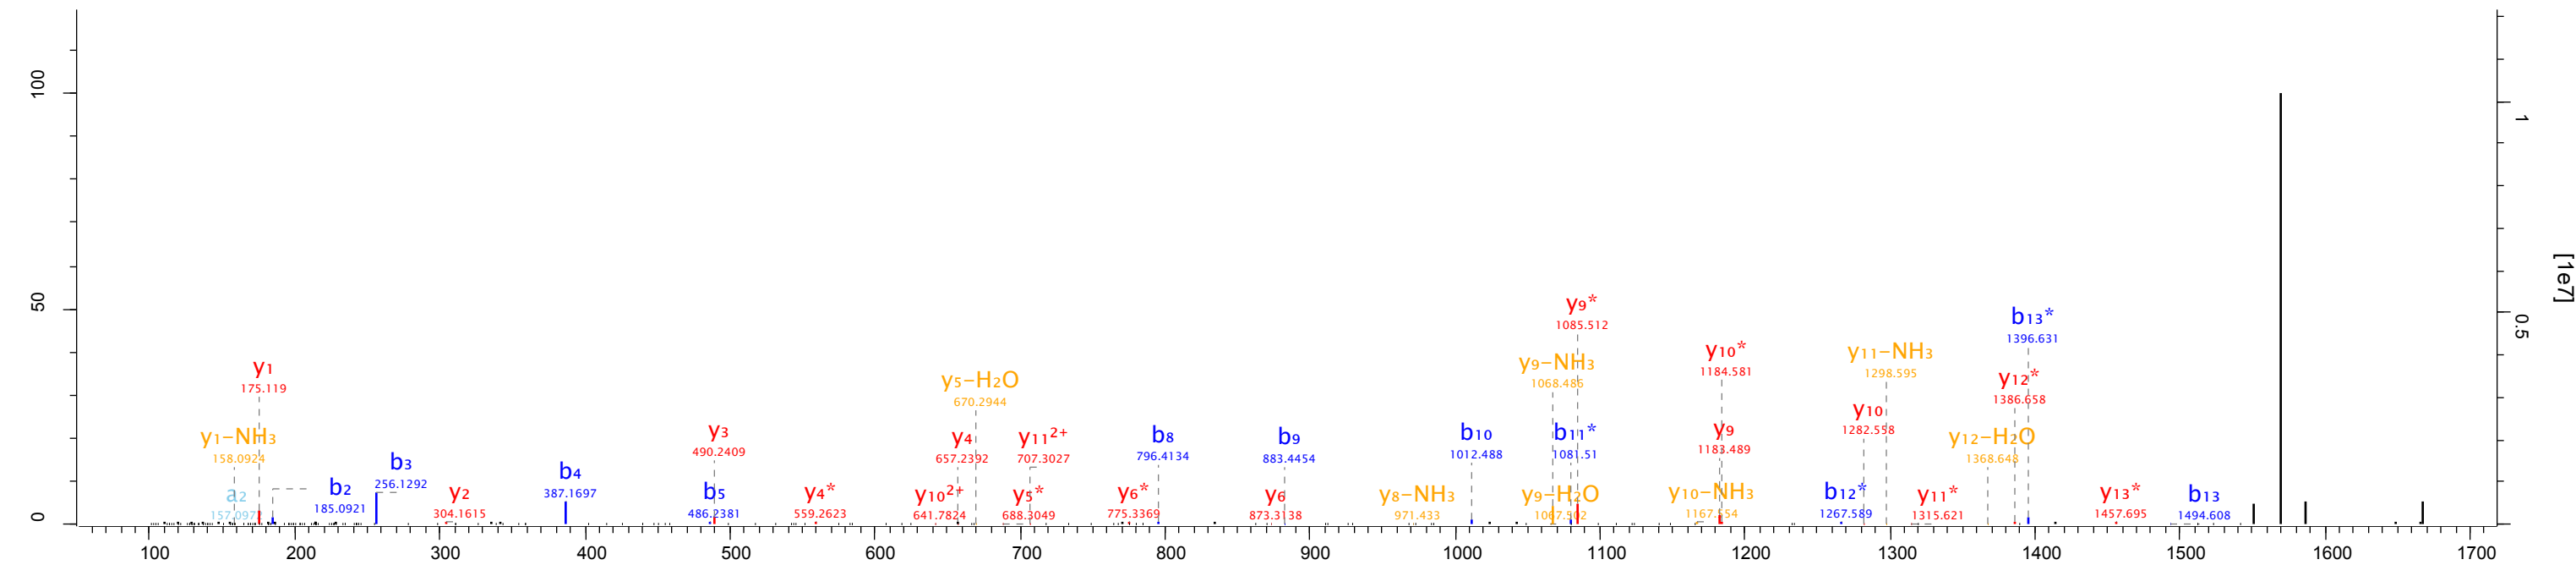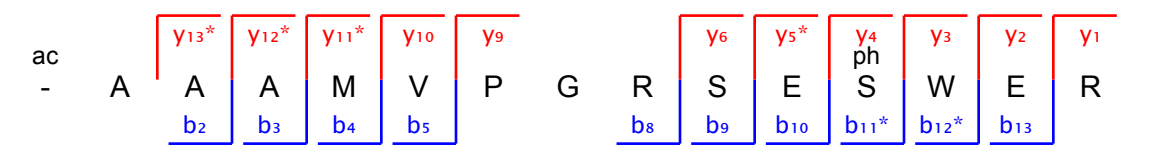

Raw file 20150814\_A375SR\_Phospho\_BR2\_05 Scan 17527 Method FTMS; HCD Score 65.42 m/z 842.36 Gene names PBRM1

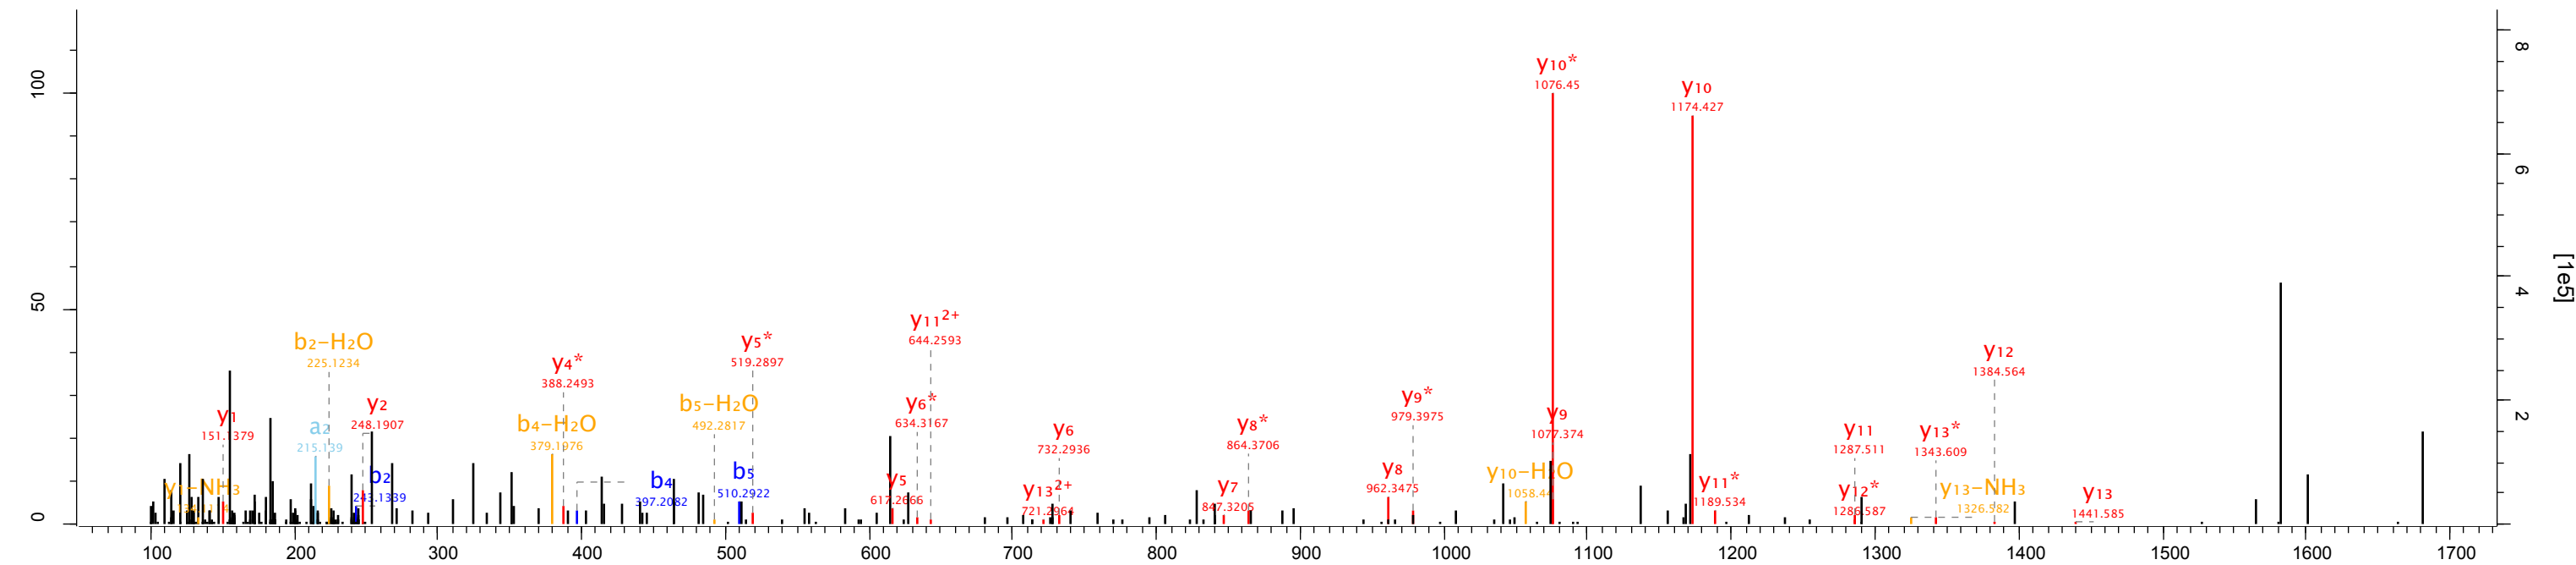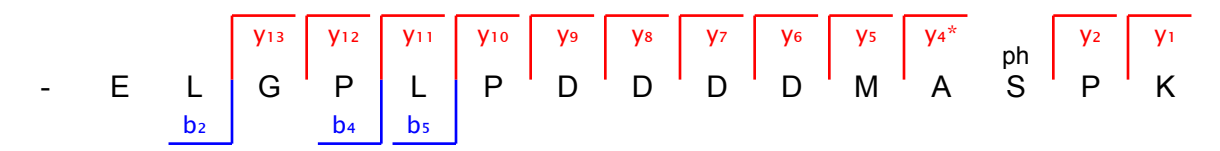

Raw file: 20150814\_A375SR\_Phospho\_BR2\_05  
 Scan: 18137 Method: FTMS; HCD Score: 245.39 m/z: 990.08 Gene names: EDC4

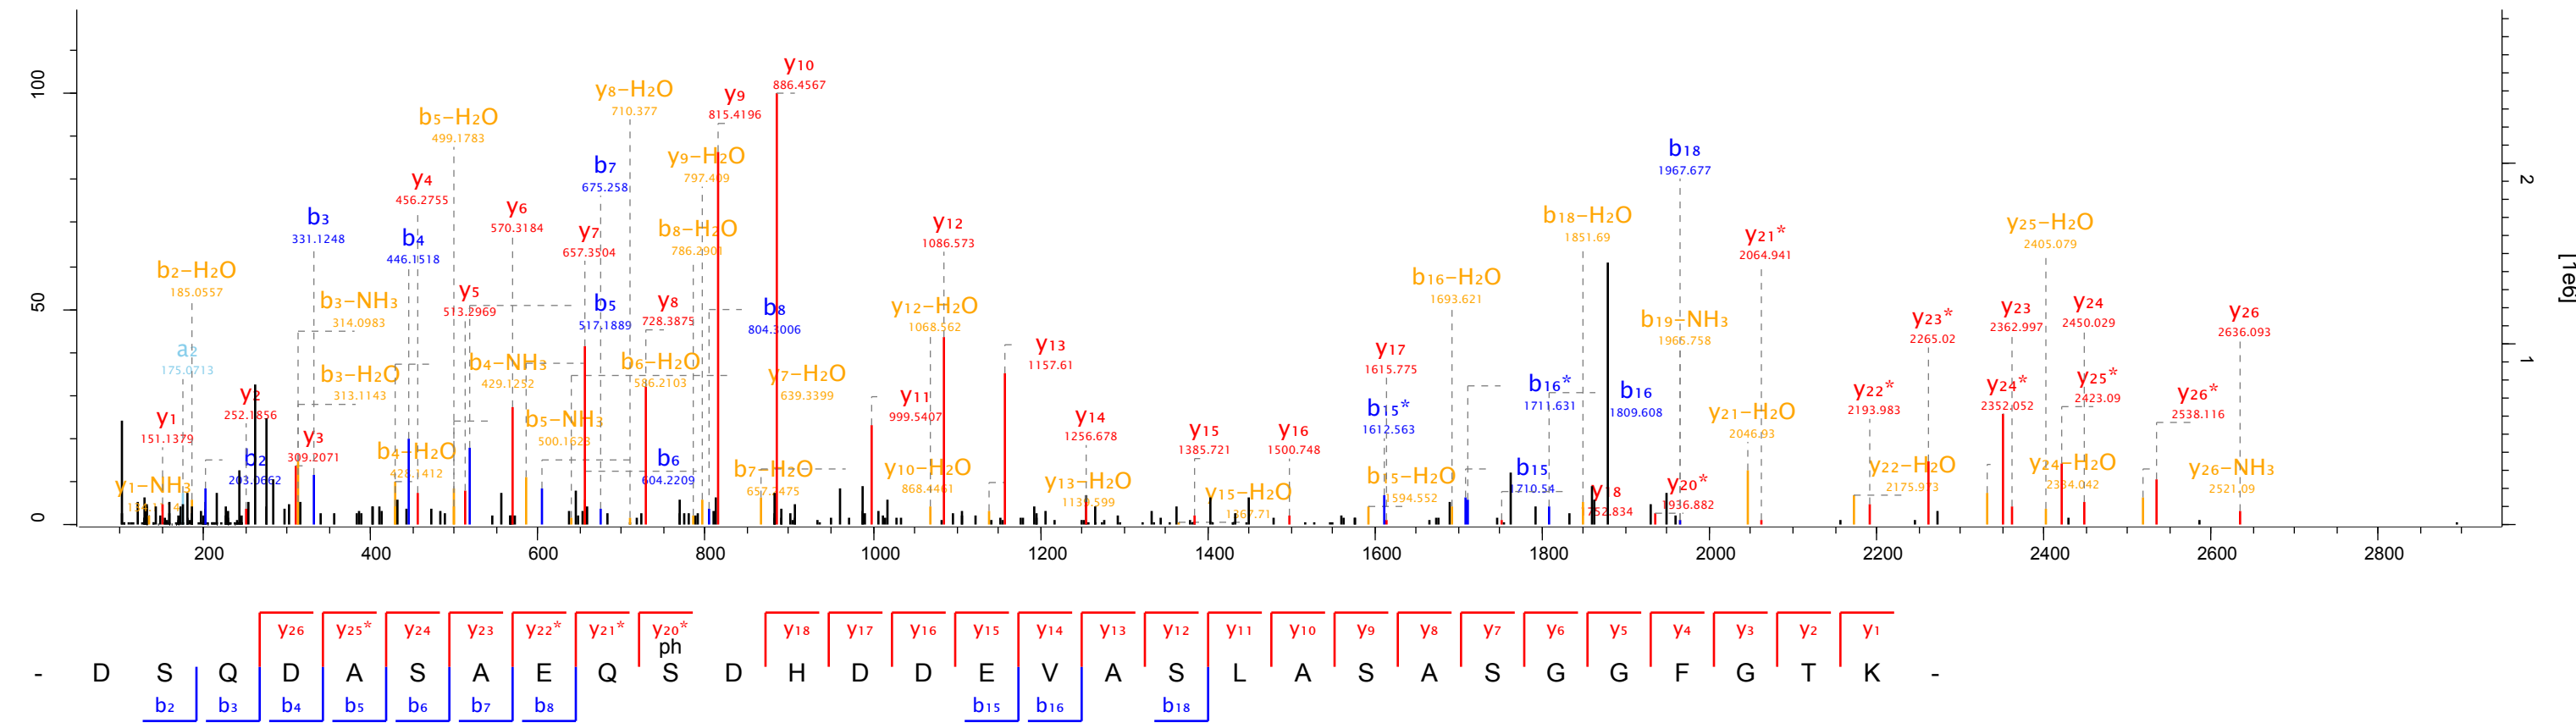

Raw file 20150814\_A375SR\_Phospho\_BR2\_05 Scan 18347 Method FTMS; HCD Score 258.4 m/z 1303.07 Gene names GTF3C4

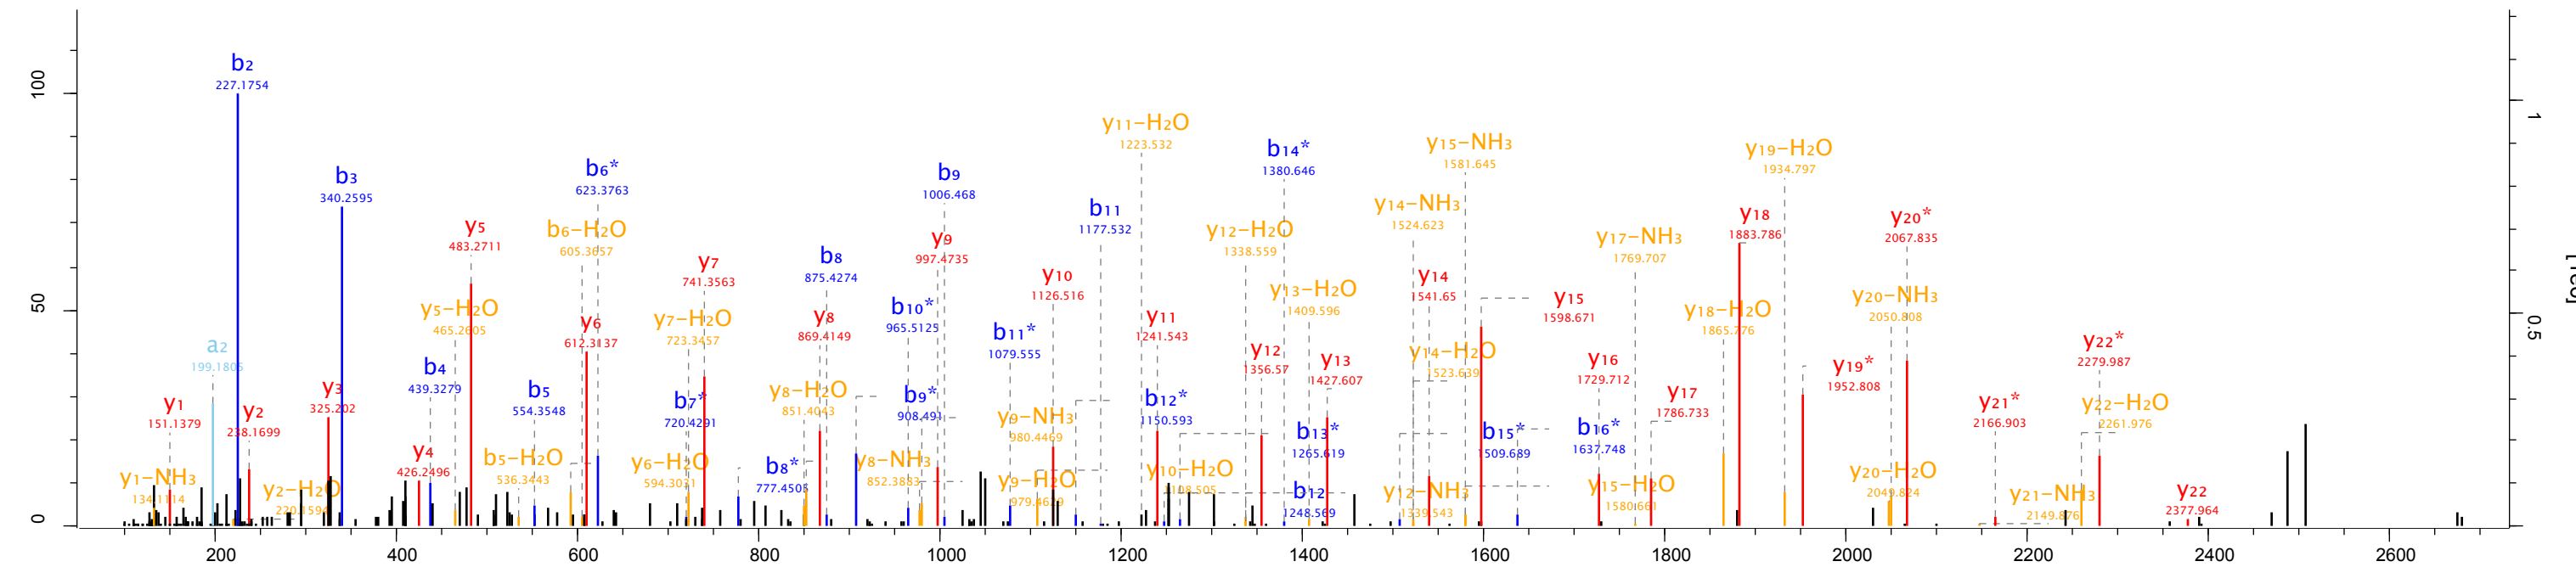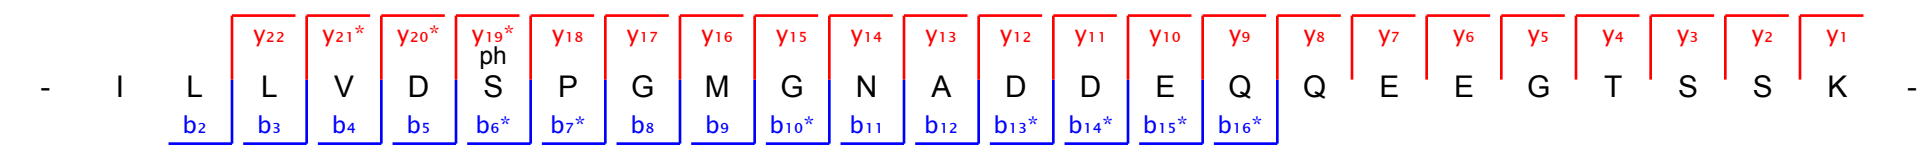

Raw file: 20150814\_A375SR\_Phospho\_BR2\_05  
 Scan: 18357 Method: FTMS; HCD Score: 104.95 m/z: 916.9 Gene names: LPIN1

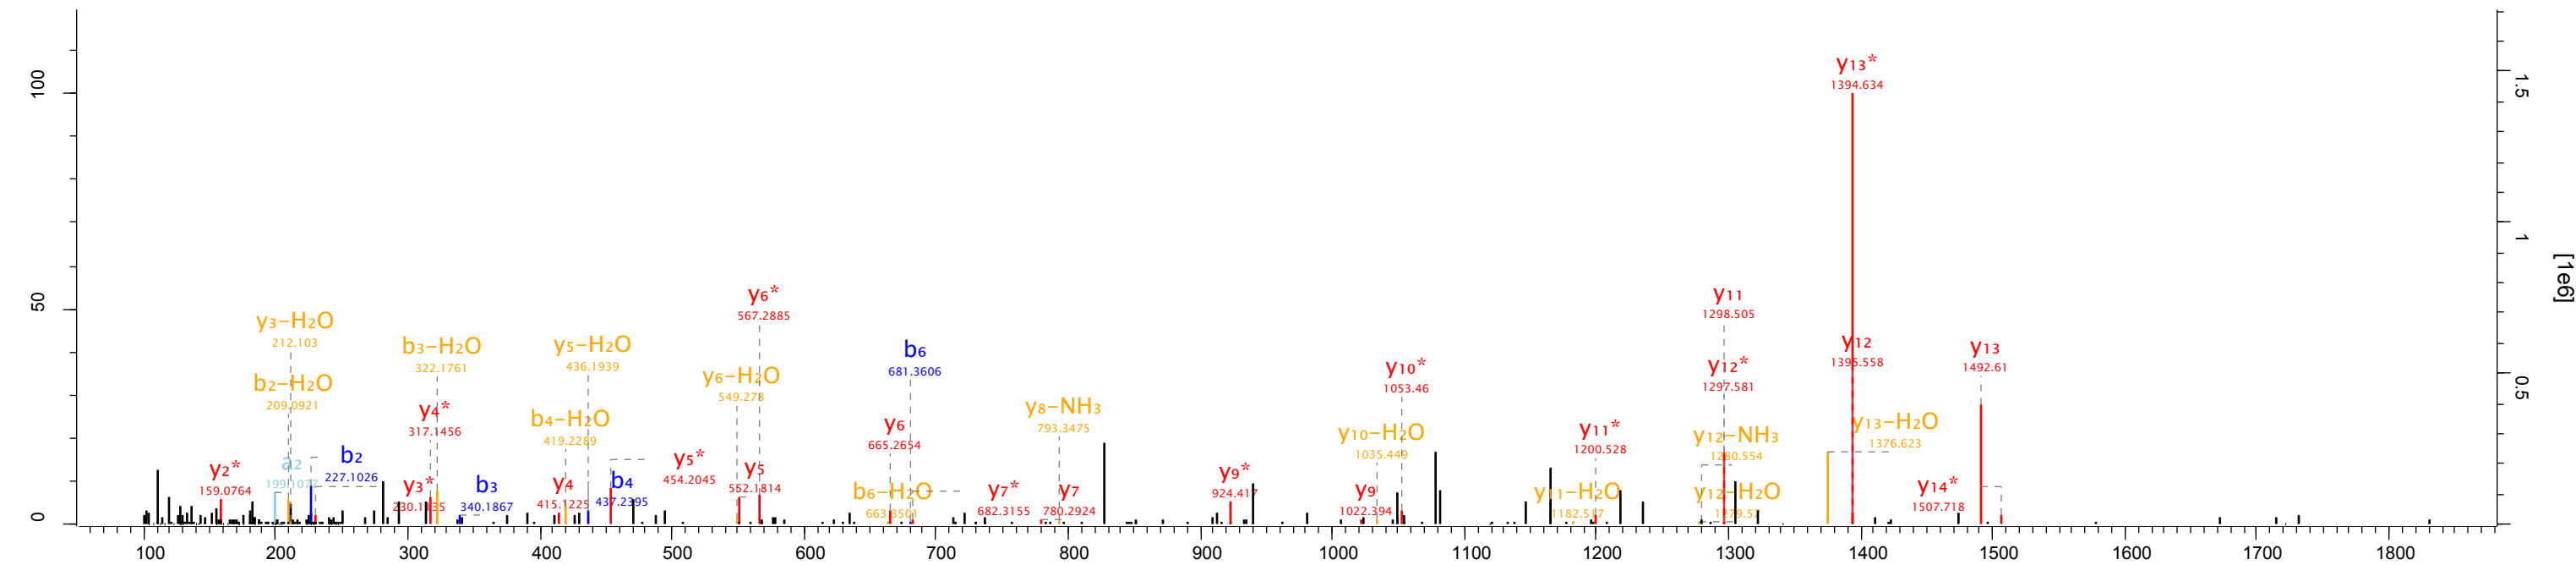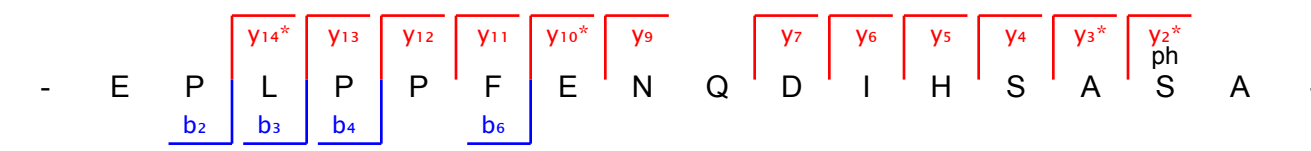

Raw file: 20150814\_A375SR\_Phospho\_BR2\_05  
 Scan: 18497 Method: FTMS; HCD Score: 152.94 m/z: 680.36 Gene names: MTA1

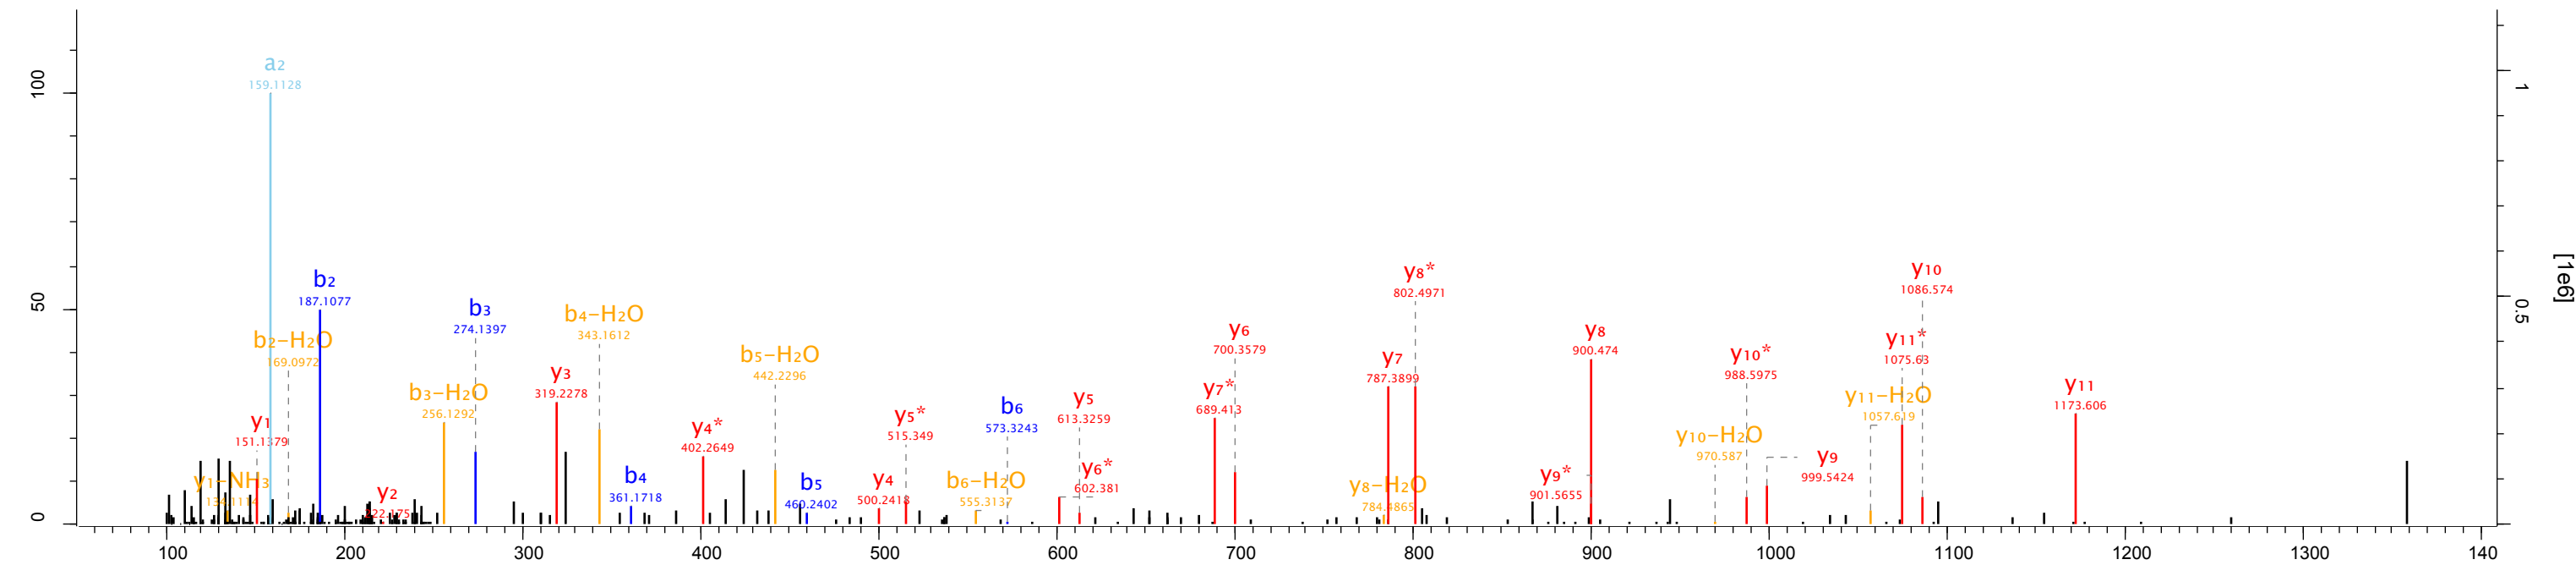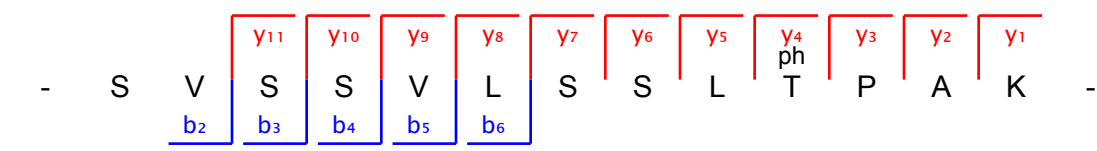

Raw file 20150814\_A375SR\_Phospho\_BR2\_05 Scan 18537 Method FTMS; HCD Score 173.81 m/z 984.15 Gene names PARD3

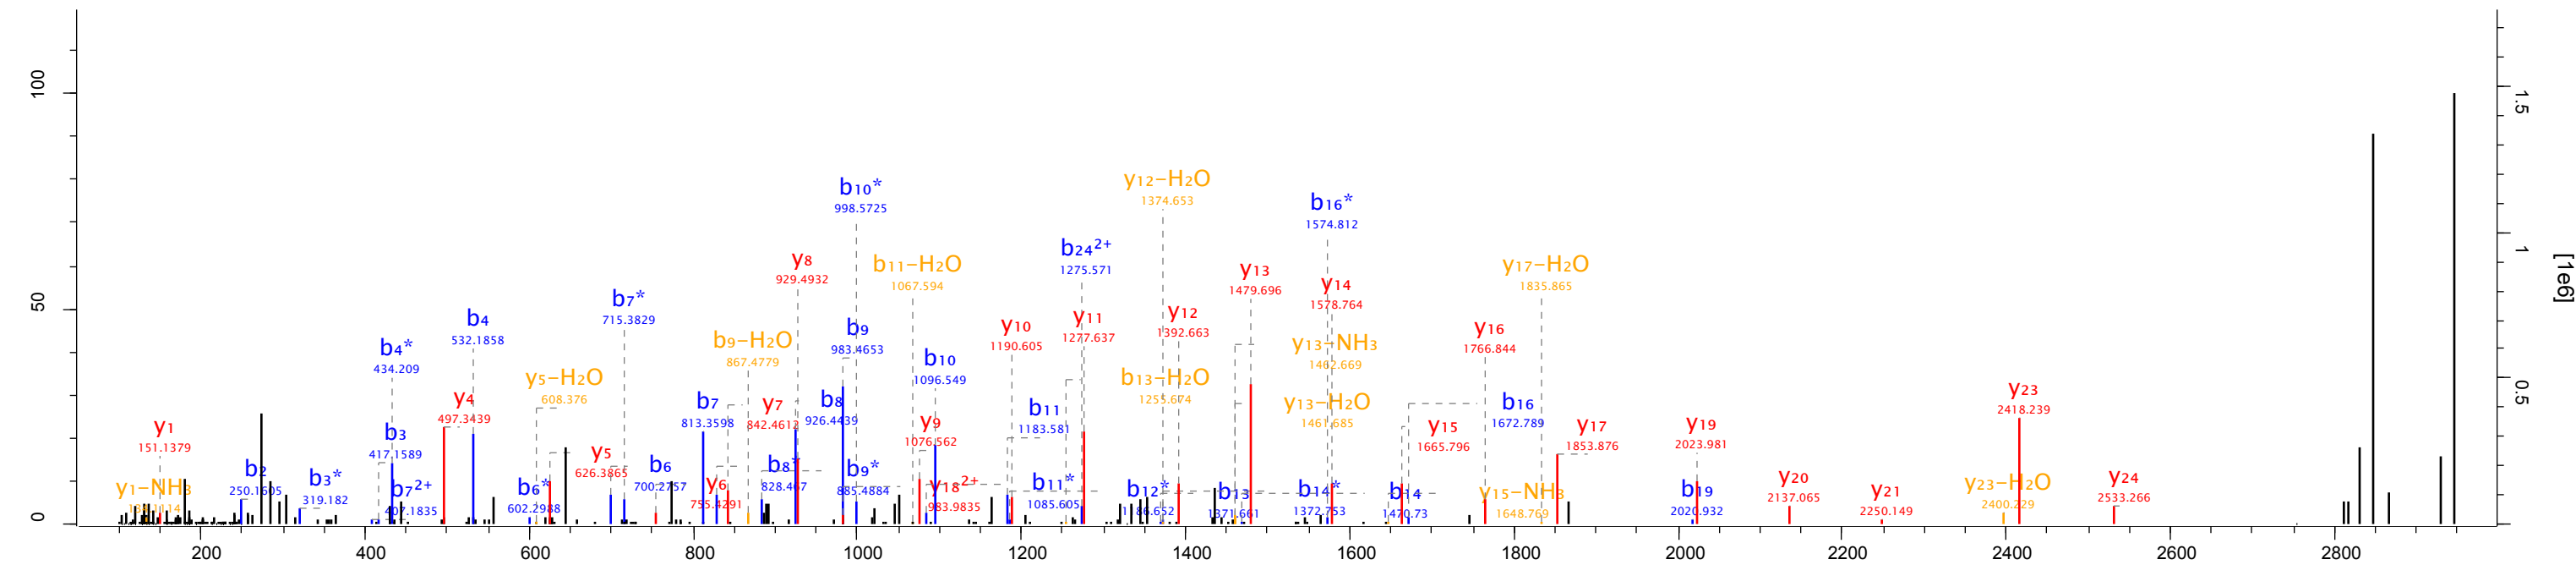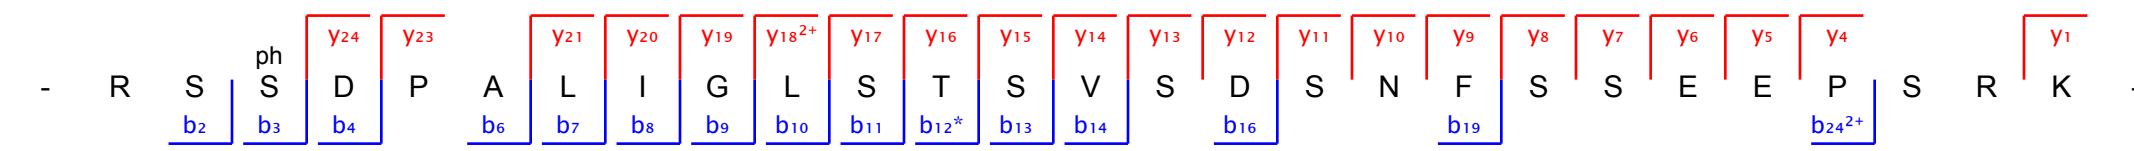

Raw file 20150814\_A375SR\_Phospho\_BR2\_05 Scan 18677 Method FTMS; HCD Score 114.58 m/z 1159.49 Gene names SLAIN2

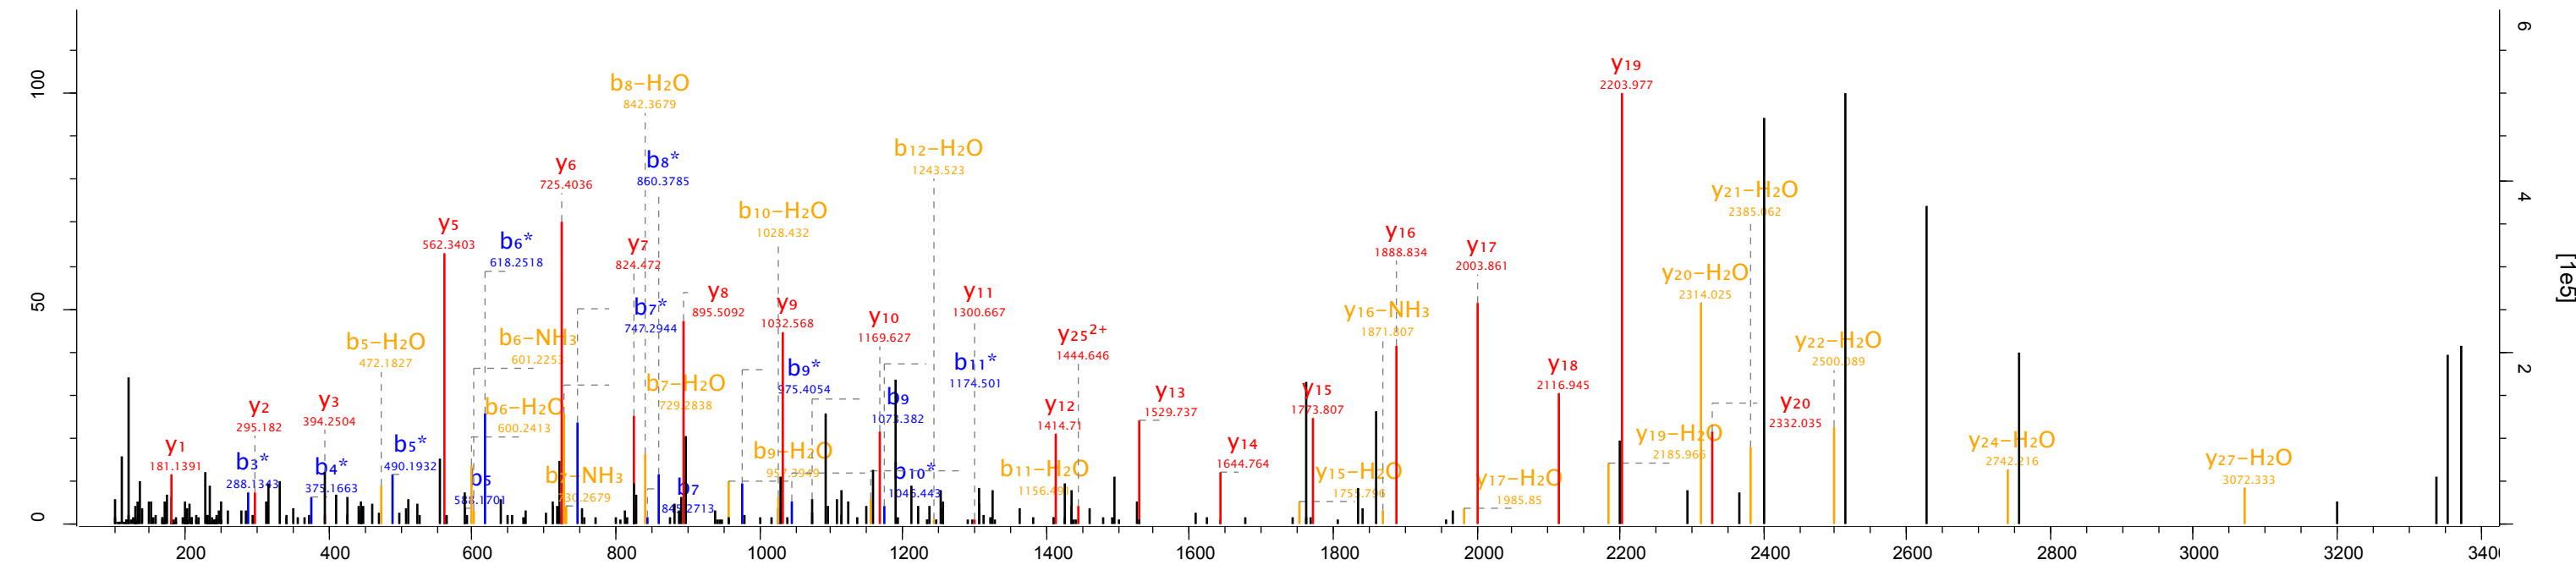

peptide sequence: - G T F S D Q E L D A Q S L D D E D D N M H H A V Y P A V N R -

Fragmentation mapping (b and y ions):

- b3\* (F), b4\* (S), b5 (D), b6\* (Q), b7 (E), b8\* (L), b9 (D), b10\* (A), b11\* (Q)
- y25<sup>2+</sup> (Q), y20 (Q), y19 (S), y18 (L), y17 (D), y16 (D), y15 (E), y14 (D), y13 (D), y12 (N), y11 (M), y10 (H), y9 (H), y8 (A), y7 (V), y6 (Y), y5 (P), y3 (A), y2 (V), y1 (N)



Raw file 20150814\_A375SR\_Phospho\_BR2\_05 Scan 18867 Method FTMS; HCD Score 108.71 m/z 837.34 Gene names SAP30BP

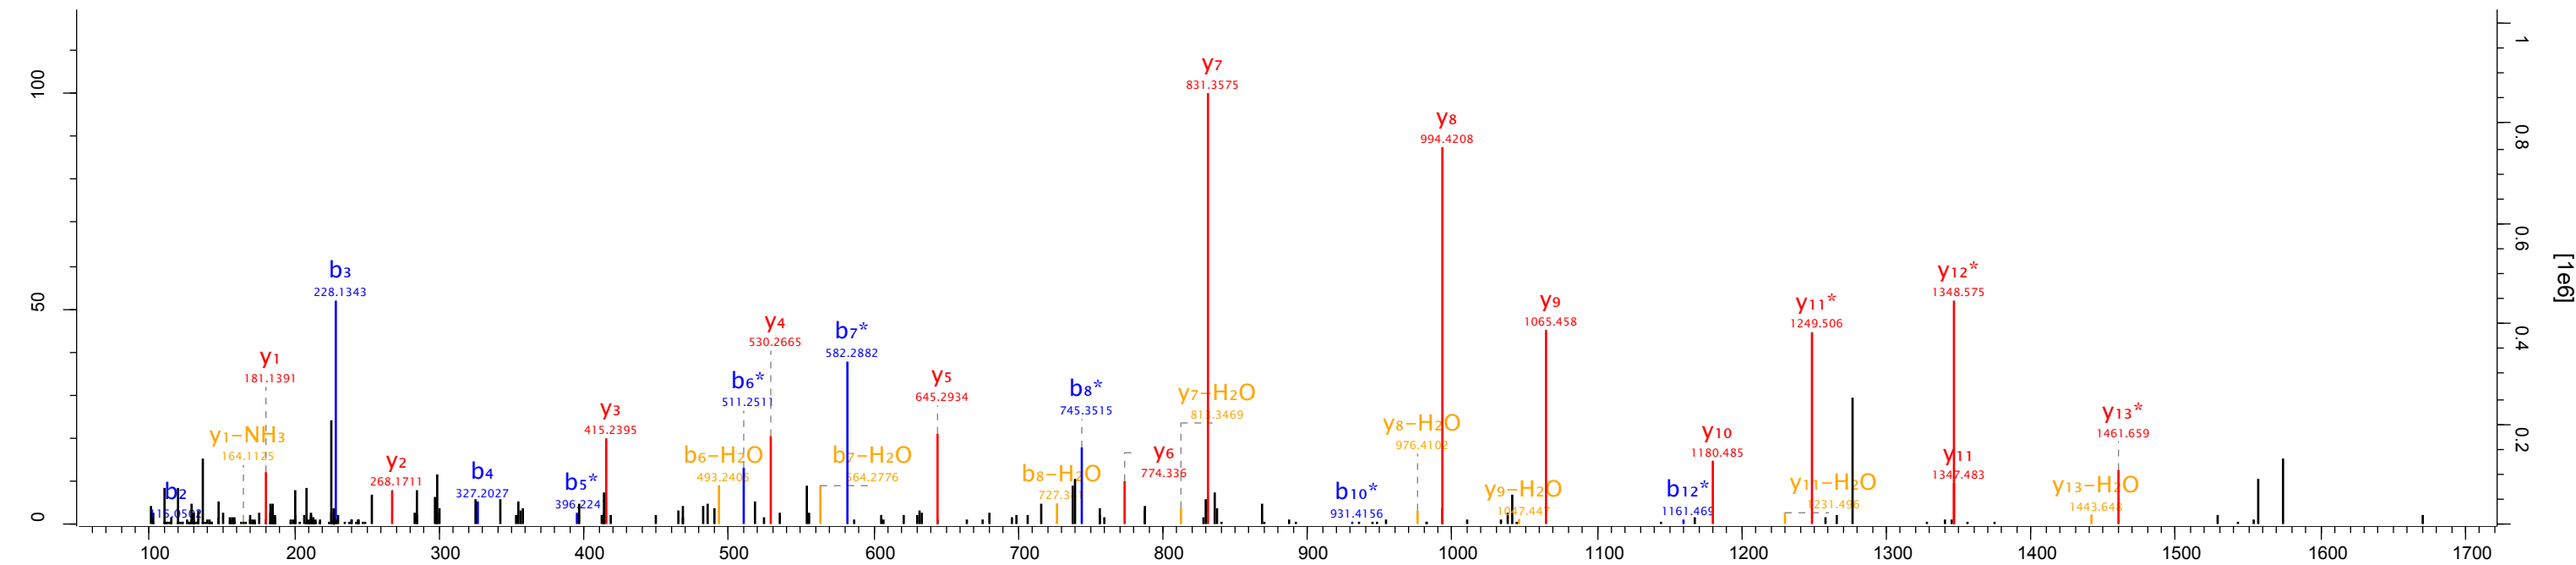

- G G L V ph S D A Y G E D D F S R -

b<sub>2</sub>
b<sub>3</sub>
b<sub>4</sub>
b<sub>5</sub>\*
b<sub>6</sub>\*
b<sub>7</sub>\*
b<sub>8</sub>\*
b<sub>10</sub>\*
b<sub>12</sub>\*
y<sub>13</sub>\*
y<sub>12</sub>\*
y<sub>11</sub>ph
y<sub>10</sub>
y<sub>9</sub>
y<sub>8</sub>
y<sub>7</sub>
y<sub>6</sub>
y<sub>5</sub>
y<sub>4</sub>
y<sub>3</sub>
y<sub>2</sub>
y<sub>1</sub>

Raw file 20150814\_A375SR\_Phospho\_BR2\_05 Scan 19377 Method FTMS; HCD Score 178.03 m/z 857.44 Gene names SIK2

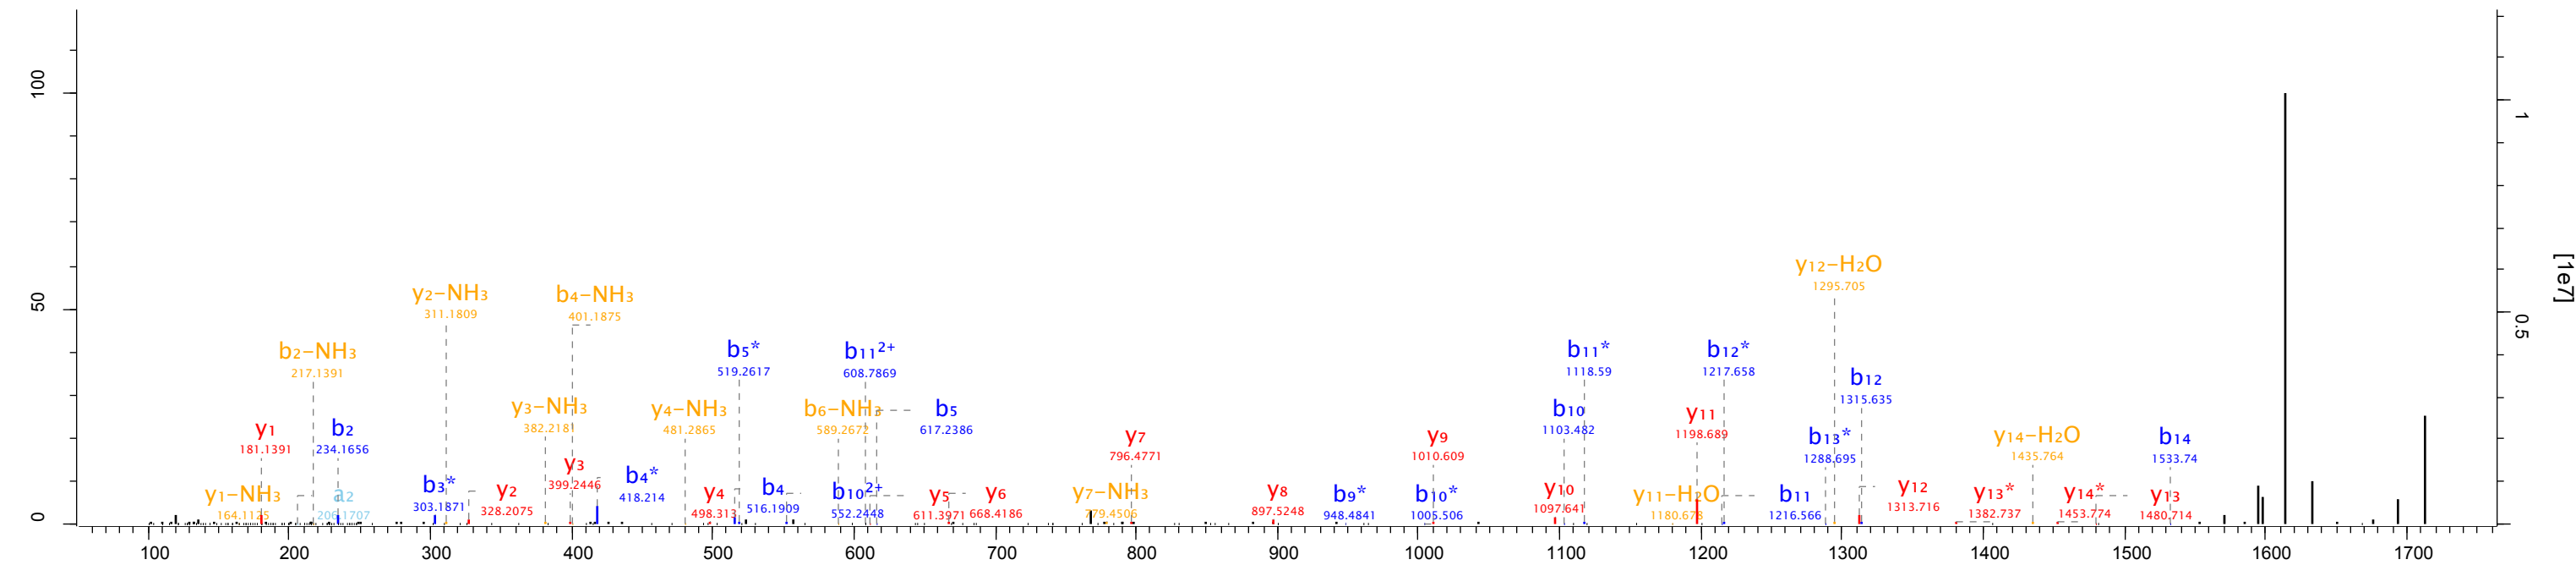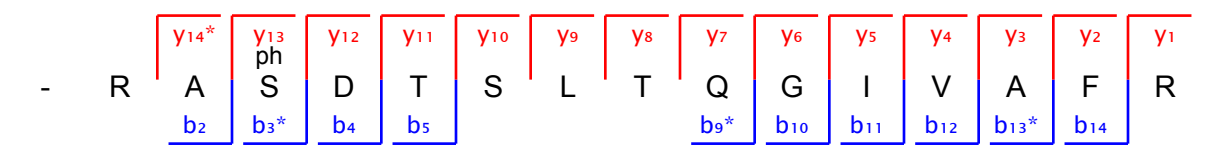

Raw file  
20150814\_A375SR\_Phospho\_BR2\_05

Scan 19857 Method FTMS; HCD Score 285.26 m/z 968.74 Gene names SMEK2

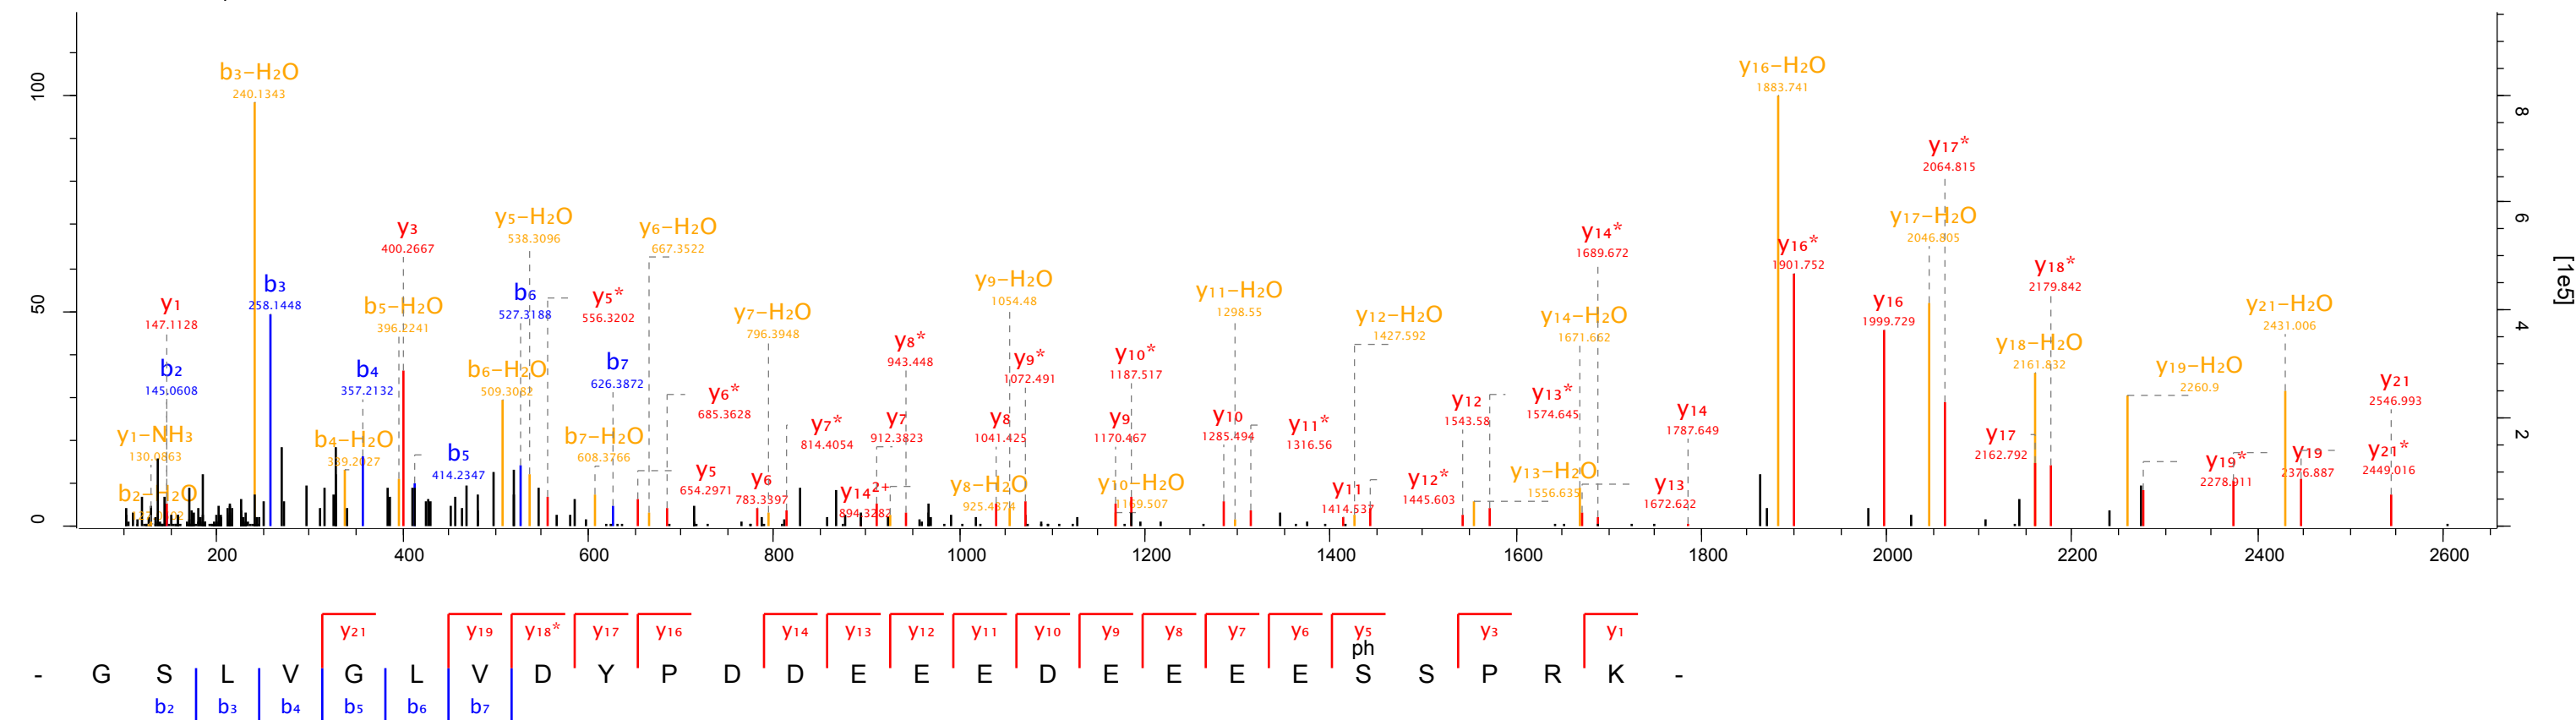

Raw file: 20150814\_A375SR\_Phospho\_BR2\_05  
 Scan: 20157 Method: FTMS; HCD Score: 79.56 m/z: 678.62 Gene names: CDC25B

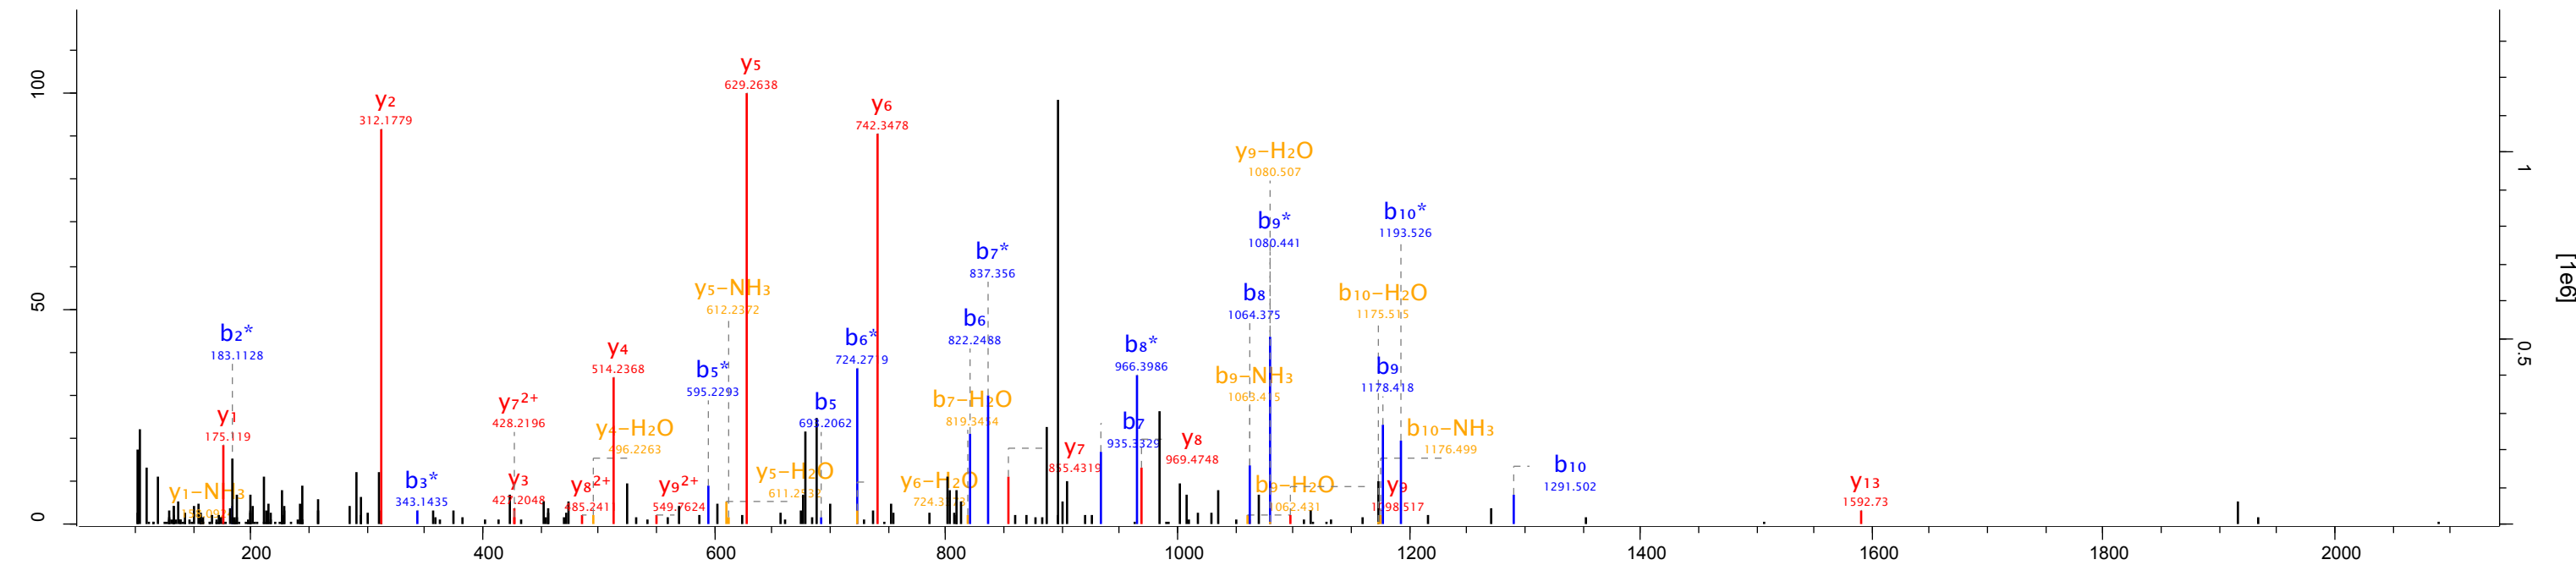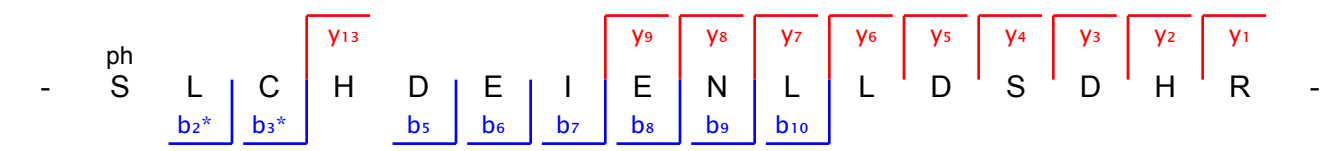

Raw file 20150814\_A375SR\_Phospho\_BR2\_05 Scan 2027 Method FTMS; HCD Score 81.02 m/z 454.26 Gene names TDP1

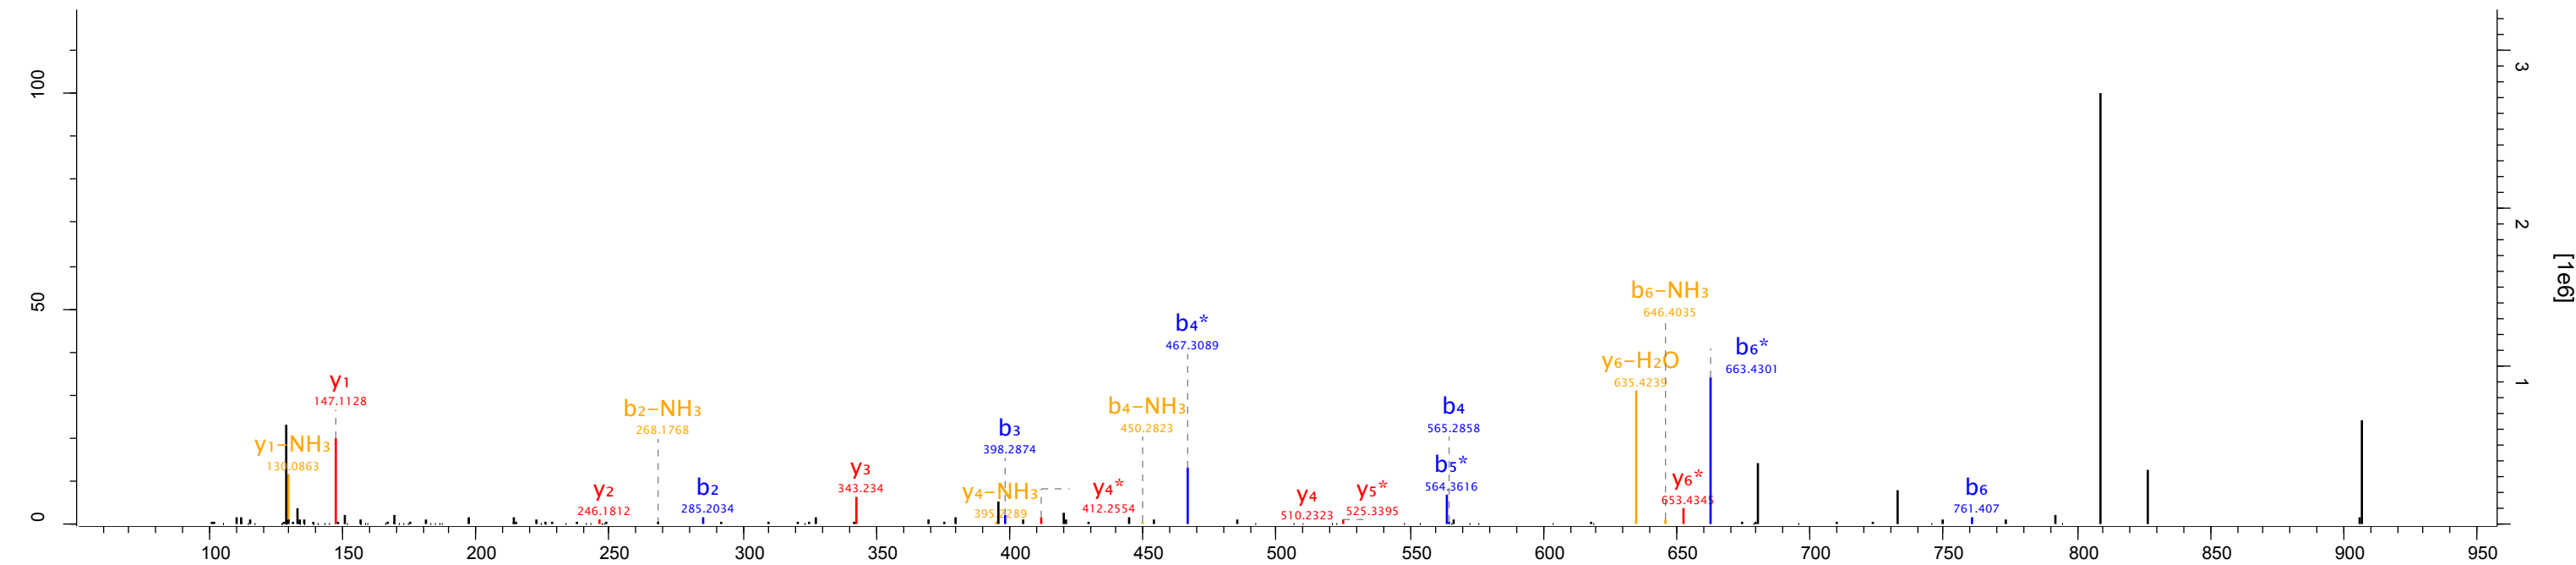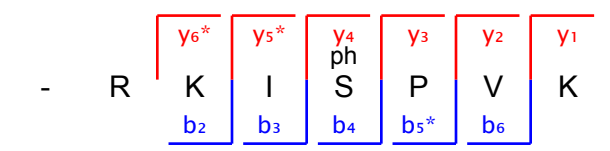

Raw file  
20150814\_A375SR\_Phospho\_BR2\_05

Scan 20957 Method FTMS; HCD Score 169.84 m/z 934.45 Gene names APC

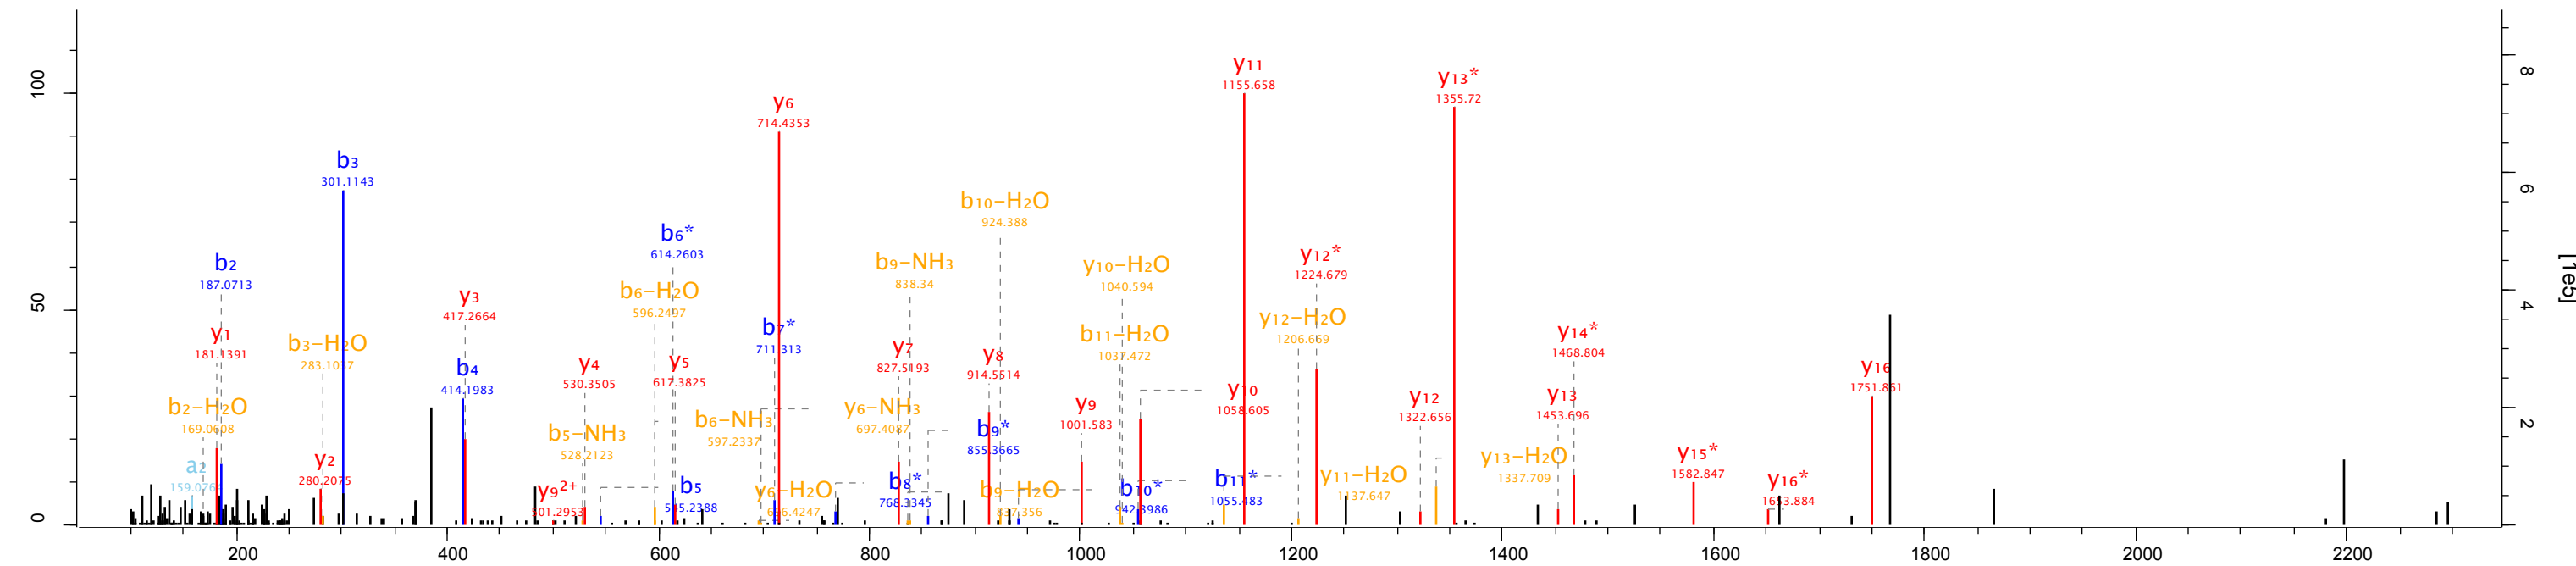

- D A N I M S P G S S L P S L H V R -

b2 b3 b4 b5 b6\* b7\* b8\* b9\* b10\* b11\*

y16 y15\* y14\* y13 y12 ph y11 y10 y9 y8 y7 y6 y5 y4 y3 y2 y1

Raw file: 20150814\_A375SR\_Phospho\_BR2\_05  
 Scan: 22277 Method: FTMS; HCD Score: 140.59 m/z: 1120.98 Gene names: PHF8

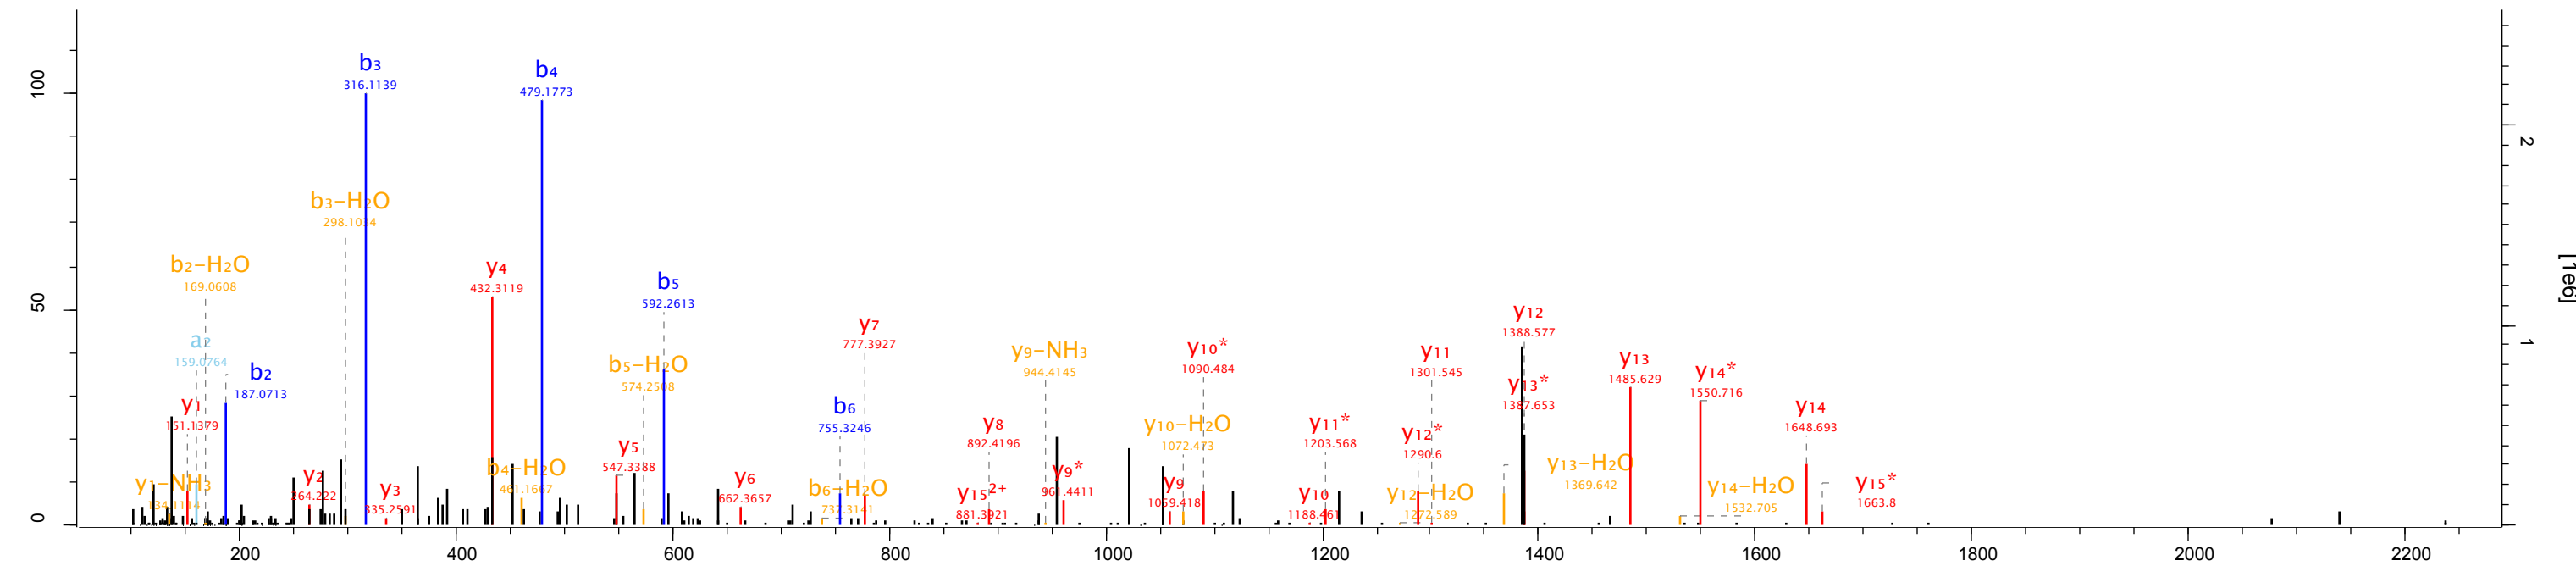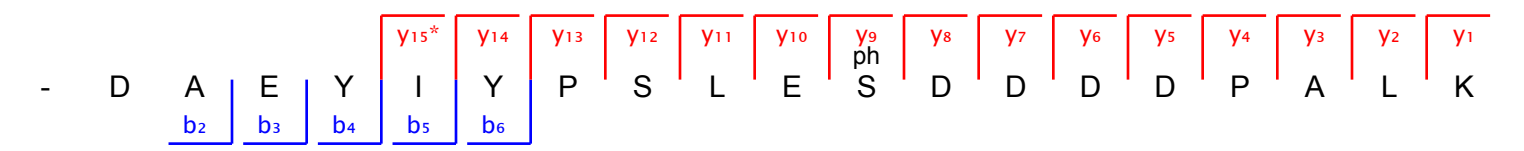

Raw file  
20150814\_A375SR\_Phospho\_BR2\_05

Scan 23067 Method FTMS; HCD Score 484.59 m/z 1067.52 Gene names MAP1B

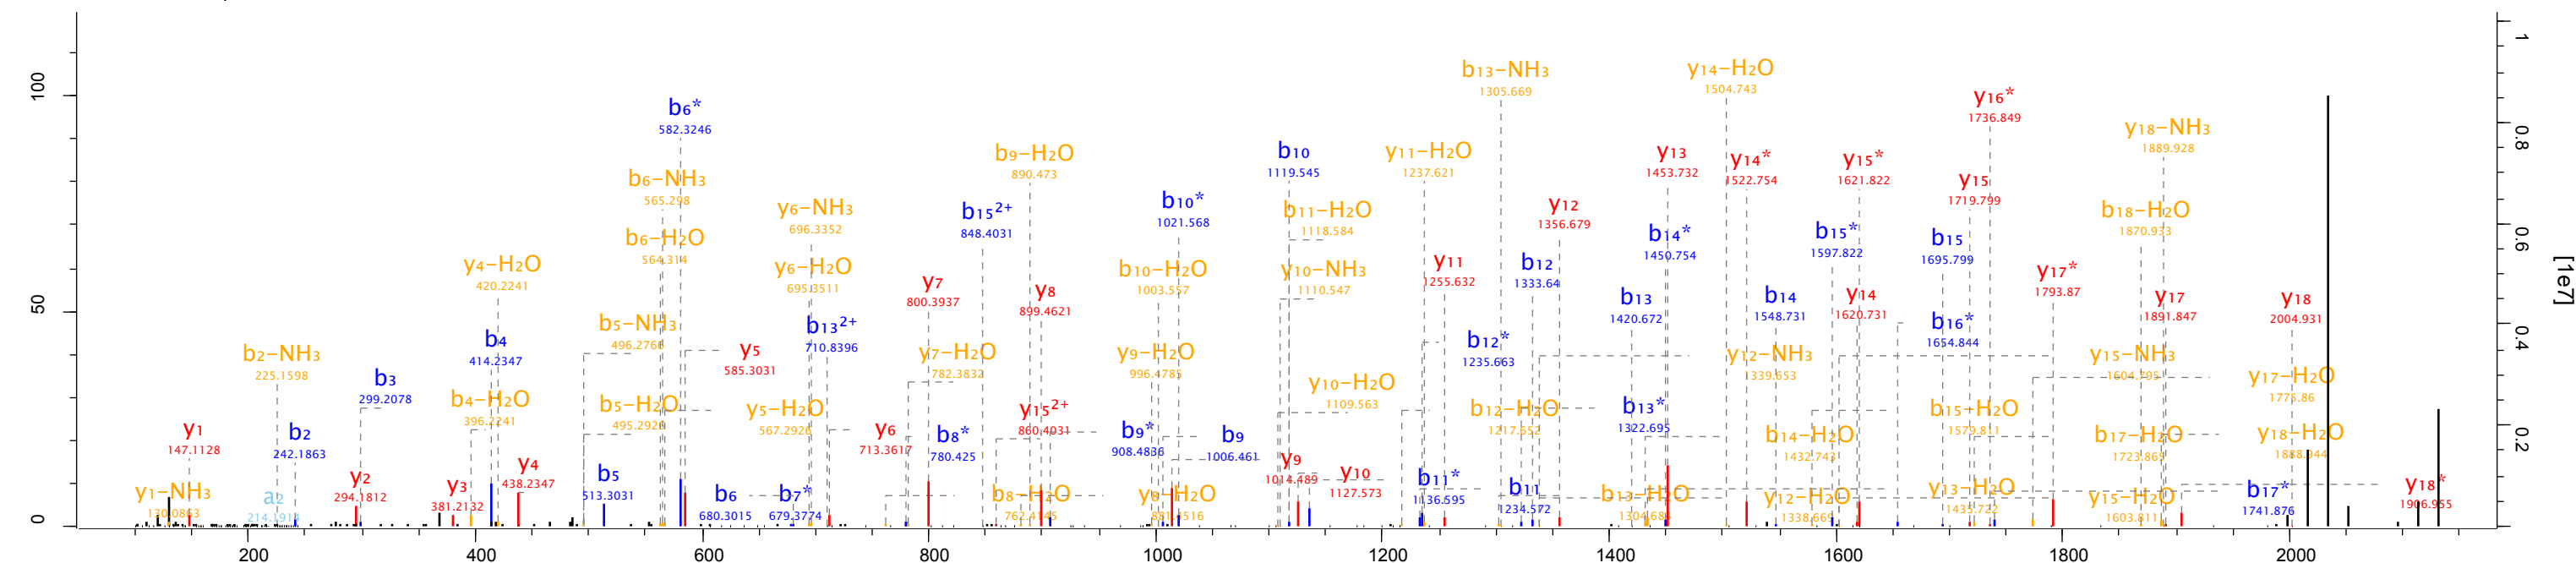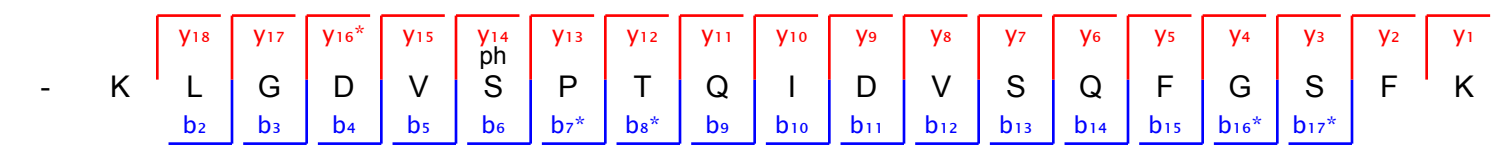



Raw file: 20150814\_A375SR\_Phospho\_BR2\_05  
 Scan: 23357 Method: FTMS; HCD Score: 112.85 m/z: 731.66 Gene names: TANC2

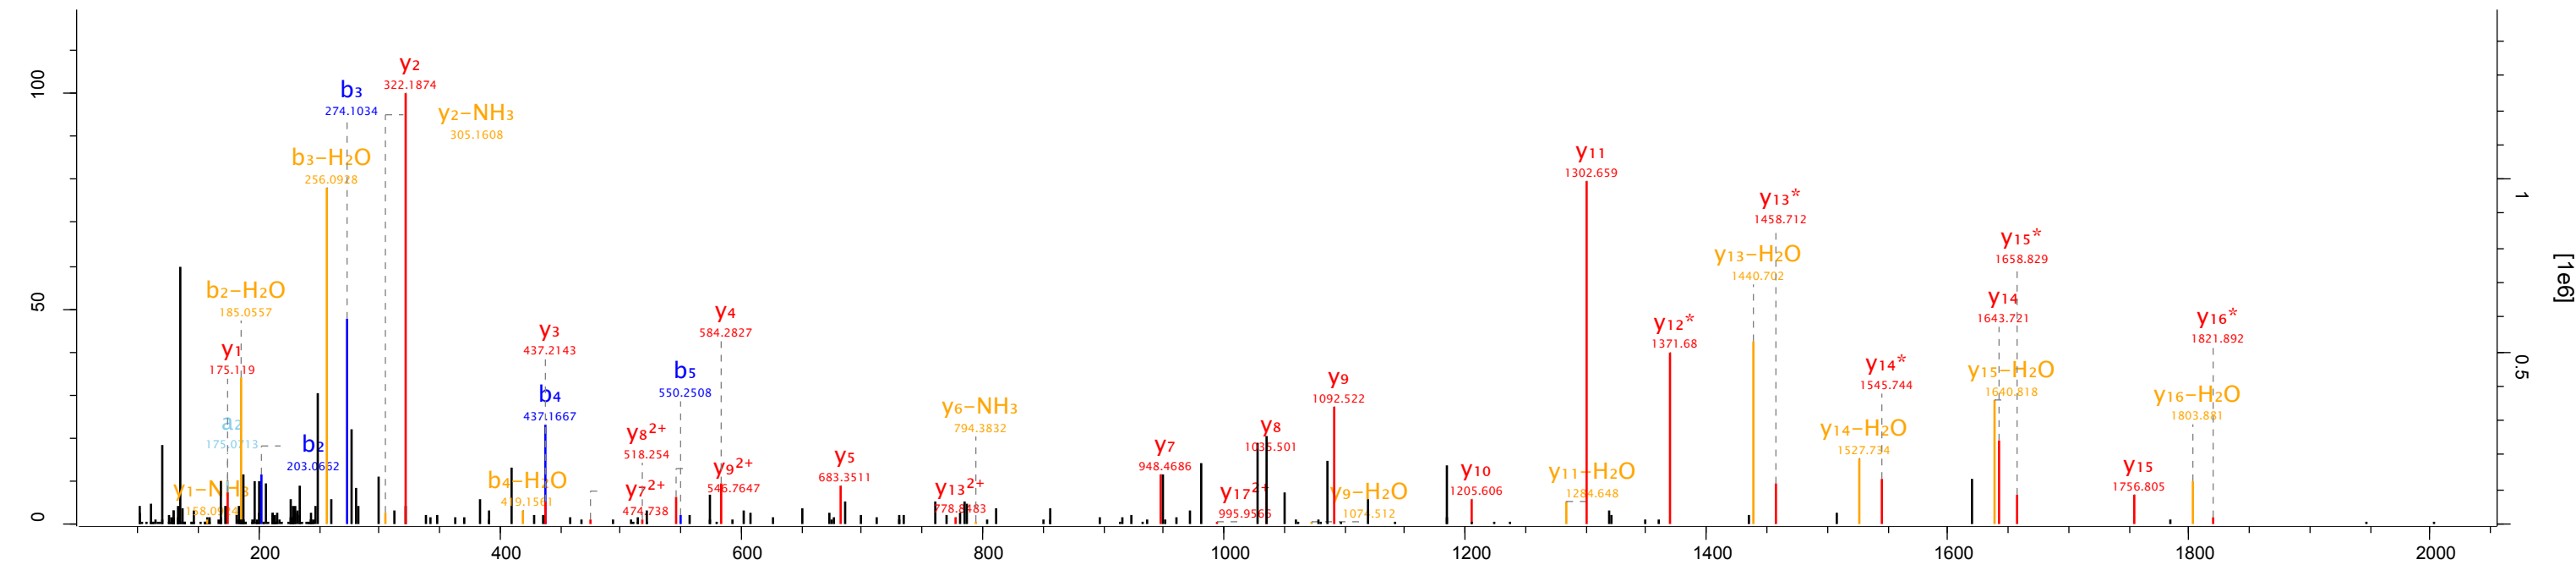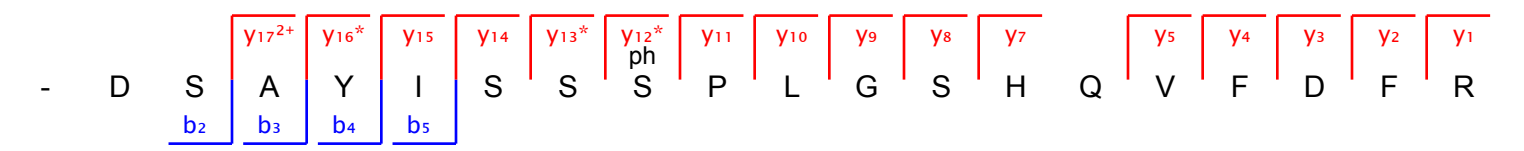

Raw file 20150814\_A375SR\_Phospho\_BR2\_05 Scan 23417 Method FTMS; HCD Score 151.41 m/z 781.86 Gene names PSMA2

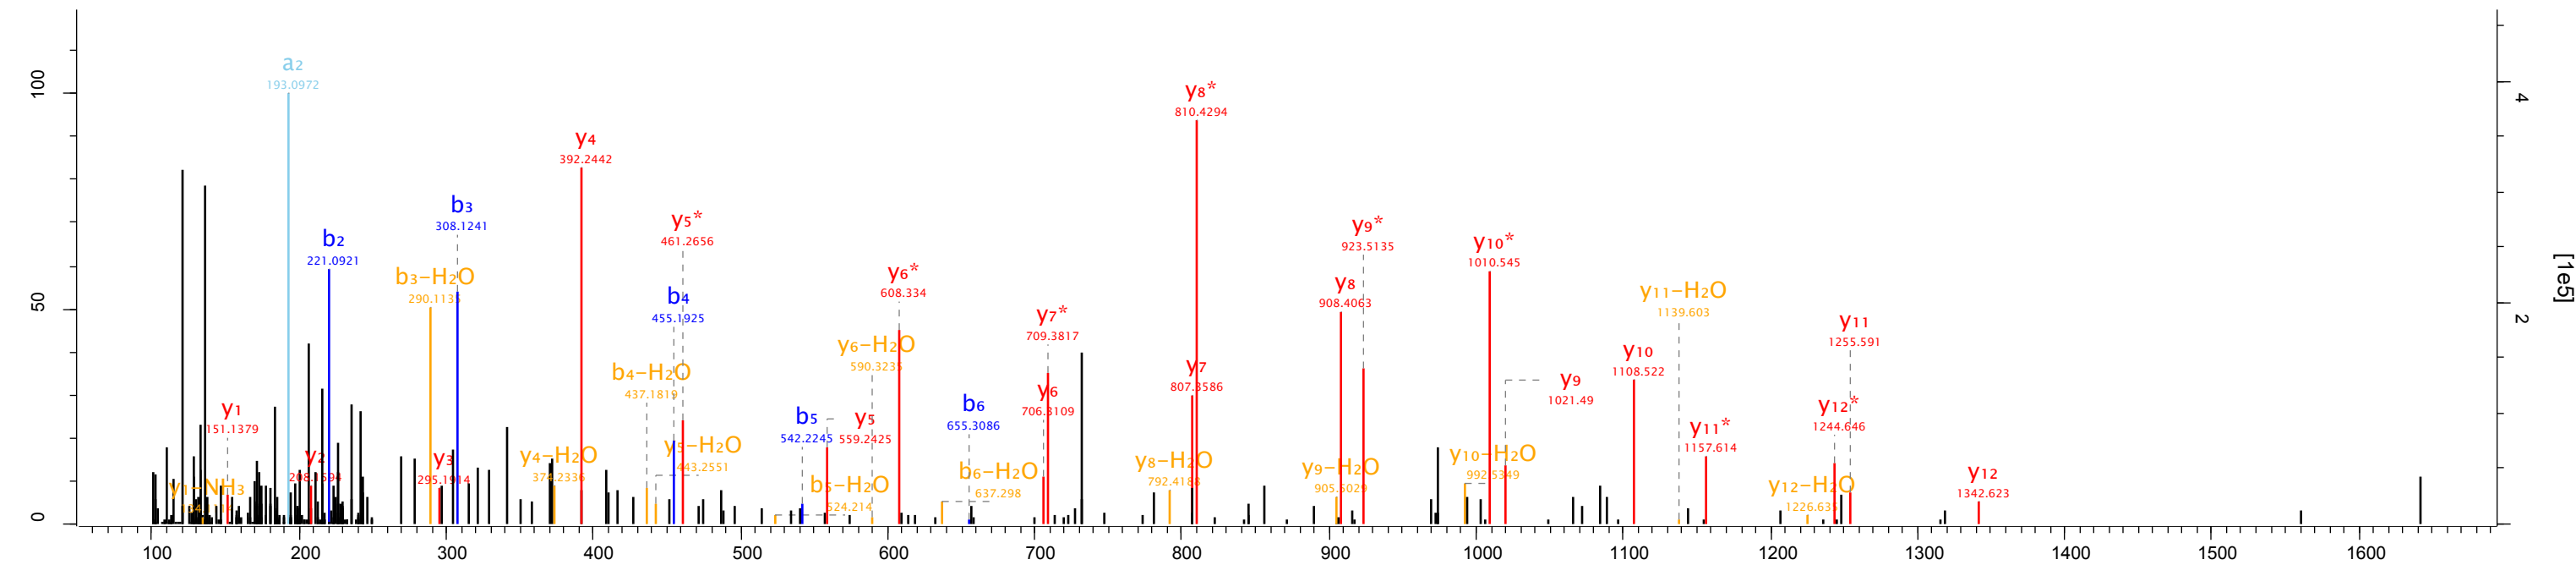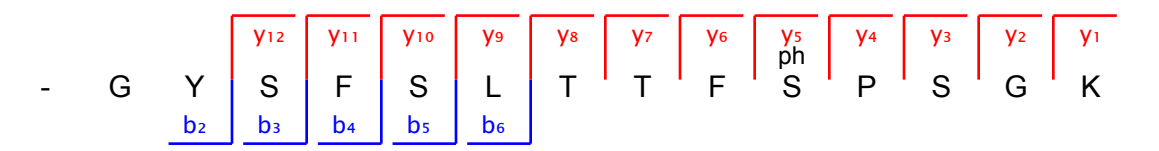

Raw file 20150814\_A375SR\_Phospho\_BR2\_05 Scan 24217 Method FTMS; HCD Score 126.52 m/z 940.42 Gene names SMG6

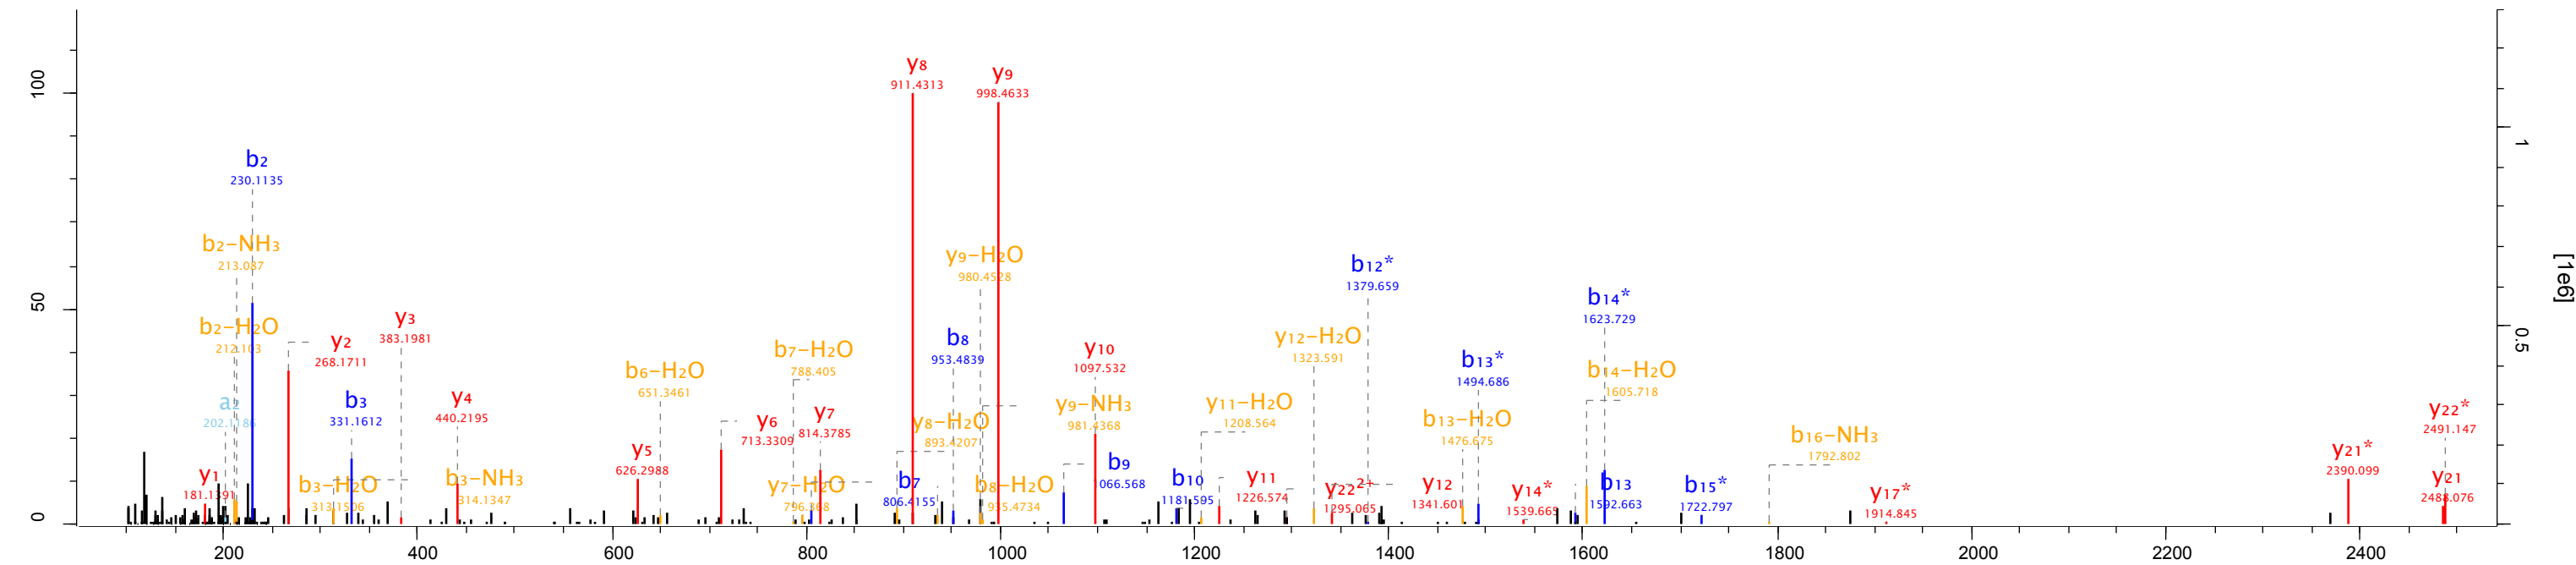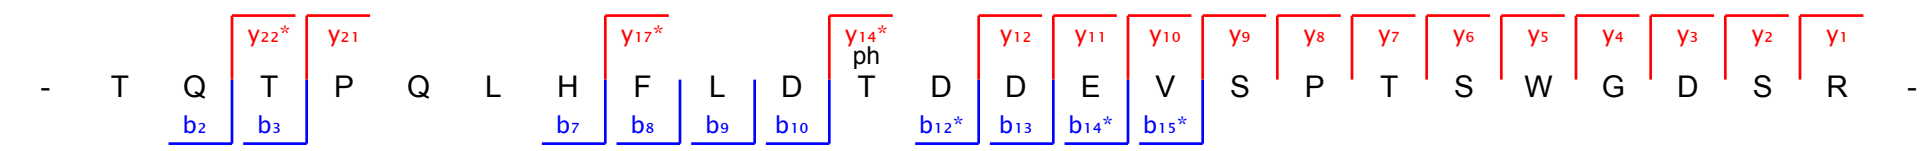

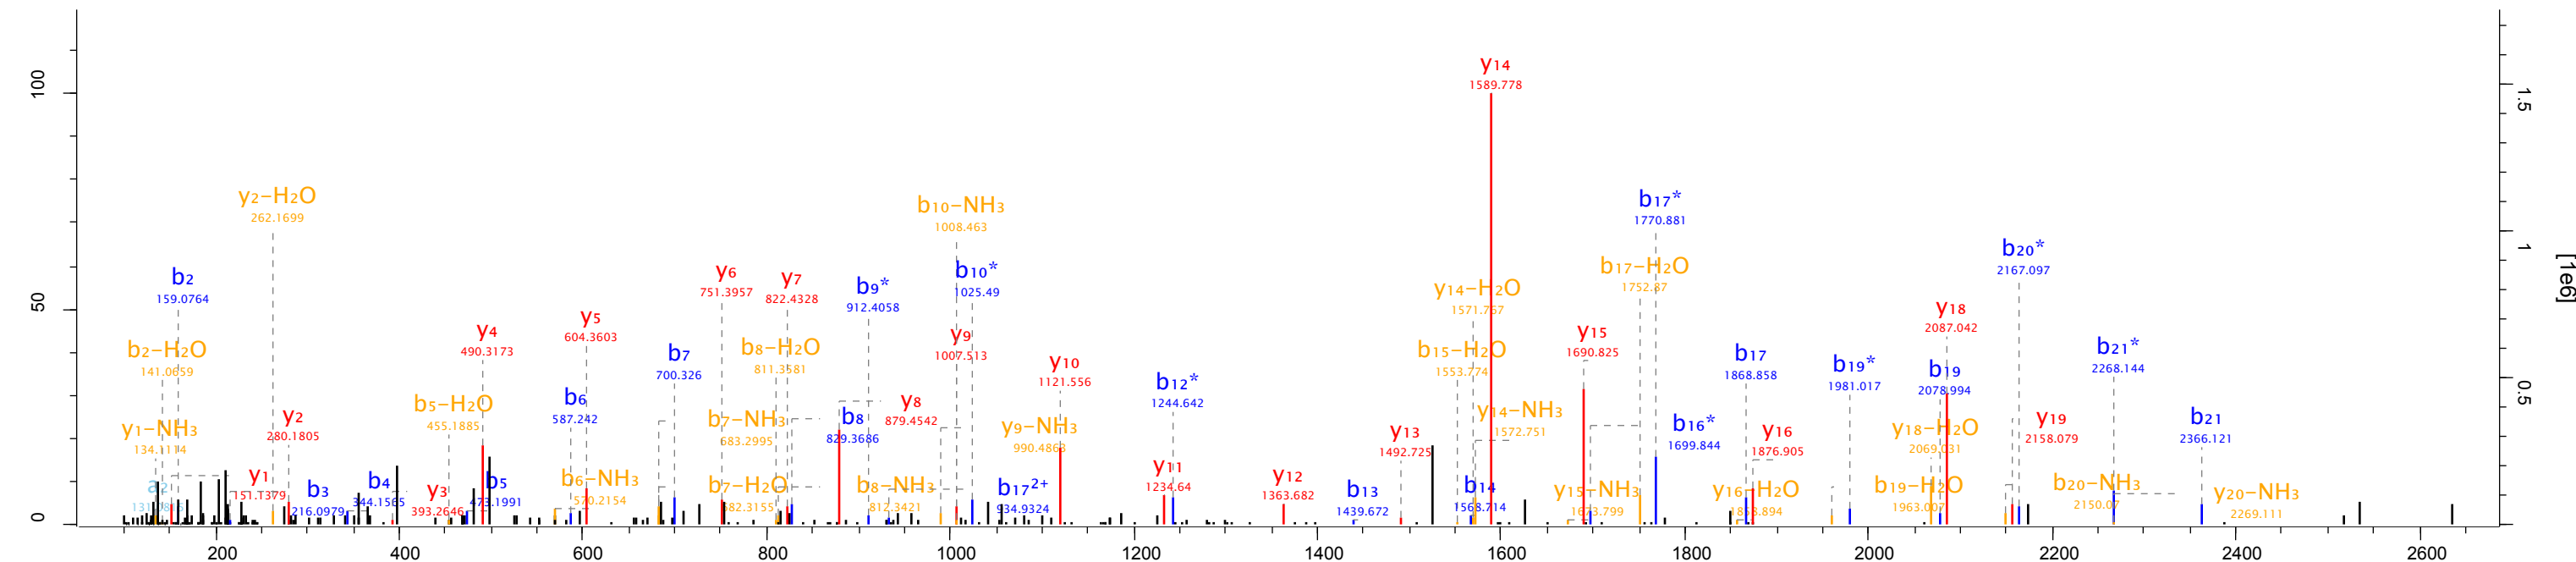

- S A G Q E N L E T L K S P E T Q A P L W T P E E I N Q G A M N P L E K -

ph

b<sub>2</sub> b<sub>3</sub> b<sub>4</sub> b<sub>5</sub> b<sub>6</sub> b<sub>7</sub> b<sub>8</sub> b<sub>9</sub>\* b<sub>10</sub>\* b<sub>12</sub>\* b<sub>13</sub> b<sub>14</sub> b<sub>16</sub>\* b<sub>17</sub> b<sub>19</sub> b<sub>20</sub>\* b<sub>21</sub>

y<sub>19</sub> y<sub>18</sub> y<sub>16</sub> y<sub>15</sub> y<sub>14</sub> y<sub>13</sub> y<sub>12</sub> y<sub>11</sub> y<sub>10</sub> y<sub>9</sub> y<sub>8</sub> y<sub>7</sub> y<sub>6</sub> OX y<sub>5</sub> y<sub>4</sub> y<sub>3</sub> y<sub>2</sub> y<sub>1</sub>

Raw file: 20150814\_A375SR\_Phospho\_BR2\_05  
 Scan: 25087 Method: FTMS; HCD Score: 107.82 m/z: 749.88 Gene names: THOC1

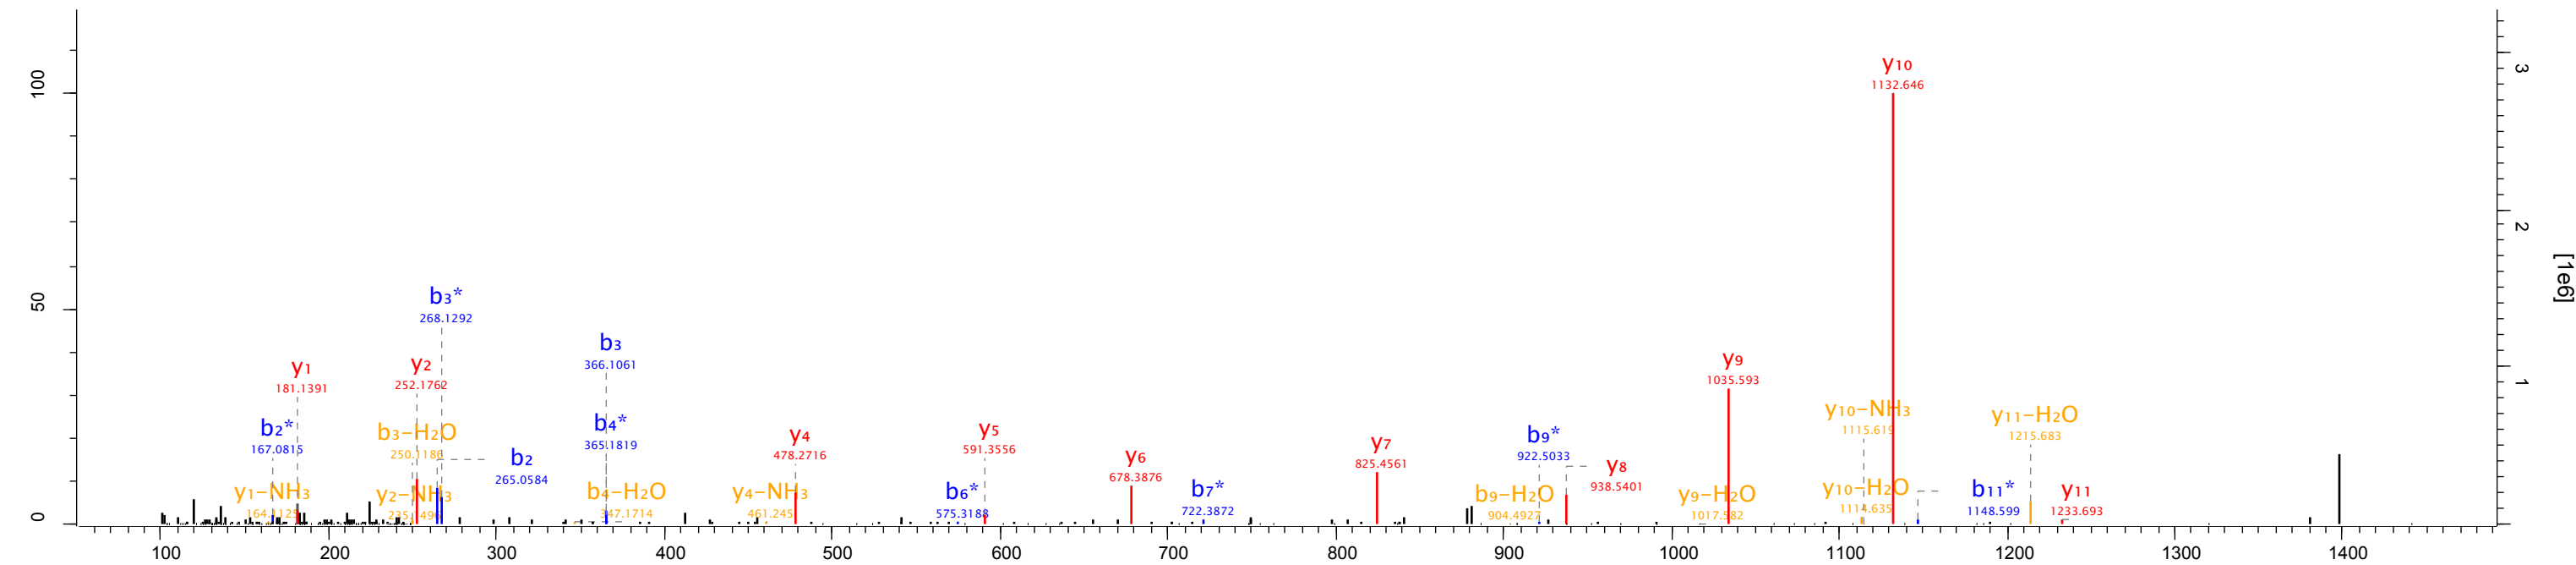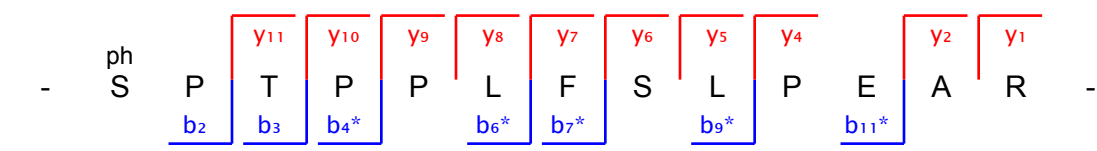

Raw file: 20150814\_A375SR\_Phospho\_BR2\_05  
 Scan: 25367 Method: FTMS; HCD Score: 265.65 m/z: 893.1 Gene names: MEPCE

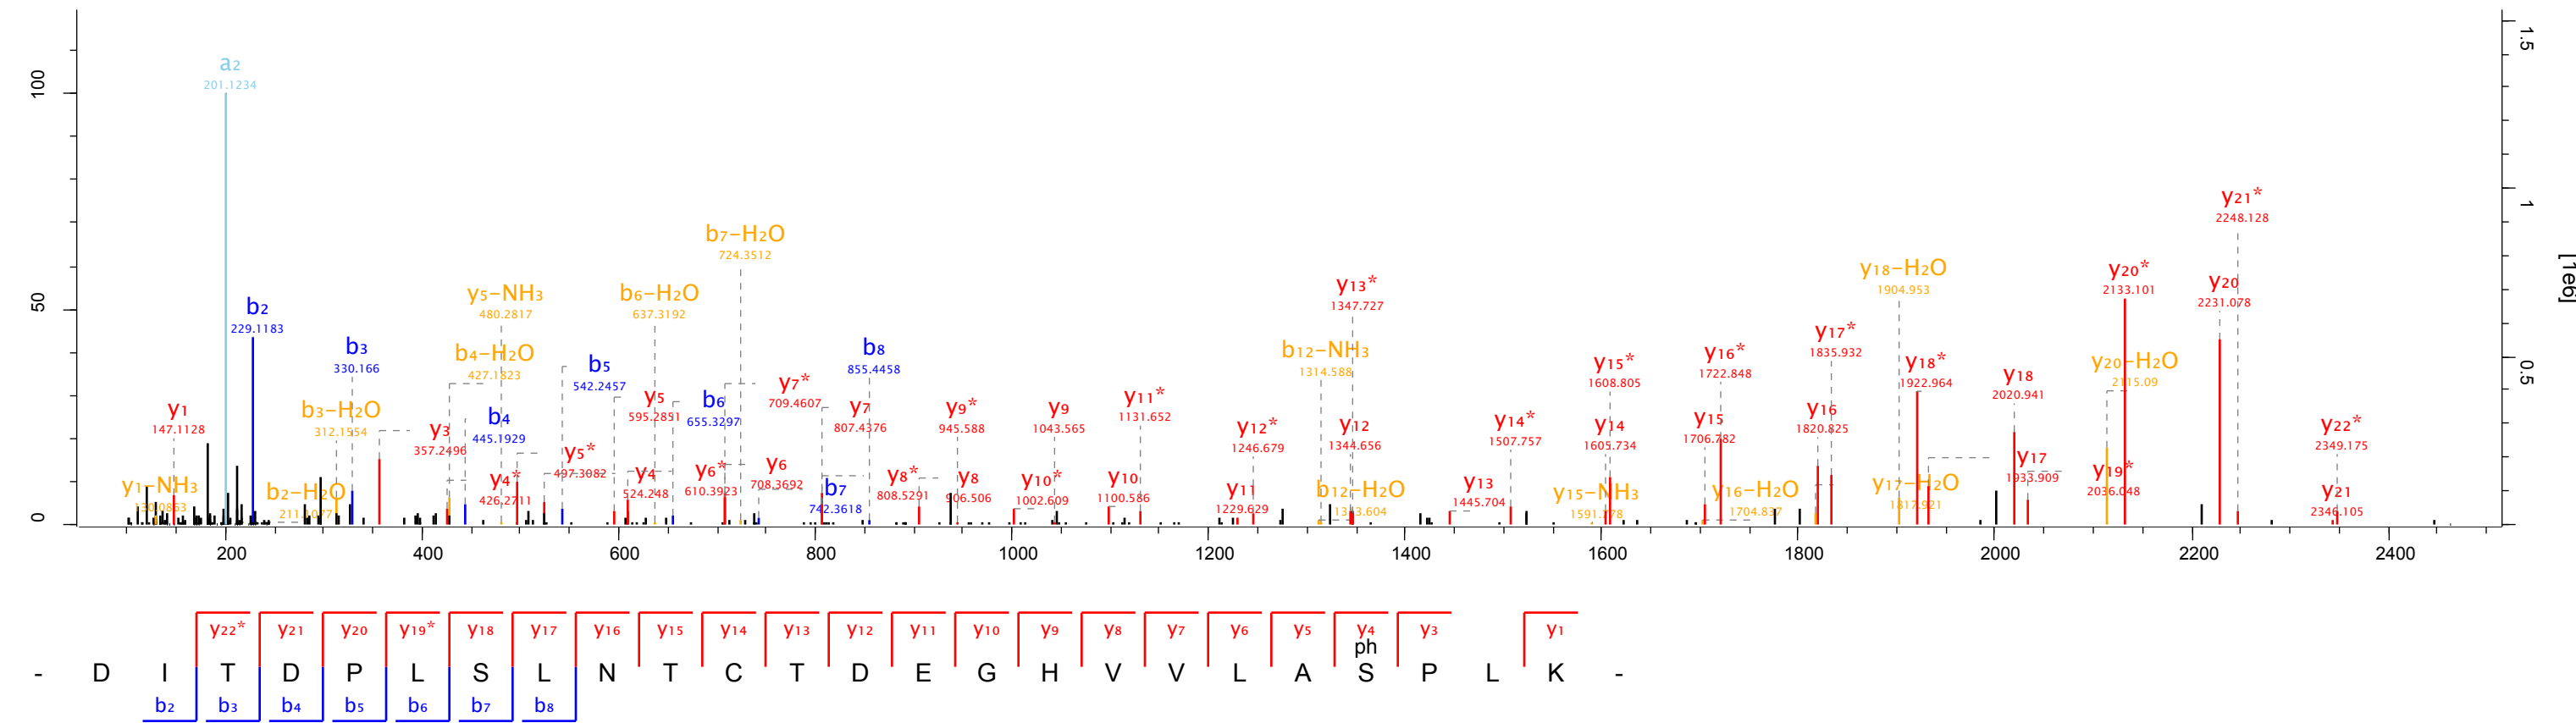

Raw file: 20150814\_A375SR\_Phospho\_BR2\_05  
 Scan: 25597 Method: FTMS; HCD Score: 179.2 m/z: 1189.99 Gene names: EXOC1

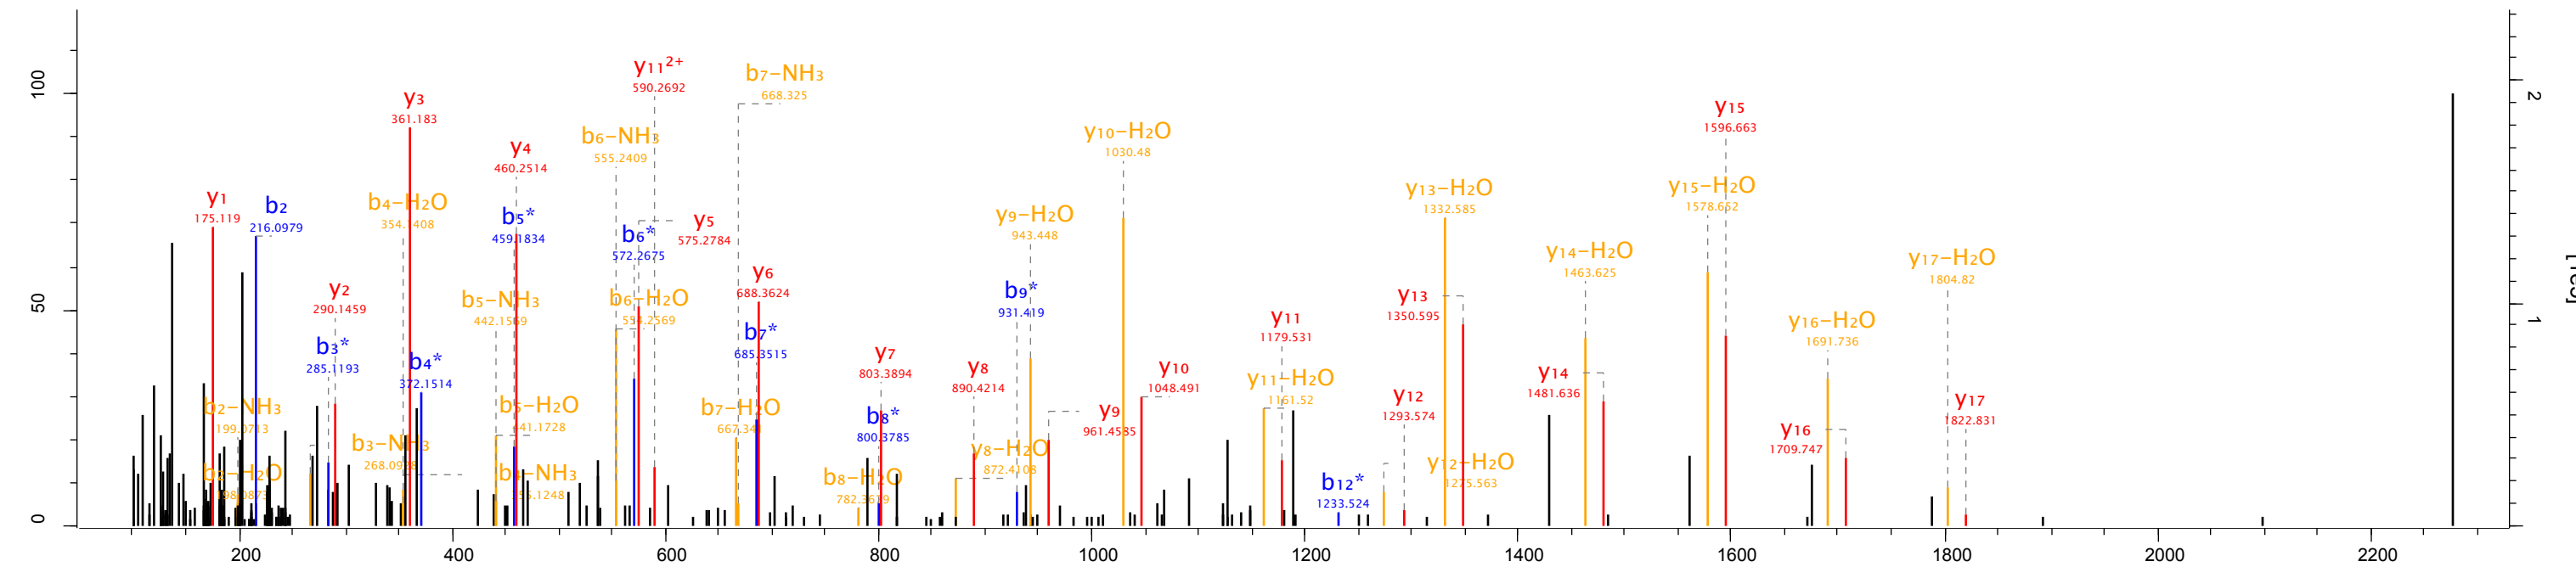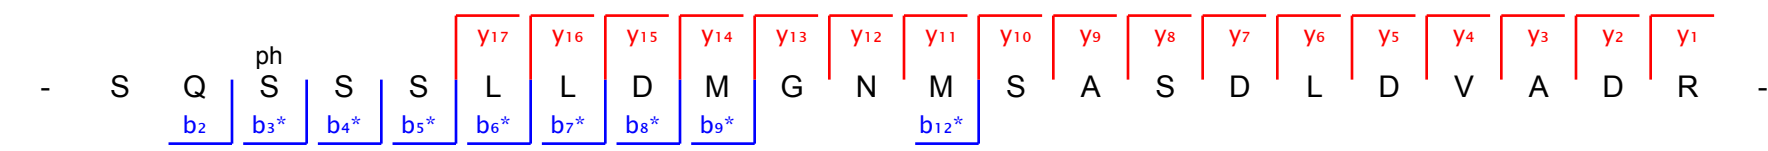

Raw file: 20150814\_A375SR\_Phospho\_BR2\_05  
 Scan: 2587 Method: FTMS; HCD Score: 137.6 m/z: 529.74 Gene names: FOXK2

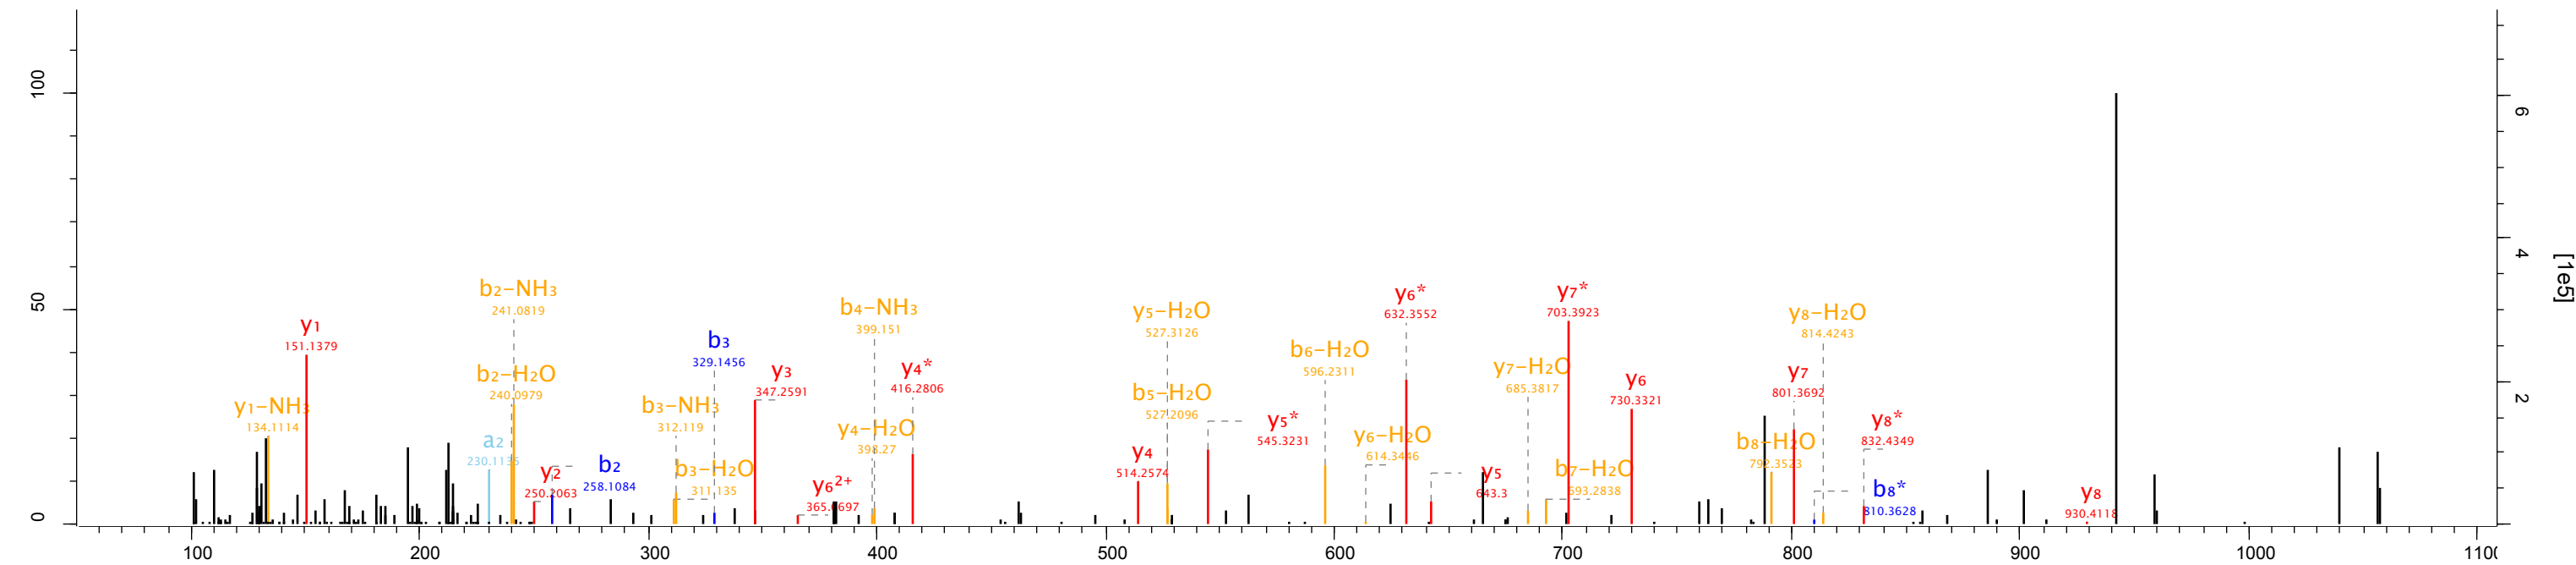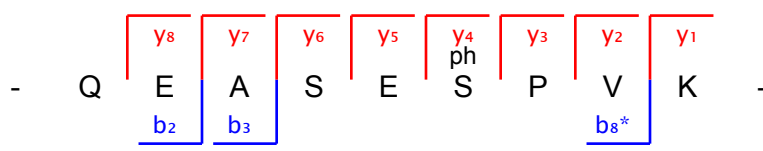



Raw file 20150814\_A375SR\_Phospho\_BR2\_05 Scan 26287 Method FTMS; HCD Score 264.63 m/z 914.78 Gene names ZCCHC24

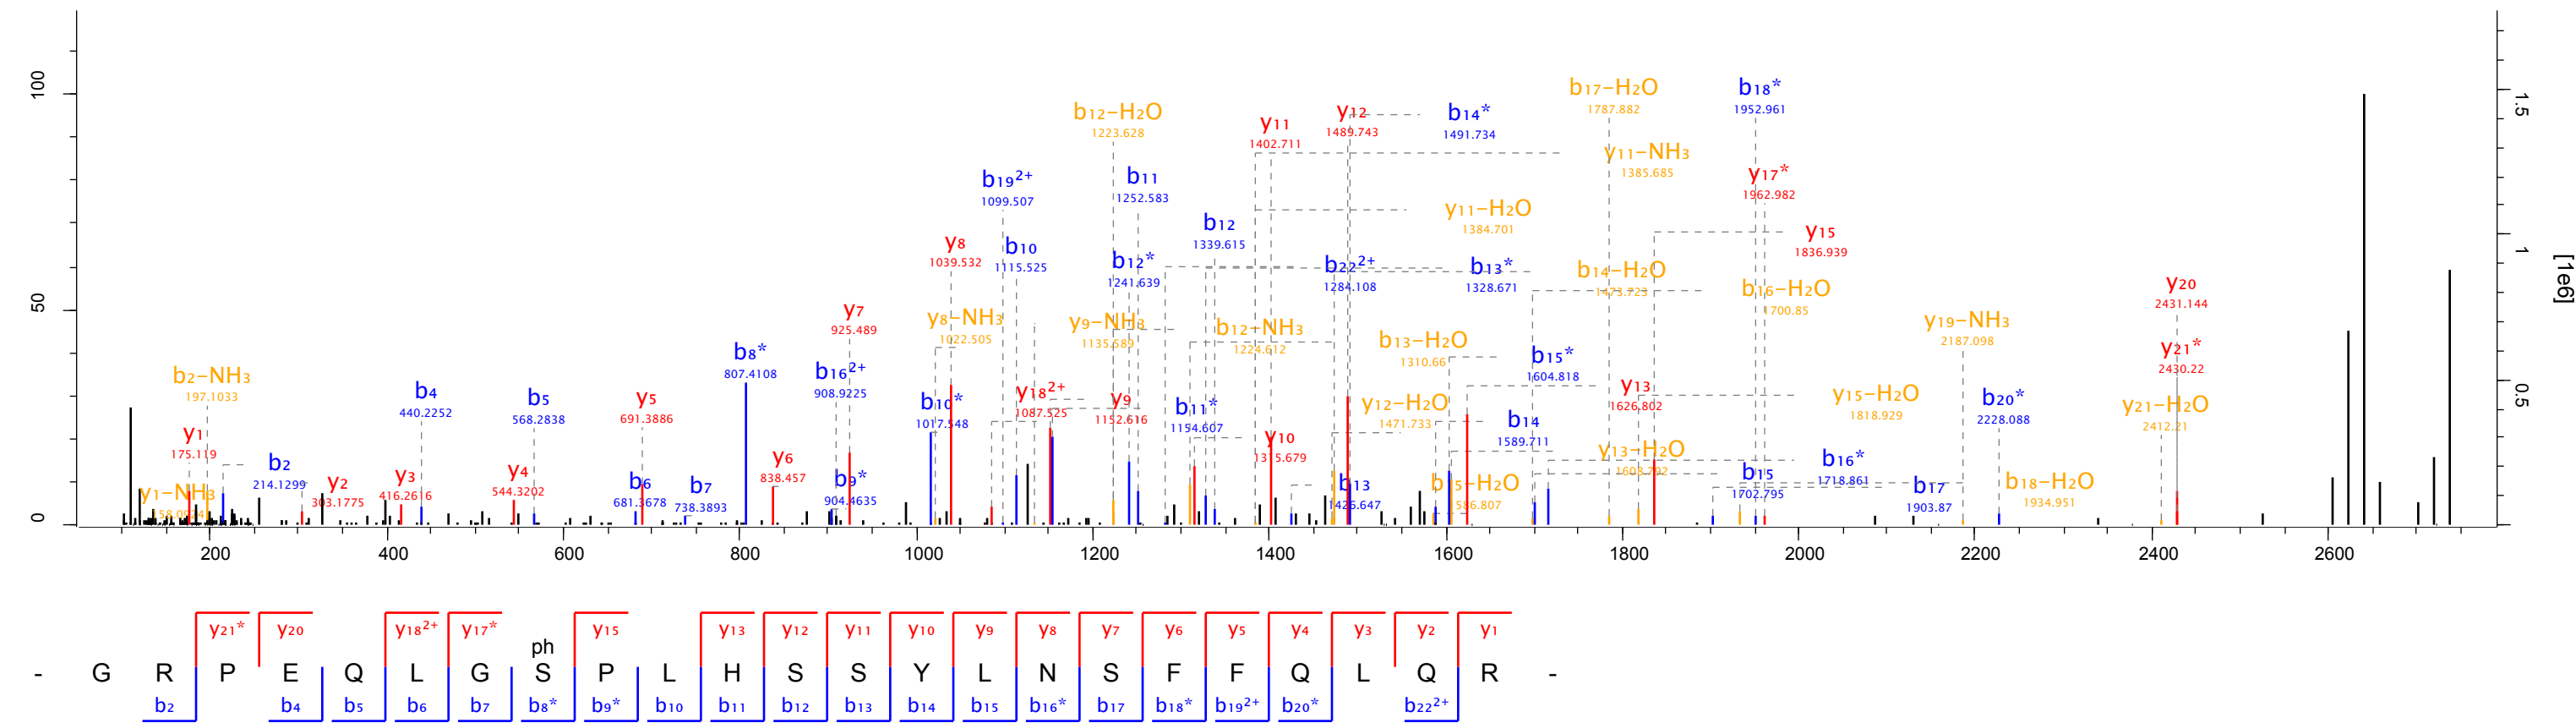

Raw file 20150814\_A375SR\_Phospho\_BR2\_05 Scan 26347 Method FTMS; HCD Score 156.28 m/z 977.71 Gene names TPR

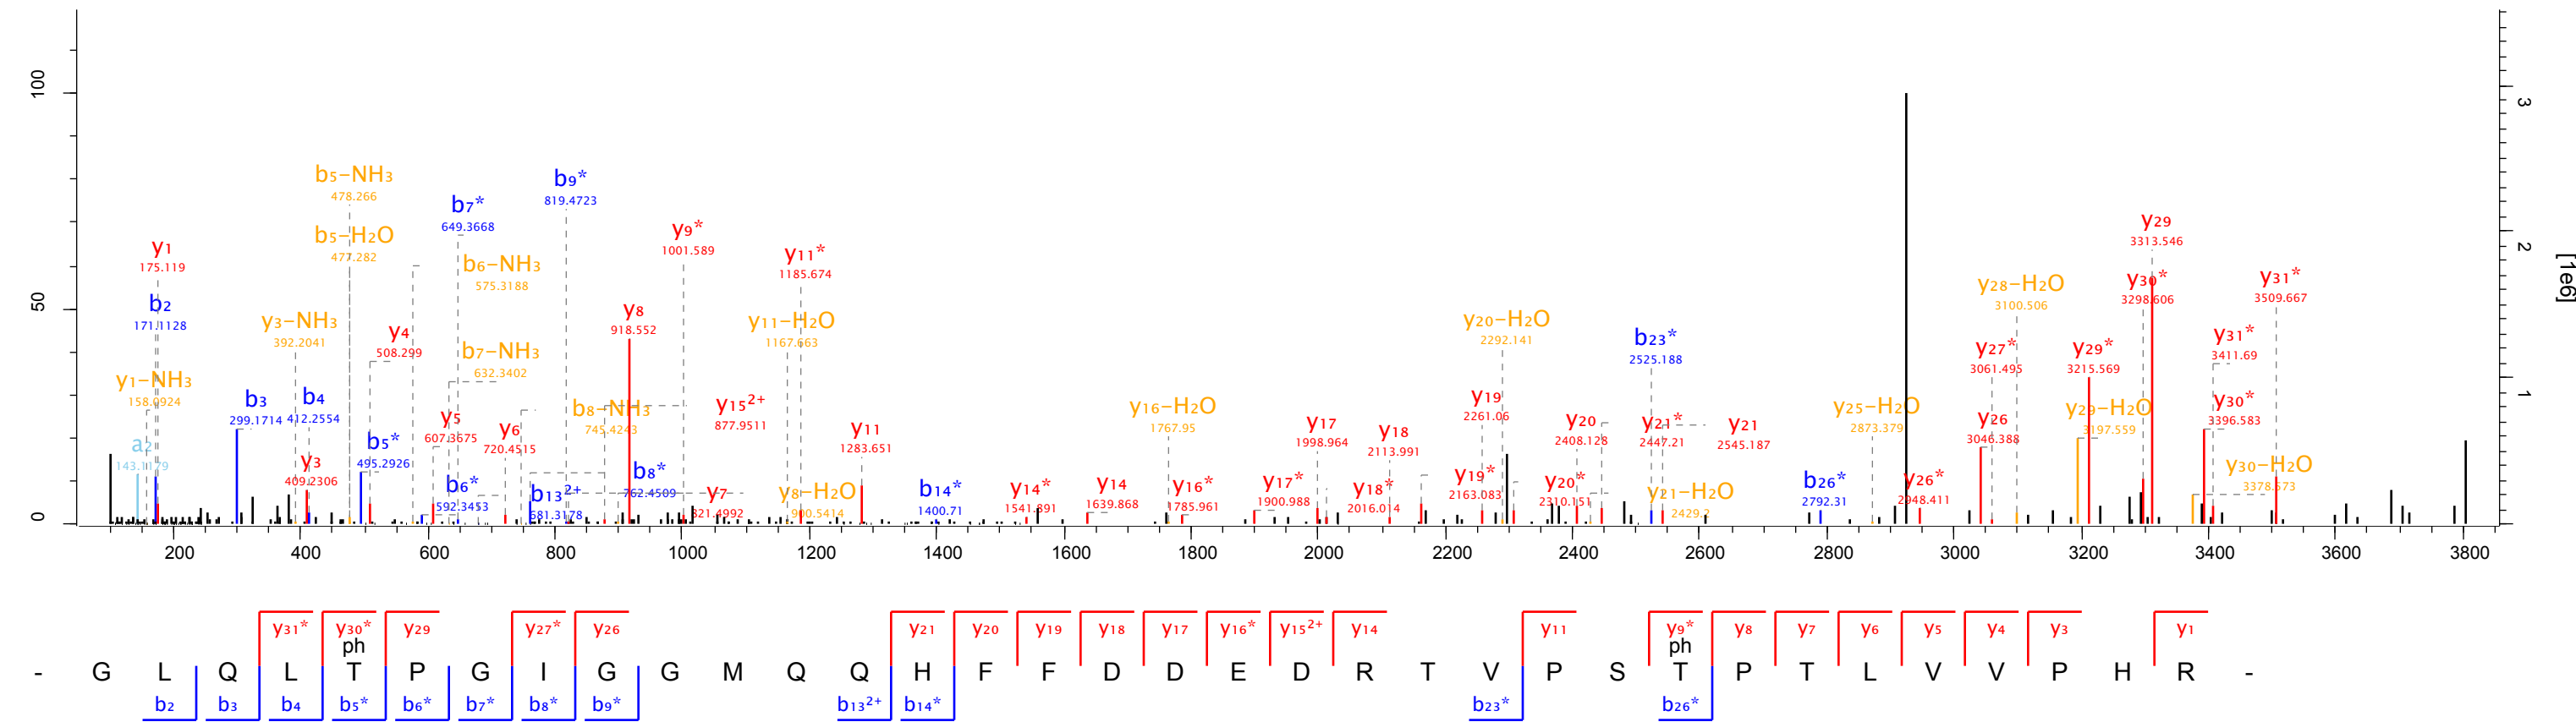

Raw file: 20150814\_A375SR\_Phospho\_BR2\_05  
 Scan: 26627 Method: FTMS; HCD Score: 173.23 m/z: 1149.23 Gene names: KIF23

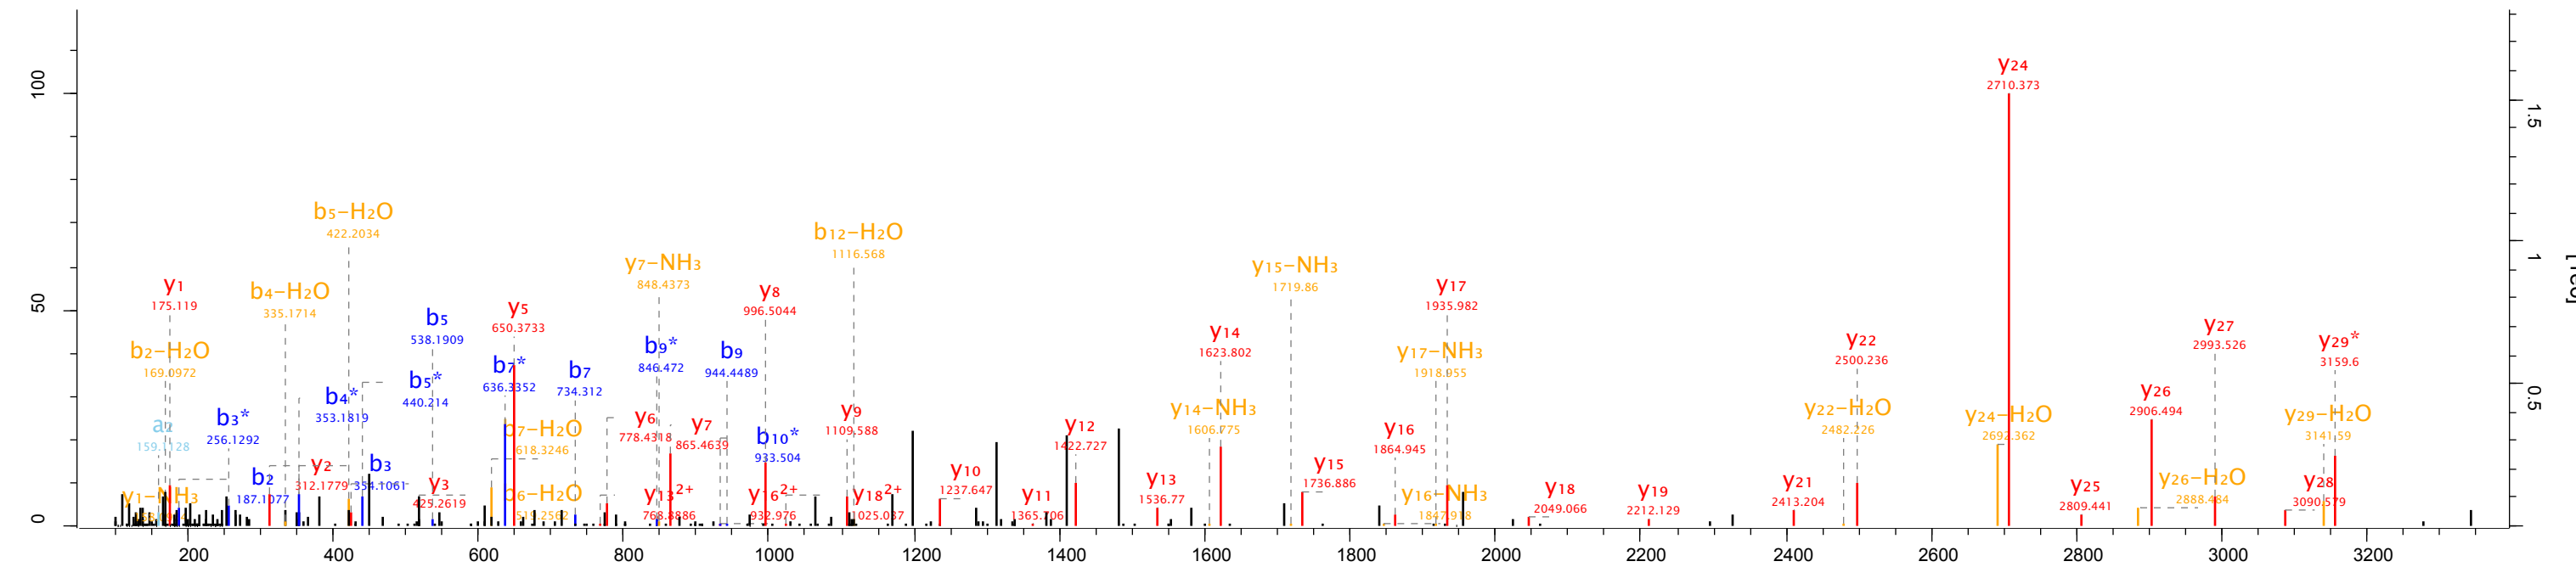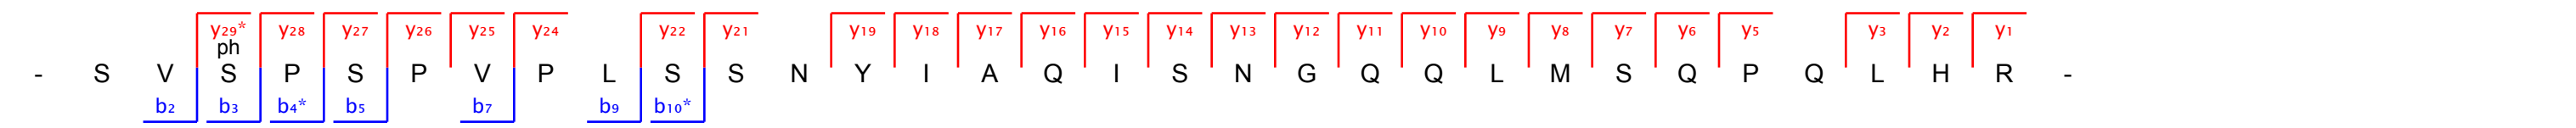

Raw file: 20150814\_A375SR\_Phospho\_BR2\_05  
 Scan: 2707 Method: FTMS; HCD Score: 99.8 m/z: 601.78 Gene names: BCAR1

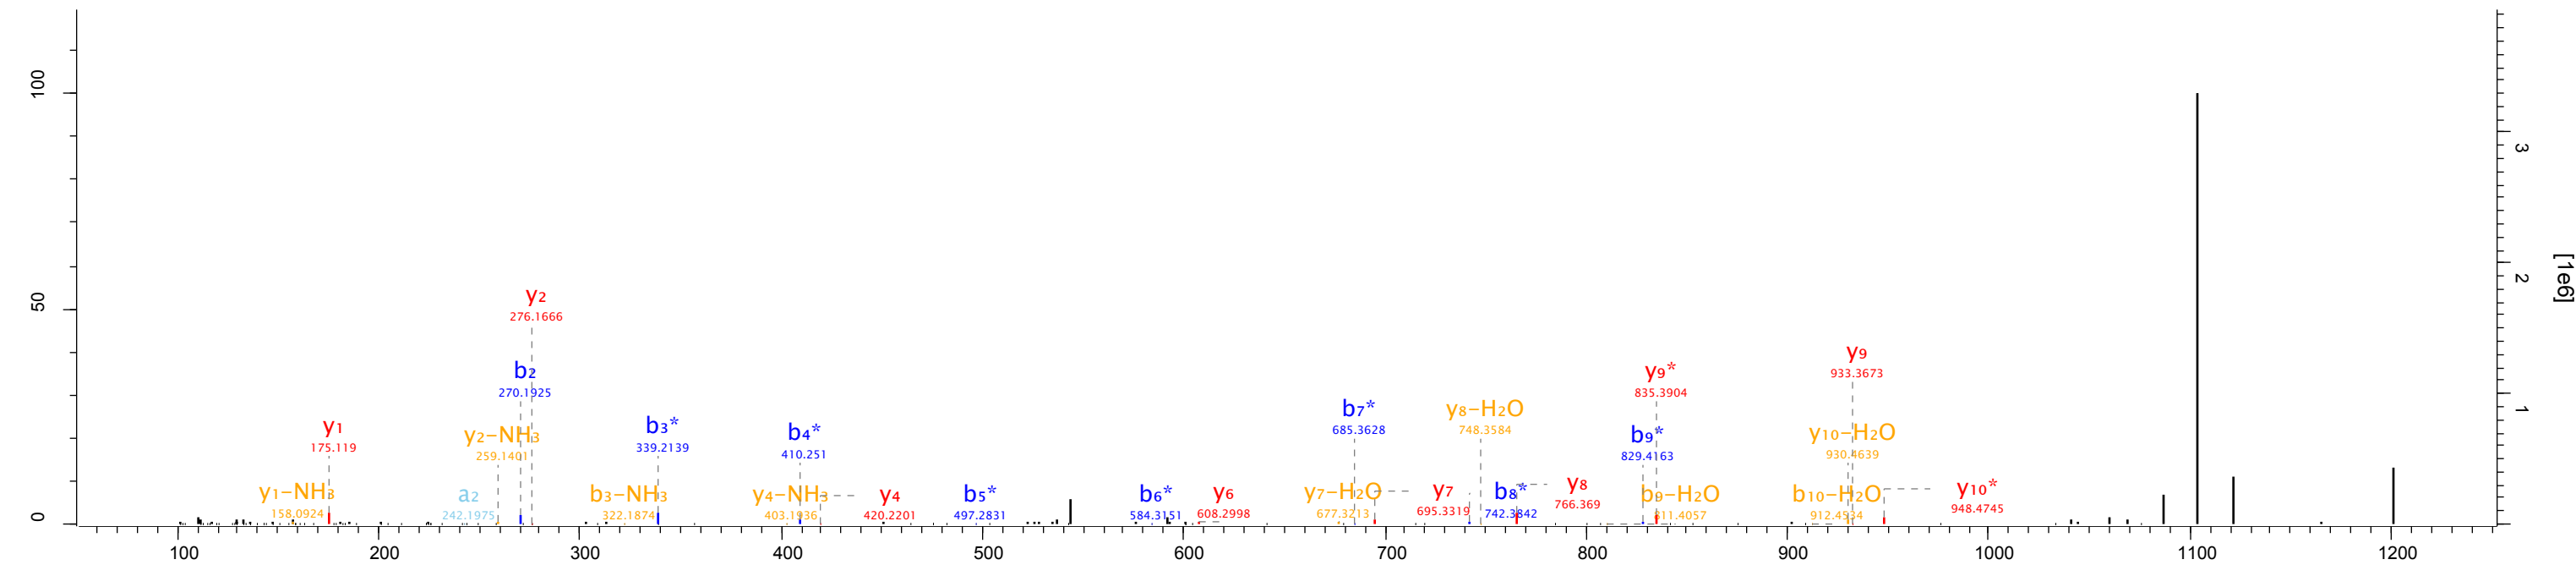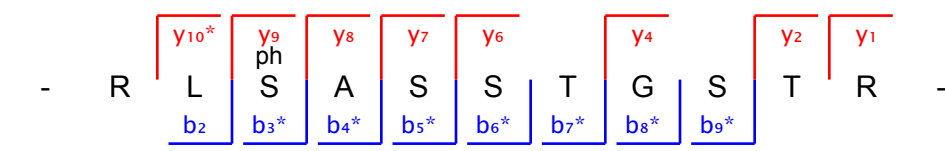

Raw file 20150814\_A375SR\_Phospho\_BR2\_05 Scan 27817 Method FTMS; HCD Score 180.05 m/z 842.9 Gene names EEF1B2

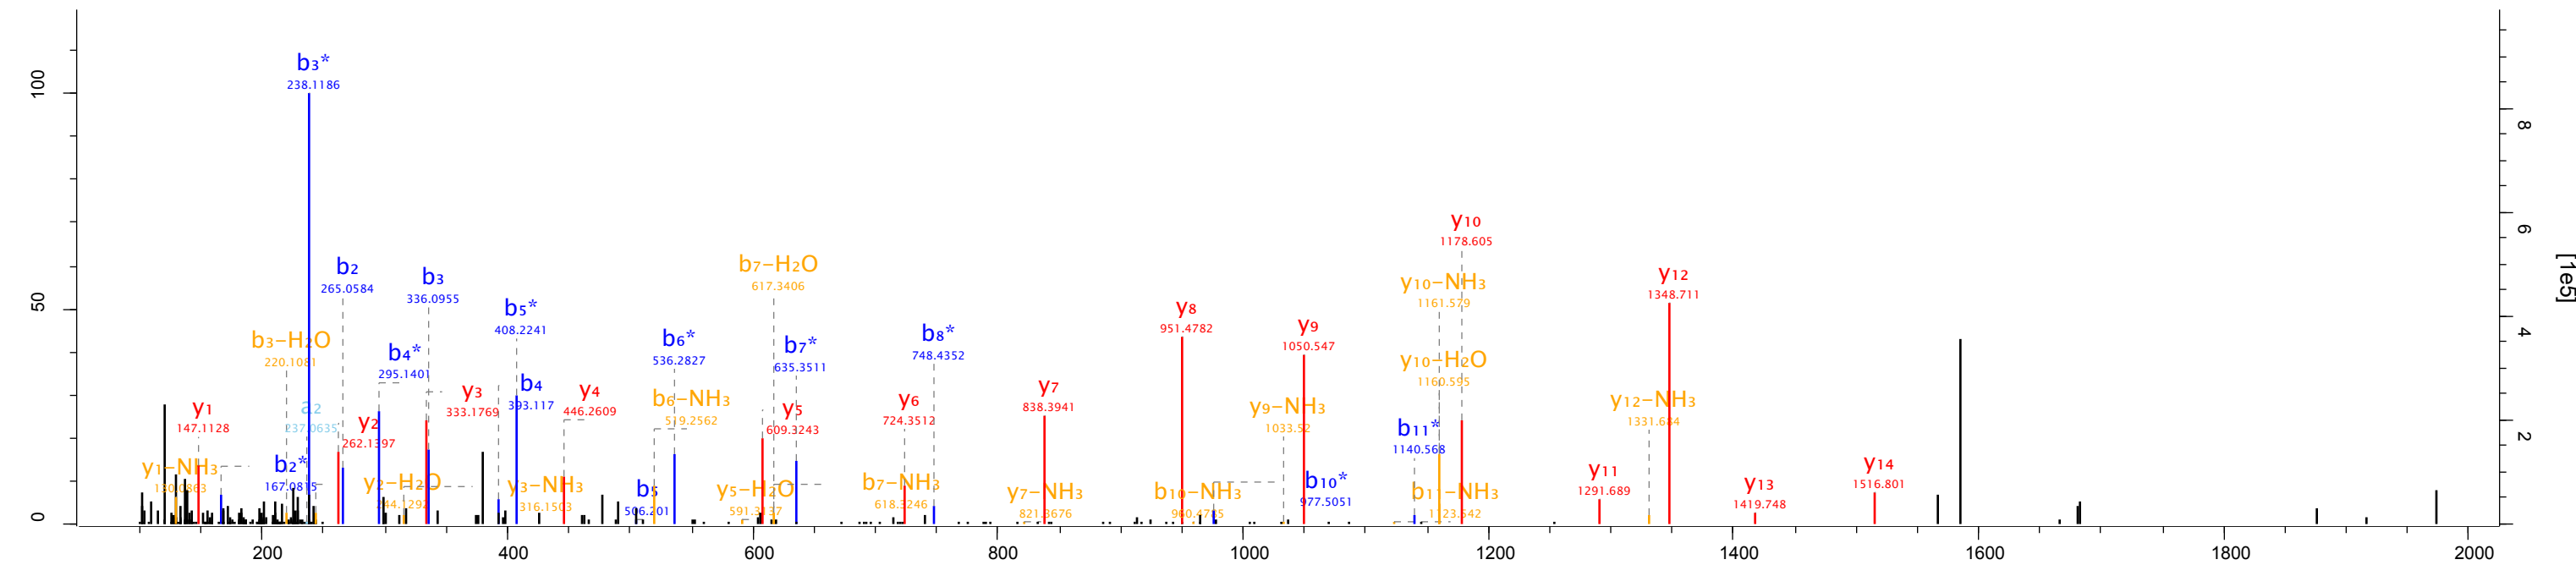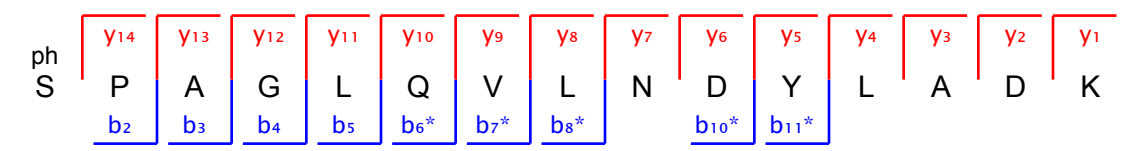

Raw file: 20150814\_A375SR\_Phospho\_BR2\_05  
 Scan: 27827 Method: FTMS; HCD Score: 103.97 m/z: 631.37 Gene names: KMT2D

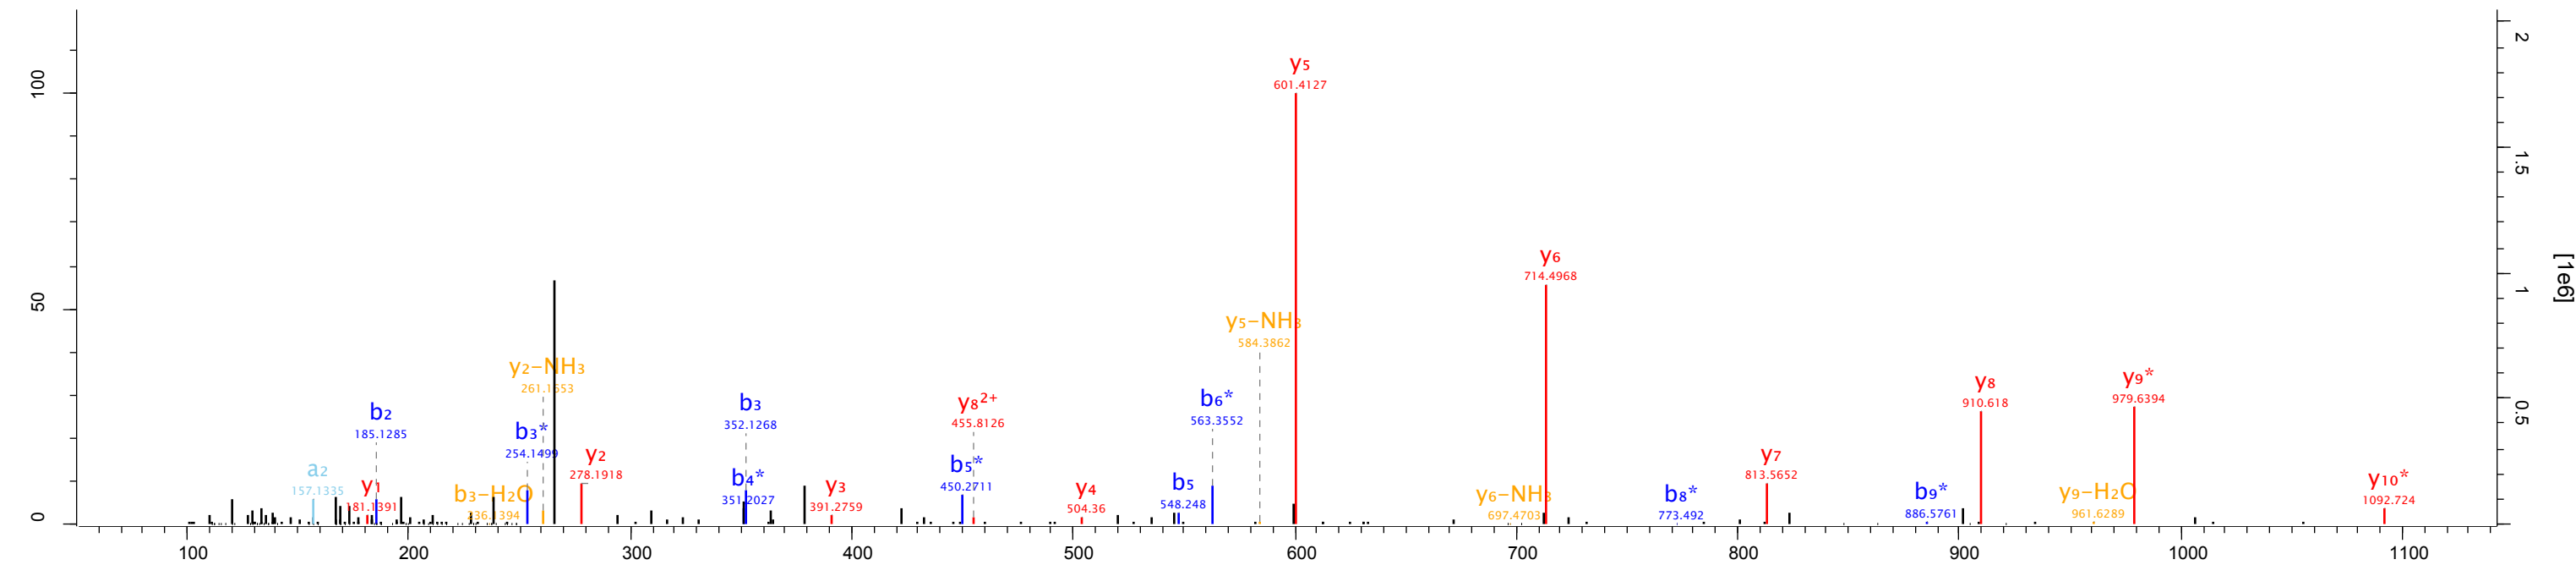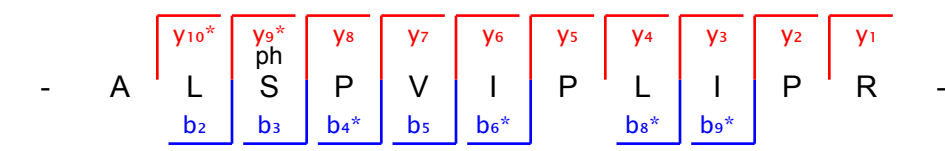

Raw file: 20150814\_A375SR\_Phospho\_BR2\_05  
 Scan: 28017 Method: FTMS; HCD Score: 269.9 m/z: 1004.16 Gene names: FAM129A

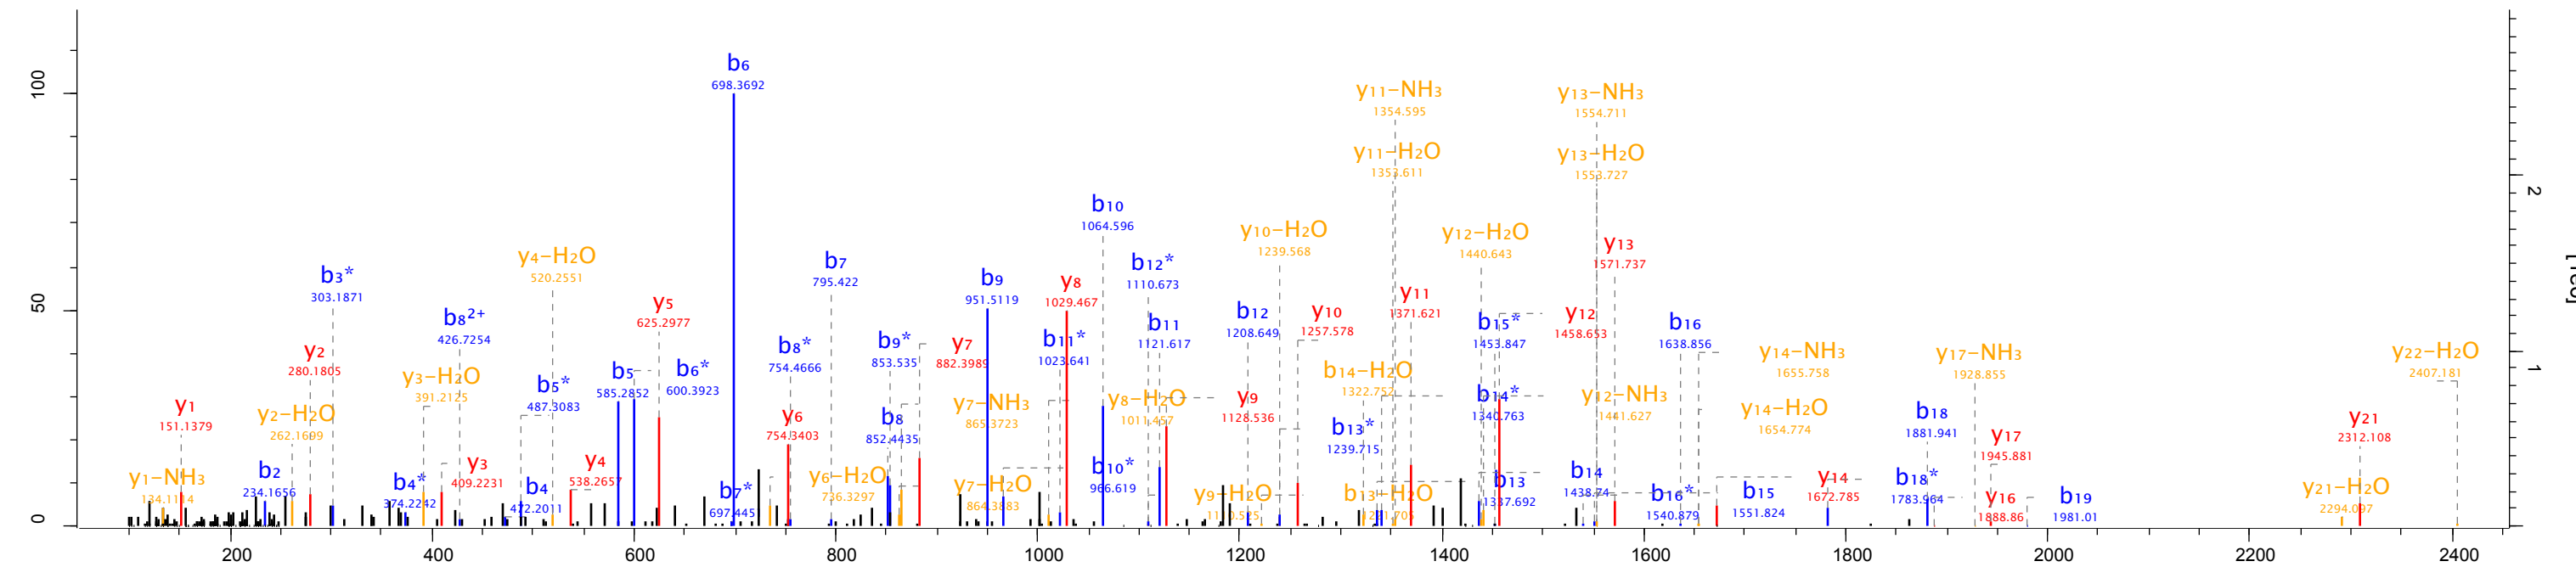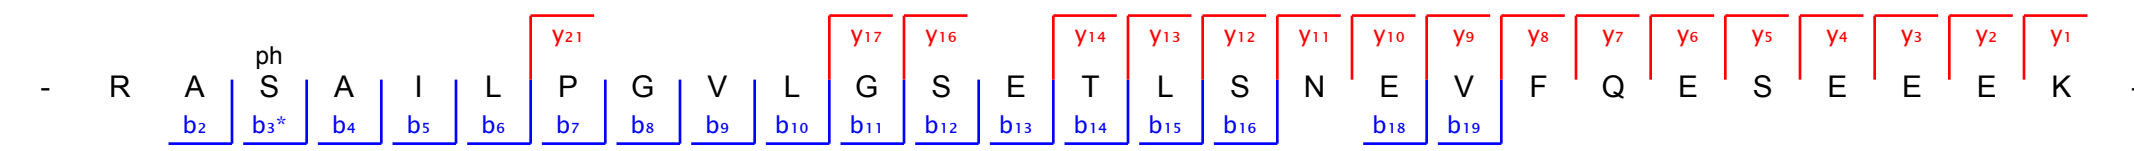

Raw file: 20150814\_A375SR\_Phospho\_BR2\_05  
 Scan: 28217 Method: FTMS; HCD Score: 142.4 m/z: 1148.06 Gene names: FMNL3

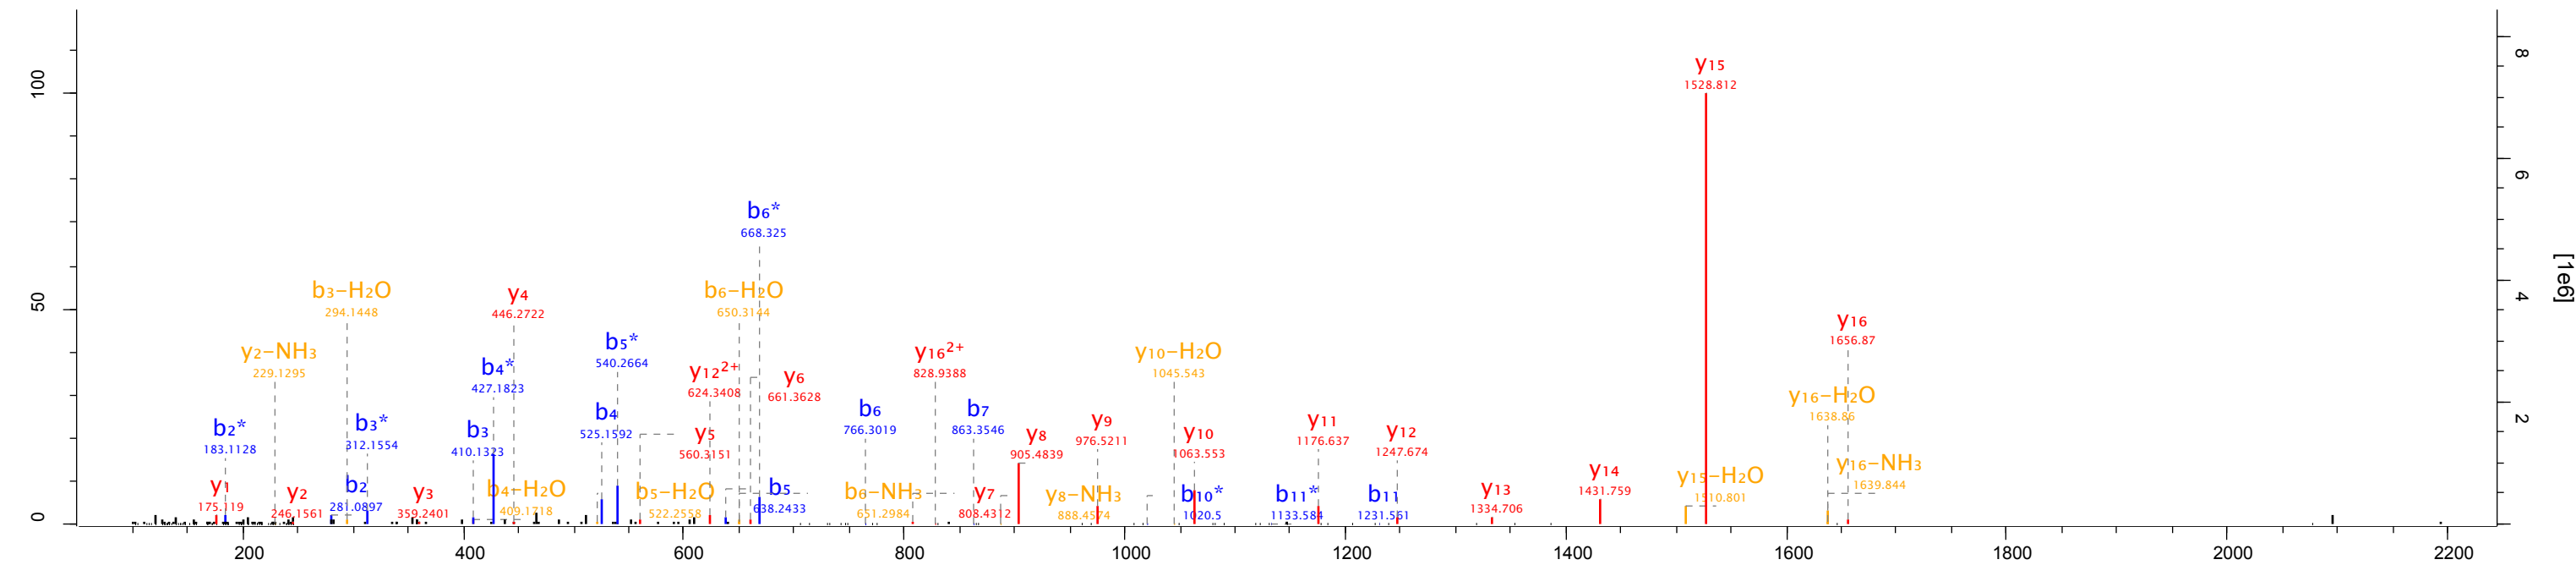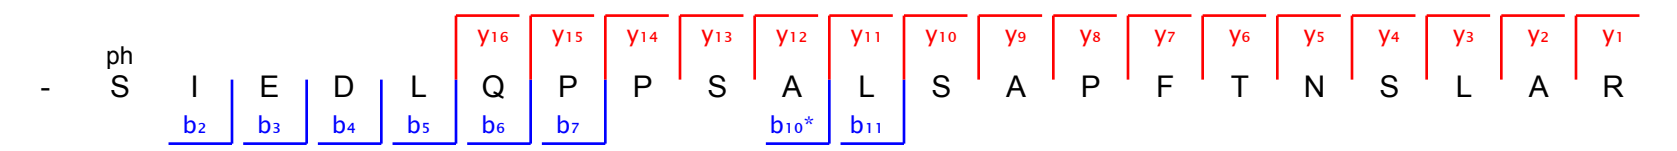



Raw file: 20150814\_A375SR\_Phospho\_BR2\_05  
 Scan: 28457  
 Method: FTMS; HCD  
 Score: 97.78  
 m/z: 1010.95  
 Gene names: GSDMD

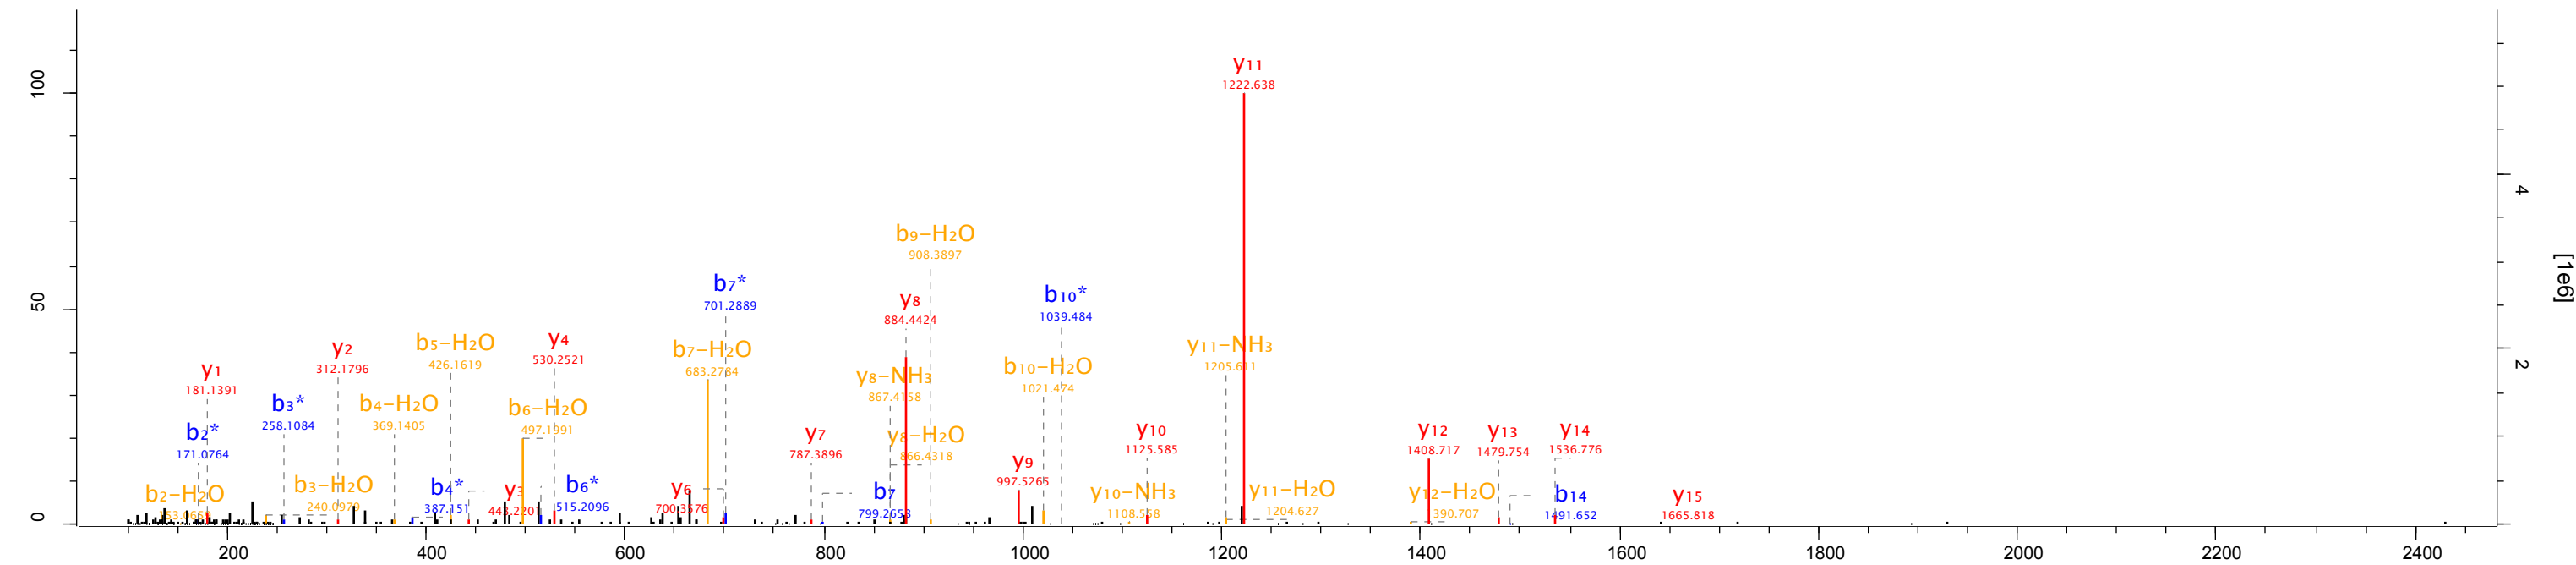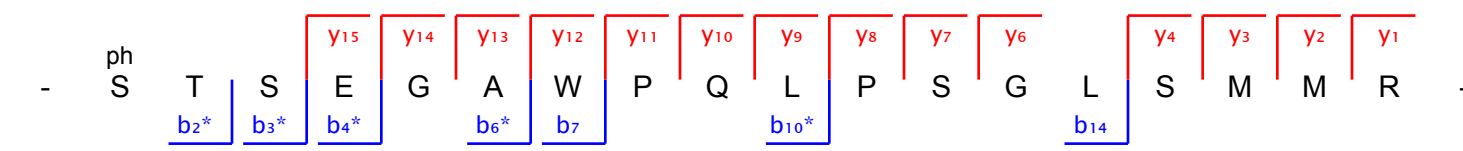

Raw file 20150814\_A375SR\_Phospho\_BR2\_05 Scan 28617 Method FTMS; HCD Score 113.39 m/z 940.45 Gene names RBM4B;MST4

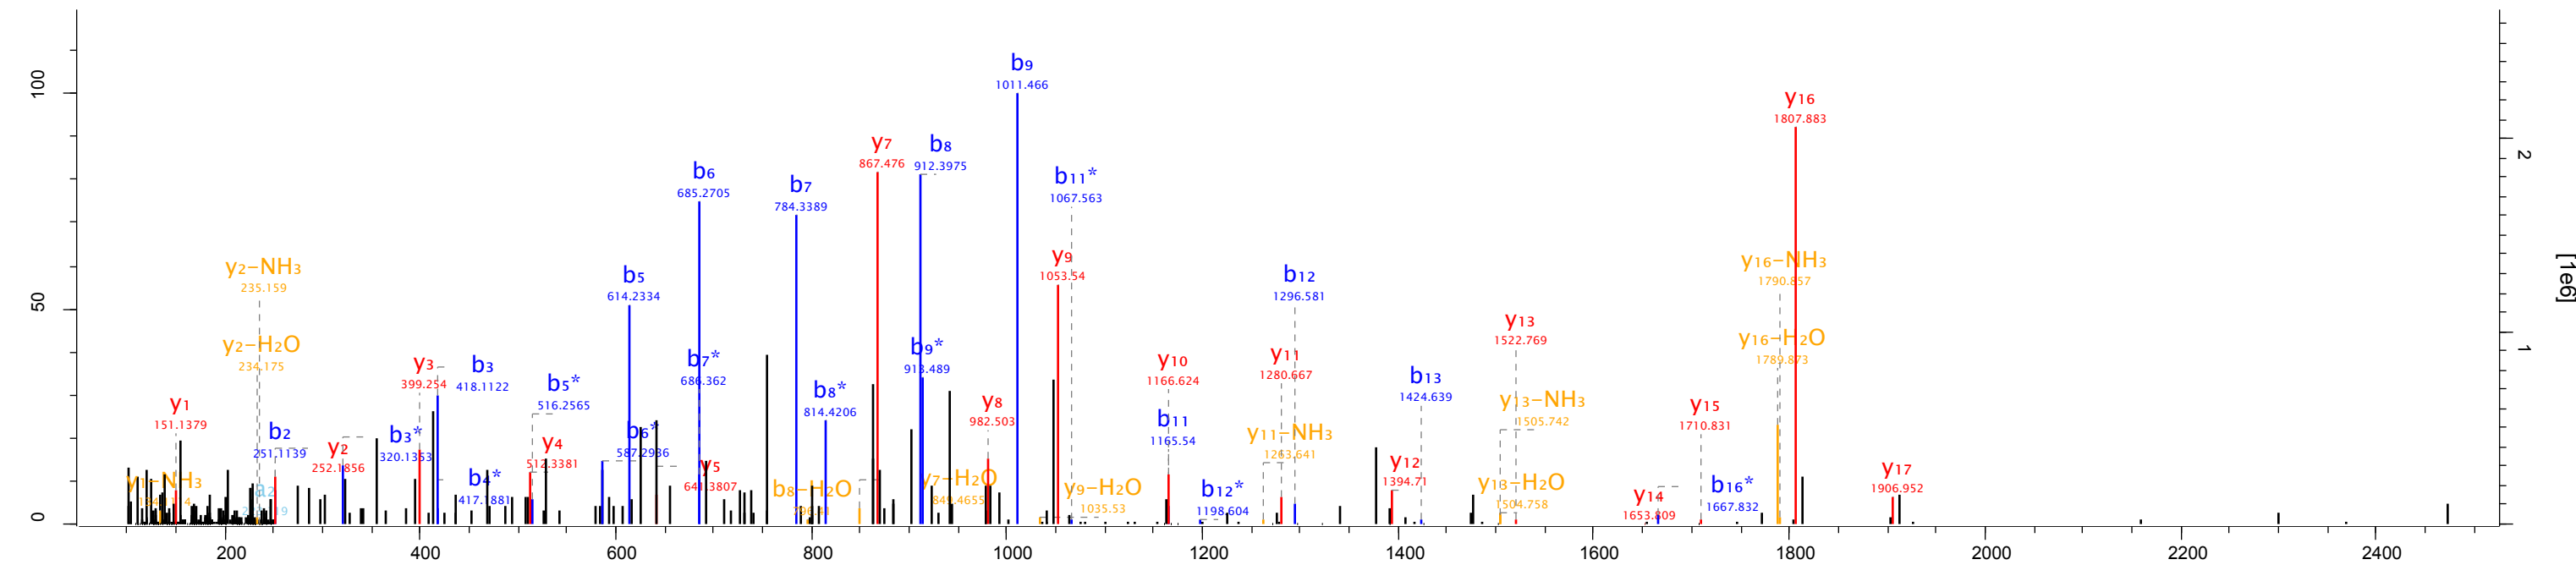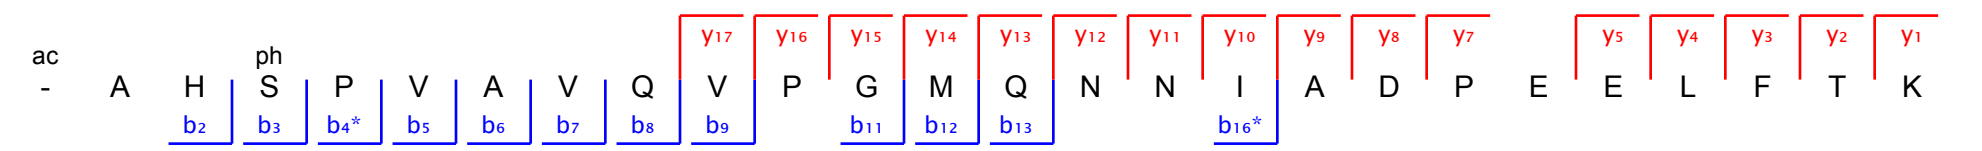

Raw file 20150814\_A375SR\_Phospho\_BR2\_05 Scan 28697 Method FTMS; HCD Score 140.9 m/z 900.04 Gene names UBL7

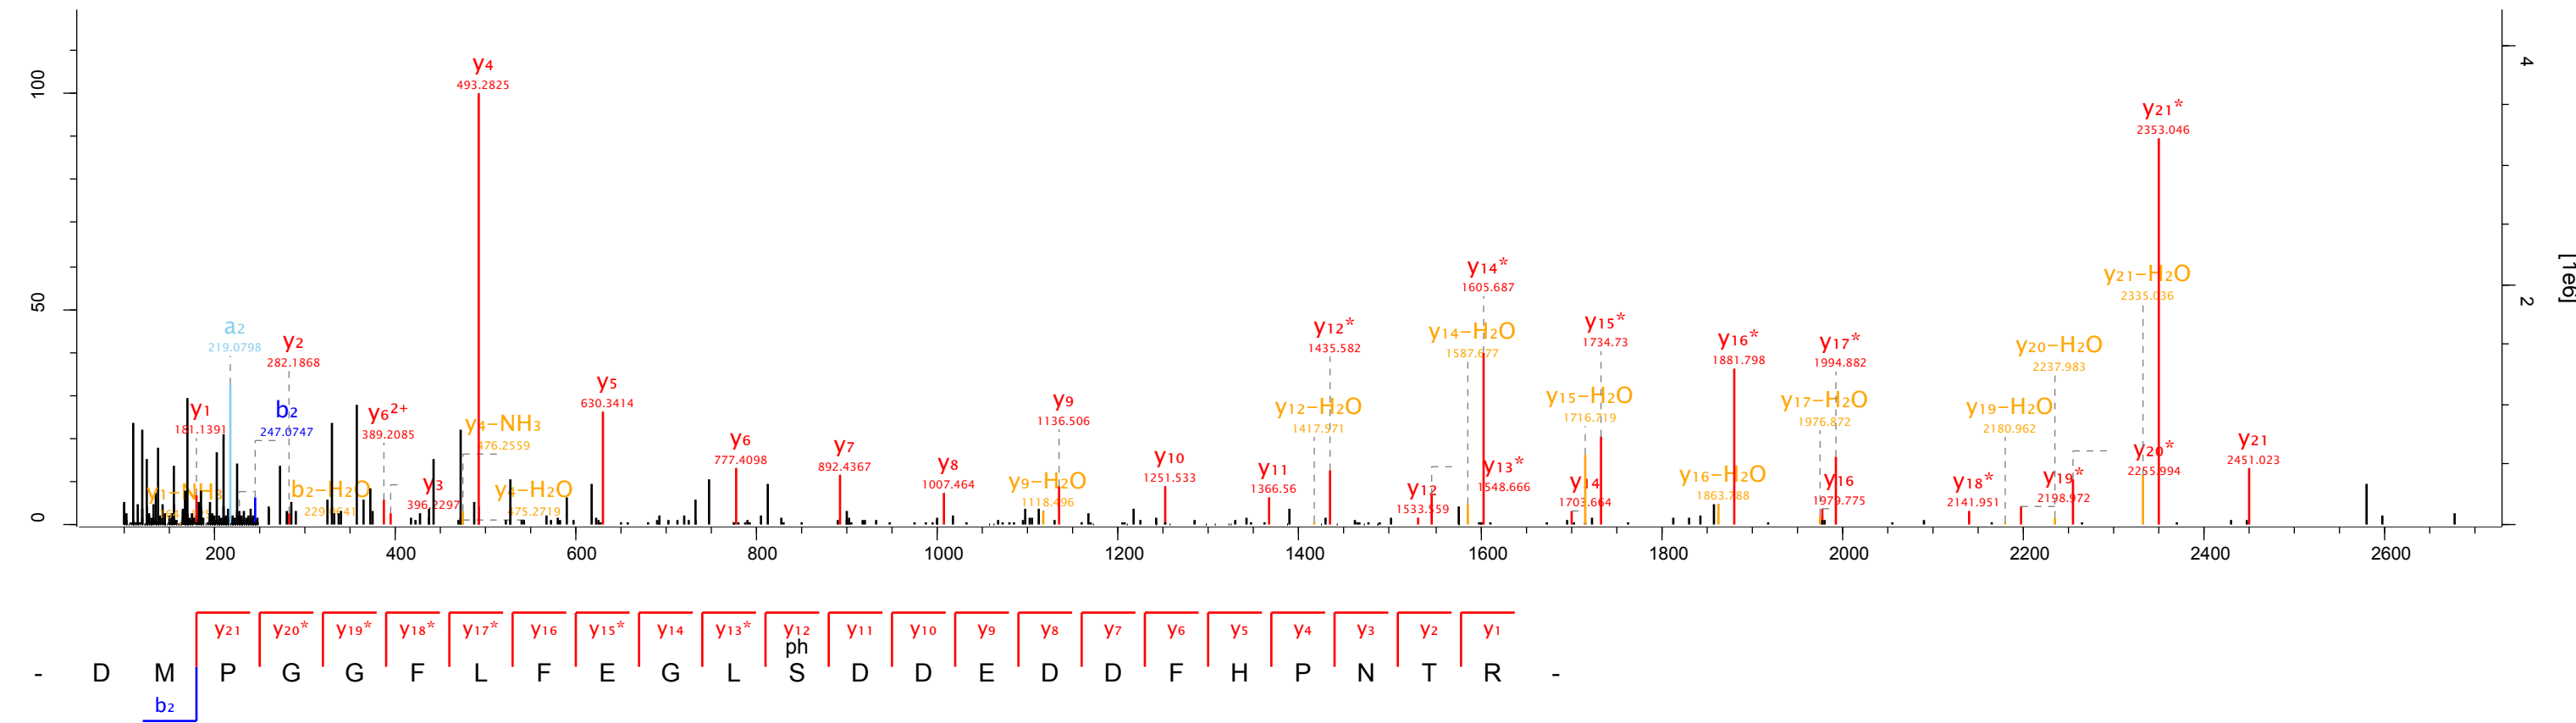

Raw file: 20150814\_A375SR\_Phospho\_BR2\_05  
 Scan: 3027 Method: FTMS; HCD Score: 169.02 m/z: 686.84 Gene names: PPIG

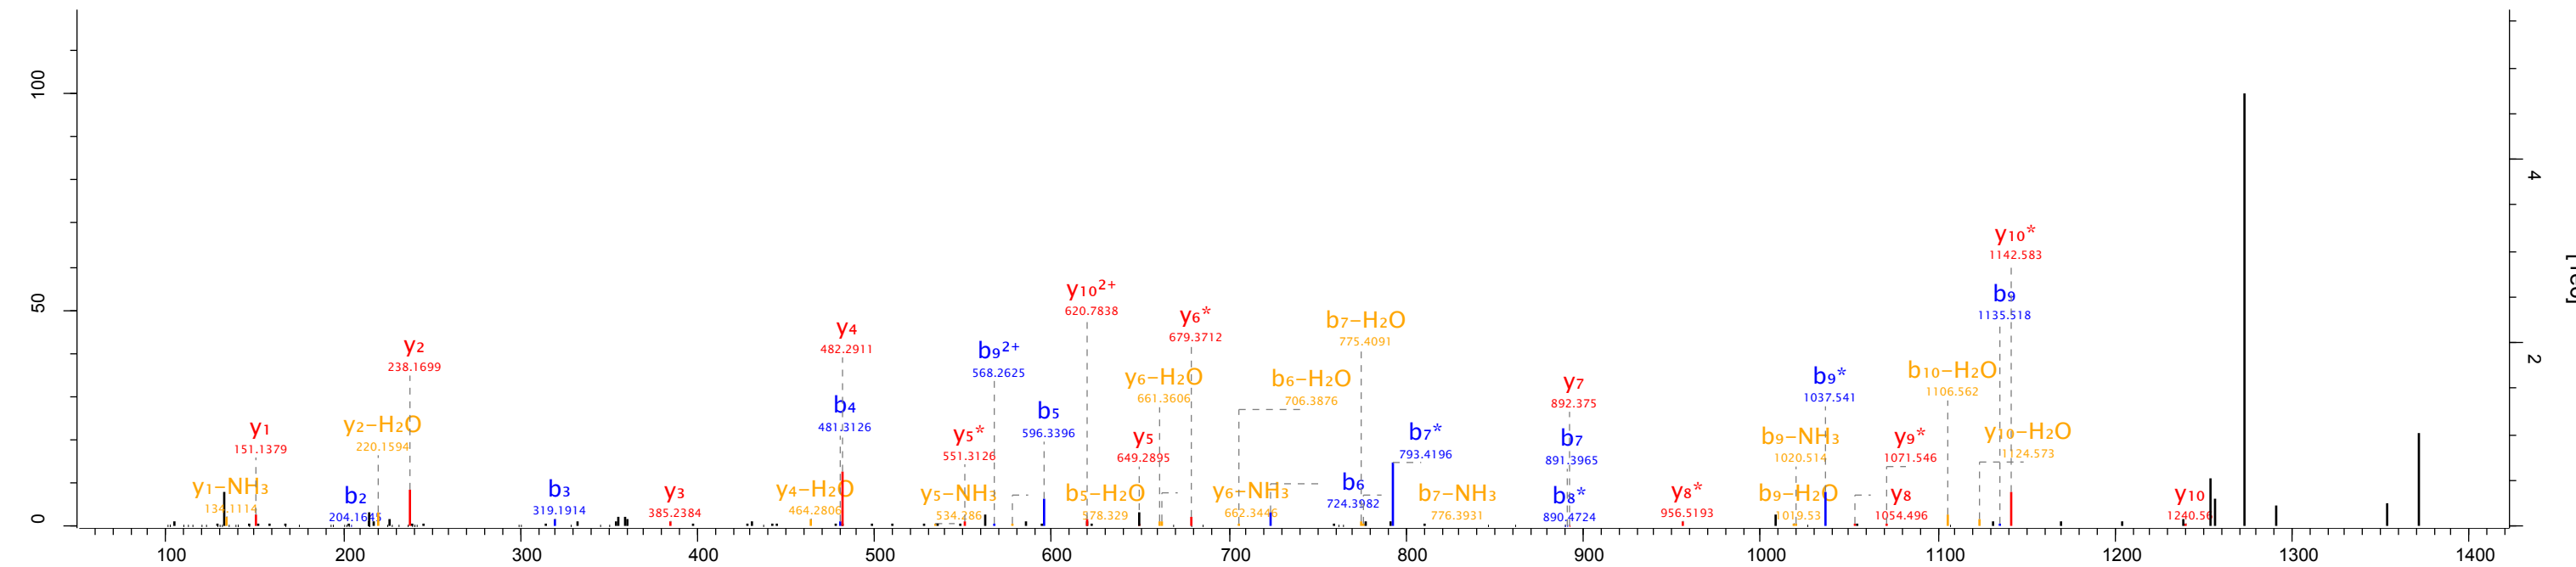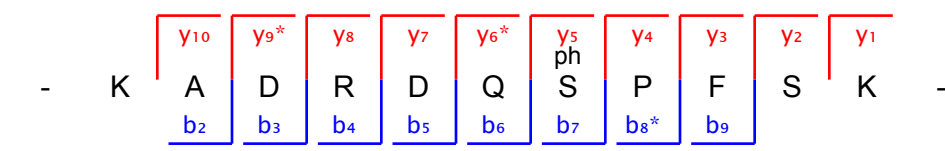

Raw file: 20150814\_A375SR\_Phospho\_BR2\_05  
 Scan: 3777 Method: FTMS; HCD Score: 117.65 m/z: 699.79 Gene names: SOGA1

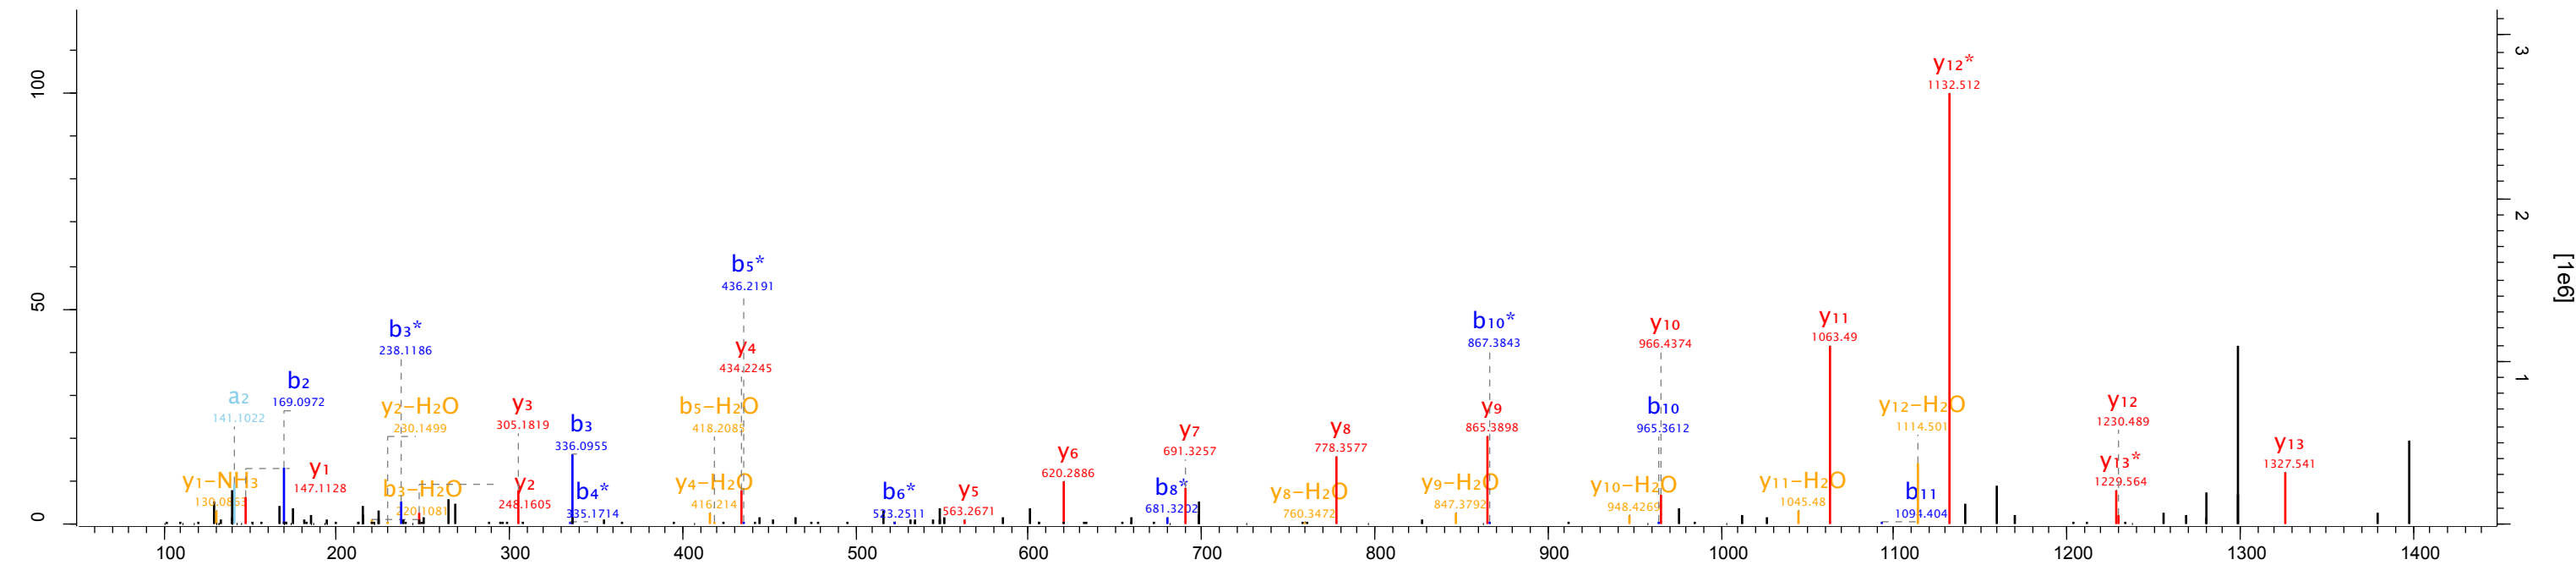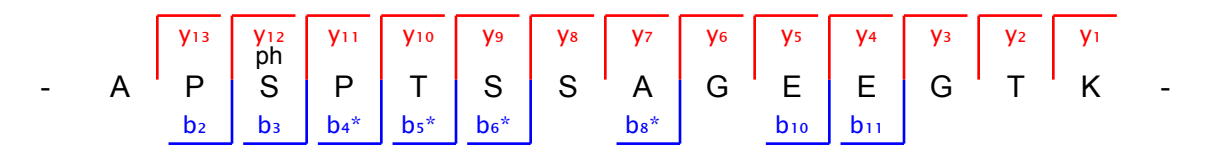

Raw file: 20150814\_A375SR\_Phospho\_BR2\_05  
 Scan: 3847 Method: FTMS; HCD Score: 113.52 m/z: 570.28 Gene names: POLR1D

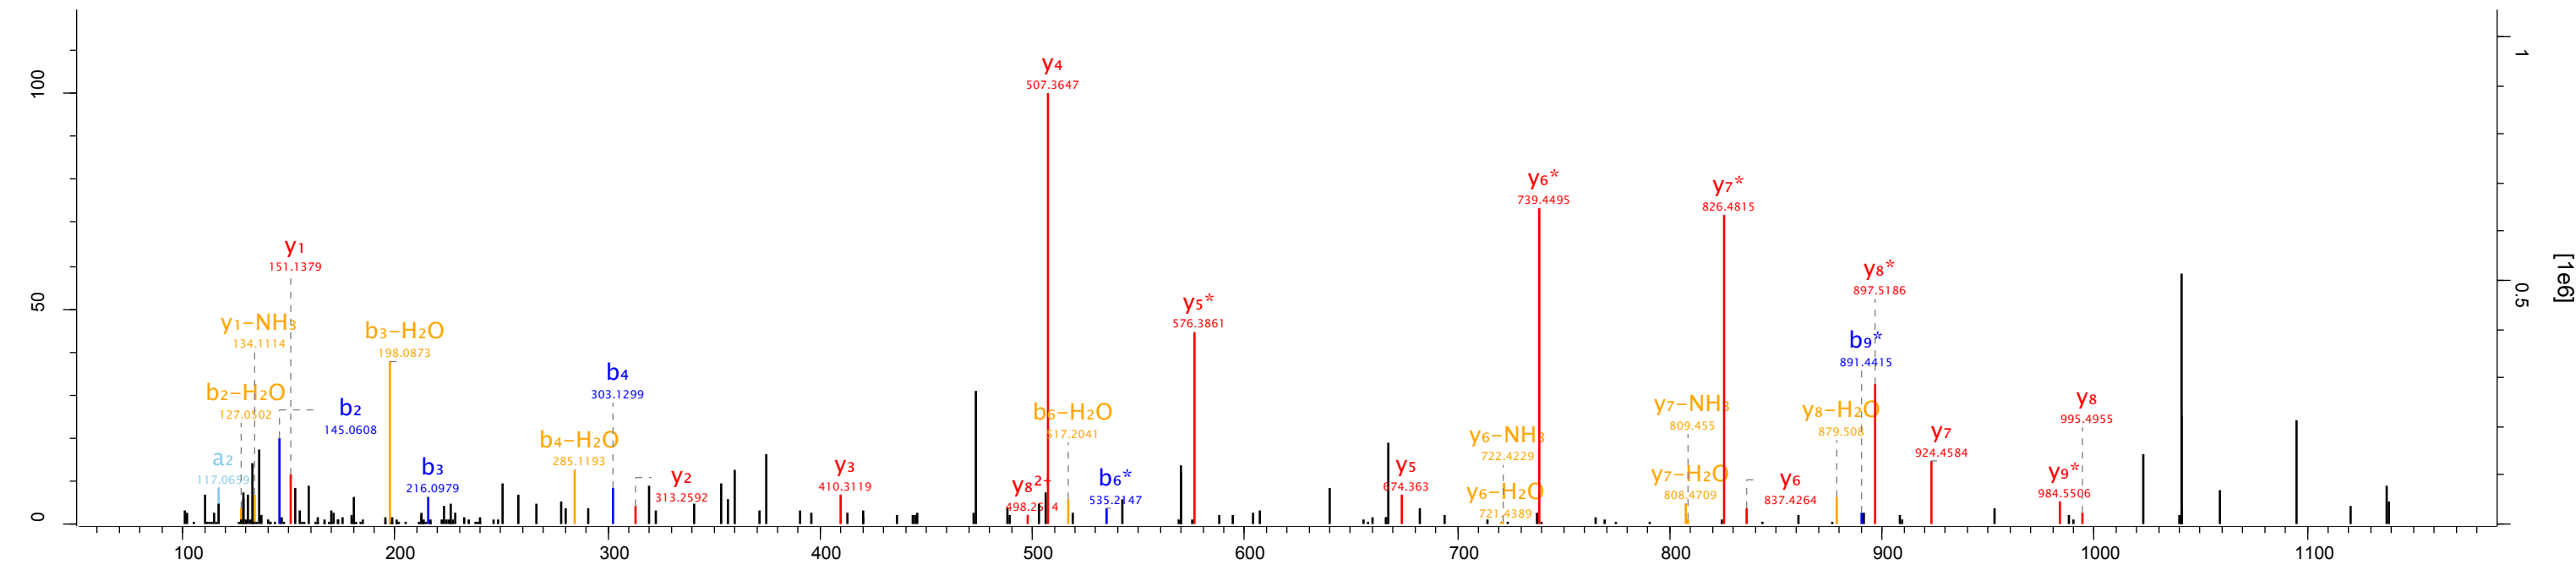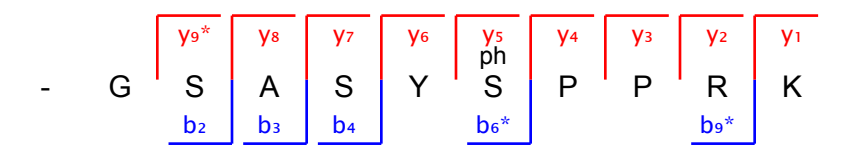

Raw file: 20150814\_A375SR\_Phospho\_BR2\_05  
 Scan: 4007 Method: FTMS; HCD Score: 122.66 m/z: 605.35 Gene names: RBM33

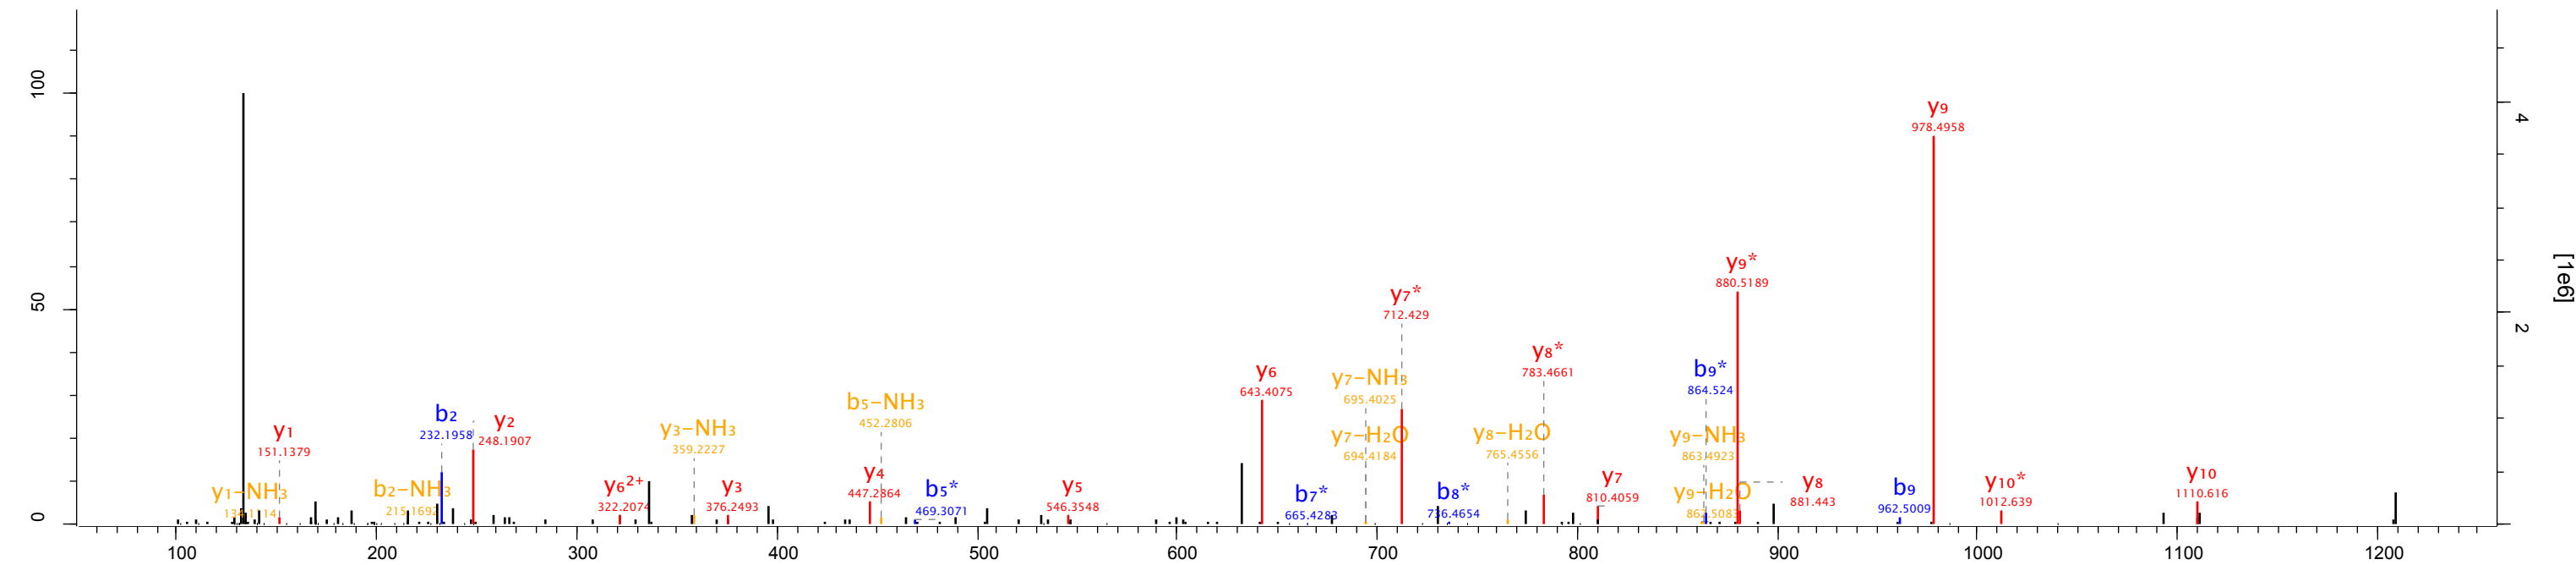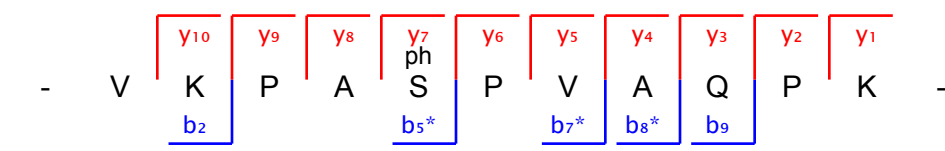

Raw file: 20150814\_A375SR\_Phospho\_BR2\_05  
 Scan: 4057 Method: FTMS; HCD Score: 135.55 m/z: 478.2 Gene names: PRKAA1

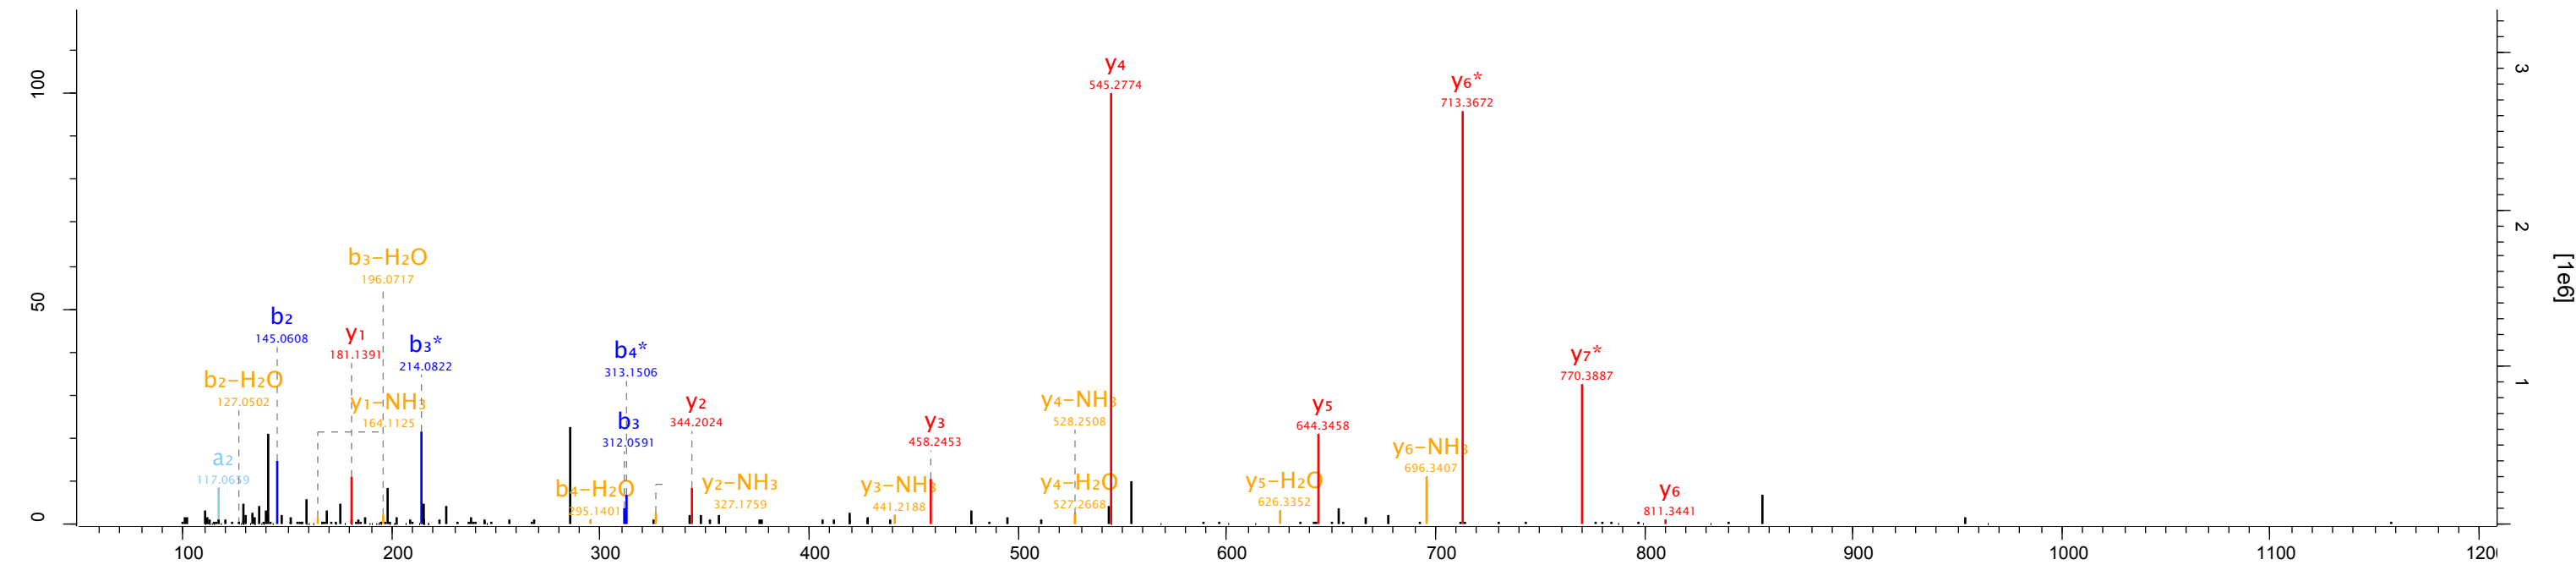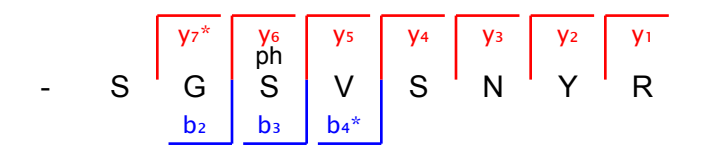



Raw file Scan Method Score m/z Gene names  
 20150814\_A375SR\_Phospho\_BR2\_05 4707 FTMS; HCD 256.79 772.85 HMGA1;C2orf81

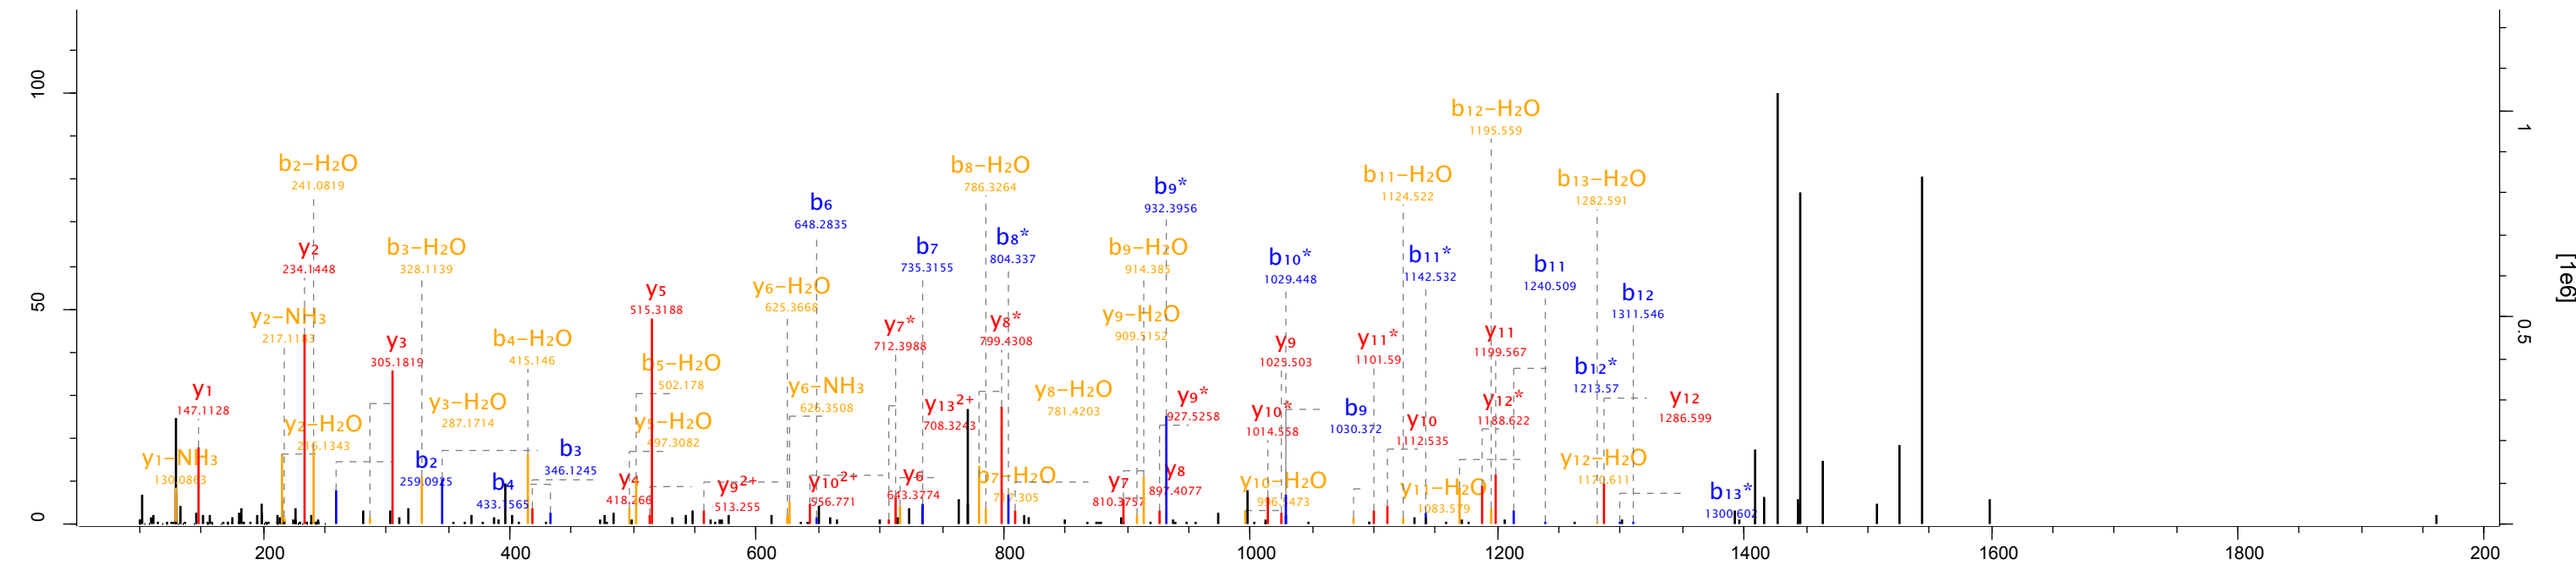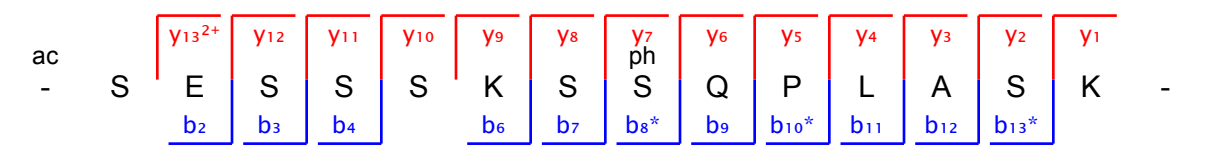

Raw file 20150814\_A375SR\_Phospho\_BR2\_05 Scan 5147 Method FTMS; HCD Score 125.75 m/z 692.79 Gene names FAM53C

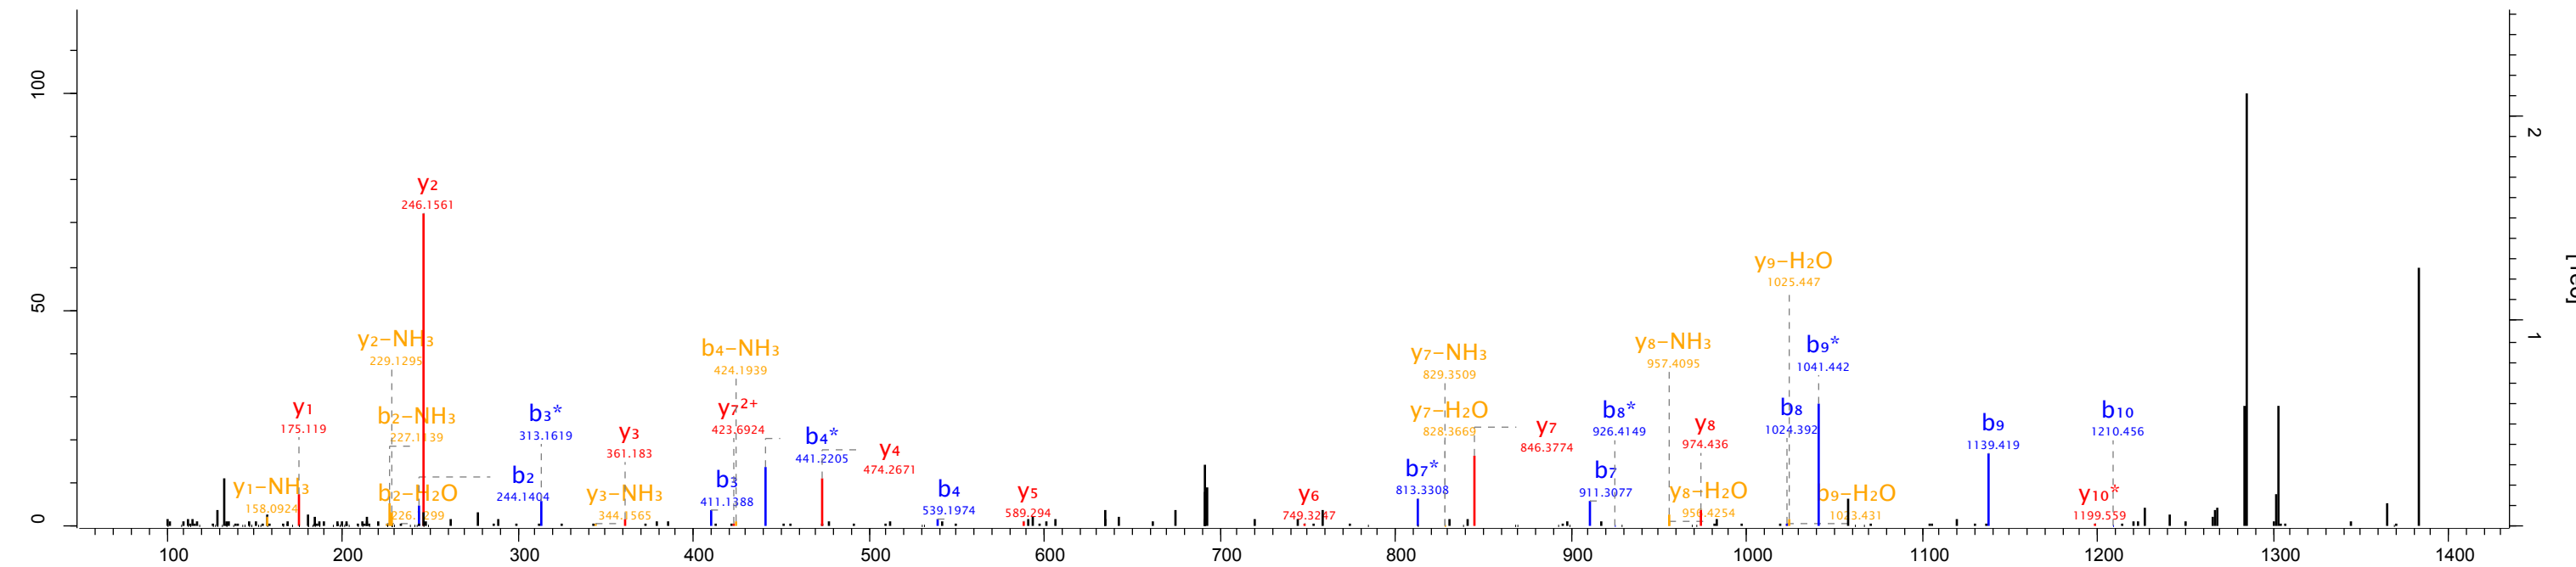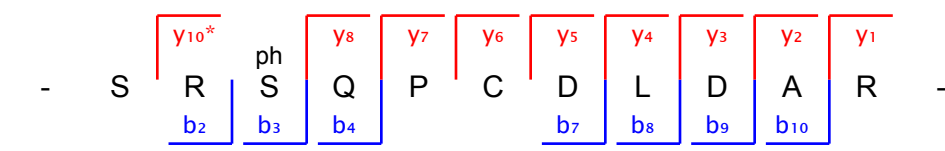

Raw file: 20150814\_A375SR\_Phospho\_BR2\_05  
 Scan: 5457 Method: FTMS; HCD Score: 120.04 m/z: 502.24 Gene names: SPEN

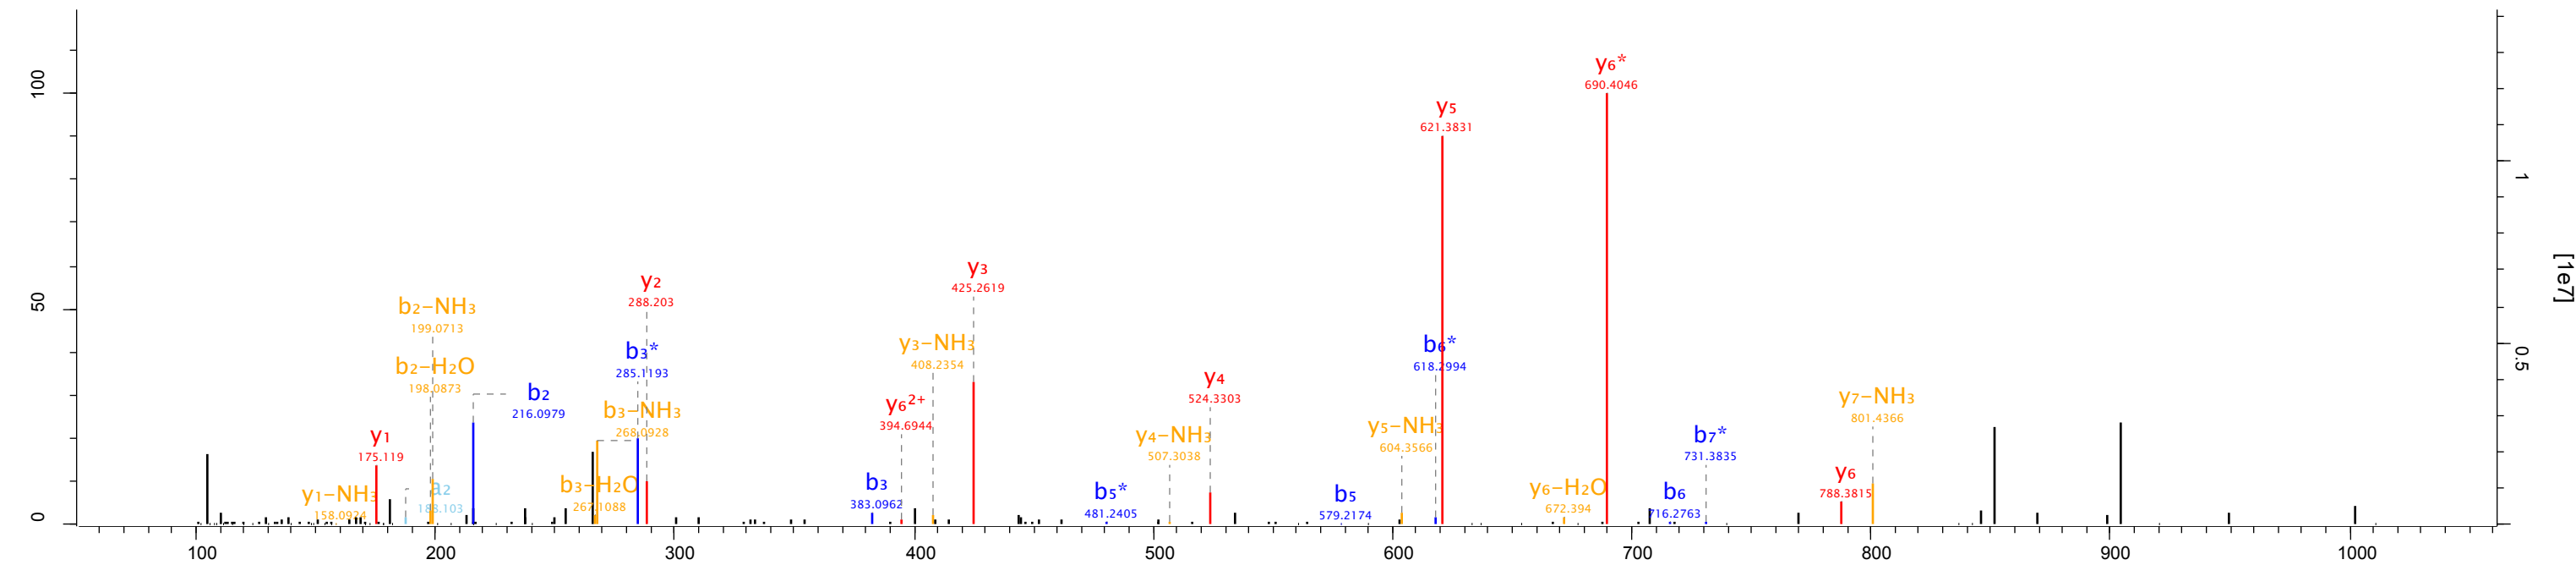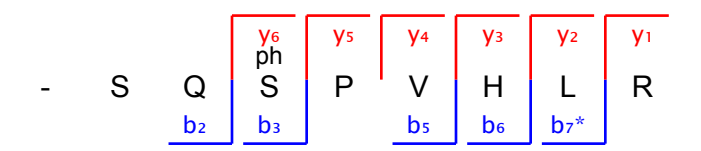

Raw file Scan Method Score m/z Gene names  
 20150814\_A375SR\_Phospho\_BR2\_05 6007 FTMS; HCD 65.04 498.58 KHDRBS1

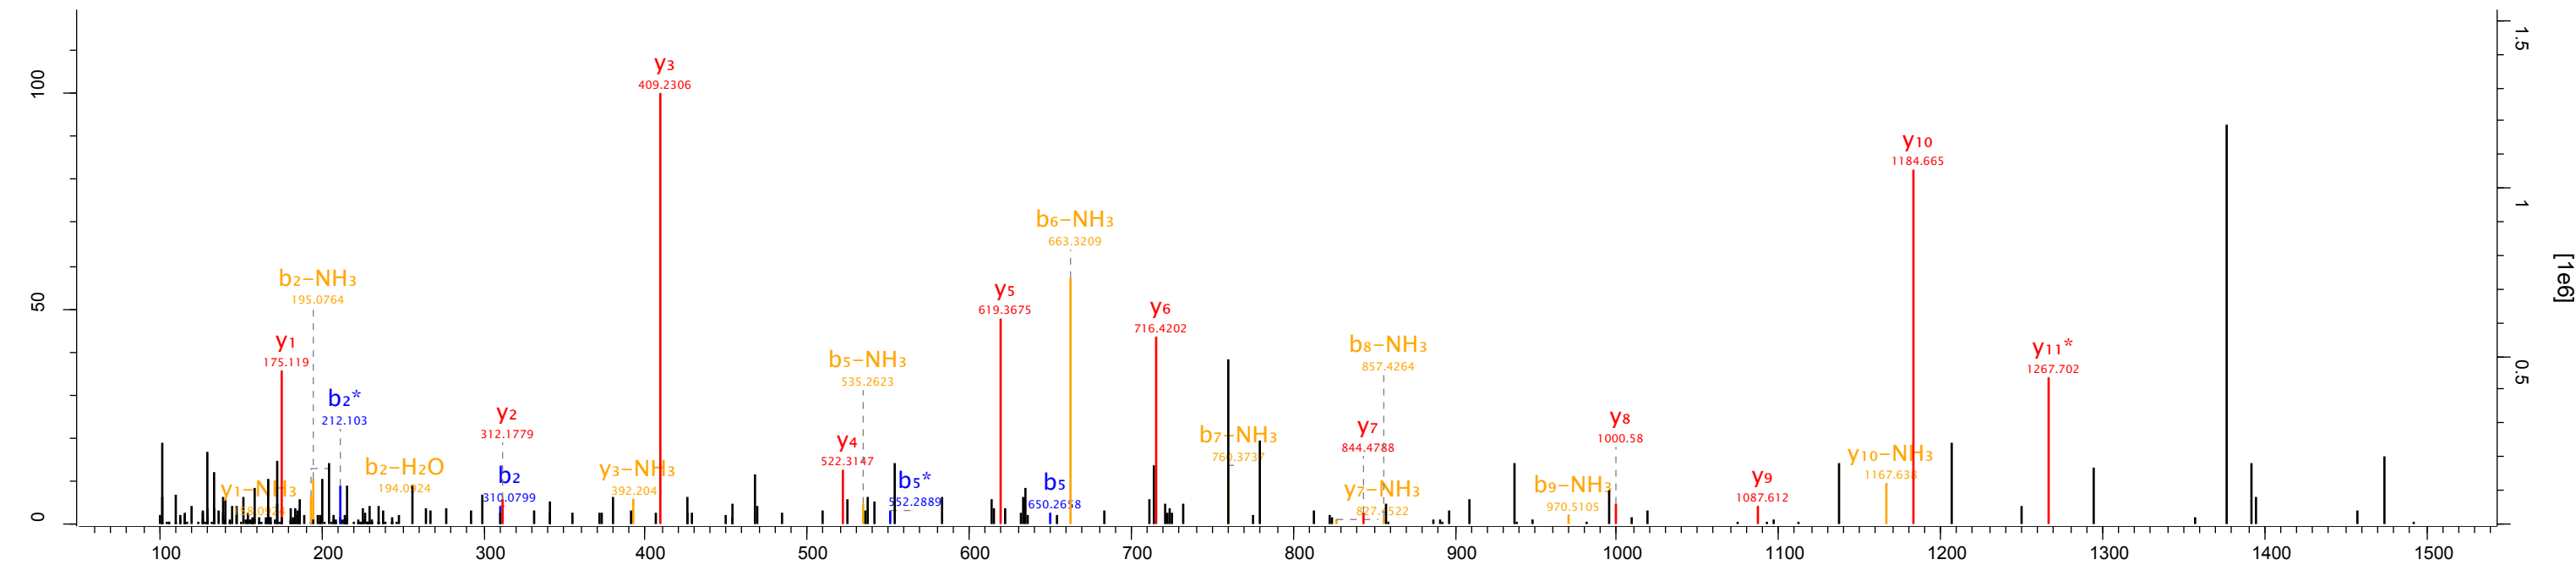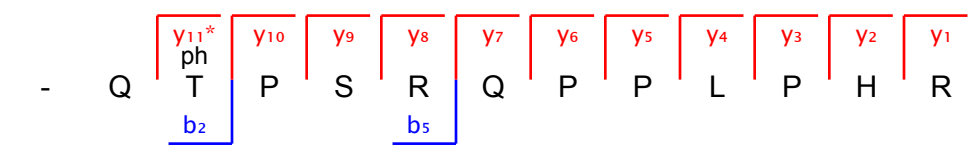

Raw file: 20150814\_A375SR\_Phospho\_BR2\_05  
 Scan: 6027 Method: FTMS; HCD Score: 60.55 m/z: 620.76 Gene names: FAM83B

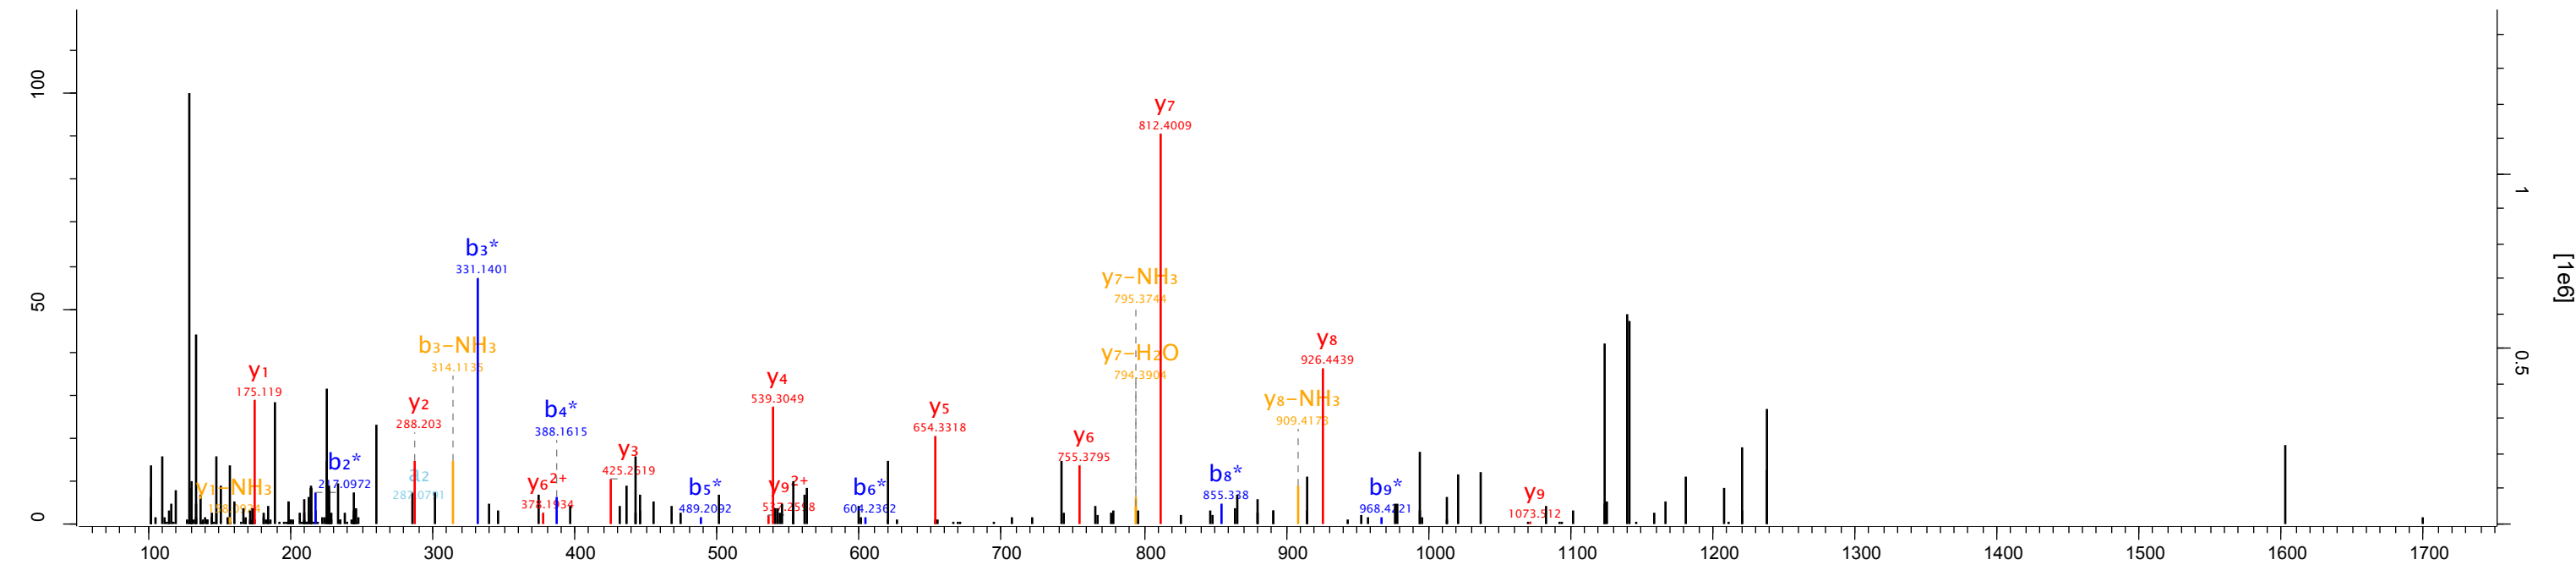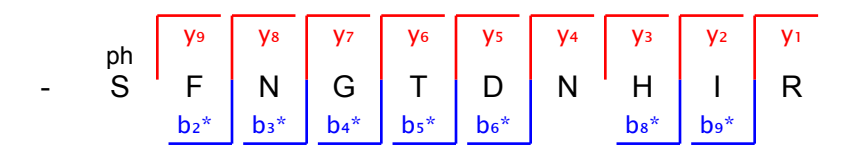

Raw file 20150814\_A375SR\_Phospho\_BR2\_05 Scan 6847 Method FTMS; HCD Score 106.6 m/z 712.31 Gene names ZNF768

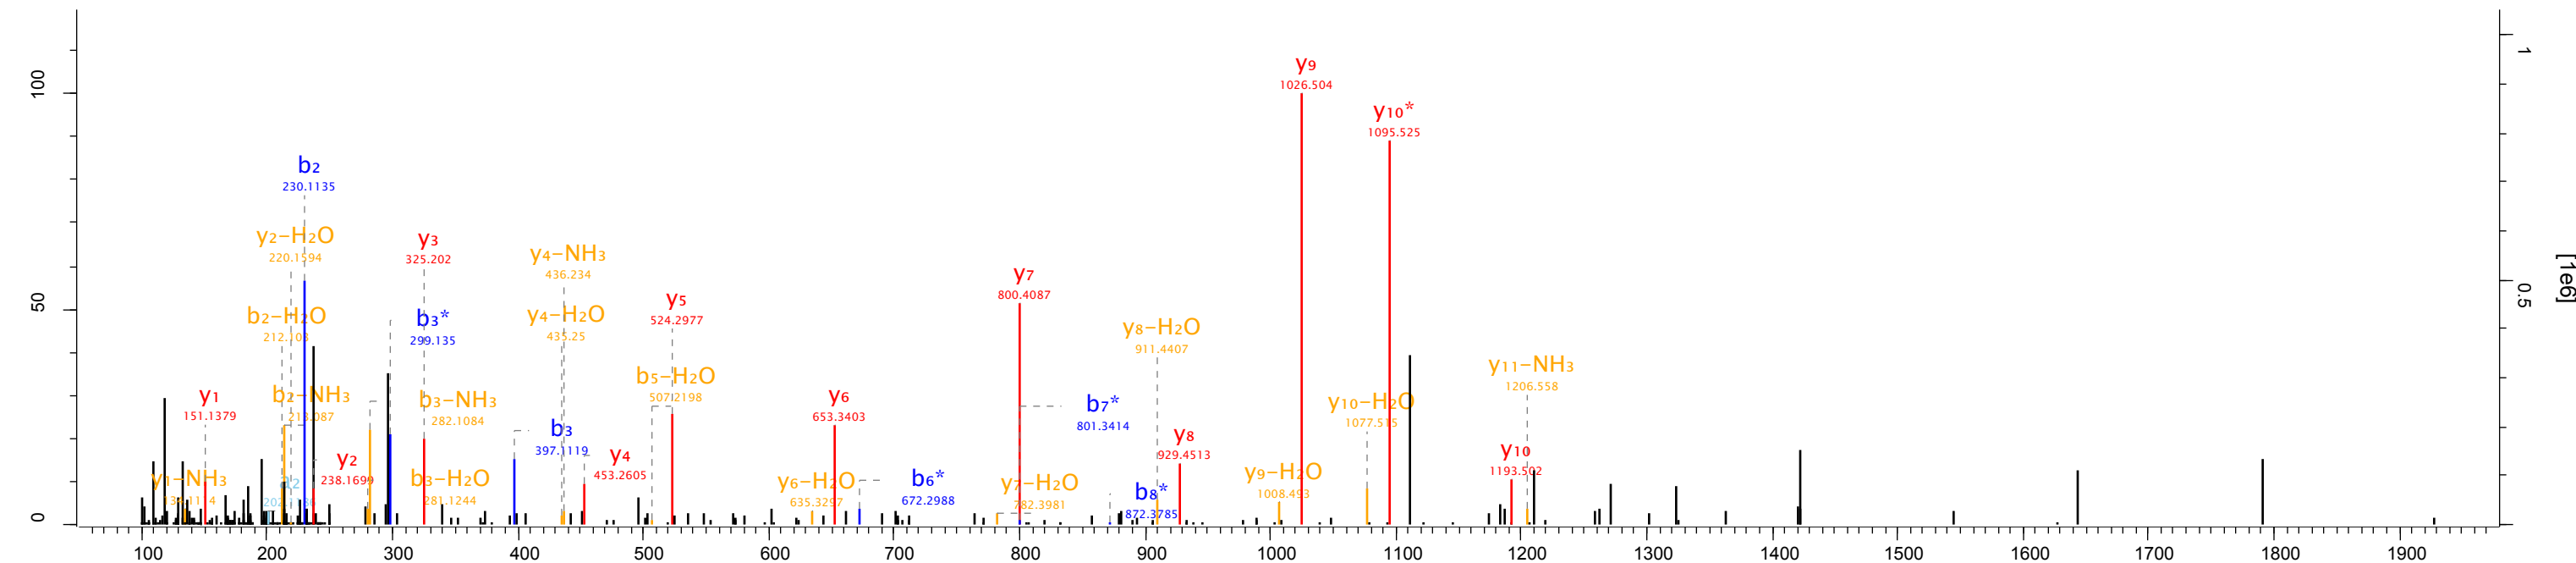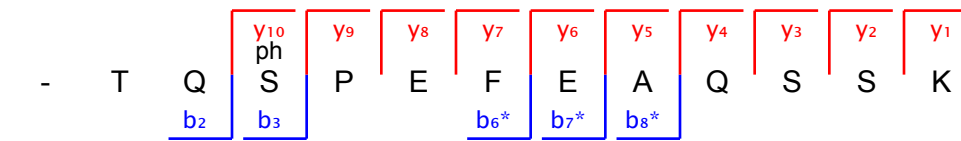

Raw file 20150814\_A375SR\_Phospho\_BR2\_05 Scan 6927 Method FTMS; HCD Score 232.6 m/z 701.33 Gene names SMEK1

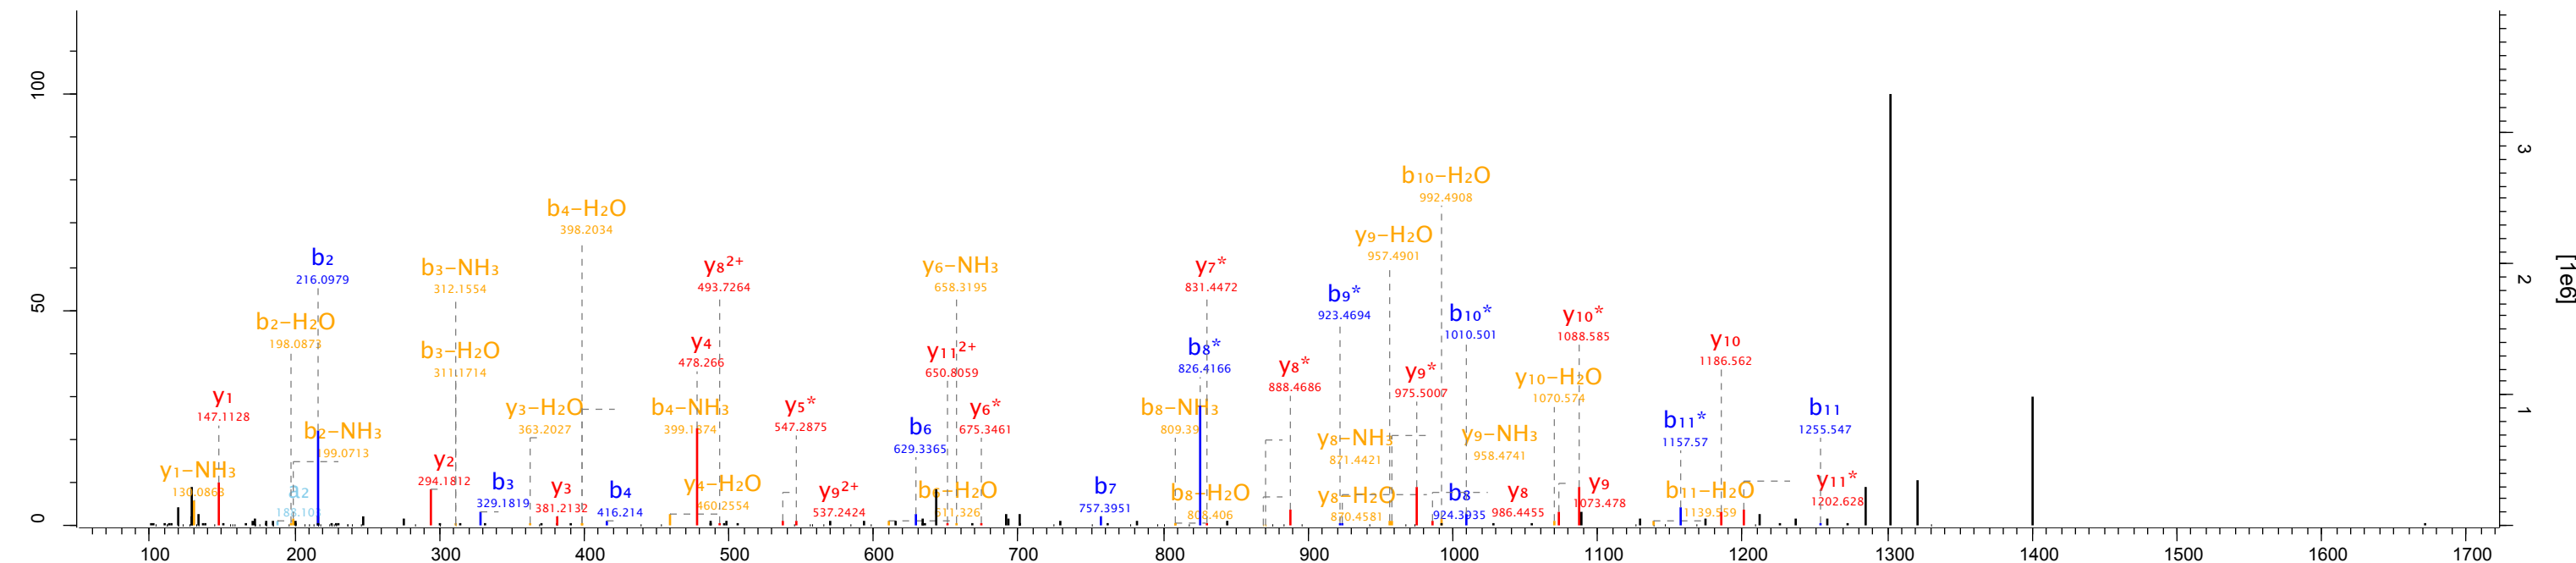

- T N L S G R Q S P S F K -

y11\*
y10
y9
y8
y7\*
y6\*
y5\*
y4
y3
y2
y1

b2
b3
b4
b6
b7
b8
b9\*
b10\*
b11

Raw file 20150814\_A375SR\_Phospho\_BR2\_05 Scan 6937 Method FTMS; HCD Score 86.9 m/z 440.73 Gene names ZNF638

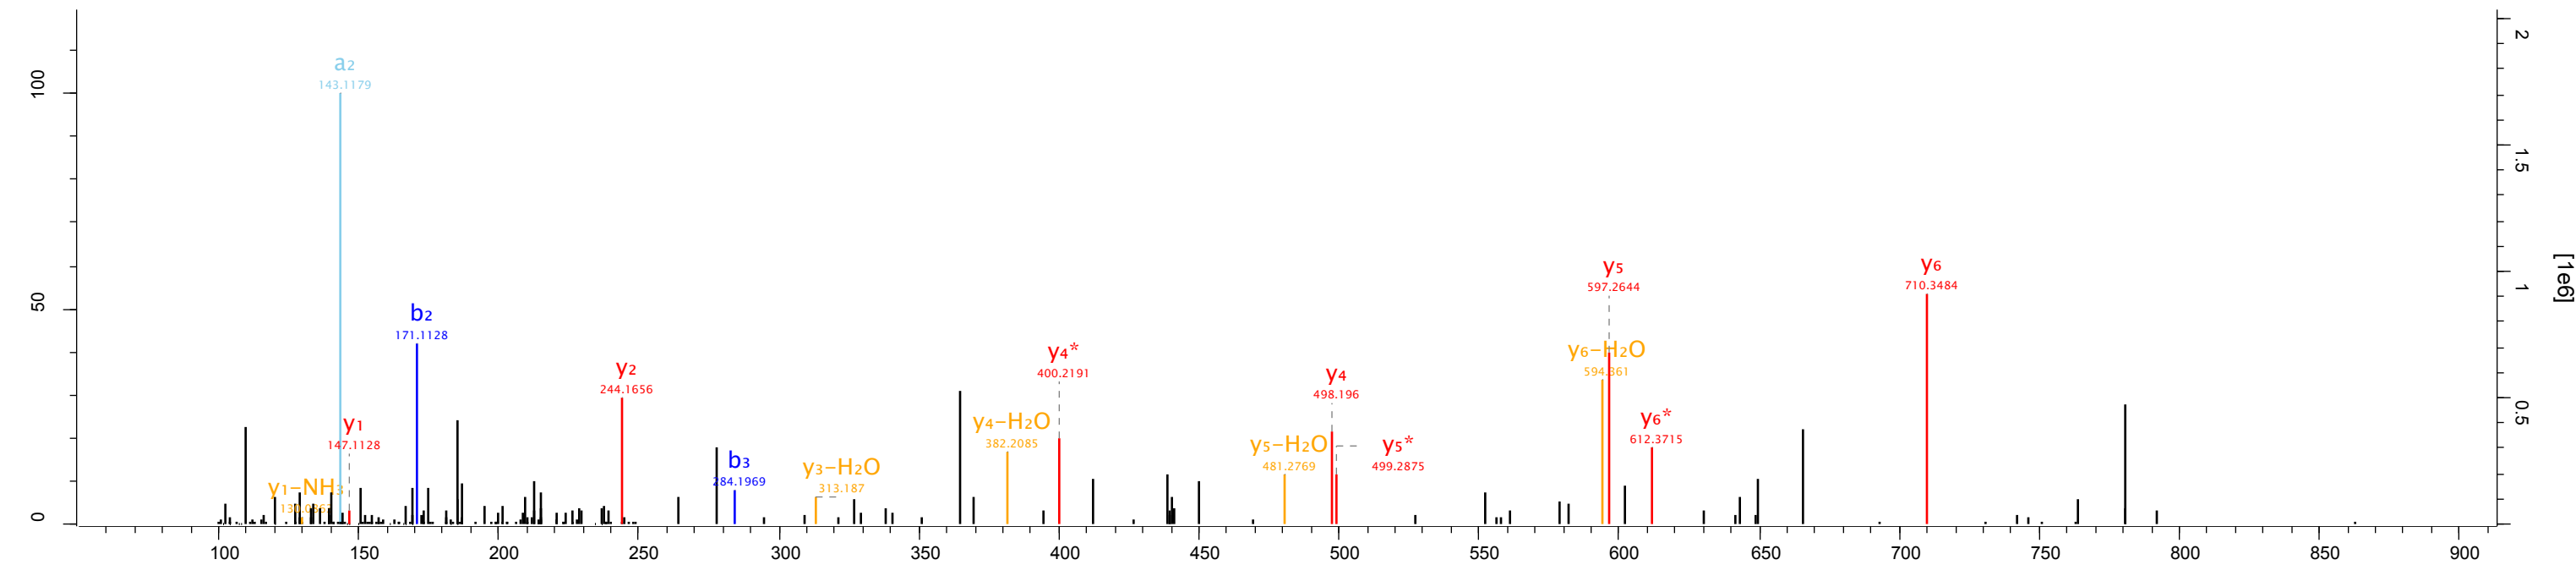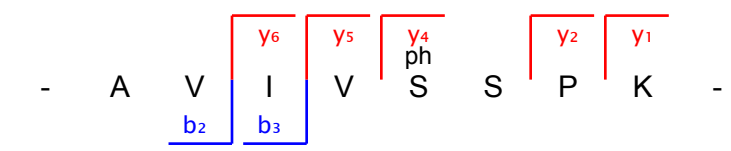



Raw file: 20150814\_A375SR\_Phospho\_BR2\_05  
 Scan: 7007 Method: FTMS; HCD Score: 100.02 m/z: 856.85 Gene names: CEP170B

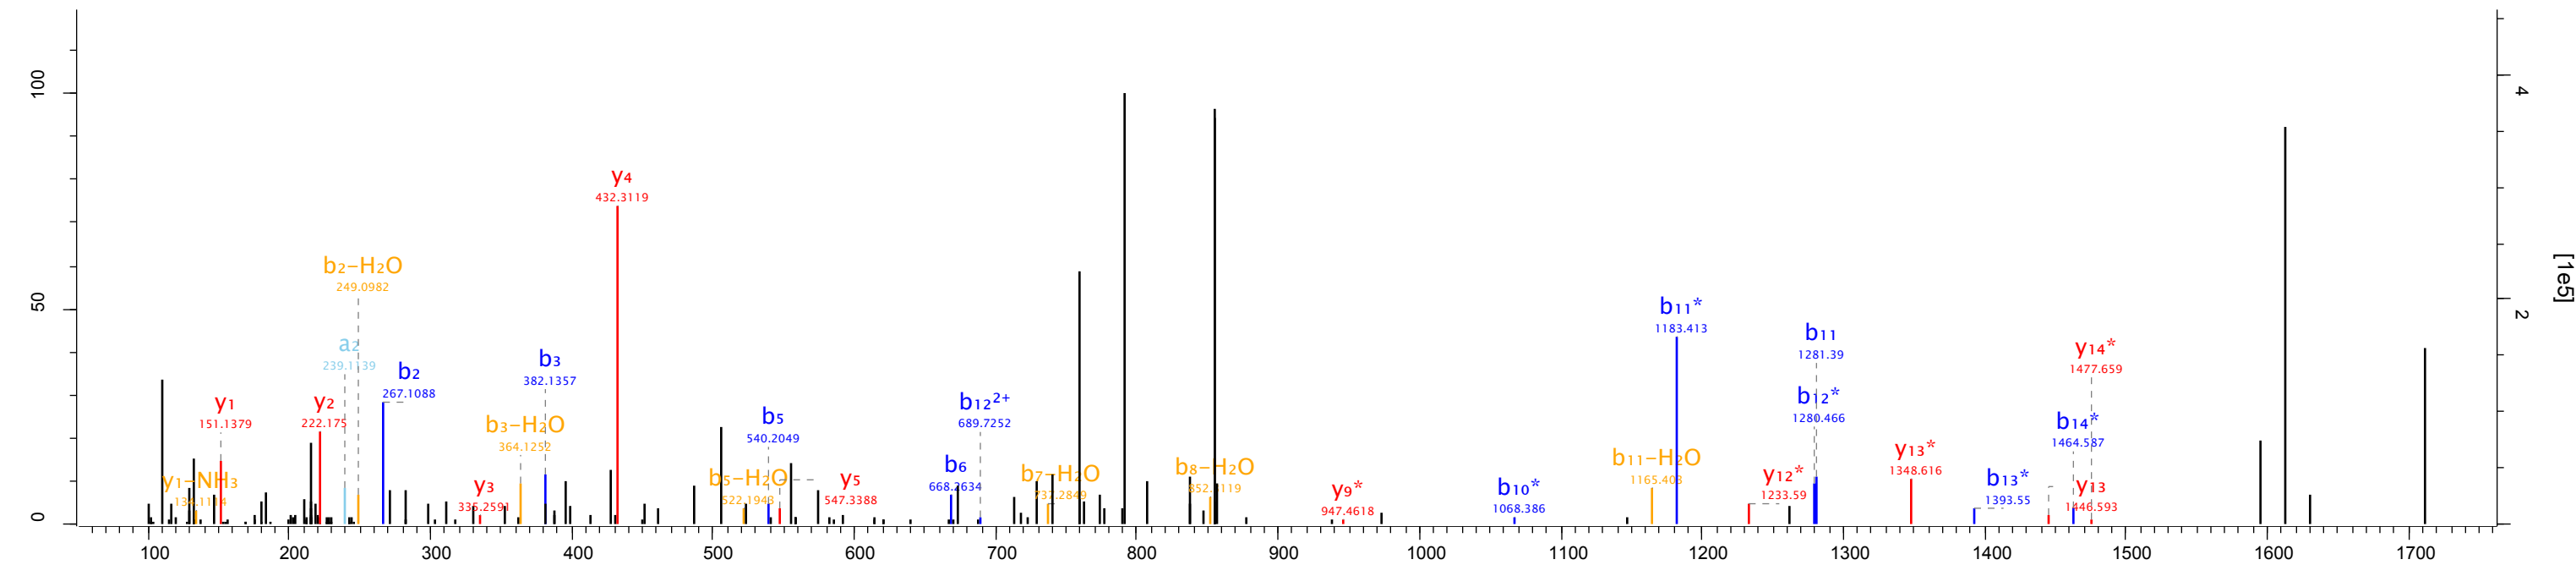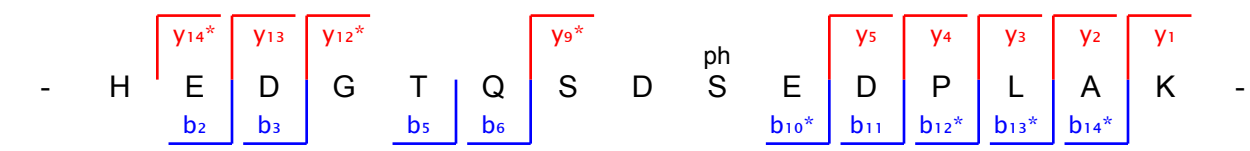

Raw file: 20150814\_A375SR\_Phospho\_BR2\_05  
 Scan: 7187 Method: FTMS; HCD Score: 161.19 m/z: 735.85 Gene names: MCC

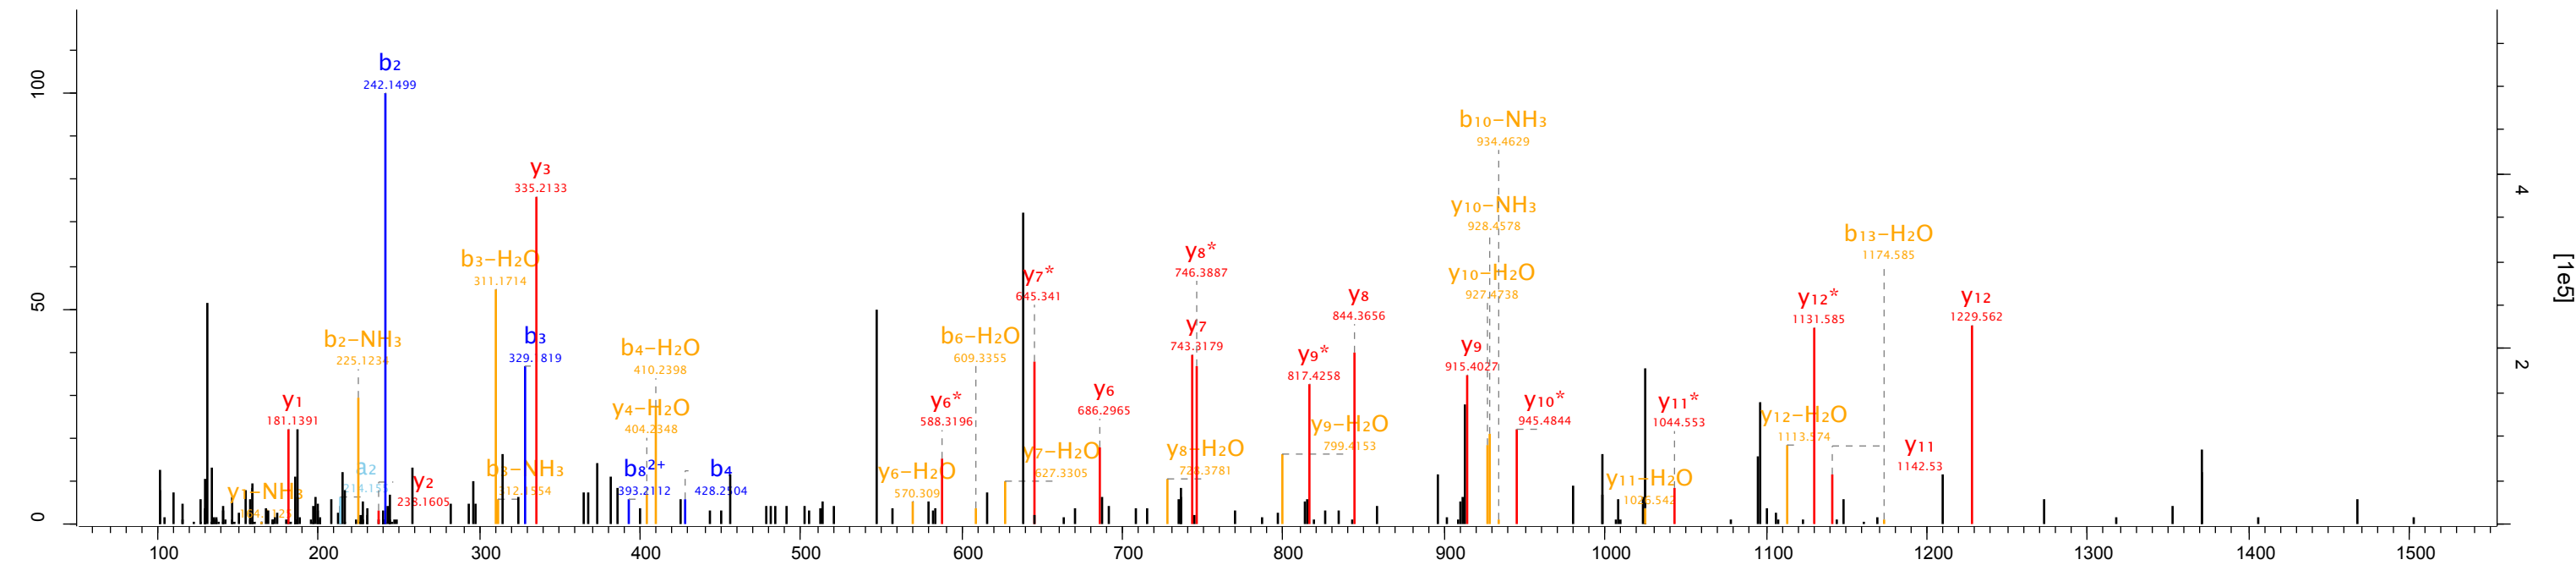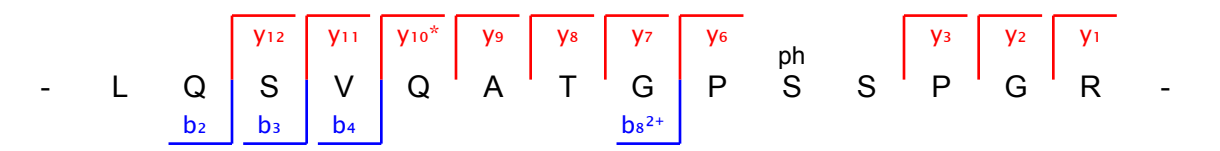

Raw file Scan Method Score m/z Gene names  
 20150814\_A375SR\_Phospho\_BR2\_05 7427 FTMS; HCD 102.52 473.74 VCPIP1

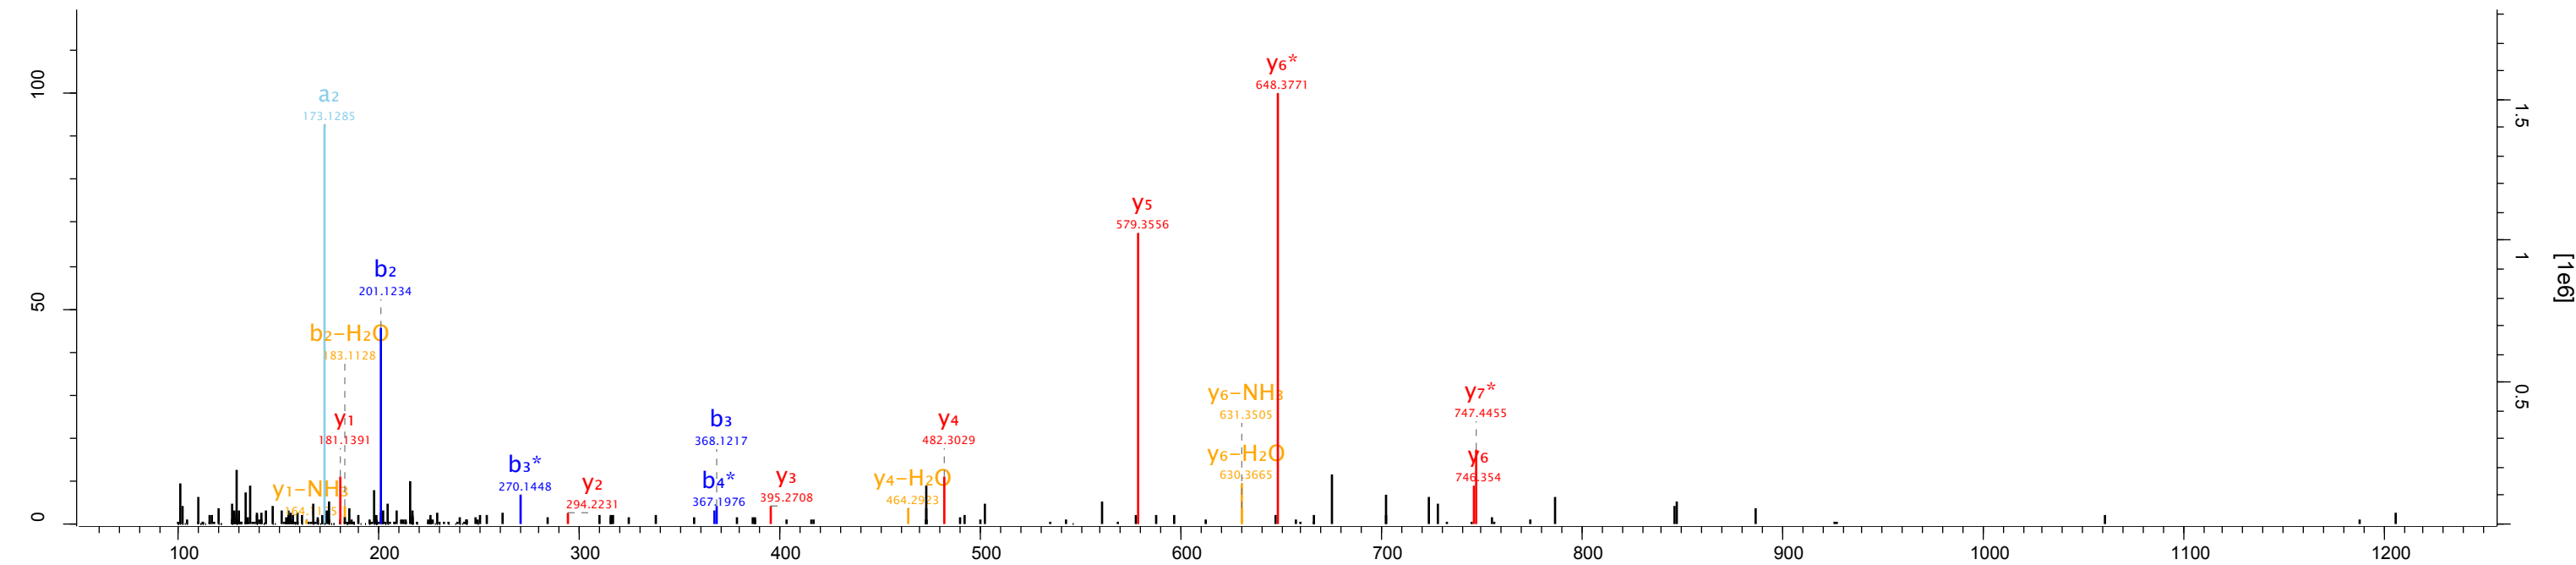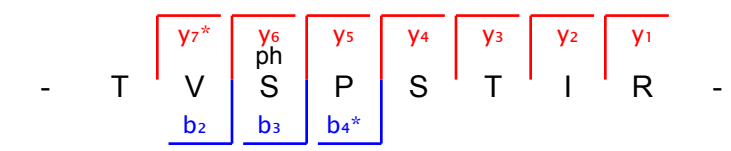

Raw file 20150814\_A375SR\_Phospho\_BR2\_05 Scan 7687 Method FTMS; HCD Score 108.14 m/z 750.32 Gene names BOD1L1

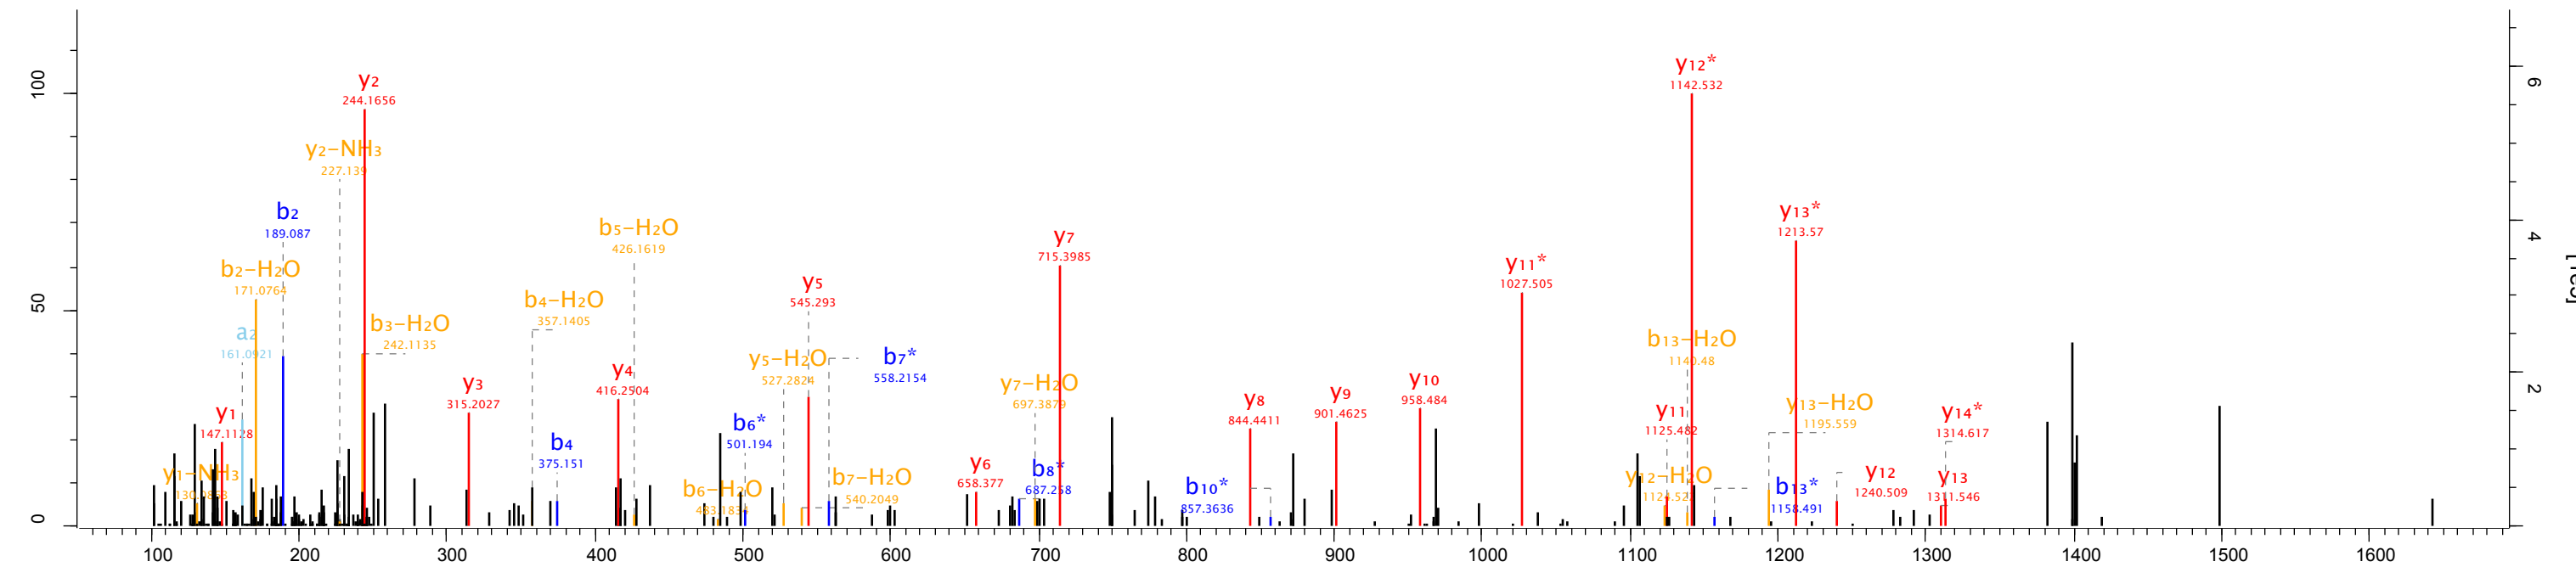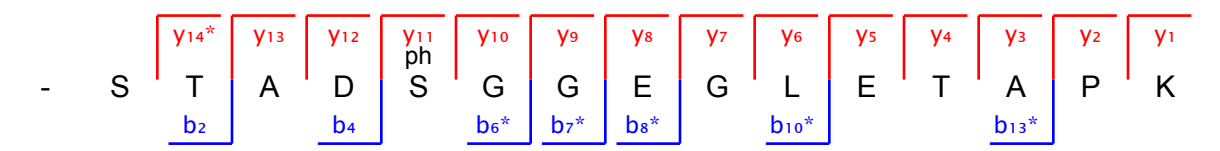

Raw file: 20150814\_A375SR\_Phospho\_BR2\_05  
 Scan: 8687 Method: FTMS; HCD Score: 103.31 m/z: 483.24 Gene names: C16orf72

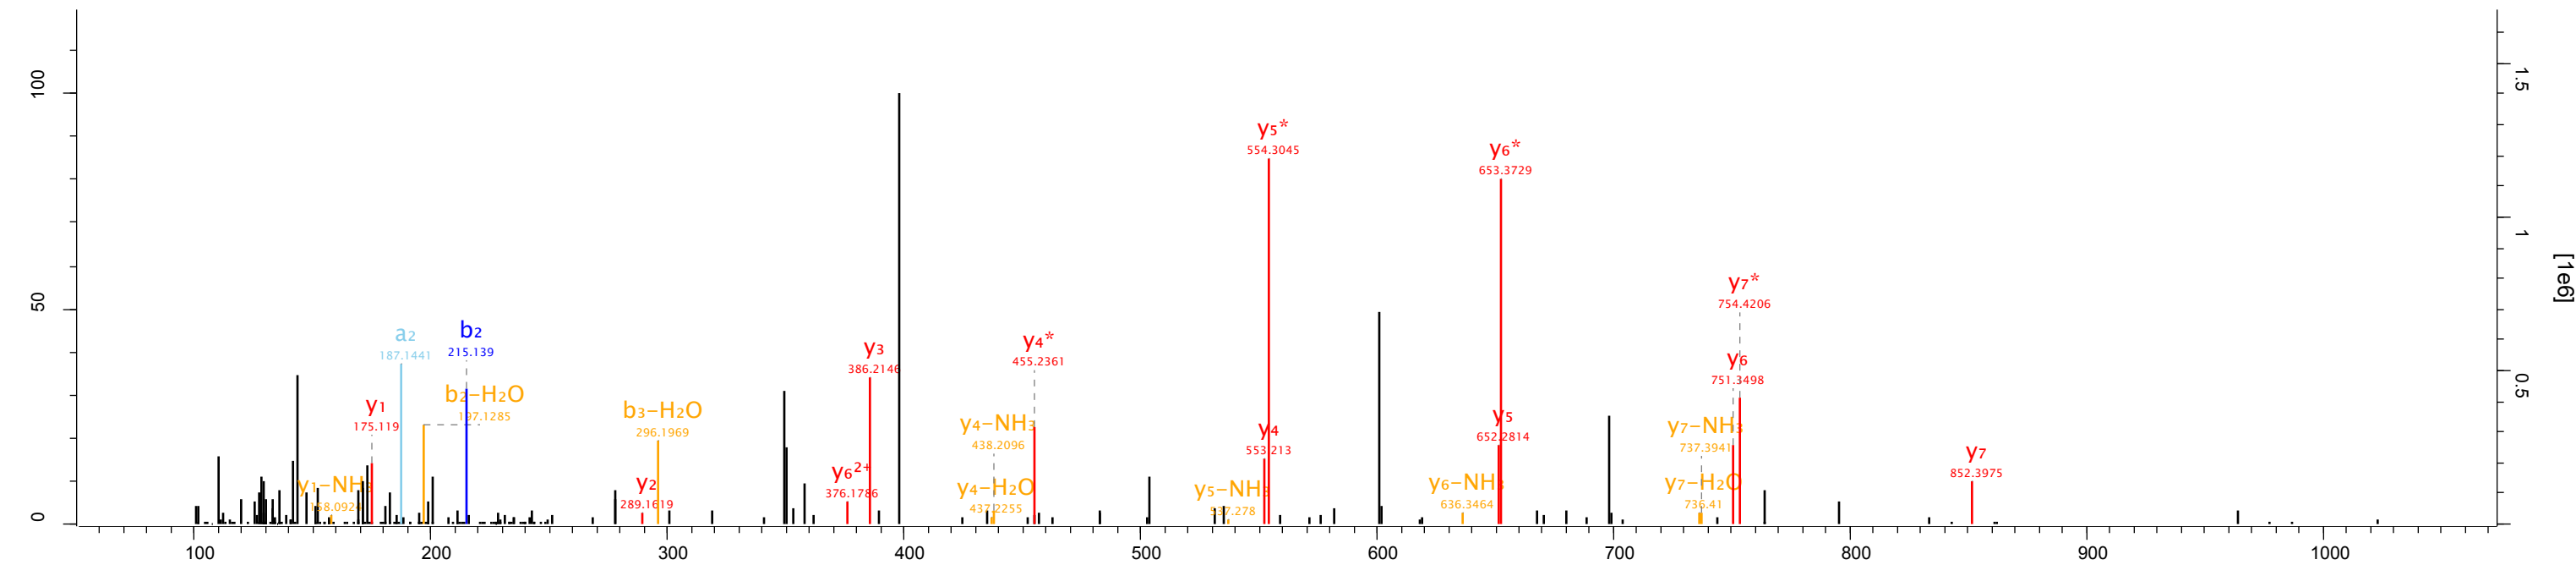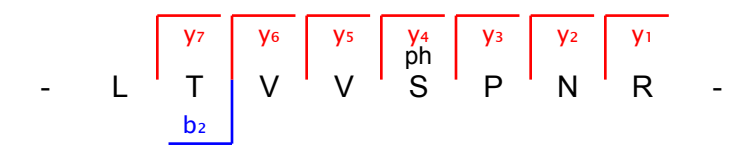

Raw file 20150814\_A375SR\_Phospho\_BR2\_05 Scan 9207 Method FTMS; HCD Score 135.99 m/z 937.43 Gene names CLIP1

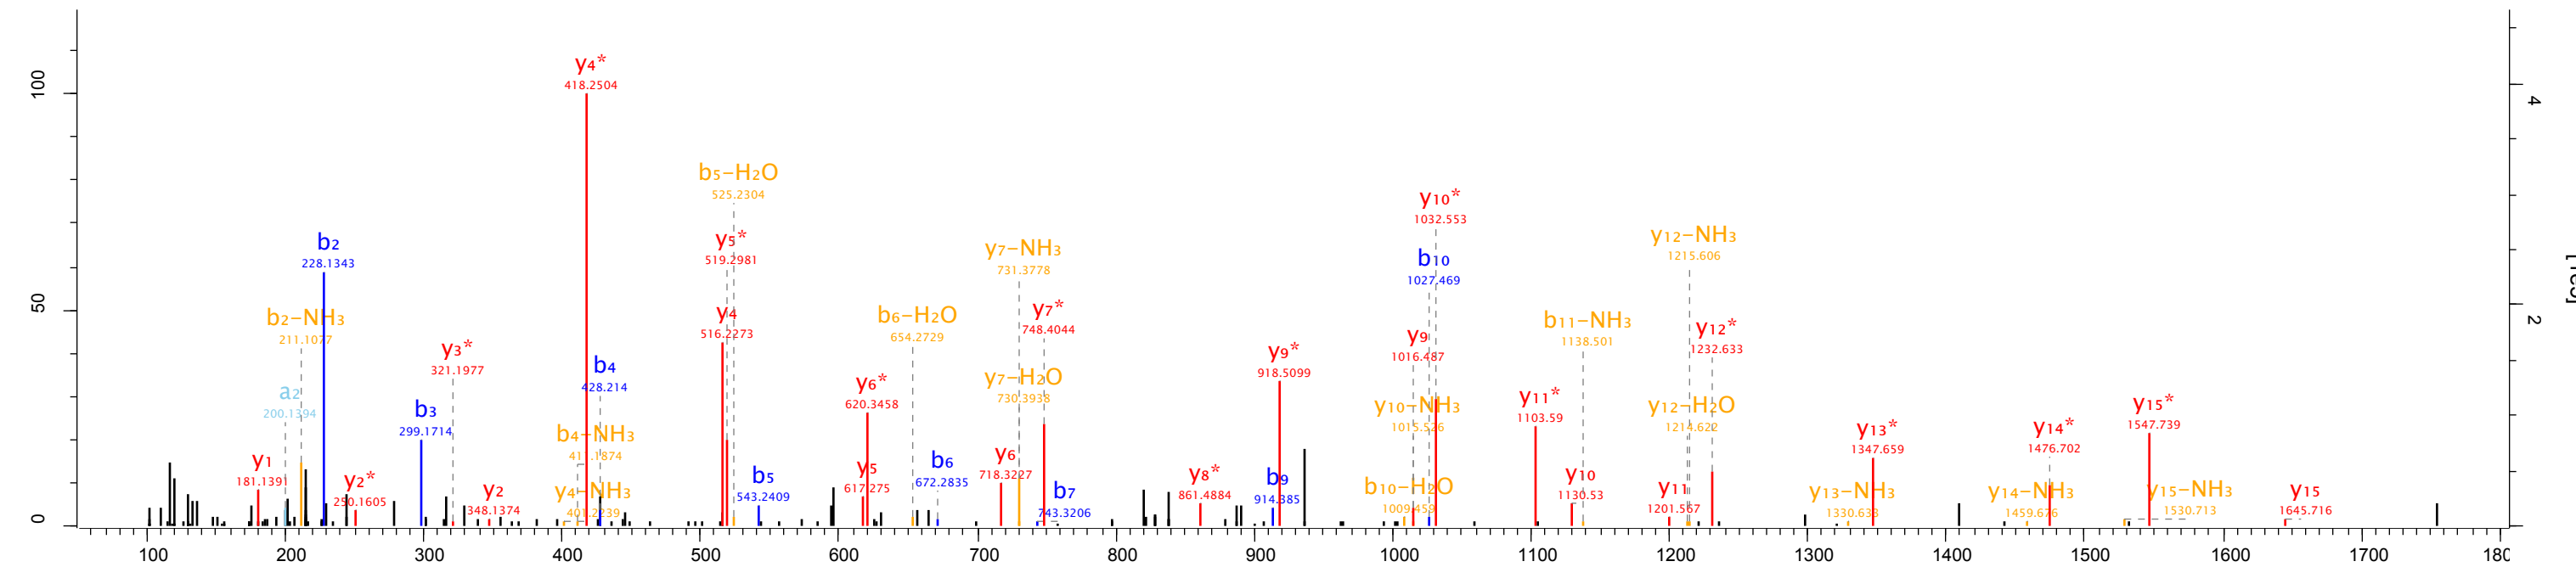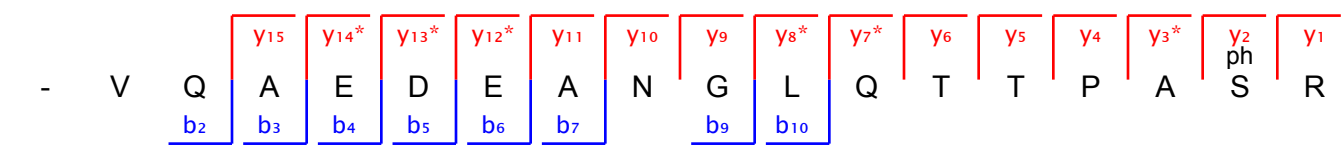

Raw file: 20150814\_A375SR\_Phospho\_BR2\_05  
 Scan: 9967 Method: FTMS; HCD Score: 135.89 m/z: 787.37 Gene names: NUP214

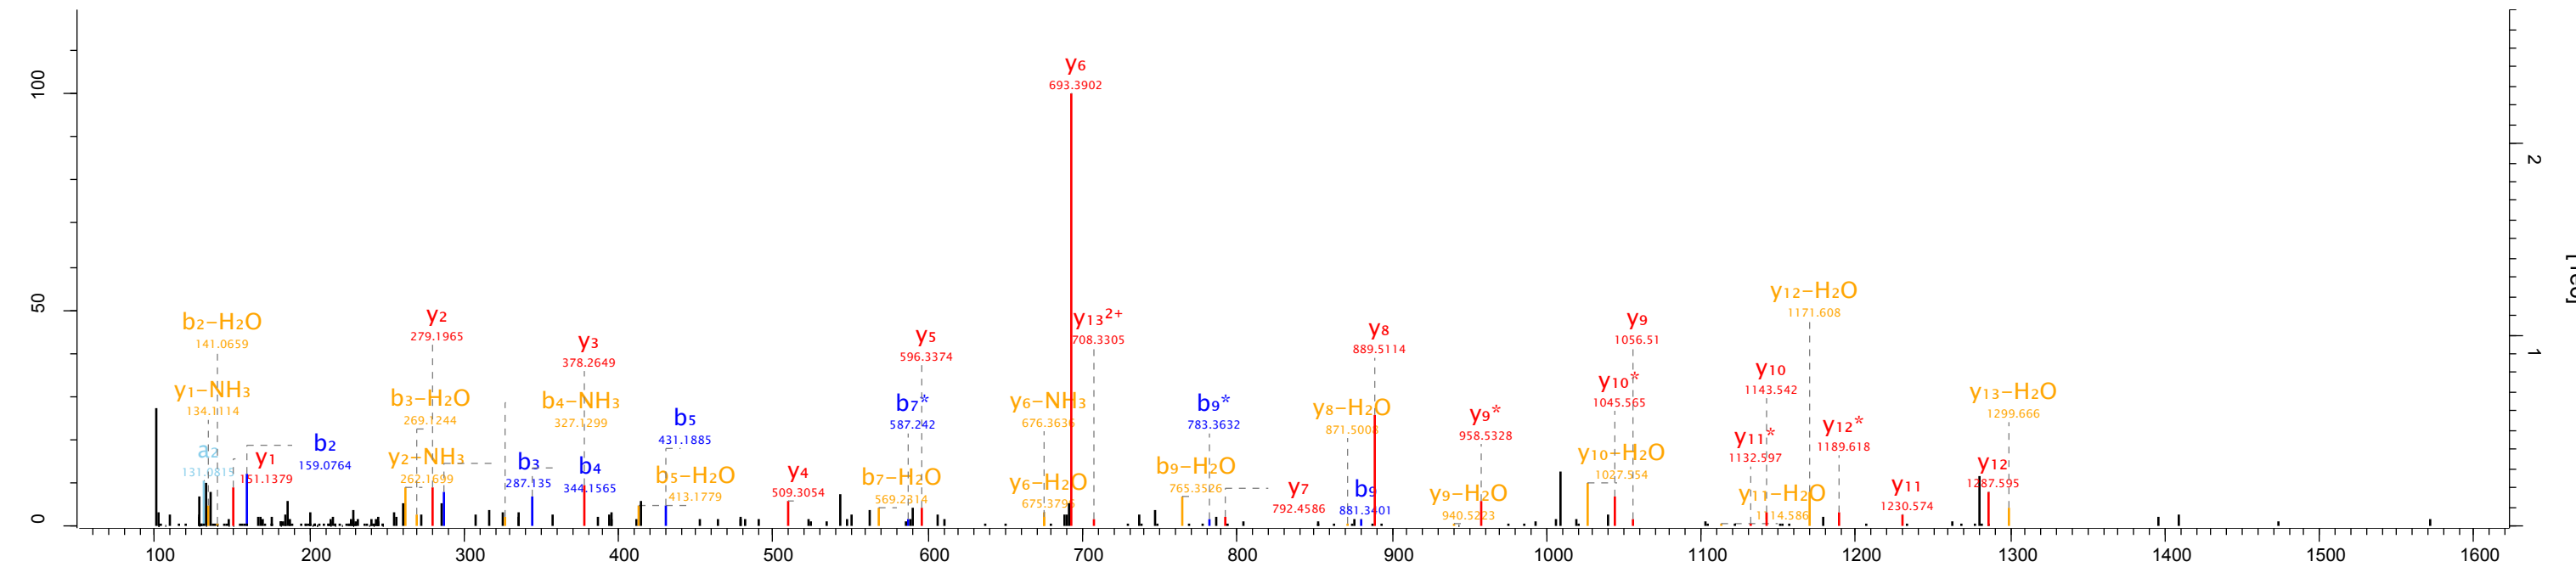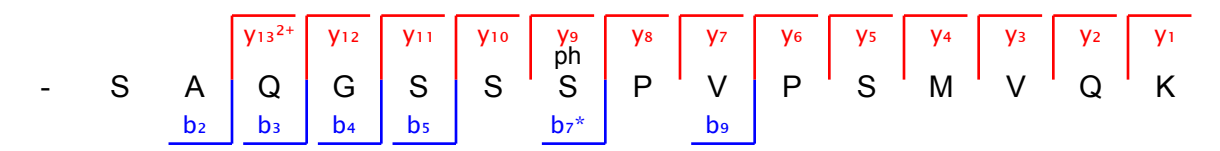

Raw file 20150814\_A375SR\_Phospho\_BR2\_06 Scan 10177 Method FTMS; HCD Score 58.08 m/z 785.86 Gene names LITAF;TLE3

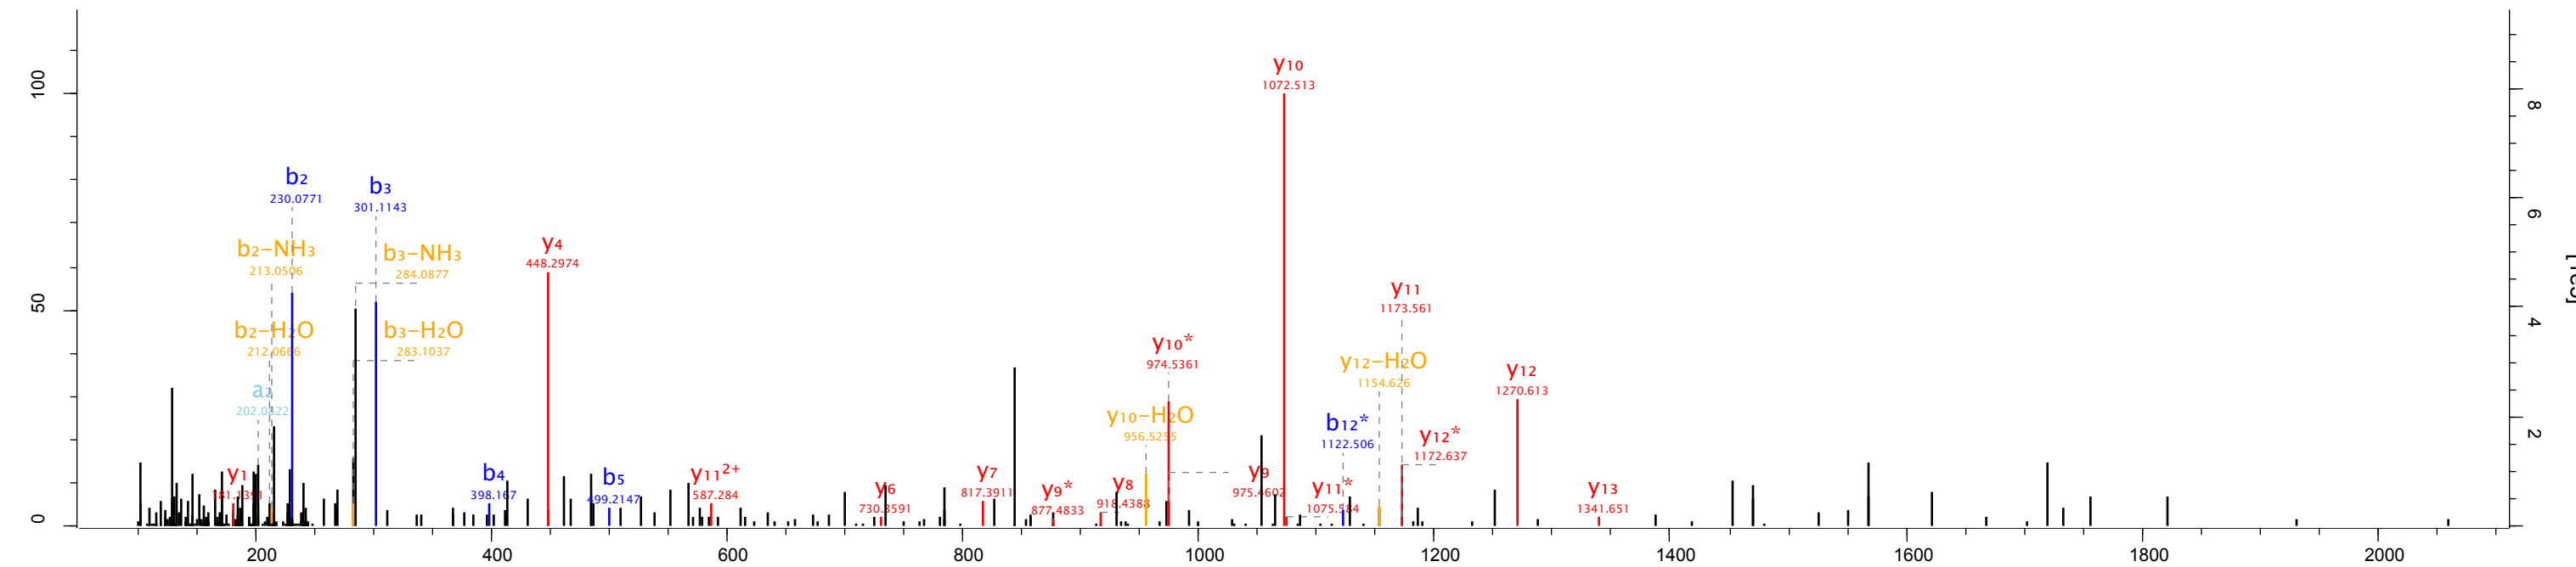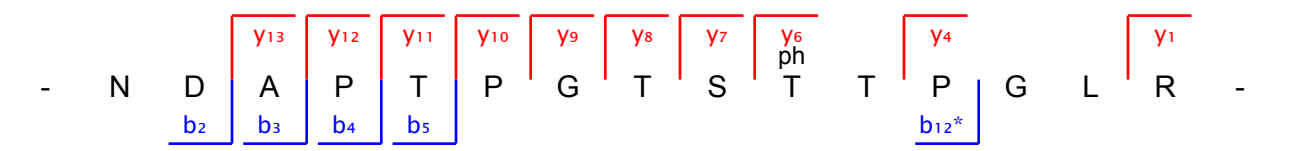



Raw file: 20150814\_A375SR\_Phospho\_BR2\_06  
 Scan: 10667  
 Method: FTMS; HCD  
 Score: 123.01  
 m/z: 509.24  
 Gene names: SAFB

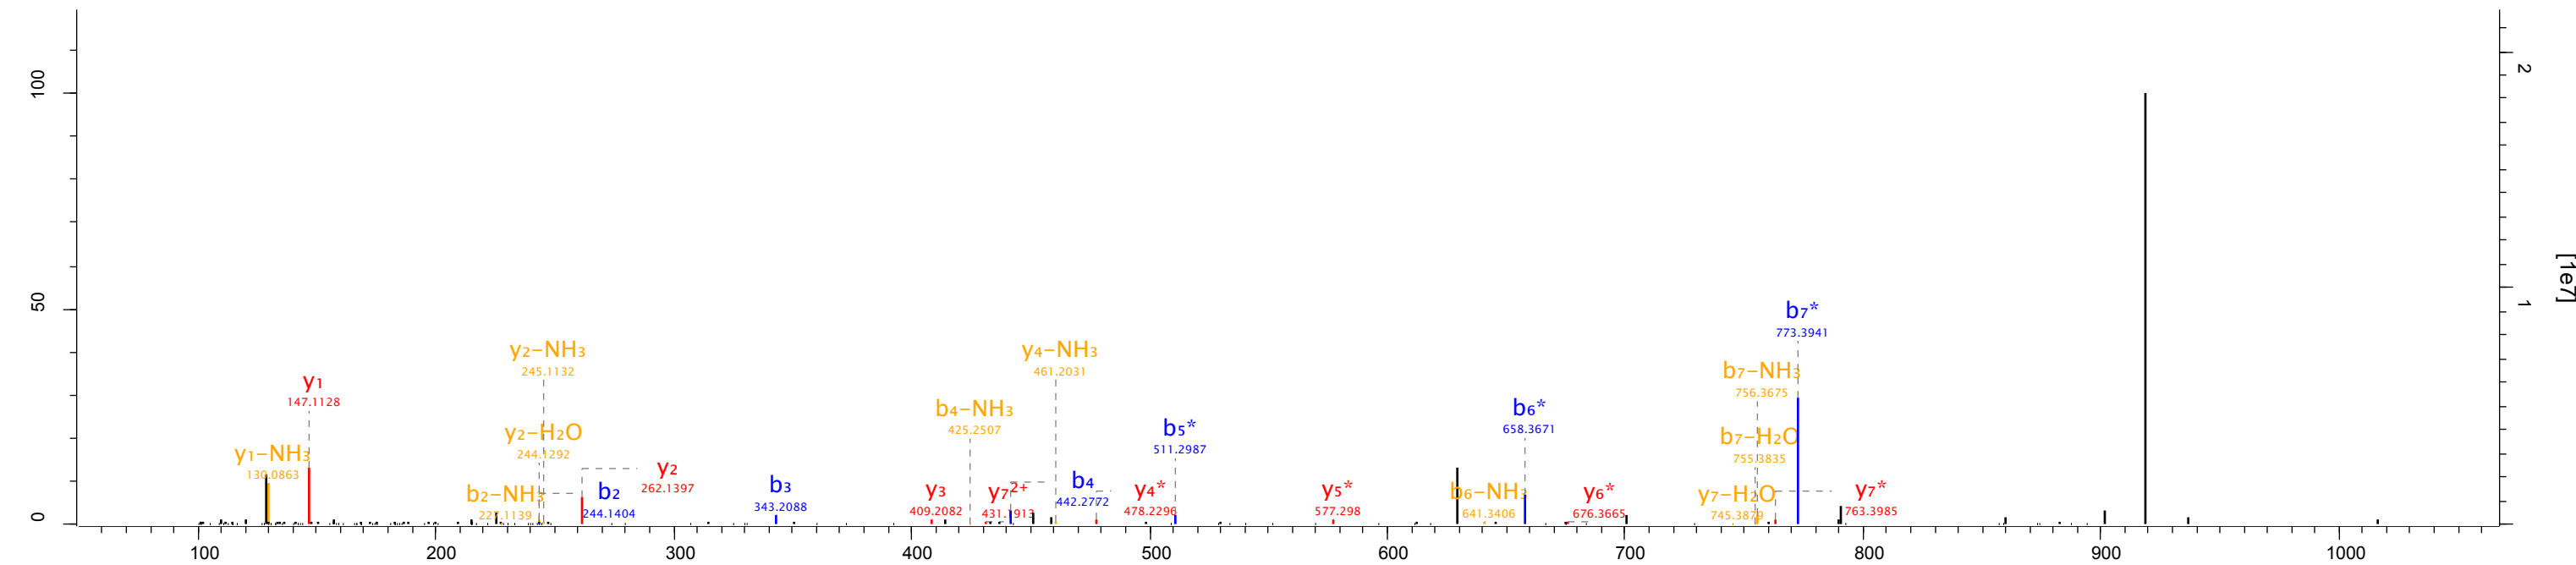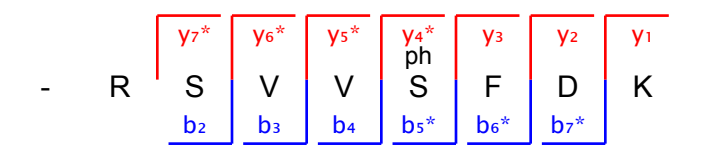

Raw file: 20150814\_A375SR\_Phospho\_BR2\_06  
 Scan: 11547  
 Method: FTMS; HCD  
 Score: 255.69  
 m/z: 928.94  
 Gene names: IRF2BP2

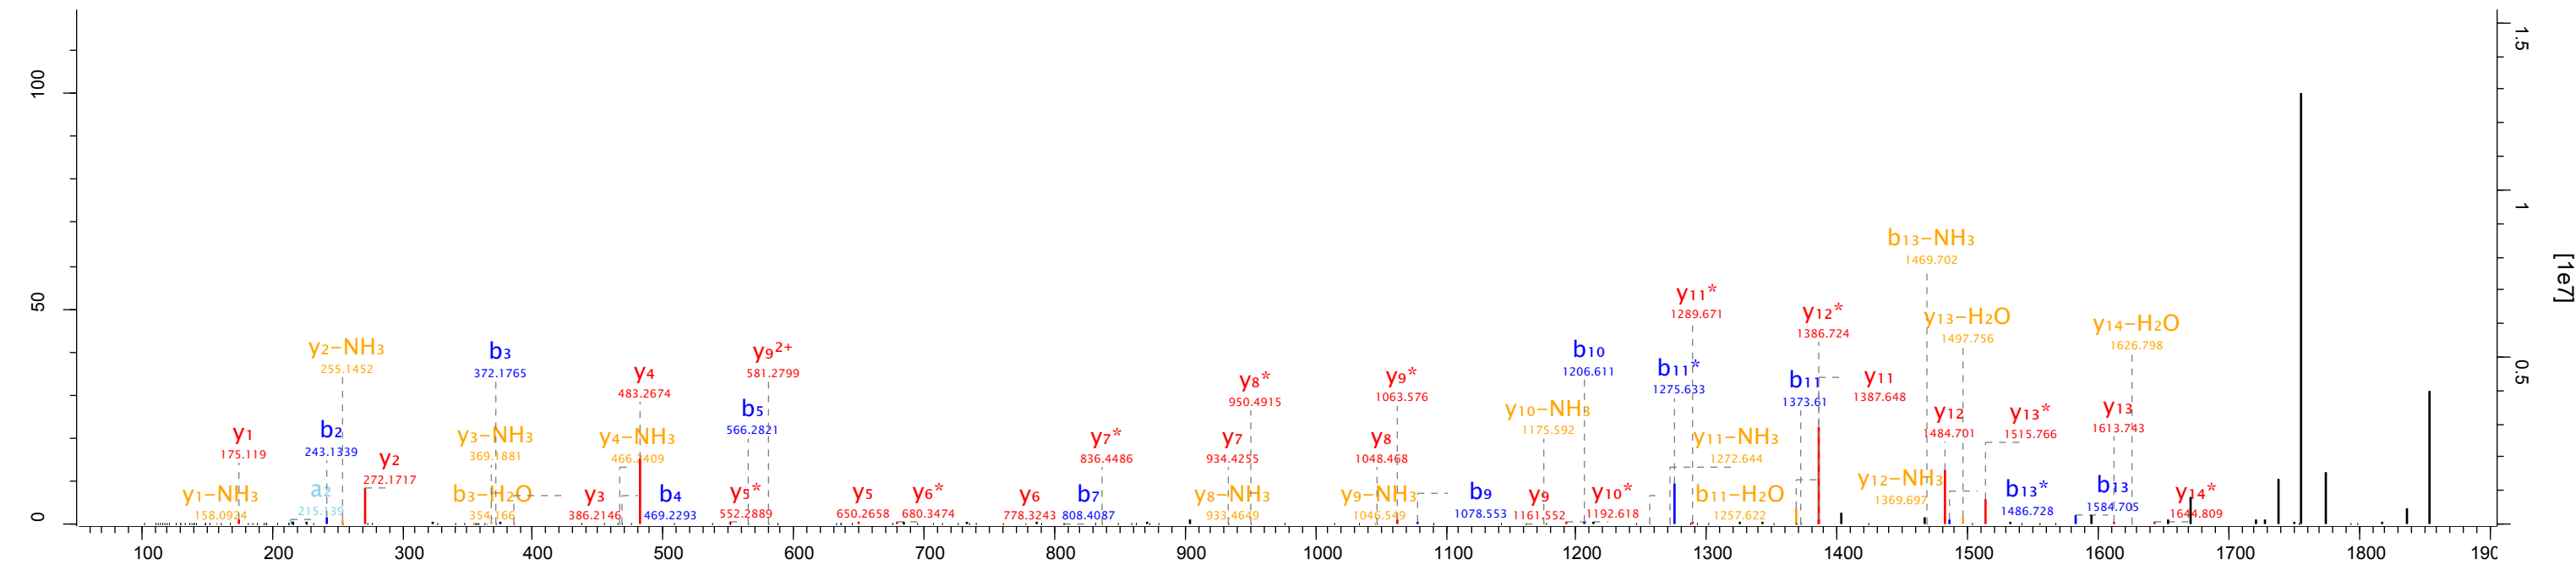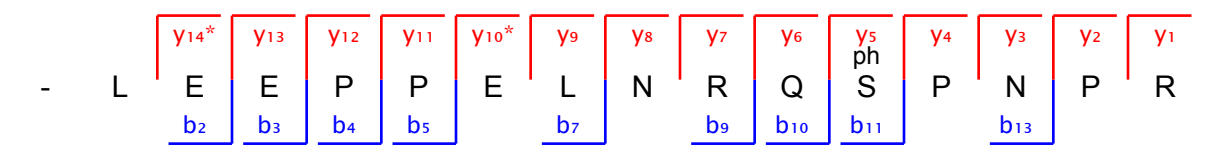

Raw file 20150814\_A375SR\_Phospho\_BR2\_06 Scan 12157 Method FTMS; HCD Score 191.89 m/z 707.84 Gene names HAUS6

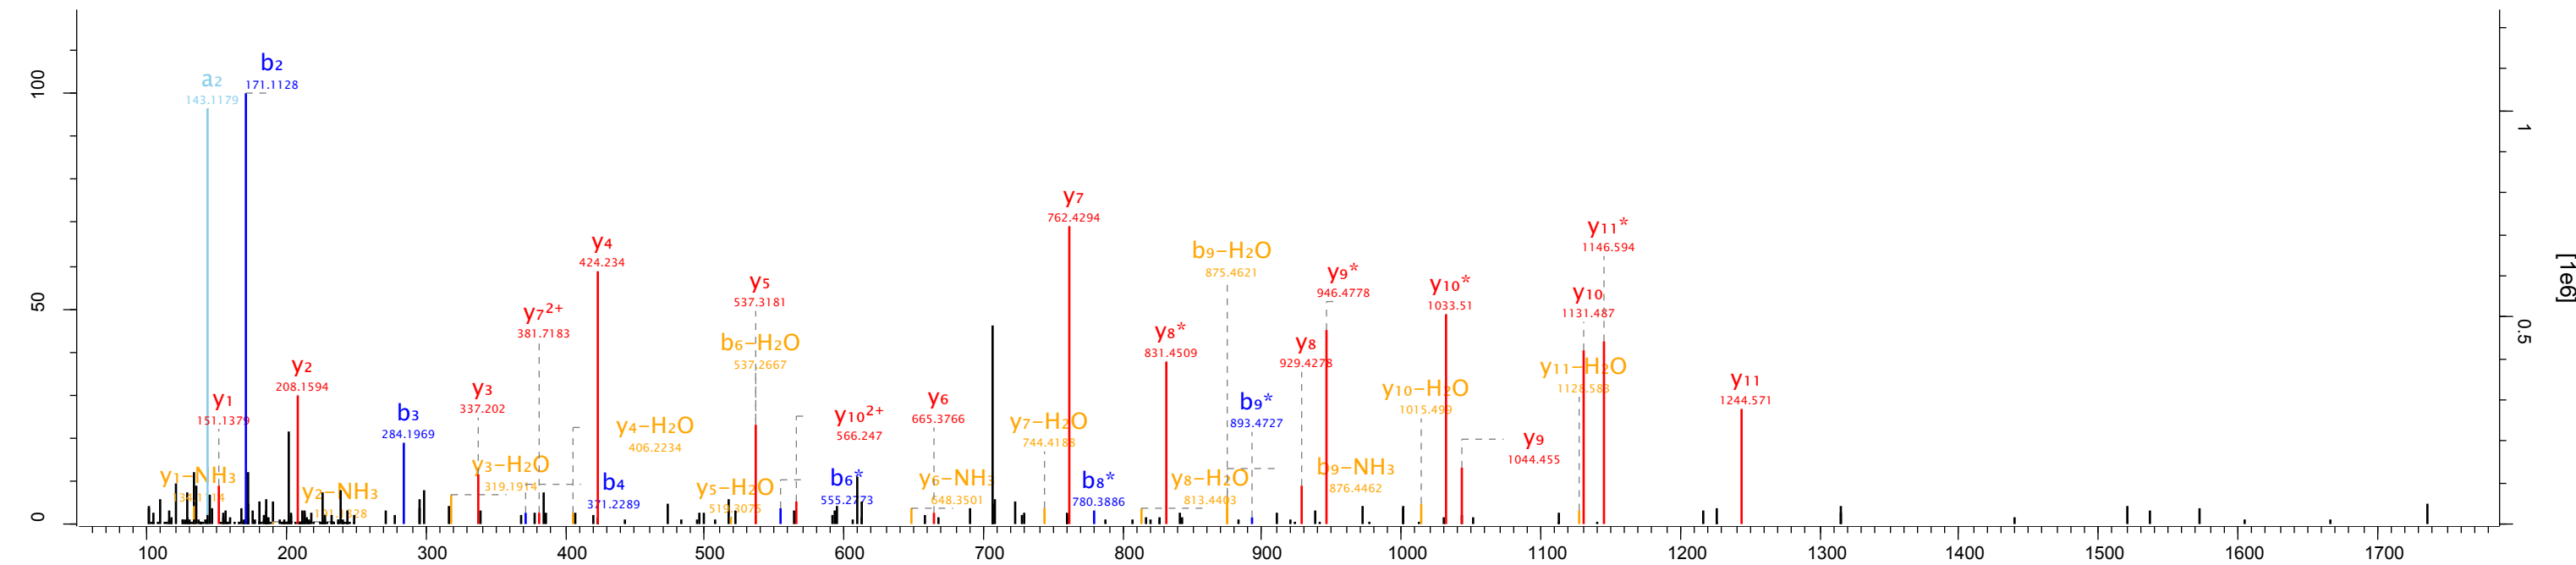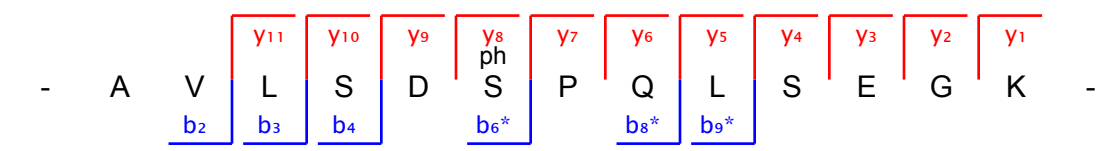

Raw file 20150814\_A375SR\_Phospho\_BR2\_06 Scan 12397 Method FTMS; HCD Score 92.54 m/z 485.76 Gene names UBAP1

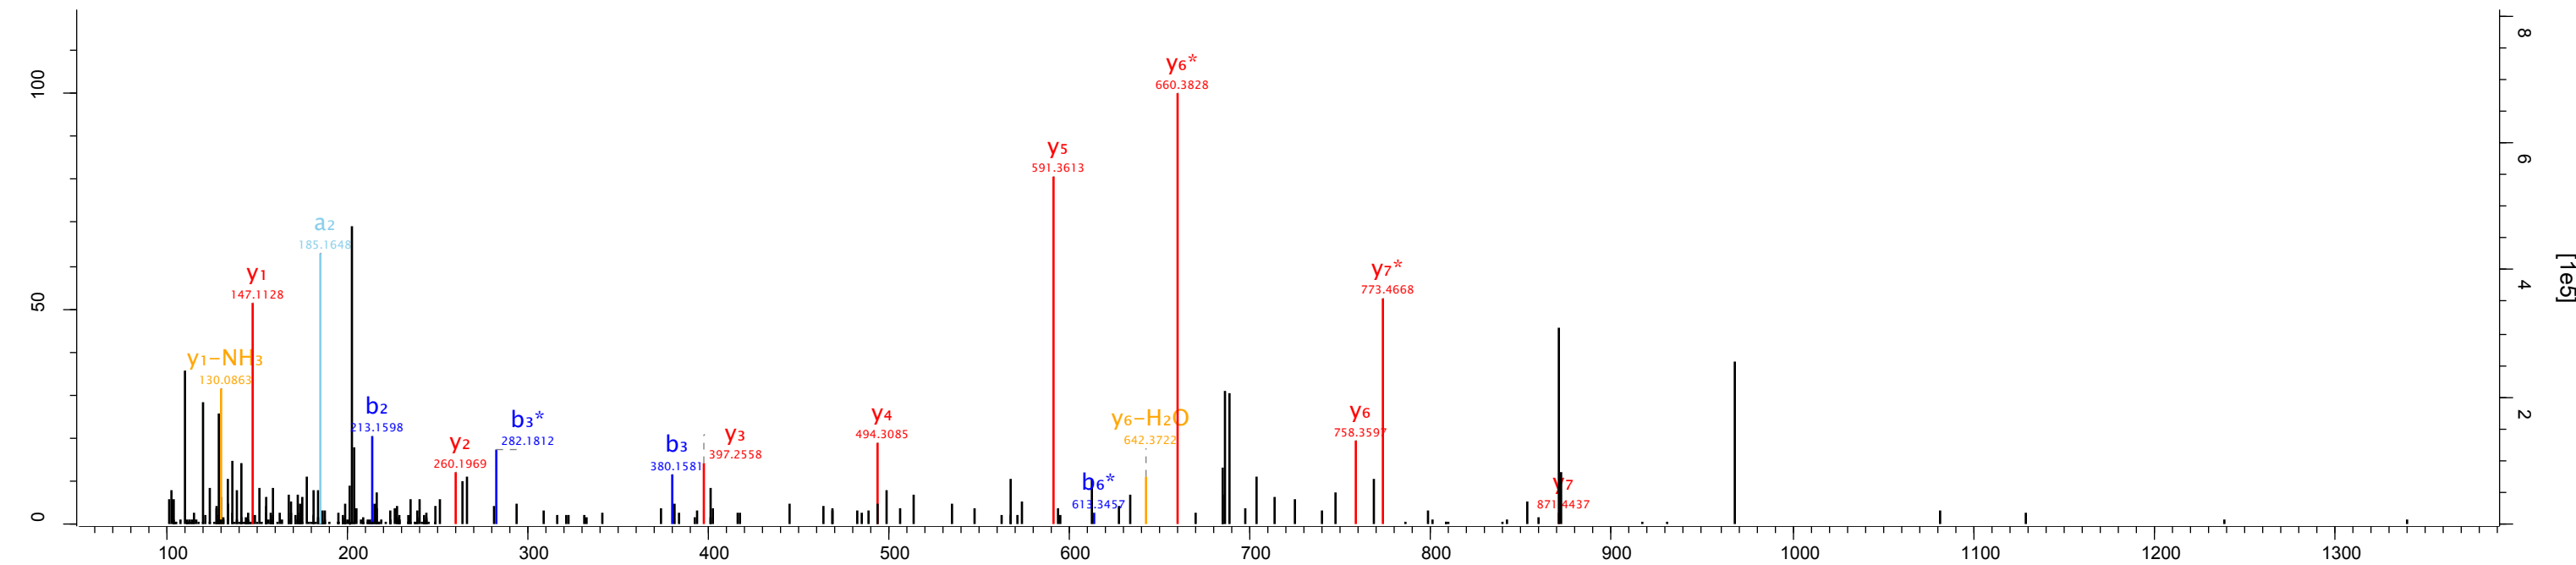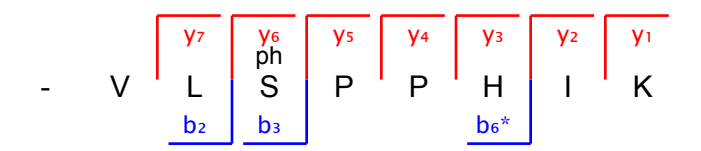

Raw file 20150814\_A375SR\_Phospho\_BR2\_06 Scan 13067 Method FTMS; HCD Score 104.95 m/z 809.68 Gene names SON

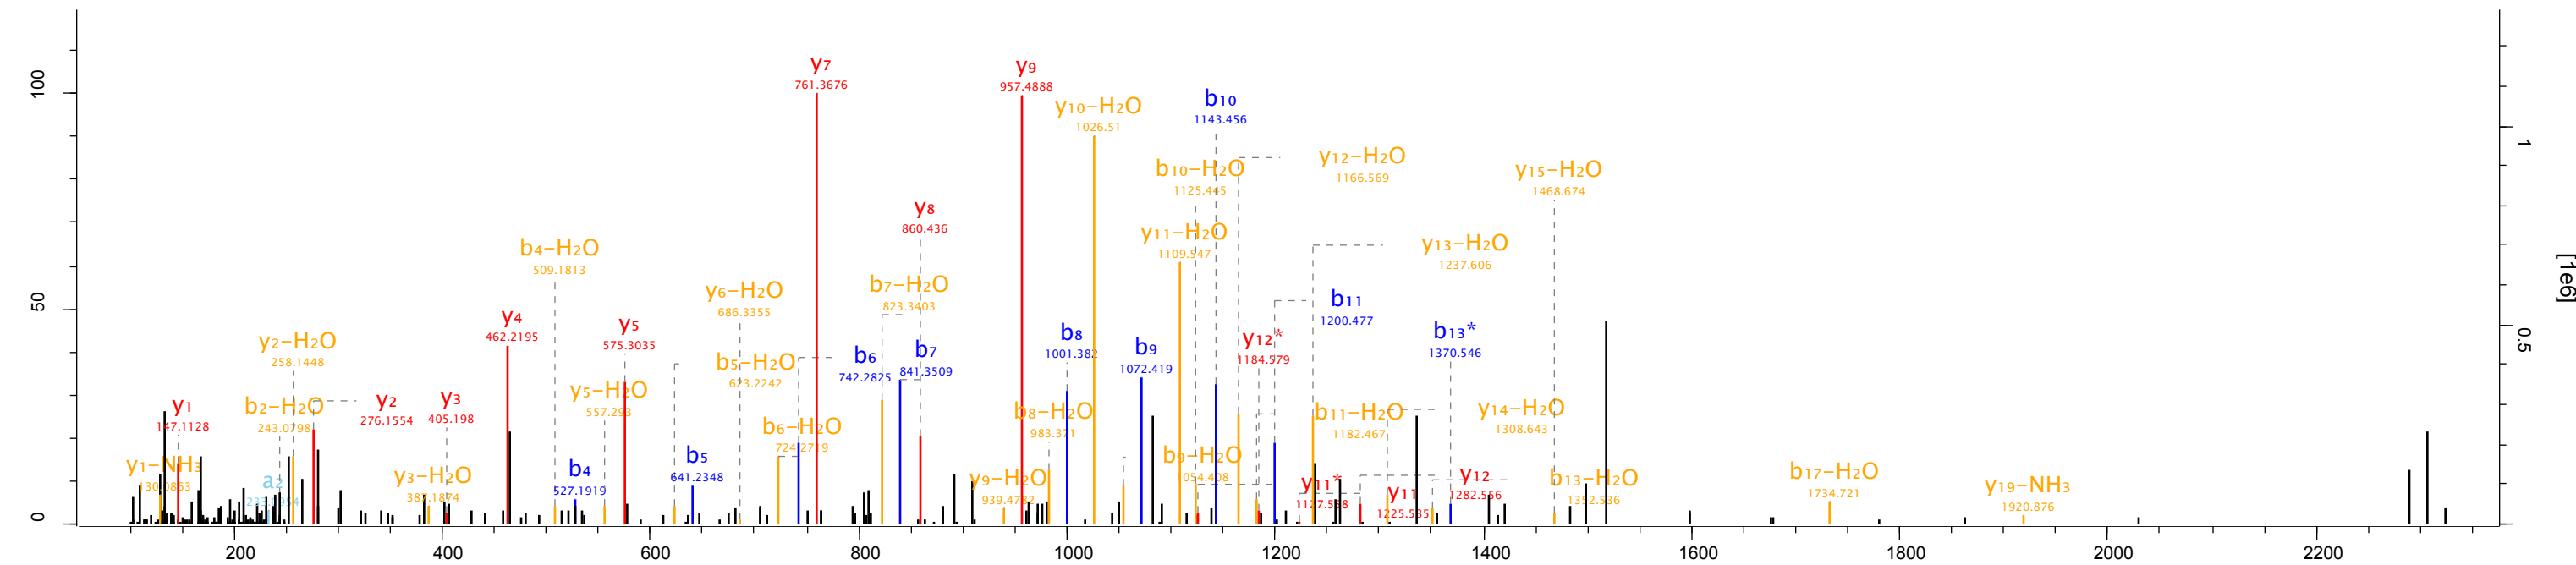

- E M E H N T V C A A G T S P V G E I G E E K -

Fragmentation sites are indicated by brackets below the sequence:

- Blue brackets (b-series): a2 (M), b4 (H), b5 (N), b6 (T), b7 (V), b8 (C), b9 (A), b10 (A), b11 (G), b13\* (S)
- Red brackets (y-series): y12 (G), y11 ph (T), y9 (P), y8 (V), y7 (G), y5 (I), y4 (G), y3 (E), y2 (E), y1 (K)

Raw file  
20150814\_A375SR\_Phospho\_BR2\_06

Scan 13707 Method FTMS; HCD Score 254.8 m/z 910.44 Gene names NES

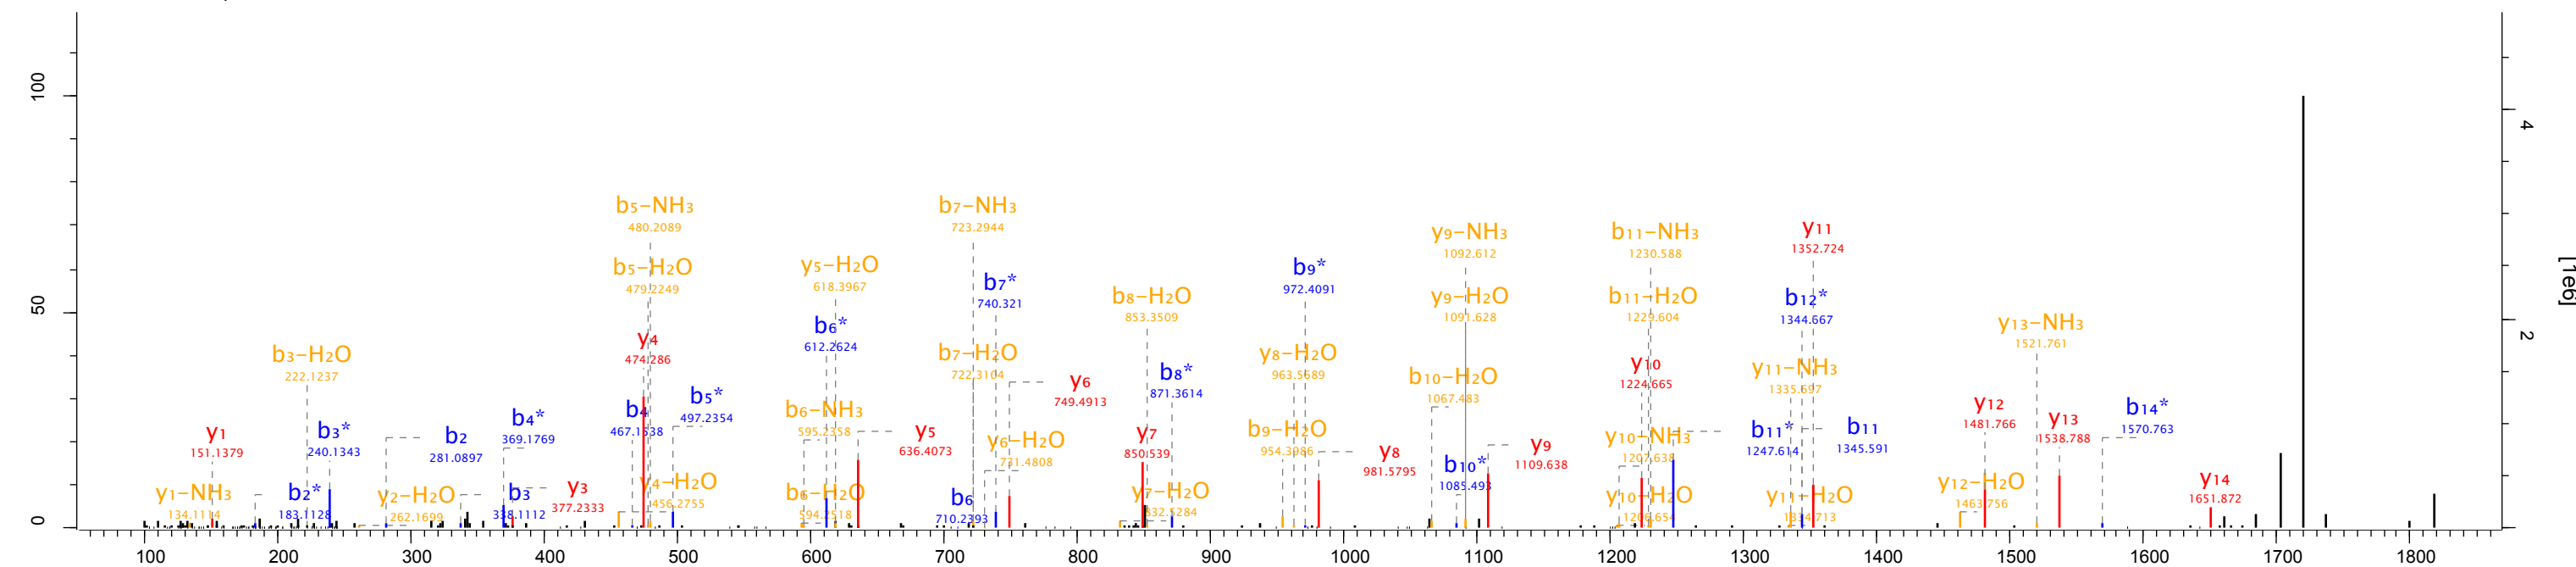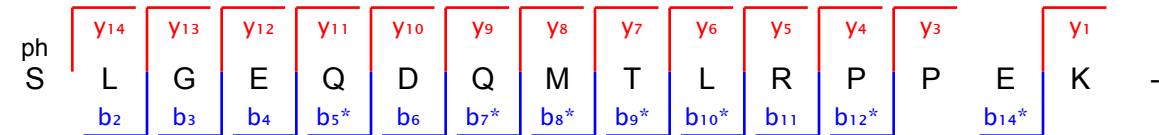

Raw file: 20150814\_A375SR\_Phospho\_BR2\_06  
 Scan: 14317 Method: FTMS; HCD Score: 274.34 m/z: 957.48 Gene names: ZYX

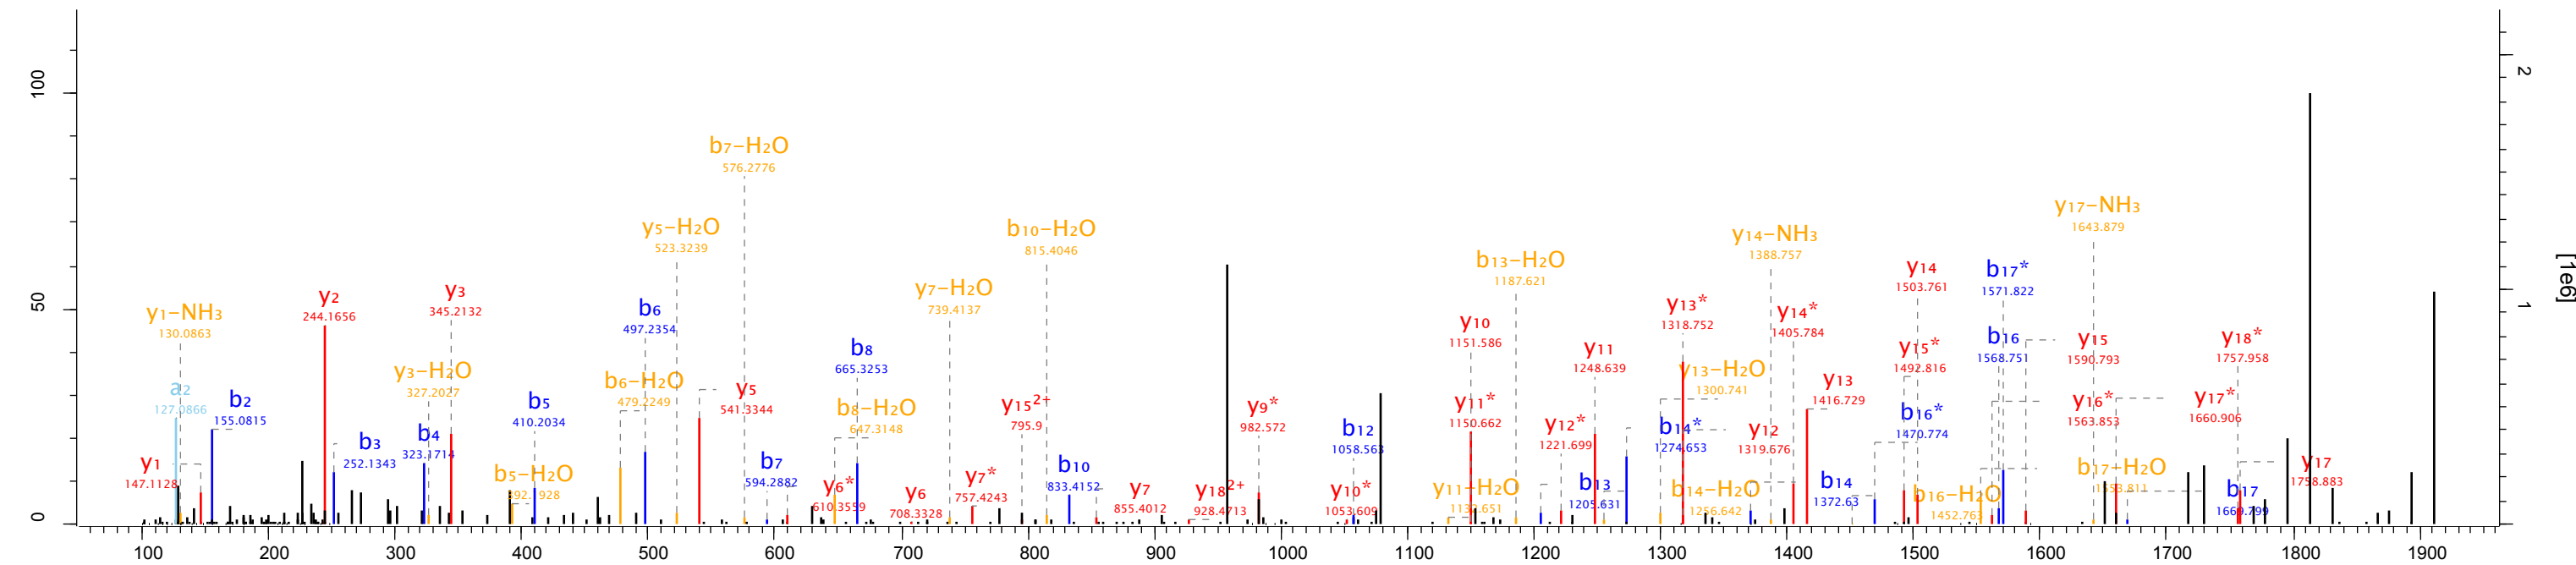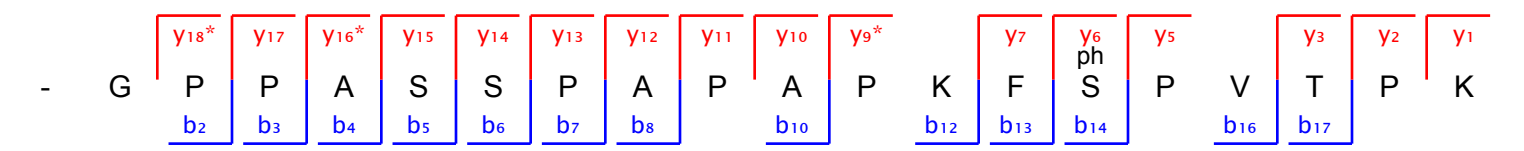

Raw file 20150814\_A375SR\_Phospho\_BR2\_06 Scan 14457 Method FTMS; HCD Score 80.36 m/z 741.37 Gene names ABI2

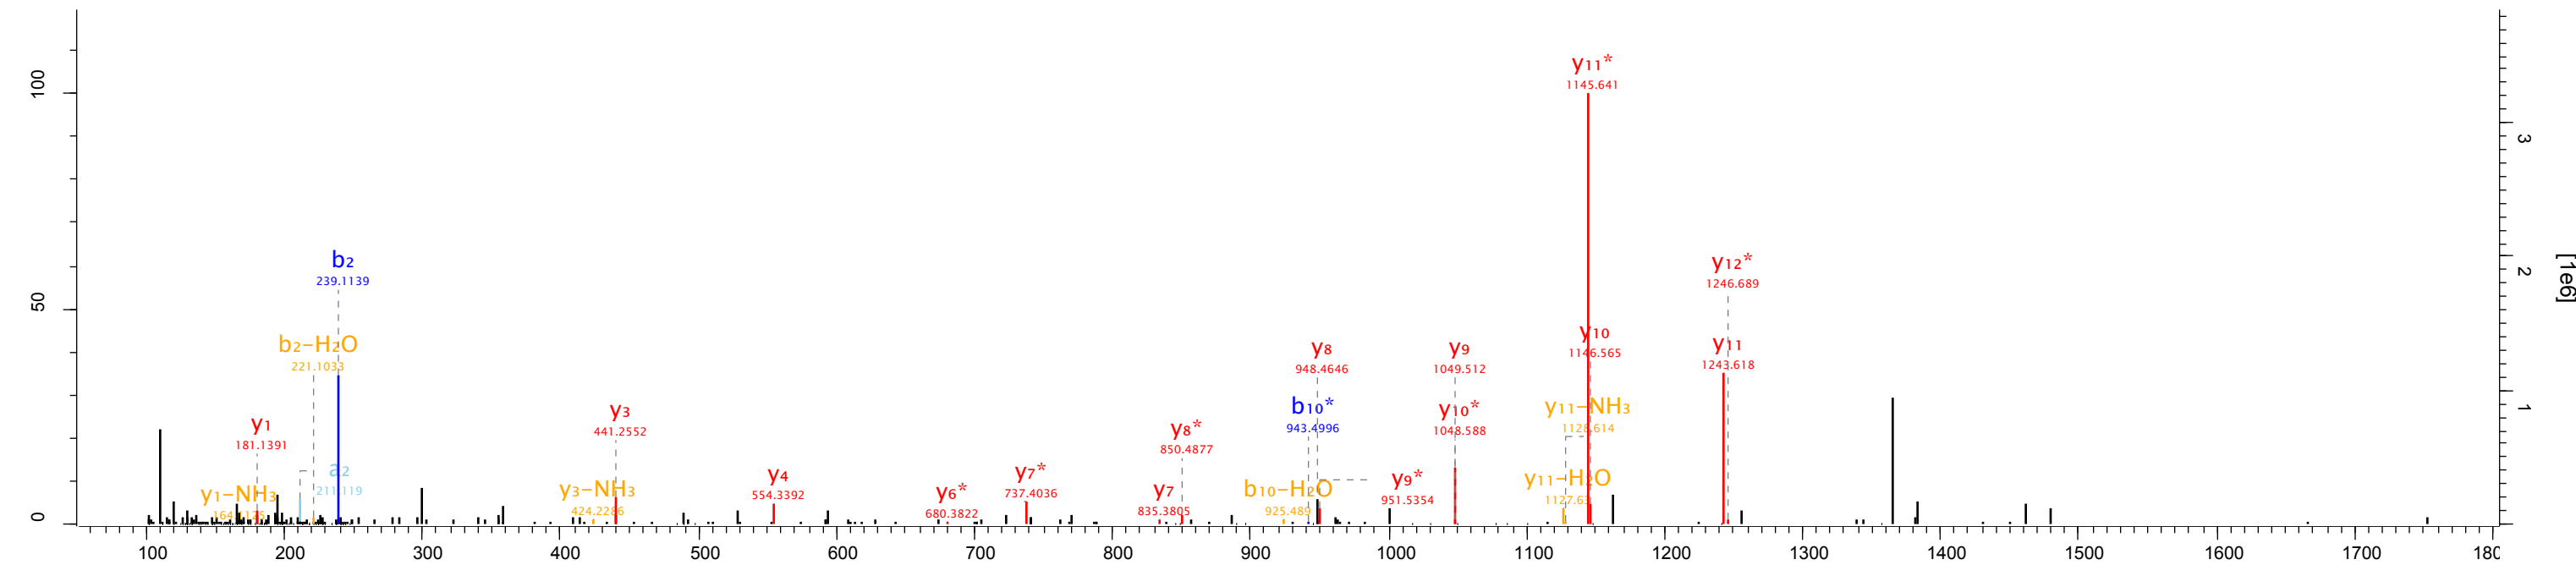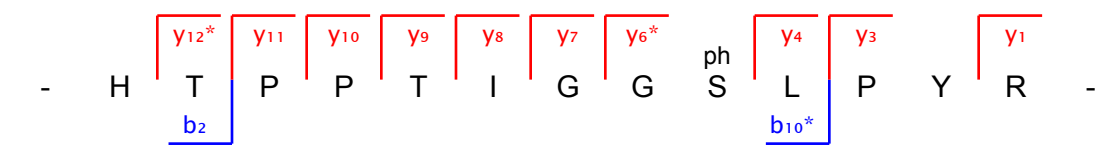



Raw file Scan Method Score m/z Gene names  
 20150814\_A375SR\_Phospho\_BR2\_06 15697 FTMS; HCD 181.97 782.83 TNKS1BP1

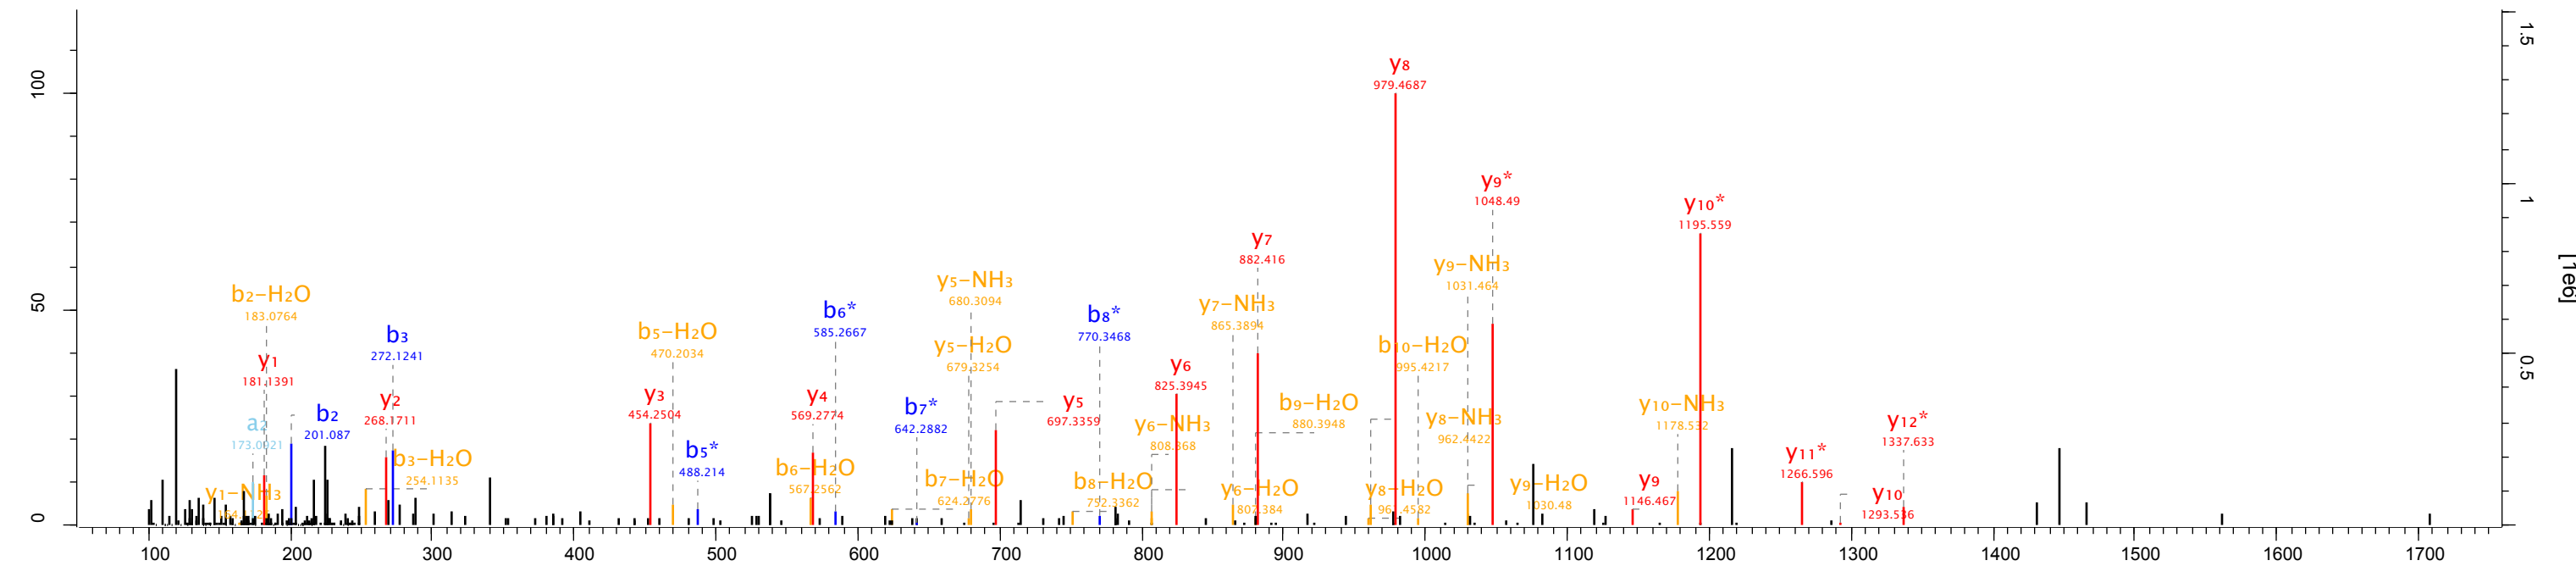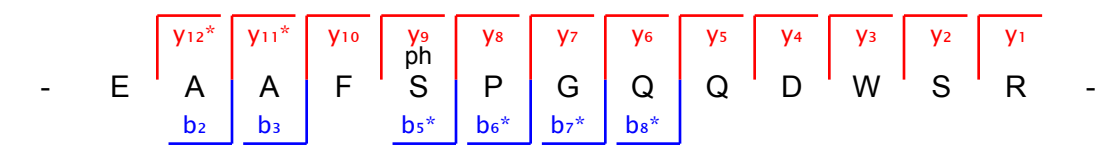

Raw file 20150814\_A375SR\_Phospho\_BR2\_06 Scan 16037 Method FTMS; HCD Score 152.94 m/z 794.4 Gene names VIM

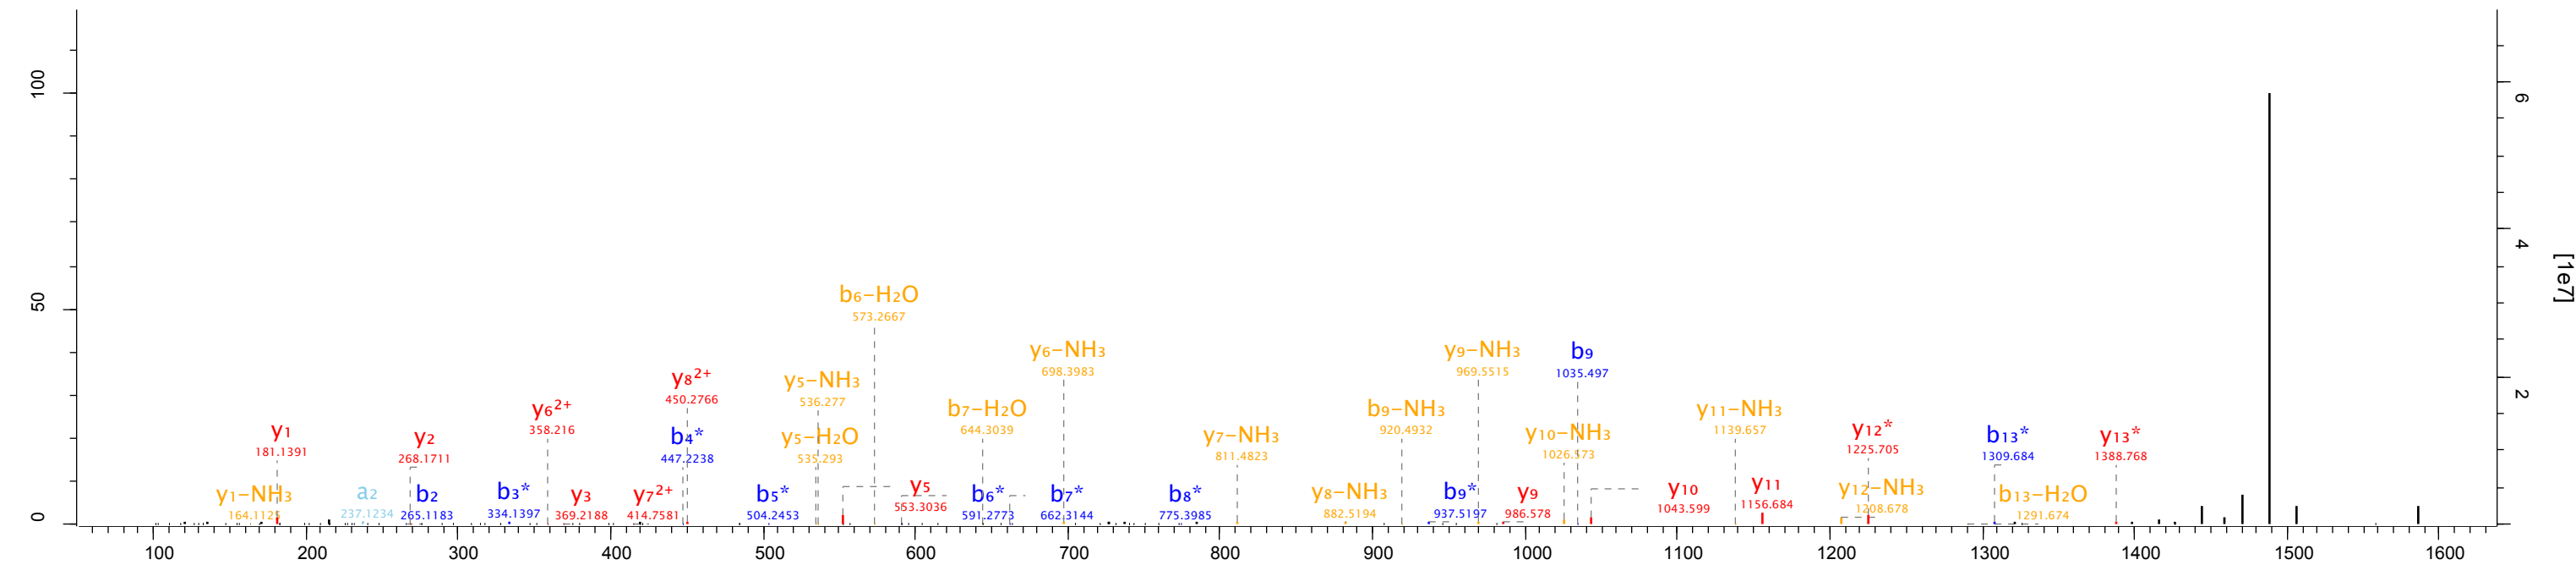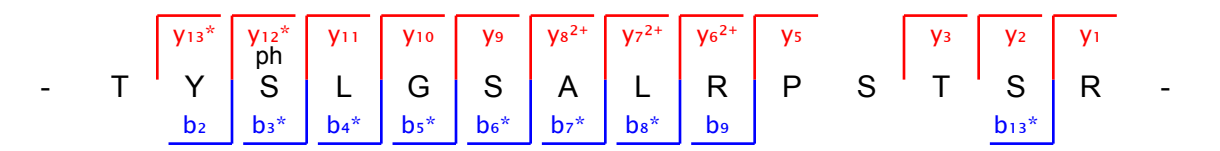

Raw file 20150814\_A375SR\_Phospho\_BR2\_06 Scan 17077 Method FTMS; HCD Score 282.12 m/z 978.47 Gene names CRTC2

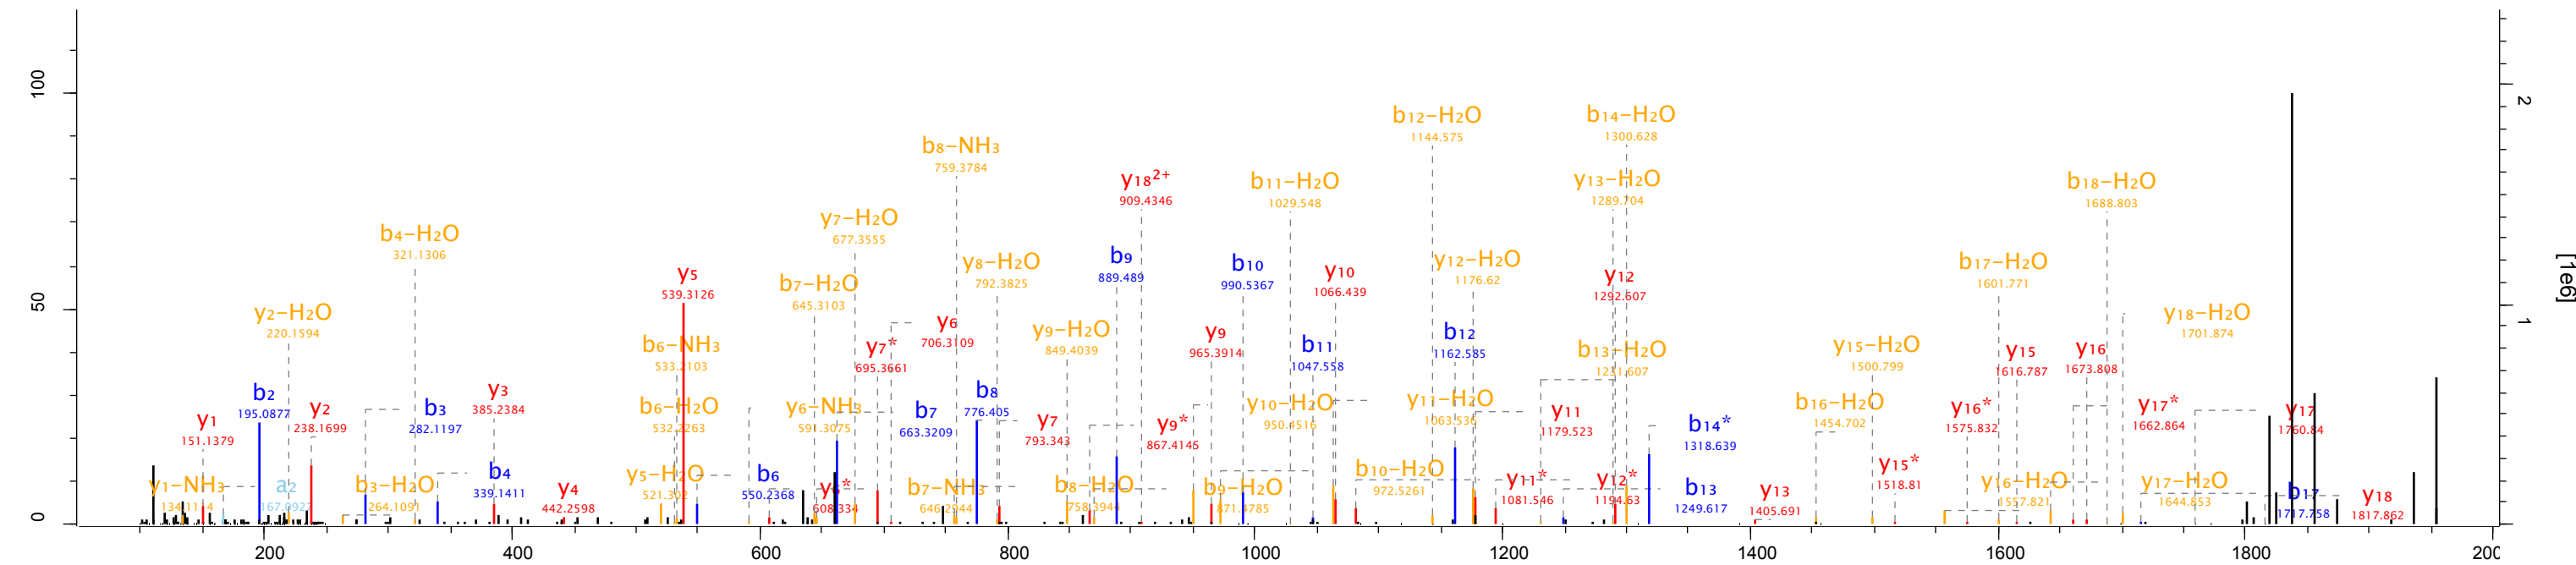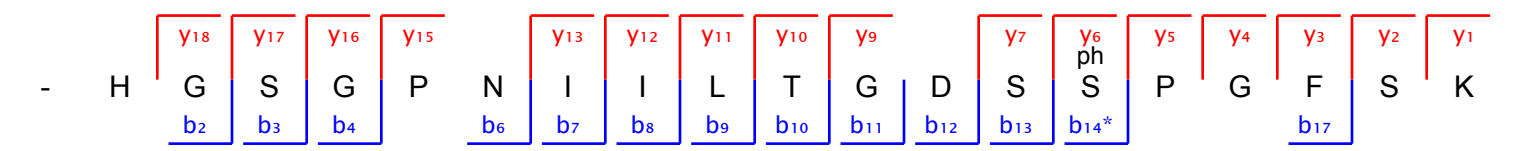

Raw file: 20150814\_A375SR\_Phospho\_BR2\_06  
 Scan: 17497 Method: FTMS; HCD Score: 148.96 m/z: 552.74 Gene names: SORBS3

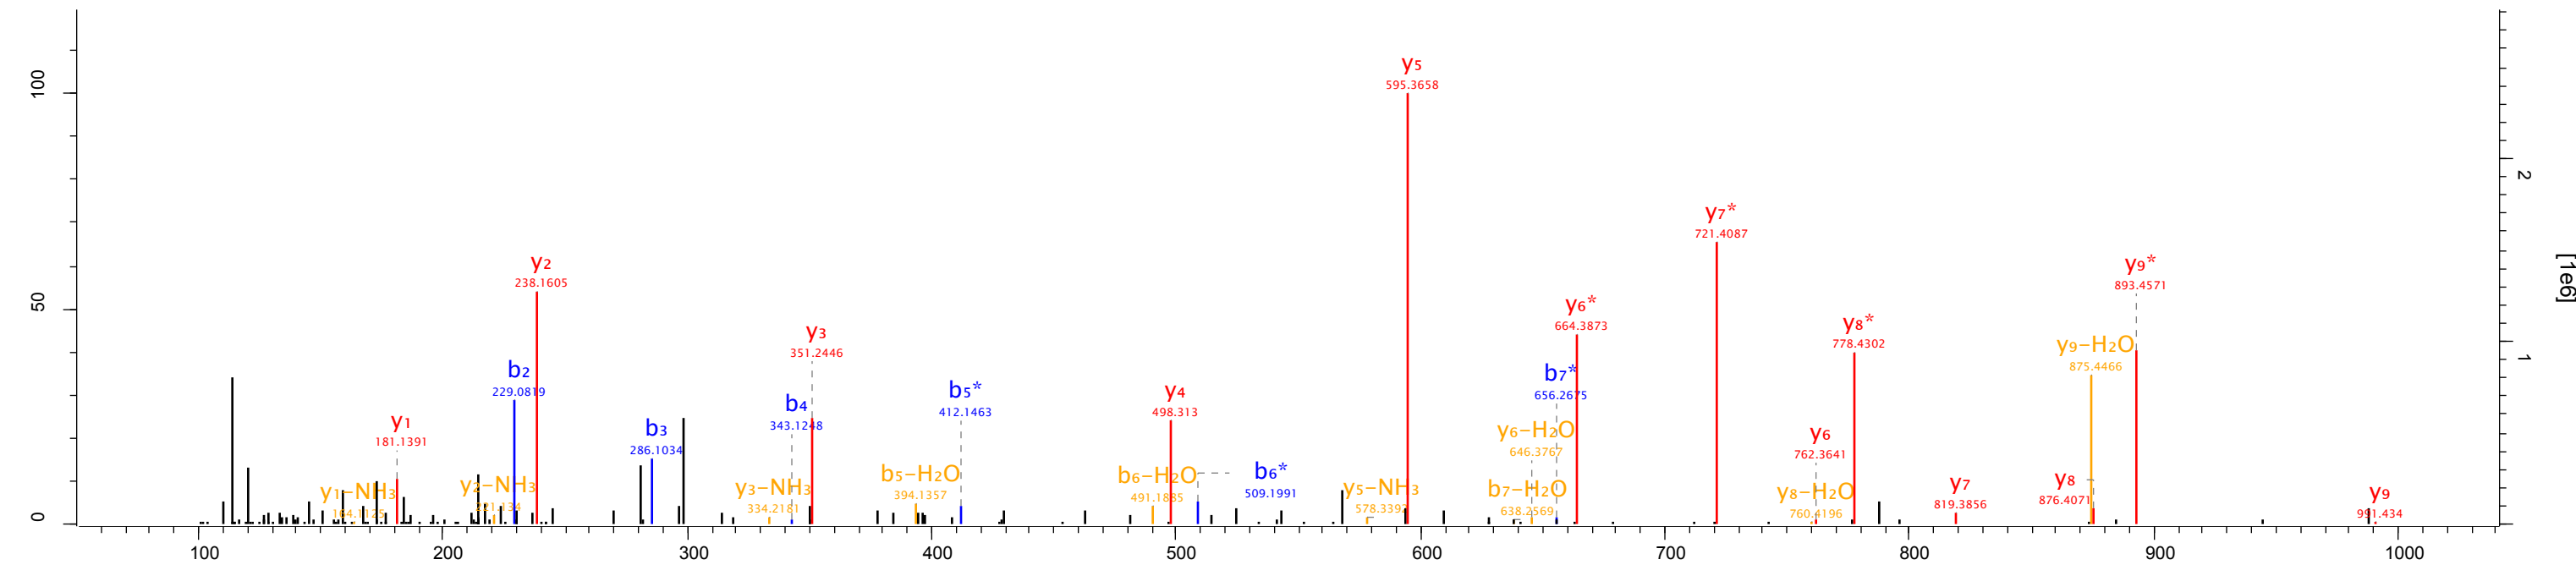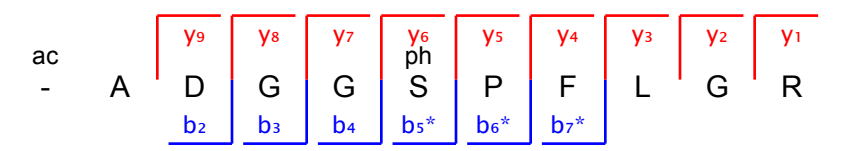

Raw file 20150814\_A375SR\_Phospho\_BR2\_06 Scan 17537 Method FTMS; HCD Score 74.9 m/z 793.37 Gene names STRN

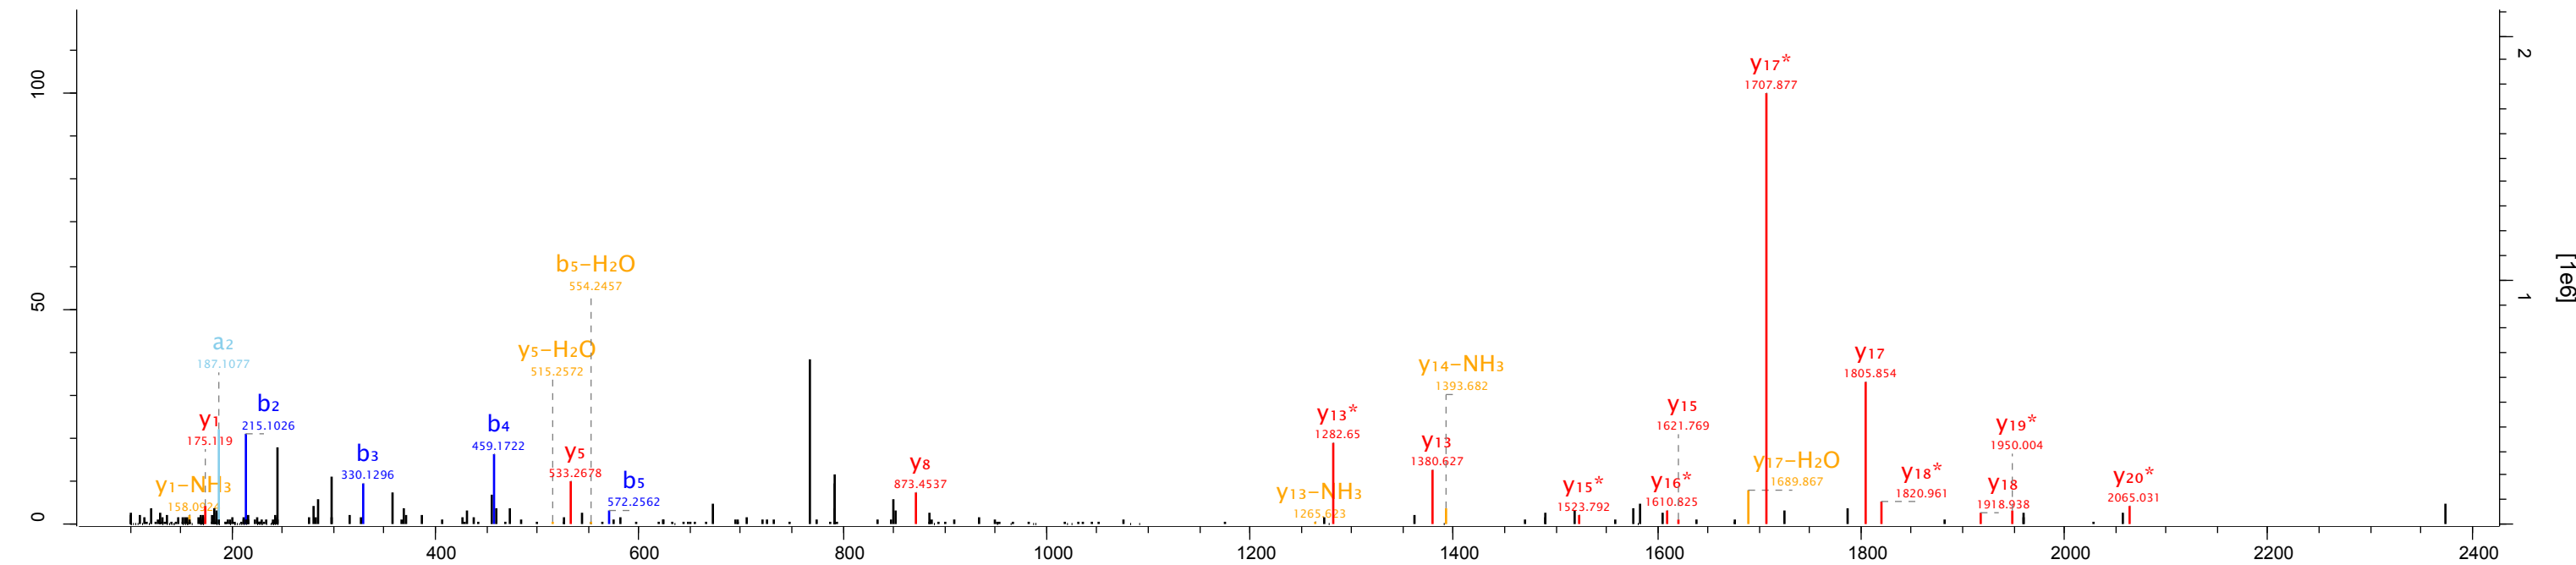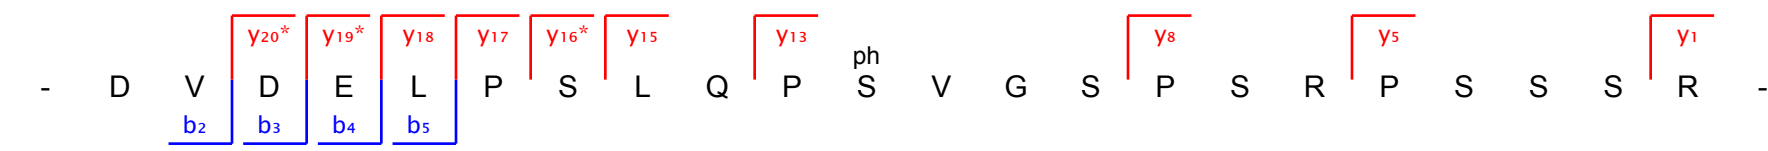

Raw file: 20150814\_A375SR\_Phospho\_BR2\_06  
 Scan: 17947 Method: FTMS; HCD Score: 114.87 m/z: 565.31 Gene names: EML3

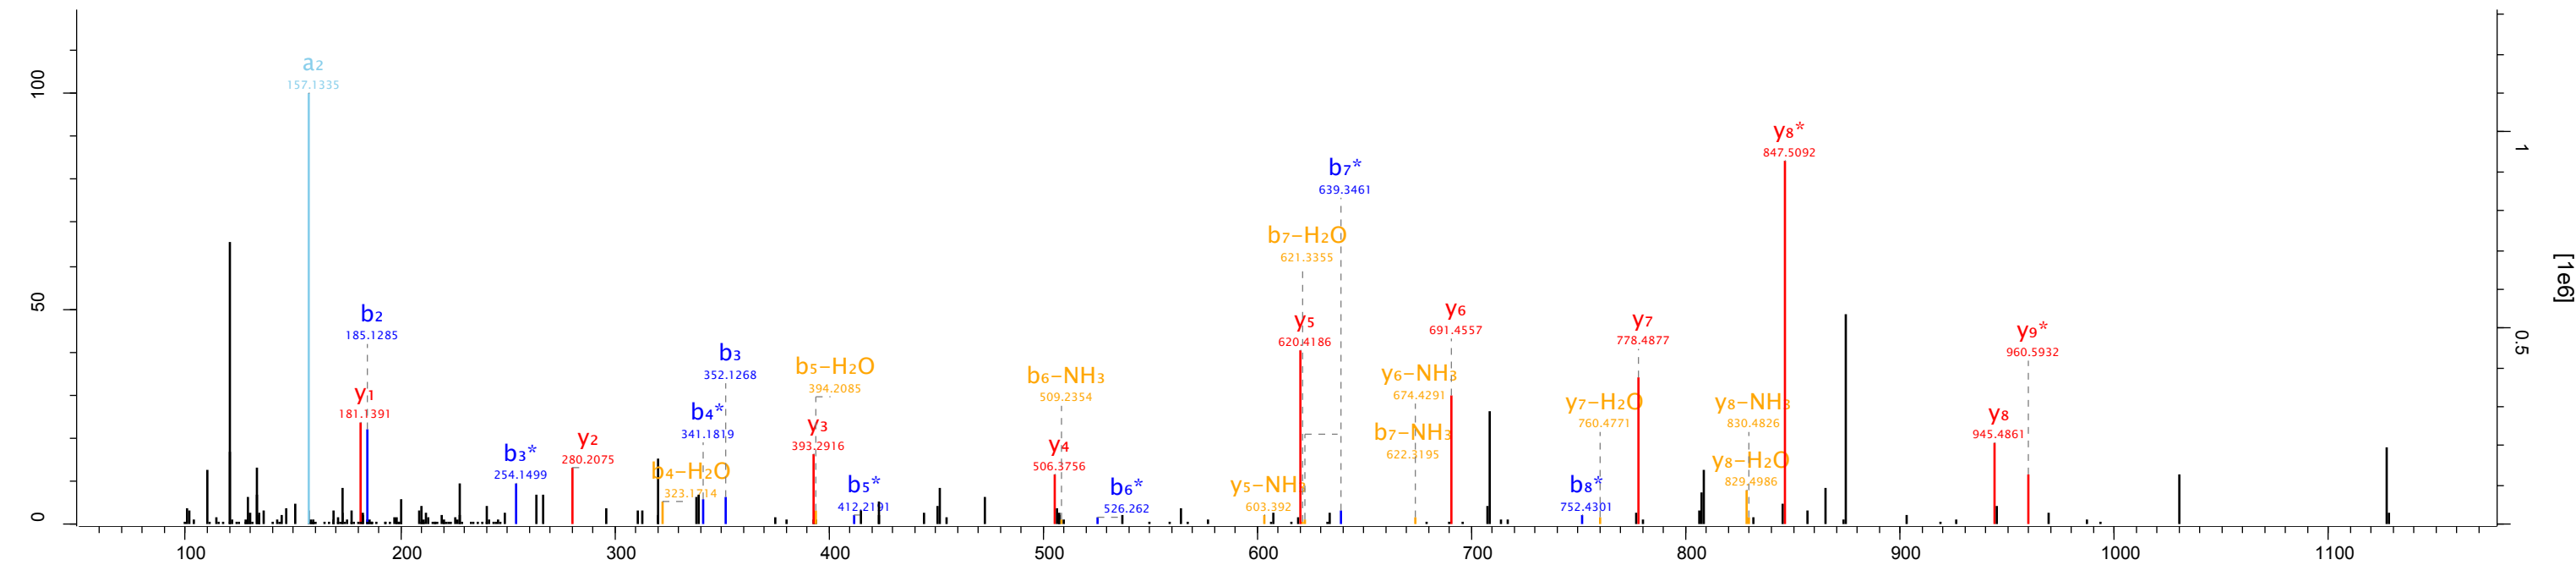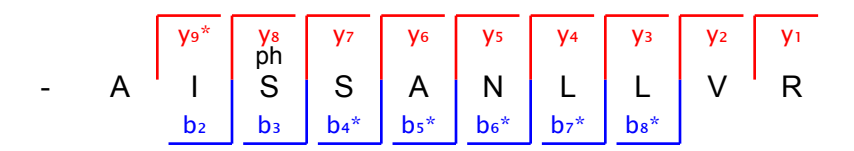

Raw file 20150814\_A375SR\_Phospho\_BR2\_06 Scan 18567 Method FTMS; HCD Score 139.73 m/z 762.34 Gene names SYTL5

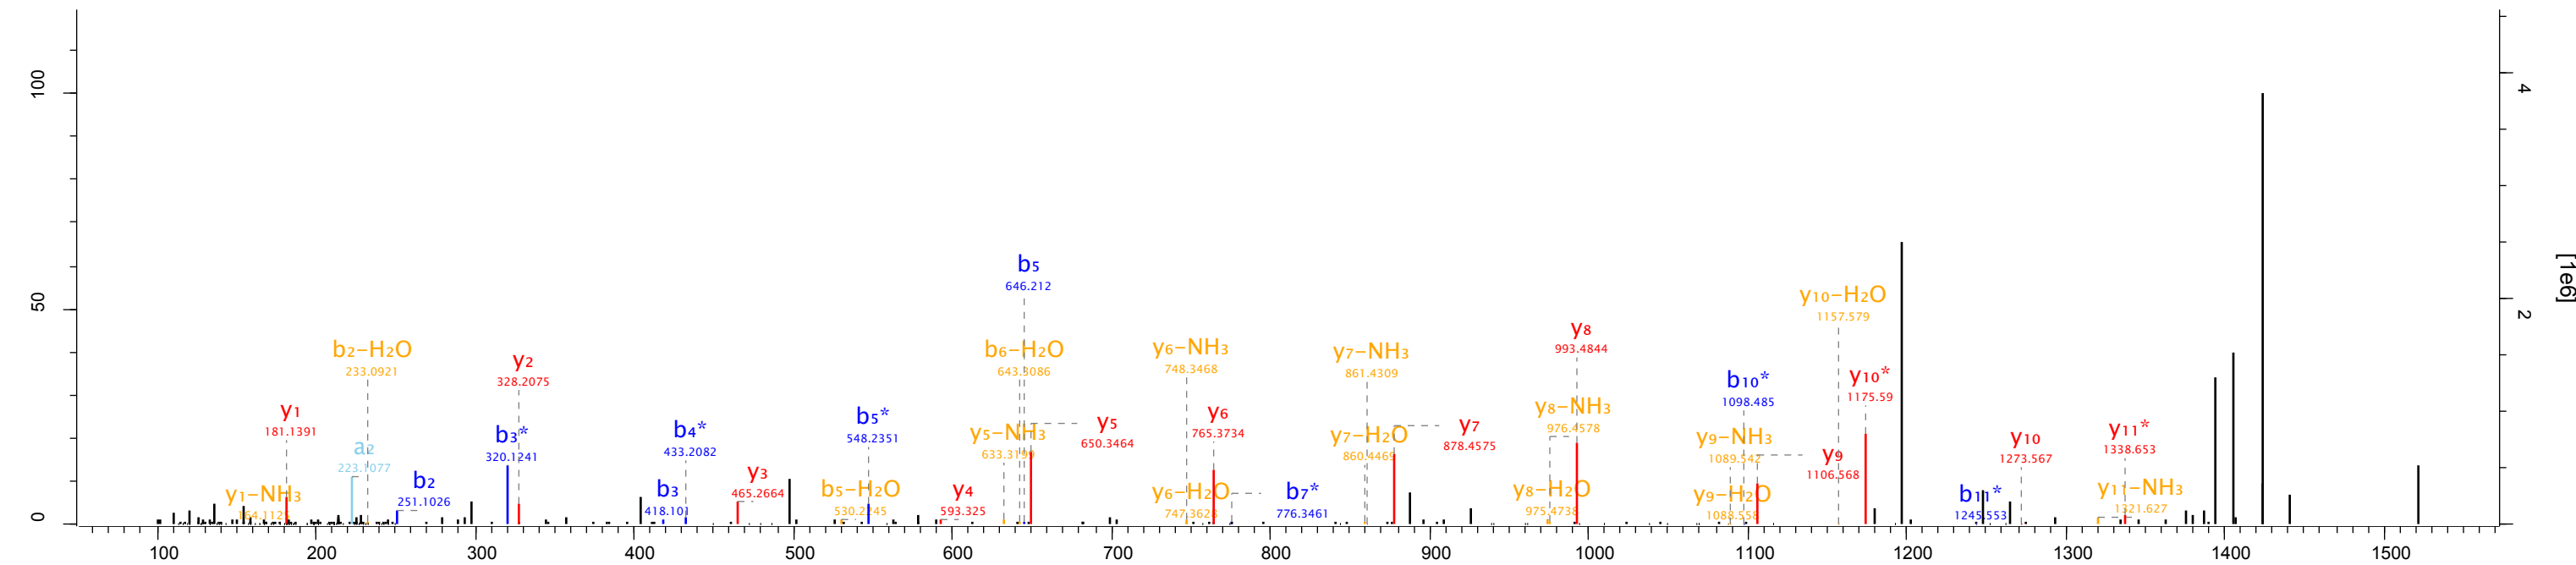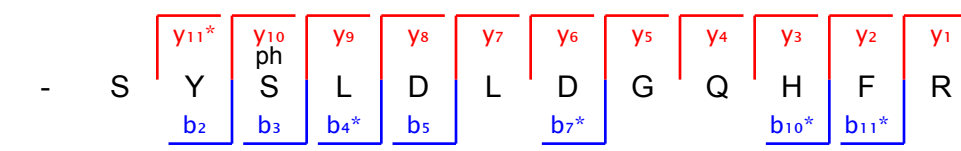

Raw file 20150814\_A375SR\_Phospho\_BR2\_06 Scan 18597 Method FTMS; HCD Score 138.77 m/z 725.87 Gene names USP36

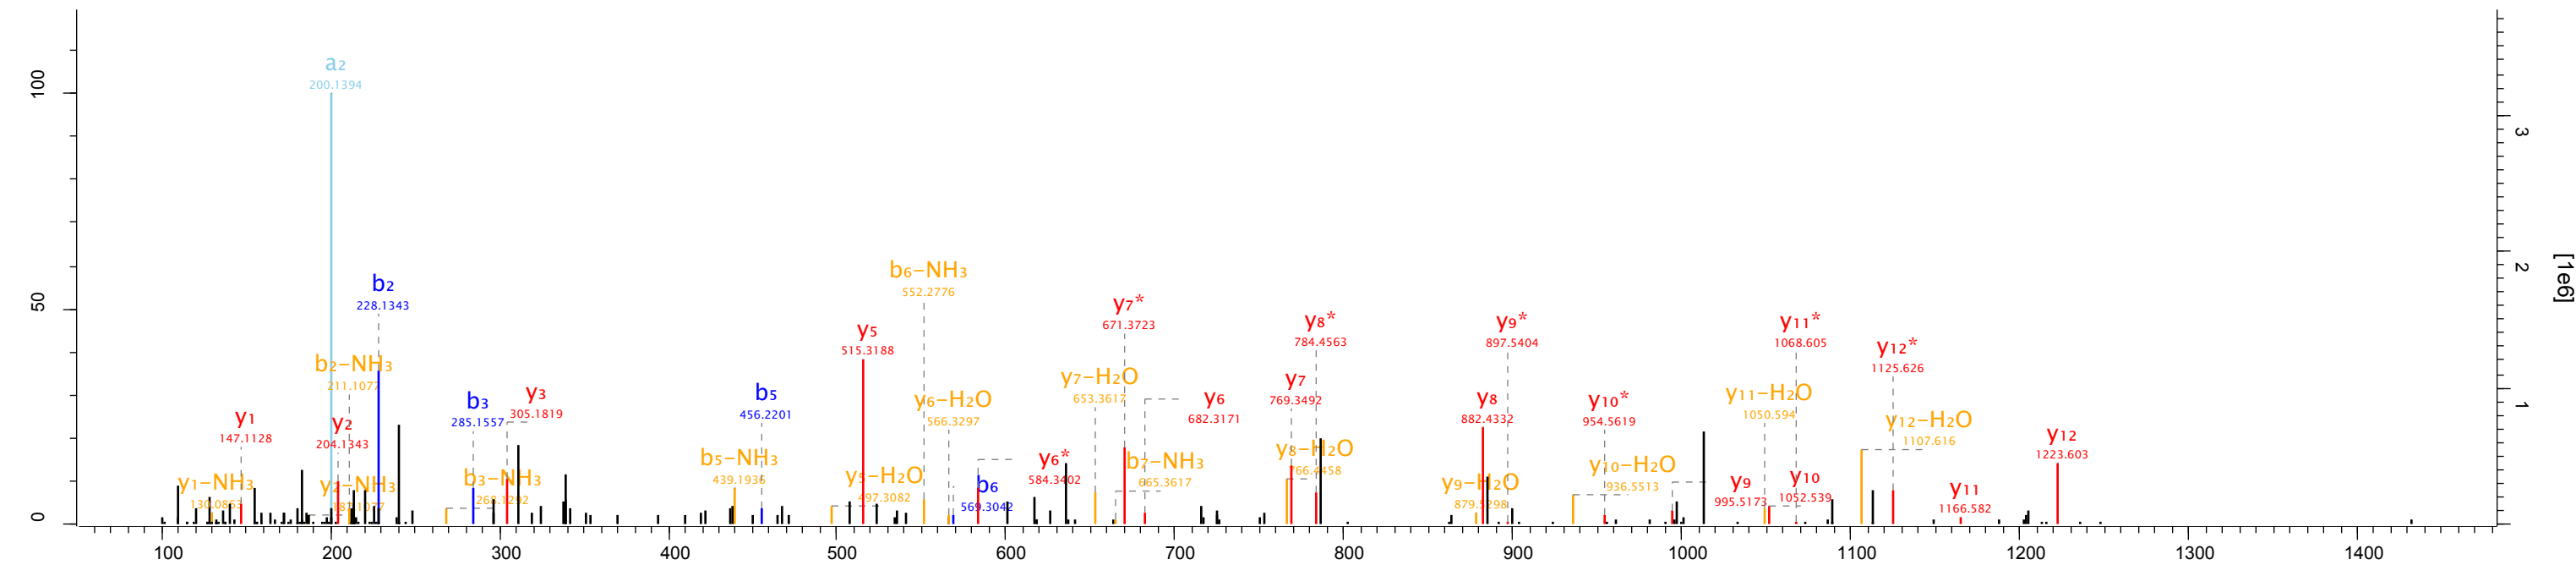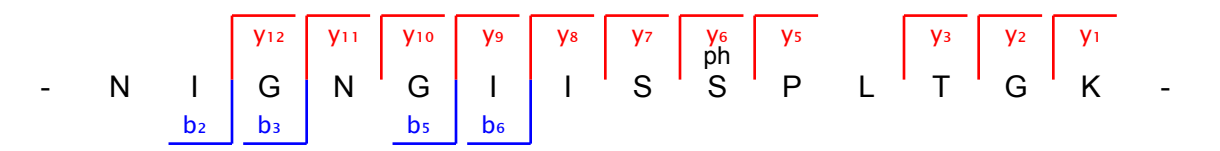



Raw file 20150814\_A375SR\_Phospho\_BR2\_06 Scan 18627 Method FTMS; HCD Score 70.42 m/z 711.88 Gene names FRYL

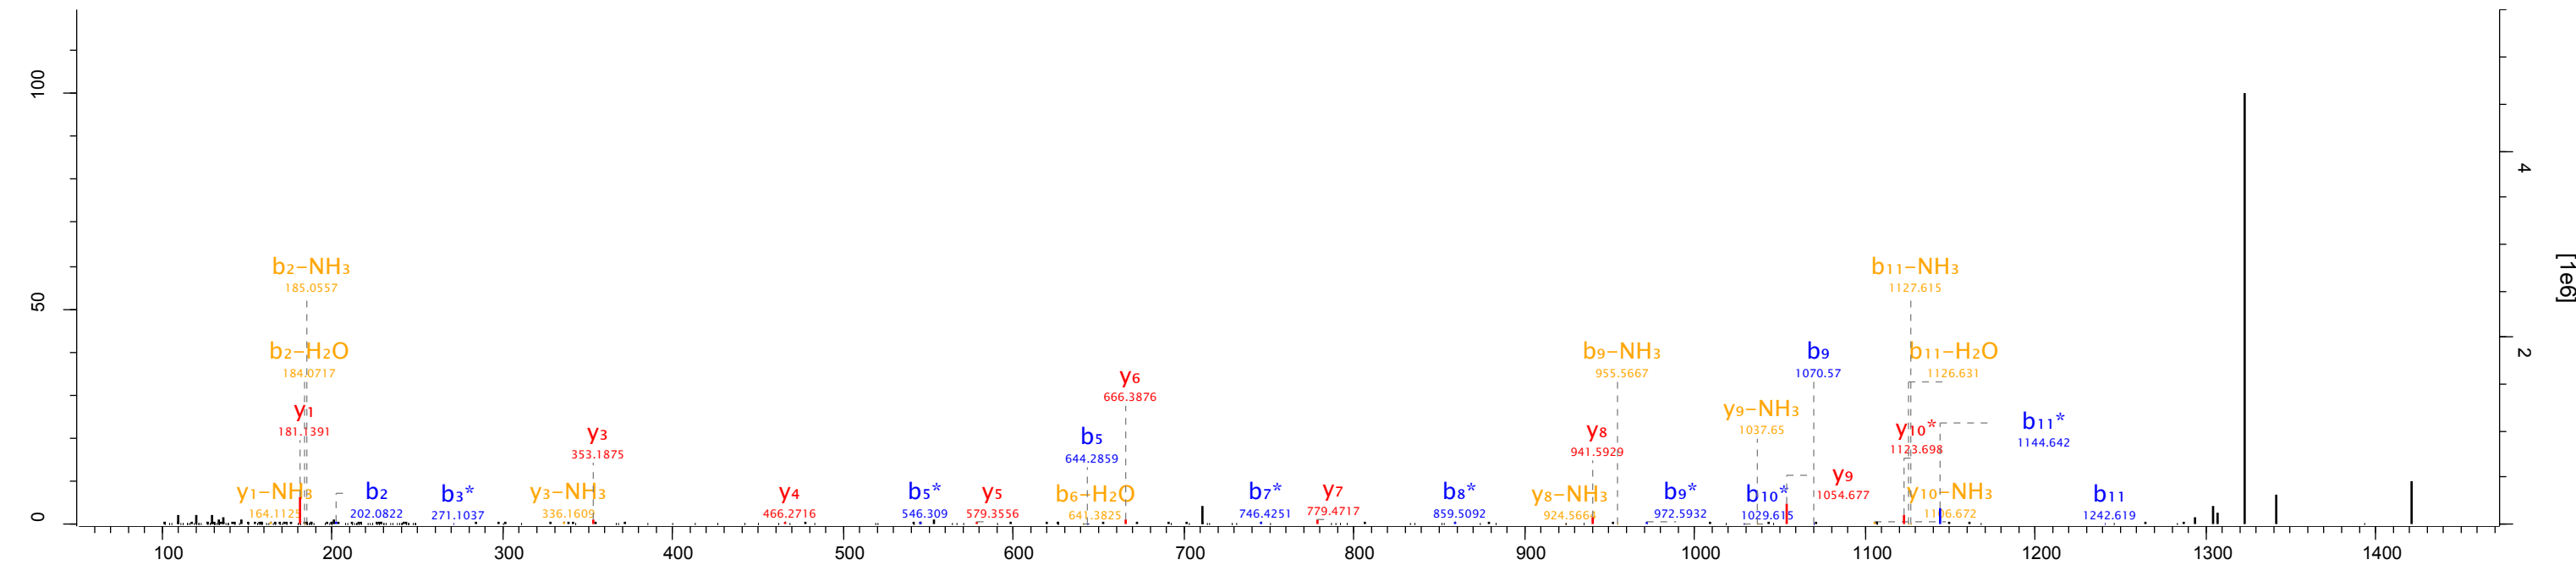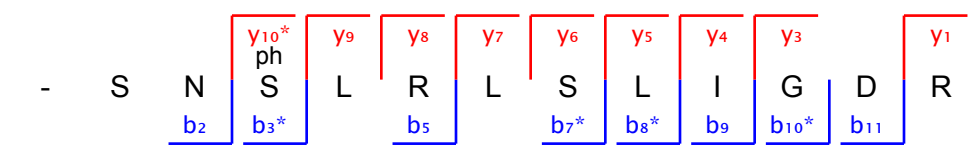

Raw file 20150814\_A375SR\_Phospho\_BR2\_06 Scan 18807 Method FTMS; HCD Score 197.28 m/z 752.69 Gene names IRS2

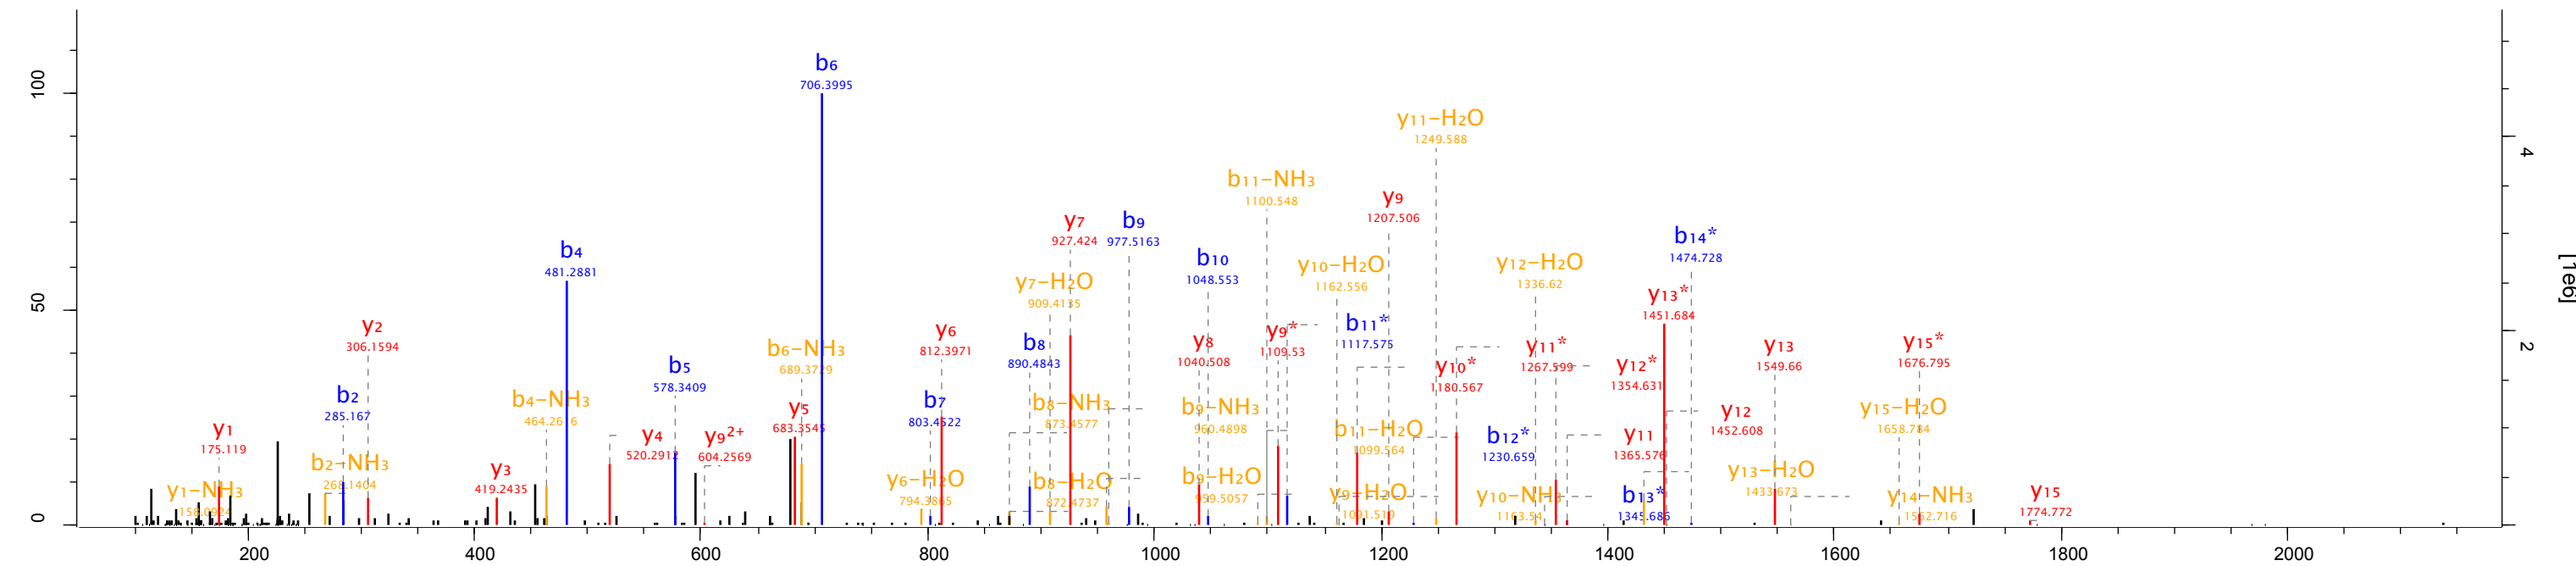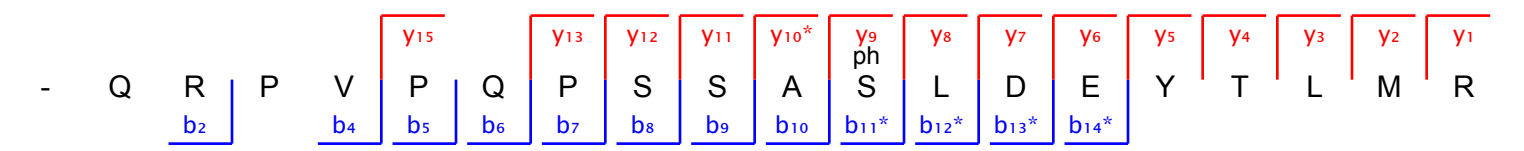

Raw file: 20150814\_A375SR\_Phospho\_BR2\_06  
 Scan: 19287 Method: FTMS; HCD Score: 84.9 m/z: 455.24 Gene names: ANXA1

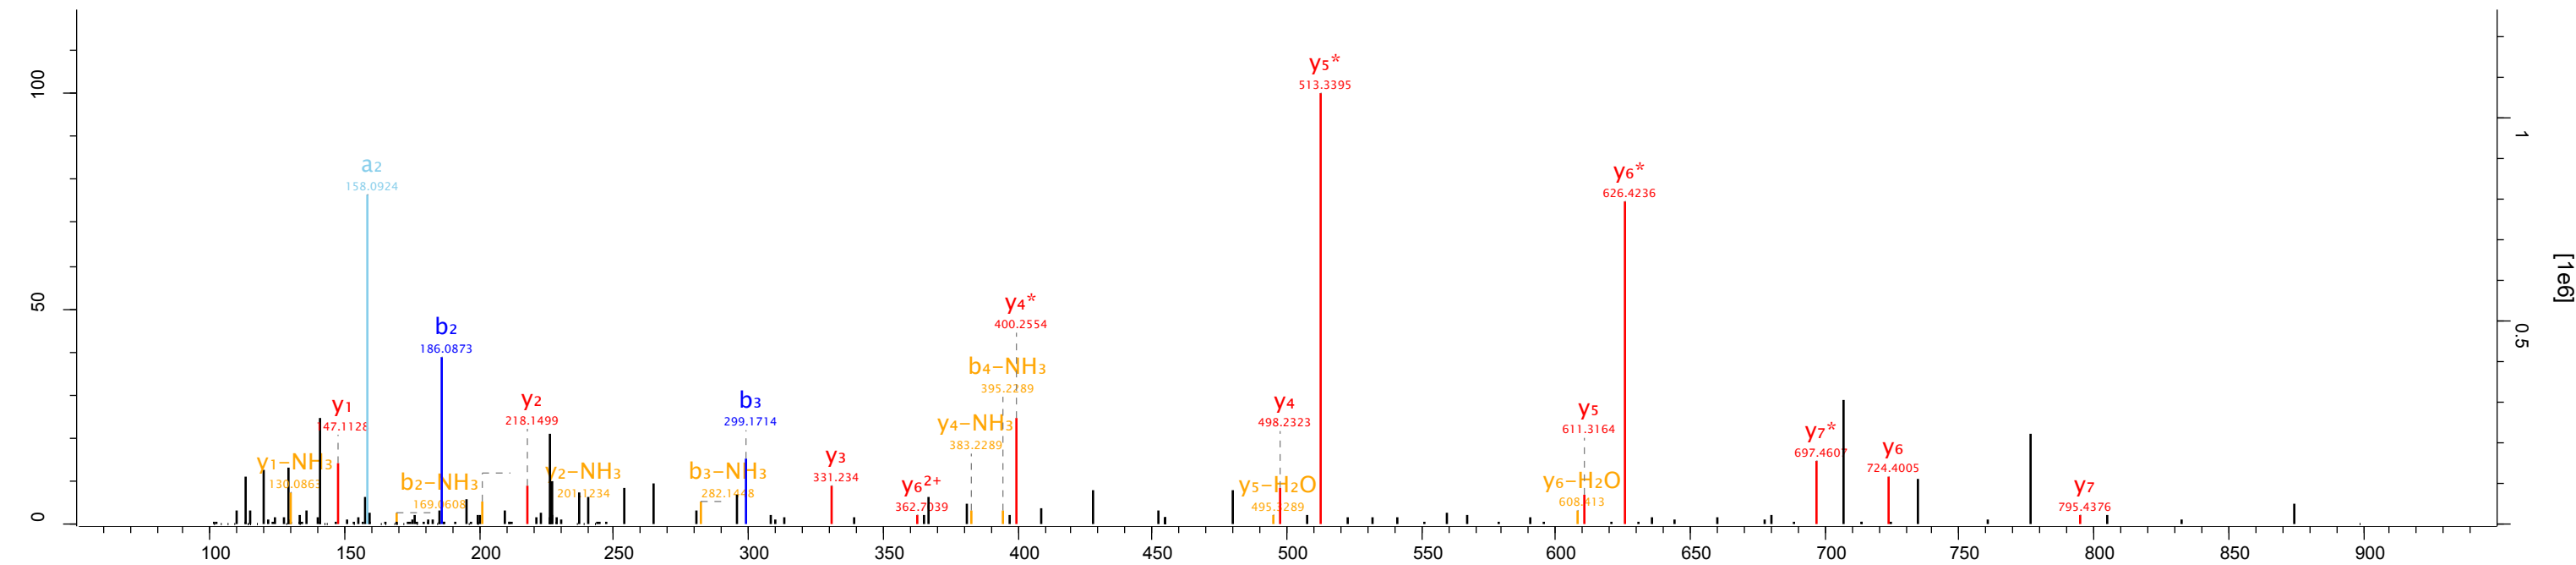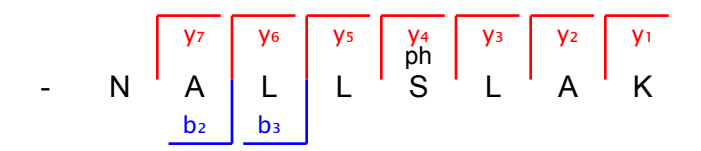

Raw file 20150814\_A375SR\_Phospho\_BR2\_06 Scan 19917 Method FTMS; HCD Score 457.21 m/z 1198.19 Gene names METAP2

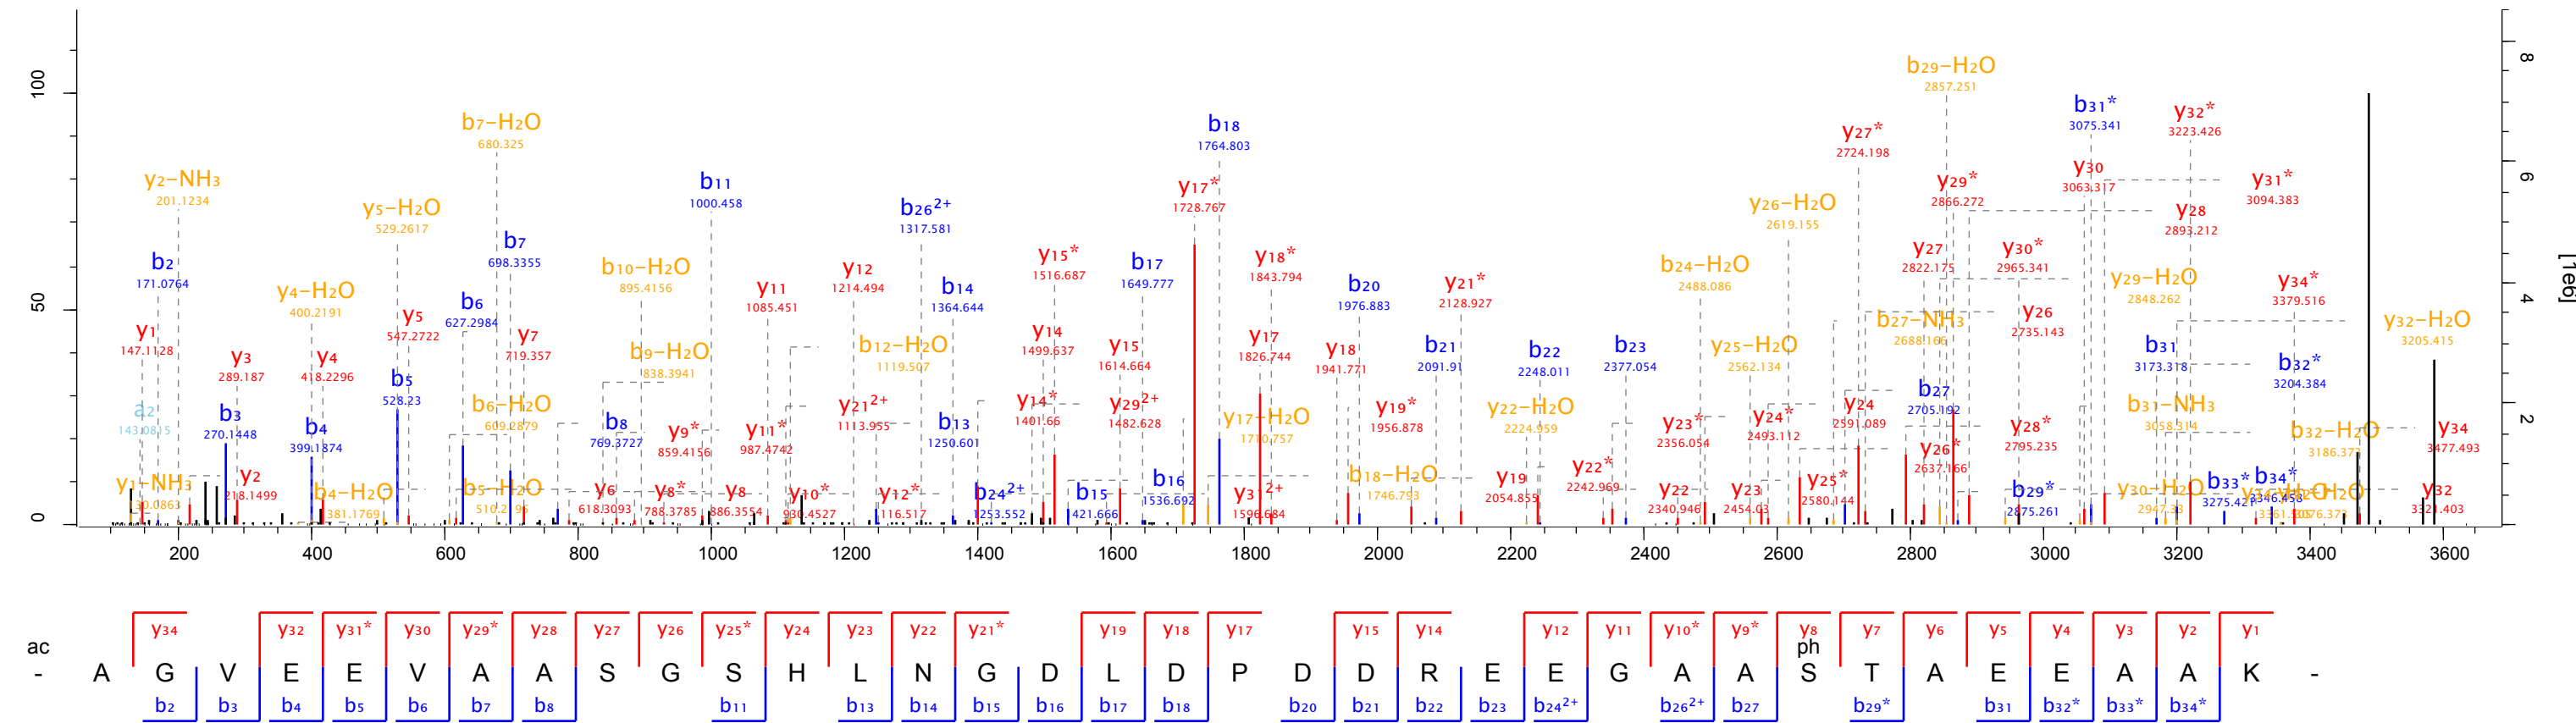

ac  
-

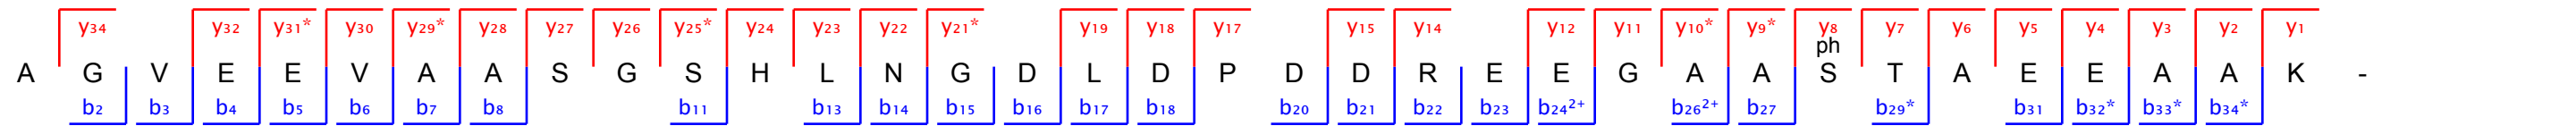

Raw file  
20150814\_A375SR\_Phospho\_BR2\_06

Scan 19997 Method FTMS; HCD Score 140.13 m/z 765.77 Gene names SYAP1

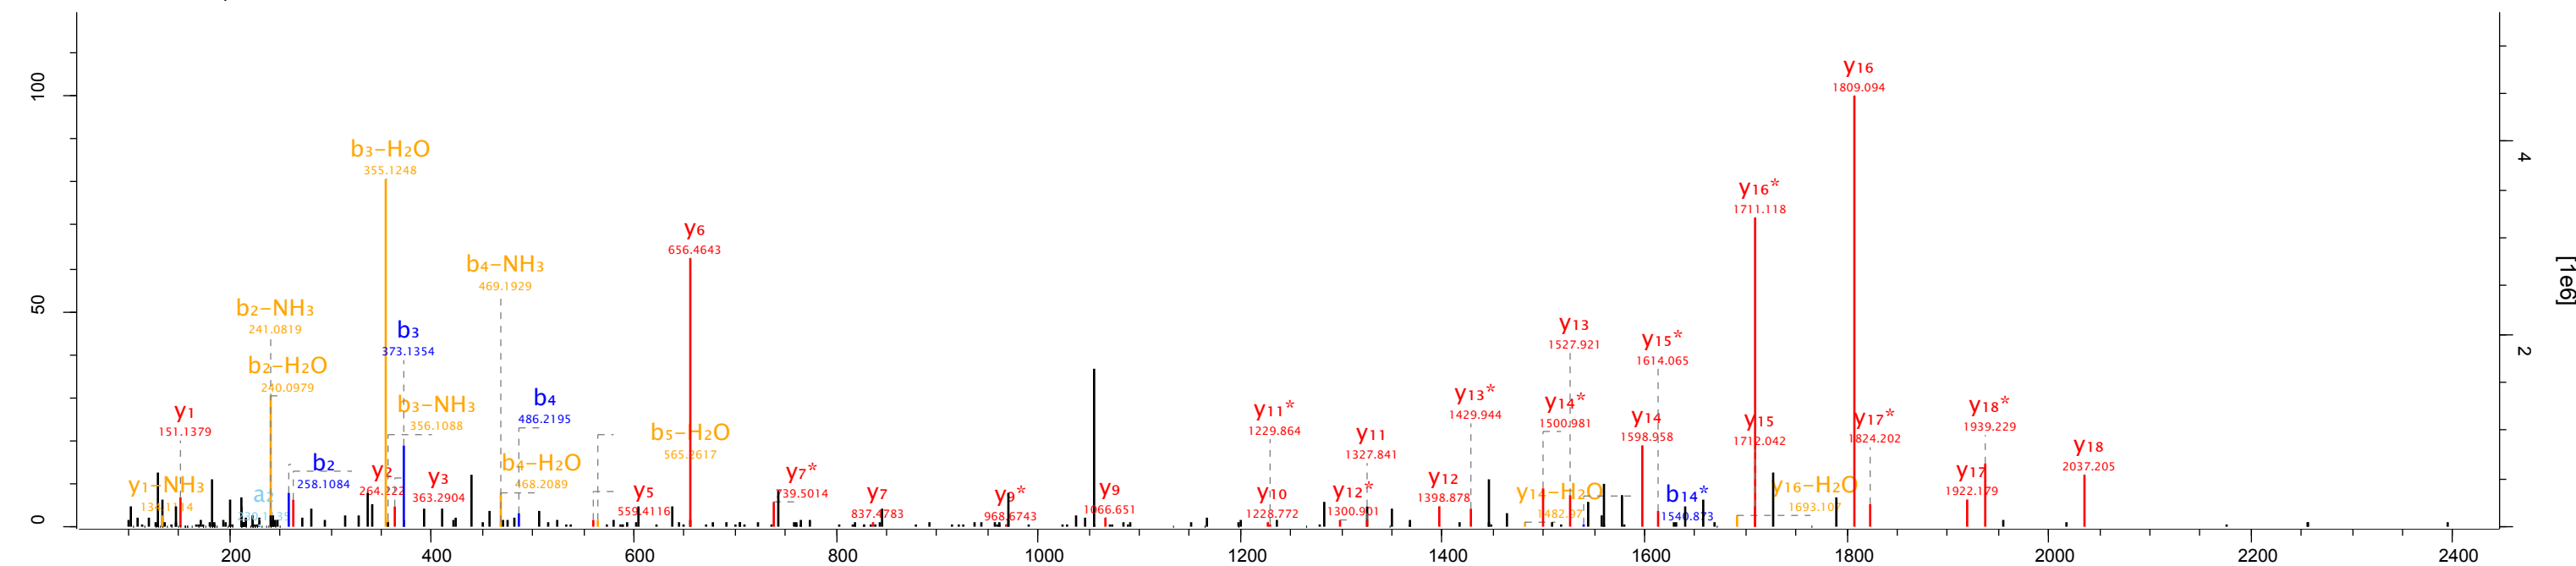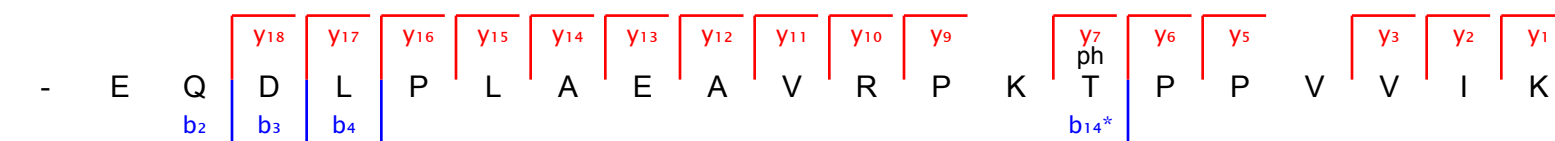

Raw file: 20150814\_A375SR\_Phospho\_BR2\_06  
 Scan: 20127  
 Method: FTMS; HCD  
 Score: 169.08  
 m/z: 1041.48  
 Gene names: PSEN1

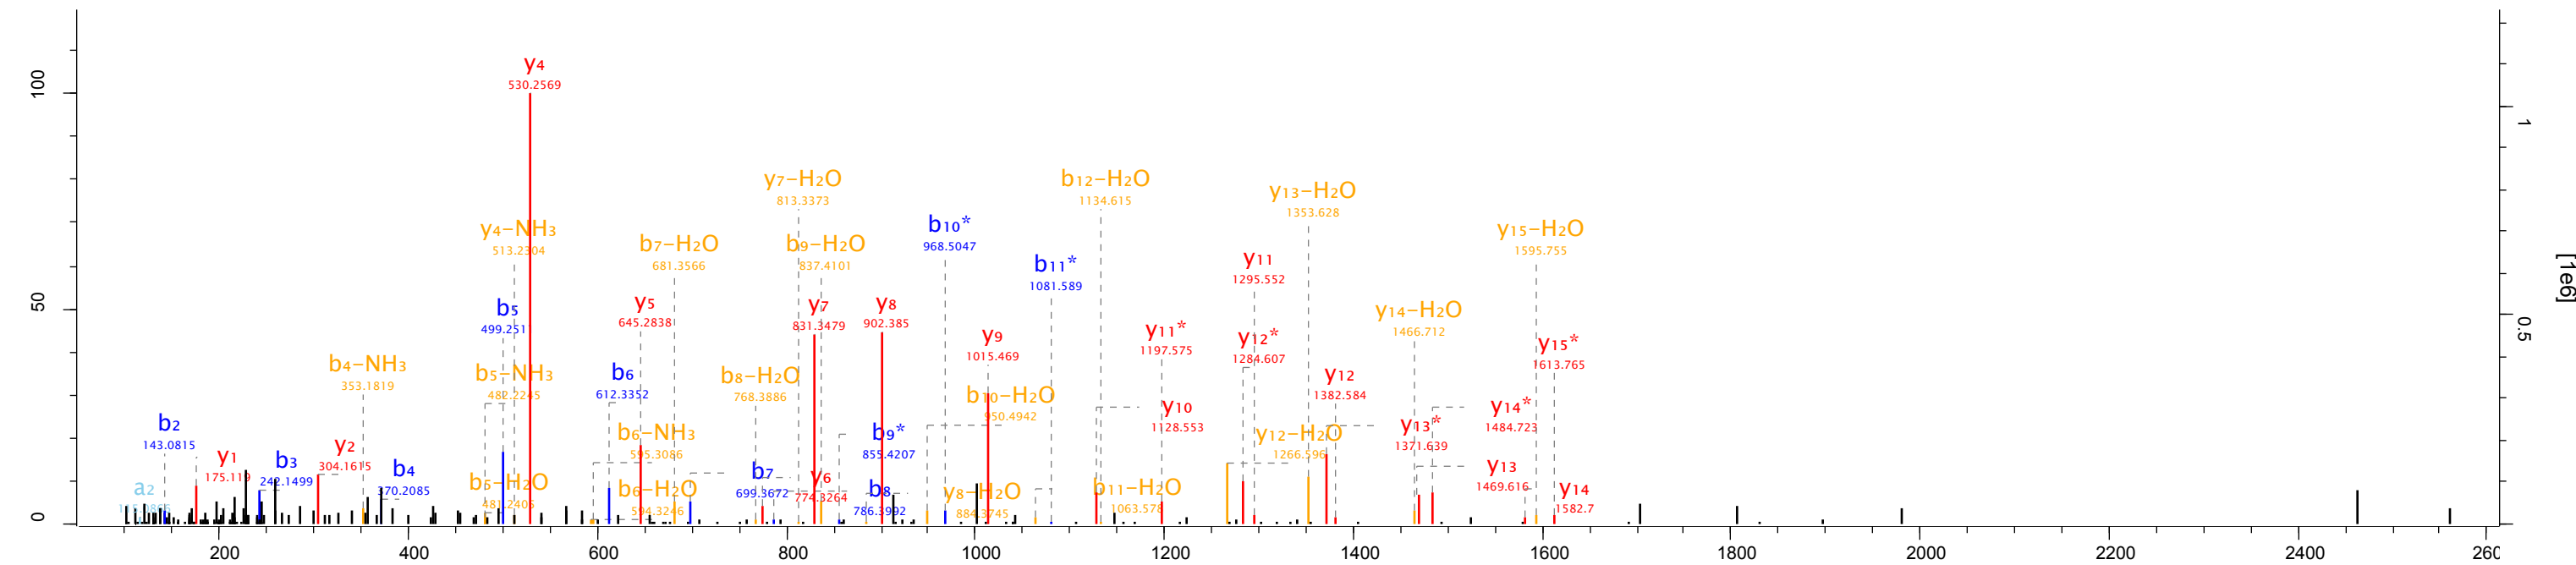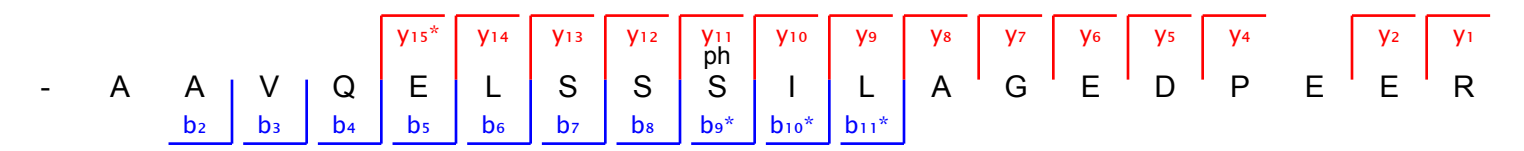

Raw file: 20150814\_A375SR\_Phospho\_BR2\_06  
 Scan: 20407 Method: FTMS; HCD Score: 208.97 m/z: 672.03 Gene names: CTTNBP2NL

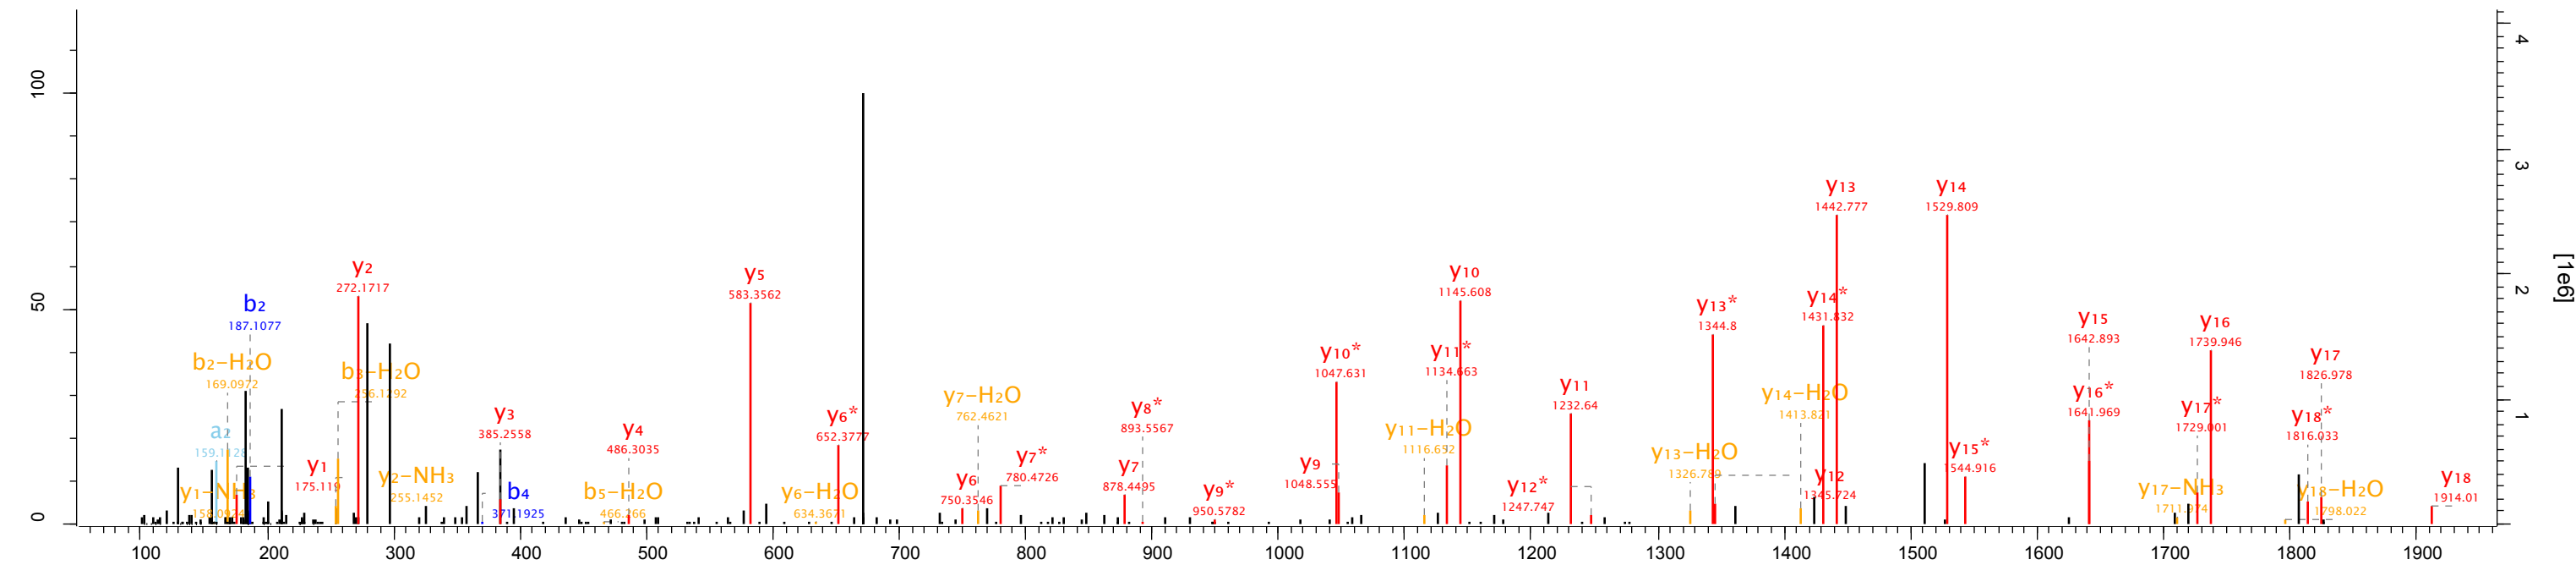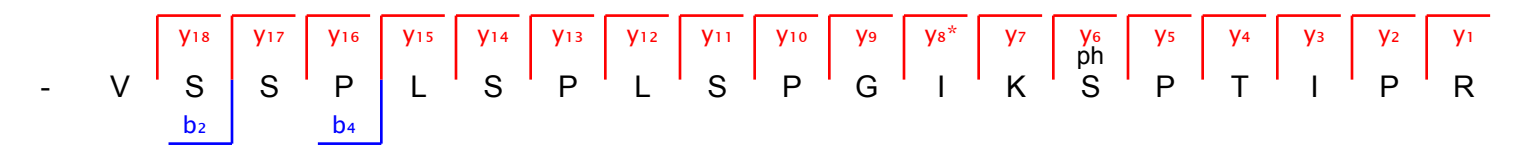

Raw file Scan Method Score m/z Gene names  
 20150814\_A375SR\_Phospho\_BR2\_06 20607 FTMS; HCD 219.23 951.48 IMPDH2

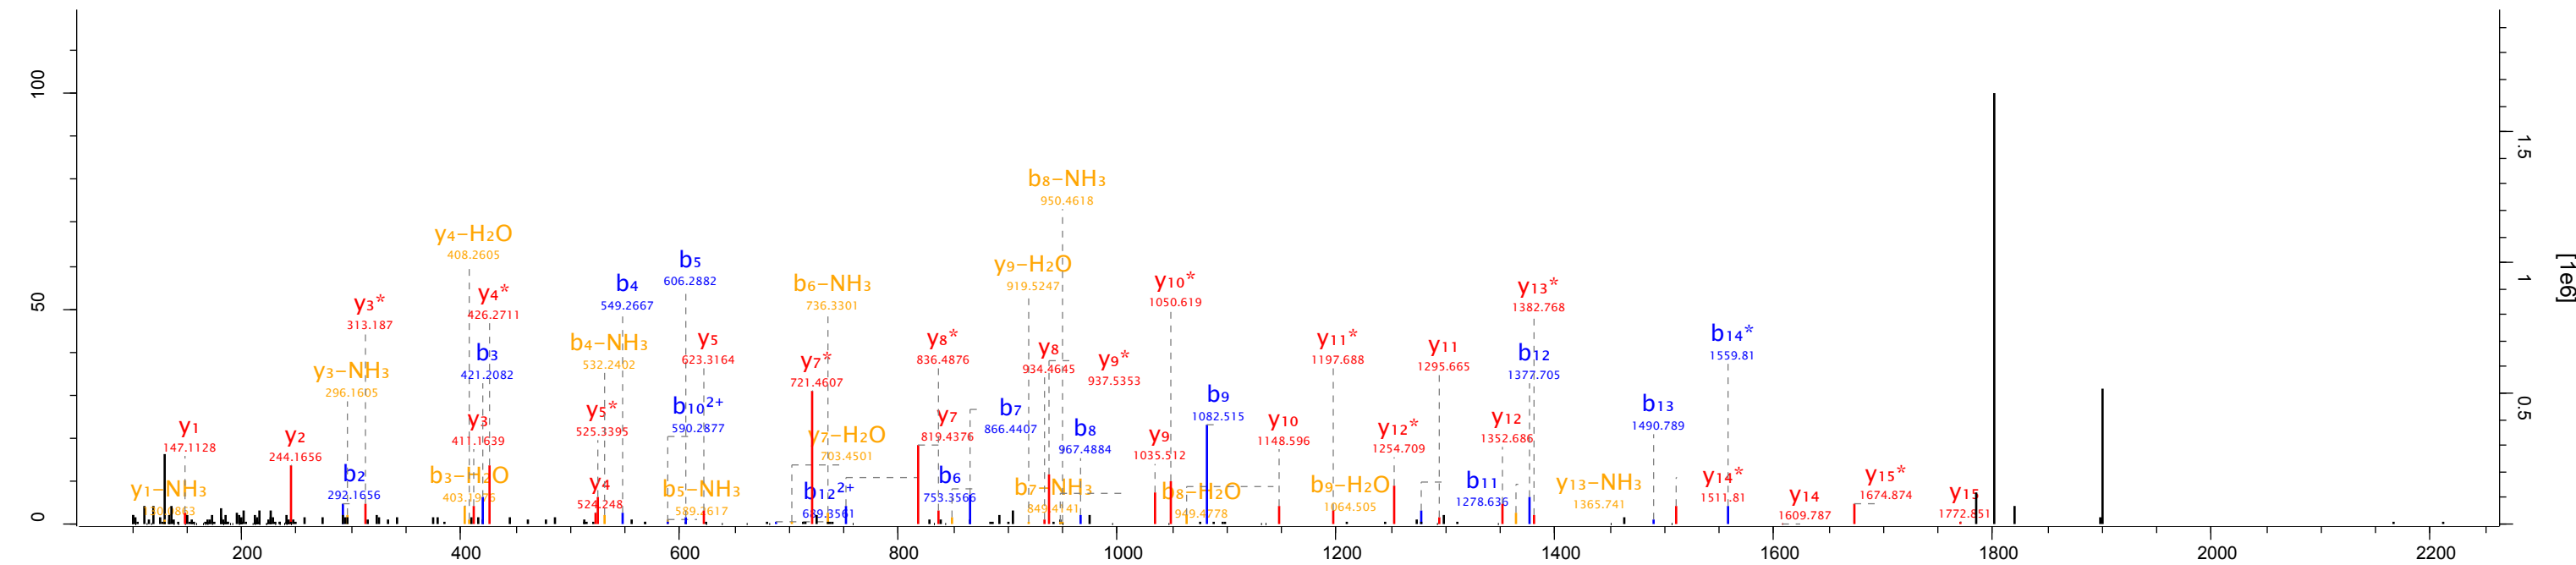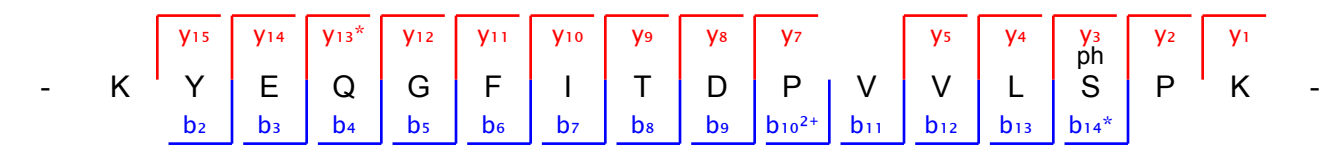



Raw file: 20150814\_A375SR\_Phospho\_BR2\_06  
 Scan: 20627 Method: FTMS; HCD Score: 110.92 m/z: 908.9 Gene names: ADD1

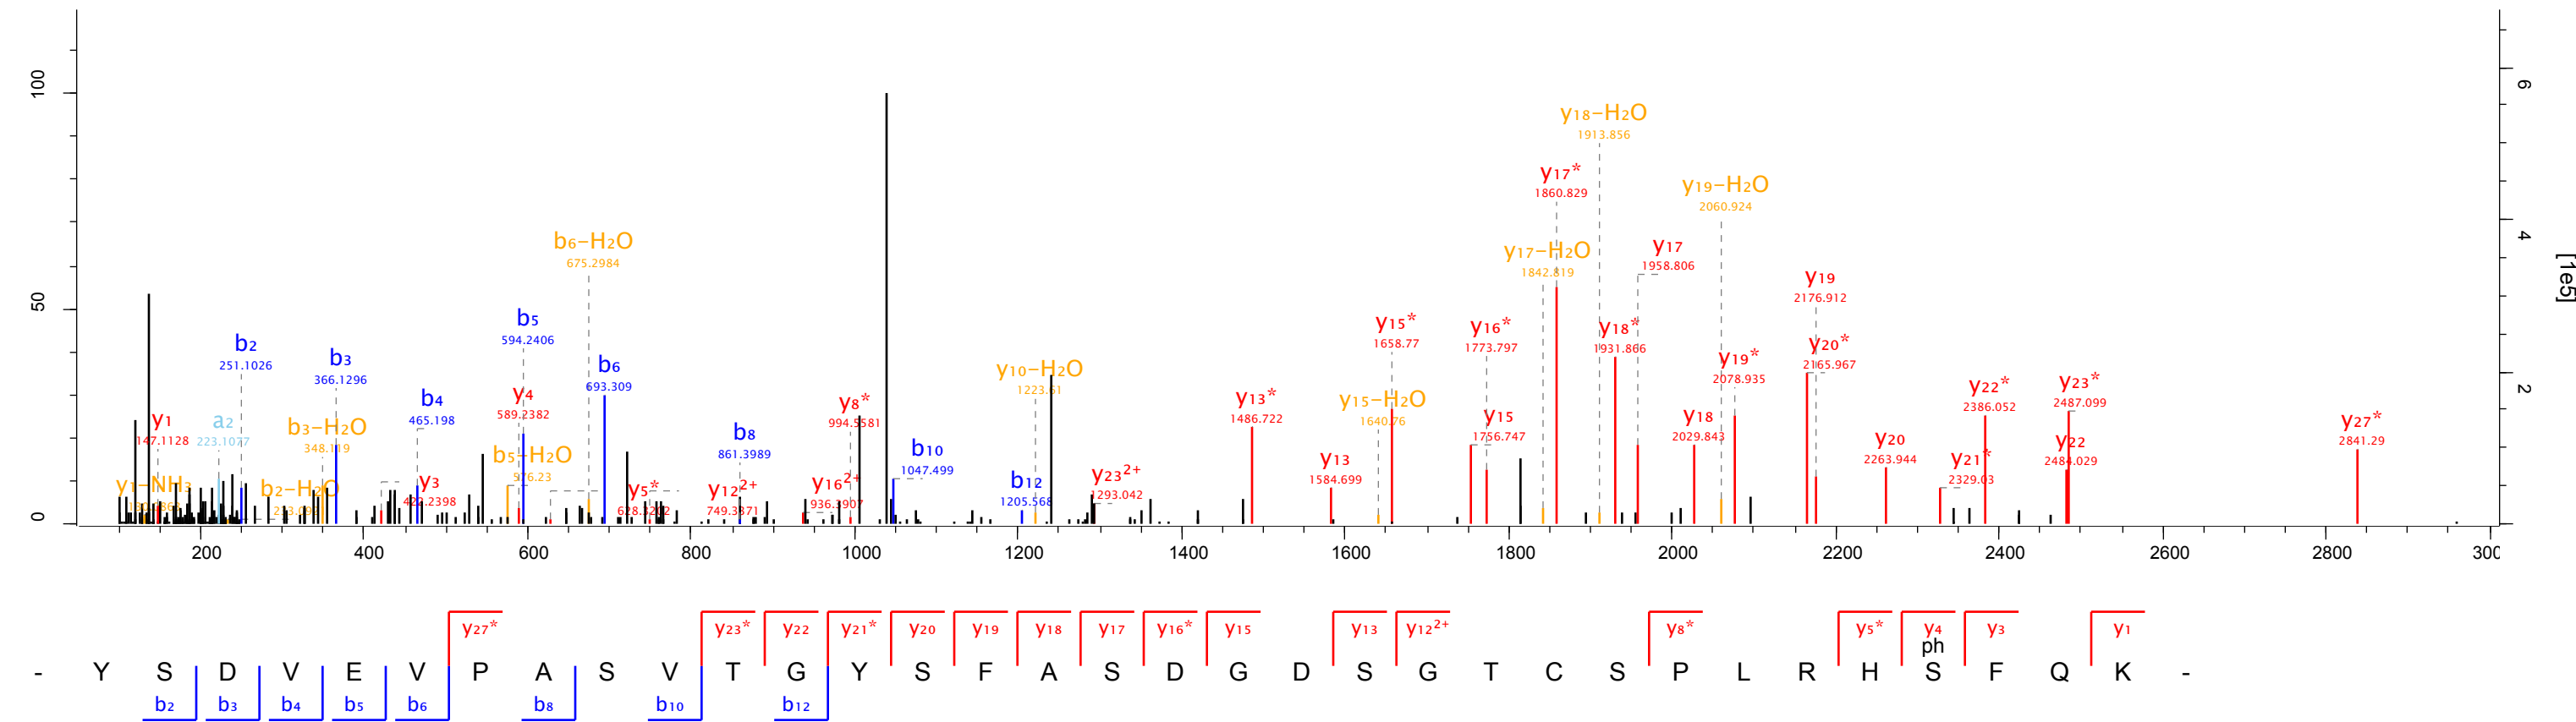

Raw file 20150814\_A375SR\_Phospho\_BR2\_06 Scan 20927 Method FTMS; HCD Score 241.8 m/z 948.46 Gene names YLPM1

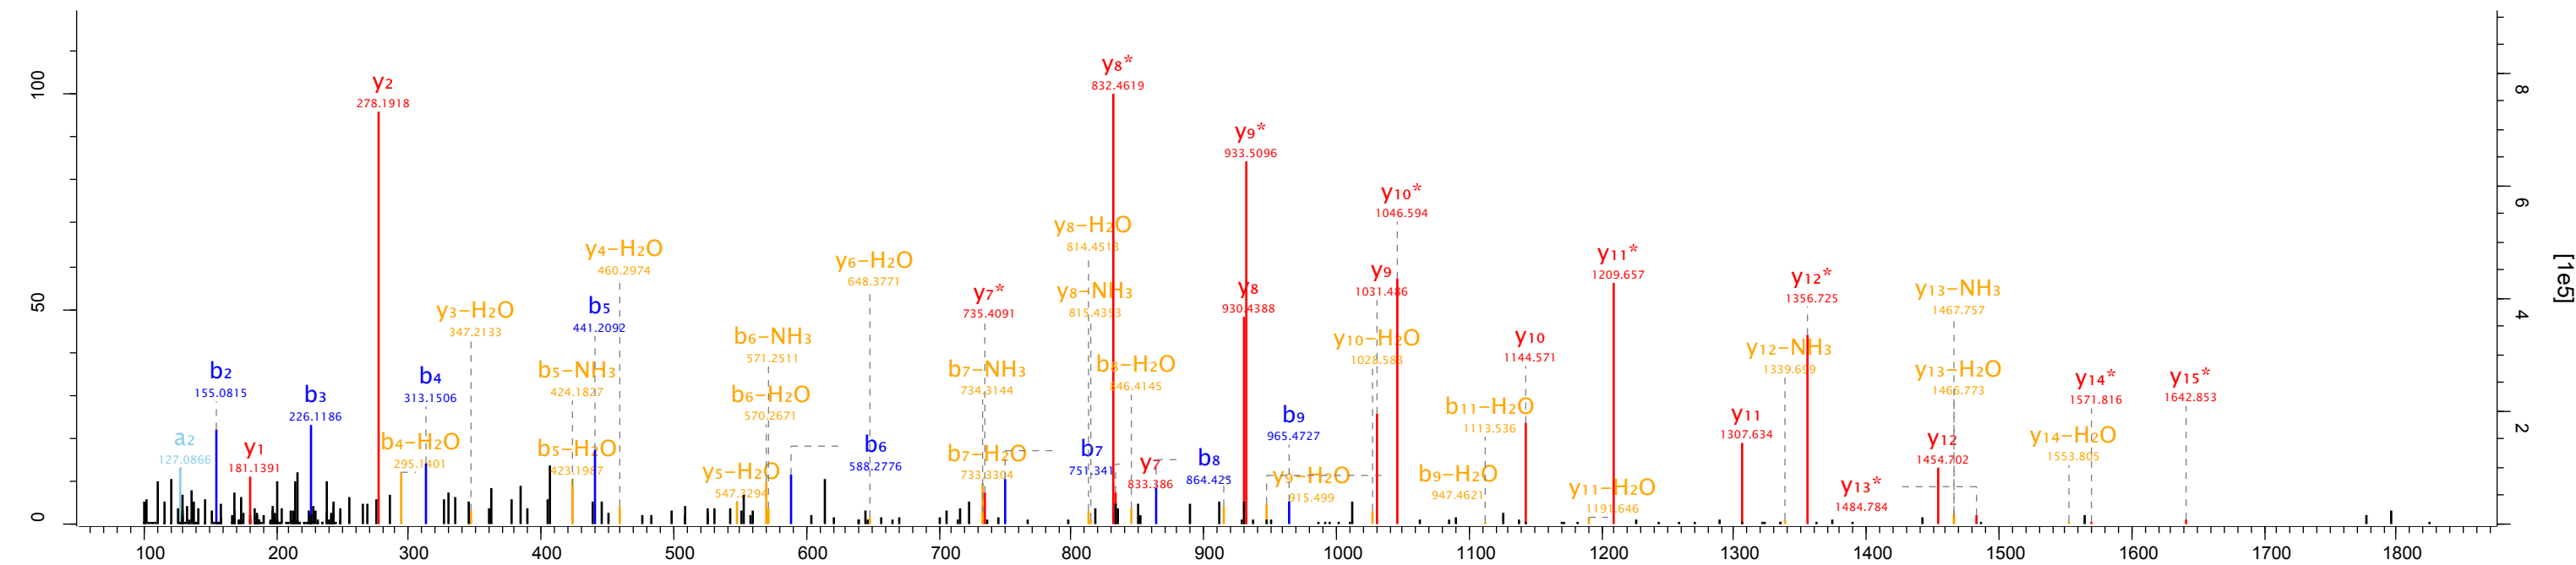

- G P A S Q F Y I T P S T S L S P R -

b<sub>2</sub>
b<sub>3</sub>
b<sub>4</sub>
b<sub>5</sub>
b<sub>6</sub>
b<sub>7</sub>
b<sub>8</sub>
b<sub>9</sub>
y<sub>15</sub>\*
y<sub>14</sub>\*
y<sub>13</sub>\*
y<sub>12</sub>
y<sub>11</sub>
y<sub>10</sub>
y<sub>9</sub>
y<sub>8</sub>
y<sub>7</sub>
y<sub>2</sub>
y<sub>1</sub>

Raw file: 20150814\_A375SR\_Phospho\_BR2\_06  
 Scan: 21237 Method: FTMS; HCD Score: 166.57 m/z: 992.51 Gene names: PRRC2C

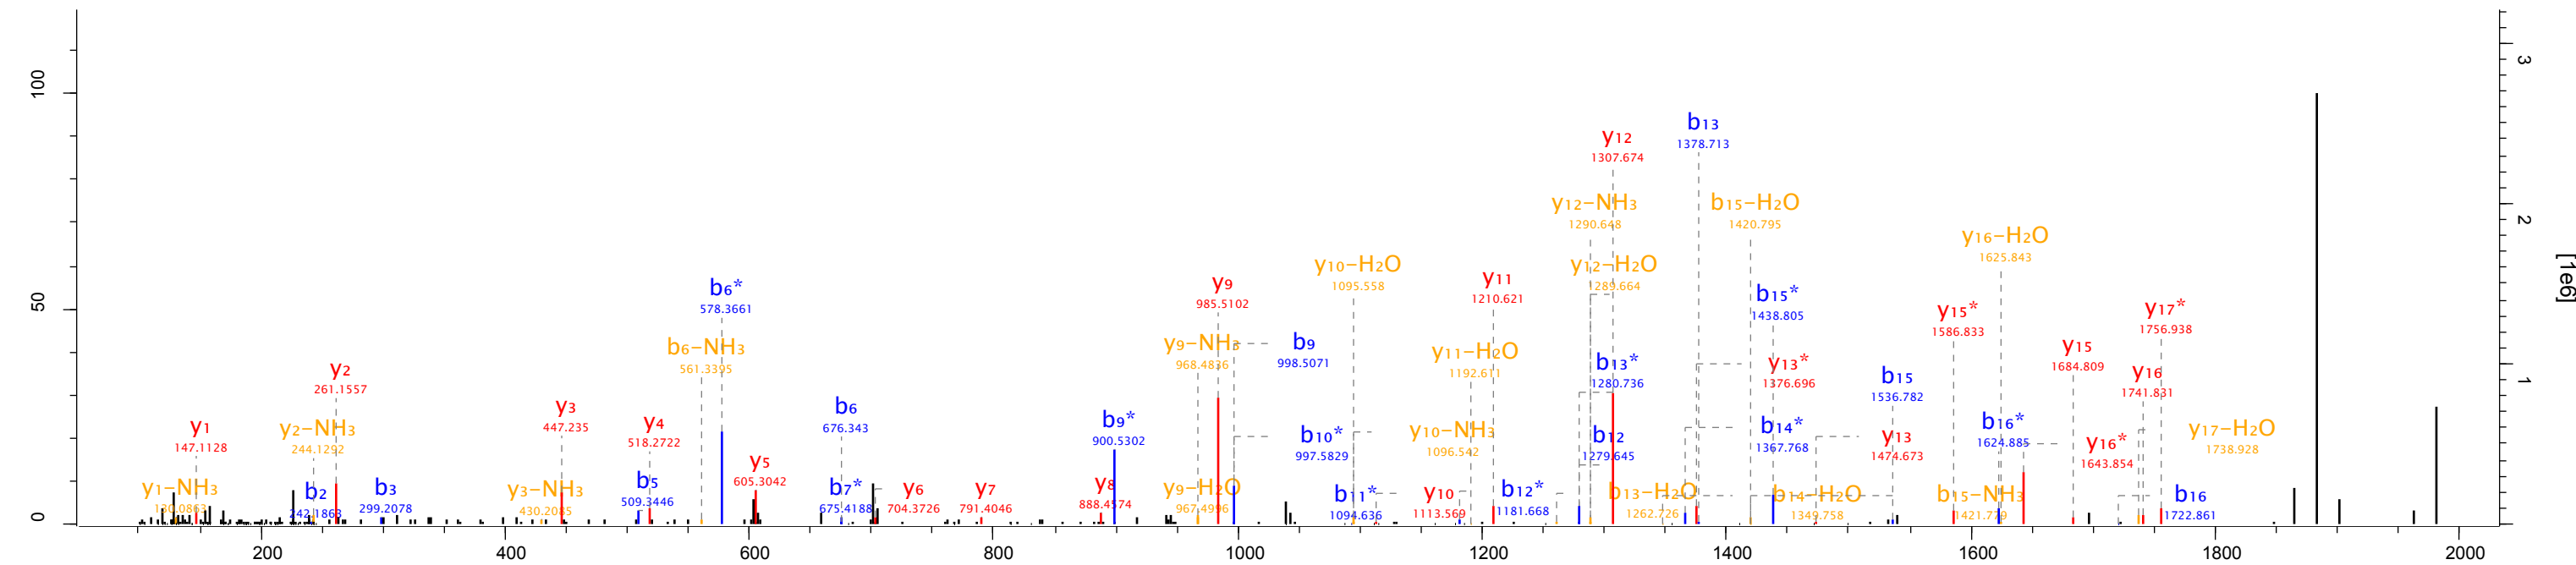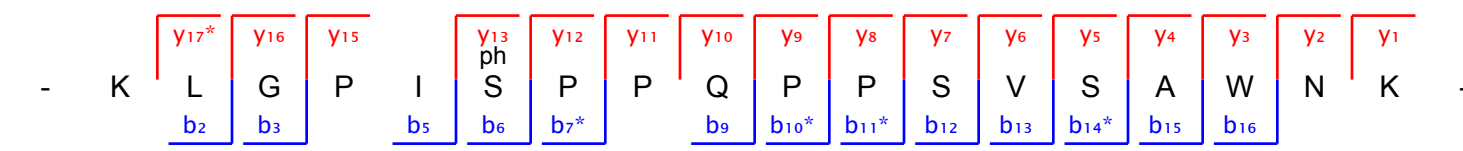

Raw file: 20150814\_A375SR\_Phospho\_BR2\_06  
 Scan: 21327 Method: FTMS; HCD Score: 119.17 m/z: 637.79 Gene names: SIPA1L2

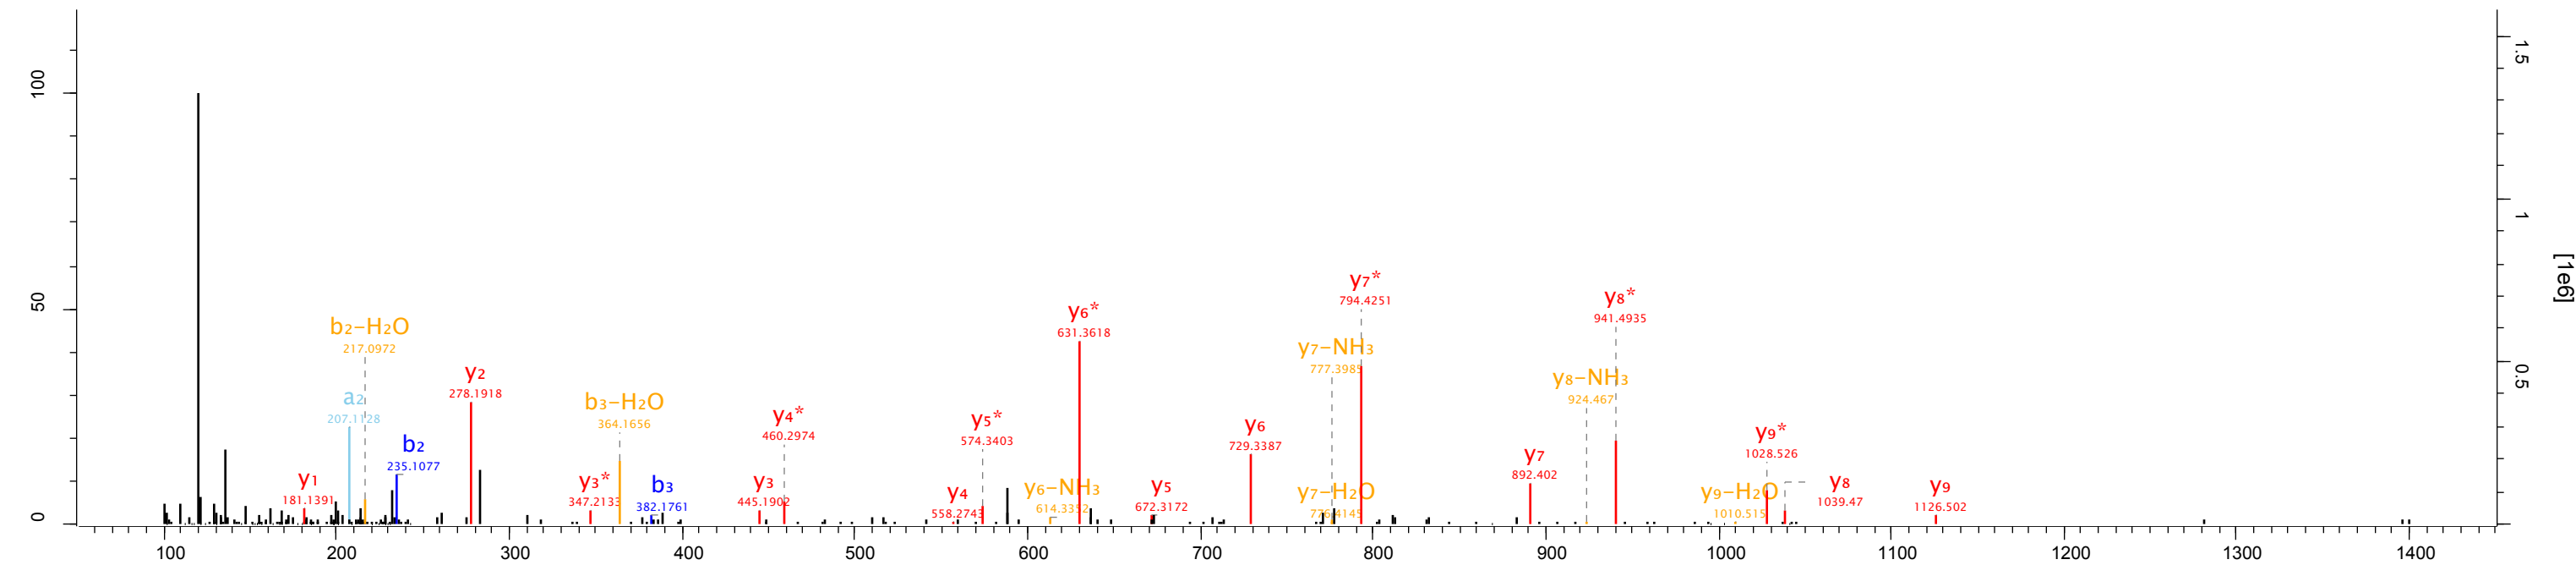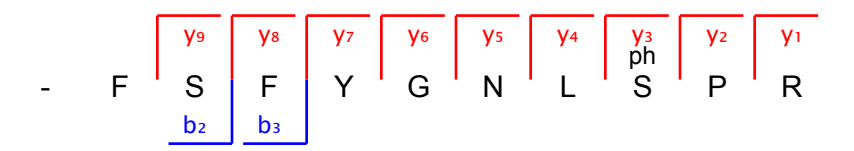

Raw file 20150814\_A375SR\_Phospho\_BR2\_06 Scan 22707 Method FTMS; HCD Score 108.66 m/z 662.31 Gene names RACGAP1

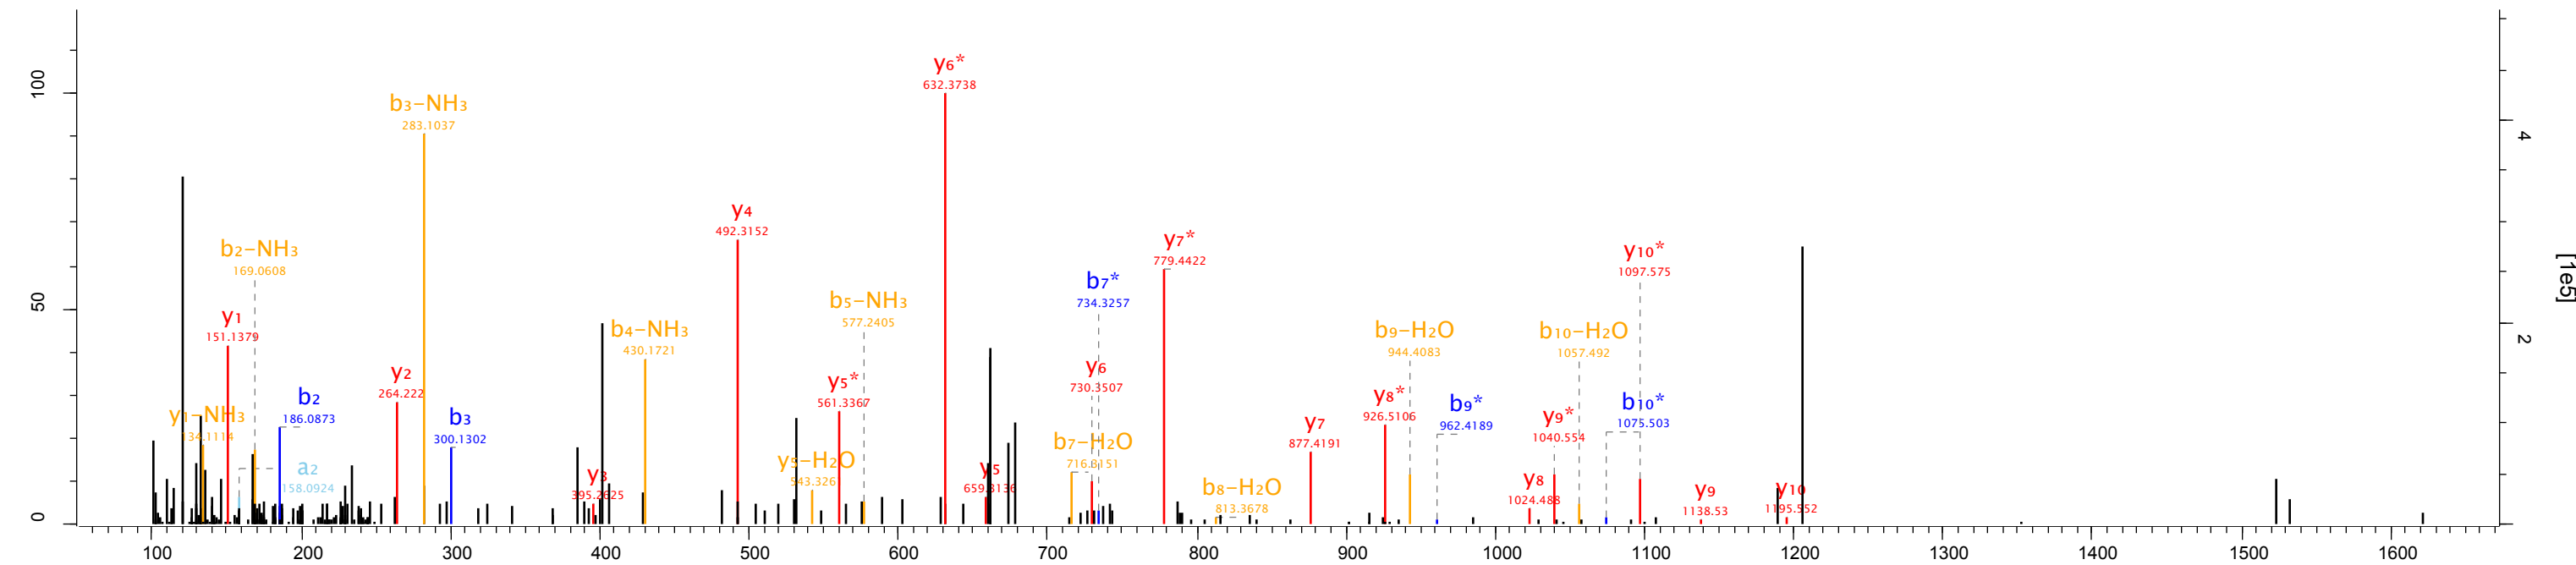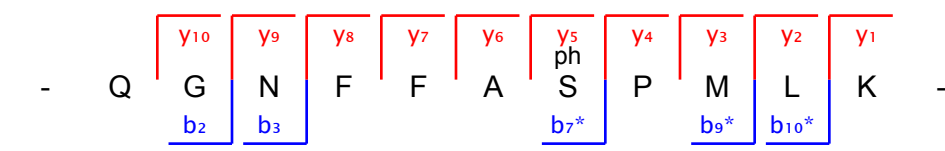

Raw file: 20150814\_A375SR\_Phospho\_BR2\_06  
 Scan: 2317 Method: FTMS; HCD Score: 43.61 m/z: 403.89 Gene names: PPP1R12A

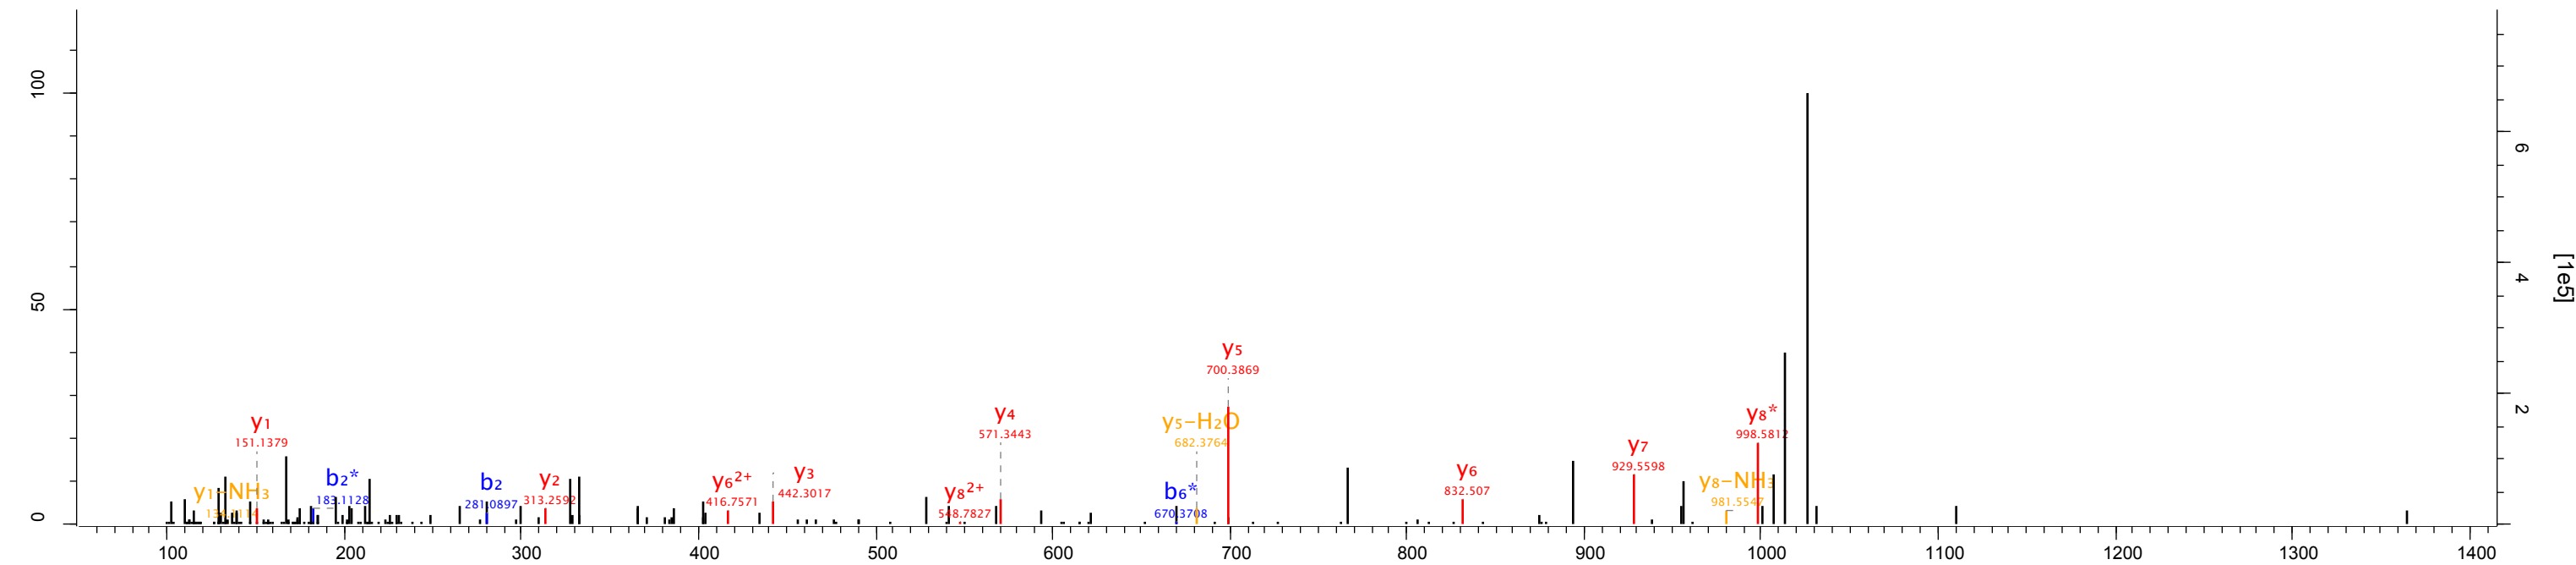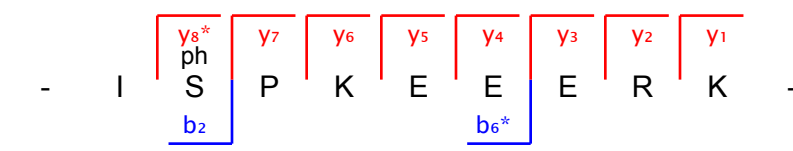

Raw file 20150814\_A375SR\_Phospho\_BR2\_06 Scan 23367 Method FTMS; HCD Score 189.22 m/z 1440.67 Gene names SPTBN1

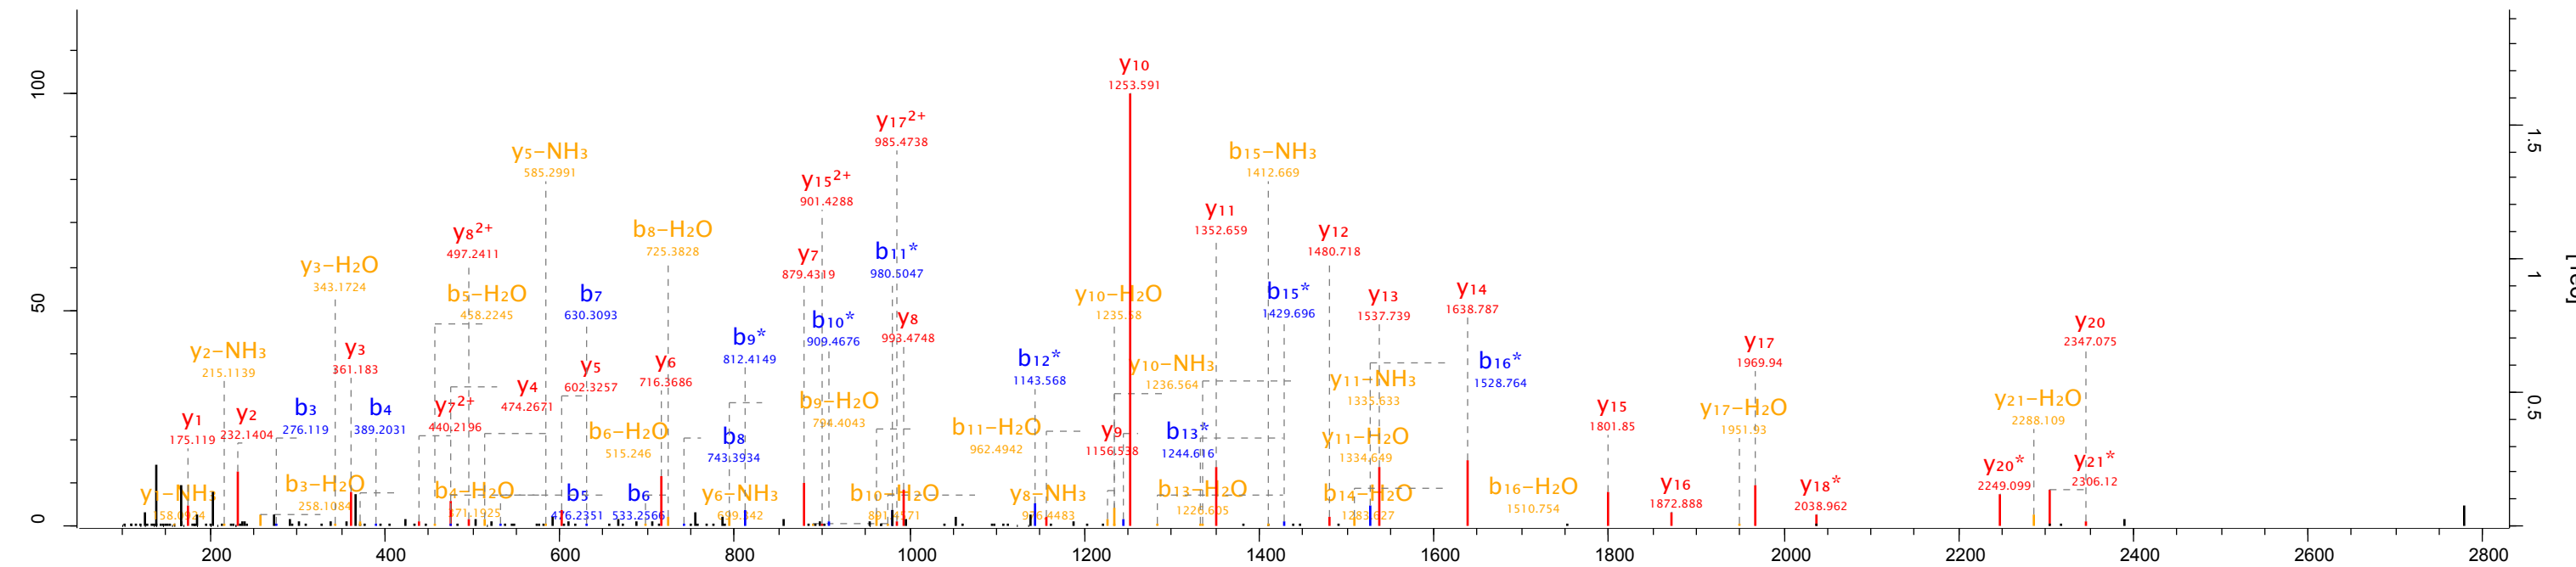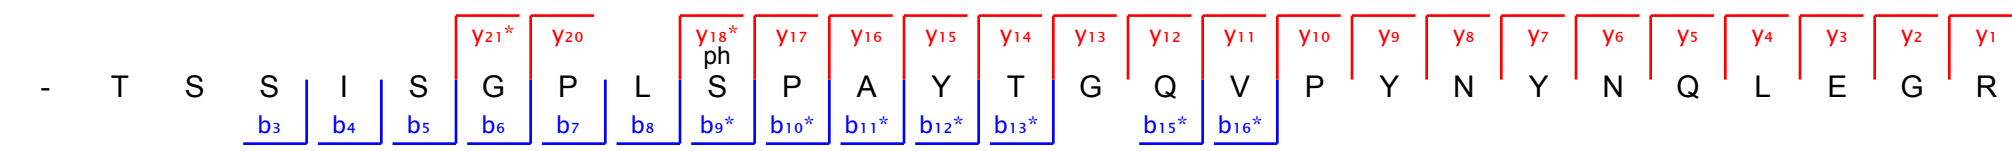

Raw file 20150814\_A375SR\_Phospho\_BR2\_06 Scan 23637 Method FTMS; HCD Score 50.2 m/z 923.08 Gene names MKL2

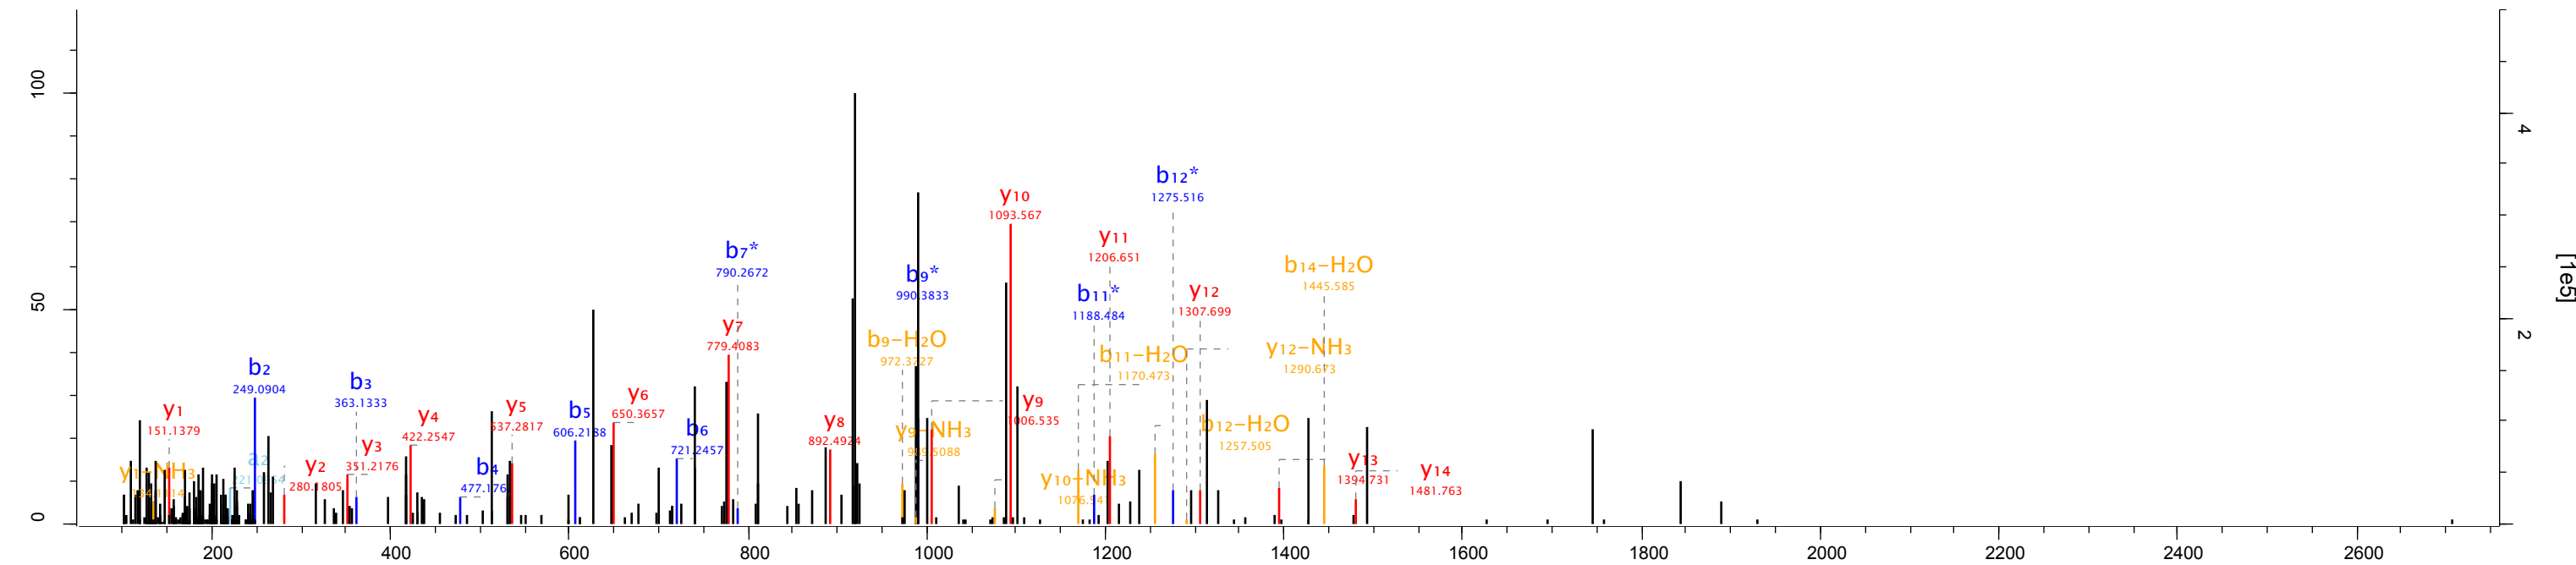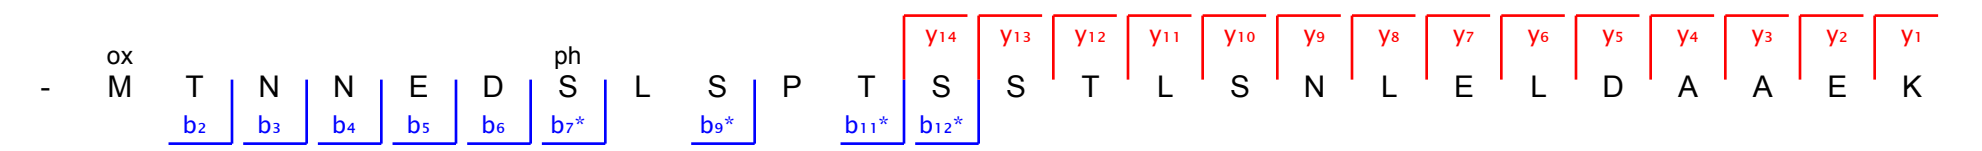



Raw file: 20150814\_A375SR\_Phospho\_BR2\_06  
 Scan: 24437 Method: FTMS; HCD Score: 121.1 m/z: 1199.04 Gene names: STAT3

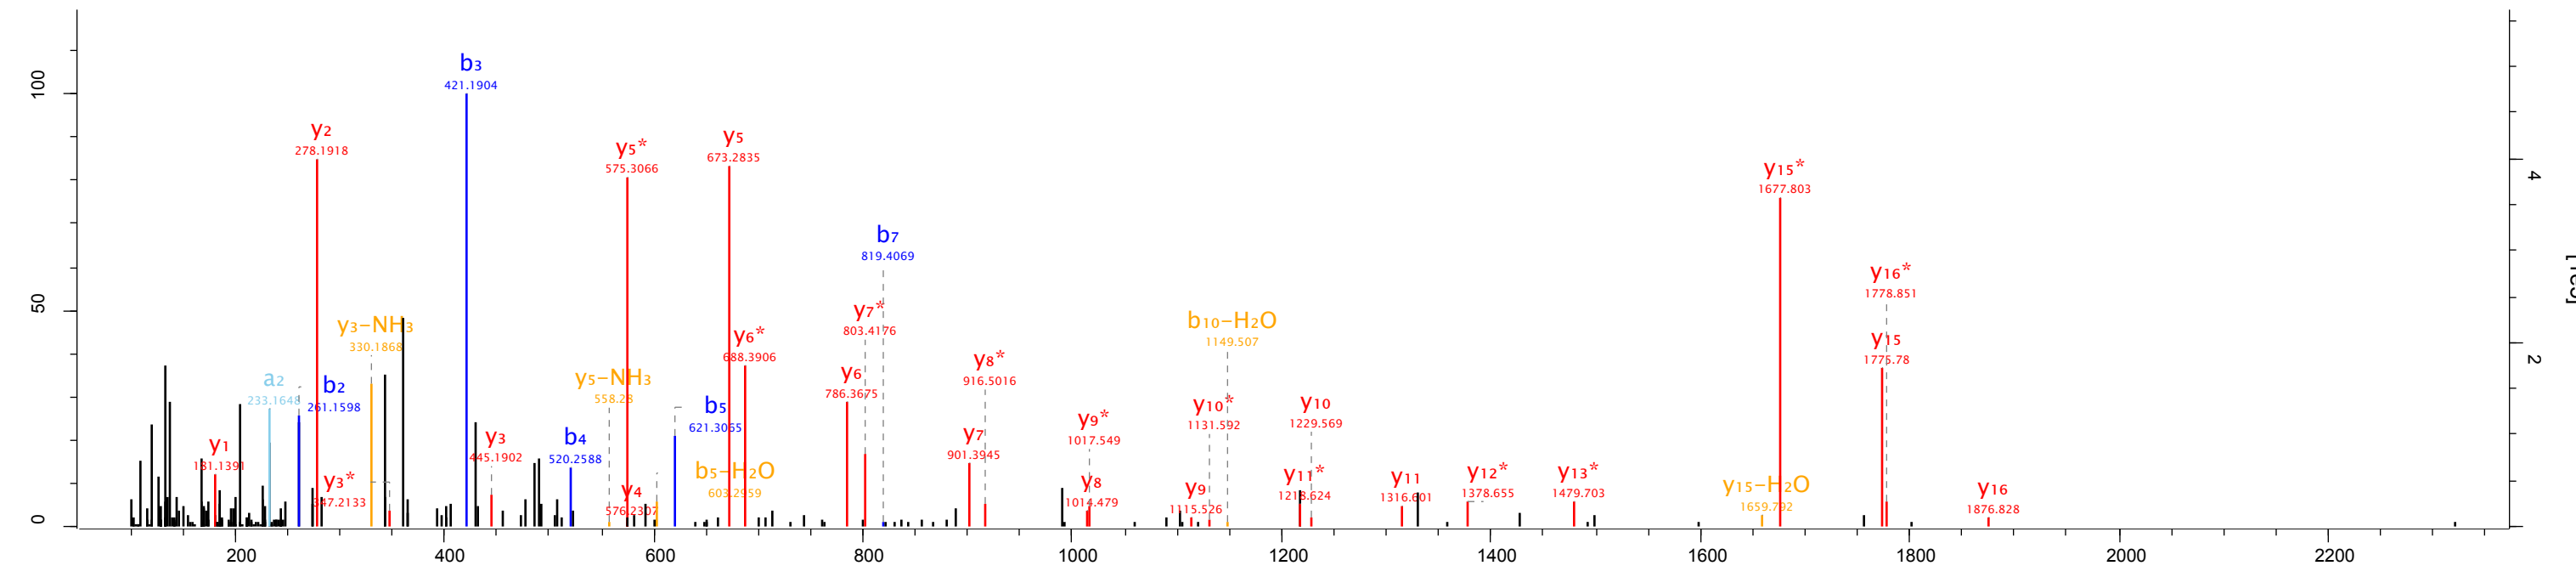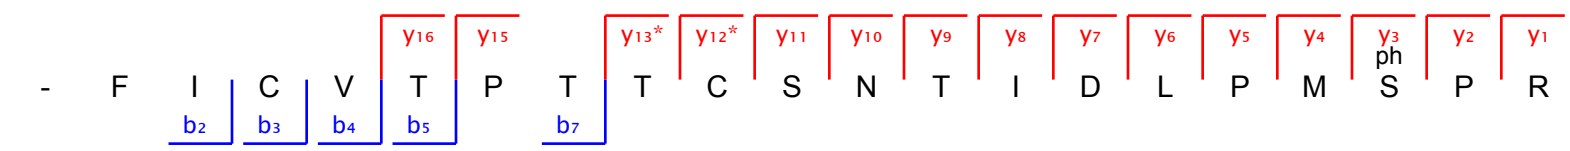

20150814\_A375SR\_Phospho\_BR2\_06

24877 FTMS; HCD 217.73 1030 CRTC3

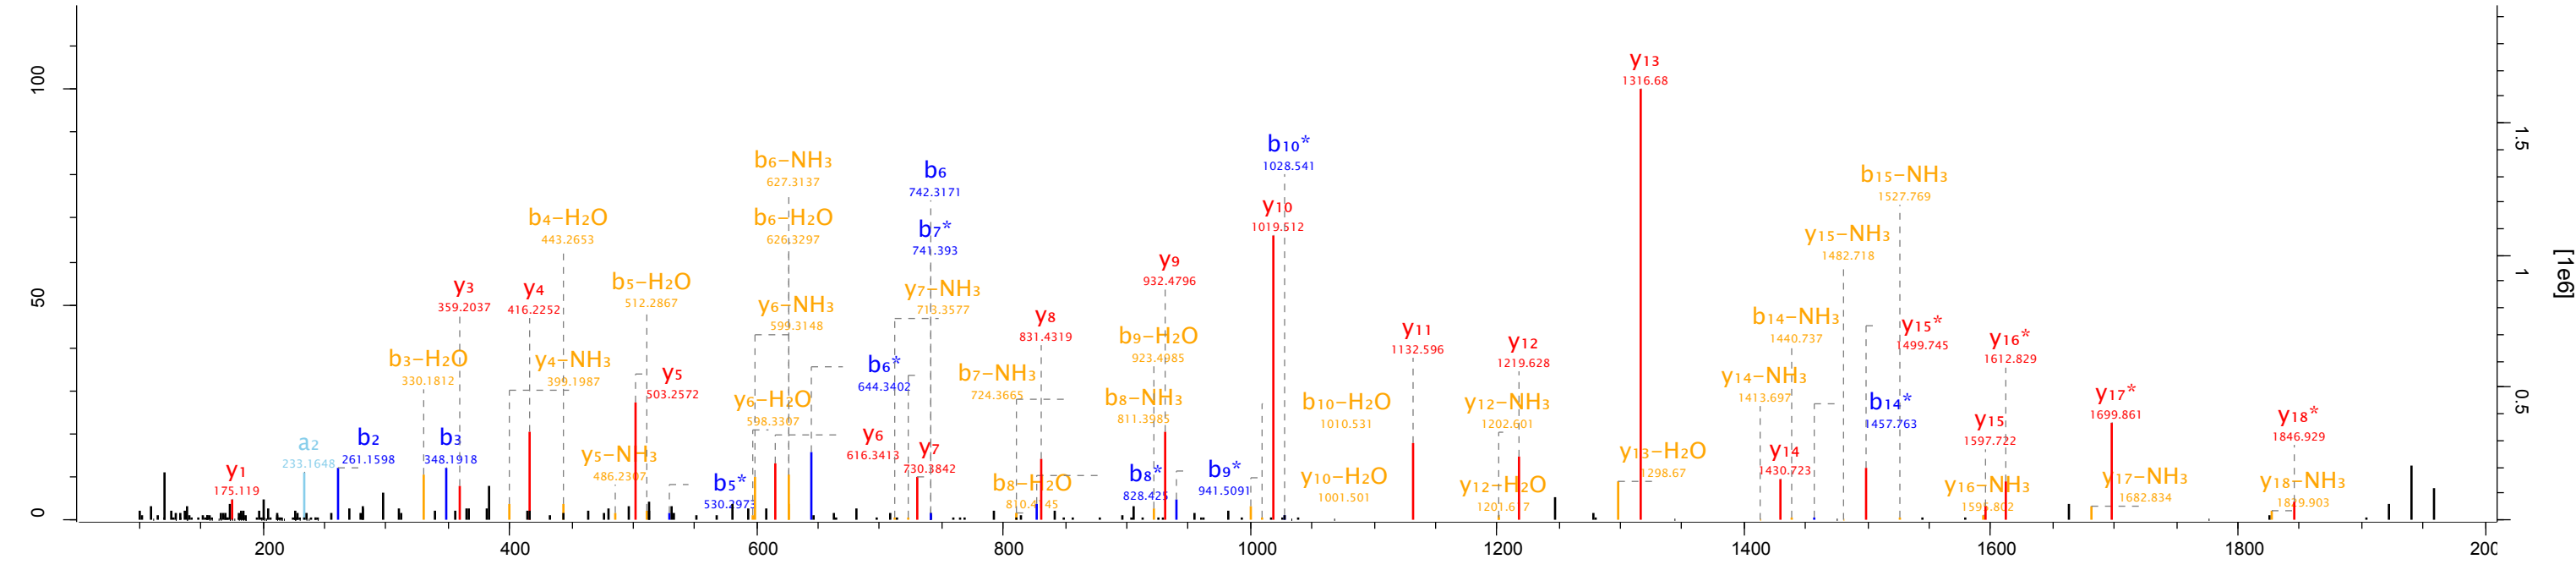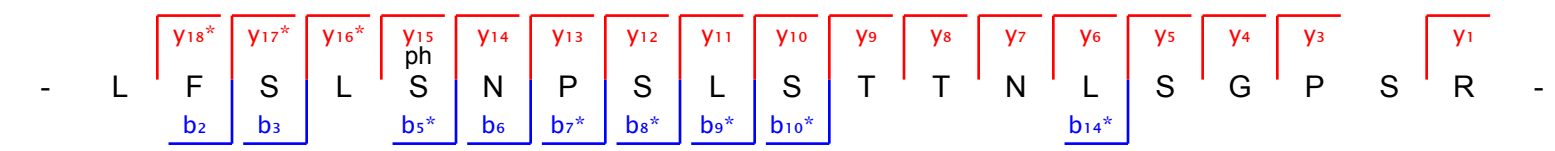

Raw file 20150814\_A375SR\_Phospho\_BR2\_06 Scan 25267 Method FTMS; HCD Score 91.75 m/z 964.46 Gene names DYNC112

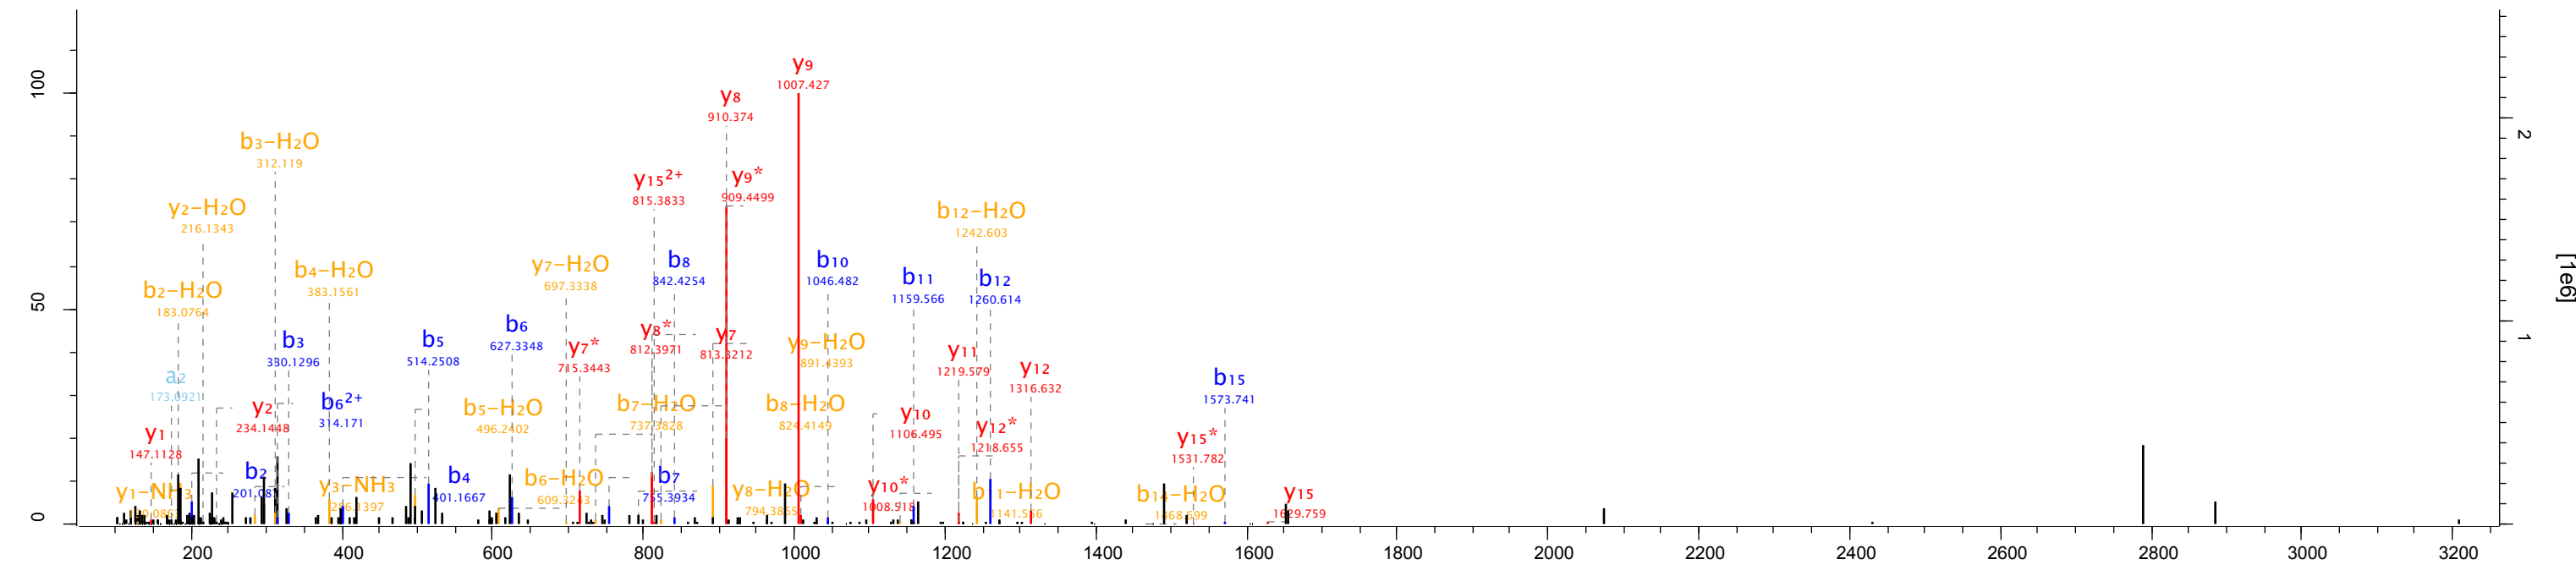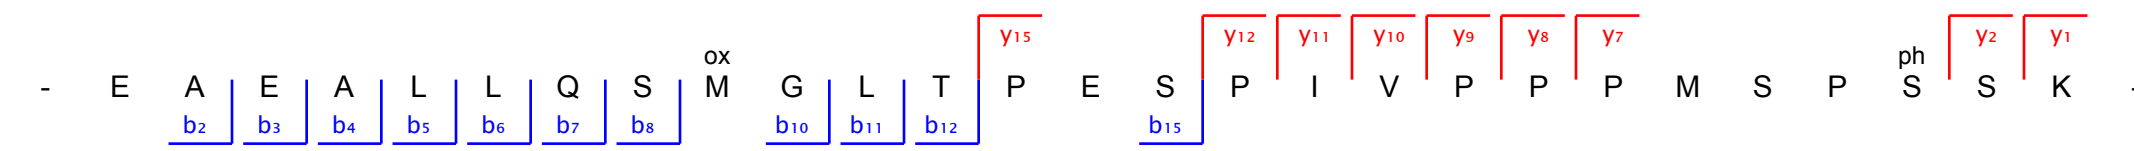

Raw file  
 20150814\_A375SR\_Phospho\_BR2\_06  
 Scan 25857 Method FTMS; HCD Score 121.94 m/z 827.41 Gene names TFEB

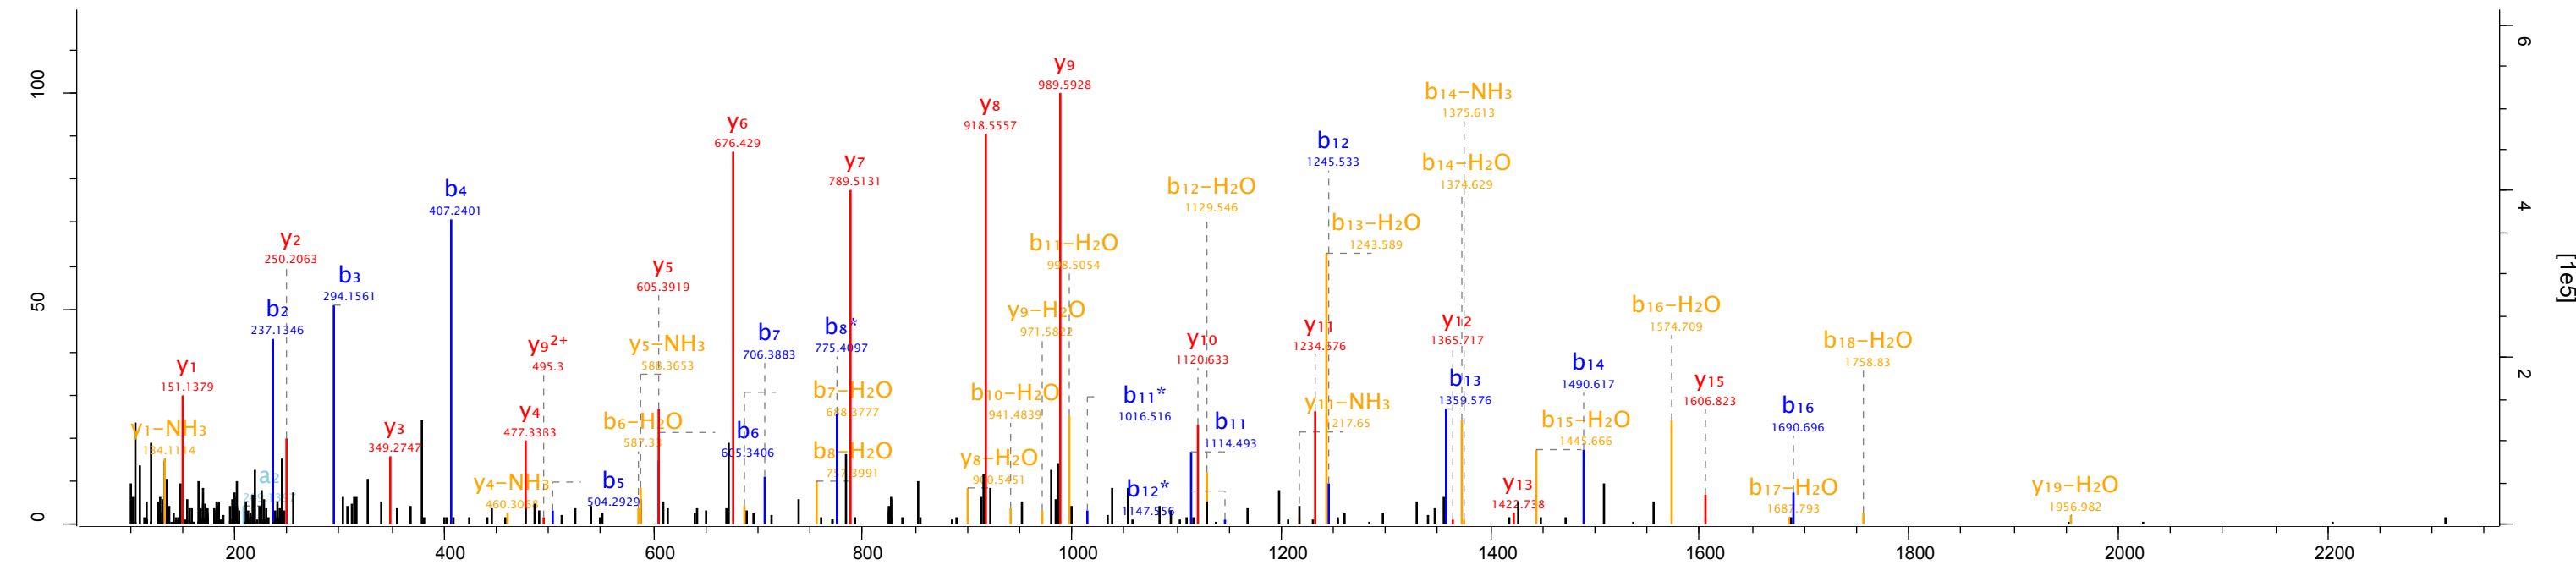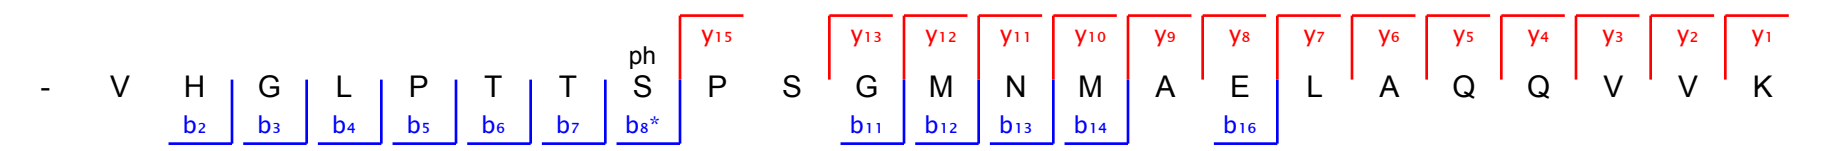

Raw file 20150814\_A375SR\_Phospho\_BR2\_06 Scan 26797 Method FTMS; HCD Score 66.36 m/z 992.46 Gene names FAS

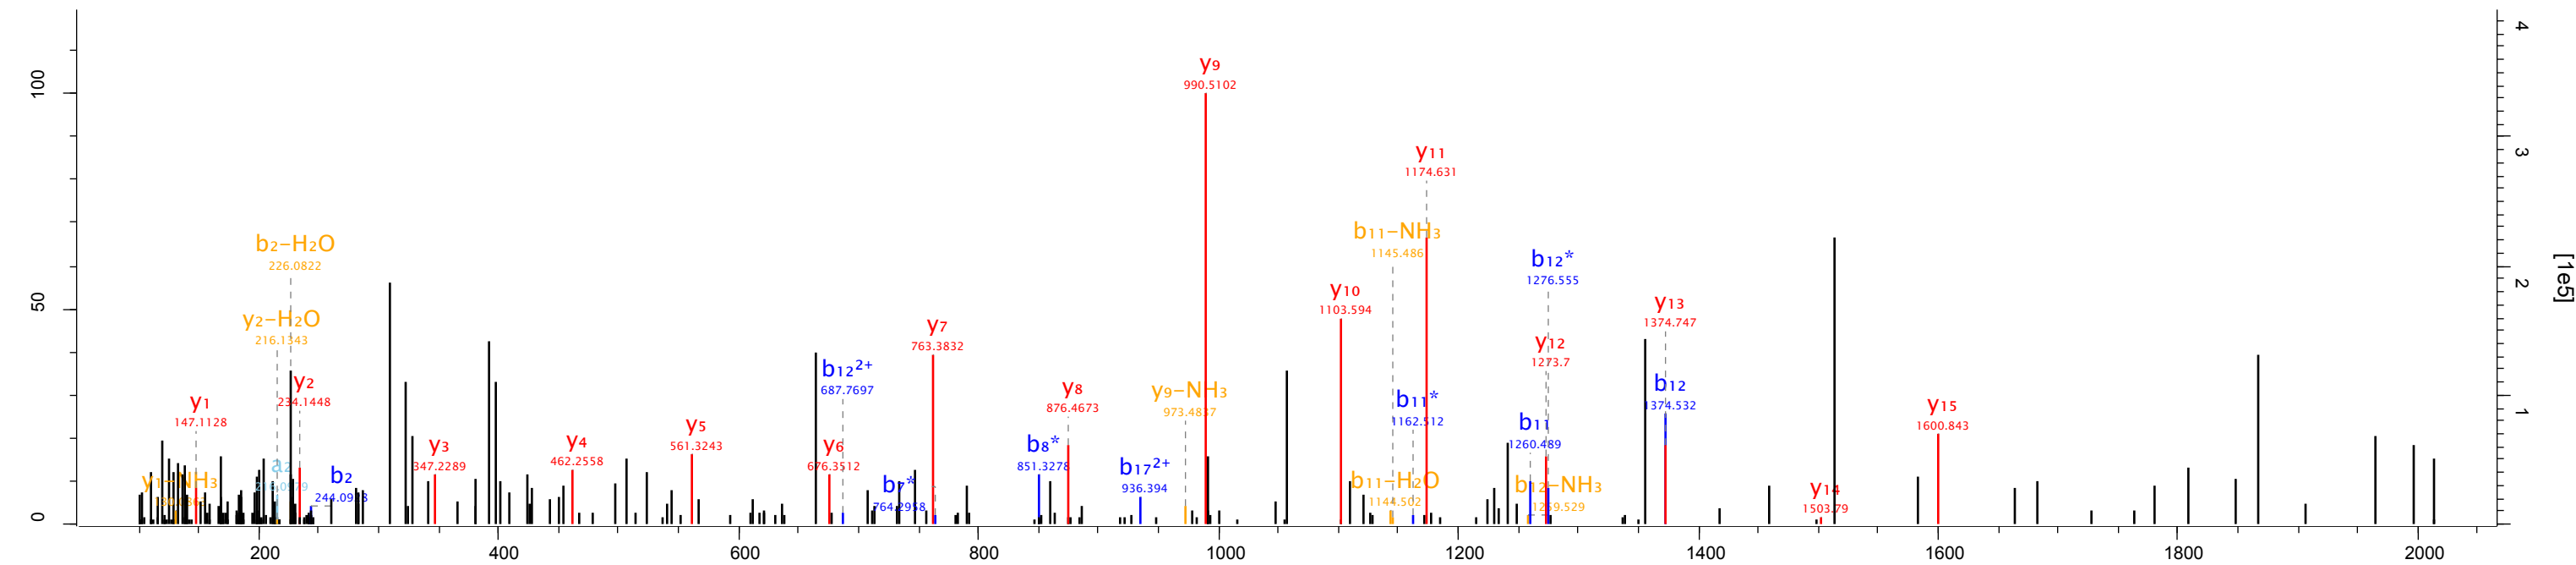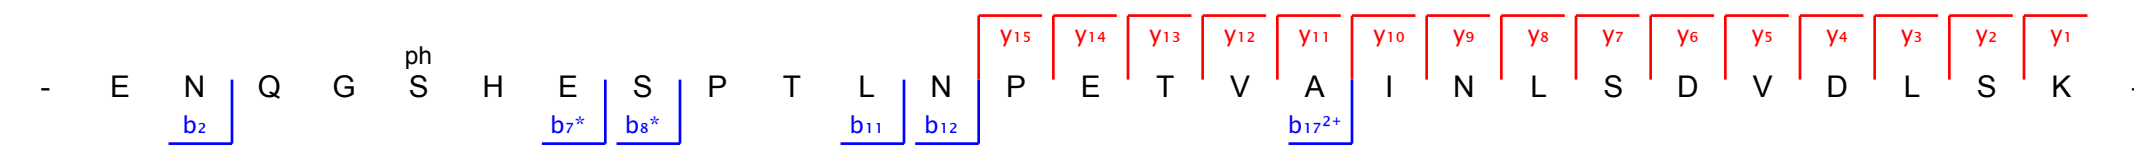

Raw file 20150814\_A375SR\_Phospho\_BR2\_06 Scan 26817 Method FTMS; HCD Score 182.77 m/z 976.42 Gene names FAM21C;FAM21A

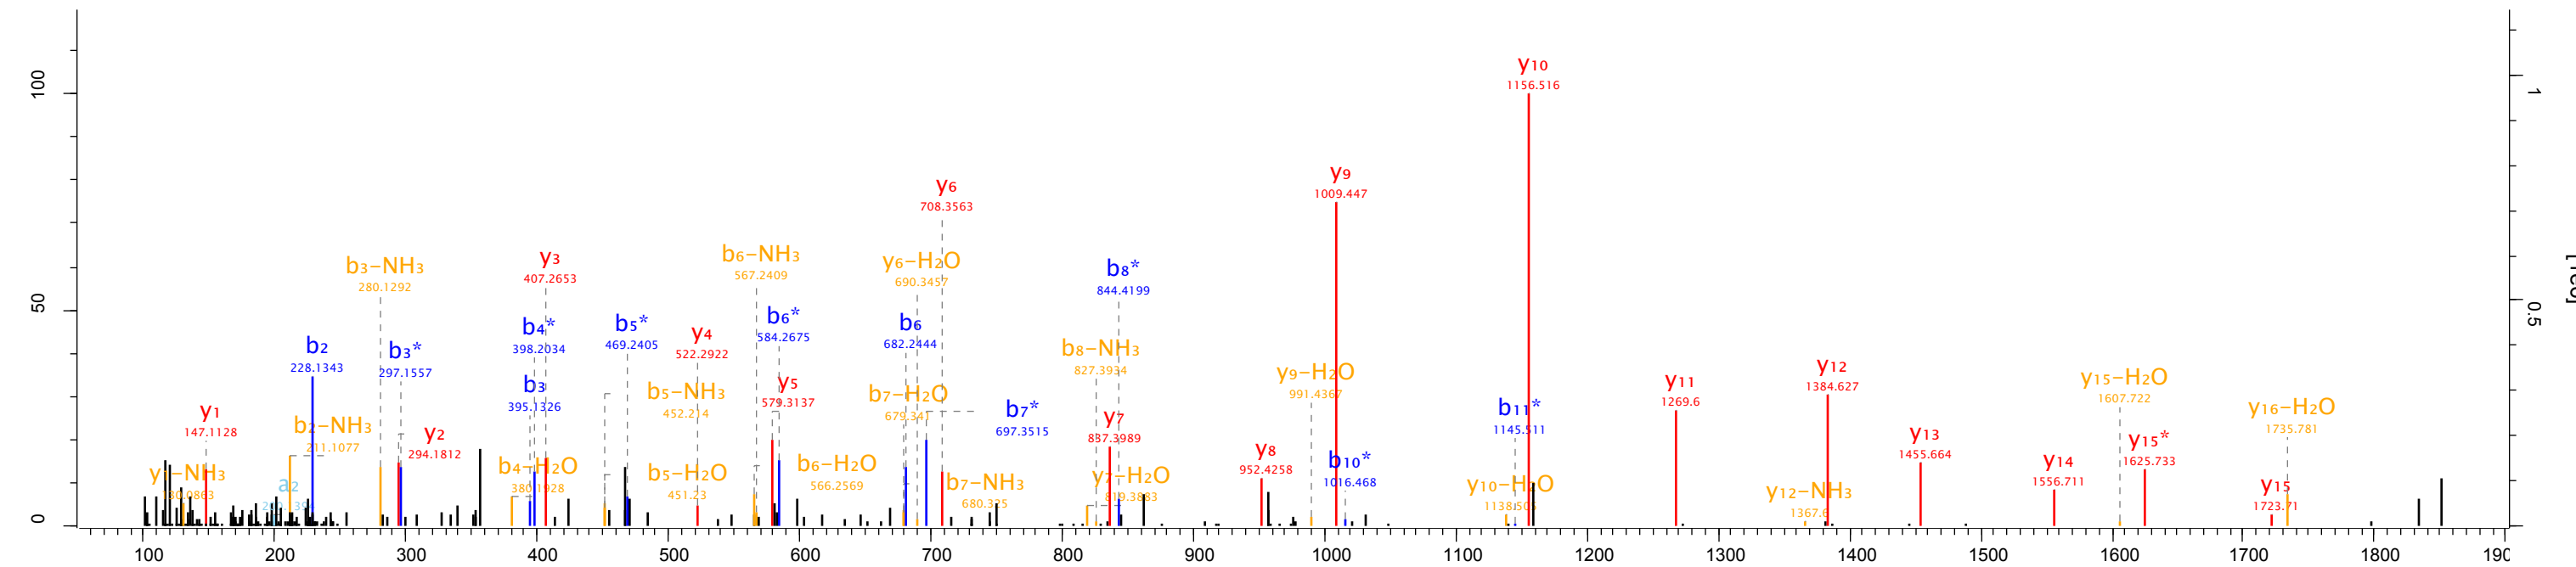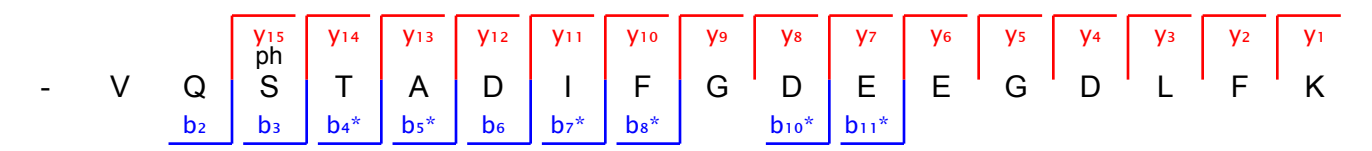

Raw file 20150814\_A375SR\_Phospho\_BR2\_06 Scan 26987 Method FTMS; HCD Score 127.58 m/z 715.33 Gene names PDE1C

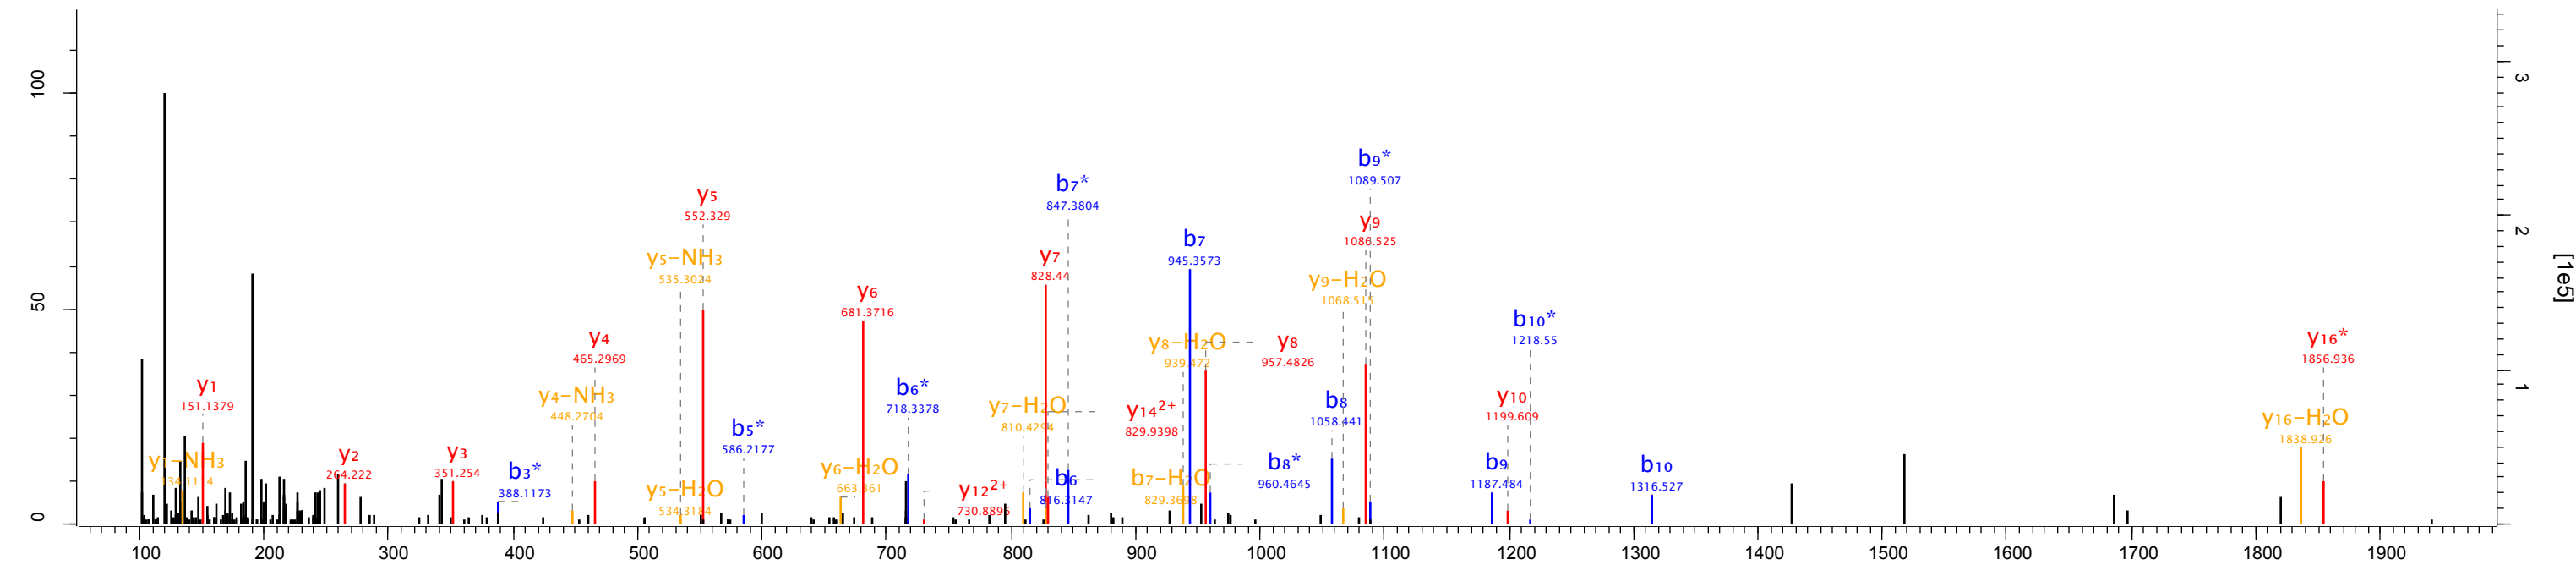

ac - ox M E ph S P T K E I E E F E S N S L K -

Fragmentation mapping (b ions in blue, y ions in red):

- b3\* (under S)
- y16\* (over E)
- y14<sup>2+</sup> (over P)
- b5\* (under T)
- y12<sup>2+</sup> (over K)
- b6 (under K)
- b7 (under E)
- b8 (under I)
- b9 (under E)
- b10 (under E)
- y10 (over I)
- y9 (over E)
- y8 (over E)
- y7 (over F)
- y6 (over E)
- y5 (over S)
- y4 (over N)
- y3 (over S)
- y2 (over L)
- y1 (over K)

Raw file 20150814\_A375SR\_Phospho\_BR2\_06 Scan 27147 Method FTMS; HCD Score 119.38 m/z 799.4 Gene names AHNAK

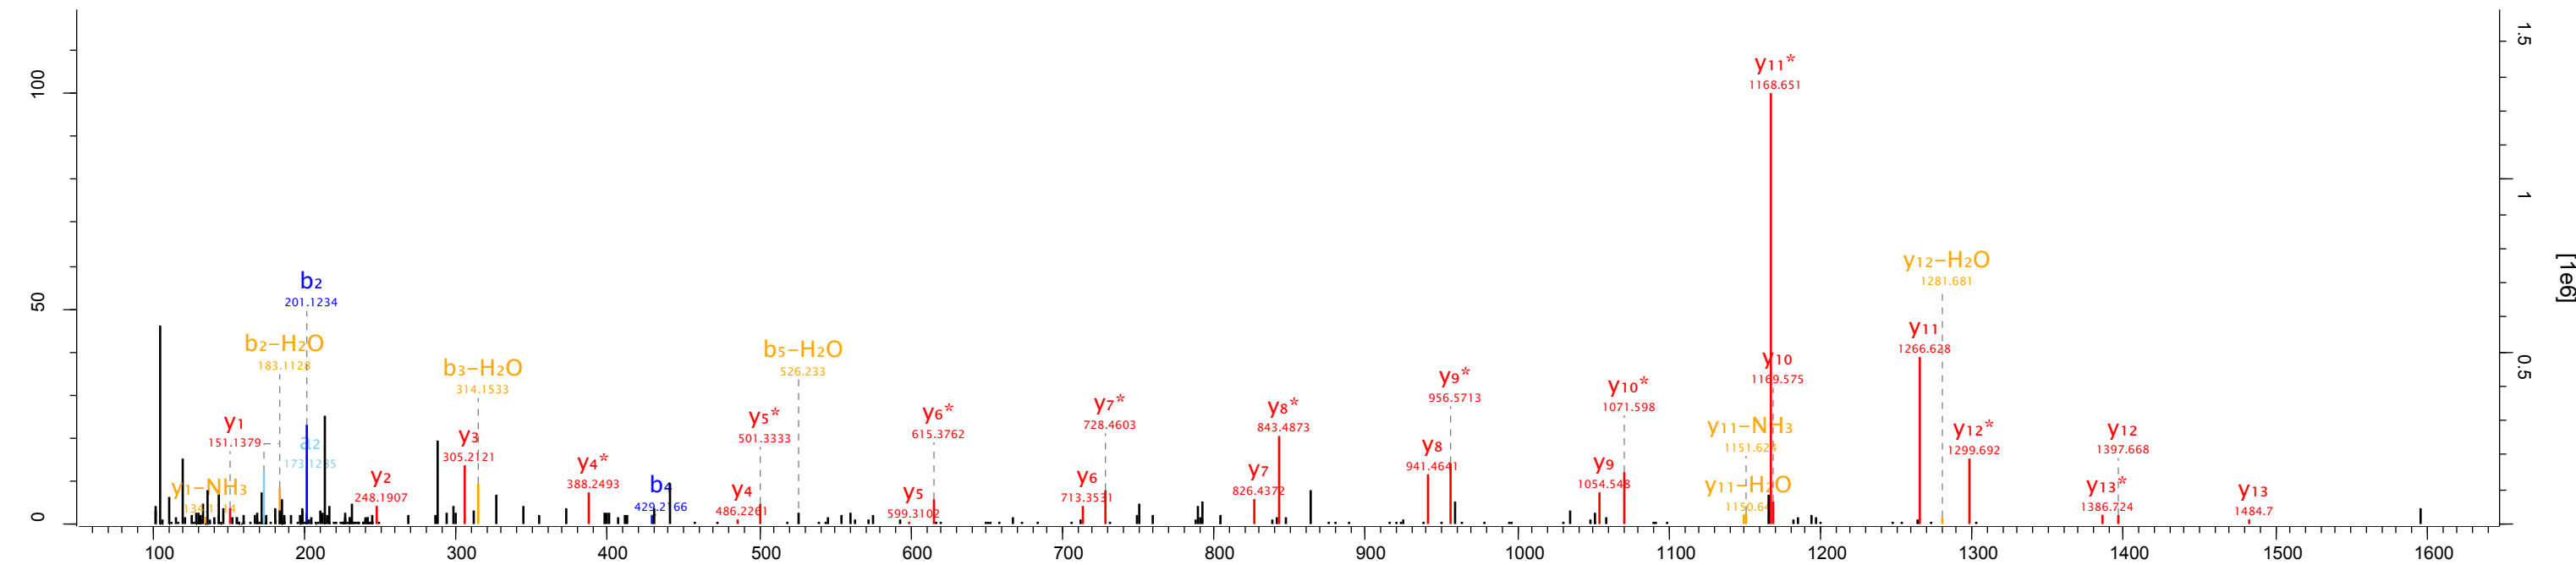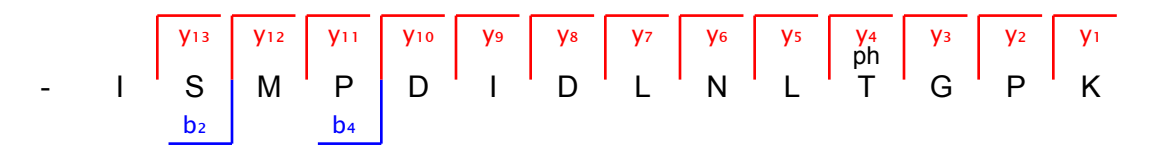



Raw file 20150814\_A375SR\_Phospho\_BR2\_06 Scan 27587 Method FTMS; HCD Score 119.69 m/z 698.03 Gene names NFKB1

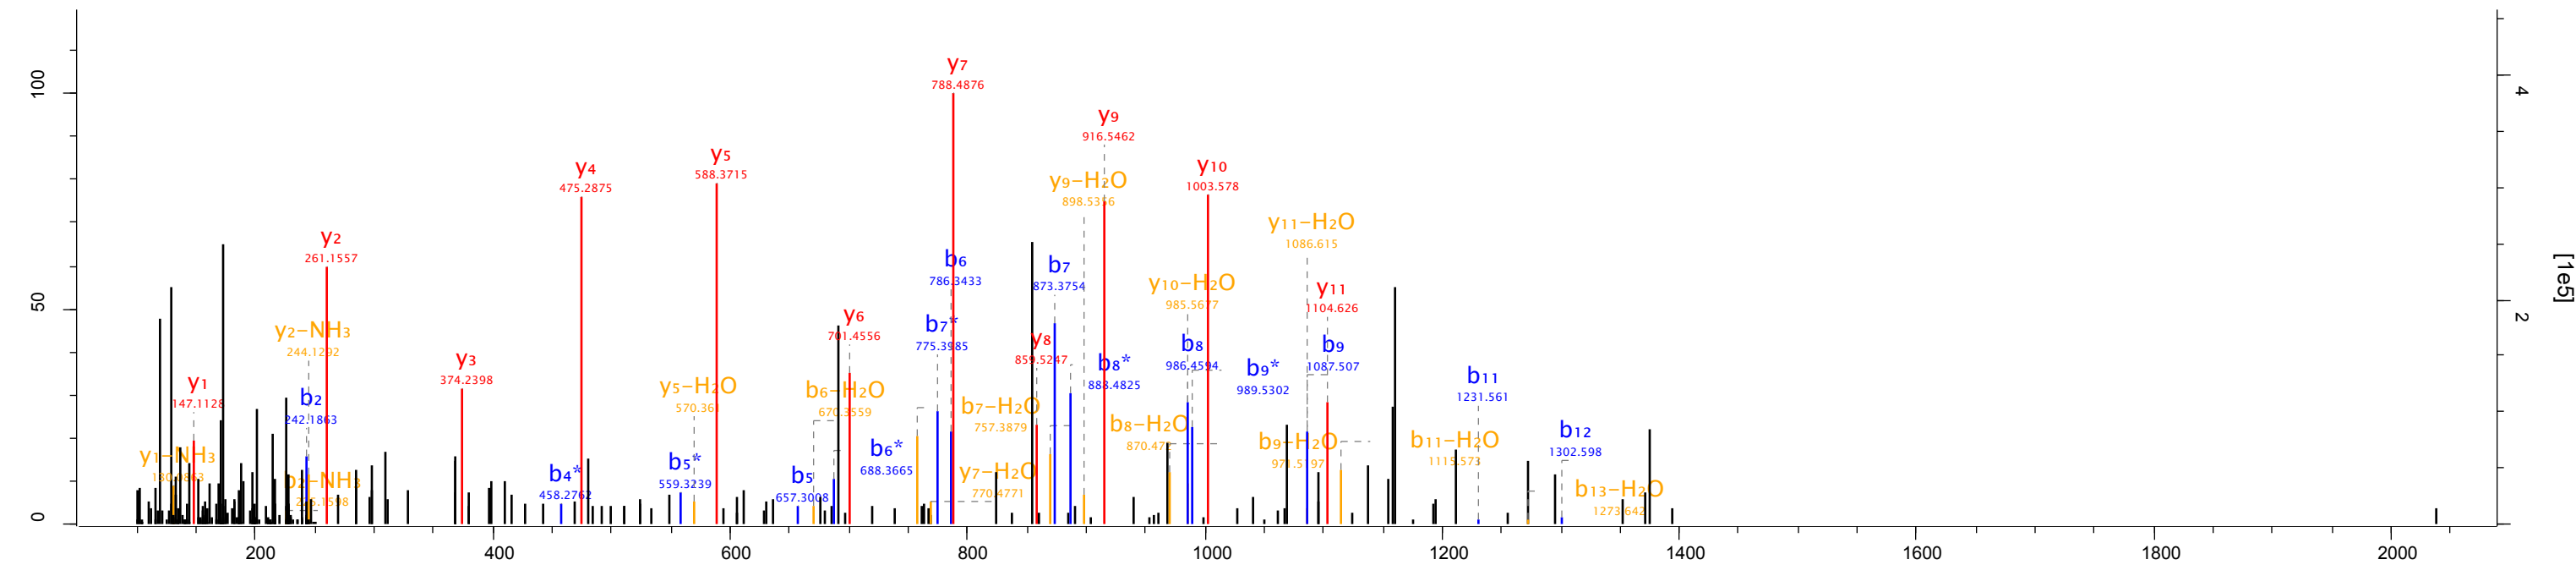

- K L S F T E S L T S G A S L L T L N K -

ph

b<sub>2</sub> b<sub>4</sub>\* b<sub>5</sub> b<sub>6</sub> b<sub>7</sub> b<sub>8</sub> b<sub>9</sub> b<sub>11</sub> b<sub>12</sub>

y<sub>11</sub> y<sub>10</sub> y<sub>9</sub> y<sub>8</sub> y<sub>7</sub> y<sub>6</sub> y<sub>5</sub> y<sub>4</sub> y<sub>3</sub> y<sub>2</sub> y<sub>1</sub>

Raw file 20150814\_A375SR\_Phospho\_BR2\_06 Scan 27687 Method FTMS; HCD Score 64.7 m/z 1031.4 Gene names RRM2

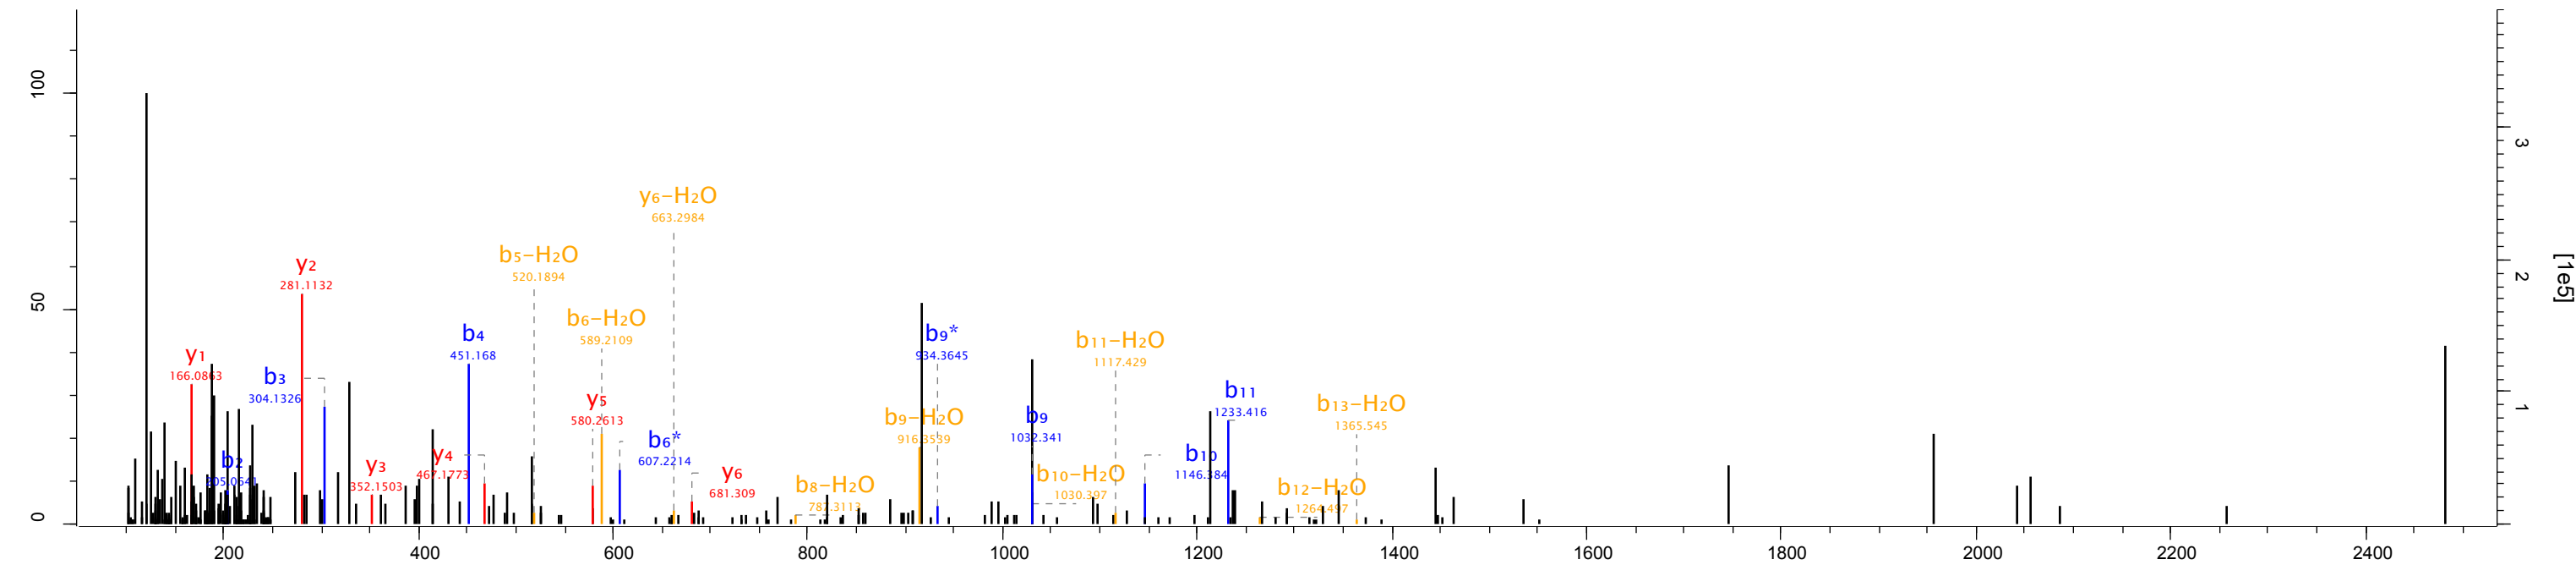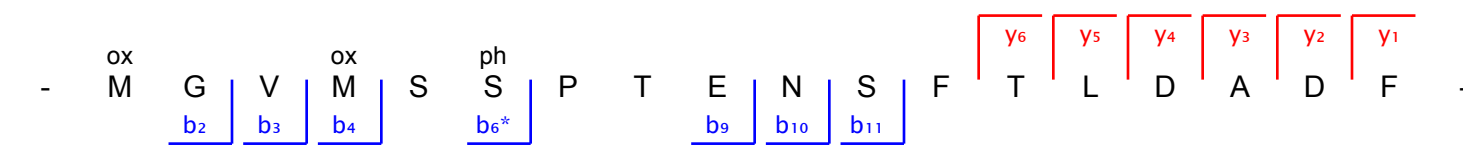

Raw file: 20150814\_A375SR\_Phospho\_BR2\_06  
 Scan: 28127 Method: FTMS; HCD Score: 207.53 m/z: 810.35 Gene names: RIN1

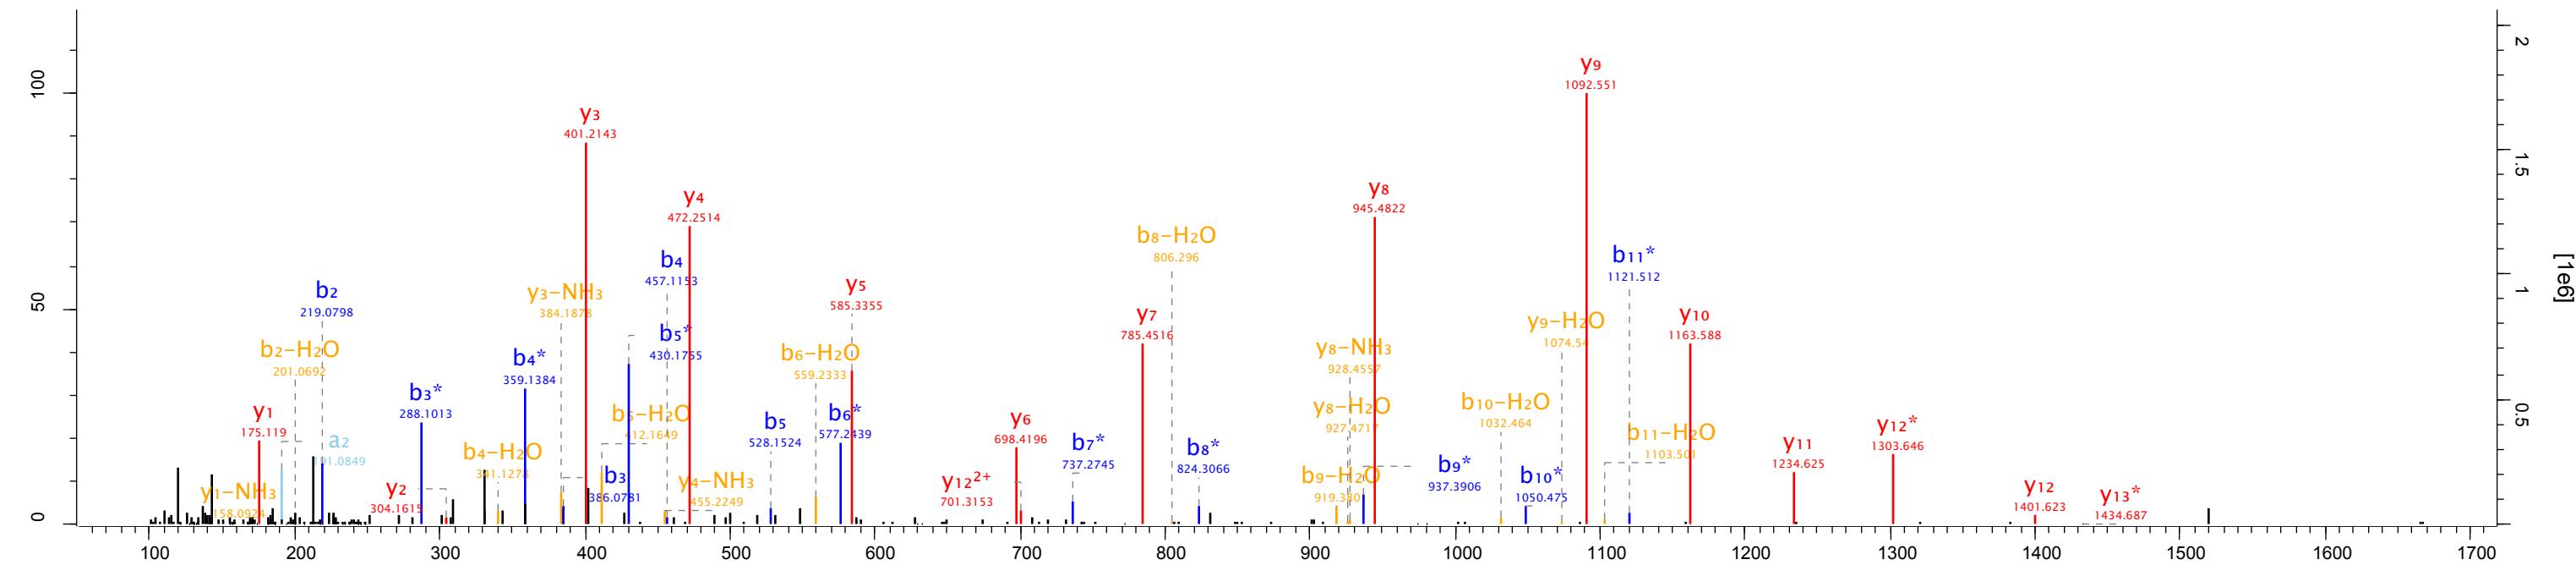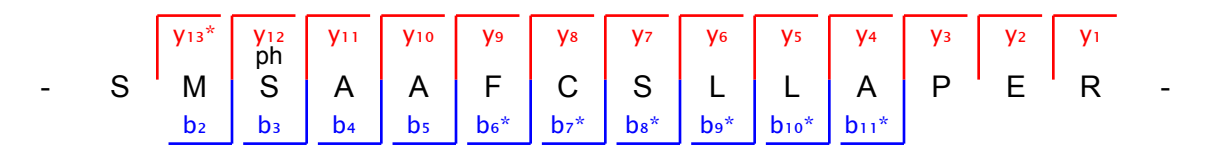

Raw file 20150814\_A375SR\_Phospho\_BR2\_06 Scan 28317 Method FTMS; HCD Score 209.68 m/z 810.75 Gene names NUP153

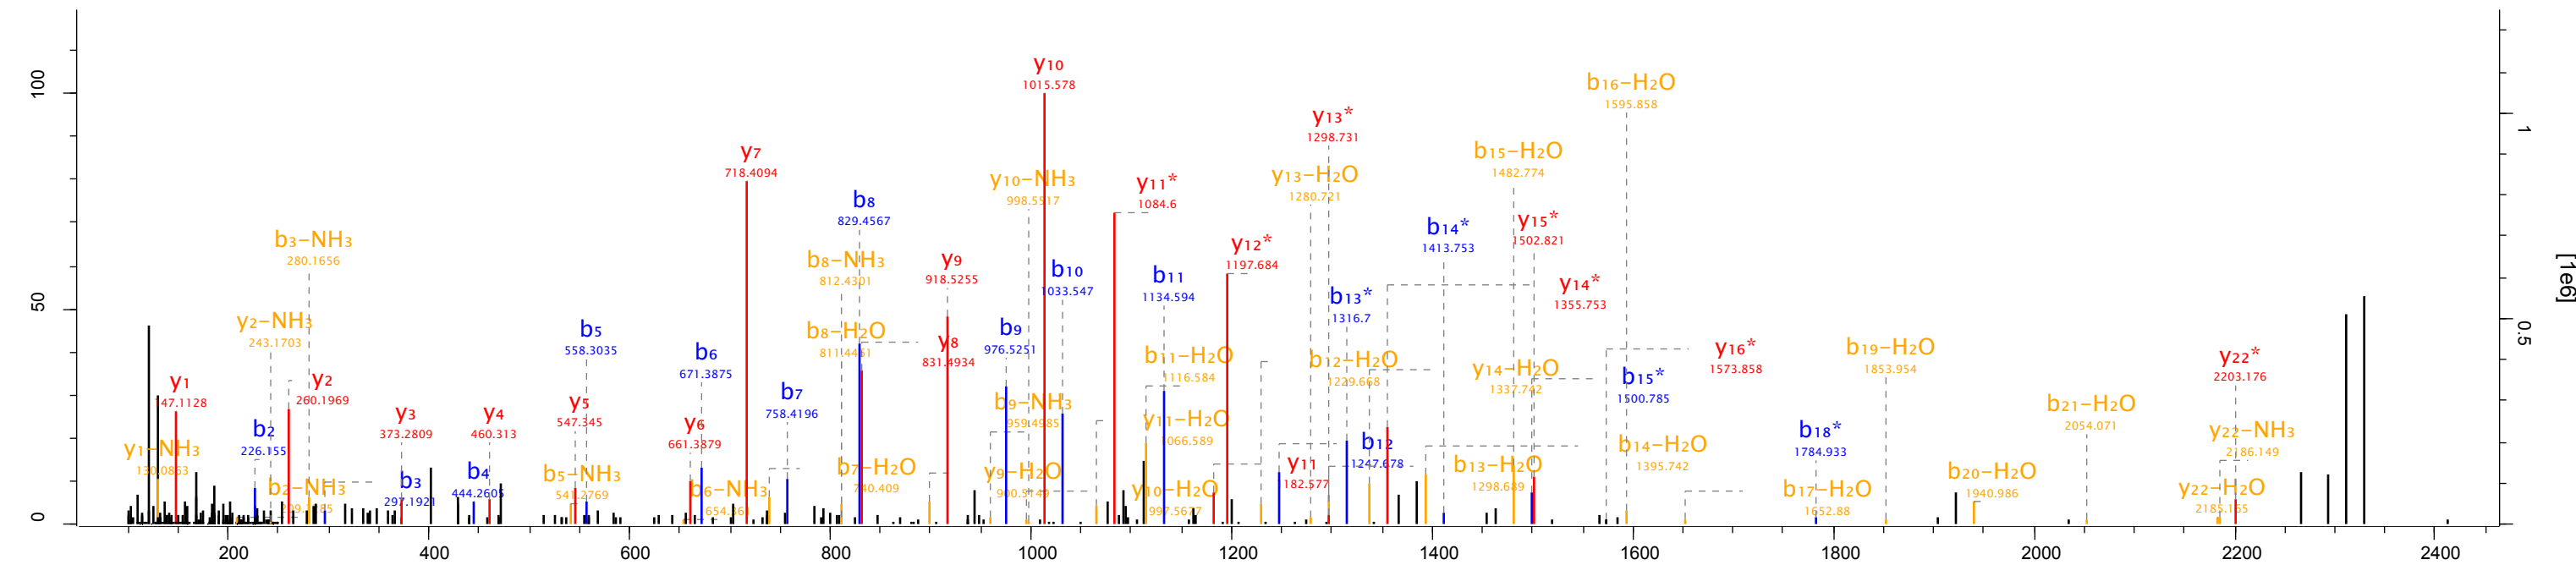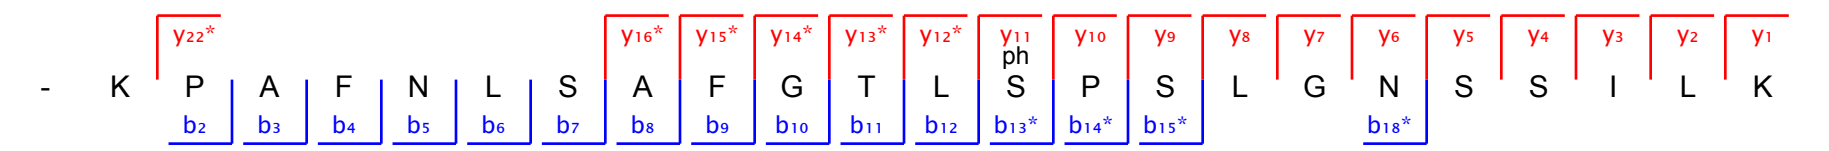

Raw file: 20150814\_A375SR\_Phospho\_BR2\_06  
 Scan: 2897 Method: FTMS; HCD Score: 78.26 m/z: 454.73 Gene names: TRIO

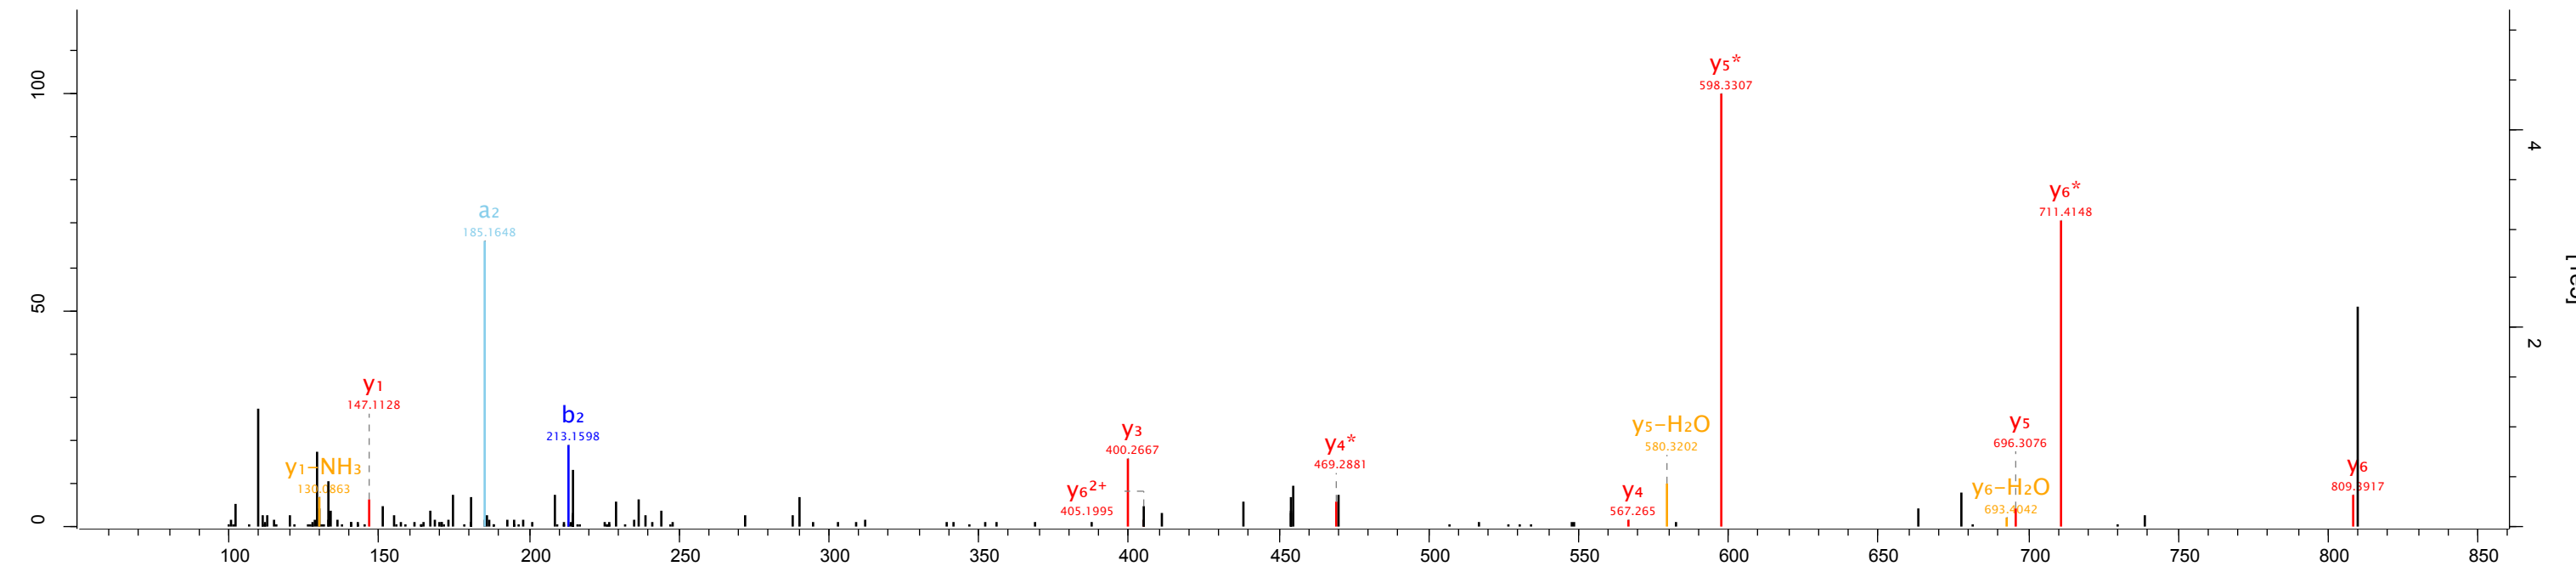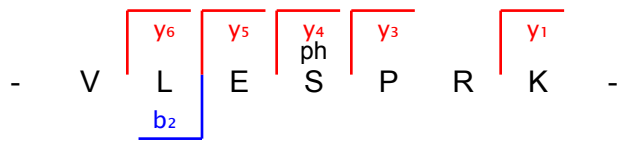

Raw file: 20150814\_A375SR\_Phospho\_BR2\_06  
 Scan: 3547 Method: FTMS; HCD Score: 171 m/z: 609.3 Gene names: SMN1

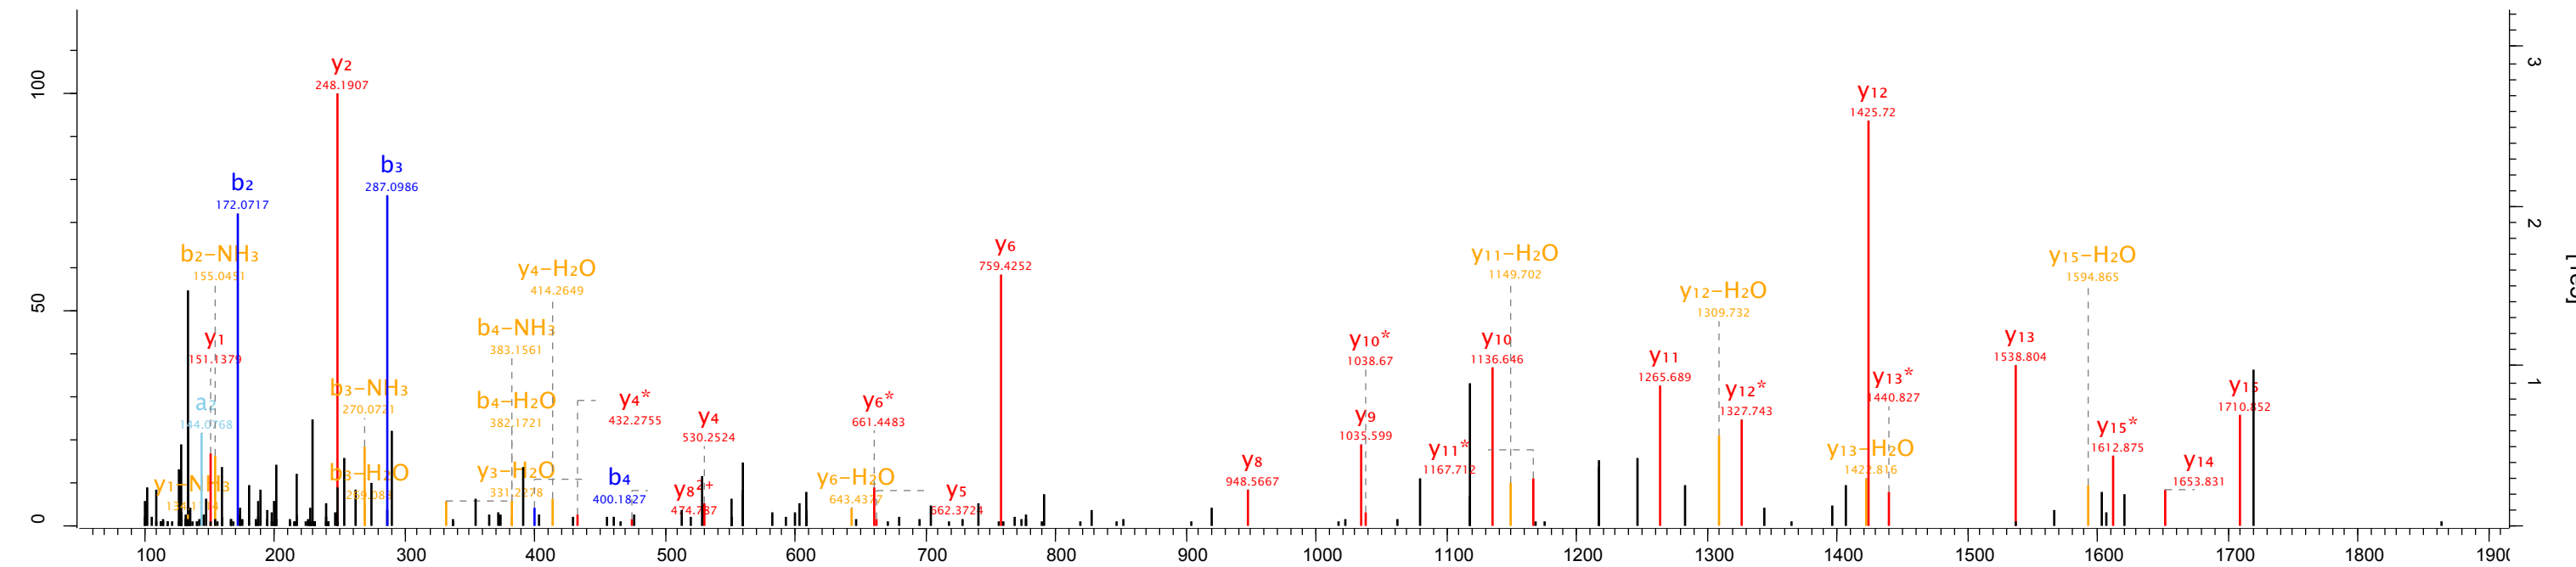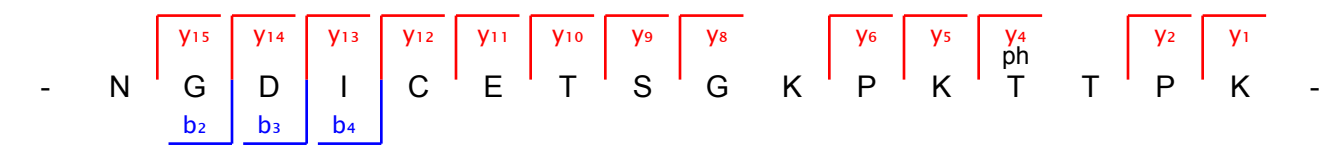

Raw file 20150814\_A375SR\_Phospho\_BR2\_06 Scan 3557 Method FTMS; HCD Score 122.78 m/z 588.74 Gene names DDX5

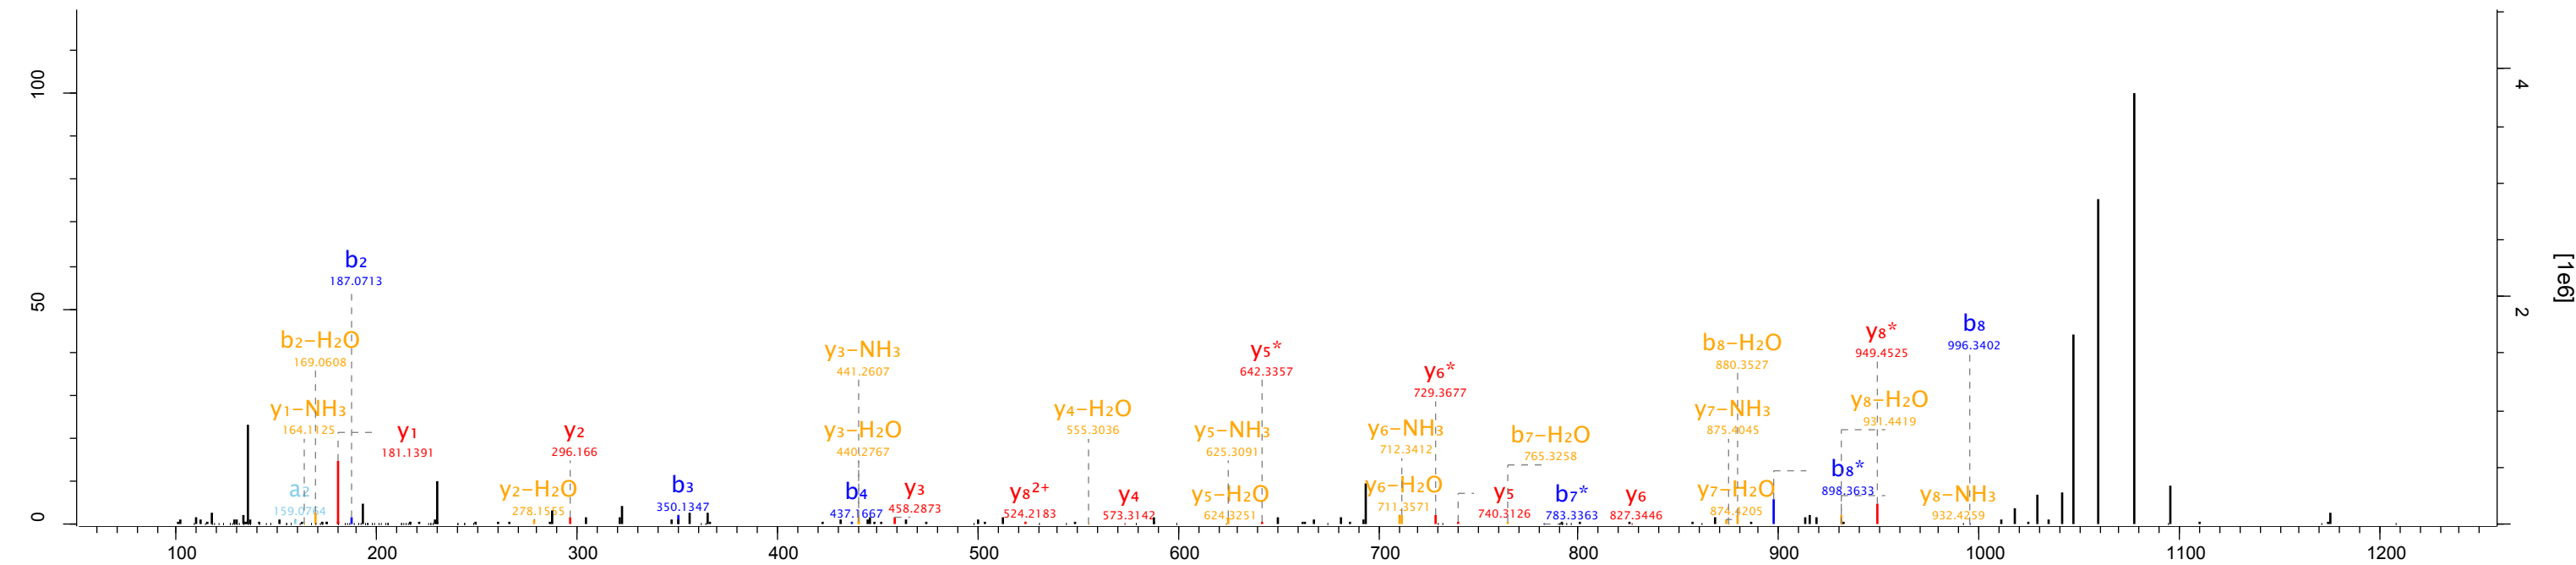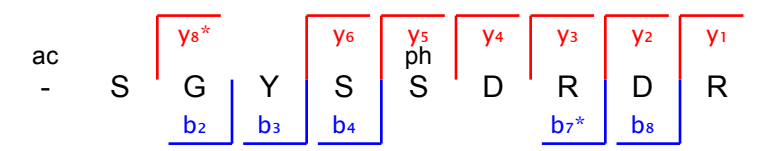

Raw file: 20150814\_A375SR\_Phospho\_BR2\_06  
 Scan: 3757 Method: FTMS; HCD Score: 54.34 m/z: 522.22 Gene names: RNF126

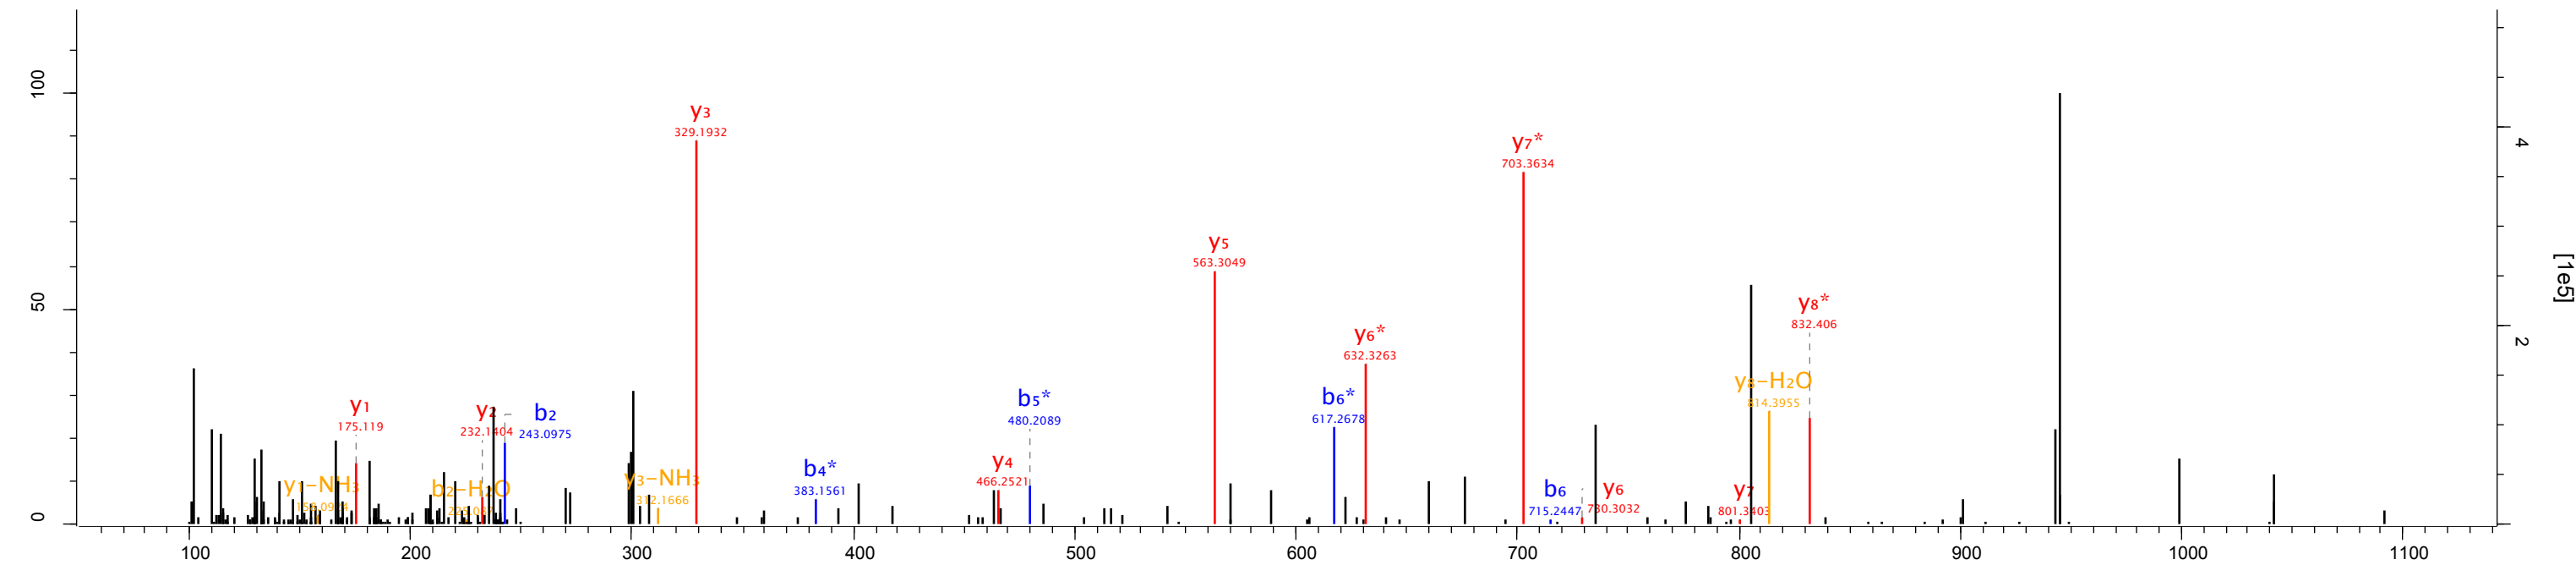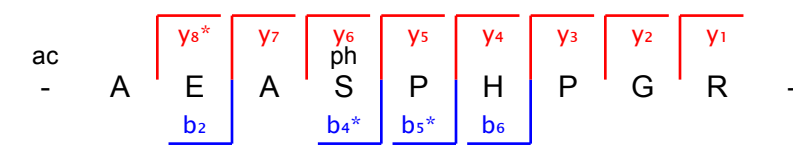



Raw file: 20150814\_A375SR\_Phospho\_BR2\_06  
 Scan: 3957 Method: FTMS; HCD Score: 111.54 m/z: 562.27 Gene names: ASXL2

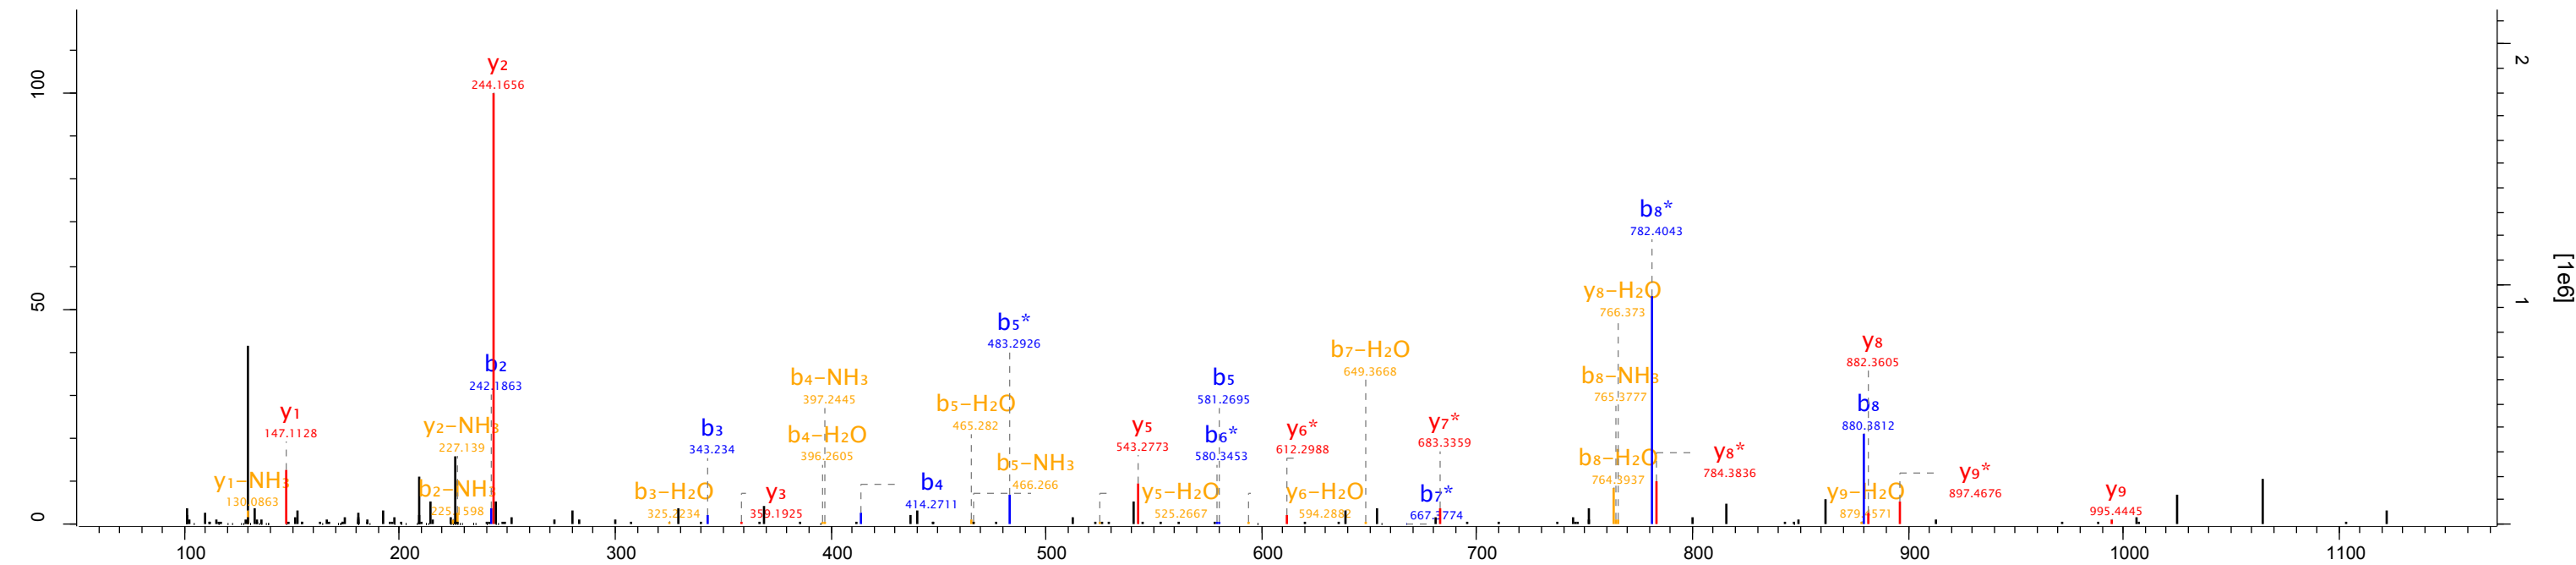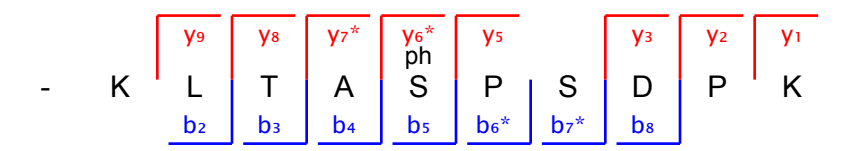

Raw file: 20150814\_A375SR\_Phospho\_BR2\_06  
 Scan: 5427 Method: FTMS; HCD Score: 169.06 m/z: 635.25 Gene names: RBM15B

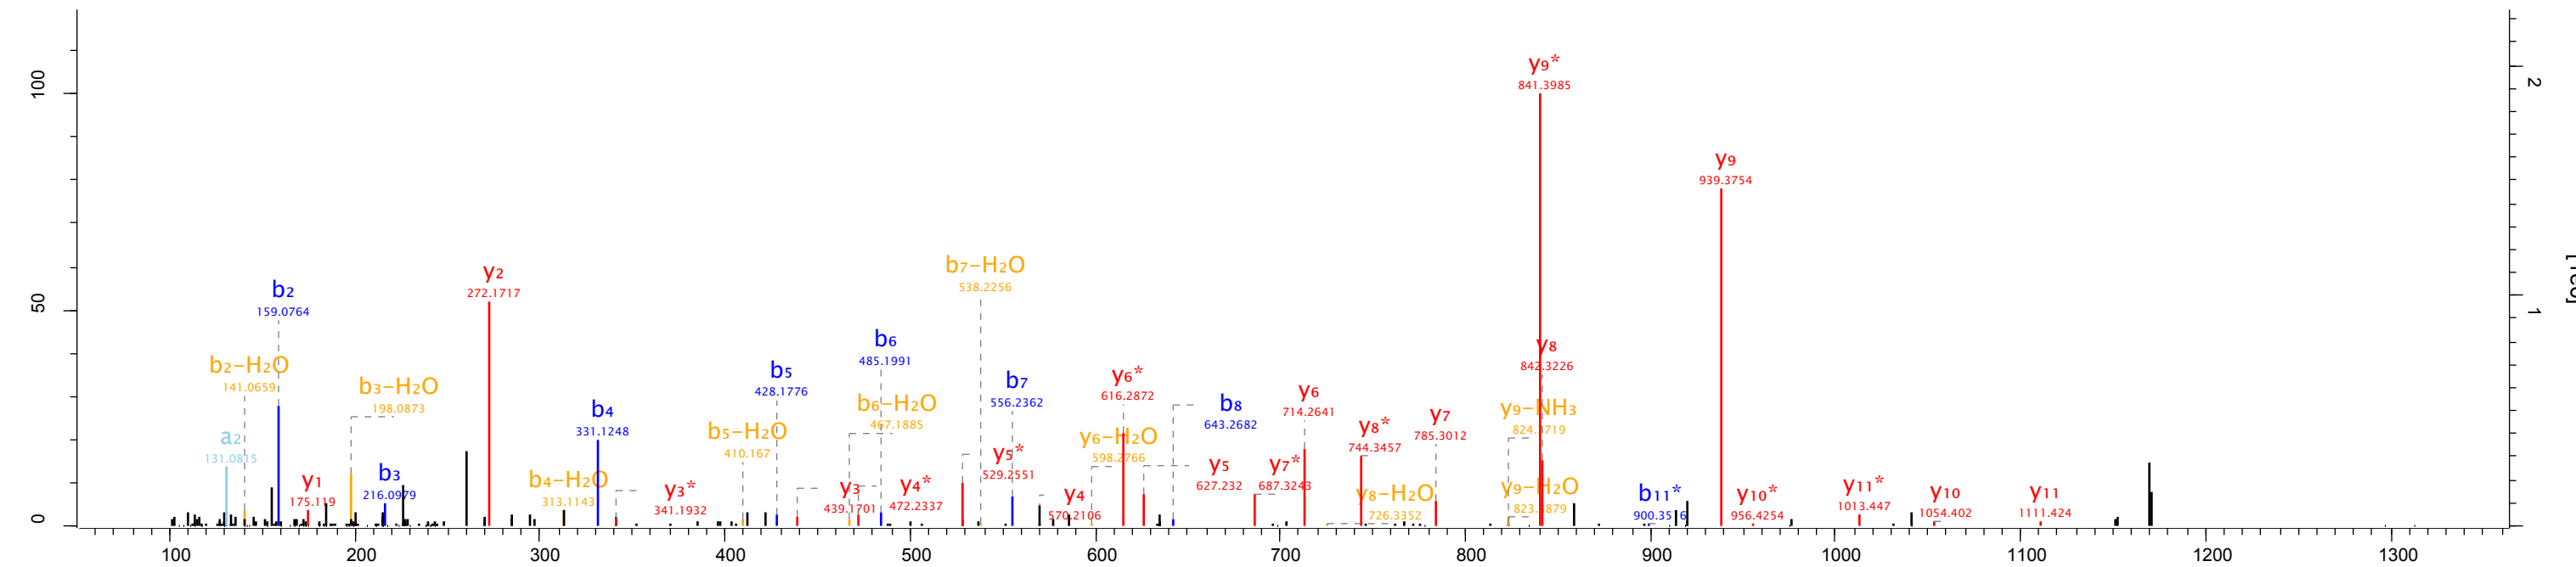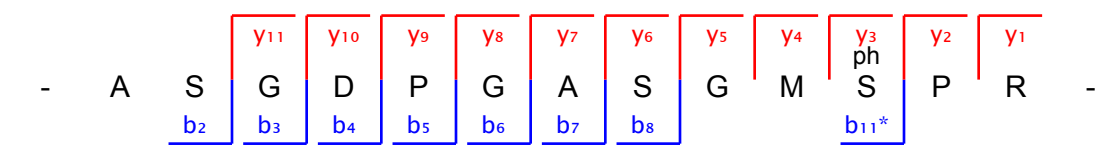

Raw file 20150814\_A375SR\_Phospho\_BR2\_06 Scan 7597 Method FTMS; HCD Score 358.7 m/z 950.35 Gene names CAMSAP2

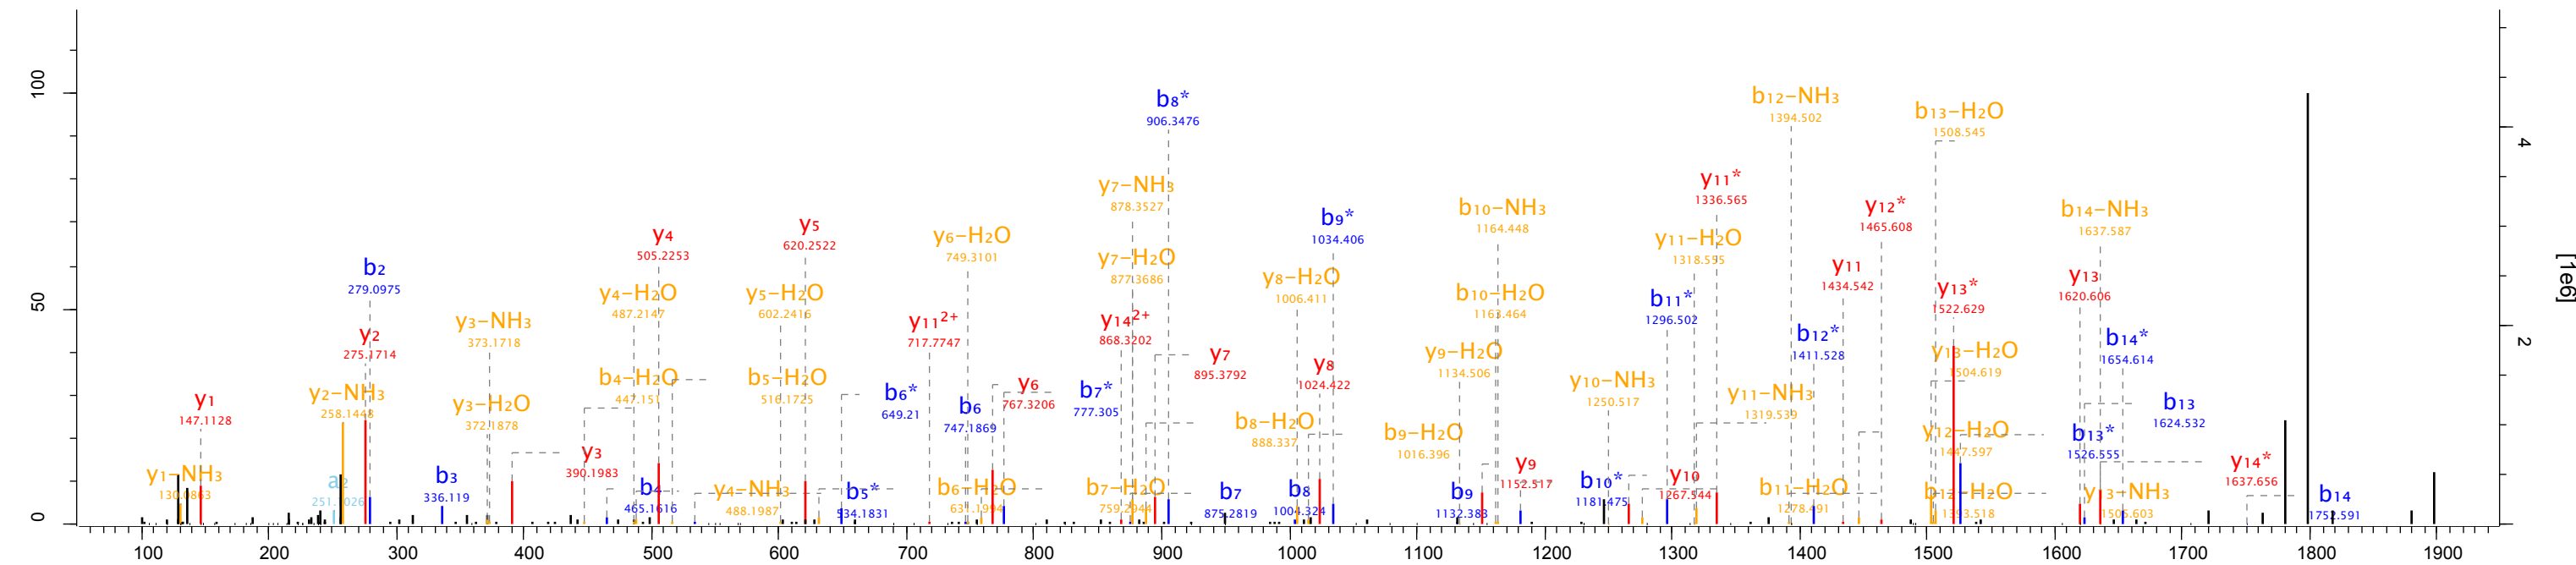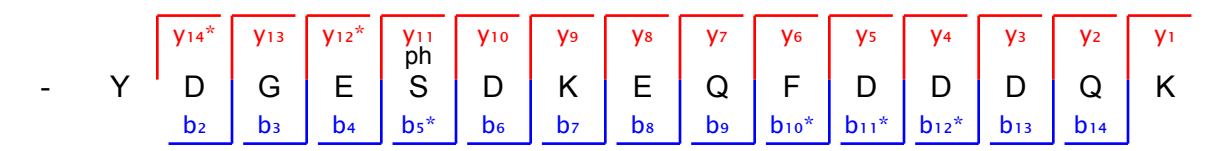

Raw file: 20150814\_A375SR\_Phospho\_BR2\_06  
 Scan: 7697 Method: FTMS; HCD Score: 190.41 m/z: 679.31 Gene names: EME1

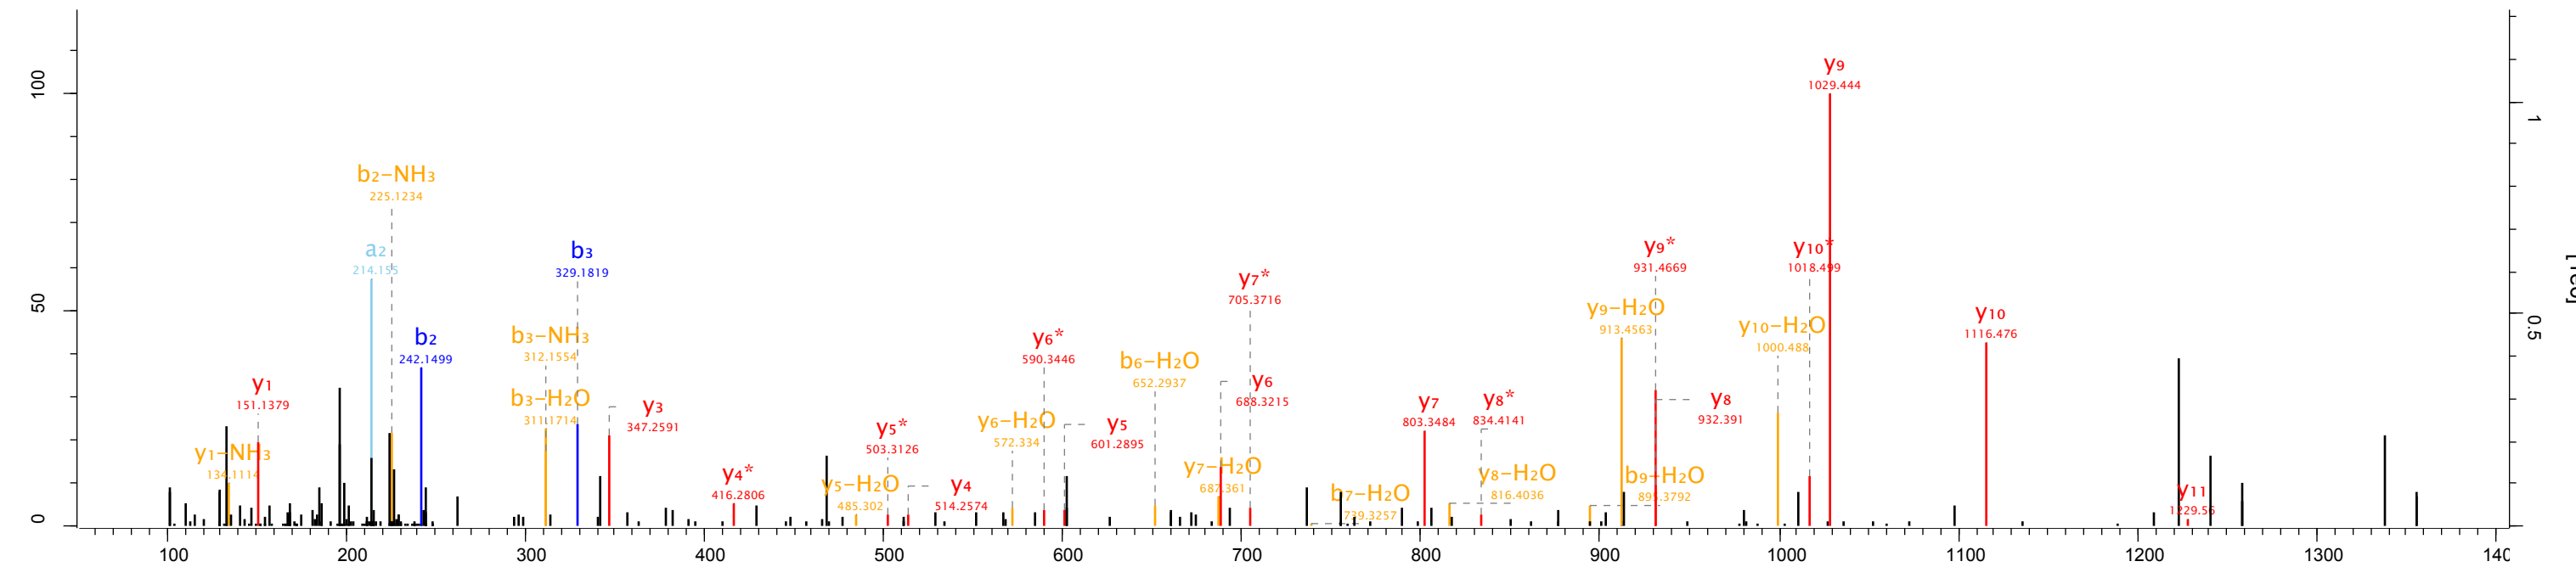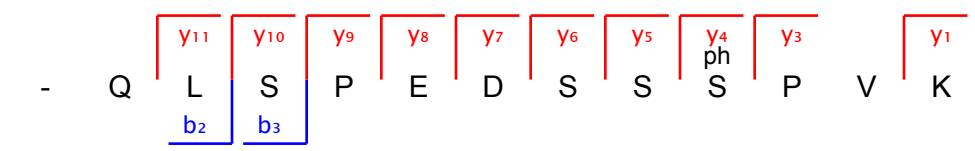

Raw file: 20150814\_A375SR\_Phospho\_BR2\_06  
 Scan: 7917 Method: FTMS; HCD Score: 233.14 m/z: 757.39 Gene names: RAB11FIP5

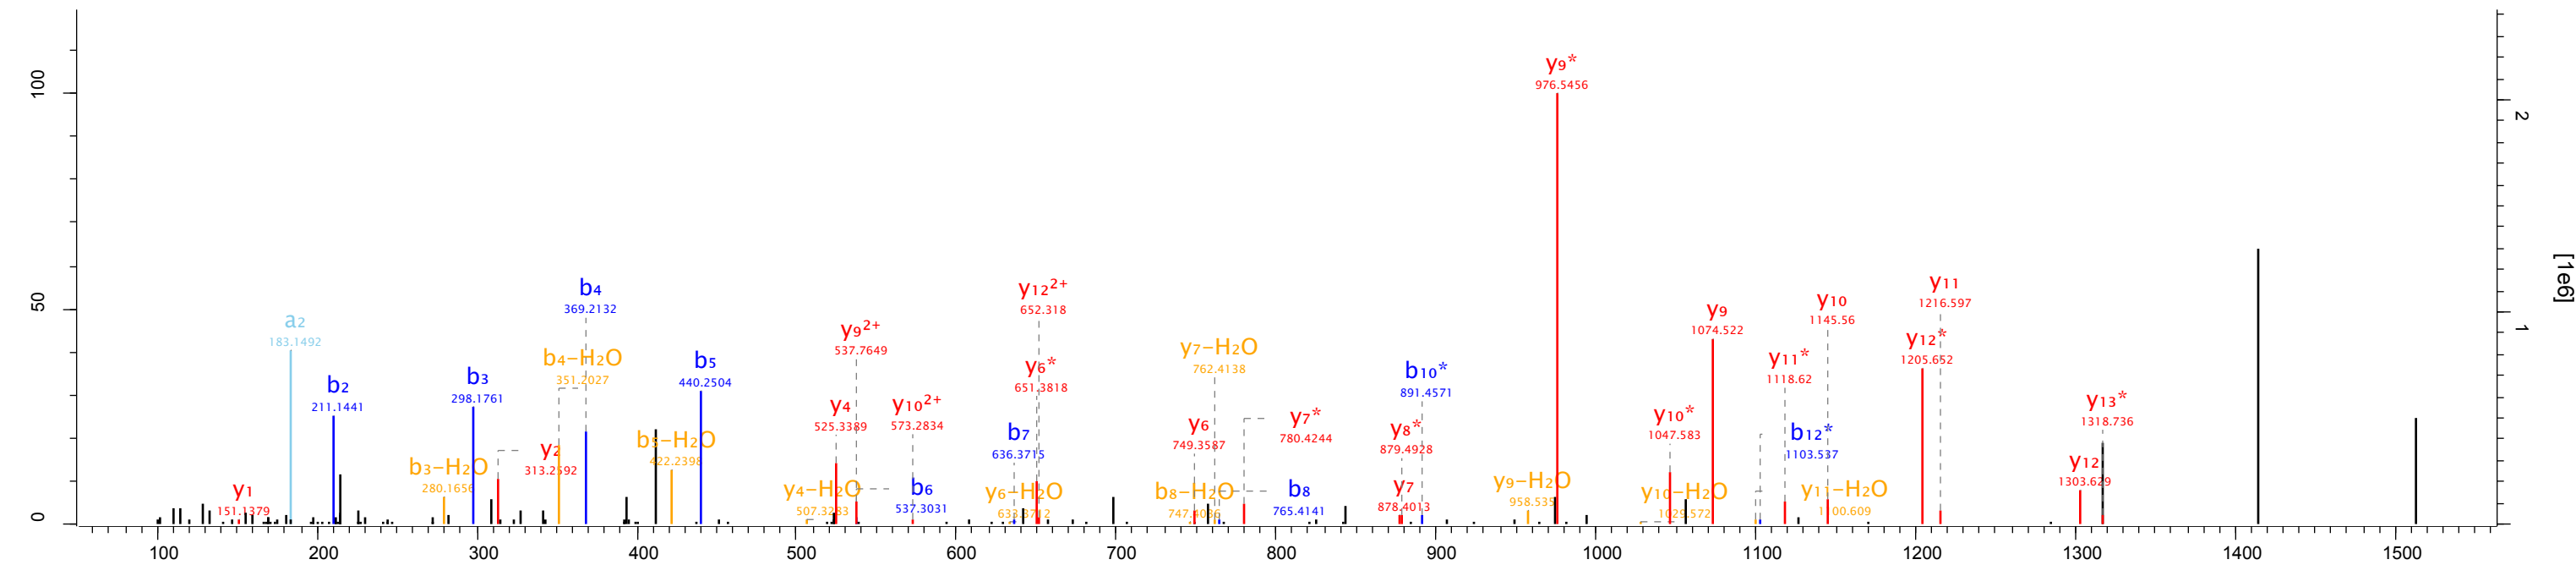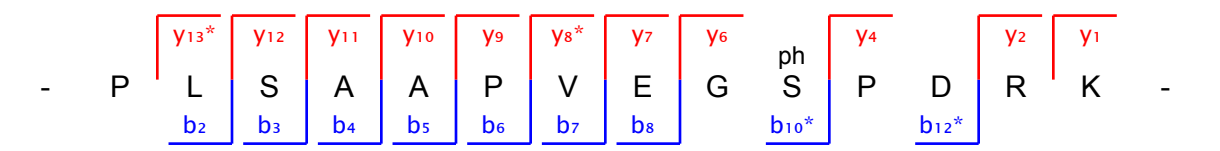

Raw file: 20150814\_A375SR\_Phospho\_BR2\_06  
 Scan: 7987 Method: FTMS; HCD Score: 113.44 m/z: 477.72 Gene names: FRMD4A

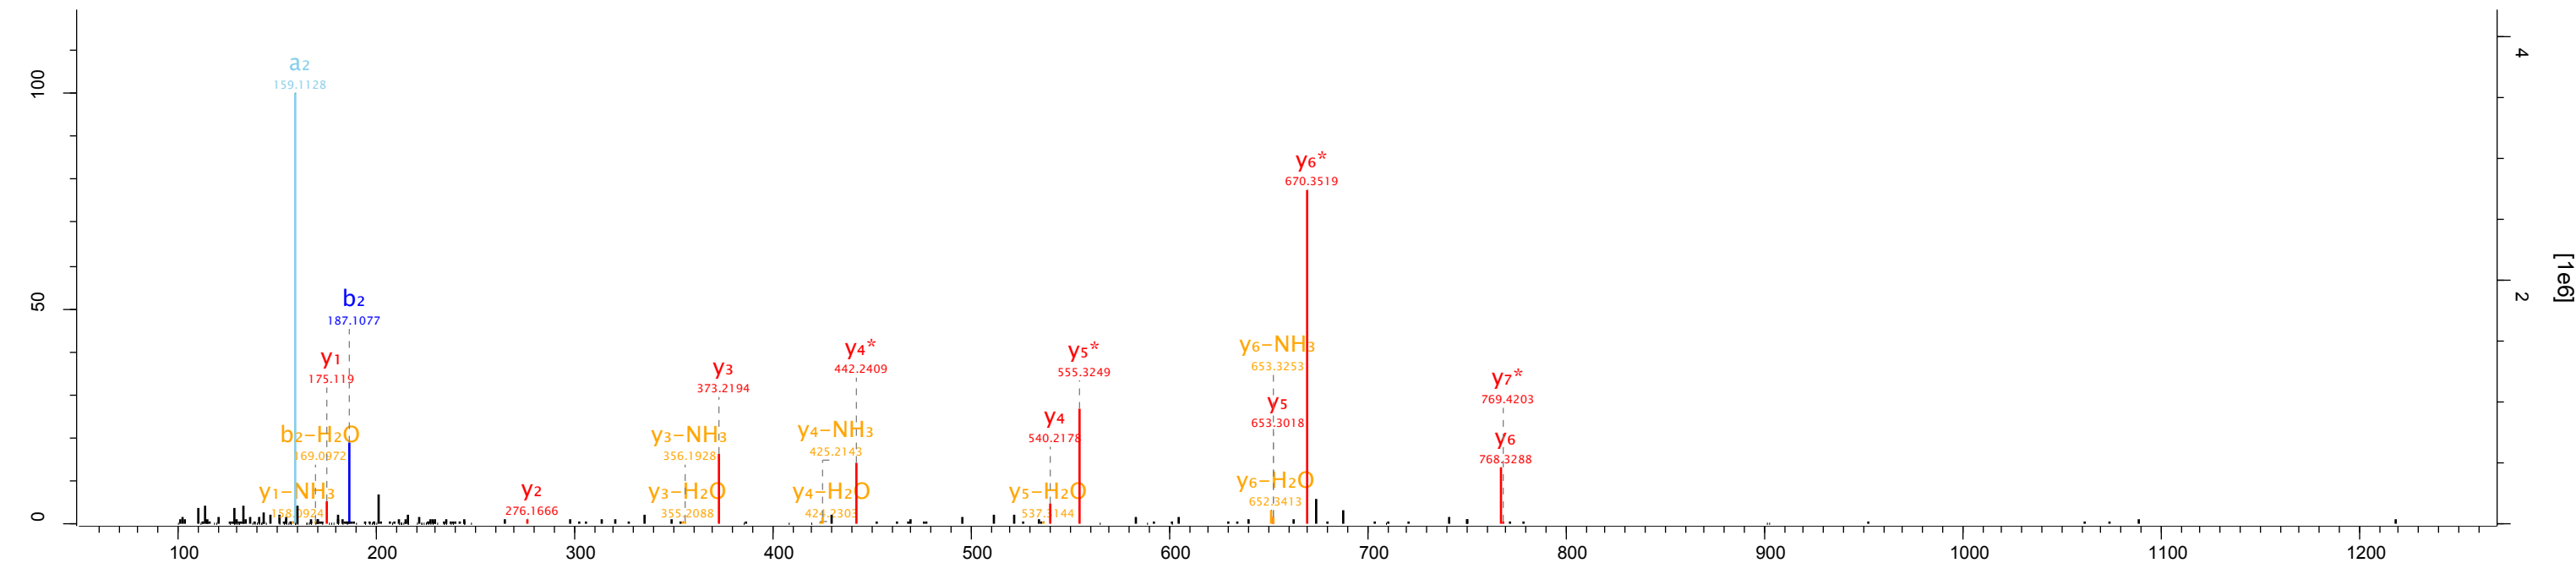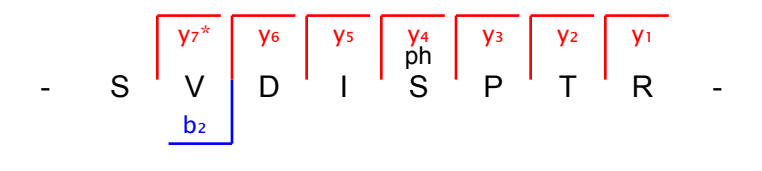

Raw file: 20150814\_A375SR\_Phospho\_BR2\_06  
 Scan: 9237 Method: FTMS; HCD Score: 76.49 m/z: 862.87 Gene names: SMARCC2

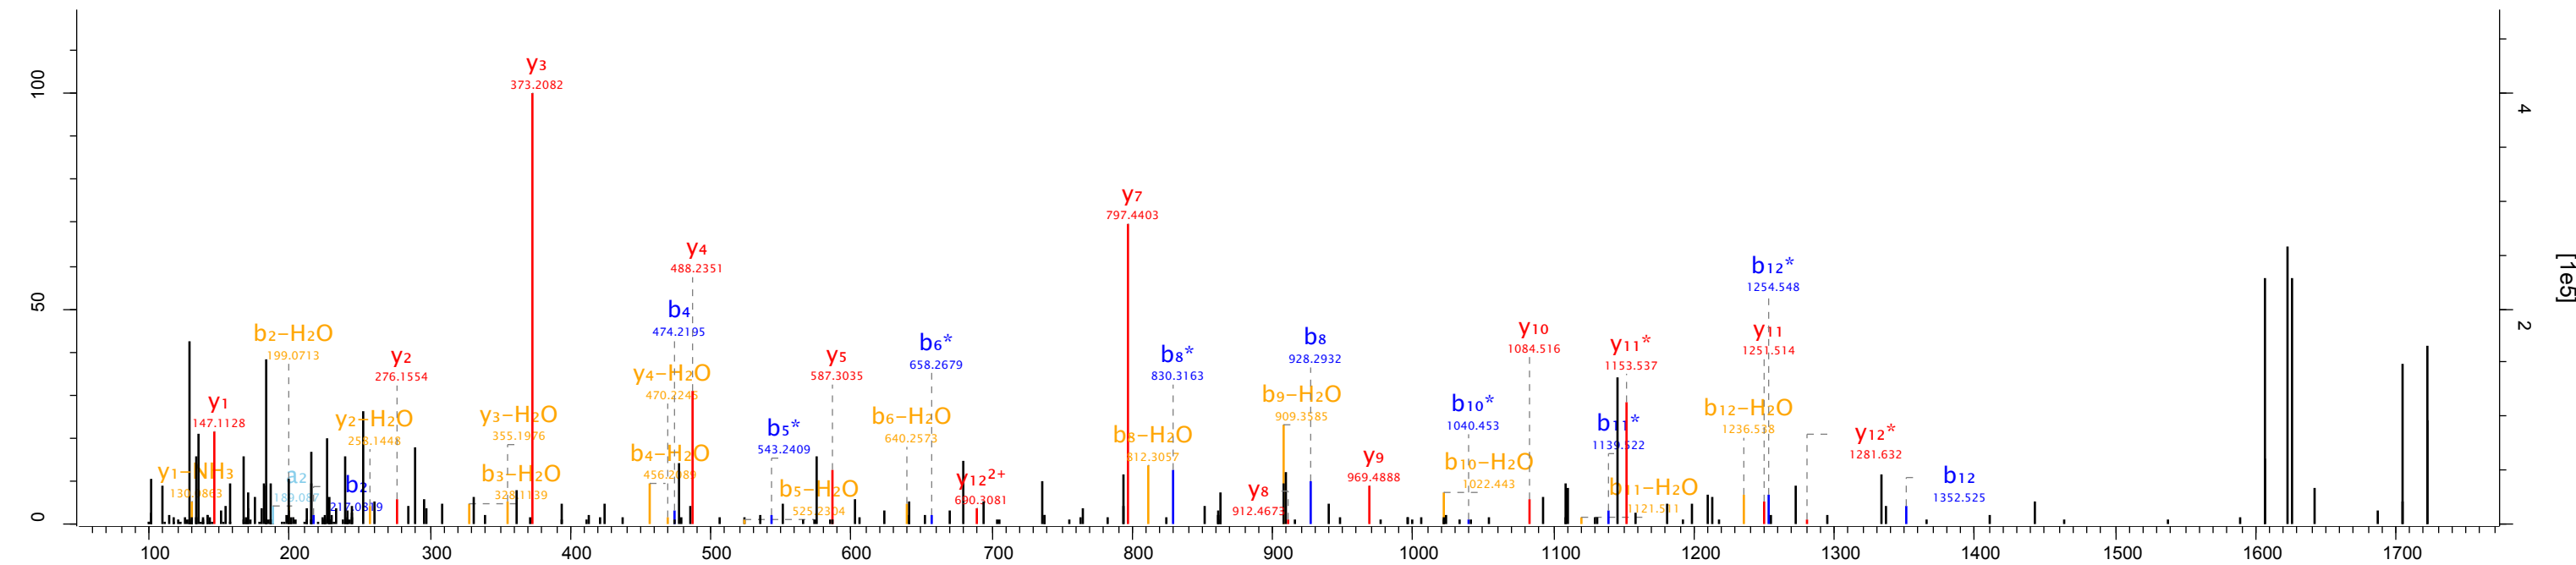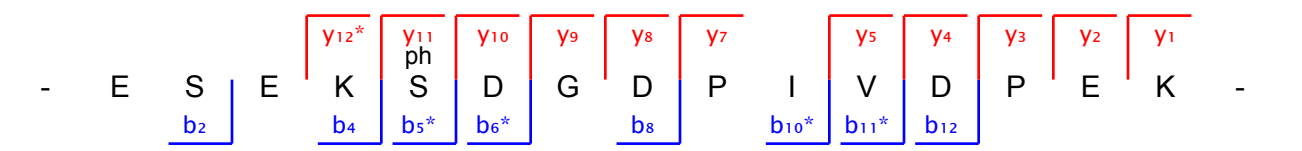

Raw file: 20150814\_A375SR\_Phospho\_BR2\_06  
 Scan: 9357 Method: FTMS; HCD Score: 188.16 m/z: 852.39 Gene names: MARCKS

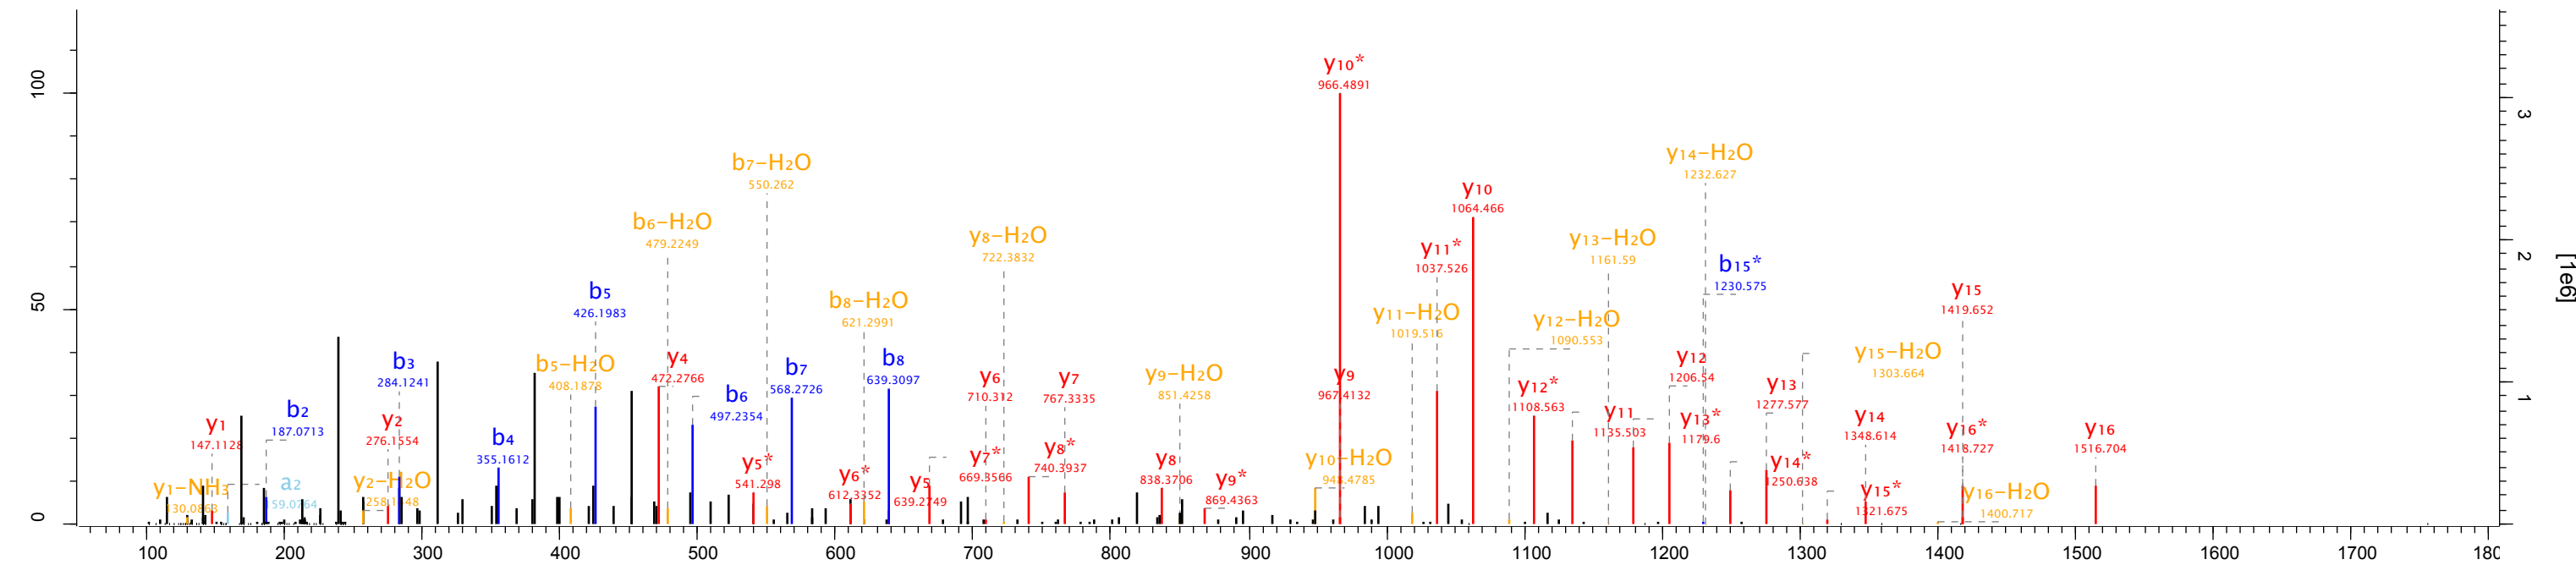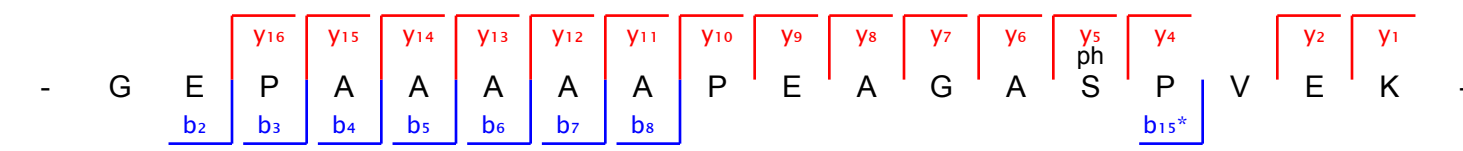



Raw file 20150814\_A375SR\_Phospho\_BR2\_06 Scan 9757 Method FTMS; HCD Score 170.1 m/z 744.69 Gene names SLC4A1AP

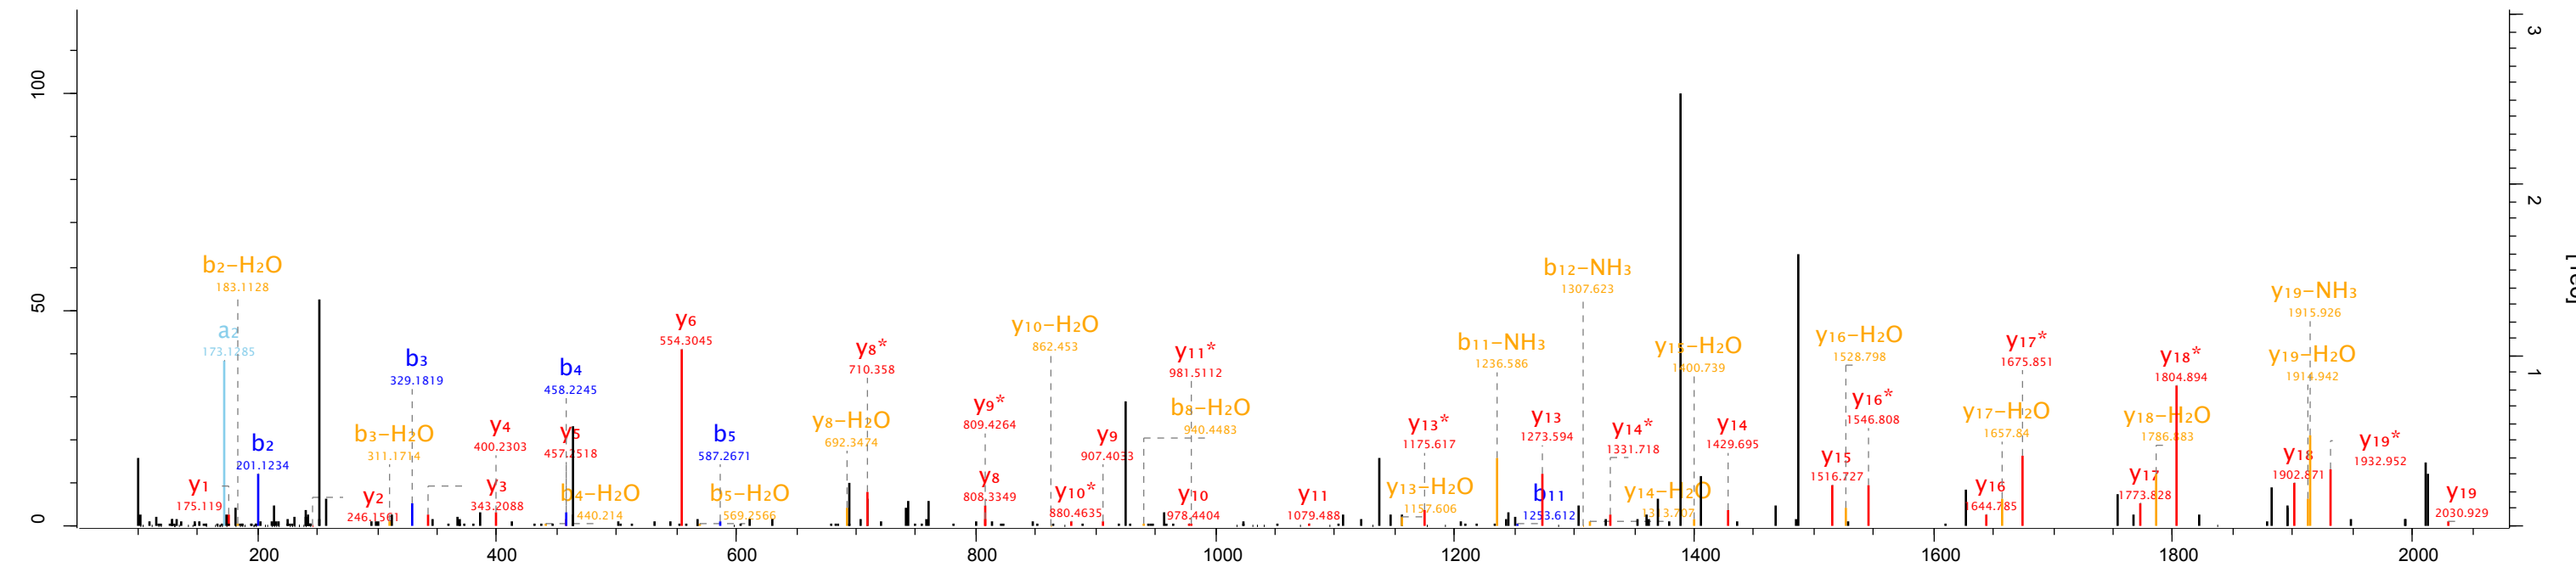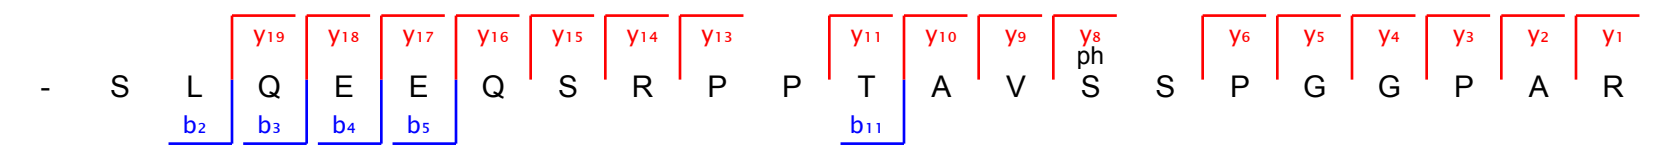

Raw file: 20150814\_A375SR\_Phospho\_BR2\_06  
 Scan: 9997 Method: FTMS; HCD Score: 110.39 m/z: 497.73 Gene names: JUN;JUND

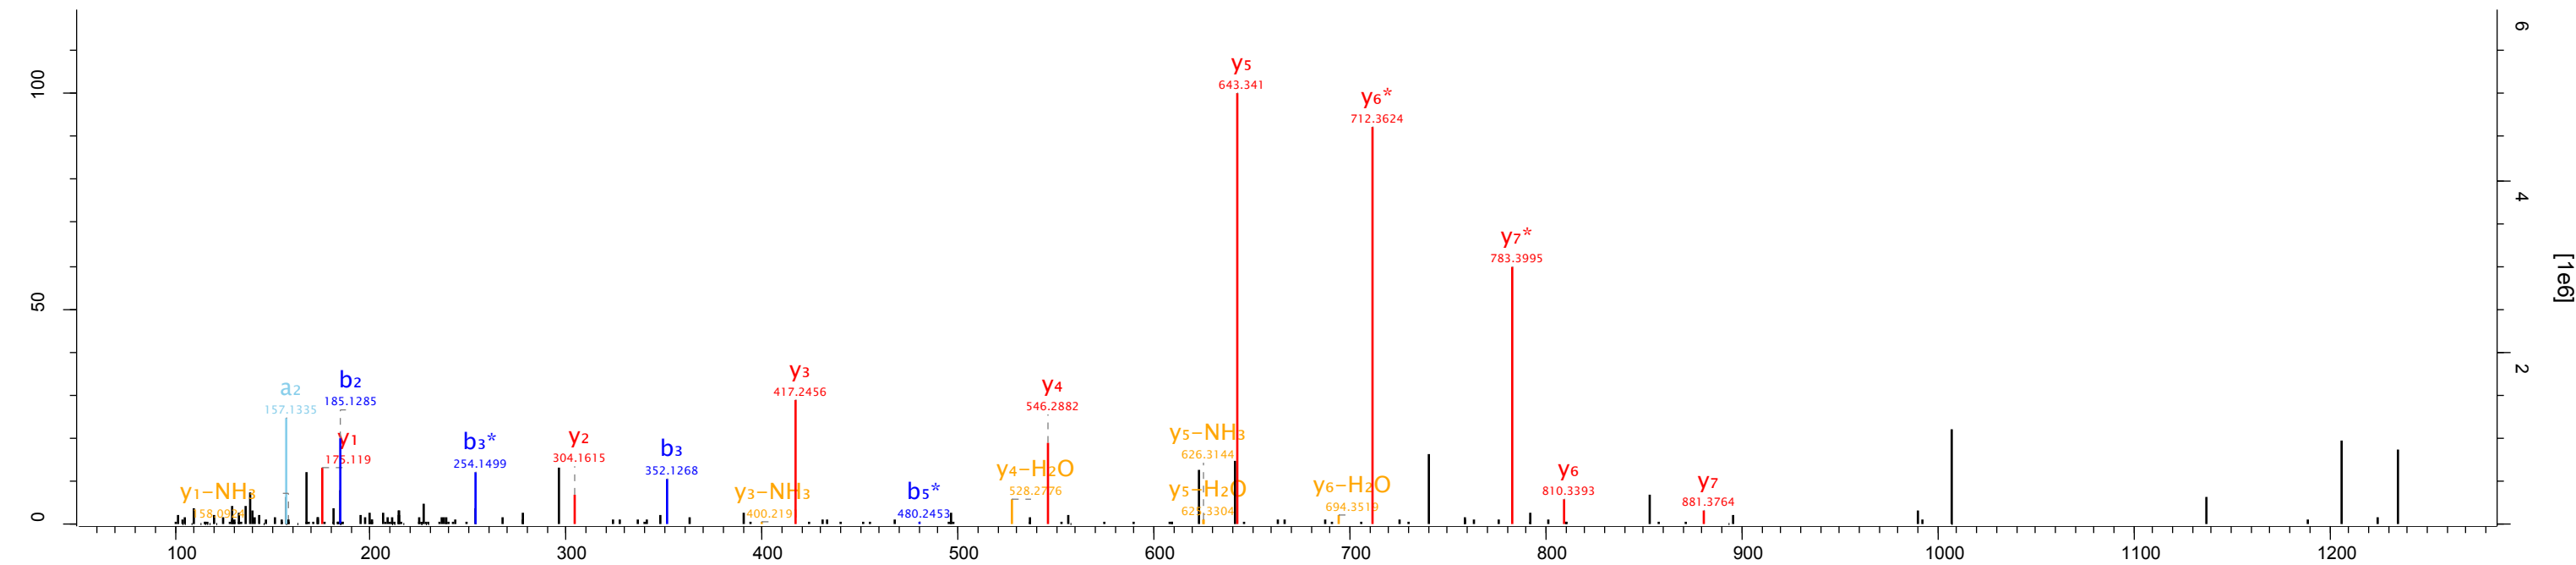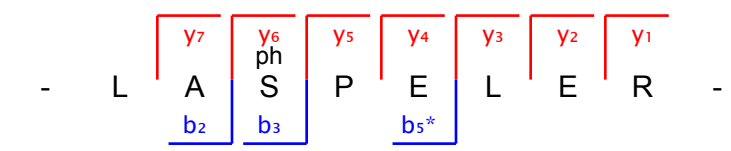

Raw file: 20150814\_A375SR\_Phospho\_BR2\_07  
 Scan: 10017 Method: FTMS; HCD Score: 80.24 m/z: 577.28 Gene names: CEP170

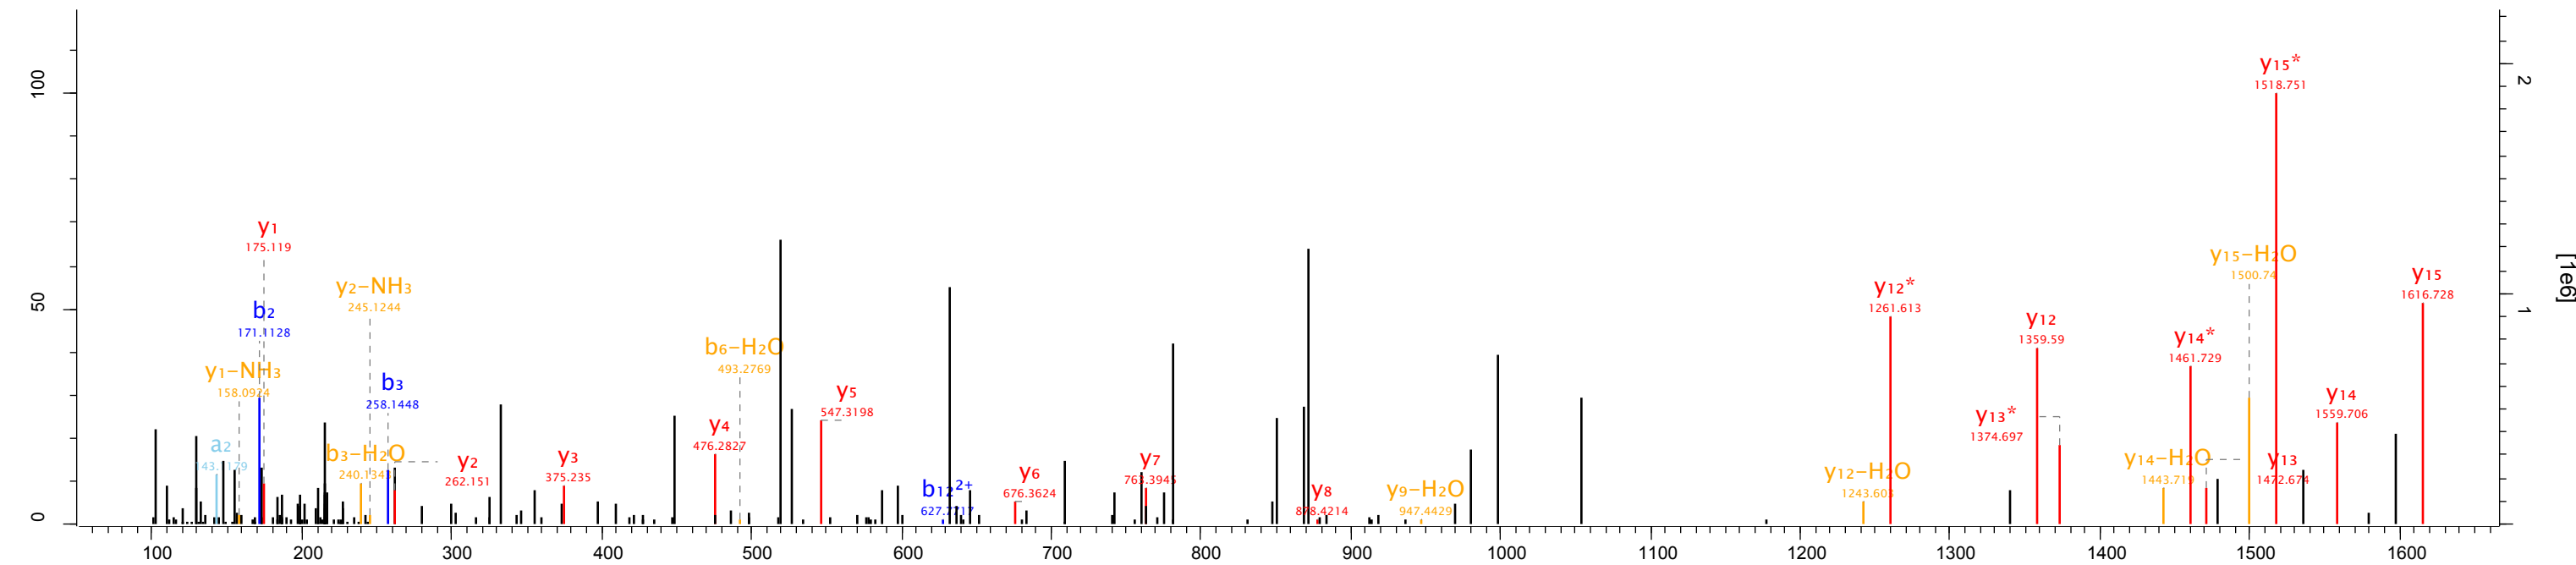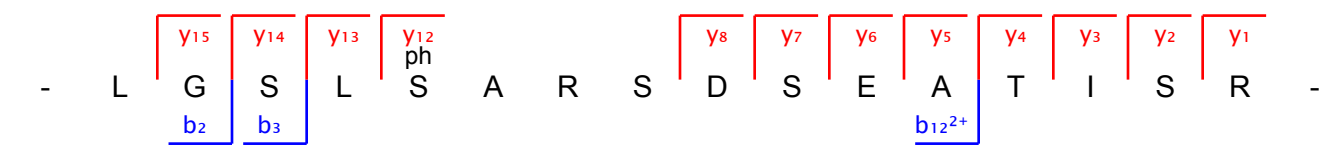

Raw file: 20150814\_A375SR\_Phospho\_BR2\_07  
 Scan: 11947 Method: FTMS; HCD Score: 56.2 m/z: 497.28 Gene names: HAUS6

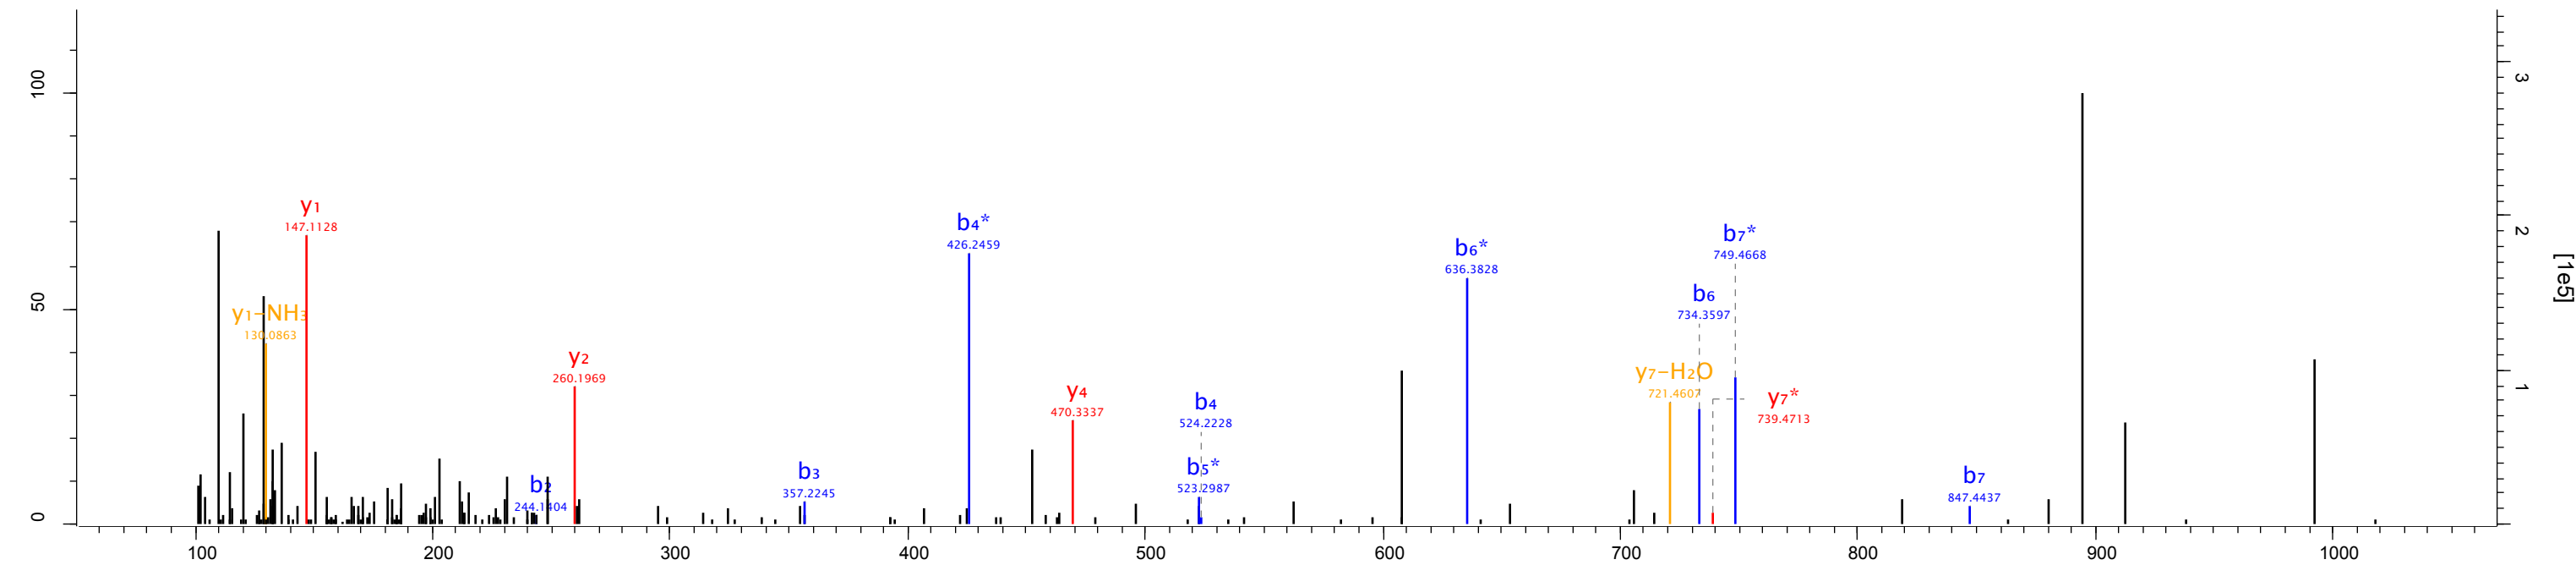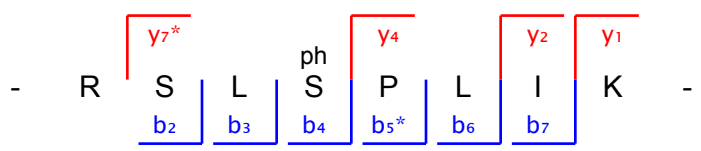

Raw file 20150814\_A375SR\_Phospho\_BR2\_07 Scan 12207 Method FTMS; HCD Score 51.71 m/z 952.48 Gene names KIAA1429

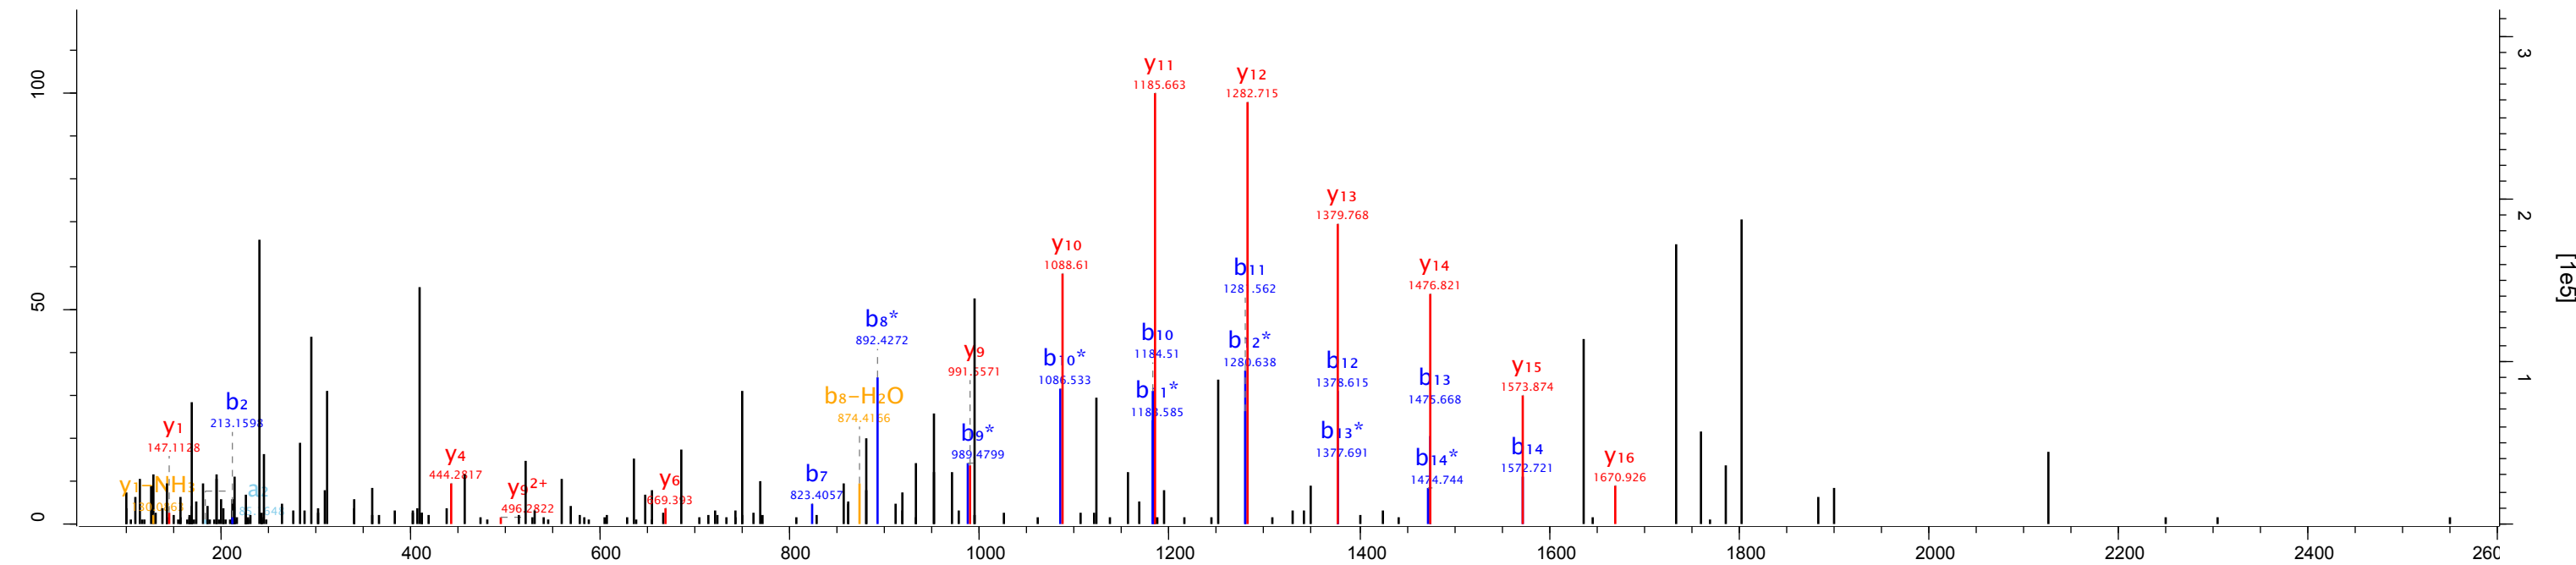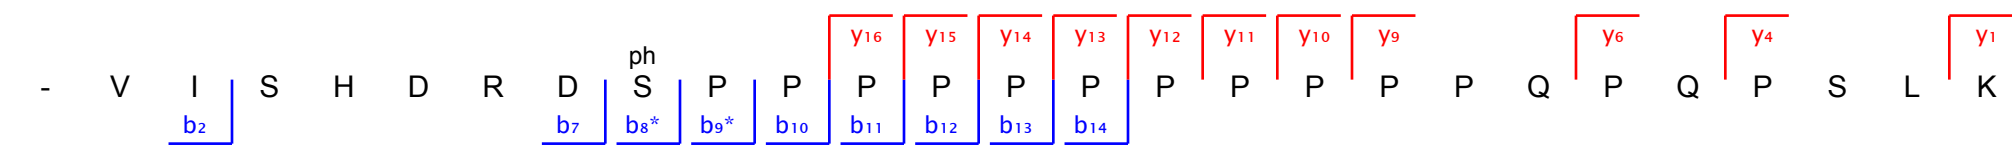

Raw file: 20150814\_A375SR\_Phospho\_BR2\_07  
 Scan: 12337 Method: FTMS; HCD Score: 208.63 m/z: 847.43 Gene names: PLEC

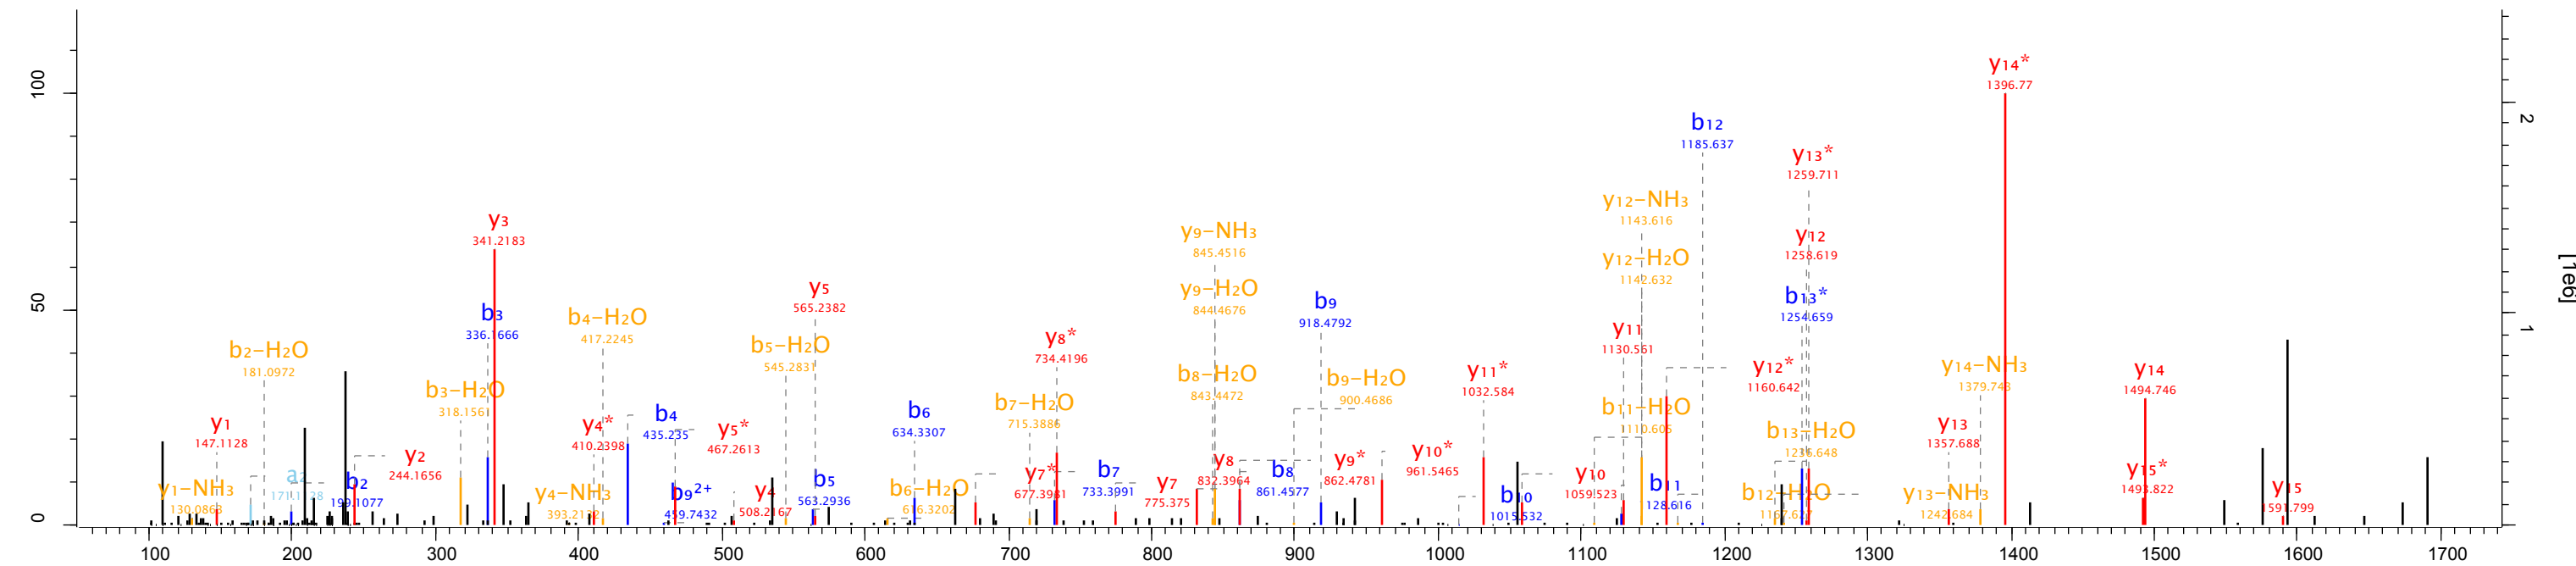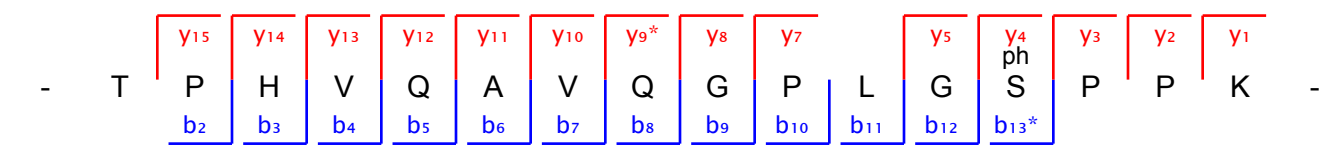

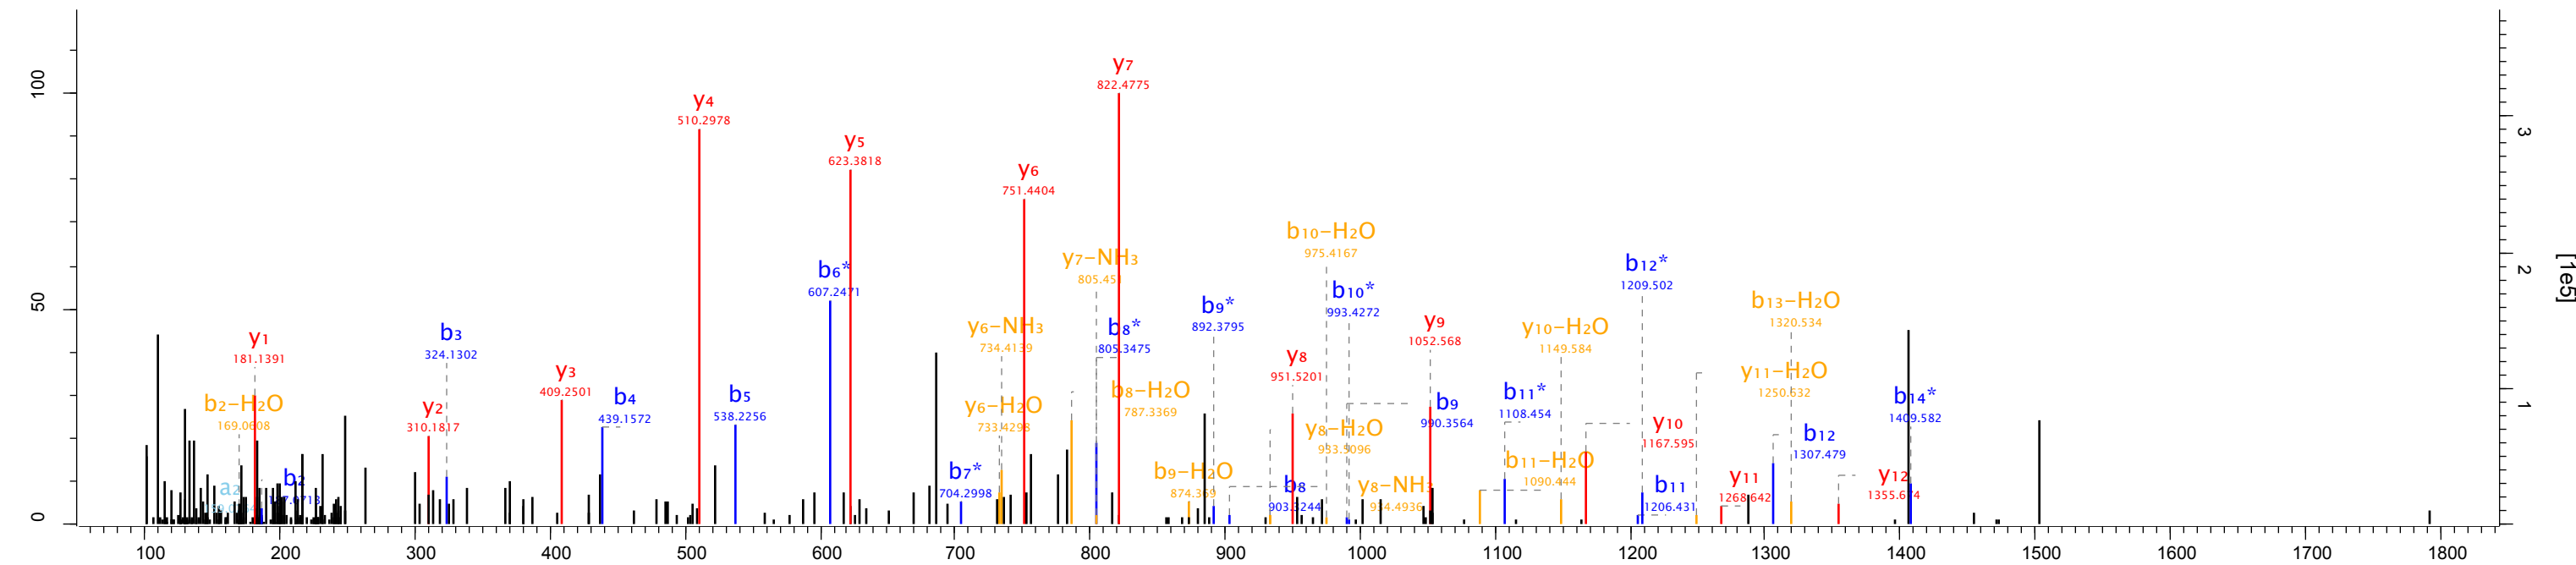

- D A H D V S P T S T D T E A Q L T V E R -

b<sub>2</sub>
b<sub>3</sub>
b<sub>4</sub>
b<sub>5</sub>
b<sub>6</sub><sup>\*</sup>
b<sub>7</sub><sup>\*</sup>
b<sub>8</sub>
b<sub>9</sub>
b<sub>10</sub><sup>\*</sup>
b<sub>11</sub>
b<sub>12</sub>
b<sub>14</sub><sup>\*</sup>
y<sub>12</sub>
y<sub>11</sub>
y<sub>10</sub>
y<sub>9</sub>
y<sub>8</sub>
y<sub>7</sub>
y<sub>6</sub>
y<sub>5</sub>
y<sub>4</sub>
y<sub>3</sub>
y<sub>2</sub>
y<sub>1</sub>

Raw file: 20150814\_A375SR\_Phospho\_BR2\_07  
 Scan: 13327 Method: FTMS; HCD Score: 139.39 m/z: 829.38 Gene names: EXOC7

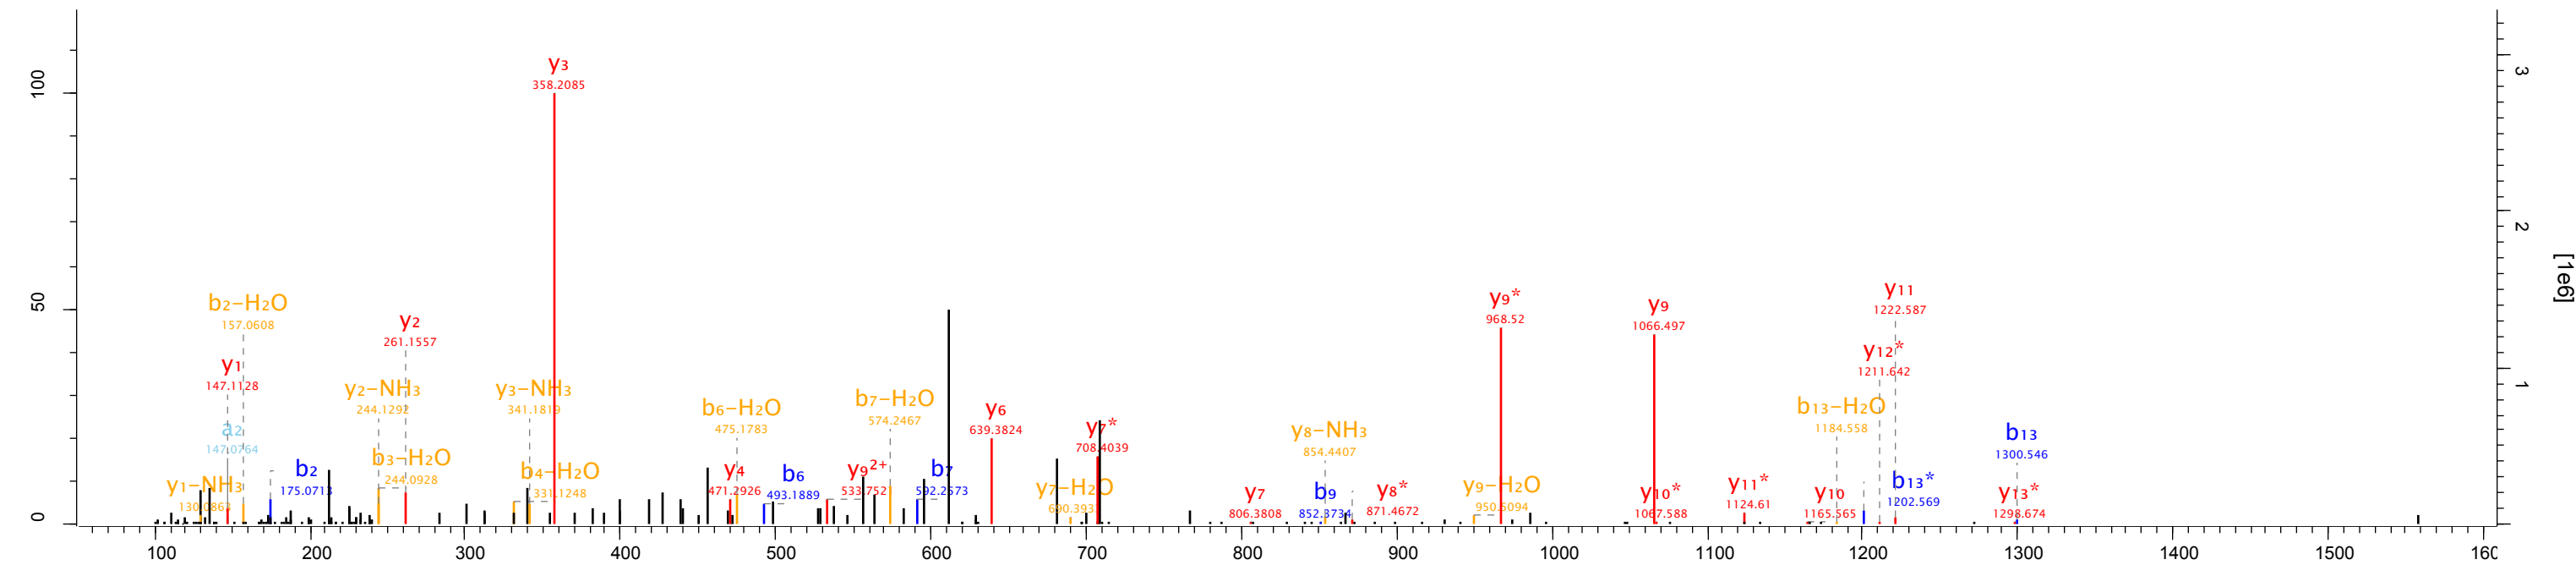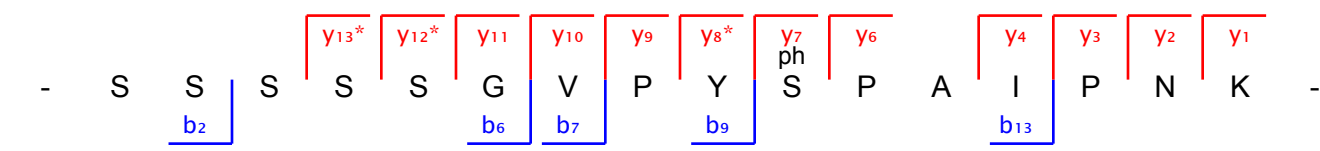



Raw file 20150814\_A375SR\_Phospho\_BR2\_07 Scan 14427 Method FTMS; HCD Score 114.63 m/z 710.68 Gene names CEP85

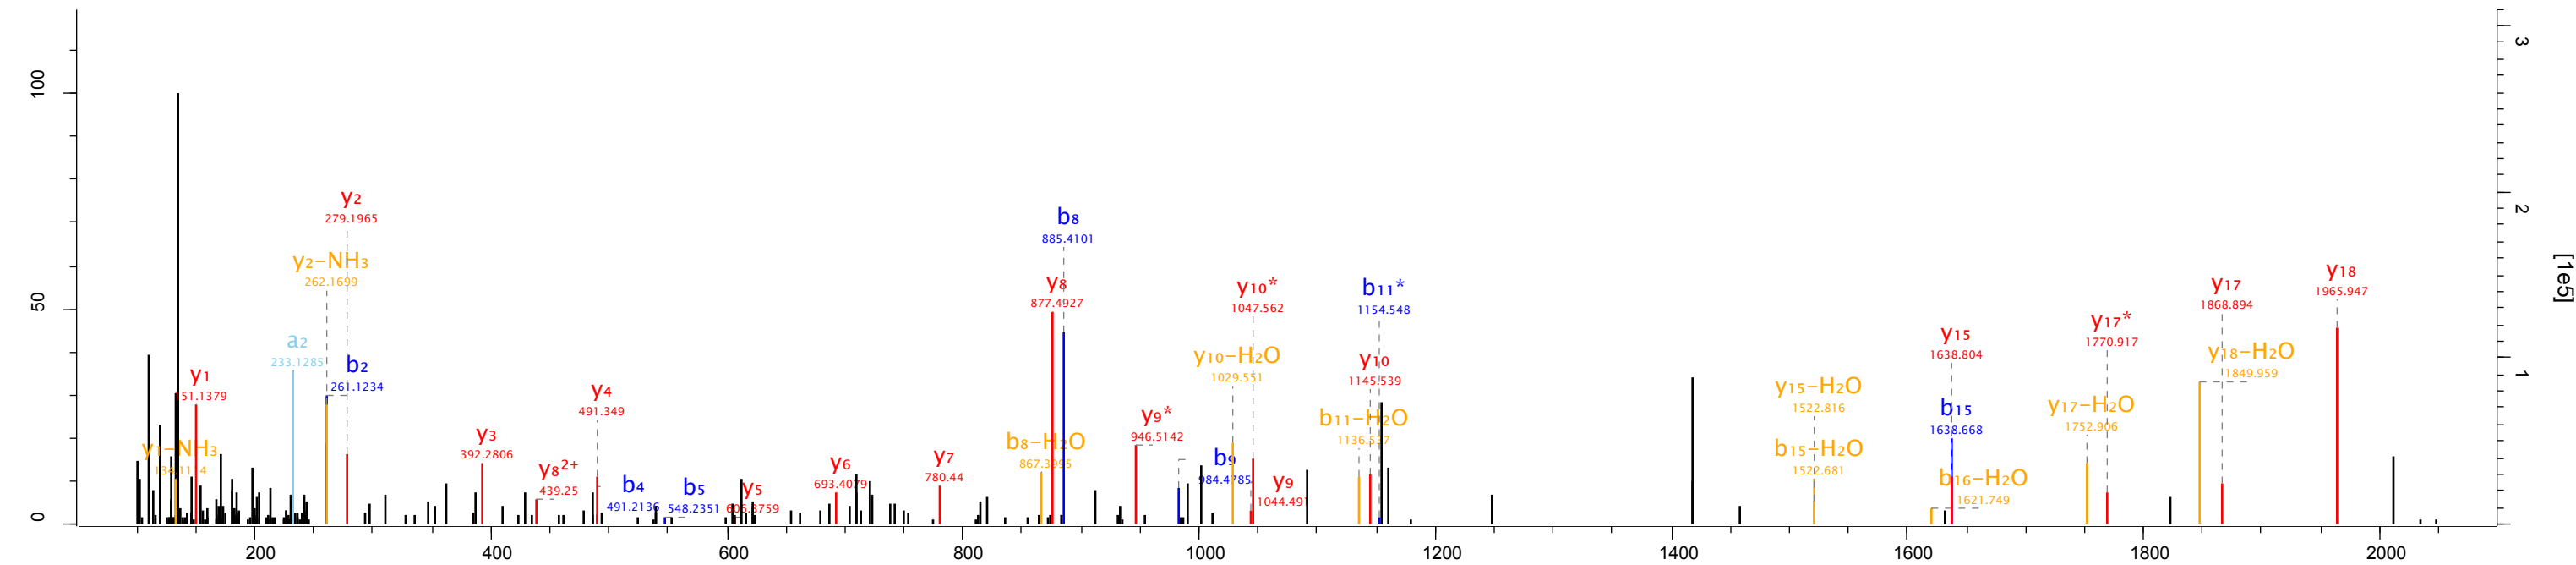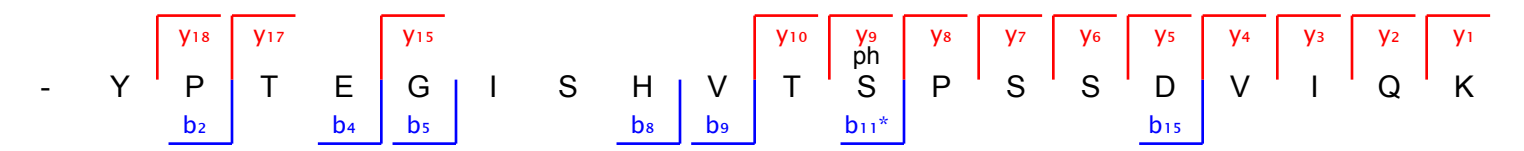

Raw file: 20150814\_A375SR\_Phospho\_BR2\_07  
 Scan: 15387 Method: FTMS; HCD Score: 78.81 m/z: 608.8 Gene names: DPYD

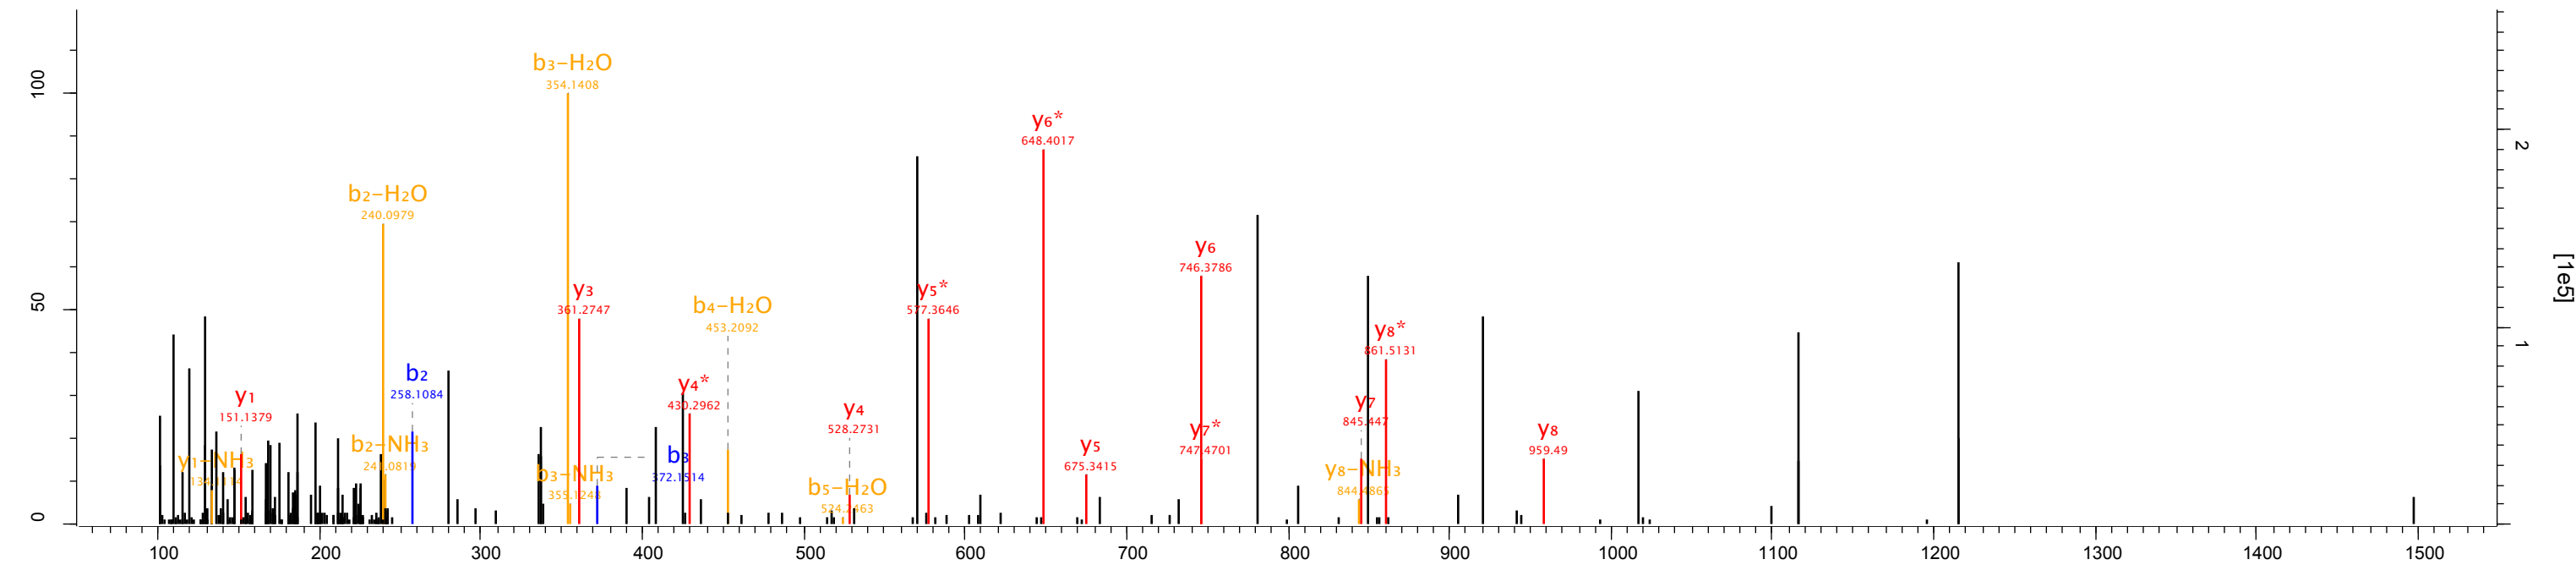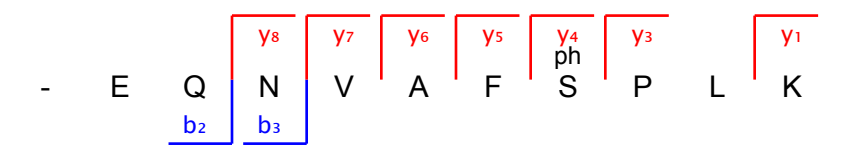

Raw file: 20150814\_A375SR\_Phospho\_BR2\_07  
 Scan: 18477 Method: FTMS; HCD Score: 103.4 m/z: 999.42 Gene names: EPHB2

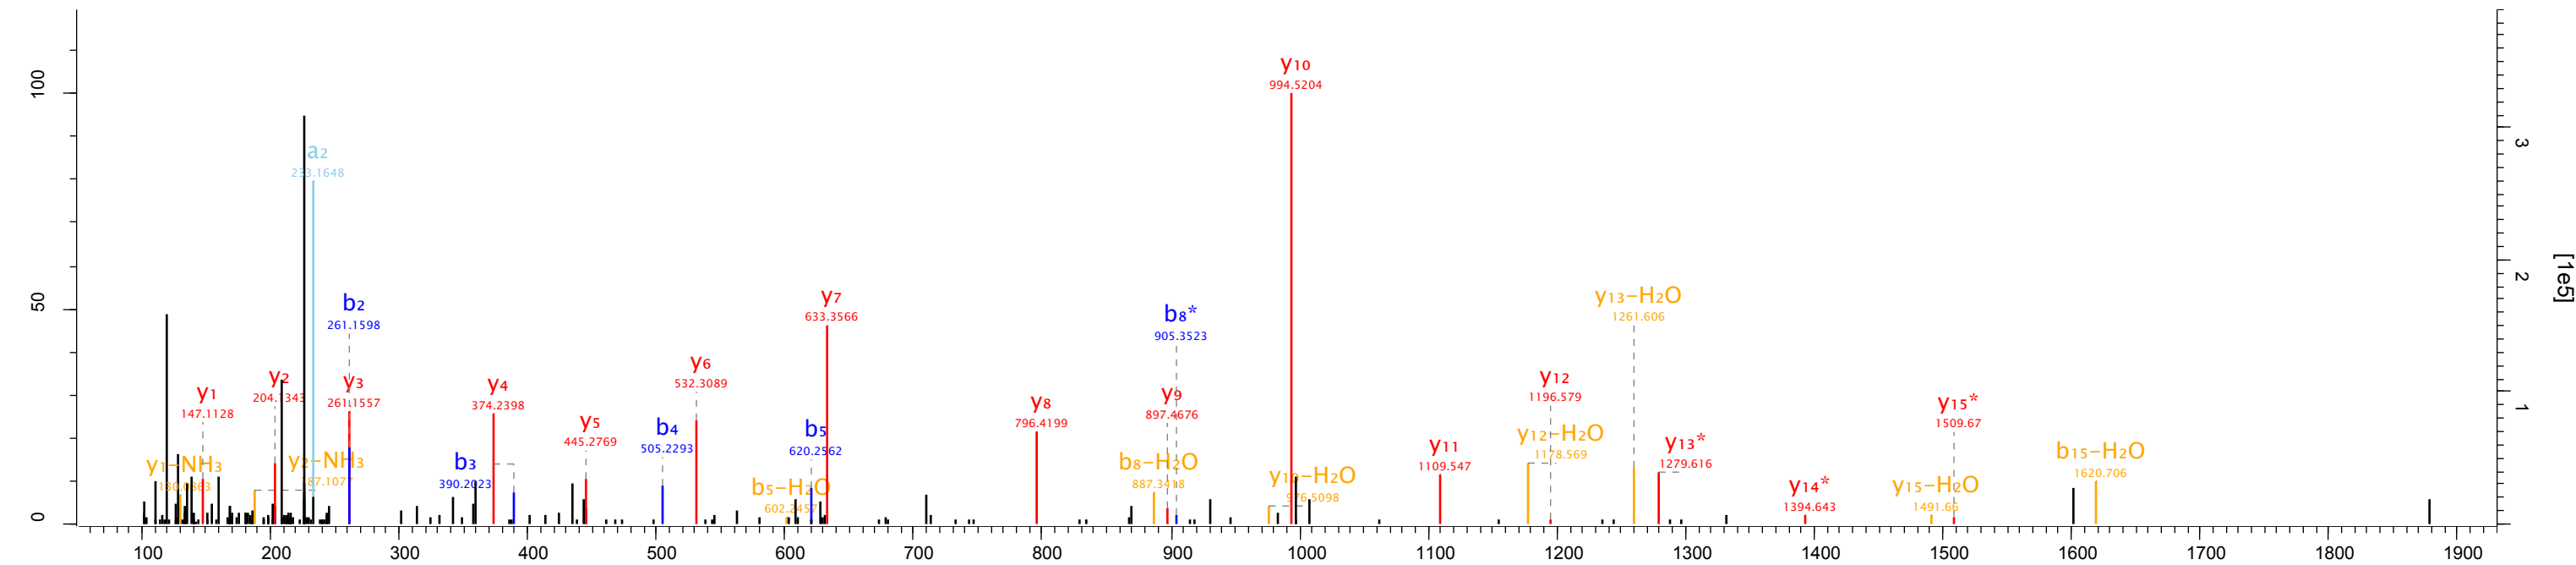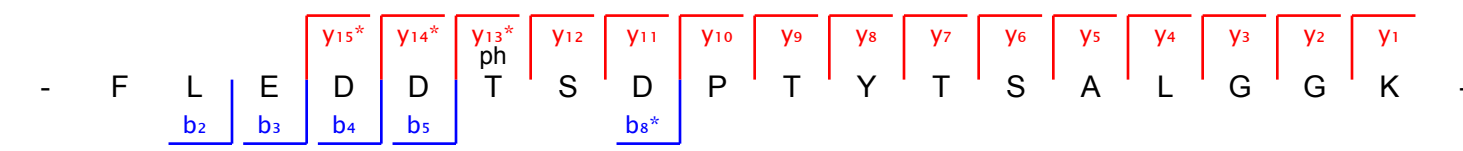

Raw file  
 20150814\_A375SR\_Phospho\_BR2\_07  
 Scan 18577 Method FTMS; HCD Score 88.87 m/z 930.94 Gene names REST

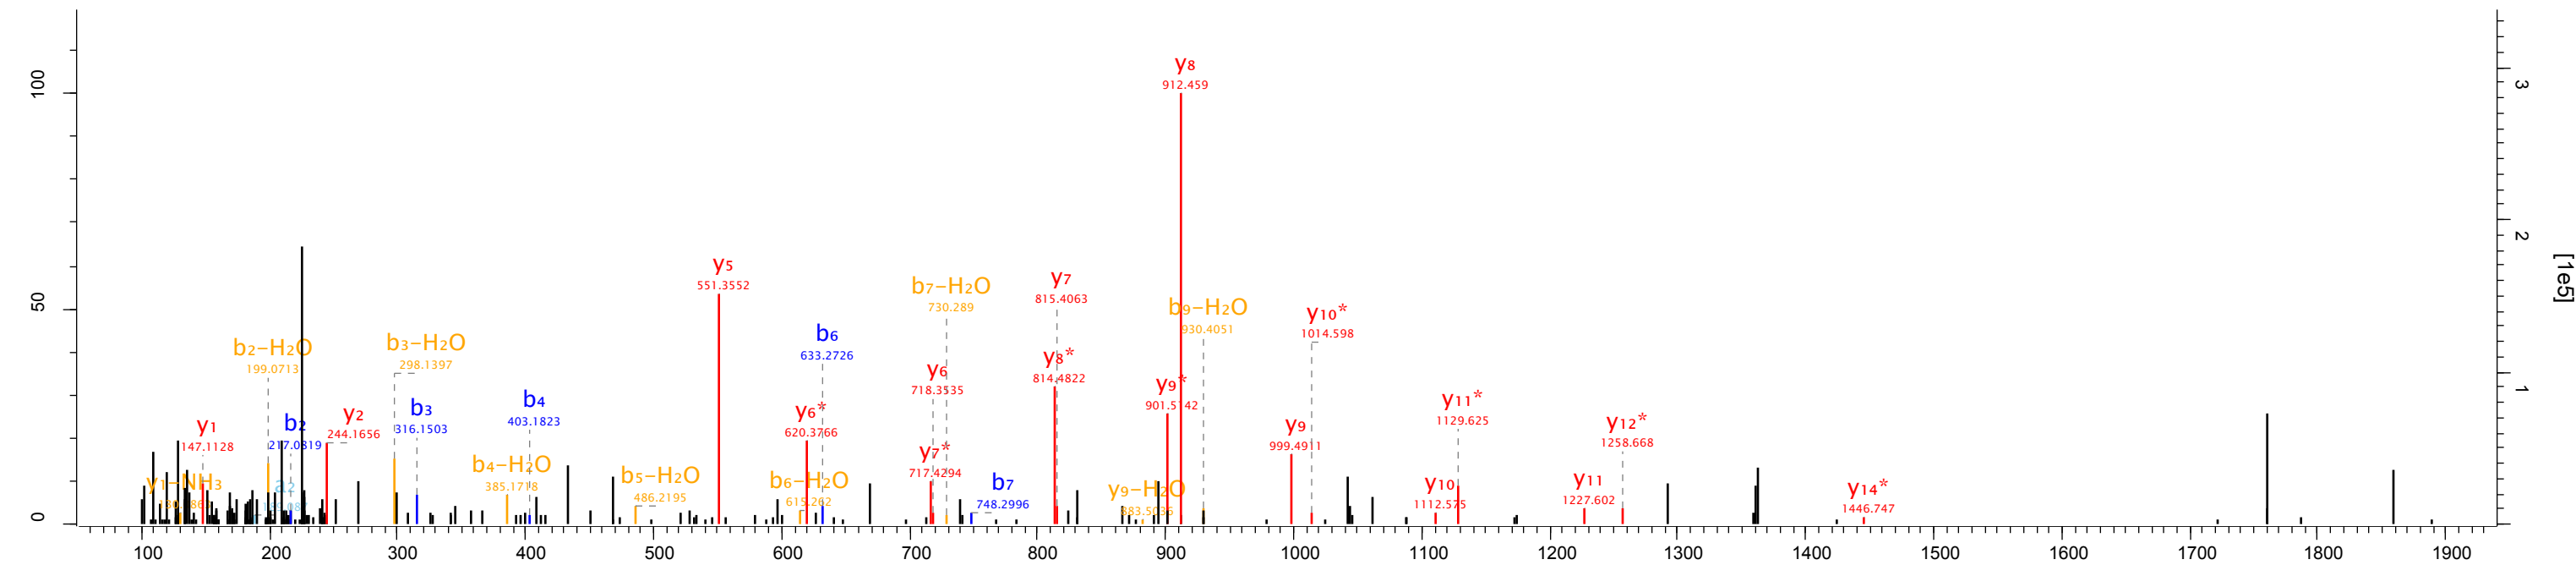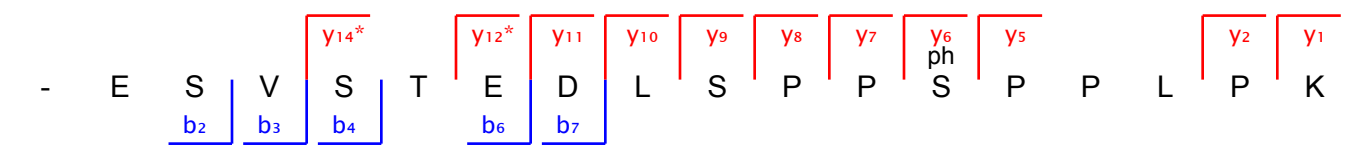

Raw file 20150814\_A375SR\_Phospho\_BR2\_07 Scan 18617 Method FTMS; HCD Score 192.63 m/z 1009.97 Gene names SRRM2

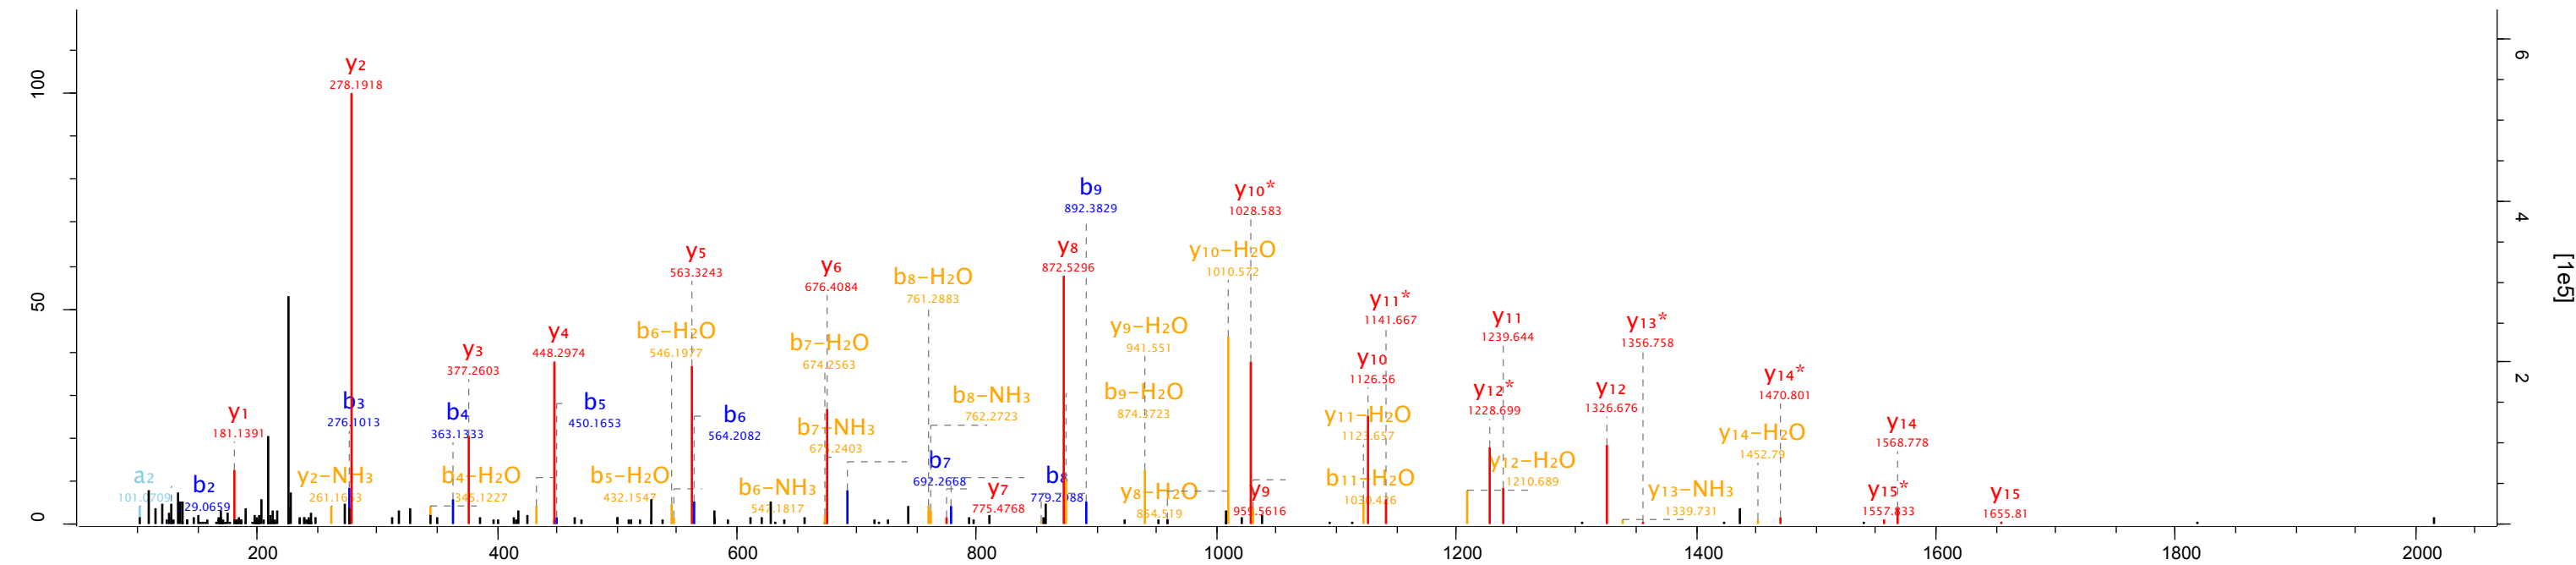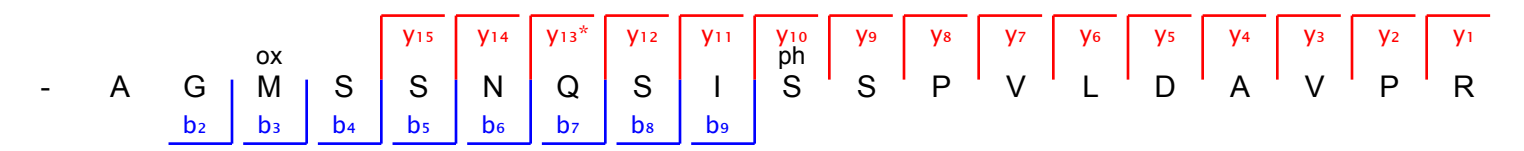

Raw file 20150814\_A375SR\_Phospho\_BR2\_07 Scan 18847 Method FTMS; HCD Score 91.08 m/z 753.72 Gene names SOX5

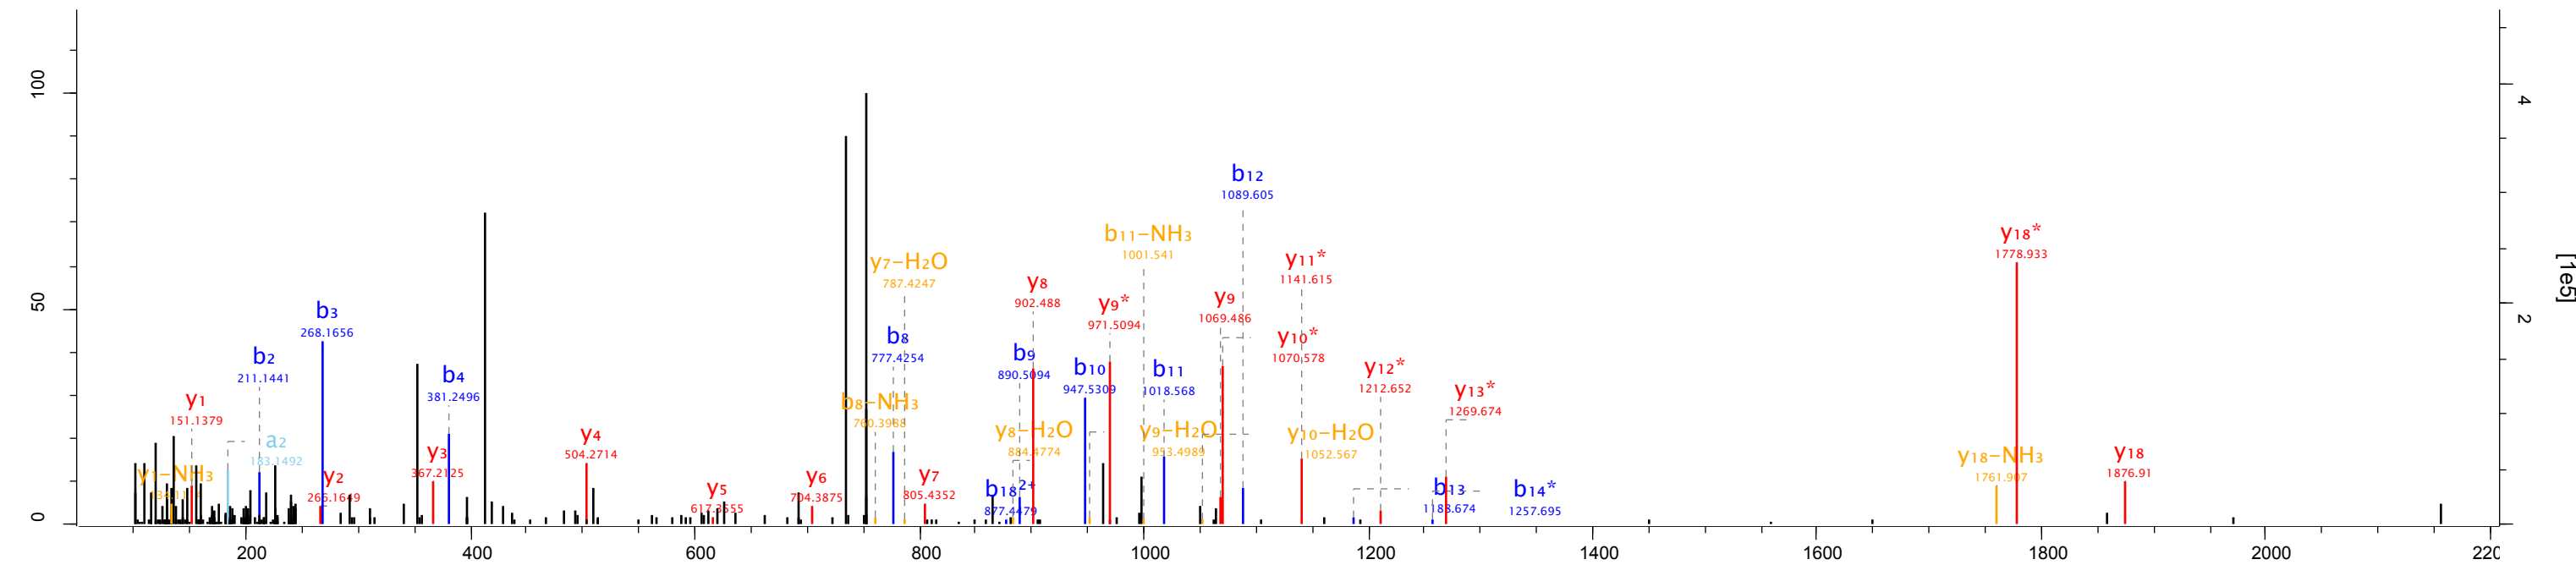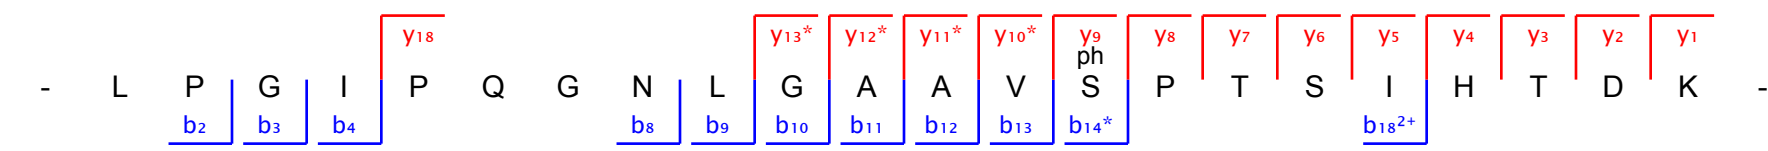

Raw file: 20150814\_A375SR\_Phospho\_BR2\_07  
 Scan: 2077 Method: FTMS; HCD Score: 50.31 m/z: 414.2 Gene names: TCP11L1

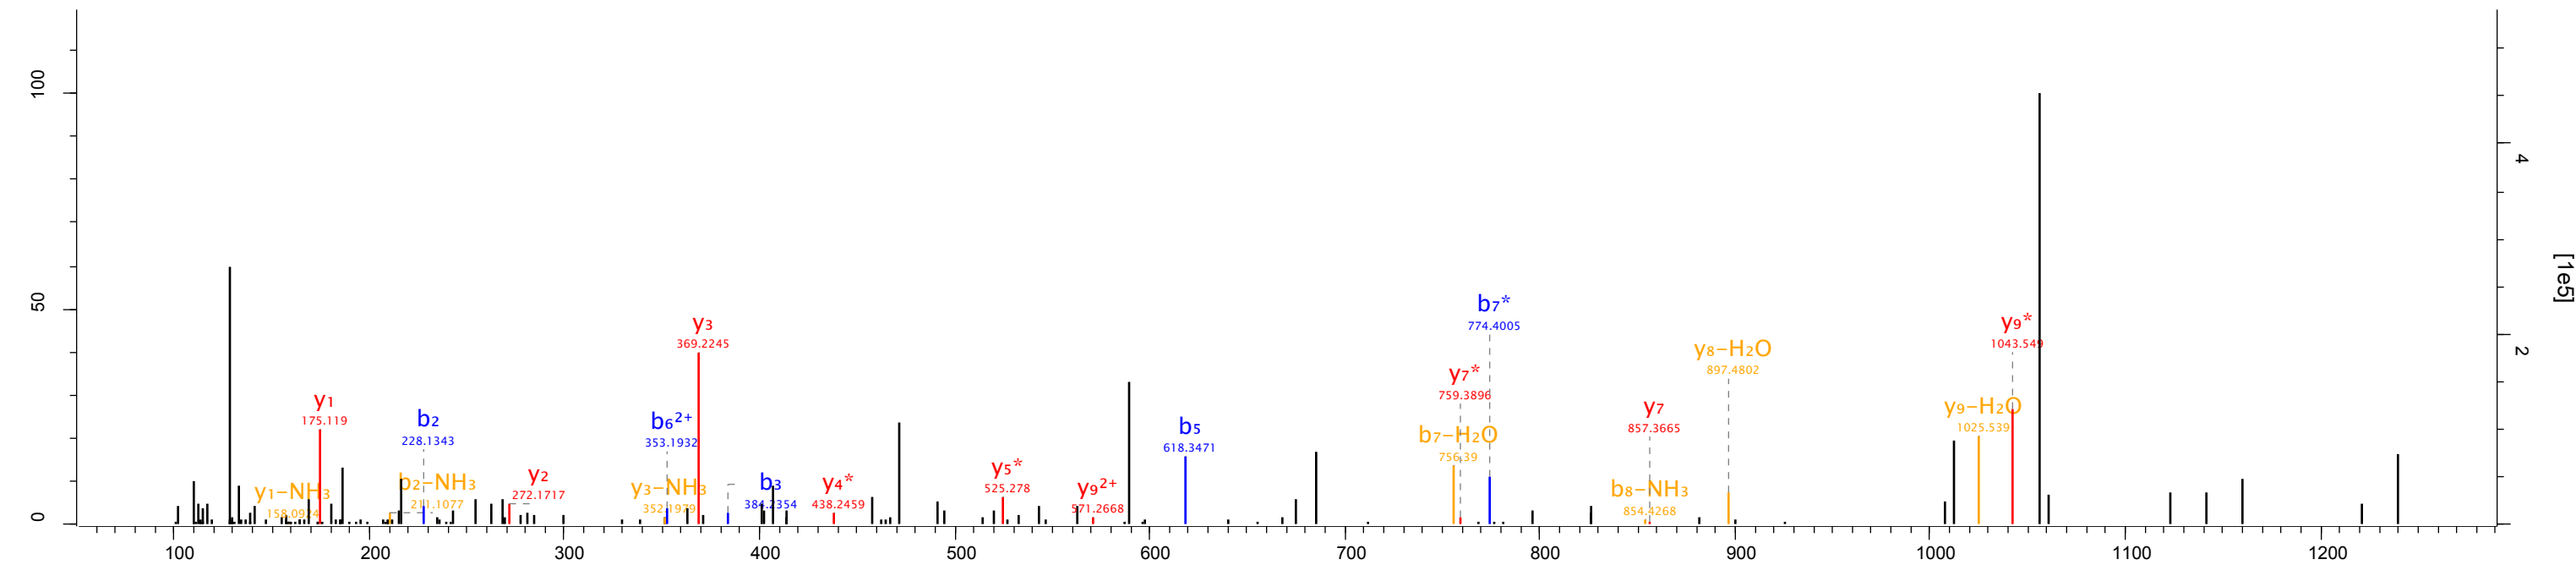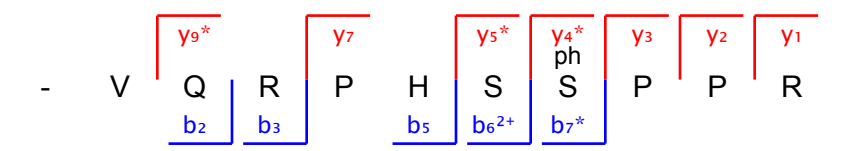

Raw file: 20150814\_A375SR\_Phospho\_BR2\_07  
 Scan: 21167 Method: FTMS; HCD Score: 54.63 m/z: 1035.49 Gene names: MAGEA10

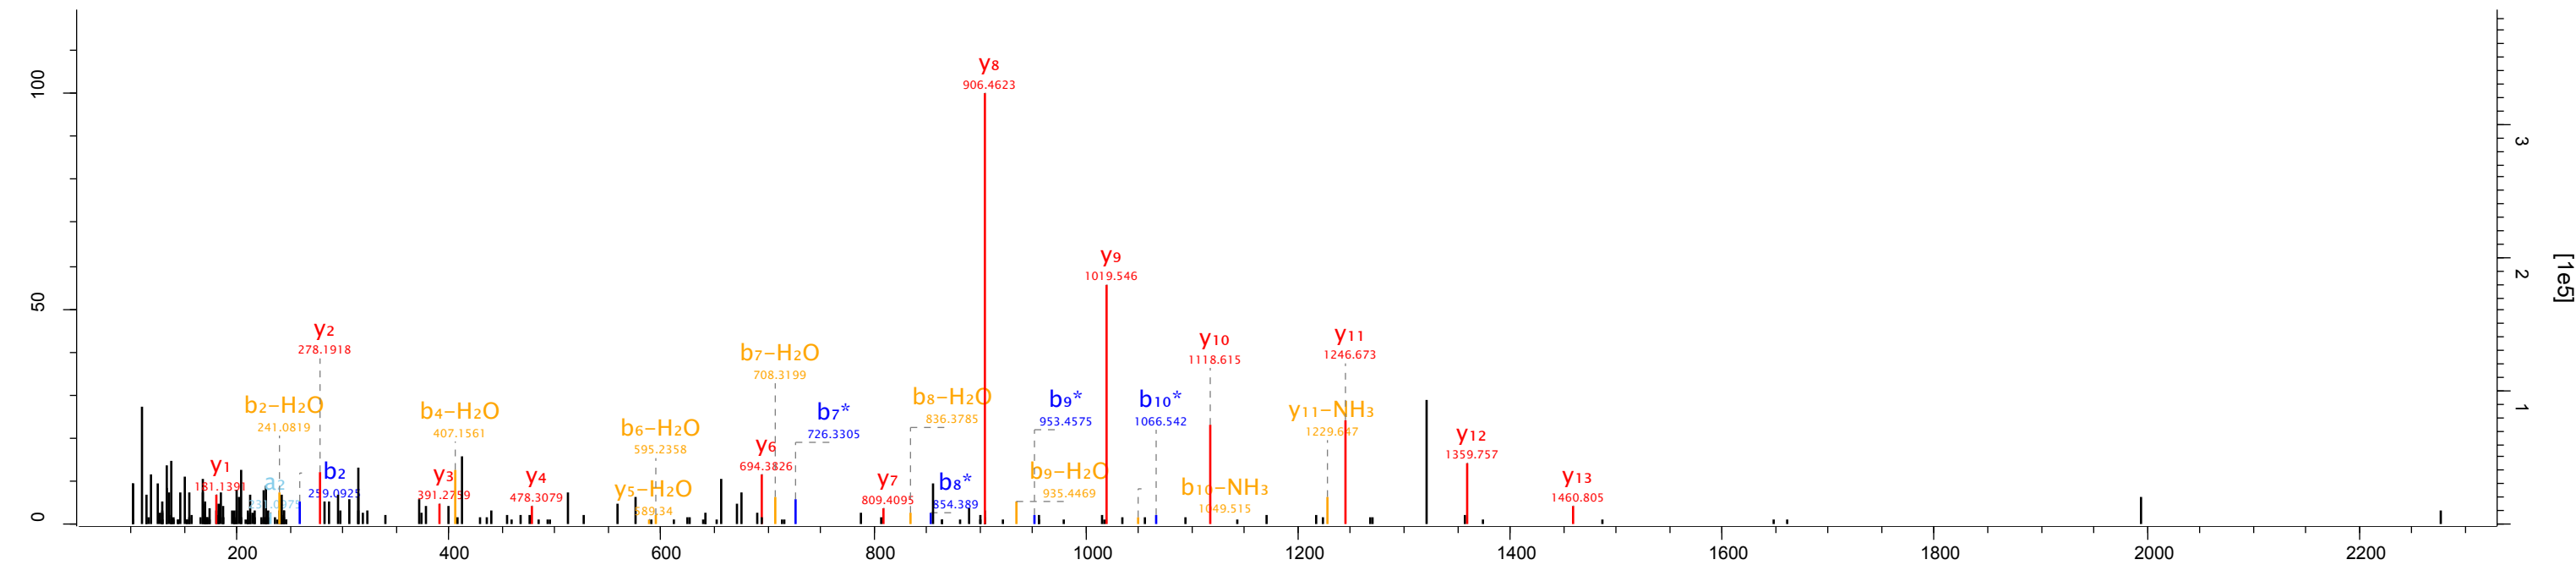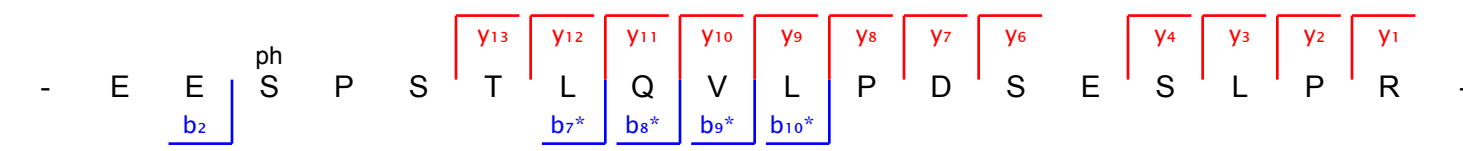



Raw file: 20150814\_A375SR\_Phospho\_BR2\_07  
 Scan: 2297 Method: FTMS; HCD Score: 142.03 m/z: 610.32 Gene names: SAFB2;SAFB

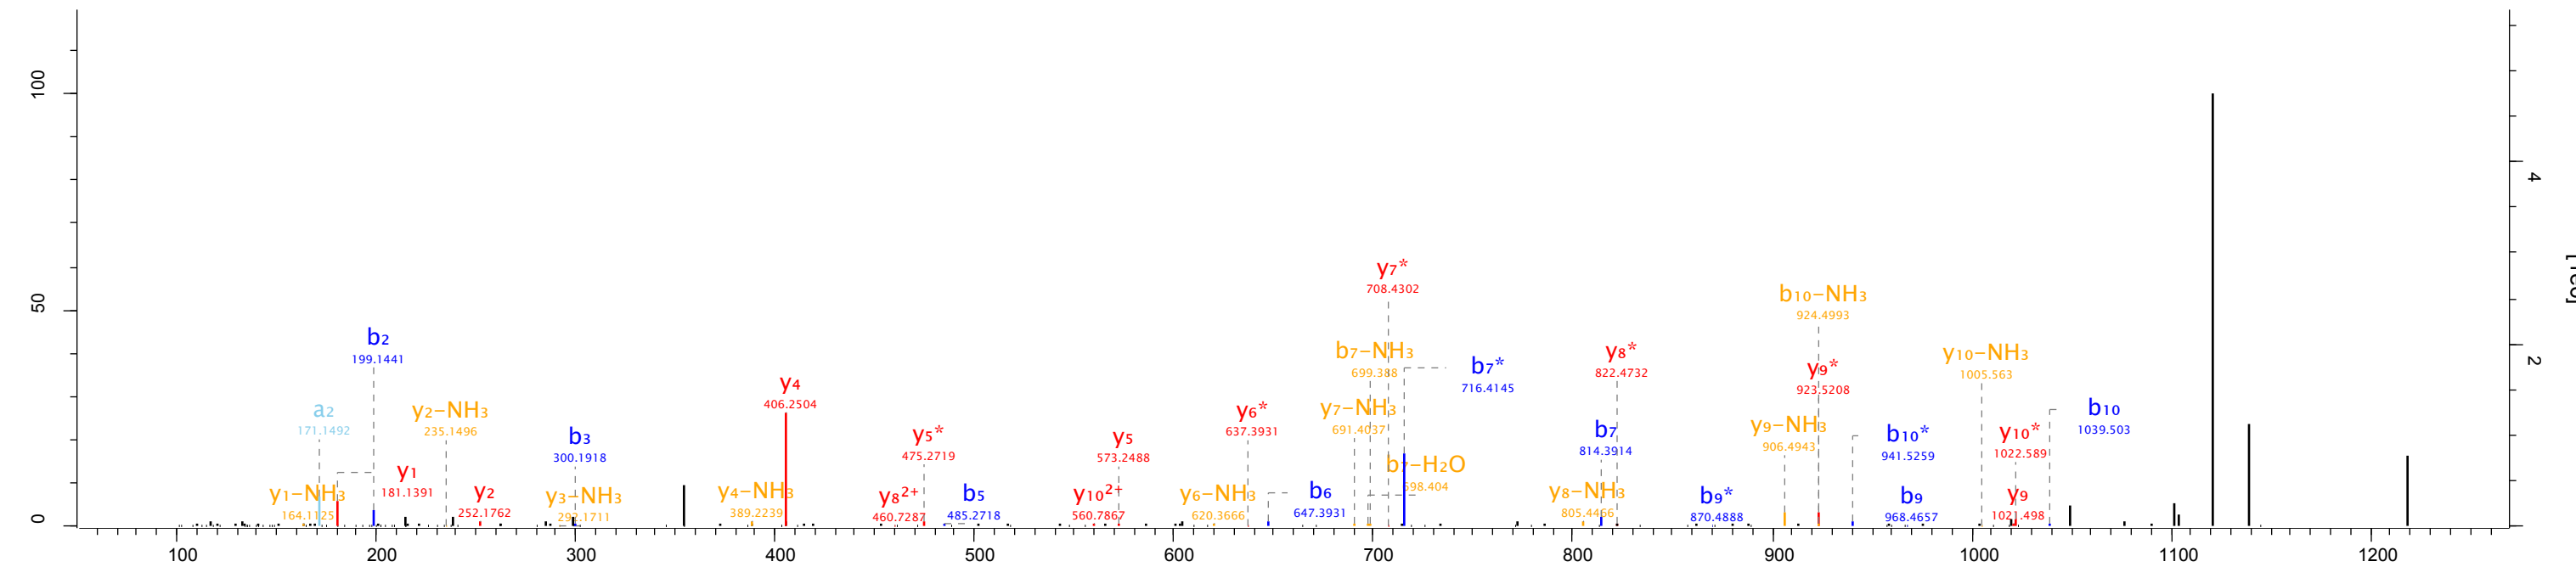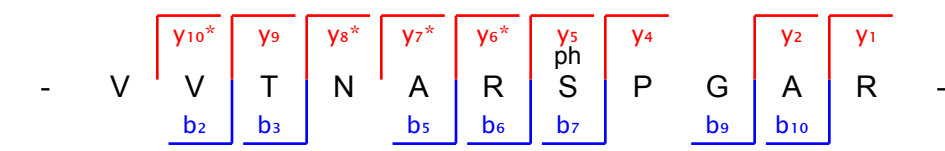

Raw file 20150814\_A375SR\_Phospho\_BR2\_07 Scan 2317 Method FTMS; HCD Score 51.57 m/z 527.78 Gene names ZMYND8

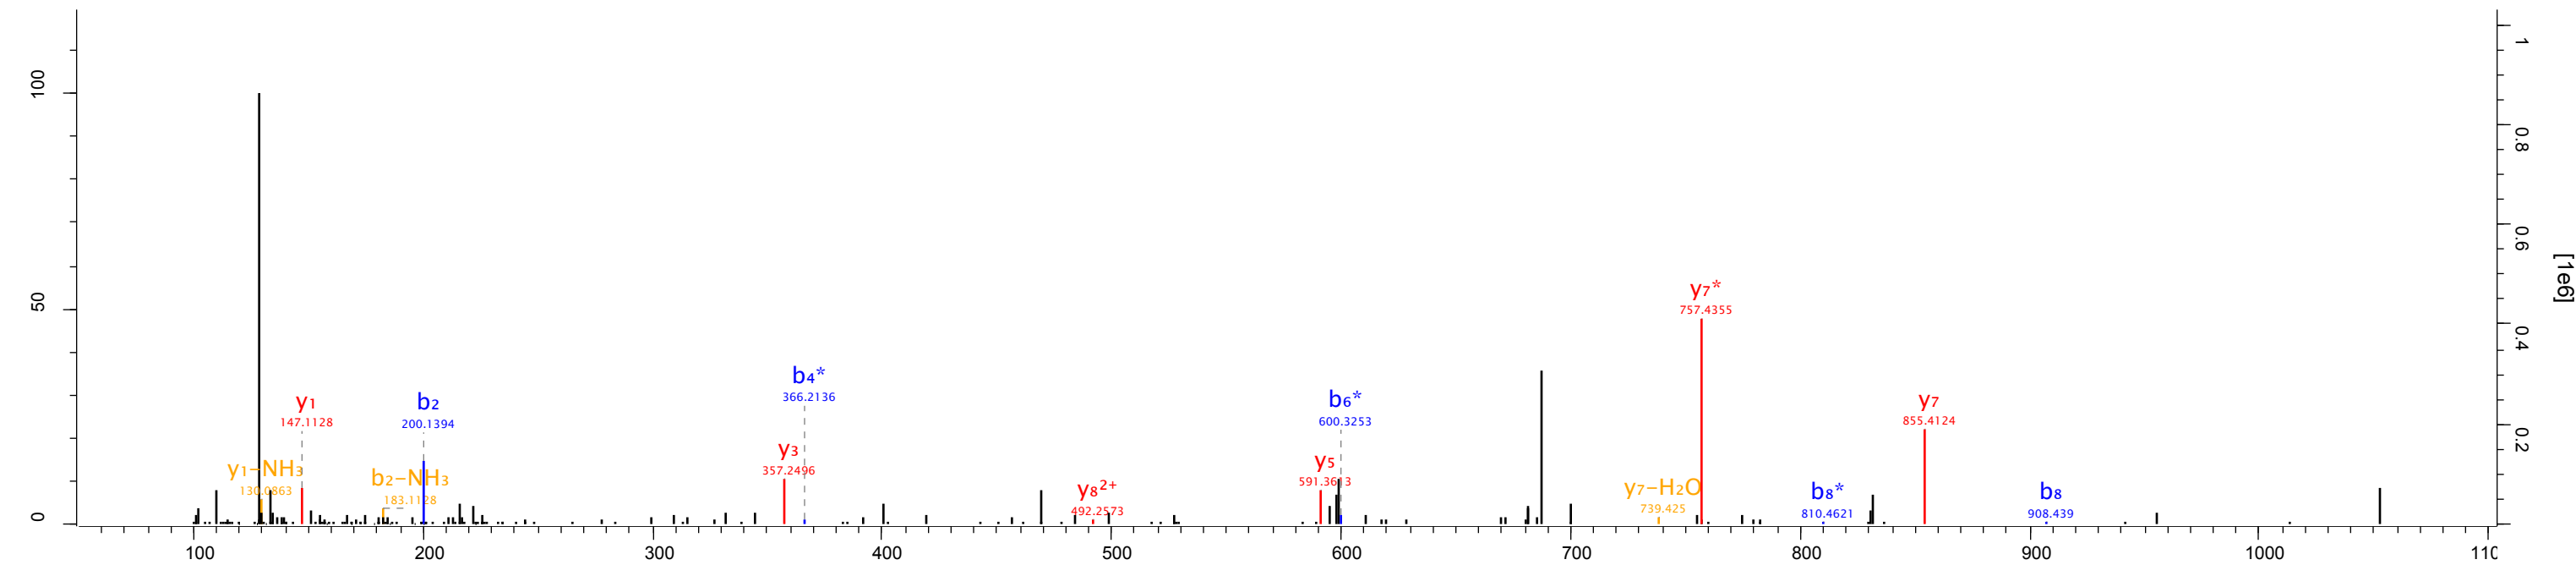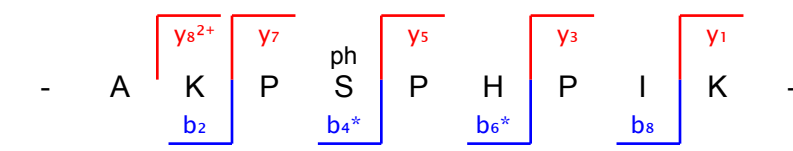

Raw file: 20150814\_A375SR\_Phospho\_BR2\_07  
 Scan: 23757 Method: FTMS; HCD Score: 108.5 m/z: 1023.48 Gene names: ZBTB21

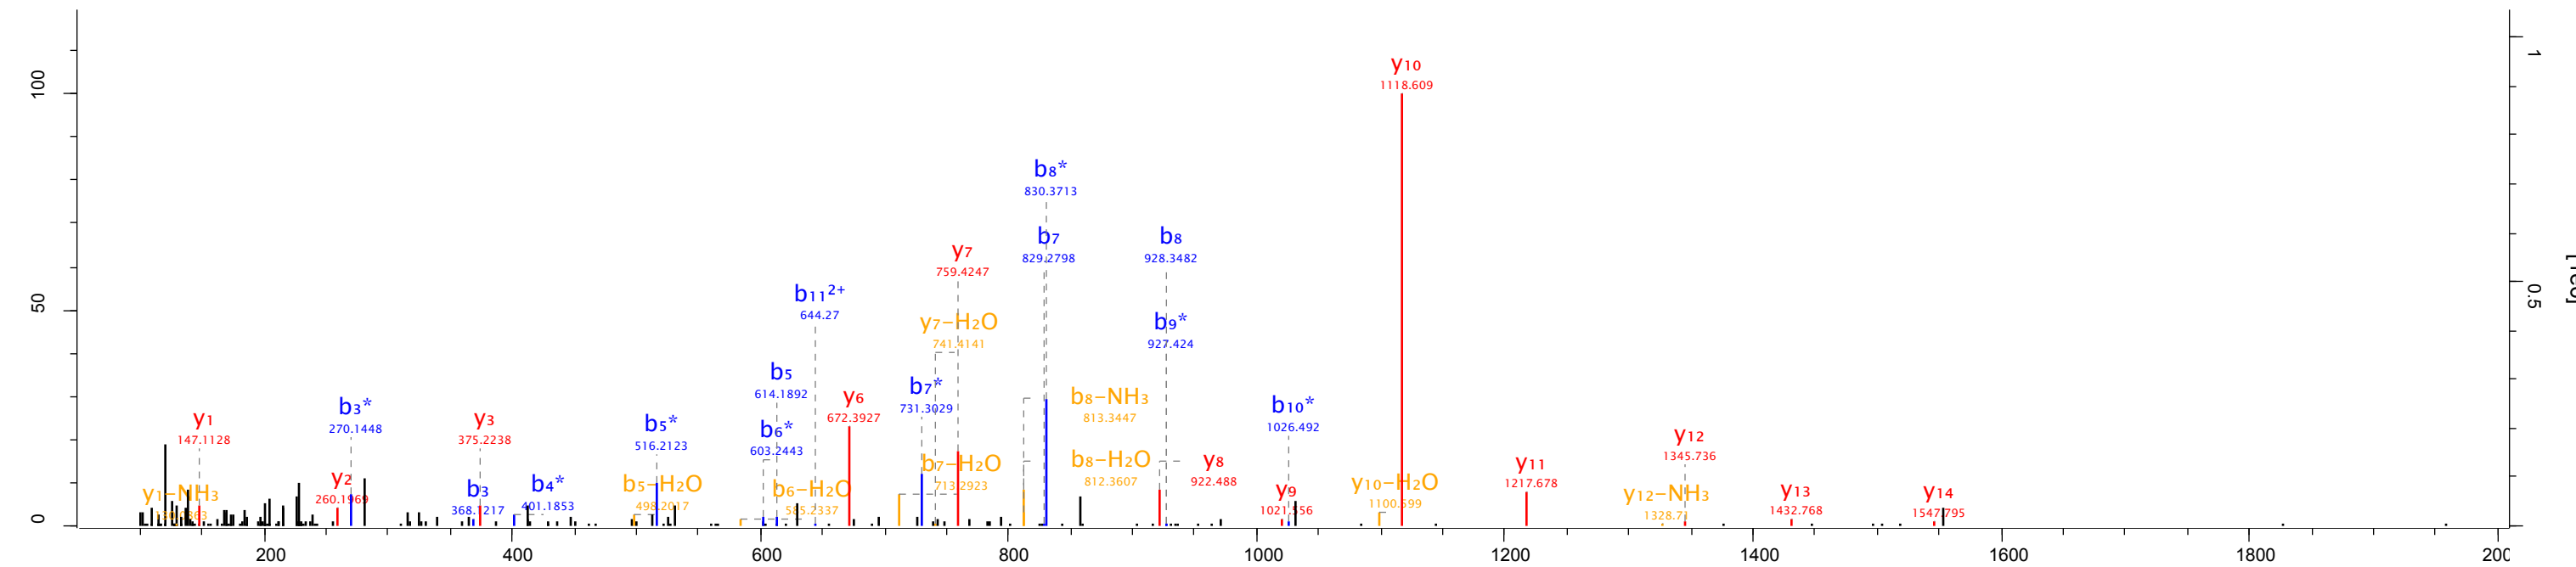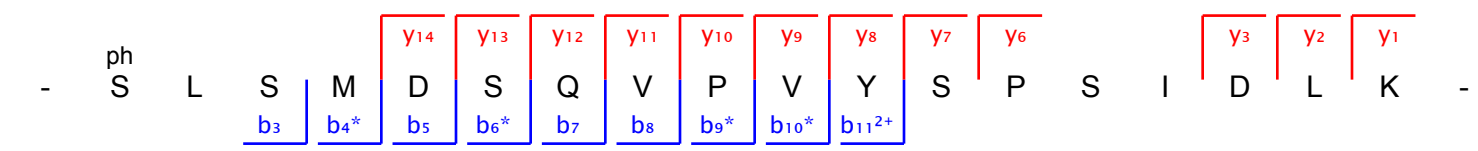

Raw file 20150814\_A375SR\_Phospho\_BR2\_07  
 Scan 27167 Method FTMS; HCD Score 50.36 m/z 697.7 Gene names NFKB1

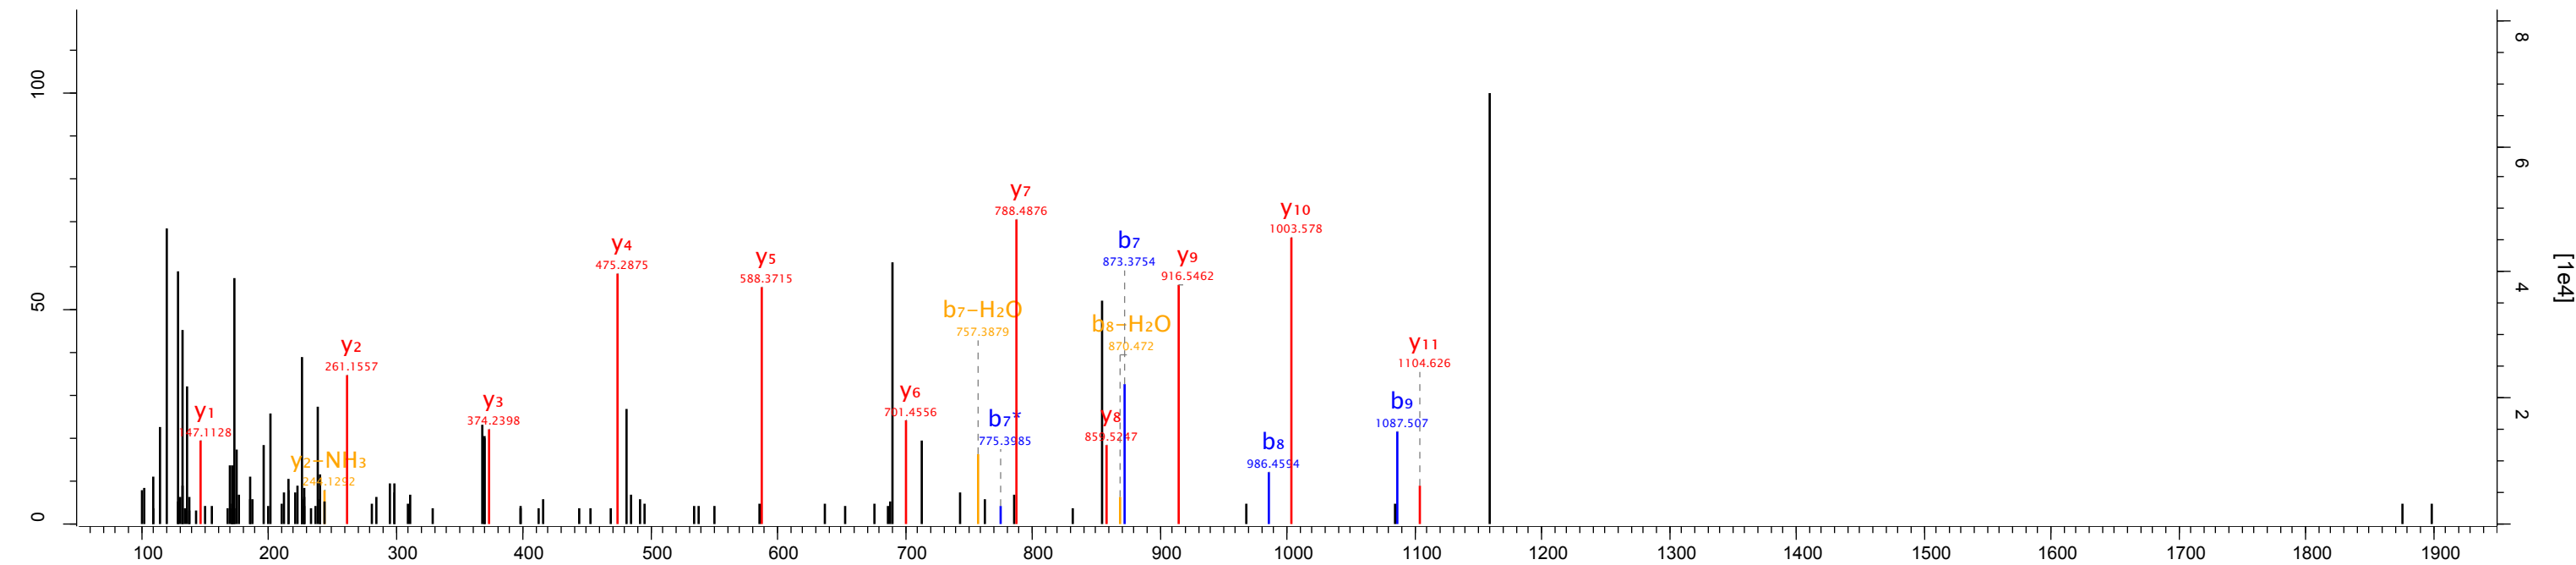

- K L S F T E ph S L T S G A S L L T L N K -  
 b7 b8 b9

Raw file 28367 FTMS; HCD 203.96 1283.64 LARP4B

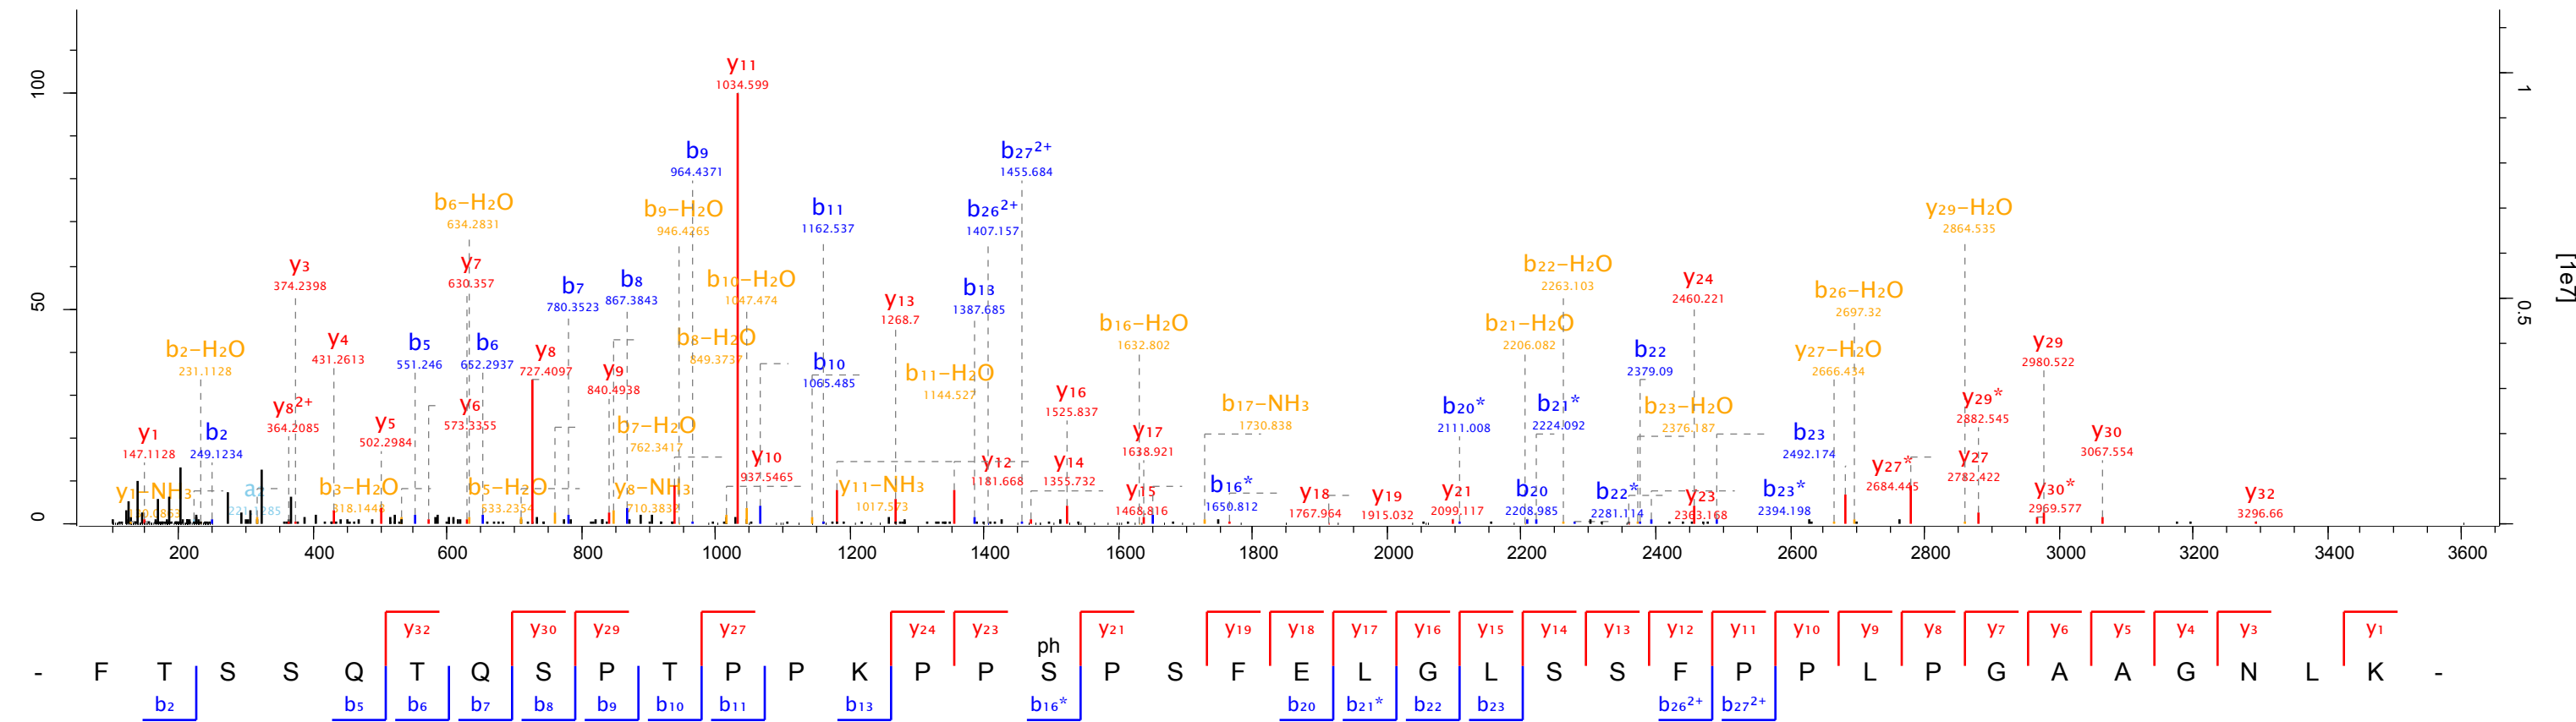

Raw file: 20150814\_A375SR\_Phospho\_BR2\_07  
 Scan: 2897 Method: FTMS; HCD Score: 96.87 m/z: 412.54 Gene names: ABI2

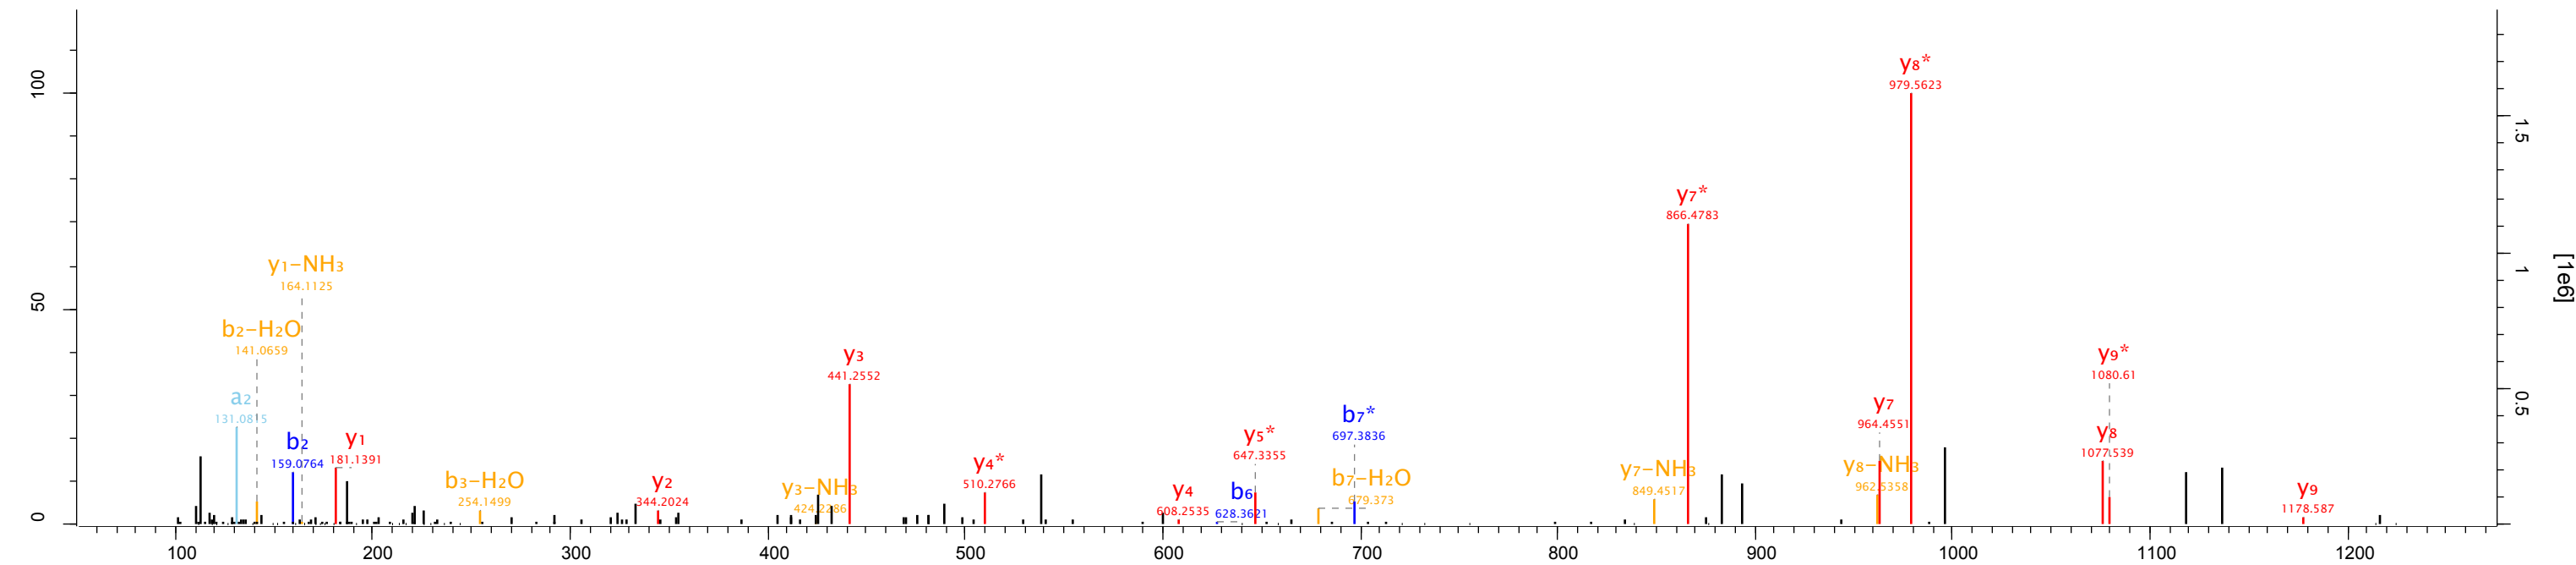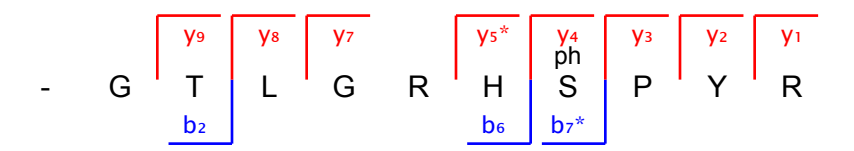

Raw file: 20150814\_A375SR\_Phospho\_BR2\_07  
 Scan: 3107 Method: FTMS; HCD Score: 287.57 m/z: 919.85 Gene names: KRI1

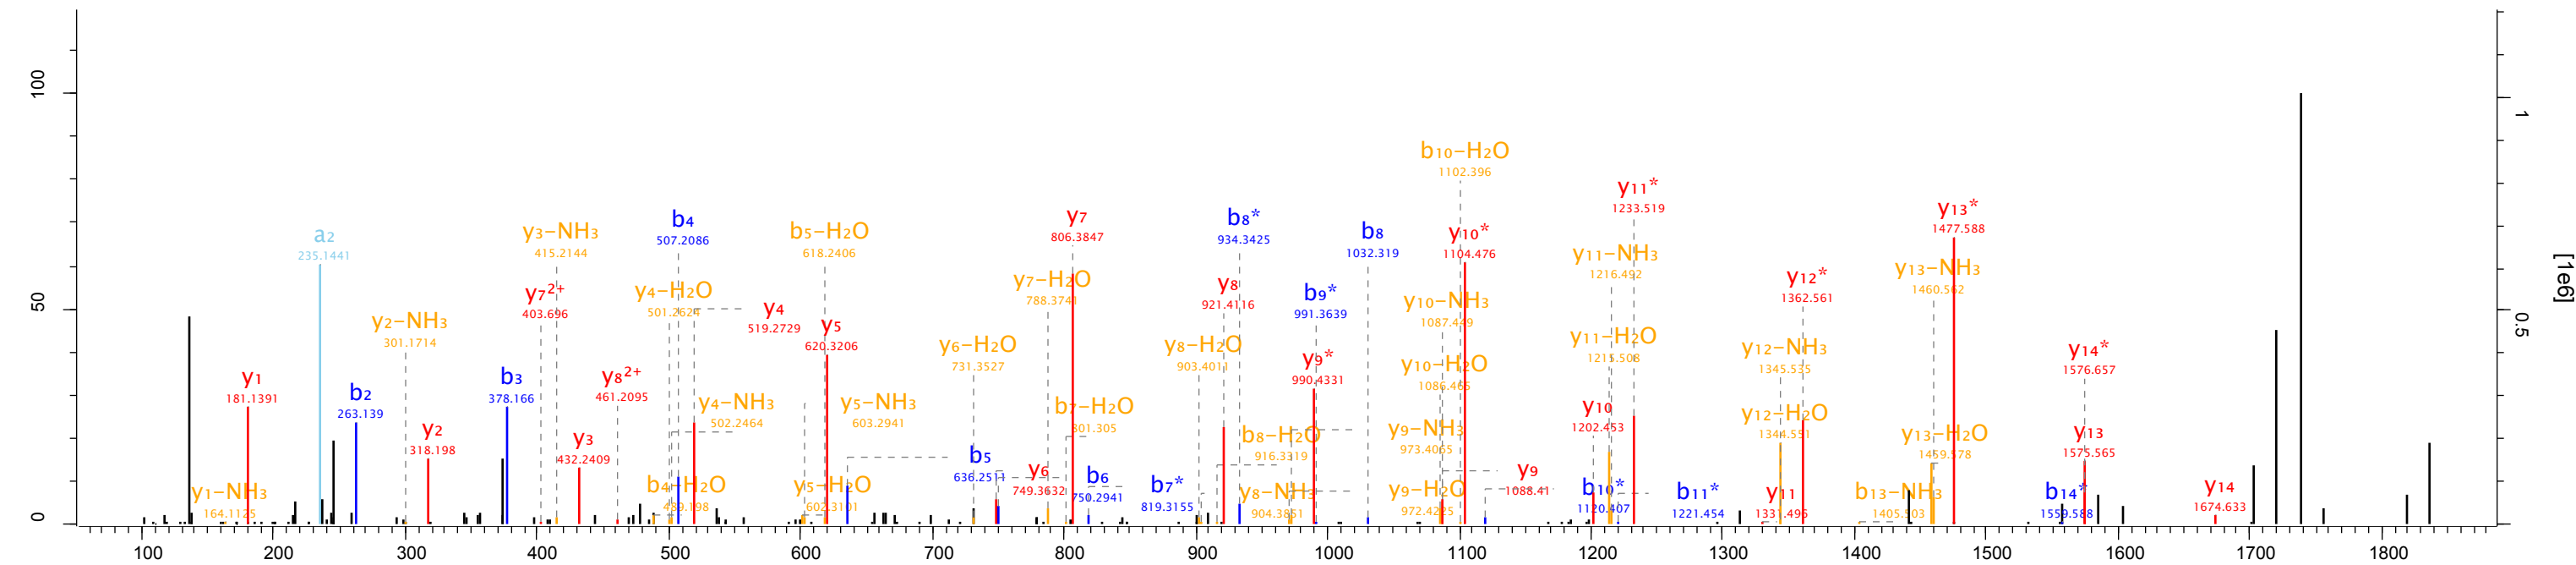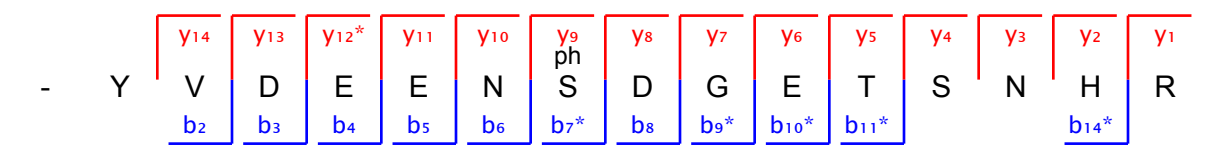

Raw file 20150814\_A375SR\_Phospho\_BR2\_07 Scan 3987 Method FTMS; HCD Score 251.28 m/z 647.8 Gene names MICAL3

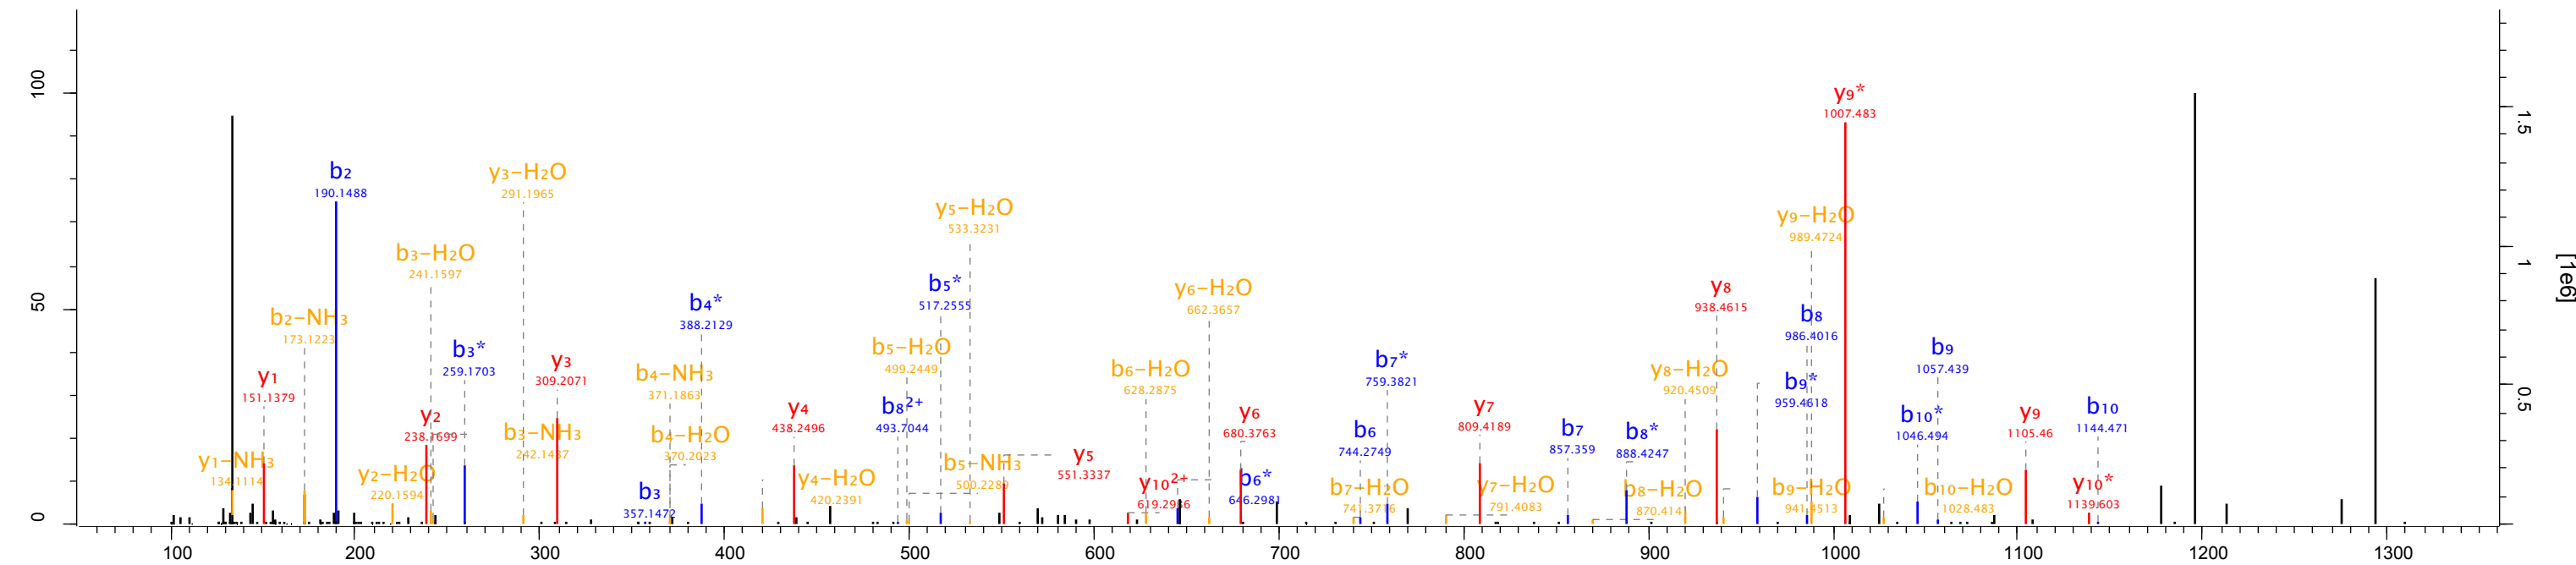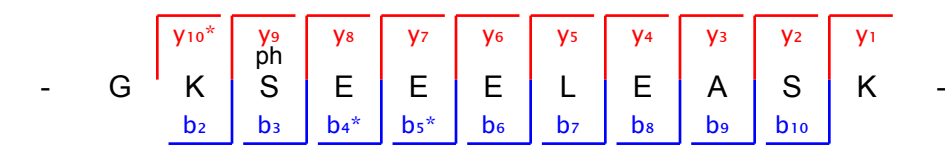



Raw file: 20150814\_A375SR\_Phospho\_BR2\_07  
 Scan: 4357 Method: FTMS; HCD Score: 150.78 m/z: 652.8 Gene names: YTHDC1

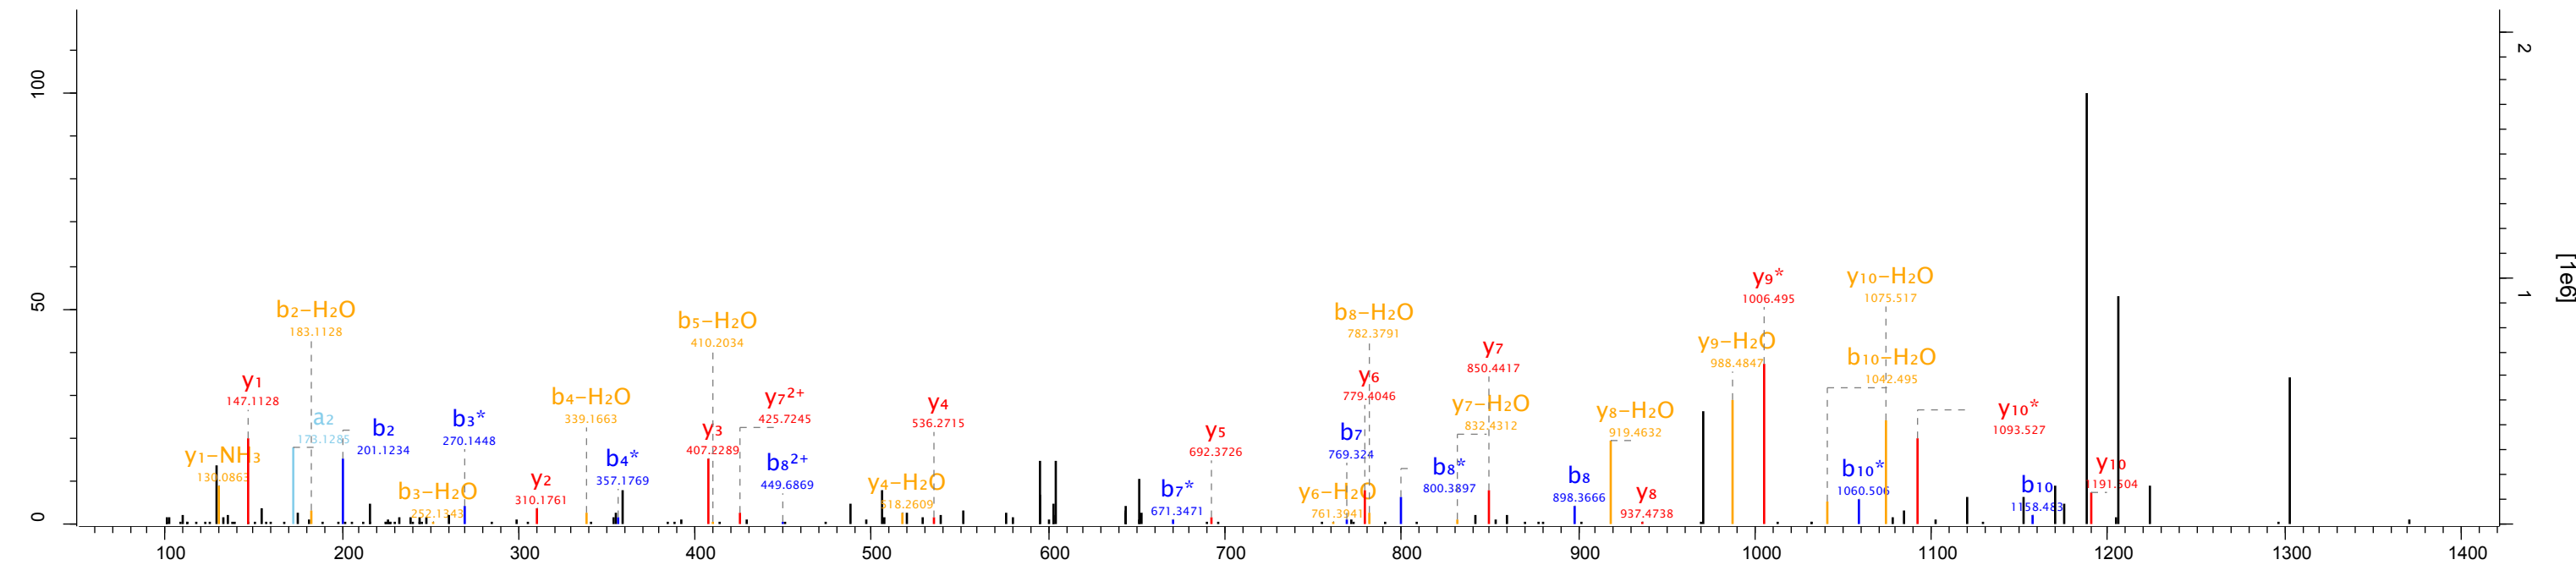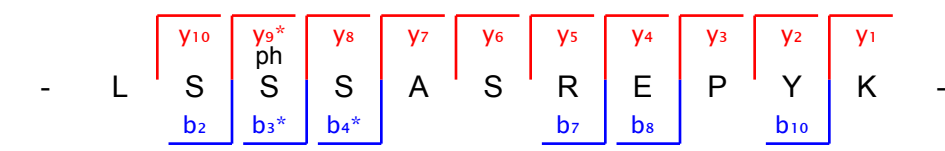

Raw file 20150814\_A375SR\_Phospho\_BR2\_07 Scan 4807 Method FTMS; HCD Score 89.01 m/z 880.43 Gene names EPB41L2

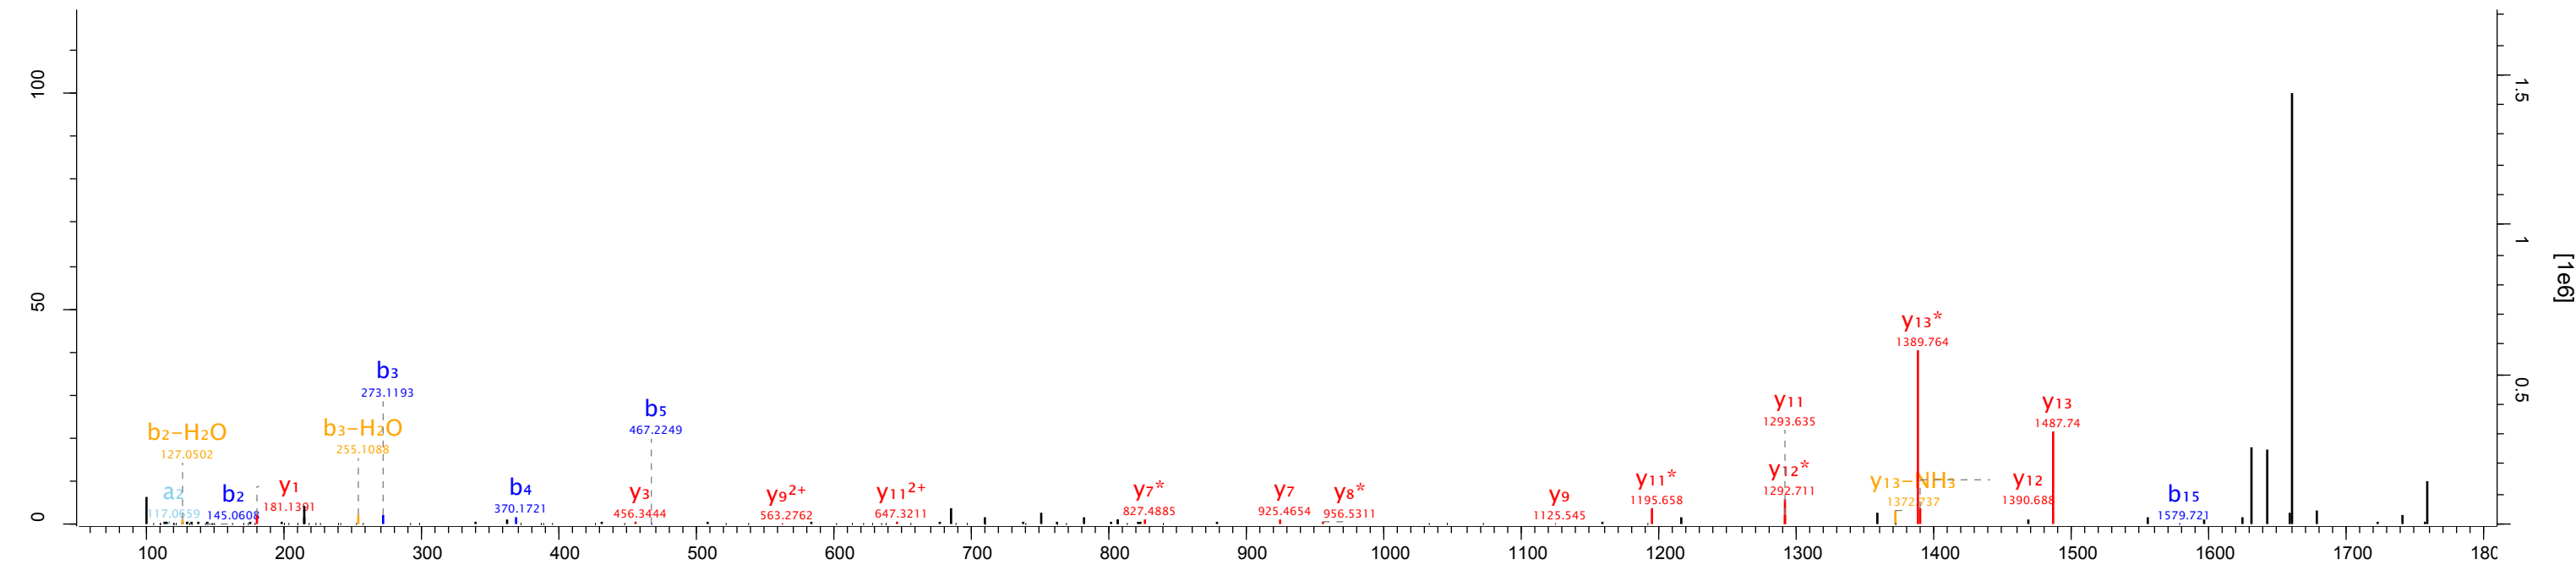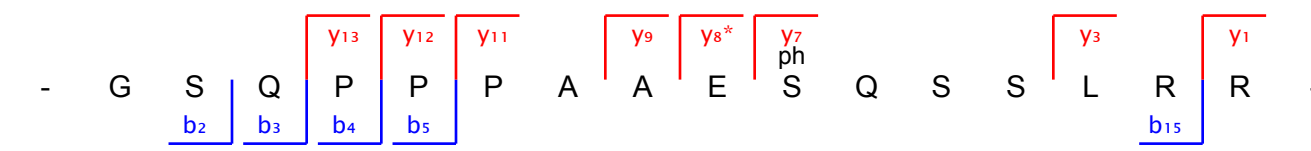

Raw file: 20150814\_A375SR\_Phospho\_BR2\_07  
 Scan: 4837 Method: FTMS; HCD Score: 42.95 m/z: 472.52 Gene names: SREK1IP1

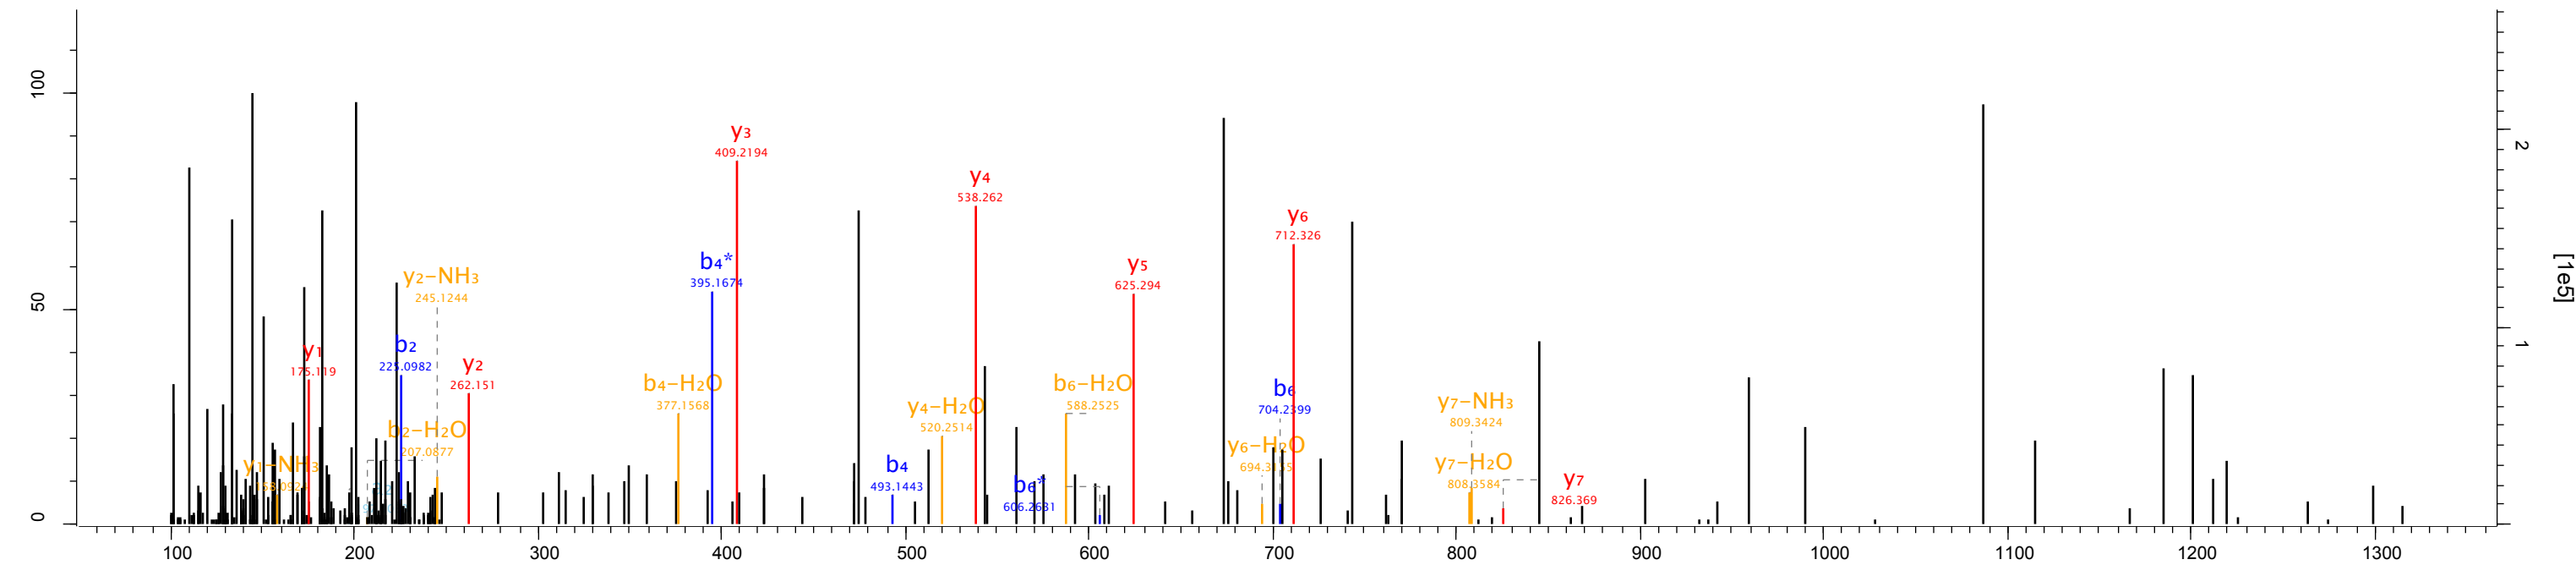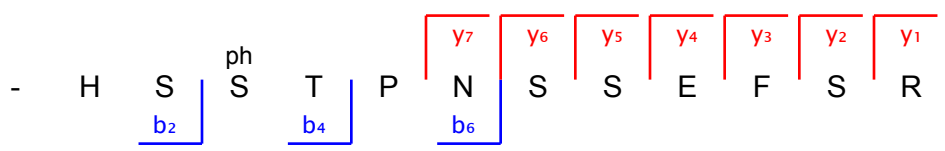

Raw file: 20150814\_A375SR\_Phospho\_BR2\_07  
 Scan: 5497 Method: FTMS; HCD Score: 120.29 m/z: 641.27 Gene names: ICE1

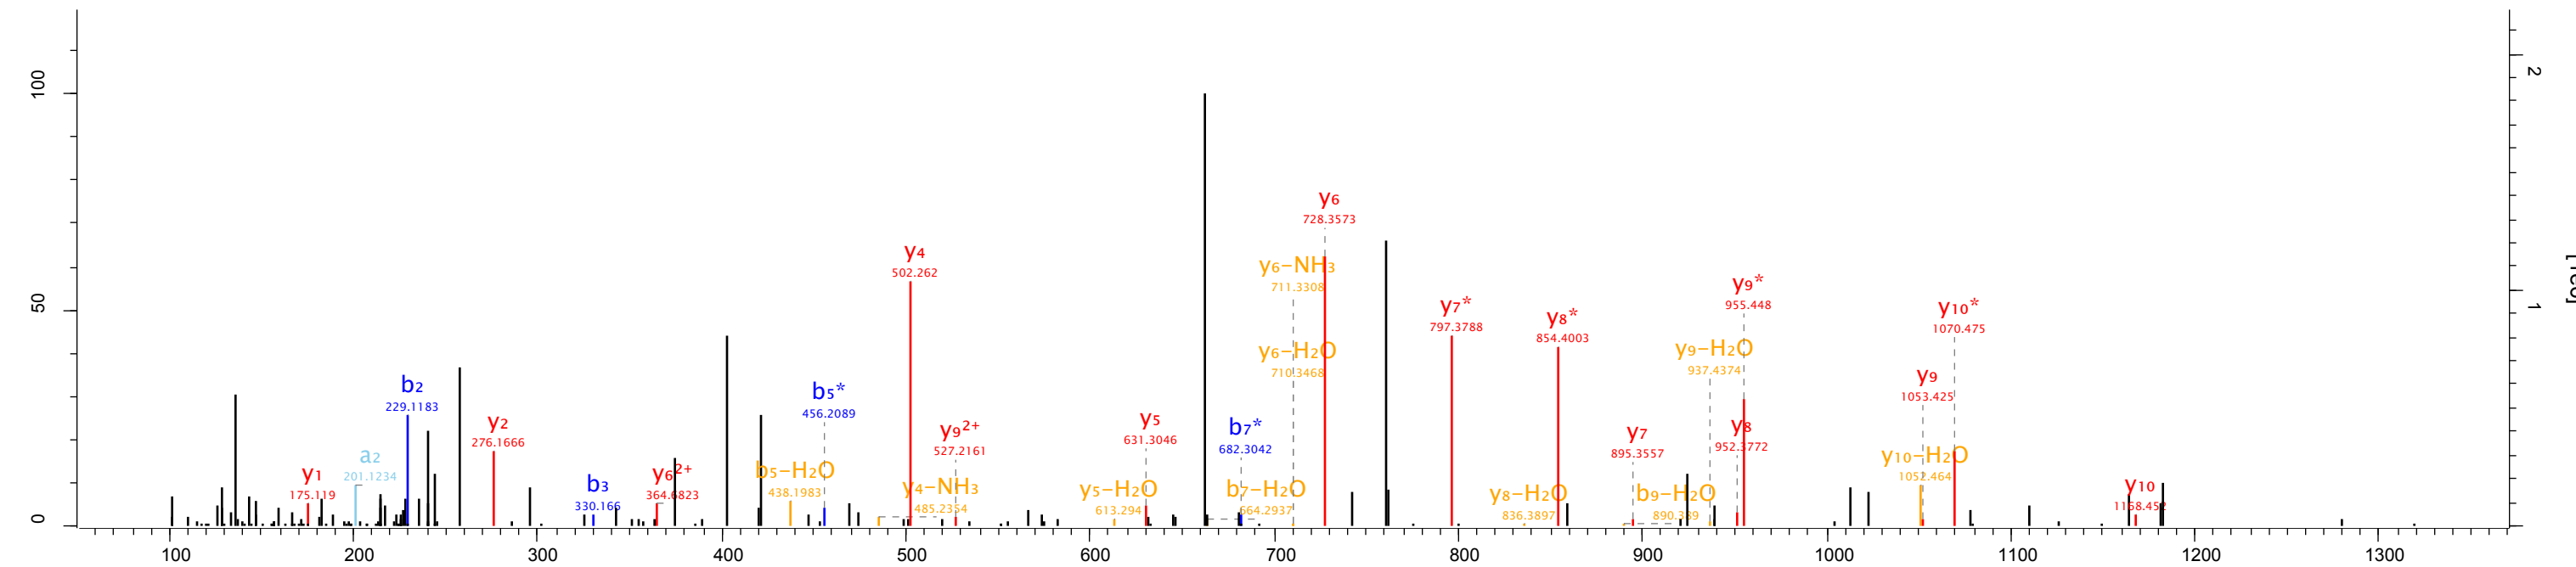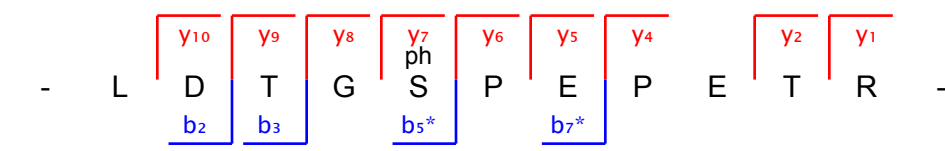

Raw file: 20150814\_A375SR\_Phospho\_BR2\_07  
 Scan: 5877 Method: FTMS; HCD Score: 117.31 m/z: 398.2 Gene names: ANKRD17

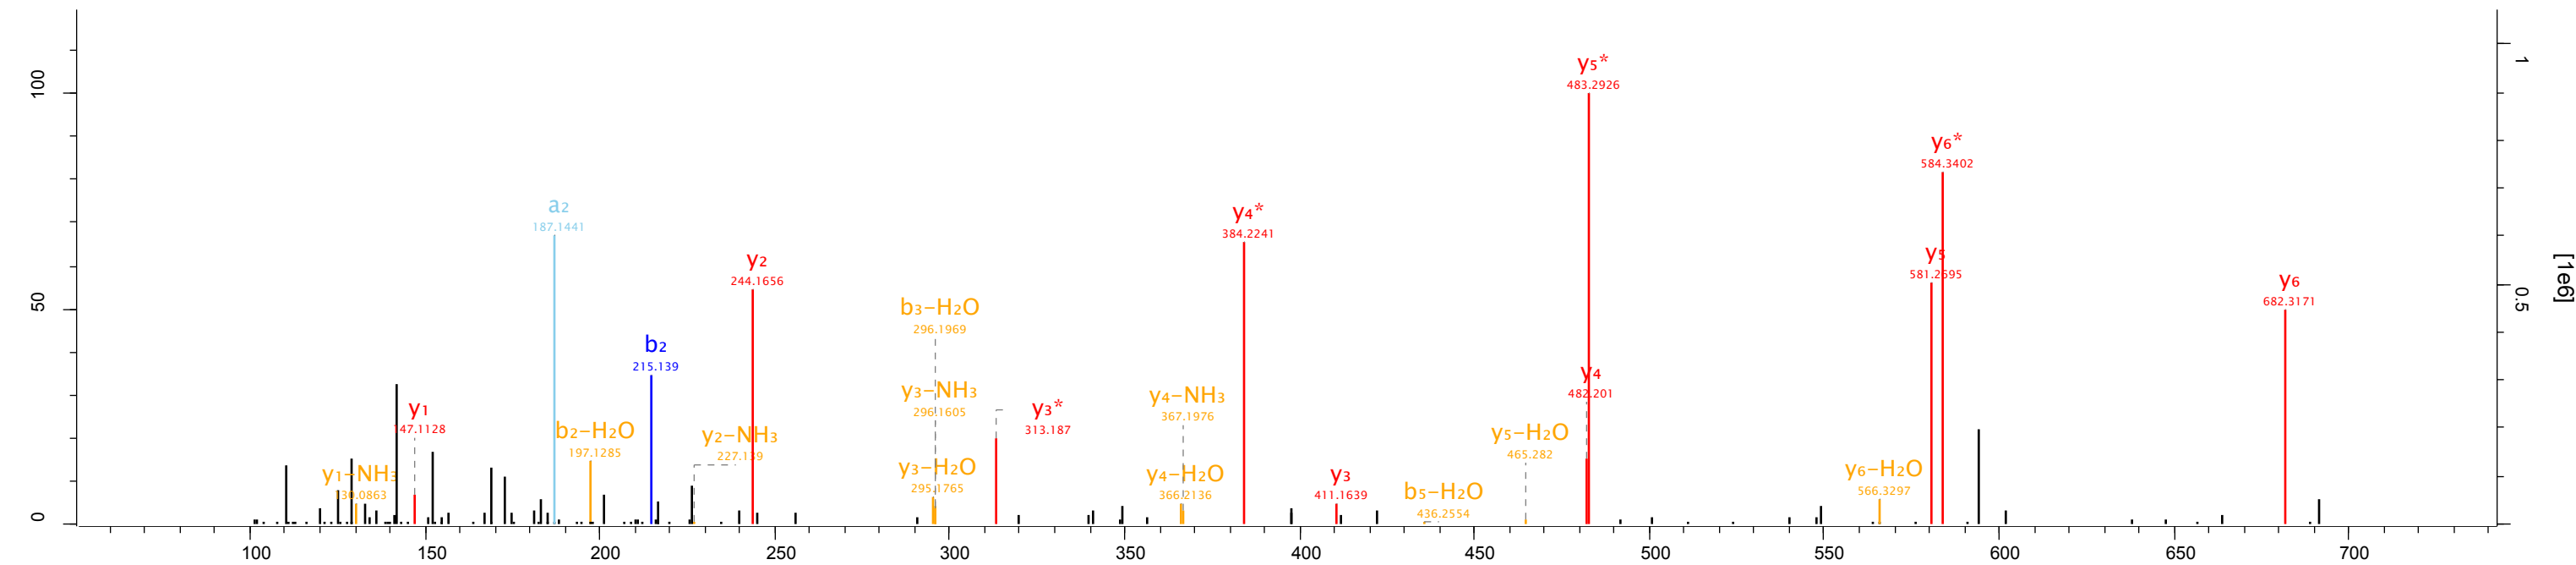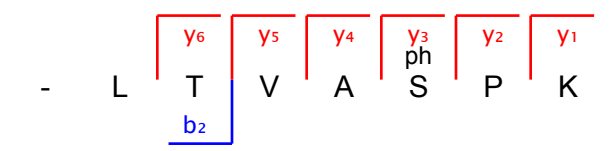

Raw file: 20150814\_A375SR\_Phospho\_BR2\_07  
 Scan: 6017 Method: FTMS; HCD Score: 167.2 m/z: 490.25 Gene names: NUCKS1

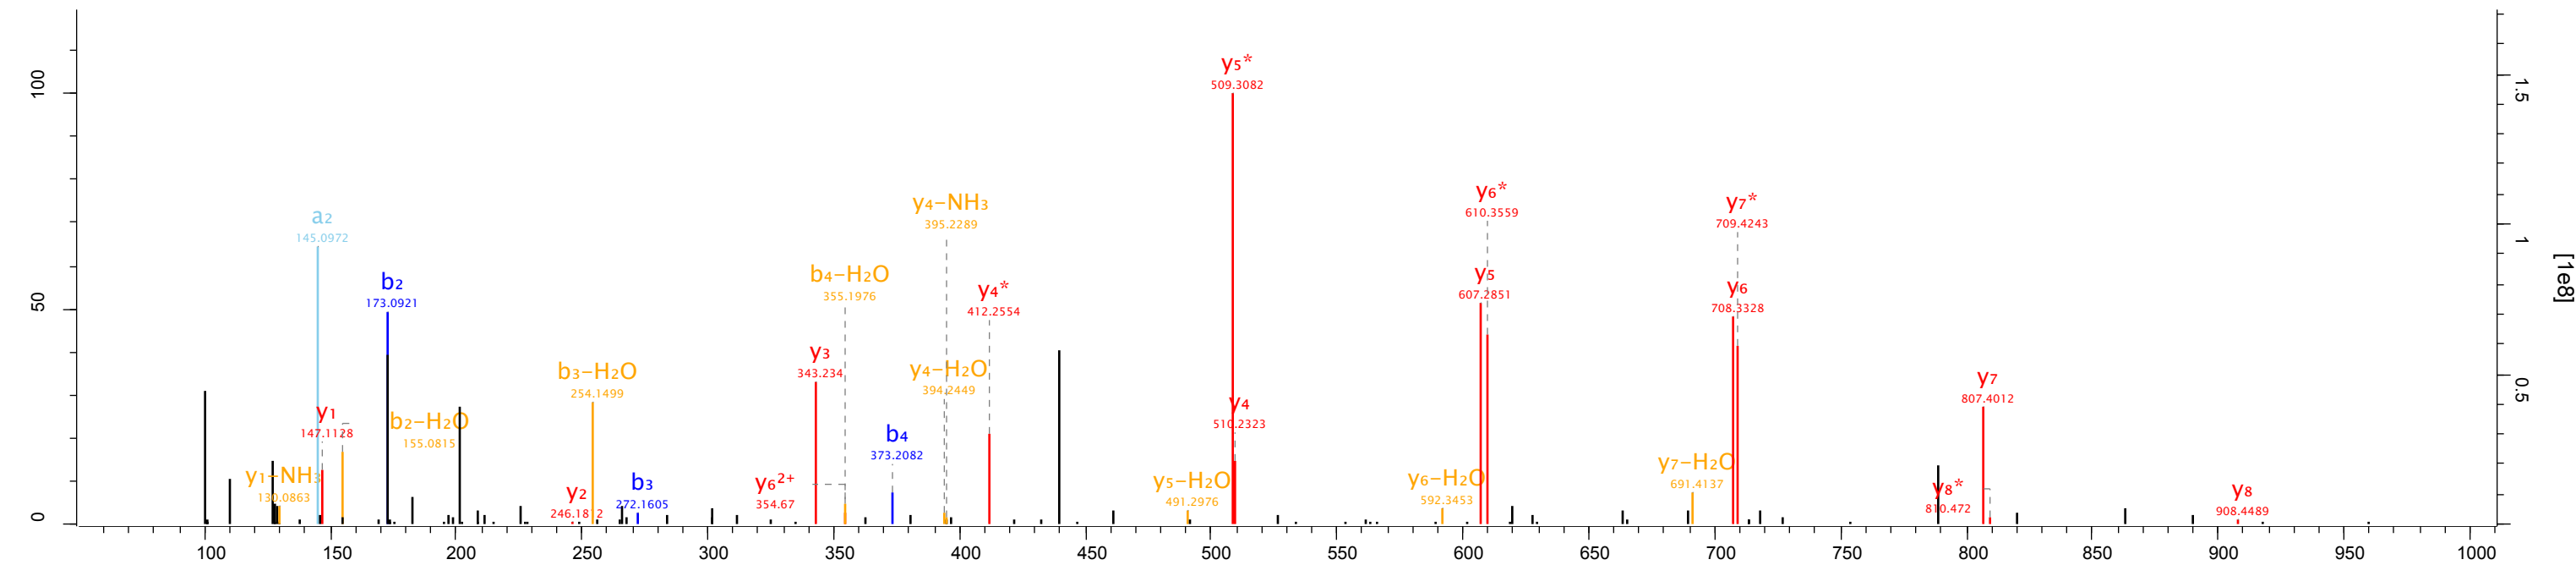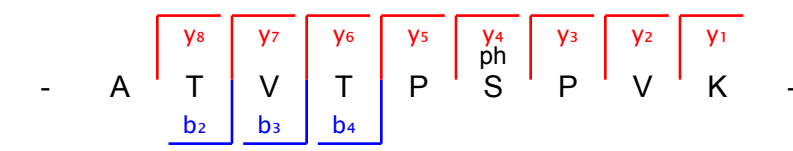

Raw file: 20150814\_A375SR\_Phospho\_BR2\_07  
 Scan: 6267 Method: FTMS; HCD Score: 128.45 m/z: 660.81 Gene names: SIPA1L3

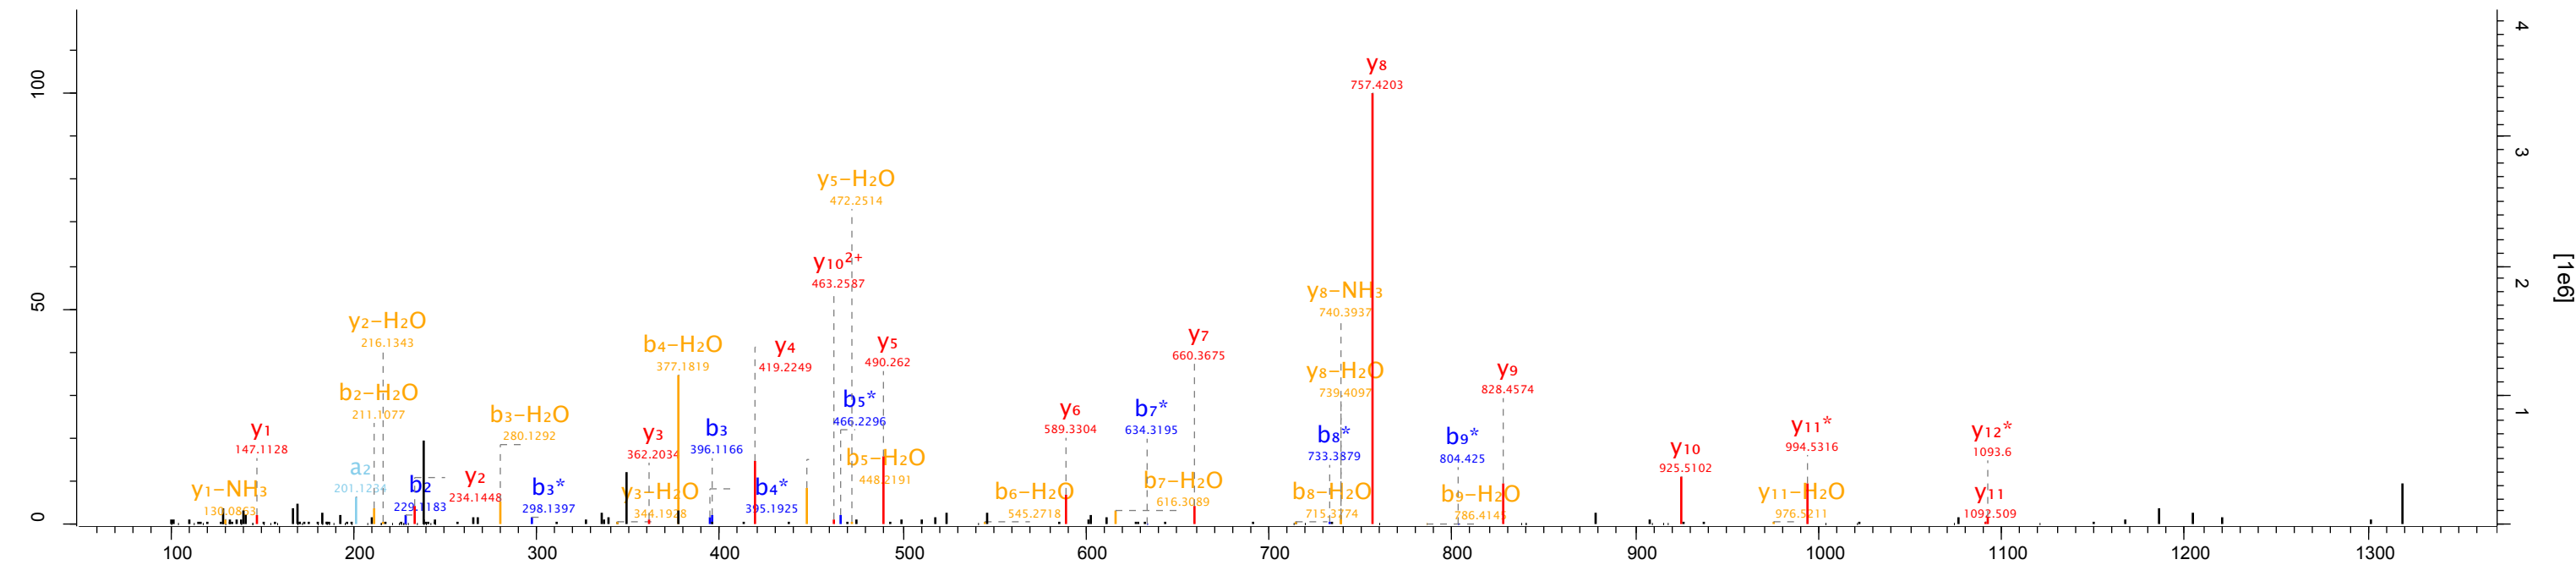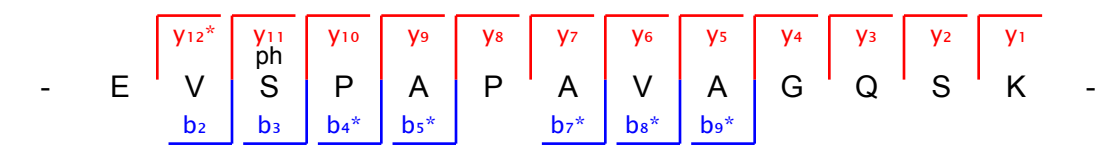

Raw file: 20150814\_A375SR\_Phospho\_BR2\_07  
 Scan: 7527 Method: FTMS; HCD Score: 67.65 m/z: 529.58 Gene names: VIM

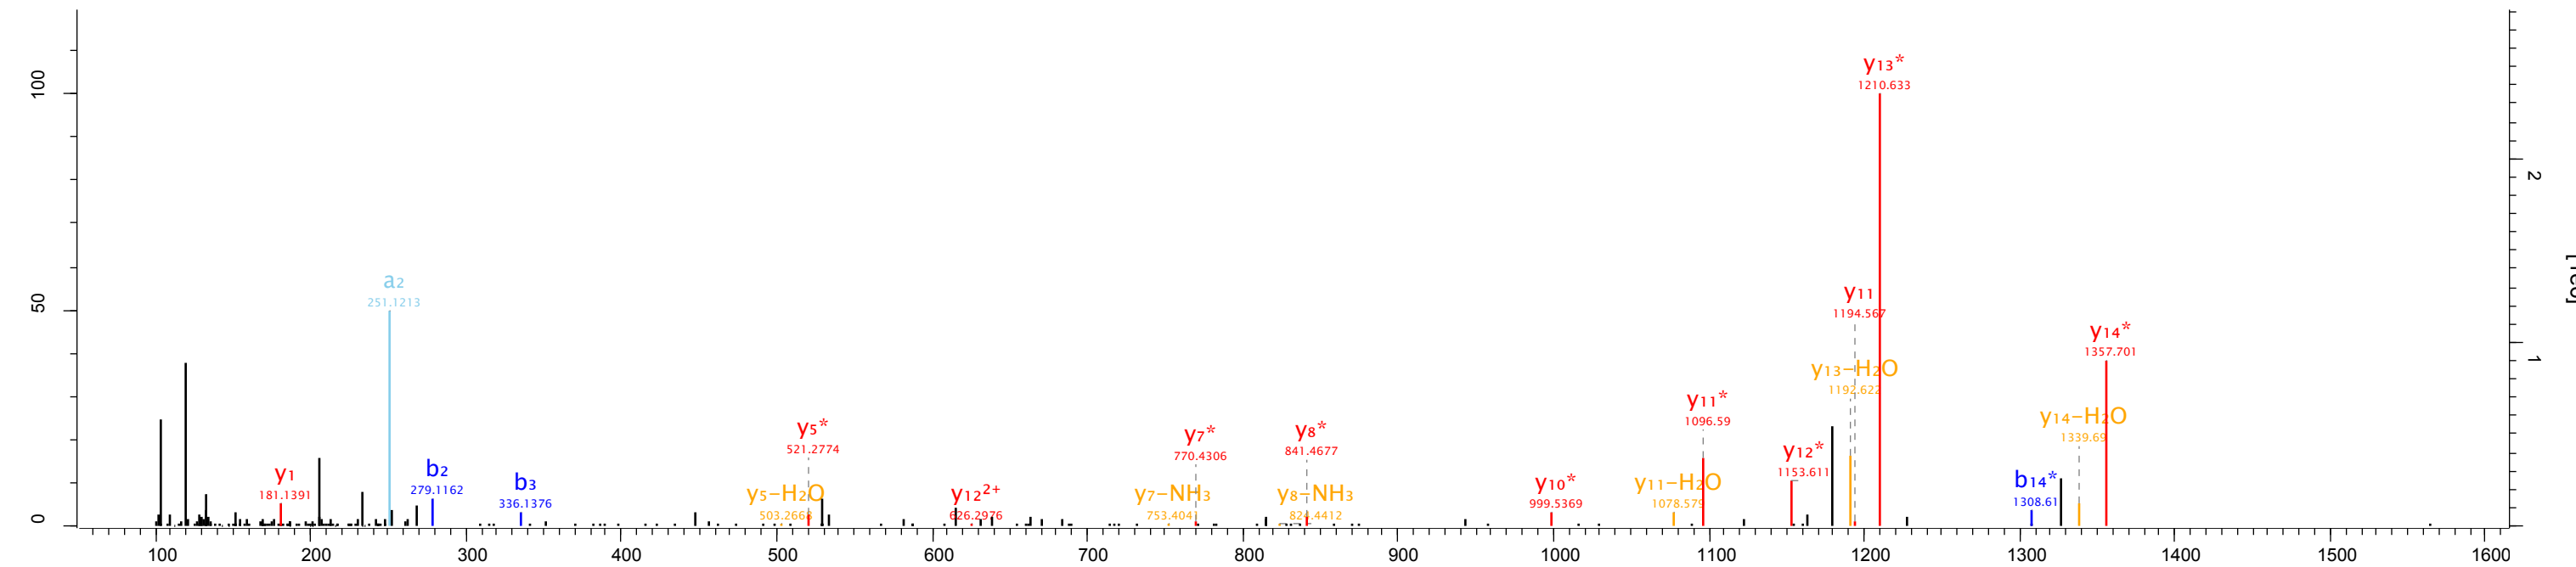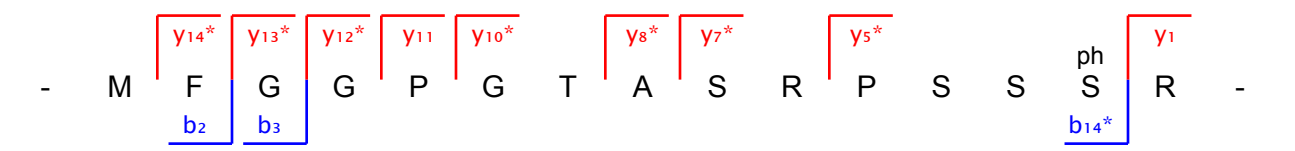



Raw file: 20150814\_A375SR\_Phospho\_BR2\_07  
 Scan: 7687 Method: FTMS; HCD Score: 100.04 m/z: 552.76 Gene names: PHLDB1

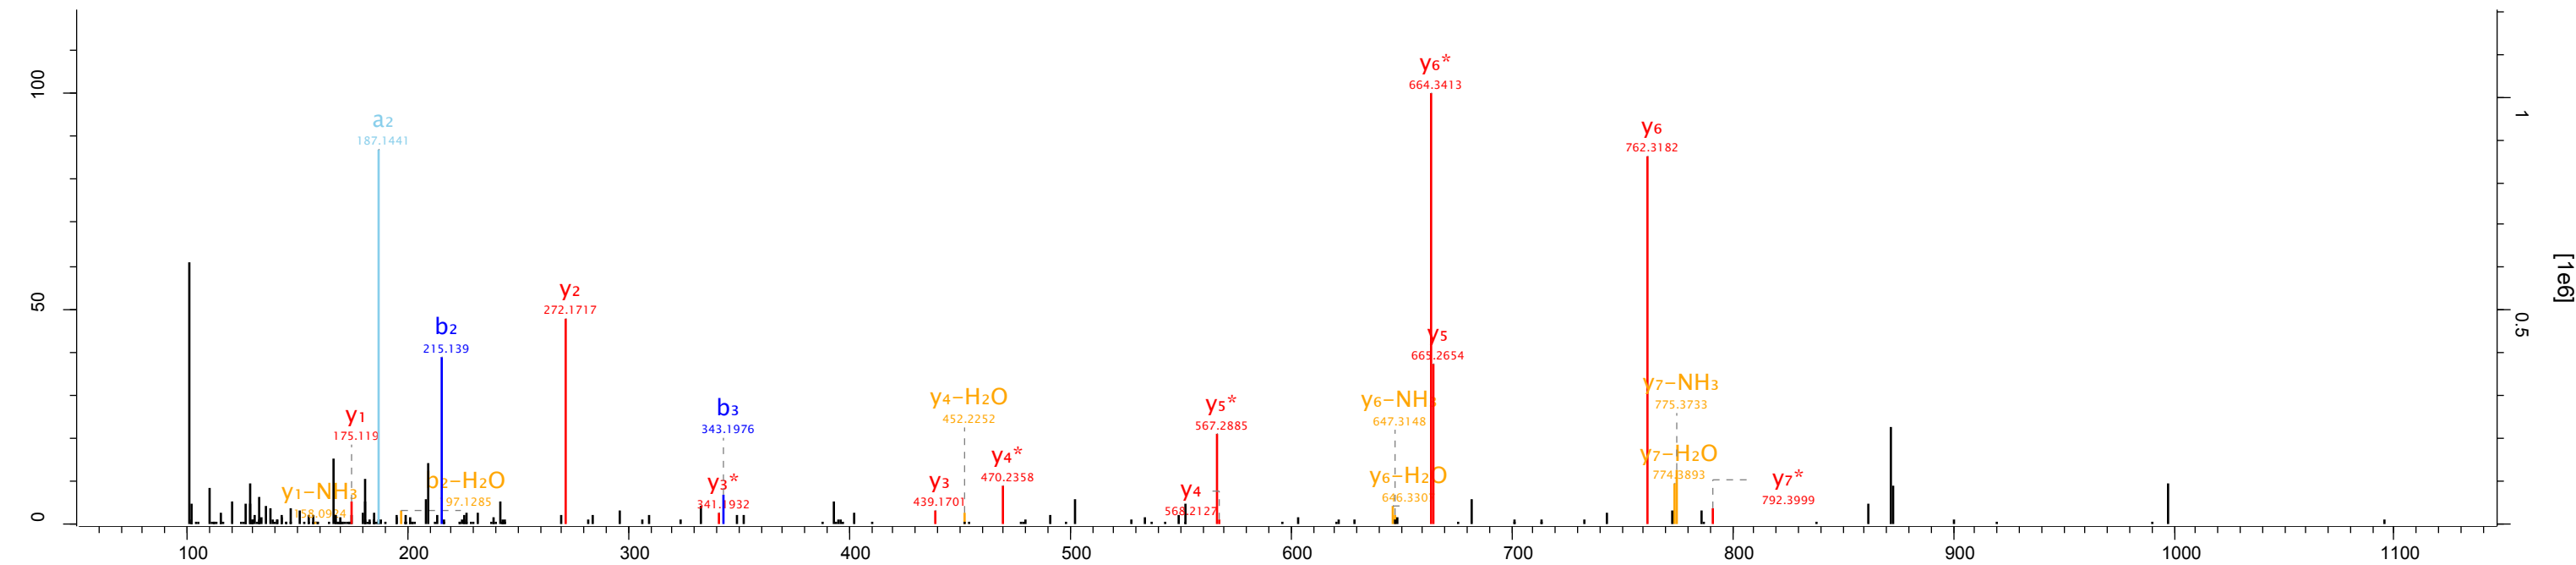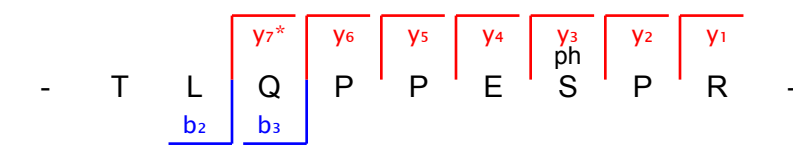

Raw file: 20150814\_A375SR\_Phospho\_BR2\_07  
 Scan: 9207 Method: FTMS; HCD Score: 66.81 m/z: 545.27 Gene names: CIT

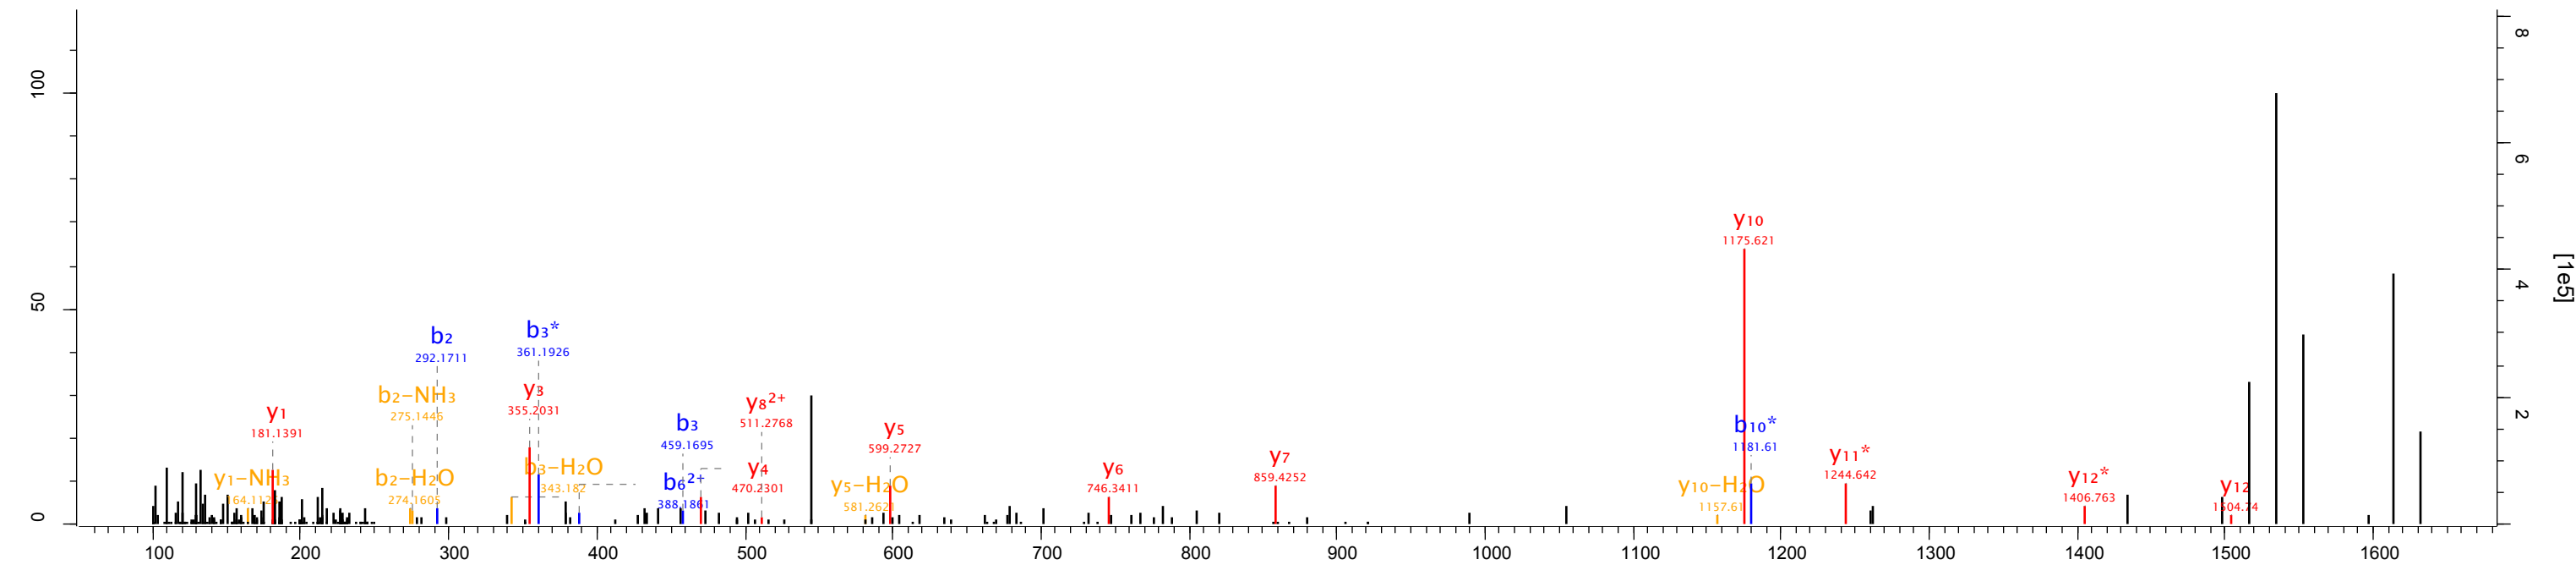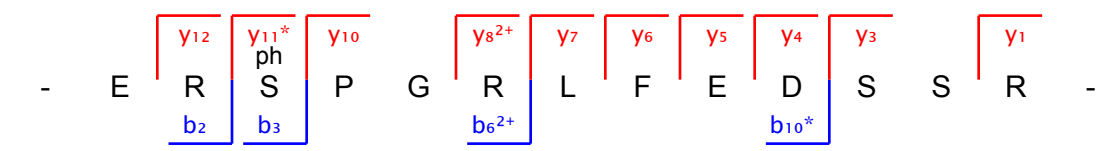

Raw file: 20150814\_A375SR\_Phospho\_BR2\_07  
 Scan: 9487 Method: FTMS; HCD Score: 159.04 m/z: 666.36 Gene names: C12orf45

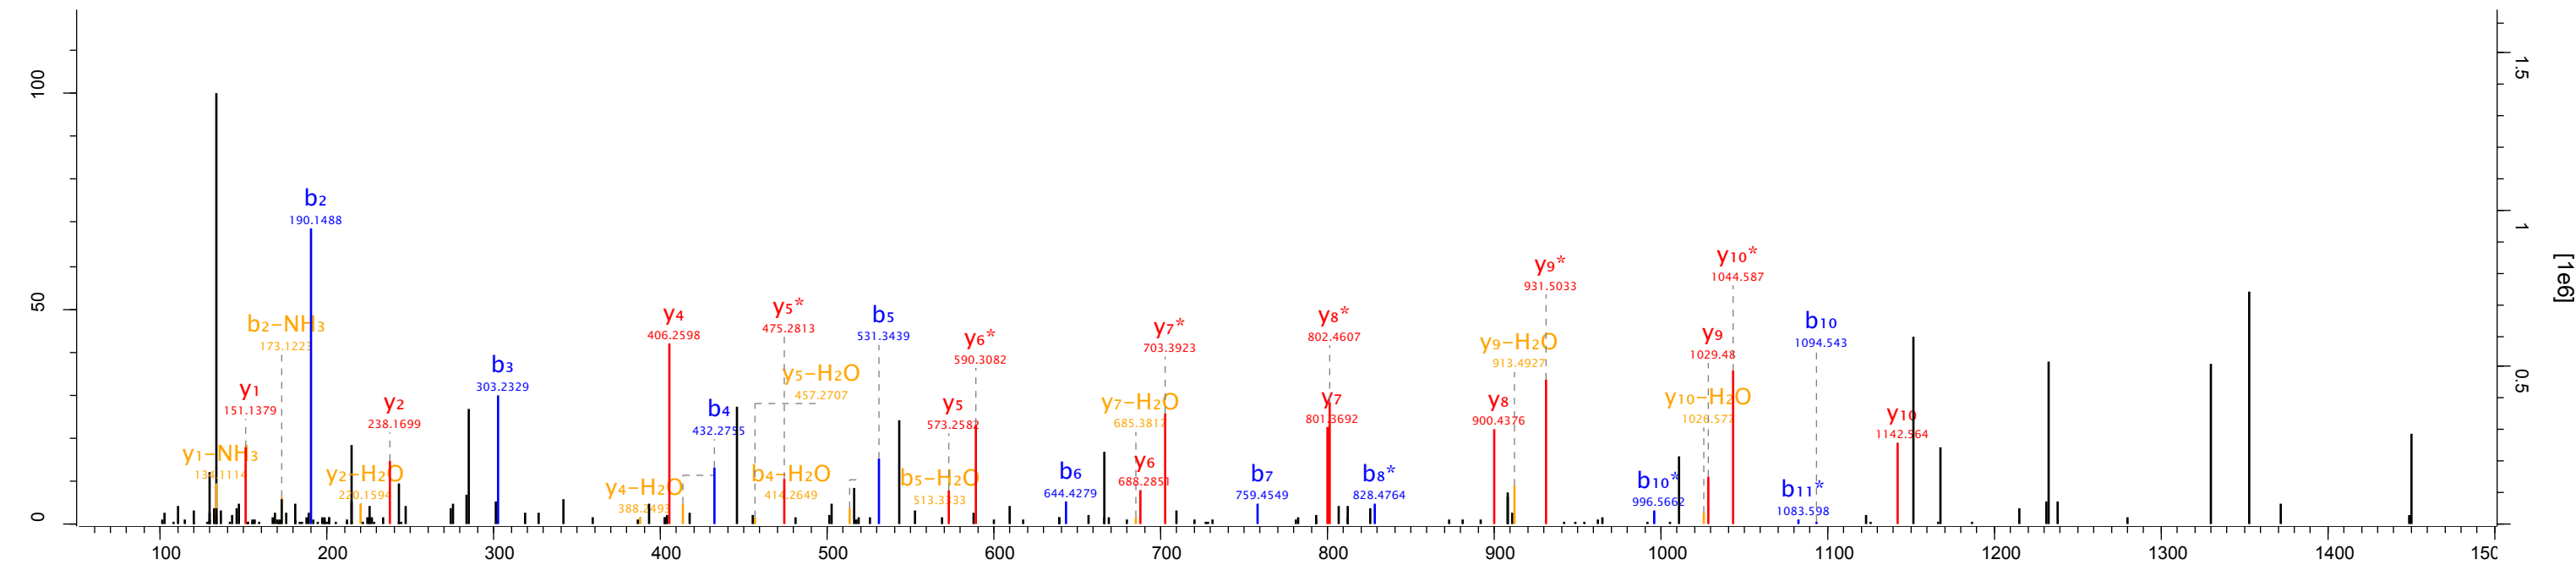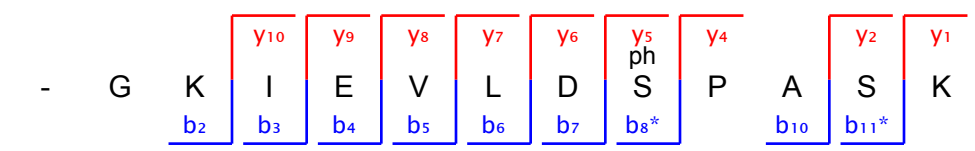

Raw file: 20150814\_A375SR\_Phospho\_BR2\_07  
 Scan: 9887 Method: FTMS; HCD Score: 122.08 m/z: 718.85 Gene names: AKAP12

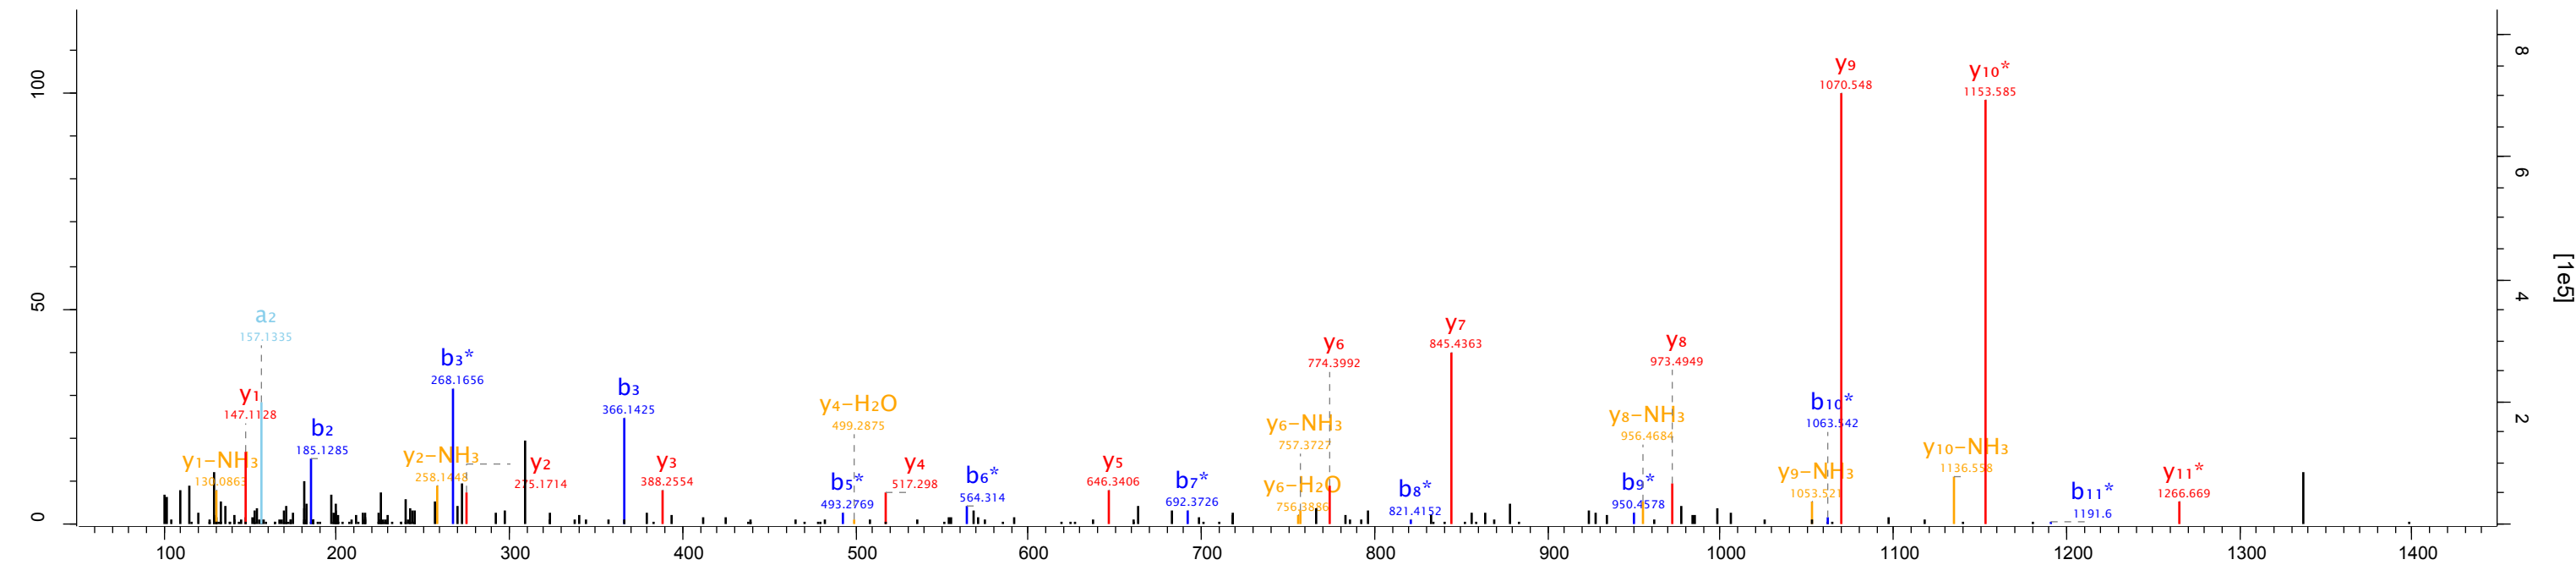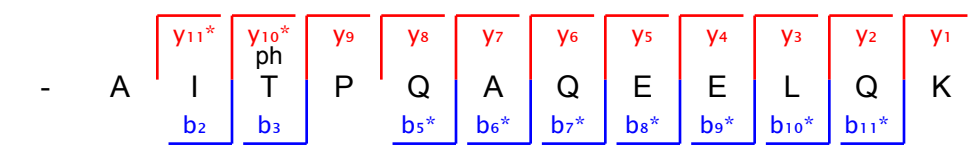

Raw file: 20150814\_A375SR\_Phospho\_BR2\_07  
 Scan: 9947 Method: FTMS; HCD Score: 193.87 m/z: 633 Gene names: SMARCA4

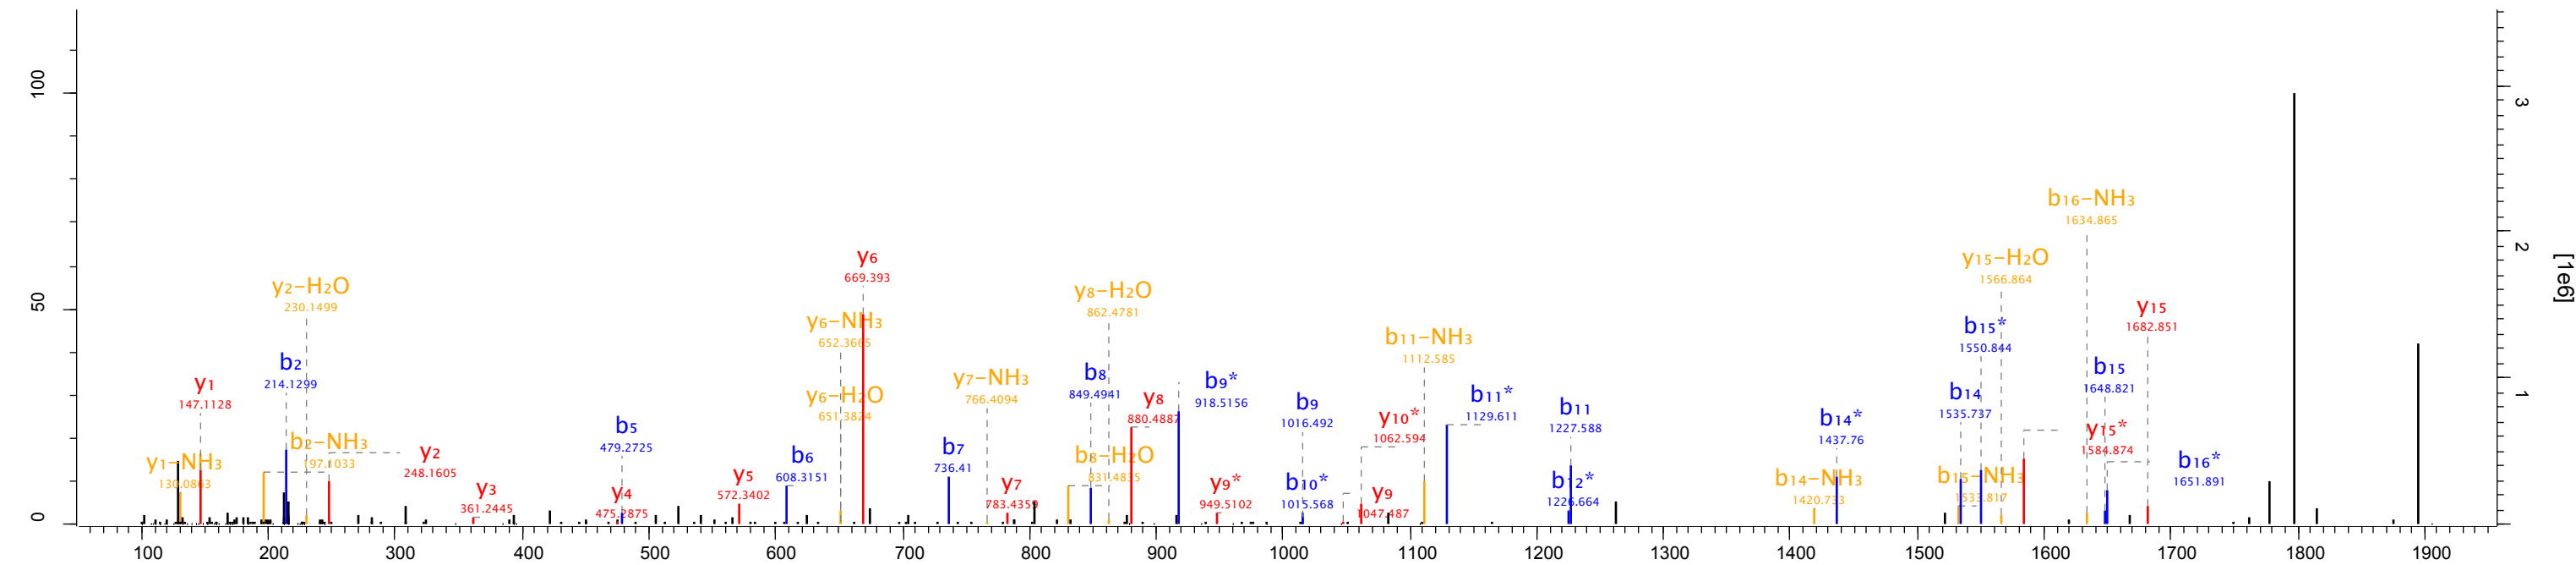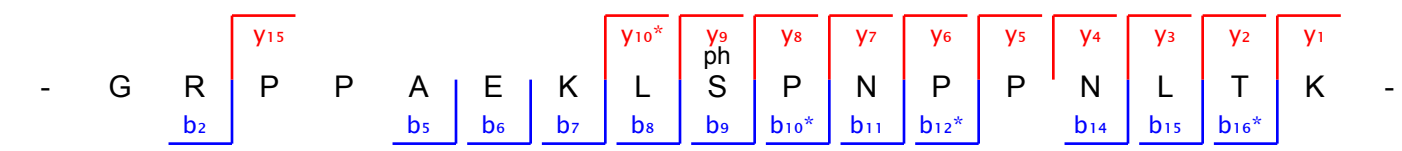

Raw file Scan Method Score m/z Gene names  
 20150814\_A375SR\_Phospho\_BR2\_08 10707 FTMS; HCD 199.31 851.95 MAPRE3

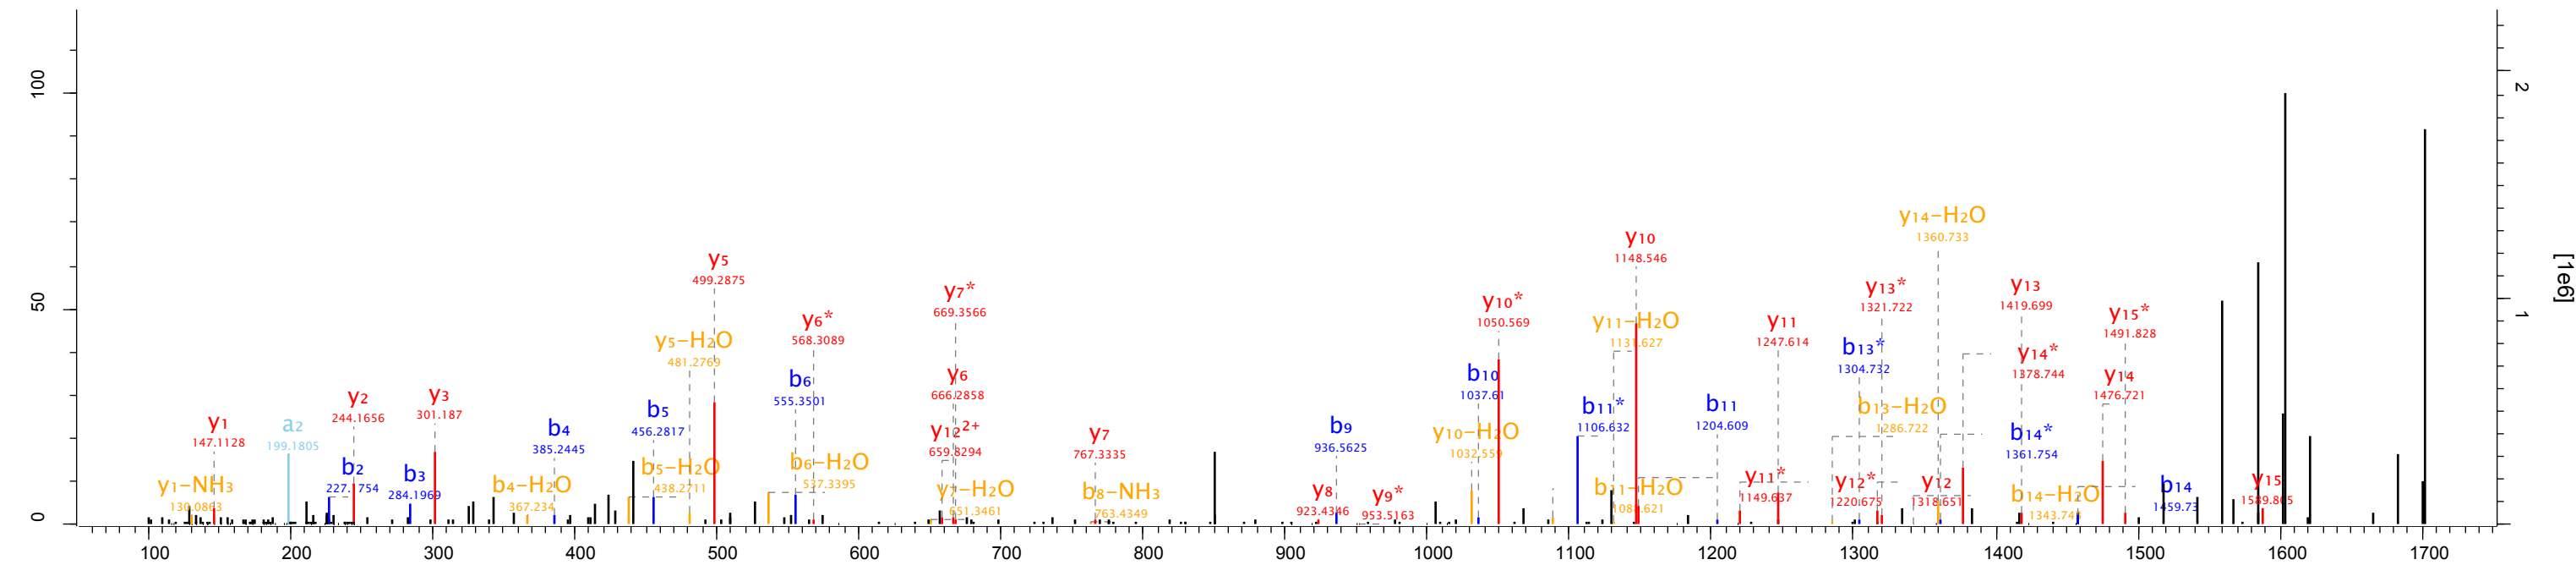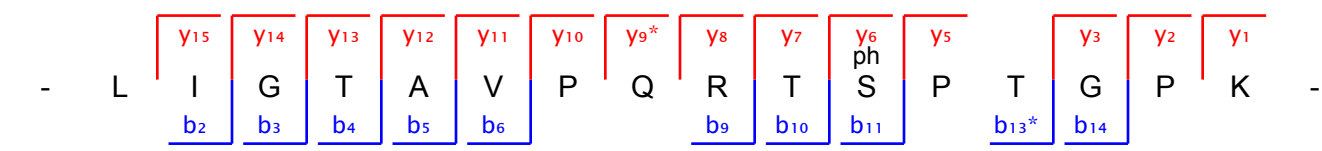

Raw file 20150814\_A375SR\_Phospho\_BR2\_08 Scan 11997 Method FTMS; HCD Score 104.84 m/z 674.81 Gene names NRD1

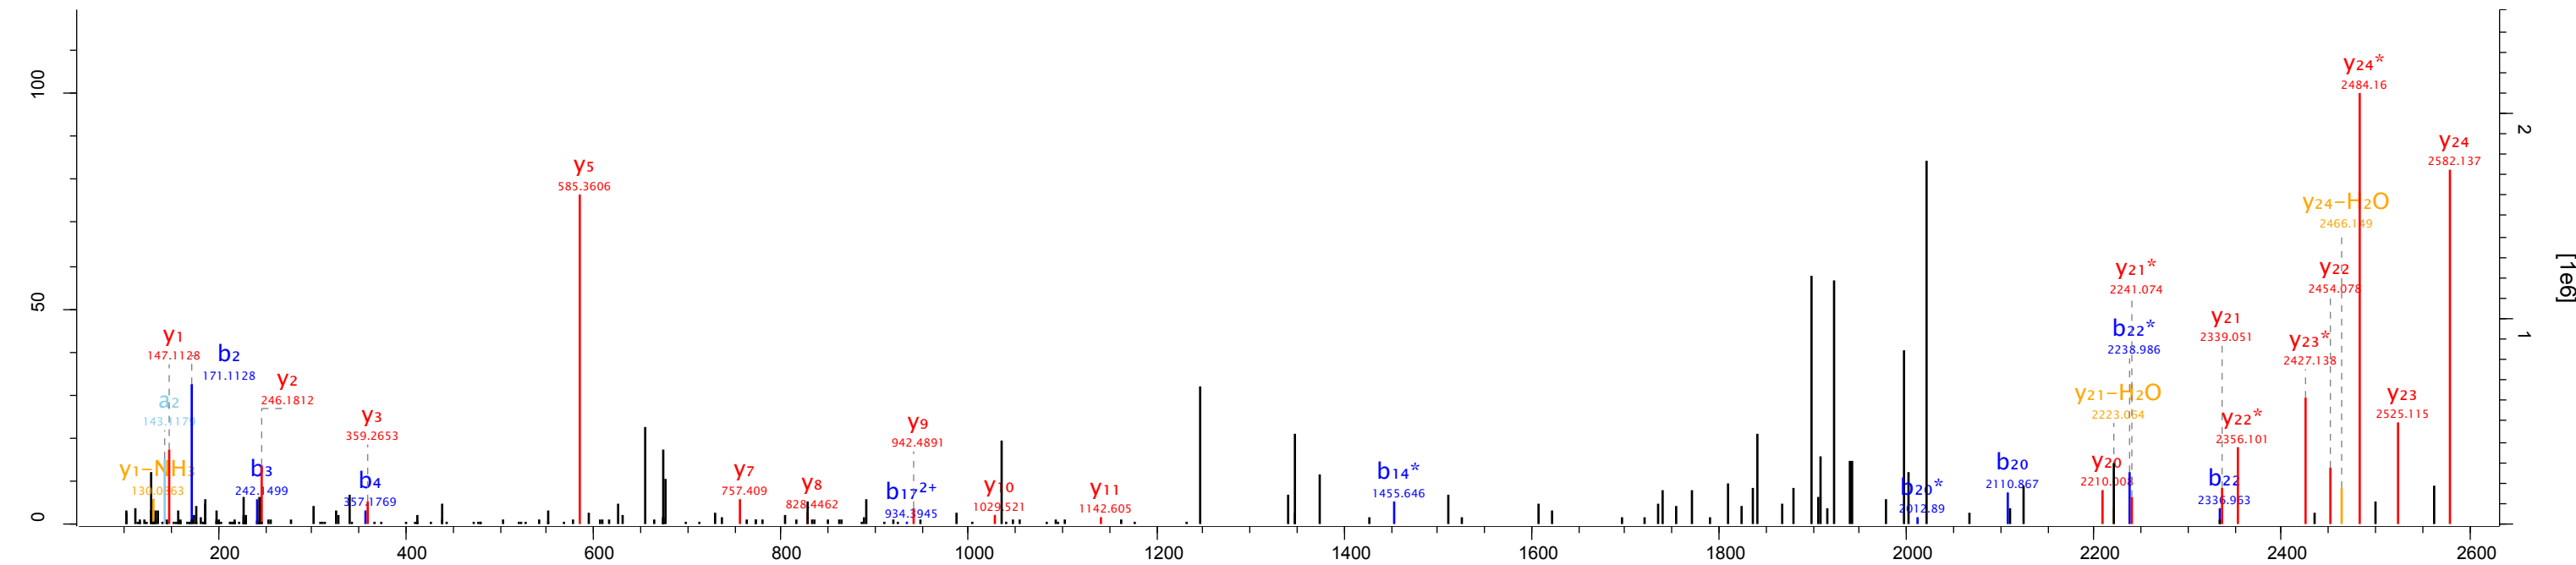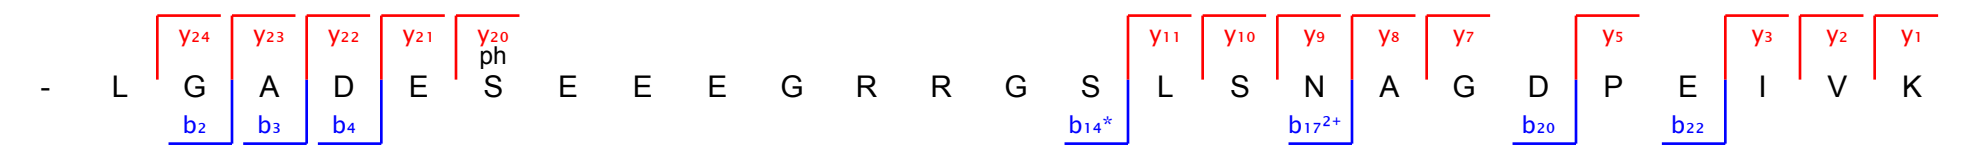

Raw file 20150814\_A375SR\_Phospho\_BR2\_08 Scan 12577 Method FTMS; HCD Score 72.58 m/z 552.95 Gene names PPP2R5D

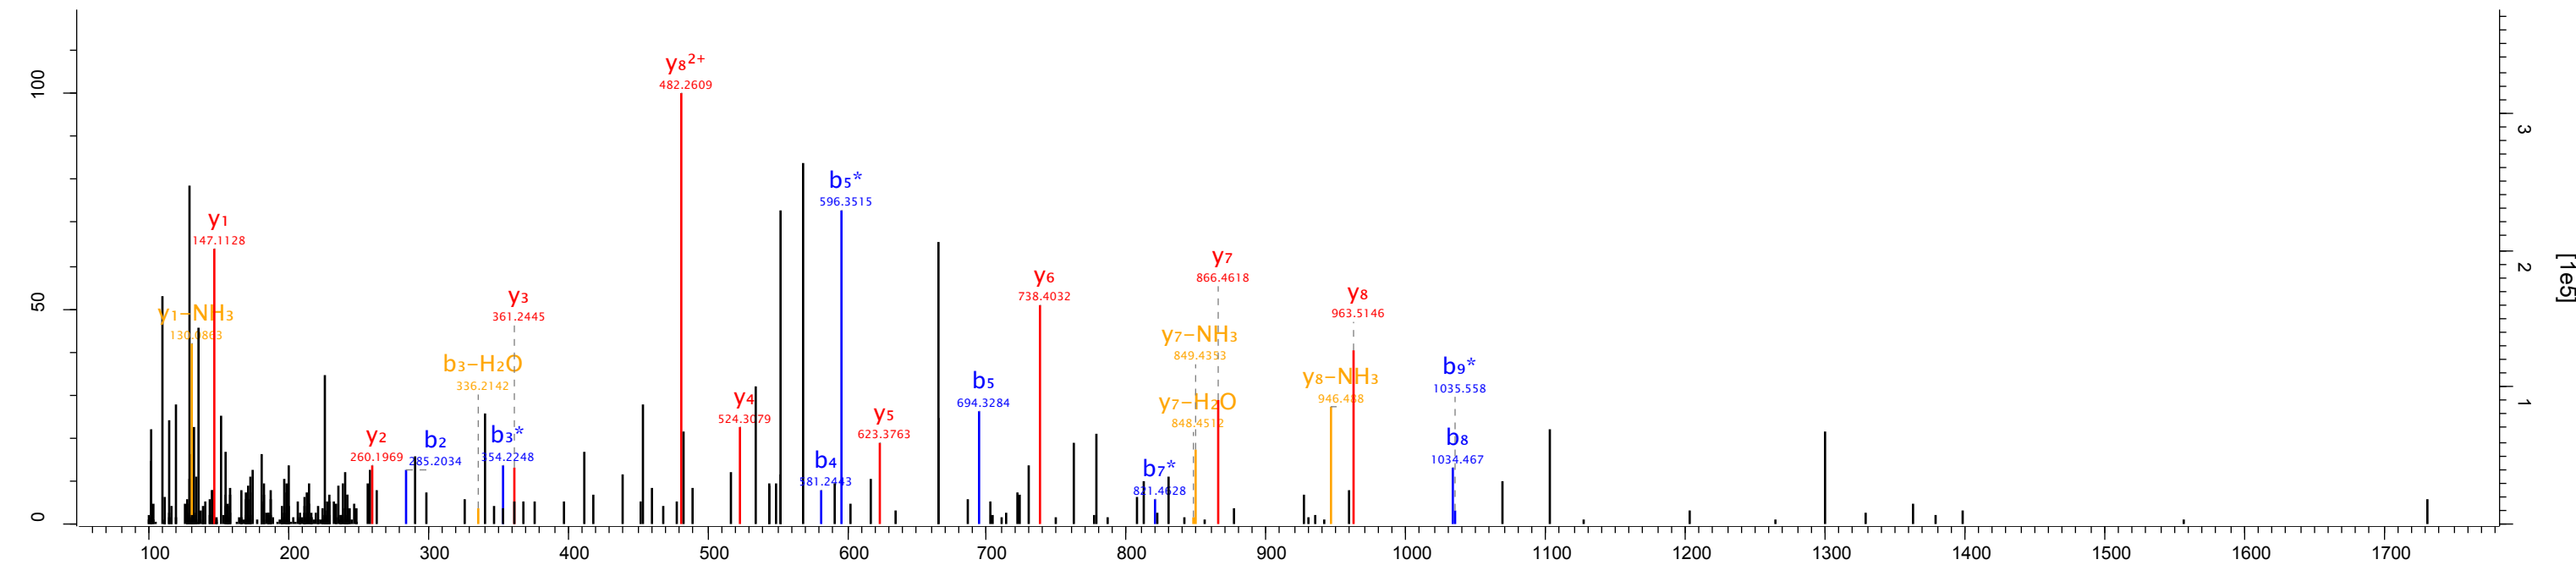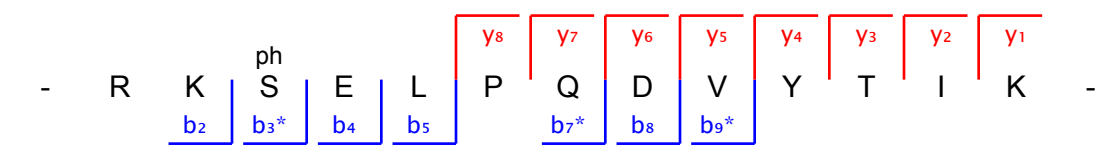



Raw file 20150814\_A375SR\_Phospho\_BR2\_08 Scan 13167 Method FTMS; HCD Score 92.29 m/z 851.41 Gene names SNX17

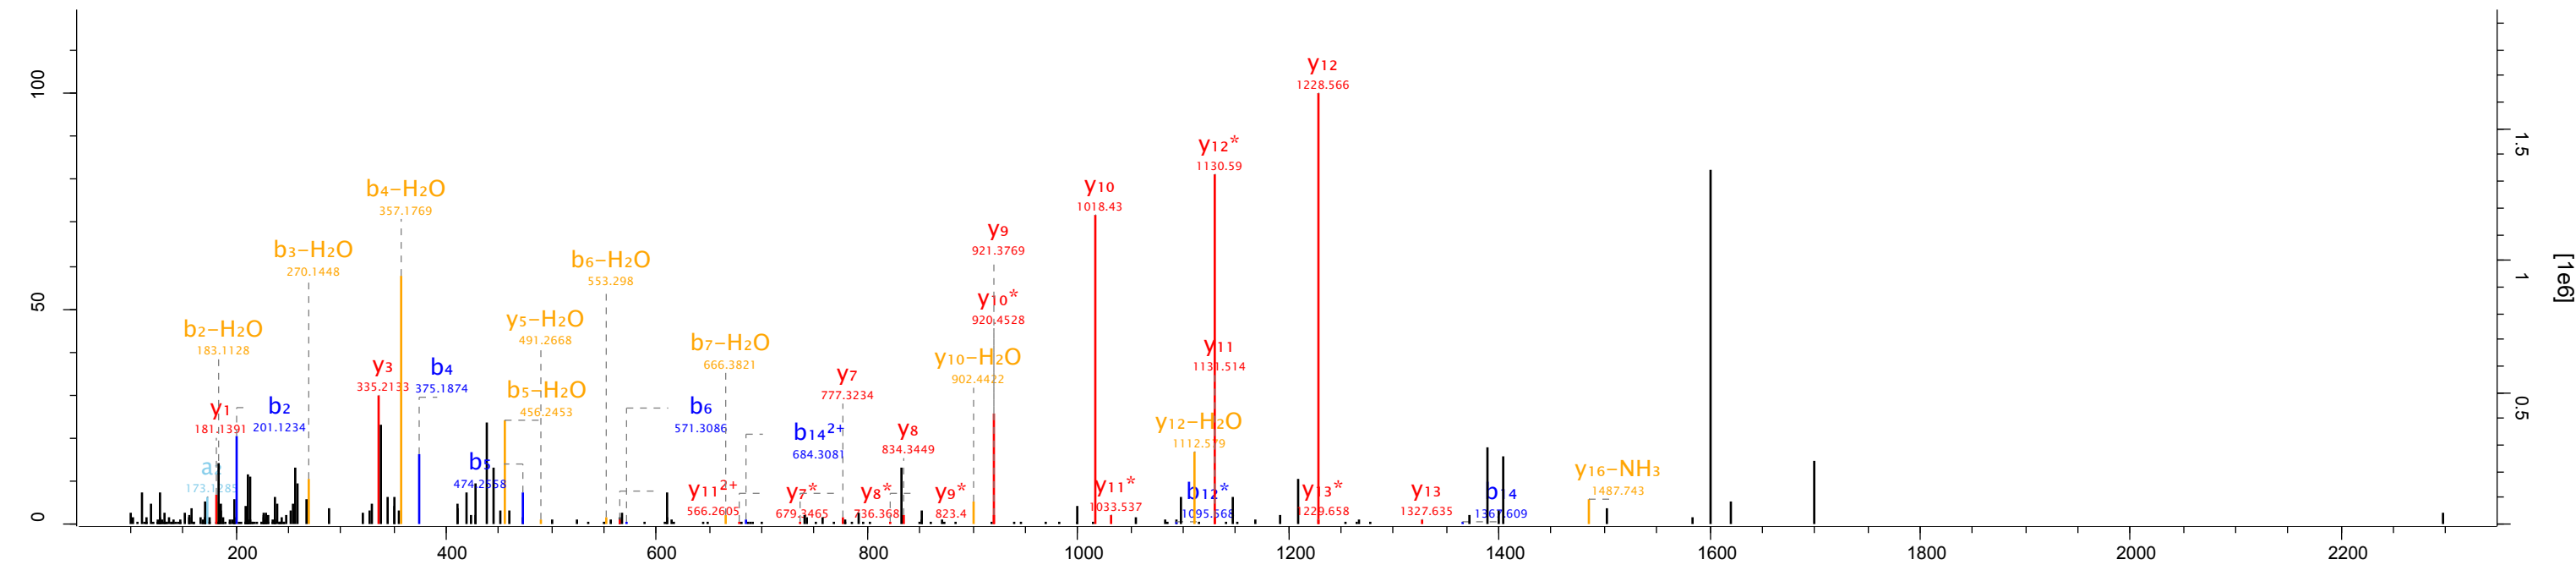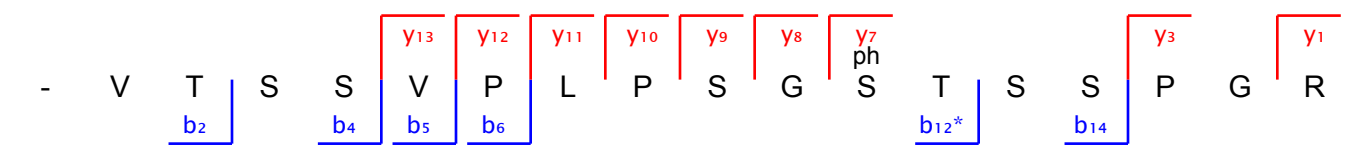

Raw file 20150814\_A375SR\_Phospho\_BR2\_08 Scan 13597 Method FTMS; HCD Score 121.86 m/z 551.28 Gene names CUL4A

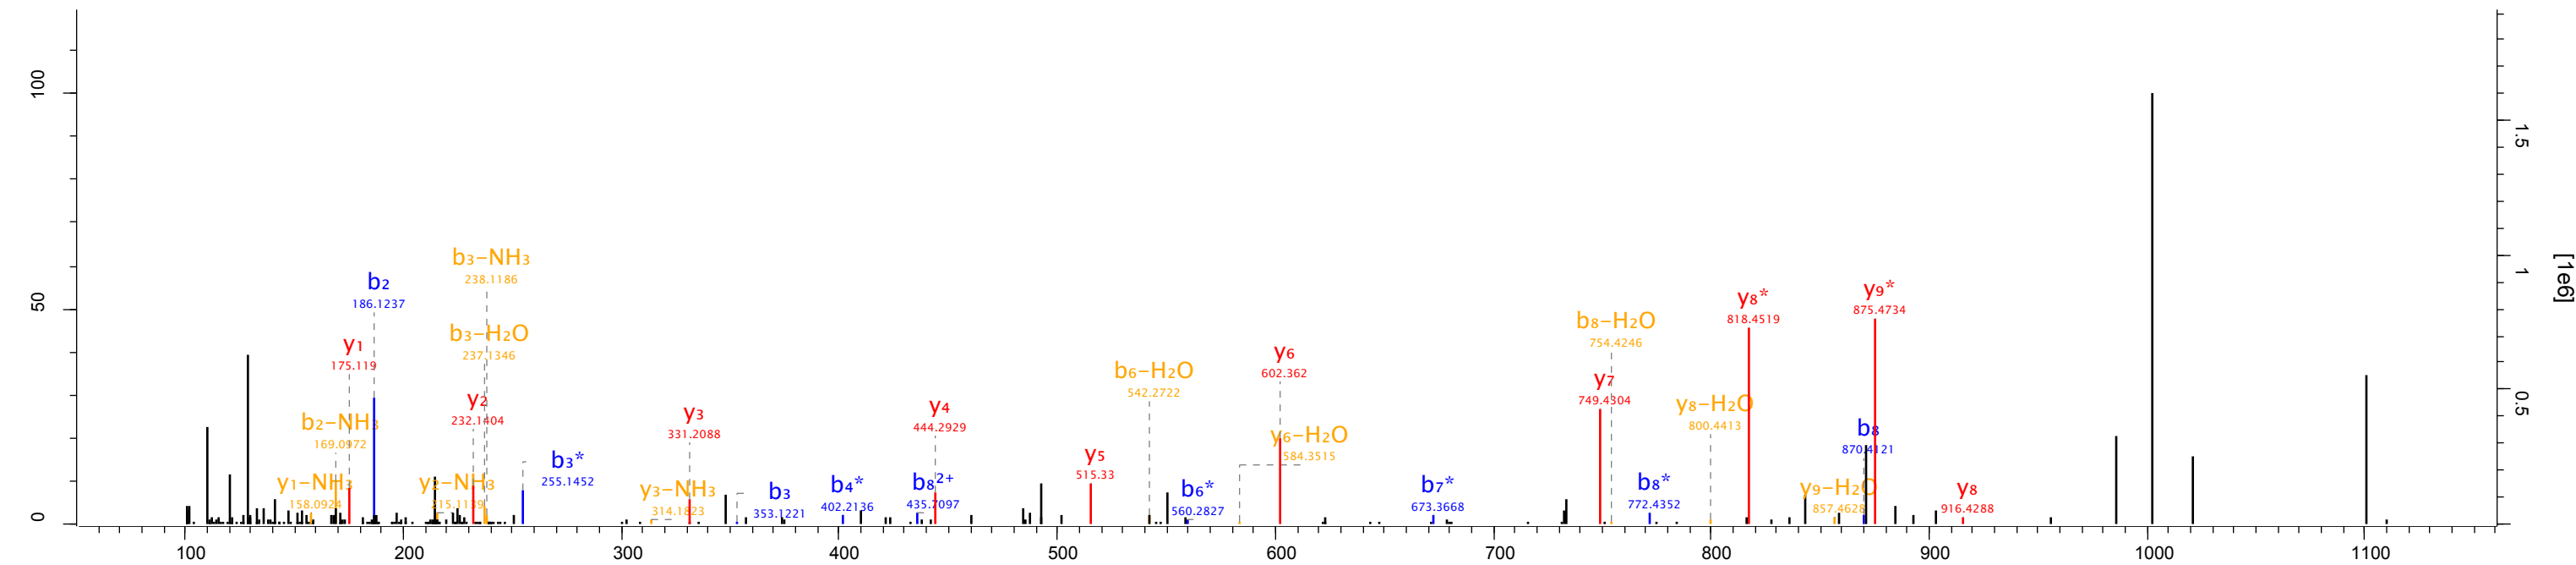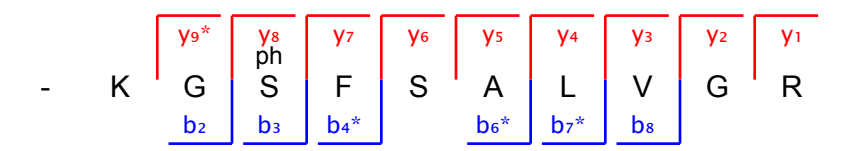

Raw file 20150814\_A375SR\_Phospho\_BR2\_08 Scan 14097 Method FTMS; HCD Score 194.94 m/z 909.85 Gene names CDCA7L

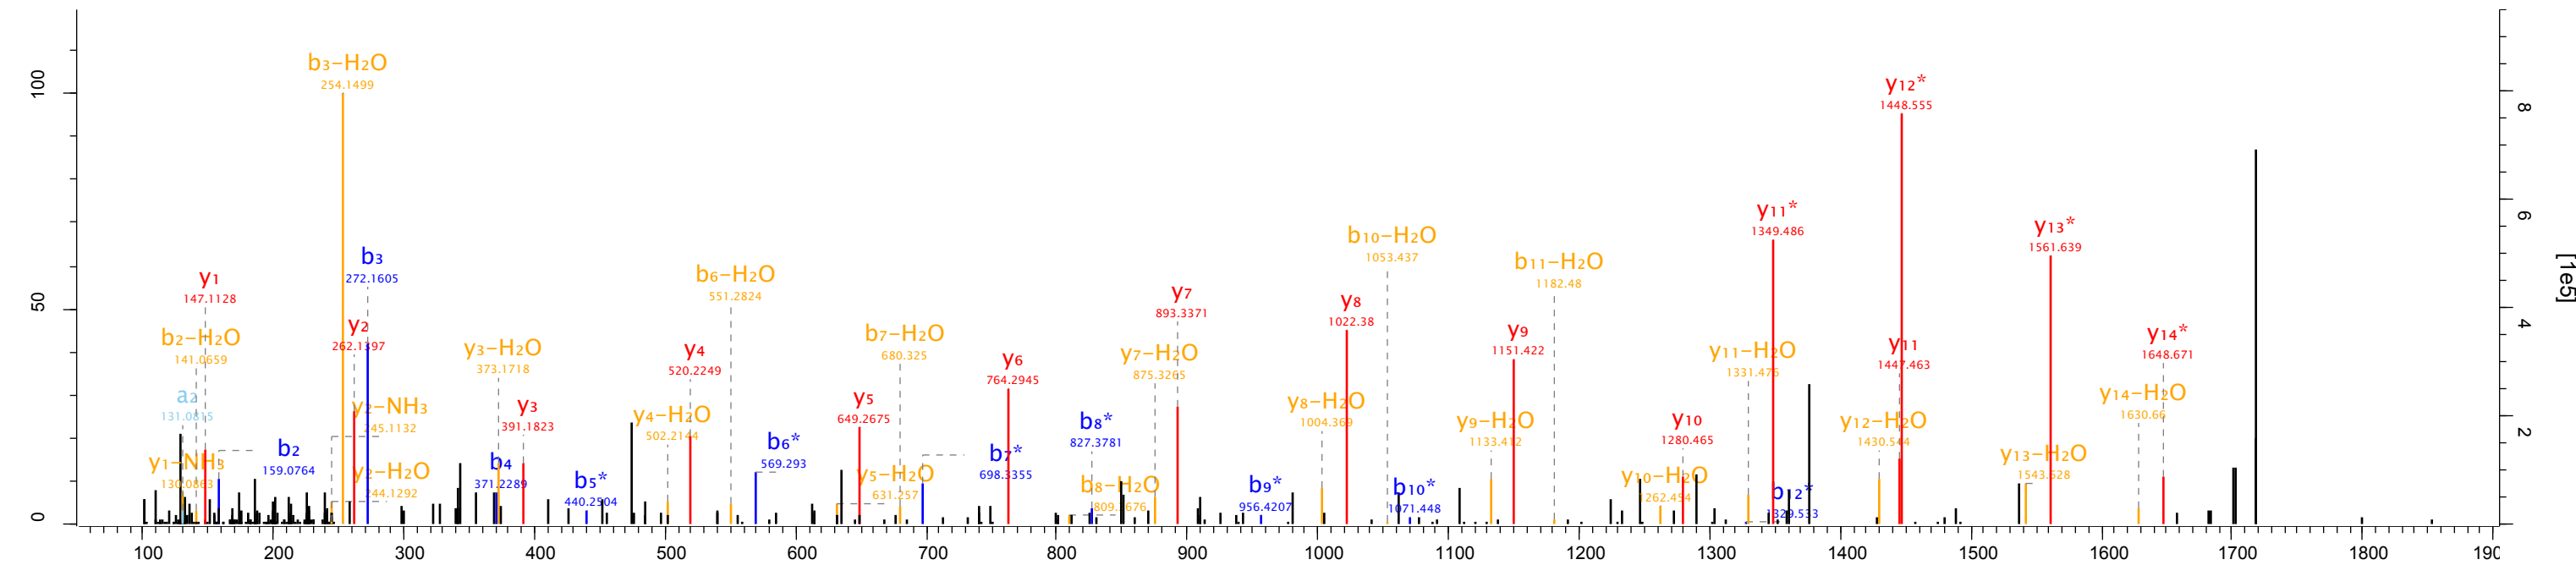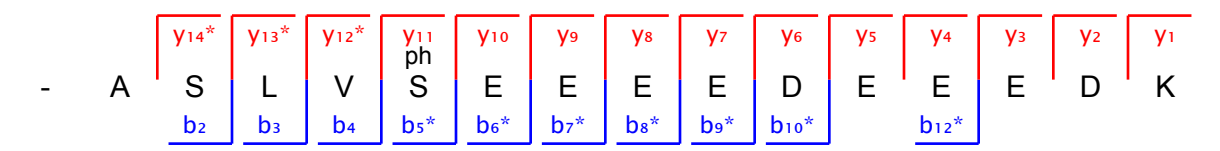

Raw file 20150814\_A375SR\_Phospho\_BR2\_08 Scan 14747 Method FTMS; HCD Score 43.79 m/z 509.26 Gene names RBM17

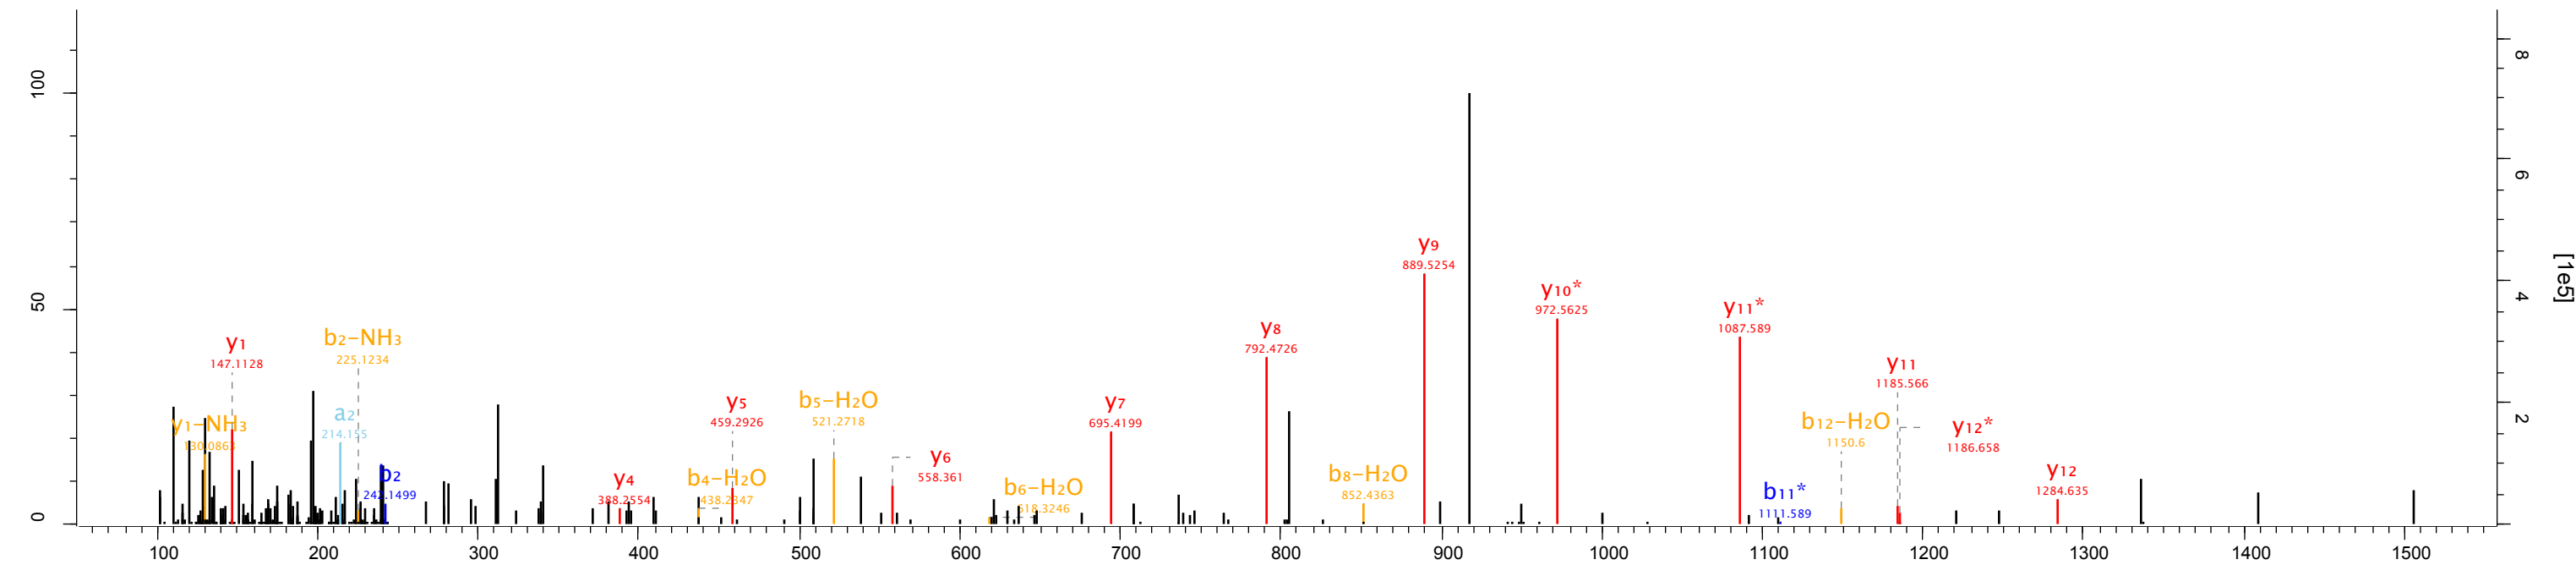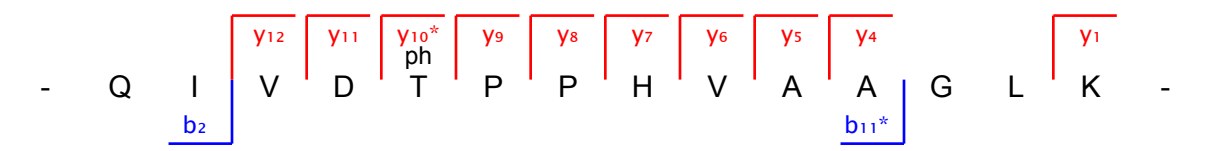

Raw file: 20150814\_A375SR\_Phospho\_BR2\_08  
 Scan: 15867 Method: FTMS; HCD Score: 95.32 m/z: 756.7 Gene names: SORBS2

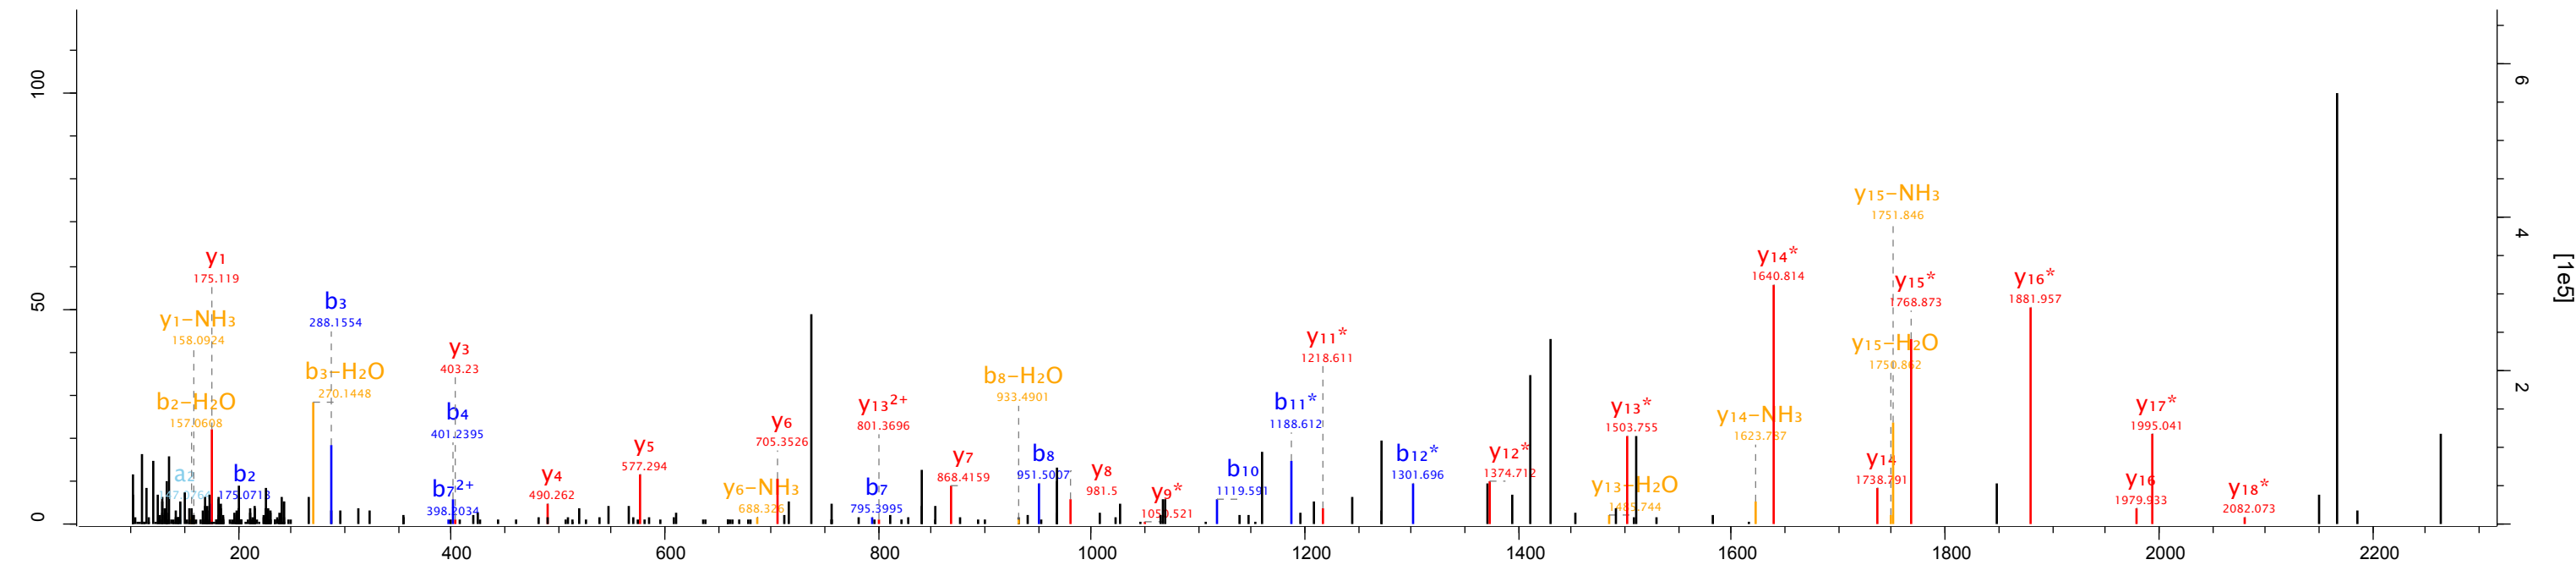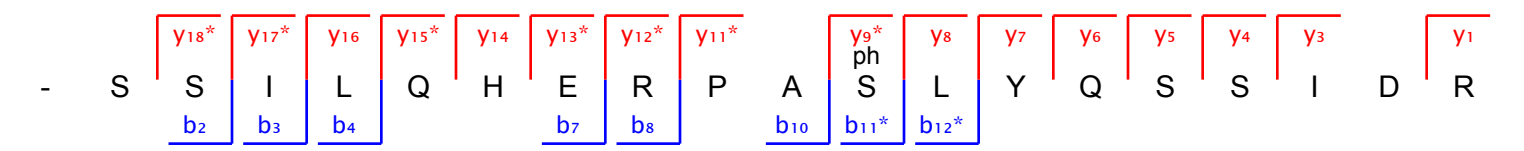

Raw file 20150814\_A375SR\_Phospho\_BR2\_08 Scan 16777 Method FTMS; HCD Score 161.35 m/z 758.37 Gene names FANCE

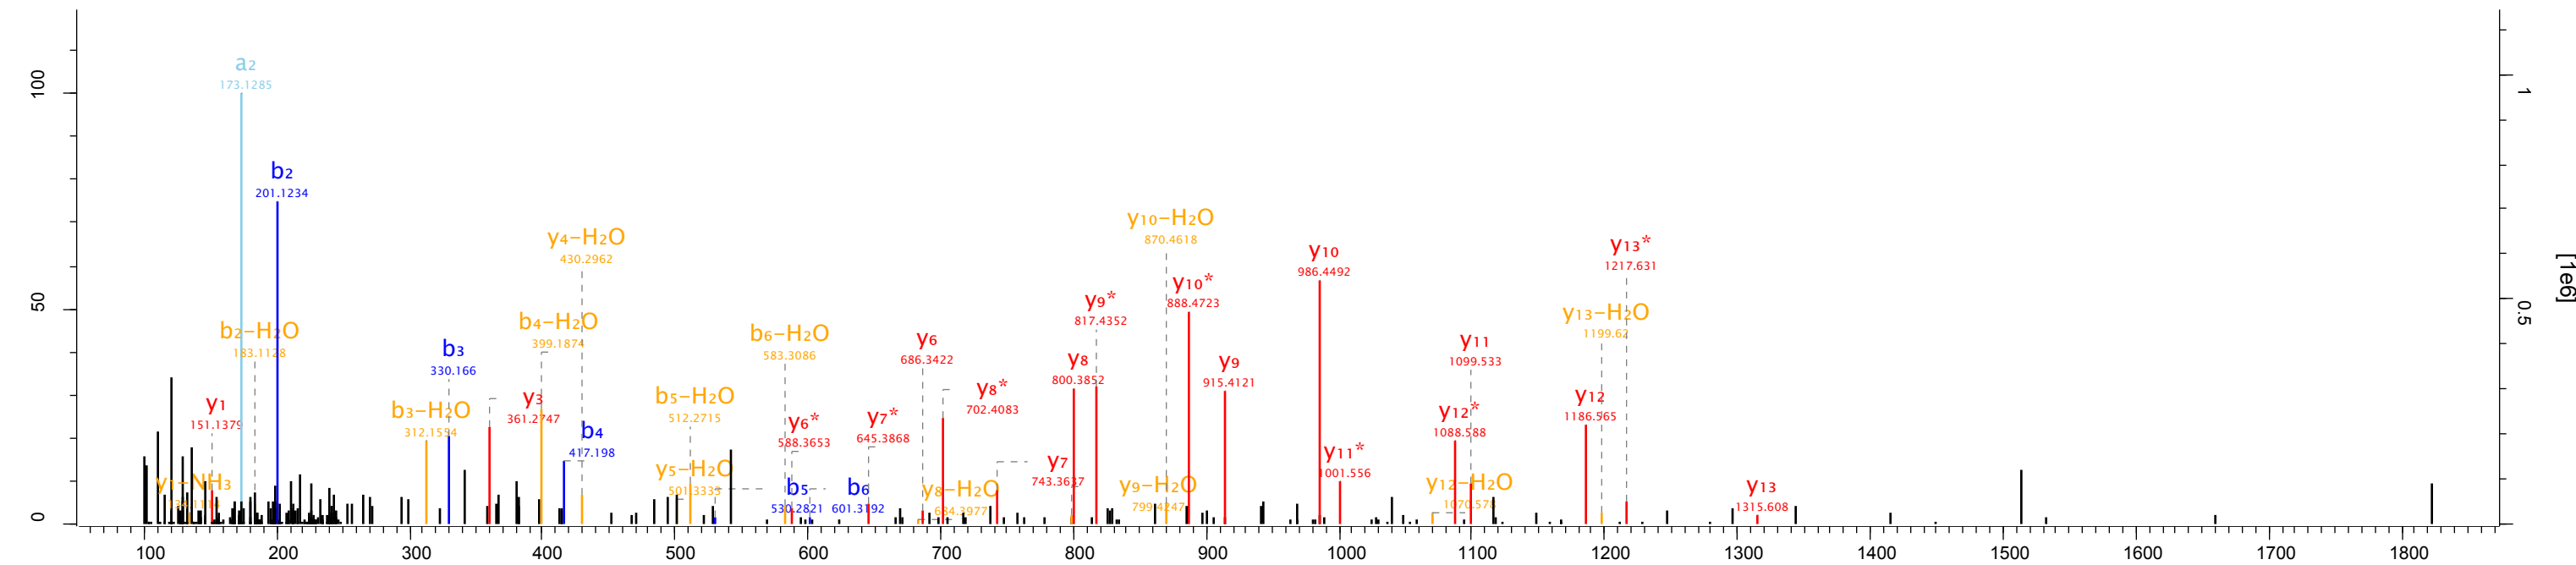

- S L E S L A D G G S A S P I K -

Fragmentation scheme showing b and y ions for the peptide sequence: S L E S L A D G G S A S P I K. The b ions (blue) are b2, b3, b4, b5, b6. The y ions (red) are y1, y3, y6, y7, y8, y9, y10, y11, y12, y13. The y6 ion is labeled as y6-ph.

Raw file 20150814\_A375SR\_Phospho\_BR2\_08 Scan 17227 Method FTMS; HCD Score 122.6 m/z 729.99 Gene names HNRNPH1

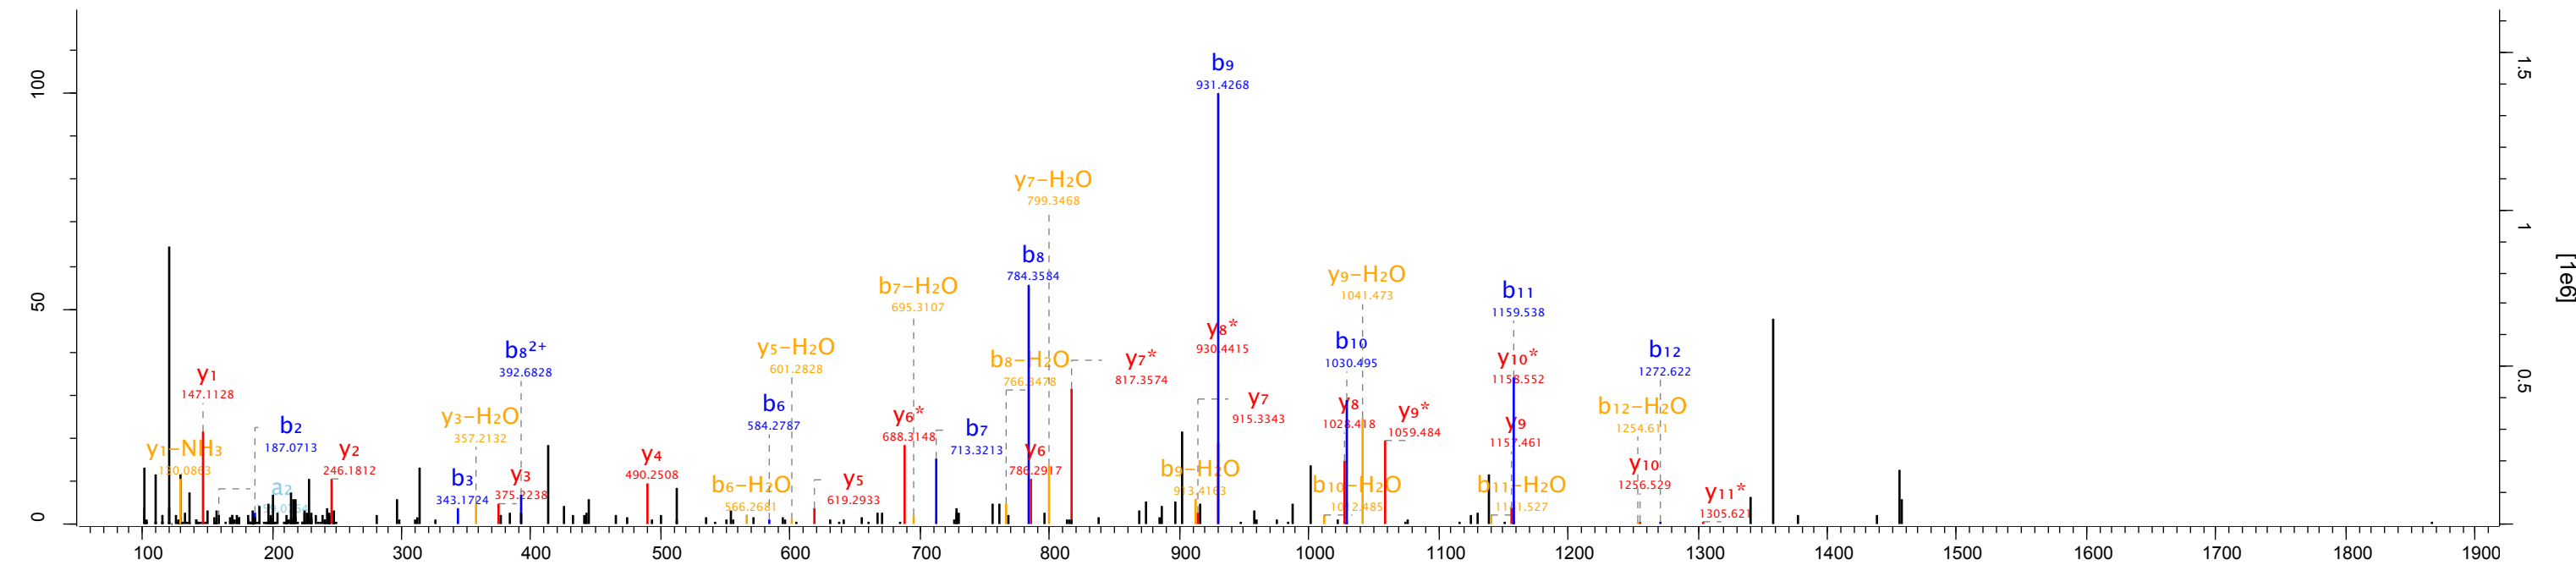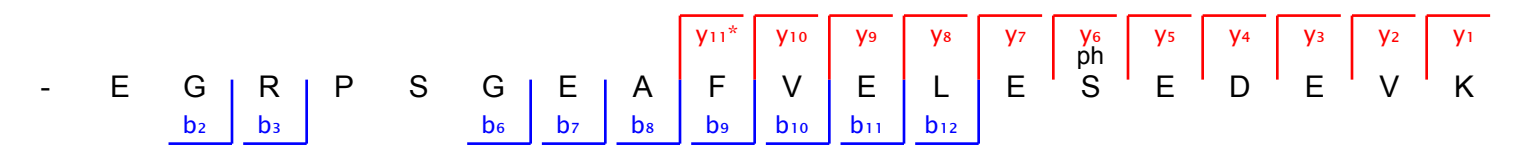

Raw file 20150814\_A375SR\_Phospho\_BR2\_08 Scan 17667 Method FTMS; HCD Score 76.3 m/z 603.96 Gene names ZMYM3

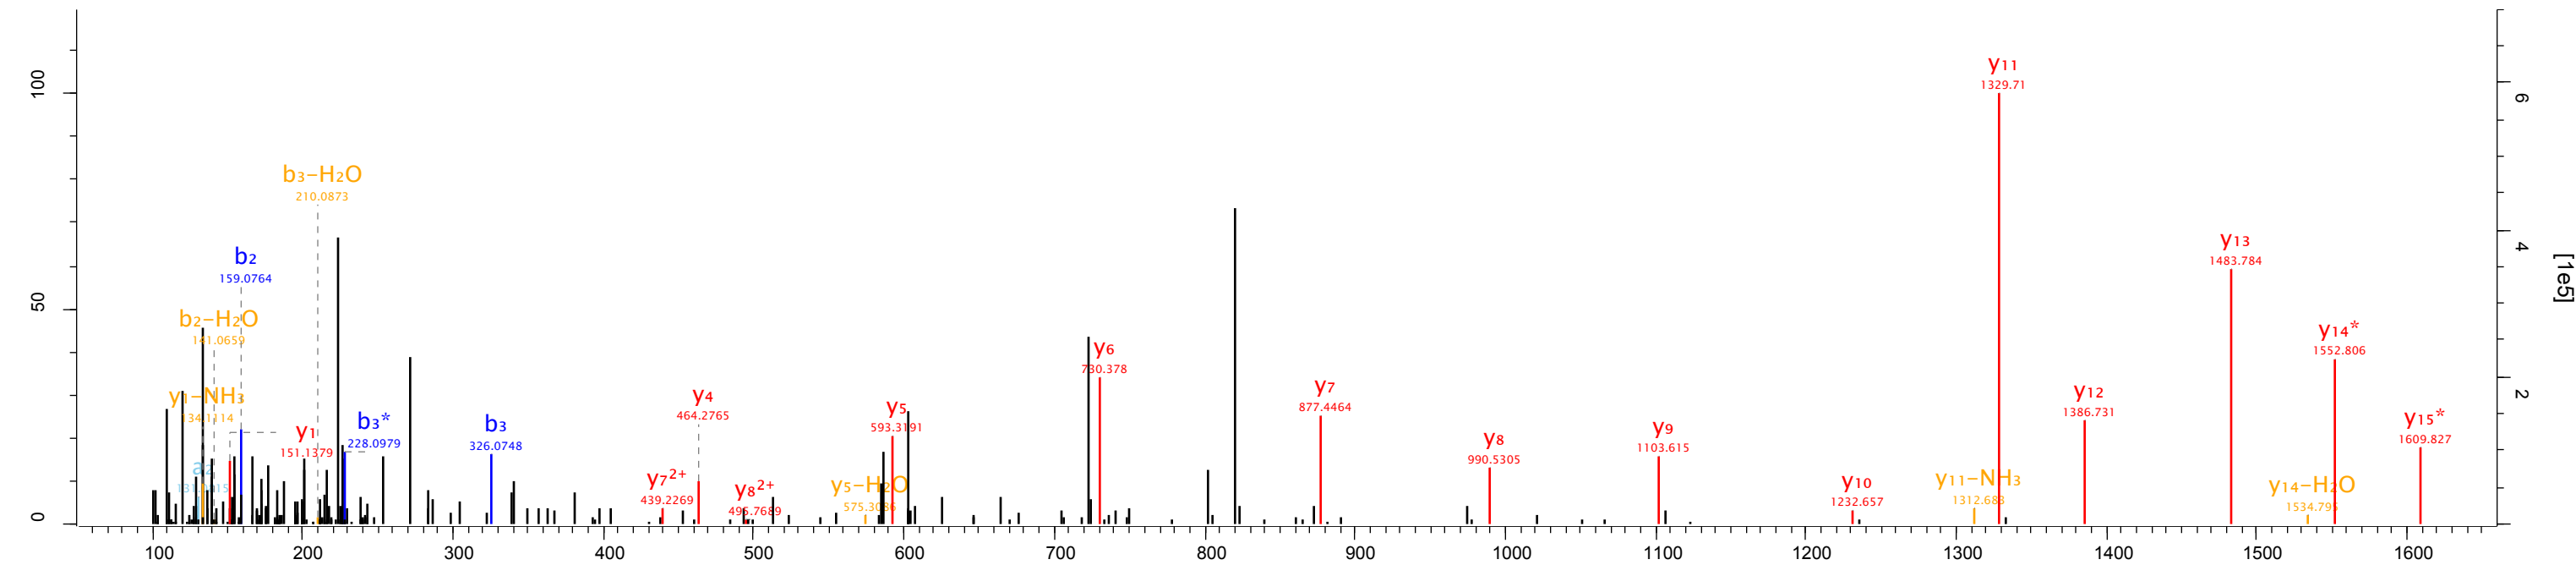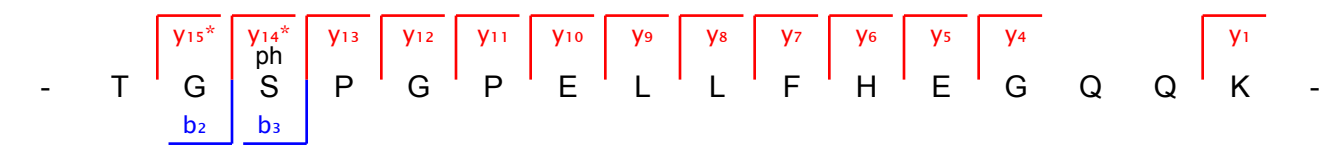



Raw file Scan Method Score m/z Gene names  
 20150814\_A375SR\_Phospho\_BR2\_08 17827 FTMS; HCD 61.81 707.04 DLGAP4

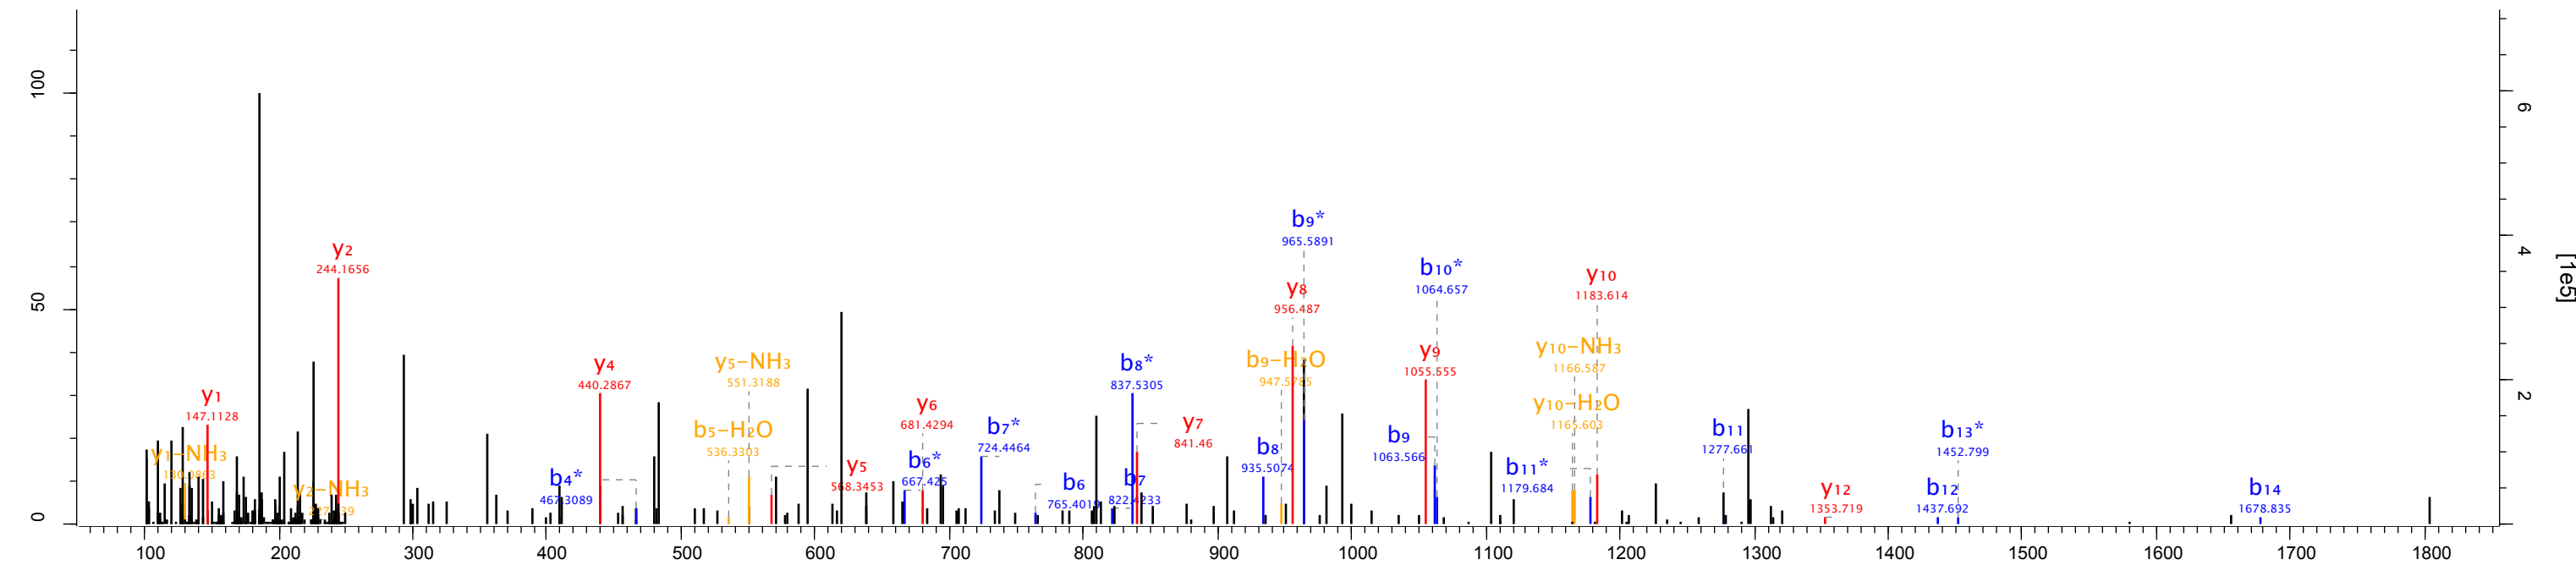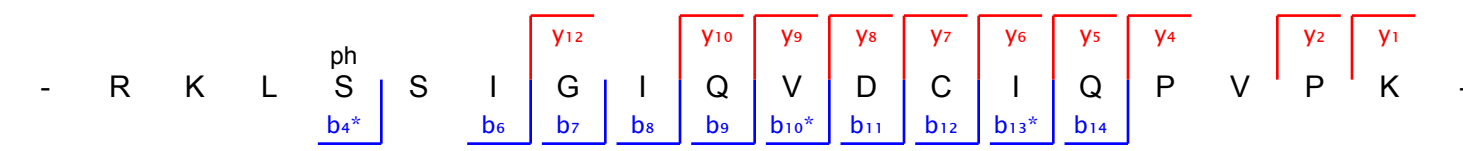

Raw file 20150814\_A375SR\_Phospho\_BR2\_08 Scan 17907 Method FTMS; HCD Score 114.9 m/z 967.94 Gene names PDAP1

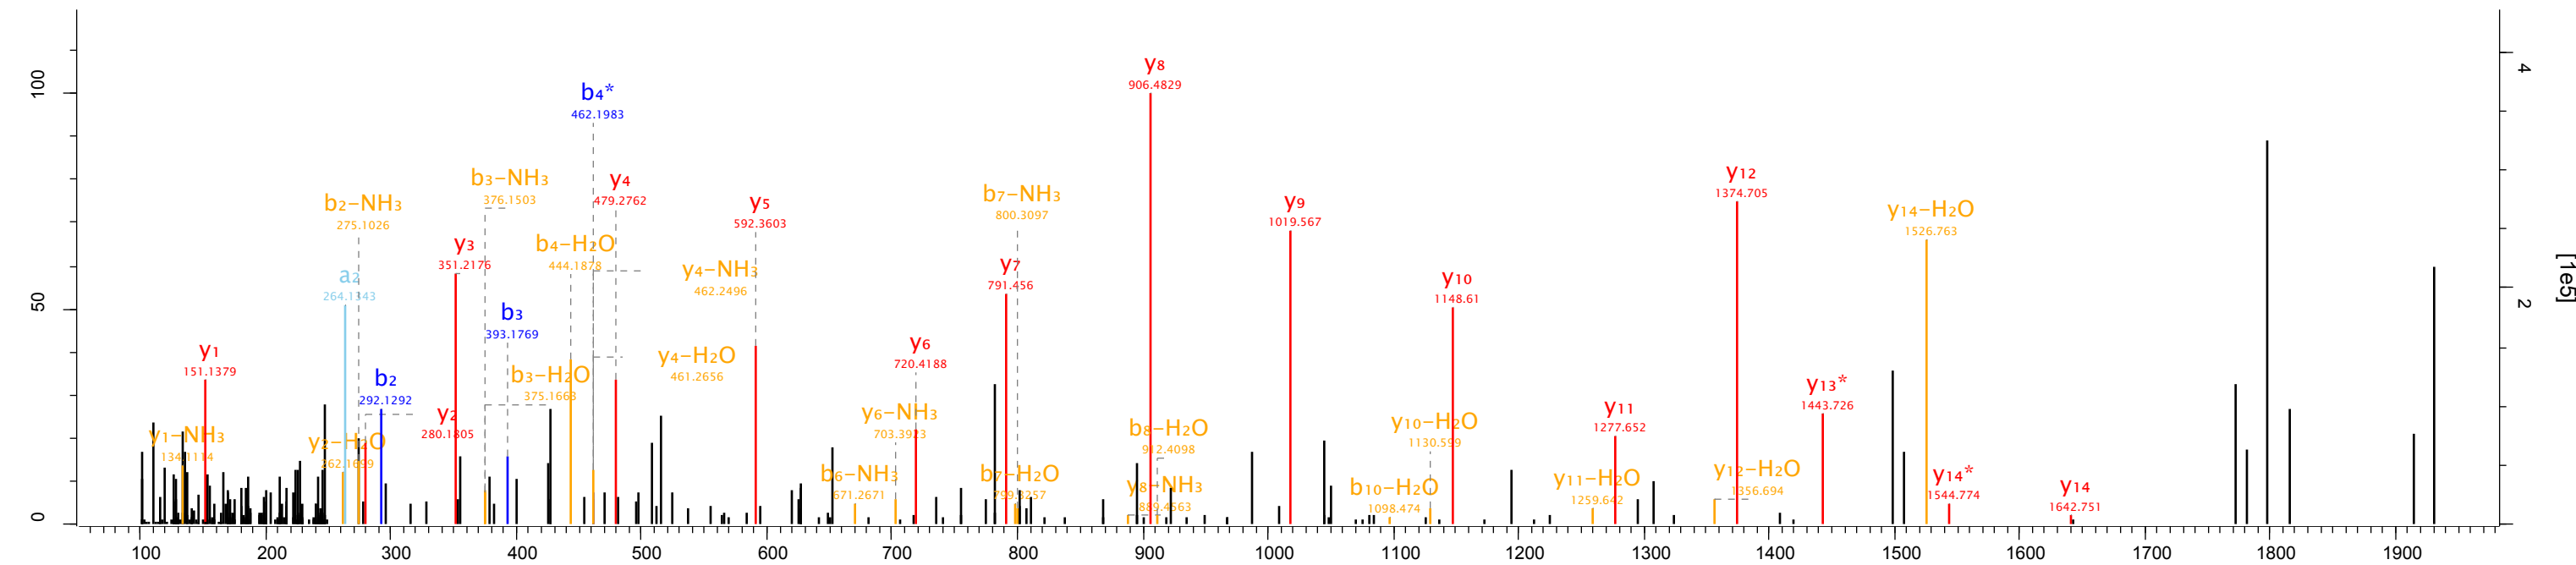

- Q Y T S P E E I D A Q L Q A E K -

Fragmentation mapping below the sequence:

- Red boxes: y14 (T), y13\* (S), y12 (P), y11 (E), y10 (E), y9 (I), y8 (D), y7 (A), y6 (Q), y5 (L), y4 (Q), y3 (A), y2 (E), y1 (K)
- Blue boxes: b2 (Y), b3 (T), b4\* (S)

Raw file 20150814\_A375SR\_Phospho\_BR2\_08 Scan 18157 Method FTMS; HCD Score 86.88 m/z 515.28 Gene names MORC2

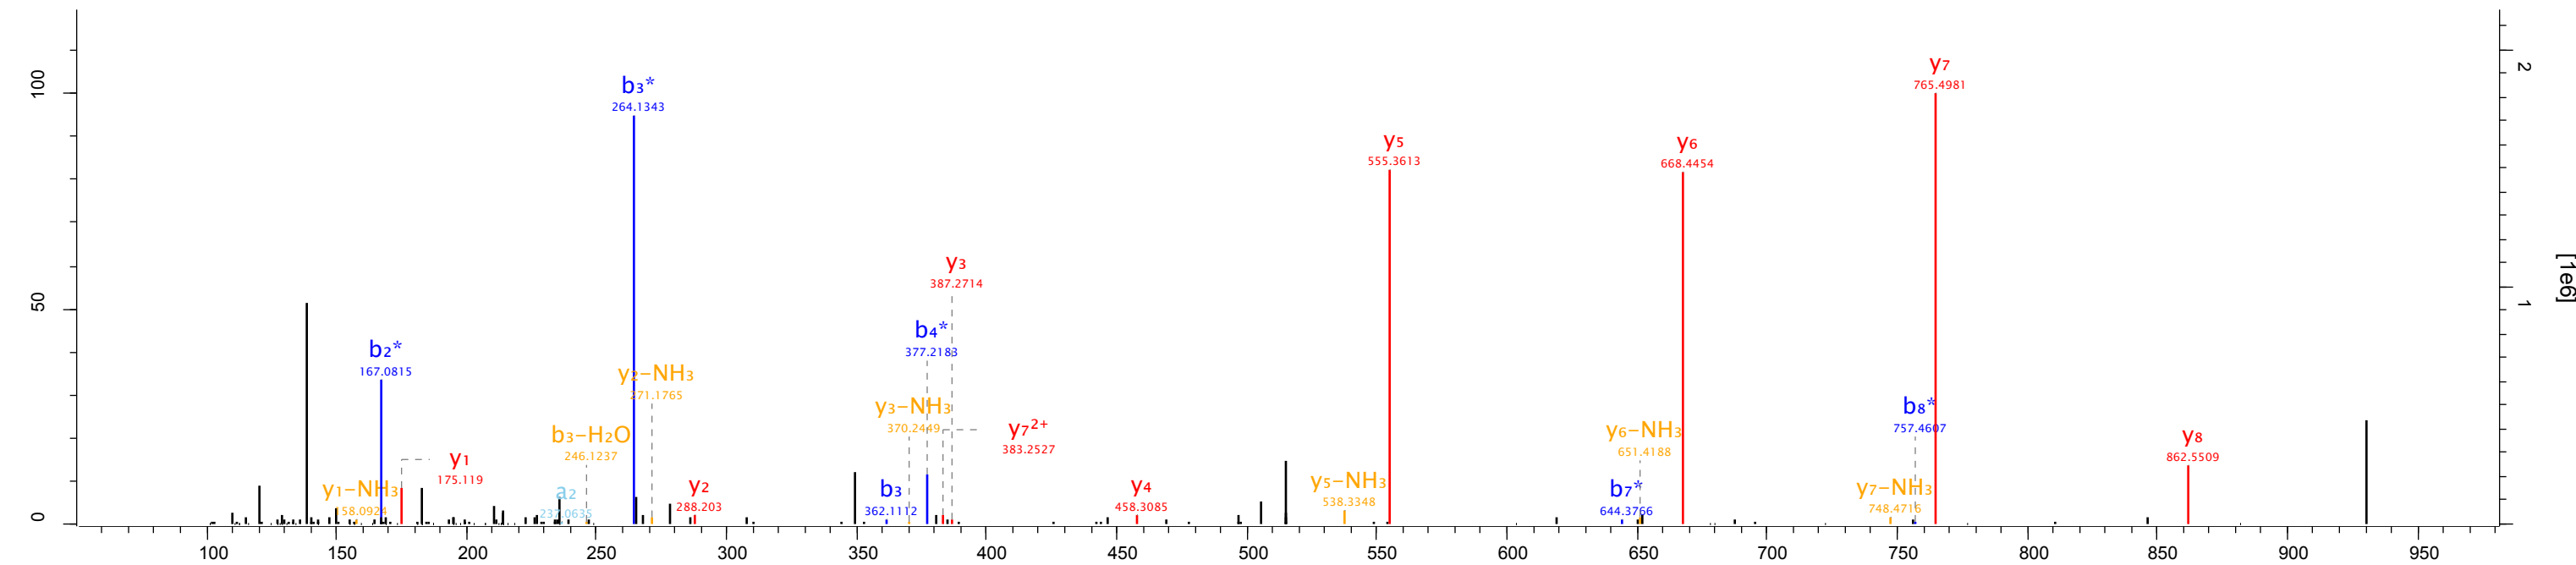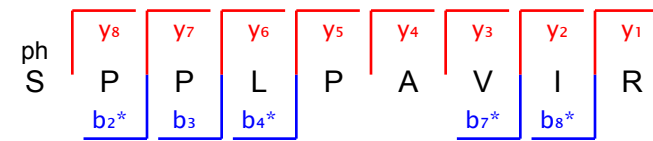

Raw file 20150814\_A375SR\_Phospho\_BR2\_08 Scan 18167 Method FTMS; HCD Score 217.26 m/z 822.39 Gene names YTHDC1

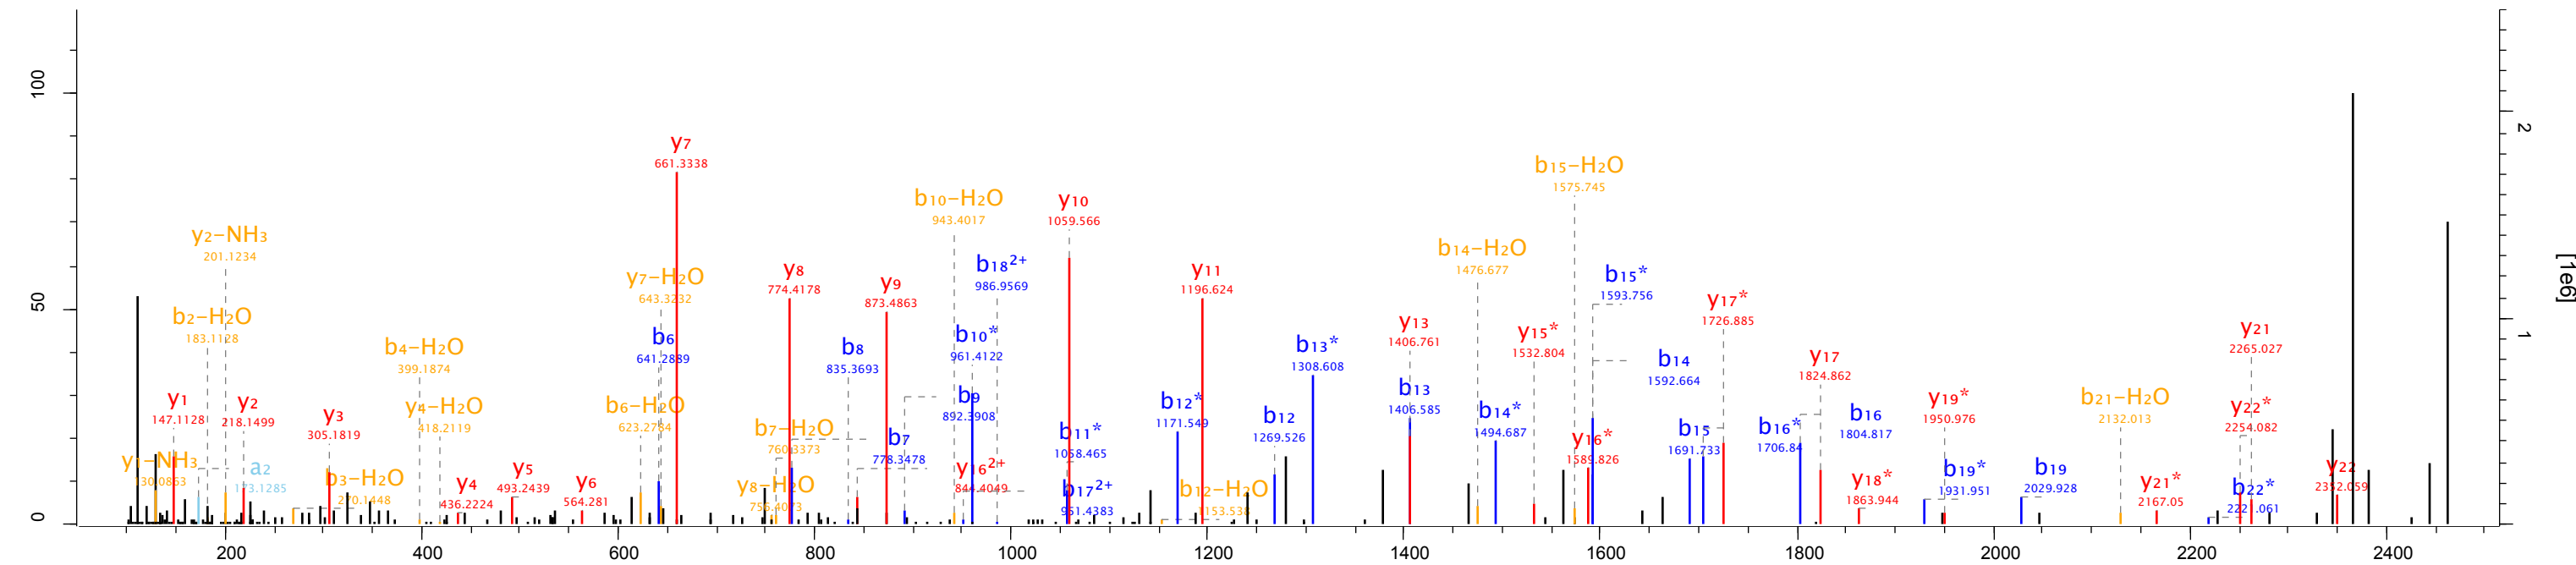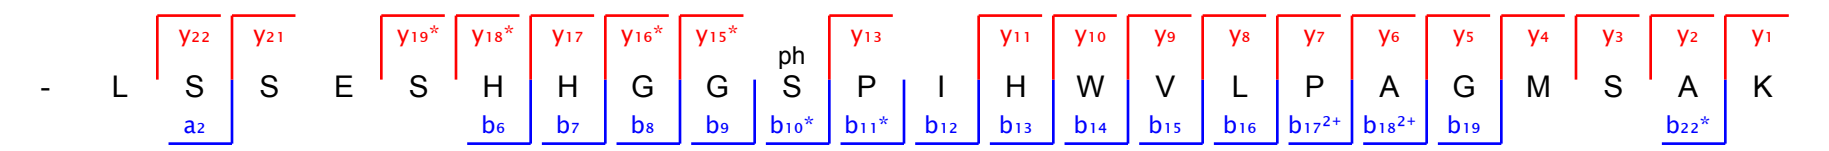

Raw file: 20150814\_A375SR\_Phospho\_BR2\_08  
 Scan: 18177 Method: FTMS; HCD Score: 102.89 m/z: 818.93 Gene names: MEF2D

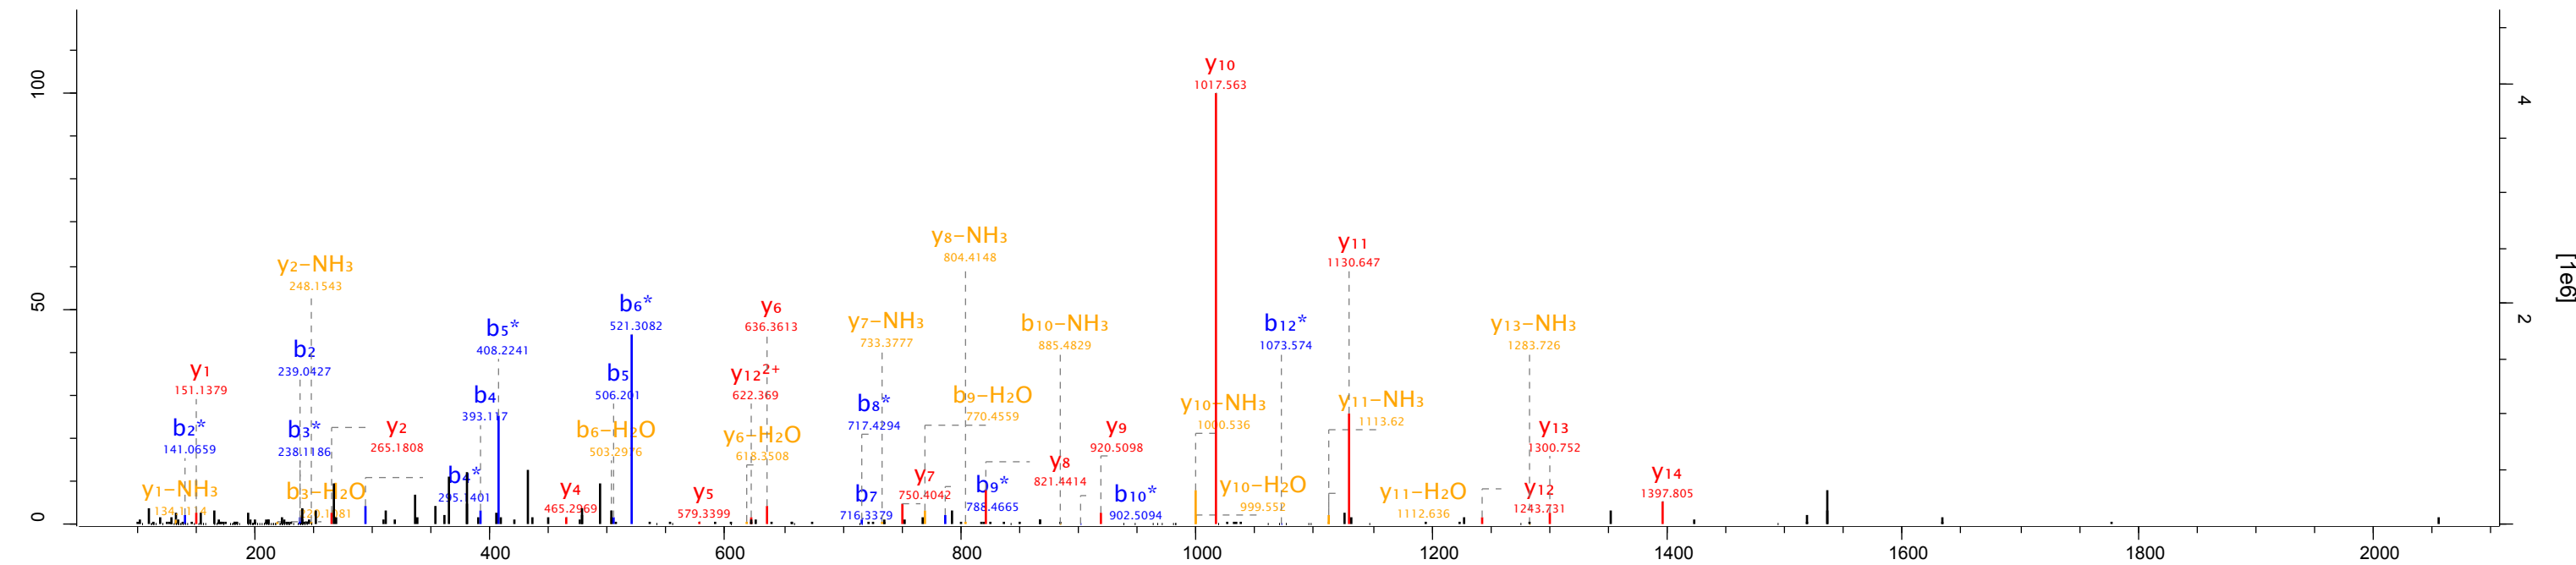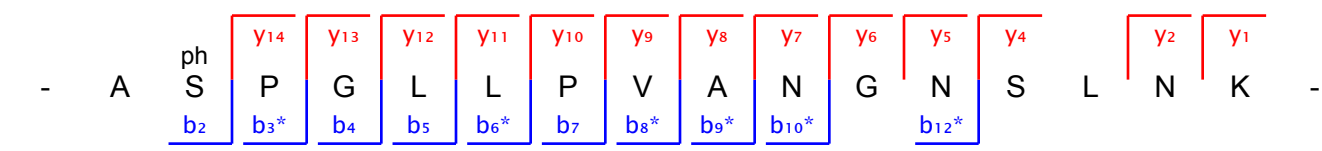

Raw file 20150814\_A375SR\_Phospho\_BR2\_08 Scan 19497 Method FTMS; HCD Score 105.32 m/z 719.04 Gene names DOT1L

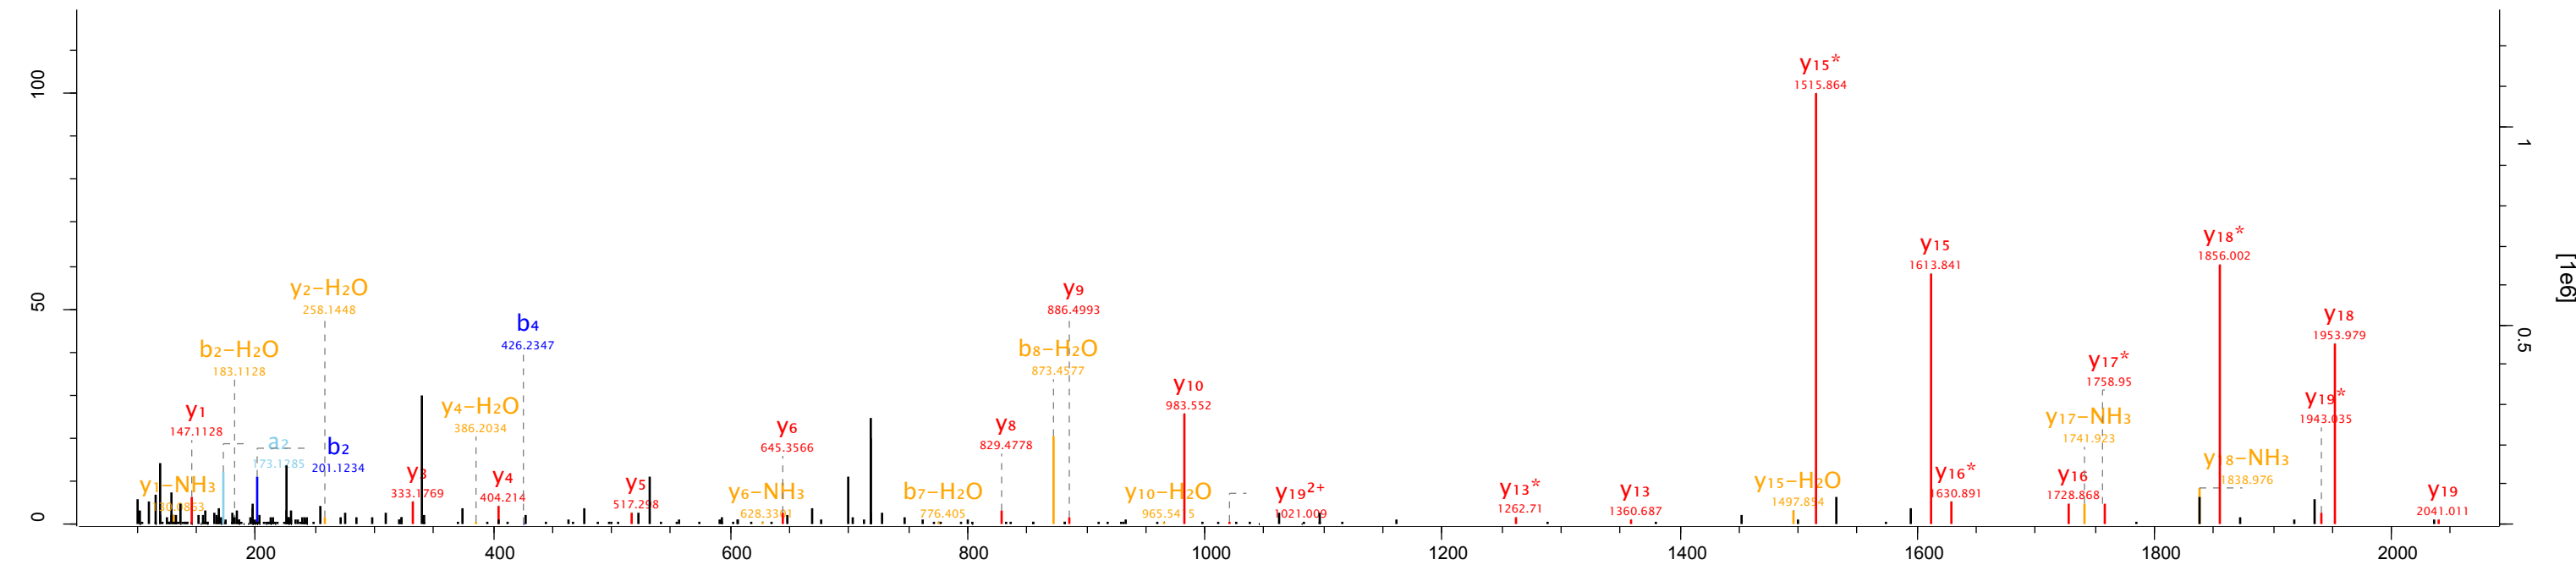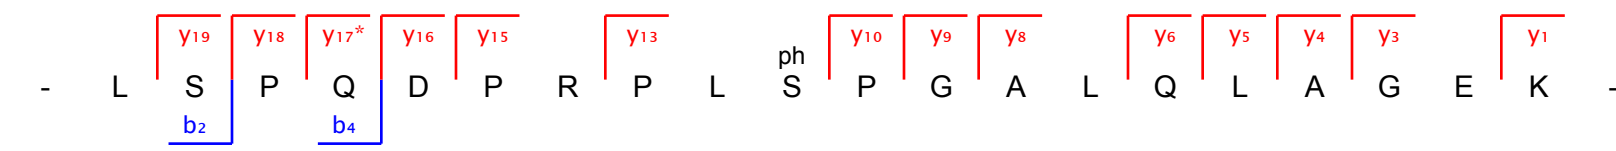

Raw file 20150814\_A375SR\_Phospho\_BR2\_08 Scan 20167 Method FTMS; HCD Score 80.36 m/z 985.49 Gene names FGD1

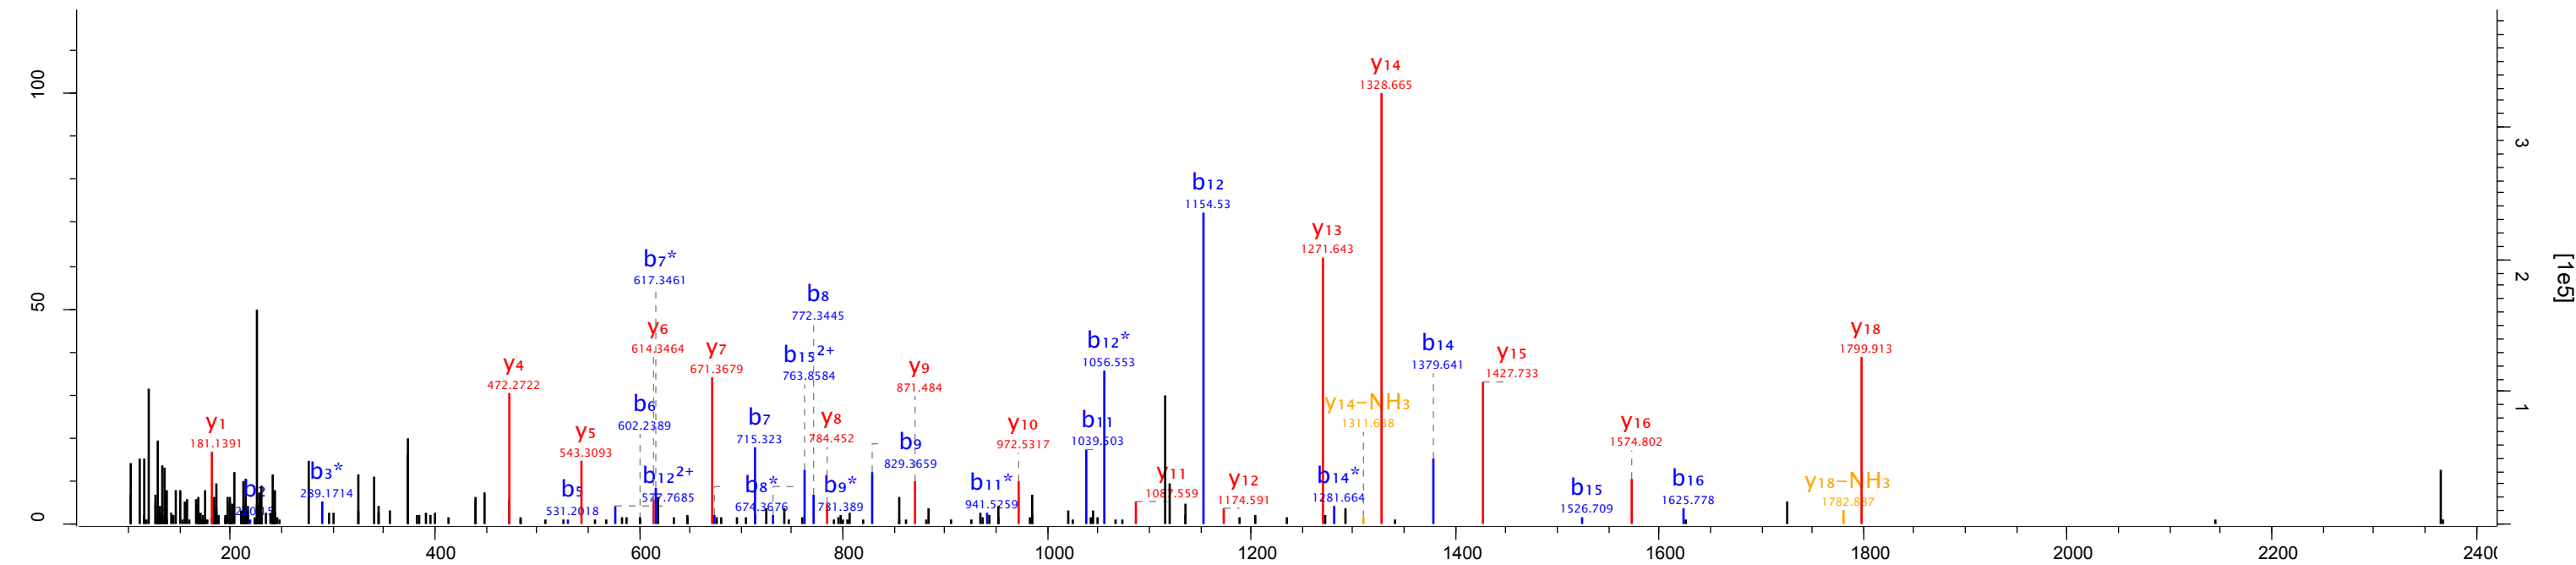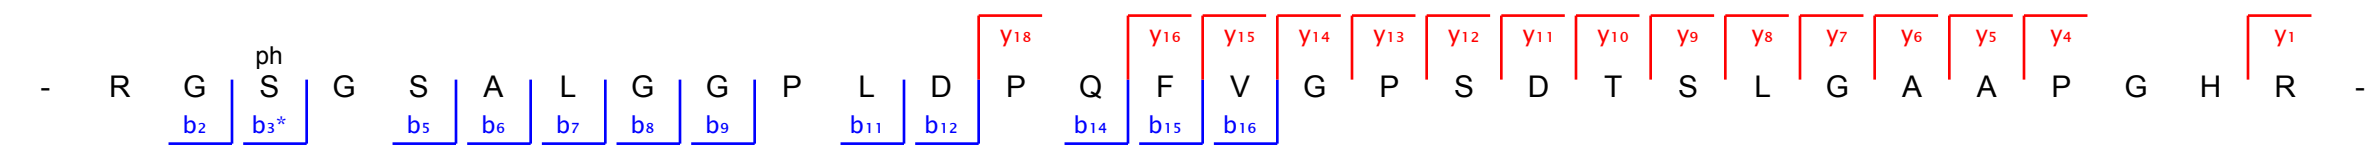

Raw file 20150814\_A375SR\_Phospho\_BR2\_08 Scan 21067 Method FTMS; HCD Score 97.85 m/z 977.11 Gene names RBBP7

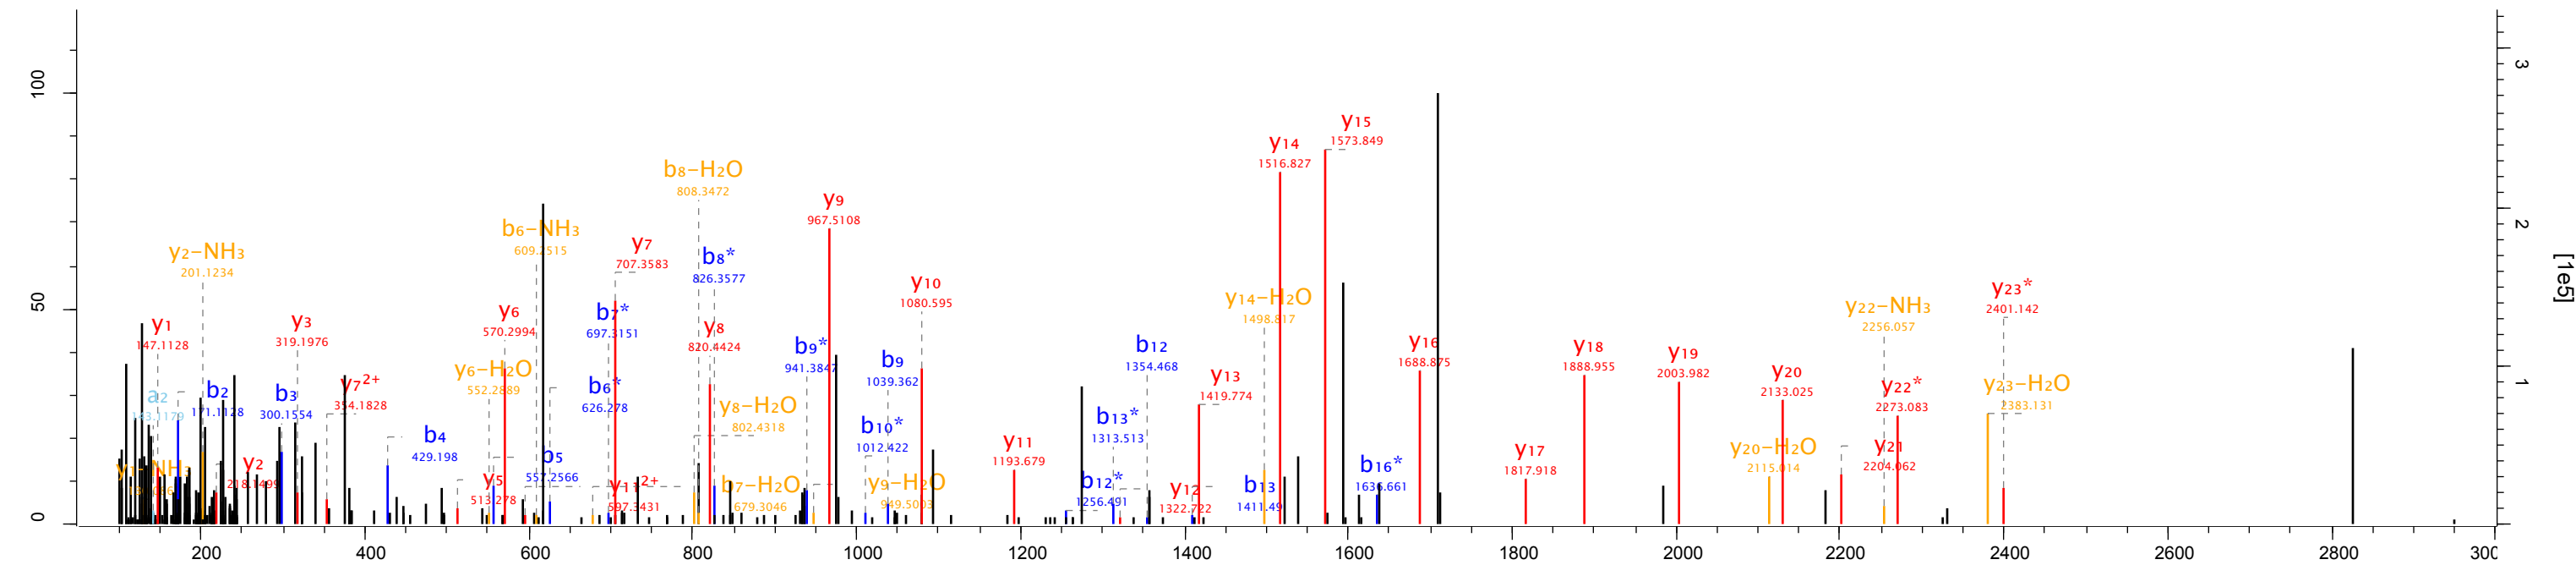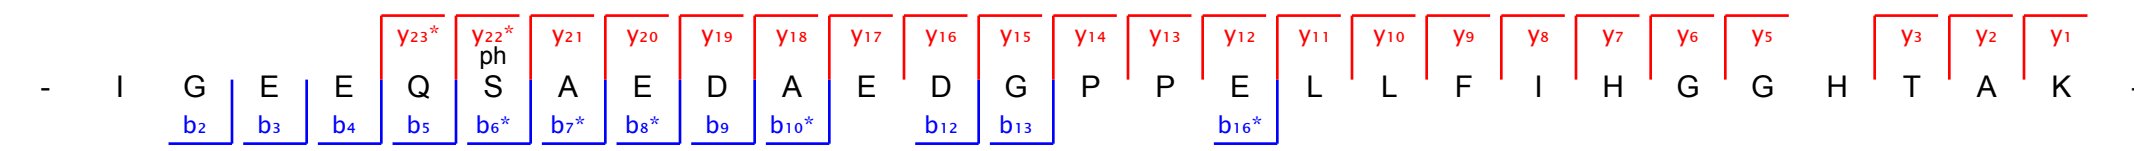



Raw file: 20150814\_A375SR\_Phospho\_BR2\_08  
 Scan: 21817 Method: FTMS; HCD Score: 98.84 m/z: 887.07 Gene names: RICTOR

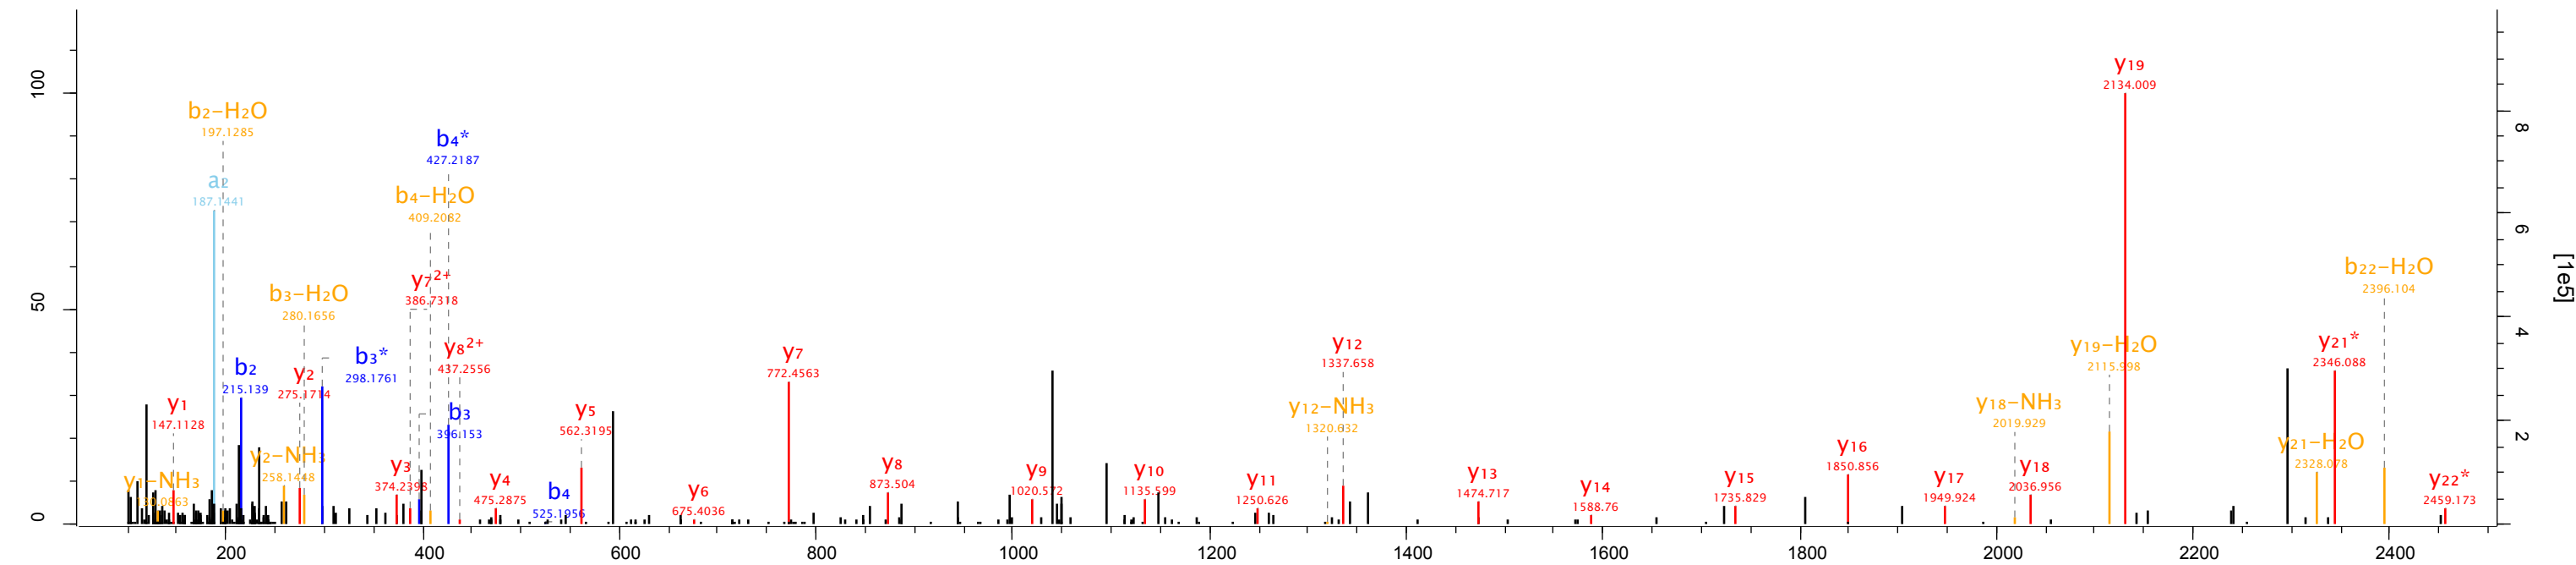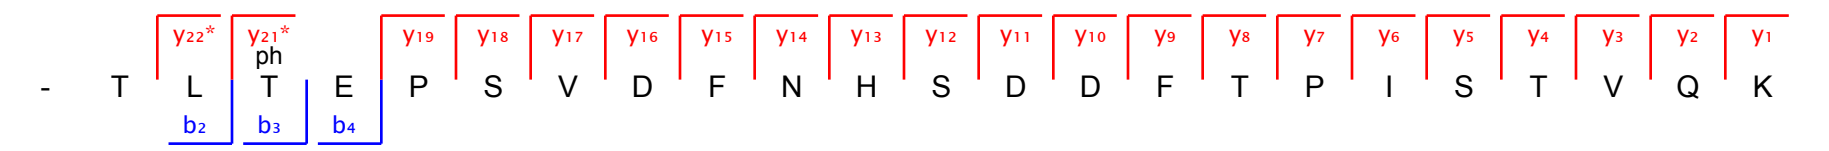

Raw file 20150814\_A375SR\_Phospho\_BR2\_08 Scan 23277 Method FTMS; HCD Score 174.19 m/z 772.37 Gene names PARD3

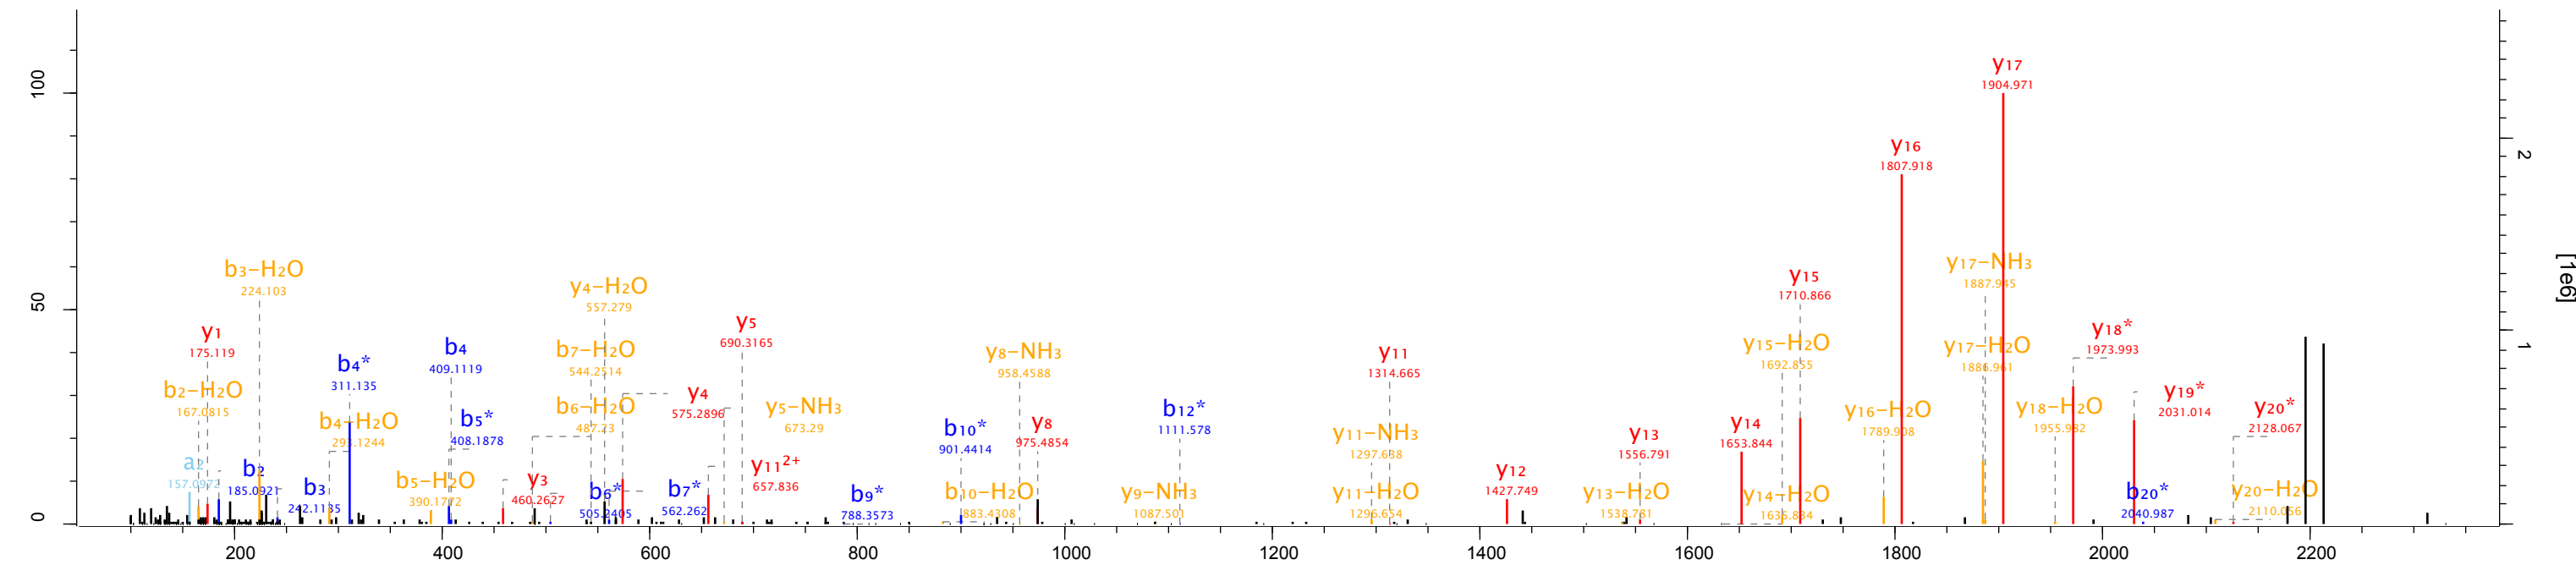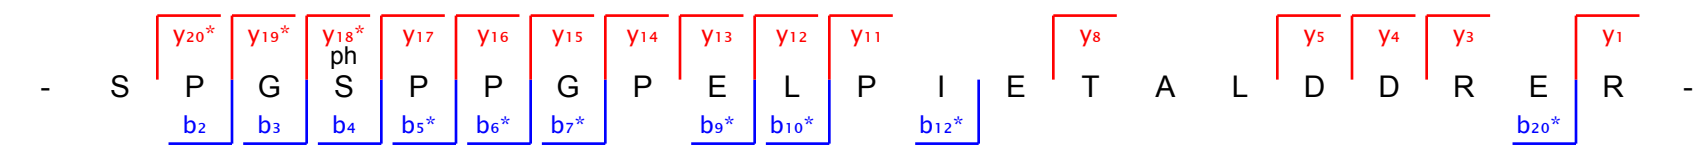

Raw file 20150814\_A375SR\_Phospho\_BR2\_08 Scan 23877 Method FTMS; HCD Score 86.49 m/z 764.39 Gene names TANC1

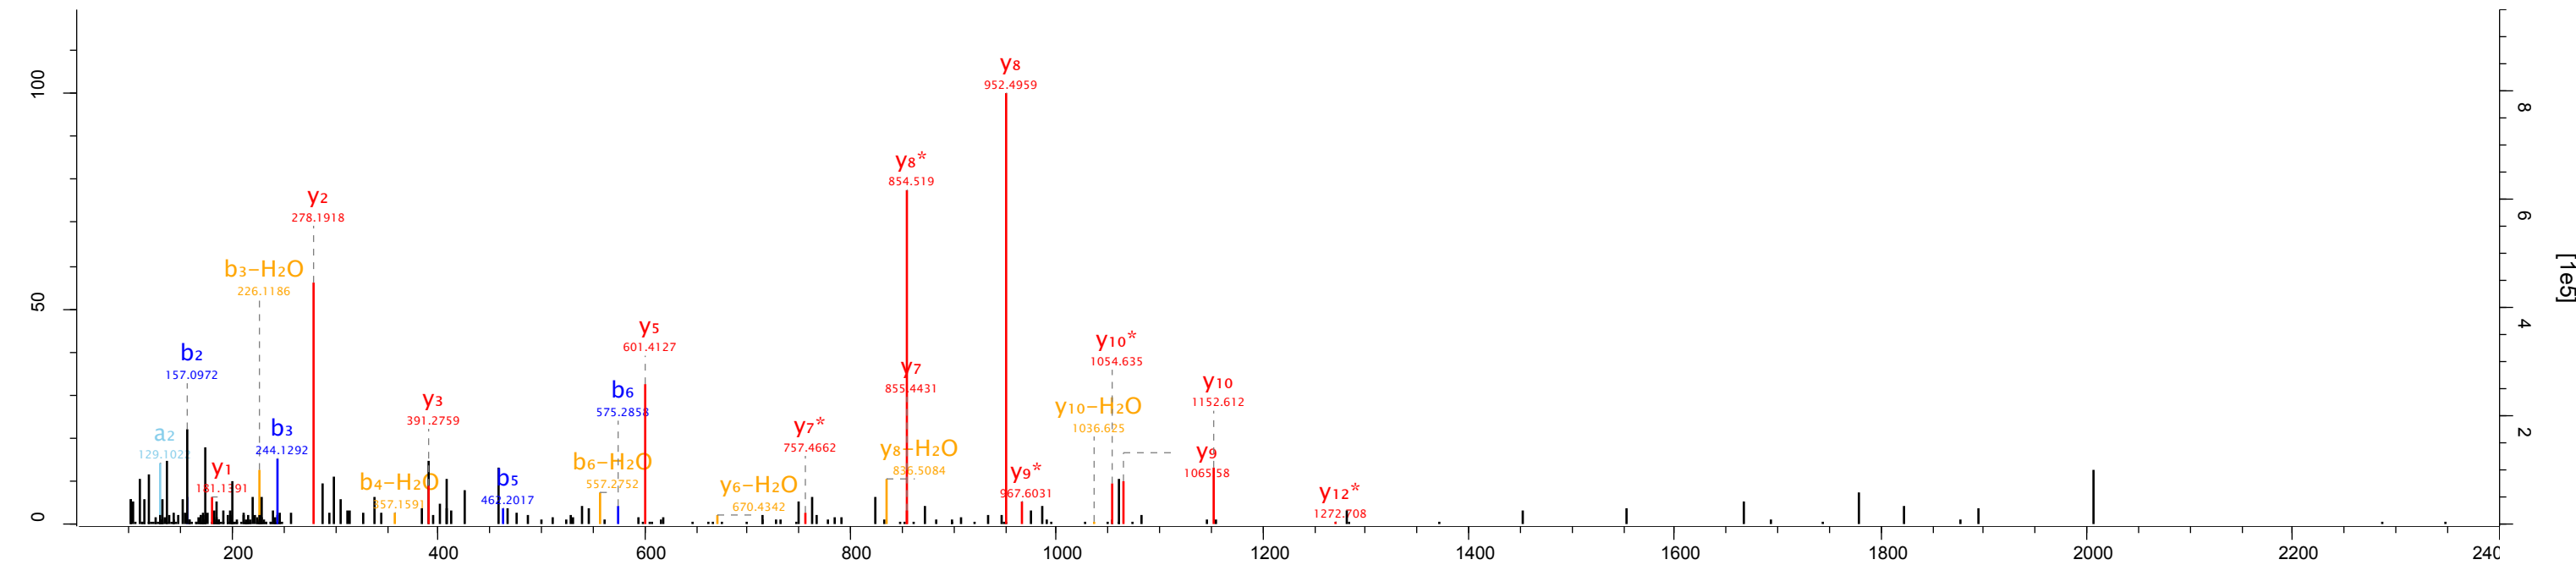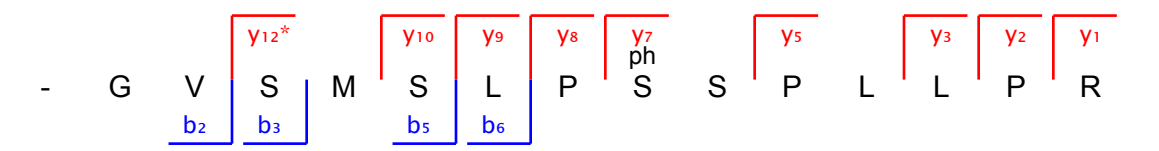

Raw file  
20150814\_A375SR\_Phospho\_BR2\_08

Scan 24187 Method FTMS; HCD Score 119.3 m/z 1170.57 Gene names KMT2D

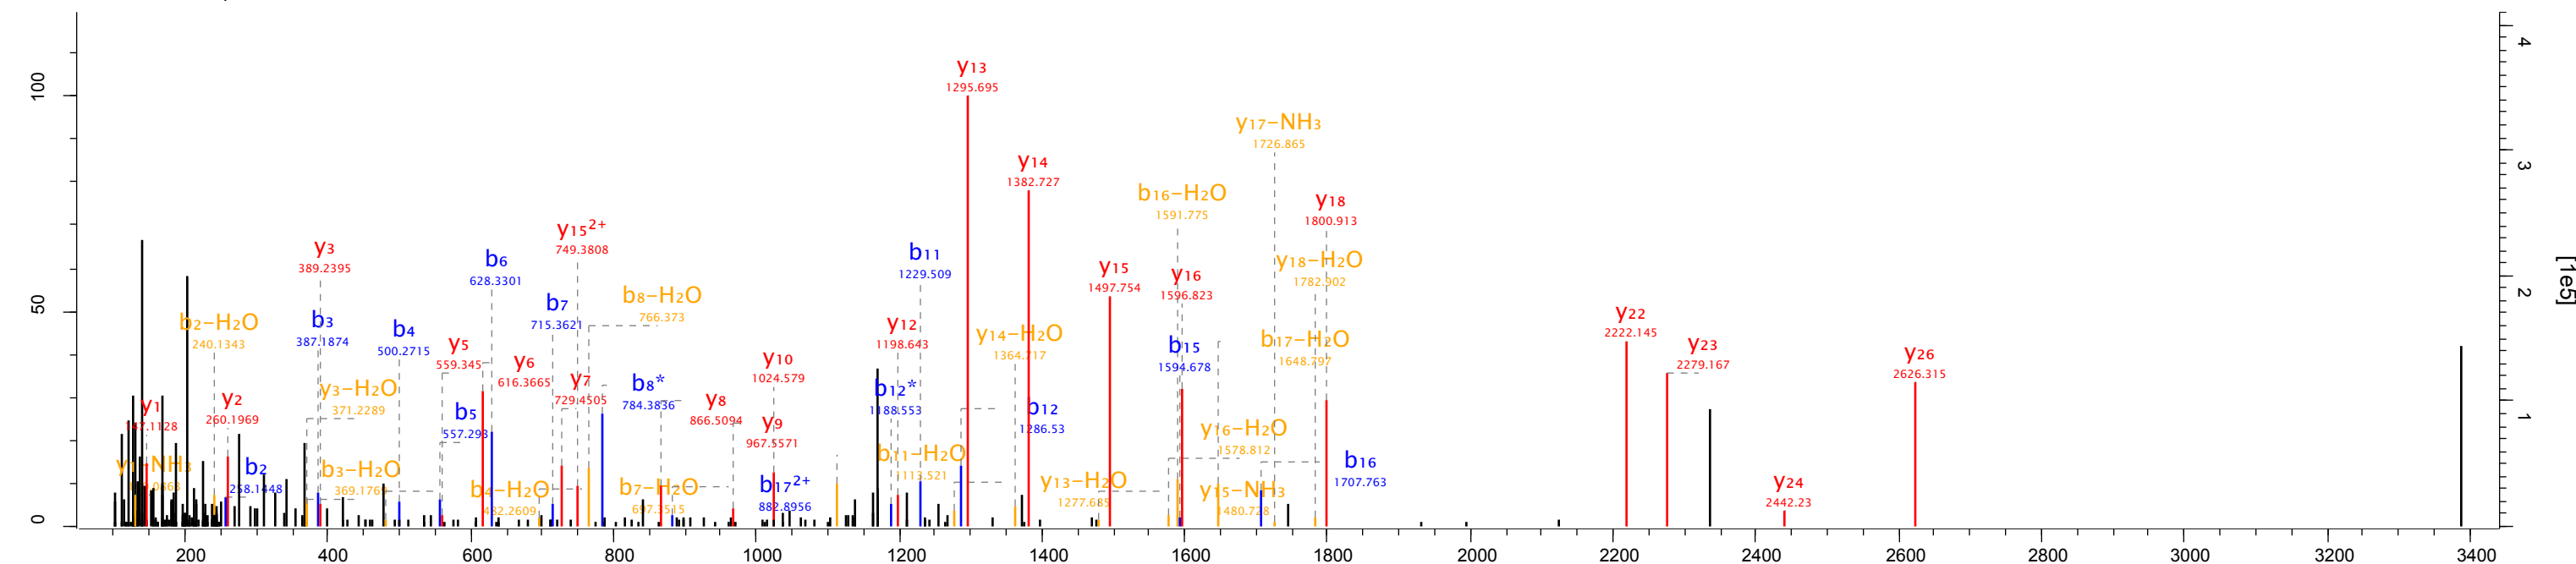

- K E E L G A S S ph Y26 P S Y24 Y23 Y22 P P N L Y18 F Y16 Y15 Y14 Y13 Y12 S Y10 Y9 Y8 Y7 Y6 Y5 L Y3 Y2 Y1 -

Fragmentation mapping below the sequence:

- Residues E, E, L, G, A, S, S are grouped by blue boxes labeled b<sub>2</sub>, b<sub>3</sub>, b<sub>4</sub>, b<sub>5</sub>, b<sub>6</sub>, b<sub>7</sub>, b<sub>8</sub>\*.
- Residues Y26, P, S, Y24, Y23, Y22 are grouped by red boxes labeled y<sub>26</sub>, y<sub>24</sub>, y<sub>23</sub>, y<sub>22</sub>.
- Residues N, L, G are grouped by blue boxes labeled b<sub>15</sub>, b<sub>16</sub>, b<sub>17</sub><sup>2+</sup>.
- Residues Y18, F, Y16, Y15, Y14, Y13, Y12 are grouped by red boxes labeled y<sub>18</sub>, y<sub>16</sub>, y<sub>15</sub>, y<sub>14</sub>, y<sub>13</sub>, y<sub>12</sub>.
- Residues S, Y10, Y9, Y8, Y7, Y6, Y5 are grouped by red boxes labeled y<sub>10</sub>, y<sub>9</sub>, y<sub>8</sub>, y<sub>7</sub>, y<sub>6</sub>, y<sub>5</sub>.
- Residues L, Y3, Y2, Y1 are grouped by red boxes labeled y<sub>3</sub>, y<sub>2</sub>, y<sub>1</sub>.

Raw file: 20150814\_A375SR\_Phospho\_BR2\_08  
 Scan: 25137 Method: FTMS; HCD Score: 74.52 m/z: 811.4 Gene names: MTCL1

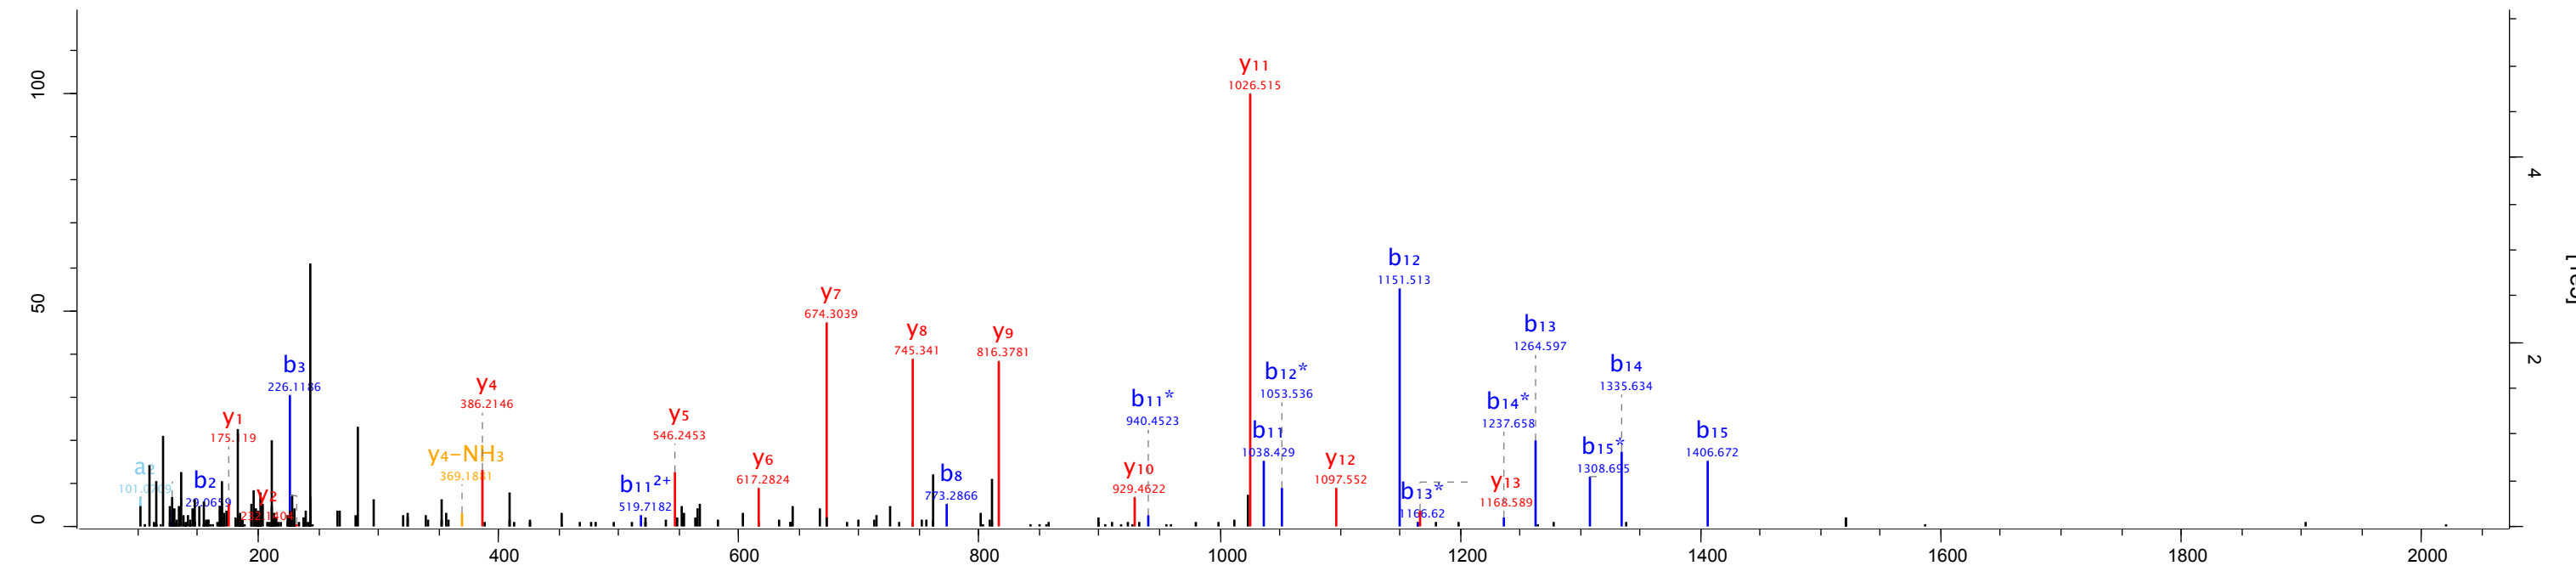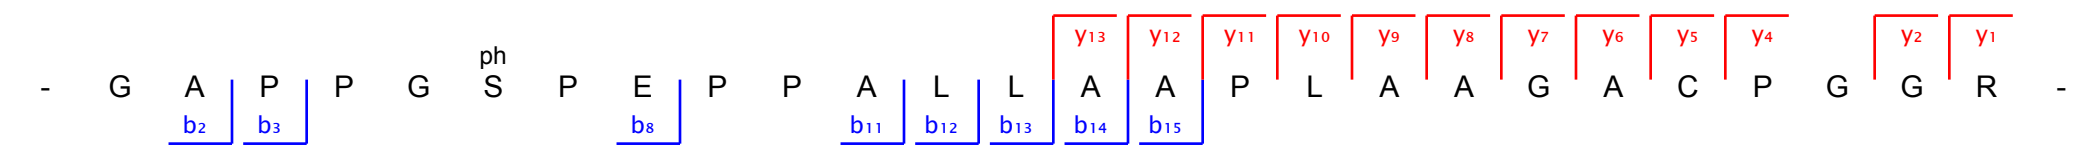

Raw file: 20150814\_A375SR\_Phospho\_BR2\_08  
 Scan: 26577 Method: FTMS; HCD Score: 80.73 m/z: 974.19 Gene names: TPR

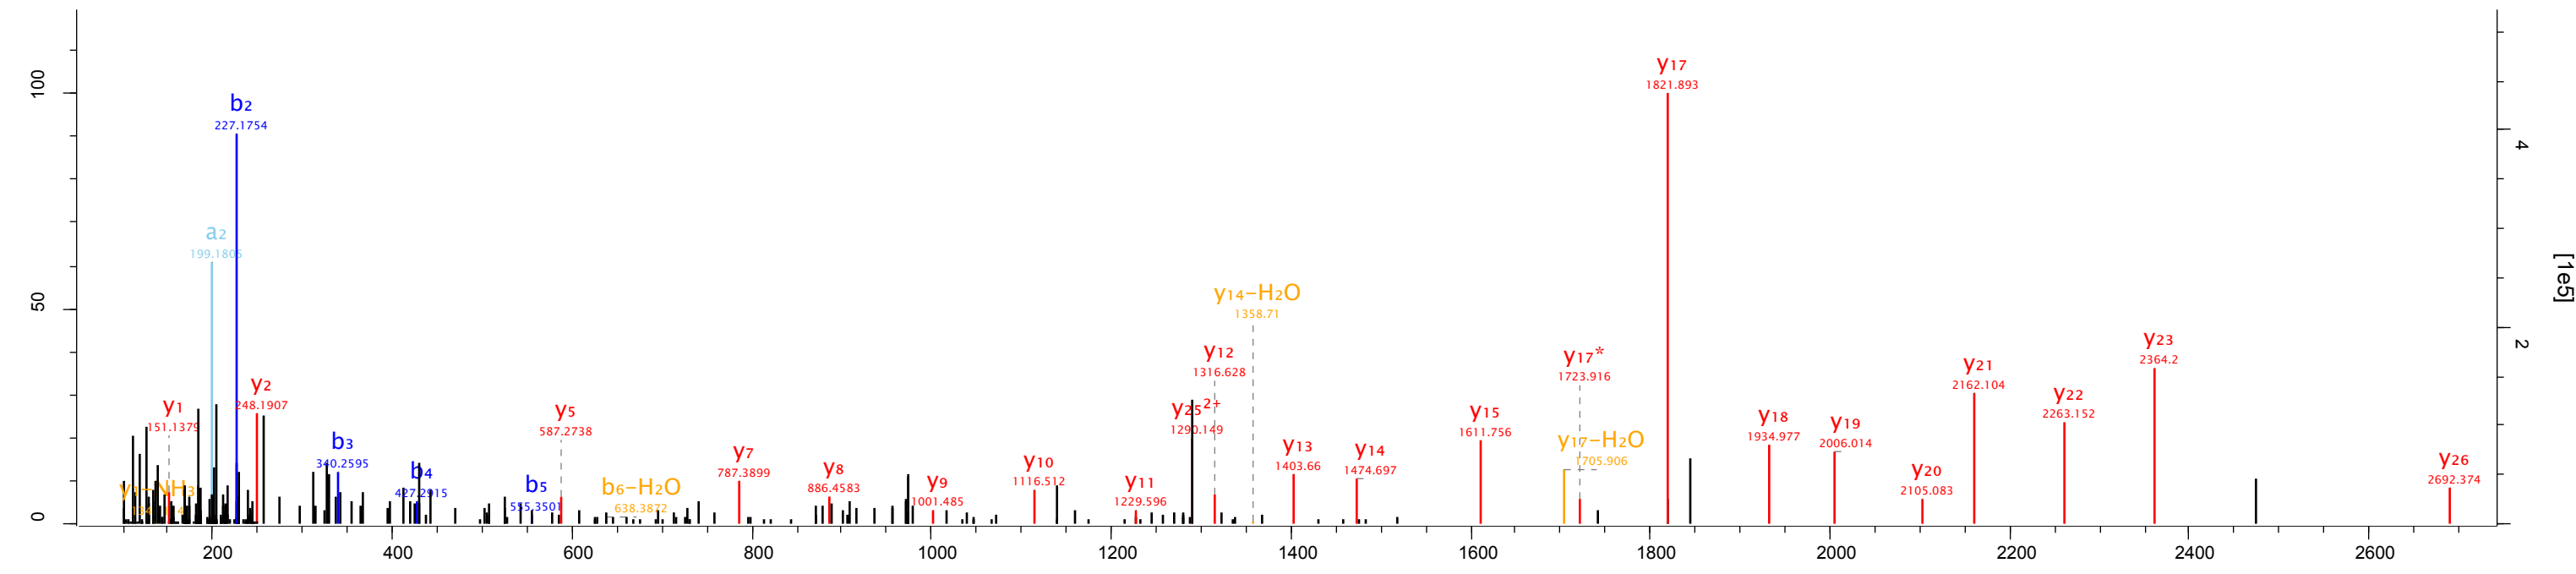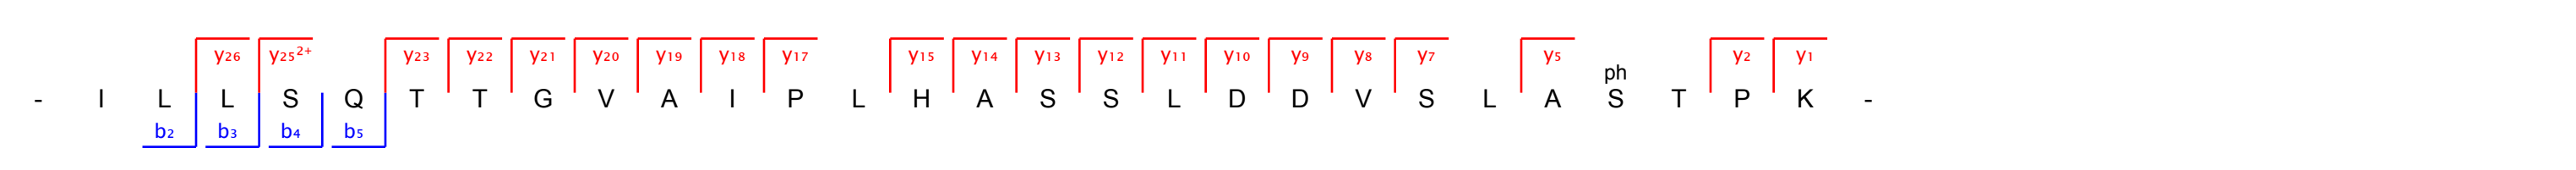

Raw file: 20150814\_A375SR\_Phospho\_BR2\_08  
 Scan: 27277 Method: FTMS; HCD Score: 217.01 m/z: 710.89 Gene names: HNRNPK

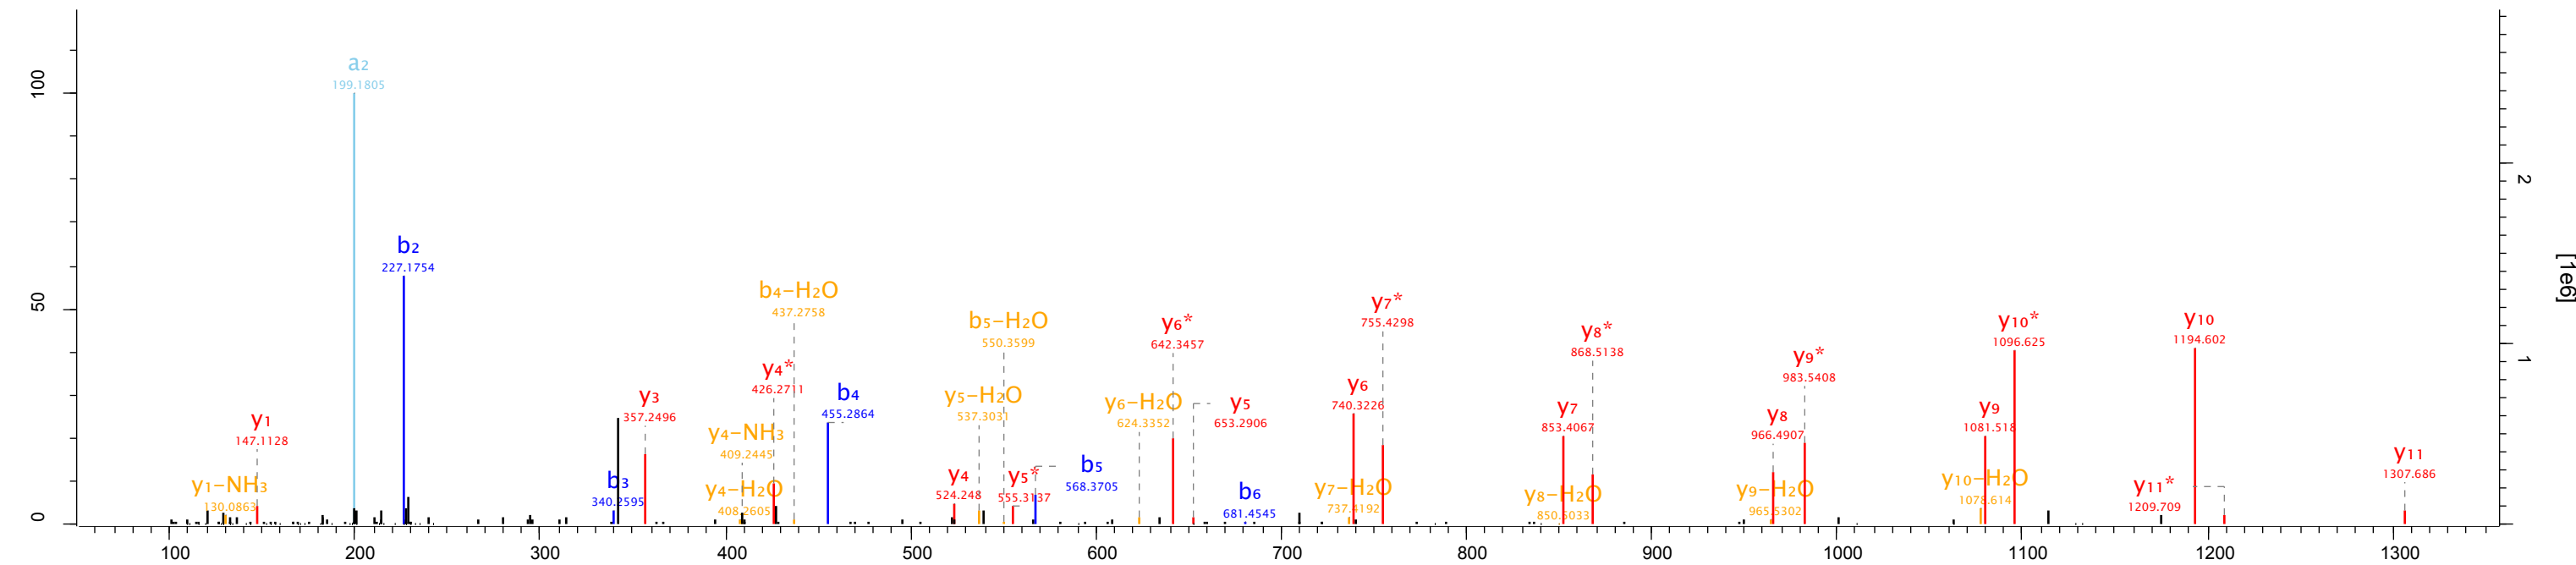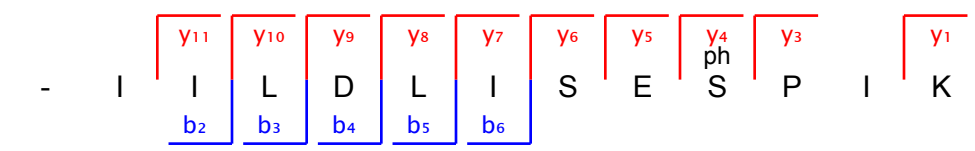

Raw file 20150814\_A375SR\_Phospho\_BR2\_08 Scan 27887 Method FTMS; HCD Score 166.74 m/z 815.67 Gene names MFF

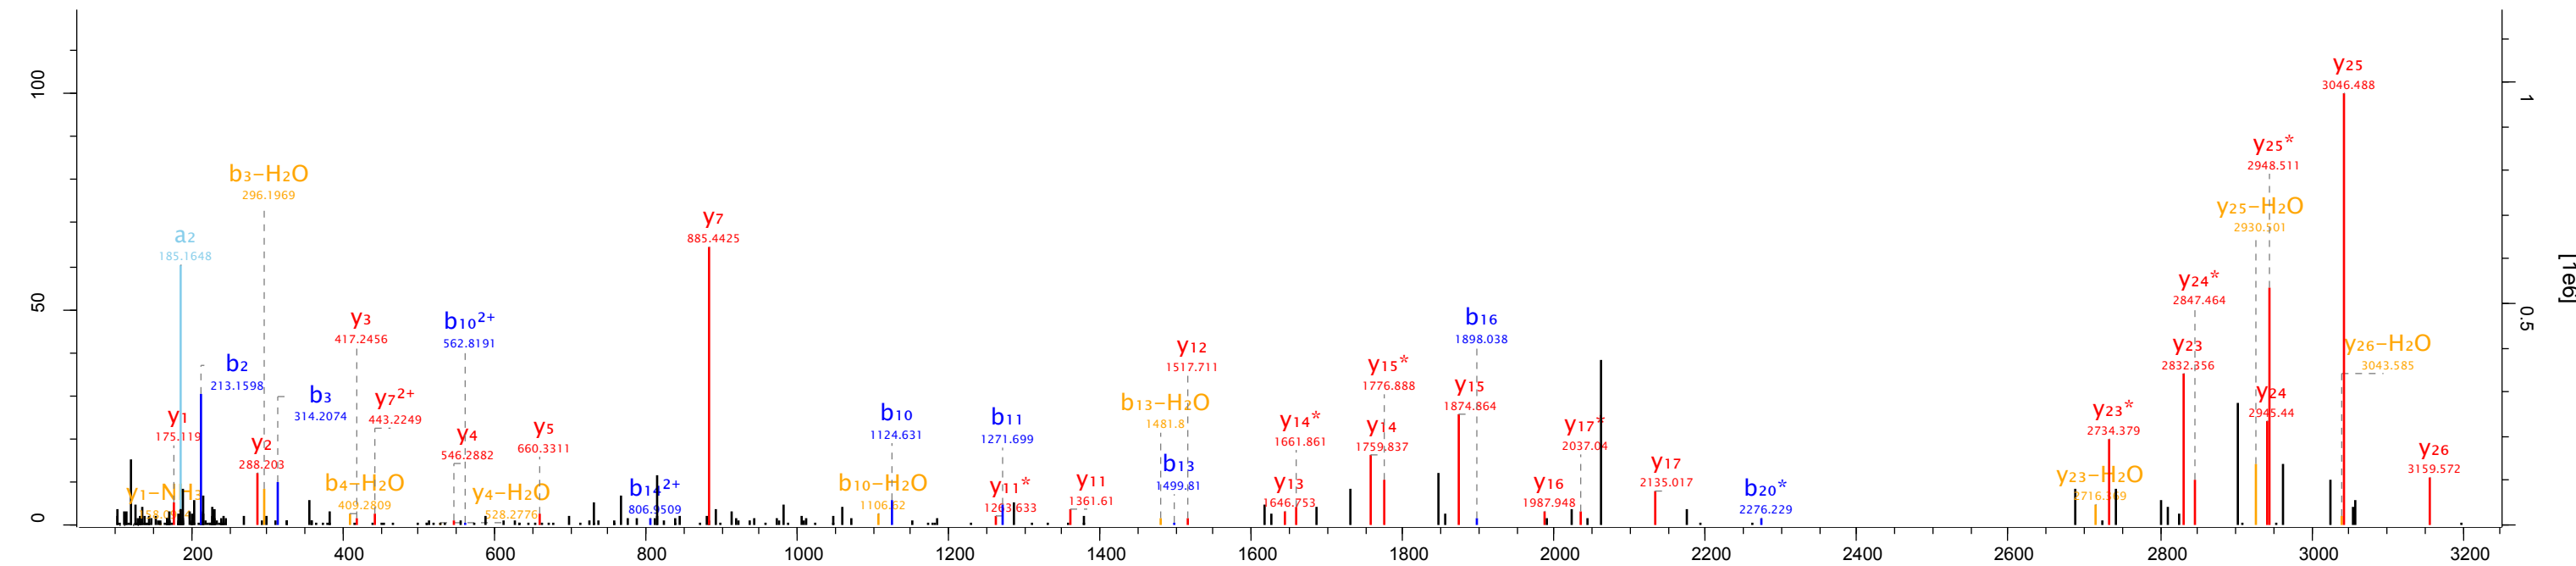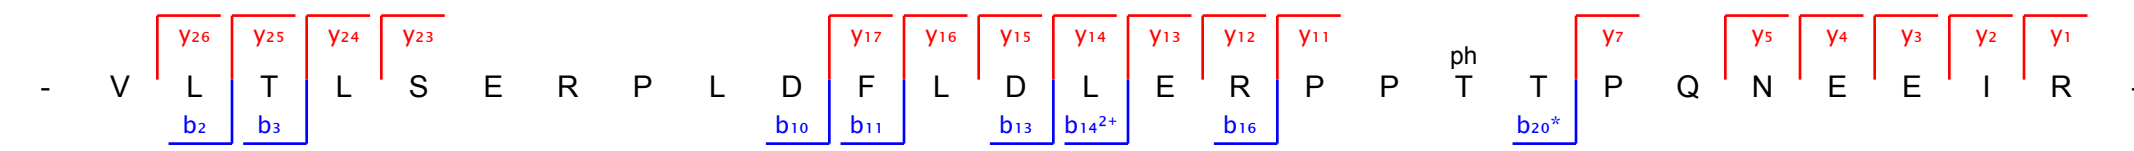



Raw file 20150814\_A375SR\_Phospho\_BR2\_08 Scan 28577 Method FTMS; HCD Score 104.05 m/z 766.05 Gene names UBA5

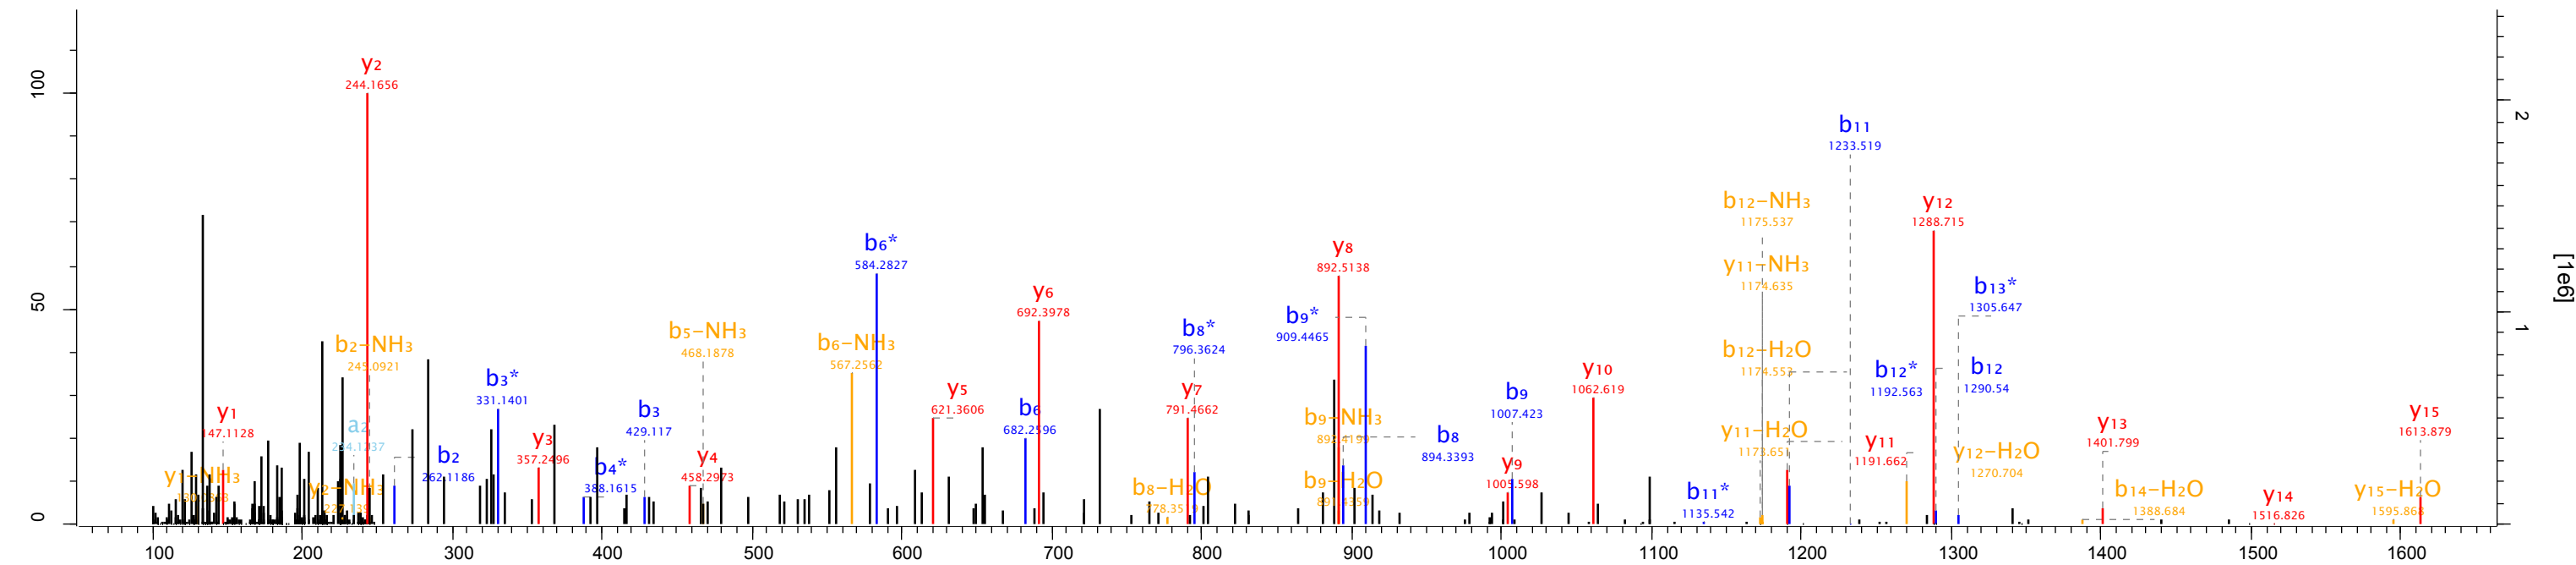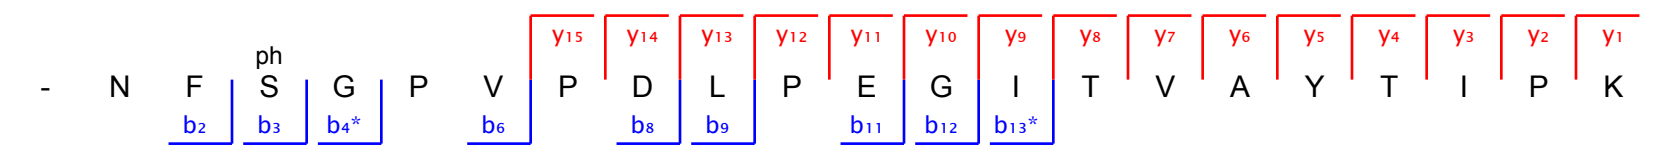

Raw file 20150814\_A375SR\_Phospho\_BR2\_08 Scan 3287 Method FTMS; HCD Score 135.1 m/z 474.72 Gene names CCDC137

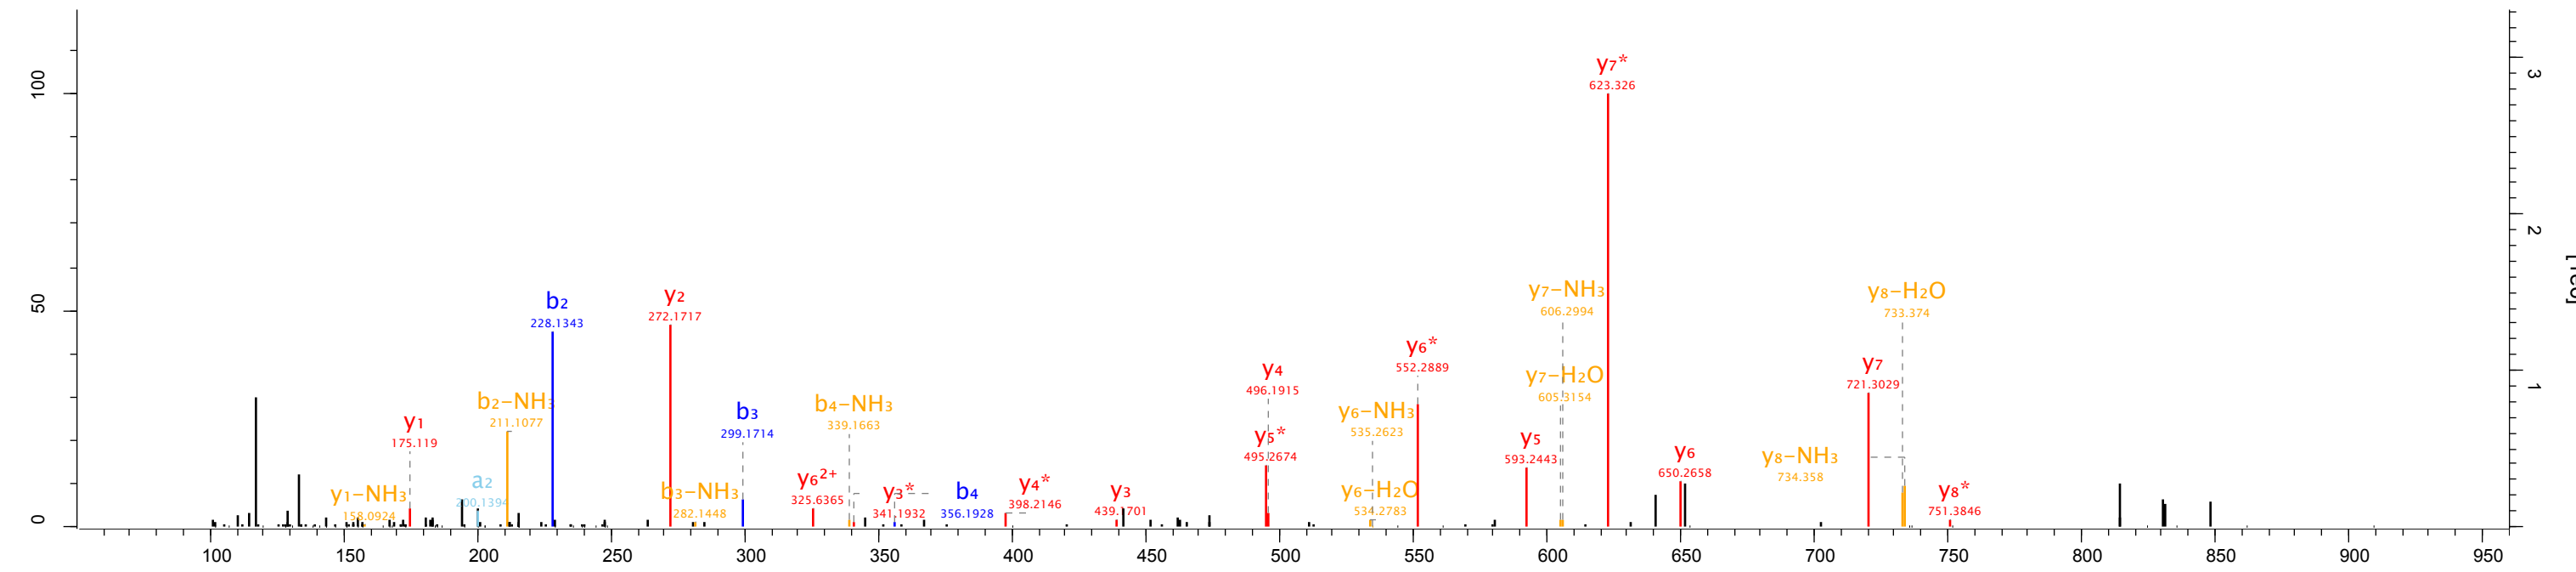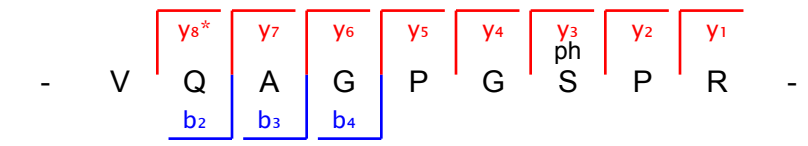

Raw file: 20150814\_A375SR\_Phospho\_BR2\_08  
 Scan: 3647 Method: FTMS; HCD Score: 152.16 m/z: 614.26 Gene names: SON

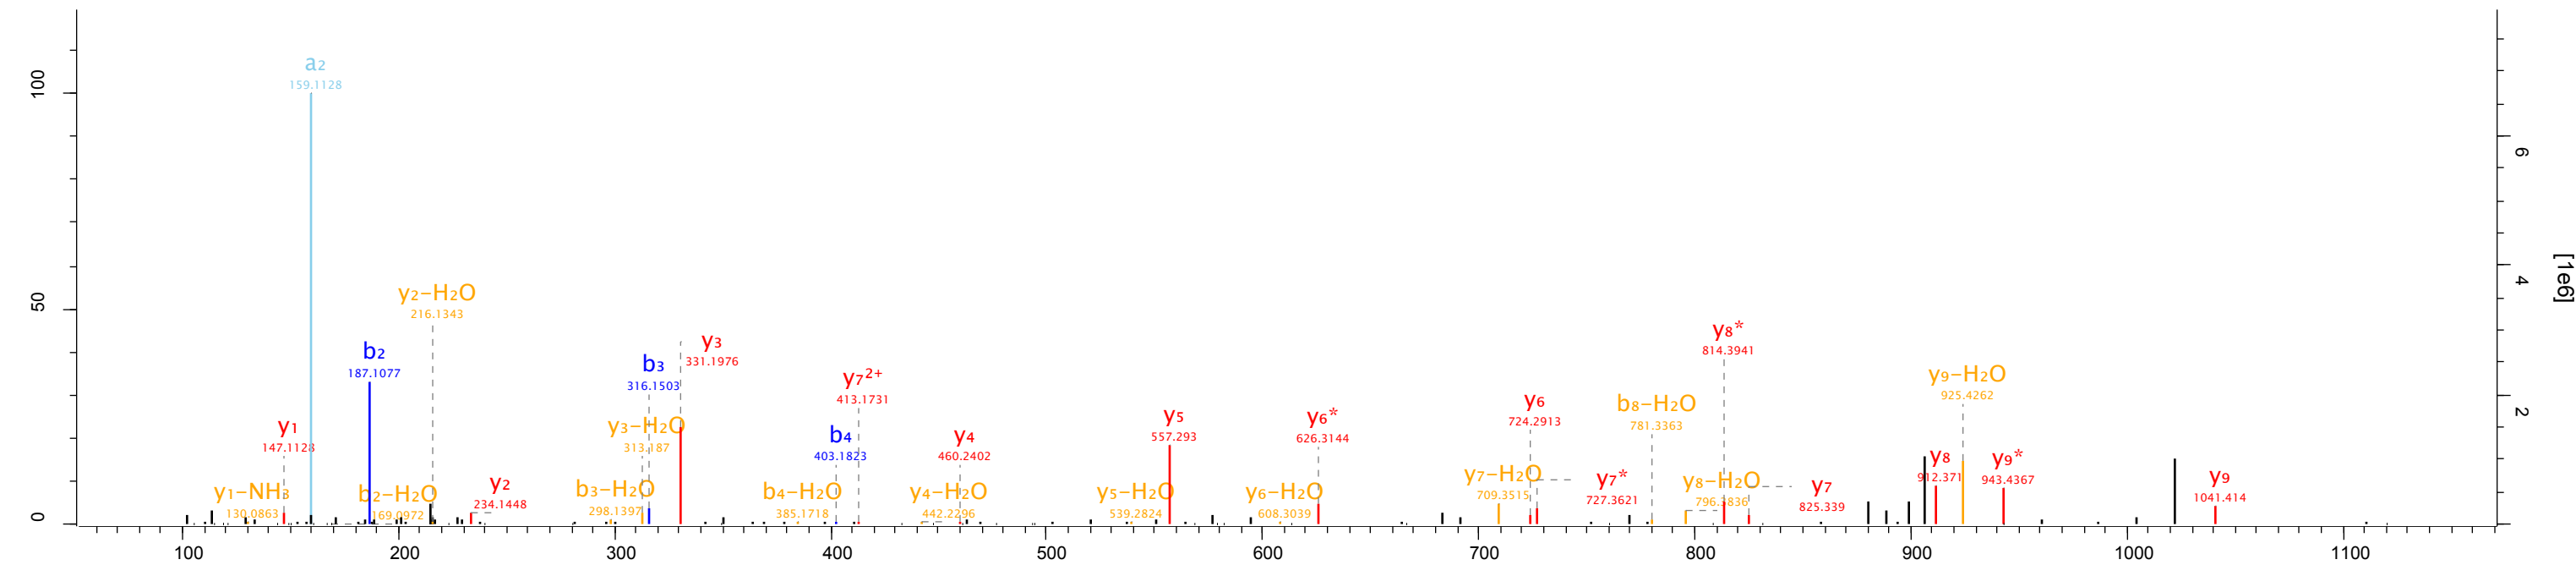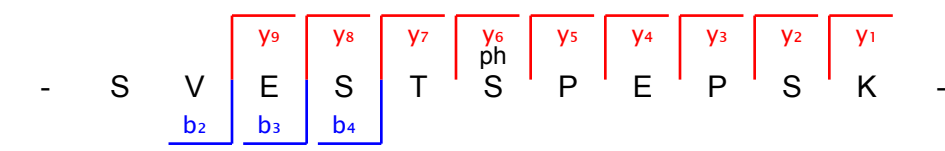

Raw file: 20150814\_A375SR\_Phospho\_BR2\_08  
 Scan: 3747 Method: FTMS; HCD Score: 154.74 m/z: 497.75 Gene names: ARHGEF7

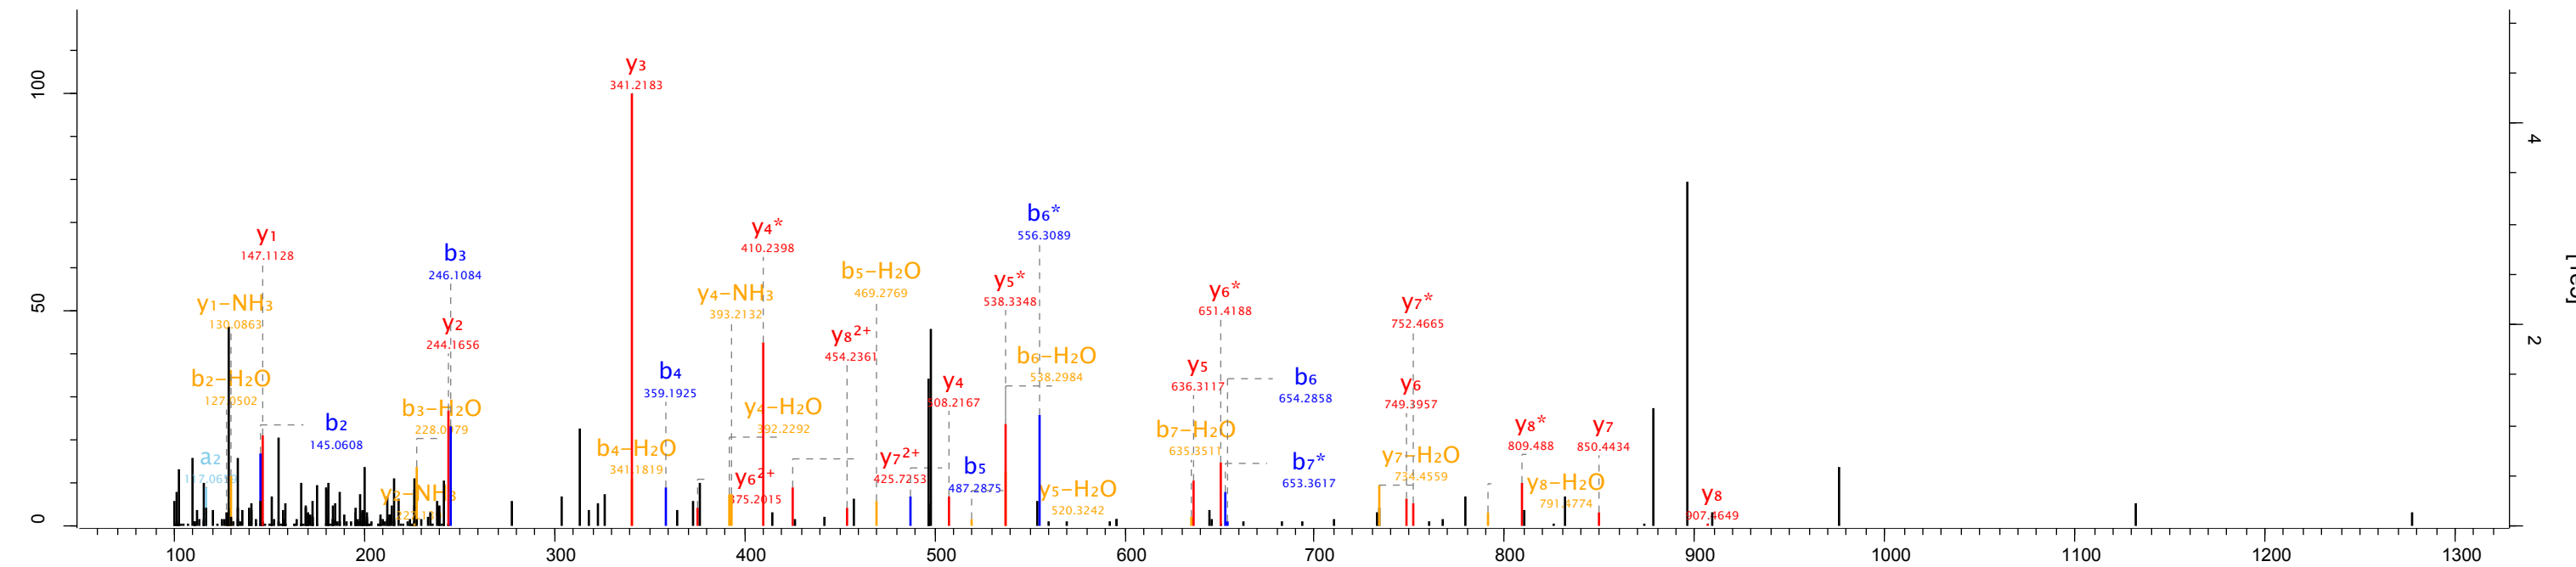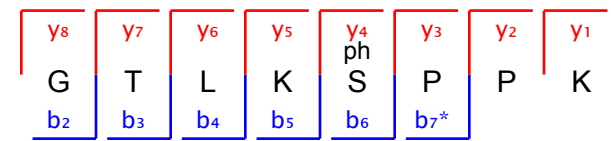

Raw file: 20150814\_A375SR\_Phospho\_BR2\_08  
 Scan: 5347 Method: FTMS; HCD Score: 88.2 m/z: 669.33 Gene names: SLX4

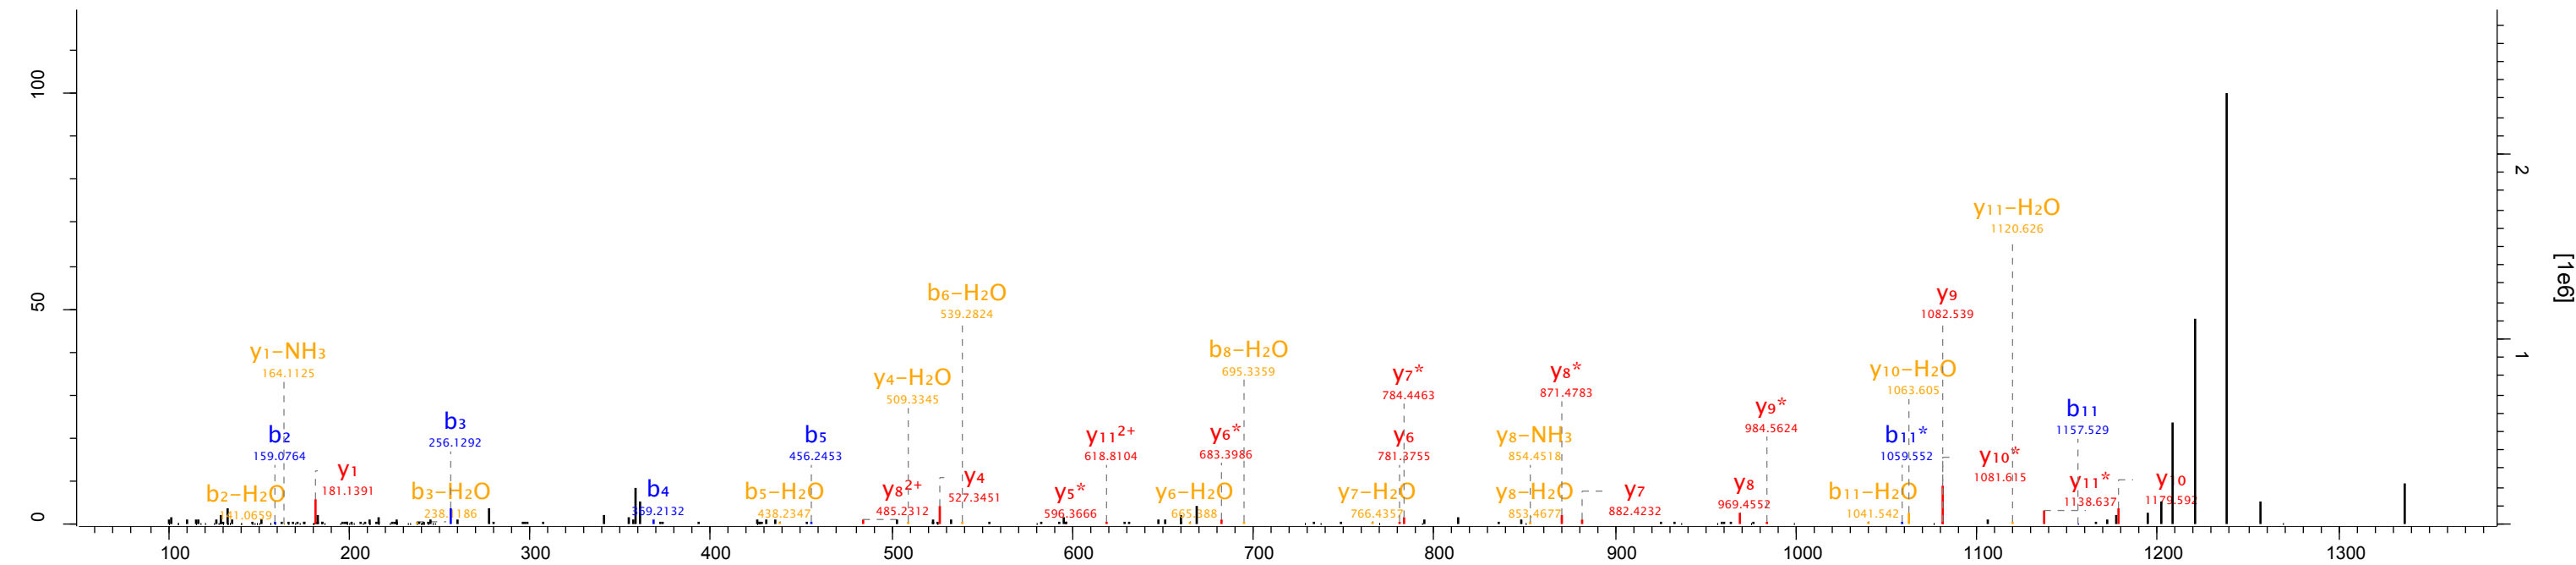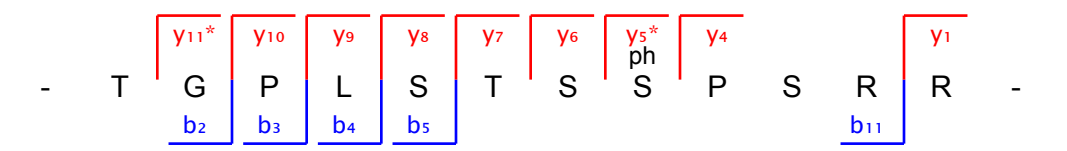

Raw file: 20150814\_A375SR\_Phospho\_BR2\_08  
 Scan: 6017 Method: FTMS; HCD Score: 68.97 m/z: 570.25 Gene names: NCOR2

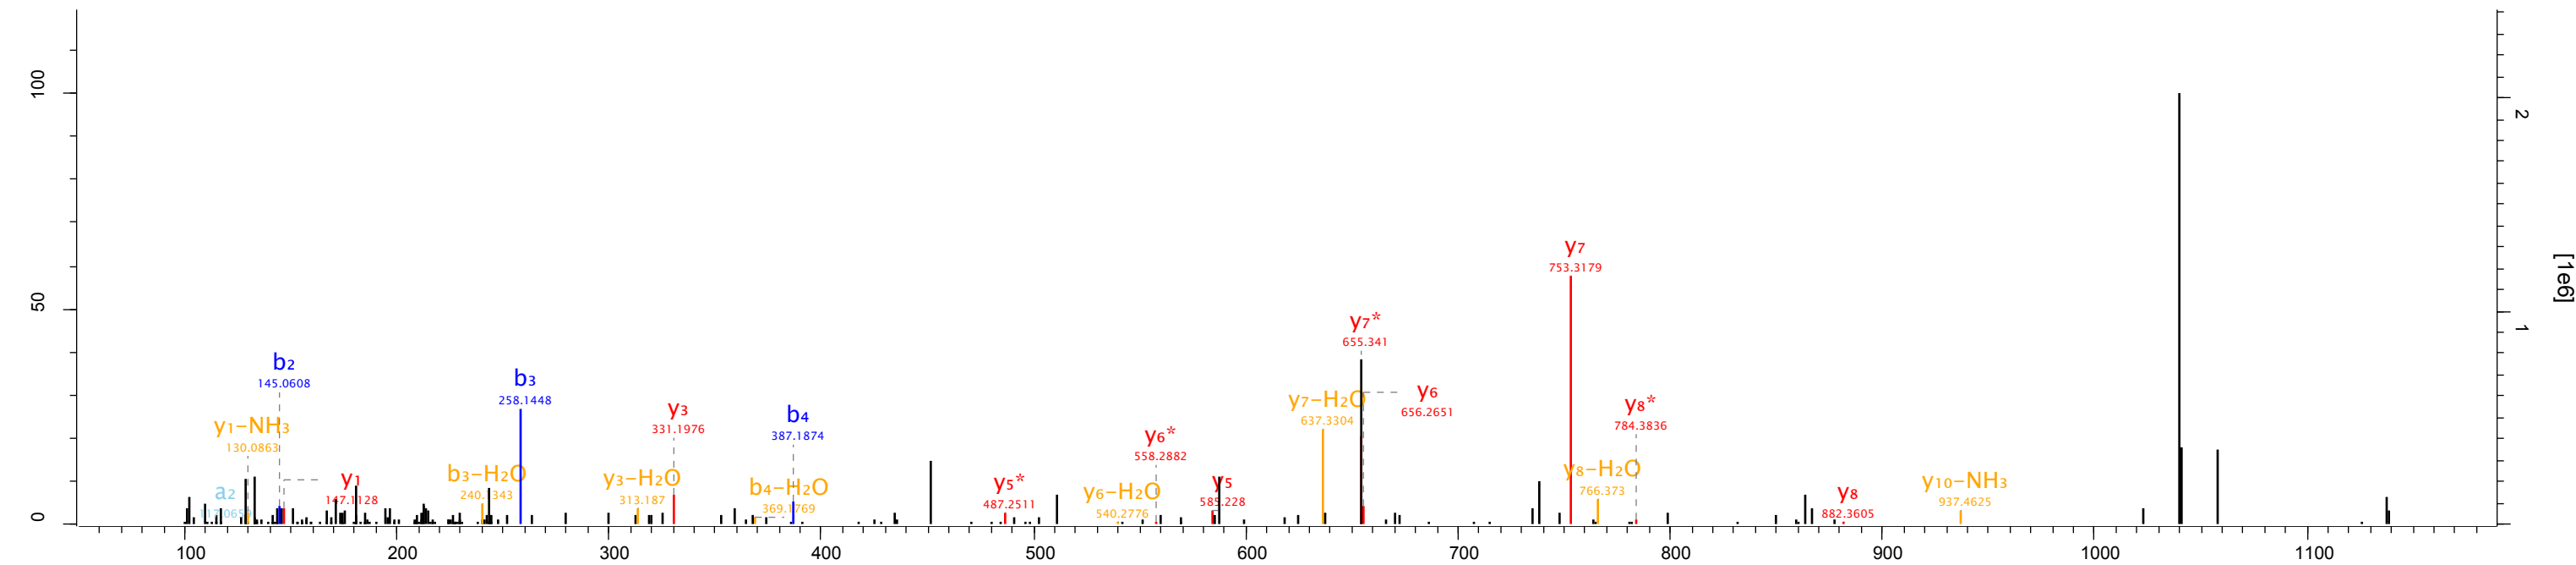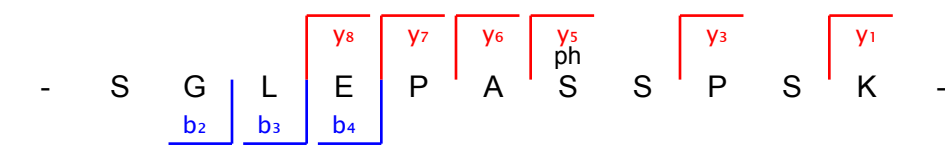

Raw file: 20150814\_A375SR\_Phospho\_BR2\_08  
 Scan: 6617 Method: FTMS; HCD Score: 161.94 m/z: 720.28 Gene names: SLC16A1

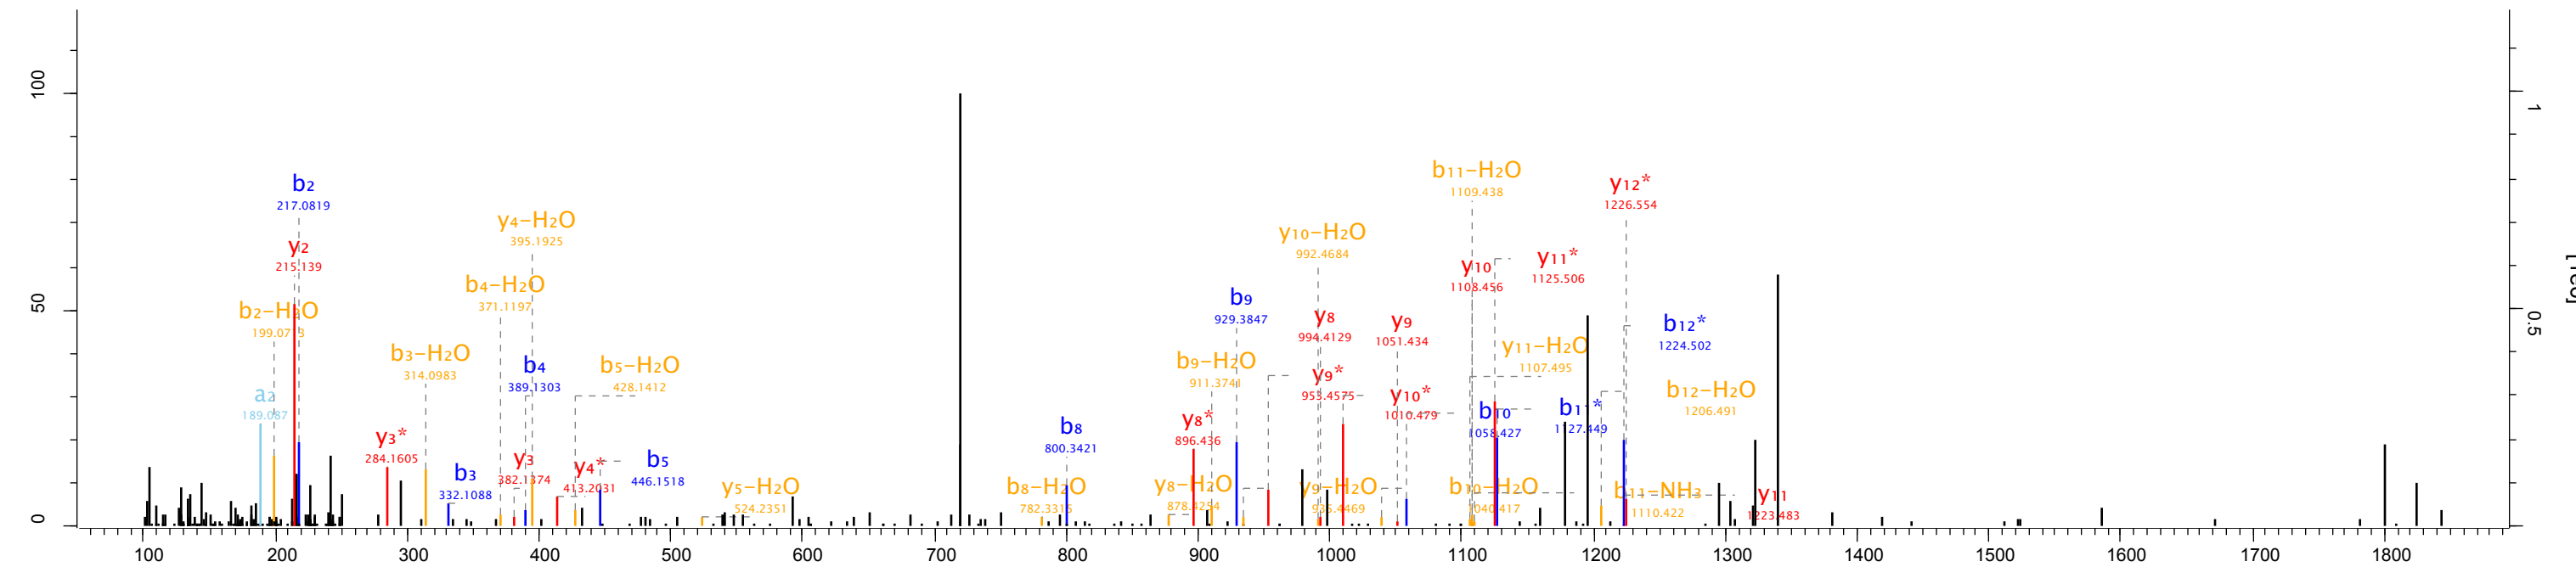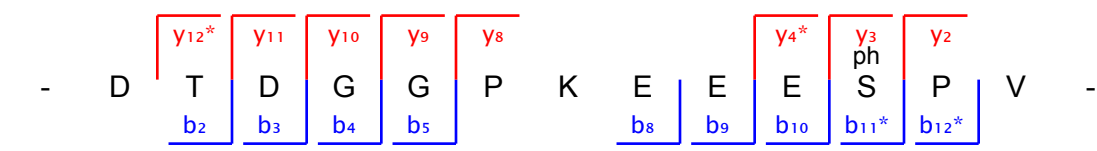

Raw file: 20150814\_A375SR\_Phospho\_BR2\_08  
 Scan: 6927 Method: FTMS; HCD Score: 100.93 m/z: 384.86 Gene names: PTS

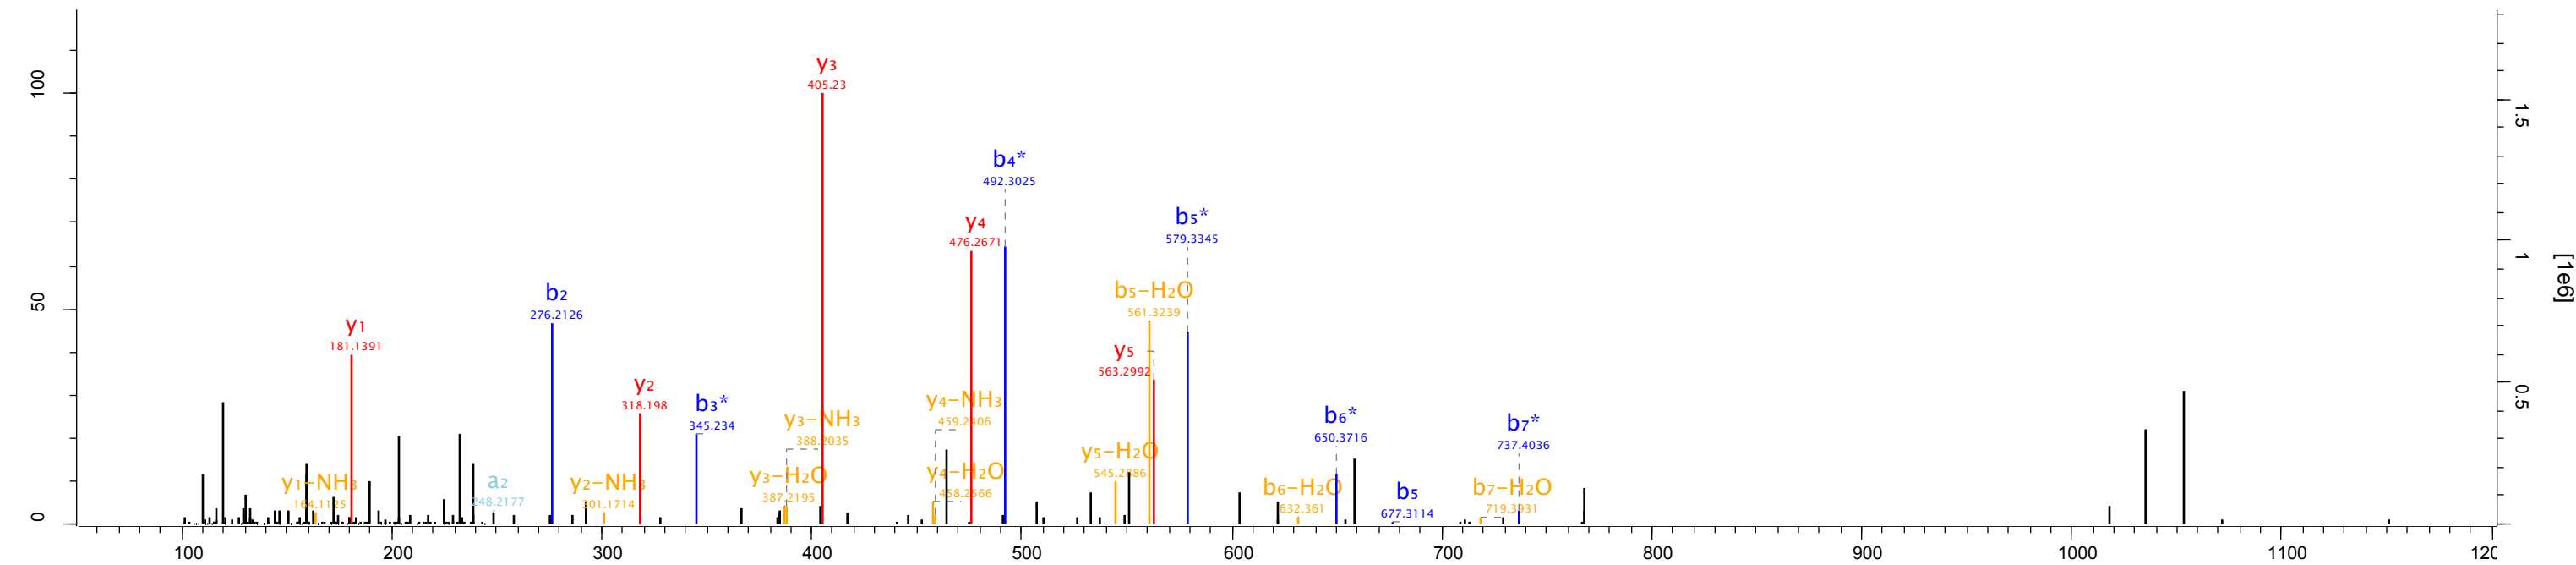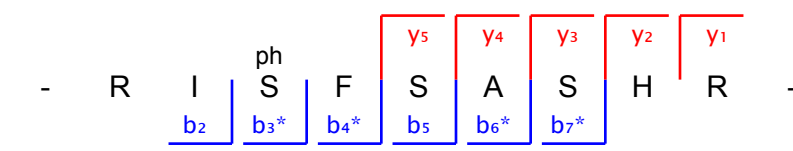



Raw file: 20150814\_A375SR\_Phospho\_BR2\_08  
 Scan: 8117 Method: FTMS; HCD Score: 90.05 m/z: 486.24 Gene names: USP10

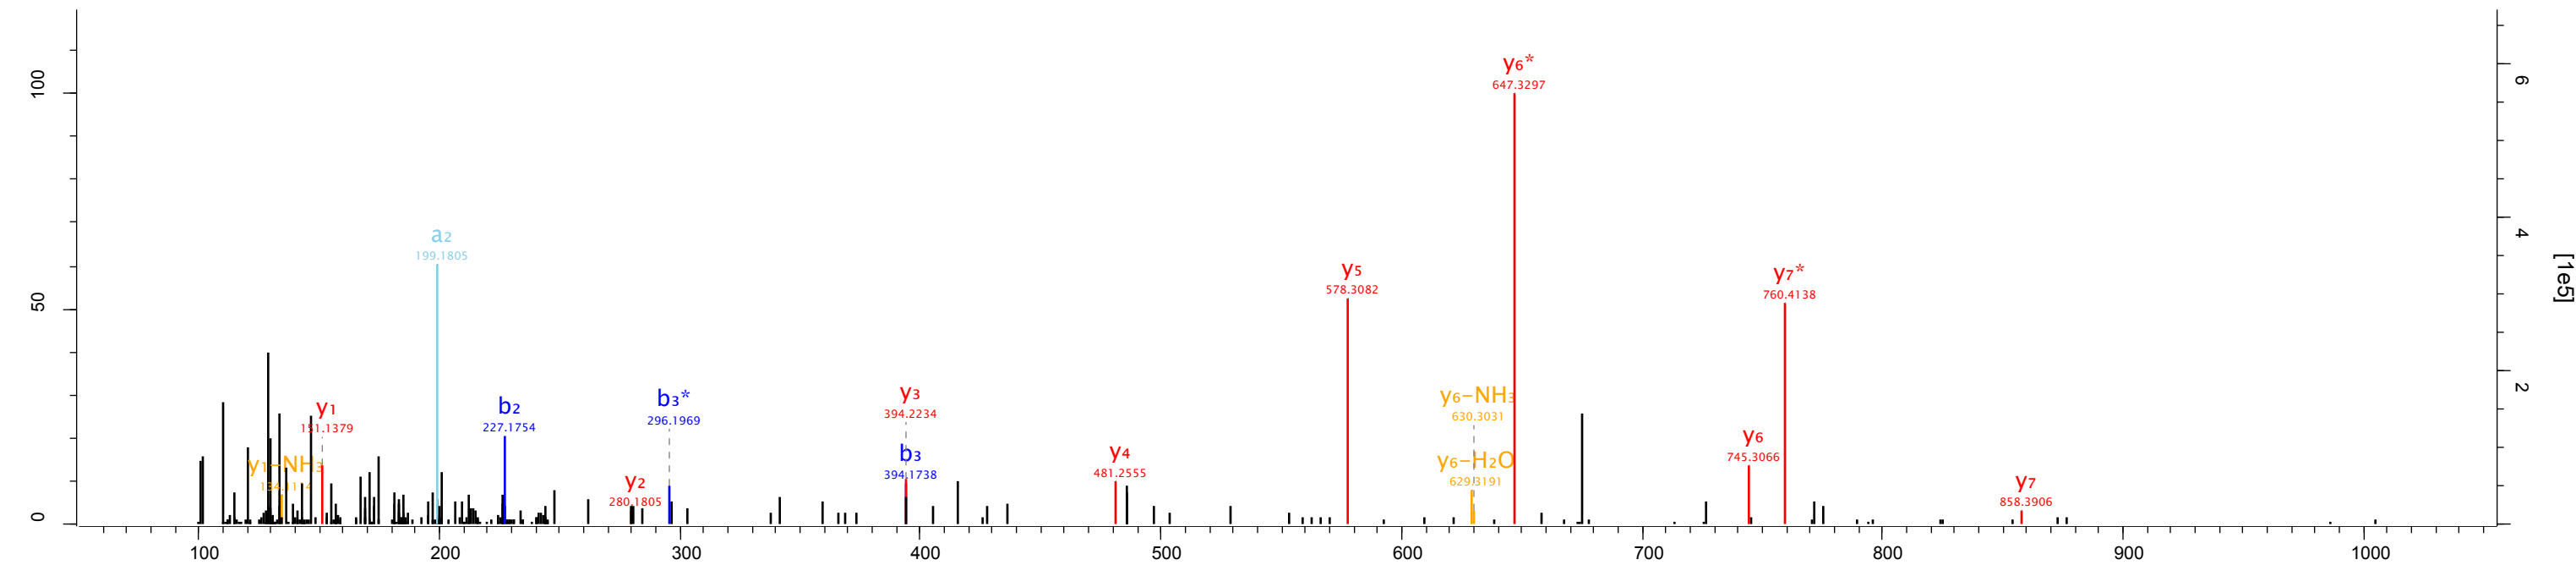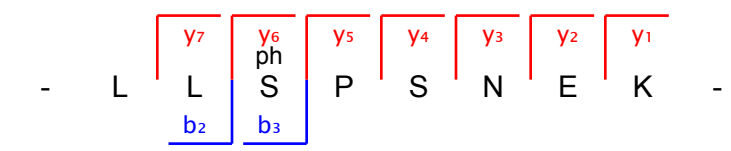

Raw file: 20150814\_A375SR\_Phospho\_BR2\_08  
 Scan: 8877 Method: FTMS; HCD Score: 116.06 m/z: 549.62 Gene names: TPX2

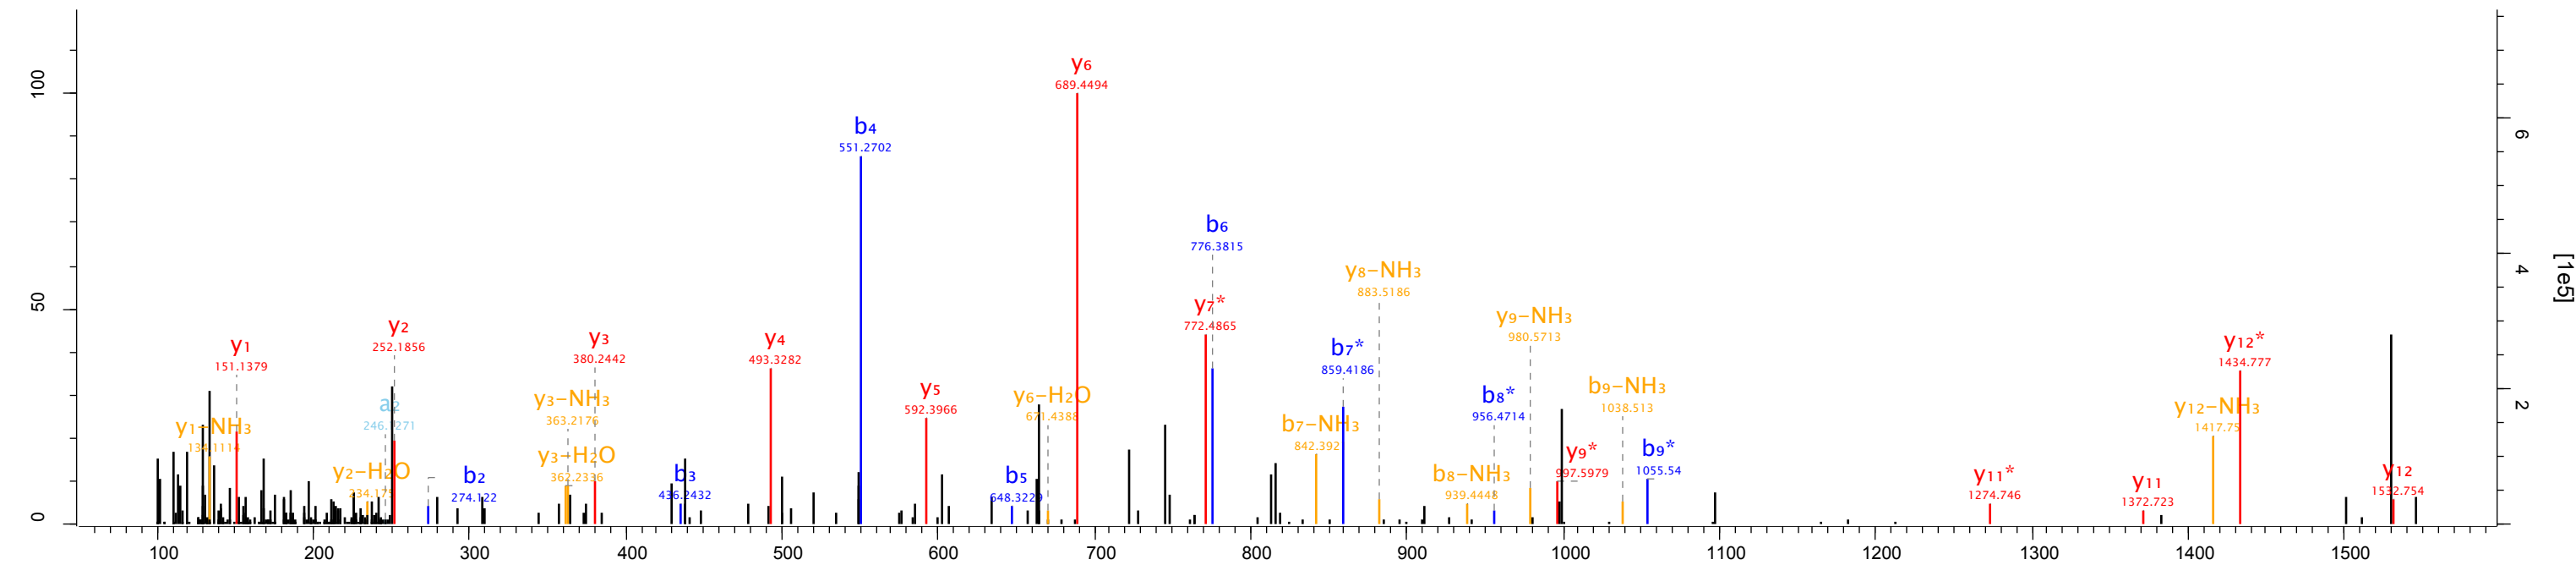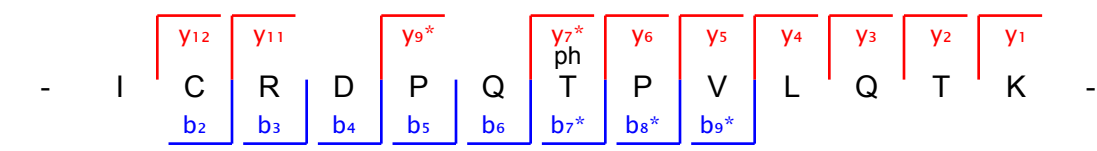

Raw file 20150814\_A375SR\_Phospho\_BR2\_08 Scan 9847 Method FTMS; HCD Score 145.88 m/z 590.96 Gene names UBE2J1

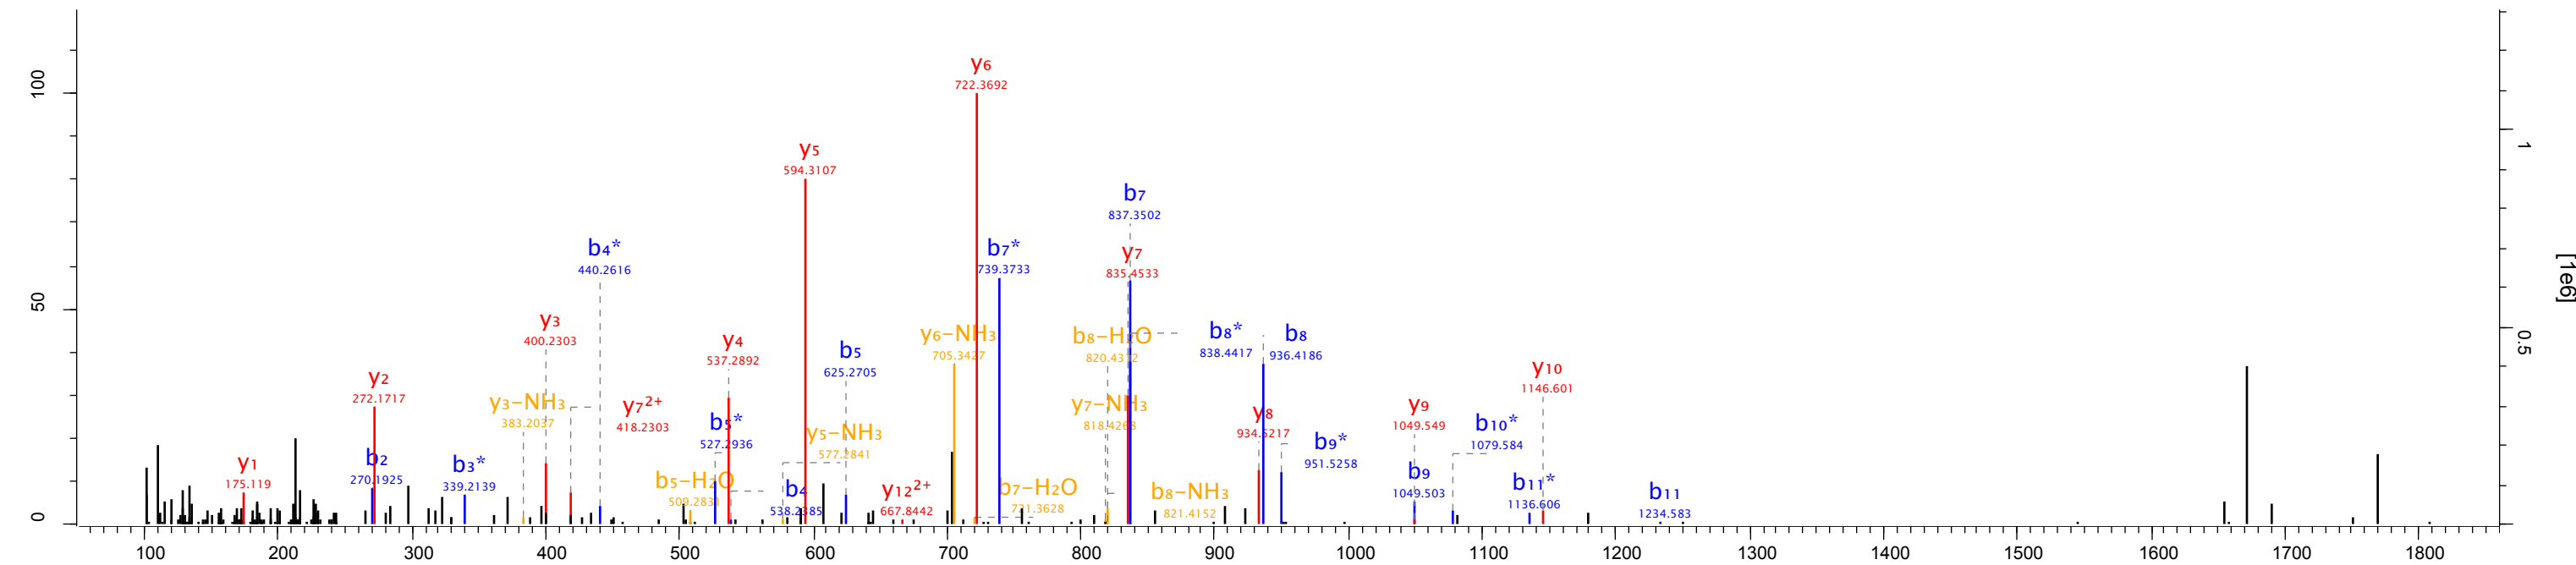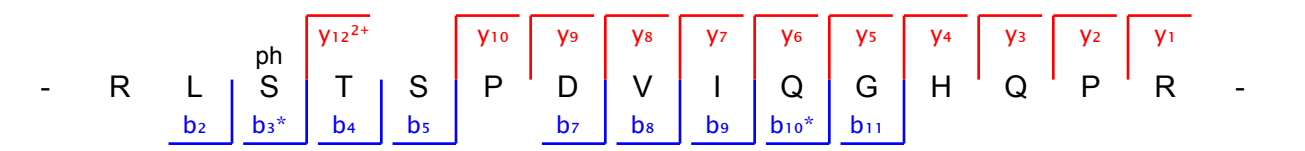

Raw file 20150814\_A375SR\_Phospho\_BR2\_09 Scan 11087 Method FTMS; HCD Score 124.21 m/z 633.28 Gene names UCK1

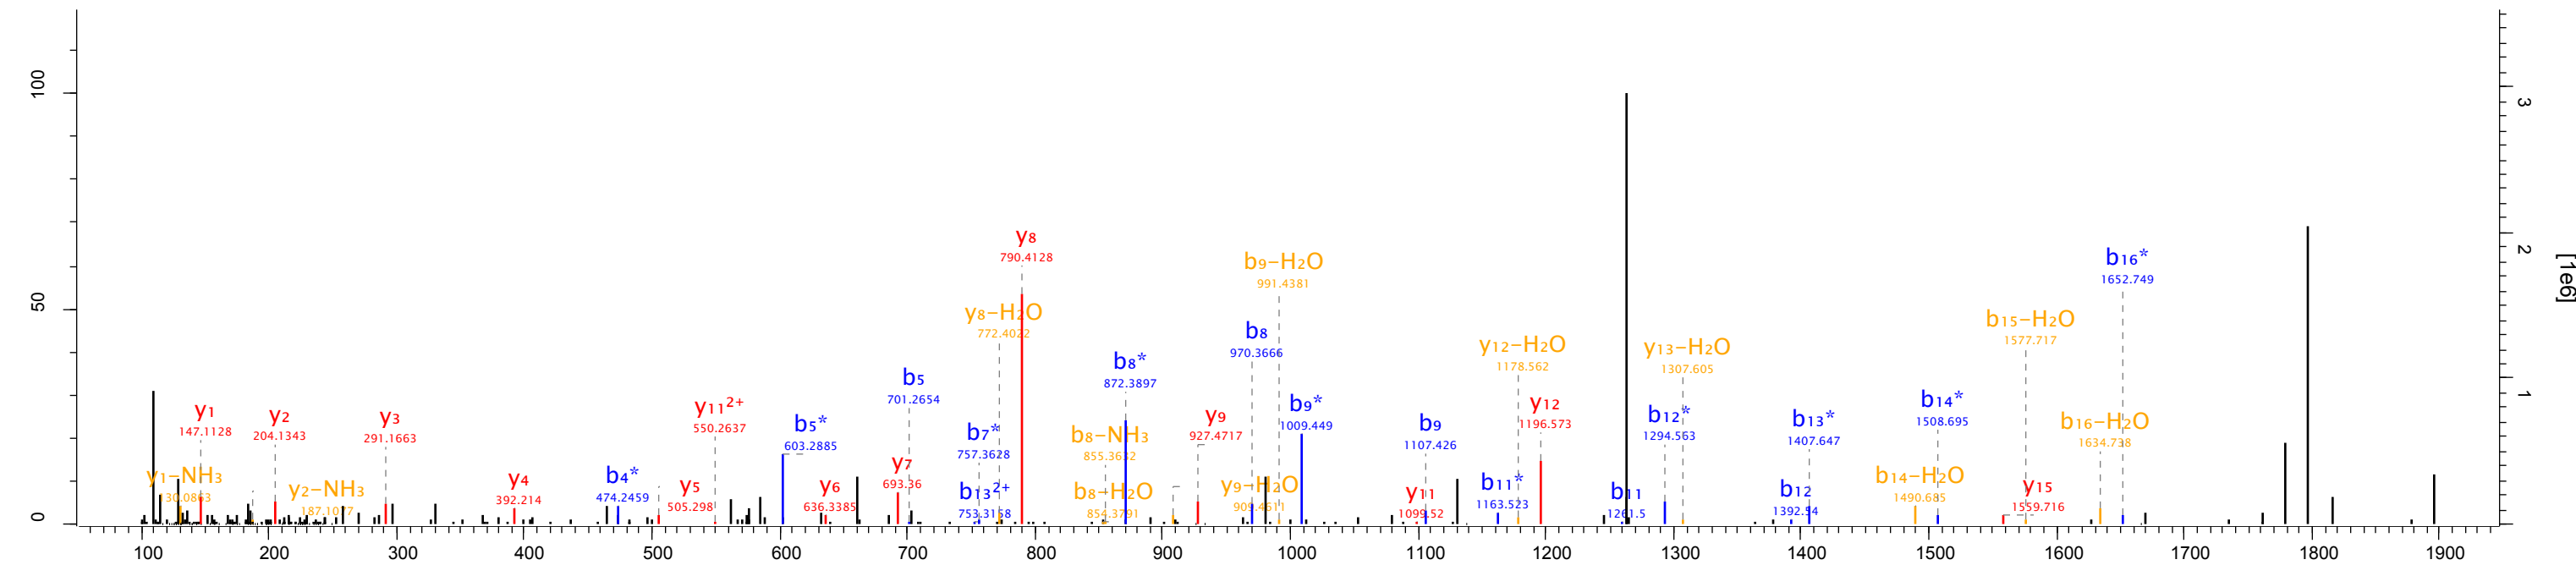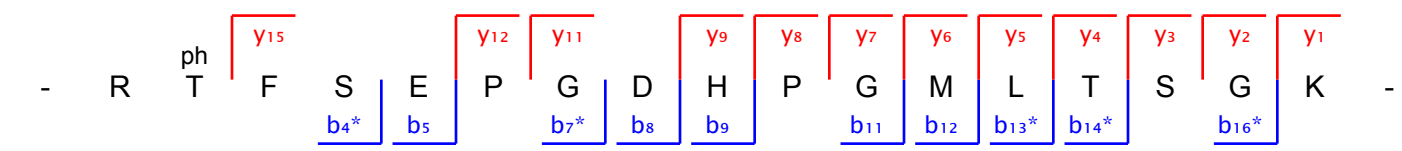

Raw file: 20150814\_A375SR\_Phospho\_BR2\_09  
 Scan: 1147 Method: FTMS; HCD Score: 93.45 m/z: 473.24 Gene names: SRSF3

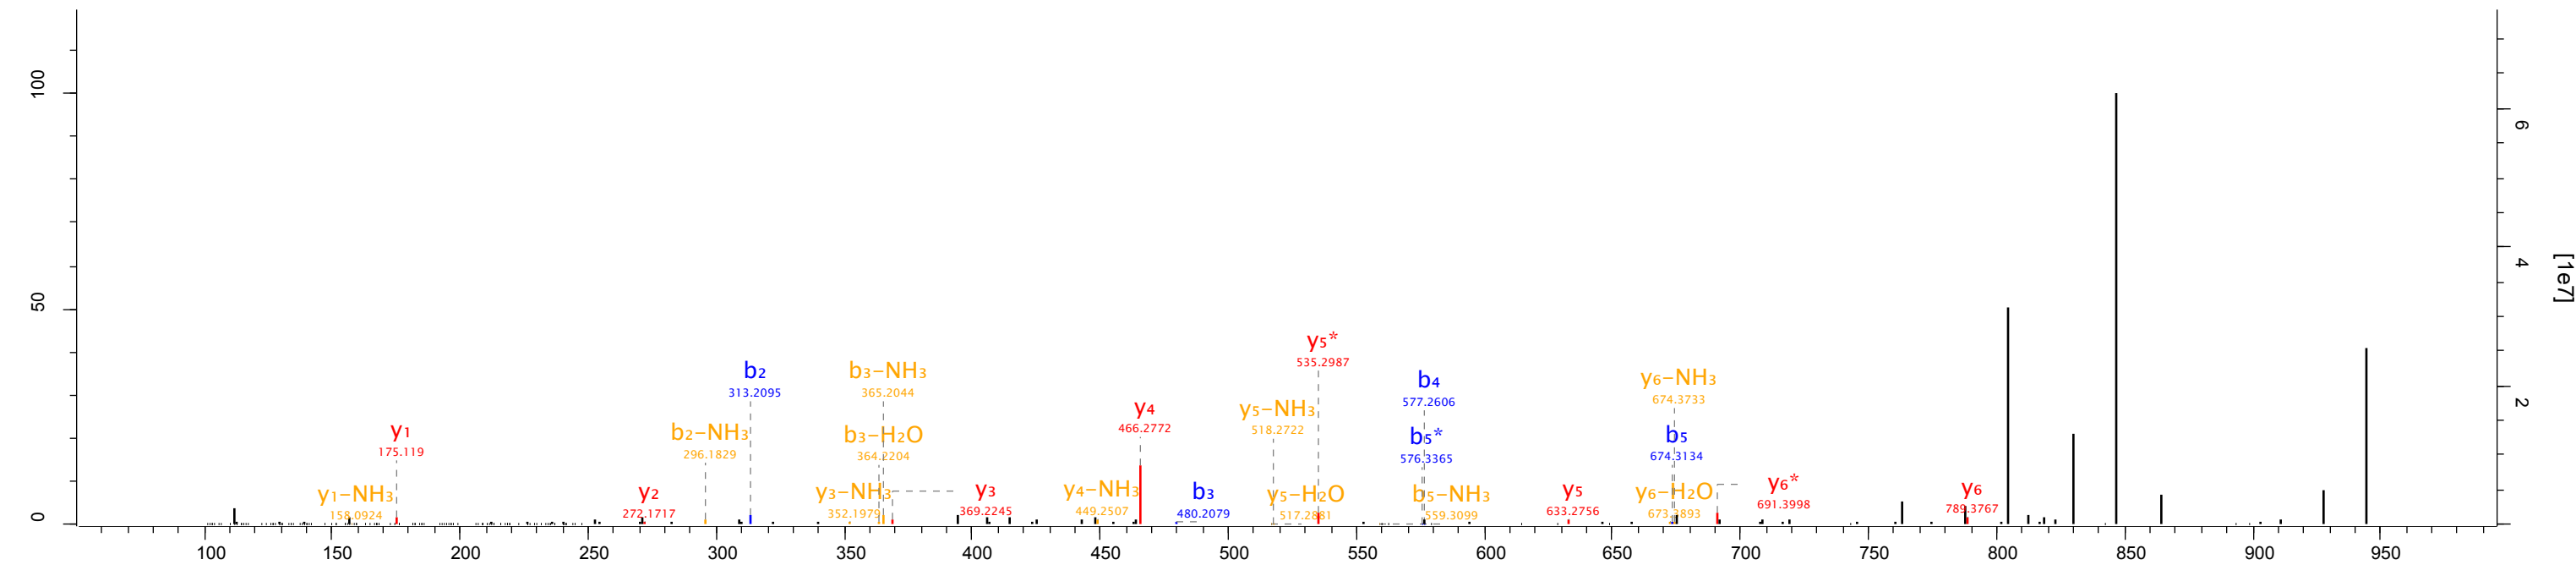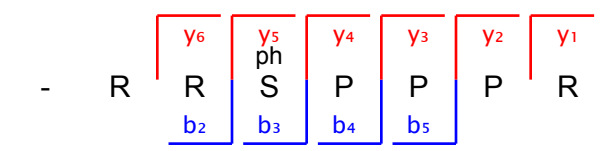

Raw file: 20150814\_A375SR\_Phospho\_BR2\_09  
 Scan: 11517 Method: FTMS; HCD Score: 78.19 m/z: 671.8 Gene names: PROSER1

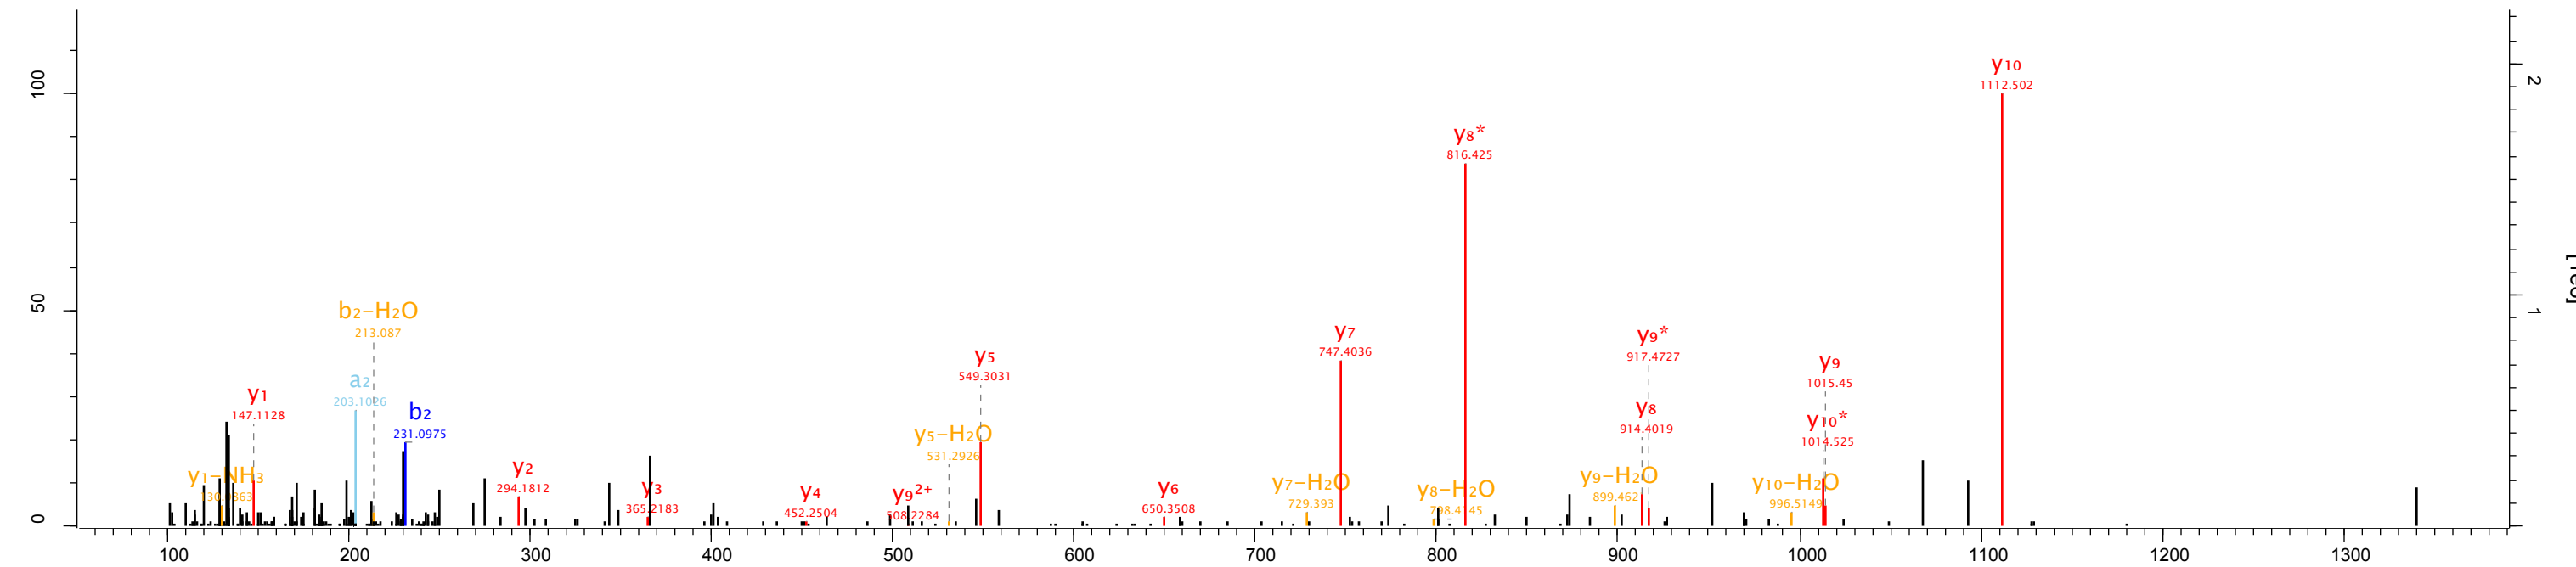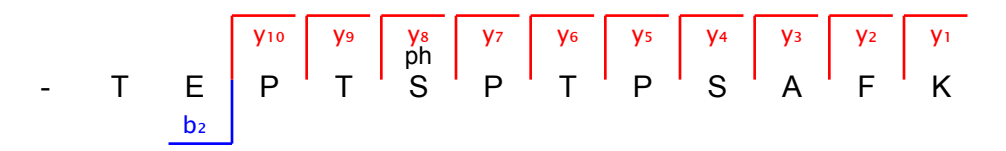

Raw file: 20150814\_A375SR\_Phospho\_BR2\_09  
 Scan: 1177 Method: FTMS; HCD Score: 64.1 m/z: 649.34 Gene names: GTF21

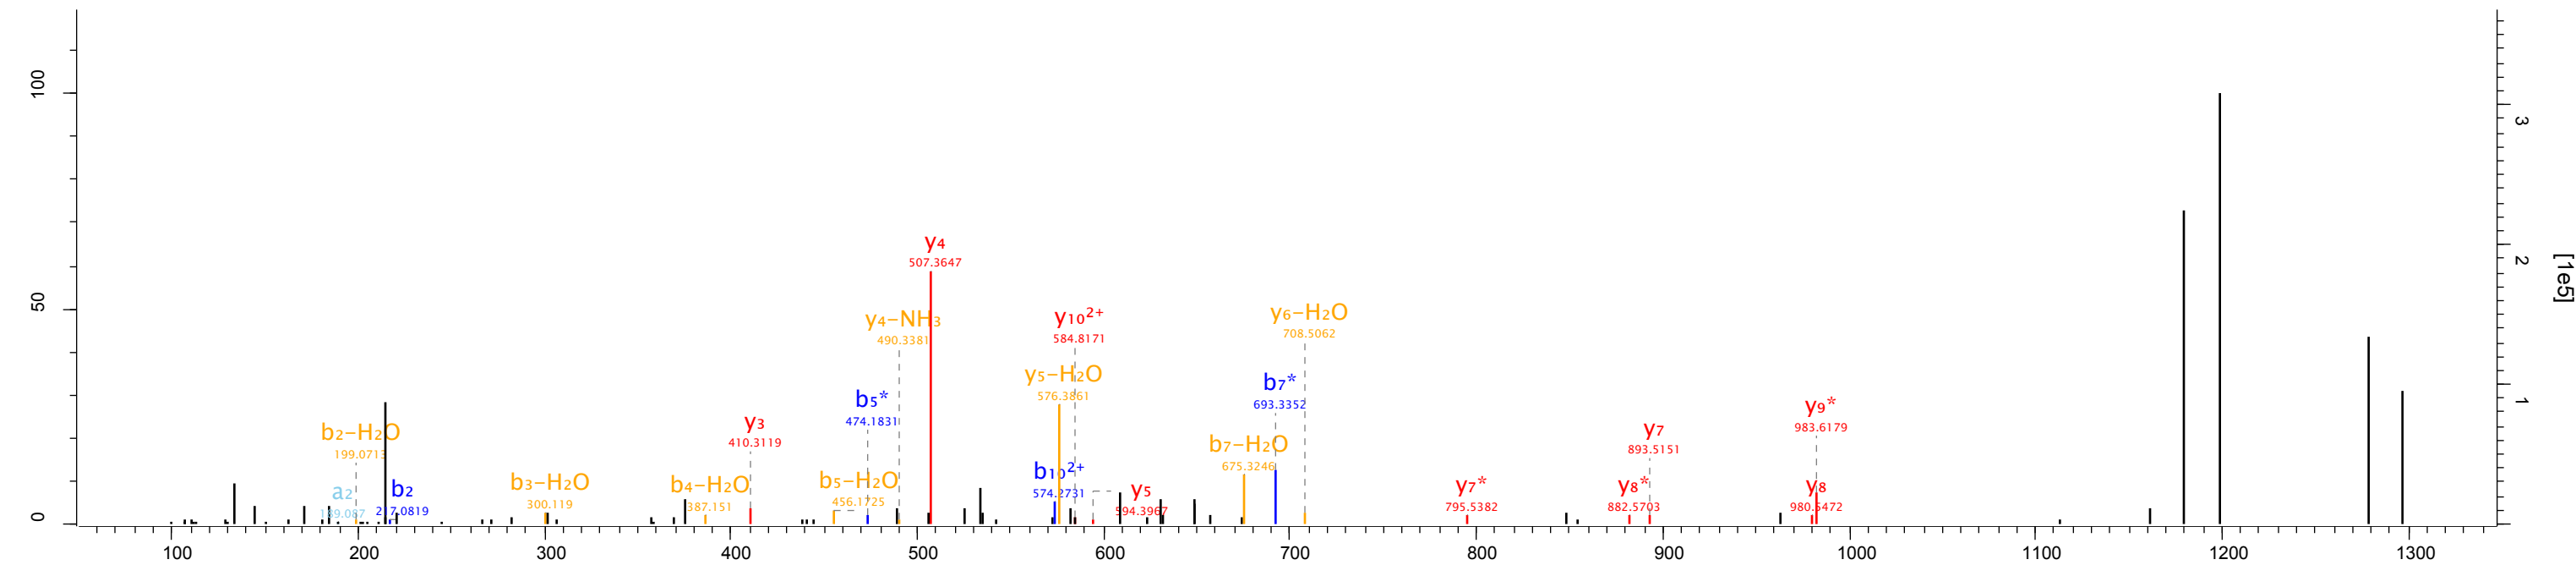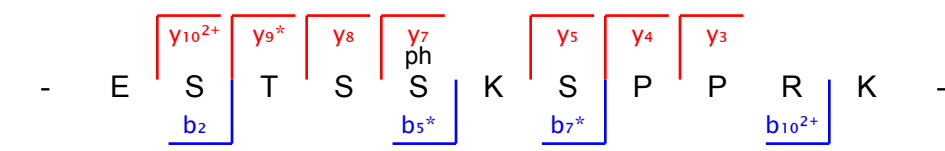

Raw file: 20150814\_A375SR\_Phospho\_BR2\_09  
 Scan: 1227 Method: FTMS; HCD Score: 100.93 m/z: 398.87 Gene names: HMGA1

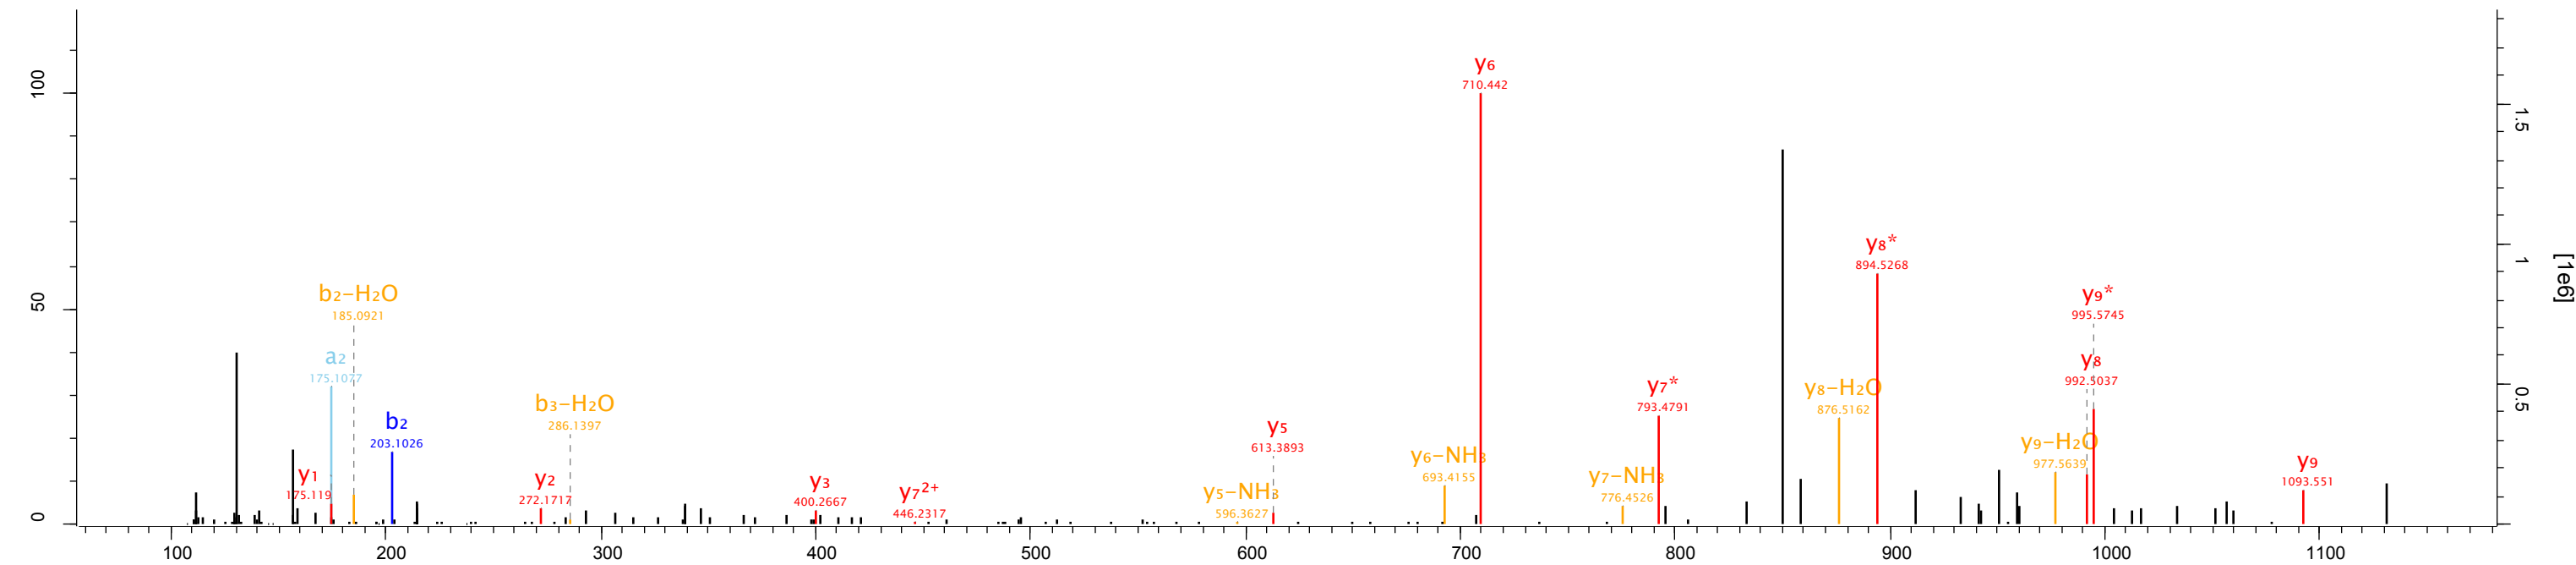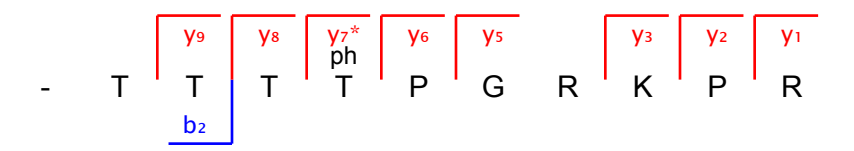



Raw file: 20150814\_A375SR\_Phospho\_BR2\_09  
 Scan: 12587 Method: FTMS; HCD Score: 122.46 m/z: 575.77 Gene names: ZNF609

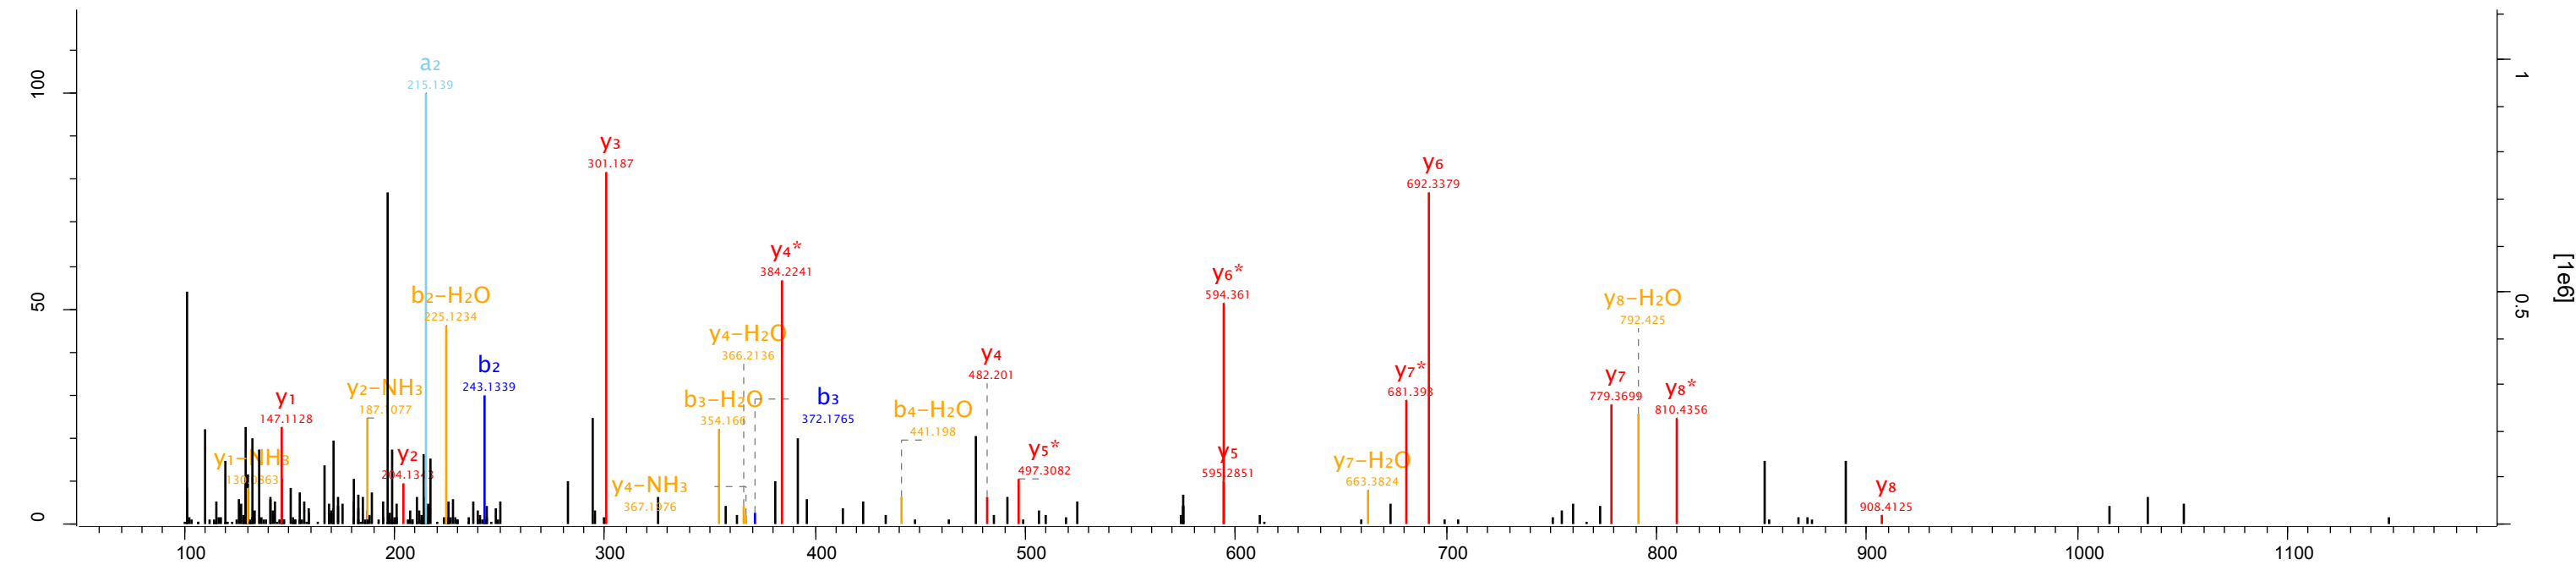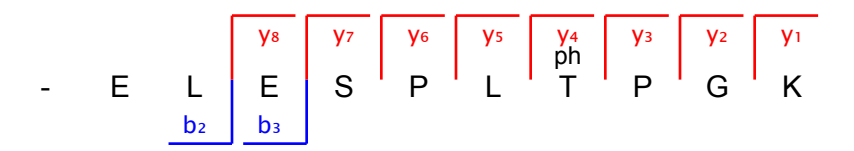

Raw file 20150814\_A375SR\_Phospho\_BR2\_09 Scan 12697 Method FTMS; HCD Score 55.69 m/z 539.25 Gene names CHAMP1

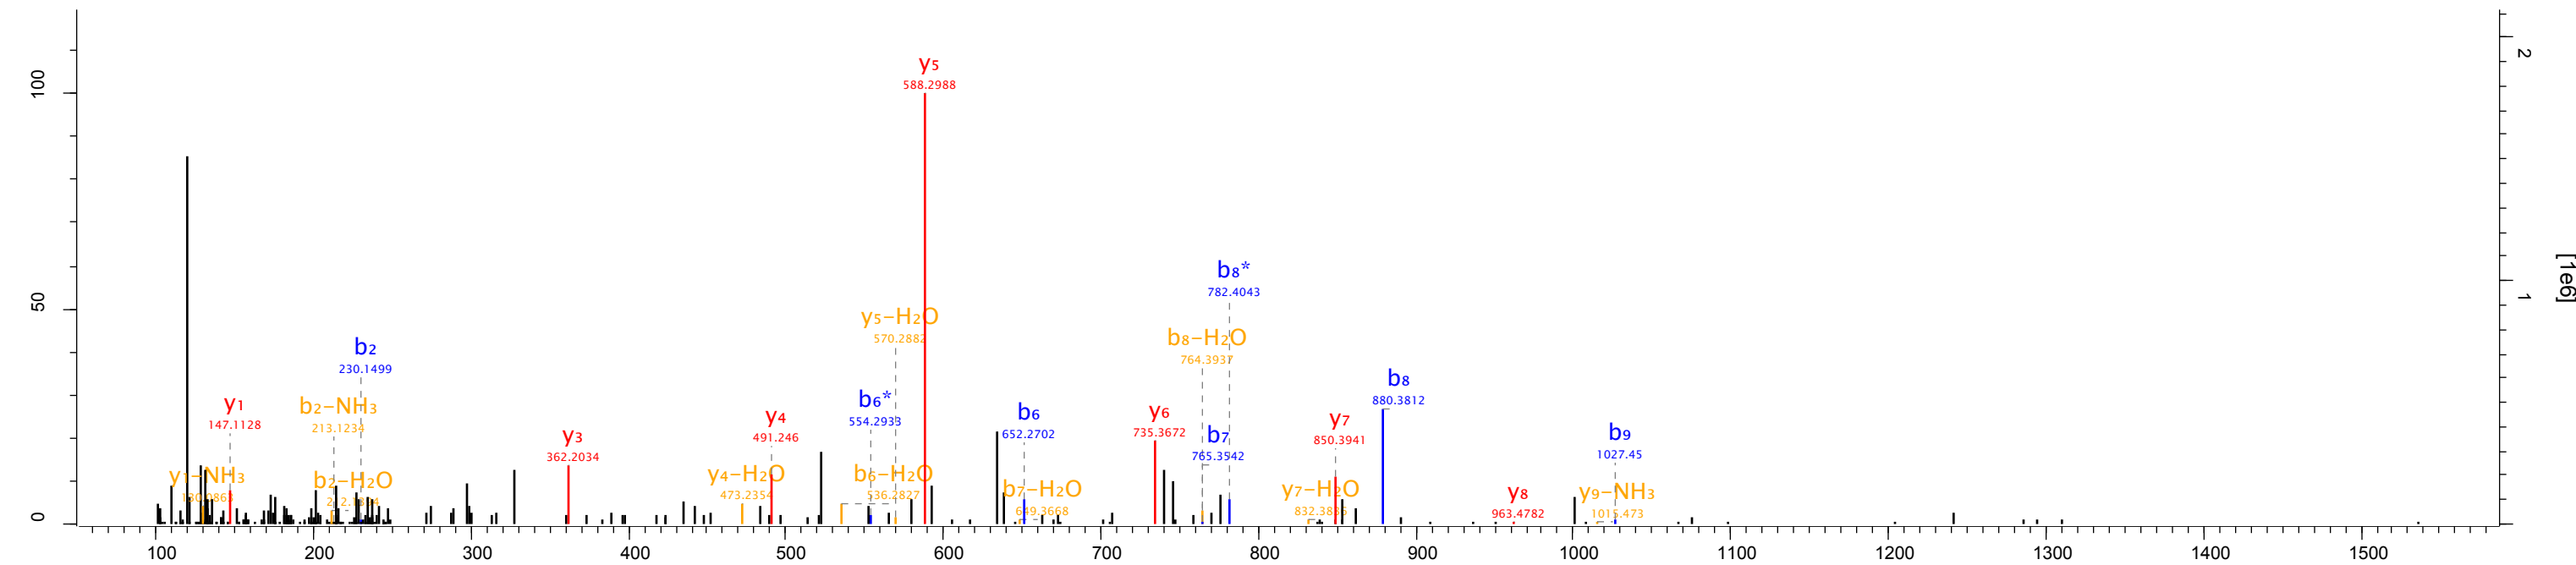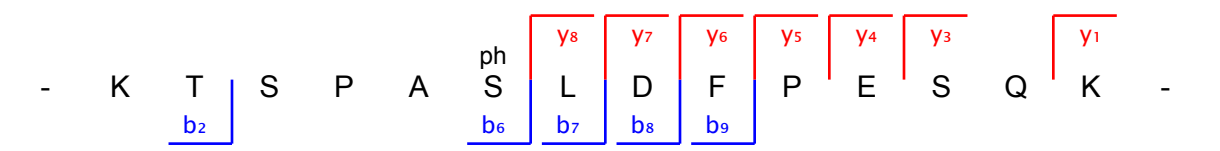

Raw file: 20150814\_A375SR\_Phospho\_BR2\_09  
 Scan: 12897 Method: FTMS; HCD Score: 190.79 m/z: 891.39

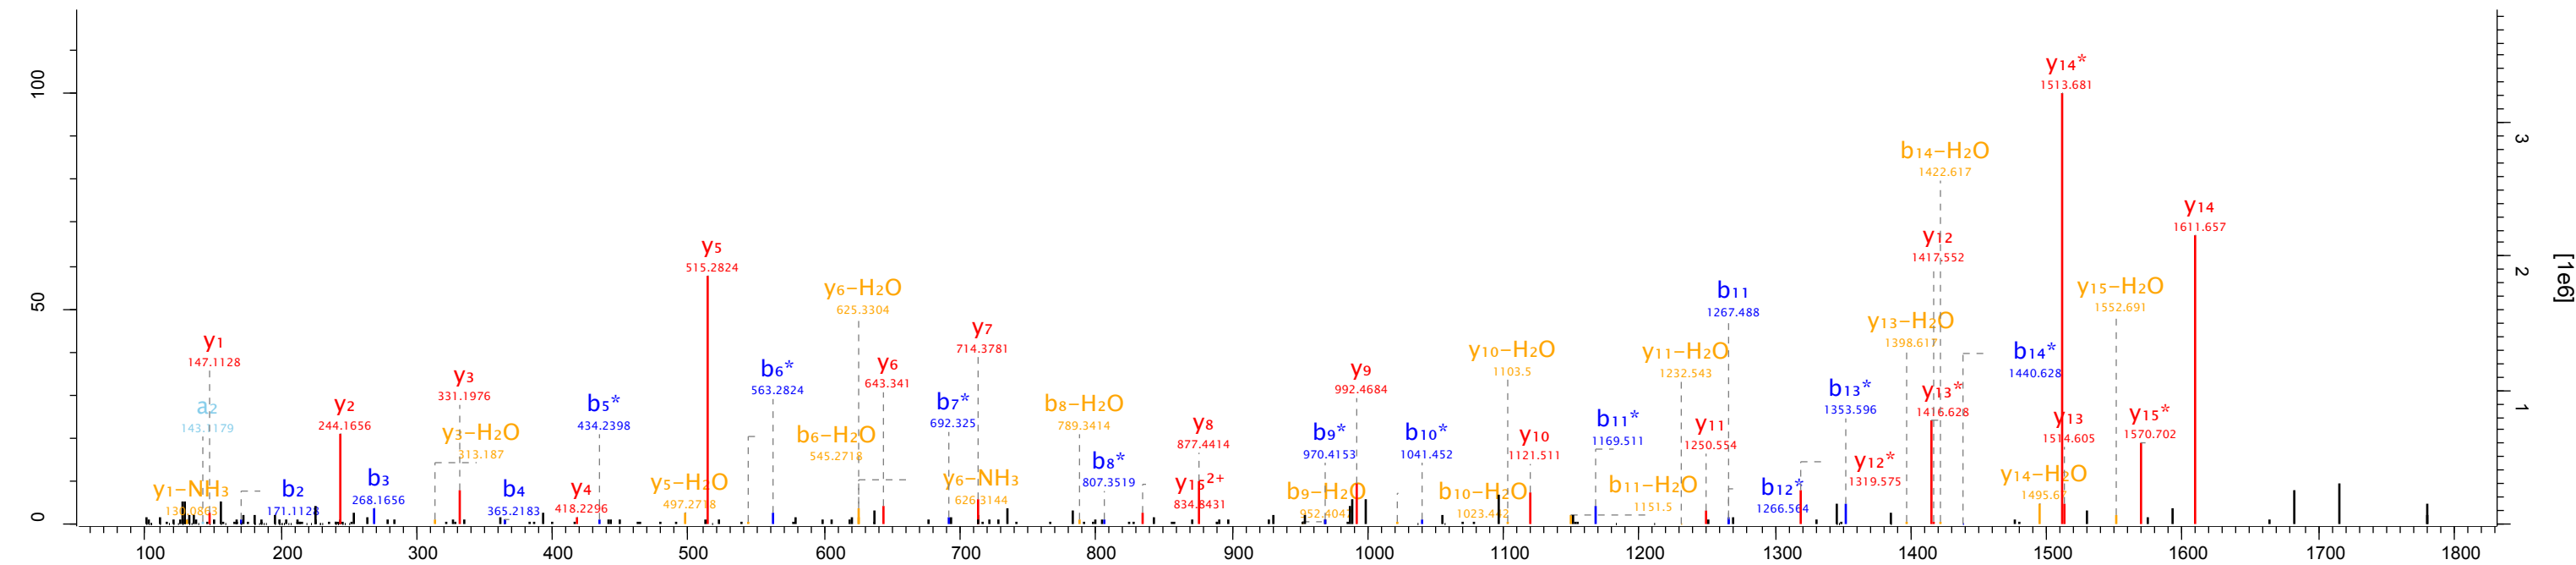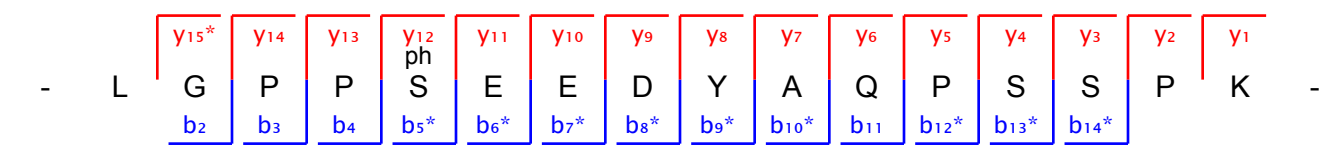

Raw file: 20150814\_A375SR\_Phospho\_BR2\_09  
 Scan: 14047  
 Method: FTMS; HCD  
 Score: 77.58  
 m/z: 963.44  
 Gene names: ANXA2;ANXA2P2

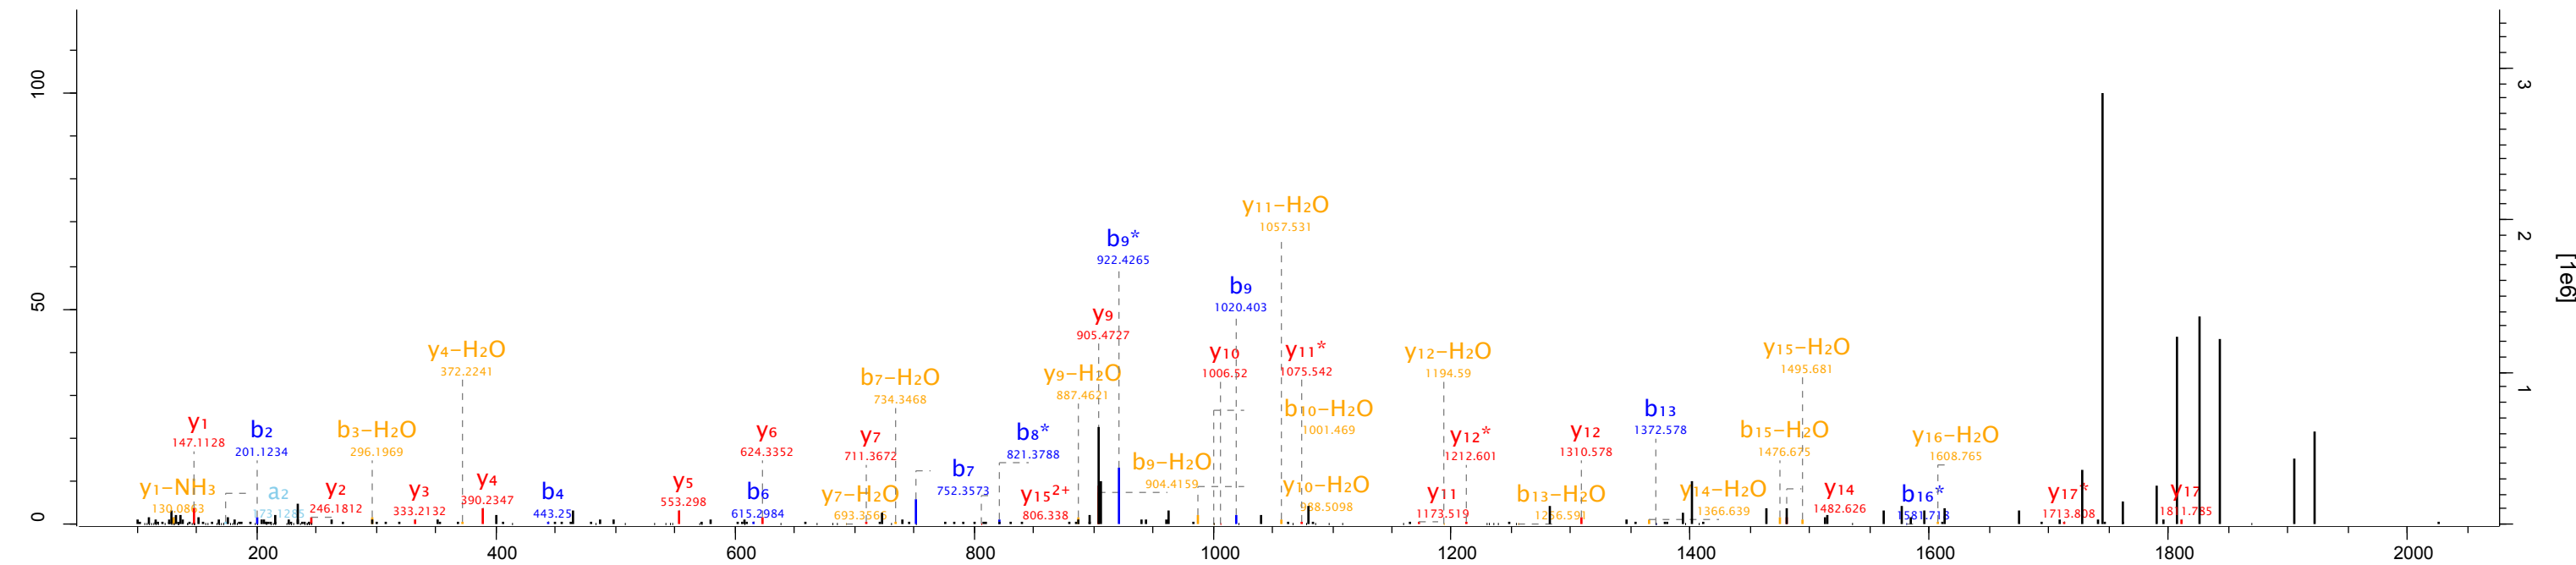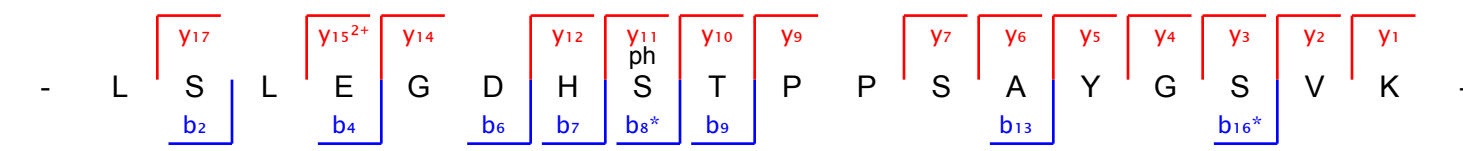

Raw file 20150814\_A375SR\_Phospho\_BR2\_09 Scan 14097 Method FTMS; HCD Score 163.4 m/z 810.71 Gene names ATG9A

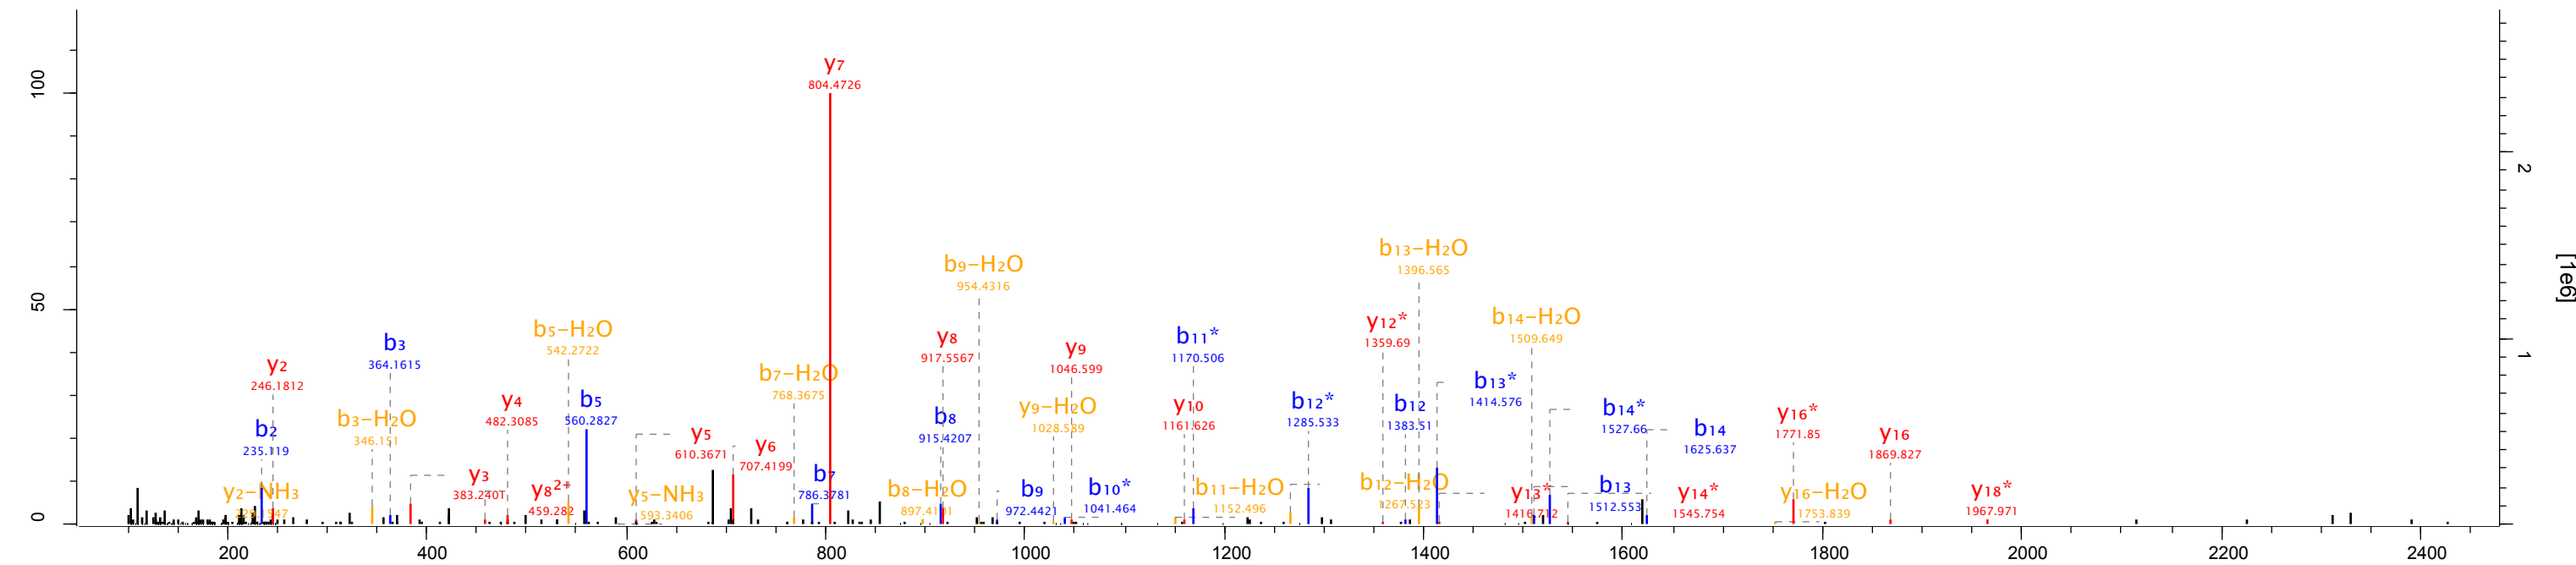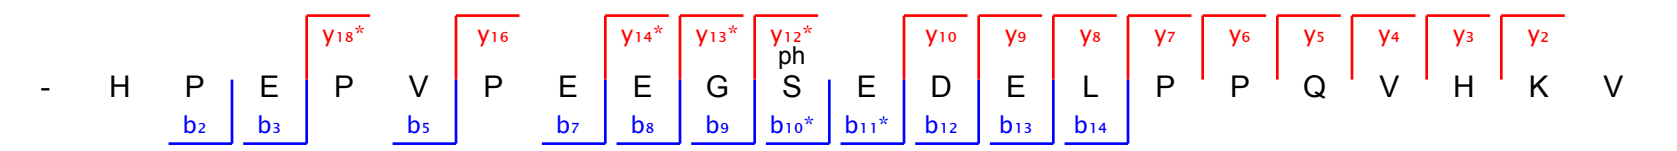

Raw file  
20150814\_A375SR\_Phospho\_BR2\_09

Scan 14347 Method FTMS; HCD Score 177.82 m/z 702.69 Gene names LIMA1;TRMT1

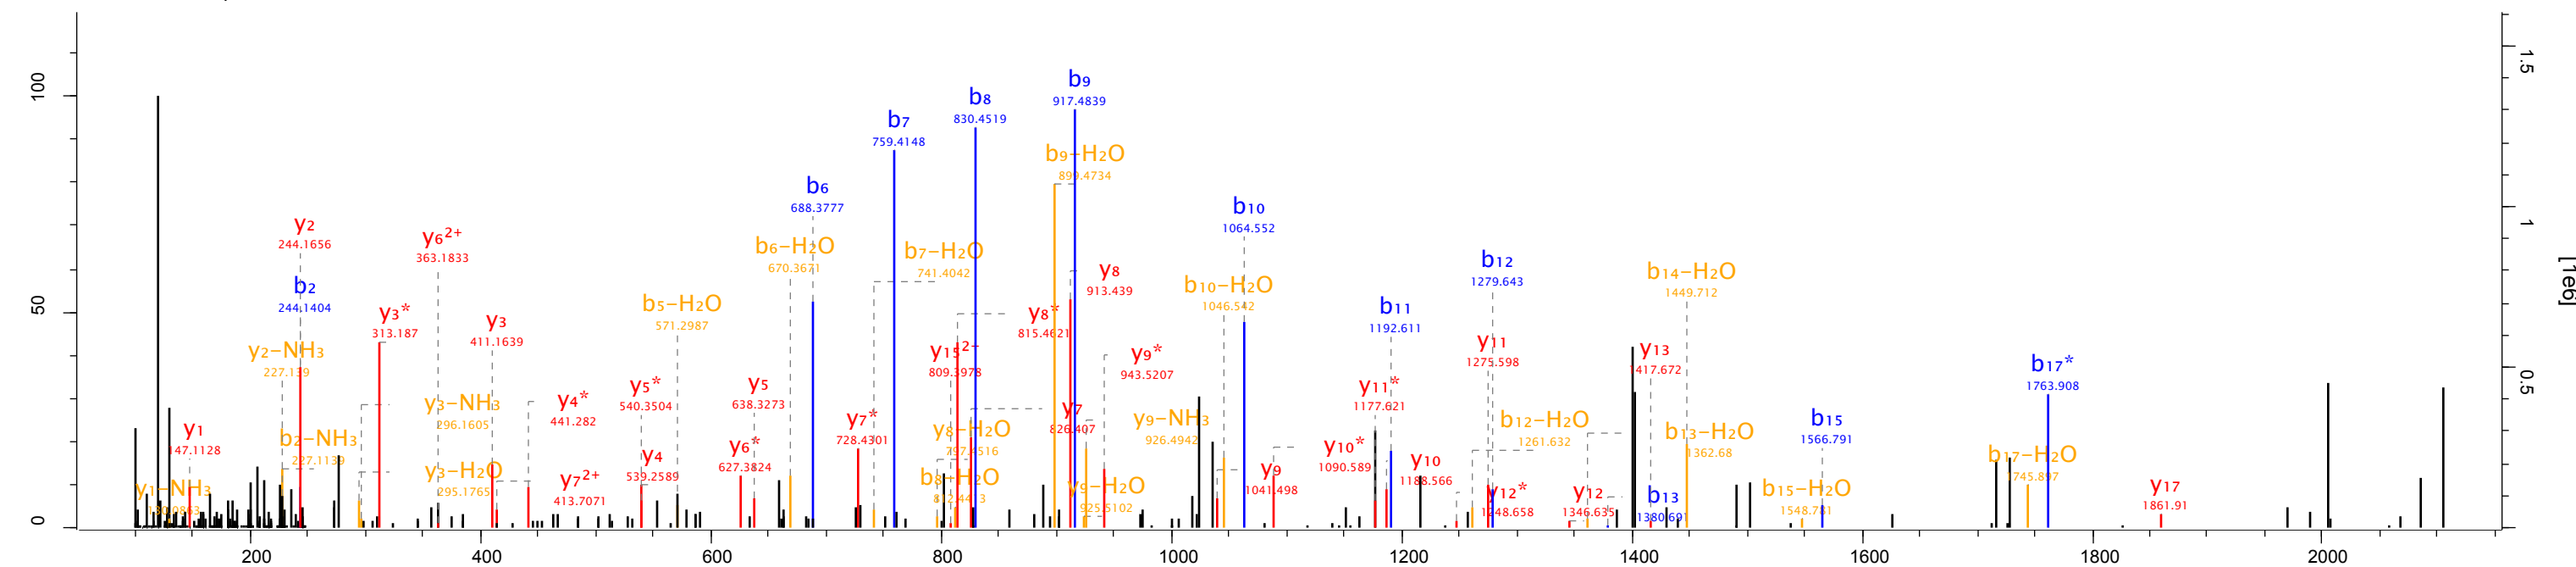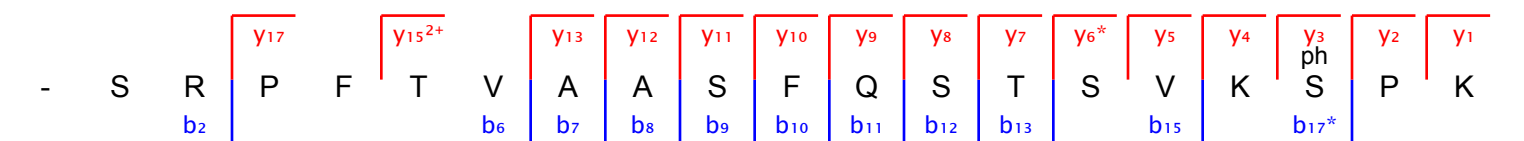

Raw file 20150814\_A375SR\_Phospho\_BR2\_09 Scan 14567 Method FTMS; HCD Score 58.12 m/z 600.62 Gene names SLAIN2

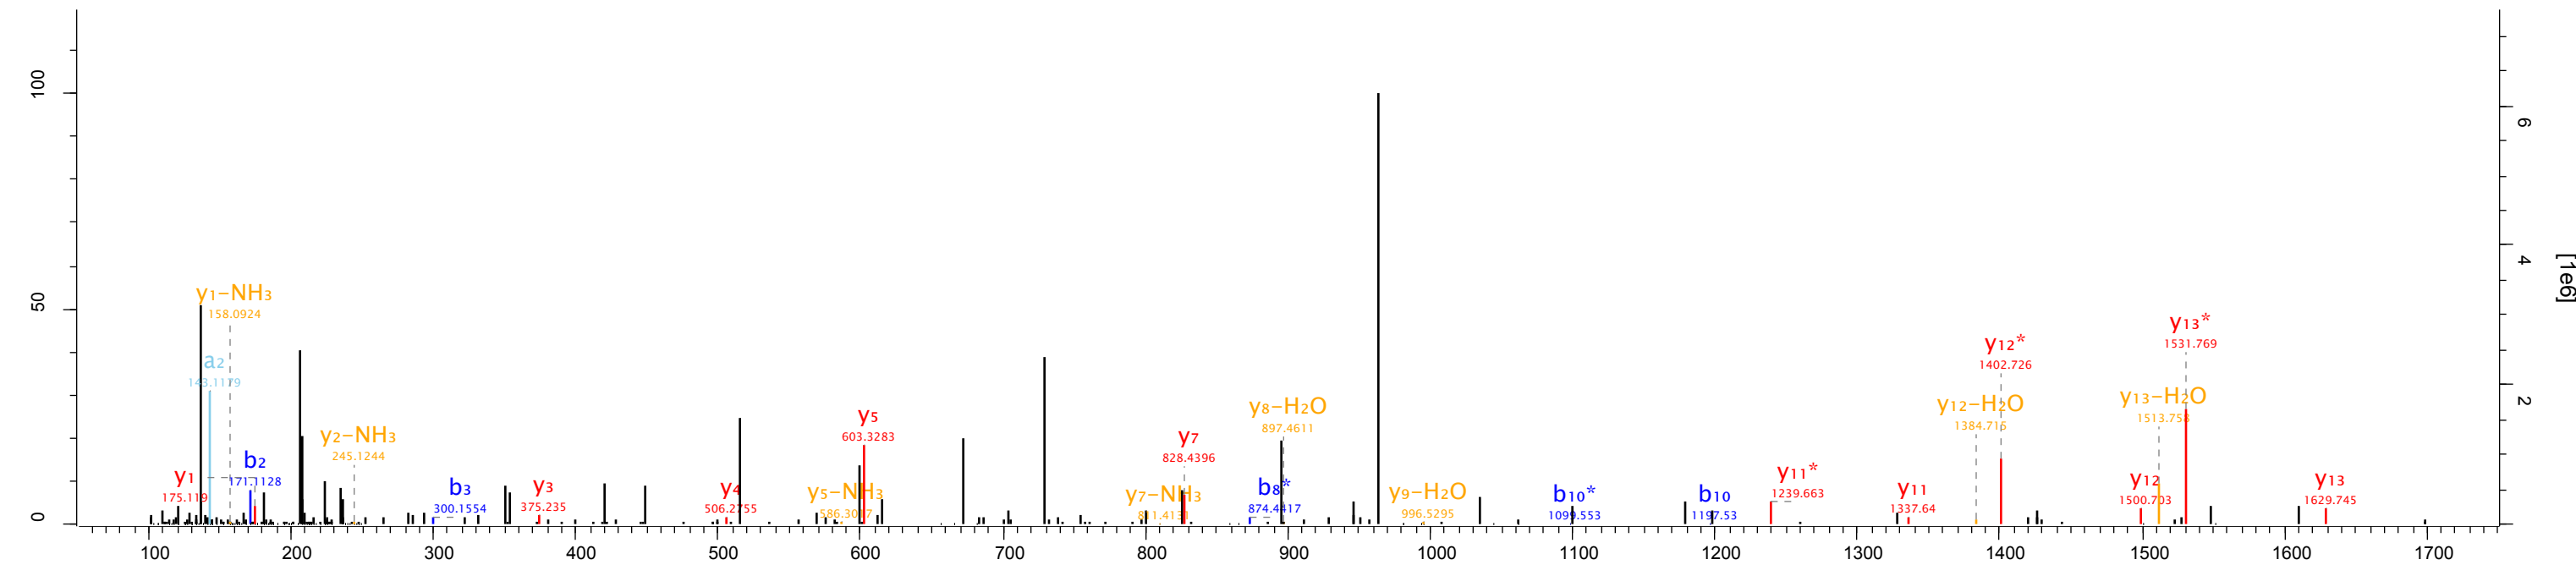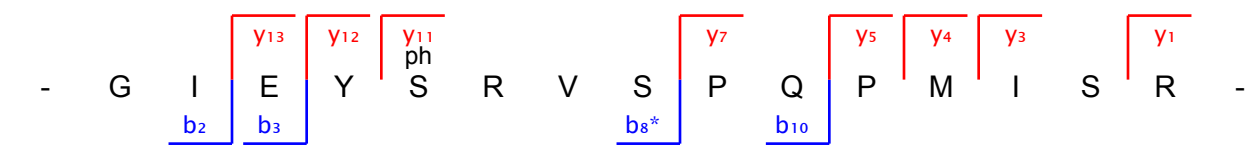

Raw file 20150814\_A375SR\_Phospho\_BR2\_09 Scan 15267 Method FTMS; HCD Score 132.16 m/z 731.02 Gene names PUM1

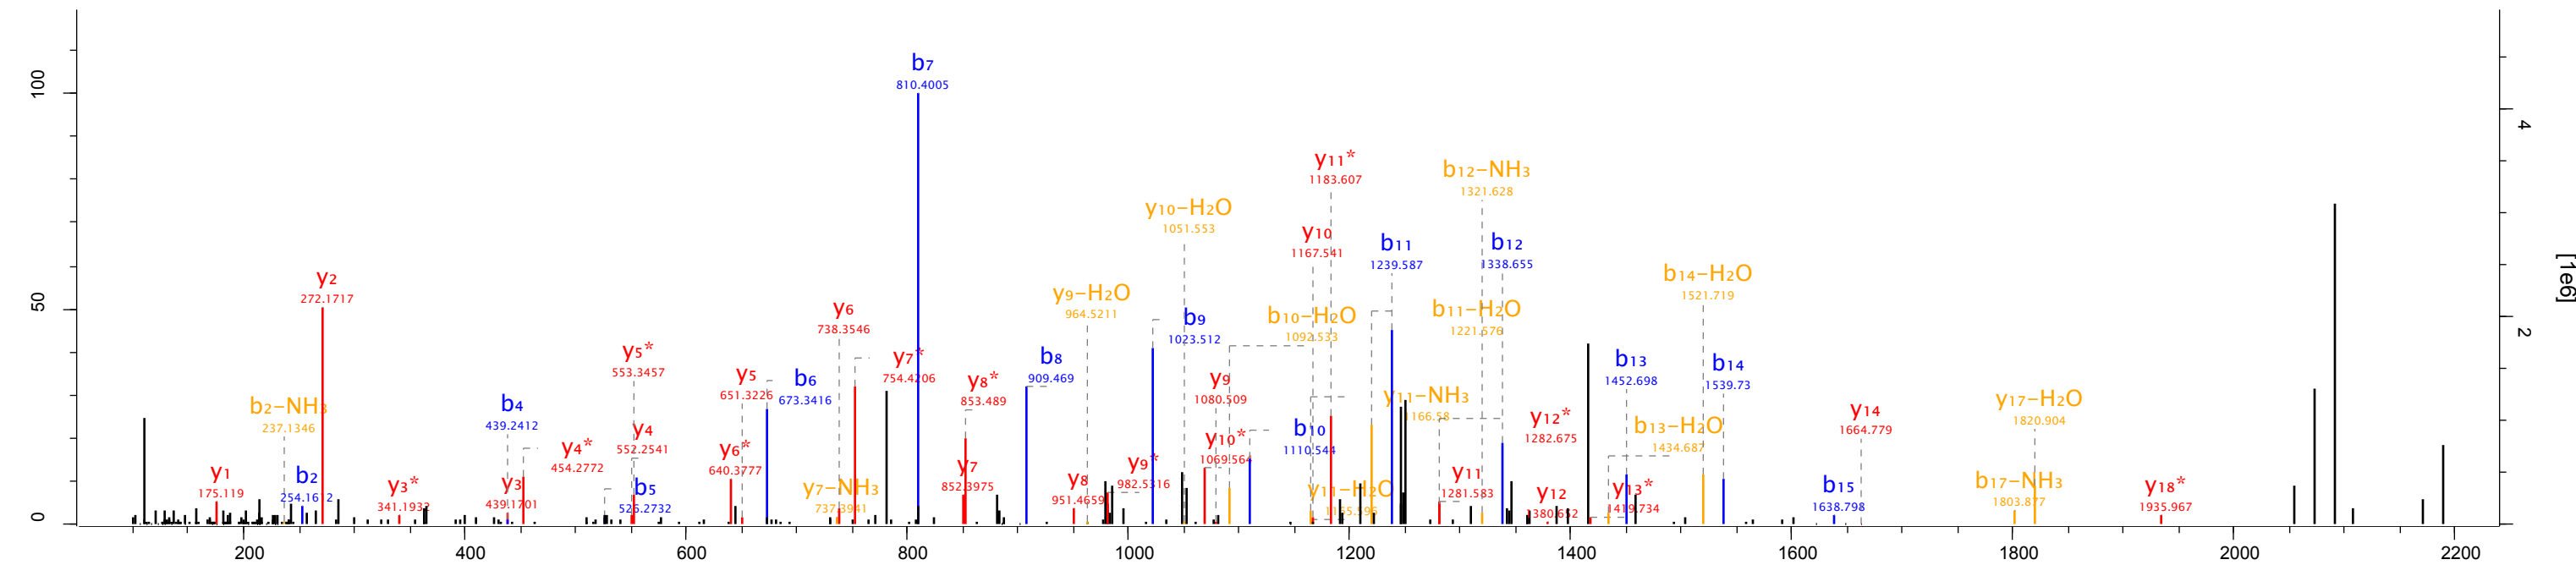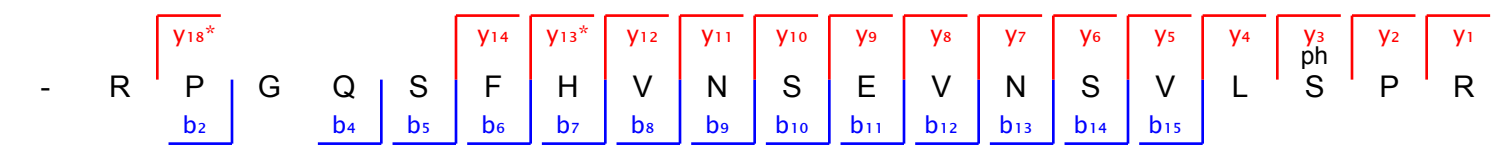



Raw file: 20150814\_A375SR\_Phospho\_BR2\_09  
 Scan: 15467 Method: FTMS; HCD Score: 107.58 m/z: 447.74 Gene names: EPB41L1

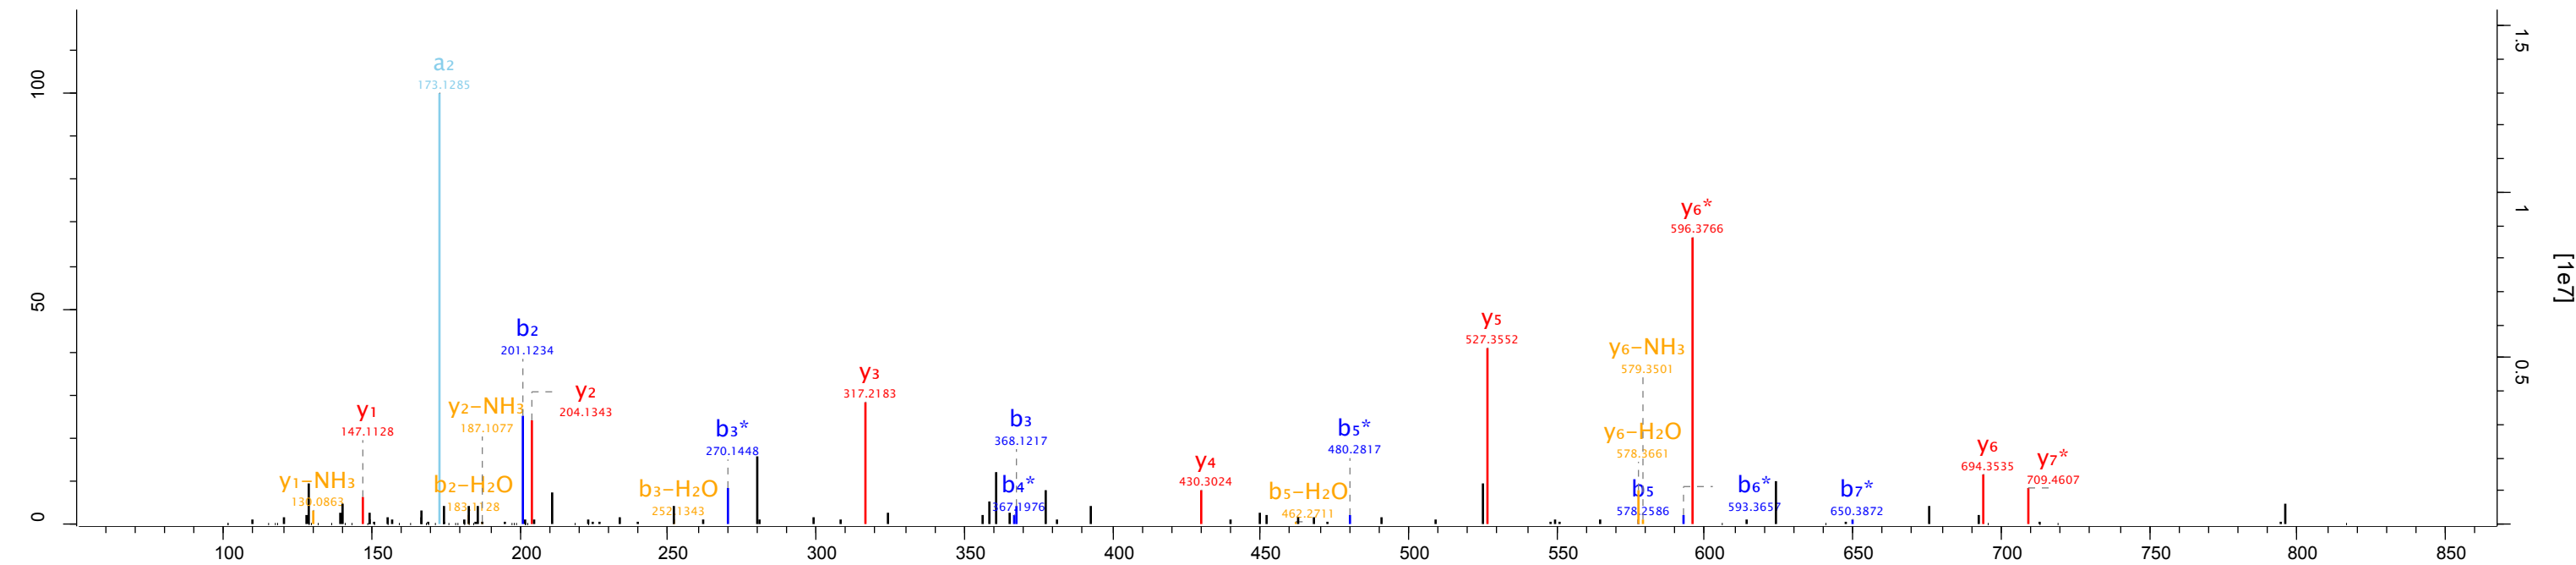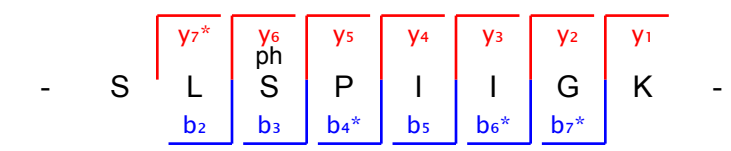

Raw file 20150814\_A375SR\_Phospho\_BR2\_09 Scan 15567 Method FTMS; HCD Score 86.37 m/z 660.32 Gene names SLCO4A1

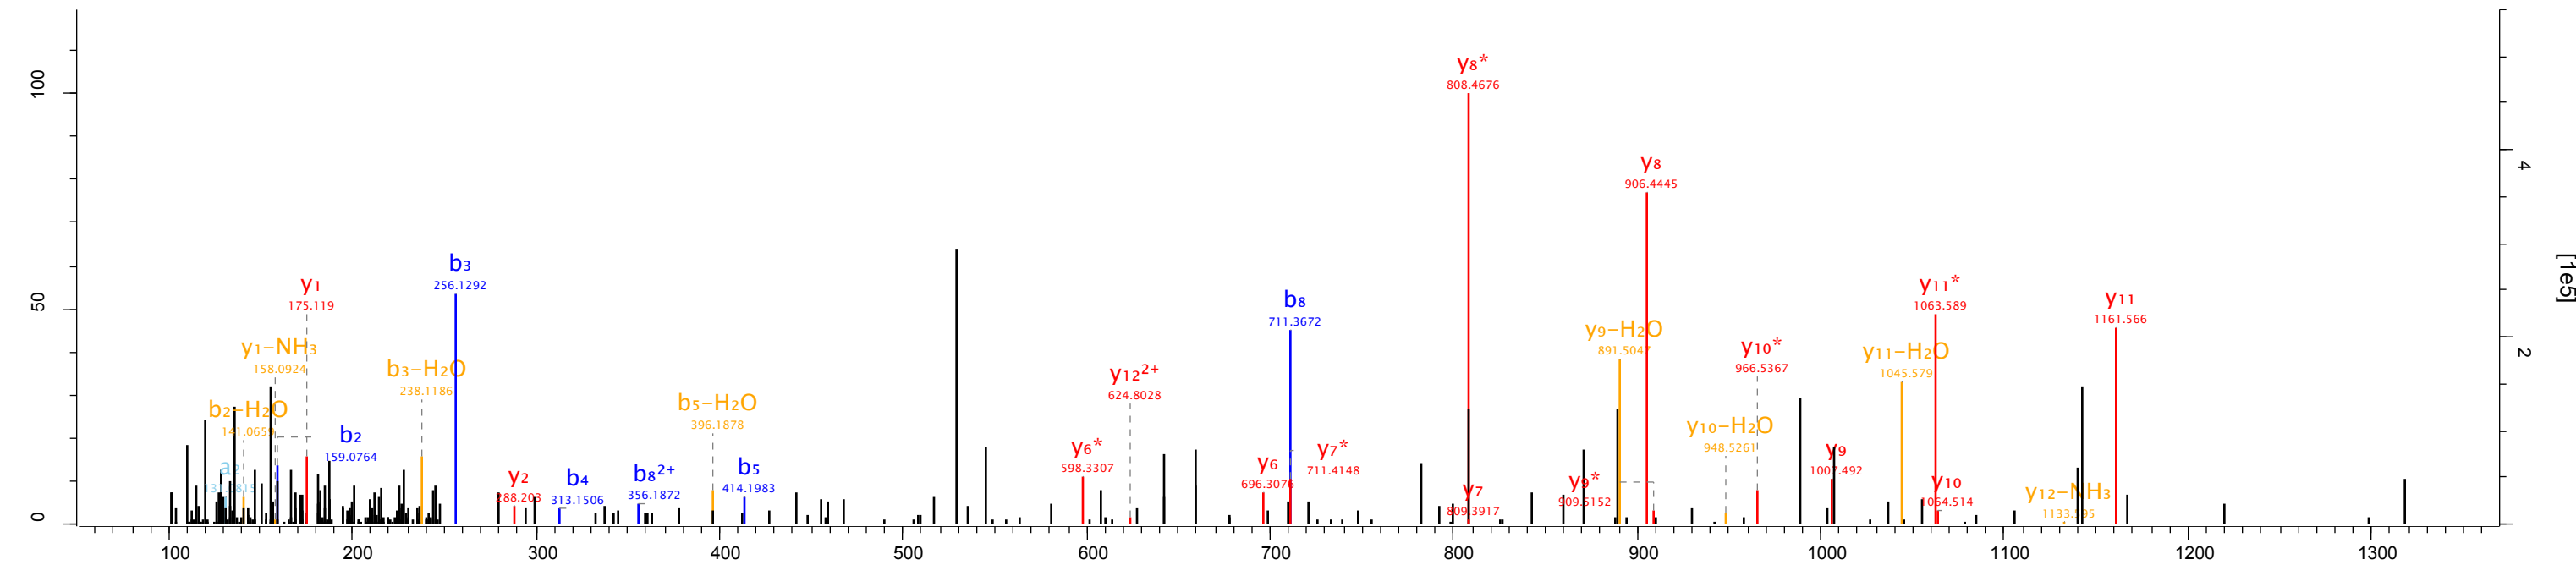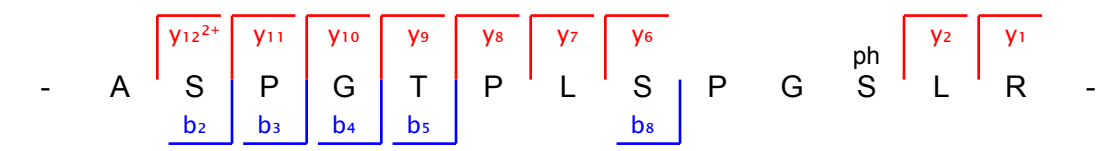

Raw file 20150814\_A375SR\_Phospho\_BR2\_09 Scan 15687 Method FTMS; HCD Score 173.23 m/z 871.65 Gene names PCBP2

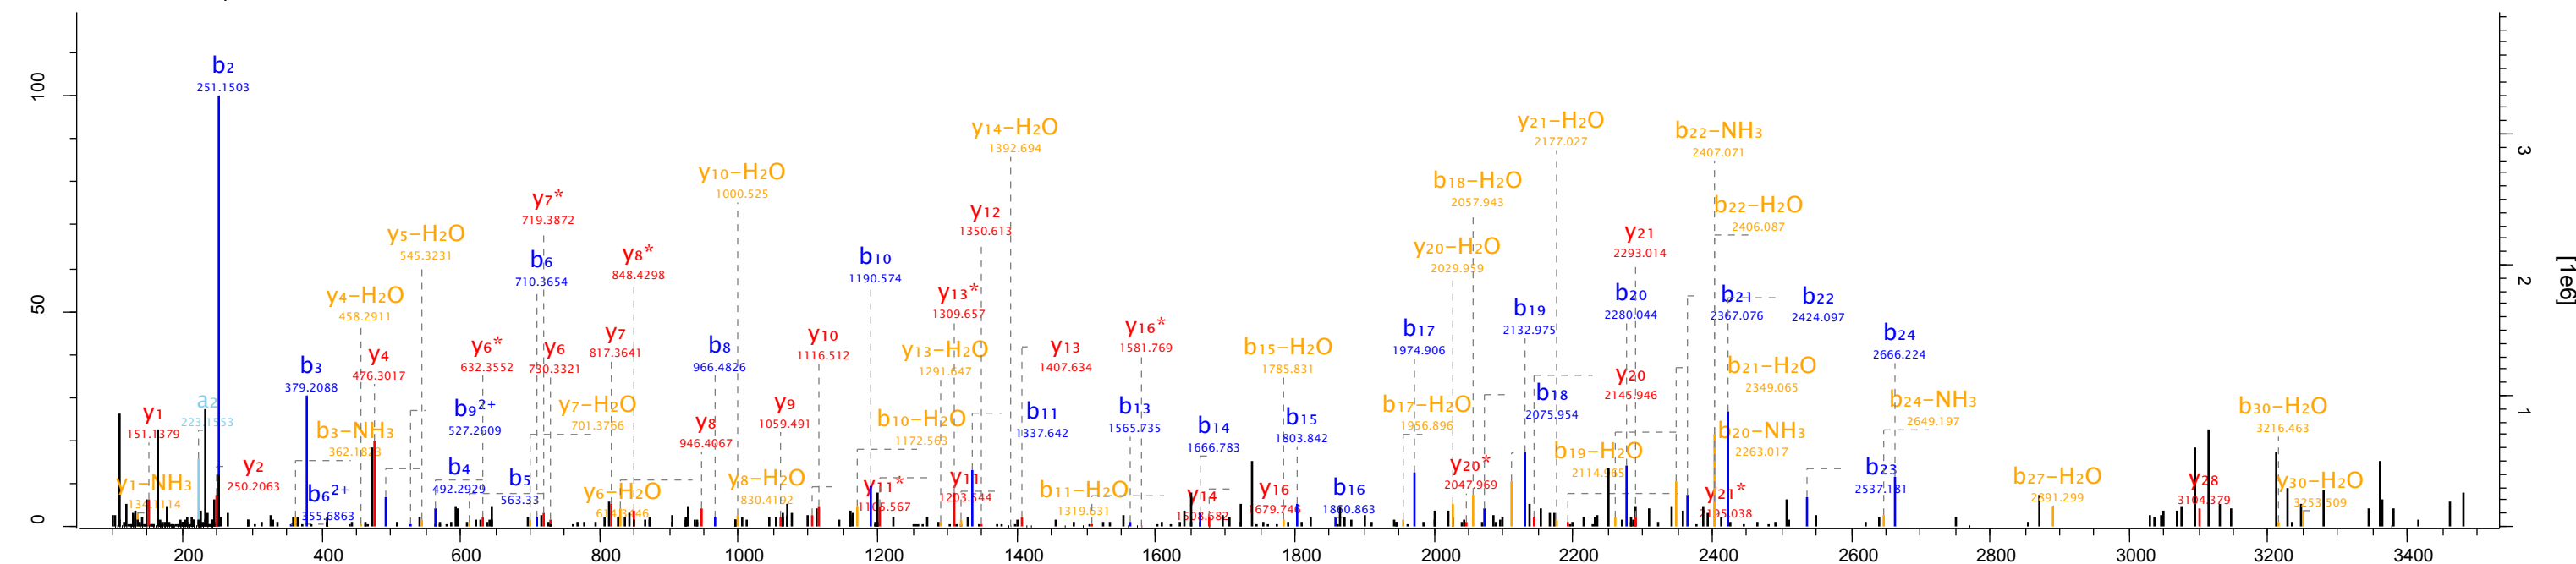

- L H Q L A M Q Q S H F P M T H G N T G F S G I E S S P E V K -

b<sub>2</sub>
b<sub>3</sub>
b<sub>4</sub>
b<sub>5</sub>
b<sub>6</sub>
b<sub>8</sub>
b<sub>9</sub><sup>2+</sup>
b<sub>10</sub>
b<sub>11</sub>
b<sub>13</sub>
b<sub>14</sub>
b<sub>15</sub>
b<sub>16</sub>
b<sub>17</sub>
b<sub>18</sub>
b<sub>19</sub>
b<sub>20</sub>
b<sub>21</sub>
b<sub>22</sub>
b<sub>23</sub>
b<sub>24</sub>
y<sub>1</sub>
y<sub>2</sub>
y<sub>4</sub>
y<sub>6</sub><sup>ph</sup>
y<sub>7</sub>
y<sub>8</sub>
y<sub>9</sub>
y<sub>10</sub>
y<sub>11</sub>
y<sub>12</sub>
y<sub>13</sub>
y<sub>14</sub>
y<sub>16</sub>
y<sub>20</sub>
y<sub>21</sub>
y<sub>28</sub>
ox

Raw file Scan Method Score m/z Gene names  
 20150814\_A375SR\_Phospho\_BR2\_09 15777 FTMS; HCD 119.62 605.98 RANBP3;ZNF8

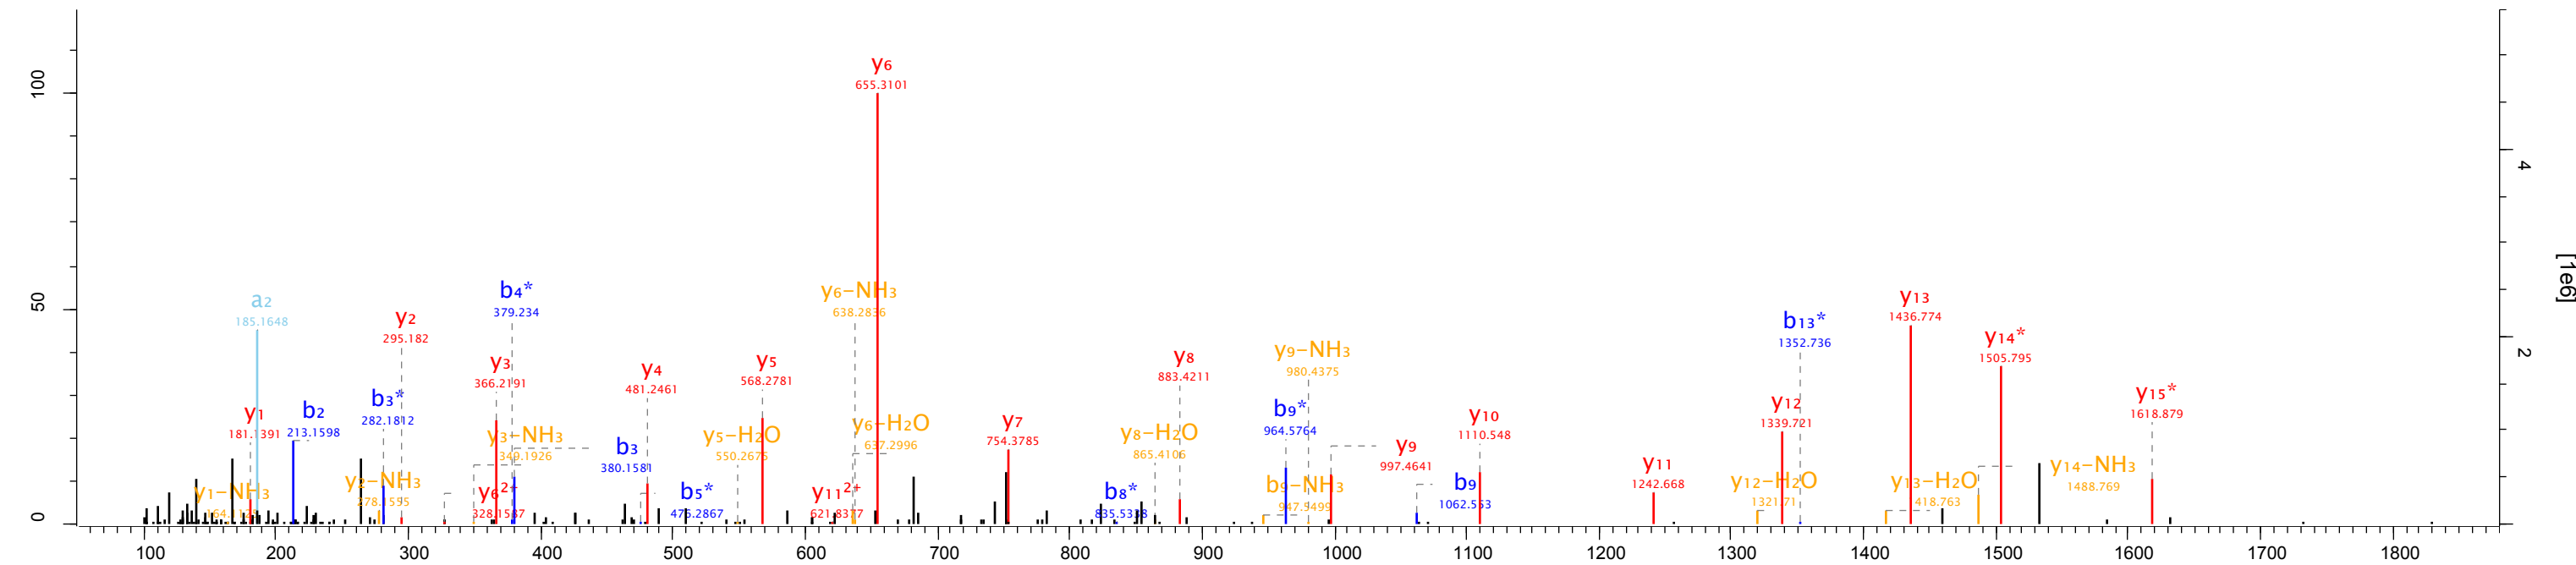

- V L S P P K L N E V S S D A N R -  
 b2 b3 b4\* b5\* b8\* b9 b13\*

Raw file: 20150814\_A375SR\_Phospho\_BR2\_09  
 Scan: 16077 Method: FTMS; HCD Score: 143.27 m/z: 845.72 Gene names: NUMA1

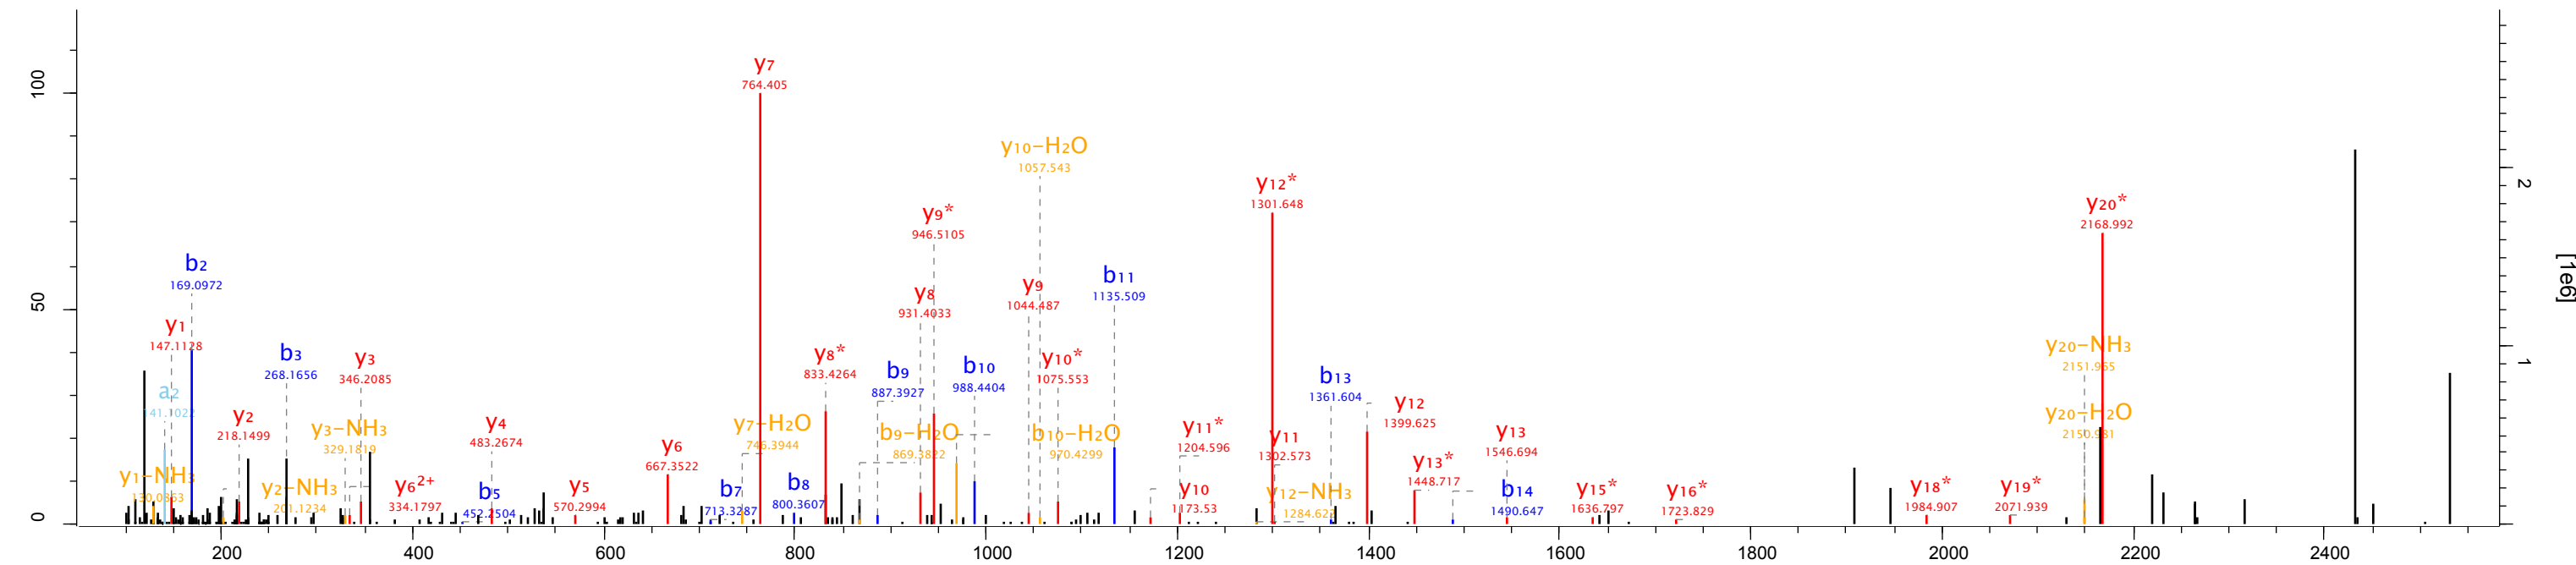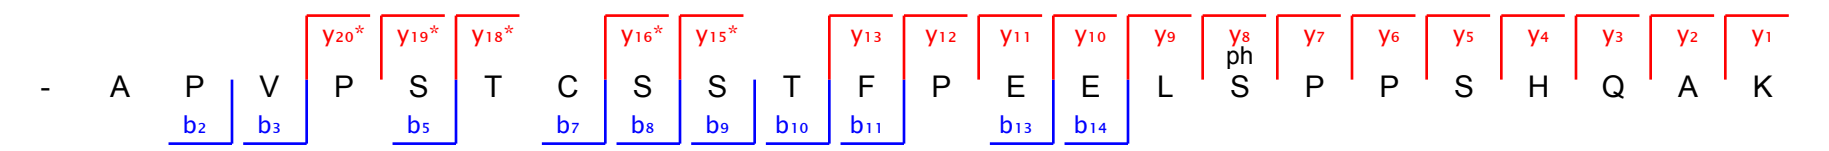

Raw file 20150814\_A375SR\_Phospho\_BR2\_09 Scan 17257 Method FTMS; HCD Score 91.66 m/z 724.85 Gene names RANBP2

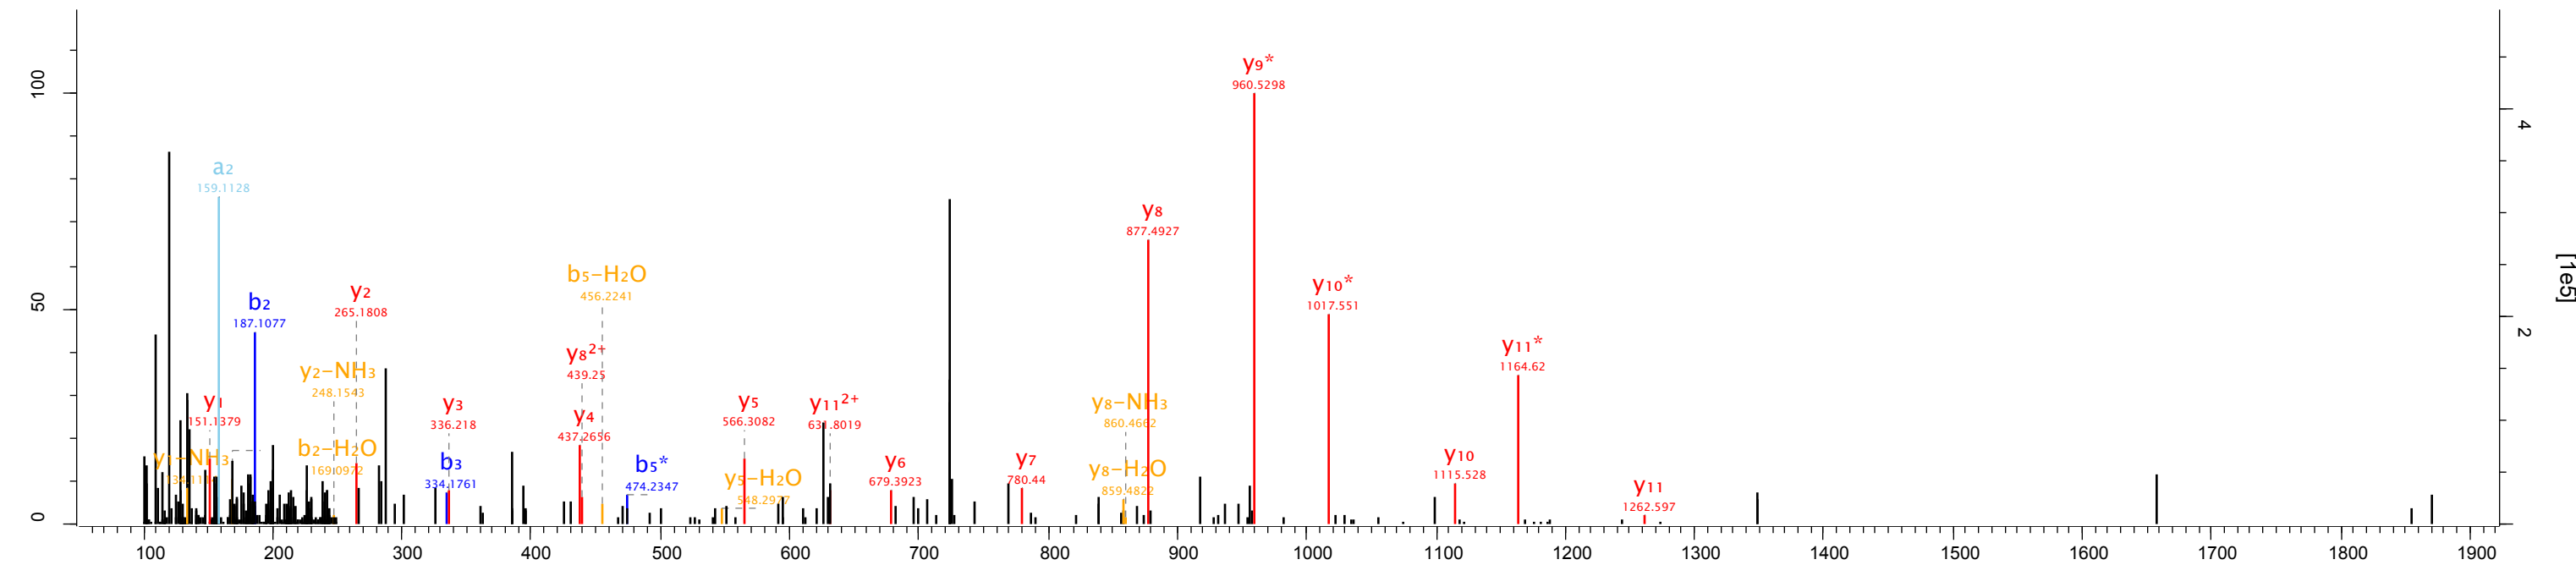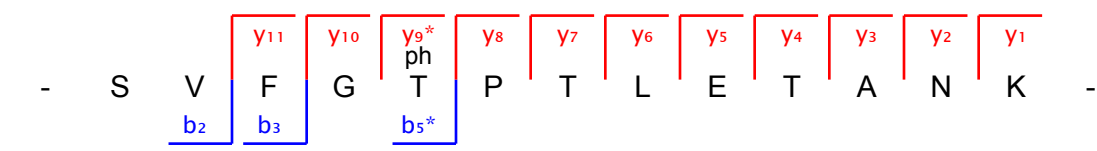

Raw file: 20150814\_A375SR\_Phospho\_BR2\_09  
 Scan: 17787 Method: FTMS; HCD Score: 157.43 m/z: 665.3 Gene names: PAICS

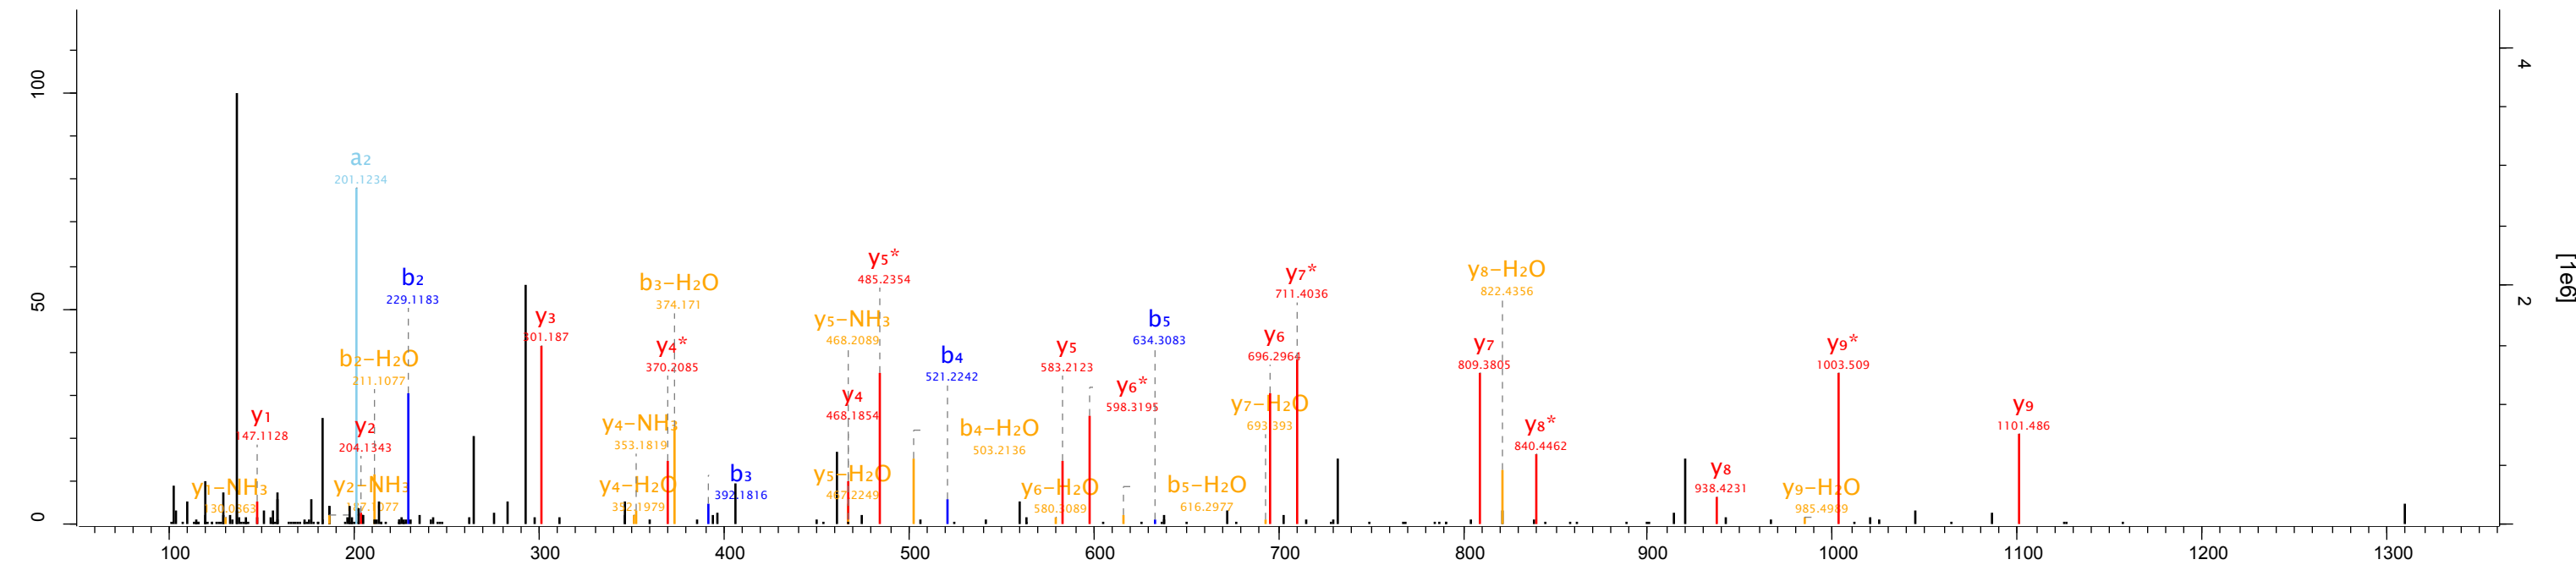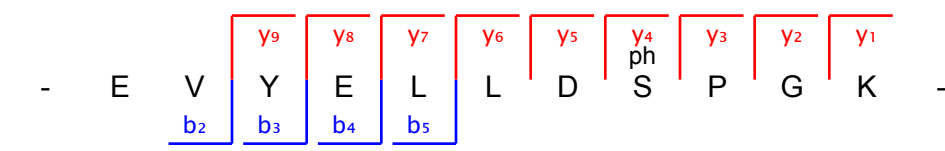

Raw file 20150814\_A375SR\_Phospho\_BR2\_09 Scan 17937 Method FTMS; HCD Score 206.85 m/z 1018.46 Gene names NF1

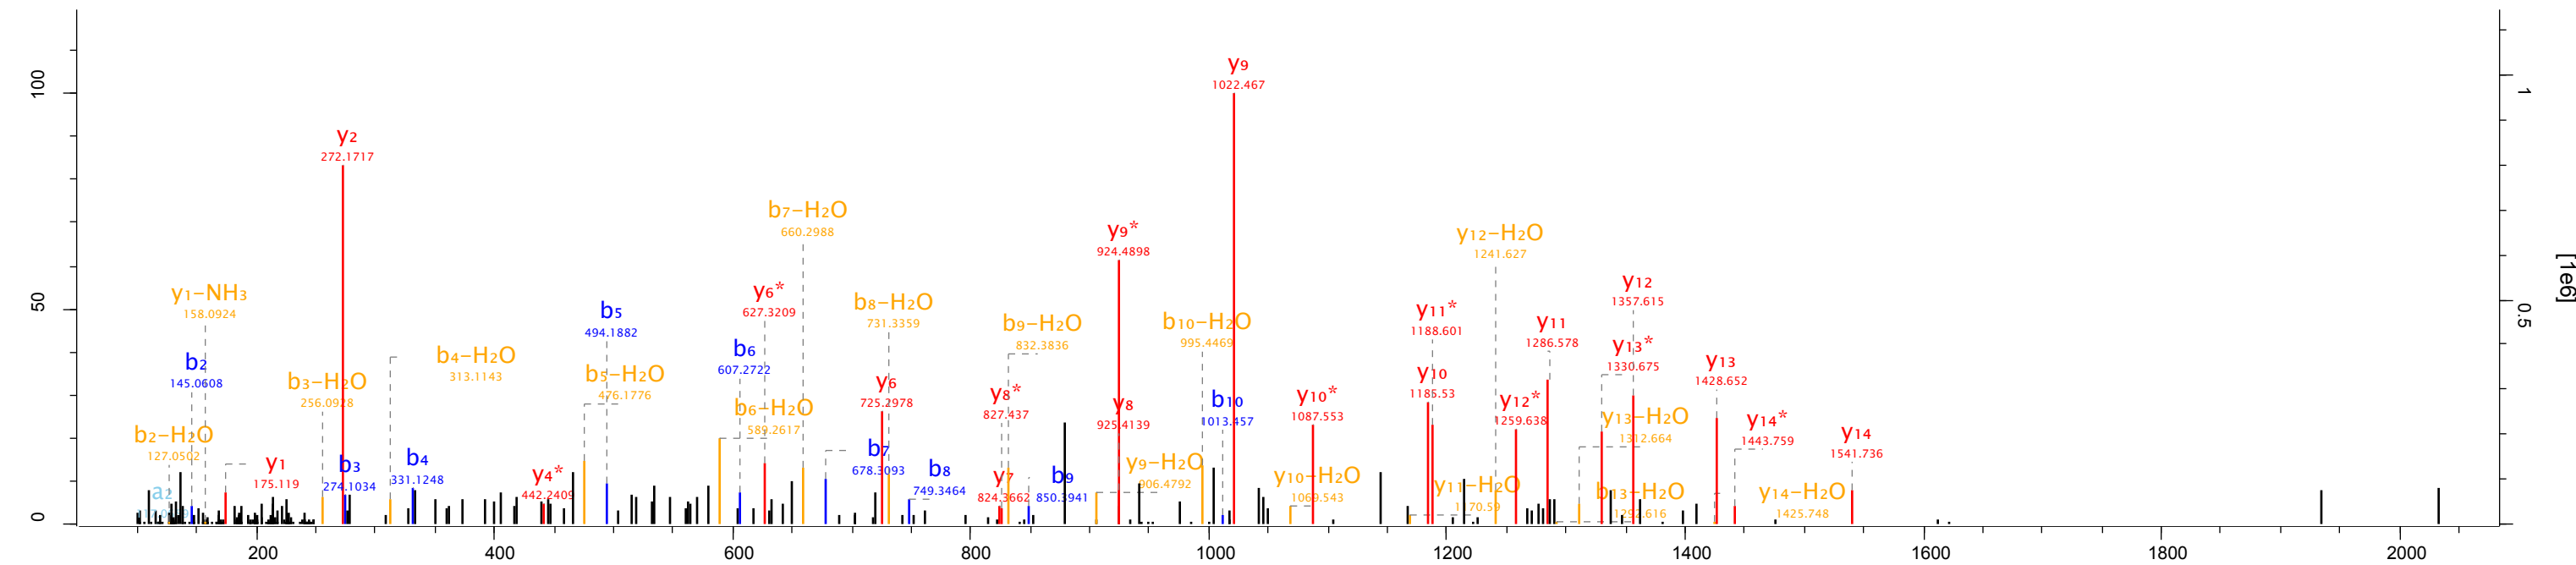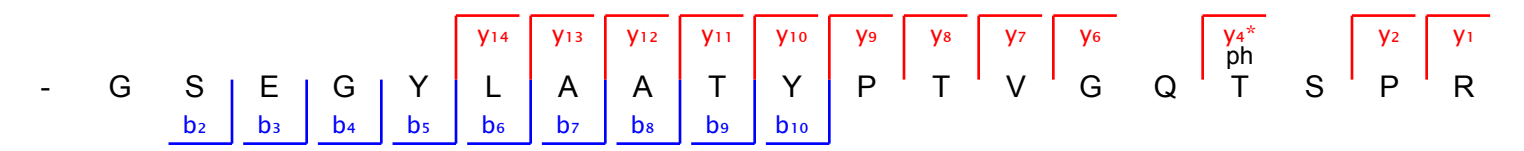



Raw file 20150814\_A375SR\_Phospho\_BR2\_09 Scan 18817 Method FTMS; HCD Score 146.25 m/z 702 Gene names DSN1

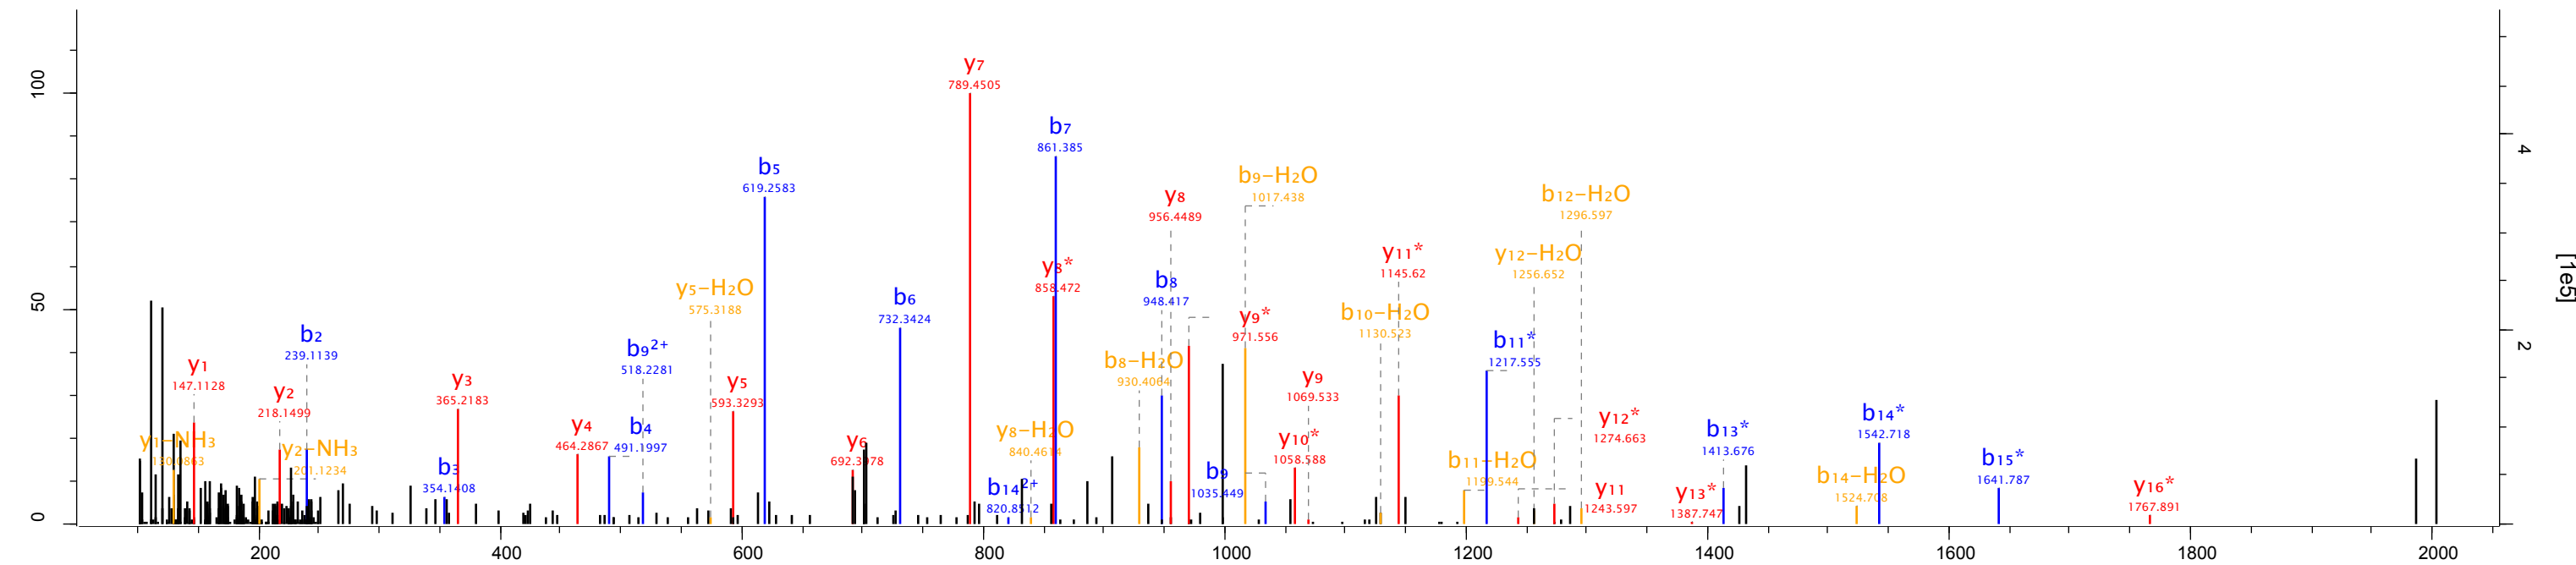

- T H D H Q L E S S L S P V E V F A K -

b<sub>2</sub>
b<sub>3</sub>
b<sub>4</sub>
b<sub>5</sub>
b<sub>6</sub>
b<sub>7</sub>
b<sub>8</sub>
b<sub>9</sub>
b<sub>11</sub>\*
b<sub>13</sub>\*
b<sub>14</sub>\*
b<sub>15</sub>\*

y<sub>16</sub>\*
y<sub>13</sub>\*
y<sub>12</sub>\*
y<sub>11</sub>
y<sub>10</sub>\*
y<sub>9</sub>
y<sub>8</sub>  
ph
y<sub>7</sub>
y<sub>6</sub>
y<sub>5</sub>
y<sub>4</sub>
y<sub>3</sub>
y<sub>2</sub>
y<sub>1</sub>

Raw file: 20150814\_A375SR\_Phospho\_BR2\_09  
 Scan: 18887 Method: FTMS; HCD Score: 176.83 m/z: 676.3 Gene names: AHCTF1

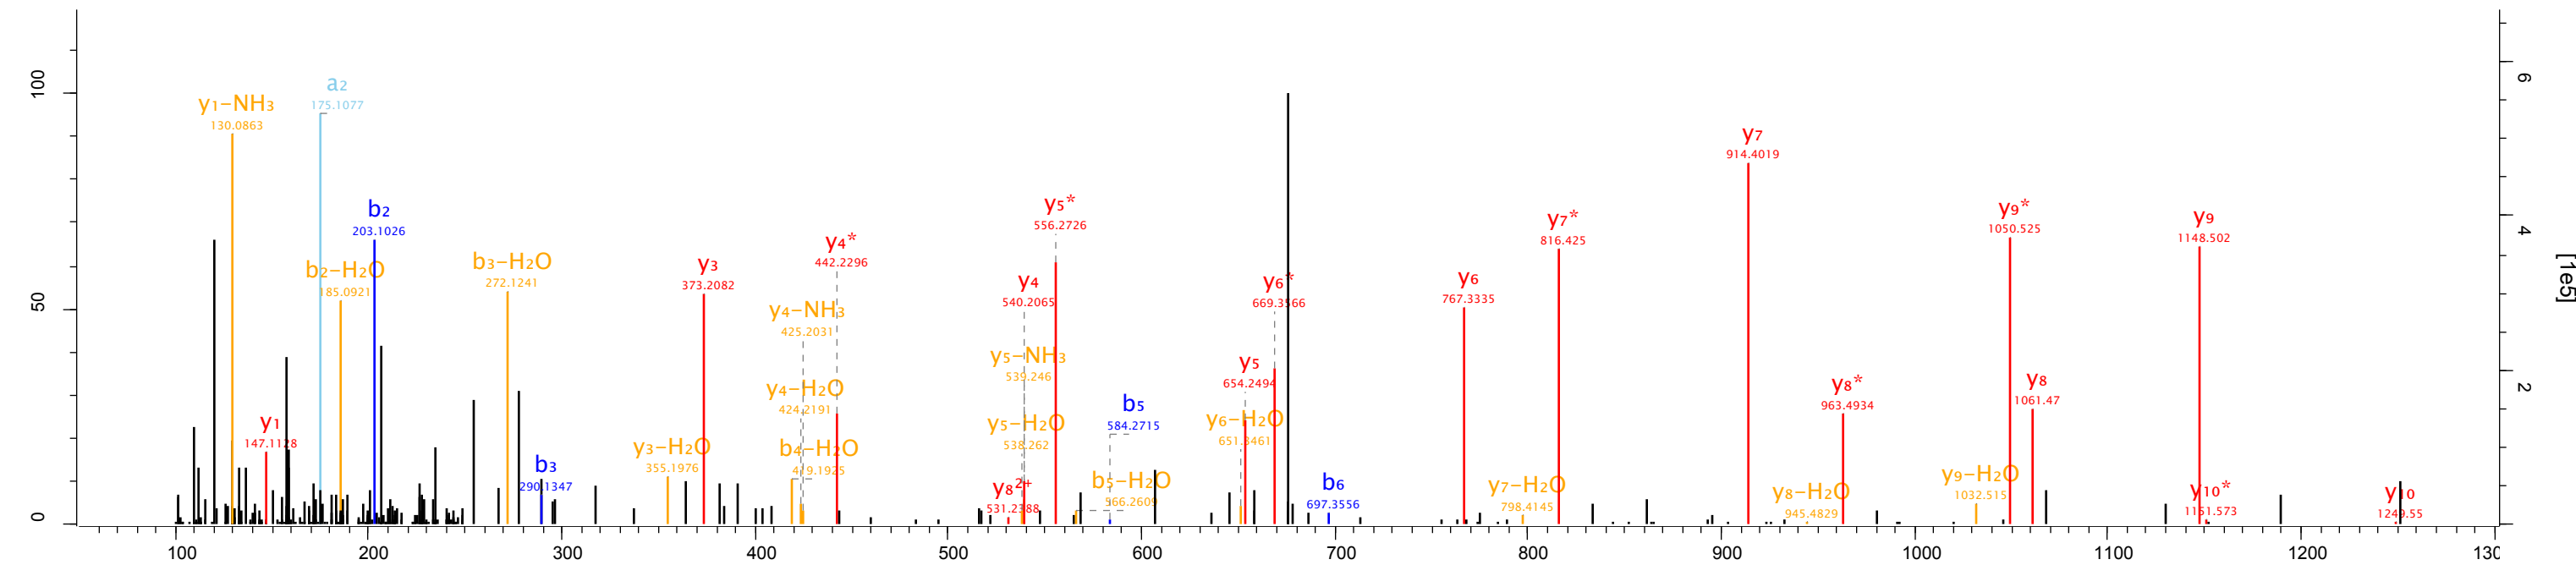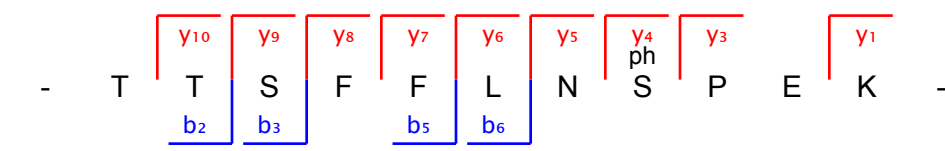

Raw file: 20150814\_A375SR\_Phospho\_BR2\_09  
 Scan: 19257 Method: FTMS; HCD Score: 85.99 m/z: 1109.9 Gene names: DDX17

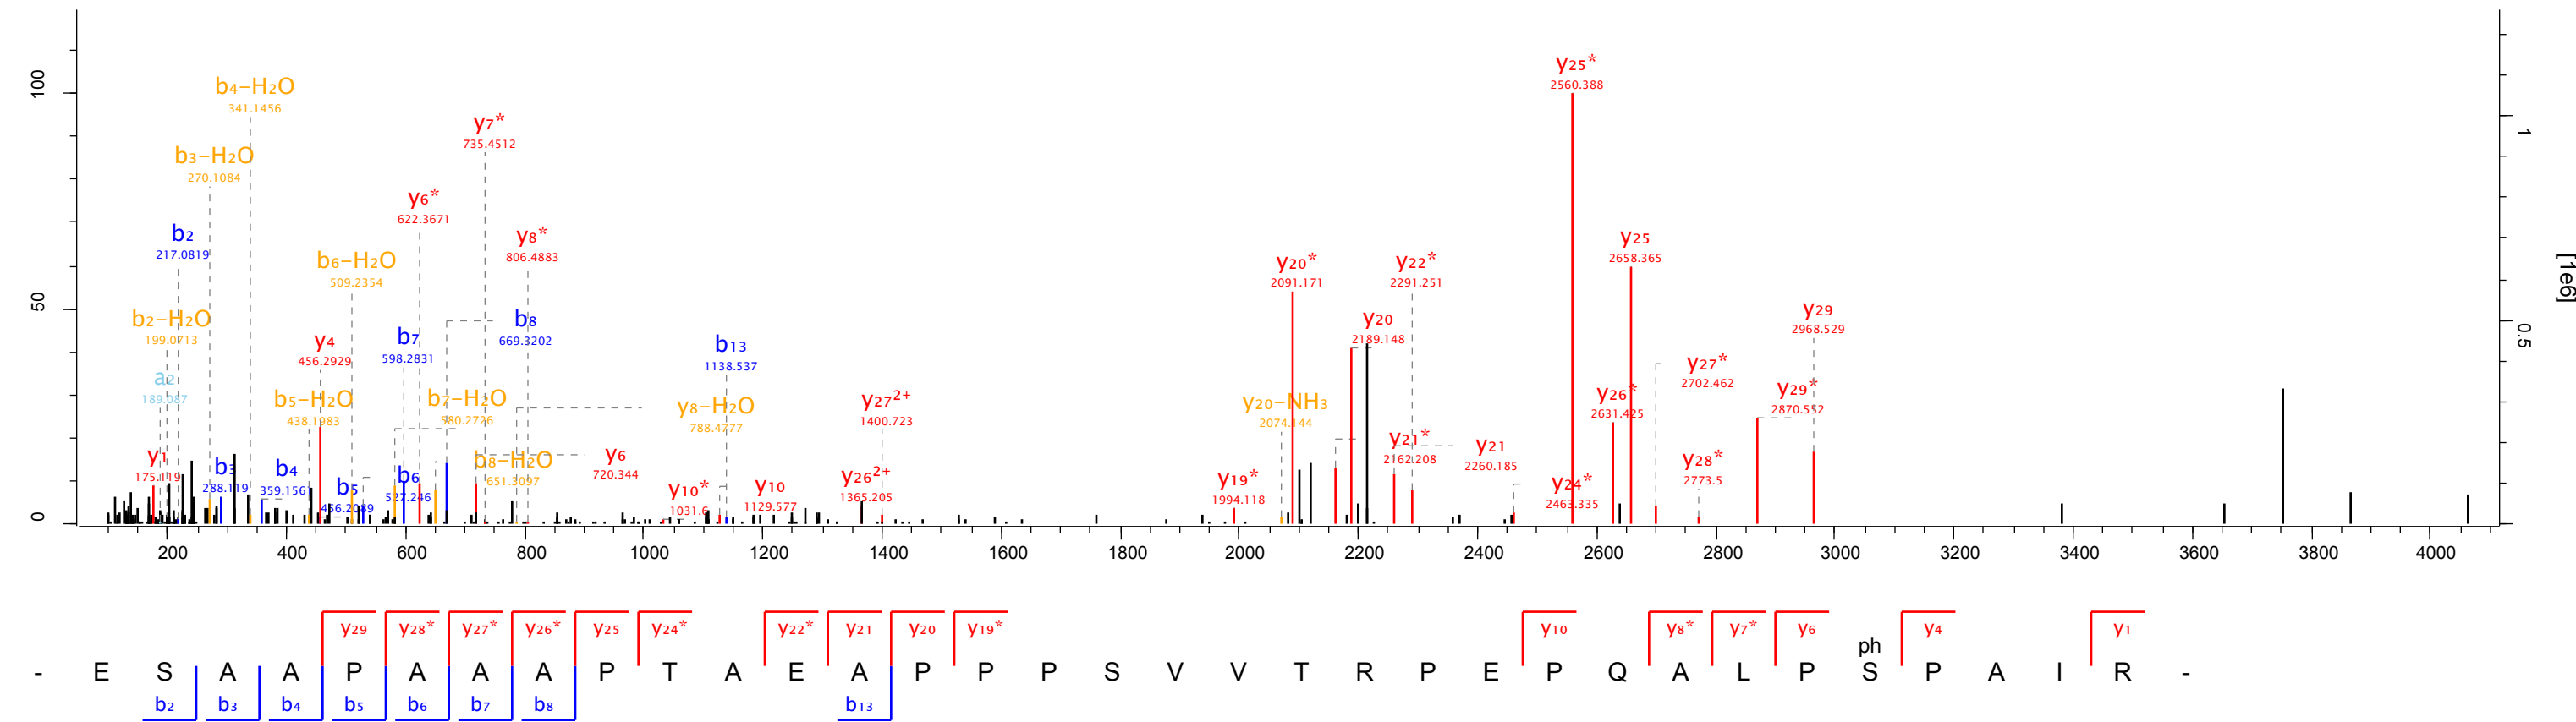

Raw file 20150814\_A375SR\_Phospho\_BR2\_09 Scan 20047 Method FTMS; HCD Score 58.43 m/z 928.75 Gene names MED12;TNRC11

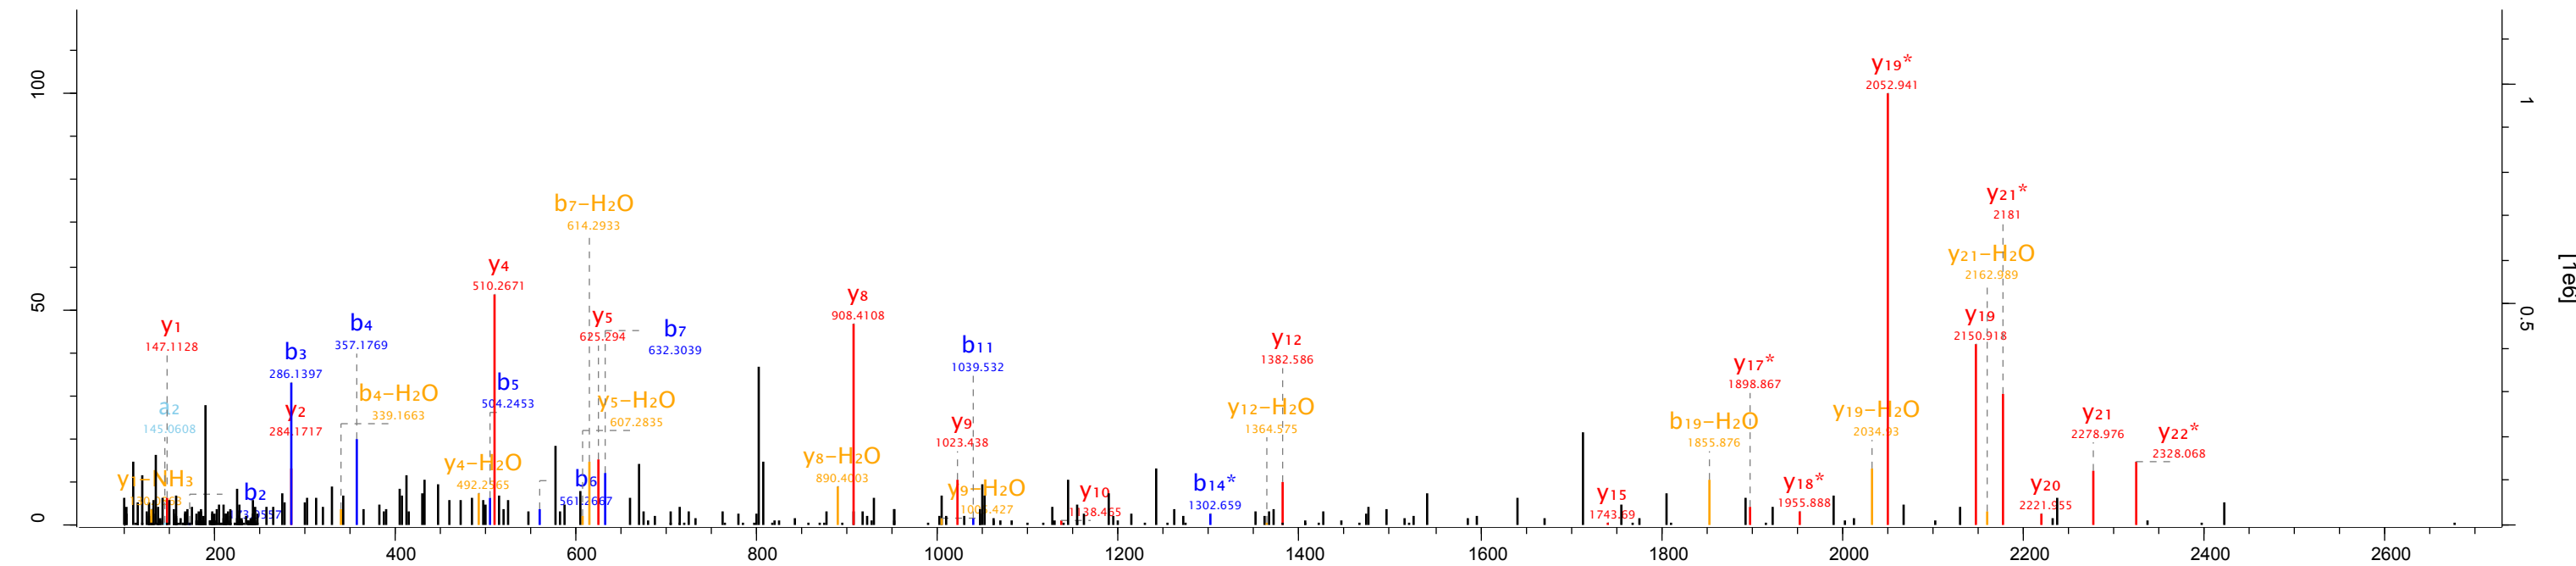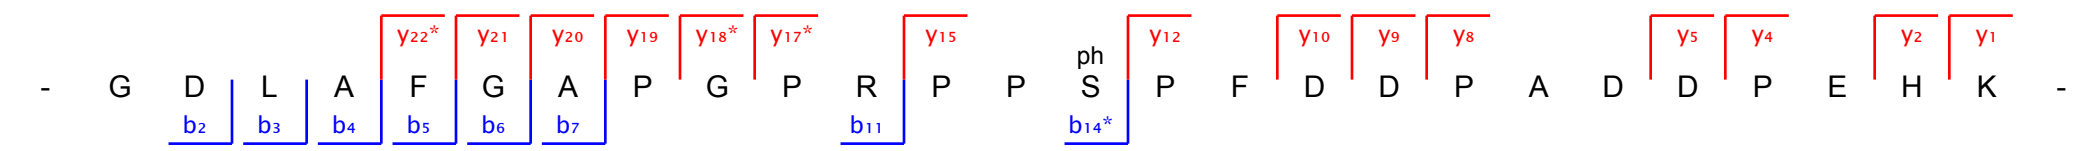

Raw file 20150814\_A375SR\_Phospho\_BR2\_09 Scan 20437 Method FTMS; HCD Score 190.73 m/z 1068.81 Gene names BRD8

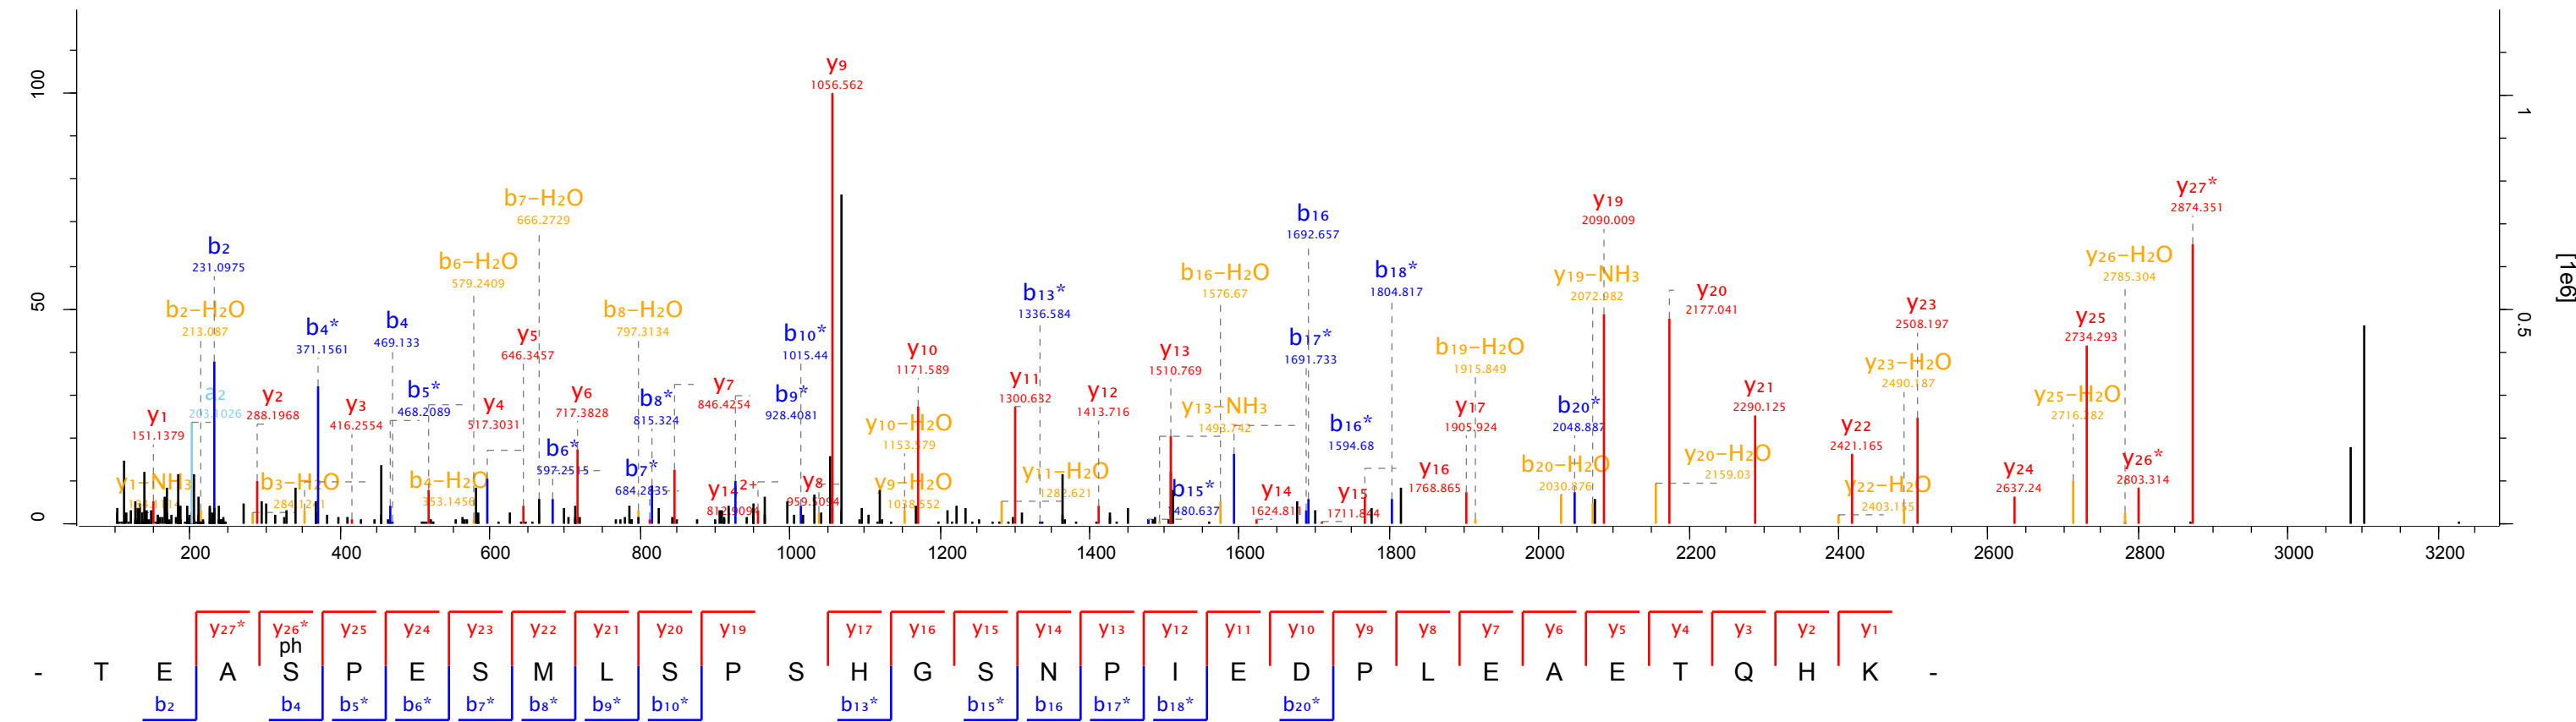

Raw file 20150814\_A375SR\_Phospho\_BR2\_09 Scan 20717 Method FTMS; HCD Score 101.04 m/z 659.36 Gene names ULK1

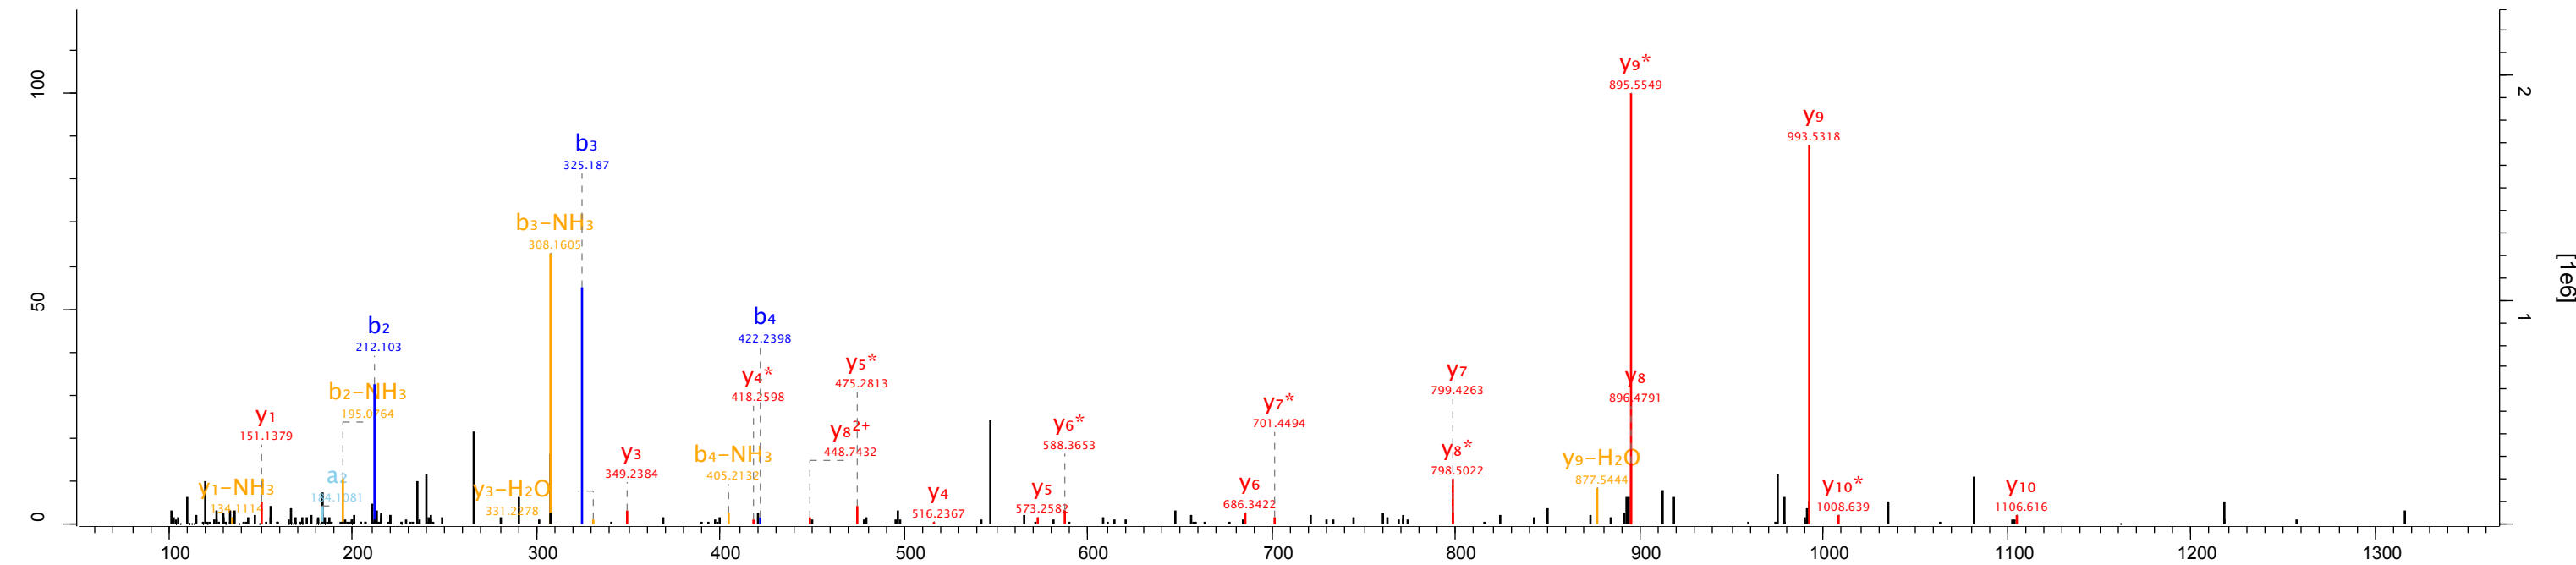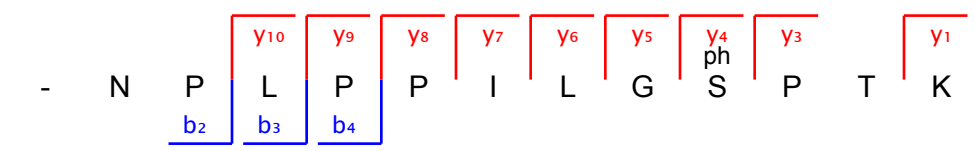

Raw file: 20150814\_A375SR\_Phospho\_BR2\_09  
 Scan: 2207 Method: FTMS; HCD Score: 95.85 m/z: 627.79 Gene names: BCLAF1

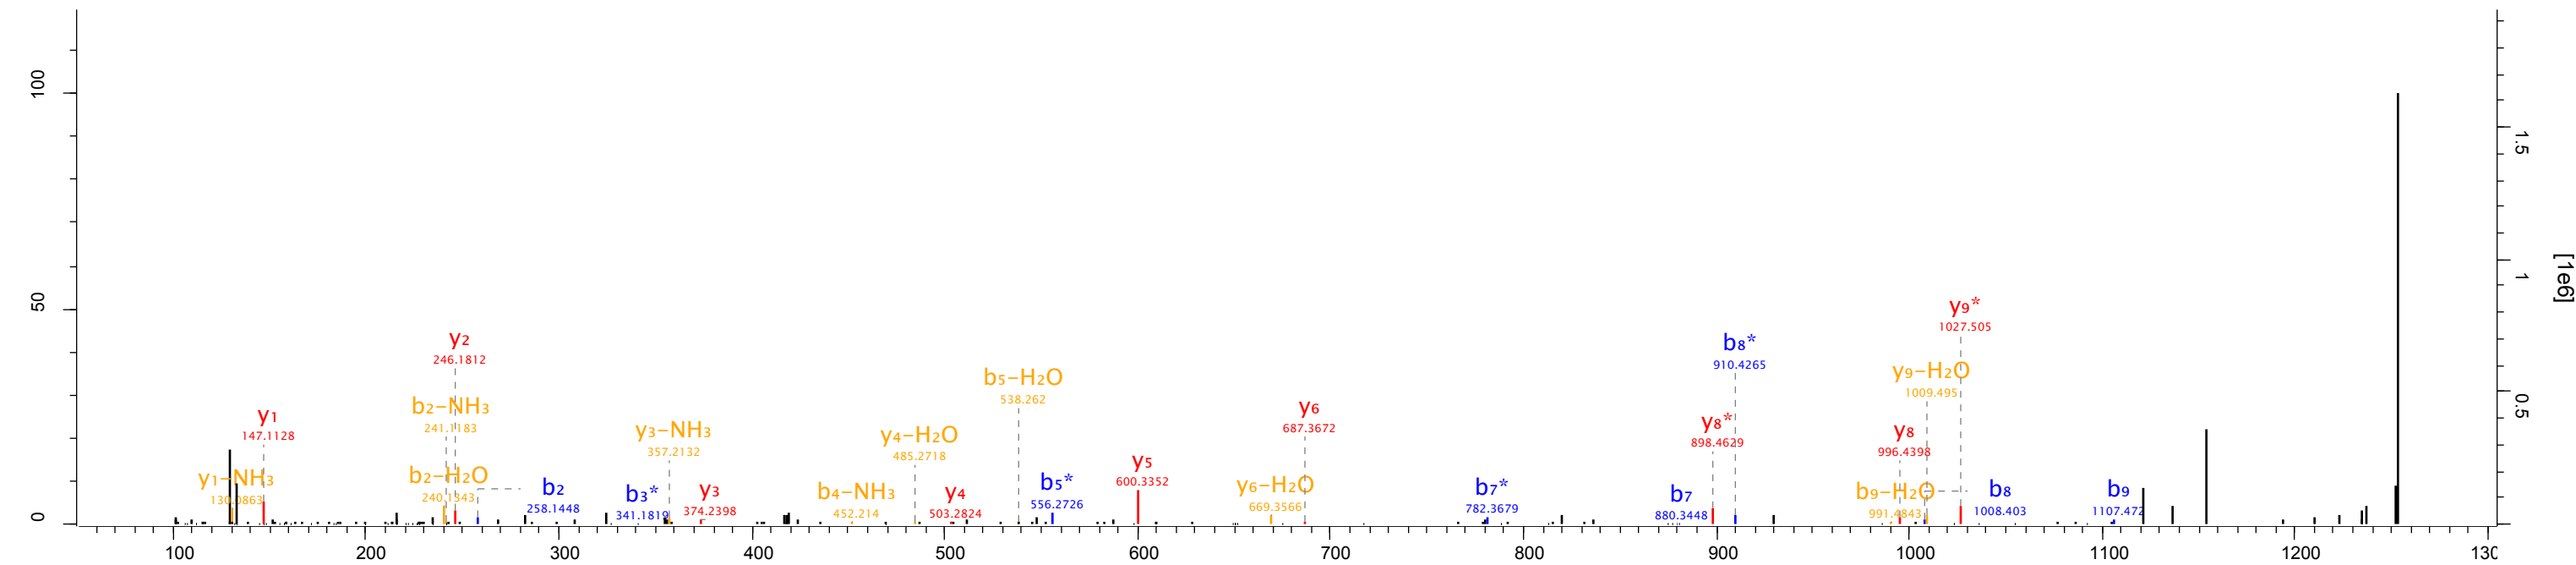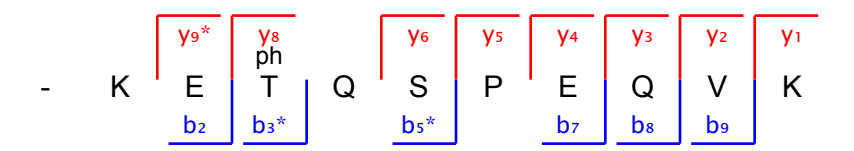

Raw file: 20150814\_A375SR\_Phospho\_BR2\_09  
 Scan: 22477 Method: FTMS; HCD Score: 159.14 m/z: 743.03 Gene names: SDAD1

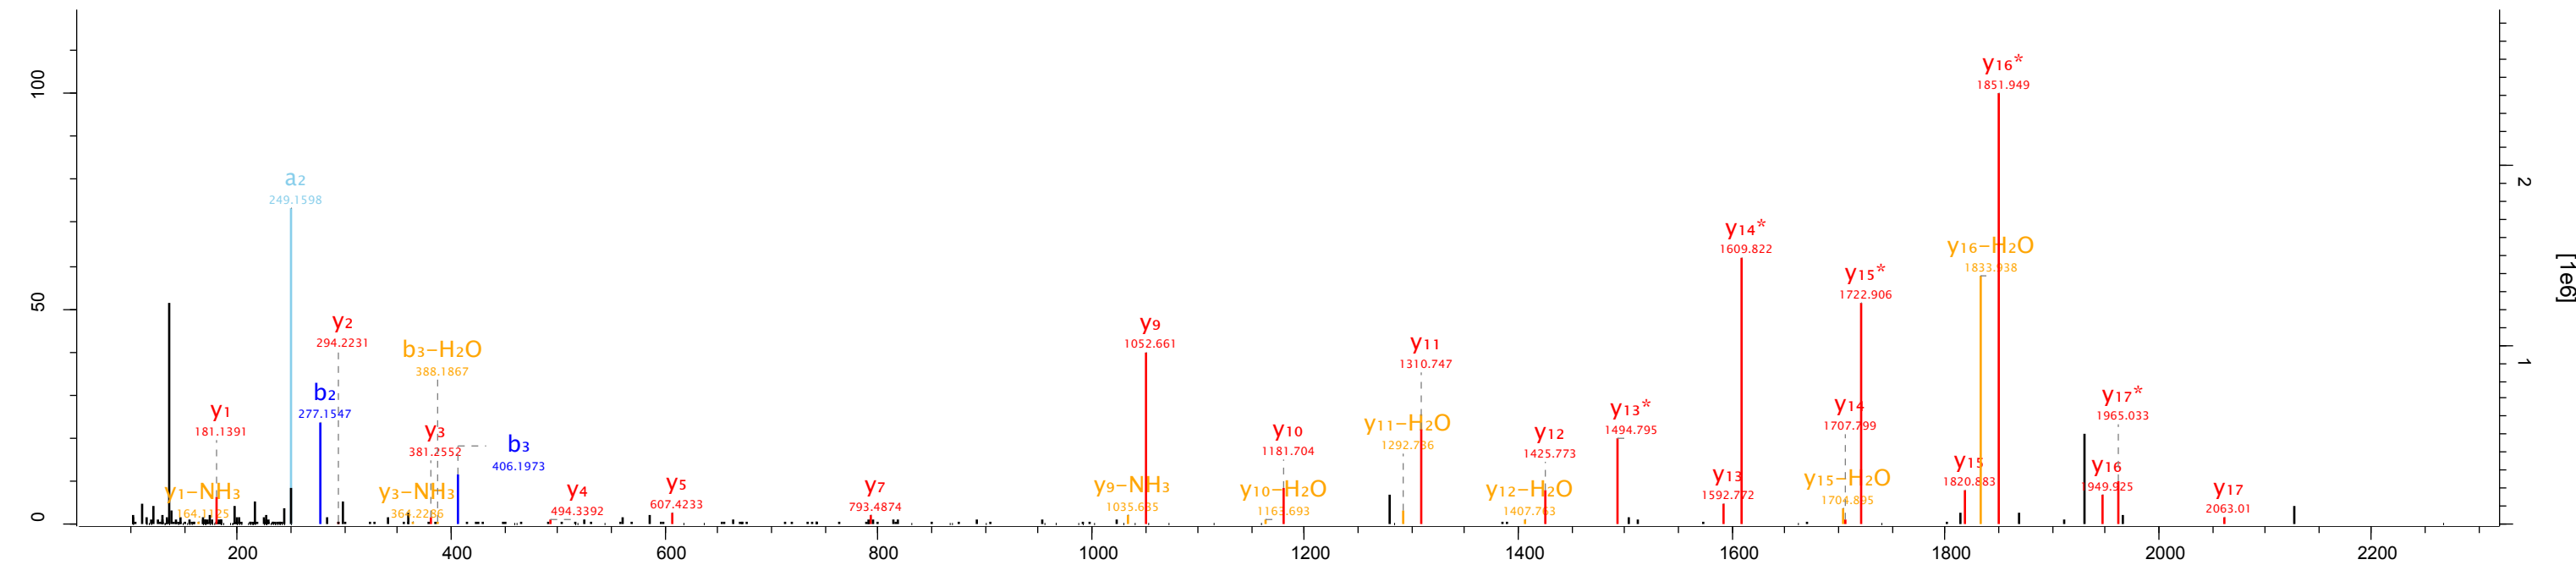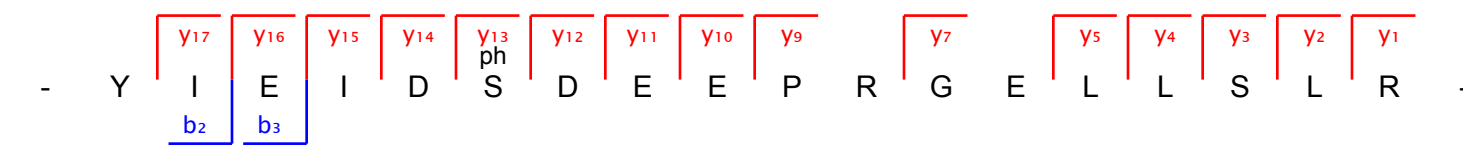



Raw file 20150814\_A375SR\_Phospho\_BR2\_09 Scan 2407 Method FTMS; HCD Score 45.38 m/z 668.82 Gene names EXOSC5

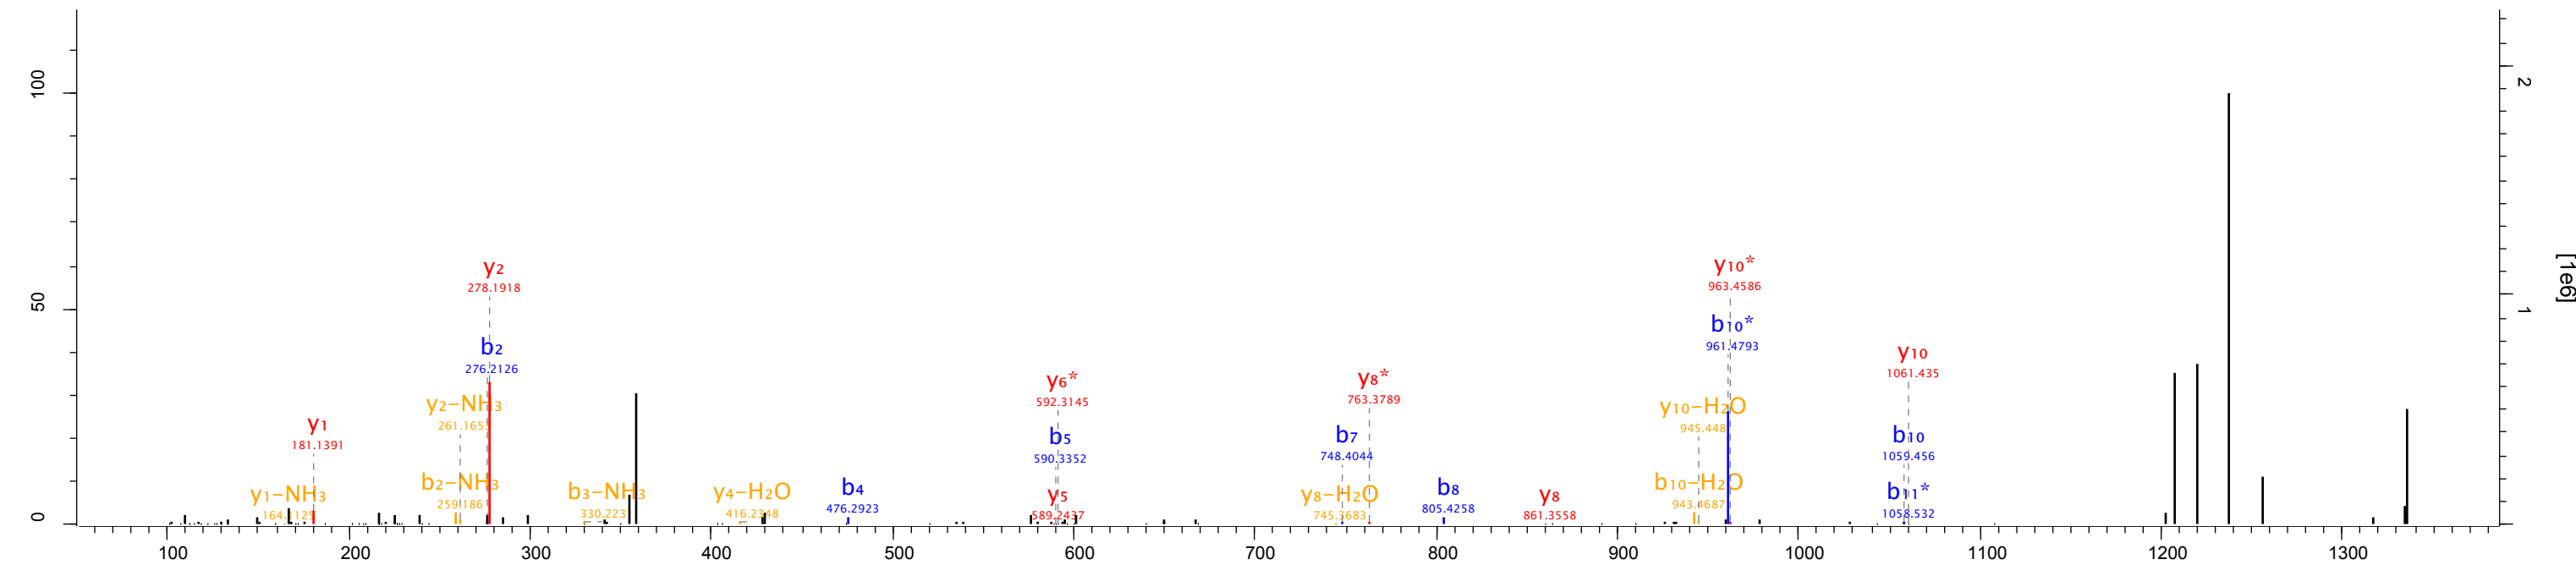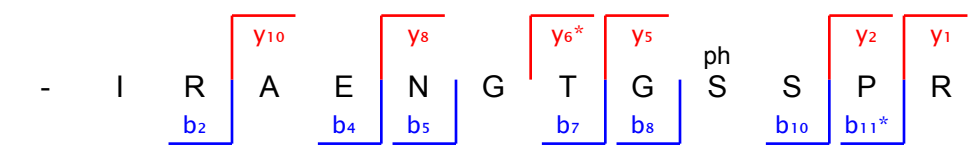

Raw file 20150814\_A375SR\_Phospho\_BR2\_09 Scan 24077 Method FTMS; HCD Score 216.82 m/z 1195.52 Gene names PKN1

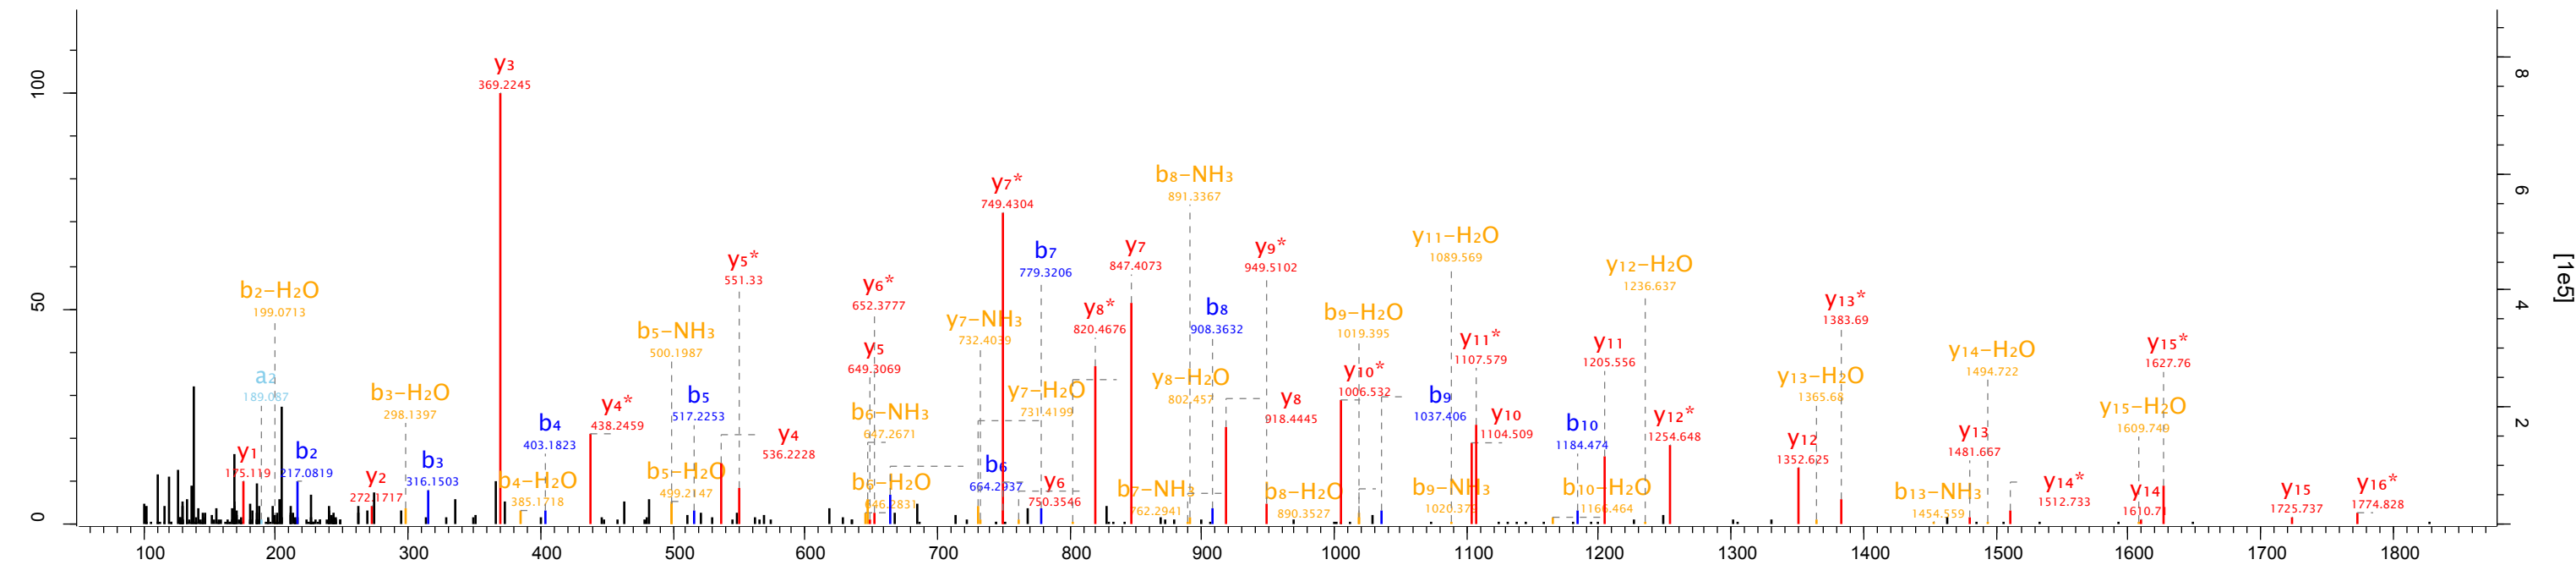

- T D V S N F D E E F T G E A P T L S P P R -

b<sub>2</sub>
b<sub>3</sub>
b<sub>4</sub>
b<sub>5</sub>
b<sub>6</sub>
b<sub>7</sub>
b<sub>8</sub>
b<sub>9</sub>
b<sub>10</sub>

y<sub>16</sub>\*
y<sub>15</sub>
y<sub>14</sub>
y<sub>13</sub>
y<sub>12</sub>
y<sub>11</sub>
y<sub>10</sub>
y<sub>9</sub>\*
y<sub>8</sub>
y<sub>7</sub>
y<sub>6</sub>
y<sub>5</sub>
y<sub>4</sub>
y<sub>3</sub>
y<sub>2</sub>
y<sub>1</sub>

Raw file: 20150814\_A375SR\_Phospho\_BR2\_09  
 Scan: 24097 Method: FTMS; HCD Score: 119.52 m/z: 1046.02 Gene names: QRICH1

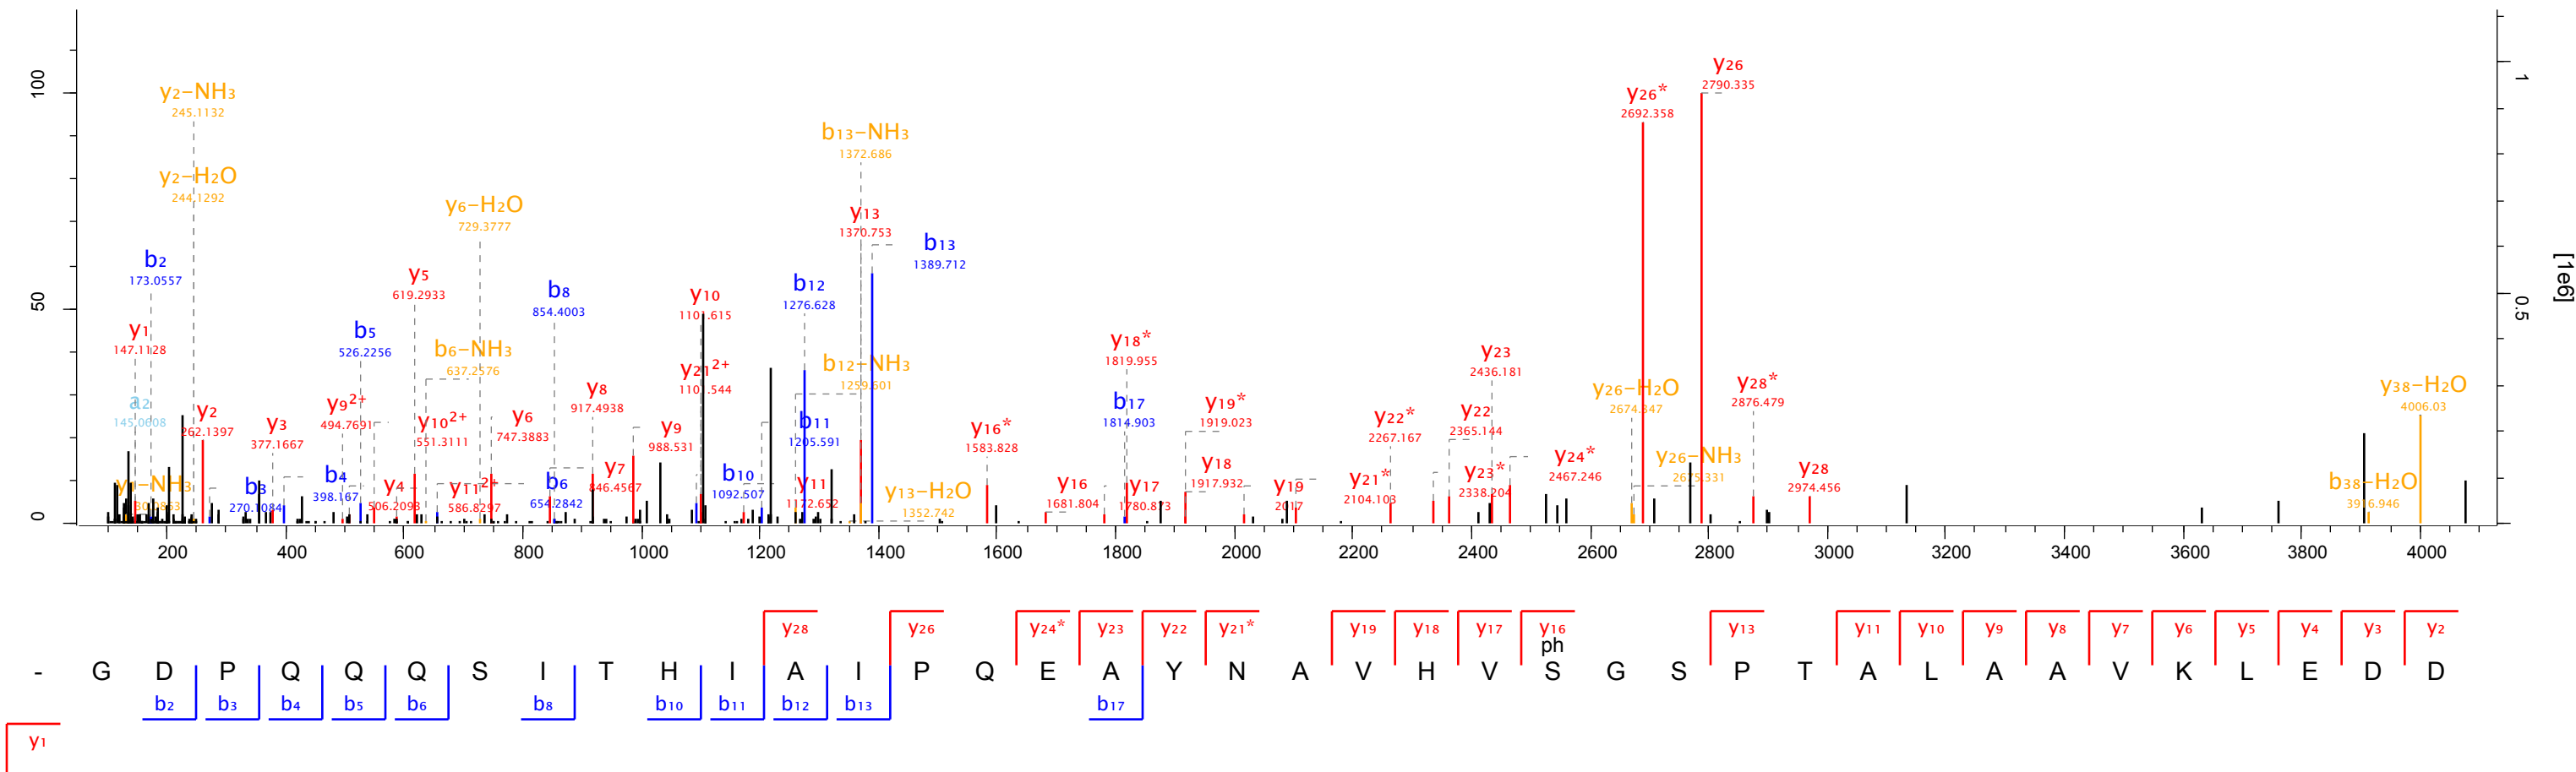

Raw file: 20150814\_A375SR\_Phospho\_BR2\_09  
 Scan: 2447 Method: FTMS; HCD Score: 94.67 m/z: 418.22 Gene names: TCP11L1

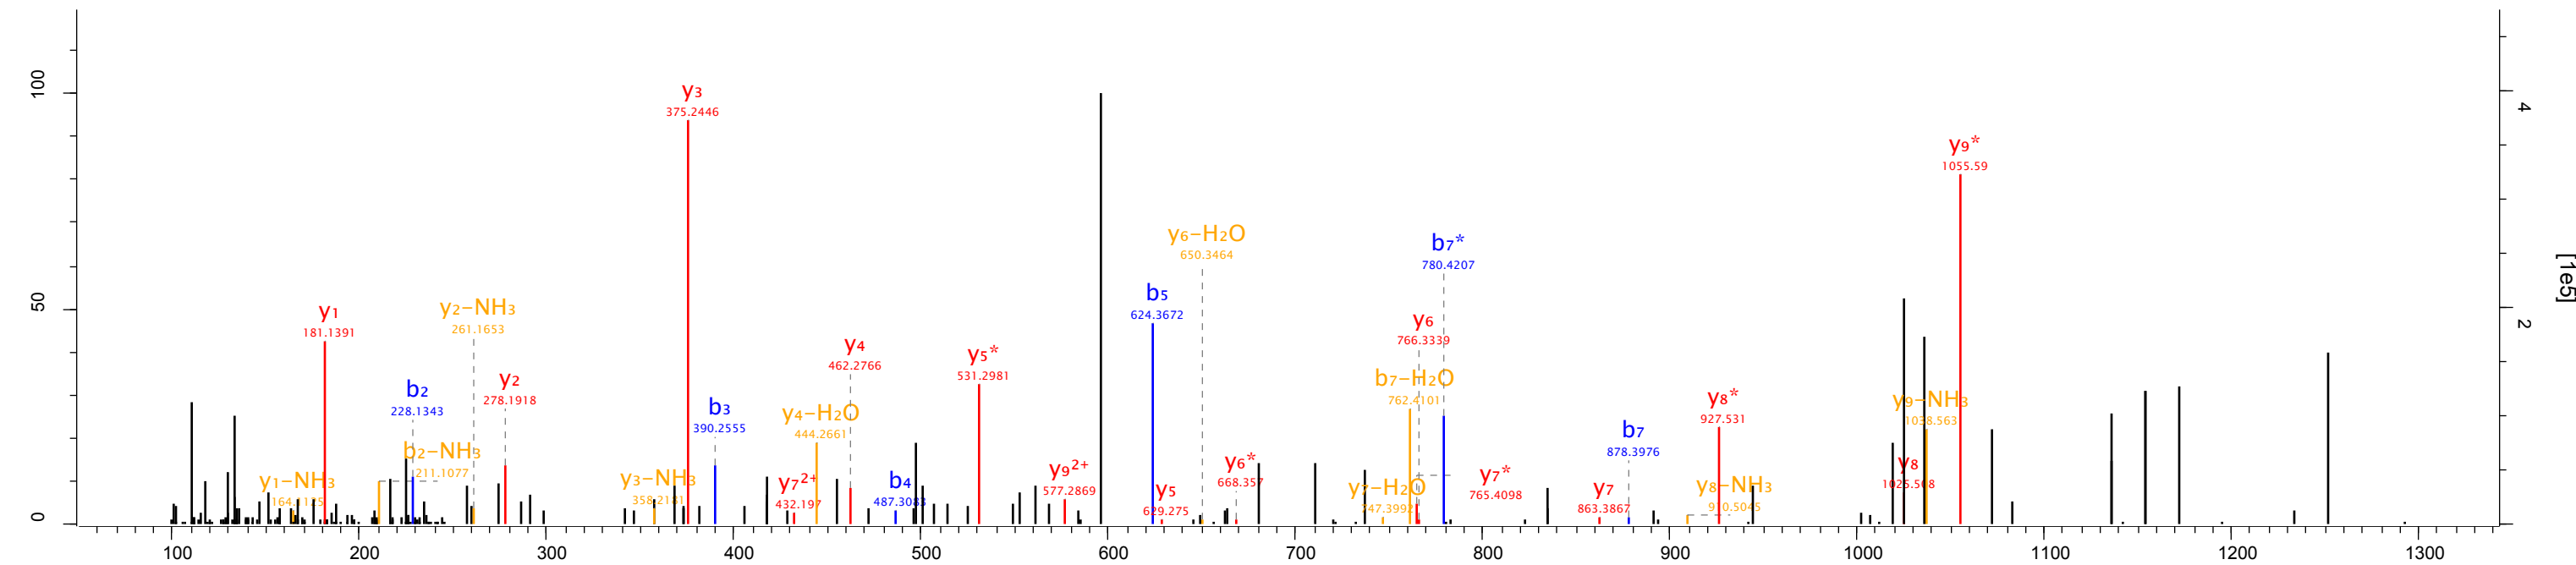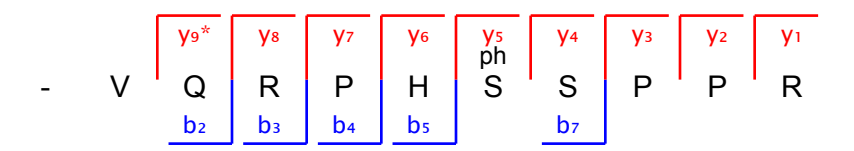

Raw file Scan Method Score m/z Gene names  
 20150814\_A375SR\_Phospho\_BR2\_09 24497 FTMS; HCD 149.67 1007.85 MDC1

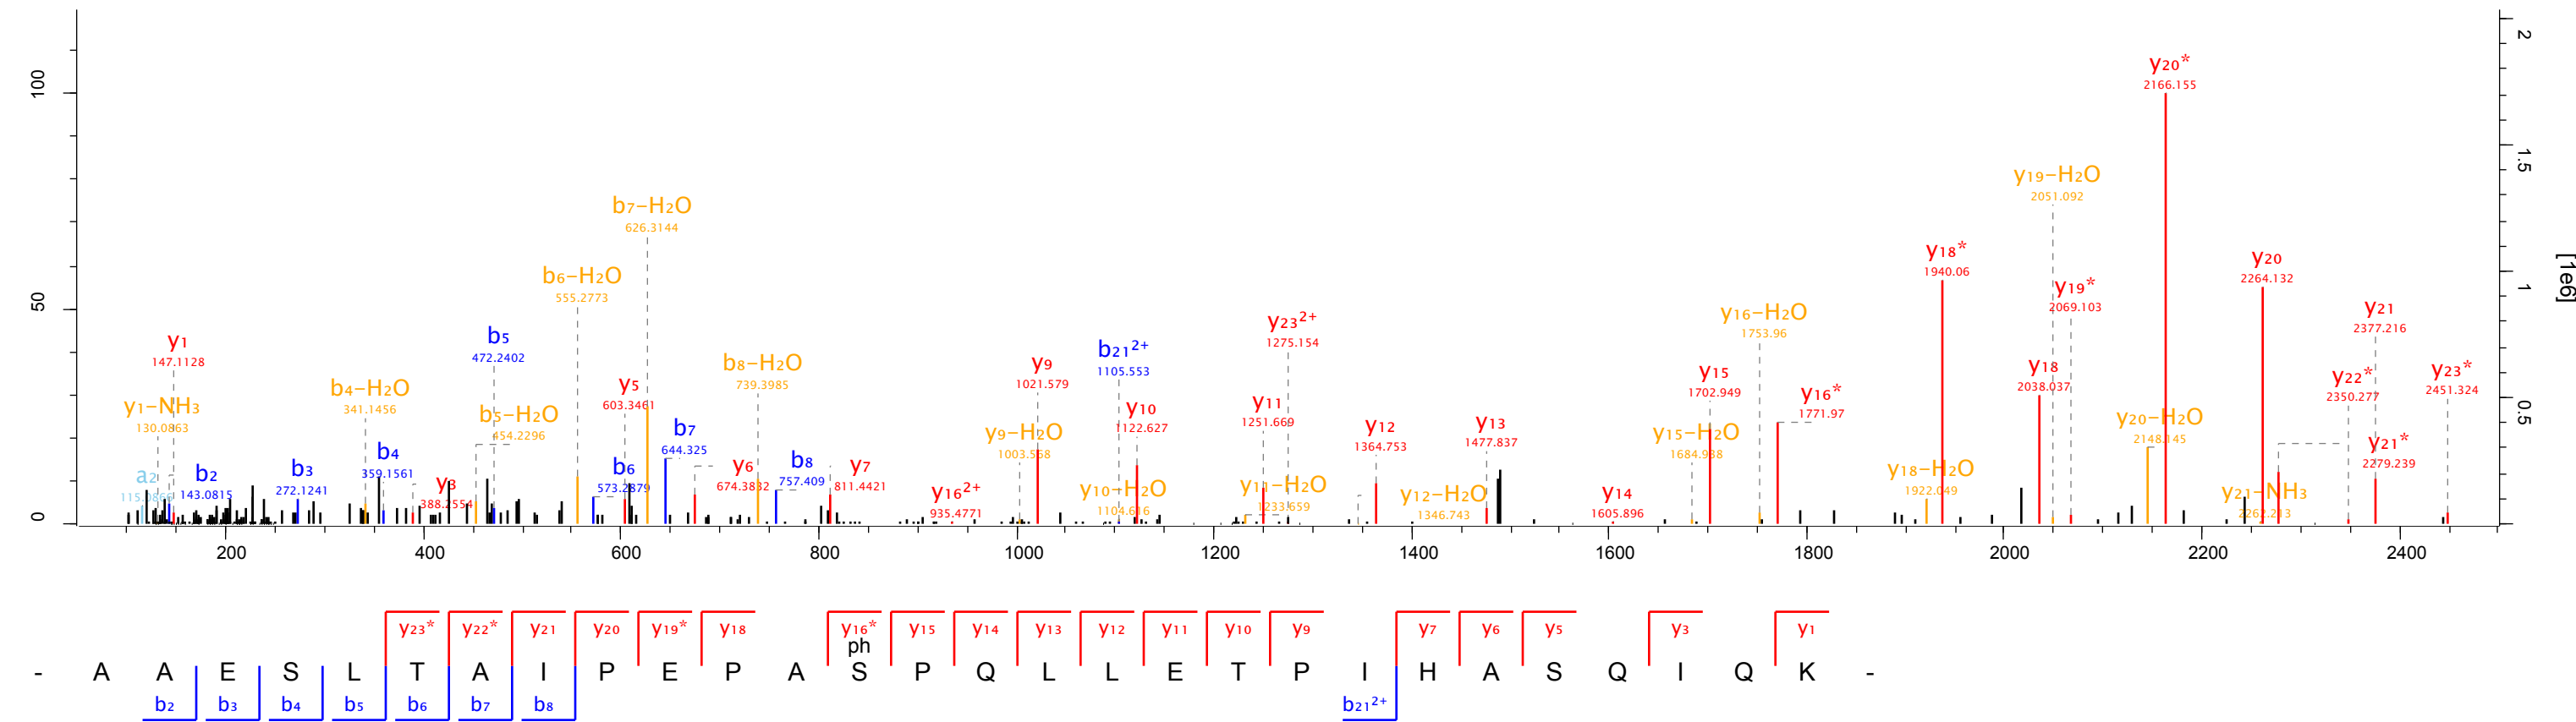

Raw file: 20150814\_A375SR\_Phospho\_BR2\_09  
 Scan: 24777 Method: FTMS; HCD Score: 82.41 m/z: 639.99 Gene names: CLDN12

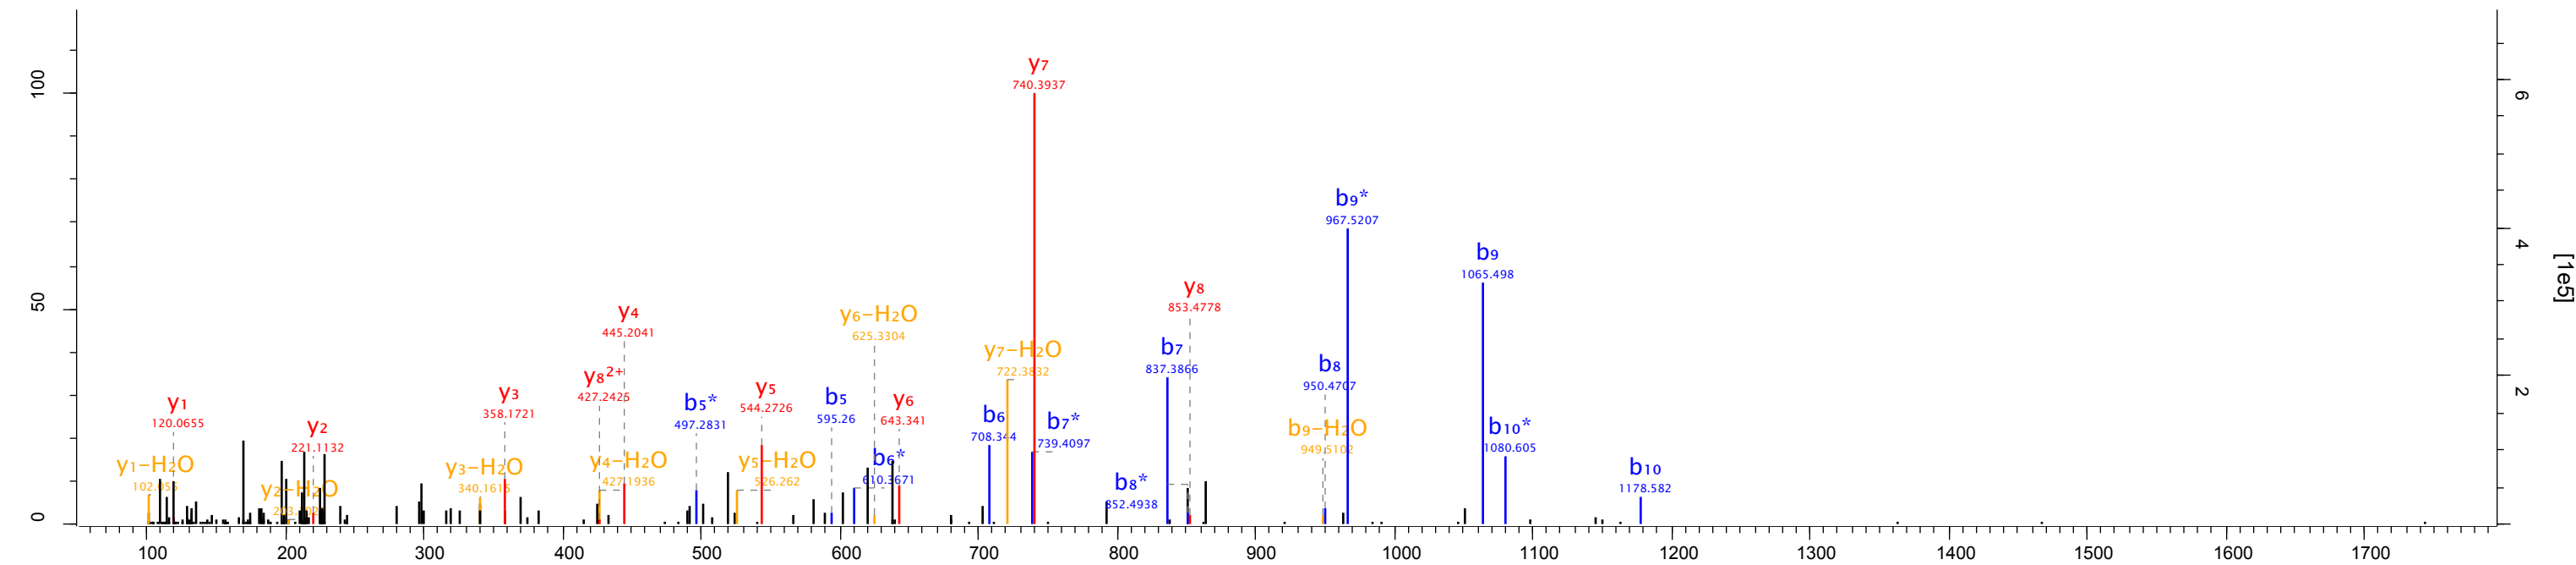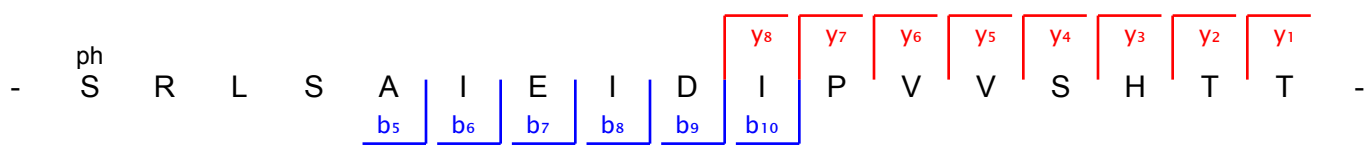

Raw file: 20150814\_A375SR\_Phospho\_BR2\_09  
 Scan: 26267 Method: FTMS; HCD Score: 86.88 m/z: 1118.22 Gene names: ITGB4

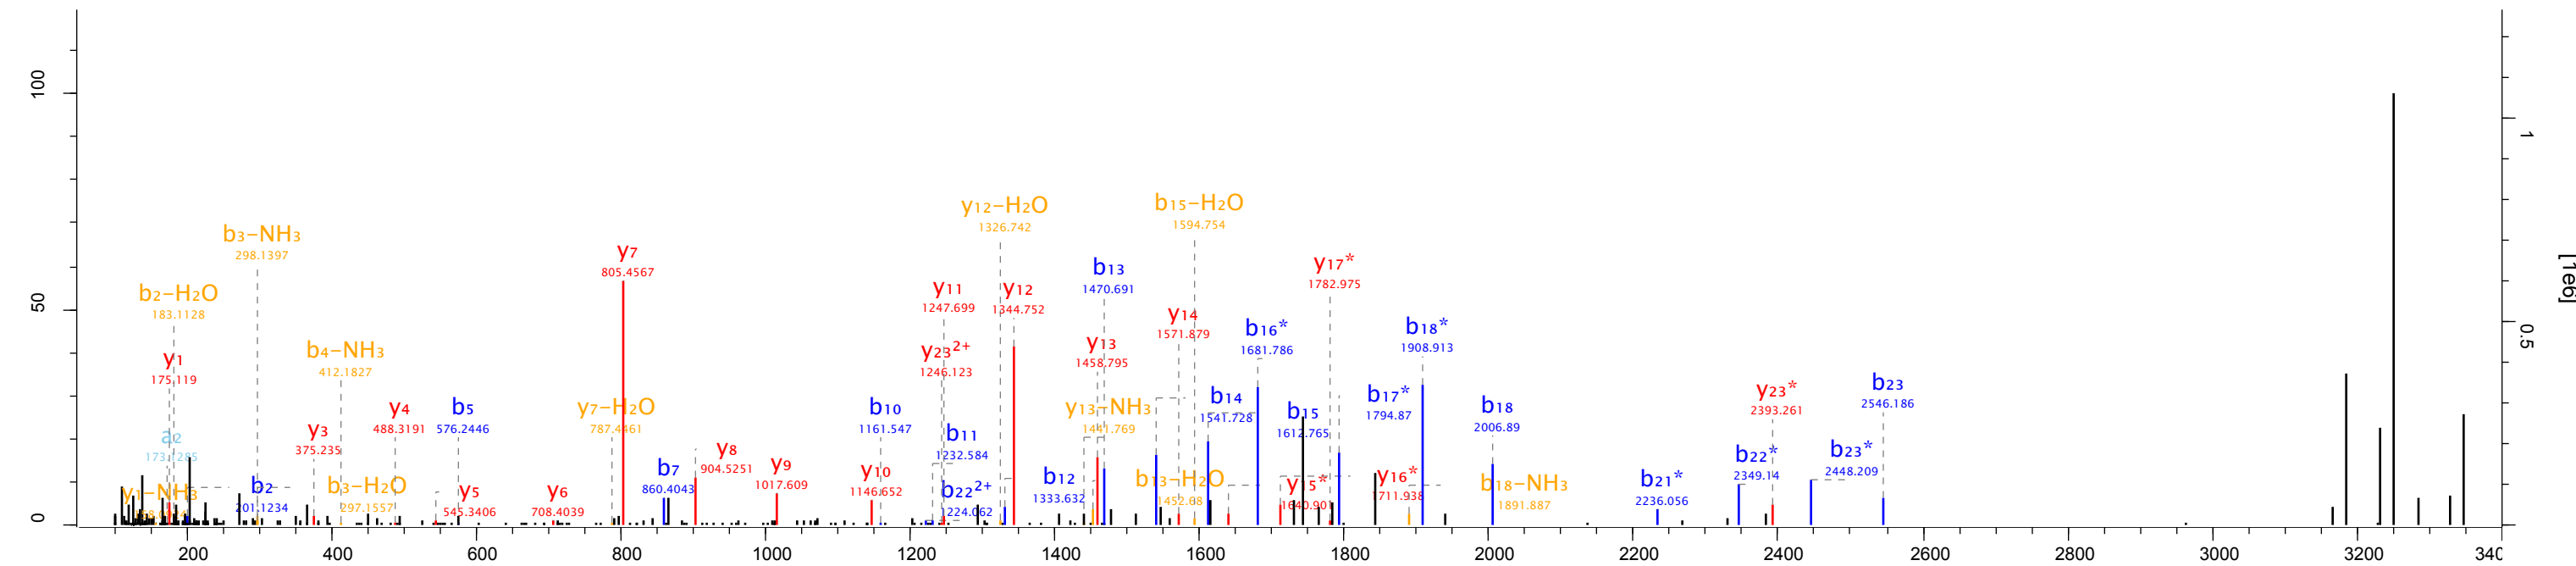

Protein sequence: - V T N N ox M Q R P G F A T H A A S I N P T E L V P Y G L S L R -

Fragmentation sites (b and y ions) are indicated by brackets below the sequence:

- b2: V T
- b5: ox M
- b7: R
- b10: F
- b11: A
- b12: T
- b13: H
- b14: A
- b15: A
- b16\*: S
- b17\*: I
- b18: N
- b21\*: E
- b22\*: L
- b23: V

Fragmentation sites (y ions) are indicated by brackets above the sequence:

- y1: R
- y3: S
- y4: L
- y5: G
- y6: Y
- y7: P
- y8: V
- y9: L
- y10: E
- y11: T
- y12: P
- y13: N
- y14: I
- y15\*: S
- y16\*: A
- y17\*: A
- y23\*: P

Raw file 20150814\_A375SR\_Phospho\_BR2\_09 Scan 26827 Method FTMS; HCD Score 142.45 m/z 1081.53 Gene names TWf1

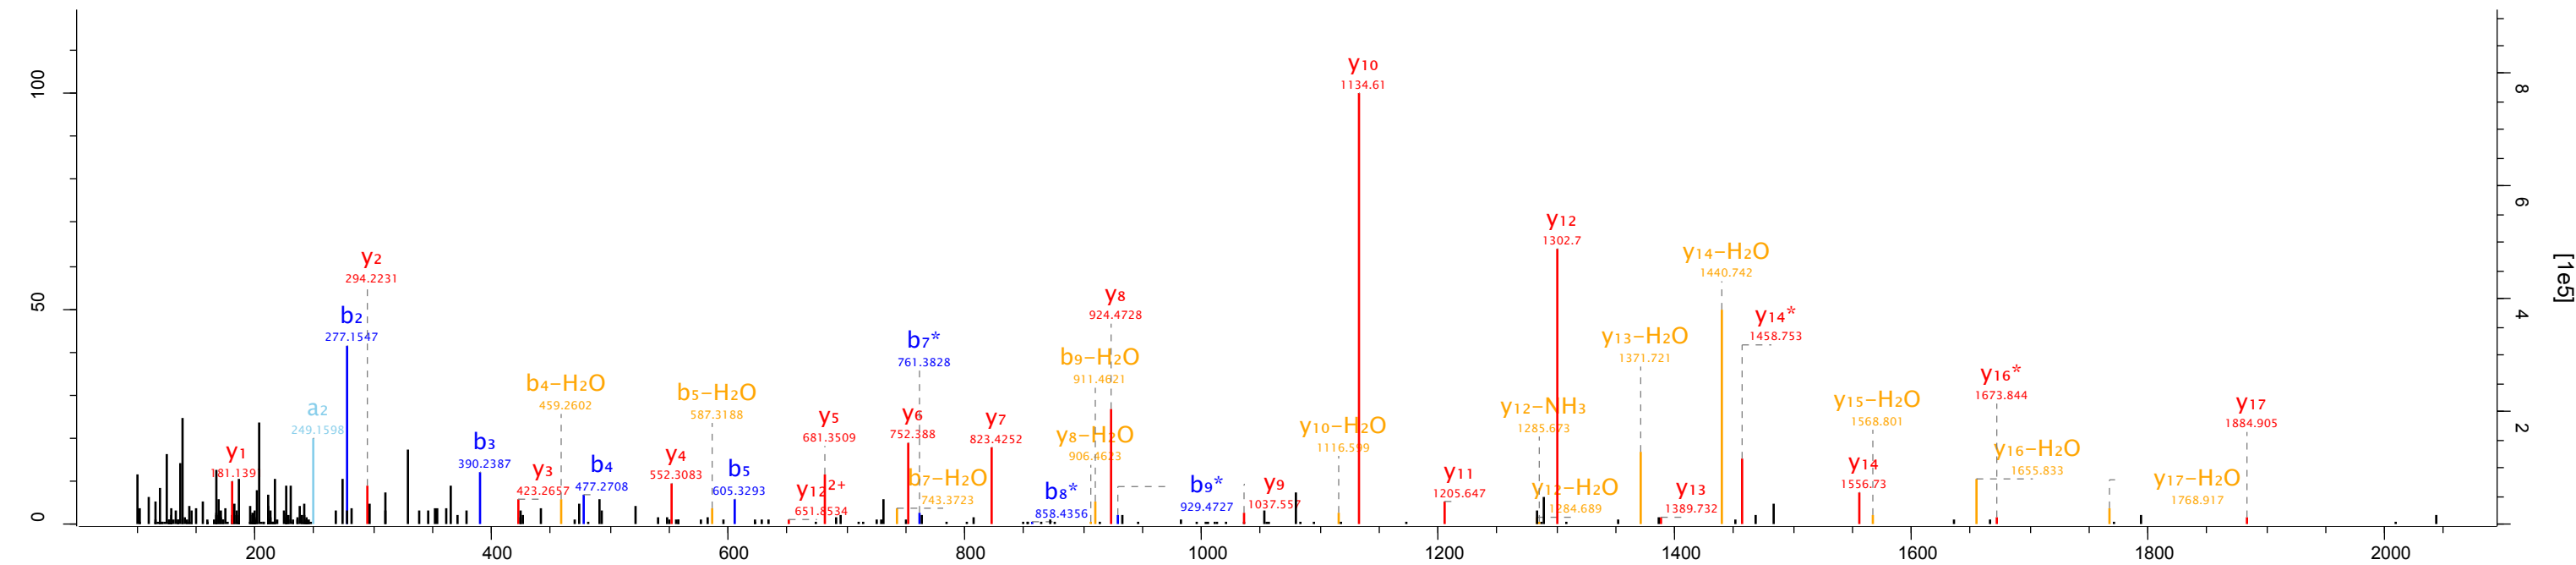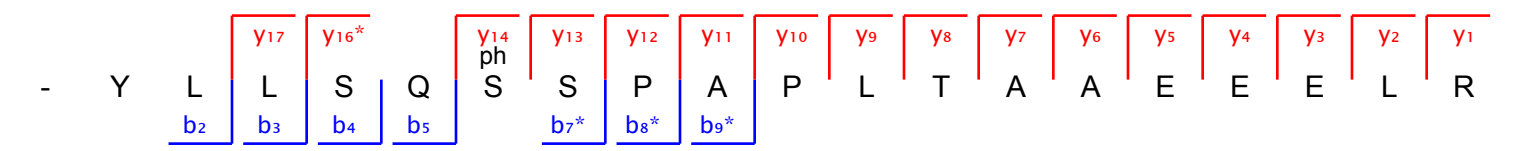



Raw file: 20150814\_A375SR\_Phospho\_BR2\_09  
 Scan: 3047 Method: FTMS; HCD Score: 107.71 m/z: 534.26 Gene names: JMJD1C

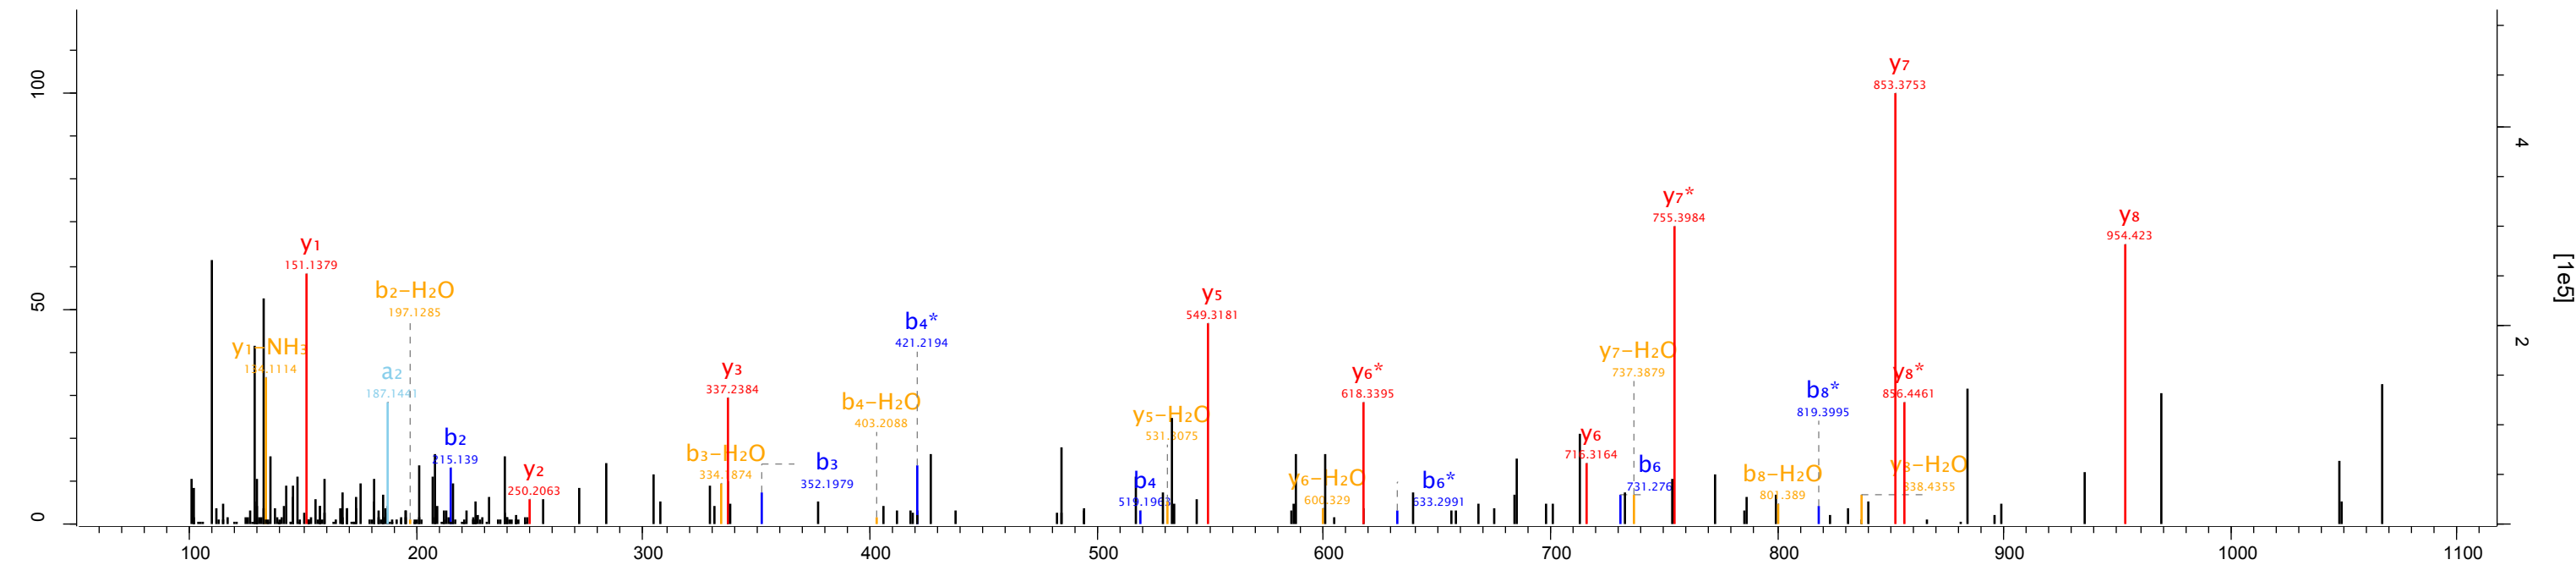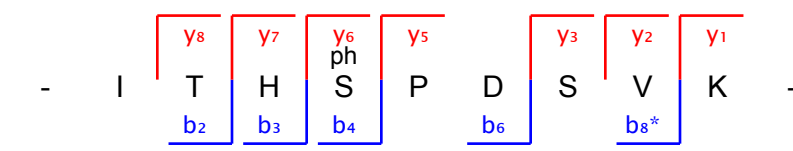

Raw file: 20150814\_A375SR\_Phospho\_BR2\_09  
 Scan: 3147 Method: FTMS; HCD Score: 113.25 m/z: 583.76 Gene names: USP36

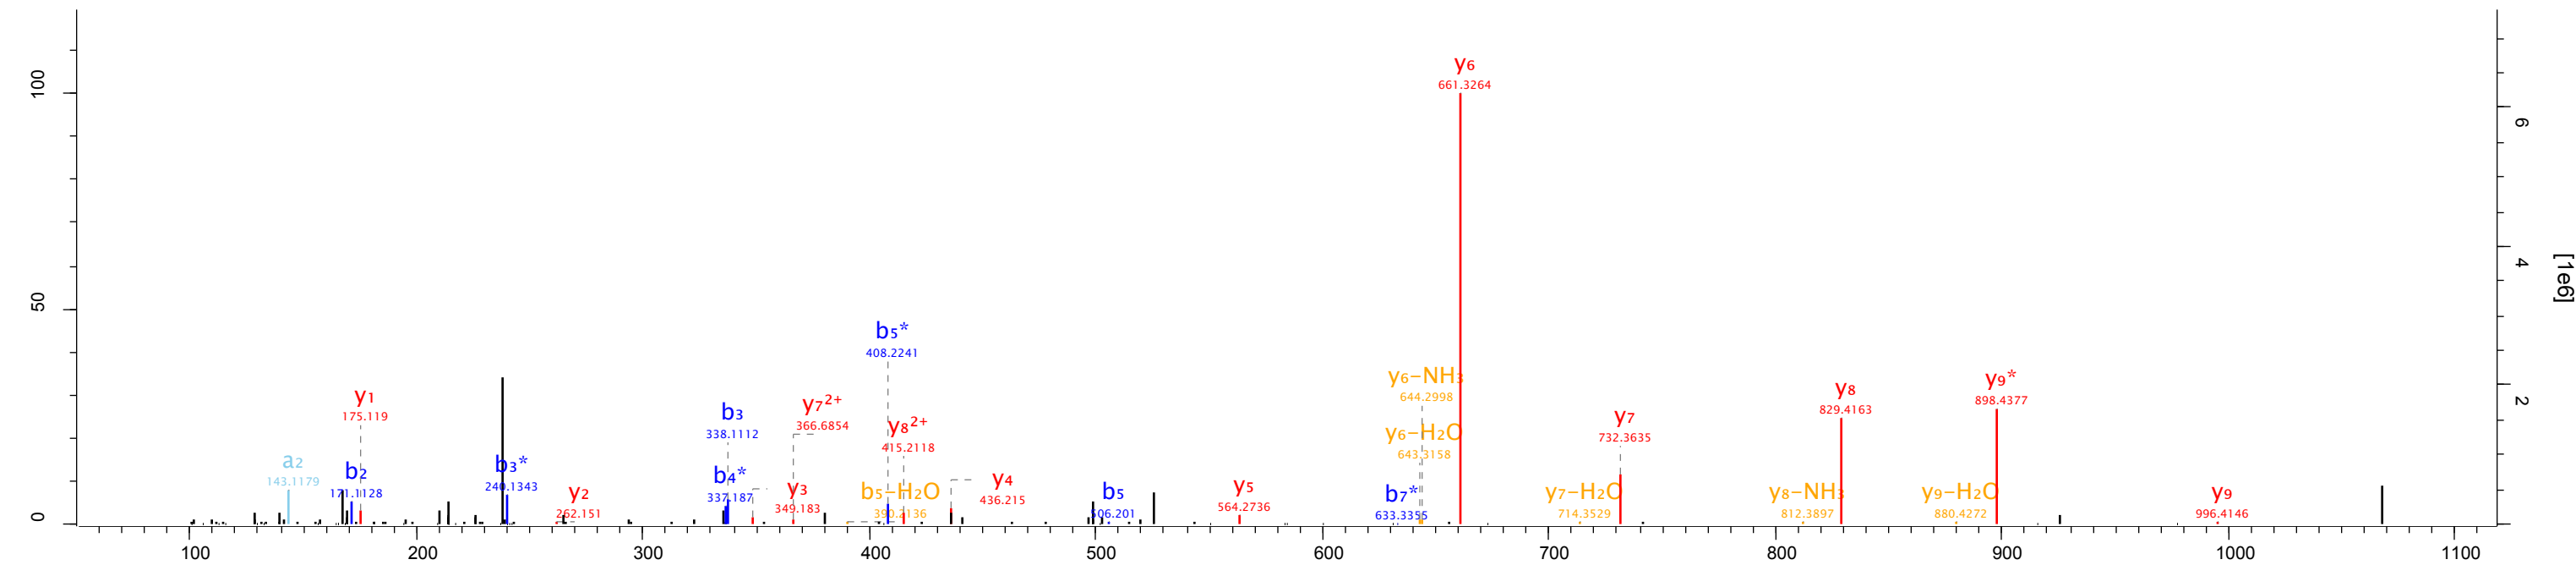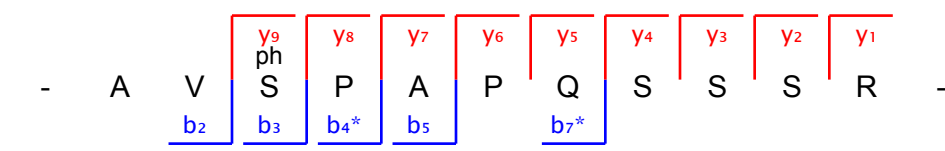

Raw file: 20150814\_A375SR\_Phospho\_BR2\_09  
 Scan: 4297 Method: FTMS; HCD Score: 164.58 m/z: 725.85 Gene names: MISP

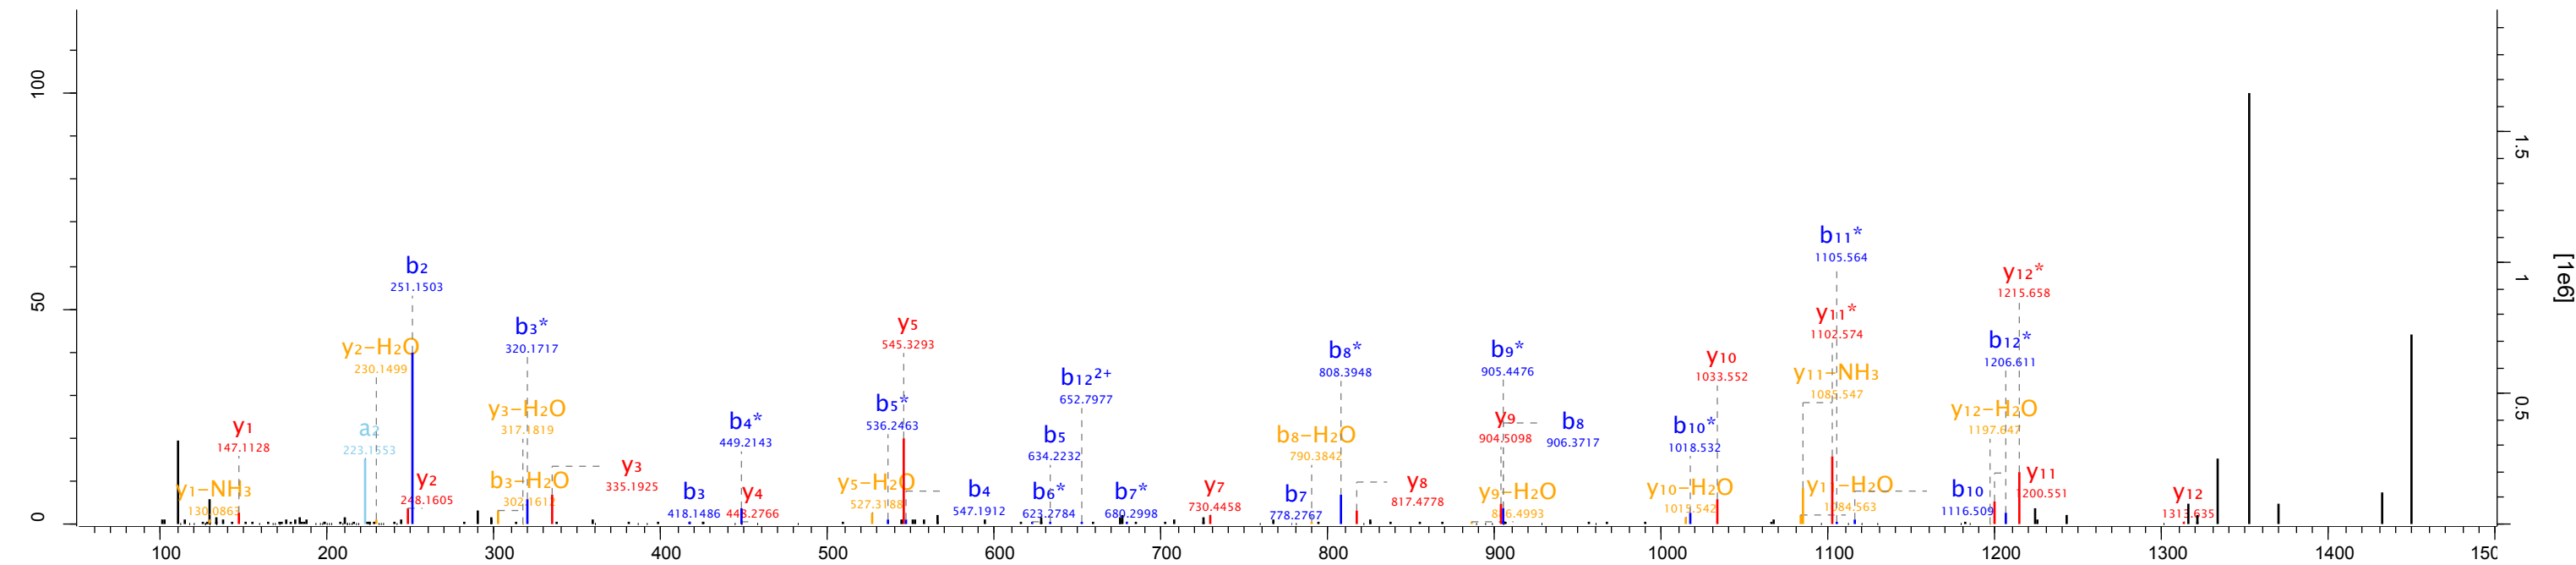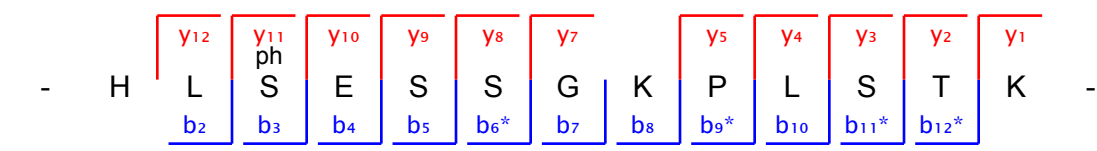

Raw file: 20150814\_A375SR\_Phospho\_BR2\_09  
 Scan: 8747 Method: FTMS; HCD Score: 164.54 m/z: 537.21 Gene names: MAP1B

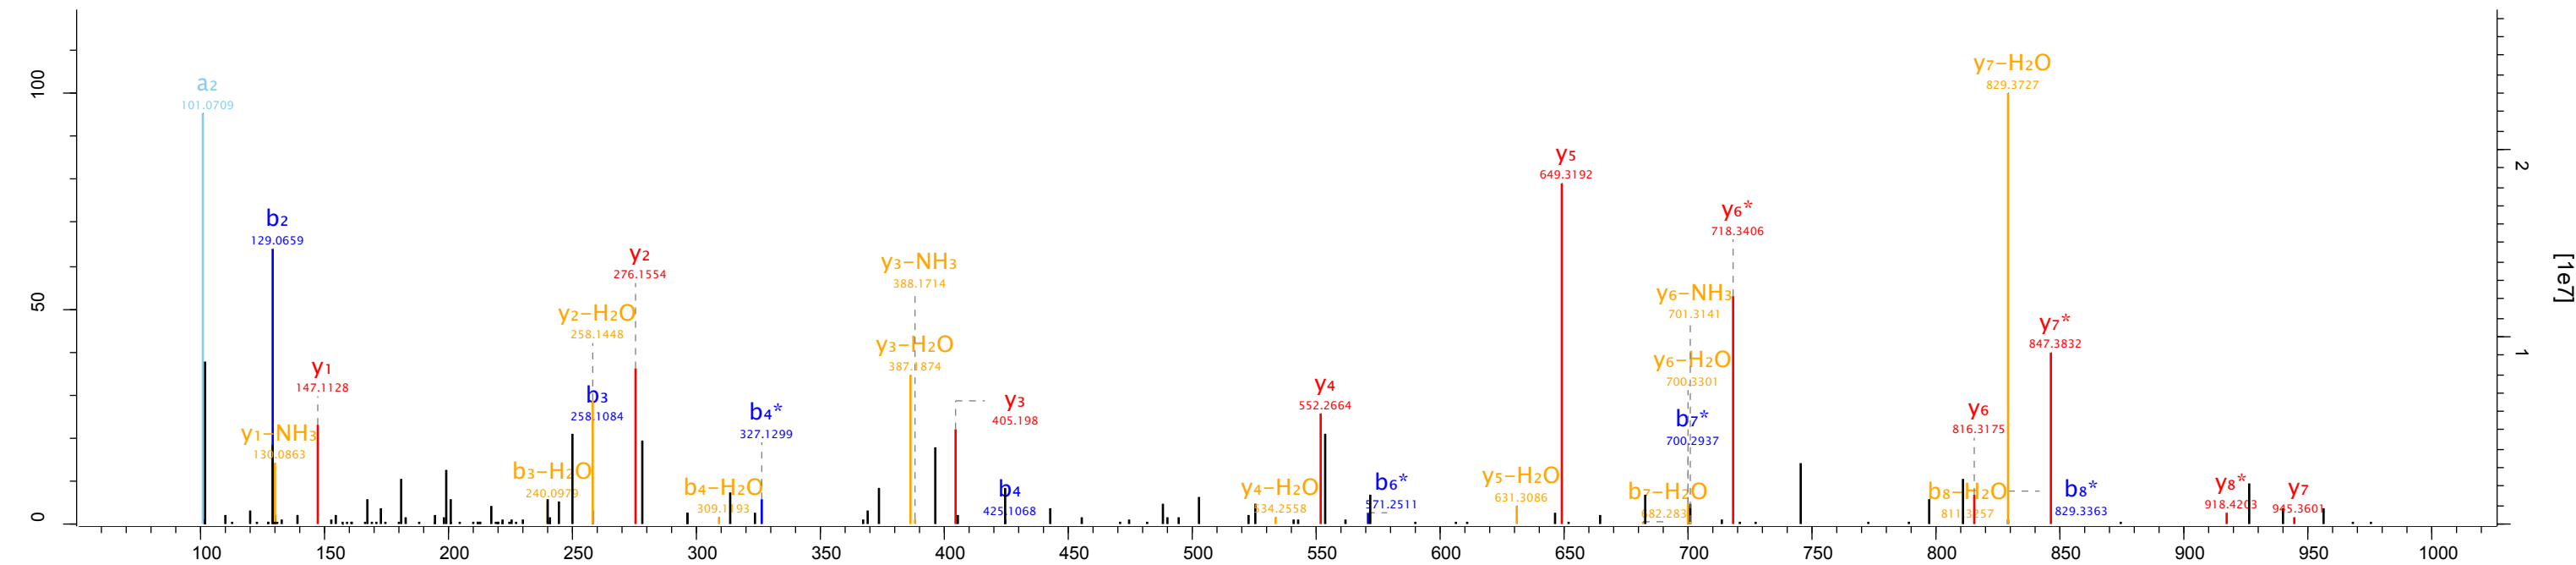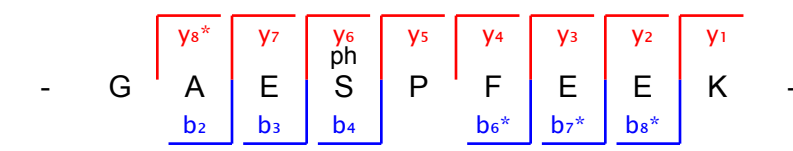

Raw file 20150814\_A375SR\_Phospho\_BR2\_09 Scan 9127 Method FTMS; HCD Score 142.23 m/z 616.02 Gene names MAPRE3

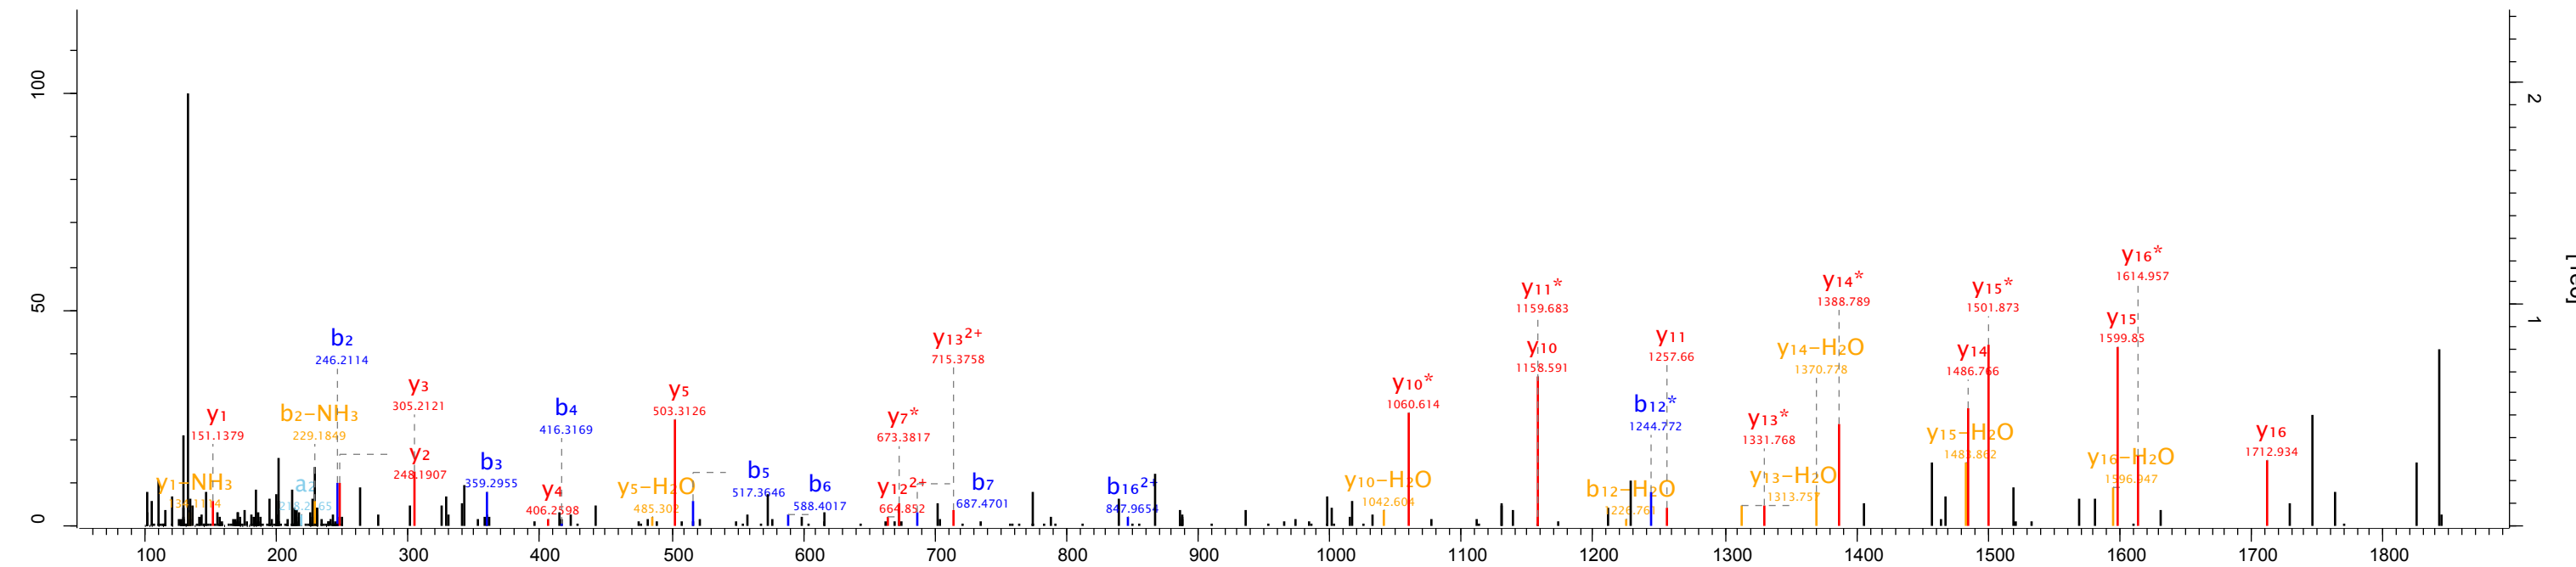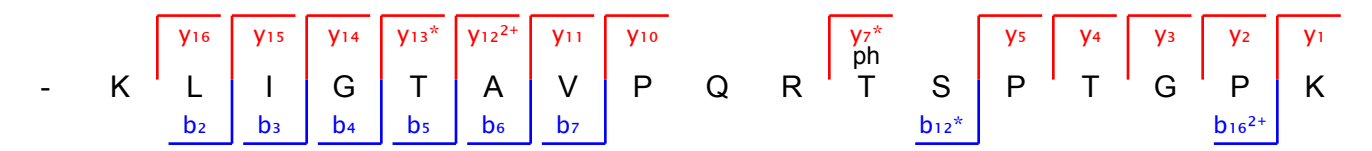

Raw file 20150814\_A375SR\_Phospho\_BR2\_02 Scan 10488 Method FTMS; HCD Score 103.9 m/z 817.87 Gene names ARFGEF2

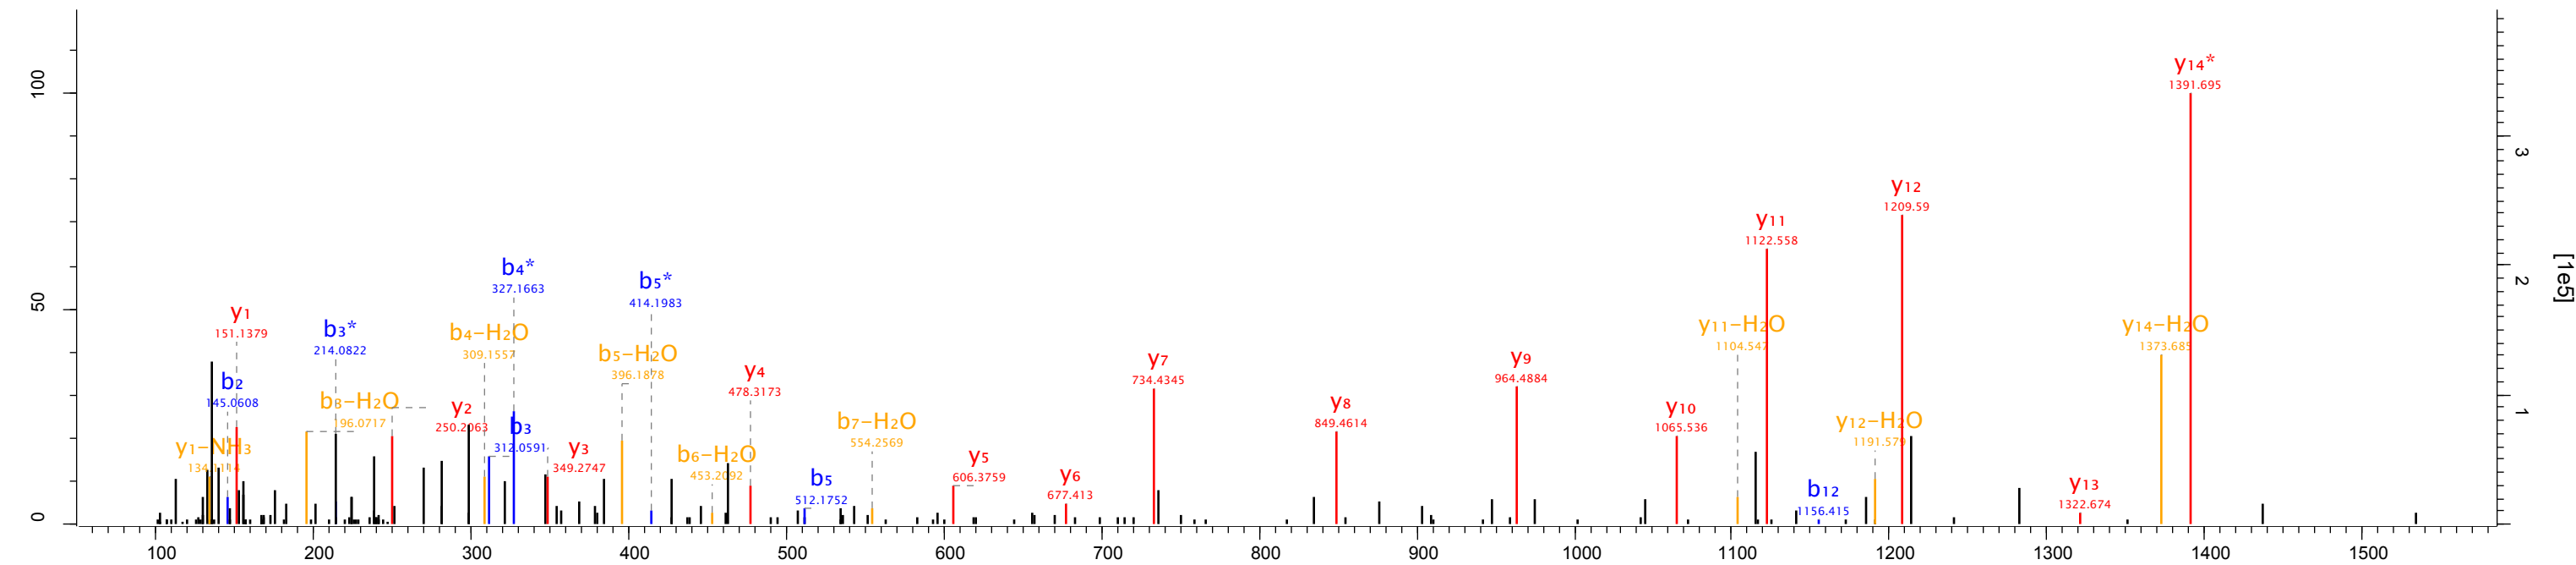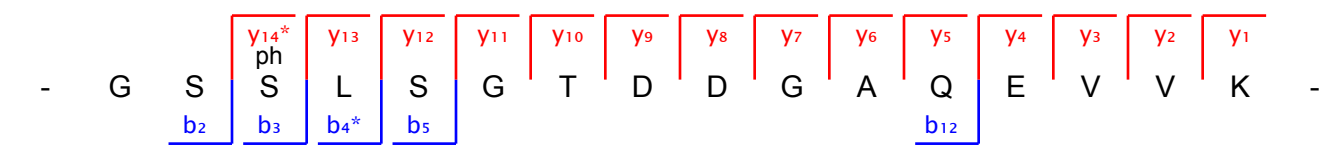

Raw file: 20150814\_A375SR\_Phospho\_BR2\_02  
 Scan: 10588 Method: FTMS; HCD Score: 102.43 m/z: 840.34 Gene names: SPICE1

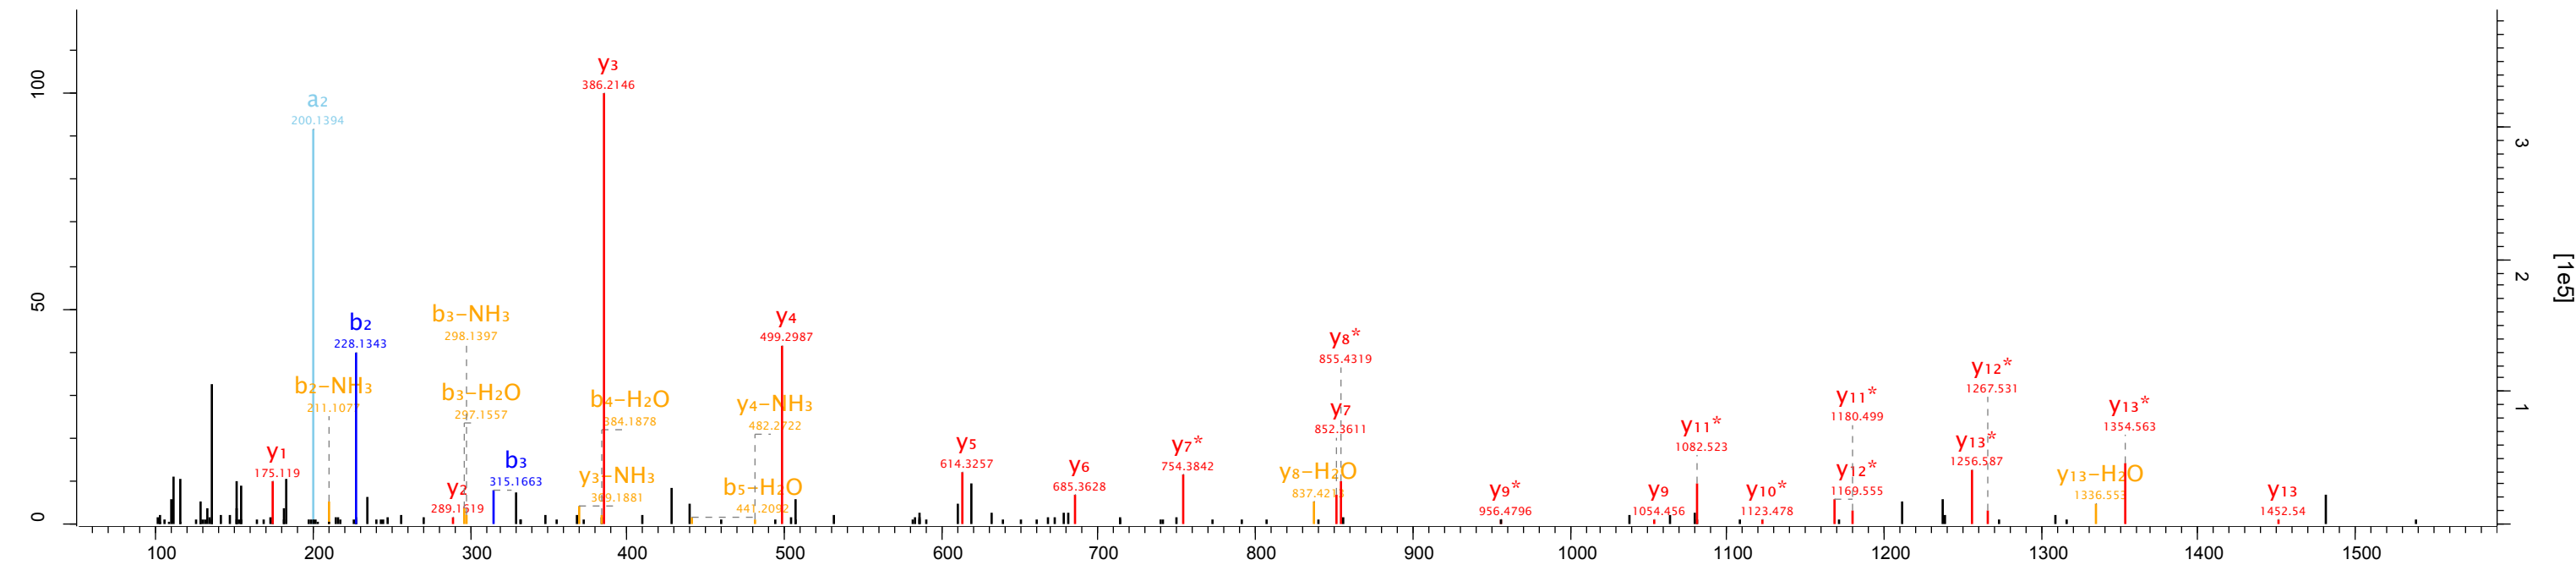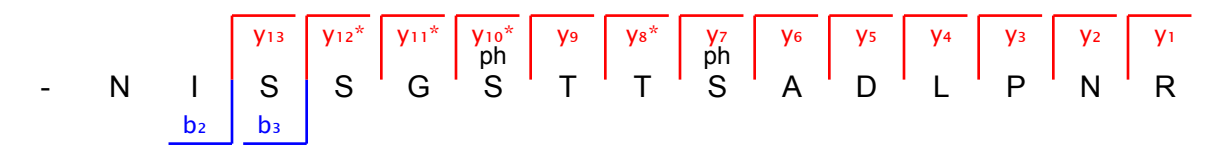

Raw file: 20150814\_A375SR\_Phospho\_BR2\_02  
 Scan: 10678 Method: FTMS; HCD Score: 139.38 m/z: 851.3 Gene names: OSBPL3

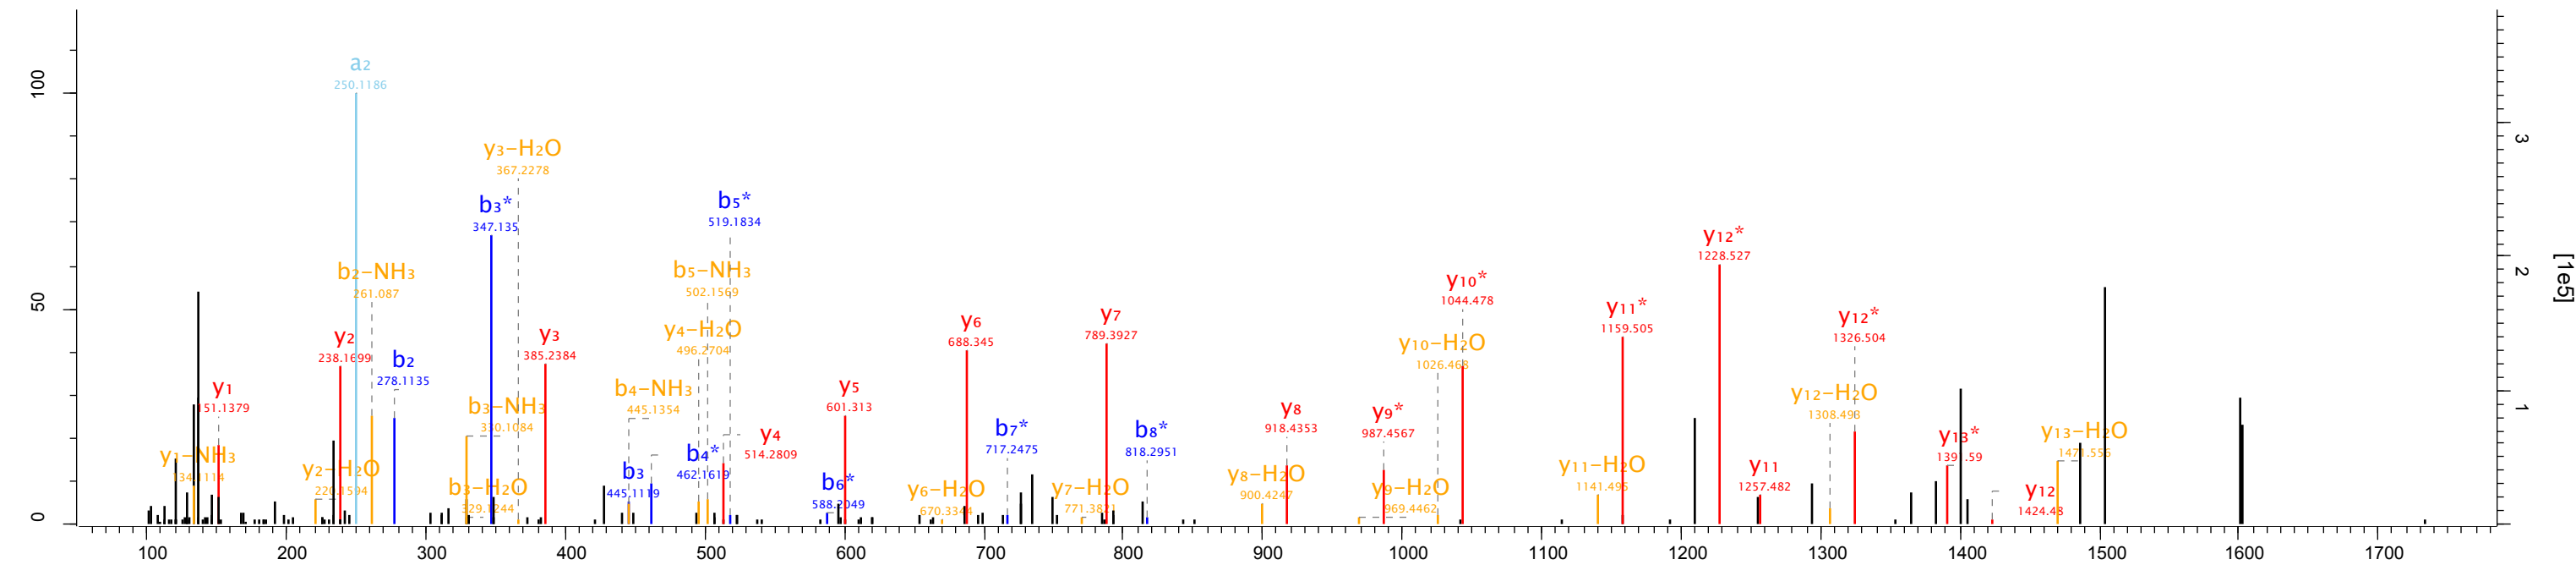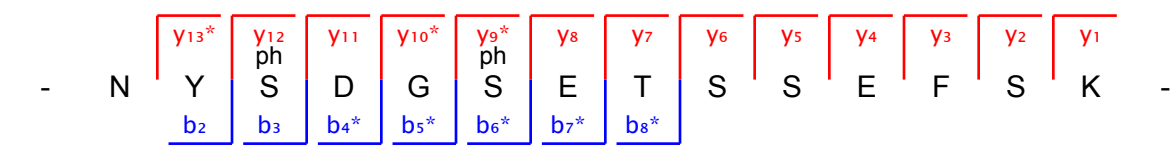



Raw file  
 20150814\_A375SR\_Phospho\_BR2\_02  
 Scan 10998 Method FTMS; HCD Score 81.88 m/z 852.82 Gene names PI4KA

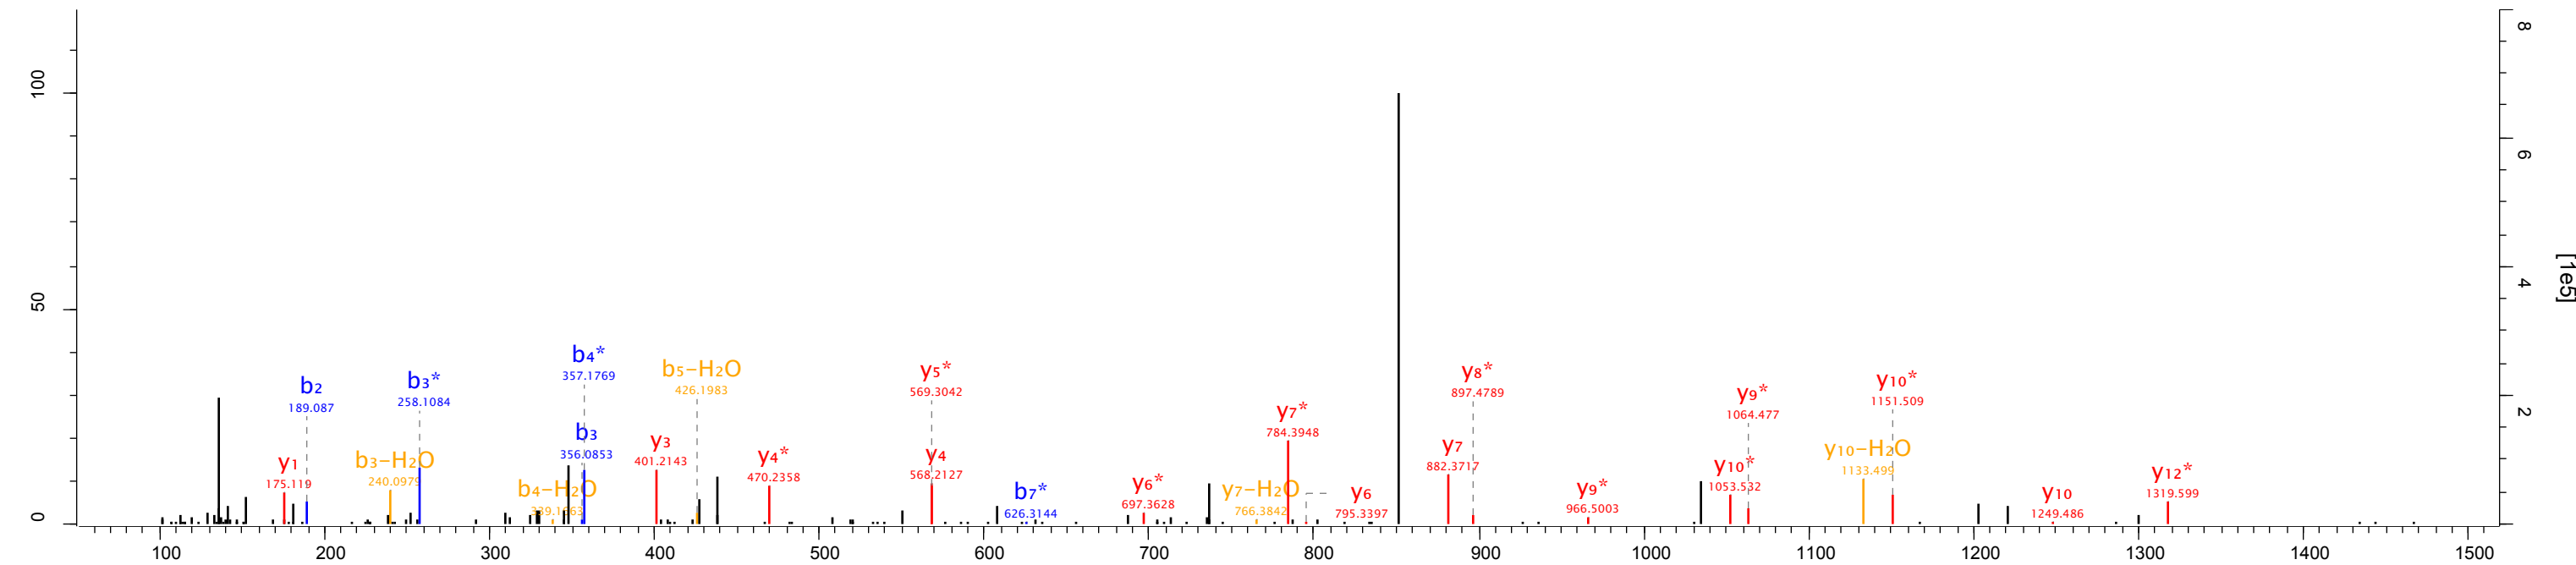

- T S S V S S I S Q V S P E R -

Fragmentation mapping (b and y ions) is shown below the sequence:

- b<sub>2</sub> (under S)
- b<sub>3</sub> (under S)
- b<sub>4</sub>\*
- b<sub>7</sub>\*
- y<sub>12</sub>\*
- y<sub>10</sub>
- y<sub>9</sub>\*
- y<sub>8</sub>\*
- y<sub>7</sub>
- y<sub>6</sub>
- y<sub>5</sub>\*
- y<sub>4</sub>
- y<sub>3</sub>
- y<sub>1</sub>

Raw file: 20150814\_A375SR\_Phospho\_BR2\_02  
 Scan: 11078 Method: FTMS; HCD Score: 68.29 m/z: 939.67 Gene names: RANBP3;ZNF8

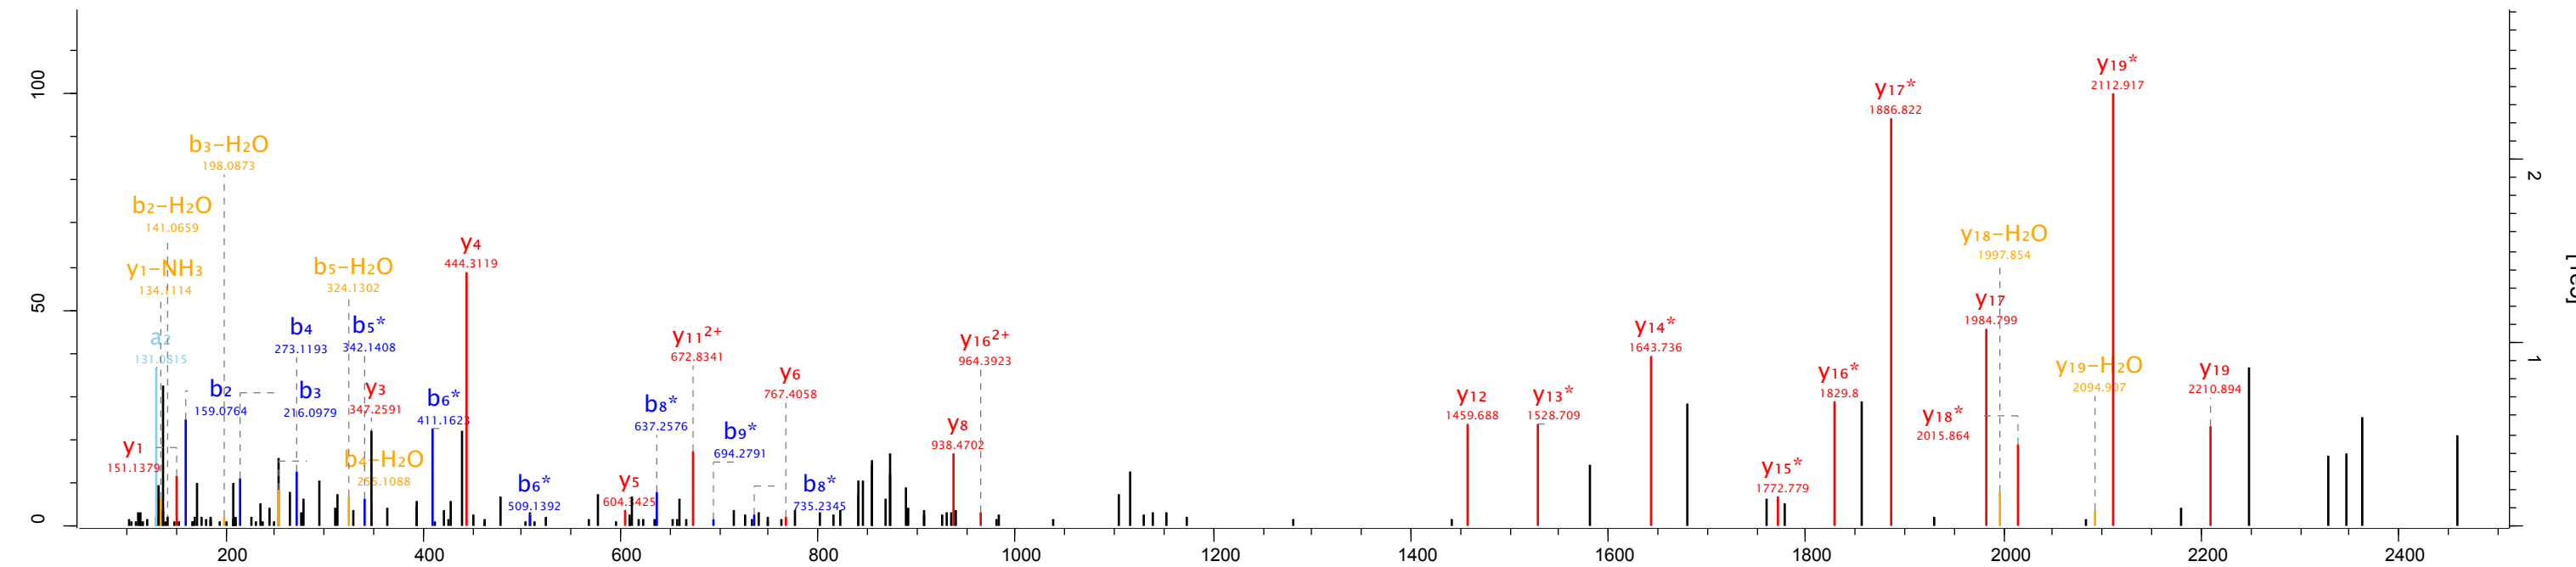

Protein sequence: - S A G G ph S ph P E G G E D S D R E D G N Y C P P V K -

Fragmentation mapping (b-ions in blue, y-ions in red):

- b<sub>2</sub> (A), b<sub>3</sub> (G), b<sub>4</sub> (G), b<sub>5</sub><sup>\*</sup> (S), b<sub>6</sub><sup>\*</sup> (S)
- y<sub>19</sub> (P), y<sub>18</sub><sup>\*</sup> (E), y<sub>17</sub> (G), y<sub>16</sub><sup>\*</sup> (G), y<sub>15</sub><sup>\*</sup> (E), y<sub>14</sub><sup>\*</sup> (D), y<sub>13</sub><sup>\*</sup> (S), y<sub>12</sub> (D), y<sub>11</sub><sup>2+</sup> (R)
- y<sub>8</sub> (G), y<sub>6</sub> (Y), y<sub>5</sub> (C), y<sub>4</sub> (P), y<sub>3</sub> (P), y<sub>1</sub> (K)

Raw file: 20150814\_A375SR\_Phospho\_BR2\_02  
 Scan: 11338 Method: FTMS; HCD Score: 87.36 m/z: 913.37 Gene names: PBRM1

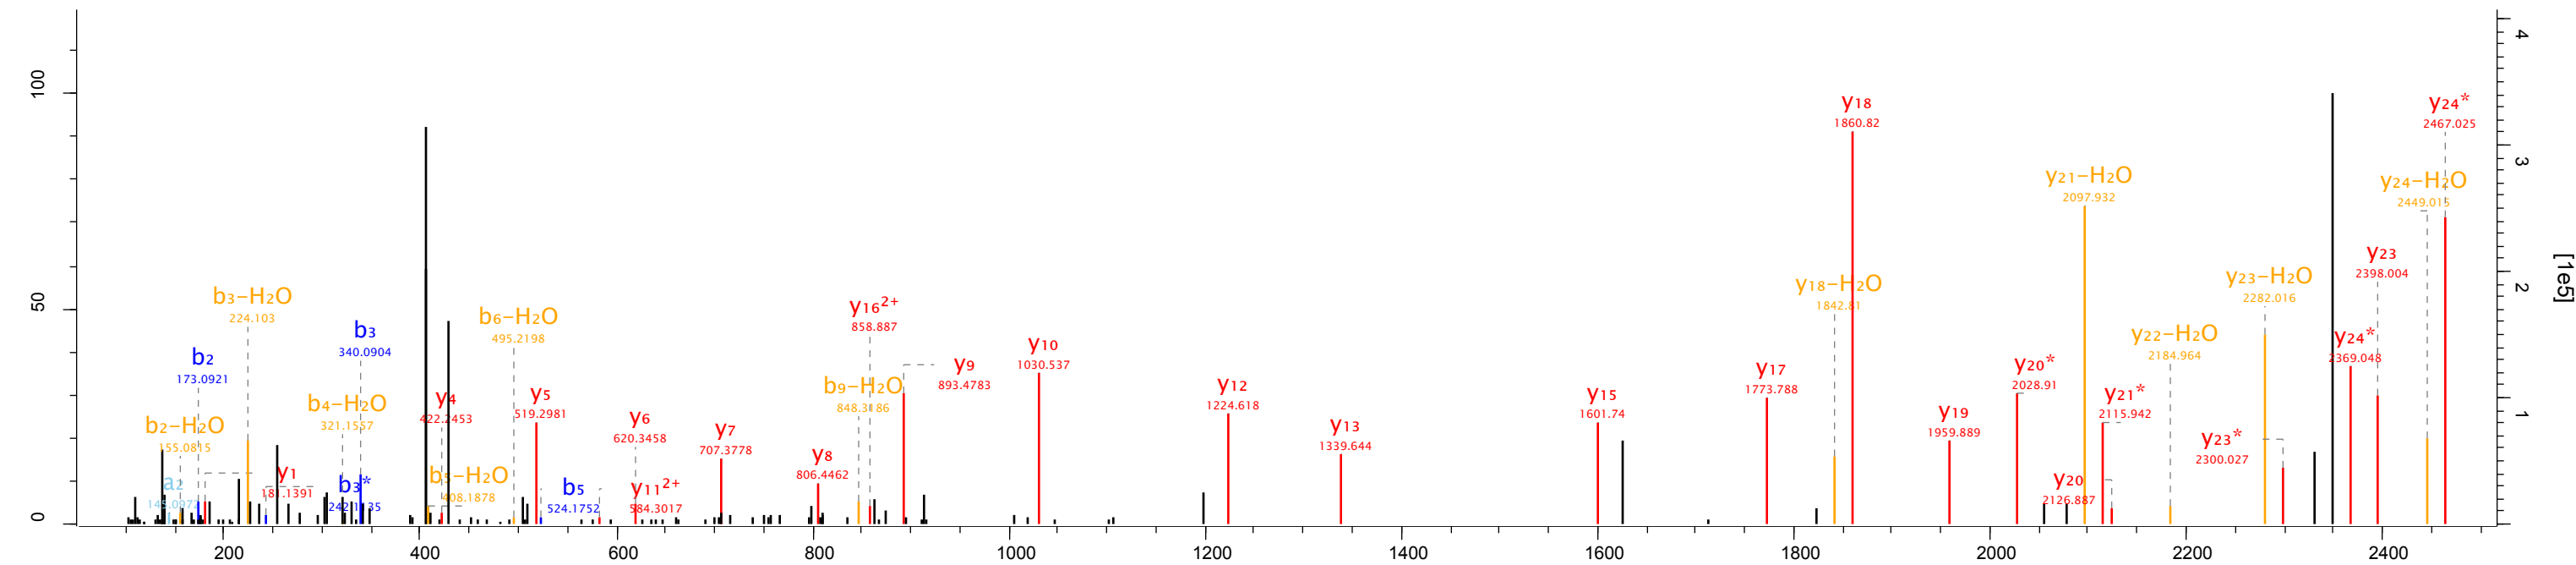

- A T S P S S V S G D F D D G H H S V S T P G P S R -

Fragmentation mapping (b and y ions) is shown below the sequence:

- b2: T
- b3: S
- b5: S
- y1: R
- y4: G
- y5: P
- y6: T
- y7: S
- y8: V
- y9: S
- y10: H
- y11<sup>2+</sup>: H
- y12: G
- y13: D
- y15: F
- y16<sup>2+</sup>: D
- y17: G
- y18: S
- y19: V
- y20<sup>ph</sup>: S
- y21<sup>\*</sup>: S
- y23: P
- y24<sup>\*</sup>: S

Raw file: 20150814\_A375SR\_Phospho\_BR2\_02  
 Scan: 11548 Method: FTMS; HCD Score: 150.95 m/z: 955.8 Gene names: IRS2

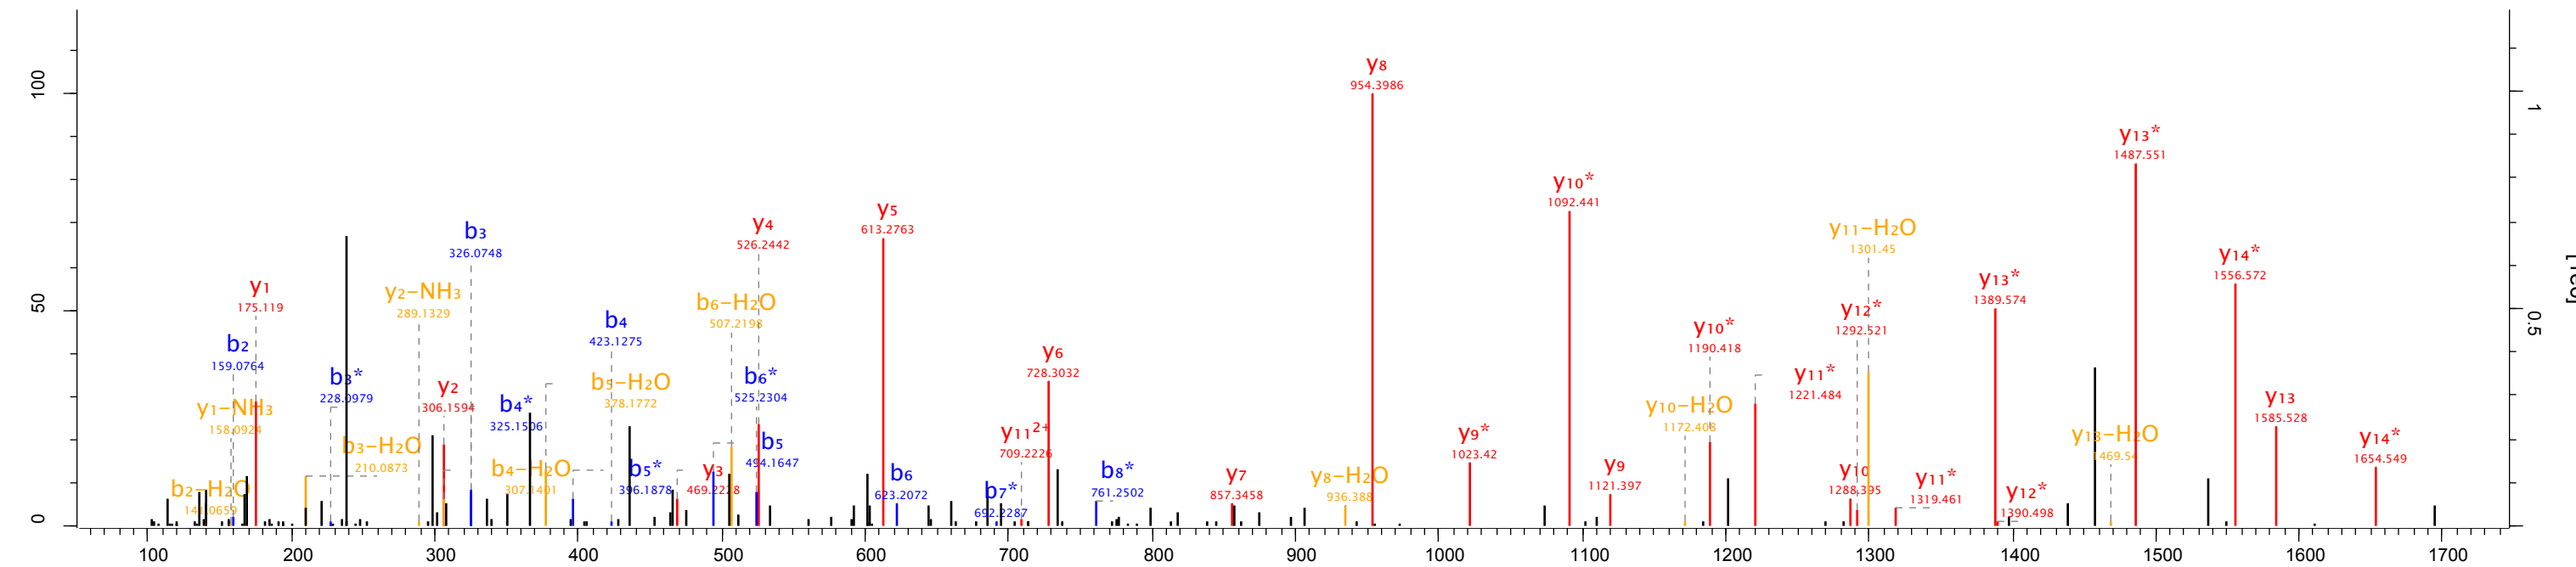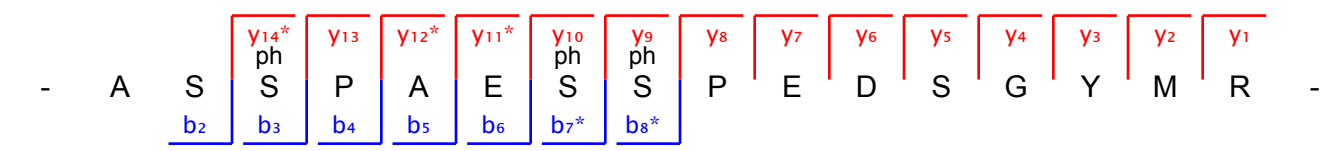

Raw file: 20150814\_A375SR\_Phospho\_BR2\_02  
 Scan: 11698 Method: FTMS; HCD Score: 67.56 m/z: 860.3 Gene names: ABCC1

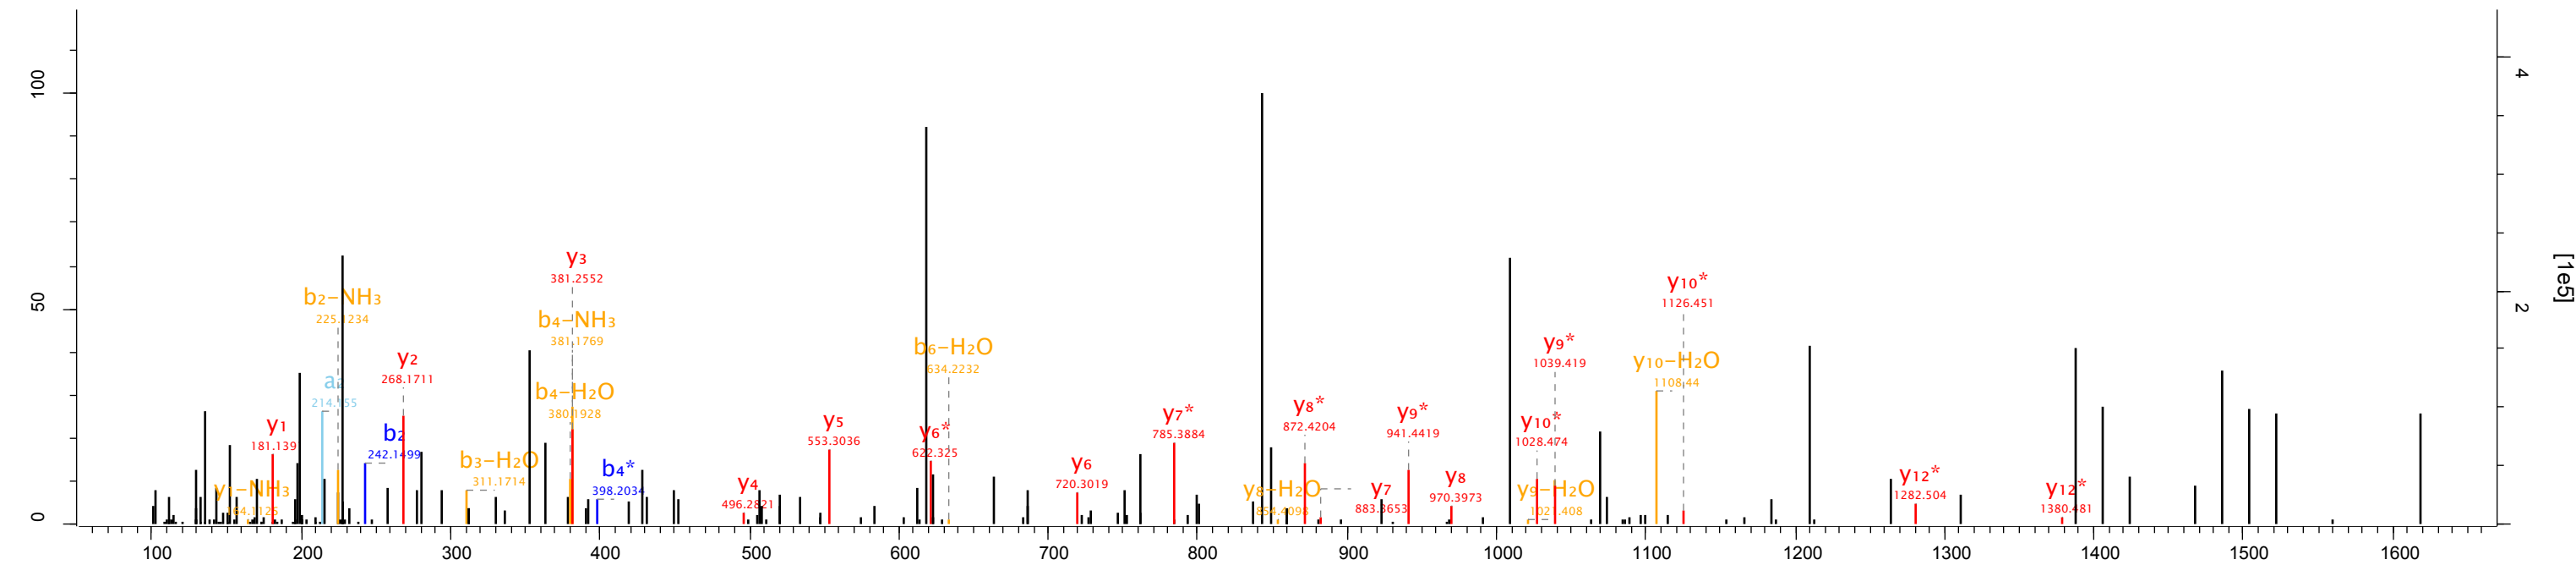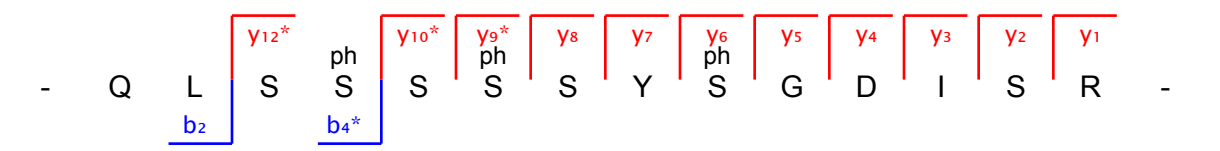

Raw file: 20150814\_A375SR\_Phospho\_BR2\_02  
 Scan: 11708 Method: FTMS; HCD Score: 110.97 m/z: 695.27 Gene names: PKP2

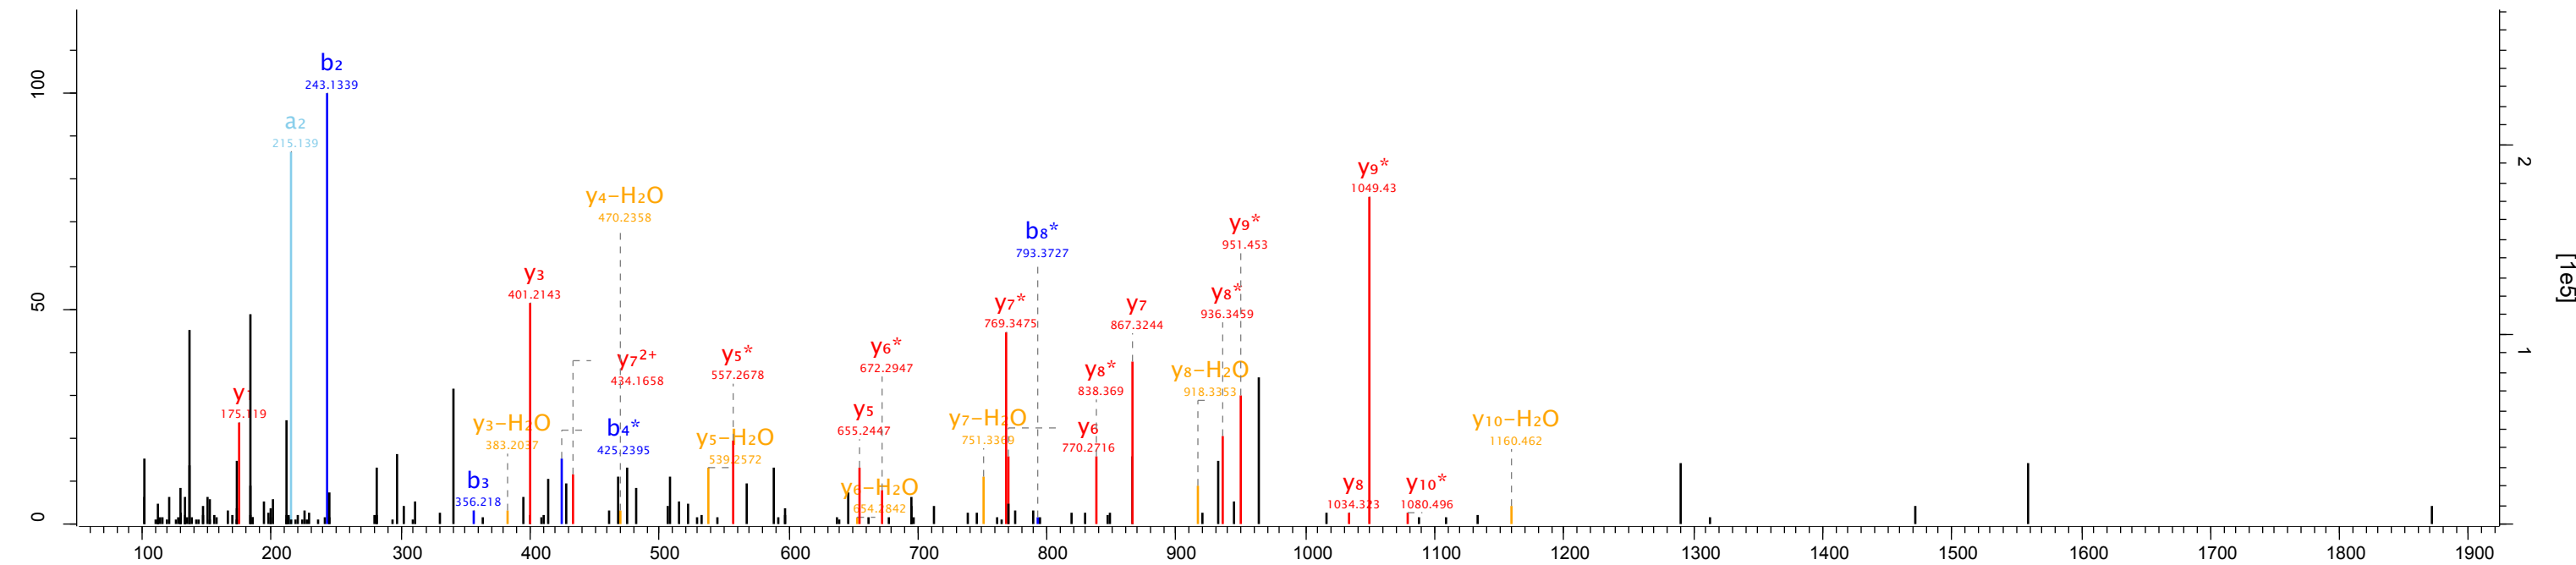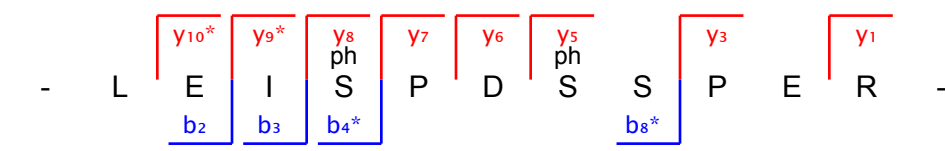

Raw file: 20150814\_A375SR\_Phospho\_BR2\_02  
 Scan: 11798 Method: FTMS; HCD Score: 149.07 m/z: 706.64 Gene names: GLCCI1

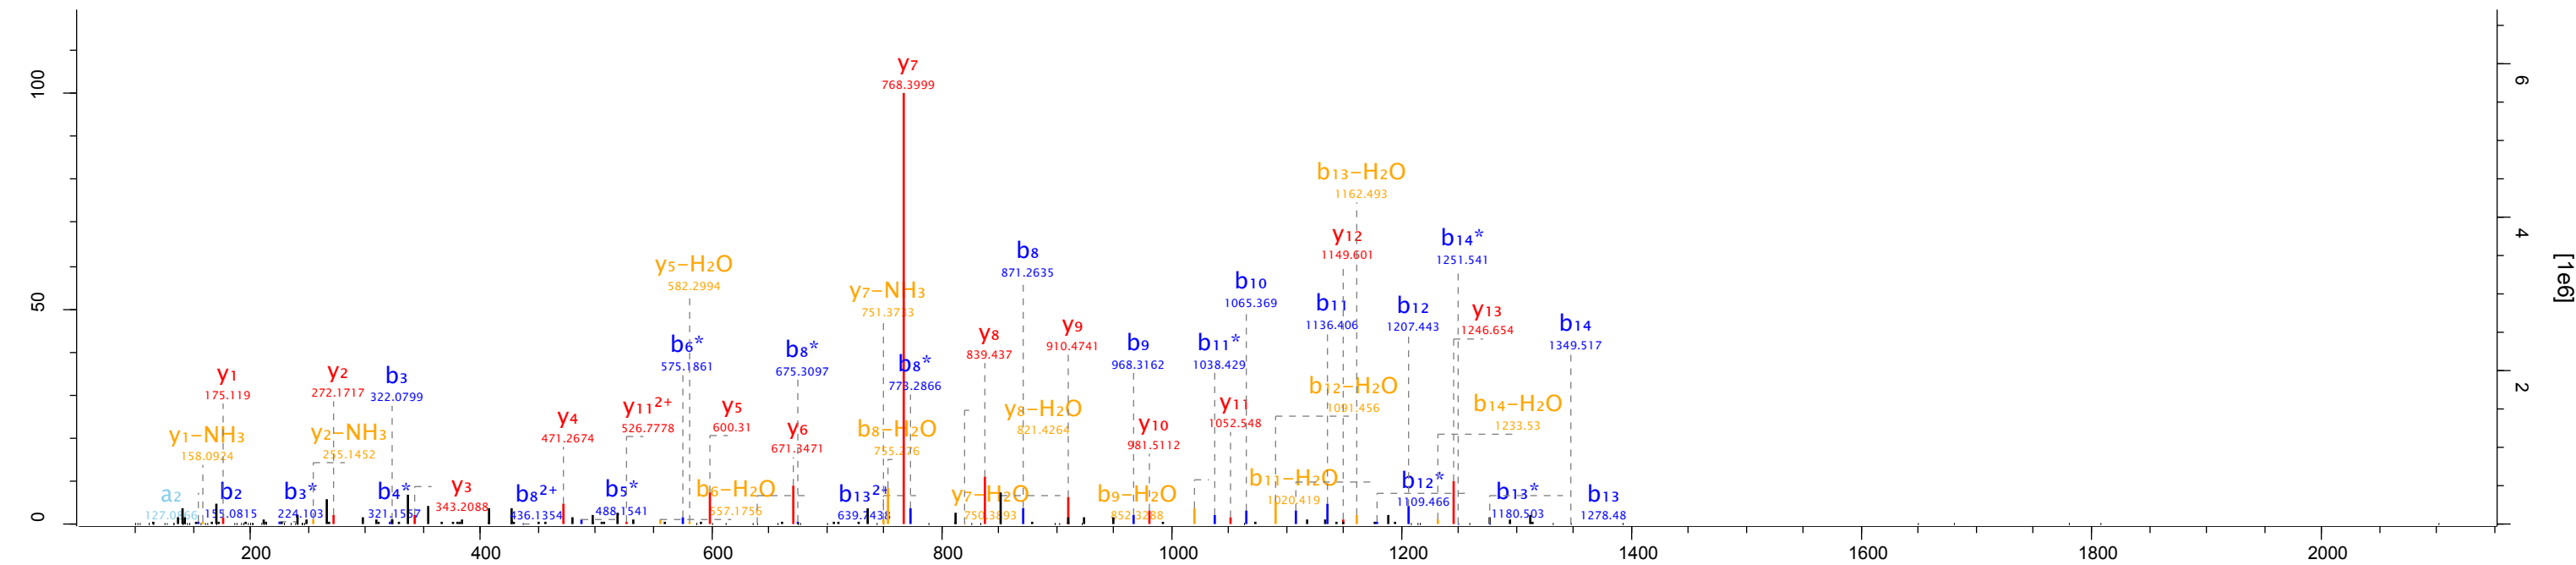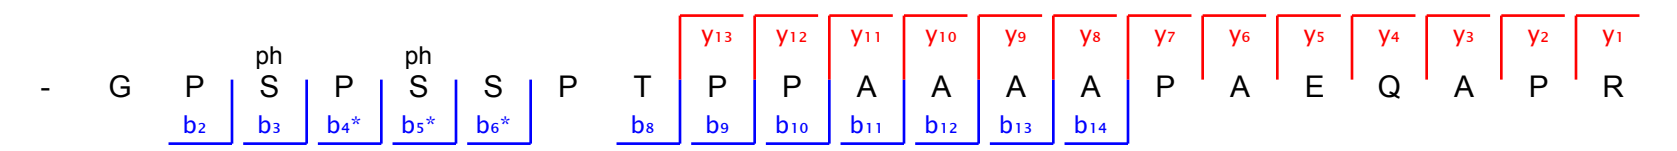

Raw file: 20150814\_A375SR\_Phospho\_BR2\_02  
 Scan: 12148 Method: FTMS; HCD Score: 207.1 m/z: 833.35 Gene names: FOXK1

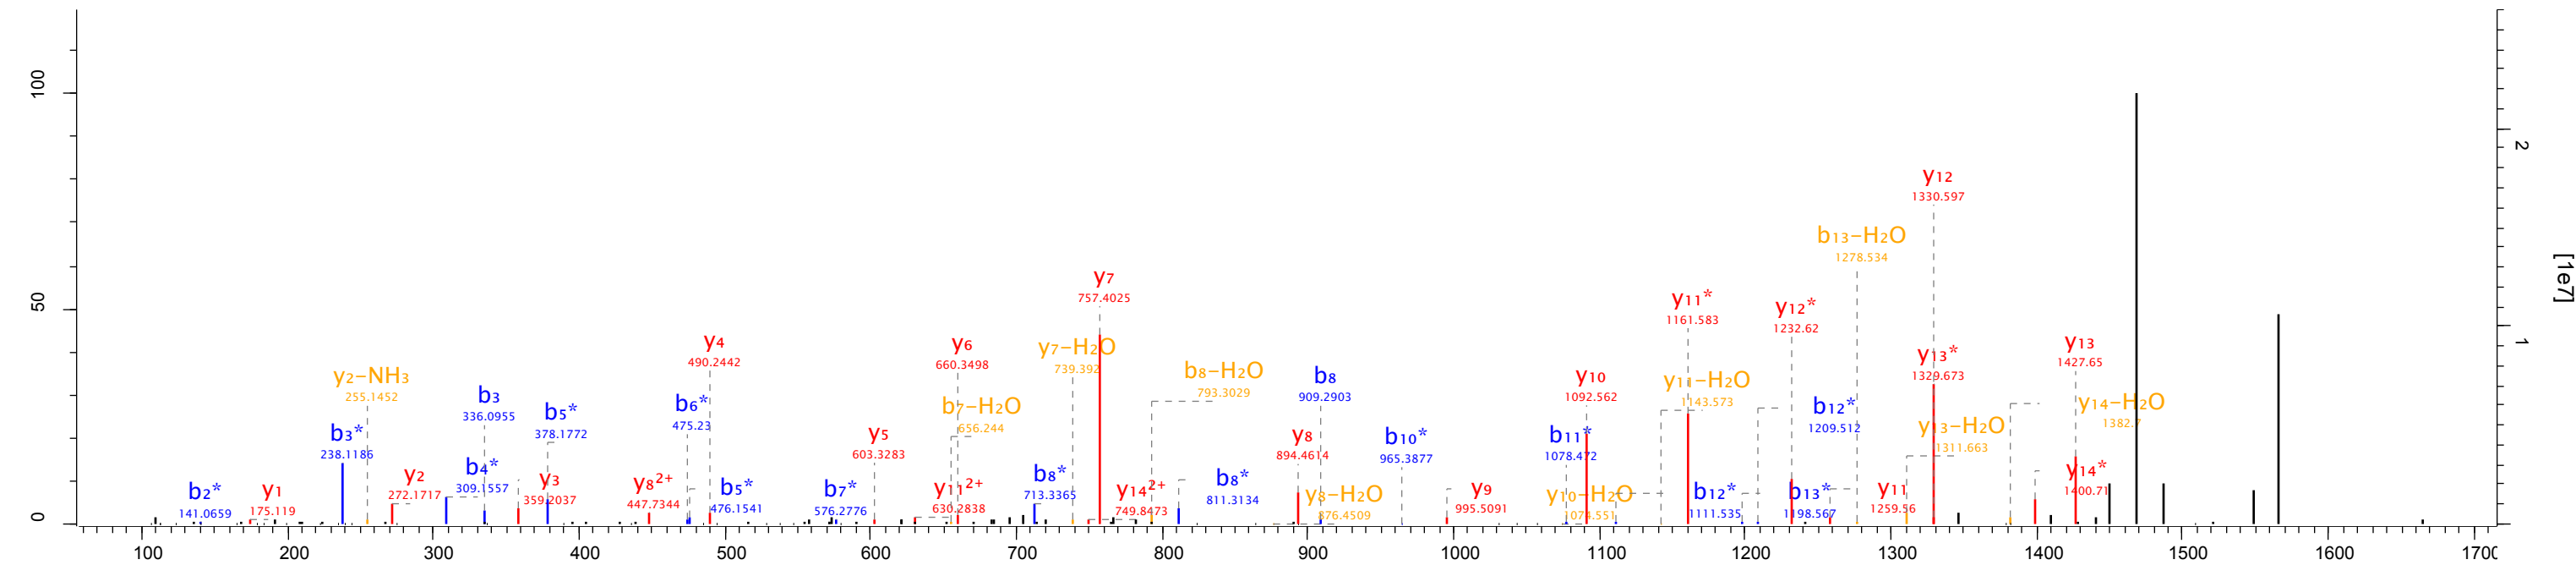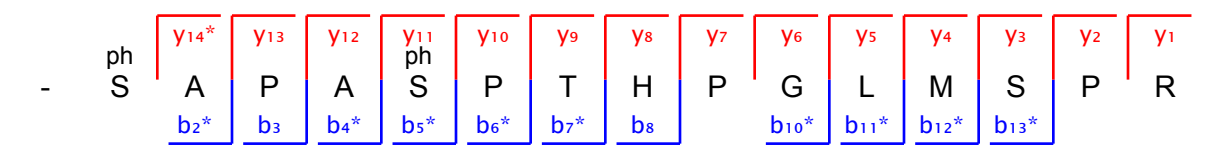



Raw file: 20150814\_A375SR\_Phospho\_BR2\_02  
 Scan: 12228 Method: FTMS; HCD Score: 175.33 m/z: 994.85 Gene names: LEO1

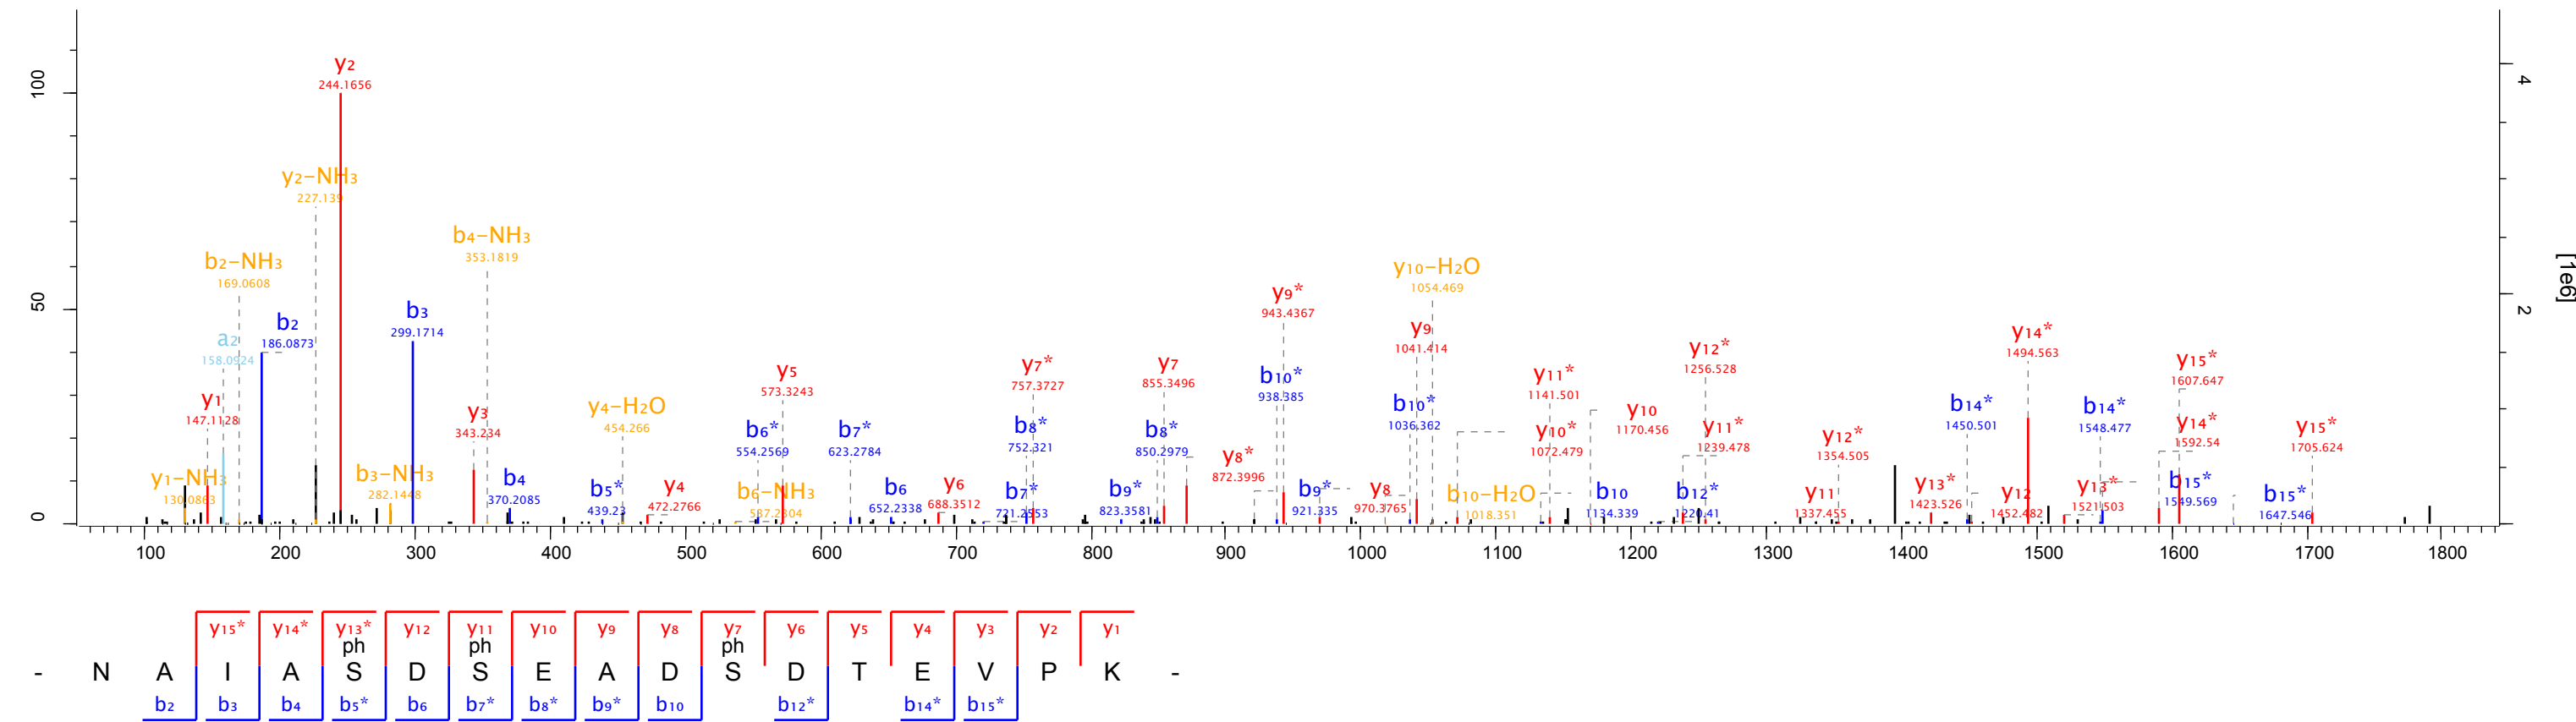

Raw file: 20150814\_A375SR\_Phospho\_BR2\_02  
 Scan: 12368 Method: FTMS; HCD Score: 160.88 m/z: 1141.39 Gene names: FBXW9

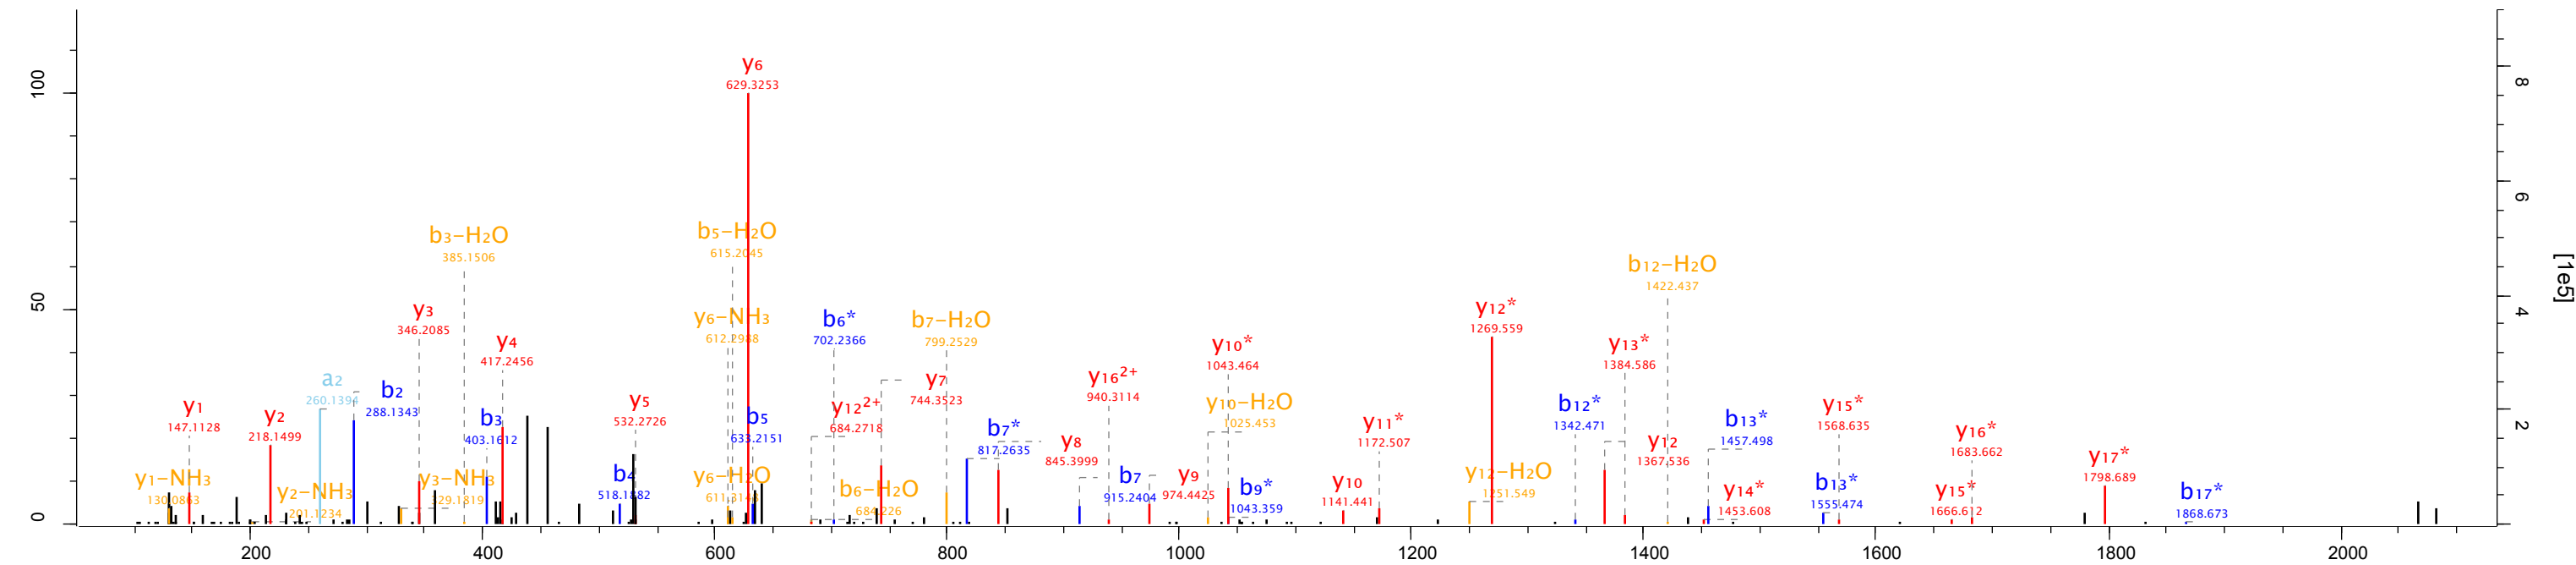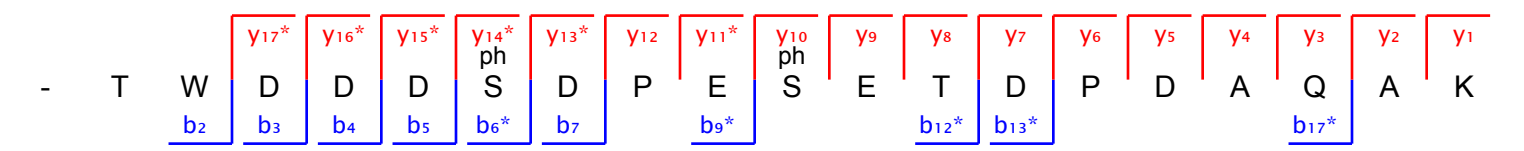

Raw file: 20150814\_A375SR\_Phospho\_BR2\_02  
 Scan: 13528 Method: FTMS; HCD Score: 72.97 m/z: 696.28 Gene names: NOL8

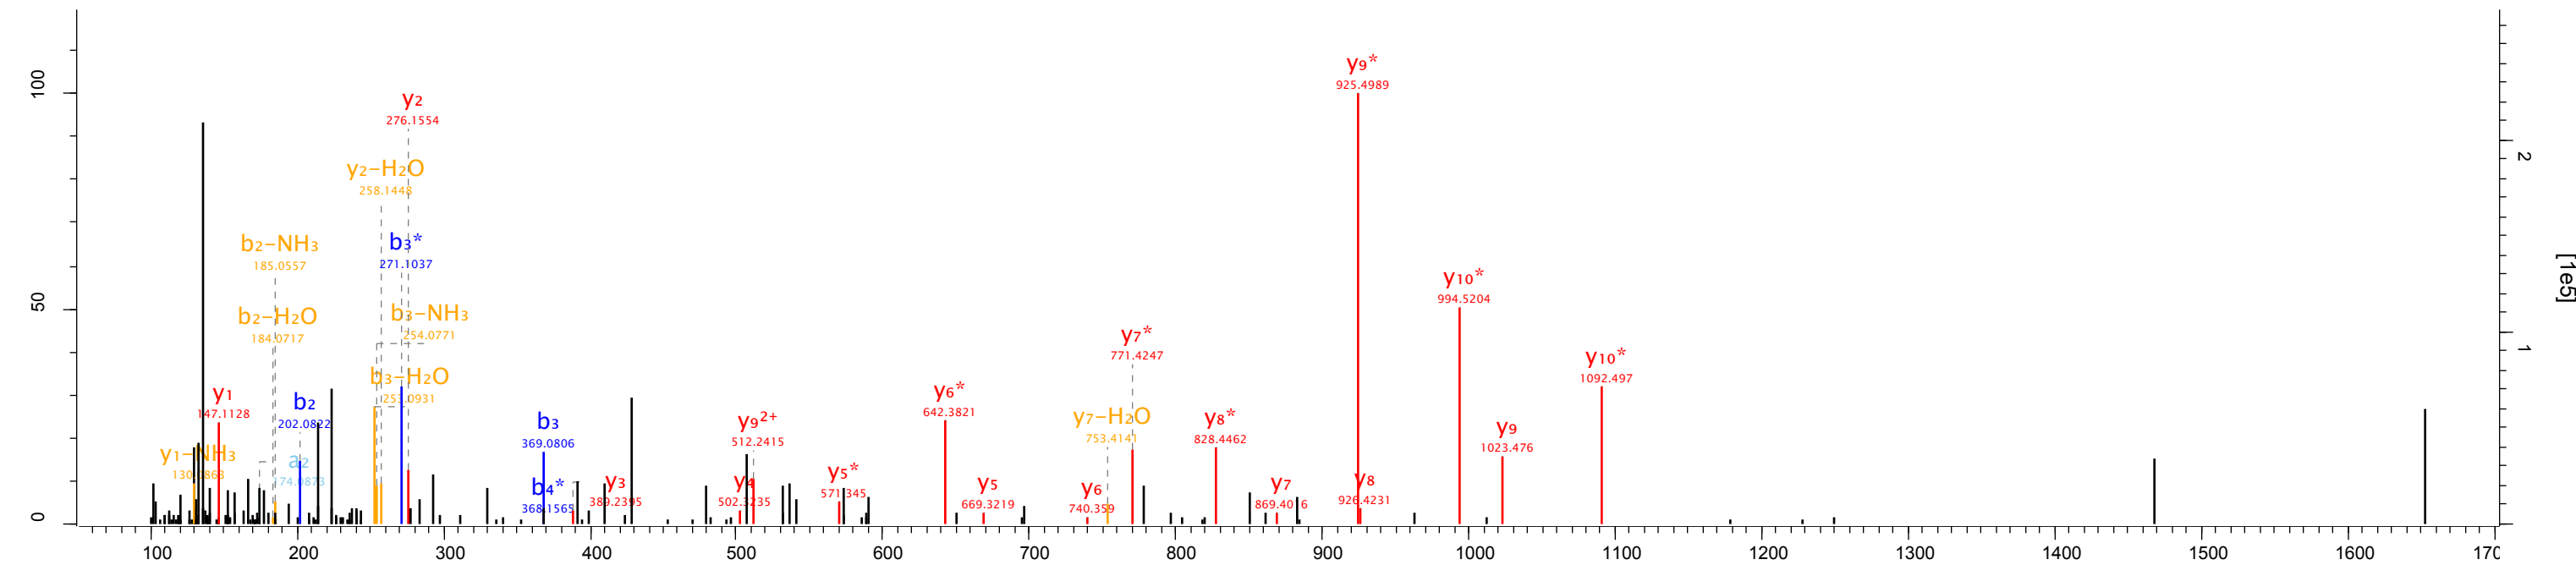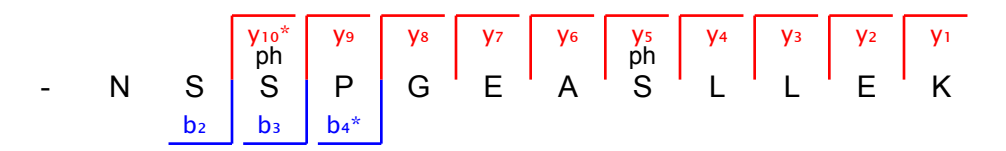

Raw file 20150814\_A375SR\_Phospho\_BR2\_02 Scan 13698 Method FTMS; HCD Score 110.33 m/z 725.3 Gene names BAIAP2L1

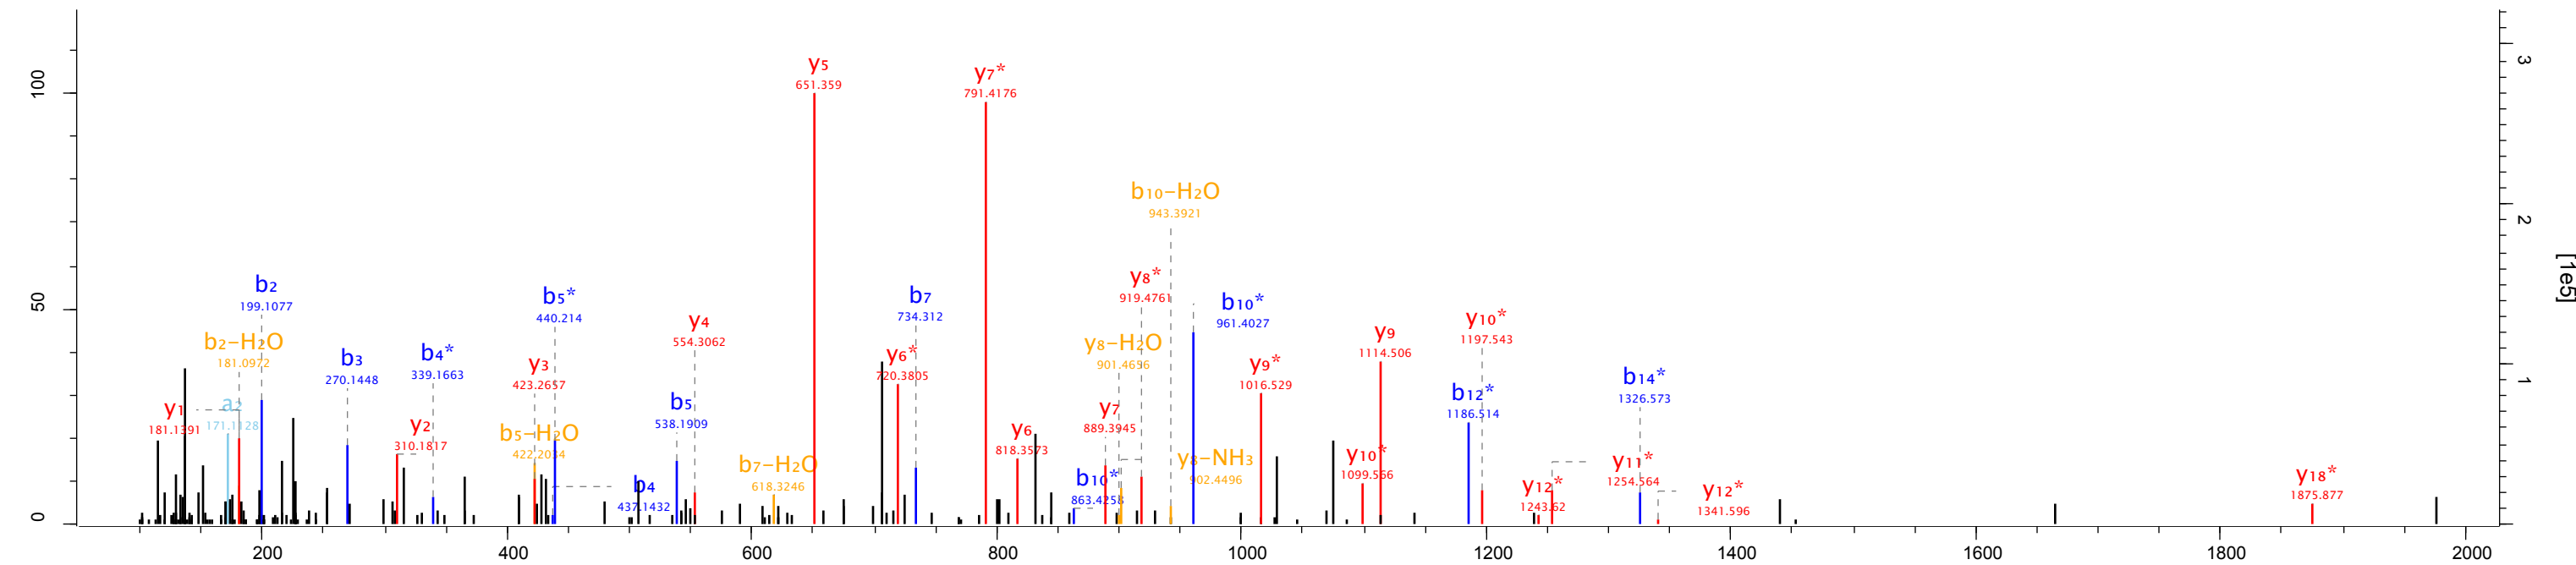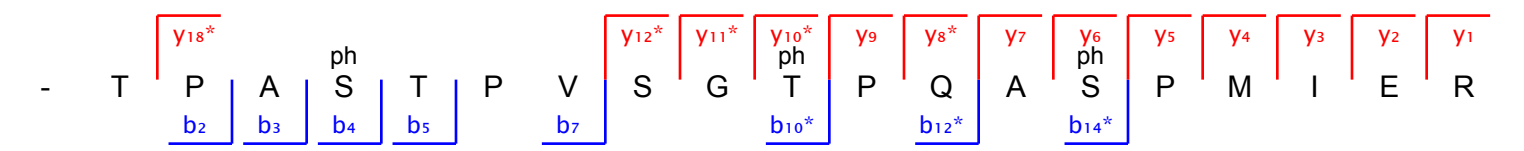

Raw file: 20150814\_A375SR\_Phospho\_BR2\_02  
 Scan: 15528 Method: FTMS; HCD Score: 214.47 m/z: 1172.98 Gene names: CTPS1

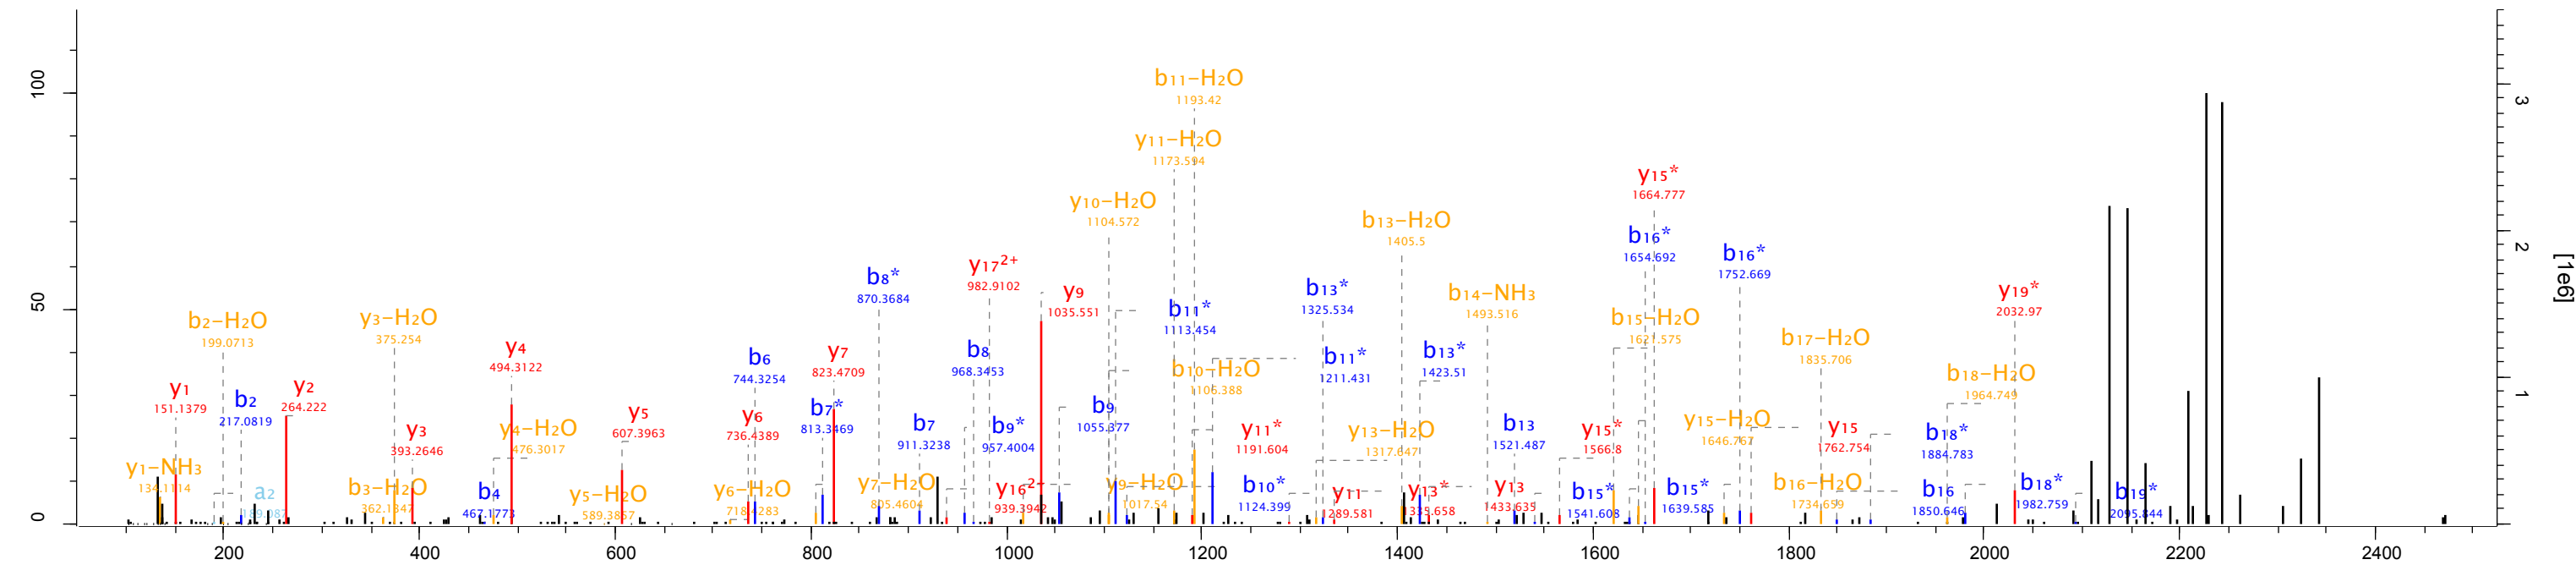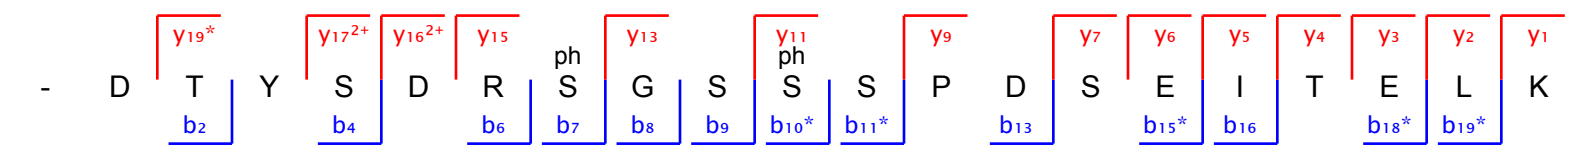

Raw file: 20150814\_A375SR\_Phospho\_BR2\_02  
 Scan: 17078 Method: FTMS; HCD Score: 122.3 m/z: 844.34 Gene names: DSP

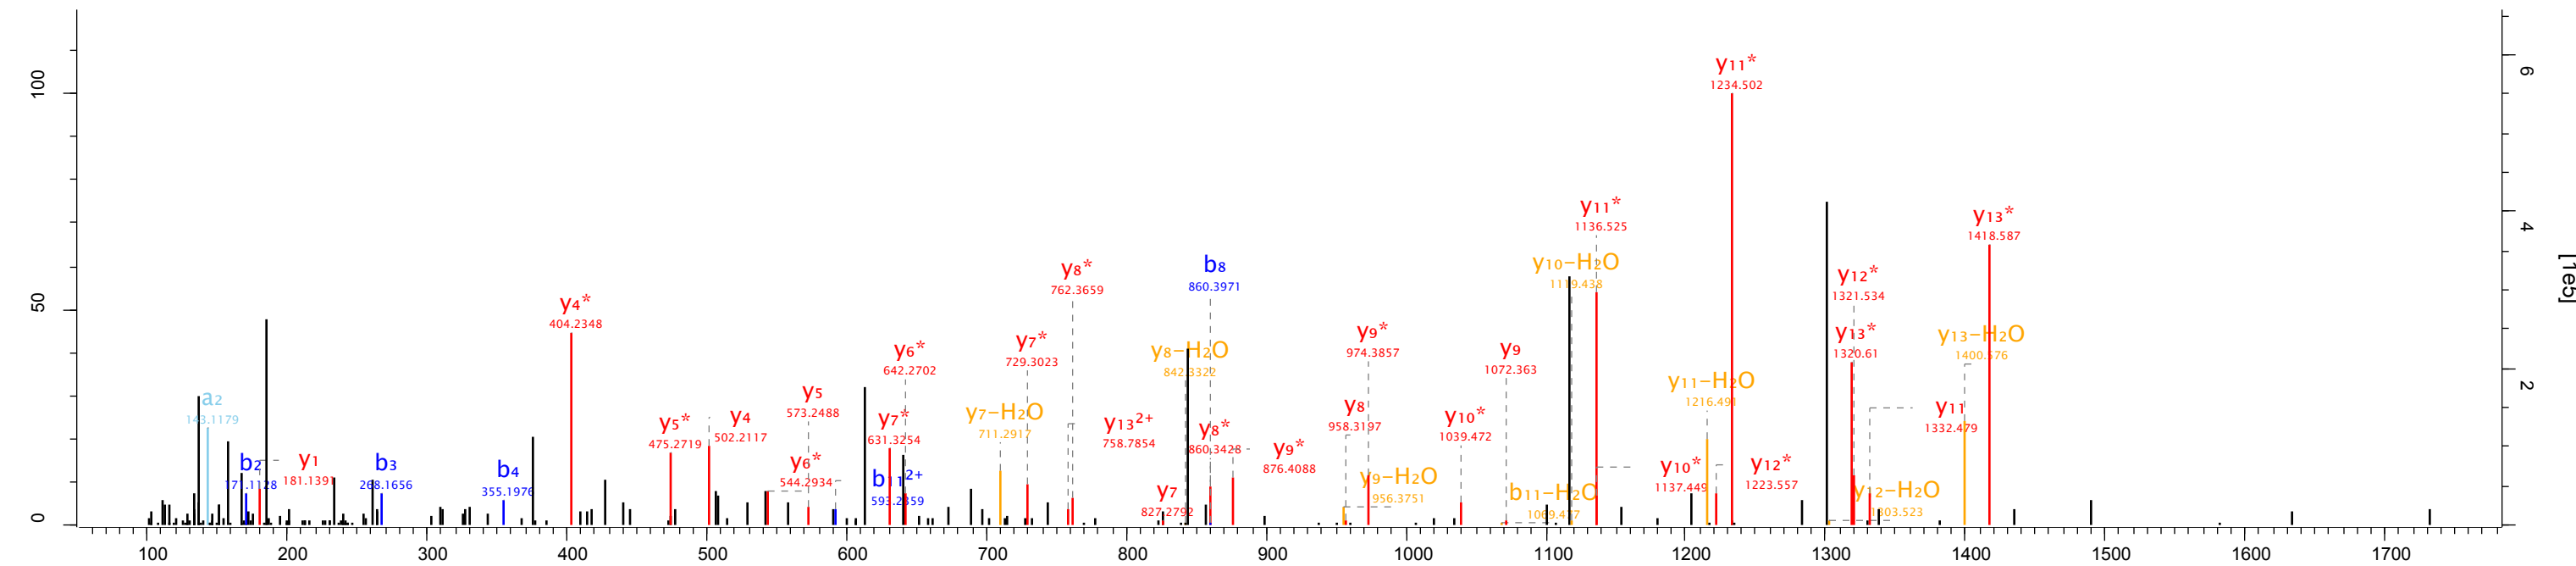

Sequence: - G L P S P Y N M S S A P G S R -

Fragmentation mapping (b-ions in blue, y-ions in red):

- b2: L
- b3: LP
- b4: LPS
- b8: M
- b112+: SA
- y1: R
- y4: AP
- y5: SA
- y6\*: SA
- y7: MS
- y8: MP
- y9: NP
- y10\*: PY
- y11: PYP
- y12\*: PYS
- y13\*: PSL

Raw file: 20150814\_A375SR\_Phospho\_BR2\_02  
 Scan: 20278 Method: FTMS; HCD Score: 106.7 m/z: 849.38 Gene names: PRKD3;PRKD1

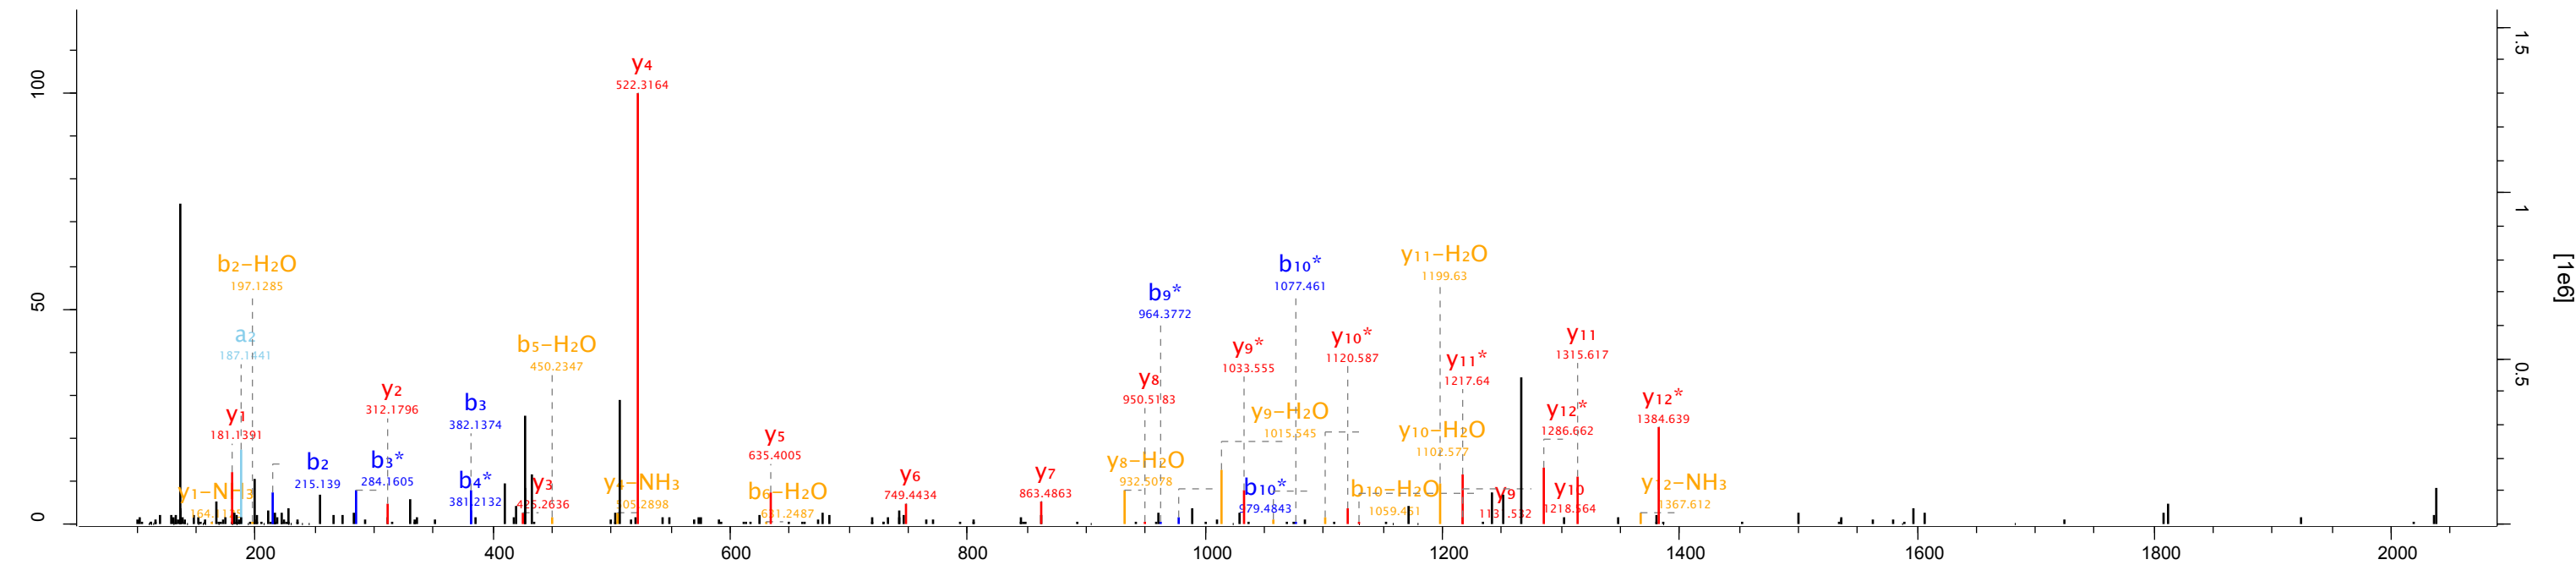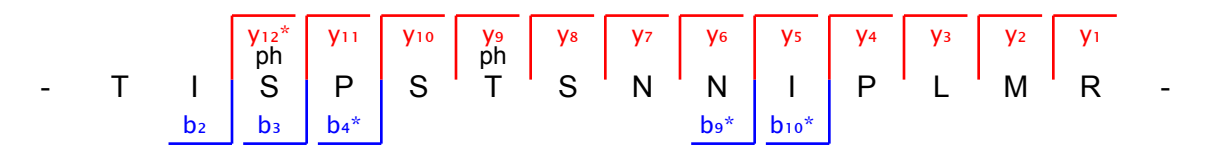

Raw file 20150814\_A375SR\_Phospho\_BR2\_02 Scan 20438 Method FTMS; HCD Score 53.9 m/z 1091.97 Gene names SPAG5

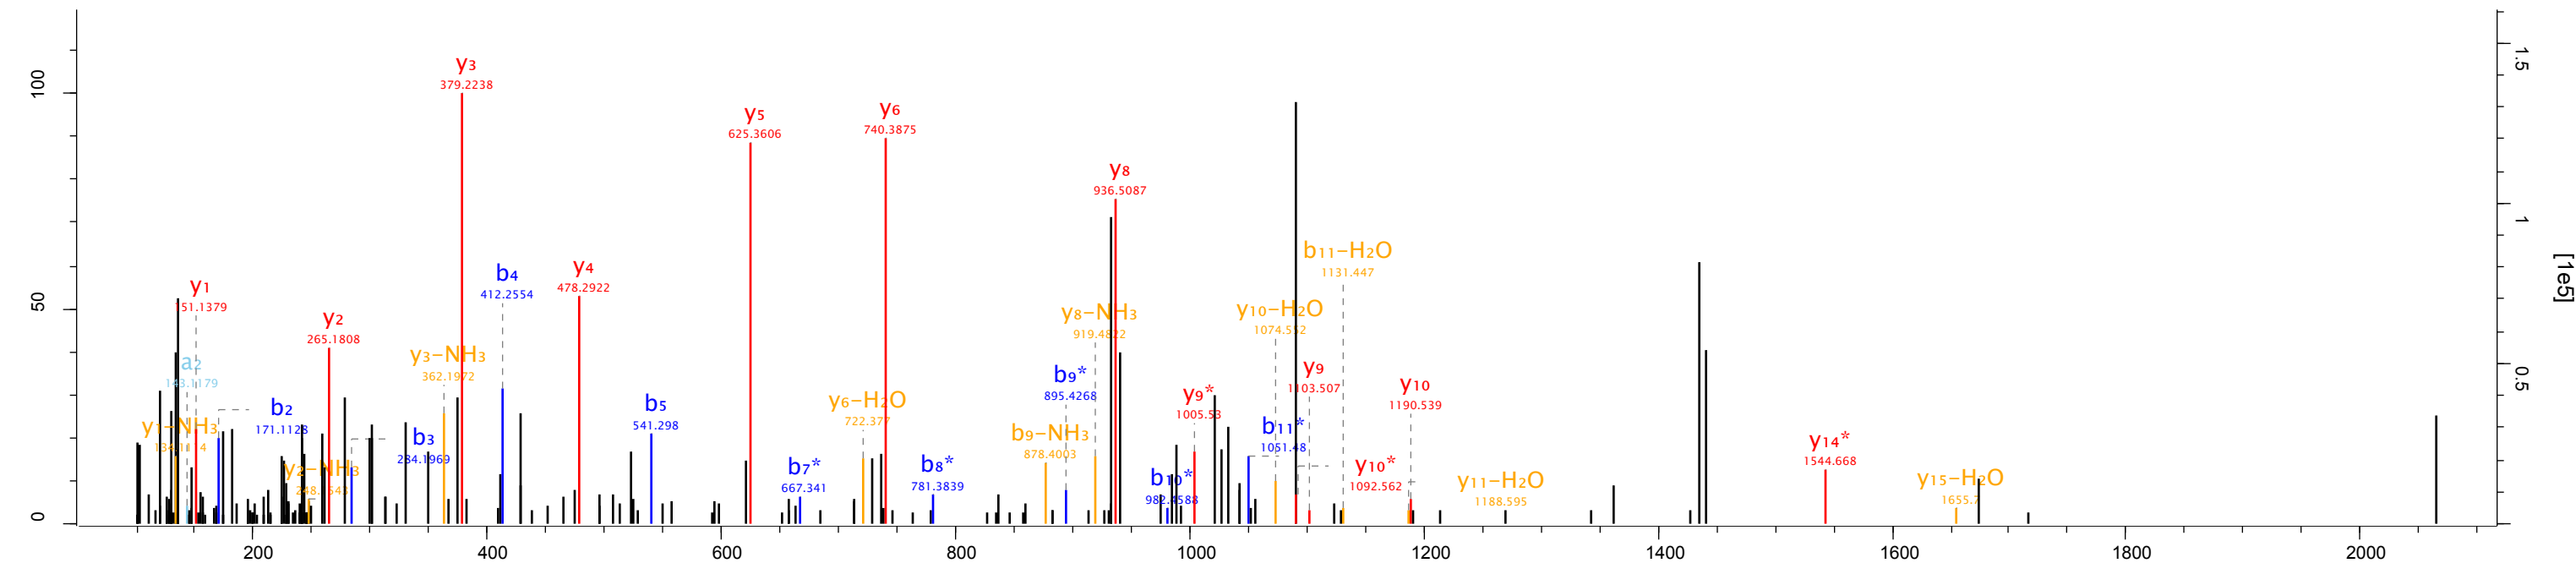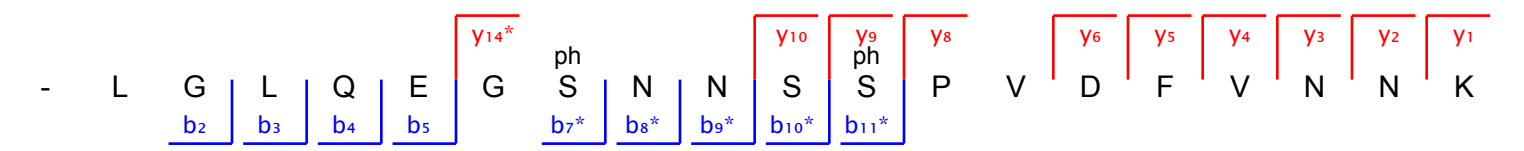



Raw file Scan Method Score m/z Gene names  
 20150814\_A375SR\_Phospho\_BR2\_02 20688 FTMS; HCD 54.67 1091.98 RPS6KC1

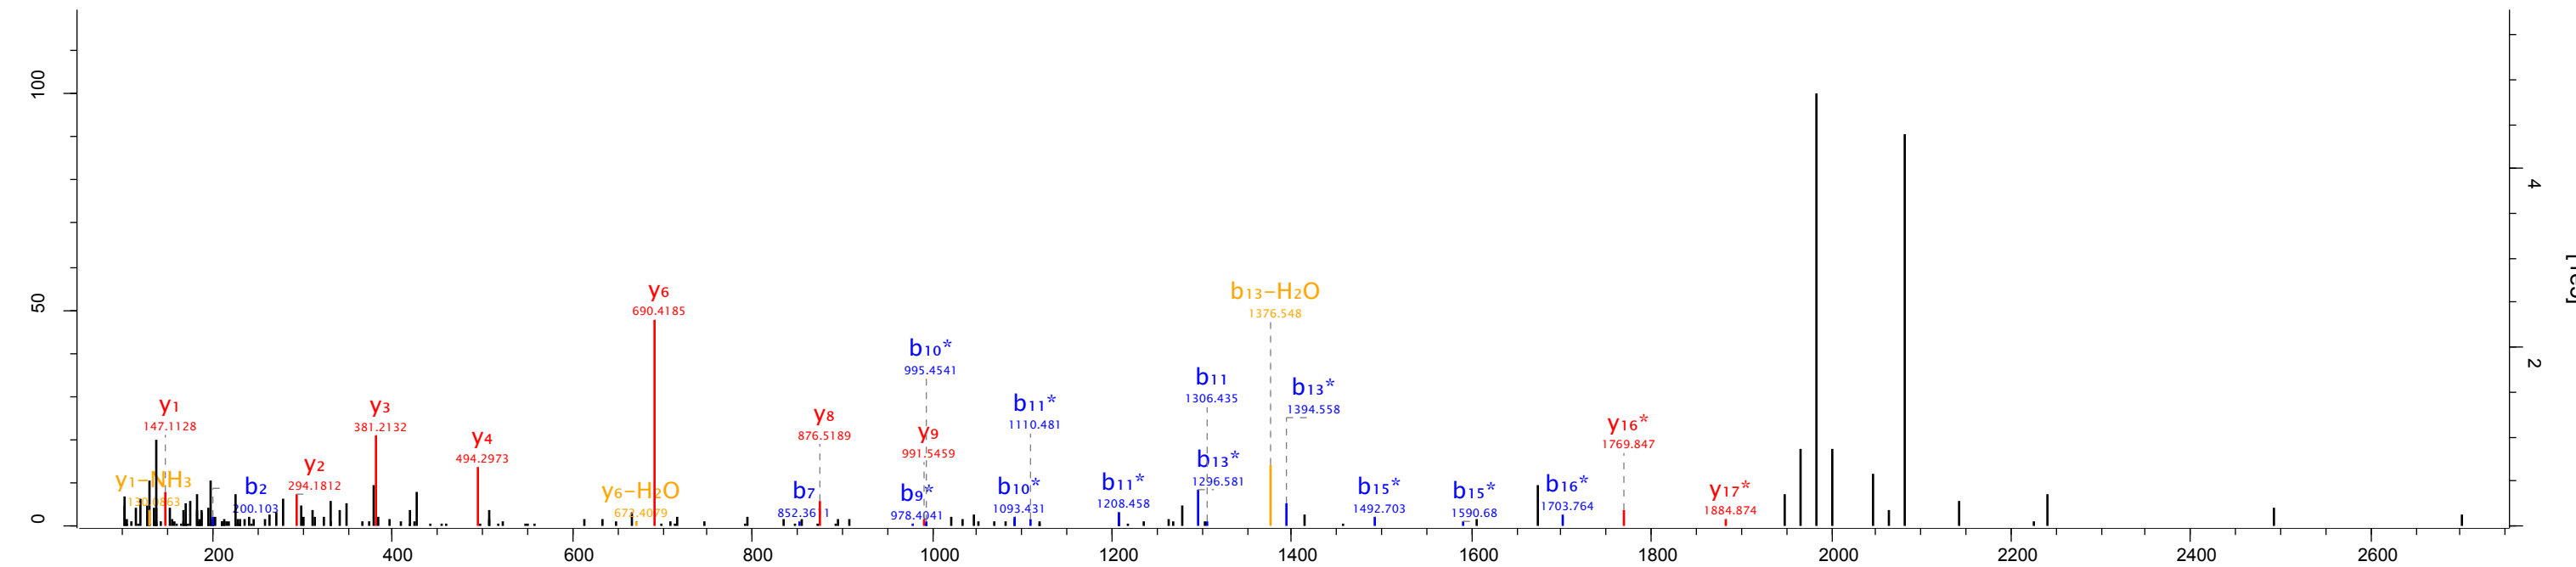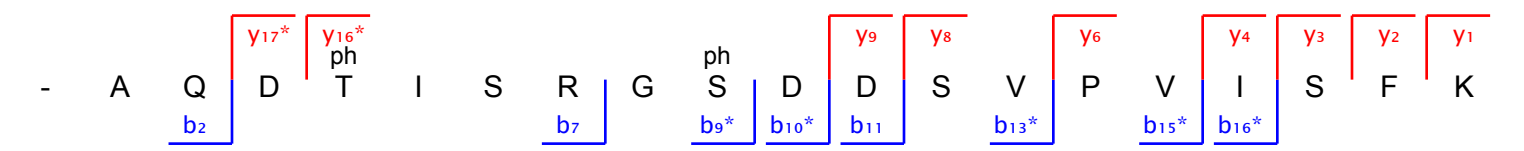

Raw file 20150814\_A375SR\_Phospho\_BR2\_02 Scan 21038 Method FTMS; HCD Score 82.41 m/z 1203.84 Gene names MYPN

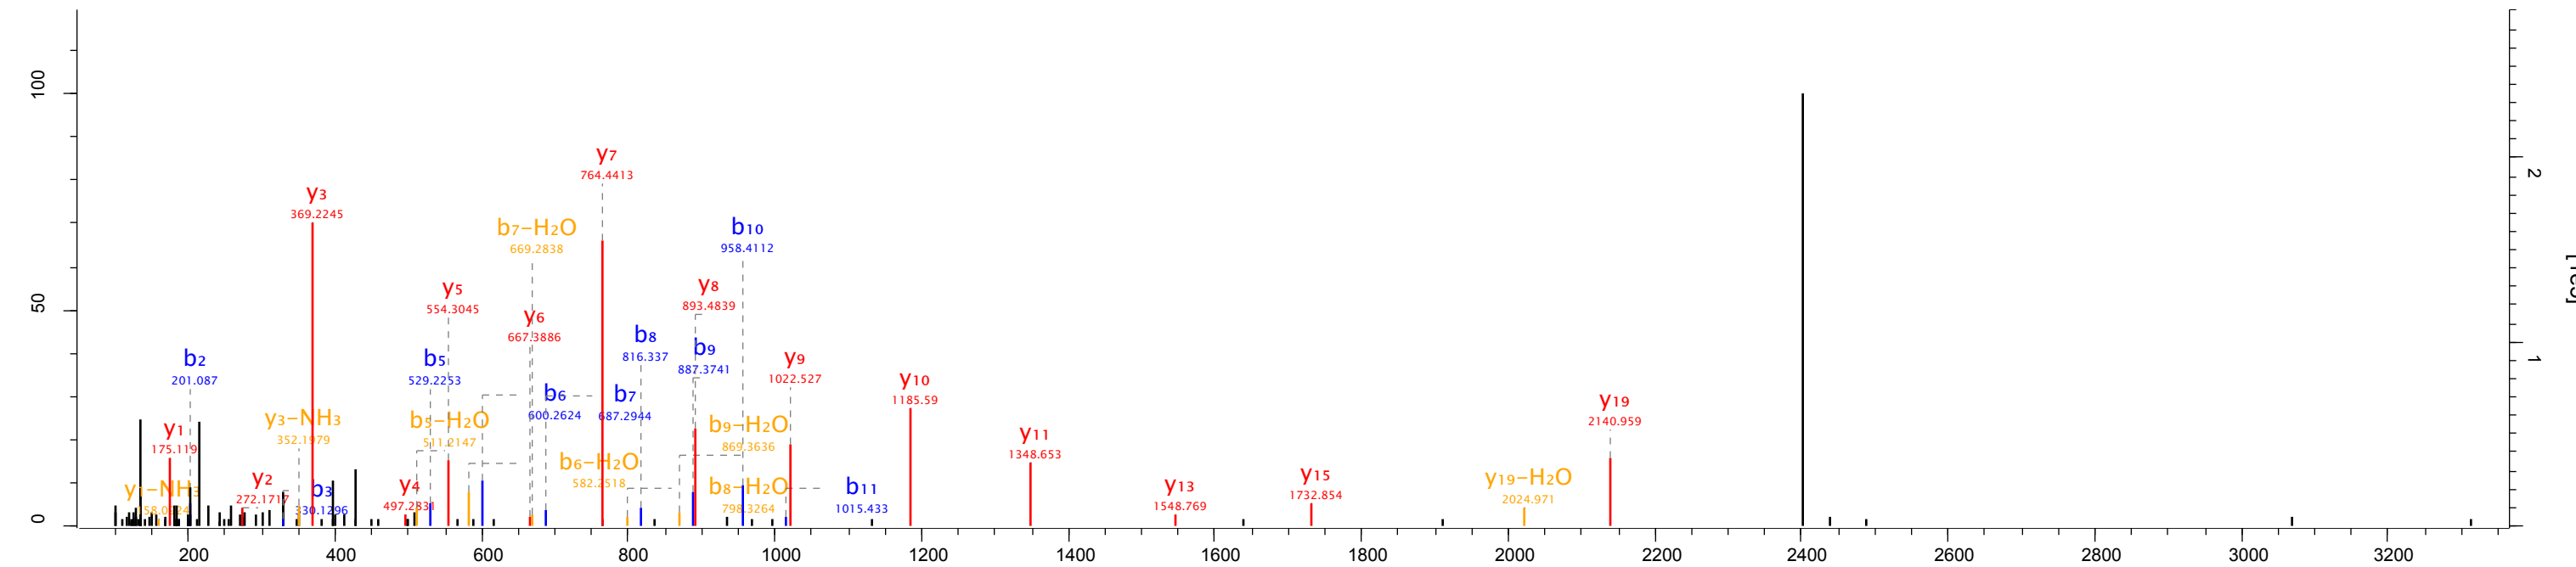

- E A E Q A A S E A A G G D T T P G S S P S S L Y Y E E P L G Q P P R -

b<sub>2</sub>
b<sub>3</sub>
b<sub>5</sub>
b<sub>6</sub>
b<sub>7</sub>
b<sub>8</sub>
b<sub>9</sub>
b<sub>10</sub>
b<sub>11</sub>
y<sub>19</sub>
y<sub>15</sub>
y<sub>13</sub>
y<sub>11</sub>
y<sub>10</sub>
y<sub>9</sub>
y<sub>8</sub>
y<sub>7</sub>
y<sub>6</sub>
y<sub>5</sub>
y<sub>4</sub>
y<sub>3</sub>
y<sub>2</sub>
y<sub>1</sub>

Raw file: 20150814\_A375SR\_Phospho\_BR2\_02  
 Scan: 22738 Method: FTMS; HCD Score: 162.41 m/z: 909.92 Gene names: NEDD4L

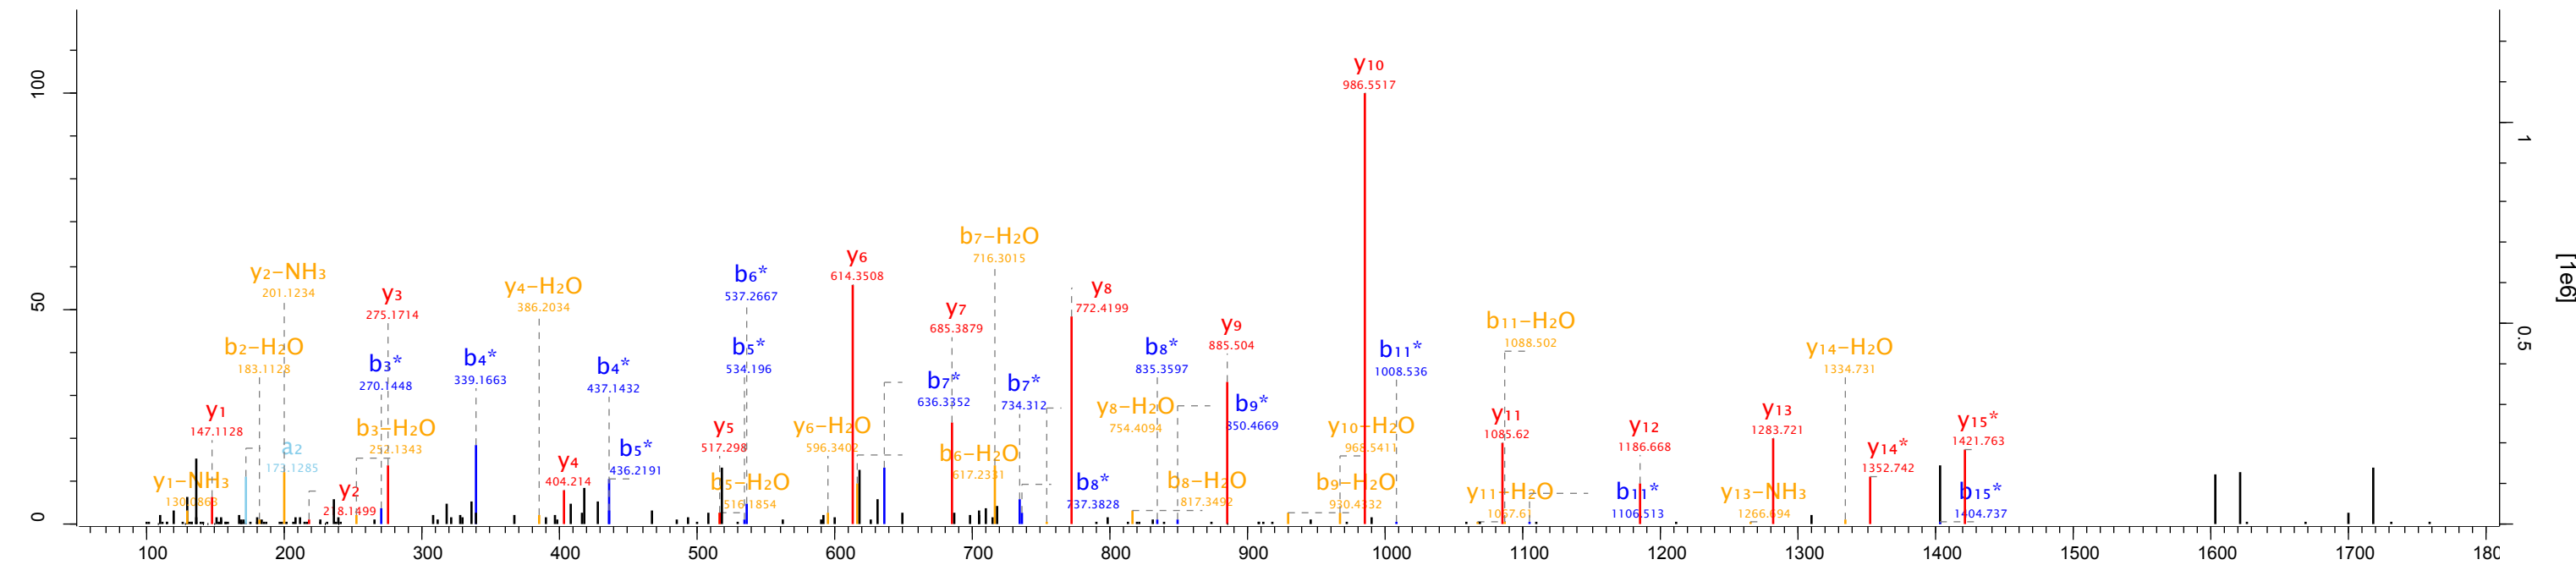

Sequence: - S L S ph S P T V T L S A P L E G A K -  
 Fragmentation: a2, b3\*, b4\*, b5\*, b6\*, b7\*, b8\*, b9\*, b11\*, b15\*

Raw file: 20150814\_A375SR\_Phospho\_BR2\_02  
 Scan: 24608 Method: FTMS; HCD Score: 102.29 m/z: 1069.14 Gene names: SNTB2

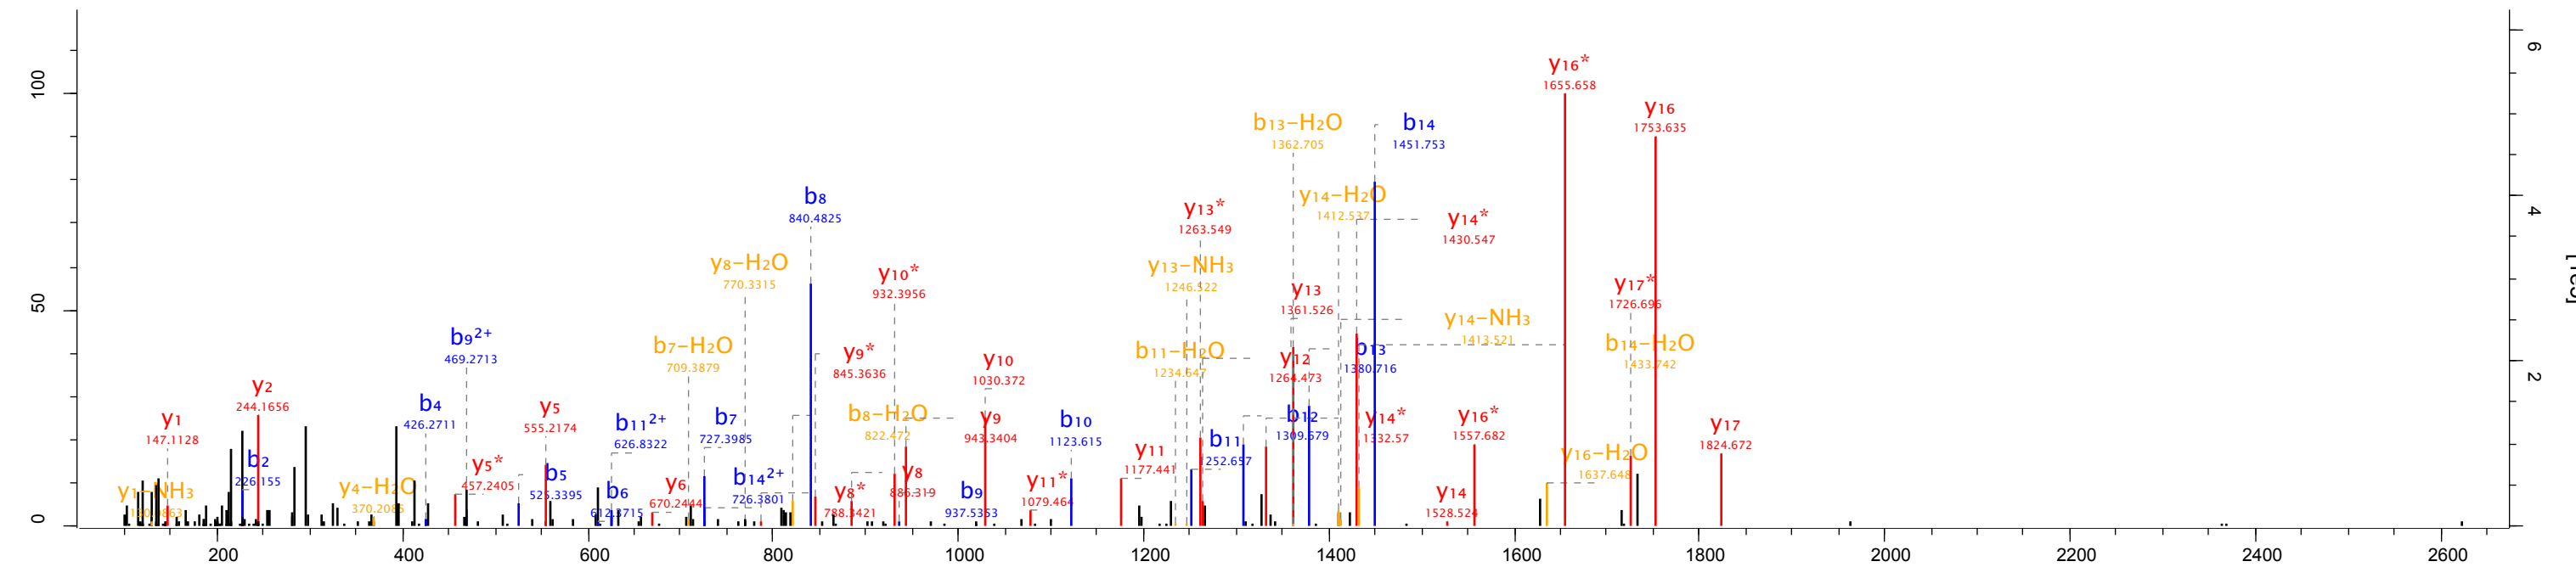

- K P S L V S D L P W E G A A P Q S P S F S G S E D S G S P K -

b<sub>2</sub>
b<sub>4</sub>
b<sub>5</sub>
b<sub>6</sub>
b<sub>7</sub>
b<sub>8</sub>
b<sub>9</sub>
b<sub>10</sub>
b<sub>11</sub>
b<sub>12</sub>
b<sub>13</sub>
b<sub>14</sub>
y<sub>17</sub>
y<sub>16</sub>
y<sub>14</sub> ph
y<sub>13</sub>
y<sub>12</sub>
y<sub>11</sub>
y<sub>10</sub>
y<sub>9</sub>
y<sub>8</sub>
y<sub>6</sub>
y<sub>5</sub> ph
y<sub>2</sub>
y<sub>1</sub>

Raw file: 20150814\_A375SR\_Phospho\_BR2\_02  
 Scan: 2558 Method: FTMS; HCD Score: 68.46 m/z: 879.9 Gene names: CLASP1

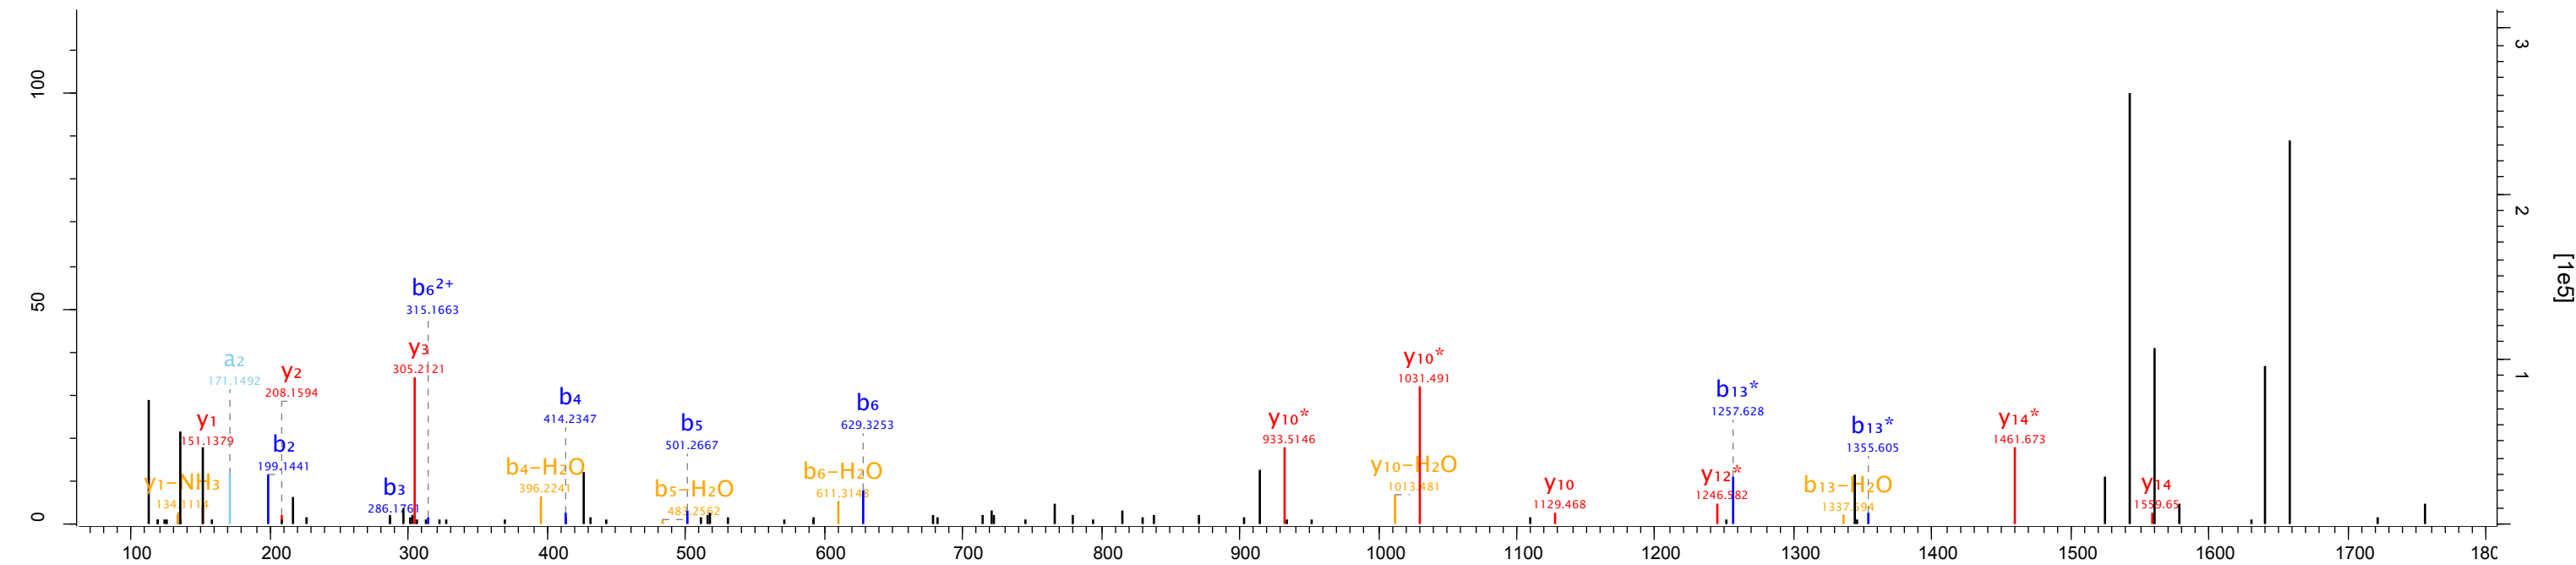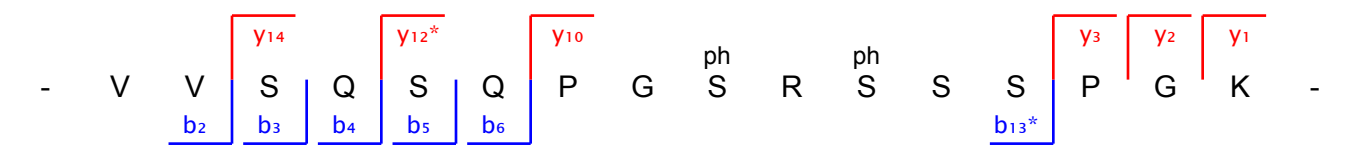

Raw file Scan Method Score m/z Gene names  
 20150814\_A375SR\_Phospho\_BR2\_02 27448 FTMS; HCD 75.87 1092.52 FOSL1

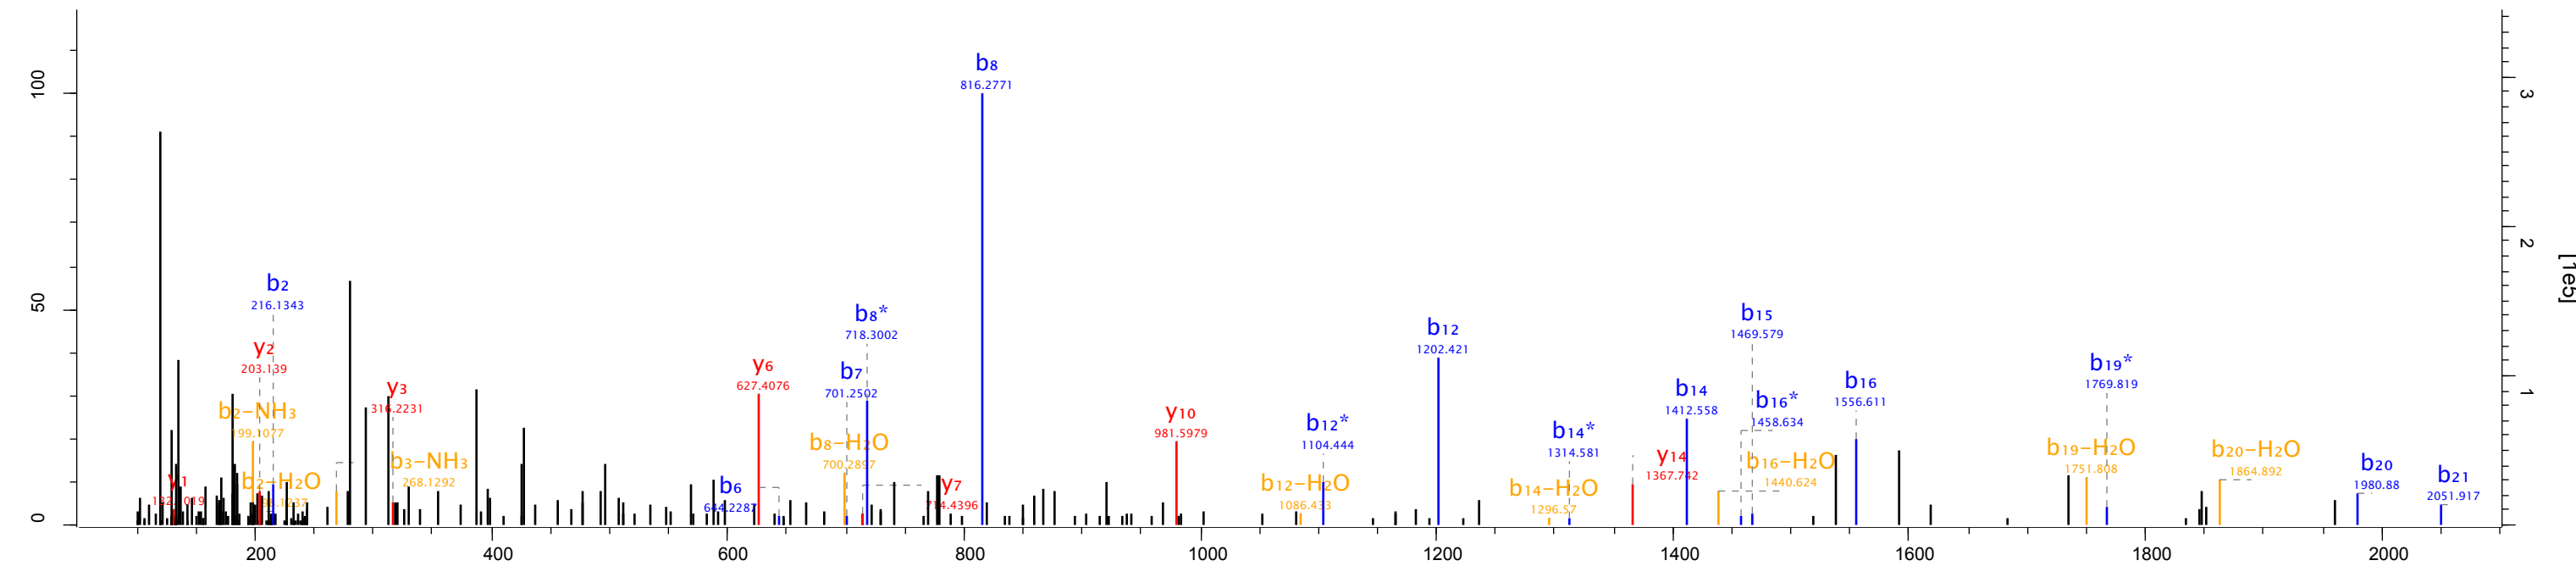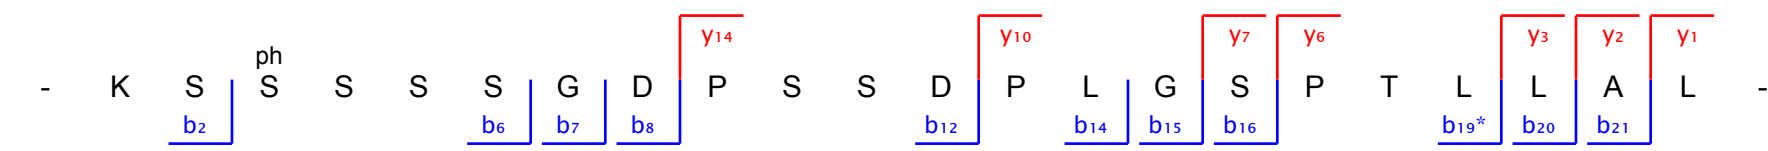

Raw file 20150814\_A375SR\_Phospho\_BR2\_02 Scan 28238 Method FTMS; HCD Score 126.49 m/z 1068.45 Gene names FOSL1

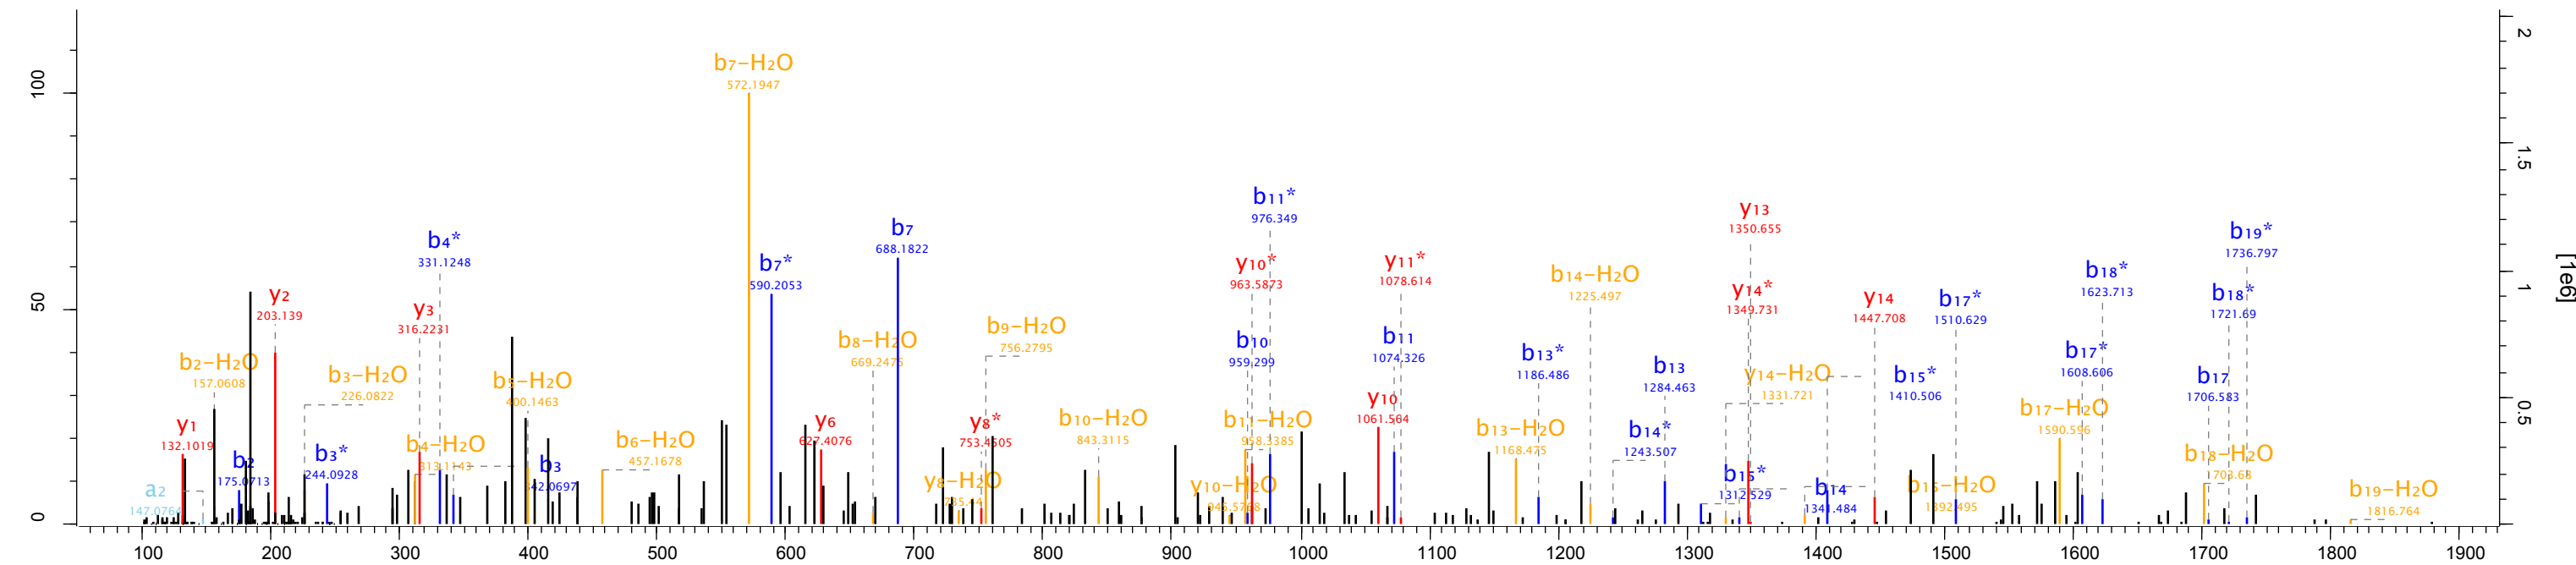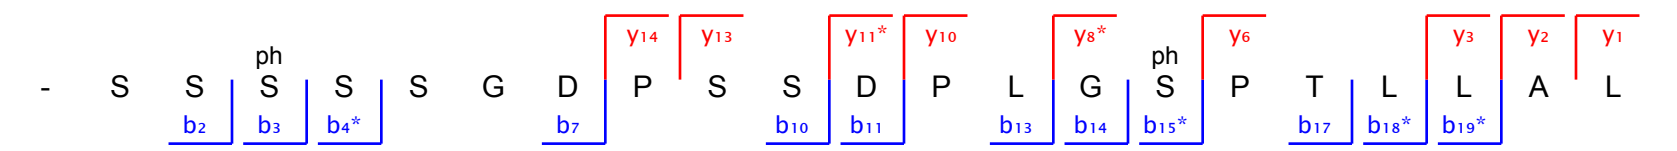

Raw file: 20150814\_A375SR\_Phospho\_BR2\_02  
 Scan: 3298 Method: FTMS; HCD Score: 79.14 m/z: 786.31 Gene names: SCAF1

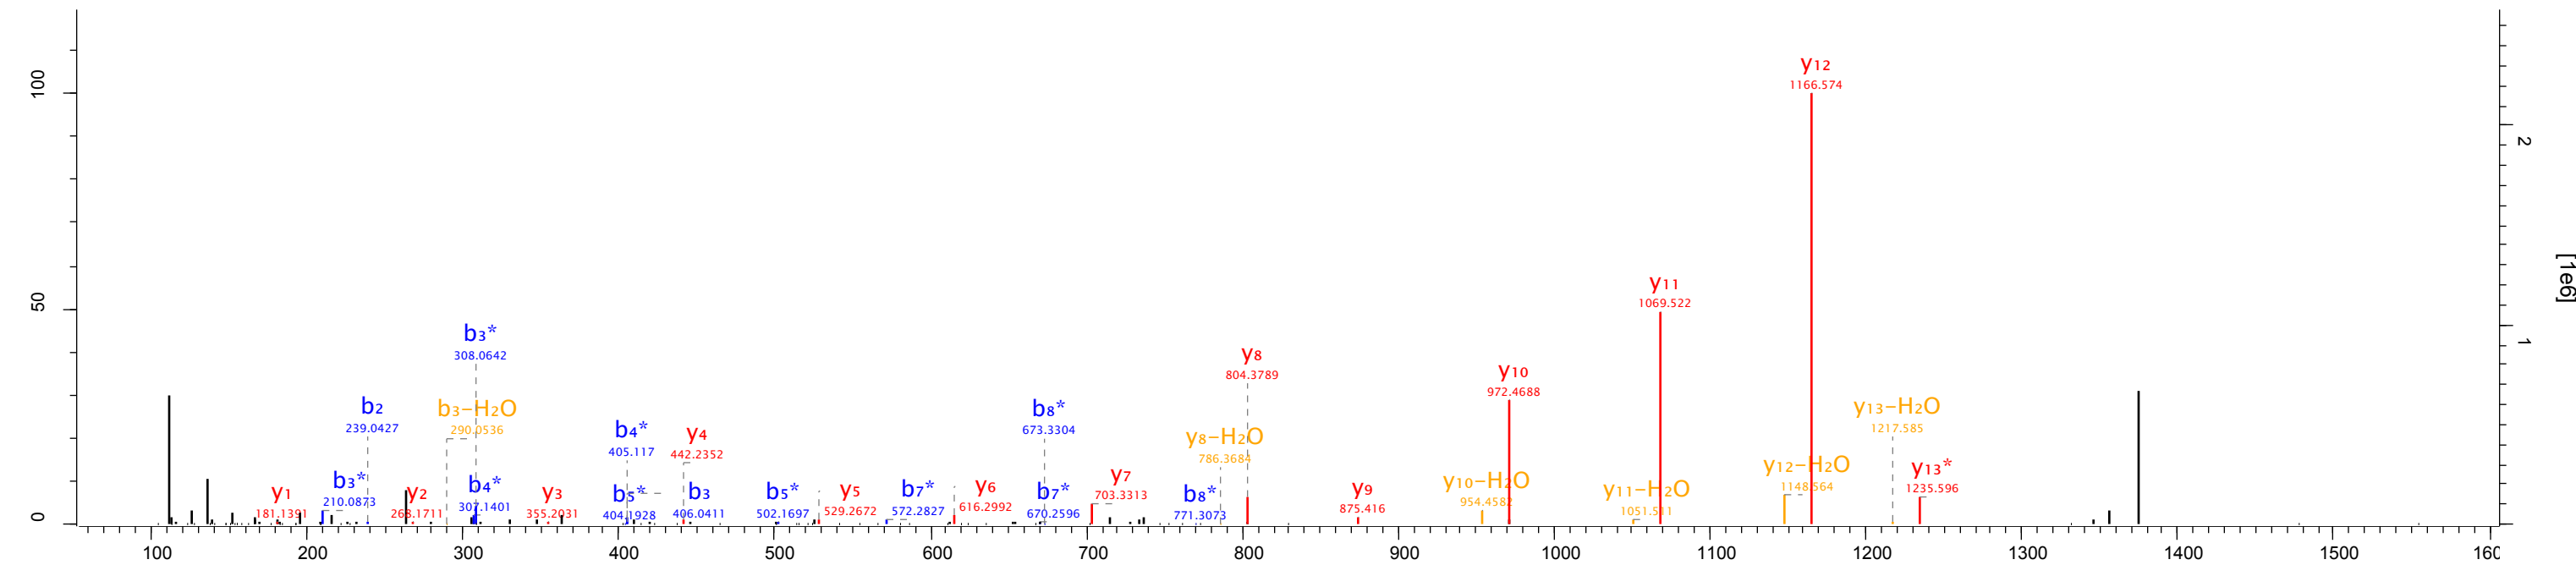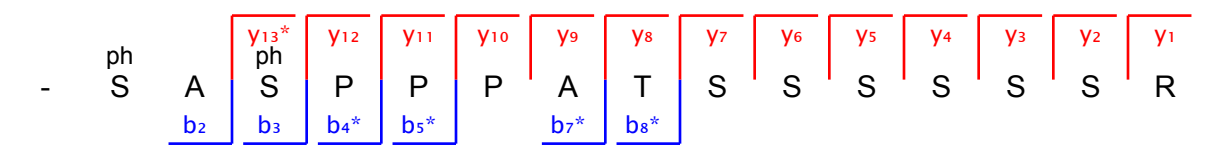



Raw file: 20150814\_A375SR\_Phospho\_BR2\_02  
 Scan: 4678 Method: FTMS; HCD Score: 212.41 m/z: 755.26 Gene names: PRPF40A

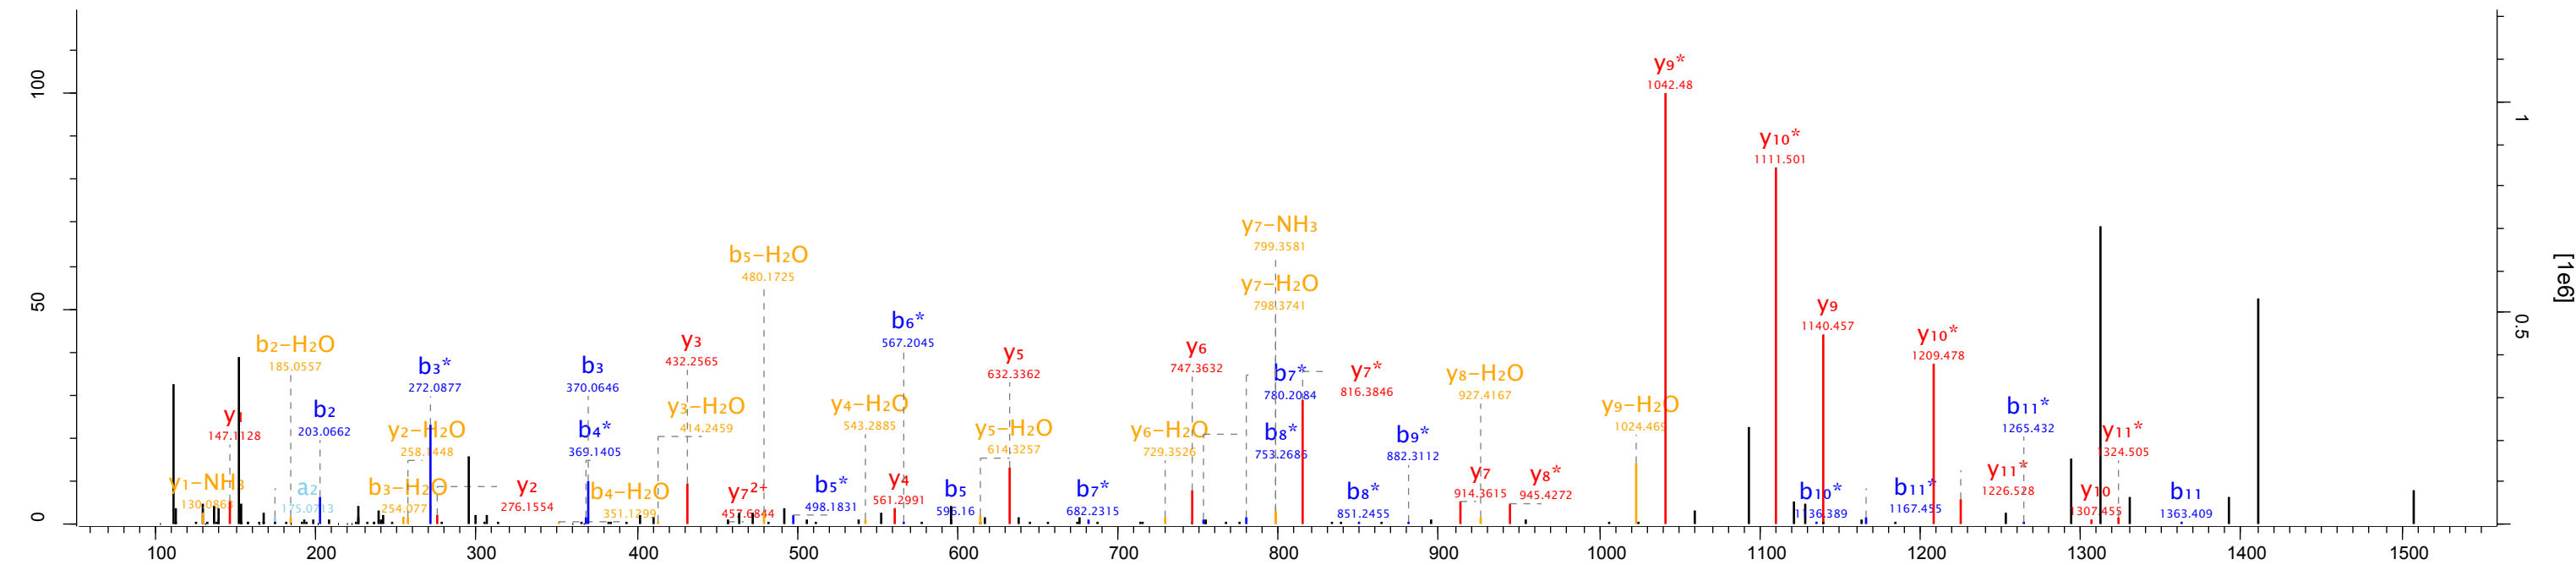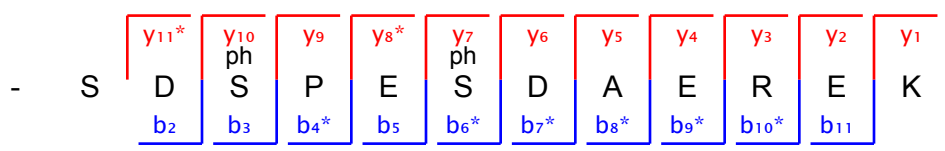

Raw file  
 20150814\_A375SR\_Phospho\_BR2\_02  
 Scan 6688 Method FTMS; HCD Score 52.45 m/z 1220 Gene names NUDC

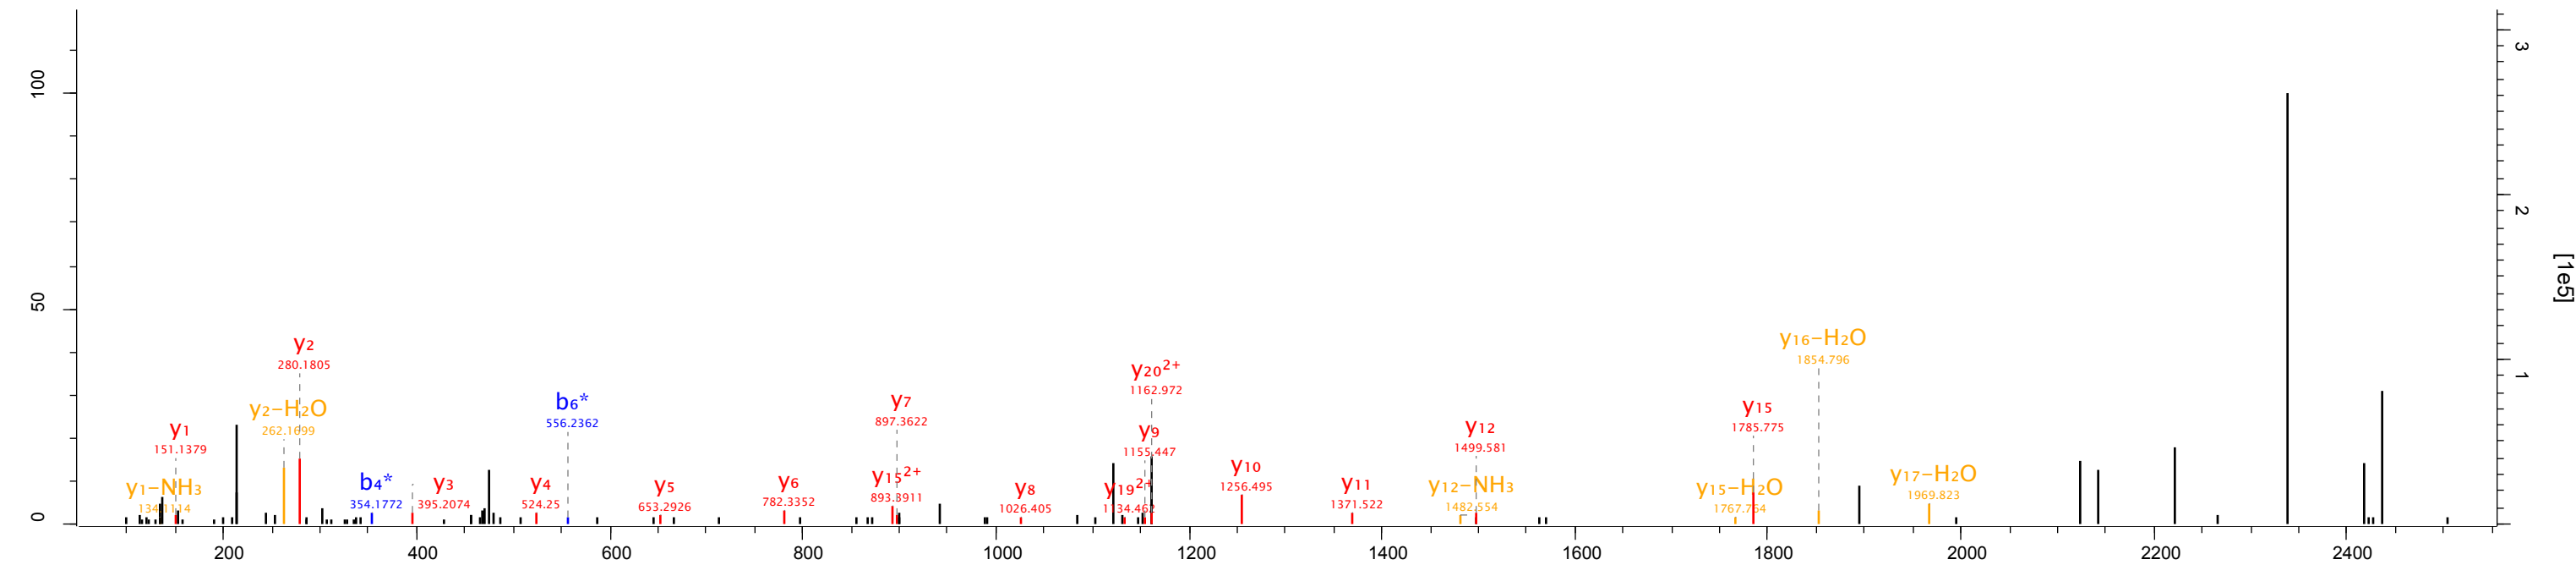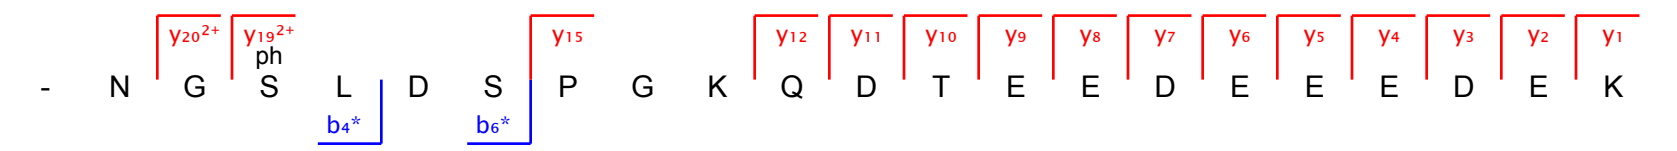

Raw file 20150814\_A375SR\_Phospho\_BR2\_02 Scan 6908 Method FTMS; HCD Score 106.6 m/z 981.4 Gene names CHTF18

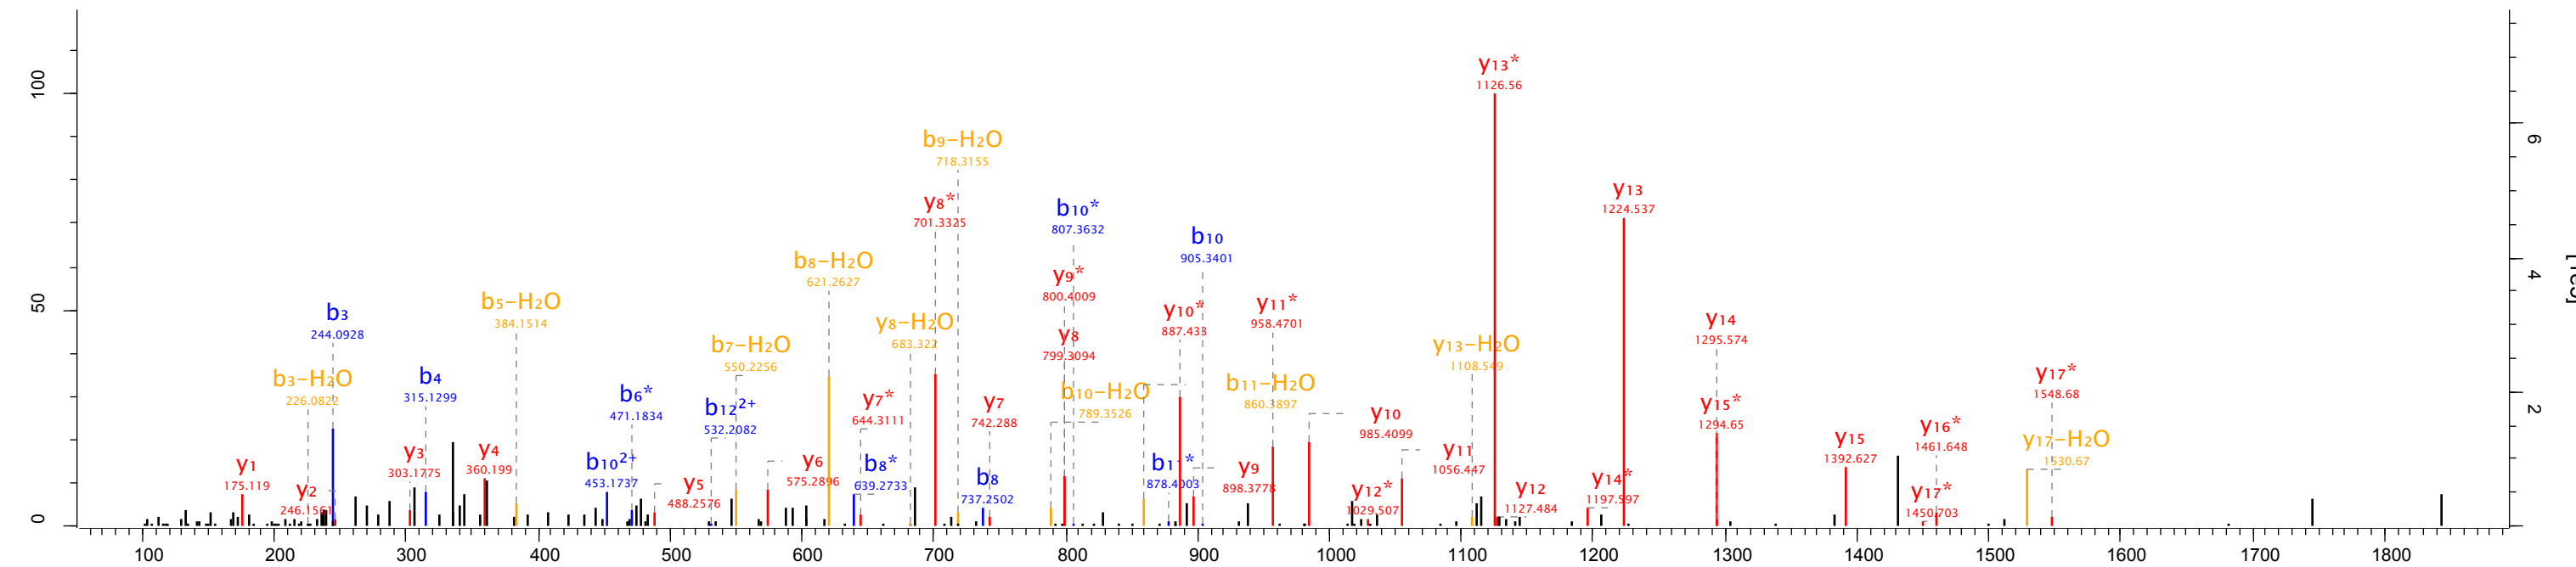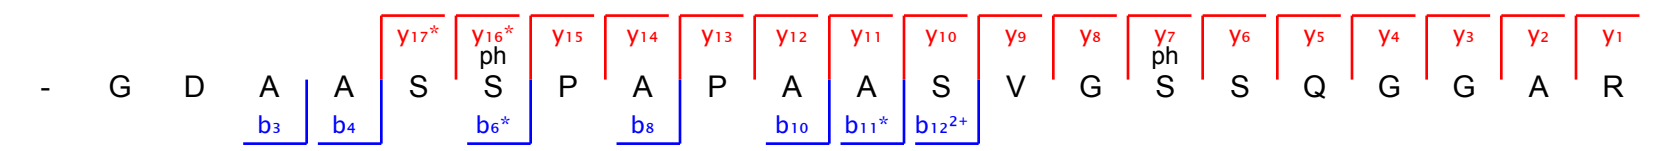

Raw file 20150814\_A375SR\_Phospho\_BR2\_02 Scan 7148 Method FTMS; HCD Score 113.91 m/z 1135.92 Gene names TRAF3IP1

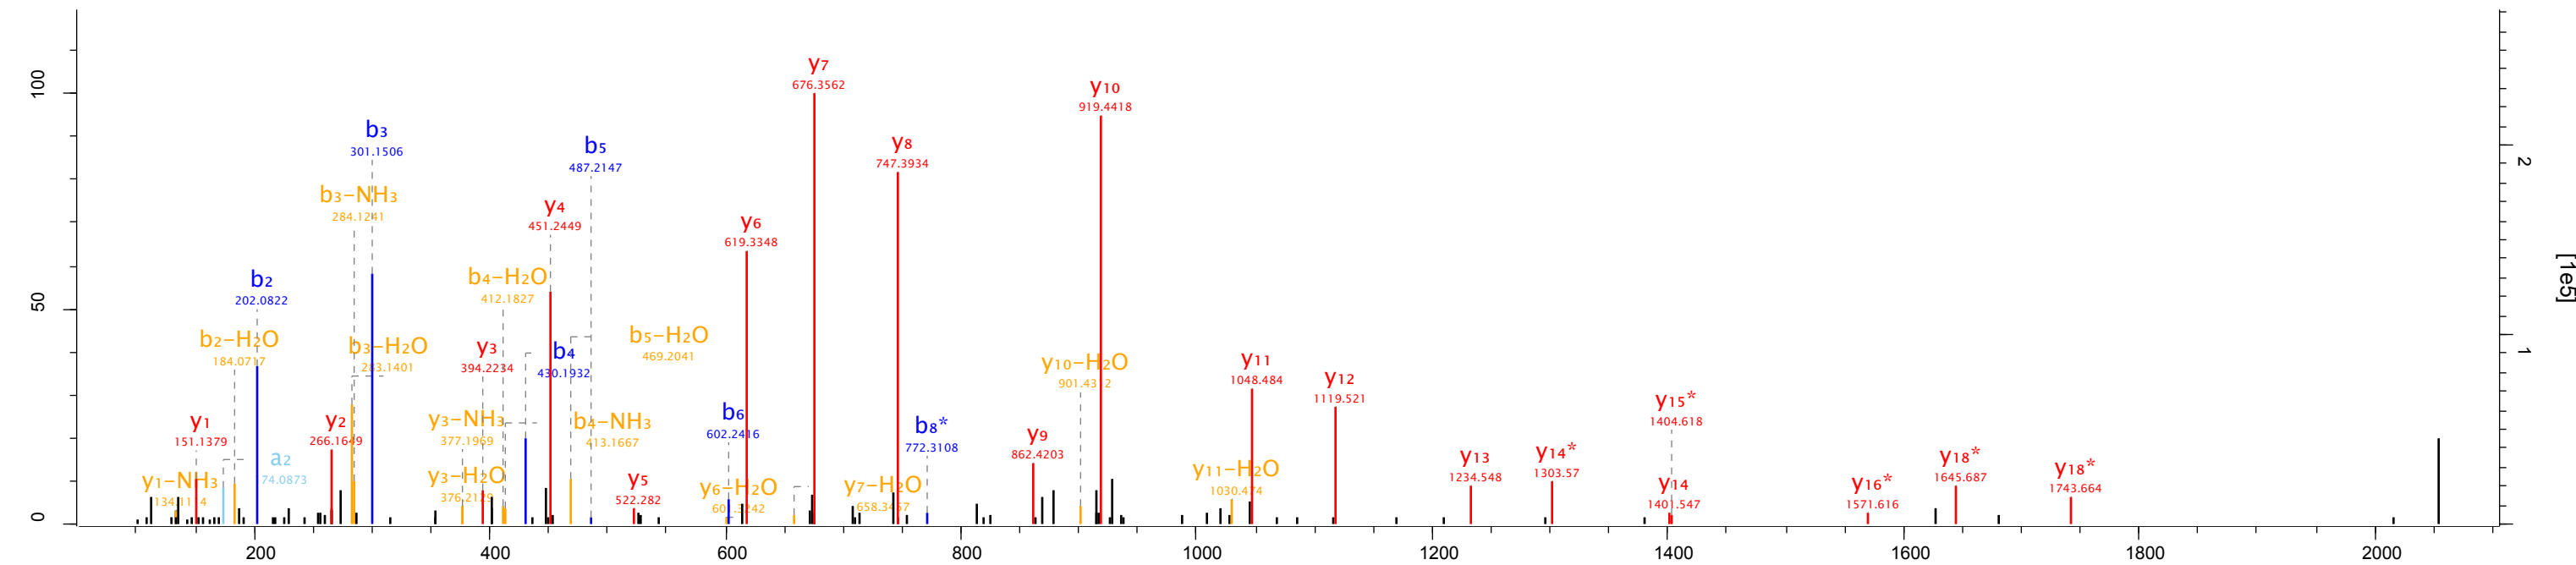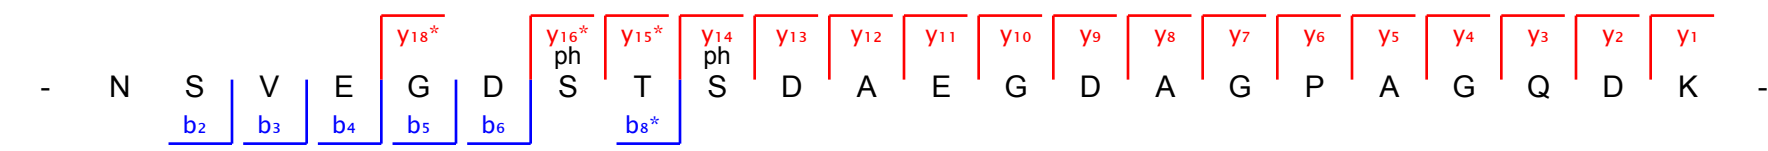

Raw file: 20150814\_A375SR\_Phospho\_BR2\_02  
 Scan: 8088 Method: FTMS; HCD Score: 88.71 m/z: 1029.37 Gene names: YBX1

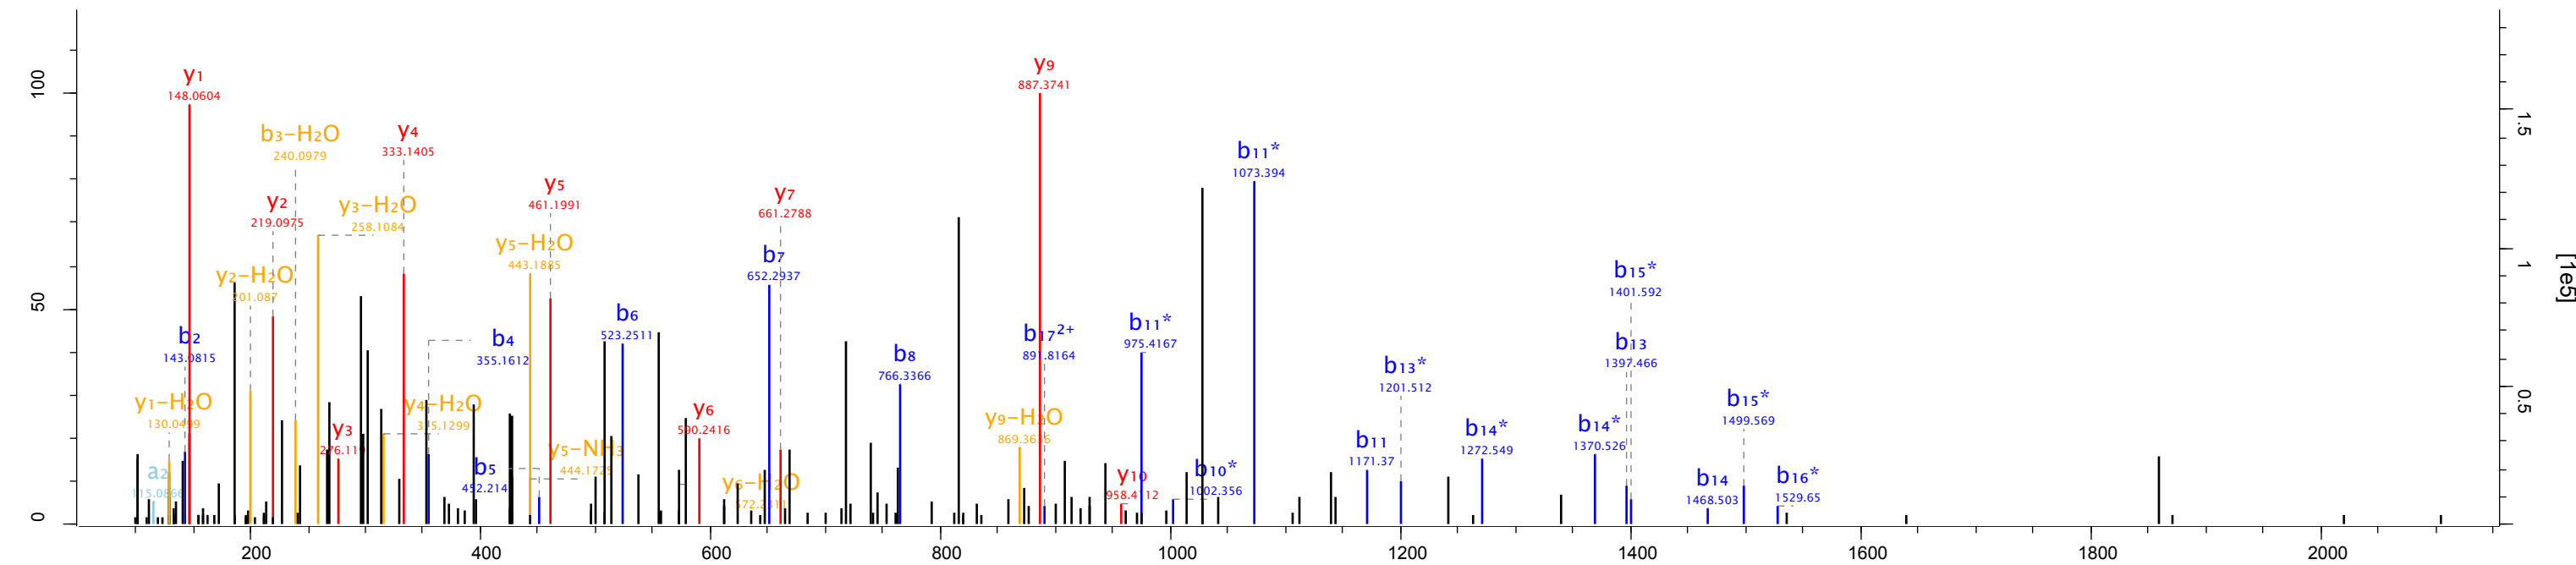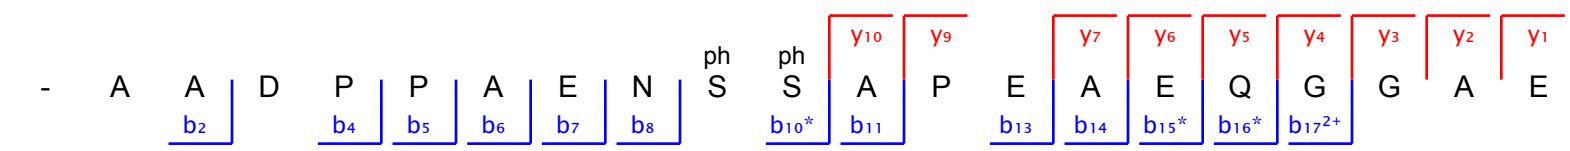

Raw file: 20150814\_A375SR\_Phospho\_BR2\_02  
 Scan: 8298 Method: FTMS; HCD Score: 101.3 m/z: 728.27 Gene names: NDEL1

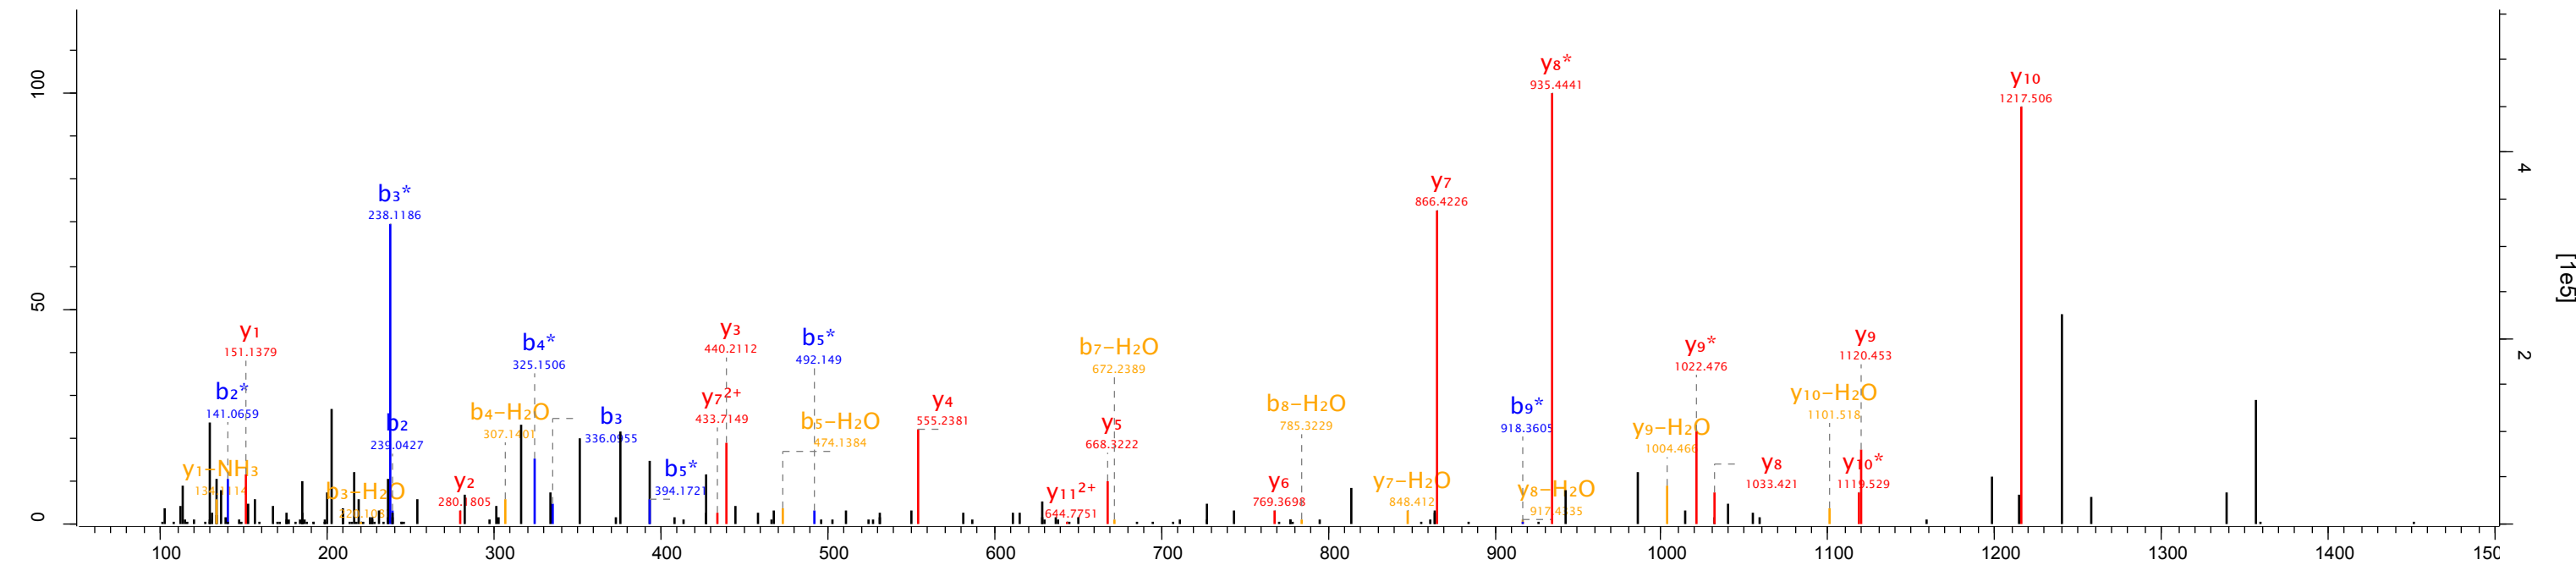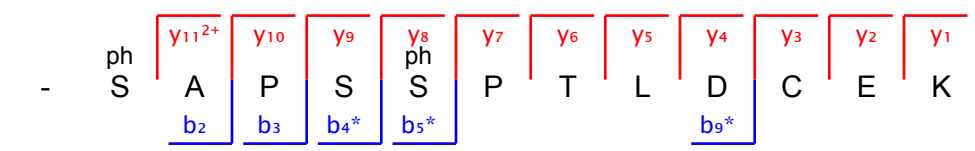

Raw file 20150814\_A375SR\_Phospho\_BR2\_02 Scan 8658 Method FTMS; HCD Score 48.9 m/z 663.77 Gene names PROSER2

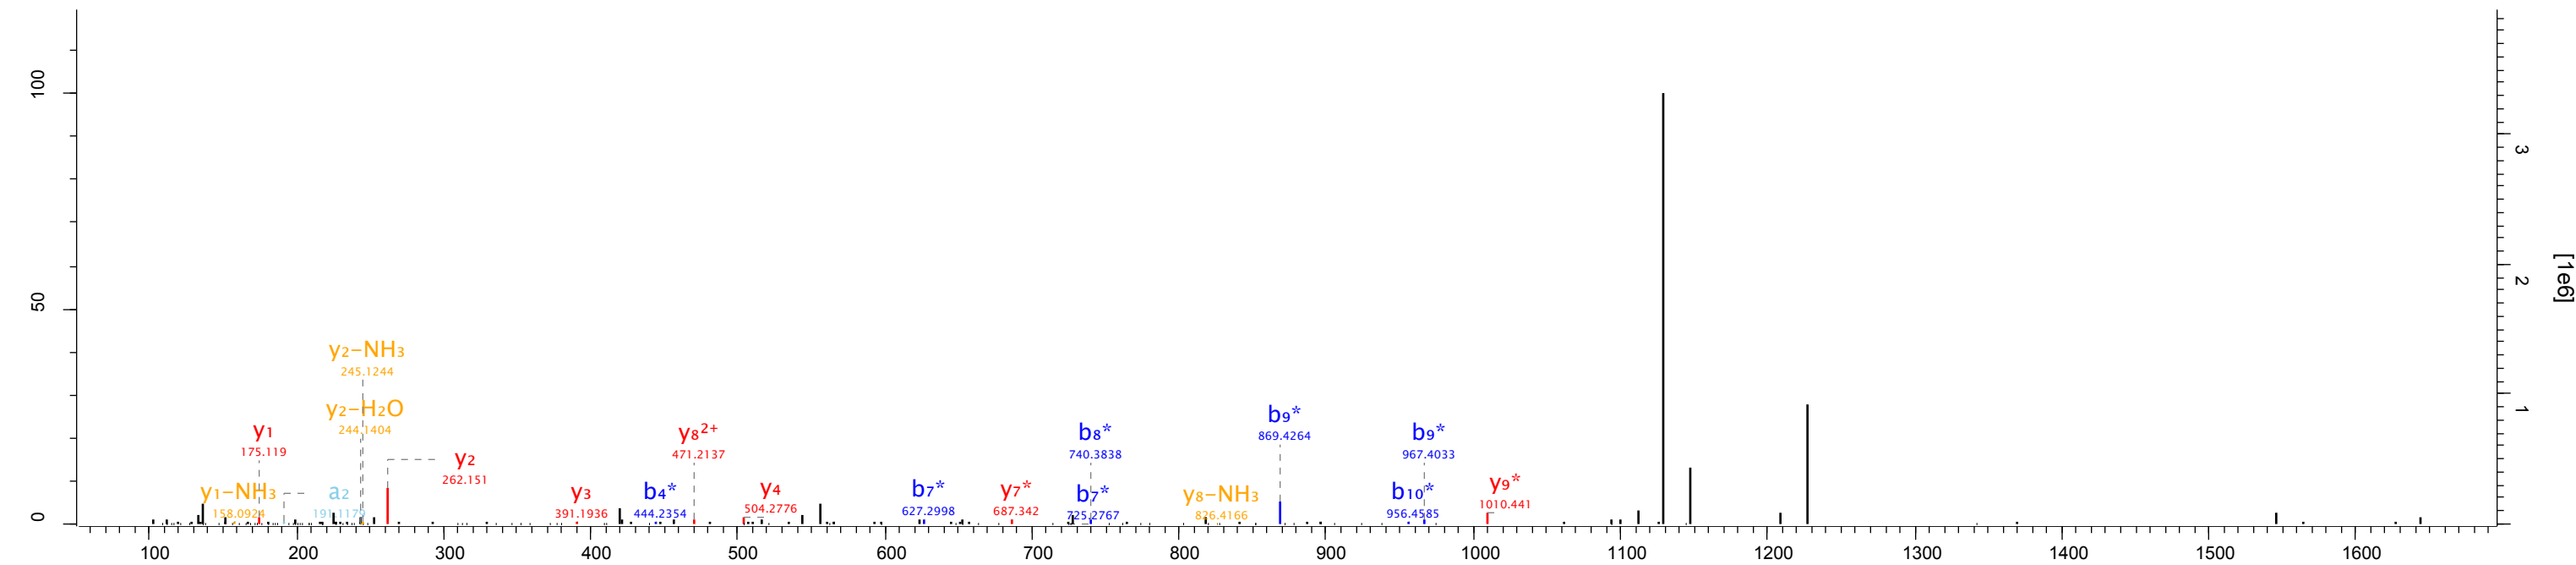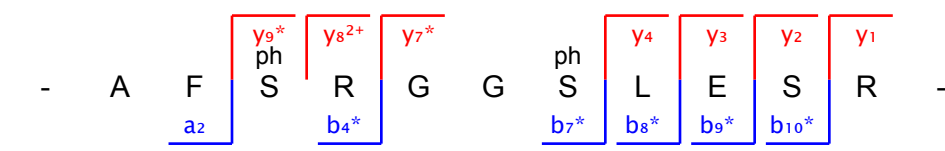

Raw file: 20150814\_A375SR\_Phospho\_BR2\_02  
 Scan: 8728 Method: FTMS; HCD Score: 59.36 m/z: 989.79 Gene names: HMGA1

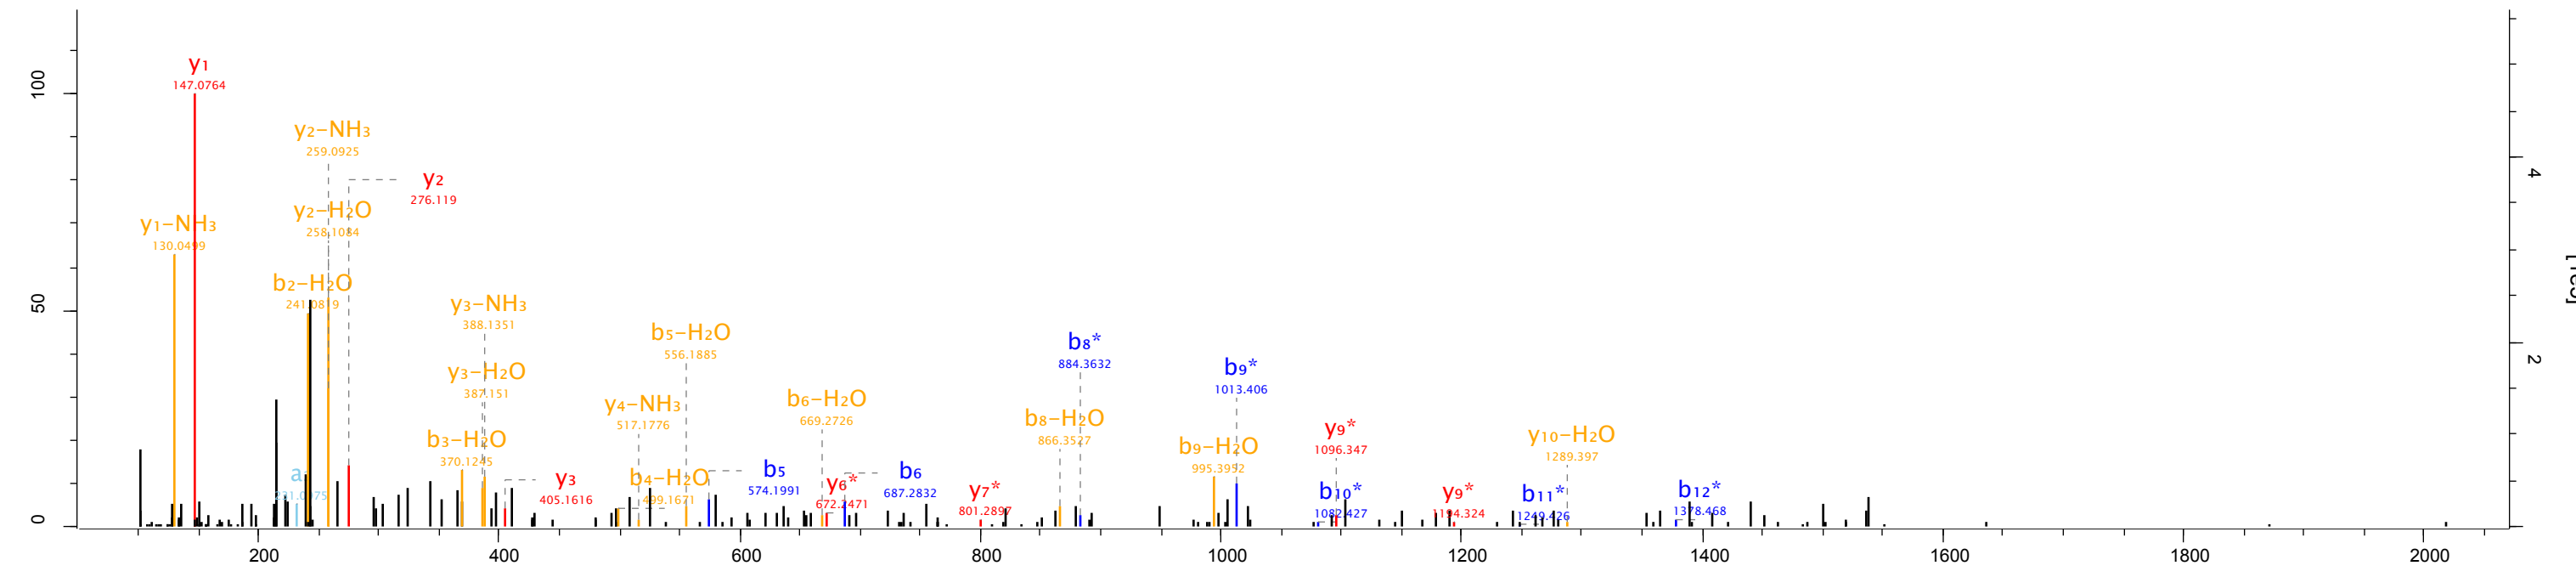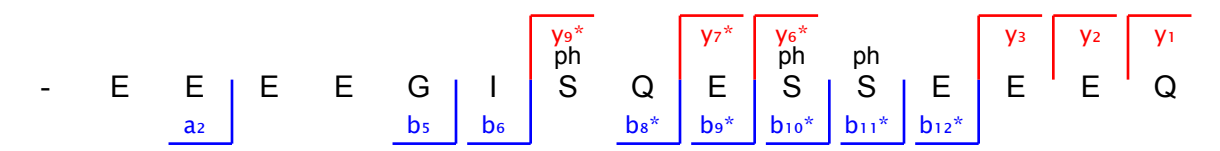



Raw file: 20150814\_A375SR\_Phospho\_BR2\_02  
 Scan: 9098 Method: FTMS; HCD Score: 148.8 m/z: 1016.43 Gene names: CCDC86

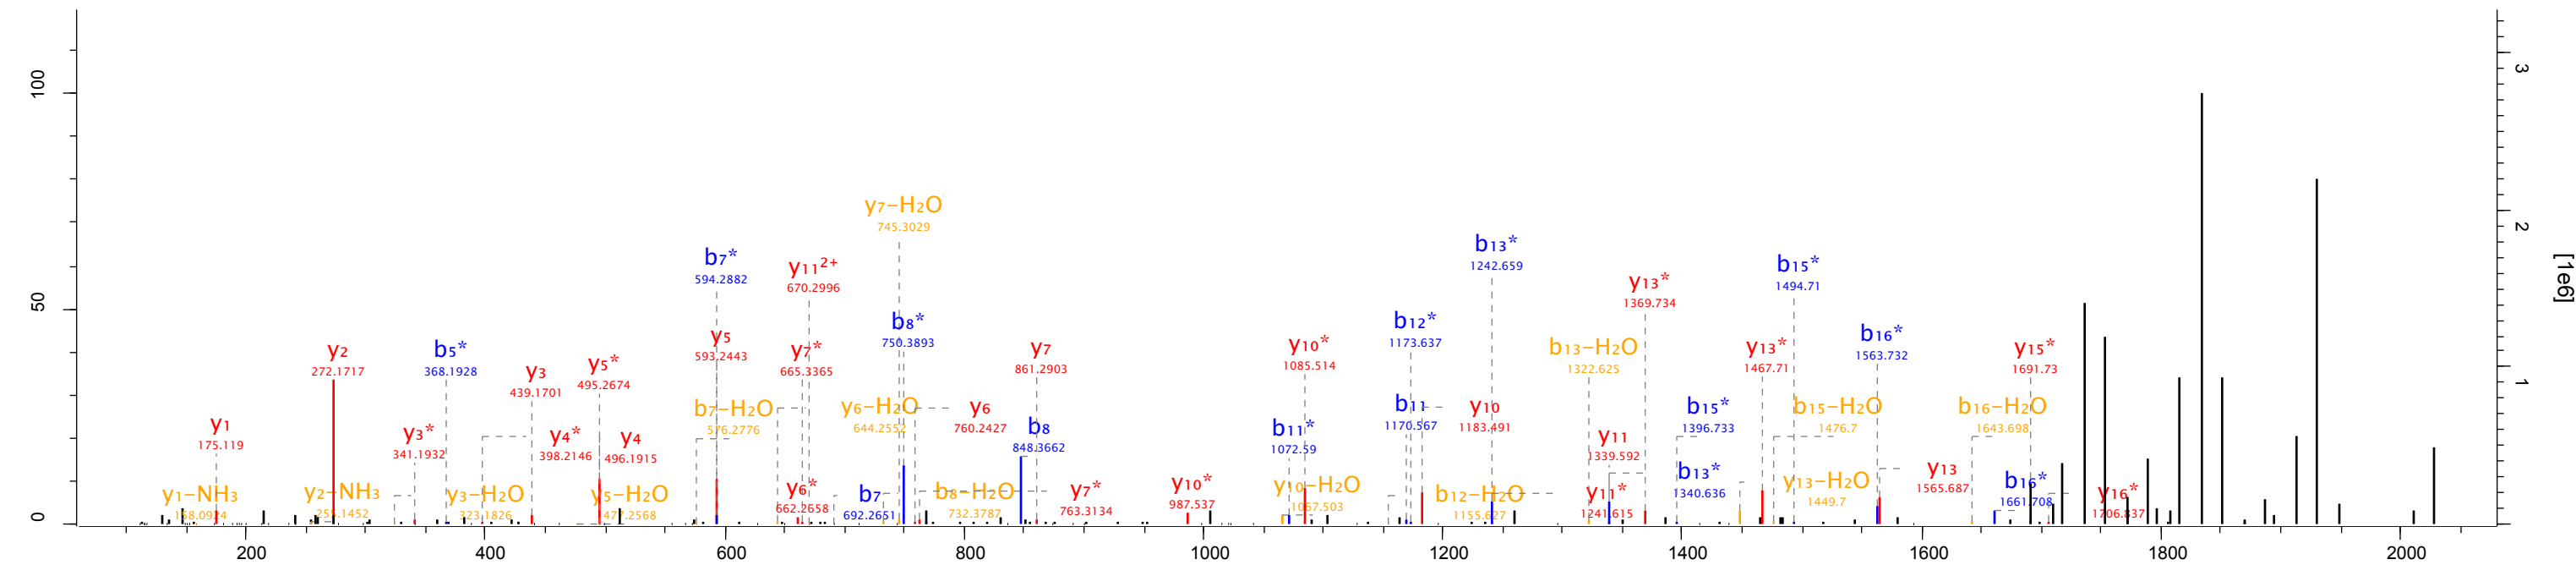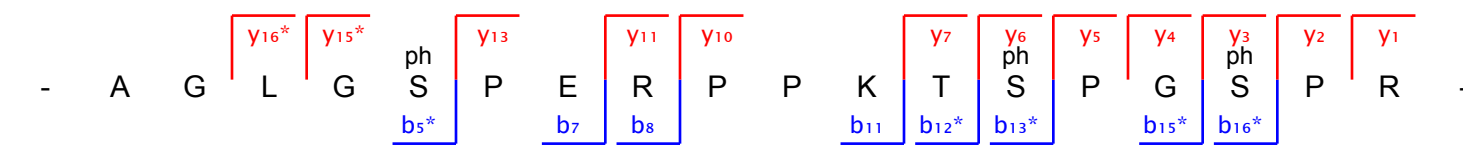

Raw file: 20150814\_A375SR\_Phospho\_BR2\_02  
 Scan: 9218 Method: FTMS; HCD Score: 81 m/z: 802.33 Gene names: FZR1

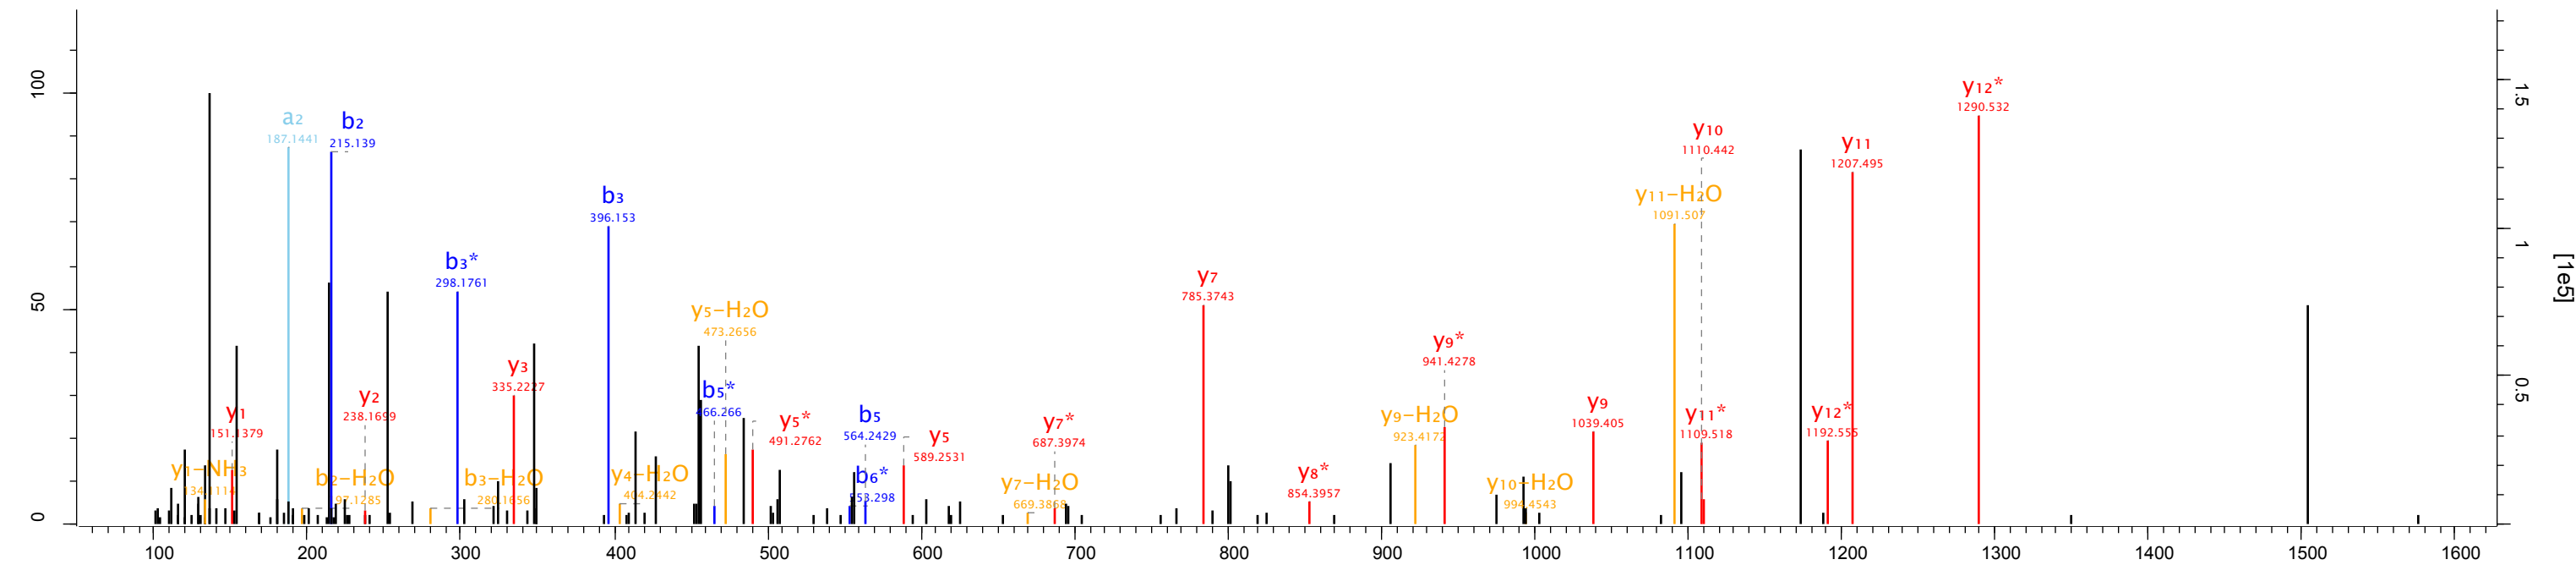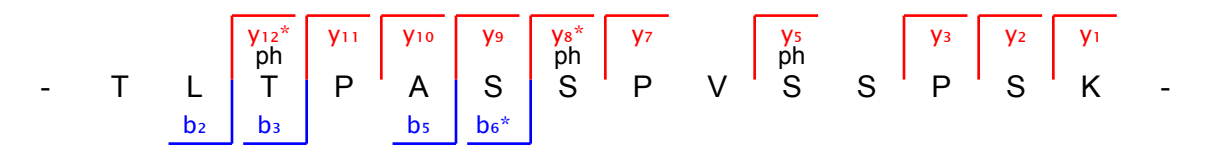

Raw file 20150814\_A375SR\_Phospho\_BR2\_03 Scan 10018 Method FTMS; HCD Score 79.59 m/z 904.42 Gene names DTL

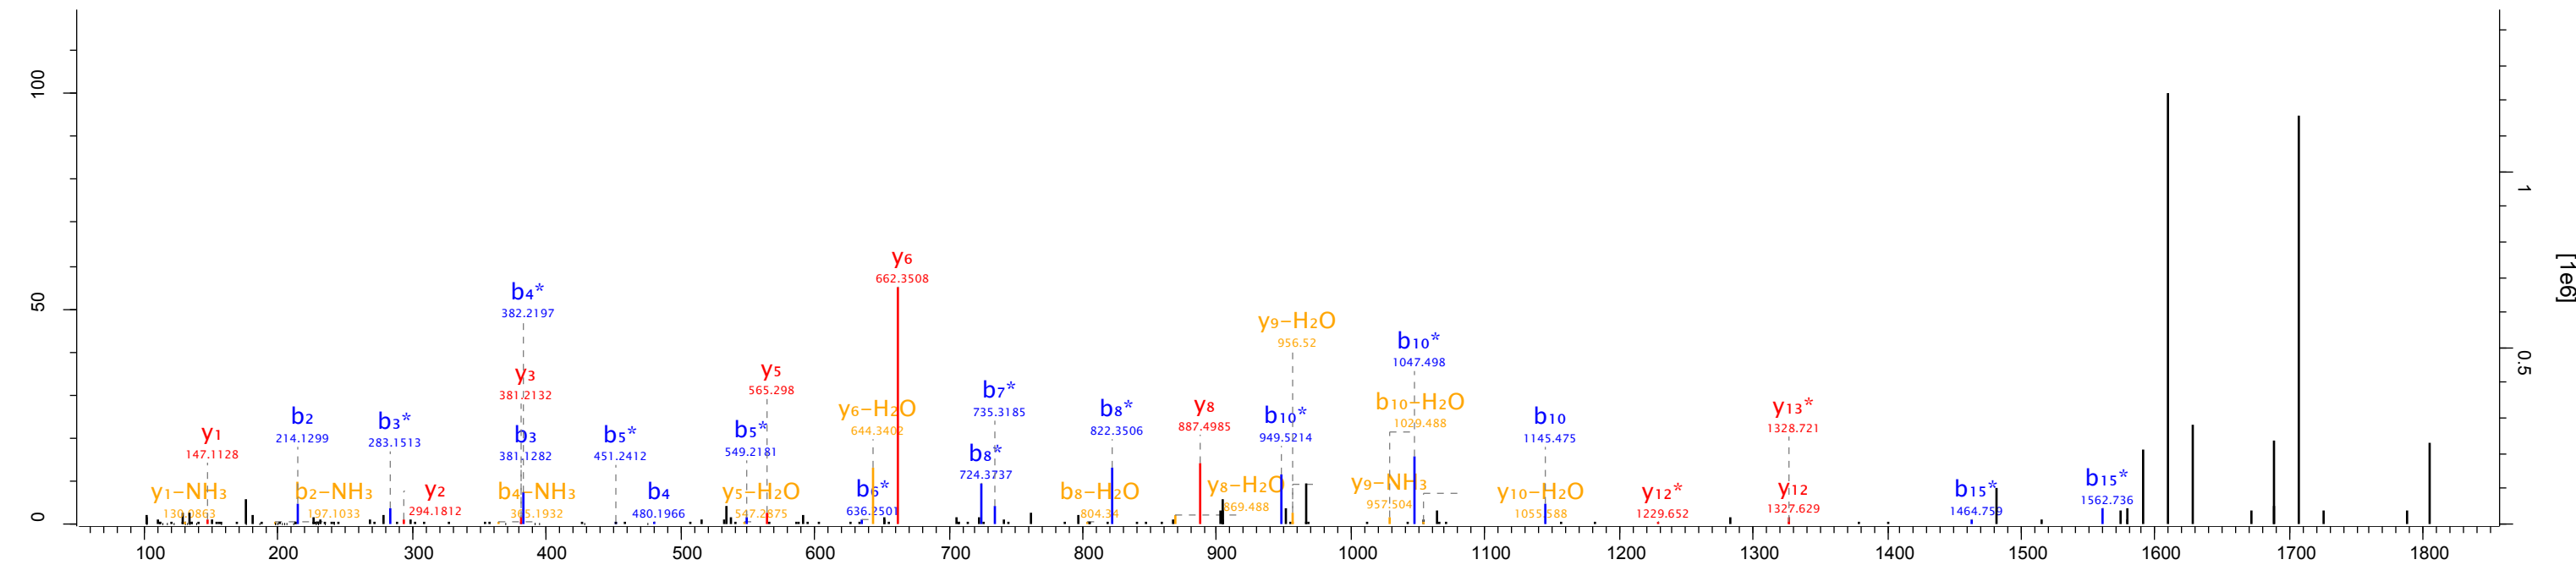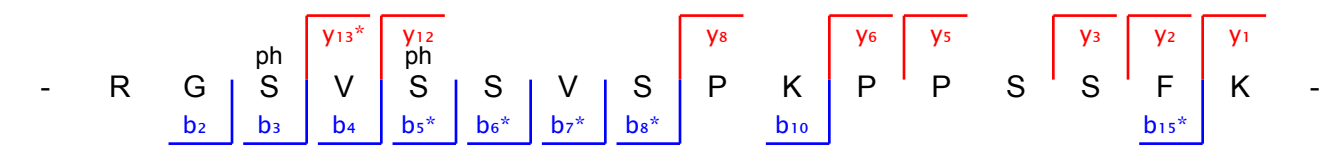

Raw file: 20150814\_A375SR\_Phospho\_BR2\_03  
 Scan: 10238 Method: FTMS; HCD Score: 77.69 m/z: 844.36 Gene names: MAP1S

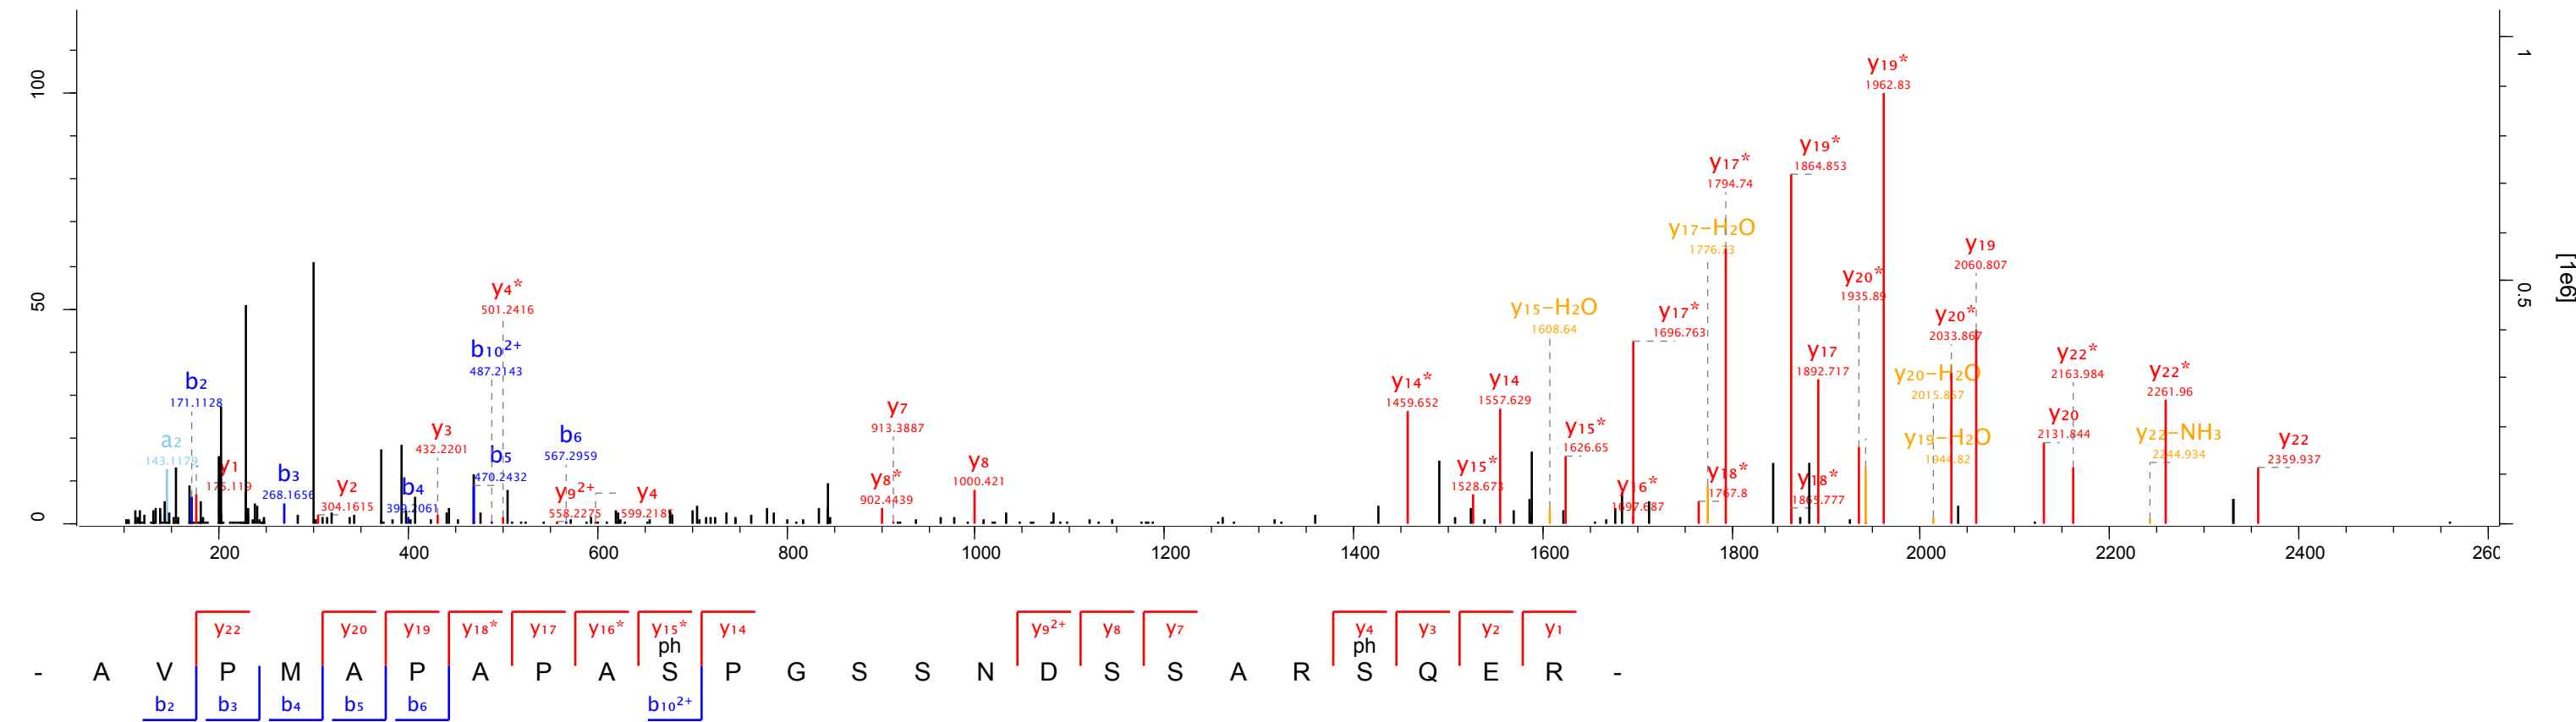

Raw file: 20150814\_A375SR\_Phospho\_BR2\_03  
 Scan: 10598 Method: FTMS; HCD Score: 313.12 m/z: 891.02 Gene names: BRPF1

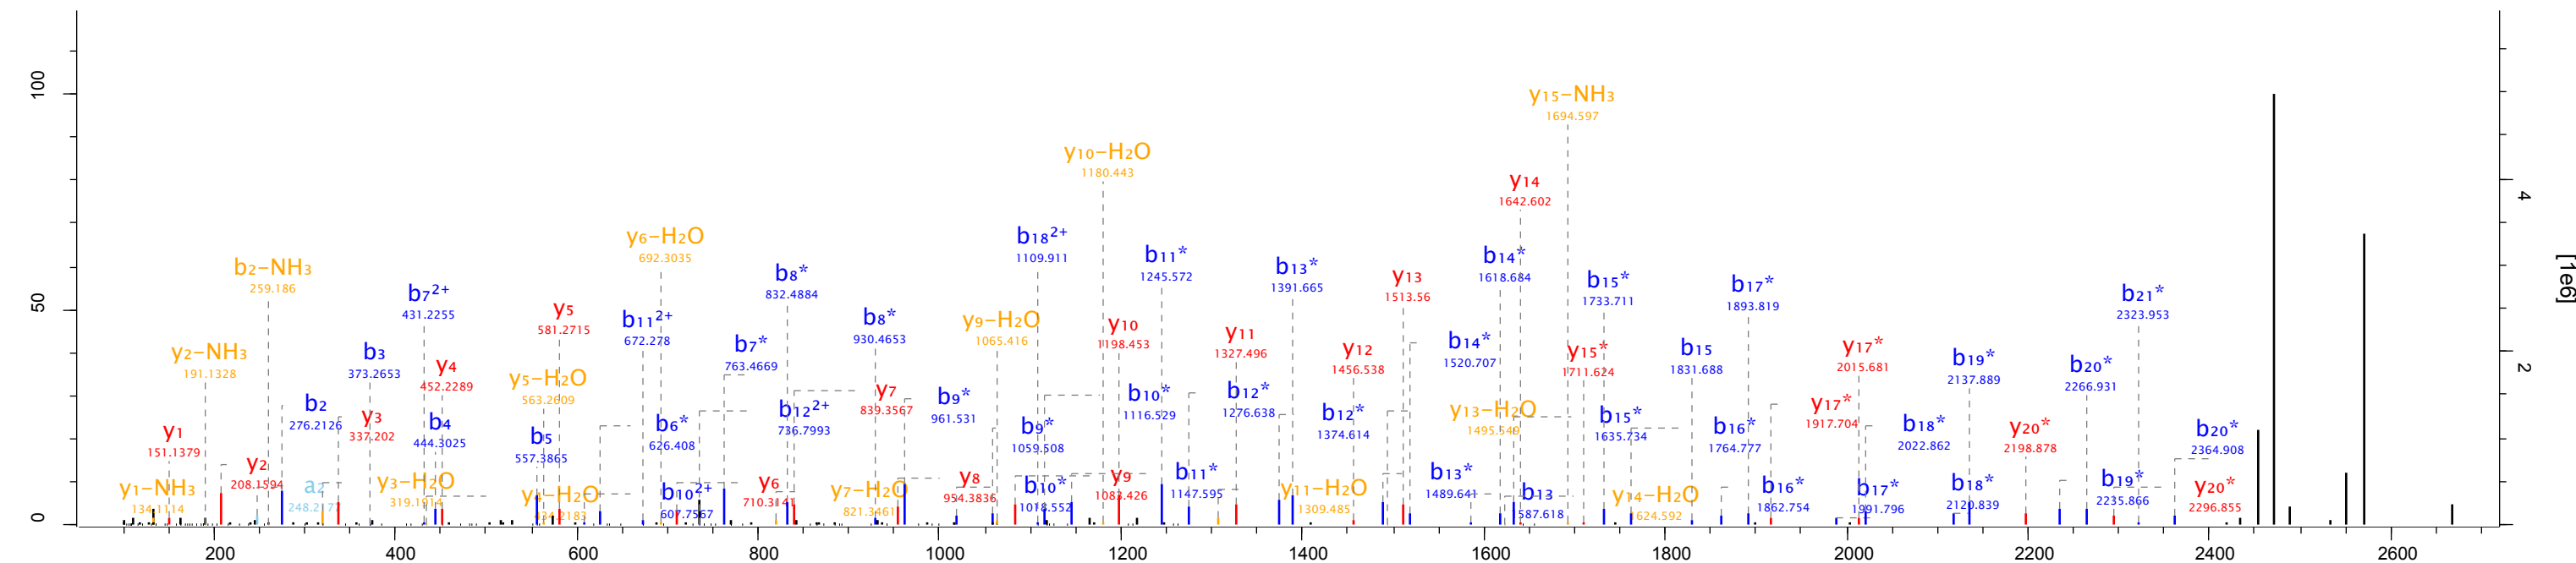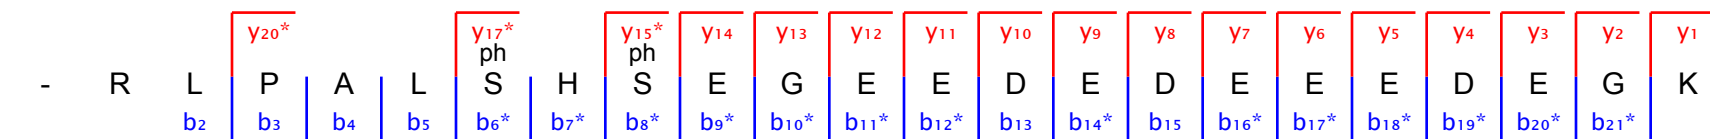



Raw file: 20150814\_A375SR\_Phospho\_BR2\_03  
 Scan: 10708  
 Method: FTMS; HCD  
 Score: 94.03  
 m/z: 930.42  
 Gene names: RPRD2

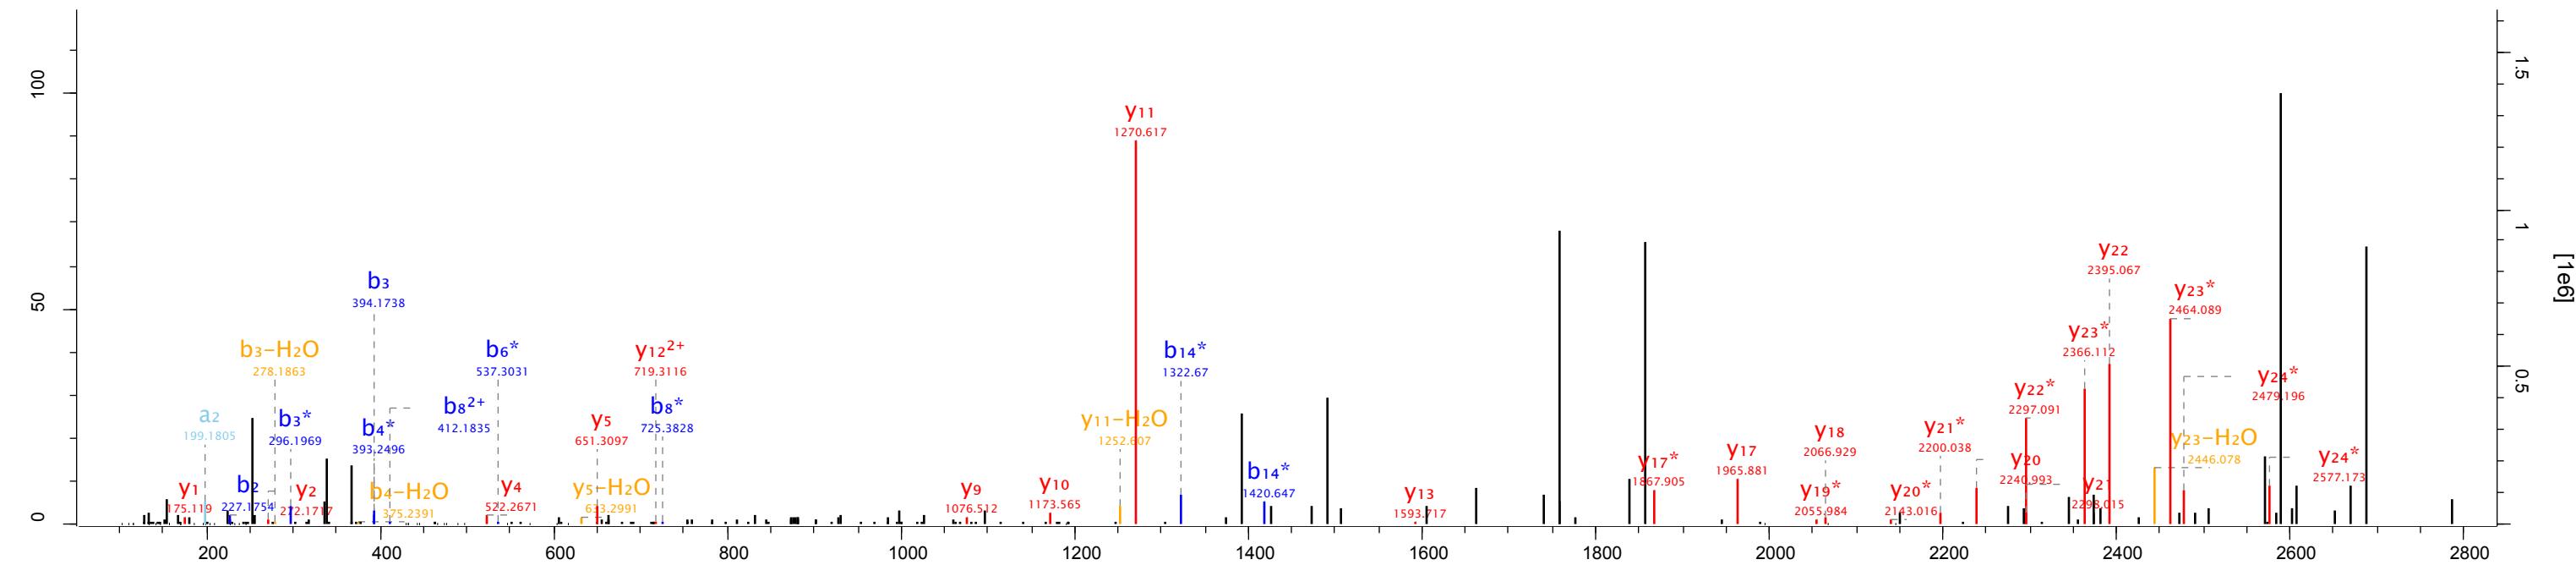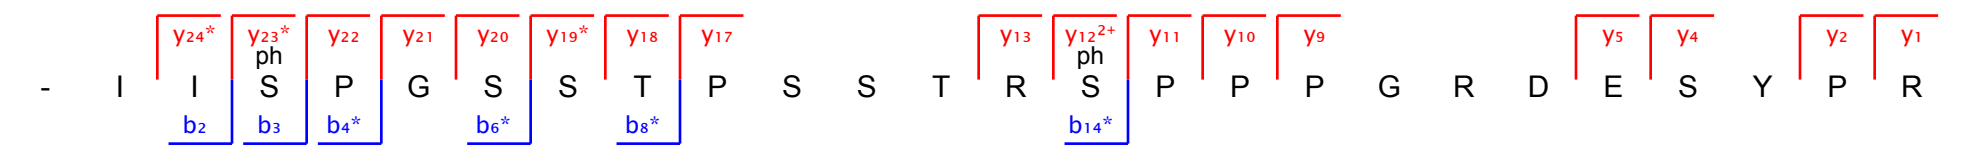

Raw file: 20150814\_A375SR\_Phospho\_BR2\_03  
 Scan: 10758 Method: FTMS; HCD Score: 50.92 m/z: 768.84 Gene names: RICTOR

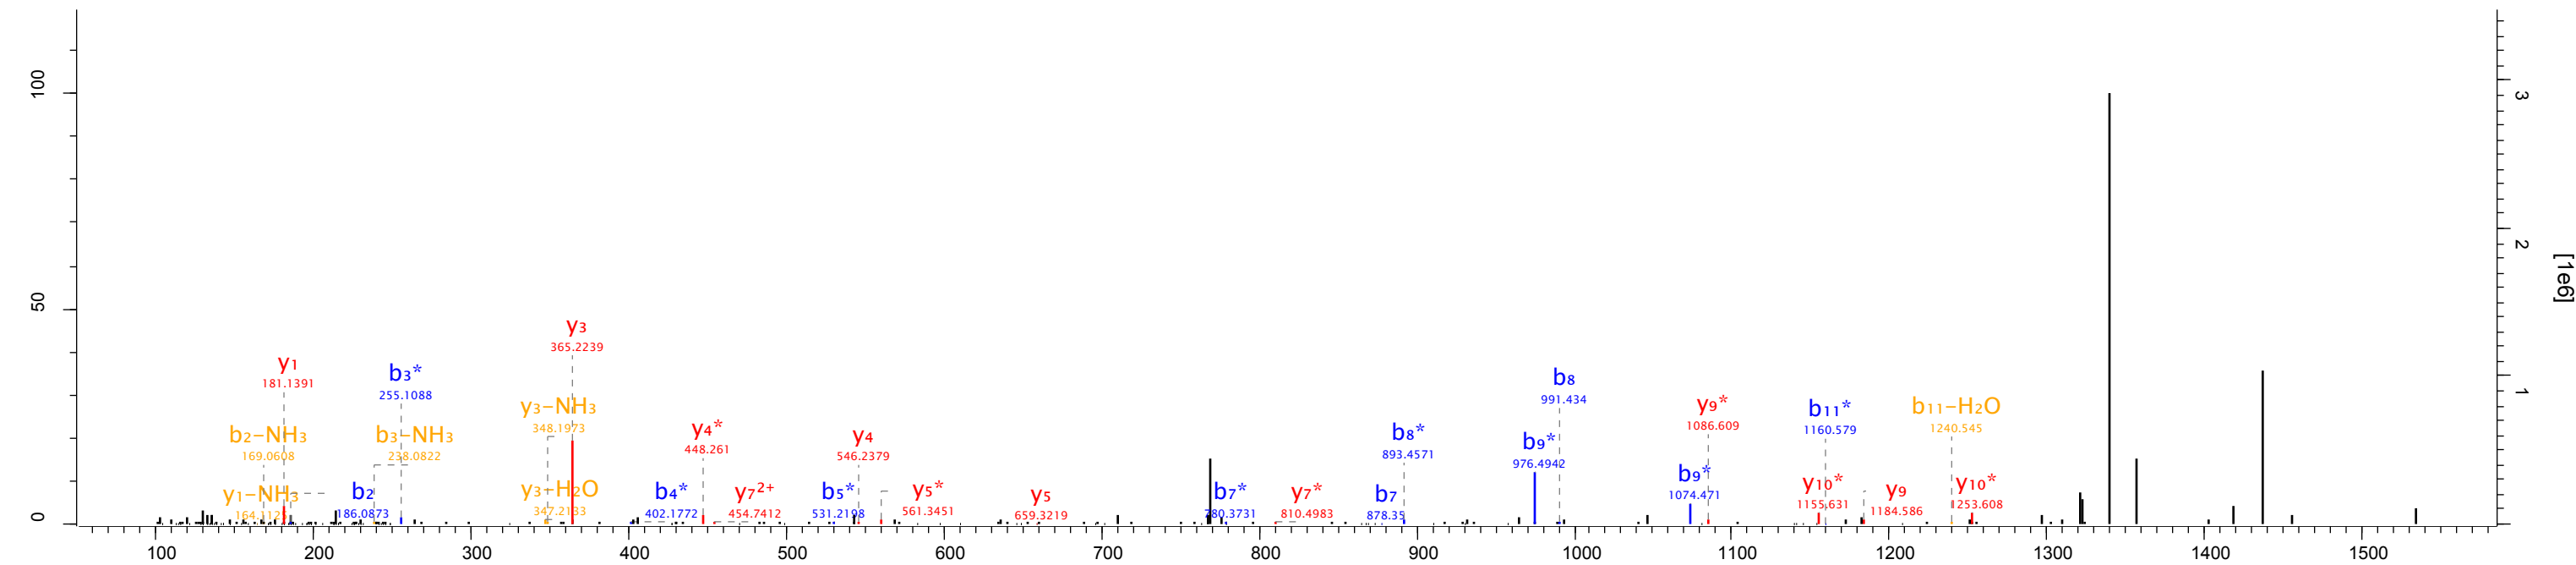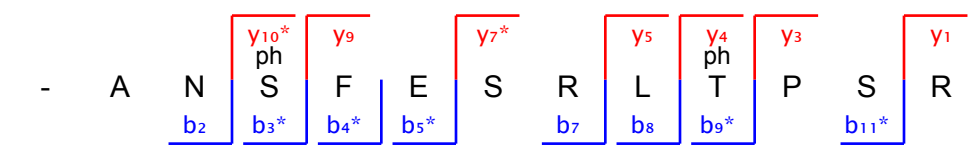



Raw file 20150814\_A375SR\_Phospho\_BR2\_03 Scan 10948 Method FTMS; HCD Score 74.79 m/z 617.77 Gene names ZNF609

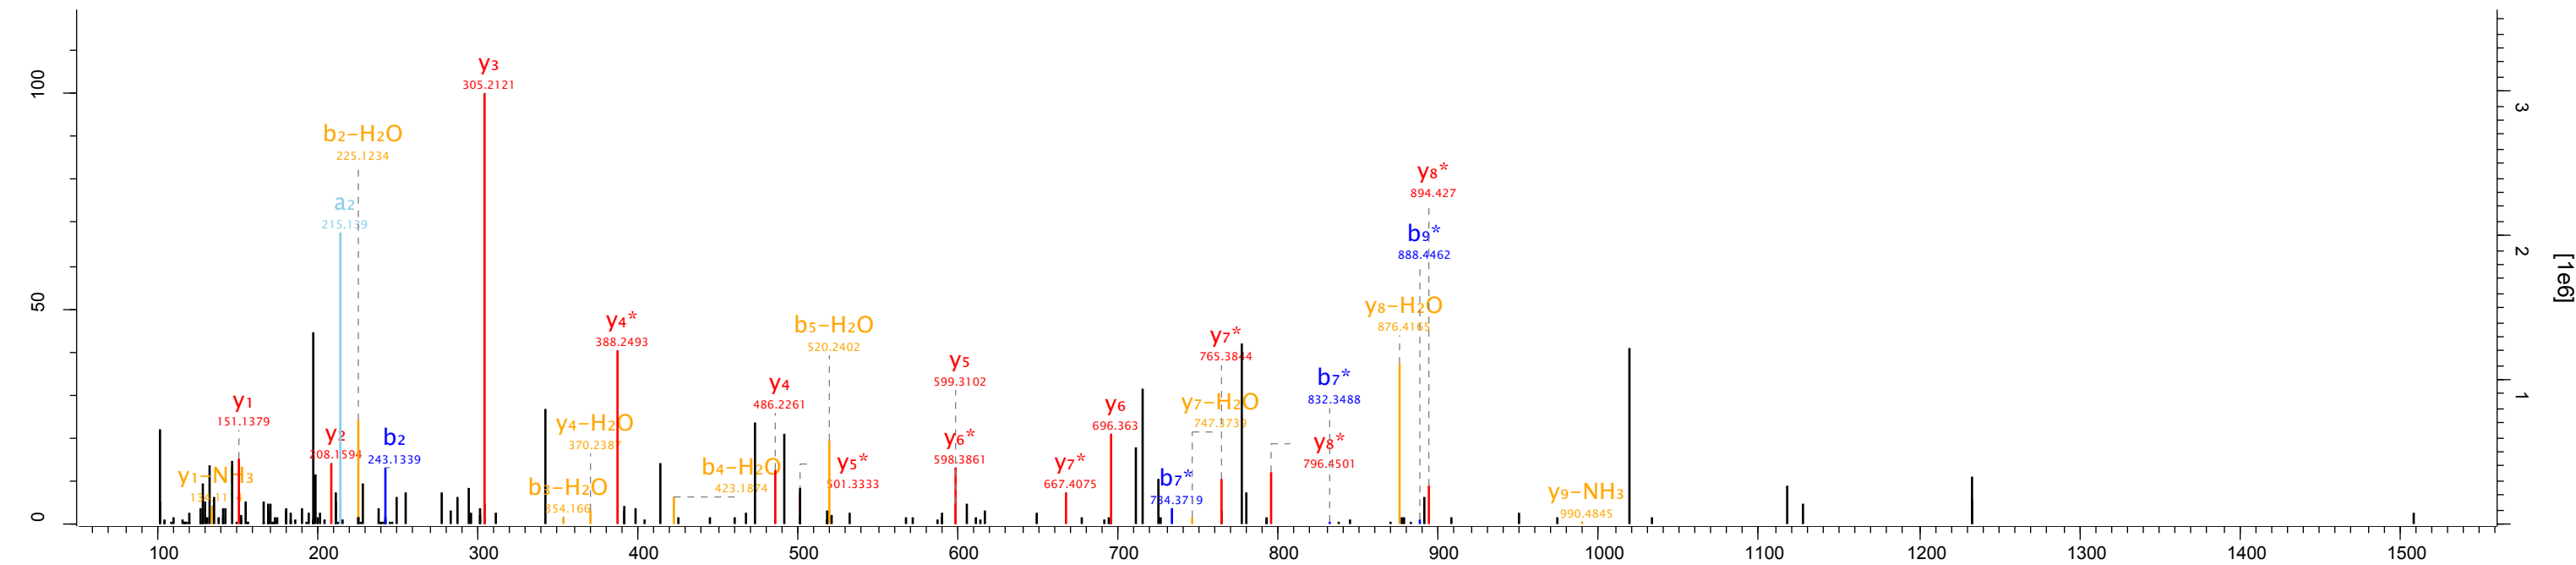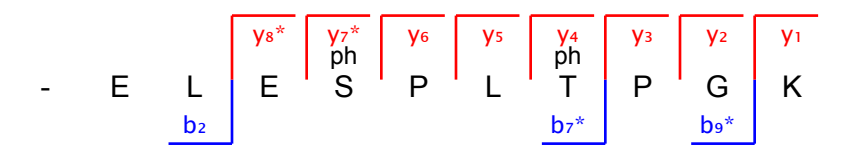

Raw file: 20150814\_A375SR\_Phospho\_BR2\_03  
 Scan: 11038 Method: FTMS; HCD Score: 220.74 m/z: 917.87 Gene names: LIG1

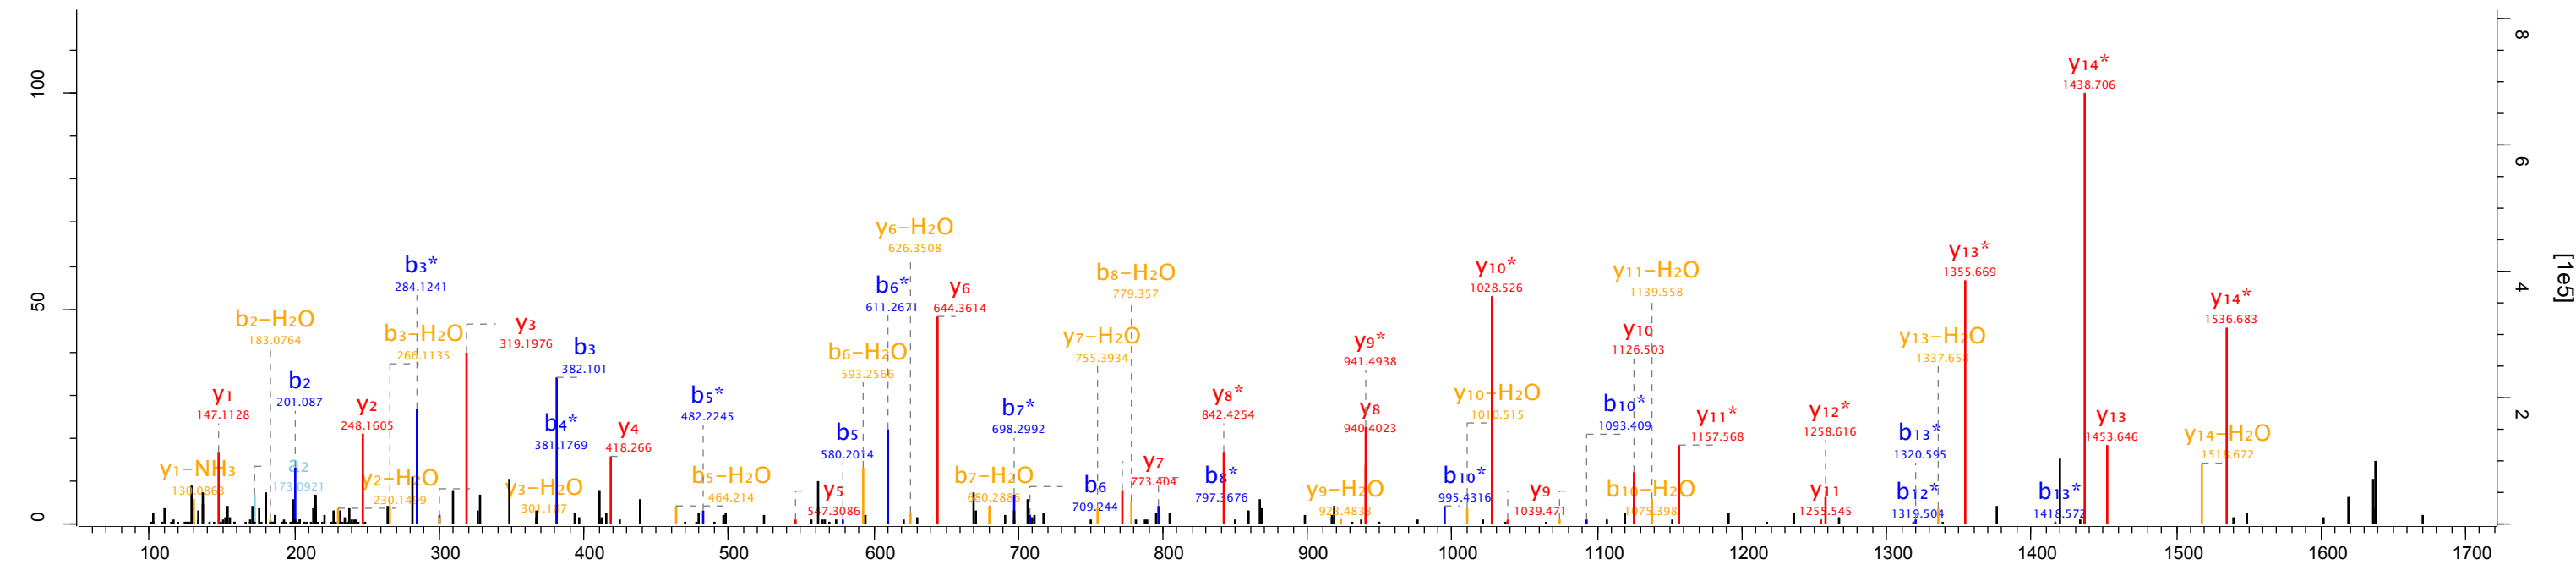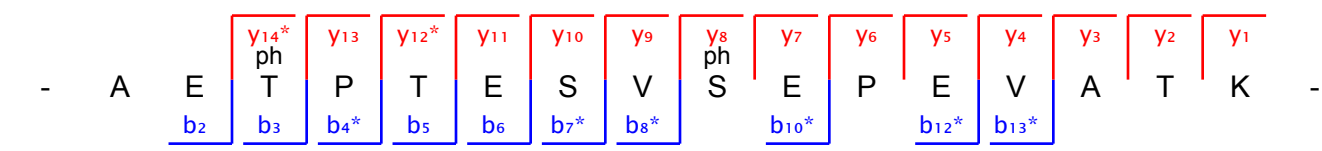

Raw file: 20150814\_A375SR\_Phospho\_BR2\_03  
 Scan: 11118 Method: FTMS; HCD Score: 138.97 m/z: 512.23 Gene names: ANKLE2

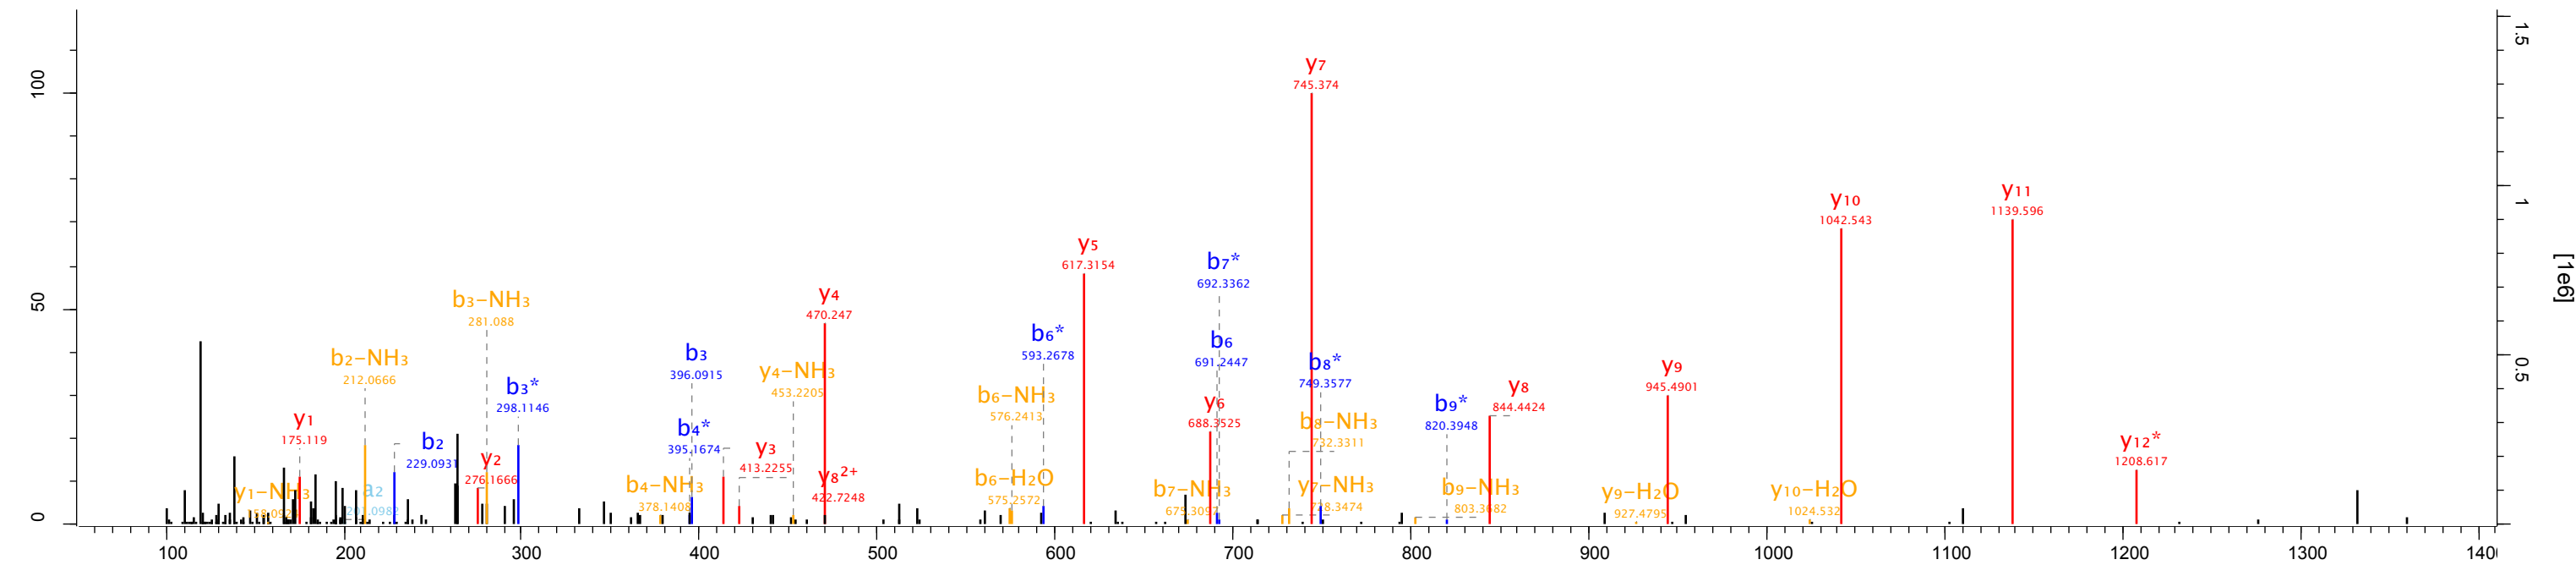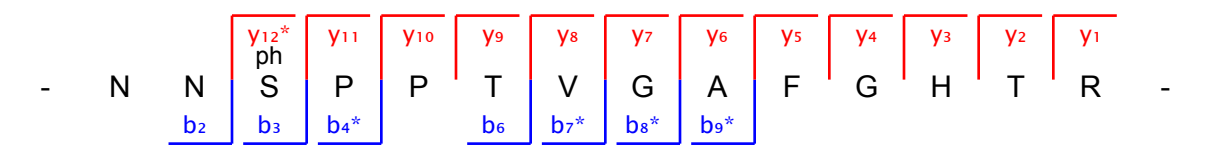

Raw file: 20150814\_A375SR\_Phospho\_BR2\_03  
 Scan: 11258 Method: FTMS; HCD Score: 45.98 m/z: 1183.95 Gene names: PRRC2A

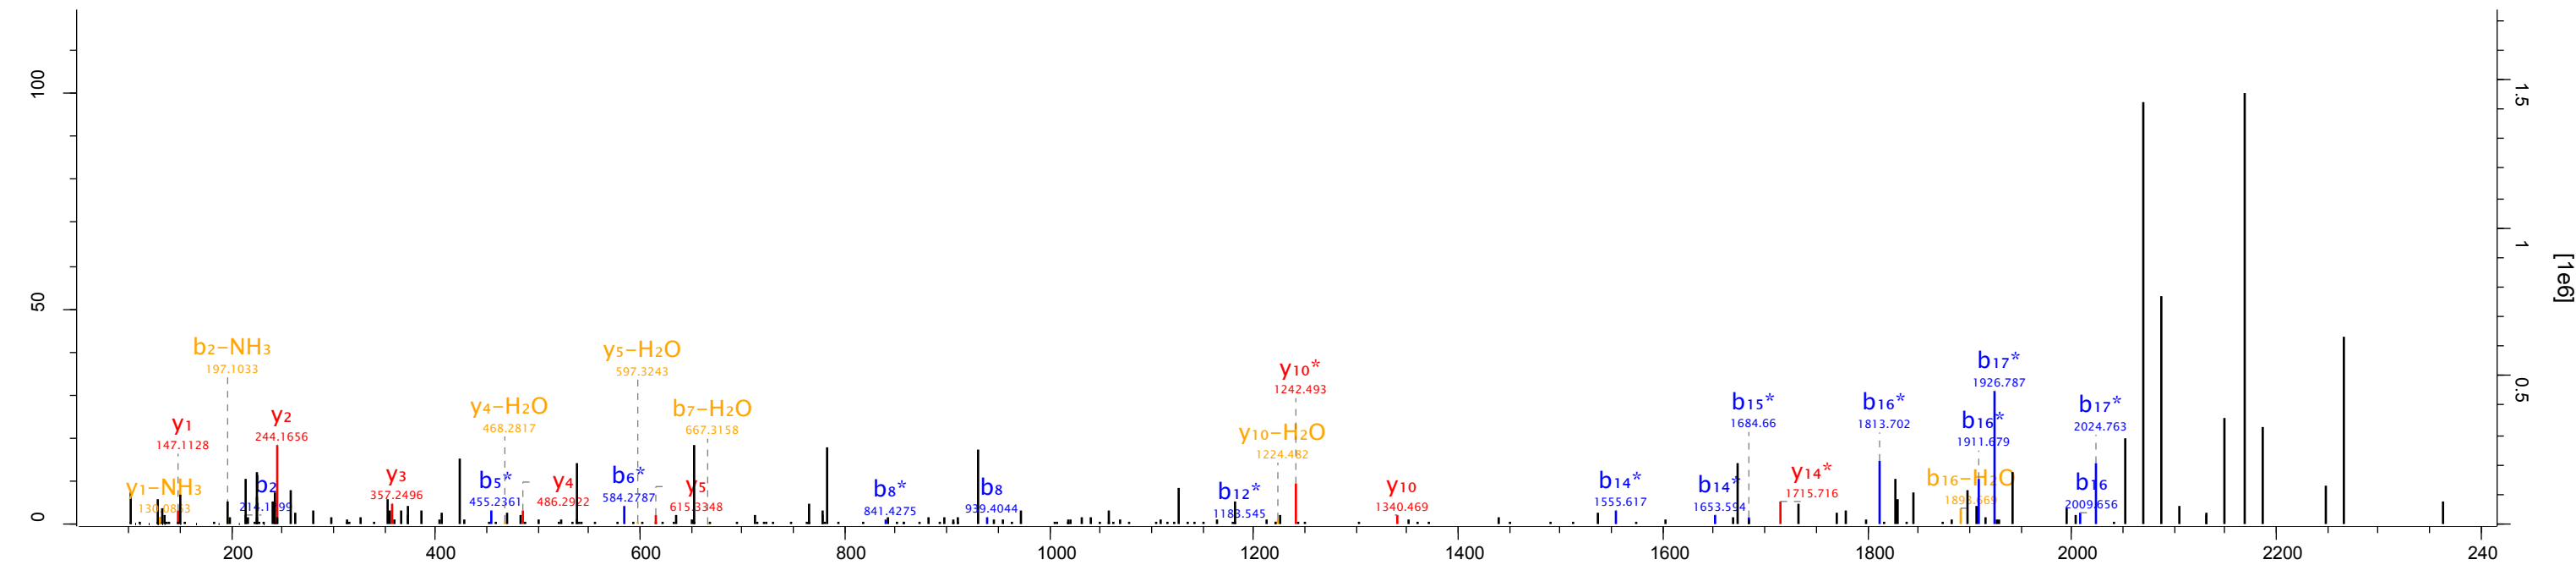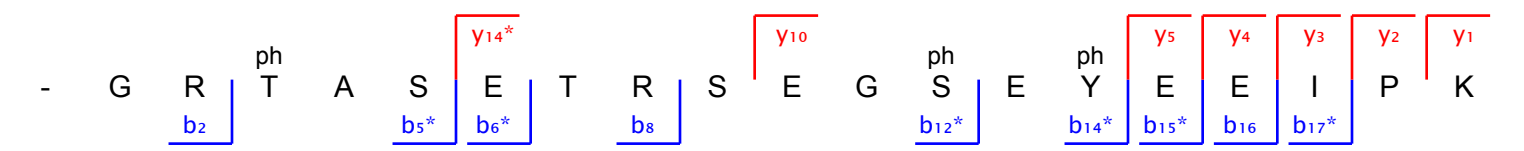

Raw file Scan Method Score m/z Gene names  
 20150814\_A375SR\_Phospho\_BR2\_03 11438 FTMS; HCD 210.32 1001.92 TRIP10

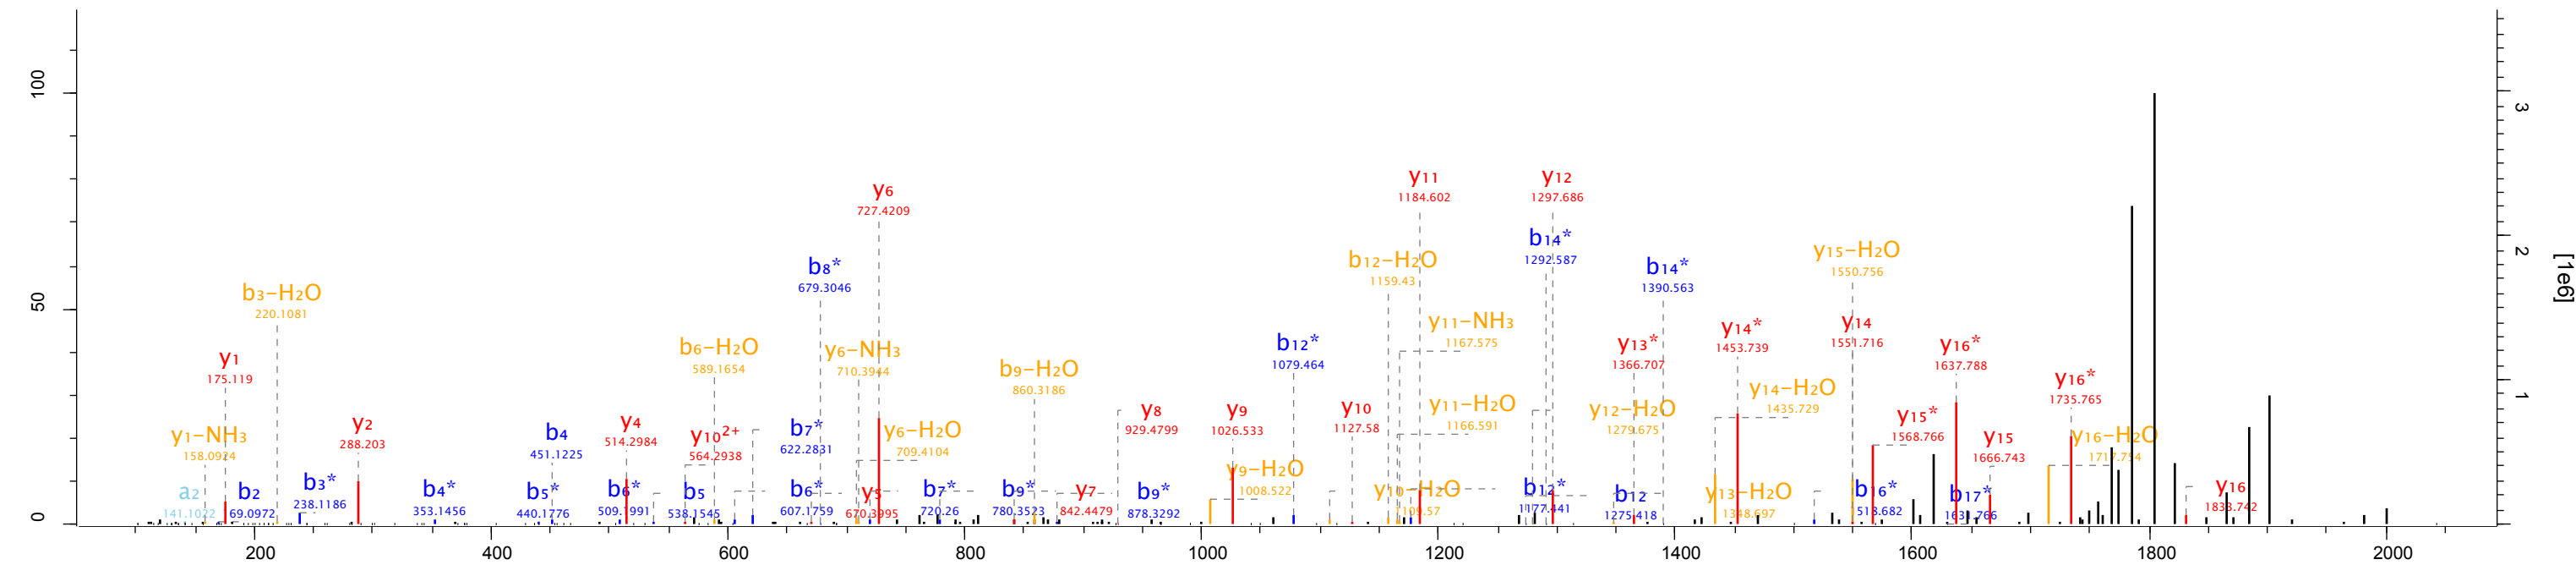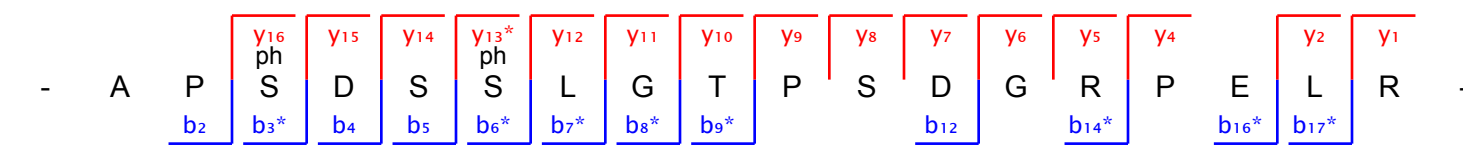

Raw file 20150814\_A375SR\_Phospho\_BR2\_03 Scan 11598 Method FTMS; HCD Score 191.33 m/z 642.74 Gene names KRT80

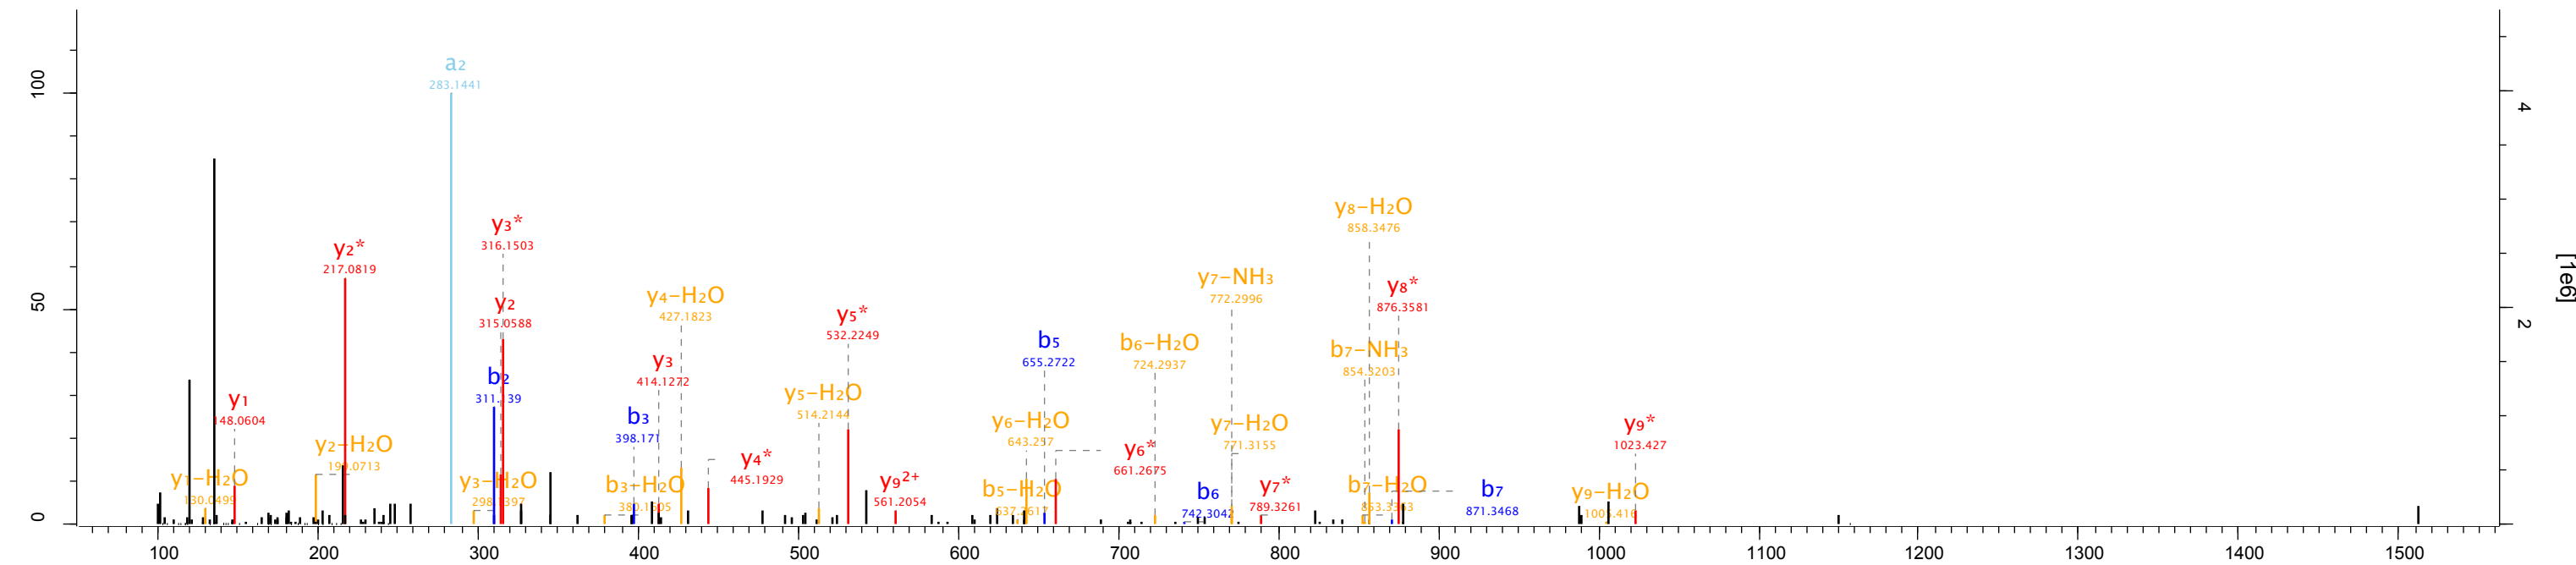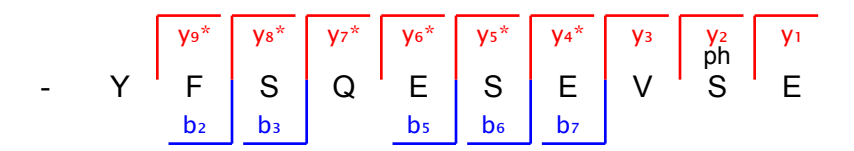

Raw file 20150814\_A375SR\_Phospho\_BR2\_03 Scan 12258 Method FTMS; HCD Score 134.87 m/z 861.37 Gene names HEATR6

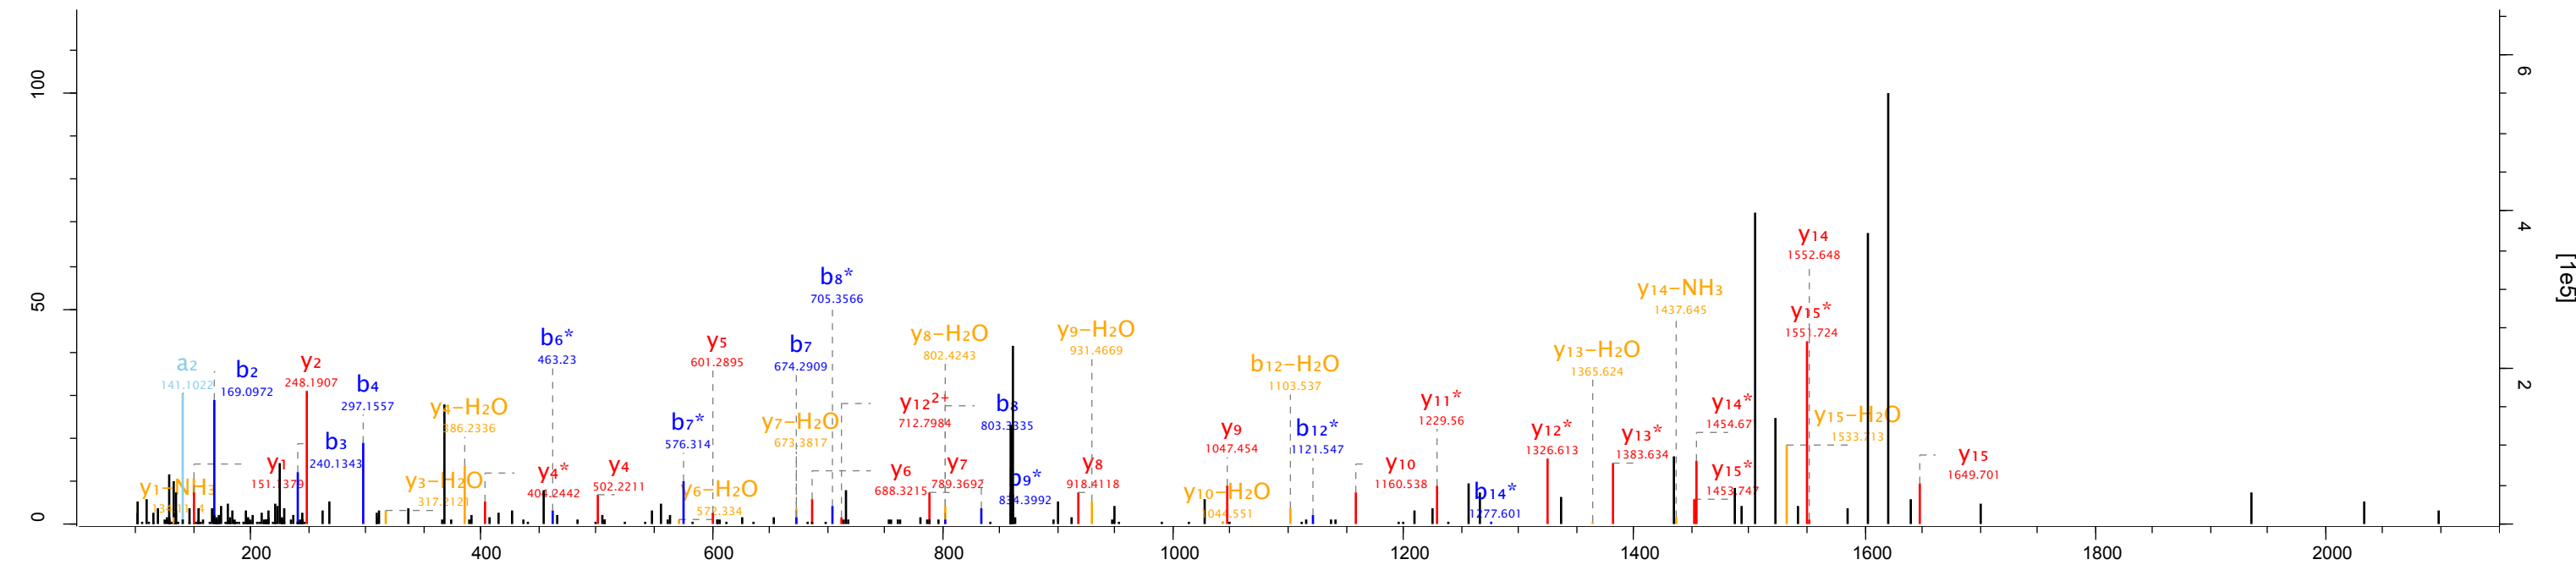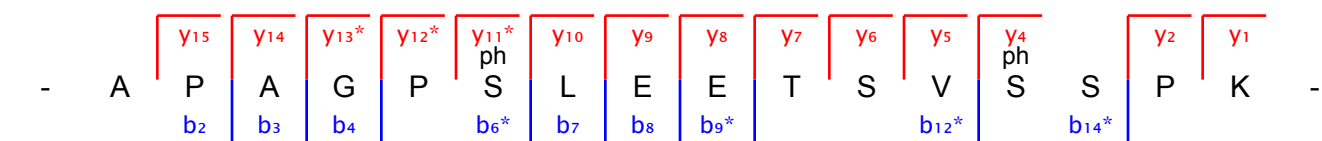

Raw file Scan Method Score m/z Gene names  
 20150814\_A375SR\_Phospho\_BR2\_03 12298 FTMS; HCD 169.19 896.87 AEBP2

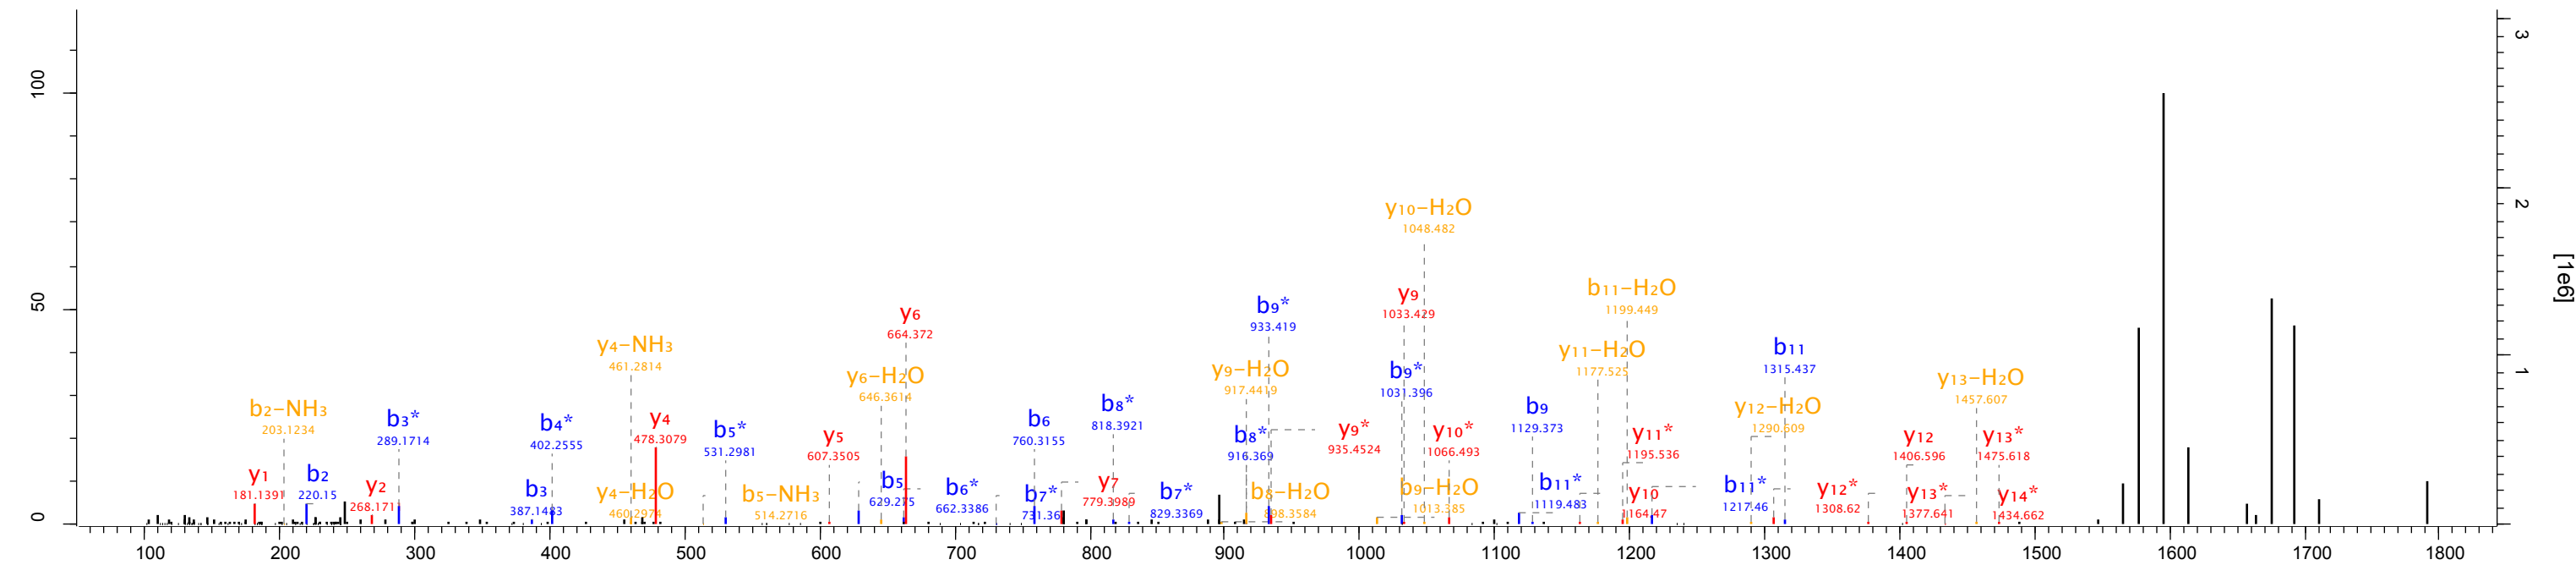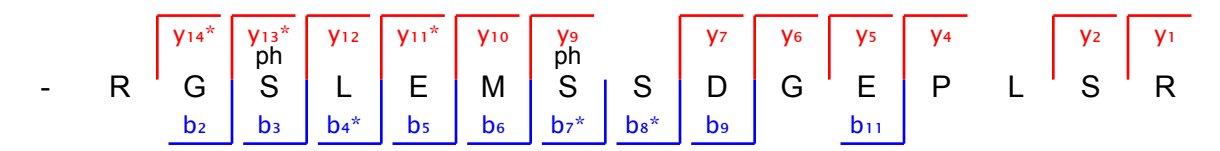



Raw file 20150814\_A375SR\_Phospho\_BR2\_03 Scan 12318 Method FTMS; HCD Score 85.84 m/z 675.27 Gene names CHAMP1

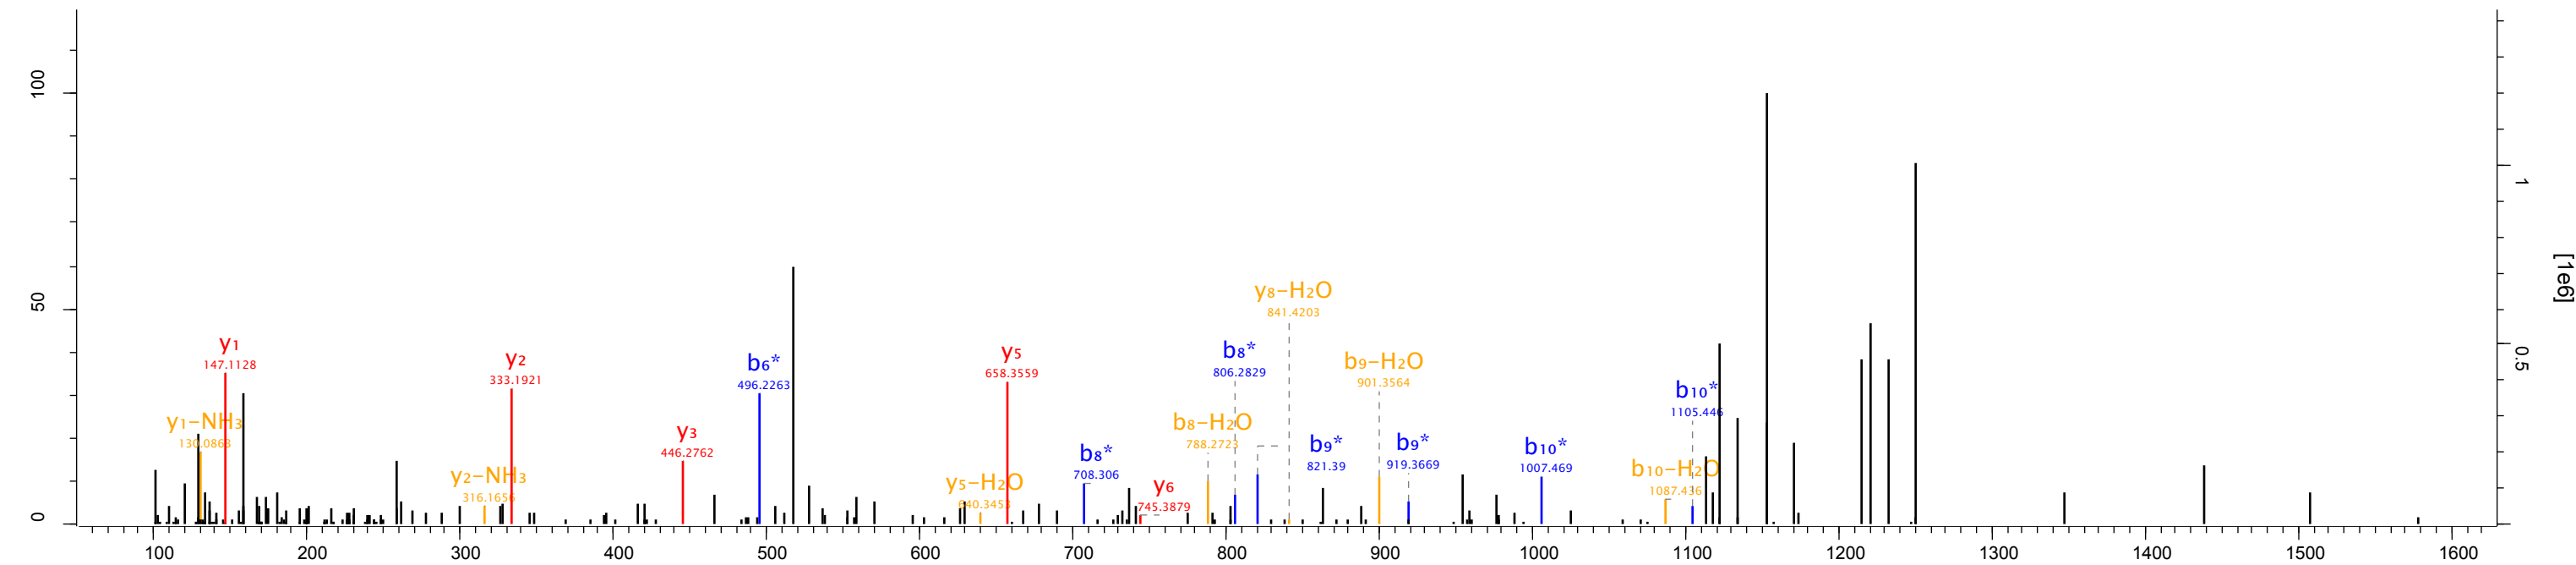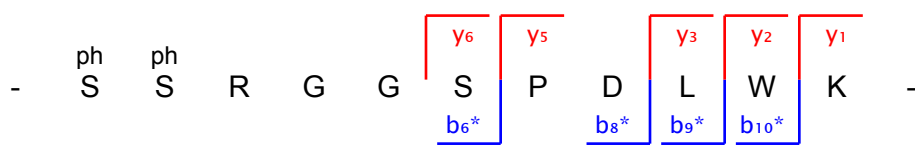

Raw file 20150814\_A375SR\_Phospho\_BR2\_03 Scan 12938 Method FTMS; HCD Score 141.66 m/z 853.38 Gene names SSBP4

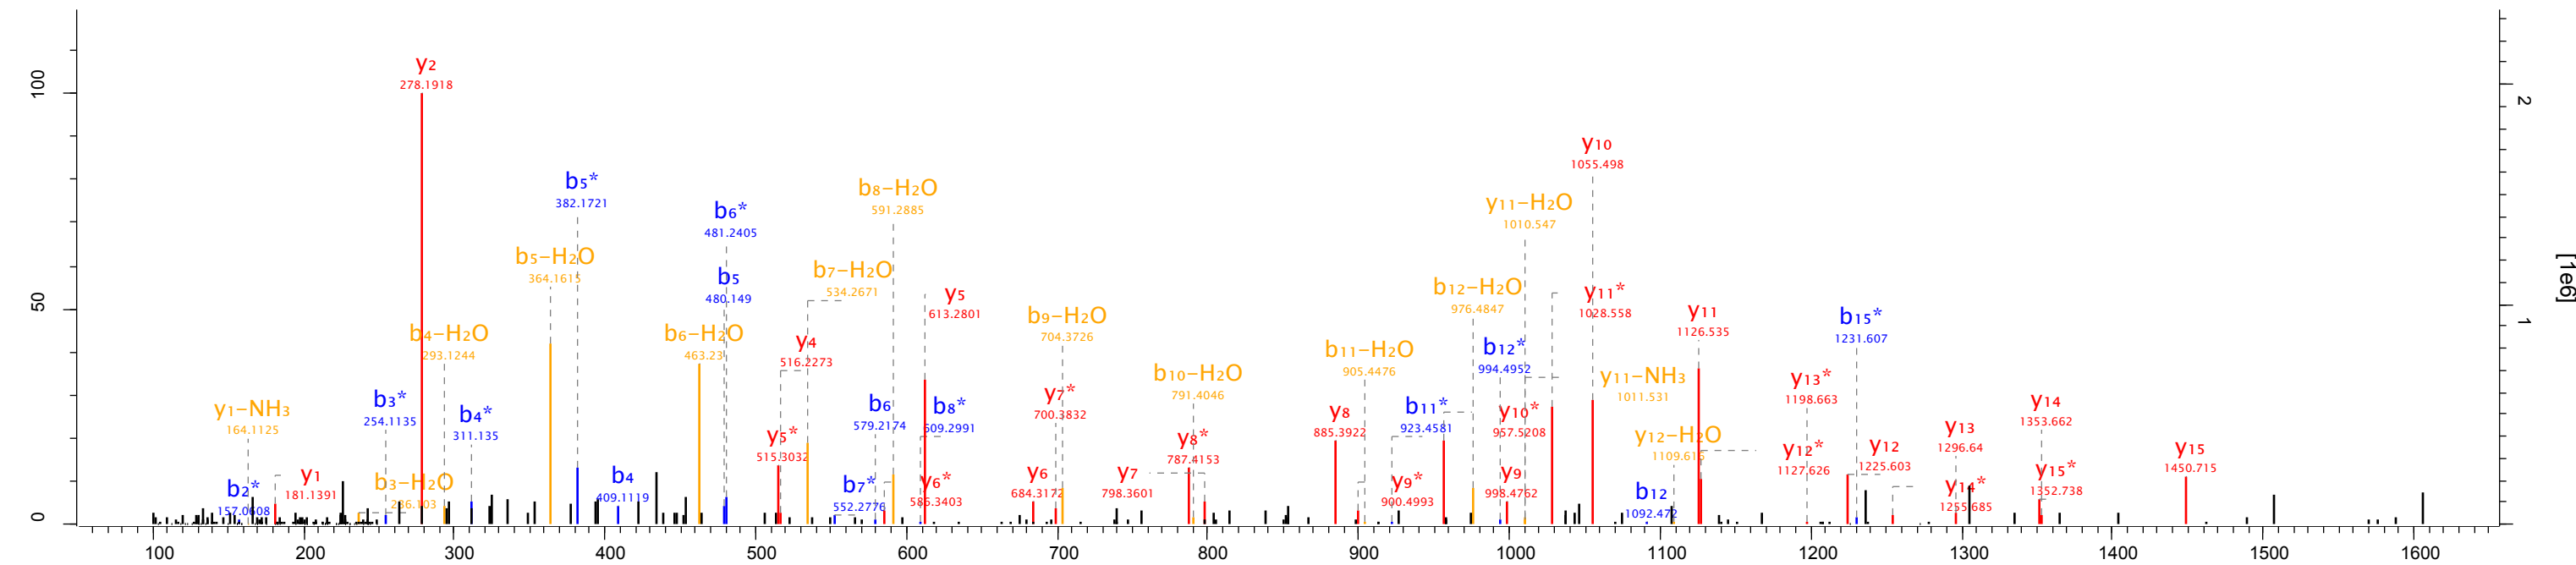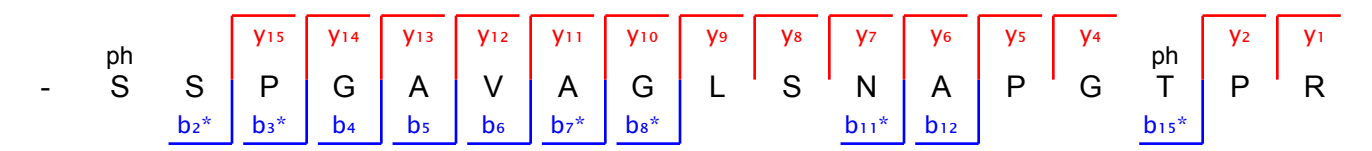

Raw file 20150814\_A375SR\_Phospho\_BR2\_03 Scan 13138 Method FTMS; HCD Score 178.46 m/z 919.76 Gene names EIF4ENIF1

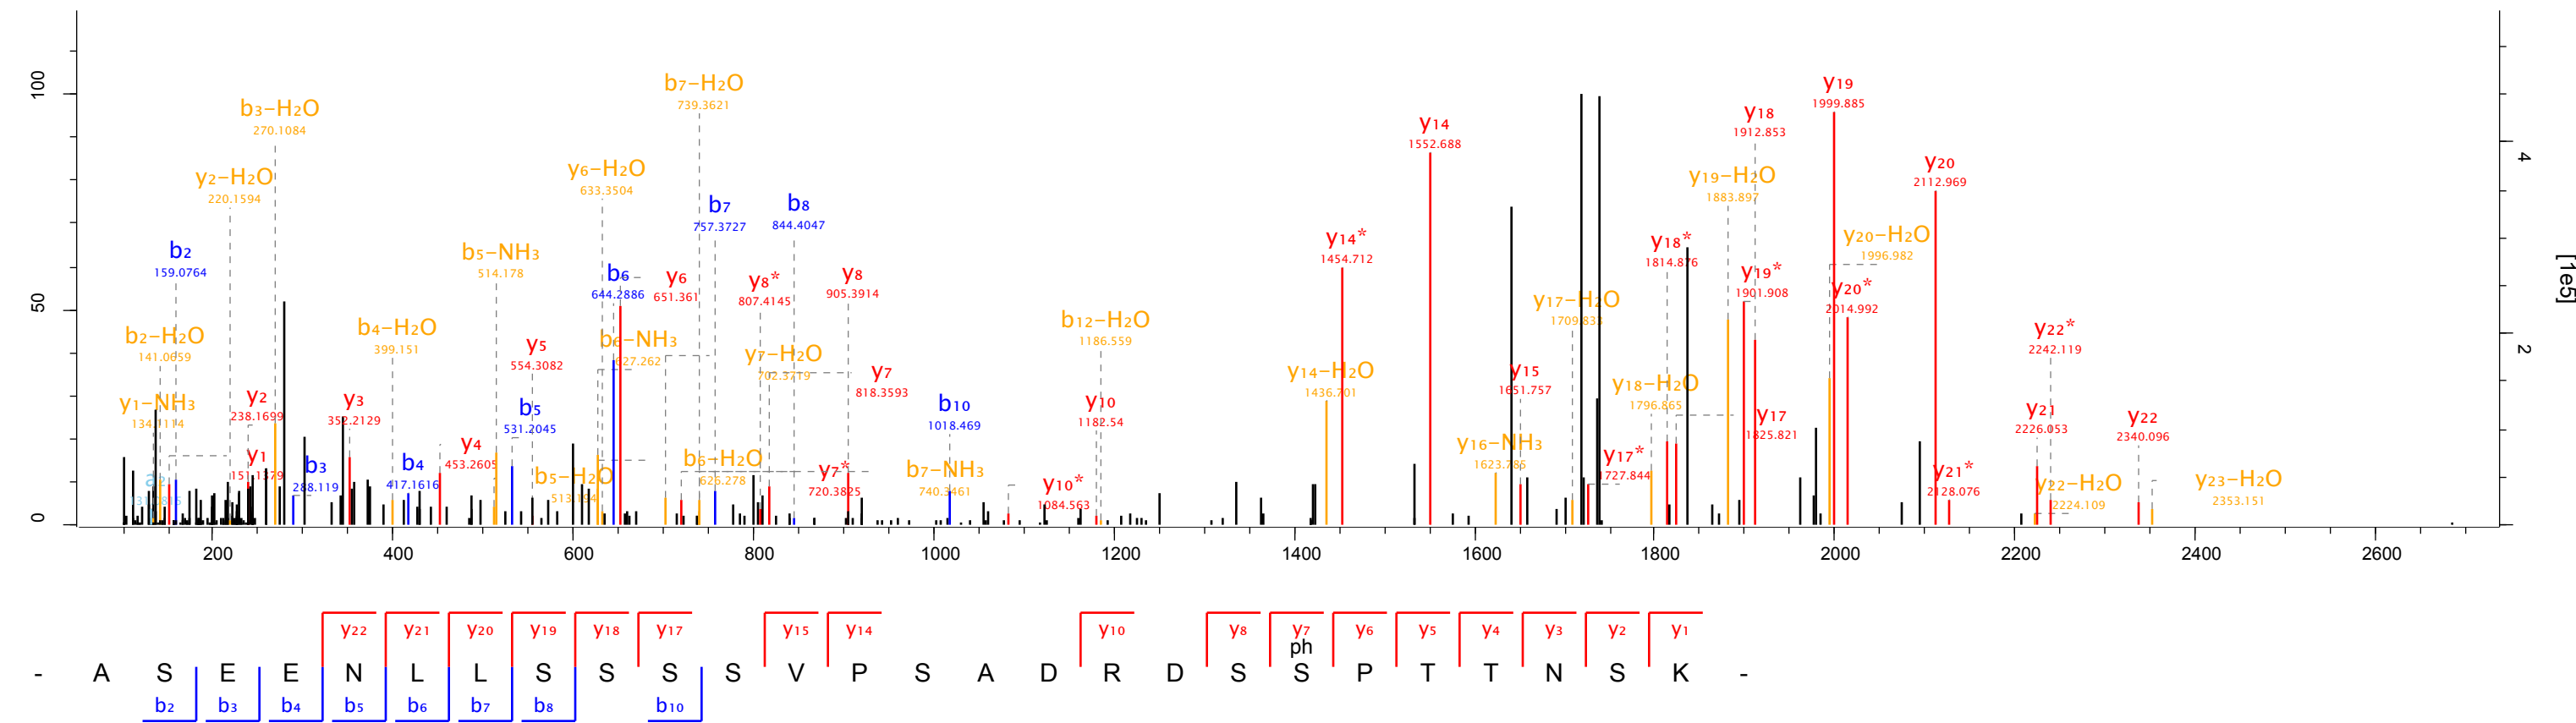

Raw file 20150814\_A375SR\_Phospho\_BR2\_03 Scan 13618 Method FTMS; HCD Score 136.59 m/z 845.41 Gene names UFD1L

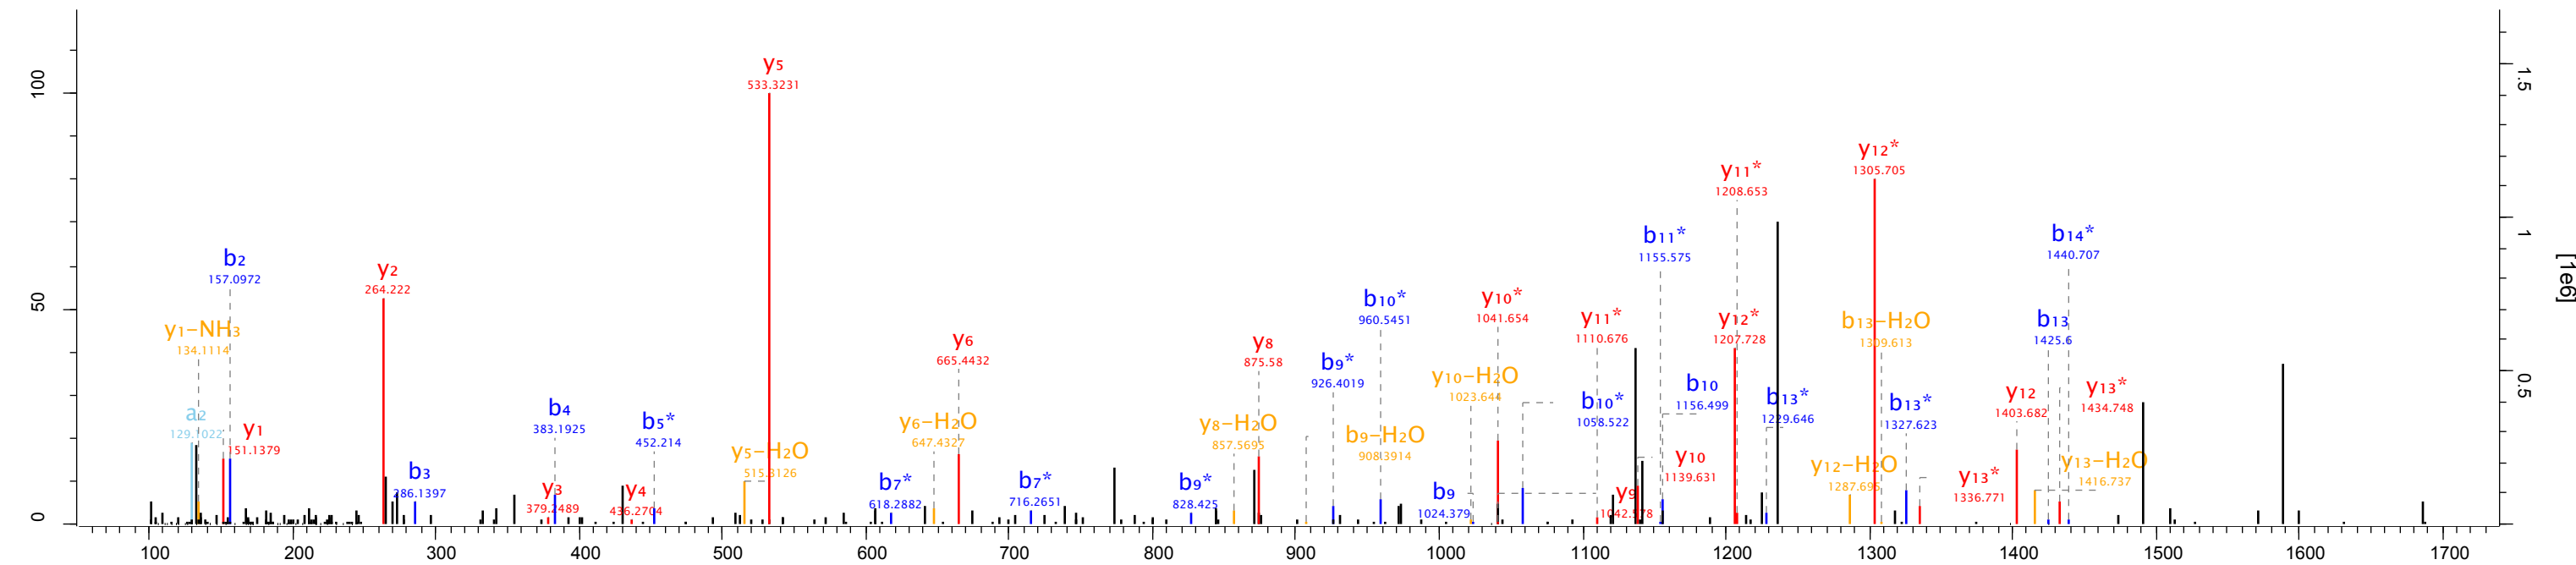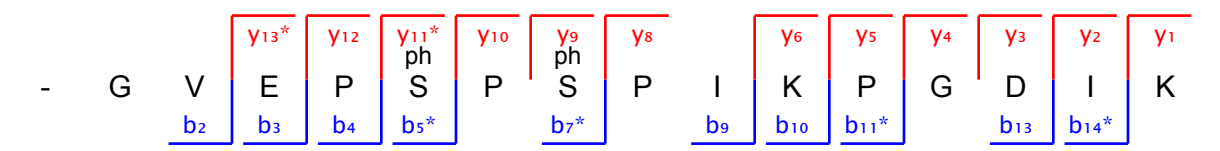

Raw file 20150814\_A375SR\_Phospho\_BR2\_03 Scan 13748 Method FTMS; HCD Score 160.78 m/z 709.28 Gene names MPHOSPH8

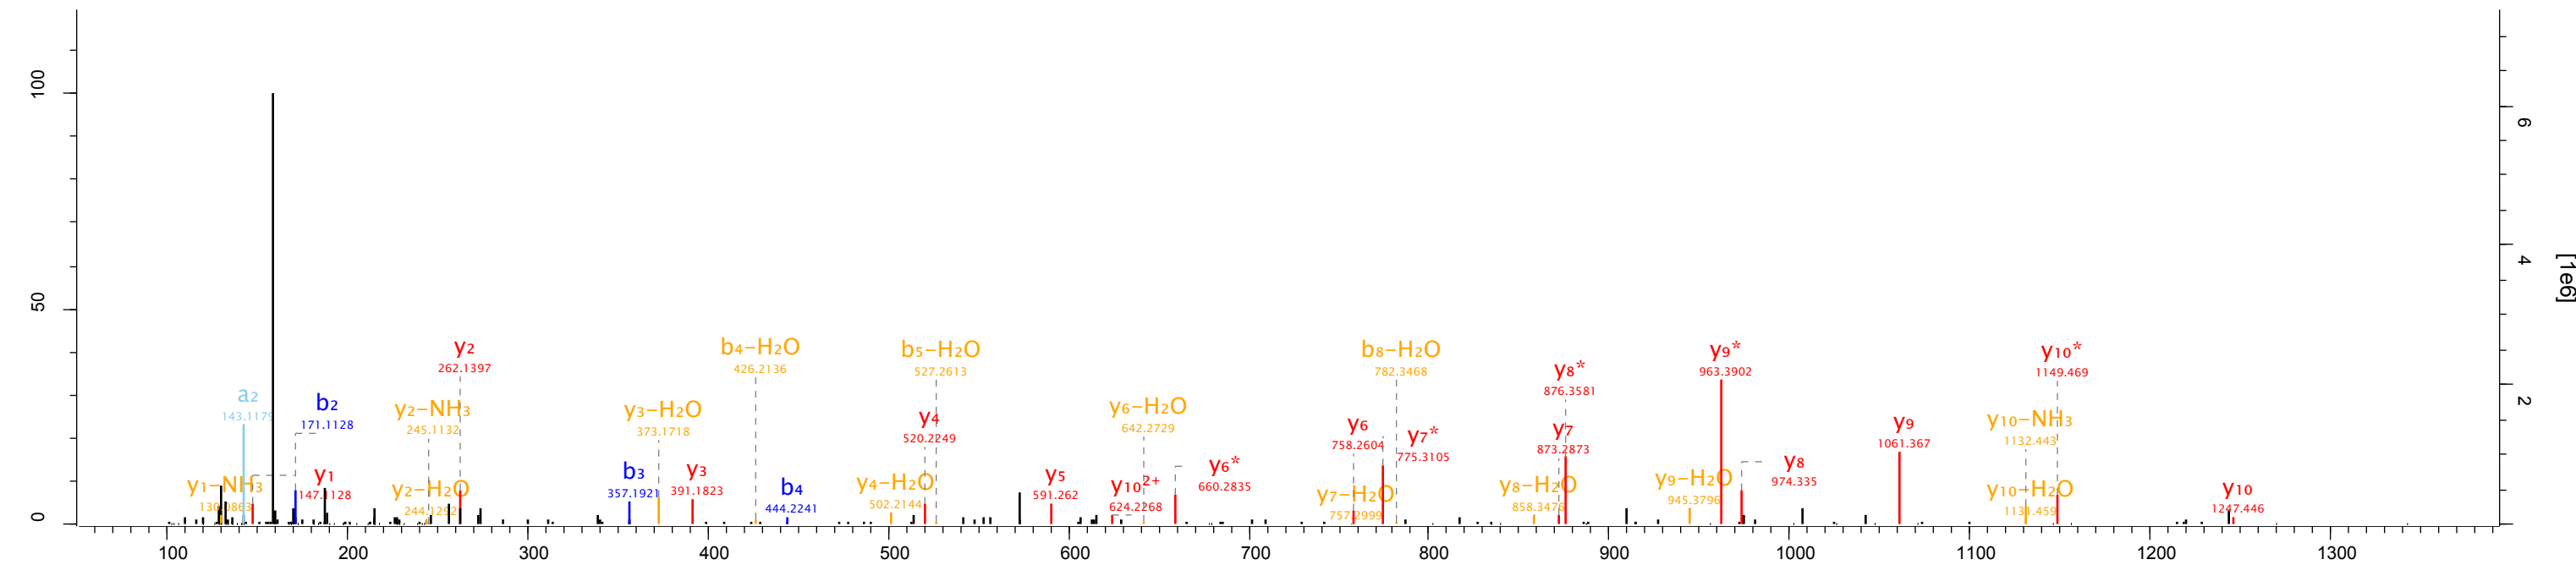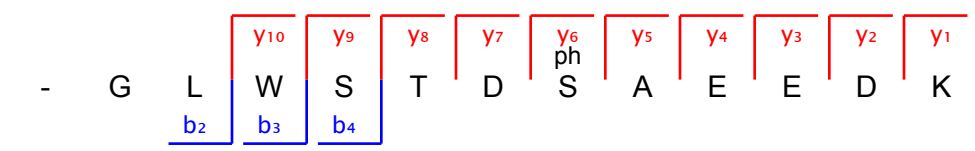

Raw file 20150814\_A375SR\_Phospho\_BR2\_03 Scan 14148 Method FTMS; HCD Score 192.16 m/z 720.83 Gene names C2orf49

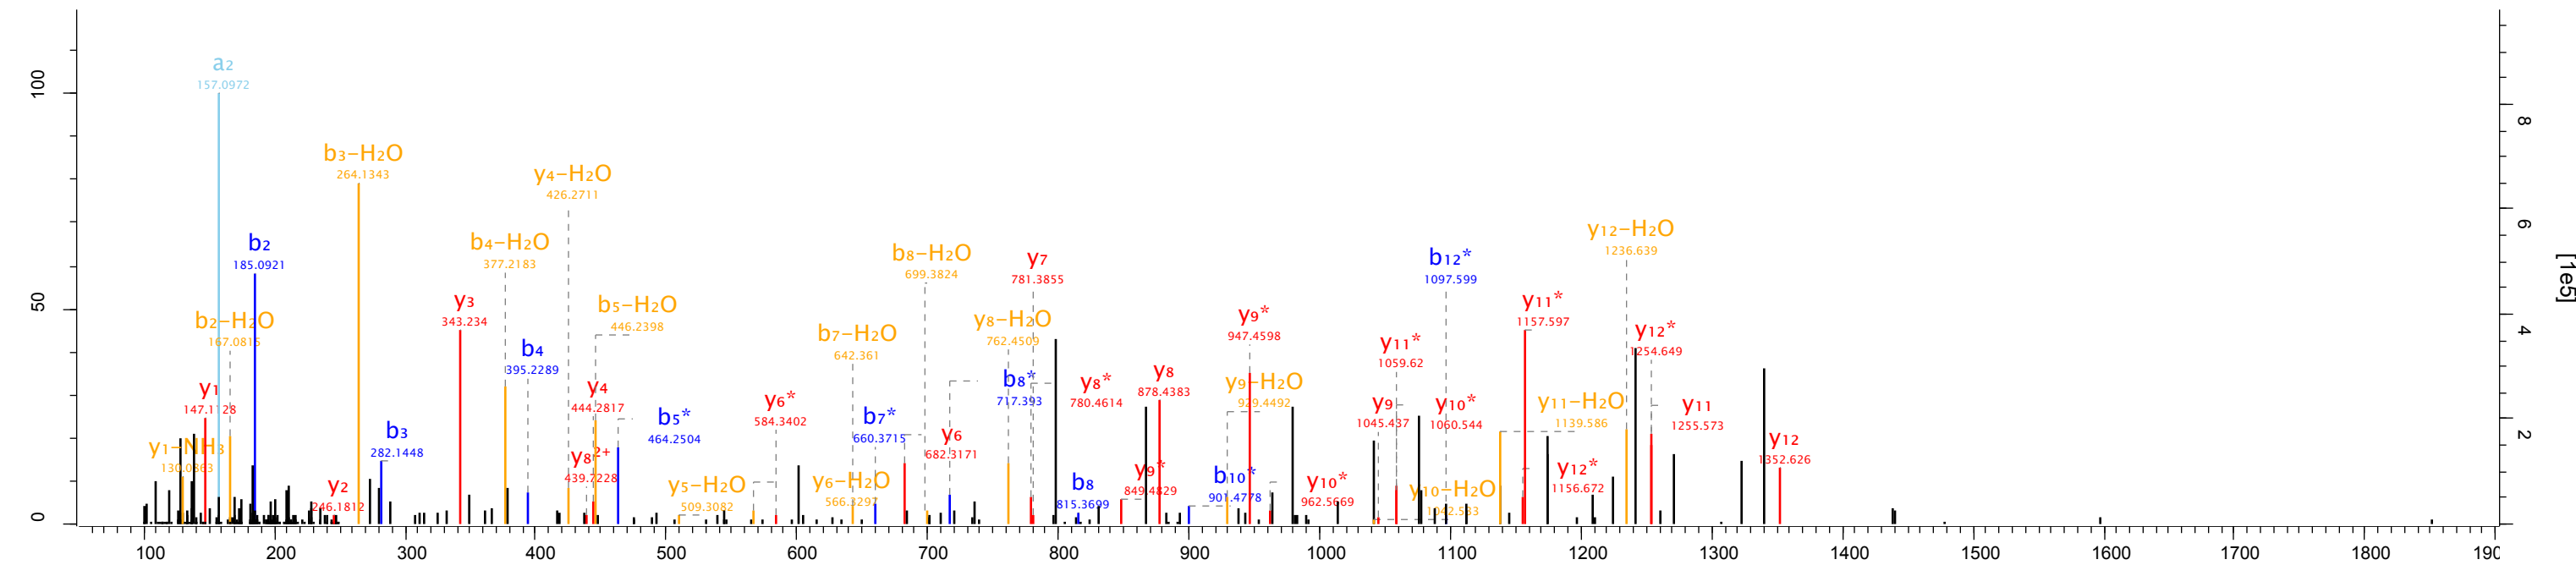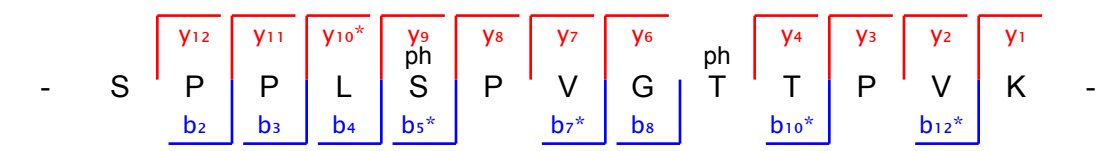

Raw file 20150814\_A375SR\_Phospho\_BR2\_03 Scan 14238 Method FTMS; HCD Score 183.05 m/z 1022.4 Gene names PRRC2B

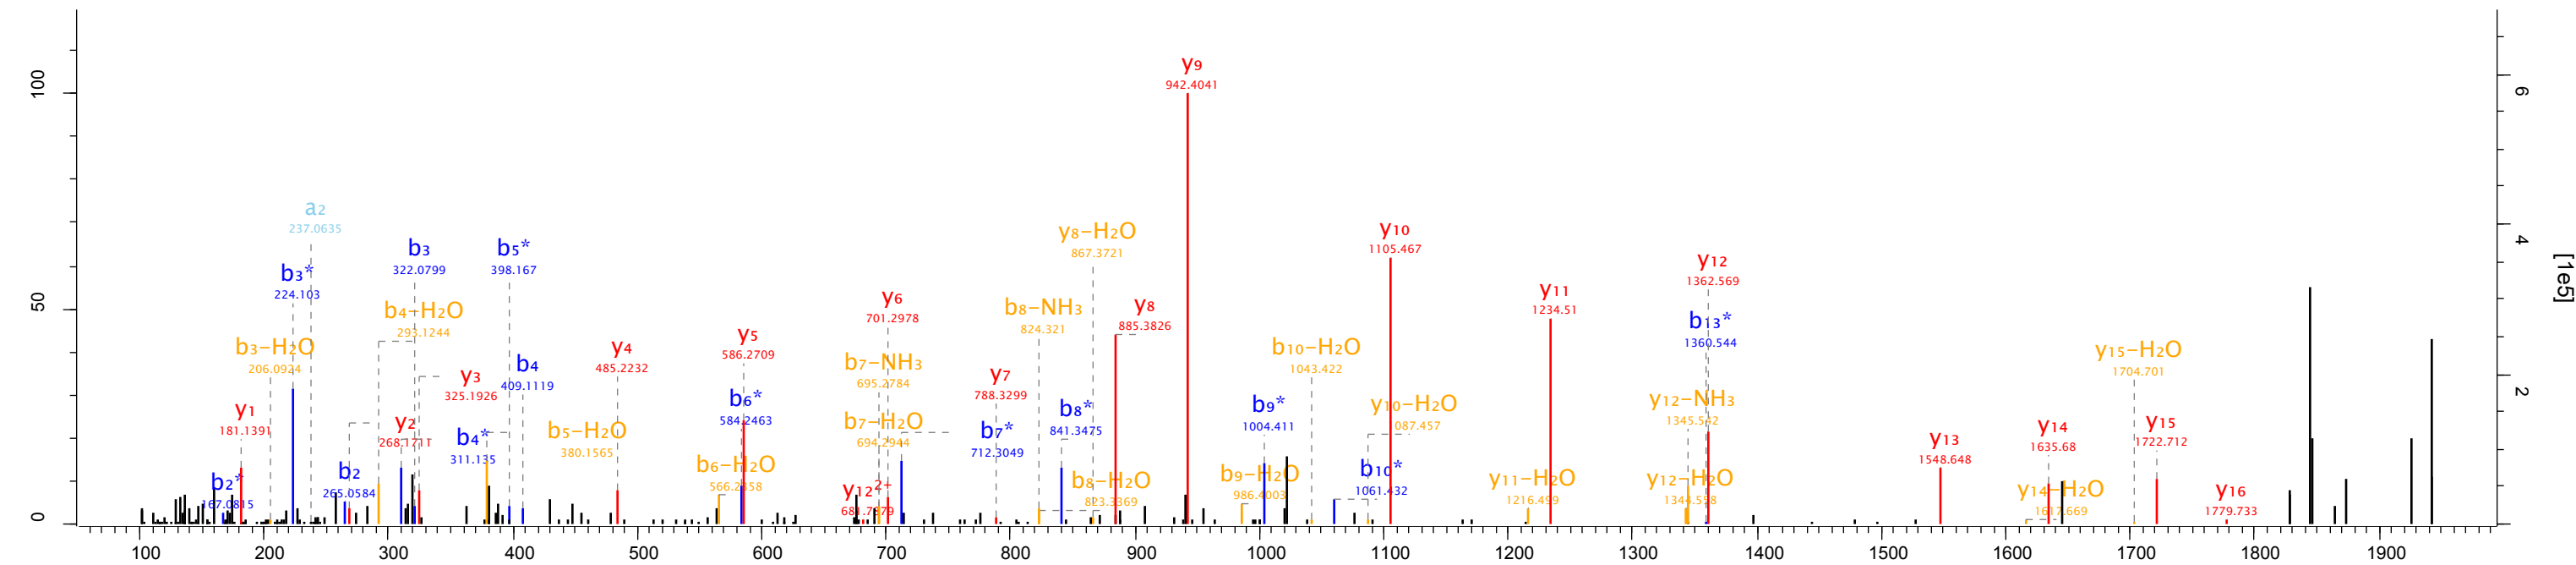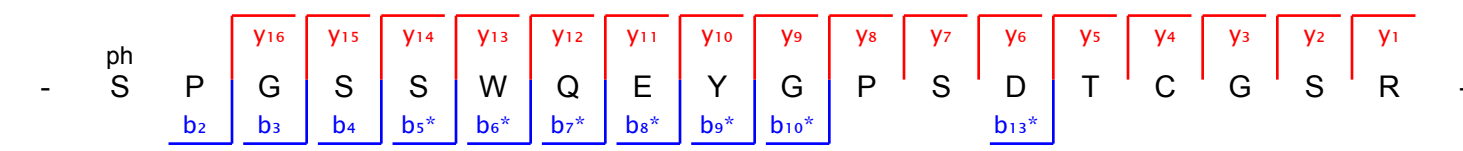

Raw file: 20150814\_A375SR\_Phospho\_BR2\_03  
 Scan: 14278 Method: FTMS; HCD Score: 94.78 m/z: 647.3 Gene names: DAB2

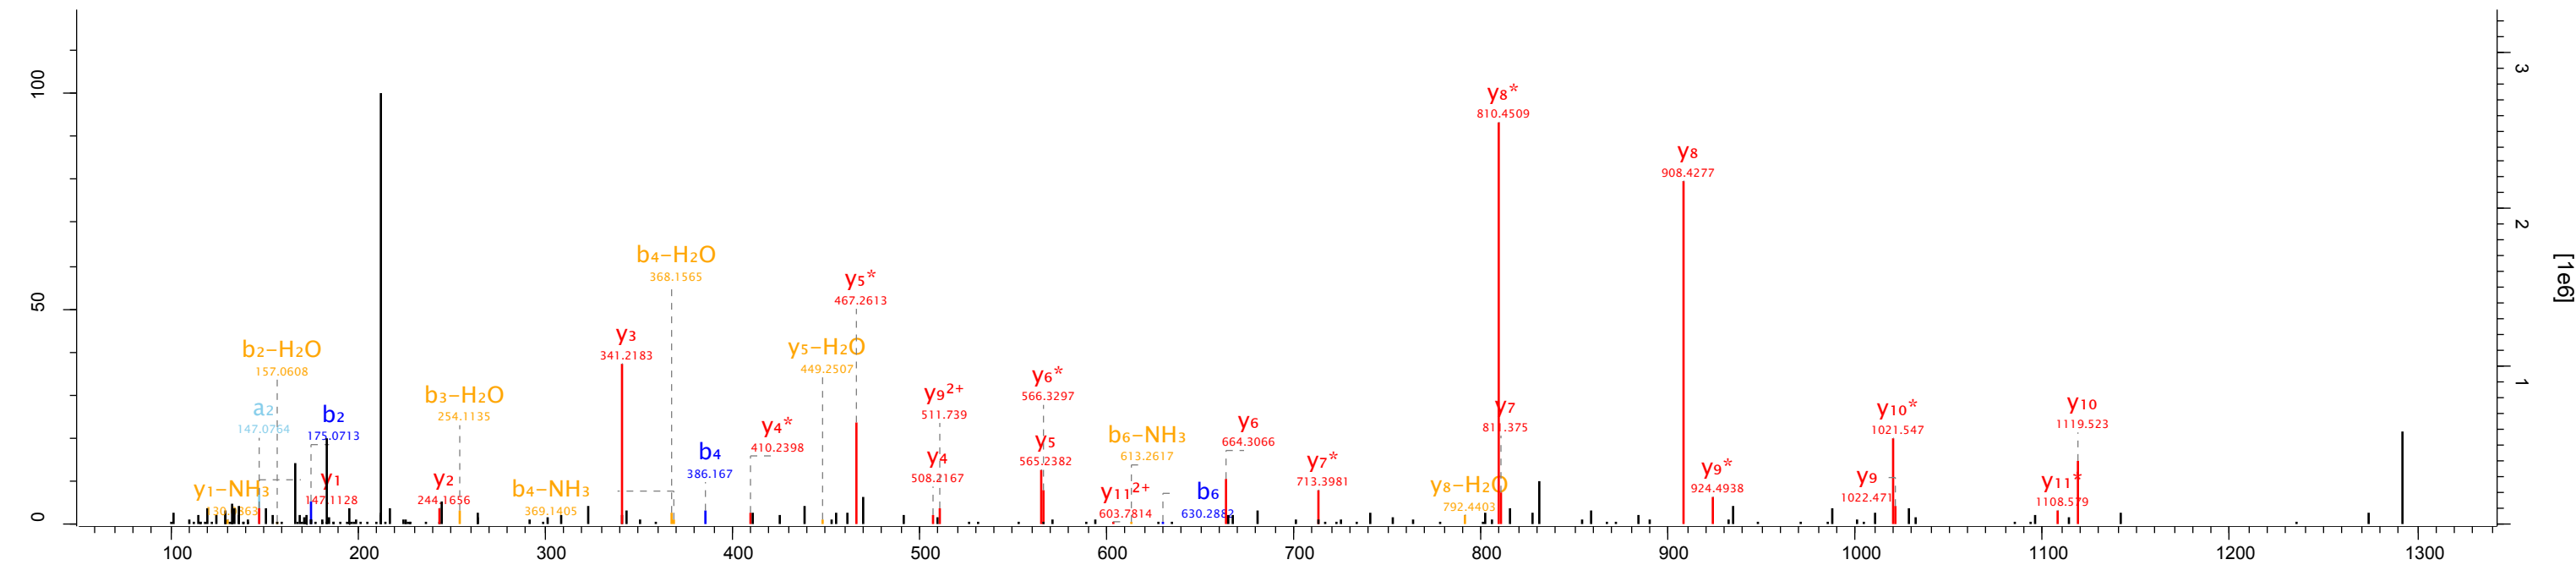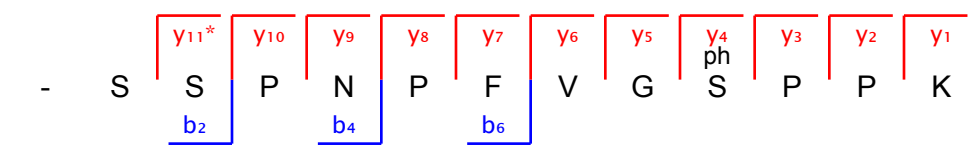



Raw file 20150814\_A375SR\_Phospho\_BR2\_03 Scan 14548 Method FTMS; HCD Score 117.02 m/z 492.71 Gene names ANLN

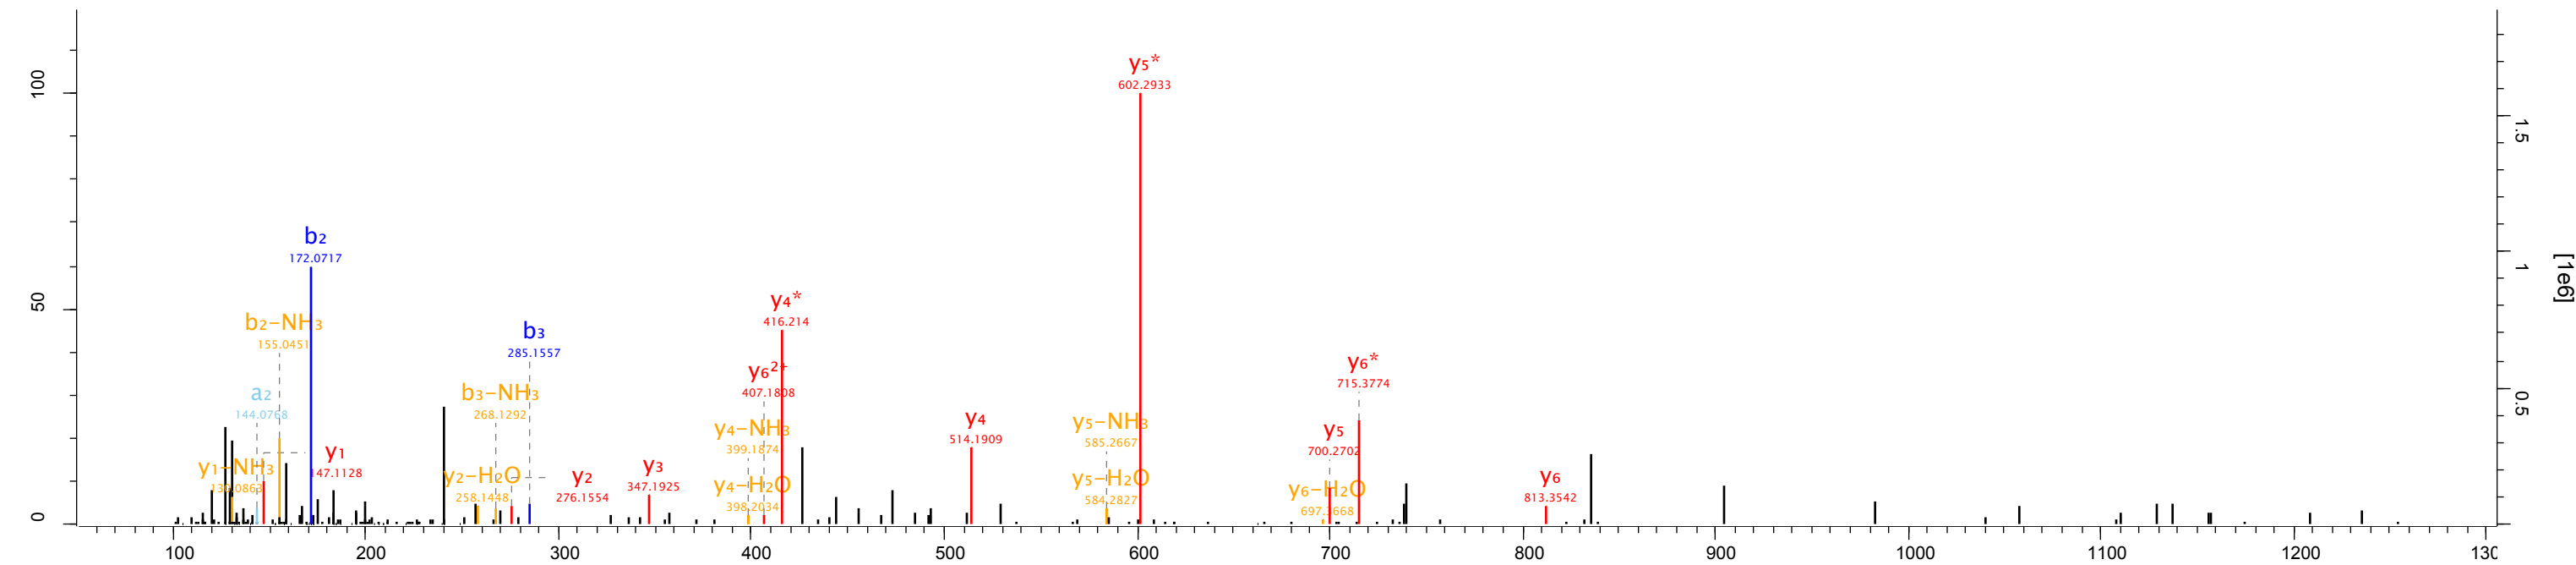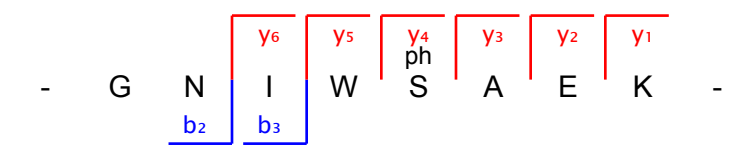

Raw file 20150814\_A375SR\_Phospho\_BR2\_03 Scan 15158 Method FTMS; HCD Score 151.01 m/z 922.38 Gene names FAM65A

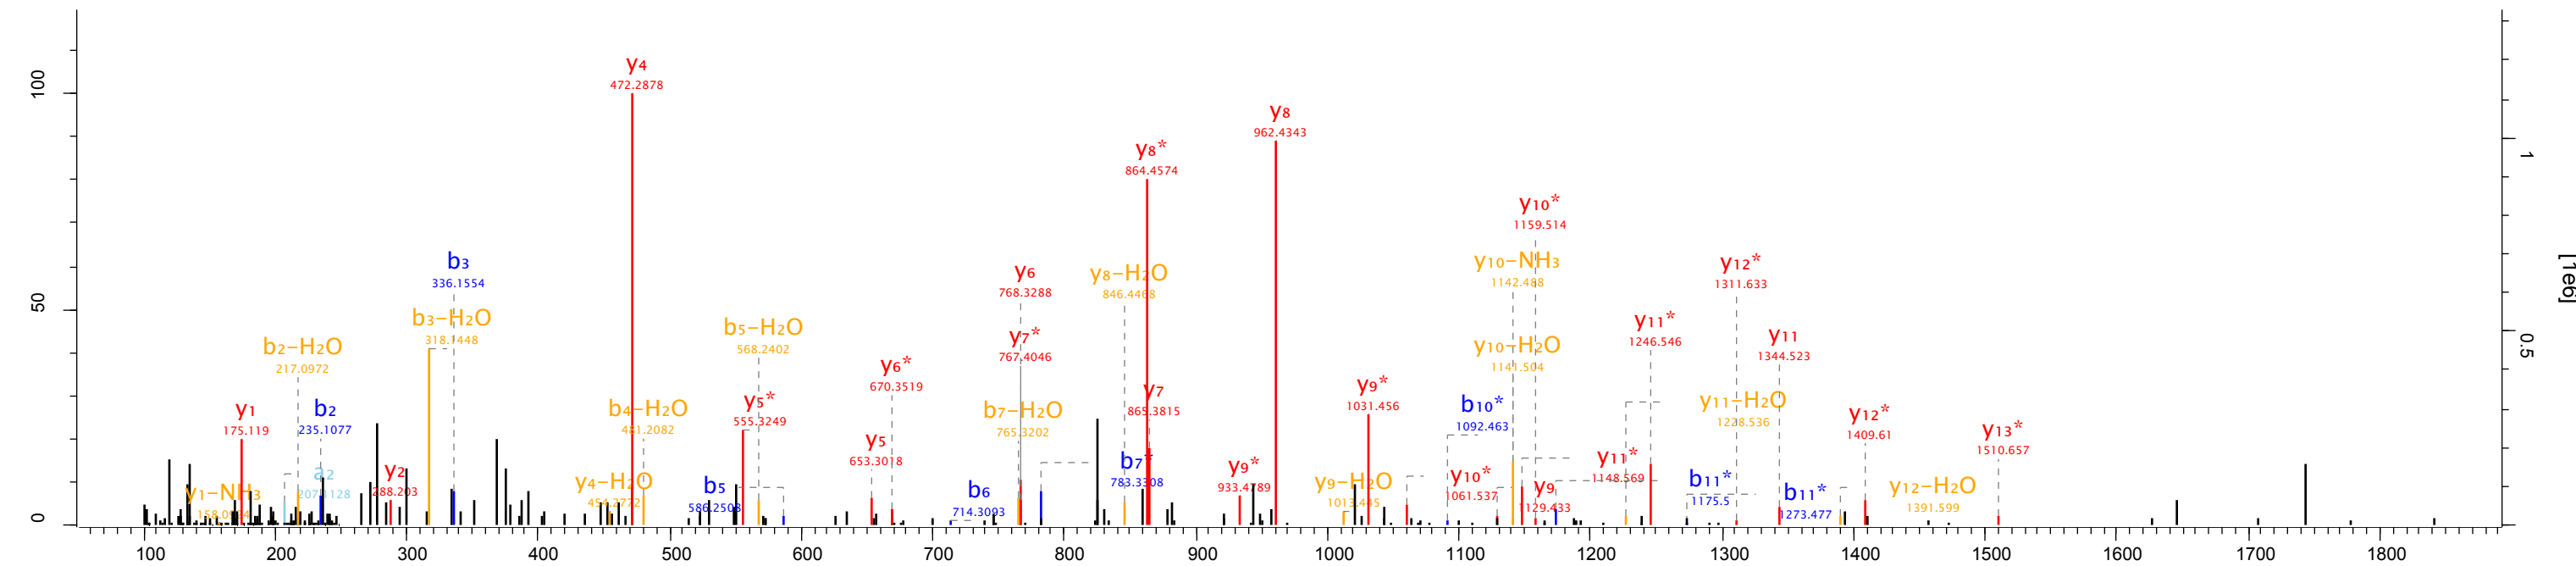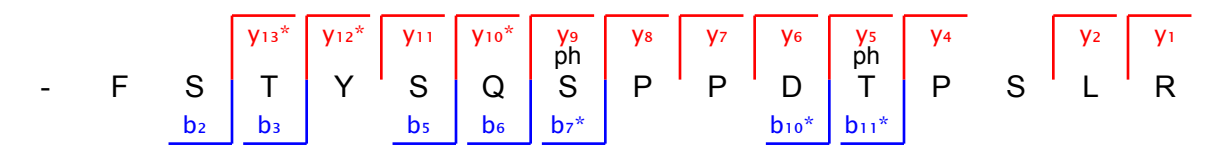

Raw file 20150814\_A375SR\_Phospho\_BR2\_03 Scan 15338 Method FTMS; HCD Score 143.04 m/z 927.85 Gene names ATRX

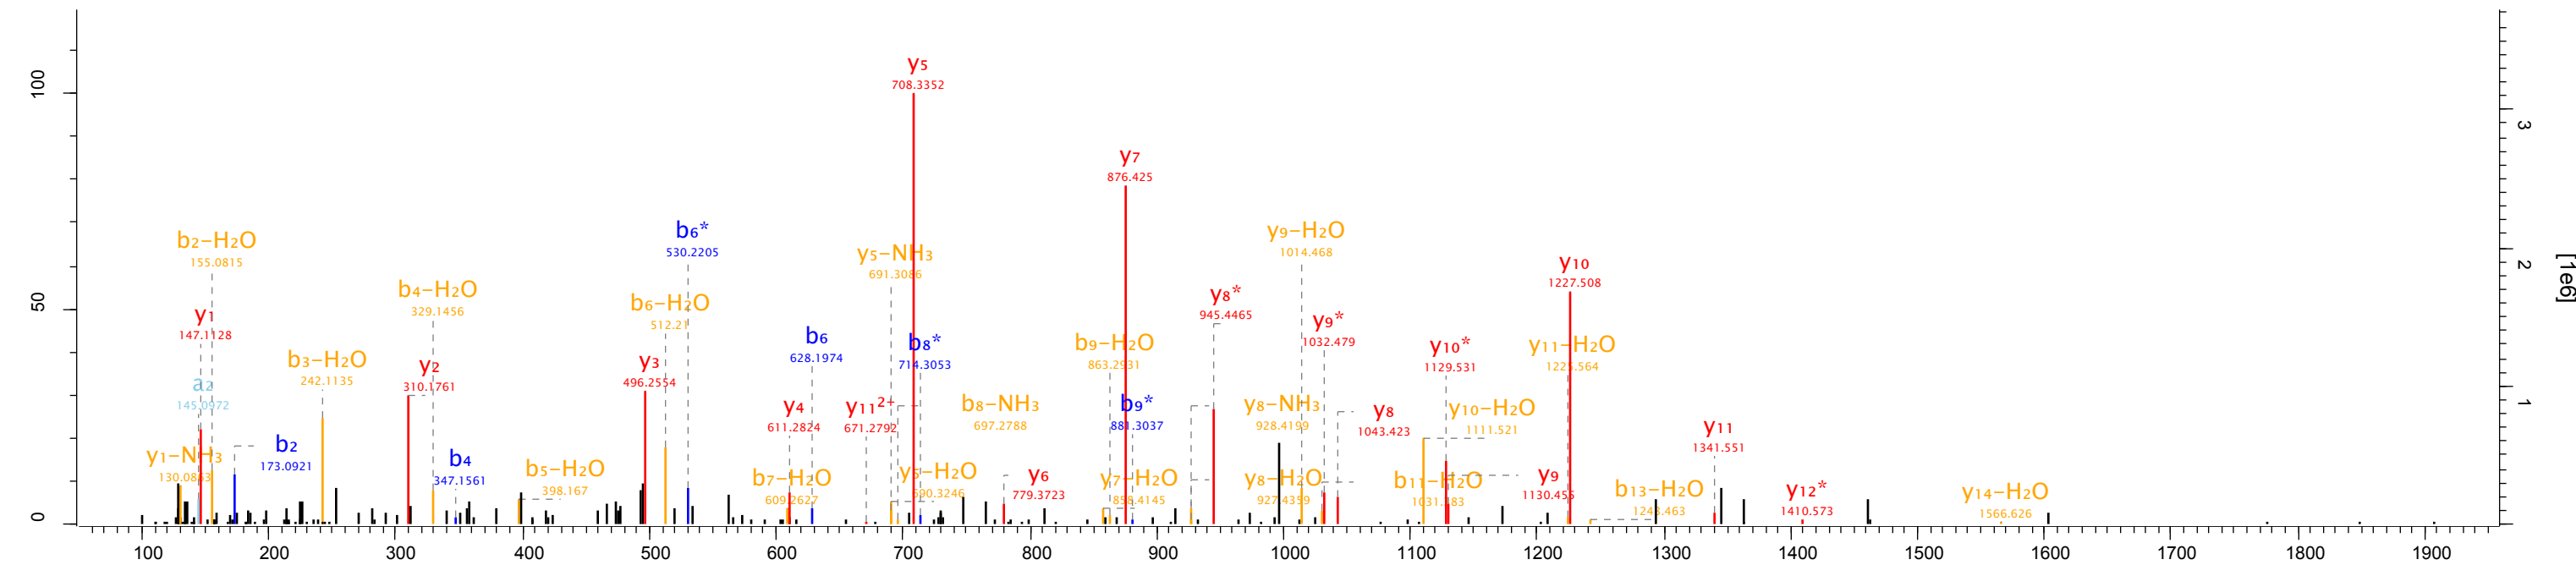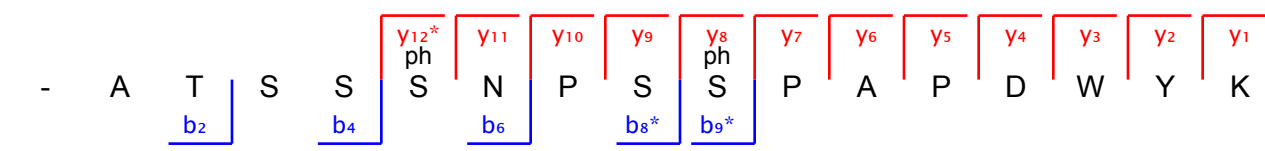

Raw file: 20150814\_A375SR\_Phospho\_BR2\_03  
 Scan: 15398 Method: FTMS; HCD Score: 56.11 m/z: 1046.13 Gene names: LARP4B

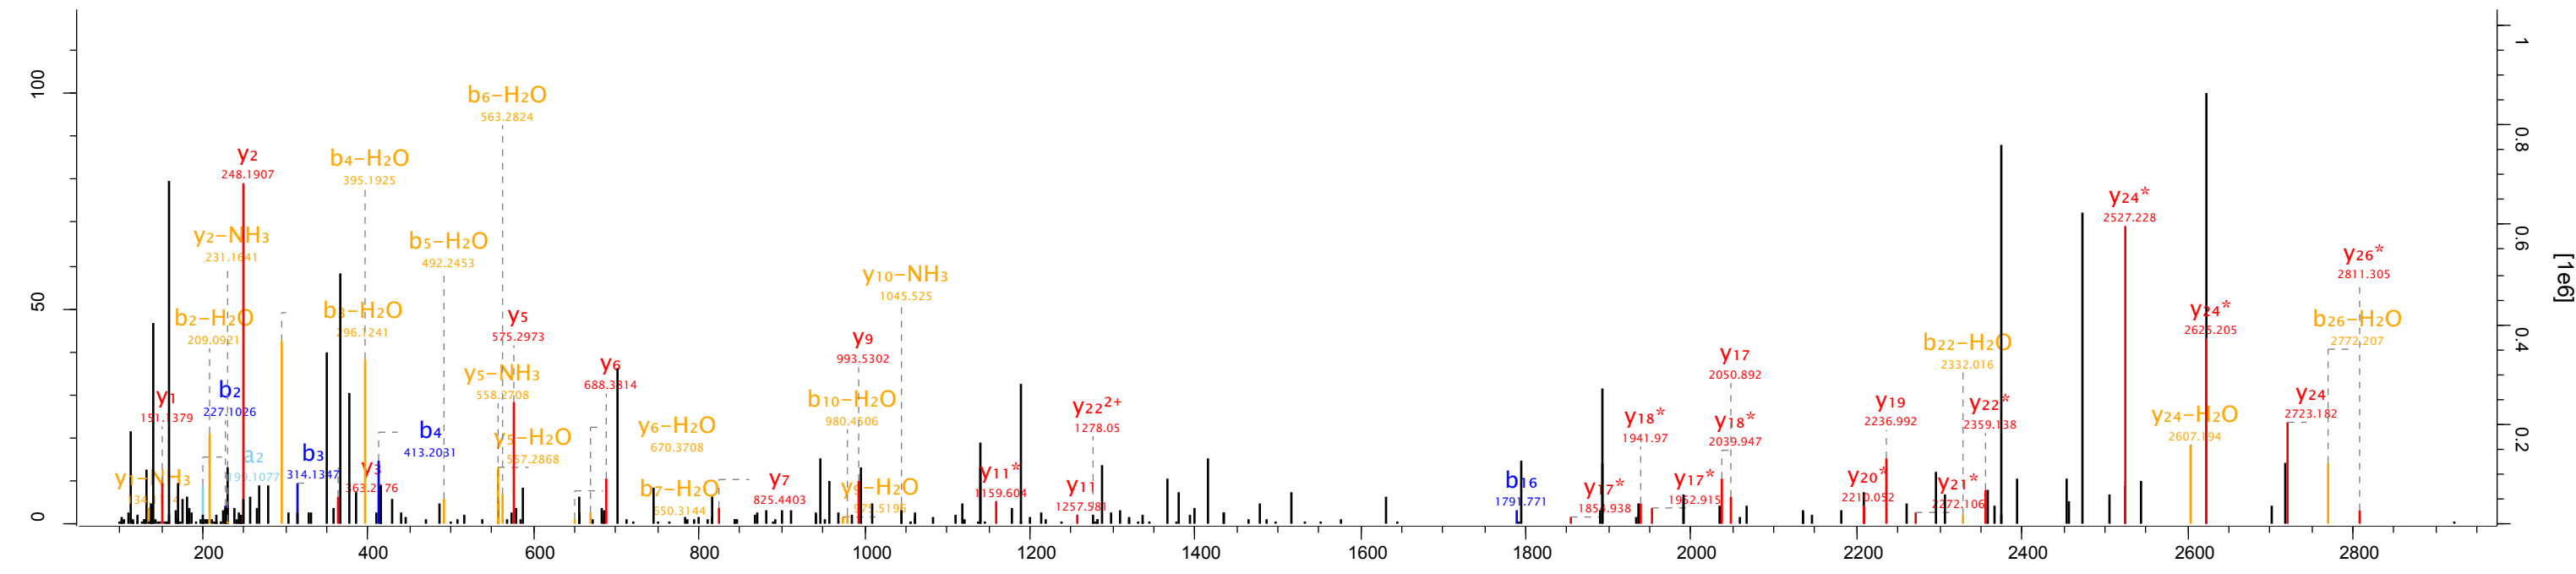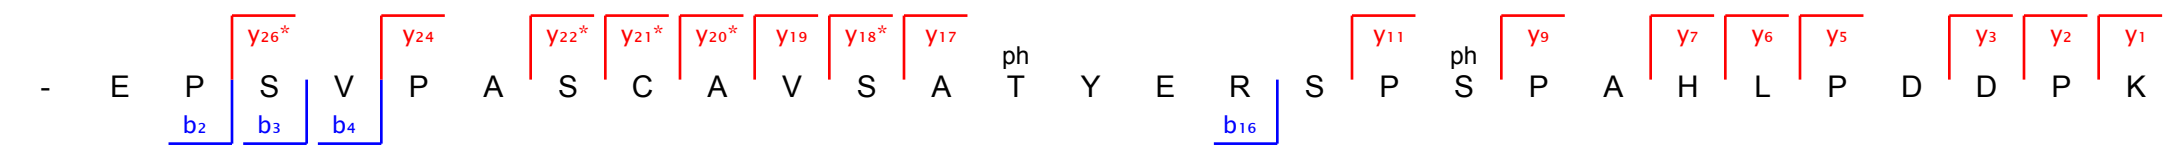

Raw file: 20150814\_A375SR\_Phospho\_BR2\_03  
 Scan: 15428 Method: FTMS; HCD Score: 227.4 m/z: 900.92 Gene names: ZNF316

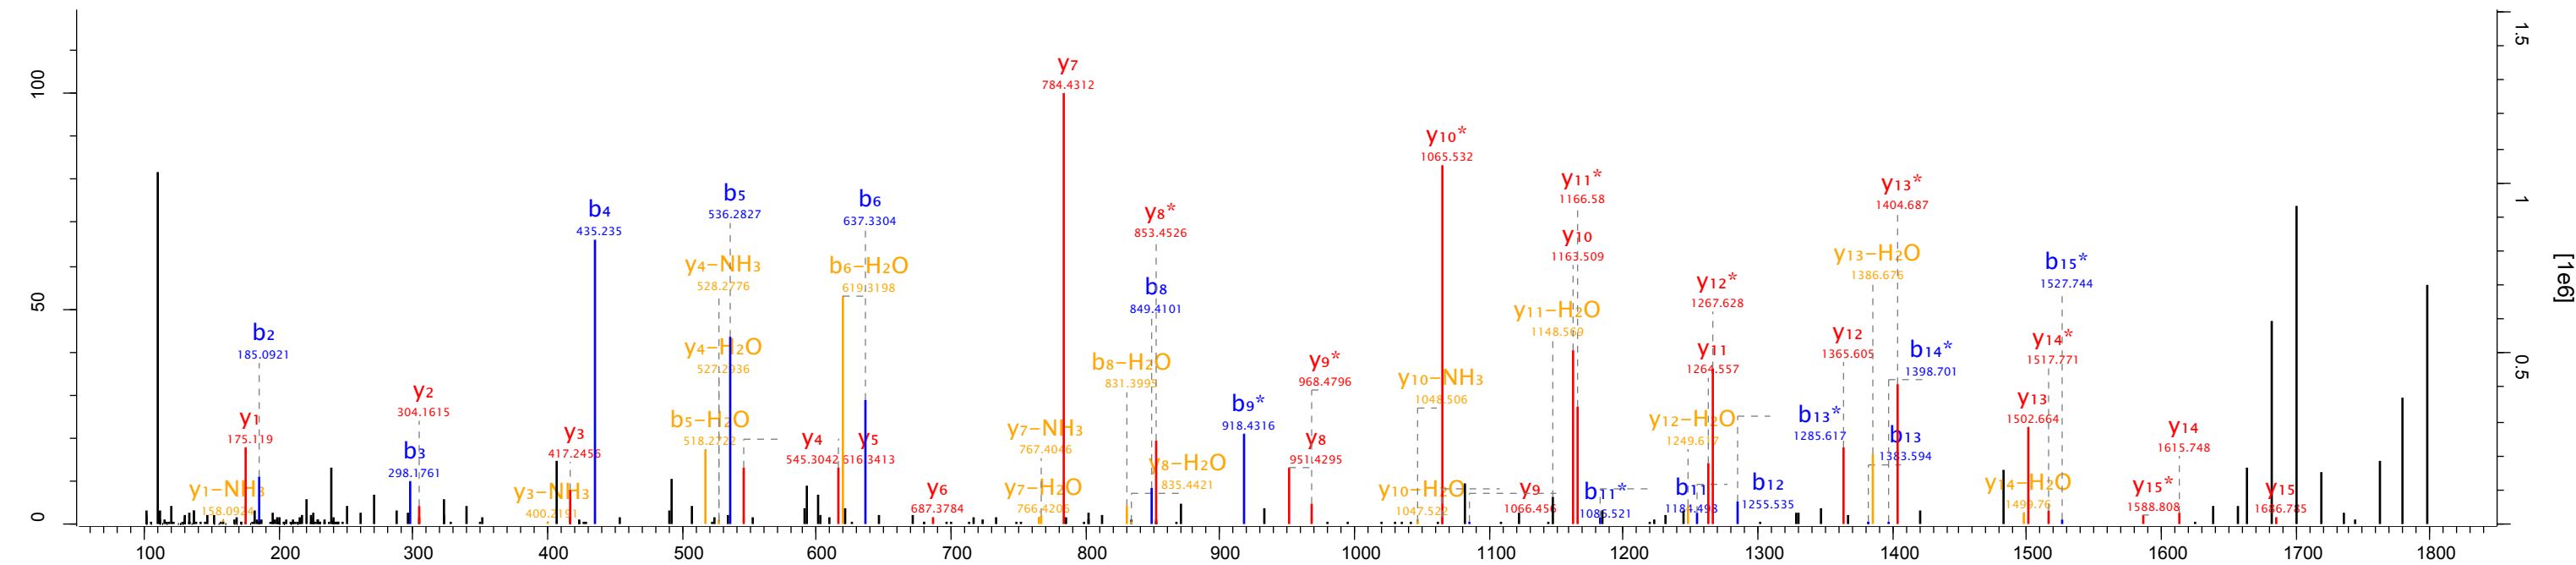

ac - A A L H T T P D S P A A Q L E R -

Fragmentation mapping:

- Red boxes (y ions): y15 (A), y14 (L), y13 (H), y12 (T), y11 (T), y10 (P), y9 (D), y8 (S), y7 (P), y6 (A), y5 (A), y4 (Q), y3 (L), y2 (E), y1 (R)
- Blue boxes (b ions): b2 (A), b3 (L), b4 (H), b5 (T), b6 (T), b8 (D), b9\* (S), b11 (A), b12 (A), b13 (Q), b14\* (L), b15\* (E)

Raw file Scan Method Score m/z Gene names  
 20150814\_A375SR\_Phospho\_BR2\_03 15758 FTMS; HCD 122.06 725 C2orf49

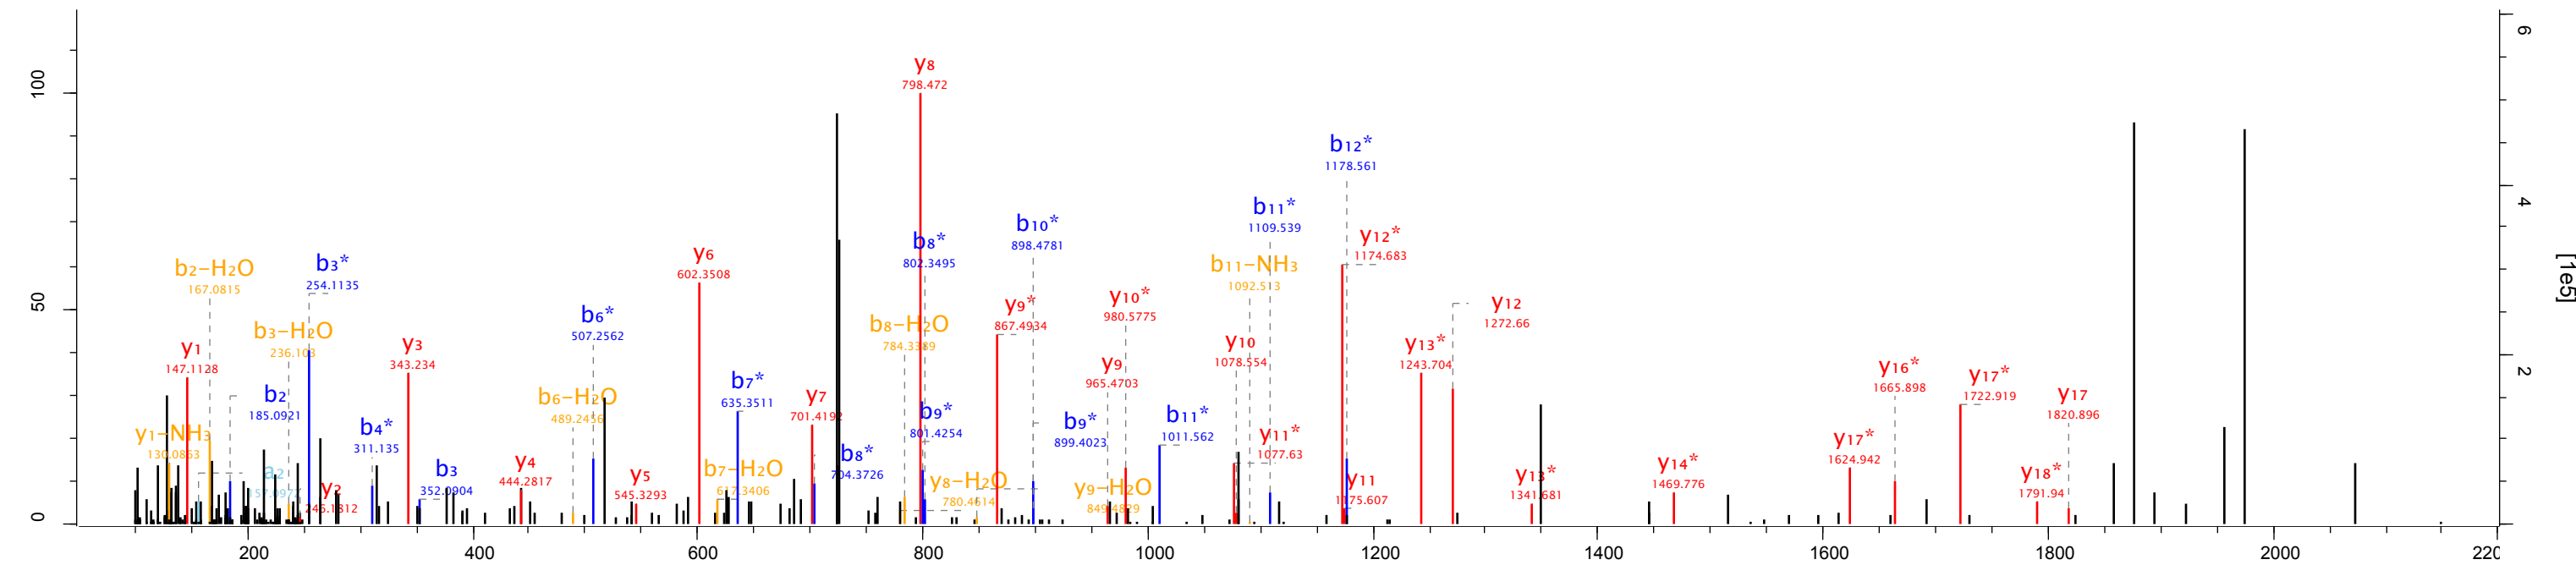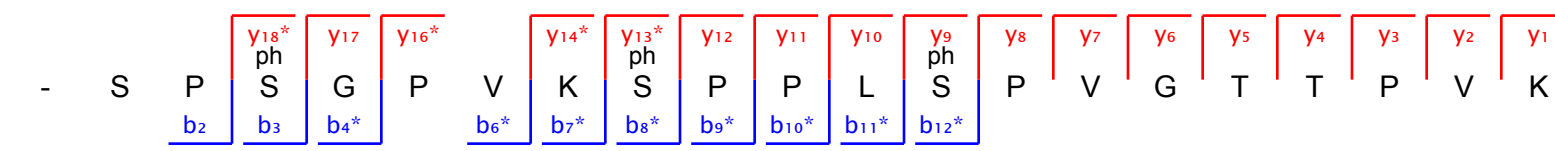

Raw file 20150814\_A375SR\_Phospho\_BR2\_03 Scan 15798 Method FTMS; HCD Score 88.31 m/z 763.78 Gene names NSUN2

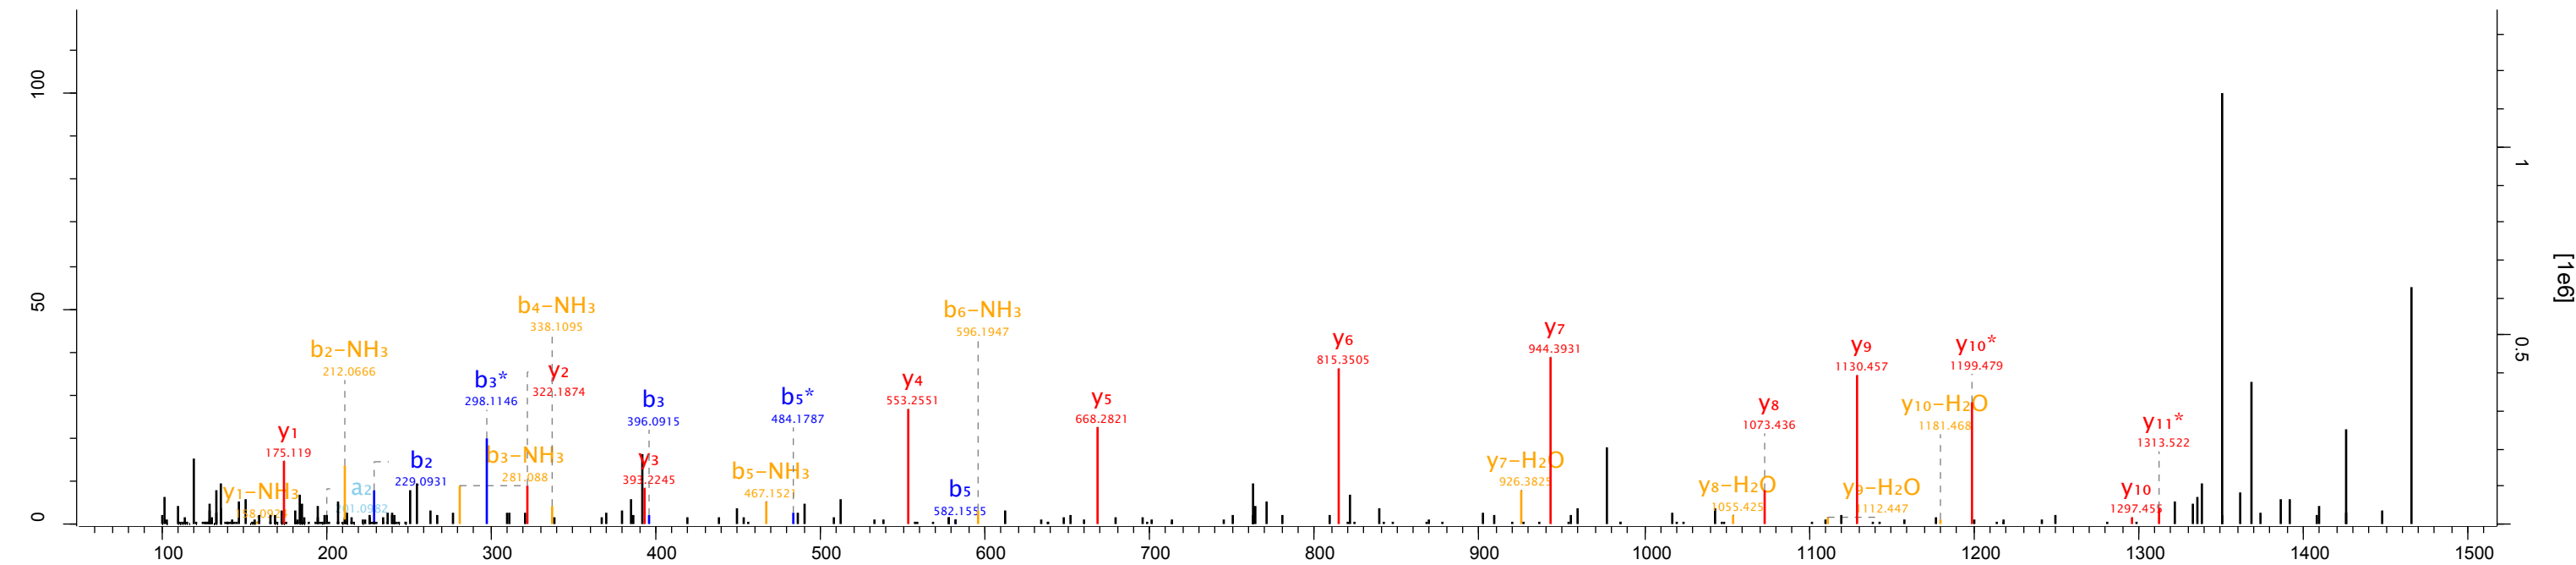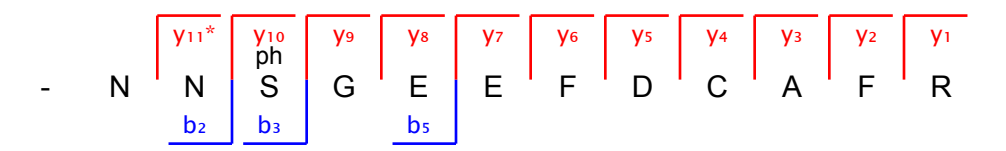

Raw file 20150814\_A375SR\_Phospho\_BR2\_03 Scan 16218 Method FTMS; HCD Score 121.09 m/z 905.1 Gene names INO80D

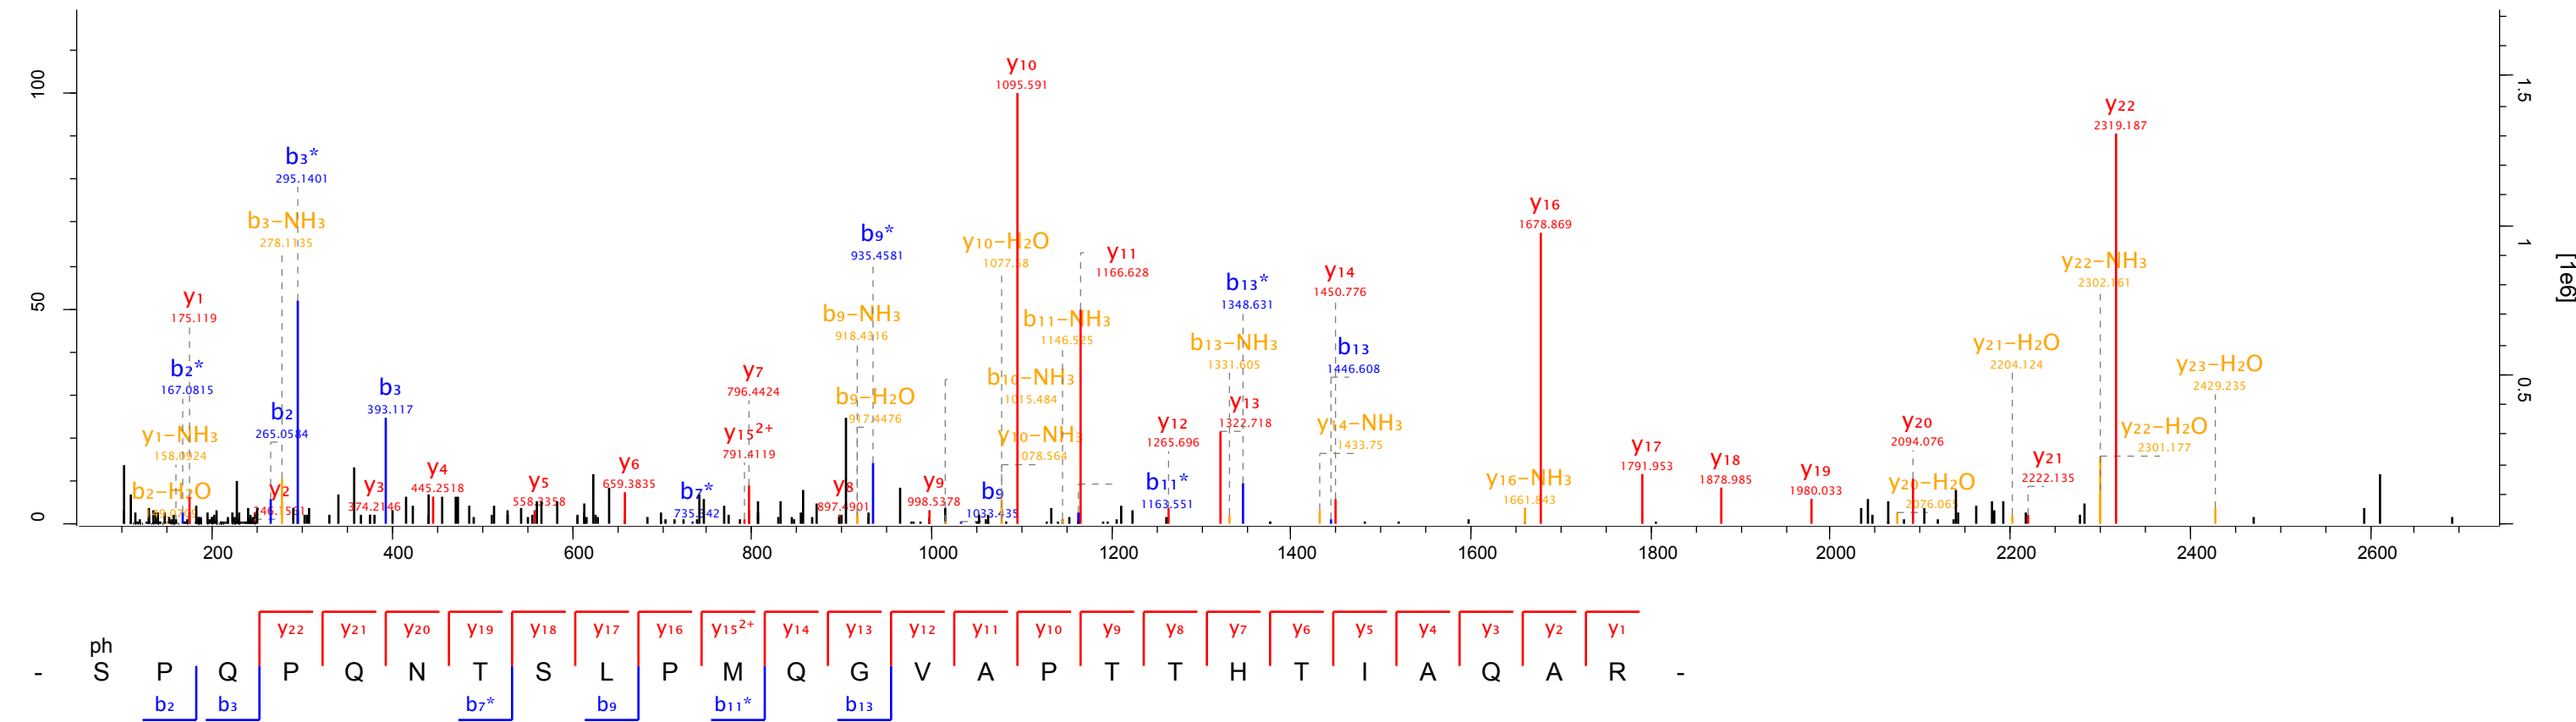



Raw file: 20150814\_A375SR\_Phospho\_BR2\_03  
 Scan: 16398 Method: FTMS; HCD Score: 247.13 m/z: 1249.48 Gene names: BOD1L1

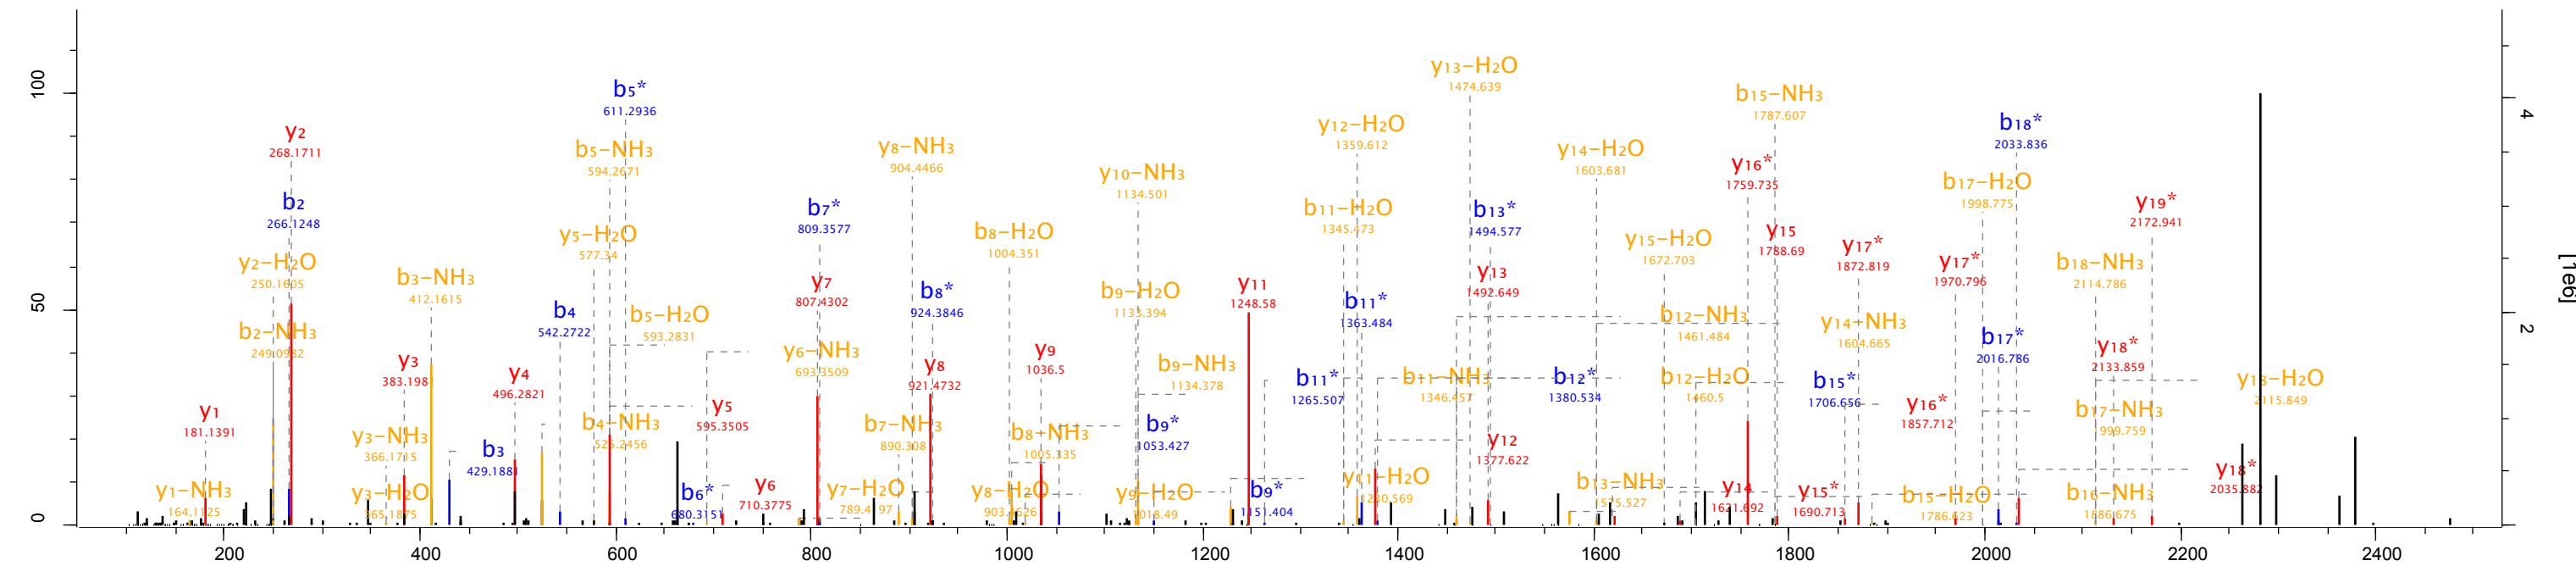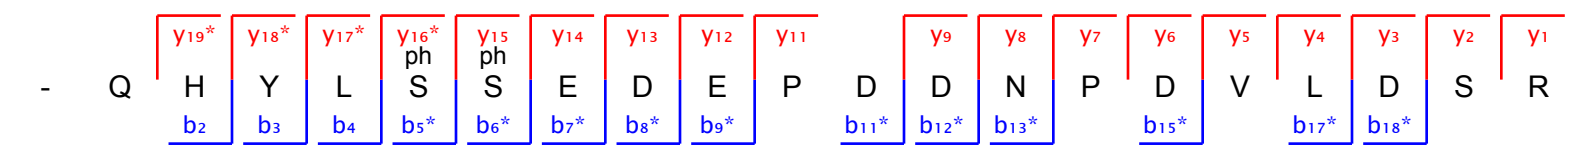

Raw file Scan Method Score m/z Gene names  
 20150814\_A375SR\_Phospho\_BR2\_03 16778 FTMS; HCD 249.96 1252.02 USP20

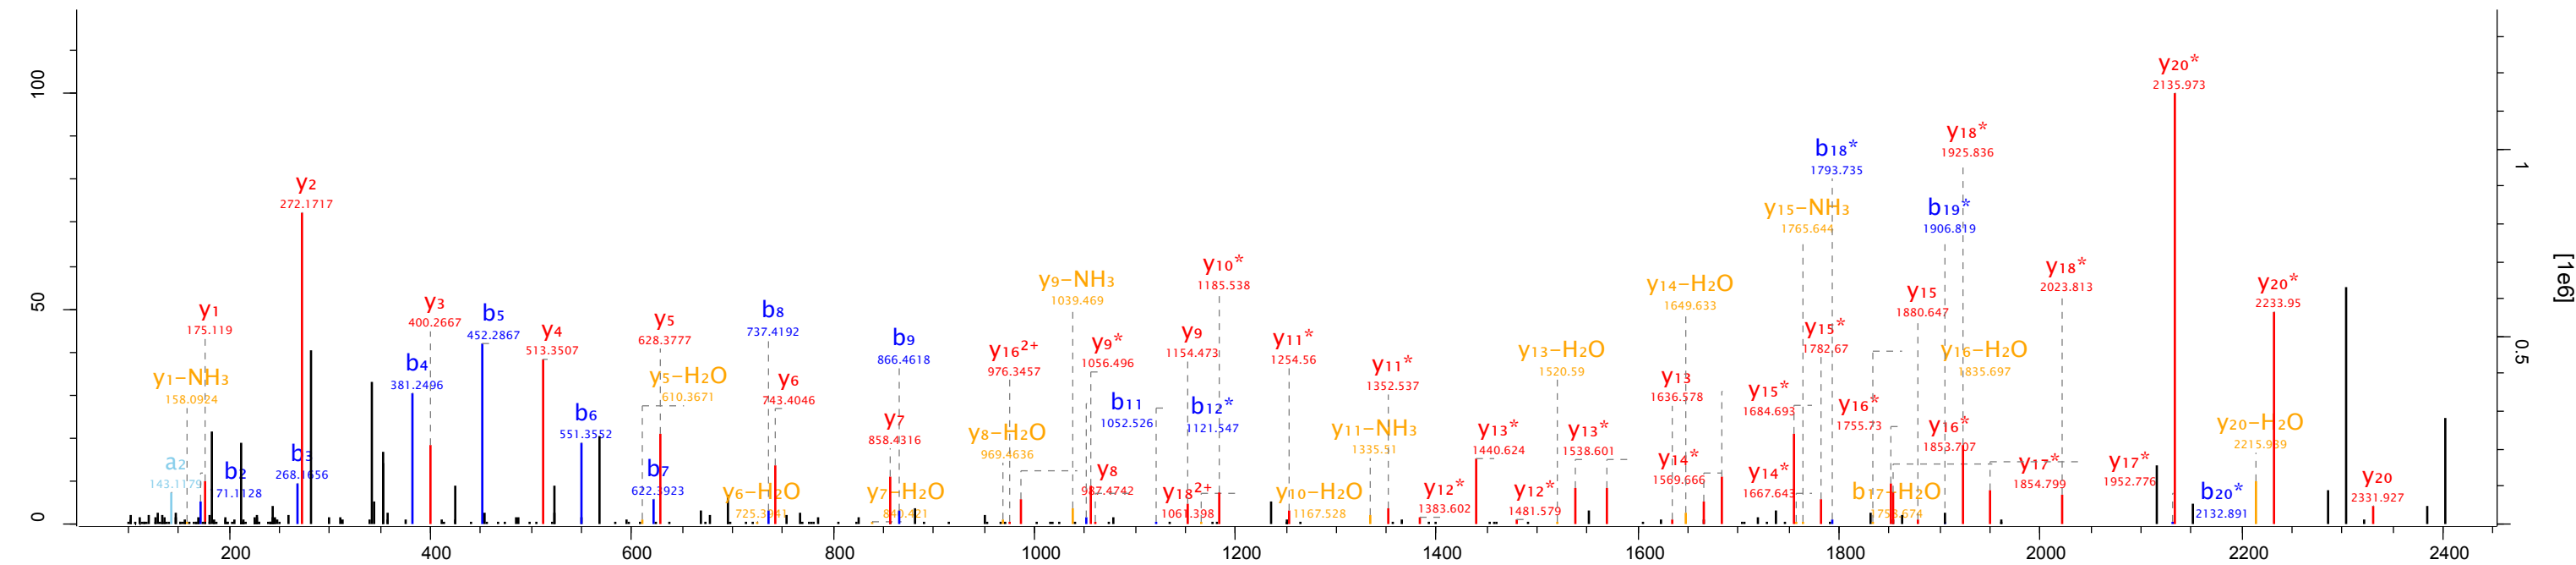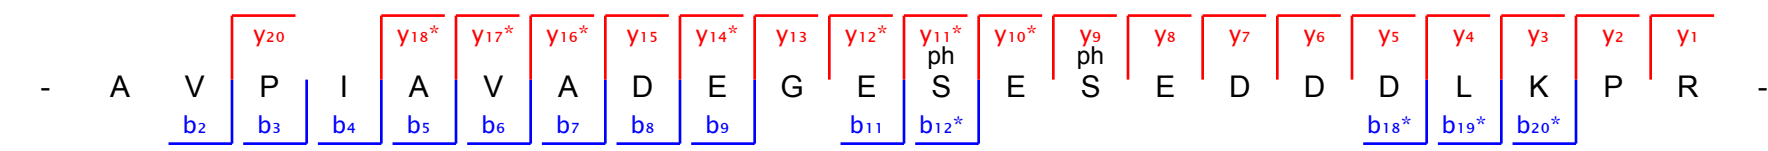

Raw file: 20150814\_A375SR\_Phospho\_BR2\_03  
 Scan: 17138 Method: FTMS; HCD Score: 199.41 m/z: 865.87 Gene names: DPF2

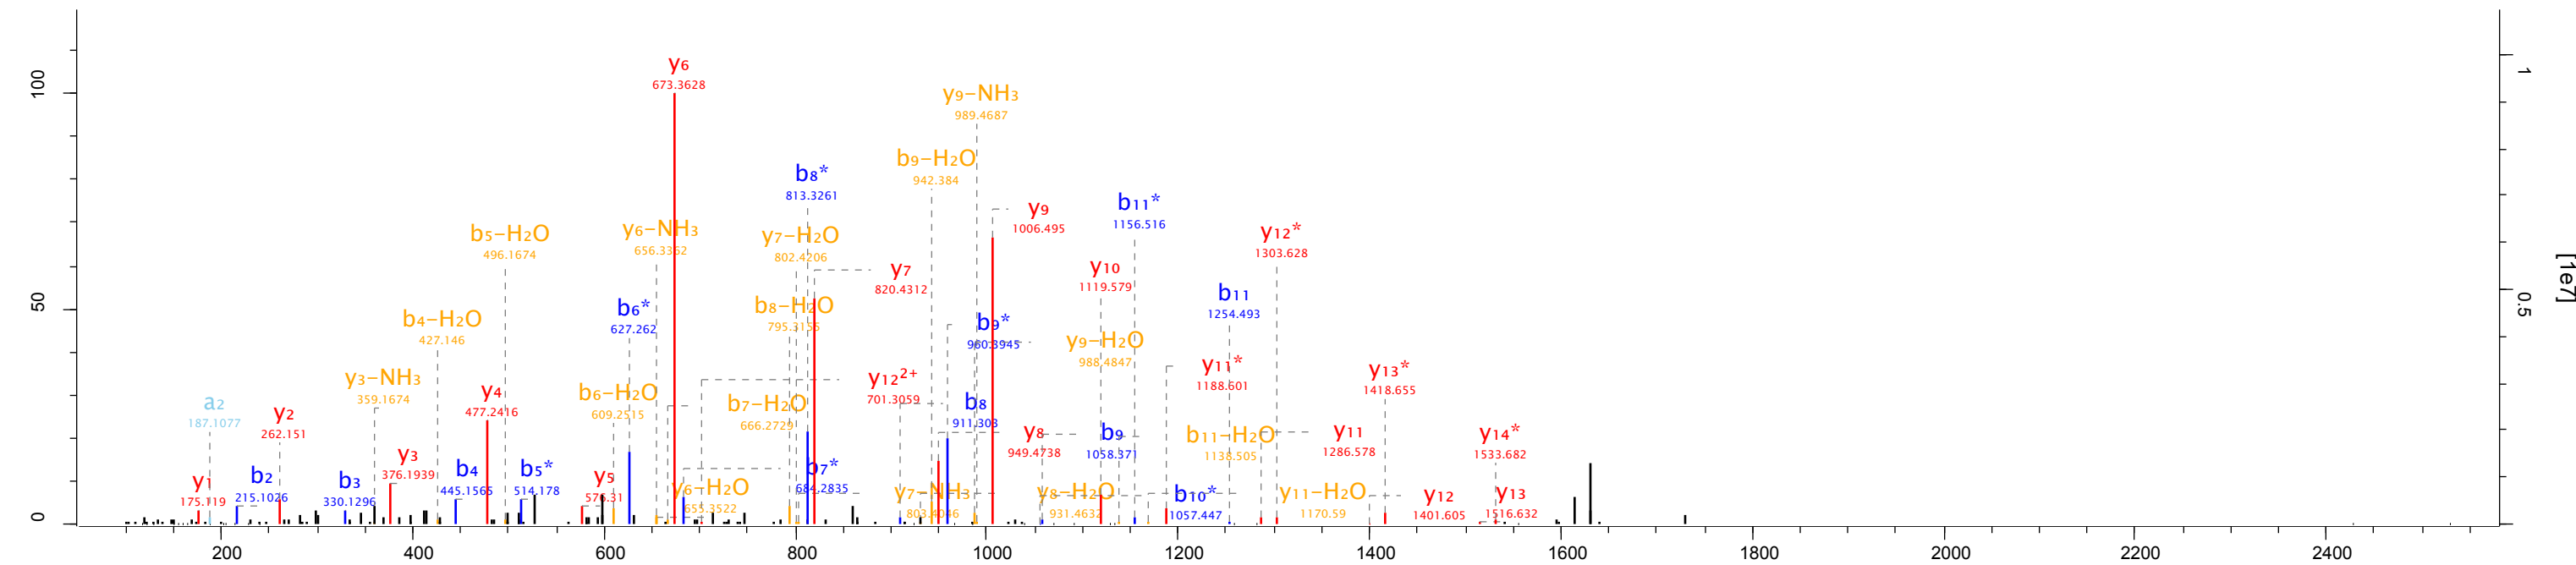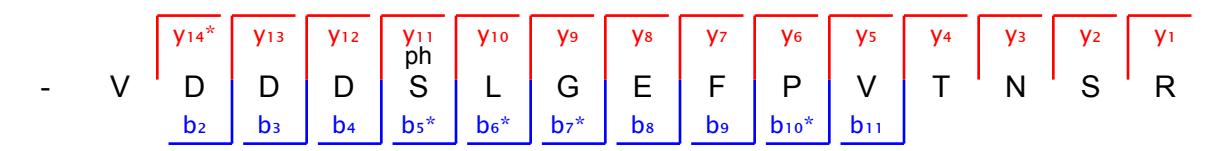

Raw file 20150814\_A375SR\_Phospho\_BR2\_03 Scan 17178 Method FTMS; HCD Score 124.57 m/z 1212.97 Gene names CTPS1

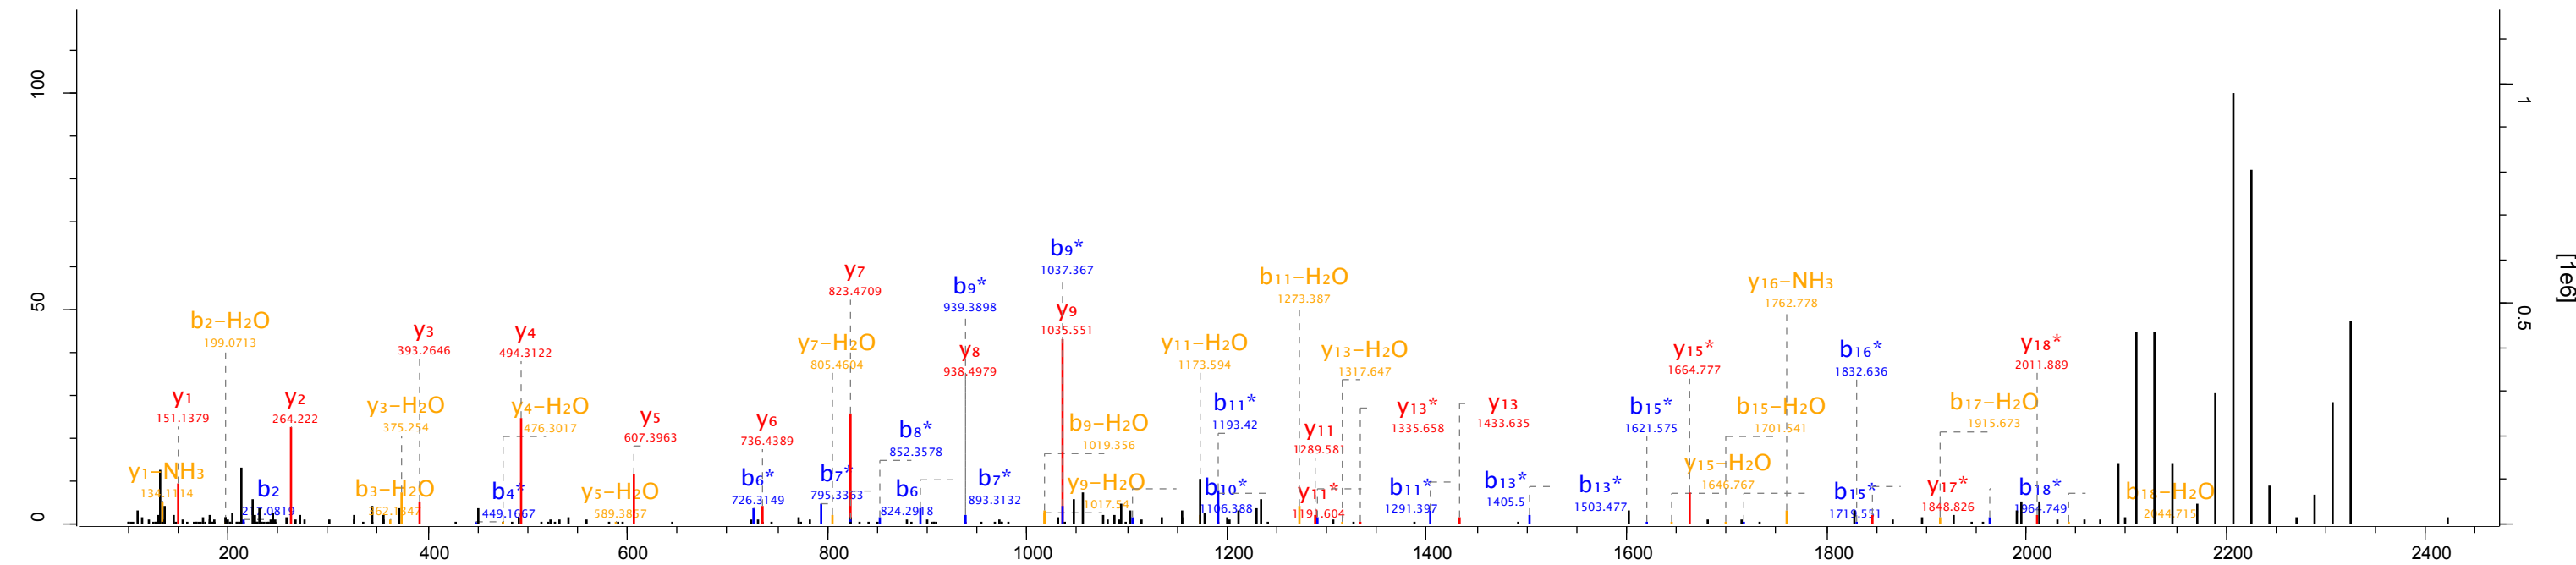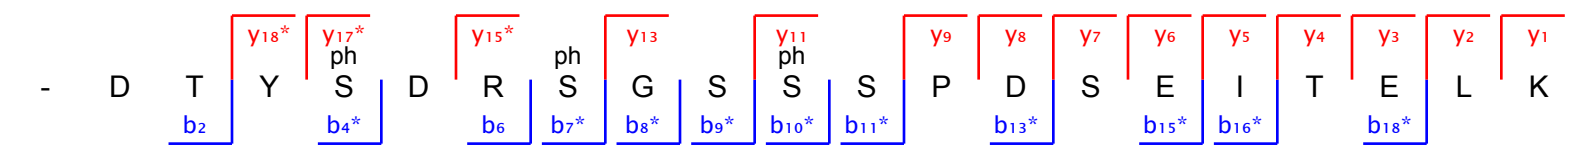

Raw file: 20150814\_A375SR\_Phospho\_BR2\_03  
 Scan: 17228 Method: FTMS; HCD Score: 83.8 m/z: 985.1 Gene names: FOXK1

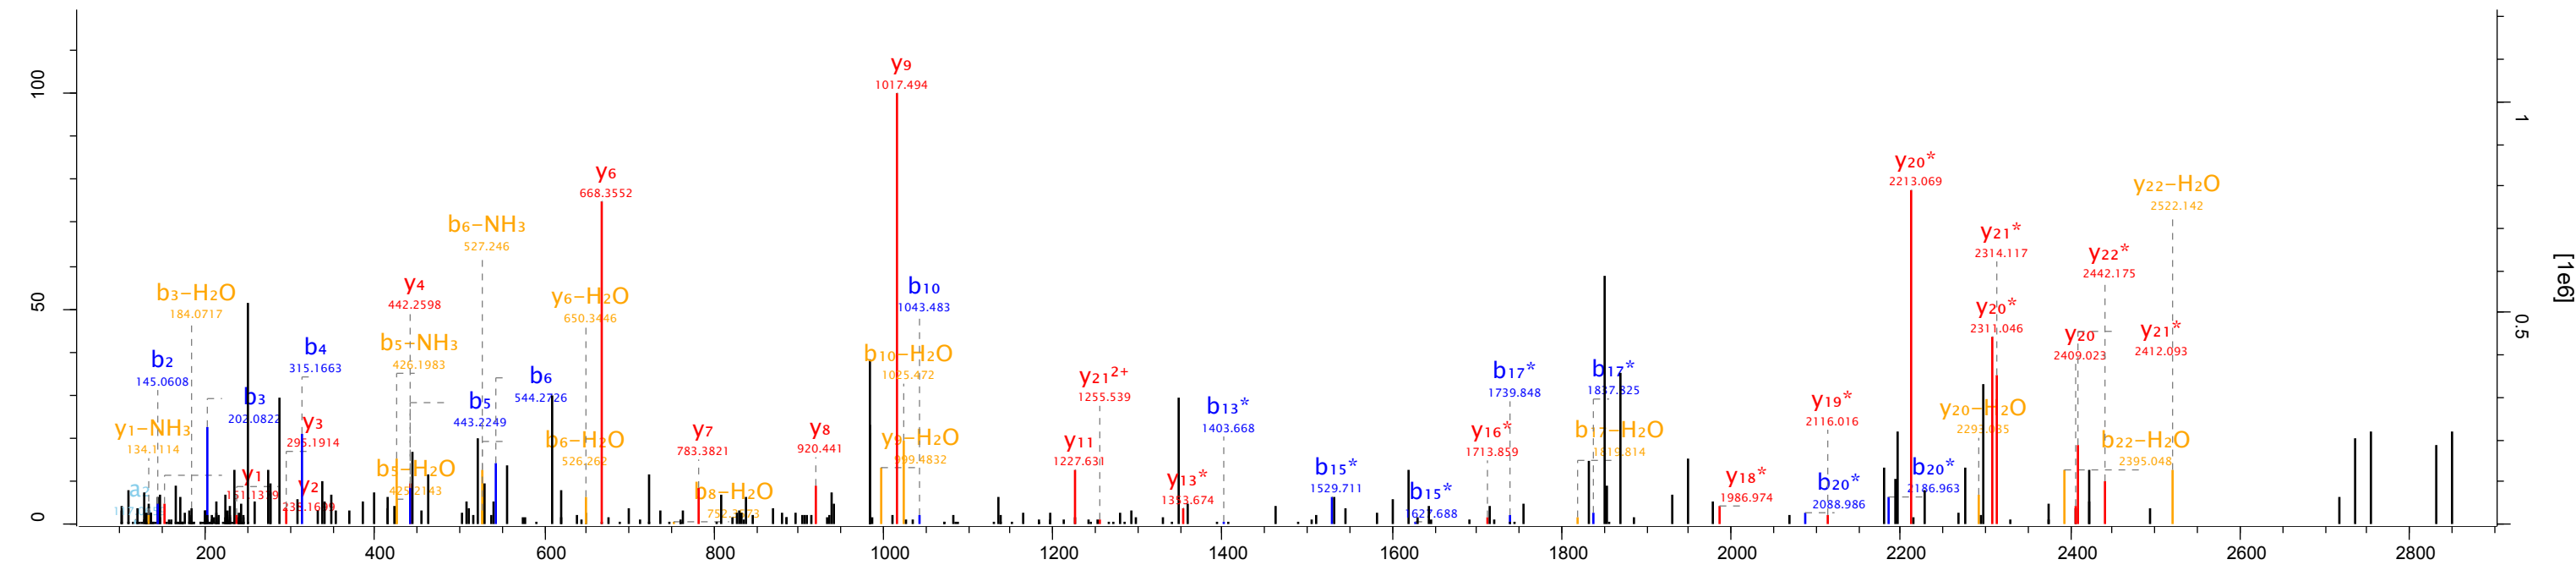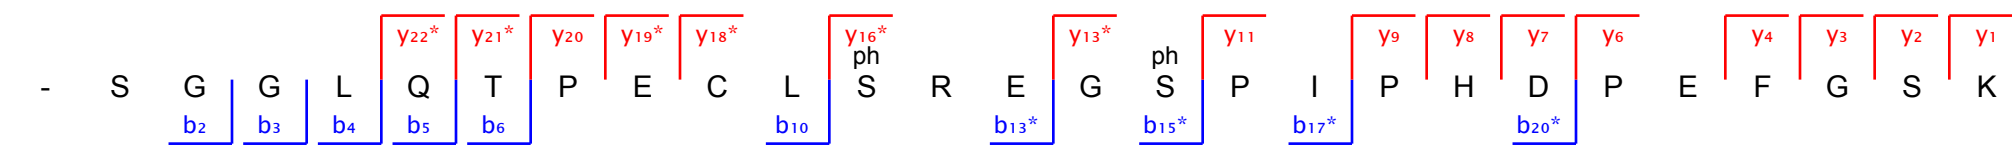

Raw file 20150814\_A375SR\_Phospho\_BR2\_03 Scan 17738 Method FTMS; HCD Score 155.8 m/z 597.81 Gene names MTMR12

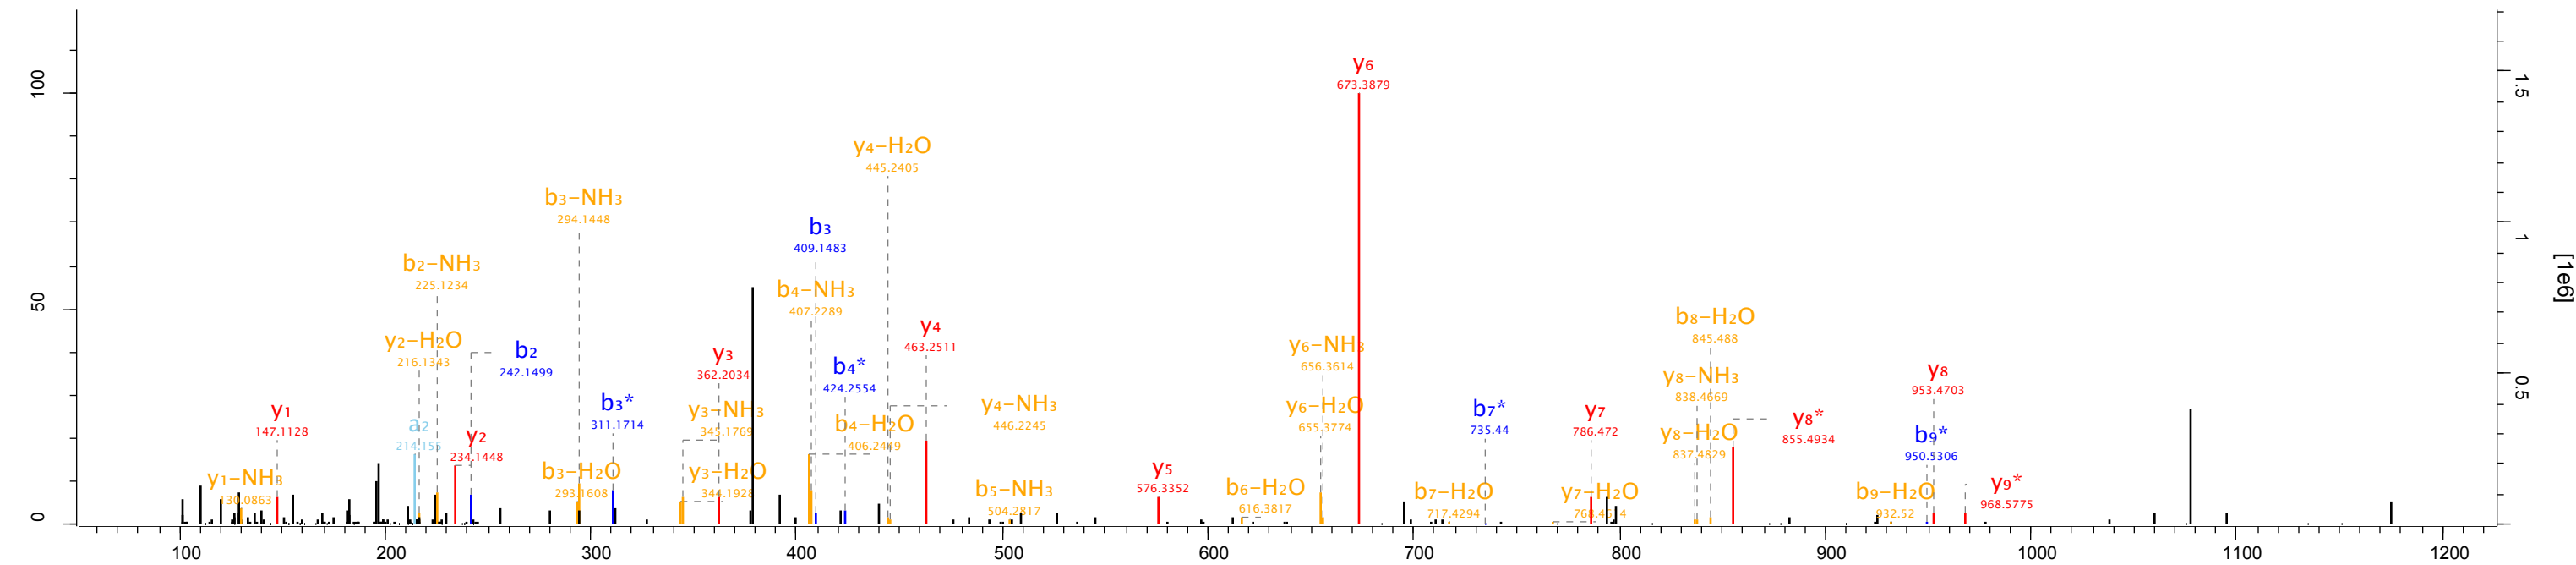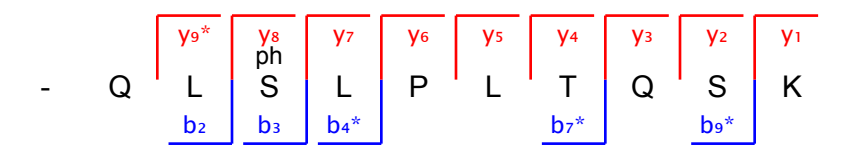

Raw file Scan Method Score m/z Gene names  
 20150814\_A375SR\_Phospho\_BR2\_03 17768 FTMS; HCD 116.39 743.83 PLEKHA4

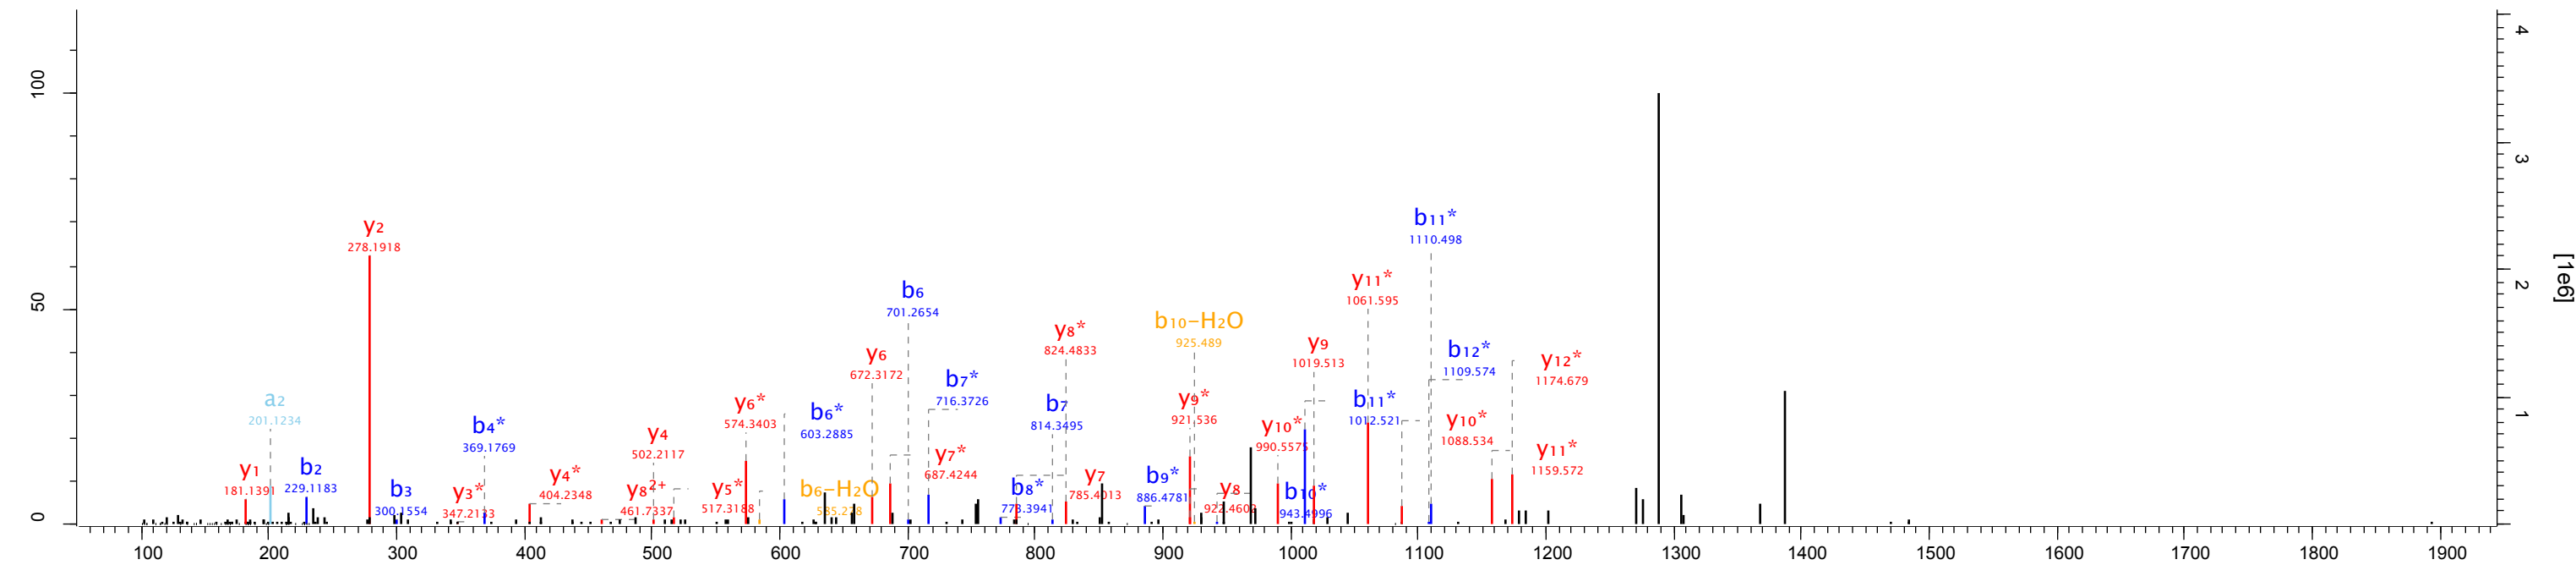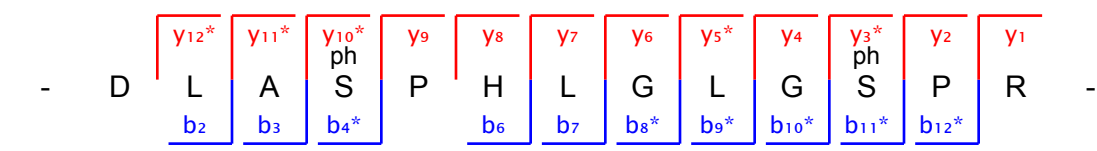

Raw file Scan Method Score m/z Gene names  
 20150814\_A375SR\_Phospho\_BR2\_03 18298 FTMS; HCD 146.67 843.75 NEDD4L

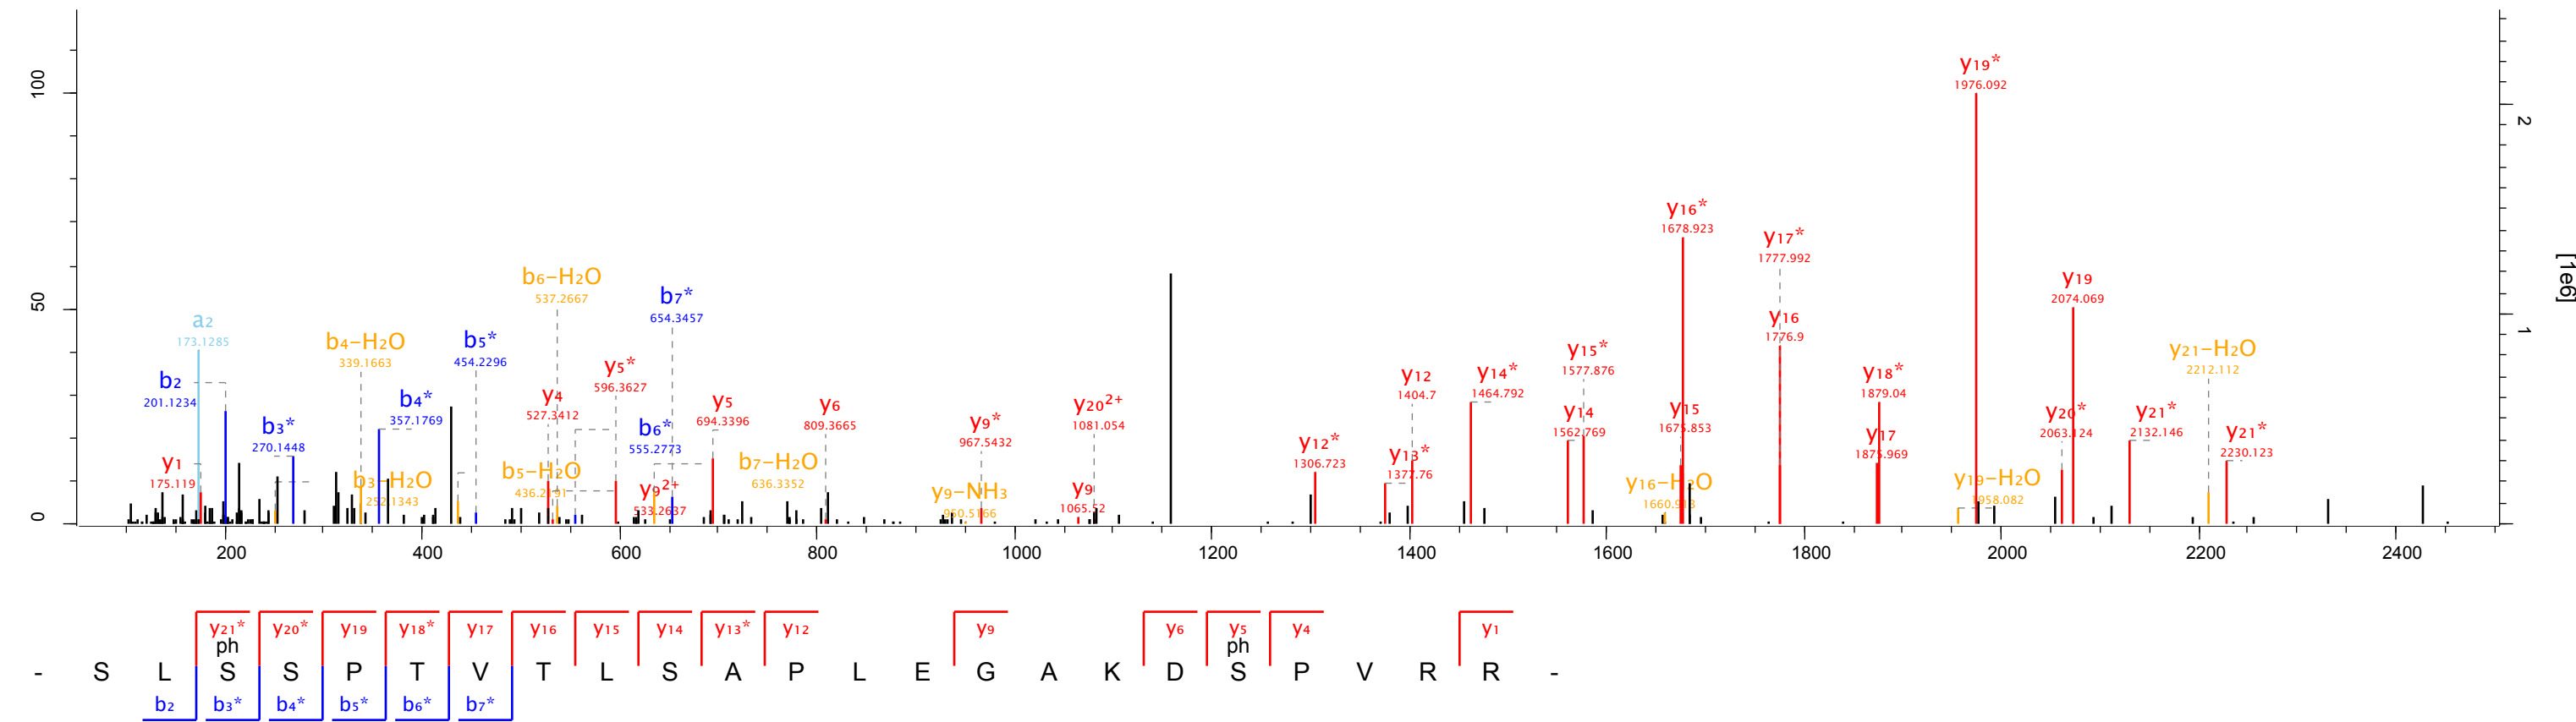

- S L S S P T V T L S A P L E G A K D S P V R R -  
 b2 b3\* b4\* b5\* b6\* b7\* y21\* ph y20\* y19 y18\* y17 y16 y15 y14 y13\* y12 y9 y6 y5 ph y4 y1



Raw file Scan Method Score m/z Gene names  
 20150814\_A375SR\_Phospho\_BR2\_03 18398 FTMS; HCD 62.01 615.74 SRRM2

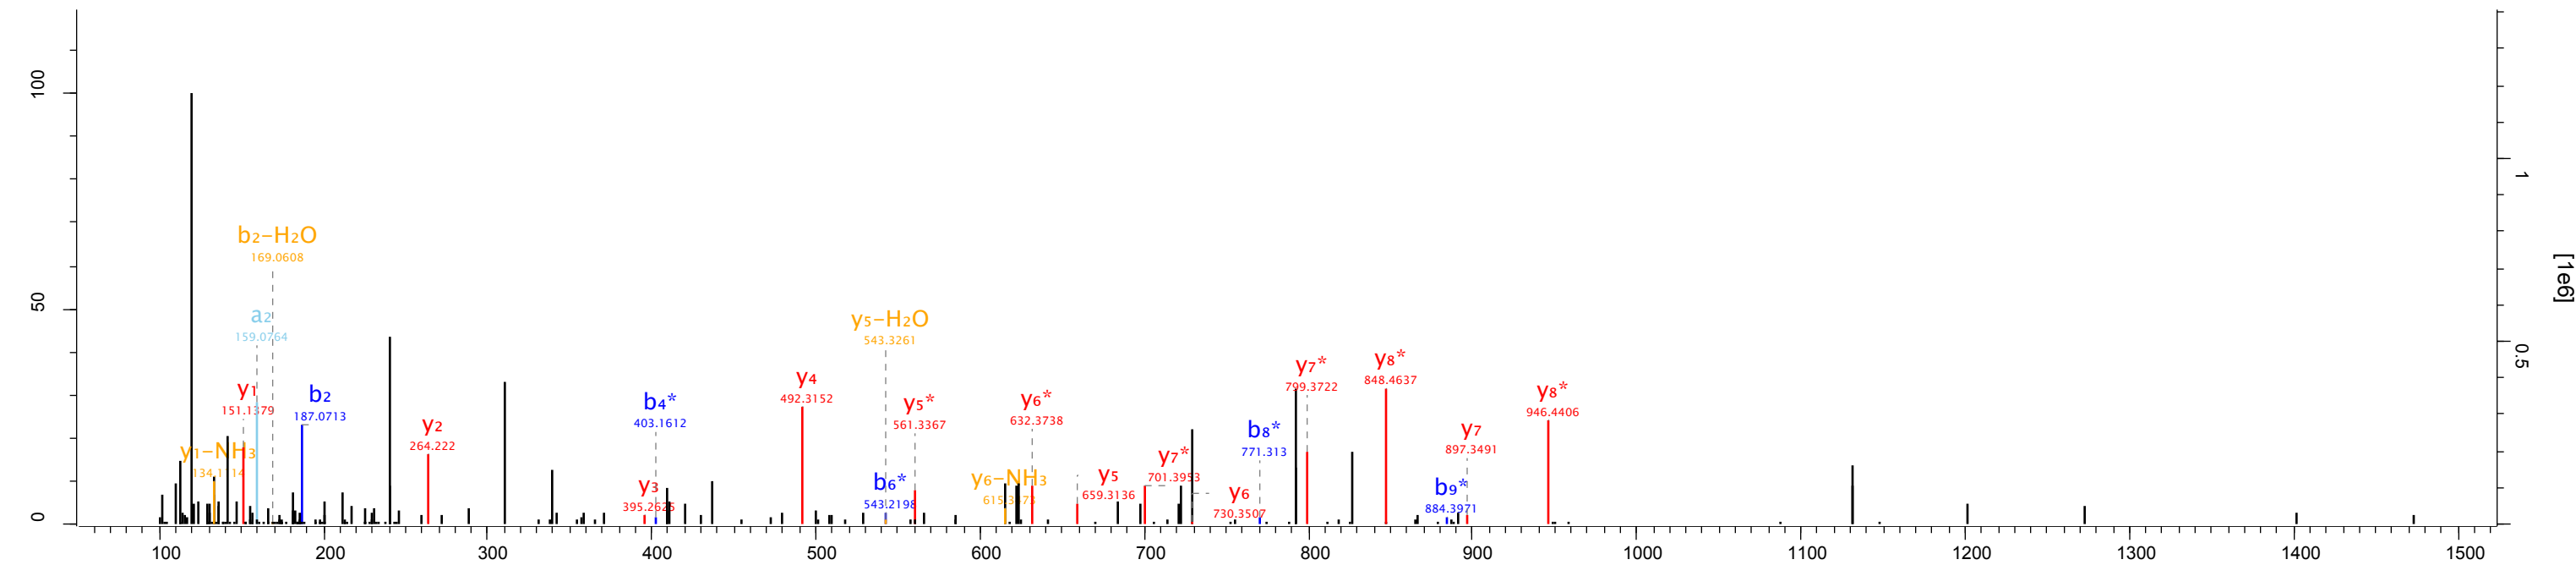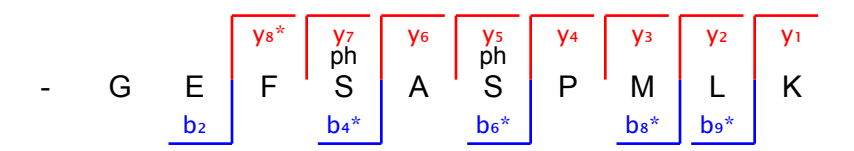

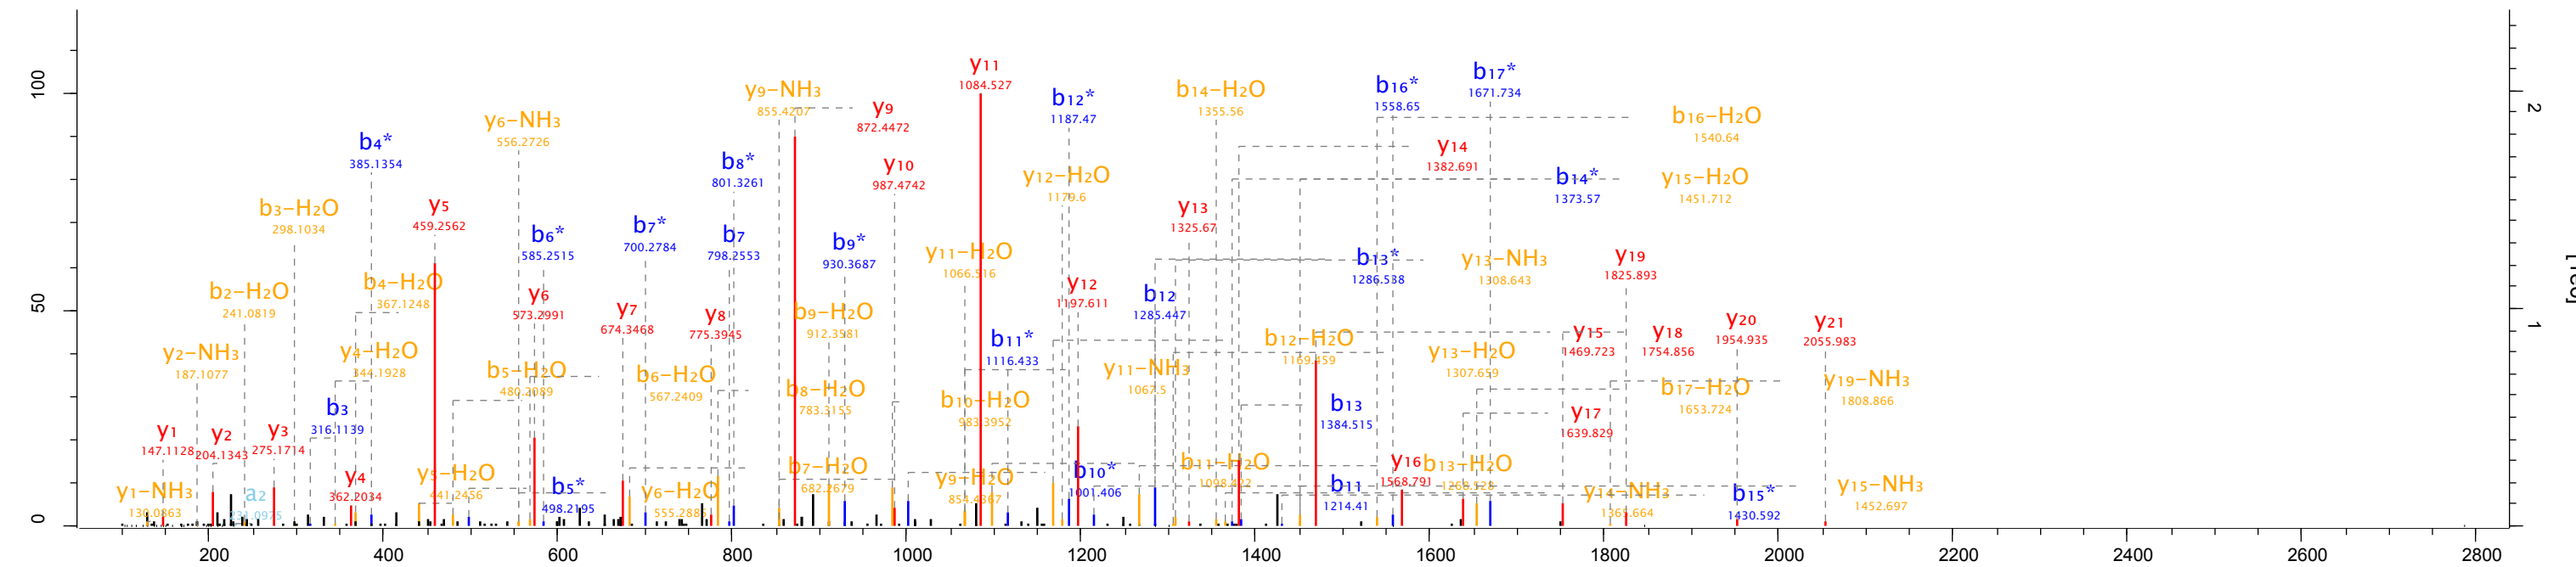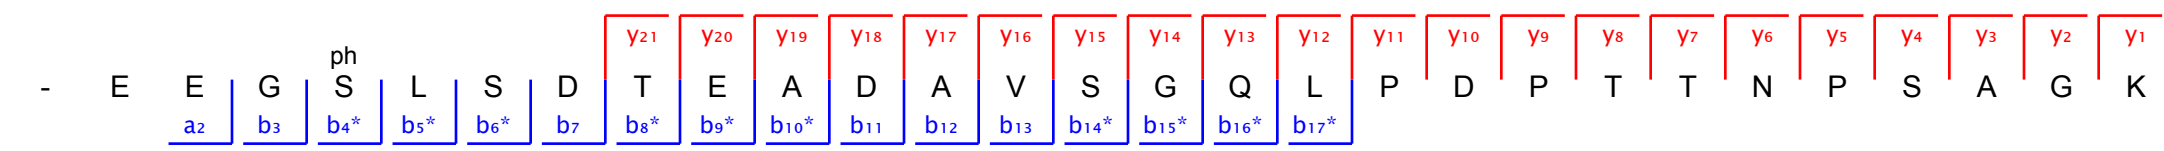

Raw file: 20150814\_A375SR\_Phospho\_BR2\_03  
 Scan: 18828 Method: FTMS; HCD Score: 159.54 m/z: 889.39 Gene names: CNOT2

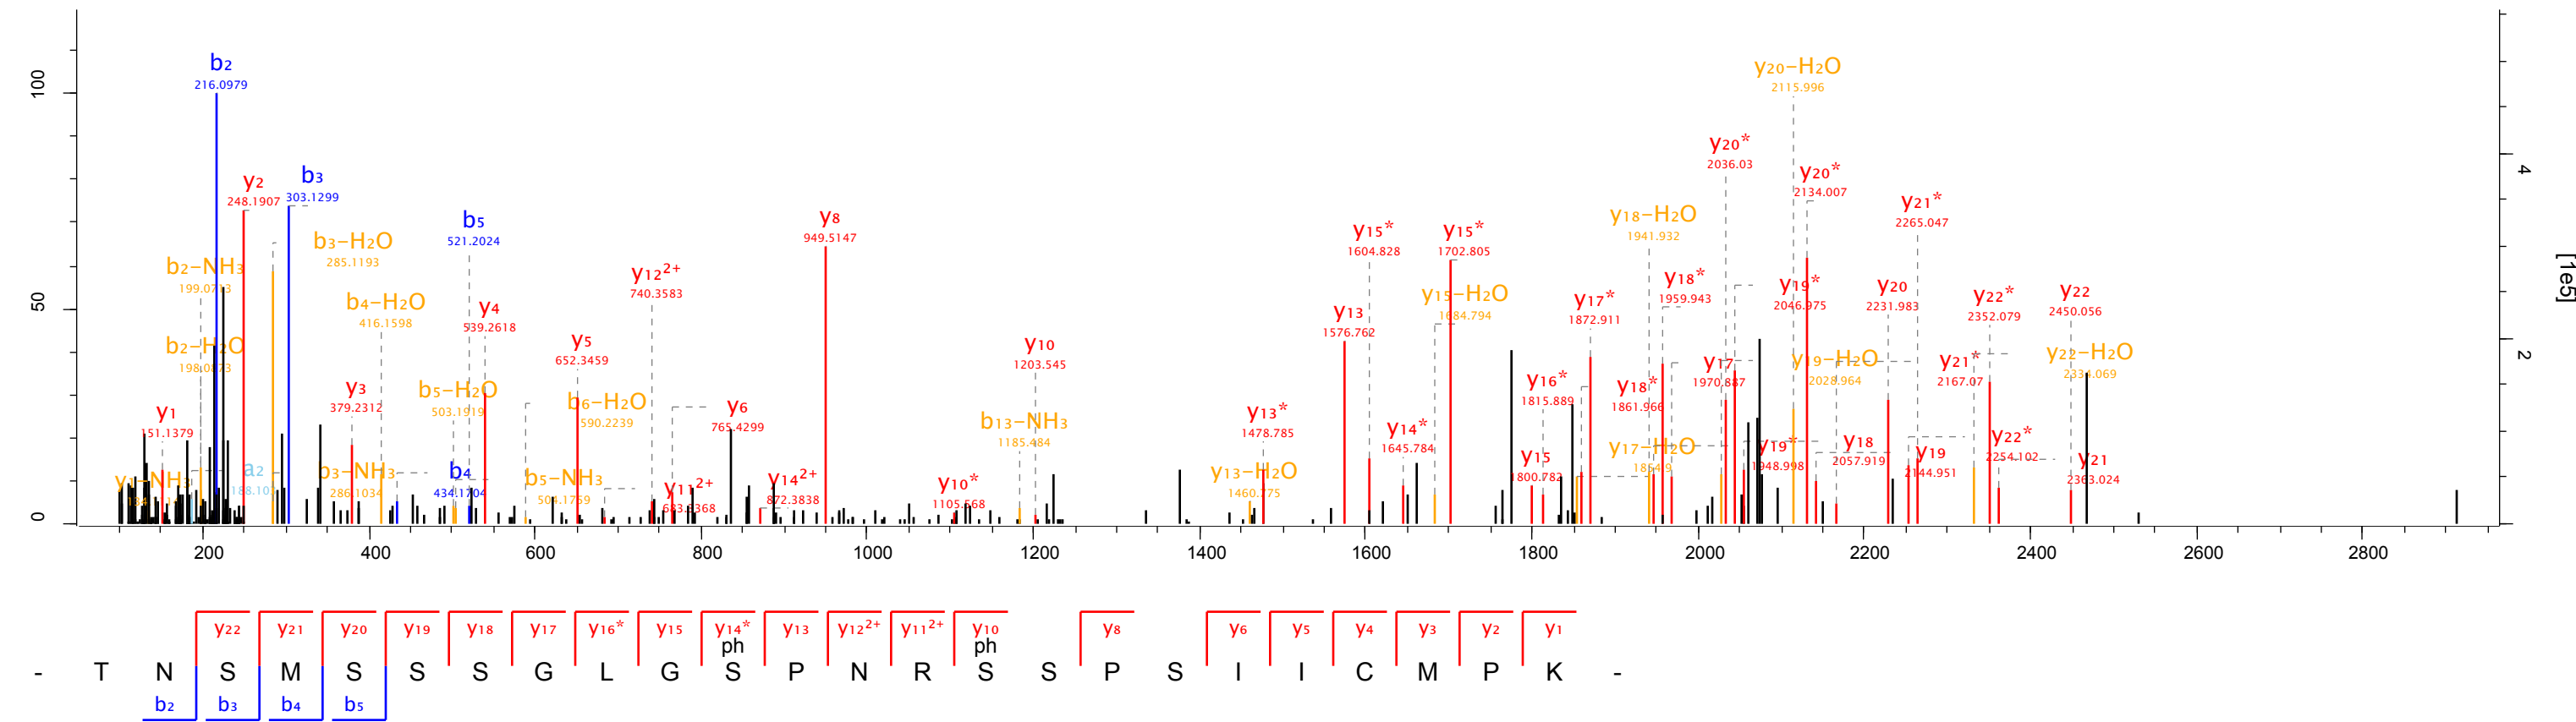

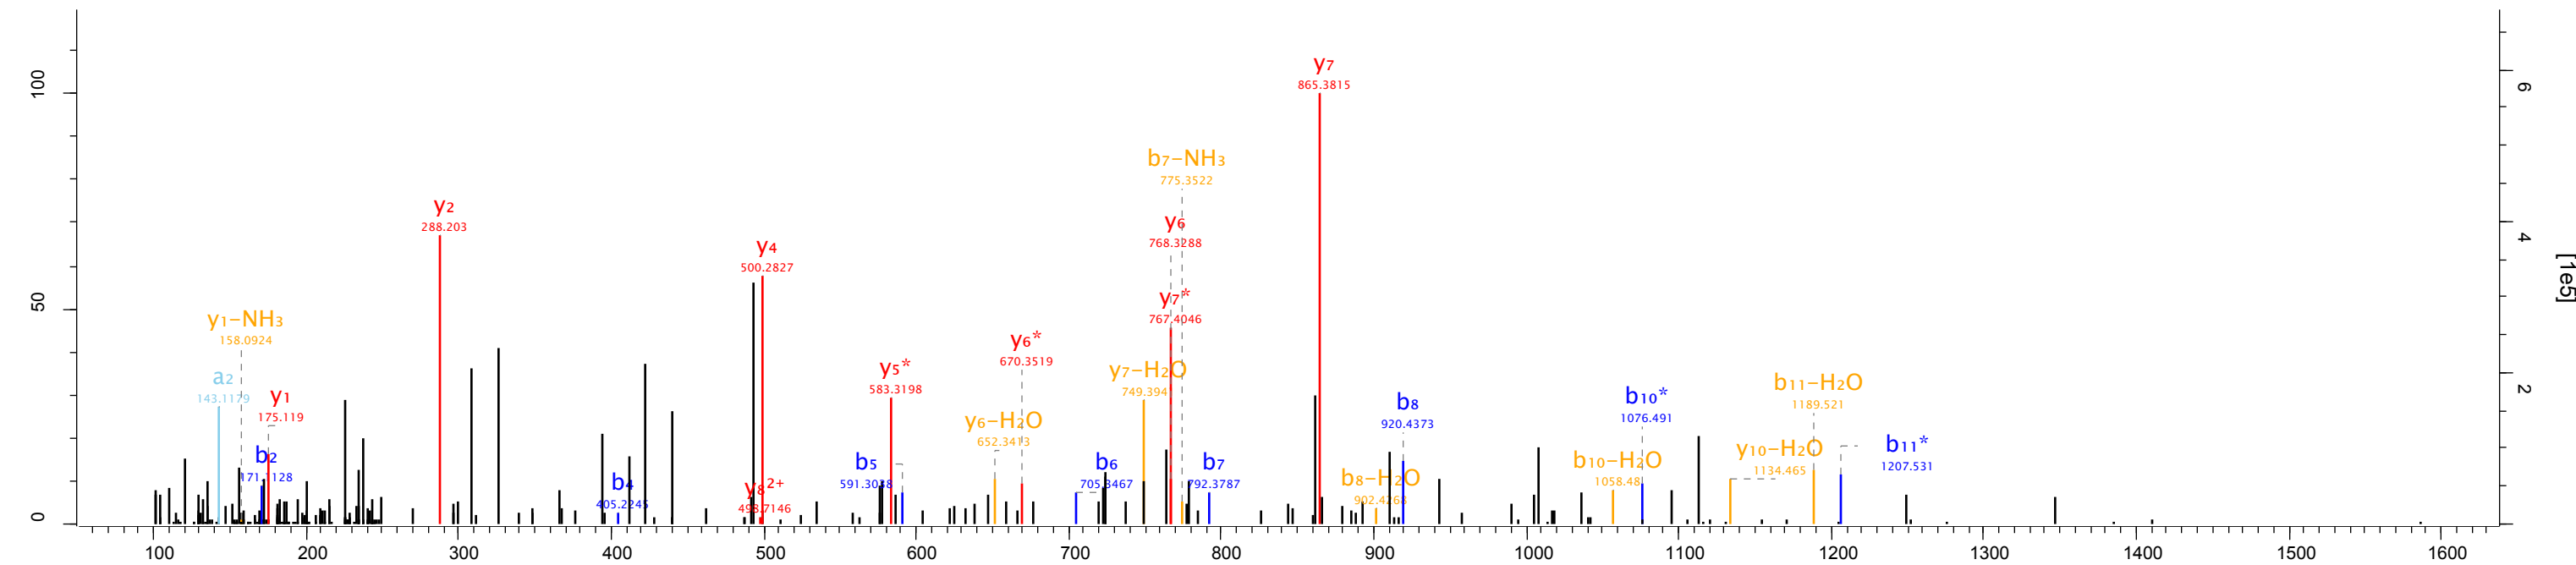

- G L P H W N S Q S ph S M P S T P D L R -

b<sub>2</sub>
b<sub>4</sub>
b<sub>5</sub>
b<sub>6</sub>
b<sub>7</sub>
b<sub>8</sub>
b<sub>10</sub>\*
b<sub>11</sub>\*
y<sub>8</sub><sup>2+</sup>
y<sub>7</sub>
y<sub>6</sub>
y<sub>5</sub>\*
y<sub>4</sub>
y<sub>2</sub>
y<sub>1</sub>

Raw file 20150814\_A375SR\_Phospho\_BR2\_03 Scan 18888 Method FTMS; HCD Score 40.75 m/z 985.47 Gene names TBC1D22A

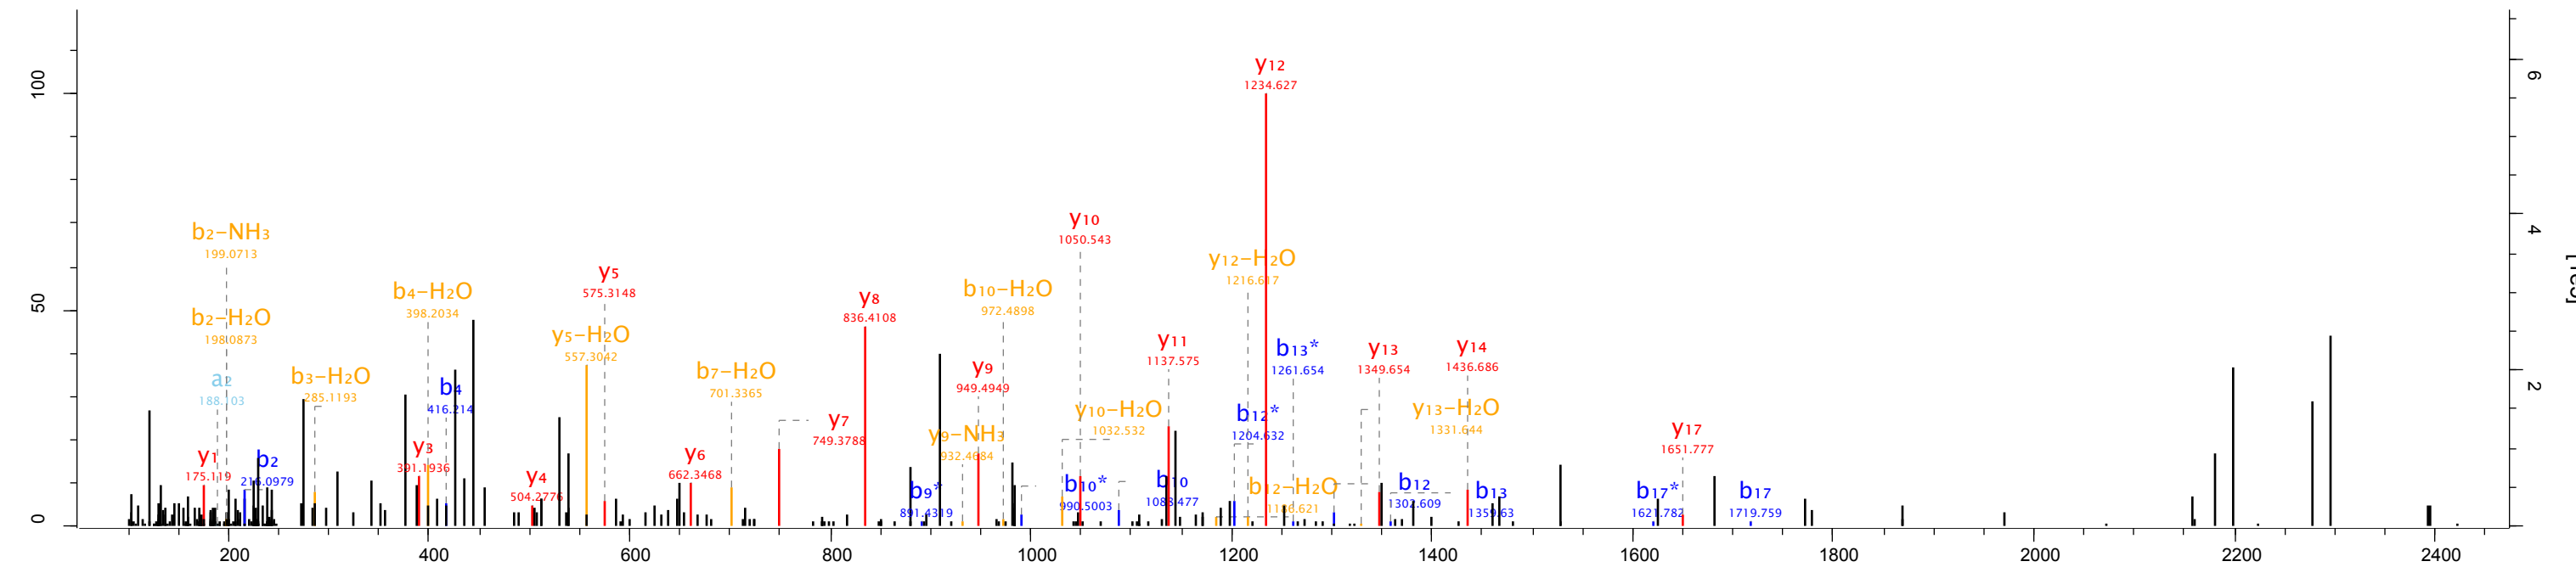

- S Q S L P H S A T V T L G G T S D P S T L S S S A L S E R -

b<sub>2</sub>
b<sub>4</sub>
b<sub>9</sub>\*
b<sub>10</sub>
b<sub>12</sub>
b<sub>13</sub>
b<sub>17</sub>
y<sub>1</sub>
y<sub>3</sub>
y<sub>4</sub>
y<sub>5</sub>
y<sub>6</sub>
y<sub>7</sub>
y<sub>8</sub>
y<sub>9</sub>
y<sub>10</sub>
y<sub>11</sub>
y<sub>12</sub>
y<sub>13</sub>
y<sub>14</sub>
y<sub>17</sub>

Raw file 20150814\_A375SR\_Phospho\_BR2\_03 Scan 18968 Method FTMS; HCD Score 218.69 m/z 844.88 Gene names TFE3

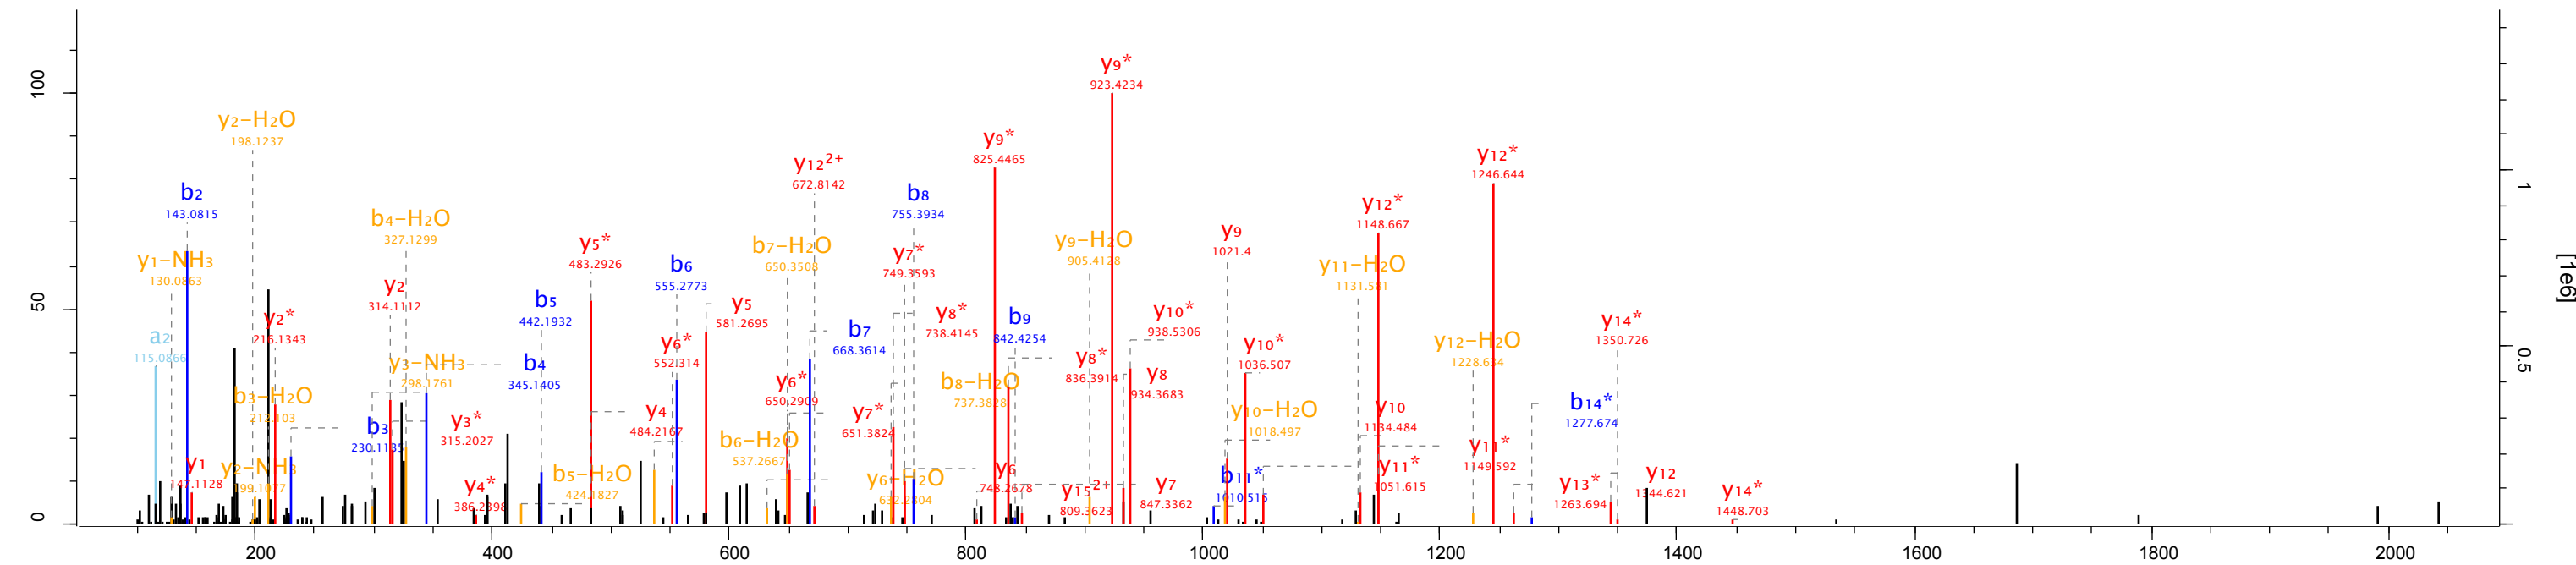

- A y15<sup>2+</sup> y14<sup>\*</sup> y13<sup>\*</sup> y12 y11<sup>\*</sup> y10 y9 y8 y7 y6<sup>ph</sup> y5 y4 y3<sup>\*</sup> y2<sup>ph</sup> y1 -

b2 b3 b4 b5 b6 b7 b8 b9 b11<sup>\*</sup> b14<sup>\*</sup>

Raw file 20150814\_A375SR\_Phospho\_BR2\_03 Scan 19398 Method FTMS; HCD Score 105.21 m/z 831.72 Gene names SIPA1L3

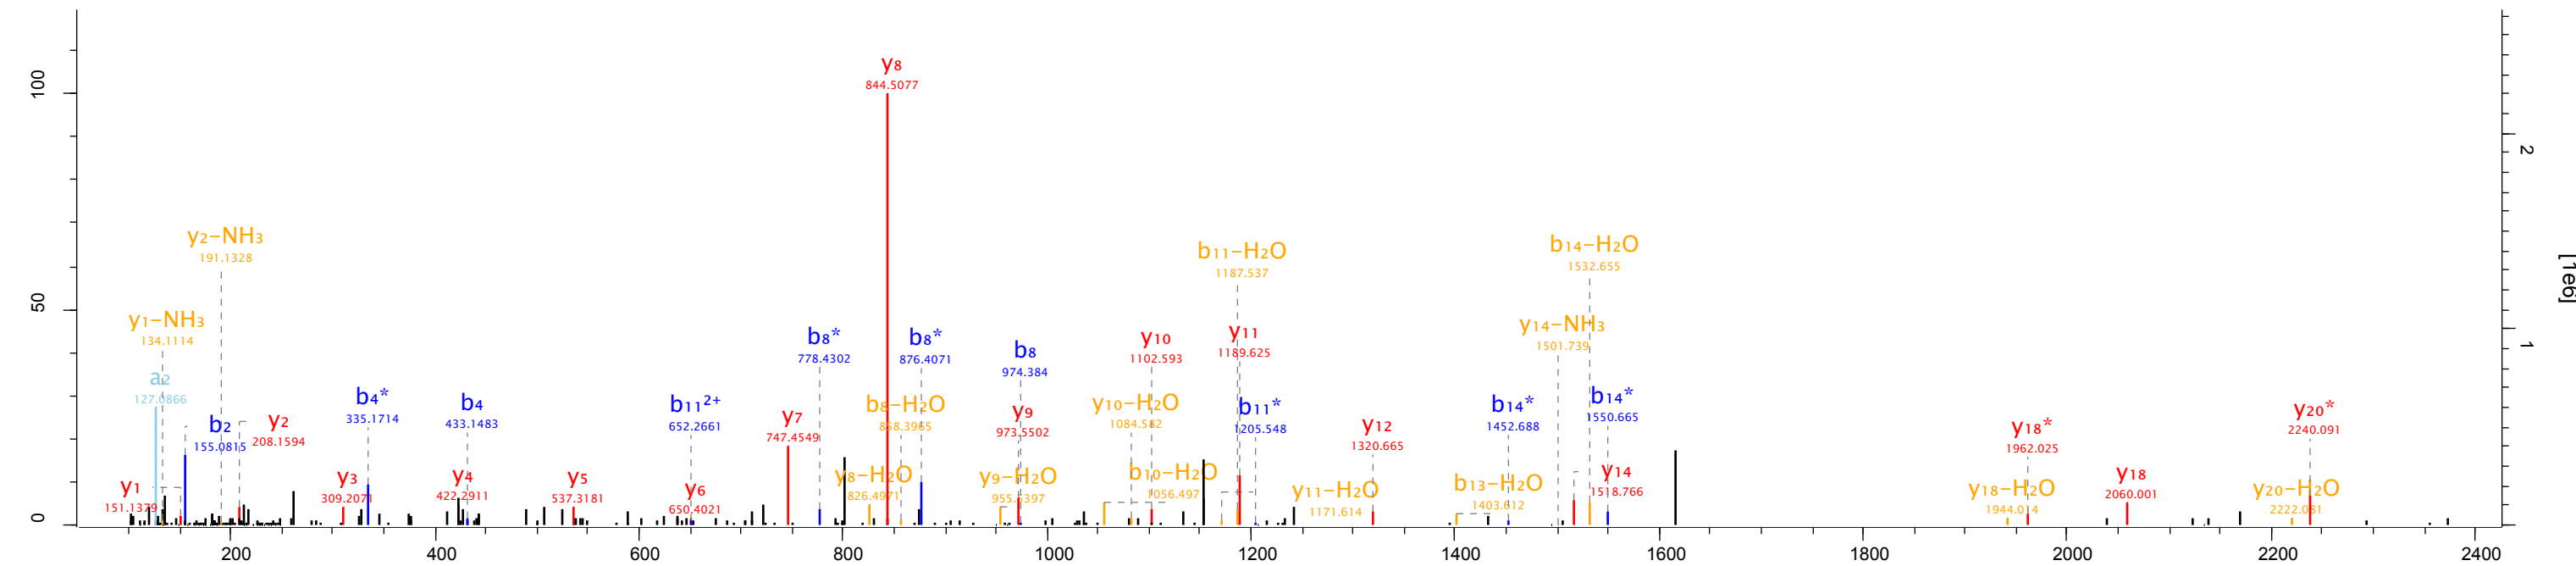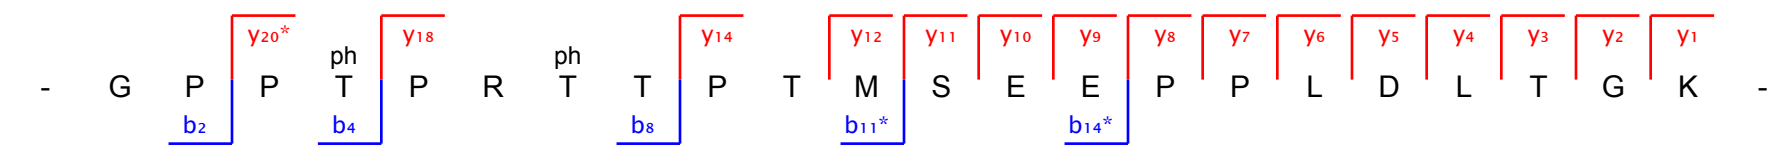

Raw file: 20150814\_A375SR\_Phospho\_BR2\_03  
 Scan: 19658 Method: FTMS; HCD Score: 224.44 m/z: 1177.57 Gene names: SRGAP2

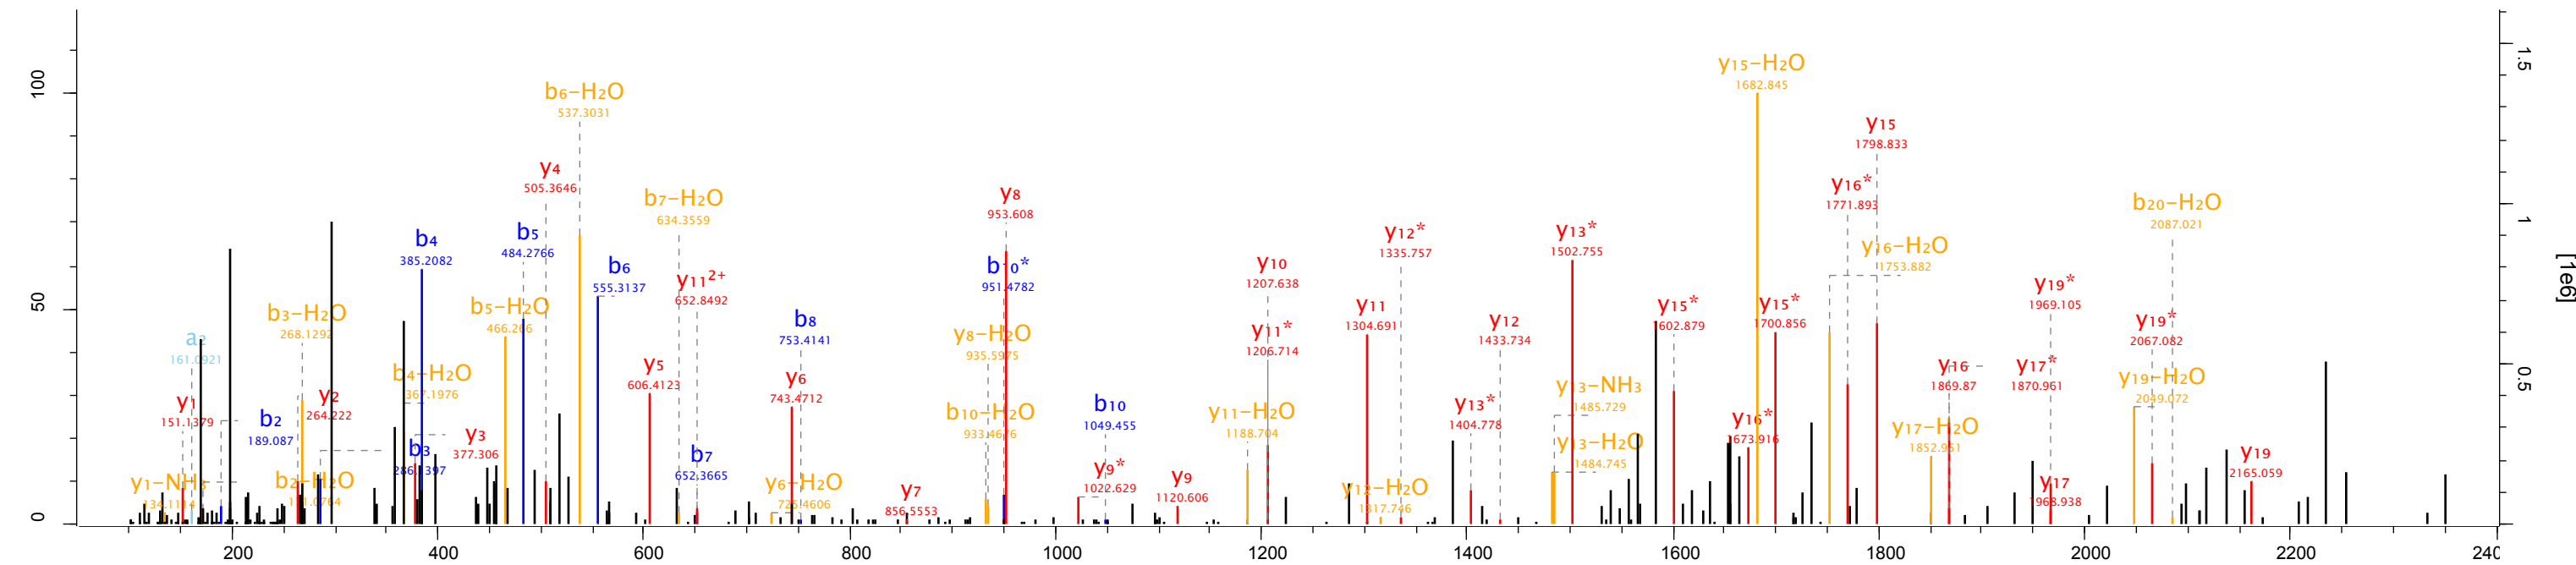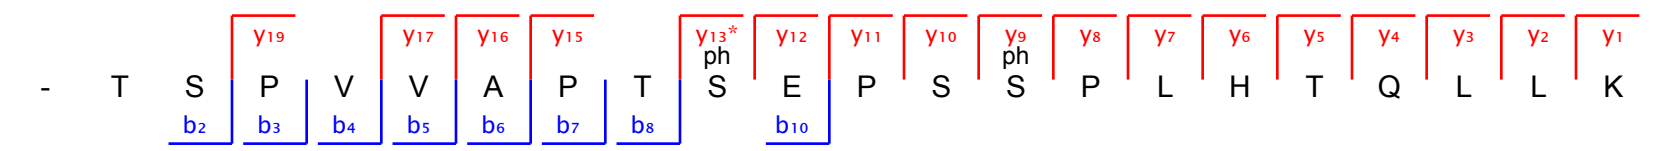



Raw file 20150814\_A375SR\_Phospho\_BR2\_03 Scan 19878 Method FTMS; HCD Score 173.96 m/z 791.7 Gene names ARHGEF11

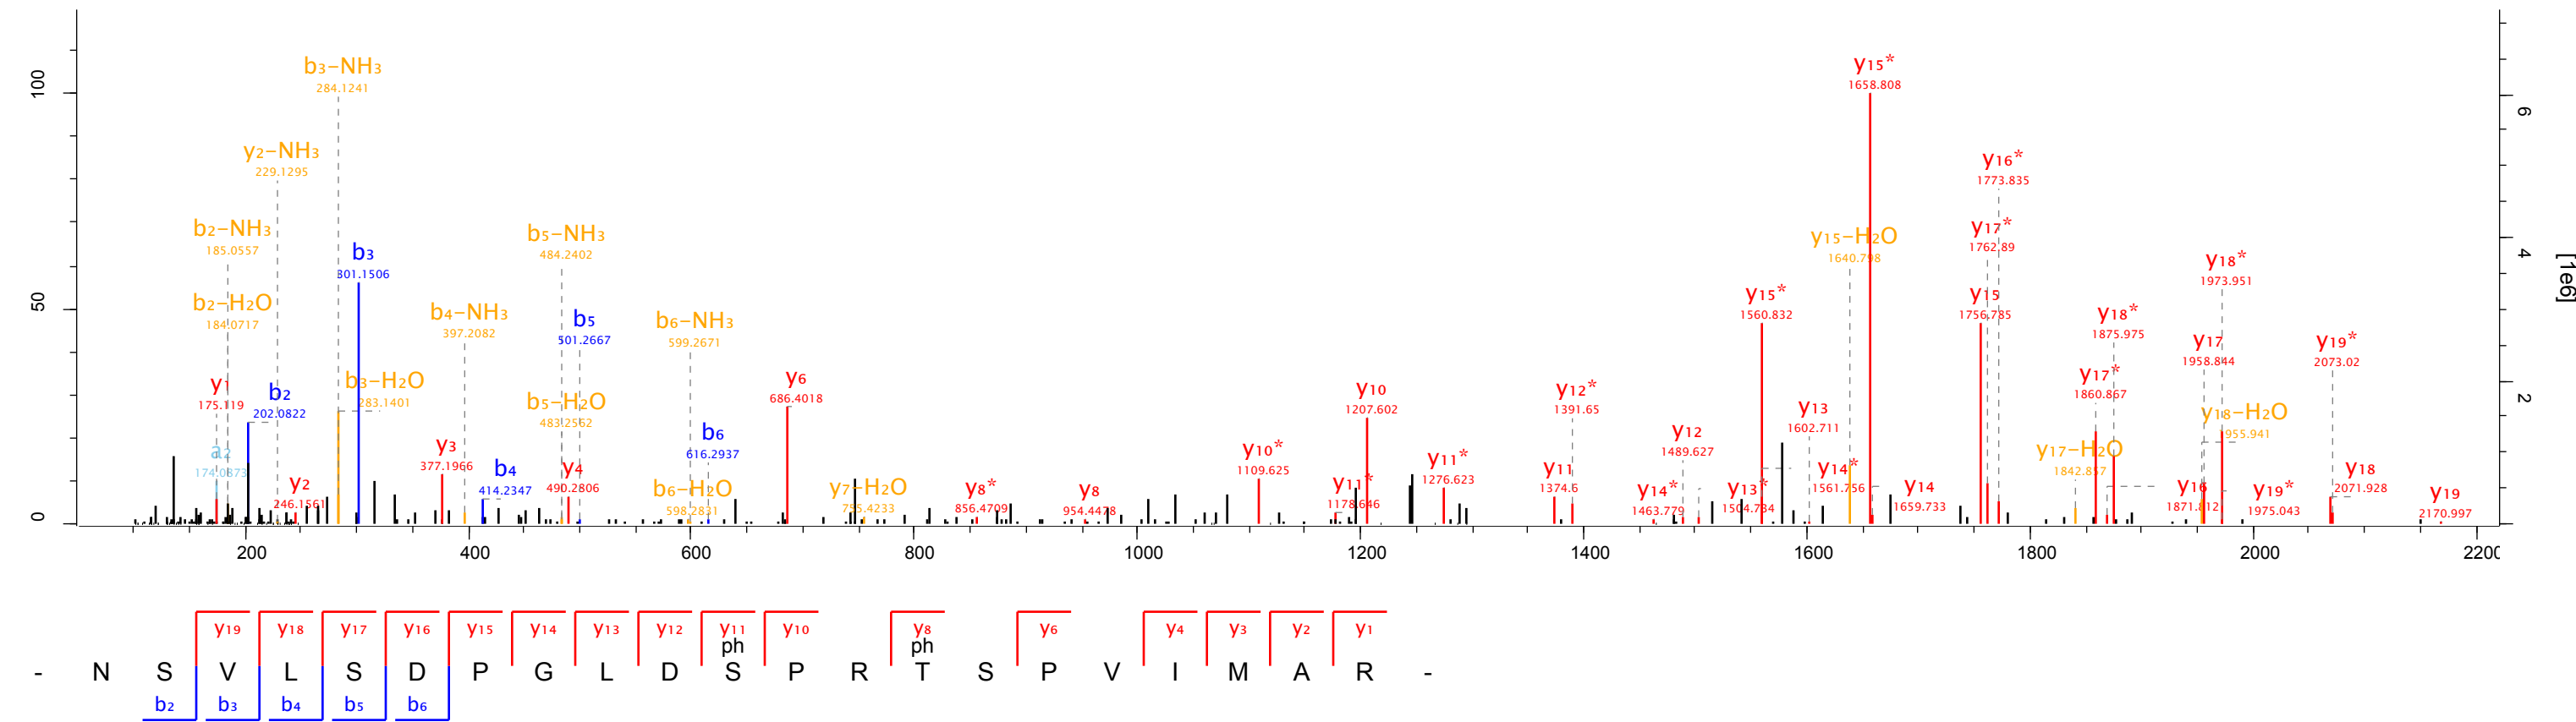

Raw file Scan Method Score m/z Gene names  
 20150814\_A375SR\_Phospho\_BR2\_03 20178 FTMS; HCD 110.12 784.71 KMT2A

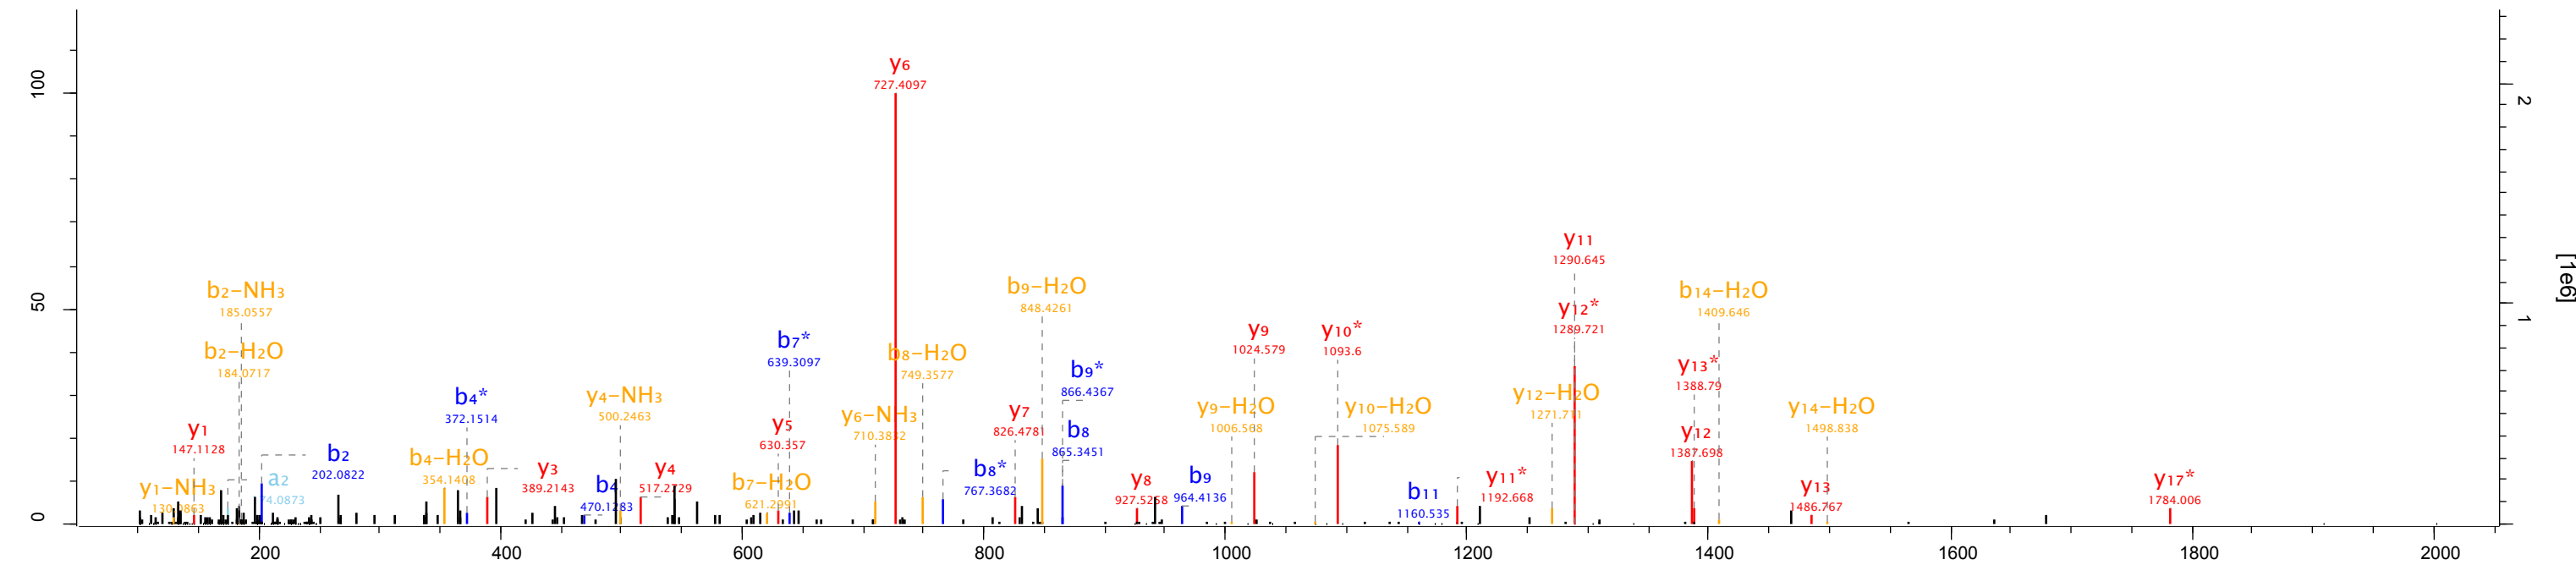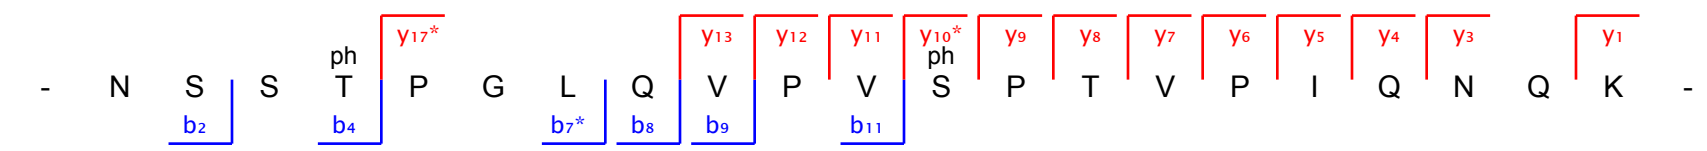

Raw file 20150814\_A375SR\_Phospho\_BR2\_03 Scan 20298 Method FTMS; HCD Score 128.55 m/z 969.93 Gene names ZFYVE20

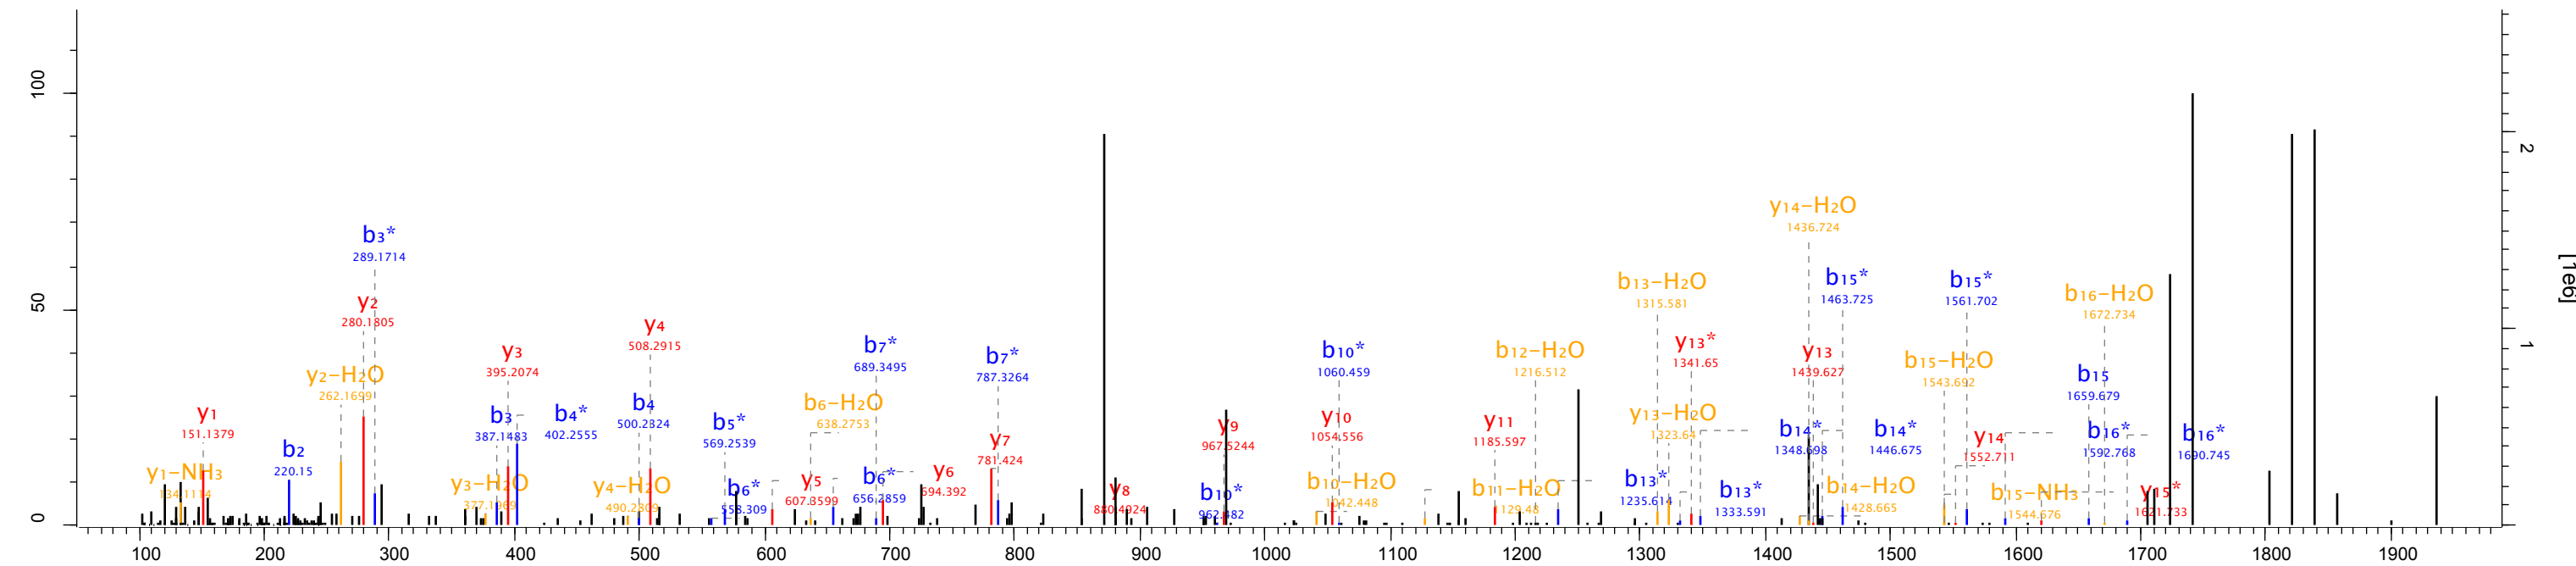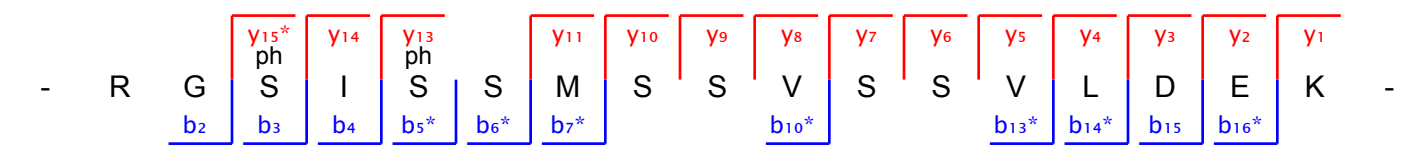

Raw file: 20150814\_A375SR\_Phospho\_BR2\_03  
 Scan: 20368 Method: FTMS; HCD Score: 234.82 m/z: 858.36 Gene names: CRACR2A

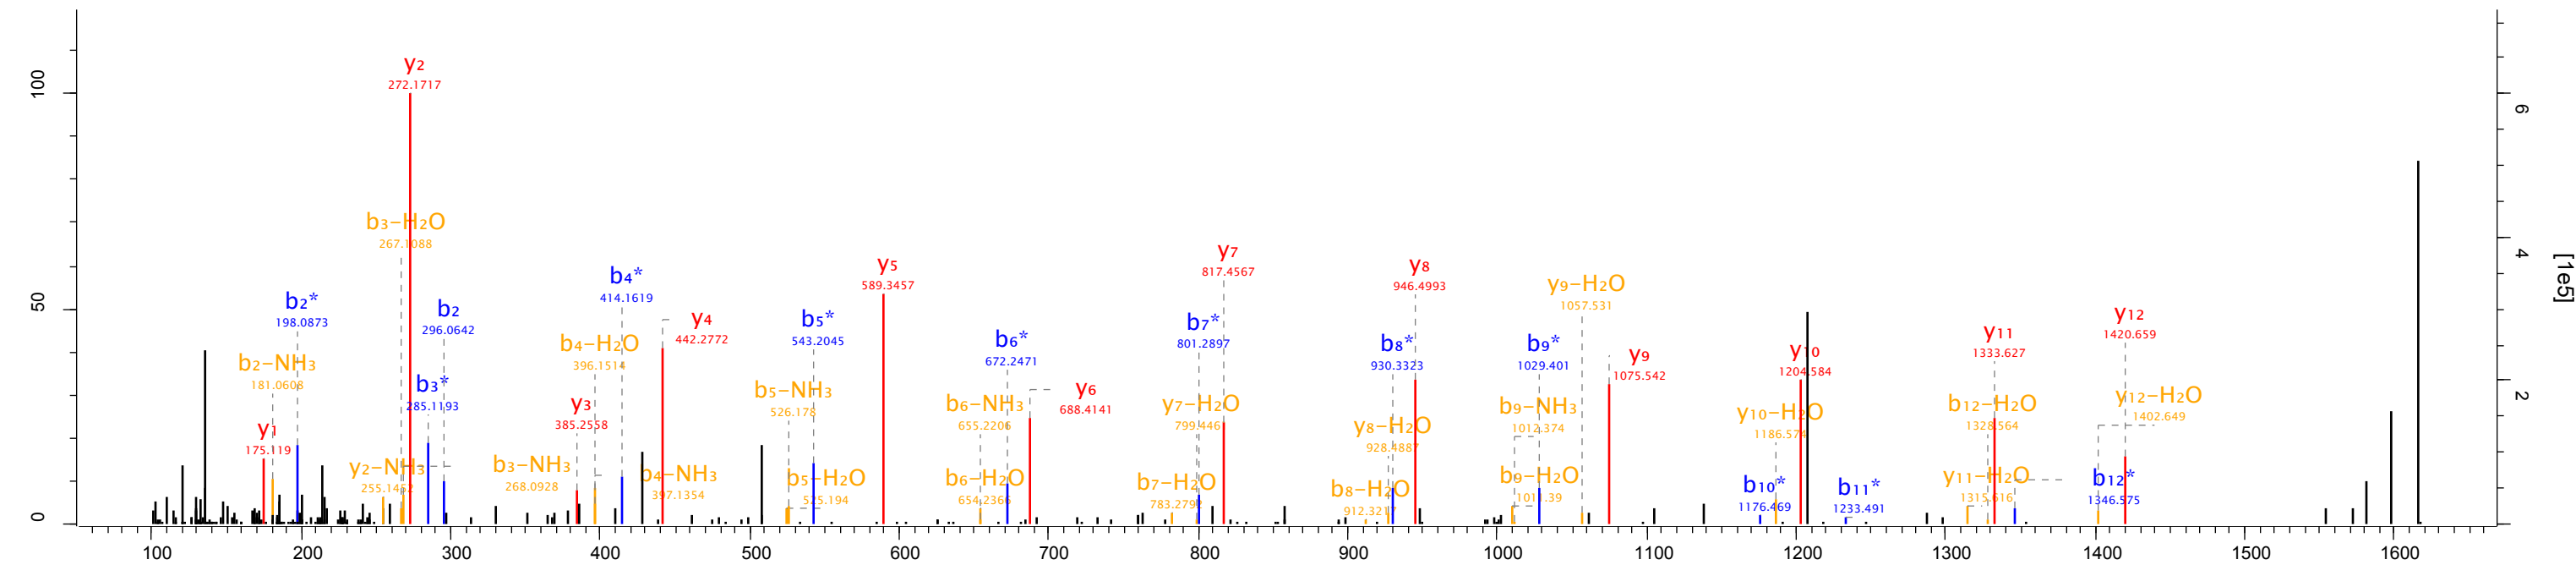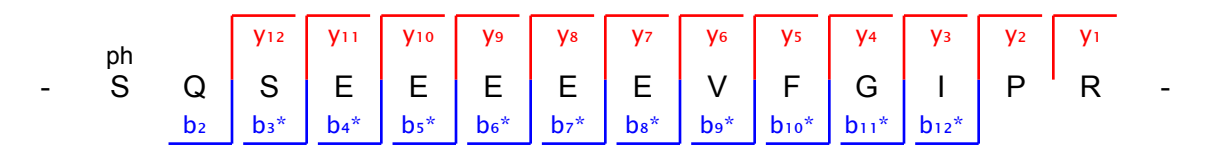



Raw file: 20150814\_A375SR\_Phospho\_BR2\_03  
 Scan: 20828 Method: FTMS; HCD Score: 148.63 m/z: 1032.42 Gene names: CBL

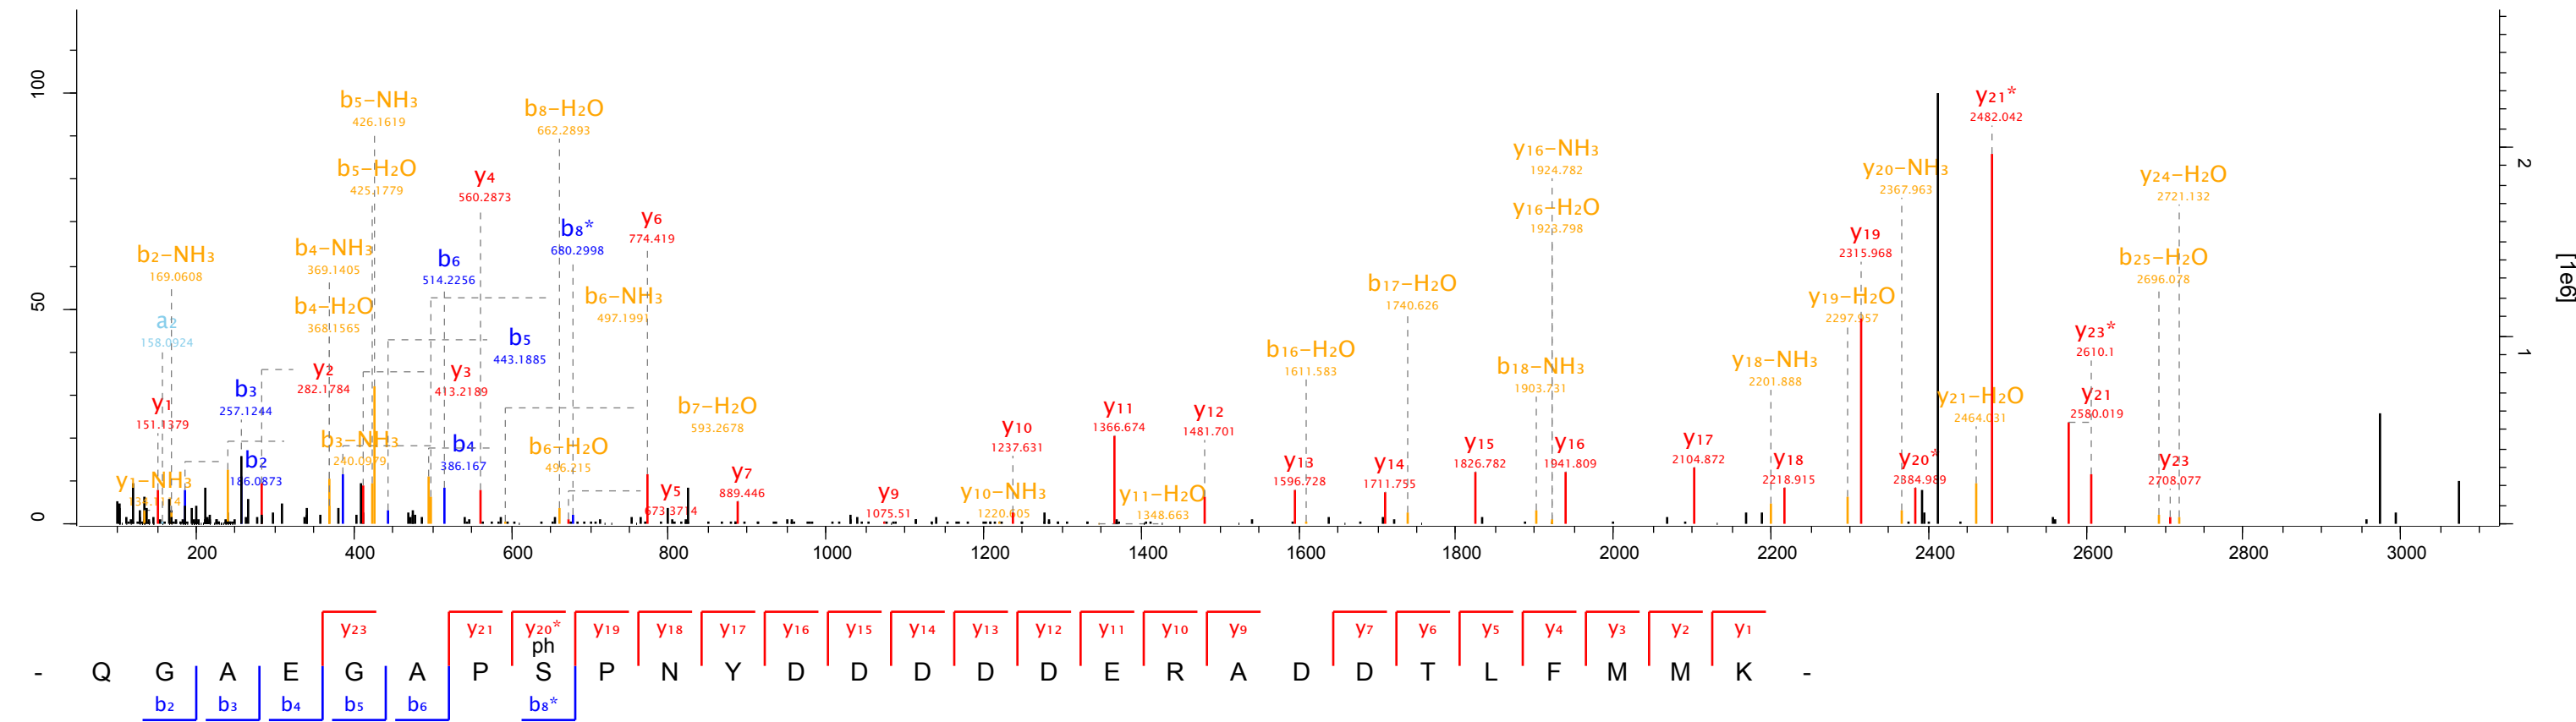

Raw file 20150814\_A375SR\_Phospho\_BR2\_03 Scan 20938 Method FTMS; HCD Score 195.66 m/z 998.08 Gene names RANBP2;RGPD3;RGPD8;RGPD5

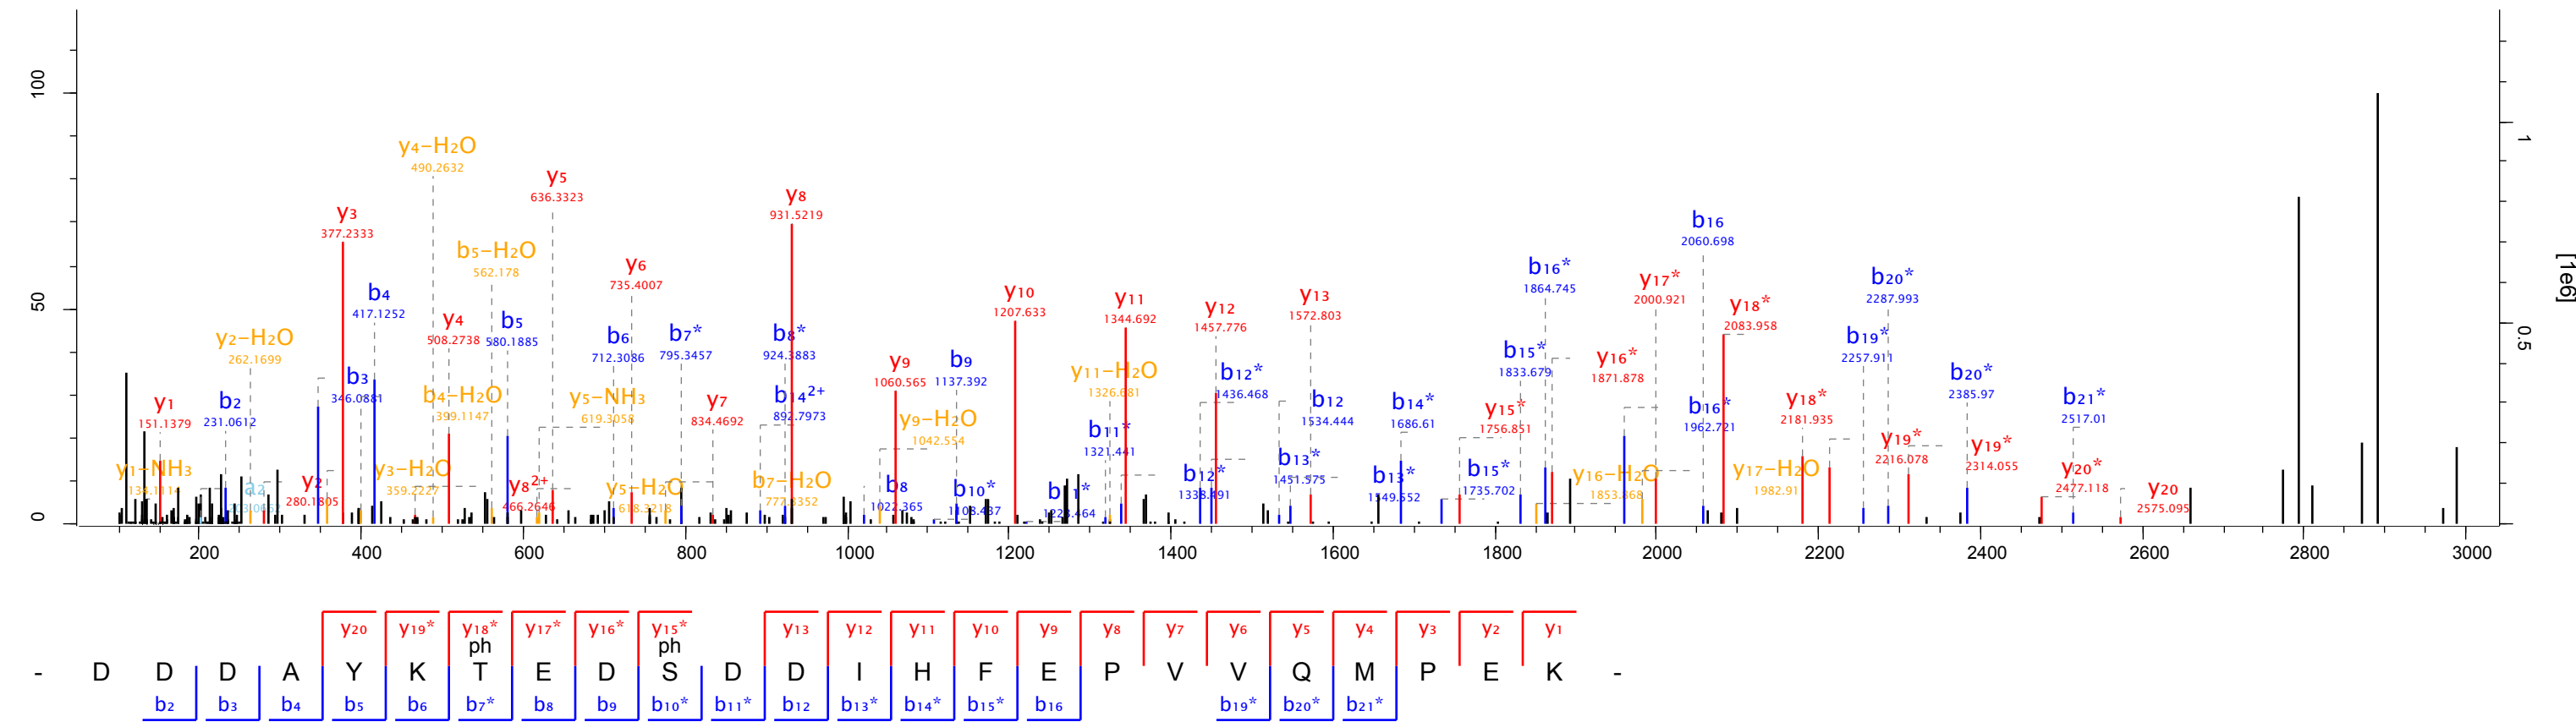

Raw file  
20150814\_A375SR\_Phospho\_BR2\_03

Scan 21038 Method FTMS; HCD Score 119.7 m/z 1004.78 Gene names MAF1

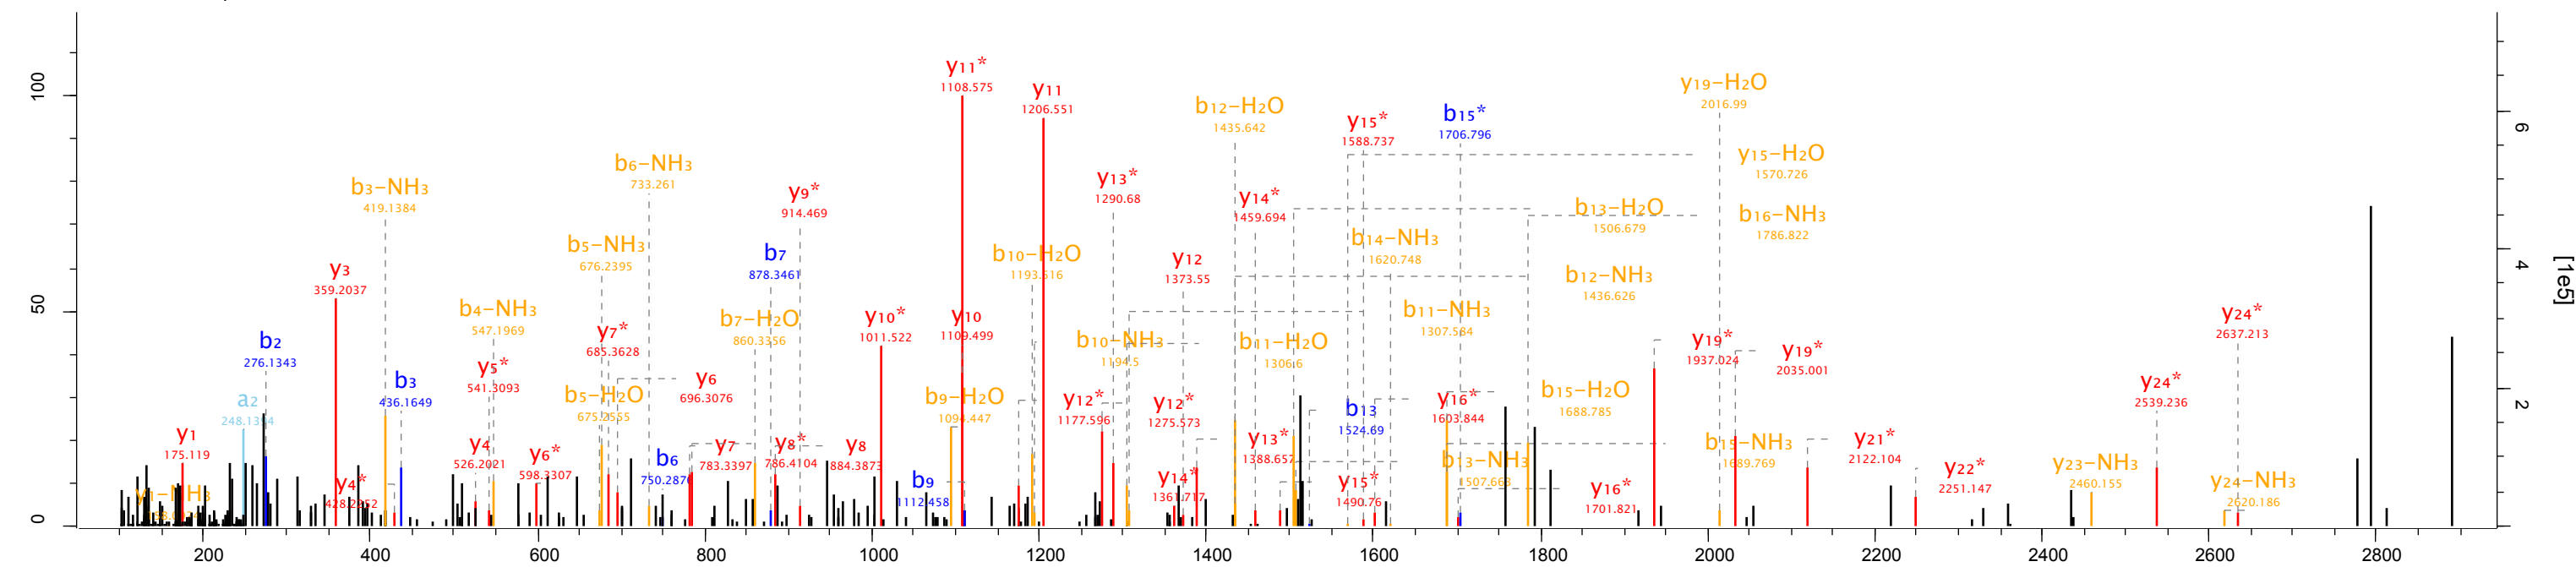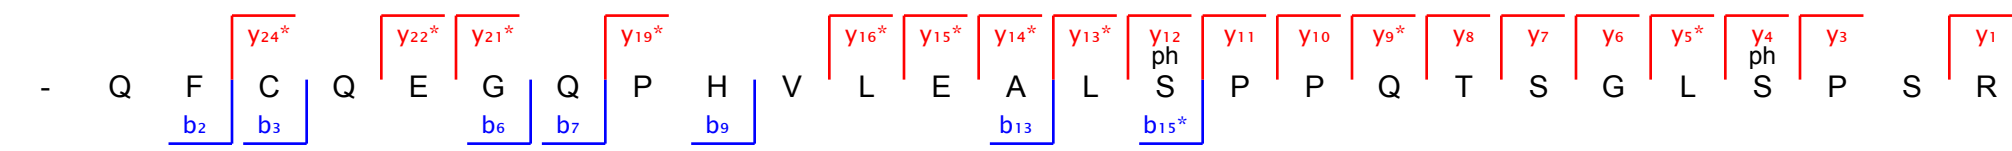



Raw file: 20150814\_A375SR\_Phospho\_BR2\_03  
 Scan: 21078 Method: FTMS; HCD Score: 232.2 m/z: 1077.43 Gene names: SLC14A1

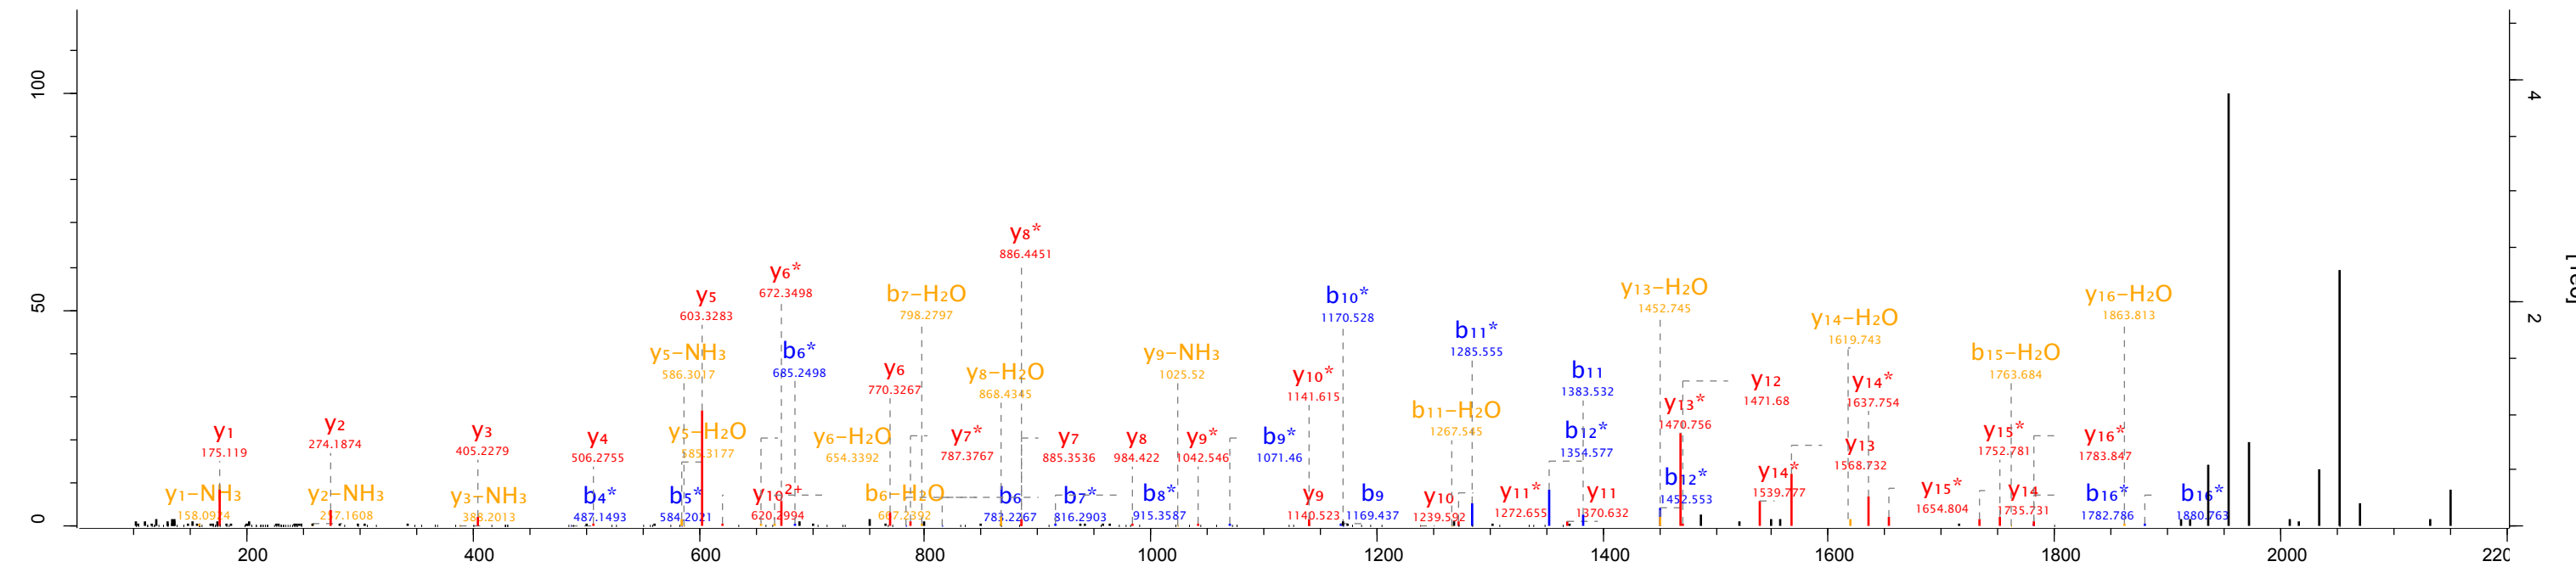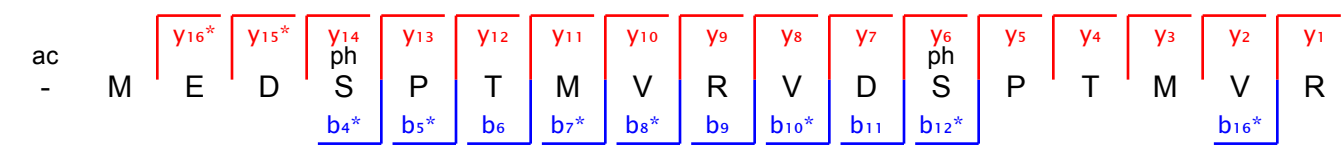

Raw file  
20150814\_A375SR\_Phospho\_BR2\_03

Scan 21158 Method FTMS; HCD Score 189.09 m/z 1055.03 Gene names ZC3H13

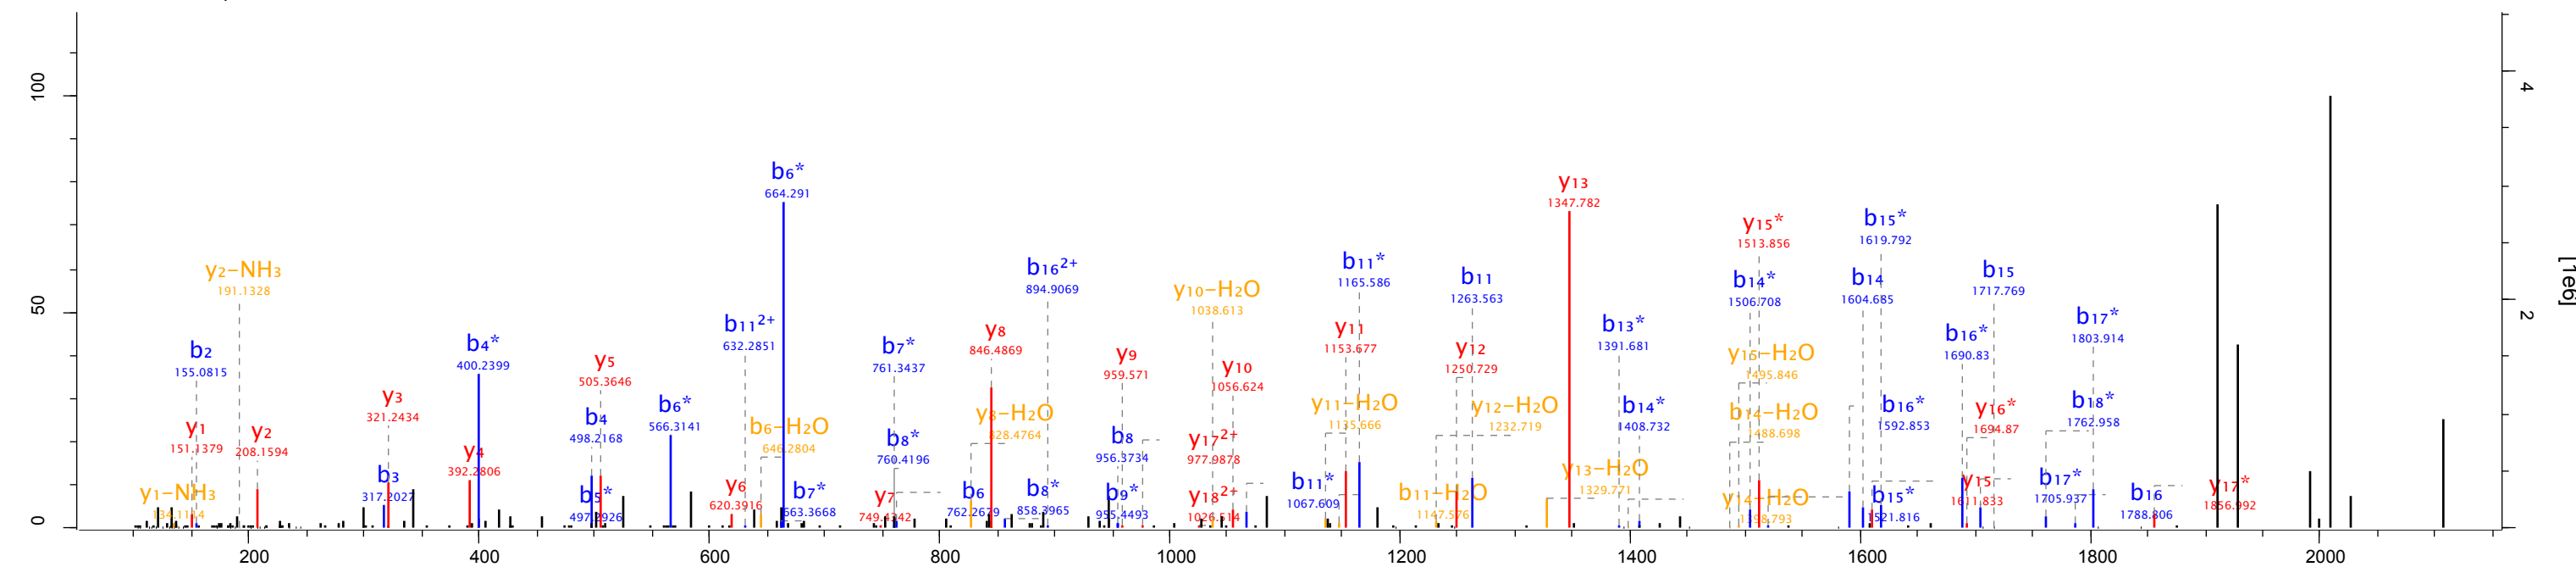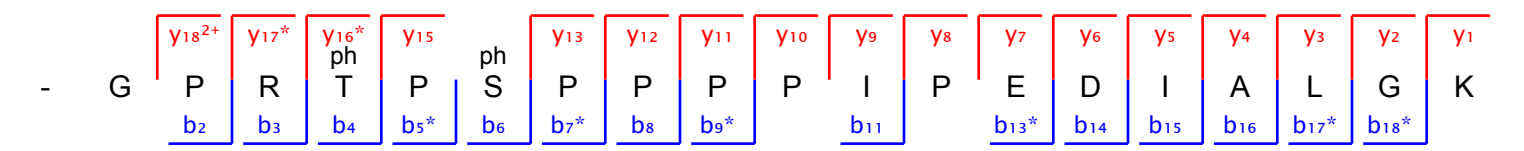

Raw file: 20150814\_A375SR\_Phospho\_BR2\_03  
 Scan: 21368 Method: FTMS; HCD Score: 58.69 m/z: 801.37 Gene names: LIMA1;TRMT1

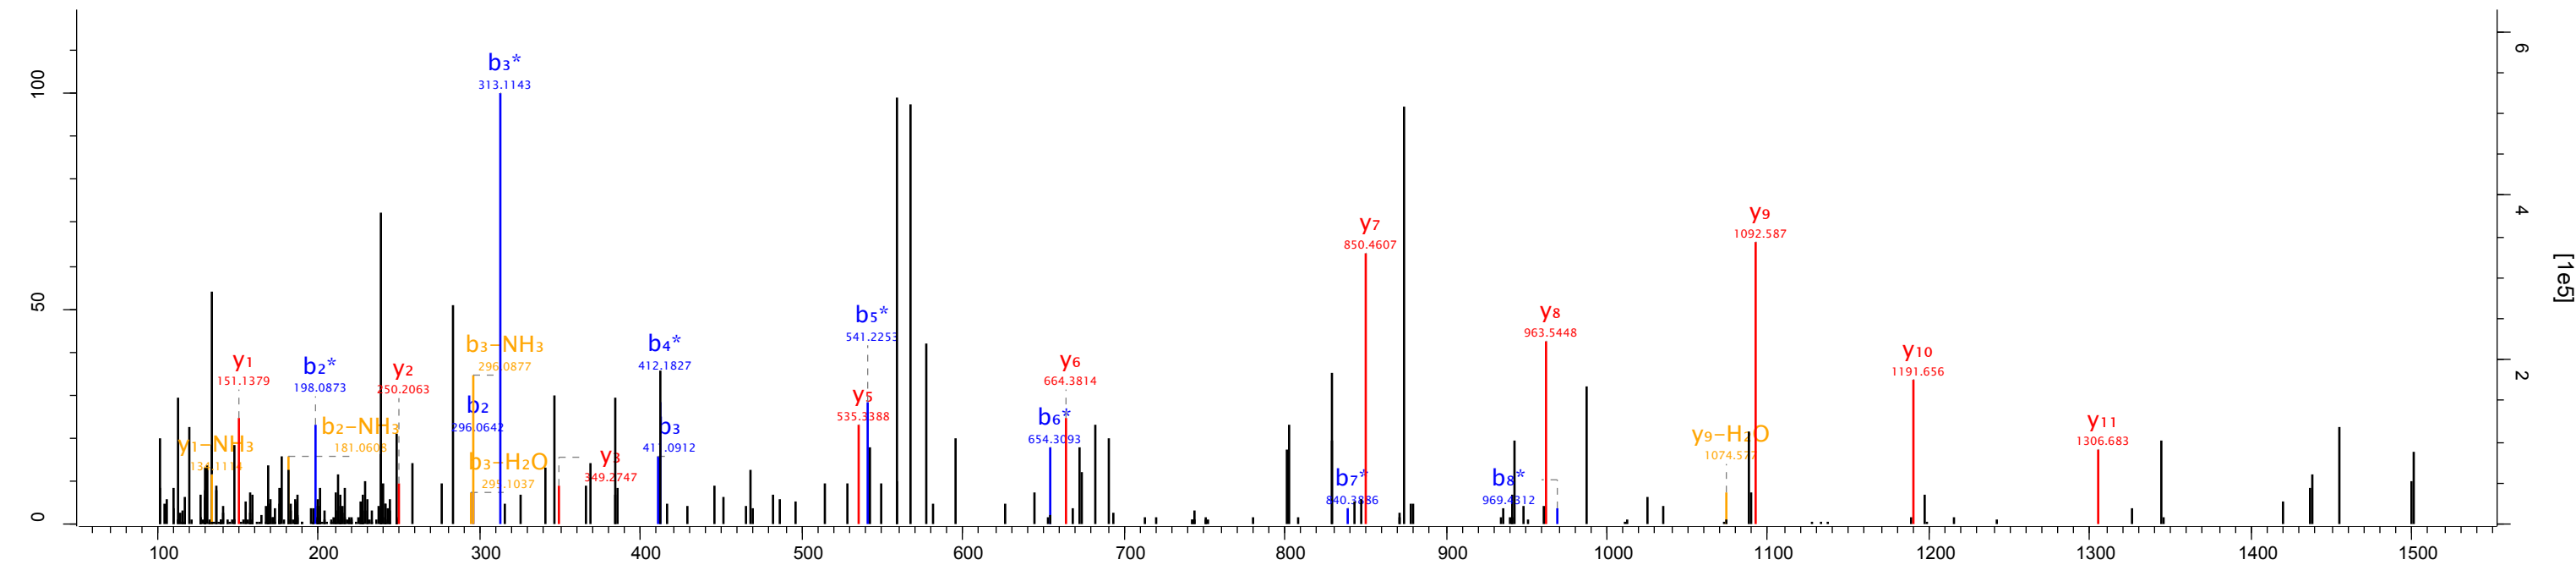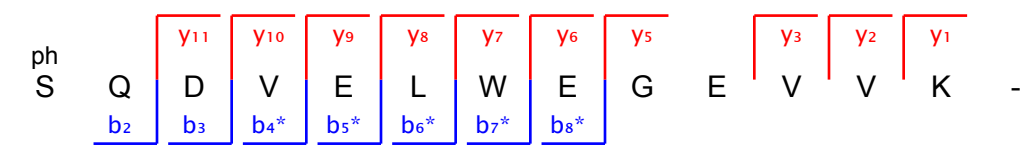

Raw file: 20150814\_A375SR\_Phospho\_BR2\_03  
 Scan: 21448 Method: FTMS; HCD Score: 287.23 m/z: 1175.84 Gene names: NUP98

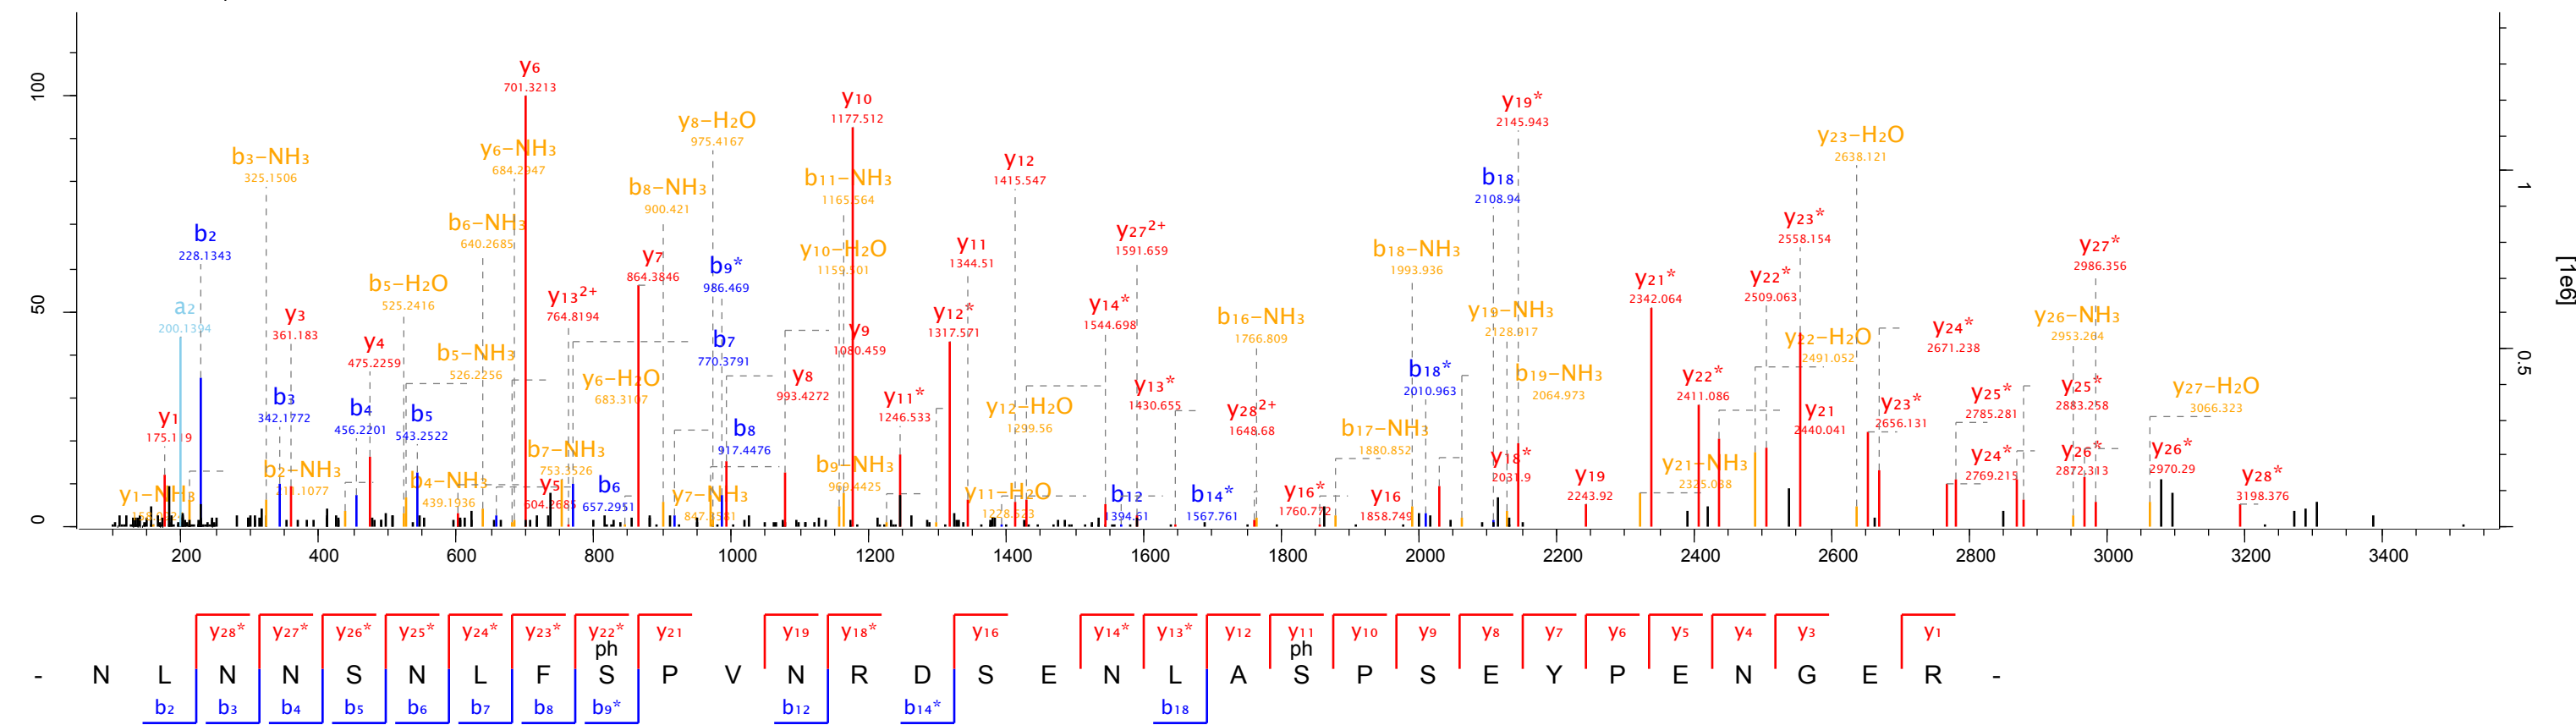

Raw file 20150814\_A375SR\_Phospho\_BR2\_03 Scan 21528 Method FTMS; HCD Score 200.46 m/z 720.3 Gene names CLINT1

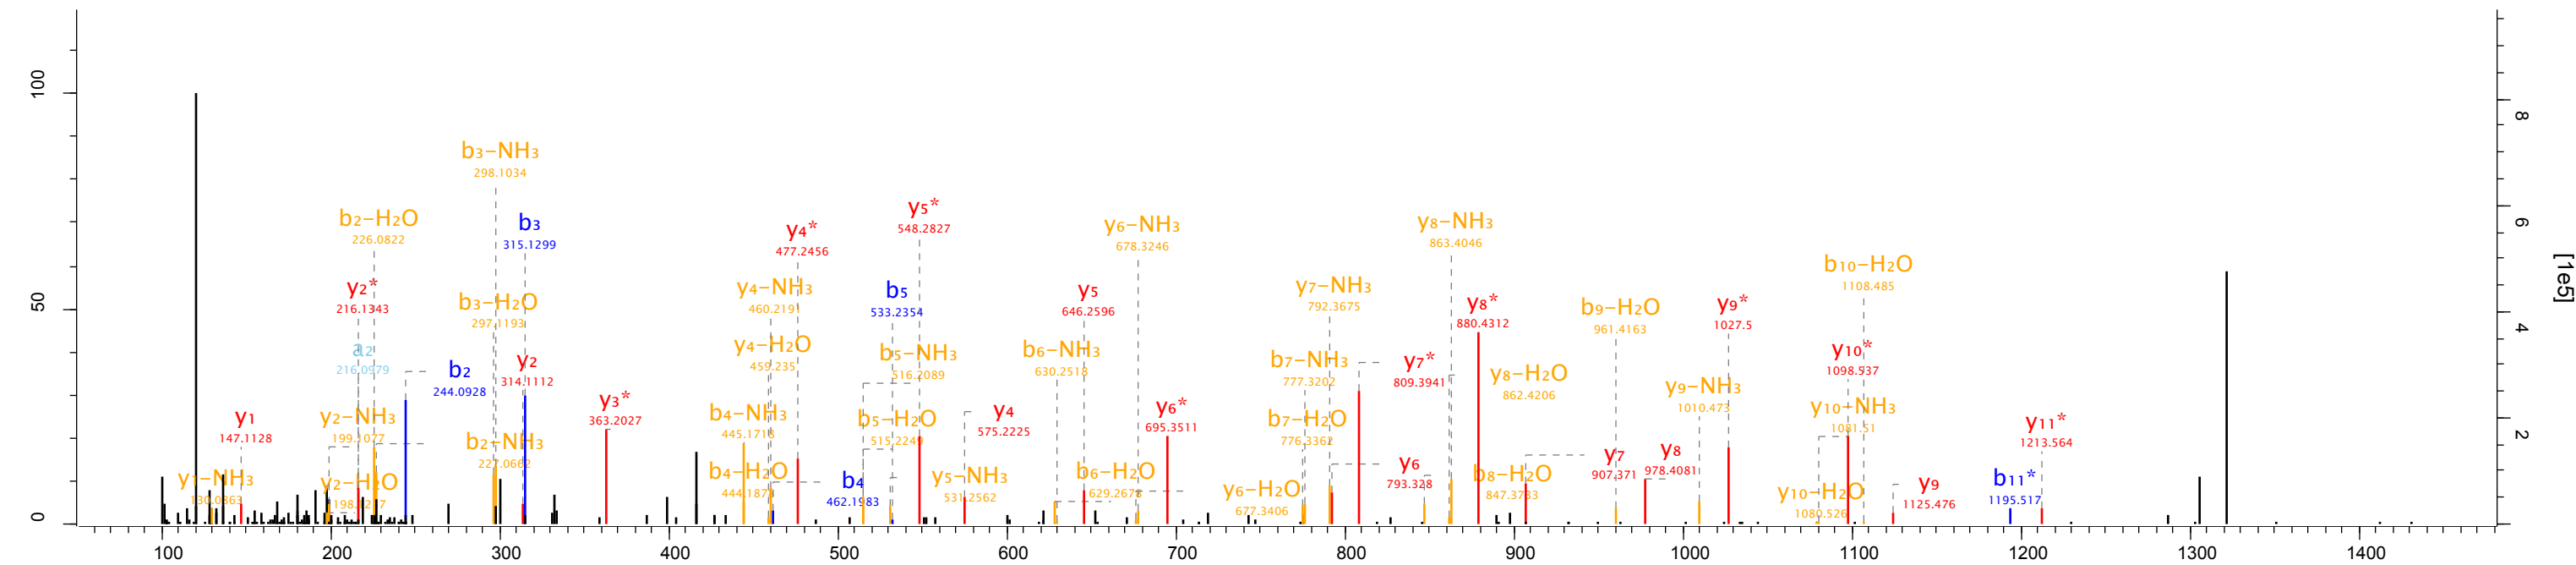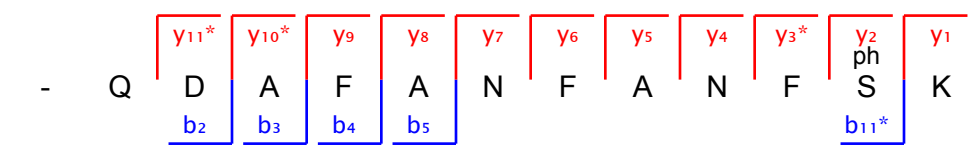

Raw file 20150814\_A375SR\_Phospho\_BR2\_03 Scan 21658 Method FTMS; HCD Score 158.99 m/z 1258.58 Gene names USP9X

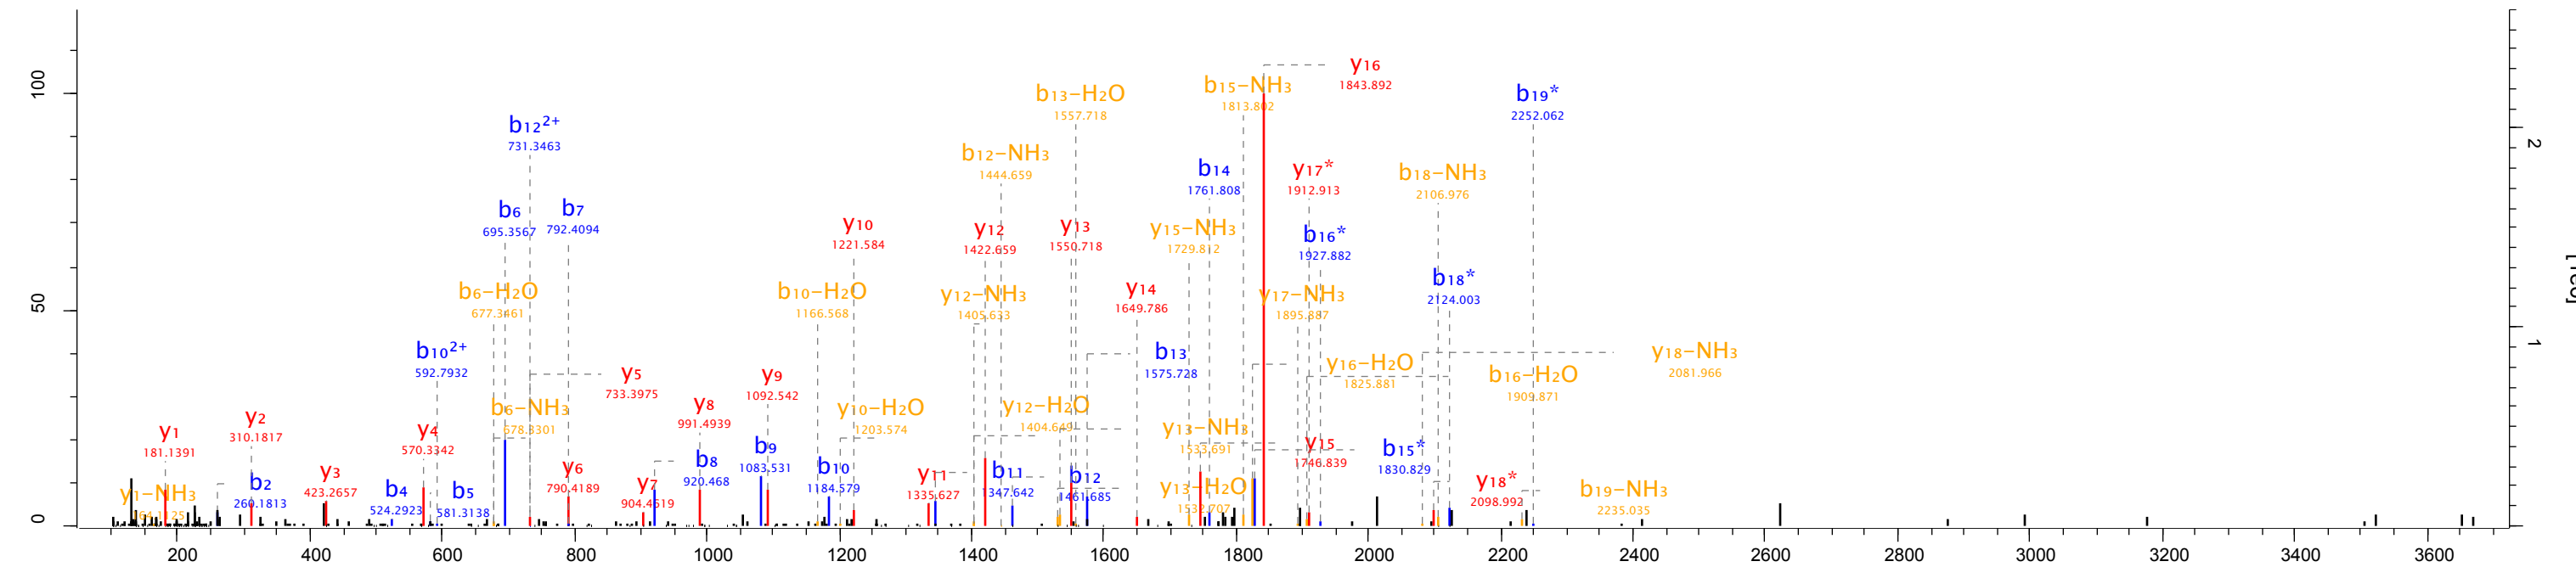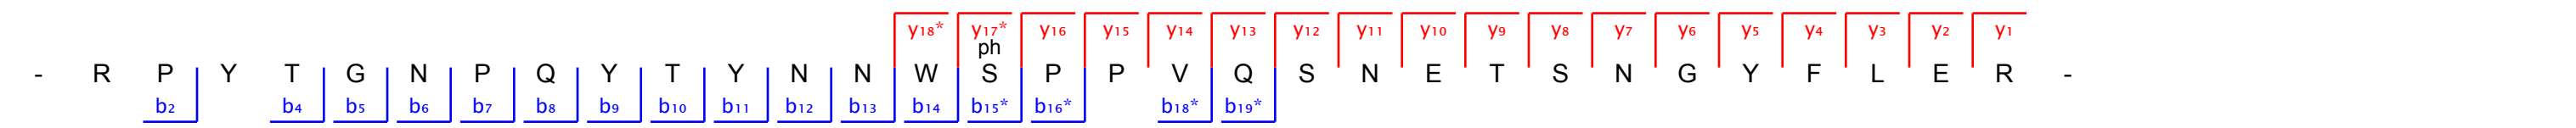

Raw file Scan Method Score m/z Gene names  
 20150814\_A375SR\_Phospho\_BR2\_03 21858 FTMS; HCD 142.9 976.76 NES

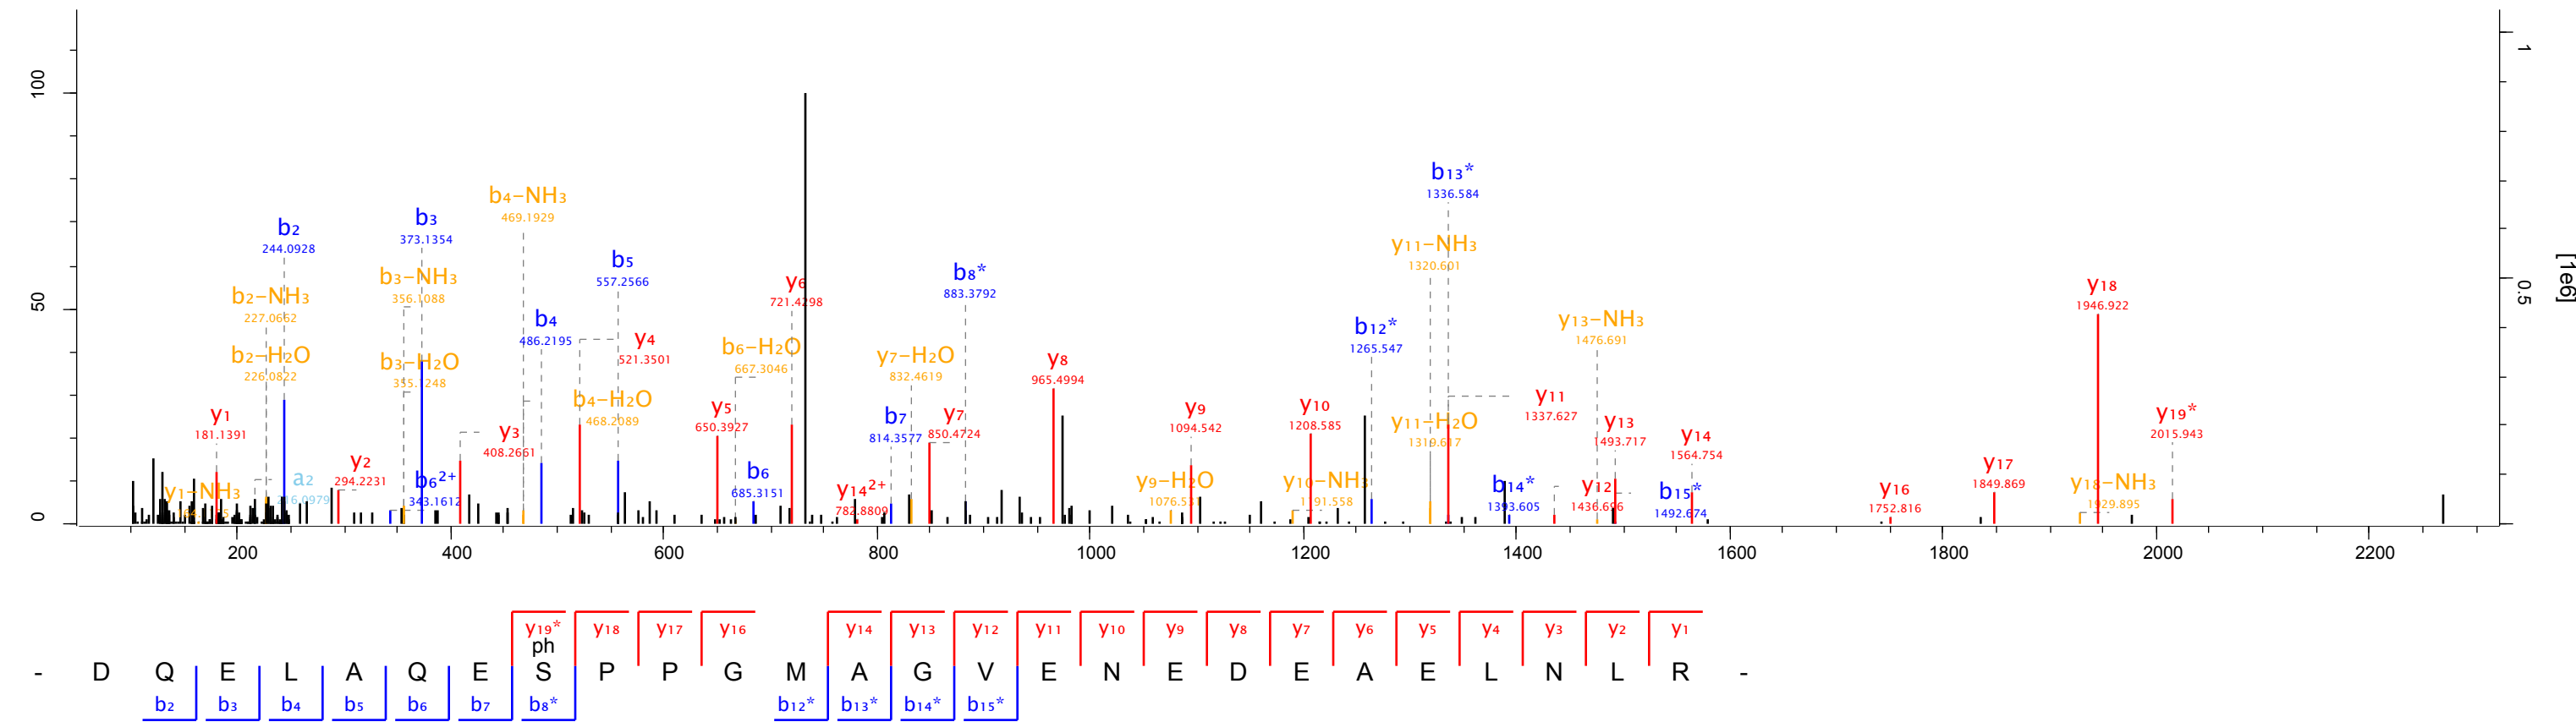

Raw file 20150814\_A375SR\_Phospho\_BR2\_03 Scan 22118 Method FTMS; HCD Score 424.12 m/z 1123.44 Gene names CTNNA1

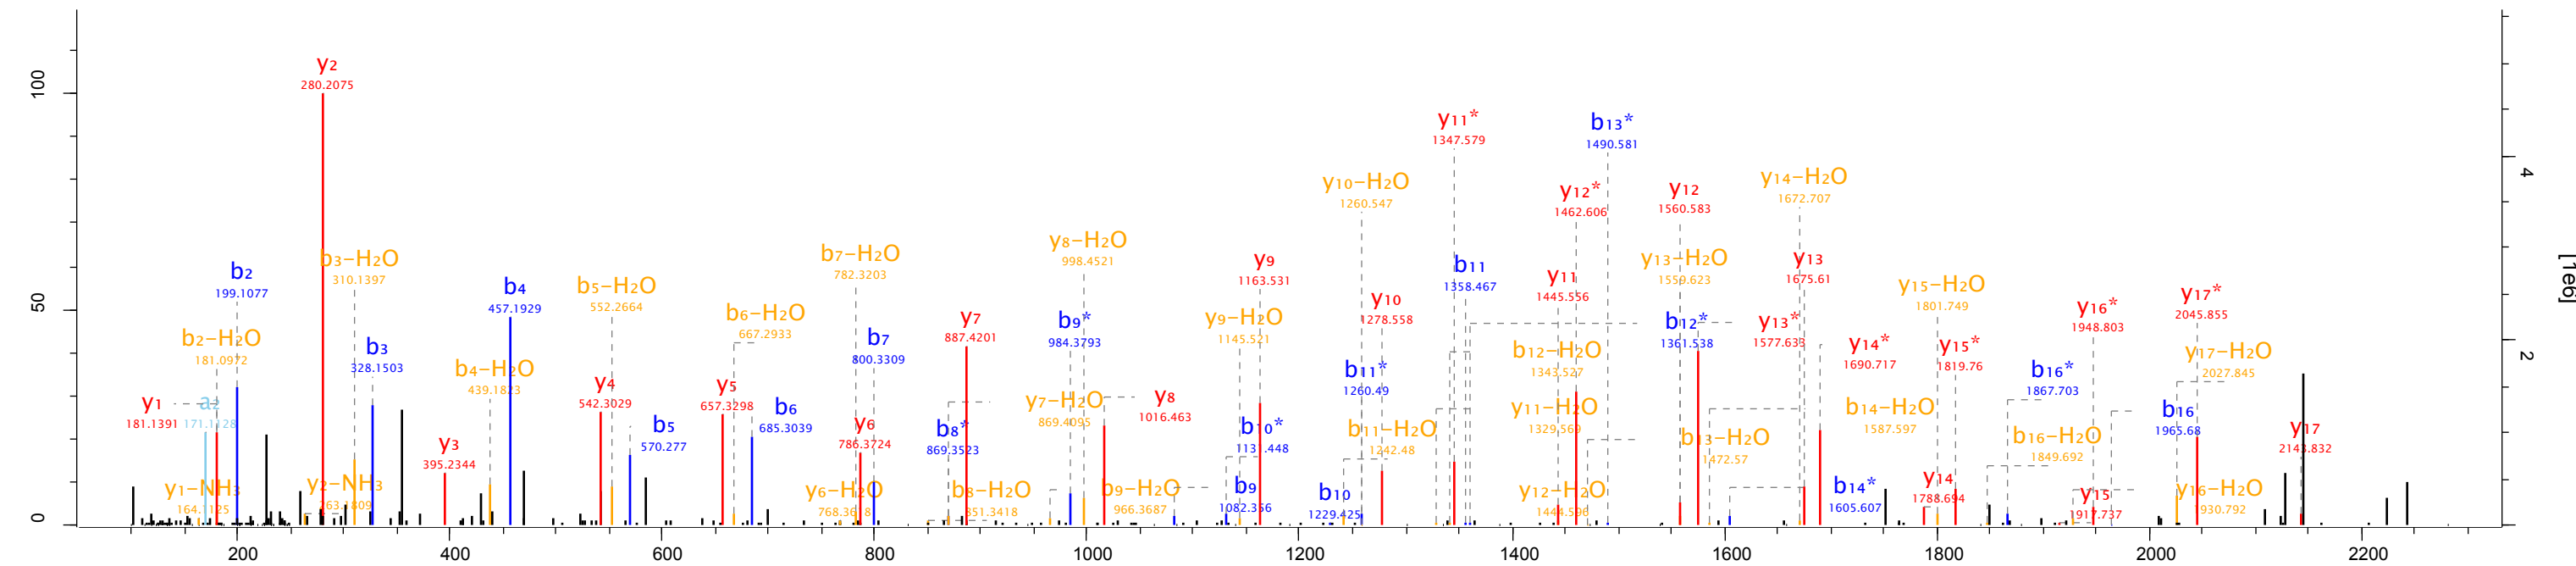

- T P E E L D D S D F E T E D F D V R -

y17
y16\*
y15
y14
y13
y12
y11  
ph
y10
y9
y8
y7
y6
y5
y4
y3
y2
y1

b2
b3
b4
b5
b6
b7
b8\*
b9
b10
b11
b12\*
b13\*
b14\*
b16



Raw file  
 20150814\_A375SR\_Phospho\_BR2\_03  
 Scan 22218 Method FTMS; HCD Score 189.68 m/z 1207.84 Gene names ZC3H18

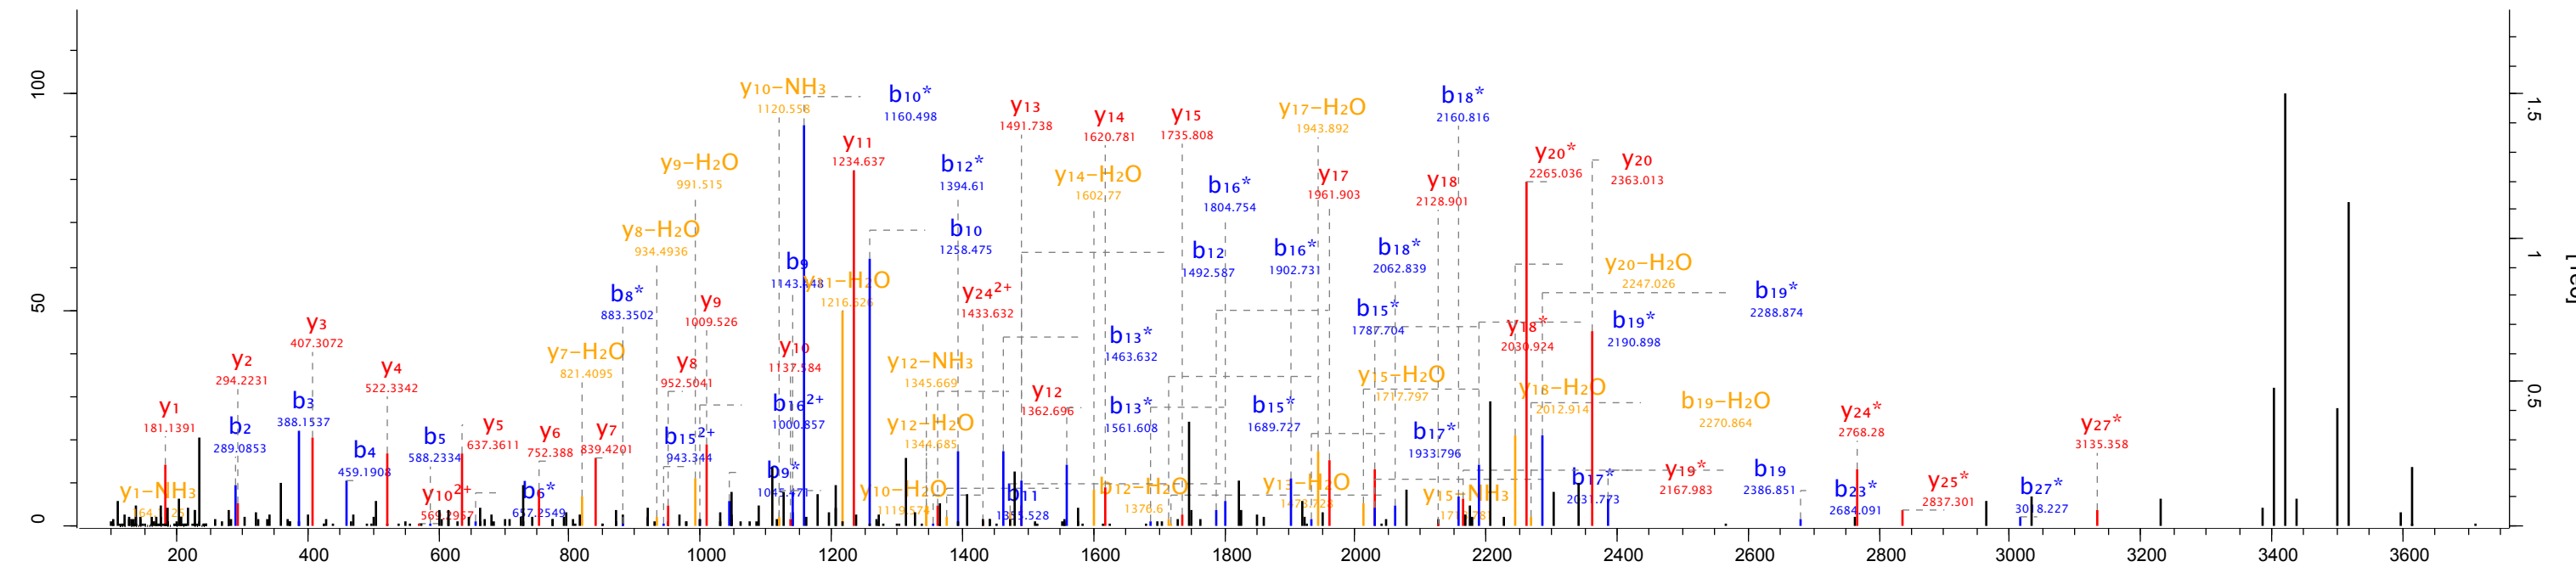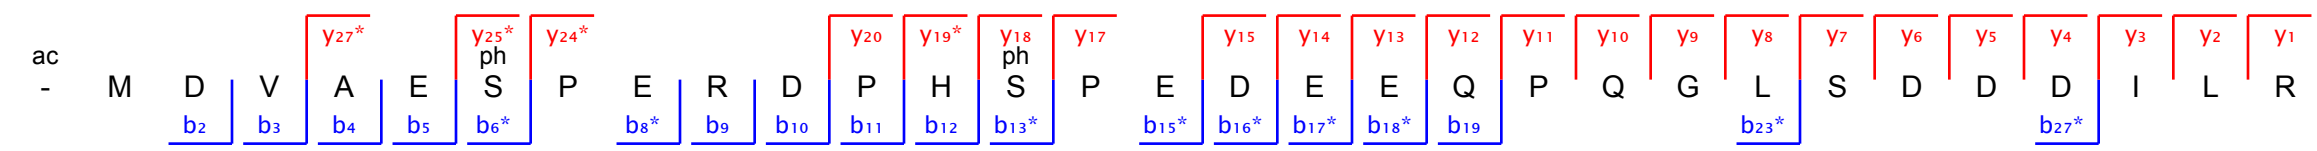

Raw file  
20150814\_A375SR\_Phospho\_BR2\_03

Scan 22328 Method FTMS; HCD Score 60.91 m/z 1151.03 Gene names WDR7

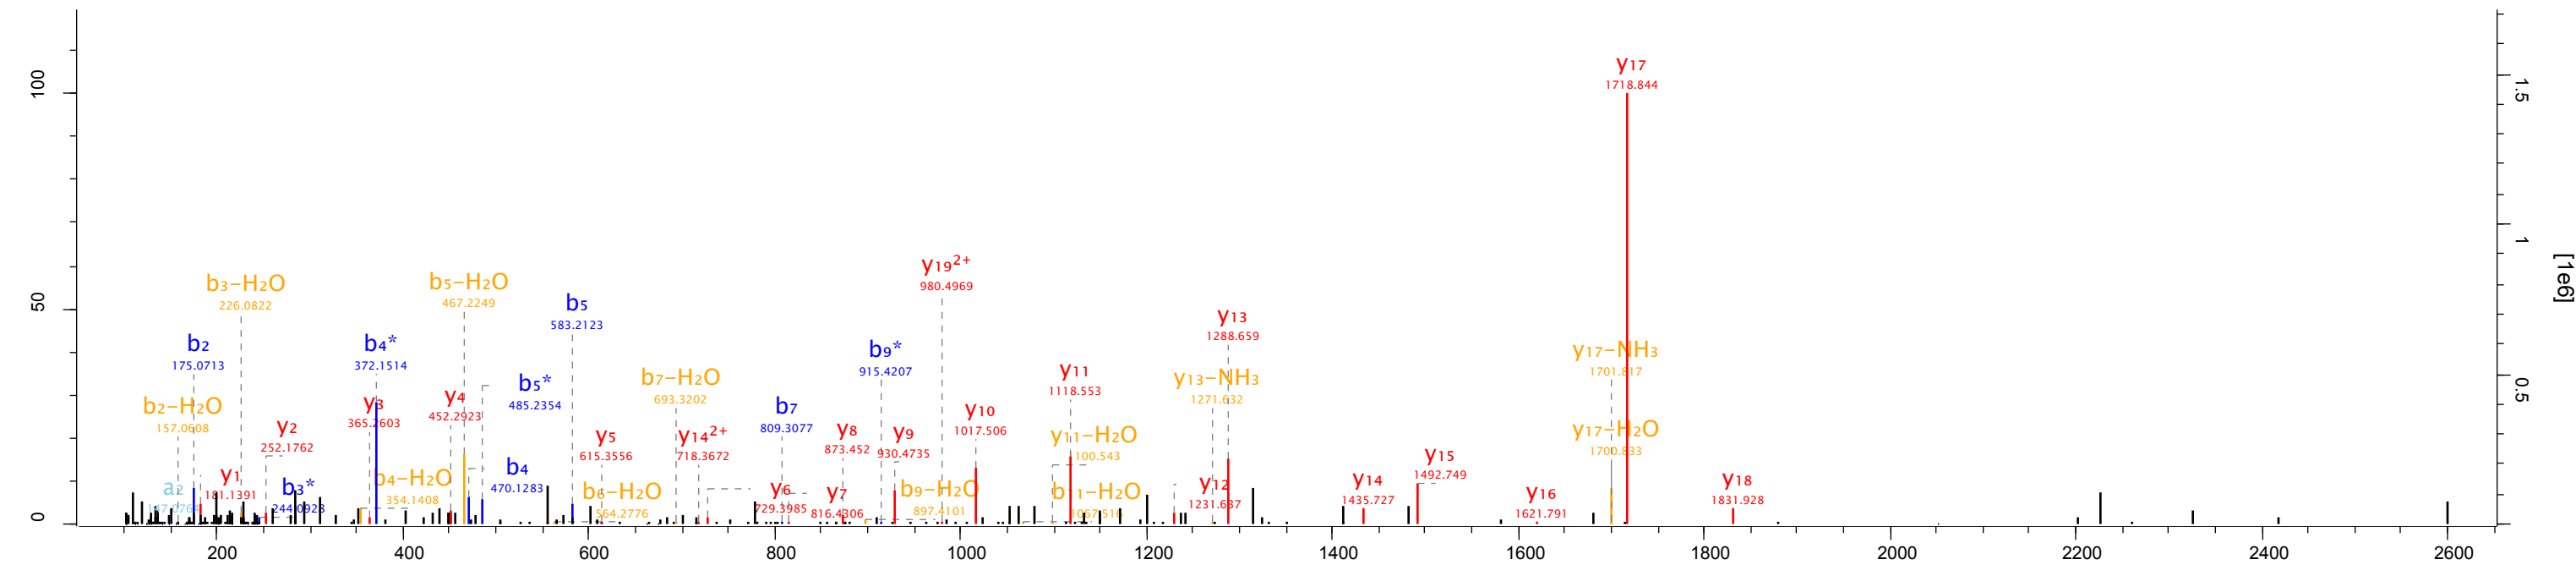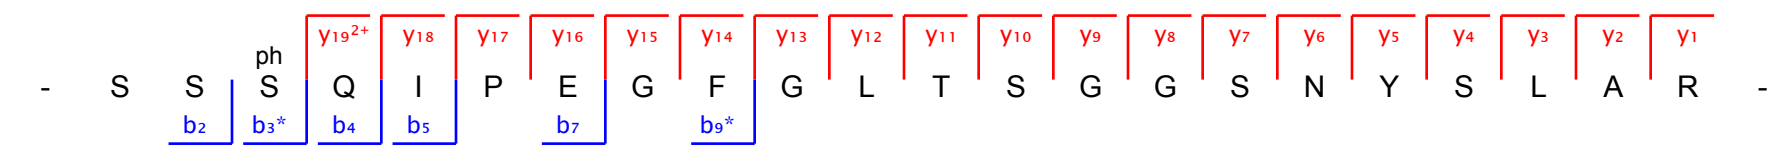

Raw file 20150814\_A375SR\_Phospho\_BR2\_03 Scan 22388 Method FTMS; HCD Score 59.63 m/z 972.44 Gene names FOXC1

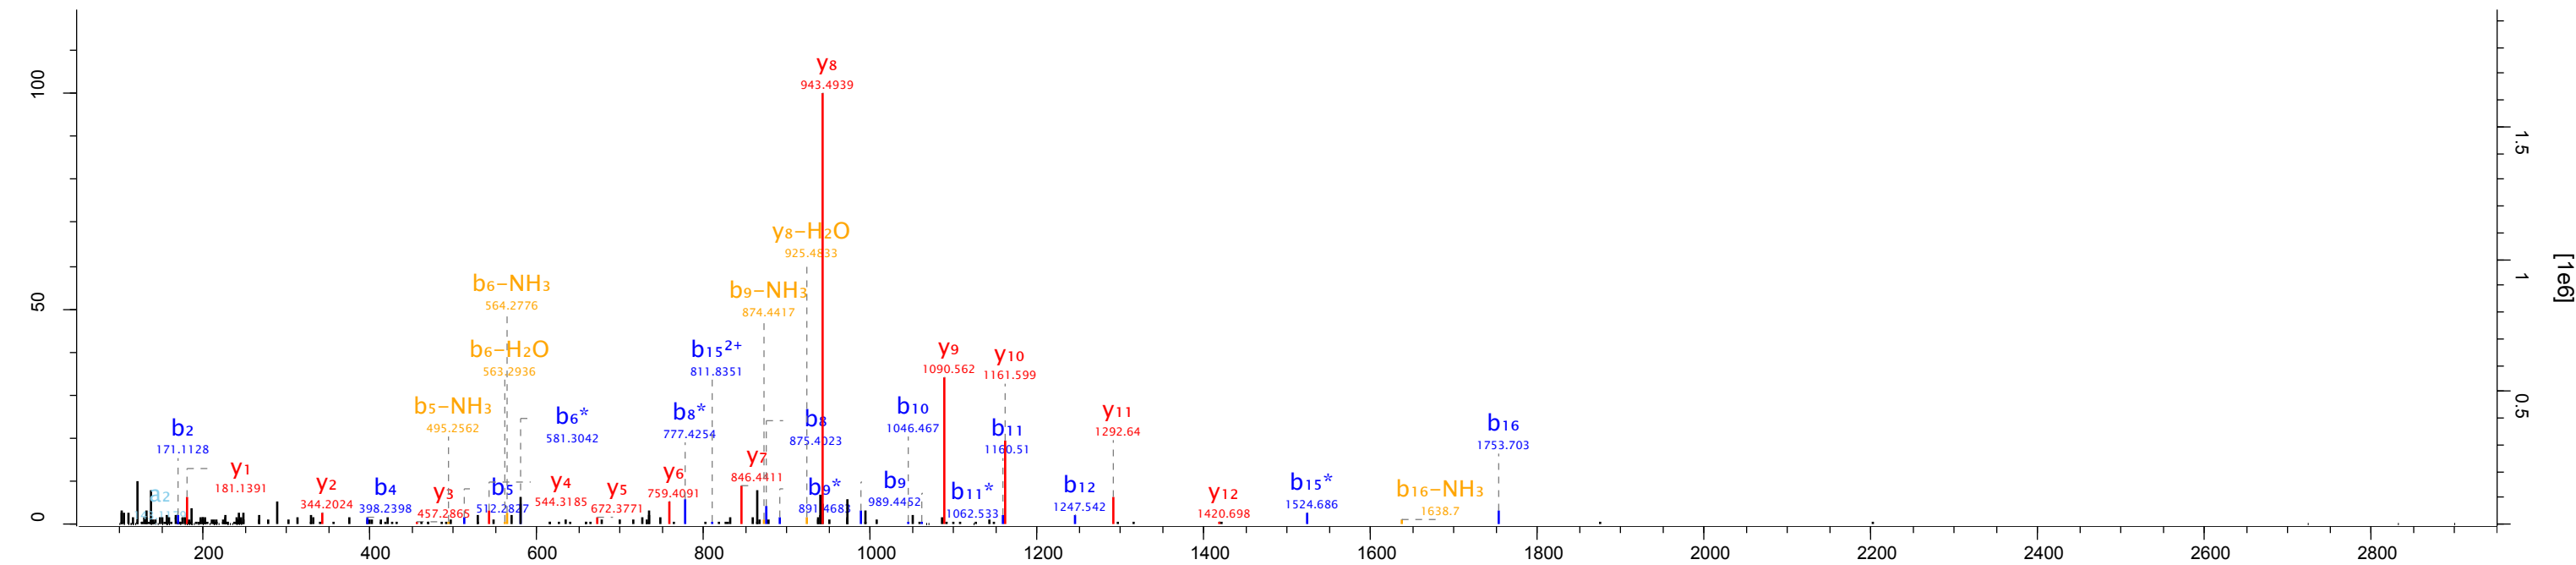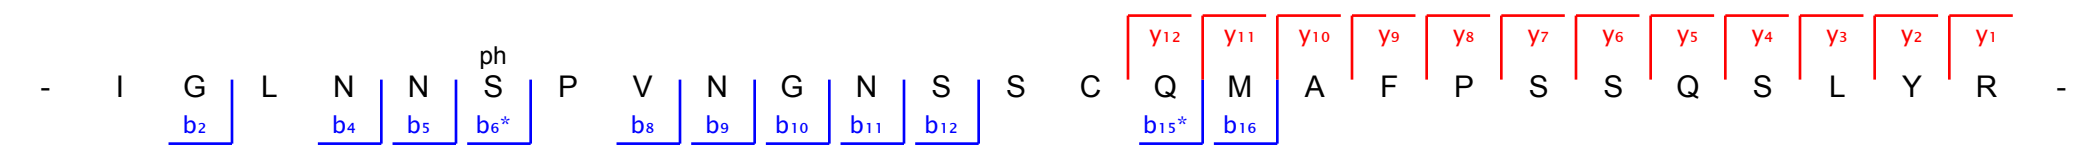

Raw file  
 20150814\_A375SR\_Phospho\_BR2\_03  
 Scan 22508 Method FTMS; HCD Score 230.94 m/z 1291.52 Gene names FNBP4

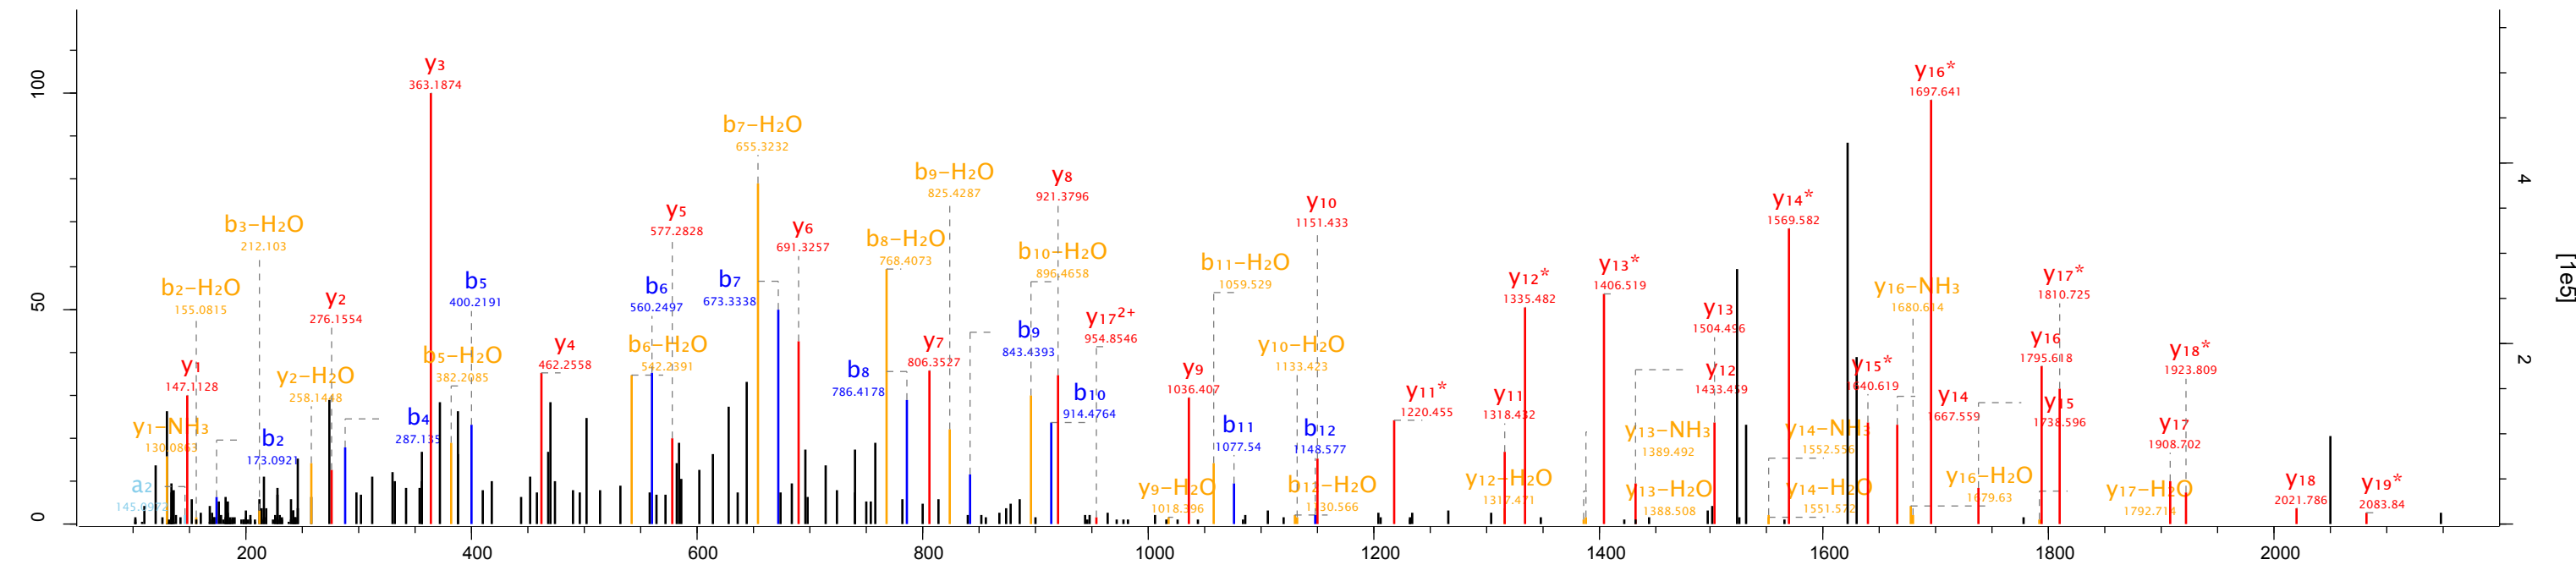

- A T G G L C L L G A Y A D S D D D D N D V S E K -

b<sub>2</sub>
b<sub>4</sub>
b<sub>5</sub>
b<sub>6</sub>
b<sub>7</sub>
b<sub>8</sub>
b<sub>9</sub>
b<sub>10</sub>
b<sub>11</sub>
b<sub>12</sub>
y<sub>19</sub>\*
y<sub>18</sub>
y<sub>17</sub>
y<sub>16</sub>
y<sub>15</sub>
y<sub>14</sub>
y<sub>13</sub>
y<sub>12</sub>
y<sub>11</sub>ph
y<sub>10</sub>
y<sub>9</sub>
y<sub>8</sub>
y<sub>7</sub>
y<sub>6</sub>
y<sub>5</sub>
y<sub>4</sub>
y<sub>3</sub>
y<sub>2</sub>
y<sub>1</sub>

Raw file: 20150814\_A375SR\_Phospho\_BR2\_03  
 Scan: 22588  
 Method: FTMS; HCD  
 Score: 46.17  
 m/z: 1241.56  
 Gene names: MICAL3

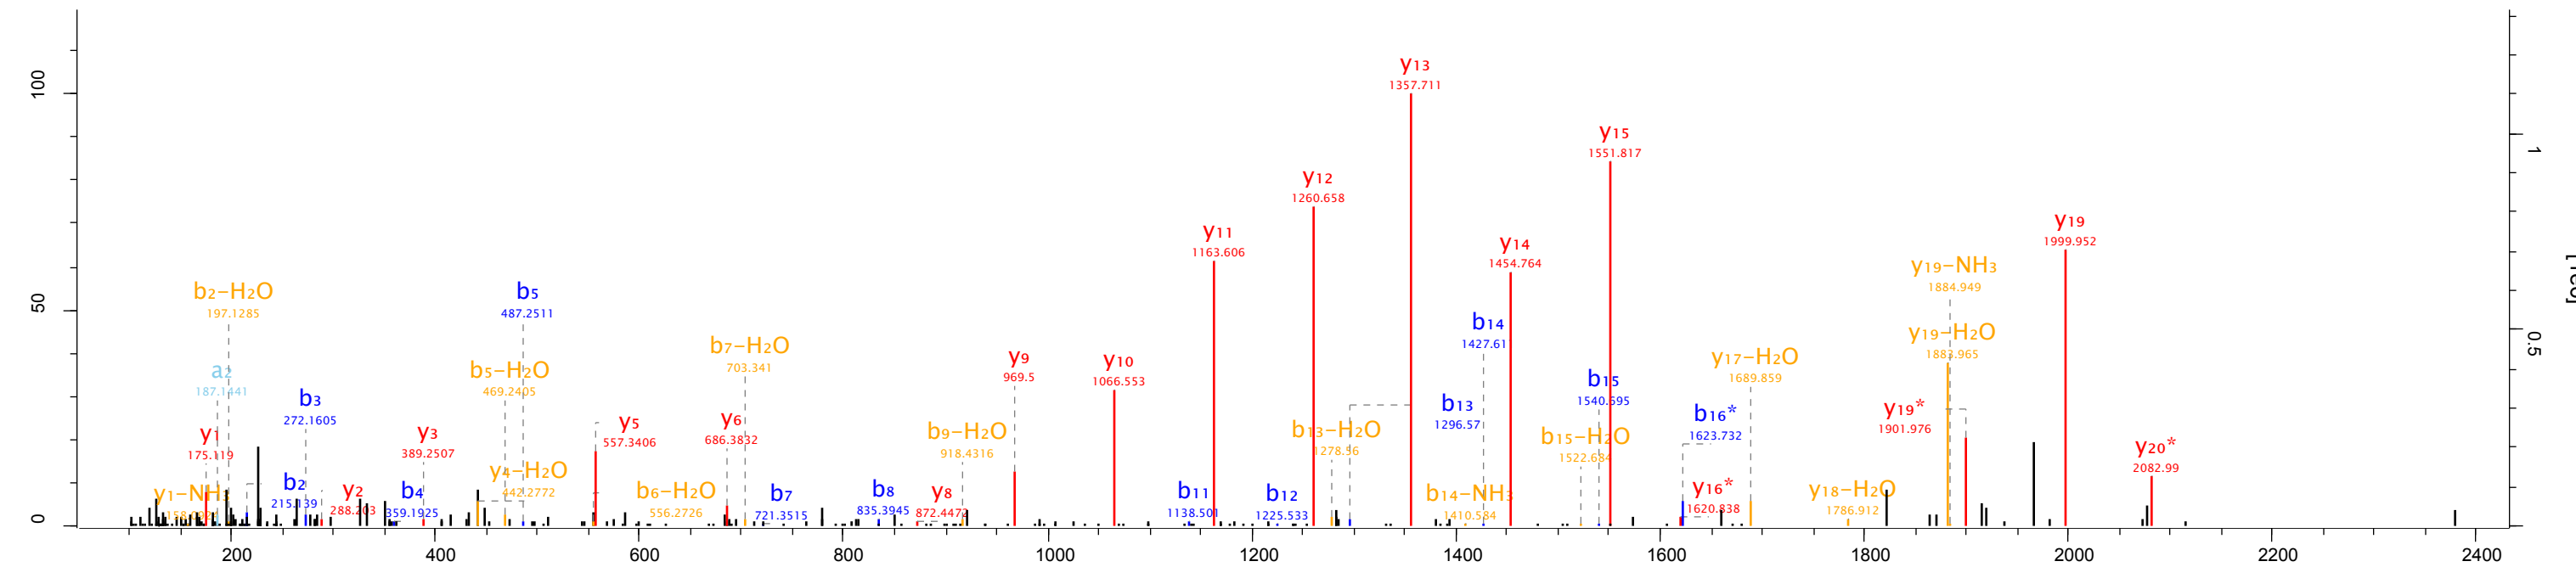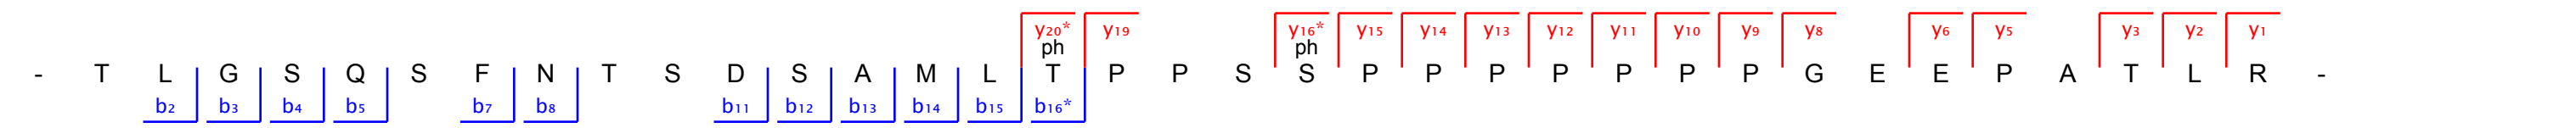

Raw file Scan Method Score m/z Gene names  
 20150814\_A375SR\_Phospho\_BR2\_03 22858 FTMS; HCD 216.24 1232.61 YAP1

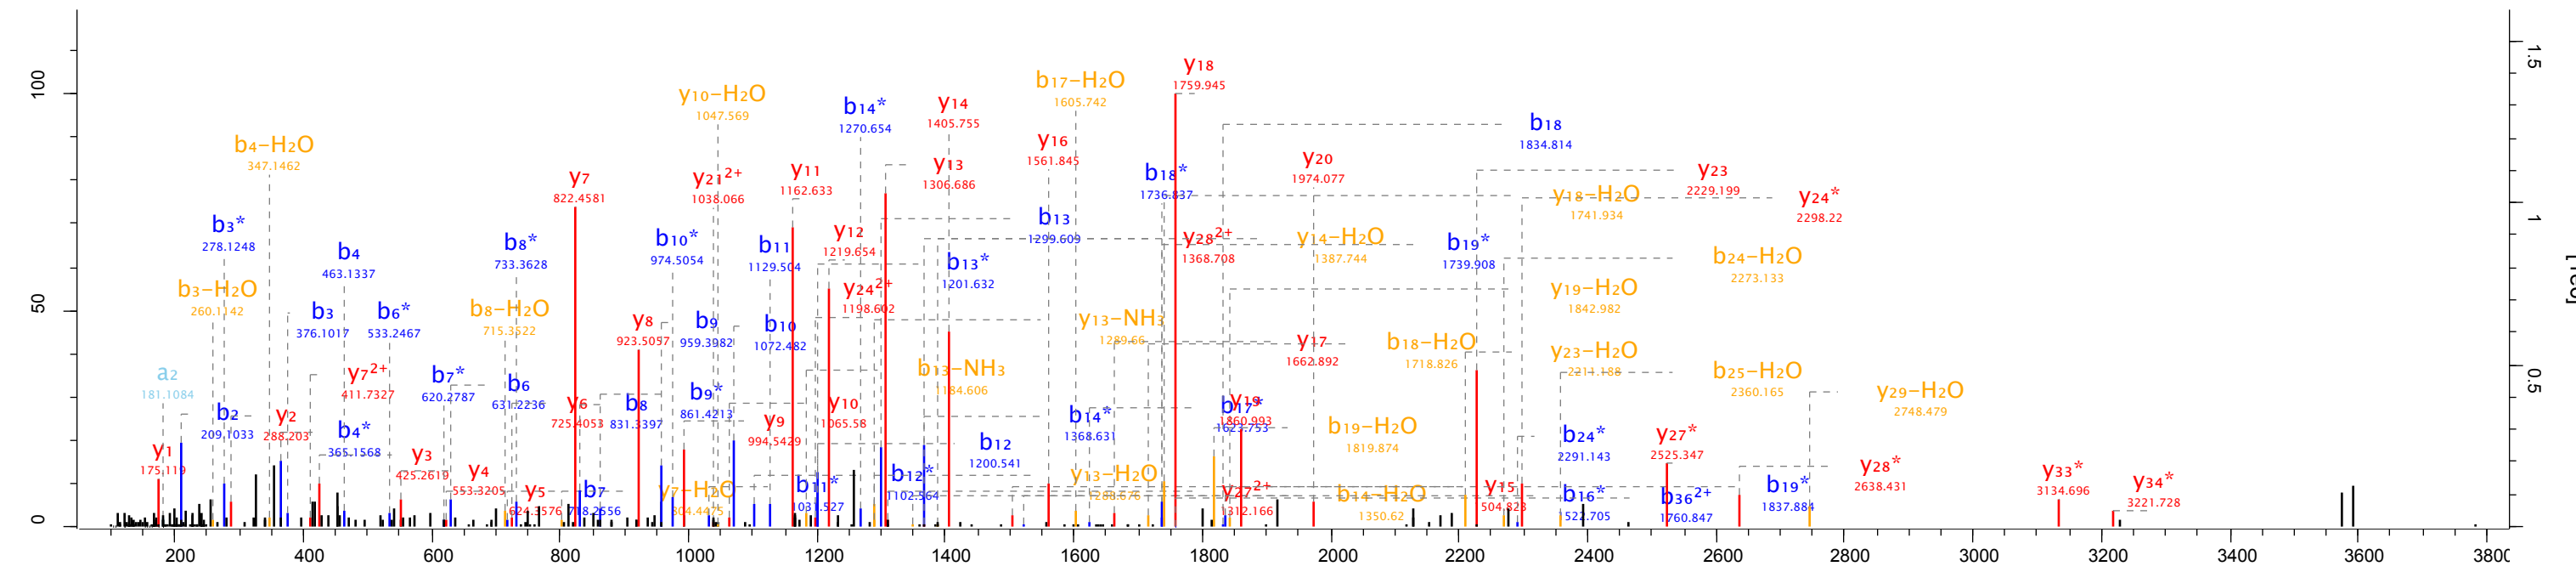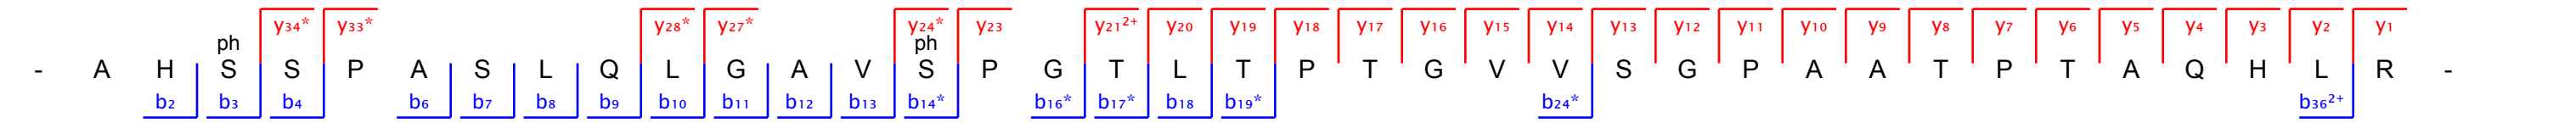

Raw file 20150814\_A375SR\_Phospho\_BR2\_03 Scan 23258 Method FTMS; HCD Score 237.19 m/z 1140.45 Gene names CCAR2

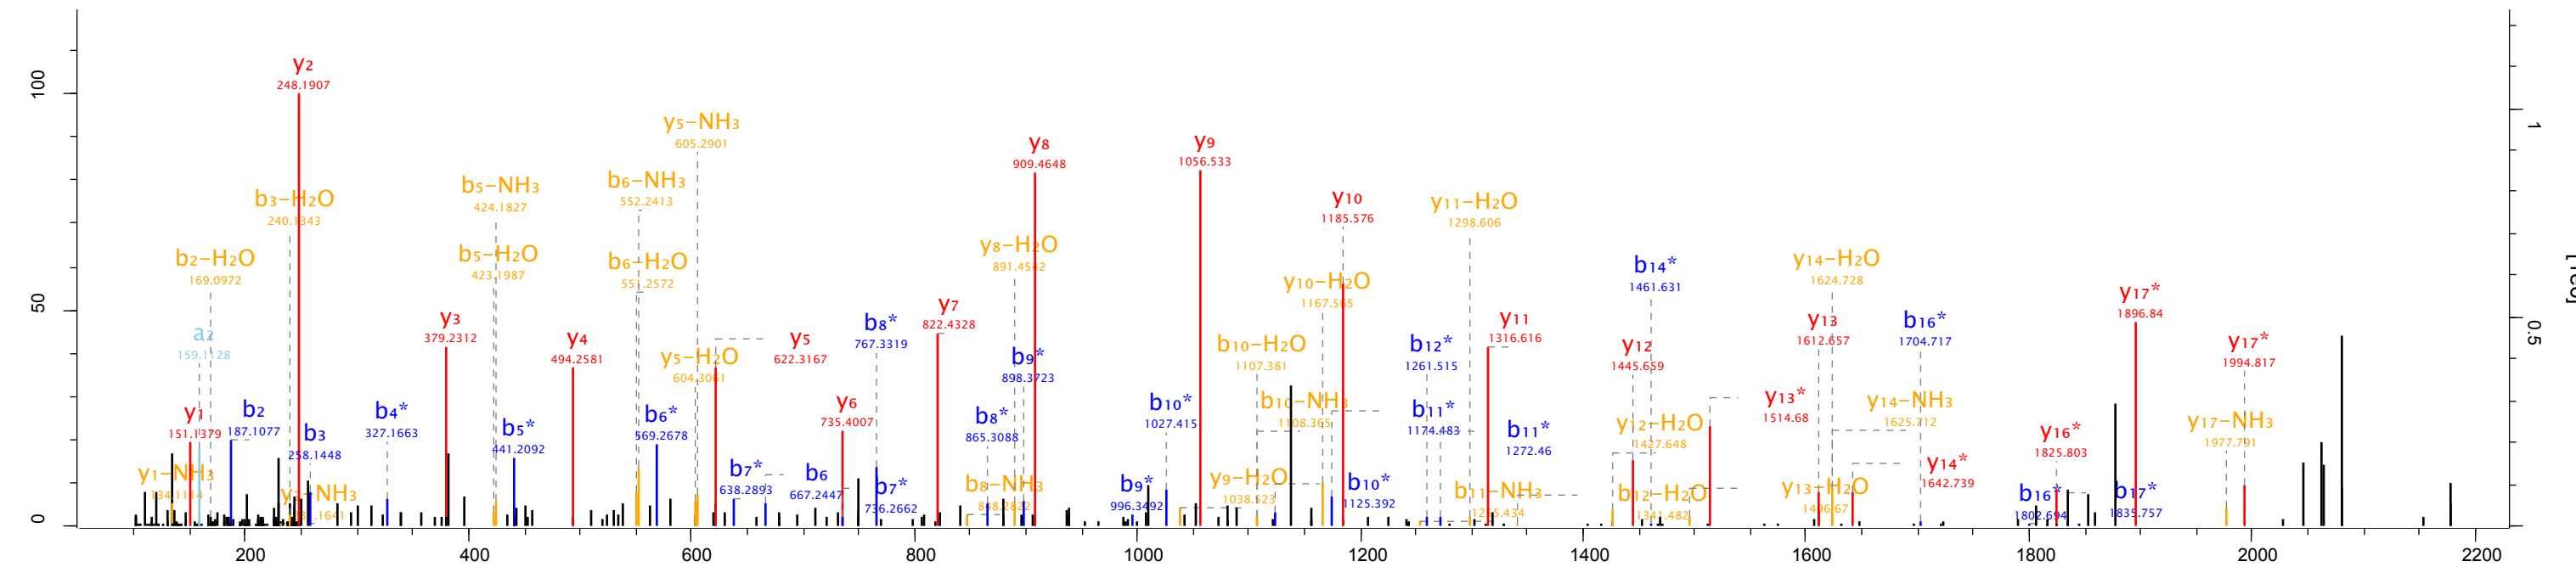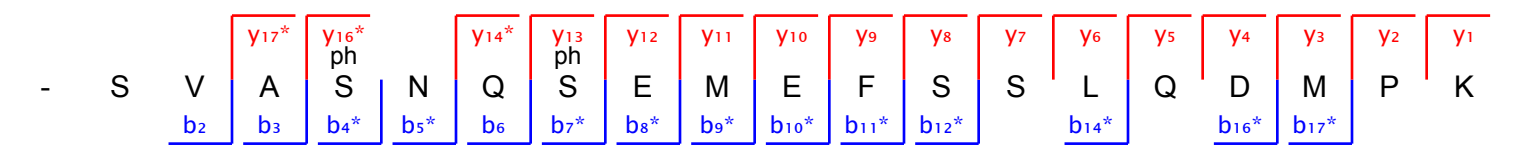

Raw file Scan Method Score m/z Gene names  
 20150814\_A375SR\_Phospho\_BR2\_03 23638 FTMS; HCD 169.23 1038.47 C1orf174

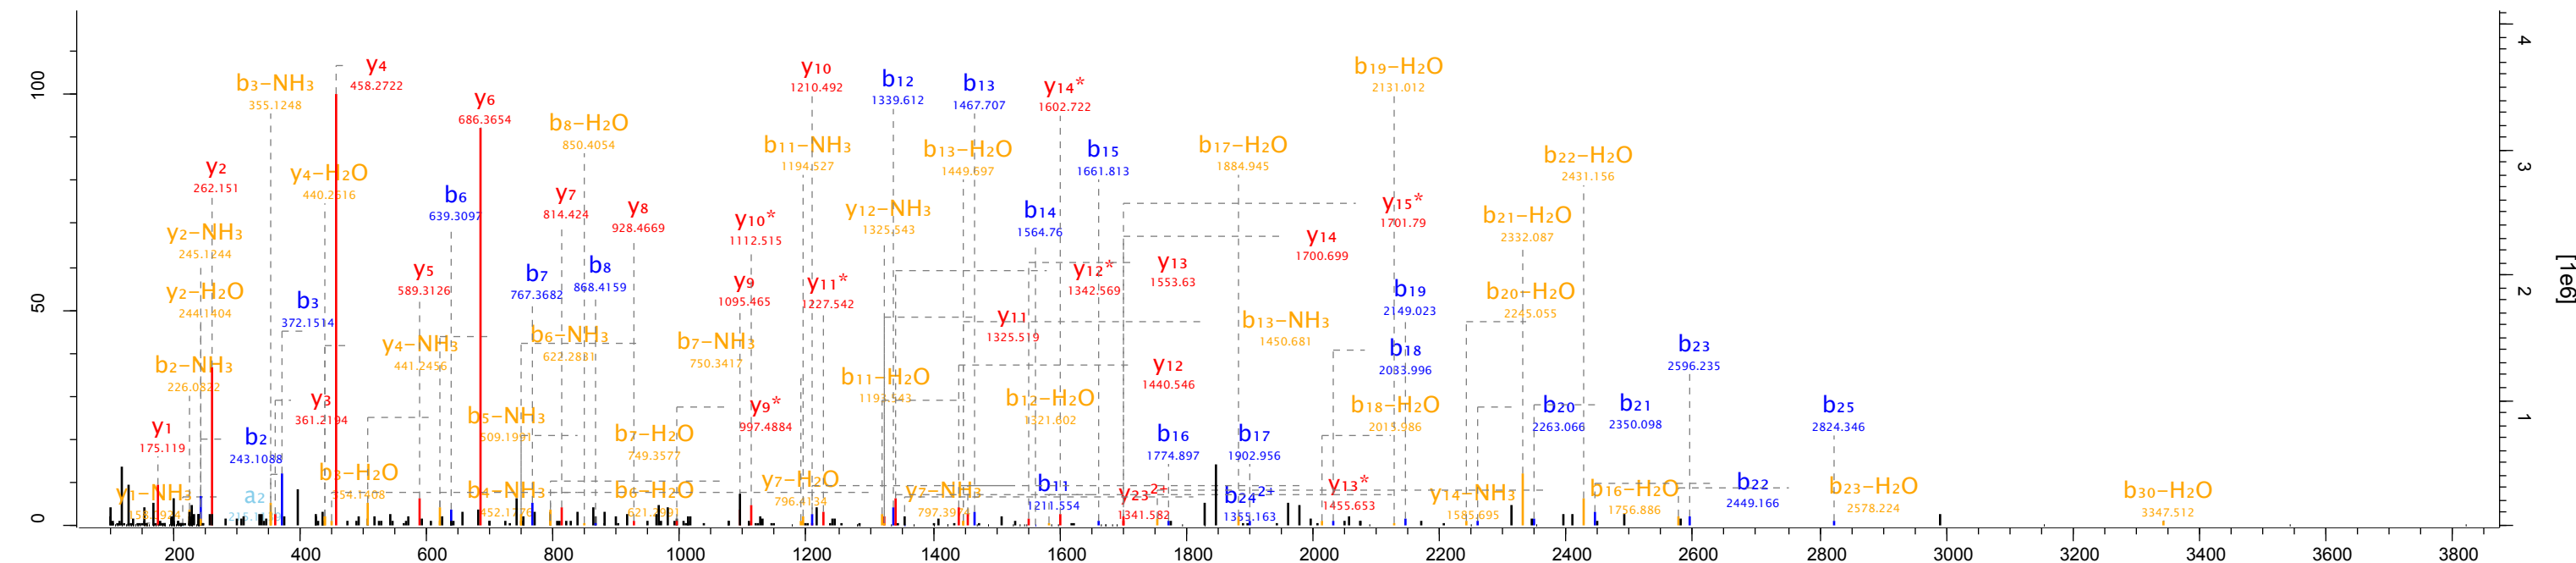

- Q N E P G L Q T E D V Q K P P L Q M D N S V F L D D D S N Q P M P V S R -

b<sub>2</sub>
b<sub>3</sub>
b<sub>6</sub>
b<sub>7</sub>
b<sub>8</sub>
b<sub>11</sub>
b<sub>12</sub>
b<sub>13</sub>
b<sub>14</sub>
b<sub>15</sub>
b<sub>16</sub>
b<sub>17</sub>
b<sub>18</sub>
b<sub>19</sub>
b<sub>20</sub>
b<sub>21</sub>
b<sub>22</sub>
b<sub>23</sub>
b<sub>24</sub><sup>2+</sup>
b<sub>25</sub>
y<sub>15</sub><sup>\*</sup>
y<sub>14</sub>
y<sub>13</sub>
y<sub>12</sub>
y<sub>11</sub>
y<sub>10</sub>
y<sub>9</sub><sup>ph</sup>
y<sub>8</sub>
y<sub>7</sub>
y<sub>6</sub>
y<sub>5</sub>
y<sub>4</sub>
y<sub>3</sub>
y<sub>2</sub>
y<sub>1</sub>
y<sub>23</sub><sup>2+</sup>



Raw file: 20150814\_A375SR\_Phospho\_BR2\_03  
 Scan: 23658 Method: FTMS; HCD Score: 103.51 m/z: 1122.02 Gene names: FRMD8

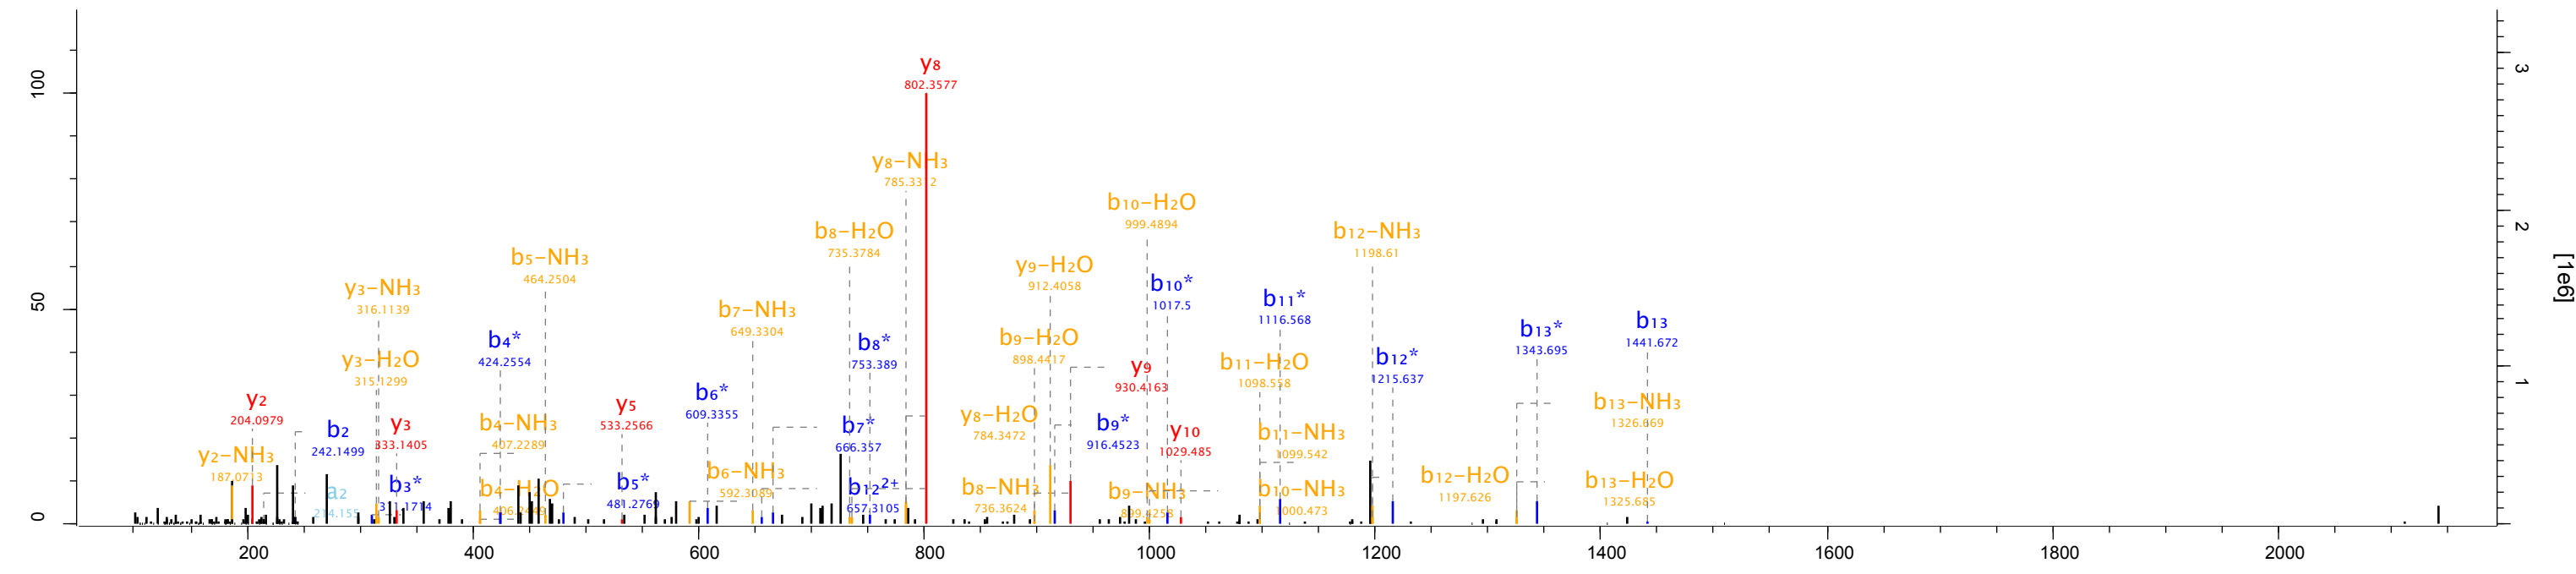

Sequence: - Q L S L G Q G S Y T V V Q P G D S L E Q G -

Fragmentation sites (b ions): b2 (L), b3\* (S), b4\* (L), b5\* (G), b6\* (Q), b7\* (G), b8\* (S), b9\* (Y), b10\* (T), b11\* (V), b12\* (V), b13 (Q)

Fragmentation sites (y ions): y10 (V), y9 (Q), y8 (P), y5 (S), y3 (E), y2 (Q)

Raw file: 20150814\_A375SR\_Phospho\_BR2\_03  
 Scan: 24168 Method: FTMS; HCD Score: 50.13 m/z: 1054.54 Gene names: PLEKHA7

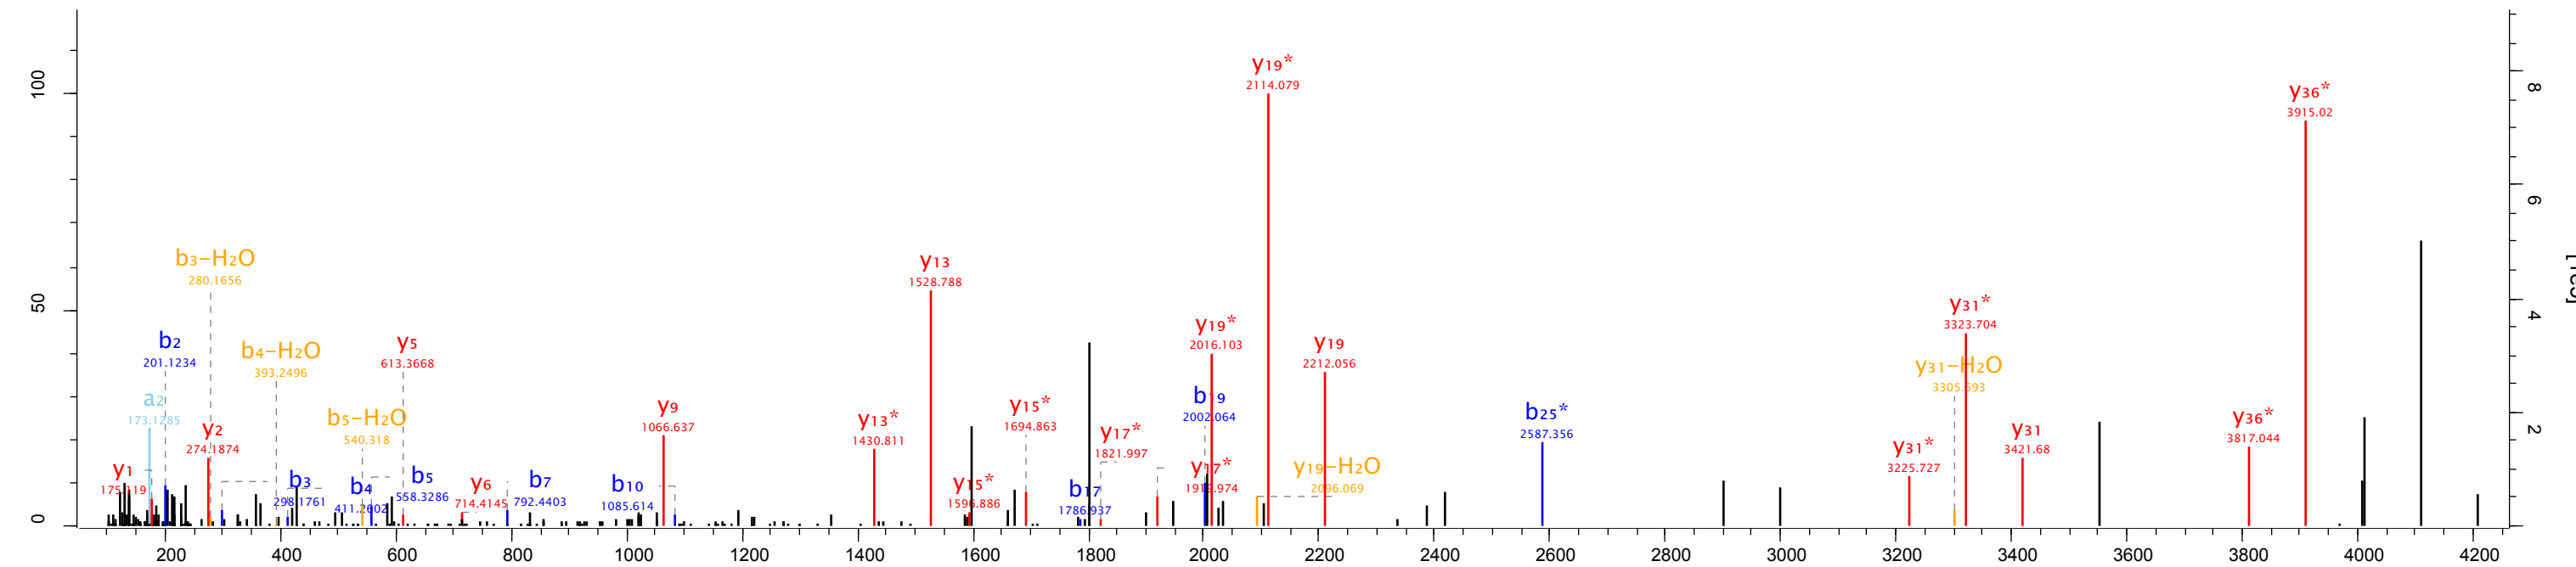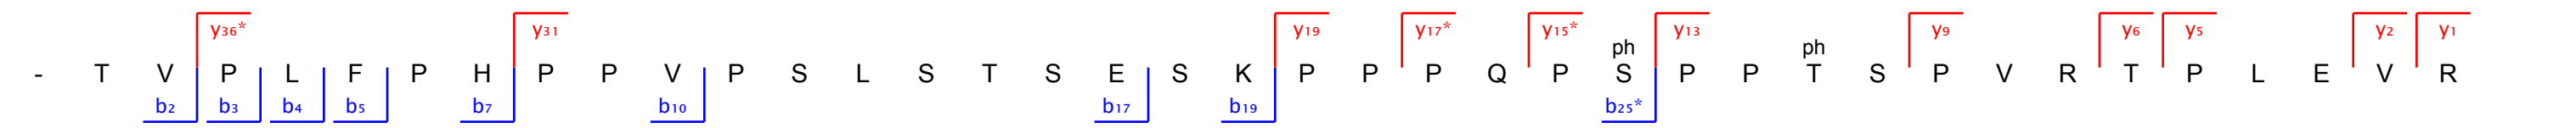

Raw file 20150814\_A375SR\_Phospho\_BR2\_03 Scan 24228 Method FTMS; HCD Score 105.36 m/z 947.4 Gene names RUNDC1

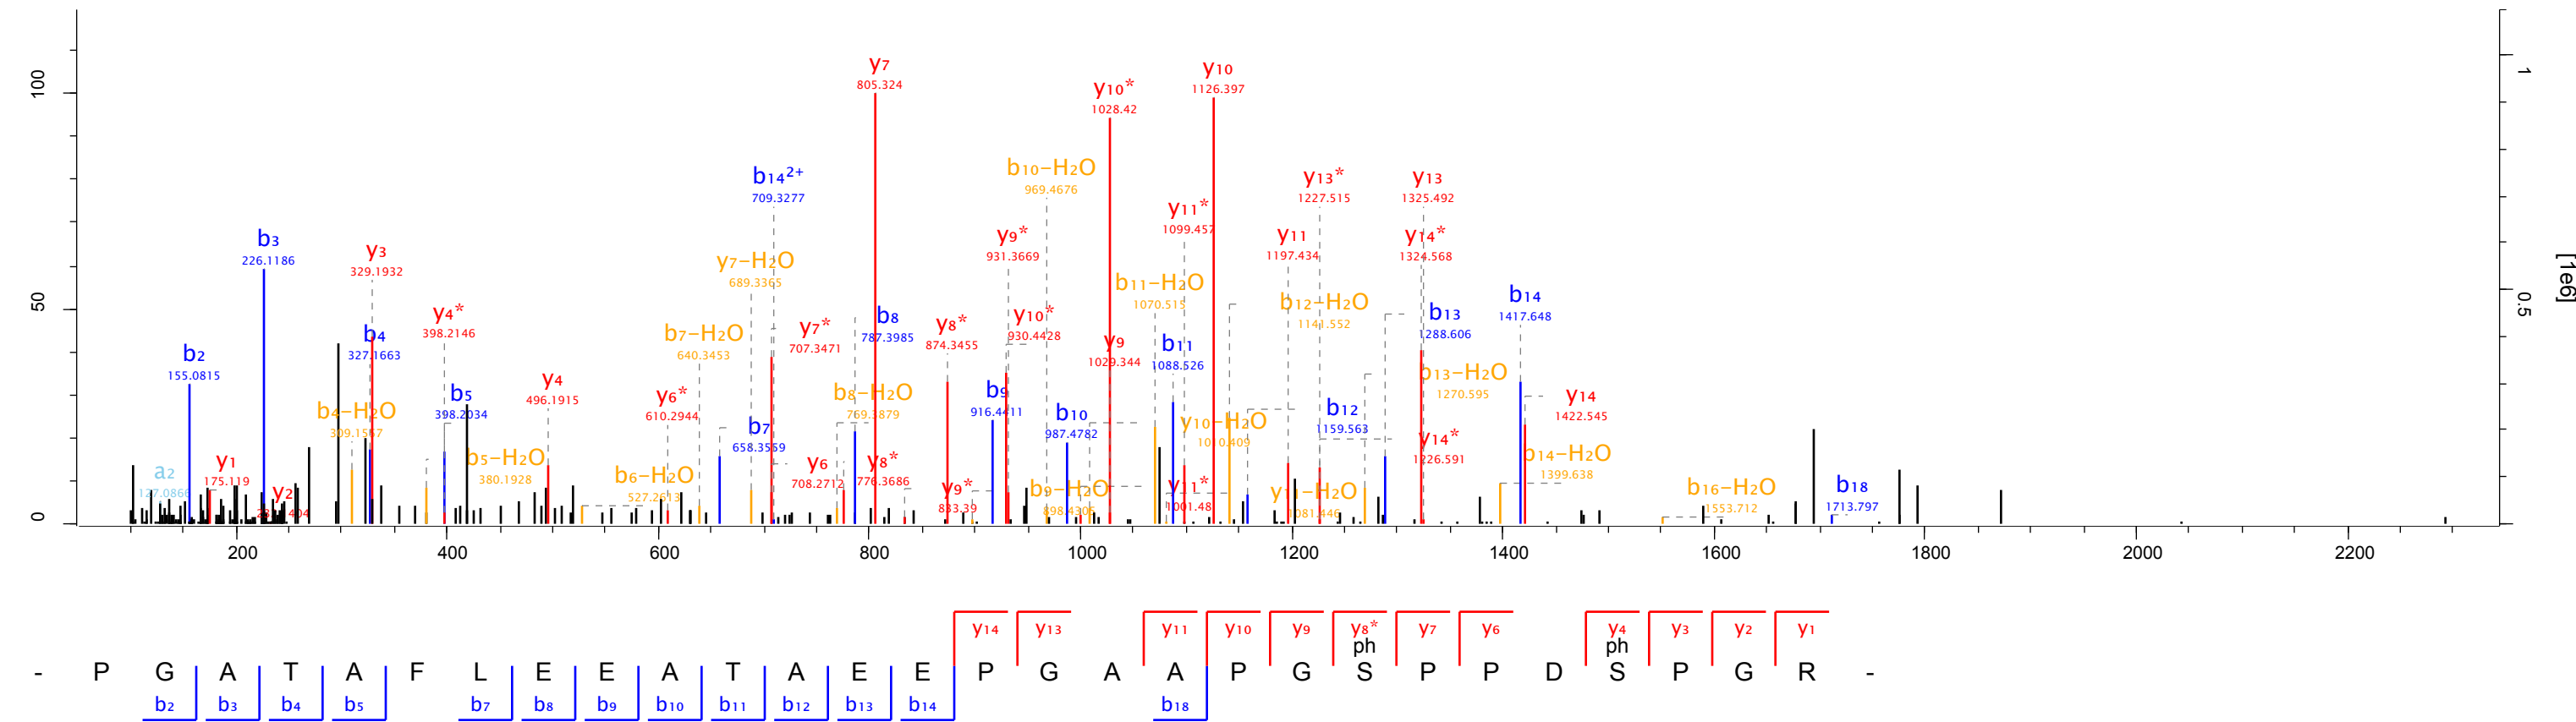

Raw file 20150814\_A375SR\_Phospho\_BR2\_03 Scan 24238 Method FTMS; HCD Score 168.17 m/z 1131.49 Gene names STAG2

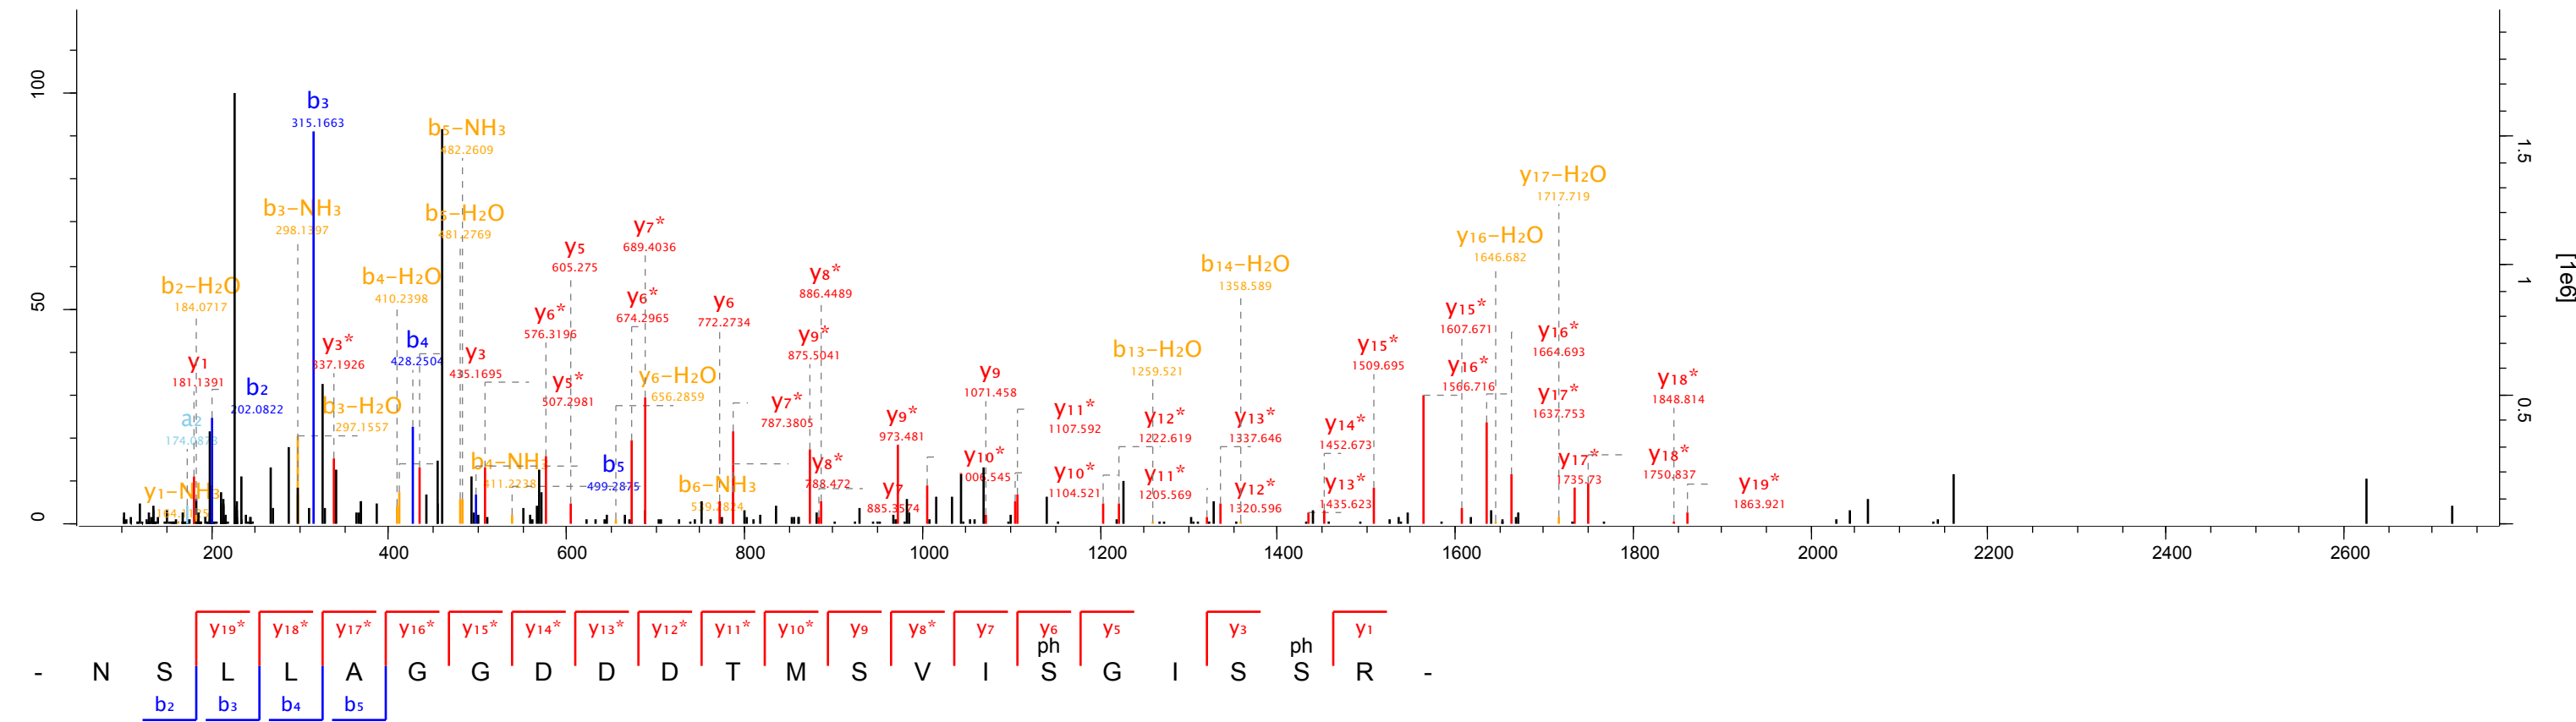

Raw file: 20150814\_A375SR\_Phospho\_BR2\_03  
 Scan: 24508 Method: FTMS; HCD Score: 89.72 m/z: 732.65 Gene names: SMN1

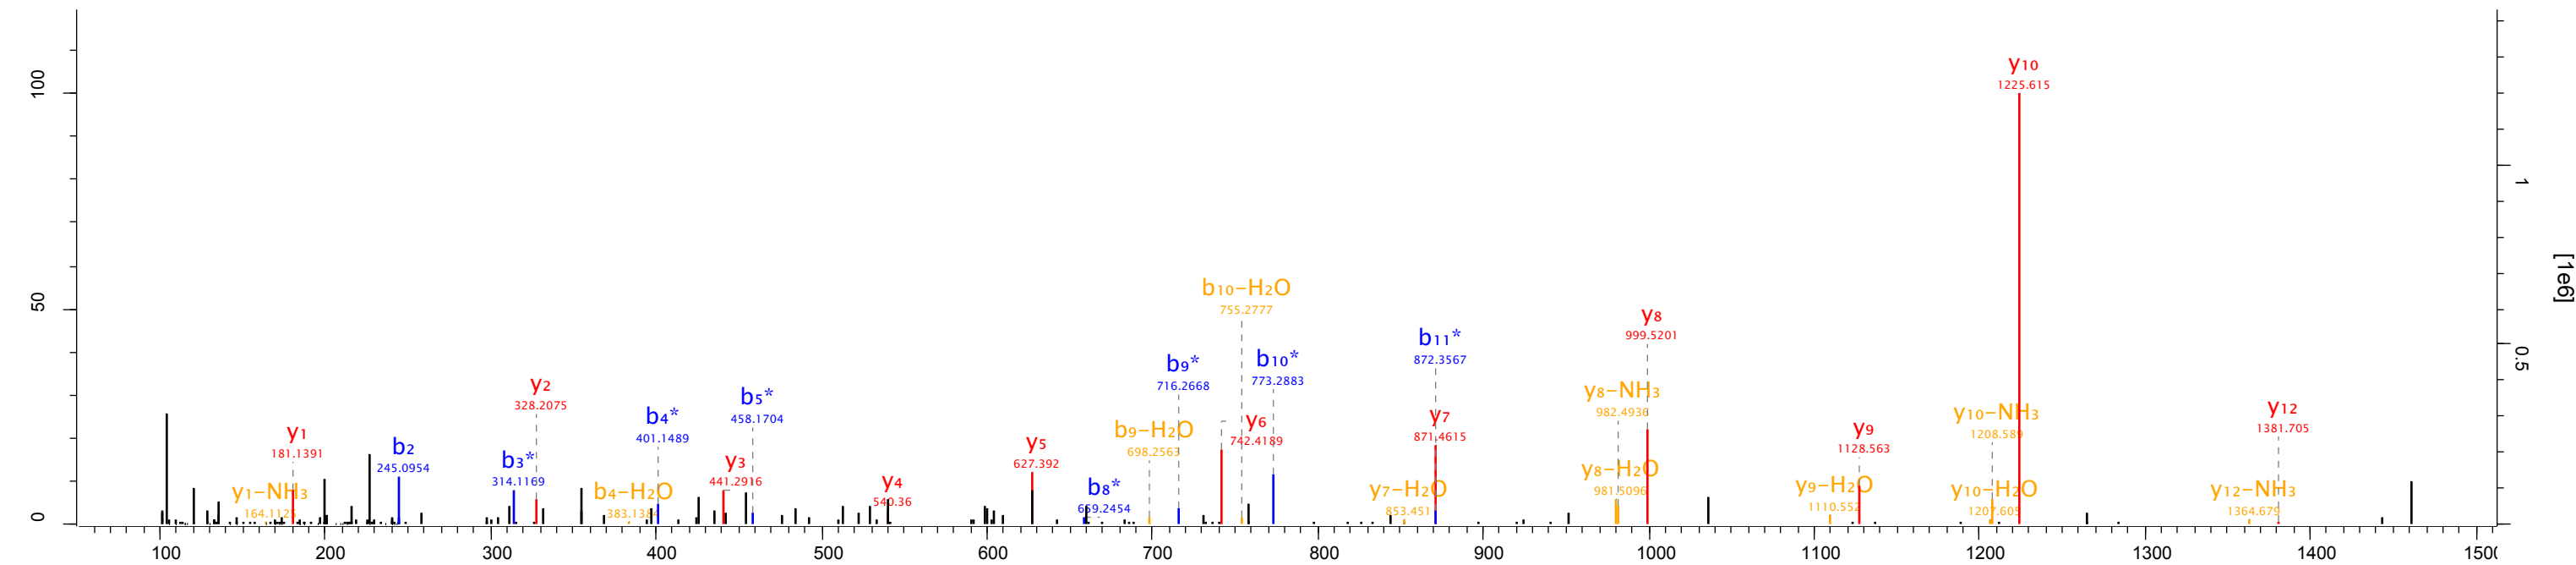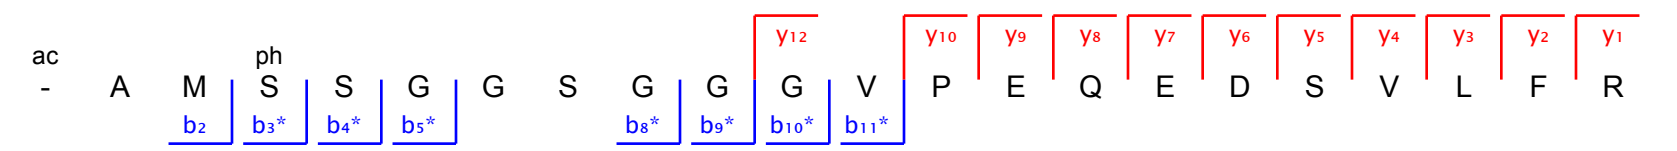

Raw file 20150814\_A375SR\_Phospho\_BR2\_03 Scan 24588 Method FTMS; HCD Score 326.97 m/z 1367.04 Gene names MFAP1

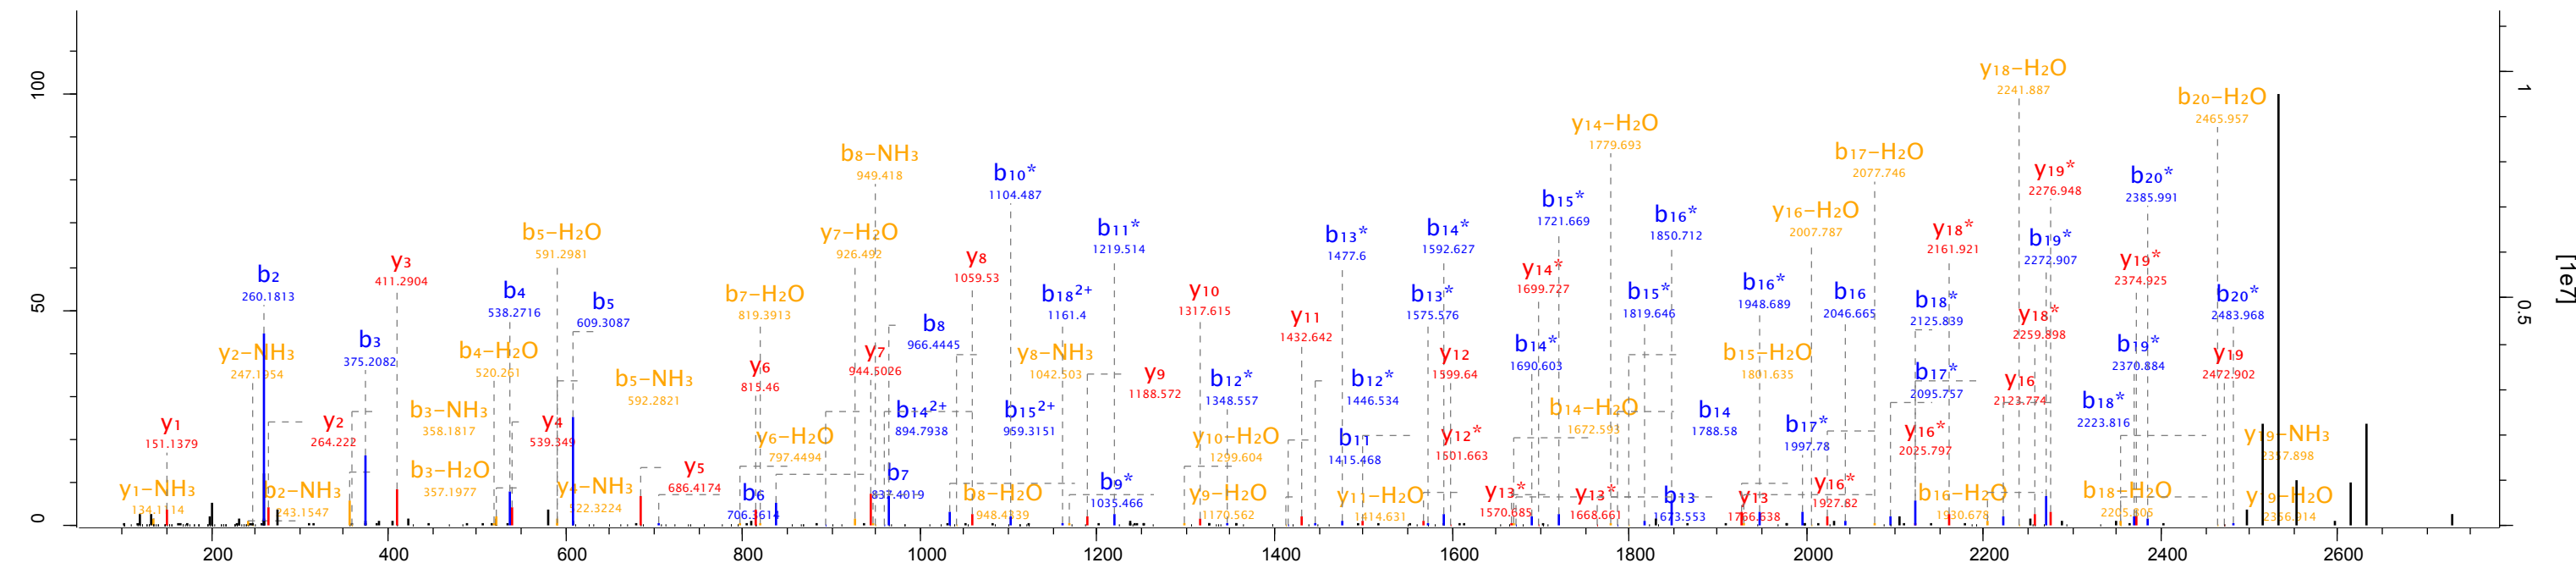

- R P D Y A P M E S S D E E D E E F Q F I K -

Fragmentation mapping below the sequence:

- b ions (blue boxes):** b<sub>2</sub> (P), b<sub>3</sub> (D), b<sub>4</sub> (Y), b<sub>5</sub> (A), b<sub>6</sub> (P), b<sub>7</sub> (M), b<sub>8</sub> (E), b<sub>9</sub><sup>\*</sup> (S), b<sub>10</sub><sup>\*</sup> (S), b<sub>11</sub> (D), b<sub>12</sub><sup>\*</sup> (E), b<sub>13</sub> (E), b<sub>14</sub> (D), b<sub>15</sub><sup>\*</sup> (E), b<sub>16</sub> (E), b<sub>17</sub><sup>\*</sup> (F), b<sub>18</sub><sup>\*</sup> (Q), b<sub>19</sub><sup>\*</sup> (F), b<sub>20</sub><sup>\*</sup> (I)
- y ions (red boxes):** y<sub>1</sub> (K), y<sub>2</sub> (I), y<sub>3</sub> (F), y<sub>4</sub> (Q), y<sub>5</sub> (F), y<sub>6</sub> (E), y<sub>7</sub> (E), y<sub>8</sub> (D), y<sub>9</sub> (E), y<sub>10</sub> (E), y<sub>11</sub> (D), y<sub>12</sub> (S), y<sub>13</sub> (S), y<sub>14</sub><sup>\*</sup> (E), y<sub>16</sub> (P), y<sub>18</sub><sup>\*</sup> (Y), y<sub>19</sub> (D)

Raw file: 20150814\_A375SR\_Phospho\_BR2\_03  
 Scan: 24678 Method: FTMS; HCD Score: 149.44 m/z: 838.93 Gene names: HCFC1

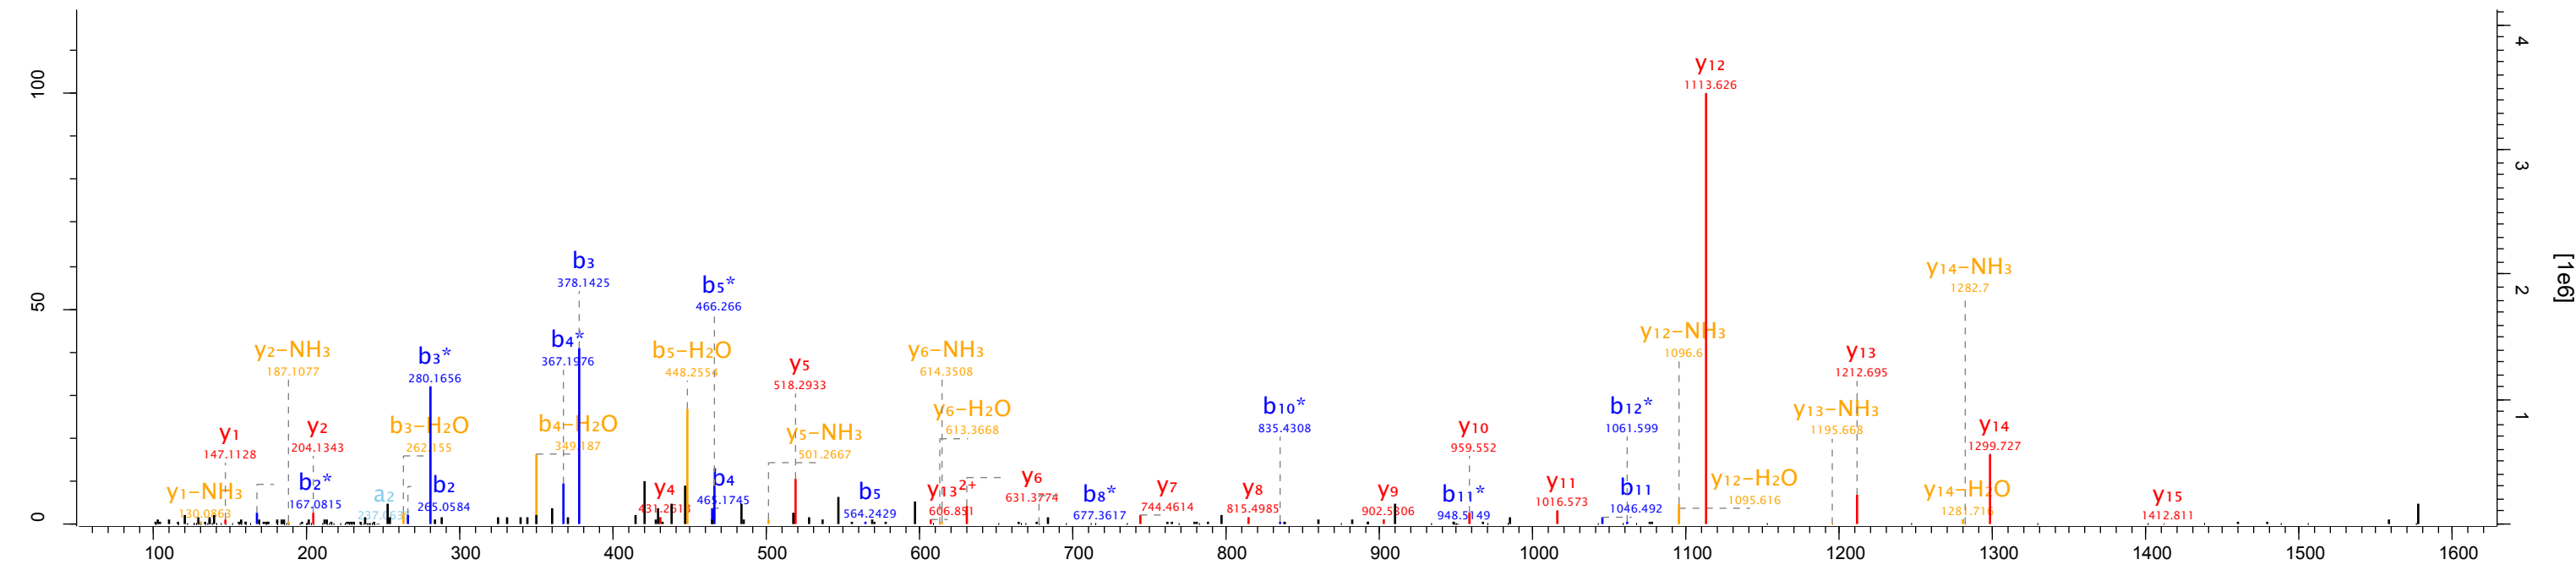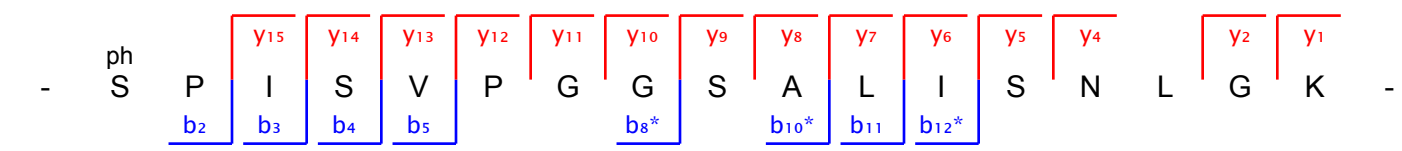

Raw file  
20150814\_A375SR\_Phospho\_BR2\_03

Scan 24958 Method FTMS; HCD Score 152.5 m/z 1044.78 Gene names PSPC1

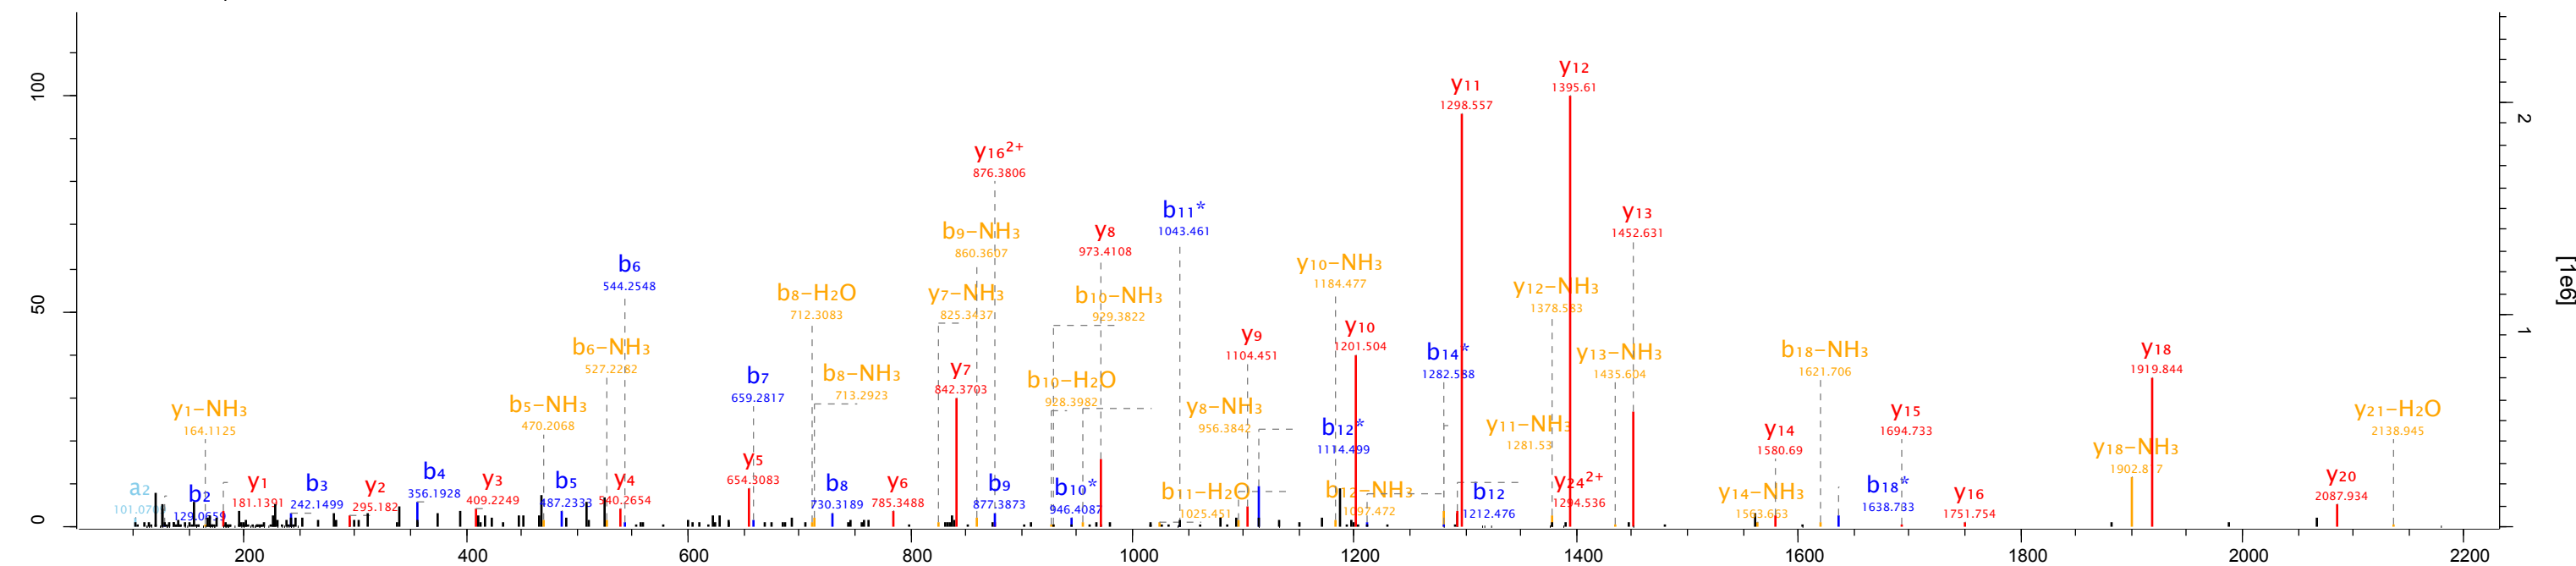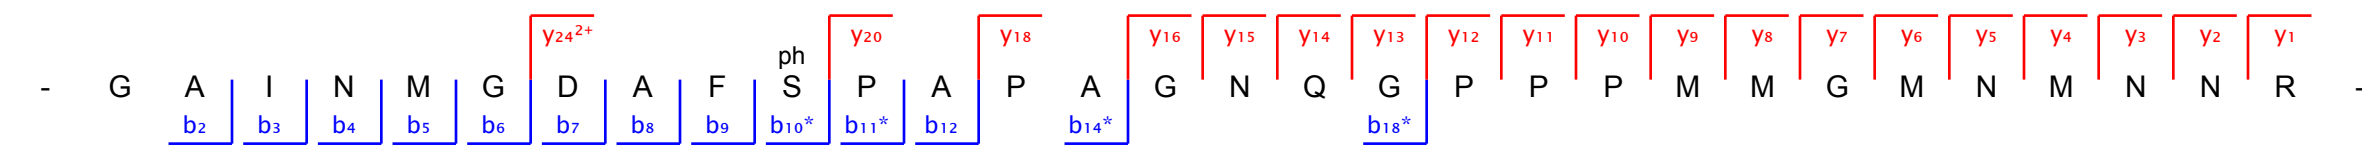



Raw file 20150814\_A375SR\_Phospho\_BR2\_03 Scan 25048 Method FTMS; HCD Score 161.13 m/z 892.76 Gene names RTN4

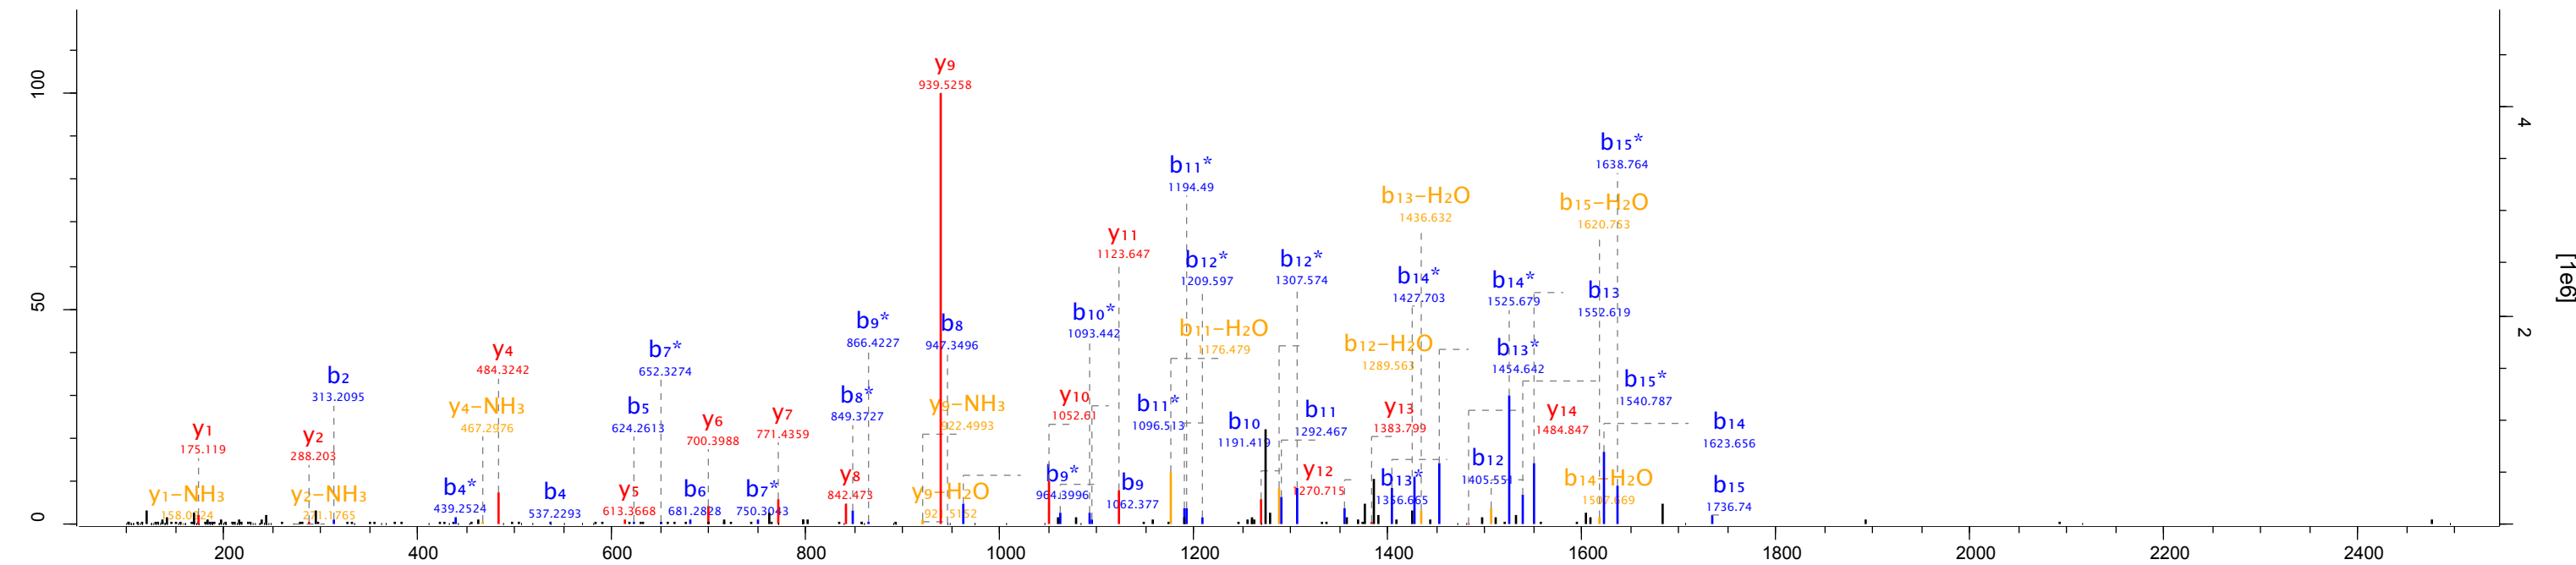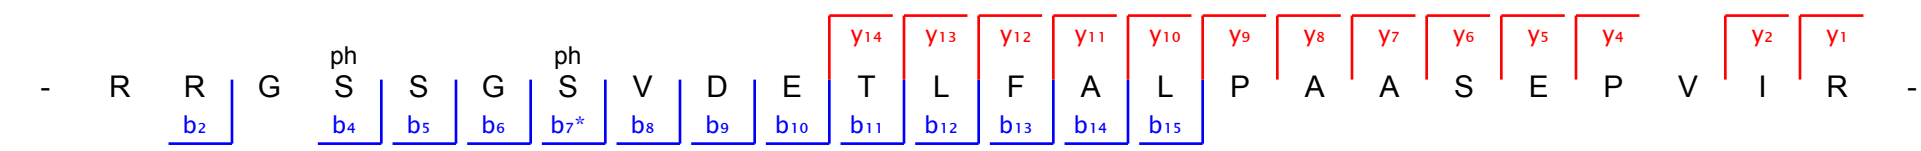

Raw file: 20150814\_A375SR\_Phospho\_BR2\_03  
 Scan: 25238 Method: FTMS; HCD Score: 261.07 m/z: 1134.56 Gene names: MICALL1

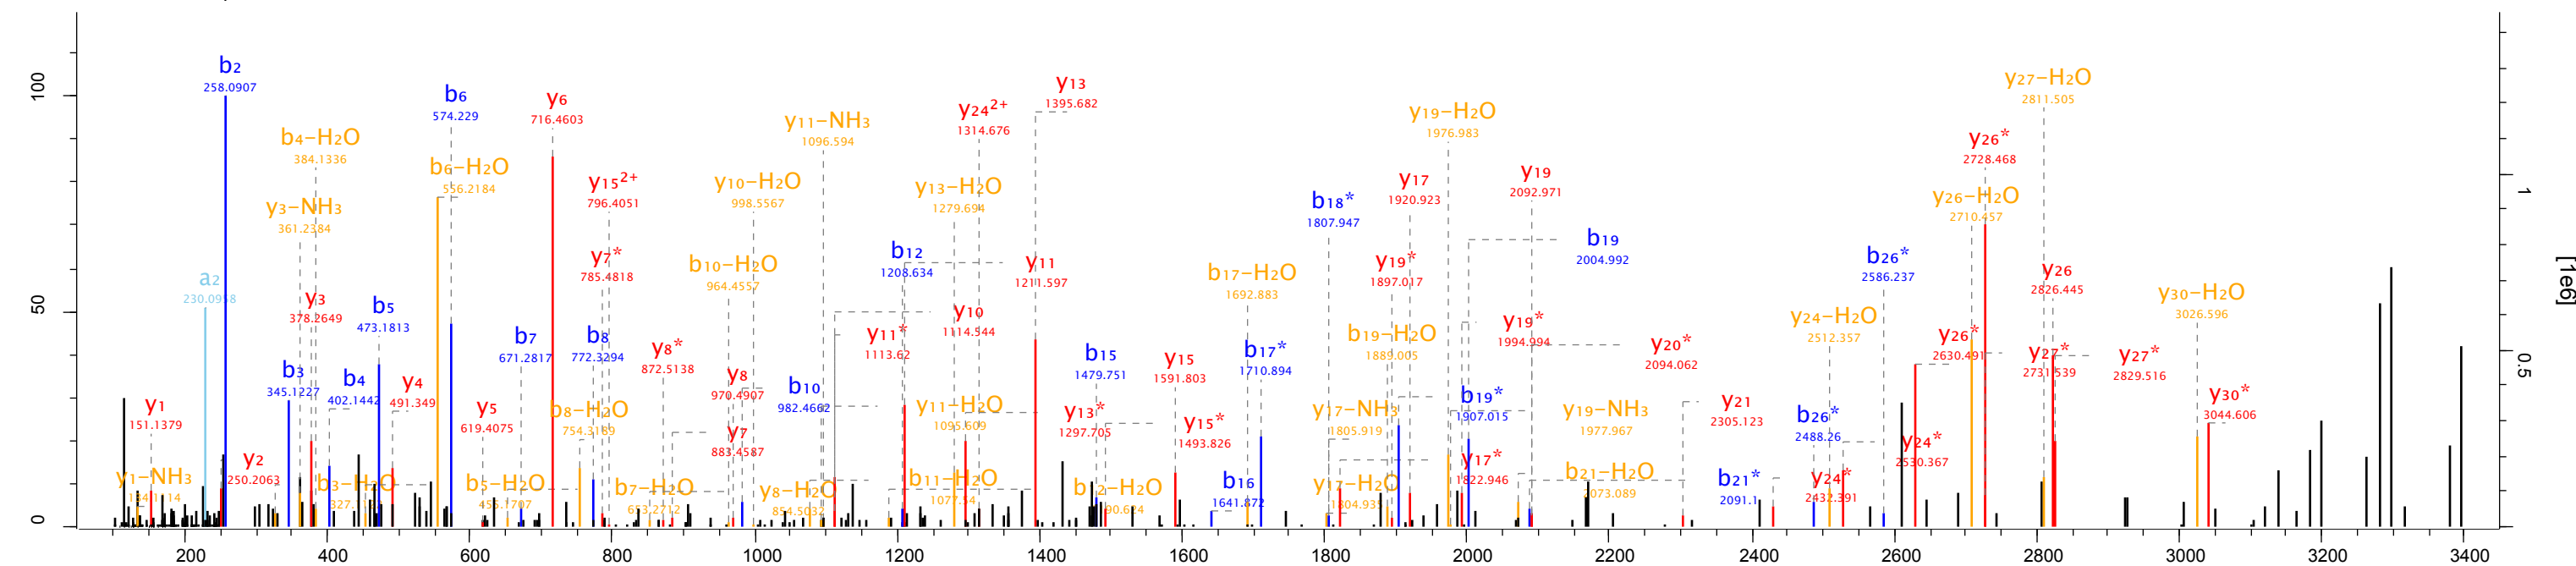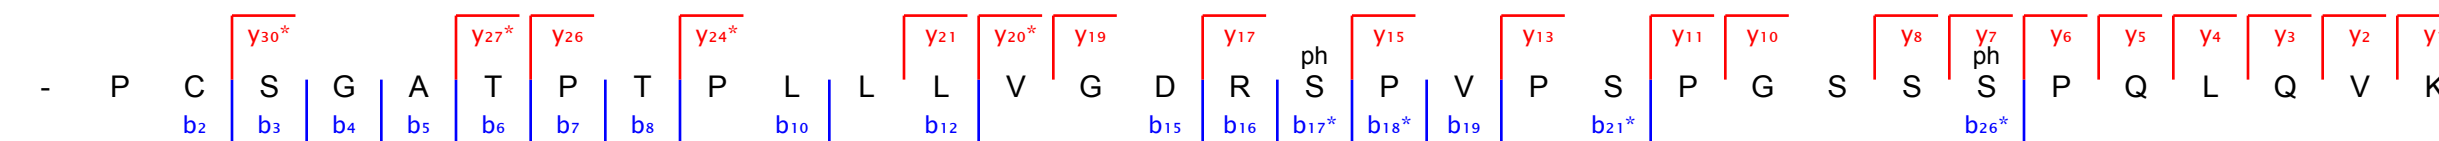

Raw file: 20150814\_A375SR\_Phospho\_BR2\_03  
 Scan: 2558 Method: FTMS; HCD Score: 105.17 m/z: 434.19 Gene names: NCOA5

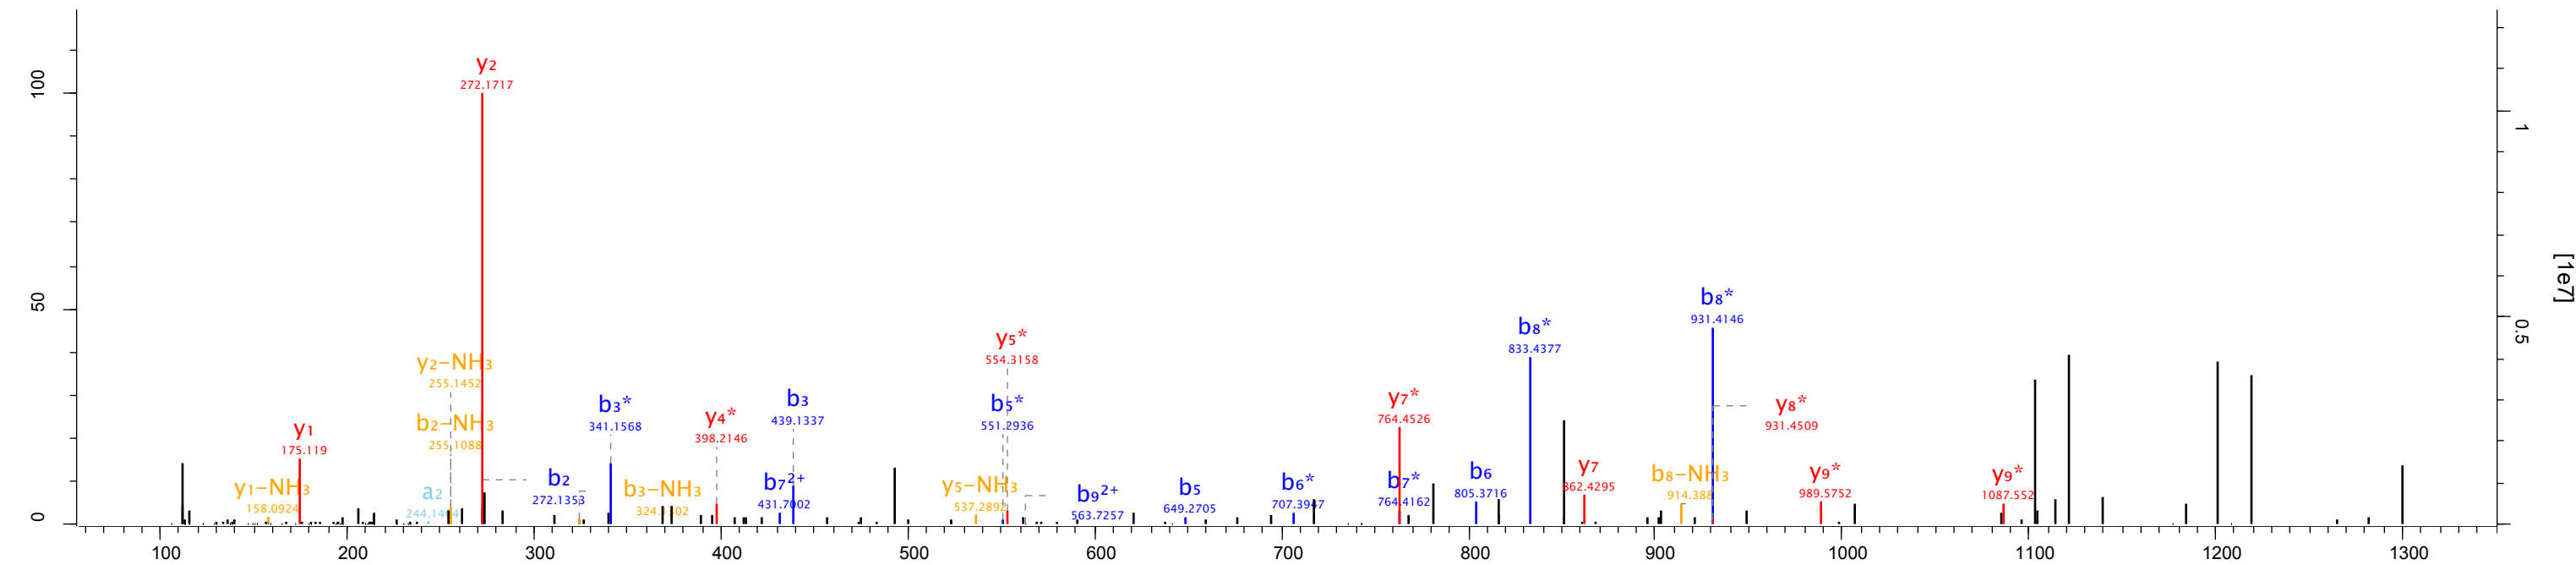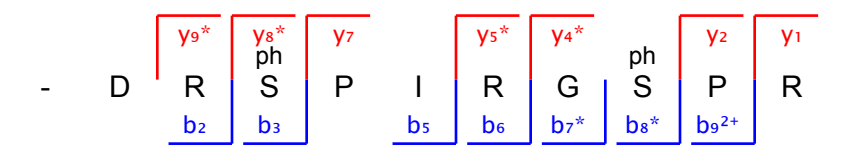

Raw file 20150814\_A375SR\_Phospho\_BR2\_03 Scan 26718 Method FTMS; HCD Score 164.85 m/z 877.04 Gene names TFG

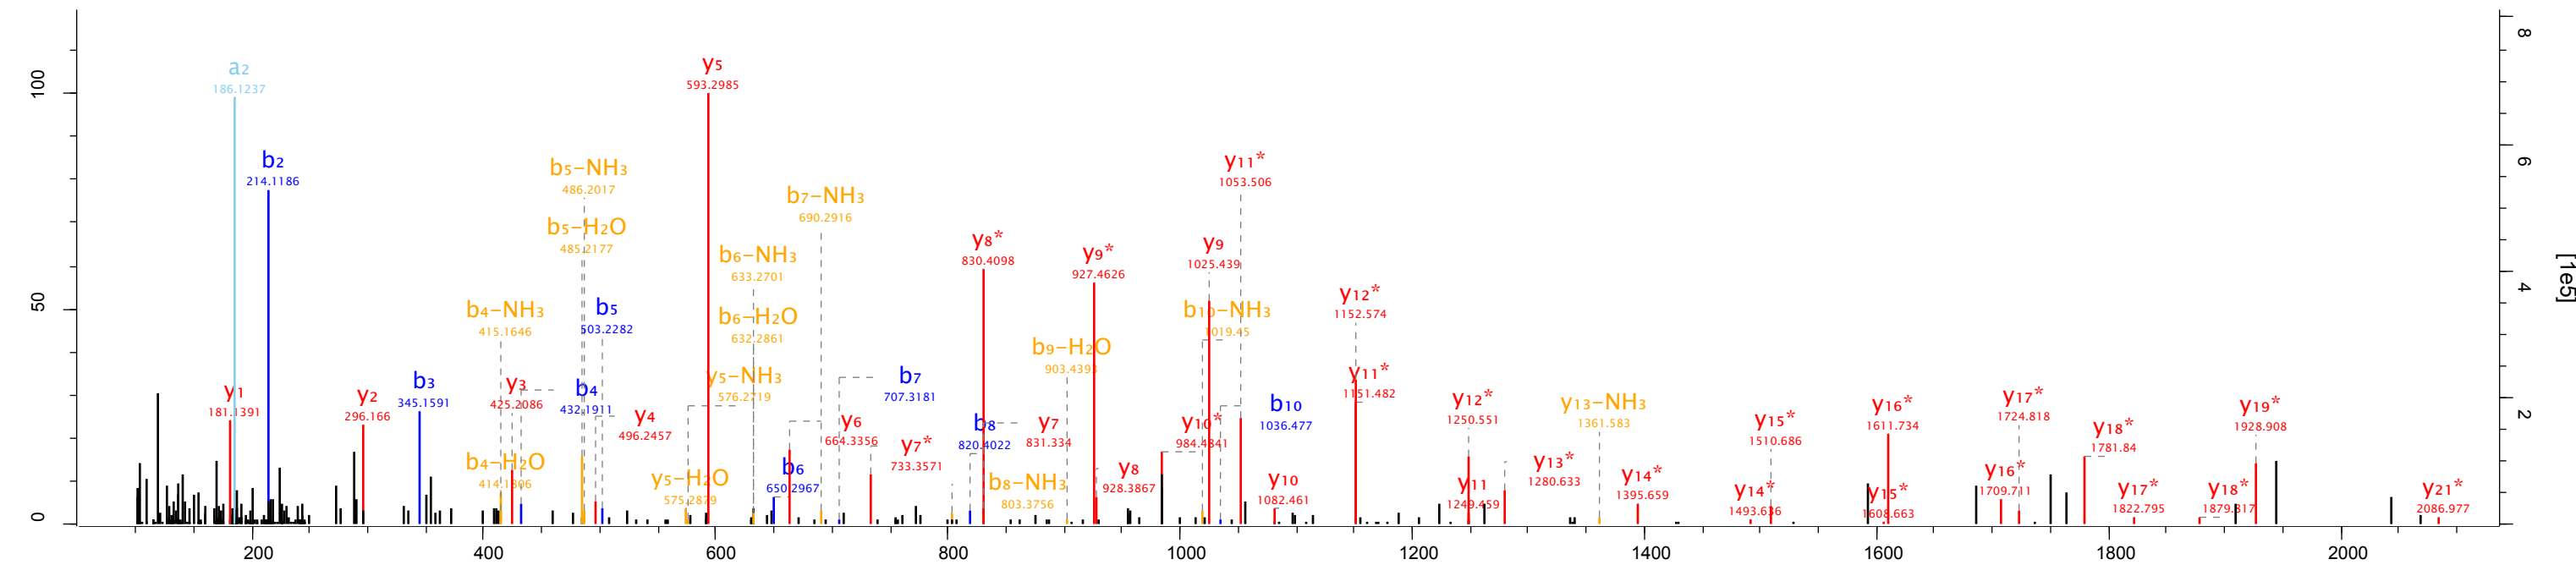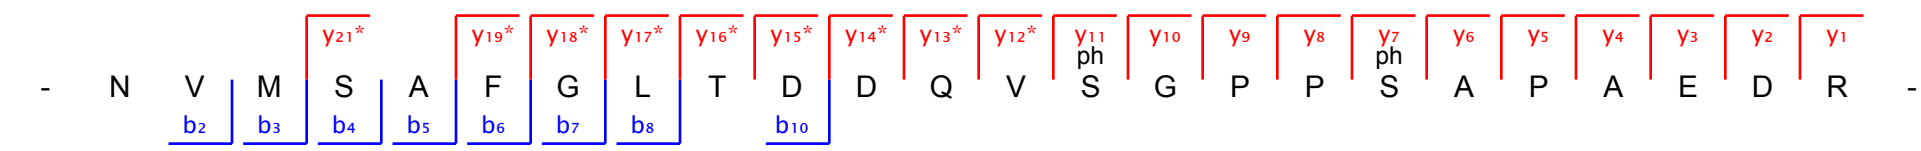

Raw file: 20150814\_A375SR\_Phospho\_BR2\_03  
 Scan: 2718 Method: FTMS; HCD Score: 66.51 m/z: 587.74 Gene names: HDGF

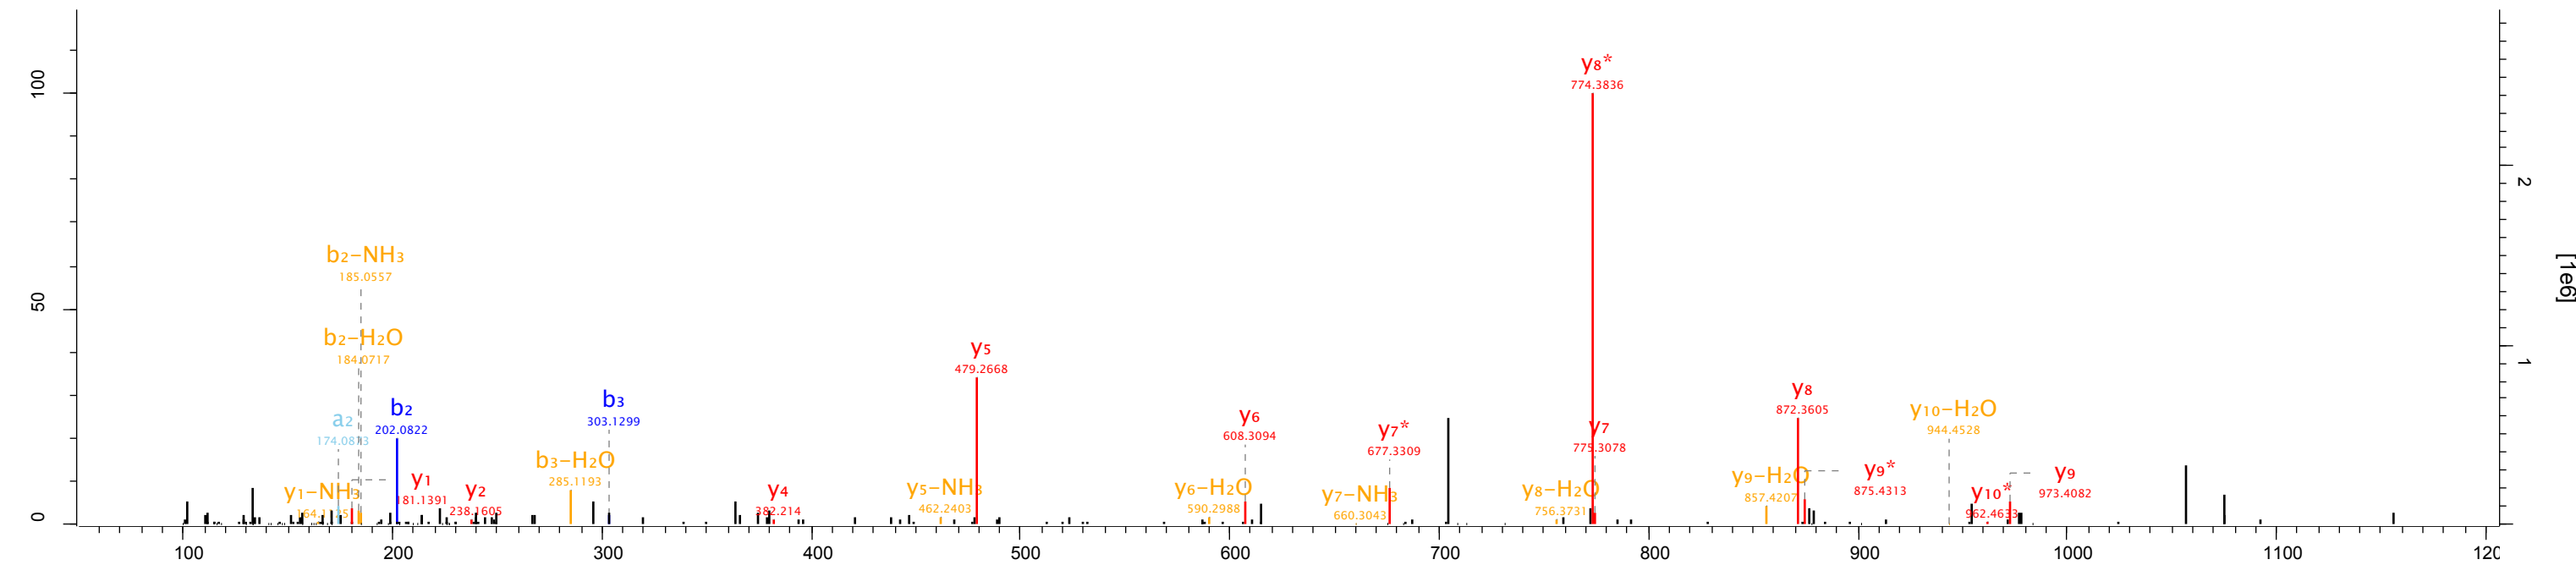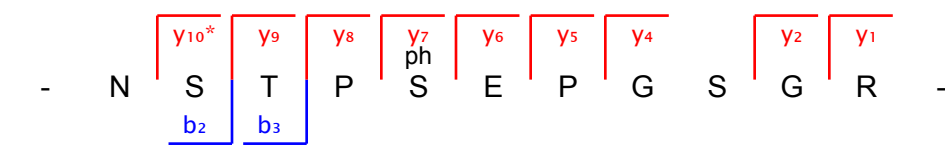

Raw file  
20150814\_A375SR\_Phospho\_BR2\_03

Scan 27438 Method FTMS; HCD Score 151.21 m/z 1029.99 Gene names FAM129A

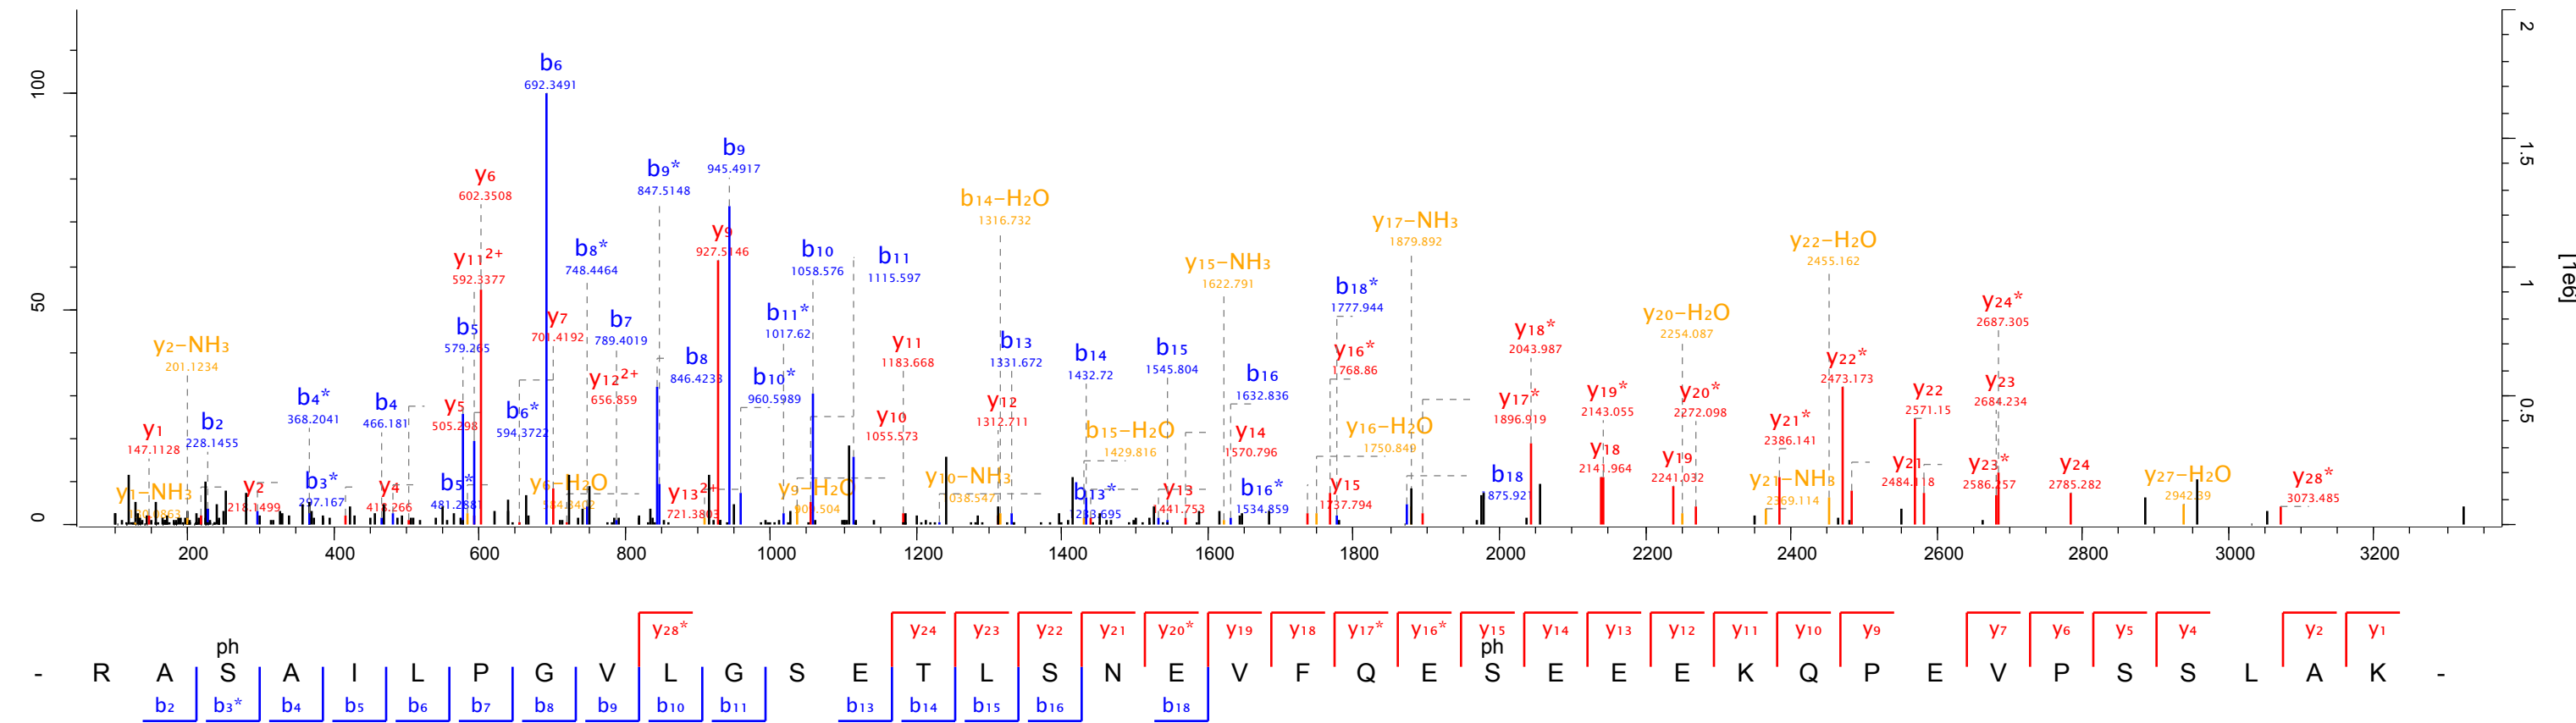

Raw file 20150814\_A375SR\_Phospho\_BR2\_03 Scan 27548 Method FTMS; HCD Score 227.7 m/z 969.43 Gene names RPS6KB1

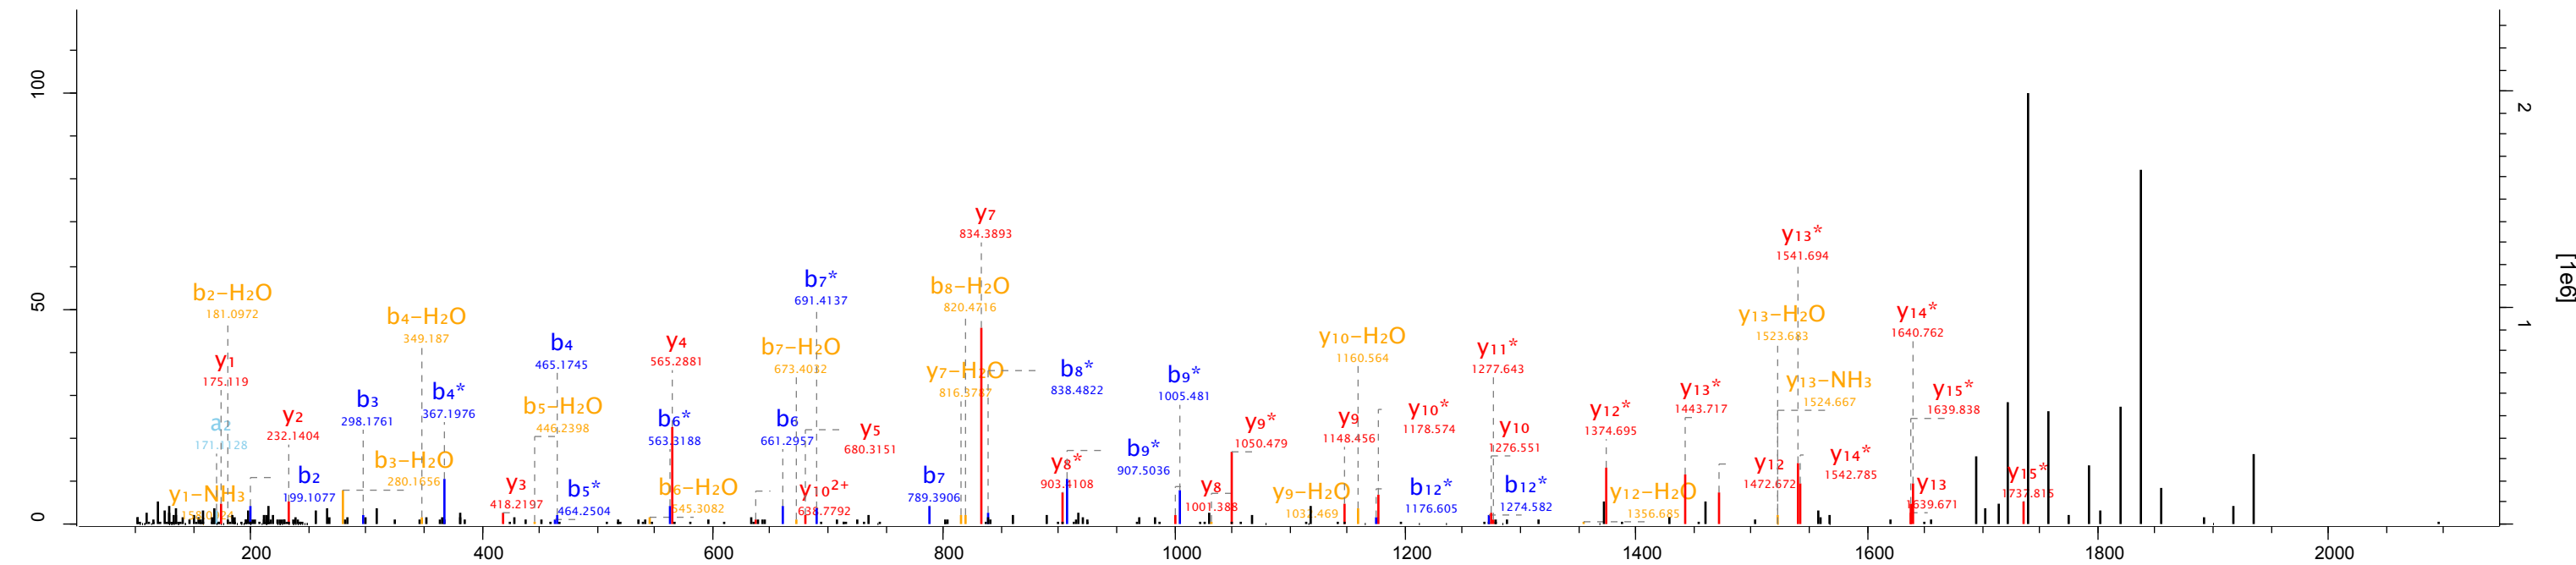

- T P V S P V K F S P G D F W G R -

Fragmentation labels (b and y ions) are shown below the amino acid sequence:

- b<sub>2</sub> (under P)
- b<sub>3</sub> (under V)
- b<sub>4</sub> (under S)
- b<sub>5</sub><sup>\*</sup> (under P)
- b<sub>6</sub> (under V)
- b<sub>7</sub> (under K)
- b<sub>8</sub><sup>\*</sup> (under F)
- b<sub>9</sub><sup>\*</sup> (under S)
- b<sub>12</sub><sup>\*</sup> (under D)
- y<sub>1</sub> (under R)
- y<sub>2</sub> (under G)
- y<sub>3</sub> (under W)
- y<sub>4</sub> (under F)
- y<sub>5</sub> (under D)
- y<sub>7</sub> (under P)
- y<sub>8</sub> (under S)
- y<sub>9</sub> (under F)
- y<sub>10</sub> (under K)
- y<sub>11</sub><sup>\*</sup> (under V)
- y<sub>12</sub> (under P)
- y<sub>13</sub> (under S)
- y<sub>14</sub><sup>\*</sup> (under V)
- y<sub>15</sub><sup>\*</sup> (under P)

Raw file  
20150814\_A375SR\_Phospho\_BR2\_03

Scan 27778 Method FTMS; HCD Score 261.81 m/z 929.46 Gene names RB1

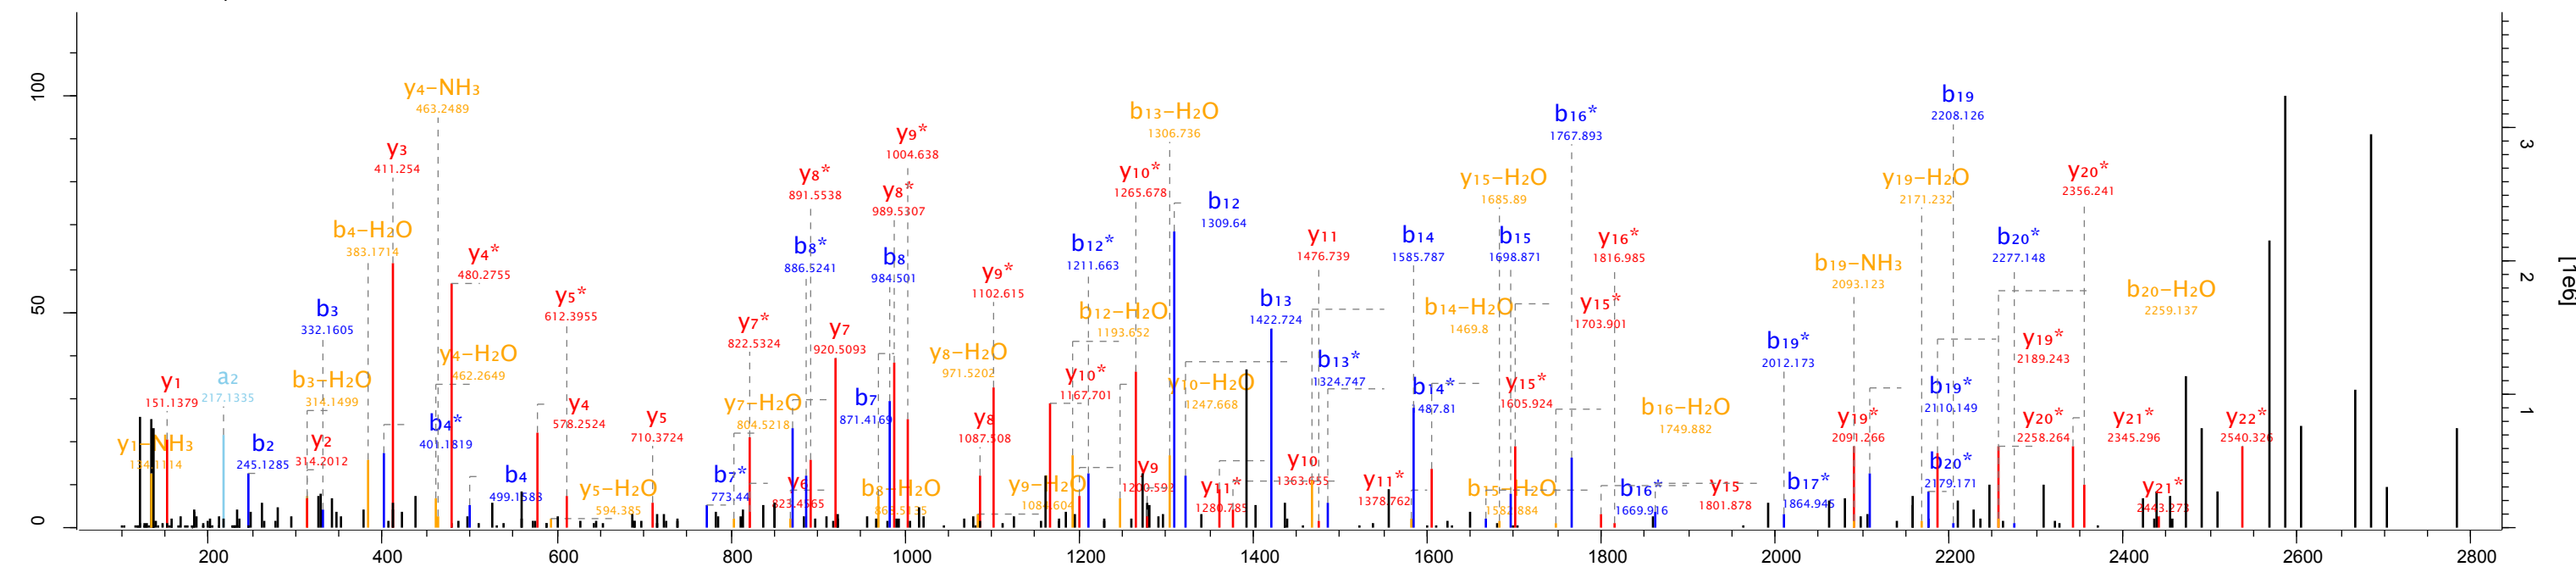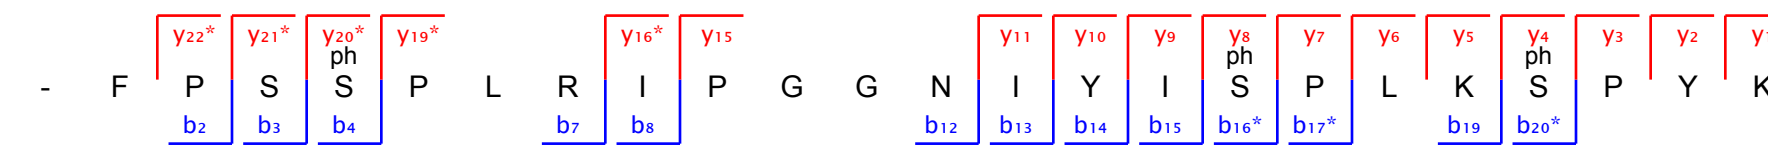



Raw file: 20150814\_A375SR\_Phospho\_BR2\_03  
 Scan: 2778 Method: FTMS; HCD Score: 106.26 m/z: 516.23 Gene names: DDX23

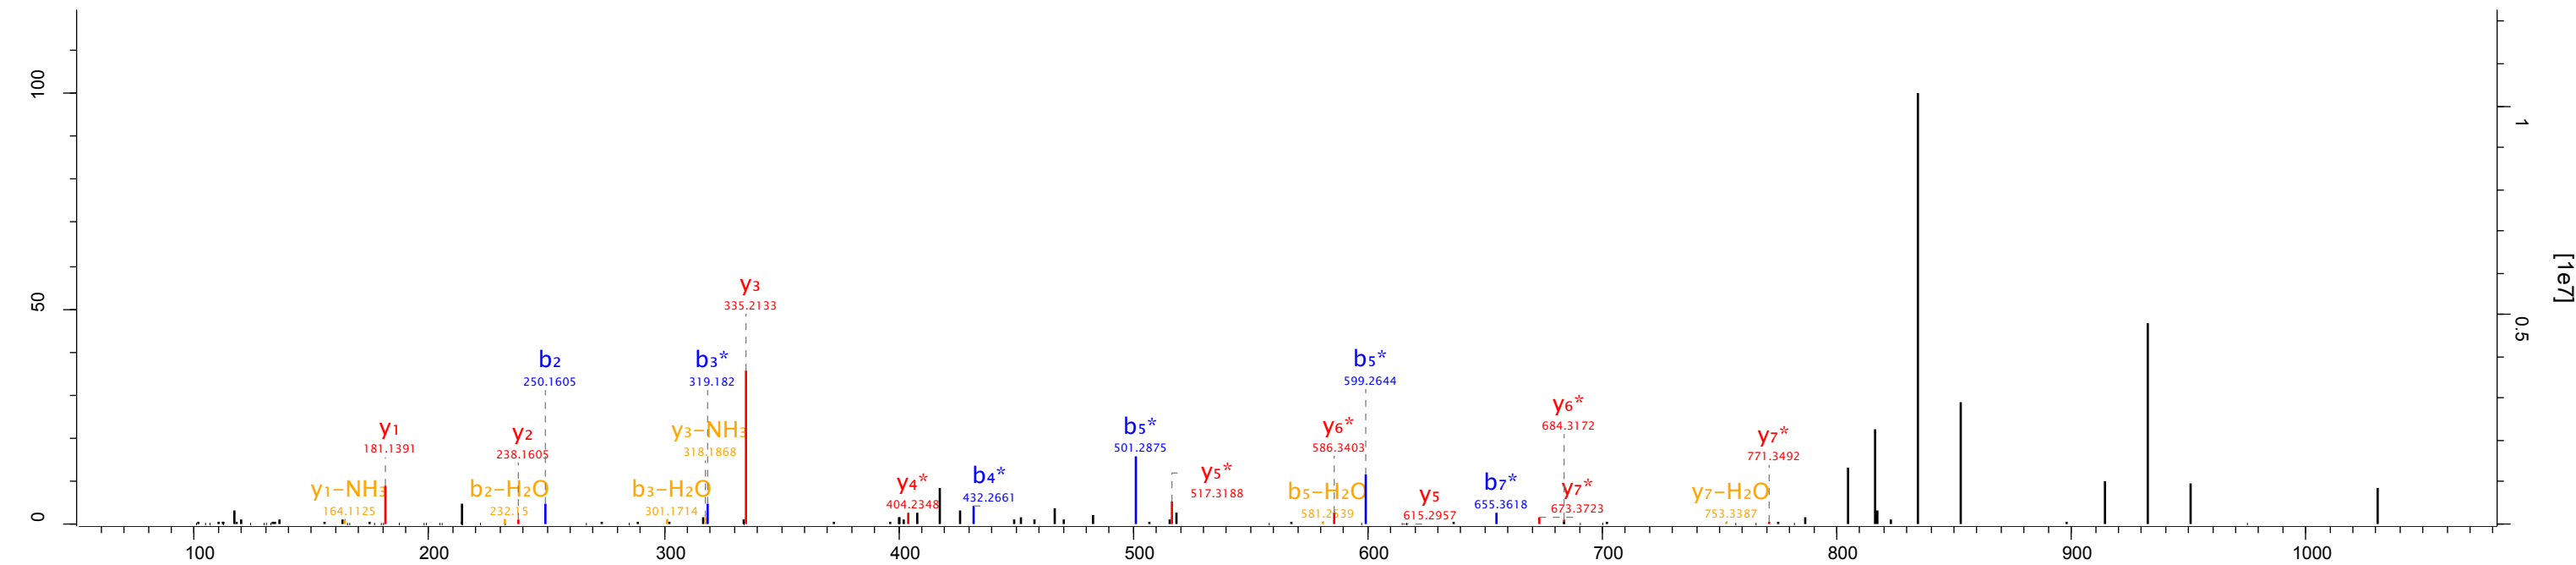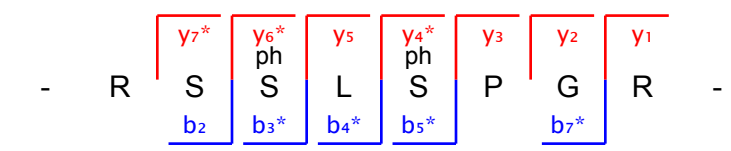

Raw file: 20150814\_A375SR\_Phospho\_BR2\_03  
 Scan: 2788 Method: FTMS; HCD Score: 177.38 m/z: 601.72 Gene names: BUD13

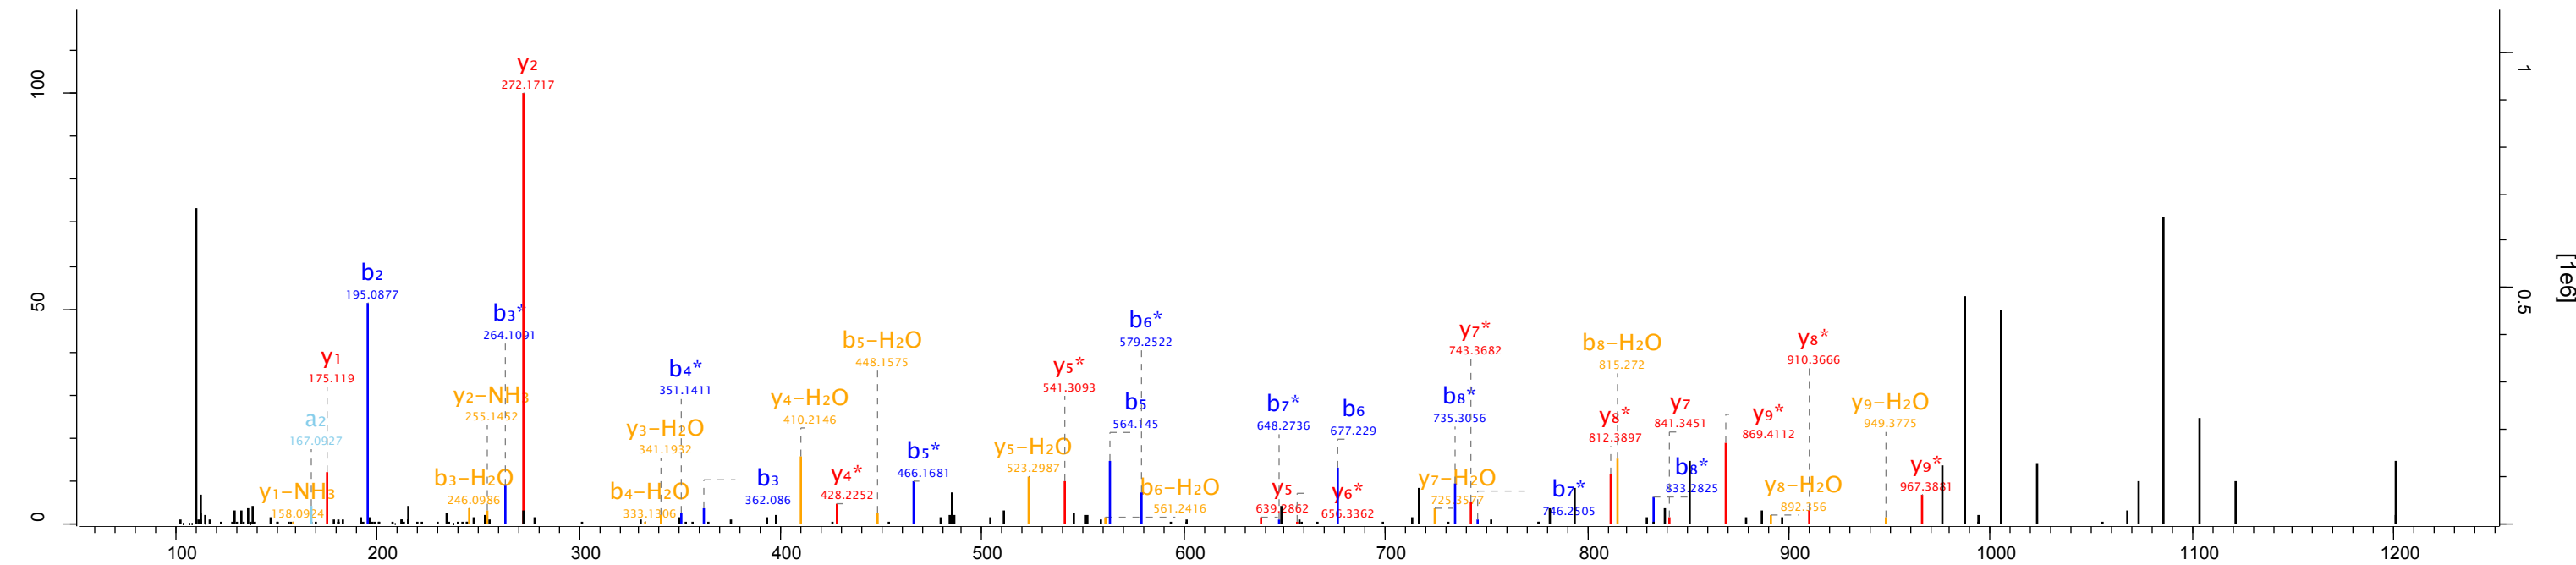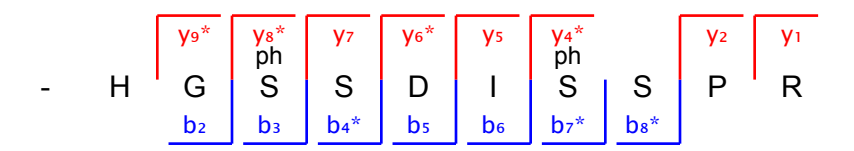

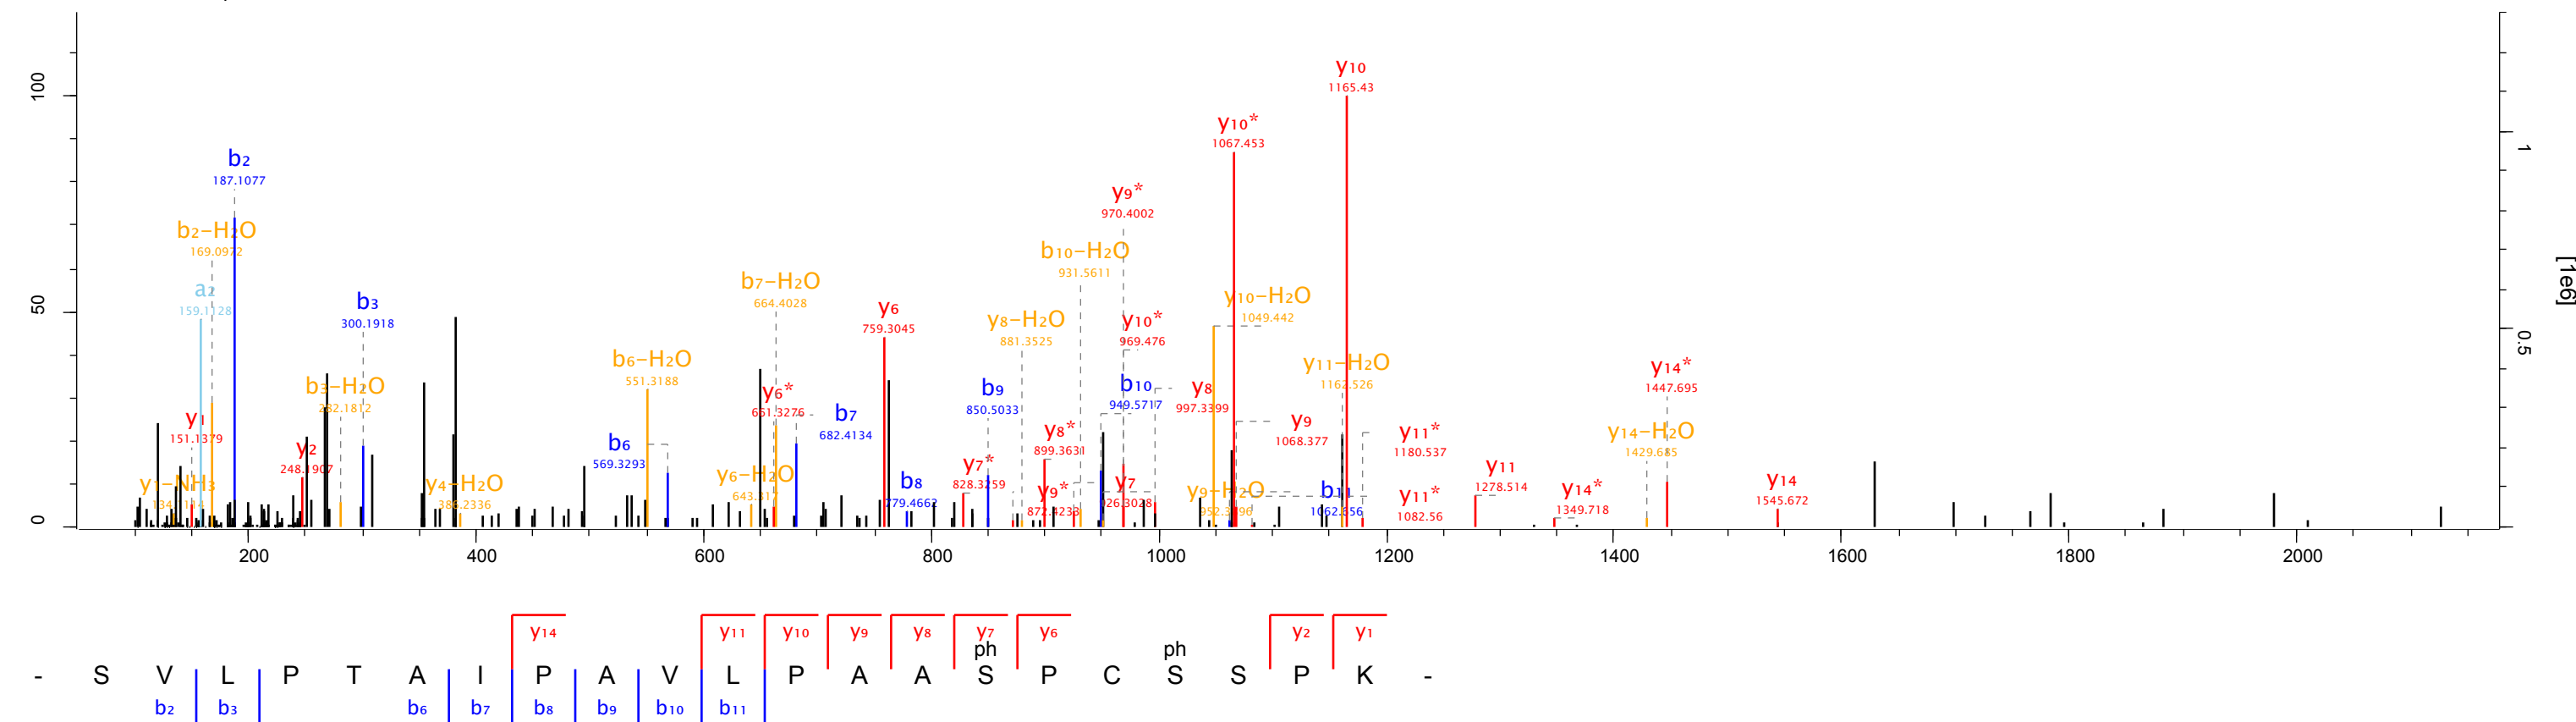

Raw file: 20150814\_A375SR\_Phospho\_BR2\_03  
 Scan: 28078 Method: FTMS; HCD Score: 209.68 m/z: 1146.5 Gene names: EHBPI1L1

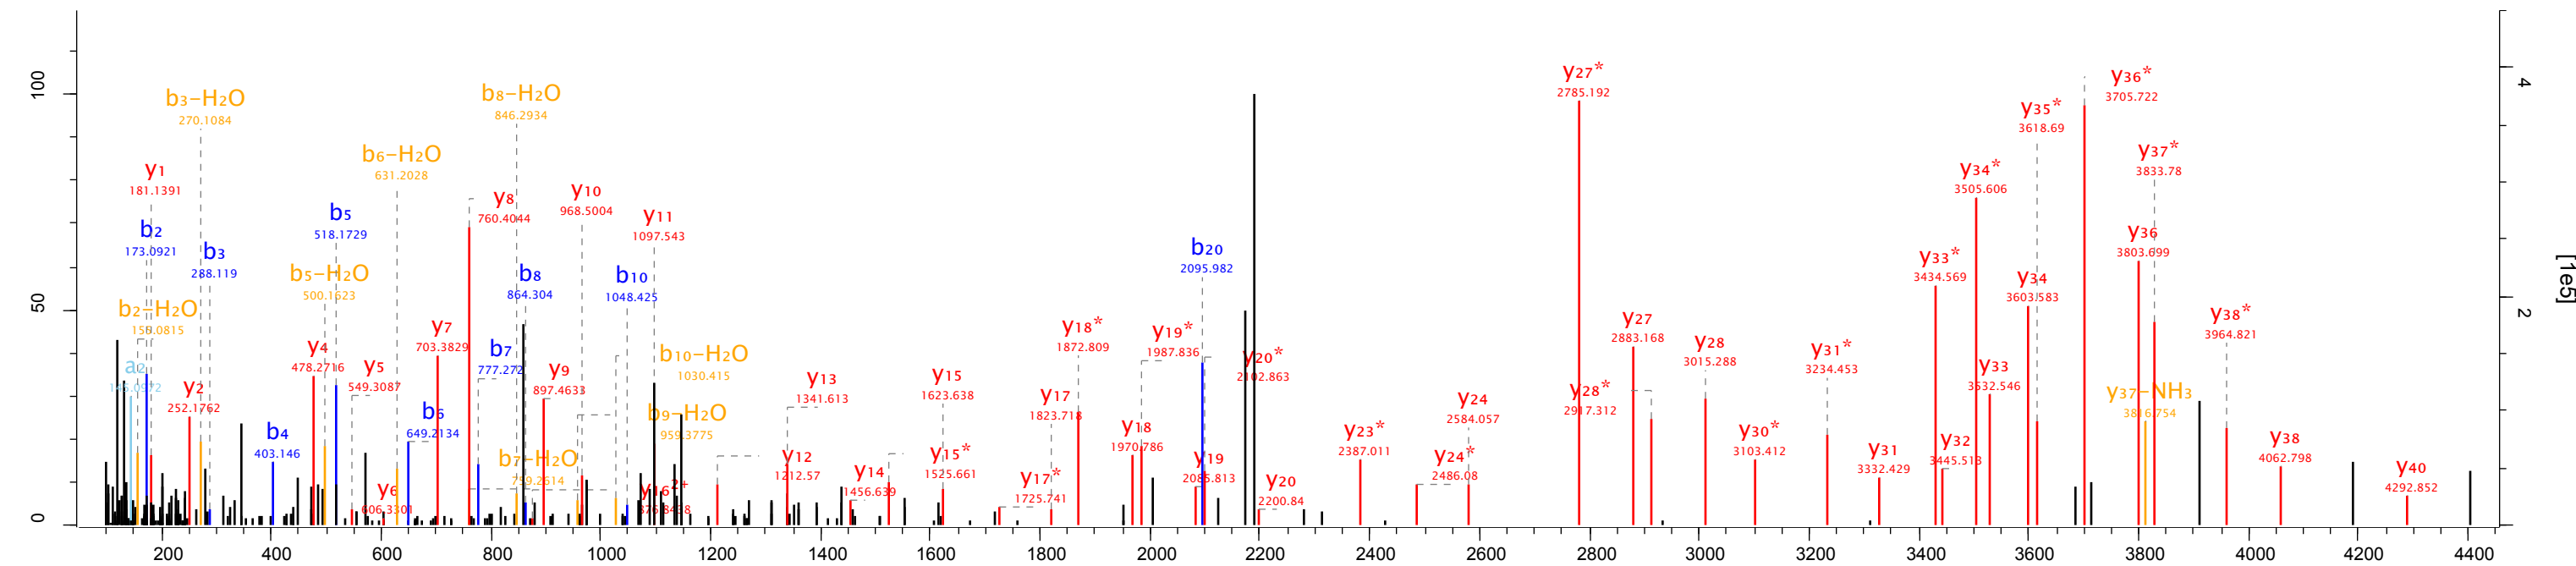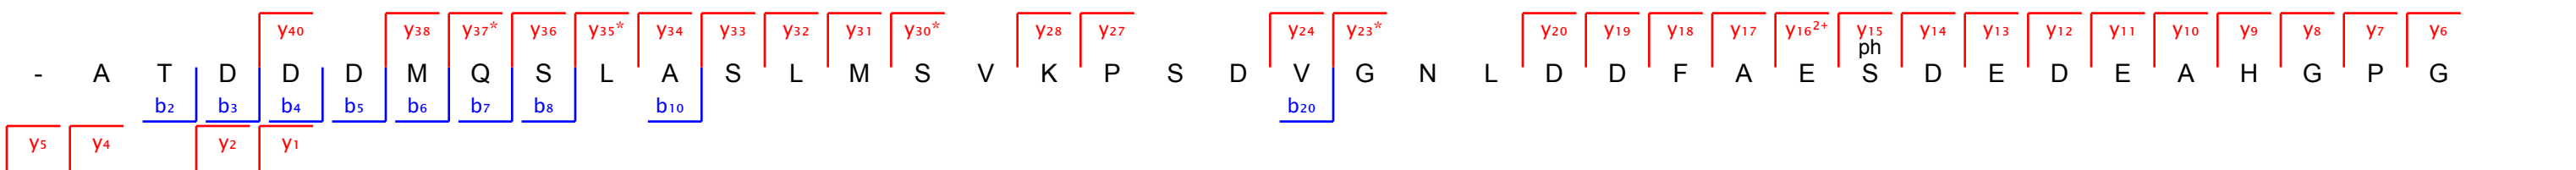

Raw file 20150814\_A375SR\_Phospho\_BR2\_03 Scan 2818 Method FTMS; HCD Score 64.4 m/z 838.39 Gene names SRRM2

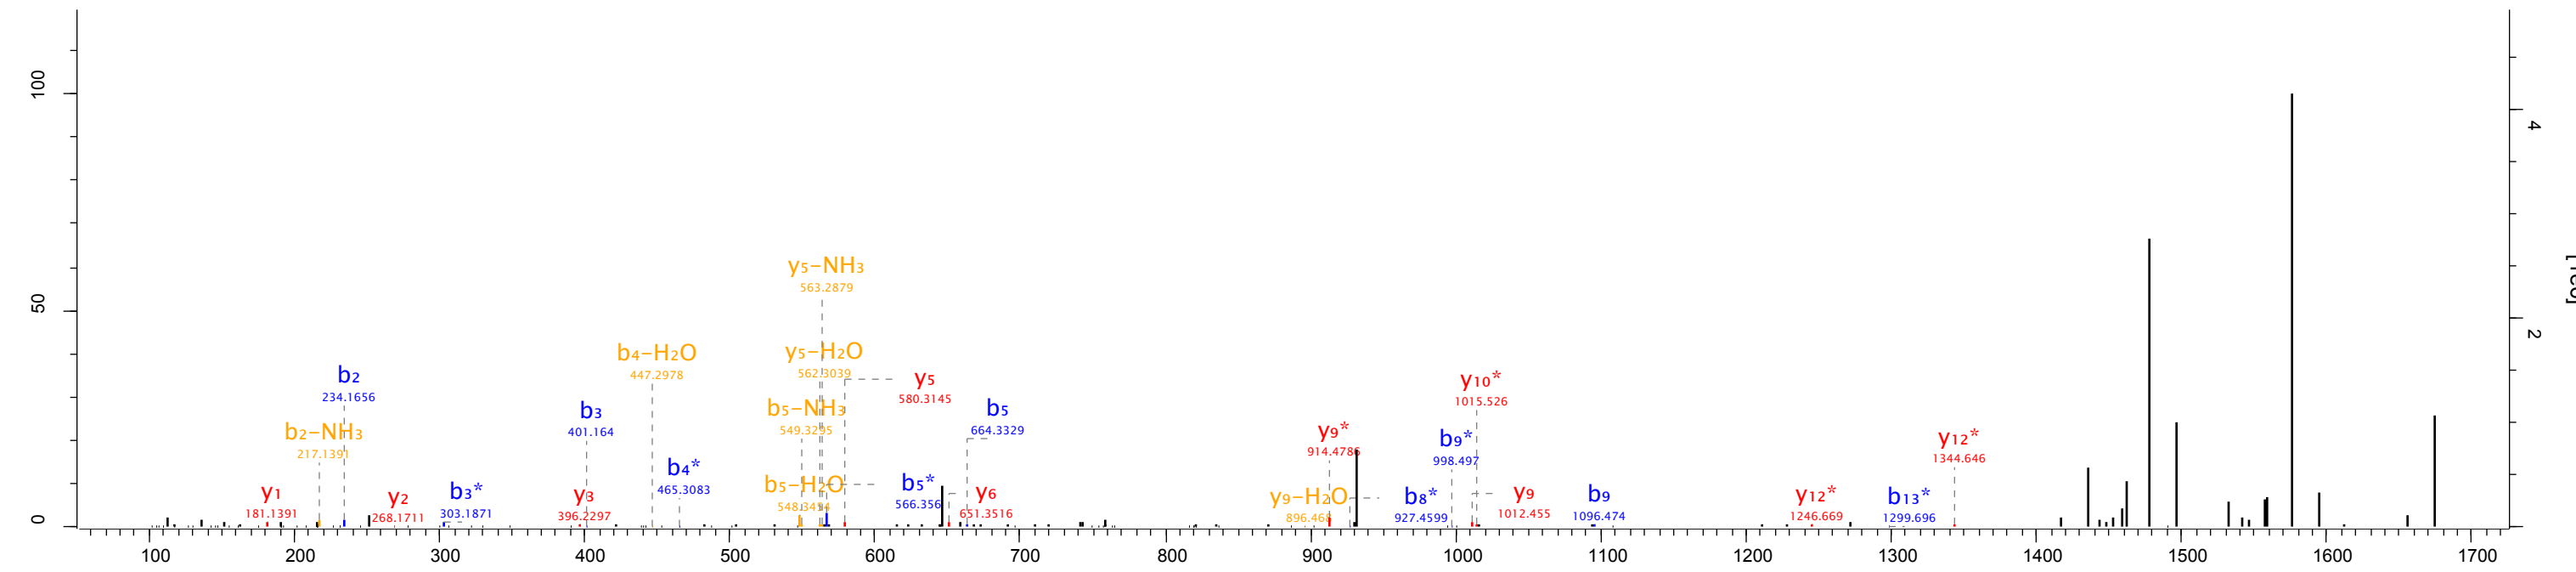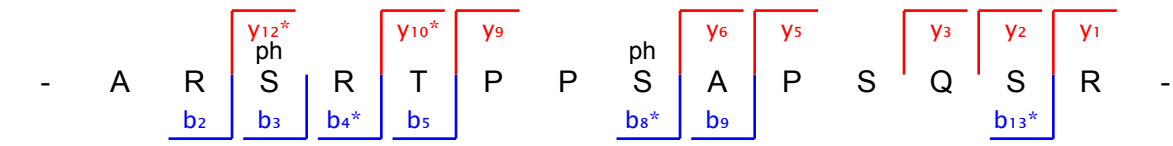

Raw file  
20150814\_A375SR\_Phospho\_BR2\_03

Scan 28588 Method FTMS; HCD Score 130.13 m/z 767.03 Gene names ESYT2

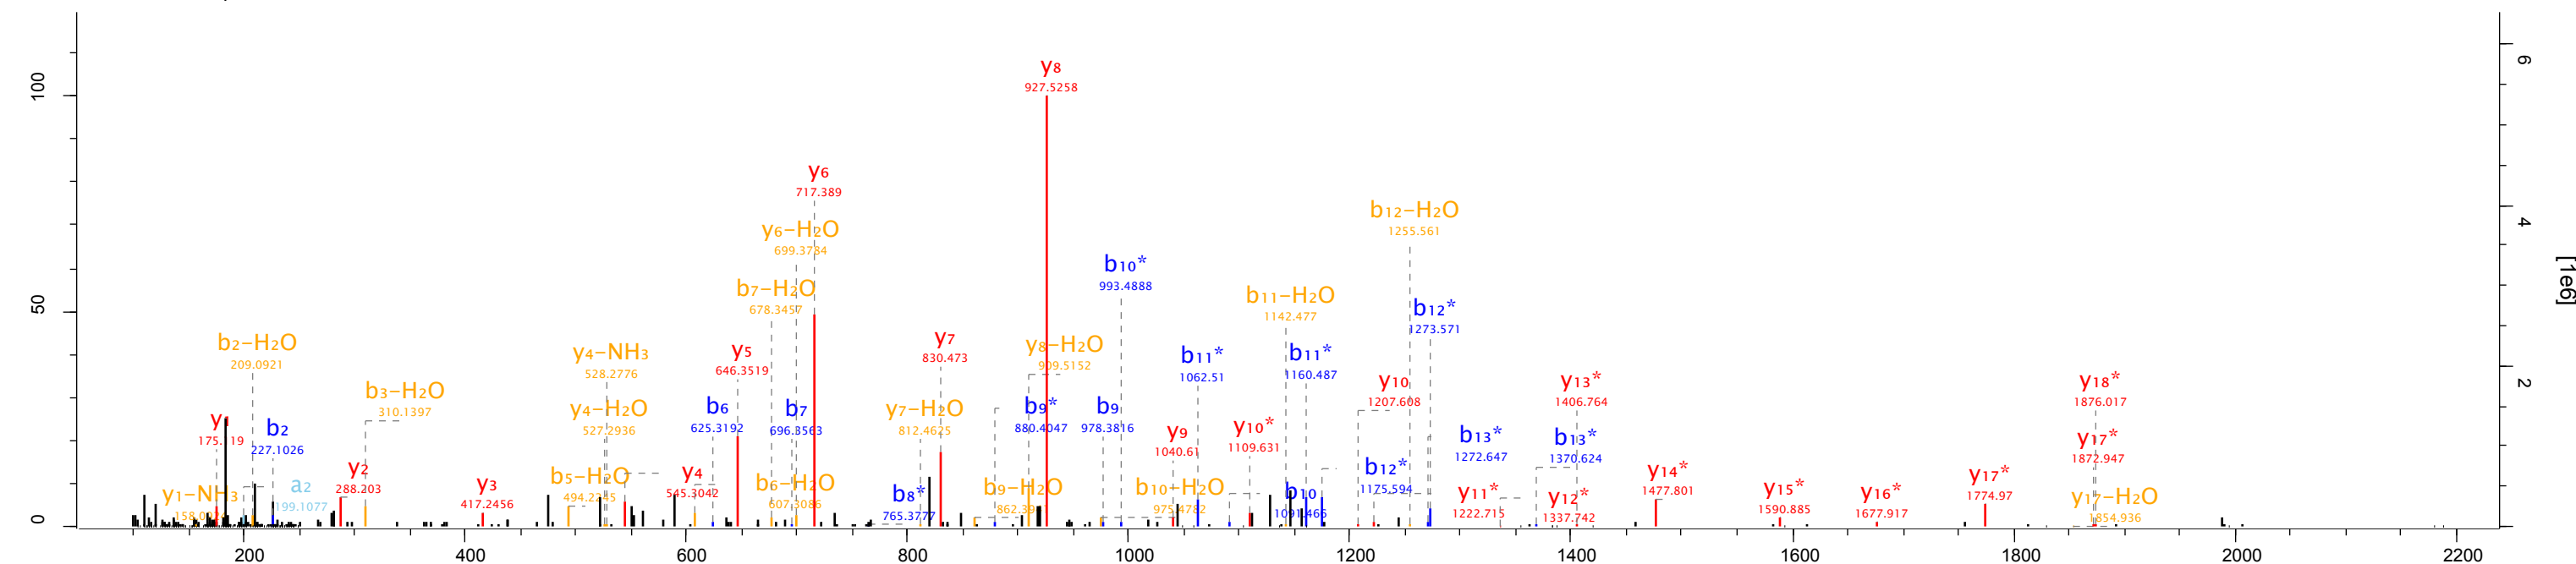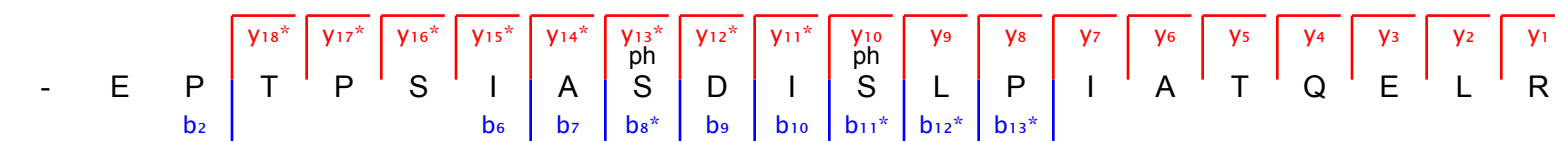

Raw file  
20150814\_A375SR\_Phospho\_BR2\_03

Scan 28638 Method FTMS; HCD Score 381.04 m/z 914.43 Gene names PTRF

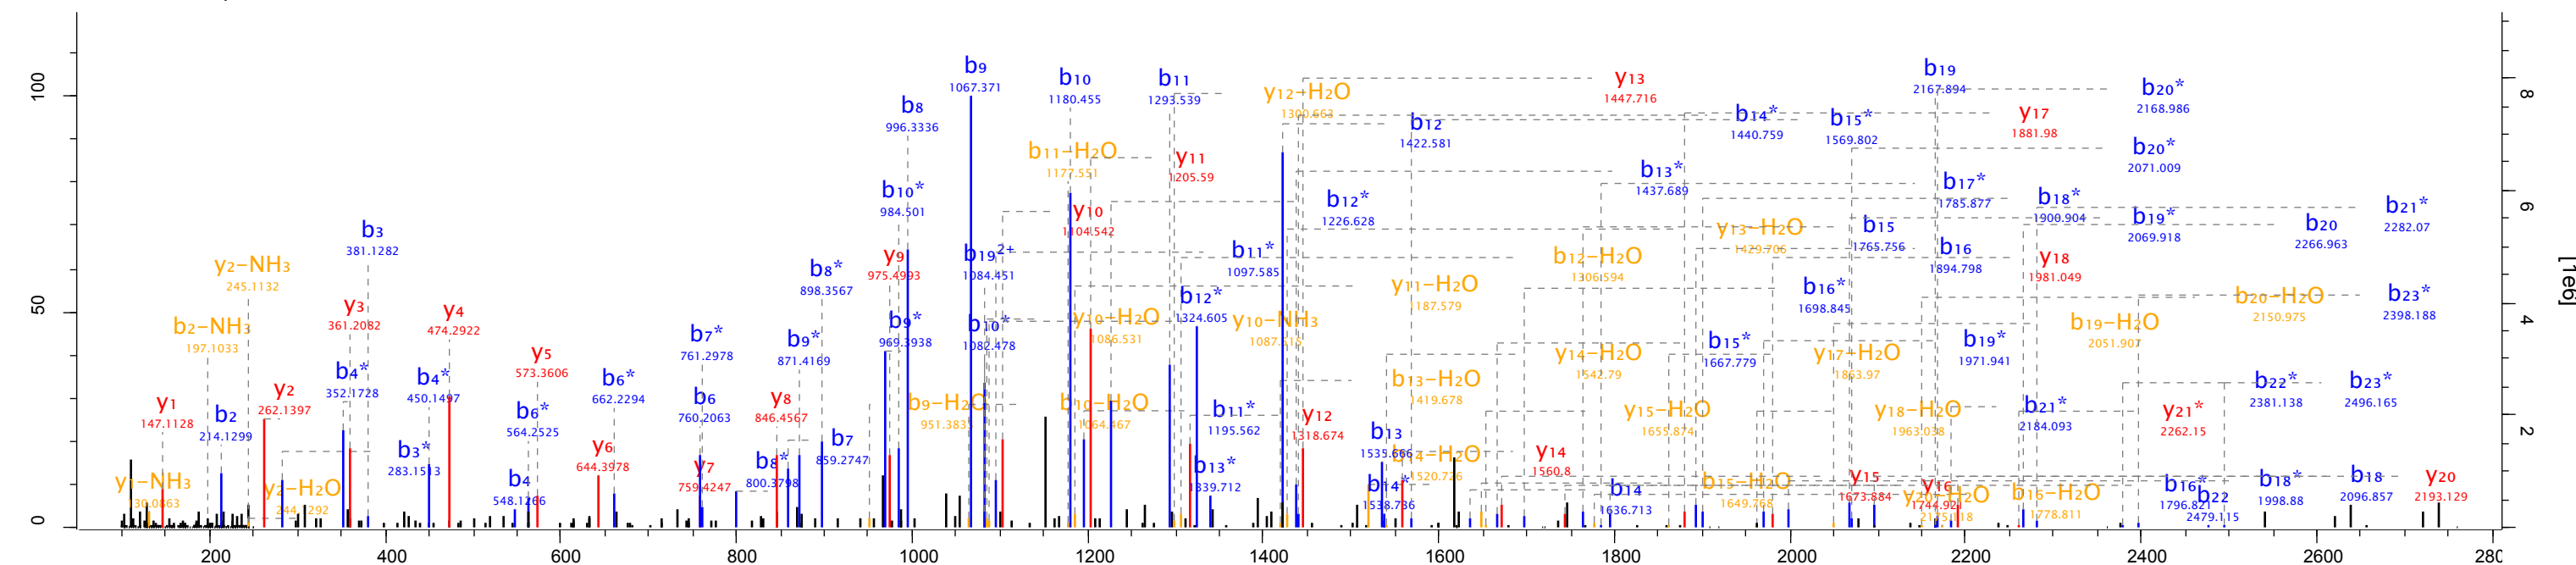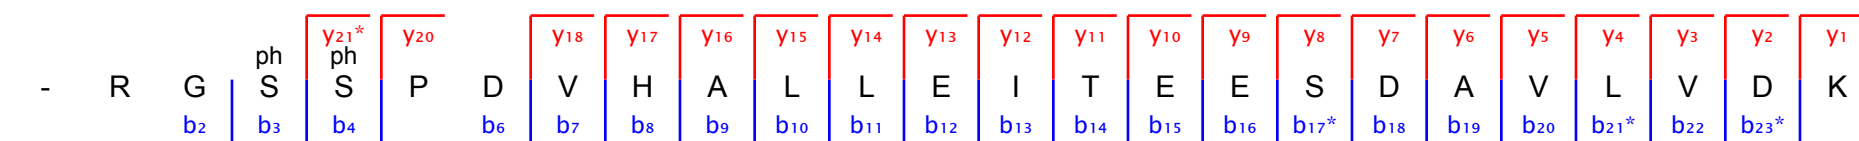

Raw file  
20150814\_A375SR\_Phospho\_BR2\_03

Scan 28828 Method FTMS; HCD Score 177.35 m/z 1062.52 Gene names PXN

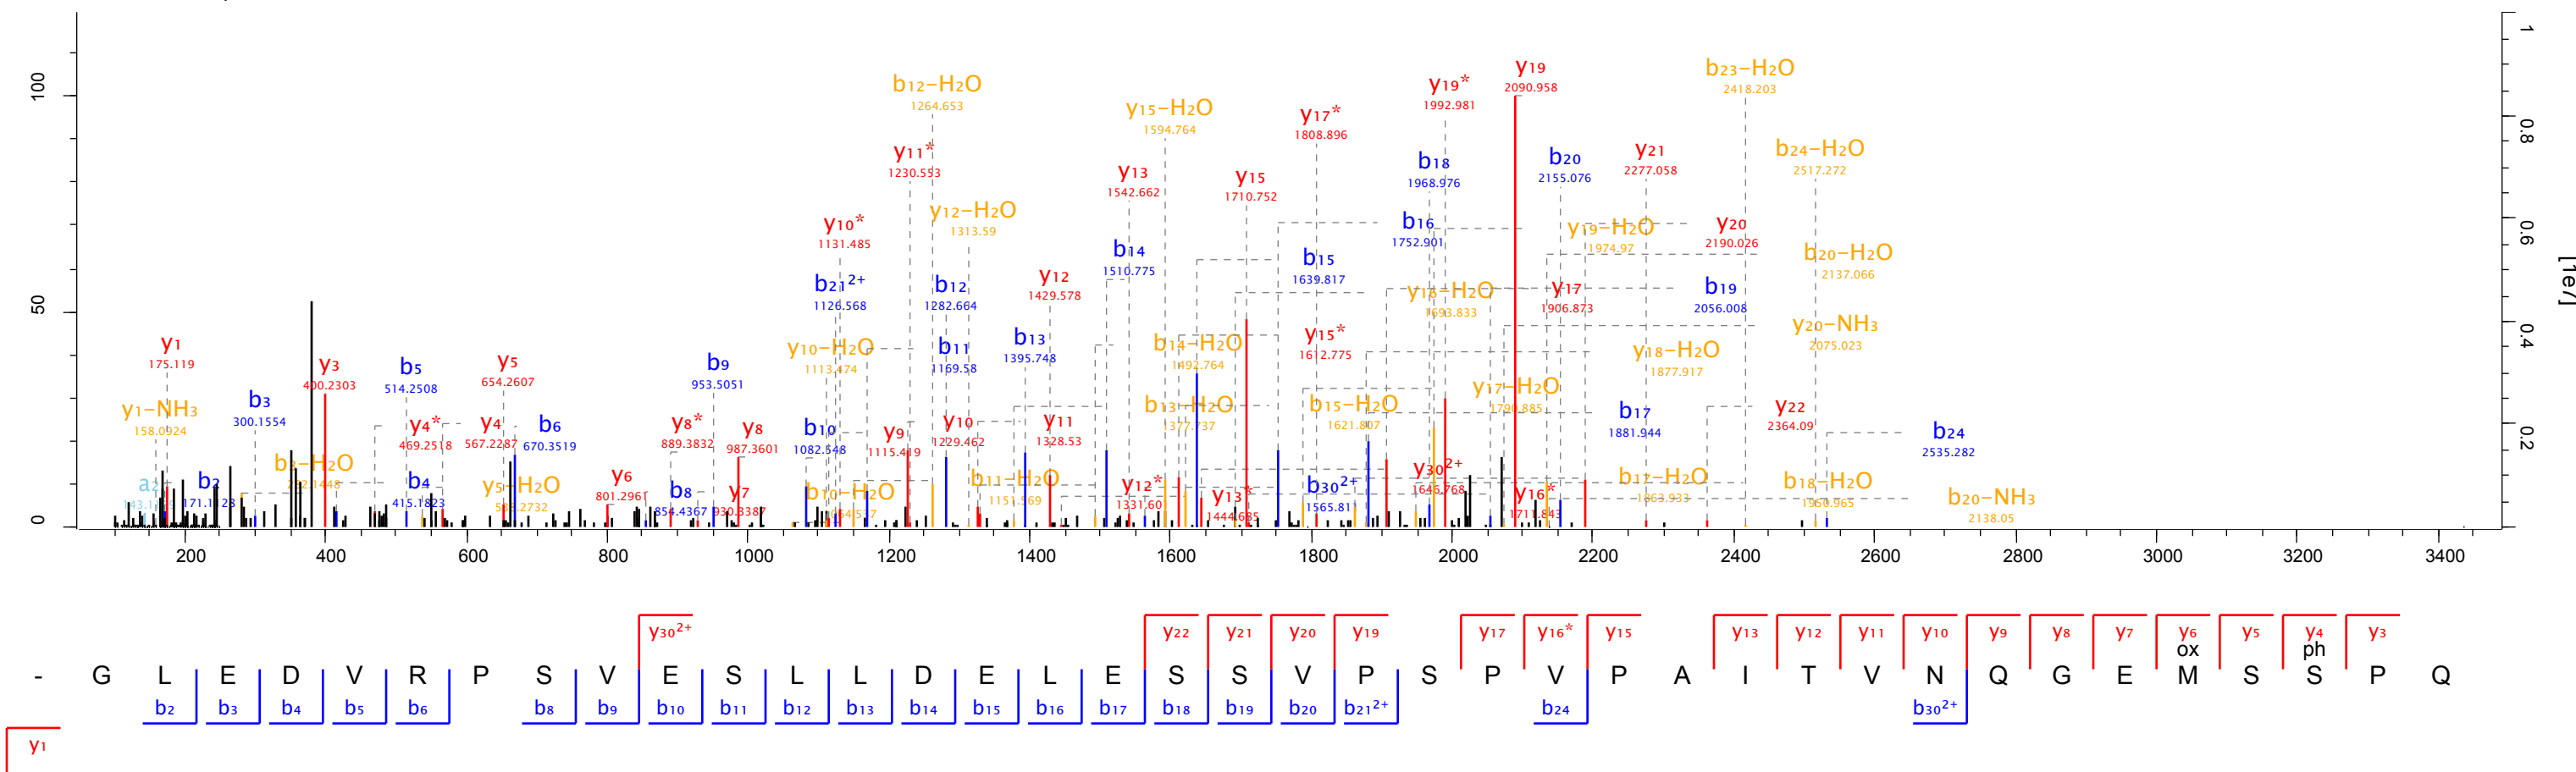



Raw file  
20150814\_A375SR\_Phospho\_BR2\_03

Scan 3078 Method FTMS; HCD Score 171.42 m/z 811.88 Gene names RAB8A

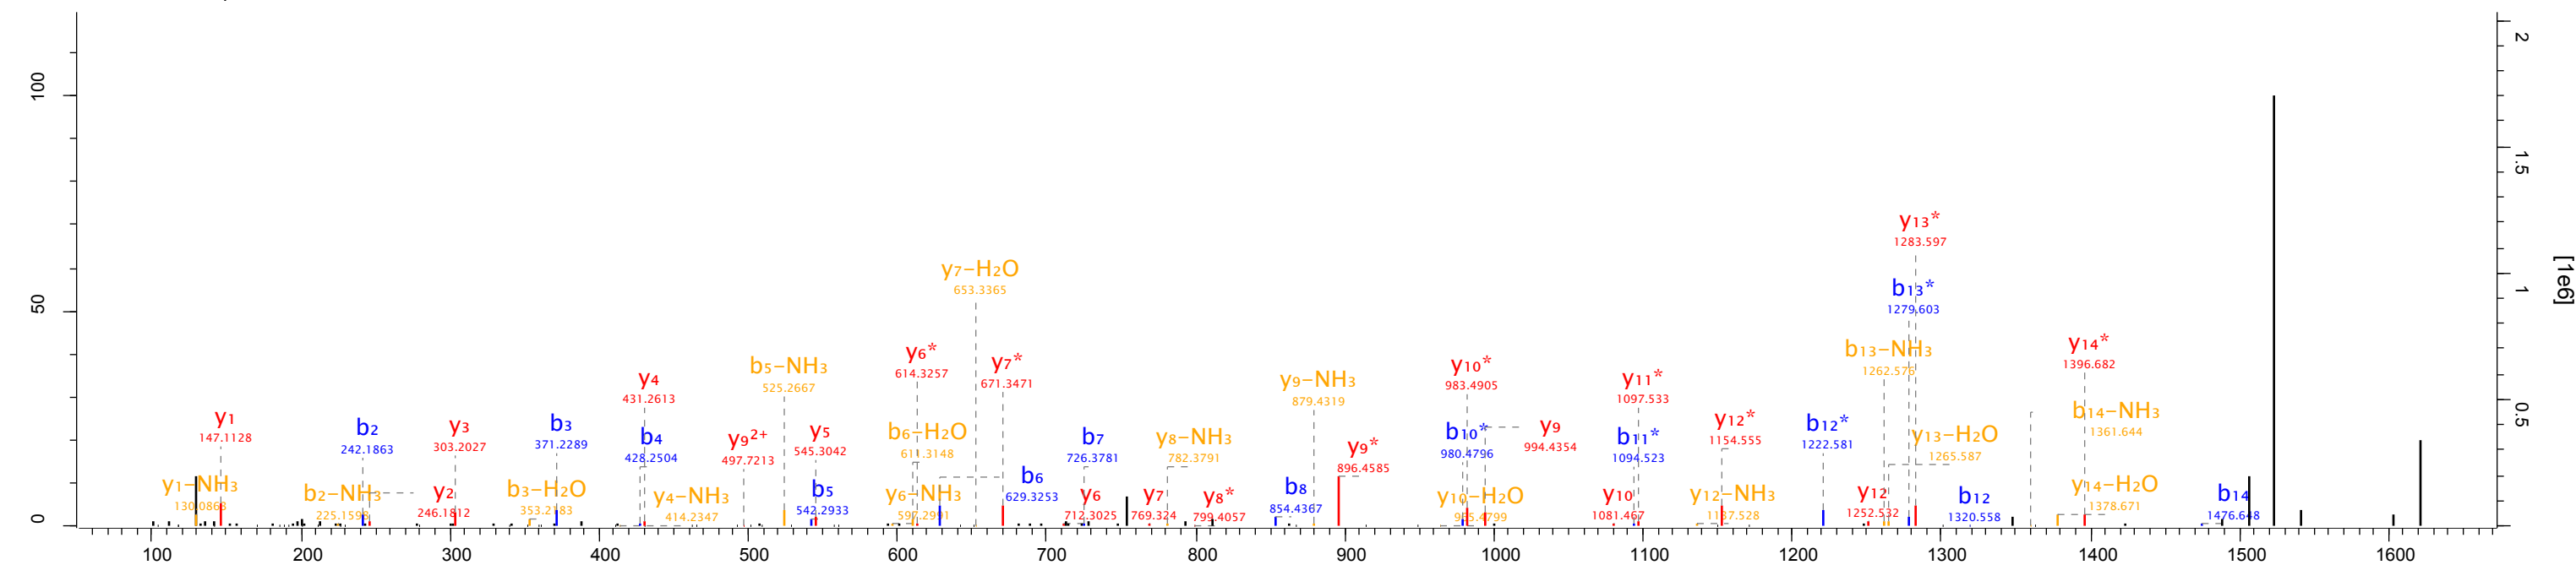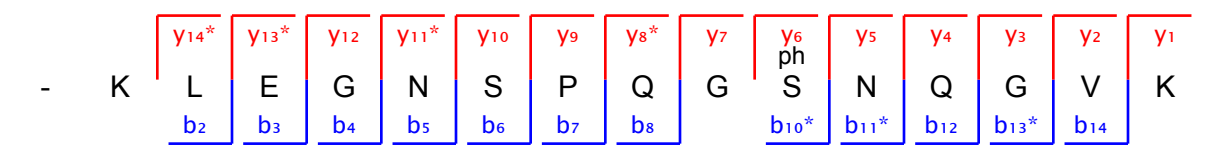

Raw file: 20150814\_A375SR\_Phospho\_BR2\_03  
 Scan: 3548 Method: FTMS; HCD Score: 140.78 m/z: 449.19 Gene names: MARCKSL1

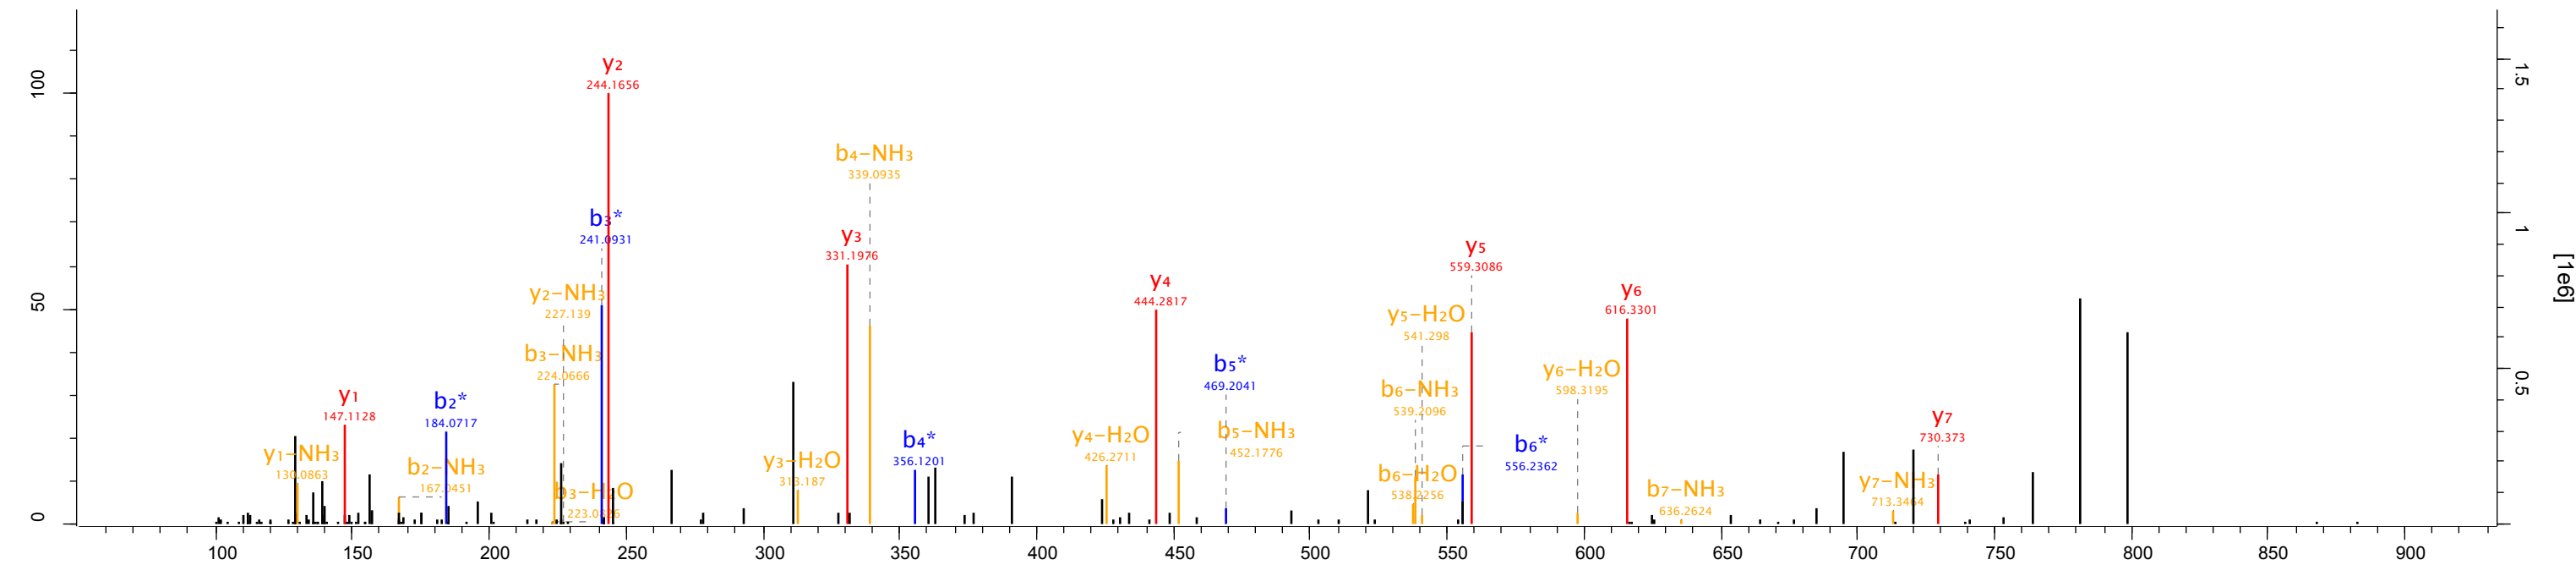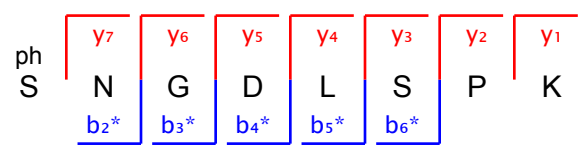

Raw file 20150814\_A375SR\_Phospho\_BR2\_03 Scan 3838 Method FTMS; HCD Score 180.08 m/z 766.34 Gene names OXSR1

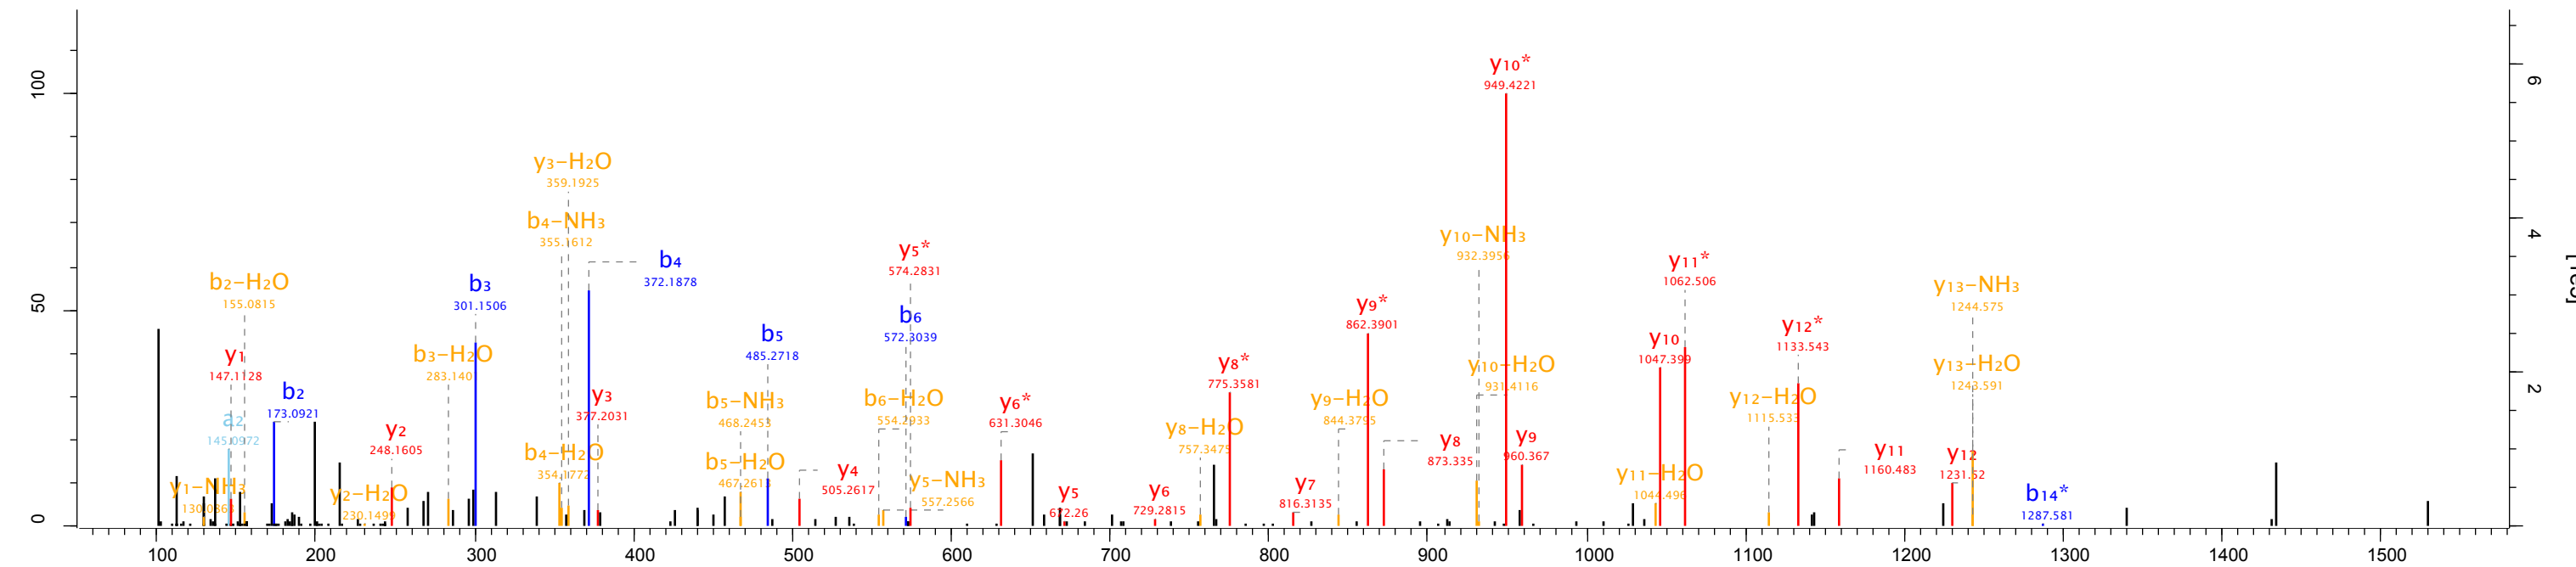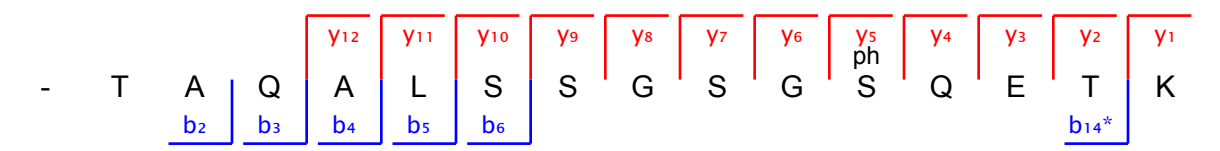

Raw file: 20150814\_A375SR\_Phospho\_BR2\_03  
 Scan: 3858 Method: FTMS; HCD Score: 191.61 m/z: 749.31 Gene names: CNOT2

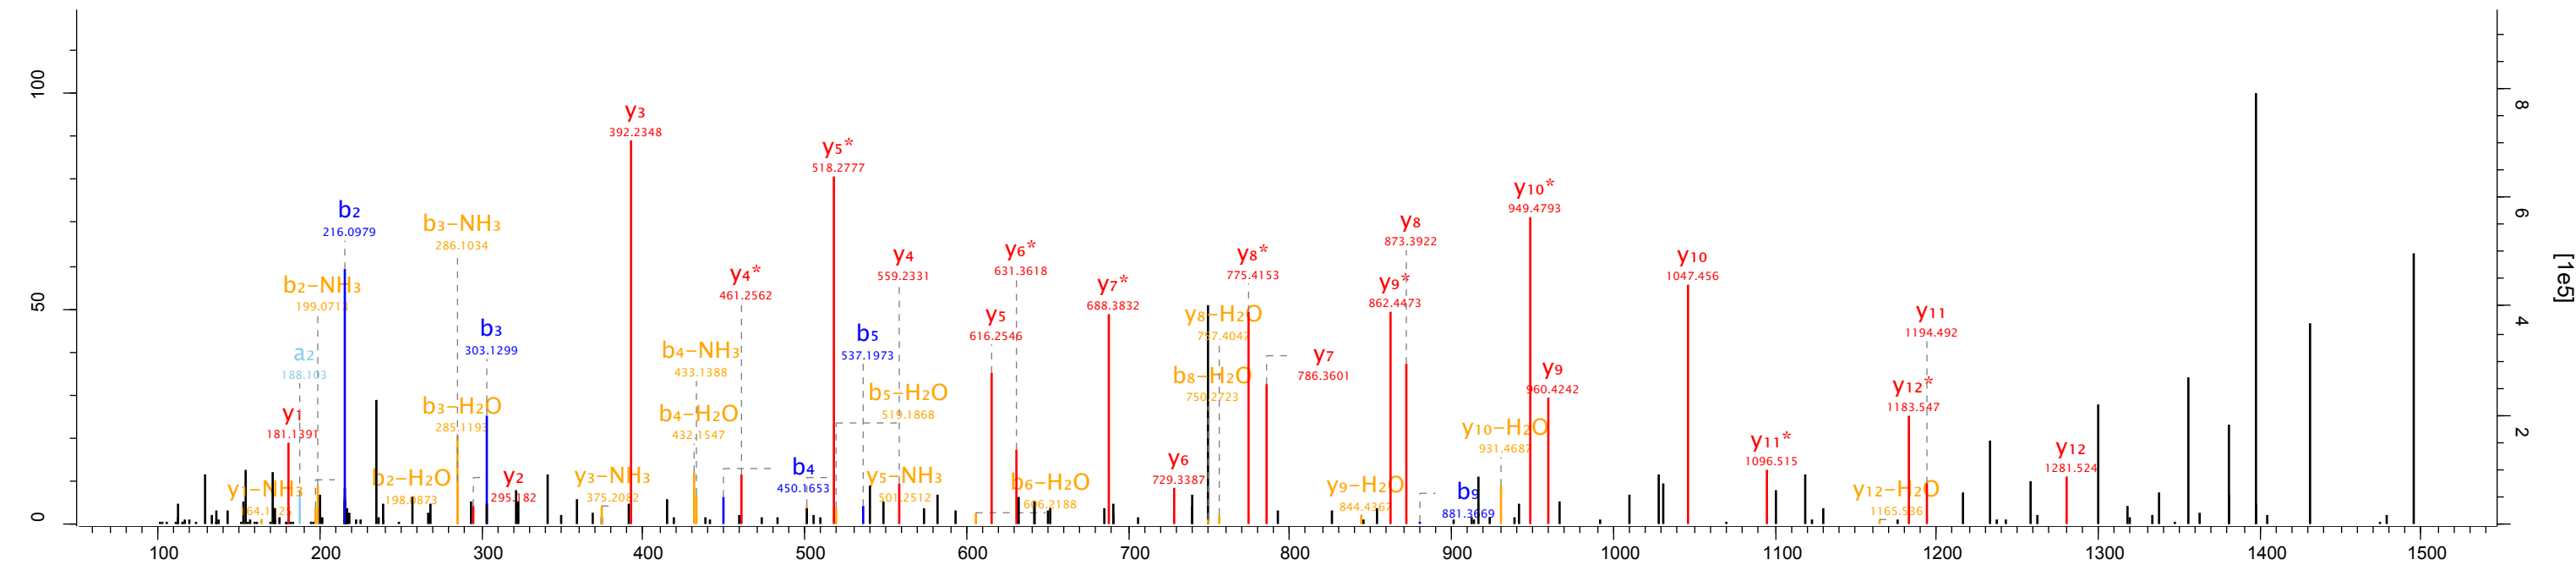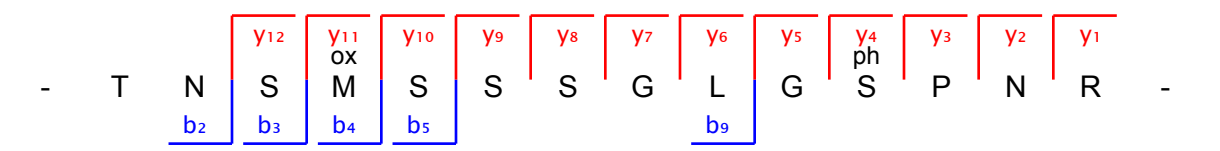

Raw file: 20150814\_A375SR\_Phospho\_BR2\_03  
 Scan: 4198 Method: FTMS; HCD Score: 180.61 m/z: 654.27 Gene names: HNRNPA2B1

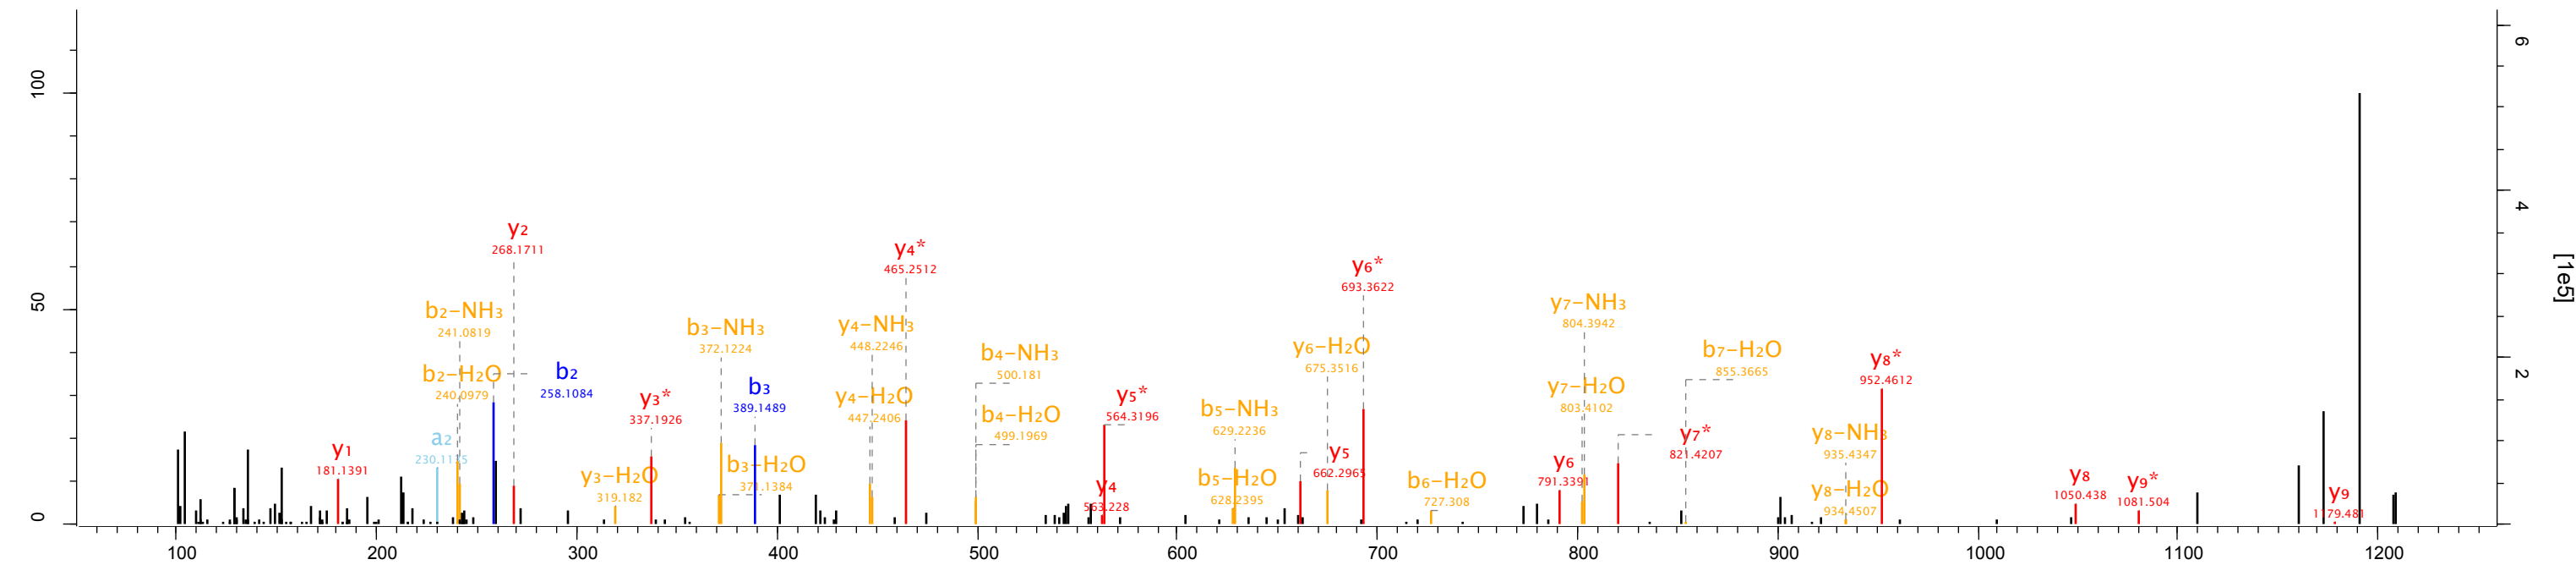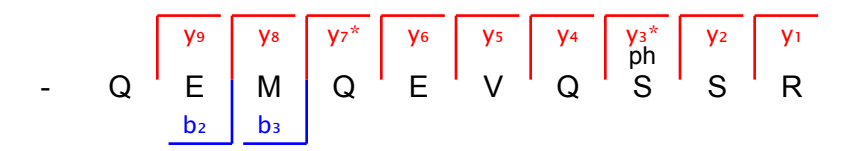

Raw file: 20150814\_A375SR\_Phospho\_BR2\_03  
 Scan: 4258 Method: FTMS; HCD Score: 84.05 m/z: 604.76 Gene names: VCPIP1

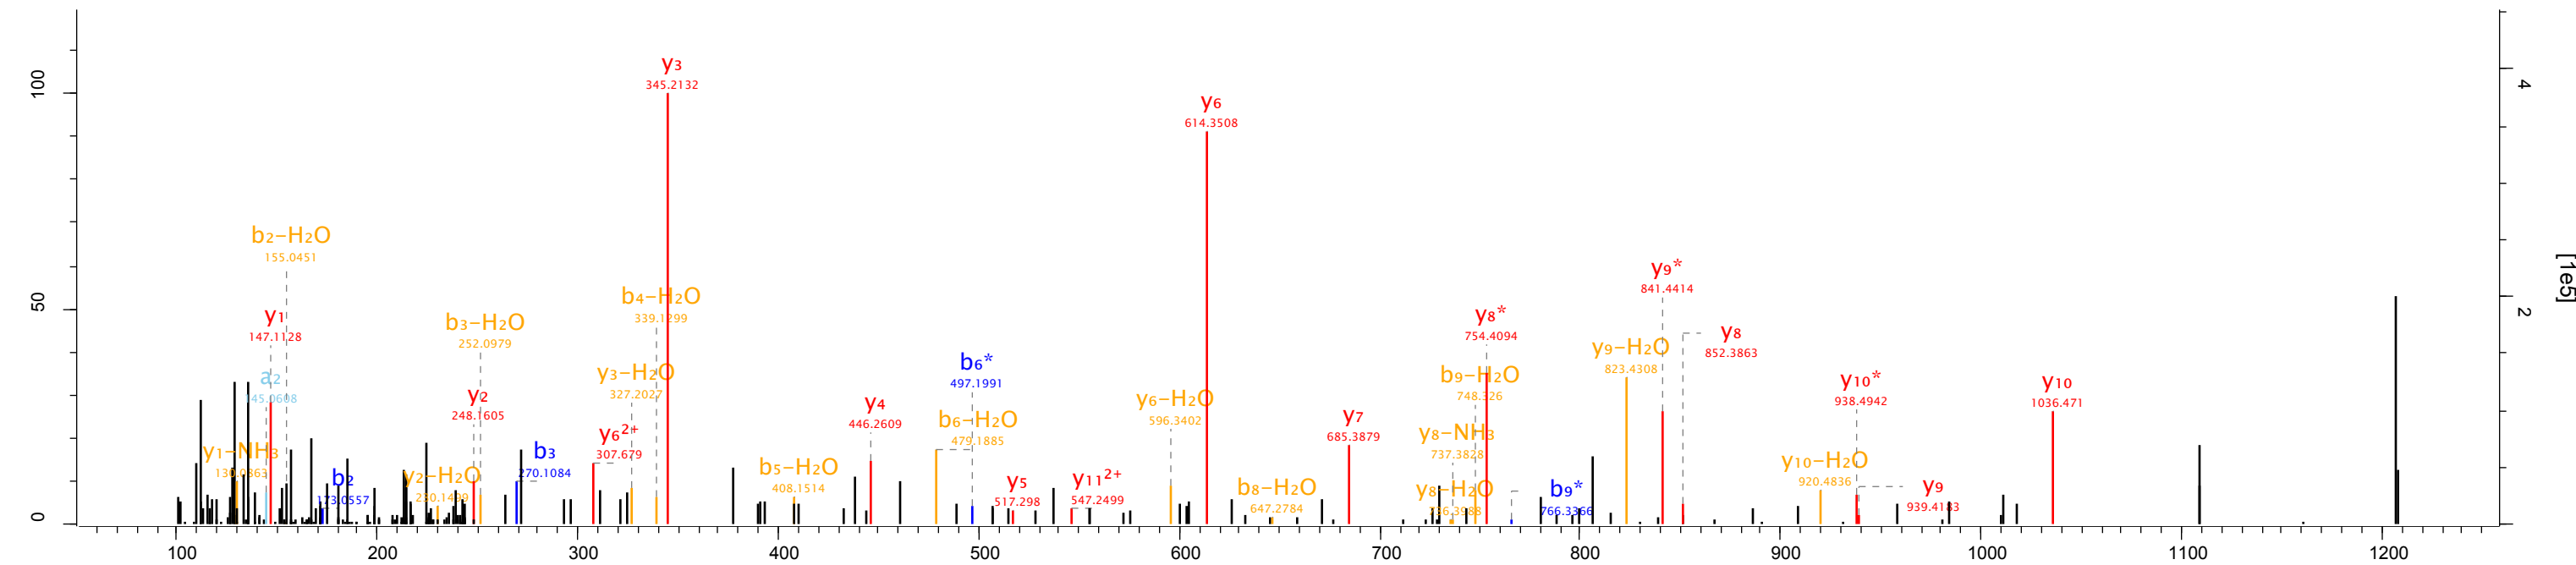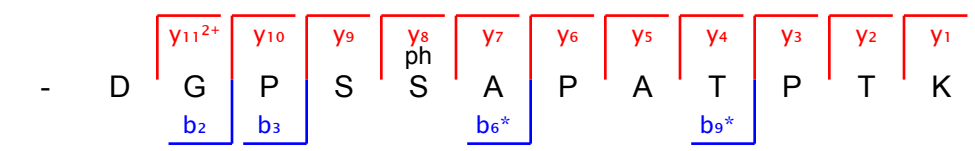

Raw file: 20150814\_A375SR\_Phospho\_BR2\_03  
 Scan: 4268 Method: FTMS; HCD Score: 134.47 m/z: 693.95 Gene names: SGTA

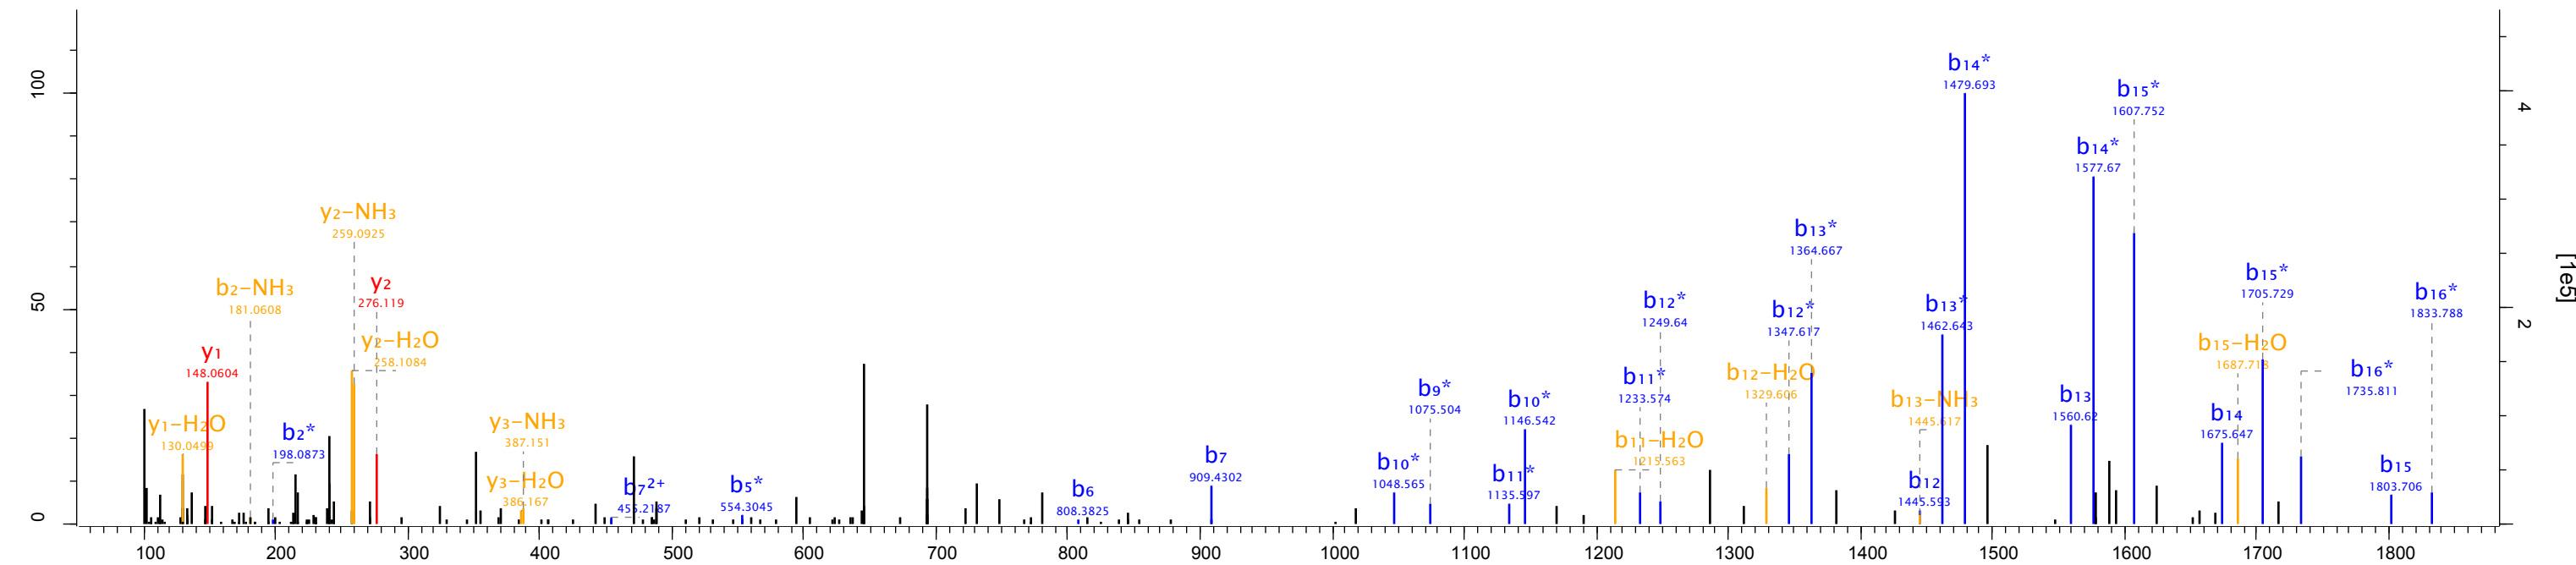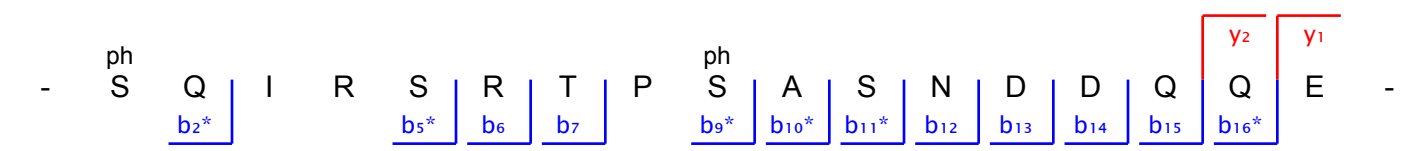

Raw file: 20150814\_A375SR\_Phospho\_BR2\_03  
 Scan: 4578 Method: FTMS; HCD Score: 177.32 m/z: 865.35 Gene names: SRSF8

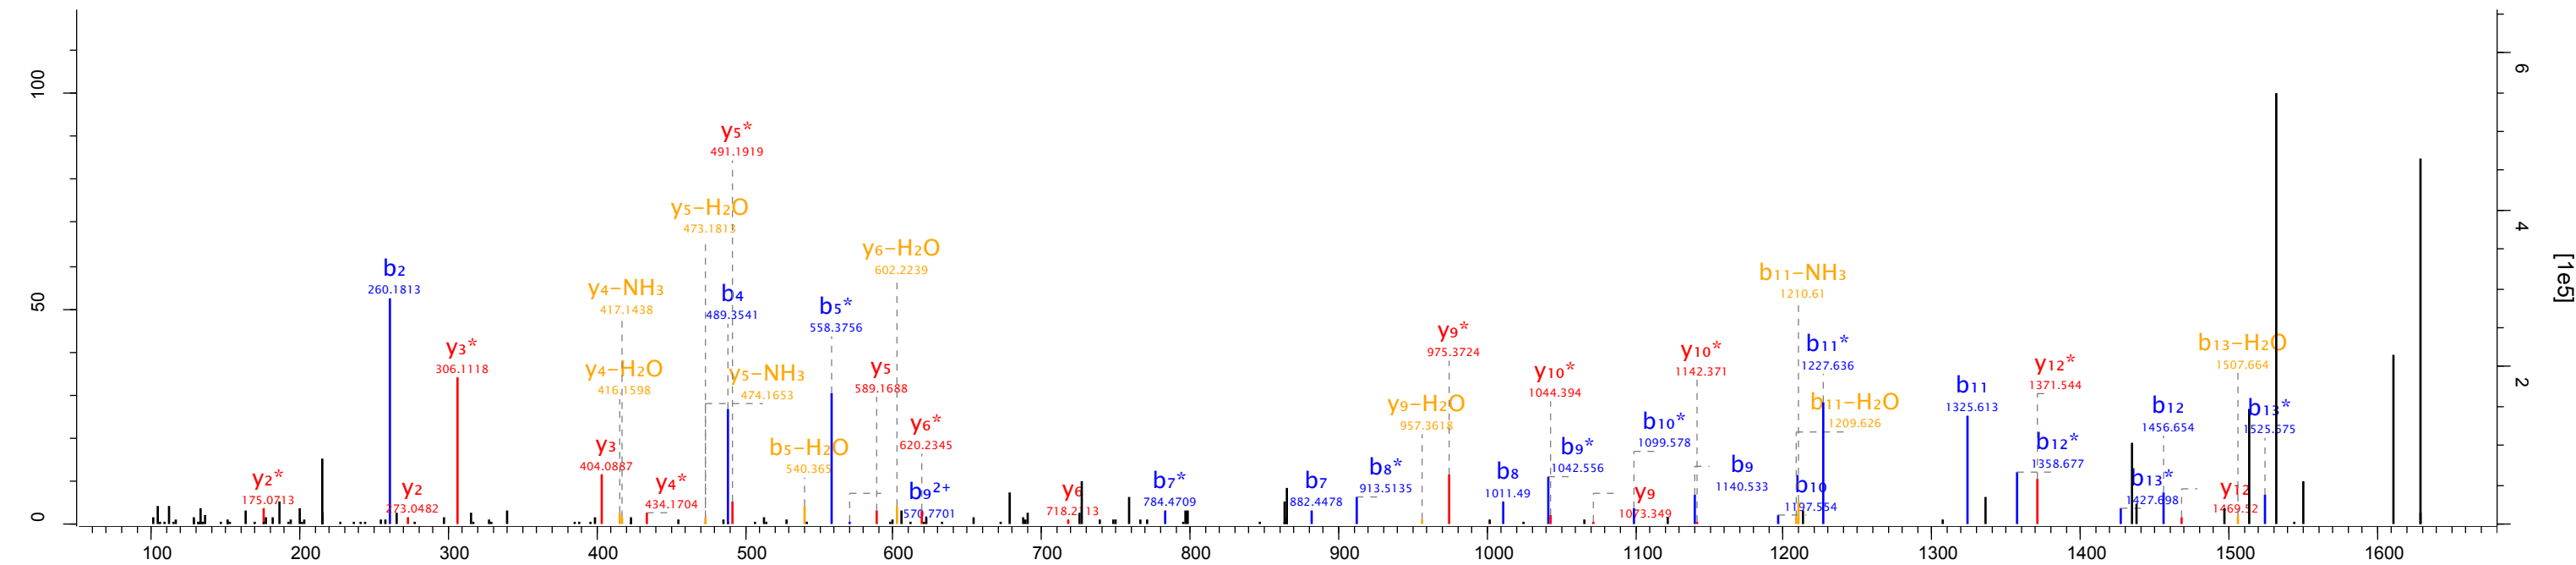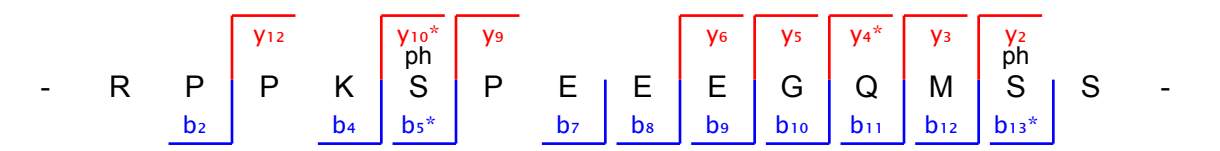



Raw file: 20150814\_A375SR\_Phospho\_BR2\_03  
 Scan: 4708 Method: FTMS; HCD Score: 94.63 m/z: 734.31 Gene names: LSM11

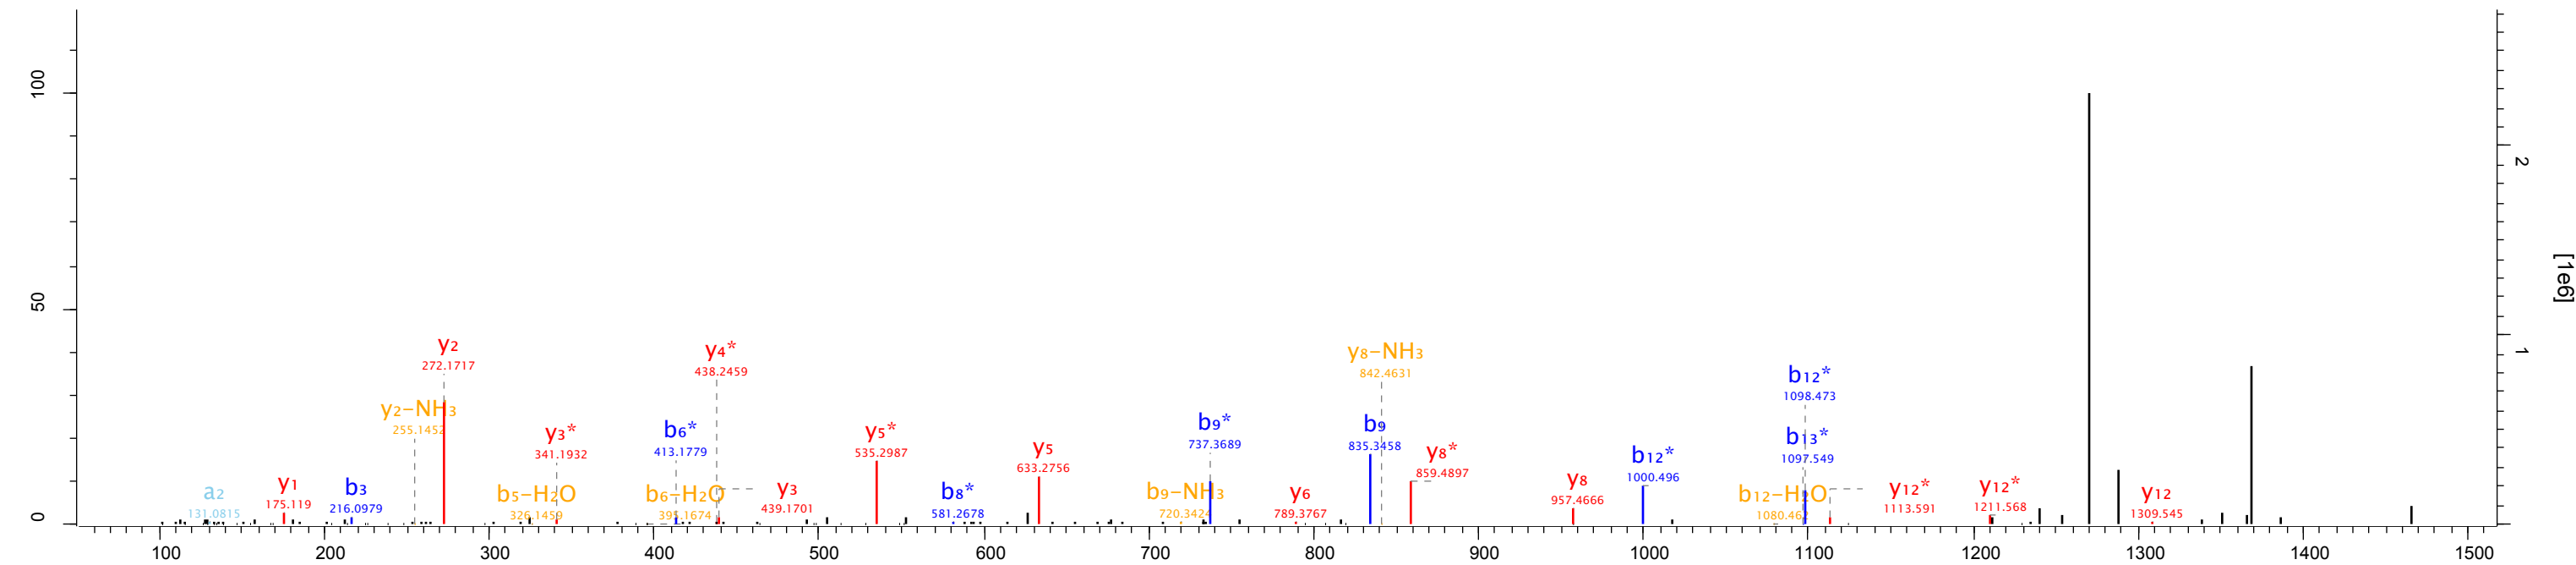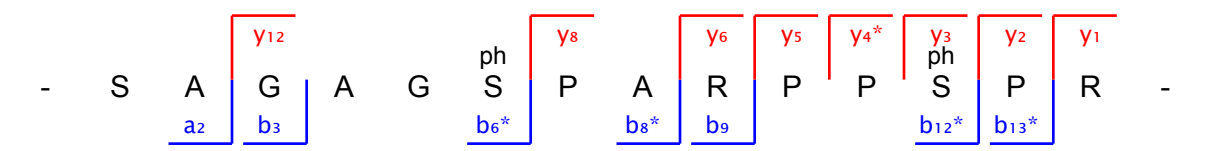

Raw file: 20150814\_A375SR\_Phospho\_BR2\_03  
 Scan: 4718 Method: FTMS; HCD Score: 185.58 m/z: 982.44 Gene names: SRGAP2

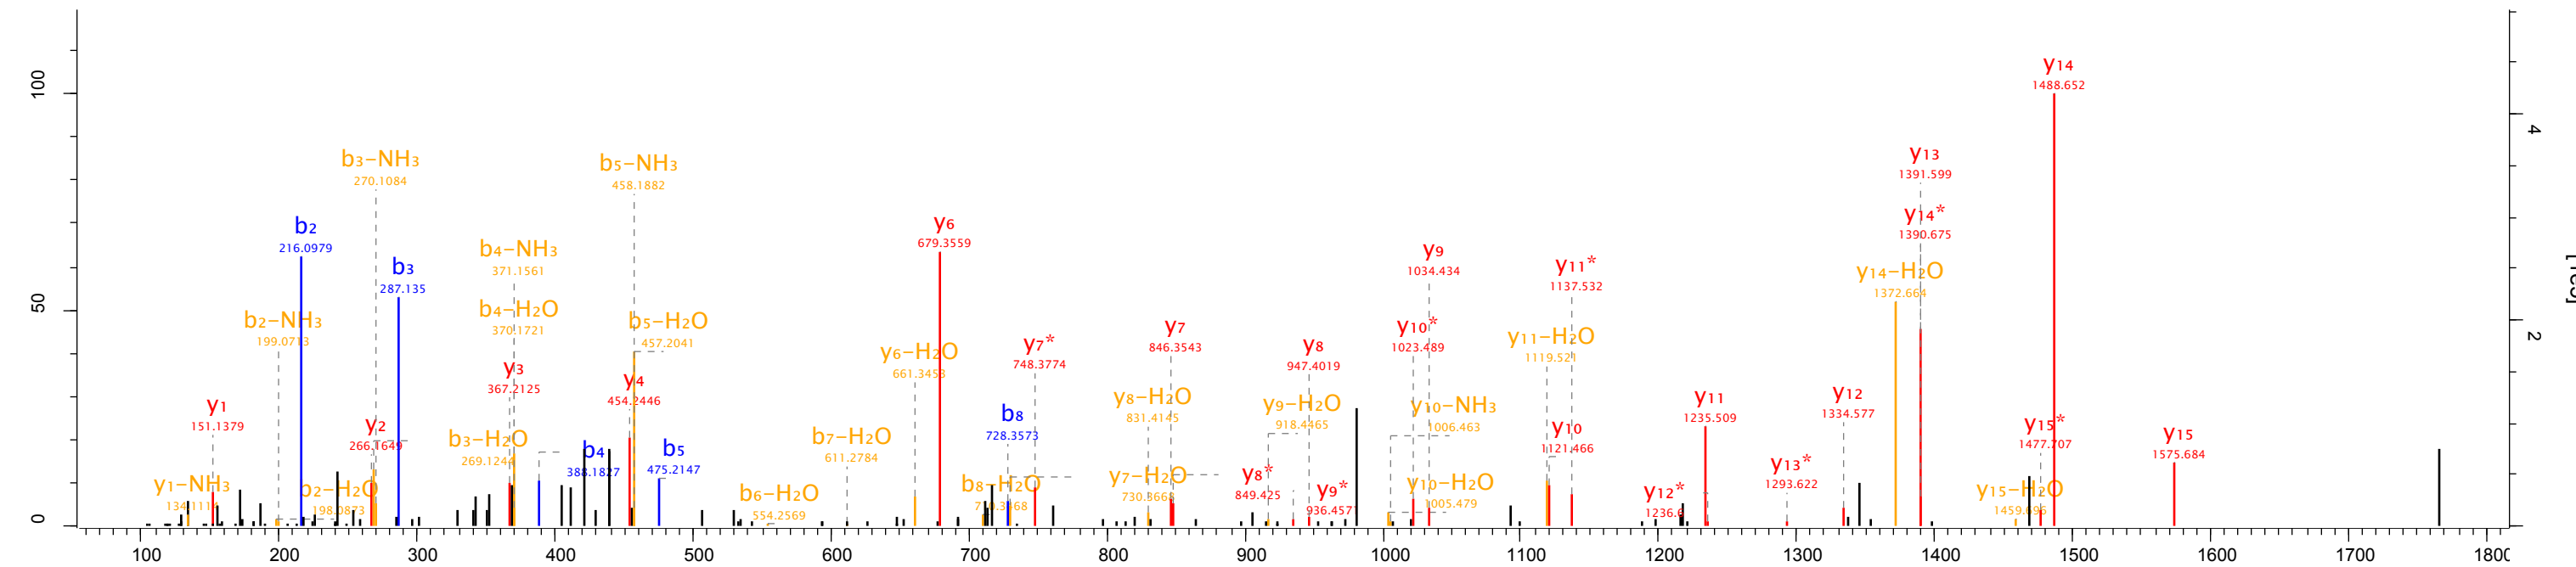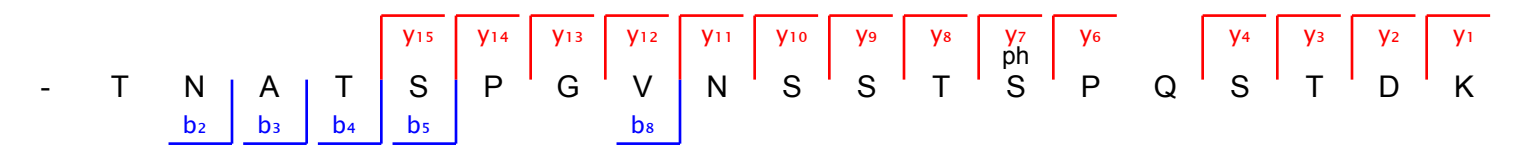

Raw file: 20150814\_A375SR\_Phospho\_BR2\_03  
 Scan: 5638 Method: FTMS; HCD Score: 256.45 m/z: 1051.86 Gene names: SNAPC5

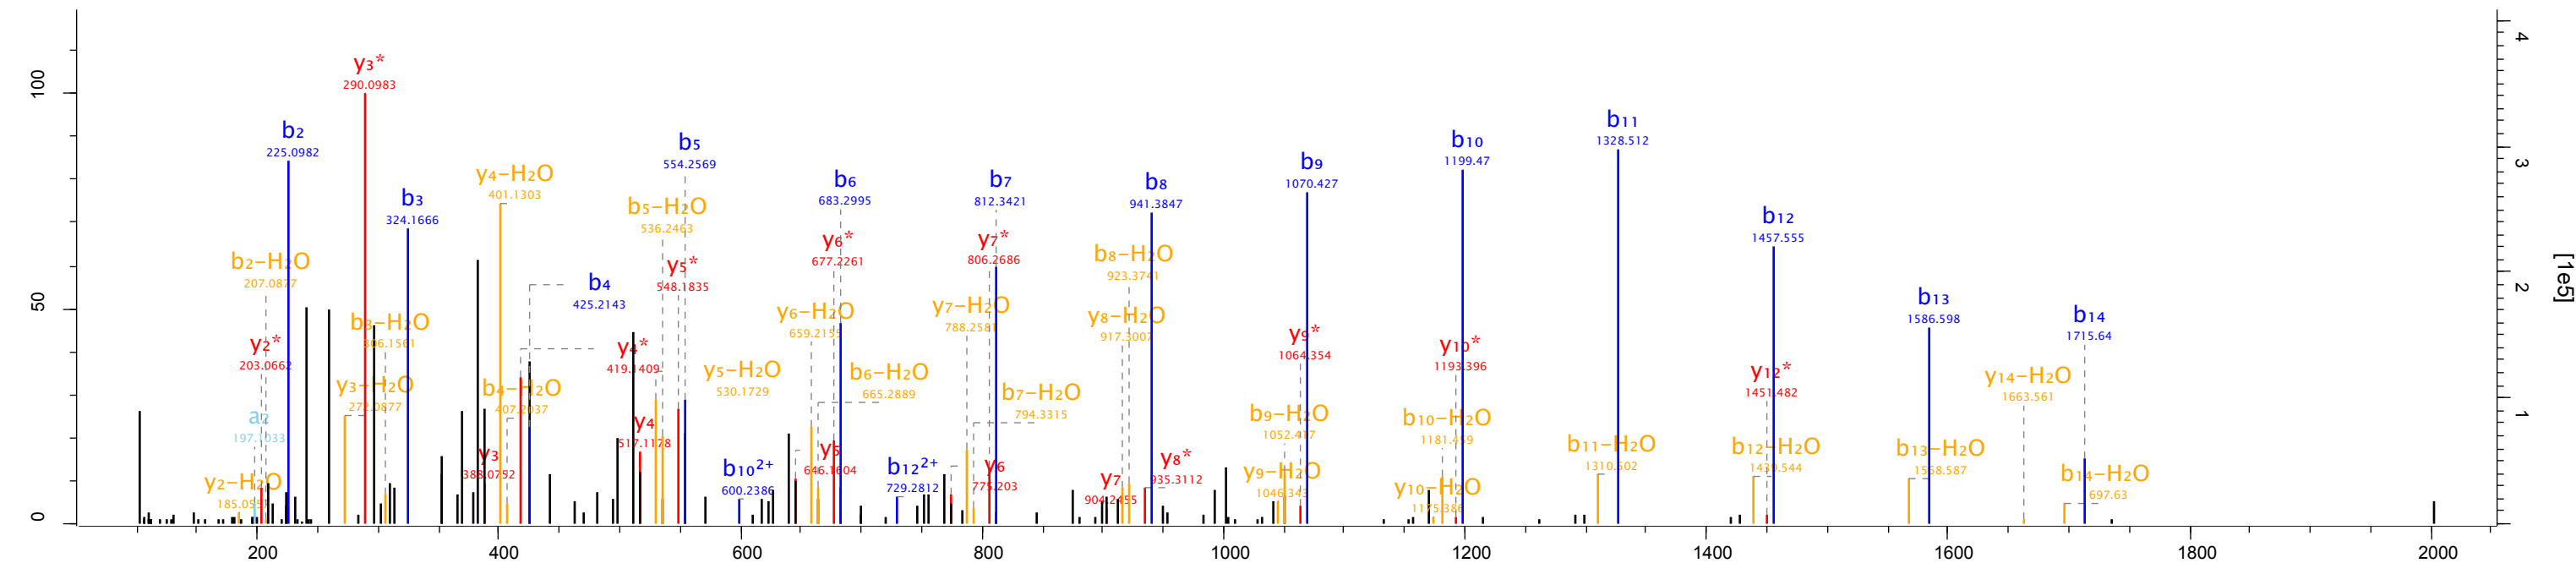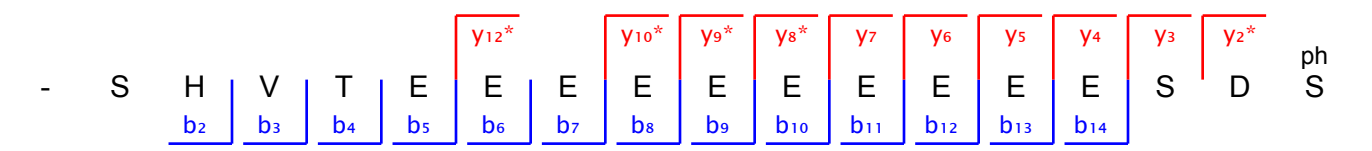

Raw file 20150814\_A375SR\_Phospho\_BR2\_03 Scan 5668 Method FTMS; HCD Score 169.98 m/z 751.84 Gene names CAMSAP2

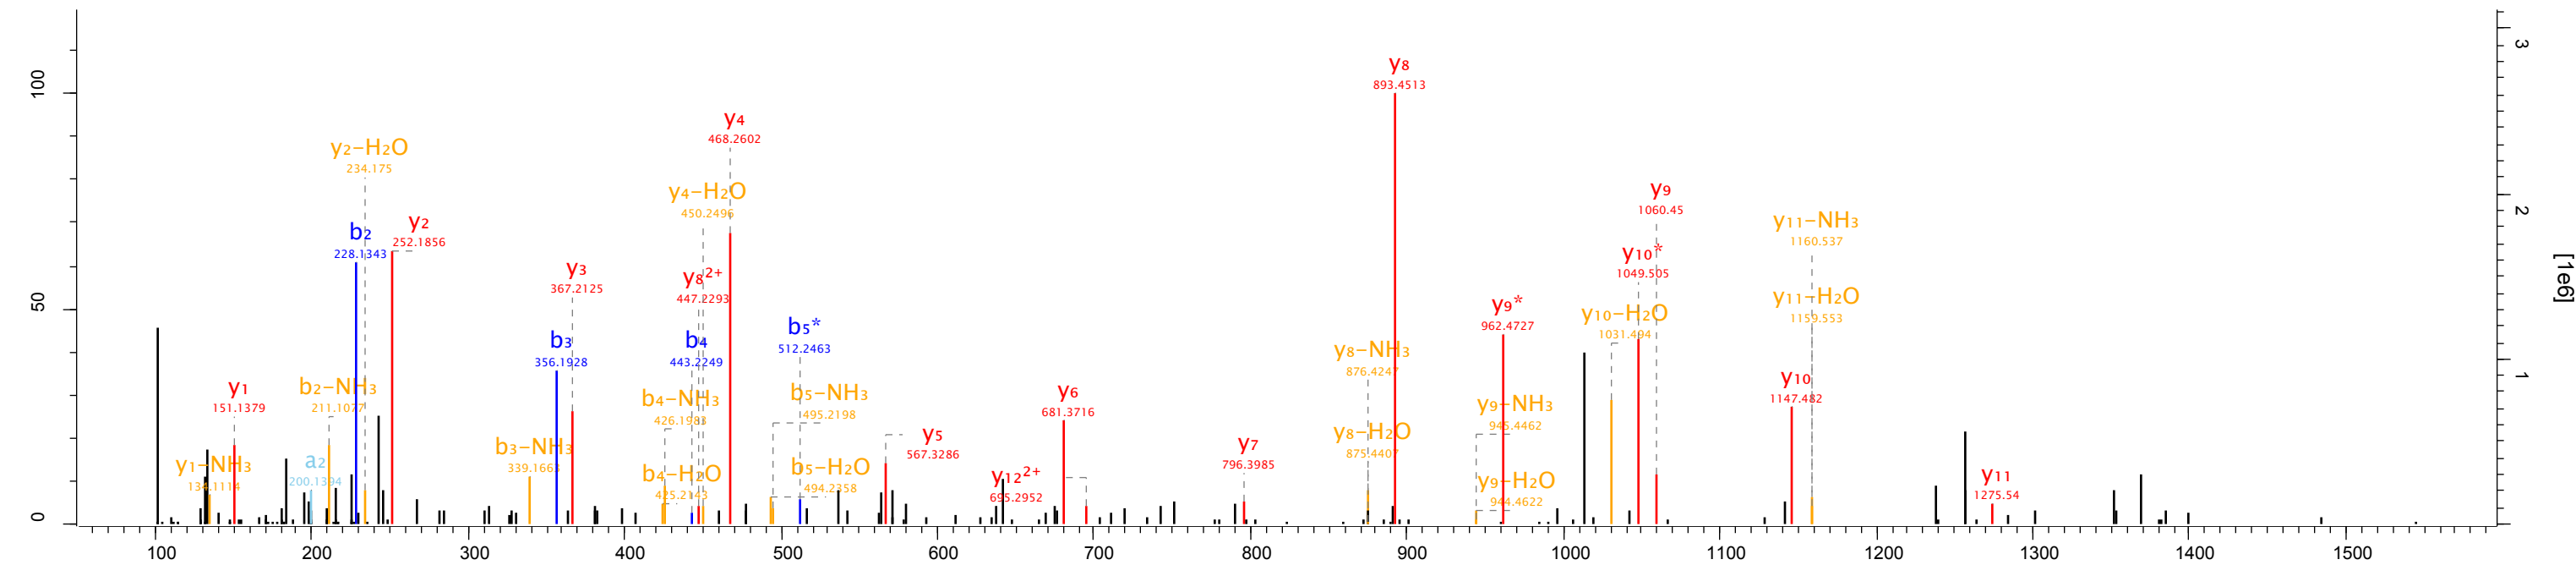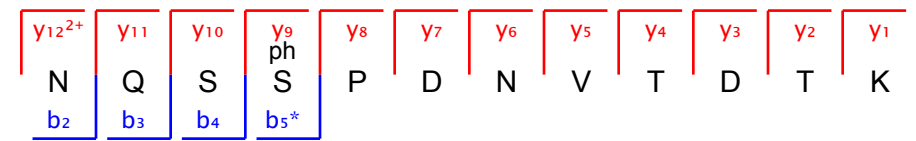



Raw file: 20150814\_A375SR\_Phospho\_BR2\_03  
 Scan: 6338 Method: FTMS; HCD Score: 417.82 m/z: 1042.92 Gene names: ENSA

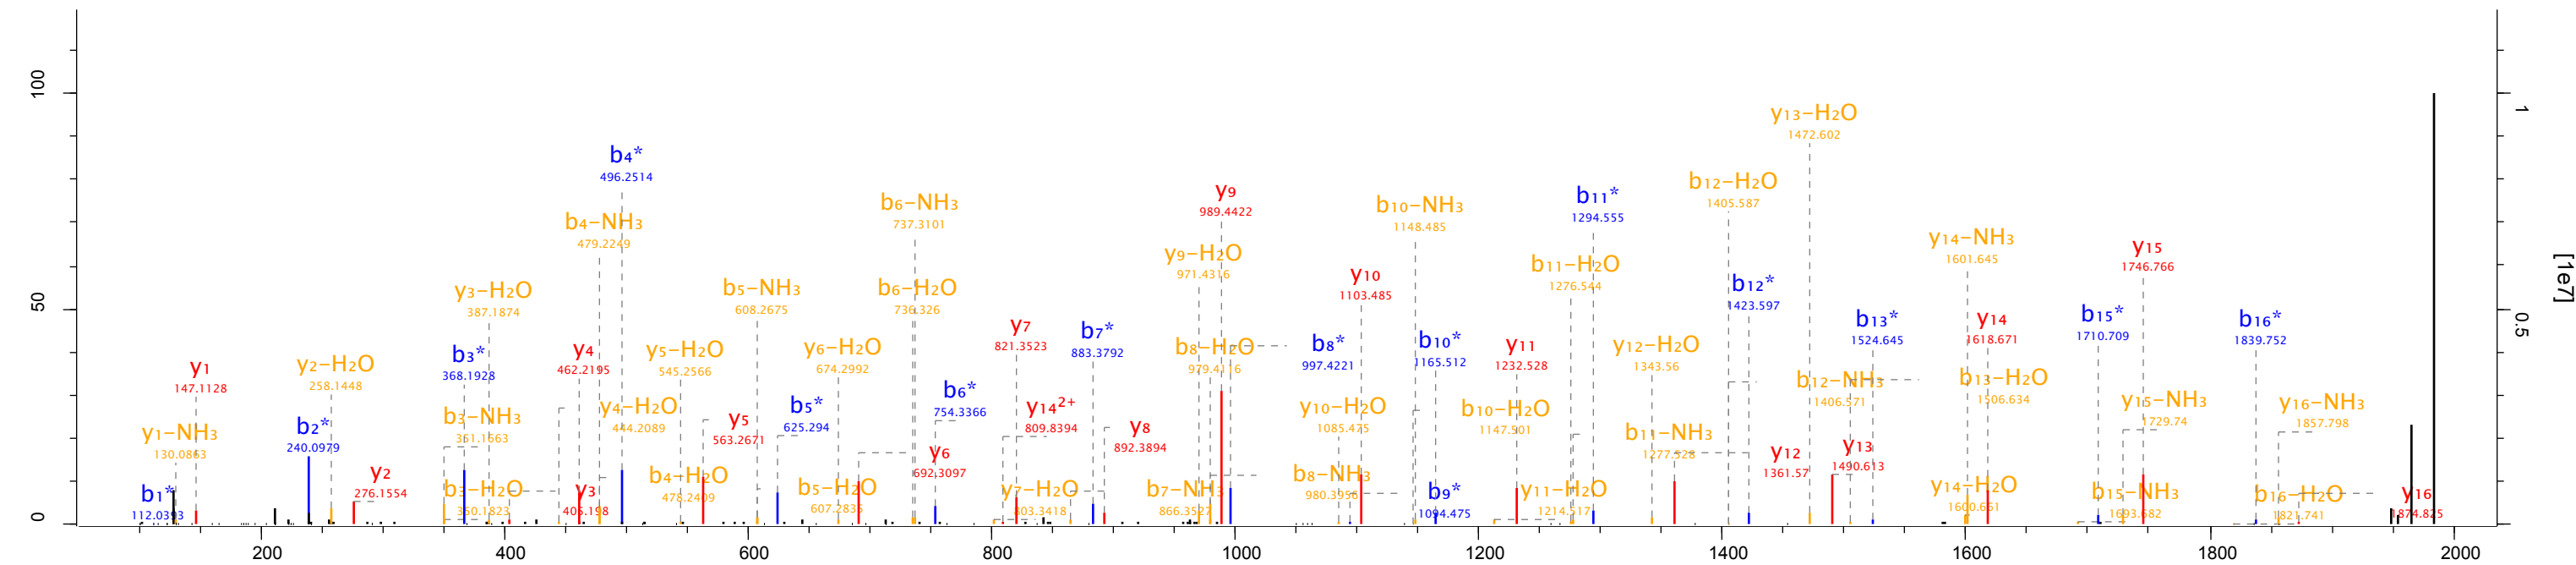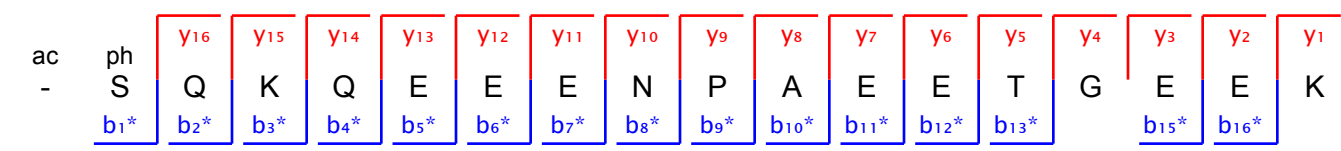

Raw file Scan Method Score m/z Gene names

20150814\_A375SR\_Phospho\_BR2\_03 6348 FTMS; HCD 153.25 767.33 FNBP4

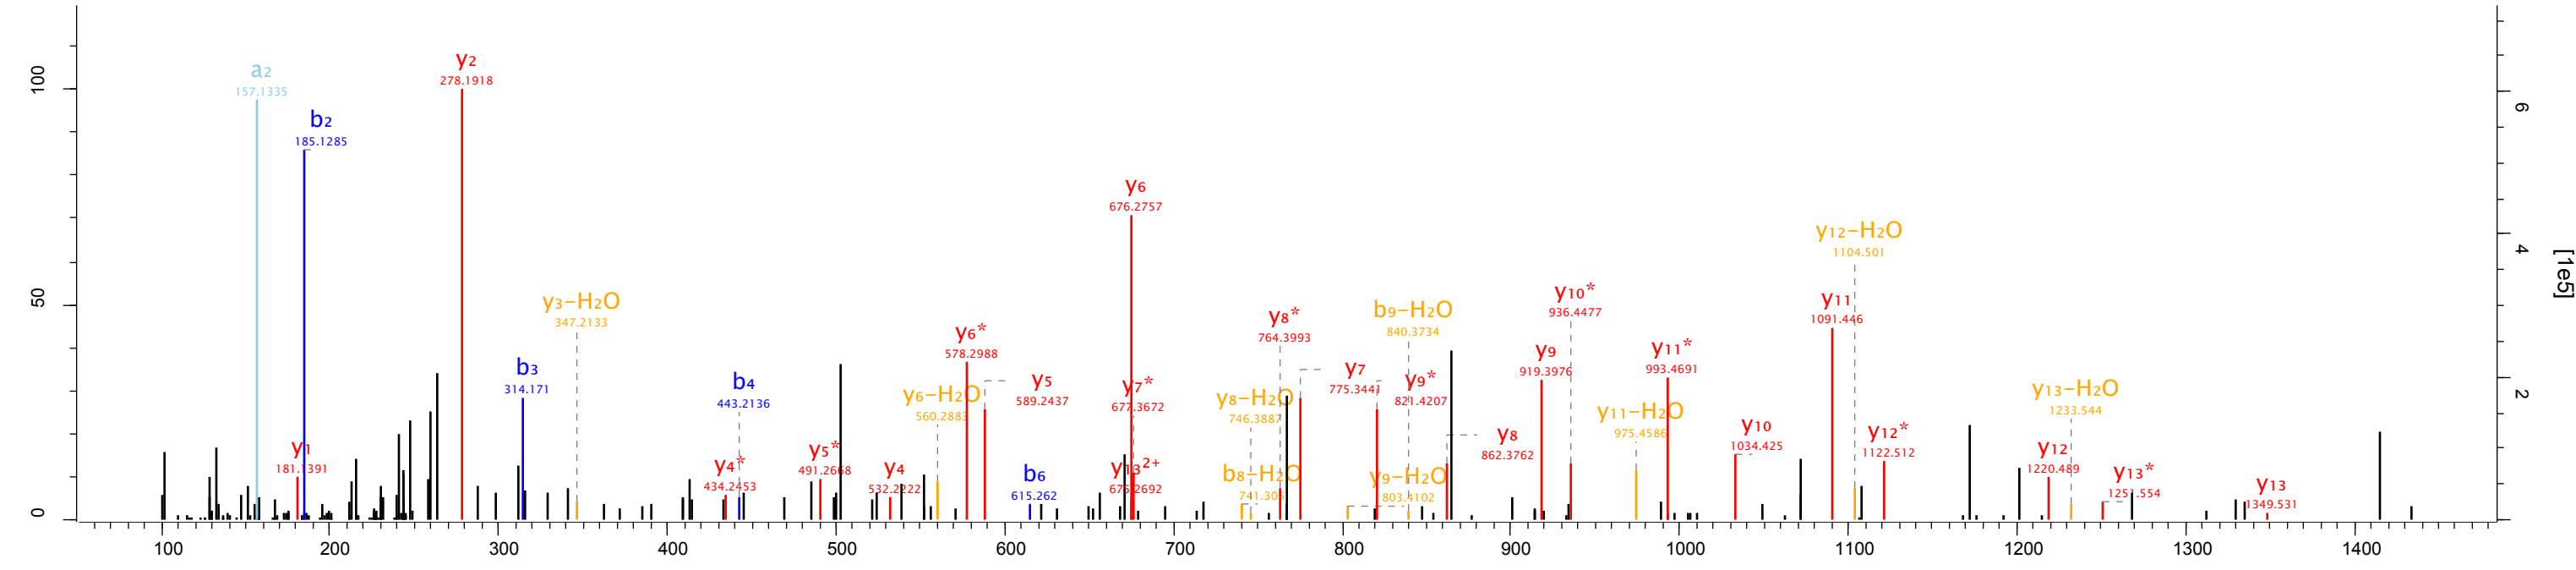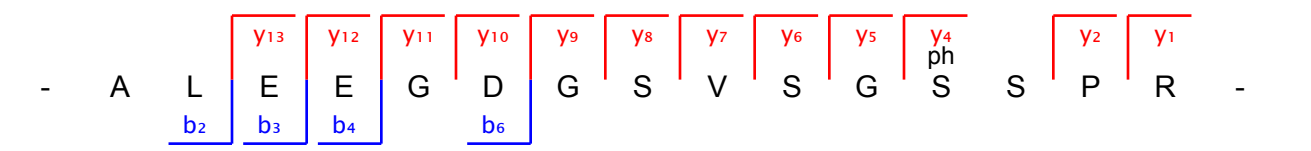

Raw file: 20150814\_A375SR\_Phospho\_BR2\_03  
 Scan: 6858 Method: FTMS; HCD Score: 78.9 m/z: 495.9 Gene names: PPP2R5D

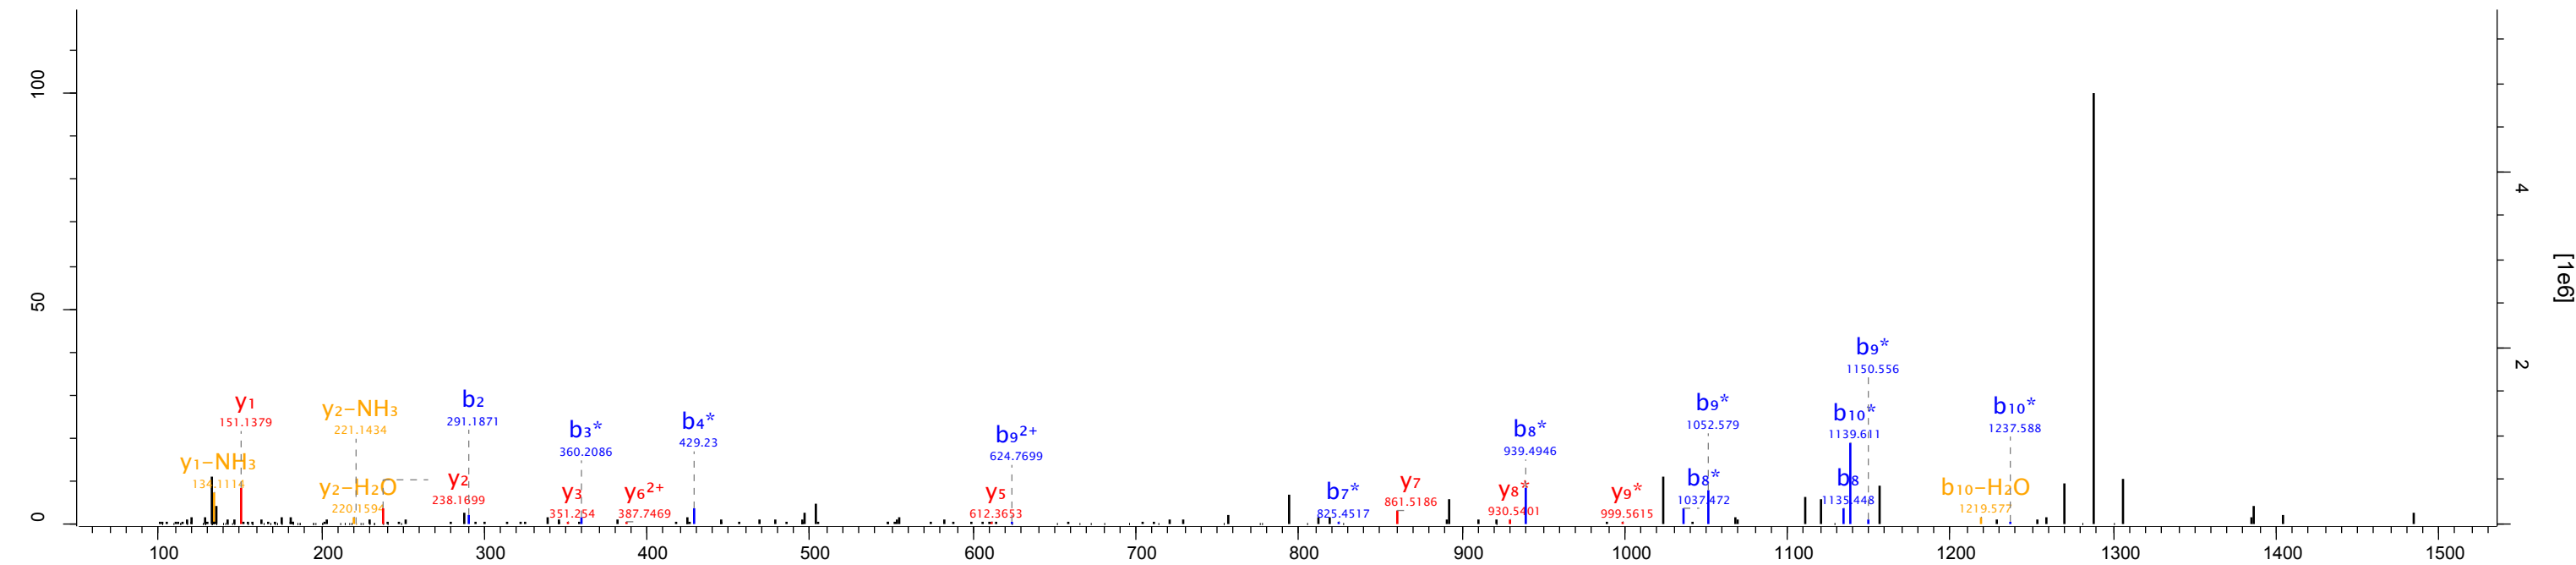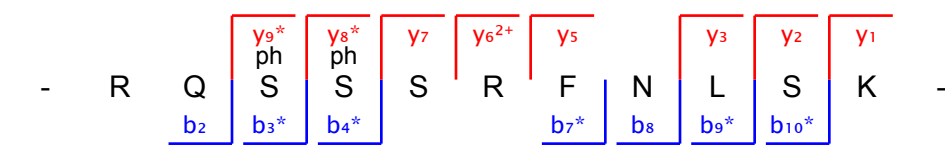



Raw file Scan Method Score m/z Gene names  
 20150814\_A375SR\_Phospho\_BR2\_03 6938 FTMS; HCD 117.23 863.39 PRPF31

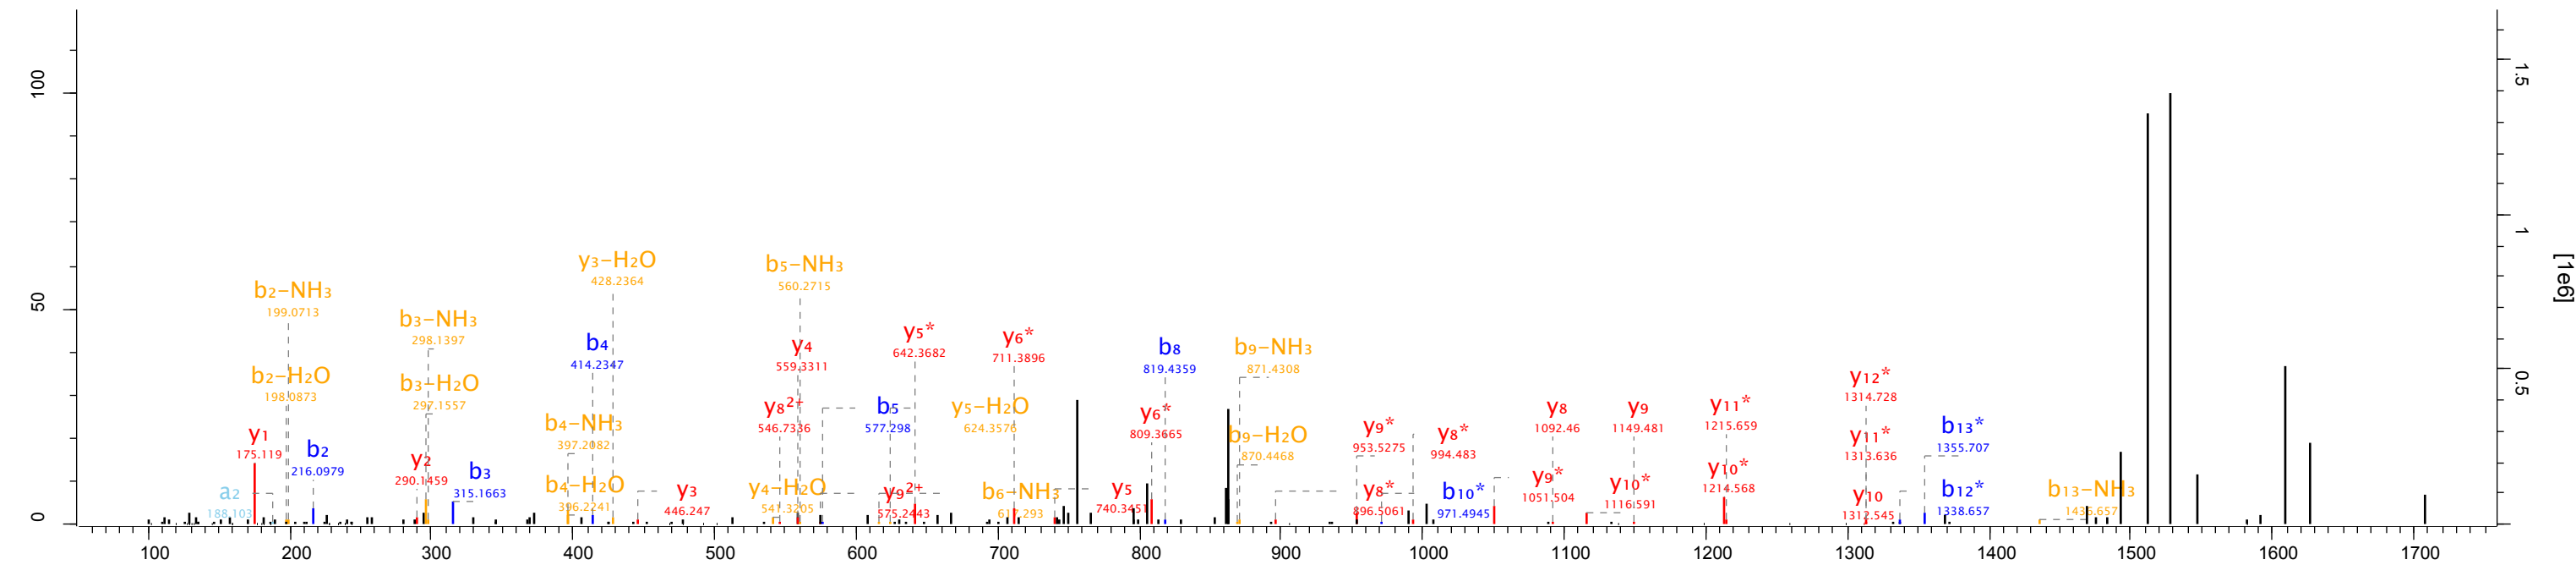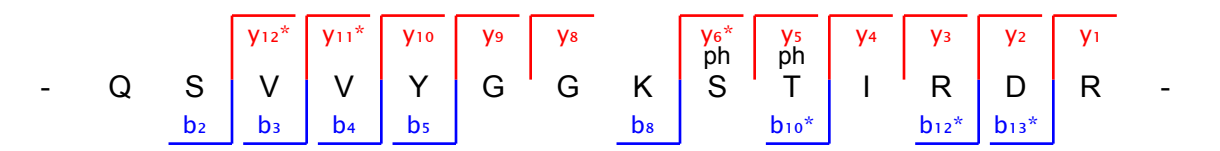

Raw file: 20150814\_A375SR\_Phospho\_BR2\_03  
 Scan: 7108 Method: FTMS; HCD Score: 125.97 m/z: 746.66 Gene names: TBC1D10B

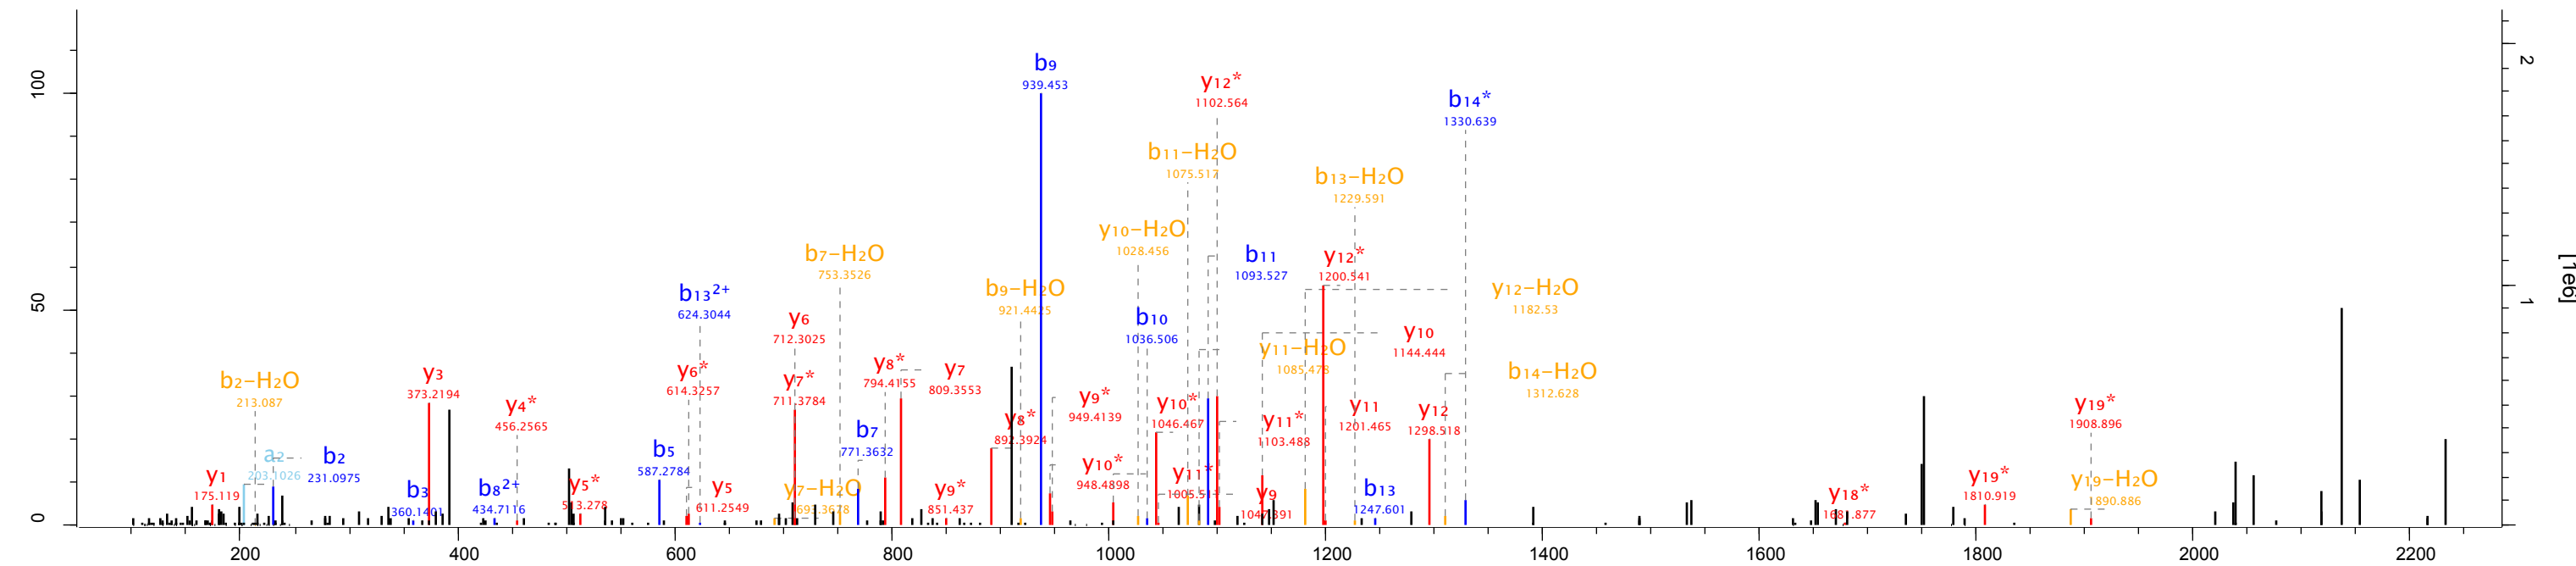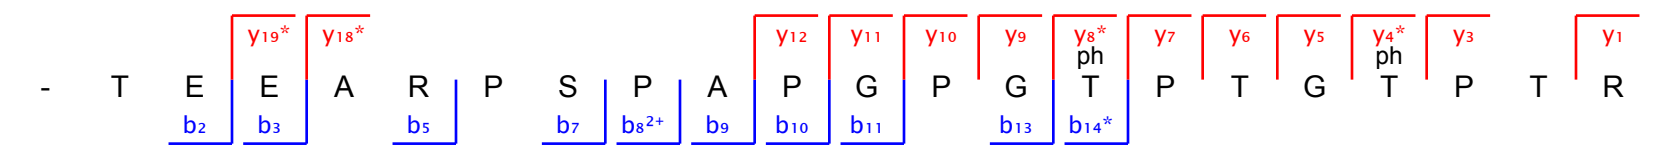

Raw file: 20150814\_A375SR\_Phospho\_BR2\_03  
 Scan: 7198 Method: FTMS; HCD Score: 249.29 m/z: 888.32 Gene names: ARHGAP5

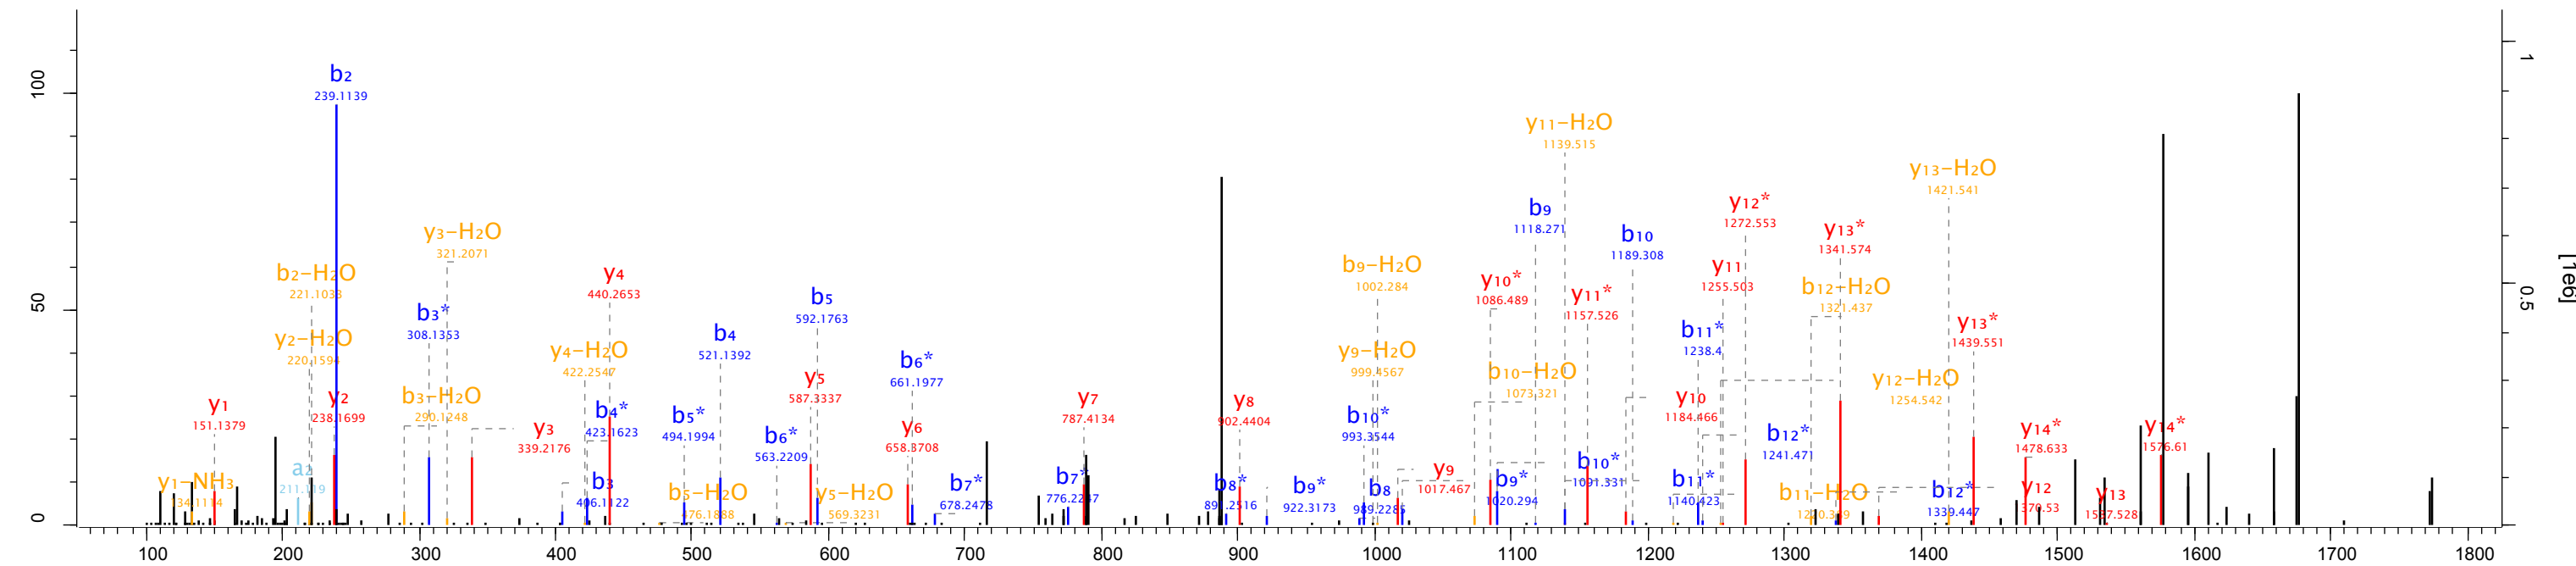

- T y<sub>14</sub>\* y<sub>13</sub>ph y<sub>12</sub> y<sub>11</sub> y<sub>10</sub>ph y<sub>9</sub> y<sub>8</sub> y<sub>7</sub> y<sub>6</sub> y<sub>5</sub> y<sub>4</sub> y<sub>3</sub> y<sub>2</sub> y<sub>1</sub> -

b<sub>2</sub> b<sub>3</sub> b<sub>4</sub> b<sub>5</sub> b<sub>6</sub>\* b<sub>7</sub>\* b<sub>8</sub> b<sub>9</sub> b<sub>10</sub> b<sub>11</sub>\* b<sub>12</sub>\*

Raw file: 20150814\_A375SR\_Phospho\_BR2\_03  
 Scan: 7498 Method: FTMS; HCD Score: 49.66 m/z: 798.83 Gene names: AMER1

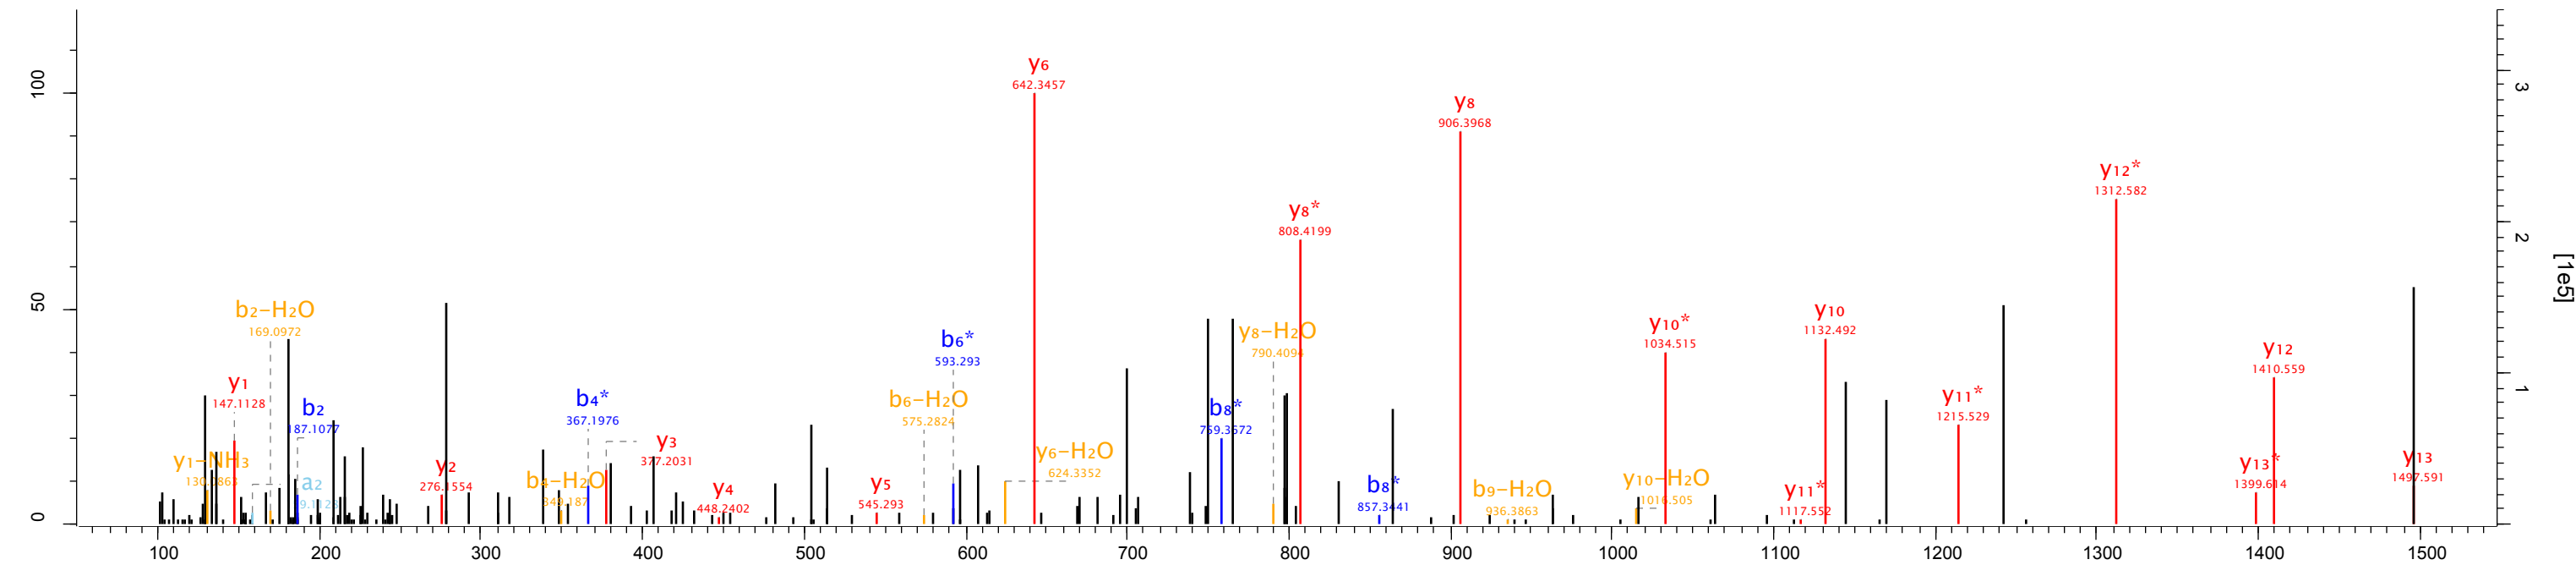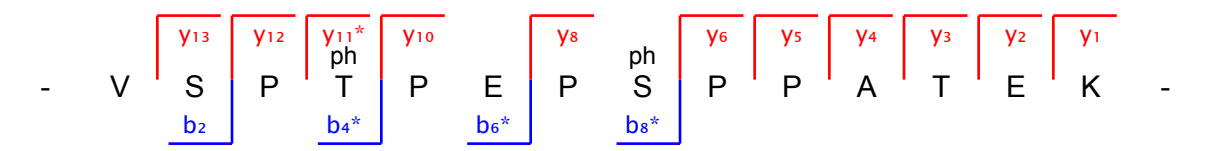

Raw file: 20150814\_A375SR\_Phospho\_BR2\_03  
 Scan: 7798 Method: FTMS; HCD Score: 221.25 m/z: 956.85 Gene names: SAFB2

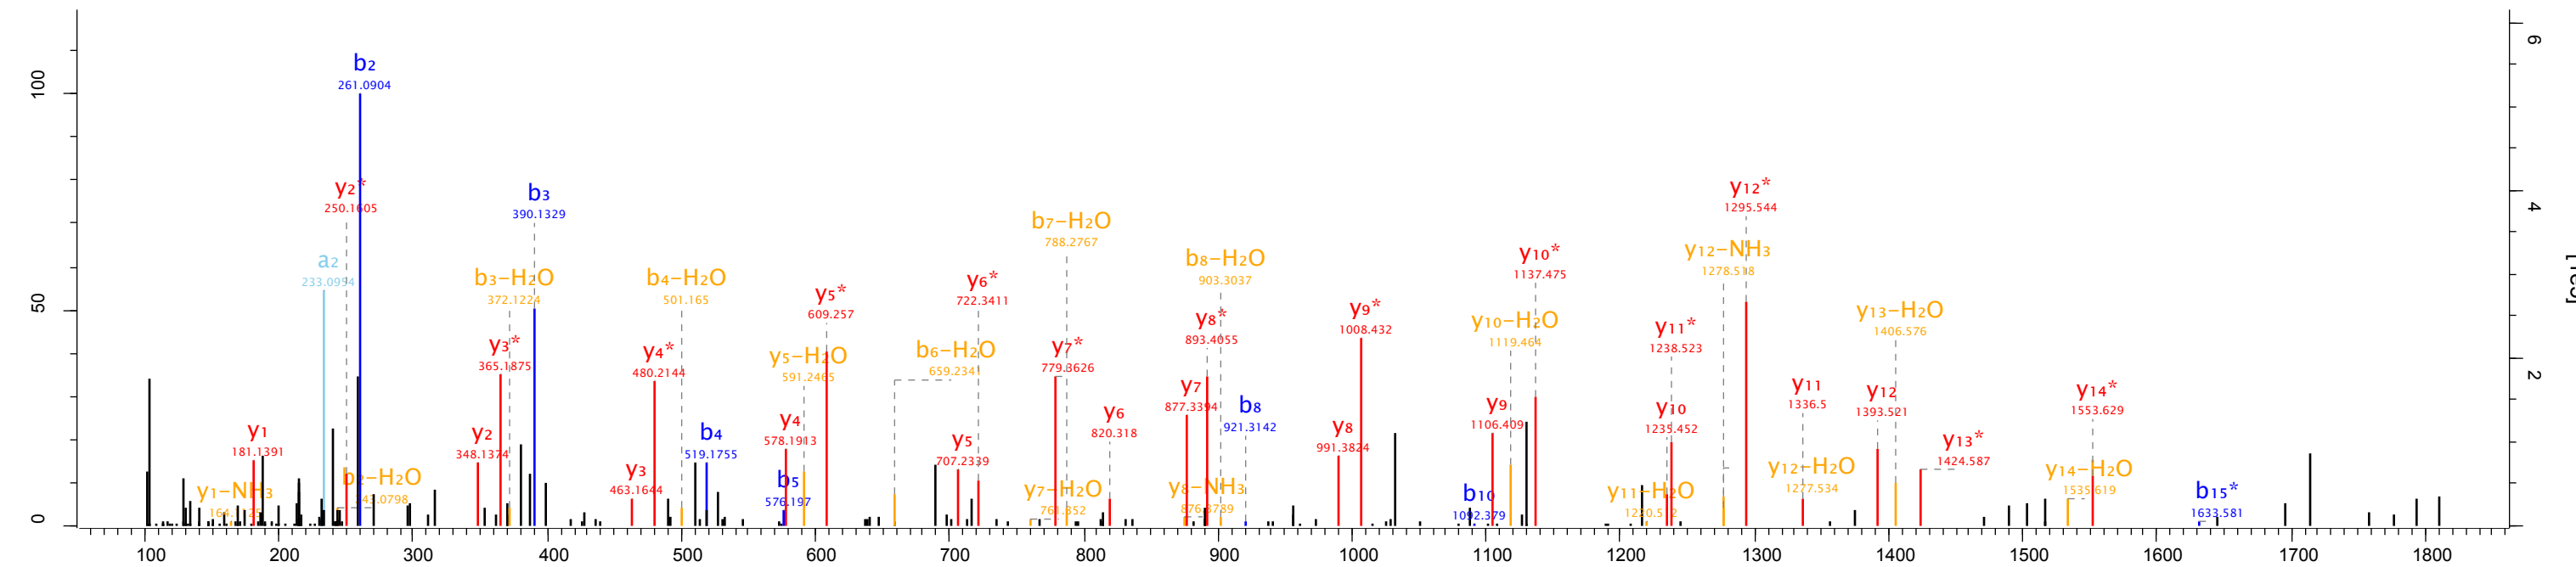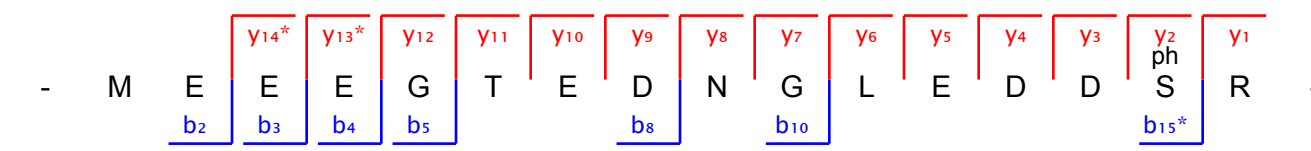

Raw file: 20150814\_A375SR\_Phospho\_BR2\_03  
 Scan: 8138 Method: FTMS; HCD Score: 128.49 m/z: 835.86 Gene names: ZNF532

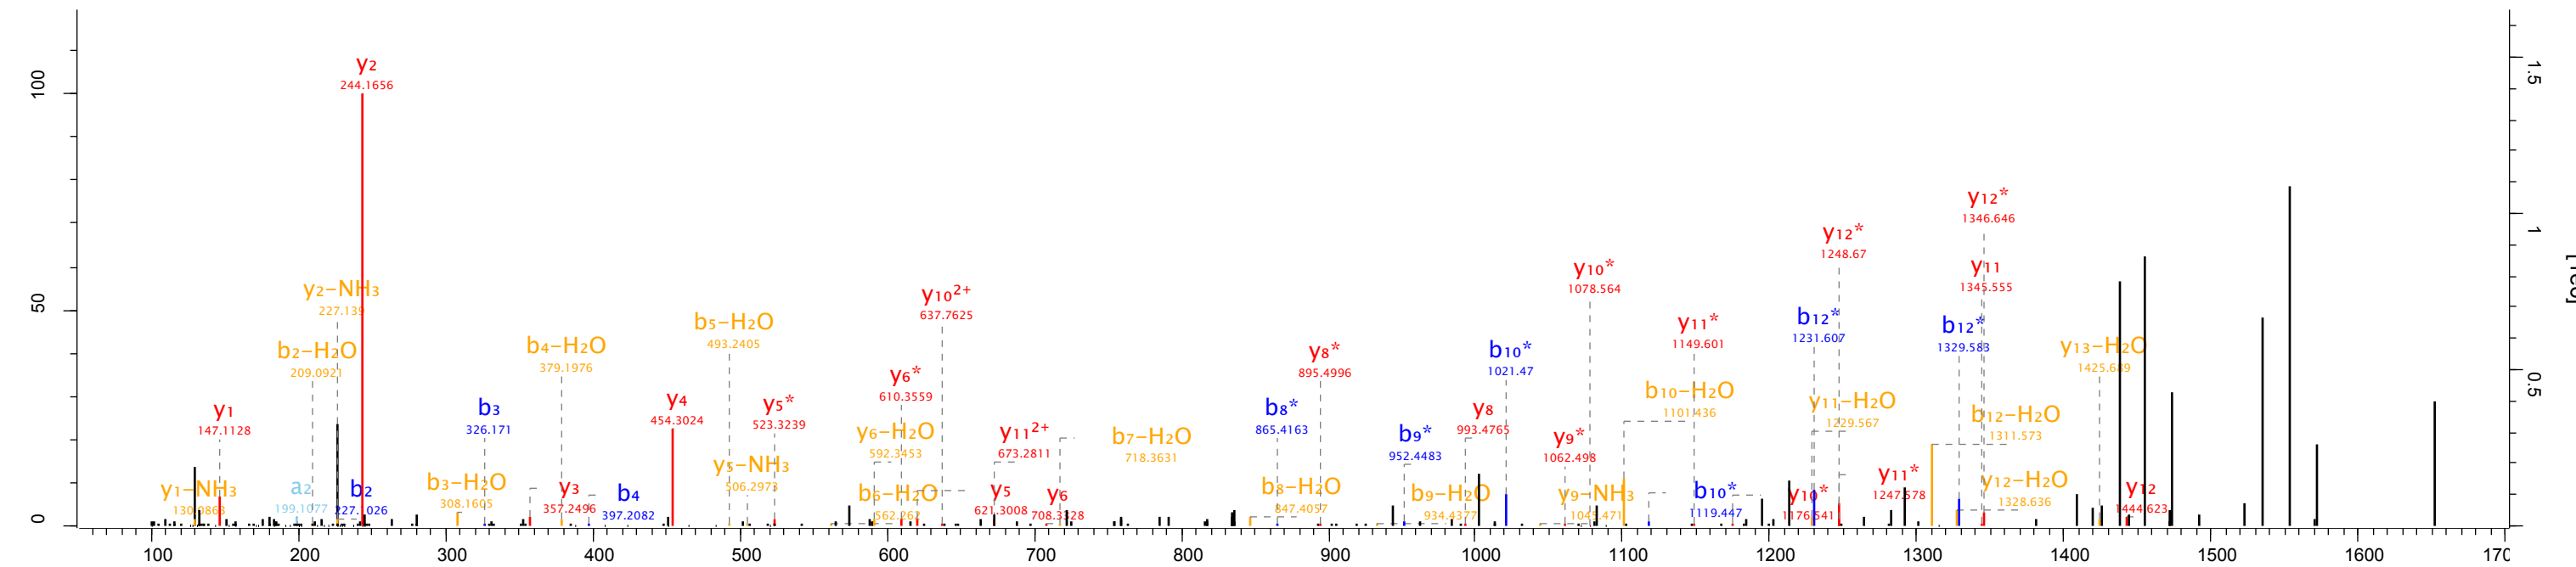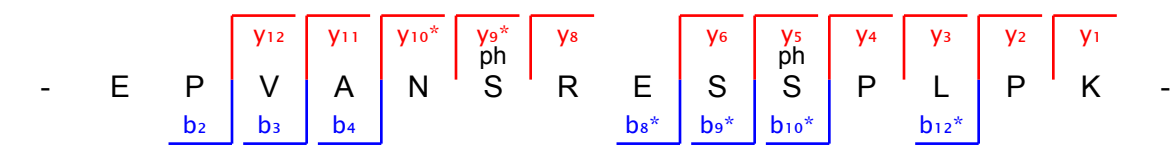

Raw file: 20150814\_A375SR\_Phospho\_BR2\_03  
 Scan: 8398 Method: FTMS; HCD Score: 92.59 m/z: 539.91 Gene names: PRKD2

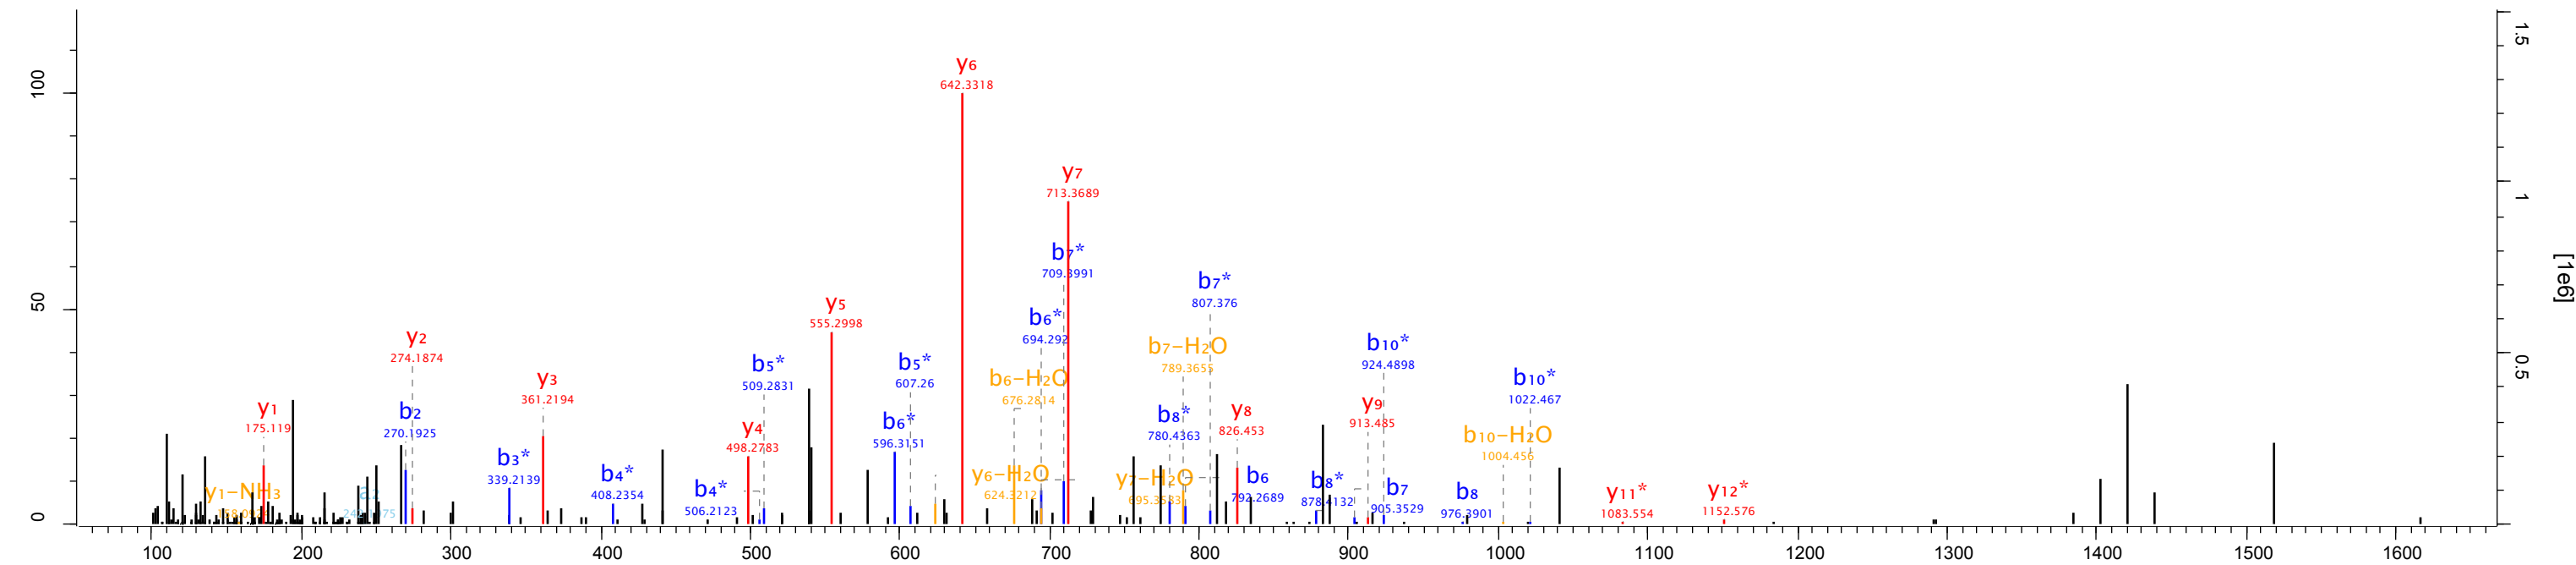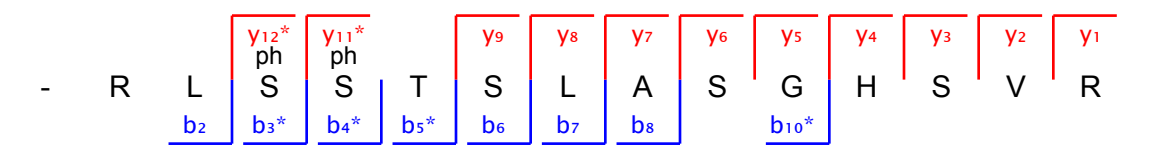

Raw file: 20150814\_A375SR\_Phospho\_BR2\_03  
 Scan: 8638 Method: FTMS; HCD Score: 193.38 m/z: 908.41 Gene names: RANBP2

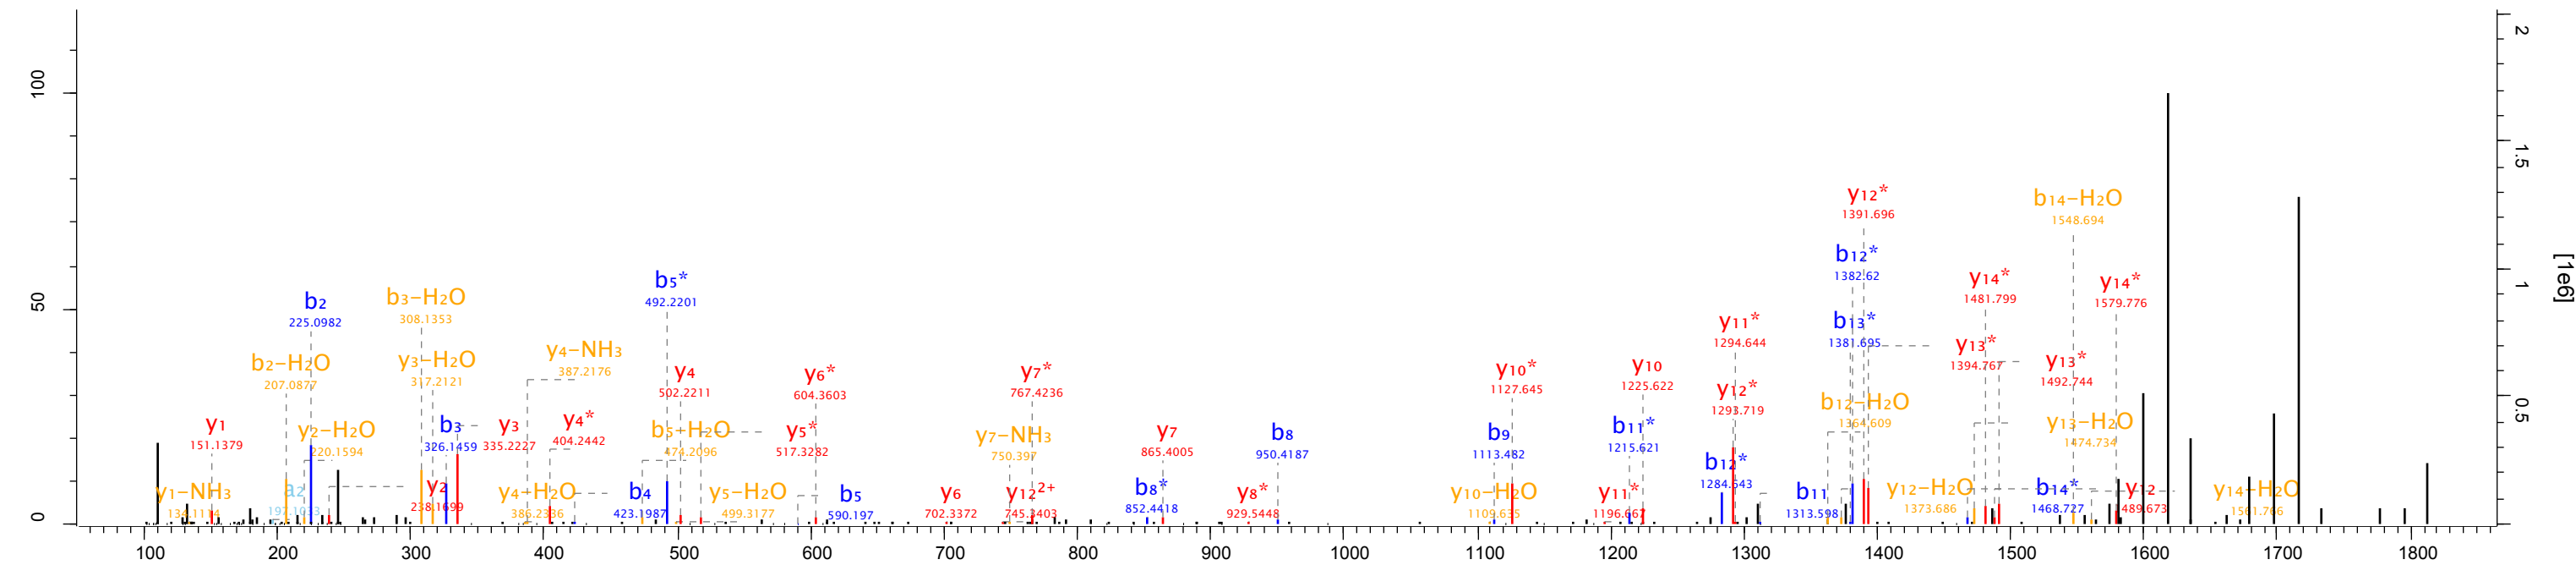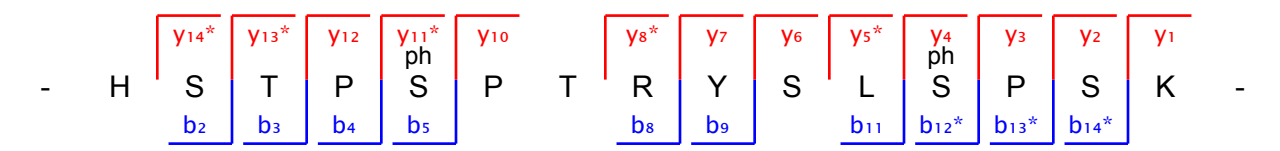



Raw file: 20150814\_A375SR\_Phospho\_BR2\_03  
 Scan: 9098 Method: FTMS; HCD Score: 192.51 m/z: 906.42 Gene names: SNW1

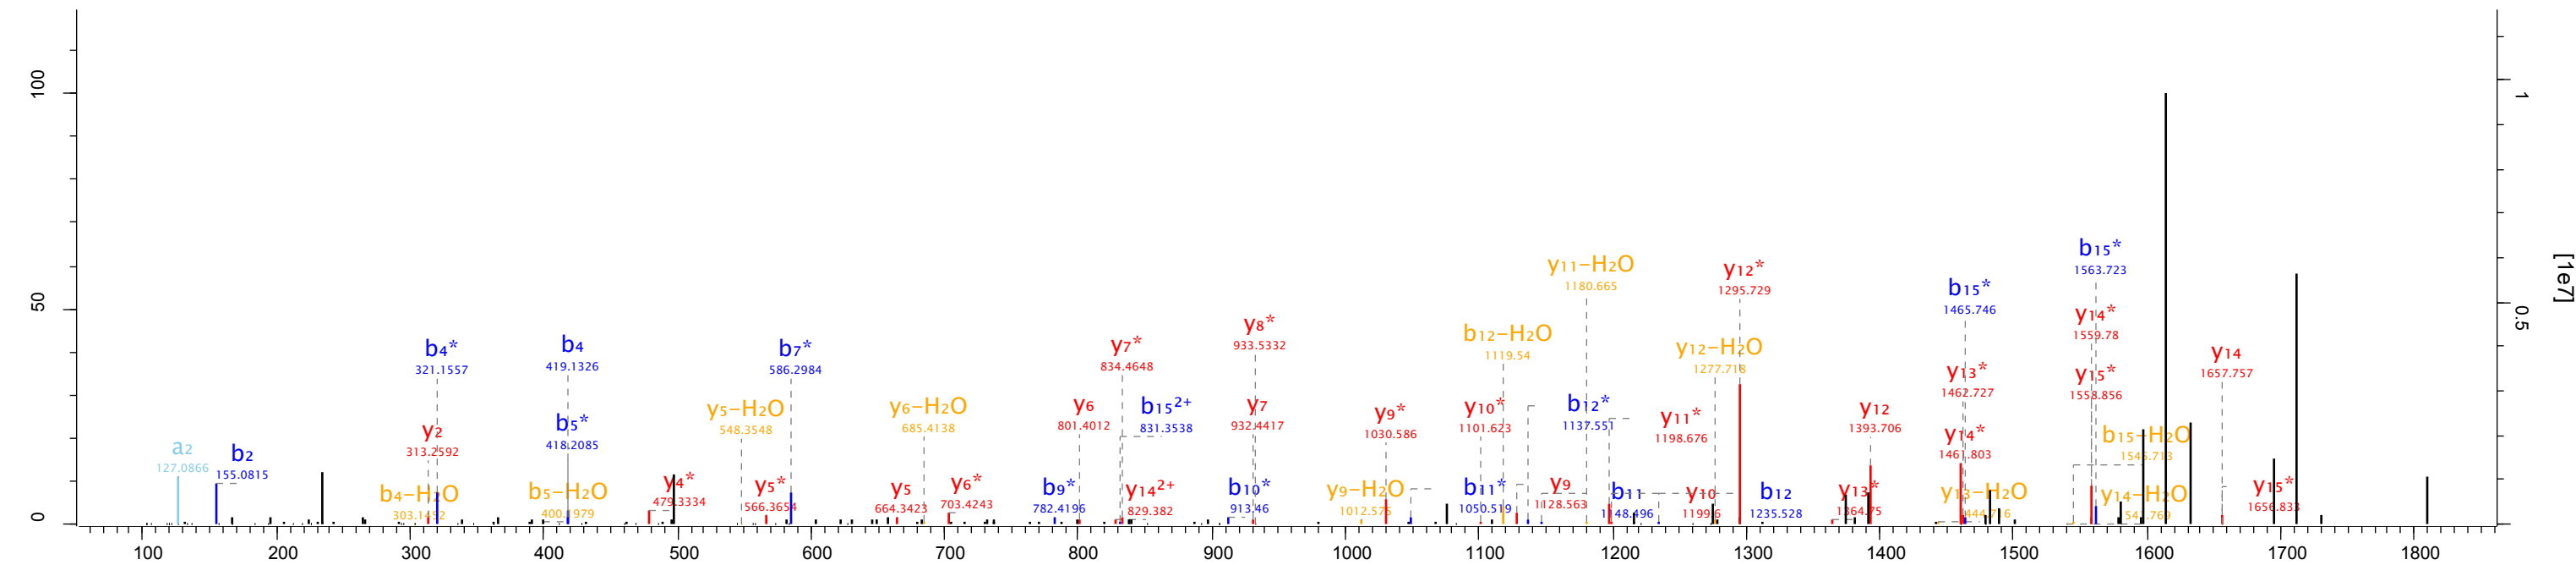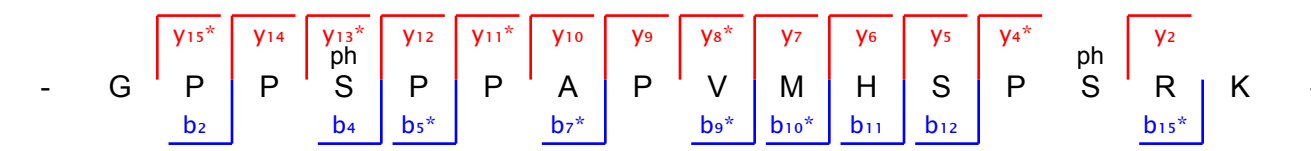

Raw file: 20150814\_A375SR\_Phospho\_BR2\_03  
 Scan: 9398 Method: FTMS; HCD Score: 269.51 m/z: 937.42 Gene names: MAP4K4

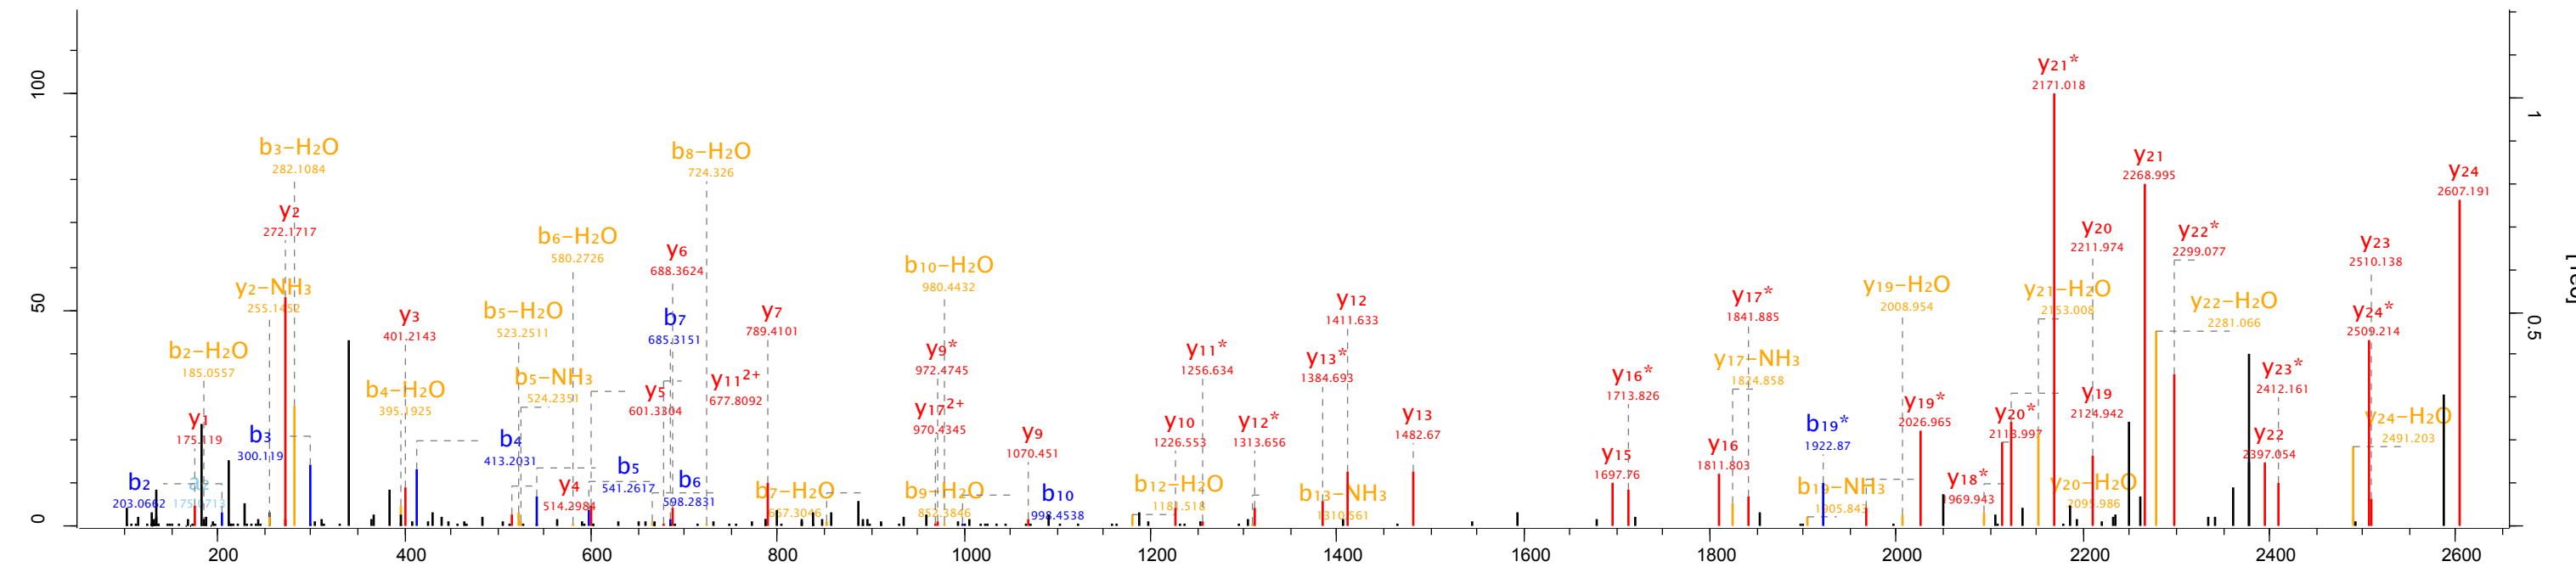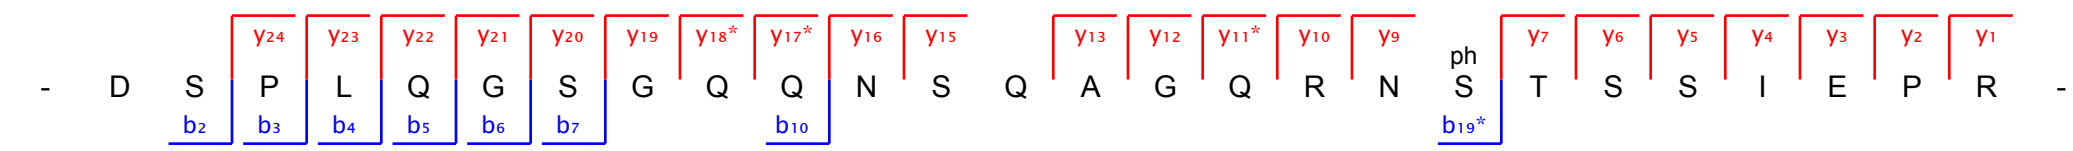

Raw file: 20150814\_A375SR\_Phospho\_BR2\_03  
 Scan: 9598 Method: FTMS; HCD Score: 52.77 m/z: 611.99 Gene names: FOXH1;XRCC1

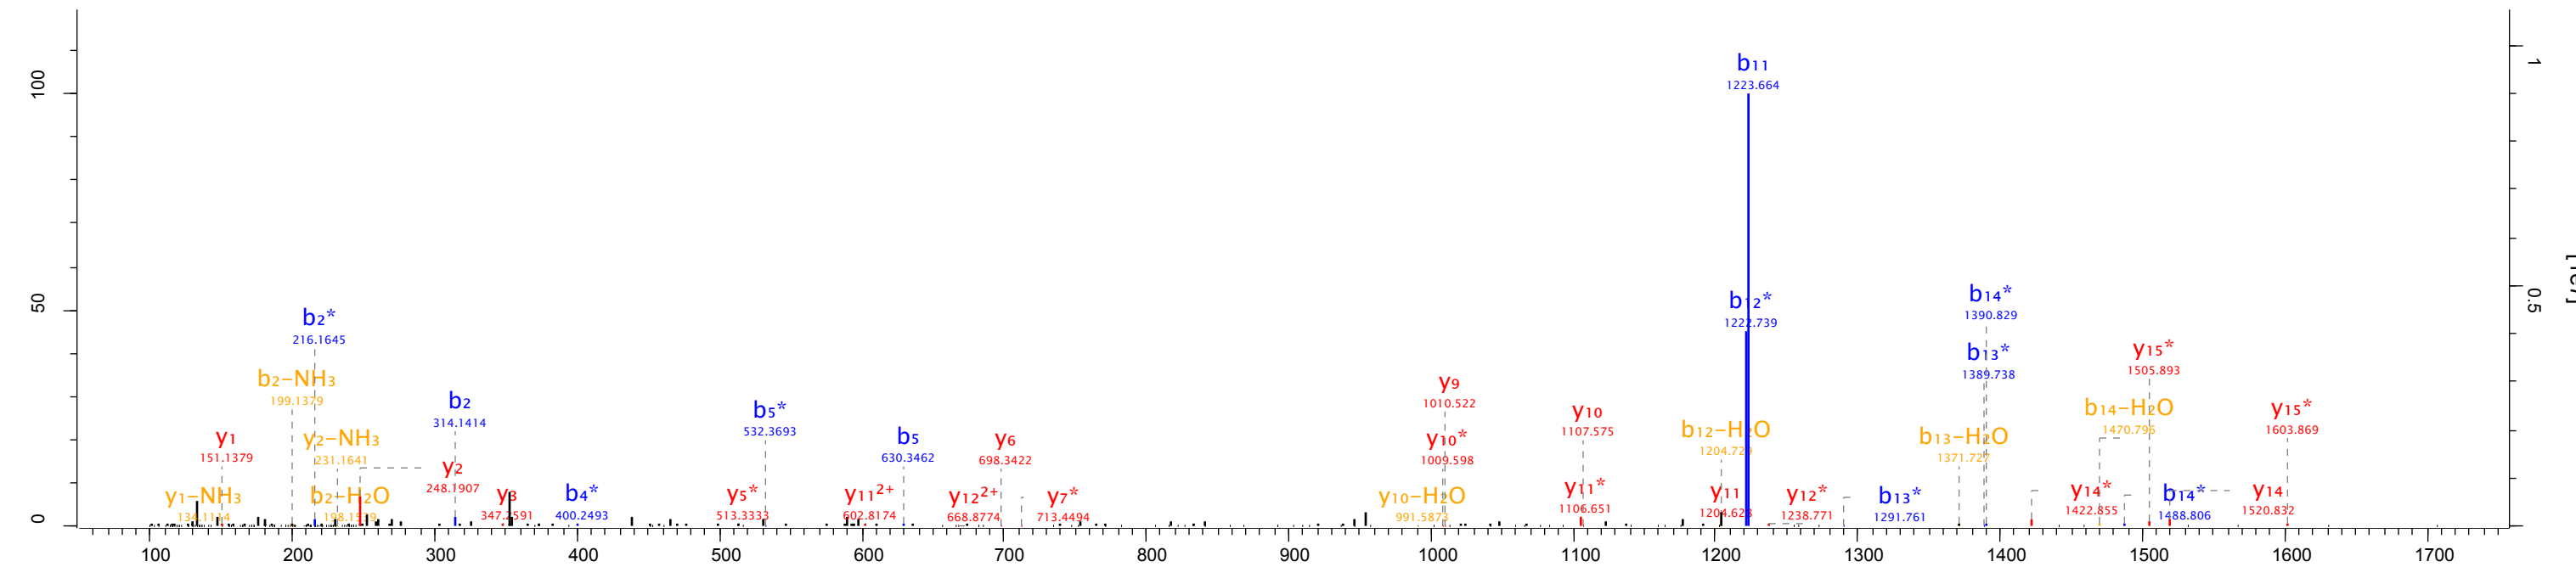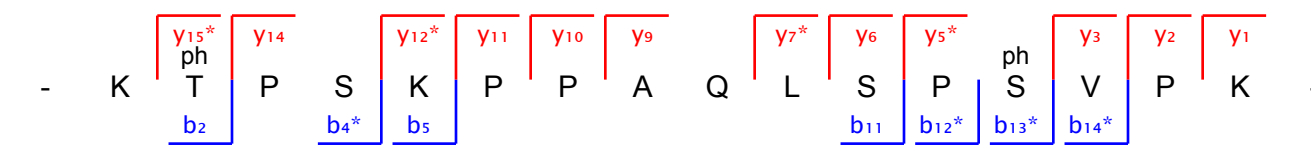

Raw file: 20150814\_A375SR\_Phospho\_BR2\_03  
 Scan: 9958 Method: FTMS; HCD Score: 141.86 m/z: 781.85 Gene names: ABLIM1

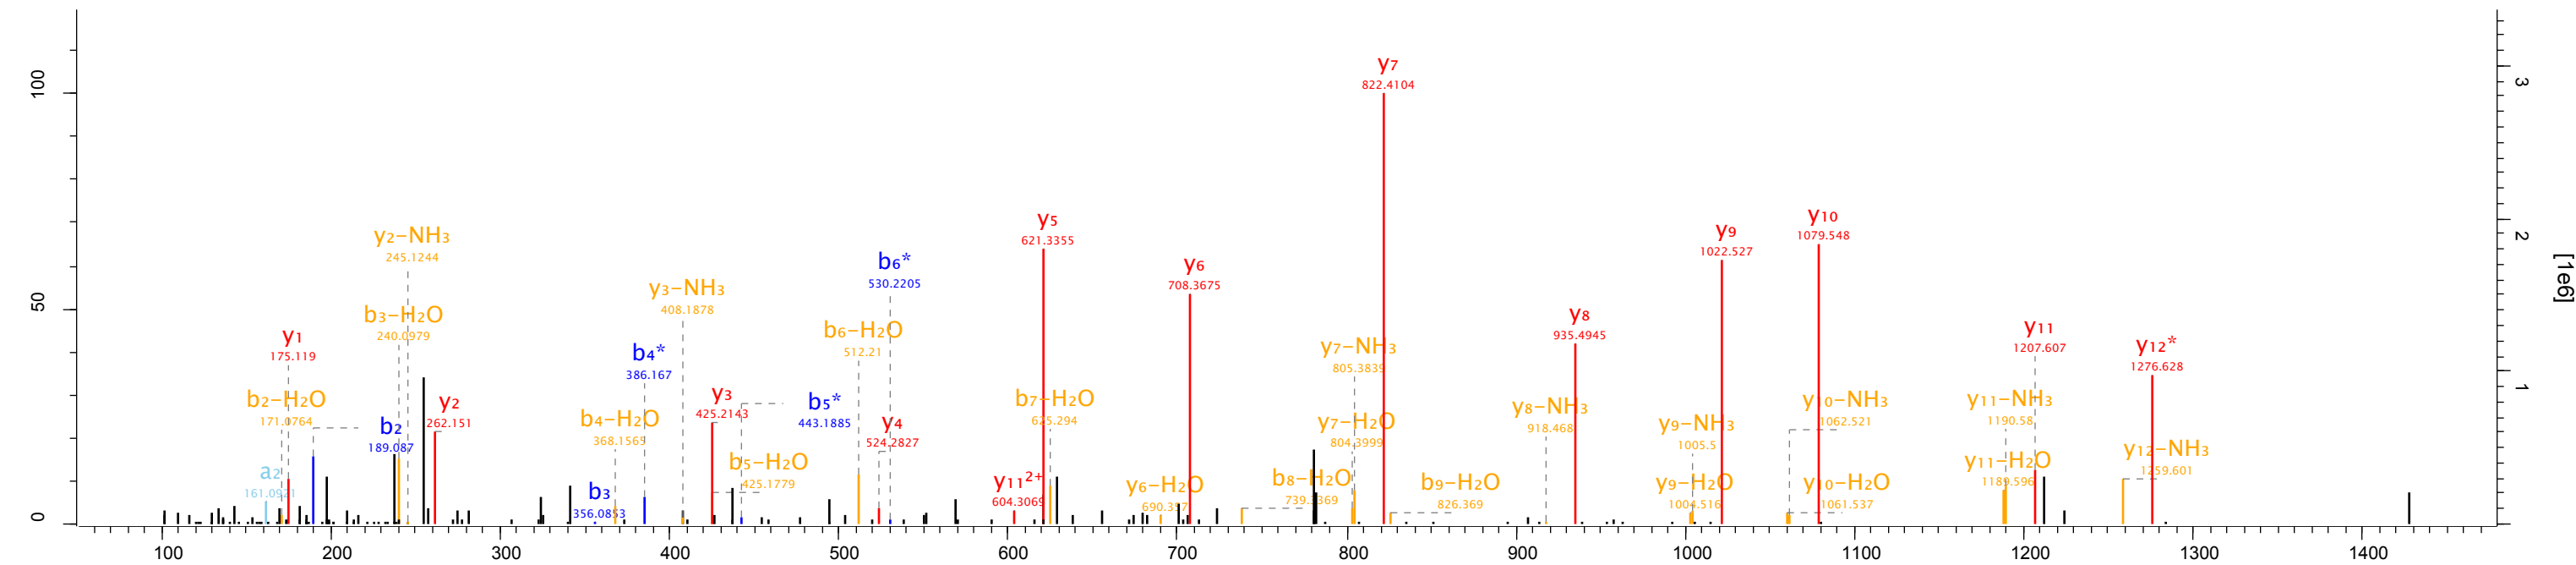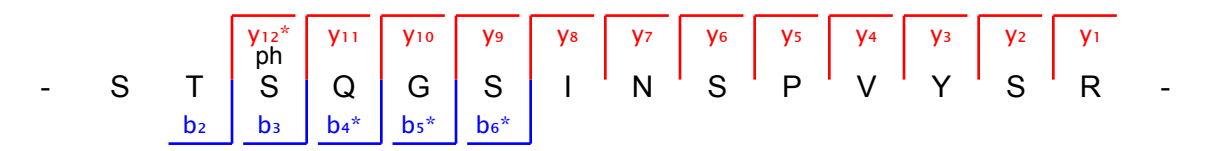

Raw file 20150814\_A375SR\_Phospho\_BR2\_04 Scan 10278 Method FTMS; HCD Score 168.57 m/z 835.04 Gene names KIF21A

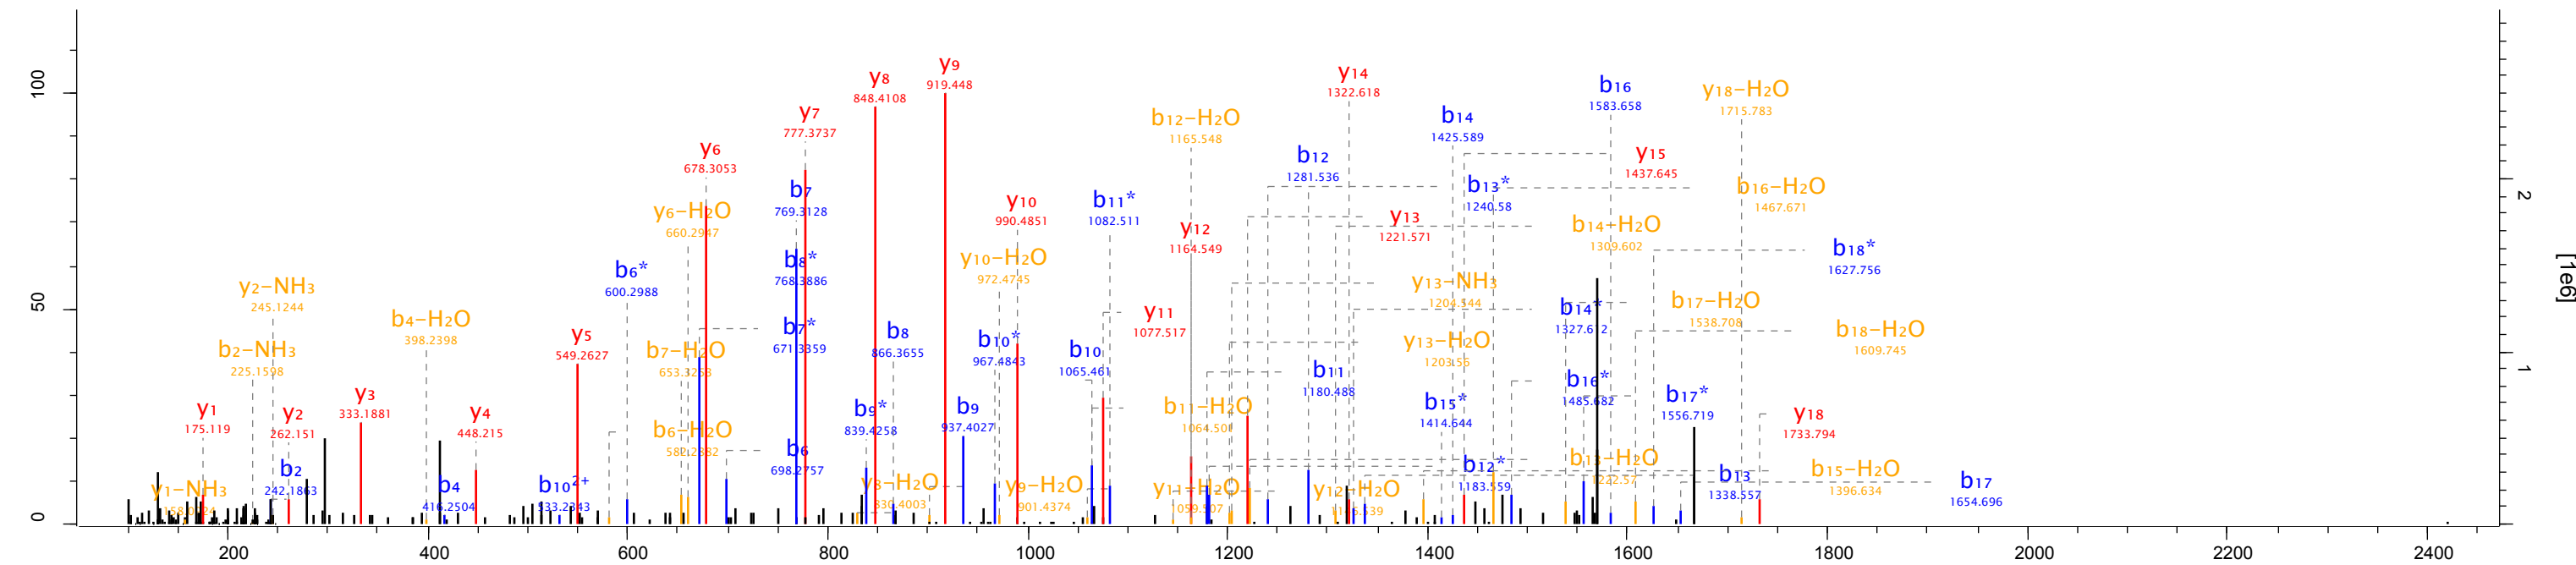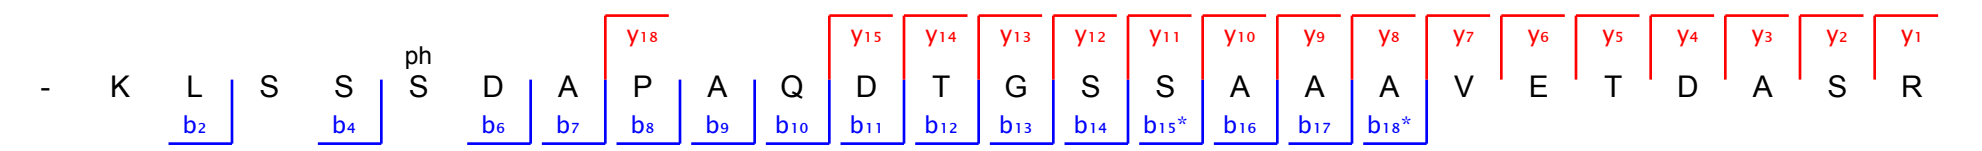

Raw file 20150814\_A375SR\_Phospho\_BR2\_04 Scan 10848 Method FTMS; HCD Score 48.39 m/z 868.74 Gene names PDLIM4

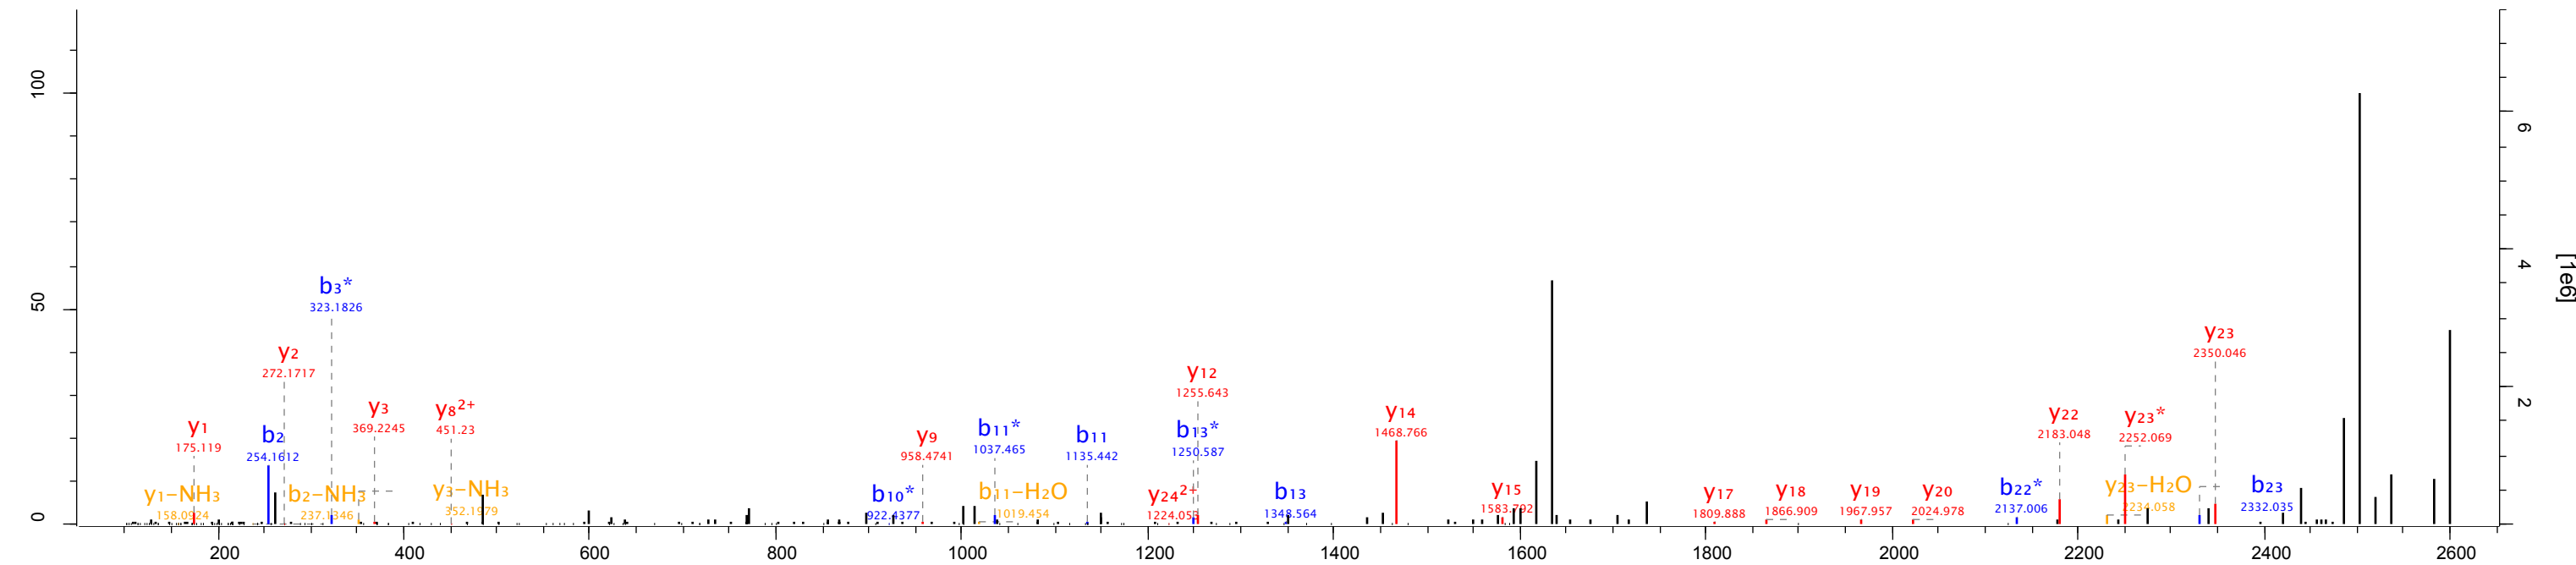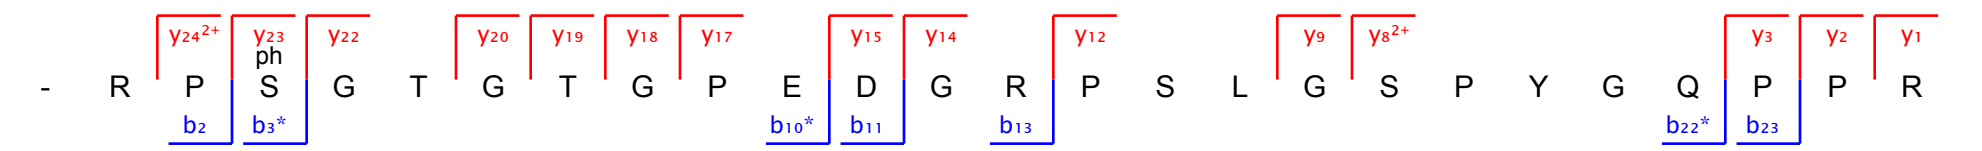

Raw file 20150814\_A375SR\_Phospho\_BR2\_04 Scan 10968 Method FTMS; HCD Score 101.35 m/z 547.25 Gene names CDC42BPA

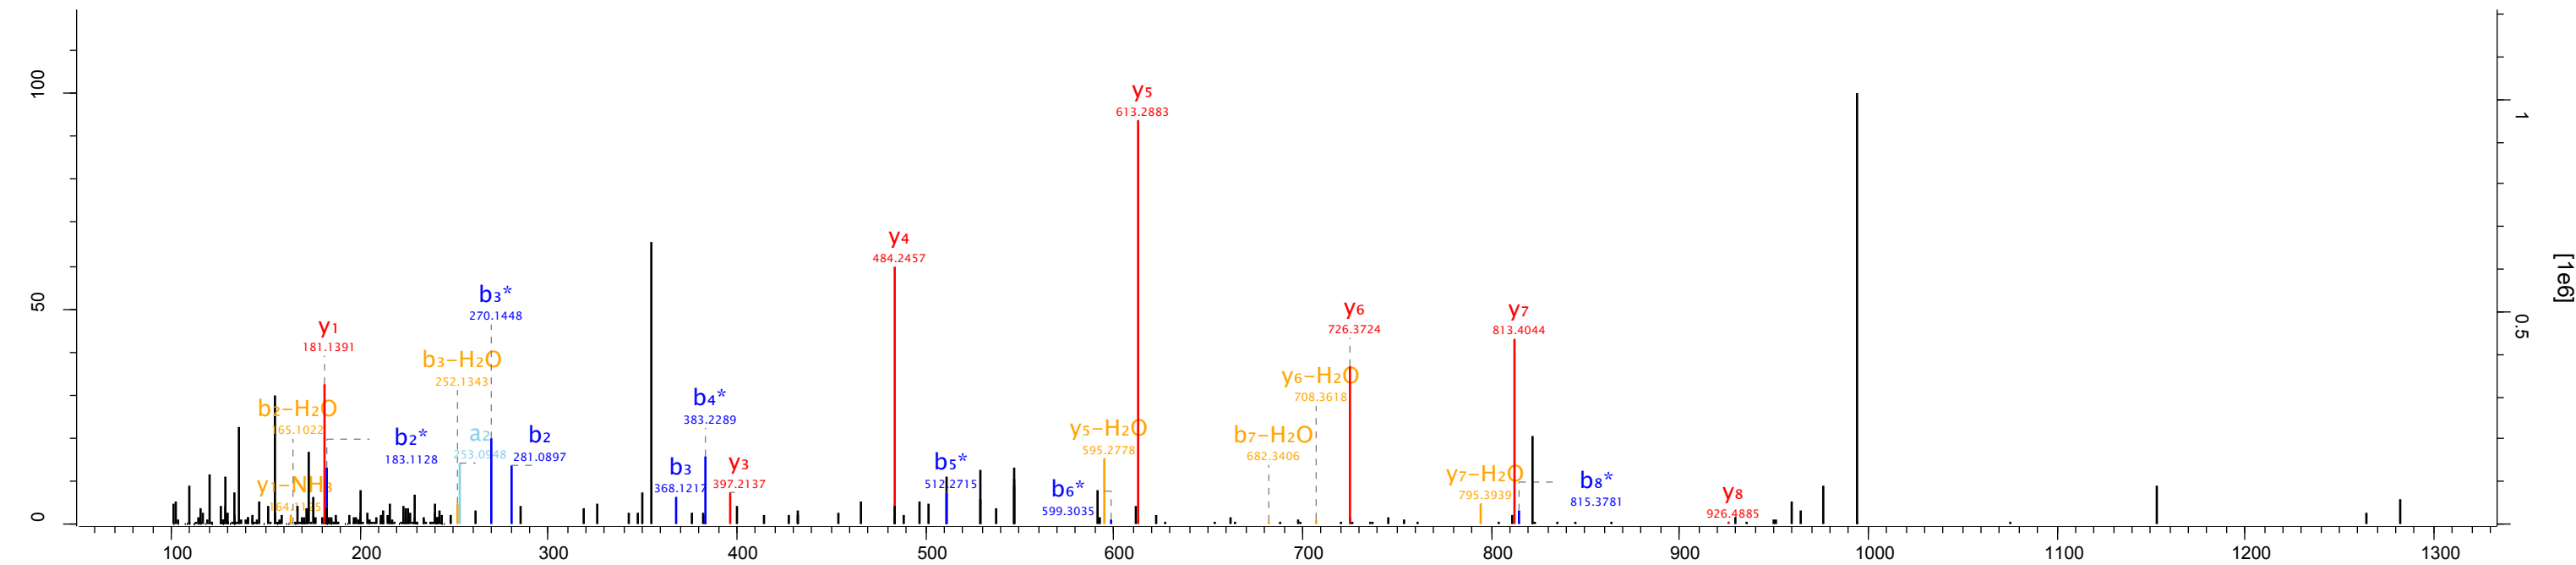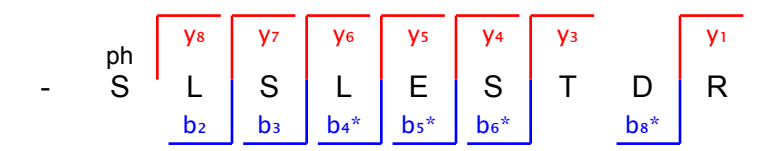

Raw file: 20150814\_A375SR\_Phospho\_BR2\_04  
 Scan: 10998 Method: FTMS; HCD Score: 131.86 m/z: 633.31 Gene names: MLK4

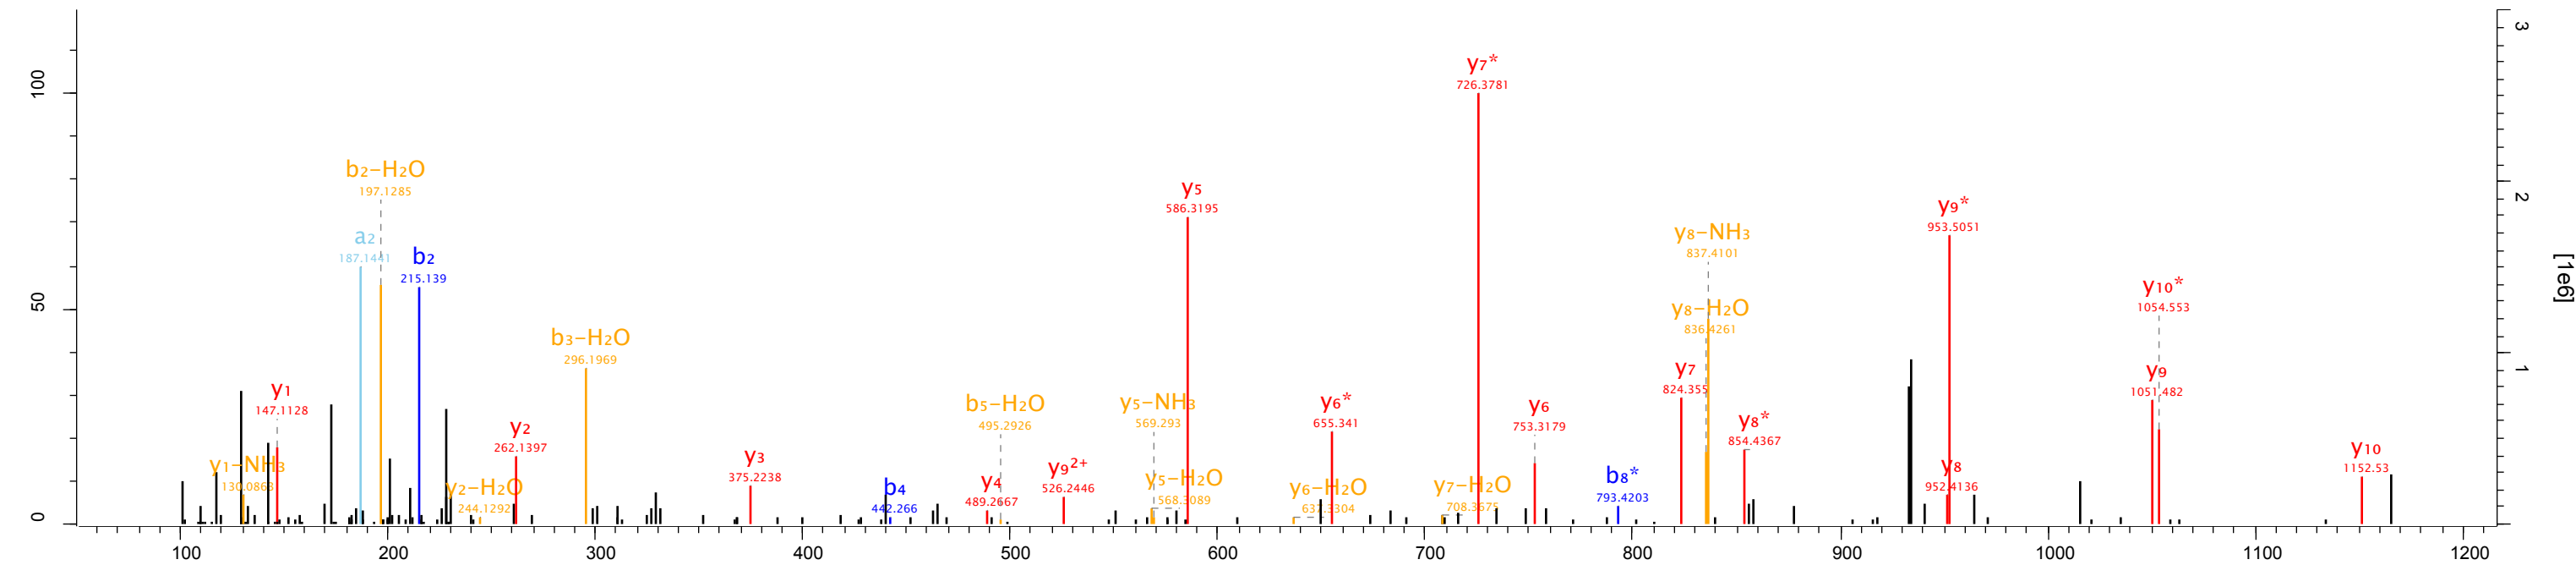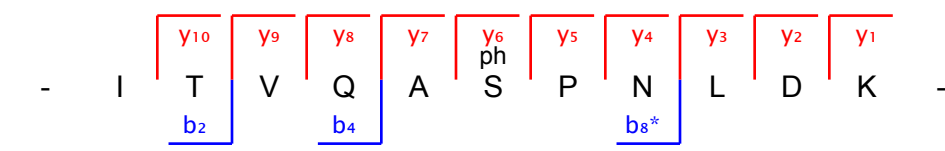



Raw file  
20150814\_A375SR\_Phospho\_BR2\_04

Scan 11118 Method FTMS; HCD Score 157.91 m/z 768.89 Gene names MYCBP2

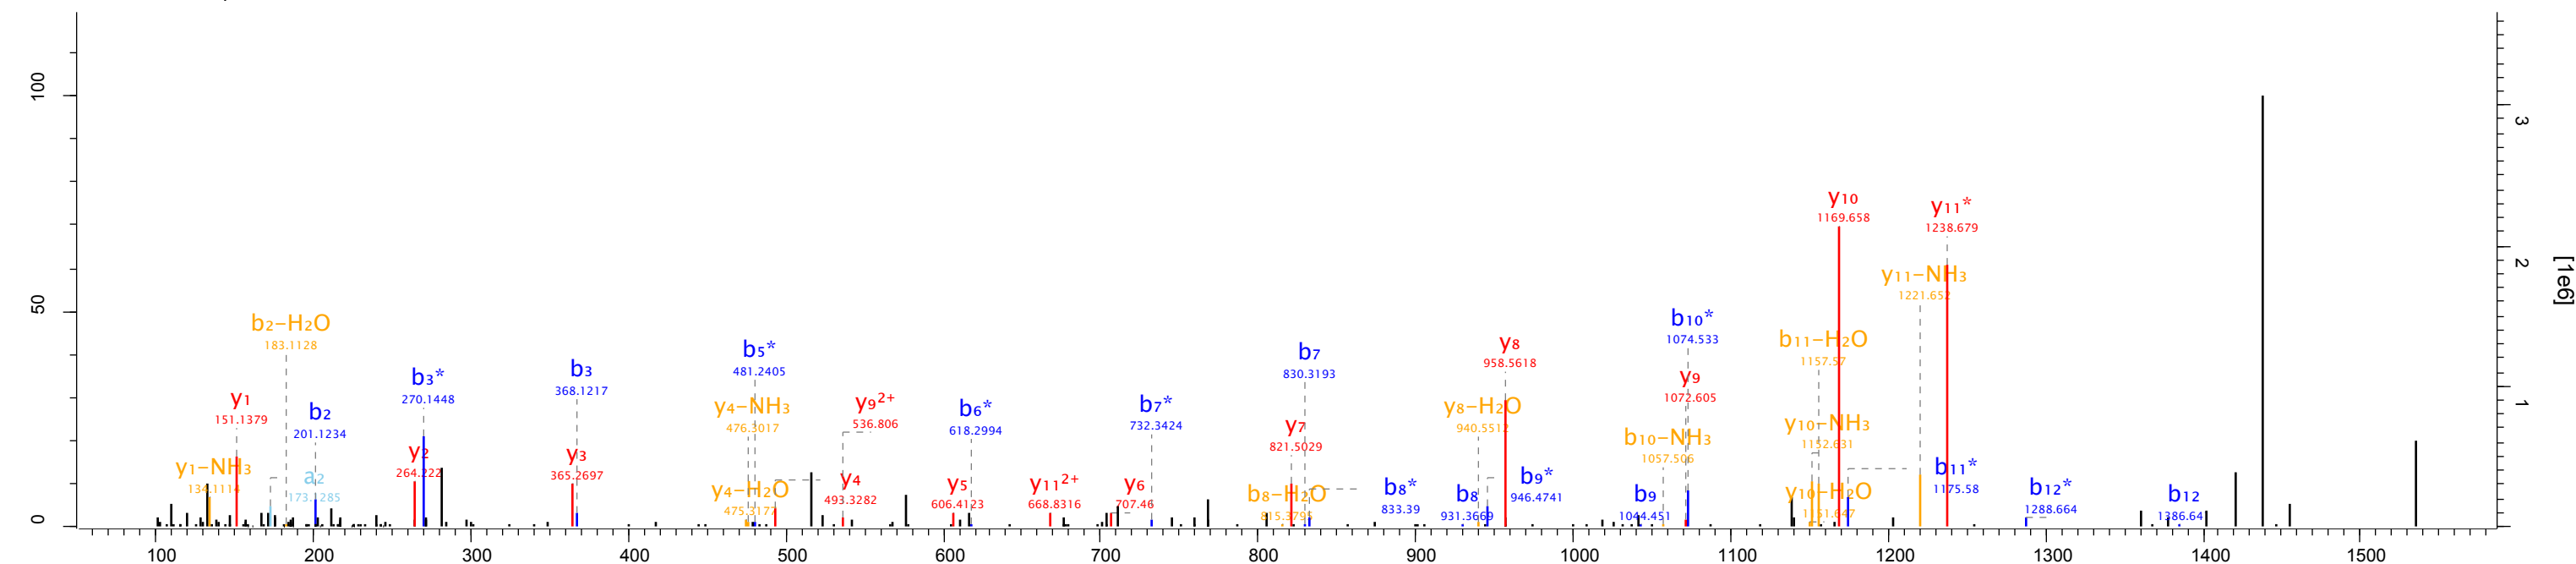

- S L S L P N H N T L Q T L K -

Peptide sequence: - S L S L P N H N T L Q T L K -

Fragmentation sites are indicated by boxes below the sequence:

- Red boxes: y<sub>11</sub>\* (ph), y<sub>10</sub>, y<sub>9</sub>, y<sub>8</sub>, y<sub>7</sub>, y<sub>6</sub>, y<sub>5</sub>, y<sub>4</sub>, y<sub>3</sub>, y<sub>2</sub>, y<sub>1</sub>
- Blue boxes: b<sub>2</sub>, b<sub>3</sub>, b<sub>5</sub>\*, b<sub>6</sub>\*, b<sub>7</sub>, b<sub>8</sub>, b<sub>9</sub>, b<sub>10</sub>\*, b<sub>11</sub>\*, b<sub>12</sub>

Raw file 20150814\_A375SR\_Phospho\_BR2\_04 Scan 11158 Method FTMS; HCD Score 88.87 m/z 636.31 Gene names ATN1

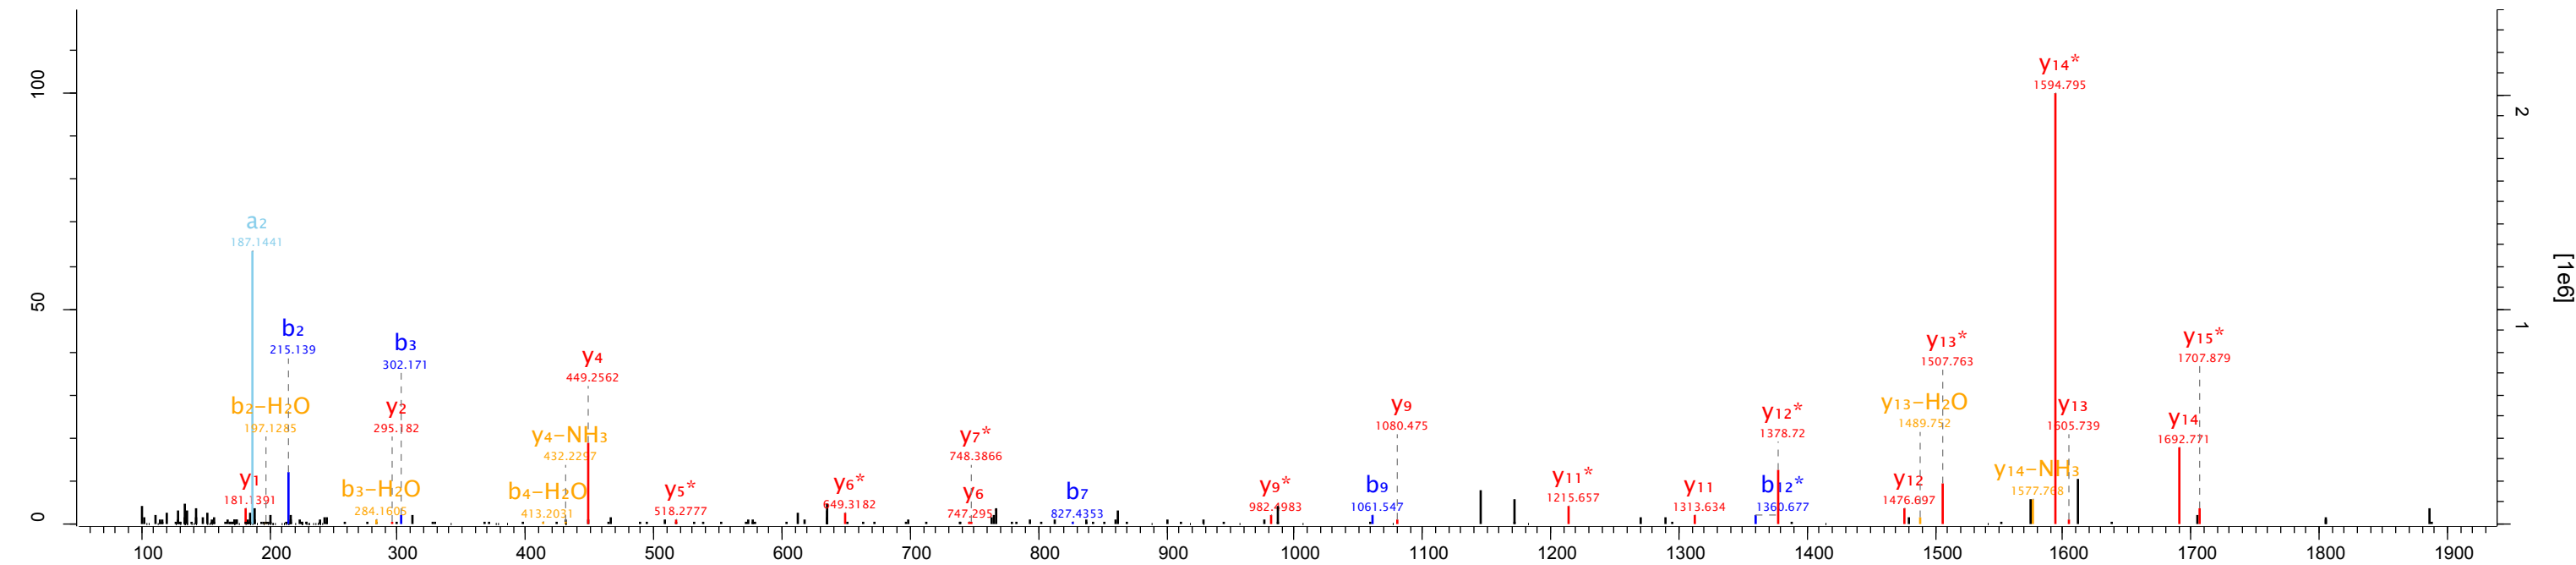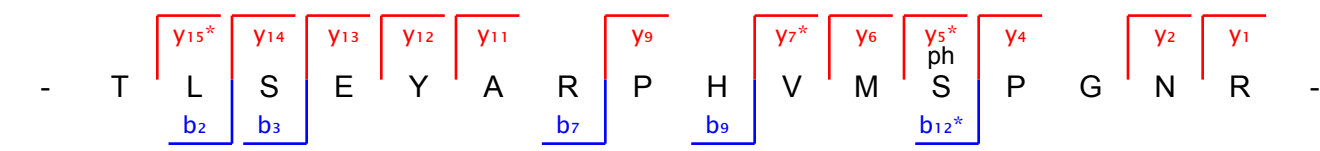

Raw file 20150814\_A375SR\_Phospho\_BR2\_04 Scan 11198 Method FTMS; HCD Score 113.91 m/z 758.99 Gene names SPTBN2

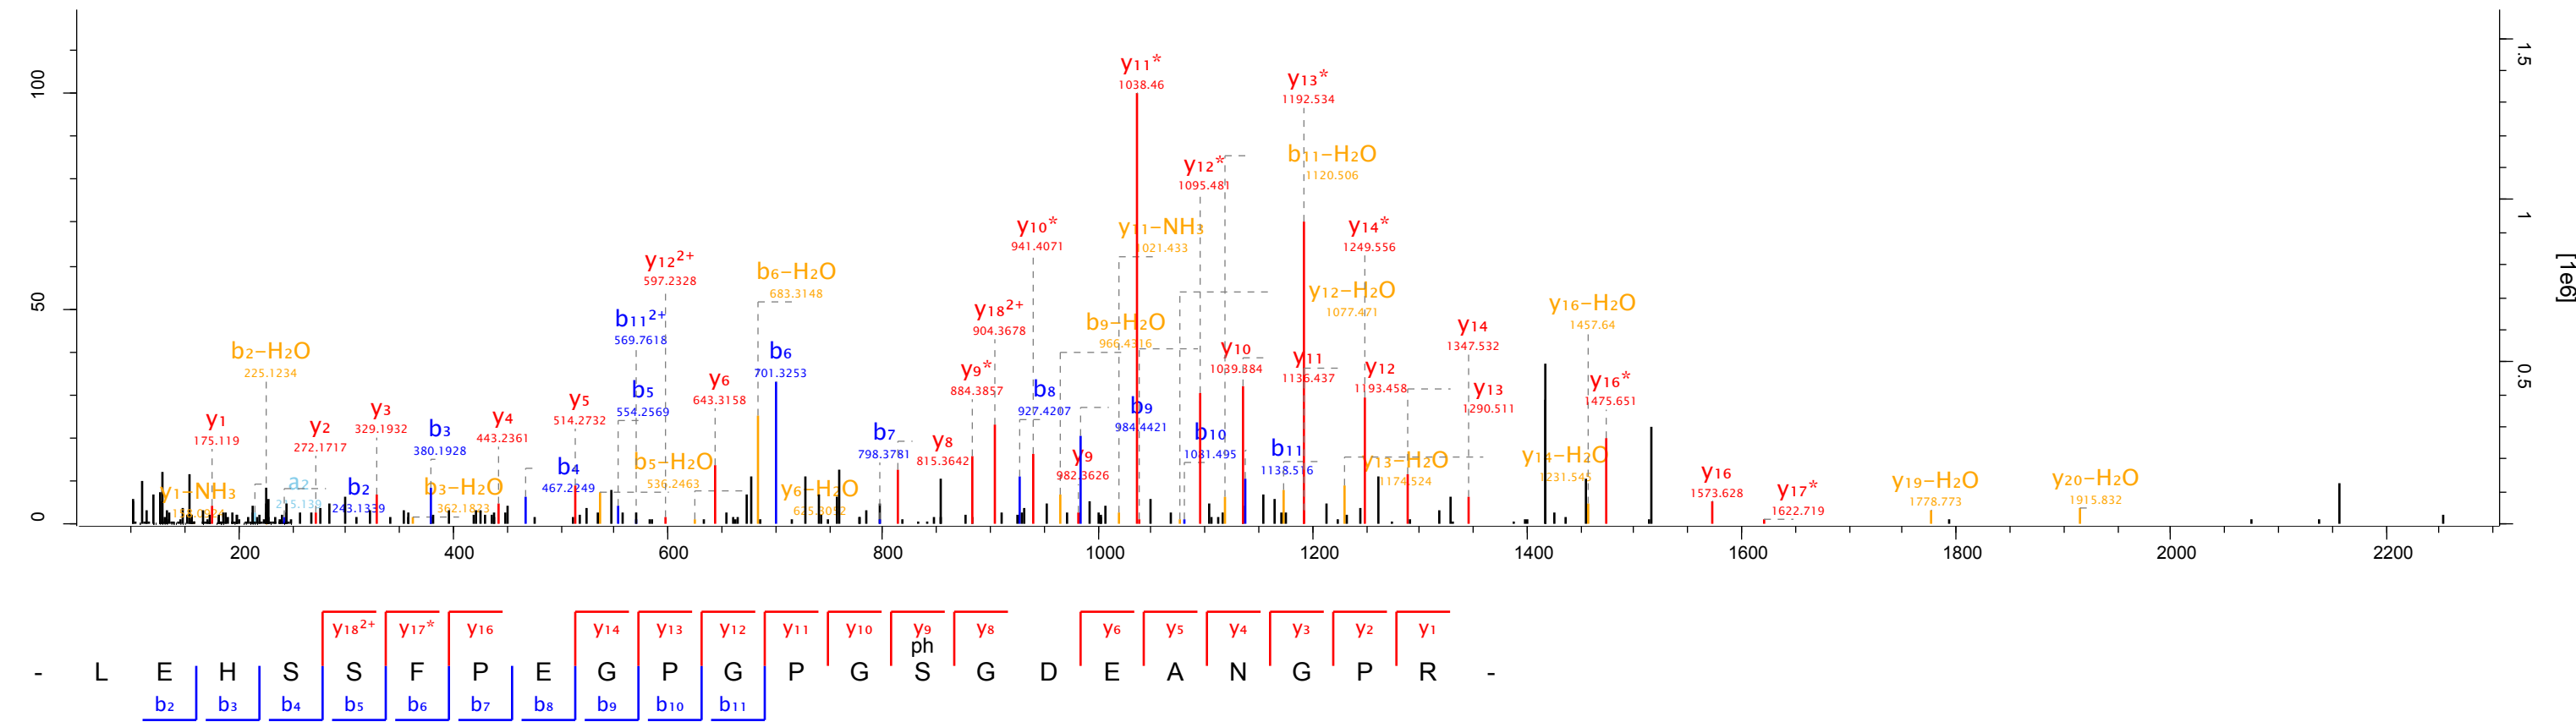

20150814\_A375SR\_Phospho\_BR2\_04 11238 FTMS; HCD 196.4 740.63 SLC4A1AP

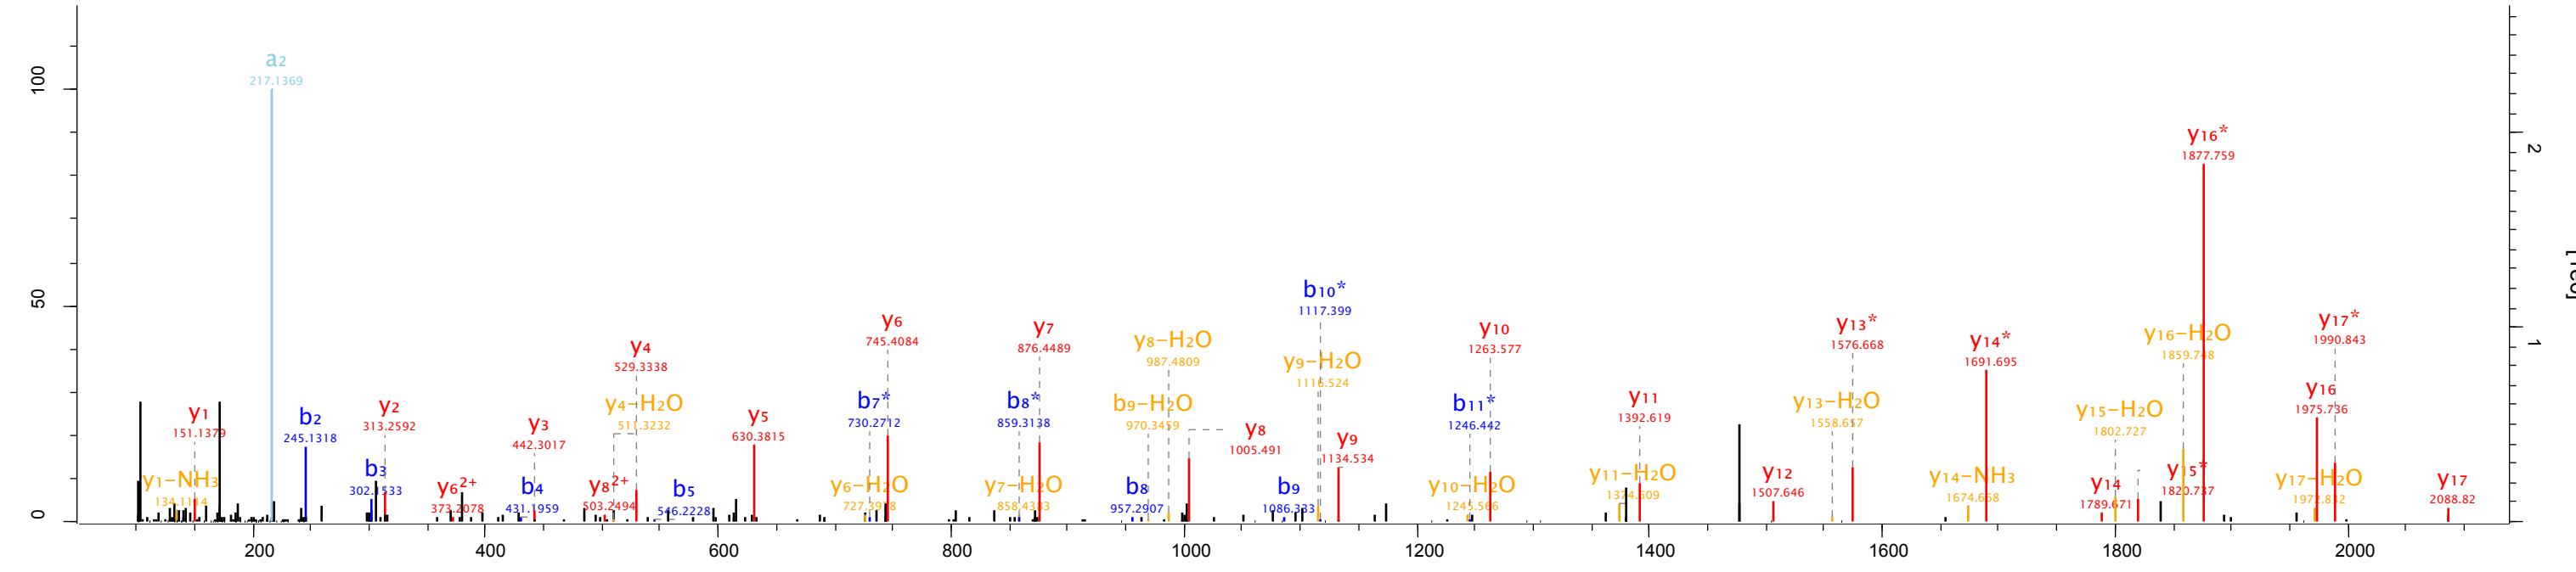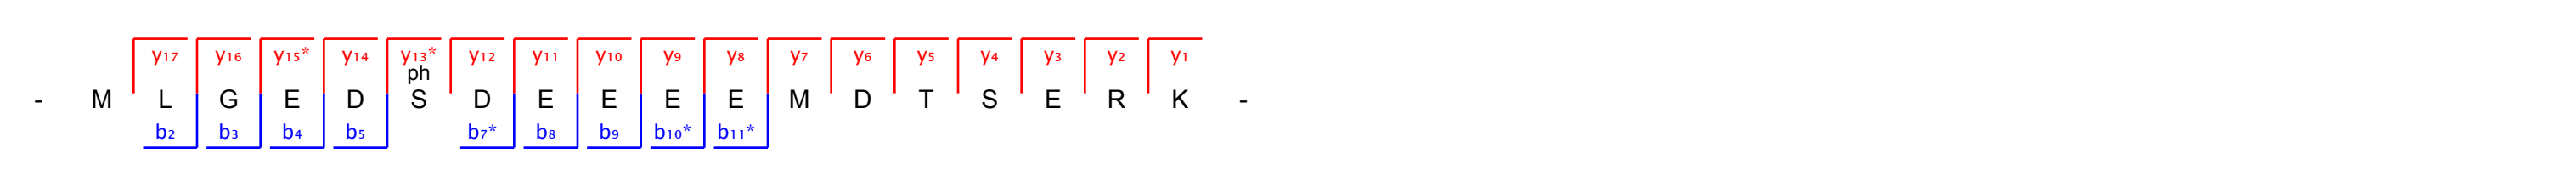

Raw file: 20150814\_A375SR\_Phospho\_BR2\_04  
 Scan: 11498 Method: FTMS; HCD Score: 160.66 m/z: 768.29 Gene names: UBE4B

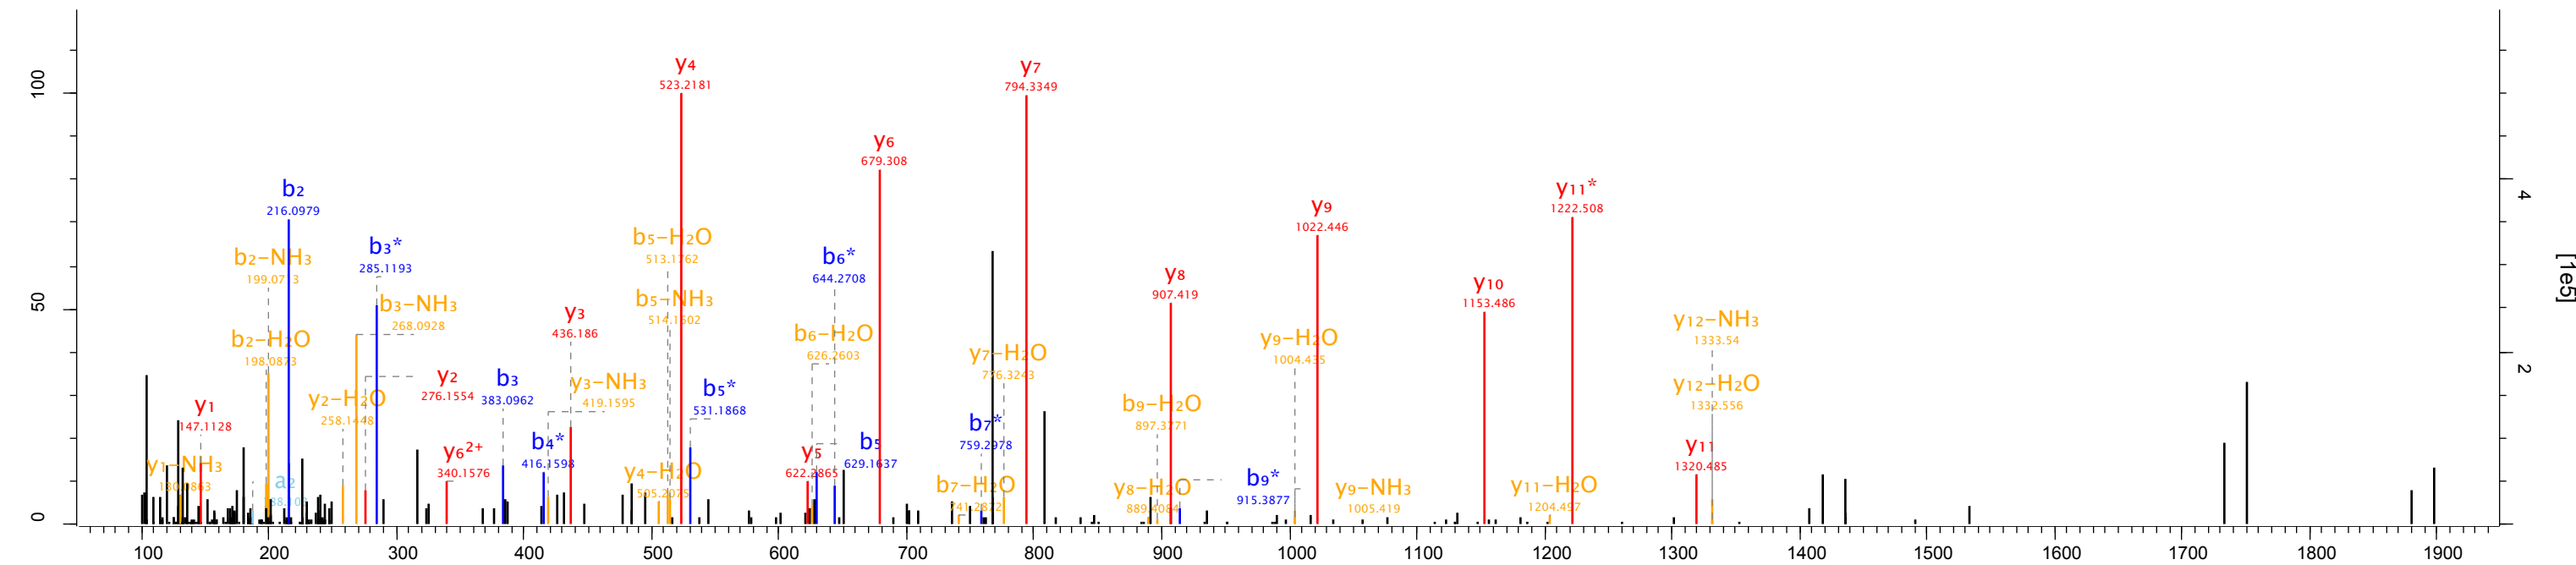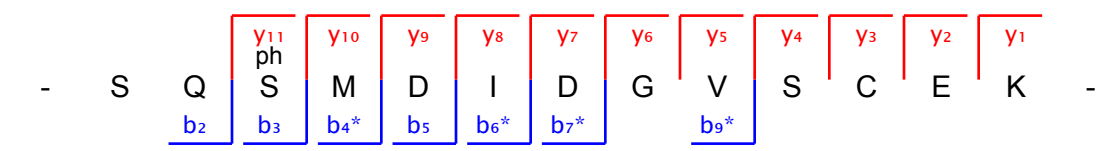

Raw file 20150814\_A375SR\_Phospho\_BR2\_04 Scan 11588 Method FTMS; HCD Score 197.44 m/z 1005.97 Gene names NUMA1

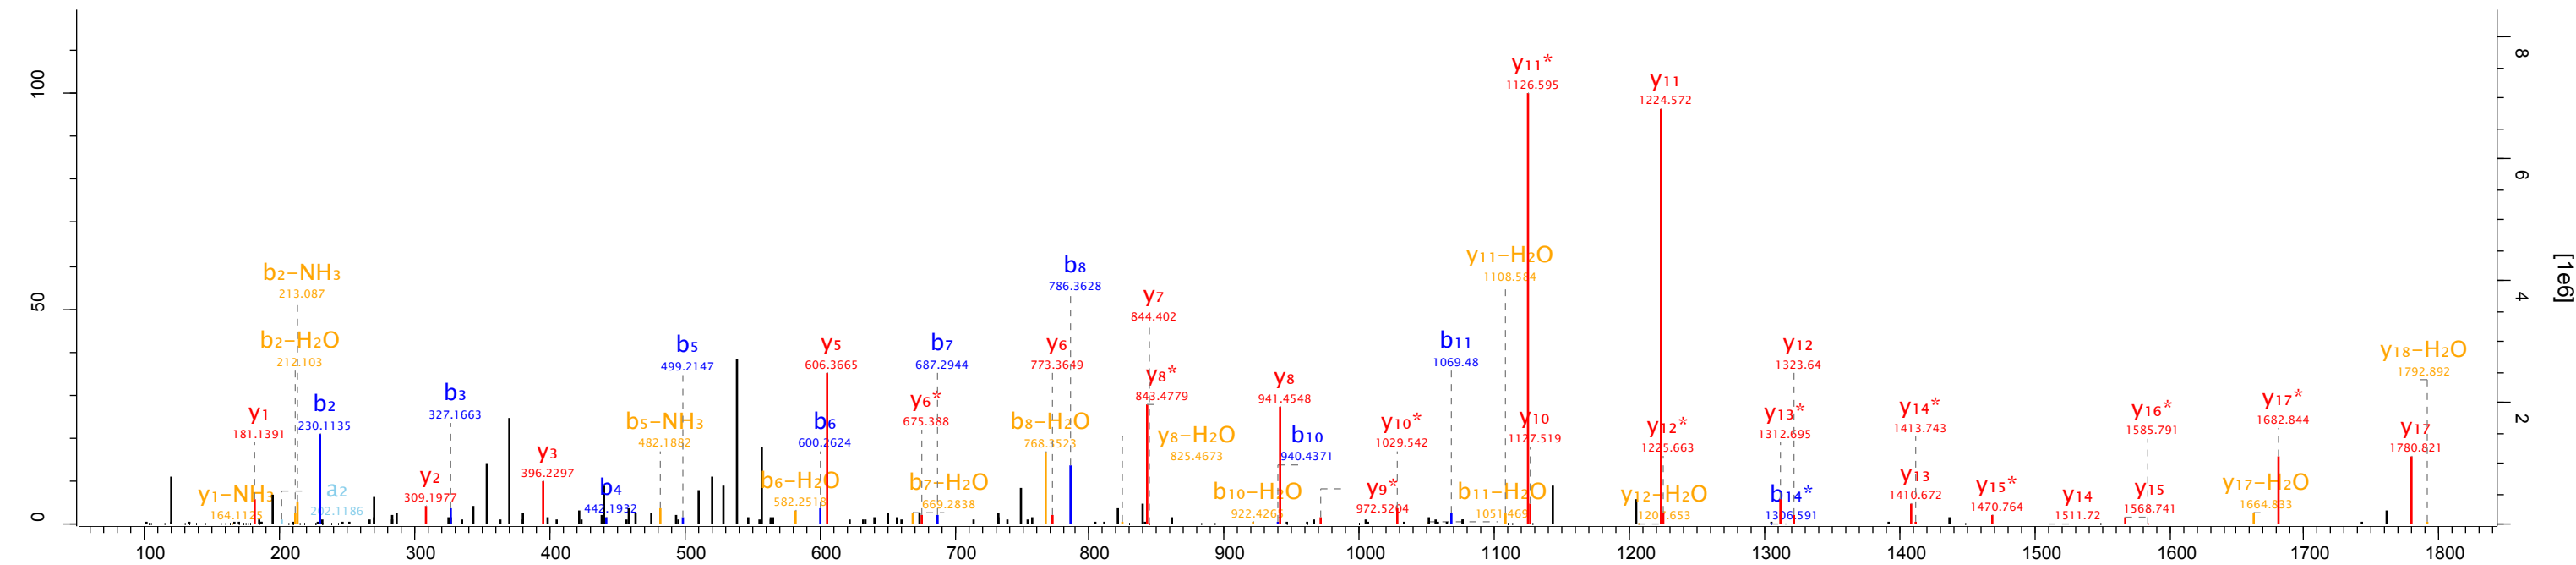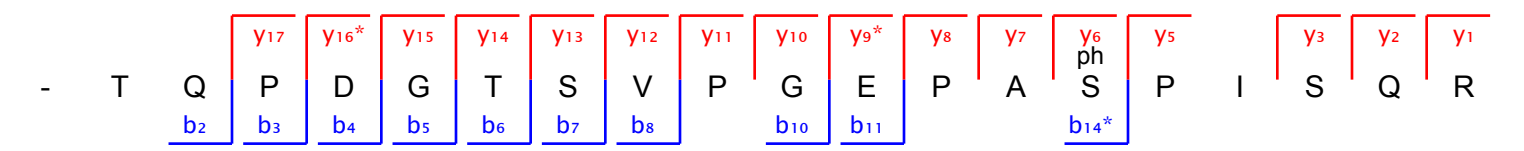

Raw file: 20150814\_A375SR\_Phospho\_BR2\_04  
 Scan: 11928 Method: FTMS; HCD Score: 272.92 m/z: 1068.99 Gene names: NAV1

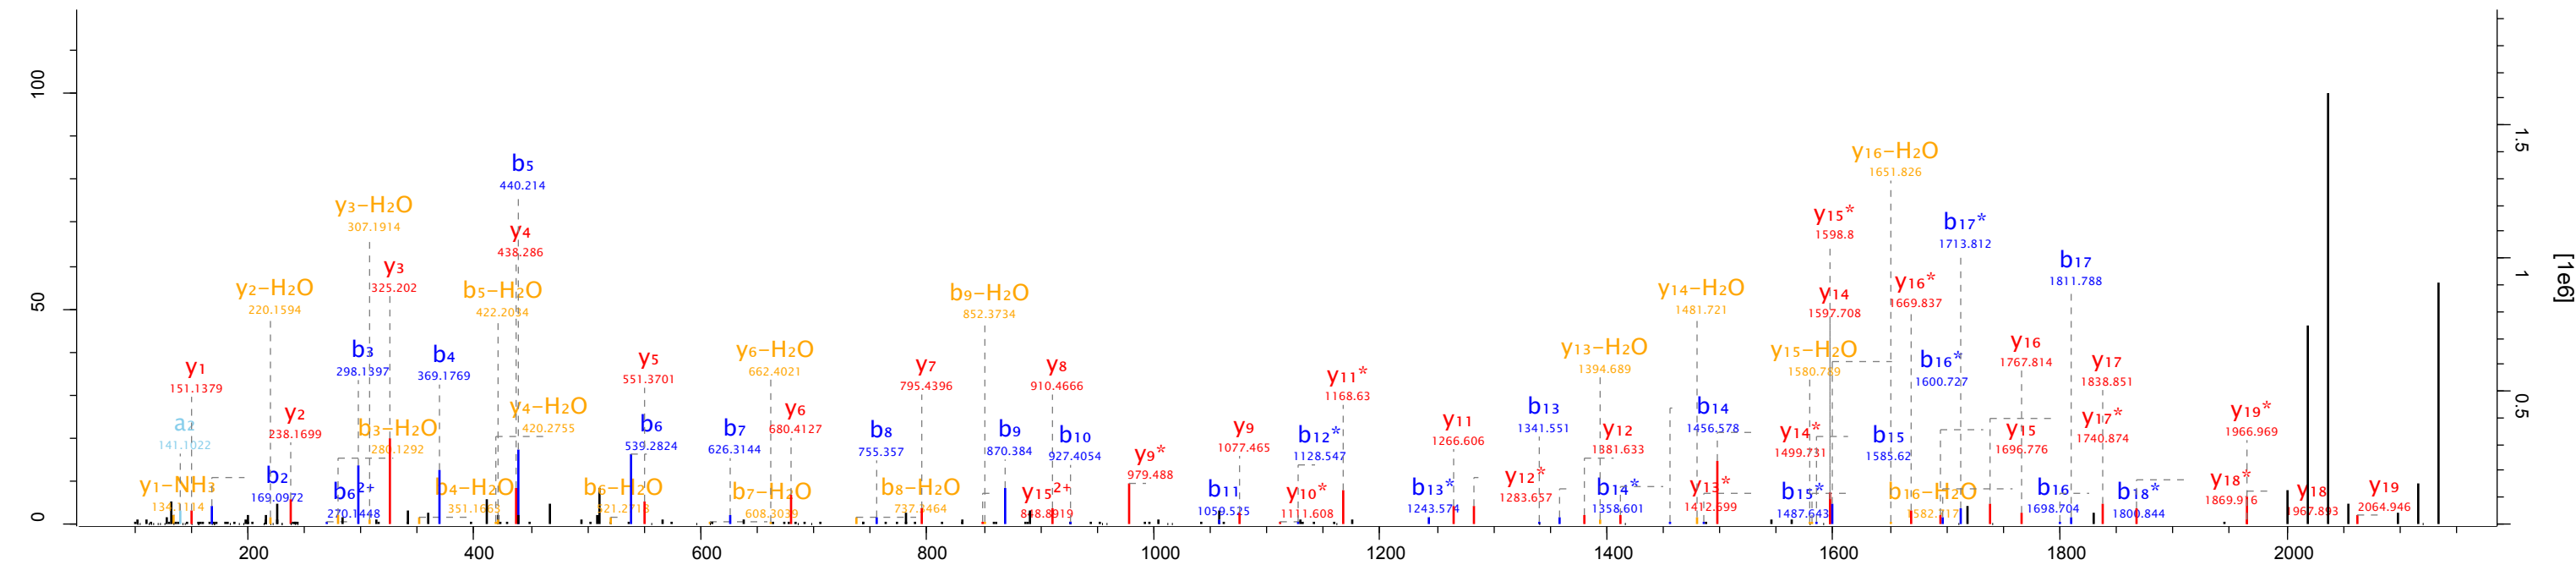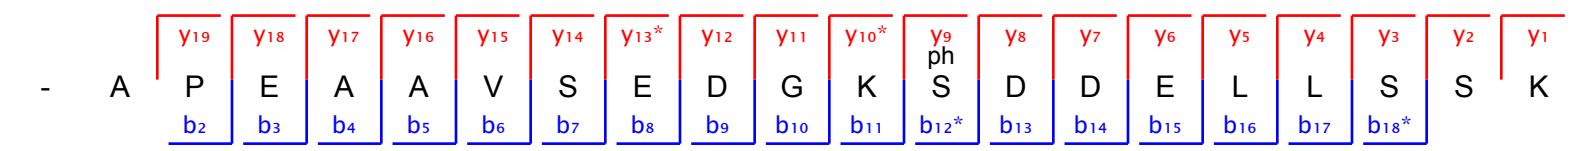

Raw file: 20150814\_A375SR\_Phospho\_BR2\_04  
 Scan: 12018 Method: FTMS; HCD Score: 142.19 m/z: 680.34 Gene names: BAIAP2L2

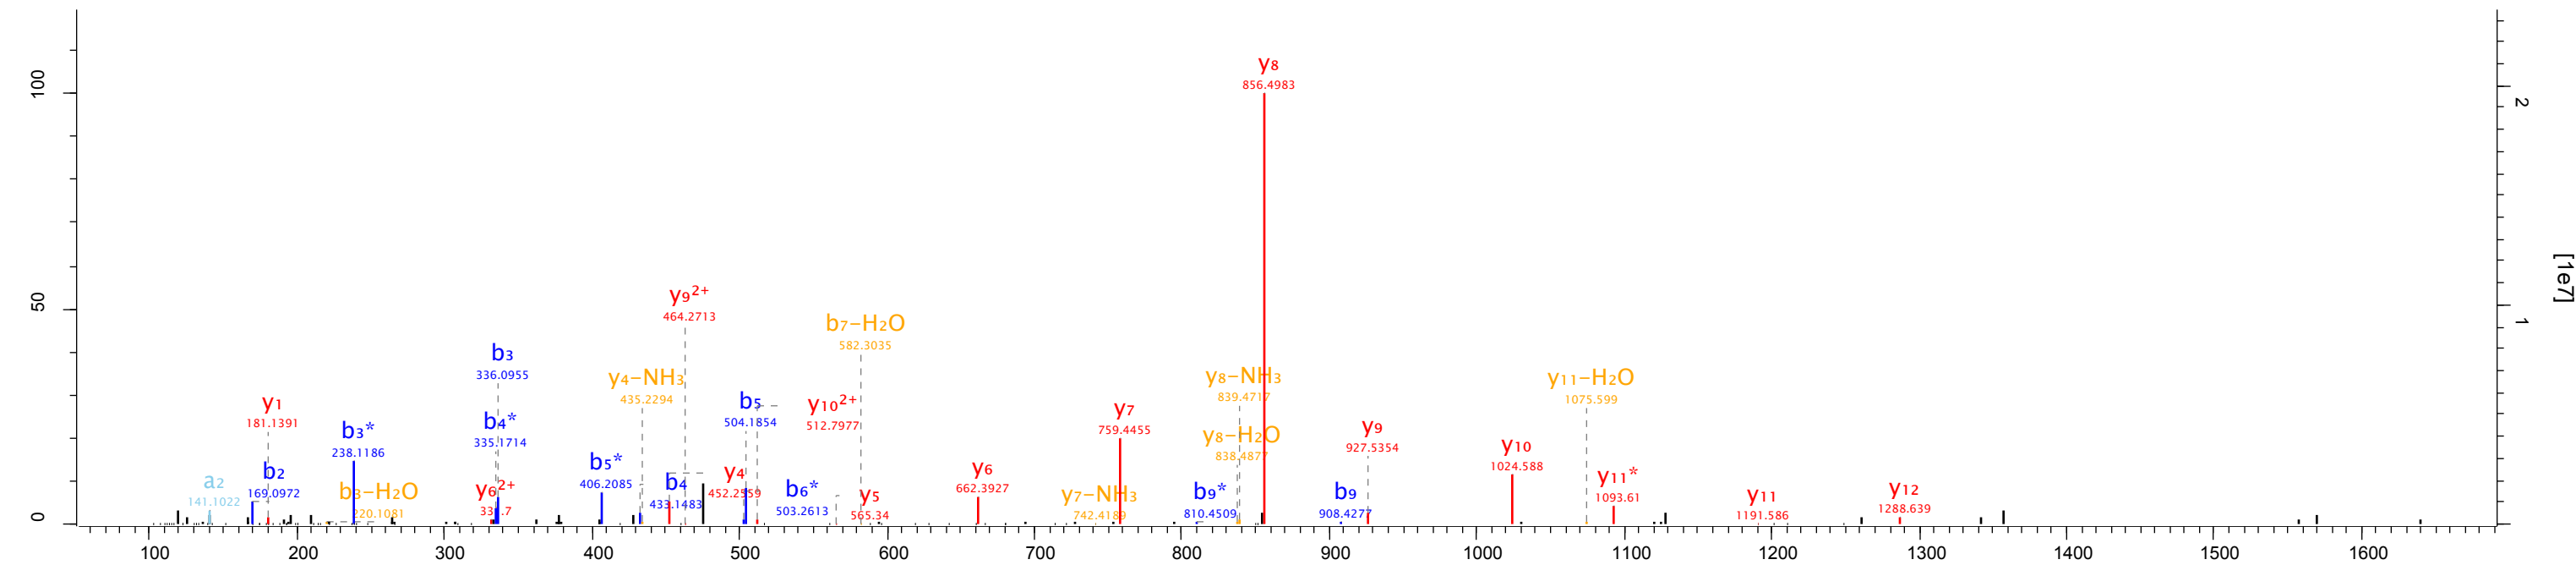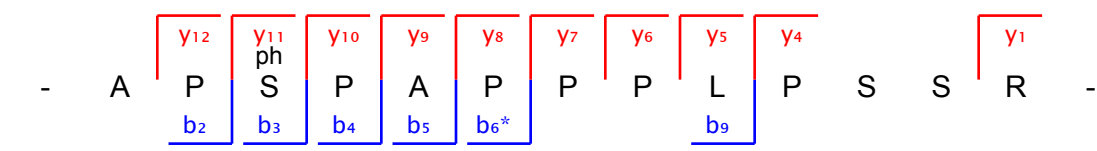



Raw file: 20150814\_A375SR\_Phospho\_BR2\_04  
 Scan: 12428 Method: FTMS; HCD Score: 116.03 m/z: 606.77 Gene names: TBC1D5

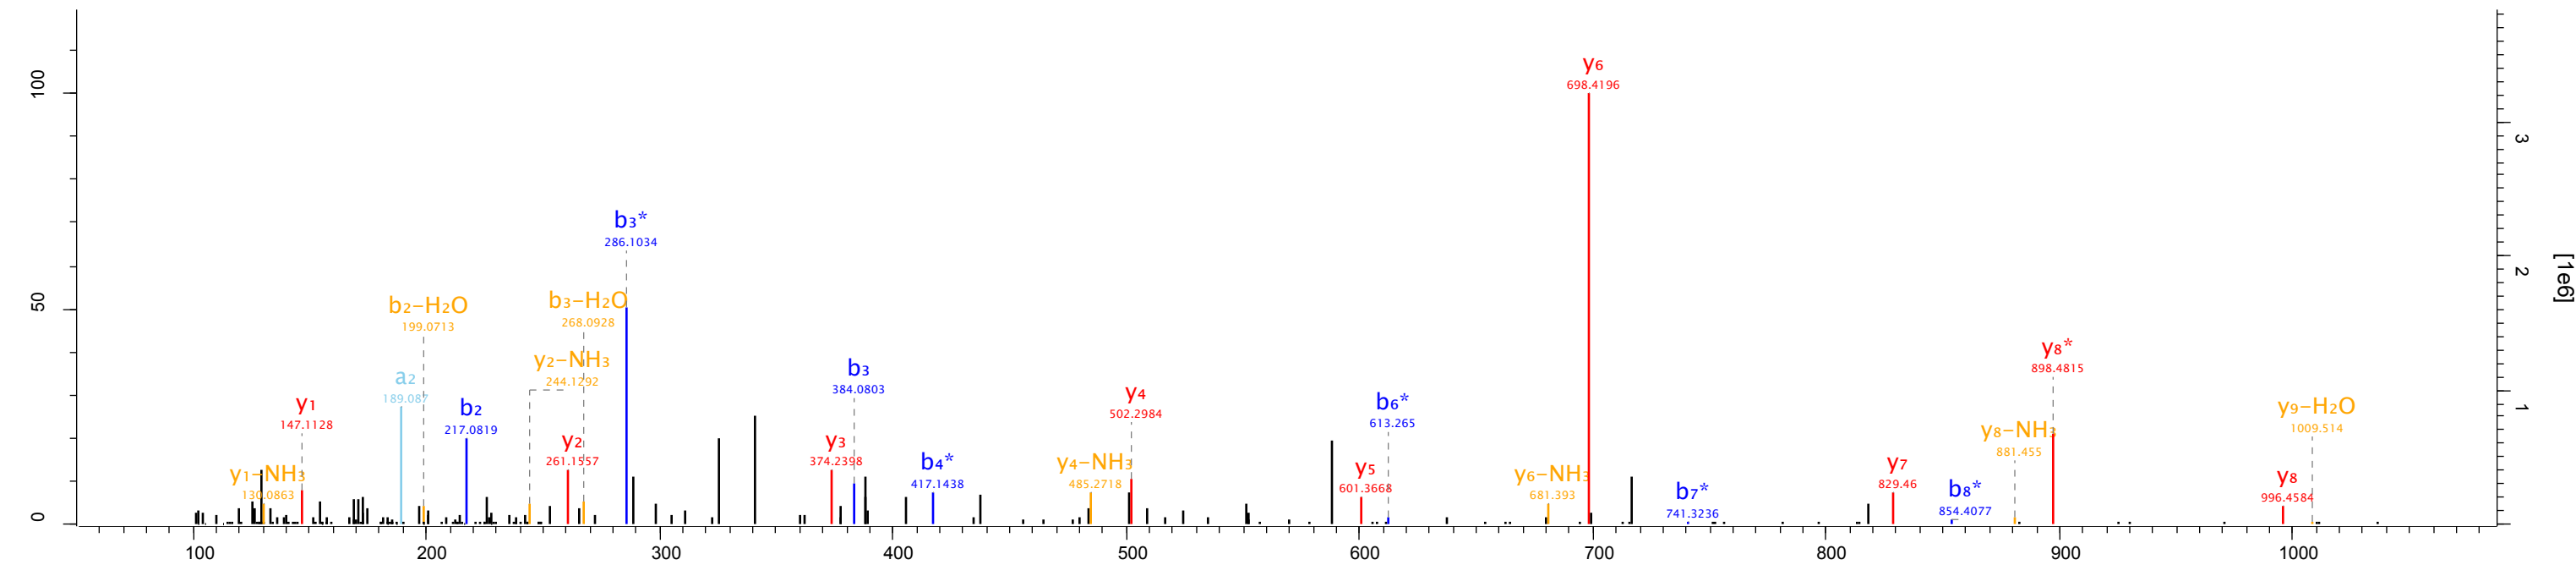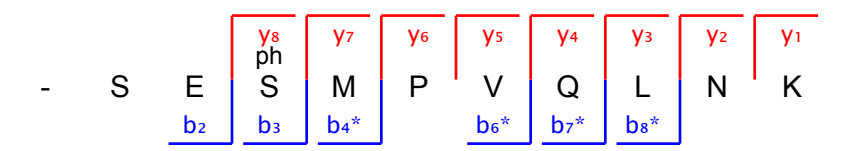

Raw file 20150814\_A375SR\_Phospho\_BR2\_04 Scan 12528 Method FTMS; HCD Score 65.43 m/z 669.64 Gene names MARK2

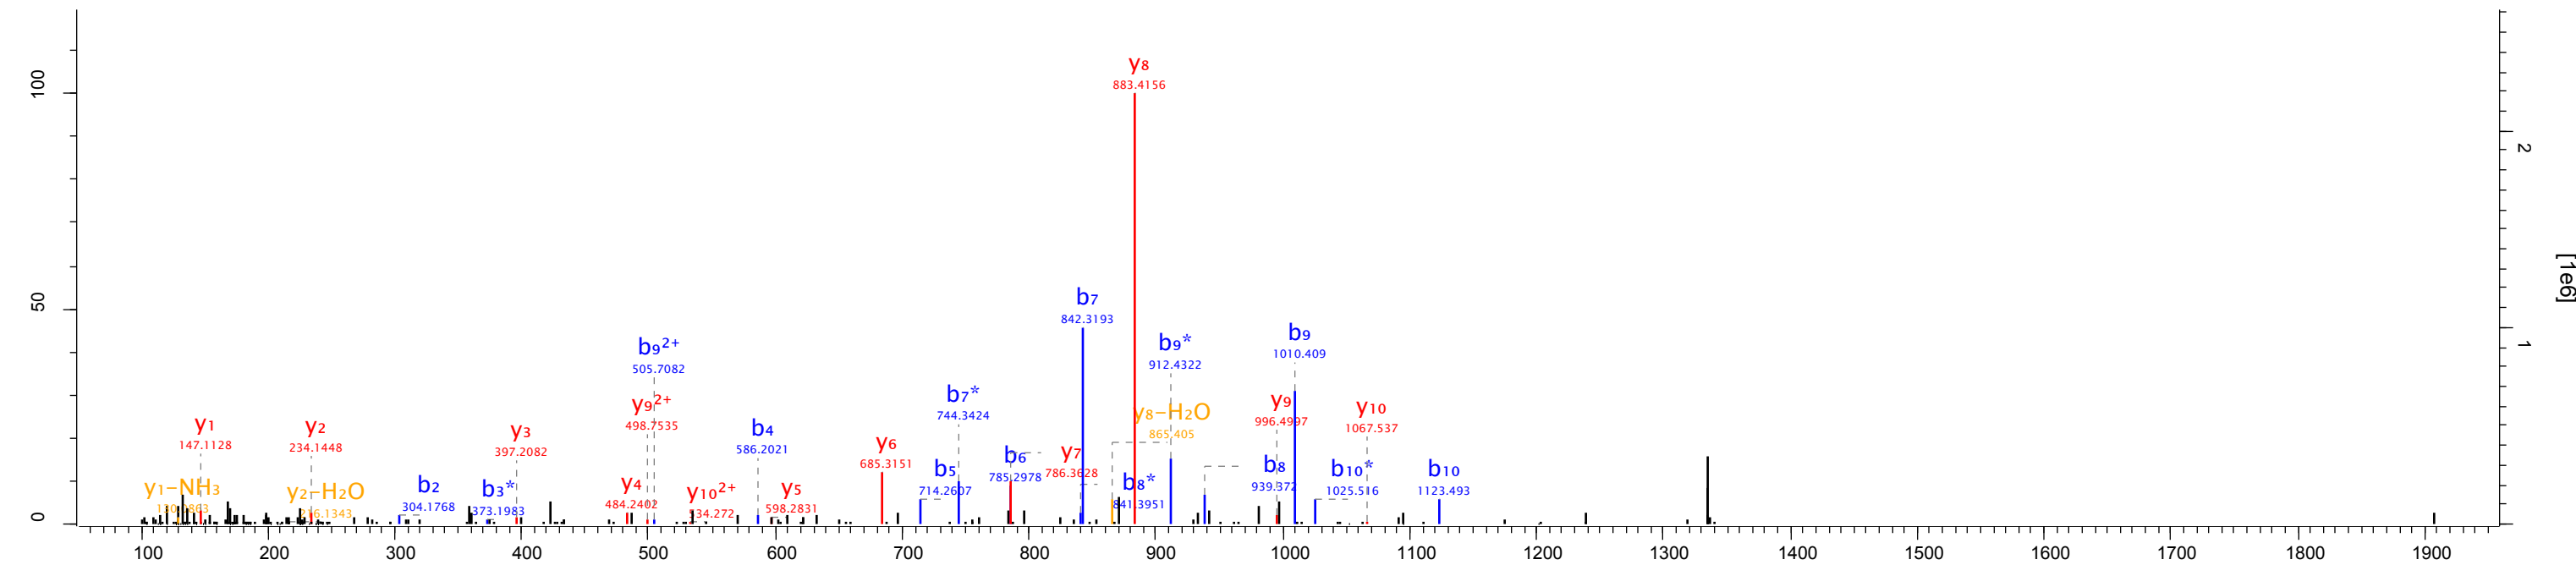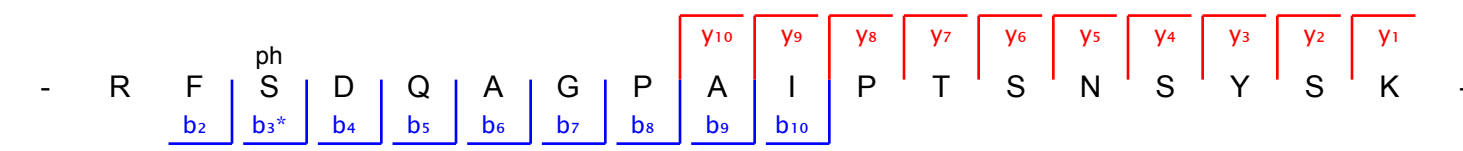

Raw file 20150814\_A375SR\_Phospho\_BR2\_04 Scan 12548 Method FTMS; HCD Score 141.85 m/z 720.82 Gene names MOCOS

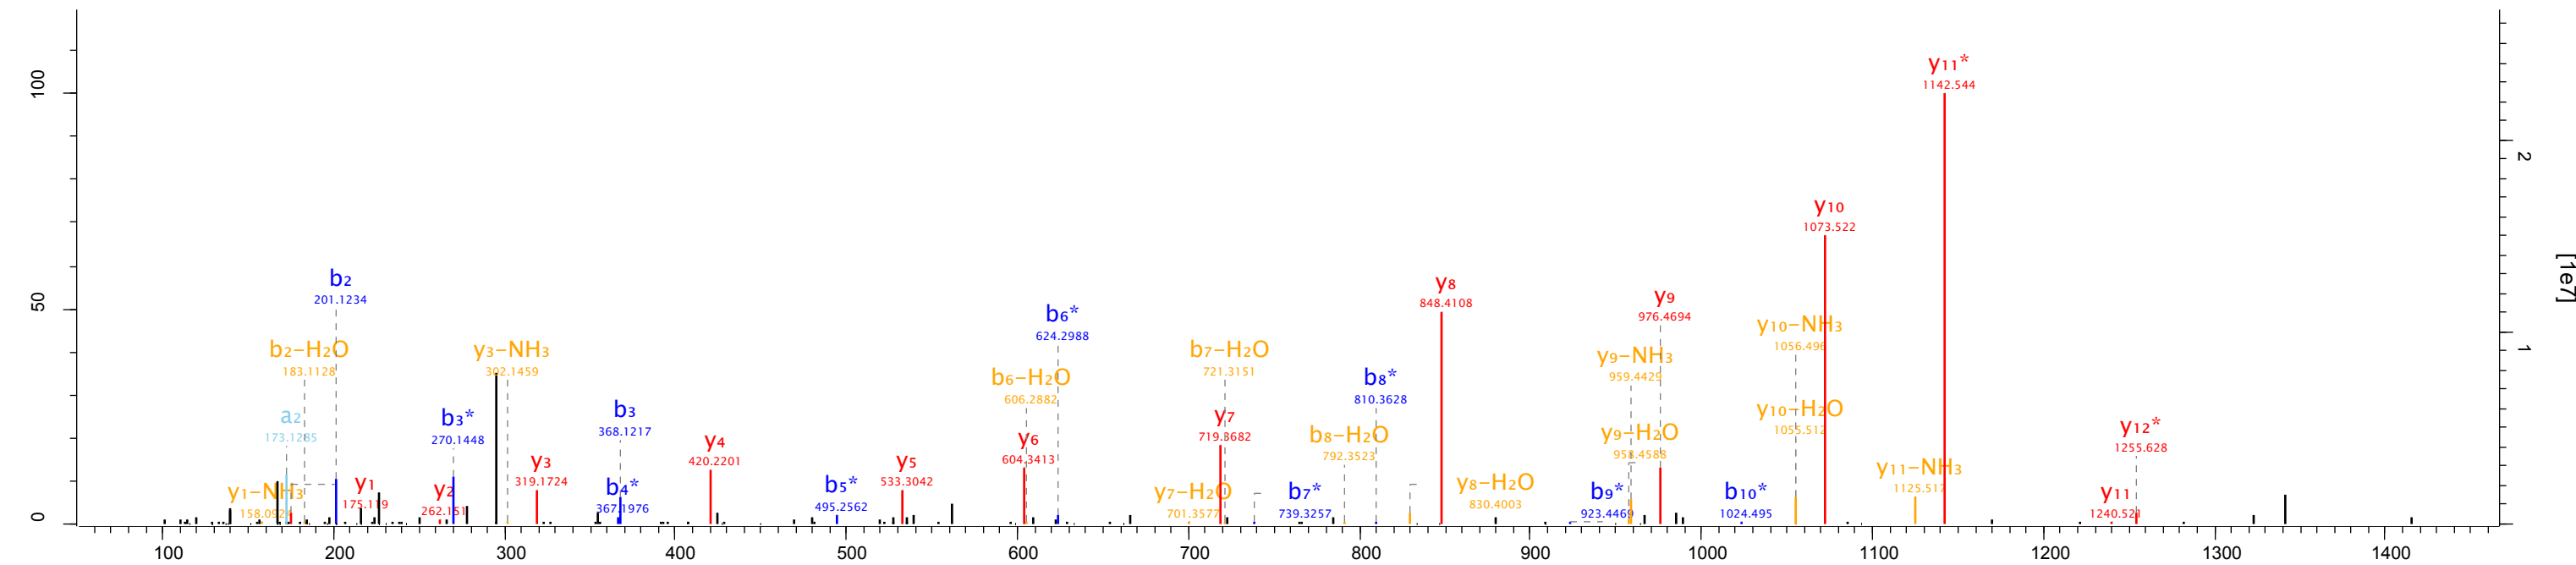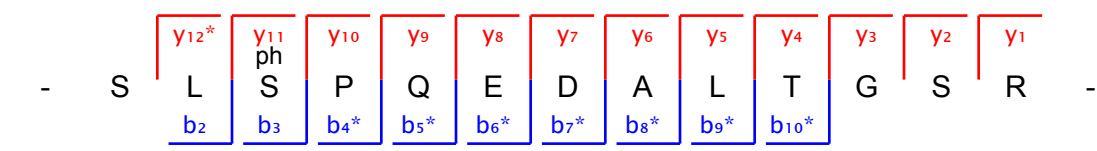

Raw file 20150814\_A375SR\_Phospho\_BR2\_04 Scan 12618 Method FTMS; HCD Score 108.08 m/z 954.44 Gene names DDX20

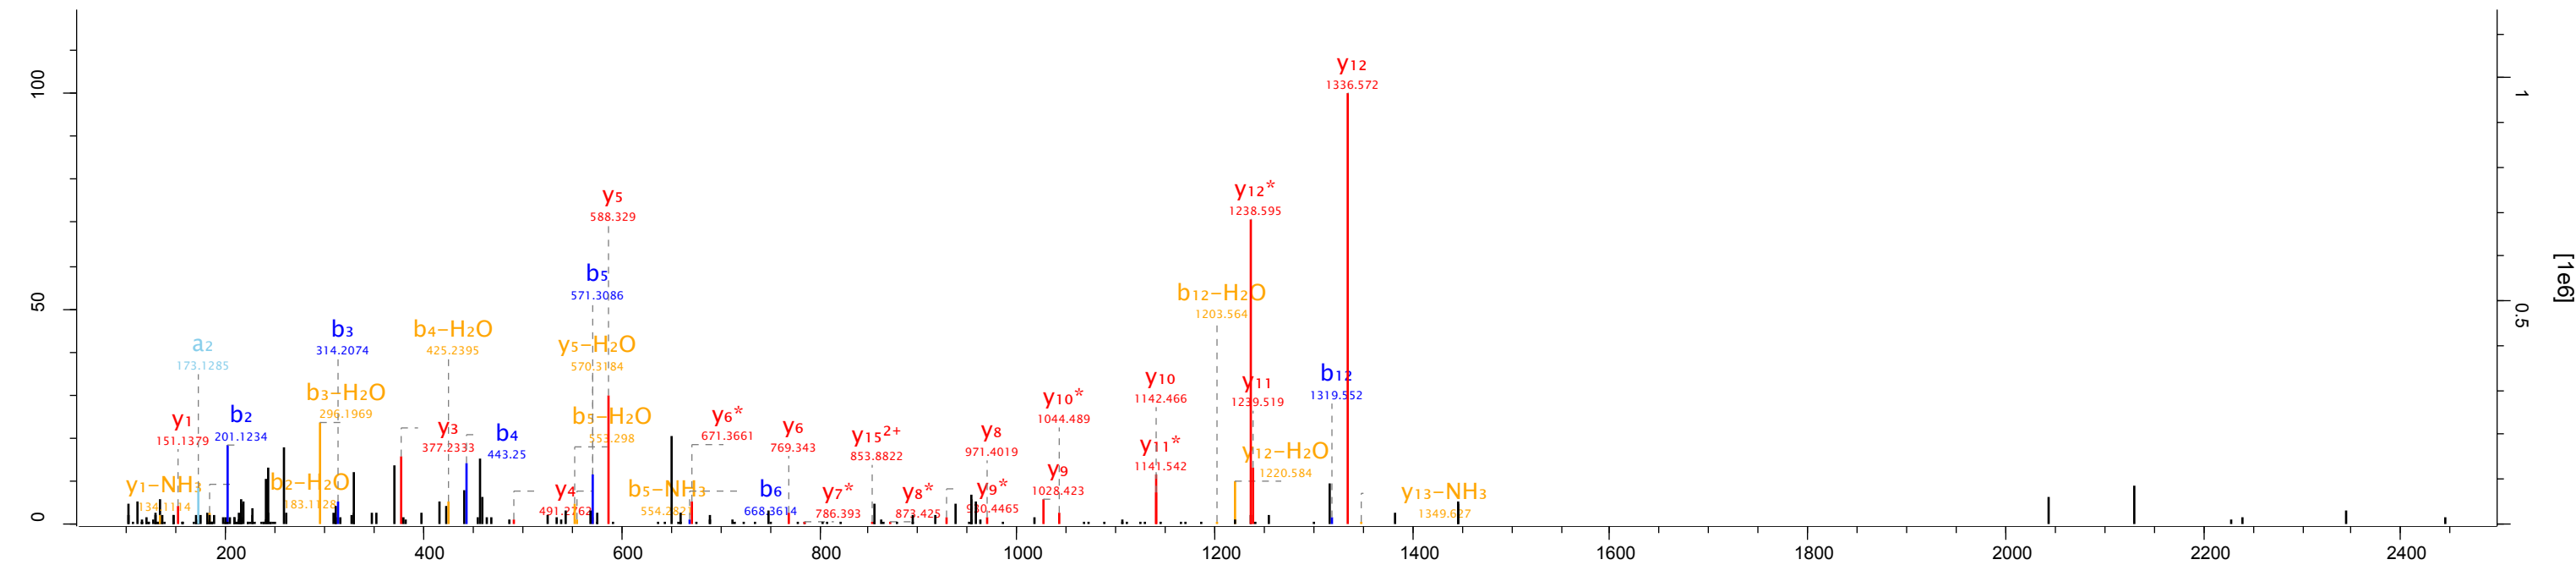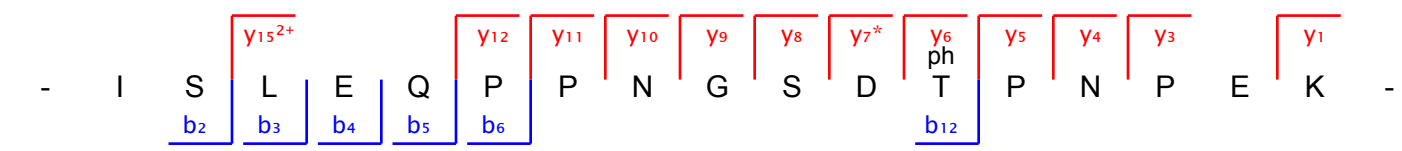

Raw file Scan Method Score m/z Gene names  
 20150814\_A375SR\_Phospho\_BR2\_04 12658 FTMS; HCD 58.69 596.96 AKAP13

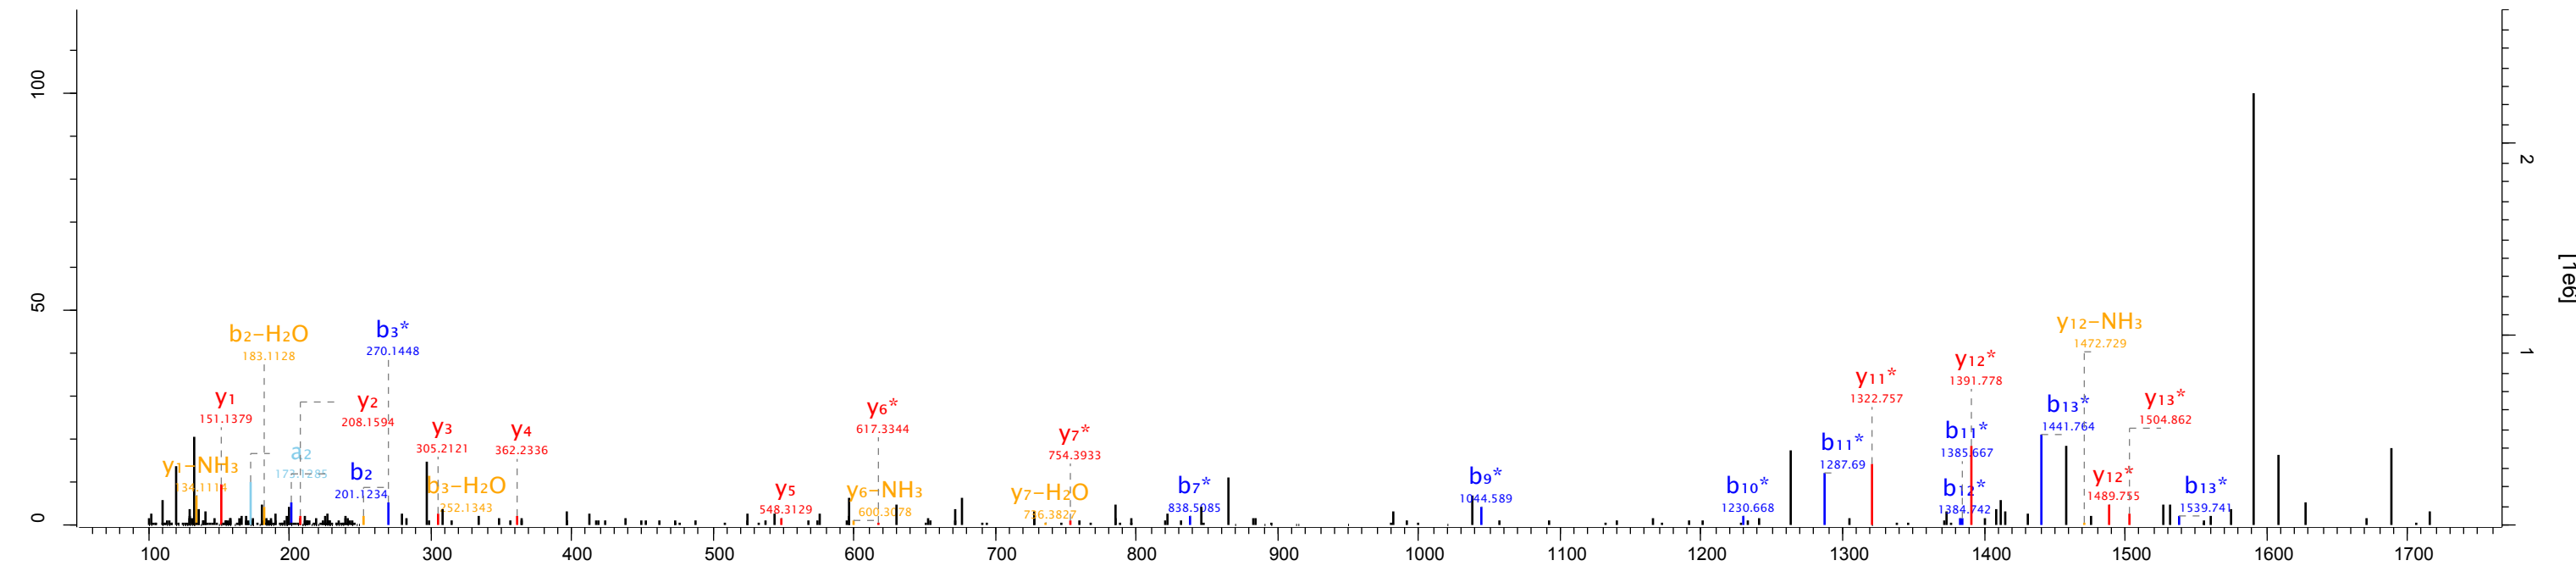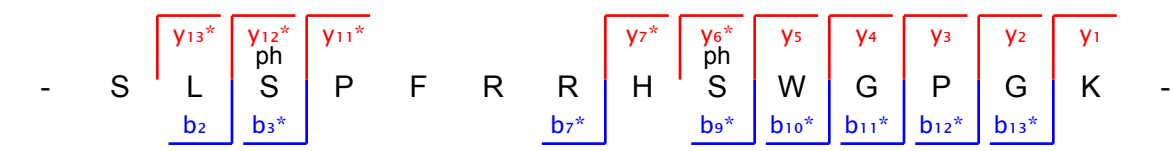

Raw file: 20150814\_A375SR\_Phospho\_BR2\_04  
 Scan: 12958 Method: FTMS; HCD Score: 177.76 m/z: 826.85 Gene names: LMO7

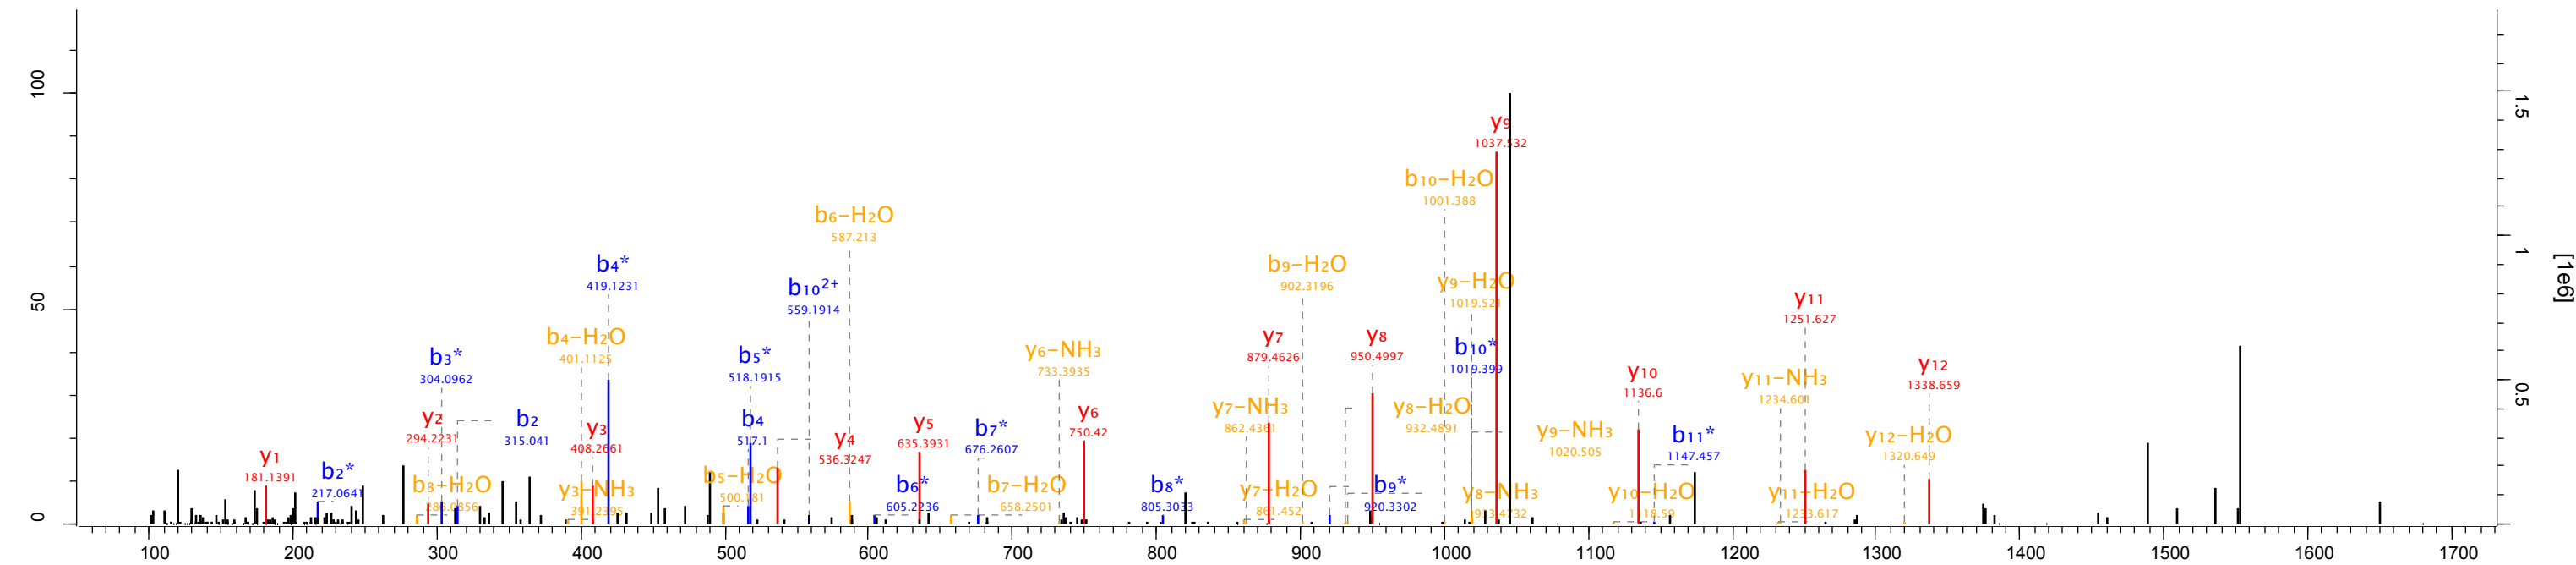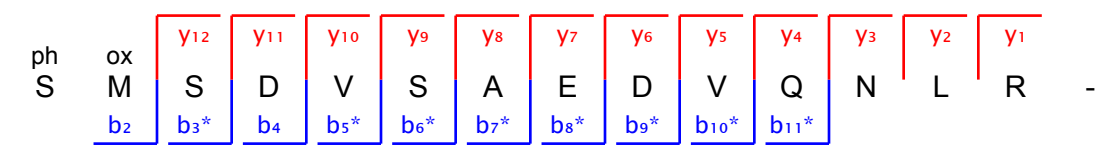

Raw file 20150814\_A375SR\_Phospho\_BR2\_04 Scan 12988 Method FTMS; HCD Score 108.52 m/z 770.83 Gene names DCAF6

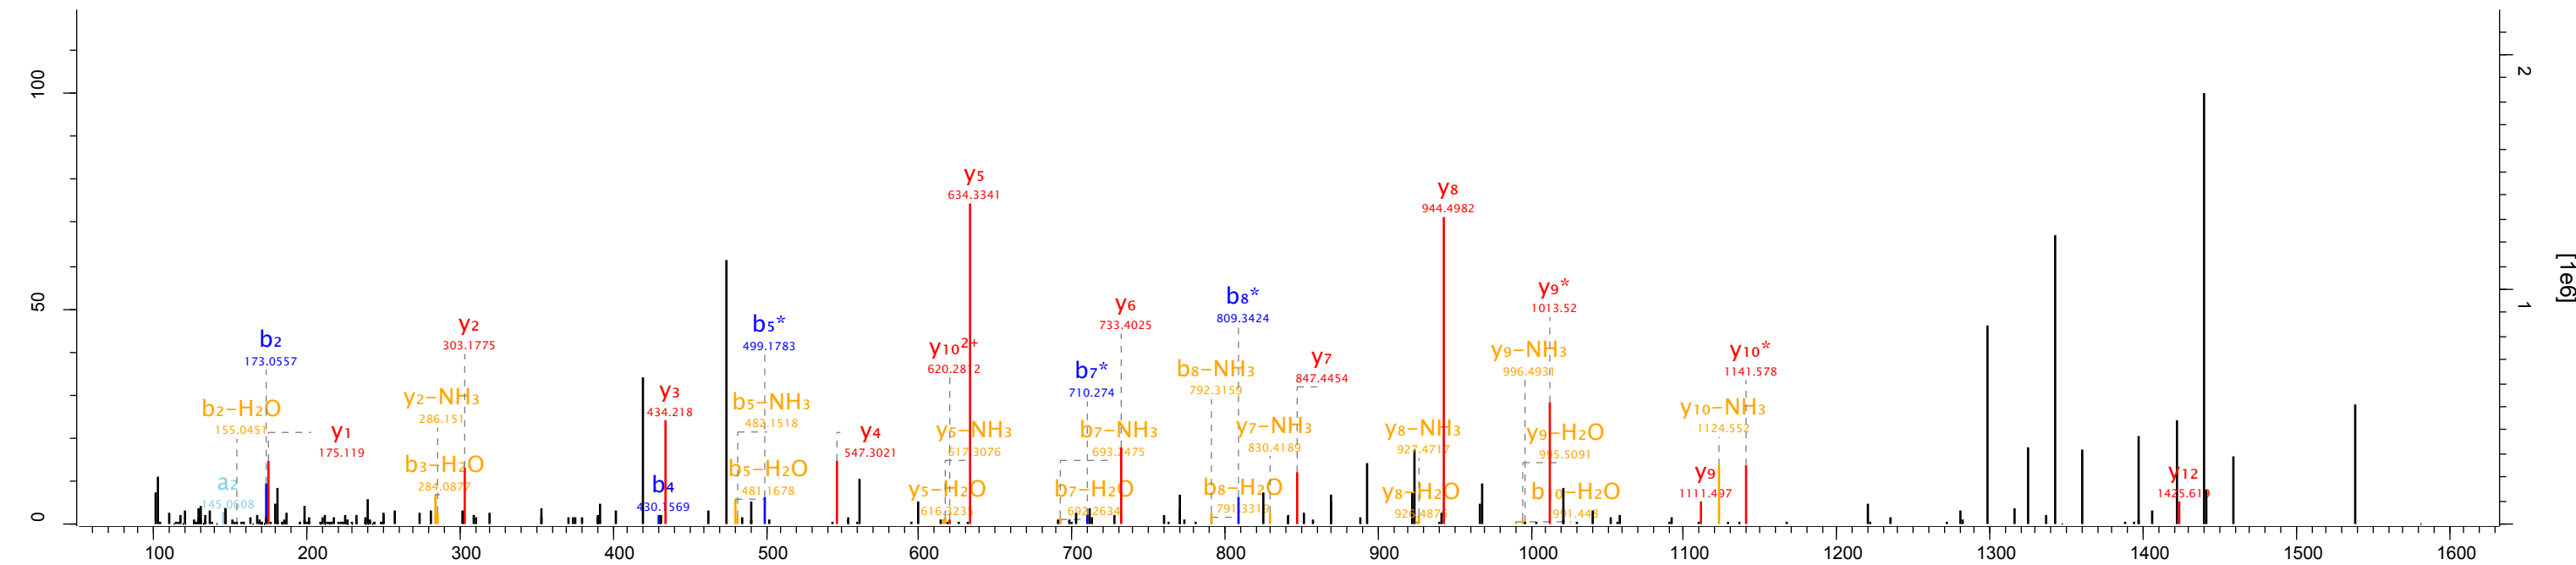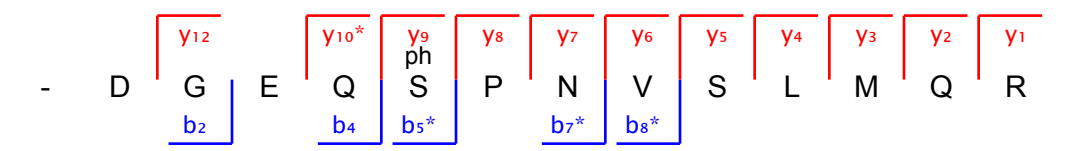

Raw file: 20150814\_A375SR\_Phospho\_BR2\_04  
 Scan: 12998 Method: FTMS; HCD Score: 220.13 m/z: 996.9 Gene names: ELMO1

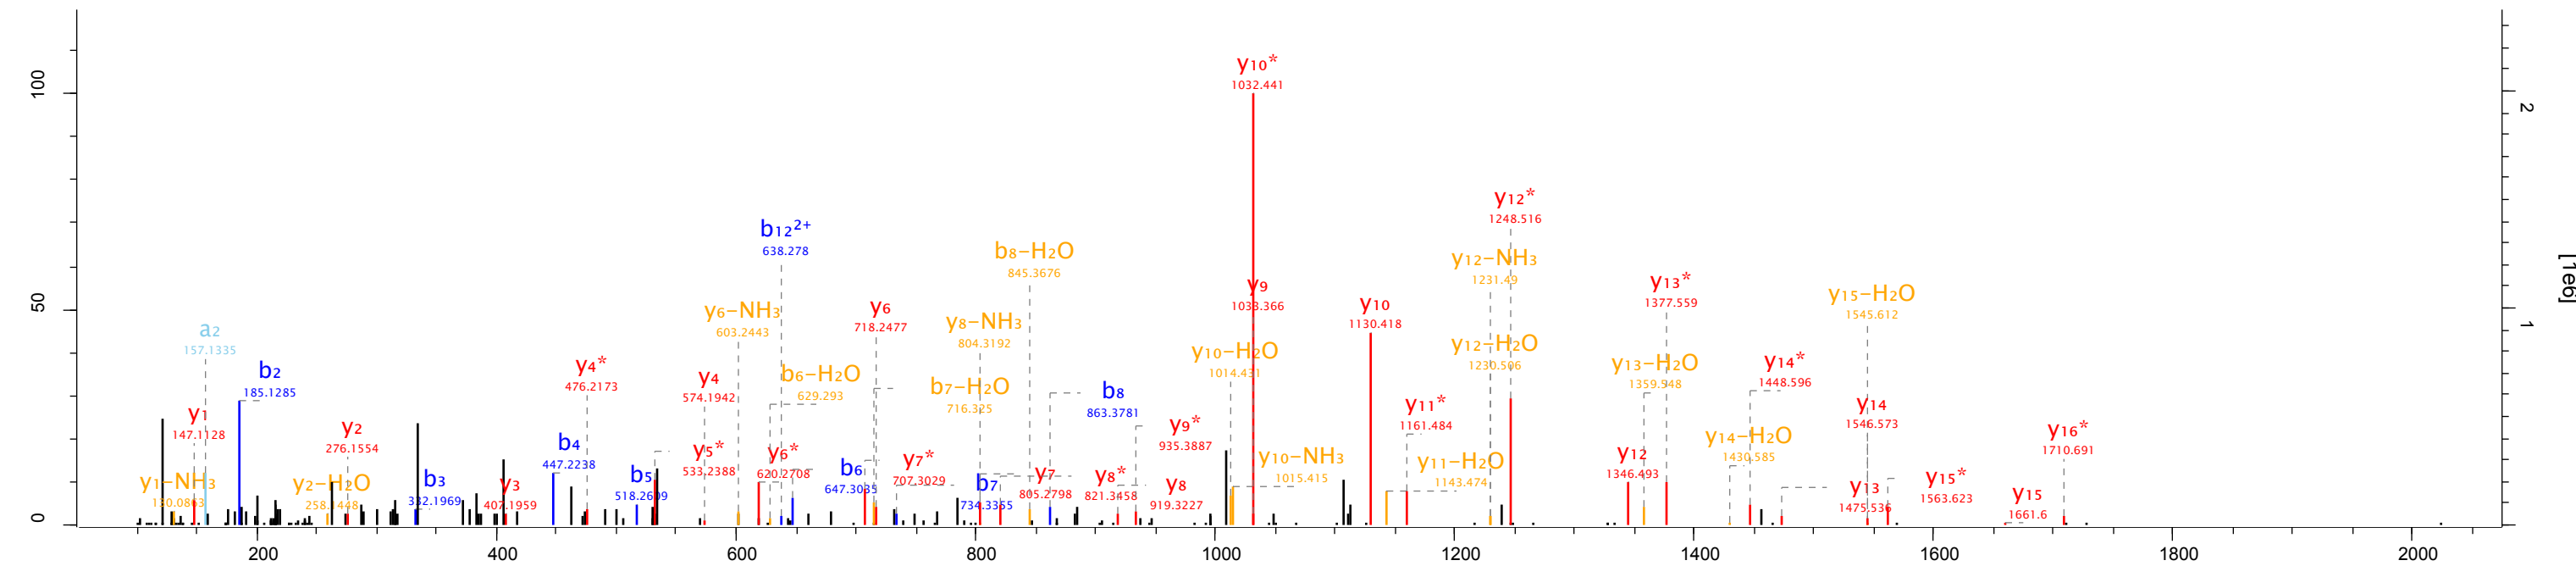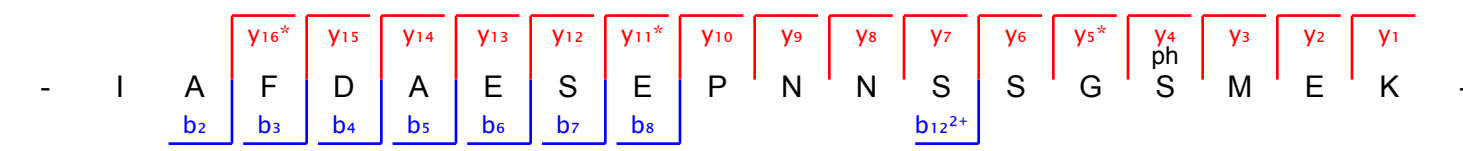



Raw file: 20150814\_A375SR\_Phospho\_BR2\_04  
 Scan: 13208  
 Method: FTMS; HCD  
 Score: 148.06  
 m/z: 830.4  
 Gene names: PFKFB2

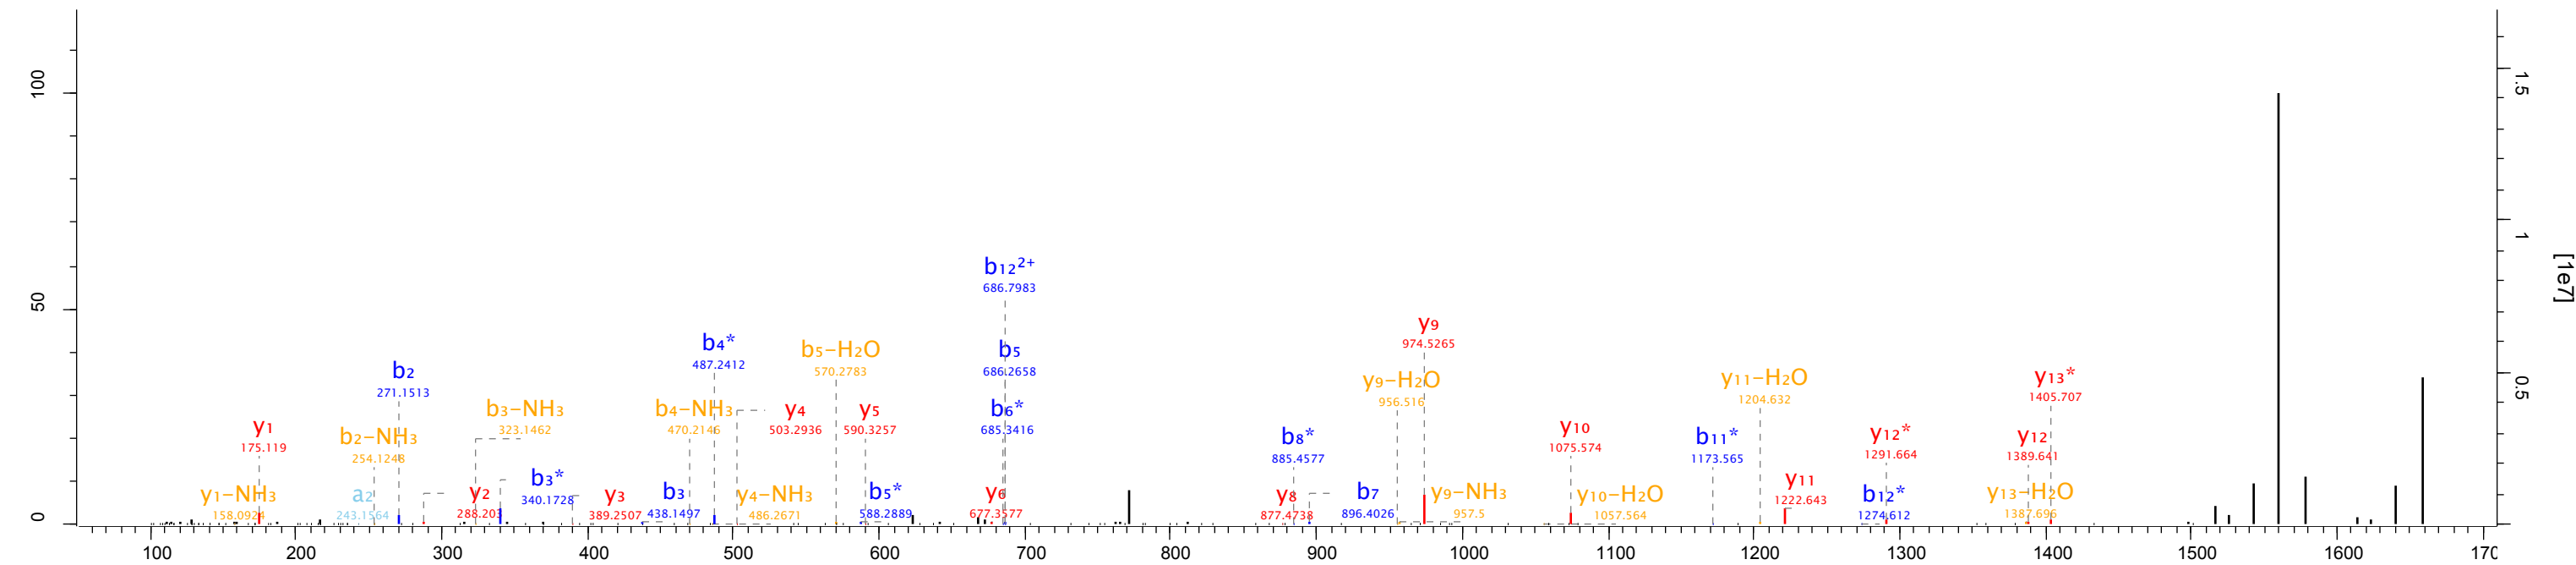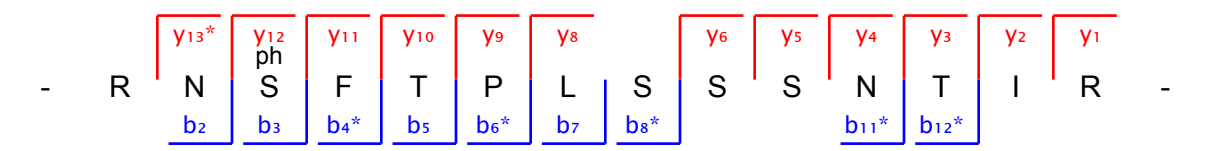

Raw file: 20150814\_A375SR\_Phospho\_BR2\_04  
 Scan: 13318  
 Method: FTMS; HCD  
 Score: 266  
 m/z: 986.11  
 Gene names: FAM169A

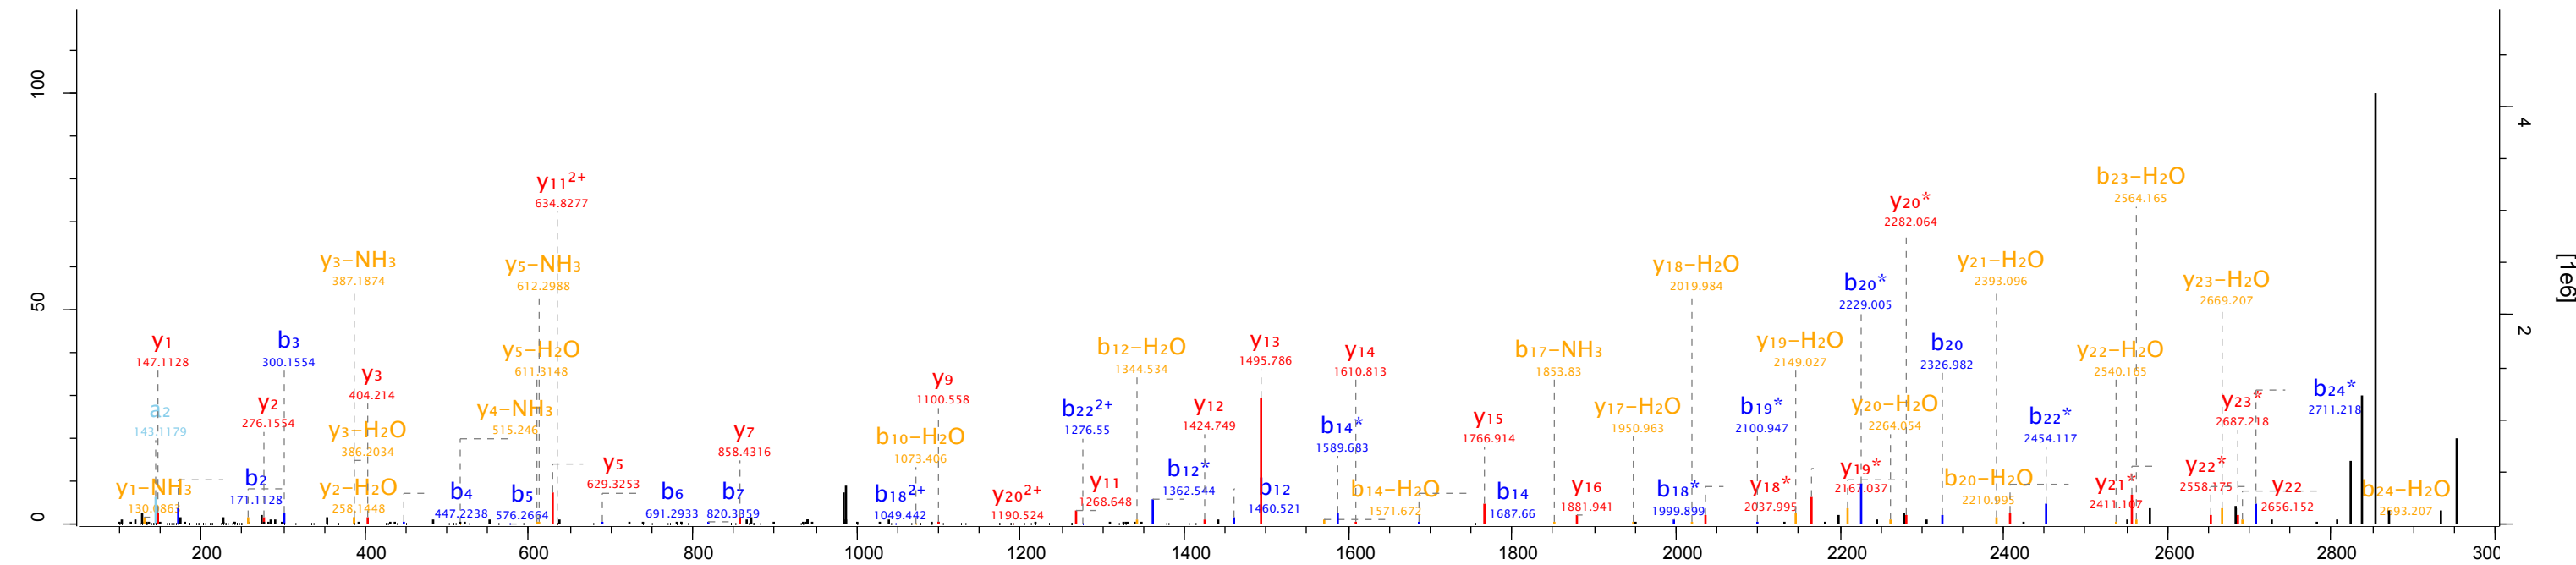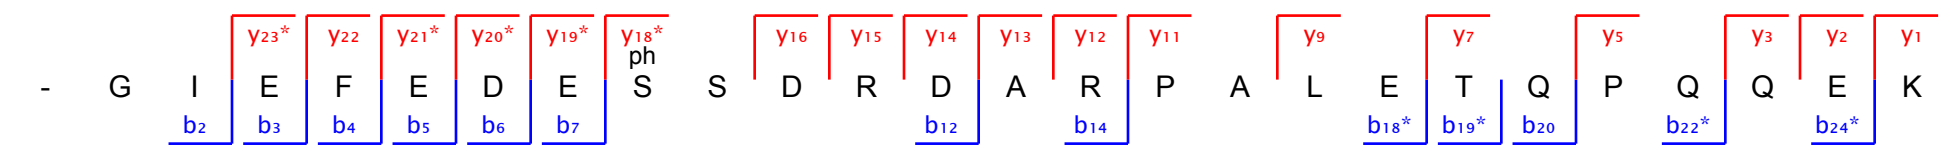

Raw file: 20150814\_A375SR\_Phospho\_BR2\_04  
 Scan: 13478 Method: FTMS; HCD Score: 171.85 m/z: 789.85 Gene names: CEP170

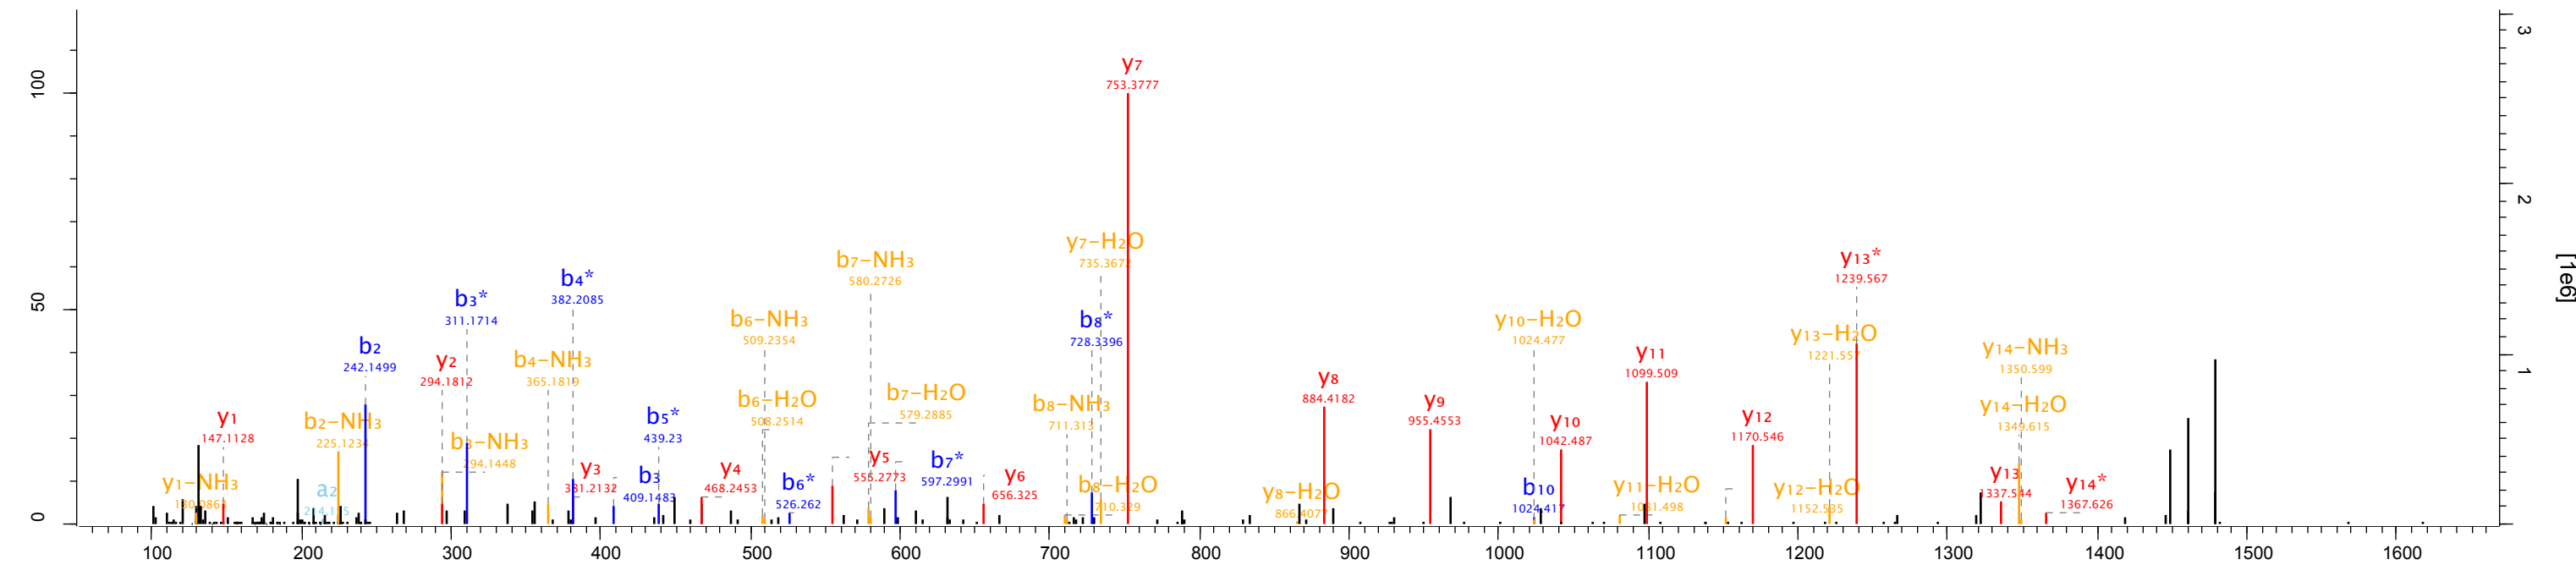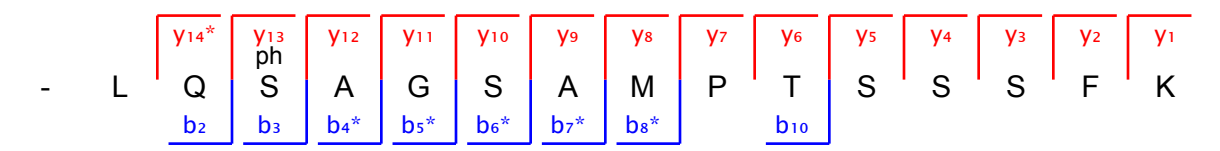

Raw file: 20150814\_A375SR\_Phospho\_BR2\_04  
 Scan: 13608 Method: FTMS; HCD Score: 97.08 m/z: 895.4 Gene names: SUB1

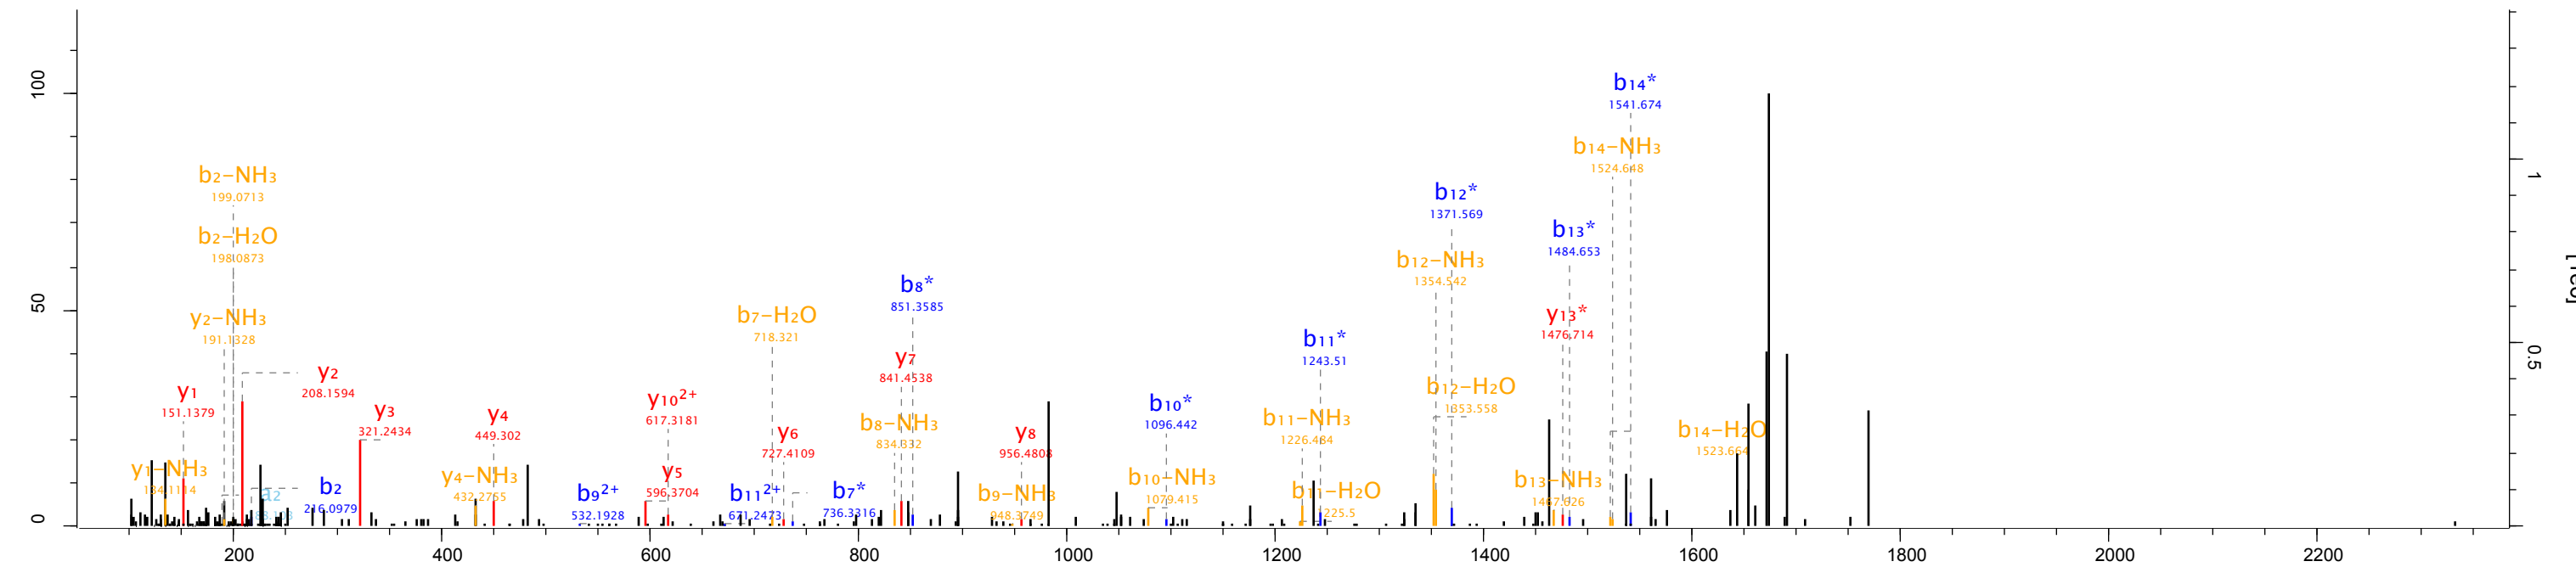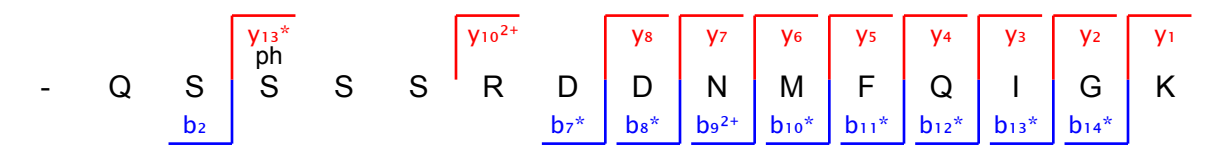

Raw file  
20150814\_A375SR\_Phospho\_BR2\_04

Scan Method Score m/z Gene names  
14078 FTMS; HCD 103.03 709.31 NUMA1

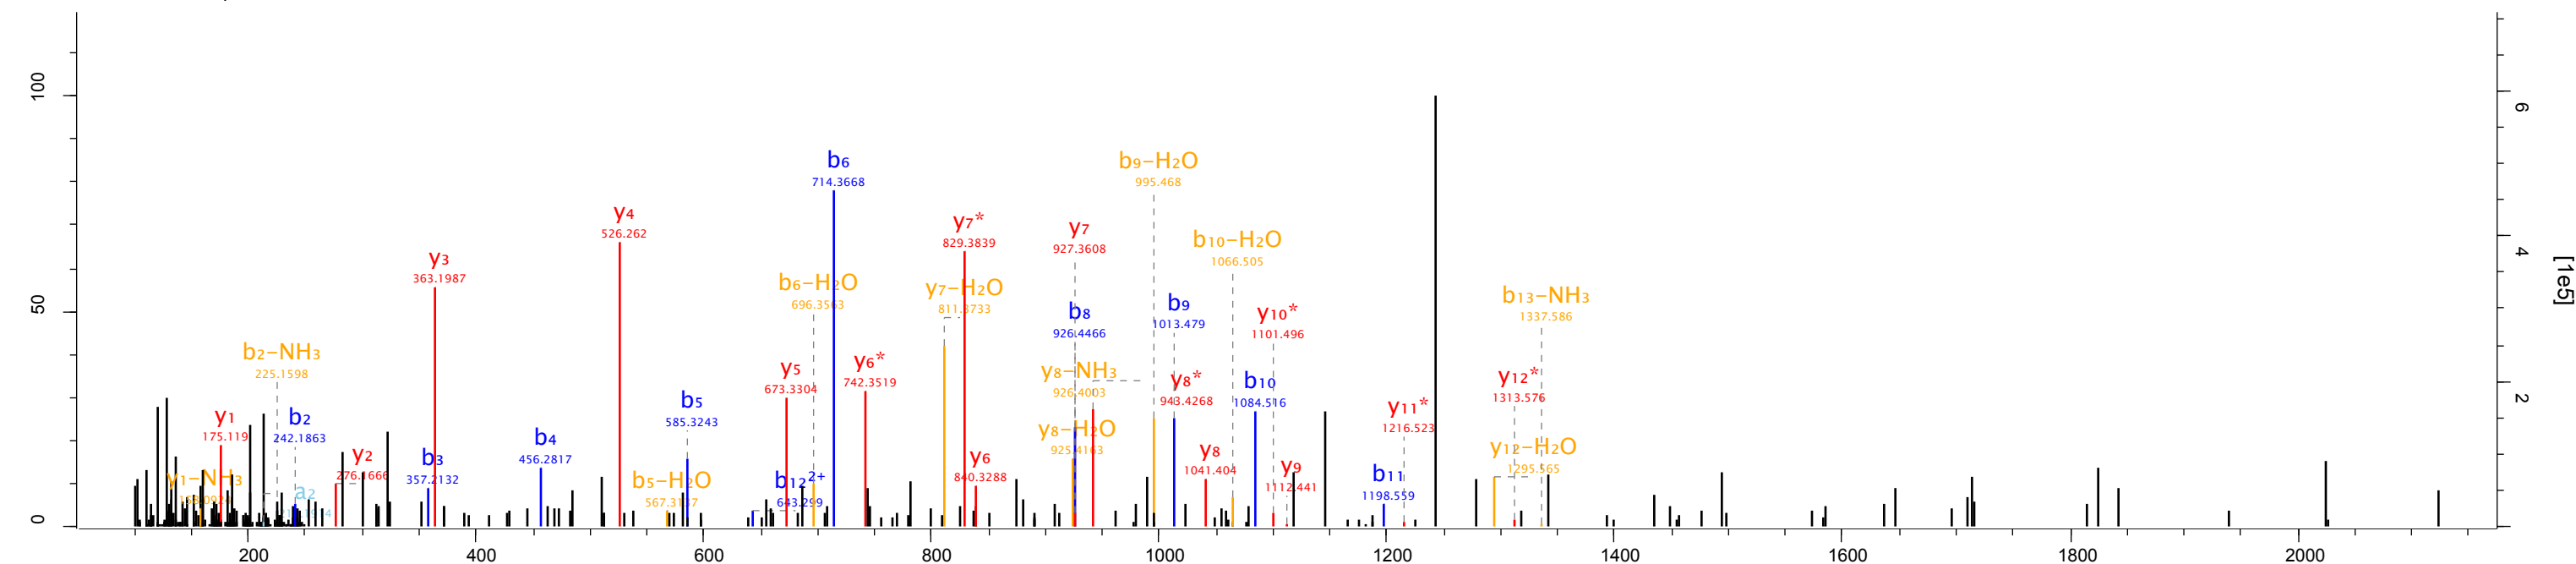

- K L D V E E P D S A N S ph S F Y S T R -

Fragmentation mapping:  
b2 (L), b3 (D), b4 (V), b5 (E), b6 (E), b8 (D), b9 (S), b10 (A), b11 (N), b12<sup>2+</sup> (S)  
y1 (R), y2 (T), y3 (S), y4 (Y), y5 (F), y6 (ph), y7 (S), y8 (N), y9 (A), y10 (S), y11 (D), y12 (P)

Raw file 20150814\_A375SR\_Phospho\_BR2\_04 Scan 14208 Method FTMS; HCD Score 108.37 m/z 913.96 Gene names OTUD5

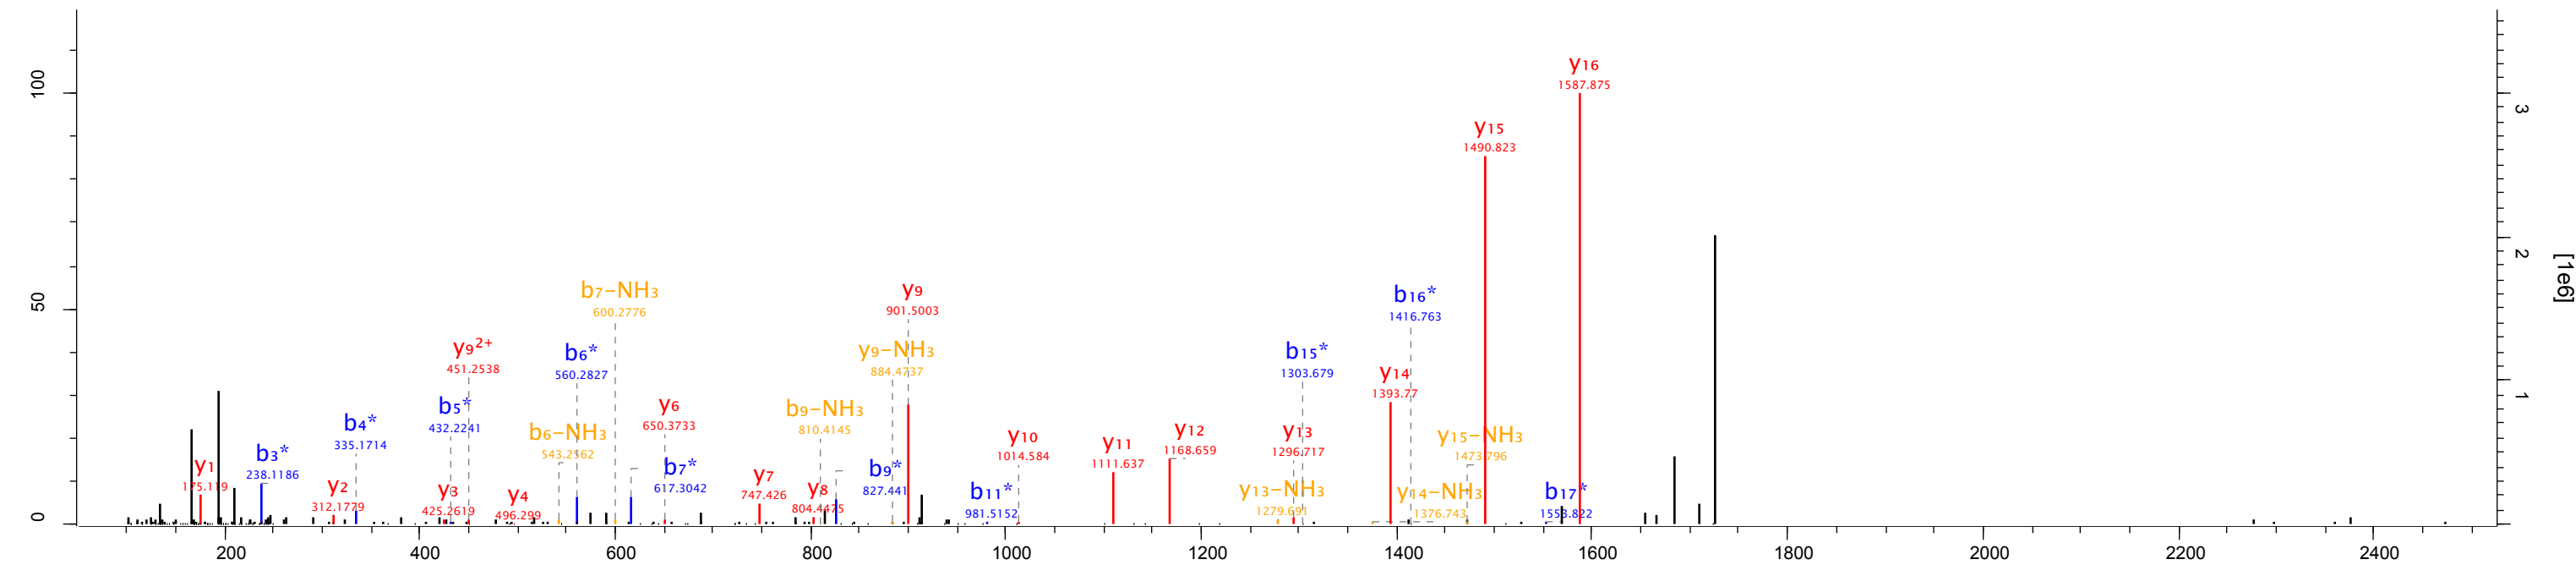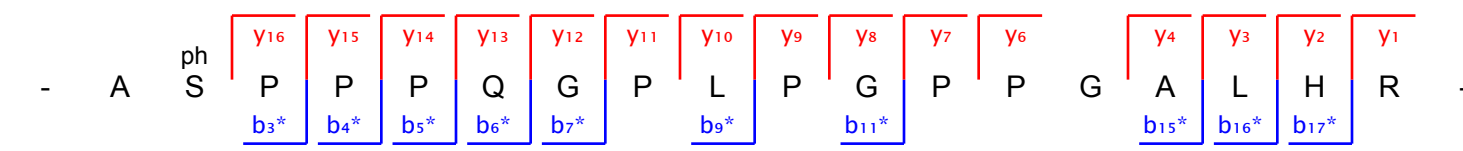

Raw file: 20150814\_A375SR\_Phospho\_BR2\_04  
 Scan: 14498 Method: FTMS; HCD Score: 208.24 m/z: 879.69 Gene names: RBMX;RBMXL1

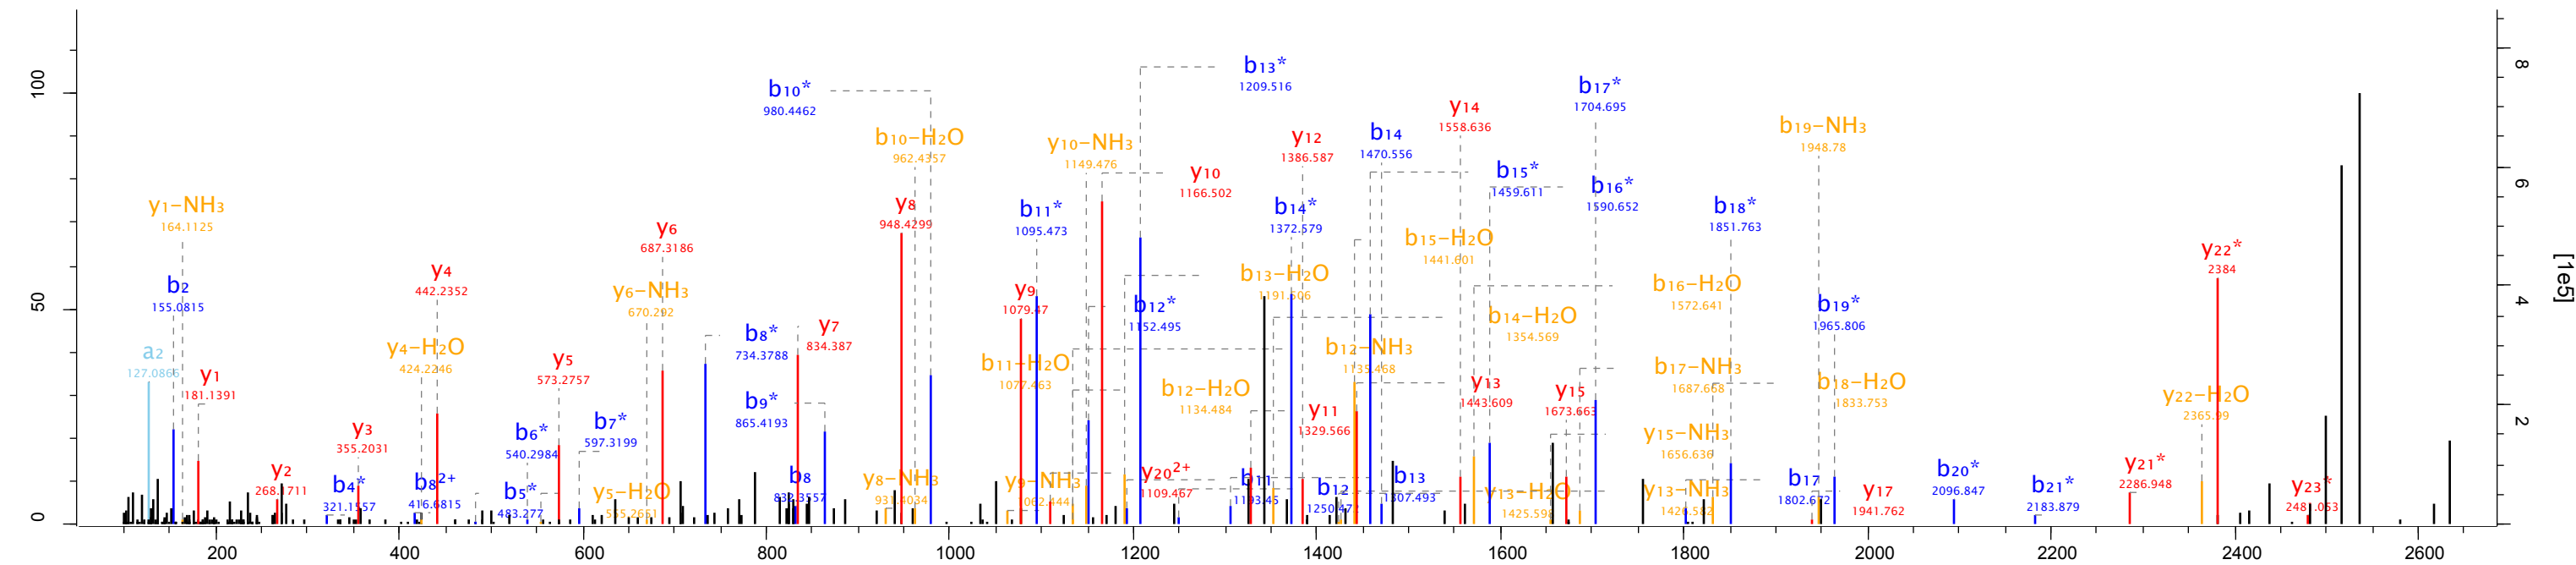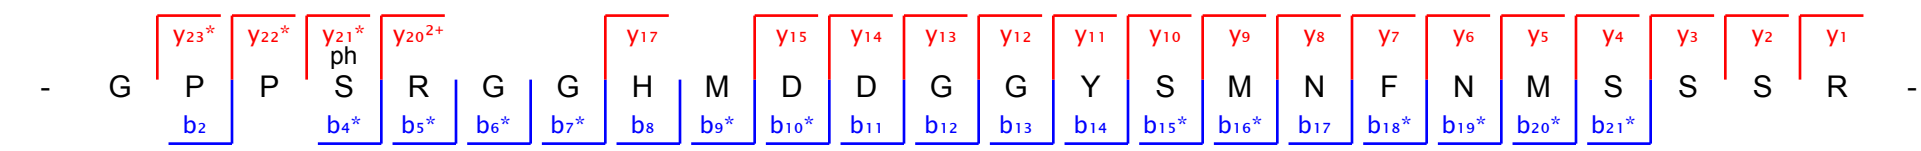

Raw file: 20150814\_A375SR\_Phospho\_BR2\_04  
 Scan: 14538 Method: FTMS; HCD Score: 118.36 m/z: 744.31 Gene names: GPATCH2

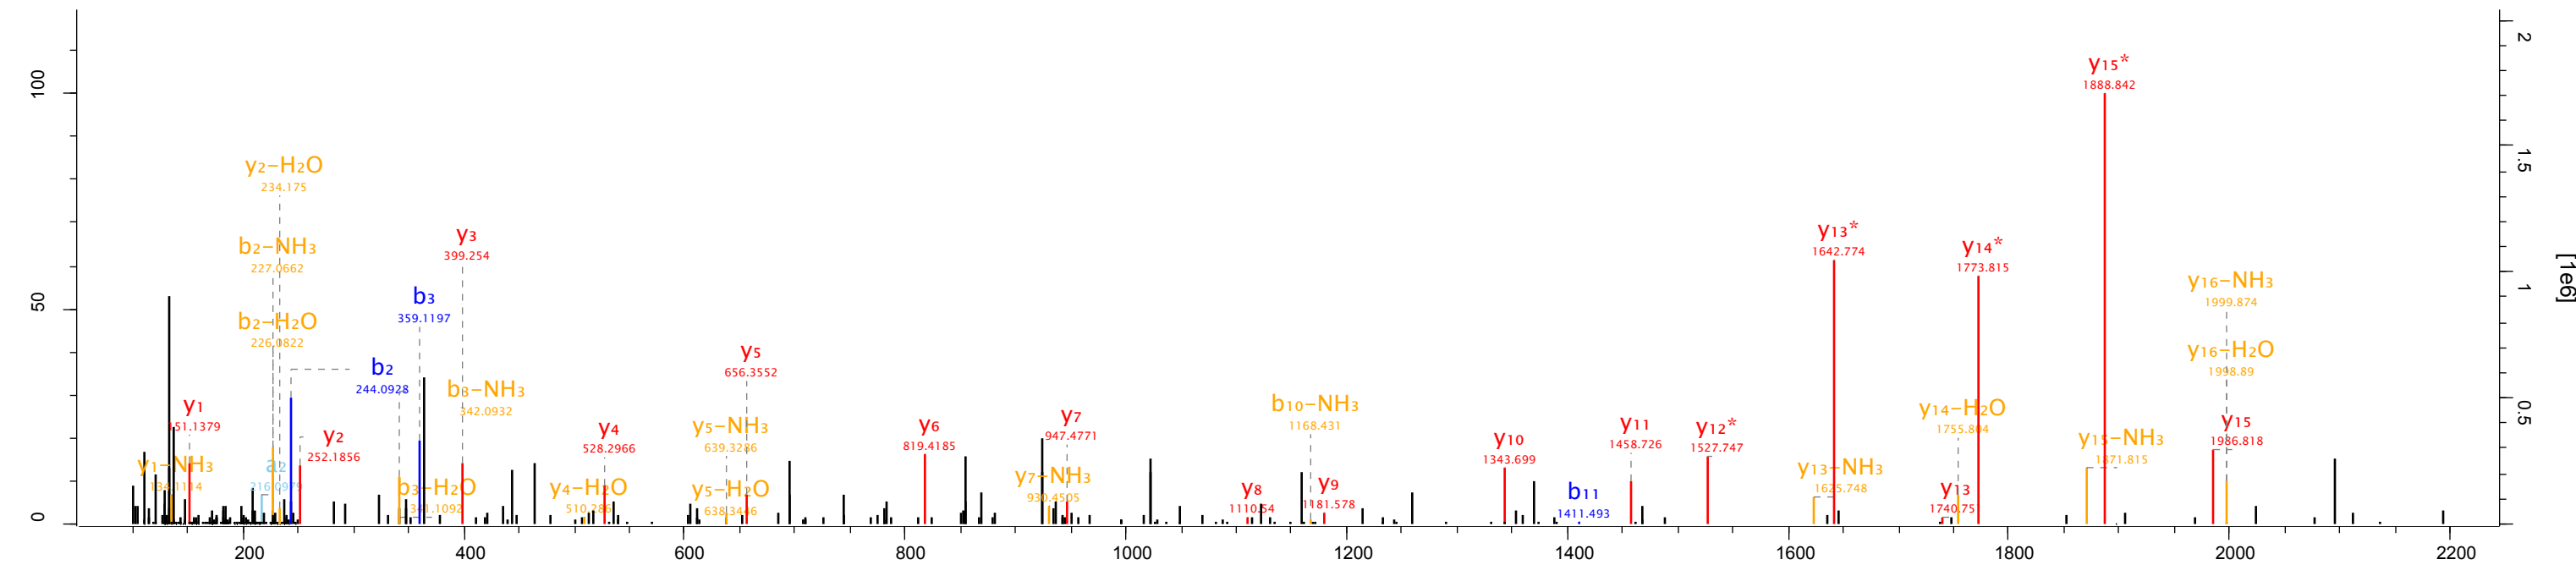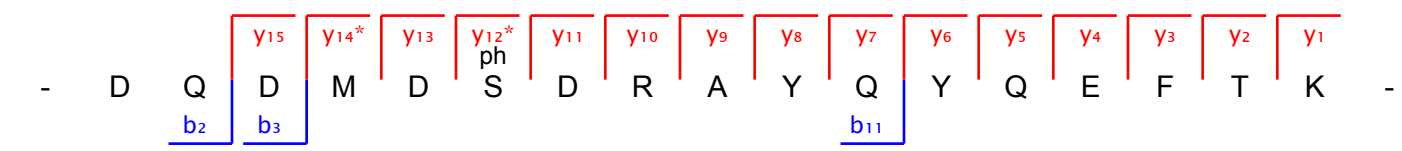



Raw file: 20150814\_A375SR\_Phospho\_BR2\_04  
 Scan: 14558 Method: FTMS; HCD Score: 115.65 m/z: 488.23 Gene names: PKP2

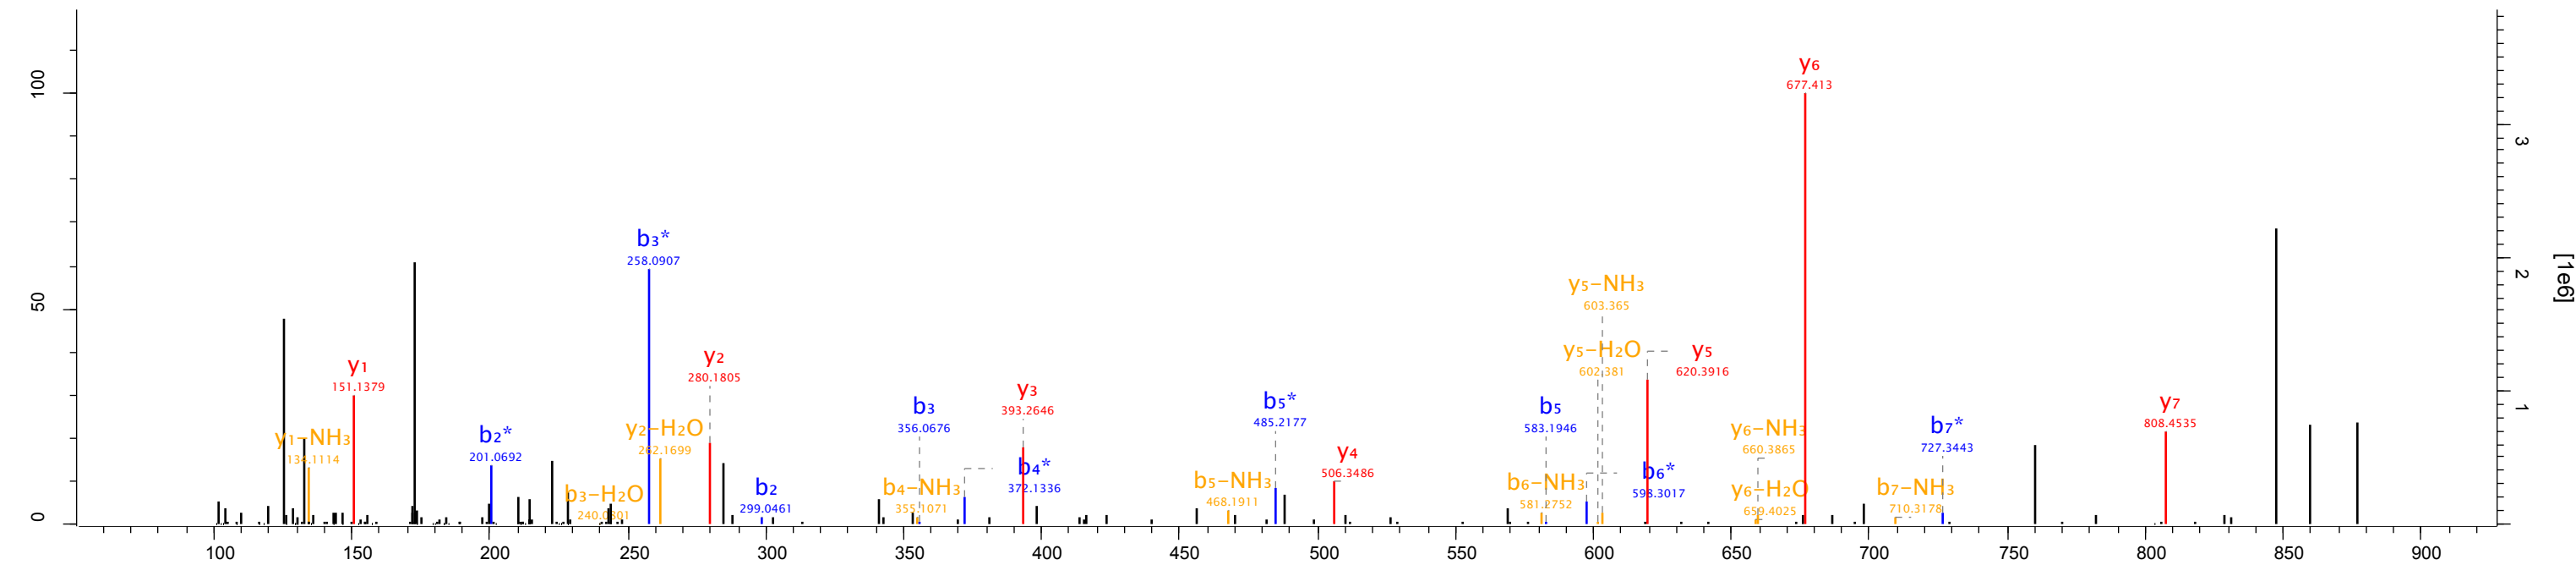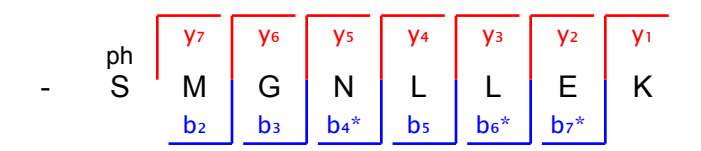

Raw file: 20150814\_A375SR\_Phospho\_BR2\_04  
 Scan: 14618 Method: FTMS; HCD Score: 96.05 m/z: 1040.96 Gene names: PIKFYVE

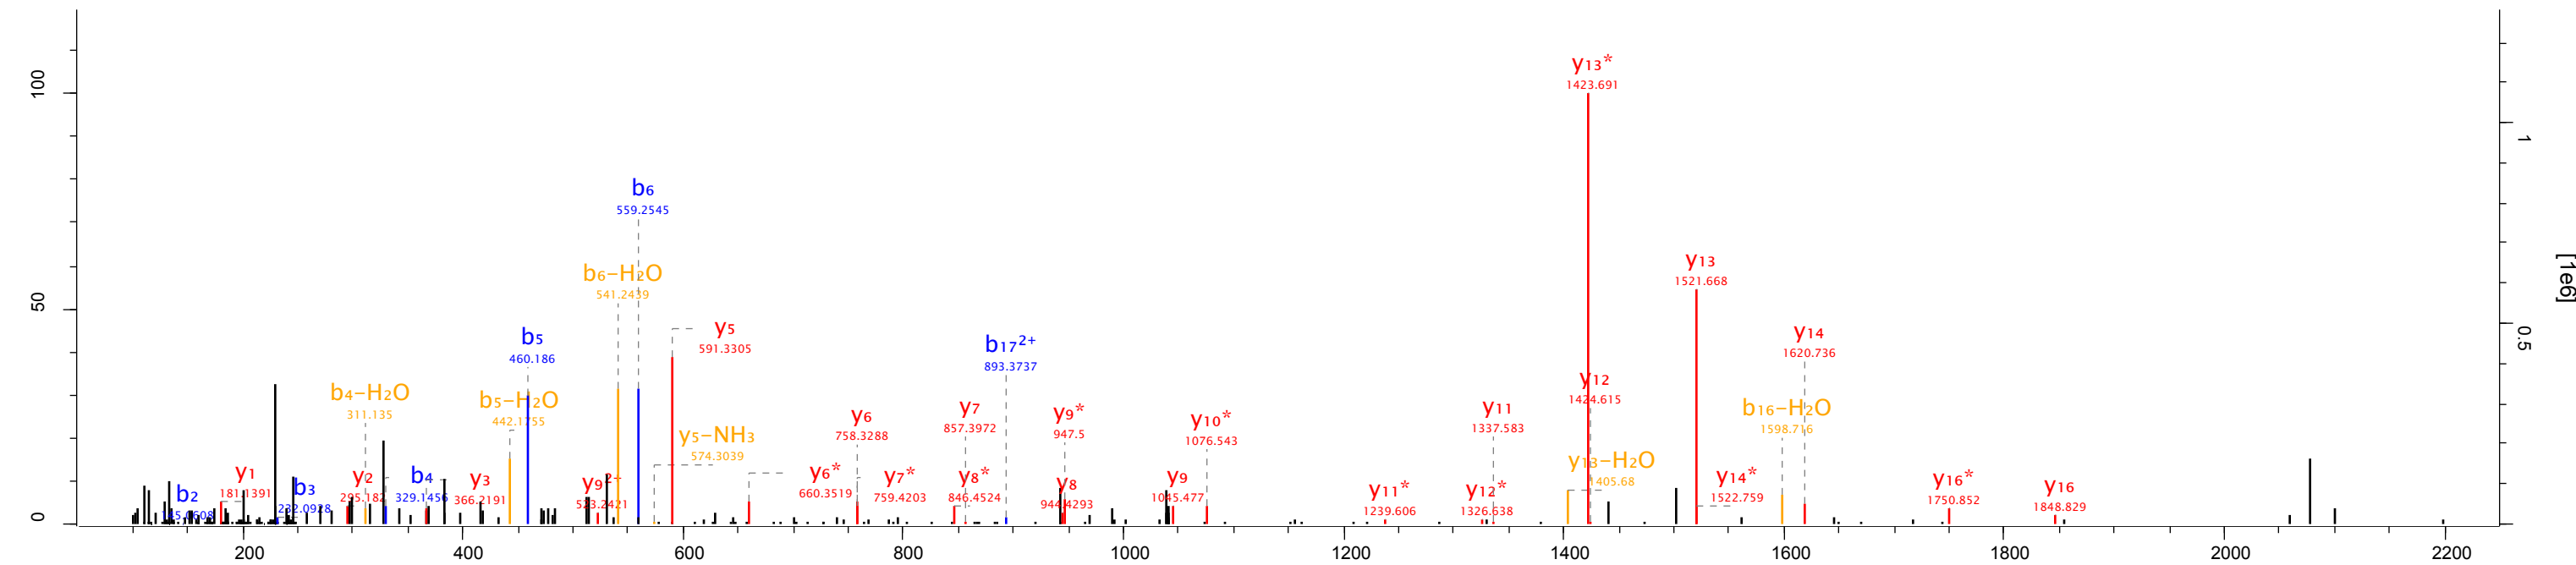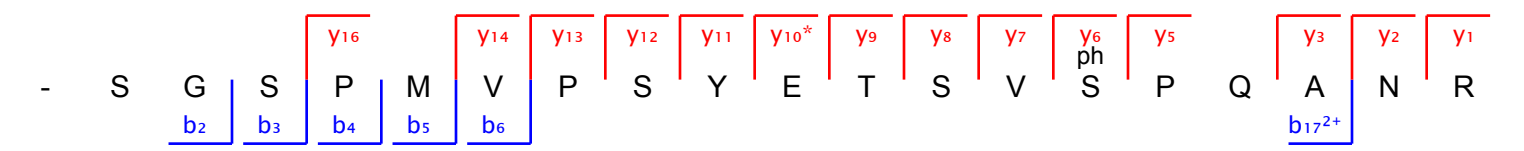

Raw file Scan Method Score m/z Gene names  
 20150814\_A375SR\_Phospho\_BR2\_04 14888 FTMS; HCD 46.15 690.87 WDR47

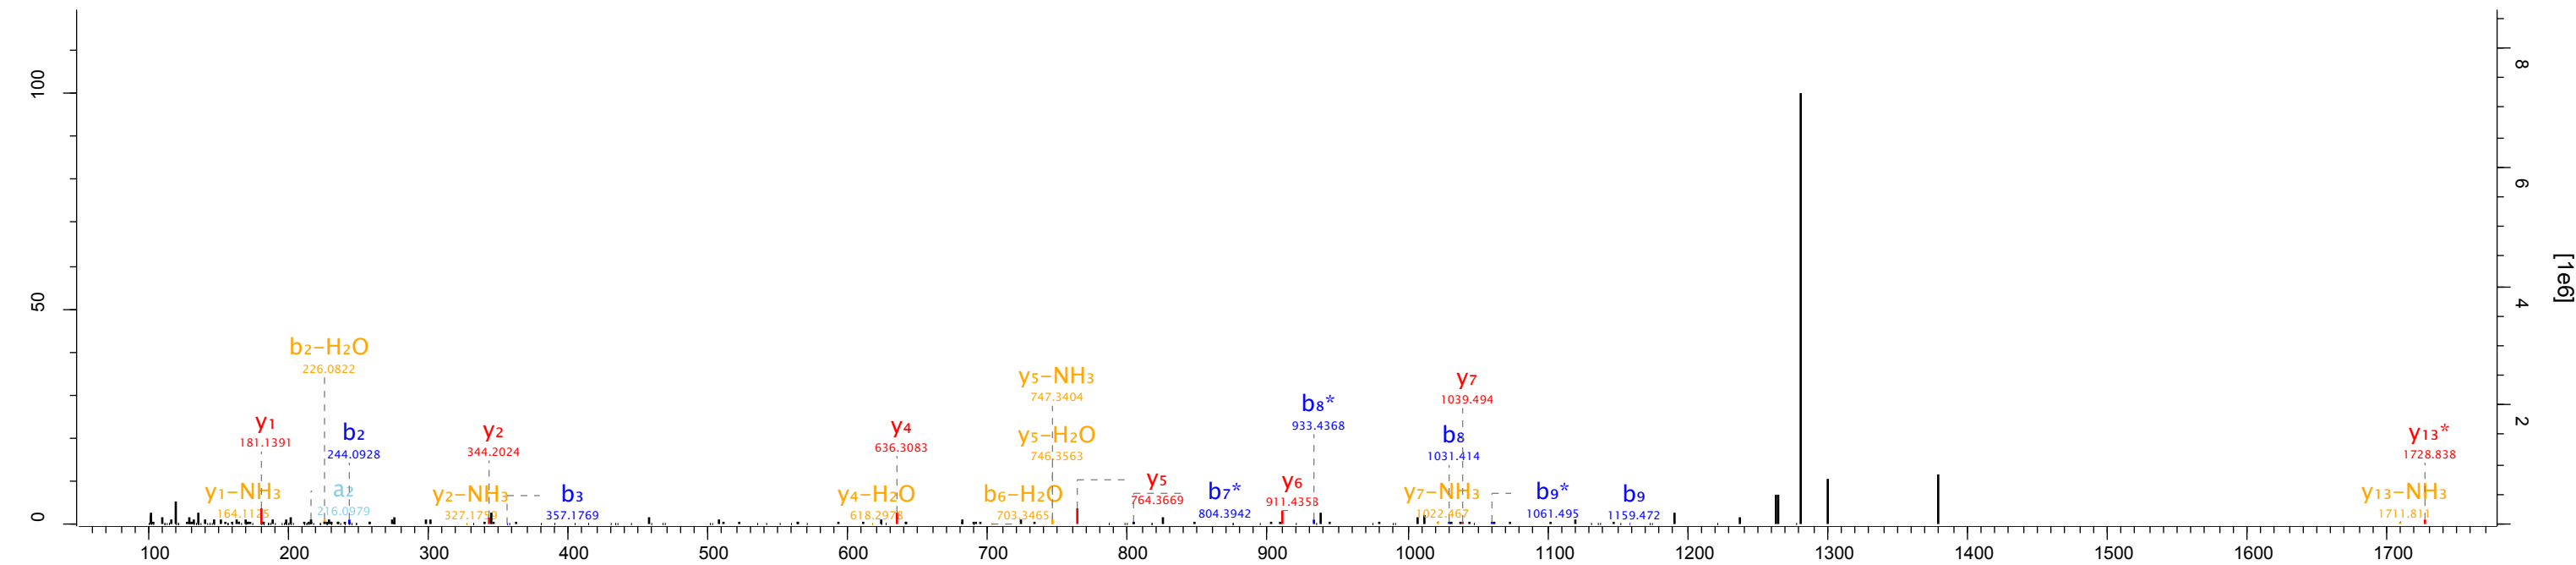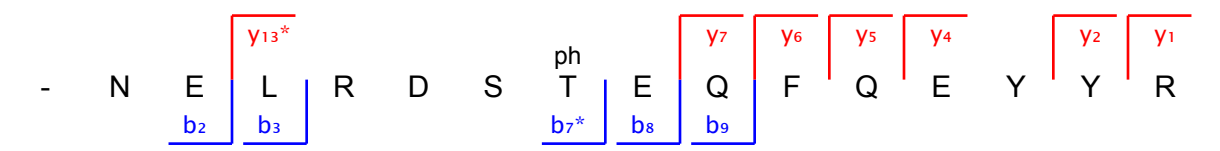

Raw file 20150814\_A375SR\_Phospho\_BR2\_04 Scan 14918 Method FTMS; HCD Score 119.62 m/z 616.61 Gene names CNKSR2

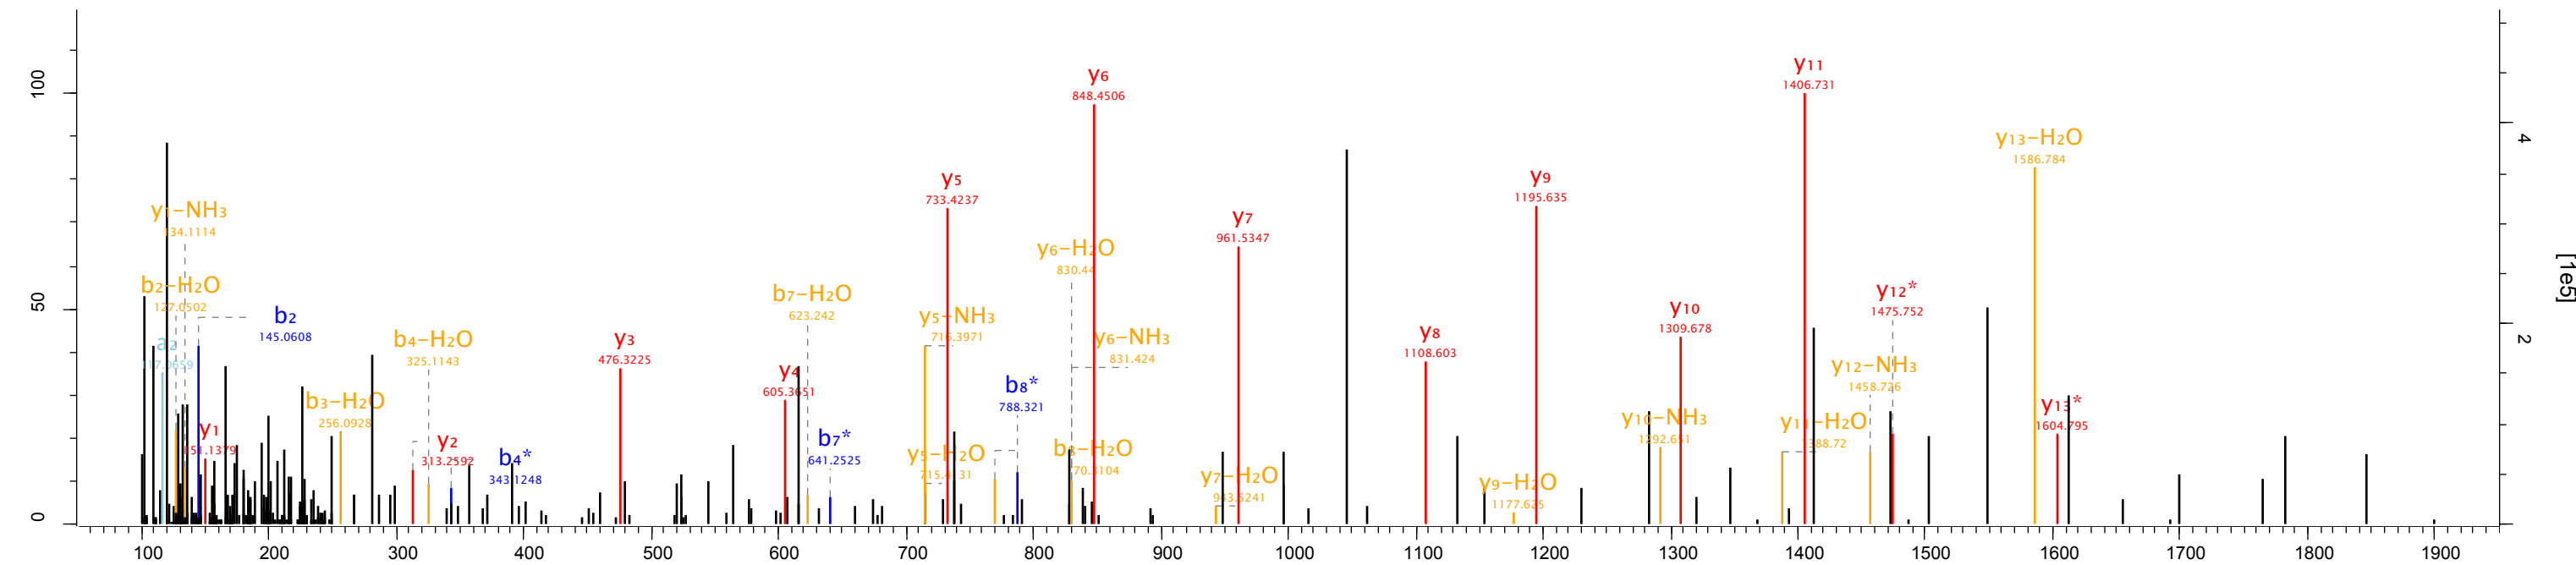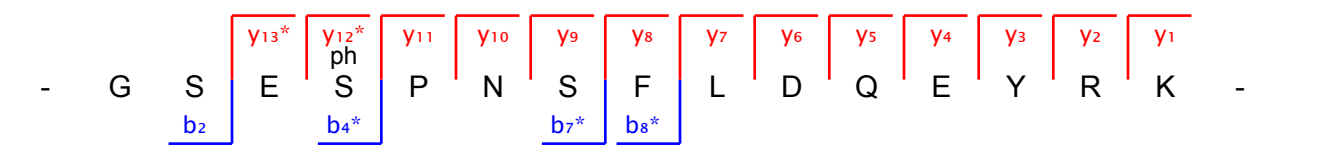

Raw file: 20150814\_A375SR\_Phospho\_BR2\_04  
 Scan: 15368 Method: FTMS; HCD Score: 131.33 m/z: 672.64 Gene names: RAB11FIP5

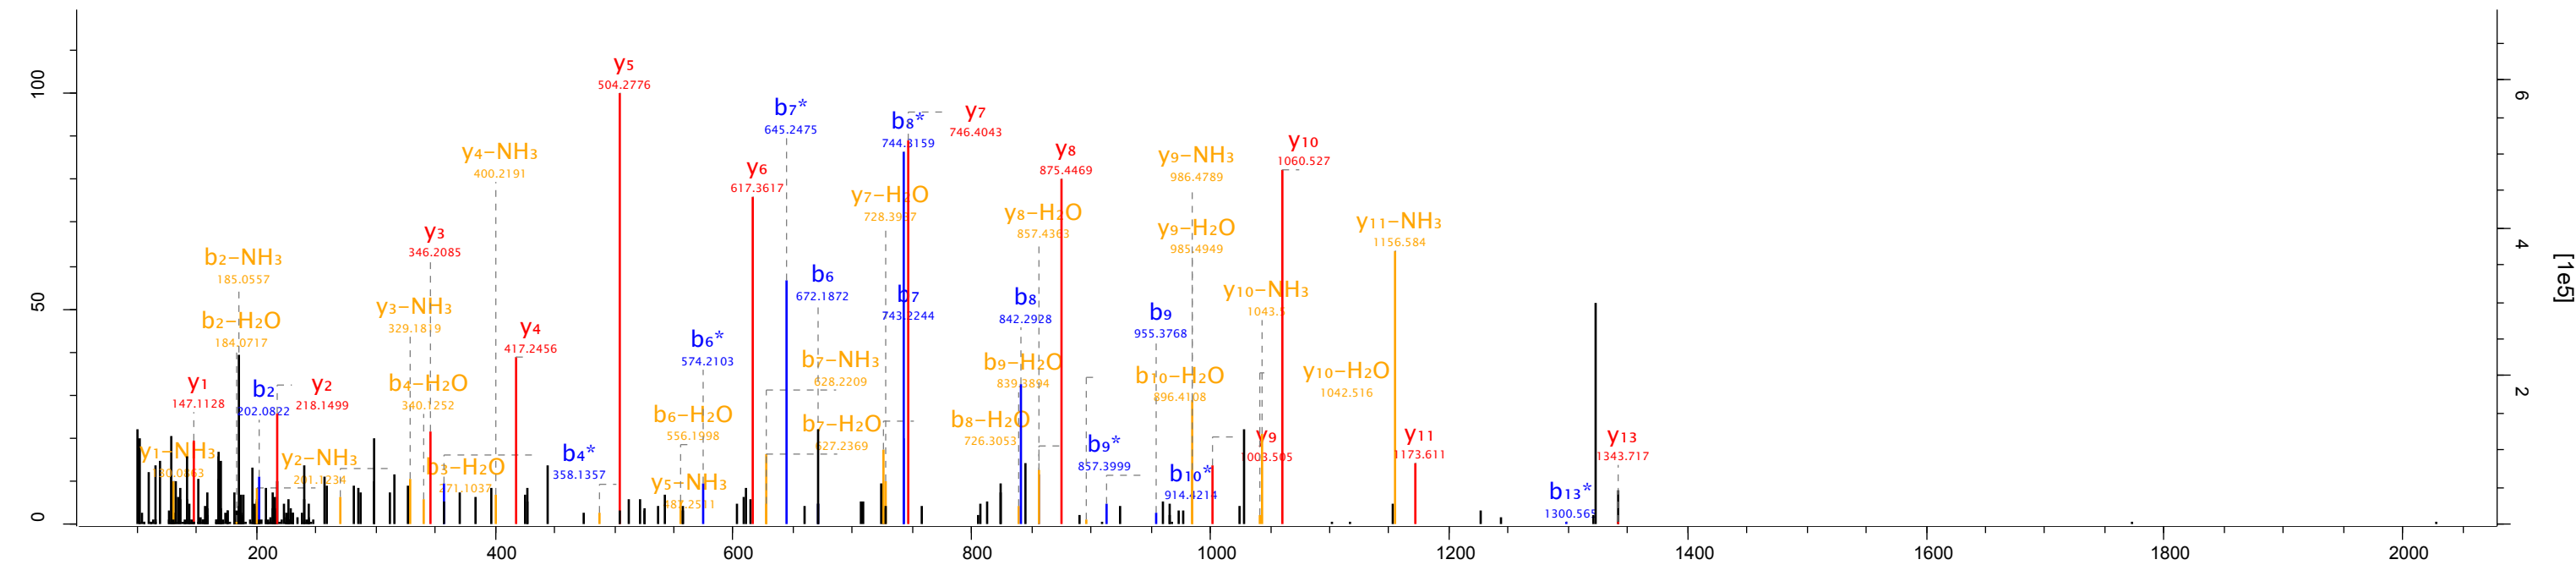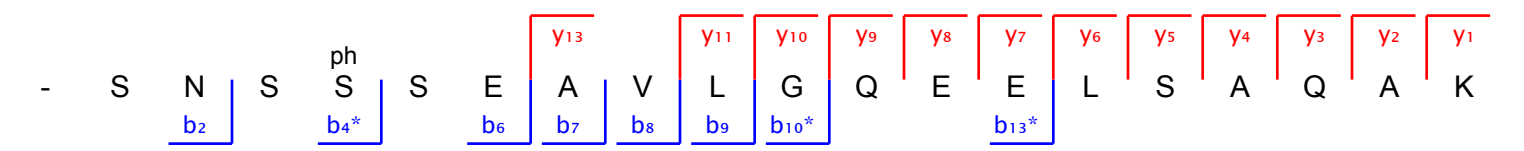

Raw file: 20150814\_A375SR\_Phospho\_BR2\_04  
 Scan: 15448 Method: FTMS; HCD Score: 114.3 m/z: 962.87 Gene names: CD44

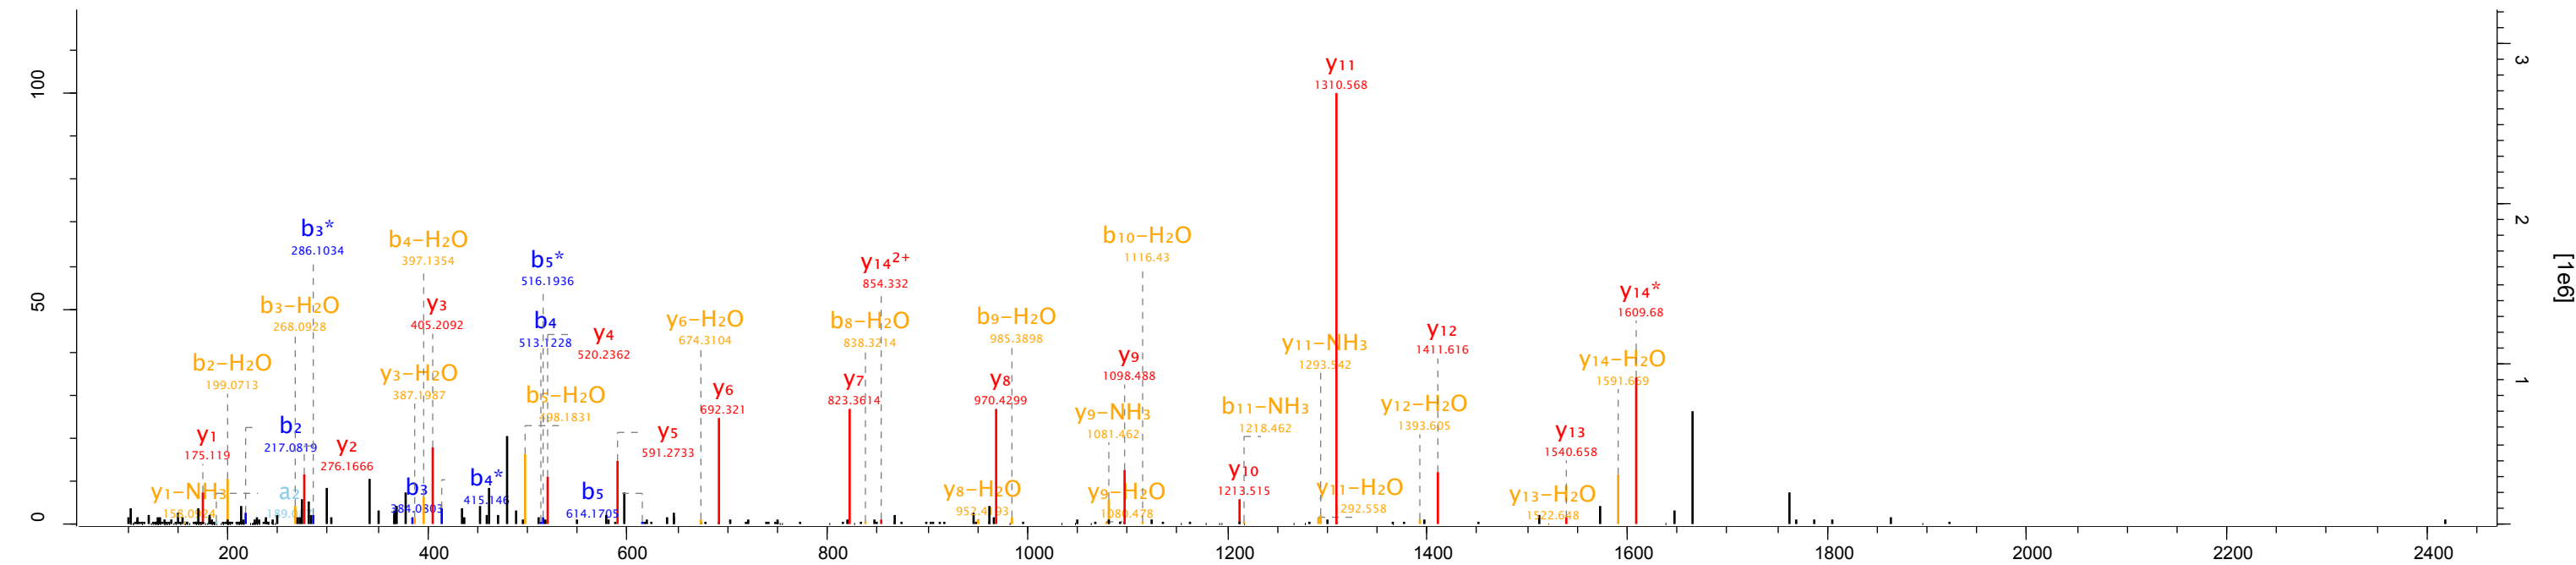

- E S S E T P D Q F M T A D E T R -

b<sub>2</sub>
b<sub>3</sub>
b<sub>4</sub>
b<sub>5</sub>
y<sub>14</sub>\*
y<sub>13</sub>
y<sub>12</sub>
y<sub>11</sub>
y<sub>10</sub>
y<sub>9</sub>
y<sub>8</sub>
y<sub>7</sub>
y<sub>6</sub>
y<sub>5</sub>
y<sub>4</sub>
y<sub>3</sub>
y<sub>2</sub>
y<sub>1</sub>

Raw file 20150814\_A375SR\_Phospho\_BR2\_04 Scan 15758 Method FTMS; HCD Score 244.87 m/z 972.02 Gene names THRAP3

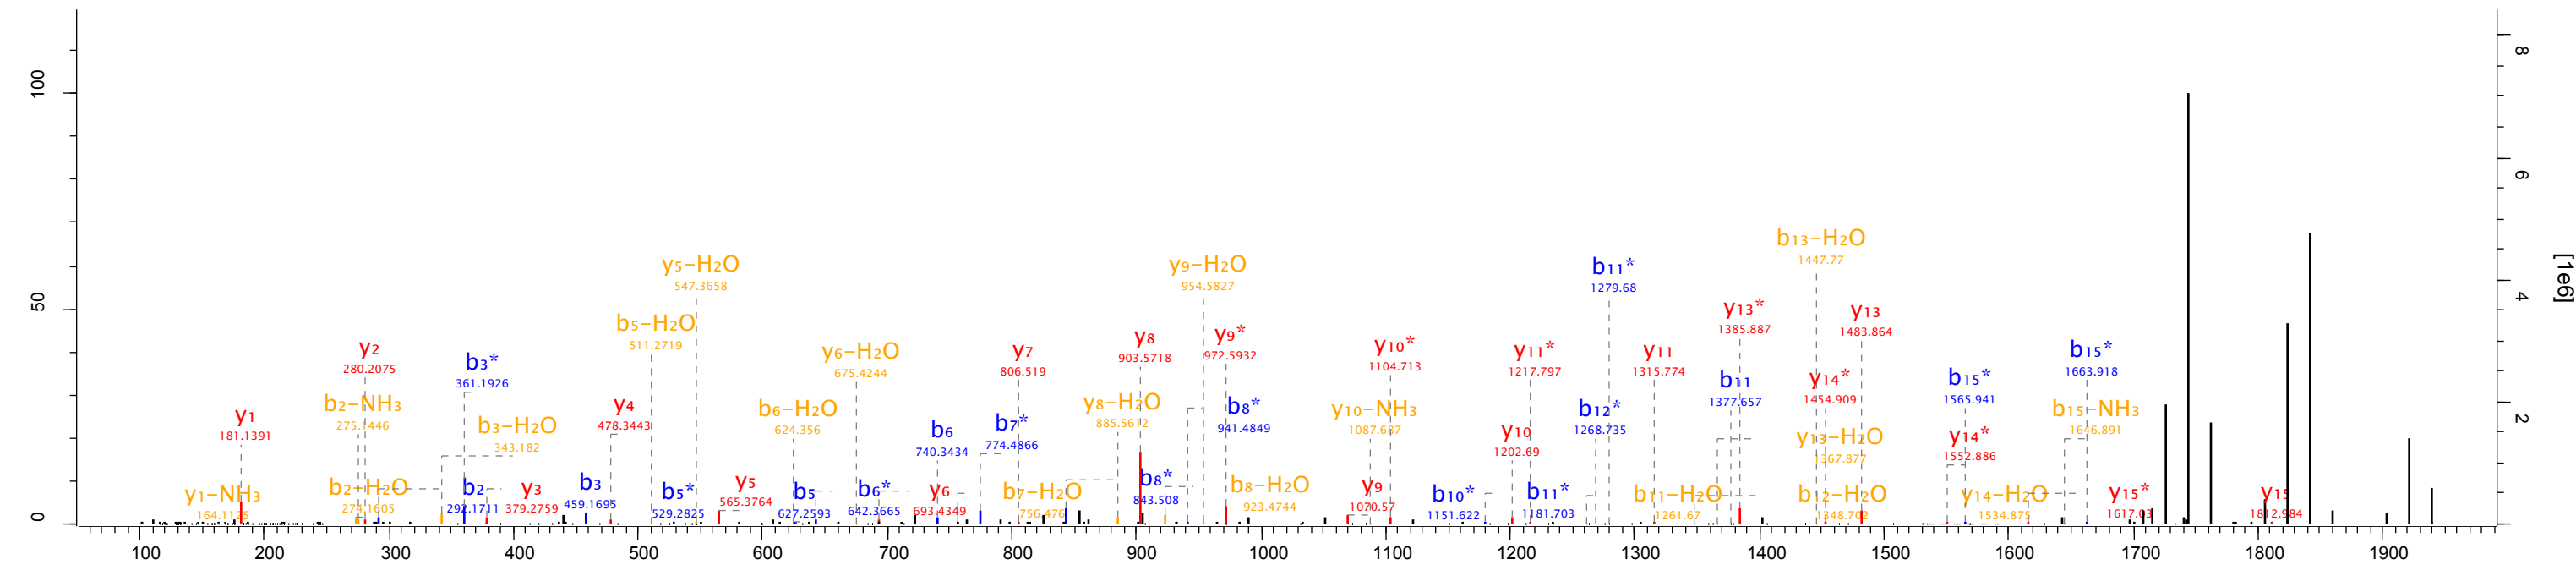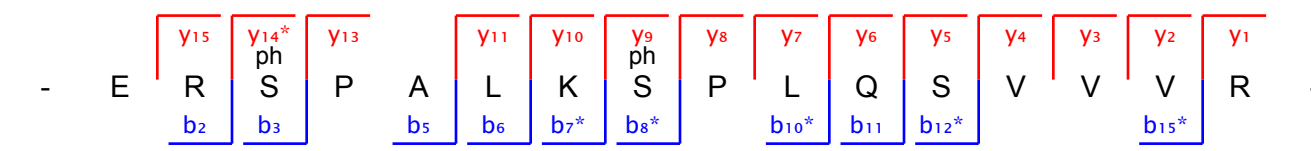

Raw file: 20150814\_A375SR\_Phospho\_BR2\_04  
 Scan: 15808 Method: FTMS; HCD Score: 302.9 m/z: 846.38 Gene names: KANK1

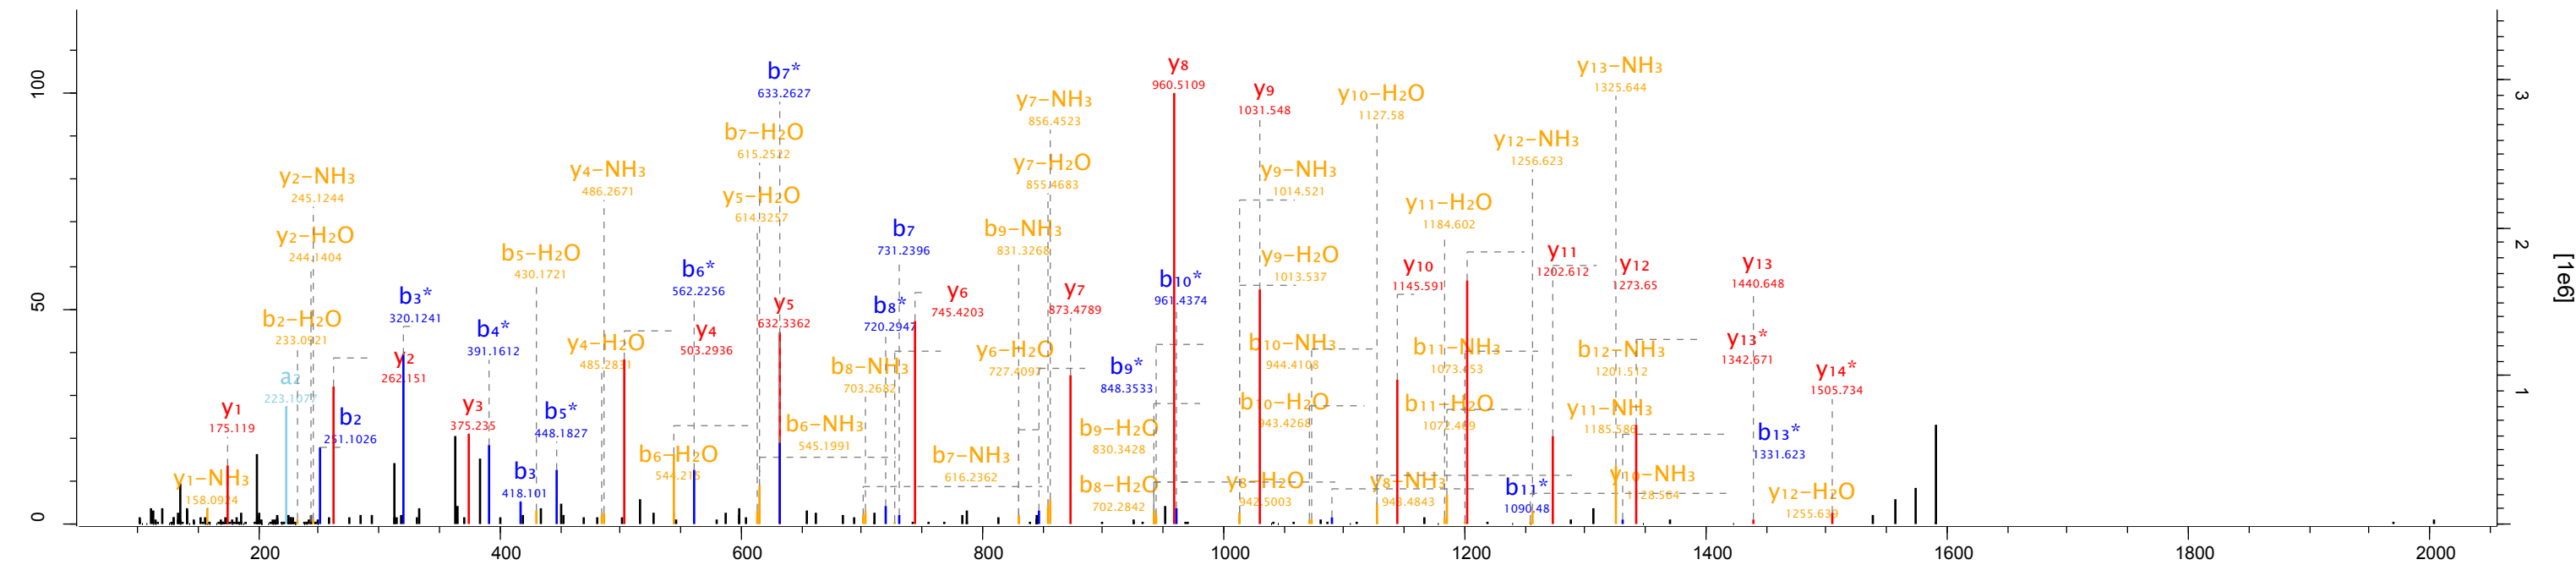

- S Y<sup>14\*</sup> Y<sup>13</sup>ph Y<sup>12</sup> Y<sup>11</sup> Y<sup>10</sup> Y<sup>9</sup> Y<sup>8</sup> Y<sup>7</sup> Y<sup>6</sup> Y<sup>5</sup> Y<sup>4</sup> Y<sup>3</sup> Y<sup>2</sup> Y<sup>1</sup> -  
b<sub>2</sub> b<sub>3</sub> b<sub>4</sub><sup>\*</sup> b<sub>5</sub><sup>\*</sup> b<sub>6</sub><sup>\*</sup> b<sub>7</sub> b<sub>8</sub><sup>\*</sup> b<sub>9</sub><sup>\*</sup> b<sub>10</sub><sup>\*</sup> b<sub>11</sub><sup>\*</sup> Q b<sub>13</sub><sup>\*</sup> R -



Raw file 20150814\_A375SR\_Phospho\_BR2\_04 Scan 15878 Method FTMS; HCD Score 221.59 m/z 941.09 Gene names RAF1

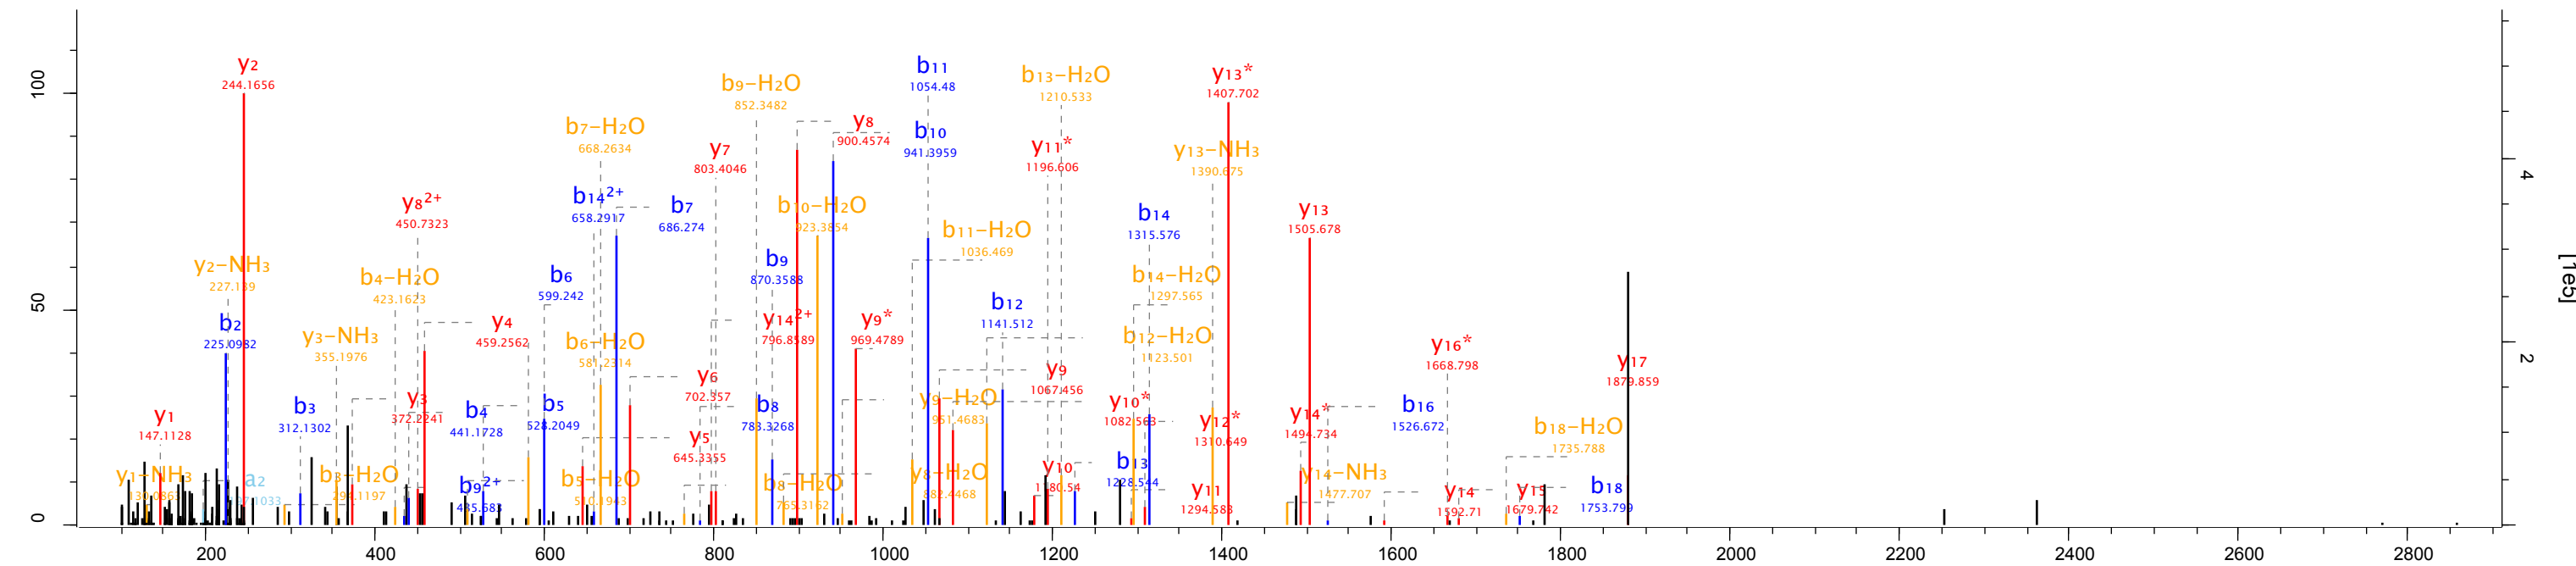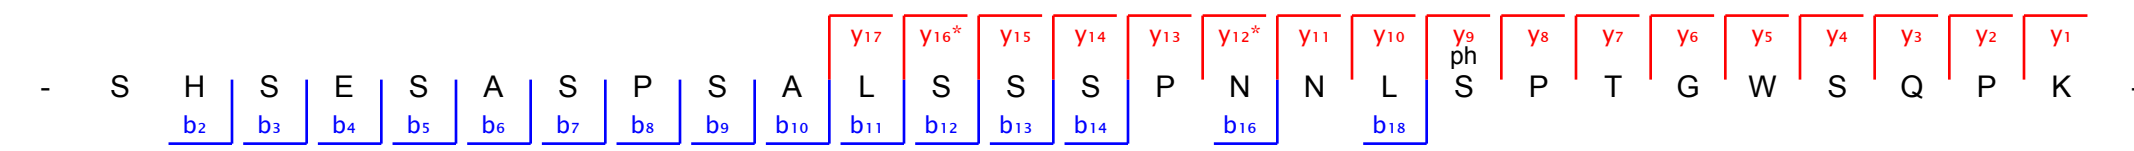

Raw file 20150814\_A375SR\_Phospho\_BR2\_04 Scan 15888 Method FTMS; HCD Score 202.6 m/z 751.67 Gene names MAPK3

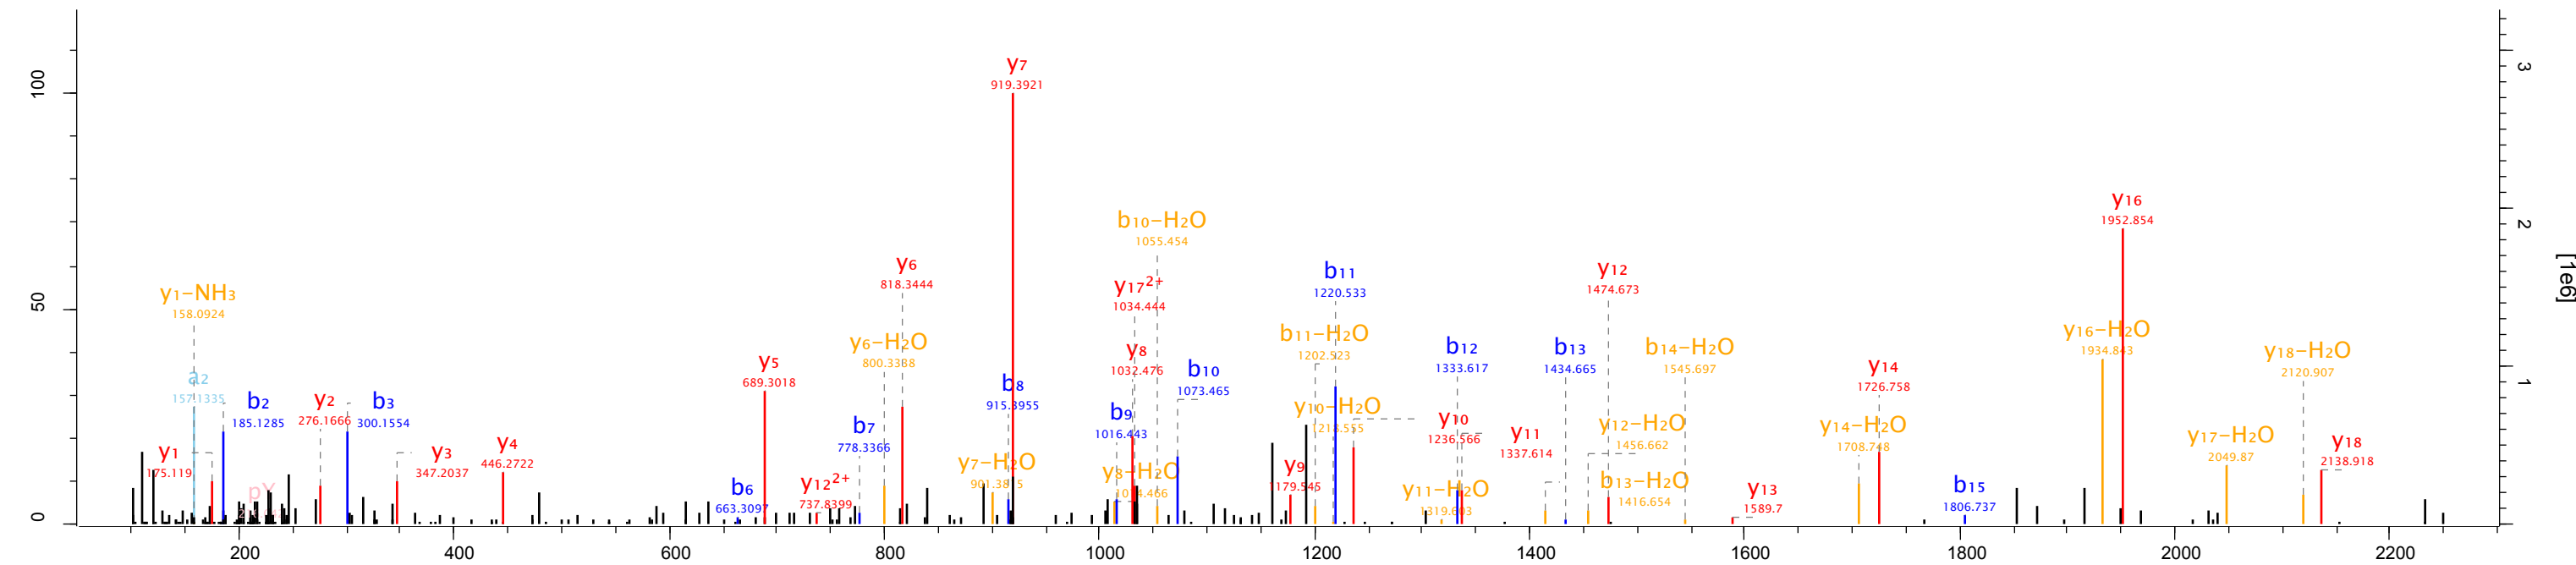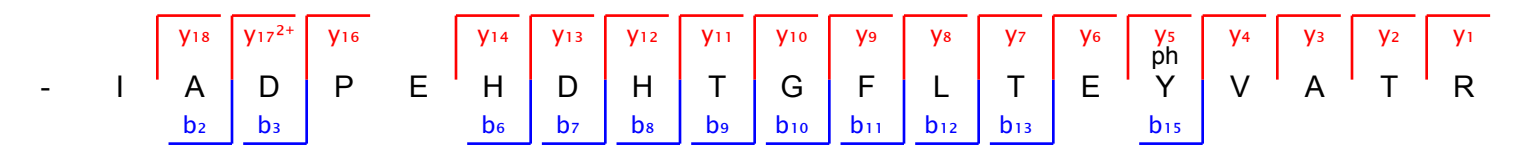

Raw file: 20150814\_A375SR\_Phospho\_BR2\_04  
 Scan: 15898 Method: FTMS; HCD Score: 87.74 m/z: 769.7 Gene names: VPS13D

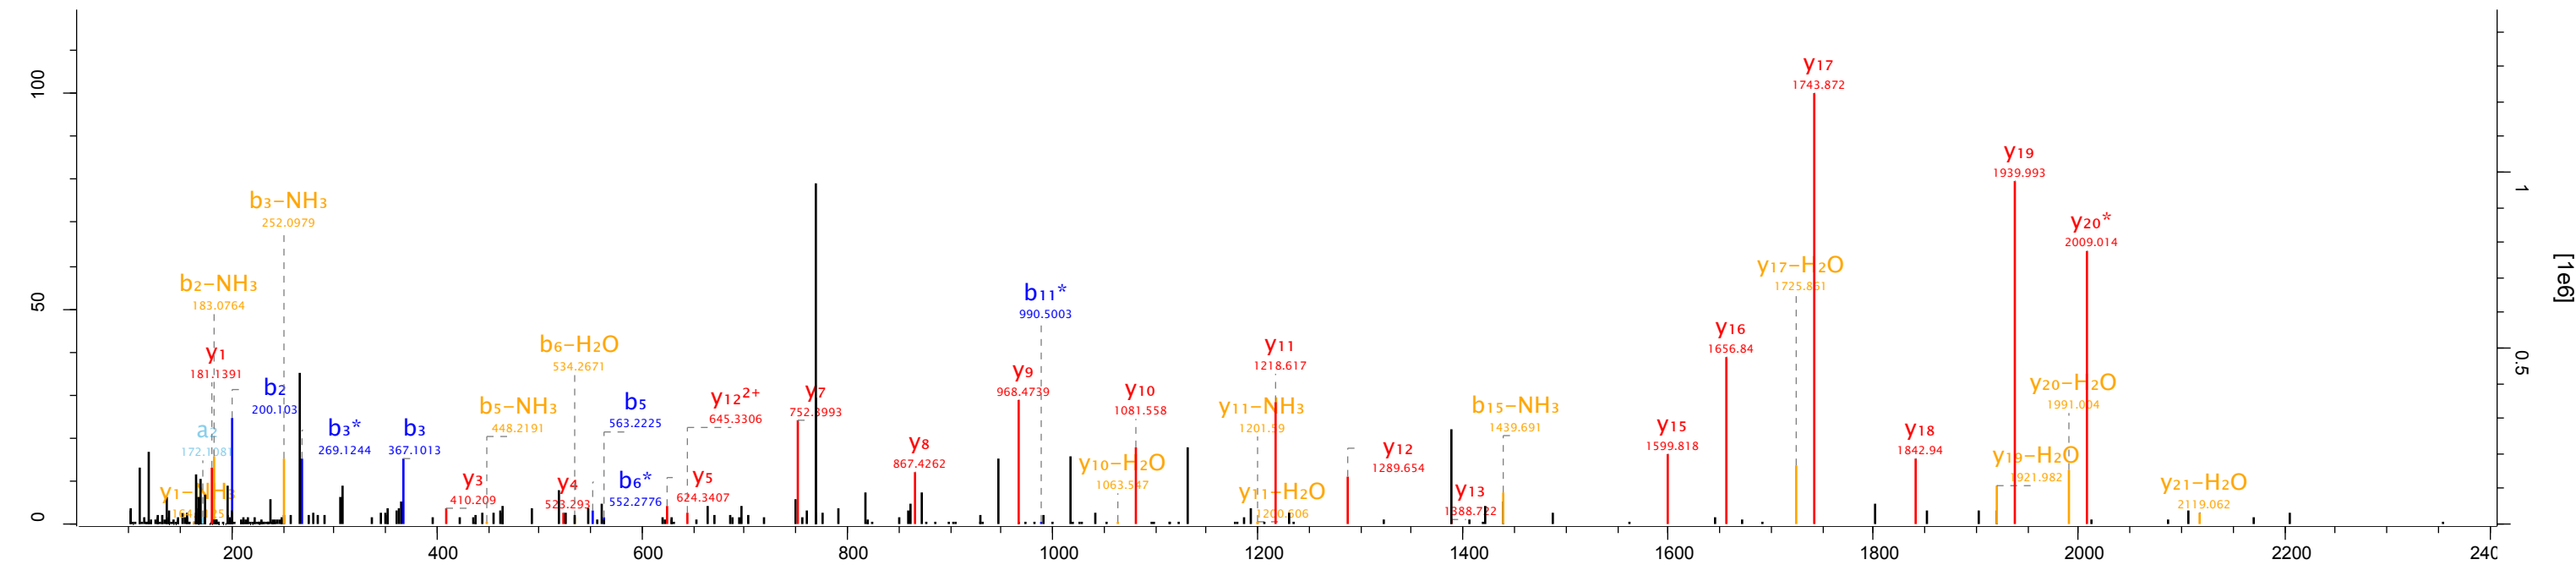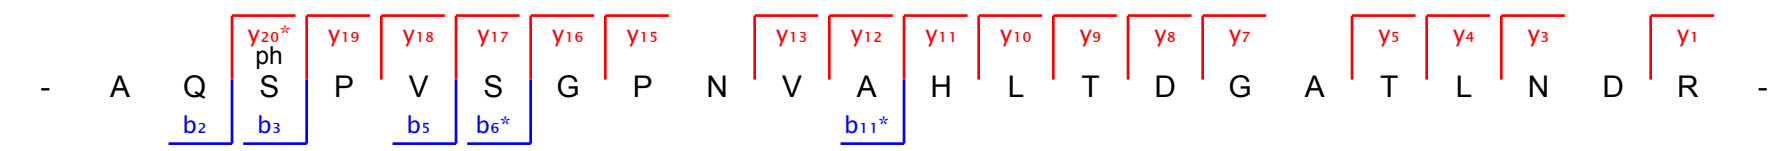

Raw file: 20150814\_A375SR\_Phospho\_BR2\_04  
 Scan: 15948 Method: FTMS; HCD Score: 206.32 m/z: 1109.01 Gene names: MPDZ

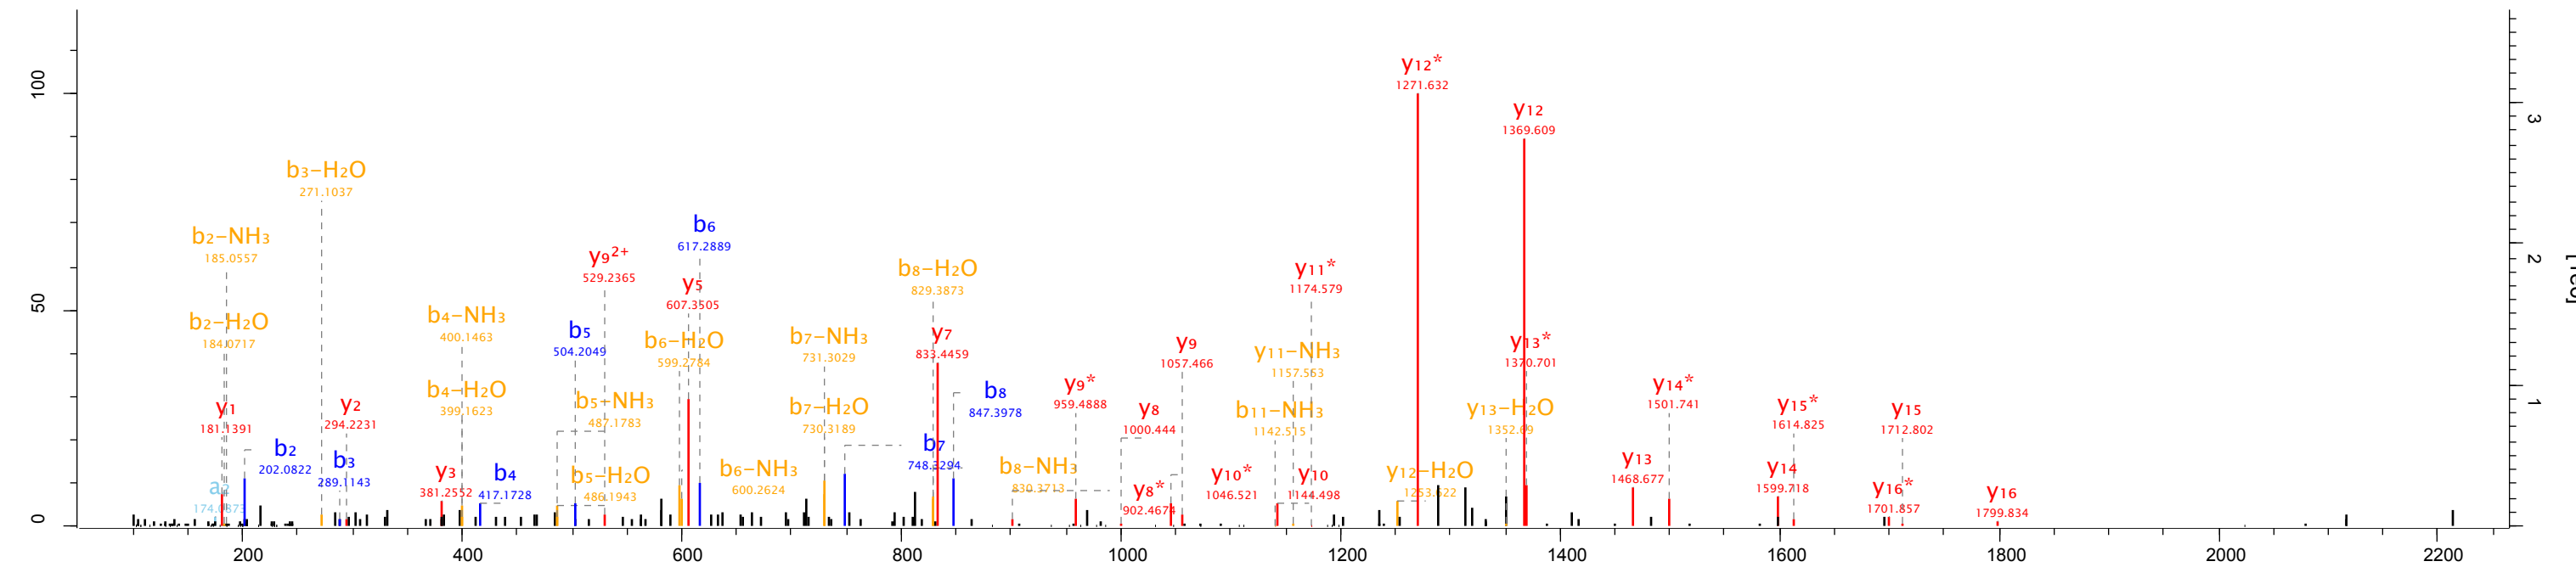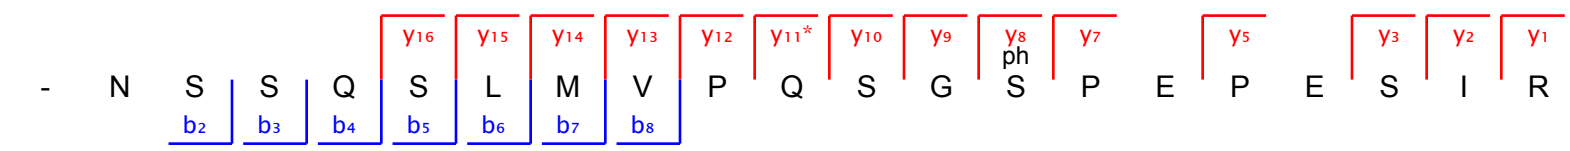

Raw file: 20150814\_A375SR\_Phospho\_BR2\_04  
 Scan: 1608 Method: FTMS; HCD Score: 174.21 m/z: 565.23 Gene names: ARHGAP12

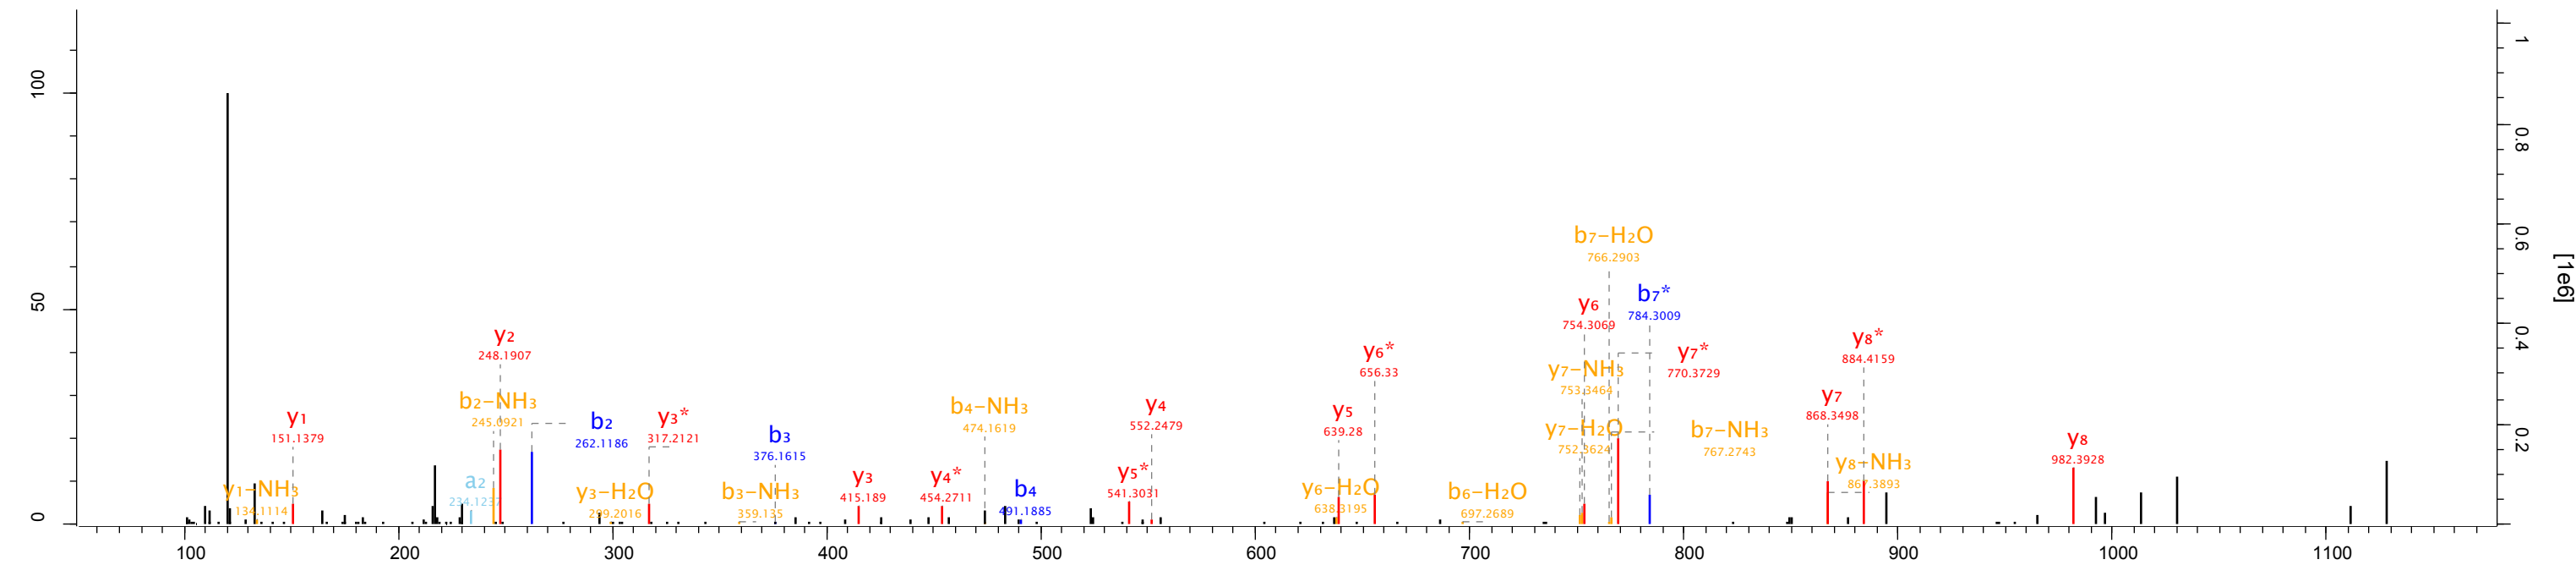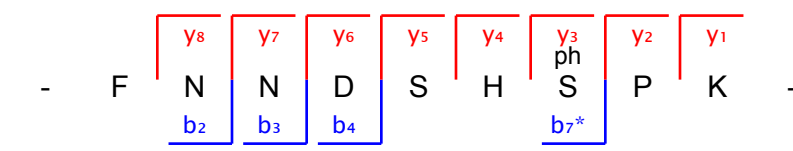

Raw file 20150814\_A375SR\_Phospho\_BR2\_04 Scan 16208 Method FTMS; HCD Score 162.87 m/z 950.45 Gene names TGOLN2

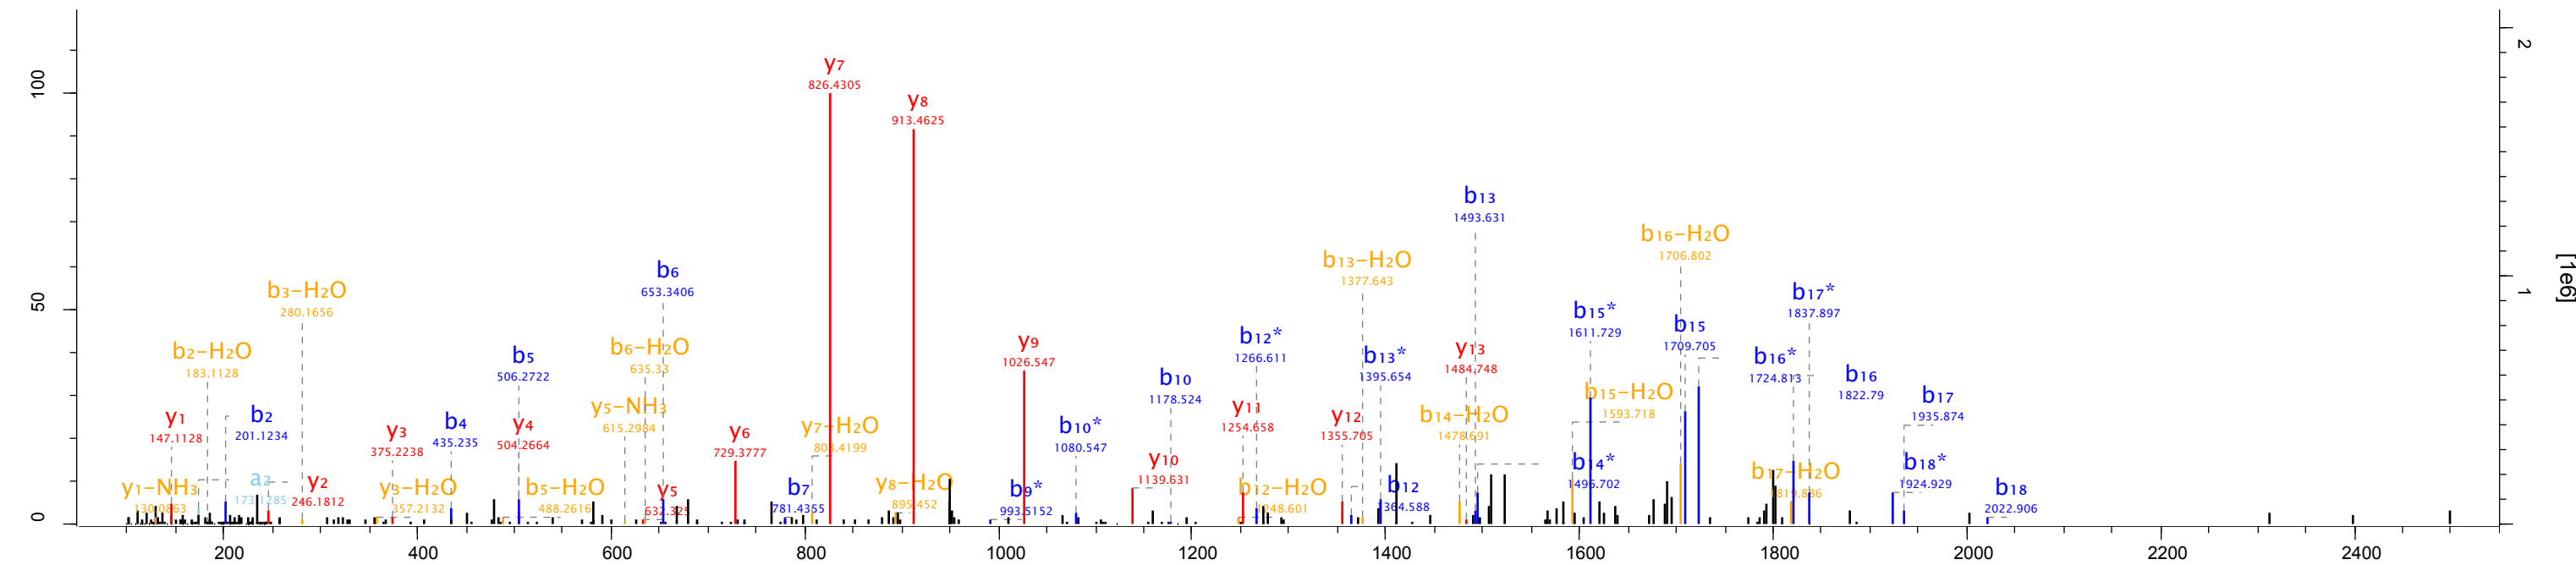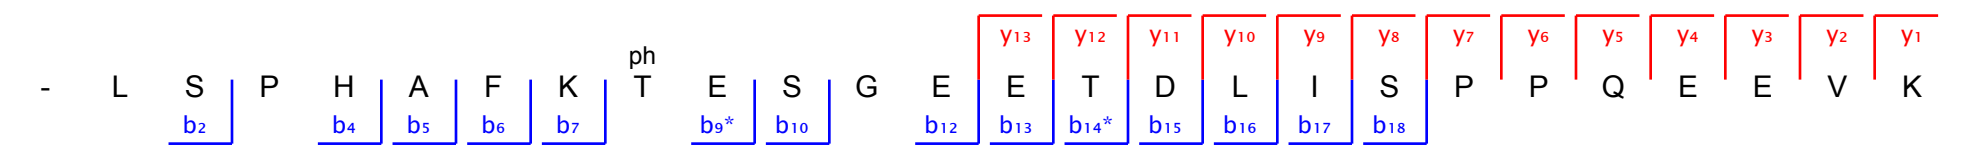

Raw file Scan Method Score m/z Gene names  
 20150814\_A375SR\_Phospho\_BR2\_04 16258 FTMS; HCD 174.4 1057.44 TFAP4

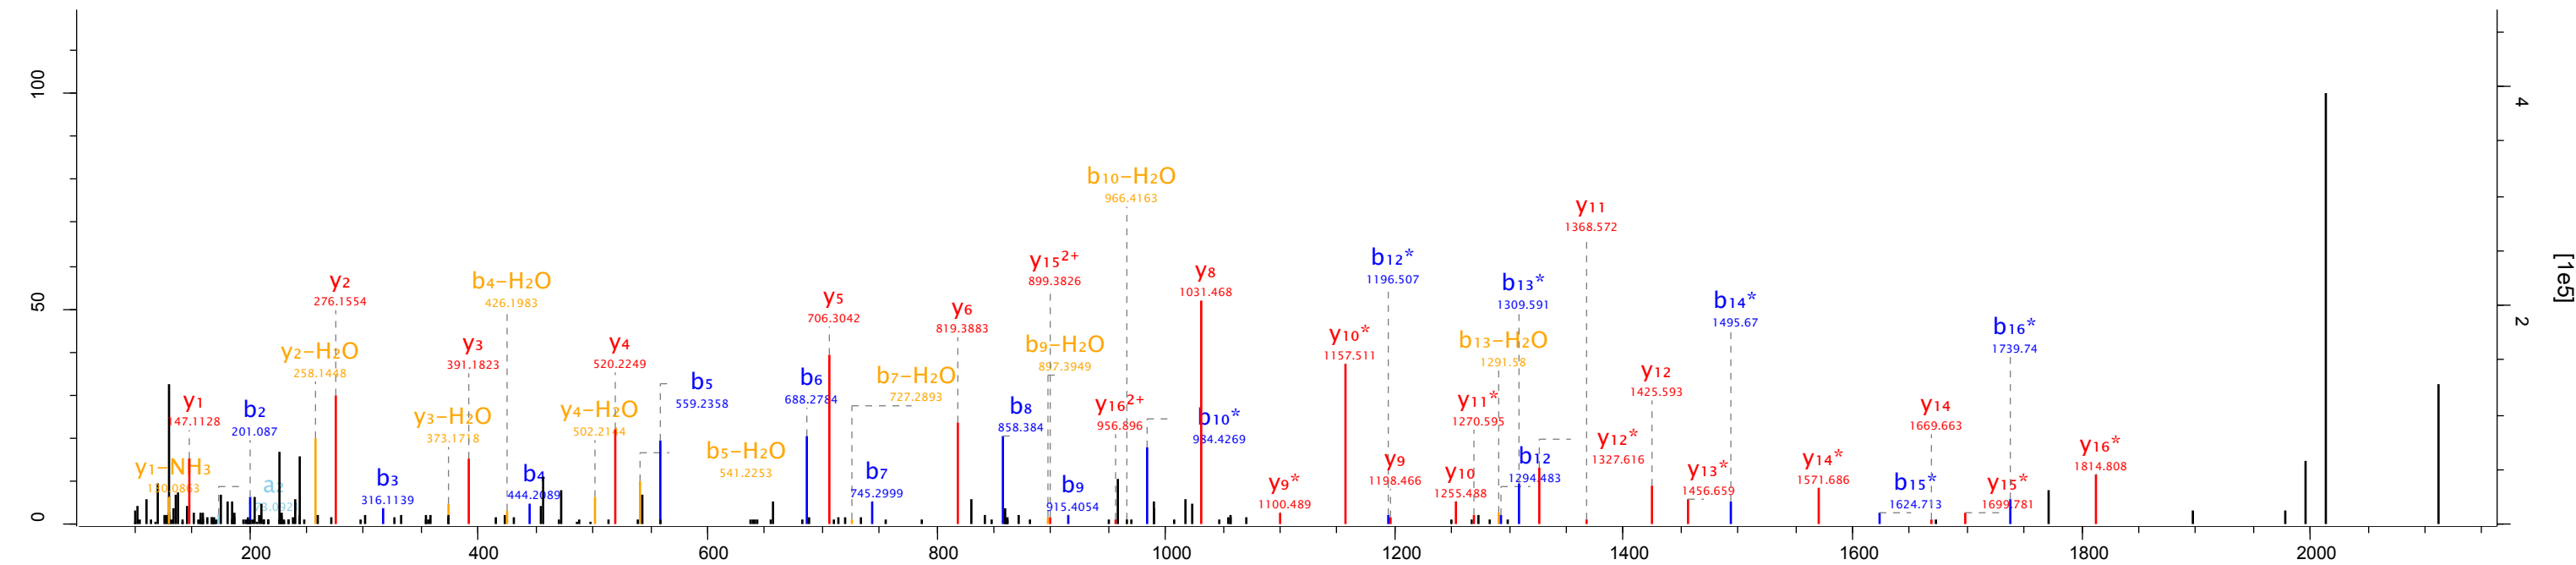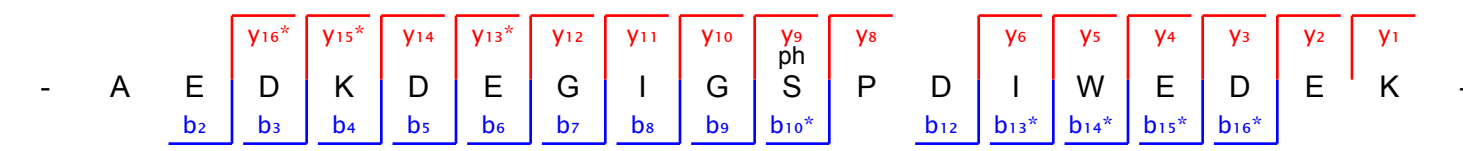

Raw file 20150814\_A375SR\_Phospho\_BR2\_04 Scan 16268 Method FTMS; HCD Score 195.13 m/z 1008.92 Gene names TNRC6B

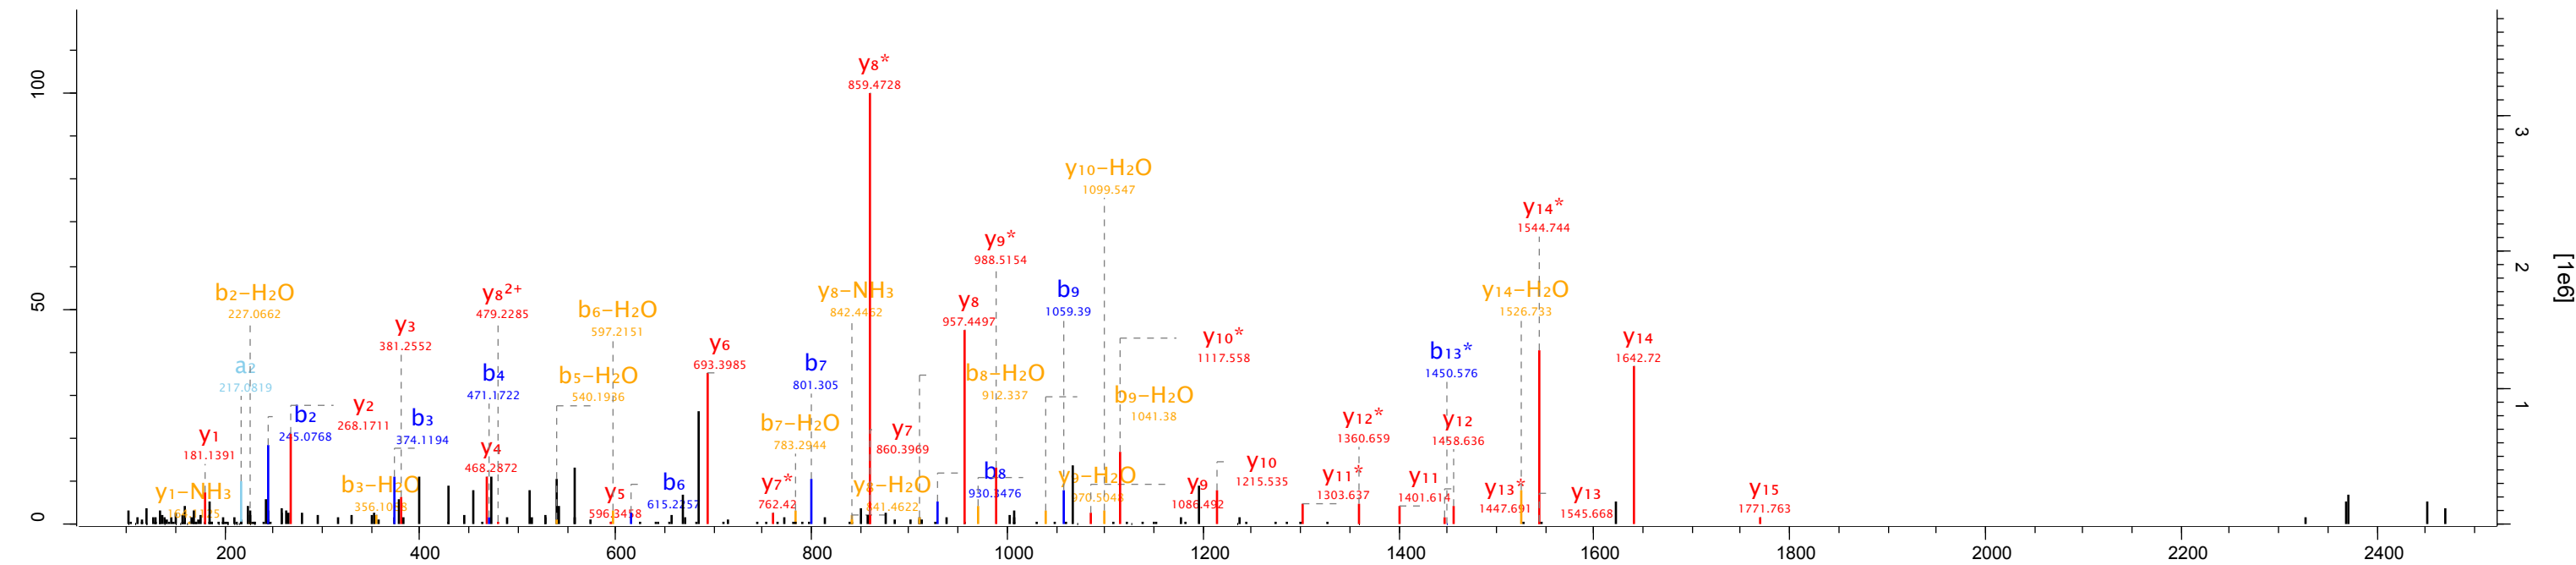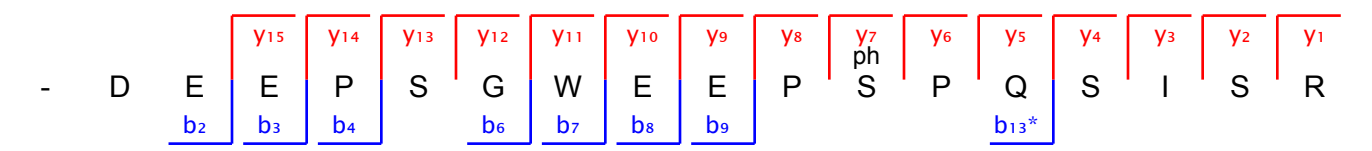





Raw file  
20150814\_A375SR\_Phospho\_BR2\_04

Scan 16628 Method FTMS; HCD Score 387.22 m/z 1367.54 Gene names USP7

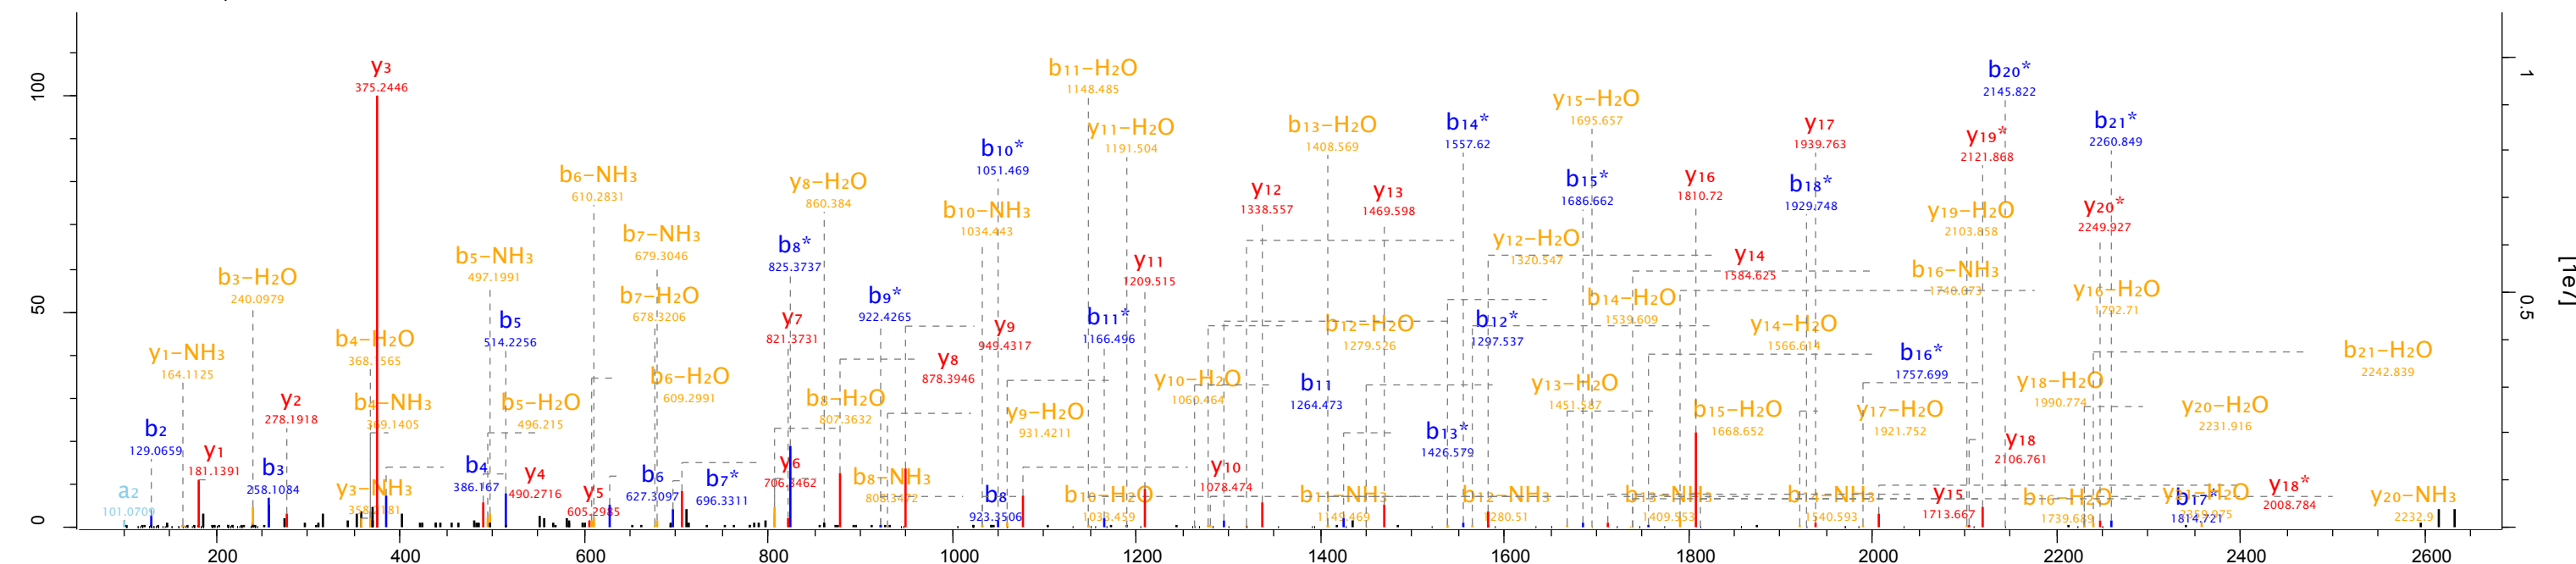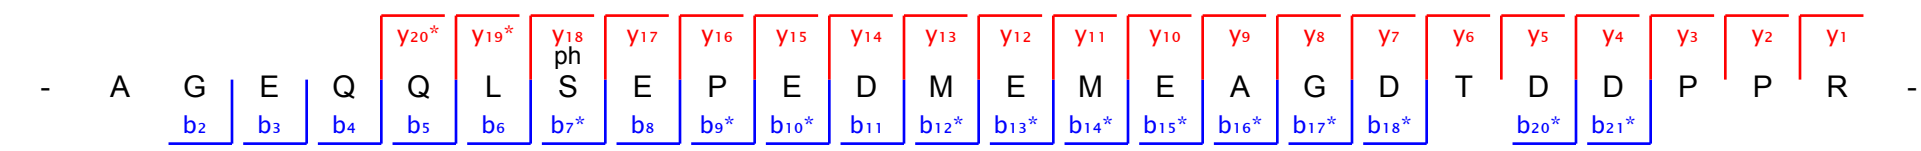

Raw file 20150814\_A375SR\_Phospho\_BR2\_04 Scan 16788 Method FTMS; HCD Score 256.68 m/z 863.36 Gene names TPD52L2

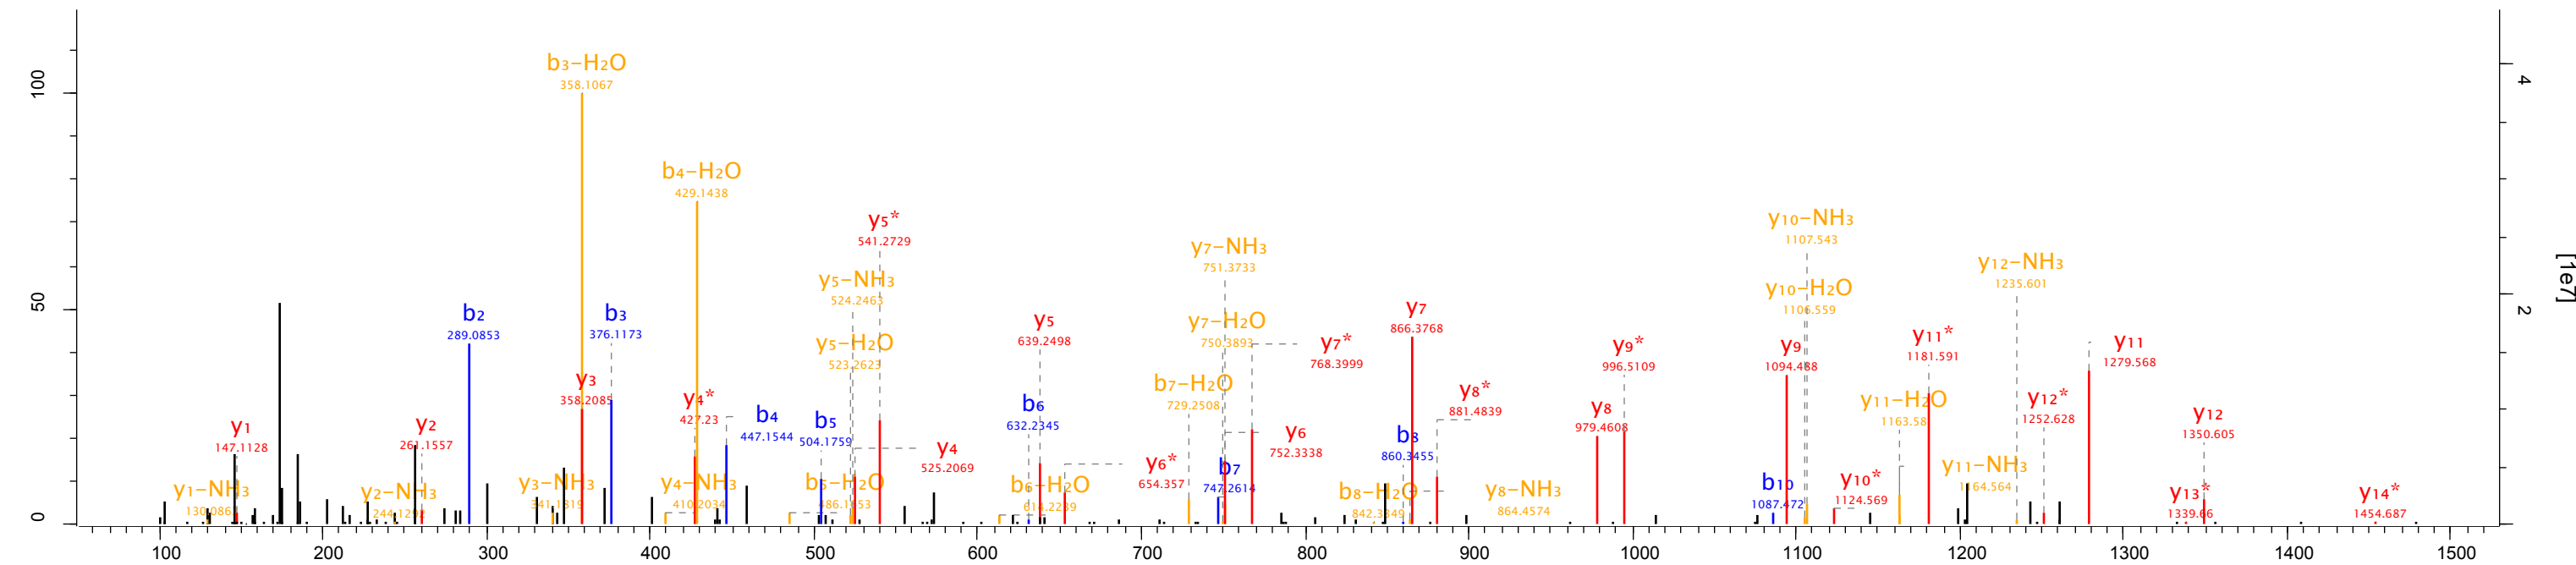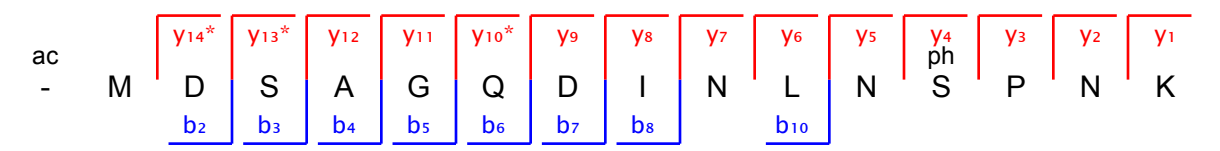

Raw file: 20150814\_A375SR\_Phospho\_BR2\_04  
 Scan: 16848 Method: FTMS; HCD Score: 119.06 m/z: 1151.2 Gene names: EPRS

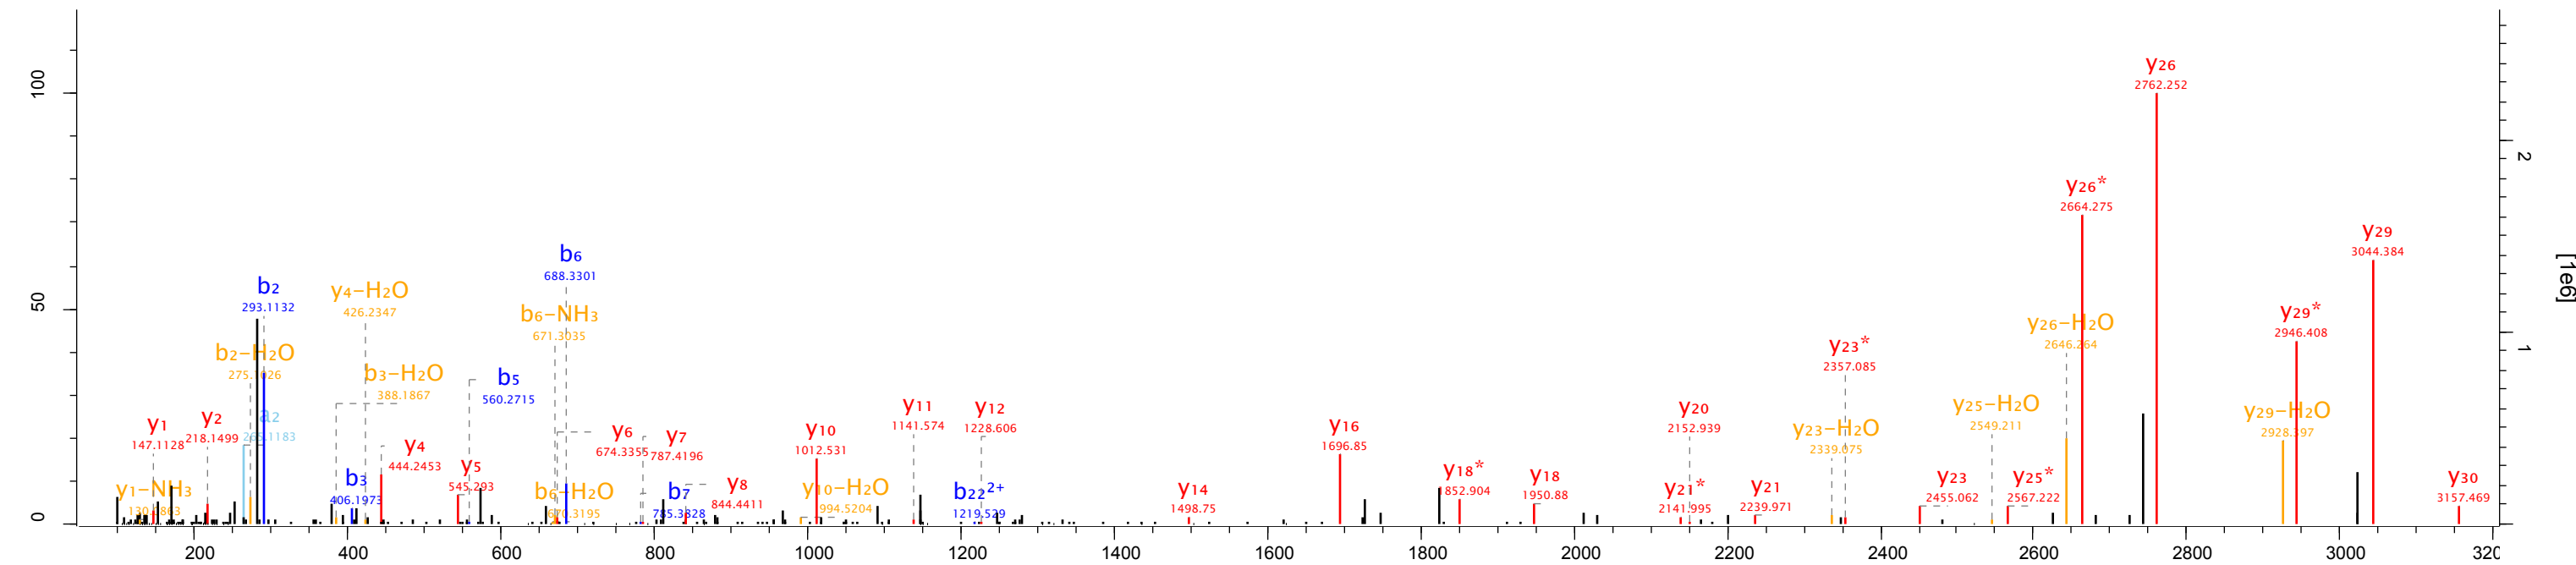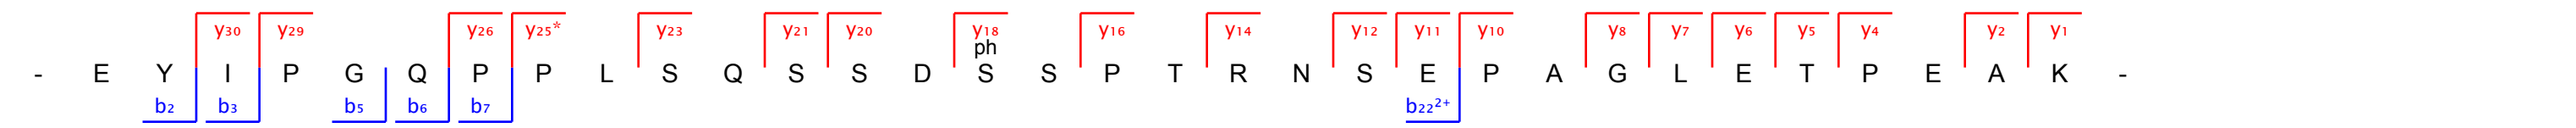

Raw file: 20150814\_A375SR\_Phospho\_BR2\_04  
 Scan: 16928 Method: FTMS; HCD Score: 150.13 m/z: 780.41 Gene names: RNF214

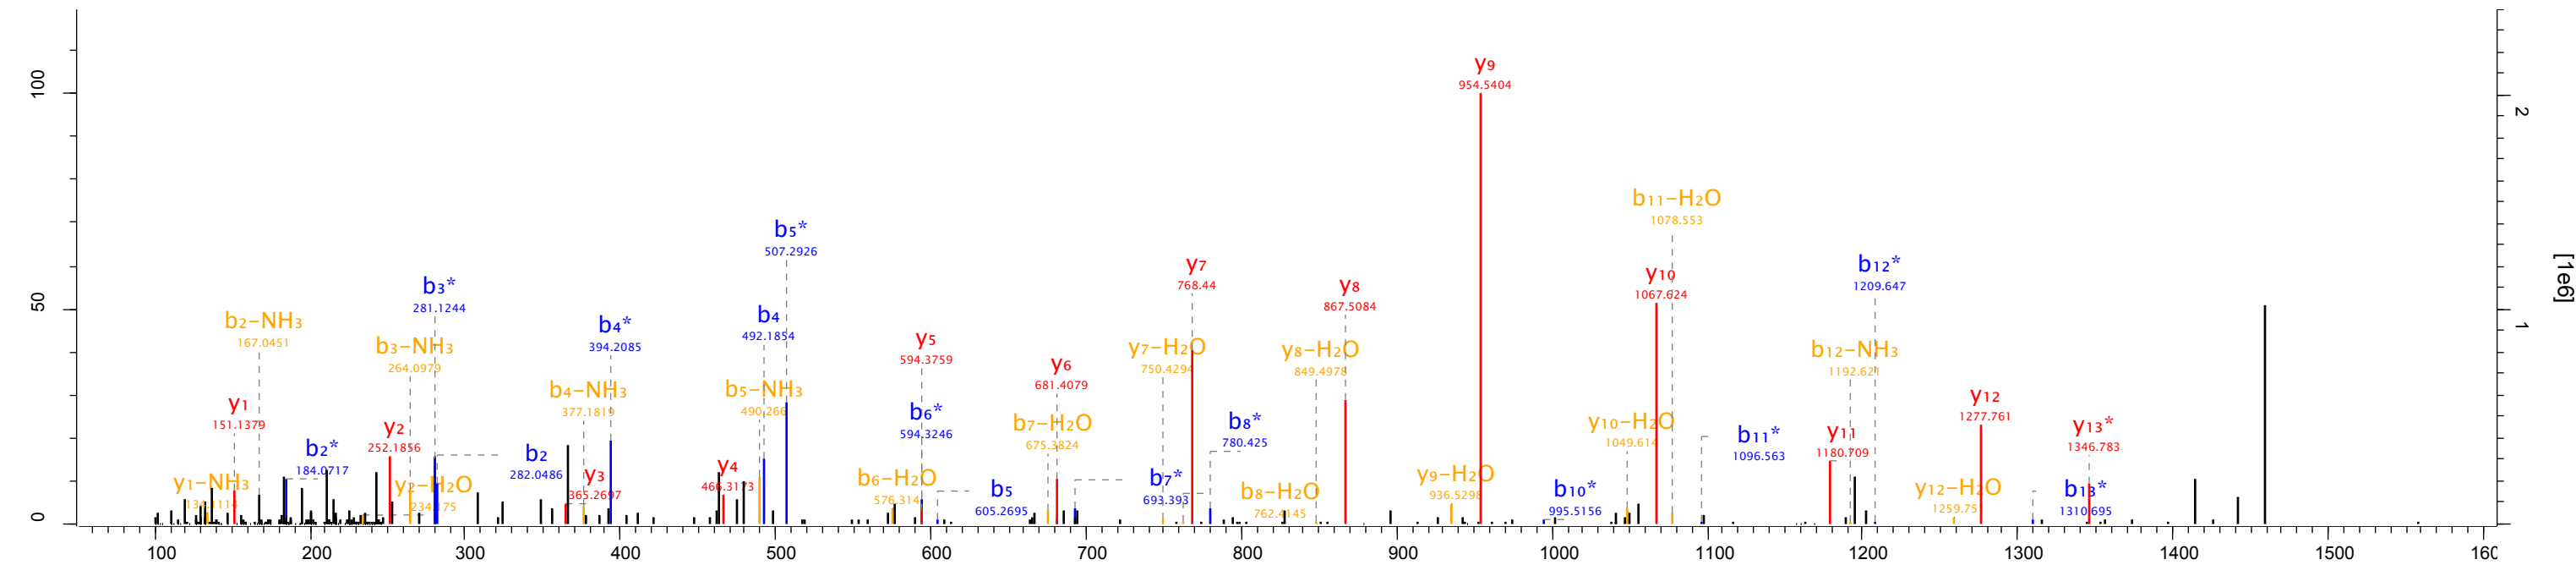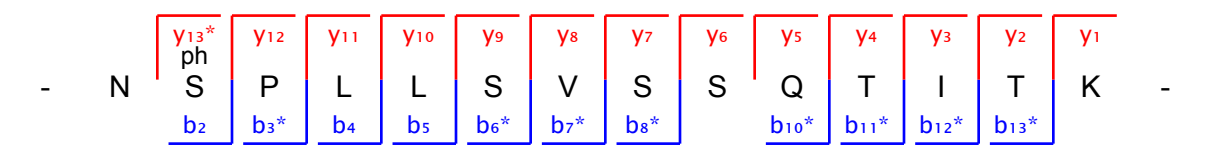

Raw file 20150814\_A375SR\_Phospho\_BR2\_04 Scan 17168 Method FTMS; HCD Score 63.92 m/z 649.31 Gene names PFN1

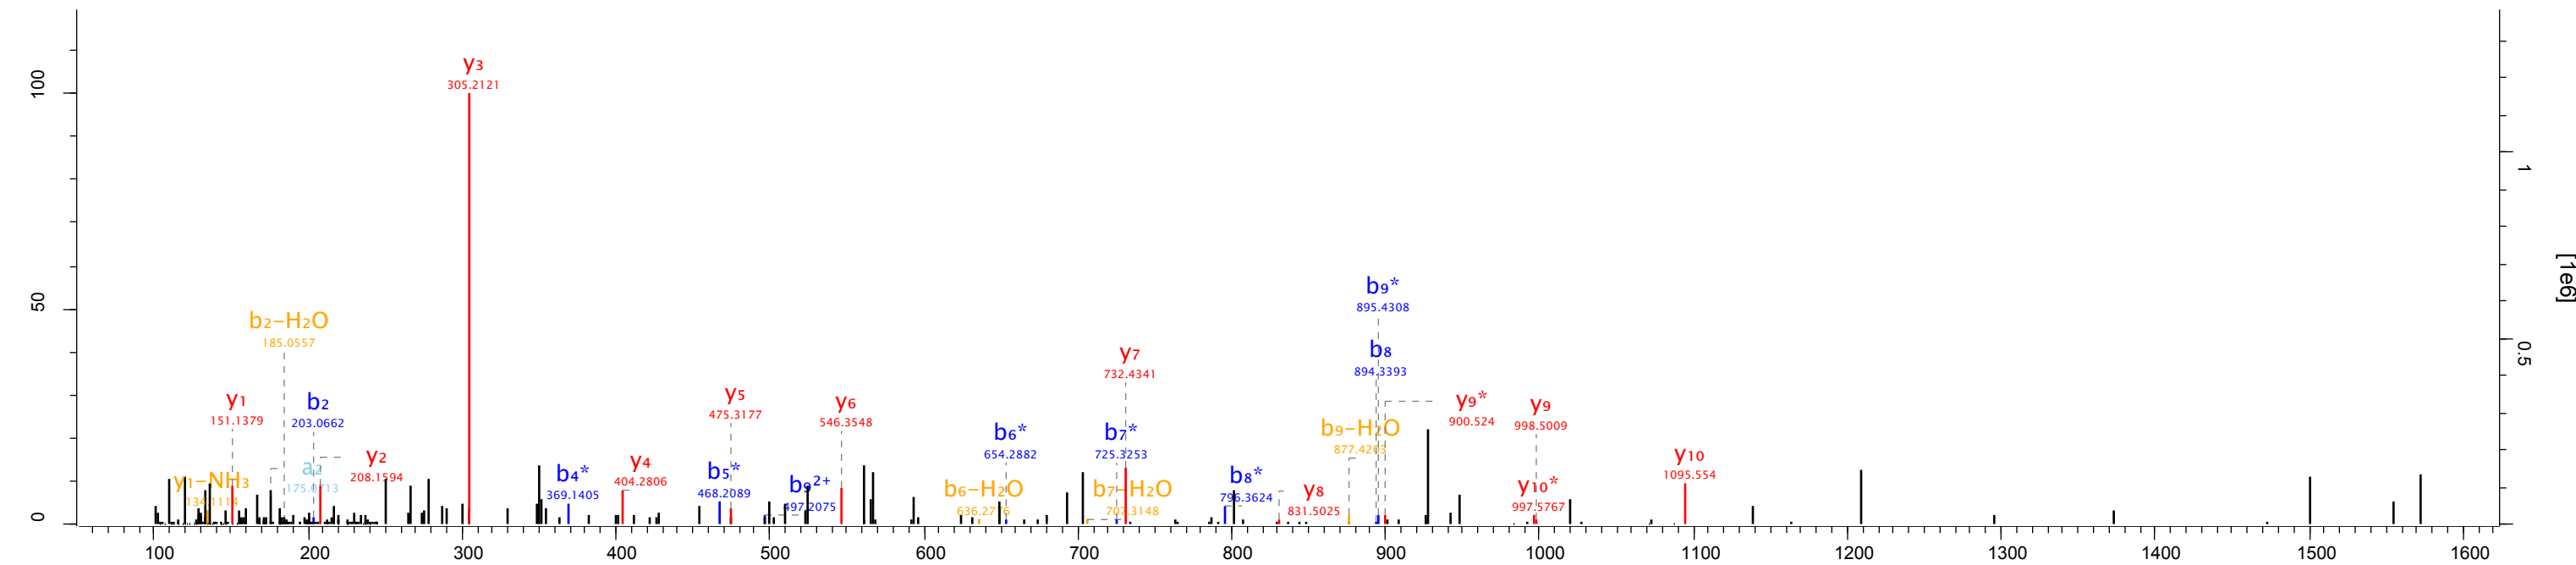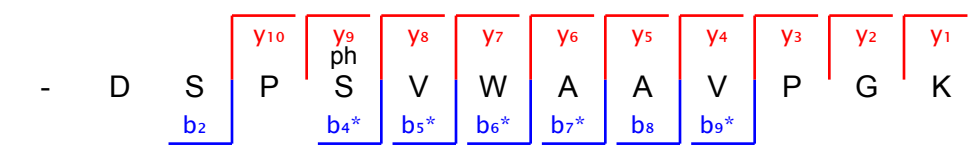

Raw file: 20150814\_A375SR\_Phospho\_BR2\_04  
 Scan: 17218 Method: FTMS; HCD Score: 132.14 m/z: 633.65 Gene names: NUMB

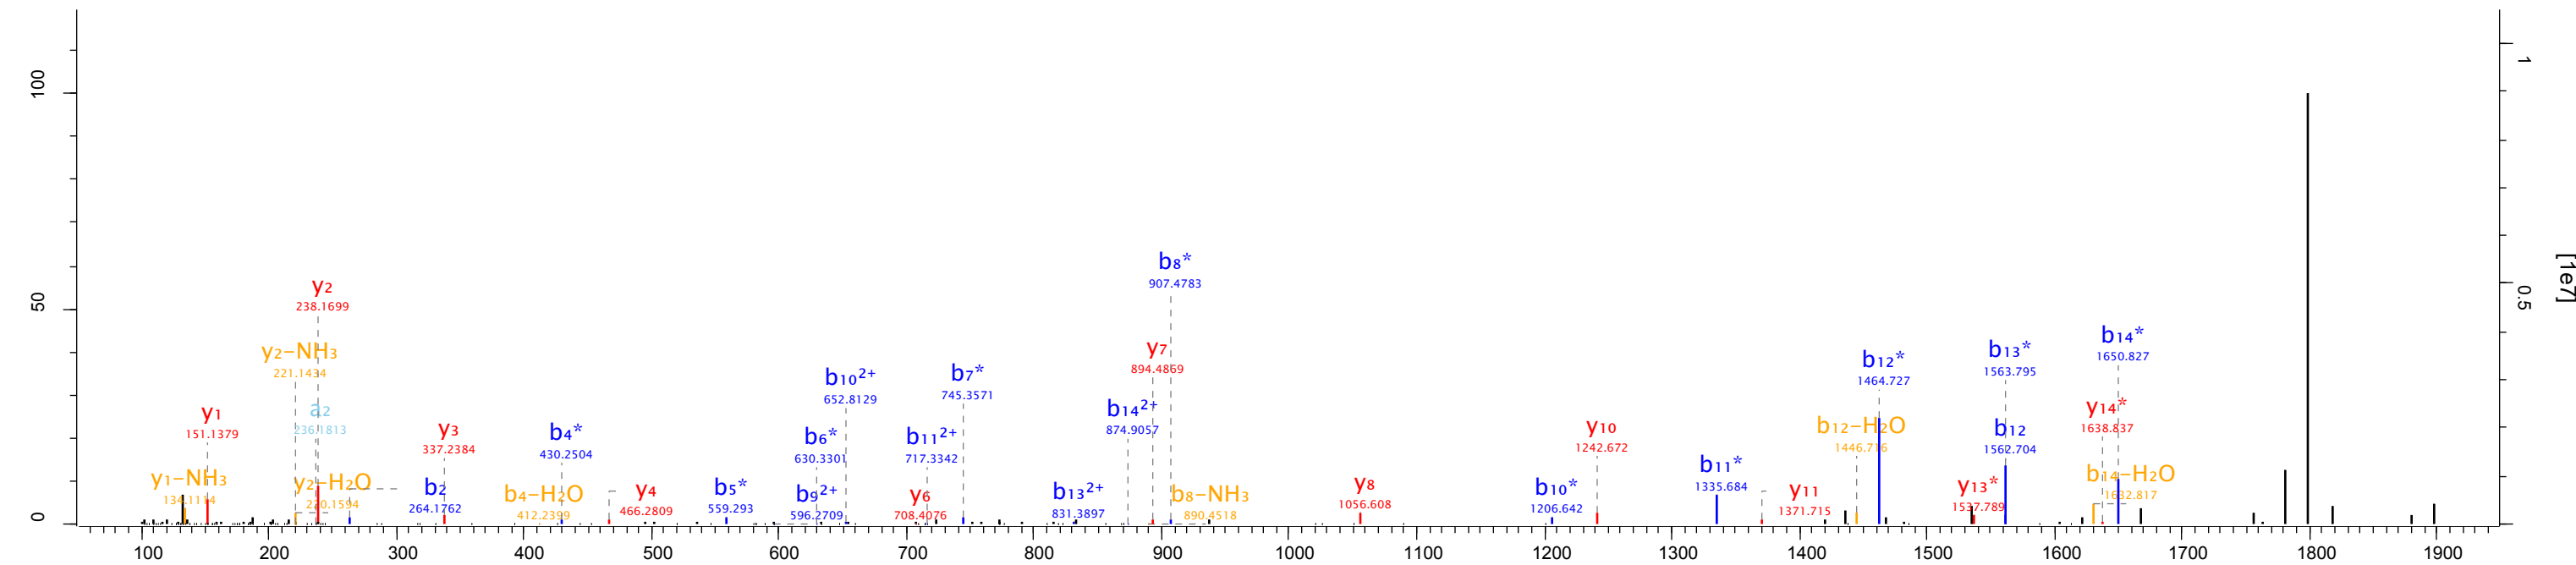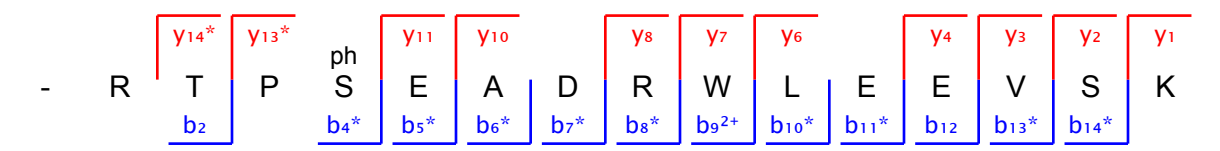

Raw file 20150814\_A375SR\_Phospho\_BR2\_04 Scan 17448 Method FTMS; HCD Score 117.48 m/z 613.29 Gene names SOX13

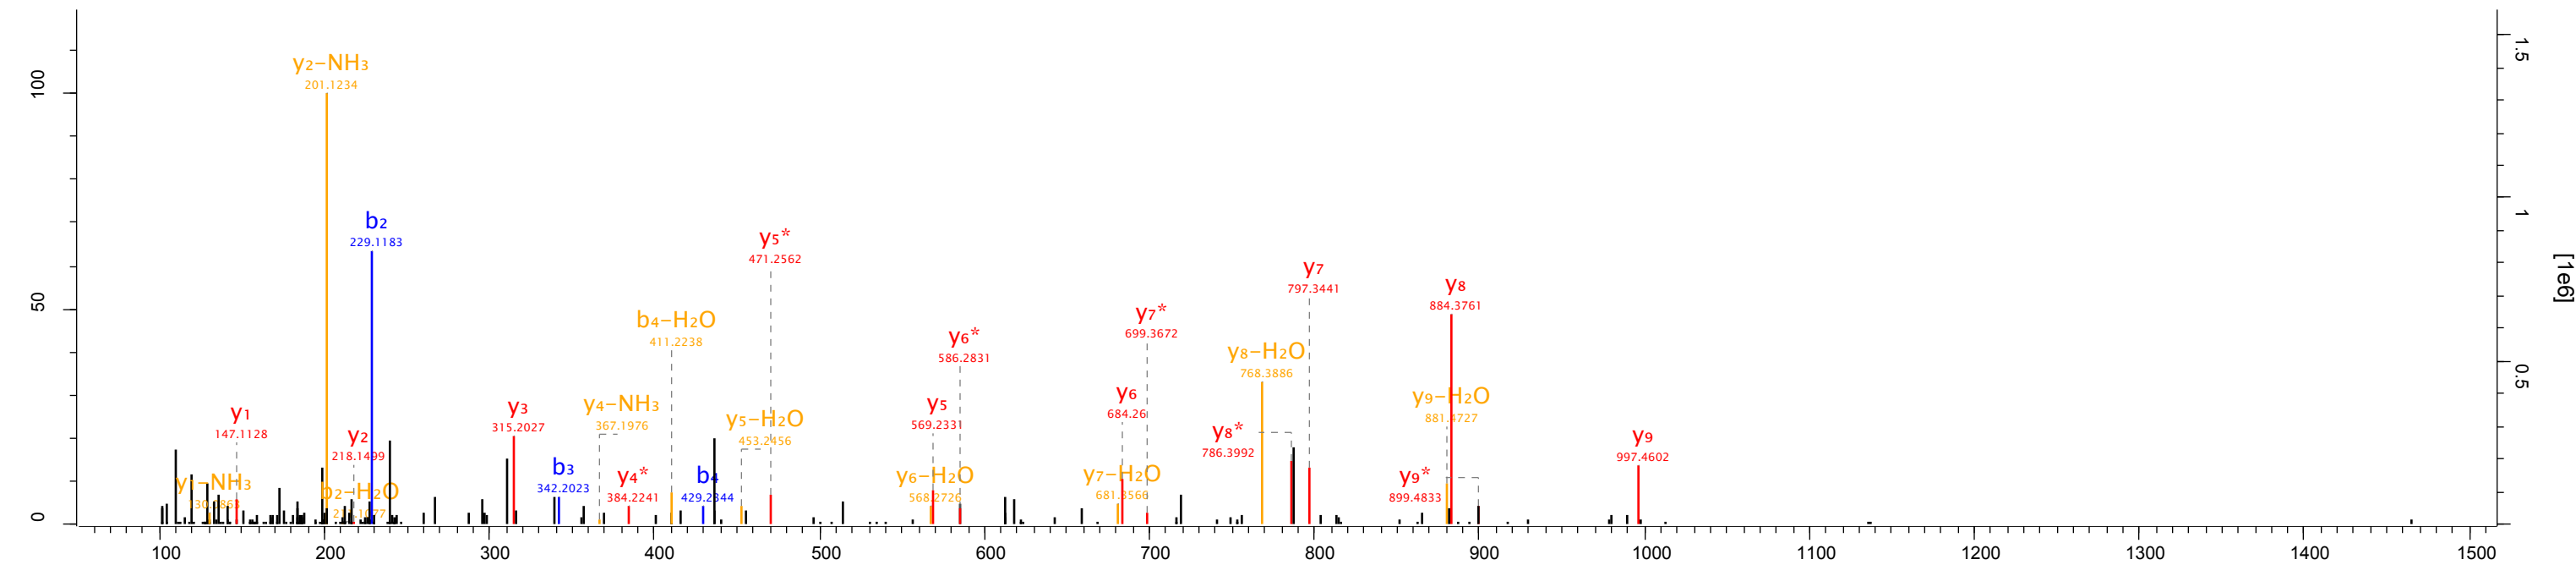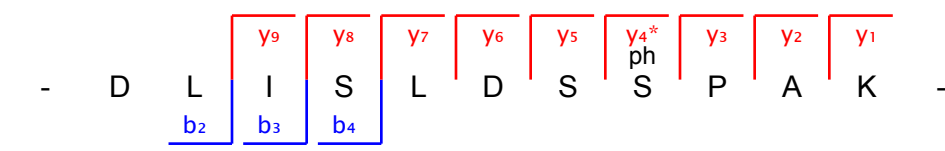



Raw file: 20150814\_A375SR\_Phospho\_BR2\_04  
 Scan: 17458 Method: FTMS; HCD Score: 229.27 m/z: 1052.97 Gene names: AATF

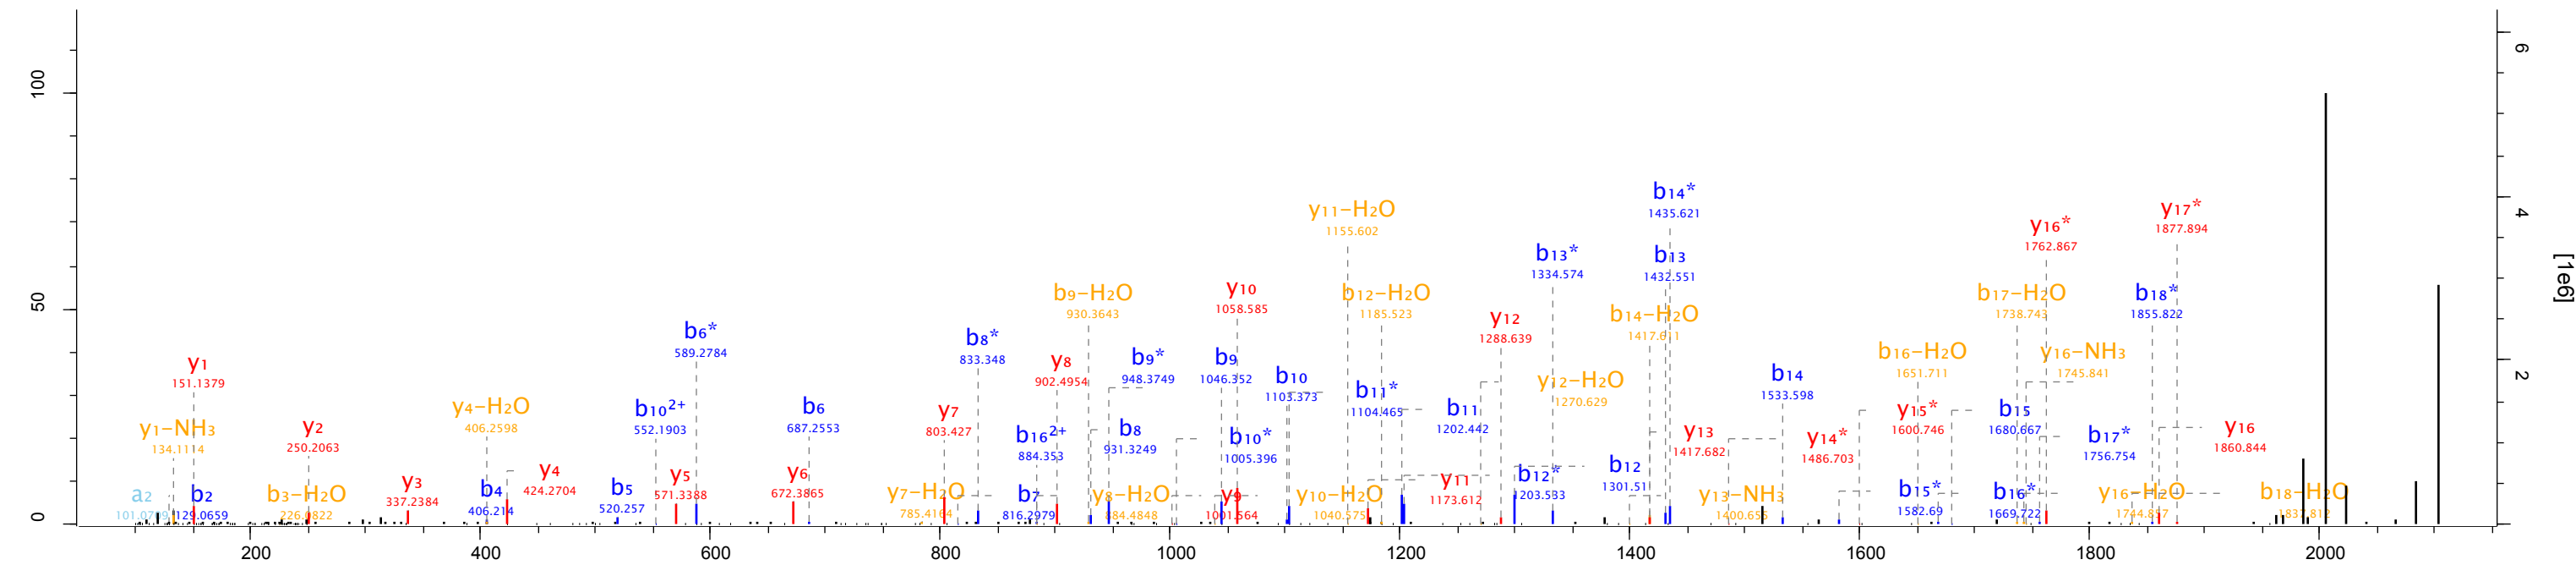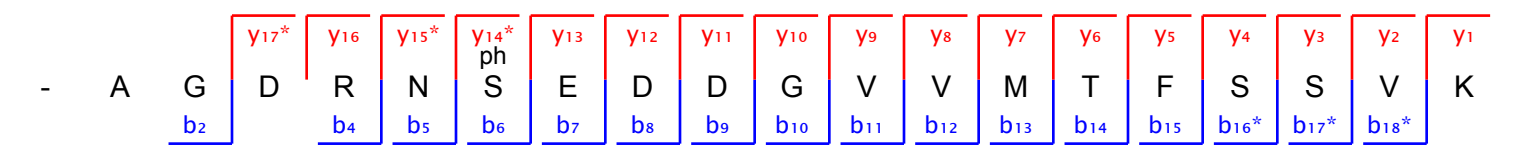

Raw file: 20150814\_A375SR\_Phospho\_BR2\_04  
 Scan: 17968 Method: FTMS; HCD Score: 181.05 m/z: 736.37 Gene names: SPACIA2;FAM122B

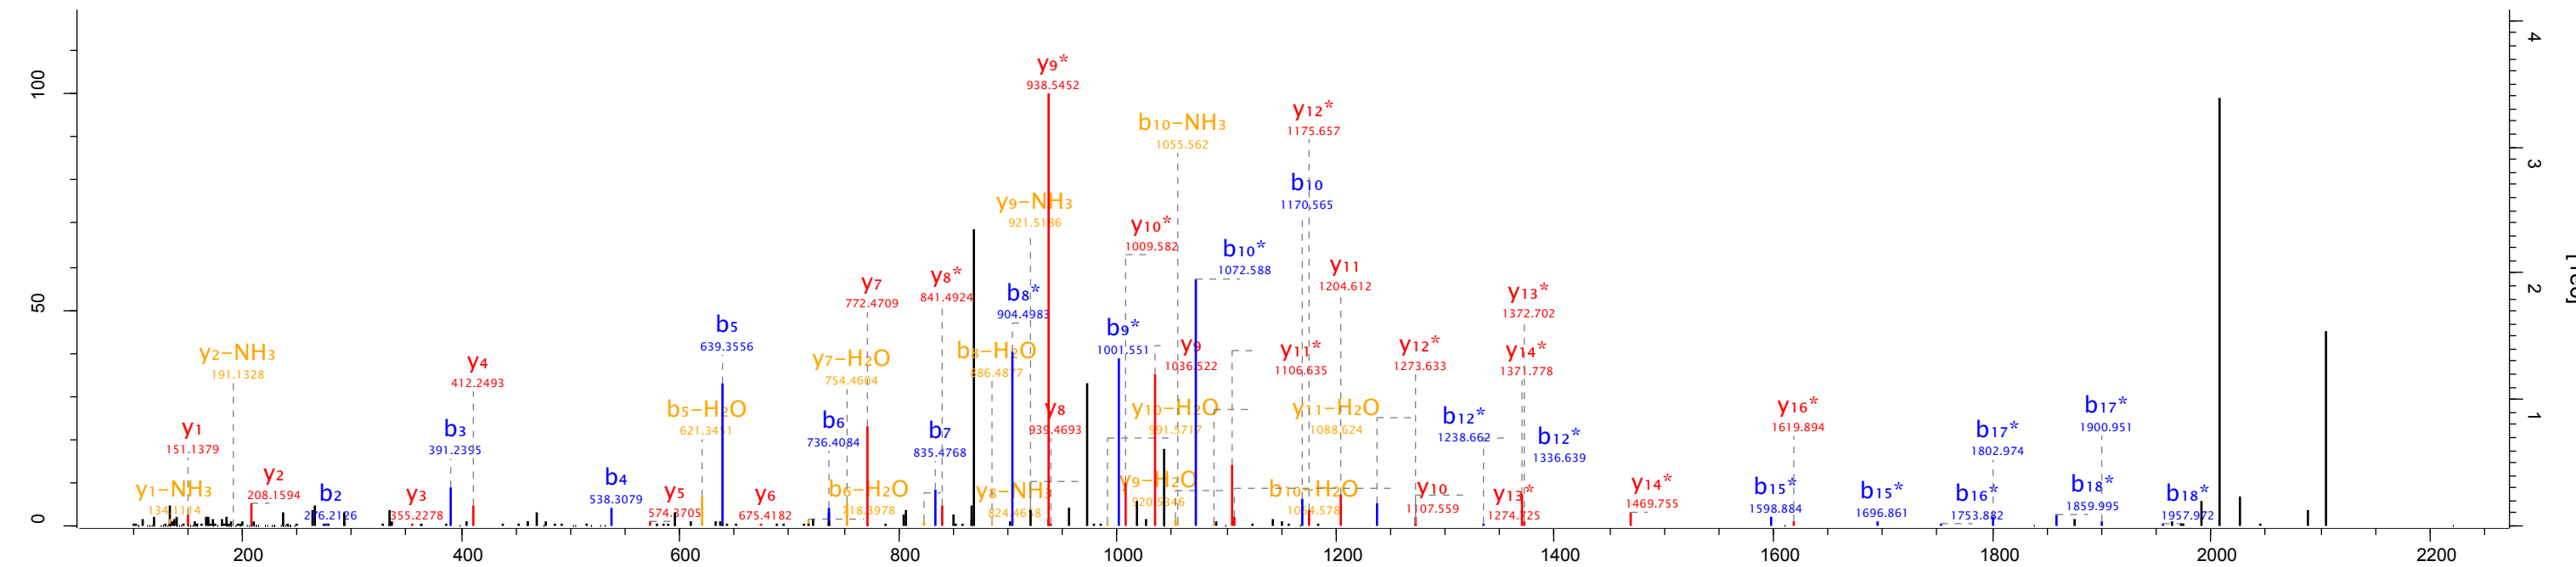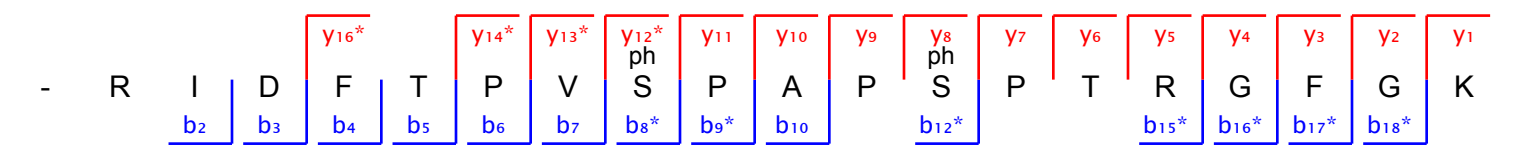

Raw file: 20150814\_A375SR\_Phospho\_BR2\_04  
 Scan: 18098 Method: FTMS; HCD Score: 132.72 m/z: 750.35 Gene names: ETV3

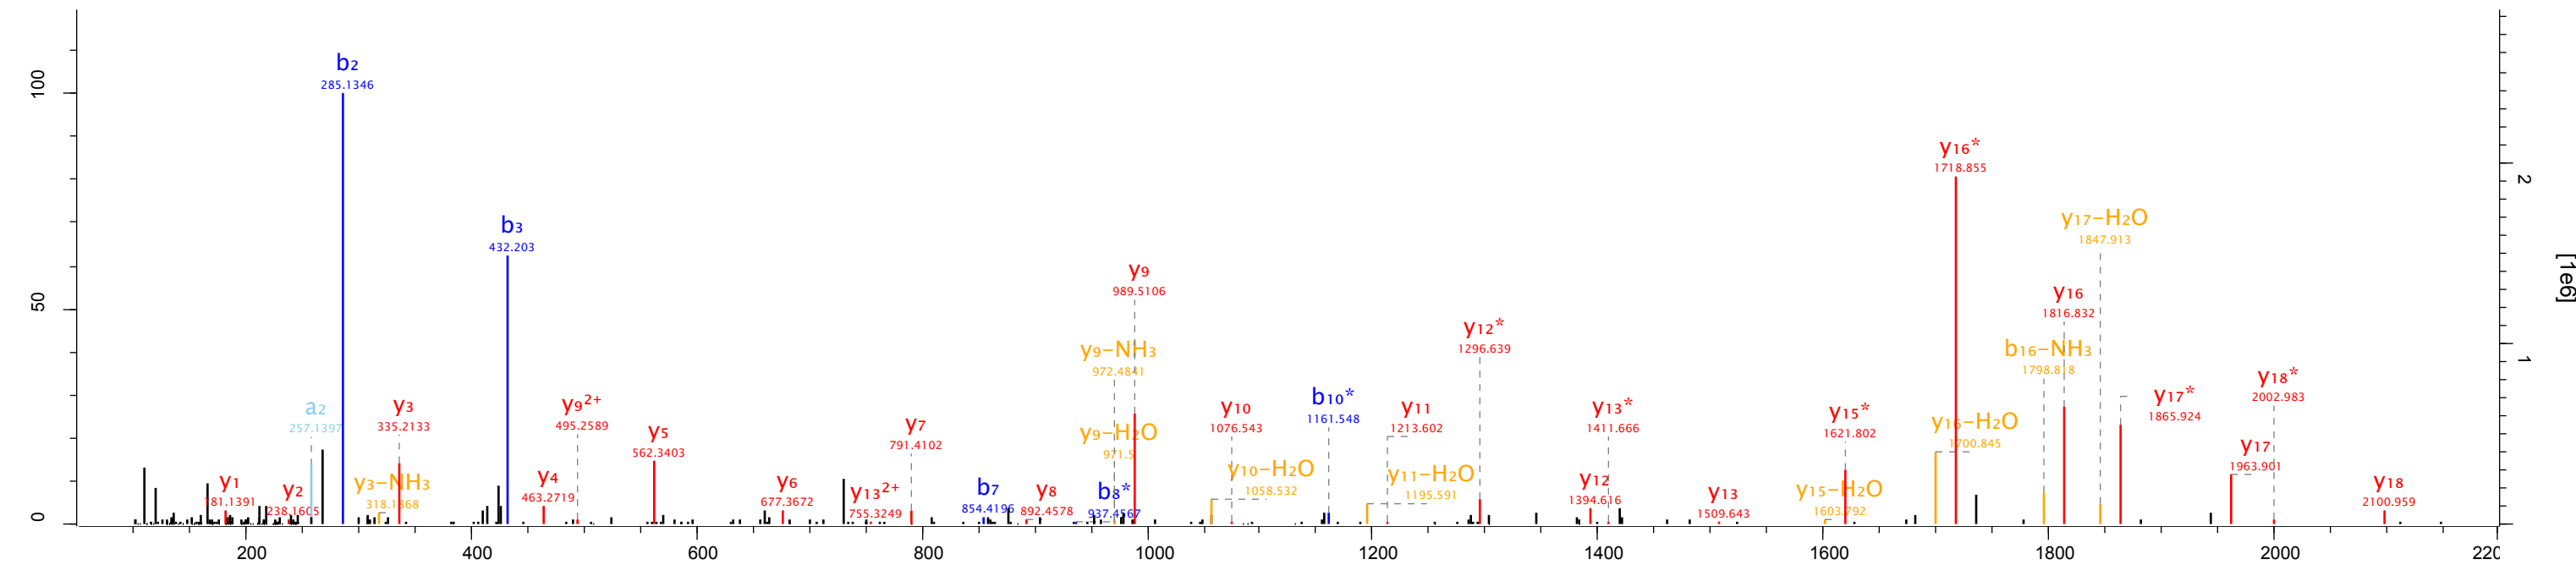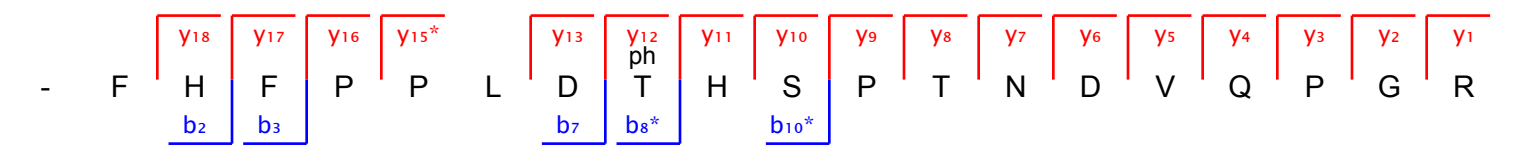

Raw file 20150814\_A375SR\_Phospho\_BR2\_04 Scan 18188 Method FTMS; HCD Score 59.73 m/z 530.92 Gene names CCNYL1

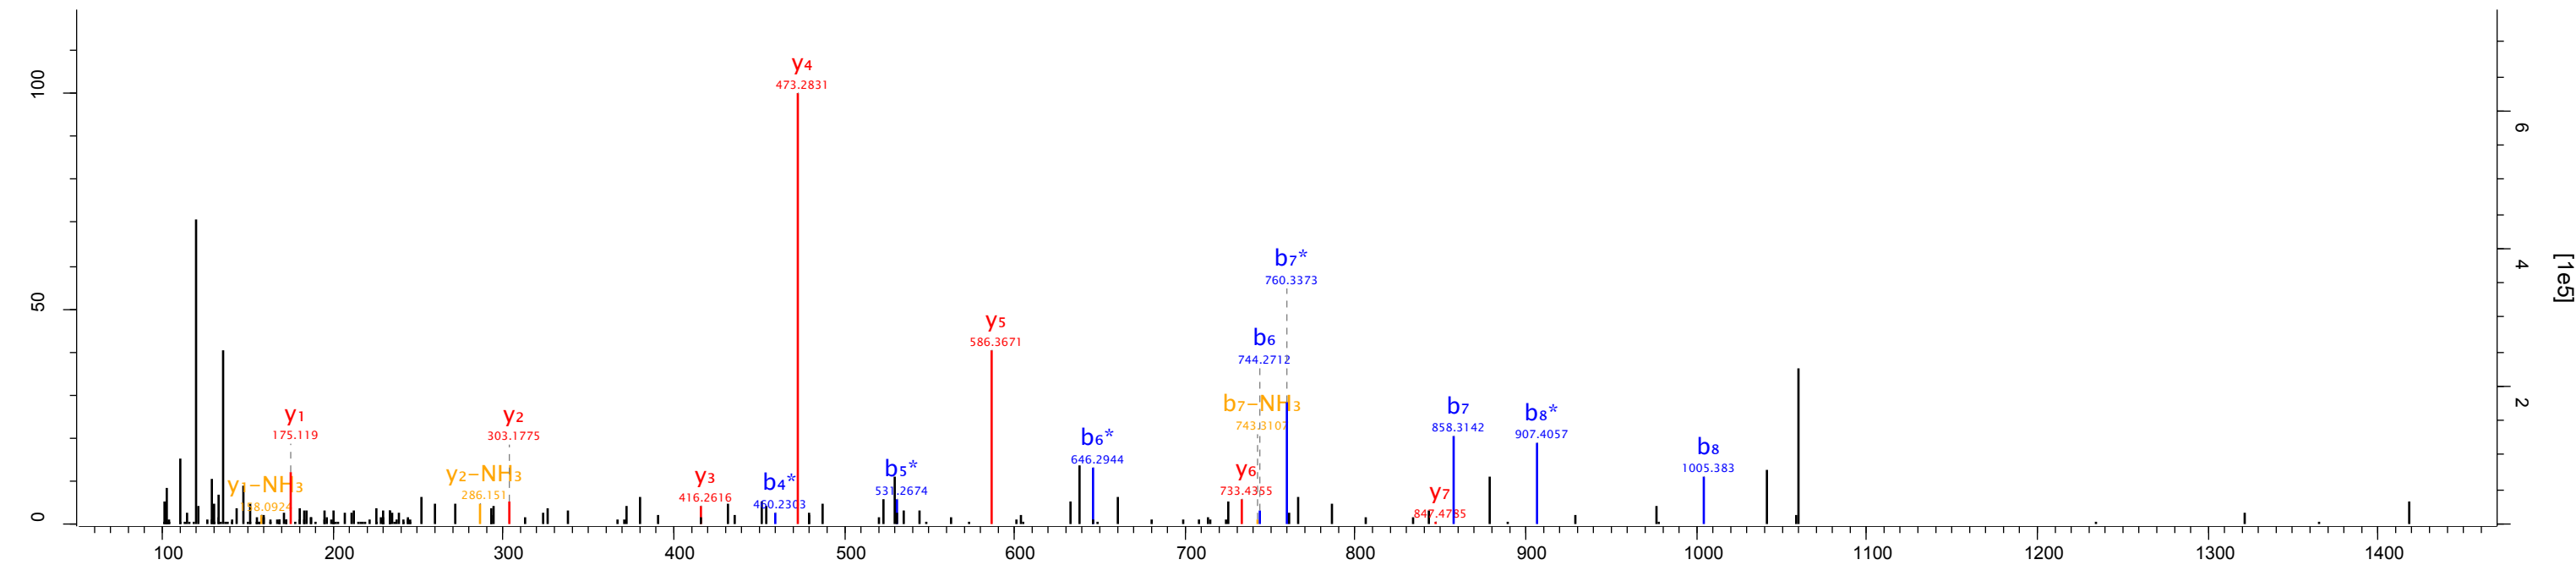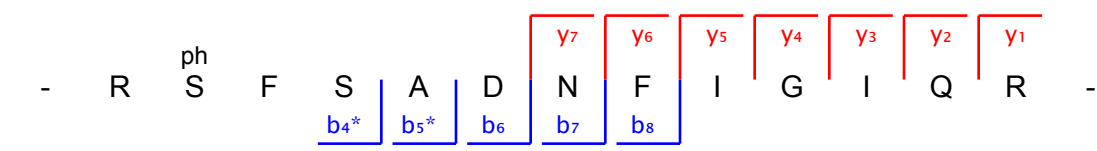

Raw file: 20150814\_A375SR\_Phospho\_BR2\_04  
 Scan: 18298 Method: FTMS; HCD Score: 130.1 m/z: 543.26 Gene names: OSBP

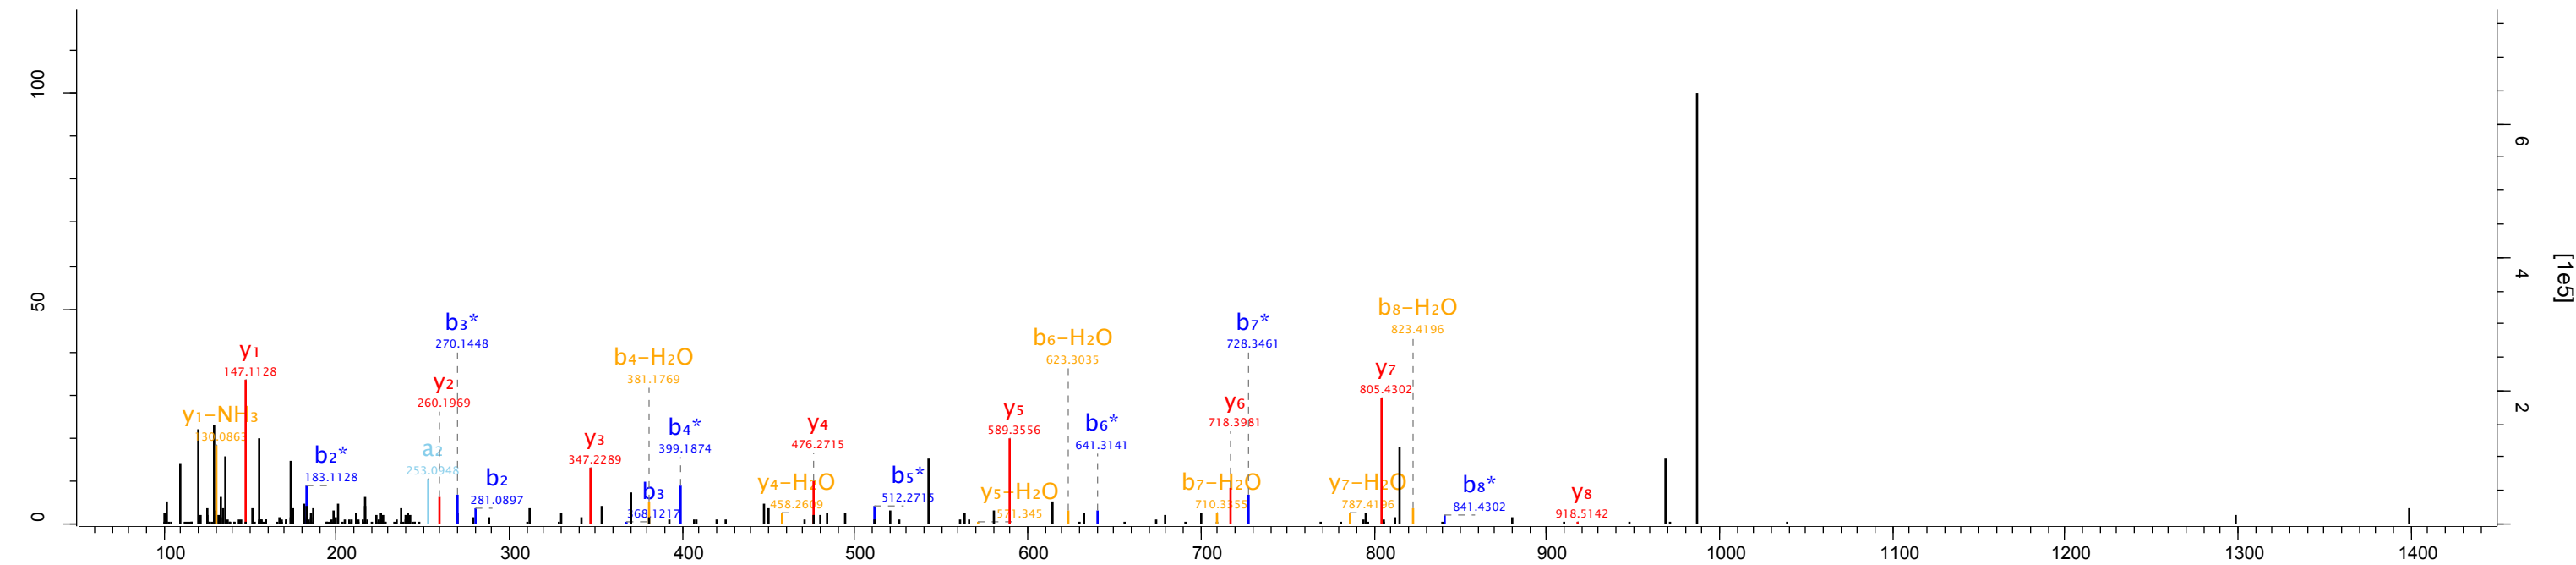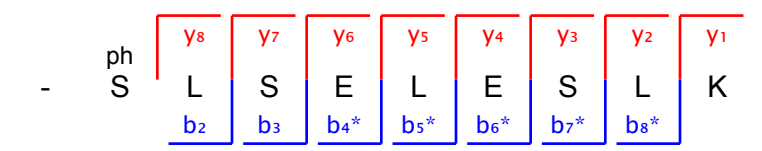

Raw file 20150814\_A375SR\_Phospho\_BR2\_04 Scan 18318 Method FTMS; HCD Score 59.23 m/z 911.42 Gene names MDC1

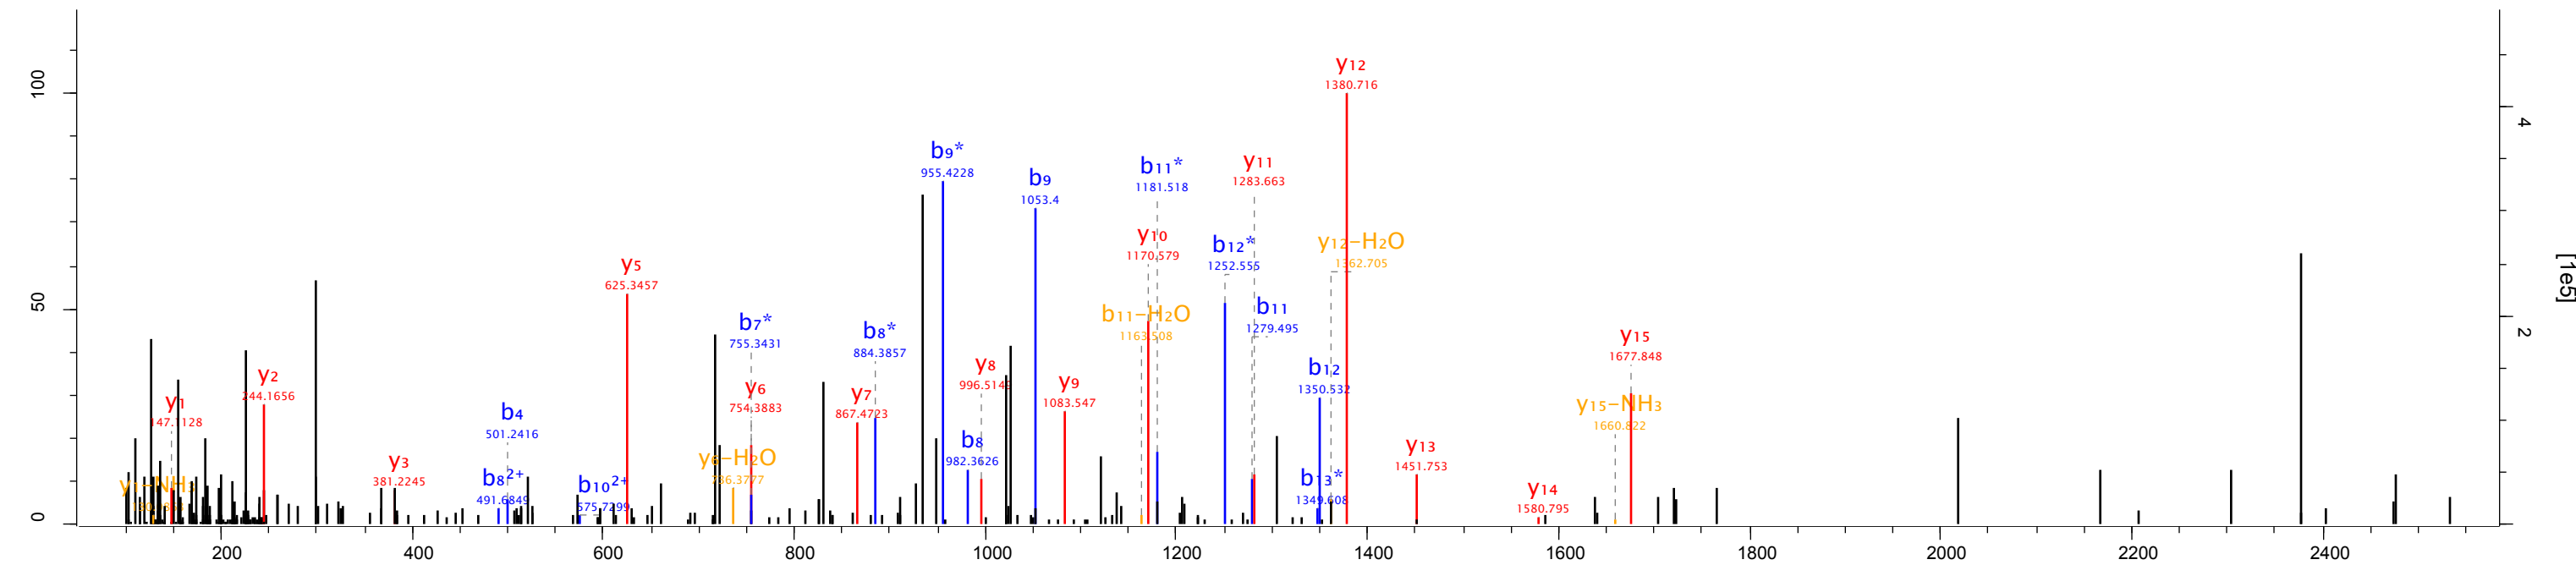

- T R Q D G S Q E A P E A P L S S E L E P F H P K -

b<sub>4</sub>
b<sub>7</sub><sup>\*</sup>
b<sub>8</sub>
b<sub>9</sub>
b<sub>10</sub><sup>2+</sup>
b<sub>11</sub>
b<sub>12</sub>
b<sub>13</sub><sup>\*</sup>
y<sub>15</sub>
y<sub>14</sub>
y<sub>13</sub>
y<sub>12</sub>
y<sub>11</sub>
y<sub>10</sub>
y<sub>9</sub>
y<sub>8</sub>
y<sub>7</sub>
y<sub>6</sub>
y<sub>5</sub>
y<sub>3</sub>
y<sub>2</sub>
y<sub>1</sub>



Raw file 20150814\_A375SR\_Phospho\_BR2\_04 Scan 18758 Method FTMS; HCD Score 282.76 m/z 1174.51 Gene names DYNC1LI1

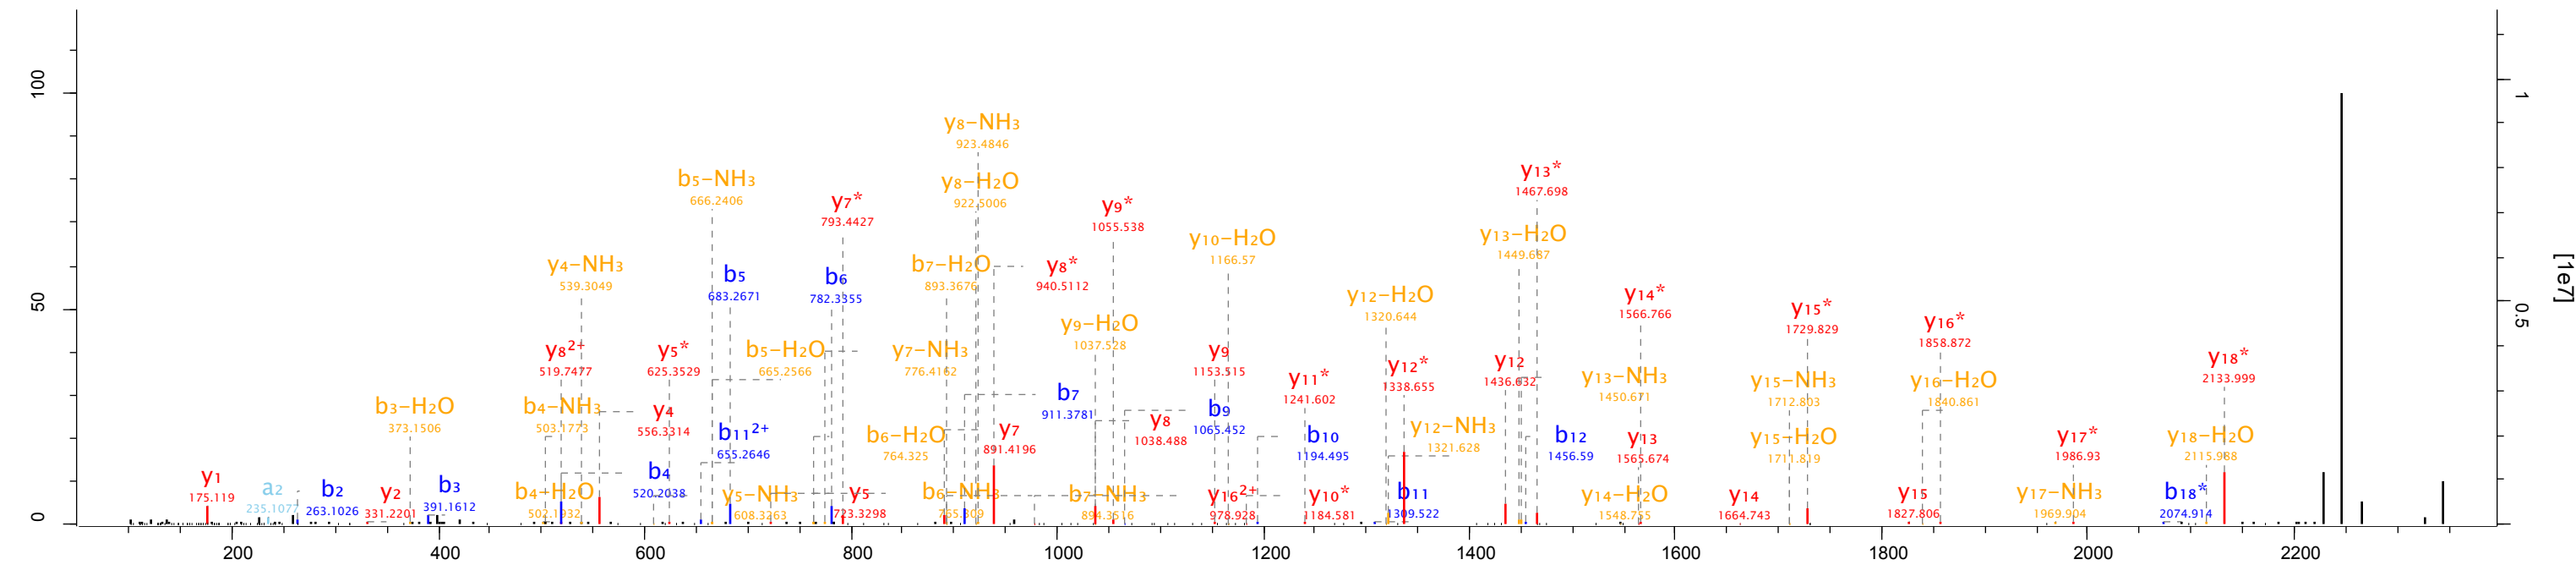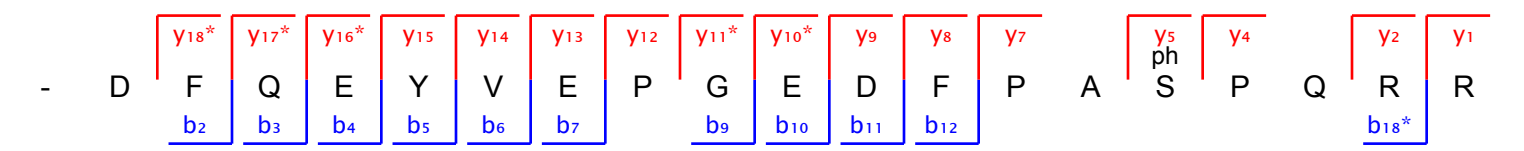



Raw file 20150814\_A375SR\_Phospho\_BR2\_04 Scan 19318 Method FTMS; HCD Score 125.79 m/z 680.6 Gene names PPF1BP1

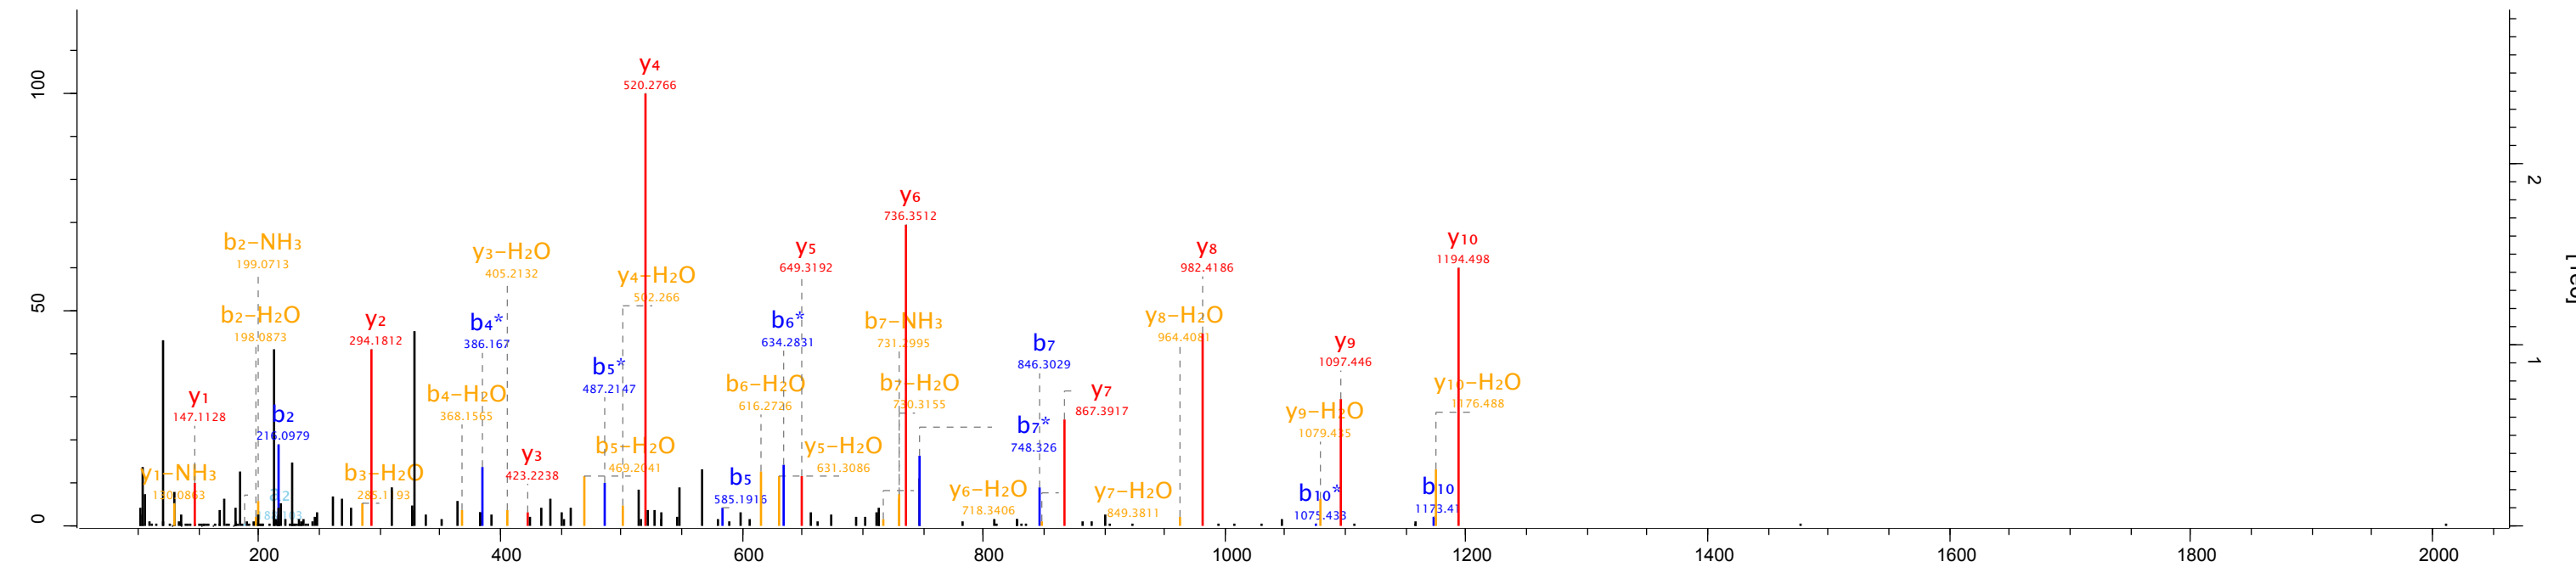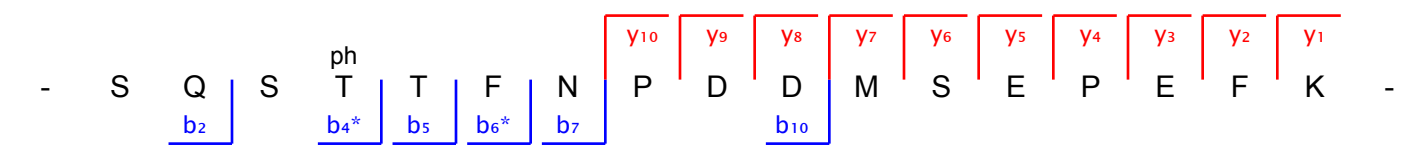

Raw file 20150814\_A375SR\_Phospho\_BR2\_04 Scan 19388 Method FTMS; HCD Score 197.54 m/z 875.69 Gene names MAP3K2

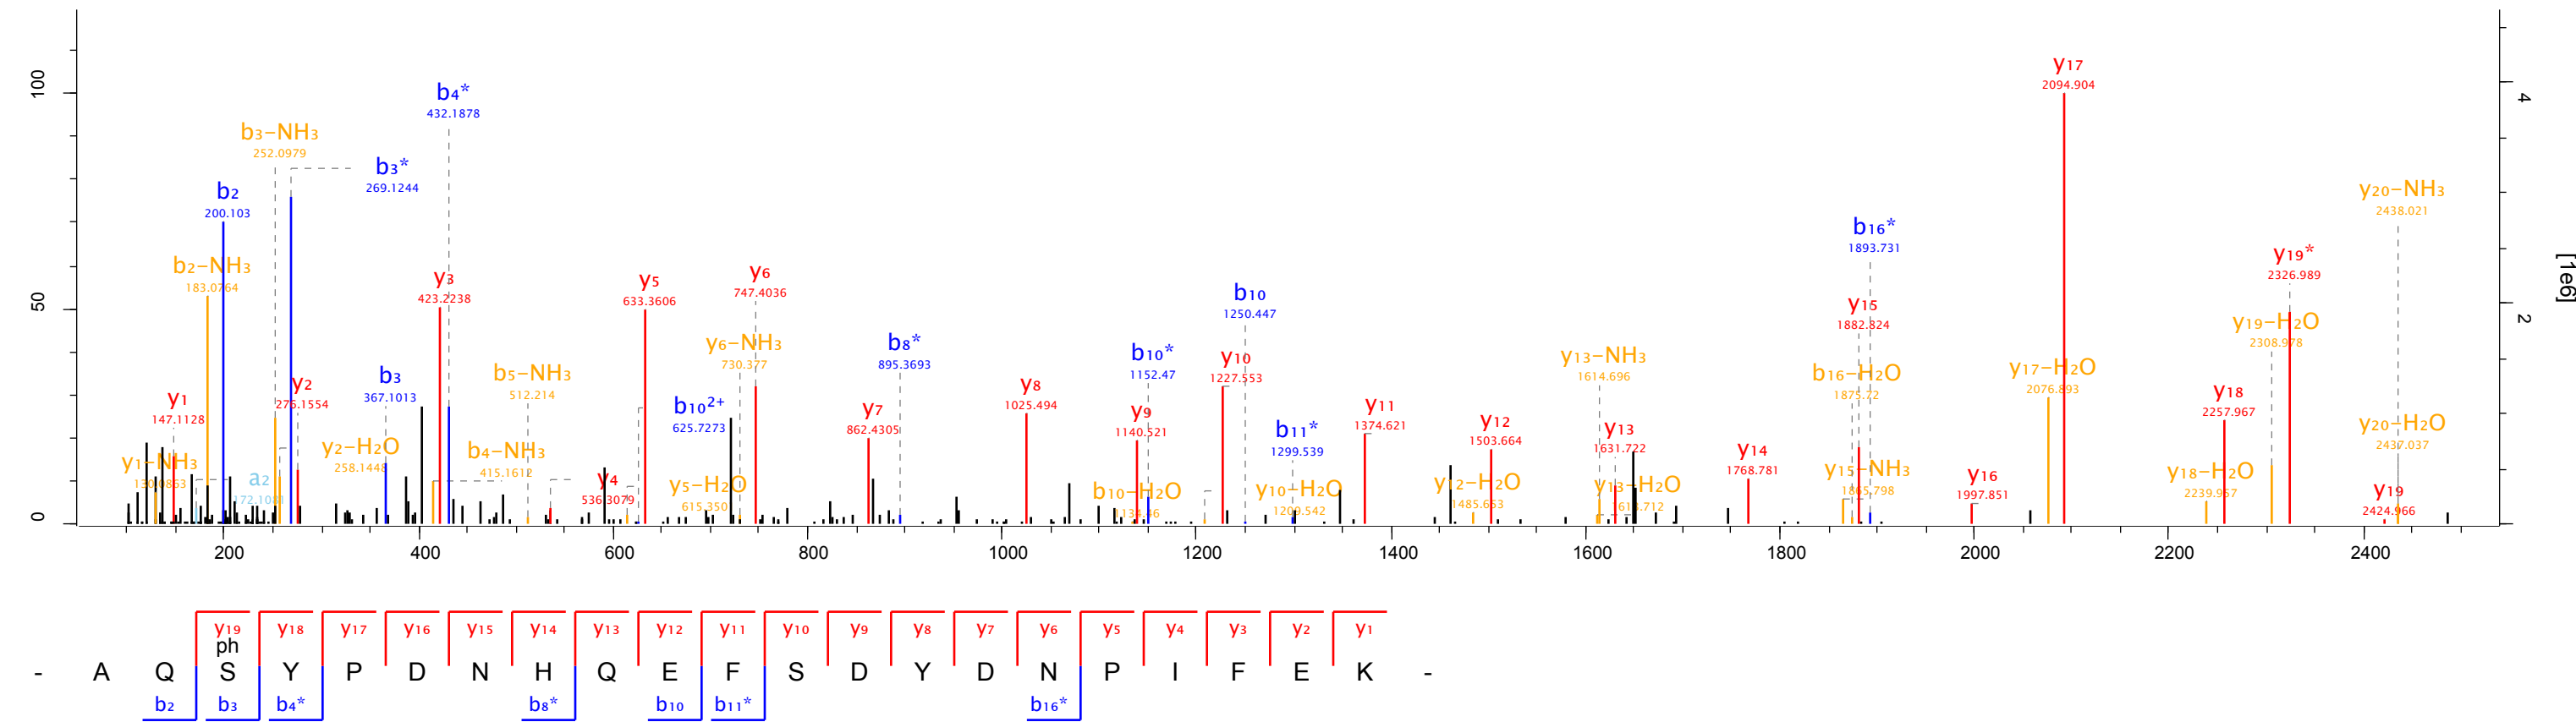

Raw file  
 20150814\_A375SR\_Phospho\_BR2\_04  
 Scan 19648 Method FTMS; HCD Score 187.57 m/z 879.08 Gene names PHKB

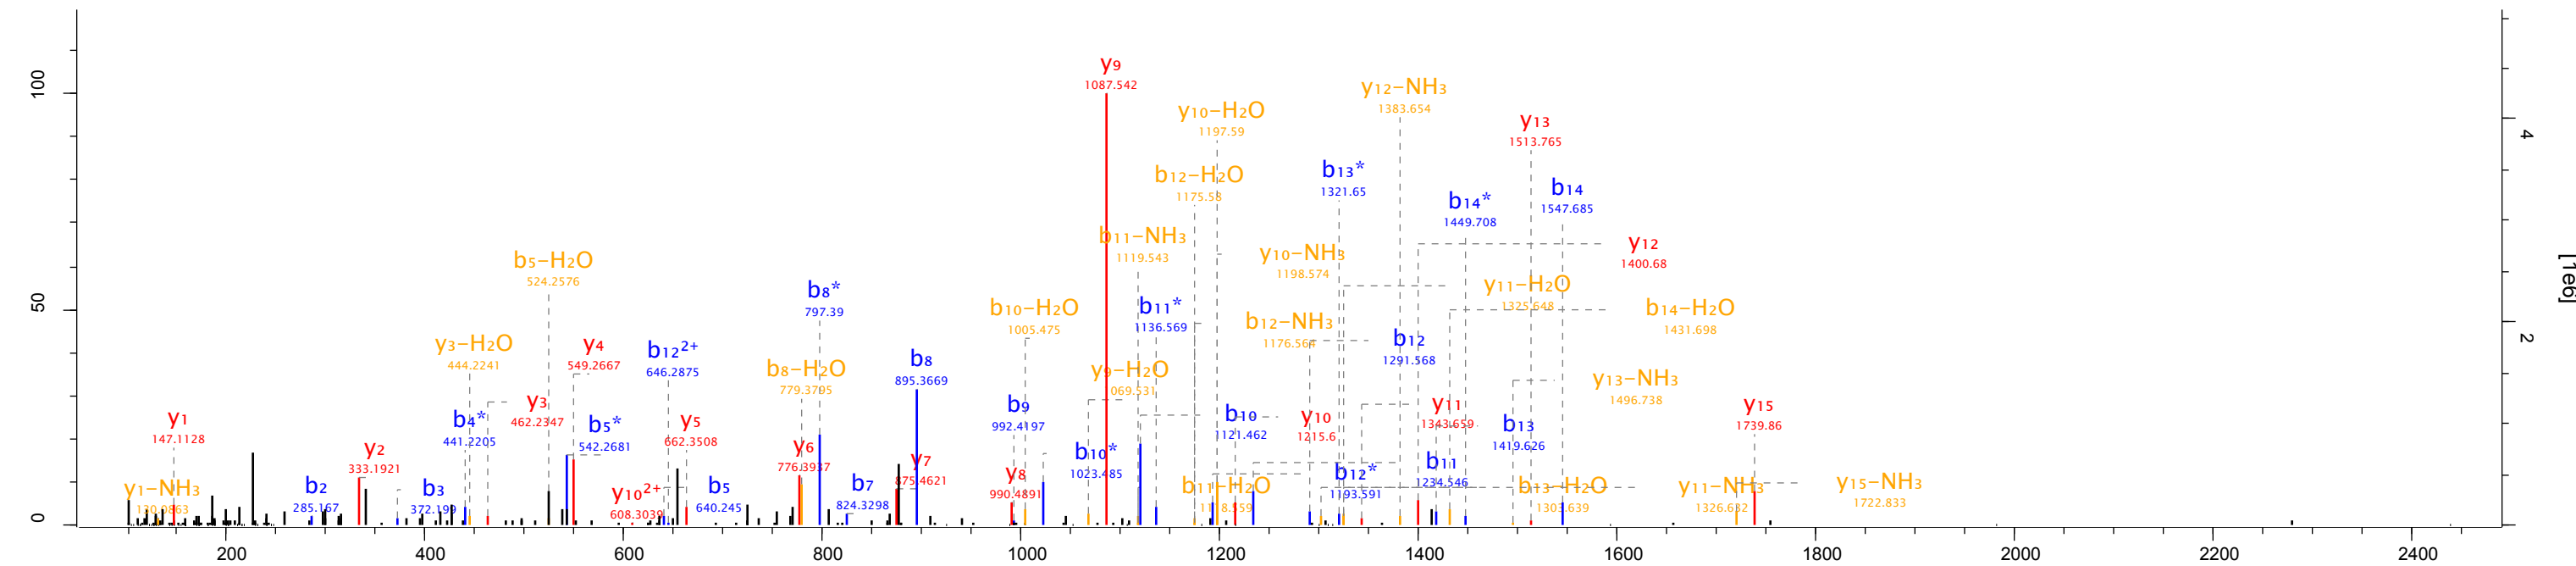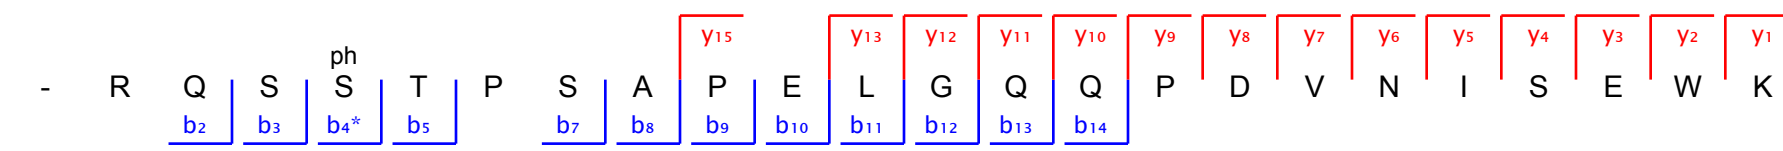

Raw file 20150814\_A375SR\_Phospho\_BR2\_04 Scan 19978 Method FTMS; HCD Score 79.02 m/z 858.91 Gene names UBA1

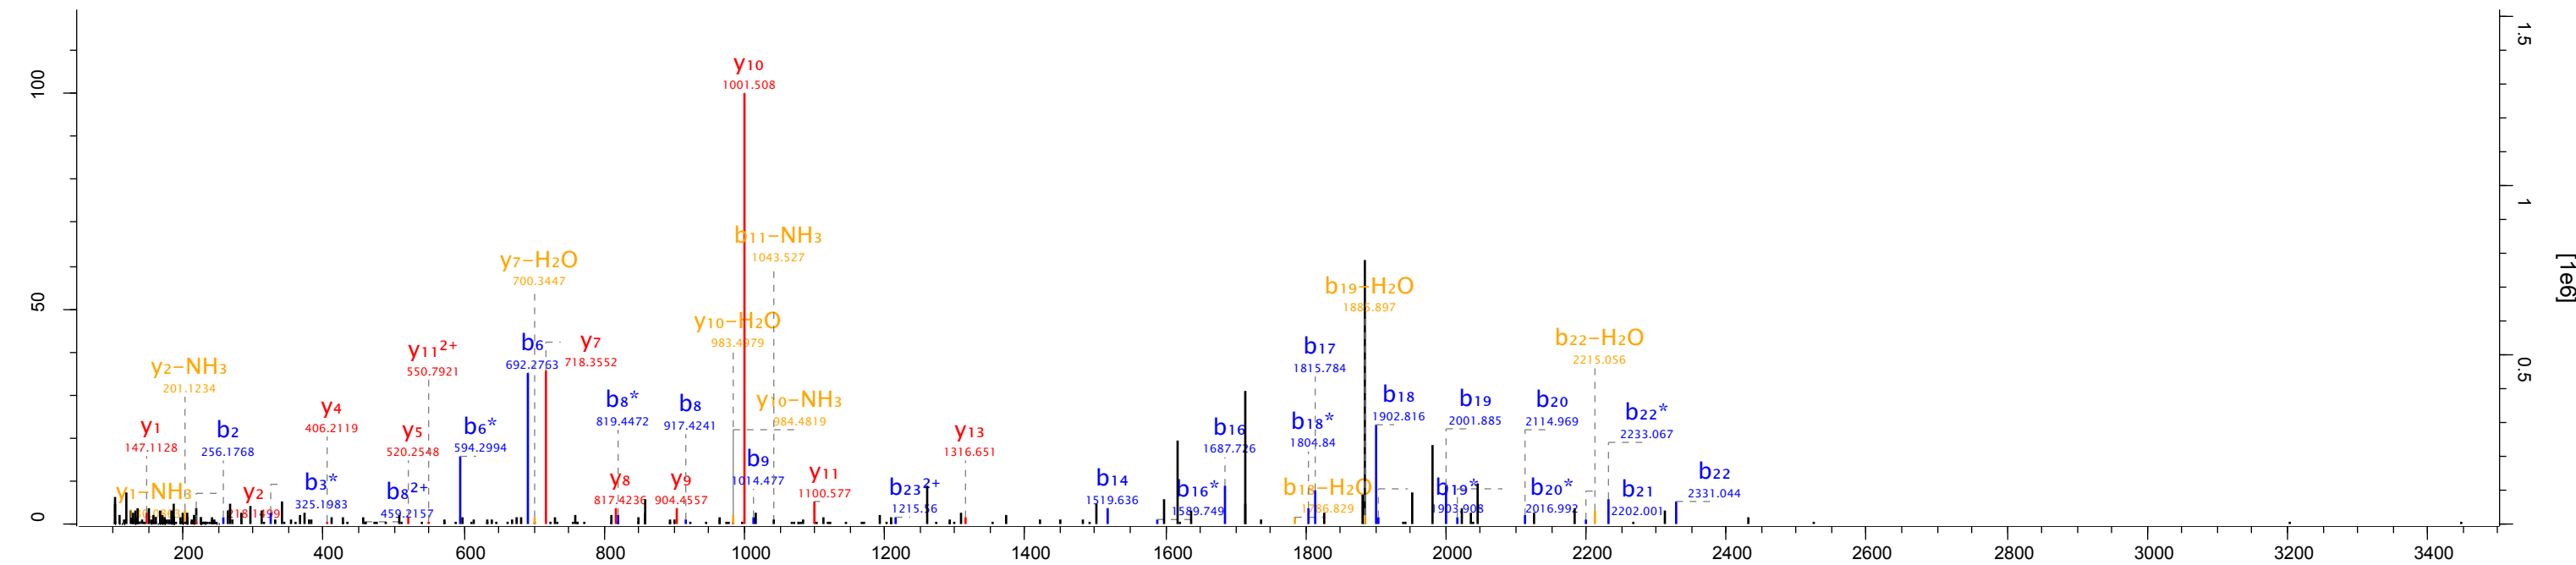

- R V S ph G P D P K P G S N C S P A Q S V L S E V P S V P T N G M A K -

b<sub>2</sub>
b<sub>3</sub><sup>\*</sup>
b<sub>6</sub><sup>\*</sup>
b<sub>8</sub><sup>\*</sup>
b<sub>9</sub>
b<sub>14</sub>
b<sub>16</sub>
b<sub>17</sub>
b<sub>18</sub>
b<sub>19</sub>
b<sub>20</sub>
b<sub>21</sub>
b<sub>22</sub>
b<sub>23</sub><sup>2+</sup>
y<sub>13</sub>
y<sub>11</sub>
y<sub>10</sub>
y<sub>9</sub>
y<sub>8</sub>
y<sub>7</sub>
y<sub>5</sub>
y<sub>4</sub>
y<sub>2</sub>
y<sub>1</sub>

Raw file Scan Method Score m/z Gene names  
 20150814\_A375SR\_Phospho\_BR2\_04 20138 FTMS; HCD 351.08 1342.9 DNAJC21

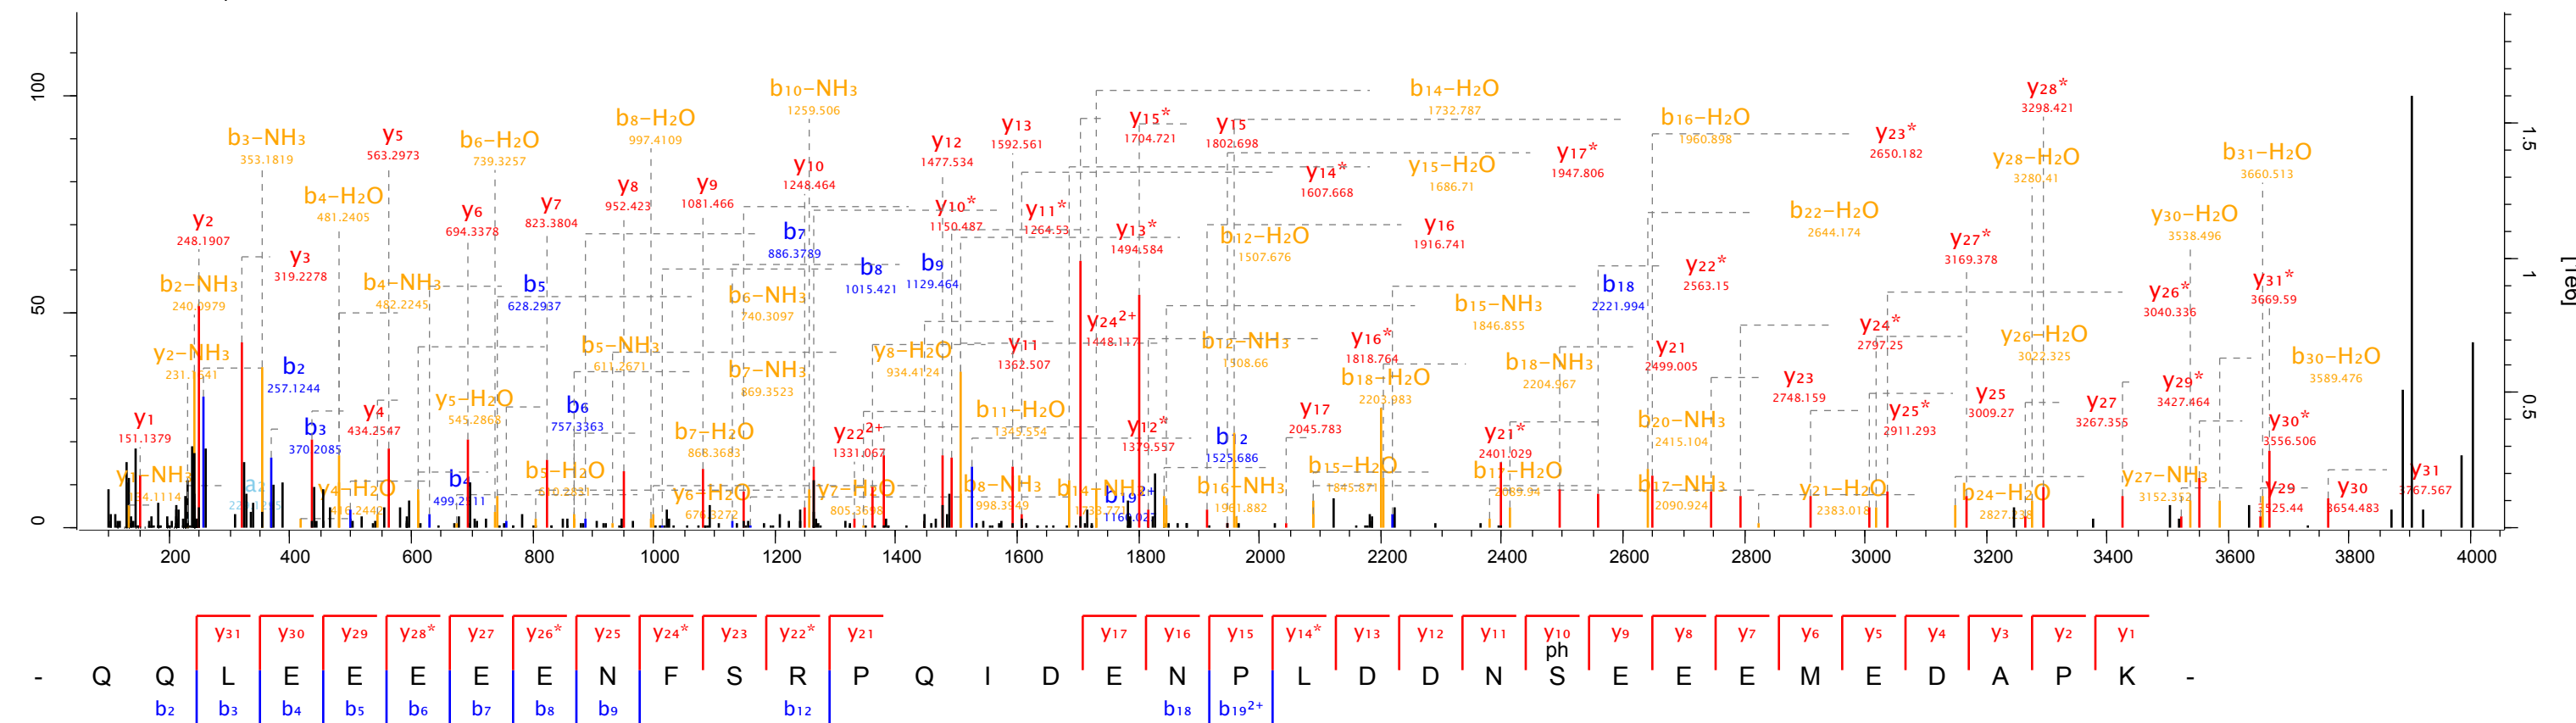

Raw file: 20150814\_A375SR\_Phospho\_BR2\_04  
 Scan: 20158 Method: FTMS; HCD Score: 203.68 m/z: 915.9 Gene names: MICALL1

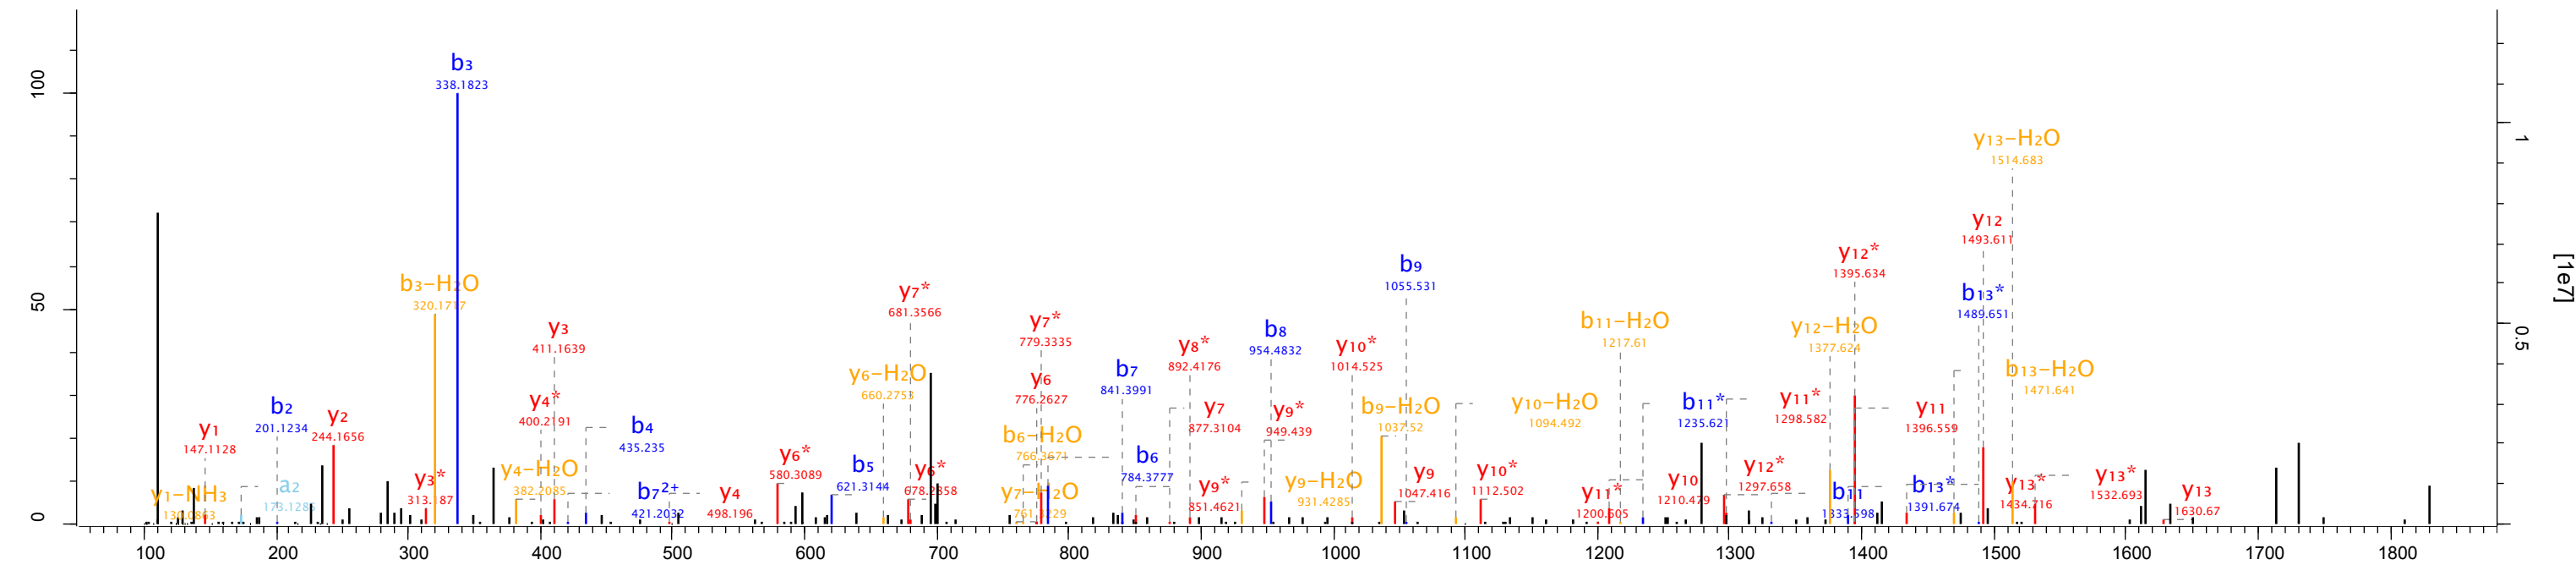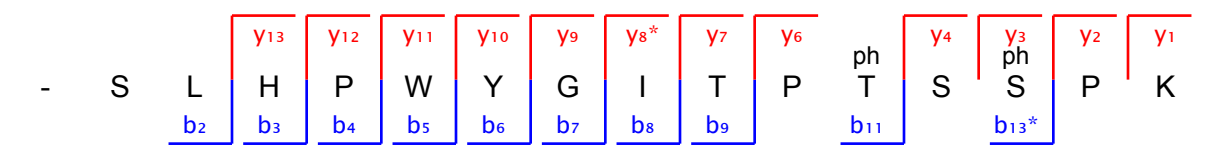



Raw file 20150814\_A375SR\_Phospho\_BR2\_04 Scan 20498 Method FTMS; HCD Score 155.94 m/z 1193.01 Gene names SH3BP4

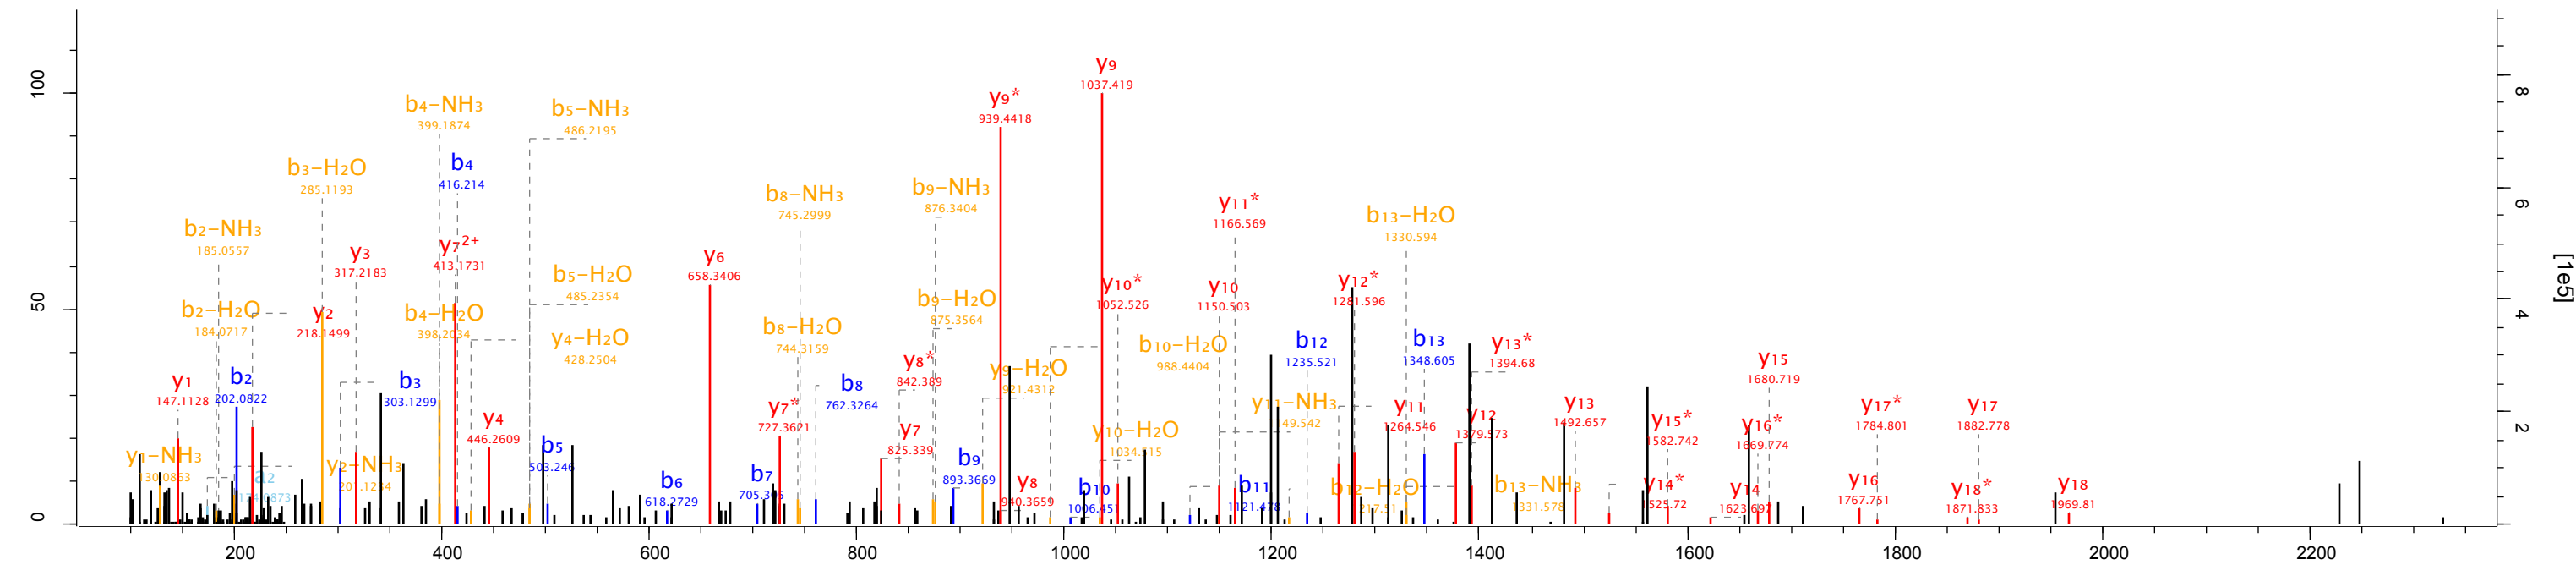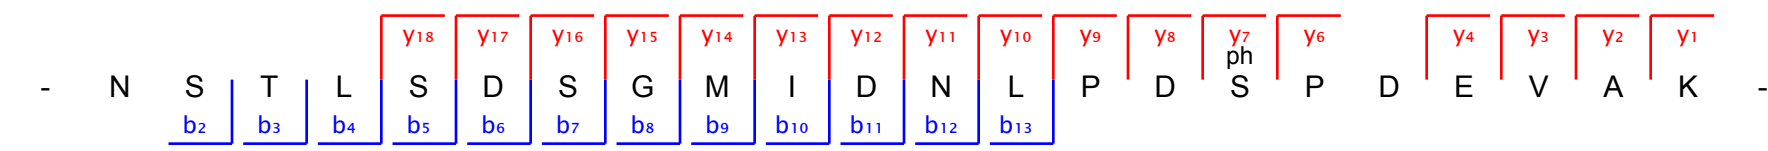



Raw file: 20150814\_A375SR\_Phospho\_BR2\_04  
 Scan: 20568 Method: FTMS; HCD Score: 220.32 m/z: 676.79 Gene names: AKAP11

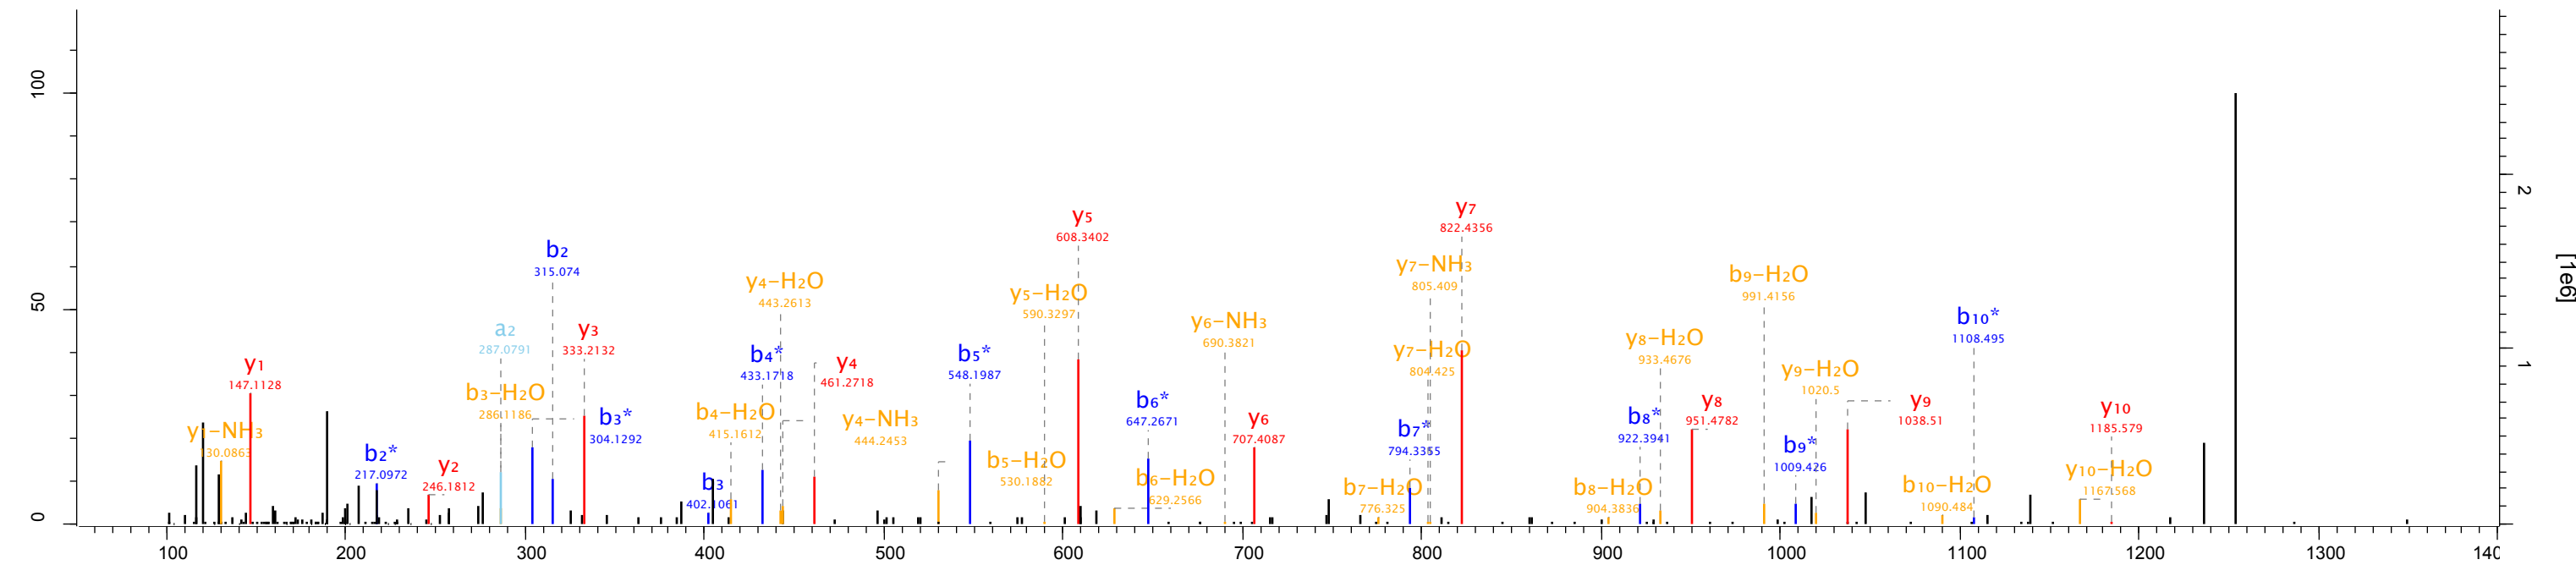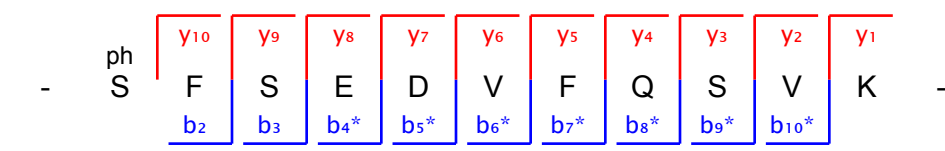

Raw file 20150814\_A375SR\_Phospho\_BR2\_04 Scan 20948 Method FTMS; HCD Score 104.38 m/z 703.99 Gene names FTSJ3

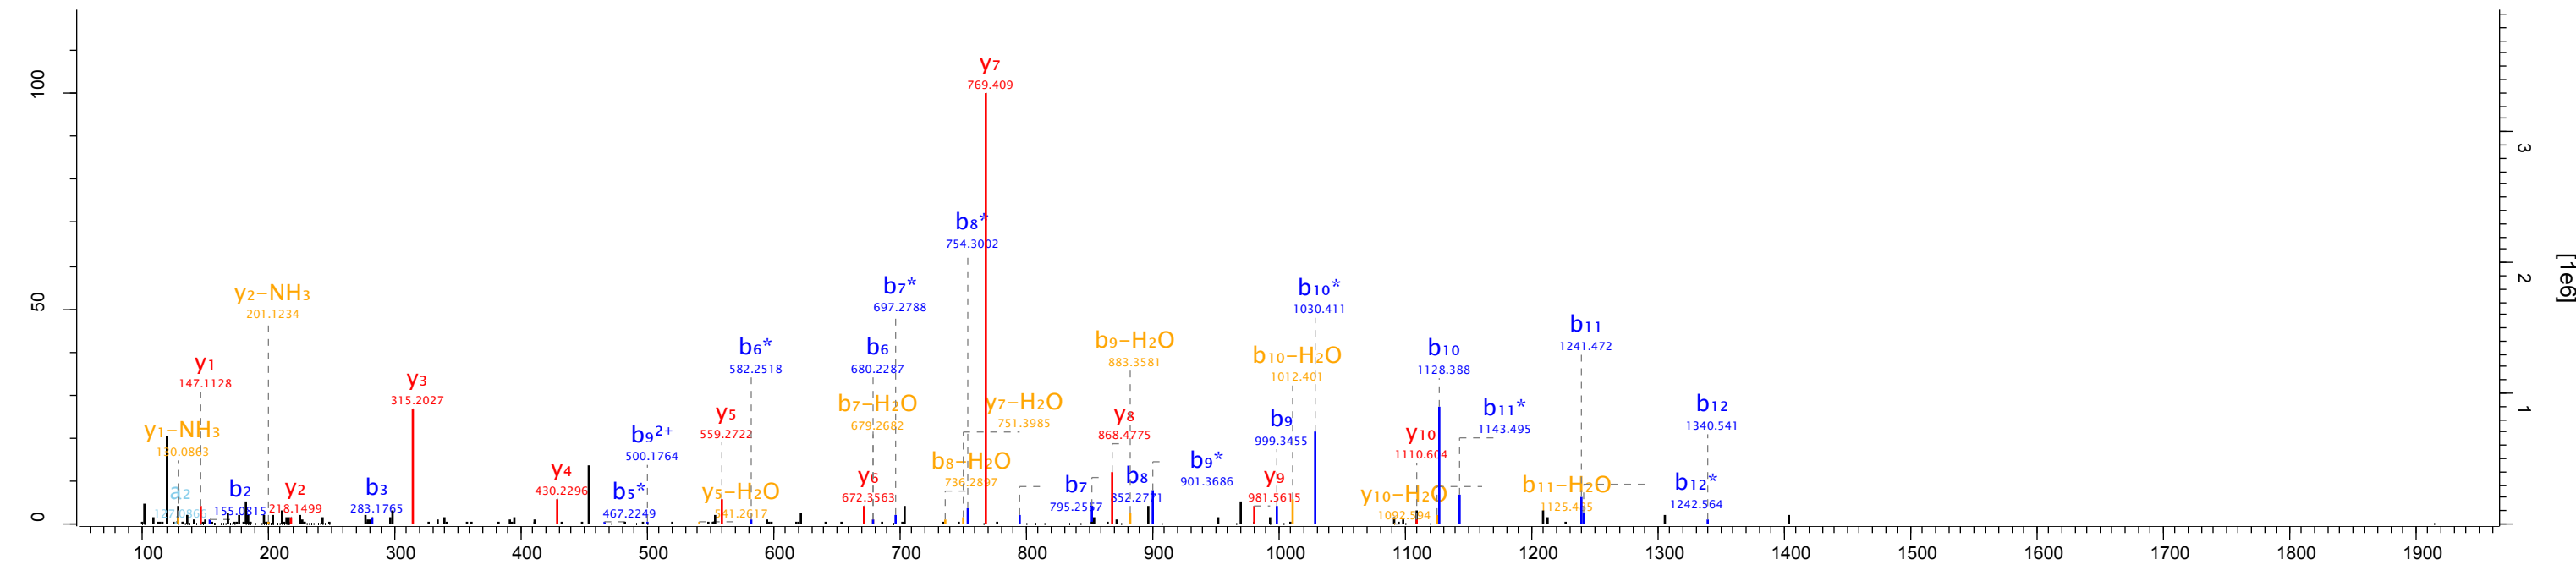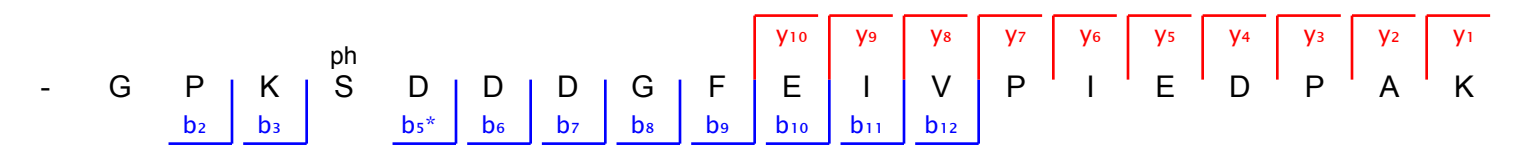

Raw file Scan Method Score m/z Gene names  
 20150814\_A375SR\_Phospho\_BR2\_04 21588 FTMS; HCD 75.44 860.39 SLC2A1

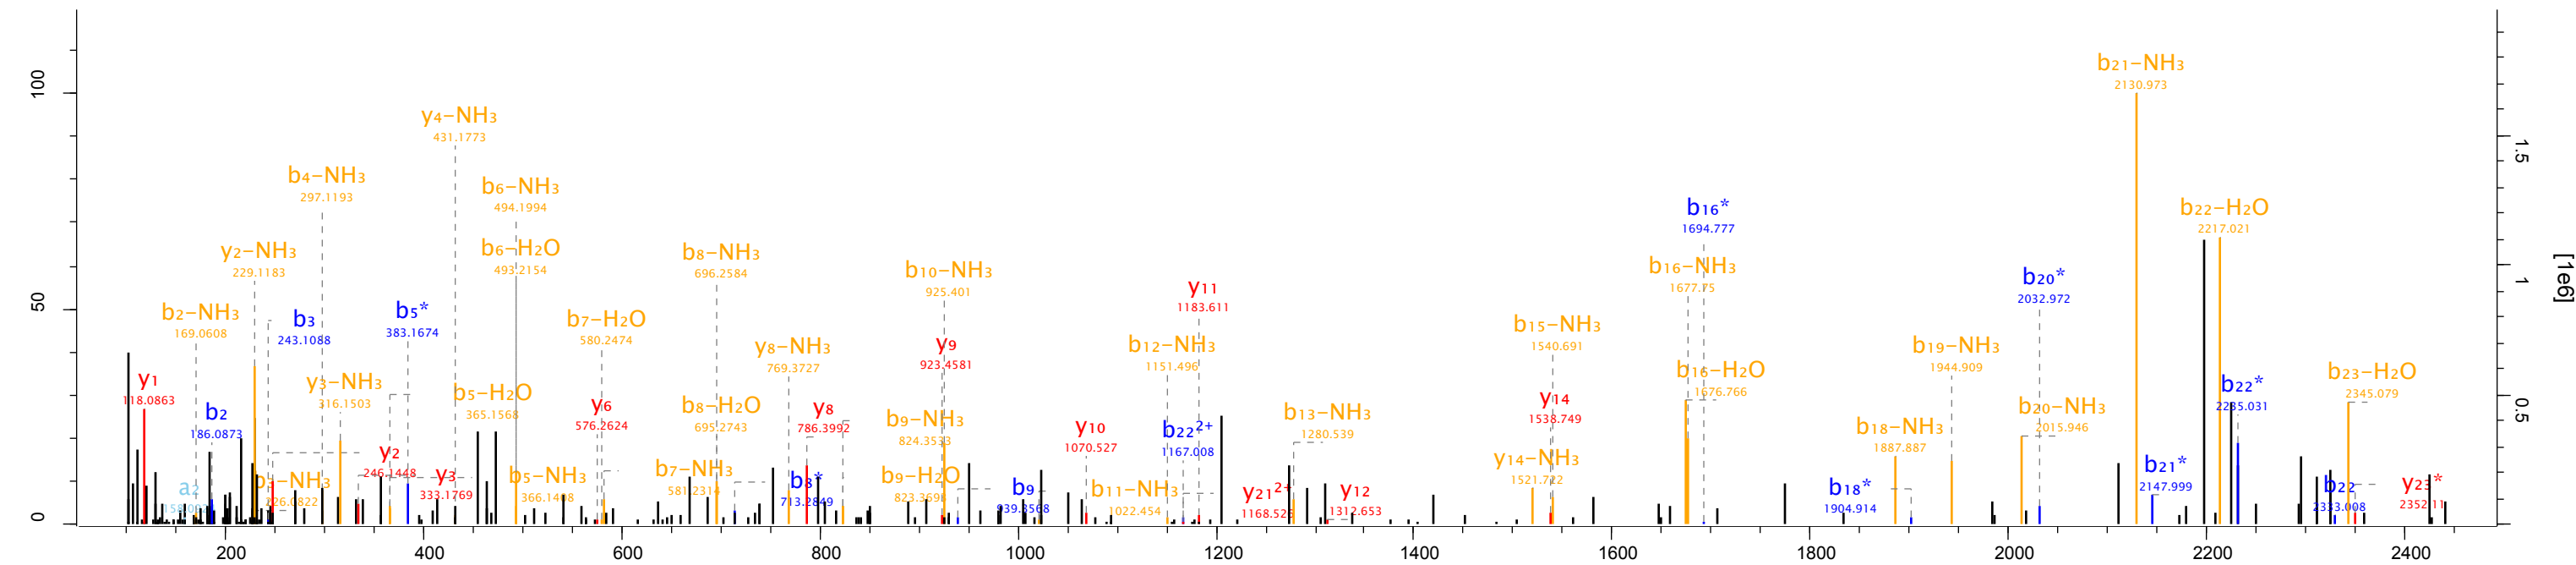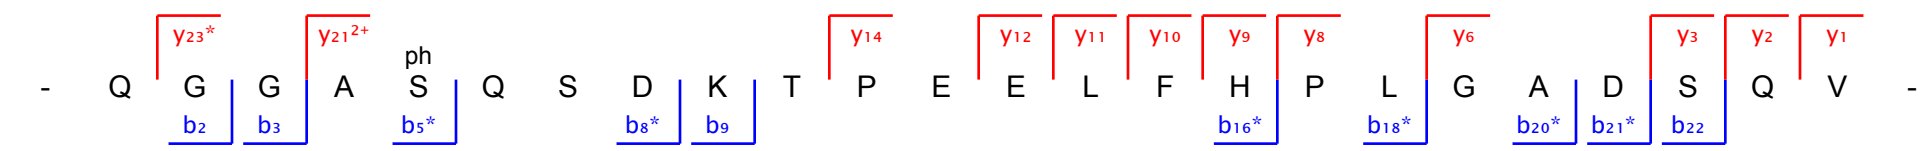

Raw file  
20150814\_A375SR\_Phospho\_BR2\_04

Scan 21648 Method FTMS; HCD Score 184.55 m/z 983.16 Gene names NCOR1

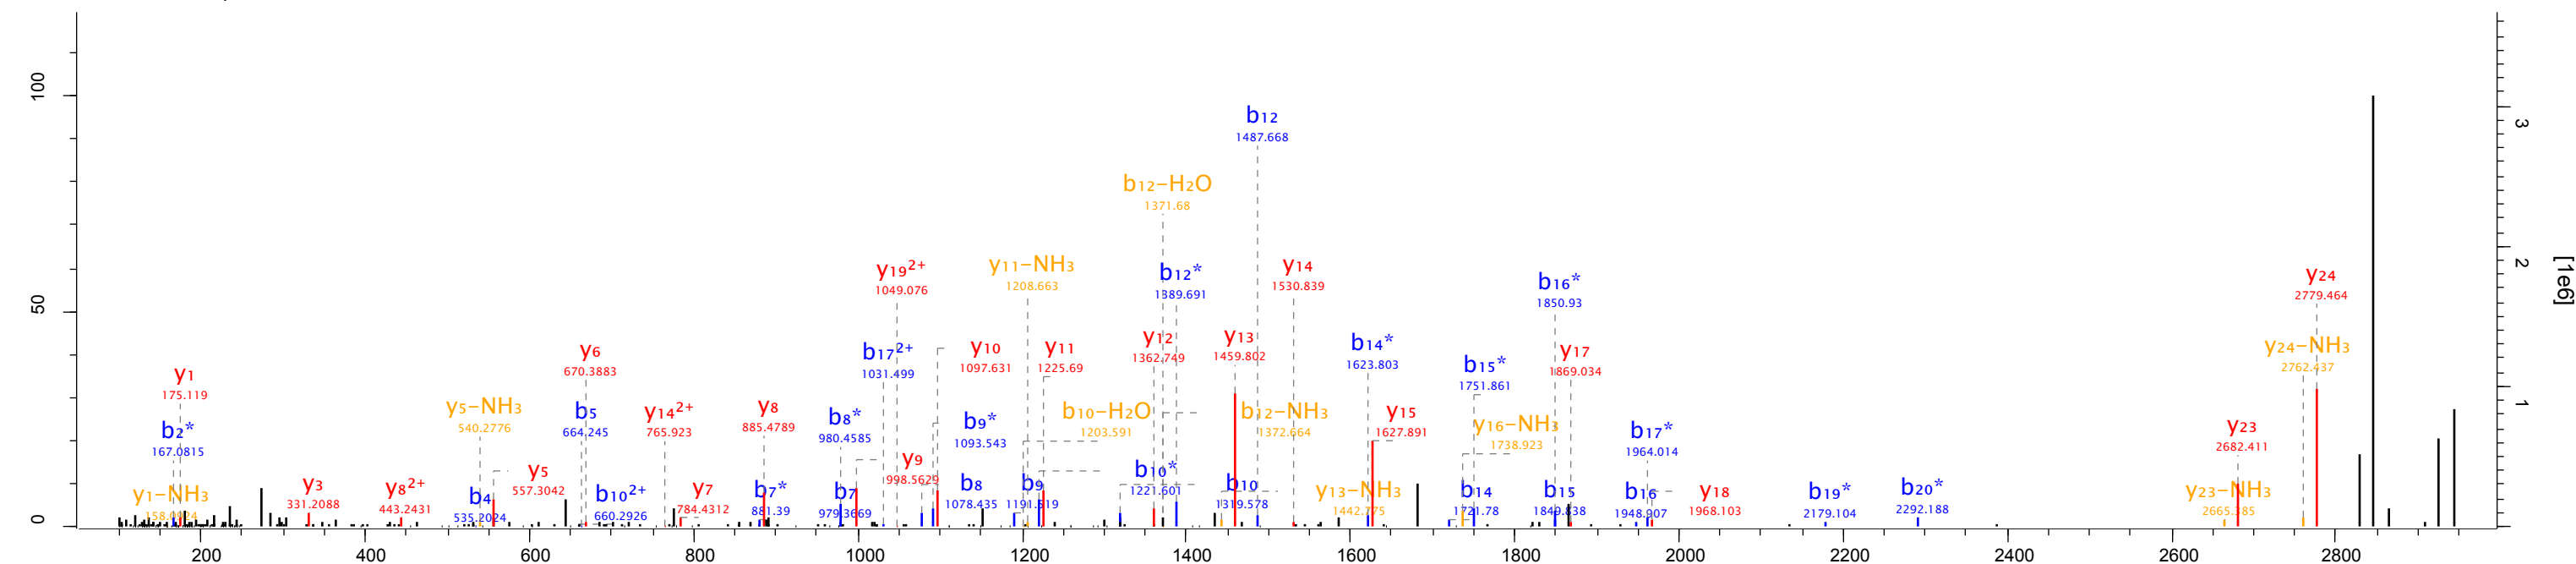

ph S  
- P N R E W E V L Q P A P H Q V I T N L P E G V R -  
b2\* b4 b5 b7 b8 b9 b10 b12 b14 b15 b16 b17\* b19\* b20\* y19<sup>2+</sup> y18 y17 y15 y14 y13 y12 y11 y10 y9 y8 y7 y6 y5 y3 y1

Raw file: 20150814\_A375SR\_Phospho\_BR2\_04  
 Scan: 21978 Method: FTMS; HCD Score: 76.81 m/z: 905.96 Gene names: DENND4C

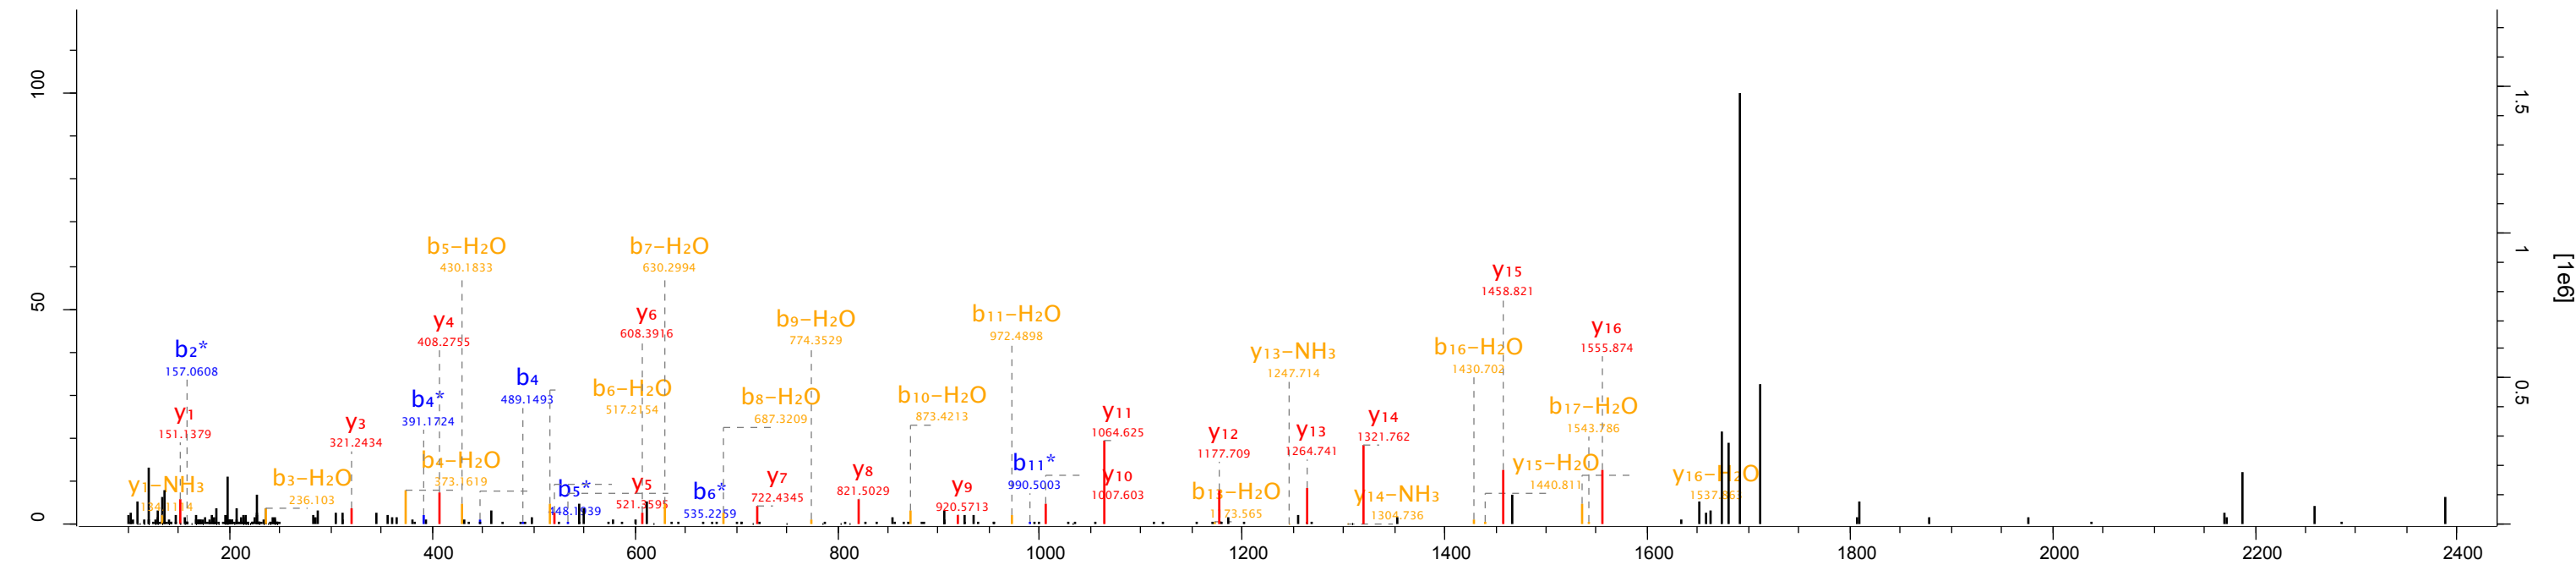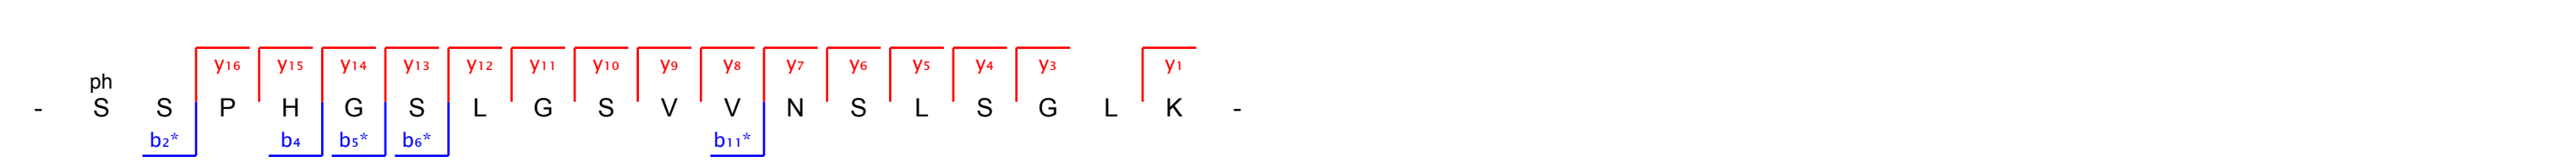

Raw file  
20150814\_A375SR\_Phospho\_BR2\_04

Scan 22518 Method FTMS; HCD Score 201.25 m/z 1171.01 Gene names GTPBP1

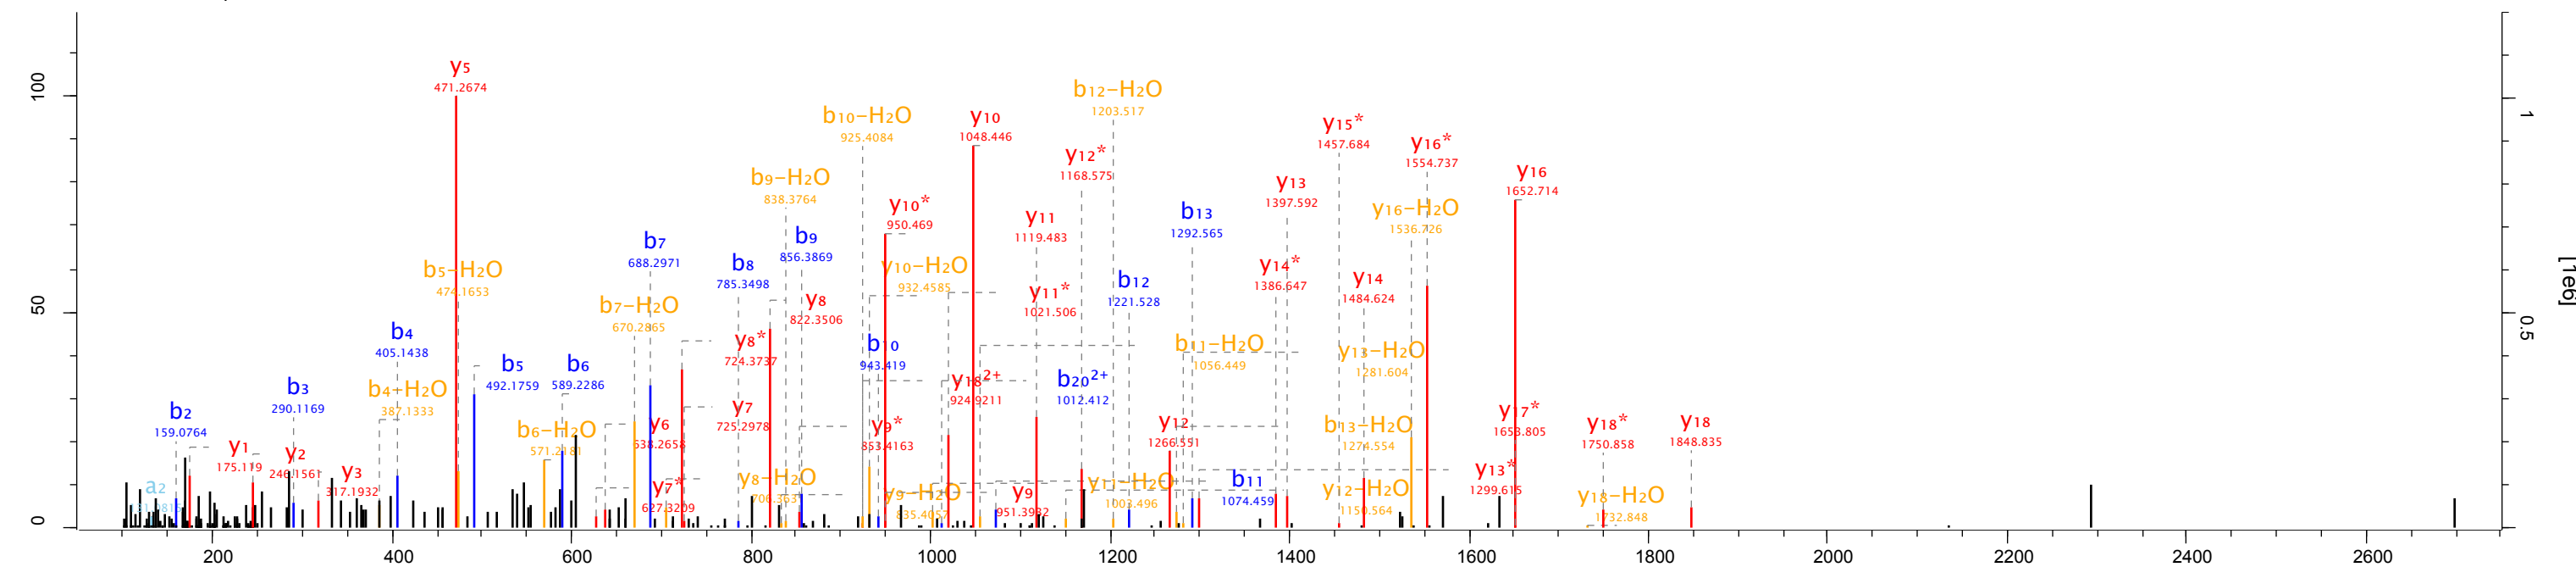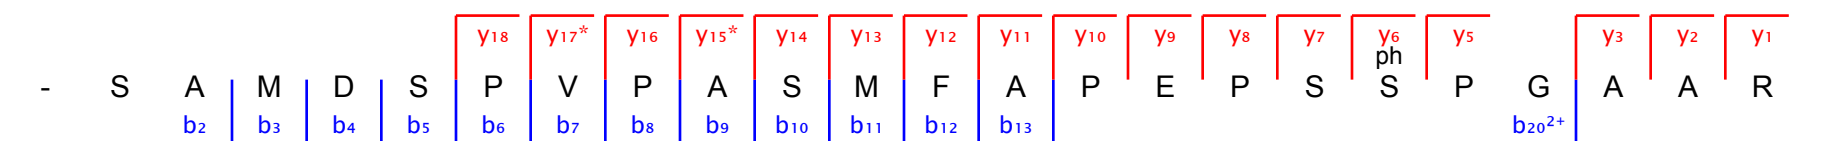

Raw file: 20150814\_A375SR\_Phospho\_BR2\_04  
 Scan: 2278 Method: FTMS; HCD Score: 115.85 m/z: 658.62 Gene names: SIRT6

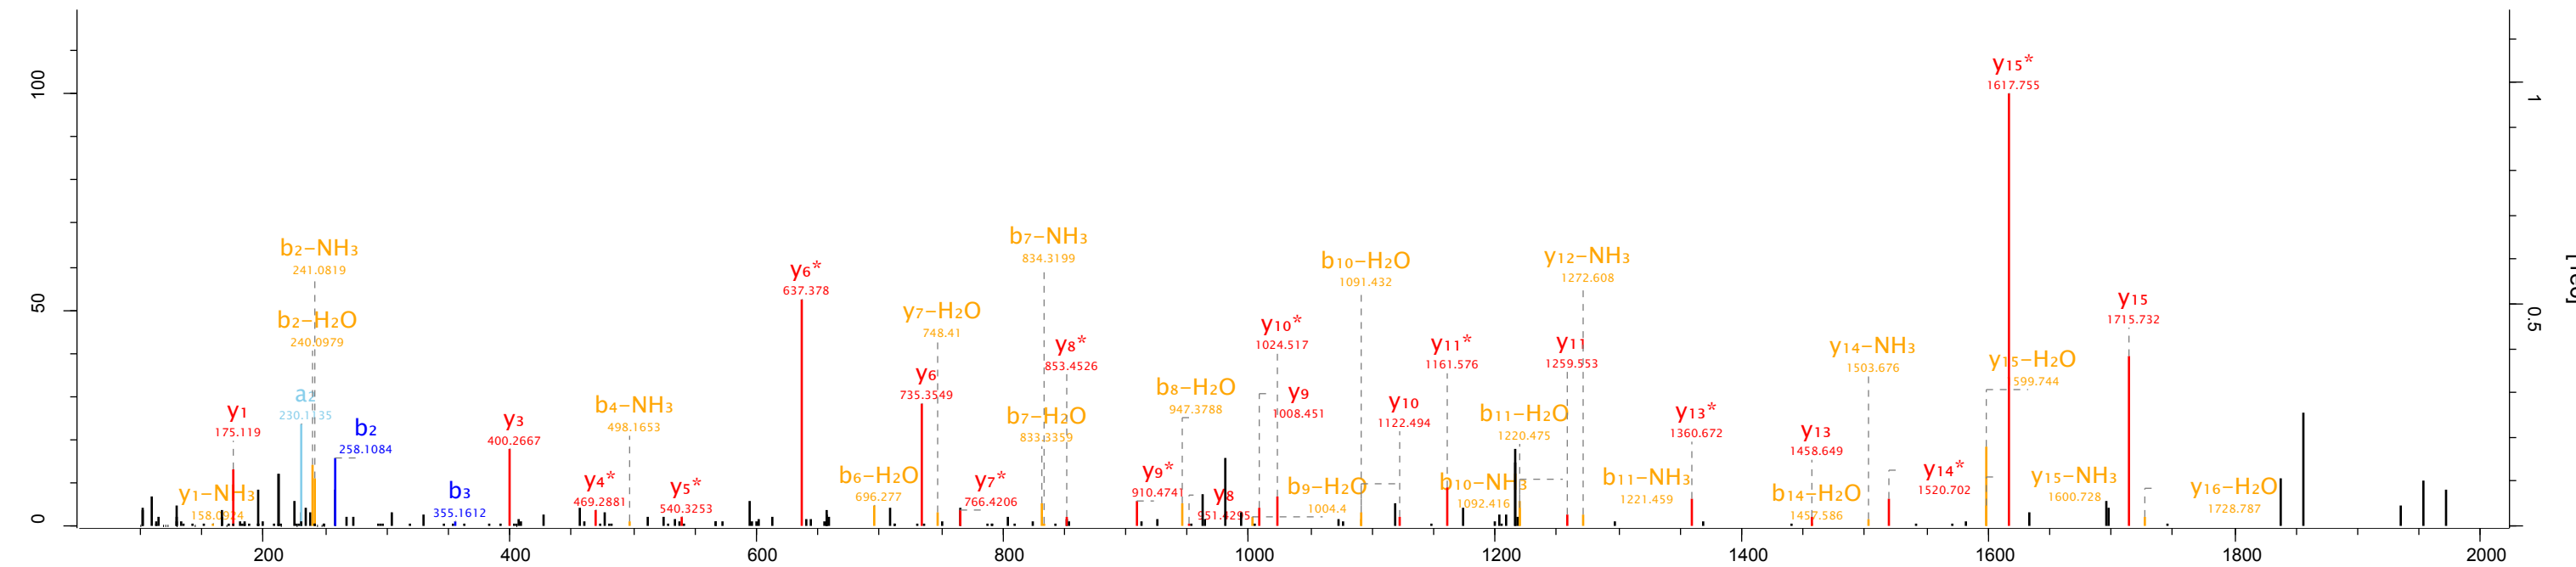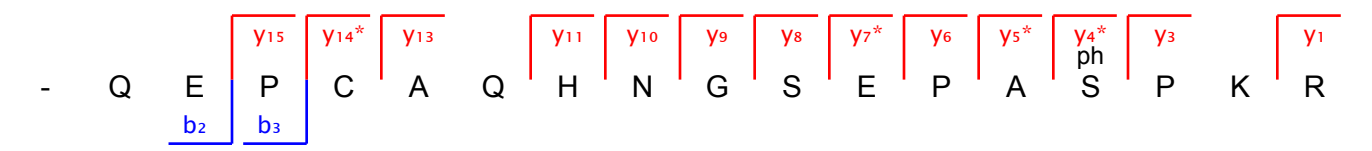

Raw file: 20150814\_A375SR\_Phospho\_BR2\_04  
 Scan: 22928  
 Method: FTMS; HCD  
 Score: 147.73  
 m/z: 1129.49  
 Gene names: CCDC6

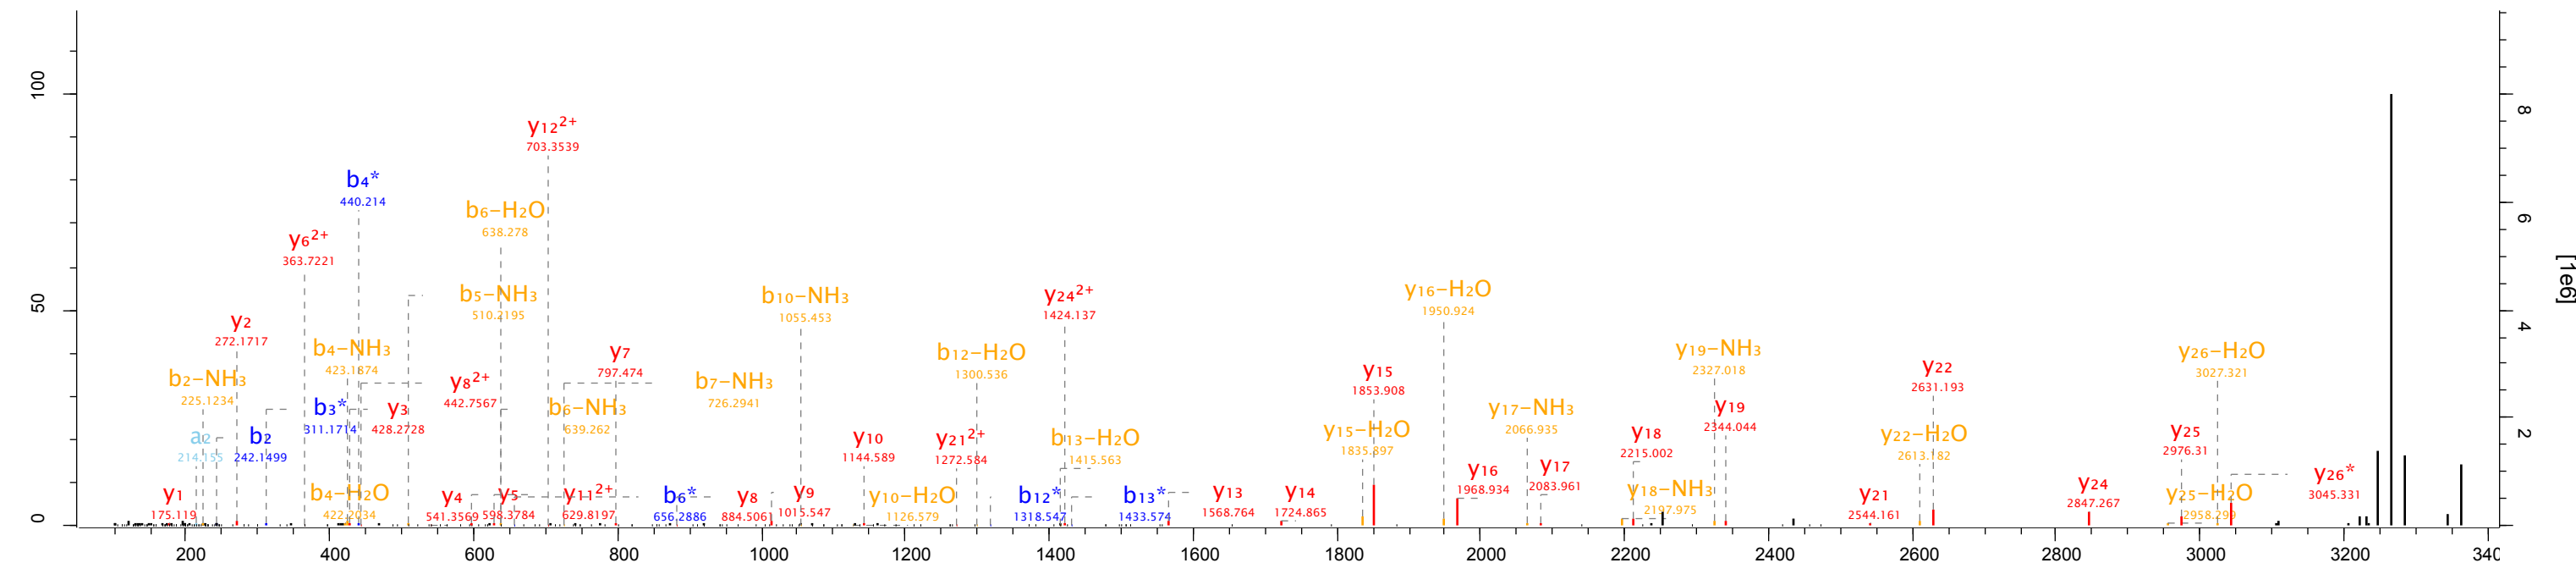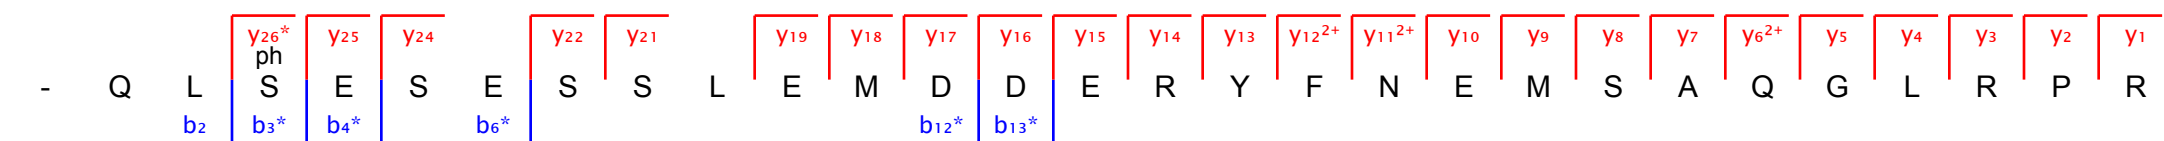



Raw file Scan Method Score m/z Gene names  
 20150814\_A375SR\_Phospho\_BR2\_04 22958 FTMS; HCD 177.34 1217.52 PANK4

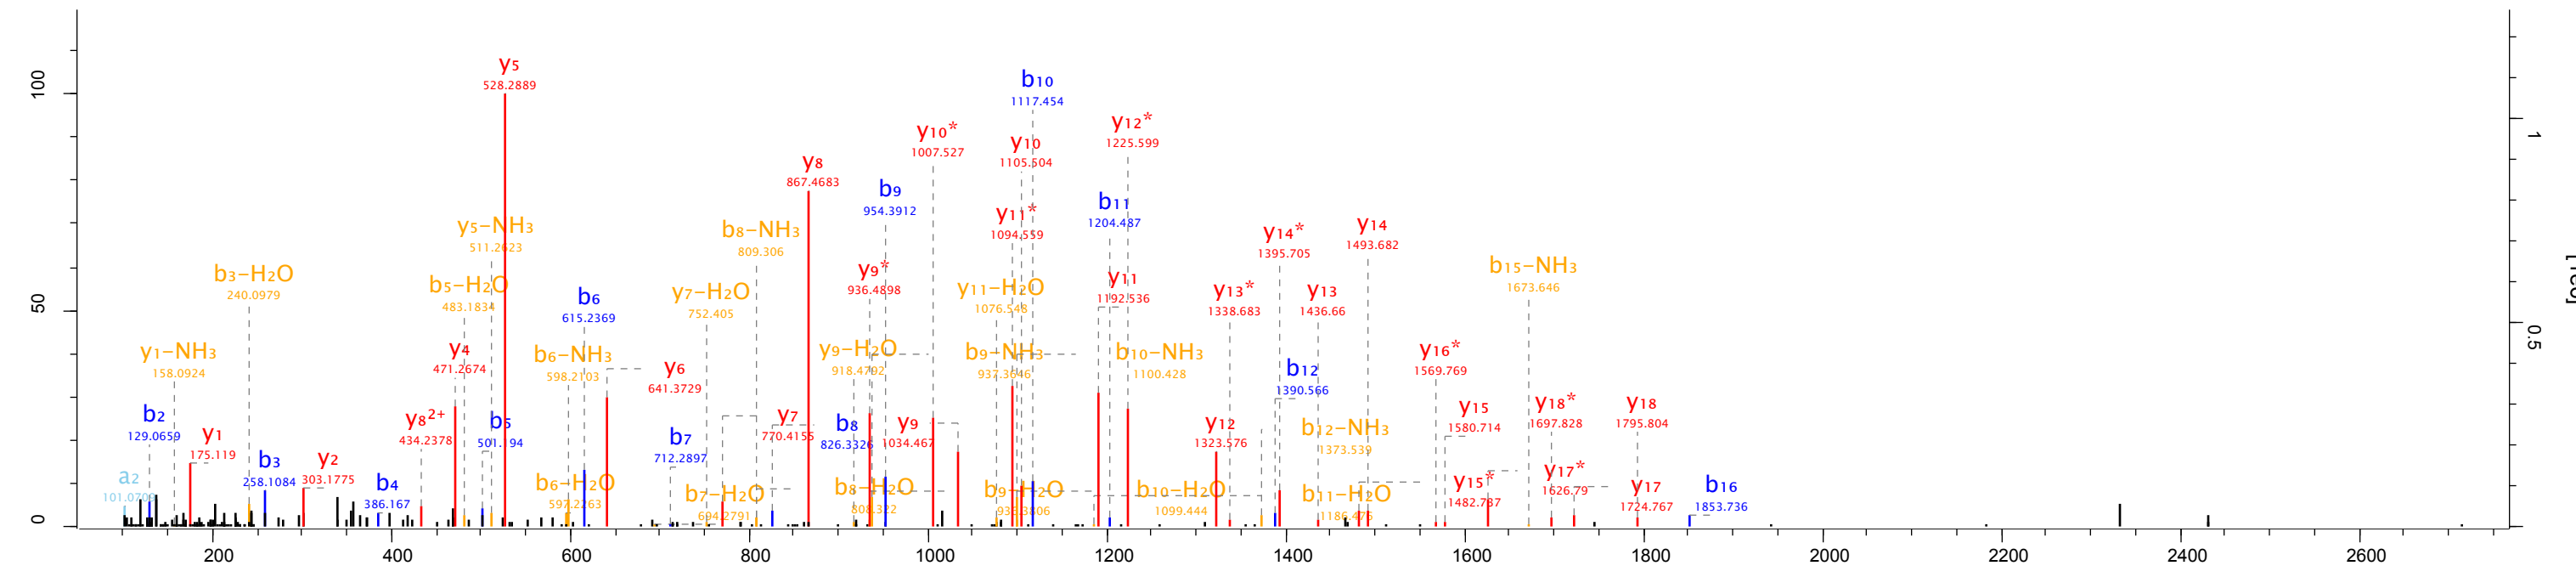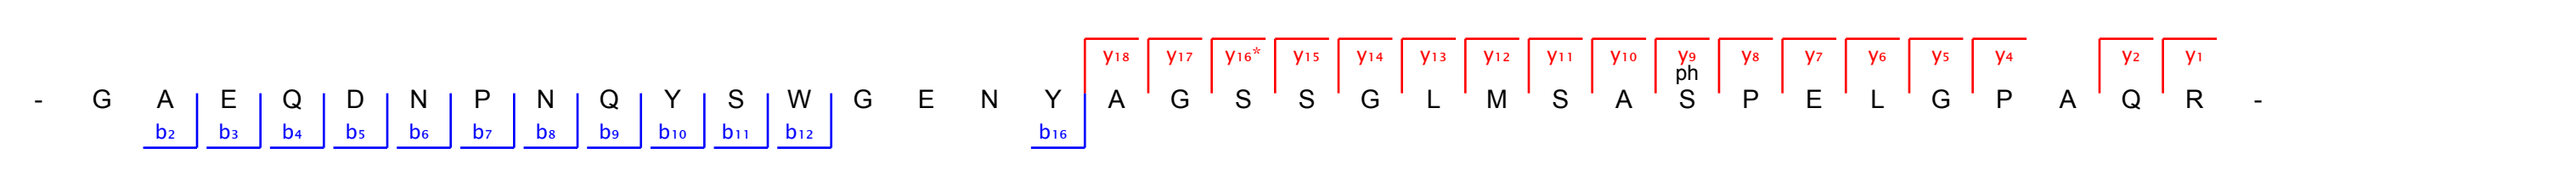

Raw file Scan Method Score m/z Gene names  
 20150814\_A375SR\_Phospho\_BR2\_04 2318 FTMS; HCD 205.15 675.8 IRF2BP1

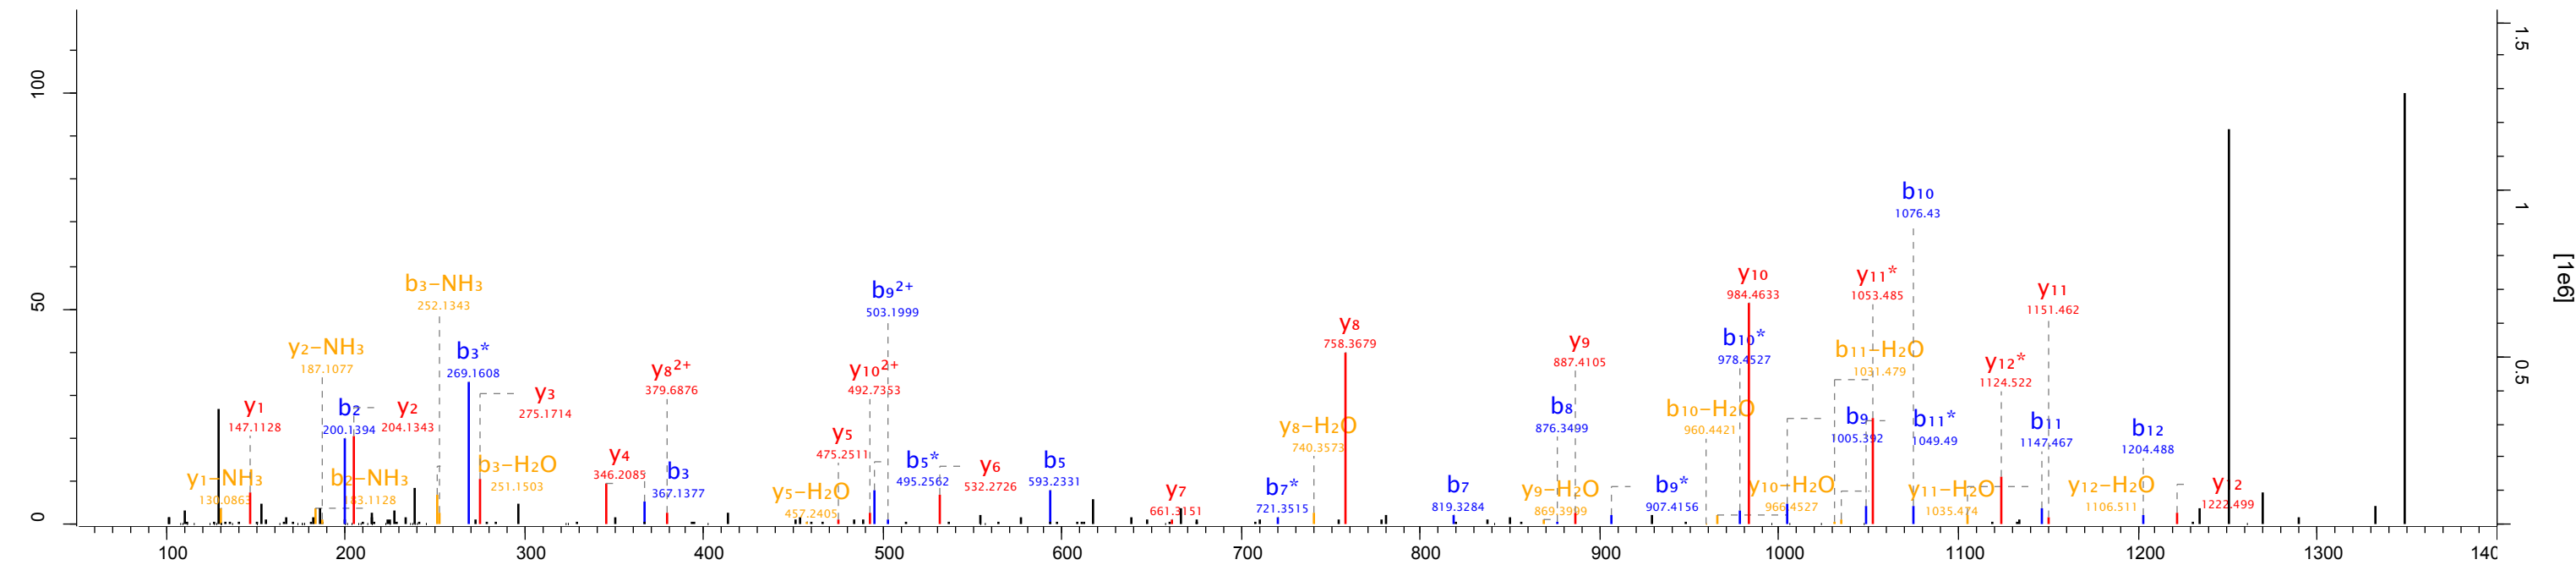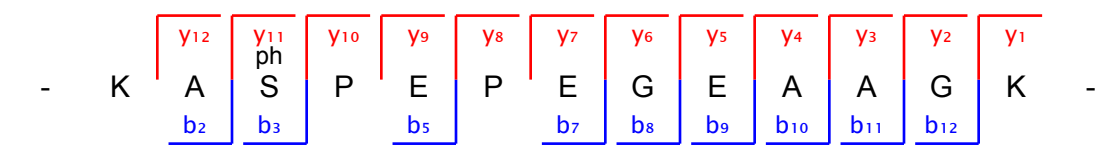

Raw file 20150814\_A375SR\_Phospho\_BR2\_04 Scan 23208 Method FTMS; HCD Score 62.66 m/z 750.41 Gene names CTNNB1

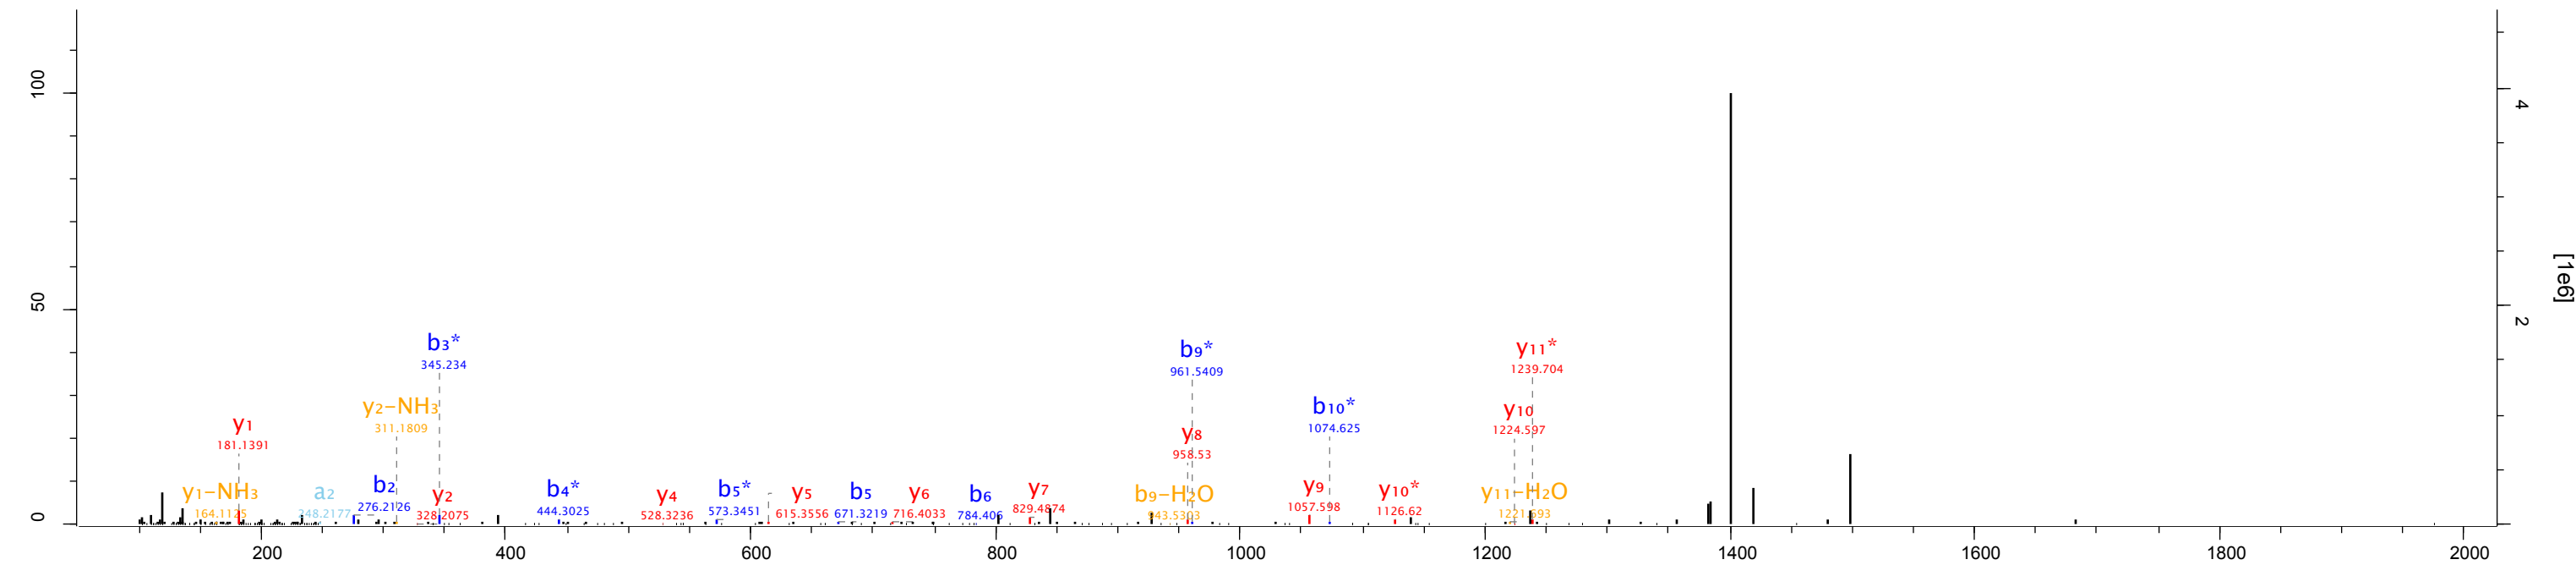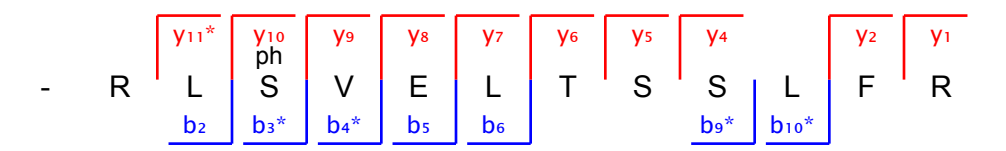

Raw file 20150814\_A375SR\_Phospho\_BR2\_04 Scan 23408 Method FTMS; HCD Score 204.99 m/z 951.1 Gene names RABGEF1

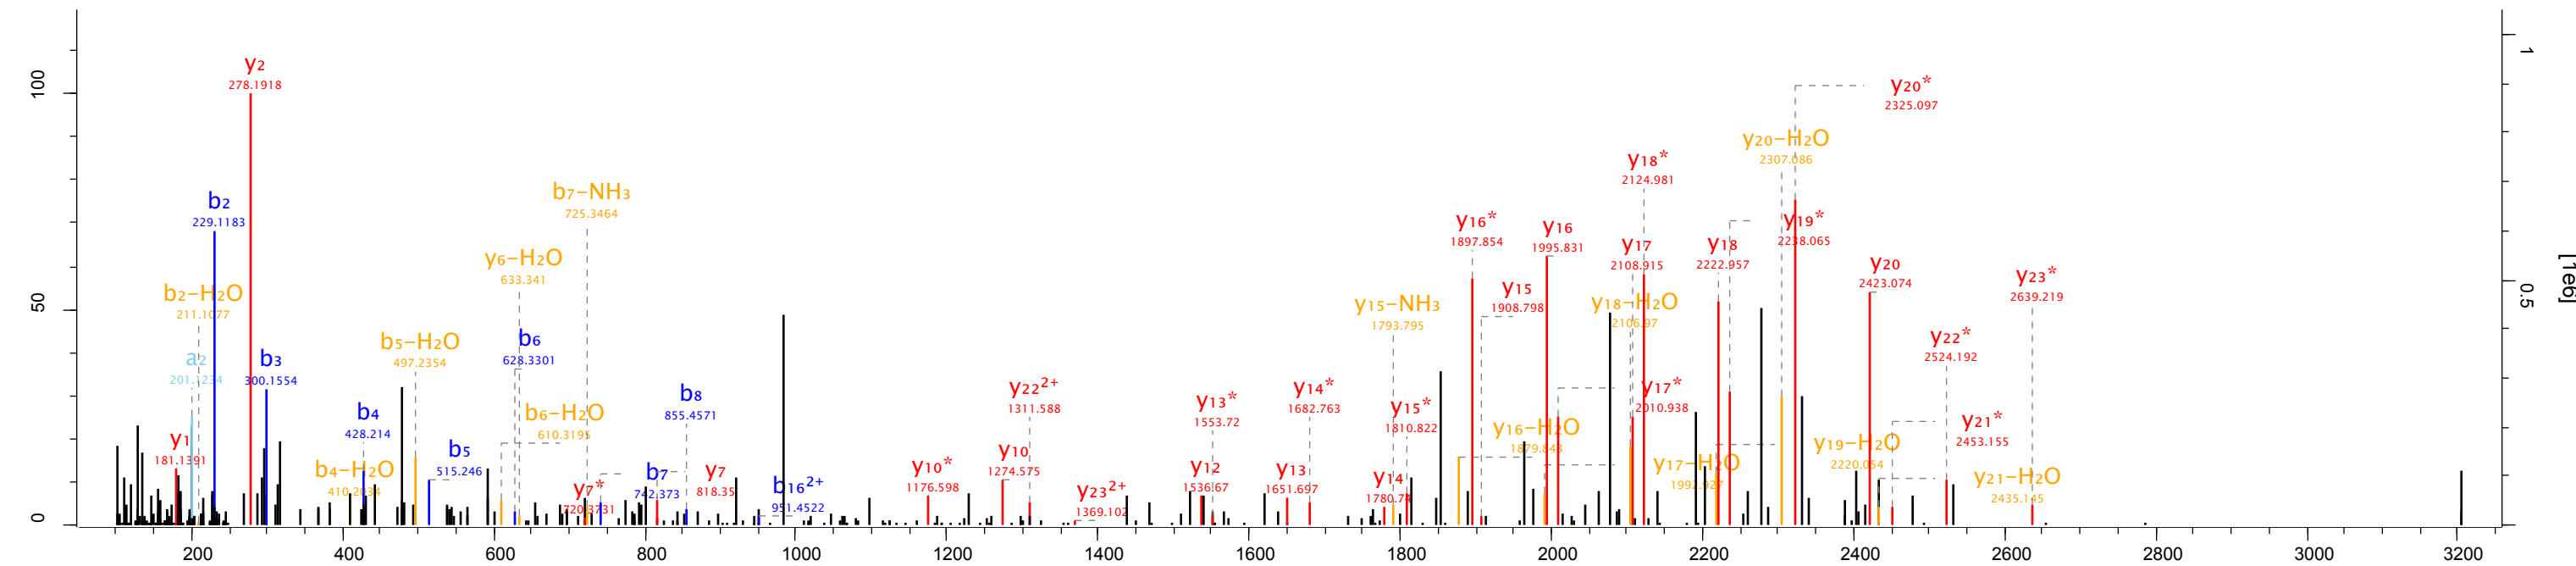

- L y23\* y22\* y21\* y20 y19\* y18 y17 y16 y15 y14 y13 y12 y10 y7<sub>ph</sub> y2 y1 -

D A Q S L N L S Q E D F D R Y M S G Q T S P R -

b2 b3 b4 b5 b6 b7 b8 b16<sup>2+</sup>

Raw file: 20150814\_A375SR\_Phospho\_BR2\_04  
 Scan: 23418 Method: FTMS; HCD Score: 56.85 m/z: 816.05 Gene names: TNRC6A

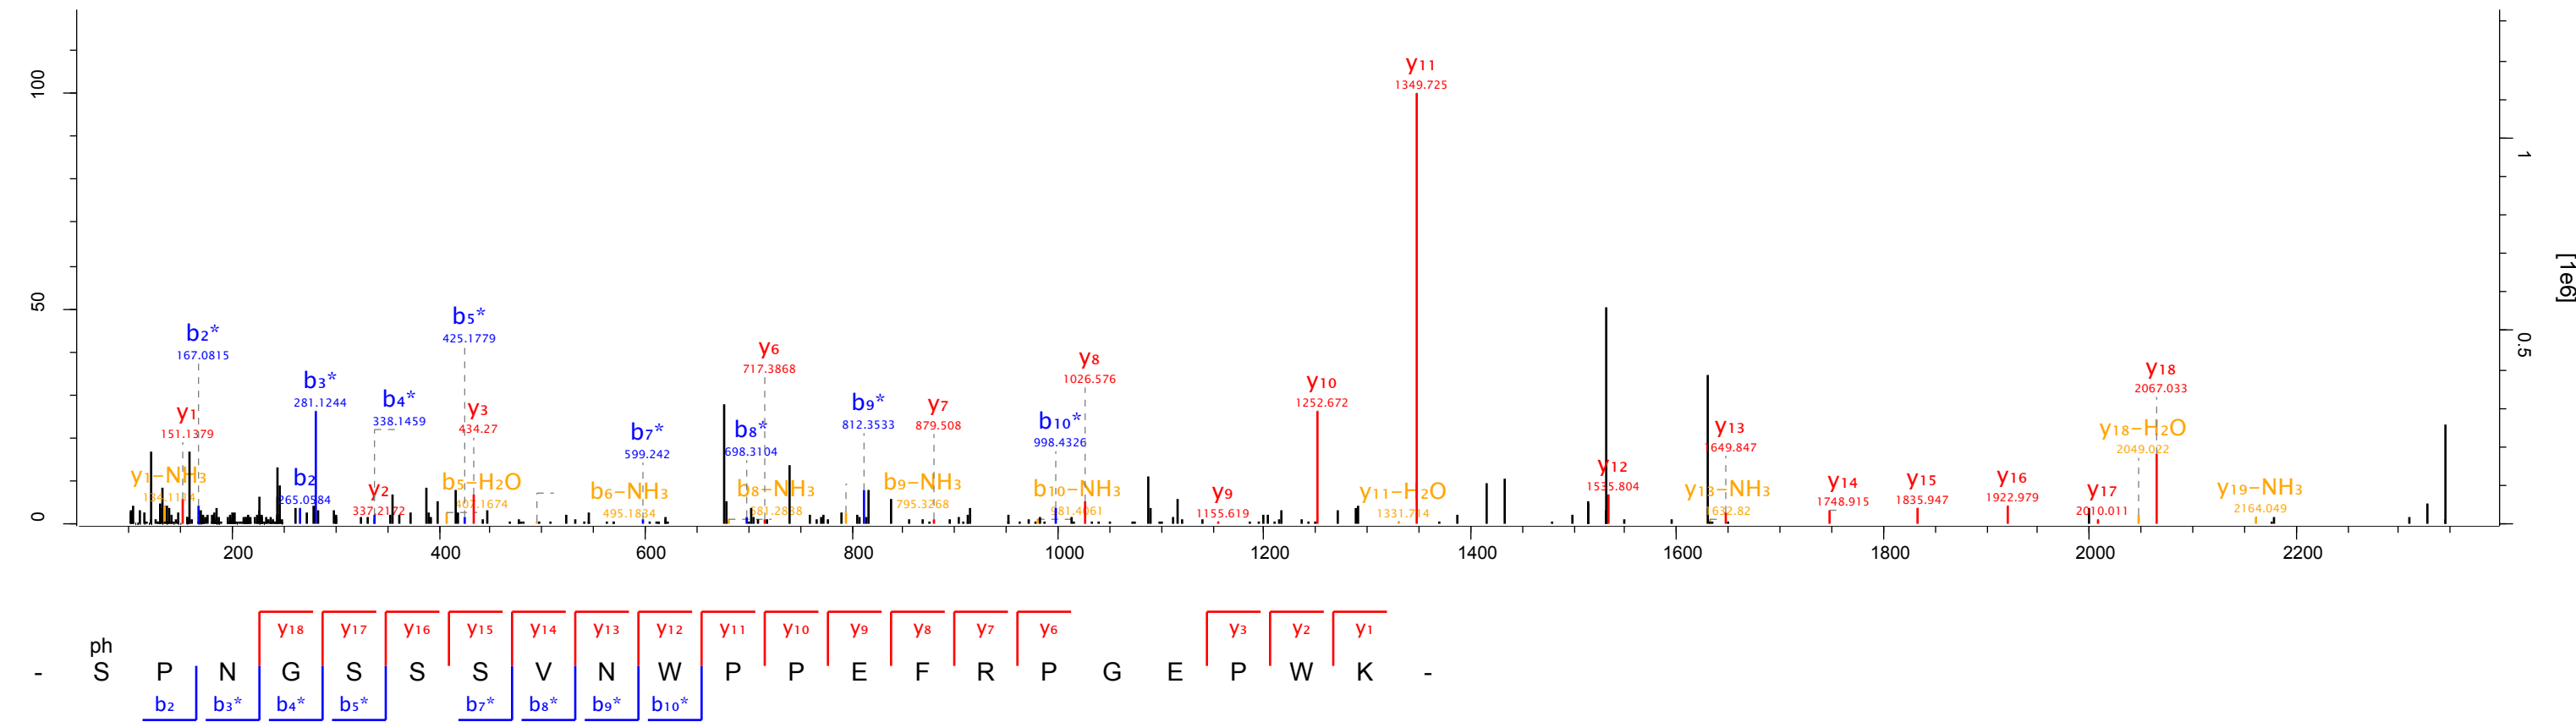

Raw file 20150814\_A375SR\_Phospho\_BR2\_04 Scan 23428 Method FTMS; HCD Score 83.6 m/z 992.12 Gene names UTP20

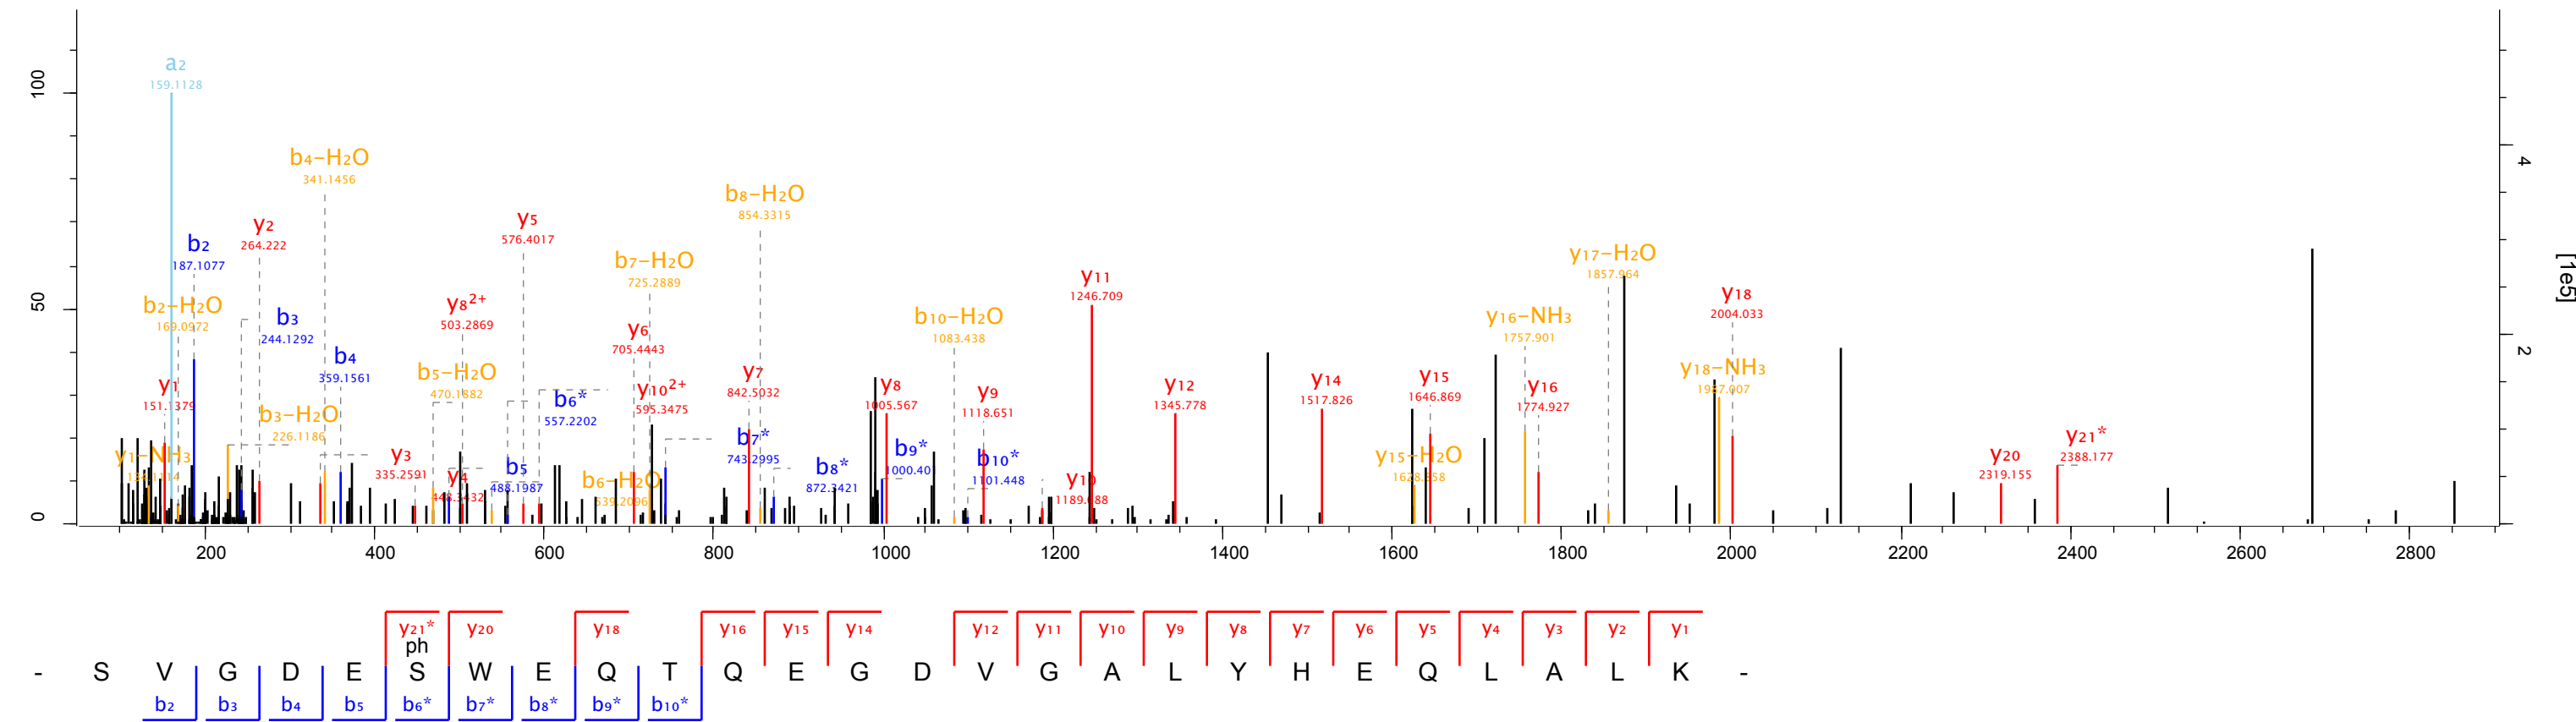

Raw file 20150814\_A375SR\_Phospho\_BR2\_04 Scan 23998 Method FTMS; HCD Score 150.68 m/z 952.92 Gene names FAM208A

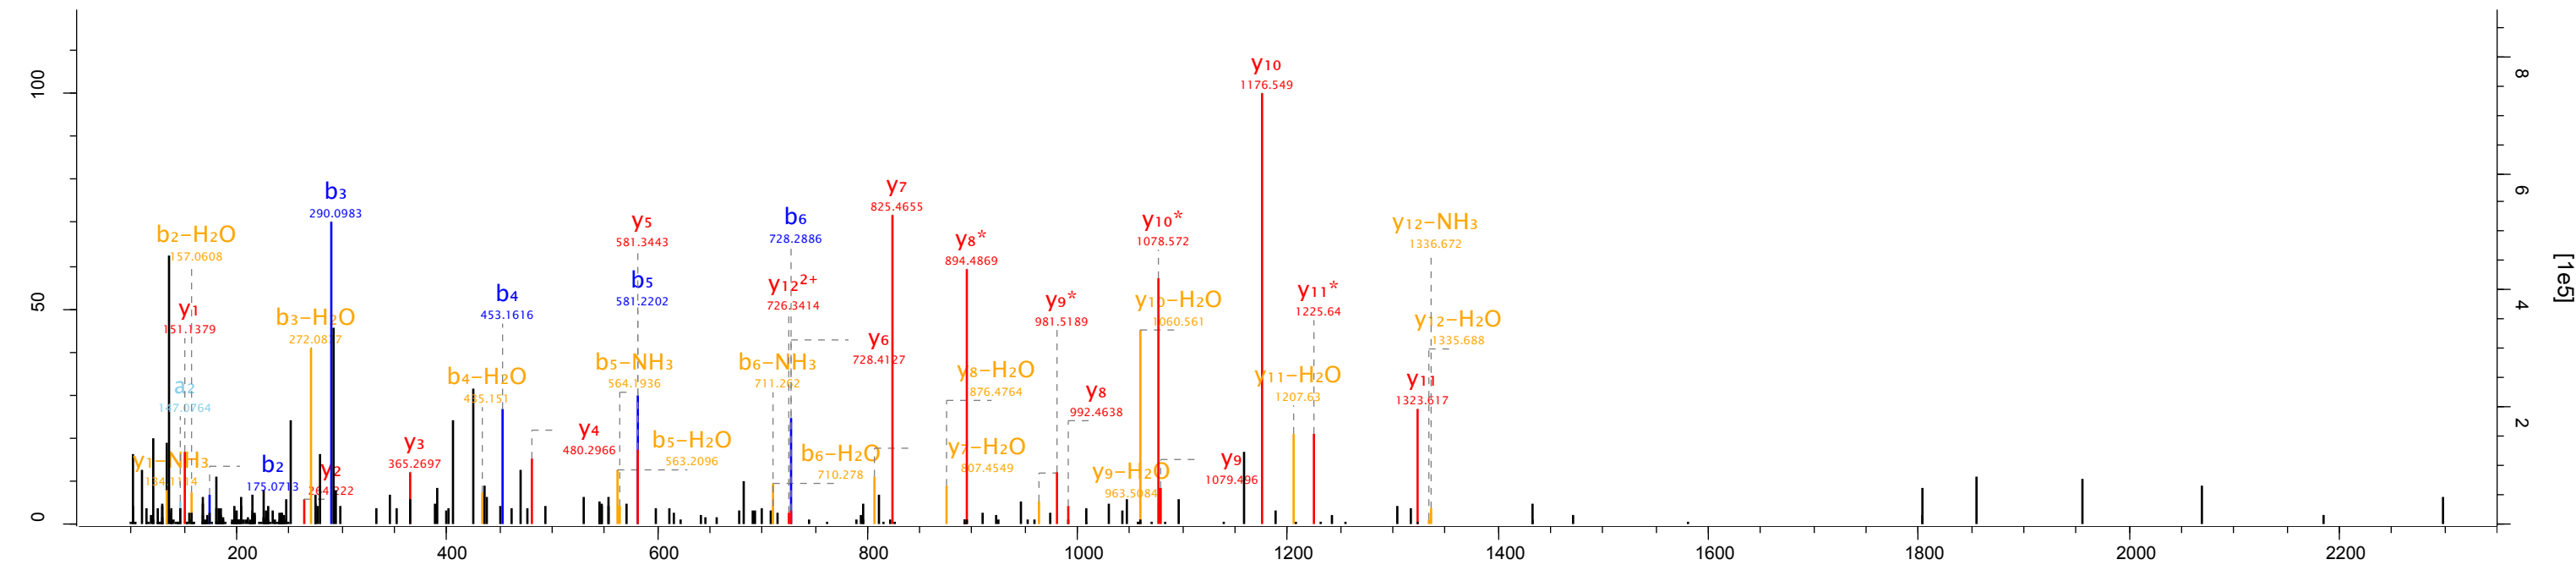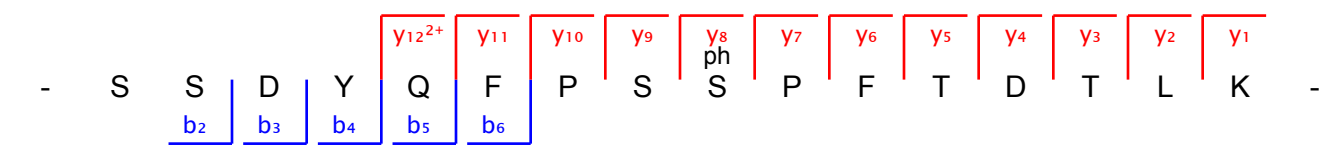

20150814\_A375SR\_Phospho\_BR2\_04 24088 FTMS; HCD 164.39 925.06 TOR1AIP1

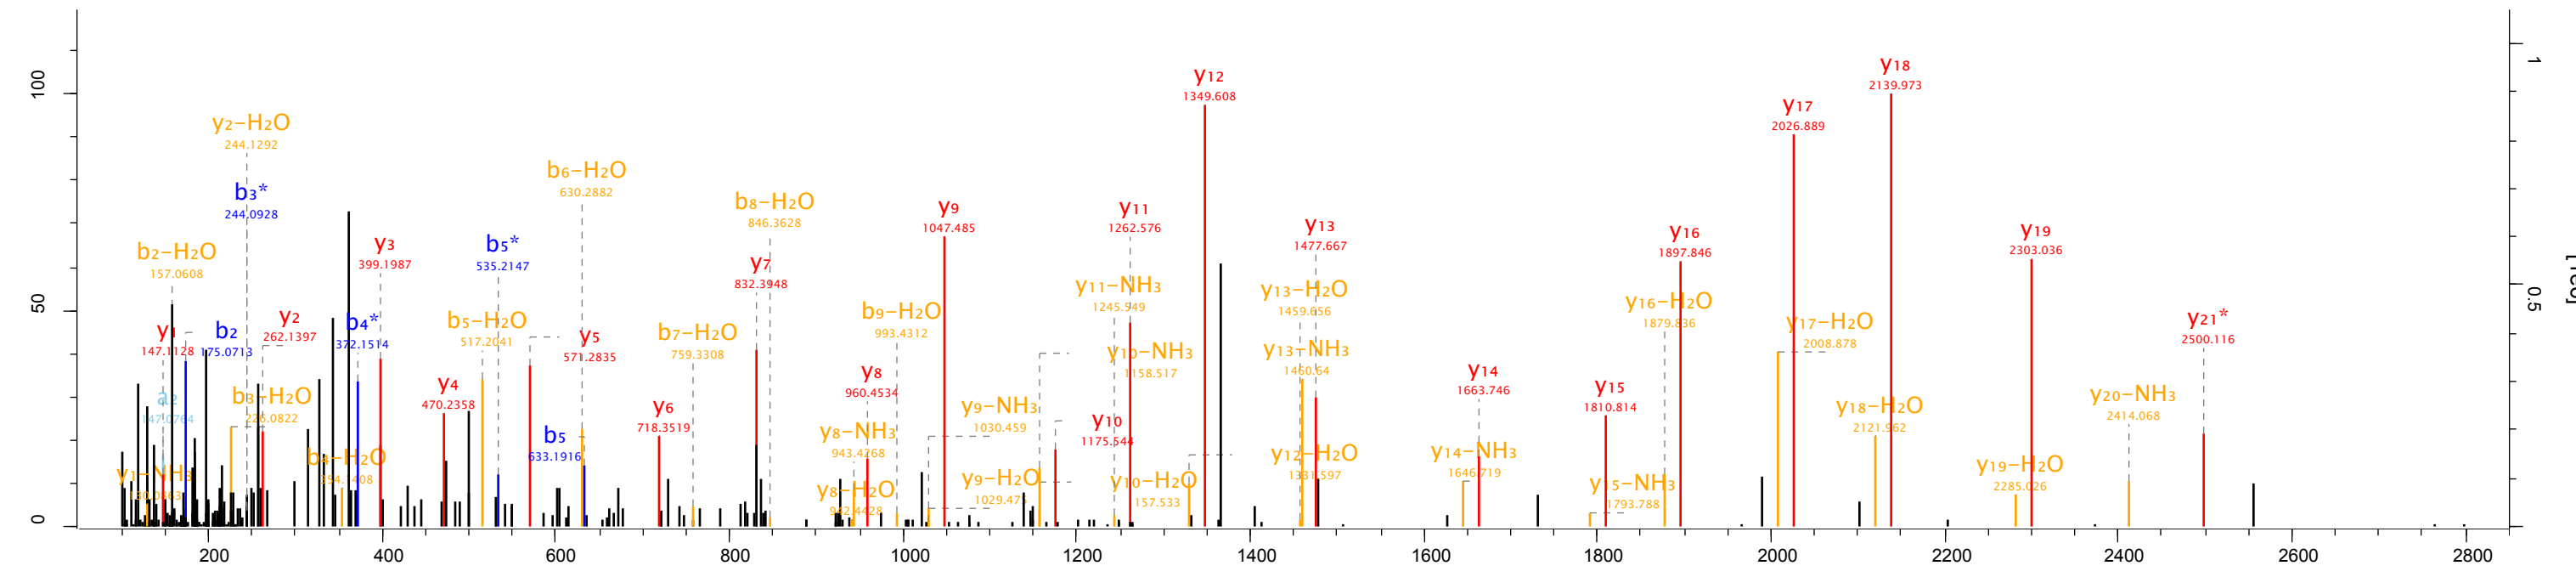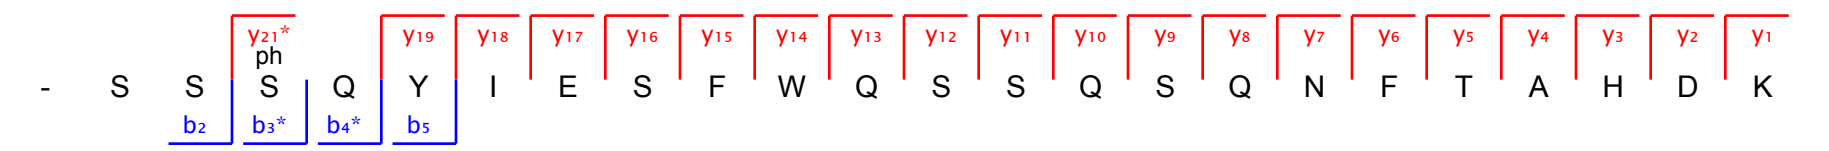



Raw file: 20150814\_A375SR\_Phospho\_BR2\_04  
 Scan: 24168 Method: FTMS; HCD Score: 123 m/z: 820.88 Gene names: AHNAK

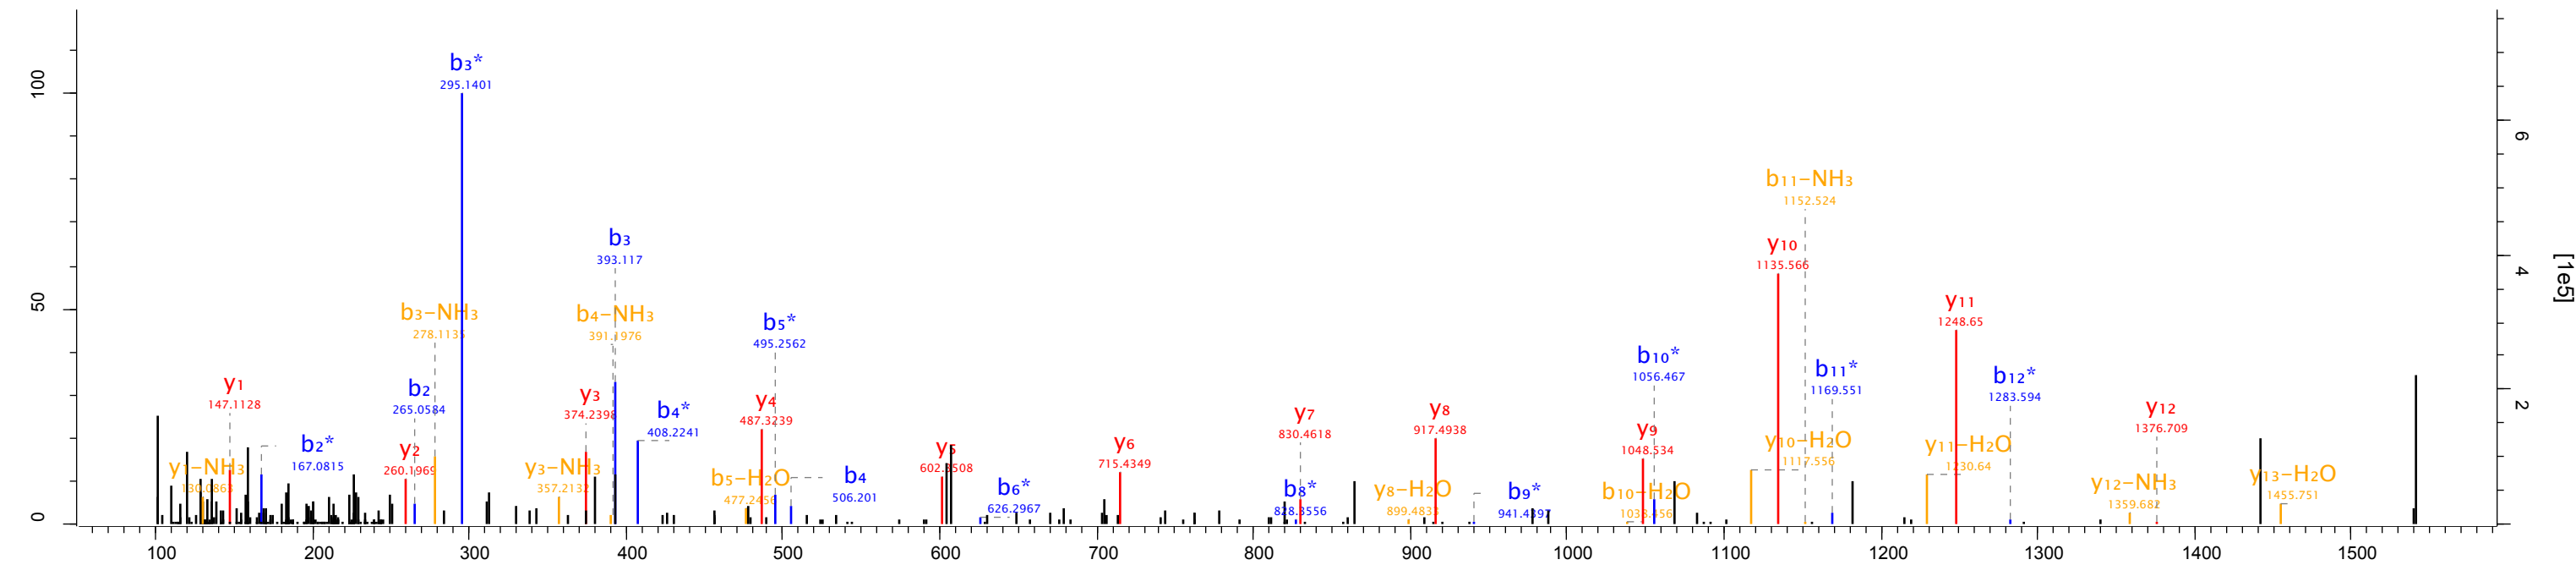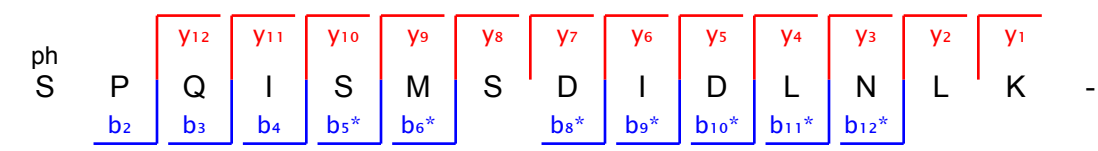

Raw file: 20150814\_A375SR\_Phospho\_BR2\_04  
 Scan: 25228 Method: FTMS; HCD Score: 151.37 m/z: 853.44 Gene names: ASH1L

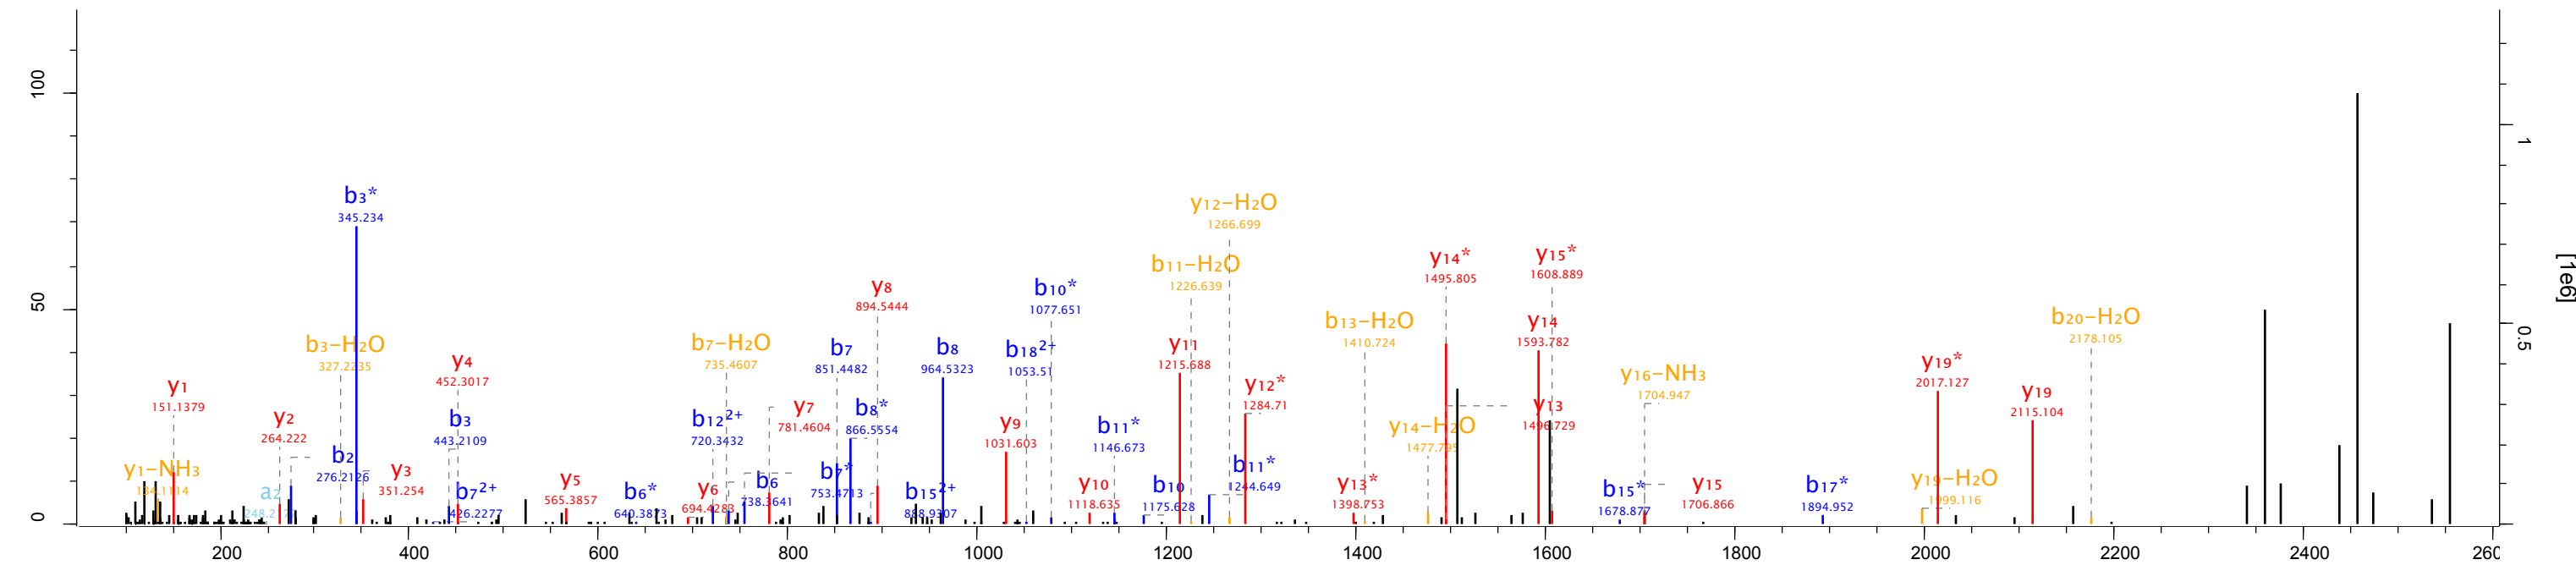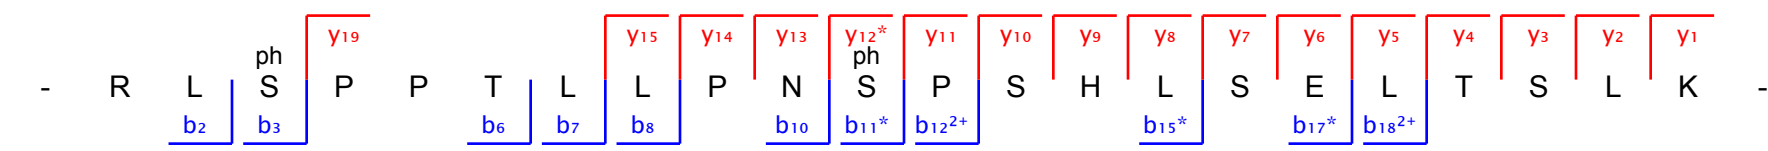

Raw file: 20150814\_A375SR\_Phospho\_BR2\_04  
 Scan: 25318 Method: FTMS; HCD Score: 137 m/z: 893.46 Gene names: CHAMP1

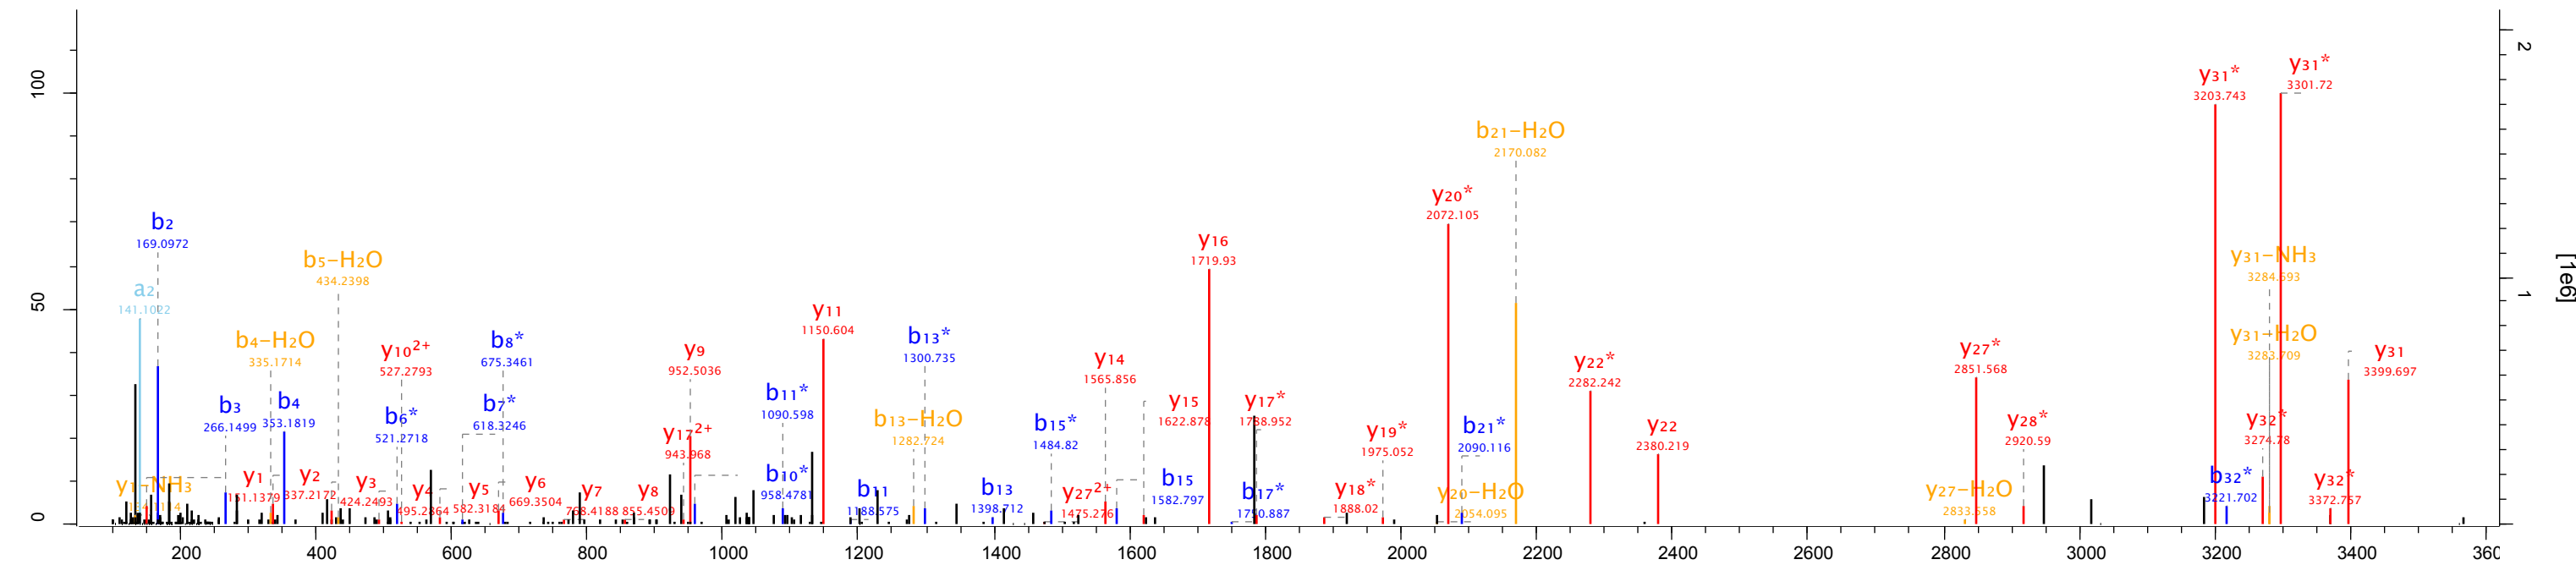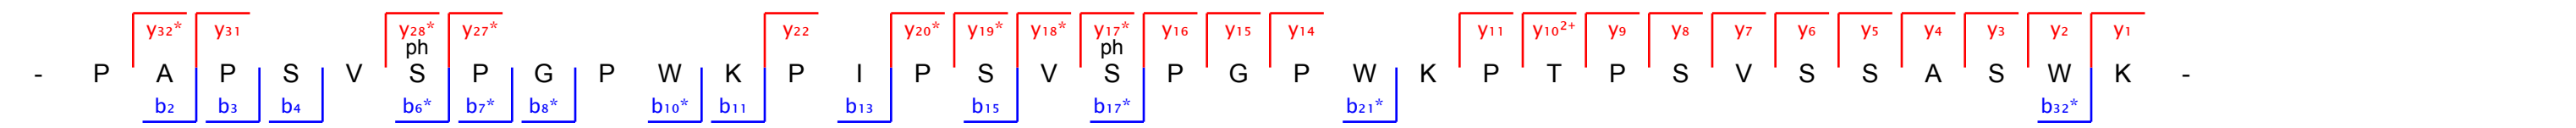

Raw file: 20150814\_A375SR\_Phospho\_BR2\_04  
 Scan: 25358 Method: FTMS; HCD Score: 45.14 m/z: 1138.86 Gene names: ZFC3H1

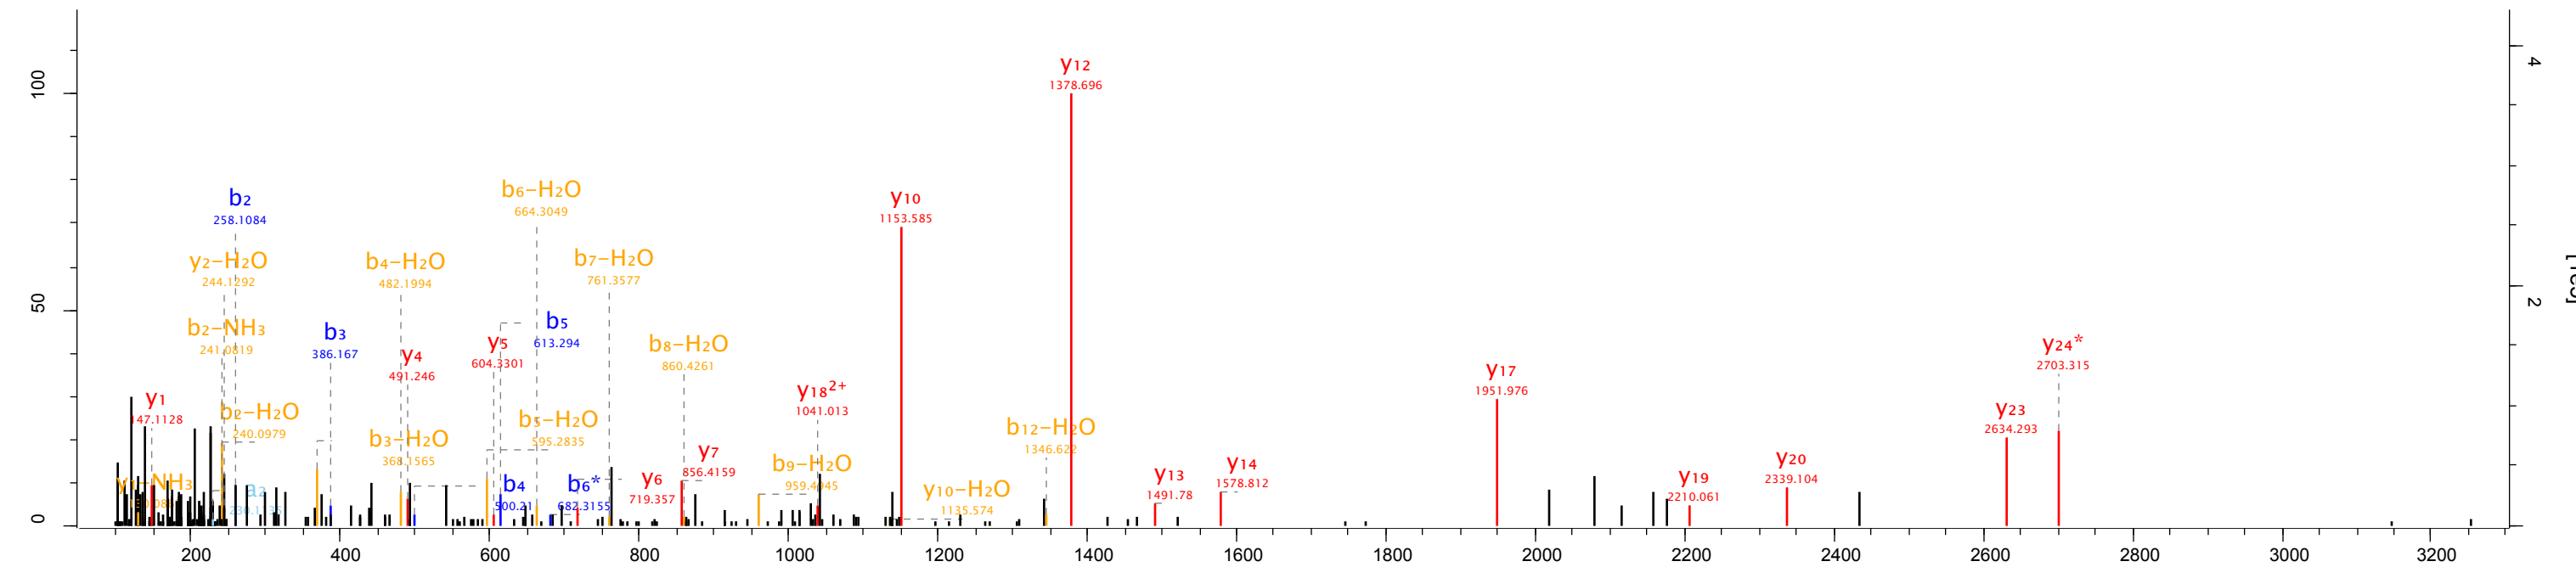

Sequence: E Q Q N I S P V V E E E P E F S L P Q P S L H D L T Q D K -

Fragmentation sites (b and y ions):

- Blue boxes (b ions): Q (b2), Q (b3), N (b4), I (b5), S (b6\*)
- Red boxes (y ions): S (y24\*), P (y23), E (y20), E (y19), E (y18<sup>2+</sup>), P (y17), S (y14), L (y13), P (y12), P (y10), H (y7), D (y6), L (y5), T (y4), K (y1)

Raw file: 20150814\_A375SR\_Phospho\_BR2\_04  
 Scan: 25658 Method: FTMS; HCD Score: 217.57 m/z: 896.09 Gene names: SBNO1

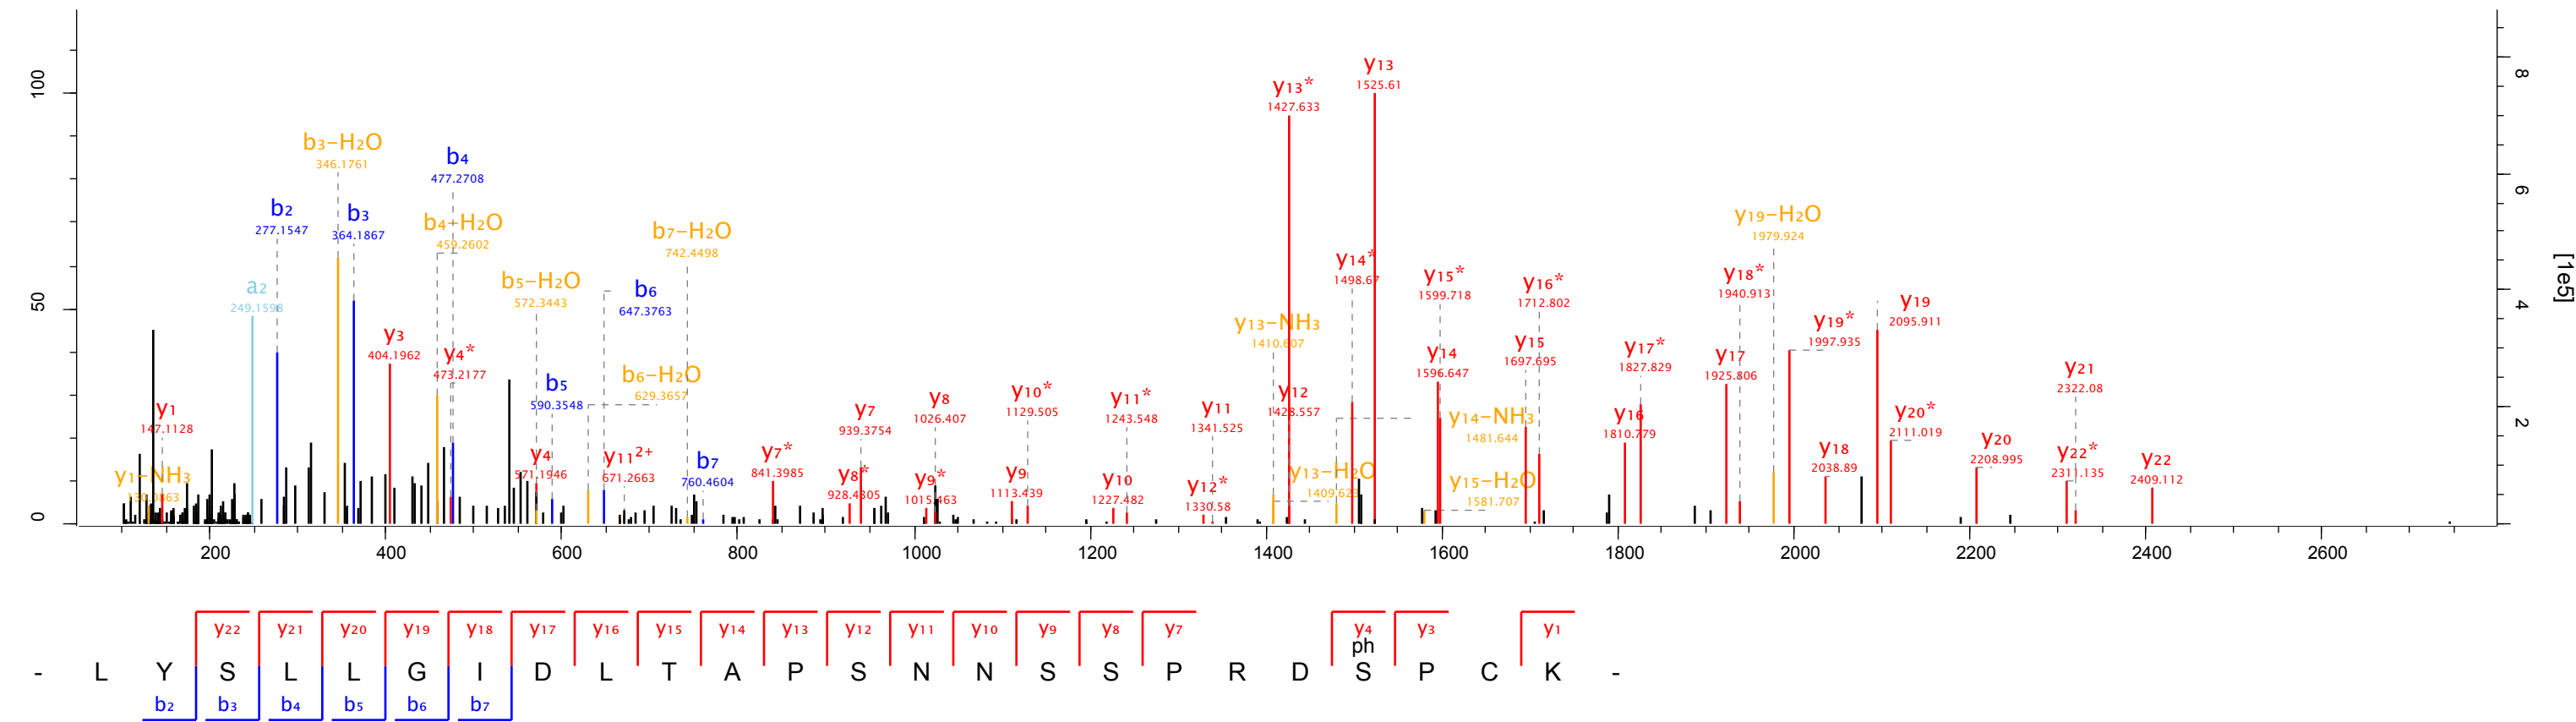

Raw file: 20150814\_A375SR\_Phospho\_BR2\_04  
 Scan: 2588 Method: FTMS; HCD Score: 131.31 m/z: 778.35 Gene names: BAG3

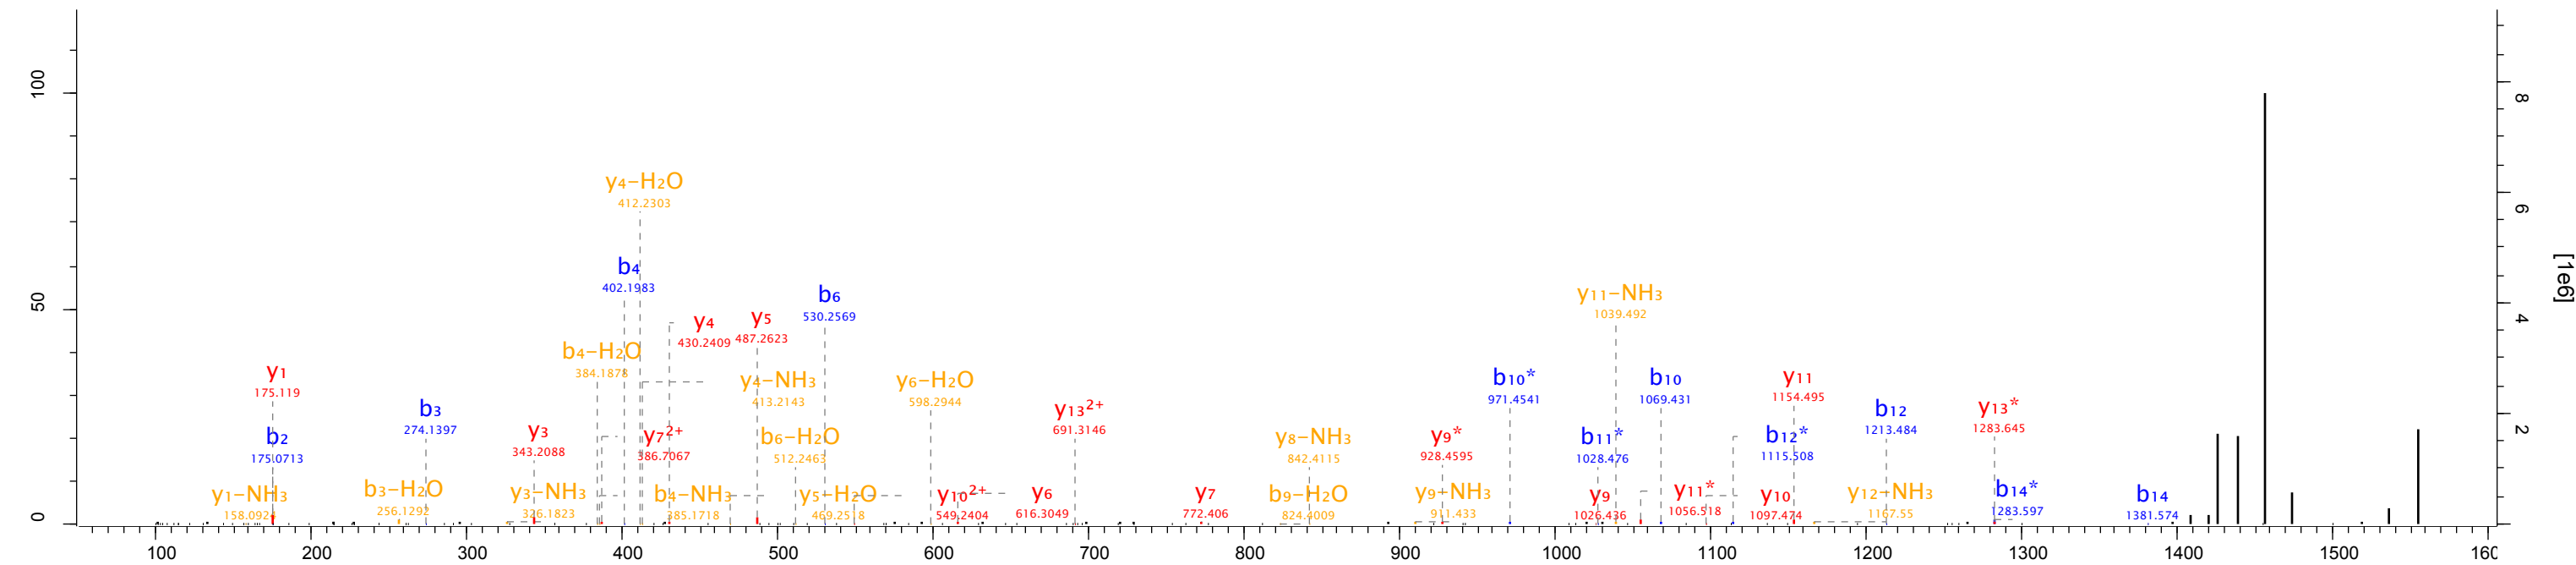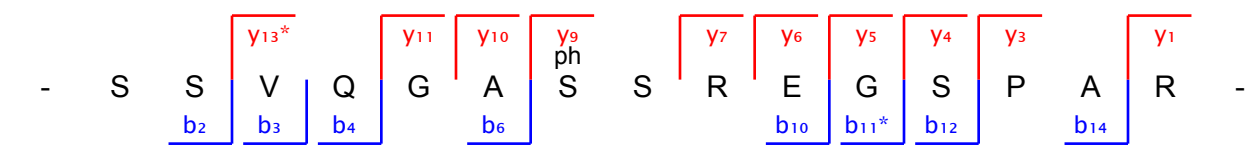

Raw file: 20150814\_A375SR\_Phospho\_BR2\_04  
 Scan: 25948 Method: FTMS; HCD Score: 48.98 m/z: 937.67 Gene names: GTSF1

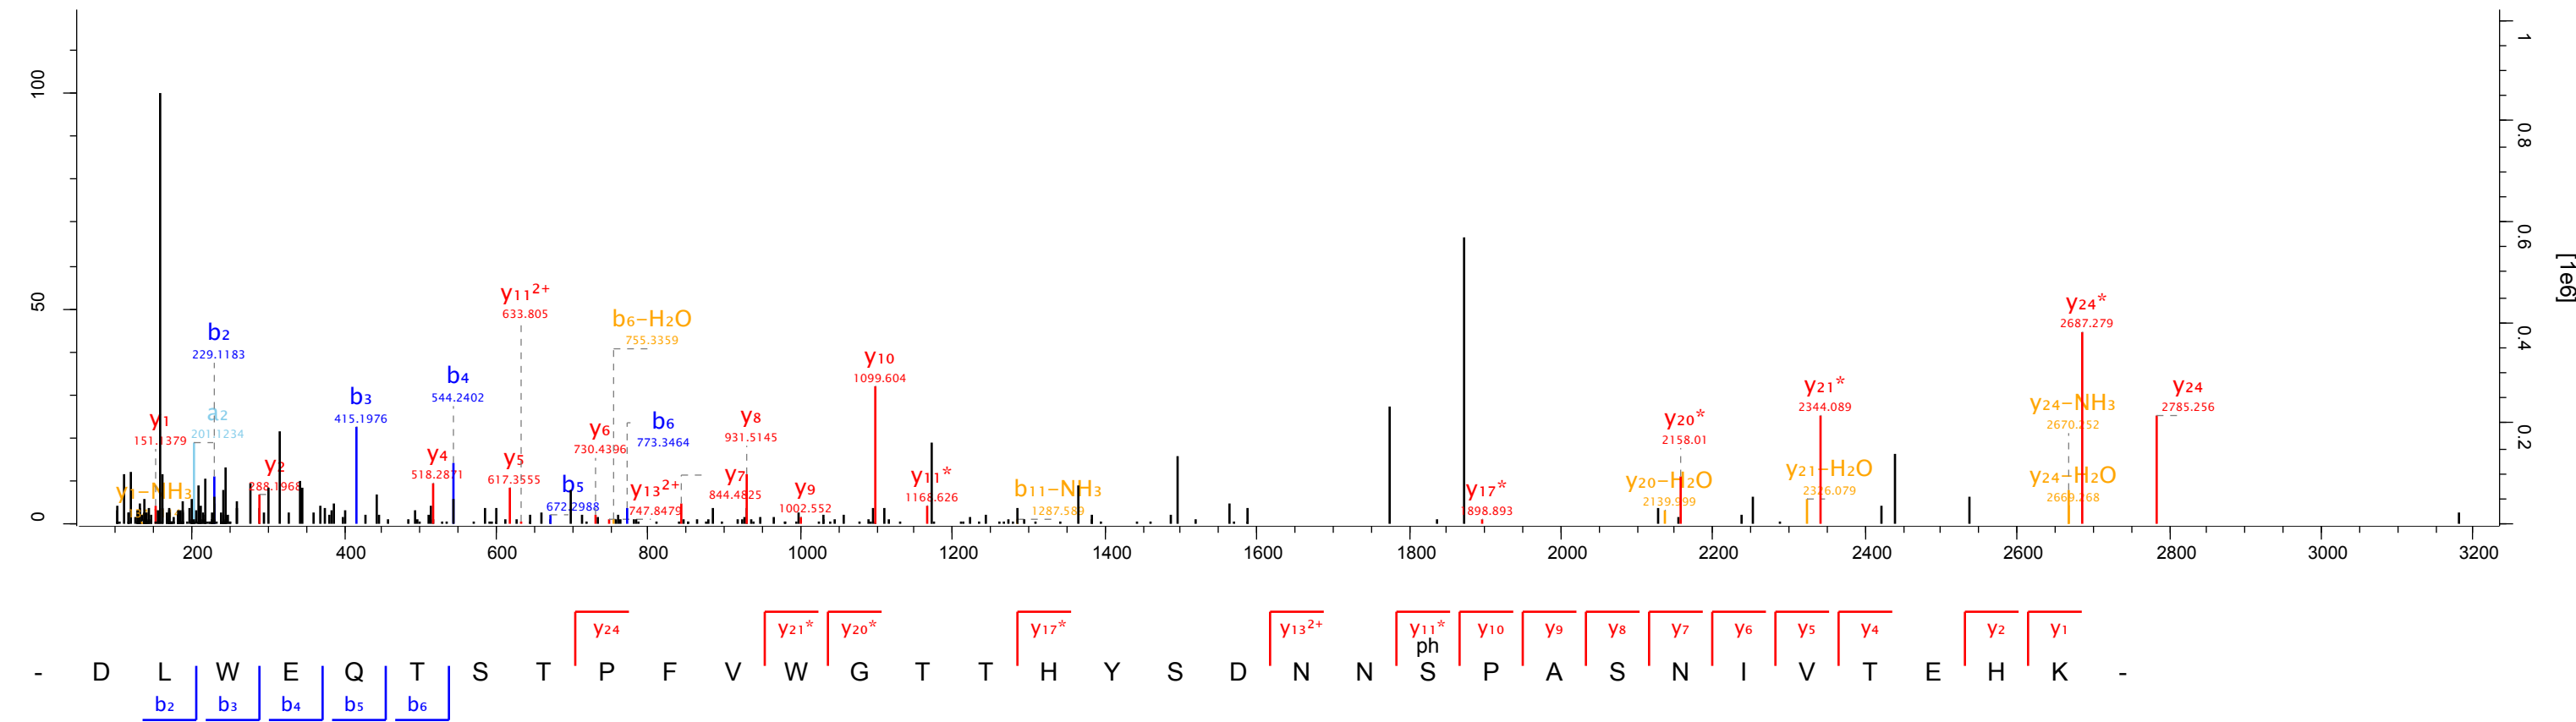

Raw file 20150814\_A375SR\_Phospho\_BR2\_04 Scan 25958 Method FTMS; HCD Score 168.31 m/z 1228.89 Gene names CAST

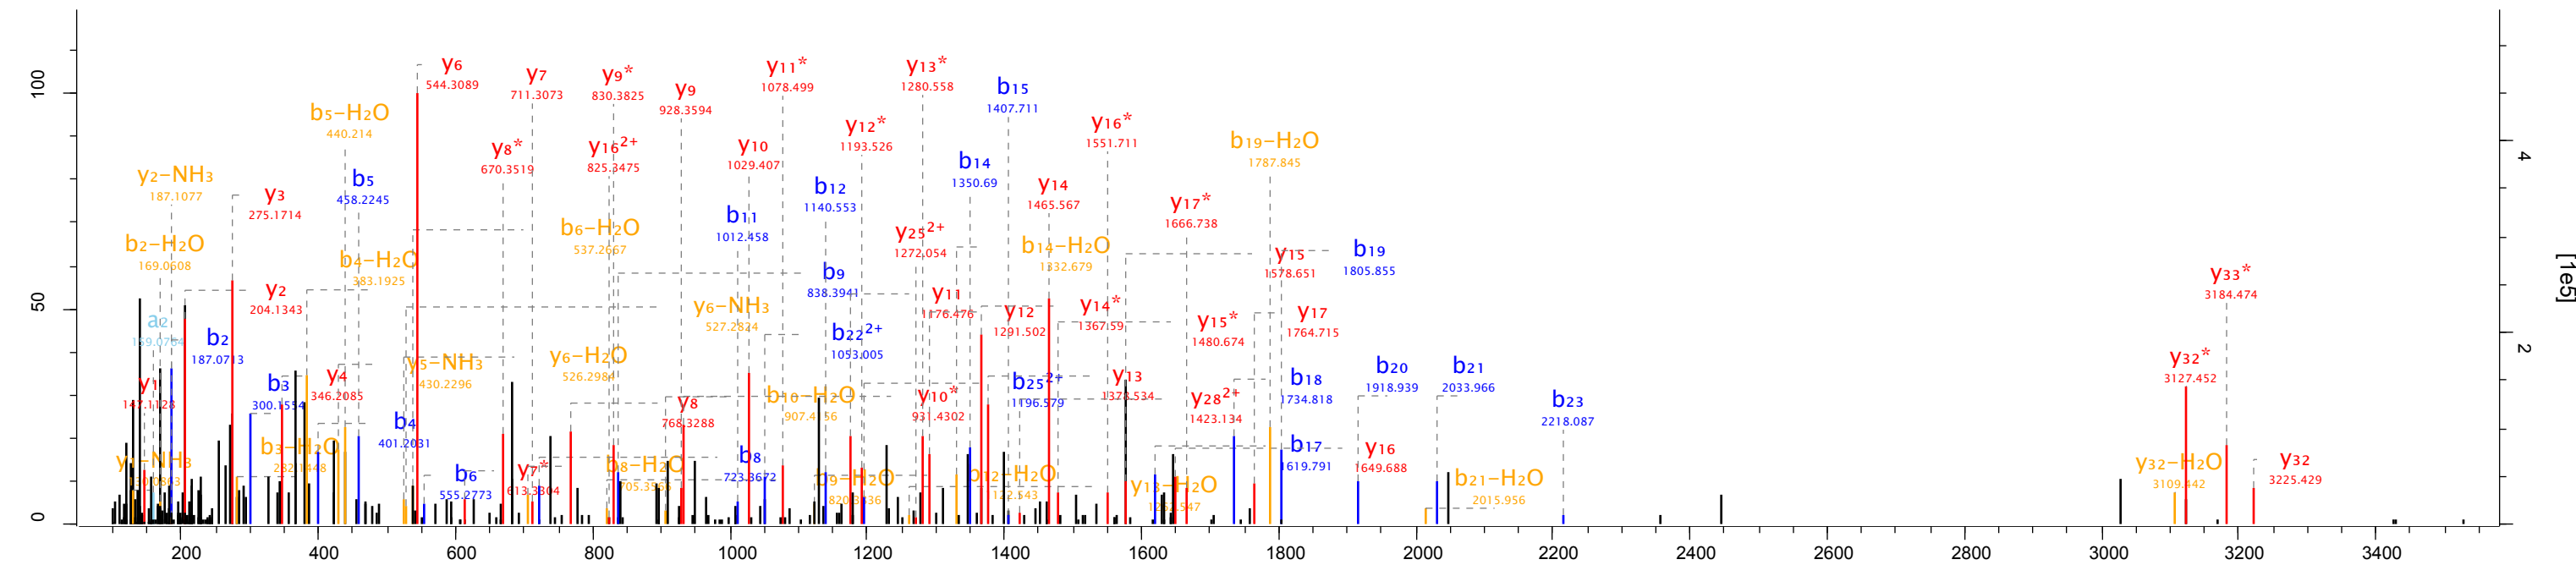

- E G I T G P P A D S S K P I G P D D A I D A L S S D F T C G S P T A A G K -

b<sub>2</sub>
b<sub>3</sub>
b<sub>4</sub>
b<sub>5</sub>
b<sub>6</sub>
b<sub>8</sub>
b<sub>9</sub>
b<sub>11</sub>
b<sub>12</sub>
b<sub>14</sub>
b<sub>15</sub>
b<sub>17</sub>
b<sub>18</sub>
b<sub>19</sub>
b<sub>20</sub>
b<sub>21</sub>
b<sub>22</sub><sup>2+</sup>
b<sub>23</sub>
b<sub>25</sub><sup>2+</sup>
y<sub>17</sub>
y<sub>16</sub>
y<sub>15</sub>
y<sub>14</sub>
y<sub>13</sub>
y<sub>12</sub>
y<sub>11</sub>
y<sub>10</sub>
y<sub>9</sub>
y<sub>8</sub>
y<sub>7</sub>
y<sub>6</sub>
y<sub>4</sub>
y<sub>3</sub>
y<sub>2</sub>
y<sub>1</sub>
y<sub>28</sub><sup>2+</sup>
y<sub>25</sub><sup>2+</sup>
y<sub>33</sub><sup>\*</sup>
y<sub>32</sub>



Raw file: 20150814\_A375SR\_Phospho\_BR2\_04  
 Scan: 26058 Method: FTMS; HCD Score: 267.81 m/z: 1220.54 Gene names: TTC1

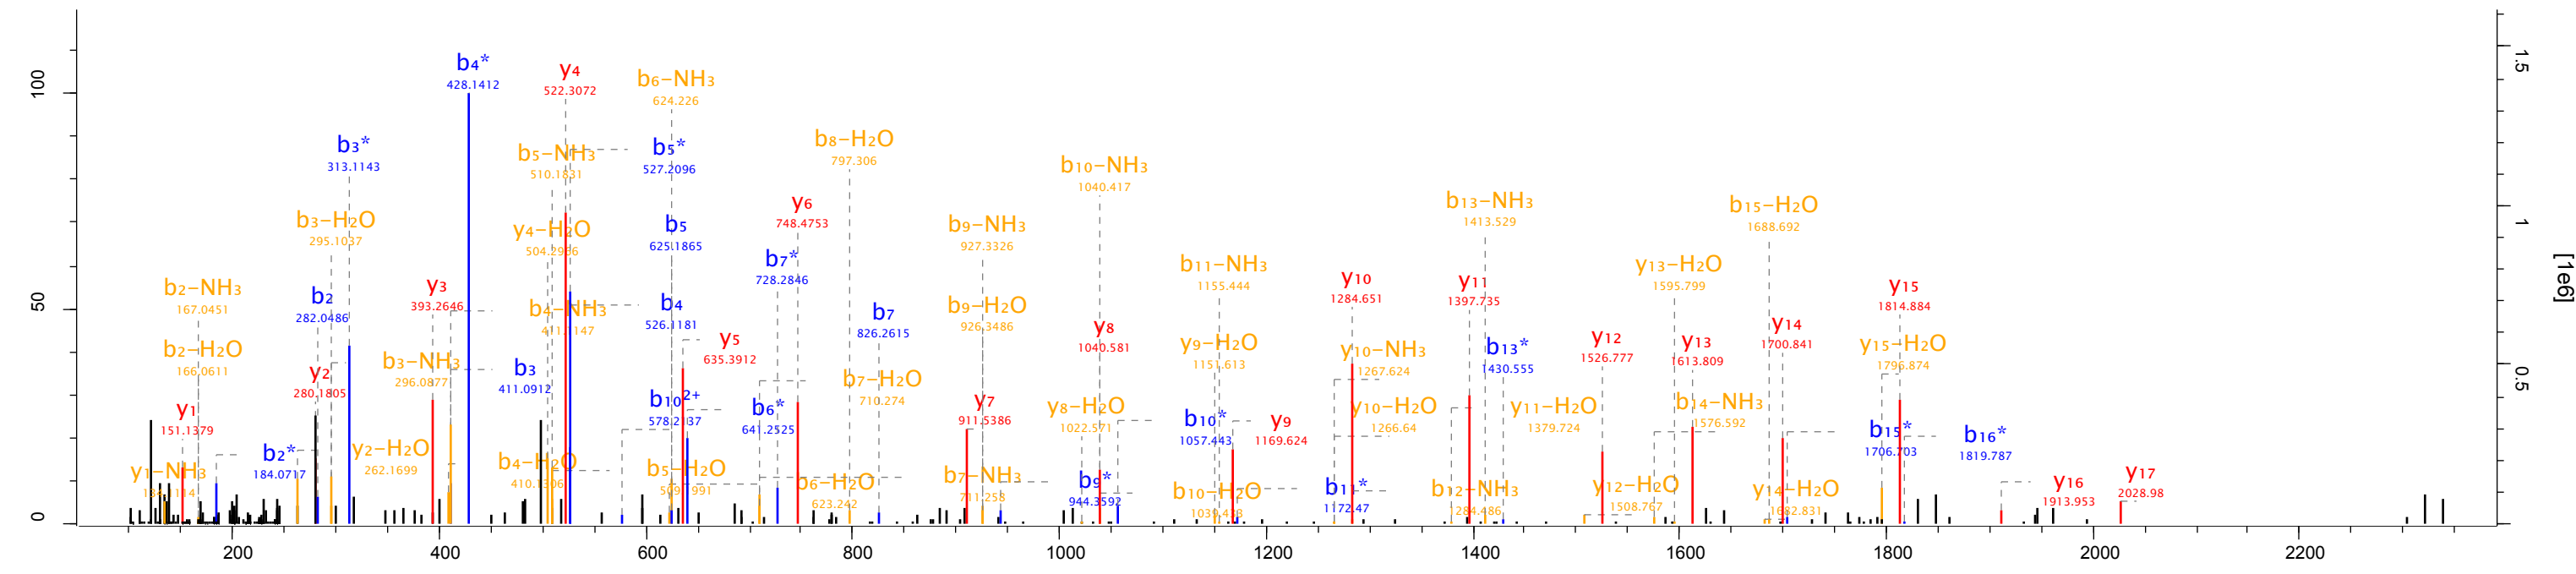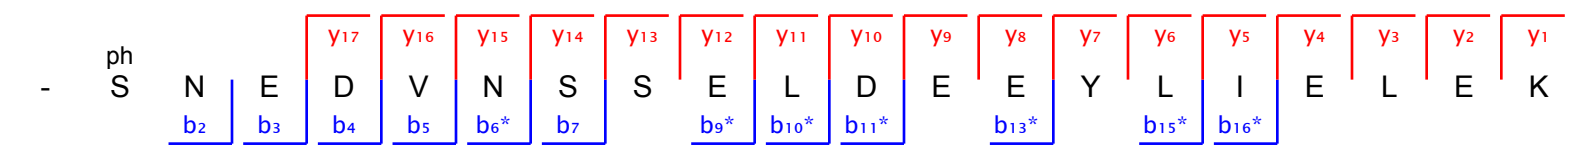

Raw file: 20150814\_A375SR\_Phospho\_BR2\_04  
 Scan: 26068 Method: FTMS; HCD Score: 101.96 m/z: 1264.24 Gene names: ARAF

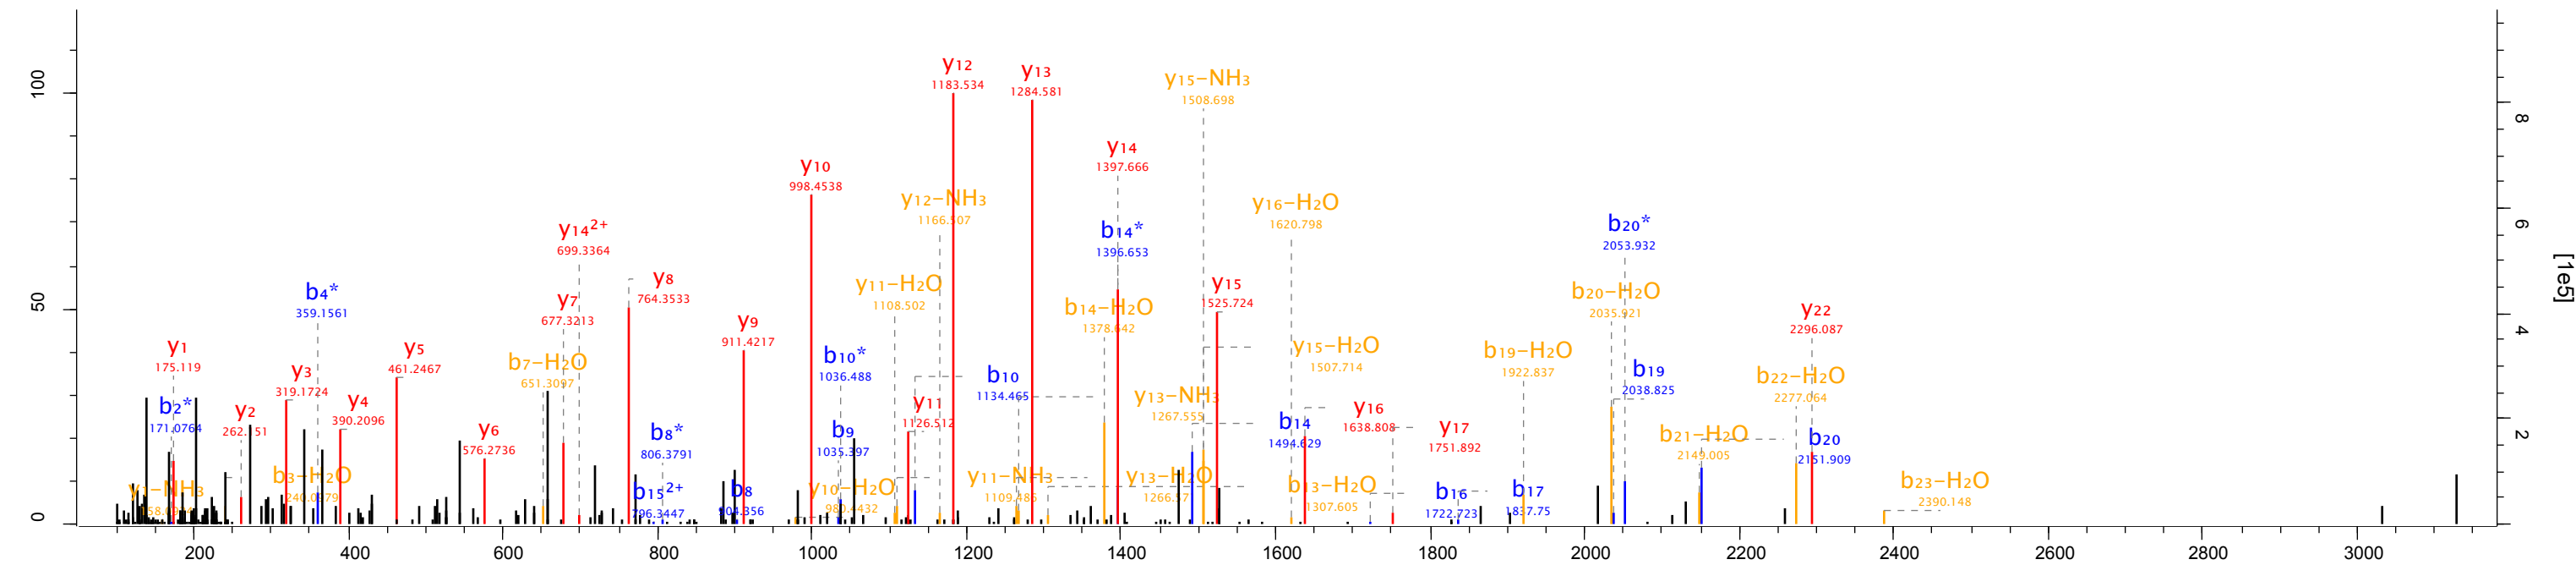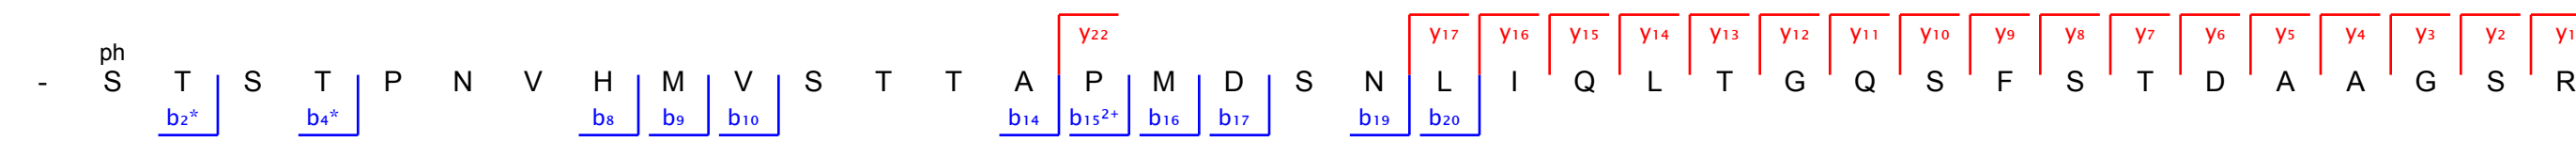

Raw file: 20150814\_A375SR\_Phospho\_BR2\_04  
 Scan: 2618 Method: FTMS; HCD Score: 248.51 m/z: 765.33 Gene names: ATN1

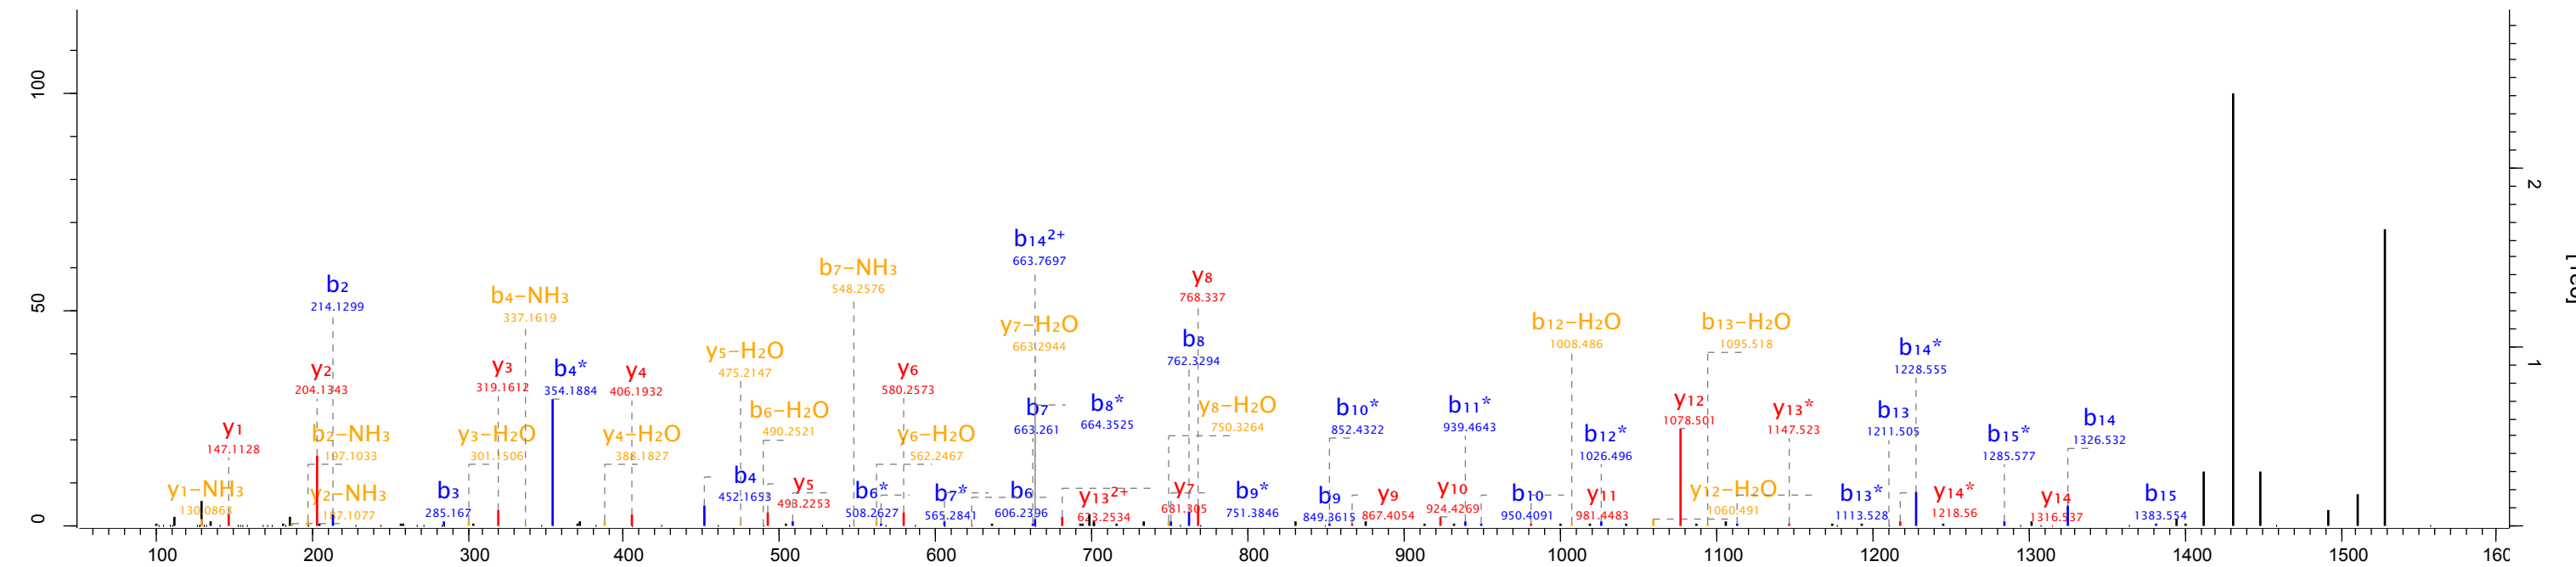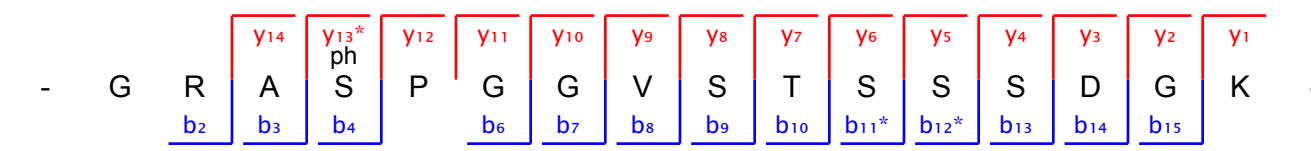

Raw file 20150814\_A375SR\_Phospho\_BR2\_04 Scan 26258 Method FTMS; HCD Score 158.64 m/z 1026.83 Gene names AMOTL2

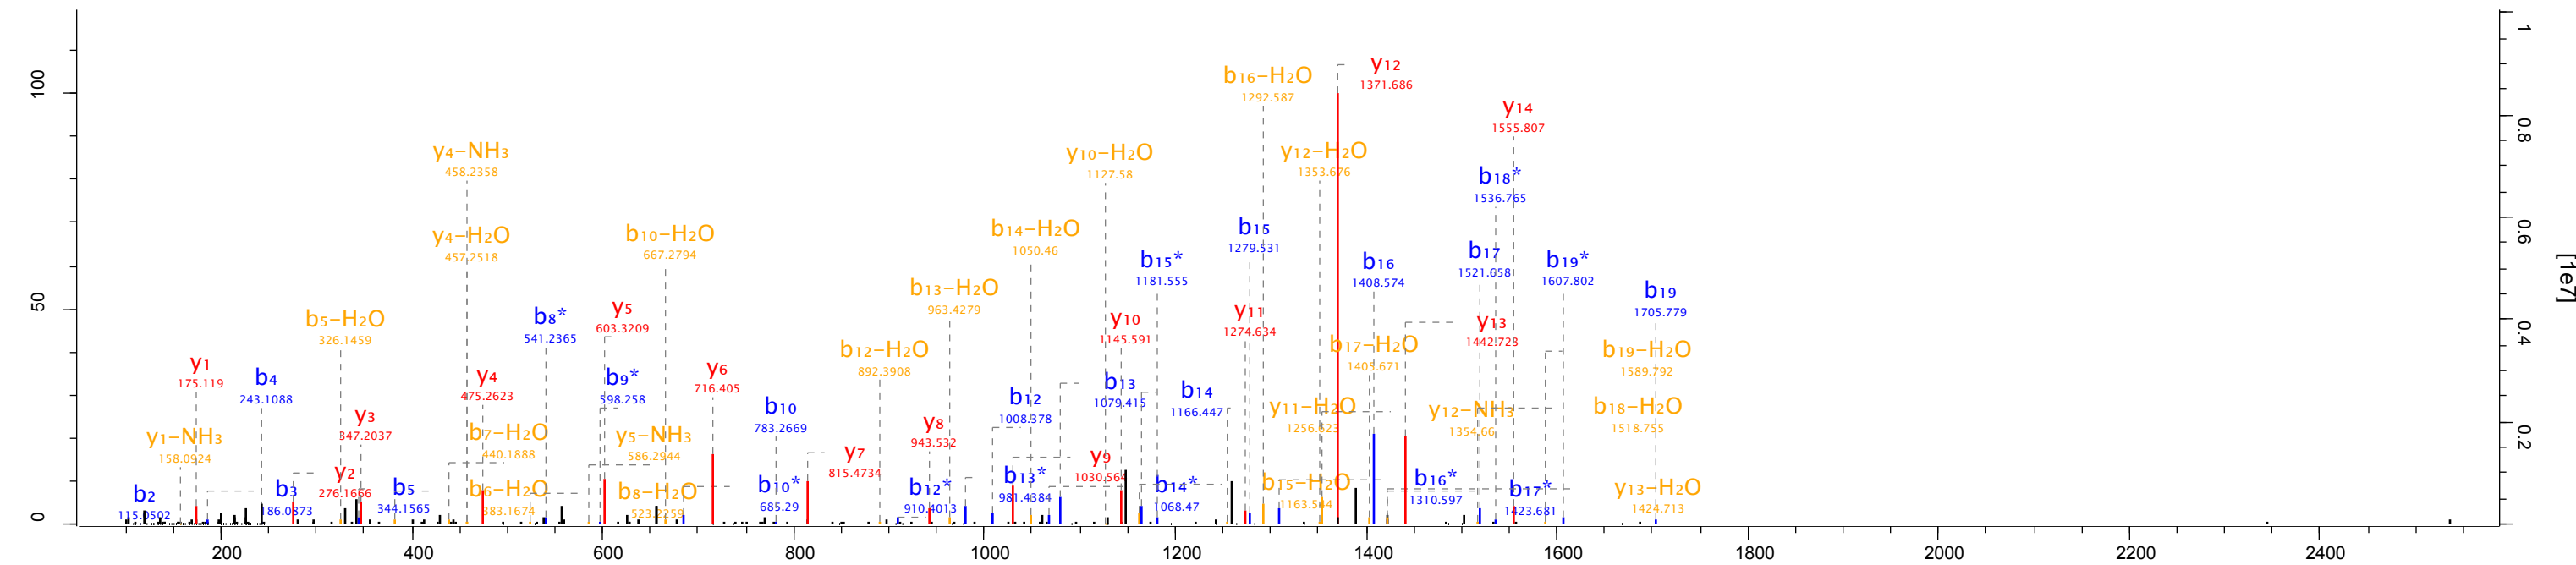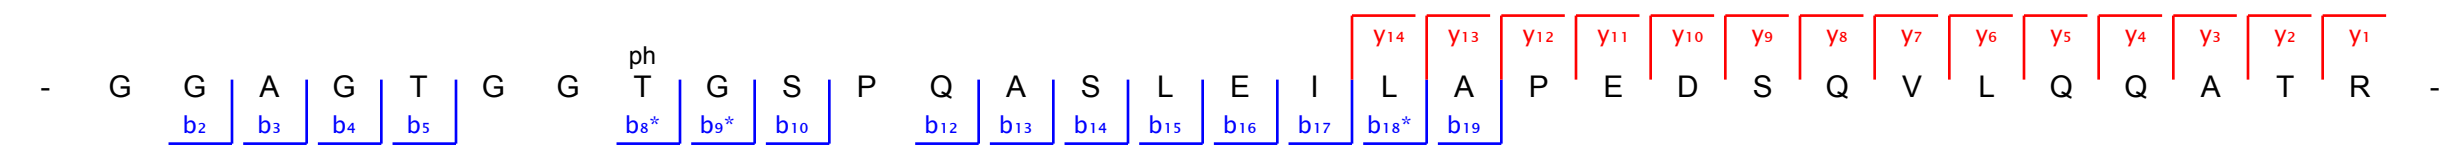

Raw file: 20150814\_A375SR\_Phospho\_BR2\_04  
 Scan: 27078 Method: FTMS; HCD Score: 135.88 m/z: 947.8 Gene names: EIF5B

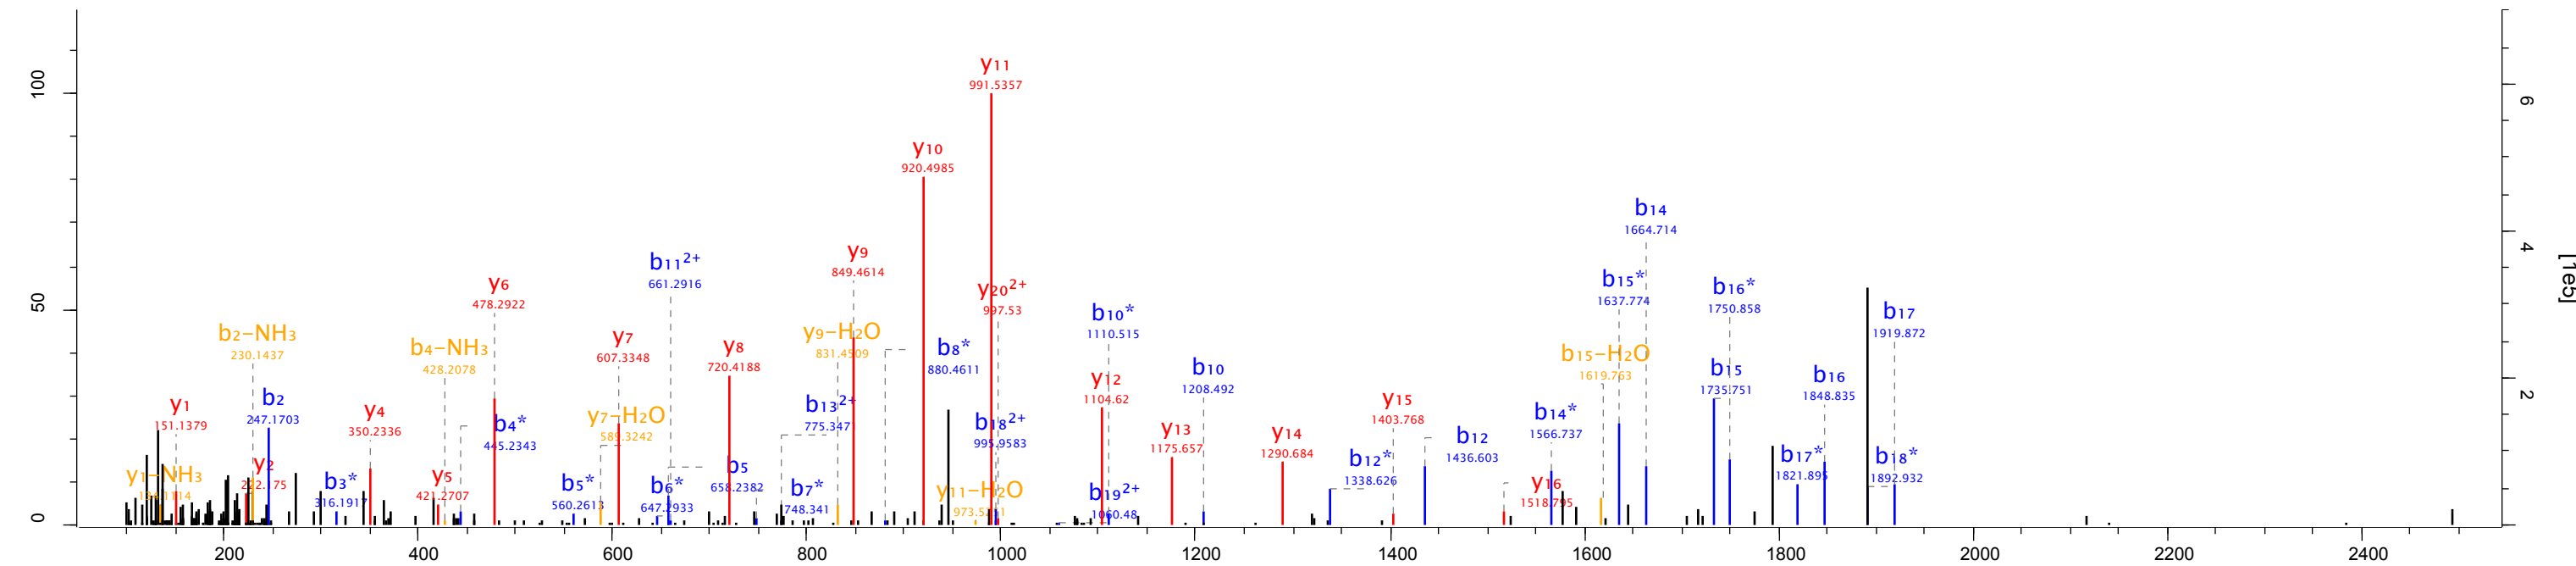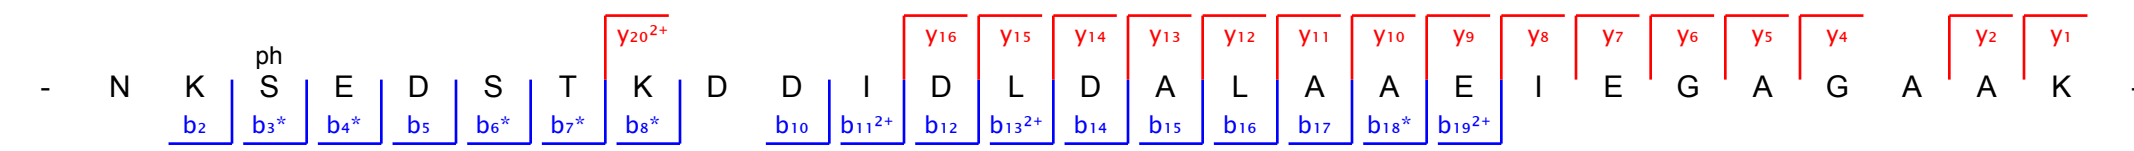

Raw file: 20150814\_A375SR\_Phospho\_BR2\_04  
 Scan: 27128 Method: FTMS; HCD Score: 51.93 m/z: 916.72 Gene names: DAB2

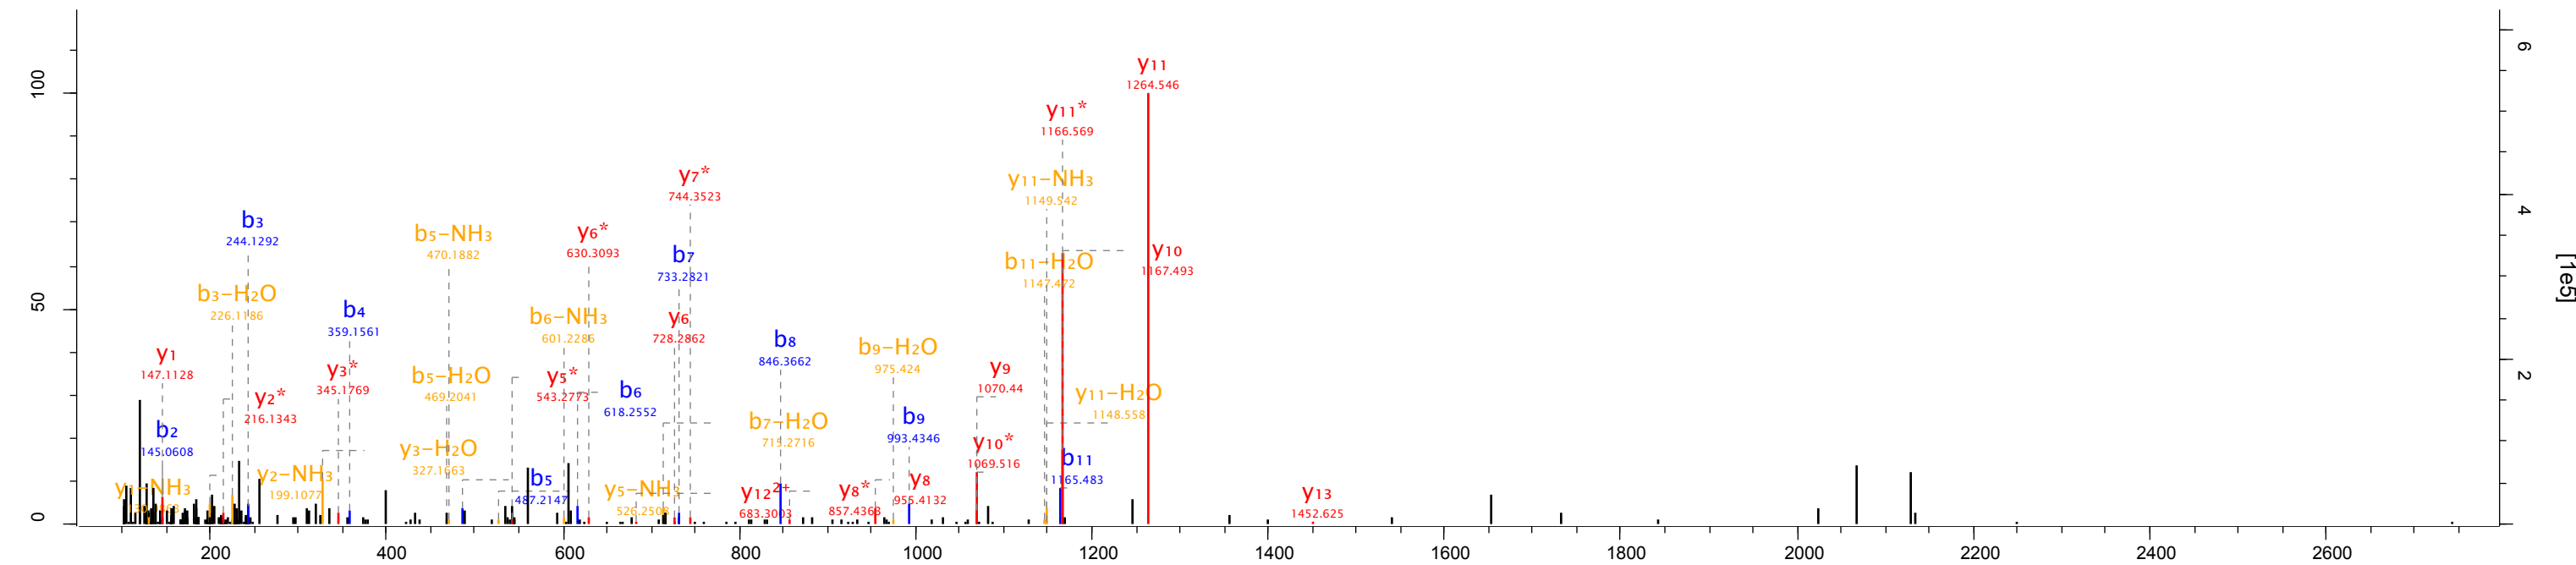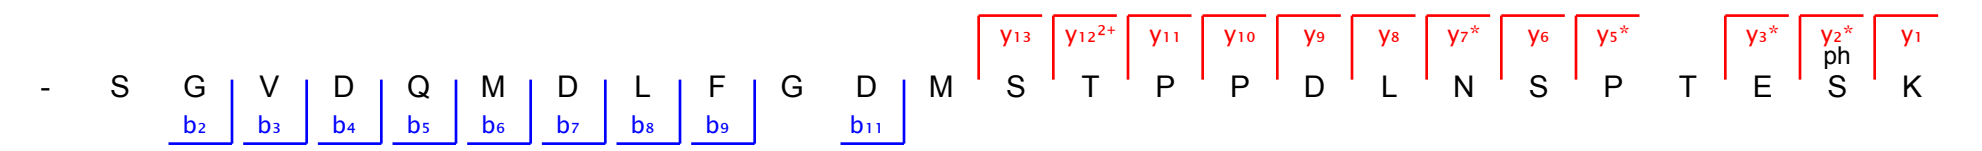

Raw file: 20150814\_A375SR\_Phospho\_BR2\_04  
 Scan: 27308 Method: FTMS; HCD Score: 226.09 m/z: 1087.02 Gene names: WDR44

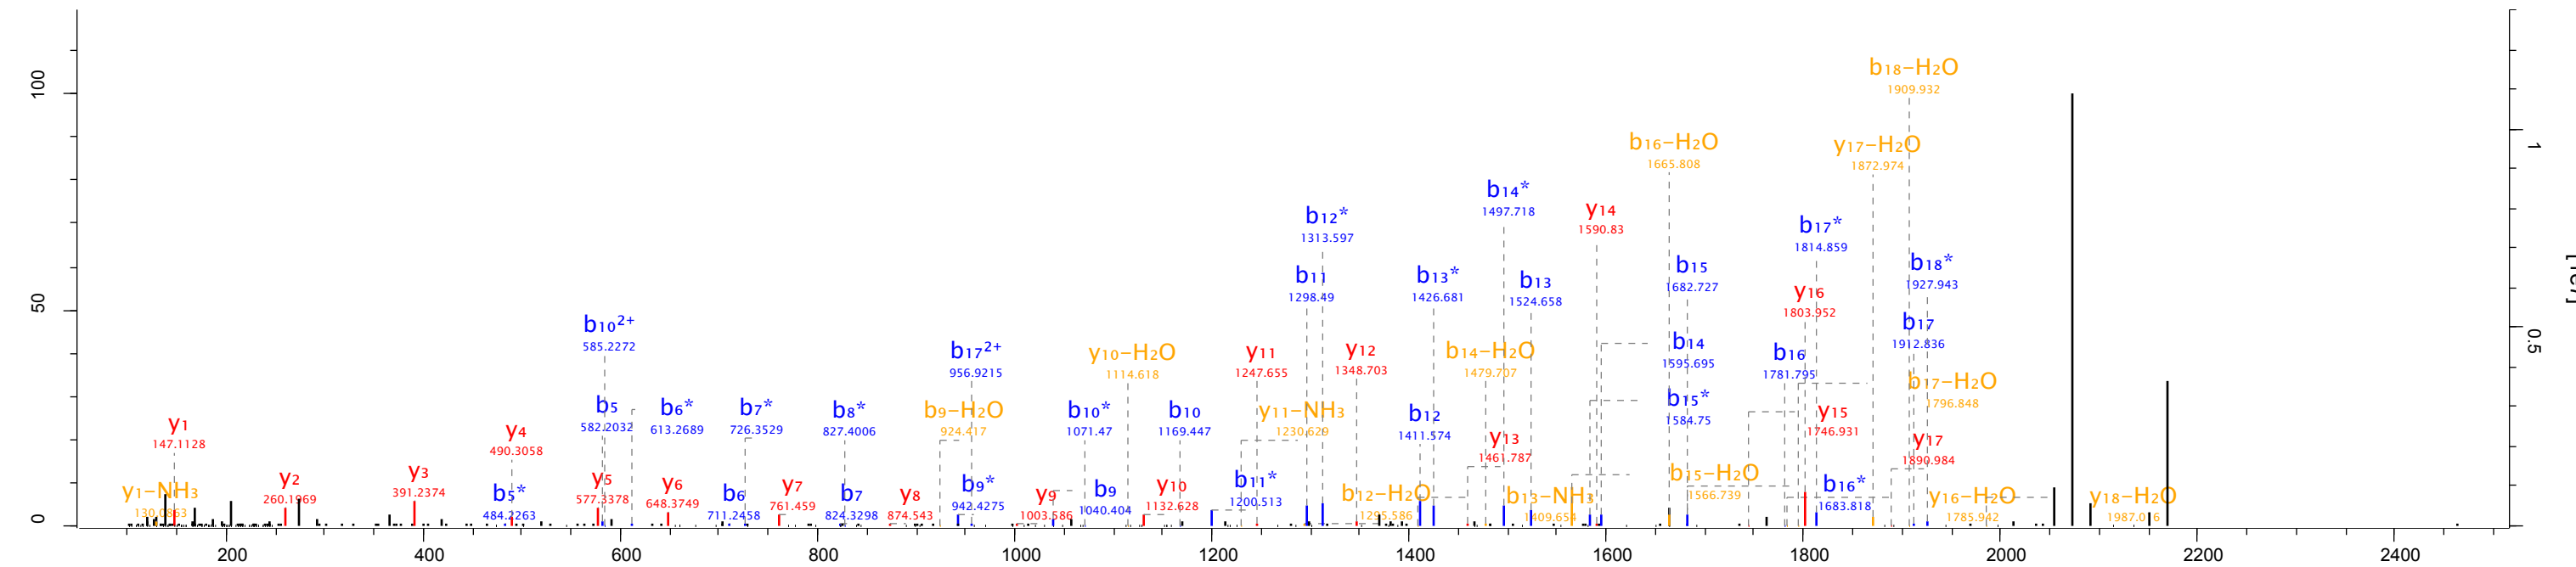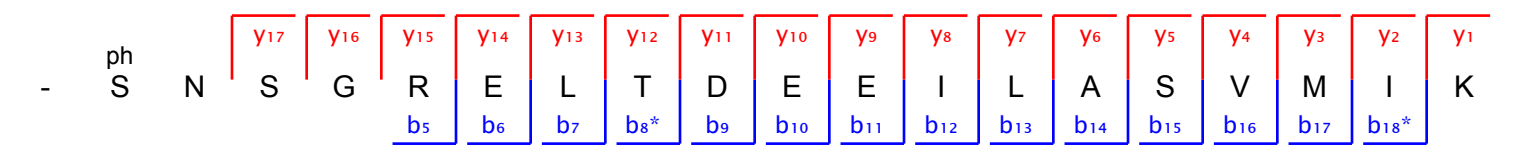

Raw file 20150814\_A375SR\_Phospho\_BR2\_04 Scan 27438 Method FTMS; HCD Score 159.13 m/z 757.87 Gene names PXN

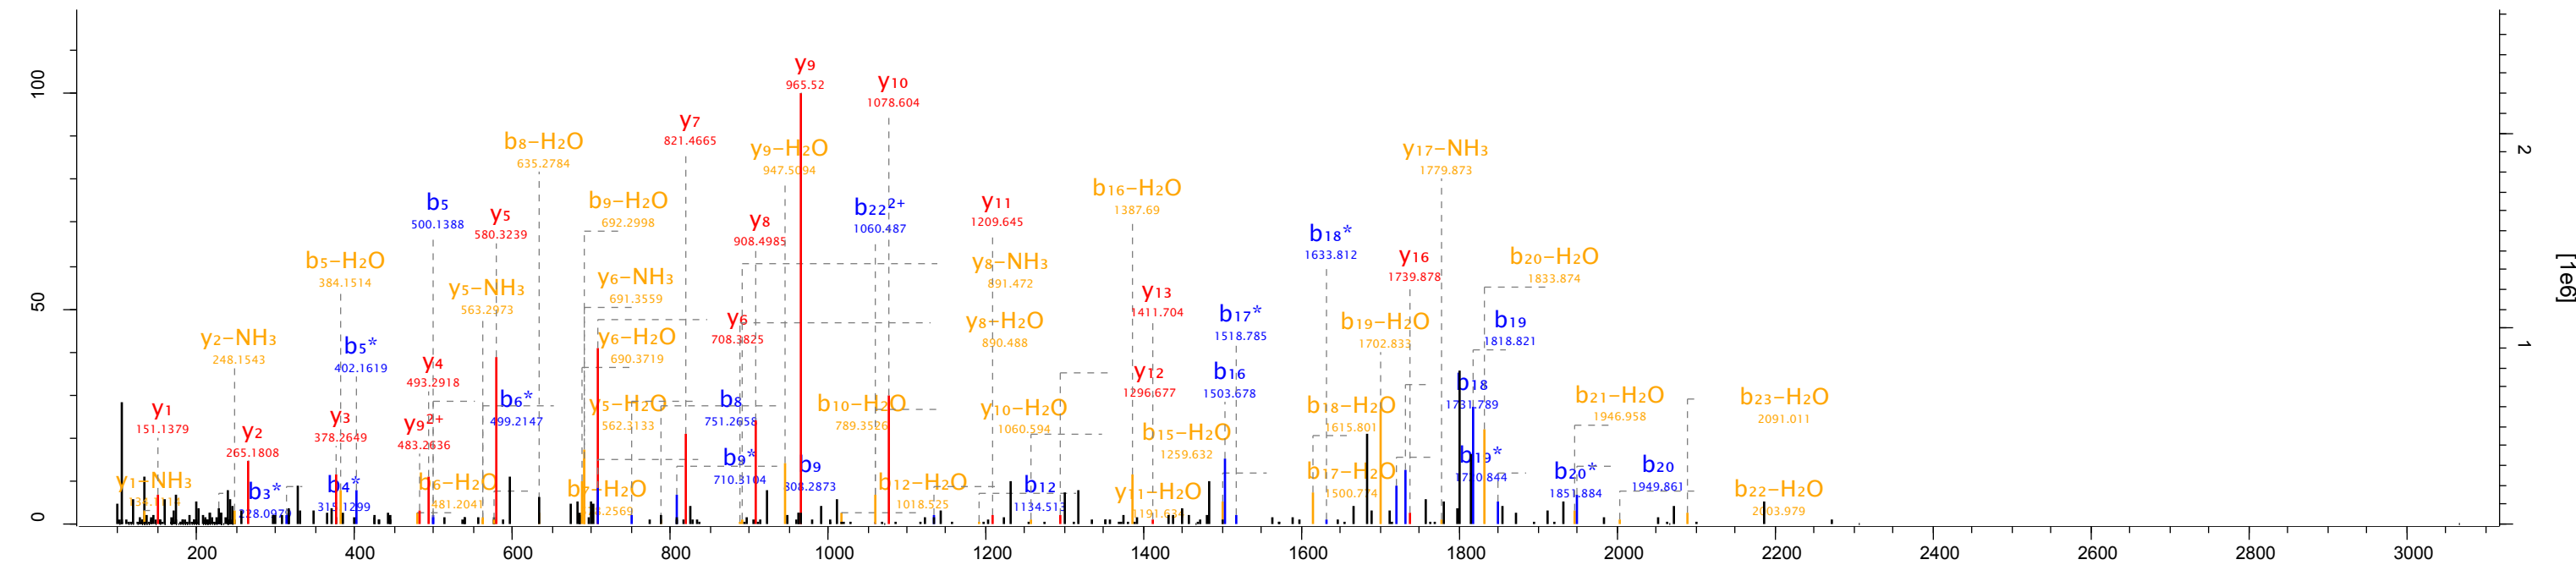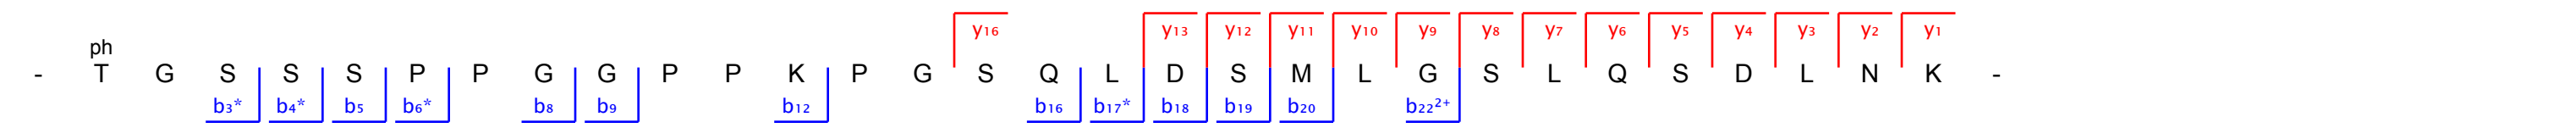



Raw file 20150814\_A375SR\_Phospho\_BR2\_04 Scan 27558 Method FTMS; HCD Score 89.34 m/z 1201.56 Gene names BCL7B

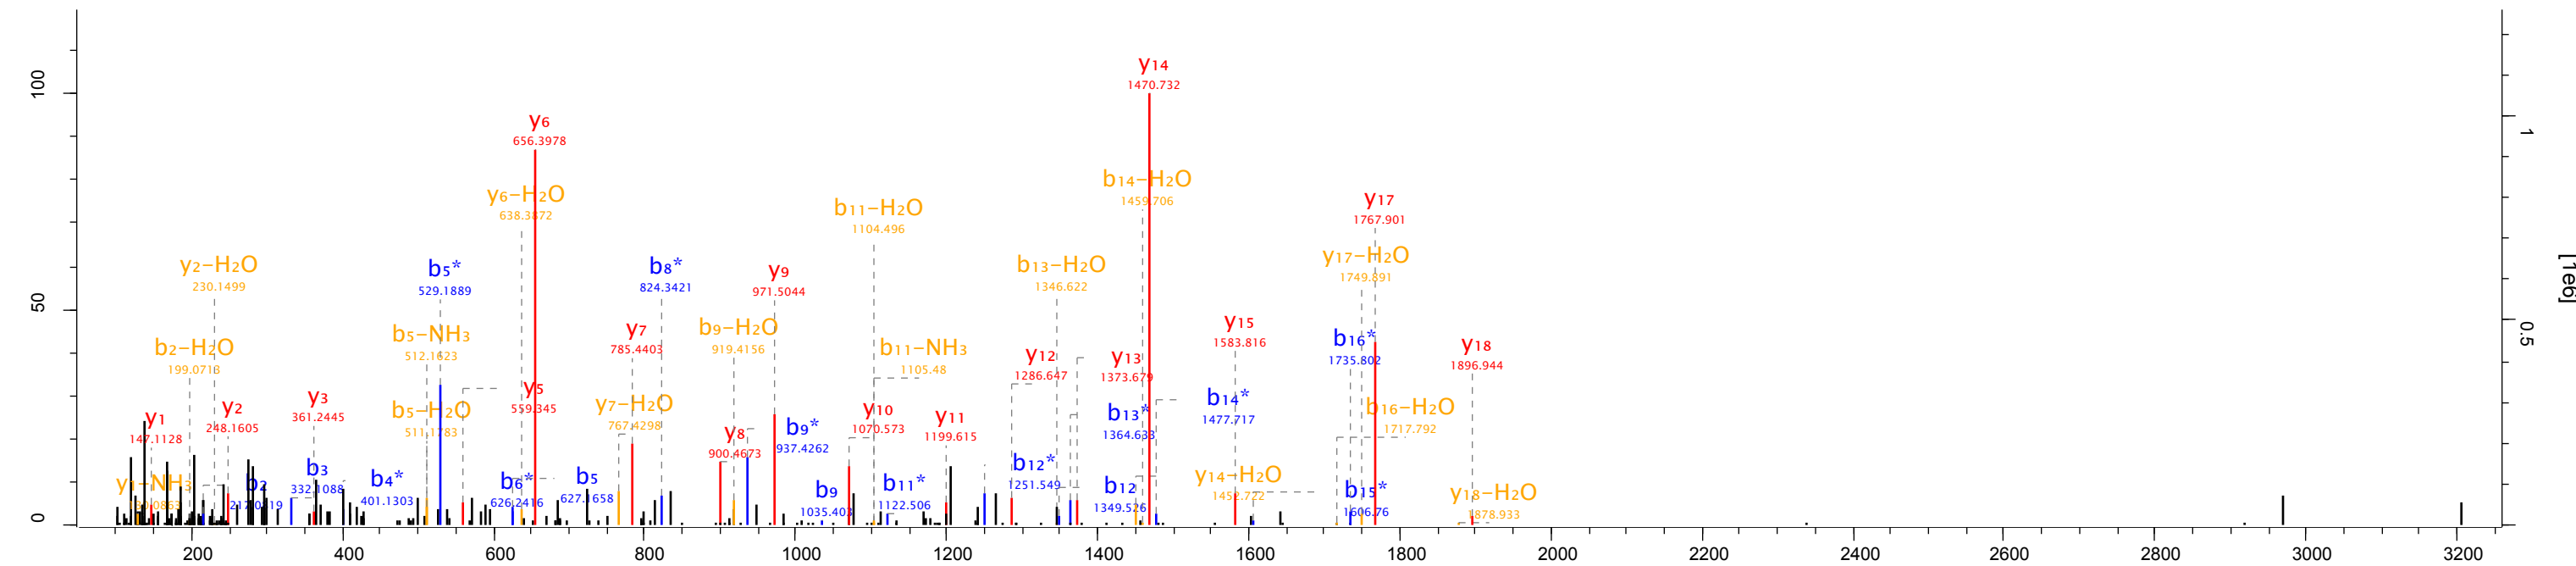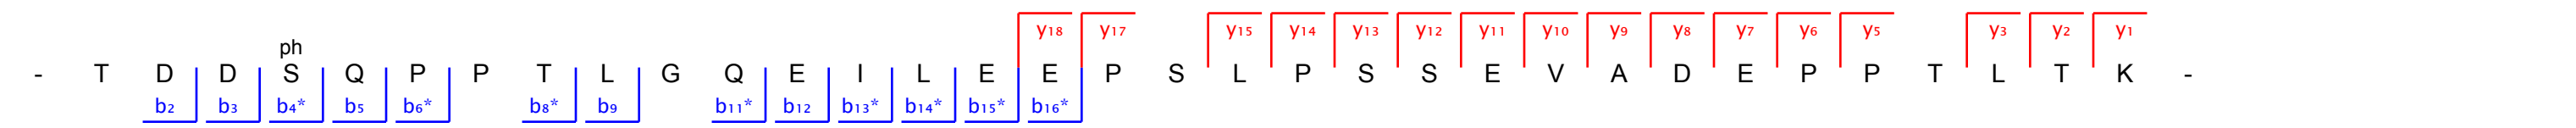

Raw file: 20150814\_A375SR\_Phospho\_BR2\_04  
 Scan: 27638 Method: FTMS; HCD Score: 67.64 m/z: 1188.89 Gene names: TRPV2

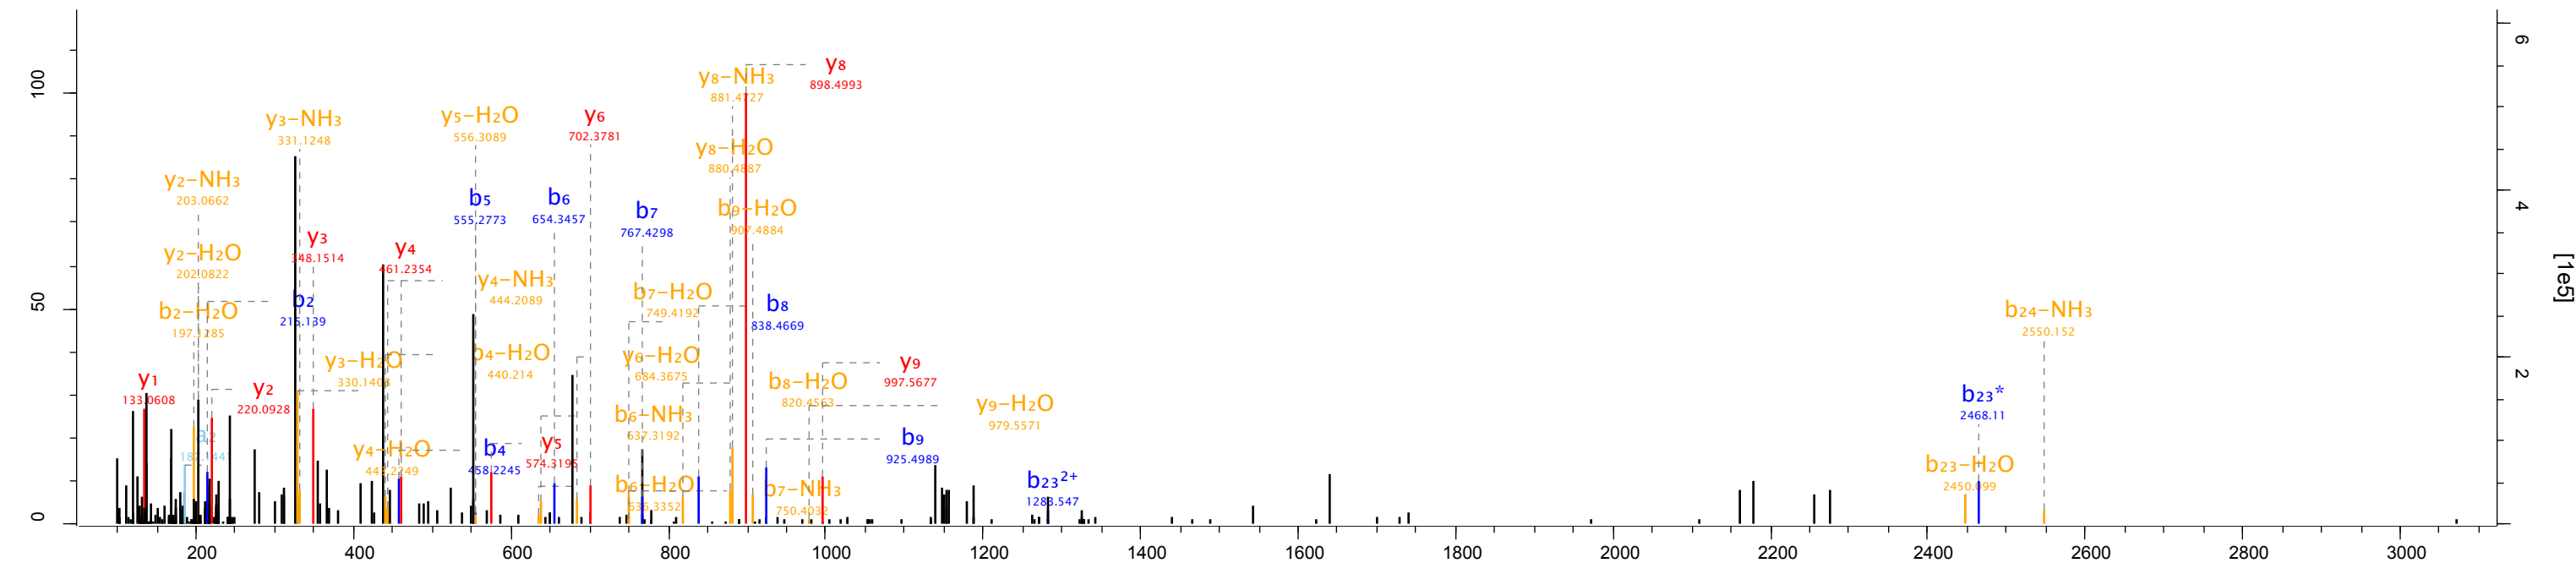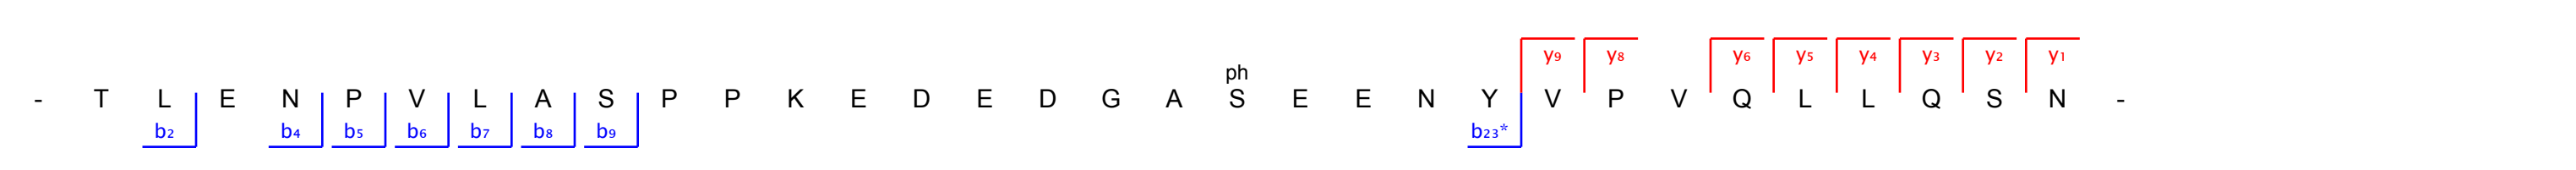

Raw file 20150814\_A375SR\_Phospho\_BR2\_04 Scan 27788 Method FTMS; HCD Score 204.94 m/z 975.45 Gene names SDCCAG8

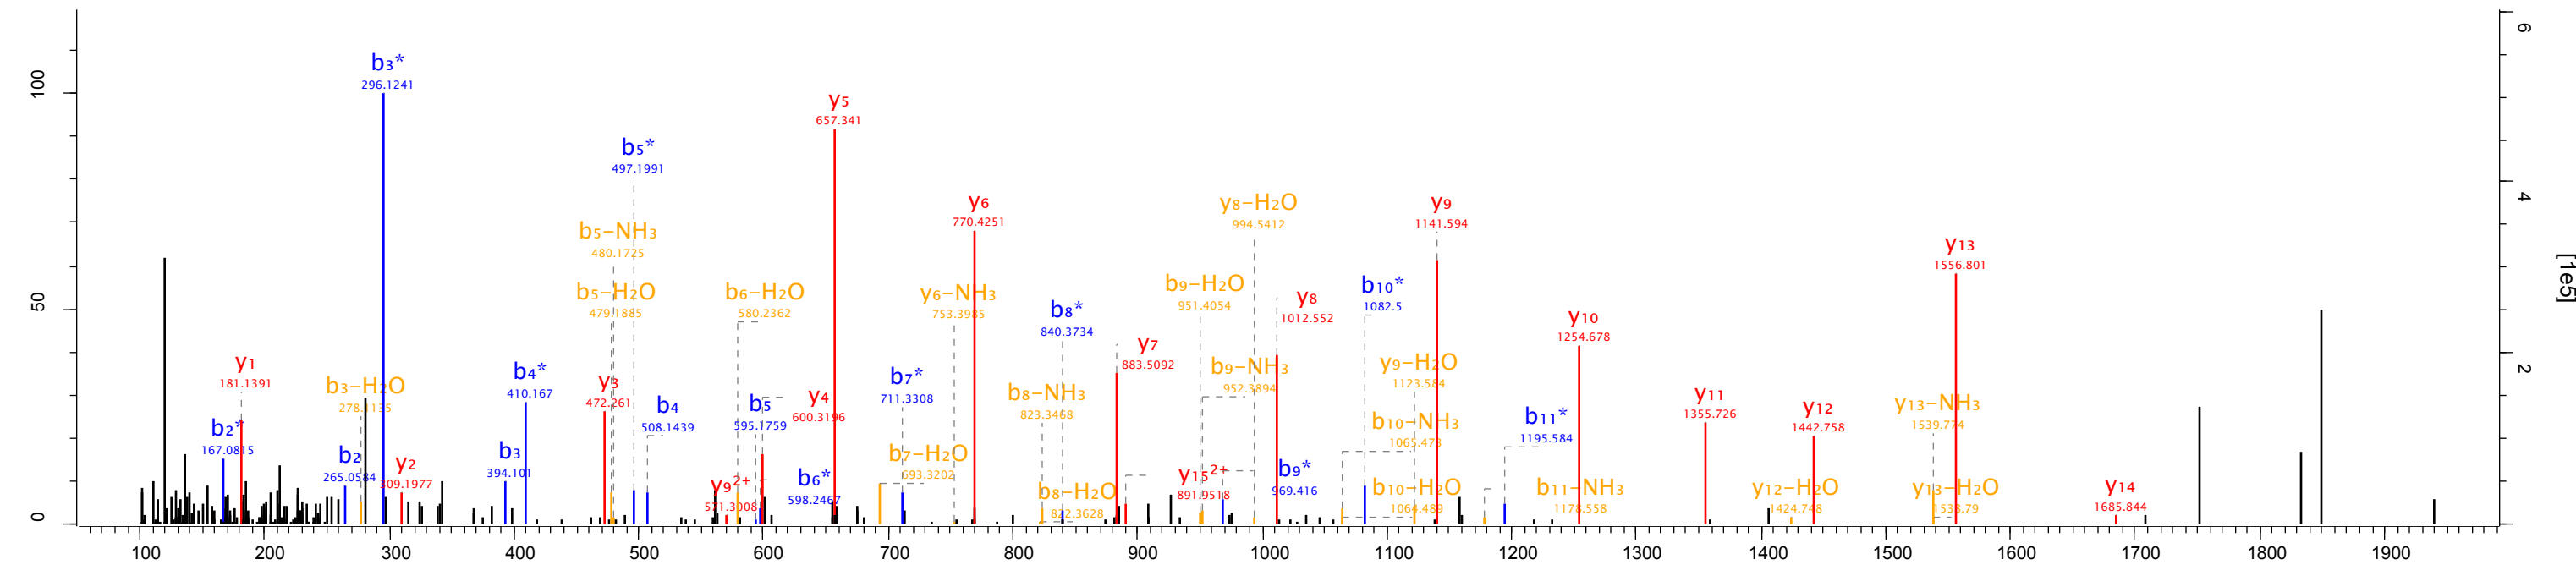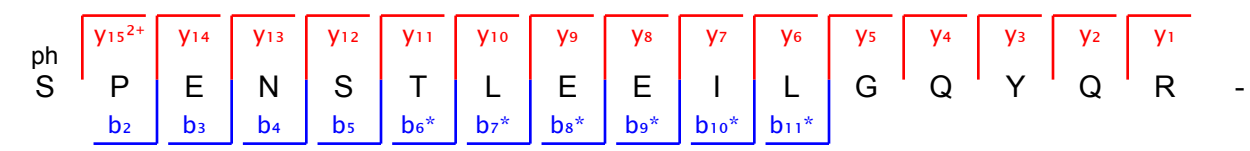

Raw file: 20150814\_A375SR\_Phospho\_BR2\_04  
 Scan: 28138 Method: FTMS; HCD Score: 306.39 m/z: 1024 Gene names: PCBP1

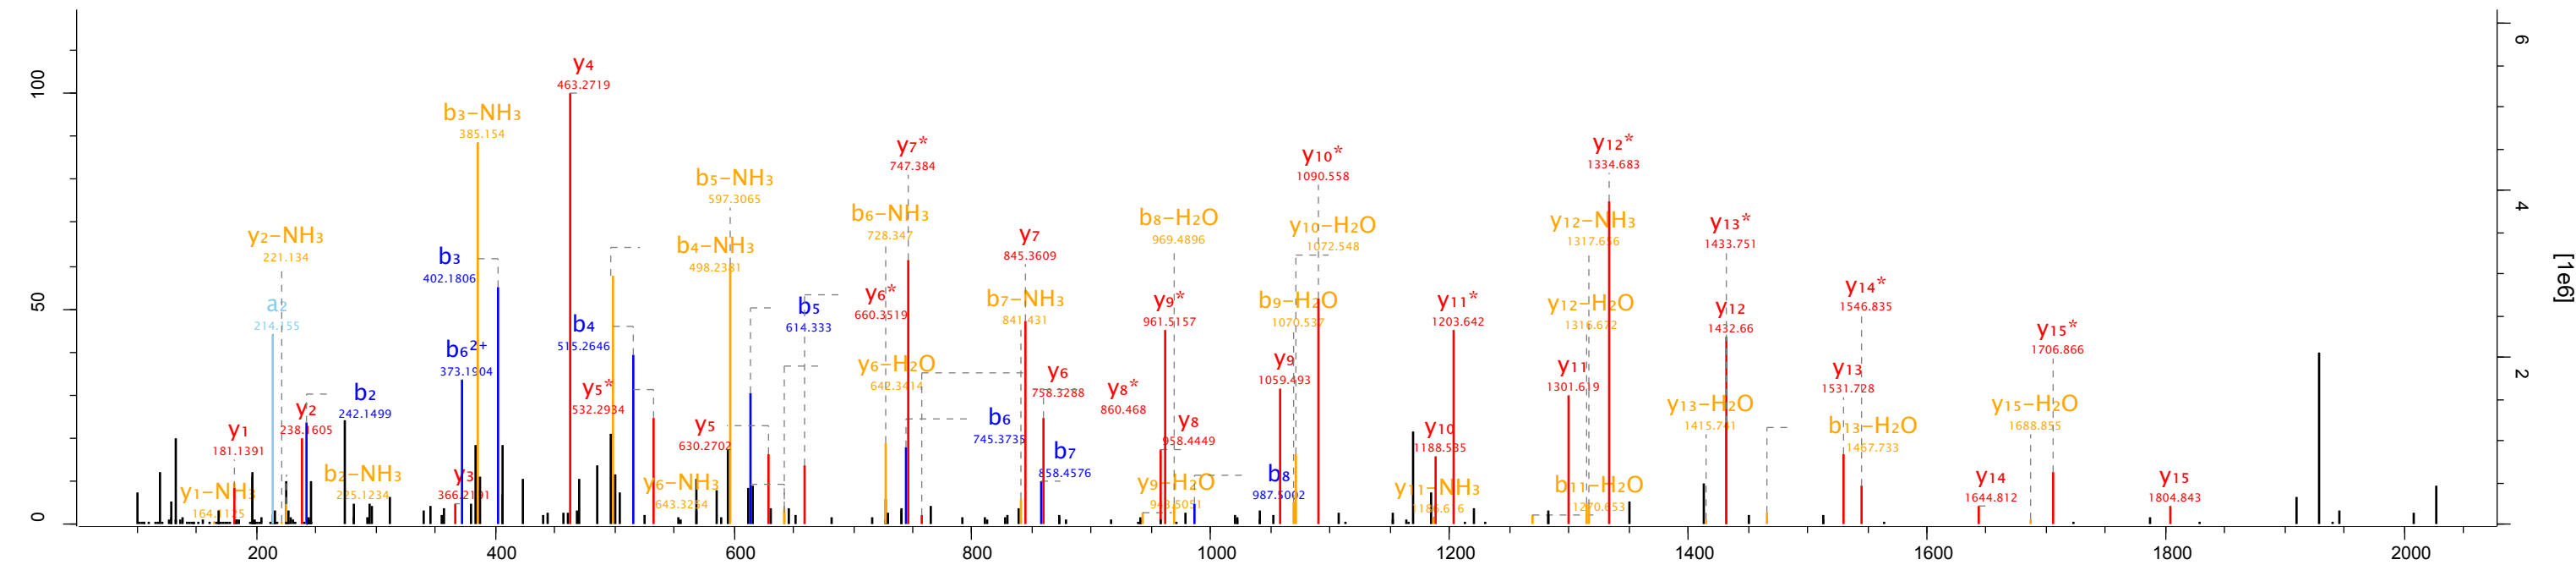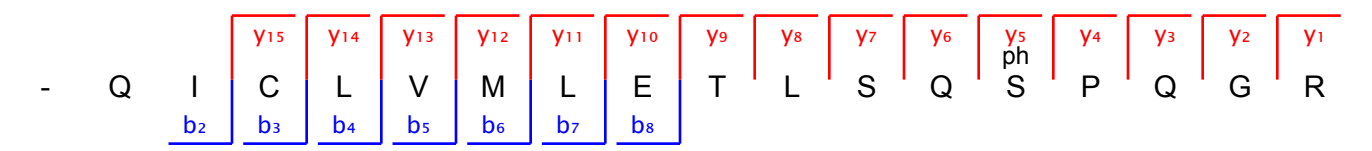

Raw file 20150814\_A375SR\_Phospho\_BR2\_04 Scan 28158 Method FTMS; HCD Score 239.51 m/z 1170.59 Gene names KIF23

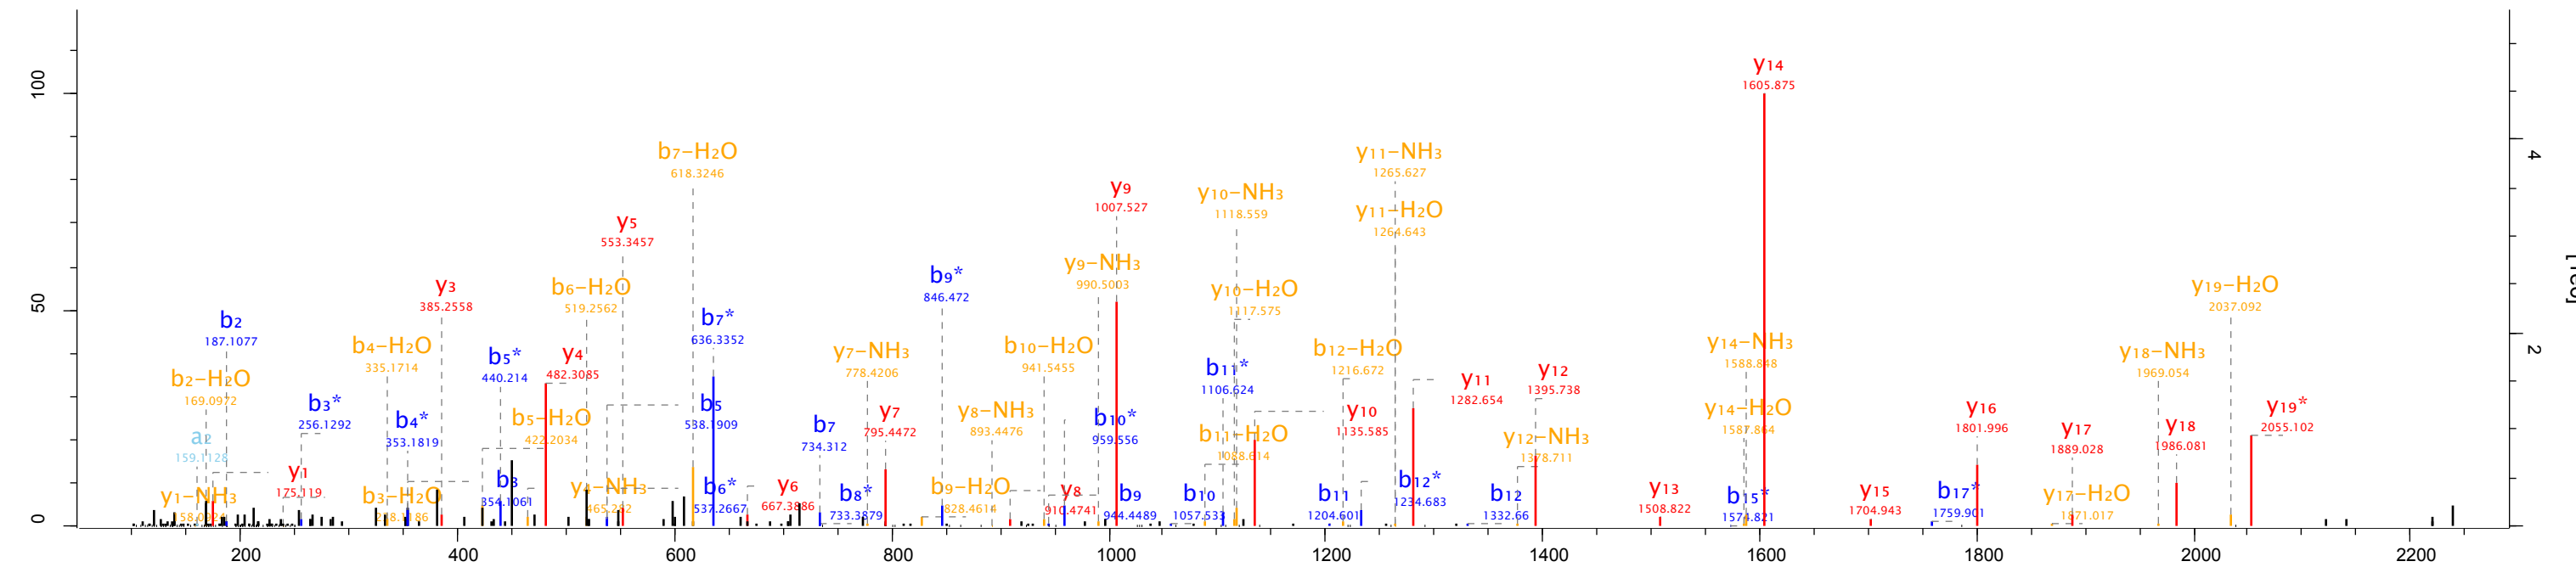

- S V S P S P V P L L F Q P D Q N A P P I R -

b<sub>2</sub>
b<sub>3</sub>
b<sub>4</sub>\*
b<sub>5</sub>
b<sub>6</sub>\*
b<sub>7</sub>
b<sub>8</sub>\*
b<sub>9</sub>
b<sub>10</sub>
b<sub>11</sub>
b<sub>12</sub>
b<sub>15</sub>\*
b<sub>17</sub>\*

y<sub>1</sub>
y<sub>3</sub>
y<sub>4</sub>
y<sub>5</sub>
y<sub>6</sub>
y<sub>7</sub>
y<sub>8</sub>
y<sub>9</sub>
y<sub>10</sub>
y<sub>11</sub>
y<sub>12</sub>
y<sub>13</sub>
y<sub>14</sub>
y<sub>15</sub>
y<sub>16</sub>
y<sub>17</sub>
y<sub>18</sub>
y<sub>19</sub>\*

Raw file  
20150814\_A375SR\_Phospho\_BR2\_04

Scan 28578 Method FTMS; HCD Score 210.68 m/z 960.44 Gene names ZAK

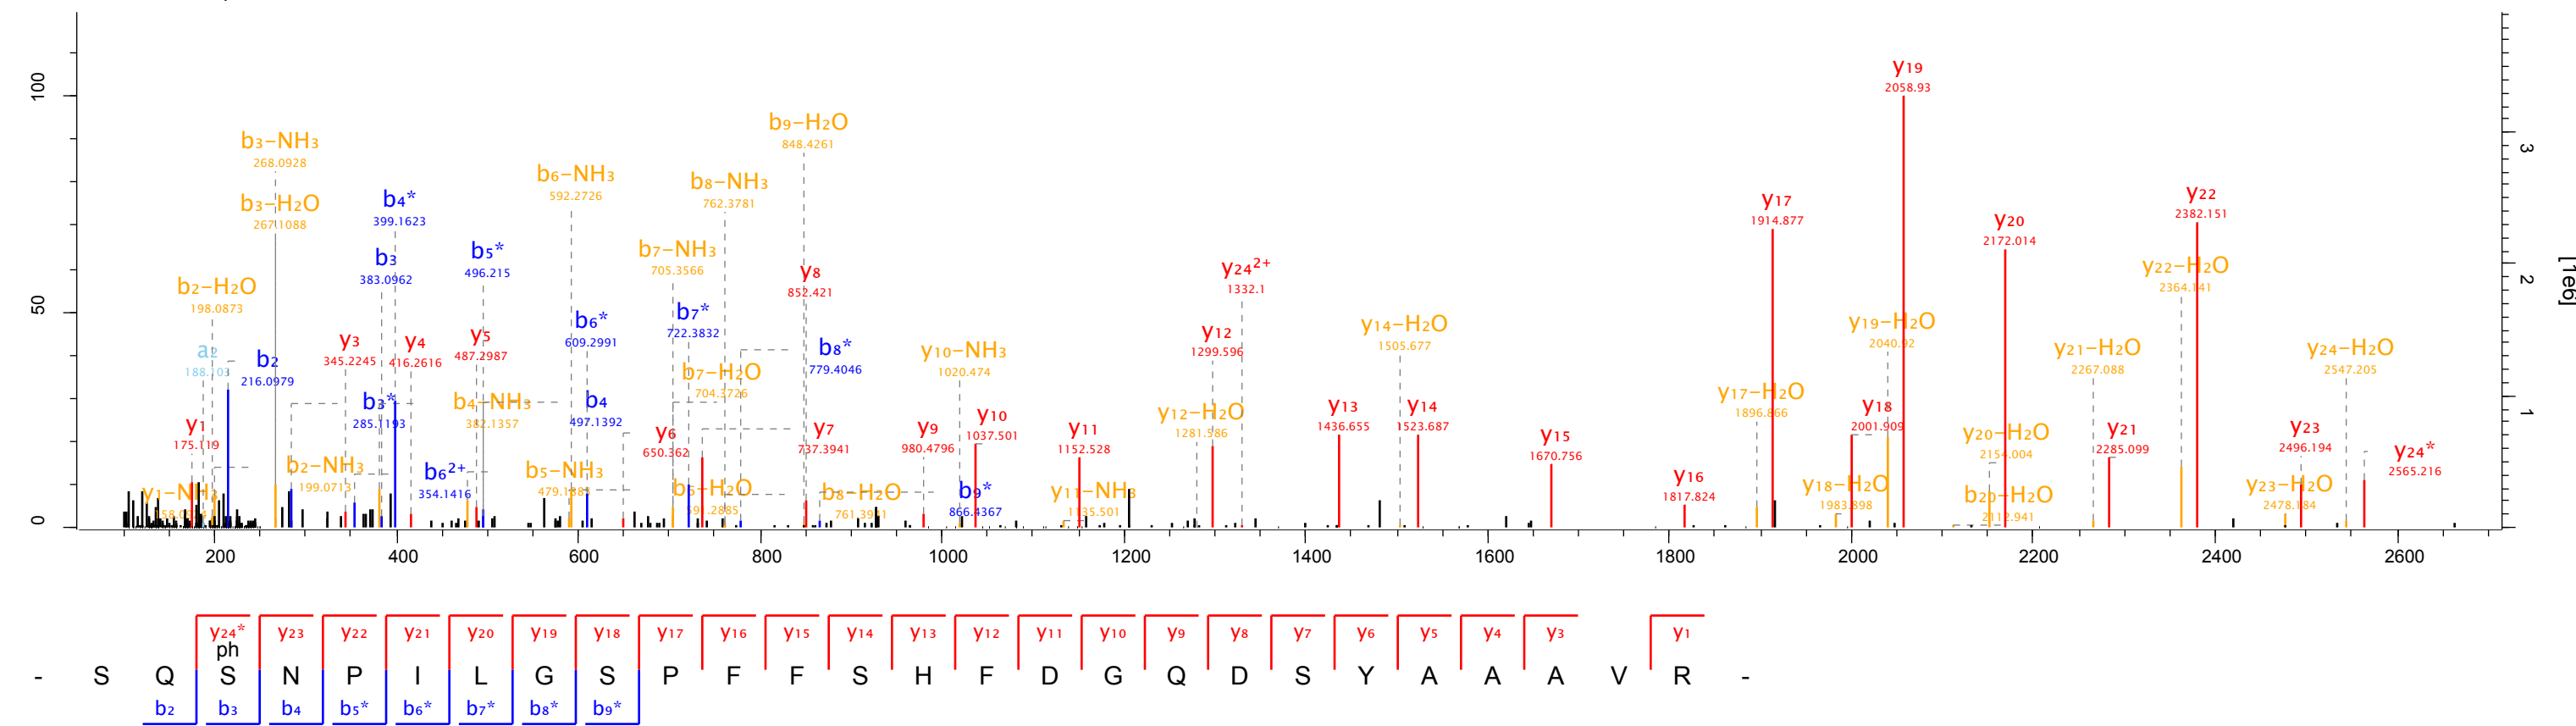



Raw file: 20150814\_A375SR\_Phospho\_BR2\_04  
 Scan: 28628 Method: FTMS; HCD Score: 298.66 m/z: 977.49 Gene names: RPLP2

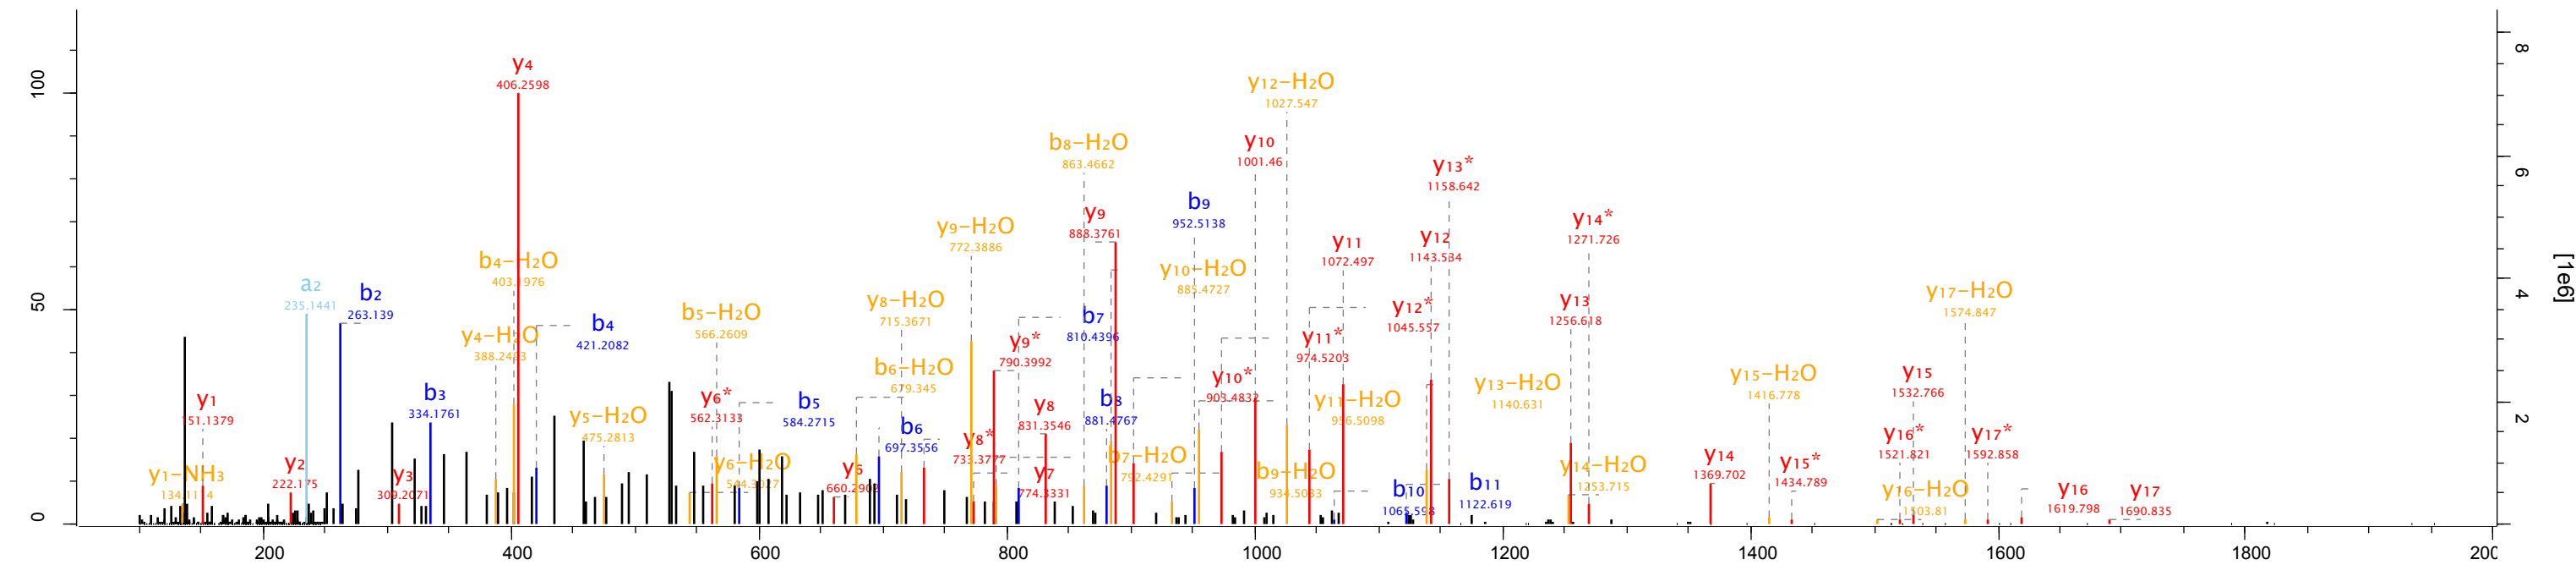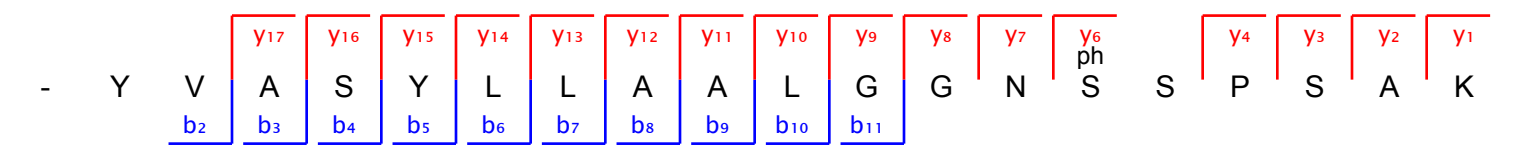



Raw file: 20150814\_A375SR\_Phospho\_BR2\_04  
 Scan: 28638 Method: FTMS; HCD Score: 104.84 m/z: 923.41 Gene names: CAMSAP2

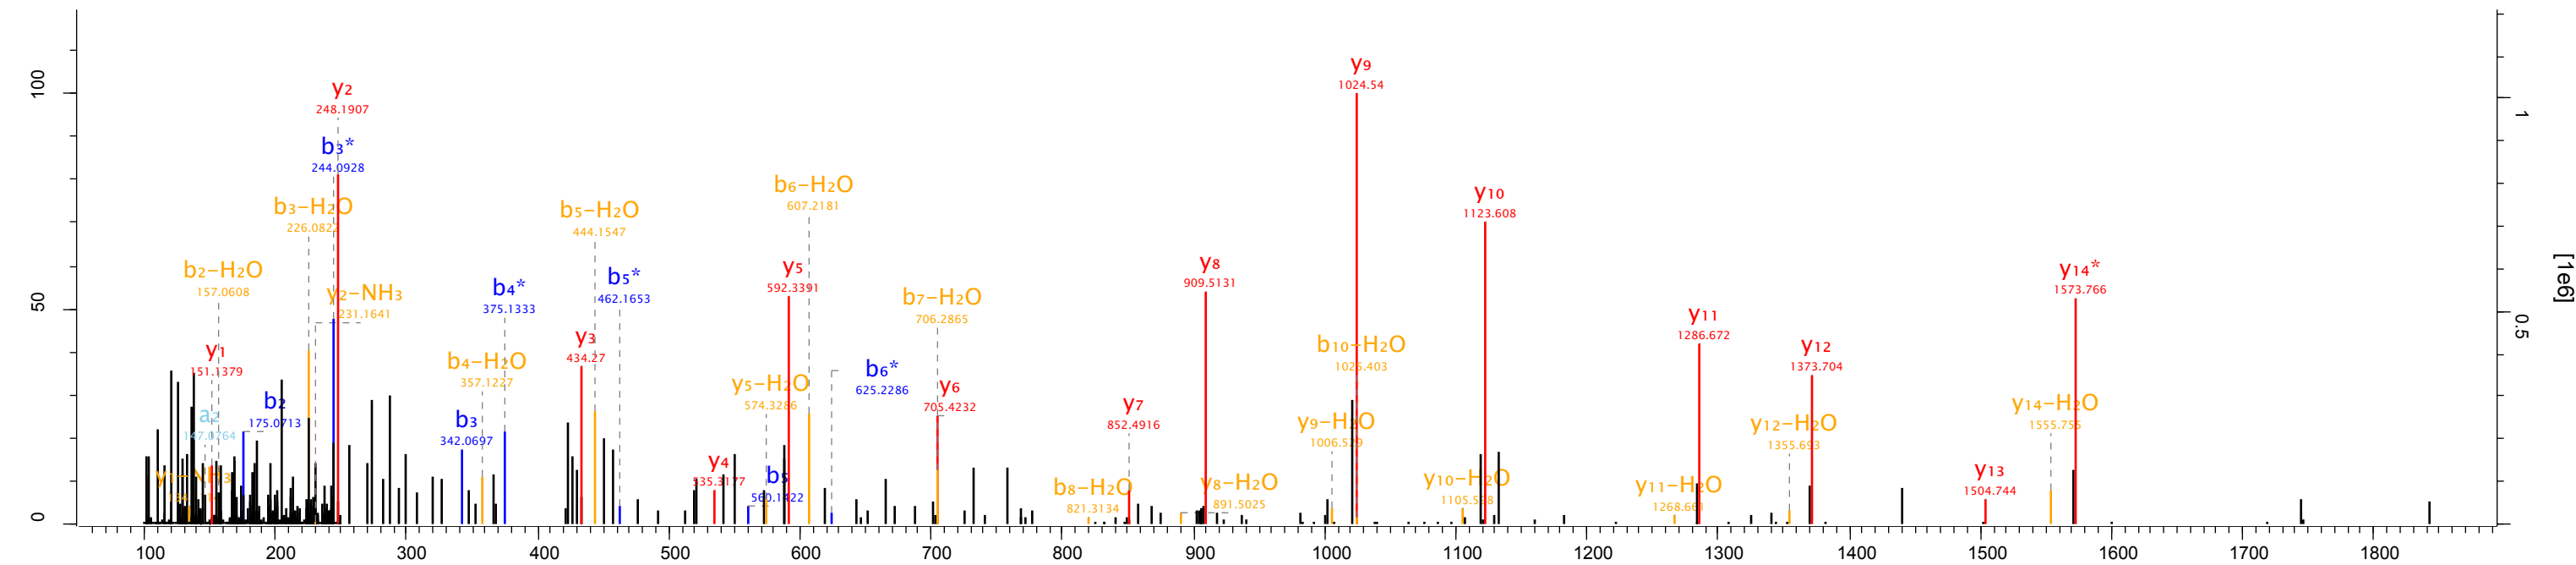

- S S y<sub>14</sub><sup>\*</sup> y<sub>13</sub> y<sub>12</sub> y<sub>11</sub> y<sub>10</sub> y<sub>9</sub> y<sub>8</sub> y<sub>7</sub> y<sub>6</sub> y<sub>5</sub> y<sub>4</sub> y<sub>3</sub> y<sub>2</sub> y<sub>1</sub> -  
 - S S b<sub>2</sub> b<sub>3</sub> b<sub>4</sub><sup>\*</sup> b<sub>5</sub> b<sub>6</sub><sup>\*</sup> V D G F I G T W P K -

Raw file: 20150814\_A375SR\_Phospho\_BR2\_04  
 Scan: 28718 Method: FTMS; HCD Score: 204.67 m/z: 725.37 Gene names: SLC35C2

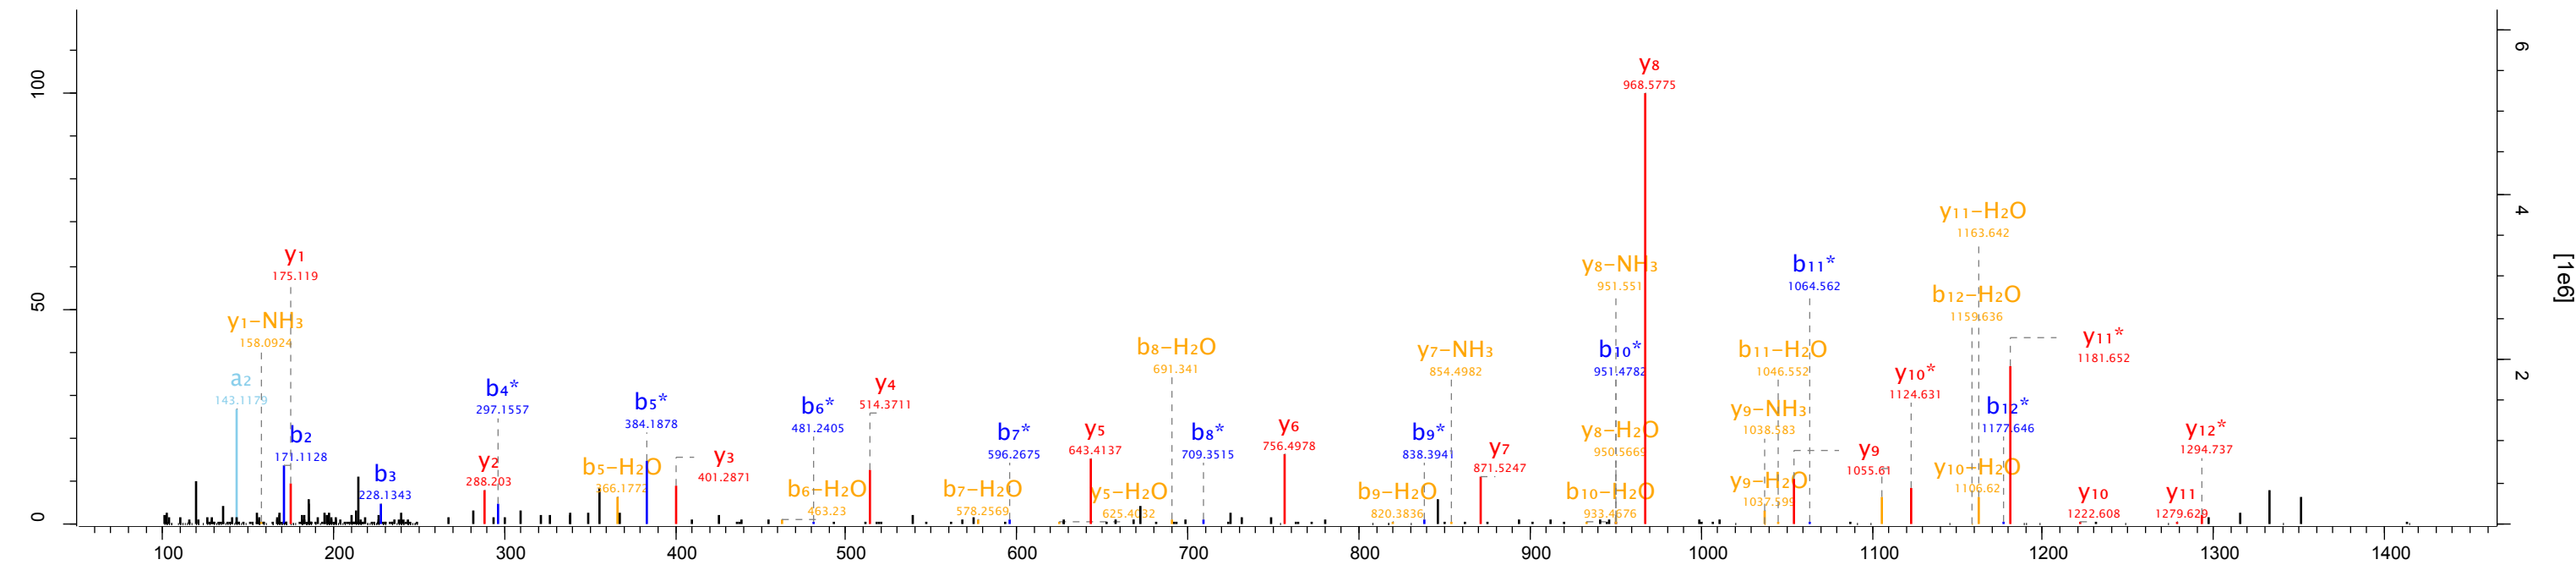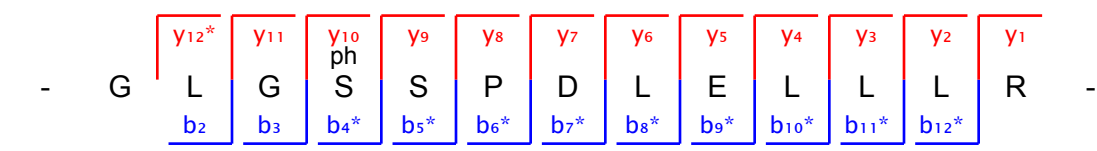

Raw file 20150814\_A375SR\_Phospho\_BR2\_04 Scan 28728 Method FTMS; HCD Score 90.18 m/z 771.88 Gene names CIC

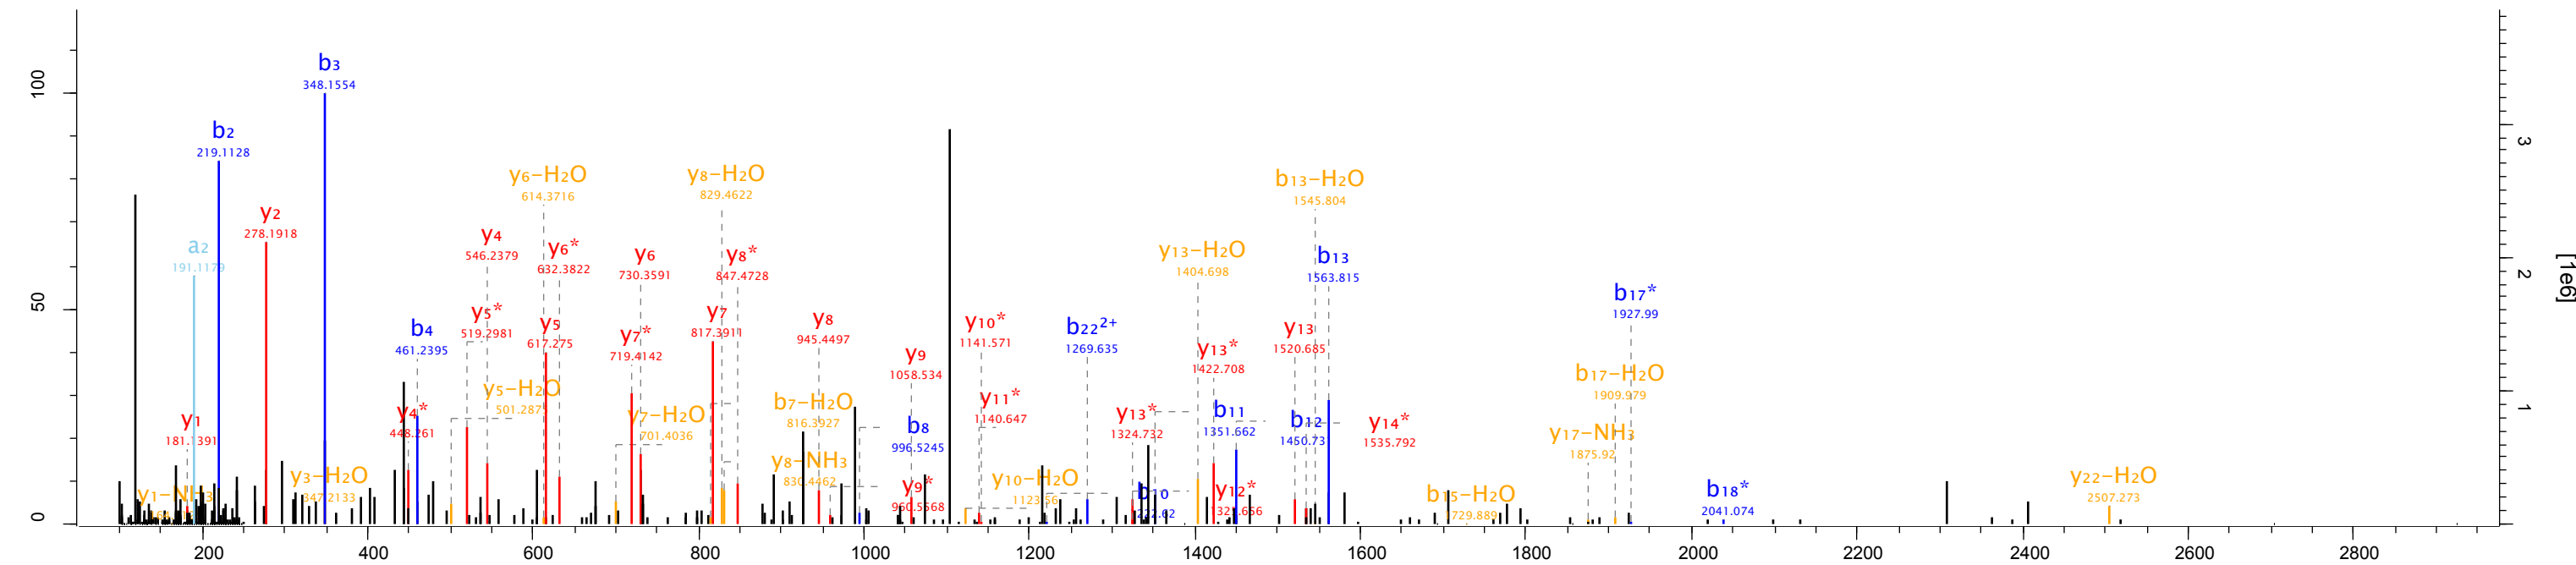

- F A E L P E F R P E E V L P S P T L Q S L A T S P R -

b<sub>2</sub>
b<sub>3</sub>
b<sub>4</sub>
b<sub>8</sub>
b<sub>10</sub>
b<sub>11</sub>
b<sub>12</sub>
b<sub>13</sub>
b<sub>17</sub>\*
b<sub>18</sub>\*
b<sub>22</sub><sup>2+</sup>
y<sub>14</sub>\*
y<sub>13</sub>
y<sub>12</sub>\*
y<sub>11</sub>\*
y<sub>10</sub>\*
y<sub>9</sub>
y<sub>8</sub>
y<sub>7</sub>
y<sub>6</sub>
y<sub>5</sub>
y<sub>4</sub>
y<sub>2</sub>
y<sub>1</sub>

Raw file: 20150814\_A375SR\_Phospho\_BR2\_04  
 Scan: 28748 Method: FTMS; HCD Score: 118.9 m/z: 1151.53 Gene names: YAP1

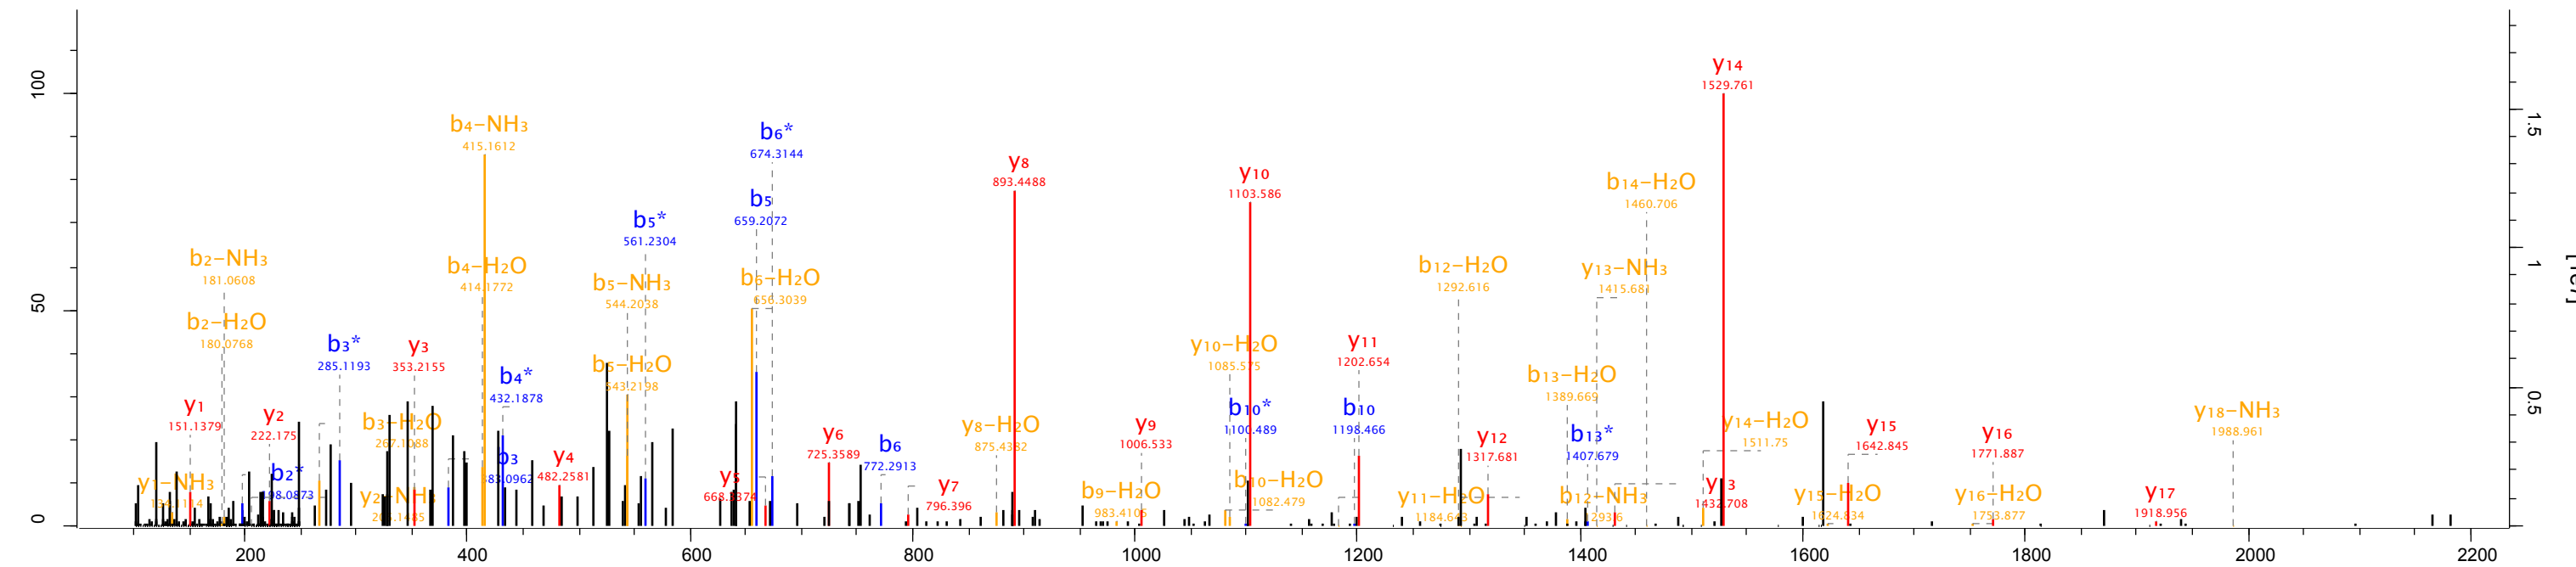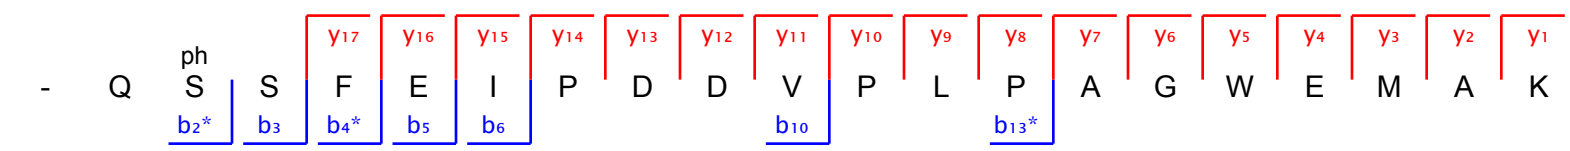

Raw file  
20150814\_A375SR\_Phospho\_BR2\_04

Scan 28798 Method FTMS; HCD Score 369.53 m/z 1220.07 Gene names PLEC

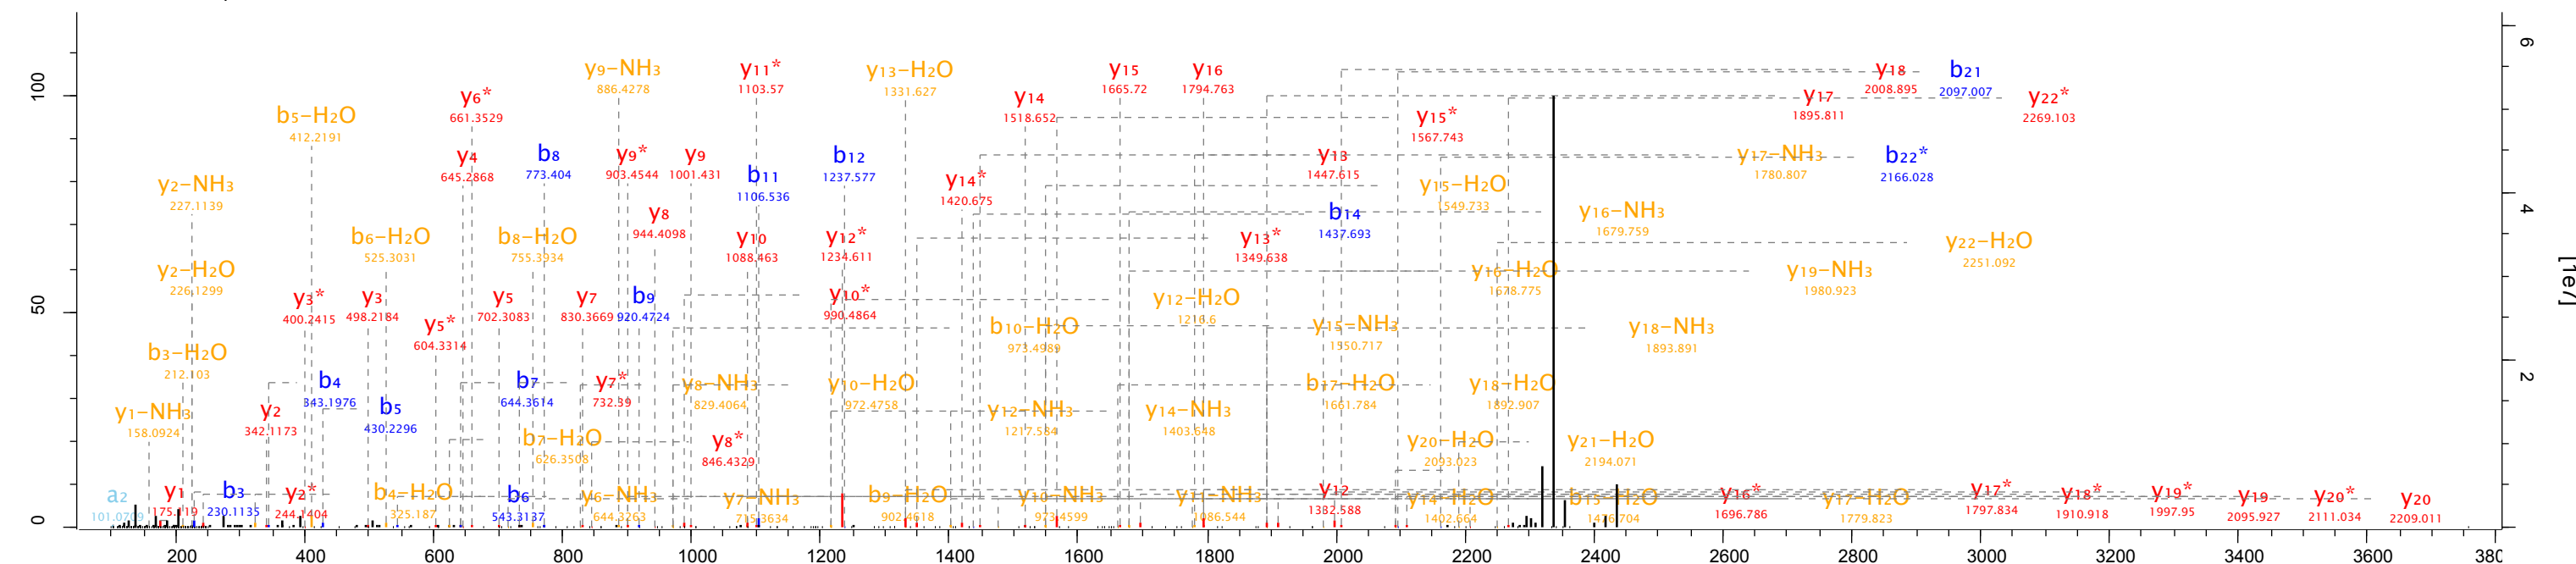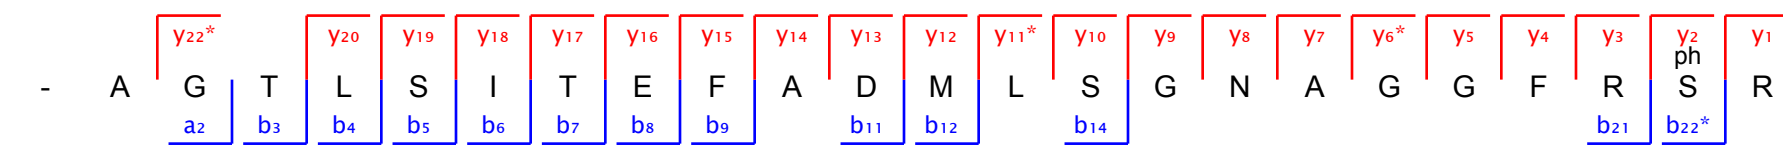

Raw file 20150814\_A375SR\_Phospho\_BR2\_04 Scan 28928 Method FTMS; HCD Score 139.6 m/z 779.08 Gene names DDX46

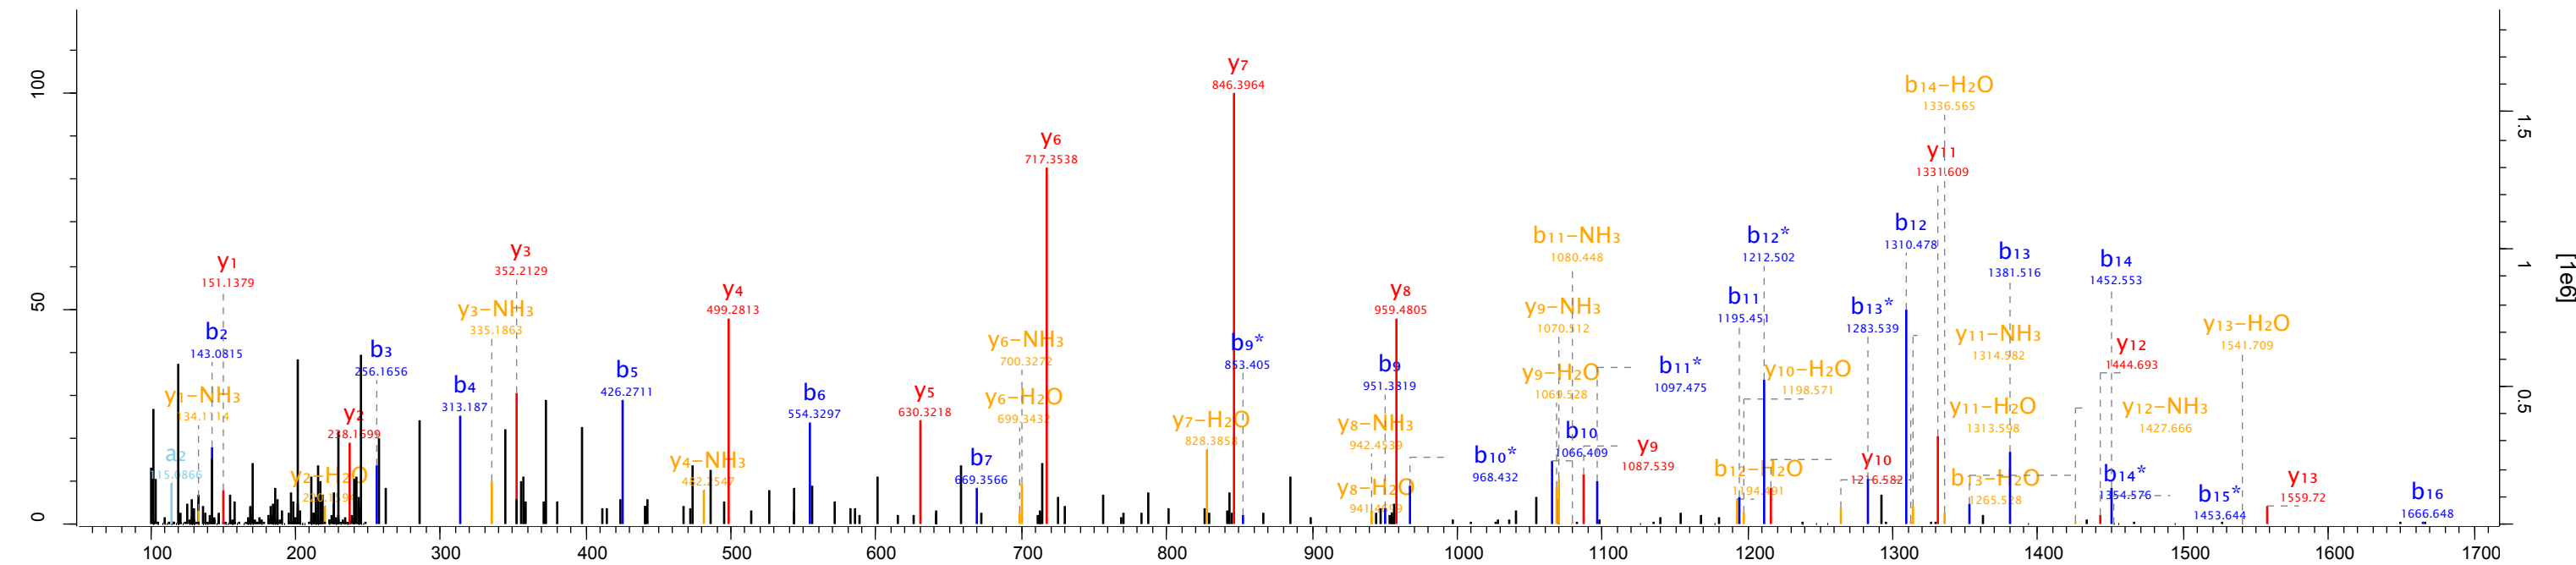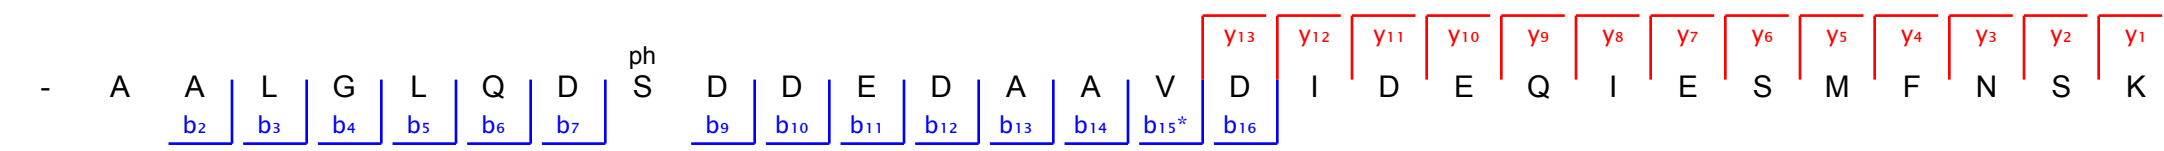

Raw file: 20150814\_A375SR\_Phospho\_BR2\_04  
 Scan: 3098 Method: FTMS; HCD Score: 240.49 m/z: 693.6 Gene names: PLA2G4A

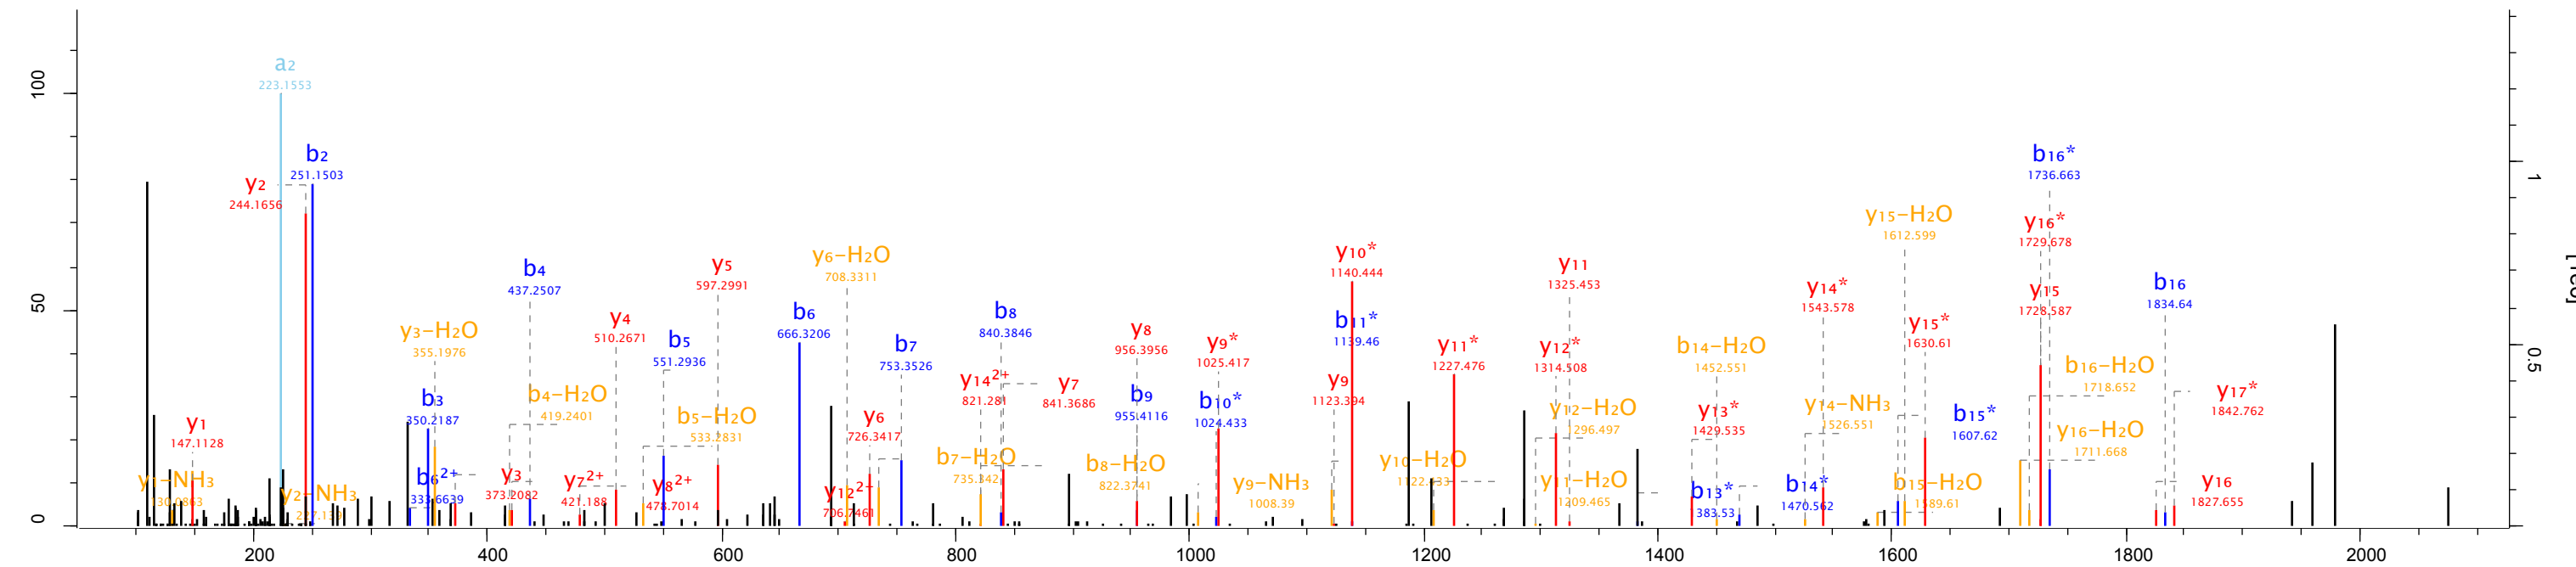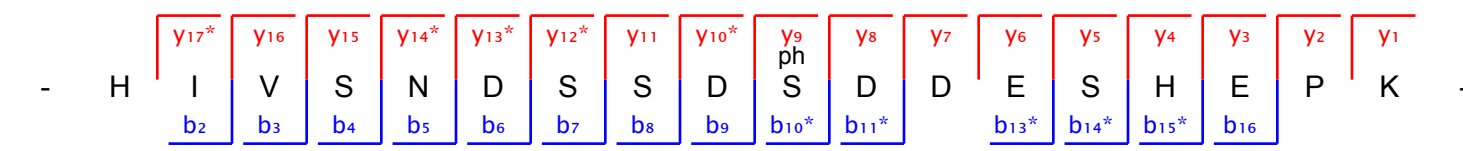

Raw file: 20150814\_A375SR\_Phospho\_BR2\_04  
 Scan: 3268 Method: FTMS; HCD Score: 122.97 m/z: 487.92 Gene names: SRRM1

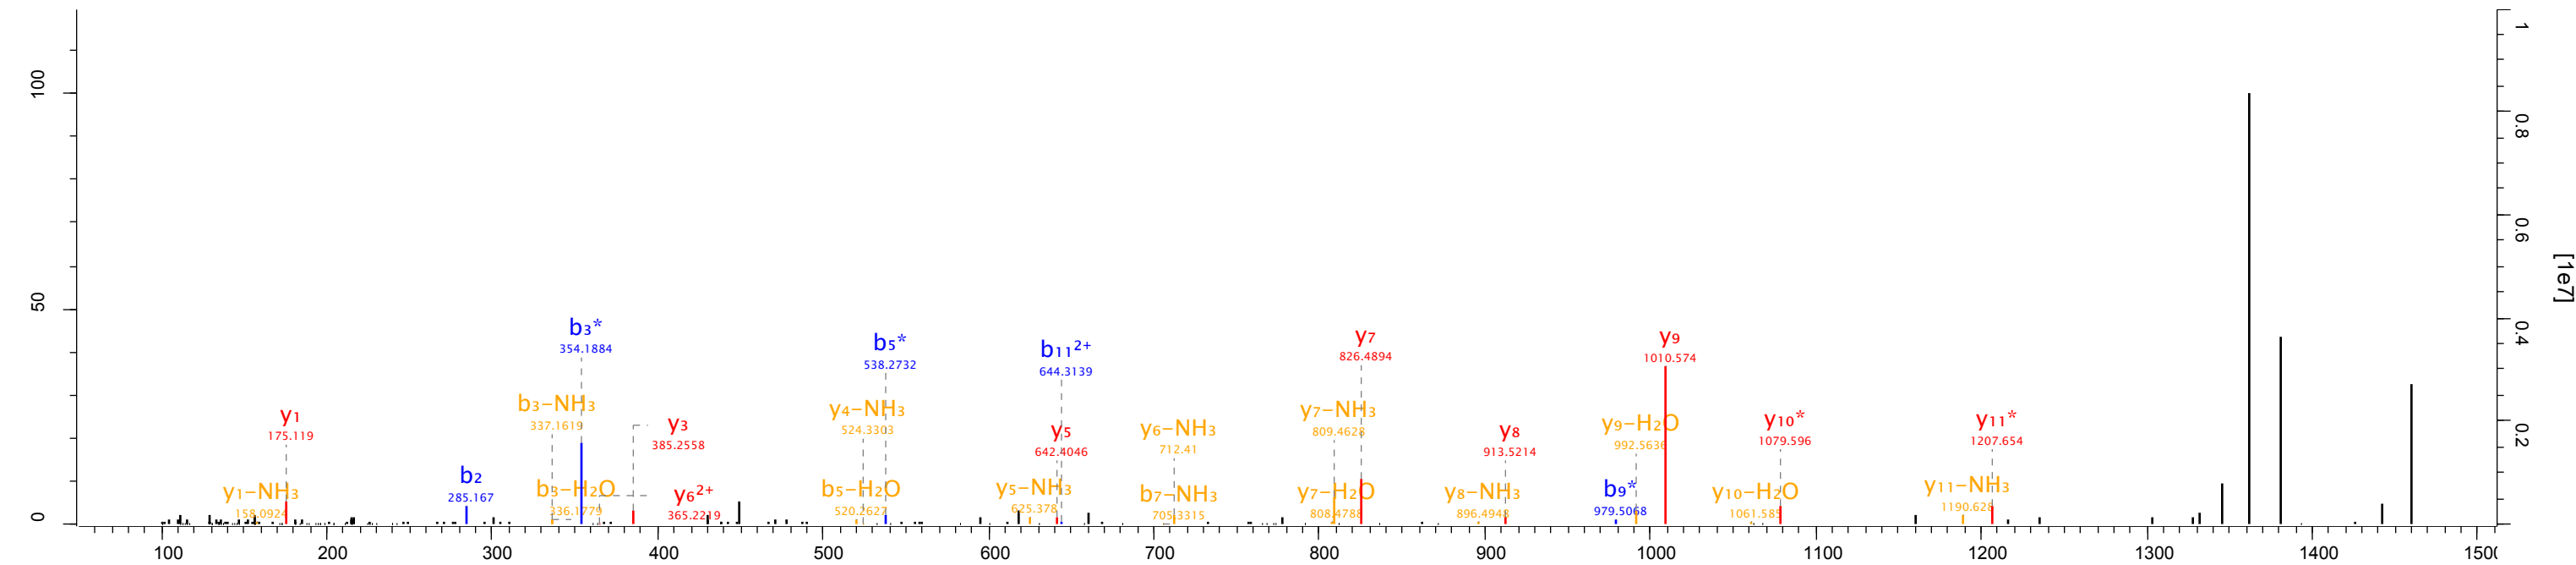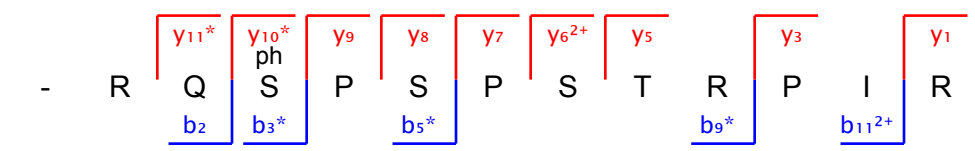



Raw file: 20150814\_A375SR\_Phospho\_BR2\_04  
 Scan: 3368 Method: FTMS; HCD Score: 61.52 m/z: 687.8 Gene names: C7orf43

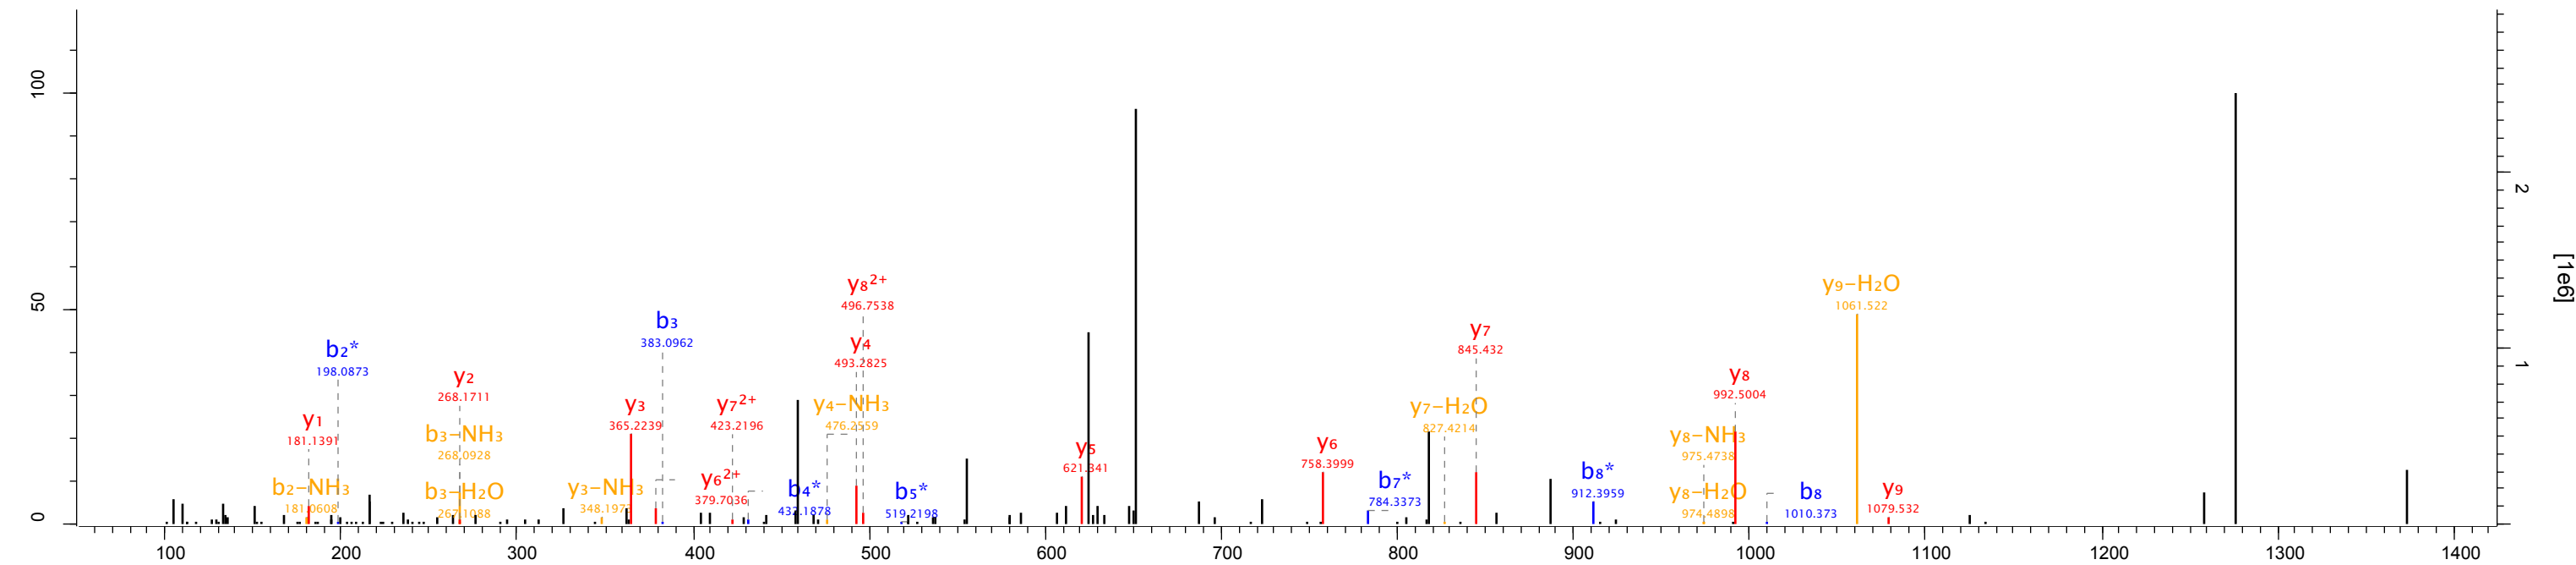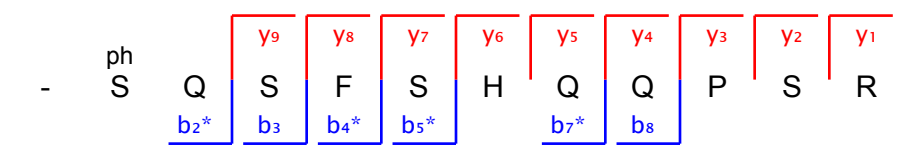

Raw file: 20150814\_A375SR\_Phospho\_BR2\_04  
 Scan: 3408 Method: FTMS; HCD Score: 136.01 m/z: 595.3 Gene names: MCM4

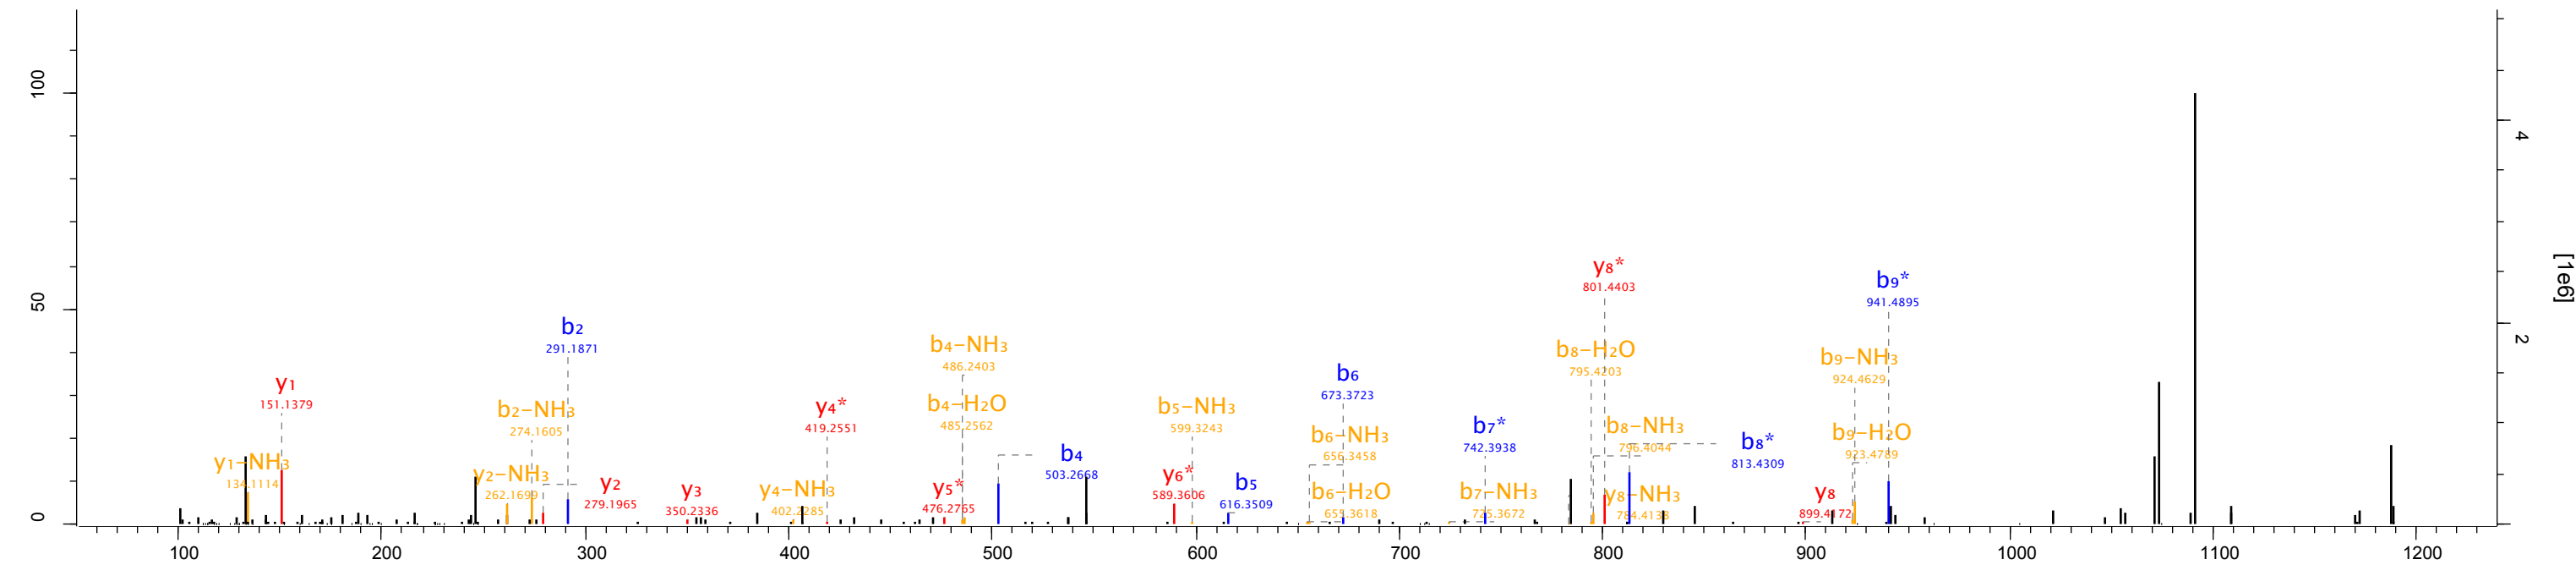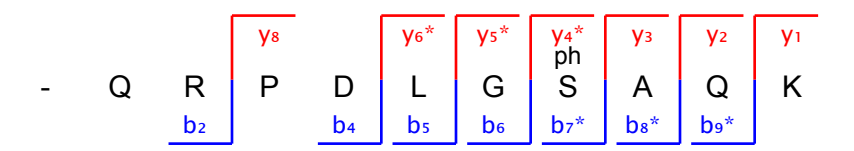

Raw file: 20150814\_A375SR\_Phospho\_BR2\_04  
 Scan: 3768 Method: FTMS; HCD Score: 106.4 m/z: 436.7 Gene names: PXN

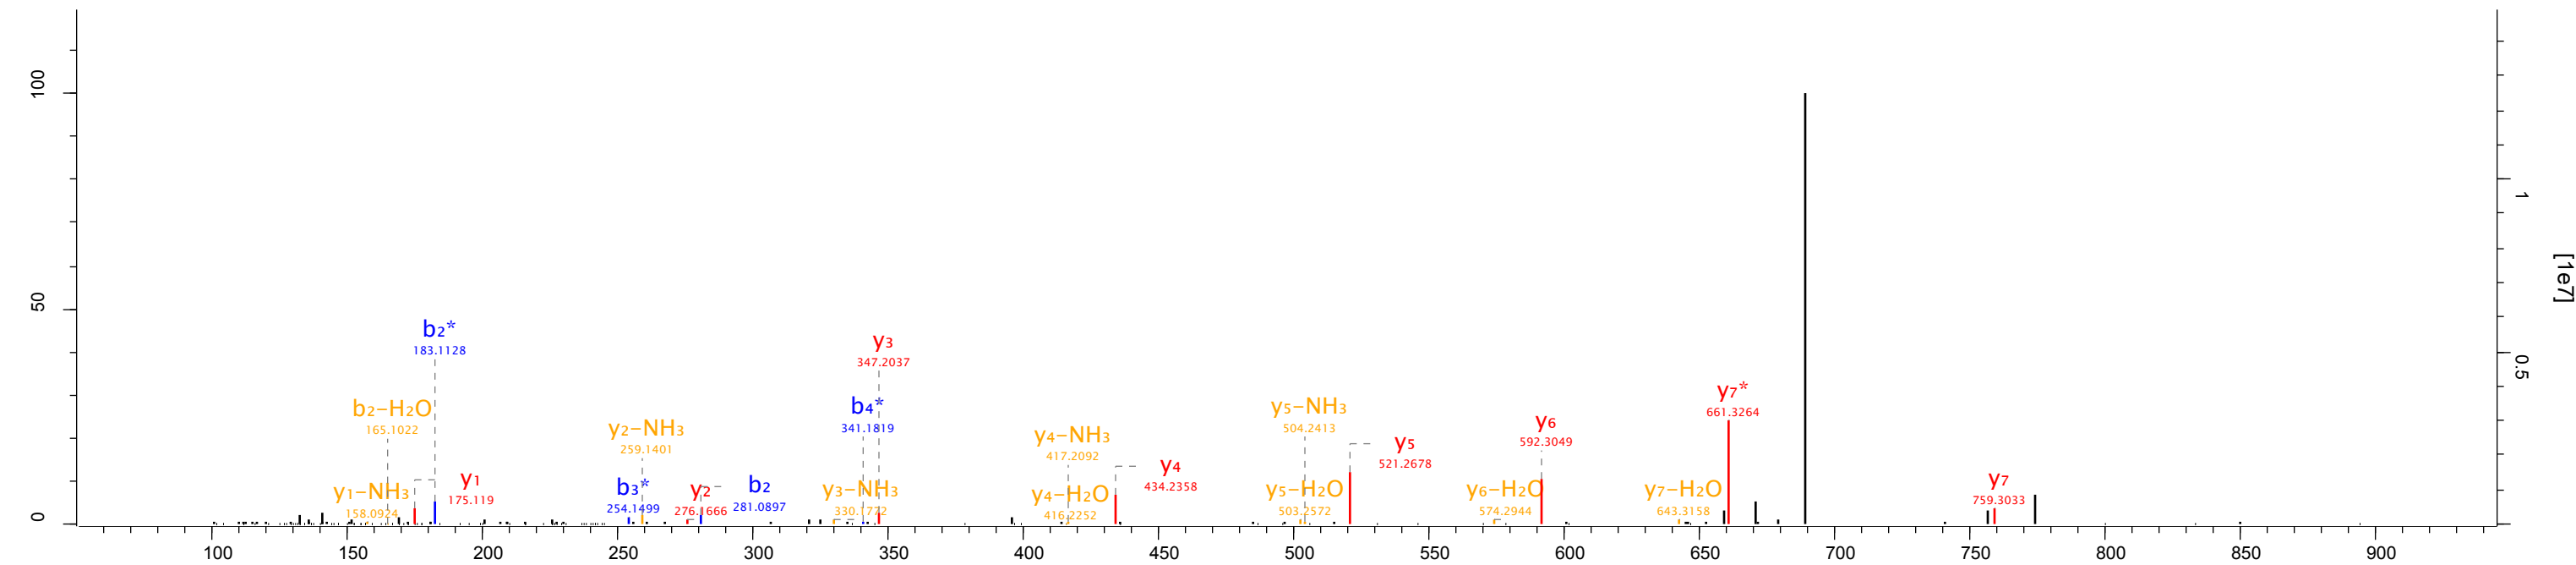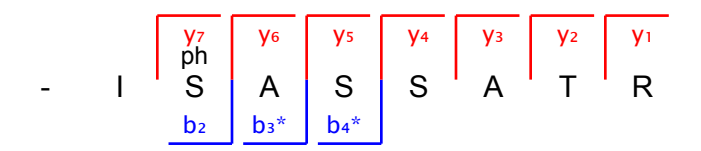

Raw file: 20150814\_A375SR\_Phospho\_BR2\_04  
 Scan: 3838 Method: FTMS; HCD Score: 137.6 m/z: 608.26 Gene names: LIN54

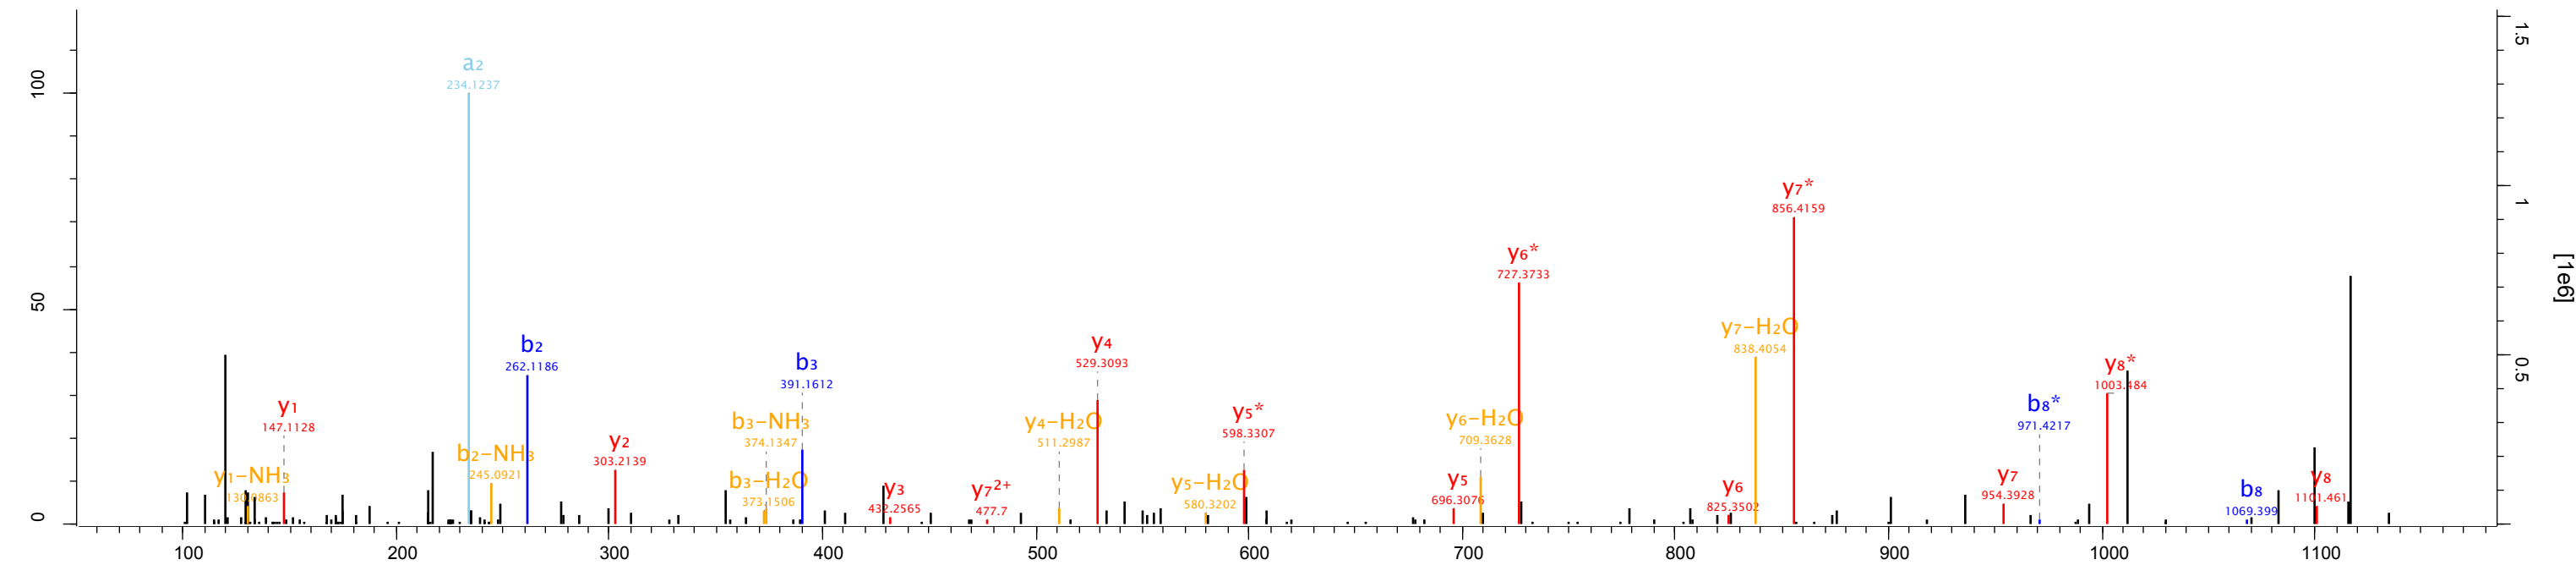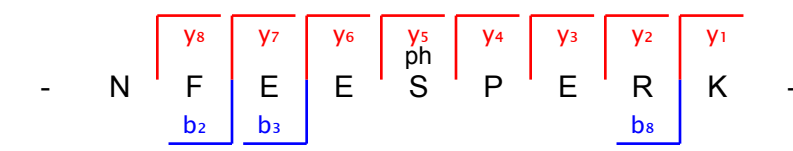

Raw file: 20150814\_A375SR\_Phospho\_BR2\_04  
 Scan: 3968 Method: FTMS; HCD Score: 87.35 m/z: 571.6 Gene names: MED1

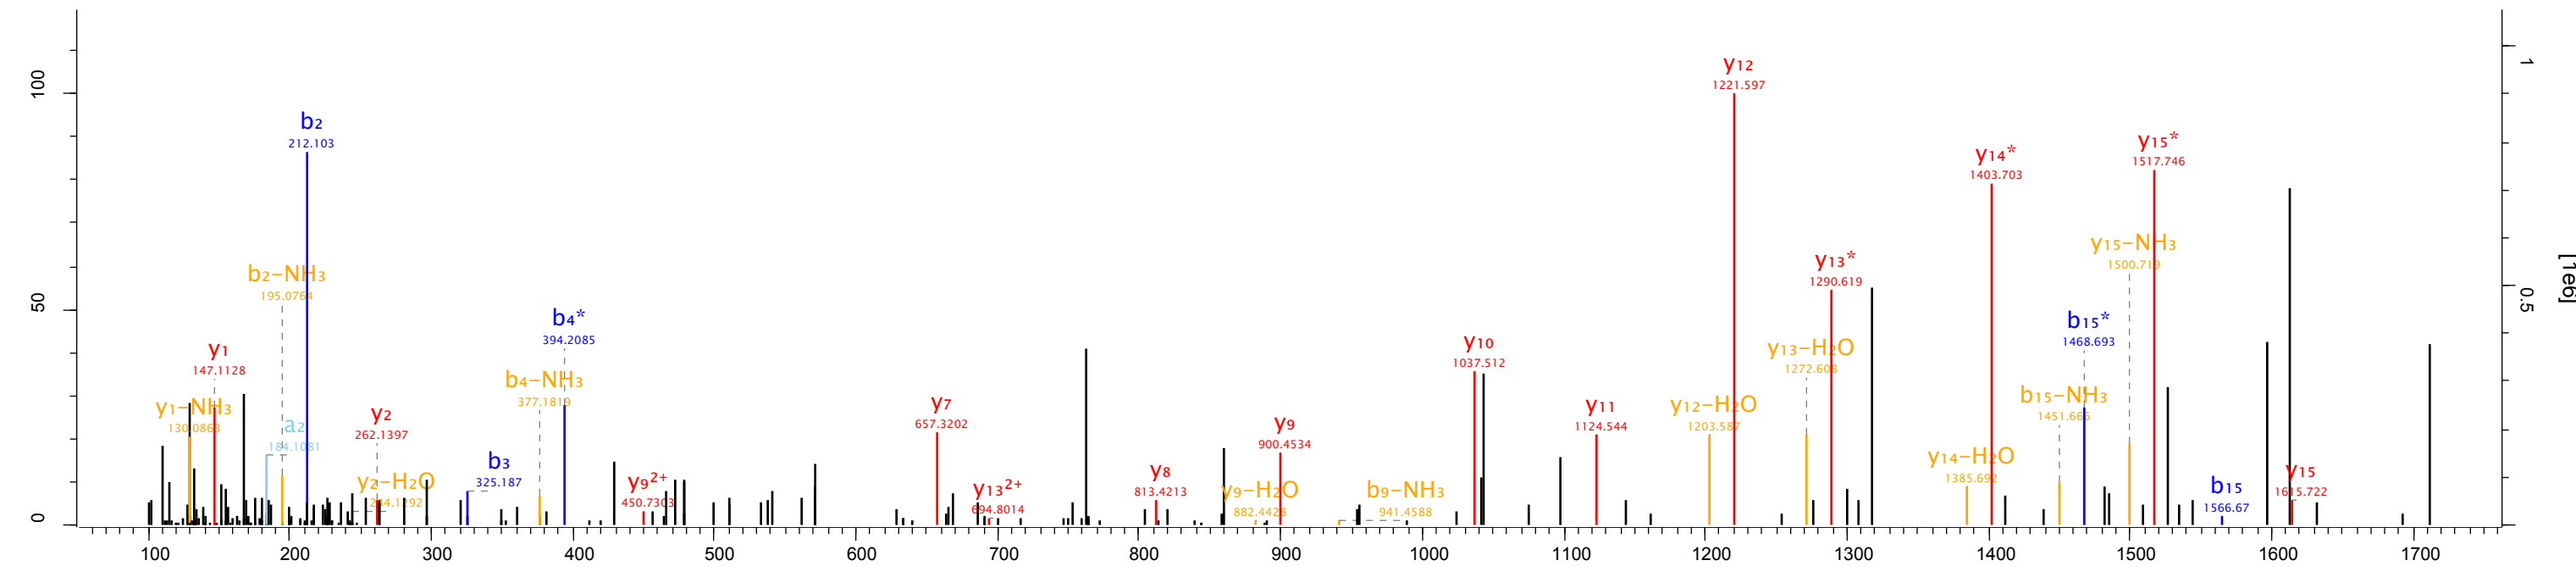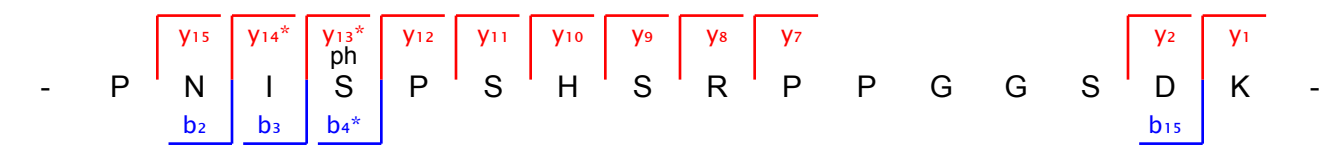

Raw file: 20150814\_A375SR\_Phospho\_BR2\_04  
 Scan: 4048 Method: FTMS; HCD Score: 214.94 m/z: 861.33 Gene names: RBMX;RBMXL1

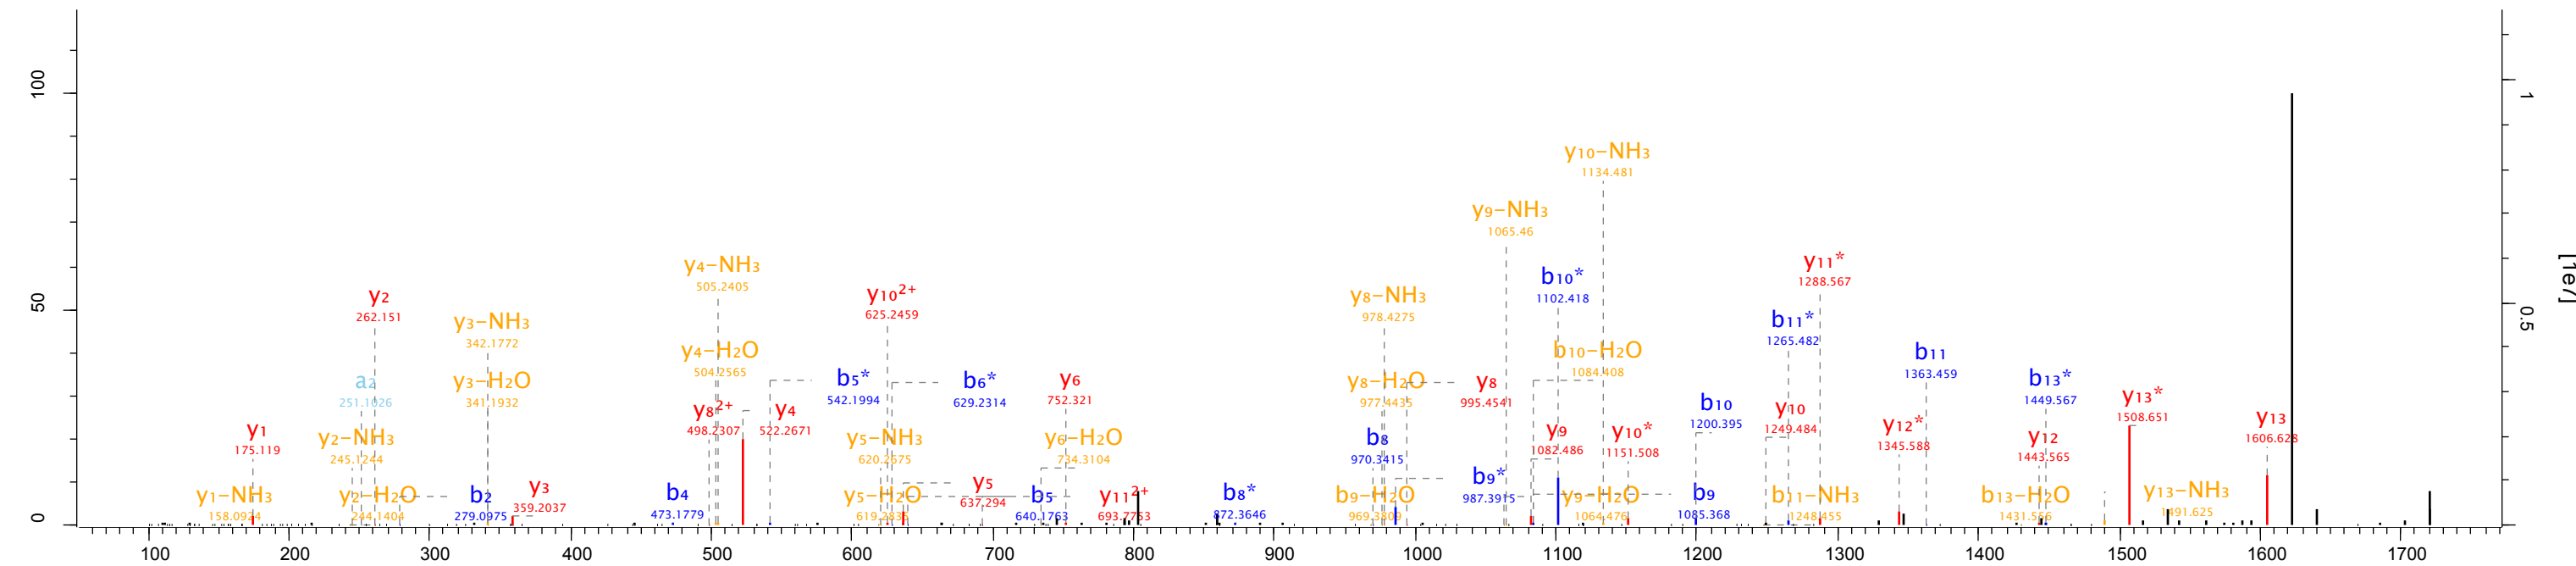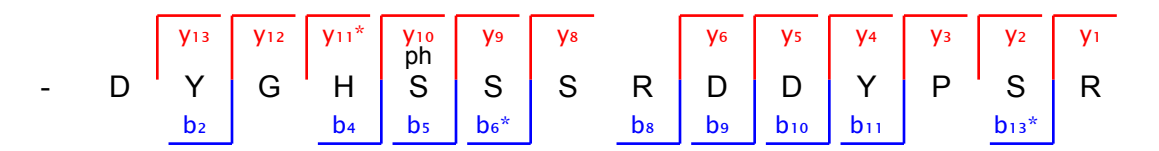

Raw file: 20150814\_A375SR\_Phospho\_BR2\_04  
 Scan: 4138 Method: FTMS; HCD Score: 116.85 m/z: 785.35 Gene names: RB1CC1

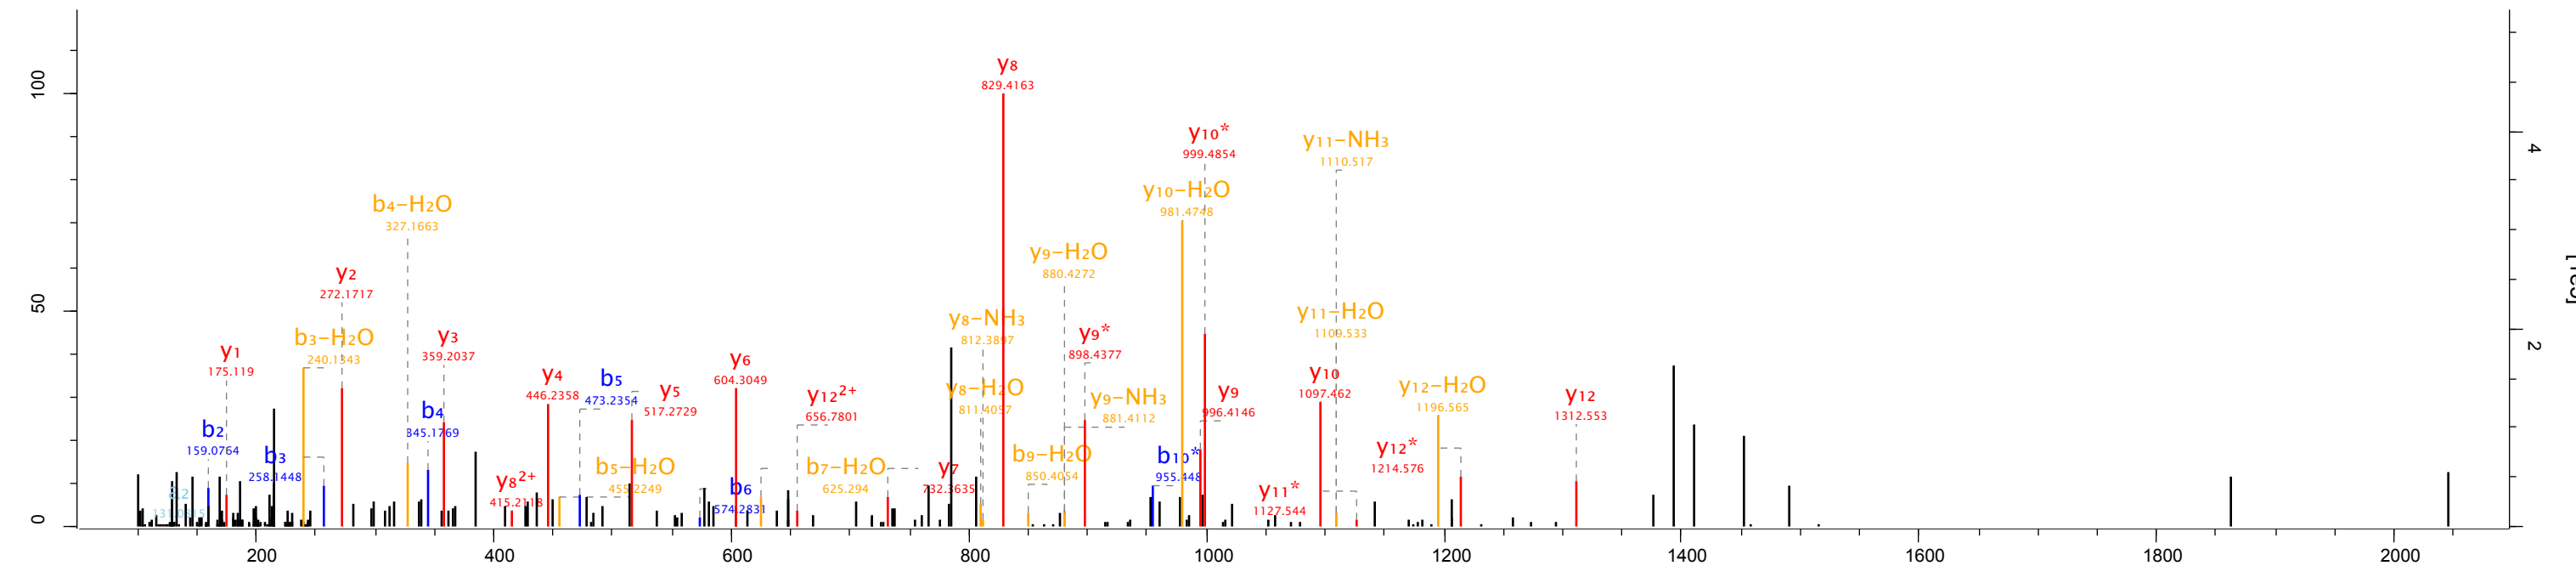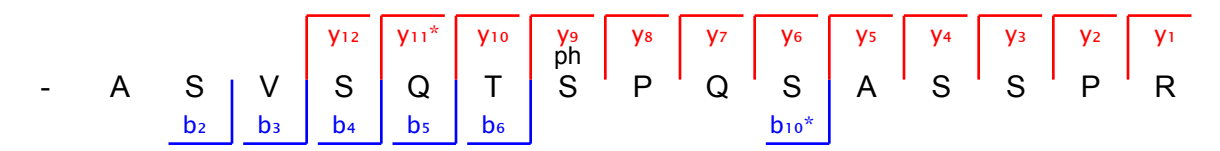

Raw file: 20150814\_A375SR\_Phospho\_BR2\_04  
 Scan: 4398 Method: FTMS; HCD Score: 127.17 m/z: 542.22 Gene names: FHOD1

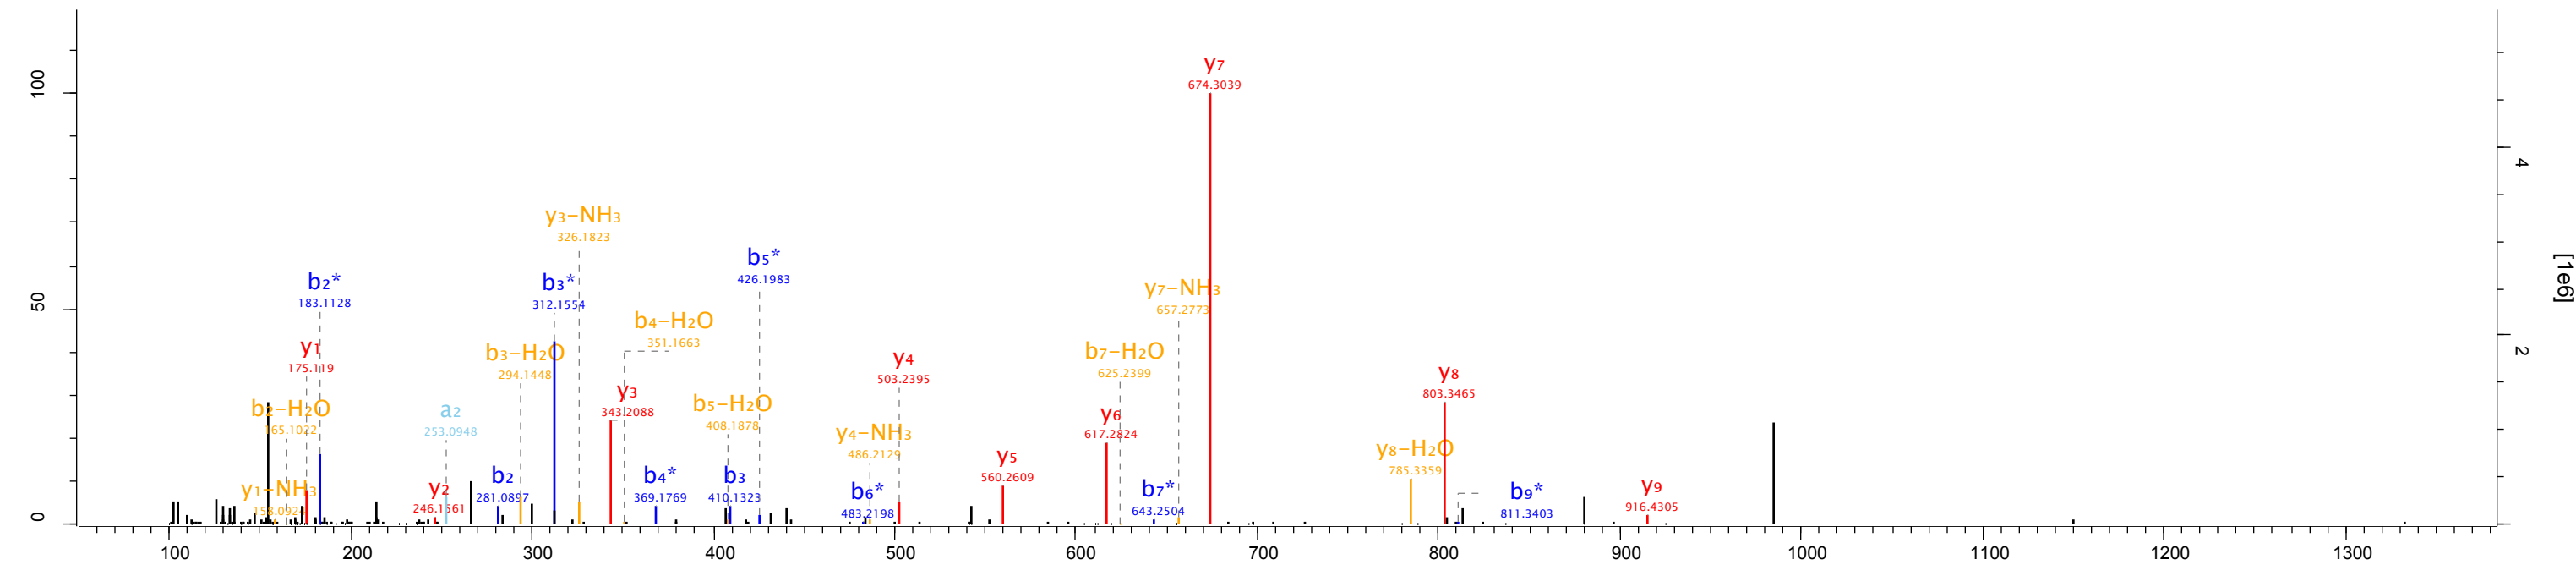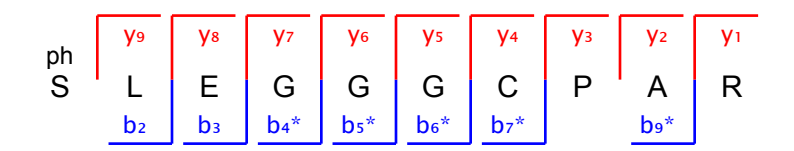



Raw file: 20150814\_A375SR\_Phospho\_BR2\_04  
 Scan: 4608 Method: FTMS; HCD Score: 109.22 m/z: 868.88 Gene names: INCENP

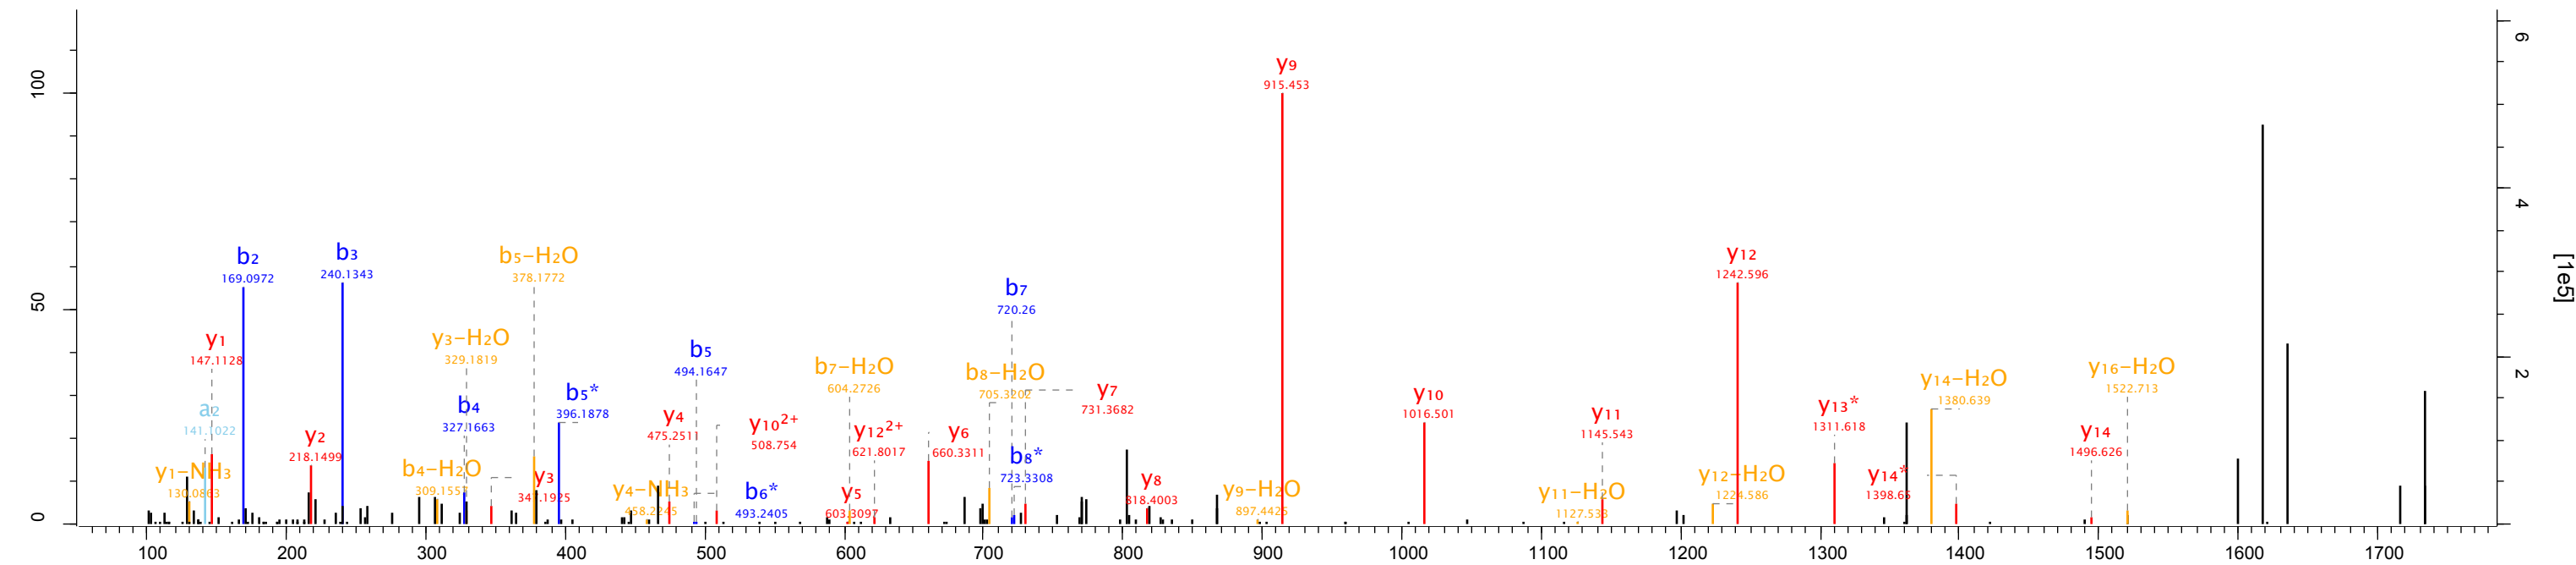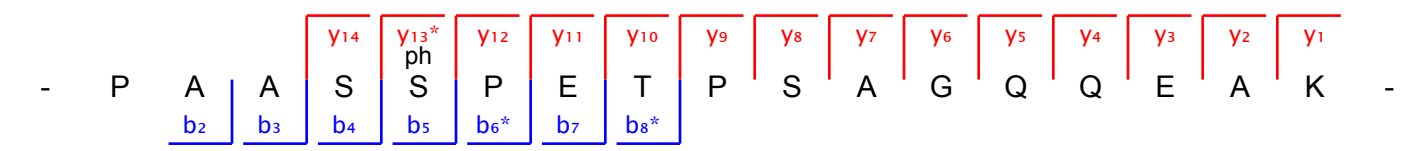

Raw file  
20150814\_A375SR\_Phospho\_BR2\_04

Scan 4678 Method FTMS; HCD Score 344.37 m/z 1143.98 Gene names CANX

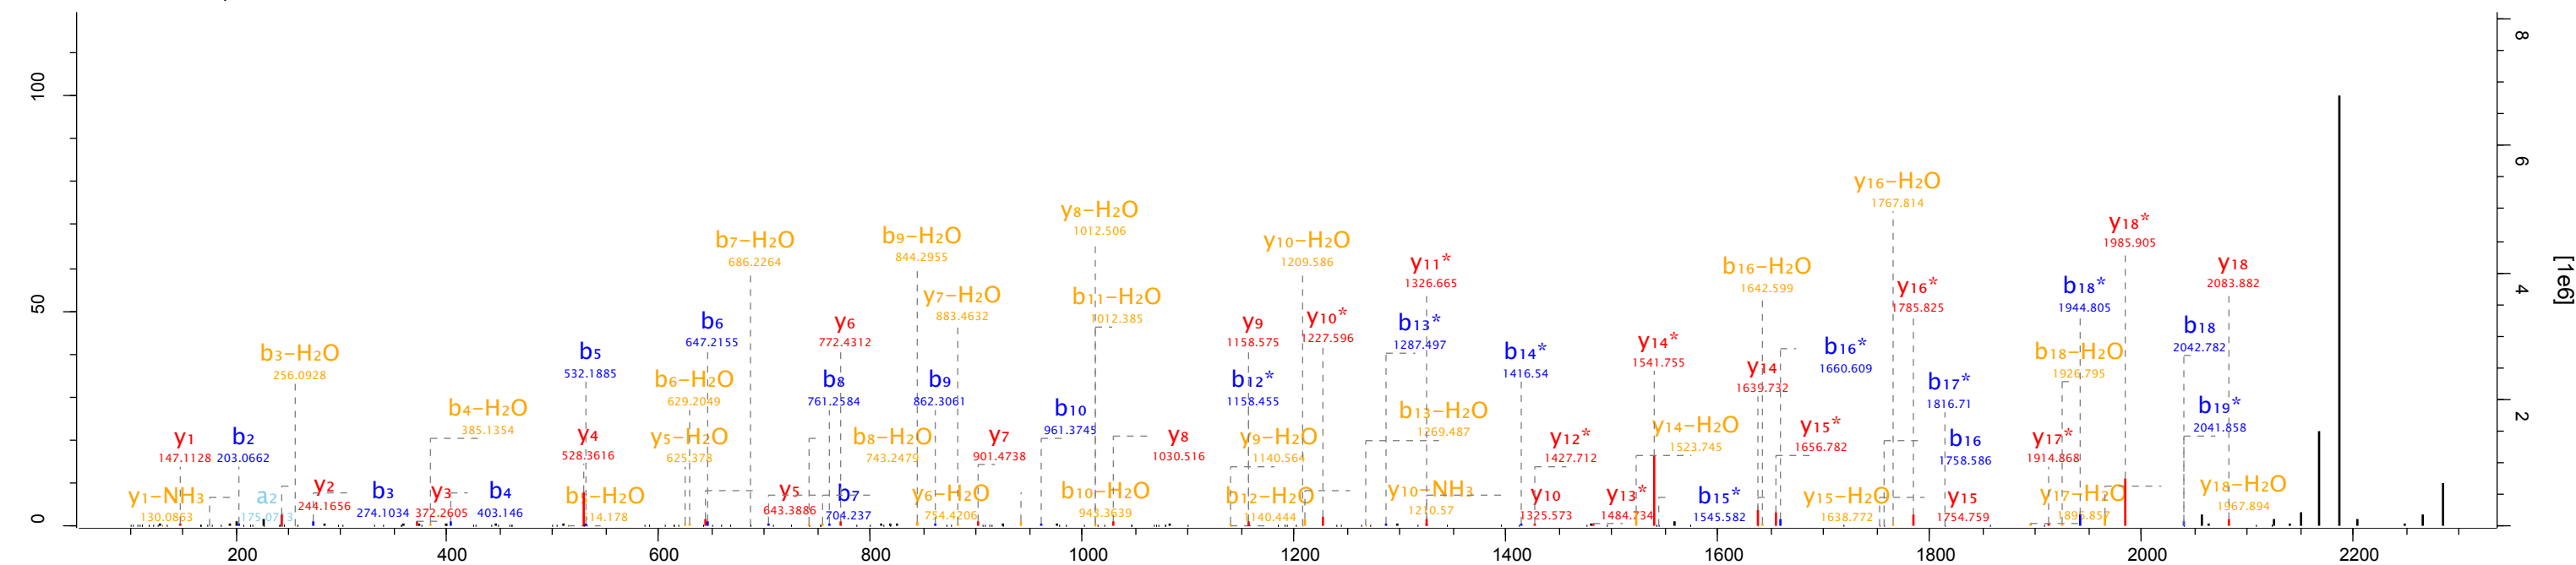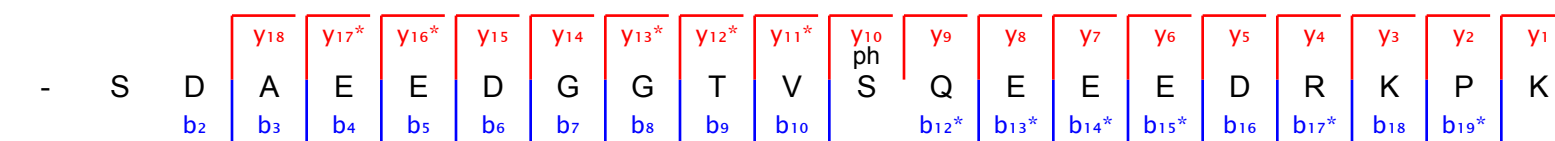

Raw file: 20150814\_A375SR\_Phospho\_BR2\_04  
 Scan: 4818 Method: FTMS; HCD Score: 95.54 m/z: 708.28 Gene names: SREK1IP1

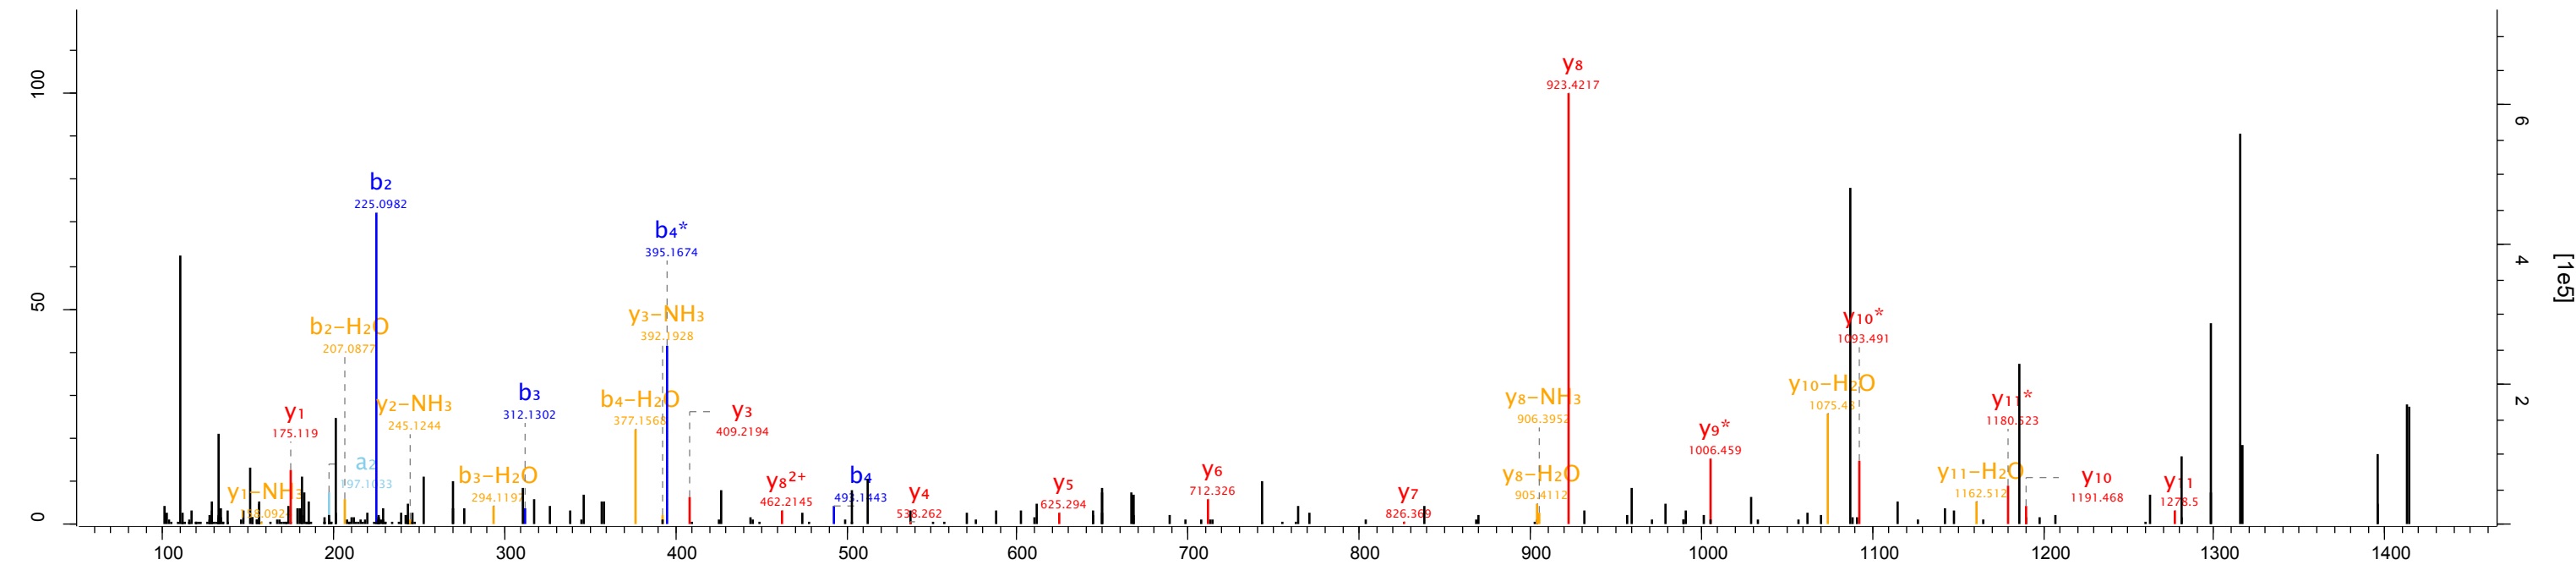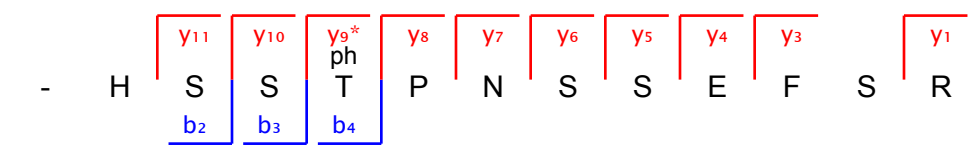

Raw file  
 20150814\_A375SR\_Phospho\_BR2\_04  
 Scan 4908 Method FTMS; HCD Score 214.44 m/z 761.7 Gene names EIF4B

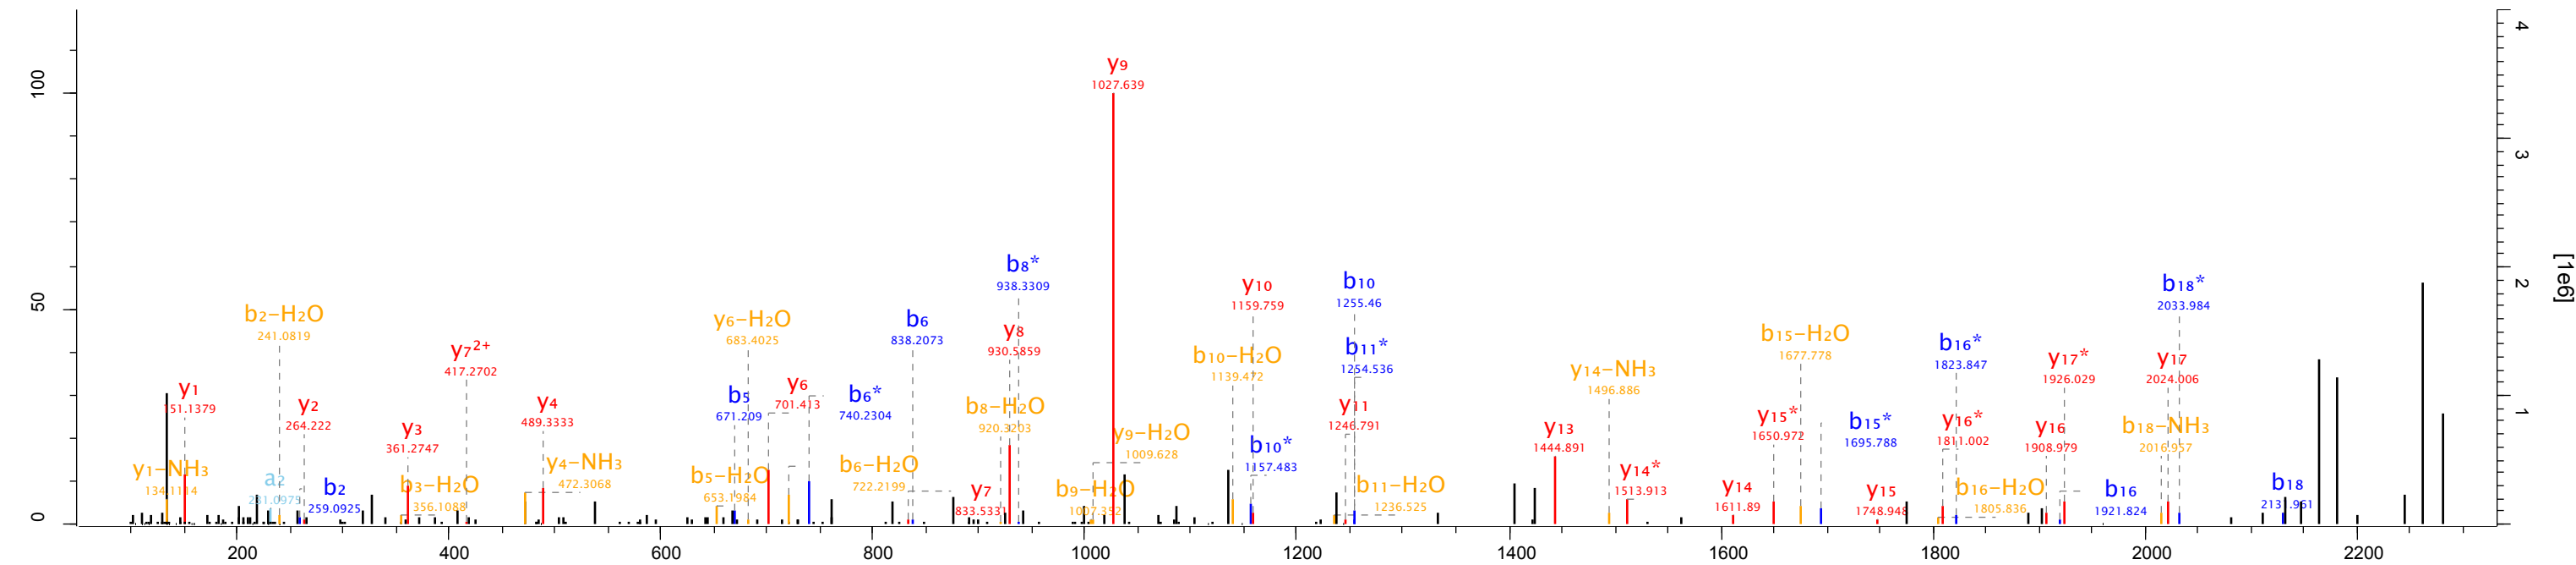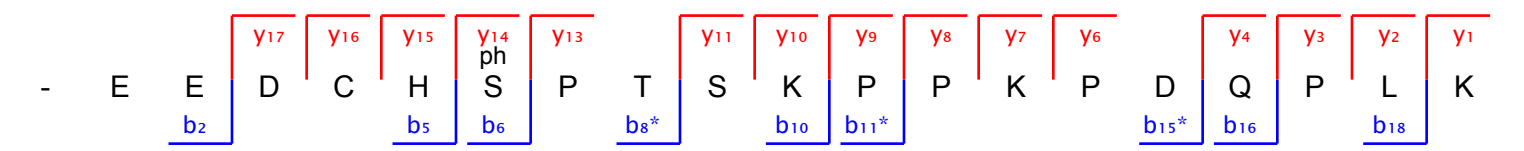

Raw file: 20150814\_A375SR\_Phospho\_BR2\_04  
 Scan: 5378 Method: FTMS; HCD Score: 134.86 m/z: 874.86 Gene names: TP53BP1

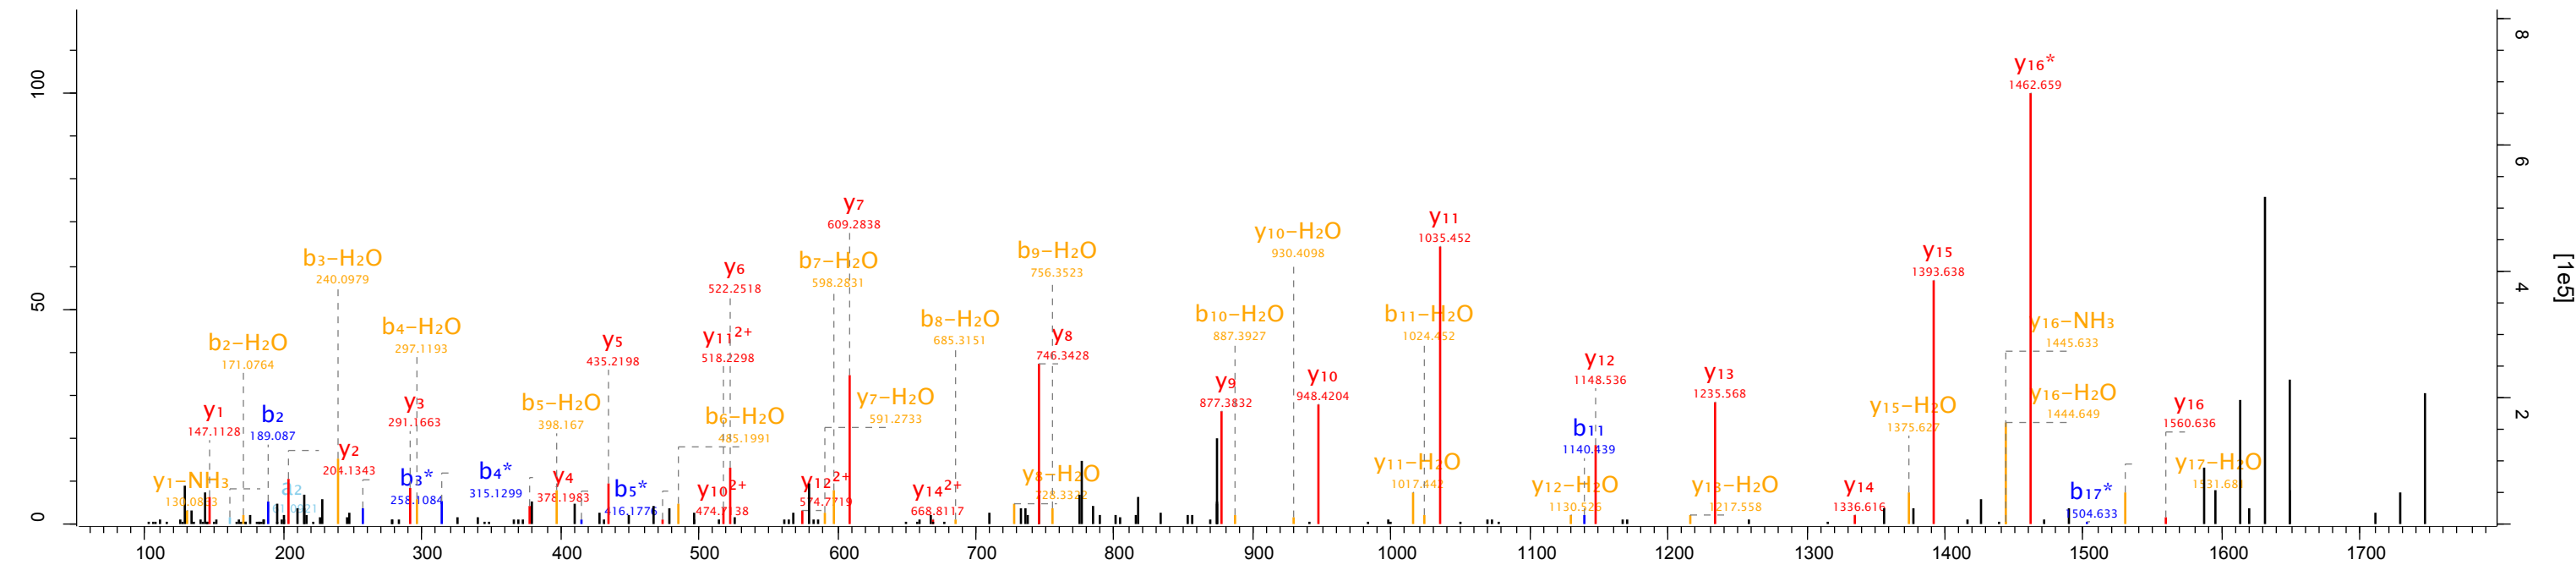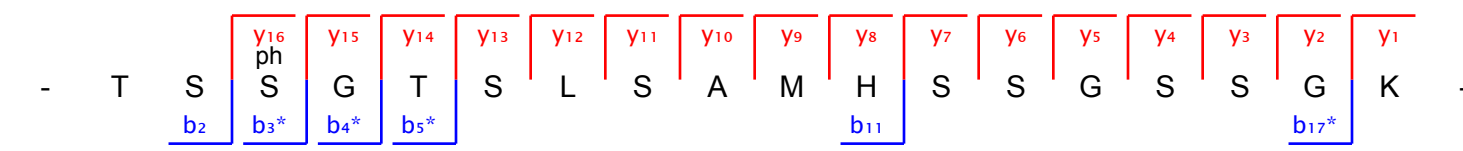

Raw file: 20150814\_A375SR\_Phospho\_BR2\_04  
 Scan: 5788 Method: FTMS; HCD Score: 139.93 m/z: 677.81 Gene names: TAOK1

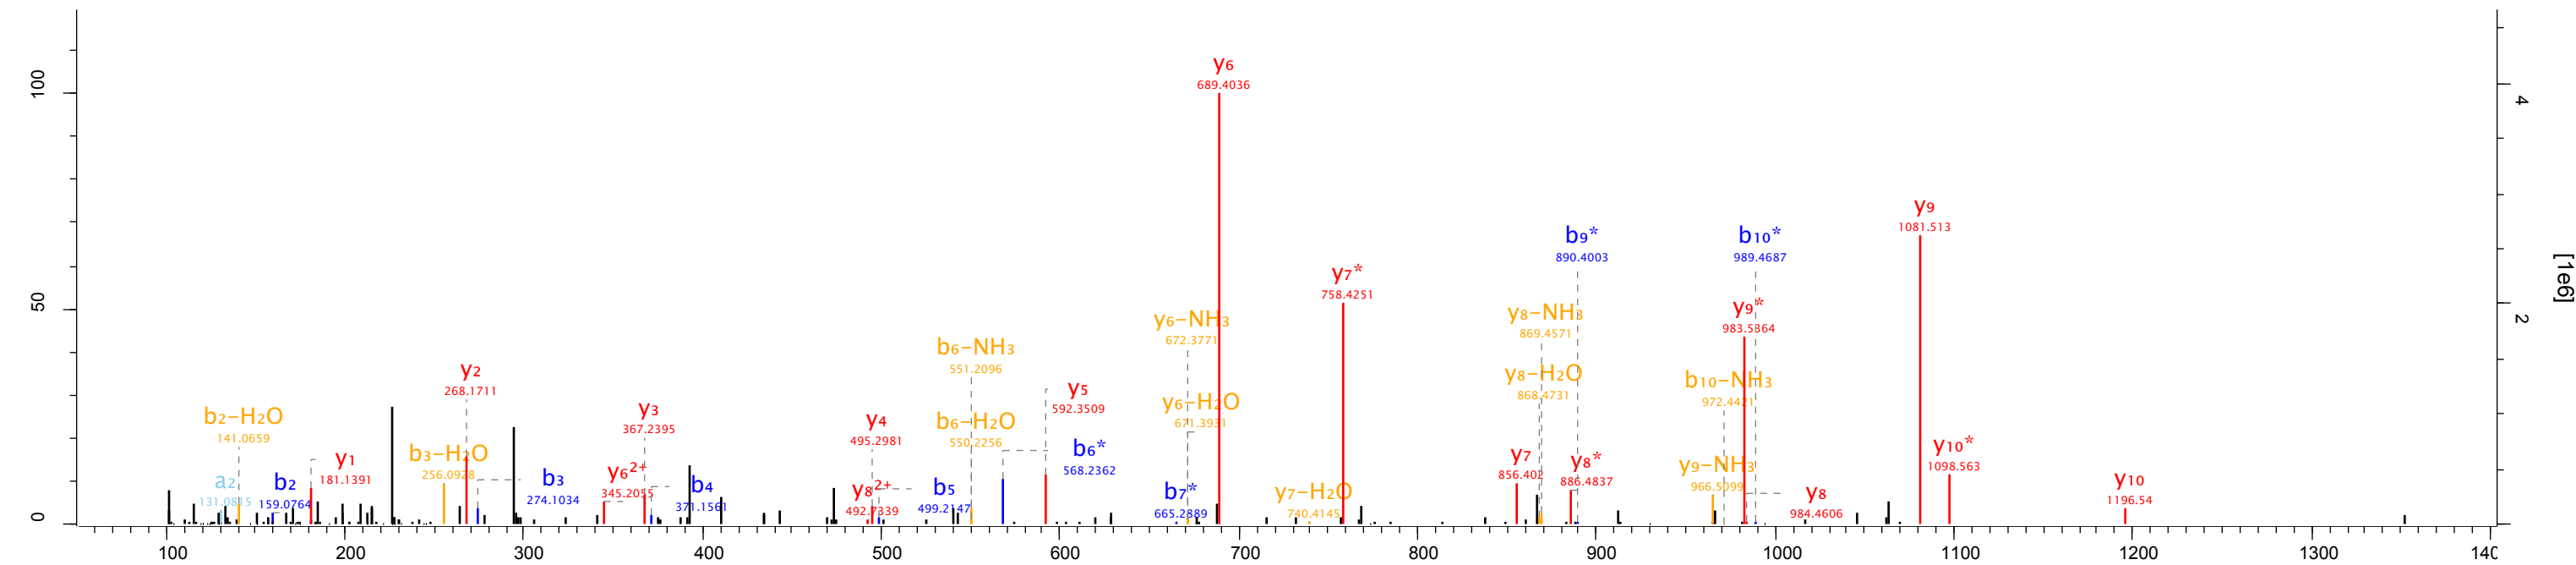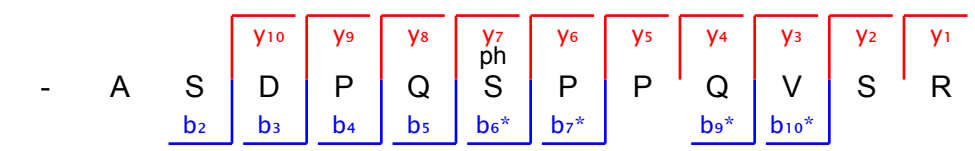

Raw file 20150814\_A375SR\_Phospho\_BR2\_04 Scan 6078 Method FTMS; HCD Score 88.73 m/z 502.73 Gene names ARHGEF18

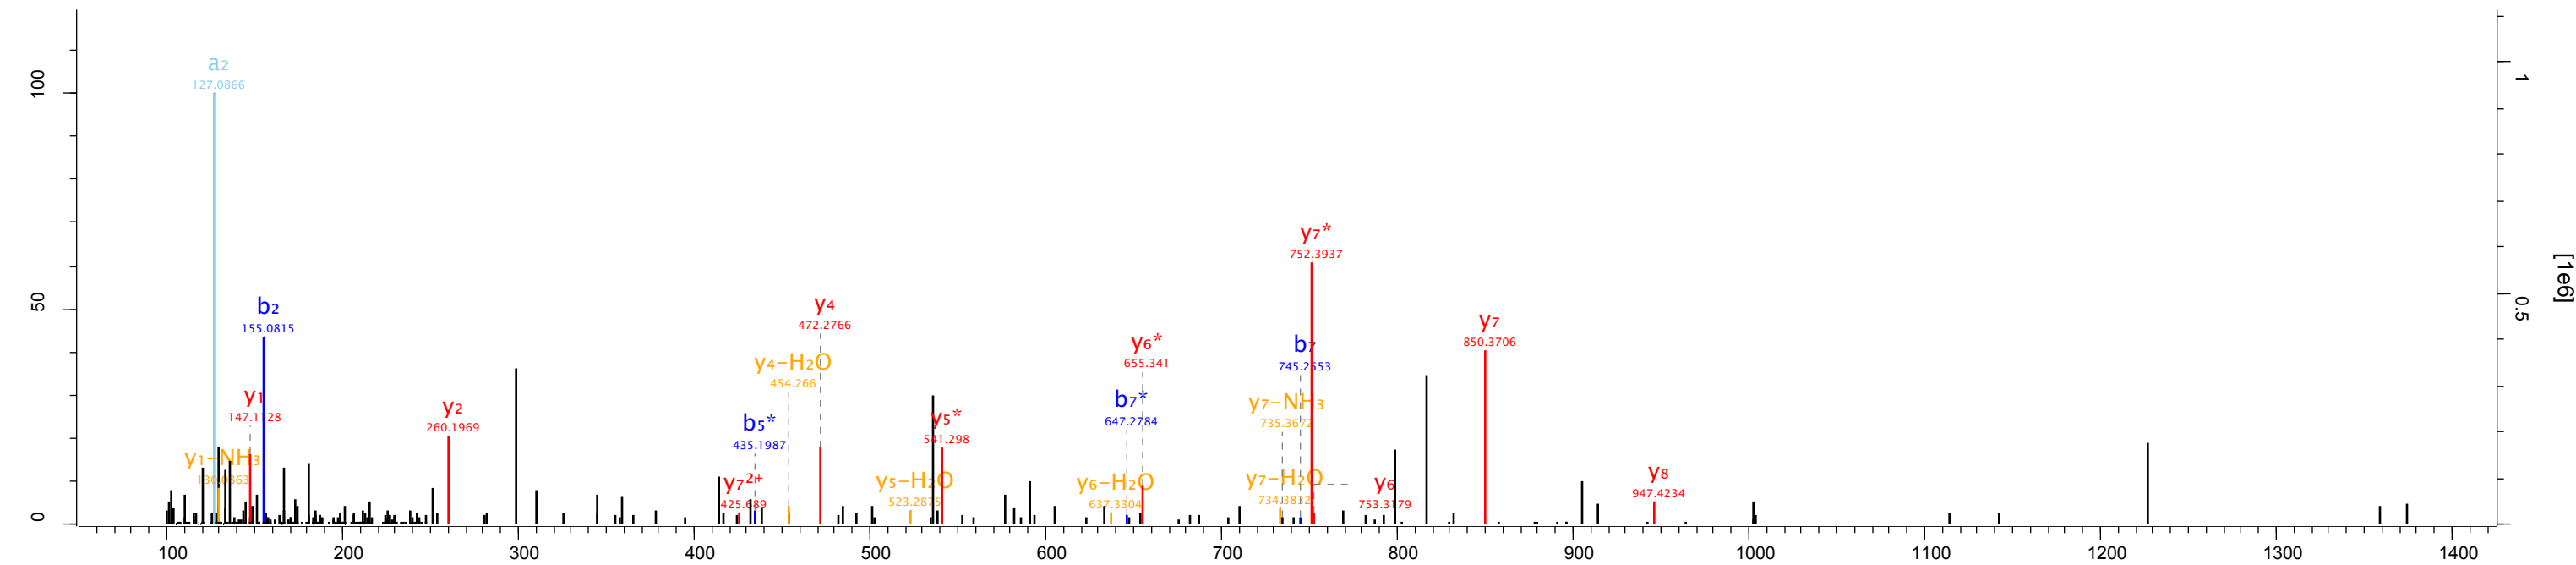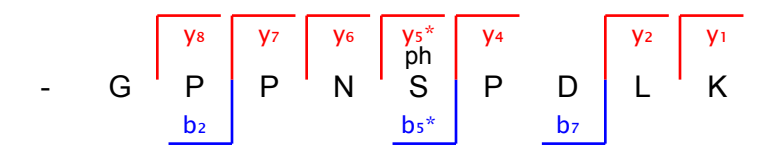

Raw file 20150814\_A375SR\_Phospho\_BR2\_04 Scan 6558 Method FTMS; HCD Score 155.98 m/z 606.77 Gene names MAP4K3

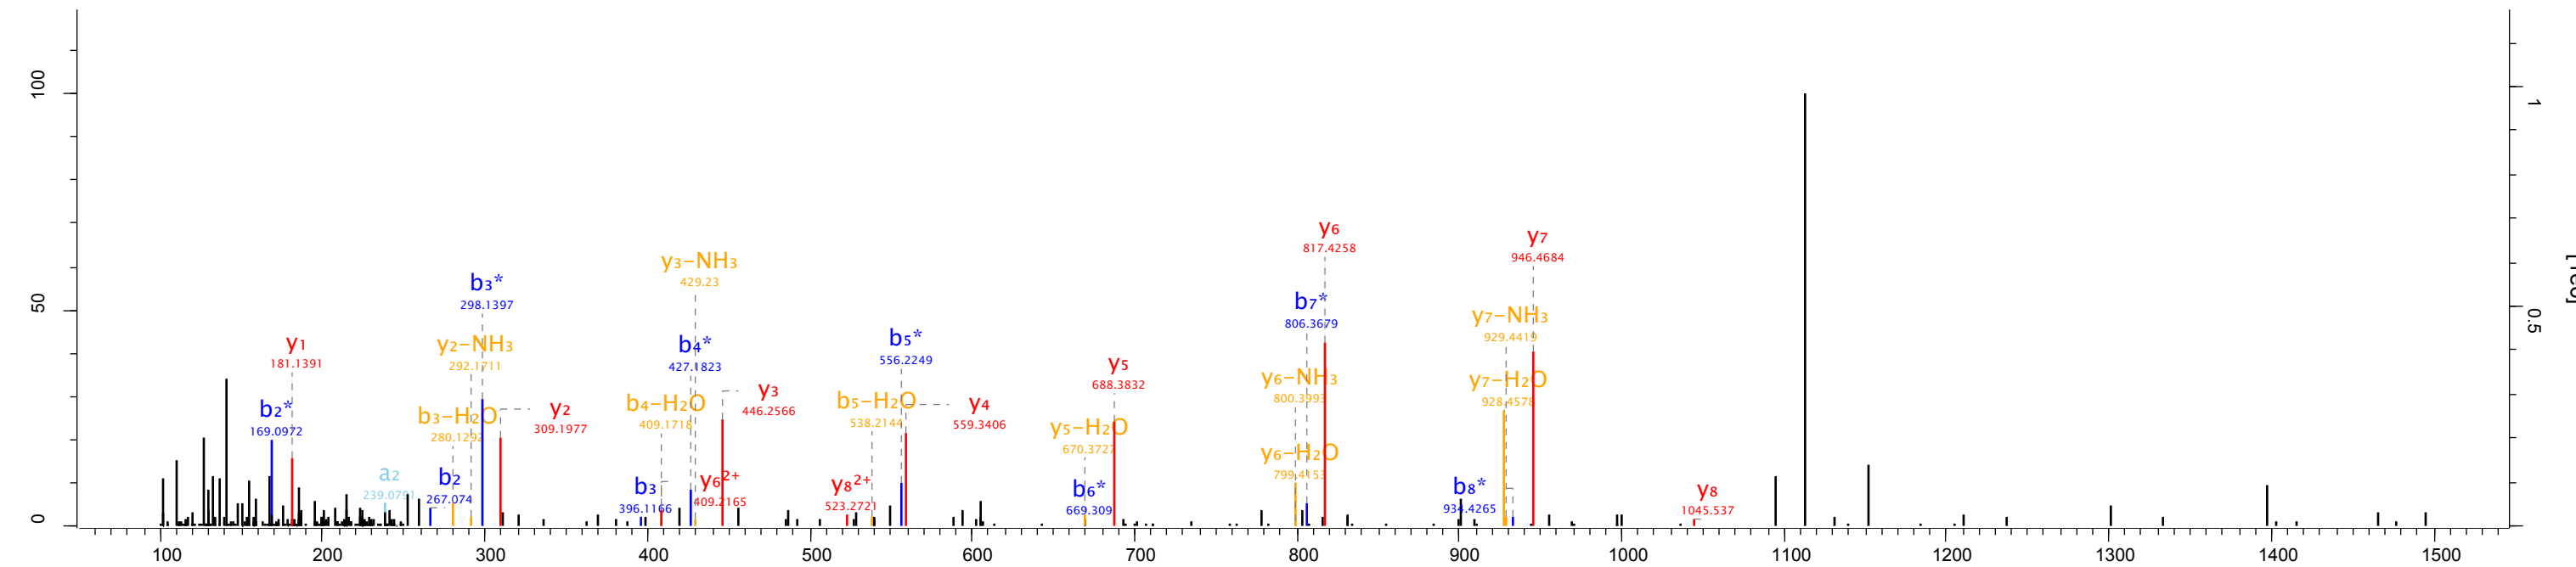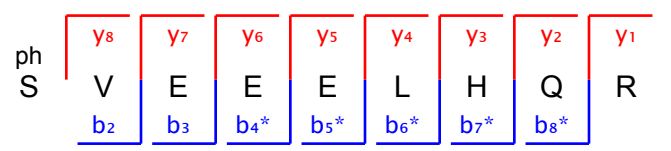



Raw file: 20150814\_A375SR\_Phospho\_BR2\_04  
 Scan: 6768 Method: FTMS; HCD Score: 91.55 m/z: 495.56 Gene names: CLASP1

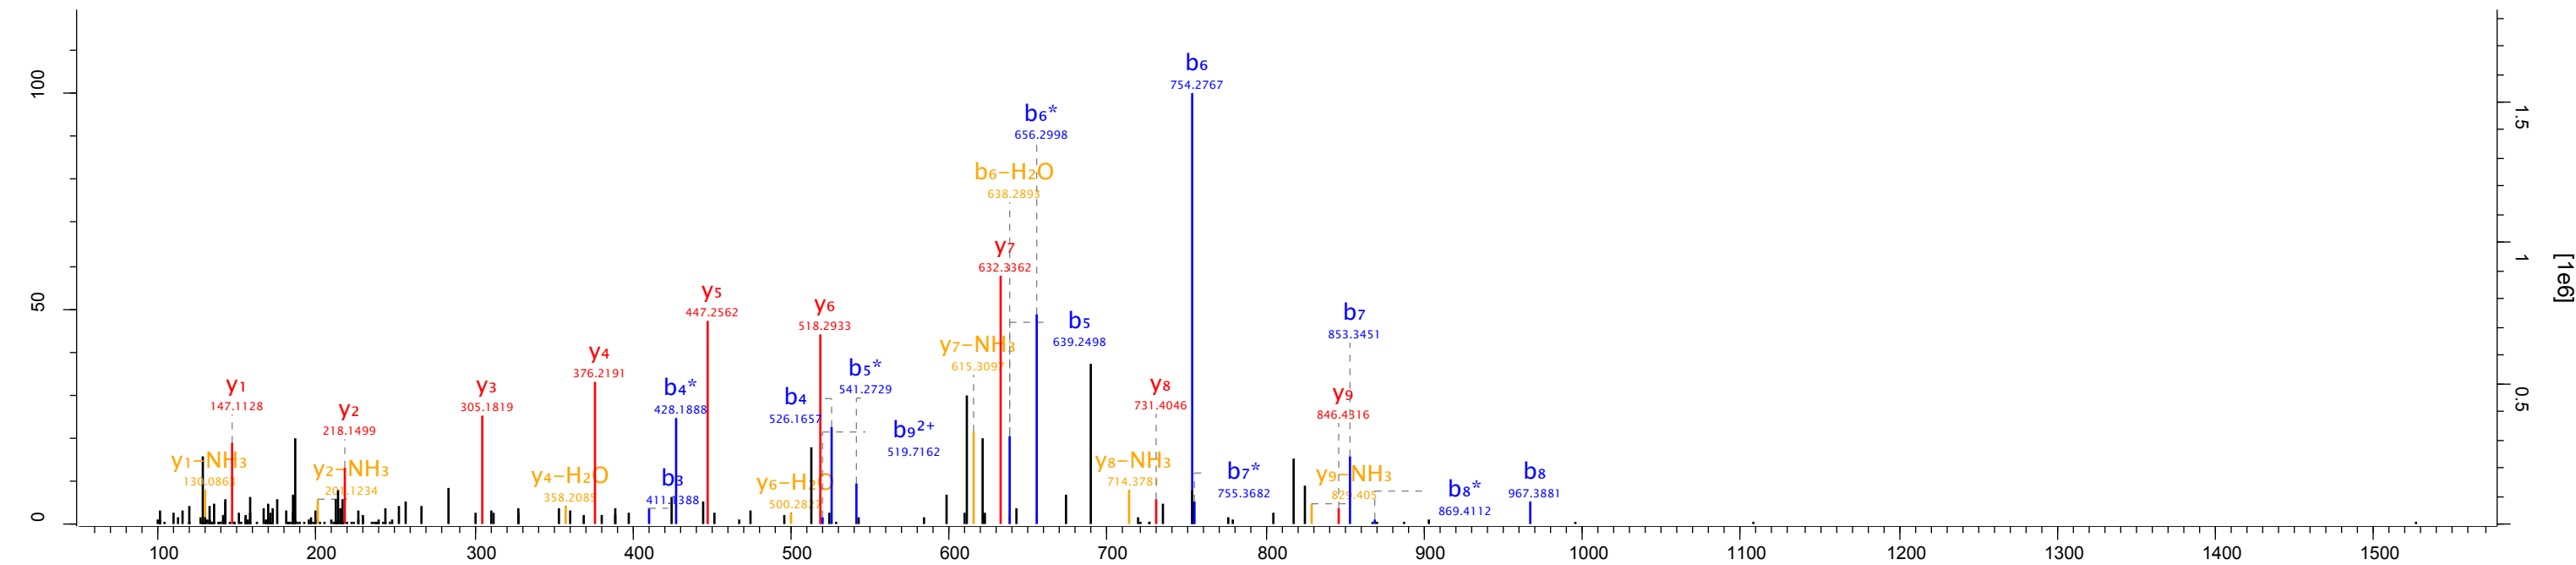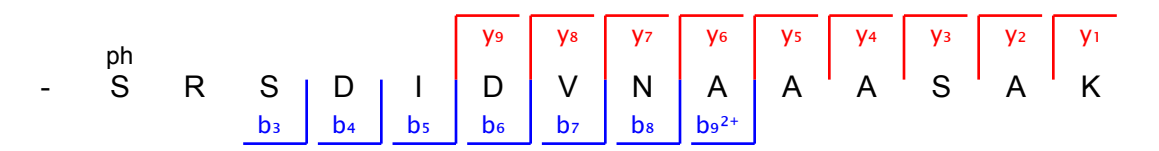

Raw file: 20150814\_A375SR\_Phospho\_BR2\_04  
 Scan: 7048 Method: FTMS; HCD Score: 59.34 m/z: 700.34 Gene names: SPECC1

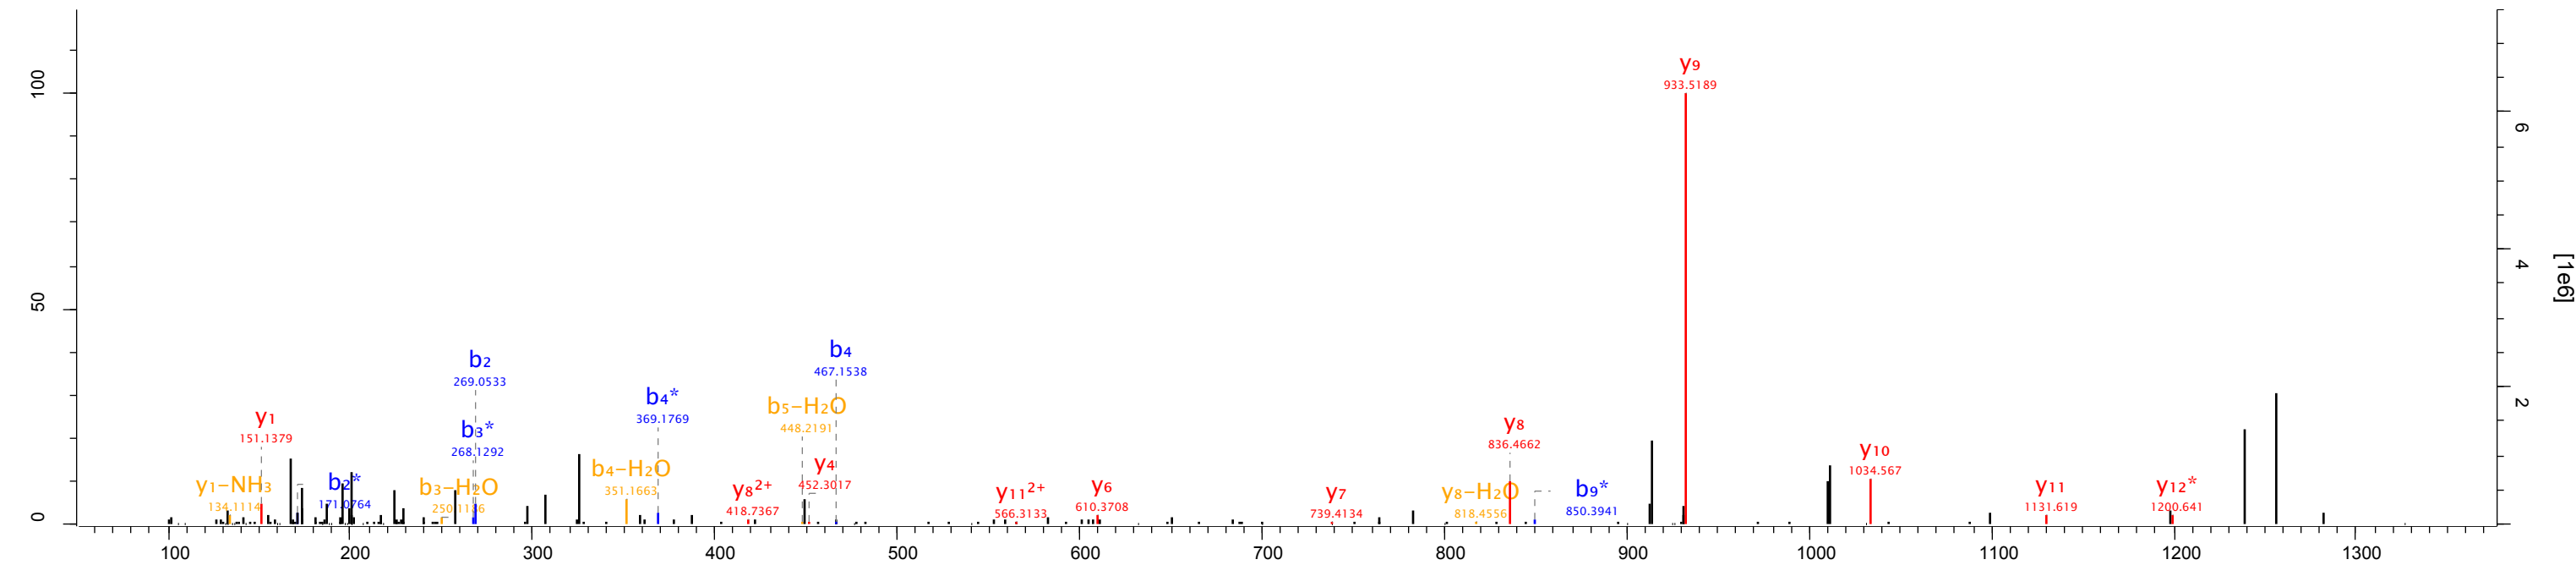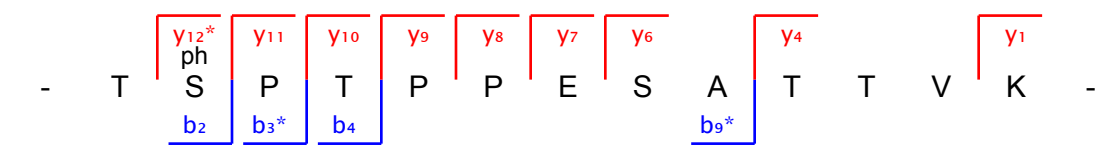

Raw file: 20150814\_A375SR\_Phospho\_BR2\_04  
 Scan: 7408 Method: FTMS; HCD Score: 121.45 m/z: 753.34 Gene names: NCOA7

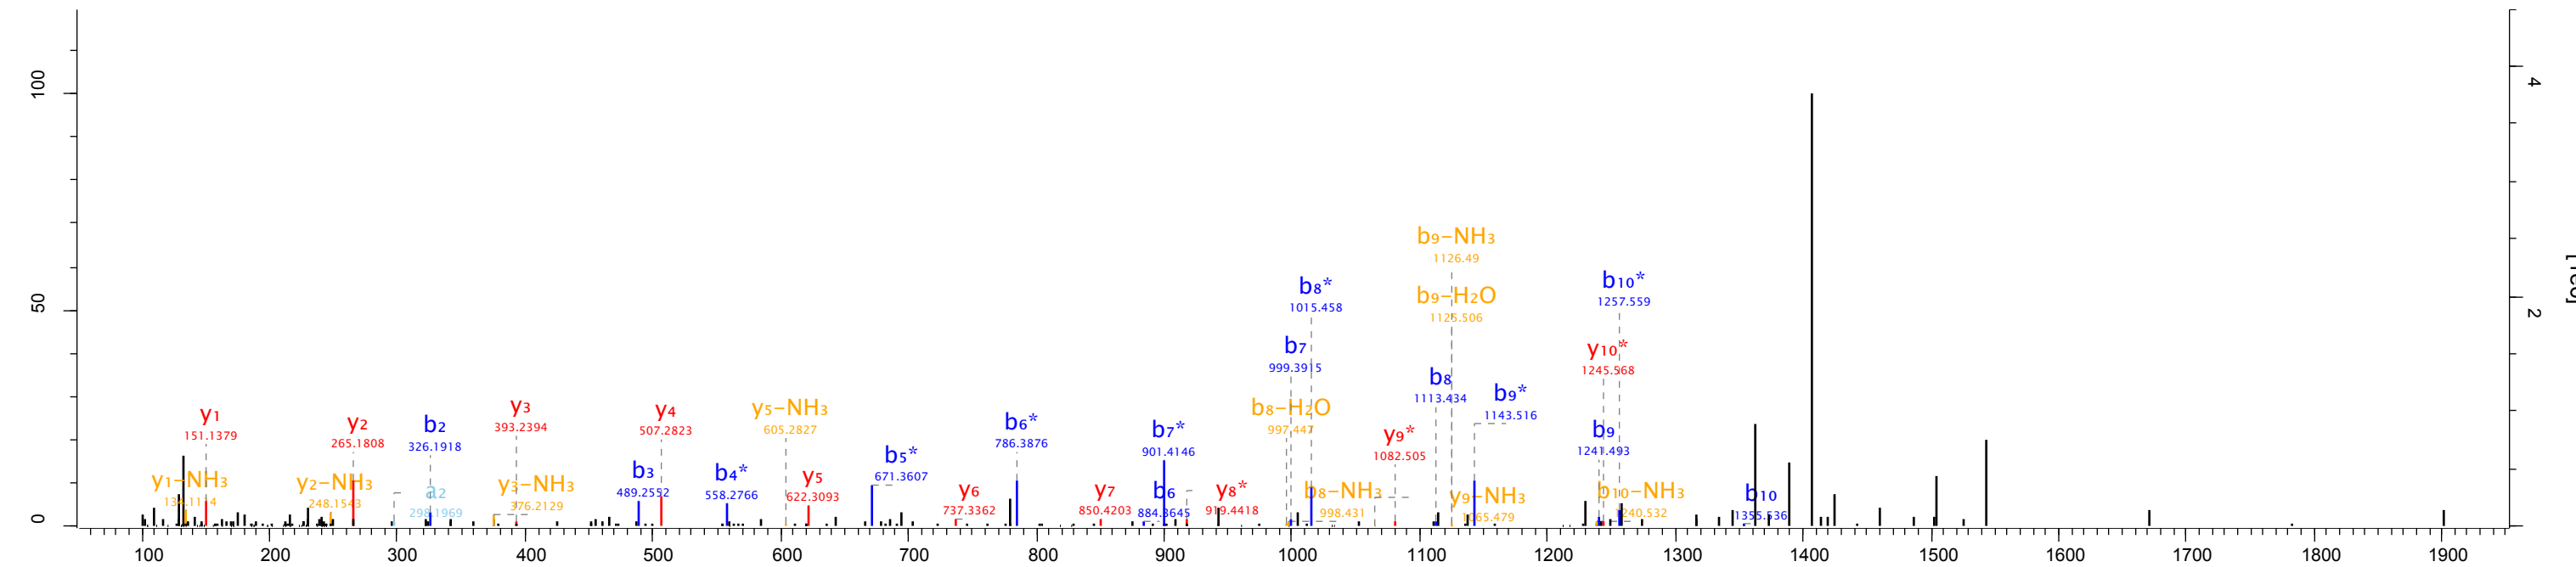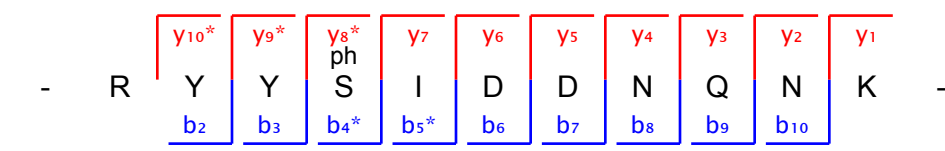

Raw file

20150814\_A375SR\_Phospho\_BR2\_04

Scan 8638 Method FTMS; HCD Score 95.24 m/z 690.33 Gene names ANKS6

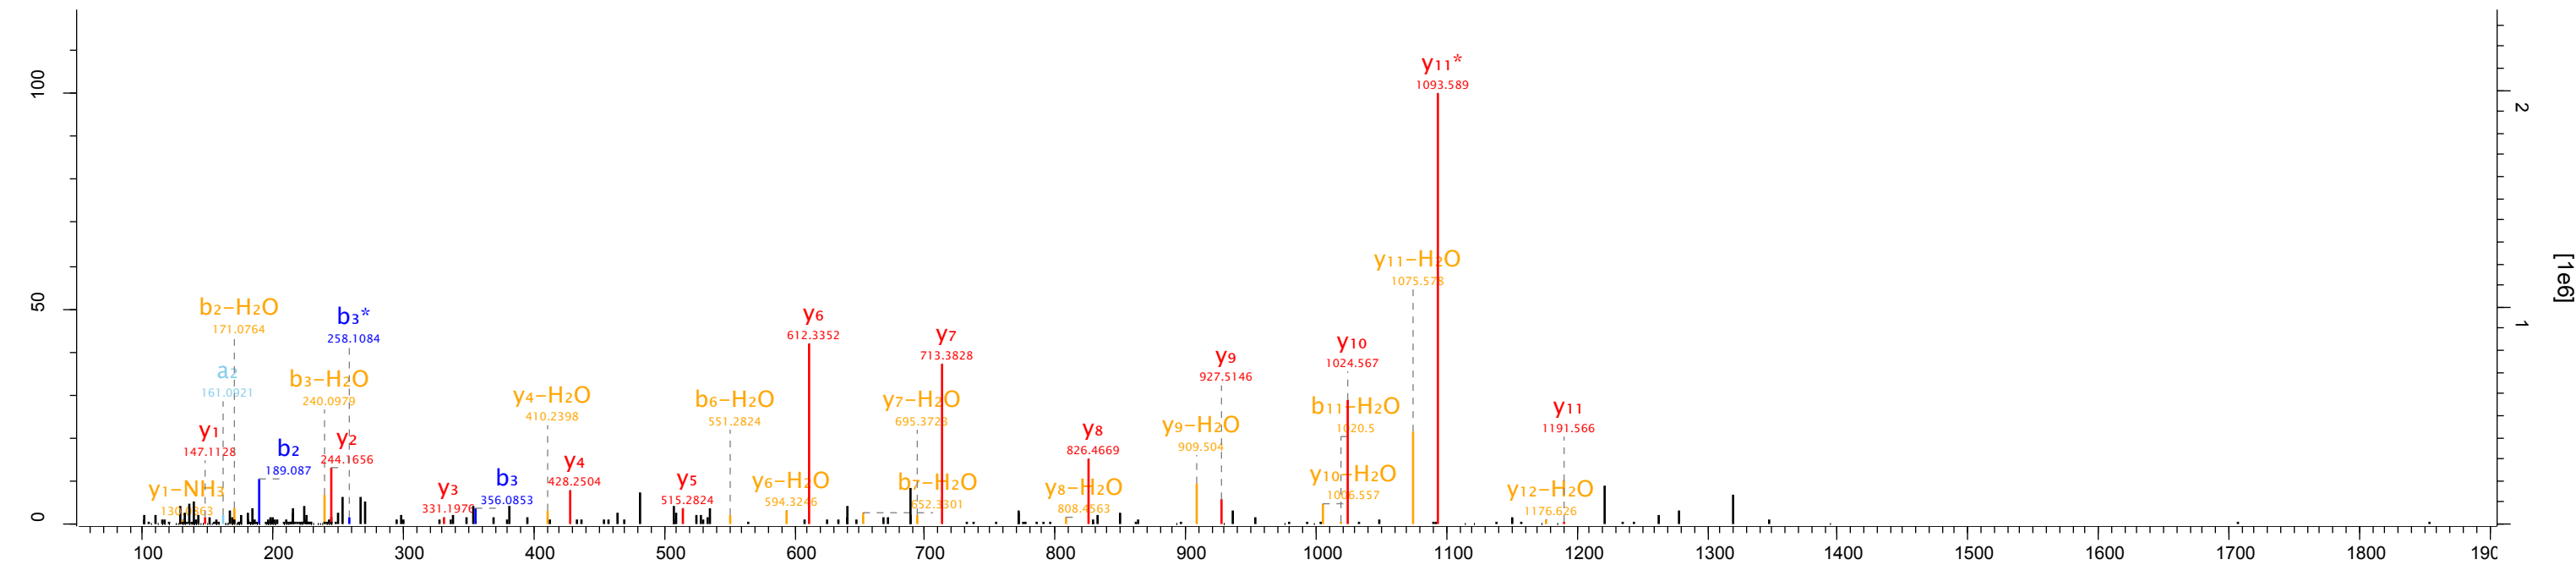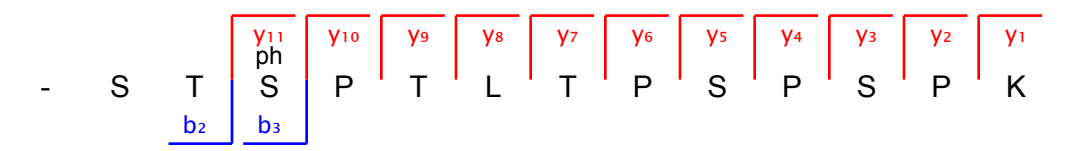

Raw file: 20150814\_A375SR\_Phospho\_BR2\_04  
 Scan: 8838 Method: FTMS; HCD Score: 166.61 m/z: 642.61 Gene names: SRGAP1

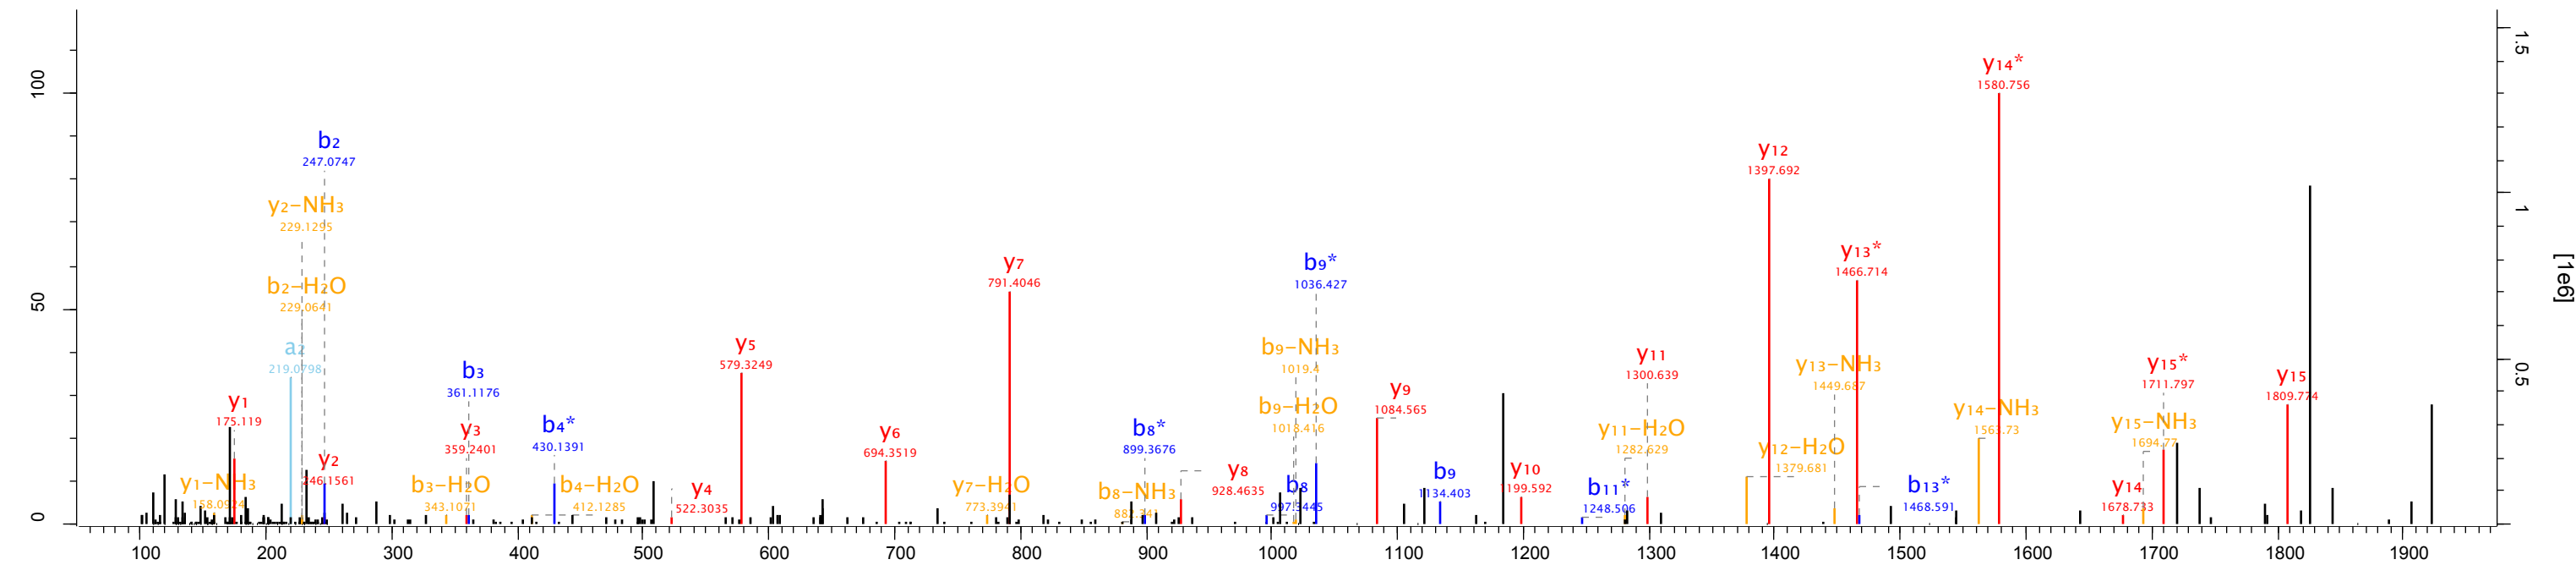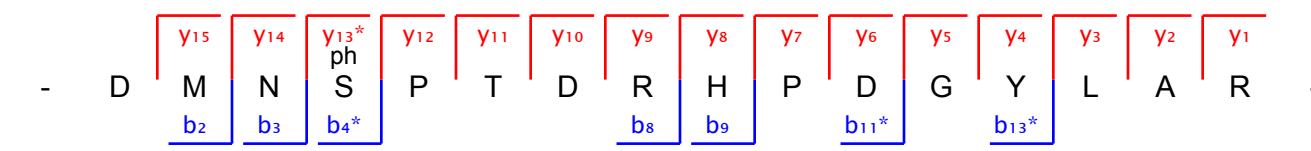

Raw file: 20150814\_A375SR\_Phospho\_BR2\_04  
 Scan: 8848 Method: FTMS; HCD Score: 193.32 m/z: 723.33 Gene names: PKN1

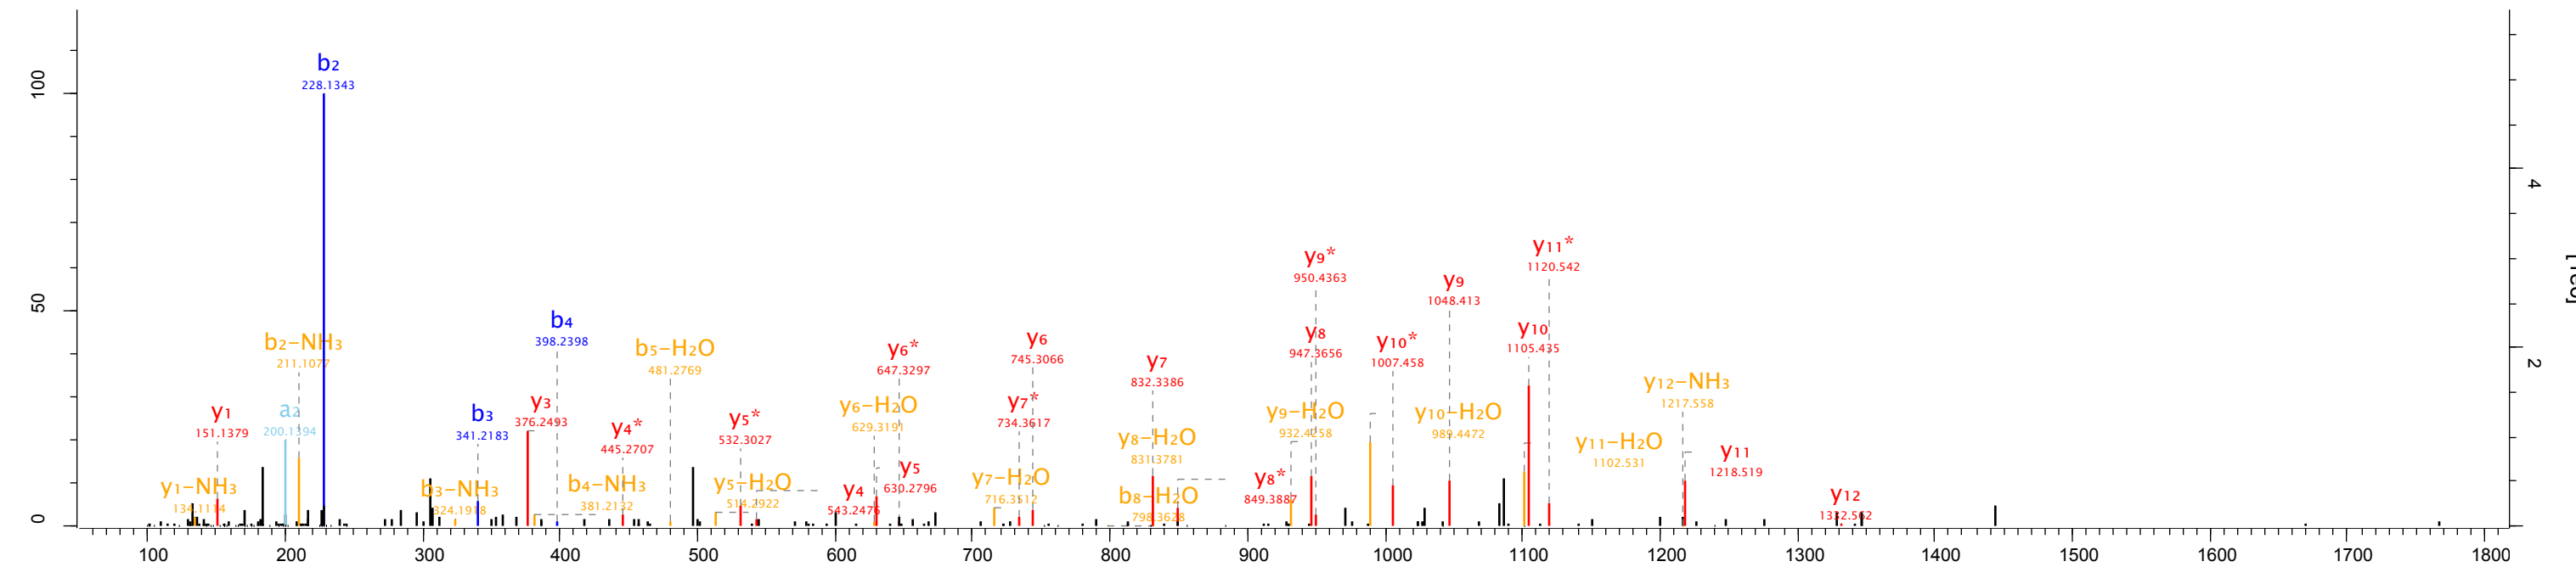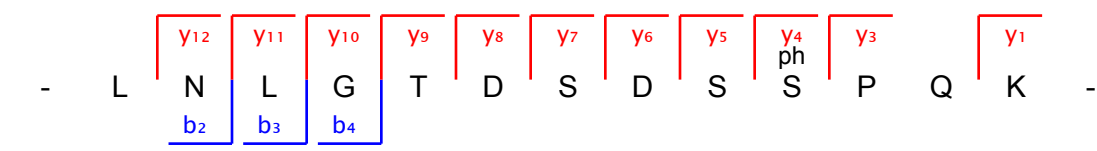

Raw file Scan Method Score m/z Gene names

20150814\_A375SR\_Phospho\_BR2\_04 8908 FTMS; HCD 188.04 713.34 YRDC

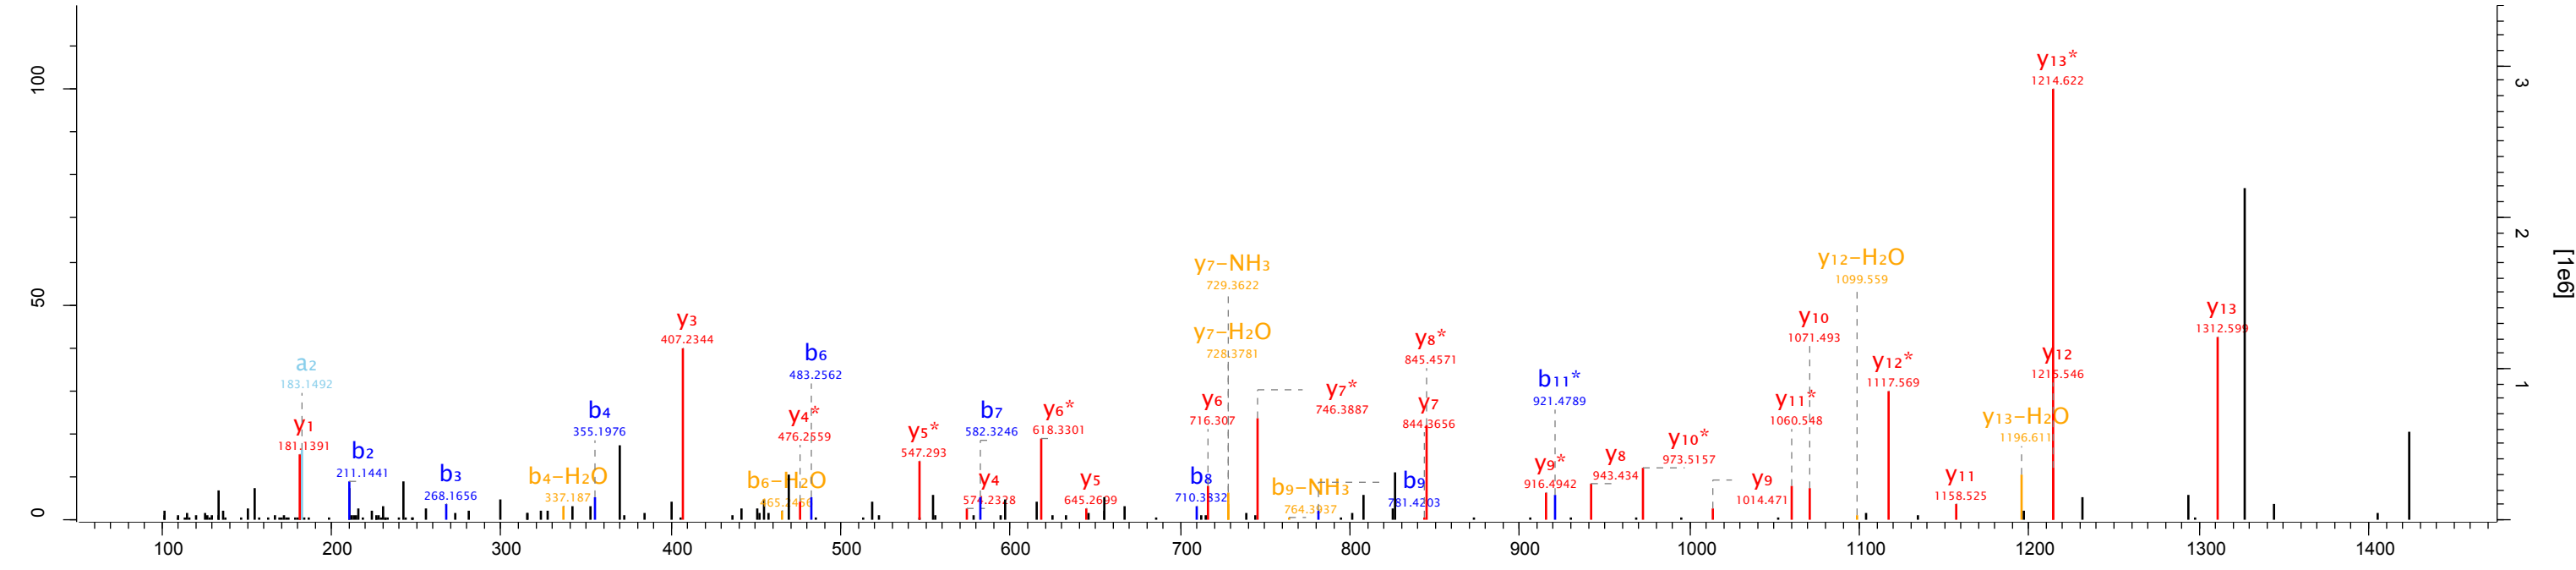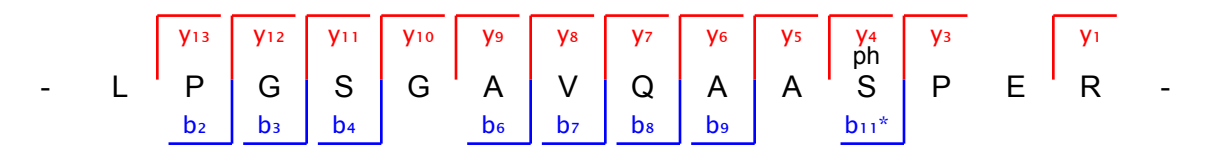

Raw file: 20150814\_A375SR\_Phospho\_BR2\_04  
 Scan: 8928 Method: FTMS; HCD Score: 147.28 m/z: 688.95 Gene names: HNRNPLL;HNRPLL

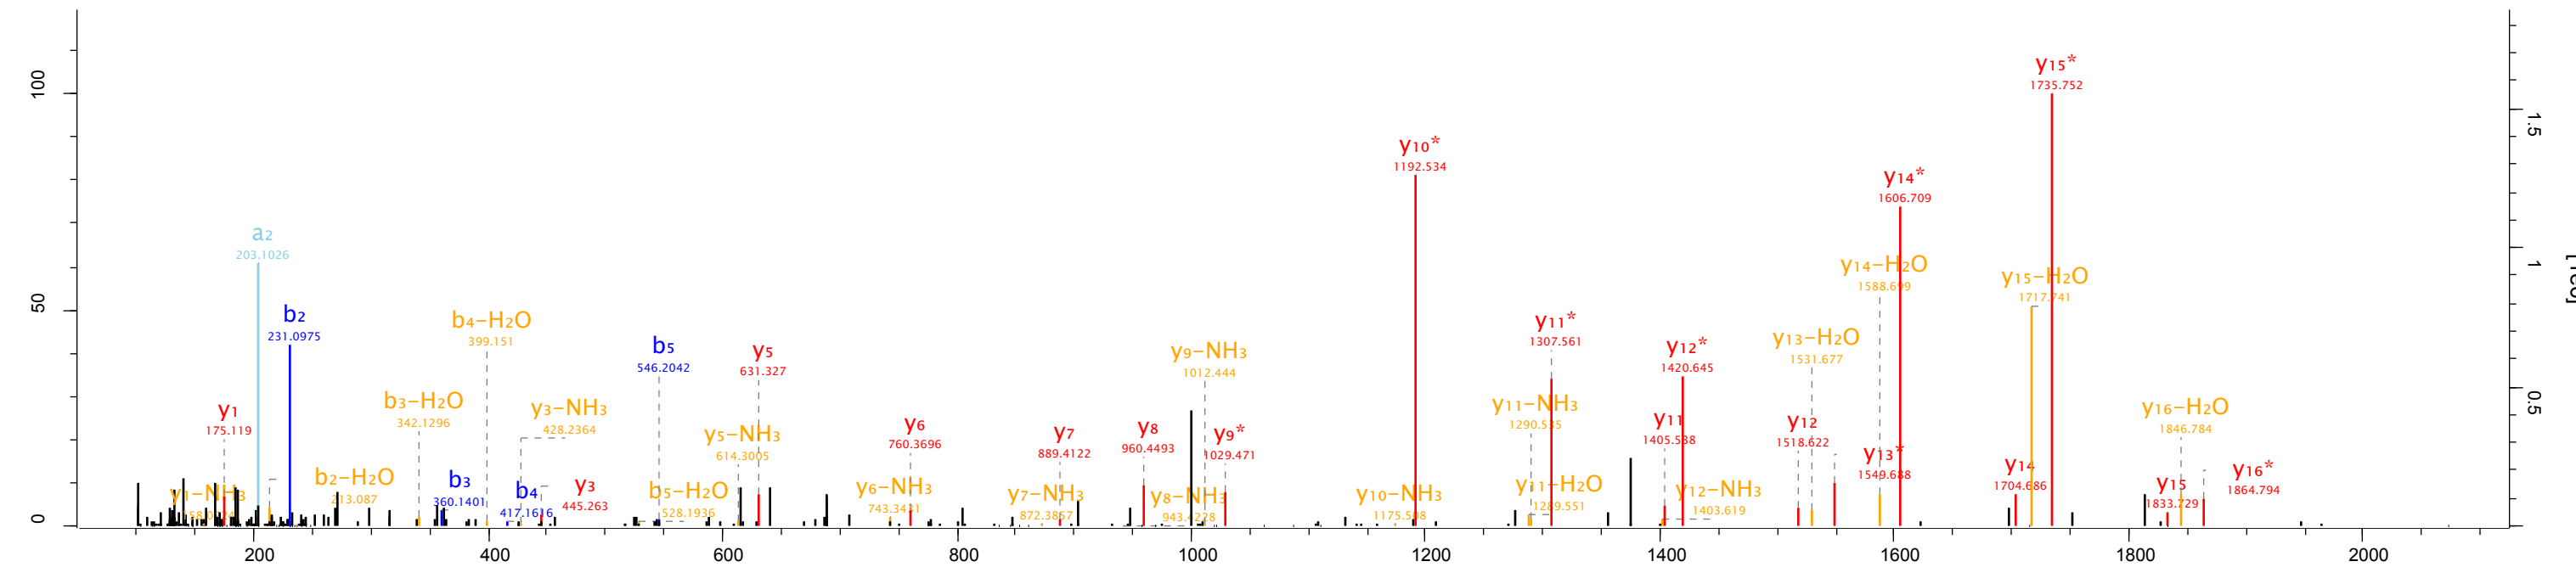

- T E E G E I D Y S A E E G E N R R -  
 b2 b3 b4 b5



Raw file: 20150814\_A375SR\_Phospho\_BR2\_04  
 Scan: 9178 Method: FTMS; HCD Score: 90.26 m/z: 691.3 Gene names: DDX3X

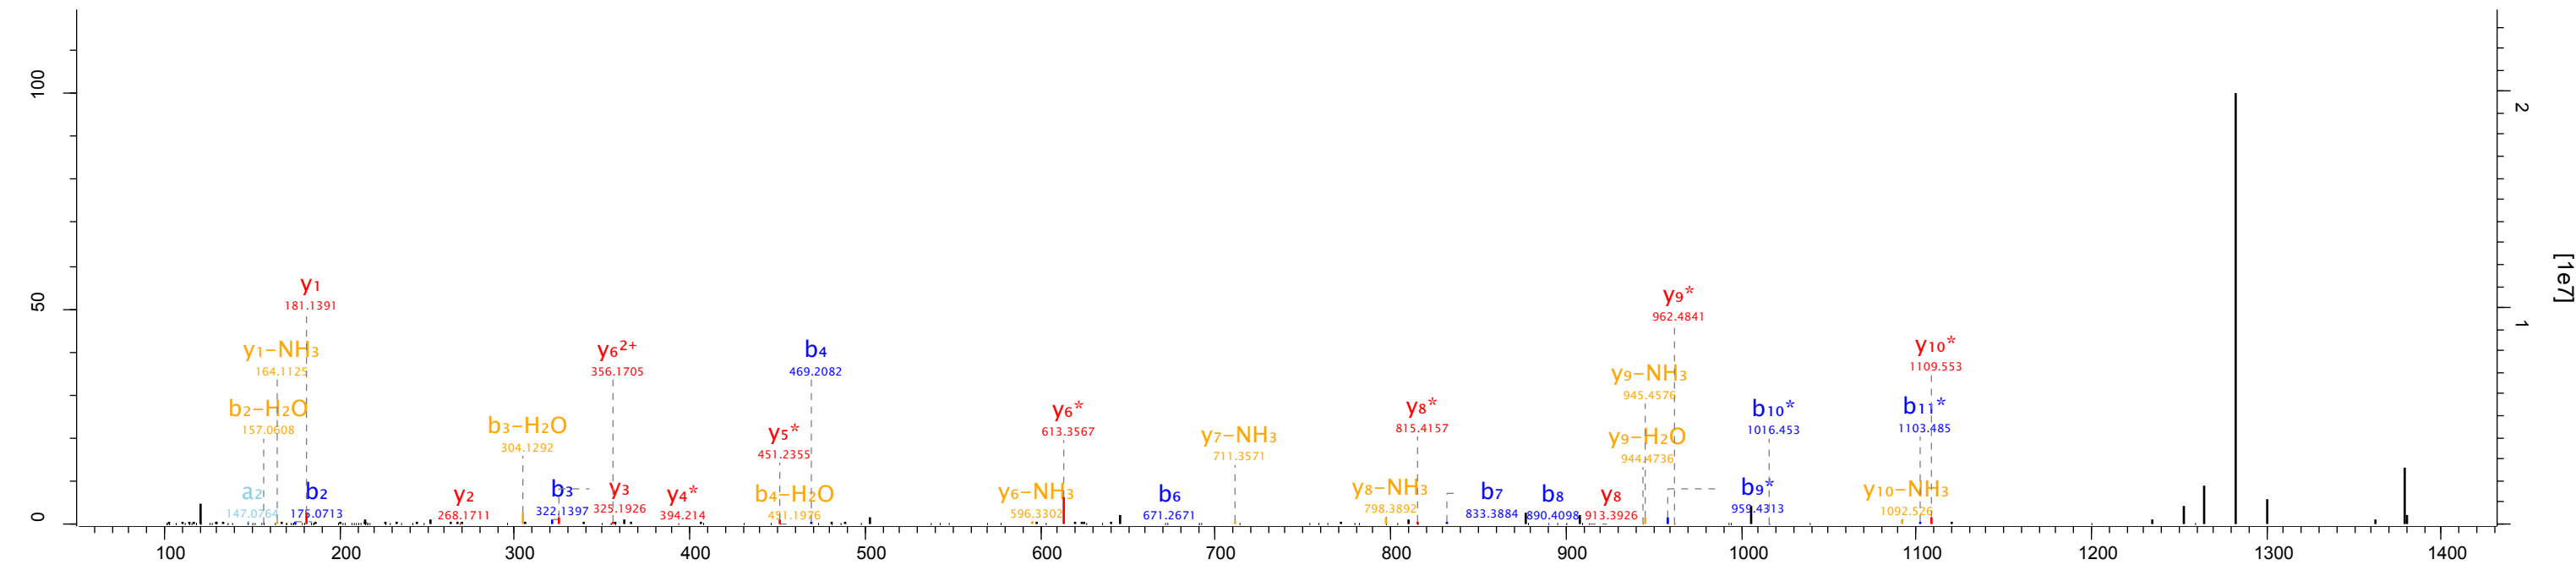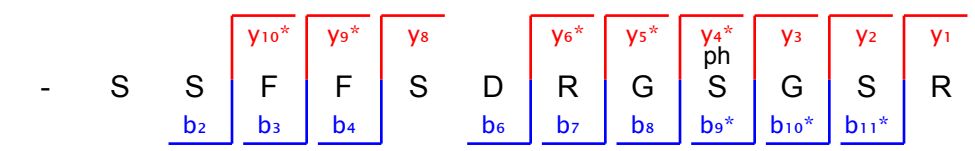

Raw file: 20150814\_A375SR\_Phospho\_BR2\_04  
 Scan: 9458 Method: FTMS; HCD Score: 131.62 m/z: 439.18 Gene names: SBNO1

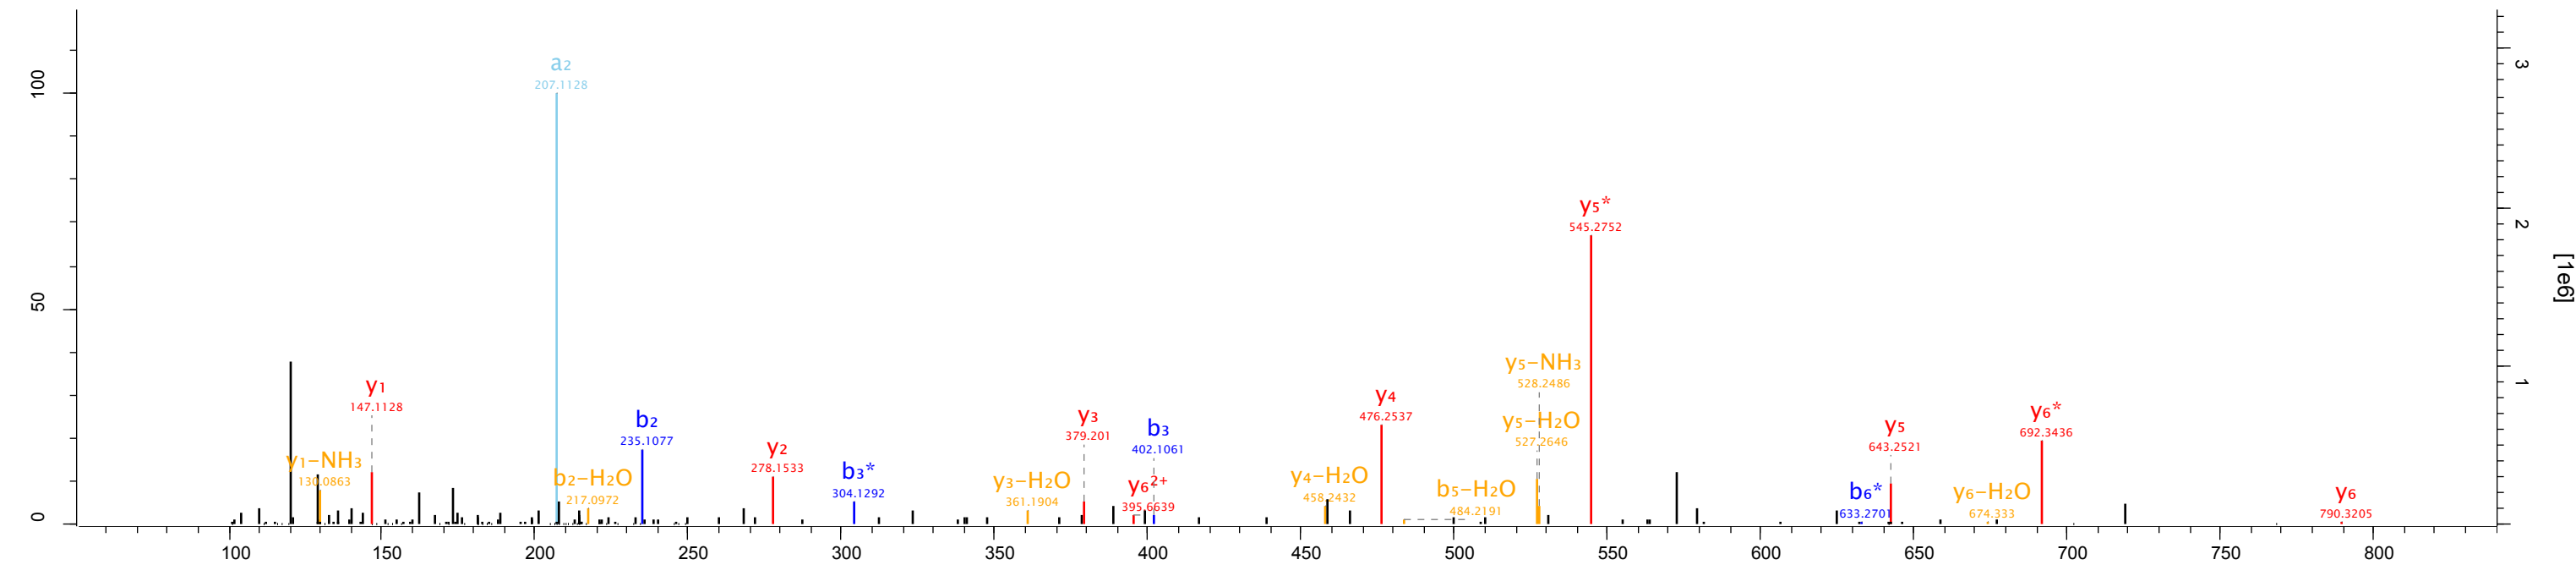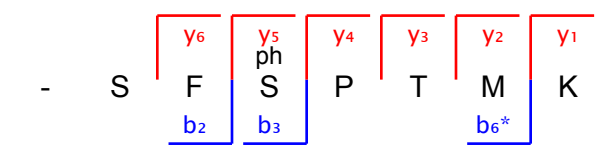

Raw file: 20150814\_A375SR\_Phospho\_BR2\_04  
 Scan: 9578 Method: FTMS; HCD Score: 107.21 m/z: 461.71 Gene names: SSRP1

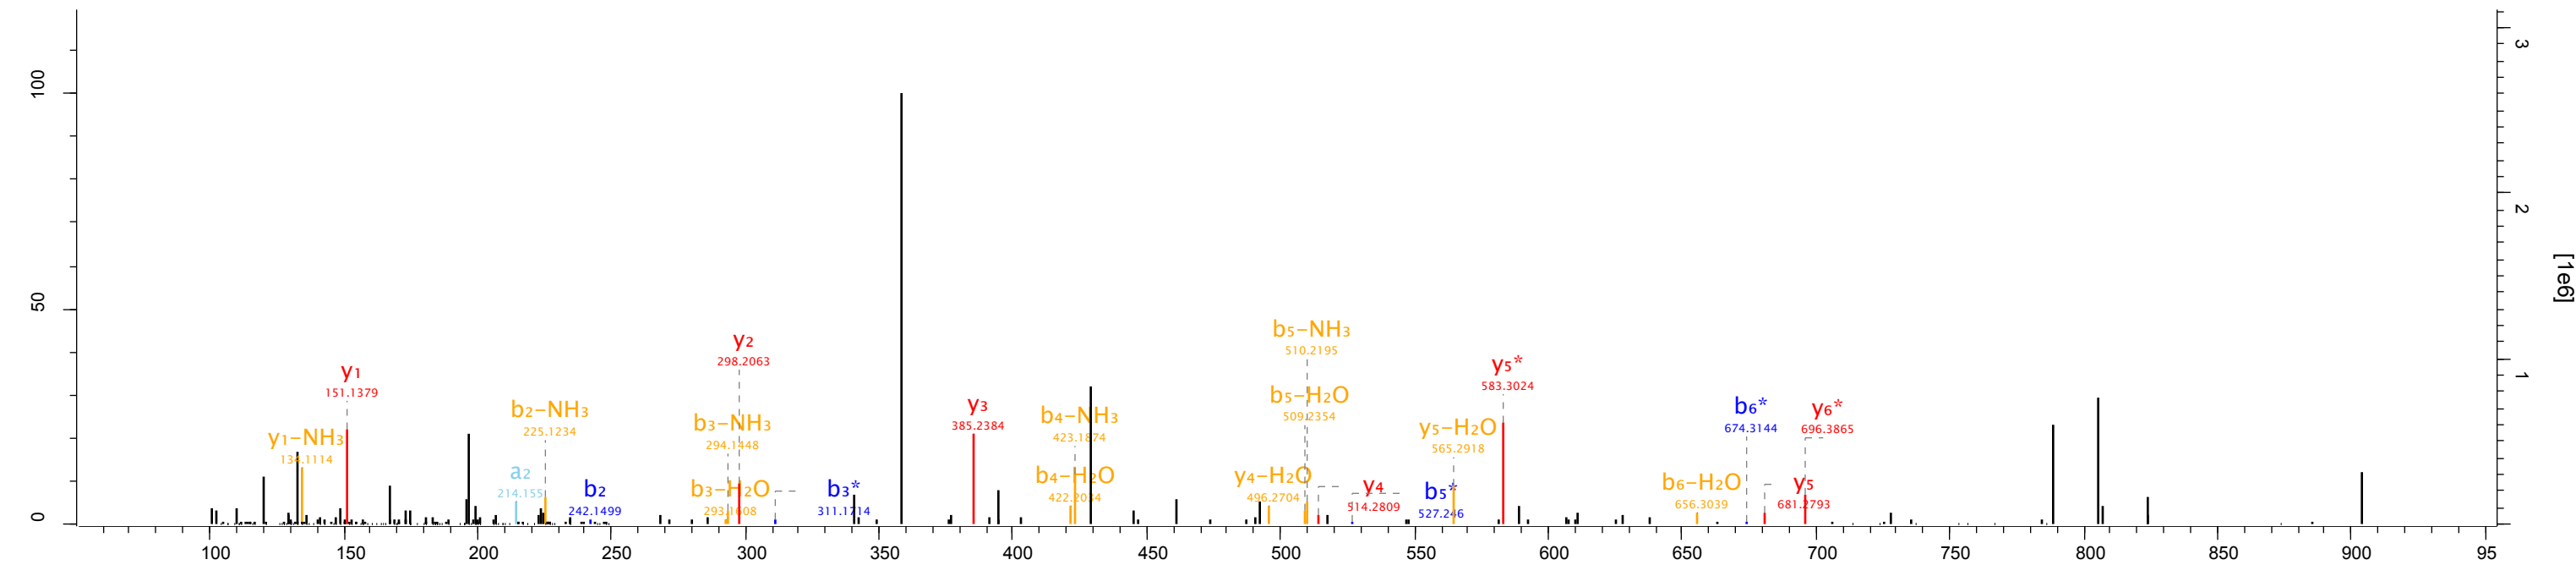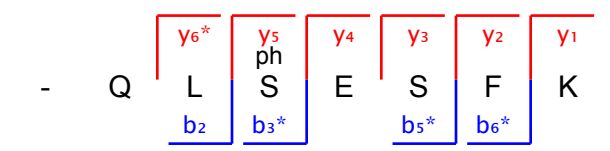

Raw file: 20150814\_A375SR\_Phospho\_BR2\_04  
 Scan: 9828 Method: FTMS; HCD Score: 199.29 m/z: 1119.46 Gene names: FXR2

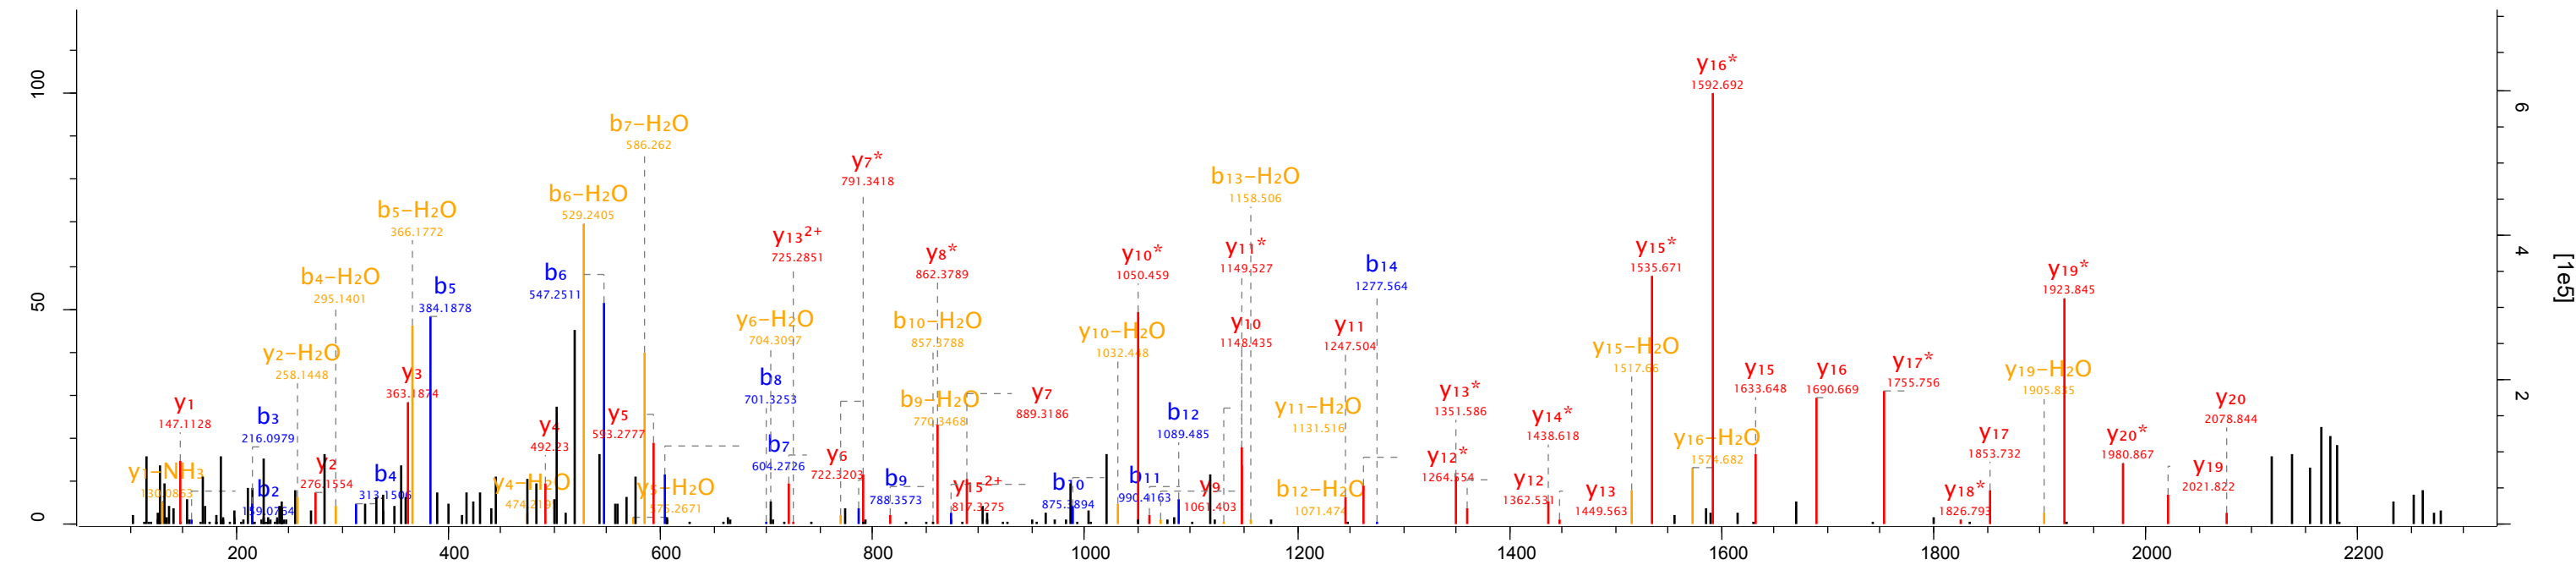

Sequence: - T G G P A Y G P S S D V S T A S E T E S E K -

Fragmentation sites (b and y ions):

- b2 (G), b3 (G), b4 (P), b5 (A), b6 (Y), b7 (G), b8 (P), b9 (S), b10 (S), b11 (D), b12 (V), b14 (T)
- y1 (K), y2 (E), y3 (S), y4 (E), y5 (T), y6 (E), y7 (S), y8\* (A), y9 (T), y10 (S), y11 (V), y12 (D), y13 (S), y14\* (S), y15 (P), y16 (G), y17 (Y), y18\* (A), y19 (P), y20 (G)

Raw file: 20150814\_A375SR\_Phospho\_BR2\_04  
 Scan: 9918 Method: FTMS; HCD Score: 230.39 m/z: 871.38 Gene names: MSL1

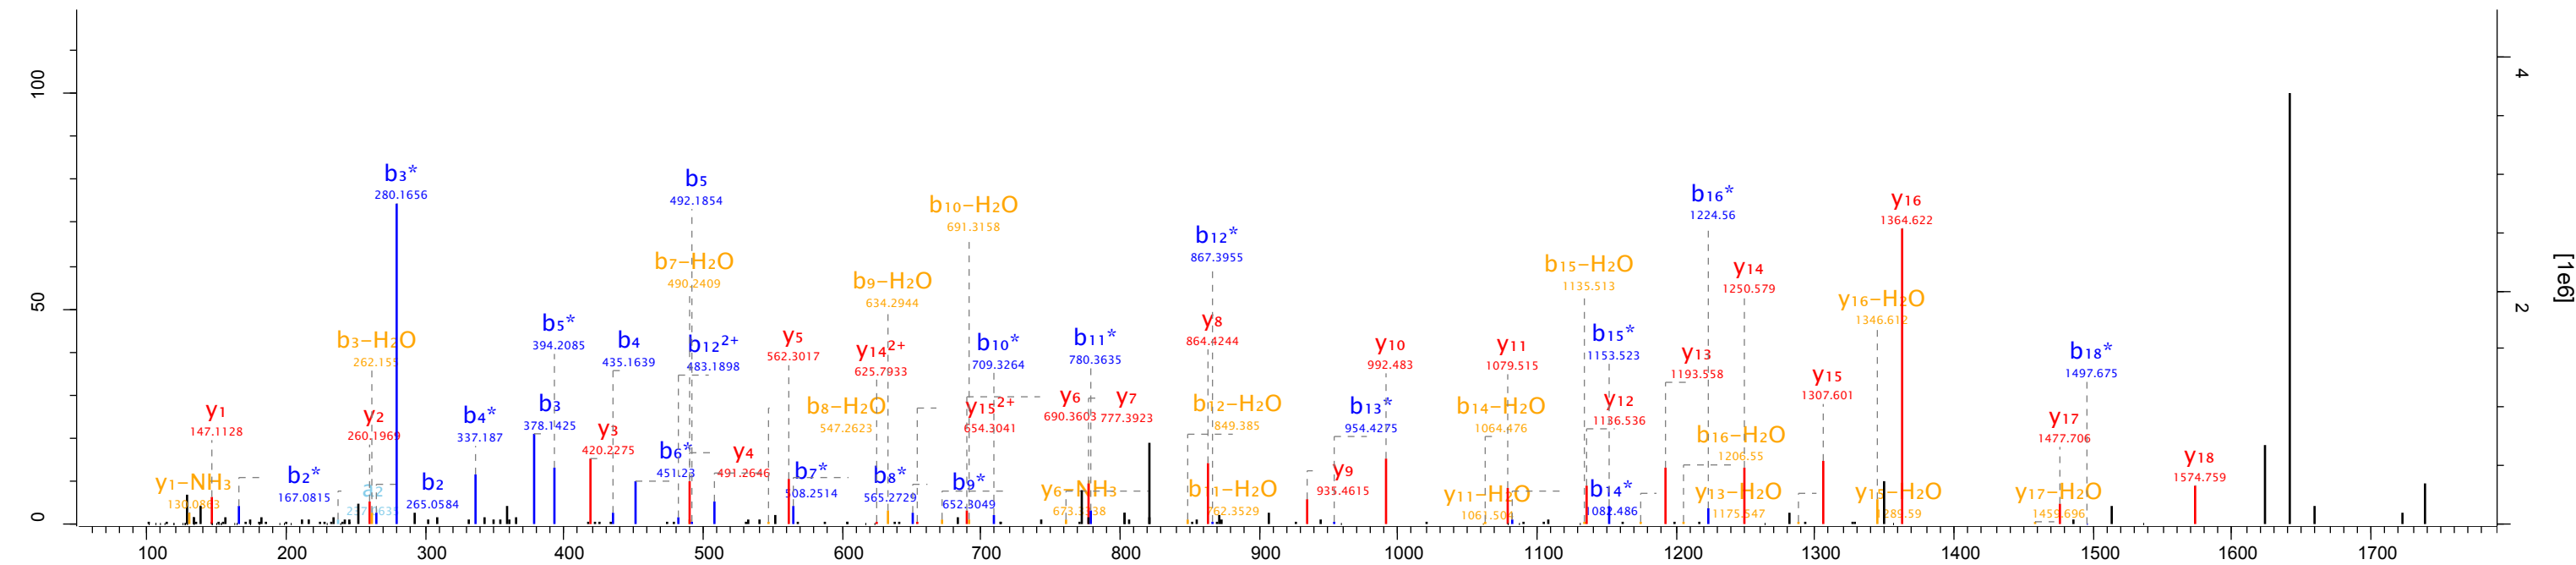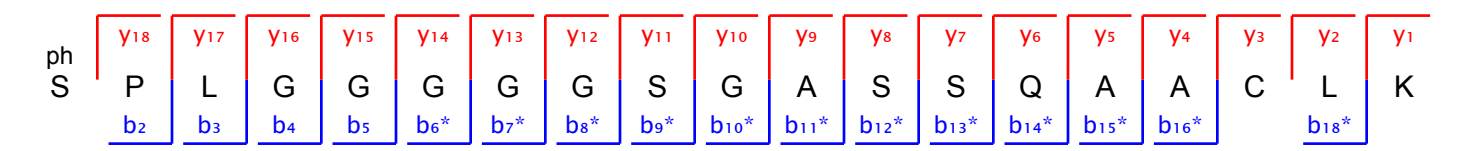

Raw file: 20150814\_A375SR\_Phospho\_BR2\_04  
 Scan: 9928 Method: FTMS; HCD Score: 115.63 m/z: 651.79 Gene names: PARN

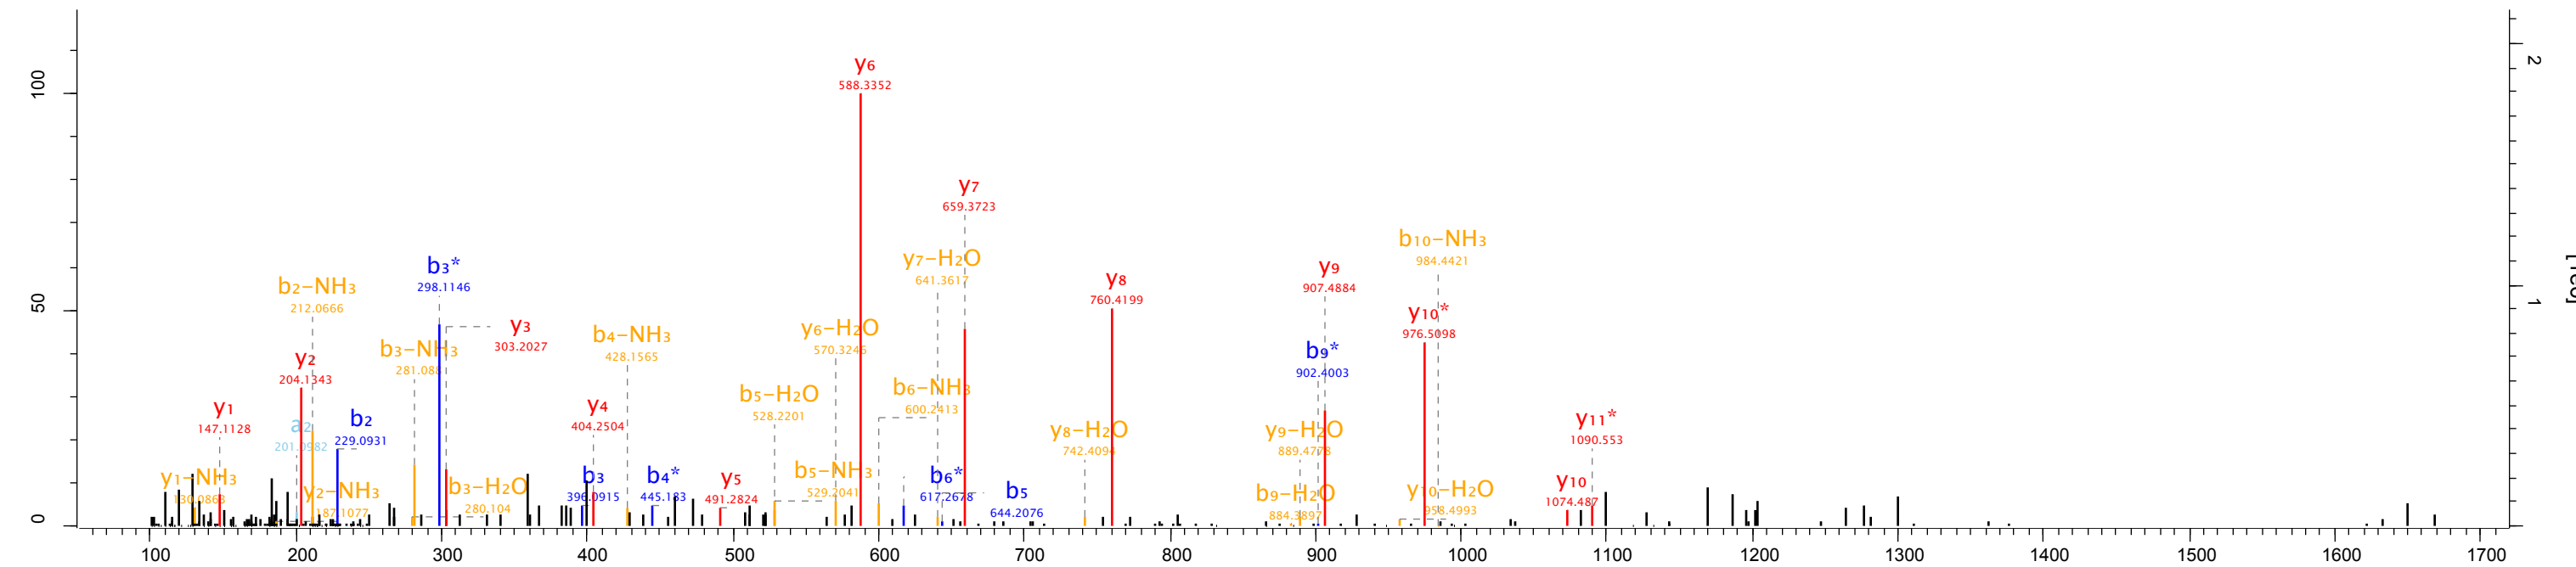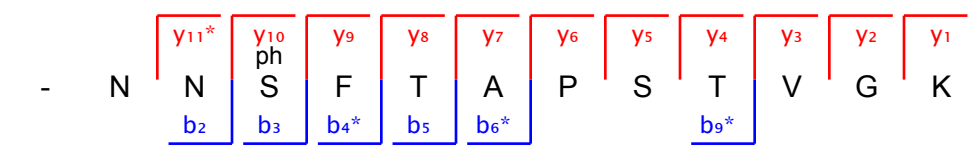

Raw file: 20150814\_A375SR\_Phospho\_BR2\_05  
 Scan: 10238 Method: FTMS; HCD Score: 40.18 m/z: 640 Gene names: CAST

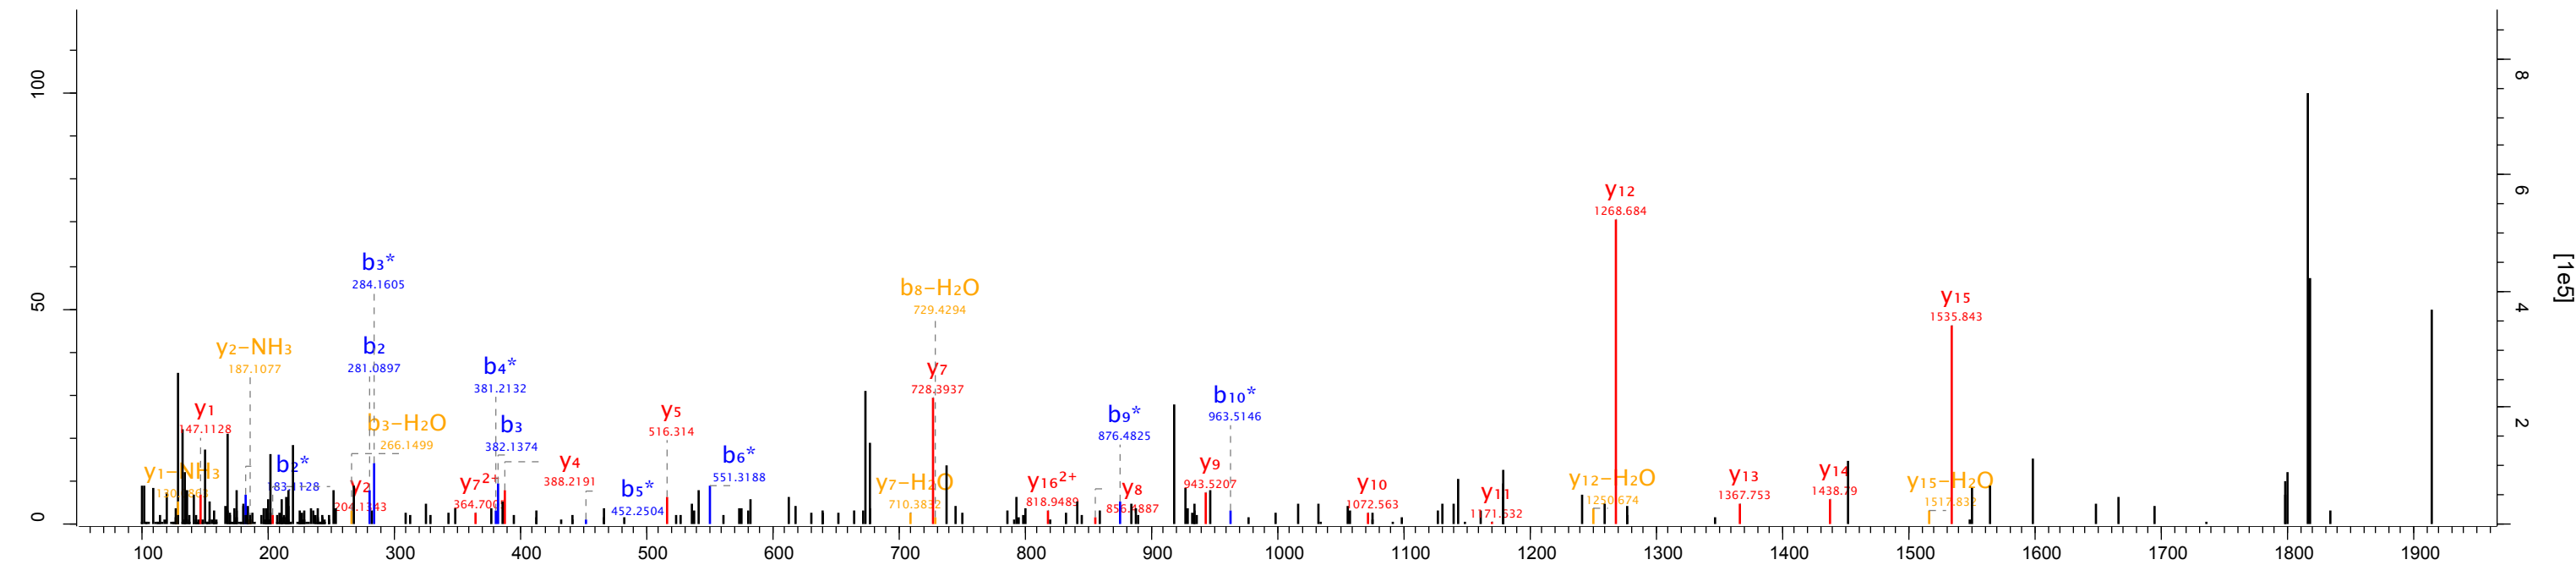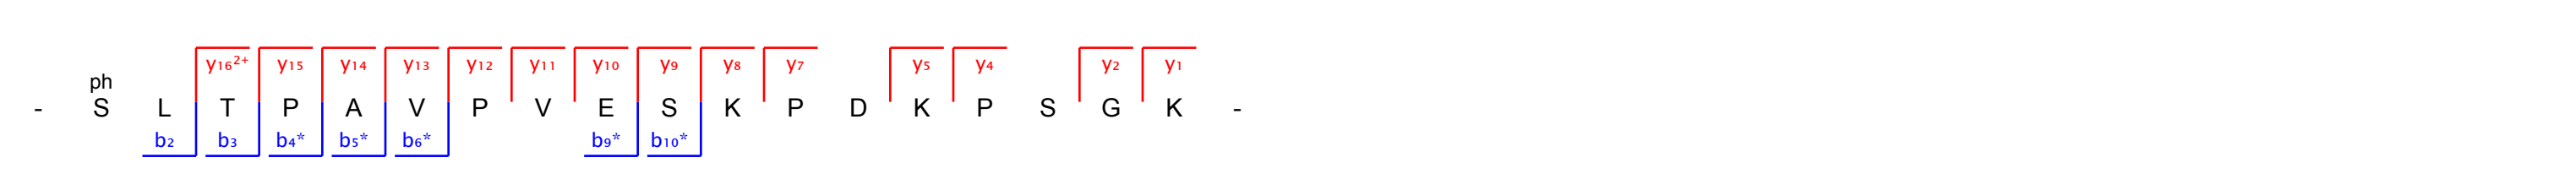

Raw file 20150814\_A375SR\_Phospho\_BR2\_05 Scan 10358 Method FTMS; HCD Score 127.32 m/z 545.56 Gene names ITGB4

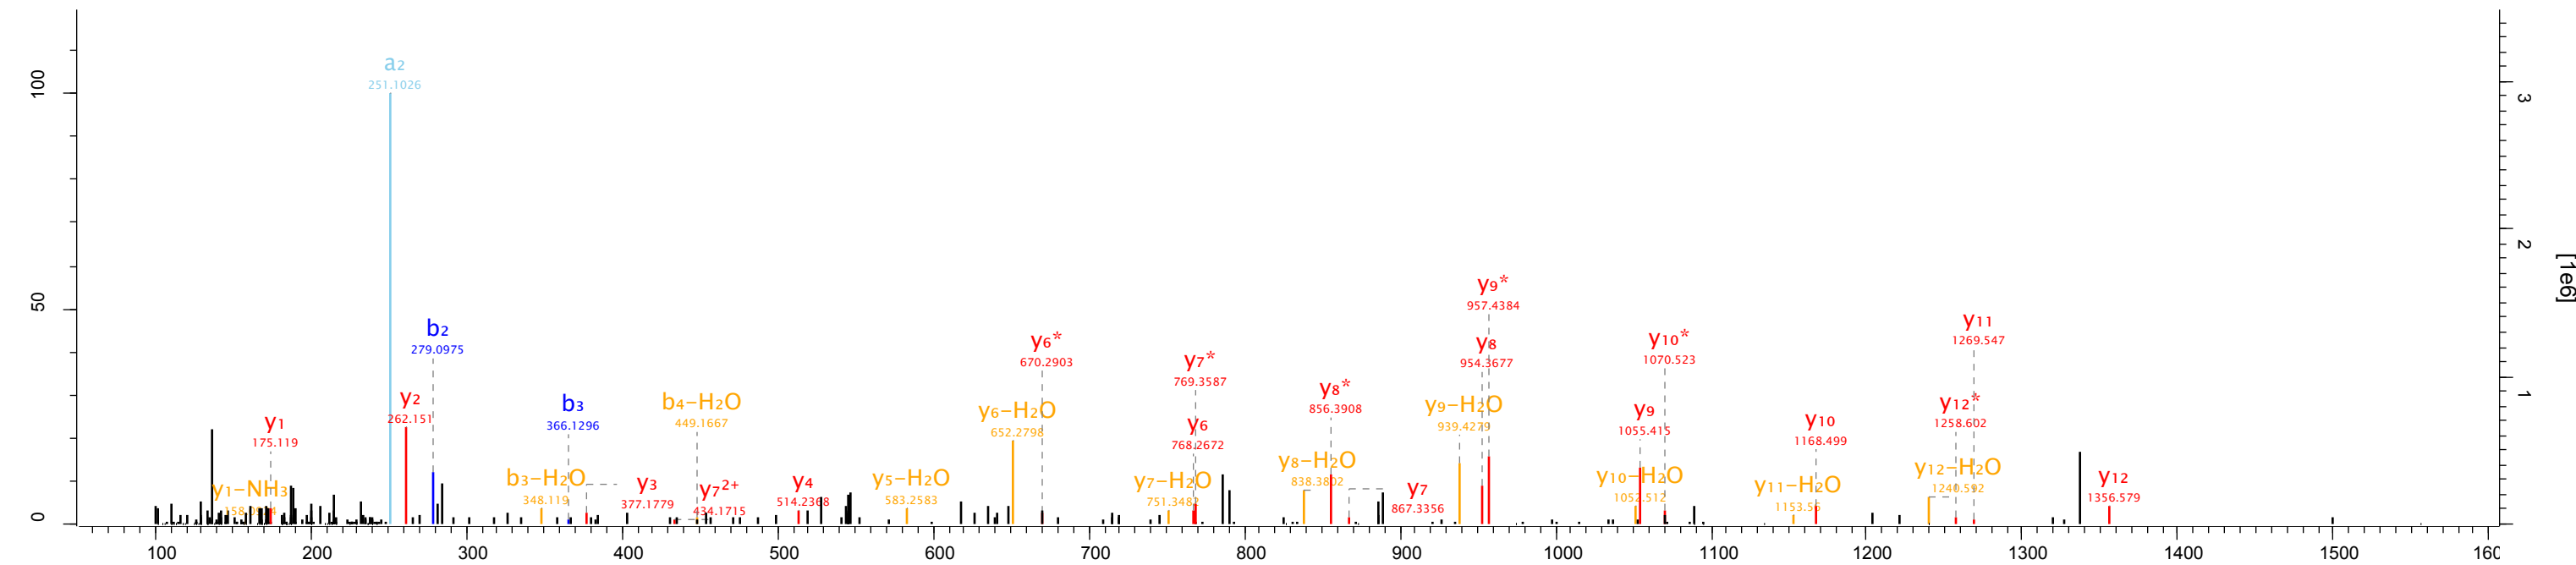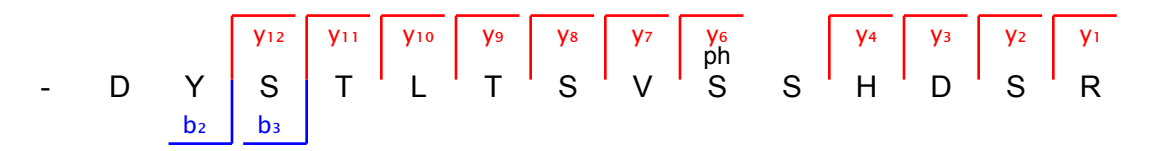



Raw file: 20150814\_A375SR\_Phospho\_BR2\_05  
 Scan: 10368 Method: FTMS; HCD Score: 247.11 m/z: 640.3 Gene names: WDR44

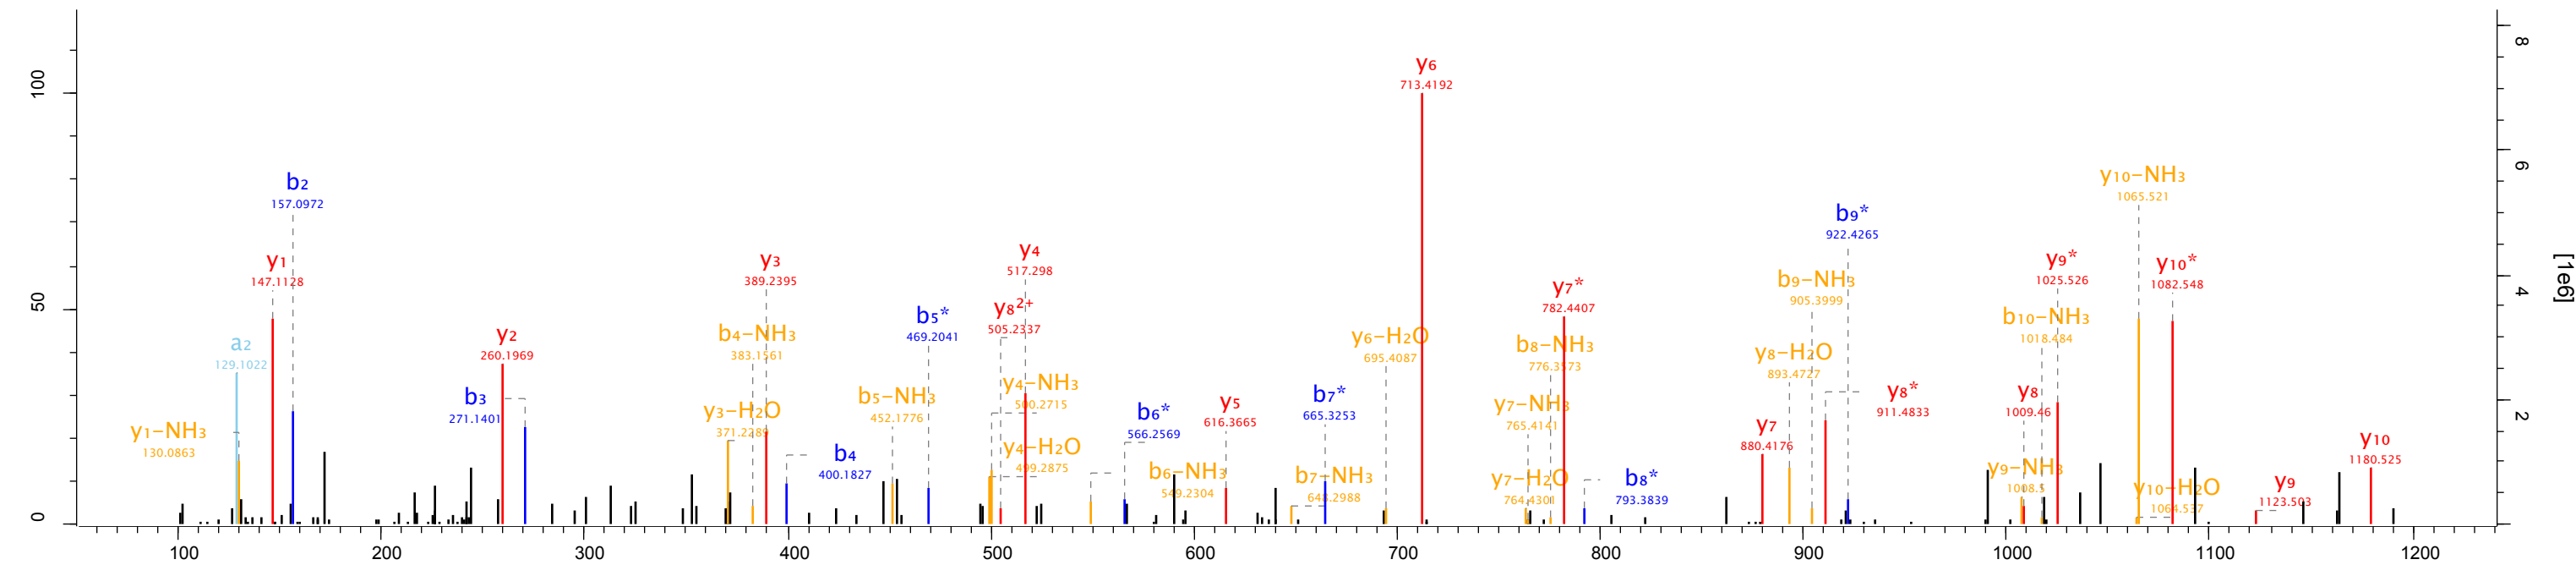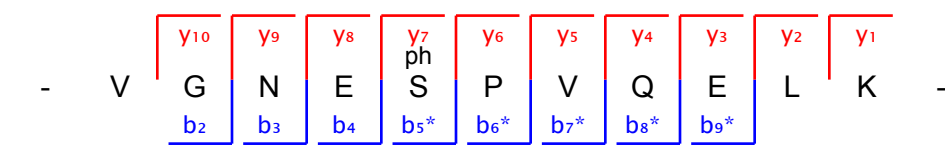

Raw file: 20150814\_A375SR\_Phospho\_BR2\_05  
 Scan: 10388 Method: FTMS; HCD Score: 153.75 m/z: 748.34 Gene names: C15orf52

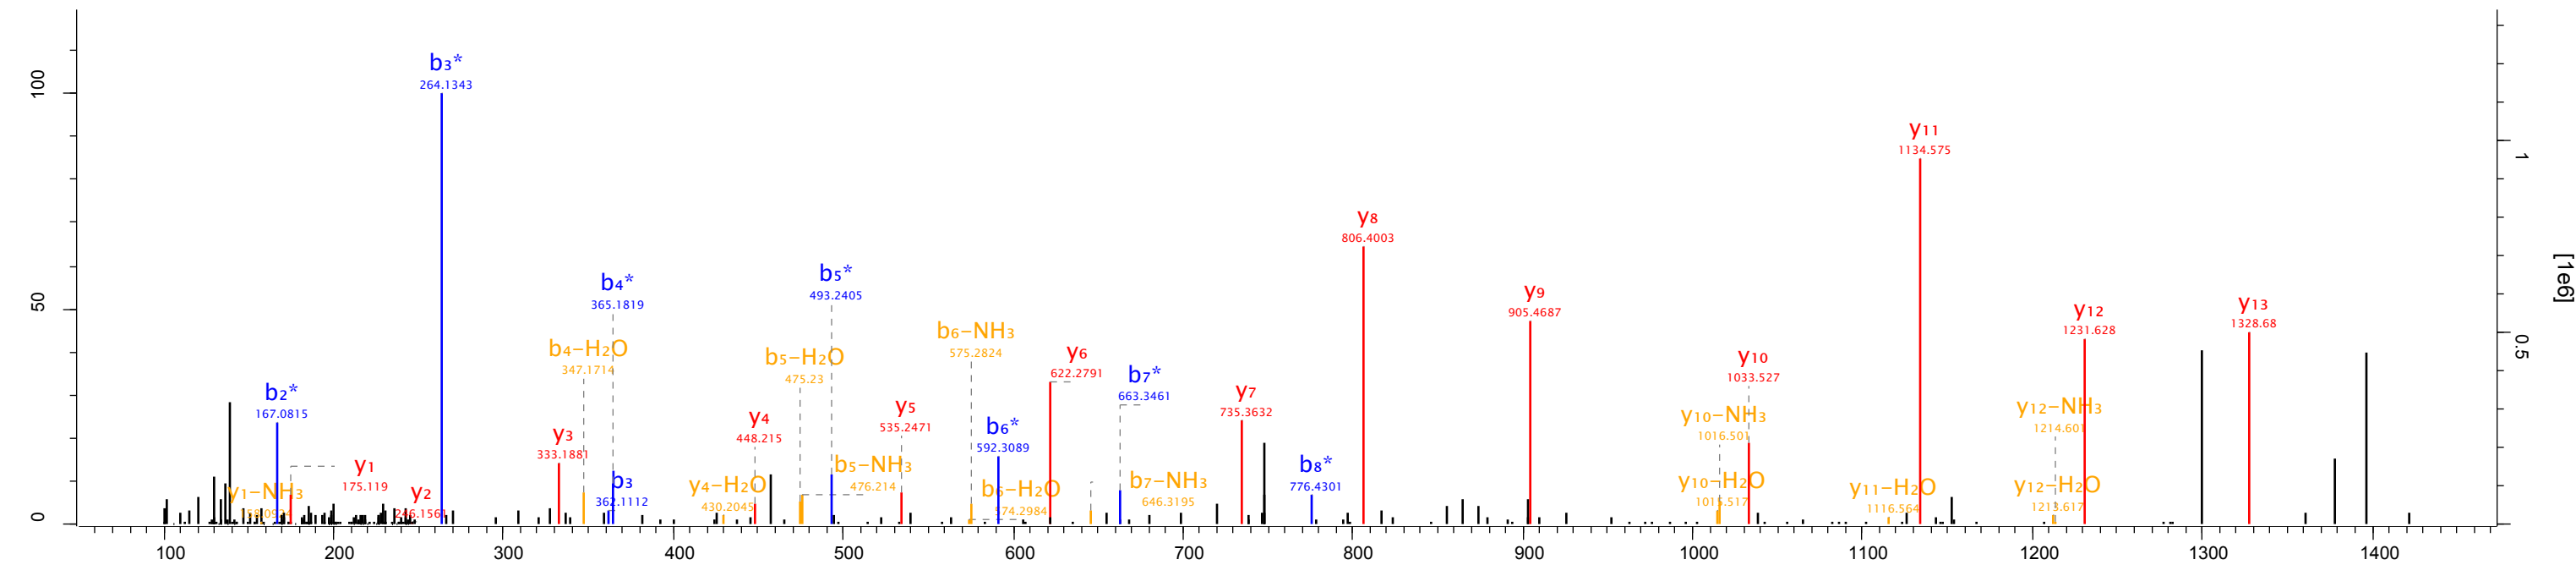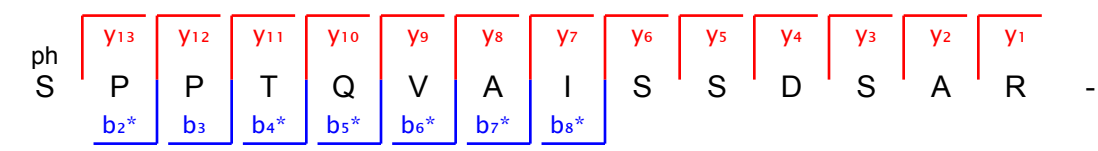

Raw file: 20150814\_A375SR\_Phospho\_BR2\_05  
 Scan: 10858 Method: FTMS; HCD Score: 145.52 m/z: 673.81 Gene names: ARFGEF1

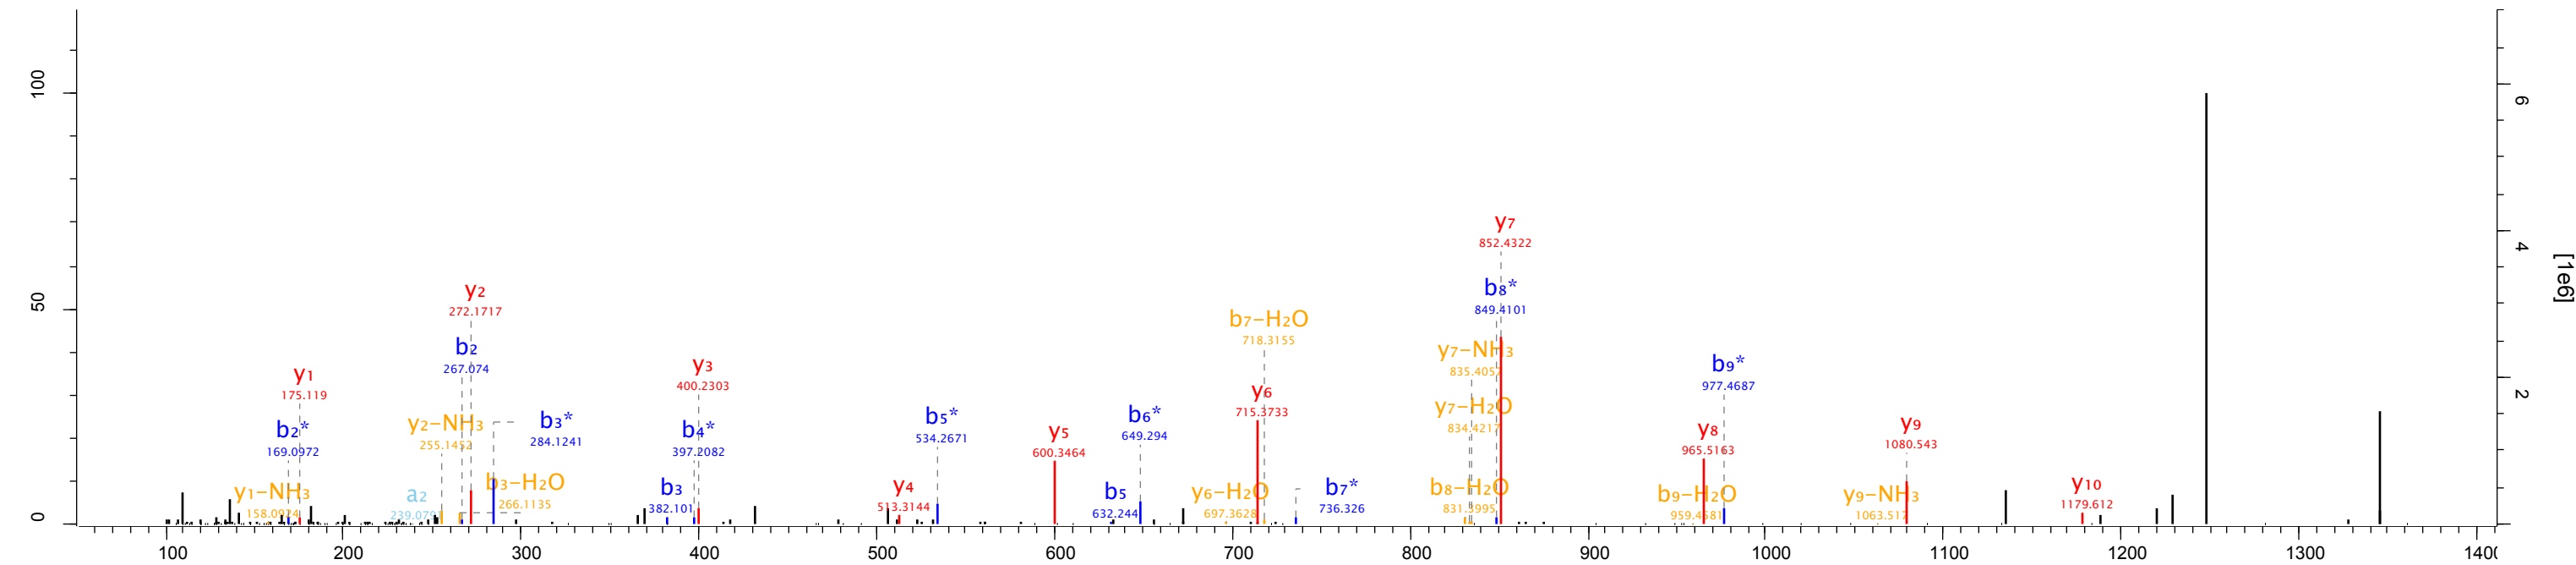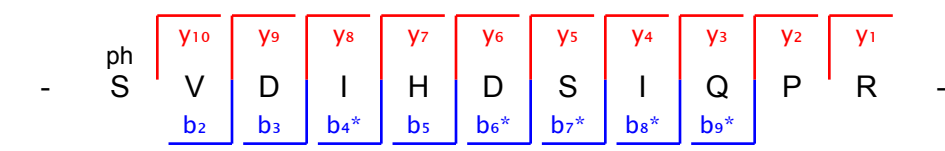

Raw file 20150814\_A375SR\_Phospho\_BR2\_05 Scan 10908 Method FTMS; HCD Score 217.71 m/z 1080.97 Gene names PGRMC2

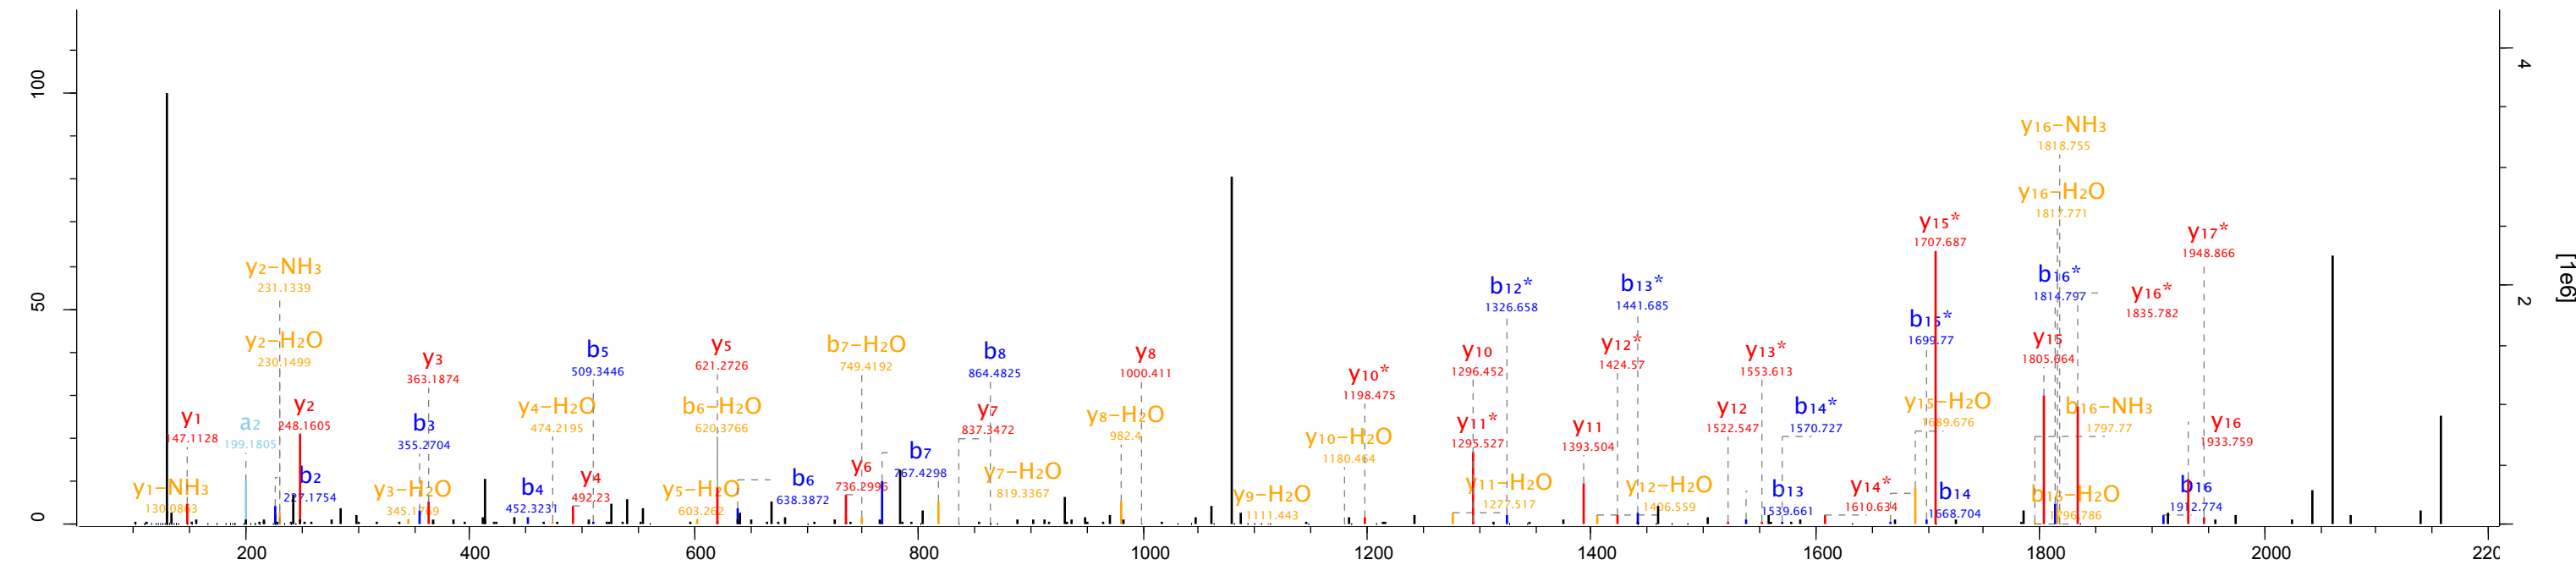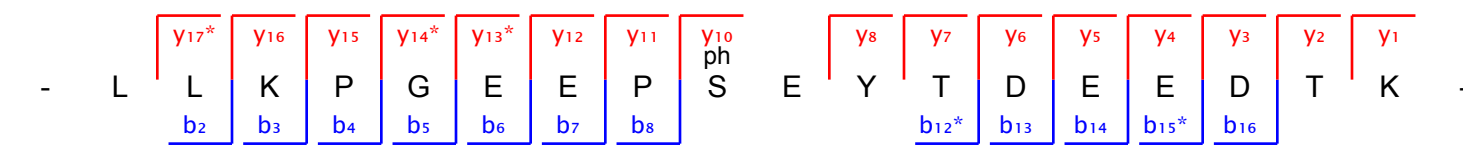

Raw file 20150814\_A375SR\_Phospho\_BR2\_05 Scan 11058 Method FTMS; HCD Score 134.81 m/z 663.24 Gene names SND1

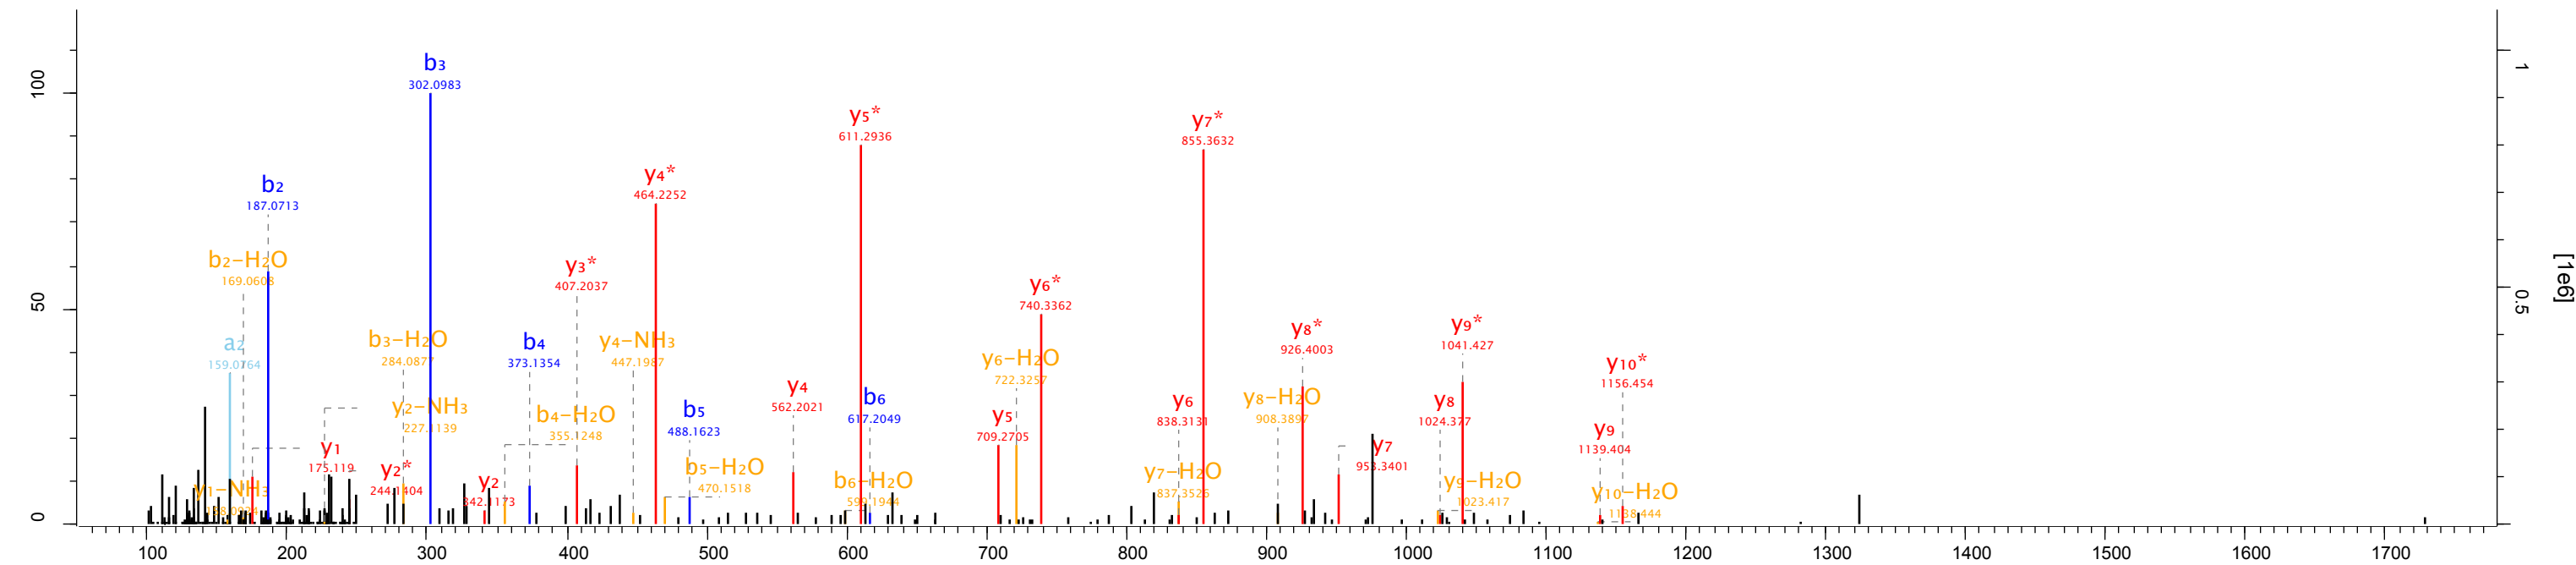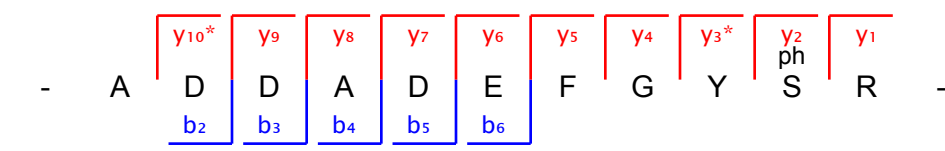

Raw file: 20150814\_A375SR\_Phospho\_BR2\_05  
 Scan: 11288 Method: FTMS; HCD Score: 209.96 m/z: 909.41 Gene names: SRRM2

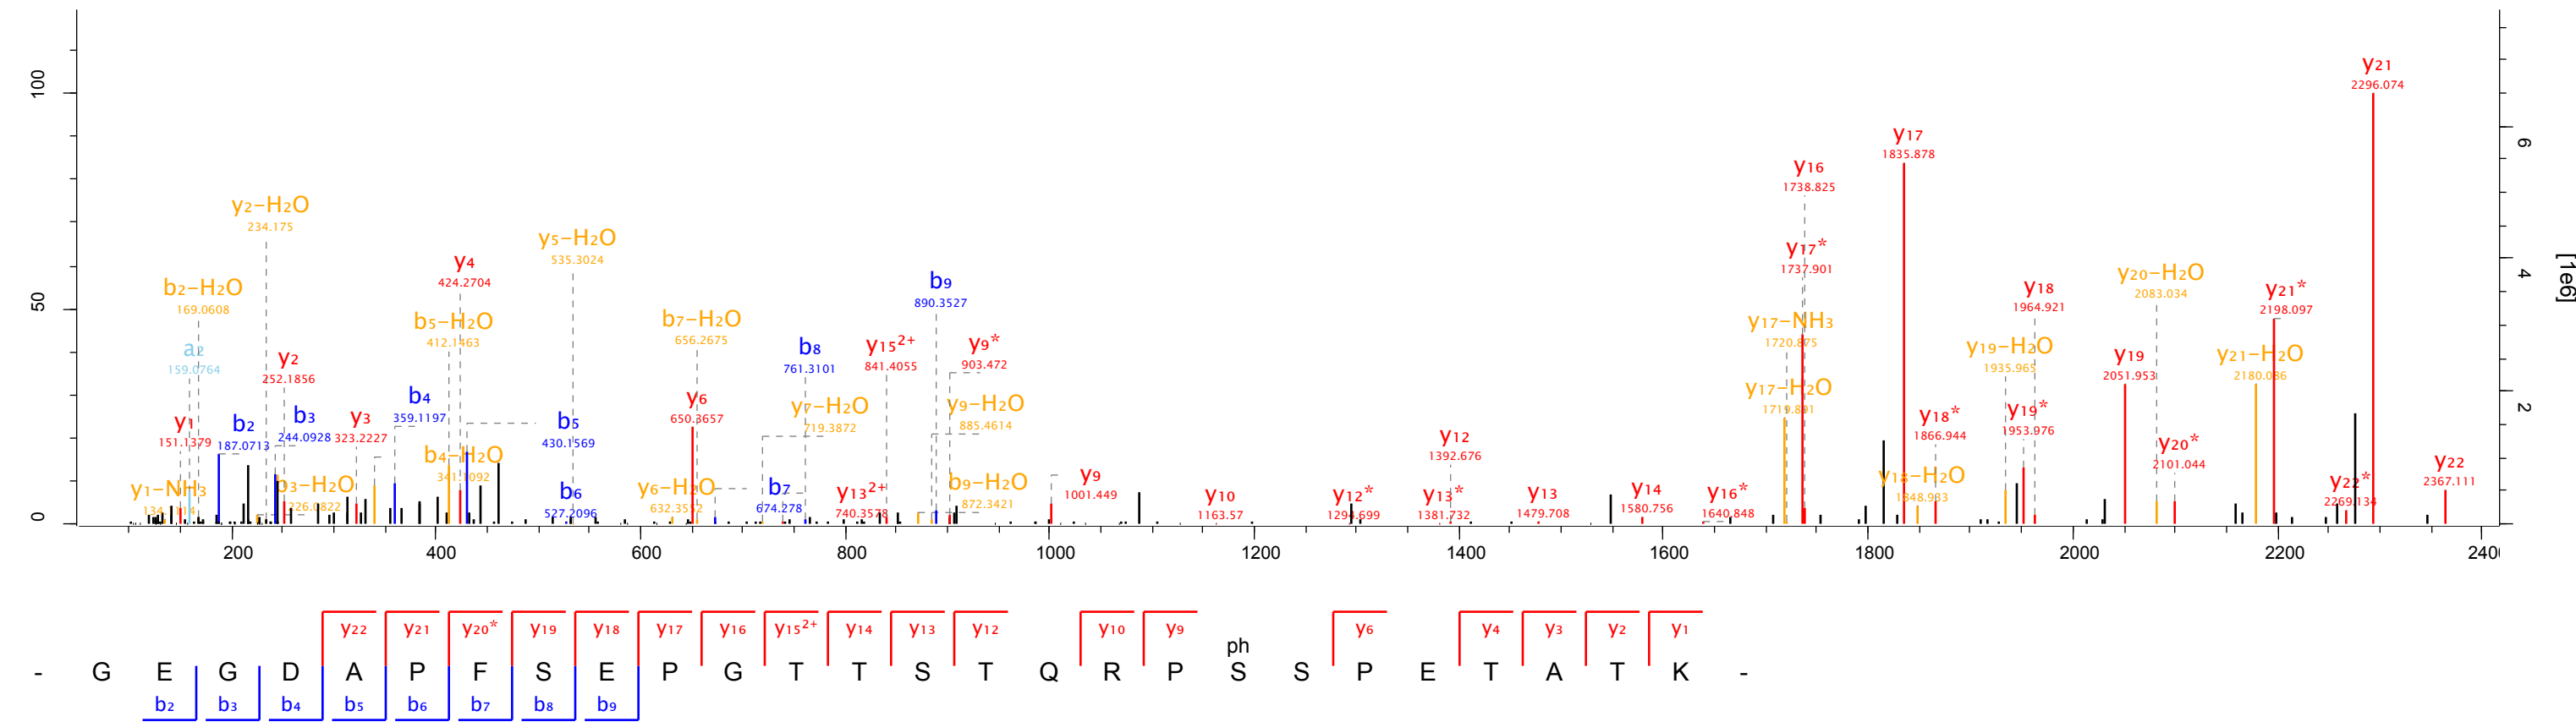

Raw file 20150814\_A375SR\_Phospho\_BR2\_05 Scan 11298 Method FTMS; HCD Score 172.43 m/z 703.35 Gene names ZC3H11A

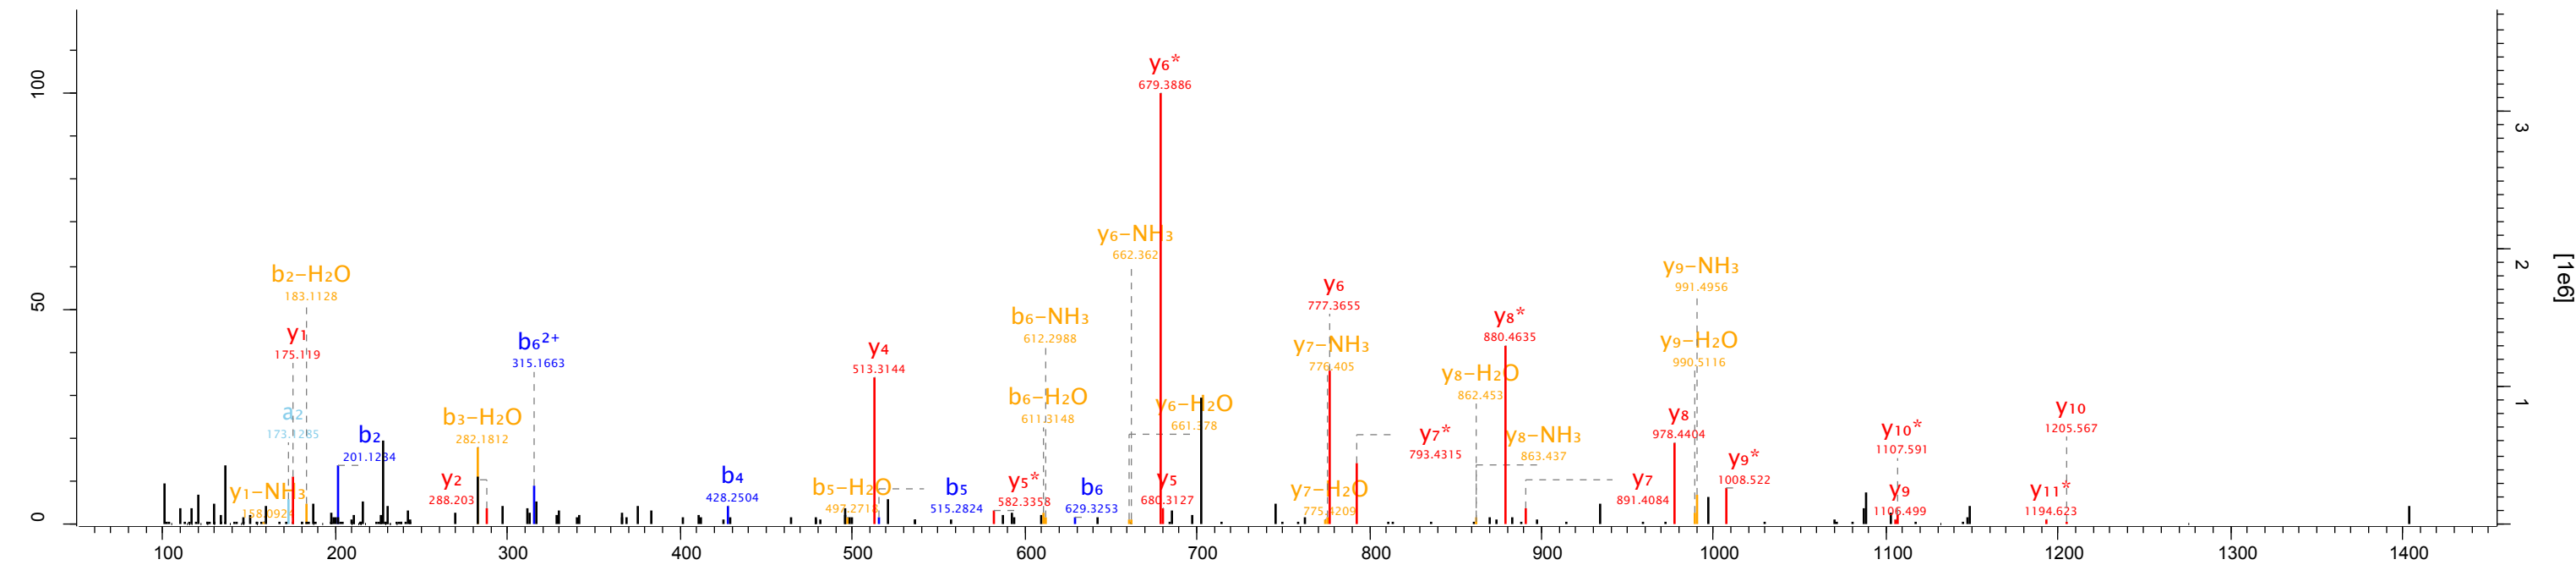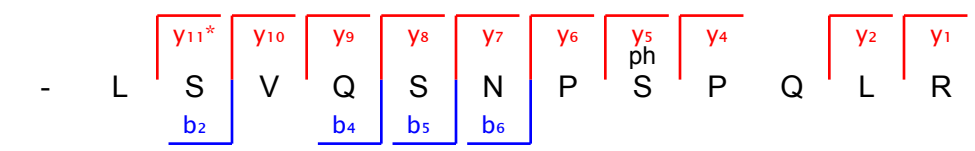

Raw file 20150814\_A375SR\_Phospho\_BR2\_05 Scan 11378 Method FTMS; HCD Score 162.86 m/z 655.82 Gene names PHACTR2

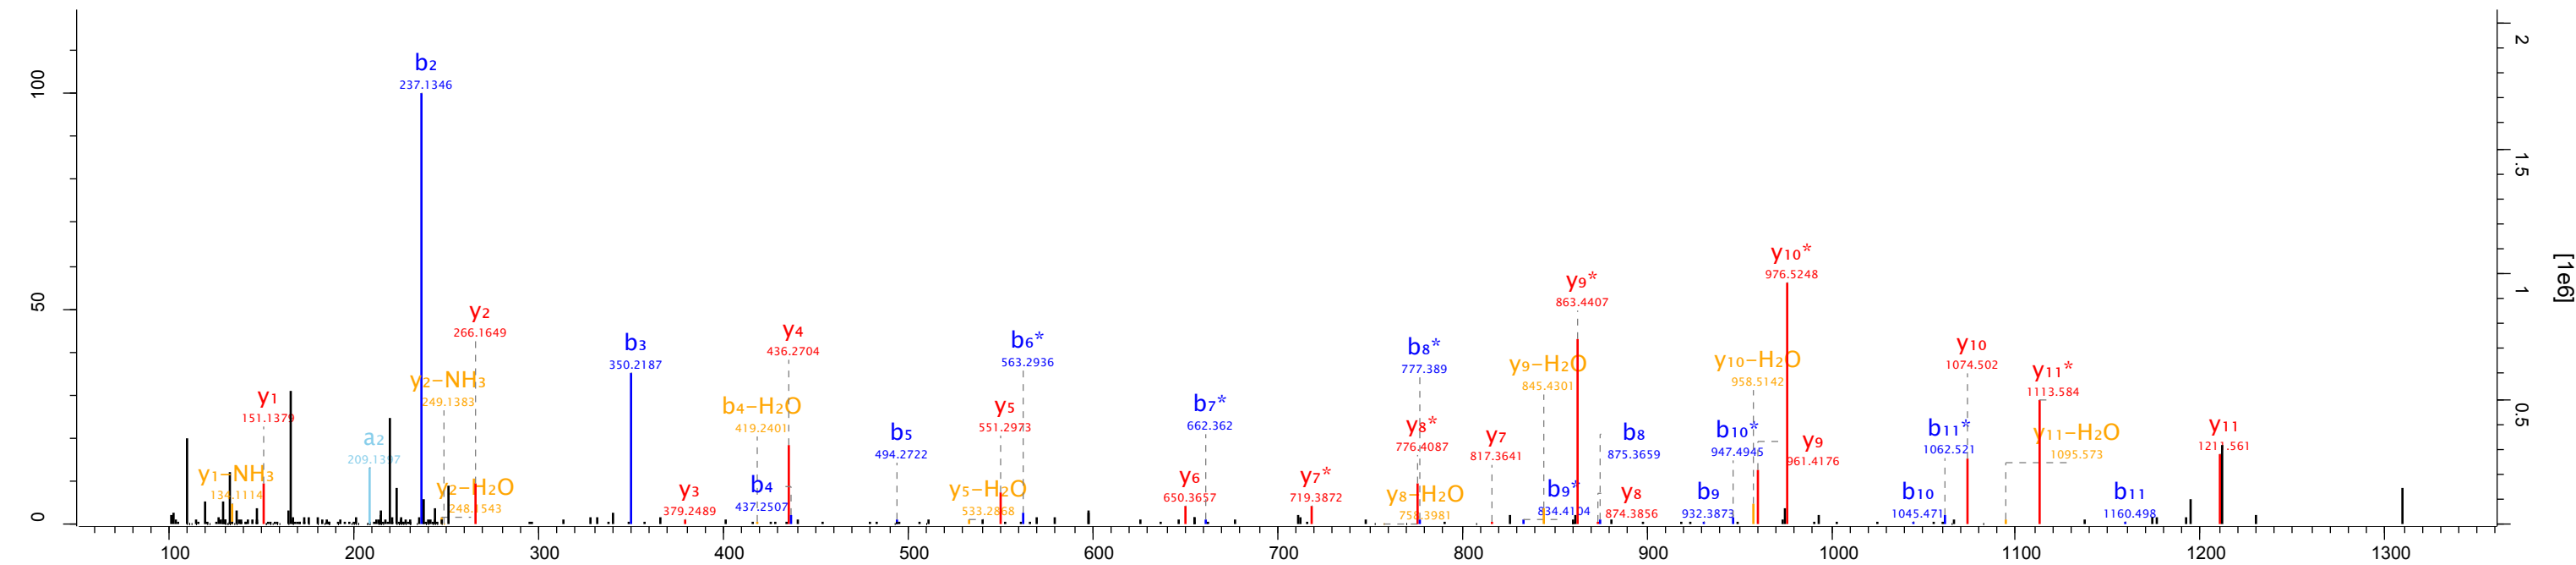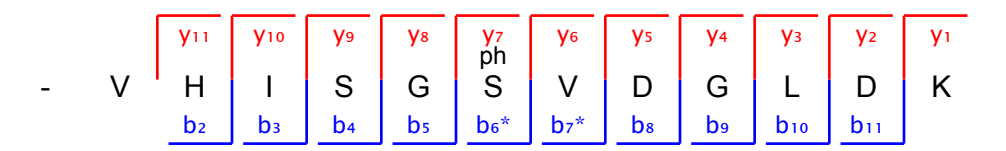



Raw file 20150814\_A375SR\_Phospho\_BR2\_05 Scan 11488 Method FTMS; HCD Score 205.12 m/z 614.77 Gene names DST

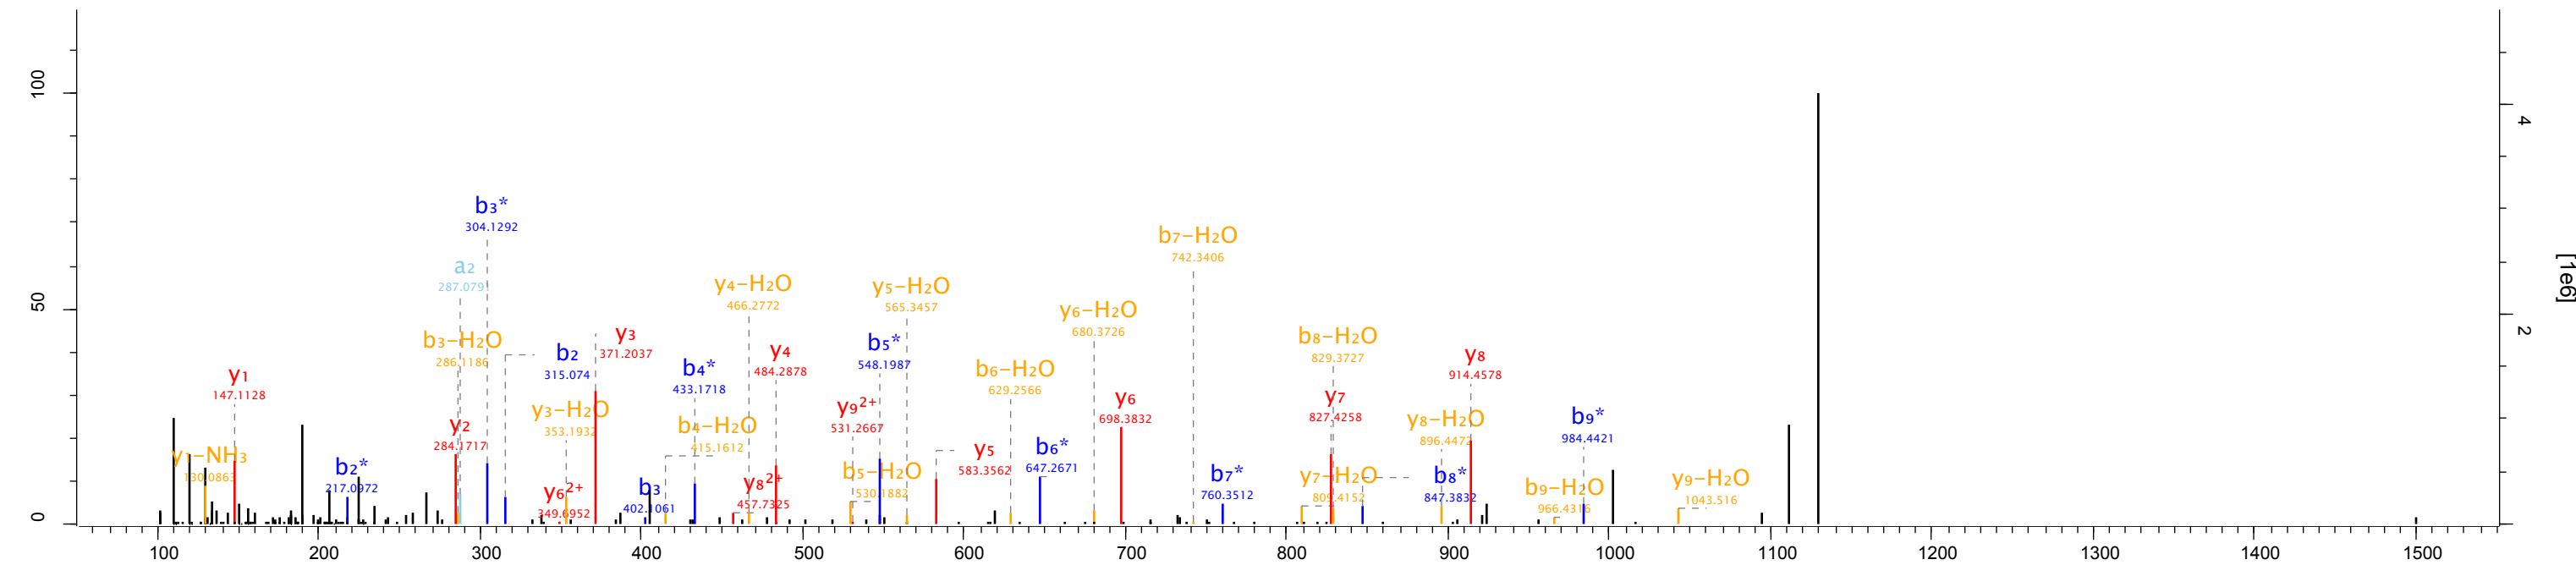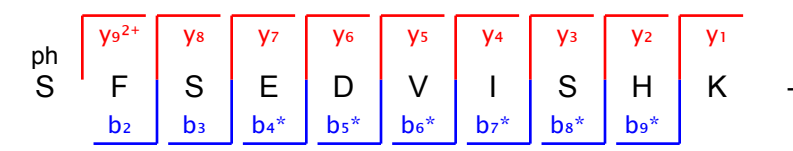

Raw file 20150814\_A375SR\_Phospho\_BR2\_05 Scan 11808 Method FTMS; HCD Score 147.63 m/z 554.75 Gene names MAP4K5

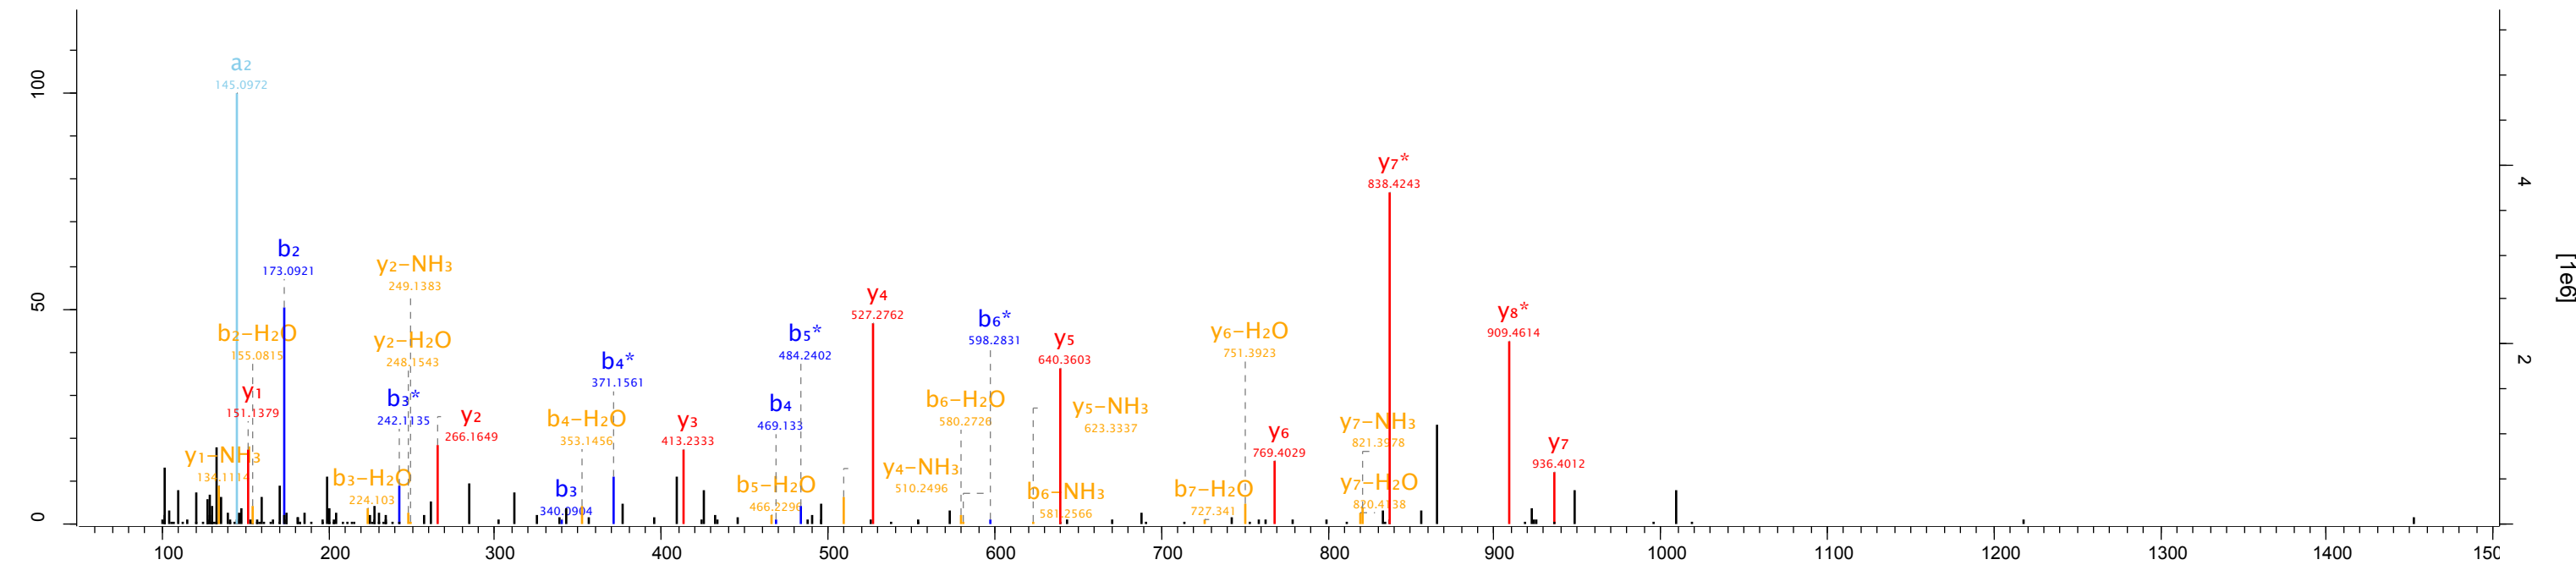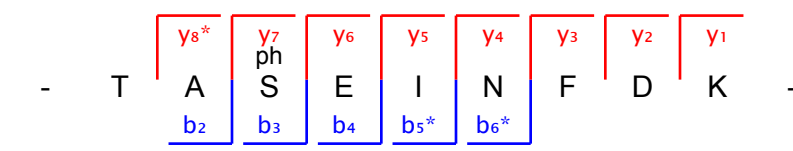

Raw file 20150814\_A375SR\_Phospho\_BR2\_05 Scan 11938 Method FTMS; HCD Score 215.2 m/z 893.41 Gene names PRRC2C

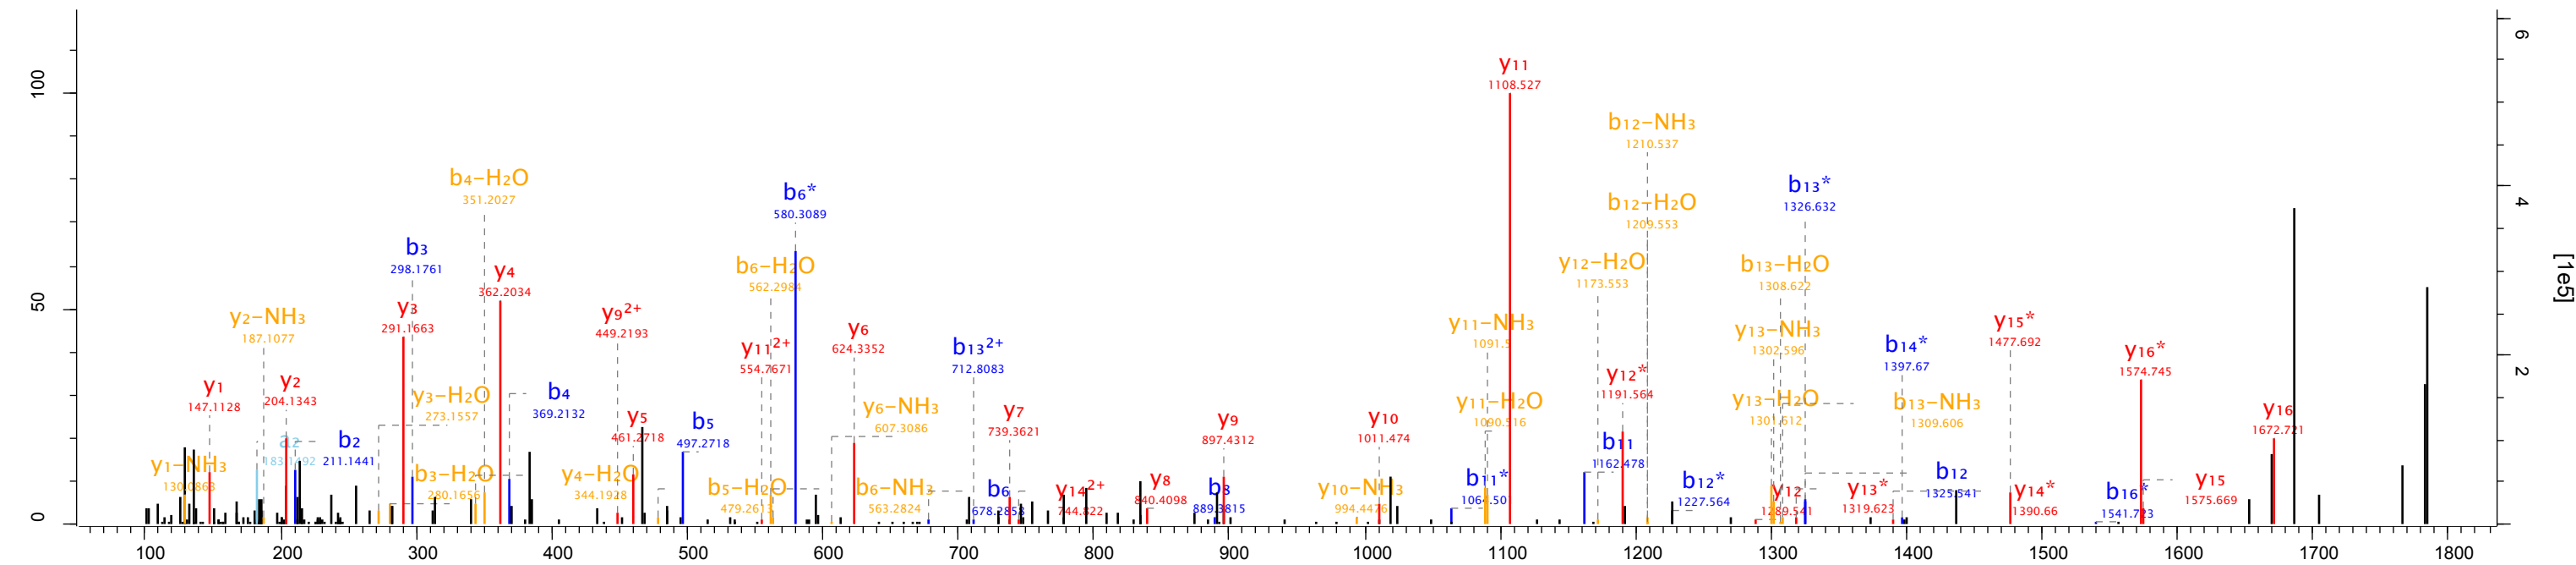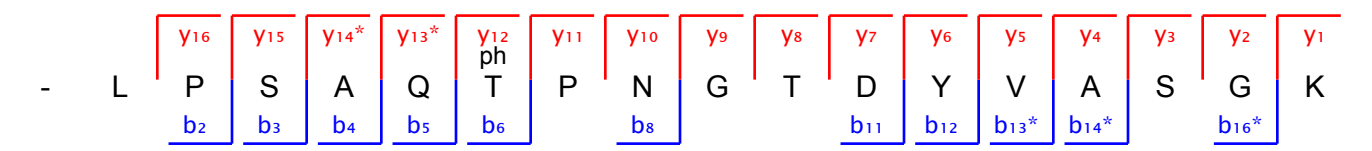

Raw file 20150814\_A375SR\_Phospho\_BR2\_05 Scan 12308 Method FTMS; HCD Score 144.57 m/z 951.96 Gene names NUP98

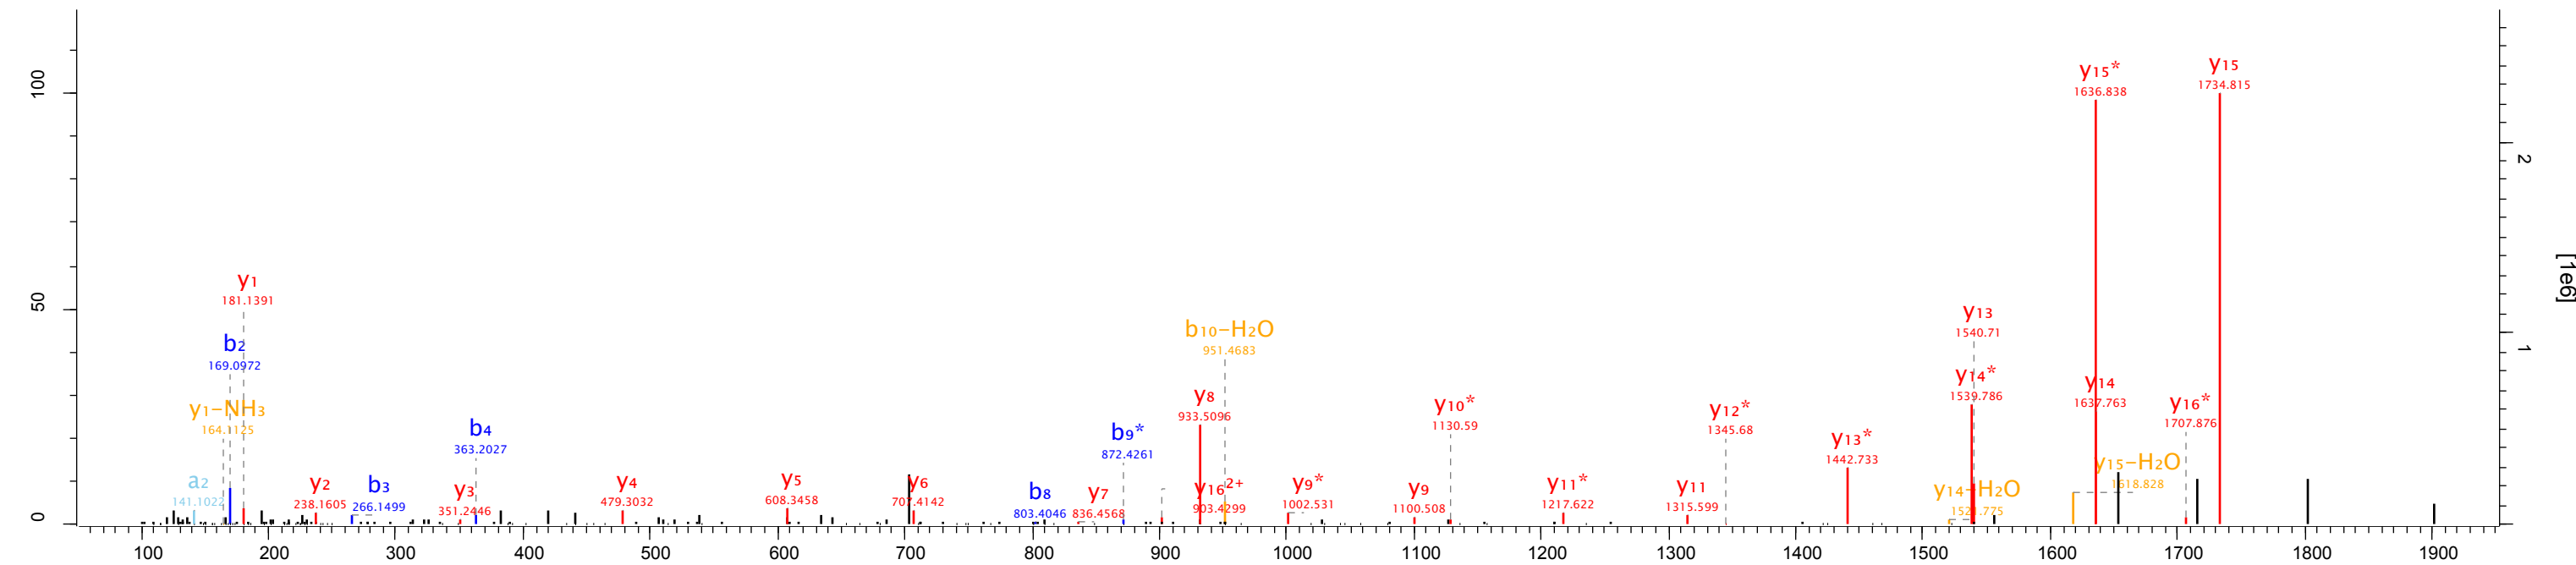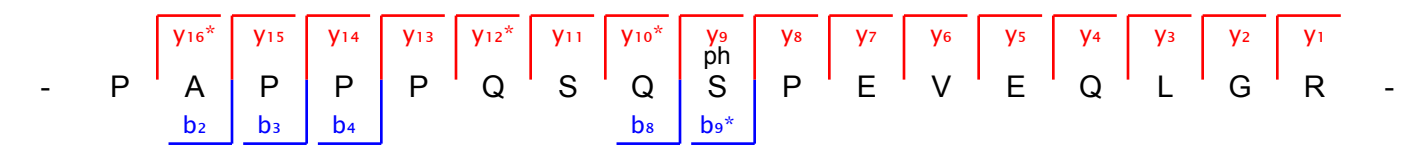

Raw file: 20150814\_A375SR\_Phospho\_BR2\_05  
 Scan: 12368 Method: FTMS; HCD Score: 131.86 m/z: 656.3 Gene names: NOL8

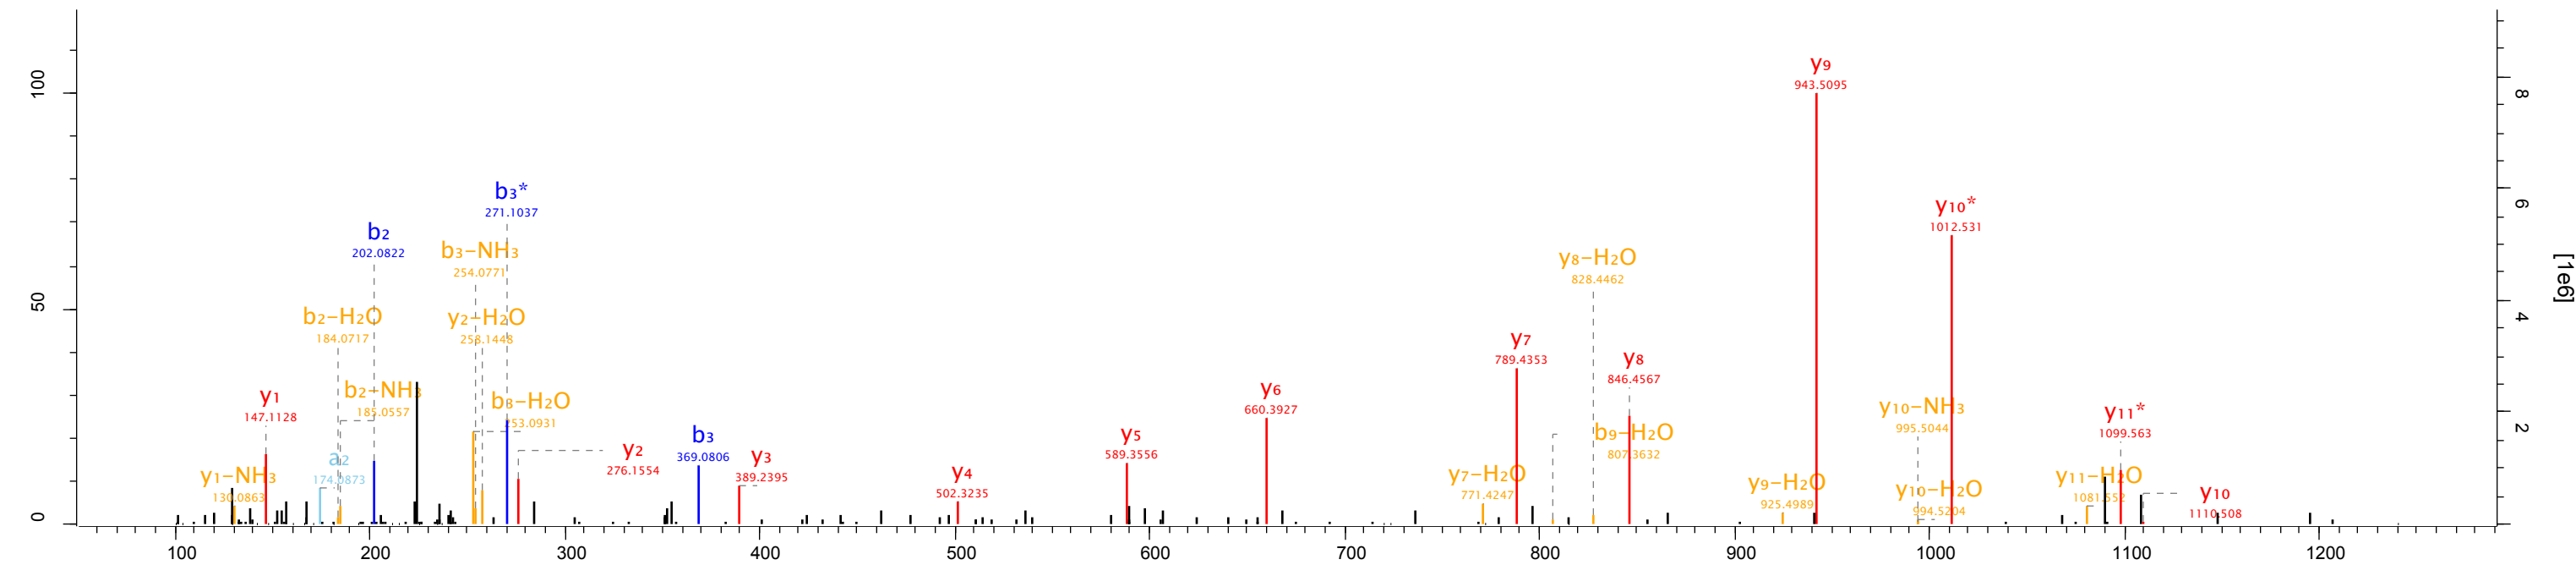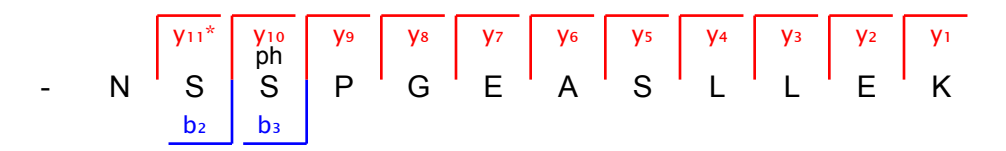

Raw file 20150814\_A375SR\_Phospho\_BR2\_05 Scan 12508 Method FTMS; HCD Score 123.73 m/z 705.36 Gene names BTG1

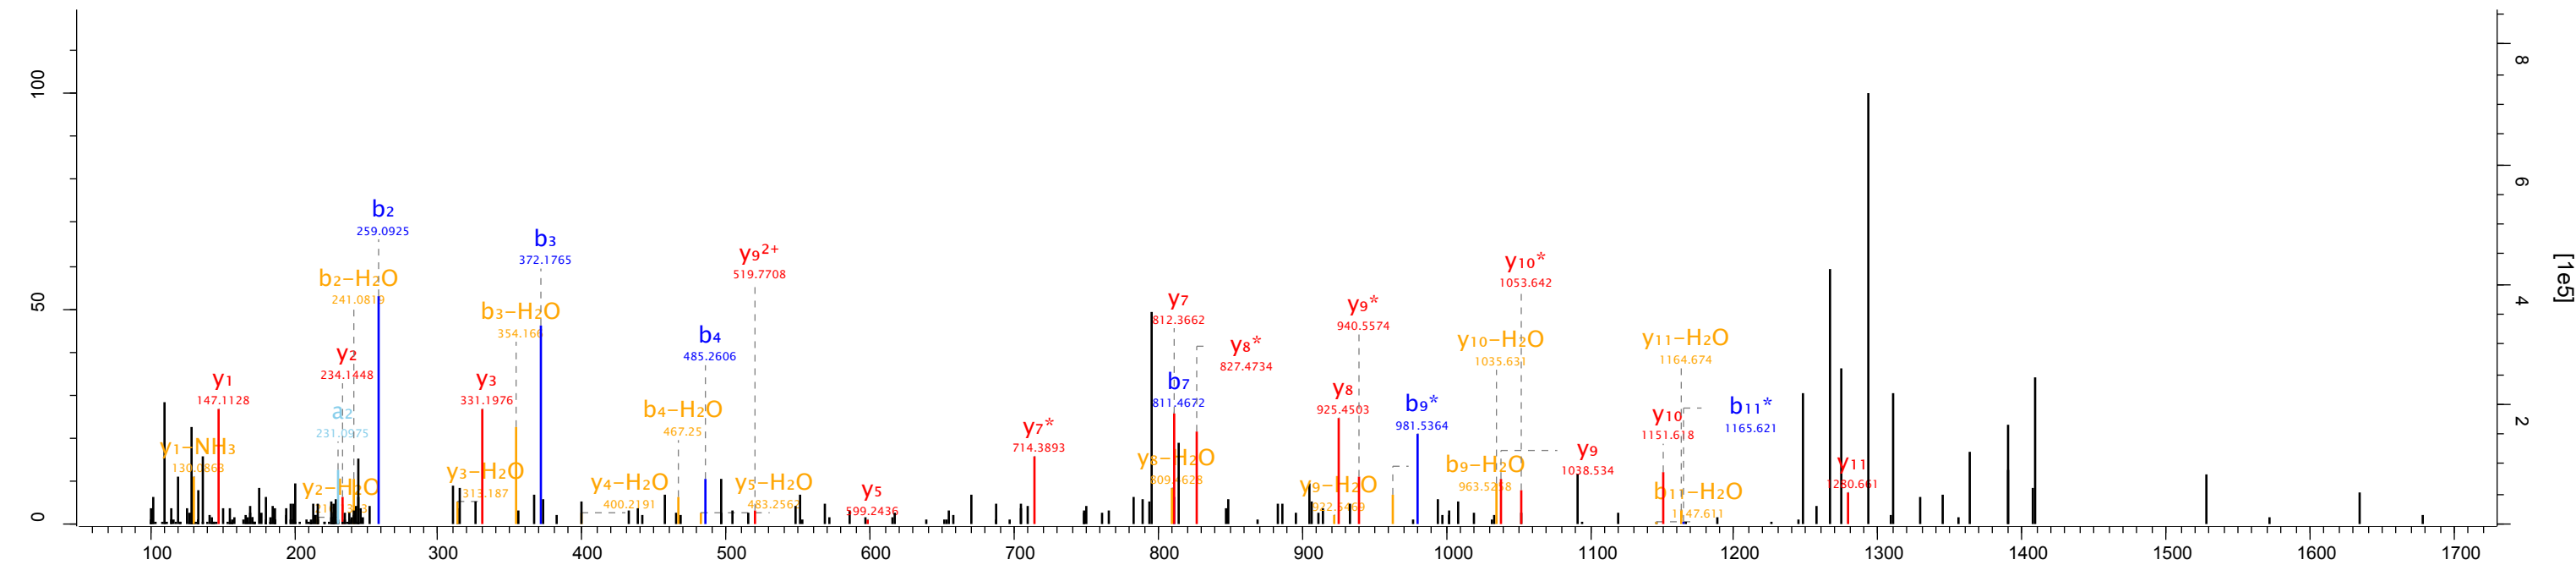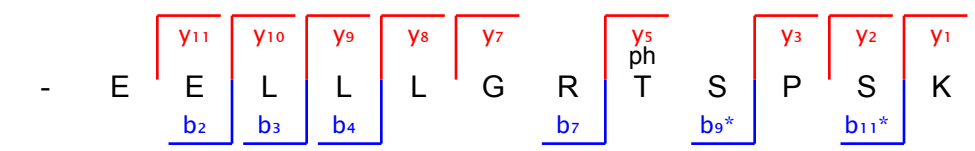

Raw file 20150814\_A375SR\_Phospho\_BR2\_05 Scan 12618 Method FTMS; HCD Score 61.19 m/z 612.77 Gene names NAMPT

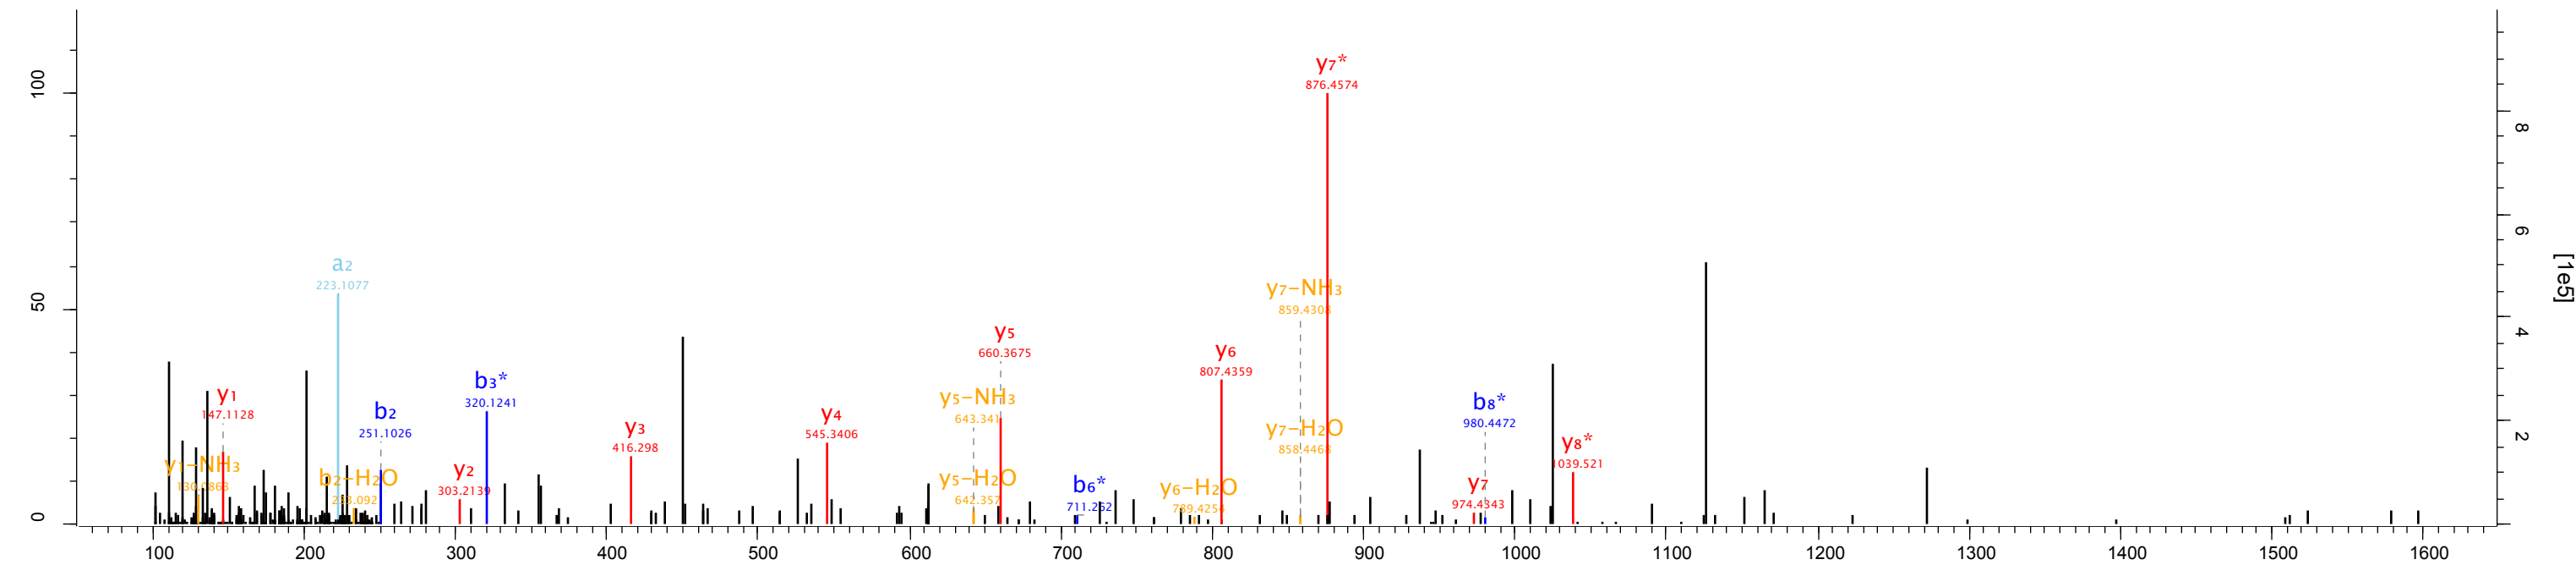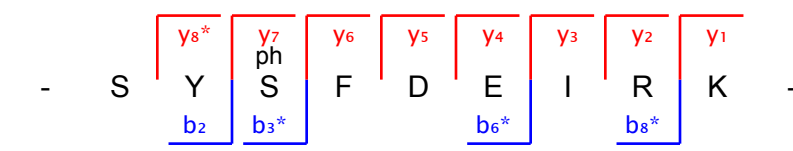

Raw file Scan Method Score m/z Gene names  
 20150814\_A375SR\_Phospho\_BR2\_05 13728 FTMS; HCD 194.77 715.68 MINK1

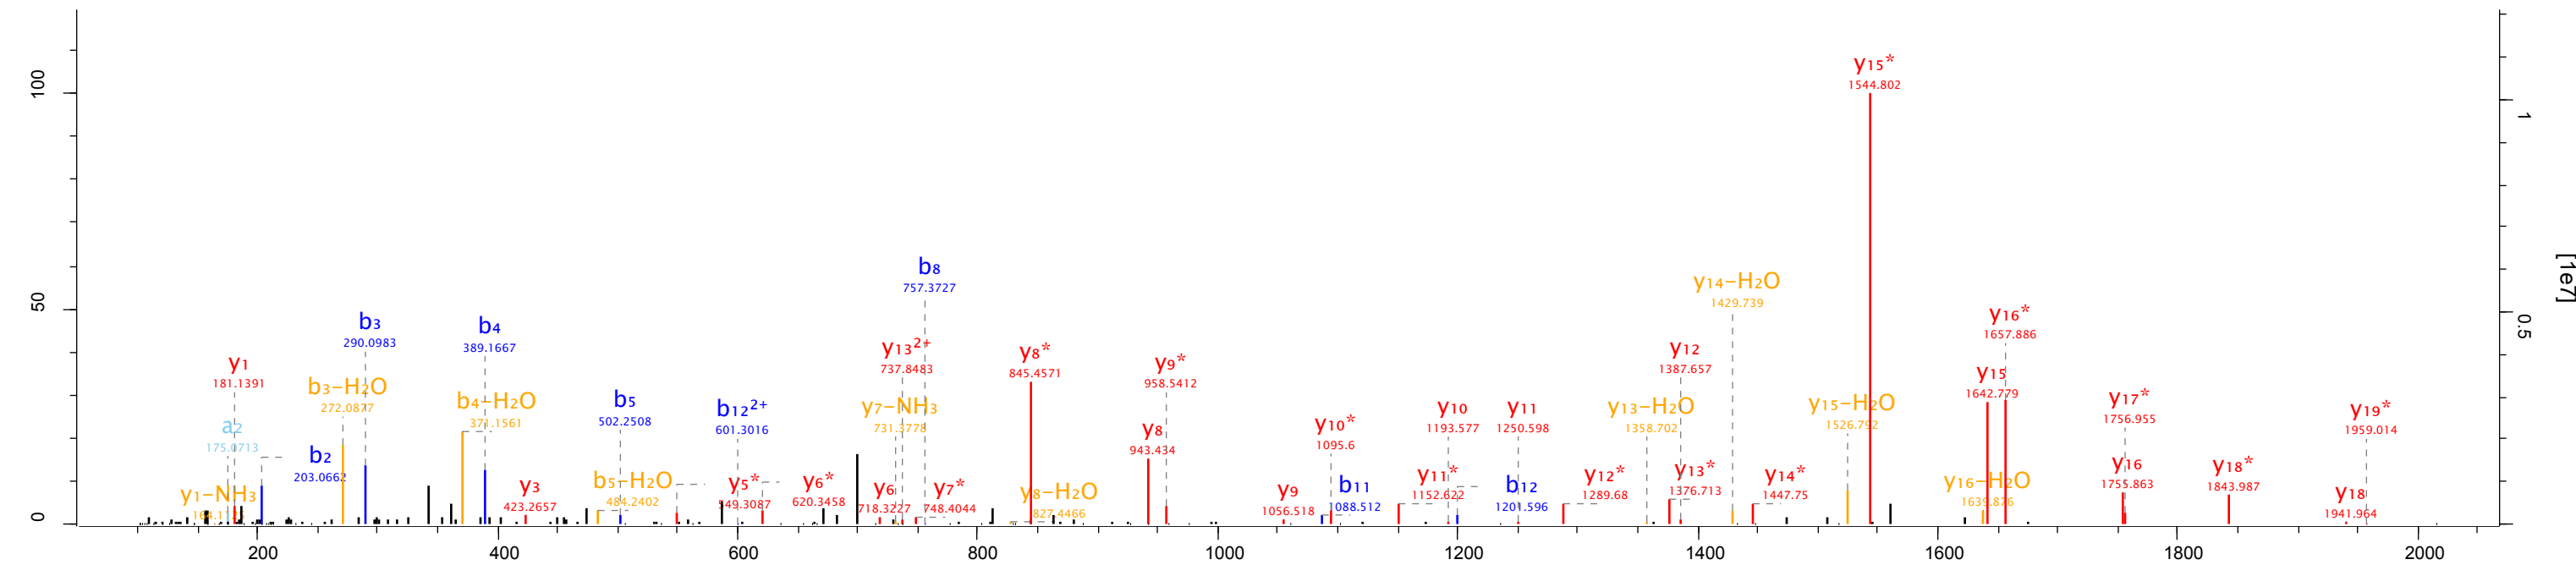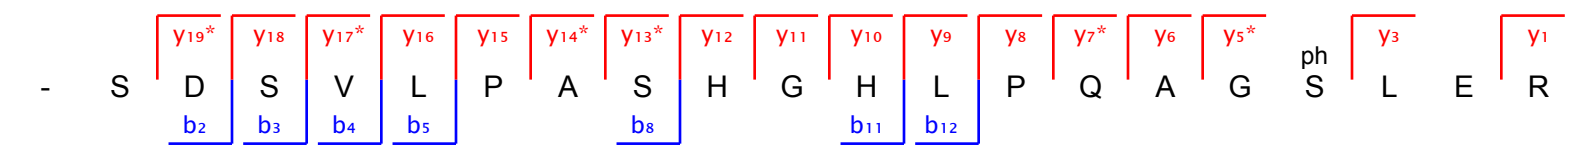



Raw file 20150814\_A375SR\_Phospho\_BR2\_05 Scan 13758 Method FTMS; HCD Score 52.81 m/z 547.92 Gene names TBC1D15

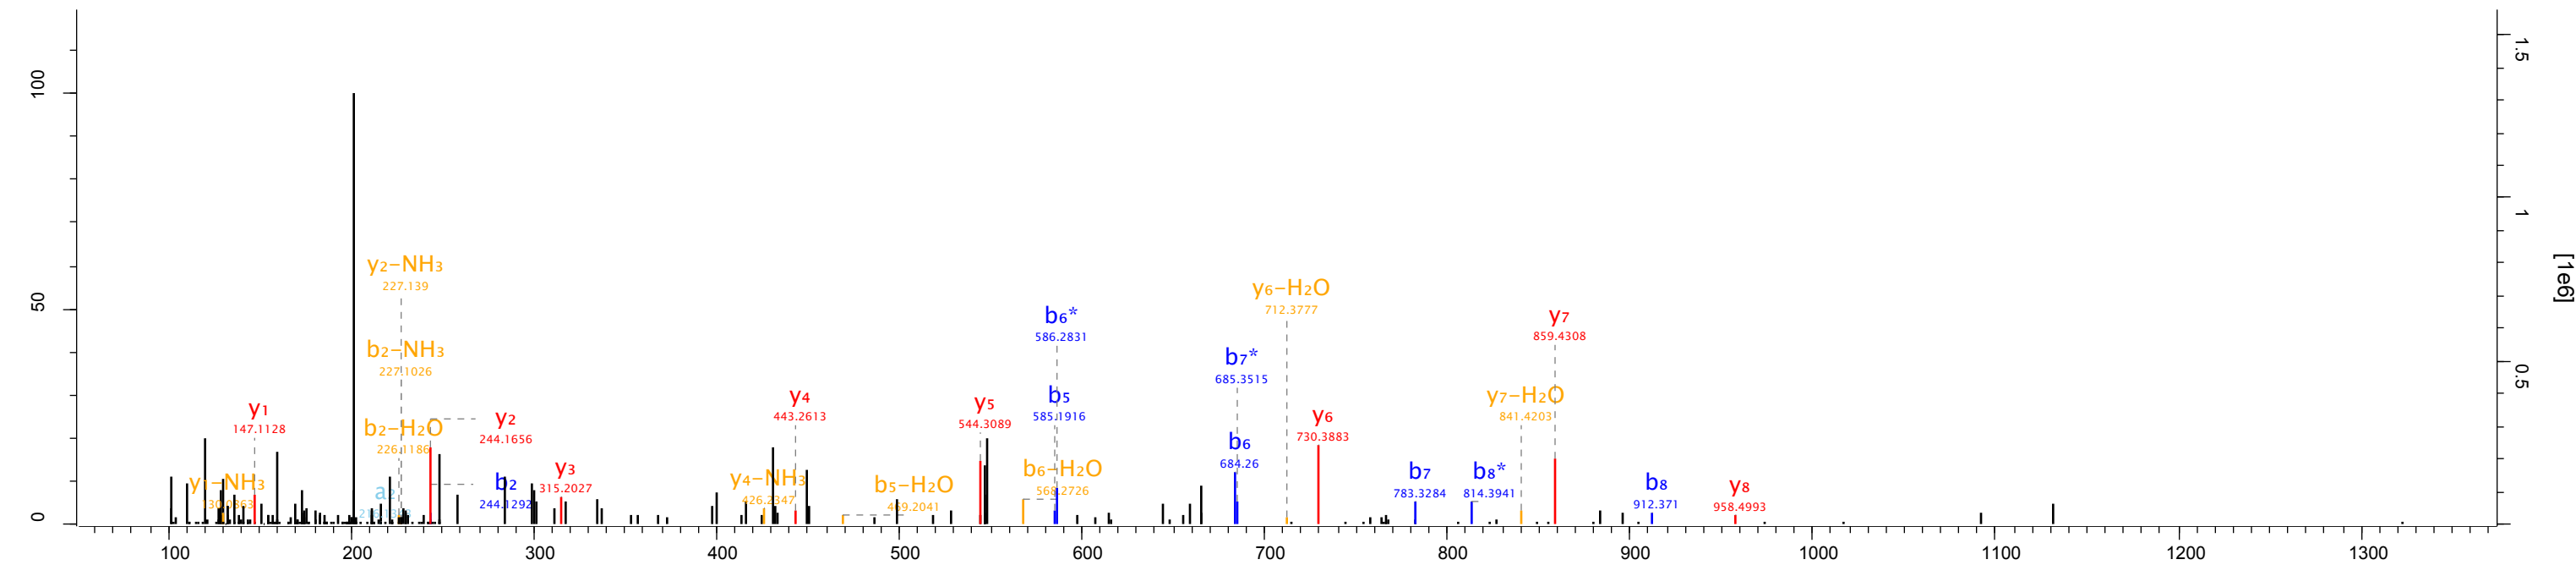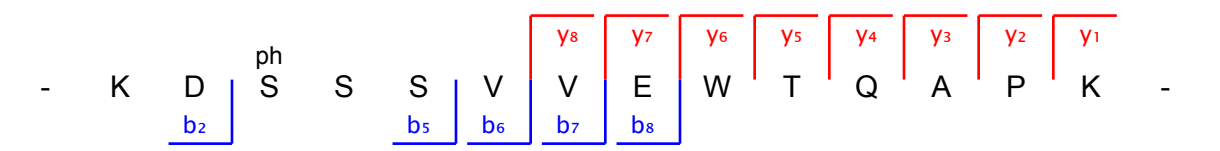

Raw file: 20150814\_A375SR\_Phospho\_BR2\_05  
 Scan: 13828 Method: FTMS; HCD Score: 96.33 m/z: 598.24 Gene names: SNX27

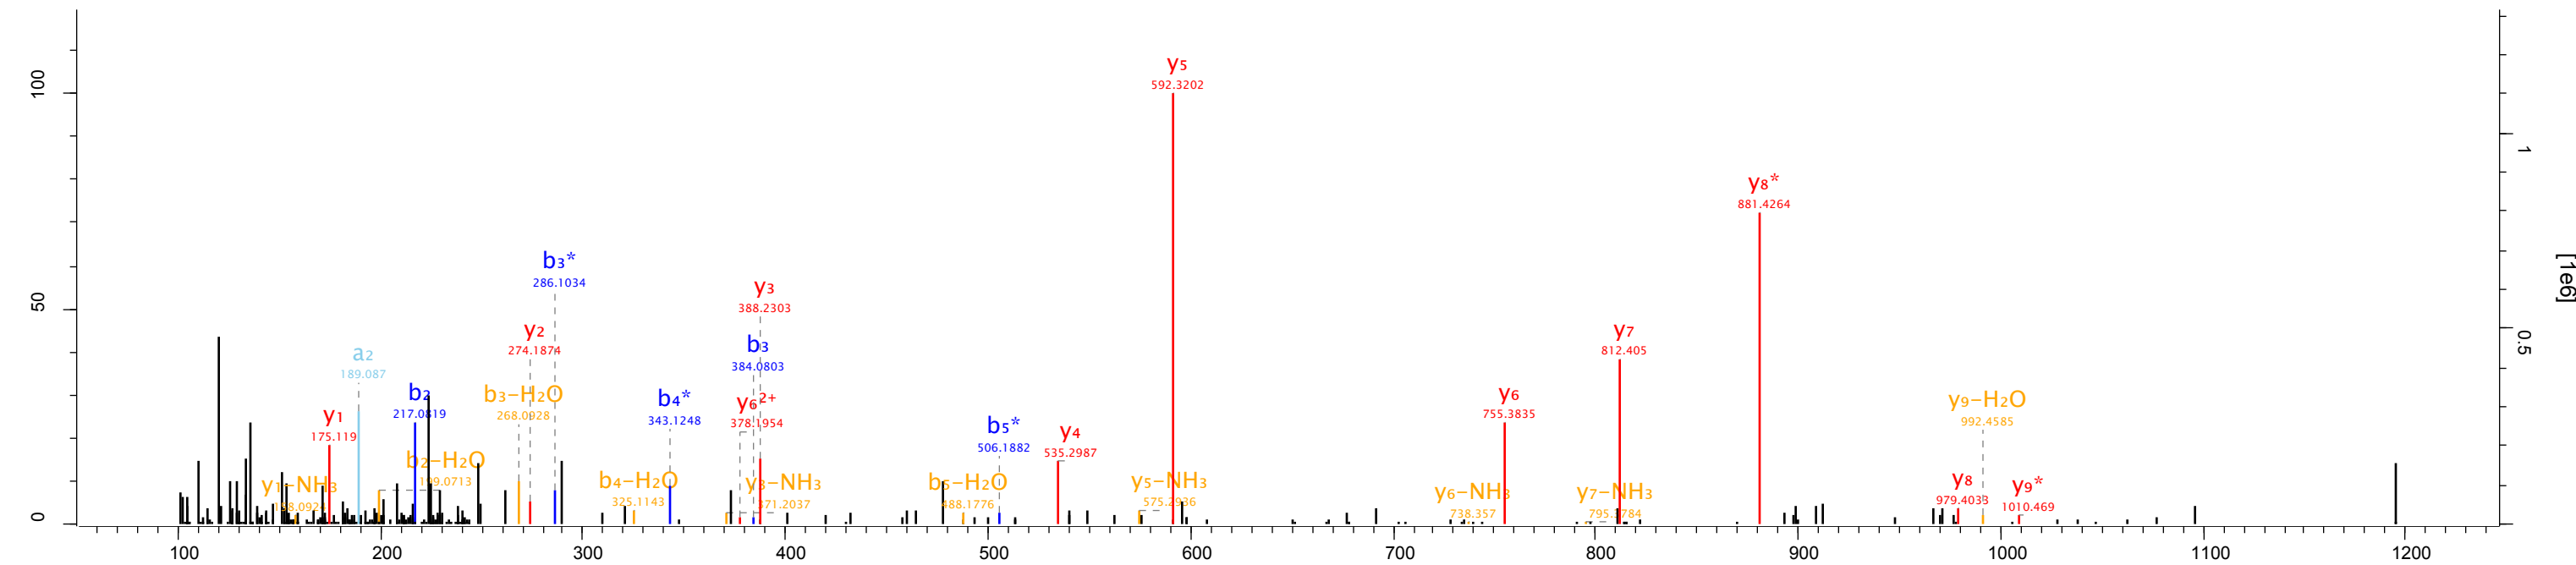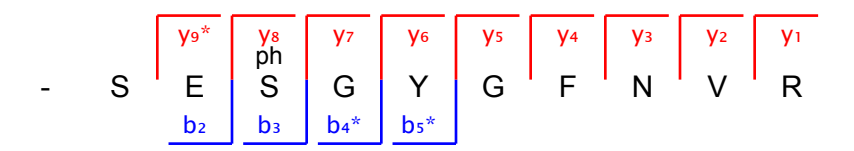

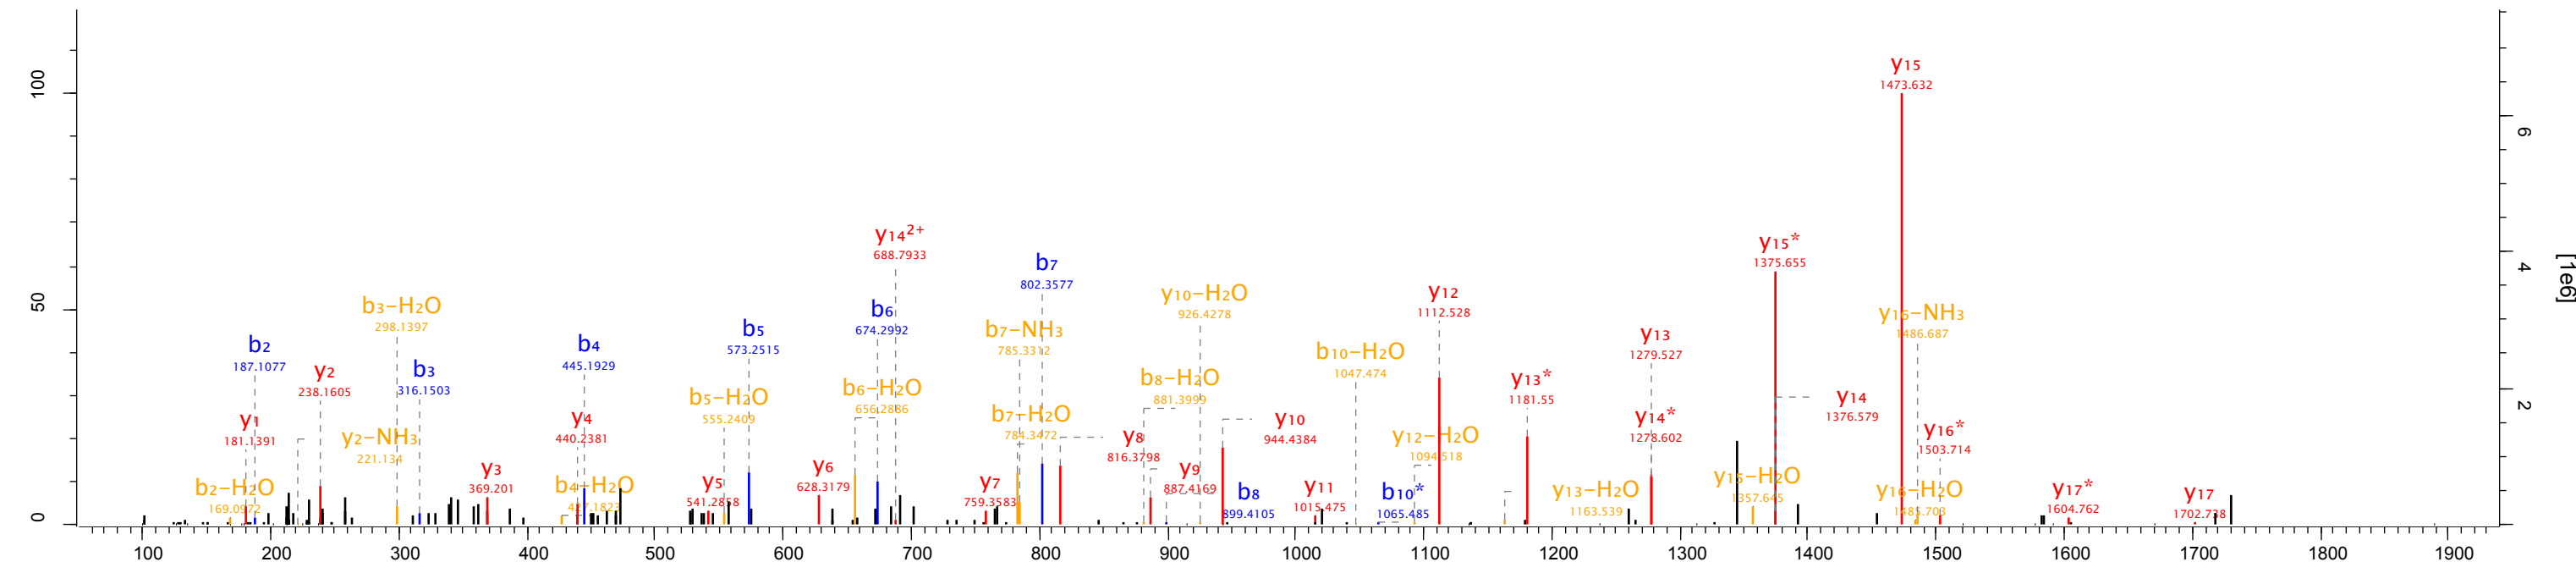

- V S E E Q T Q P P y17 y16\* y15 y14 y13 ph S y12 y11 y10 y9 y8 y7 y6 y5 y4 y3 y2 y1 -

b2 b3 b4 b5 b6 b7 b8 b10\*

Raw file: 20150814\_A375SR\_Phospho\_BR2\_05  
 Scan: 14138  
 Method: FTMS; HCD  
 Score: 193.06  
 m/z: 846.37  
 Gene names: ARHGEF2

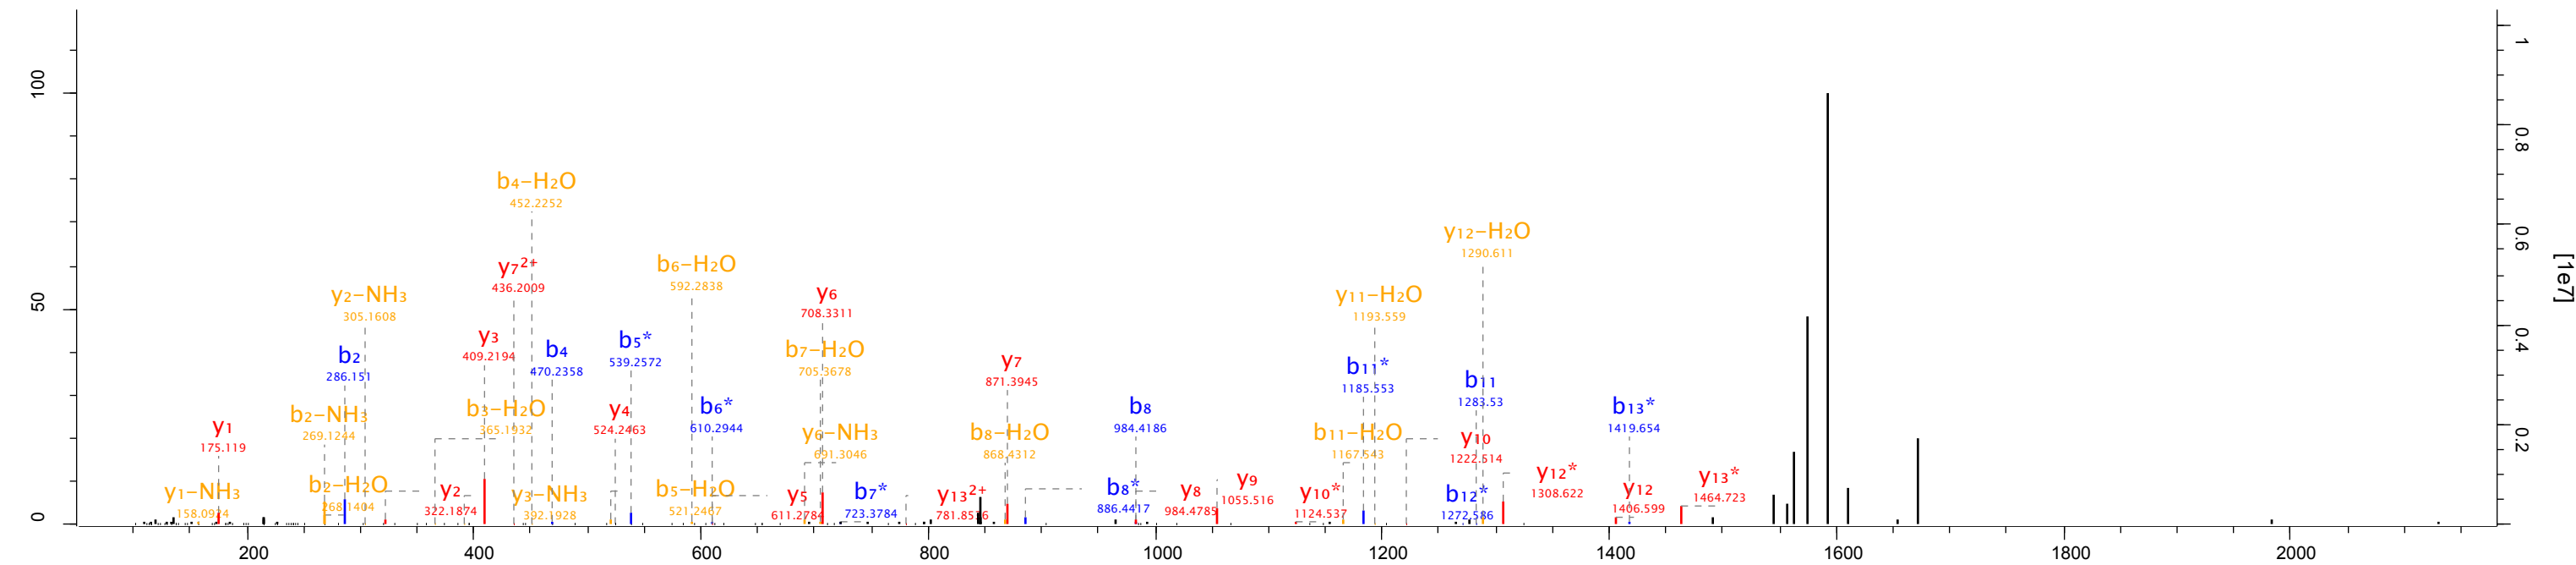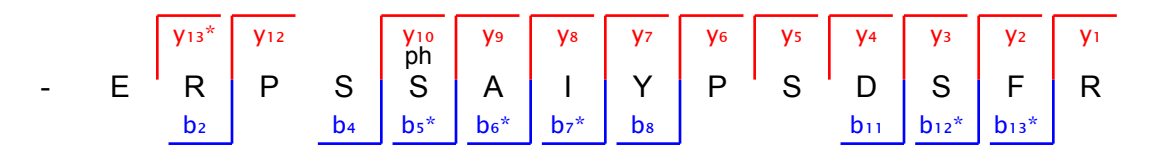

Raw file: 20150814\_A375SR\_Phospho\_BR2\_05  
 Scan: 14928 Method: FTMS; HCD Score: 102.57 m/z: 764.87 Gene names: ATG9A

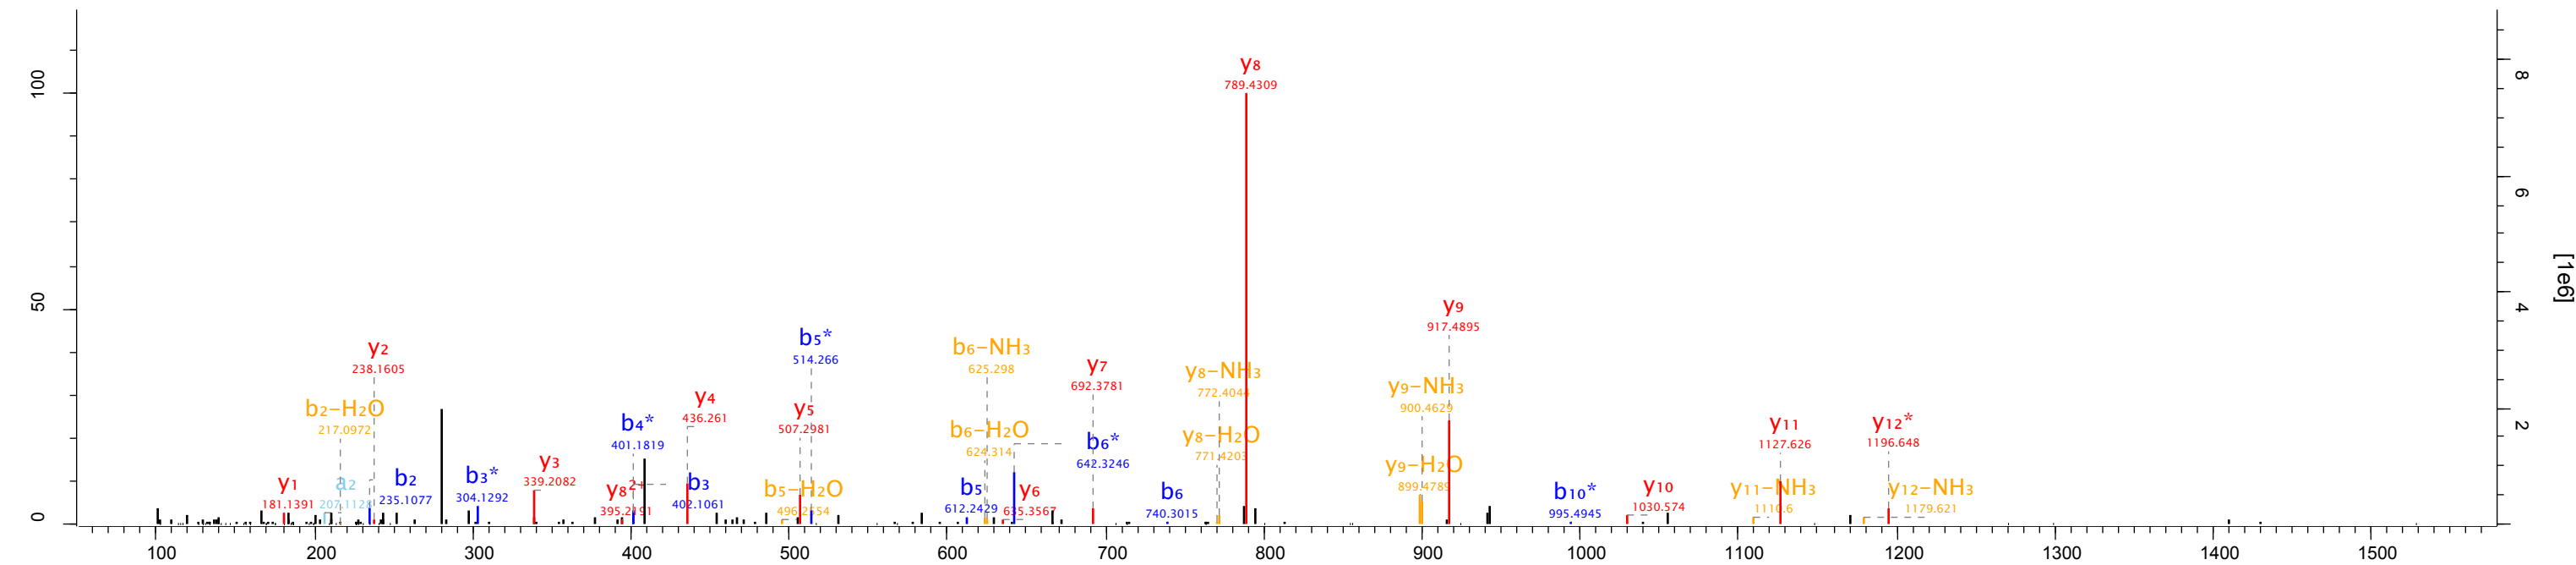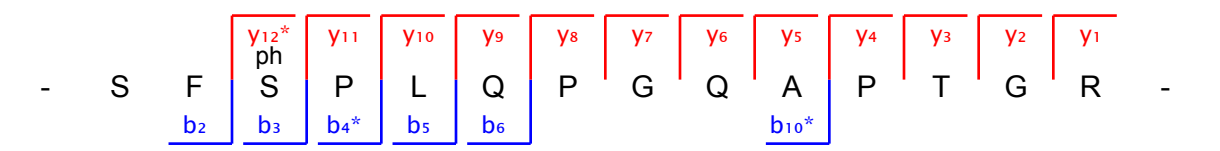

Raw file 20150814\_A375SR\_Phospho\_BR2\_05 Scan 14988 Method FTMS; HCD Score 130.87 m/z 919.36 Gene names SEPT7

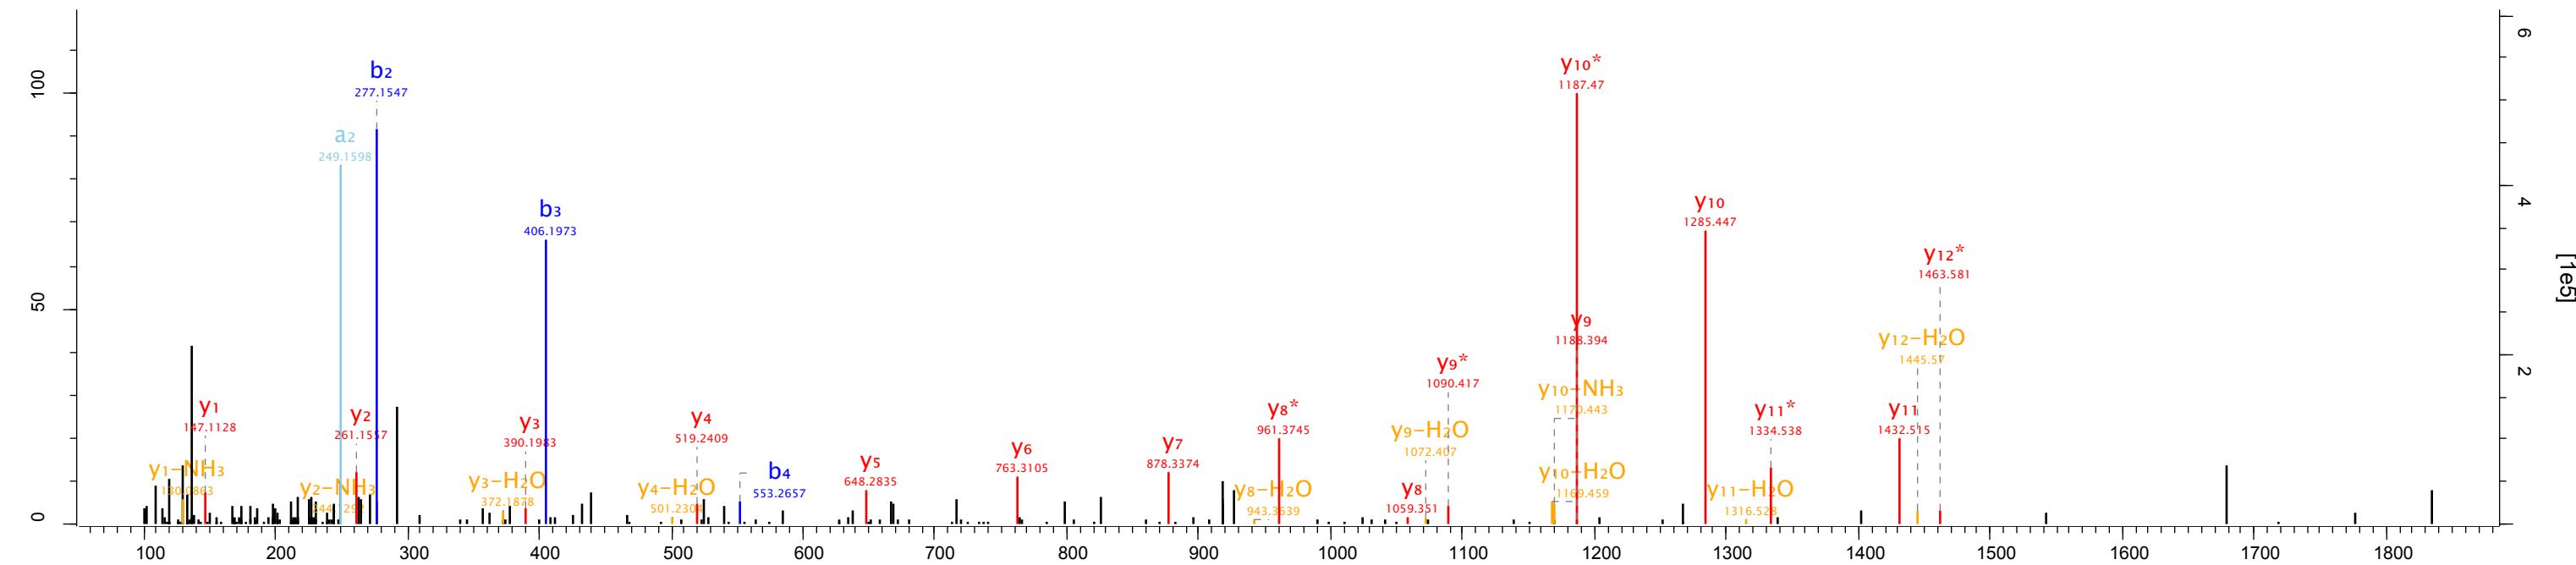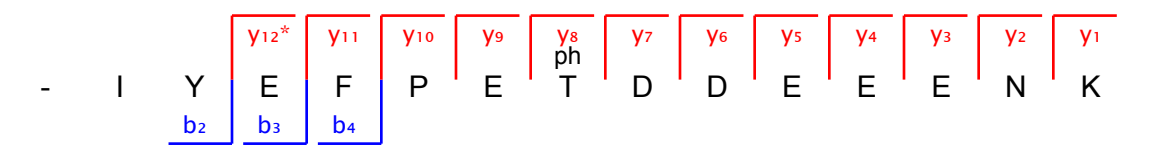

Raw file: 20150814\_A375SR\_Phospho\_BR2\_05  
 Scan: 1508 Method: FTMS; HCD Score: 92.11 m/z: 590.26 Gene names: C12orf43

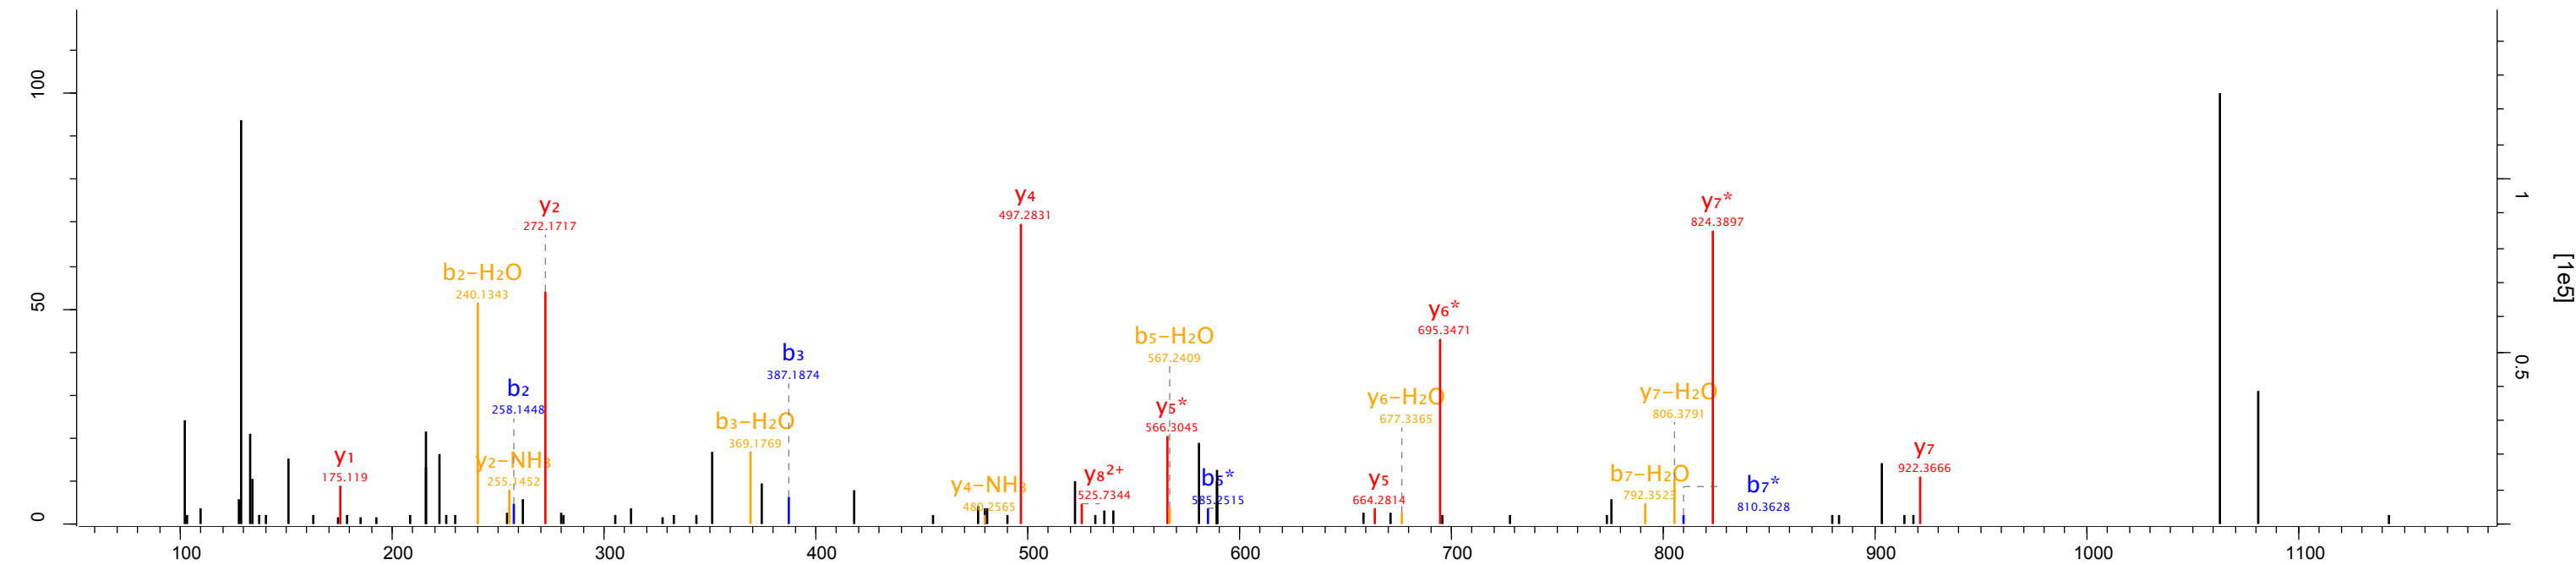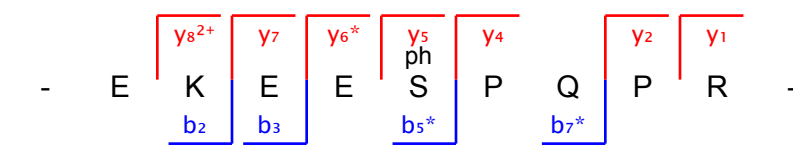

Raw file: 20150814\_A375SR\_Phospho\_BR2\_05  
 Scan: 15128 Method: FTMS; HCD Score: 107.63 m/z: 690.87 Gene names: BCAR3

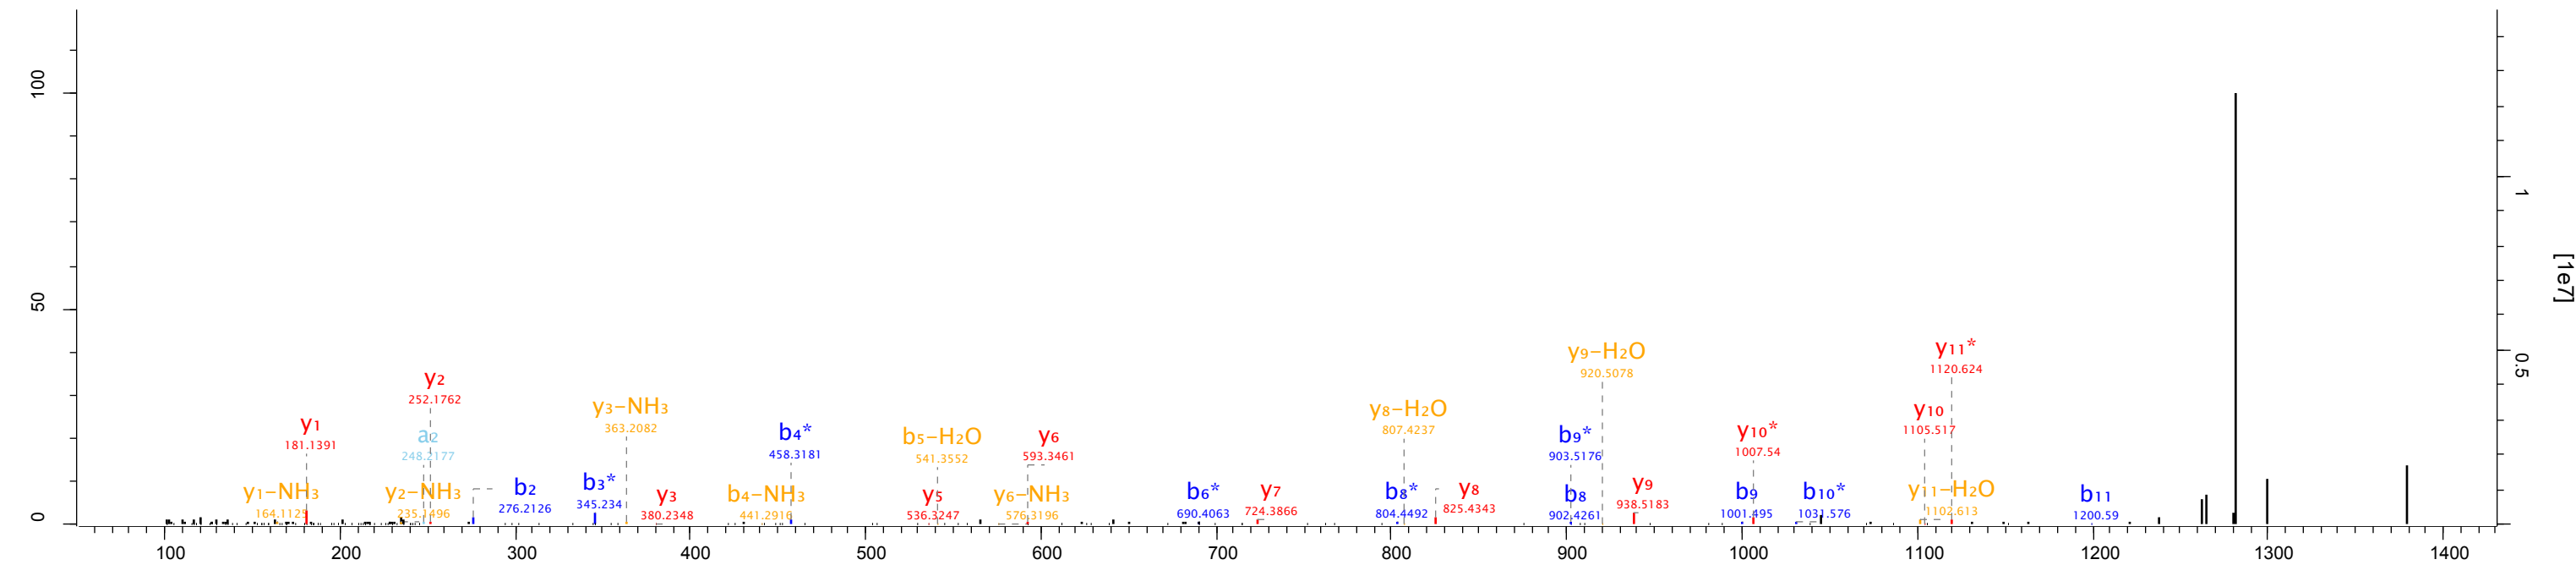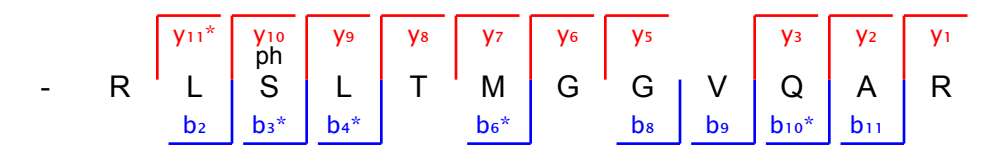



Raw file 20150814\_A375SR\_Phospho\_BR2\_05 Scan 15638 Method FTMS; HCD Score 129.37 m/z 961.43 Gene names EPS15L1;SPATA22

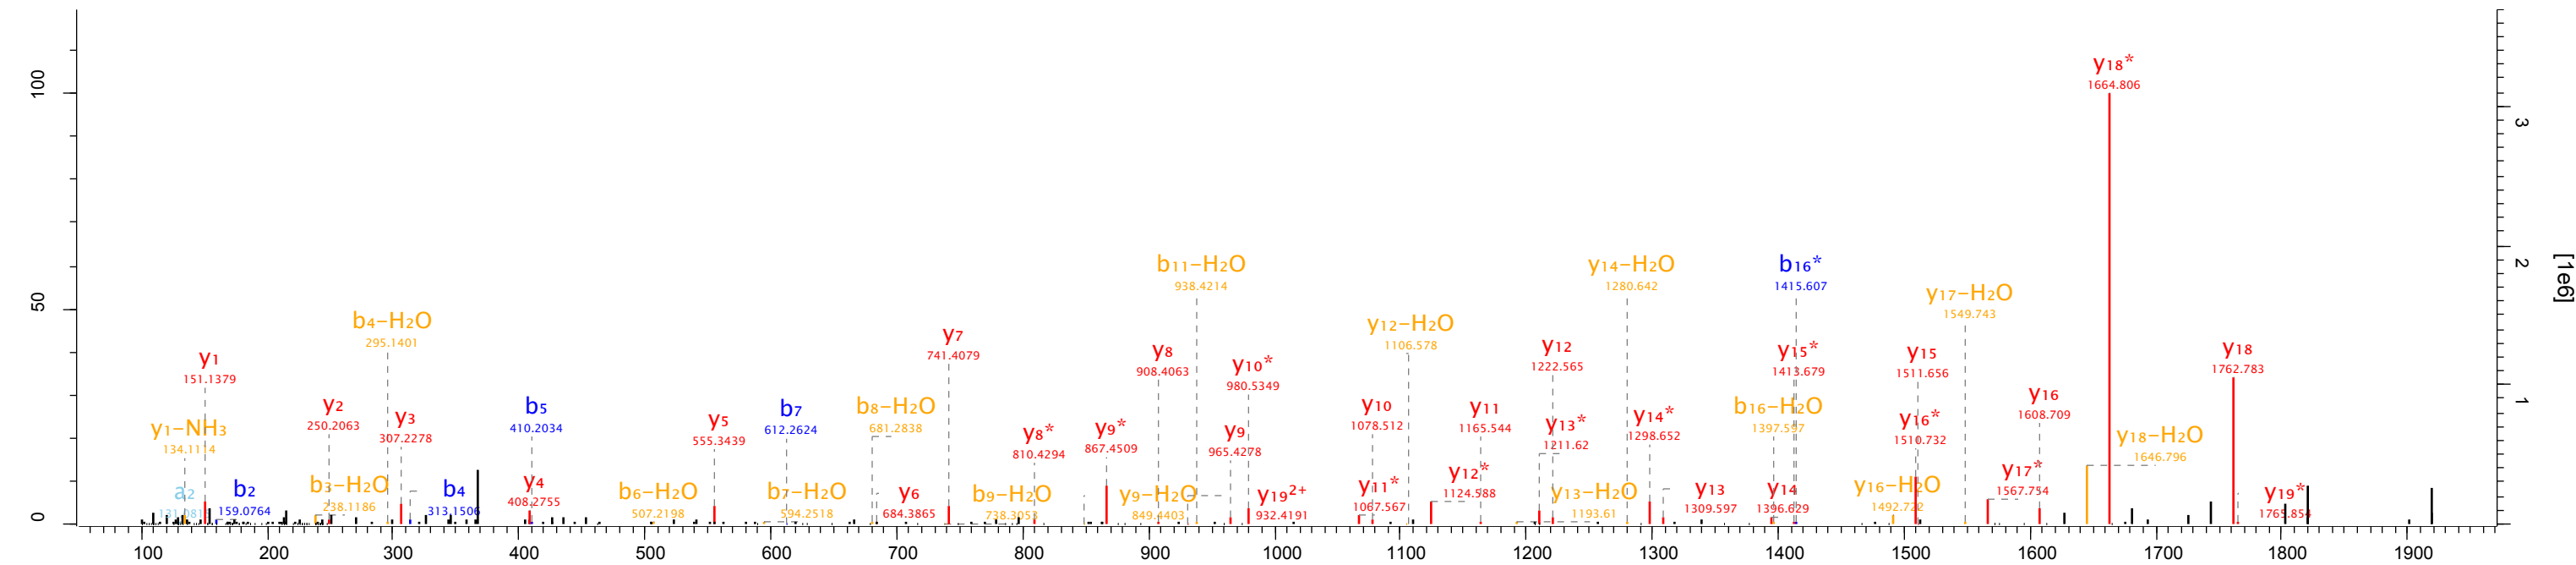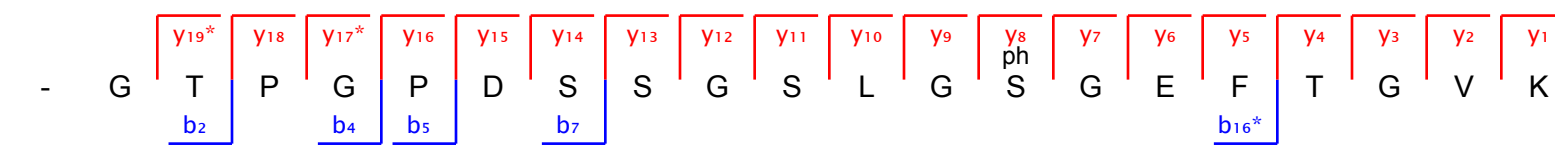

Raw file 20150814\_A375SR\_Phospho\_BR2\_05 Scan 15928 Method FTMS; HCD Score 215.59 m/z 876.39 Gene names TP53BP1

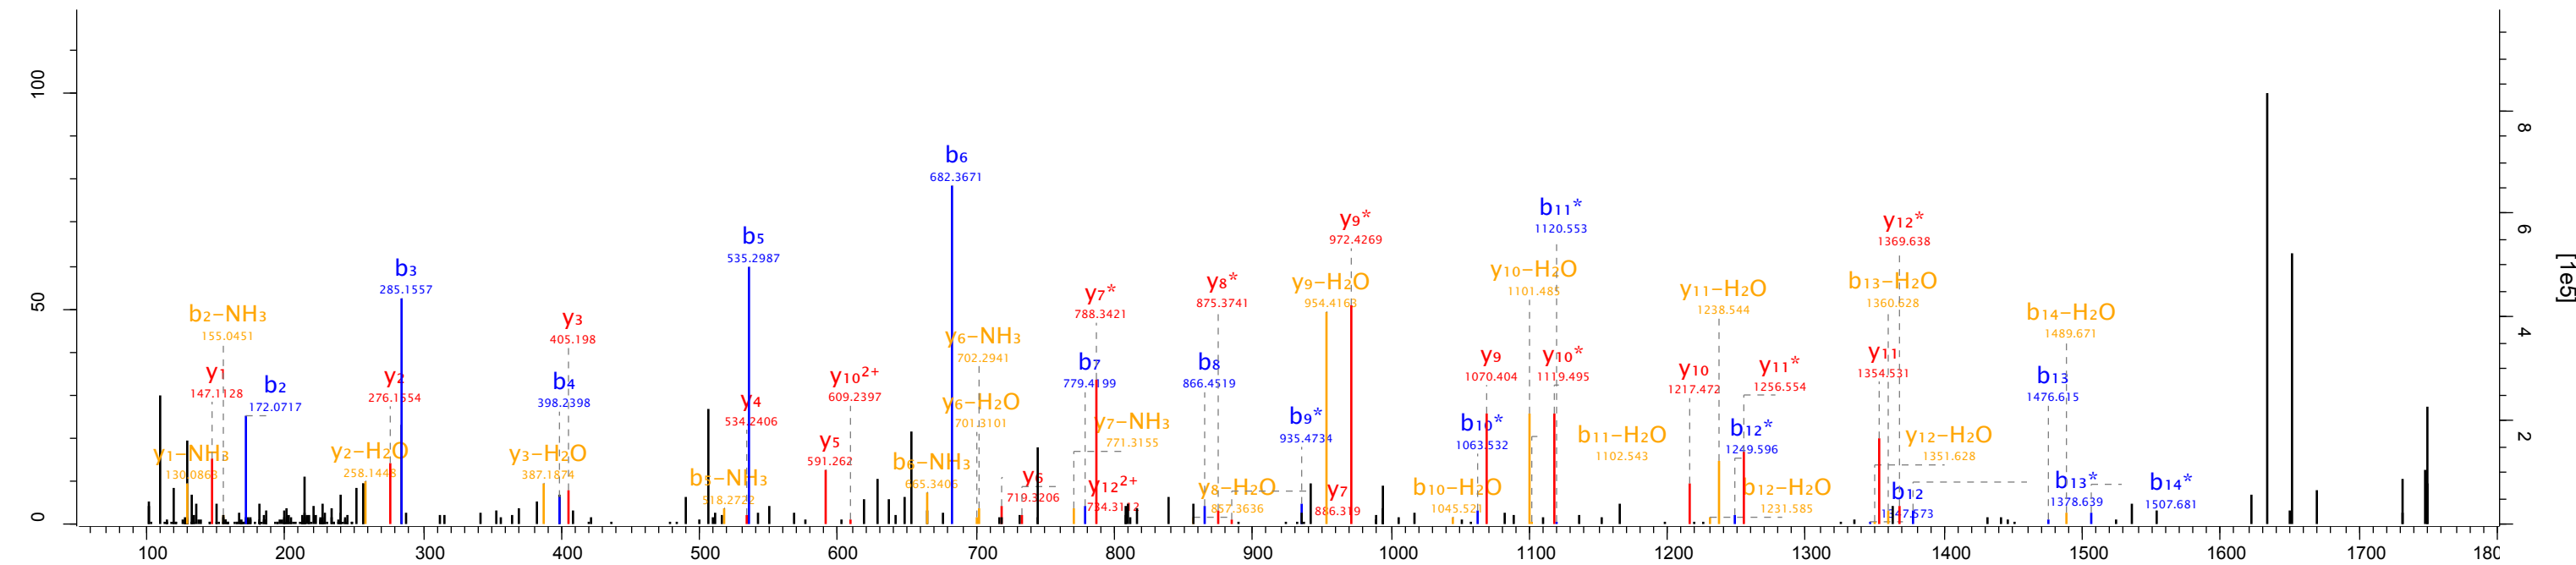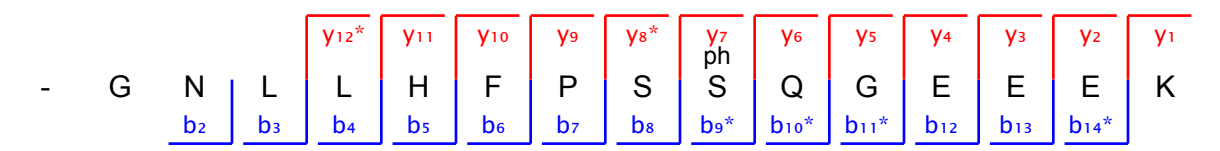

Raw file 20150814\_A375SR\_Phospho\_BR2\_05 Scan 16368 Method FTMS; HCD Score 81.33 m/z 952.47 Gene names RPLP2

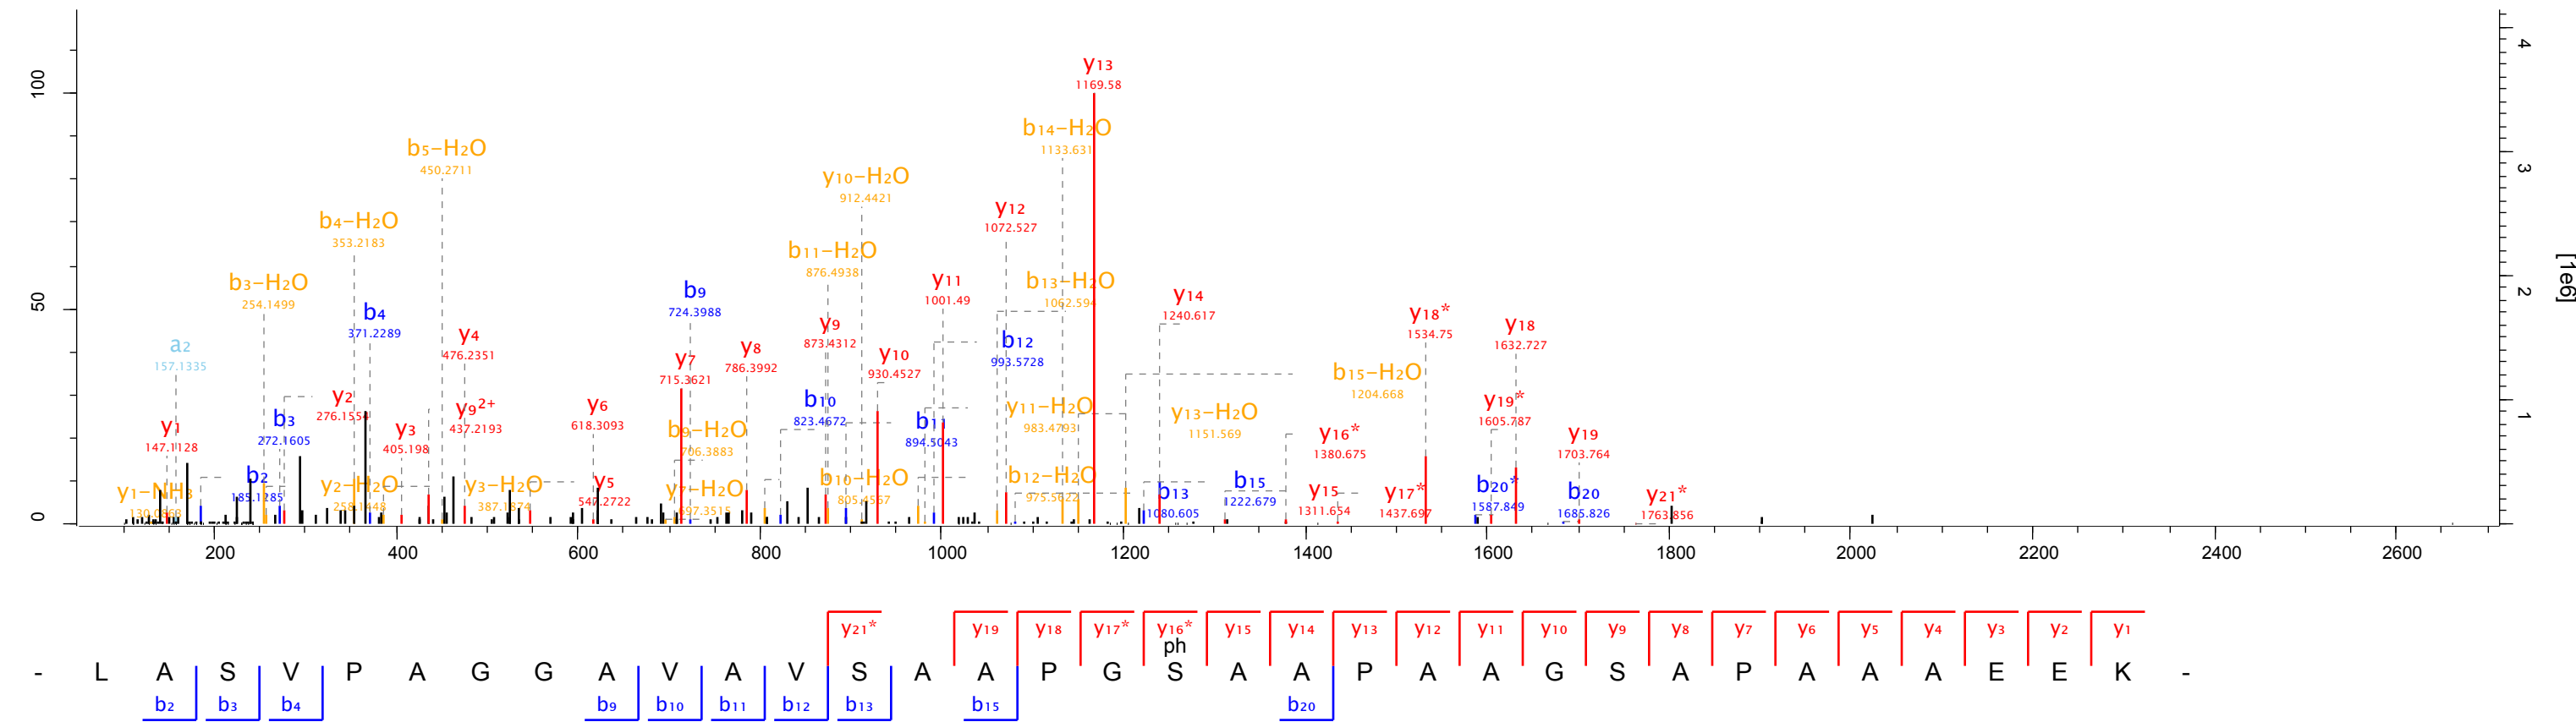

Raw file: 20150814\_A375SR\_Phospho\_BR2\_05  
 Scan: 1638 Method: FTMS; HCD Score: 110.08 m/z: 470.22 Gene names: SRRM2

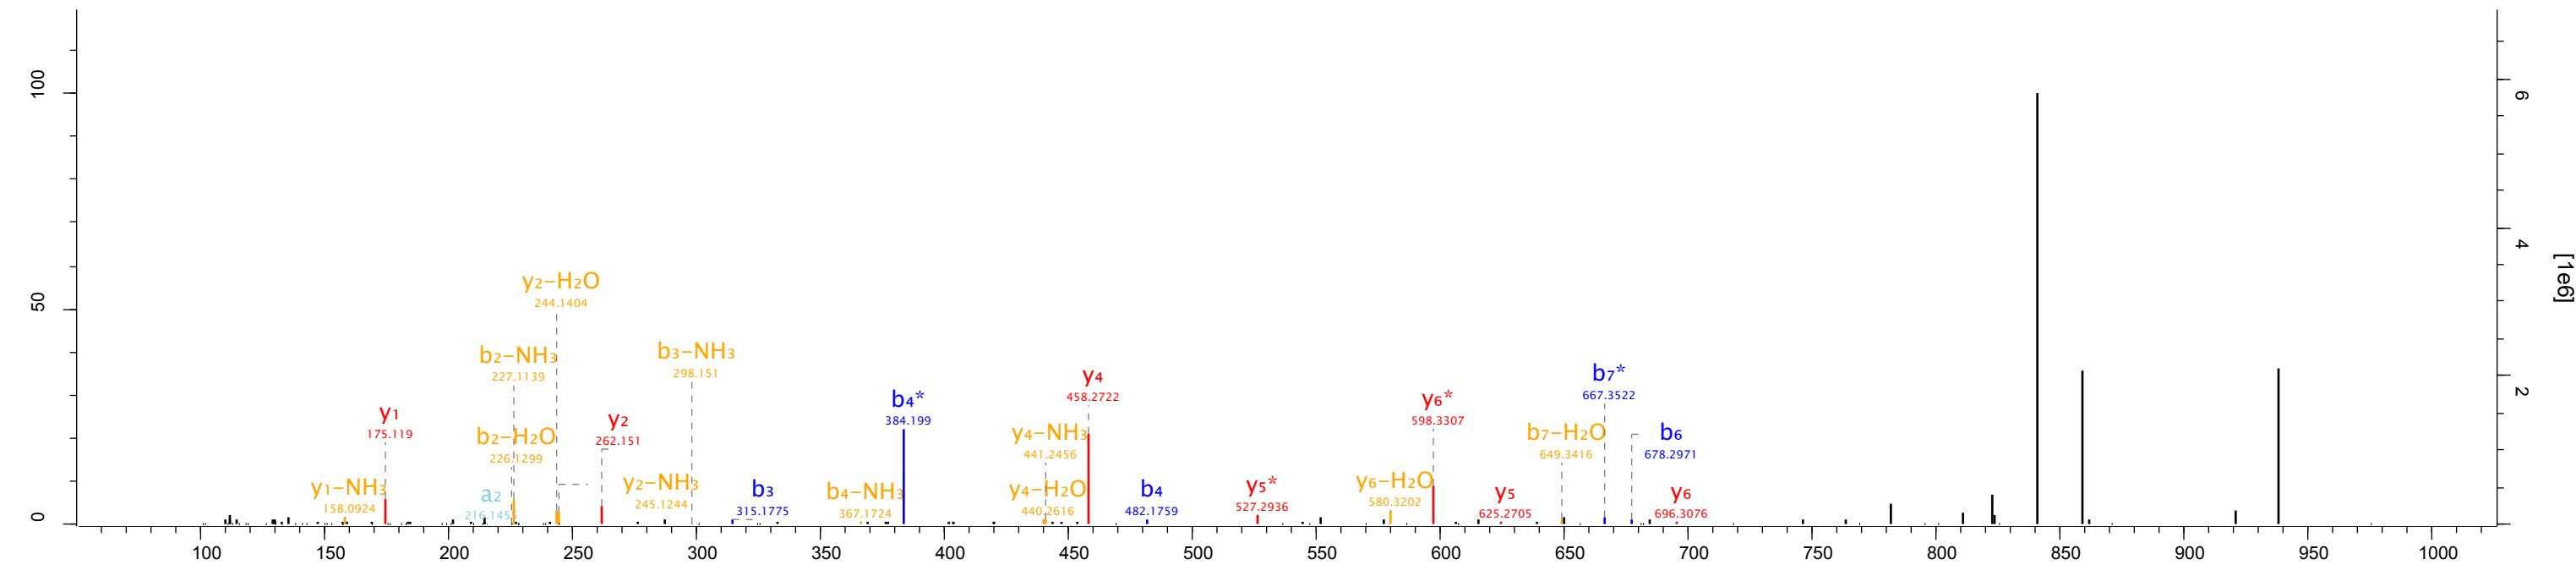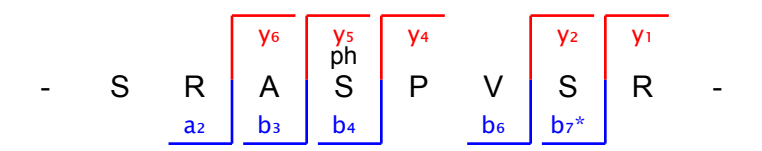

Raw file 20150814\_A375SR\_Phospho\_BR2\_05 Scan 16458 Method FTMS; HCD Score 247.19 m/z 1016.47 Gene names MAP1B

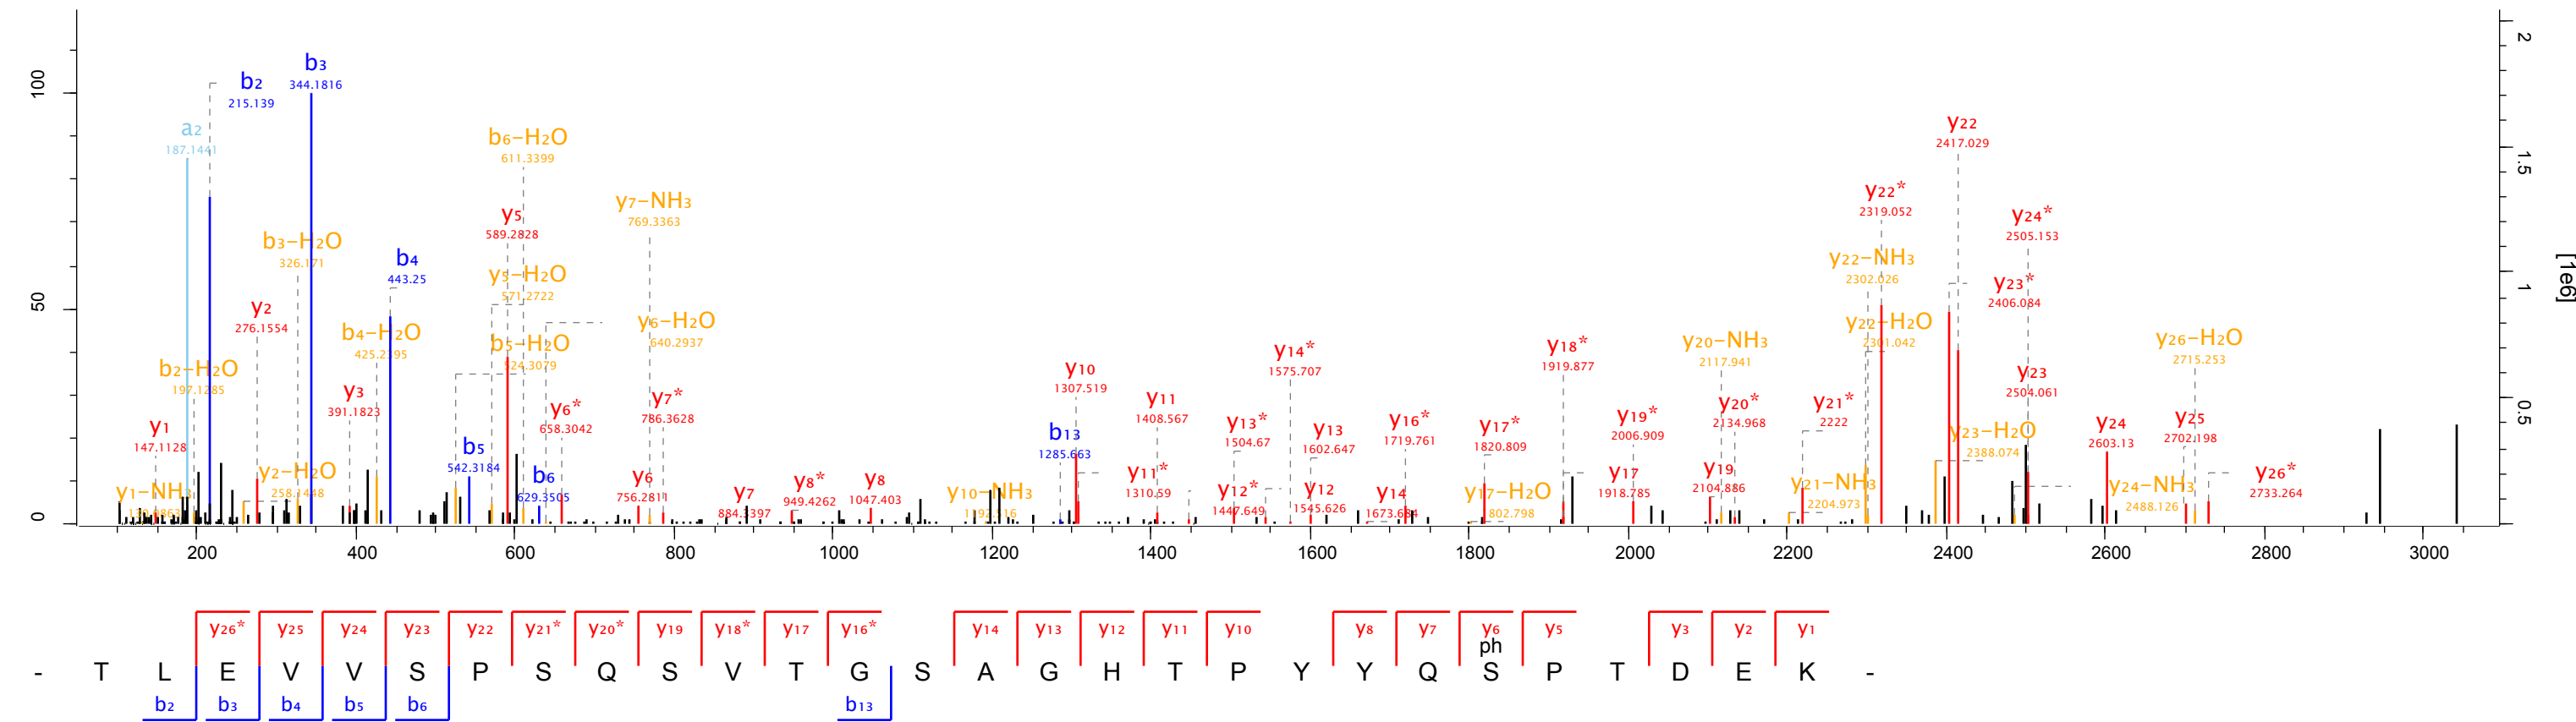

Raw file 20150814\_A375SR\_Phospho\_BR2\_05 Scan 17108 Method FTMS; HCD Score 226.44 m/z 910.37 Gene names SP1

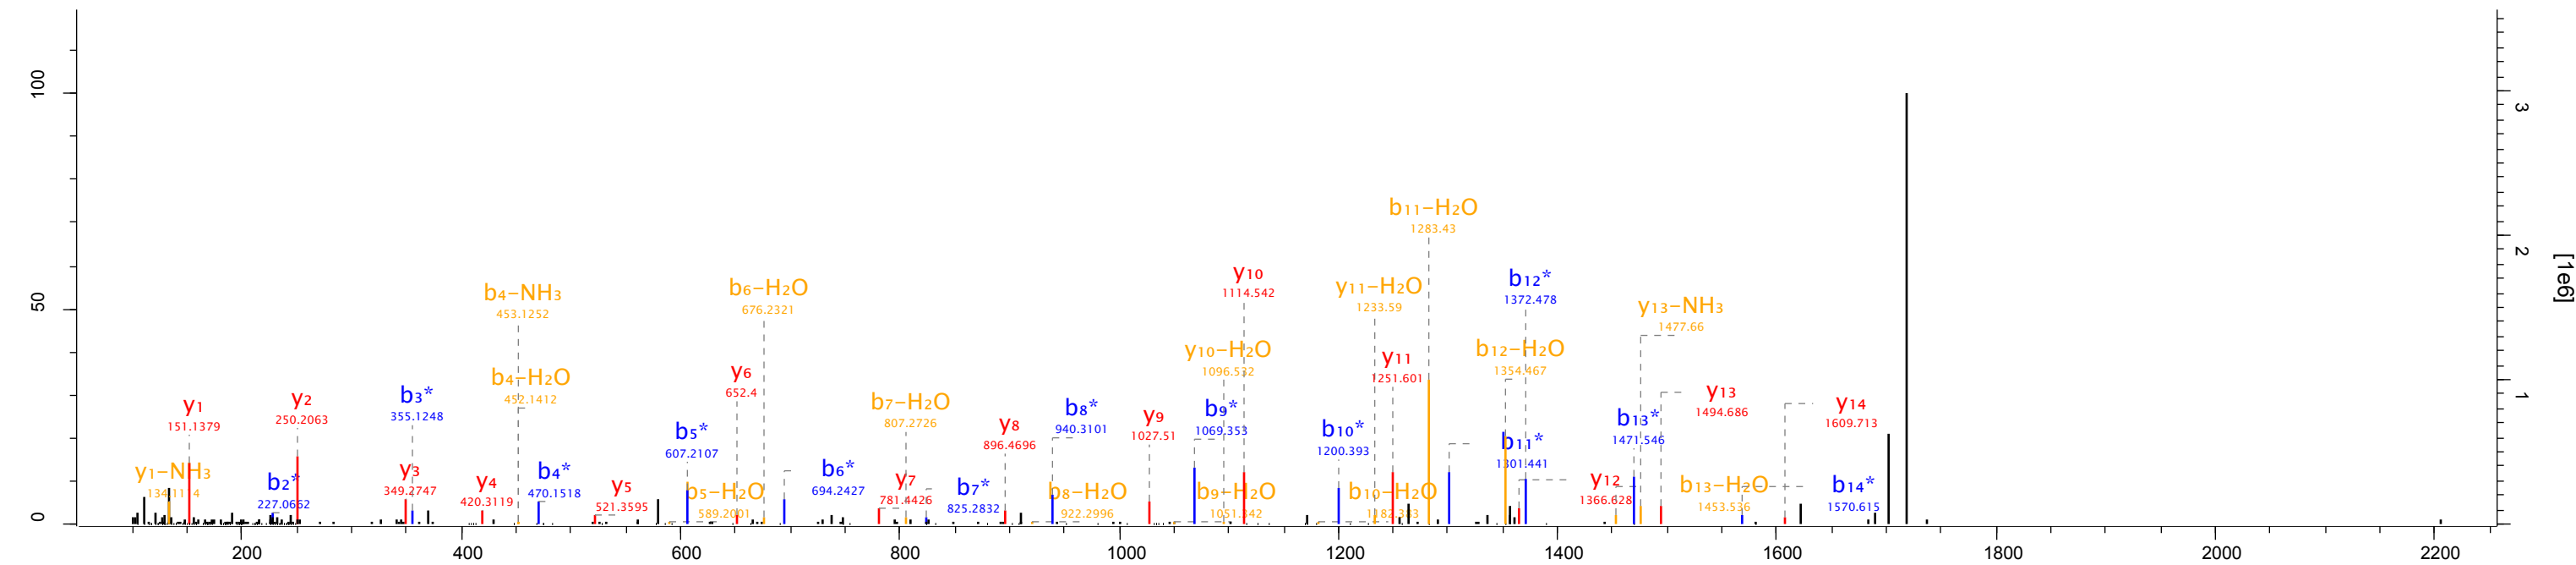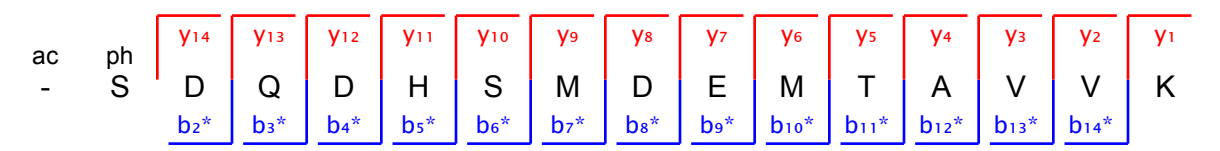

Raw file 20150814\_A375SR\_Phospho\_BR2\_05 Scan 17438 Method FTMS; HCD Score 190.82 m/z 752.86 Gene names LASP1

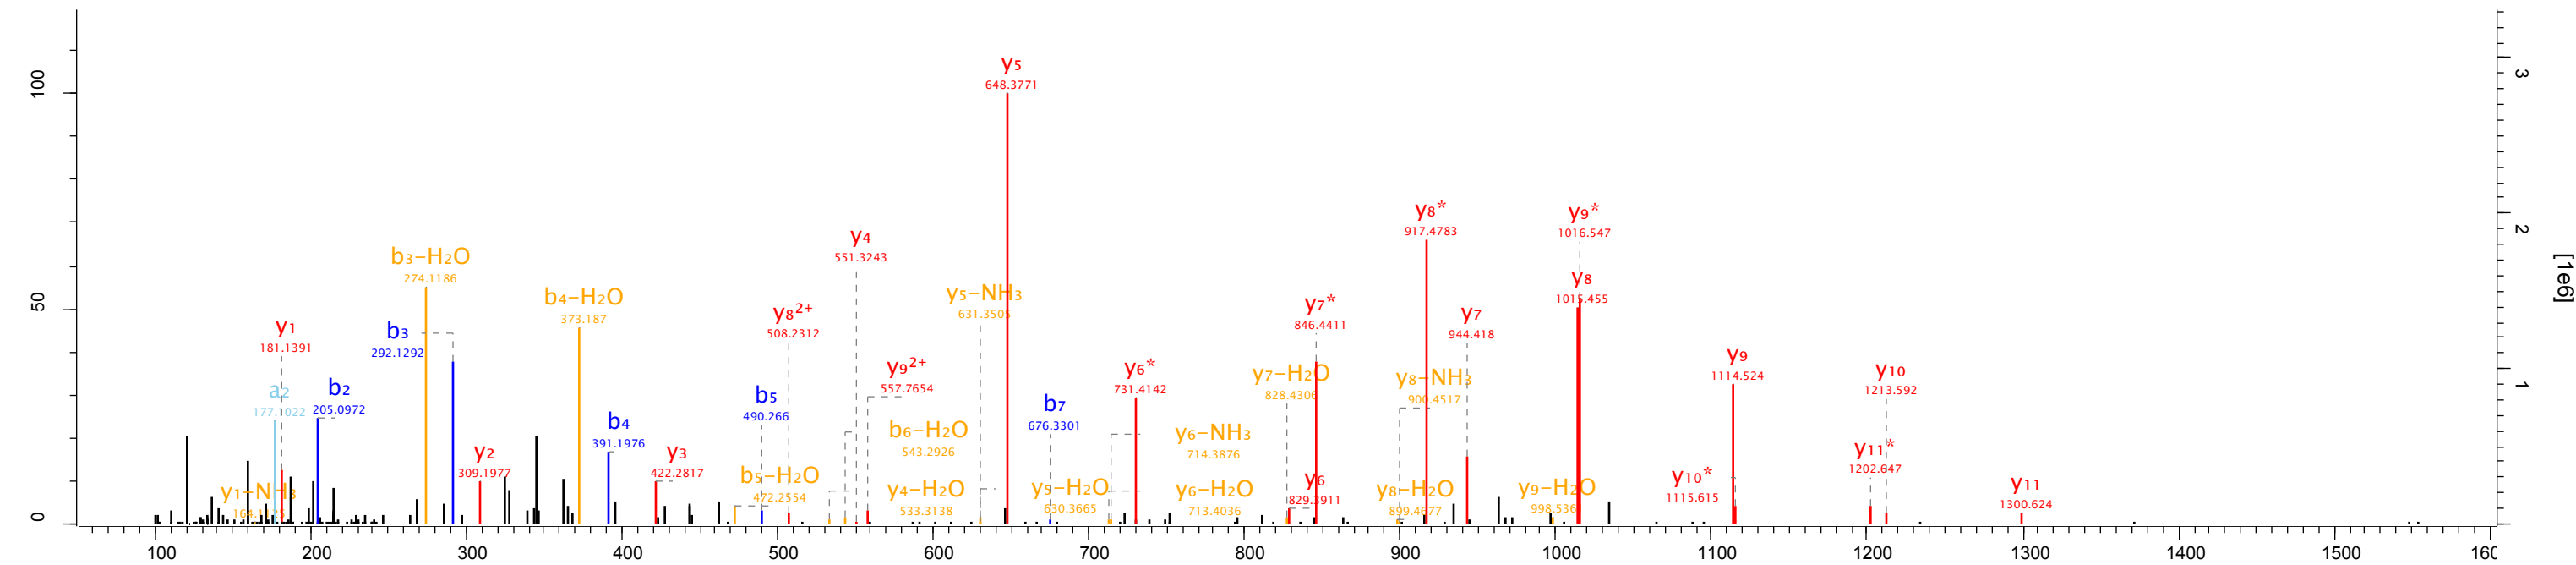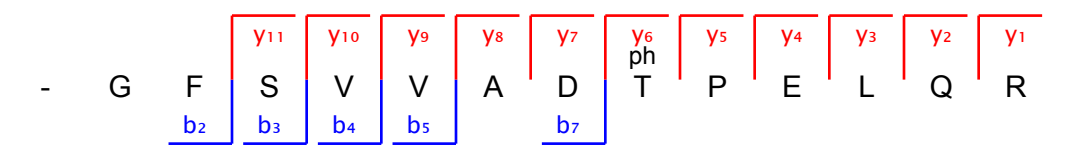

Raw file 20150814\_A375SR\_Phospho\_BR2\_05 Scan 1788 Method FTMS; HCD Score 62 m/z 448.21 Gene names OXSR1

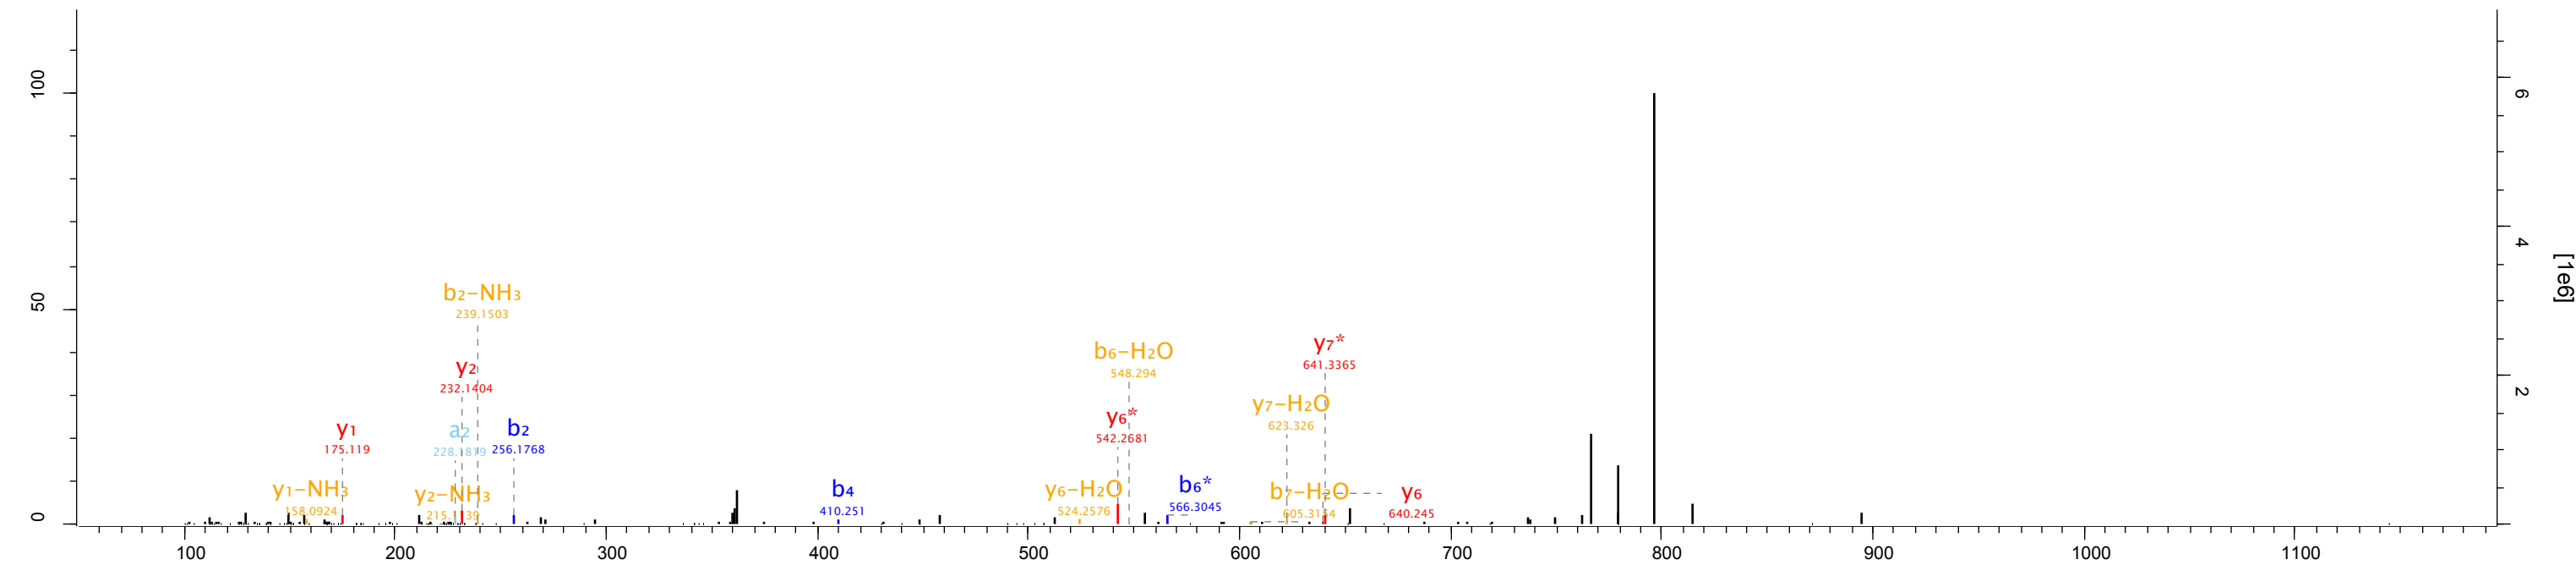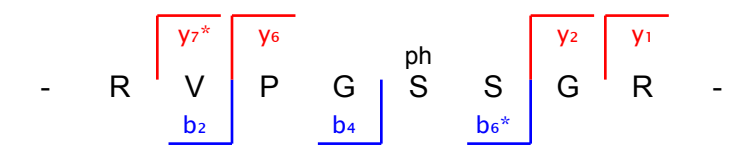



Raw file: 20150814\_A375SR\_Phospho\_BR2\_05  
 Scan: 1798 Method: FTMS; HCD Score: 187.49 m/z: 576.27 Gene names: NUCKS1

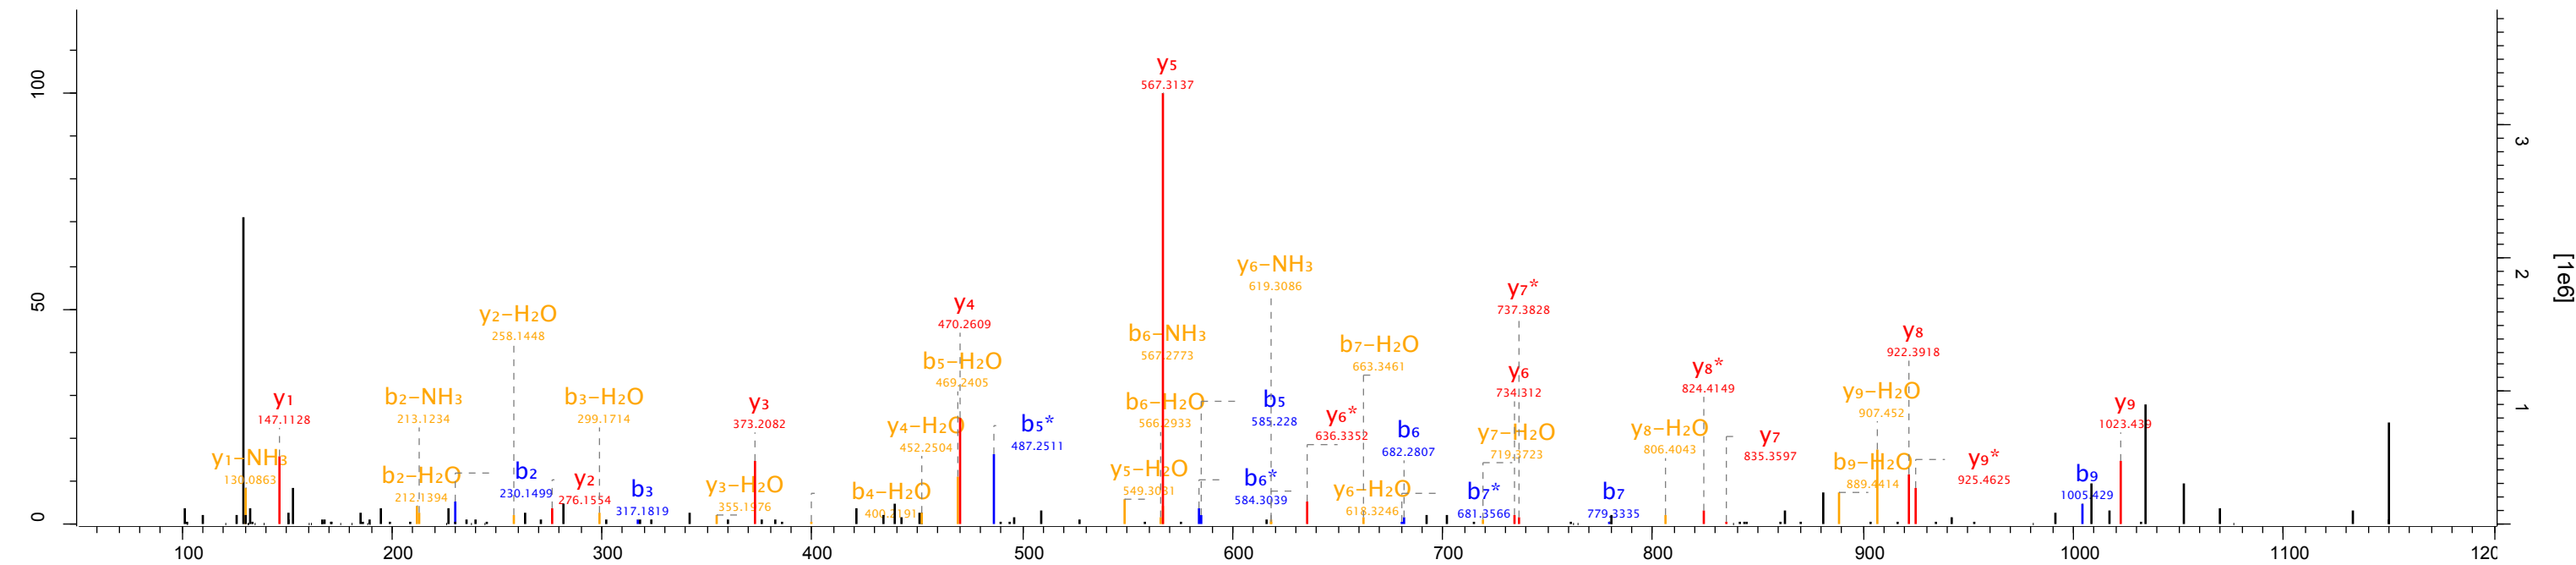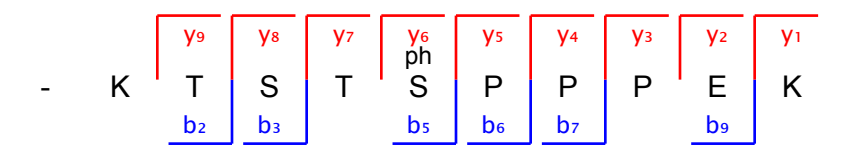

Raw file 20150814\_A375SR\_Phospho\_BR2\_05 Scan 18148 Method FTMS; HCD Score 108.99 m/z 966.41 Gene names TNRC6C

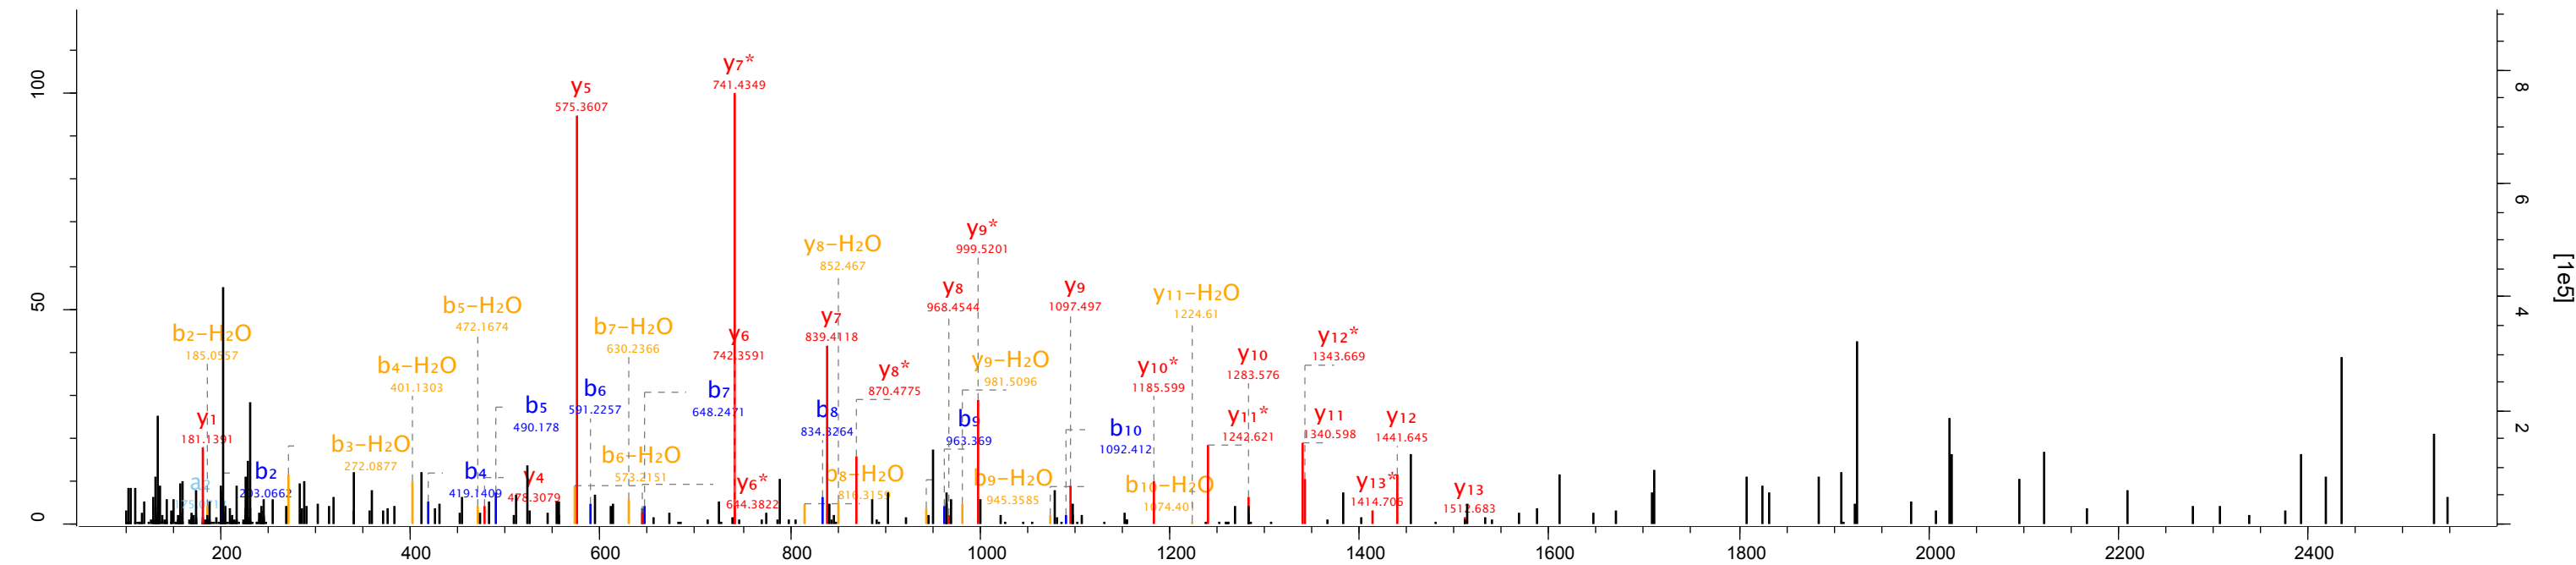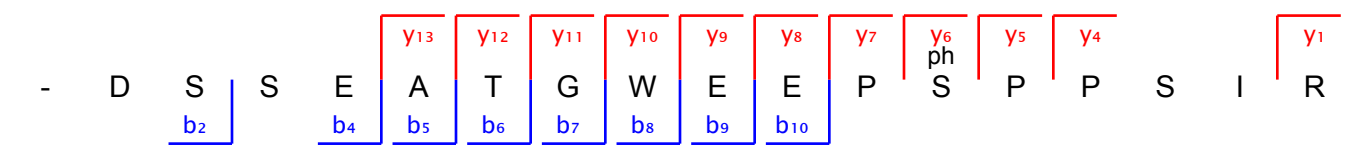

Raw file 20150814\_A375SR\_Phospho\_BR2\_05 Scan 18628 Method FTMS; HCD Score 189.21 m/z 1206.5 Gene names CLSPN

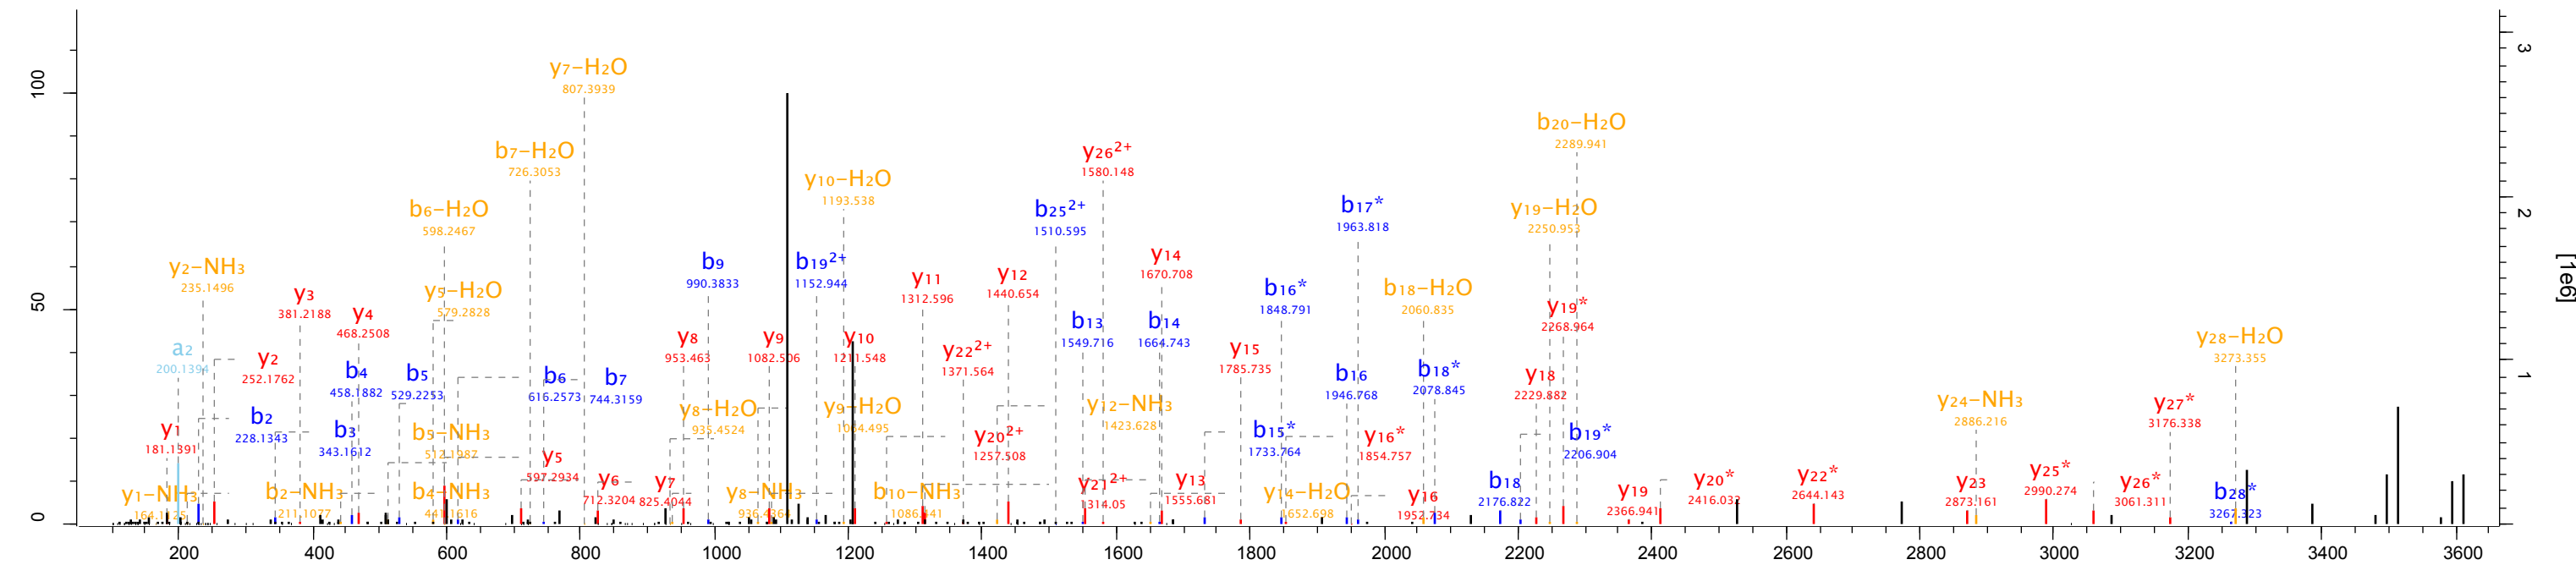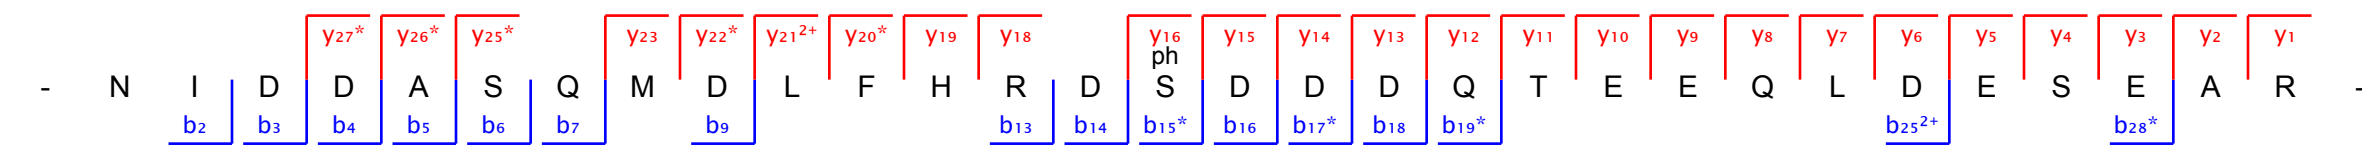

Raw file: 20150814\_A375SR\_Phospho\_BR2\_05  
 Scan: 18698 Method: FTMS; HCD Score: 126.04 m/z: 786.9 Gene names: PCBP2

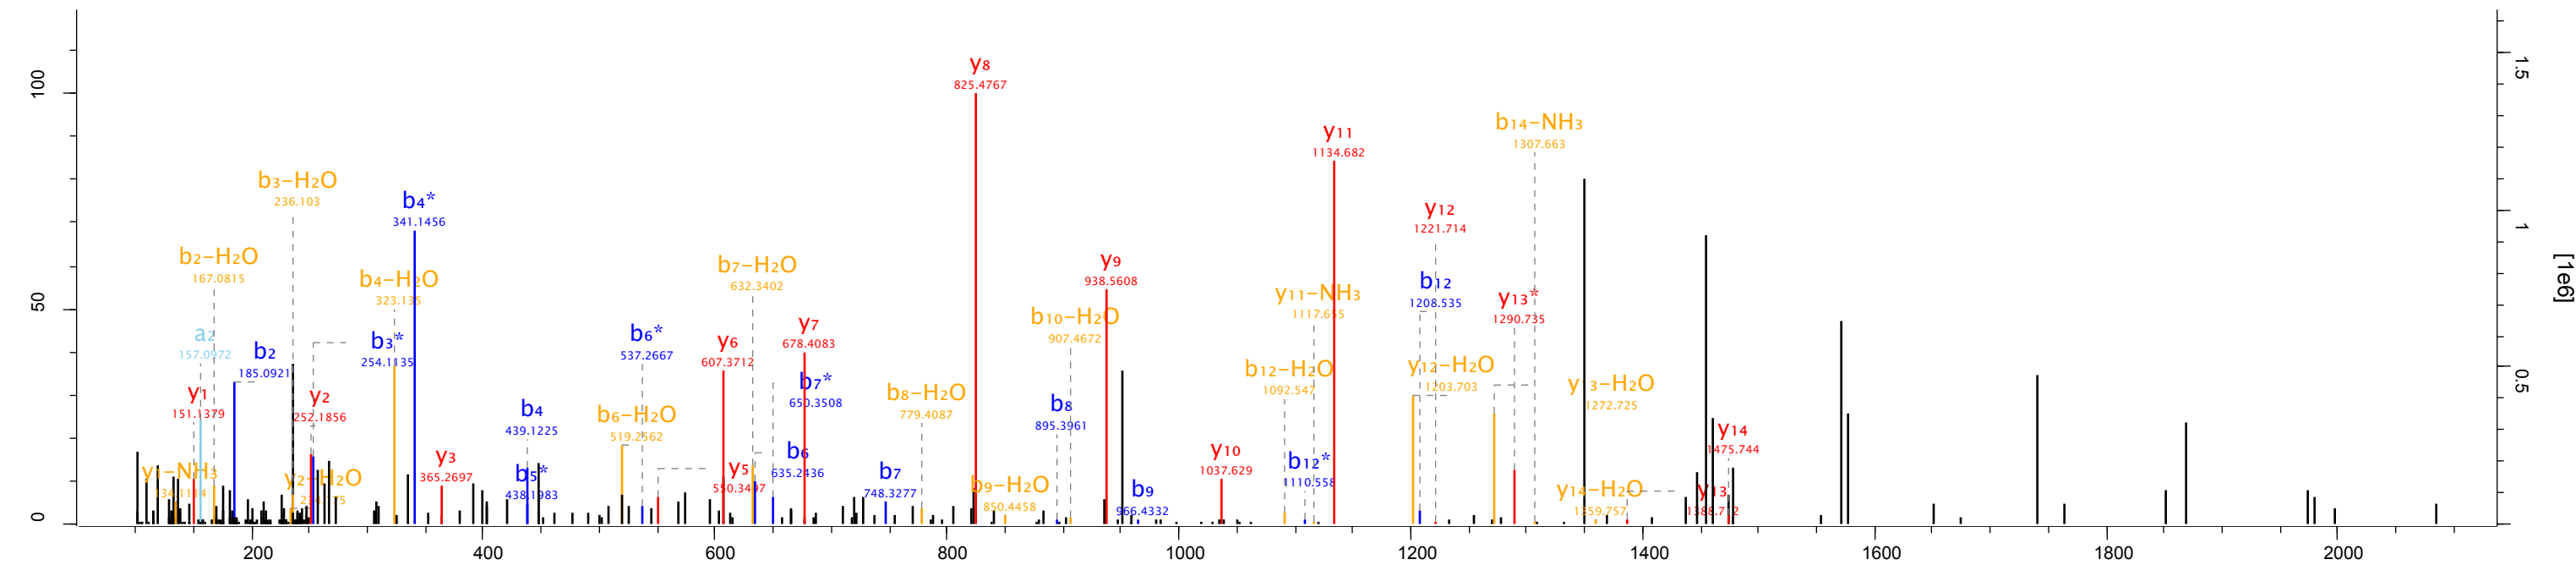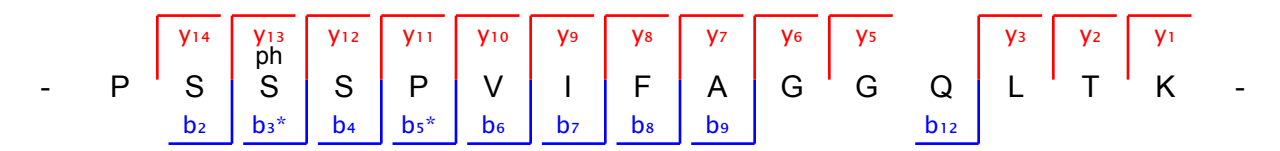

Raw file 20150814\_A375SR\_Phospho\_BR2\_05 Scan 18908 Method FTMS; HCD Score 85.56 m/z 793.86 Gene names NHS

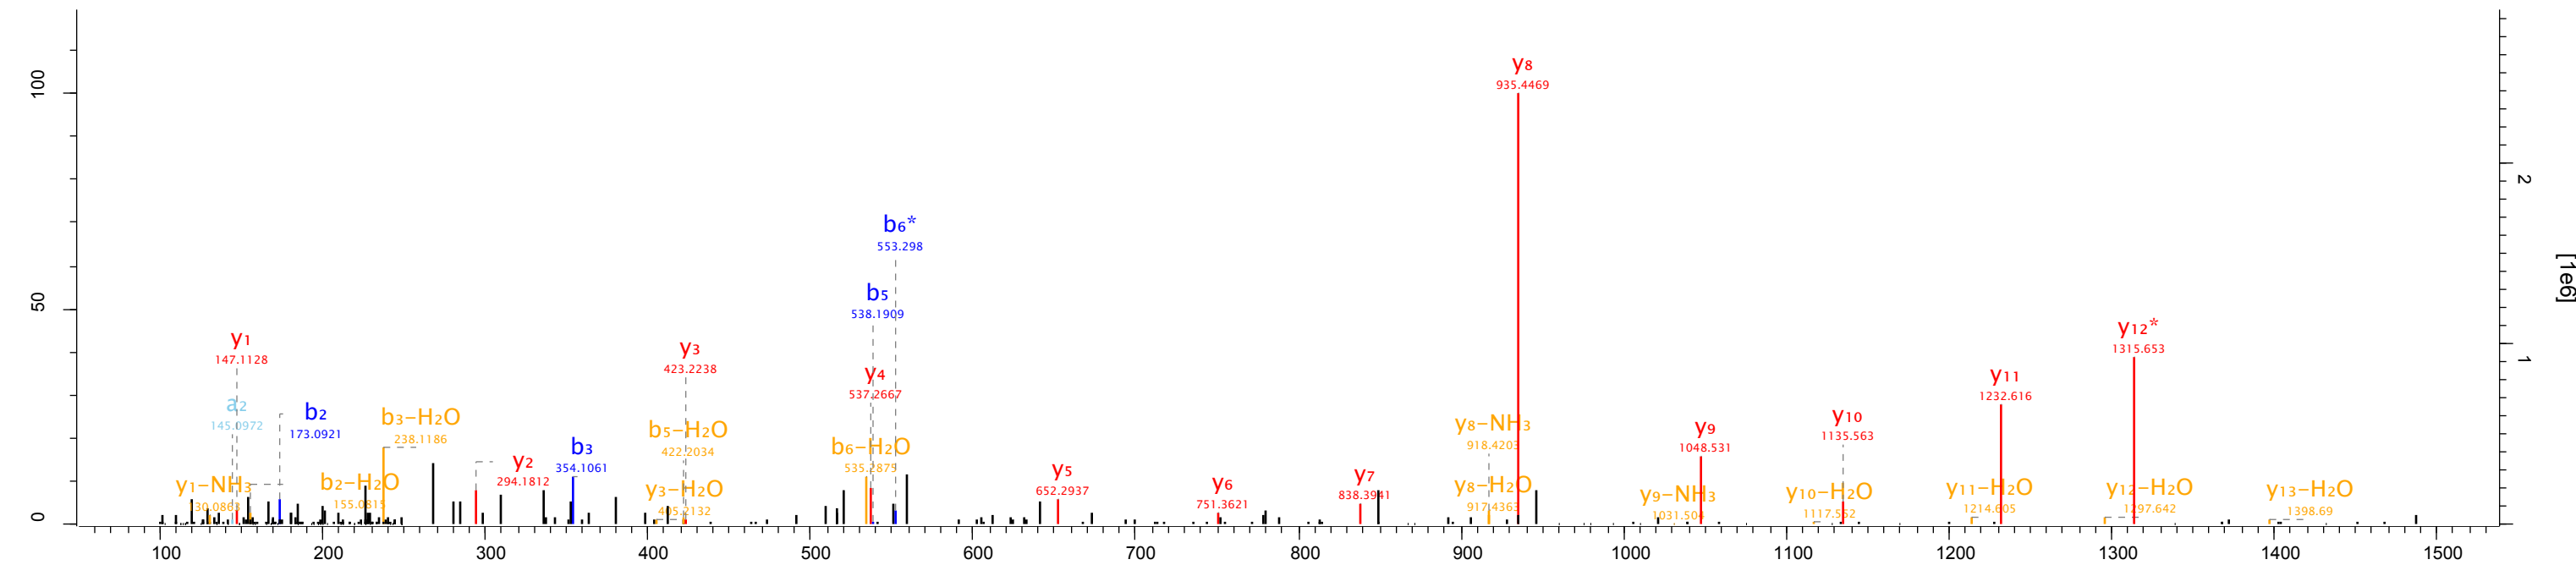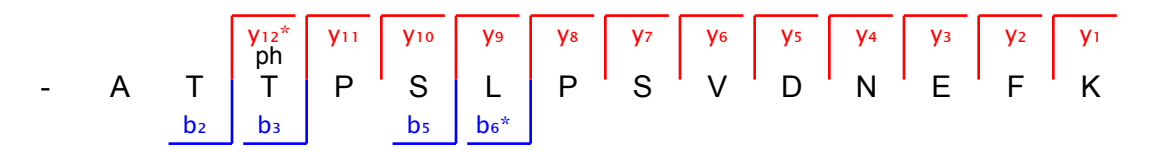

Raw file: 20150814\_A375SR\_Phospho\_BR2\_05  
 Scan: 19138 Method: FTMS; HCD Score: 226.55 m/z: 1087.85 Gene names: SRRM2

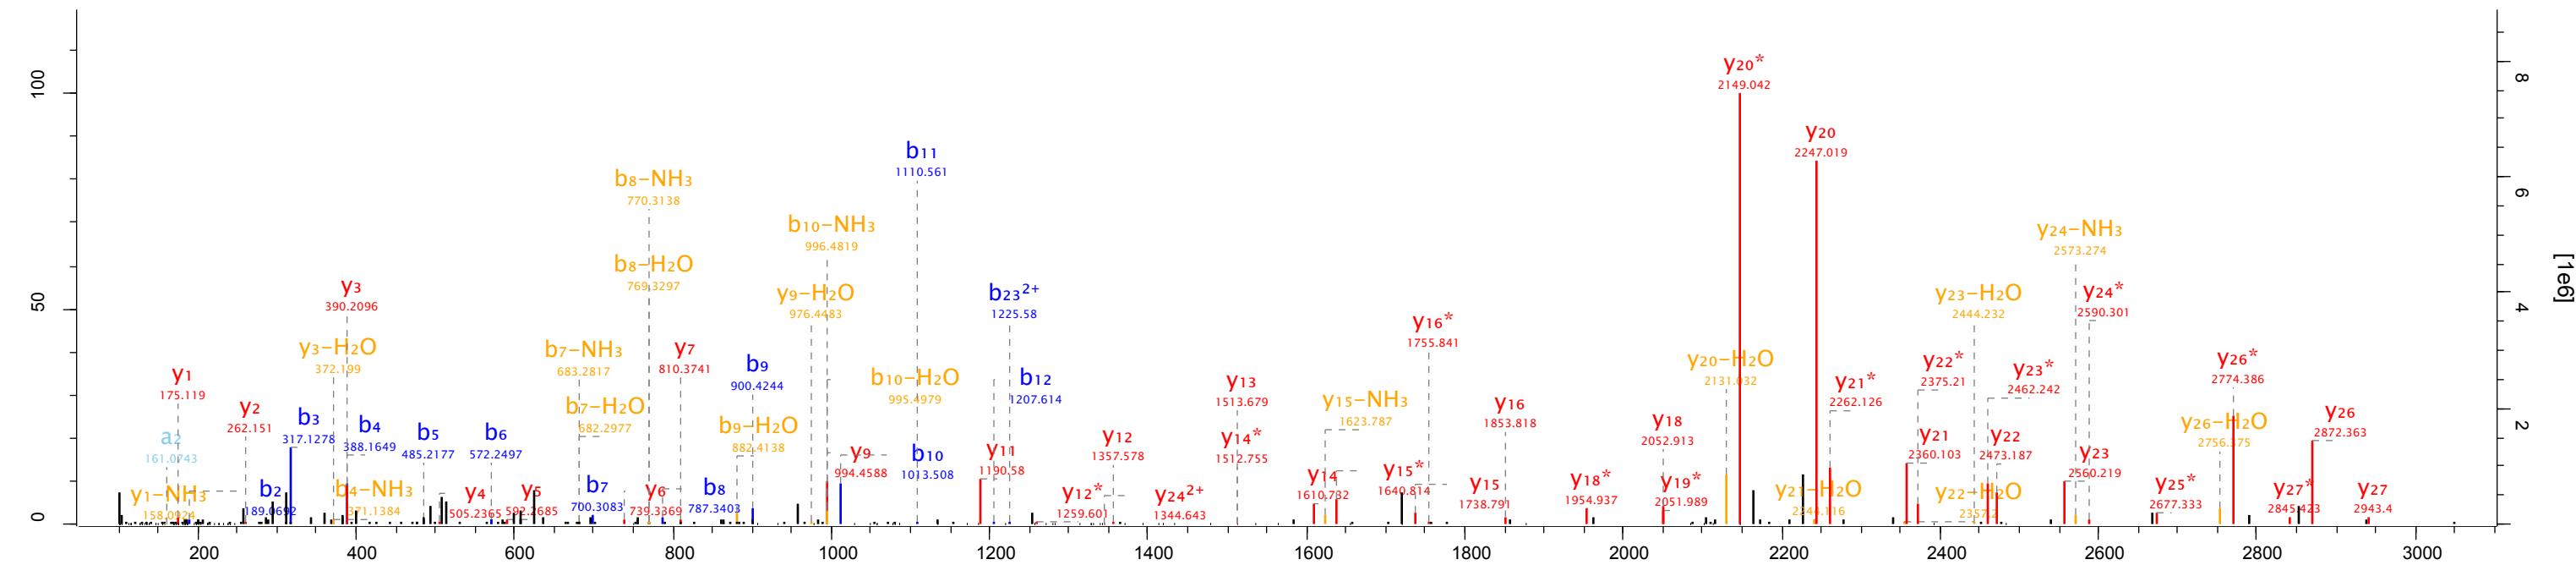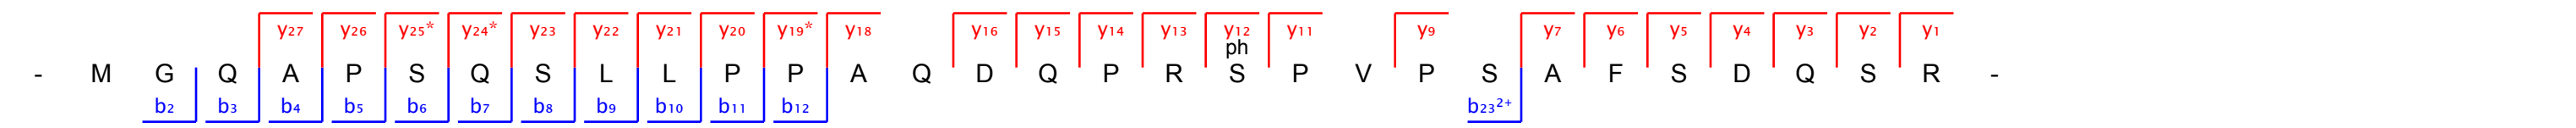

Raw file: 20150814\_A375SR\_Phospho\_BR2\_05  
 Scan: 19148 Method: FTMS; HCD Score: 153.36 m/z: 941.4 Gene names: PRKCD

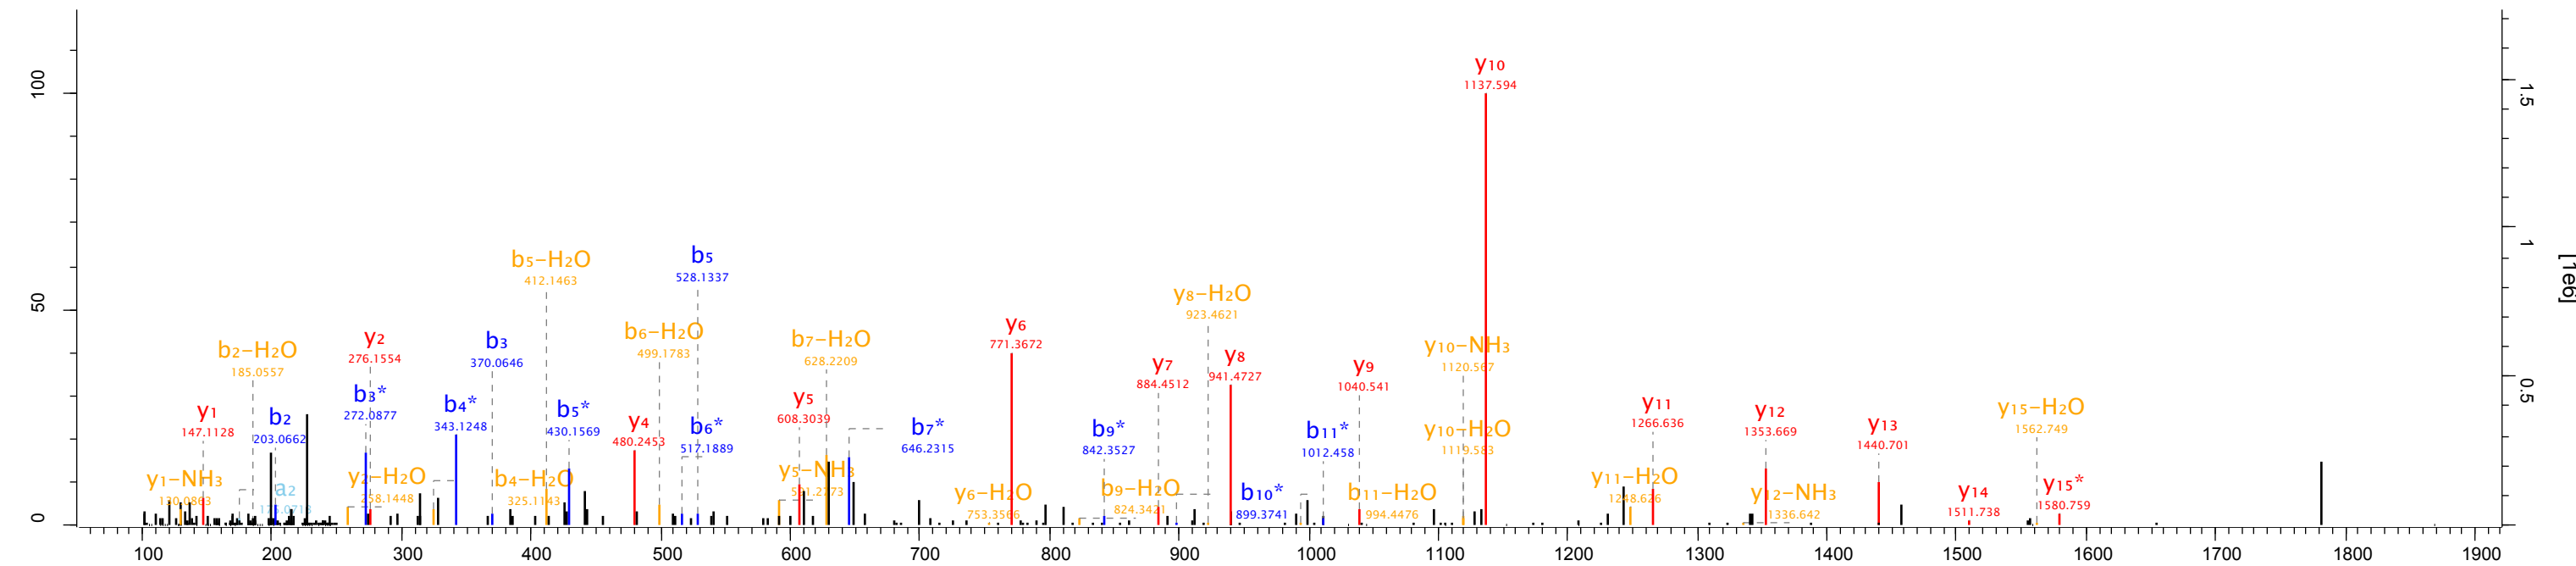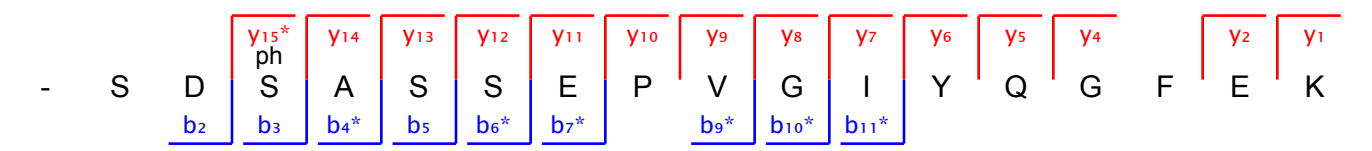

Raw file 20150814\_A375SR\_Phospho\_BR2\_05 Scan 19168 Method FTMS; HCD Score 137.31 m/z 926.5 Gene names TRIP10

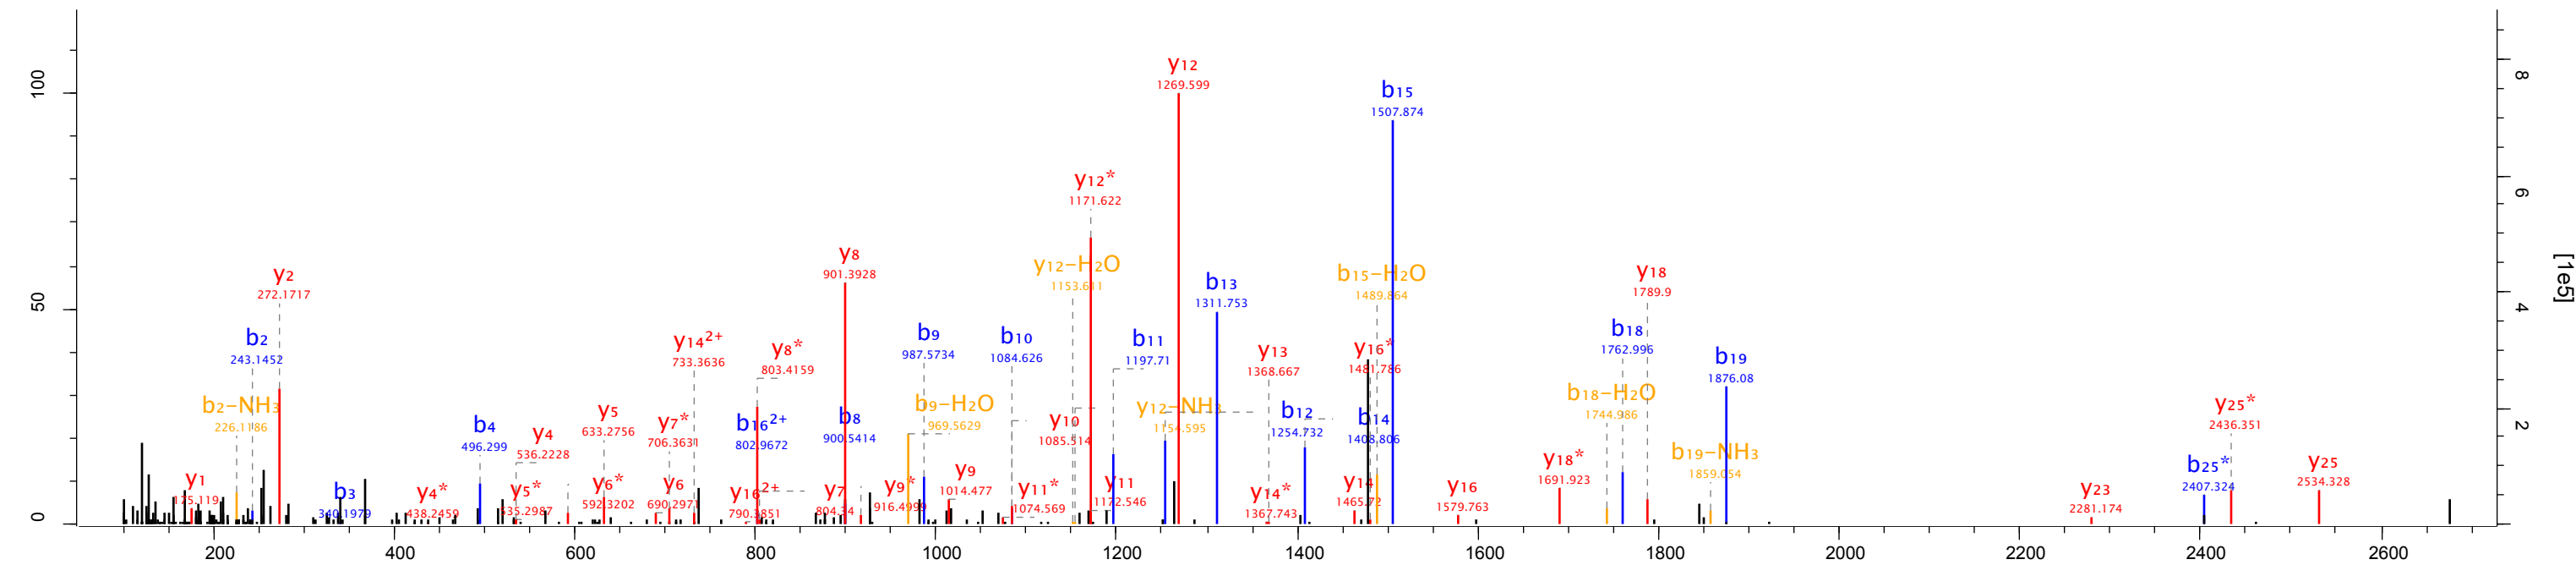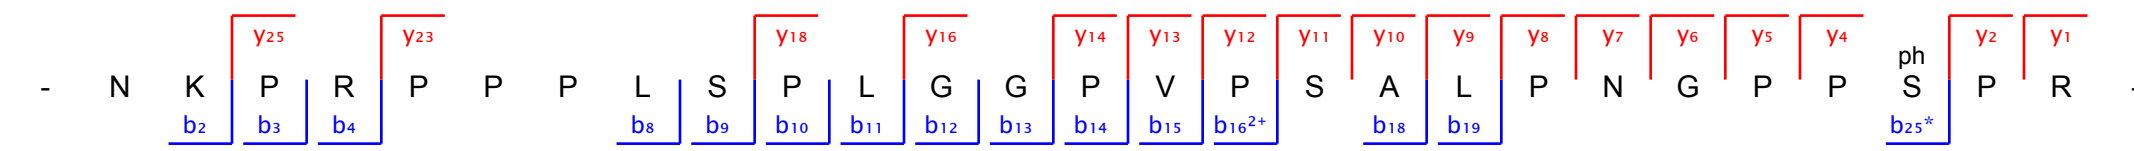



Raw file: 20150814\_A375SR\_Phospho\_BR2\_05  
 Scan: 19408 Method: FTMS; HCD Score: 118.31 m/z: 514.27 Gene names: ZNF609

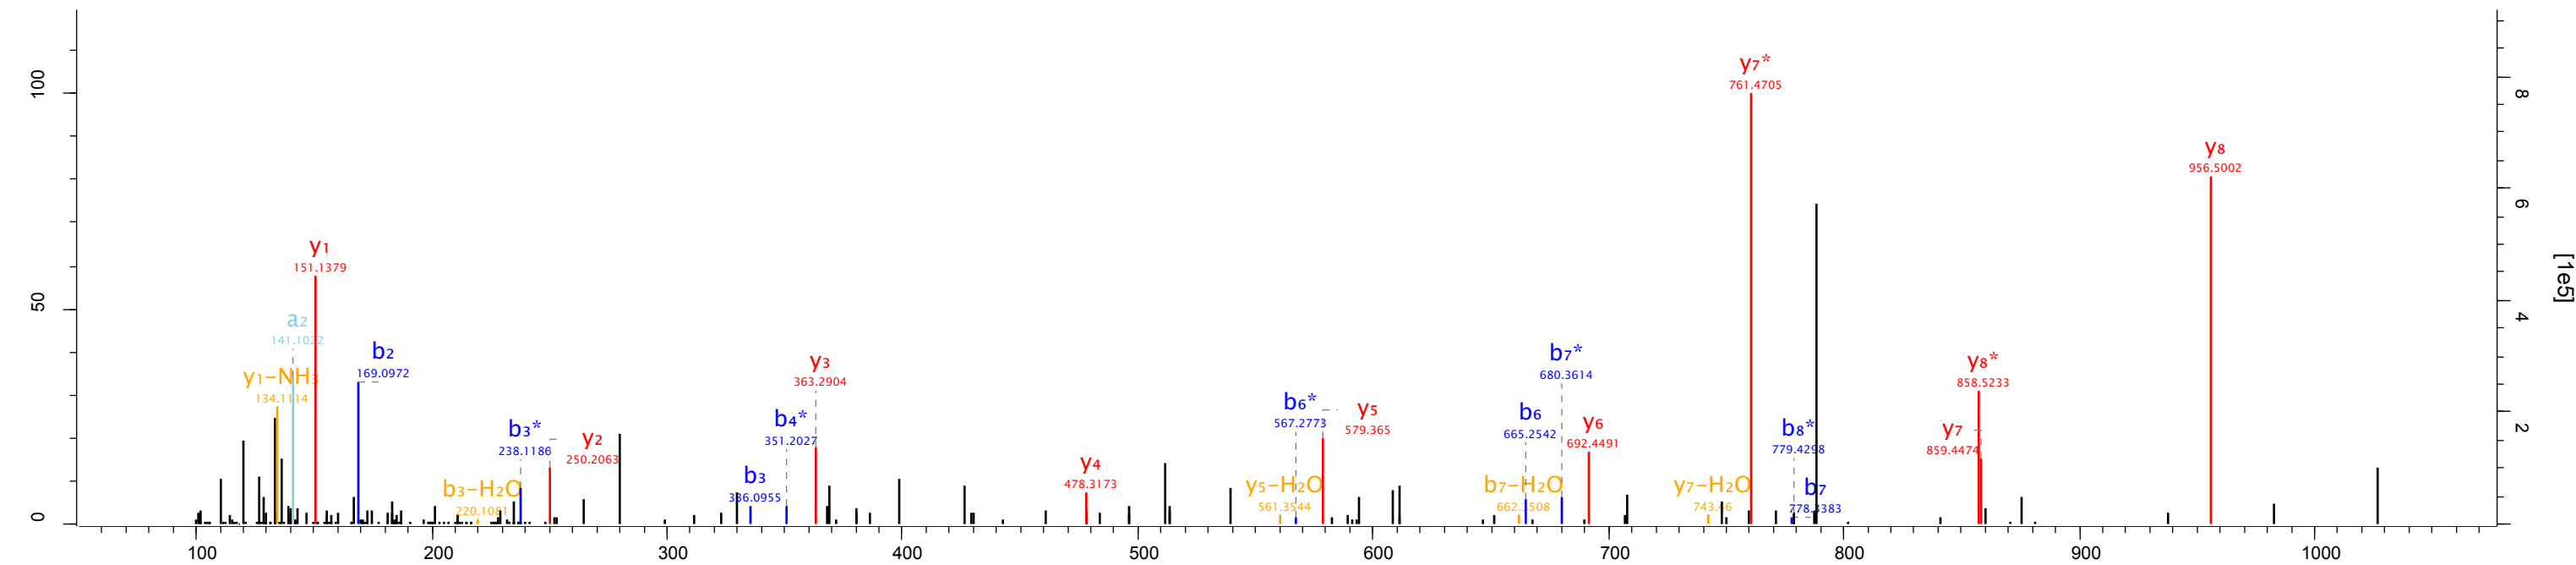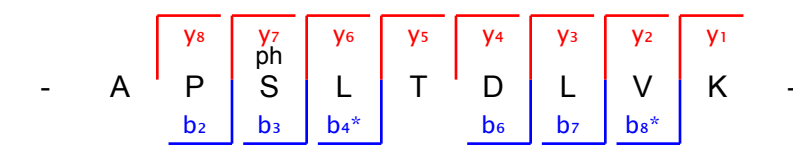

Raw file 20150814\_A375SR\_Phospho\_BR2\_05 Scan 19568 Method FTMS; HCD Score 167.27 m/z 786.39 Gene names PLEKHA2

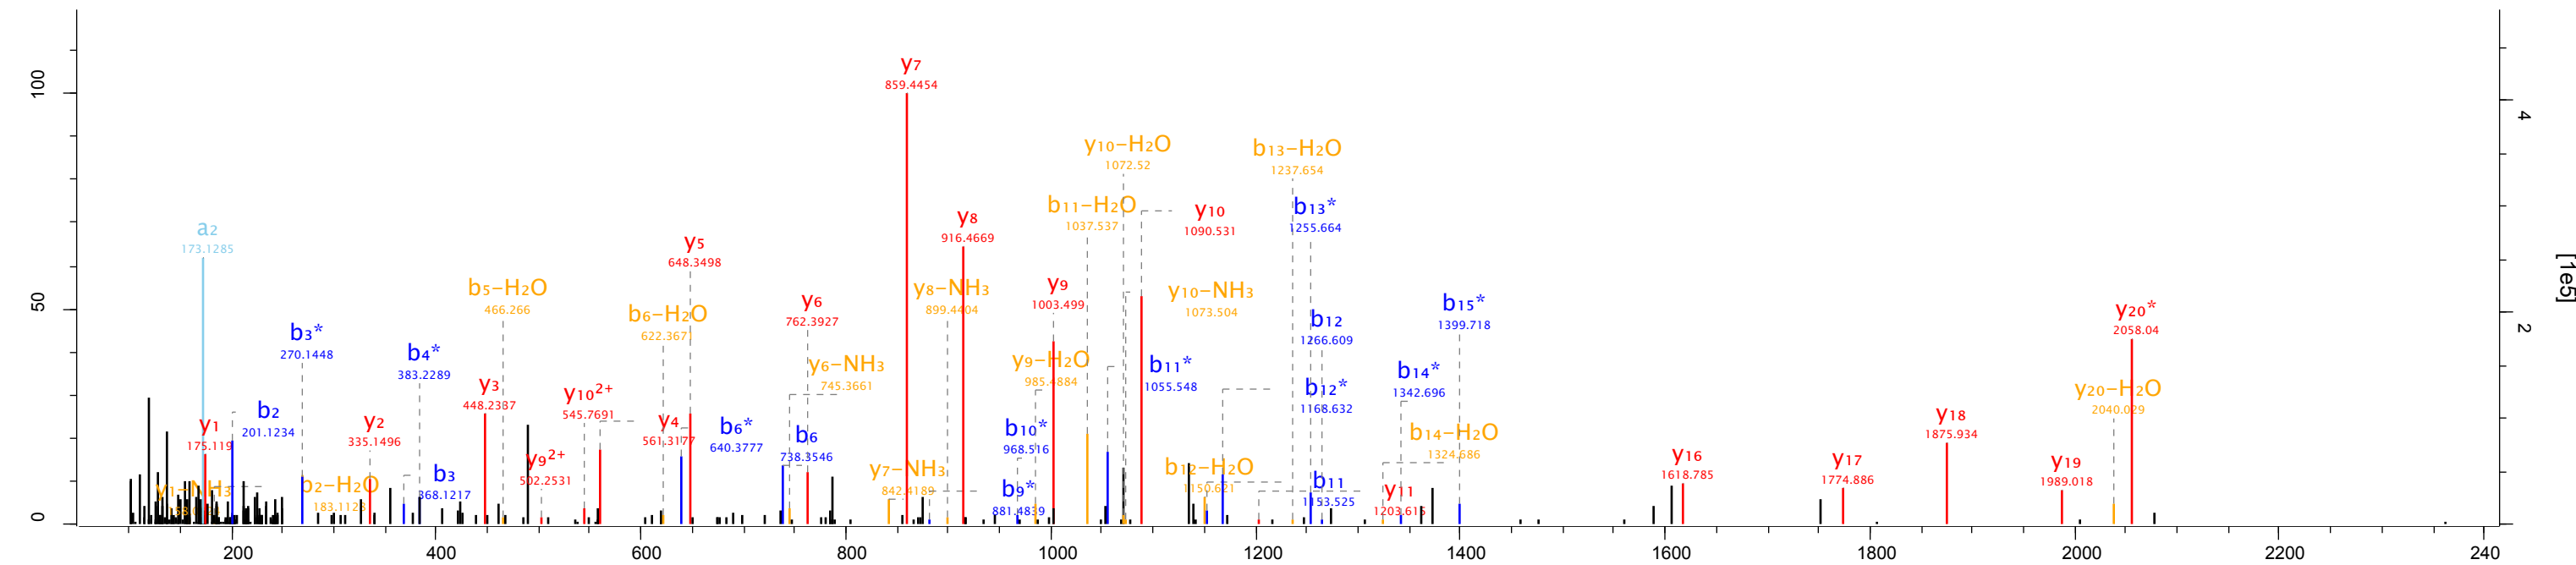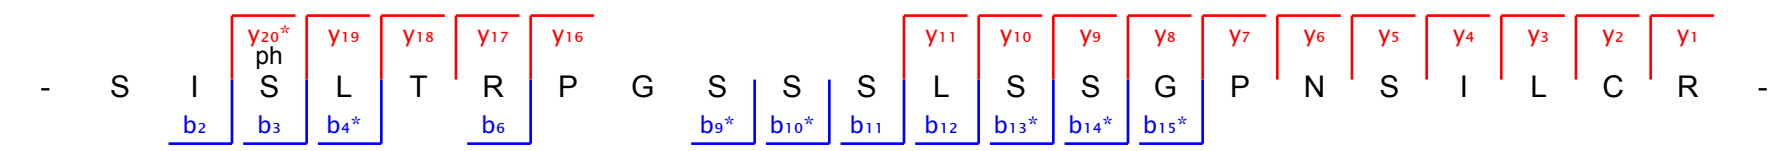

Raw file: 20150814\_A375SR\_Phospho\_BR2\_05  
 Scan: 1958 Method: FTMS; HCD Score: 145.01 m/z: 512.25 Gene names: ZC3H18

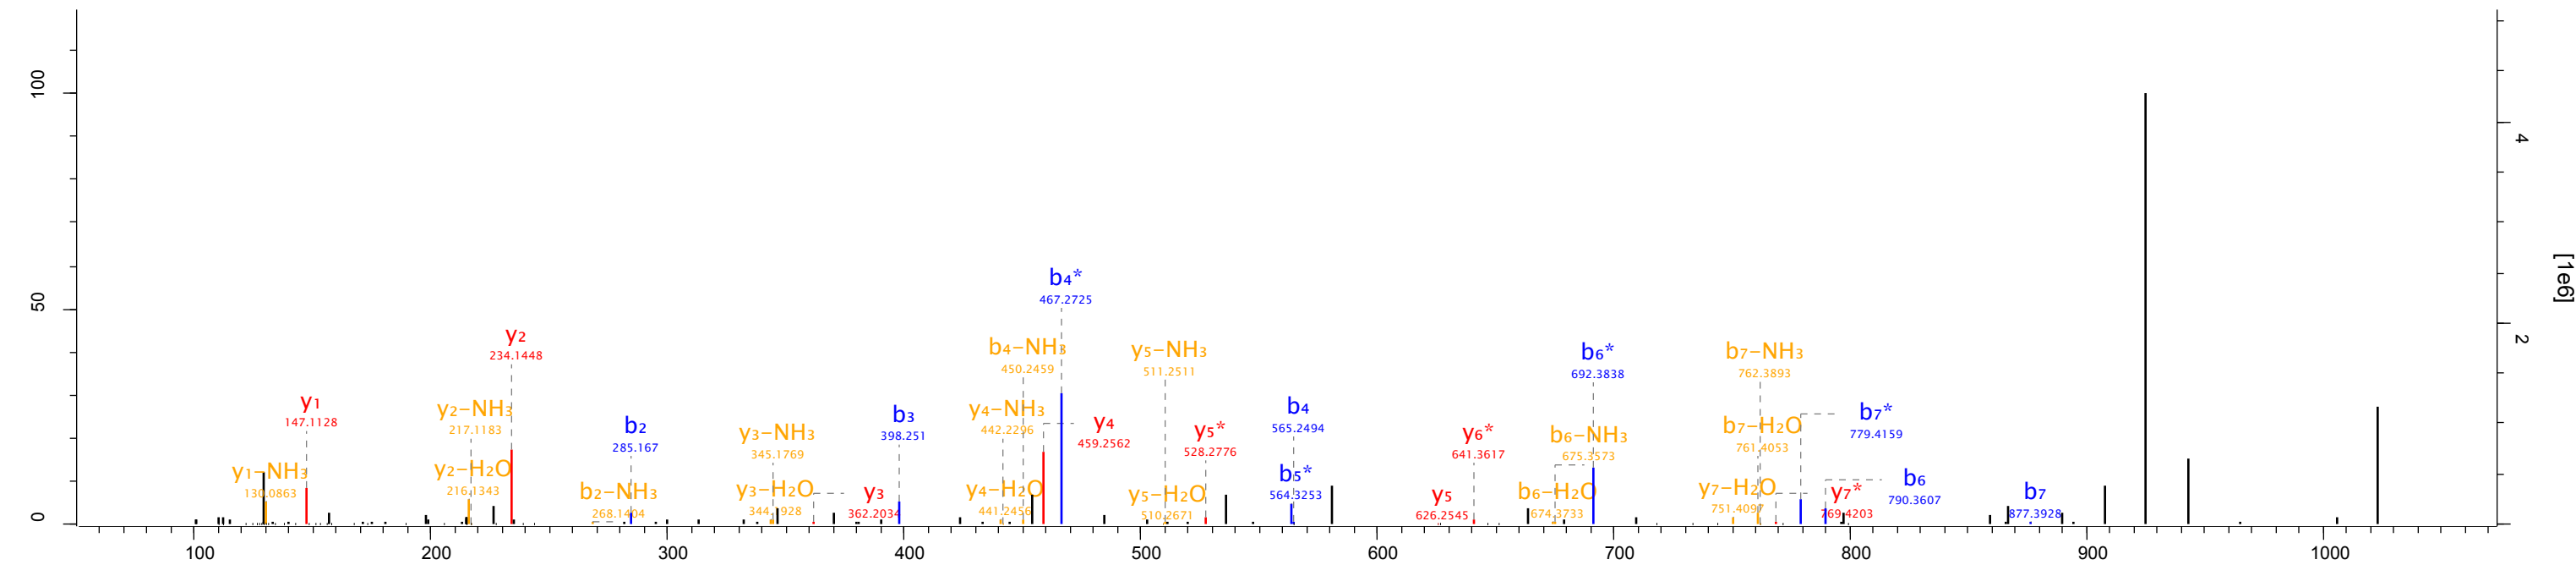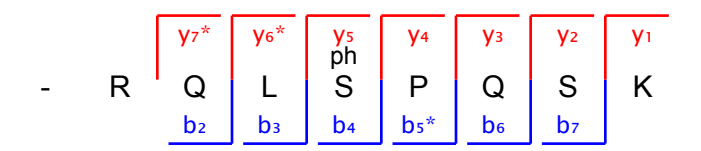

Raw file 20150814\_A375SR\_Phospho\_BR2\_05 Scan 19648 Method FTMS; HCD Score 182.03 m/z 1046.49 Gene names TNKS1BP1

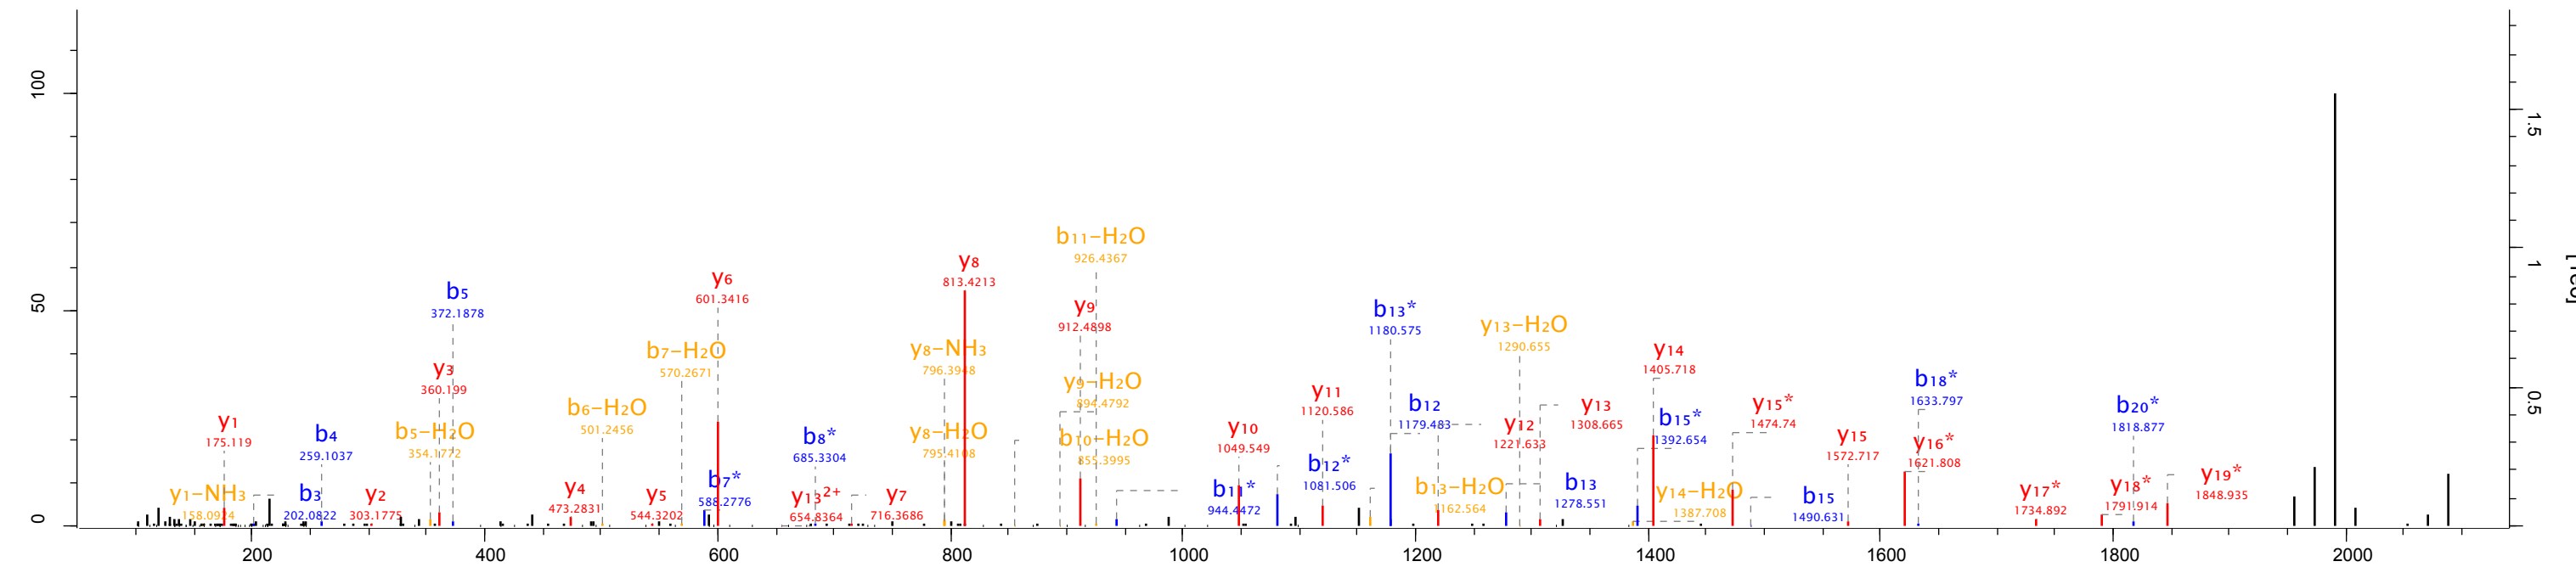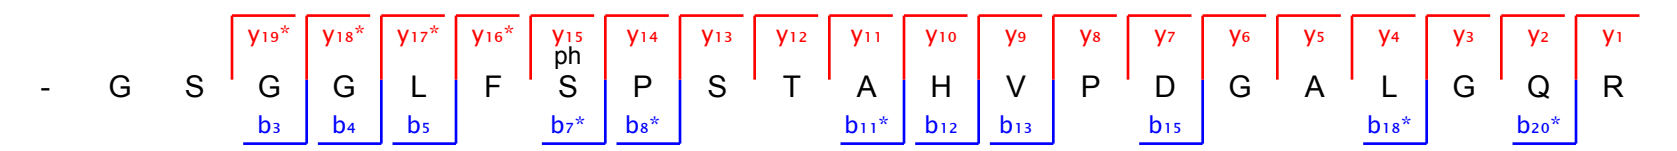

Raw file: 20150814\_A375SR\_Phospho\_BR2\_05  
 Scan: 19668 Method: FTMS; HCD Score: 64.27 m/z: 756.35 Gene names: BRAF

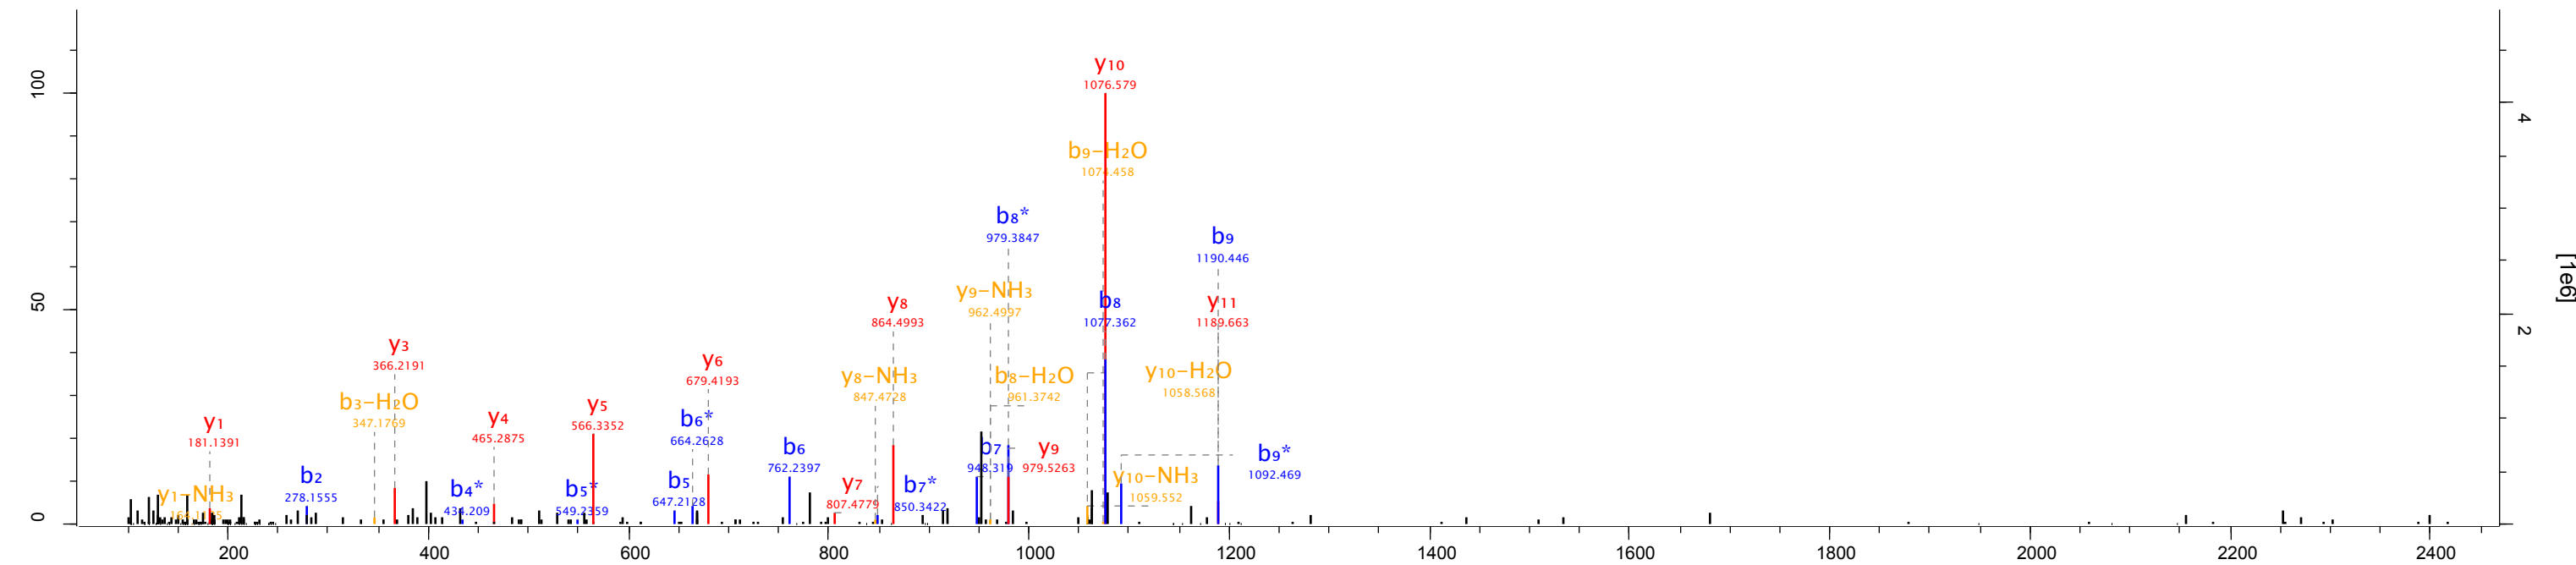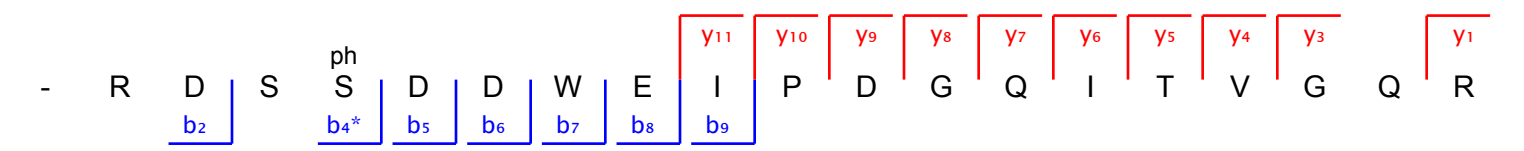

Raw file: 20150814\_A375SR\_Phospho\_BR2\_05  
 Scan: 1988 Method: FTMS; HCD Score: 152 m/z: 624.32 Gene names: TRIP12

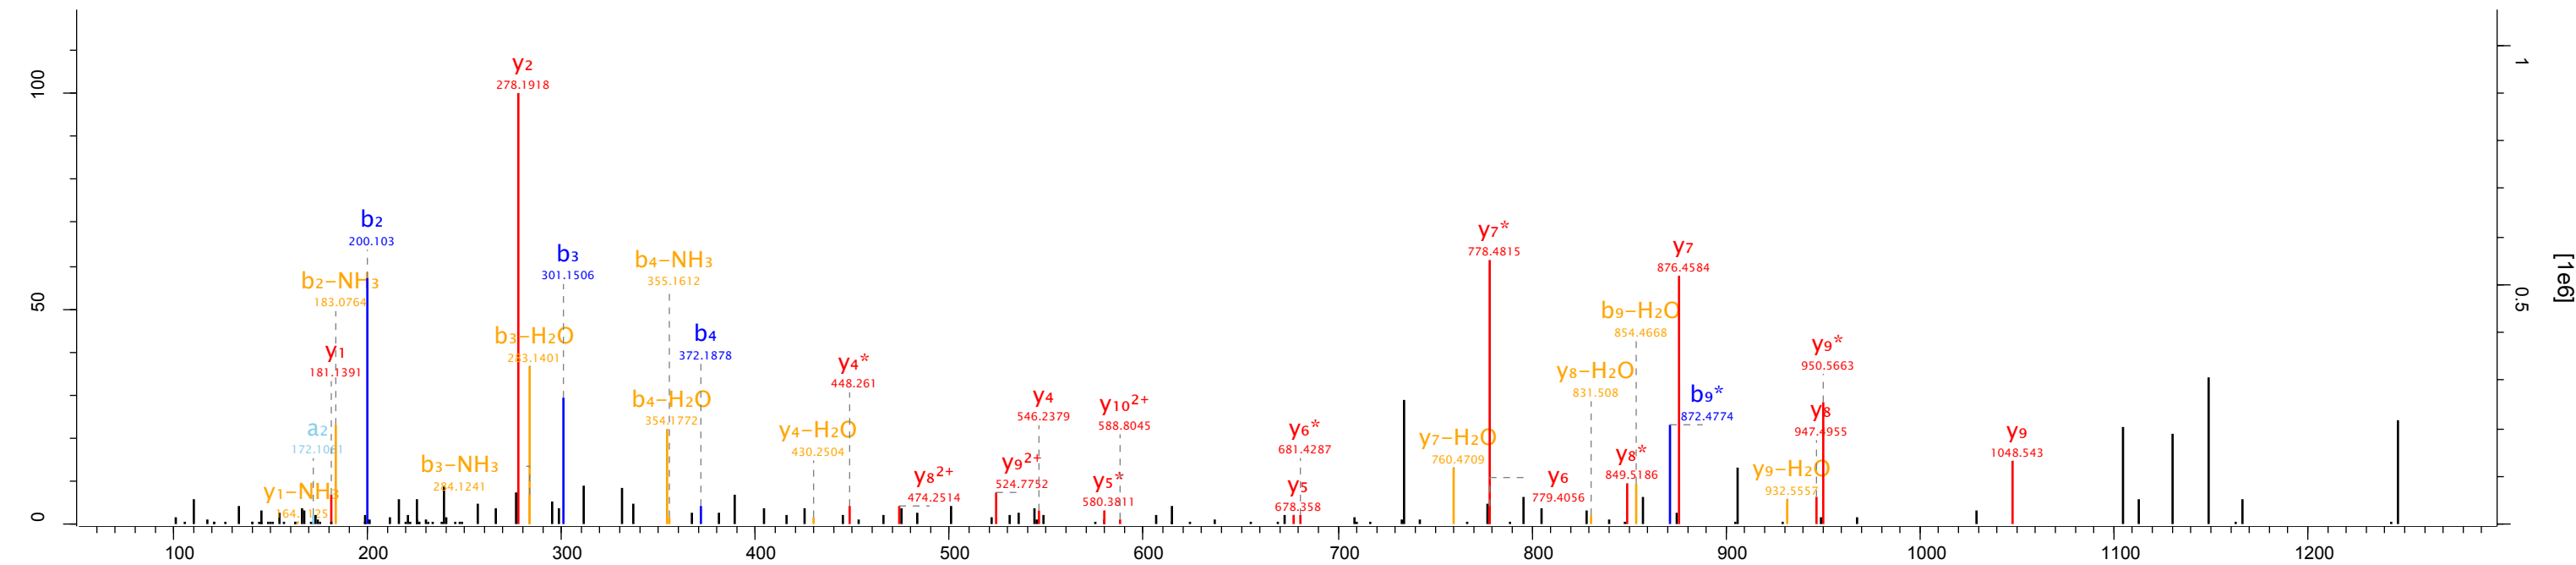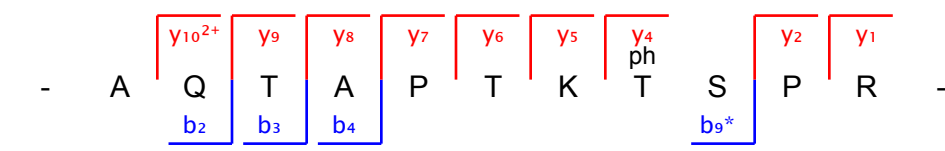

Raw file: 20150814\_A375SR\_Phospho\_BR2\_05  
 Scan: 19988 Method: FTMS; HCD Score: 262.97 m/z: 1168.49 Gene names: BCLAF1

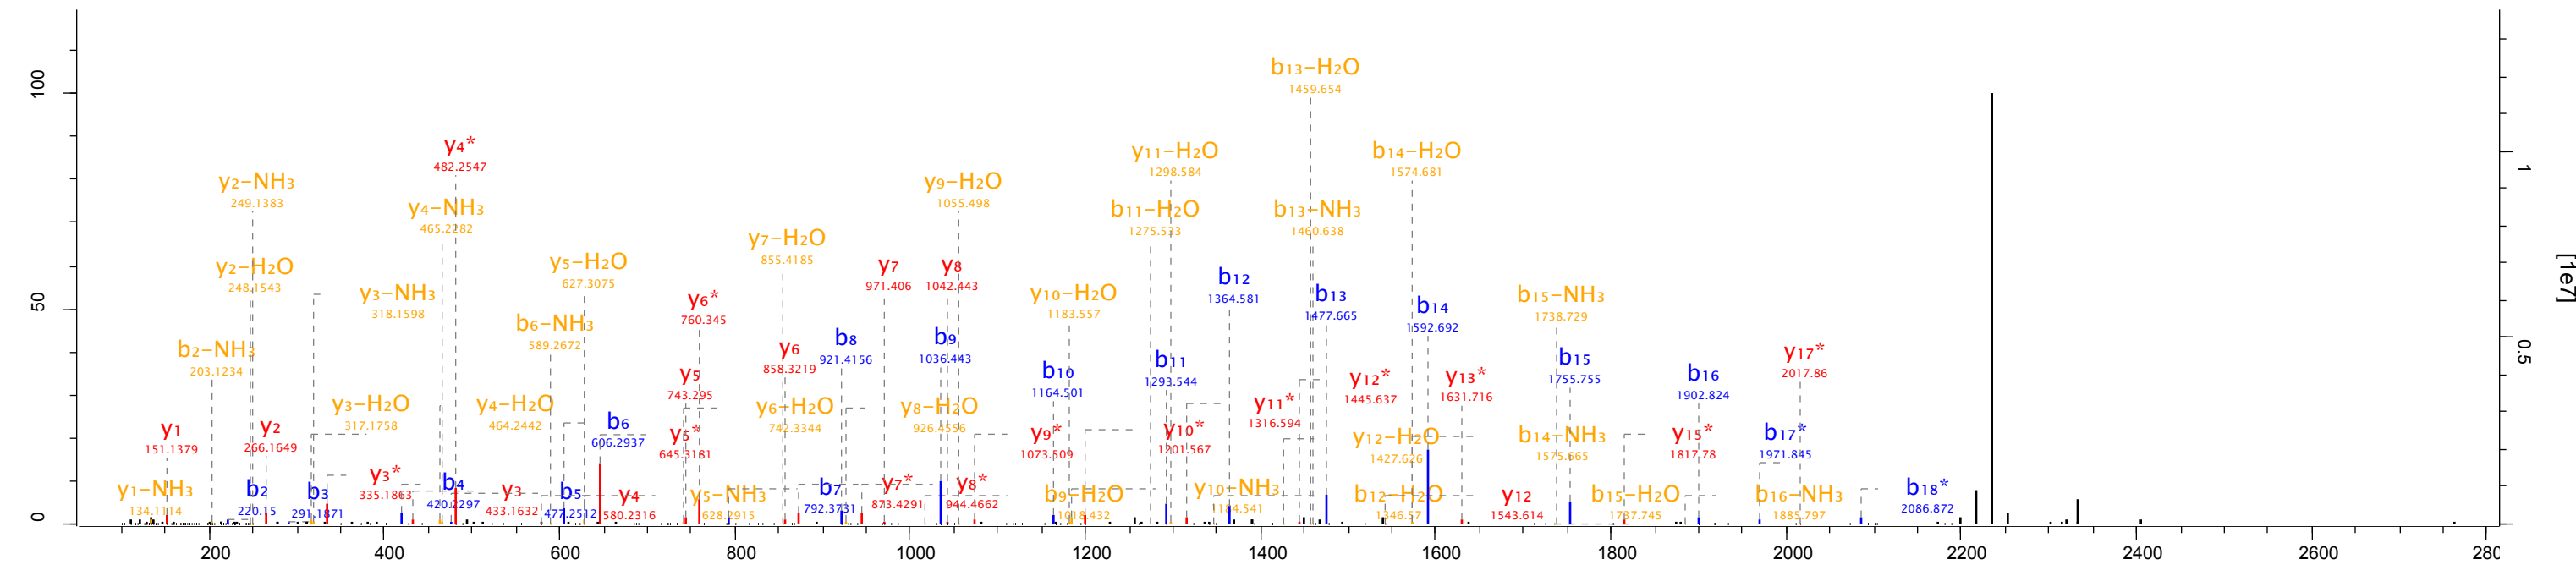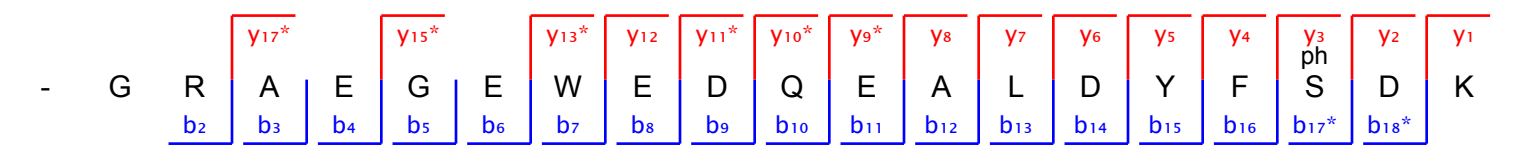

Raw file: 20150814\_A375SR\_Phospho\_BR2\_05  
 Scan: 20148 Method: FTMS; HCD Score: 152.08 m/z: 680.29 Gene names: CDC25B

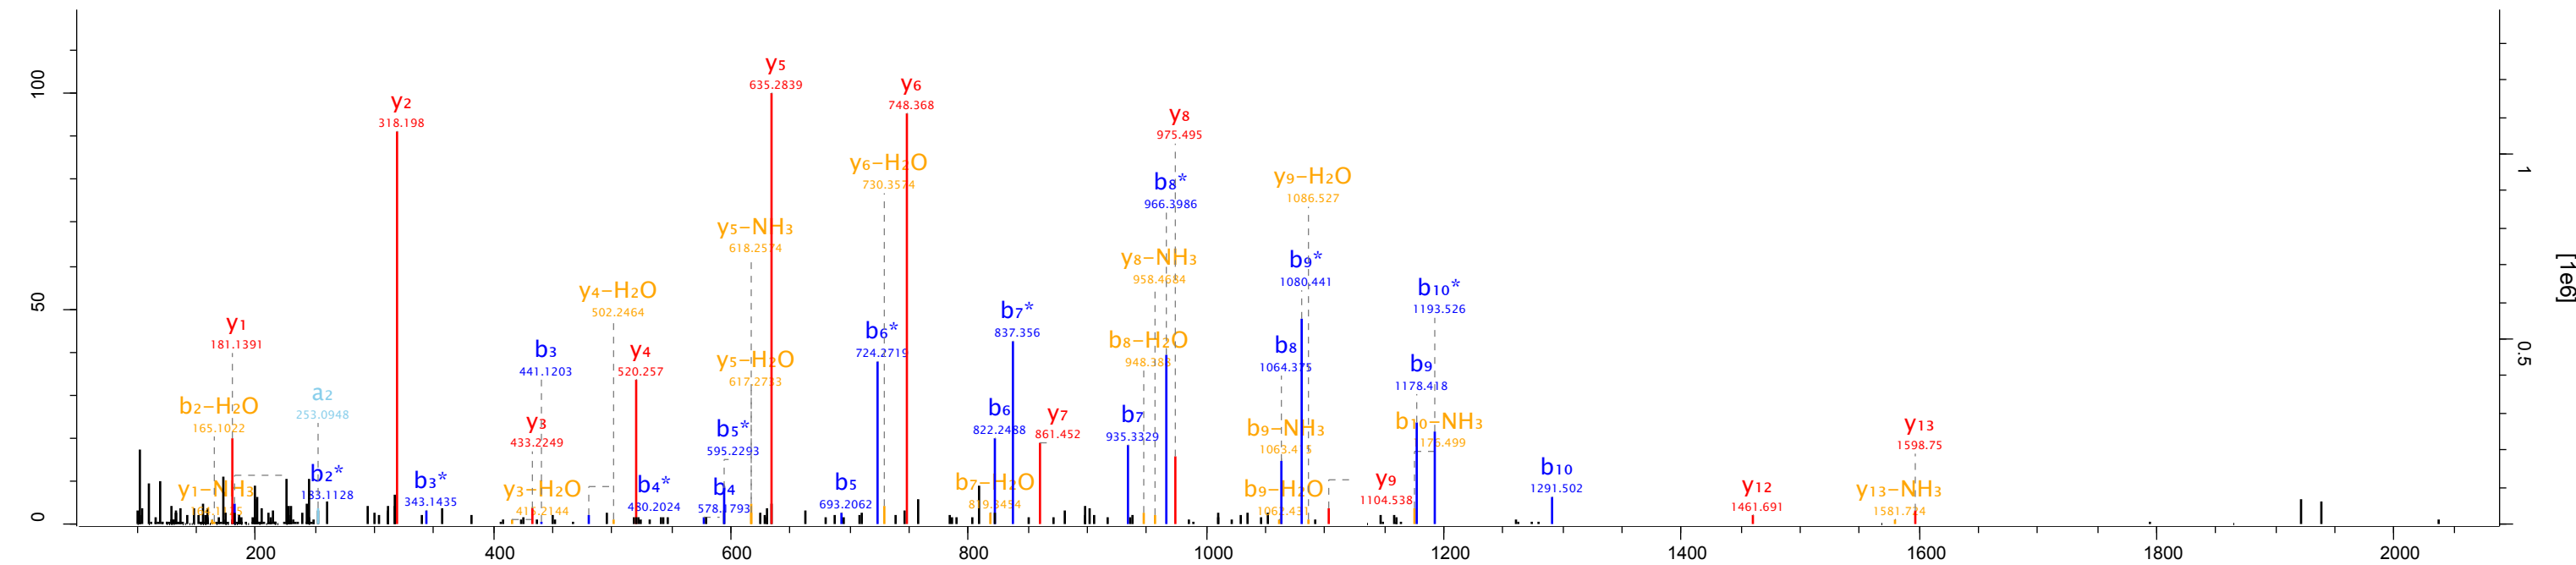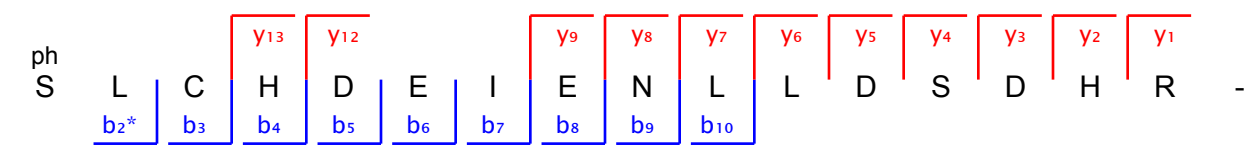



Raw file: 20150814\_A375SR\_Phospho\_BR2\_05  
 Scan: 2018 Method: FTMS; HCD Score: 90.05 m/z: 452.23 Gene names: SOGA1

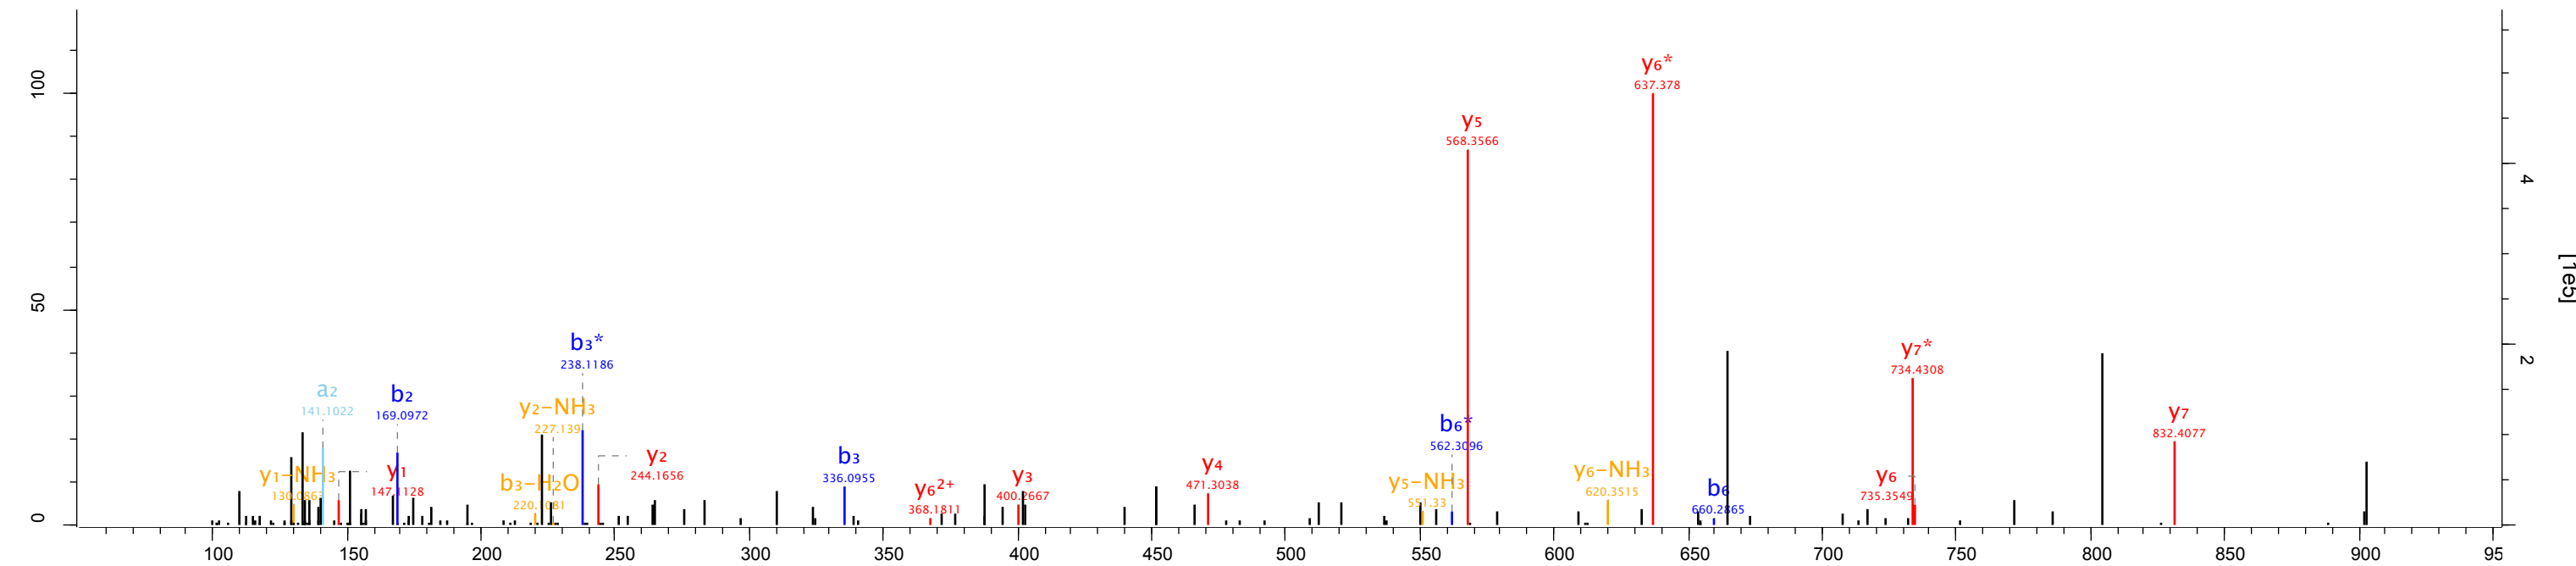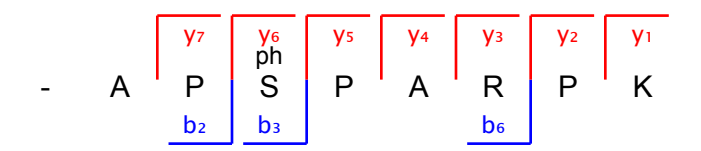

Raw file Scan Method Score m/z Gene names  
 20150814\_A375SR\_Phospho\_BR2\_05 20508 FTMS; HCD 152.06 910.96 SVIL

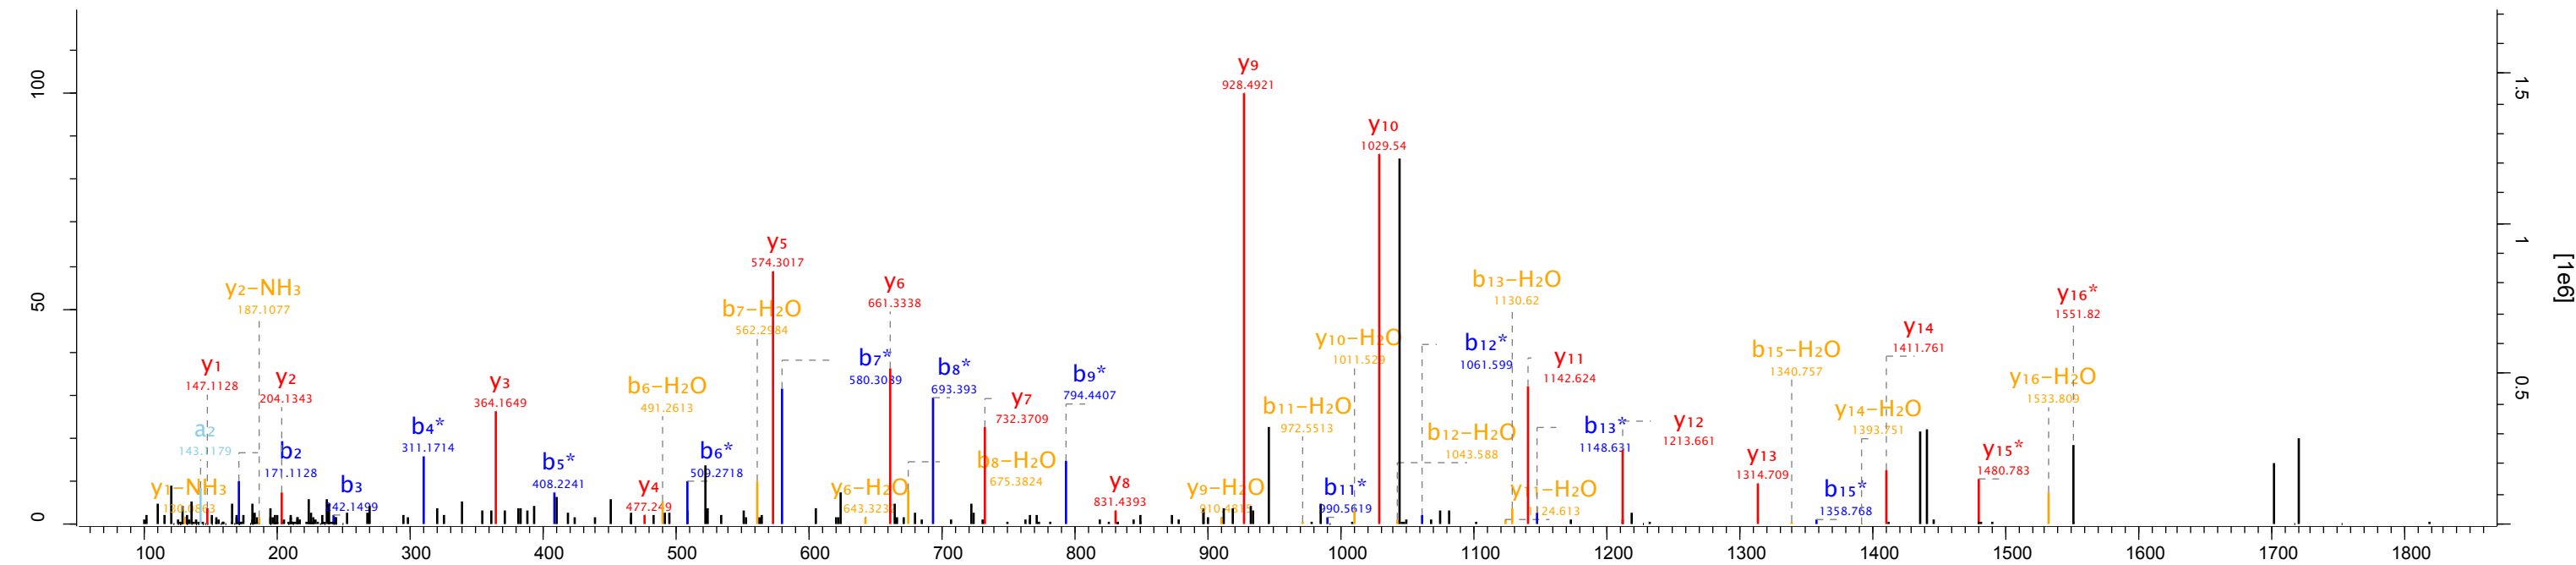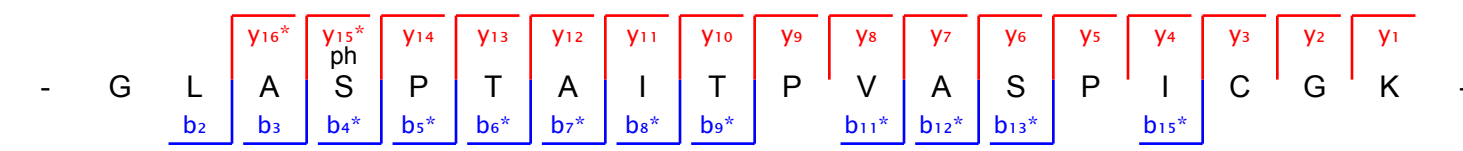

Raw file 20150814\_A375SR\_Phospho\_BR2\_05 Scan 21228 Method FTMS; HCD Score 198.05 m/z 1002.91 Gene names CLASP2

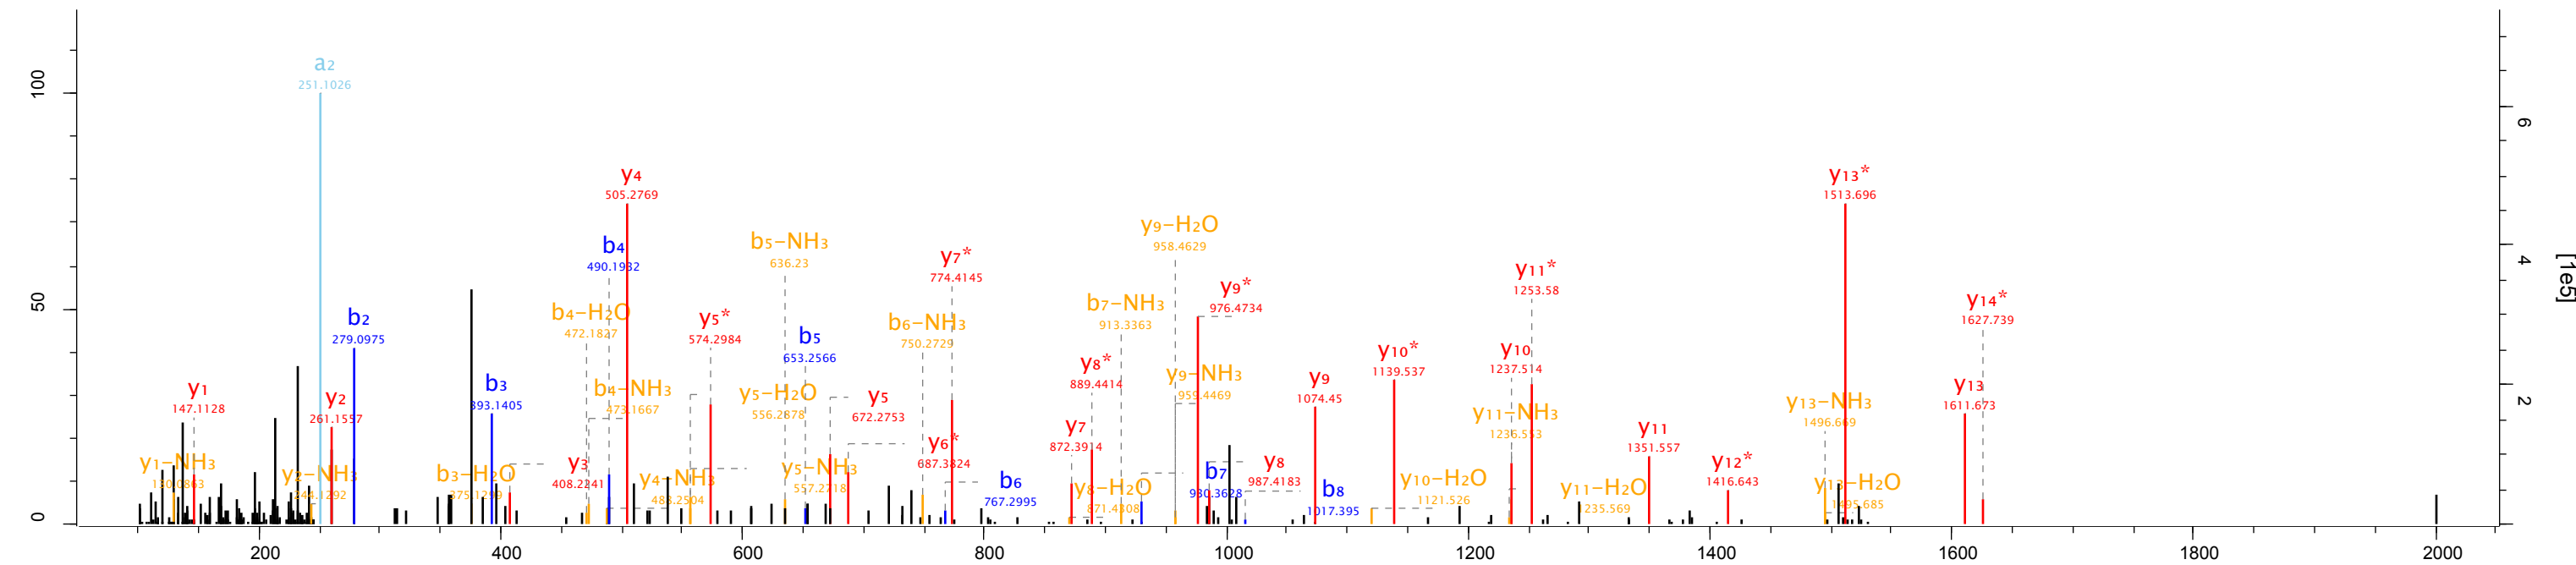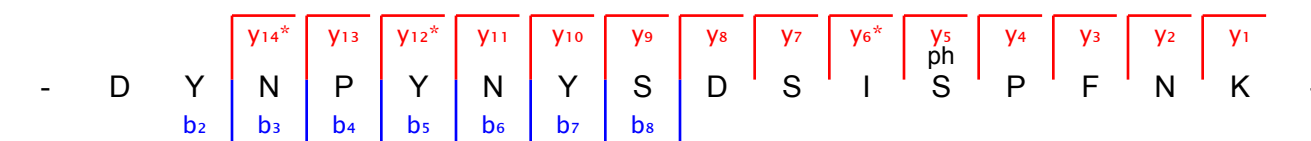

Raw file: 20150814\_A375SR\_Phospho\_BR2\_05  
 Scan: 21508 Method: FTMS; HCD Score: 88.19 m/z: 697.34 Gene names: BCL9L

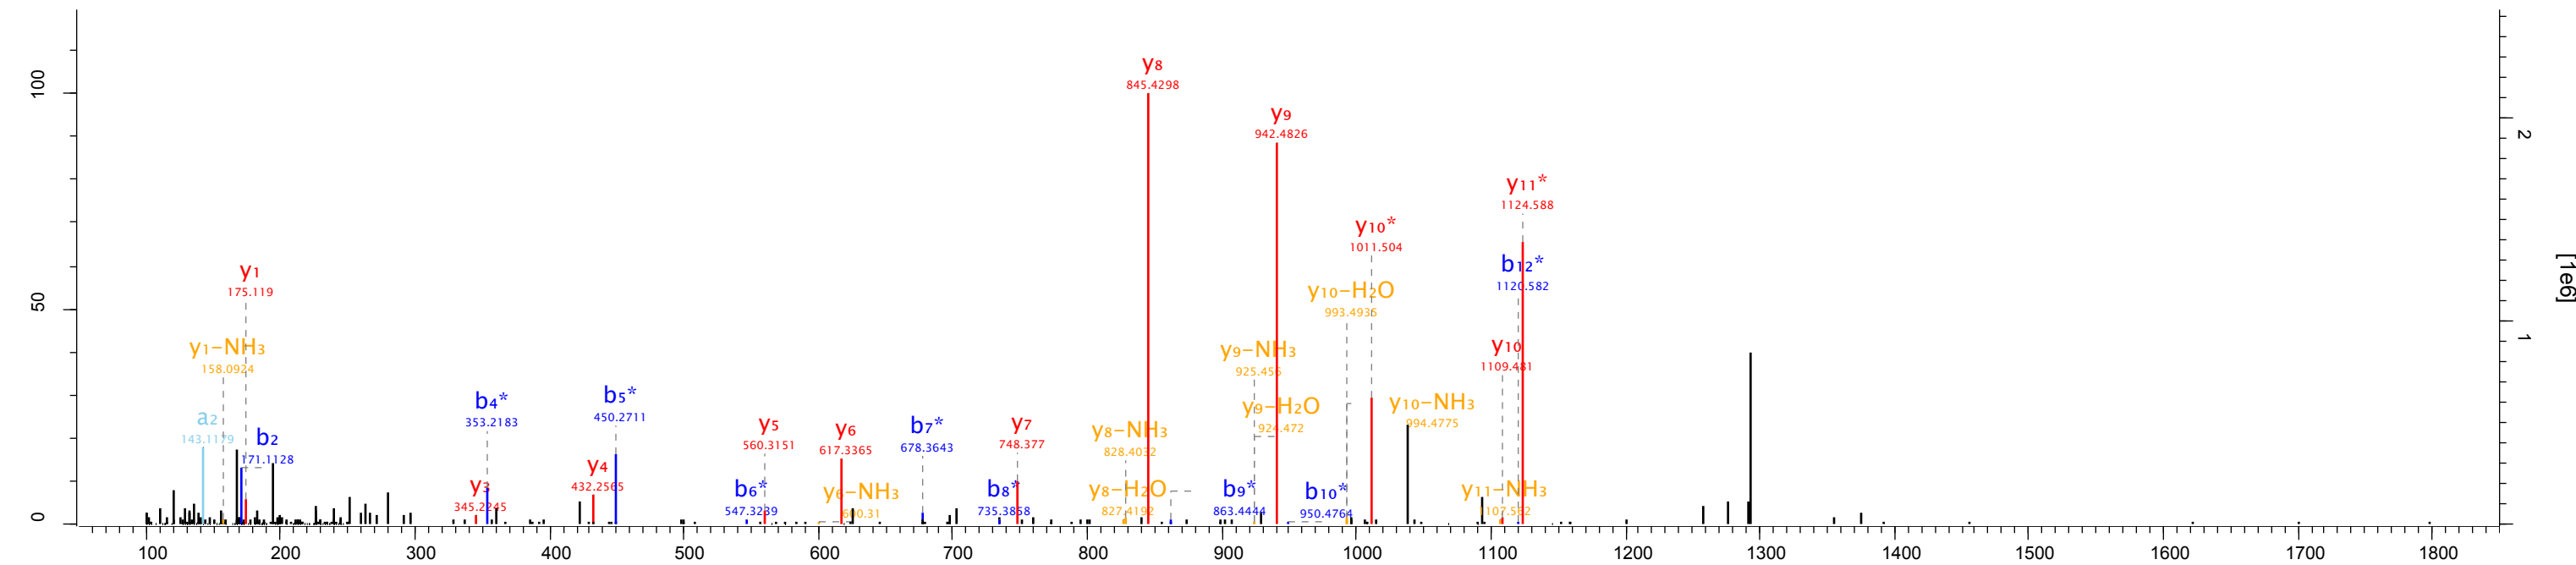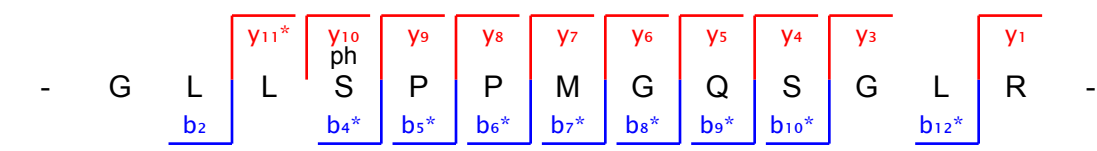

Raw file: 20150814\_A375SR\_Phospho\_BR2\_05  
 Scan: 21538 Method: FTMS; HCD Score: 122.34 m/z: 1032.98 Gene names: MAGEA10

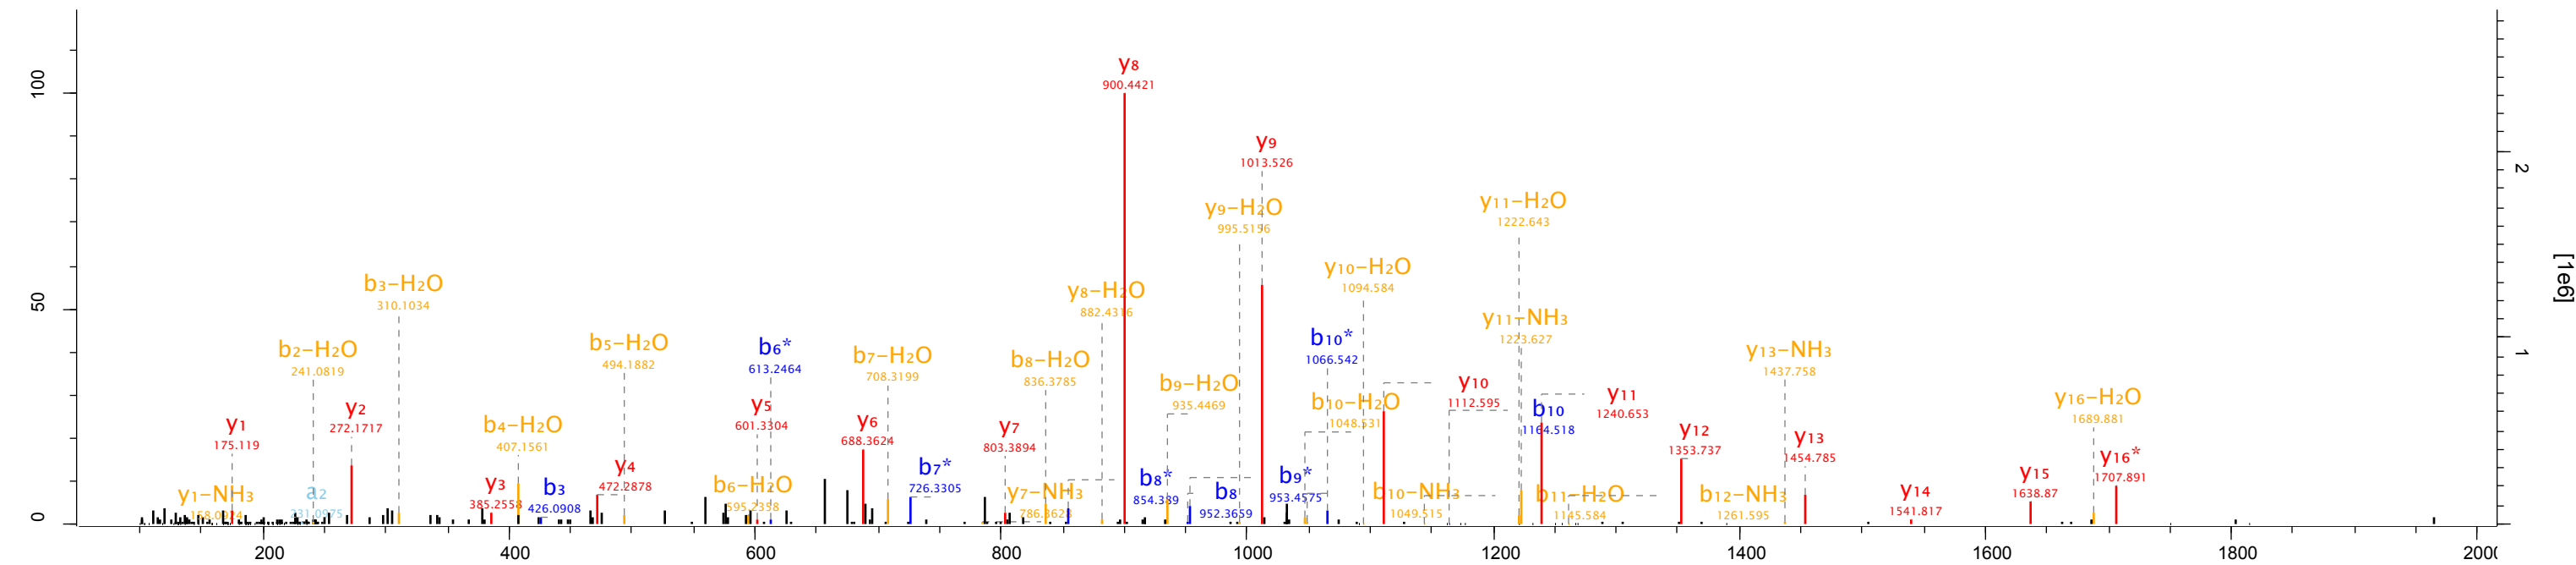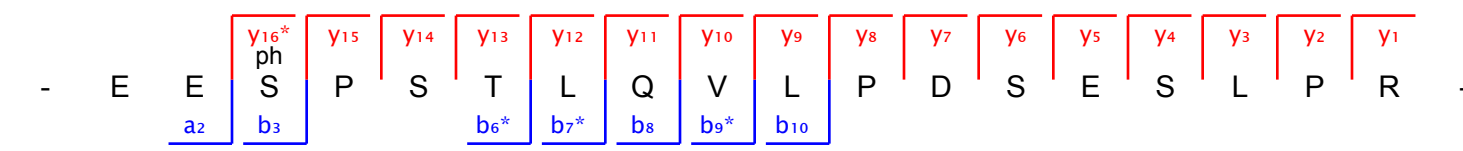

Raw file 20150814\_A375SR\_Phospho\_BR2\_05 Scan 21858 Method FTMS; HCD Score 227.4 m/z 932.94 Gene names CAAP1

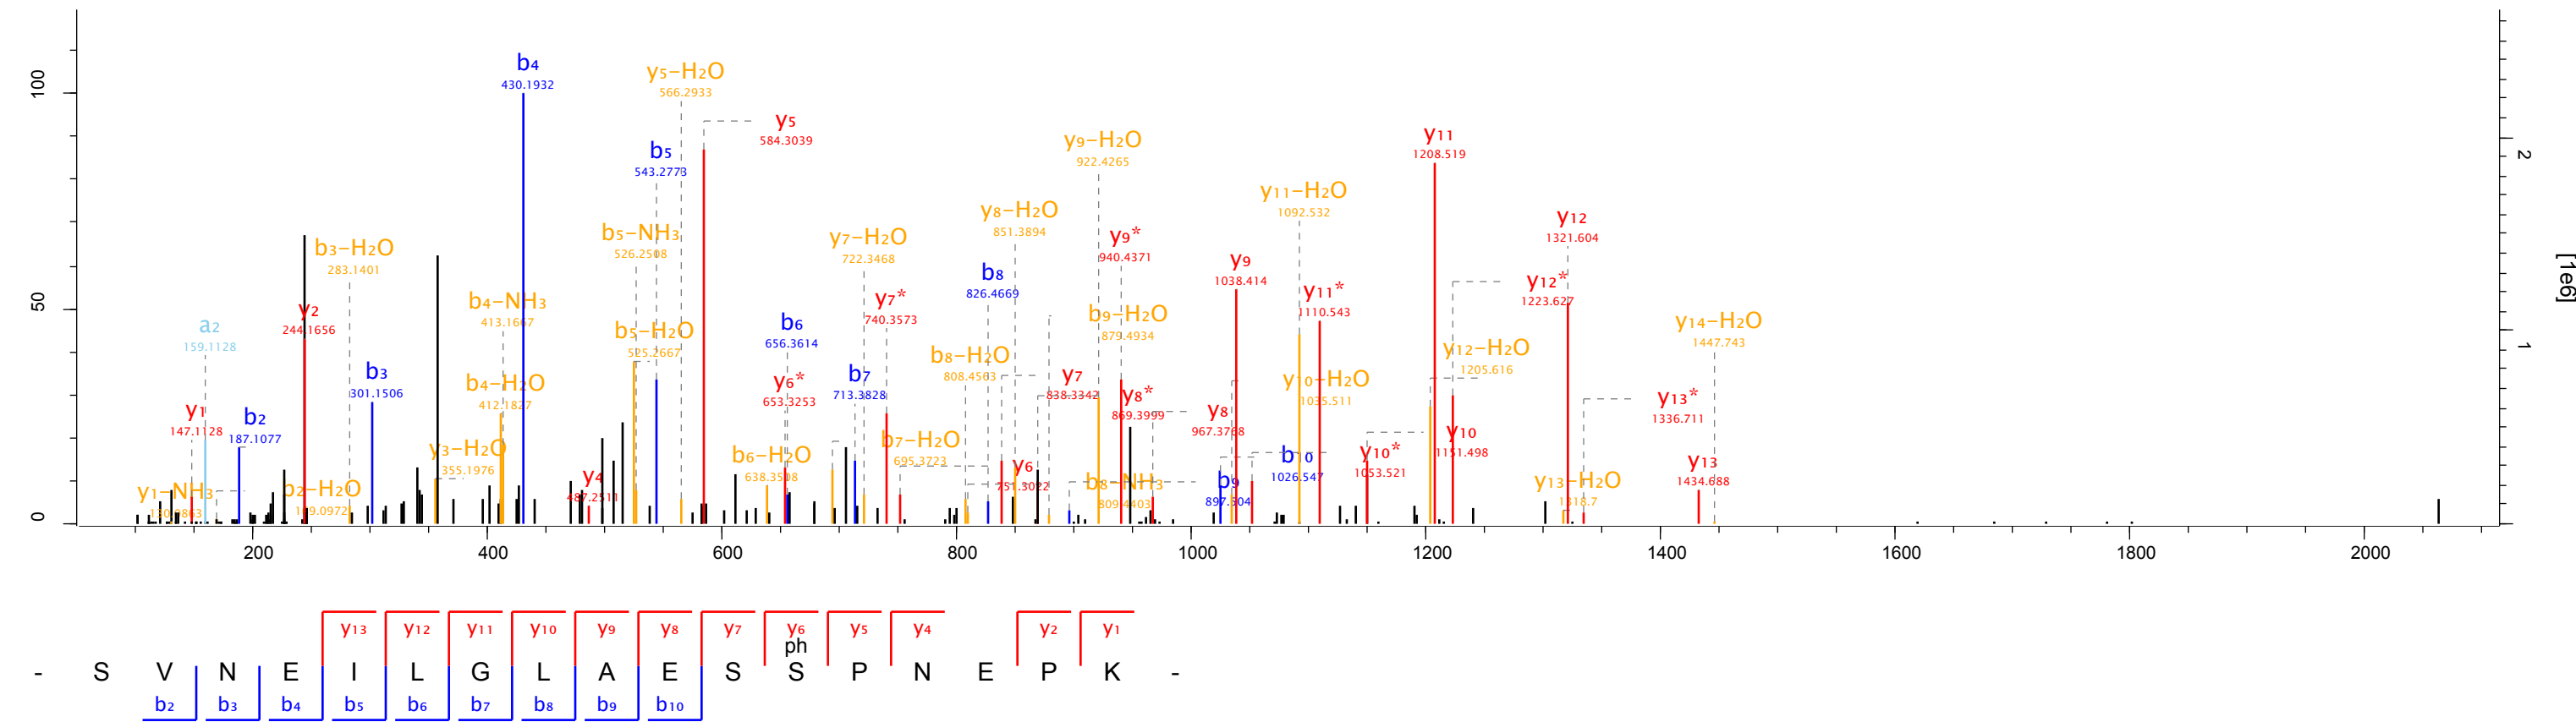

Raw file Scan Method Score m/z Gene names  
 20150814\_A375SR\_Phospho\_BR2\_05 21908 FTMS; HCD 204.65 716.69 NES

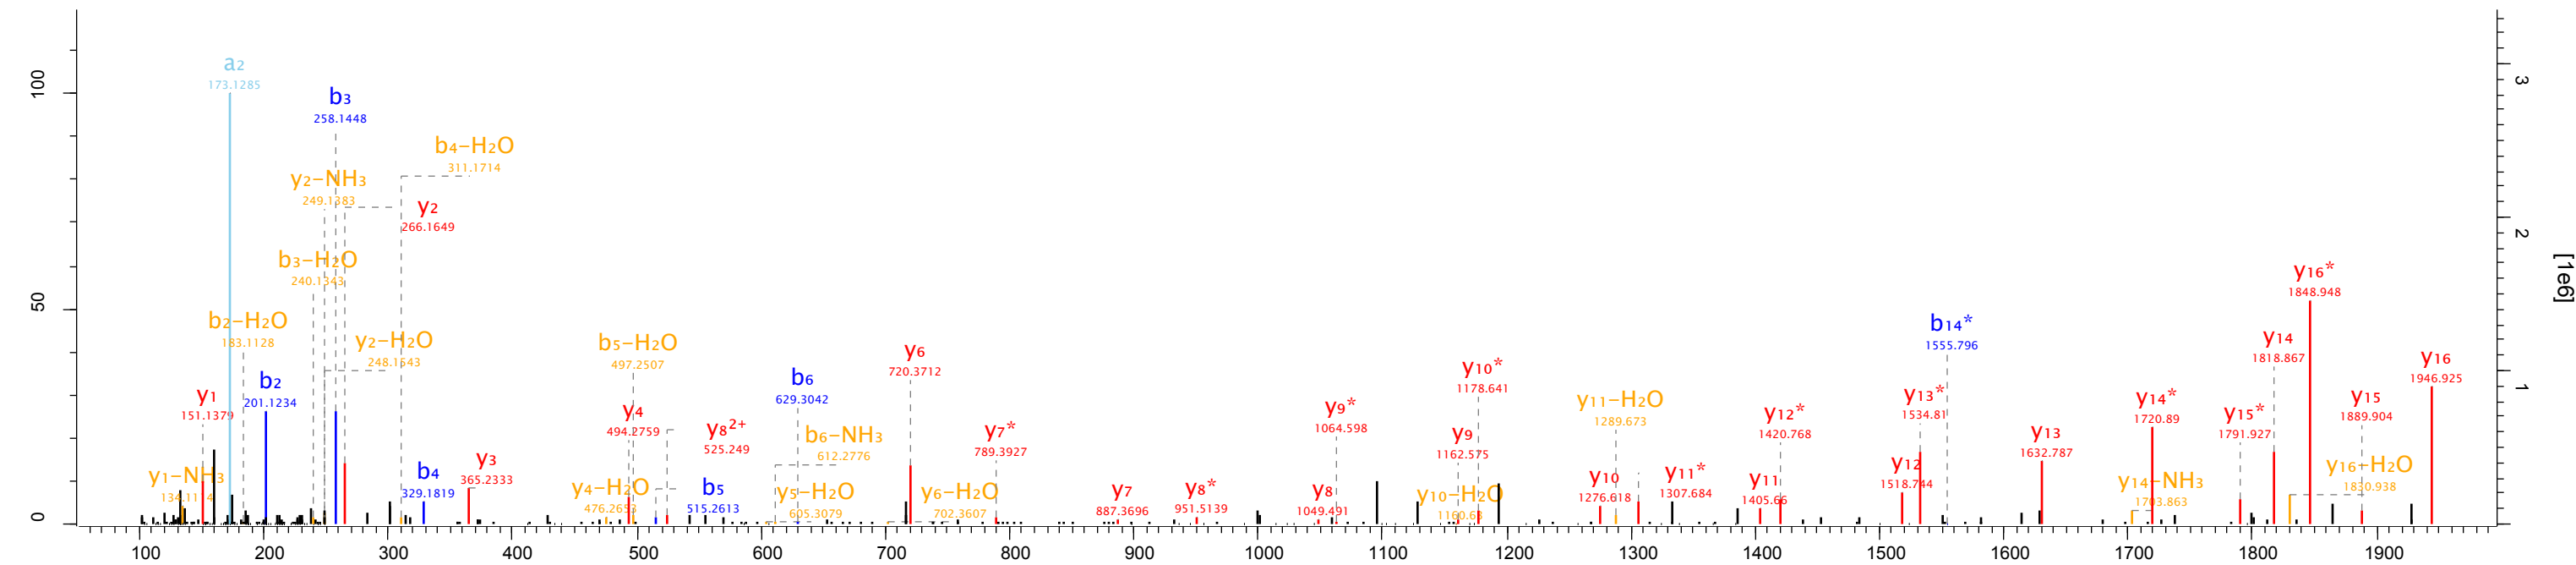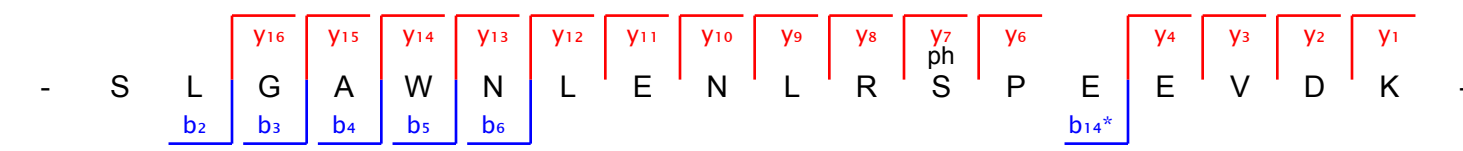

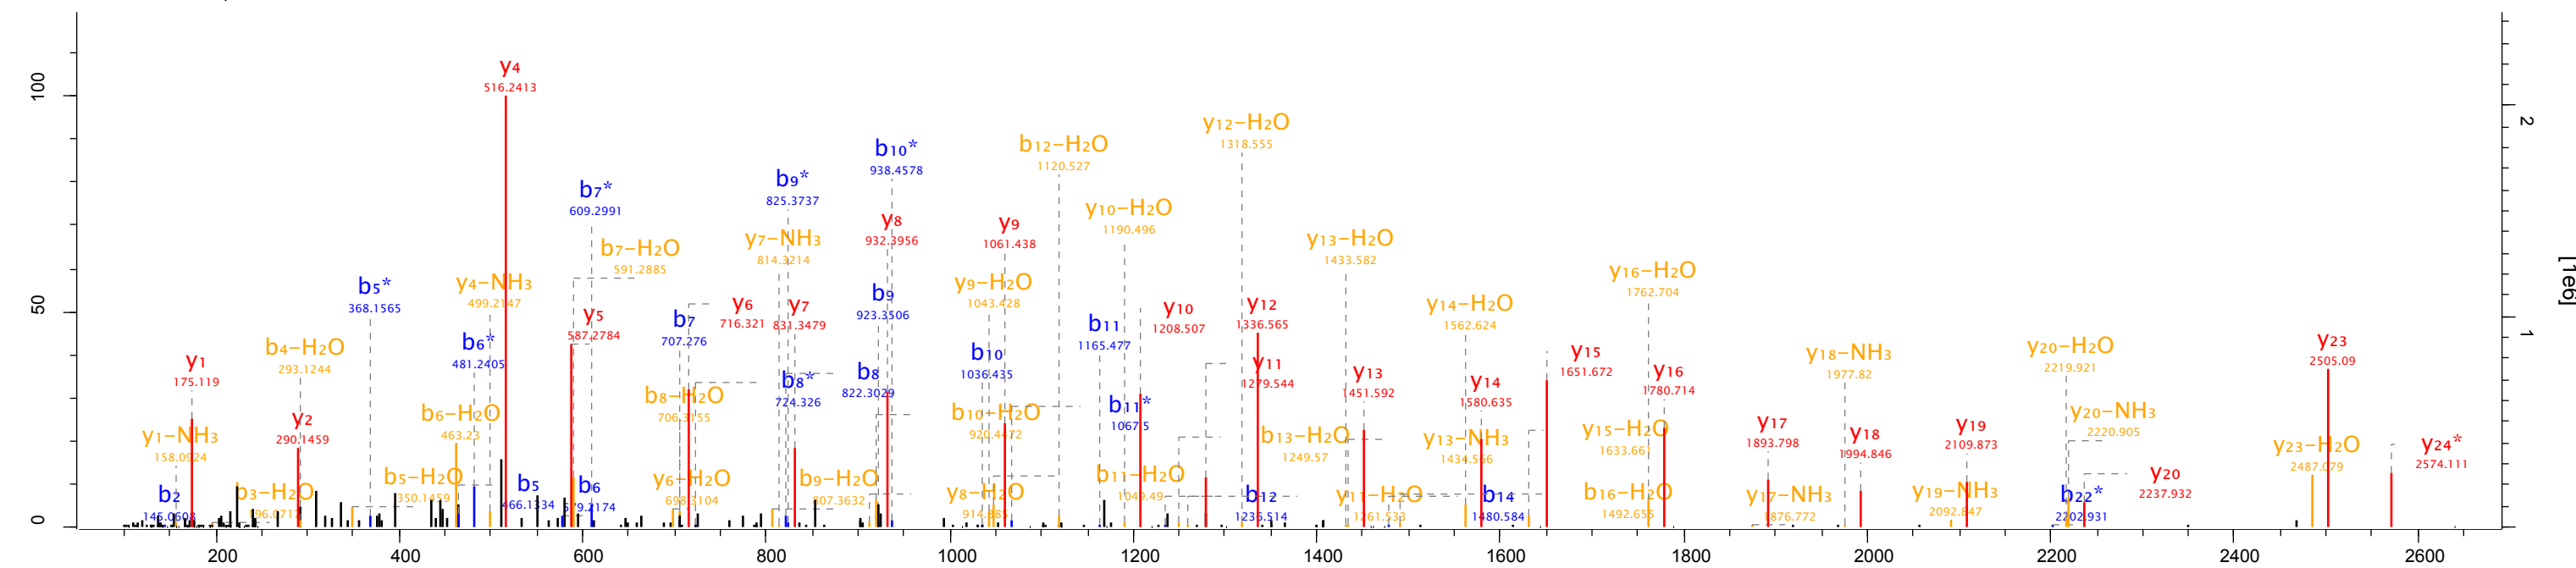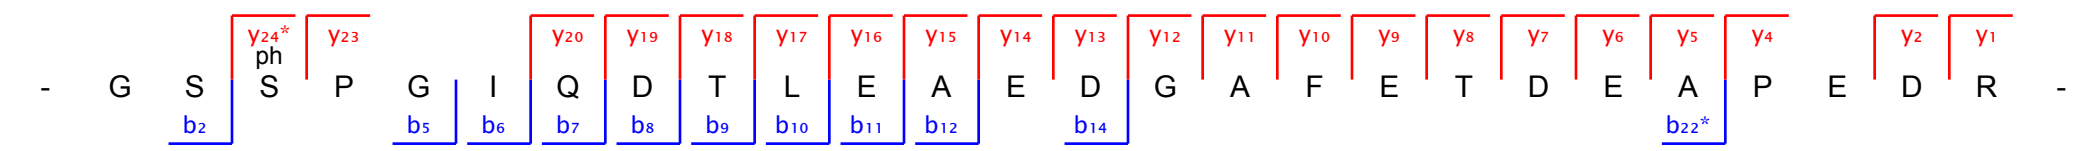



Raw file: 20150814\_A375SR\_Phospho\_BR2\_05  
 Scan: 22668 Method: FTMS; HCD Score: 57.66 m/z: 1092.47 Gene names: PFKP

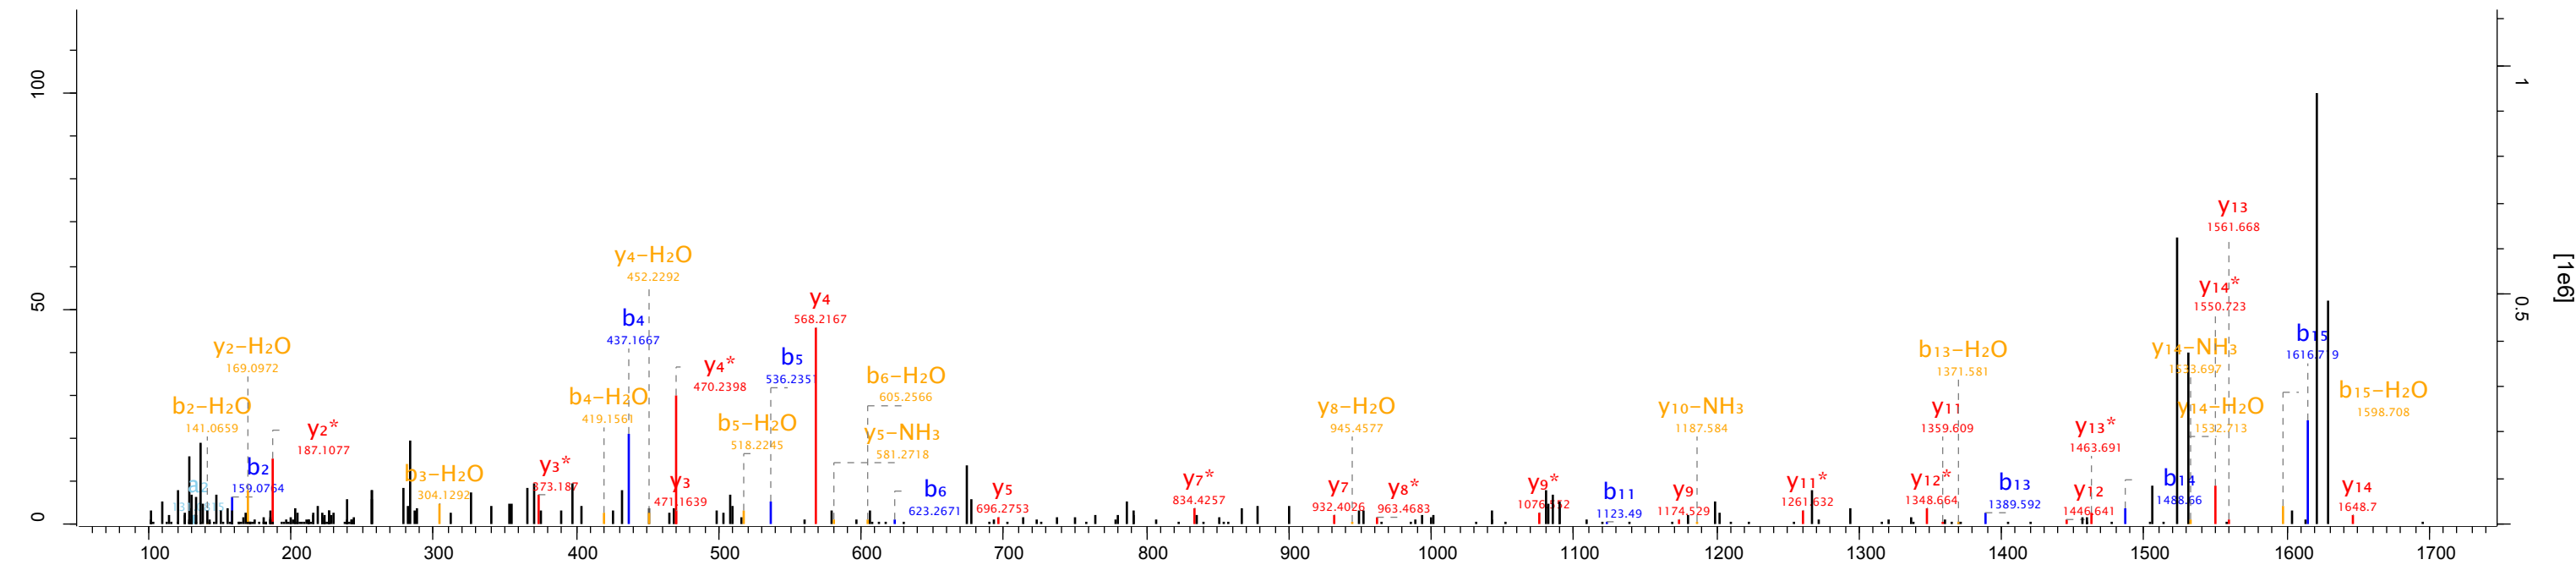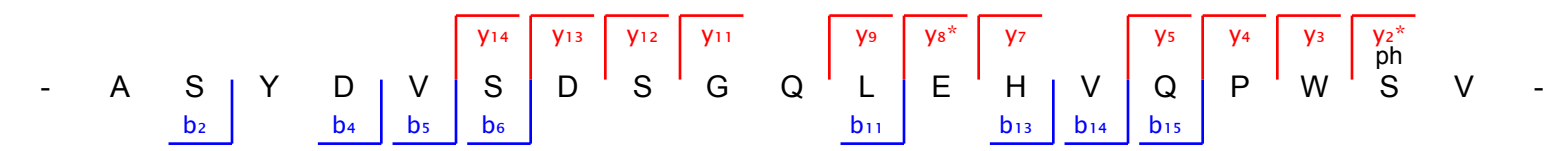

Raw file: 20150814\_A375SR\_Phospho\_BR2\_05  
 Scan: 22868 Method: FTMS; HCD Score: 217.39 m/z: 1095.99 Gene names: ARFGAP1

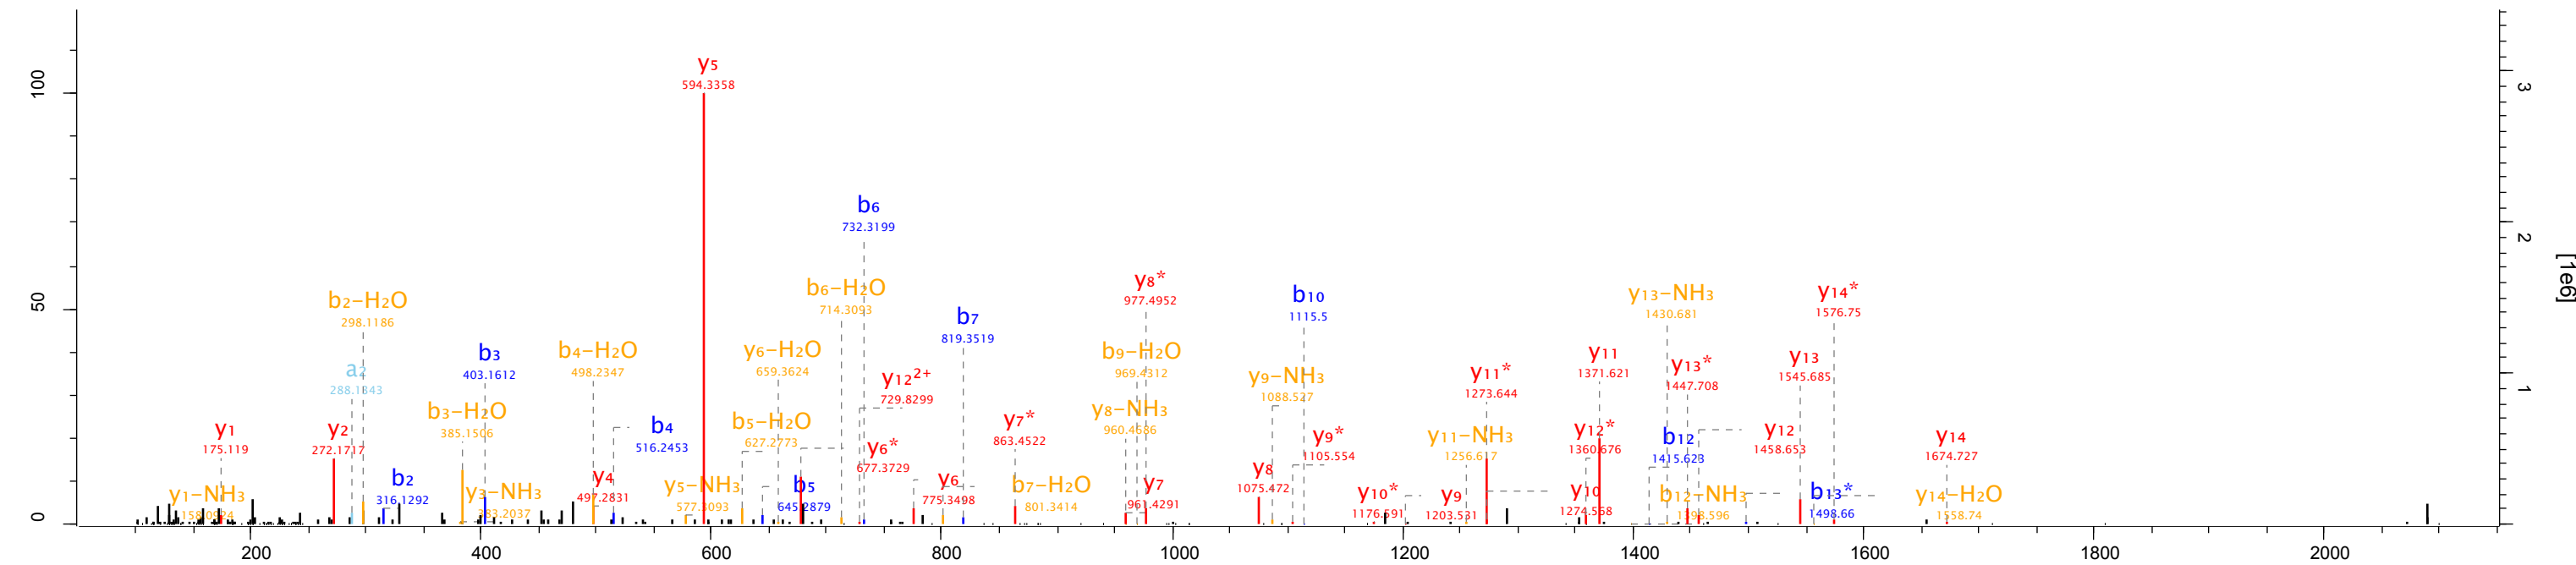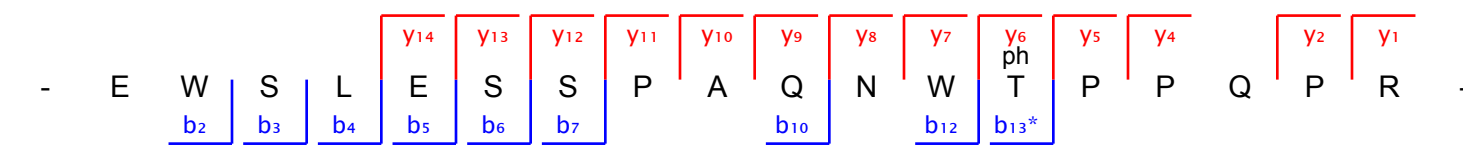

Raw file 20150814\_A375SR\_Phospho\_BR2\_05 Scan 23198 Method FTMS; HCD Score 188.47 m/z 936.08 Gene names AFTPH

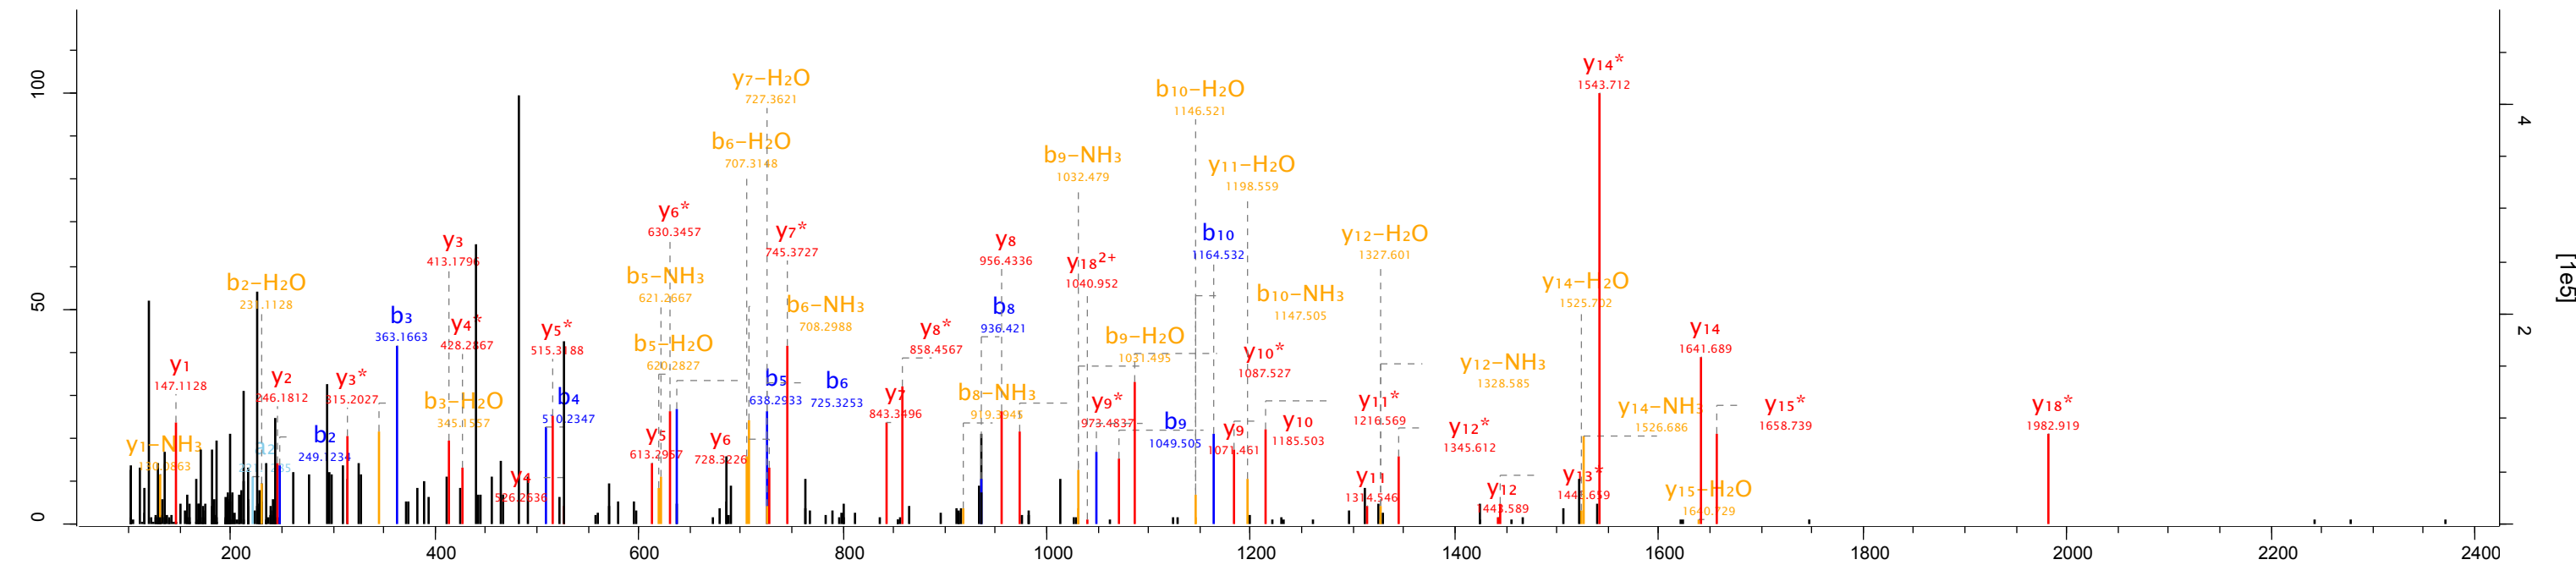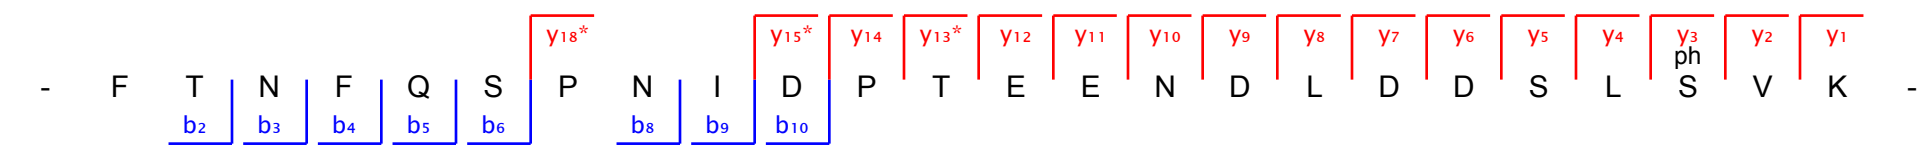

Raw file: 20150814\_A375SR\_Phospho\_BR2\_05  
 Scan: 23418 Method: FTMS; HCD Score: 230.48 m/z: 903.44 Gene names: MTRF1

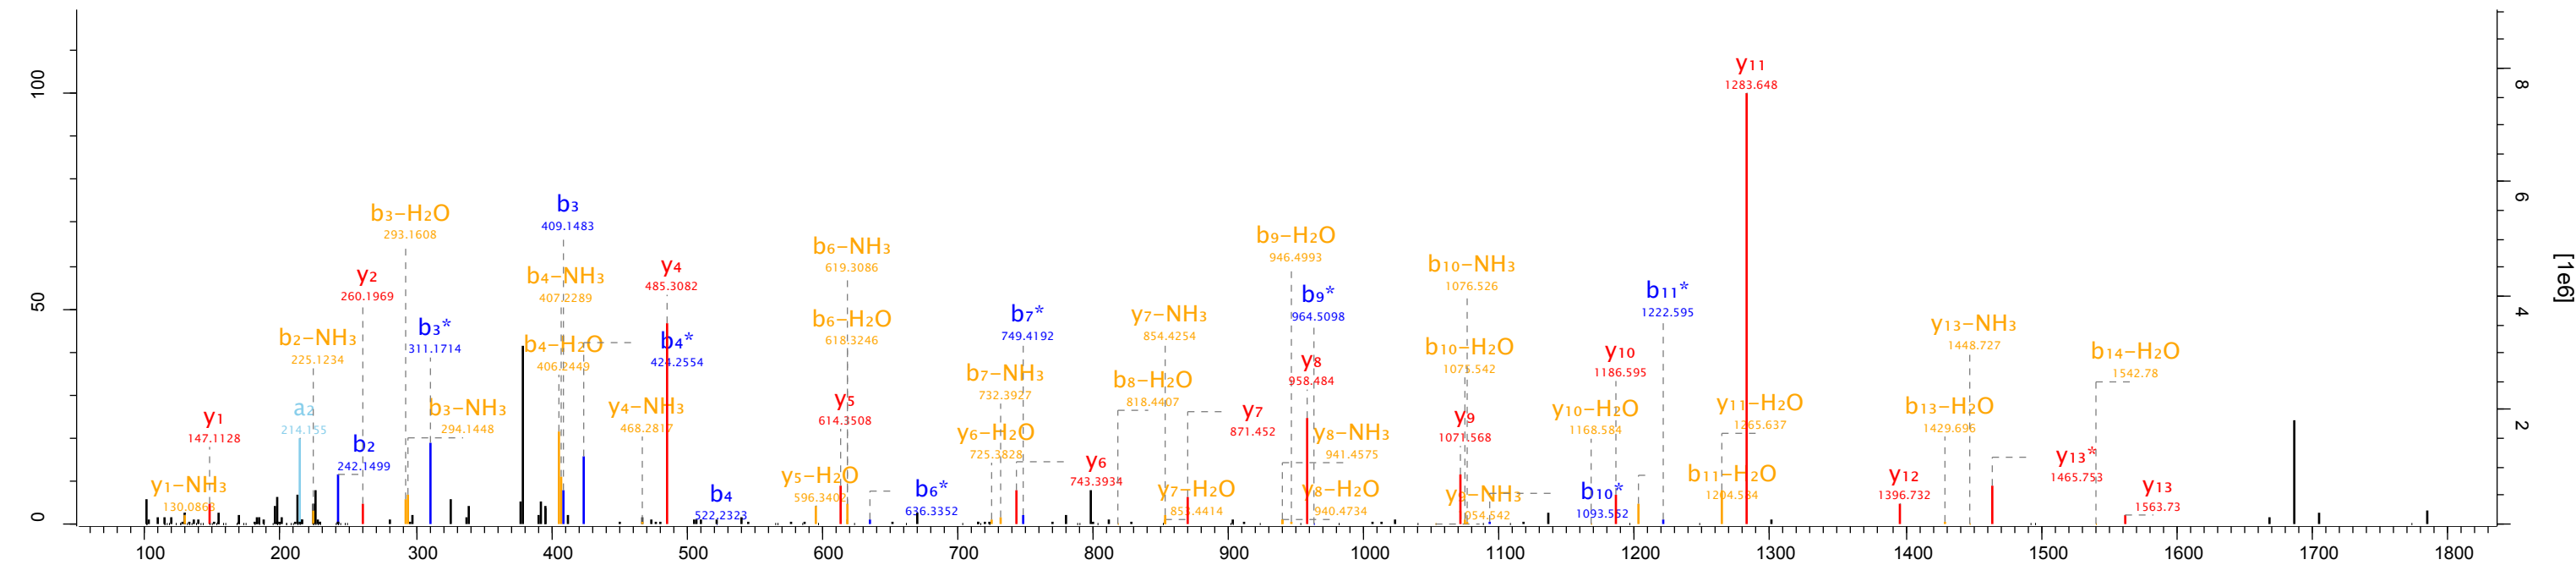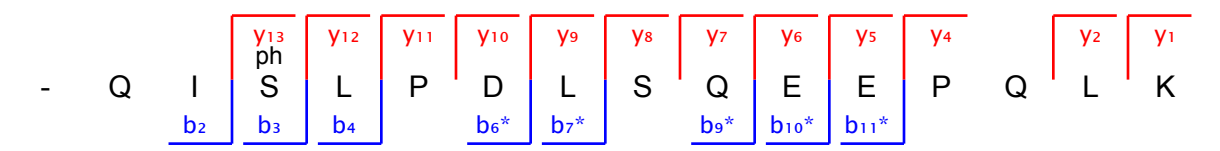

Raw file Scan Method Score m/z Gene names  
 20150814\_A375SR\_Phospho\_BR2\_05 23568 FTMS; HCD 263.33 1036.86 RB1

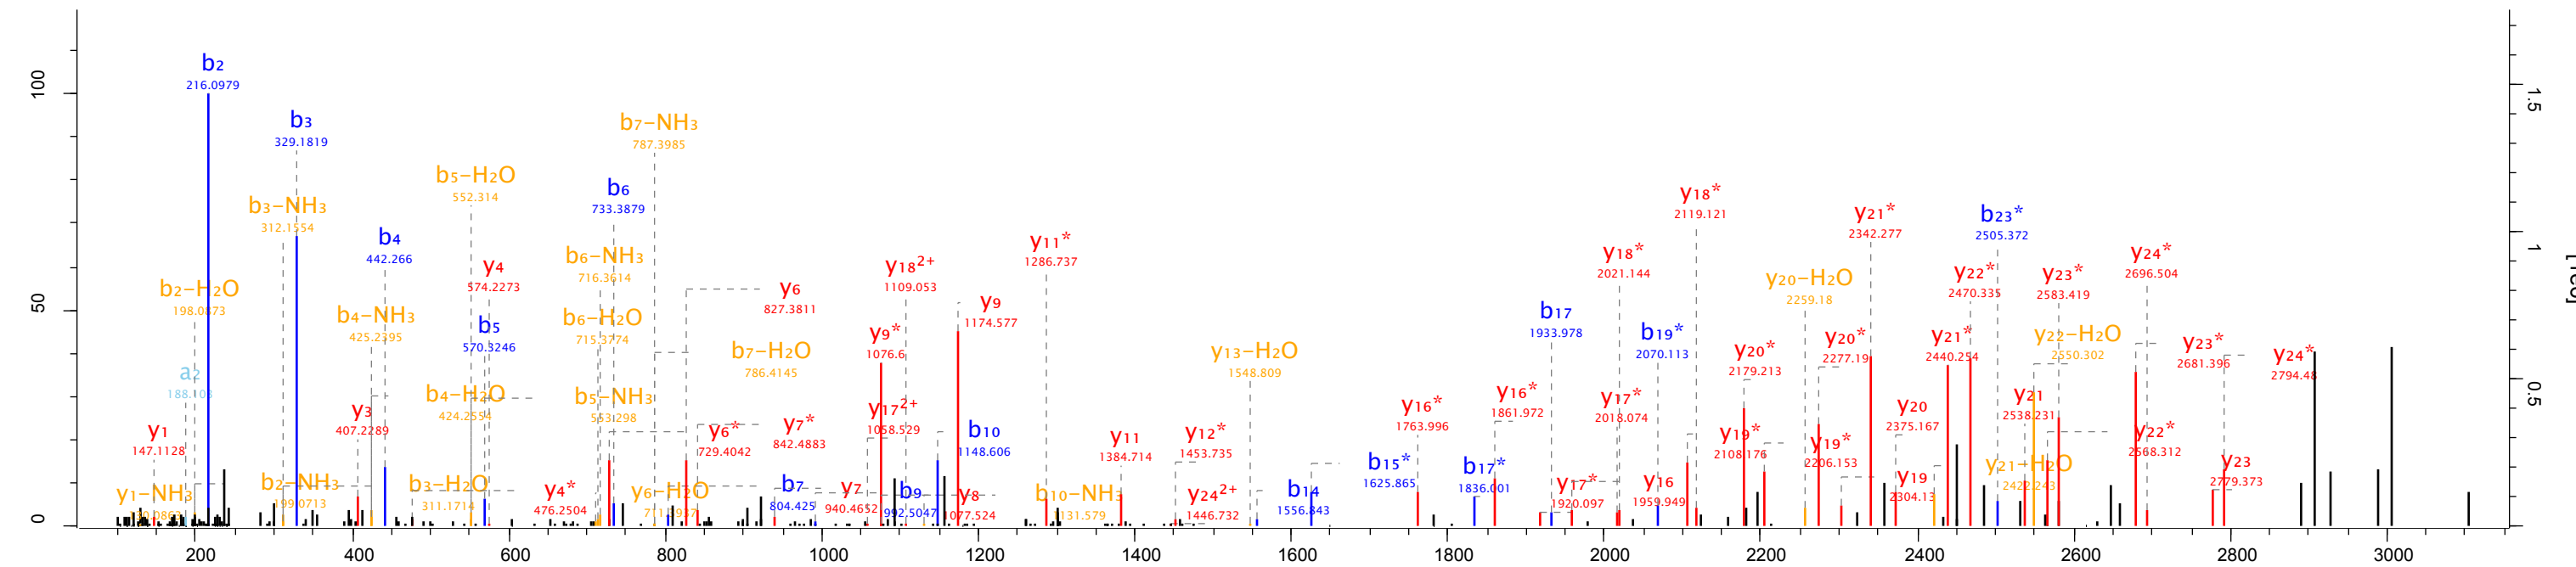

- T N I L Q Y A S T R P P T L S P I P H I P R S P Y K -

Fragmentation mapping (b and y ions) is shown below the sequence:

- b2: N
- b3: I
- b4: L
- b5: Q
- b6: Y
- b7: A
- b9: T
- b10: R
- b14: L
- b15\*: S
- b17: I
- b19\*: H
- b23\*: S

Fragmentation mapping (y ions) is shown below the sequence:

- y1: K
- y3: P
- y4: S
- y6: P
- y7: I
- y8: H
- y9: P
- y11: S
- y12\*: ph
- y16: P
- y17\*: R
- y18\*: T
- y19: S
- y20: A
- y21: Y
- y22\*: Q
- y23: L
- y24\*: I

Raw file: 20150814\_A375SR\_Phospho\_BR2\_05  
 Scan: 23618 Method: FTMS; HCD Score: 166.77 m/z: 821.83 Gene names: NCL

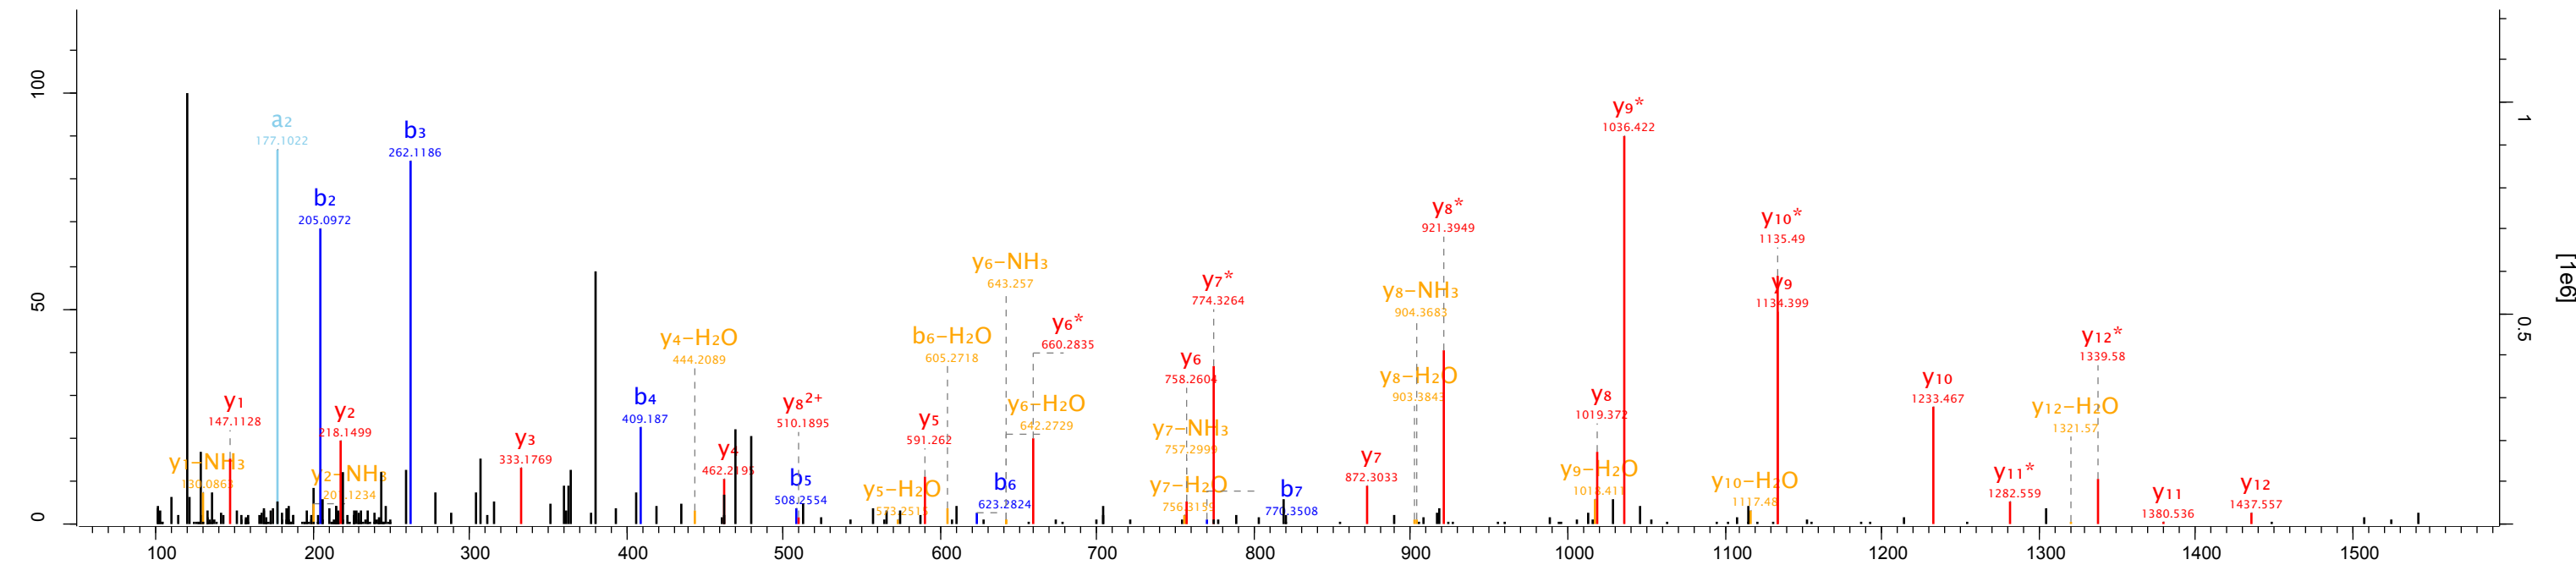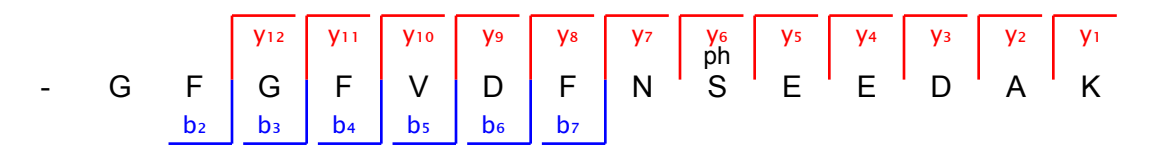

Raw file 20150814\_A375SR\_Phospho\_BR2\_05 Scan 23868 Method FTMS; HCD Score 142.22 m/z 876.74 Gene names KNOX1

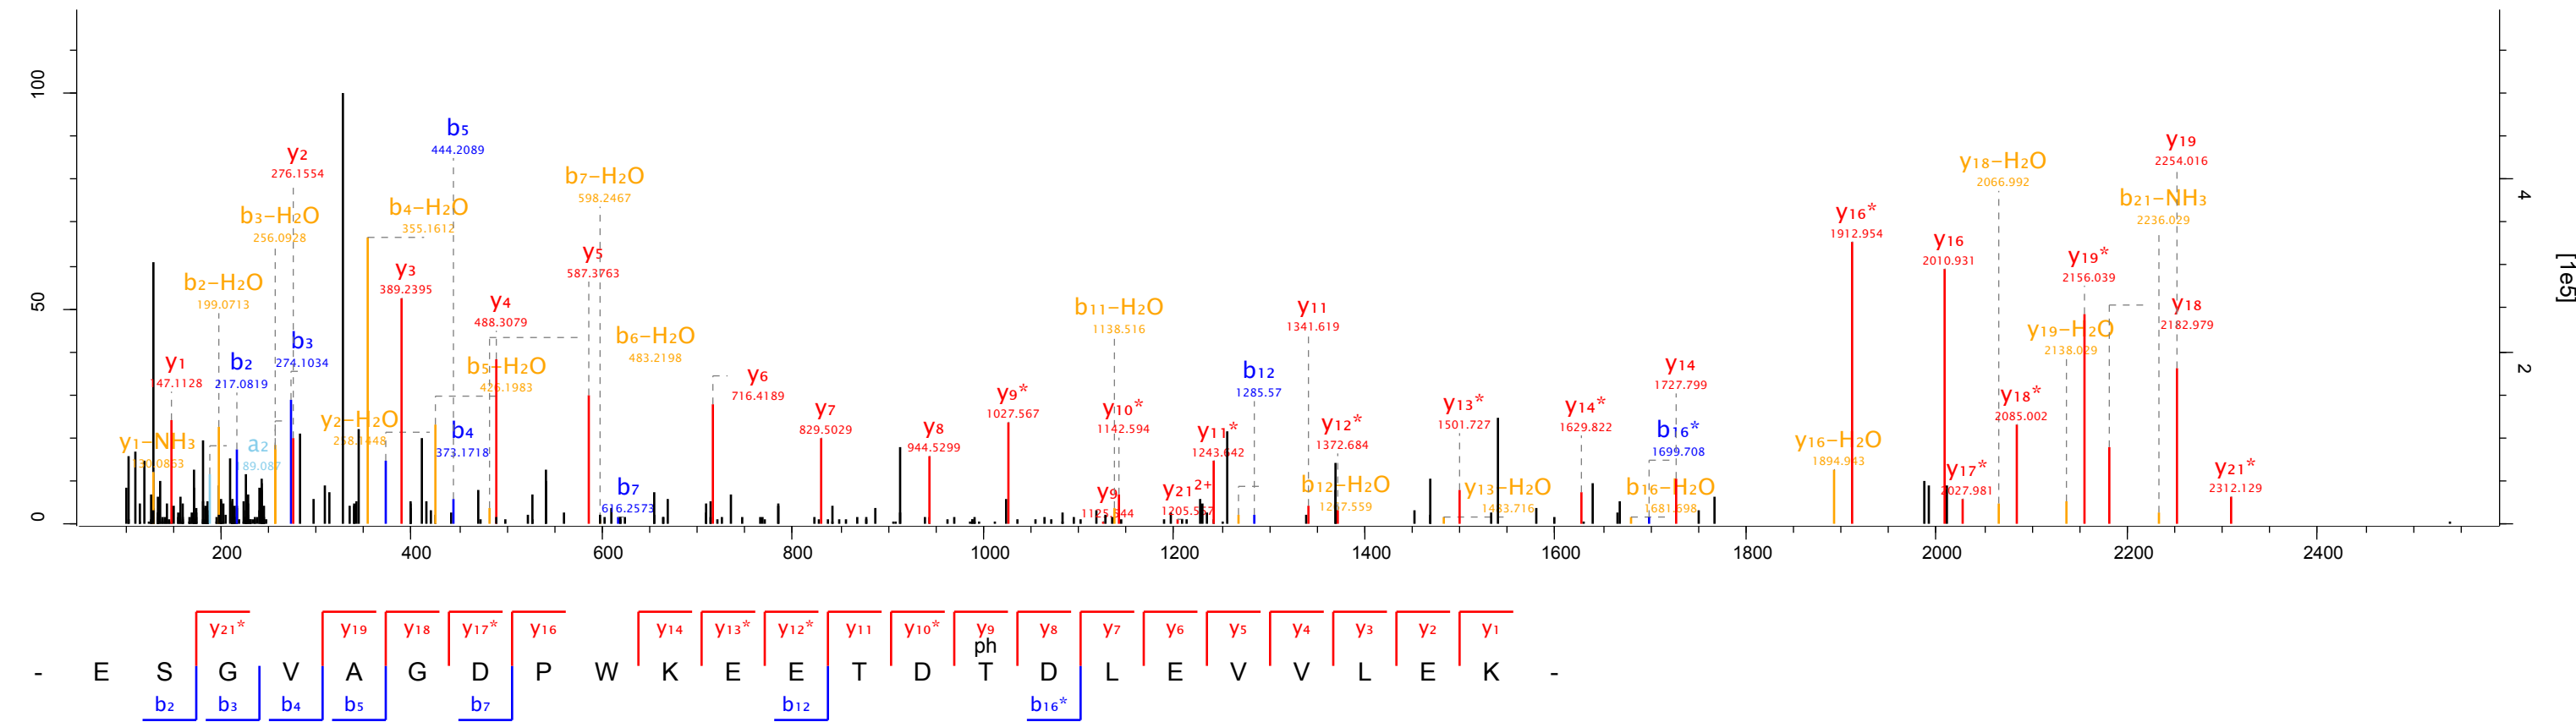

Raw file: 20150814\_A375SR\_Phospho\_BR2\_05  
 Scan: 23998 Method: FTMS; HCD Score: 270.93 m/z: 1052.18 Gene names: PTPN12

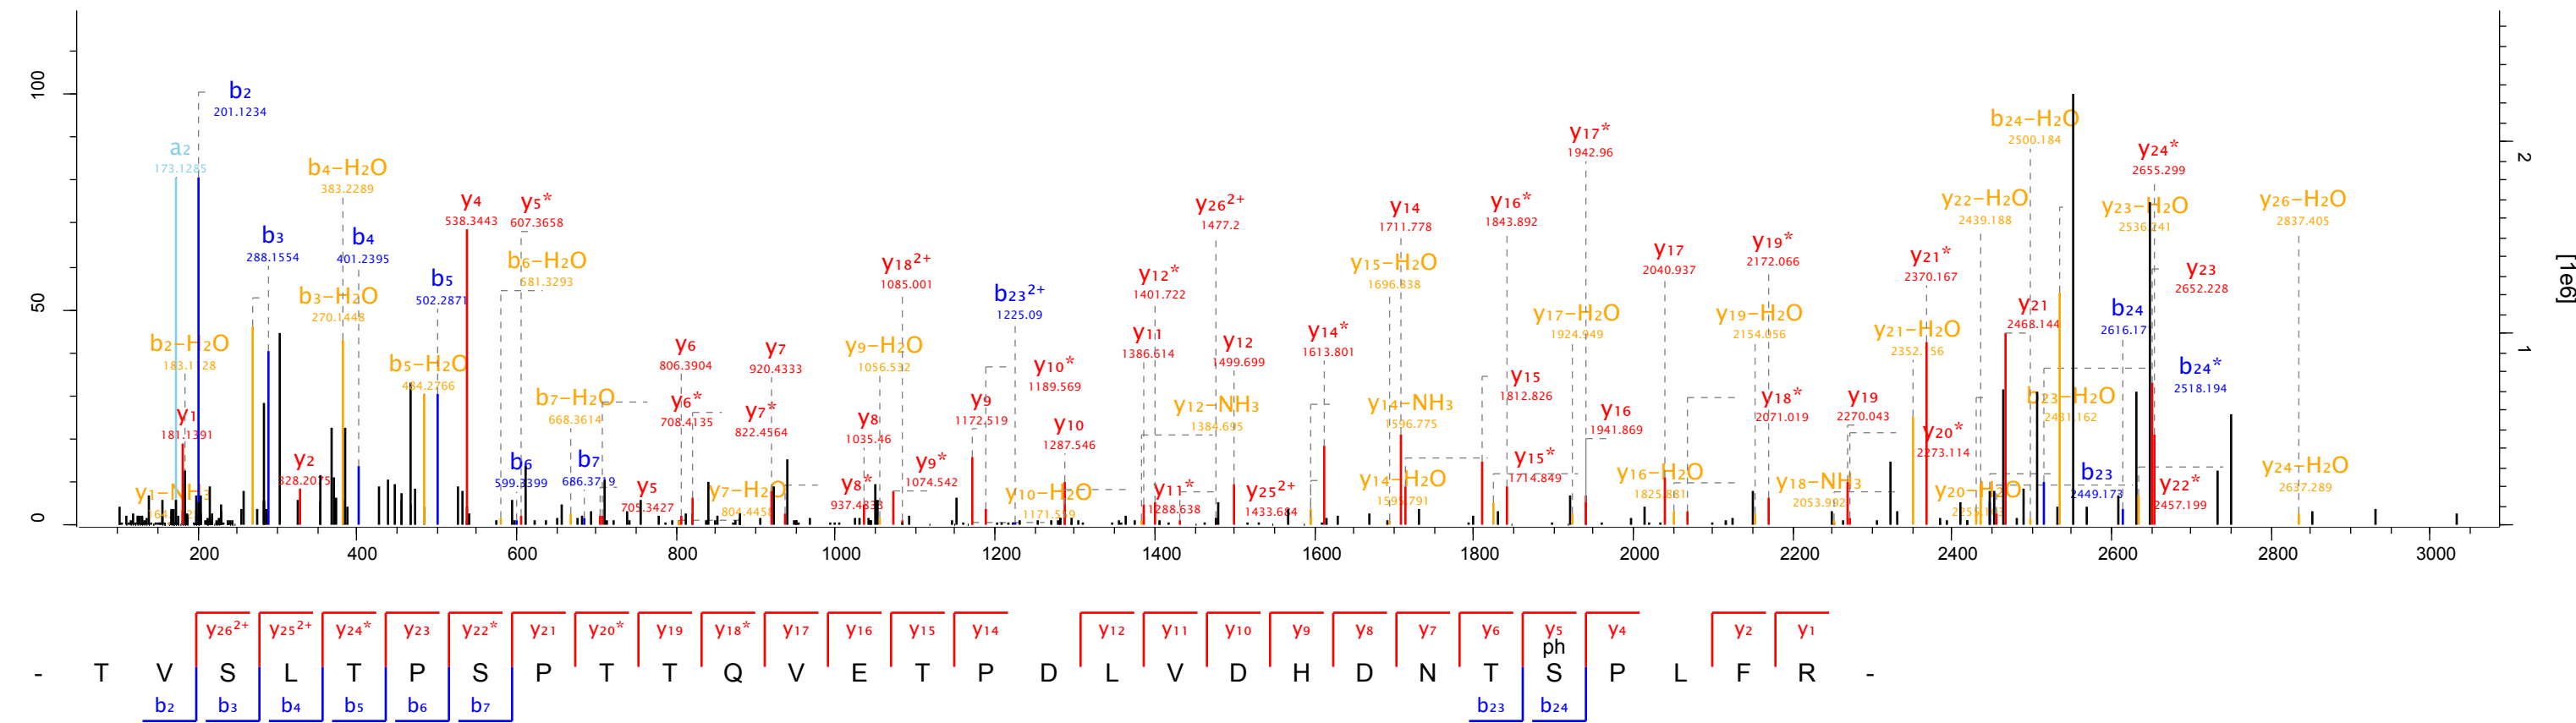



Raw file: 20150814\_A375SR\_Phospho\_BR2\_05  
 Scan: 24008 Method: FTMS; HCD Score: 190.92 m/z: 770.01 Gene names: PABPN1;BCL2L2

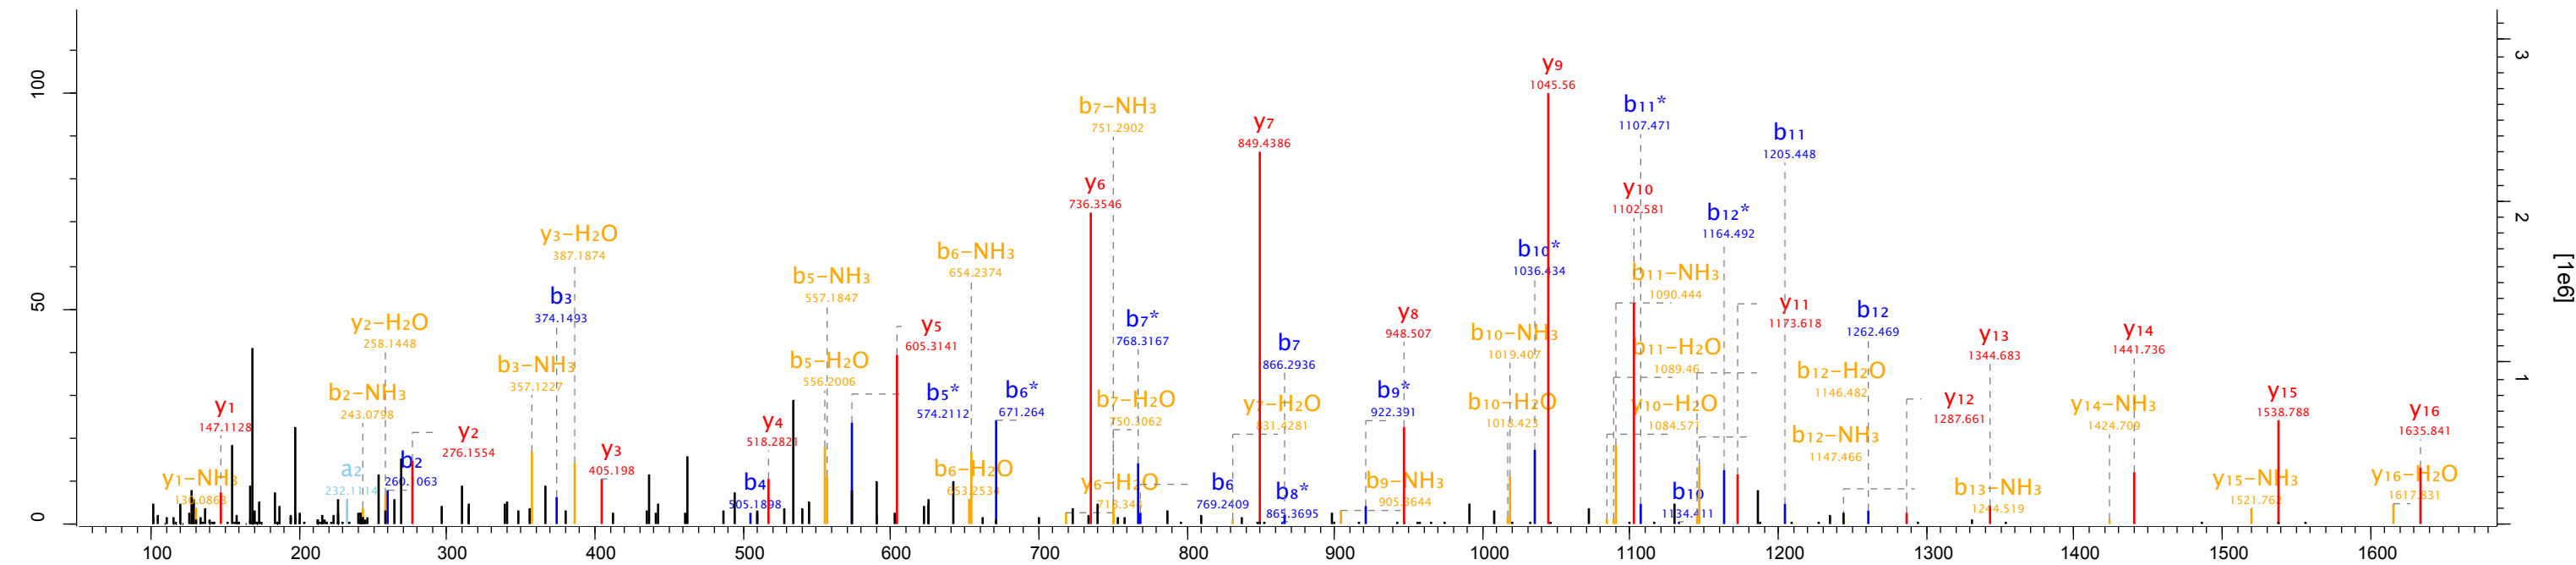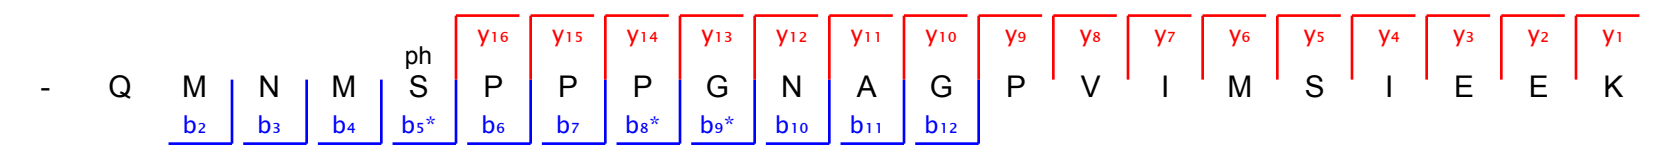

Raw file: 20150814\_A375SR\_Phospho\_BR2\_05  
 Scan: 2458 Method: FTMS; HCD Score: 88.8 m/z: 462.2 Gene names: SLC9A3R2

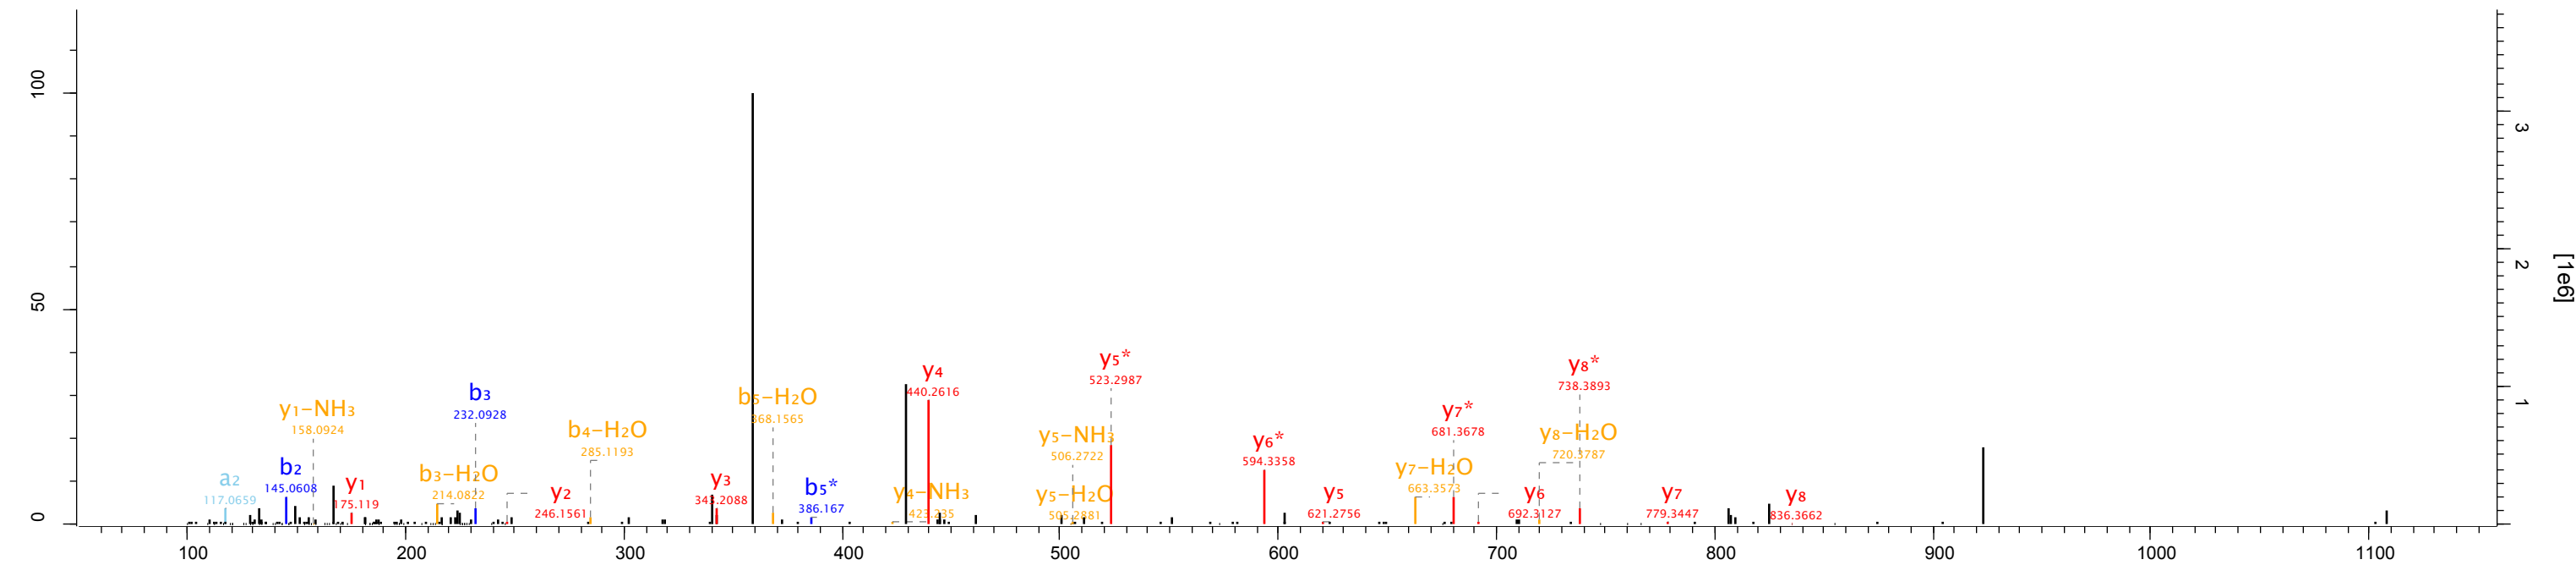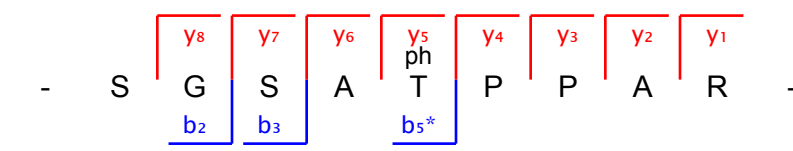

Raw file 20150814\_A375SR\_Phospho\_BR2\_05 Scan 24778 Method FTMS; HCD Score 63.22 m/z 898.44 Gene names HNRNPU

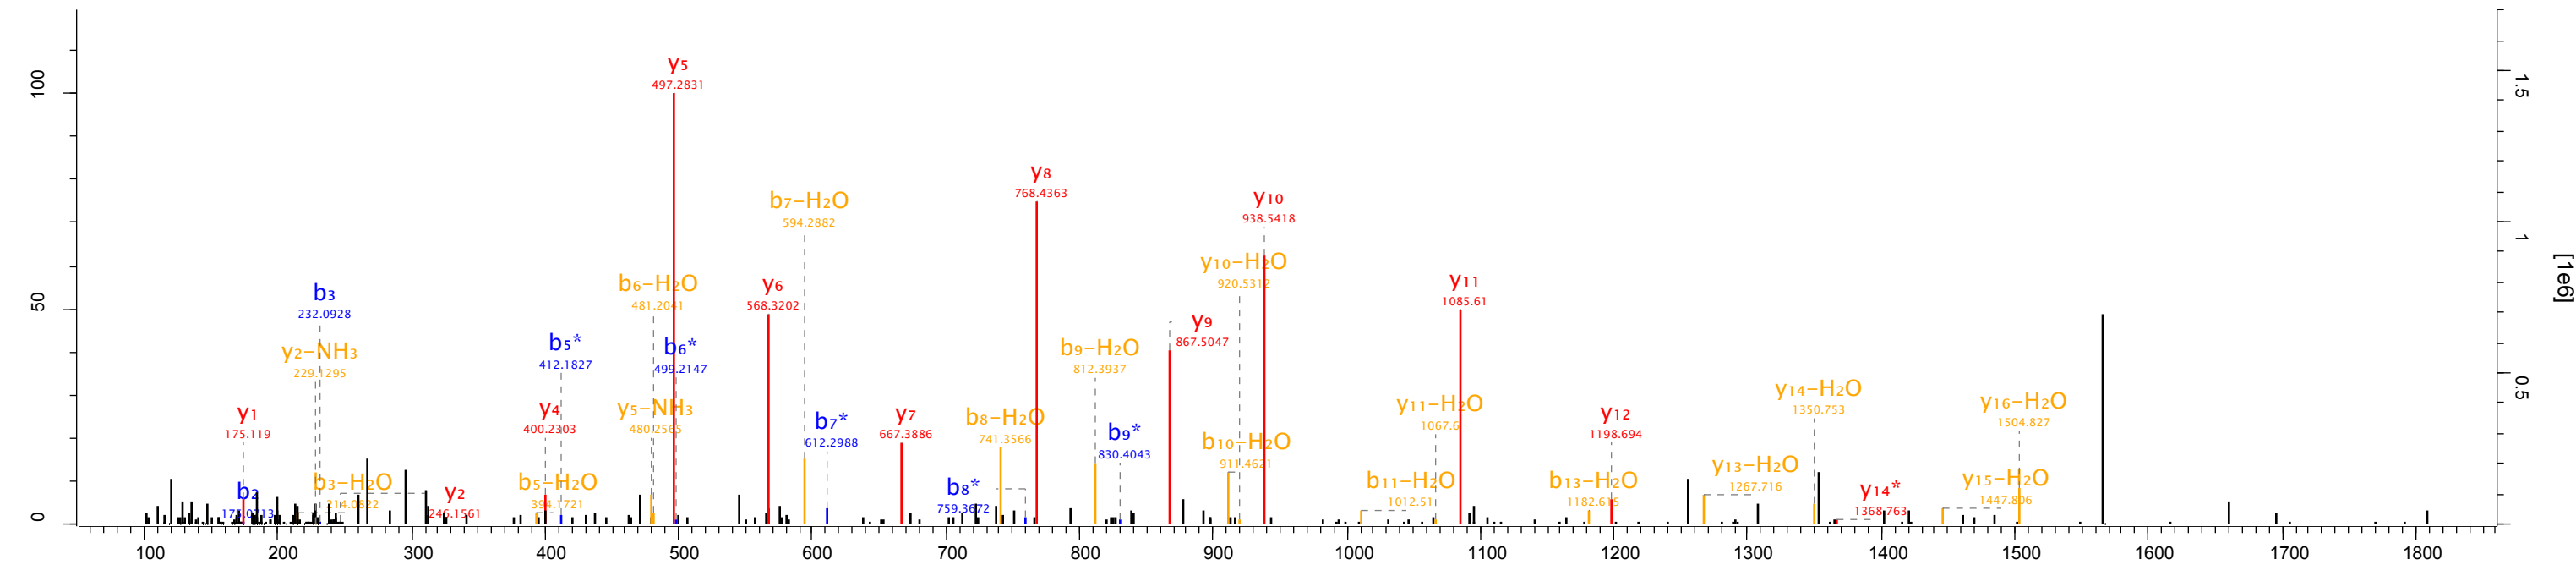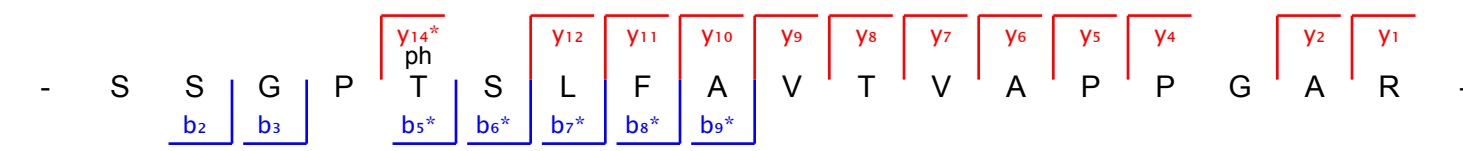

Raw file 20150814\_A375SR\_Phospho\_BR2\_05 Scan 24818 Method FTMS; HCD Score 157 m/z 924.42 Gene names MSANTD3

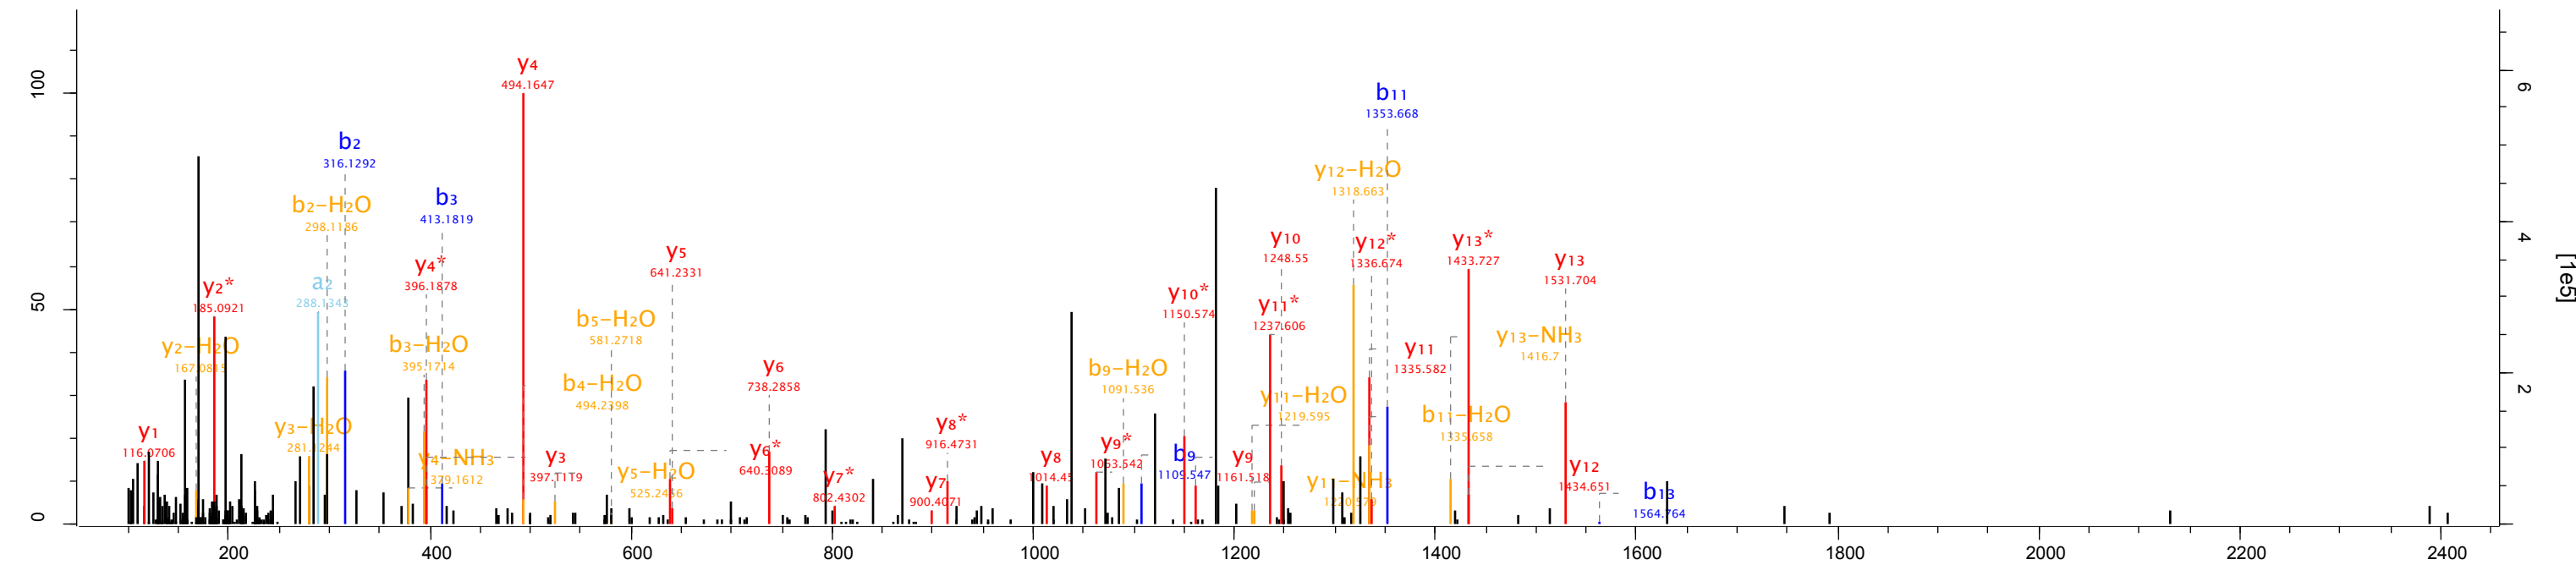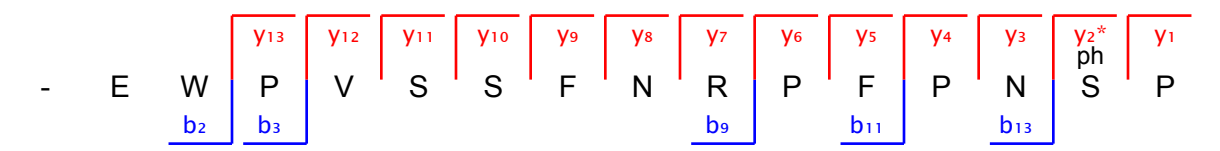

Raw file: 20150814\_A375SR\_Phospho\_BR2\_05  
 Scan: 24878 Method: FTMS; HCD Score: 147.83 m/z: 769.83 Gene names: RAB11FIP5

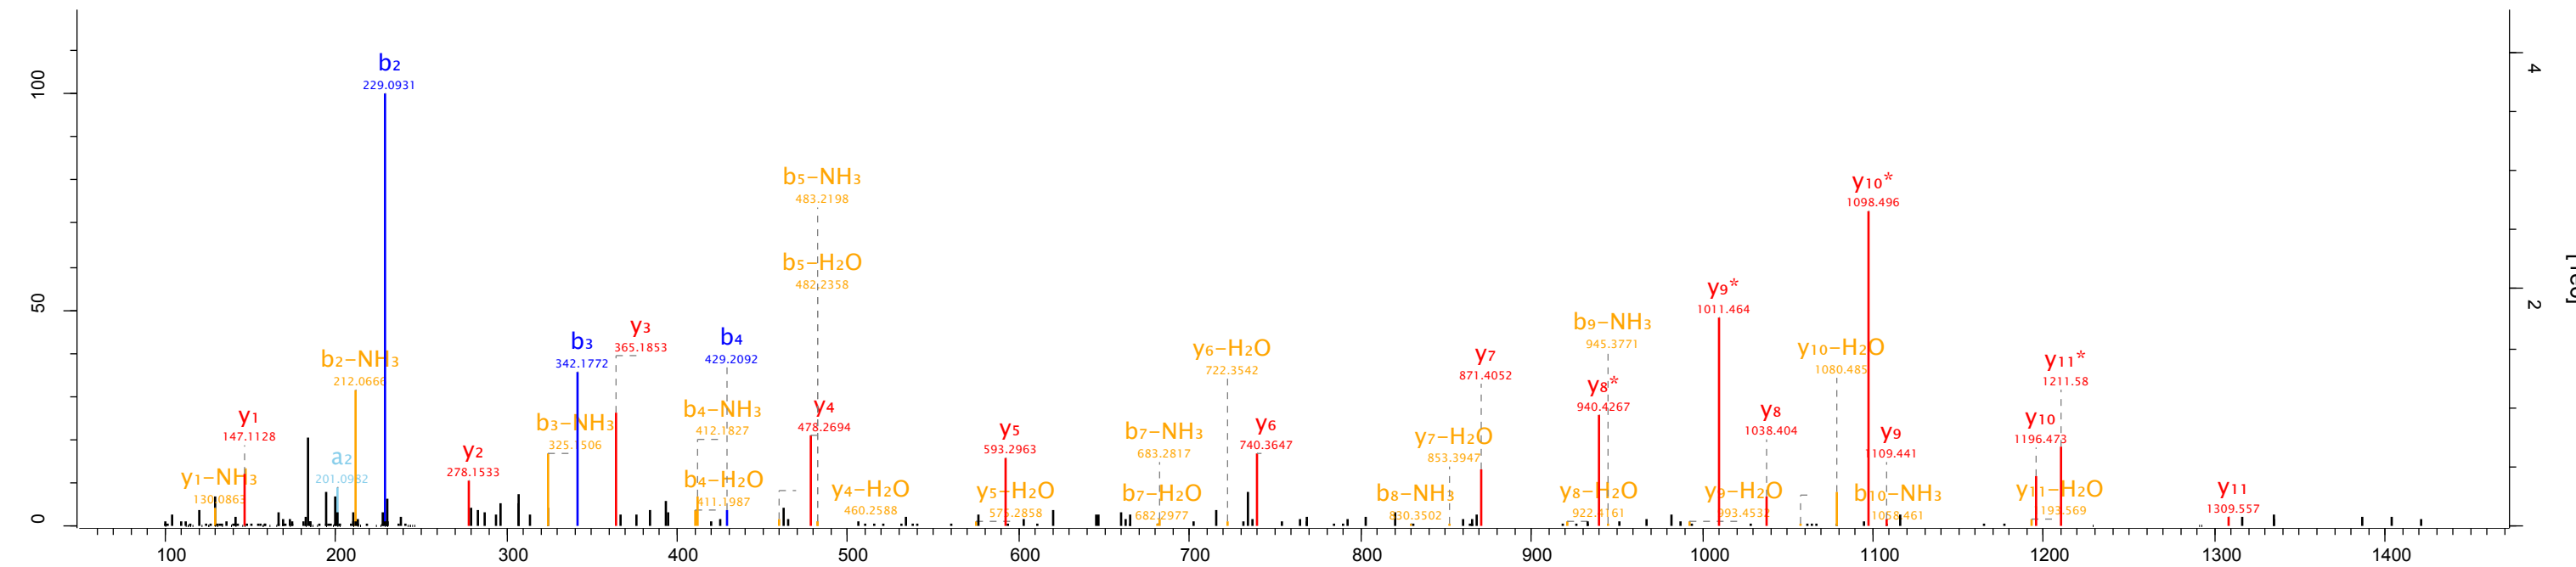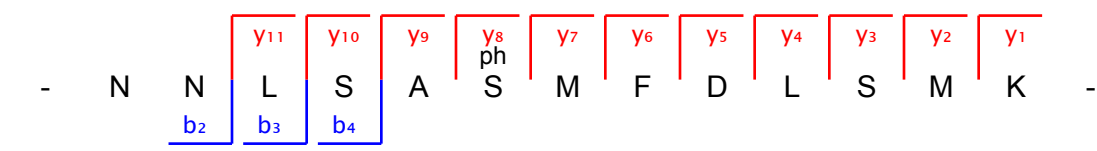

Raw file: 20150814\_A375SR\_Phospho\_BR2\_05  
 Scan: 25198 Method: FTMS; HCD Score: 128.89 m/z: 1317.05 Gene names: ARAP1

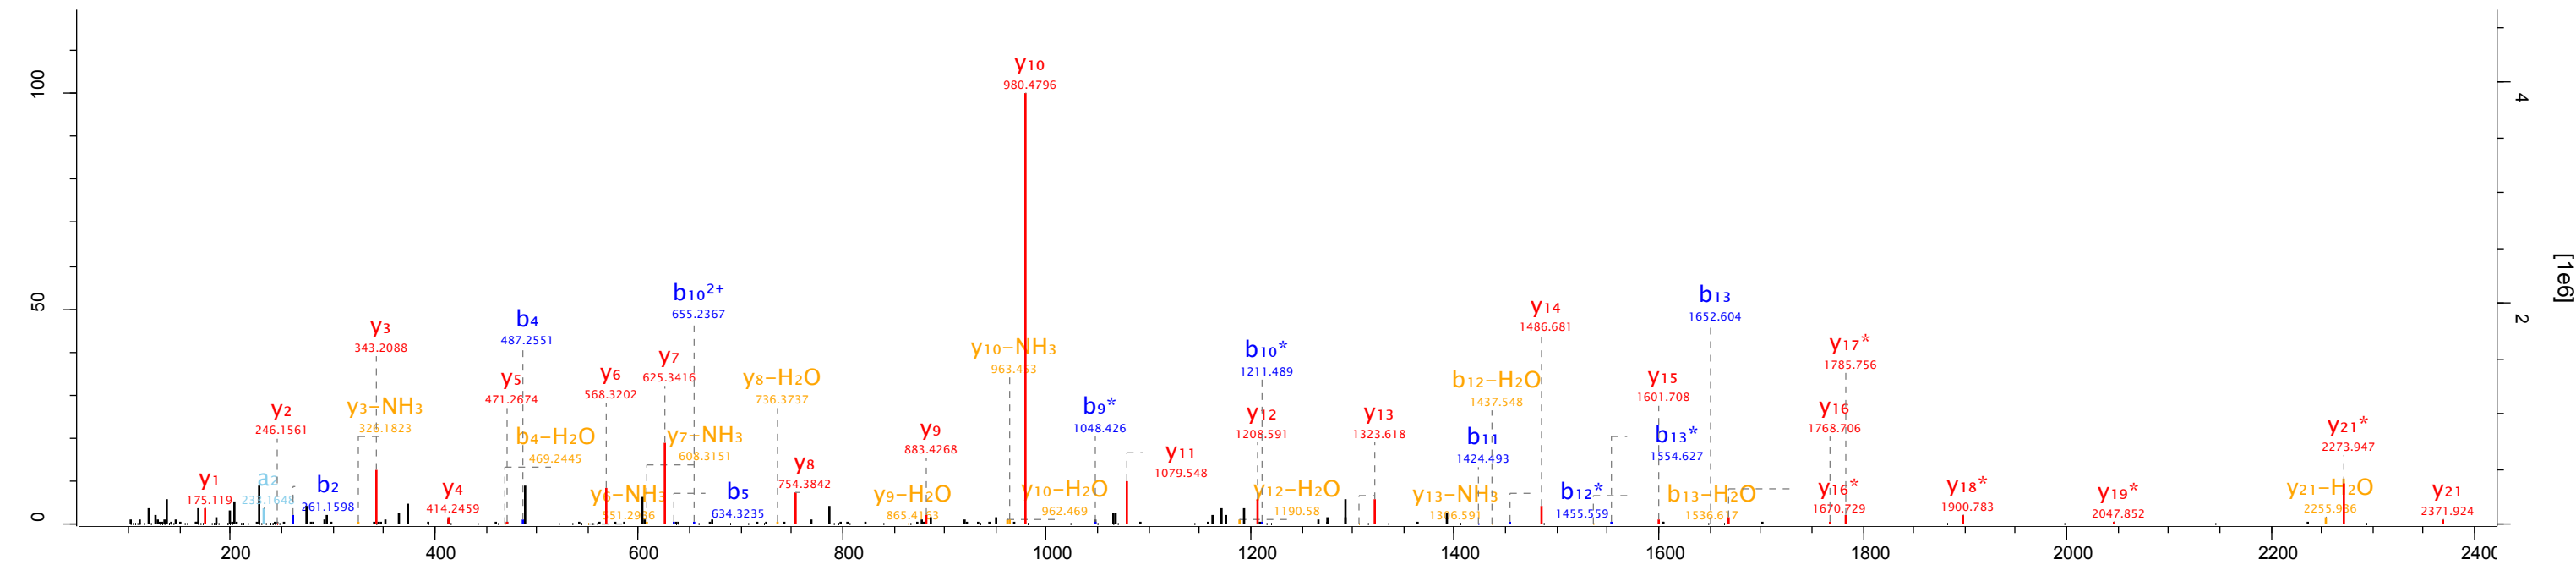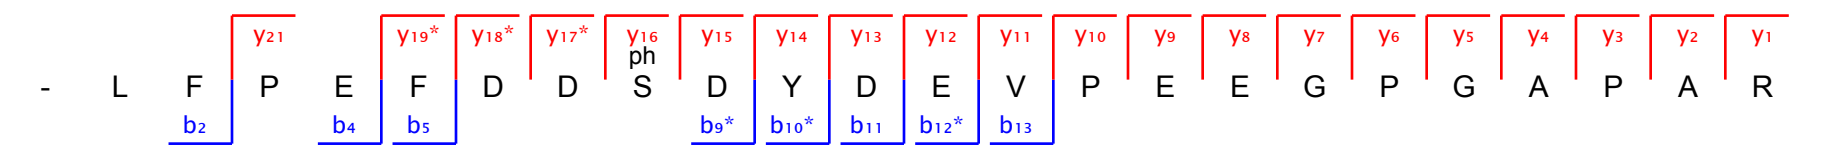

Raw file 20150814\_A375SR\_Phospho\_BR2\_05 Scan 25358 Method FTMS; HCD Score 191.73 m/z 676.3 Gene names PUM1

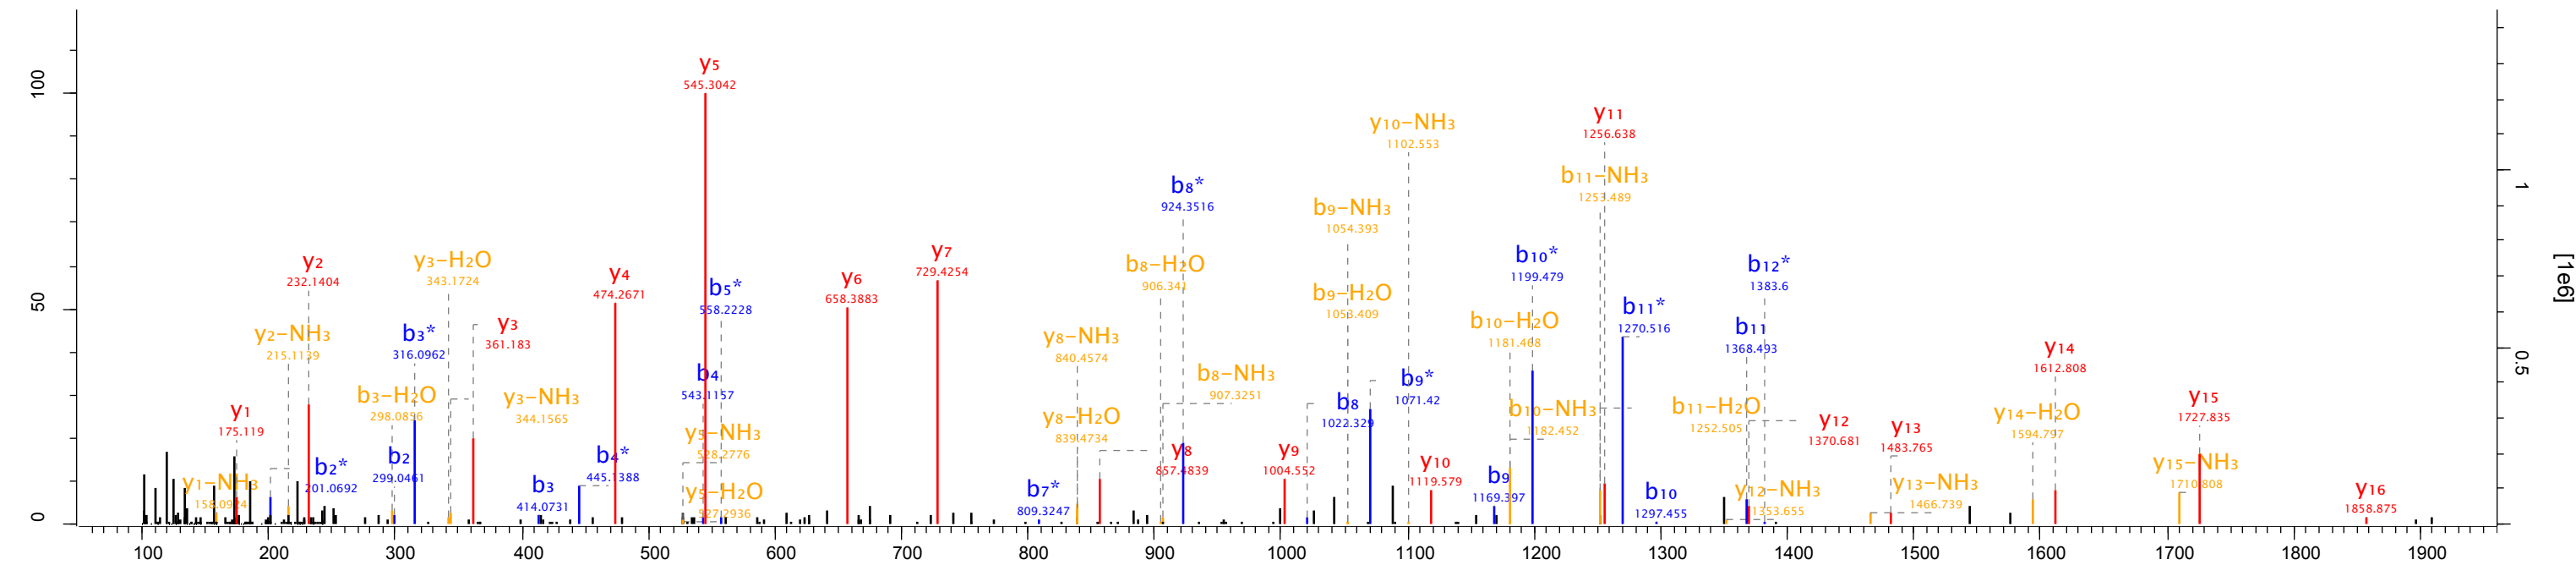

- pH S  
 M D E L N H D F Q A L A L E G R -  
 b2 b3 b4 b5\* b7\* b8 b9 b10 b11 b12\*

Raw file Scan Method Score m/z Gene names  
 20150814\_A375SR\_Phospho\_BR2\_05 25528 FTMS; HCD 108.85 984.7 TSSC1

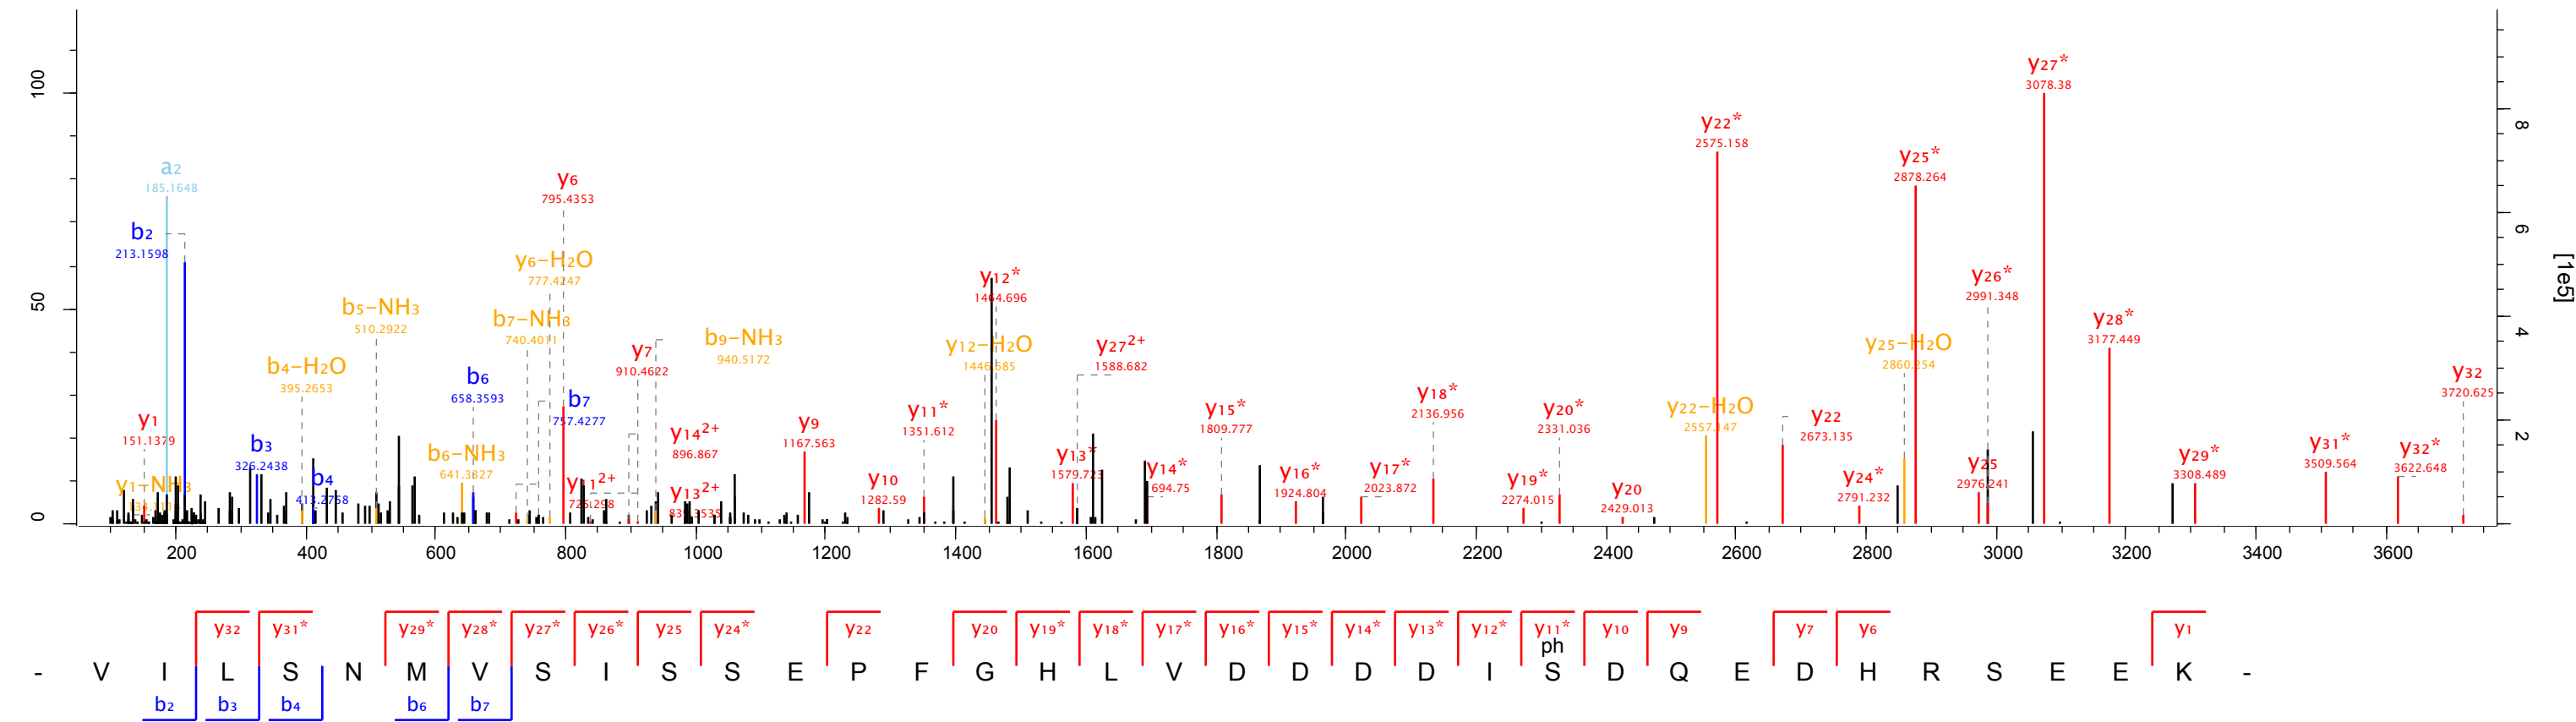



Raw file: 20150814\_A375SR\_Phospho\_BR2\_05  
 Scan: 25538 Method: FTMS; HCD Score: 85.34 m/z: 1009.48 Gene names: CEP76

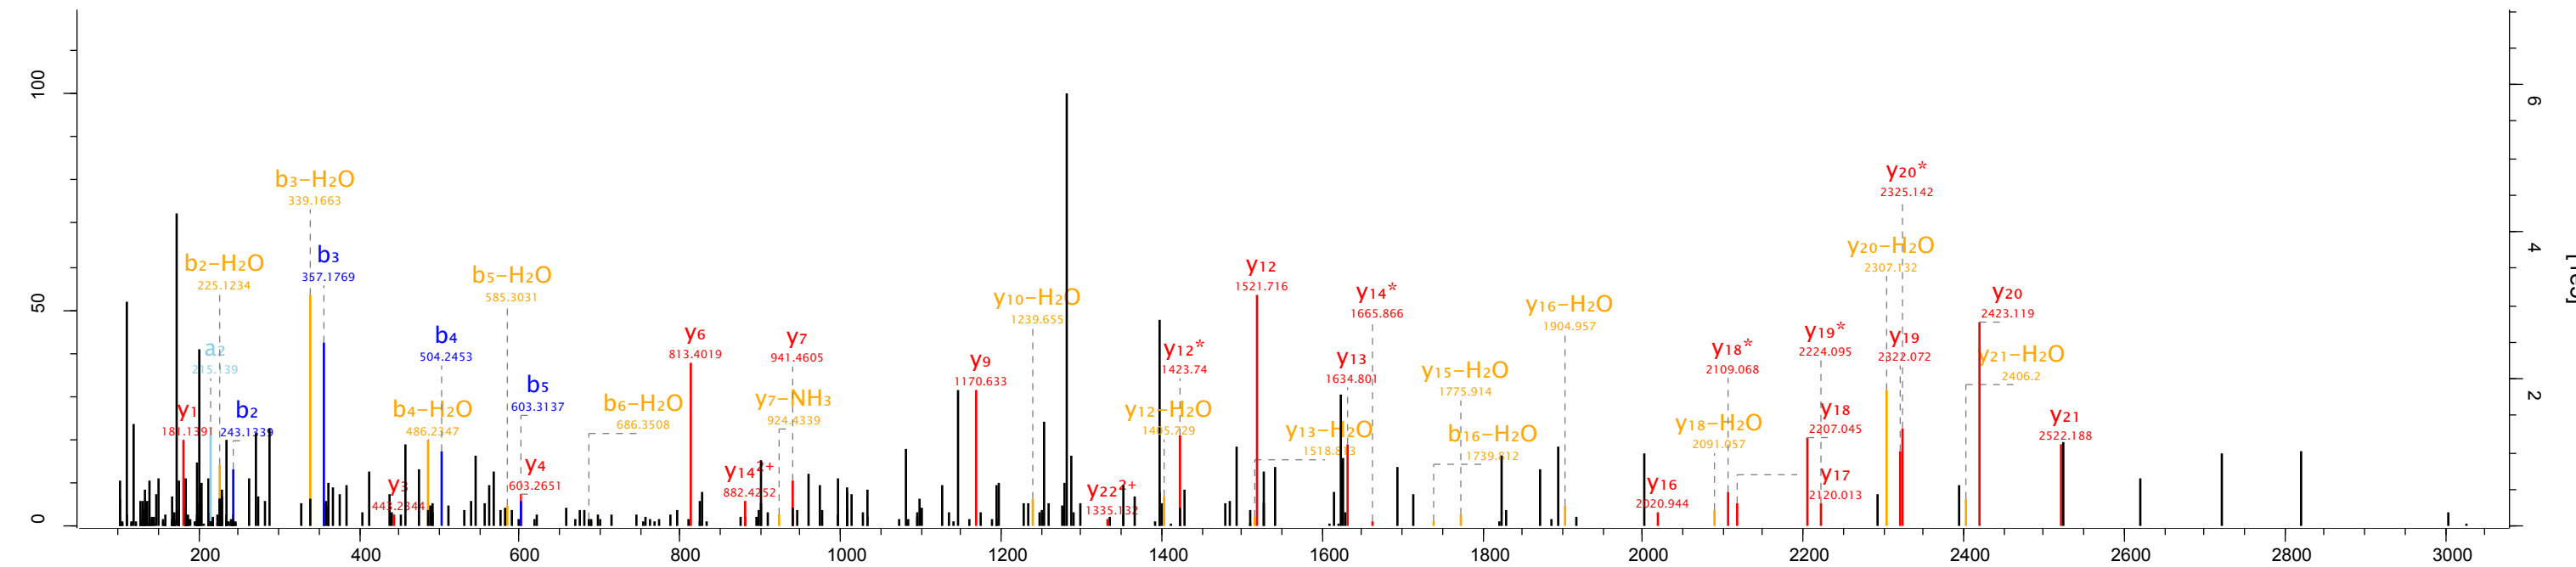

- E L N F V T D S V E Q E L P S S P K Q P I C F D R -  
 (Labels b2, b3, b4, b5 are under L, N, F, V respectively)  
 (Labels y16, y17, y18, y19, y20, y21, y22<sup>2+</sup> are above F, V, T, D, S, V, E, Q, E, L, P, S, P, K, Q, P, I, C, F, D, R respectively)

Raw file: 20150814\_A375SR\_Phospho\_BR2\_05  
 Scan: 25648 Method: FTMS; HCD Score: 234.3 m/z: 1198.99 Gene names: NFIX

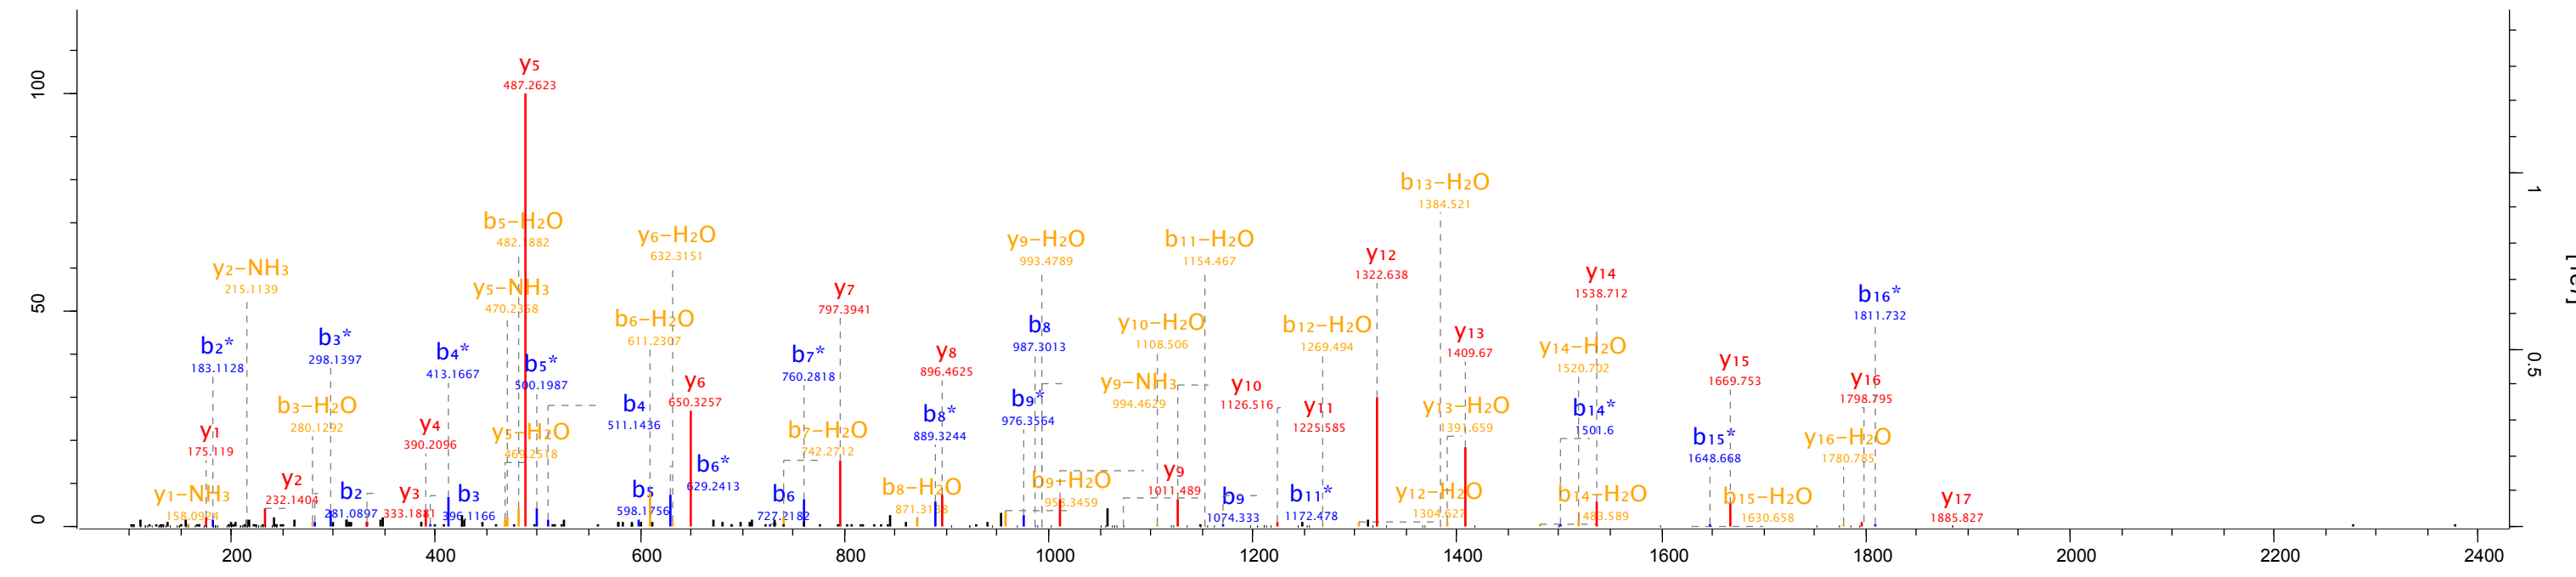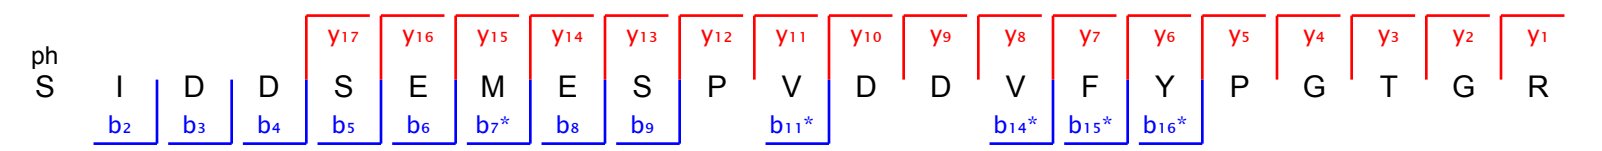

Raw file Scan Method Score m/z Gene names  
 20150814\_A375SR\_Phospho\_BR2\_05 25928 FTMS; HCD 113.86 920.89 SERBP1

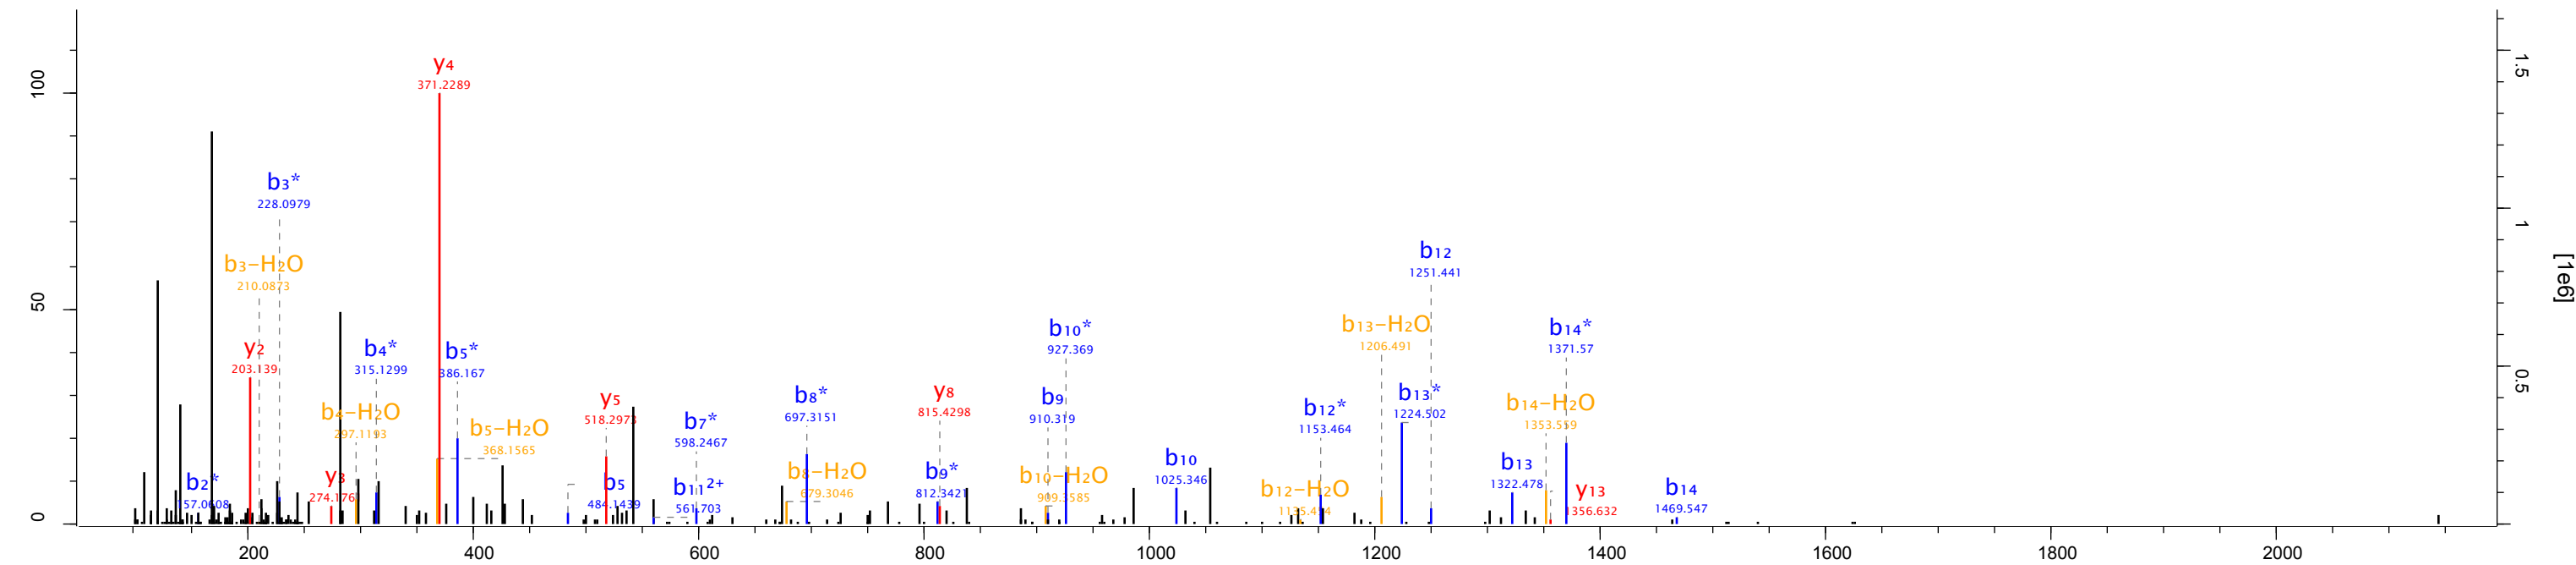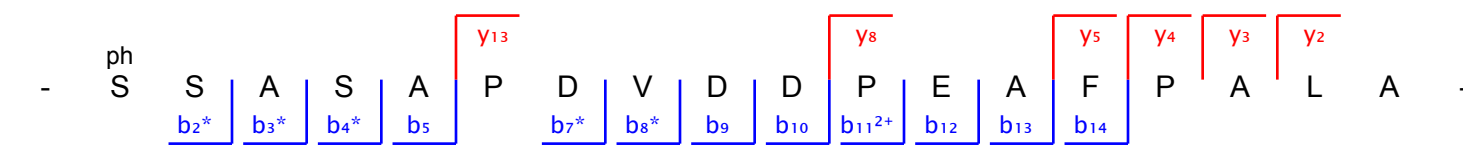

Raw file: 20150814\_A375SR\_Phospho\_BR2\_05  
 Scan: 26358 Method: FTMS; HCD Score: 68.86 m/z: 980.72 Gene names: TPR

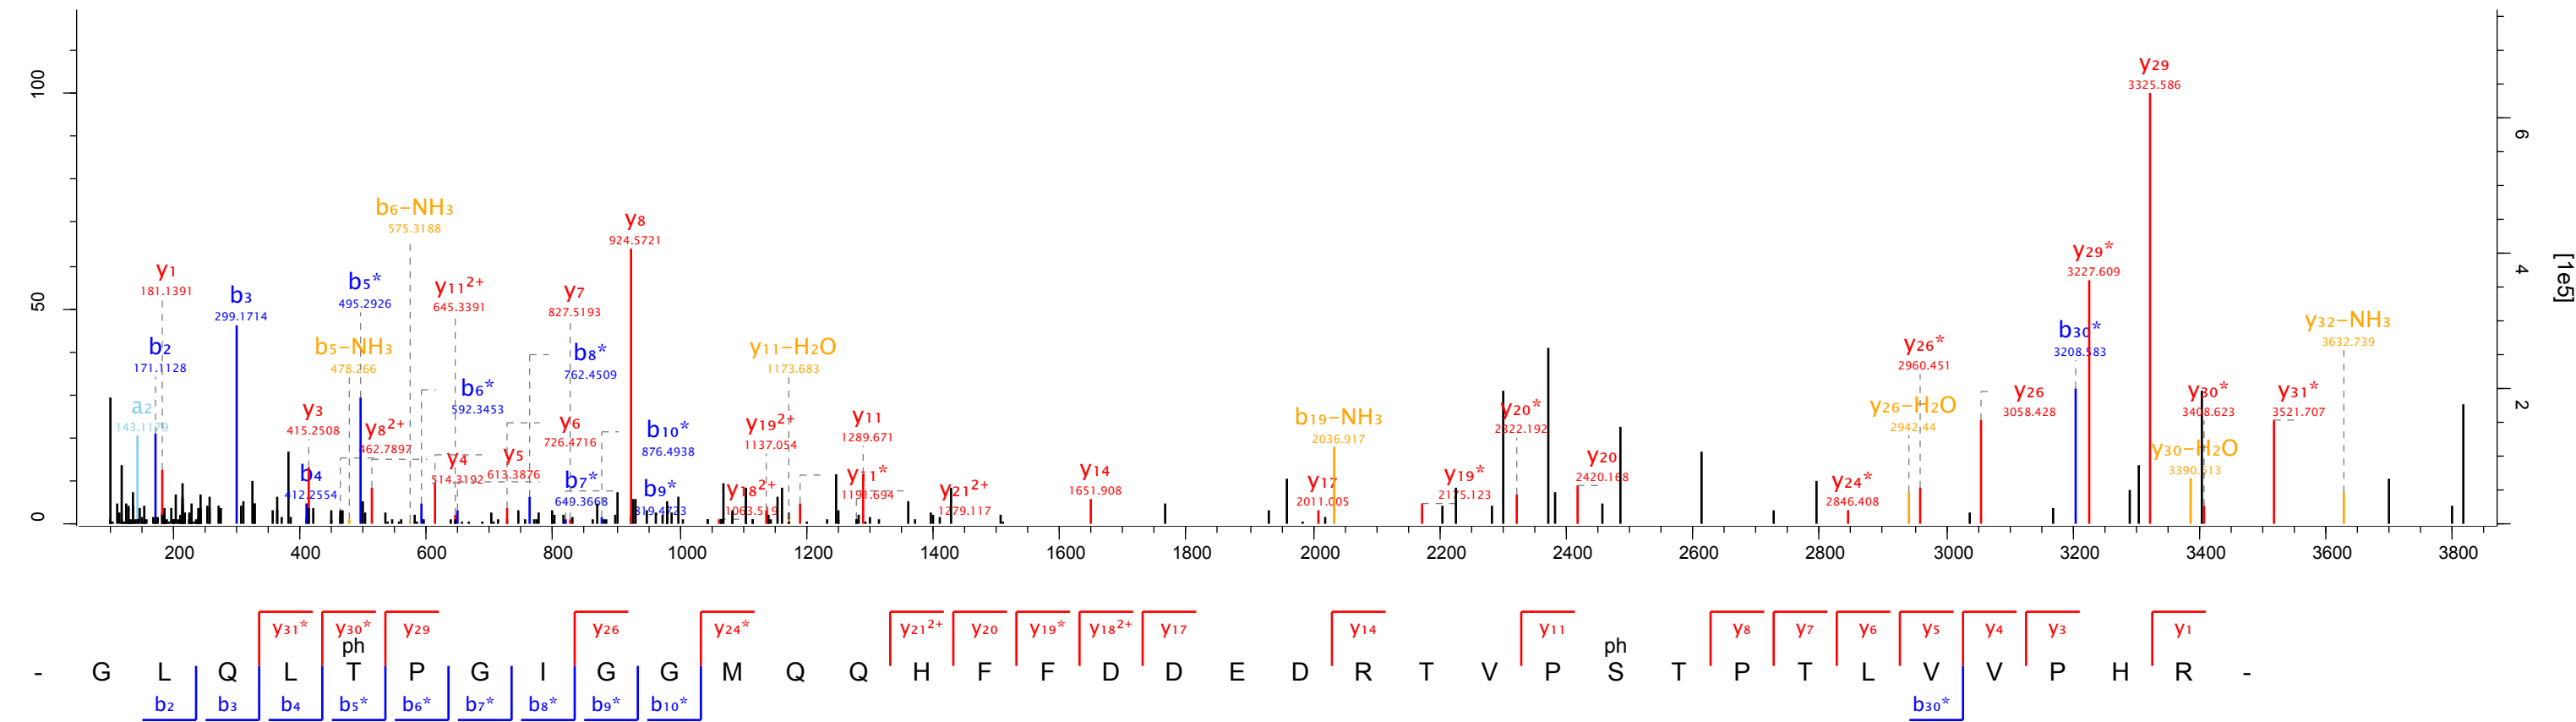

Raw file  
 20150814\_A375SR\_Phospho\_BR2\_05  
 Scan 26438 Method FTMS; HCD Score 203.79 m/z 1225.89 Gene names RANBP2

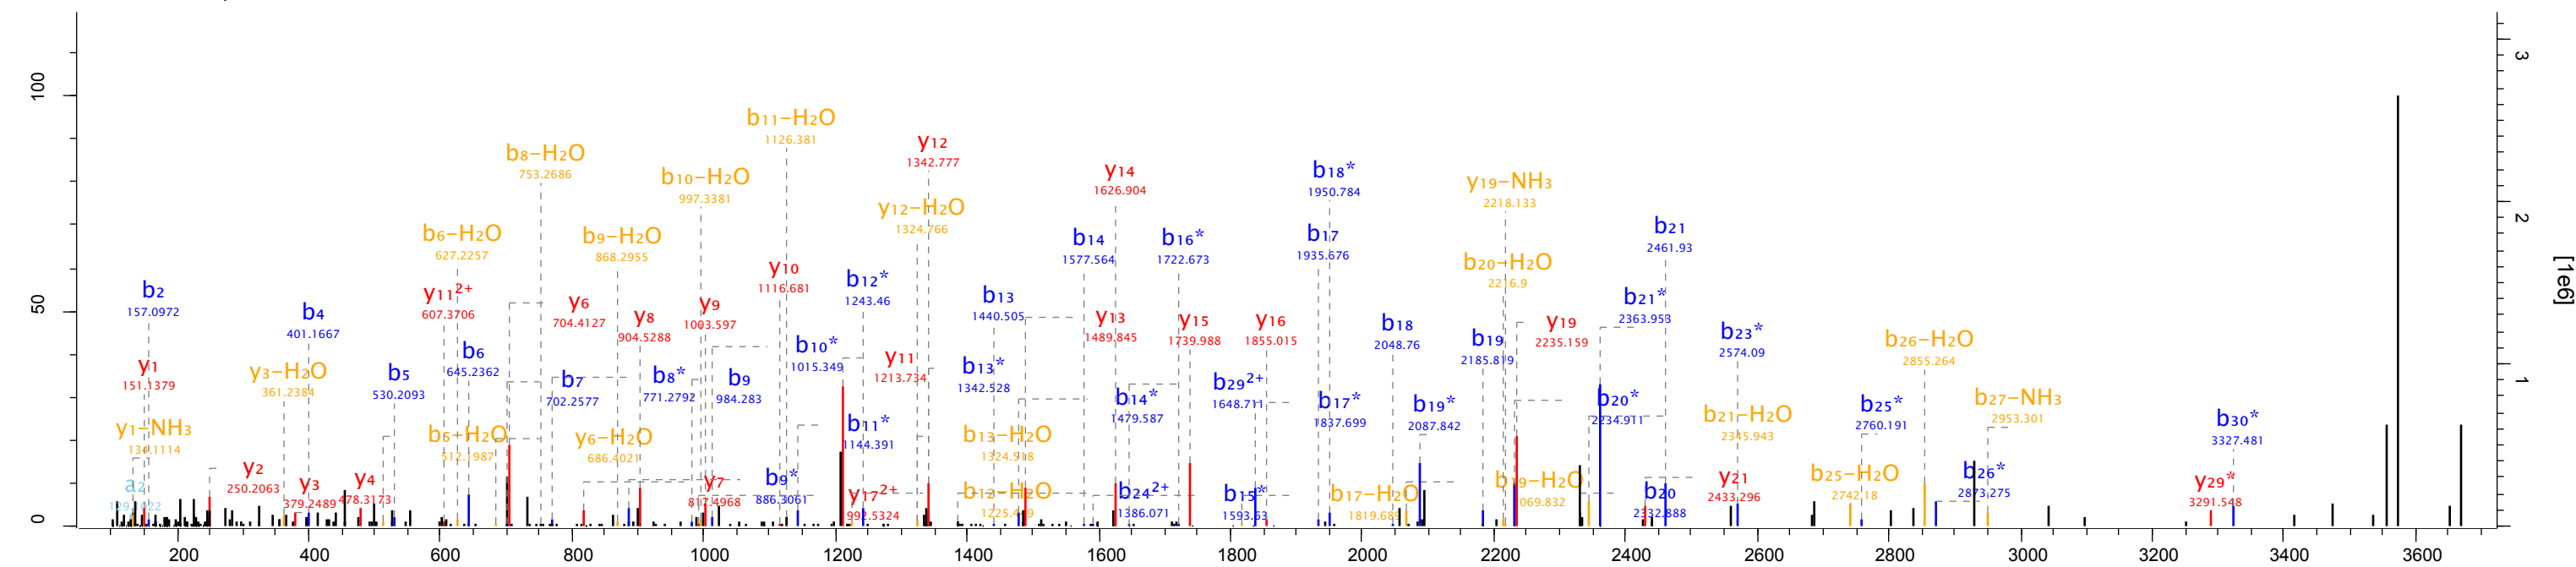

Raw file: 20150814\_A375SR\_Phospho\_BR2\_05  
 Scan: 26638 Method: FTMS; HCD Score: 207.5 m/z: 936.17 Gene names: GBF1

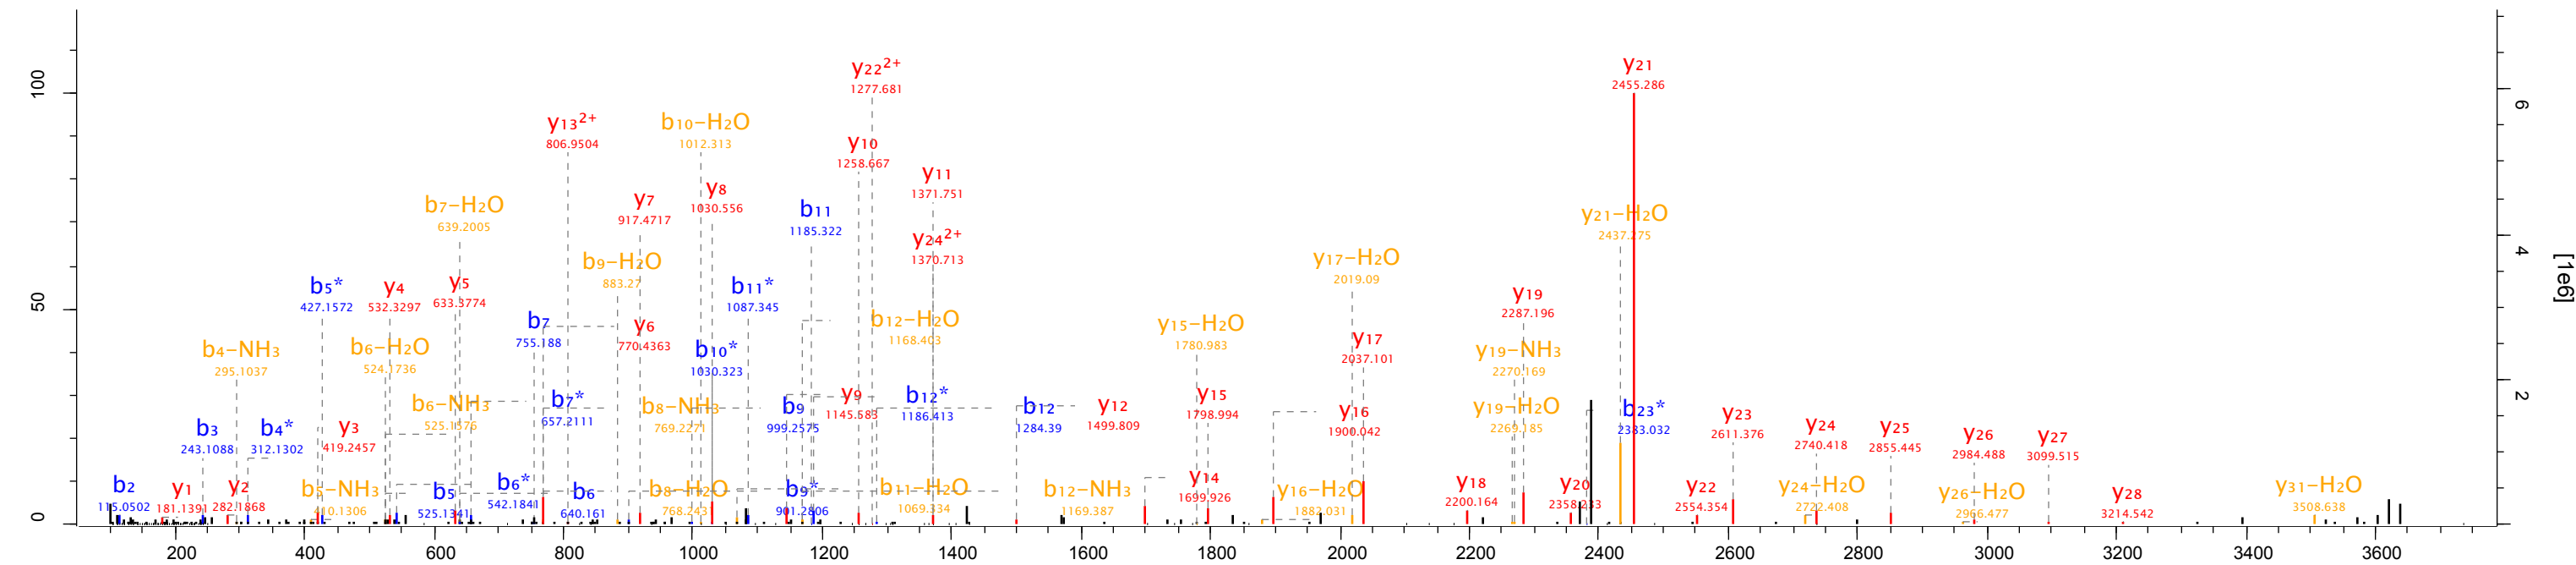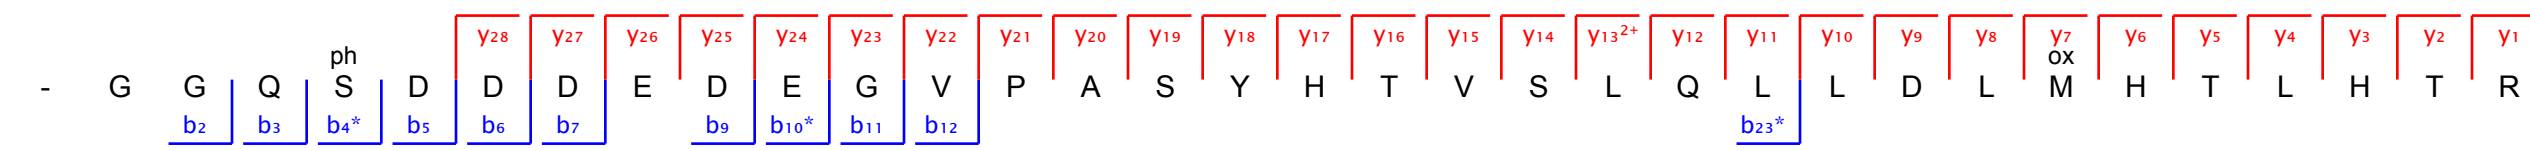

Raw file 20150814\_A375SR\_Phospho\_BR2\_05 Scan 26698 Method FTMS; HCD Score 243.23 m/z 1163.46 Gene names DDX55

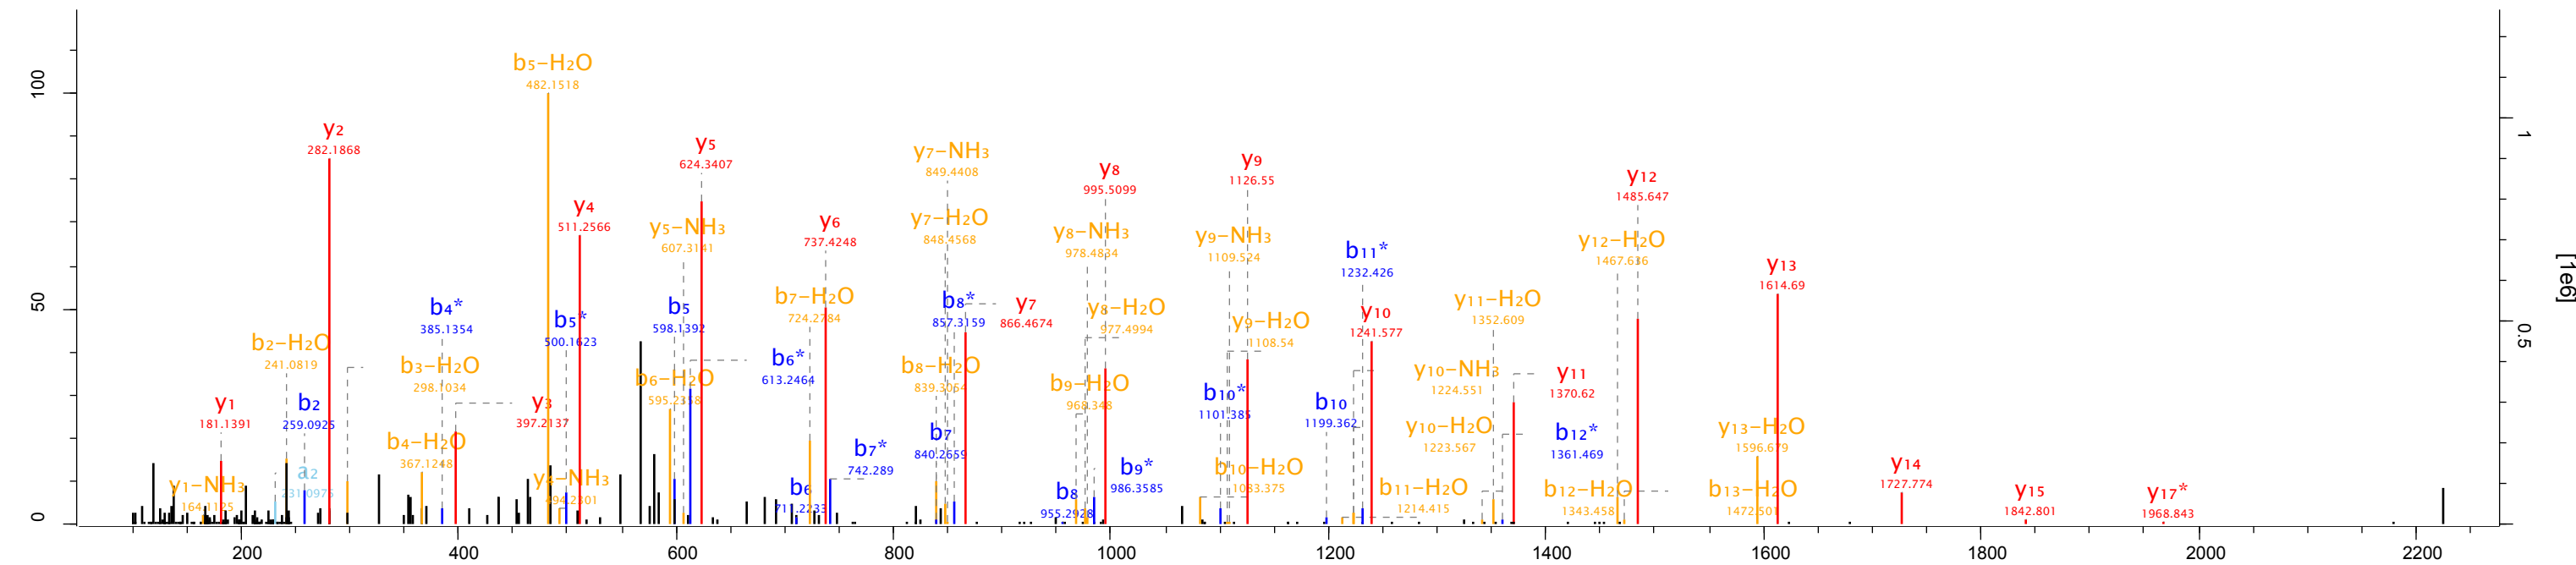

- E E G ph S D I E D E D M E E L L N D T R -

b<sub>2</sub>
b<sub>4</sub>\*
b<sub>5</sub>
b<sub>6</sub>
b<sub>7</sub>
b<sub>8</sub>
b<sub>9</sub>\*
b<sub>10</sub>
b<sub>11</sub>\*
b<sub>12</sub>\*
y<sub>17</sub>\*
y<sub>15</sub>
y<sub>14</sub>
y<sub>13</sub>
y<sub>12</sub>
y<sub>11</sub>
y<sub>10</sub>
y<sub>9</sub>
y<sub>8</sub>
y<sub>7</sub>
y<sub>6</sub>
y<sub>5</sub>
y<sub>4</sub>
y<sub>3</sub>
y<sub>2</sub>
y<sub>1</sub>

Raw file: 20150814\_A375SR\_Phospho\_BR2\_05  
 Scan: 26768 Method: FTMS; HCD Score: 71.98 m/z: 743.34 Gene names: AKAP6

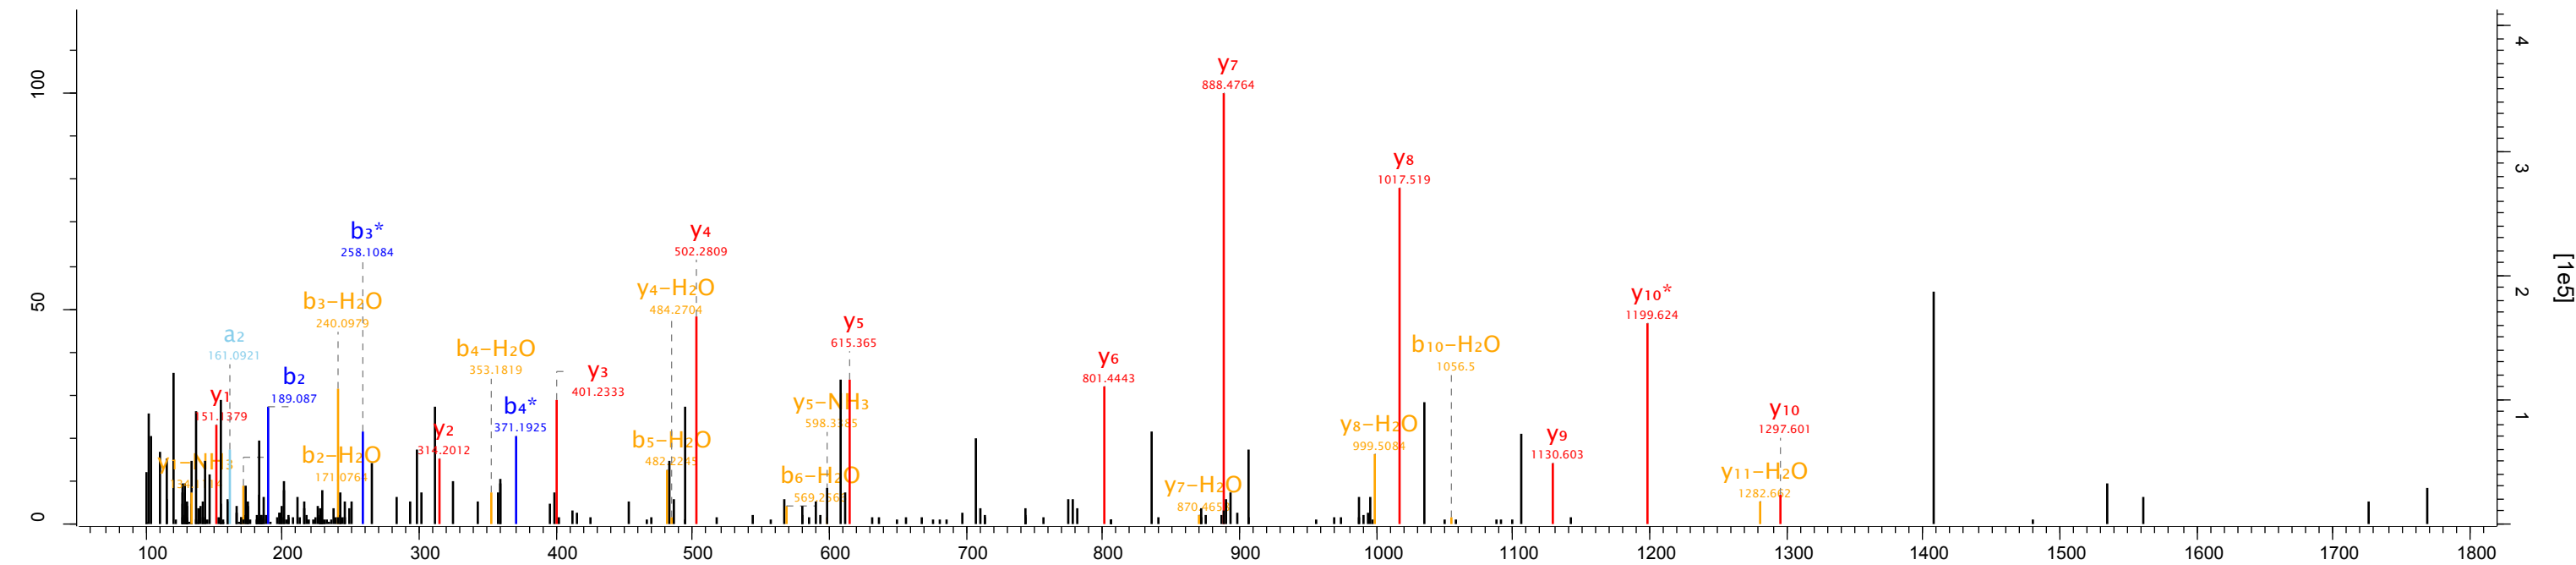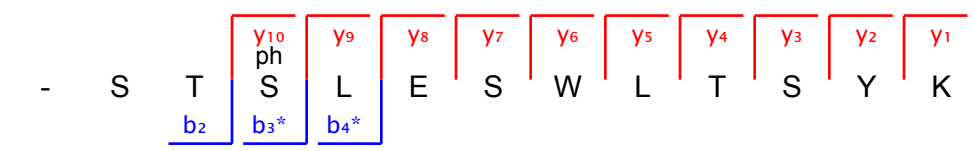



Raw file 20150814\_A375SR\_Phospho\_BR2\_05 Scan 26898 Method FTMS; HCD Score 50.84 m/z 870.41 Gene names FOXC1

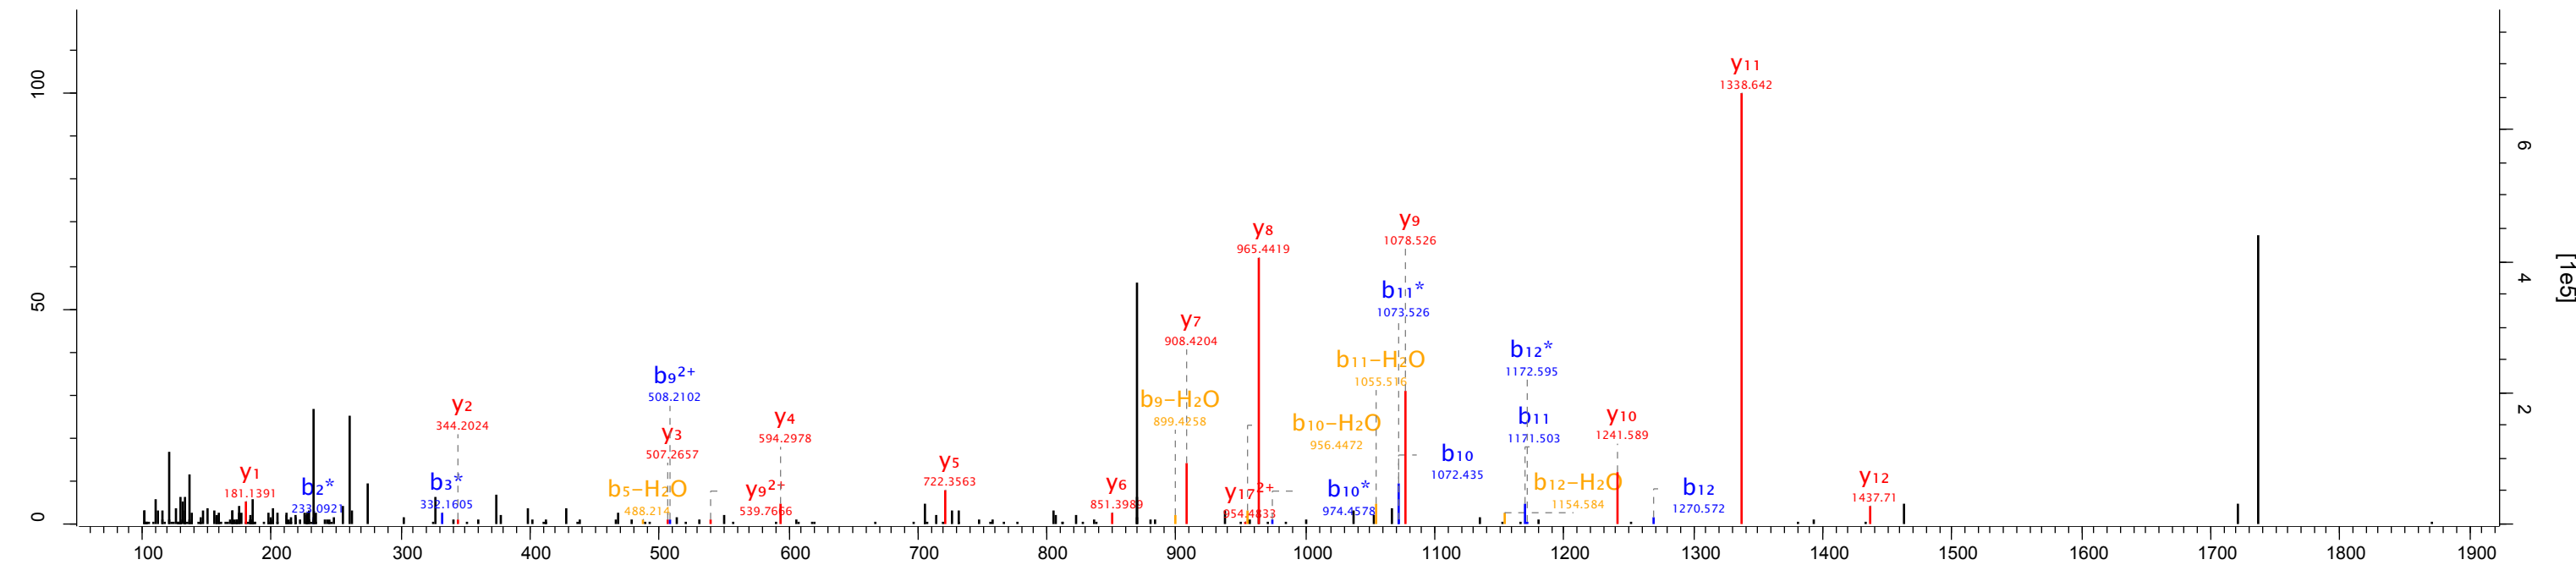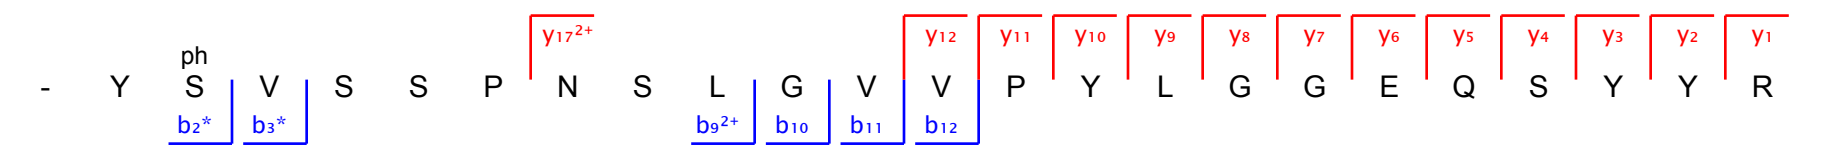

Raw file 20150814\_A375SR\_Phospho\_BR2\_05 Scan 27048 Method FTMS; HCD Score 80.63 m/z 703.3 Gene names PRKAR2A

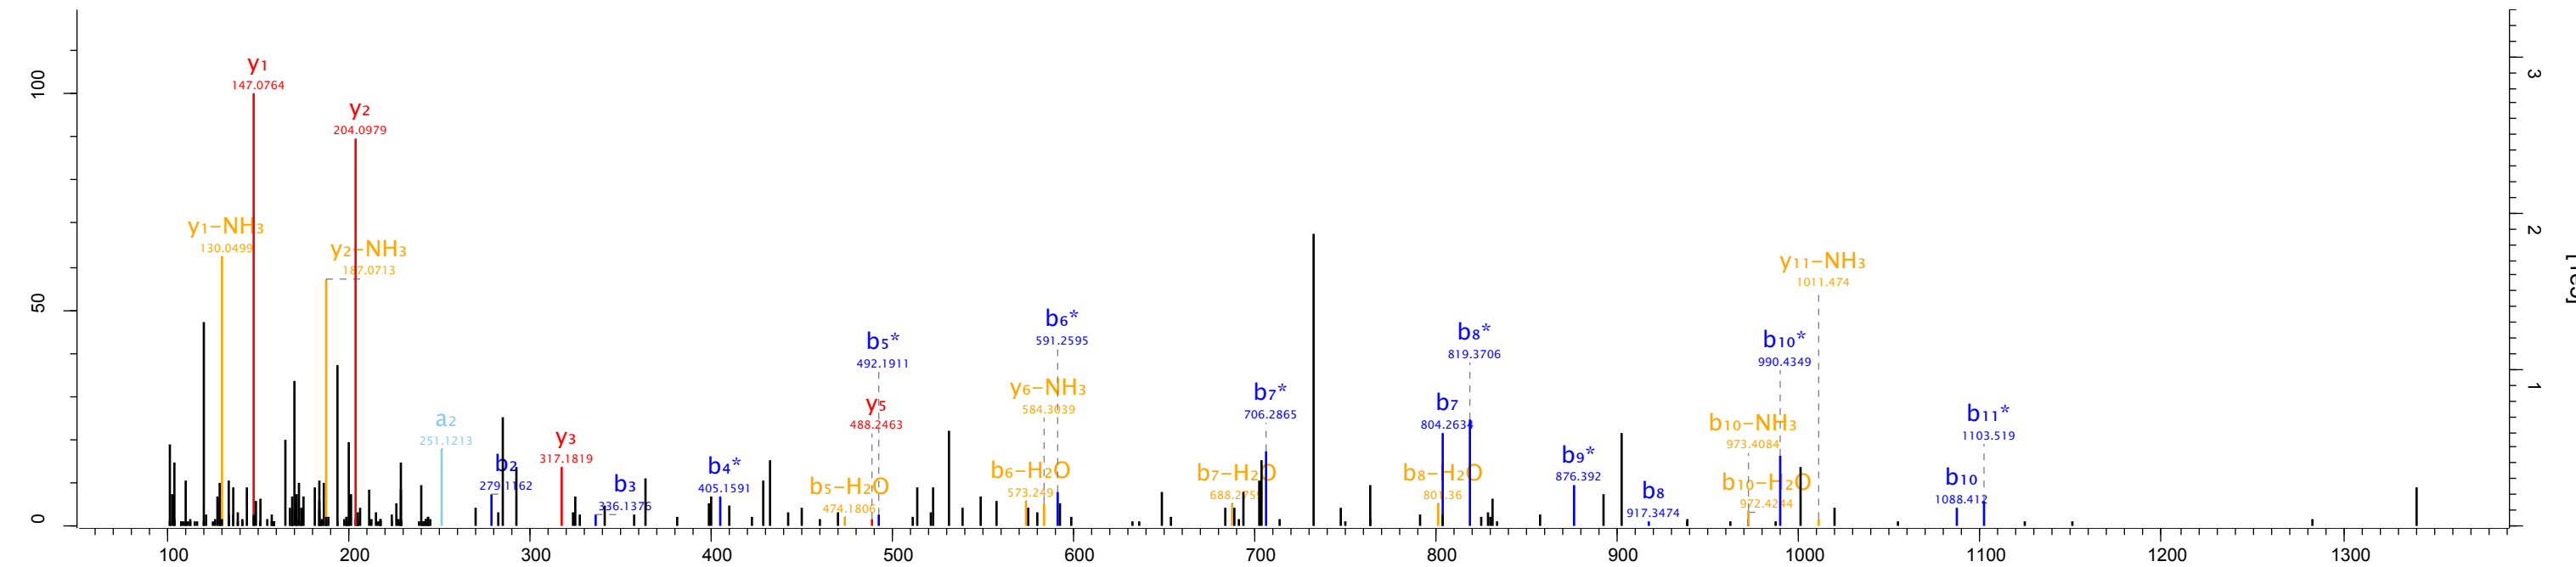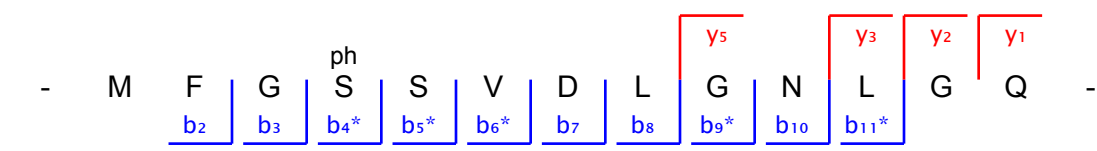

Raw file 20150814\_A375SR\_Phospho\_BR2\_05 Scan 27248 Method FTMS; HCD Score 145.29 m/z 1226.25 Gene names FERMT2

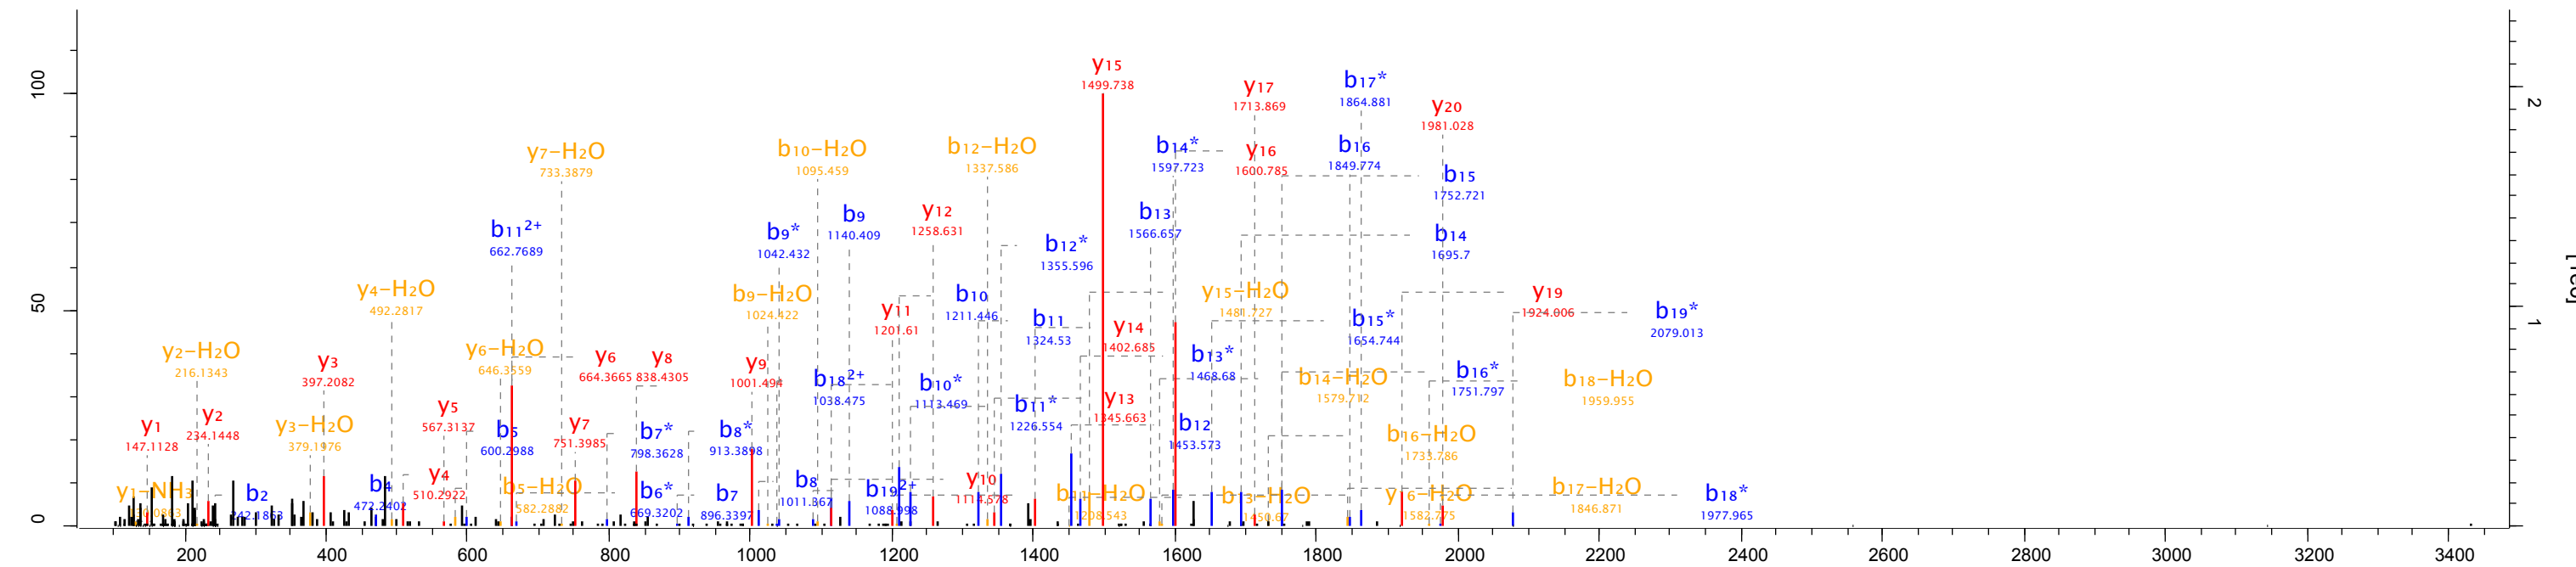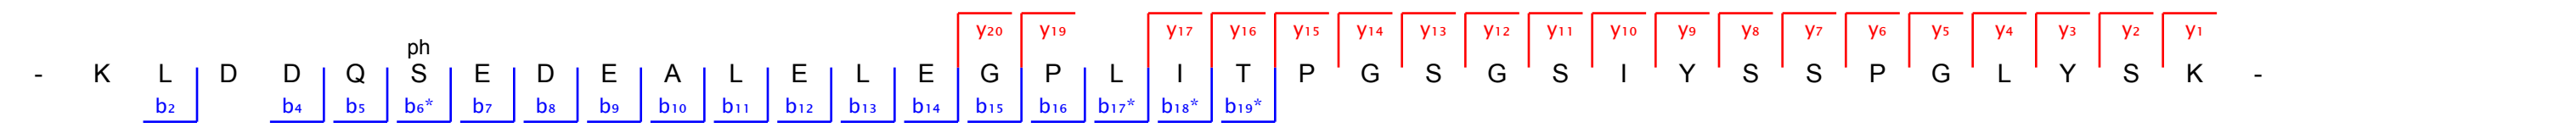

Raw file: 20150814\_A375SR\_Phospho\_BR2\_05  
 Scan: 2728 Method: FTMS; HCD Score: 136.84 m/z: 464.22 Gene names: RBM27

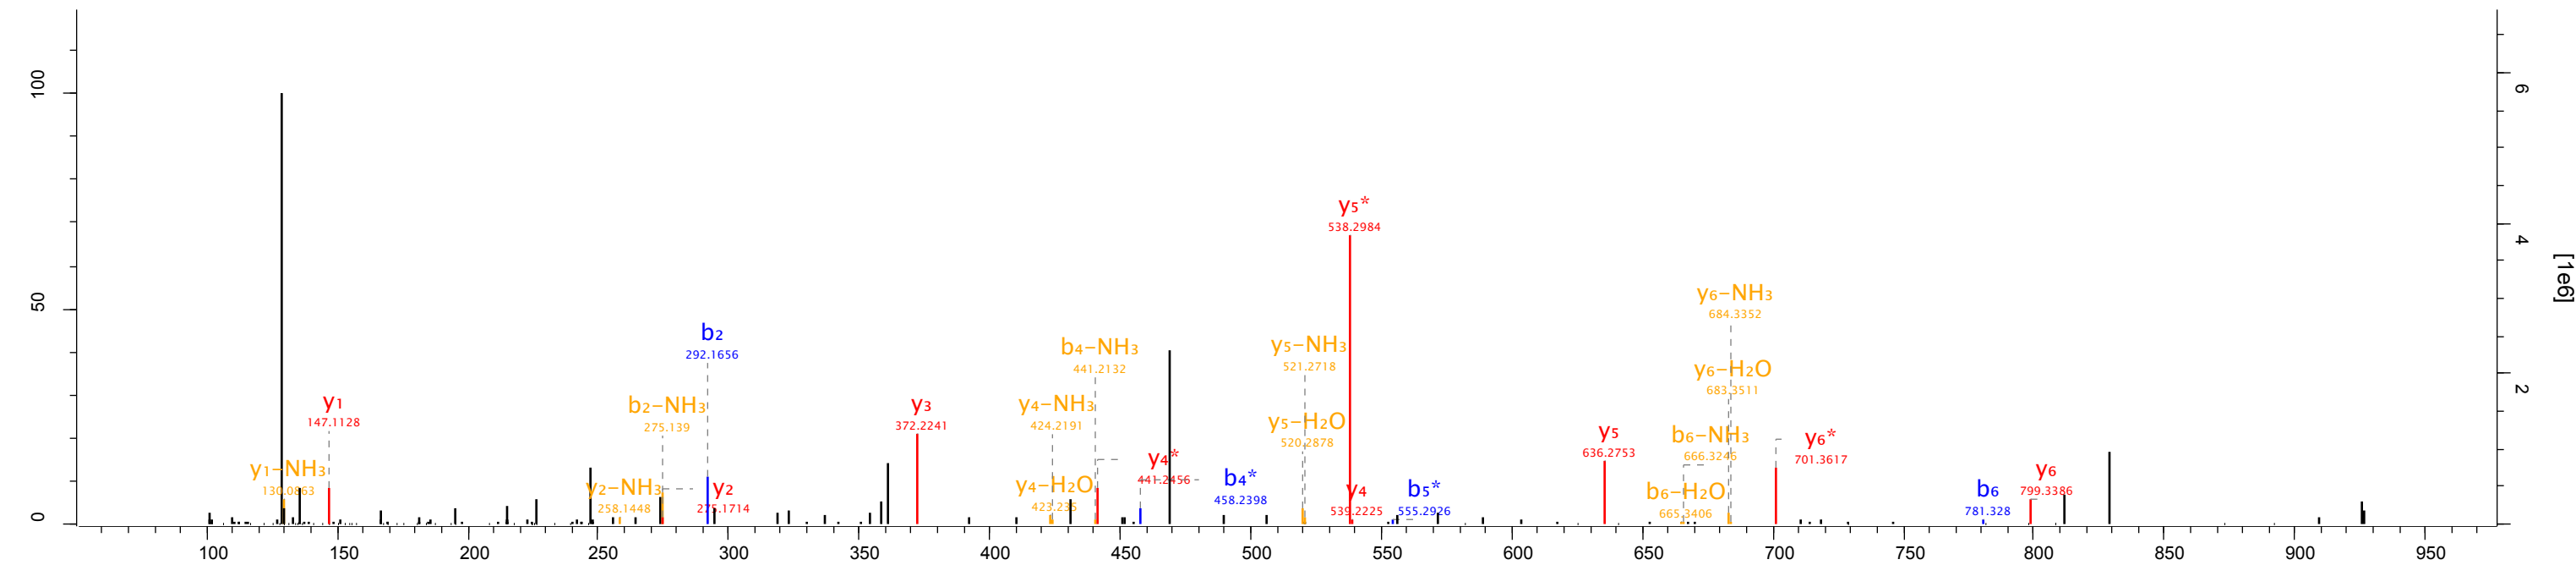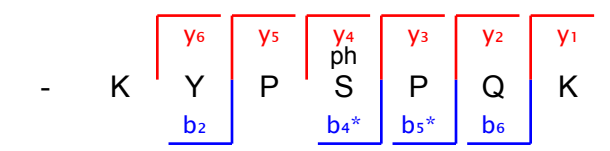

Raw file 20150814\_A375SR\_Phospho\_BR2\_05 Scan 27438 Method FTMS; HCD Score 165.45 m/z 832.42 Gene names PLEKHG5

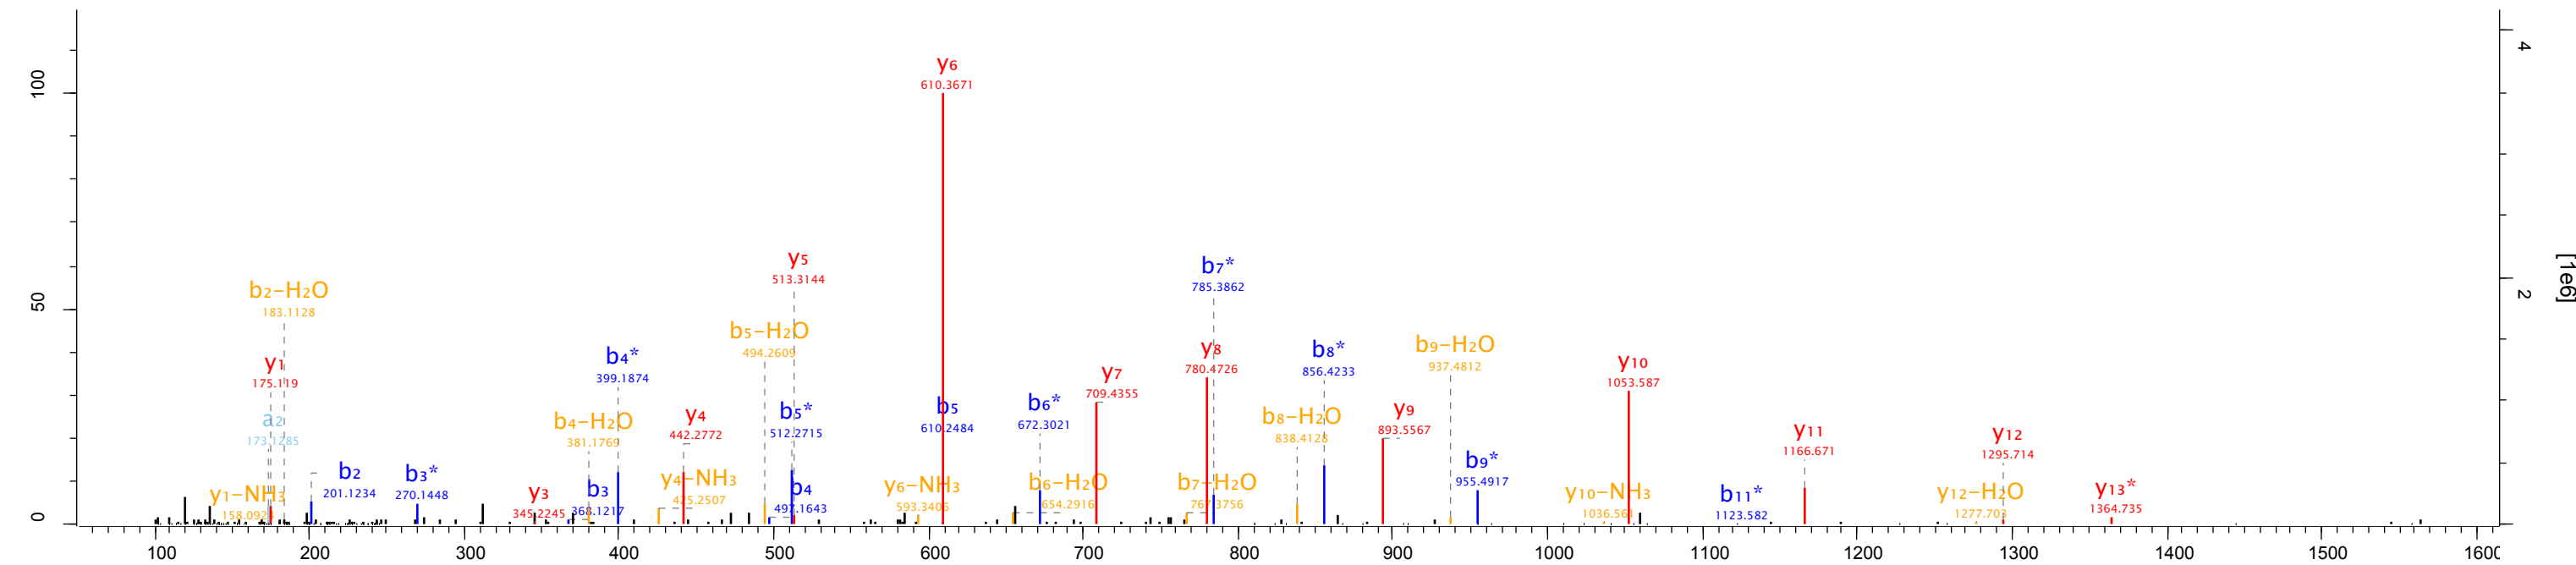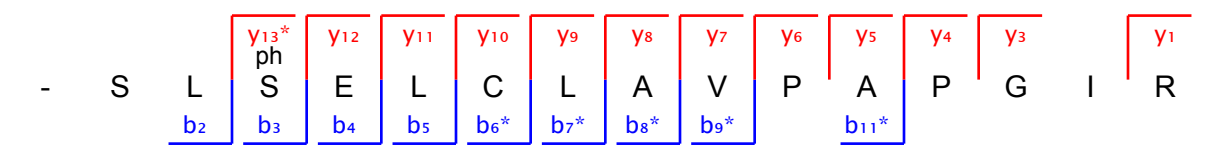

Raw file 20150814\_A375SR\_Phospho\_BR2\_05 Scan 28348 Method FTMS; HCD Score 268.76 m/z 979.13 Gene names LRRFIP2

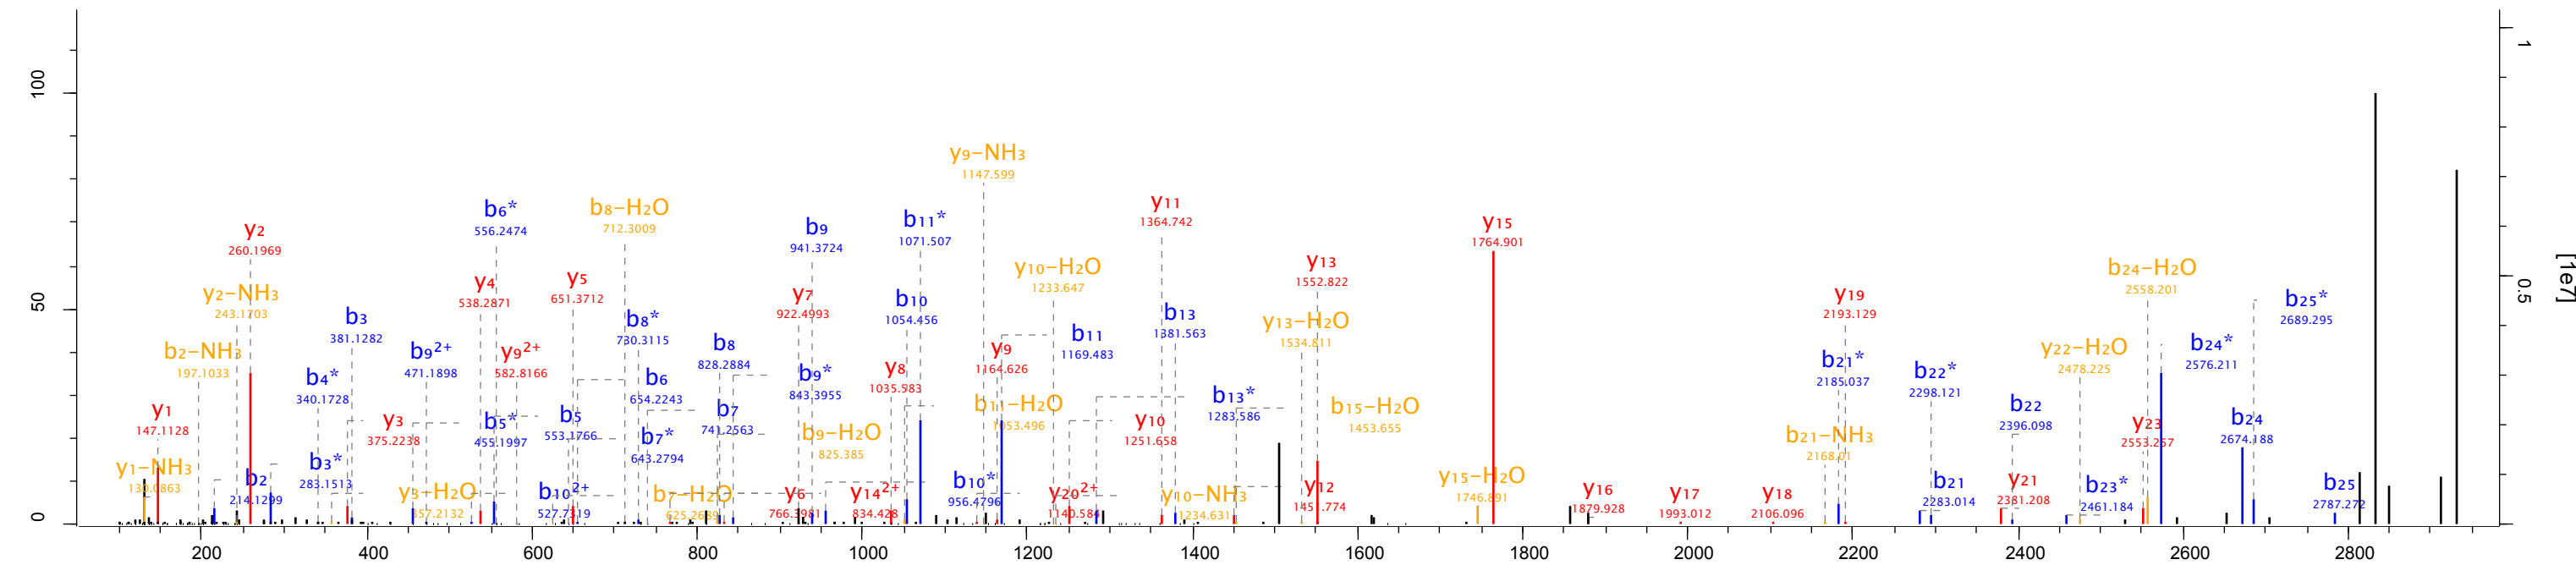

- R G S ph Y23 Y21 Y20<sup>2+</sup> Y19 Y18 Y17 Y16 Y15 Y14<sup>2+</sup> Y13 Y12 Y11 Y10 Y9 Y8 Y7 Y6 Y5 Y4 Y3 Y2 Y1 -  
 b2 b3 b4\* b5 b6 b7 b8 b9 b10 b11 b13 b21 b22 b23\* b24 b25

Raw file 20150814\_A375SR\_Phospho\_BR2\_05 Scan 28428 Method FTMS; HCD Score 121.96 m/z 943.13 Gene names FAM122A

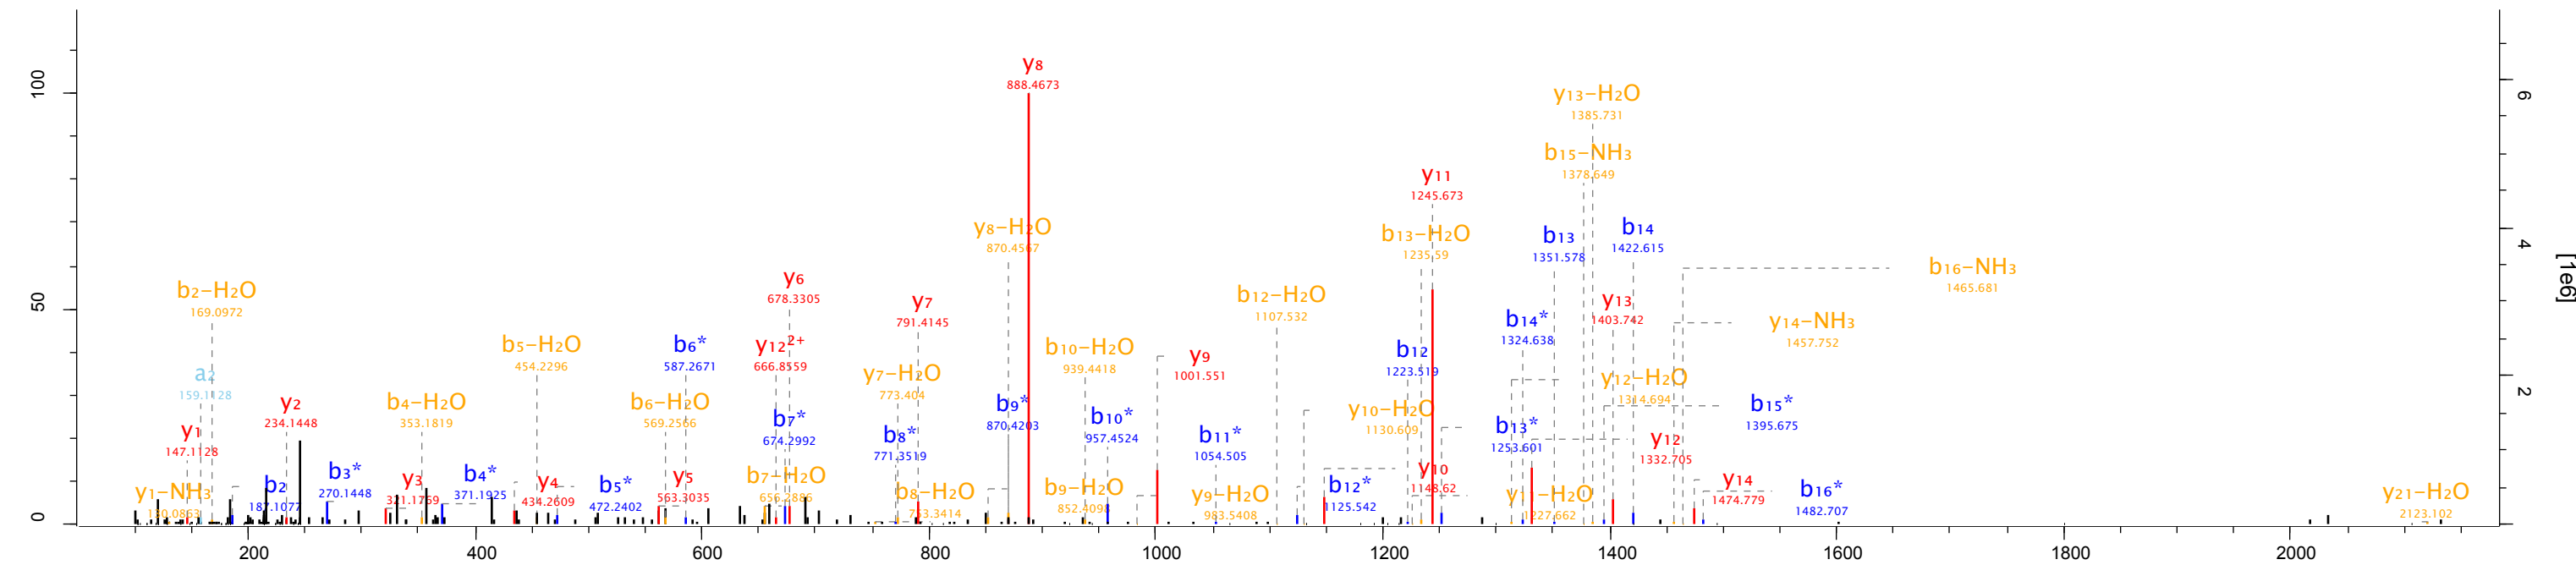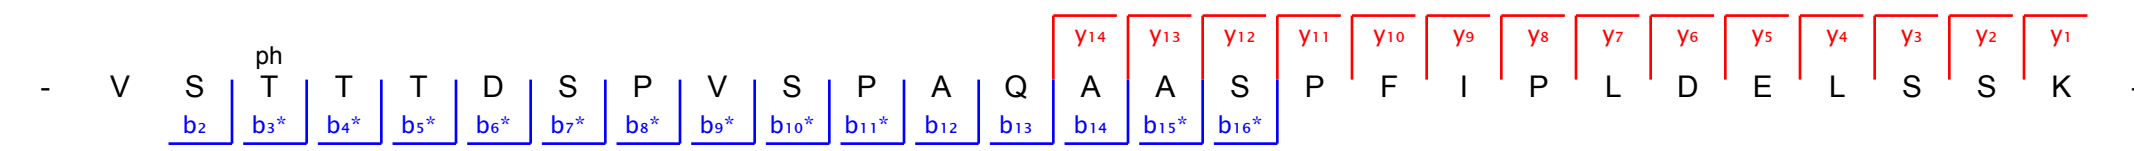

Raw file: 20150814\_A375SR\_Phospho\_BR2\_05  
 Scan: 28728 Method: FTMS; HCD Score: 235.33 m/z: 733.01 Gene names: EEF2K

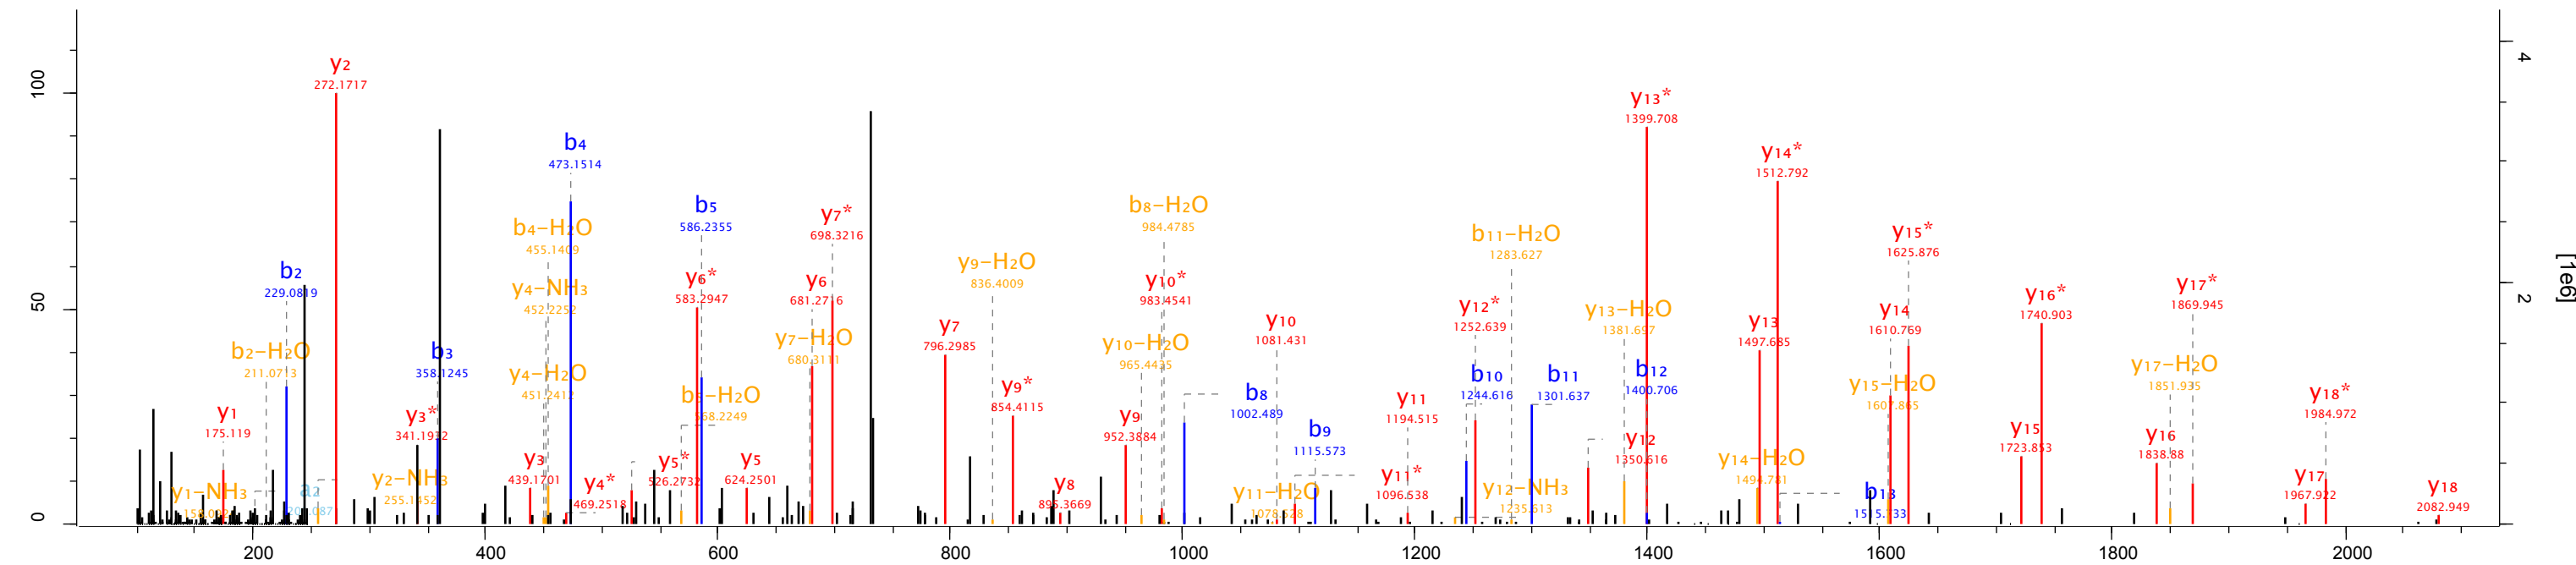

ac - A D E D L I F R L E G V D G G Q S P R -

Fragmentation scheme showing b and y ions for each amino acid:

- D: b<sub>2</sub>, y<sub>18</sub>
- E: b<sub>3</sub>, y<sub>17</sub>
- D: b<sub>4</sub>, y<sub>16</sub>
- L: b<sub>5</sub>, y<sub>15</sub>
- I: y<sub>14</sub>
- F: y<sub>13</sub>
- R: b<sub>8</sub>, y<sub>12</sub>
- L: b<sub>9</sub>, y<sub>11</sub>
- E: b<sub>10</sub>, y<sub>10</sub>
- G: b<sub>11</sub>, y<sub>9</sub>
- V: b<sub>12</sub>, y<sub>8</sub>
- D: b<sub>13</sub>, y<sub>7</sub>
- G: y<sub>6</sub>
- G: y<sub>5</sub>
- Q: y<sub>4</sub>\*
- S: y<sub>3</sub>ph
- P: y<sub>2</sub>
- R: y<sub>1</sub>



Raw file: 20150814\_A375SR\_Phospho\_BR2\_05  
 Scan: 28888 Method: FTMS; HCD Score: 293.3 m/z: 1515.62 Gene names: NPM1

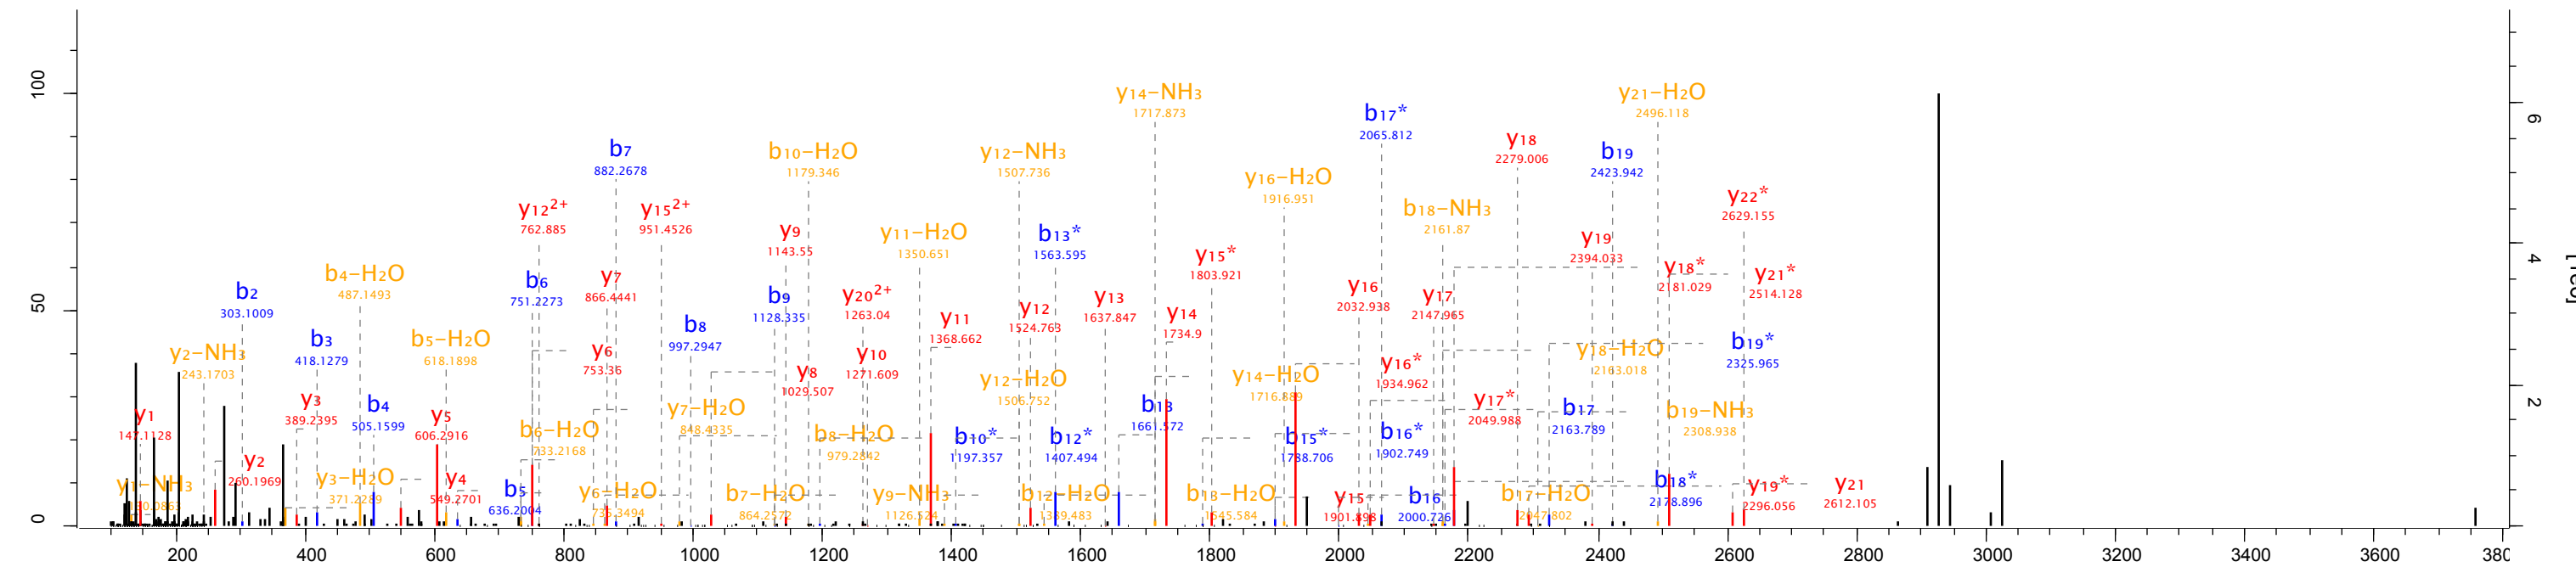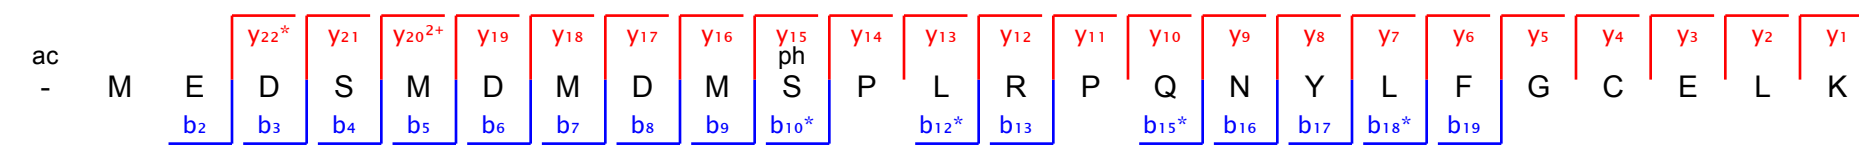

Raw file: 20150814\_A375SR\_Phospho\_BR2\_05  
 Scan: 3028 Method: FTMS; HCD Score: 81.48 m/z: 570.81 Gene names: SET

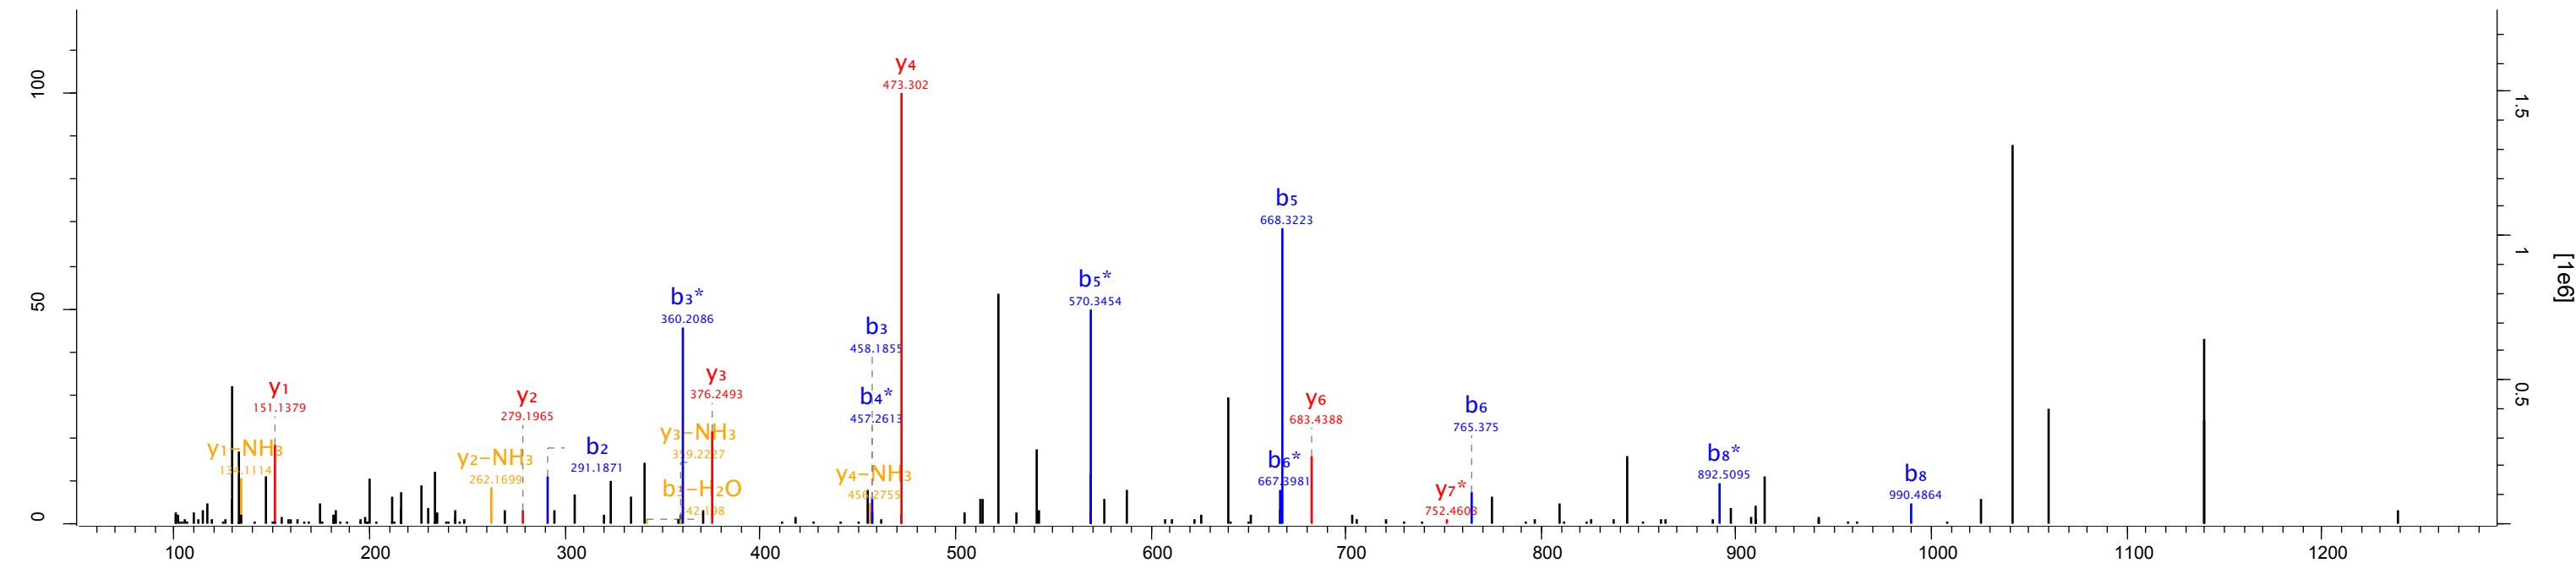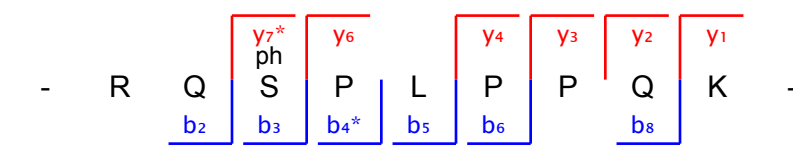

Raw file Scan Method Score m/z Gene names  
 20150814\_A375SR\_Phospho\_BR2\_05 3148 FTMS; HCD 89.86 557.74 PLEC

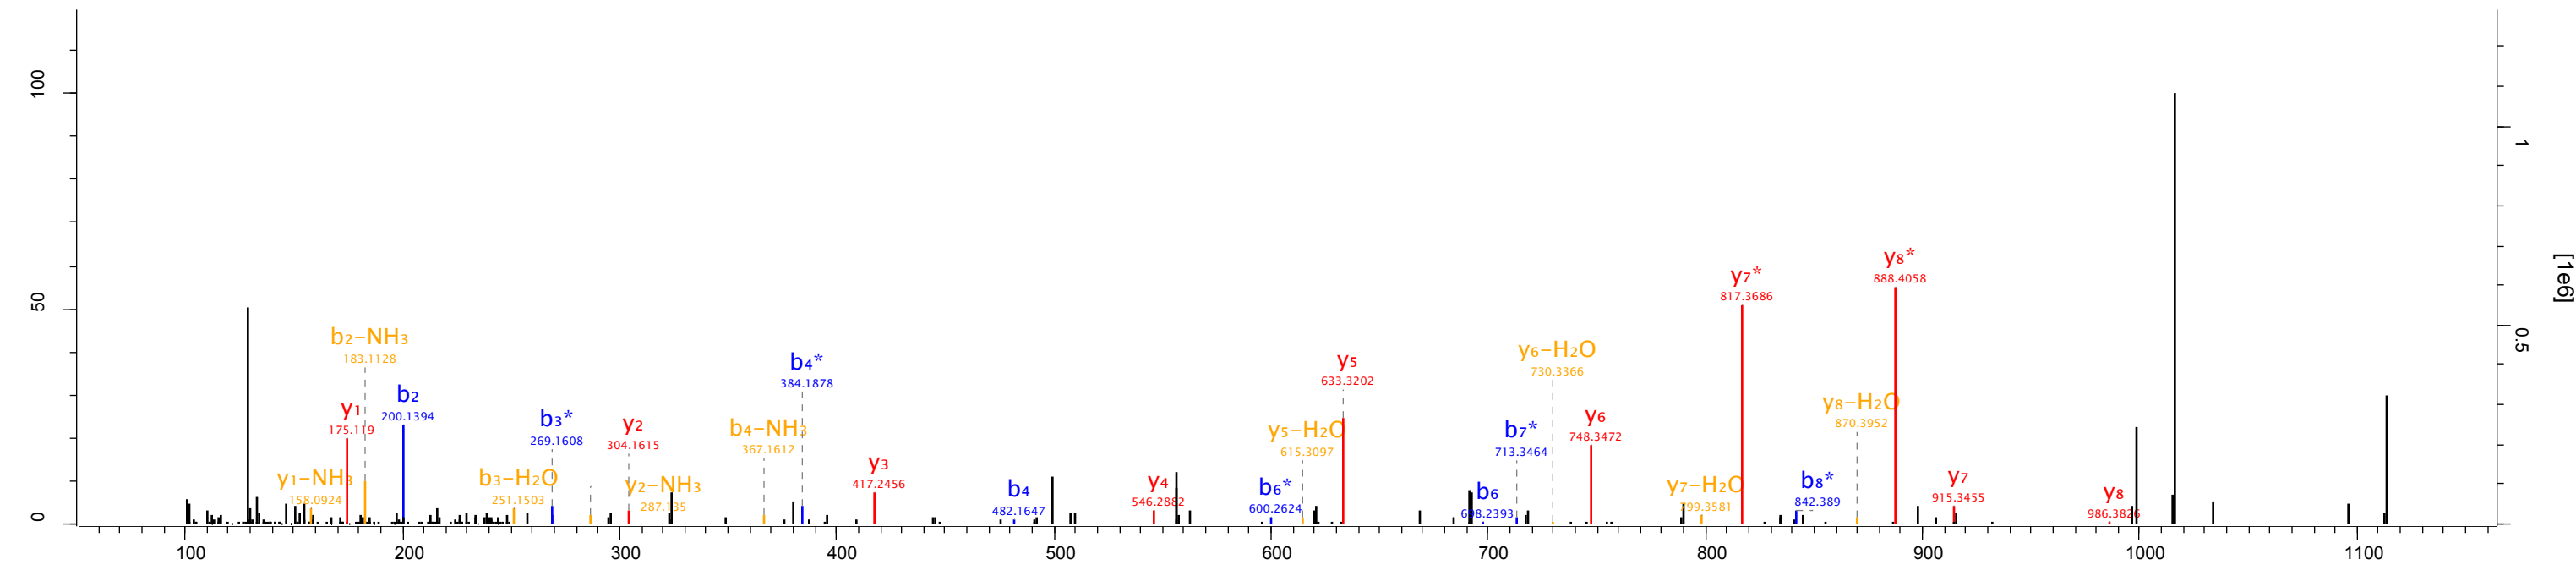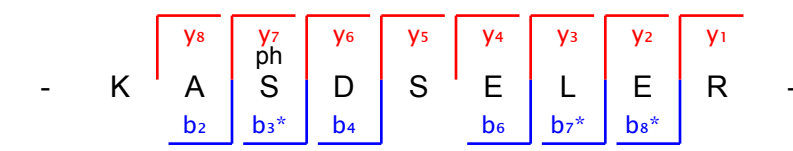

Raw file 20150814\_A375SR\_Phospho\_BR2\_05 Scan 3458 Method FTMS; HCD Score 97.3 m/z 611.79 Gene names SHC1

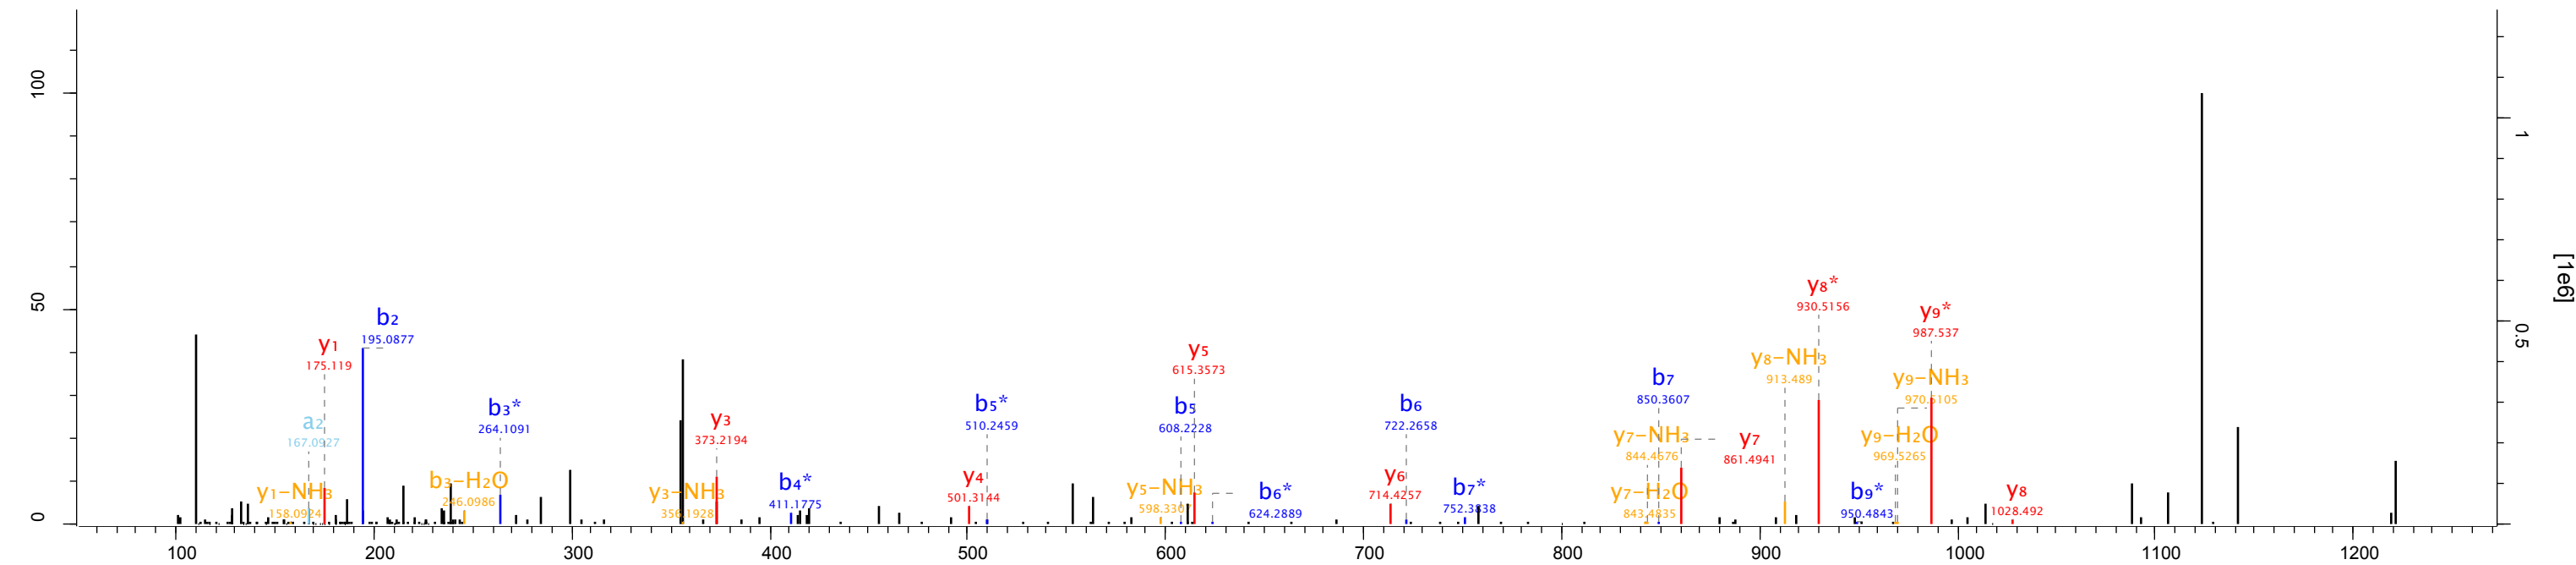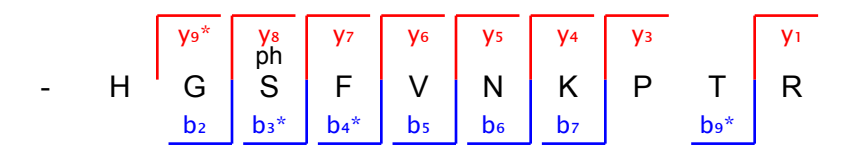

Raw file: 20150814\_A375SR\_Phospho\_BR2\_05  
 Scan: 4188 Method: FTMS; HCD Score: 94.53 m/z: 671.3 Gene names: SYNPO

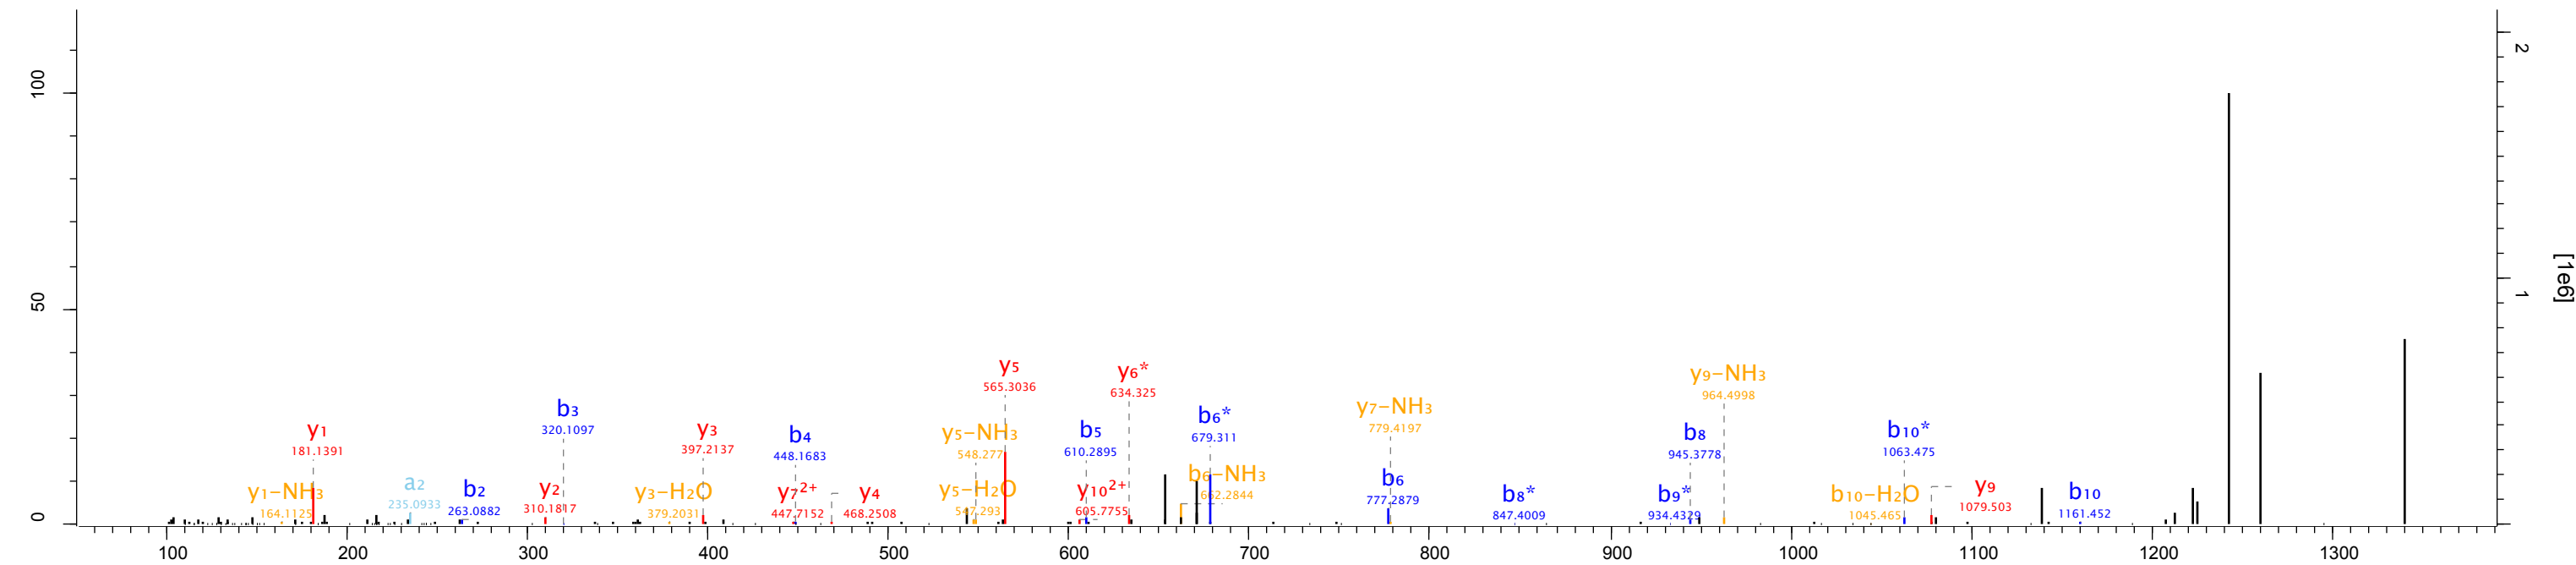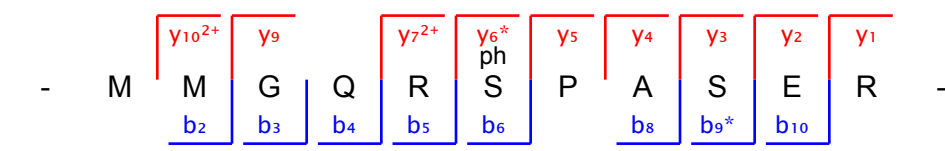

Raw file: 20150814\_A375SR\_Phospho\_BR2\_05  
 Scan: 4618 Method: FTMS; HCD Score: 126.34 m/z: 748.34 Gene names: PKP4

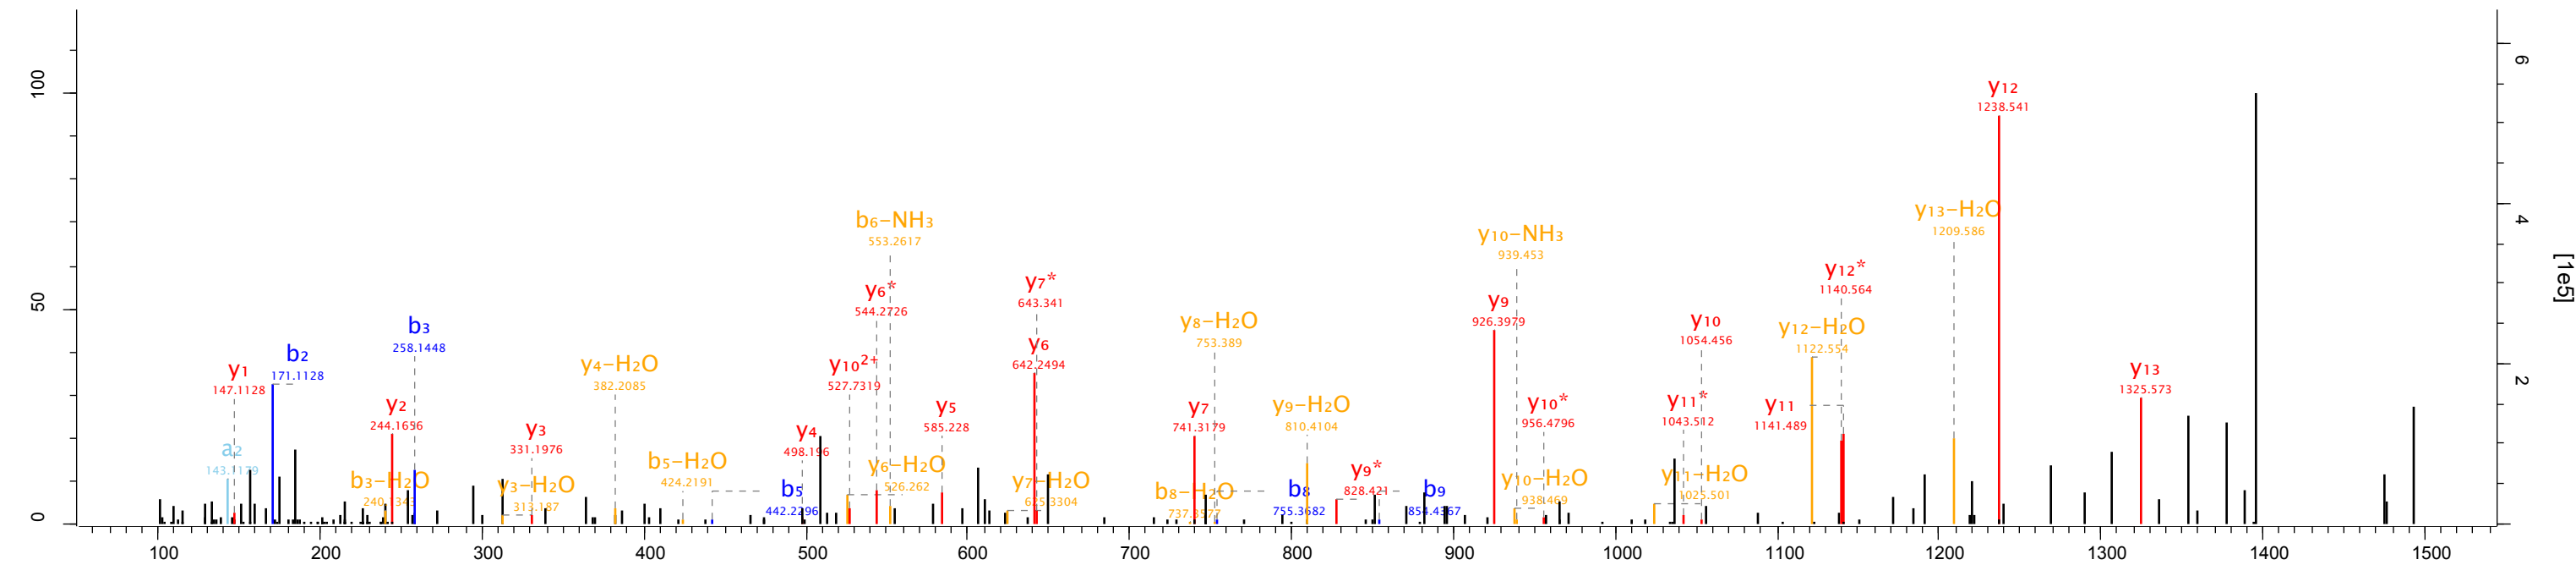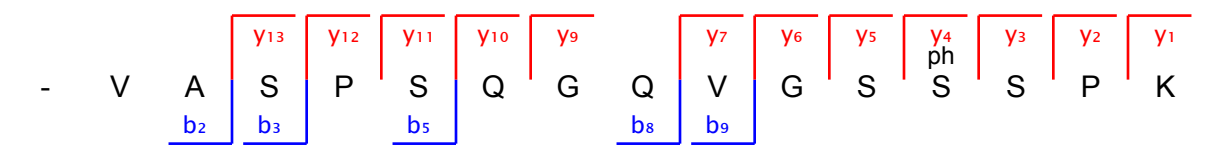

Raw file: 20150814\_A375SR\_Phospho\_BR2\_05  
 Scan: 4988 Method: FTMS; HCD Score: 81.62 m/z: 781.36 Gene names: DDX10

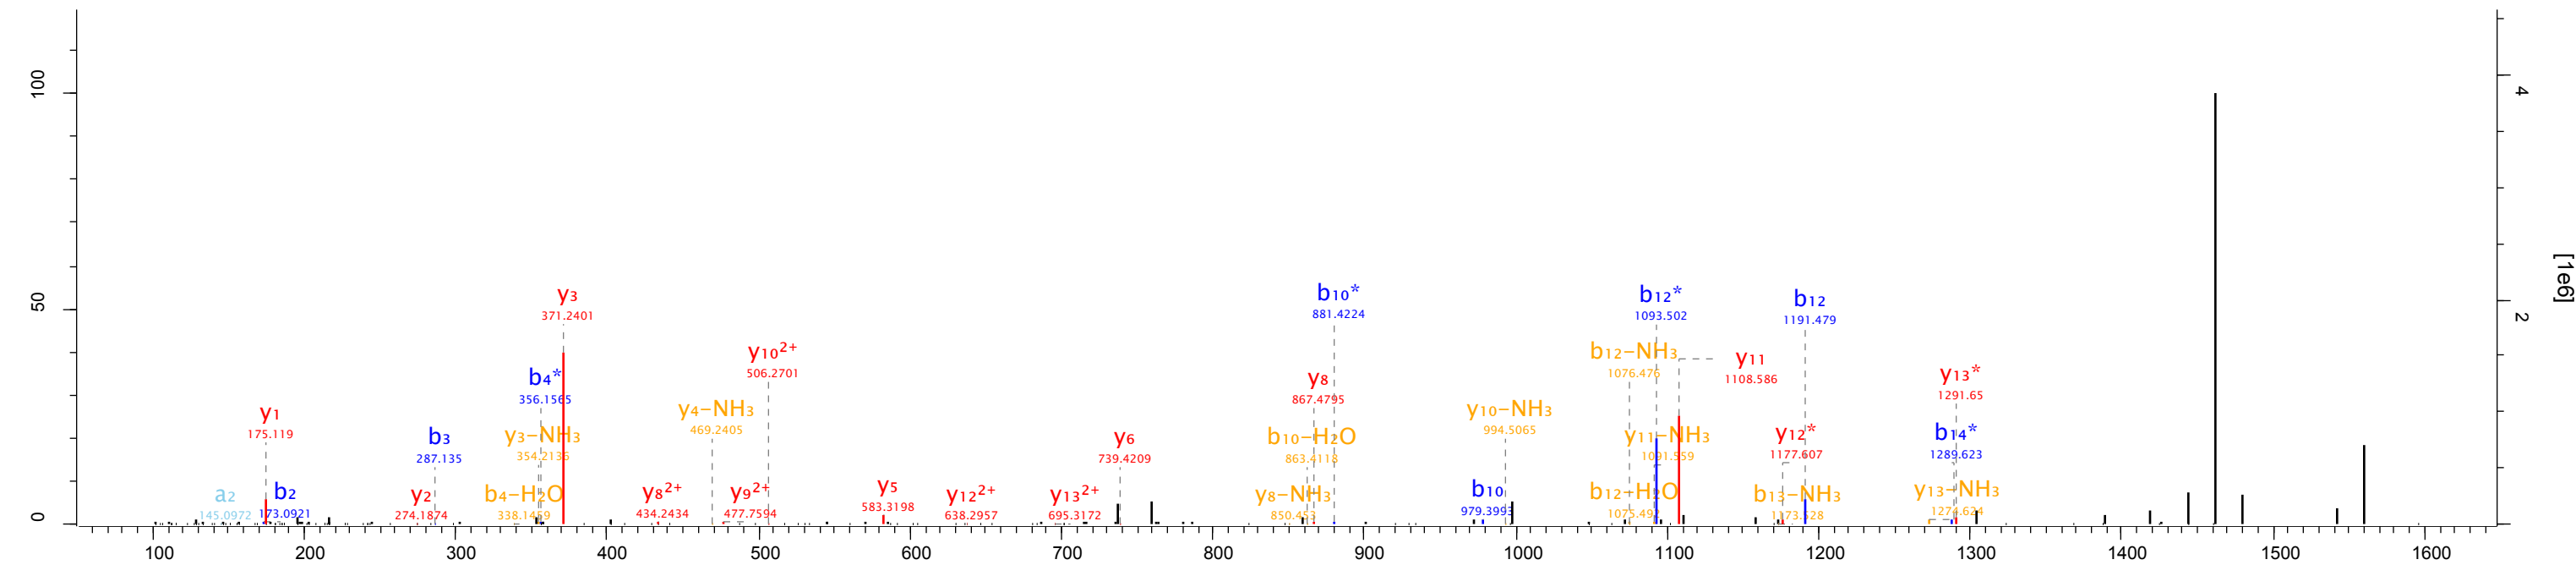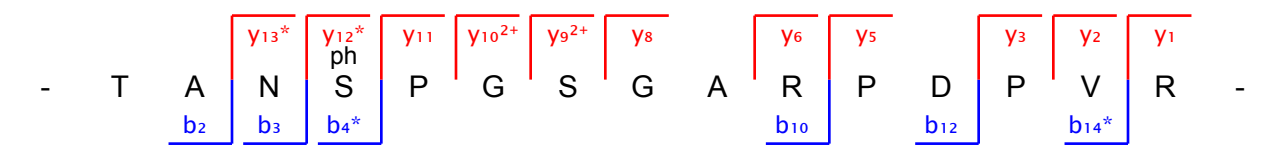

Raw file Scan Method Score m/z Gene names

20150814\_A375SR\_Phospho\_BR2\_05 5318 FTMS; HCD 105.13 555.76 NASP

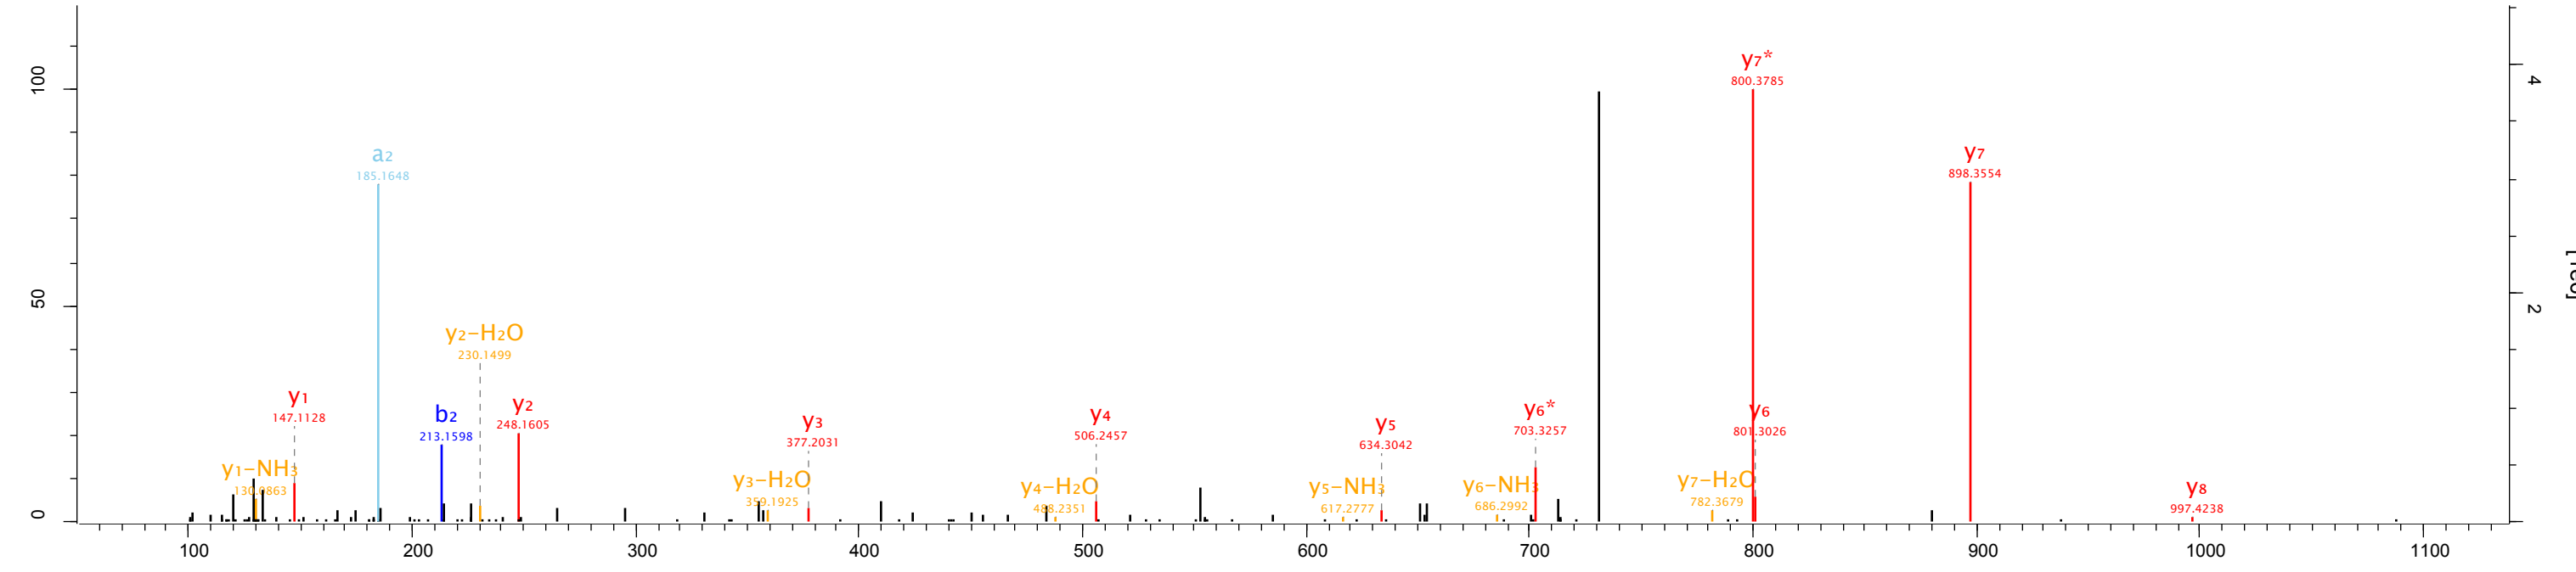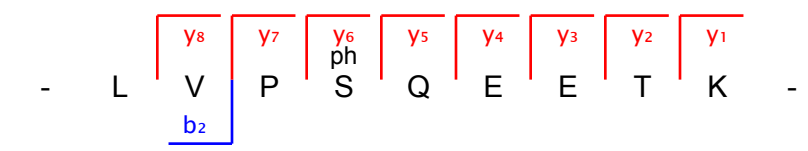



Raw file: 20150814\_A375SR\_Phospho\_BR2\_05  
 Scan: 5678 Method: FTMS; HCD Score: 175.88 m/z: 647.78 Gene names: ABI2

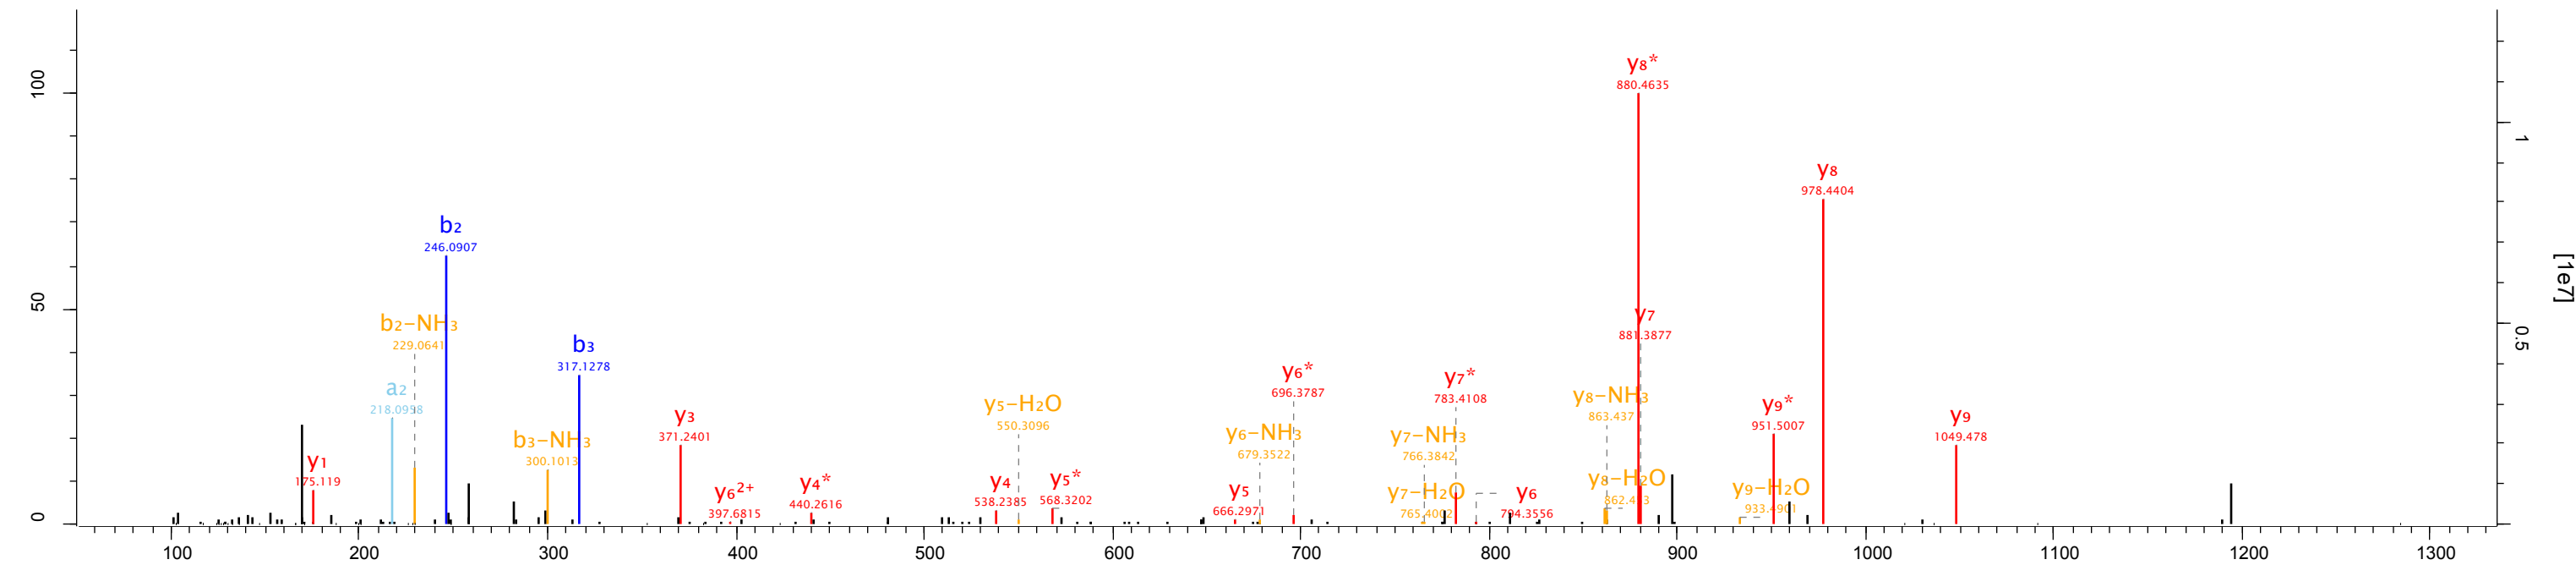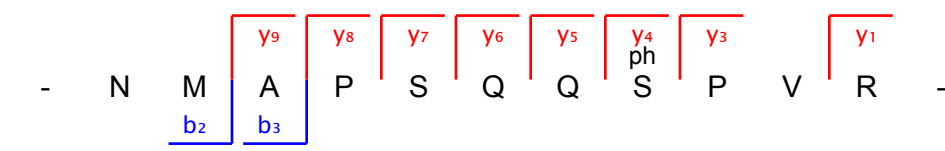

Raw file: 20150814\_A375SR\_Phospho\_BR2\_05  
 Scan: 5818 Method: FTMS; HCD Score: 108.75 m/z: 481.58 Gene names: NUP214

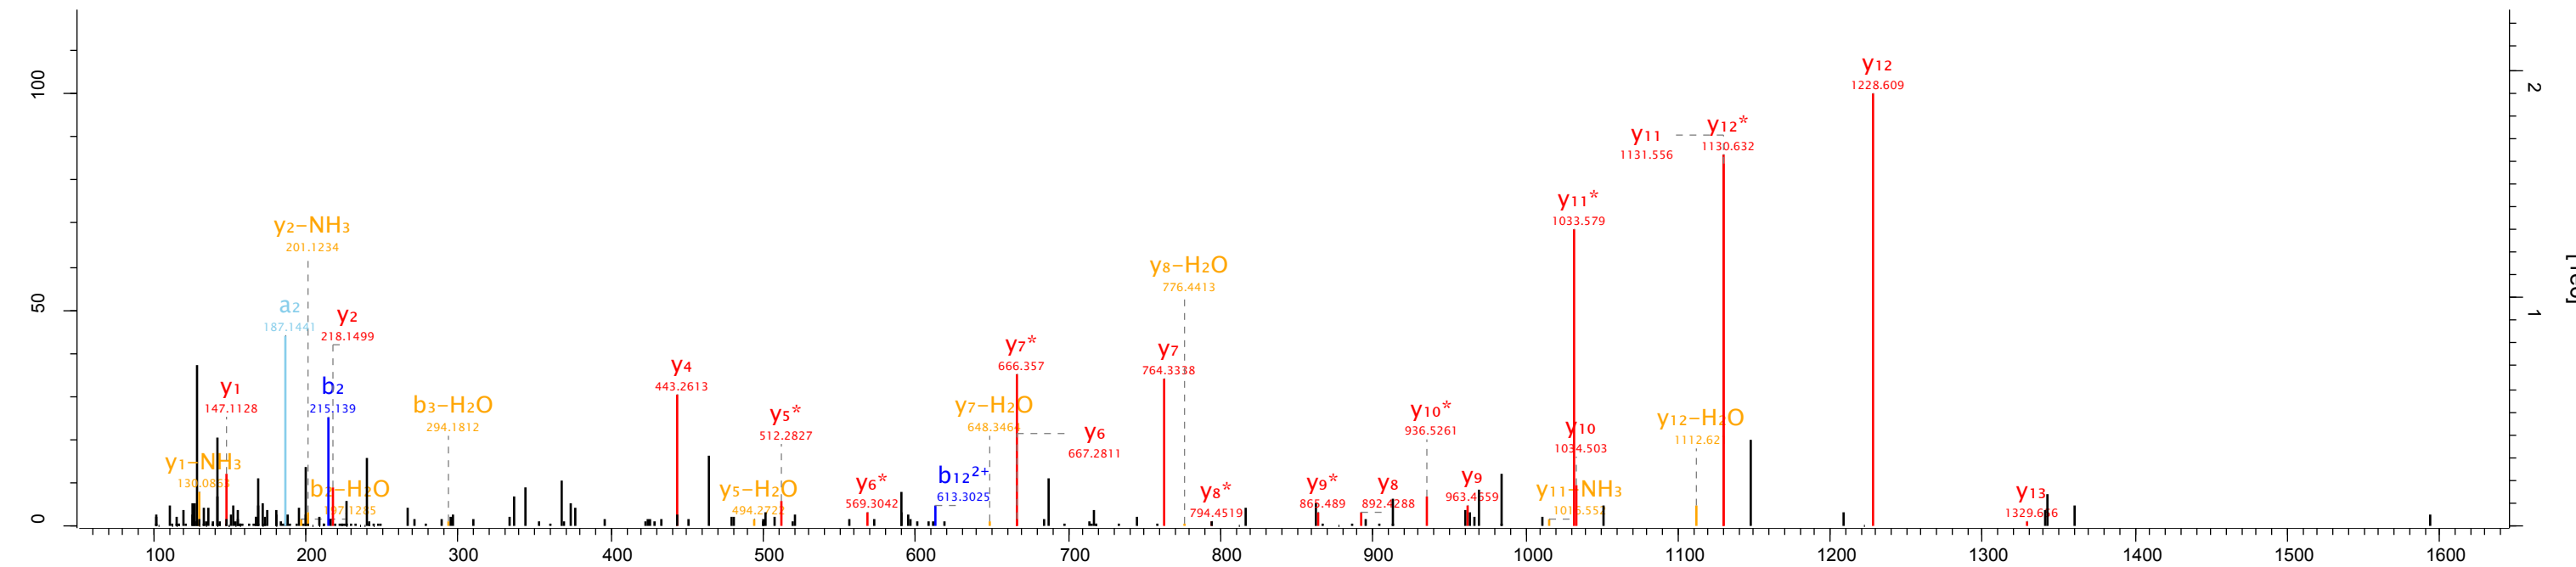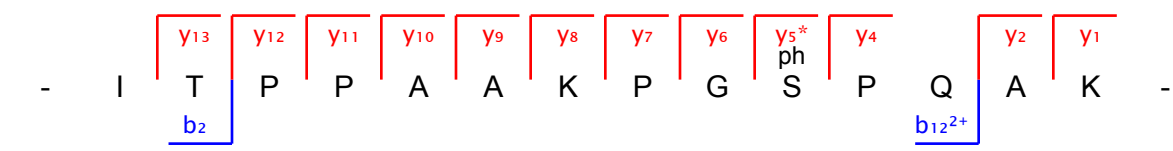

Raw file: 20150814\_A375SR\_Phospho\_BR2\_05  
 Scan: 6098 Method: FTMS; HCD Score: 212.08 m/z: 903.4 Gene names: SOX5

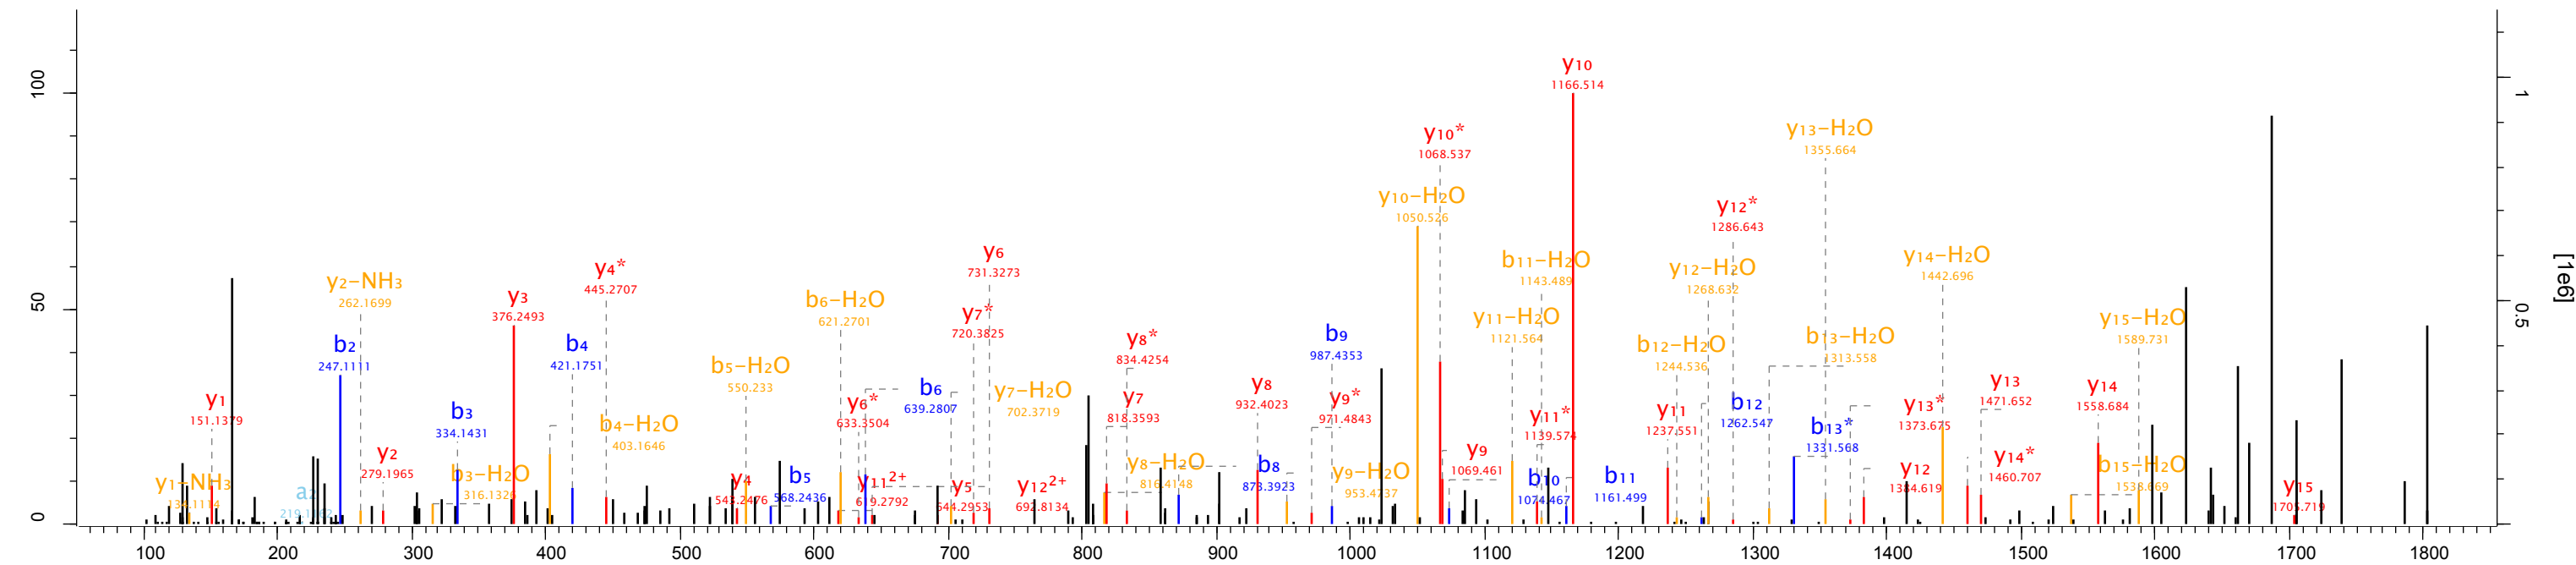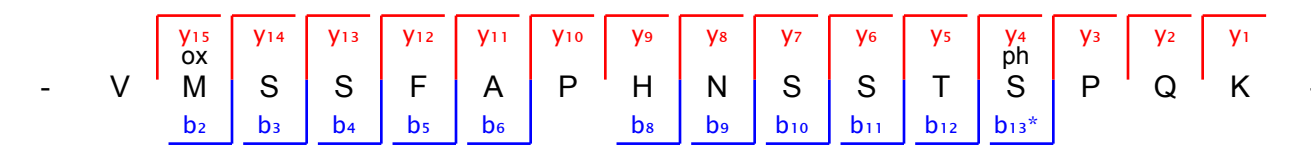

Raw file: 20150814\_A375SR\_Phospho\_BR2\_05  
 Scan: 6128 Method: FTMS; HCD Score: 123.5 m/z: 442.7 Gene names: USP24

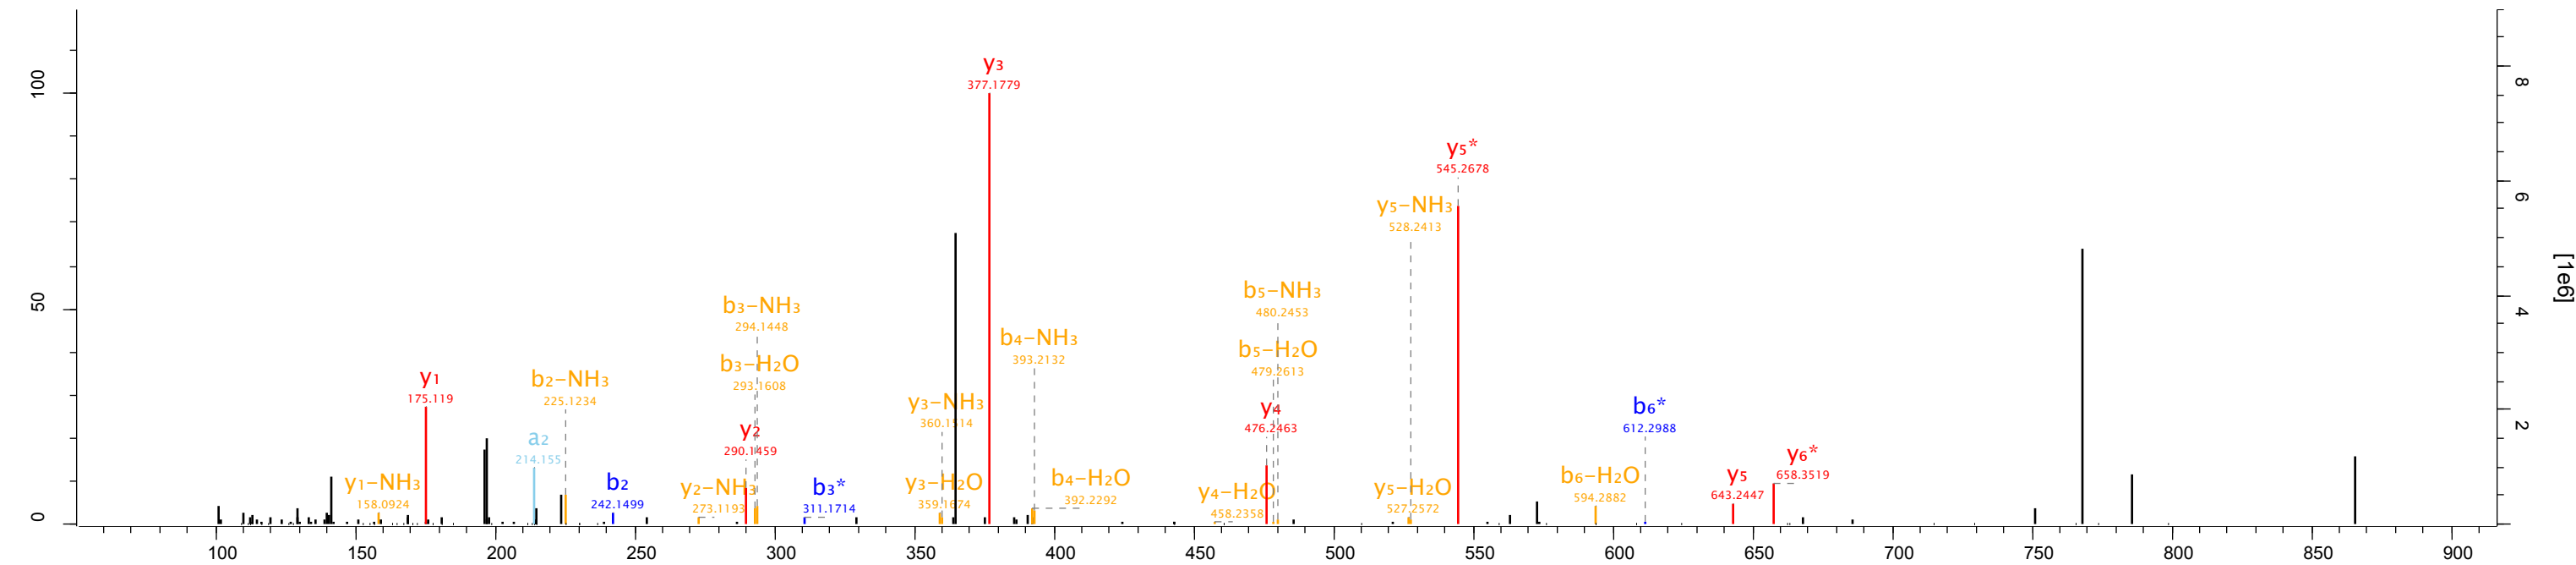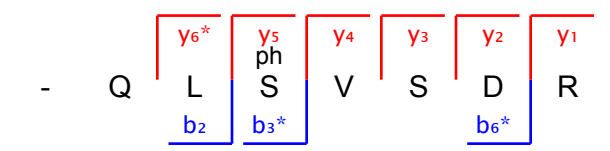

Raw file: 20150814\_A375SR\_Phospho\_BR2\_05  
 Scan: 6318 Method: FTMS; HCD Score: 245.42 m/z: 841.37 Gene names: CDK12

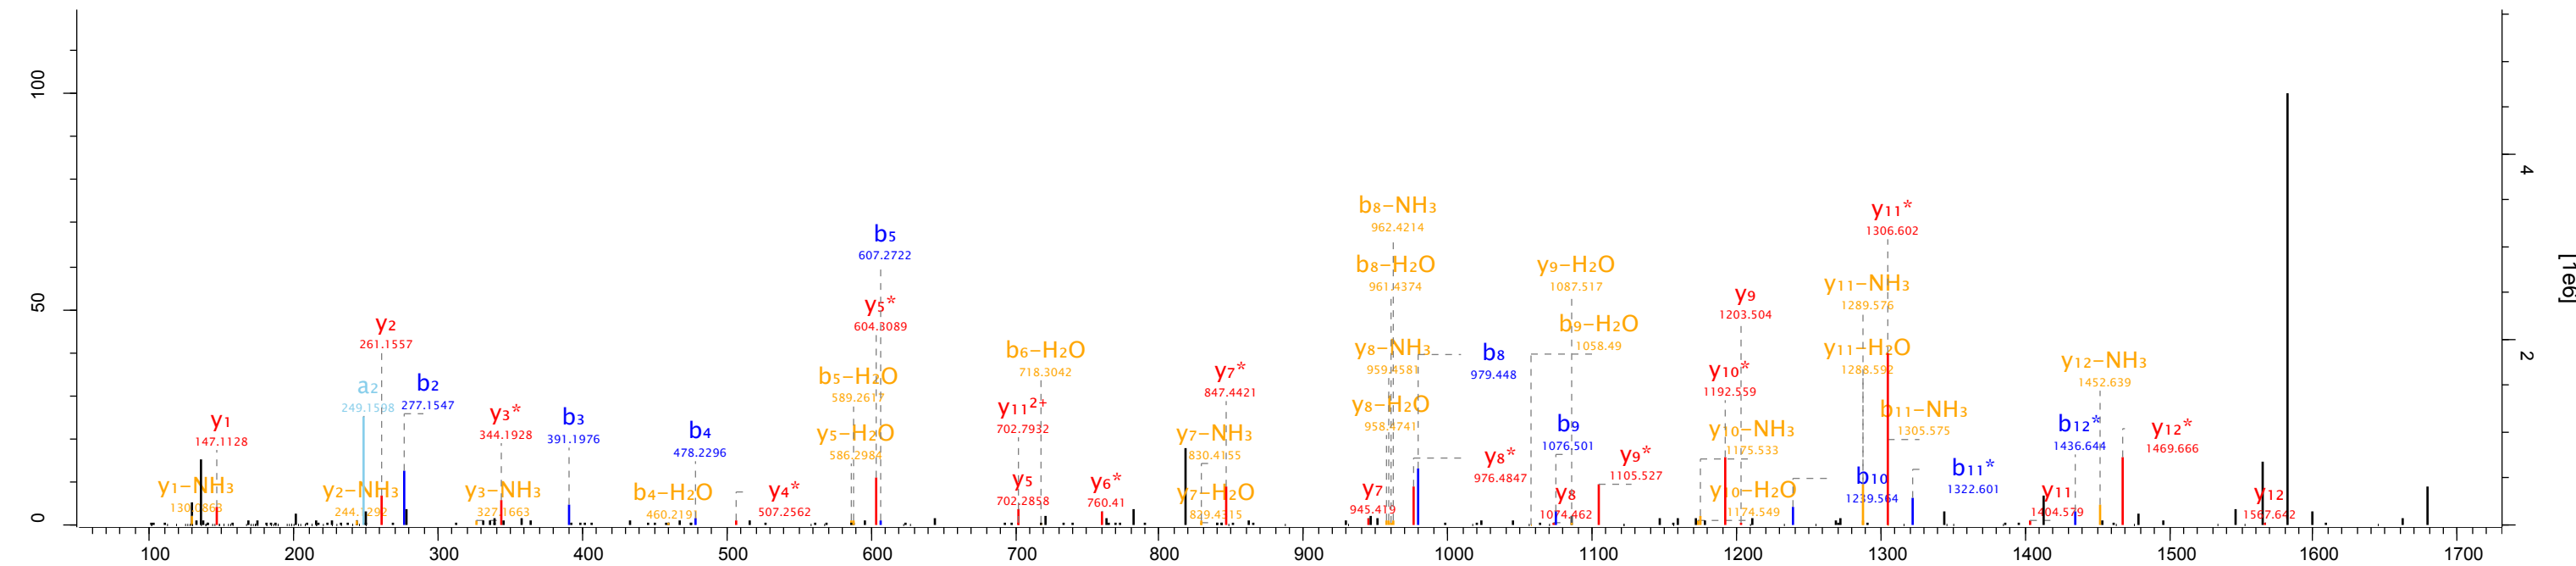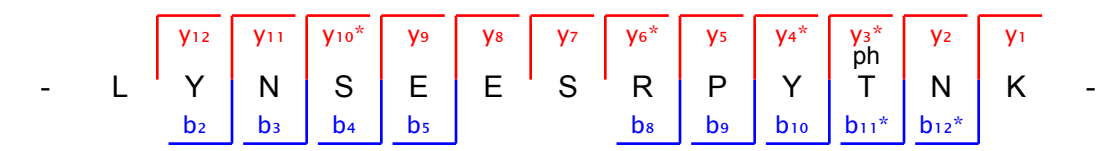

Raw file: 20150814\_A375SR\_Phospho\_BR2\_05  
 Scan: 6378 Method: FTMS; HCD Score: 151.49 m/z: 679.76 Gene names: HDGFRP2

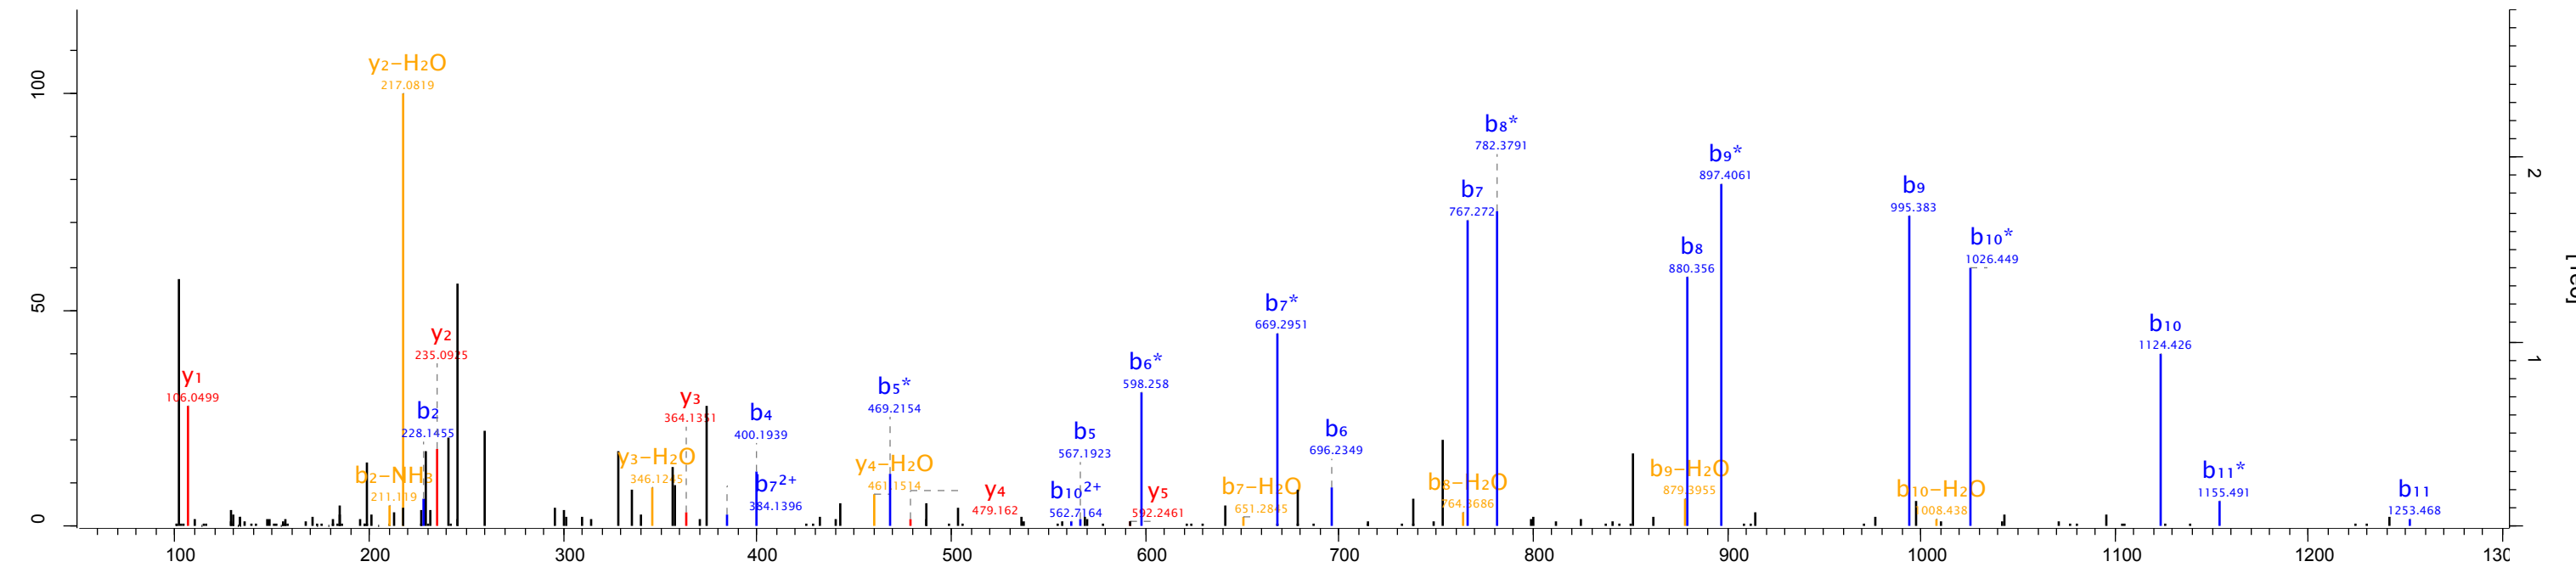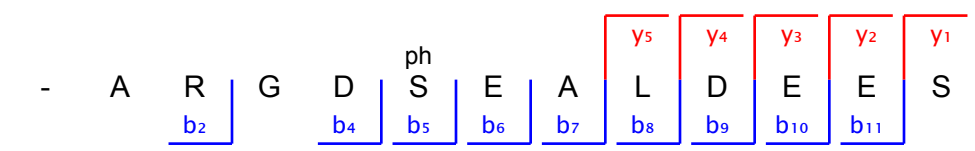

Raw file 20150814\_A375SR\_Phospho\_BR2\_05 Scan 6498 Method FTMS; HCD Score 156.17 m/z 743.79 Gene names CEP170B

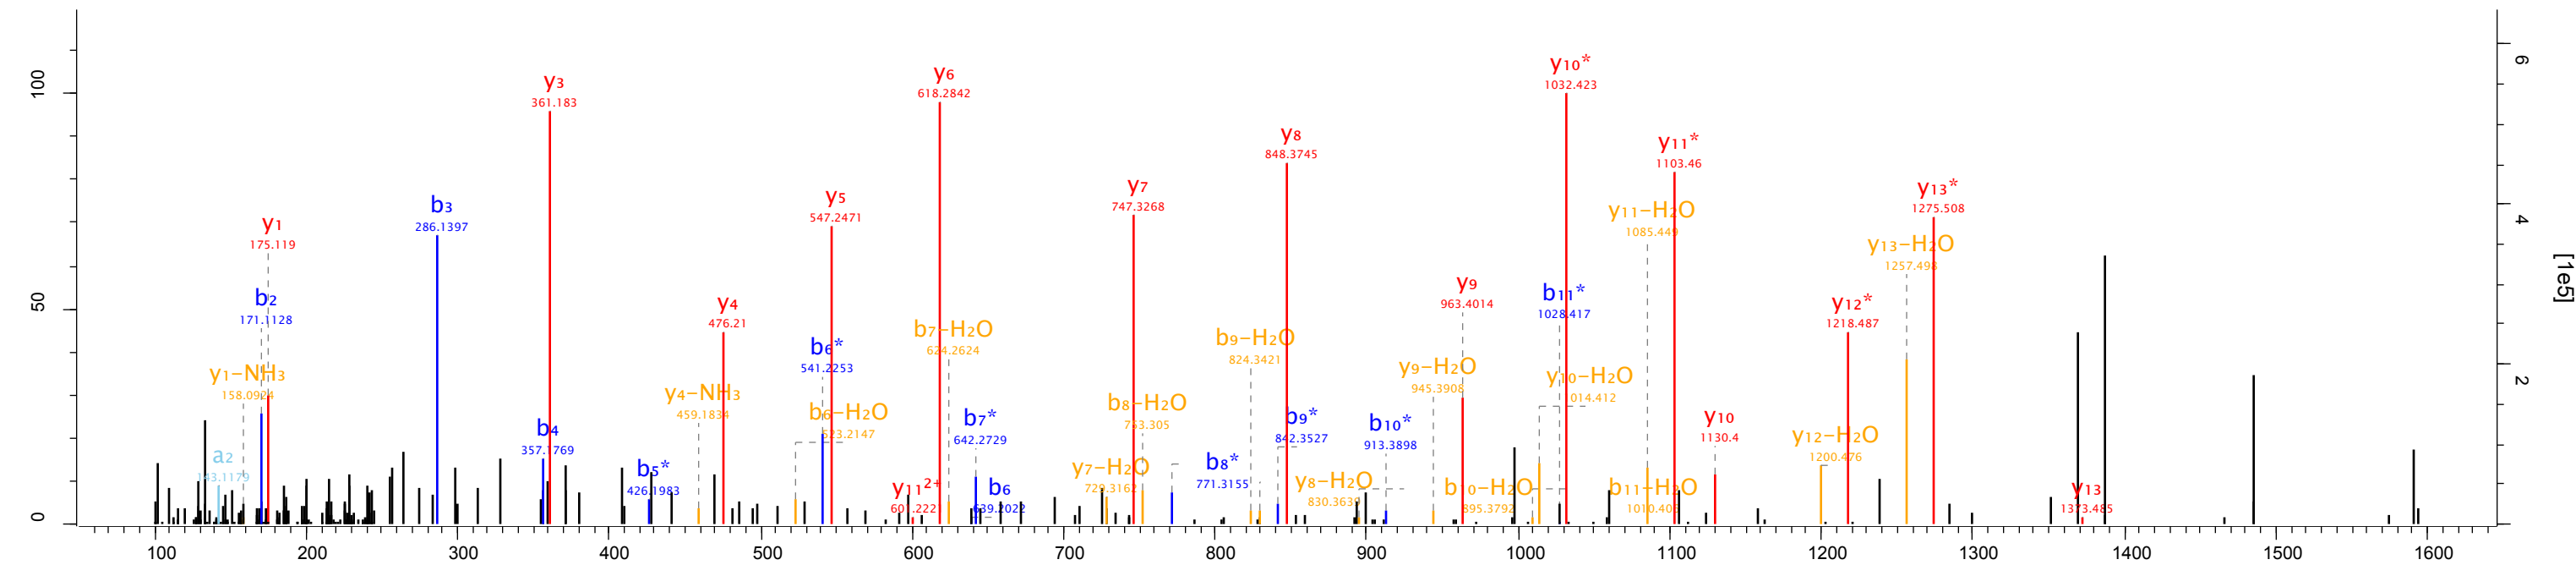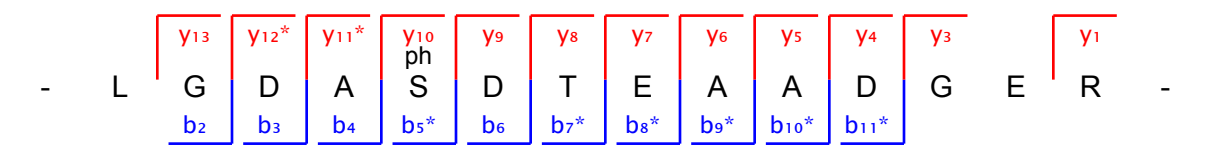

Raw file: 20150814\_A375SR\_Phospho\_BR2\_05  
 Scan: 6658 Method: FTMS; HCD Score: 108.31 m/z: 465.24 Gene names: EIF4ENIF1

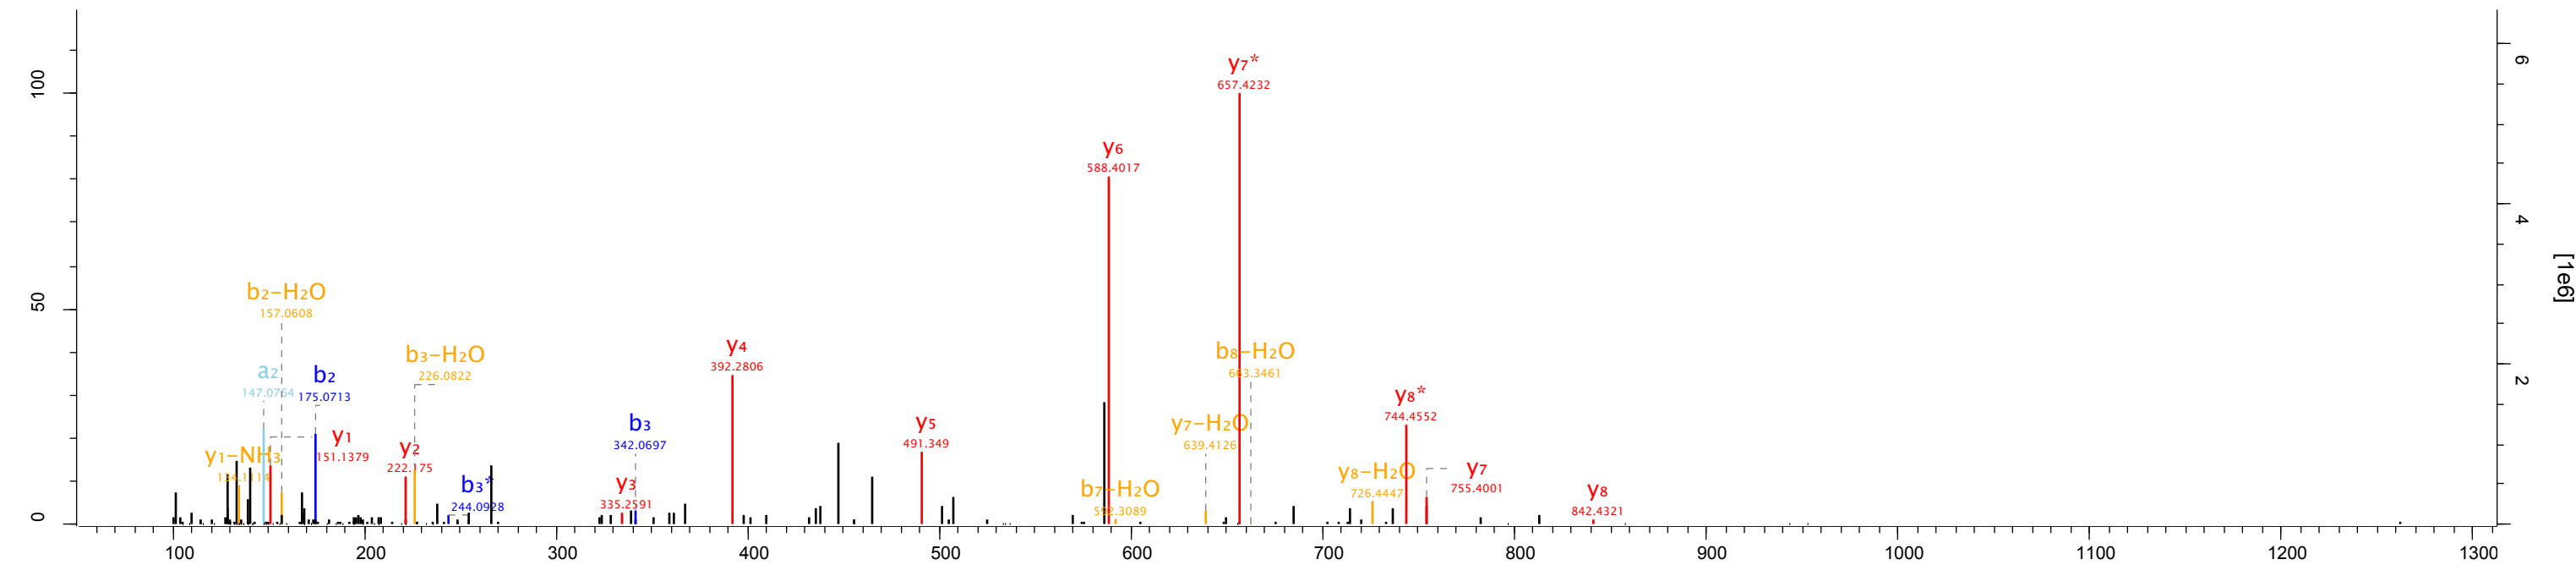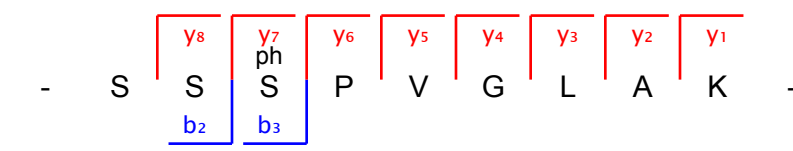



Raw file: 20150814\_A375SR\_Phospho\_BR2\_05  
 Scan: 6848 Method: FTMS; HCD Score: 139.46 m/z: 559.27 Gene names: CWC25

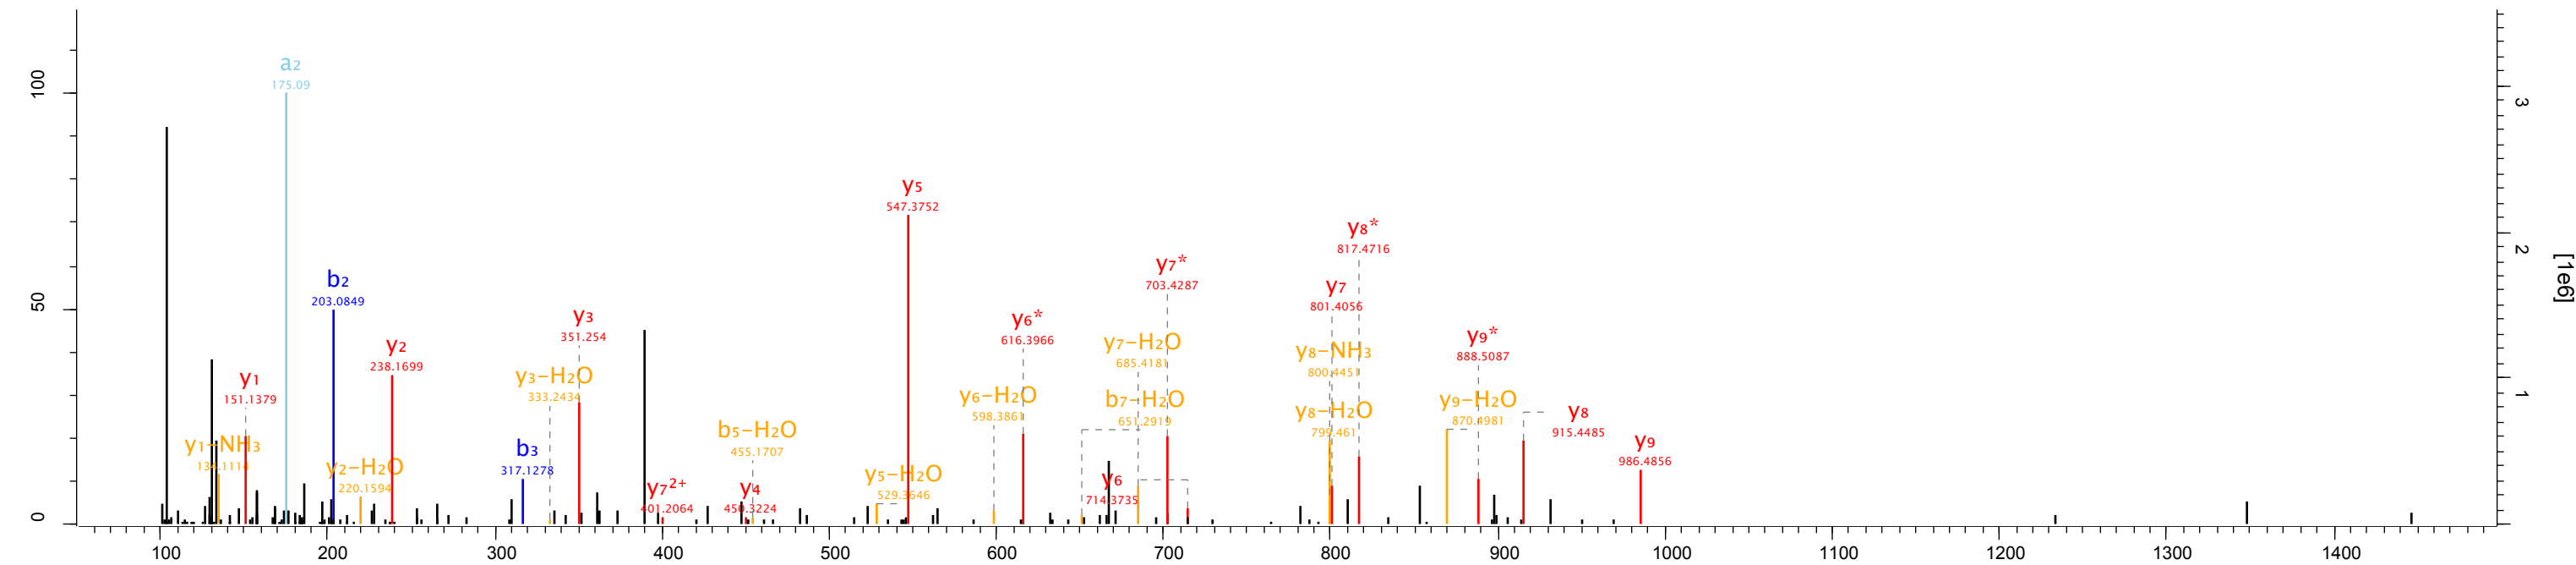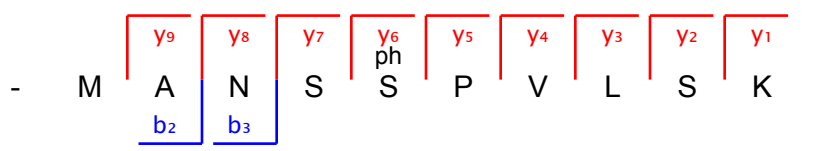

Raw file 20150814\_A375SR\_Phospho\_BR2\_05 Scan 7328 Method FTMS; HCD Score 128.51 m/z 459.71 Gene names SH3GL1

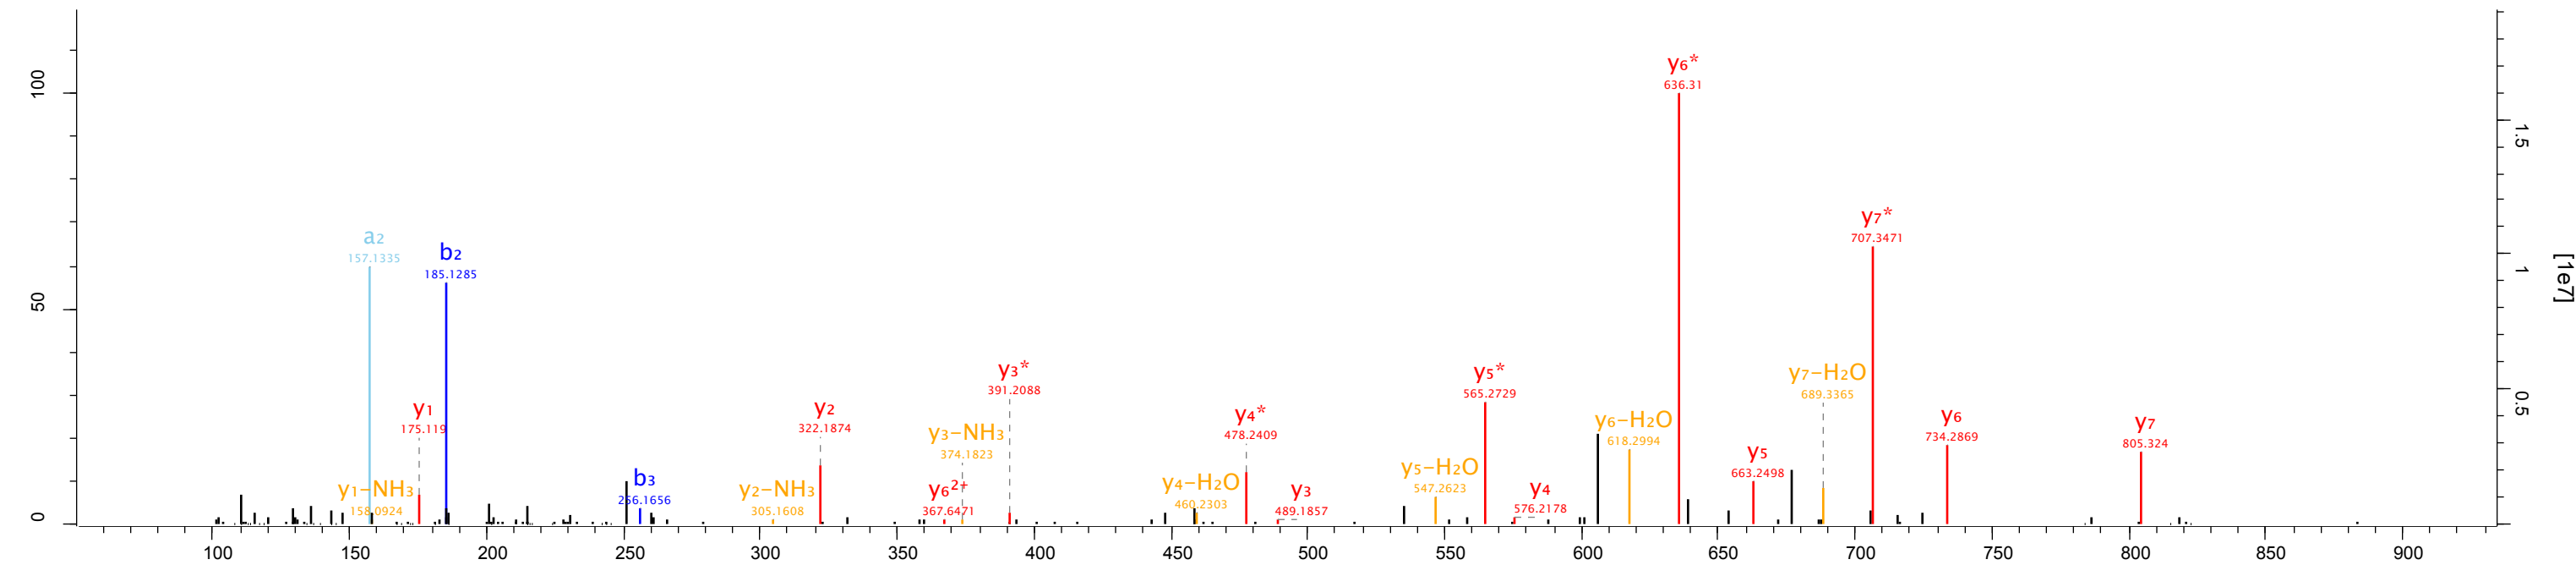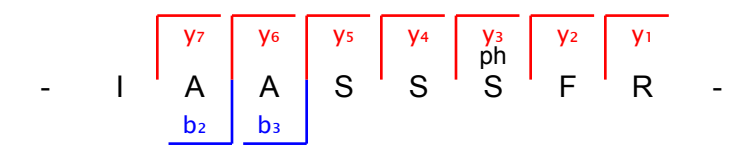

Raw file 20150814\_A375SR\_Phospho\_BR2\_05 Scan 7338 Method FTMS; HCD Score 97.78 m/z 661.64 Gene names PSEN1

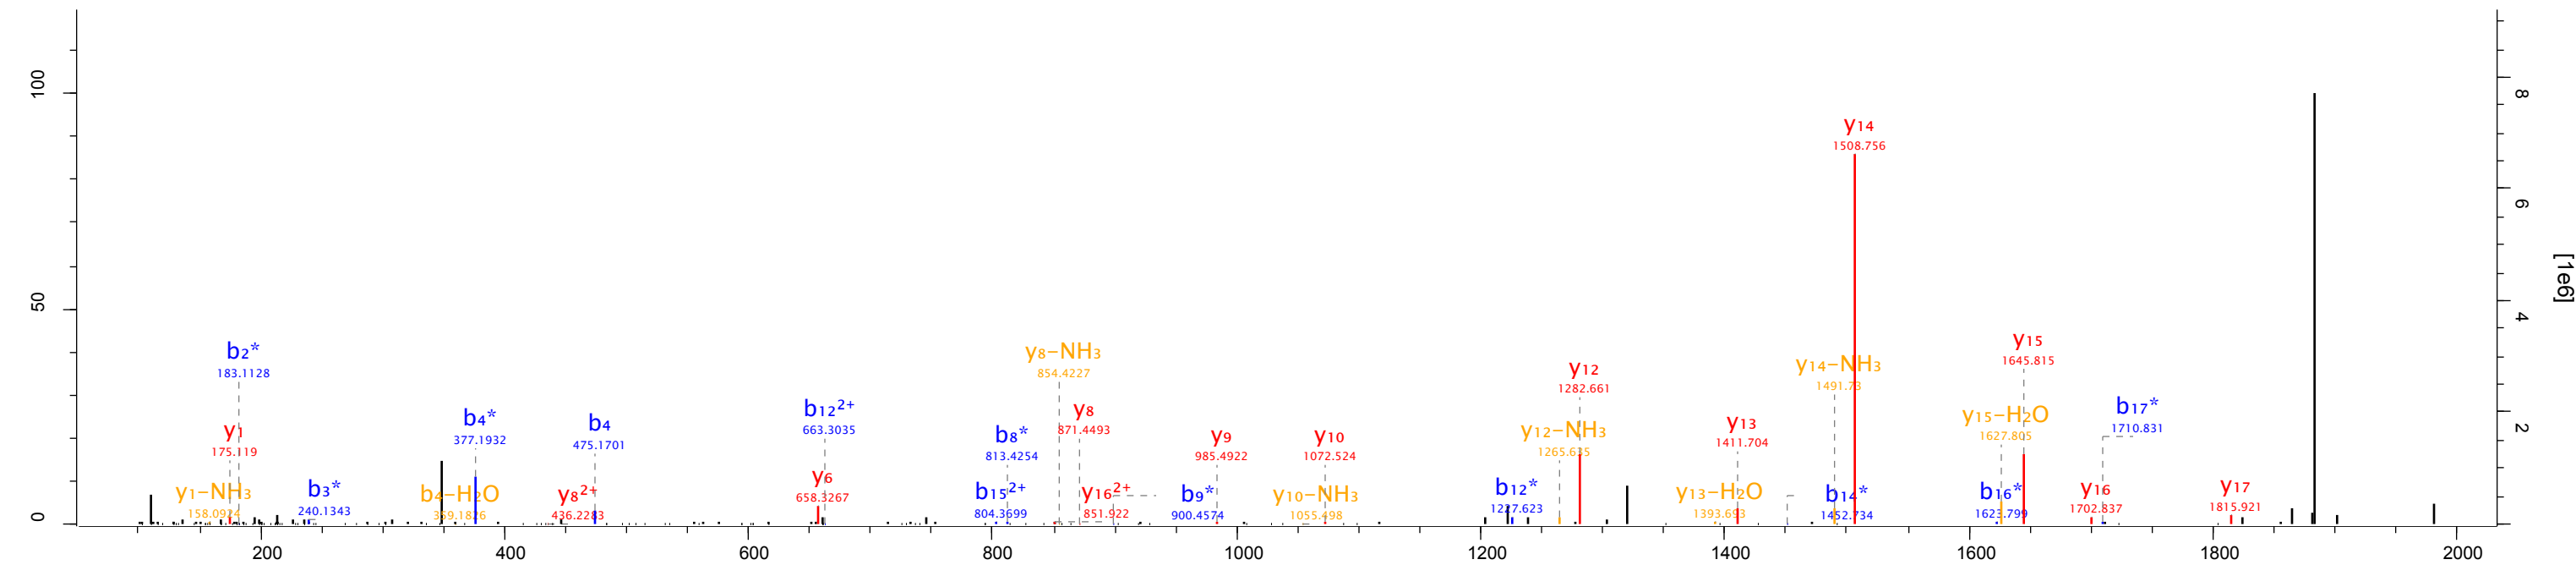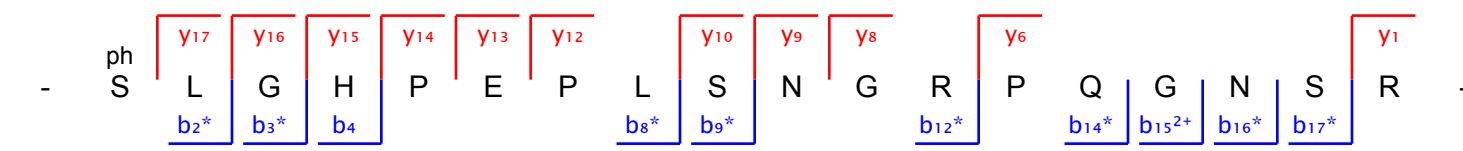

Raw file 20150814\_A375SR\_Phospho\_BR2\_05 Scan 7398 Method FTMS; HCD Score 71.51 m/z 530.76 Gene names VGLL4

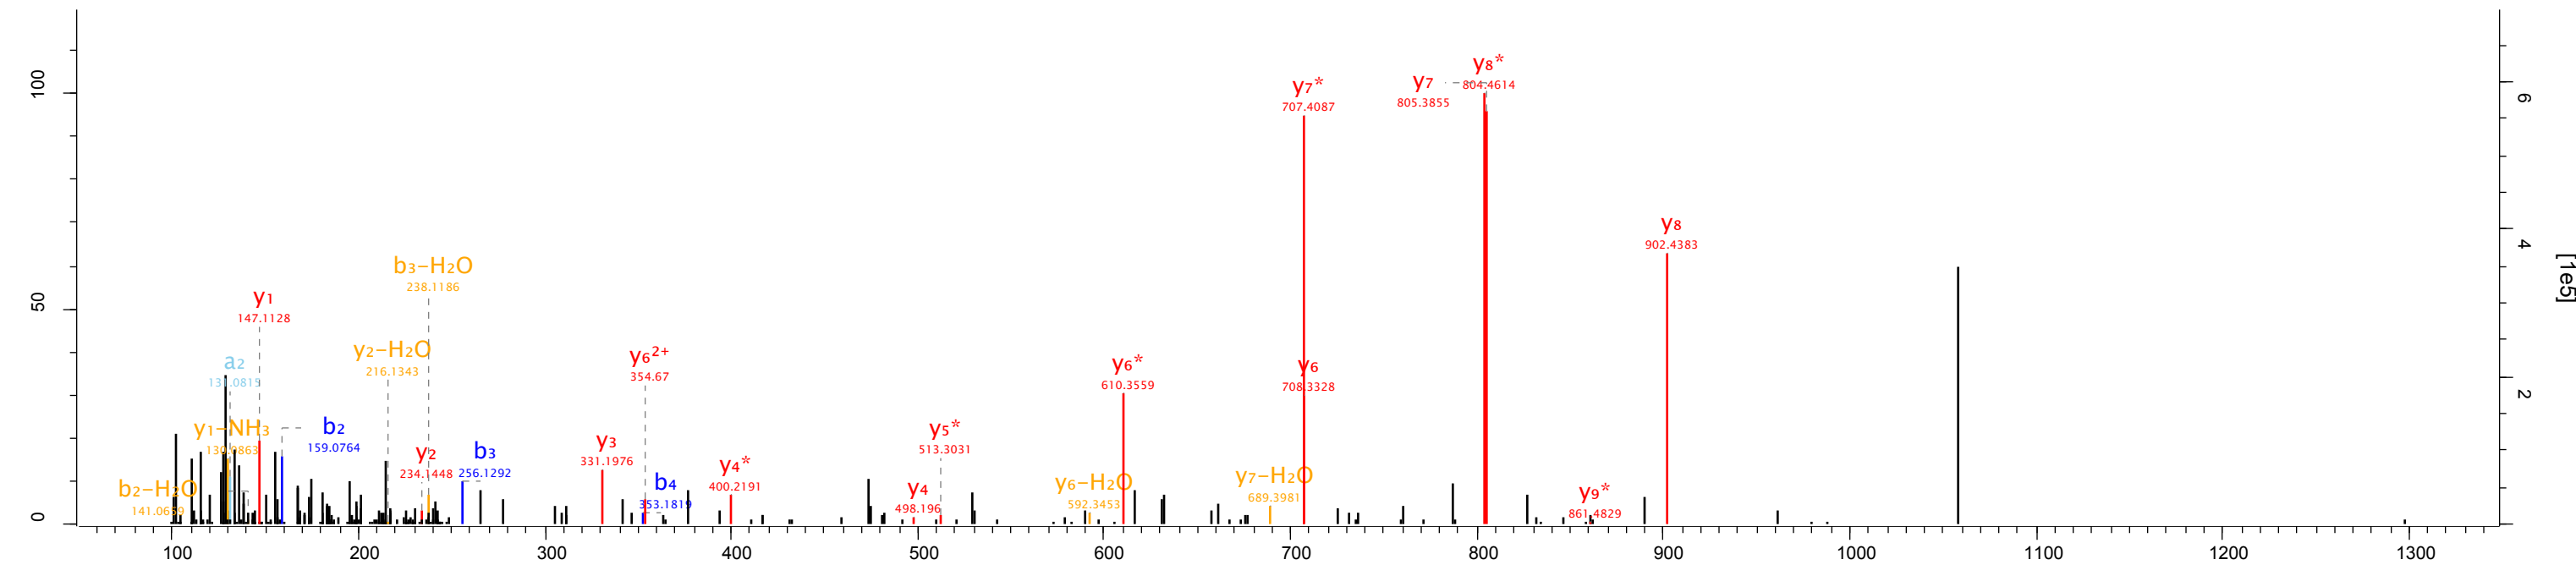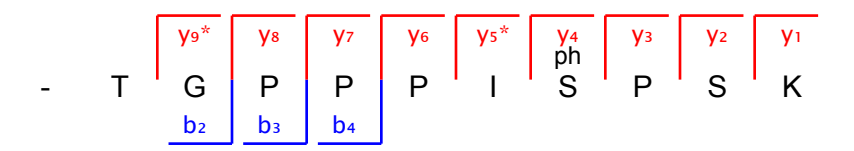

Raw file 20150814\_A375SR\_Phospho\_BR2\_05 Scan 7818 Method FTMS; HCD Score 75.97 m/z 642.78 Gene names RAPH1

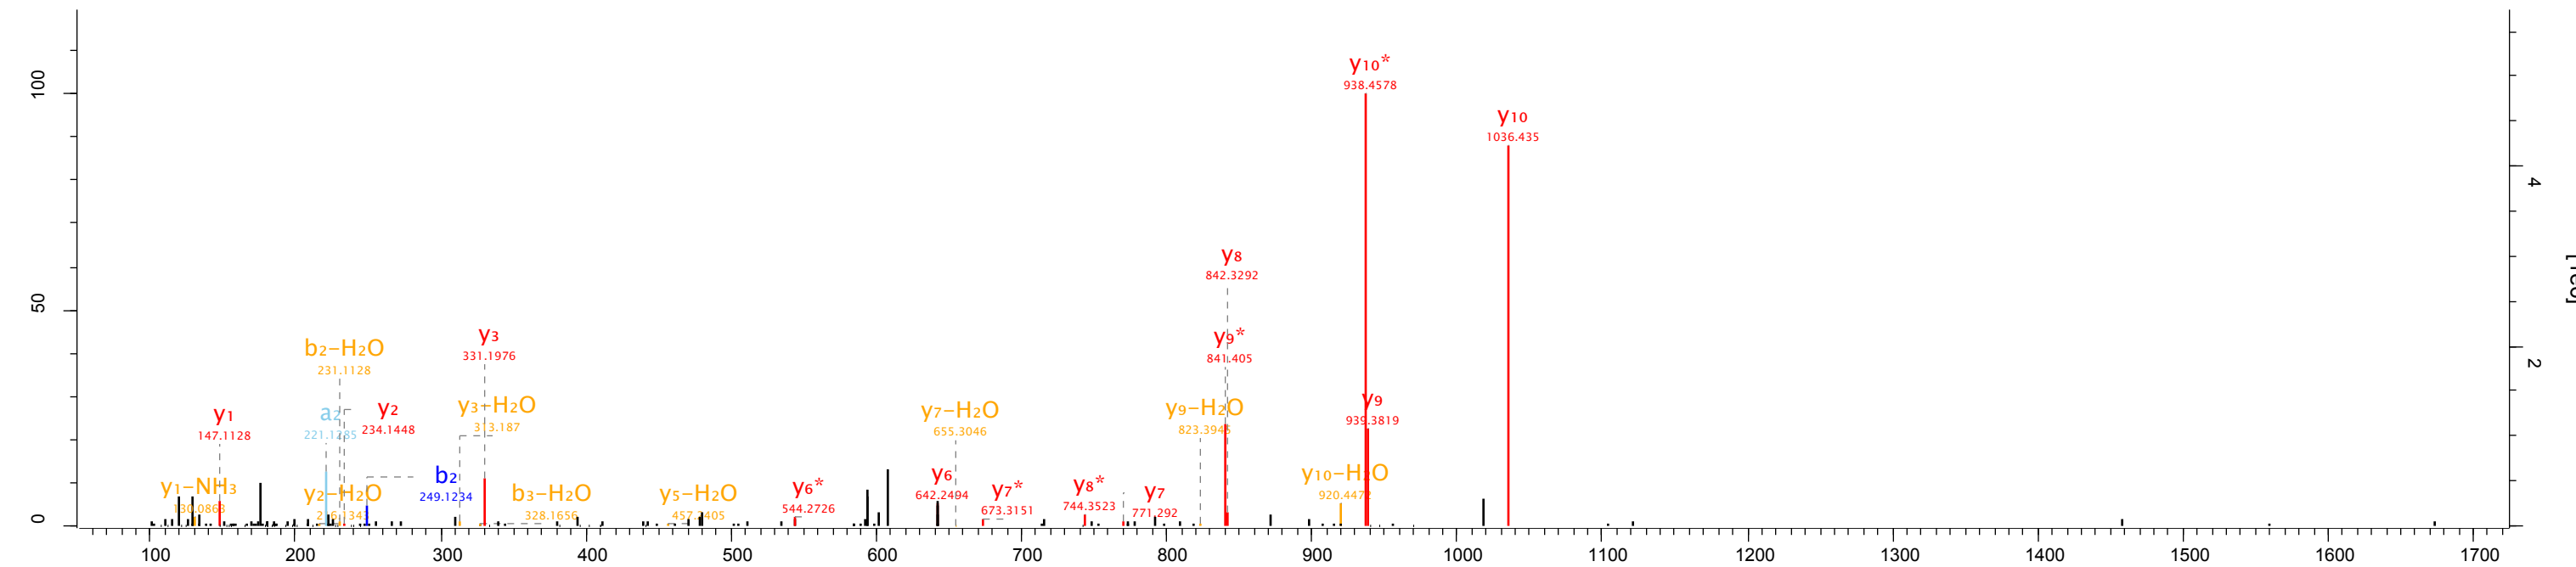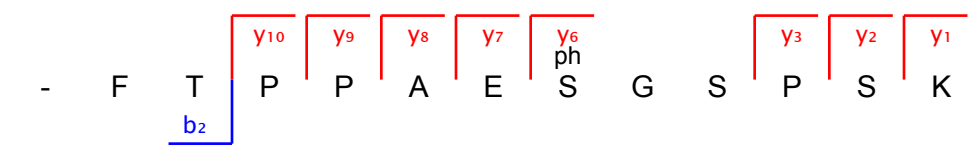

Raw file 20150814\_A375SR\_Phospho\_BR2\_05 Scan 8428 Method FTMS; HCD Score 91.14 m/z 755.83 Gene names SRP72

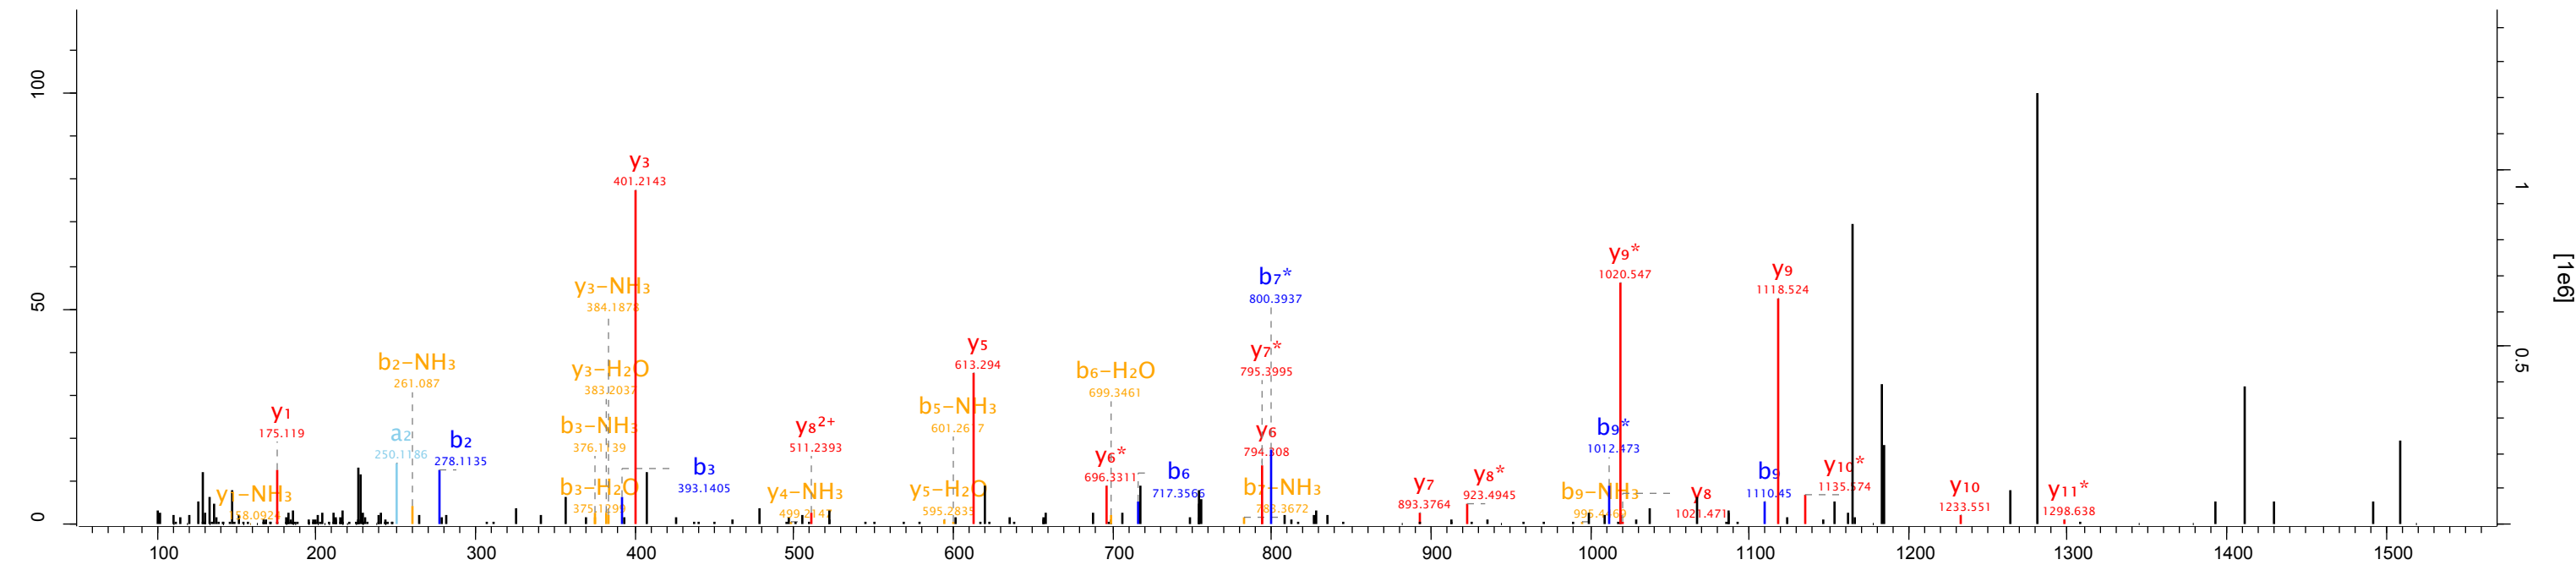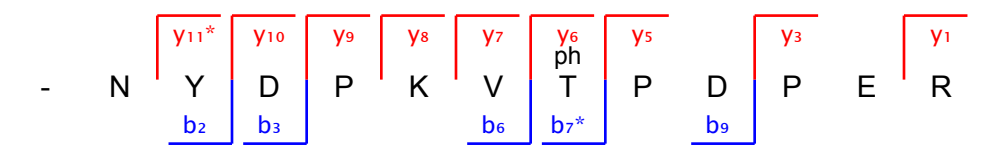

Raw file: 20150814\_A375SR\_Phospho\_BR2\_05  
 Scan: 9278 Method: FTMS; HCD Score: 165.66 m/z: 744.69 Gene names: SLC4A1AP

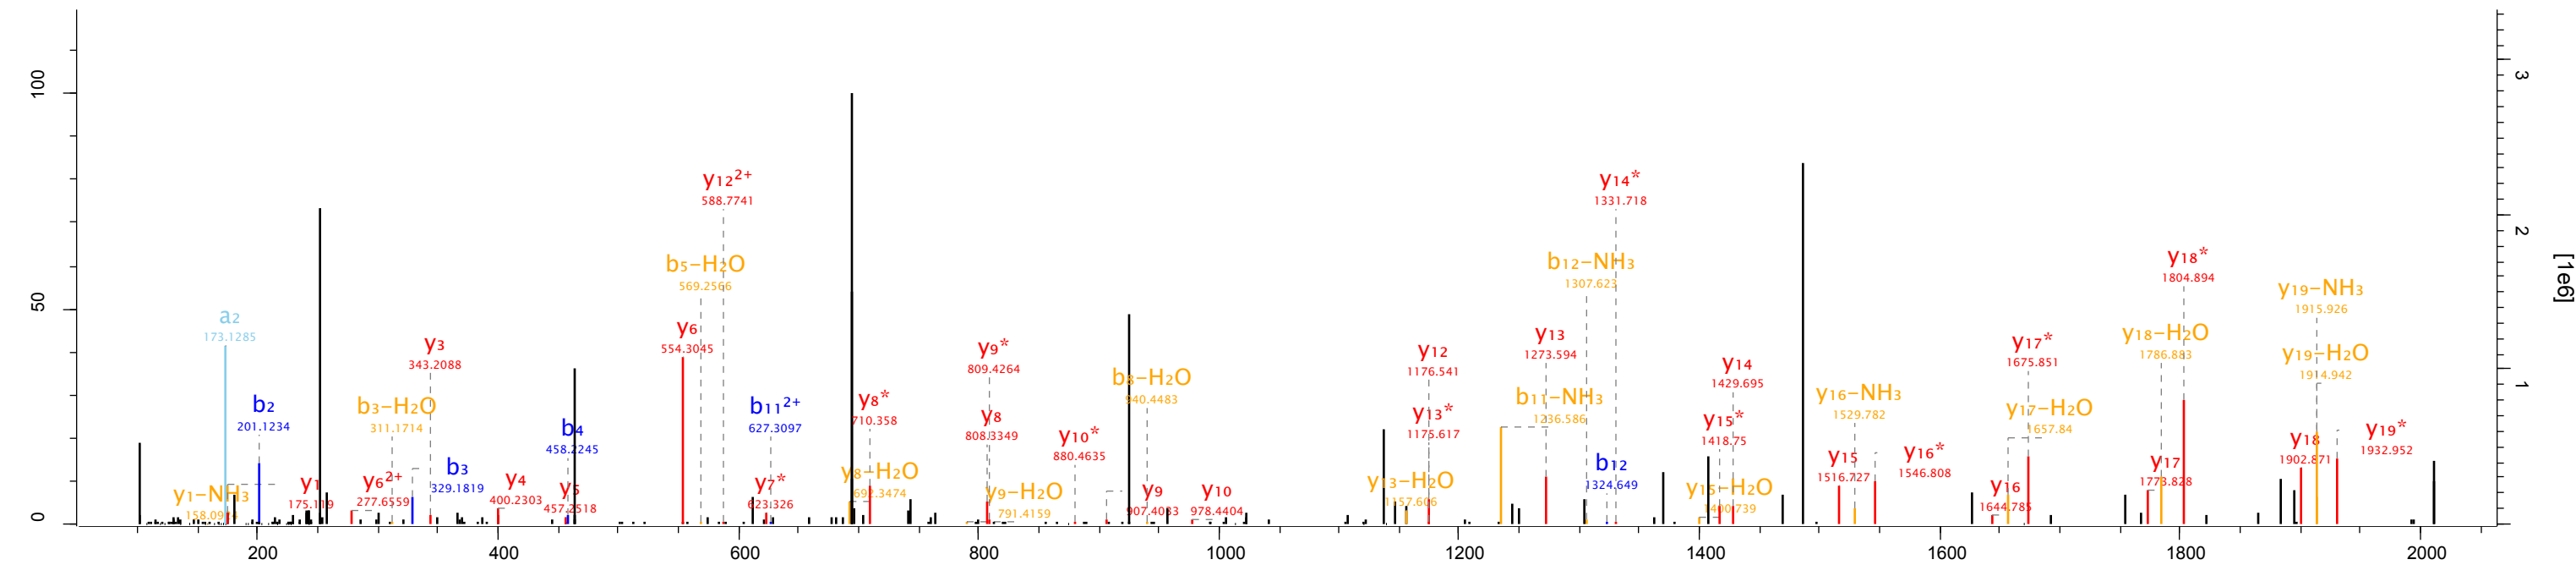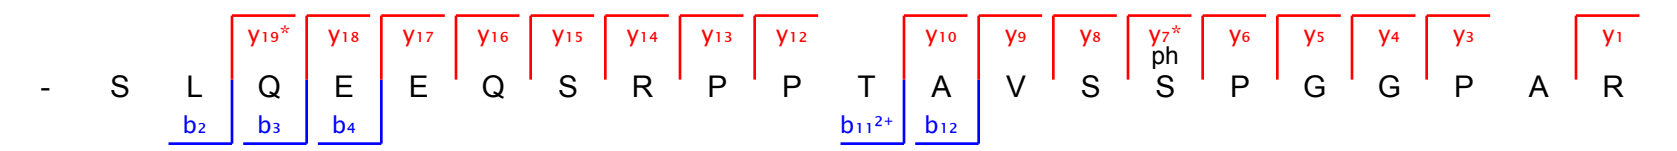

Raw file: 20150814\_A375SR\_Phospho\_BR2\_05  
 Scan: 9338 Method: FTMS; HCD Score: 89.35 m/z: 471.73 Gene names: AKAP13

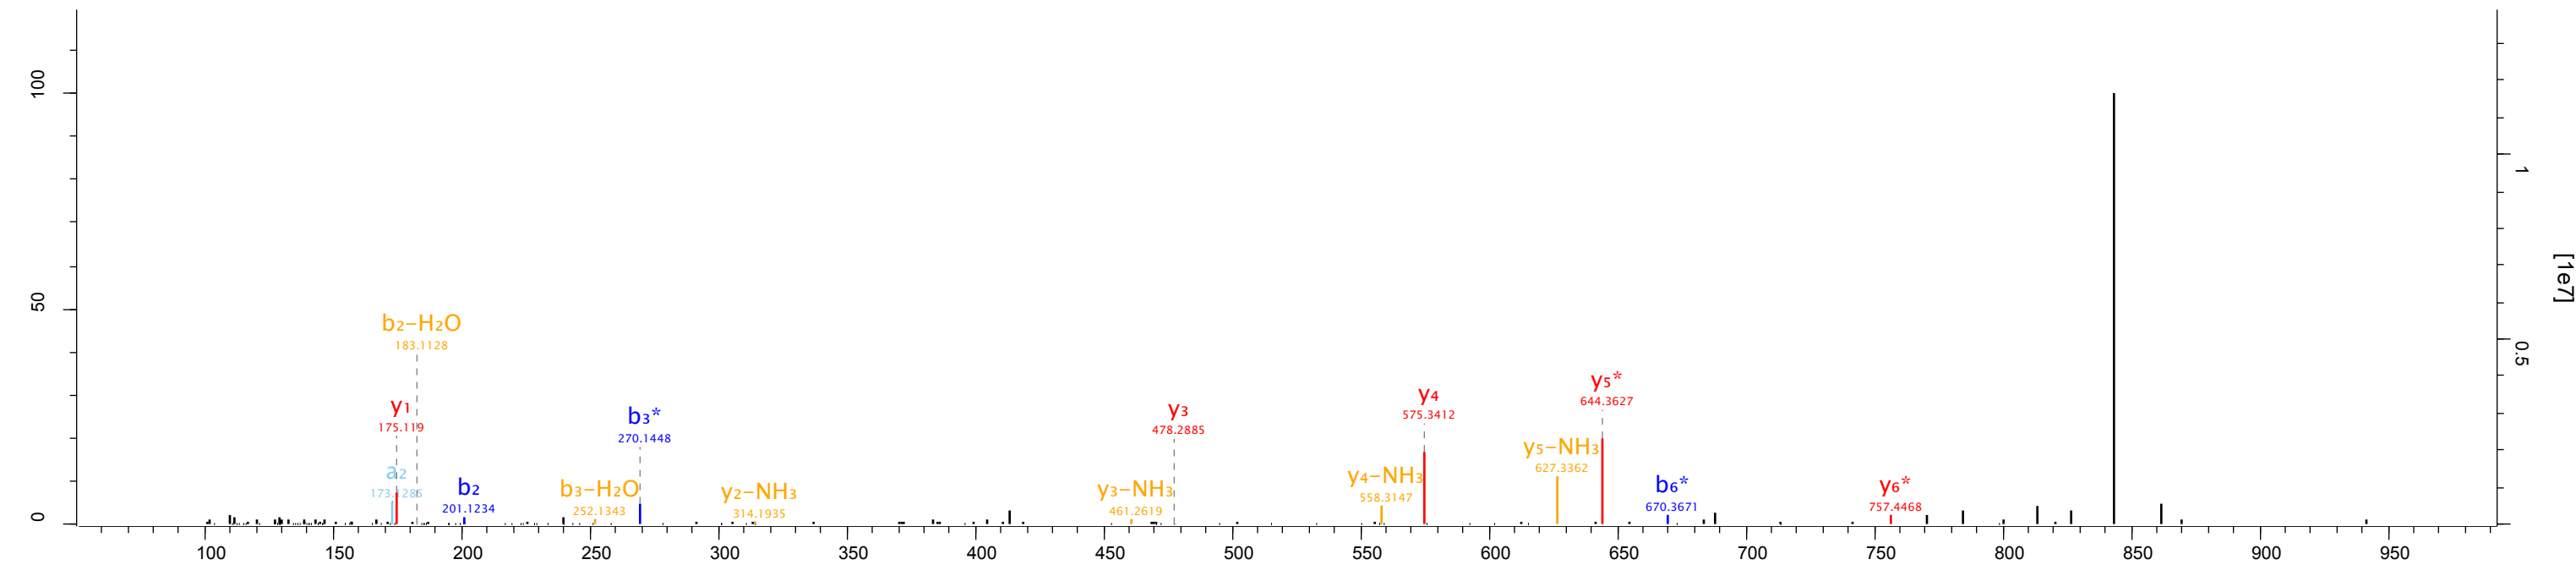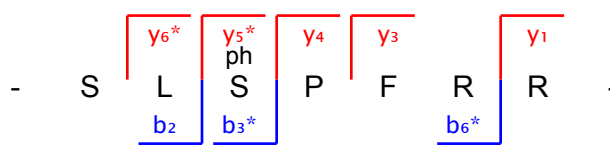



Raw file: 20150814\_A375SR\_Phospho\_BR2\_05  
 Scan: 9988 Method: FTMS; HCD Score: 168.05 m/z: 756.83 Gene names: AMBRA1

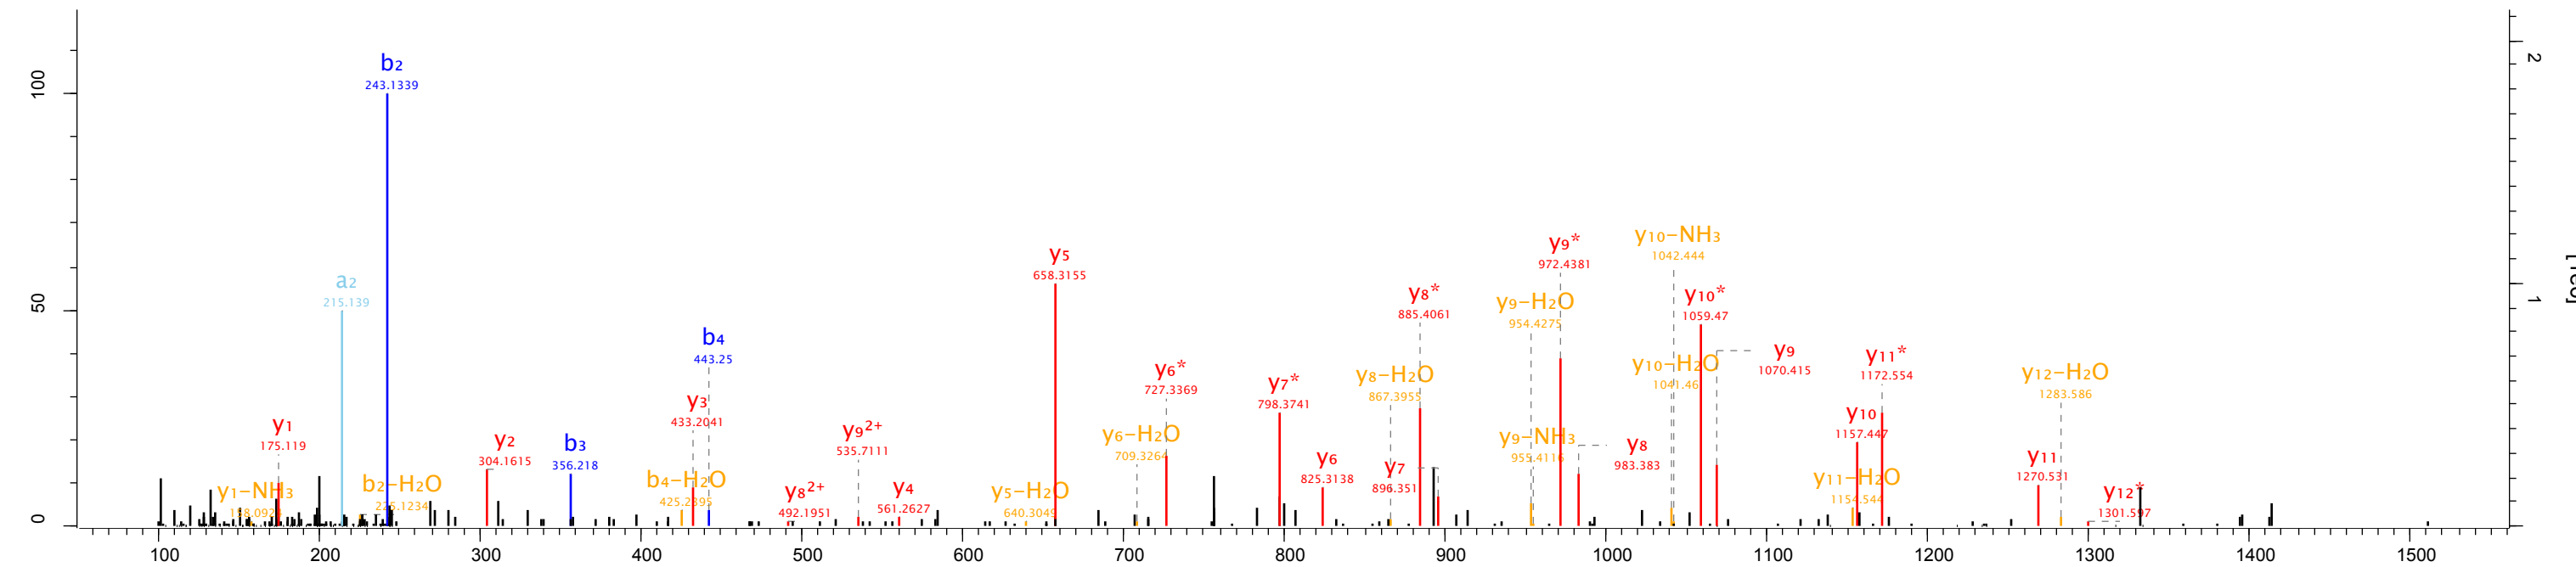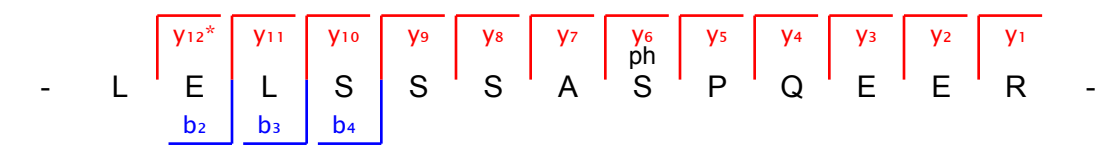

Raw file: 20150814\_A375SR\_Phospho\_BR2\_06  
 Scan: 10628 Method: FTMS; HCD Score: 147.1 m/z: 606.26 Gene names: DYNC1H1

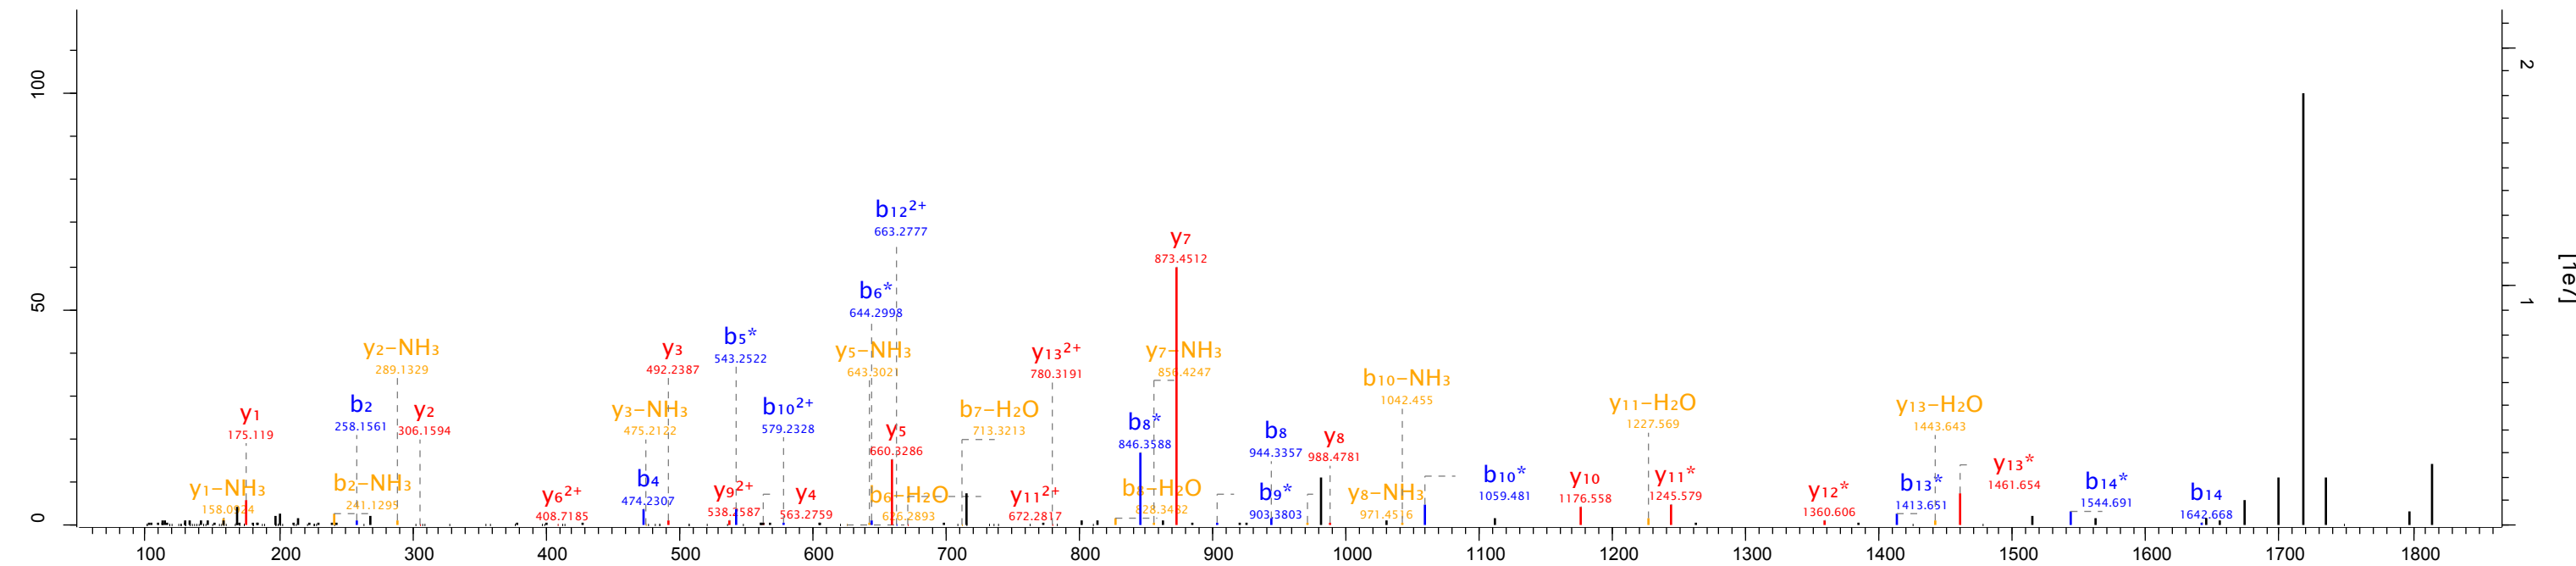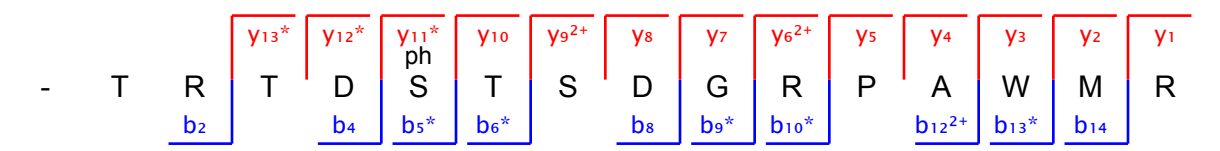

Raw file: 20150814\_A375SR\_Phospho\_BR2\_06  
 Scan: 11148 Method: FTMS; HCD Score: 183.58 m/z: 751.69 Gene names: MTA2

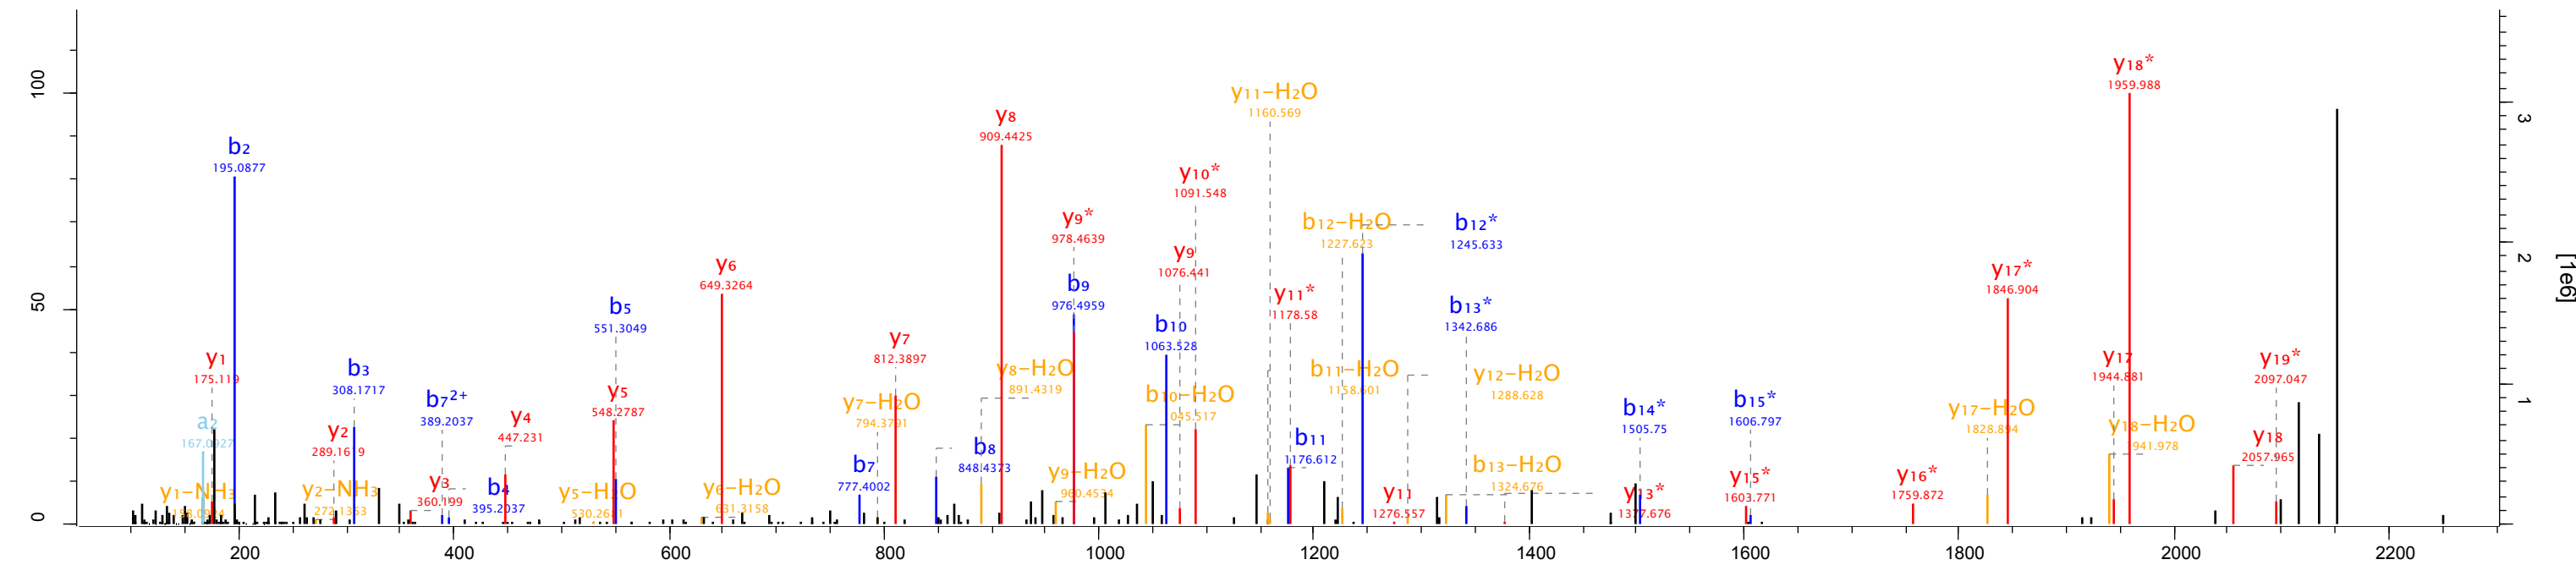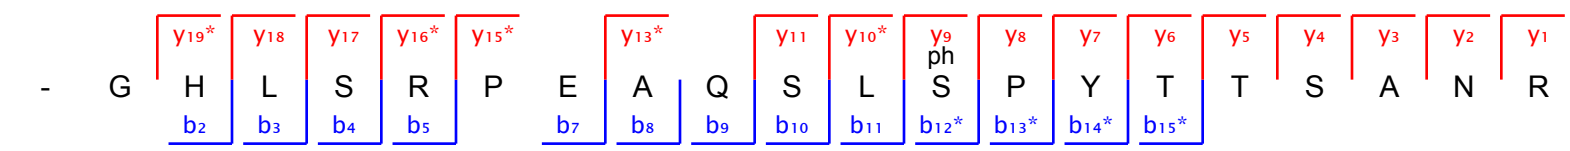

Raw file: 20150814\_A375SR\_Phospho\_BR2\_06  
 Scan: 11218 Method: FTMS; HCD Score: 113.38 m/z: 560.23 Gene names: TP53BP1

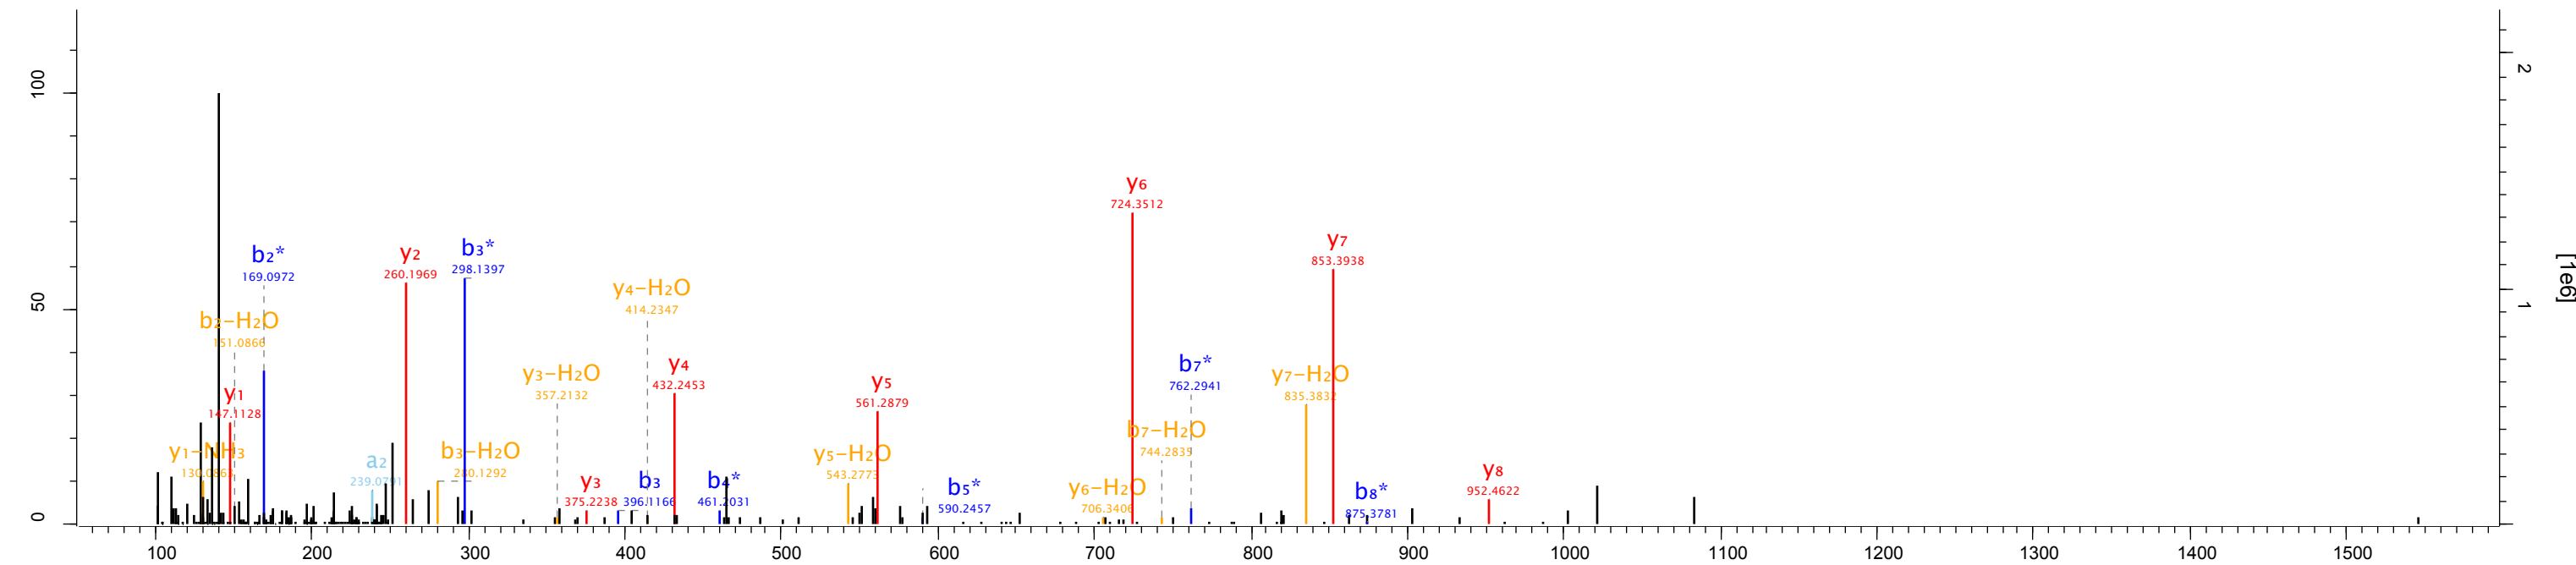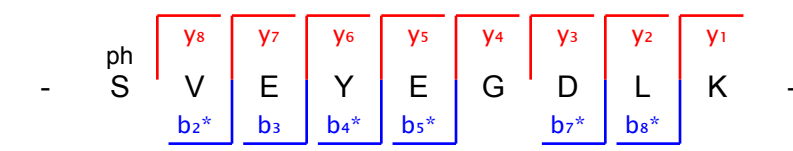

Raw file 20150814\_A375SR\_Phospho\_BR2\_06 Scan 11388 Method FTMS; HCD Score 191.73 m/z 791.89 Gene names SLAIN2

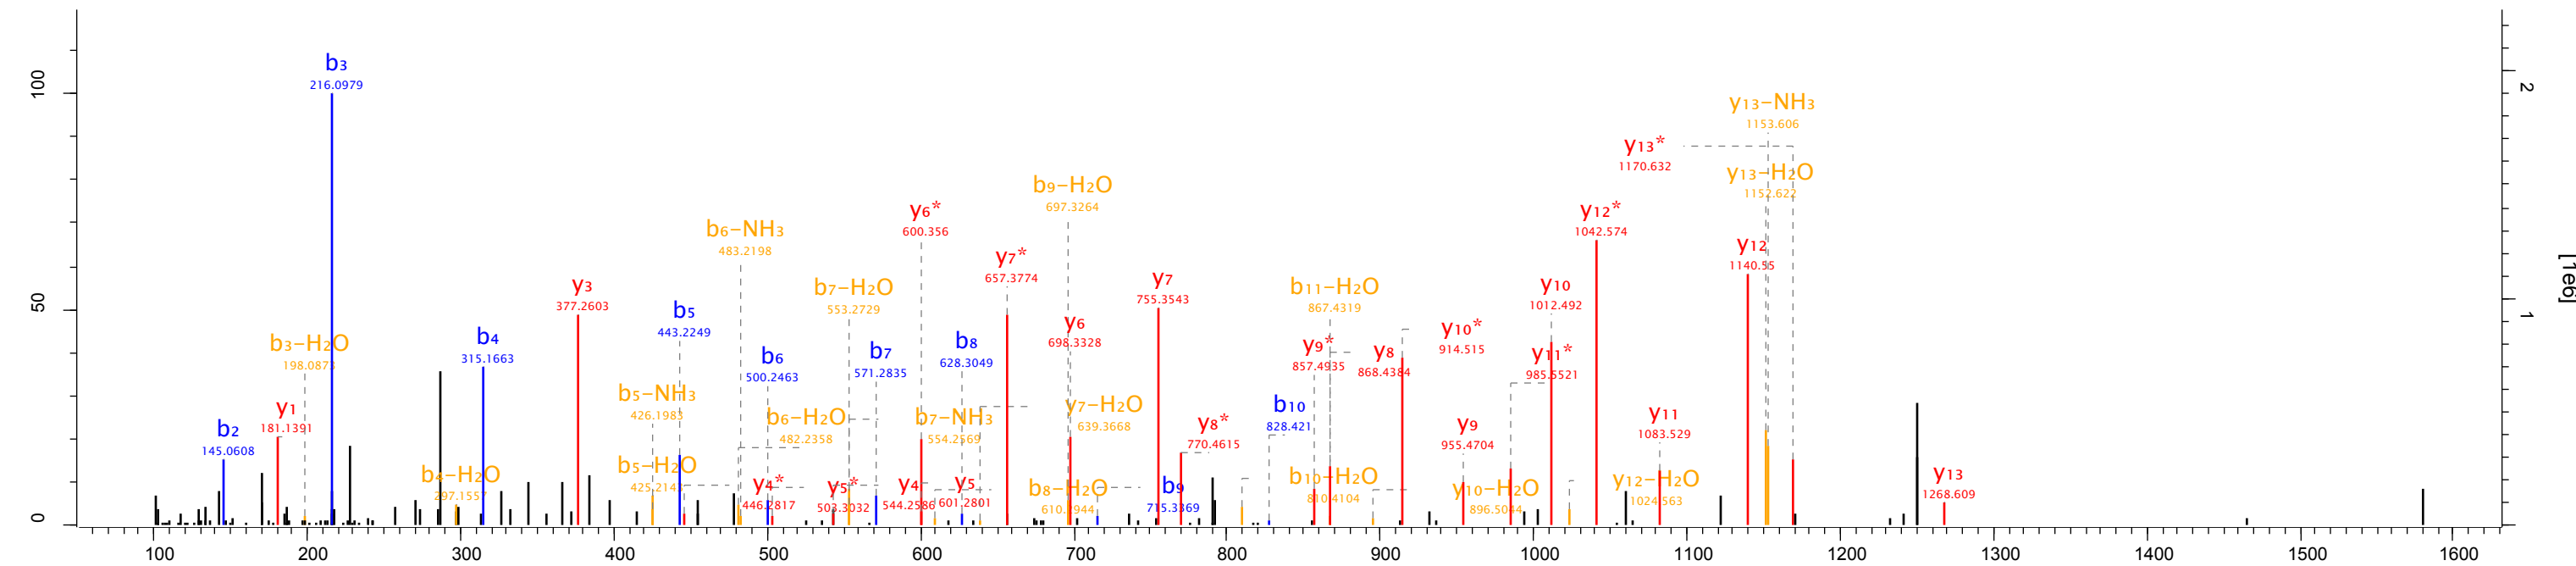

- S G A V Q G A G S L G P G S P V R -  
 b2 b3 b4 b5 b6 b7 b8 b9 b10 y13 y12 y11 y10 y9 y8 y7 y6 y5 y4 ph y3 y1

Raw file Scan Method Score m/z Gene names  
 20150814\_A375SR\_Phospho\_BR2\_06 12198 FTMS; HCD 213.37 820.04 EHBPI1L1

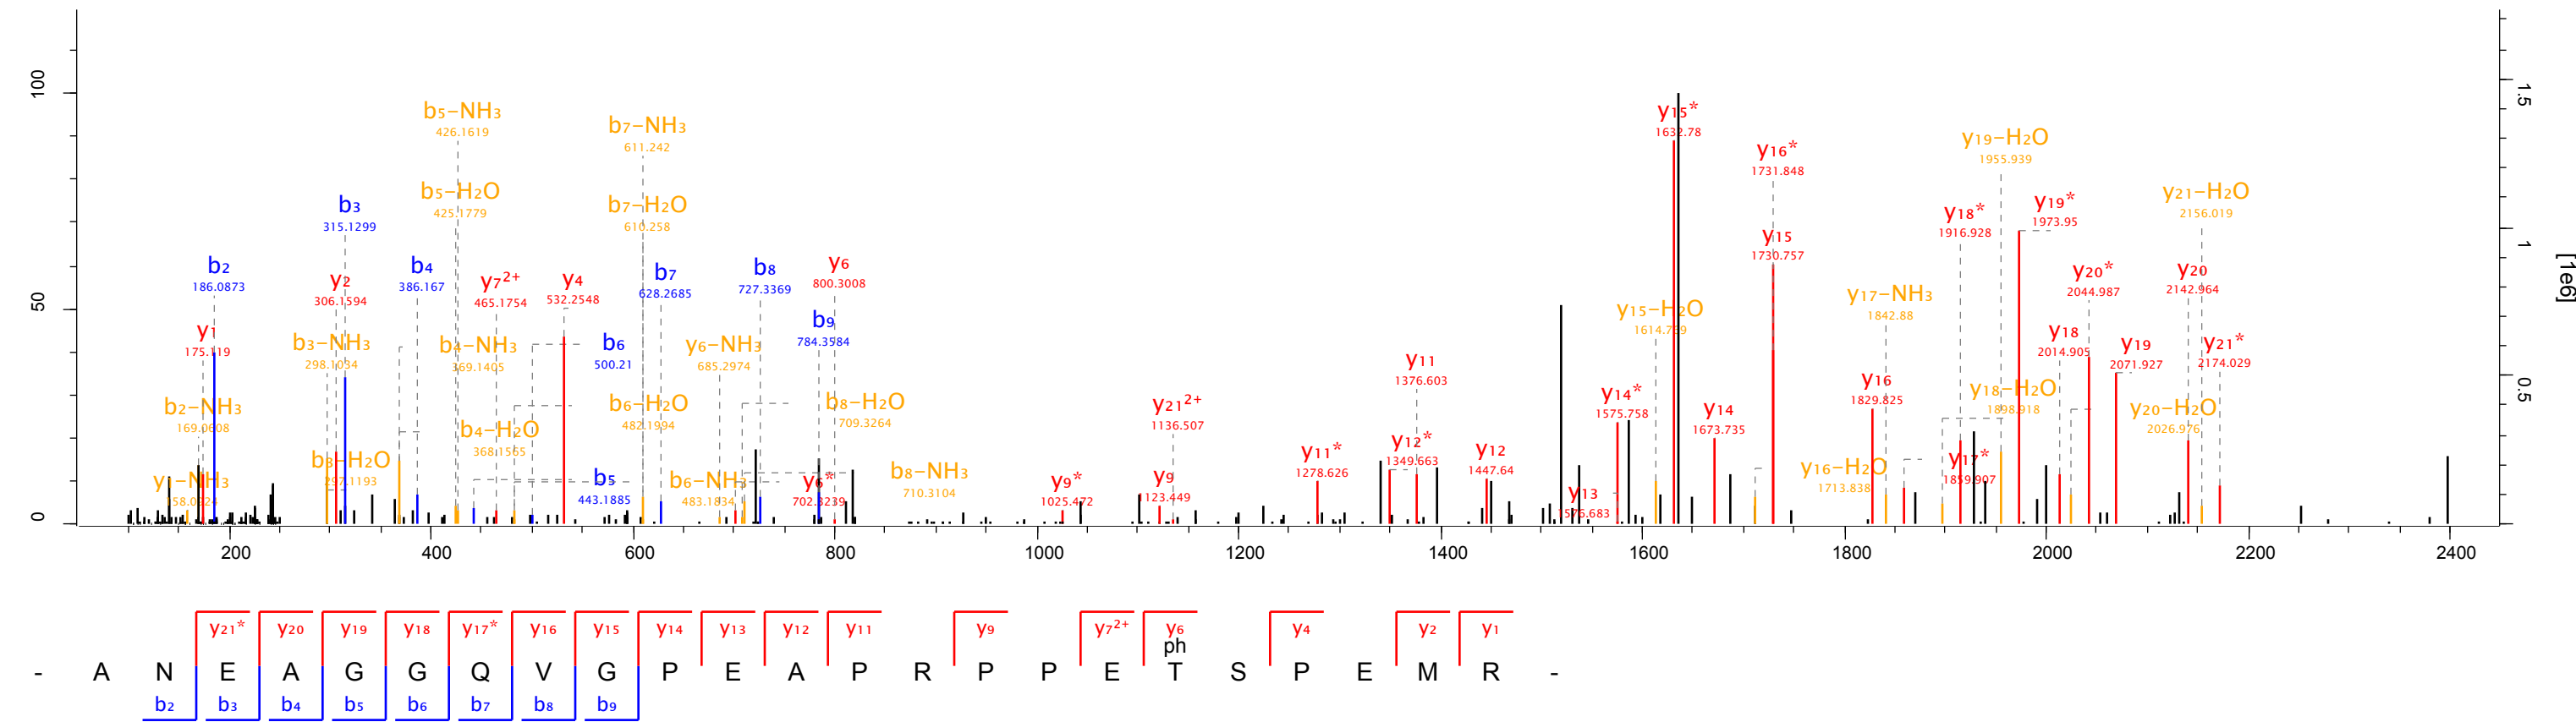

Raw file 20150814\_A375SR\_Phospho\_BR2\_06 Scan 12568 Method FTMS; HCD Score 91.62 m/z 761.37 Gene names TOR1AIP1

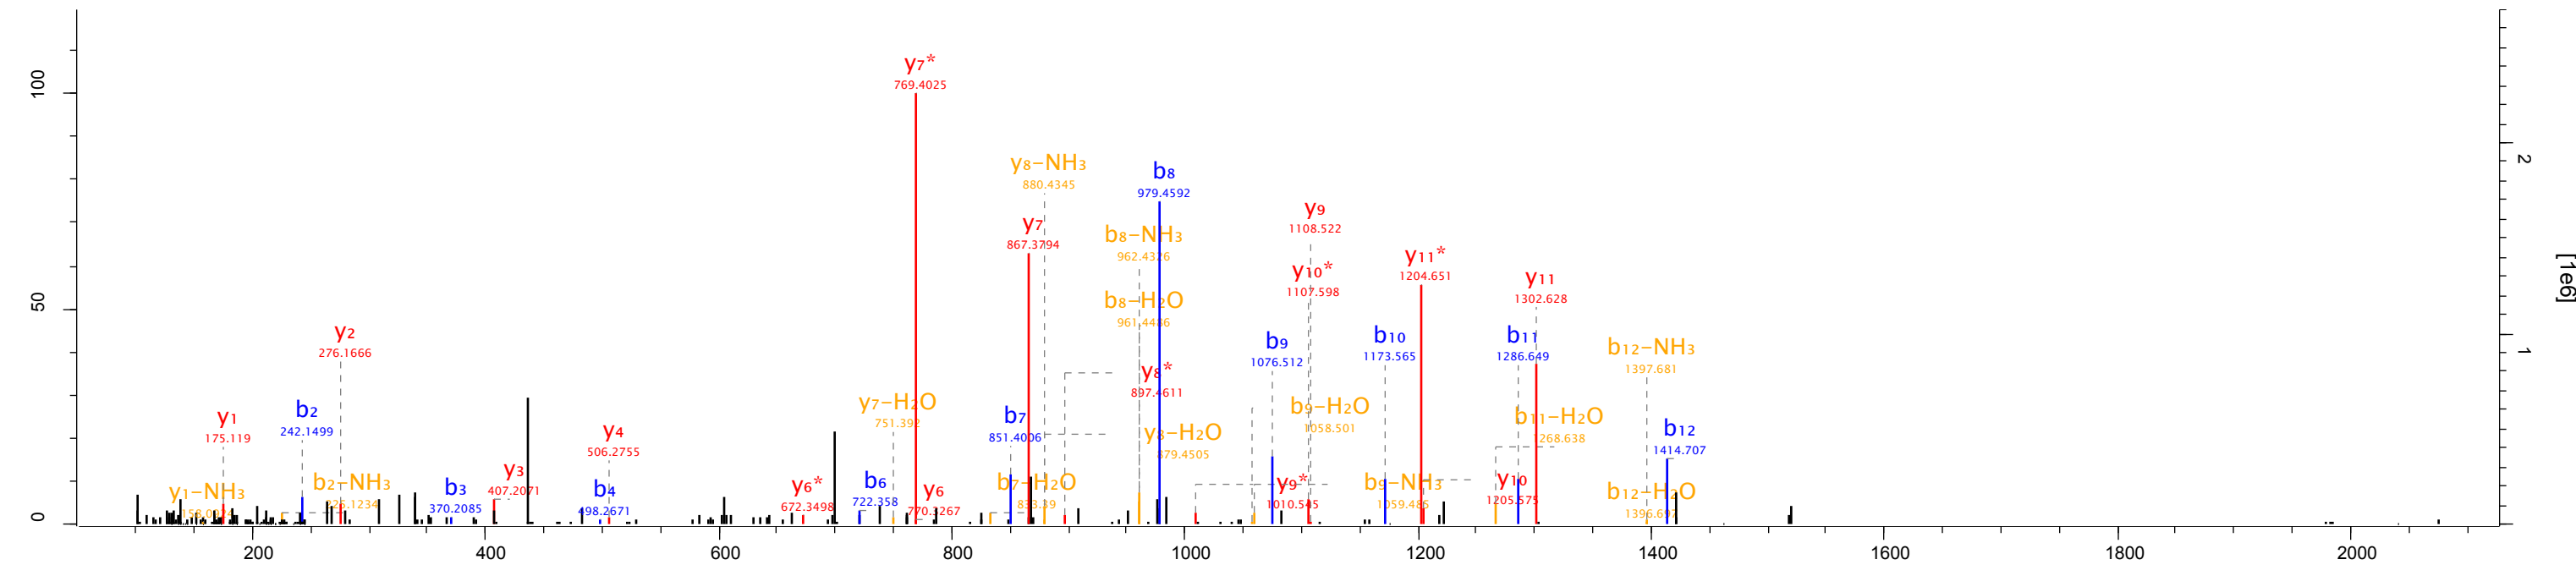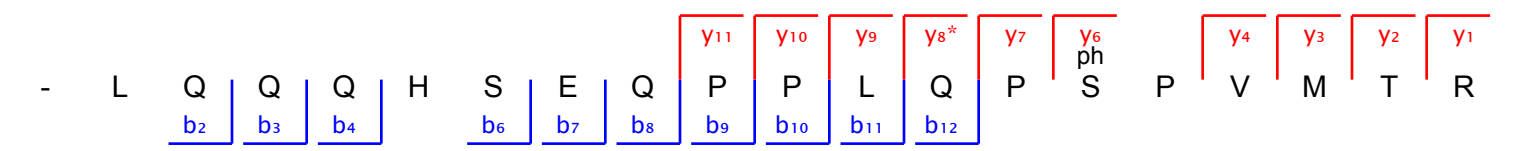

Raw file 20150814\_A375SR\_Phospho\_BR2\_06 Scan 13308 Method FTMS; HCD Score 89.19 m/z 552.75 Gene names NEK1

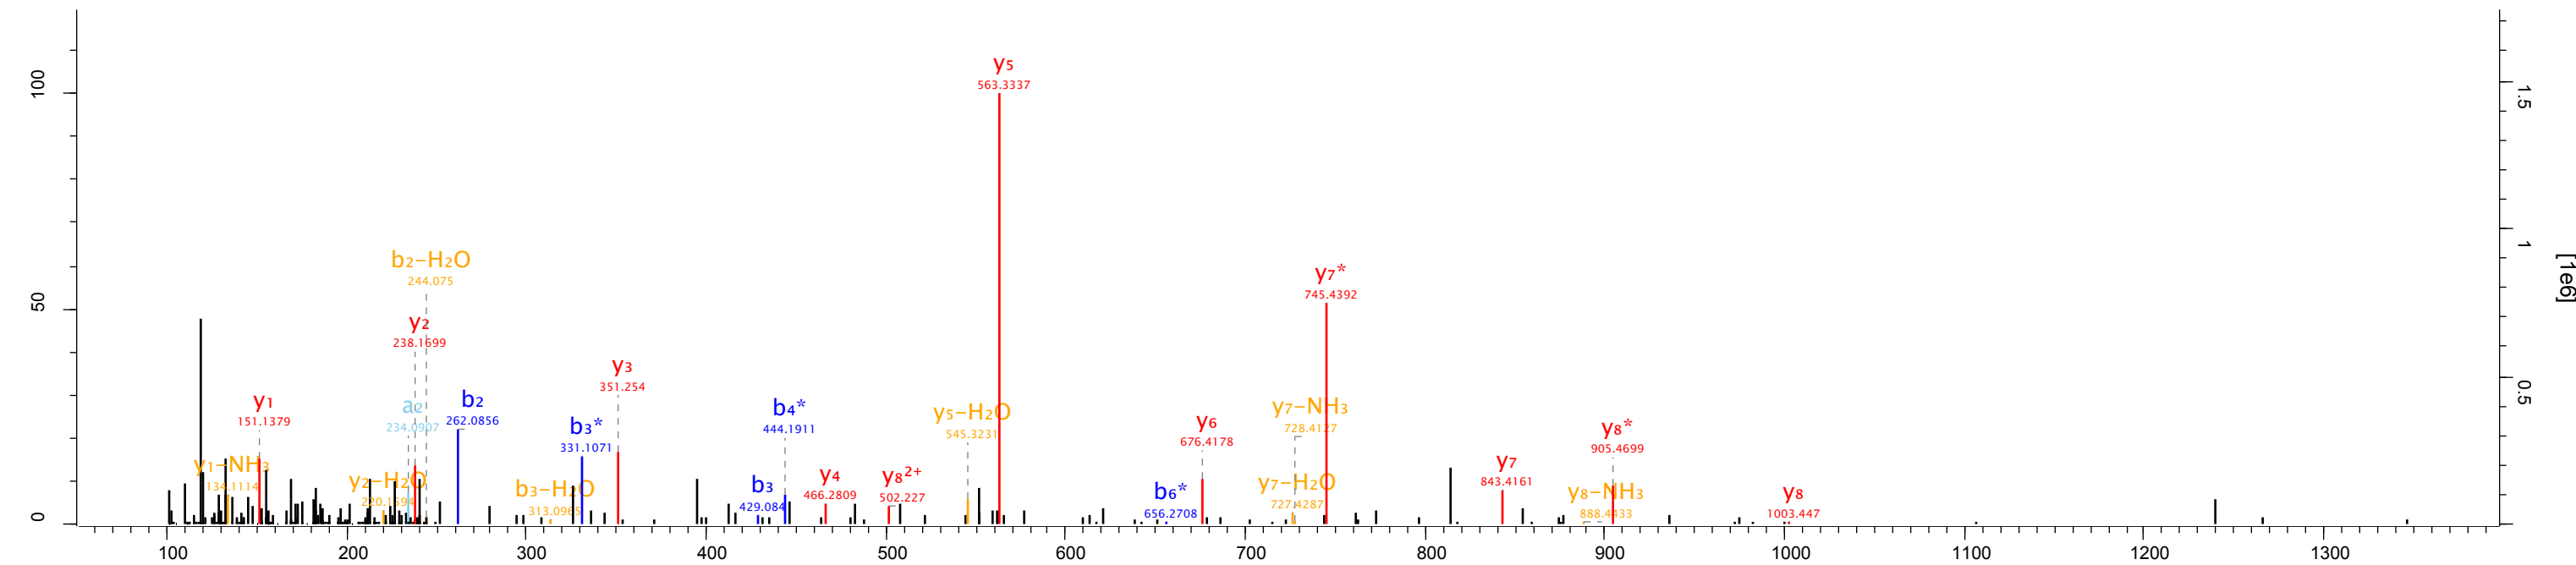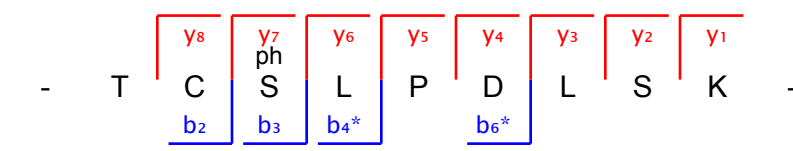



Raw file: 20150814\_A375SR\_Phospho\_BR2\_06  
 Scan: 13368 Method: FTMS; HCD Score: 89.6 m/z: 723.36 Gene names: ZNF592

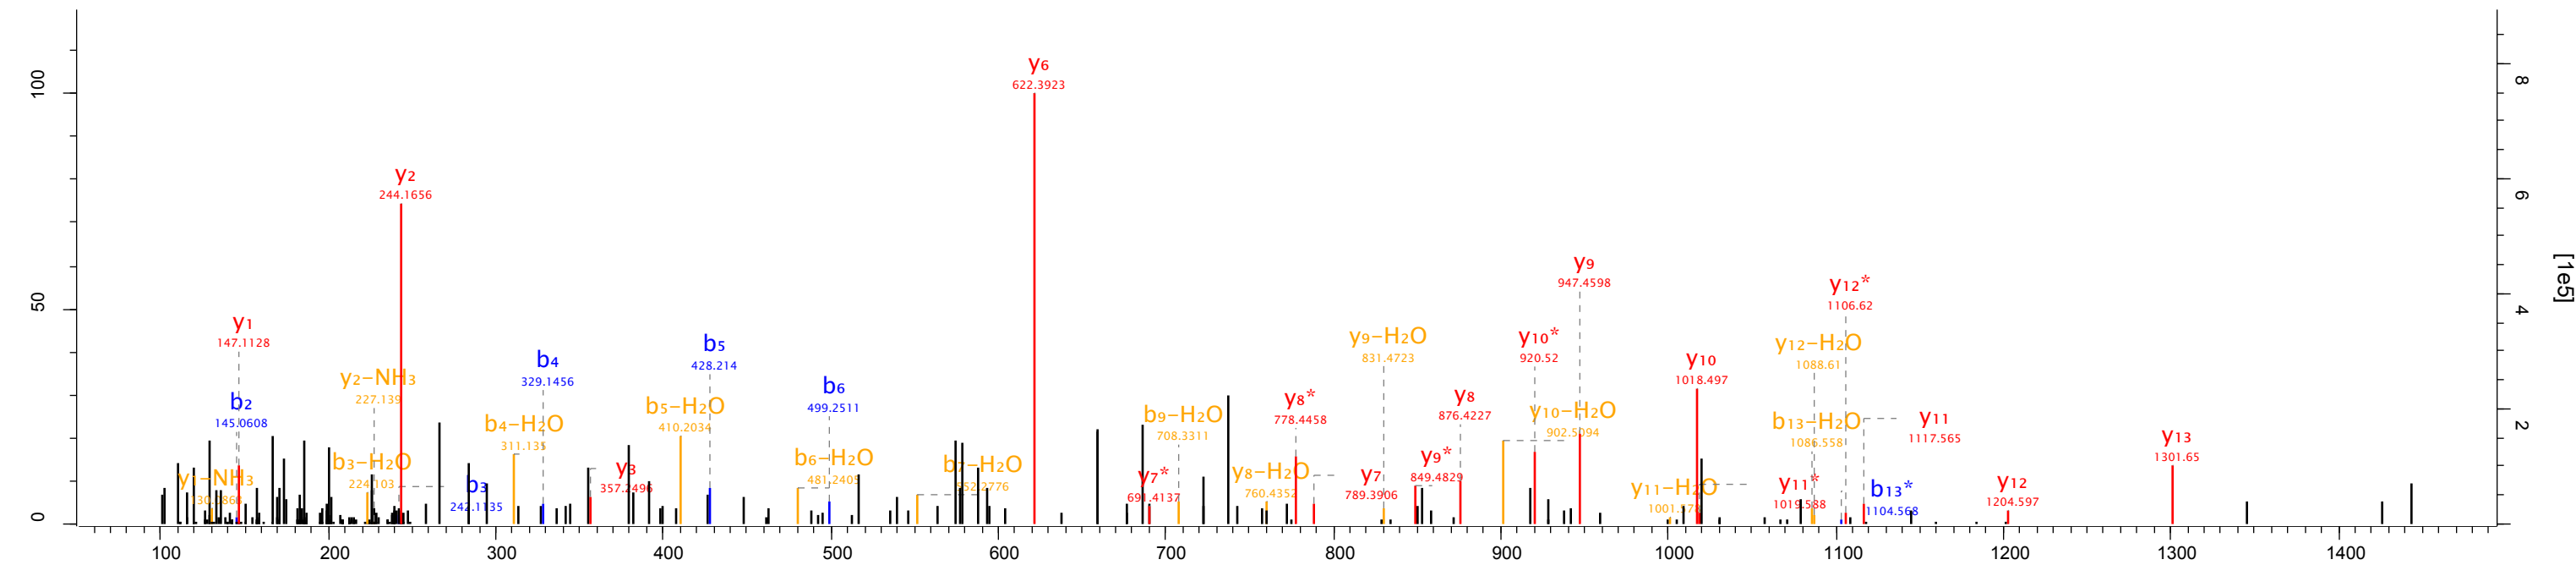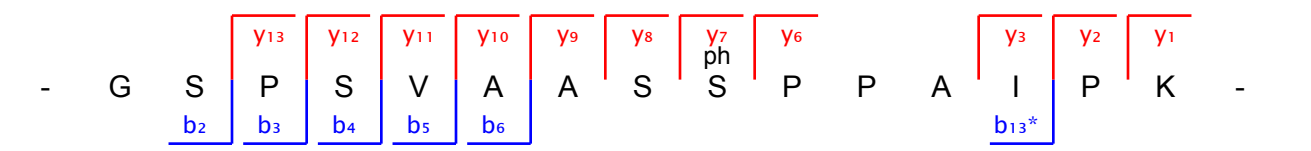

Raw file: 20150814\_A375SR\_Phospho\_BR2\_06  
 Scan: 14038 Method: FTMS; HCD Score: 99.75 m/z: 671.81 Gene names: EFHD2

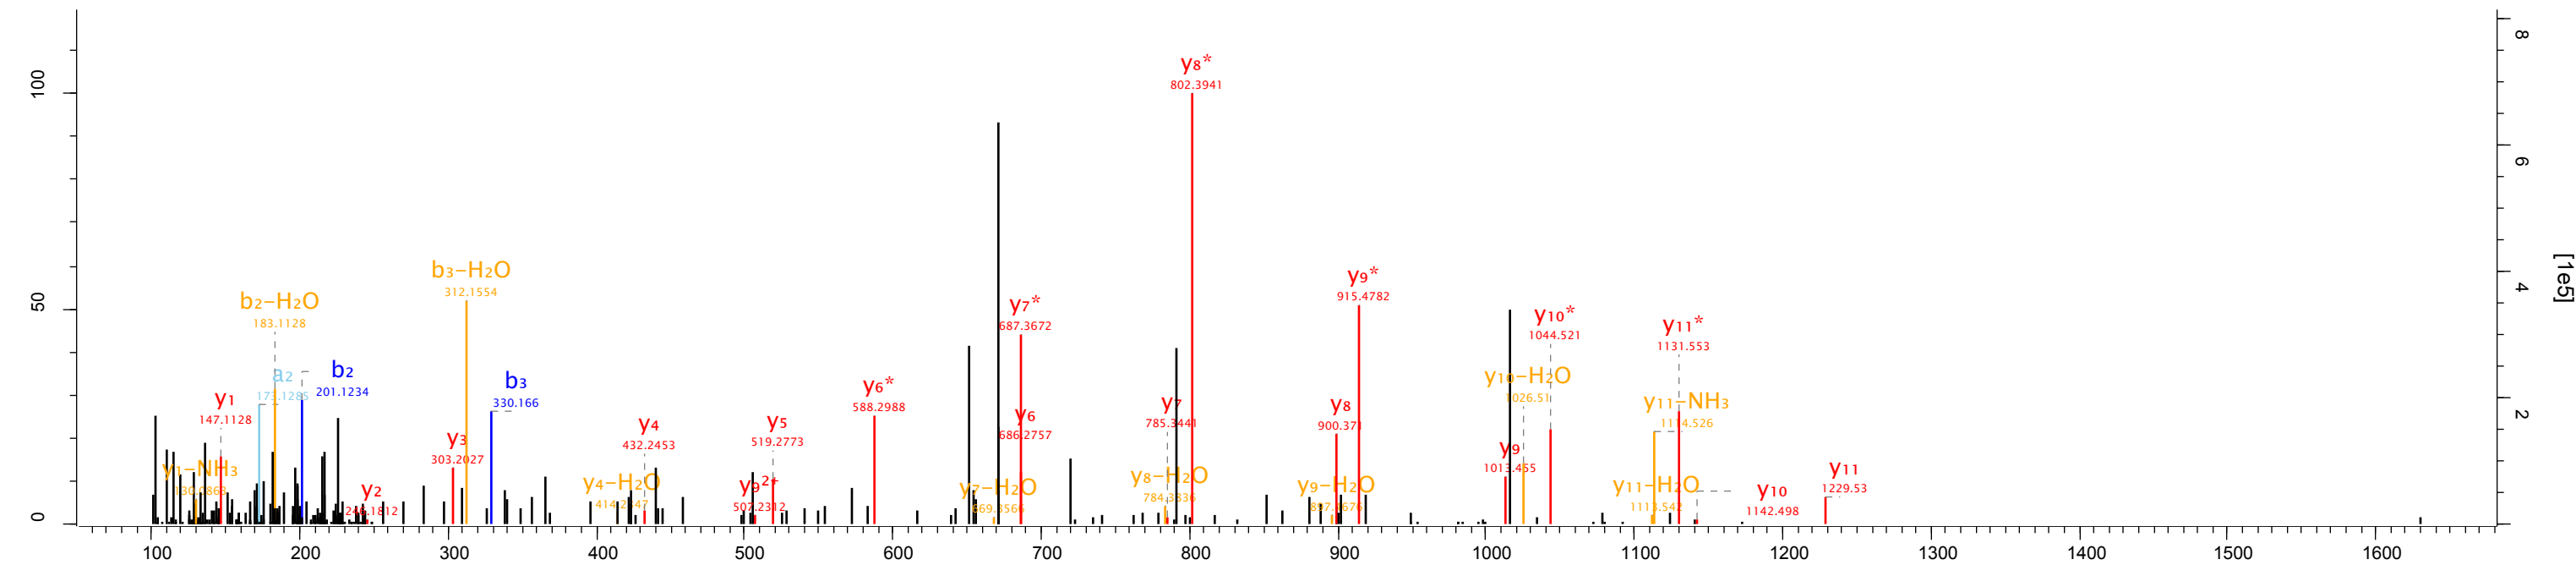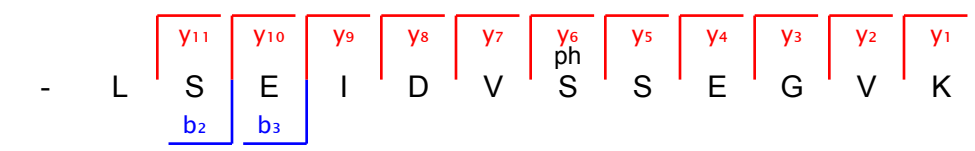

Raw file: 20150814\_A375SR\_Phospho\_BR2\_06  
 Scan: 14548 Method: FTMS; HCD Score: 89.01 m/z: 604.97 Gene names: SLAIN2

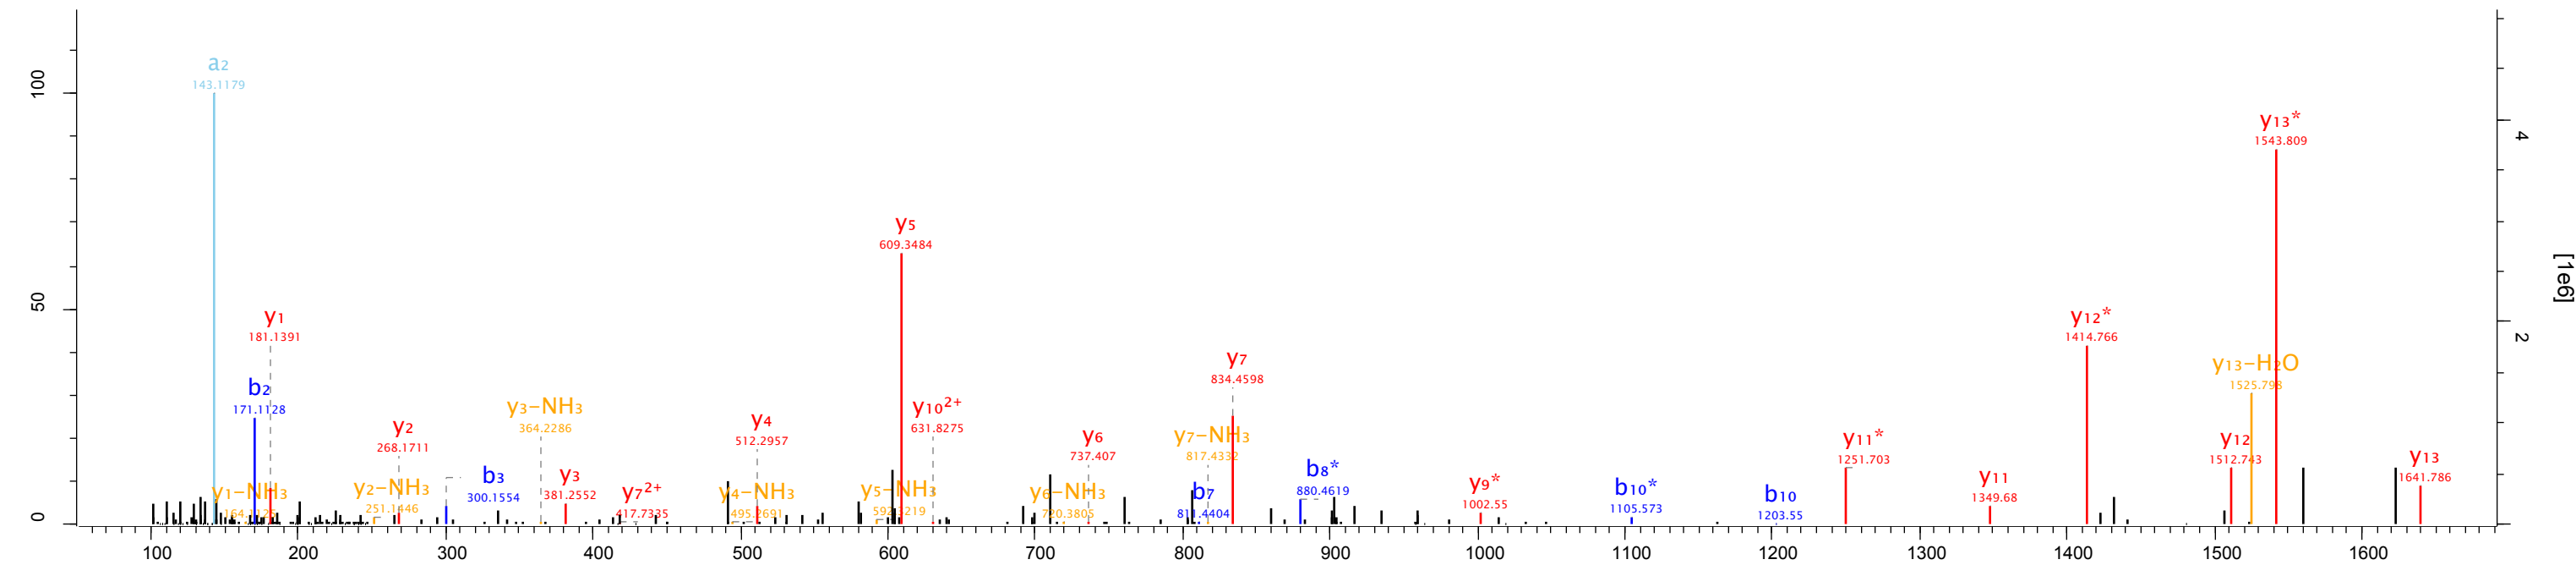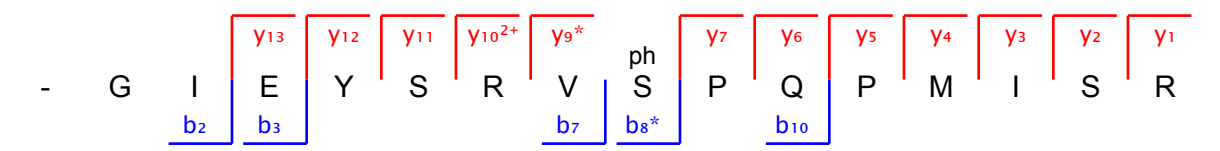

Raw file 20150814\_A375SR\_Phospho\_BR2\_06 Scan 15558 Method FTMS; HCD Score 156.78 m/z 893.39 Gene names SLC3A2

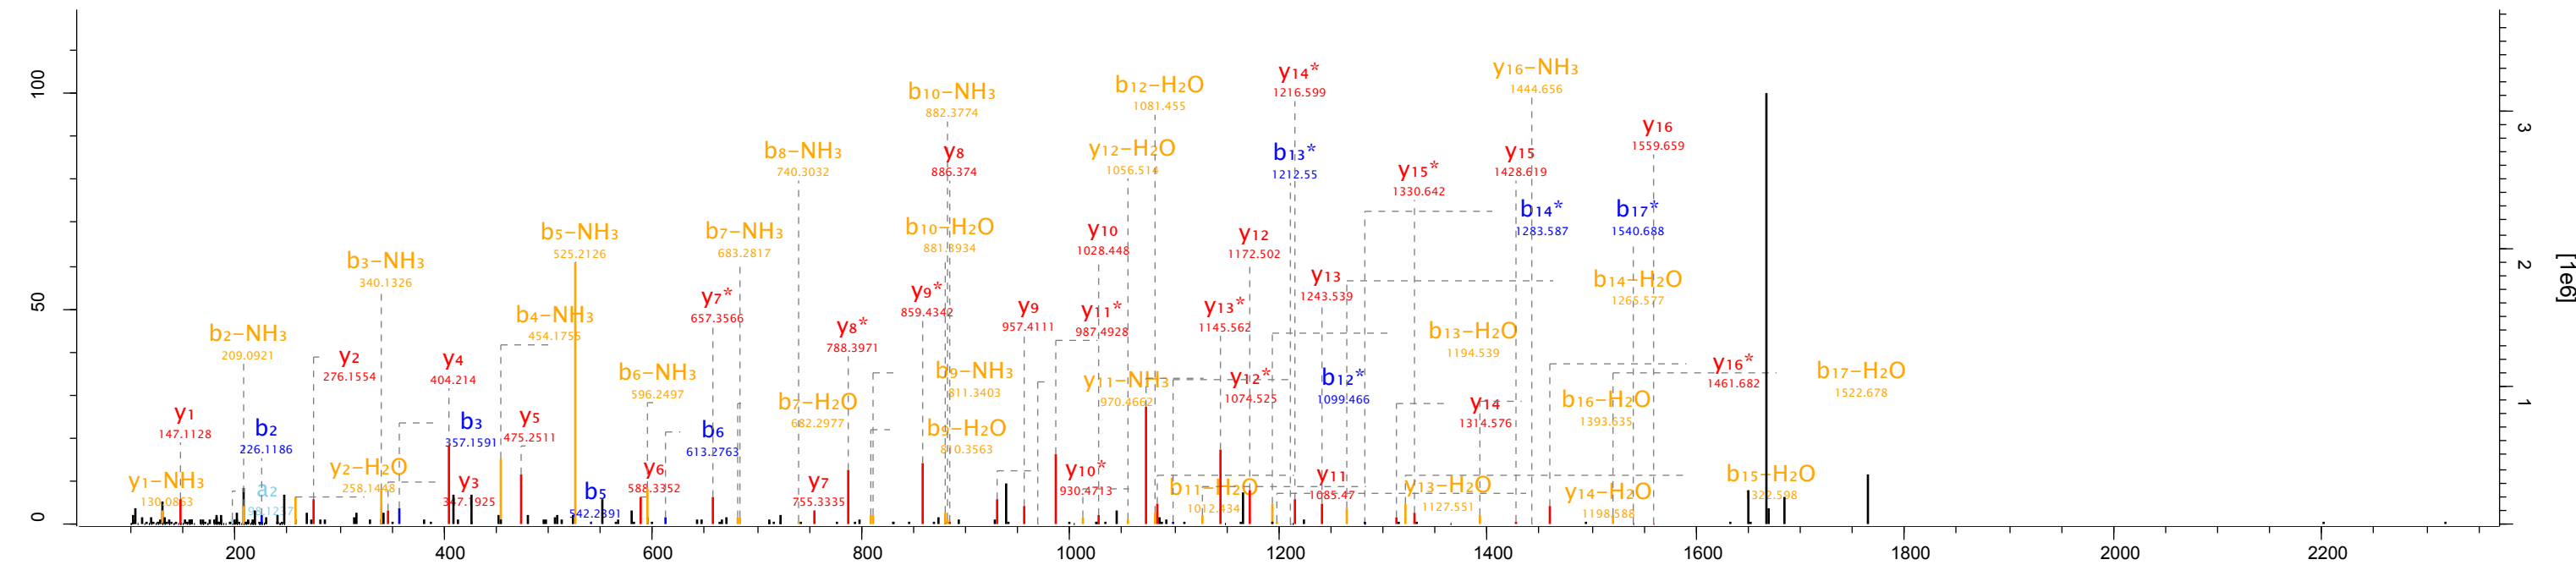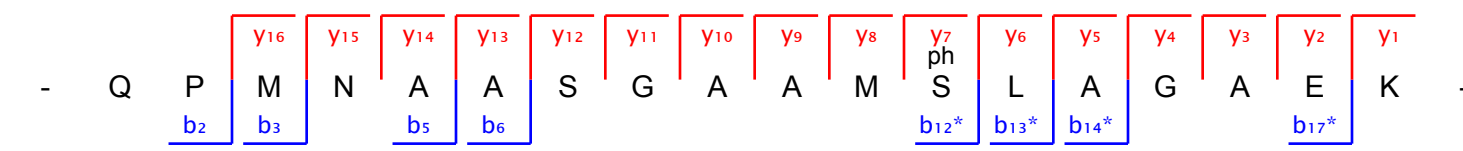

Raw file: 20150814\_A375SR\_Phospho\_BR2\_06  
 Scan: 15908 Method: FTMS; HCD Score: 210.19 m/z: 1117.02 Gene names: TJP1

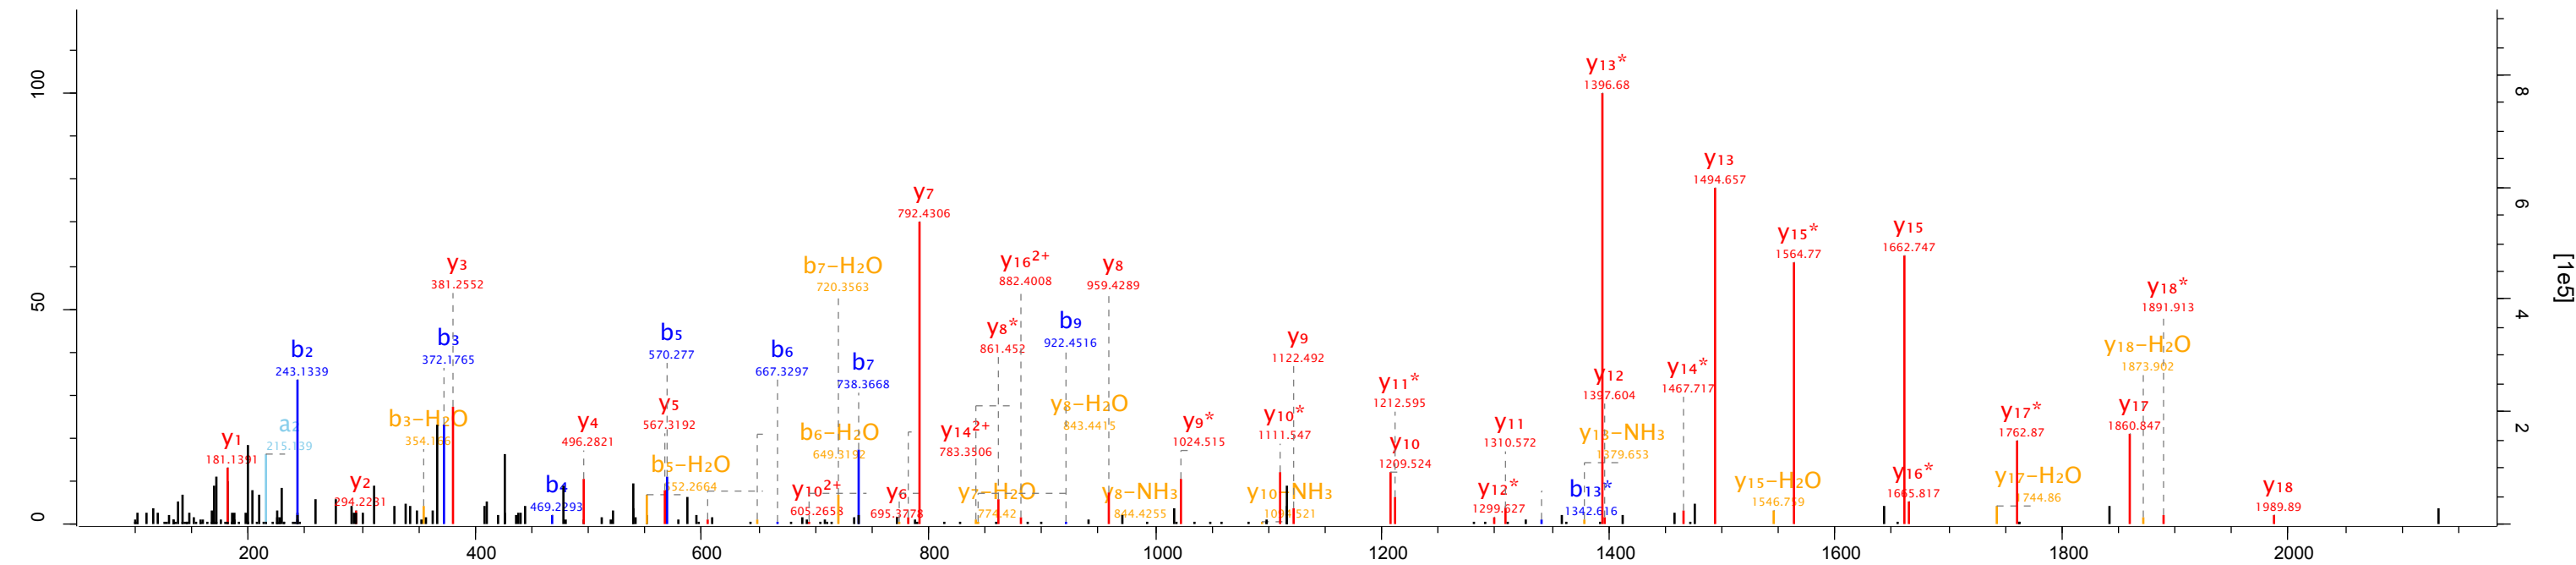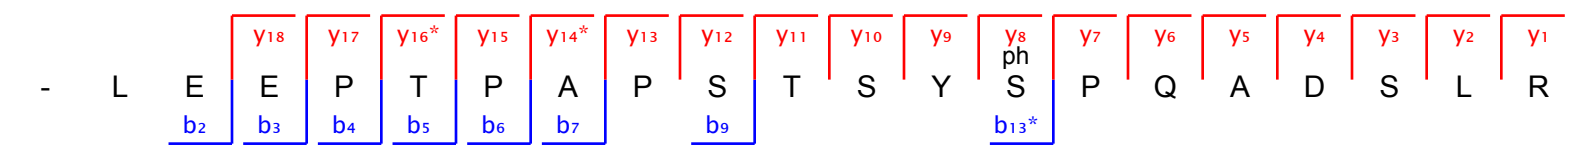

Raw file Scan Method Score m/z Gene names  
 20150814\_A375SR\_Phospho\_BR2\_06 16188 FTMS; HCD 172.37 716.34 TRIM24

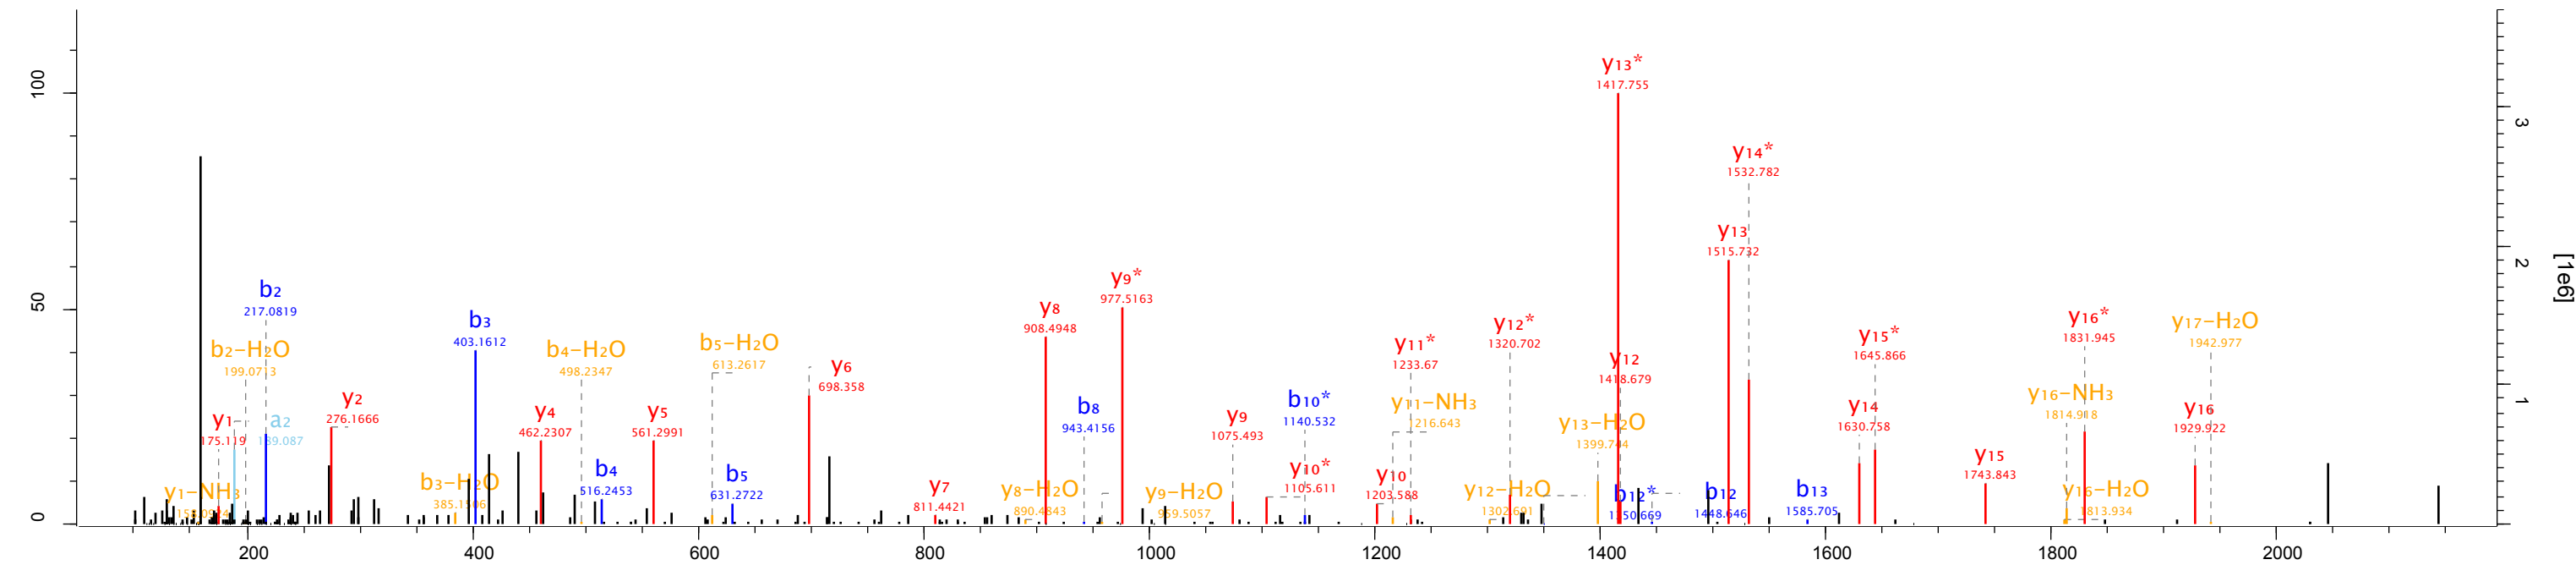

- S E W L D P S Q K S P L H V G E T R -

Fragmentation mapping (b-ions in blue, y-ions in red):

- b2: E
- b3: W
- b4: L
- b5: D
- b8: Q
- b10\*: S
- b12: L
- b13: H
- y1: R
- y2: T
- y4: G
- y5: V
- y6: H
- y7: L
- y8: P
- y9: S
- y10: K
- y11\*: Q
- y12: S
- y13: P
- y14: D
- y15: L
- y16: W

Raw file 20150814\_A375SR\_Phospho\_BR2\_06 Scan 16548 Method FTMS; HCD Score 89.8 m/z 483.27 Gene names ZNF318

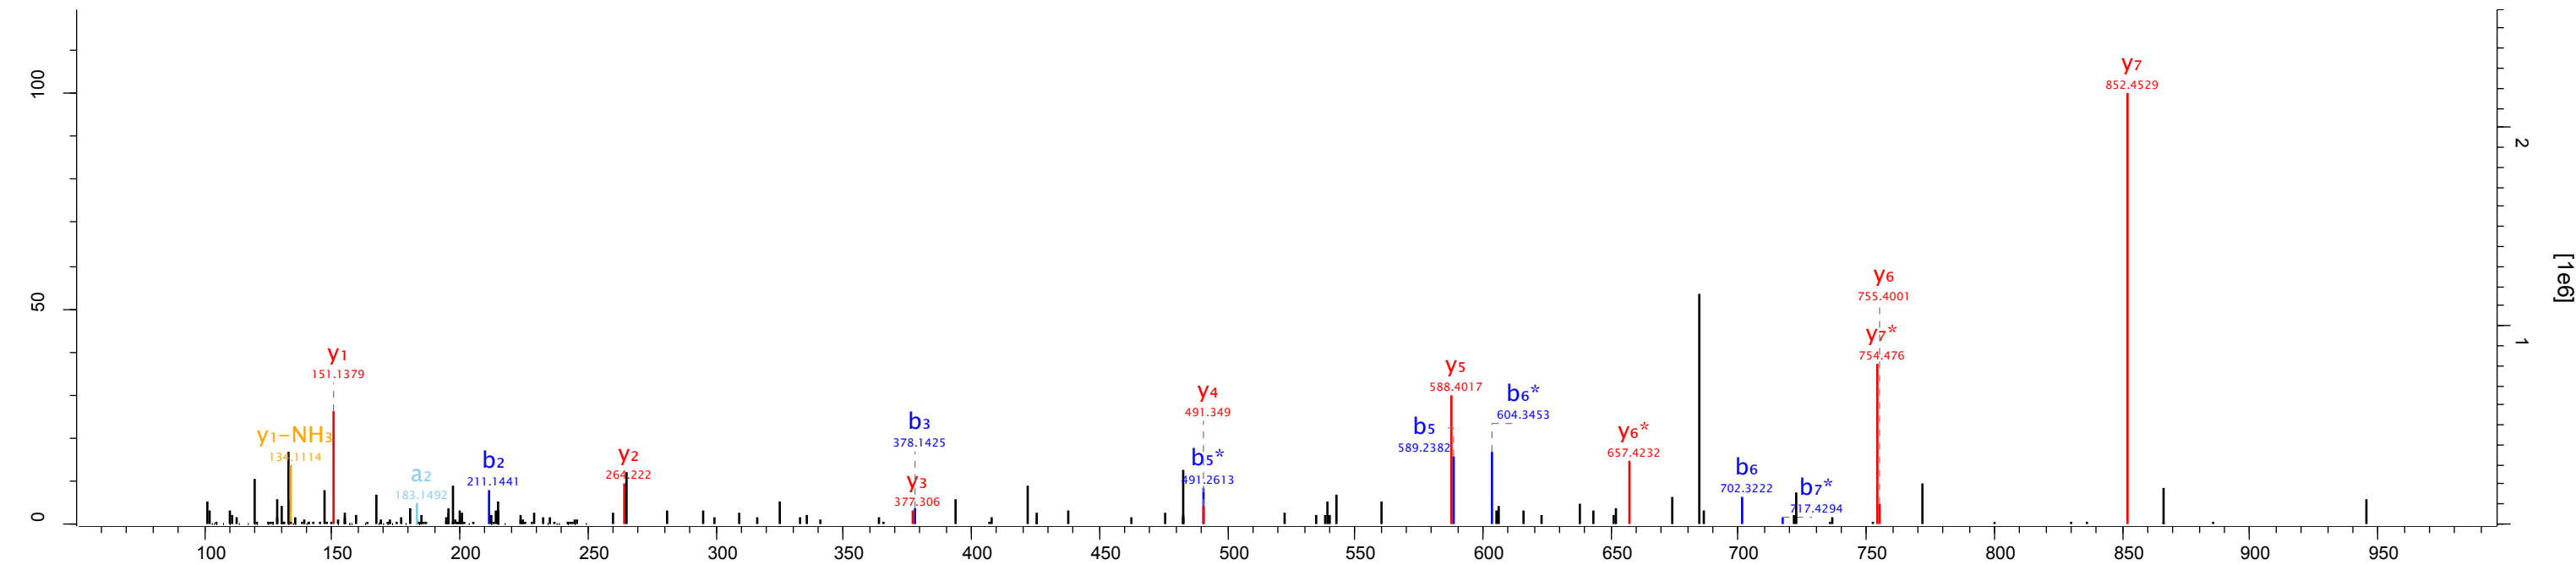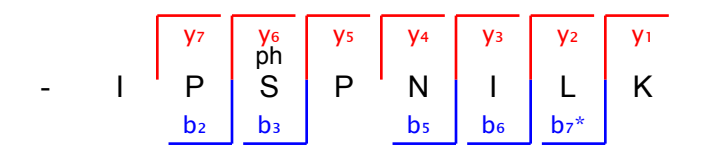

Raw file 20150814\_A375SR\_Phospho\_BR2\_06 Scan 16998 Method FTMS; HCD Score 251.8 m/z 1016.13 Gene names MAP1B

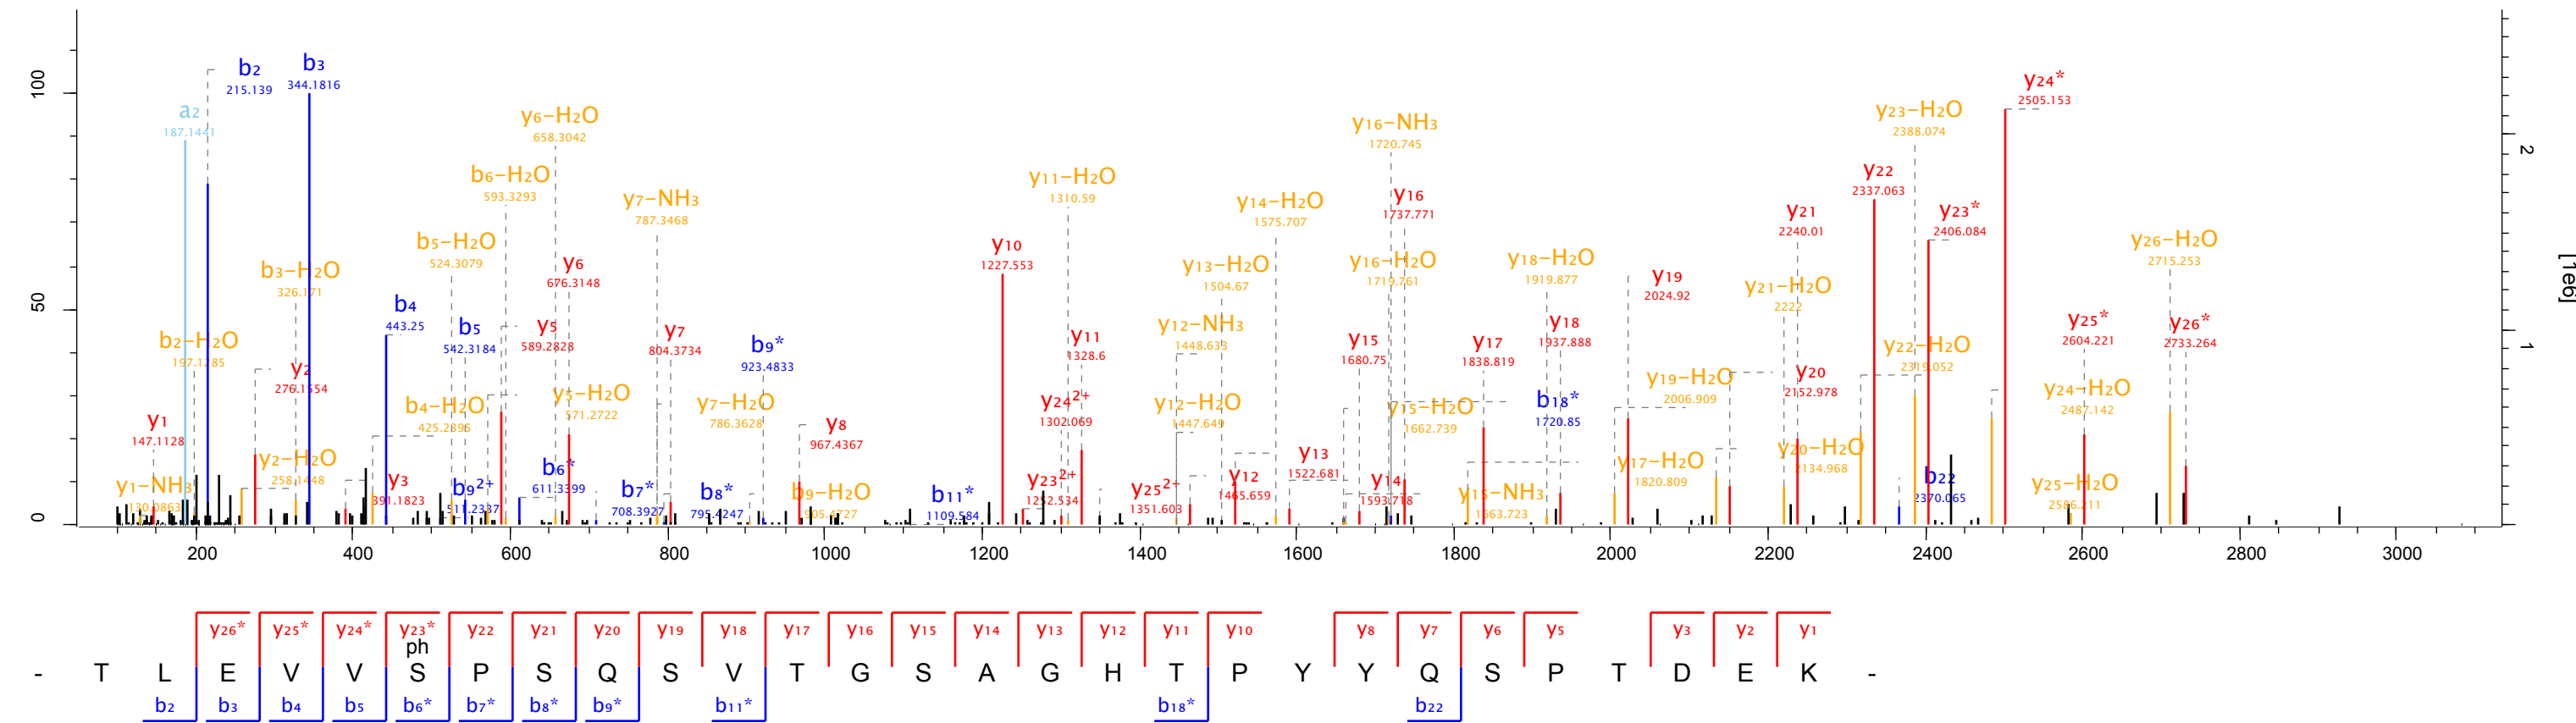



Raw file: 20150814\_A375SR\_Phospho\_BR2\_06  
 Scan: 17108 Method: FTMS; HCD Score: 103.41 m/z: 872.94 Gene names: RANBP2;RGPD3

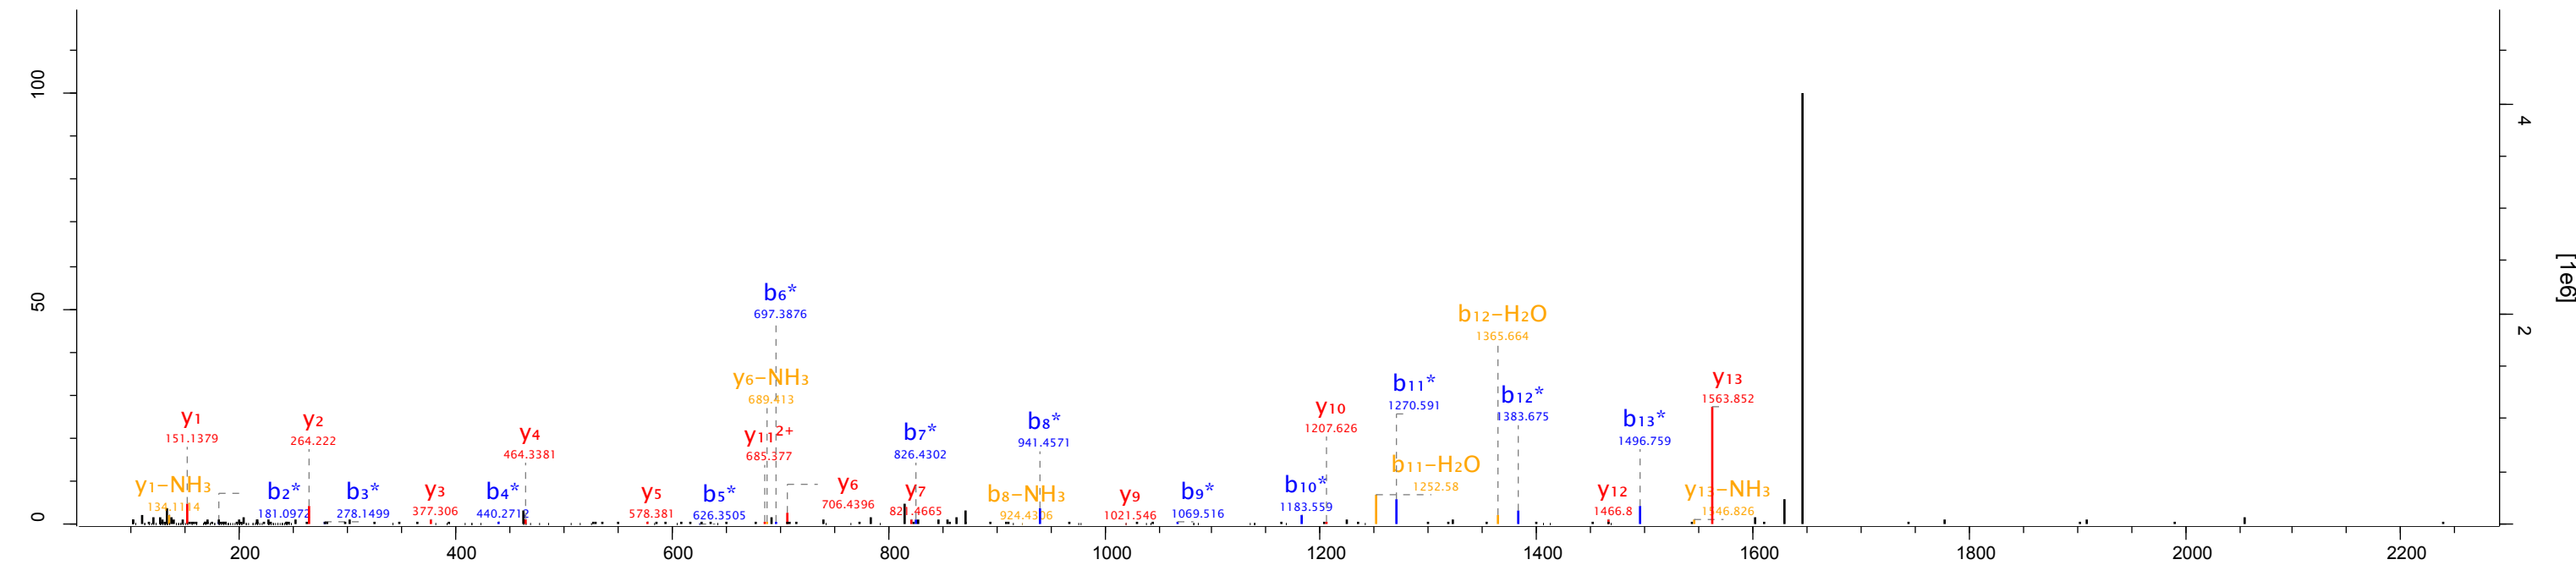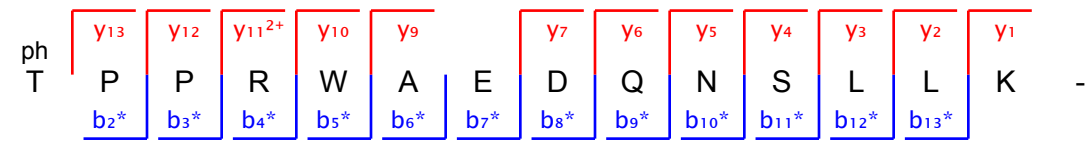

Raw file 20150814\_A375SR\_Phospho\_BR2\_06 Scan 17188 Method FTMS; HCD Score 148.7 m/z 903.77 Gene names NUFIP1

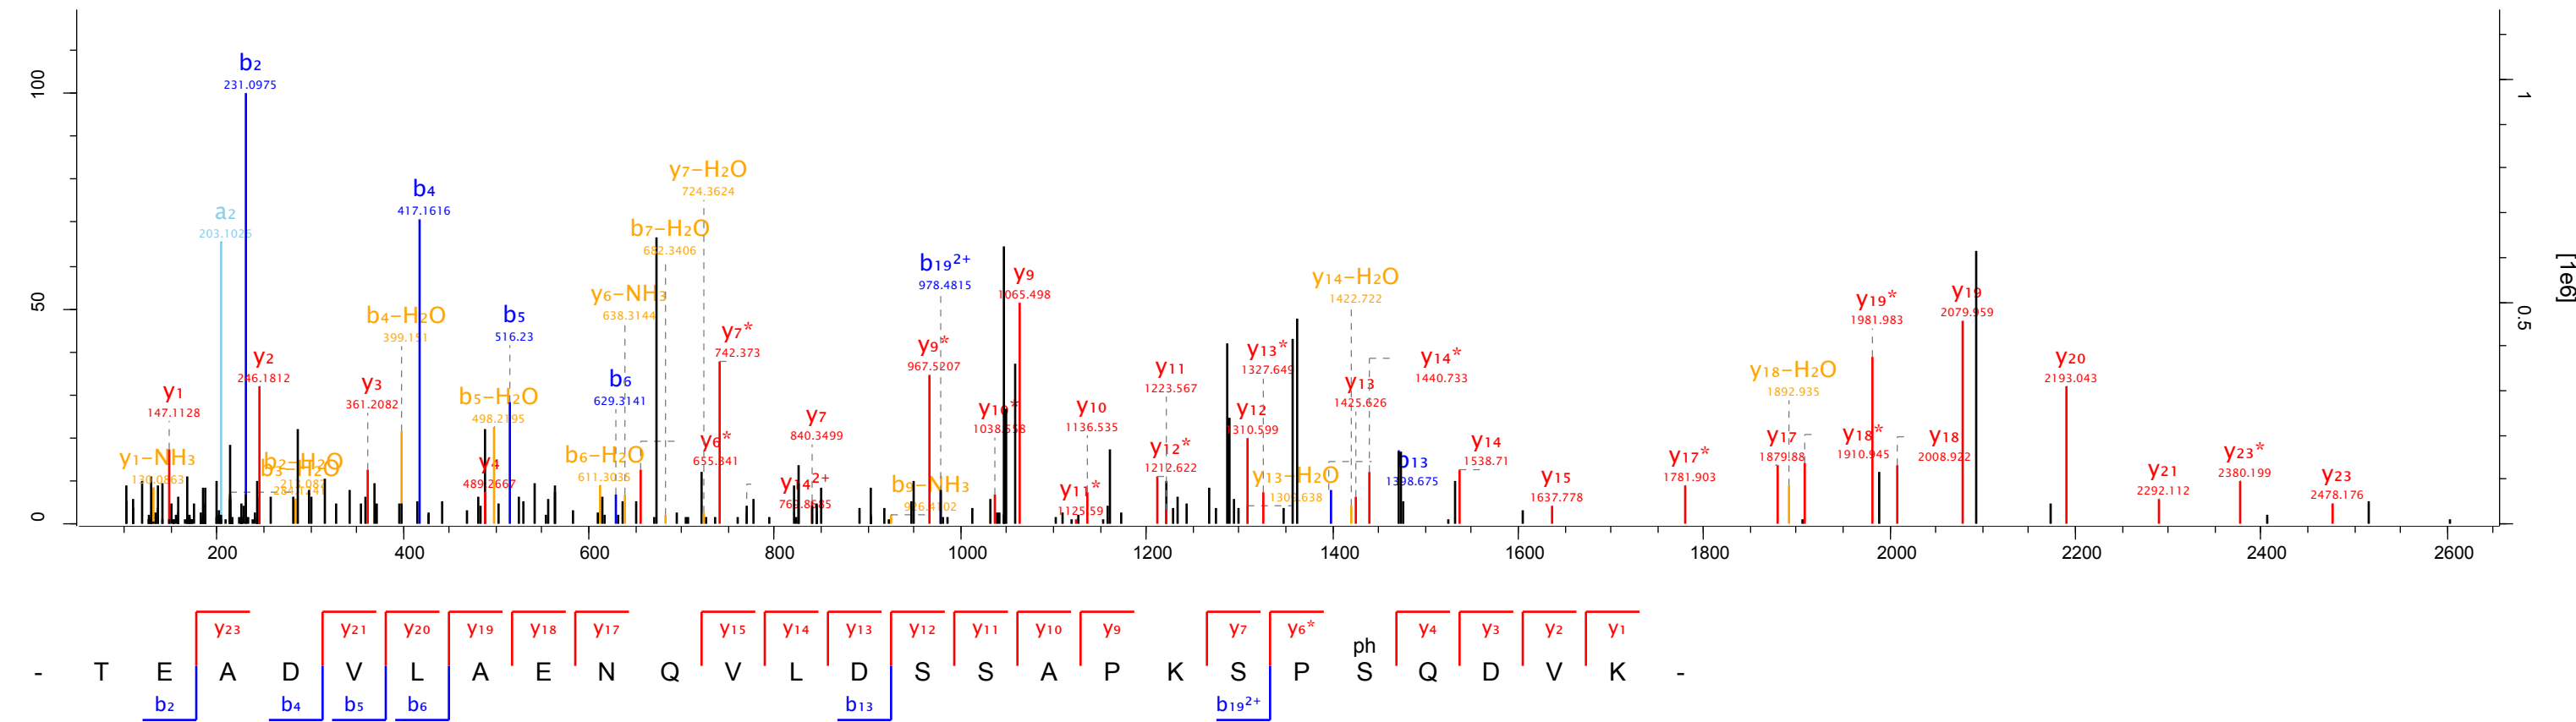

Raw file: 20150814\_A375SR\_Phospho\_BR2\_06  
 Scan: 18208 Method: FTMS; HCD Score: 85.91 m/z: 638.32 Gene names: PHLDB1

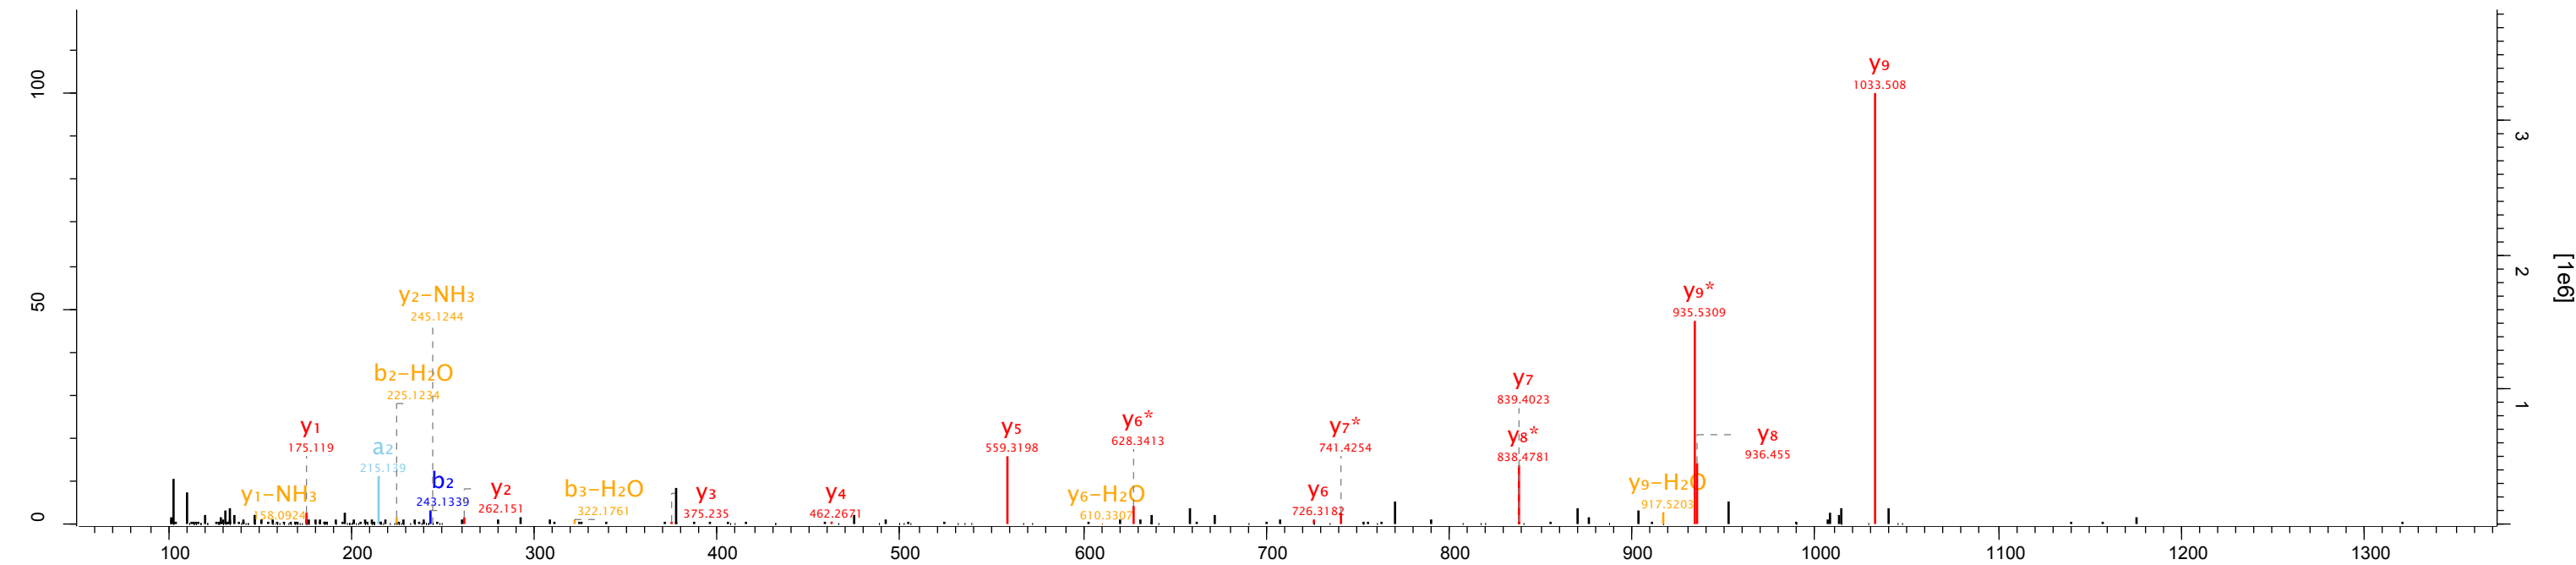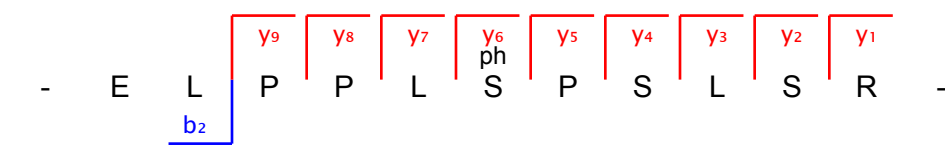

Raw file 20150814\_A375SR\_Phospho\_BR2\_06 Scan 18648 Method FTMS; HCD Score 48.92 m/z 824.36 Gene names FAM175B

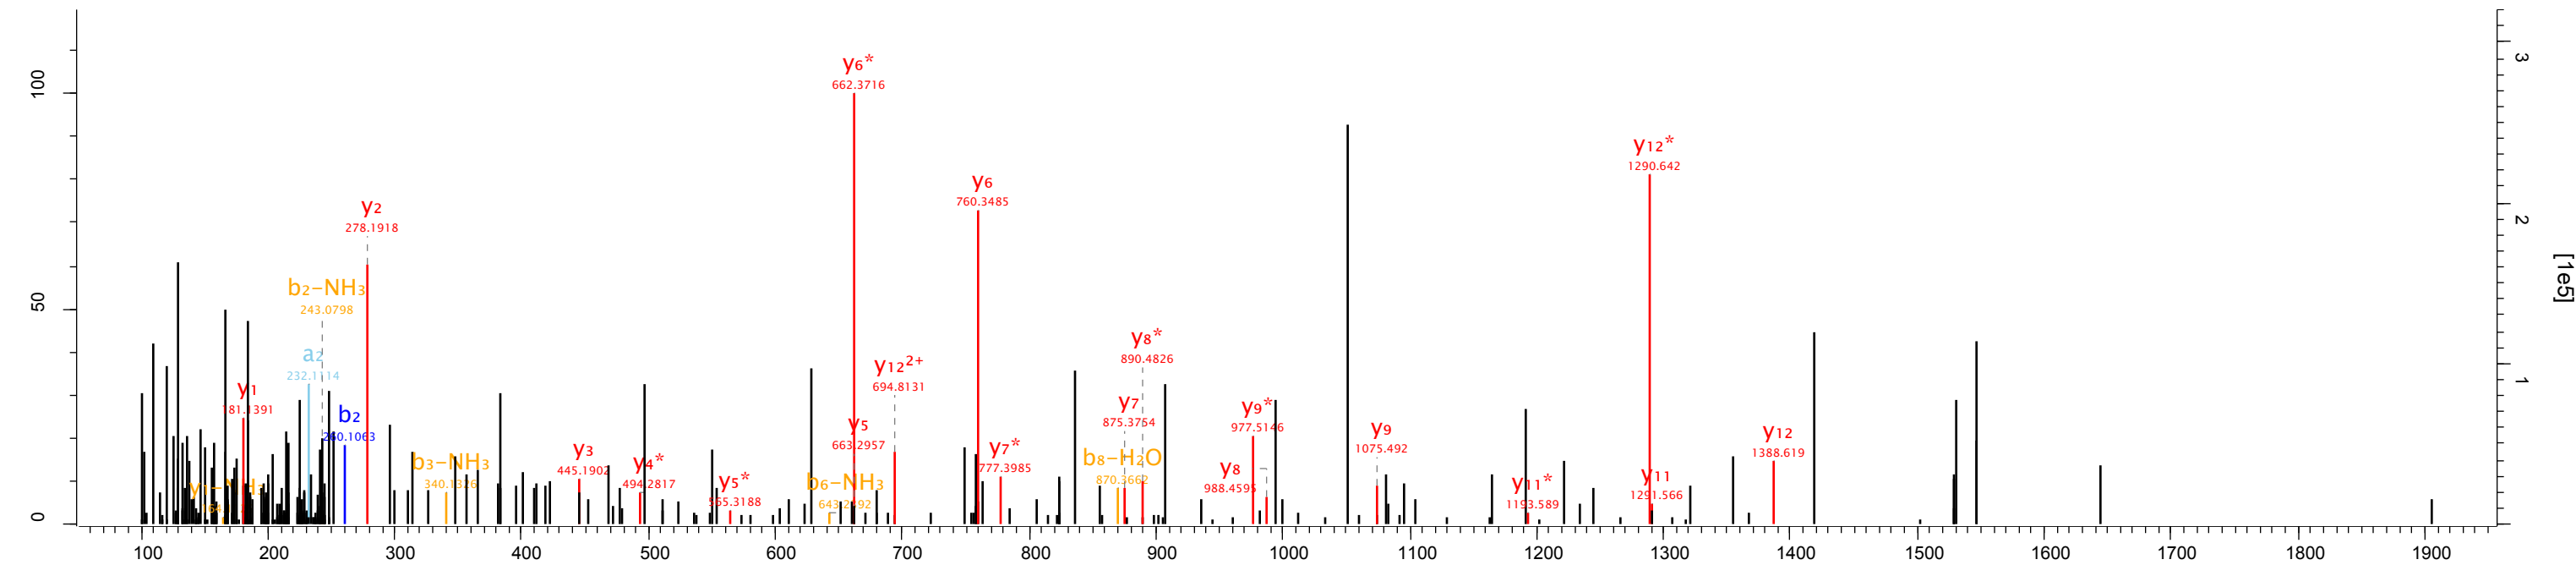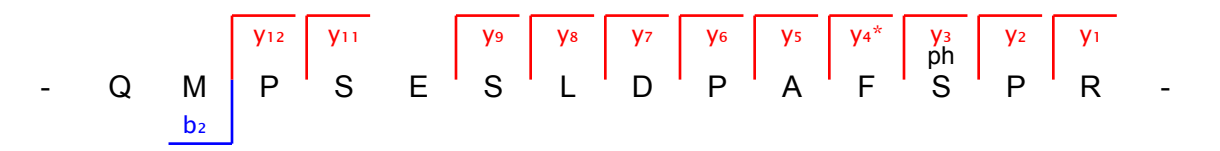

Raw file 20150814\_A375SR\_Phospho\_BR2\_06 Scan 19478 Method FTMS; HCD Score 75.59 m/z 600.77 Gene names AKAP11

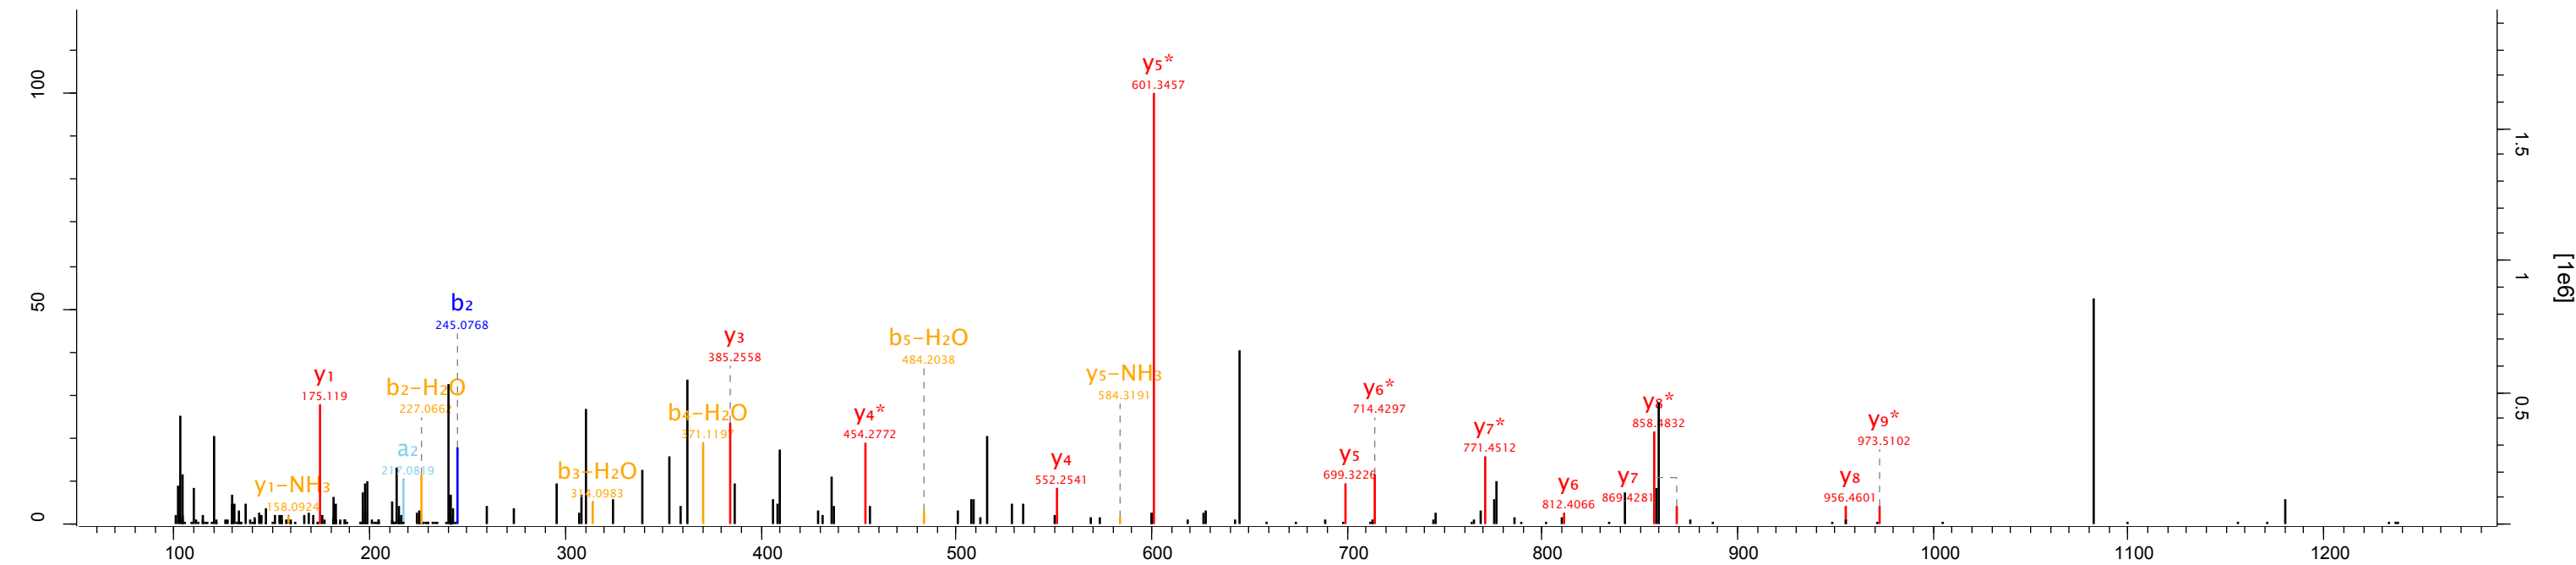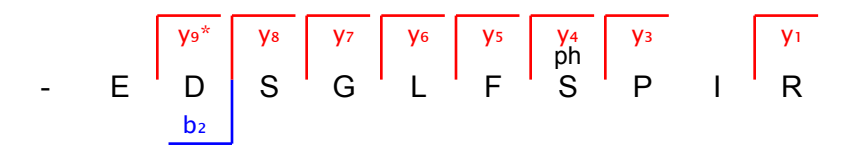

Raw file 20150814\_A375SR\_Phospho\_BR2\_06 Scan 19508 Method FTMS; HCD Score 324.57 m/z 849.78 Gene names PSIP1

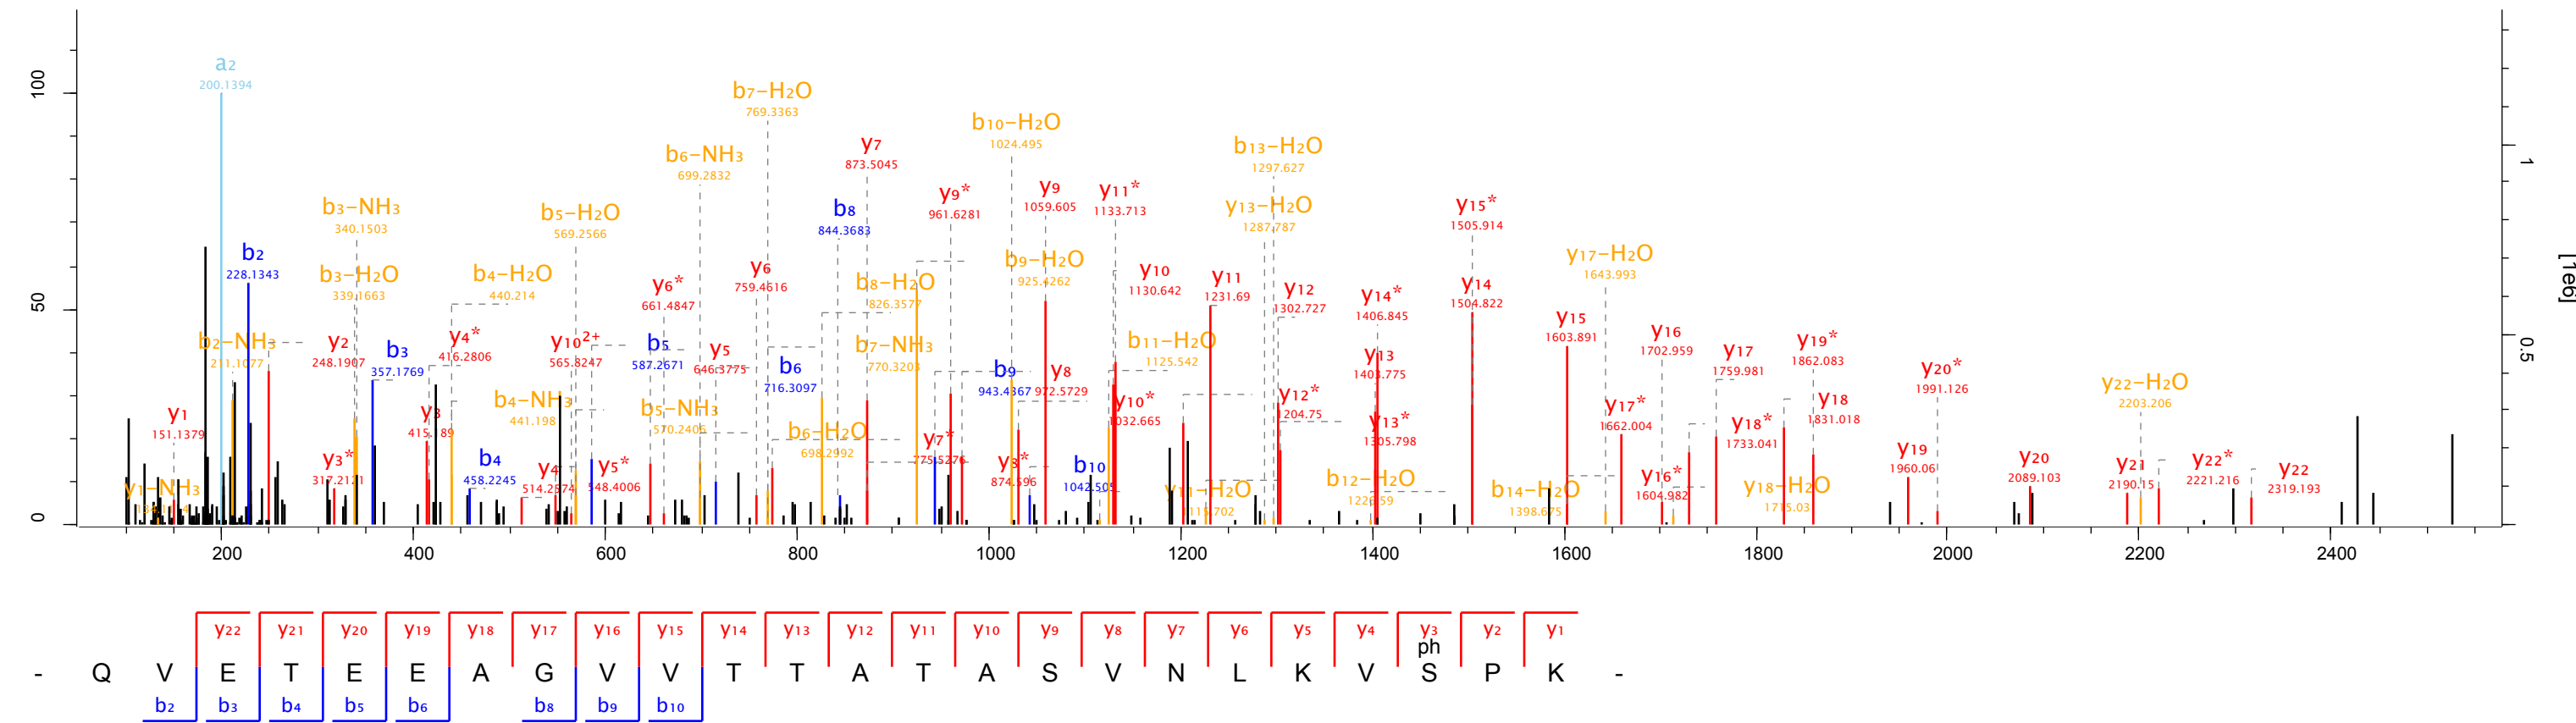

Raw file 20150814\_A375SR\_Phospho\_BR2\_06 Scan 20188 Method FTMS; HCD Score 257.46 m/z 739.85 Gene names STRN3

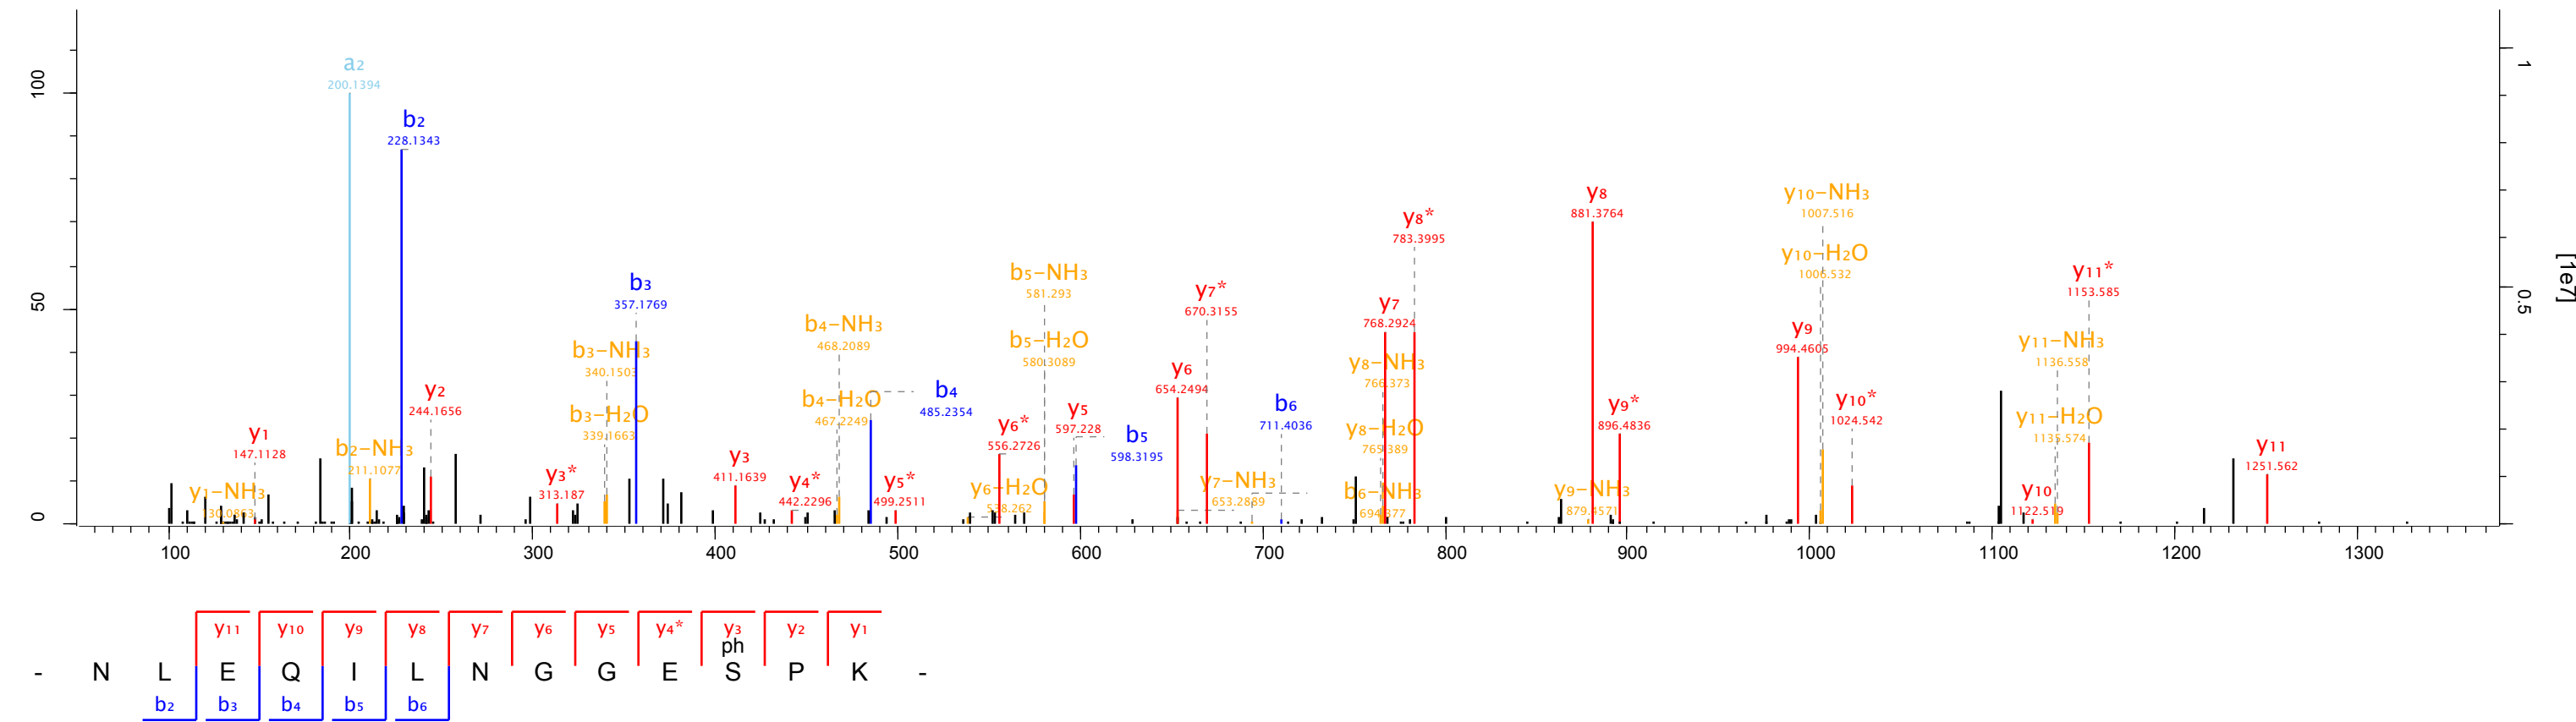

Raw file  
20150814\_A375SR\_Phospho\_BR2\_06

Scan 20568 Method FTMS; HCD Score 63.09 m/z 1037.15 Gene names DNAJC6

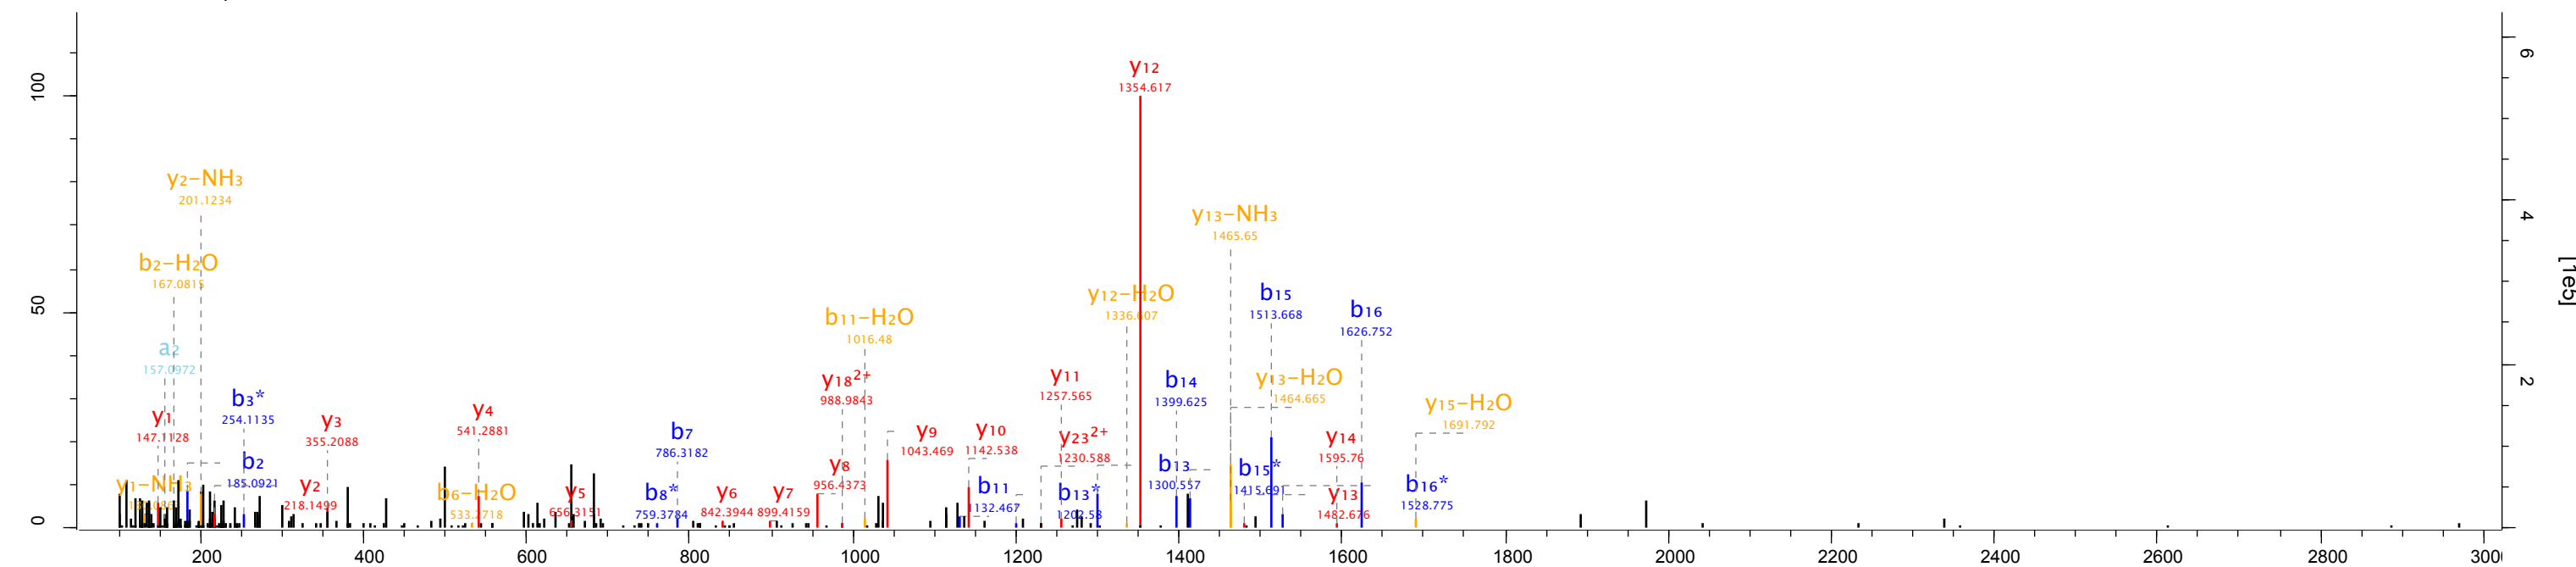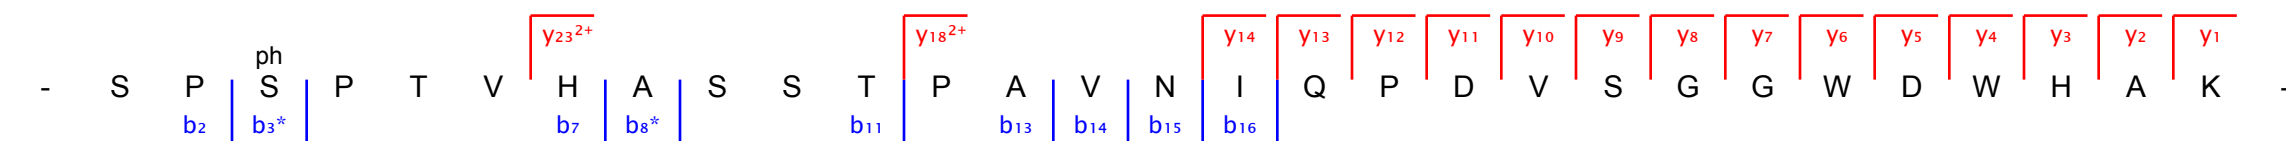



Raw file: 20150814\_A375SR\_Phospho\_BR2\_06  
 Scan: 20578 Method: FTMS; HCD Score: 145.77 m/z: 974.45 Gene names: ATXN2L

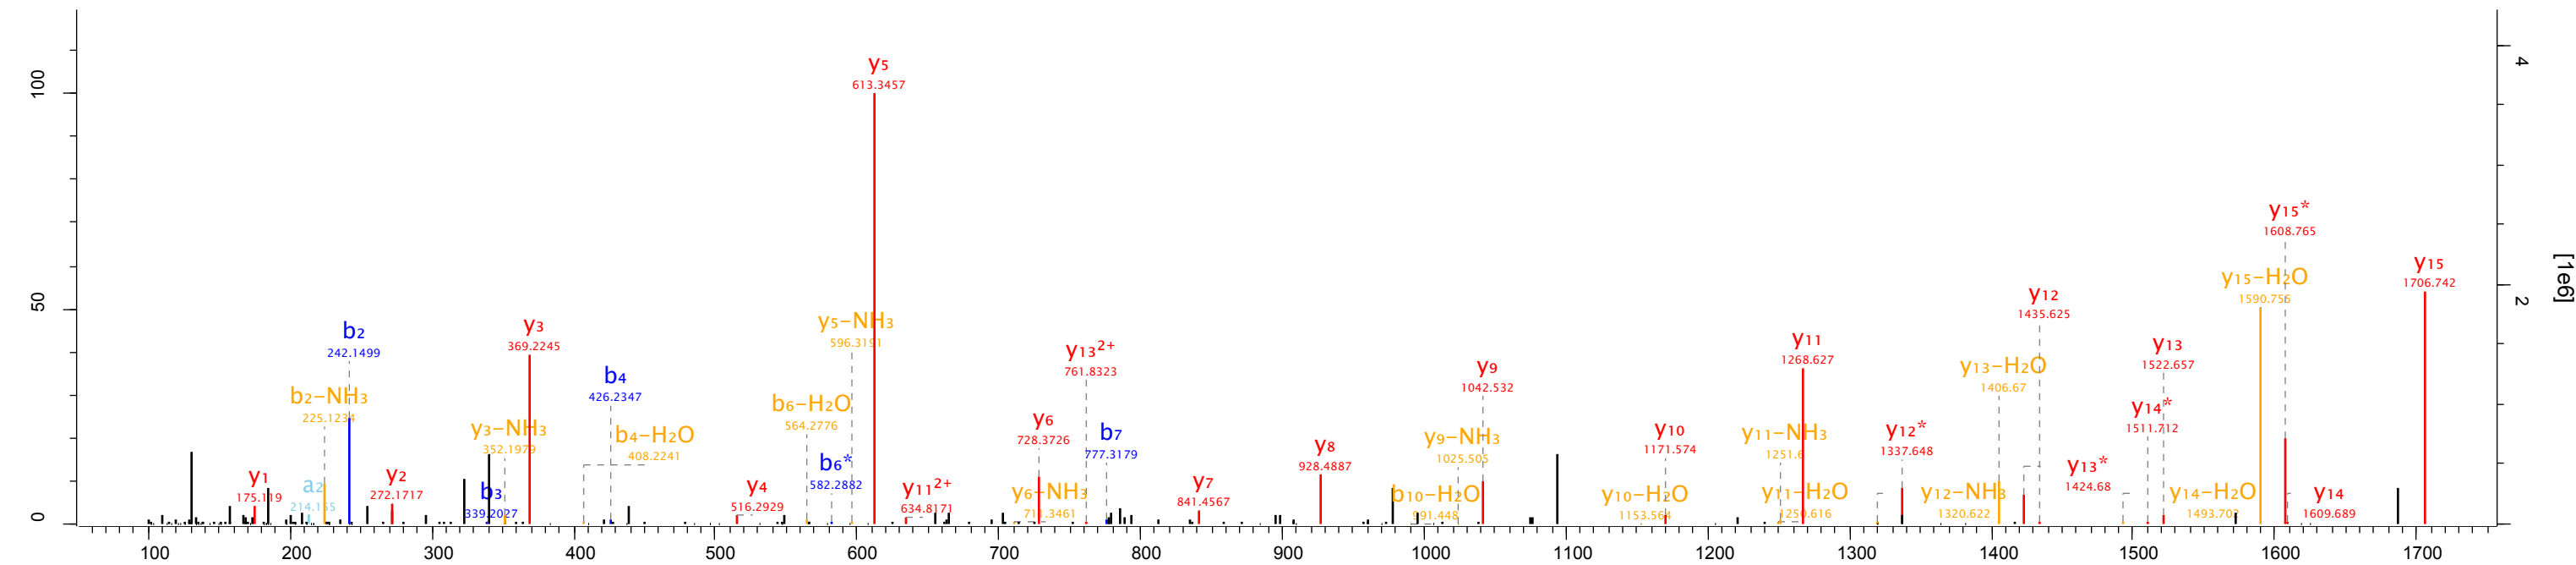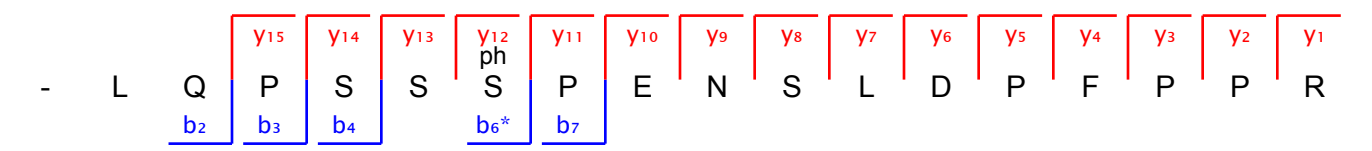

Raw file 20150814\_A375SR\_Phospho\_BR2\_06 Scan 20698 Method FTMS; HCD Score 179.56 m/z 713.38 Gene names LAMTOR1

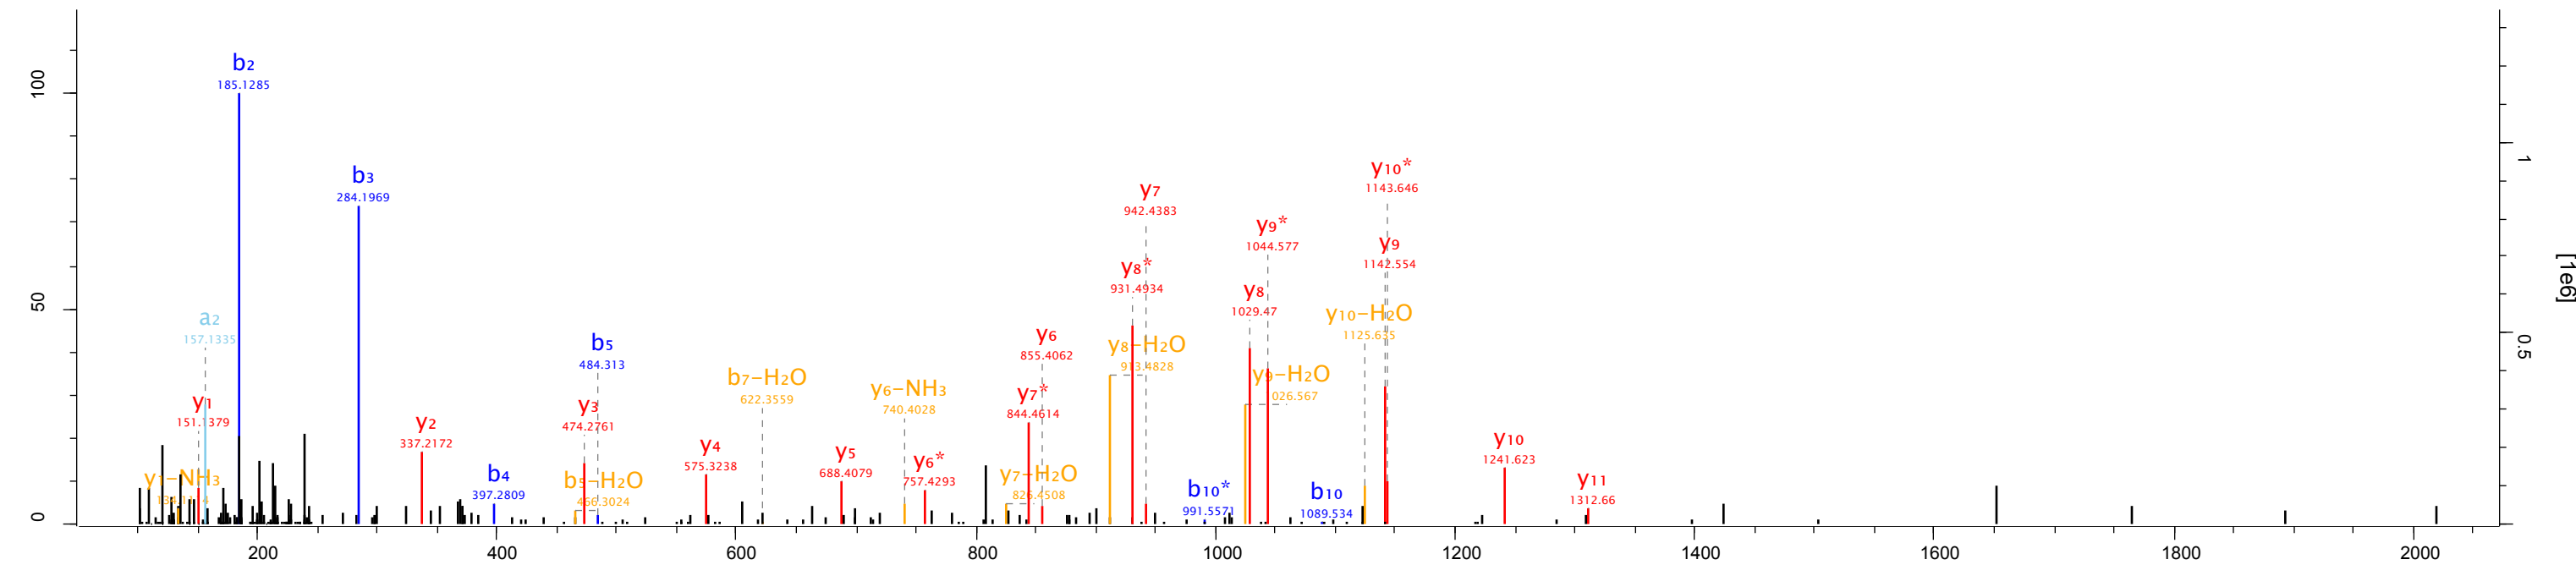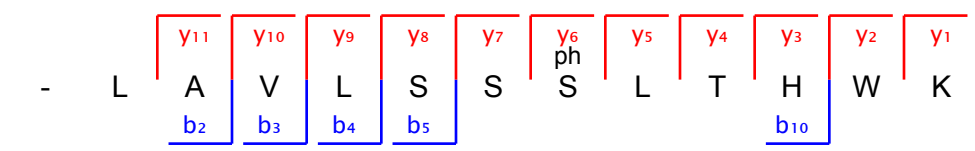

Raw file: 20150814\_A375SR\_Phospho\_BR2\_06  
 Scan: 20728 Method: FTMS; HCD Score: 66.11 m/z: 748.36 Gene names: PRC1

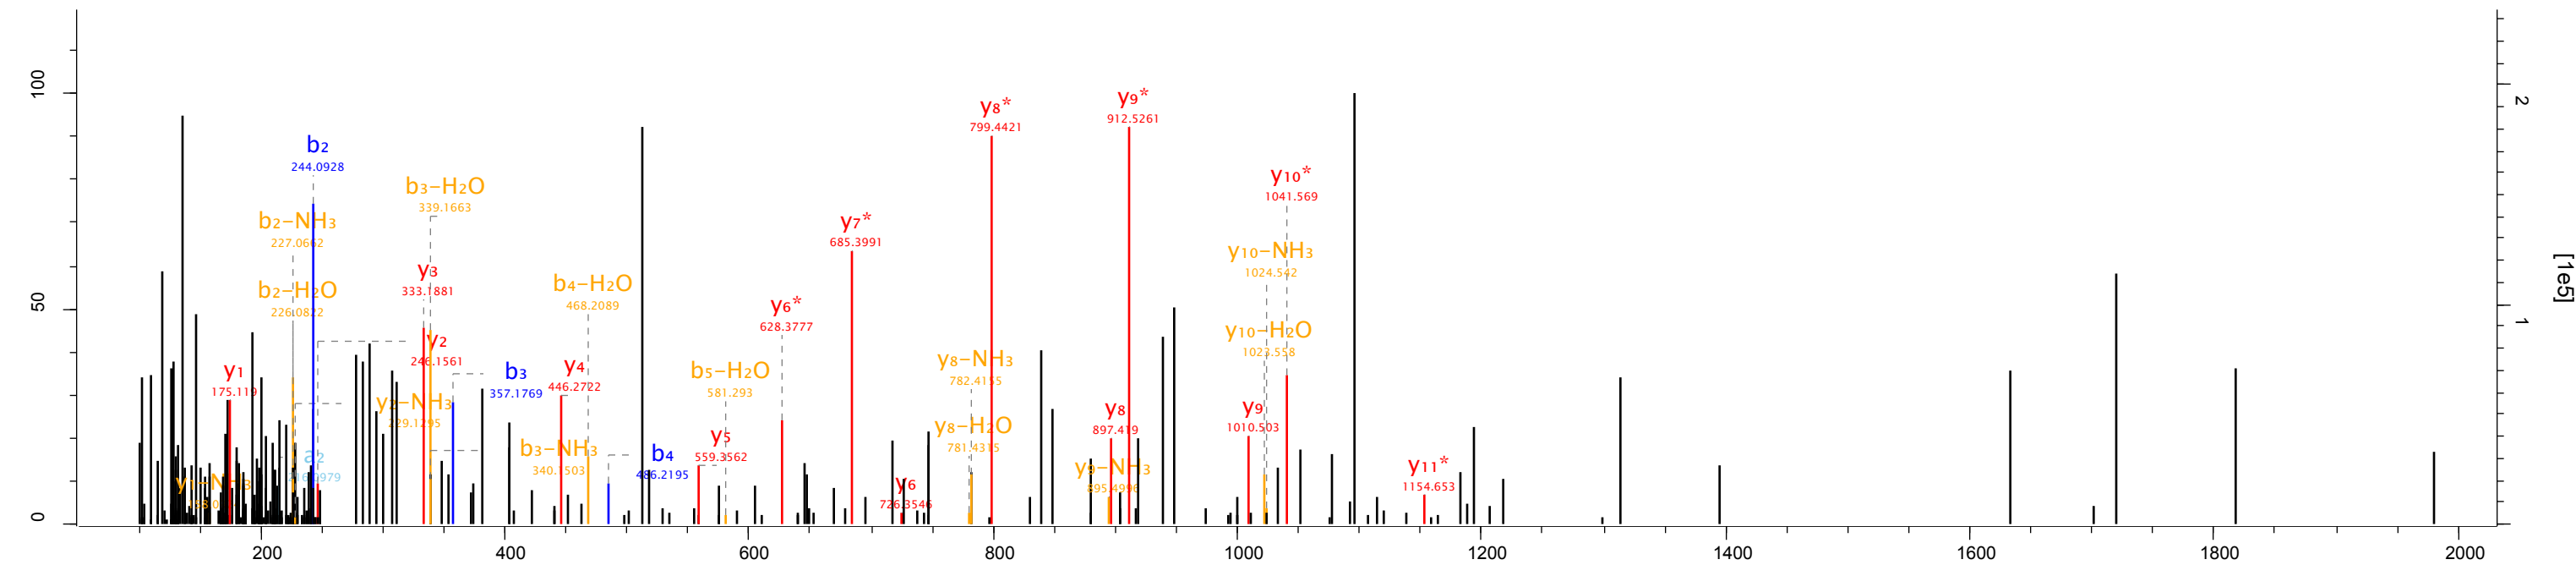

- E N L E L N G S I L S A R -  
 b2 b3 b4

Raw file: 20150814\_A375SR\_Phospho\_BR2\_06  
 Scan: 21158 Method: FTMS; HCD Score: 105.06 m/z: 929.44 Gene names: RABGAP1L

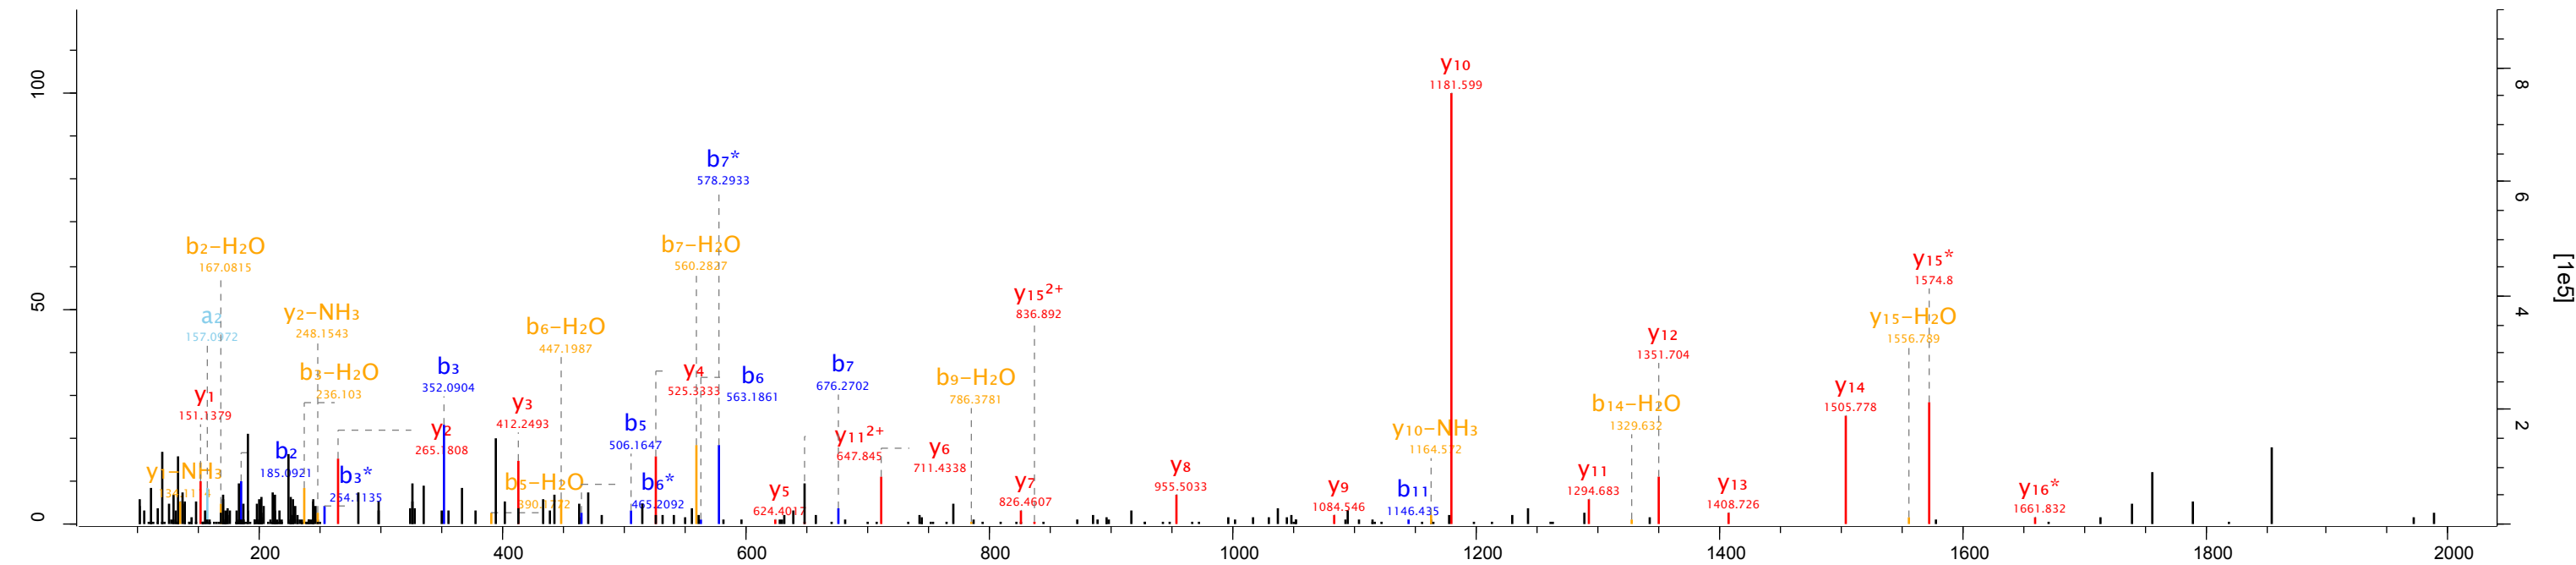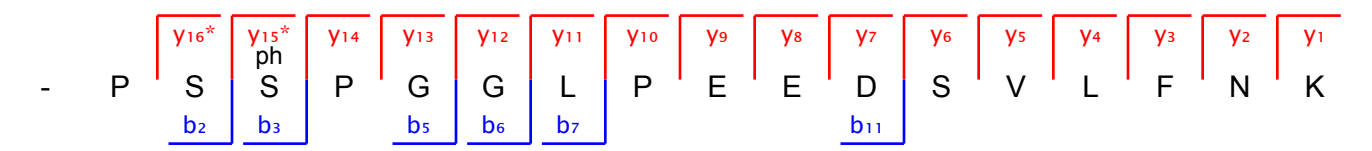

Raw file: 20150814\_A375SR\_Phospho\_BR2\_06  
 Scan: 22758 Method: FTMS; HCD Score: 89.47 m/z: 875.47 Gene names: ZFH3

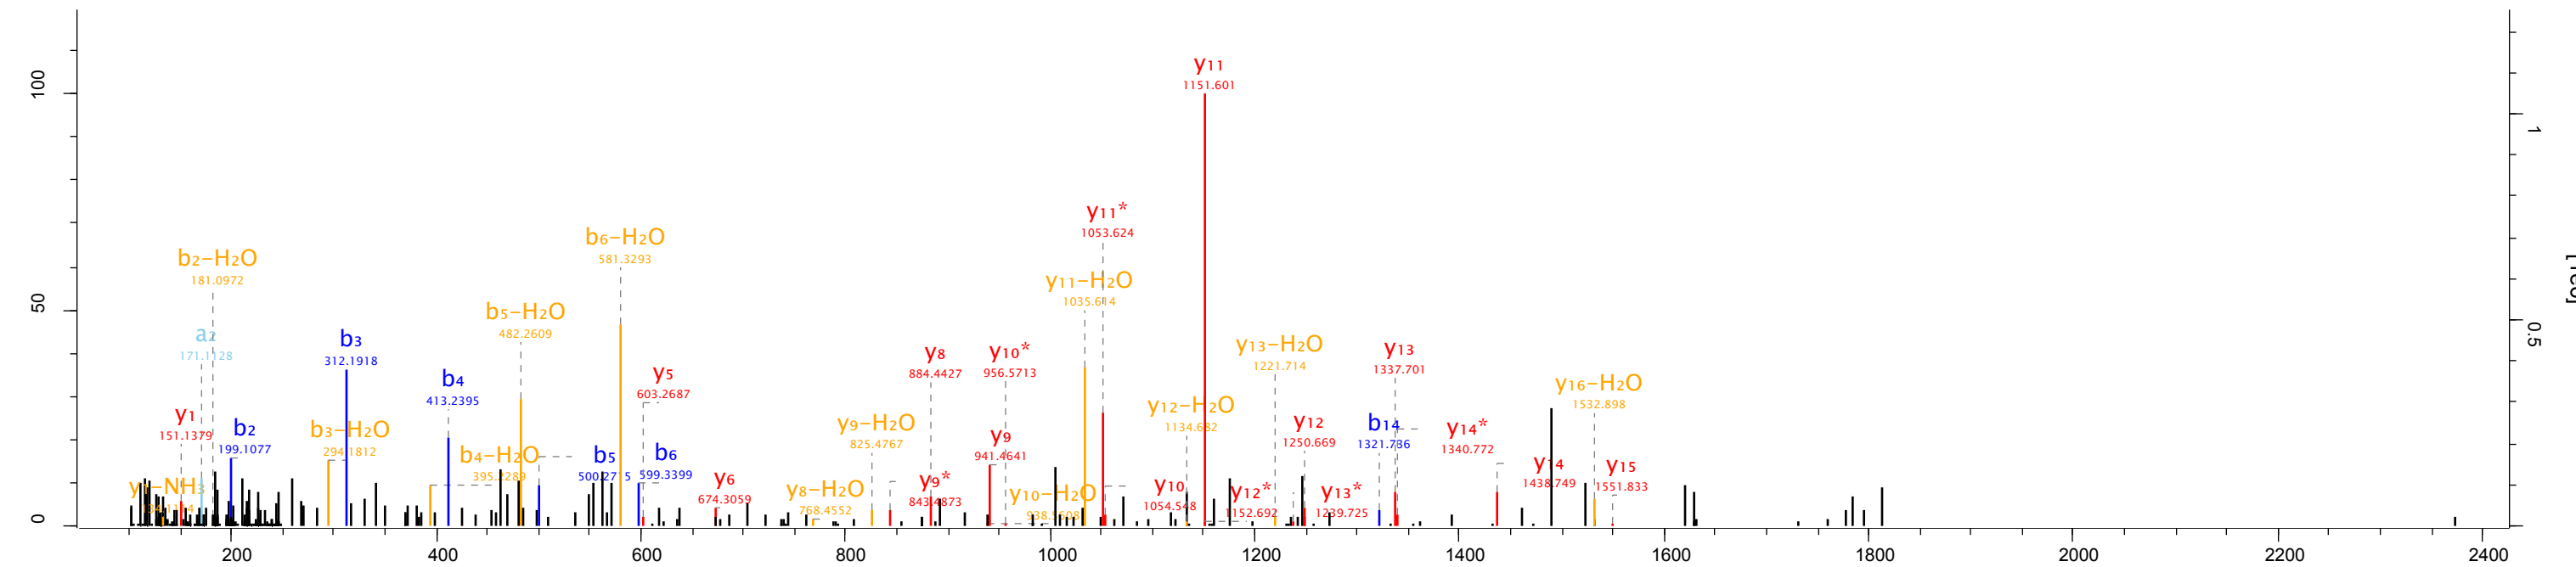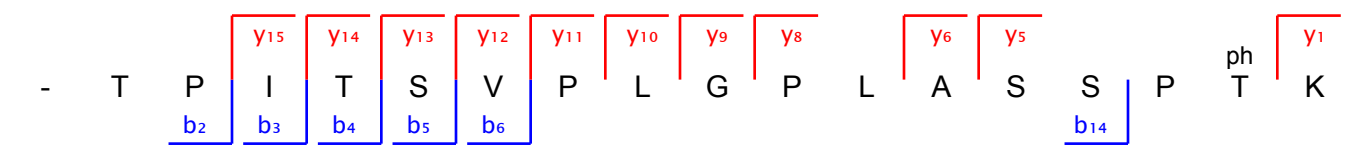

Raw file 20150814\_A375SR\_Phospho\_BR2\_06 Scan 22768 FTMS; HCD Score 157.82 m/z 743.39 Gene names SSFA2

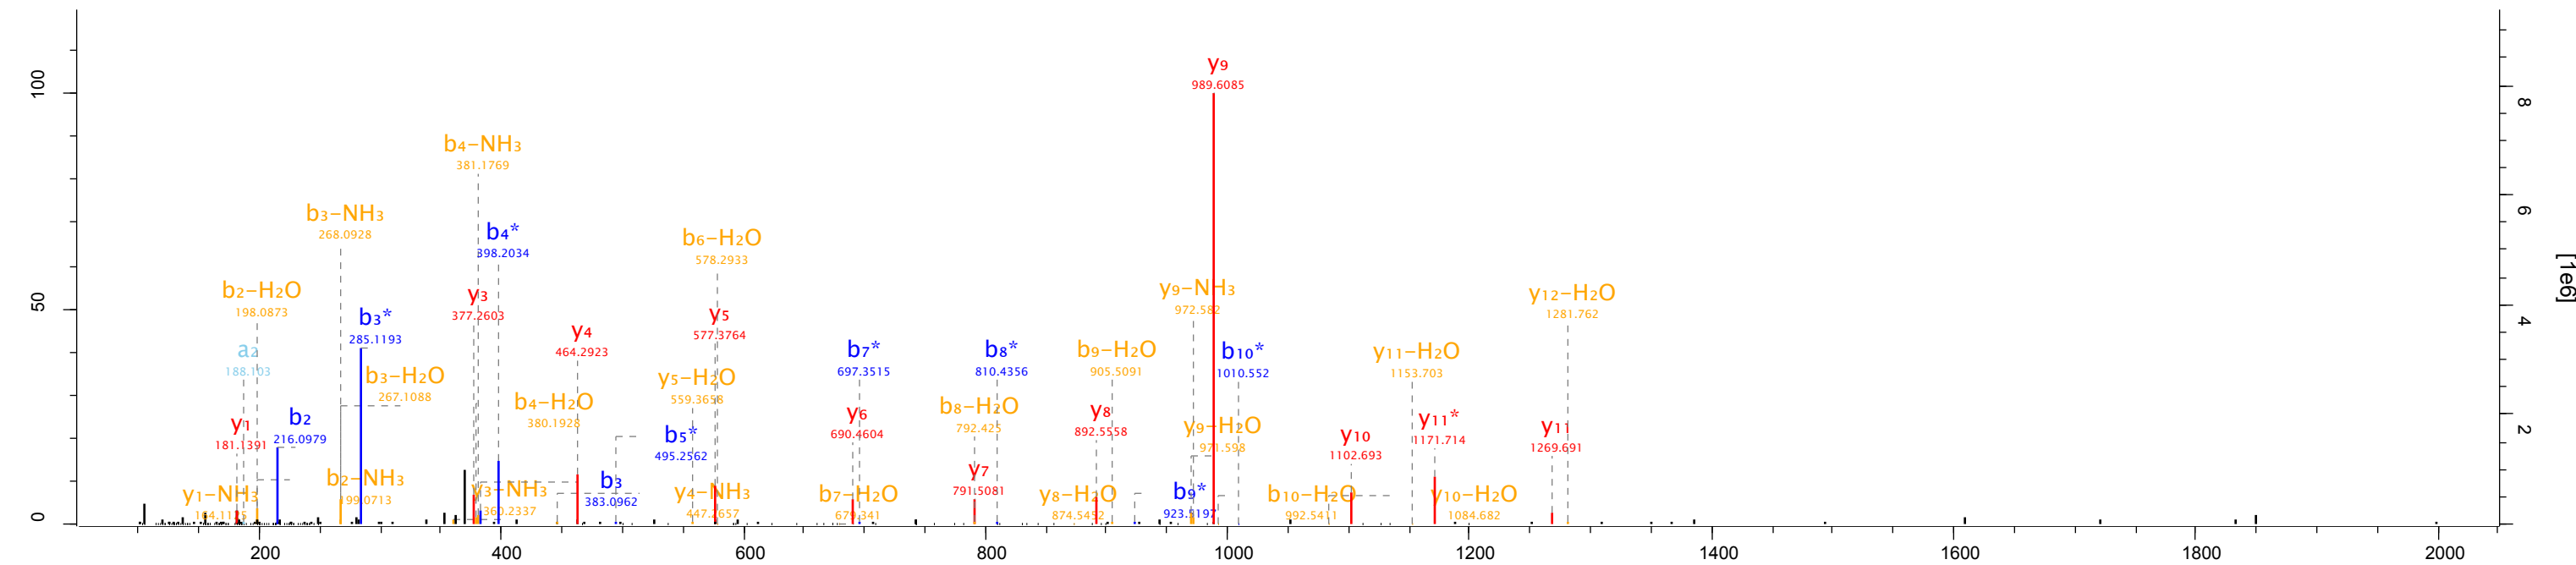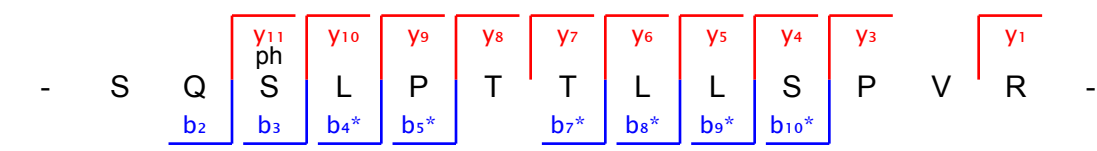

Raw file 20150814\_A375SR\_Phospho\_BR2\_06 Scan 23058 Method FTMS; HCD Score 88.84 m/z 1042.48 Gene names NES

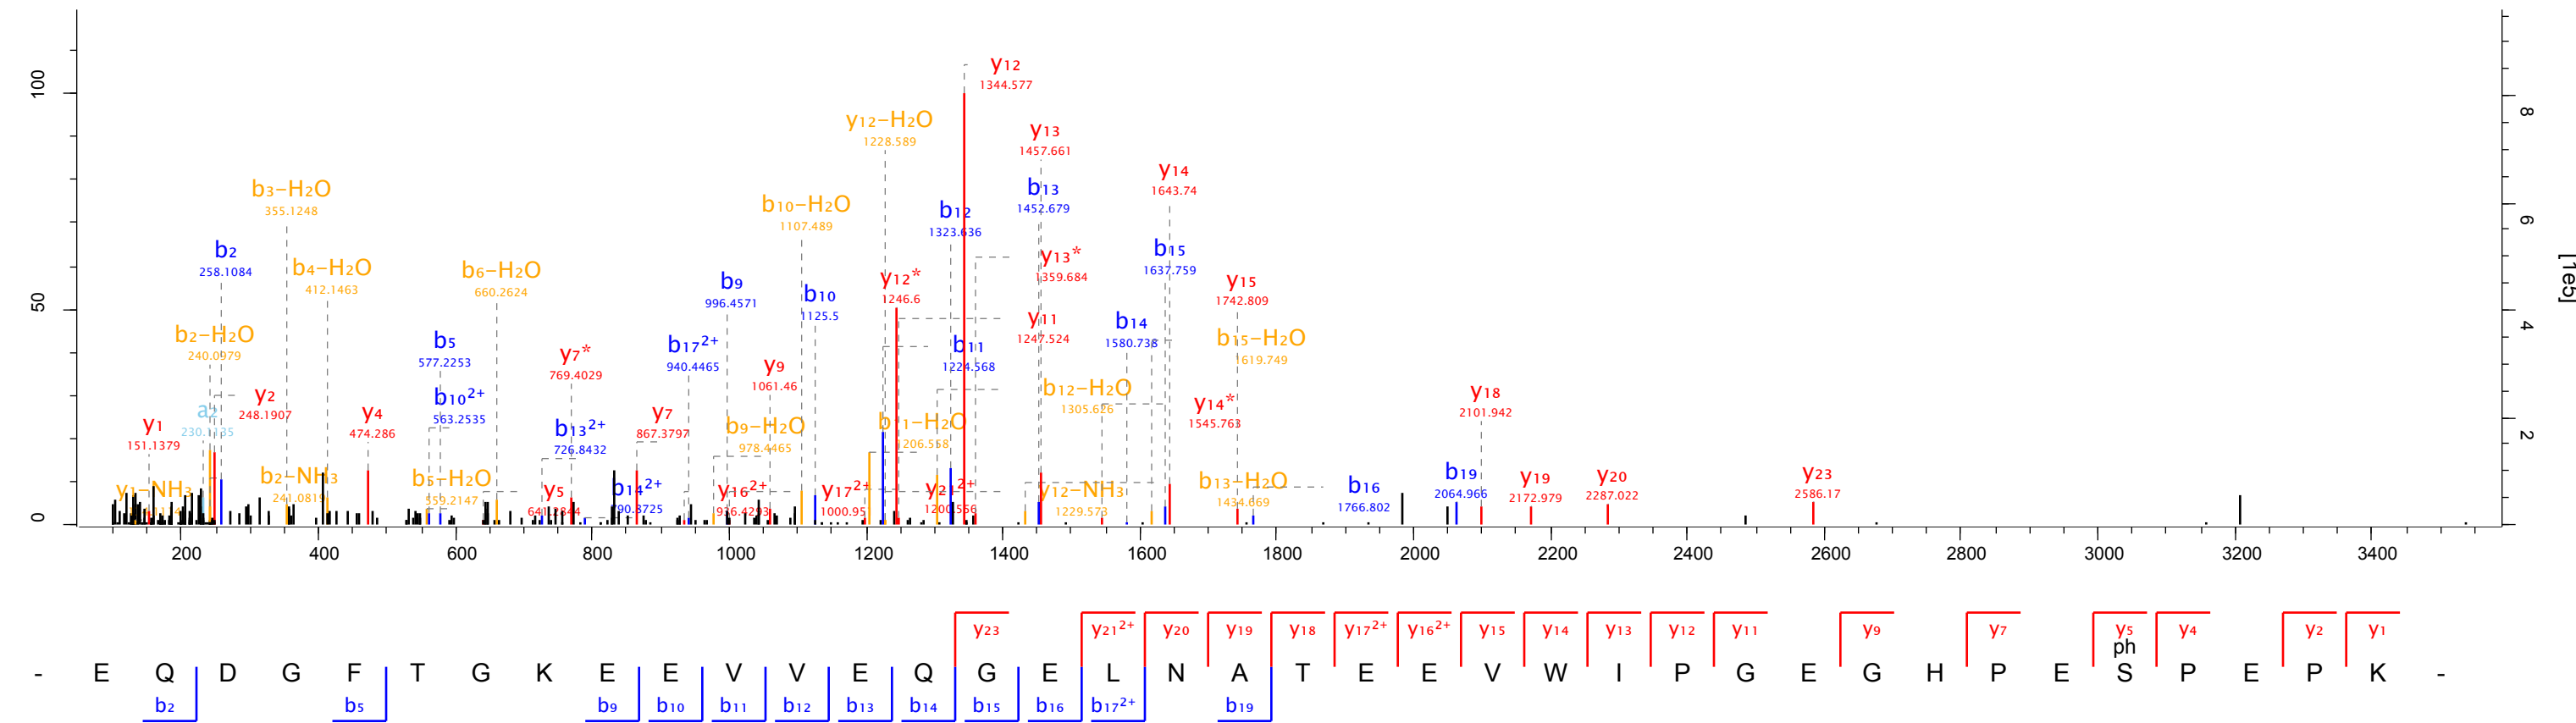

Raw file 20150814\_A375SR\_Phospho\_BR2\_06 Scan 23428 Method FTMS; HCD Score 104.81 m/z 717.05 Gene names MED26

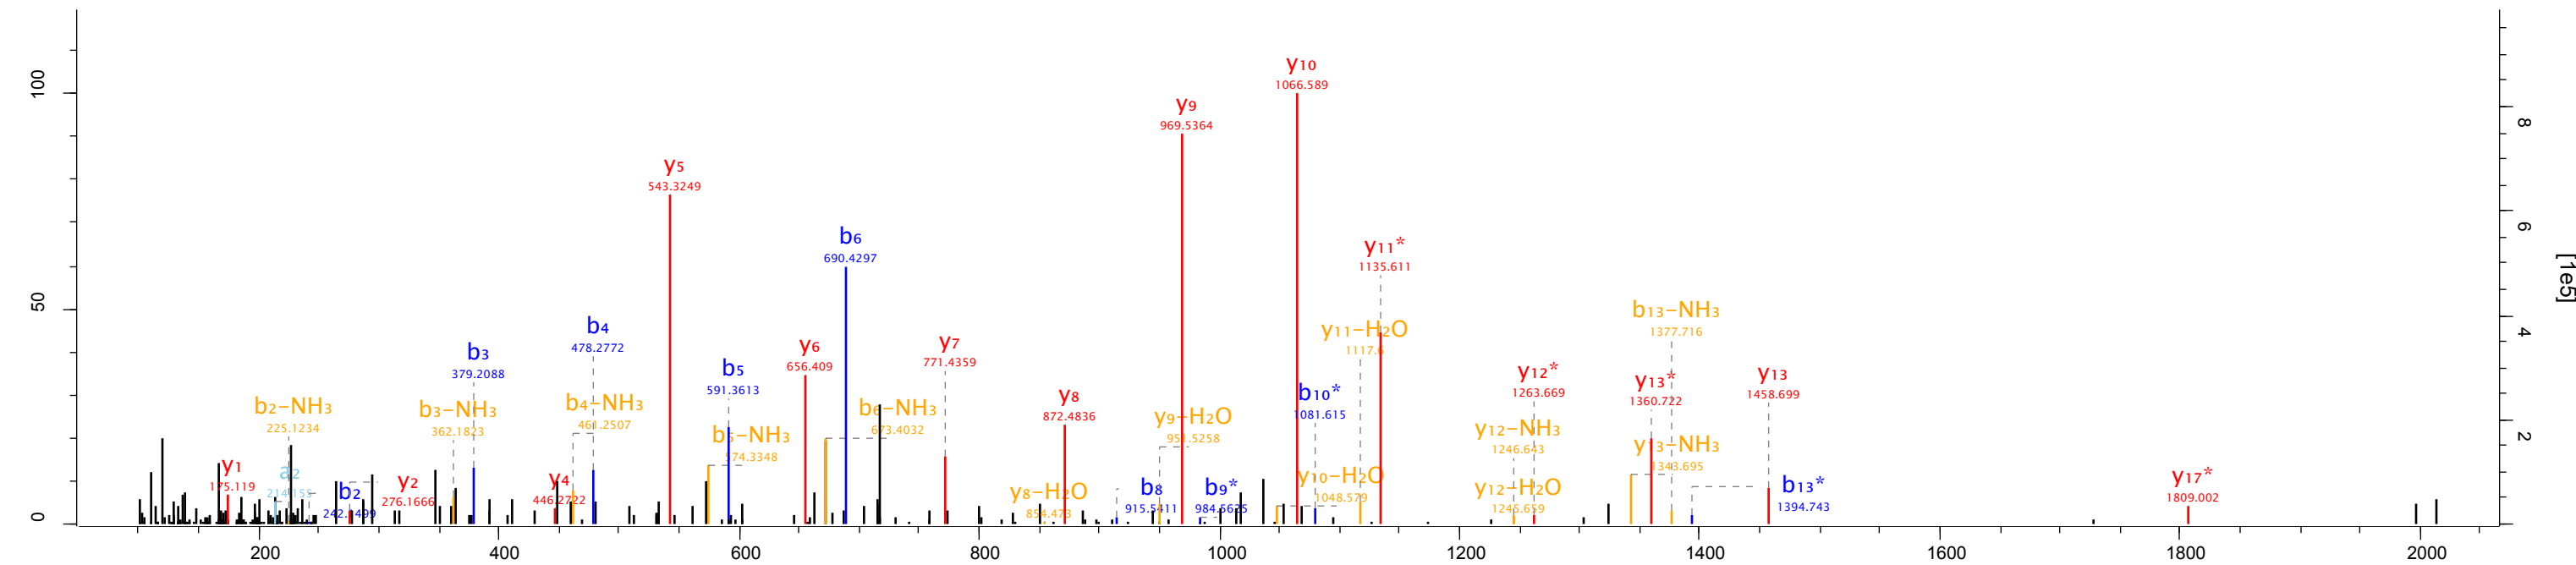

- Q L H V L V P Q S P P T D L P G L T R -

Fragmentation scheme showing b and y ions corresponding to the peptide sequence: Q L H V L V P Q S P P T D L P G L T R. The b ions are labeled b2 through b13\*, and the y ions are labeled y1 through y17\*.



Raw file Scan Method Score m/z Gene names  
 20150814\_A375SR\_Phospho\_BR2\_06 23448 FTMS; HCD 105.5 570.94 DENND6A

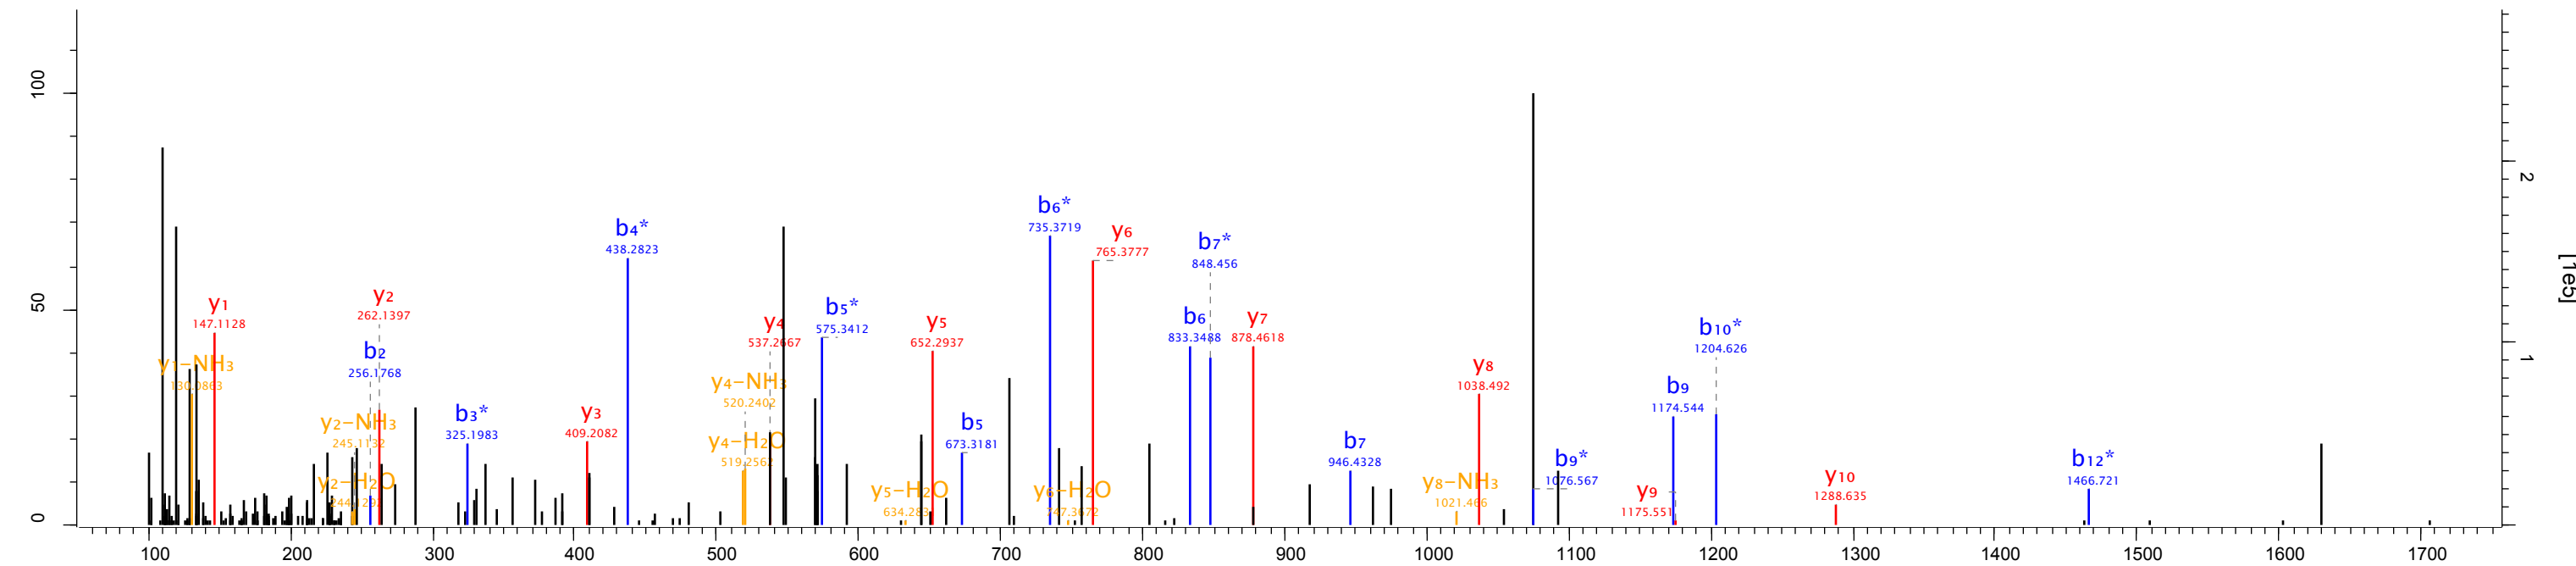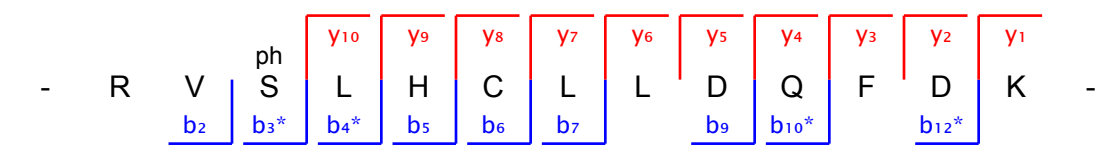

Raw file: 20150814\_A375SR\_Phospho\_BR2\_06  
 Scan: 23458 Method: FTMS; HCD Score: 276.2 m/z: 1222.08 Gene names: SF3B2

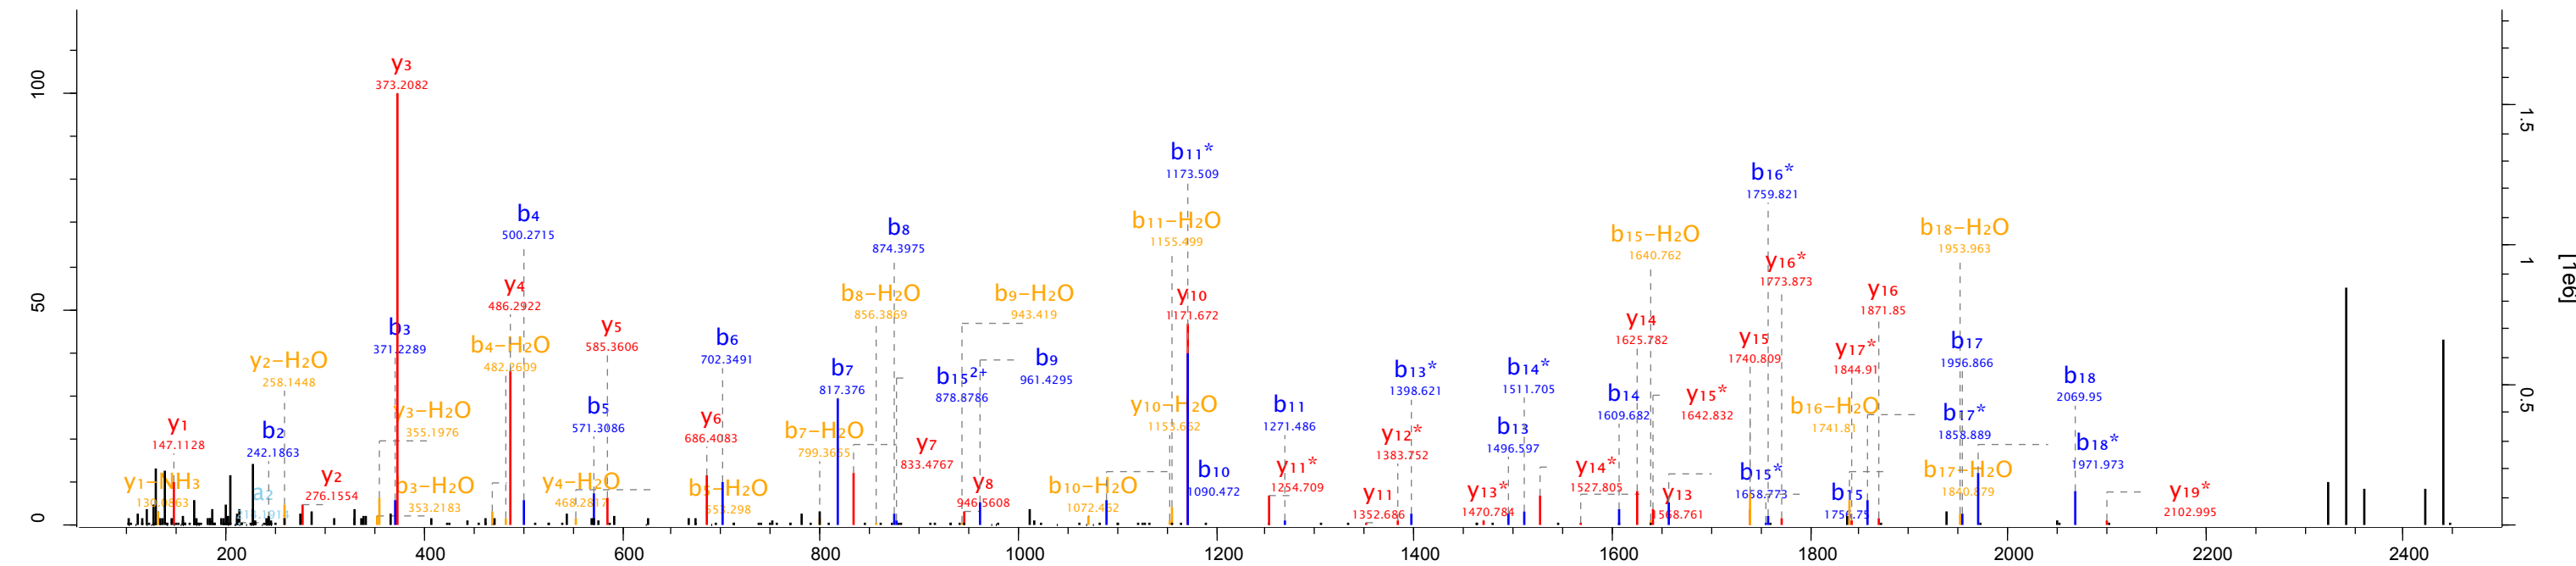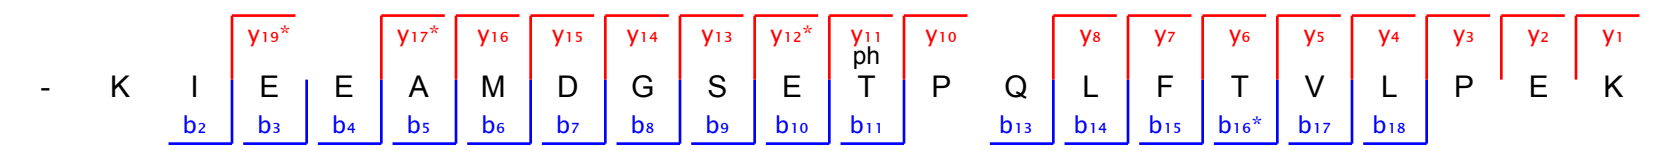

Raw file: 20150814\_A375SR\_Phospho\_BR2\_06  
 Scan: 23598 Method: FTMS; HCD Score: 82.45 m/z: 849.43 Gene names: SPG20

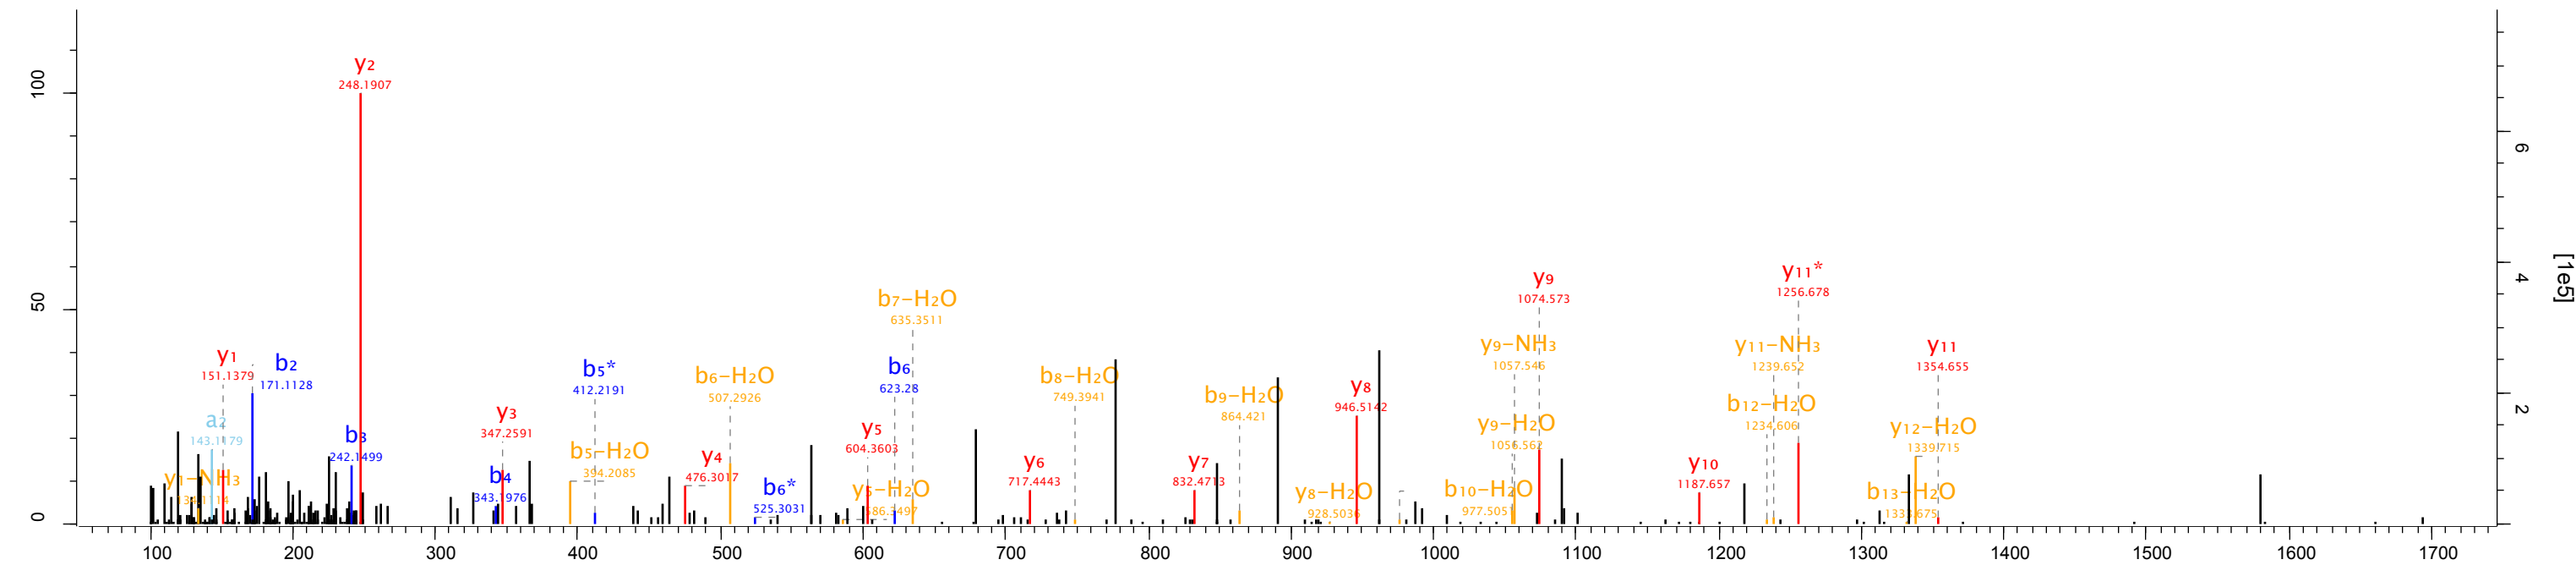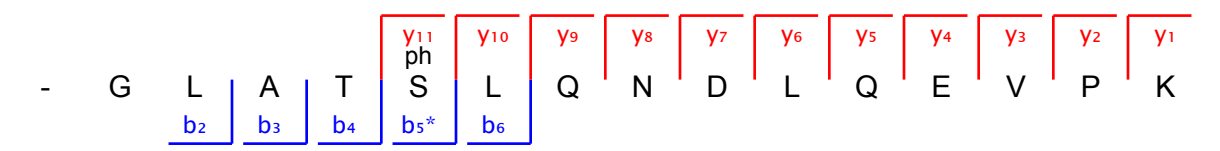

Raw file  
20150814\_A375SR\_Phospho\_BR2\_06

Scan Method Score m/z Gene names  
24008 FTMS; HCD 222.71 1022.2 FCHO2

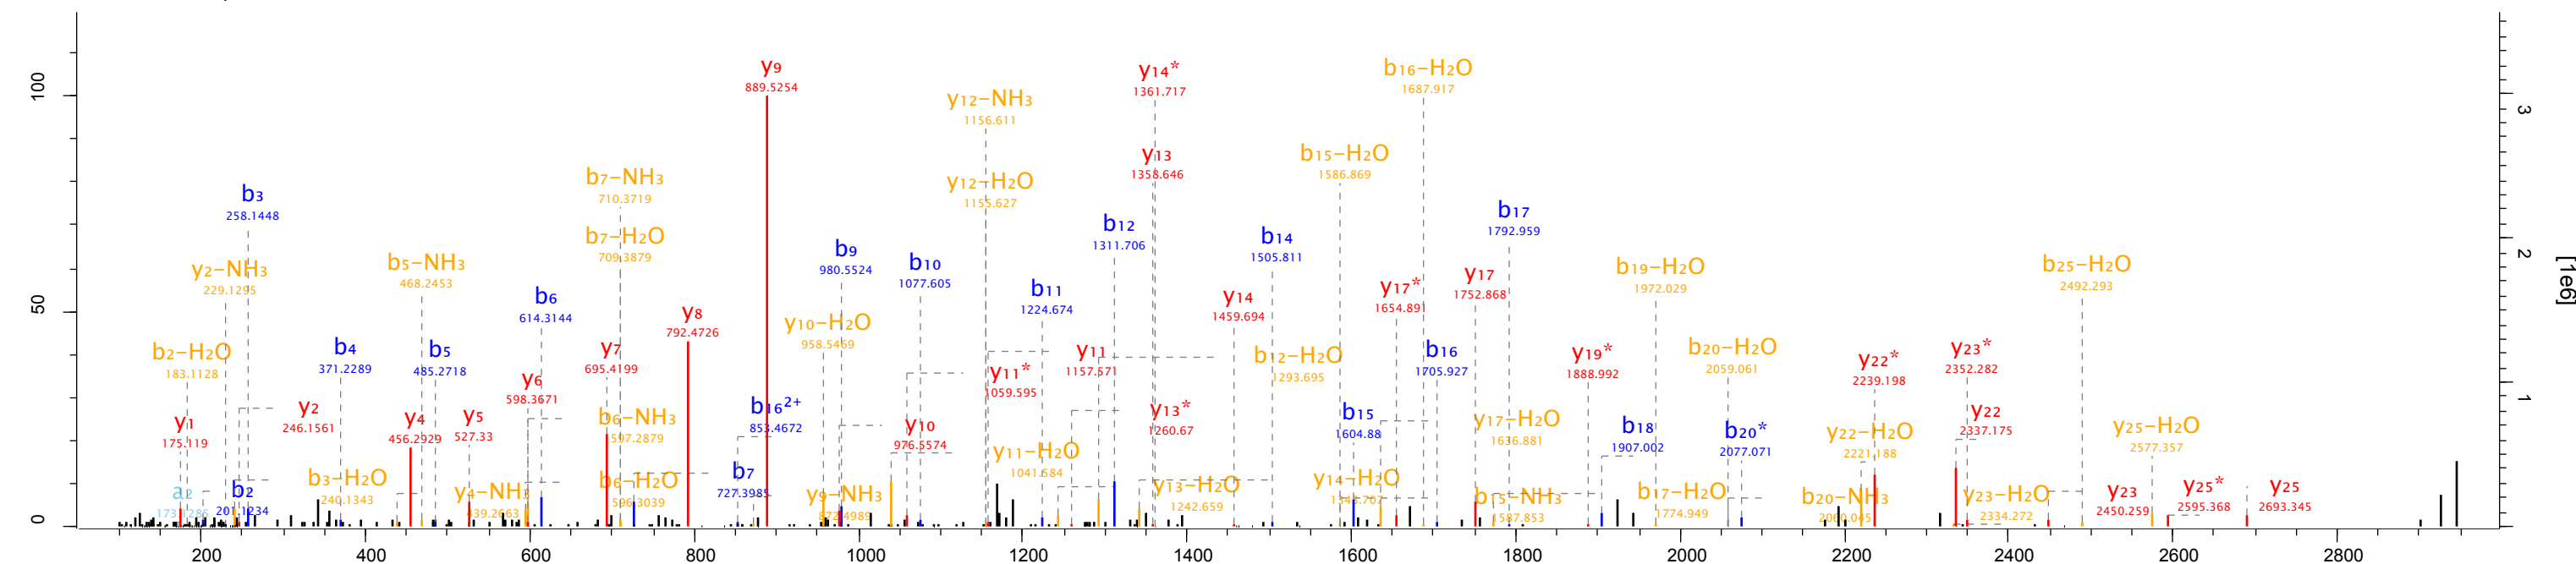

- L S G I N E I P R P F S P P V T S N T S P P P A A P L A R -

b<sub>2</sub> b<sub>3</sub> b<sub>4</sub> b<sub>5</sub> b<sub>6</sub> b<sub>7</sub> b<sub>9</sub> b<sub>10</sub> b<sub>11</sub> b<sub>12</sub> b<sub>14</sub> b<sub>15</sub> b<sub>16</sub> b<sub>17</sub> b<sub>18</sub> b<sub>20</sub>\*

y<sub>25</sub> y<sub>23</sub> y<sub>22</sub> y<sub>19</sub>\* y<sub>17</sub> y<sub>14</sub> y<sub>13</sub> y<sub>11</sub> y<sub>10</sub> y<sub>9</sub> y<sub>8</sub> y<sub>7</sub> y<sub>6</sub> y<sub>5</sub> y<sub>4</sub> y<sub>2</sub> y<sub>1</sub>

Raw file  
20150814\_A375SR\_Phospho\_BR2\_06

Scan 24128 Method FTMS; HCD Score 192.69 m/z 989.86 Gene names NUP160

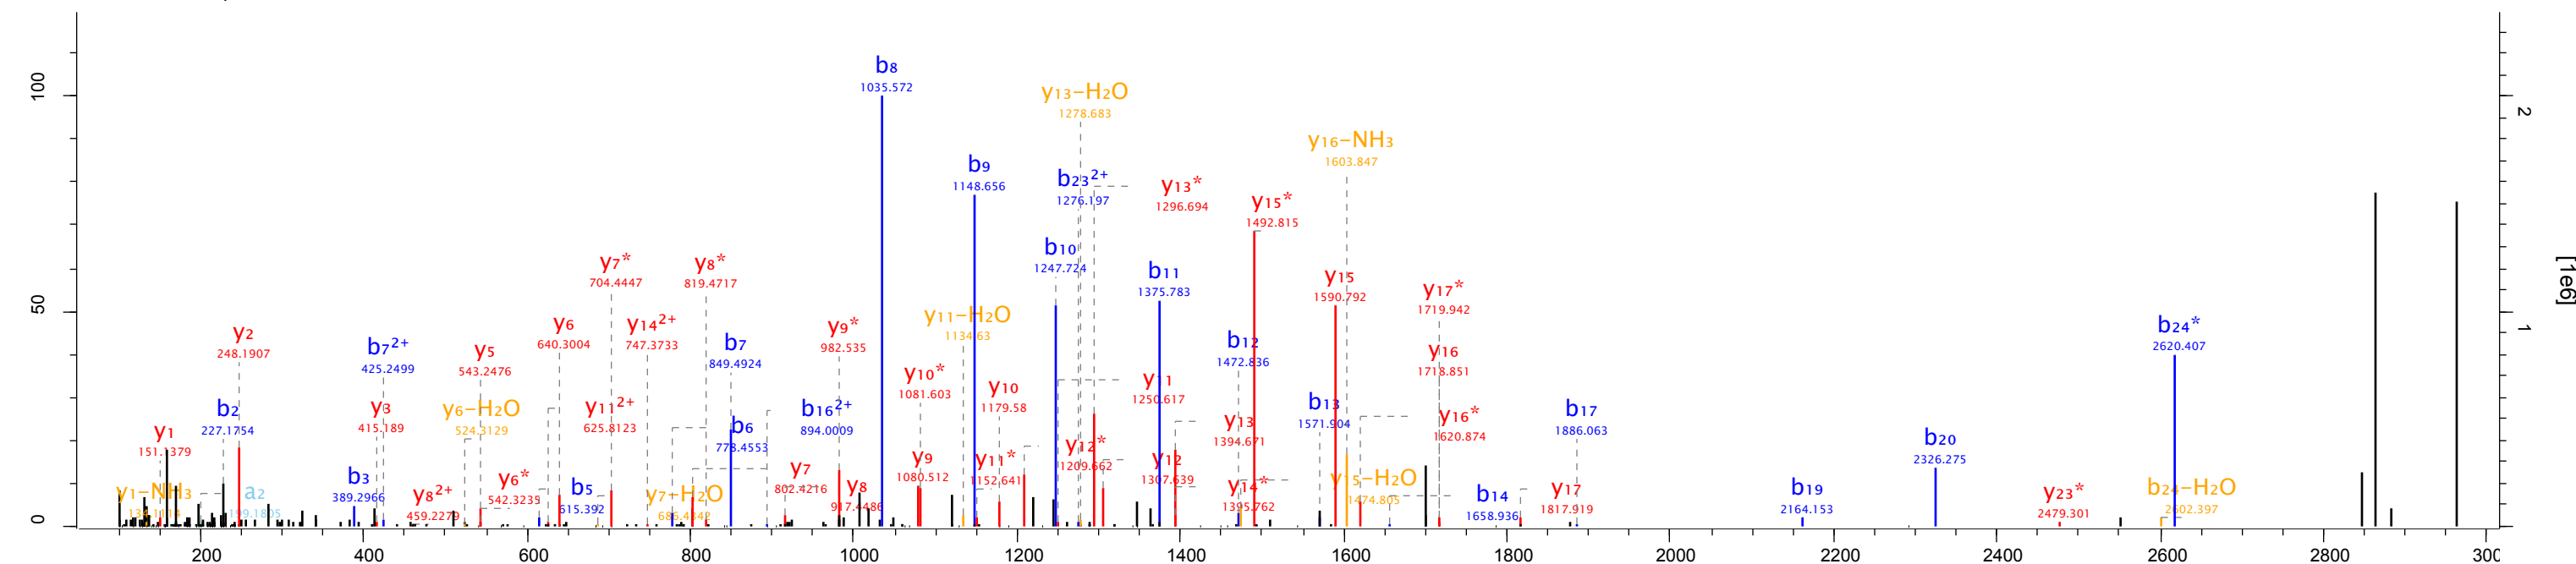

- L I R P E Y A W I V Q P V S G A V Y D R P G A S P K -  
b<sub>2</sub> b<sub>3</sub> b<sub>5</sub> b<sub>6</sub> b<sub>7</sub> b<sub>8</sub> b<sub>9</sub> b<sub>10</sub> b<sub>11</sub> b<sub>12</sub> b<sub>13</sub> b<sub>14</sub> b<sub>16</sub><sup>2+</sup> b<sub>17</sub> b<sub>19</sub> b<sub>20</sub> b<sub>23</sub><sup>2+</sup> b<sub>24</sub><sup>\*</sup> y<sub>23</sub><sup>\*</sup> y<sub>17</sub> y<sub>16</sub> y<sub>15</sub> y<sub>14</sub><sup>\*</sup> y<sub>13</sub> y<sub>12</sub> y<sub>11</sub> y<sub>10</sub> y<sub>9</sub> y<sub>8</sub> y<sub>7</sub> y<sub>6</sub> y<sub>5</sub> y<sub>3</sub> y<sub>2</sub> y<sub>1</sub>

Raw file Scan Method Score m/z Gene names  
 20150814\_A375SR\_Phospho\_BR2\_06 25358 FTMS; HCD 106.35 1028.77 L1RE1

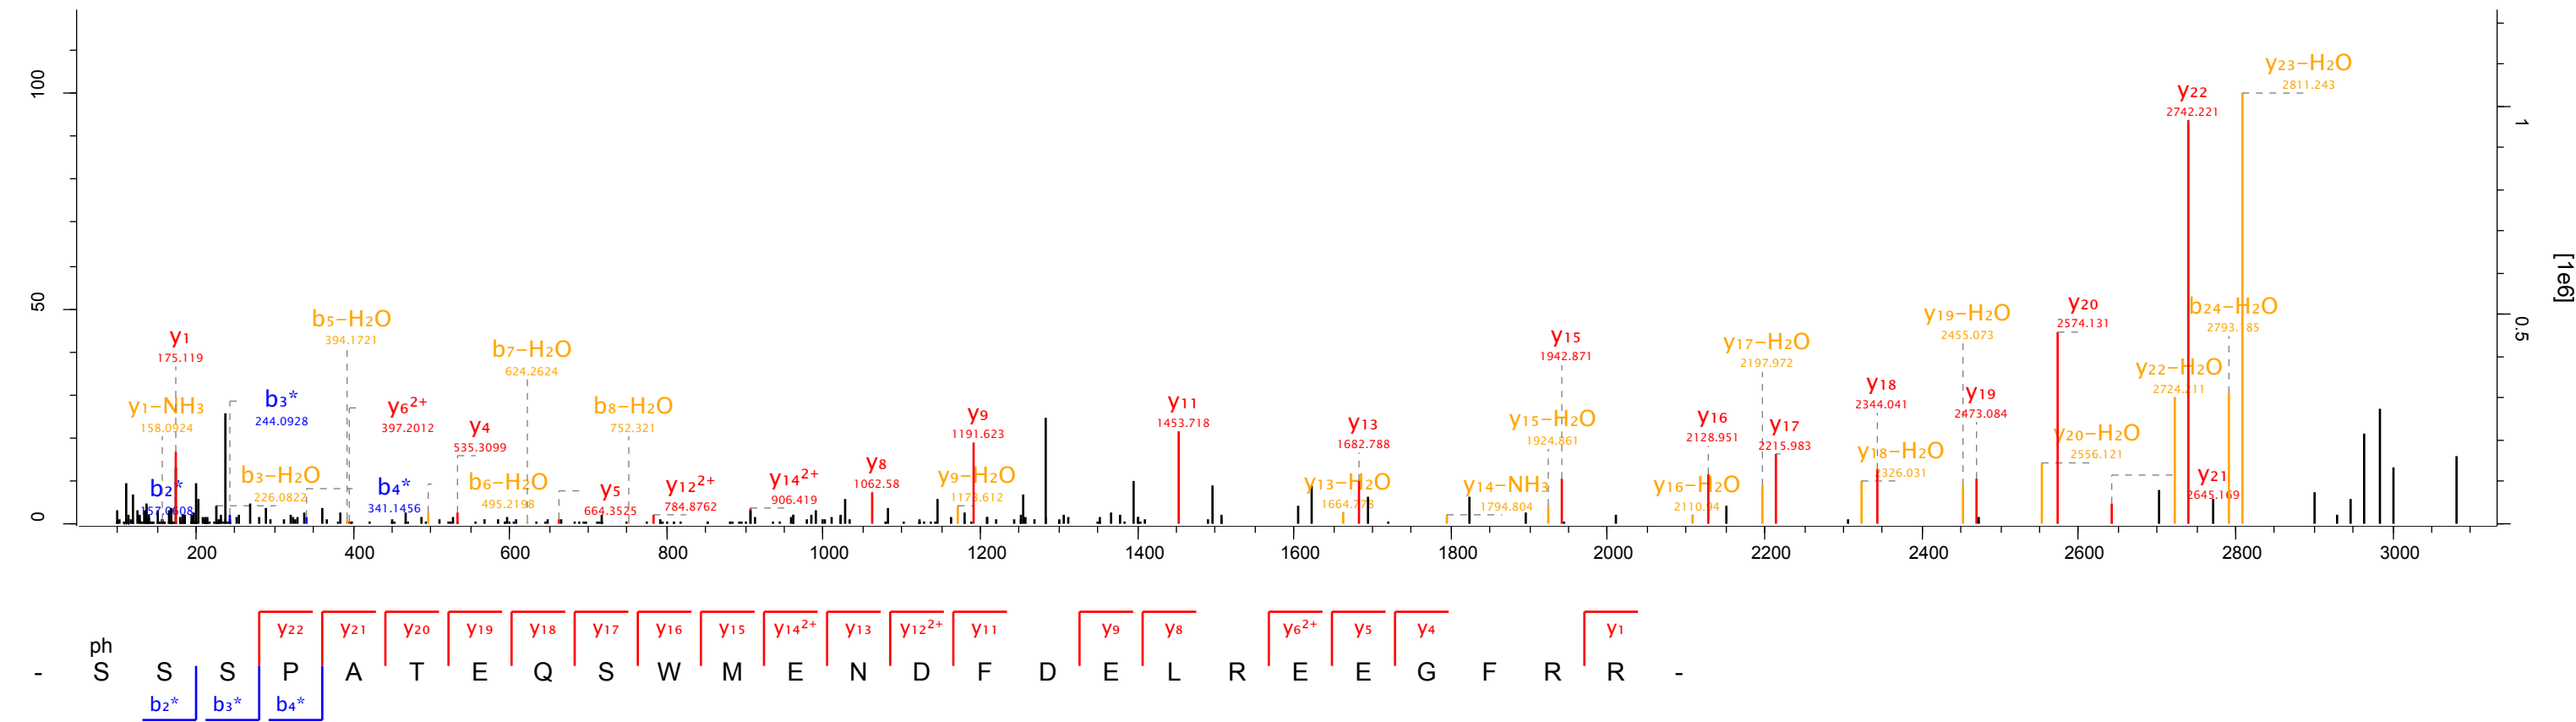

Raw file: 20150814\_A375SR\_Phospho\_BR2\_06  
 Scan: 25558 Method: FTMS; HCD Score: 146.94 m/z: 1009.81 Gene names: CEP76

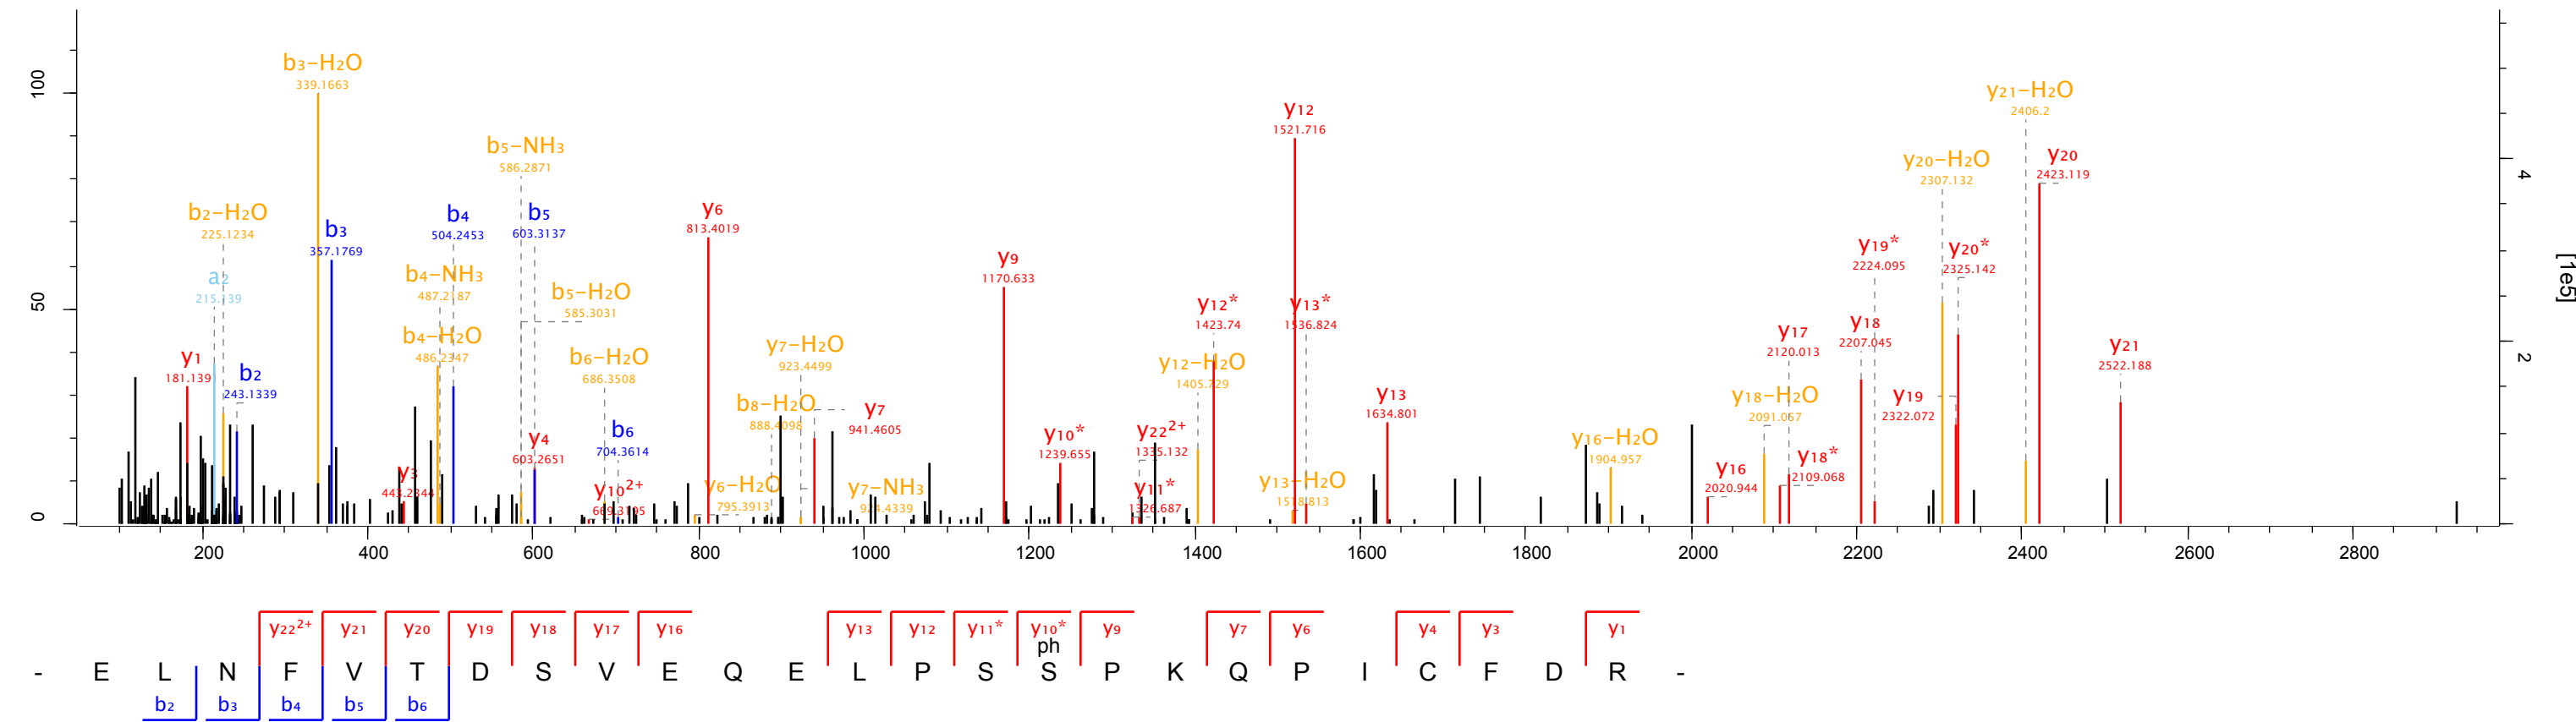

Raw file  
20150814\_A375SR\_Phospho\_BR2\_06

Scan 25768 Method FTMS; HCD Score 167.11 m/z 1084 Gene names NES

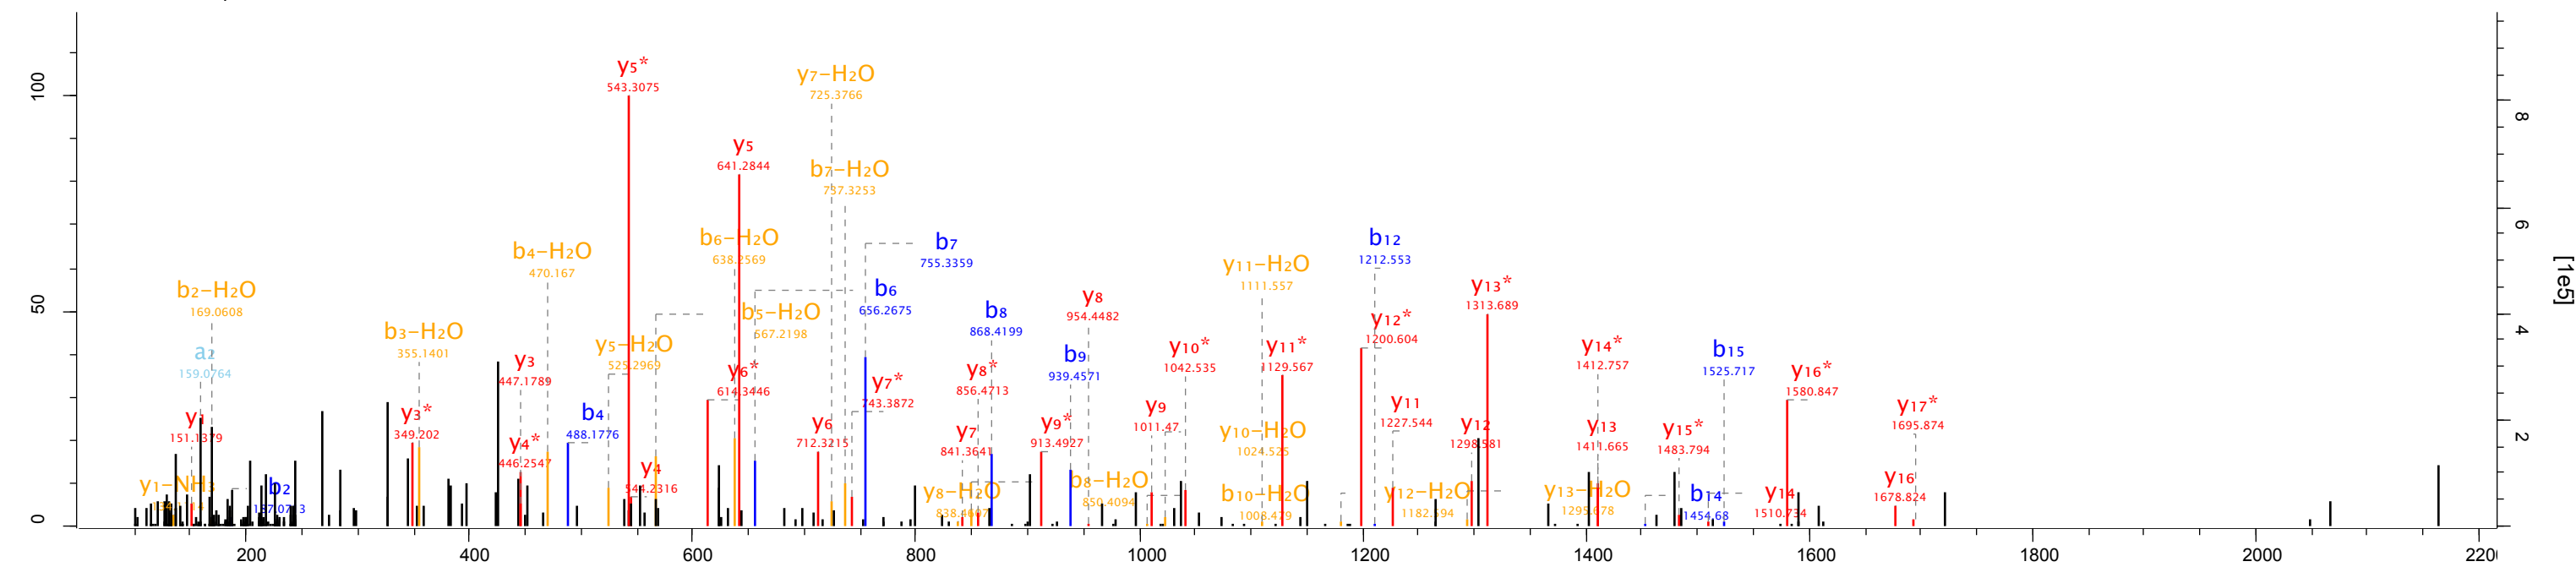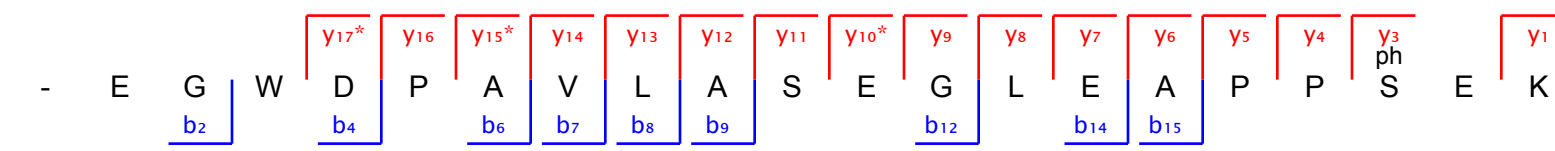



Raw file: 20150814\_A375SR\_Phospho\_BR2\_06  
 Scan: 25938 Method: FTMS; HCD Score: 107.74 m/z: 663.31 Gene names: AHNAK

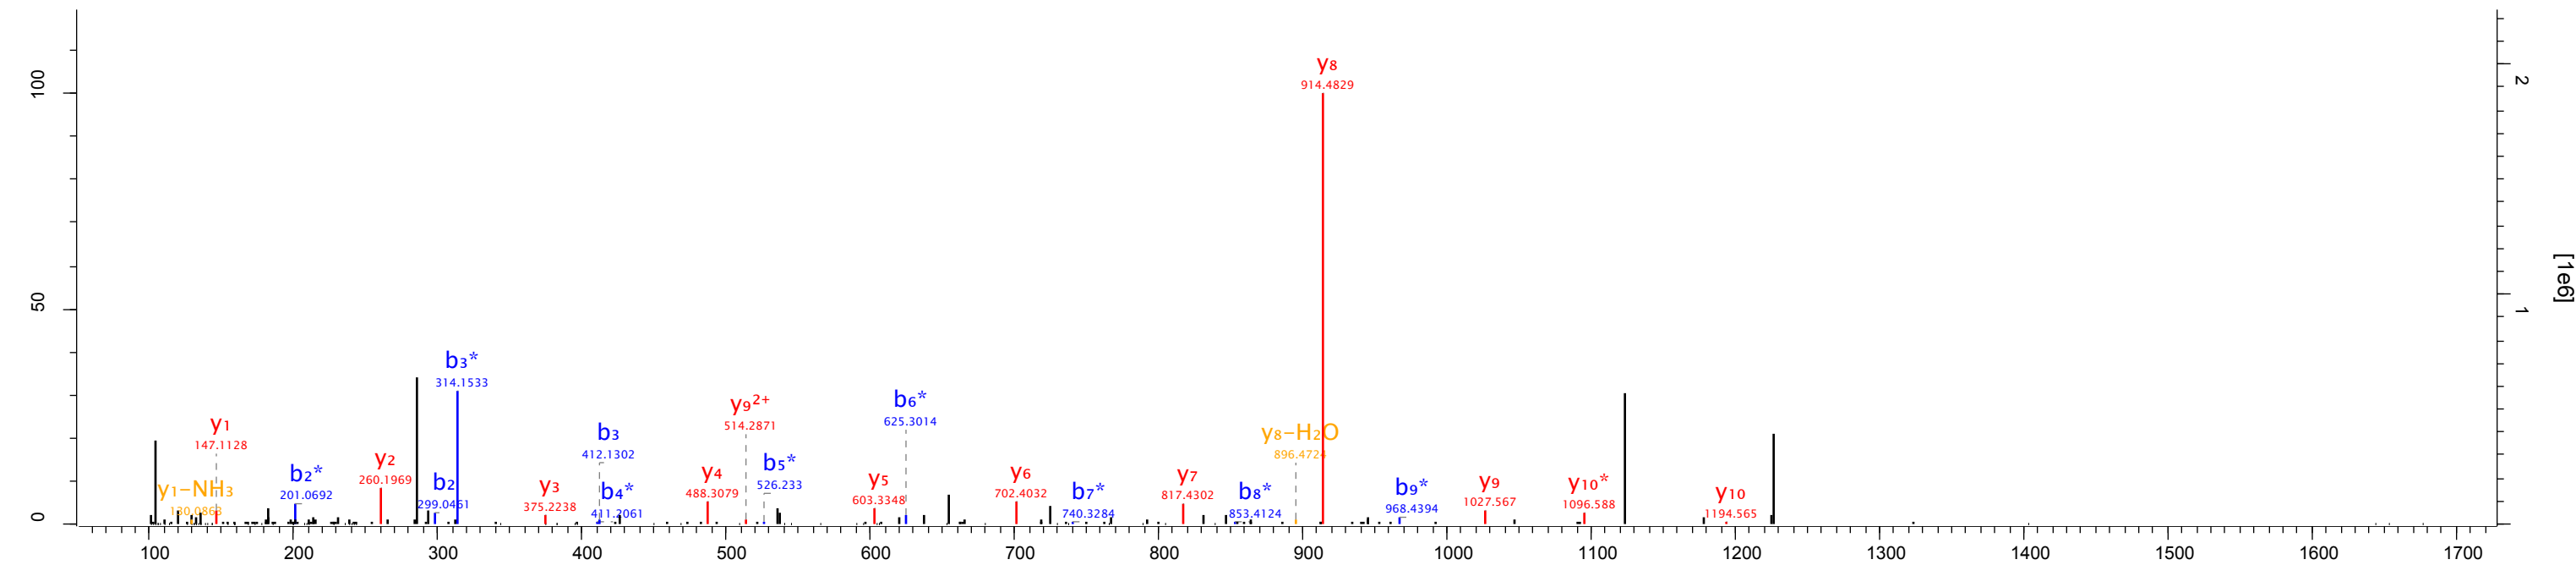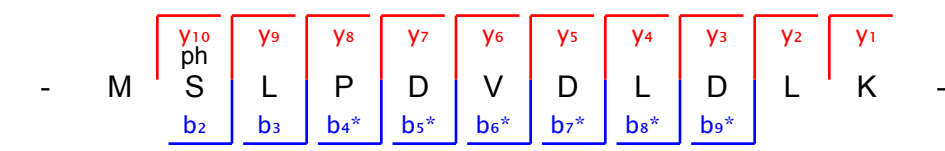

Raw file: 20150814\_A375SR\_Phospho\_BR2\_06  
 Scan: 26058 Method: FTMS; HCD Score: 128.82 m/z: 1345.97 Gene names: PDLIM7

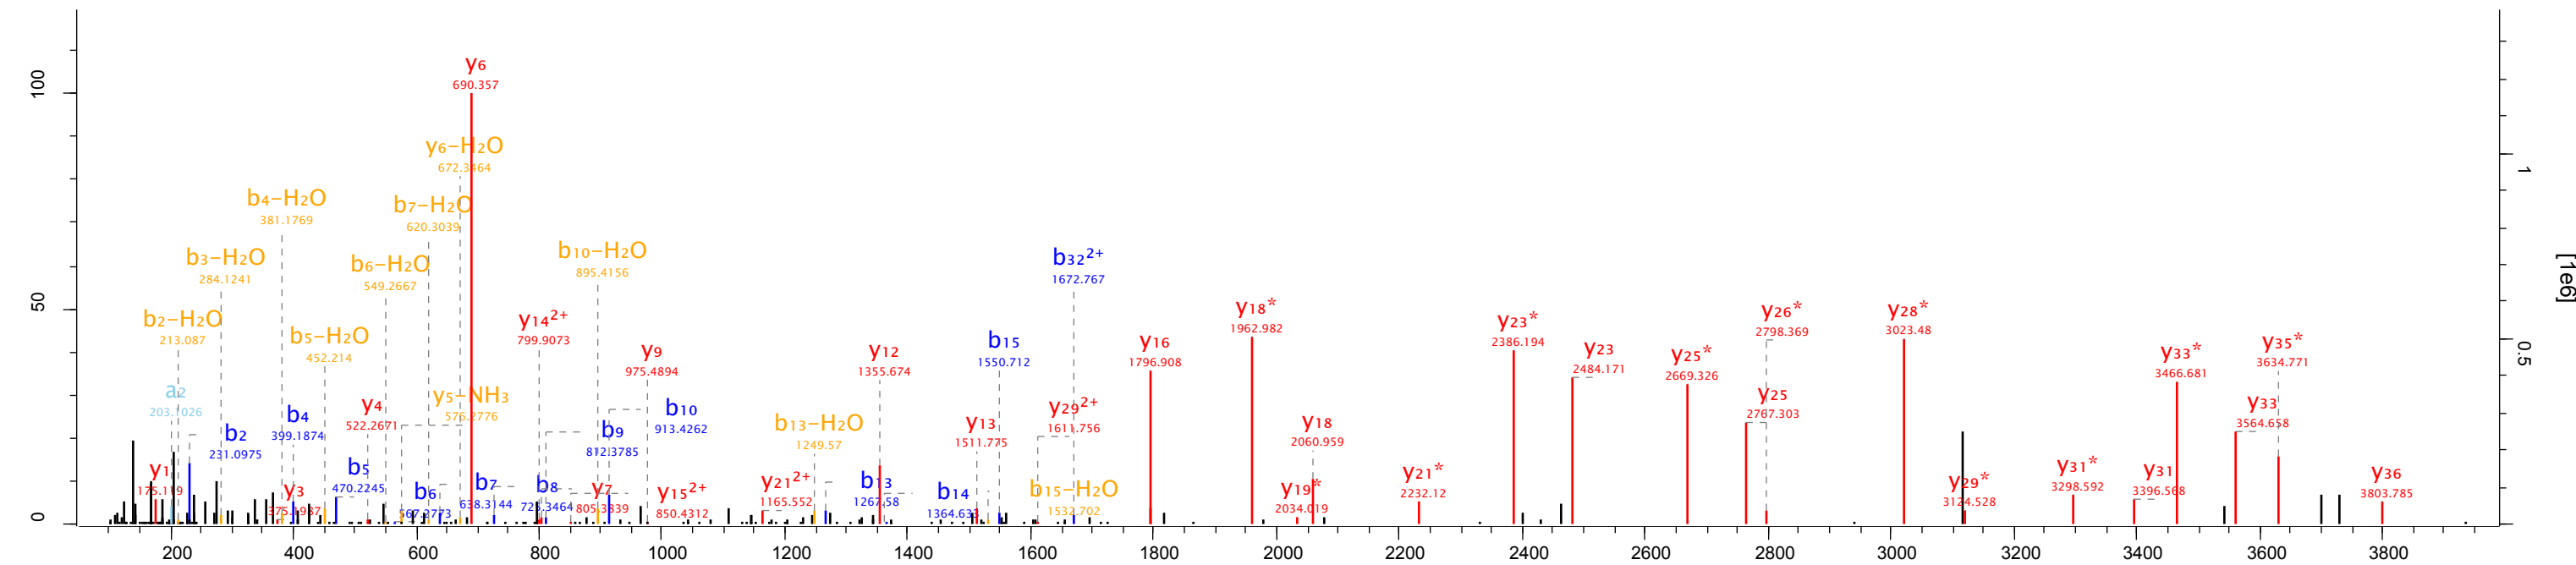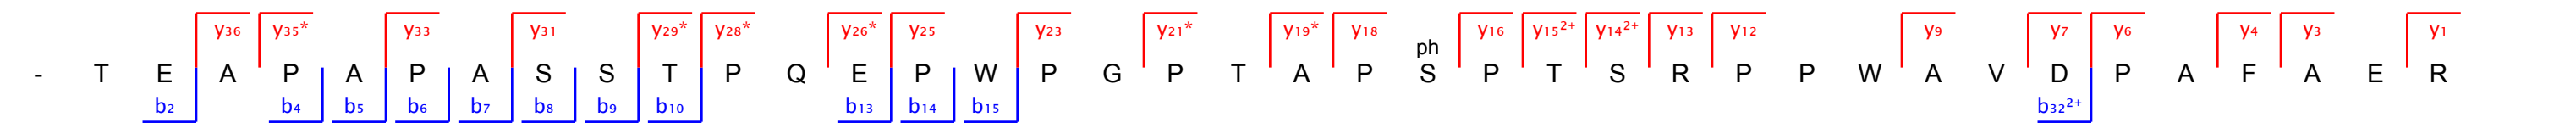

Raw file 20150814\_A375SR\_Phospho\_BR2\_06 Scan 26528 Method FTMS; HCD Score 147.26 m/z 672.83 Gene names ANKRD28

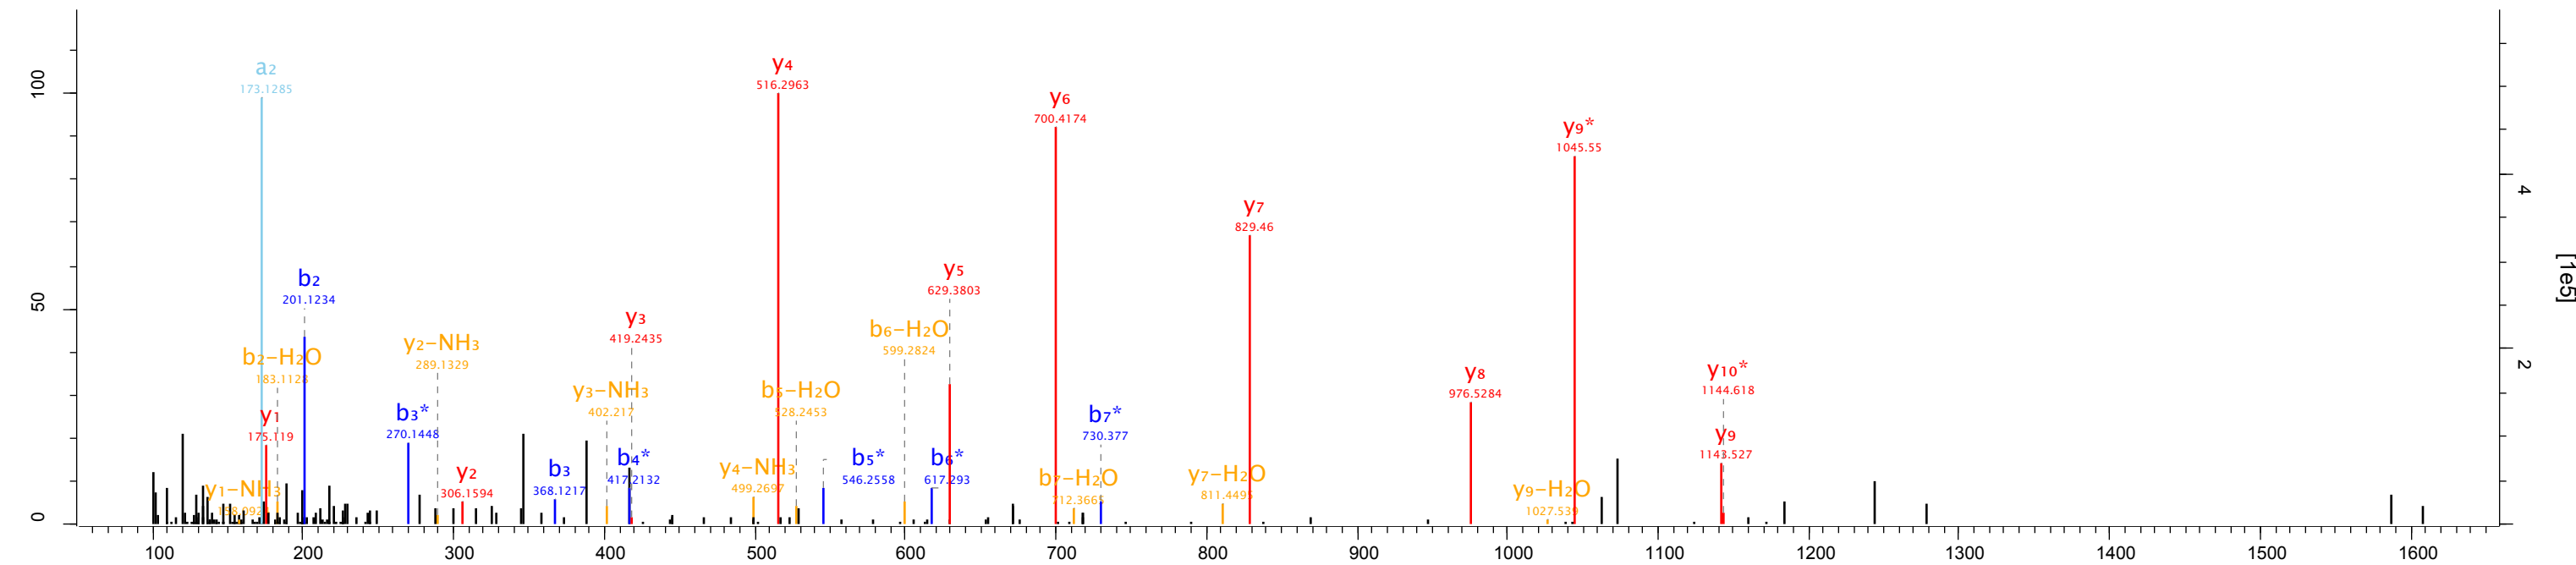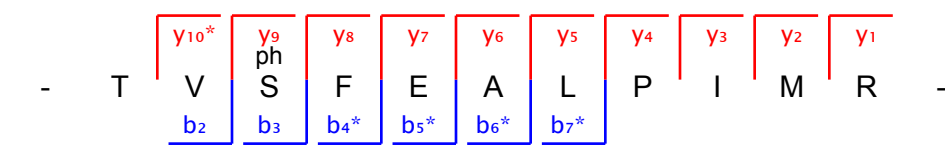

Raw file: 20150814\_A375SR\_Phospho\_BR2\_06  
 Scan: 2658 Method: FTMS; HCD Score: 101.38 m/z: 529.75 Gene names: SMARCC2

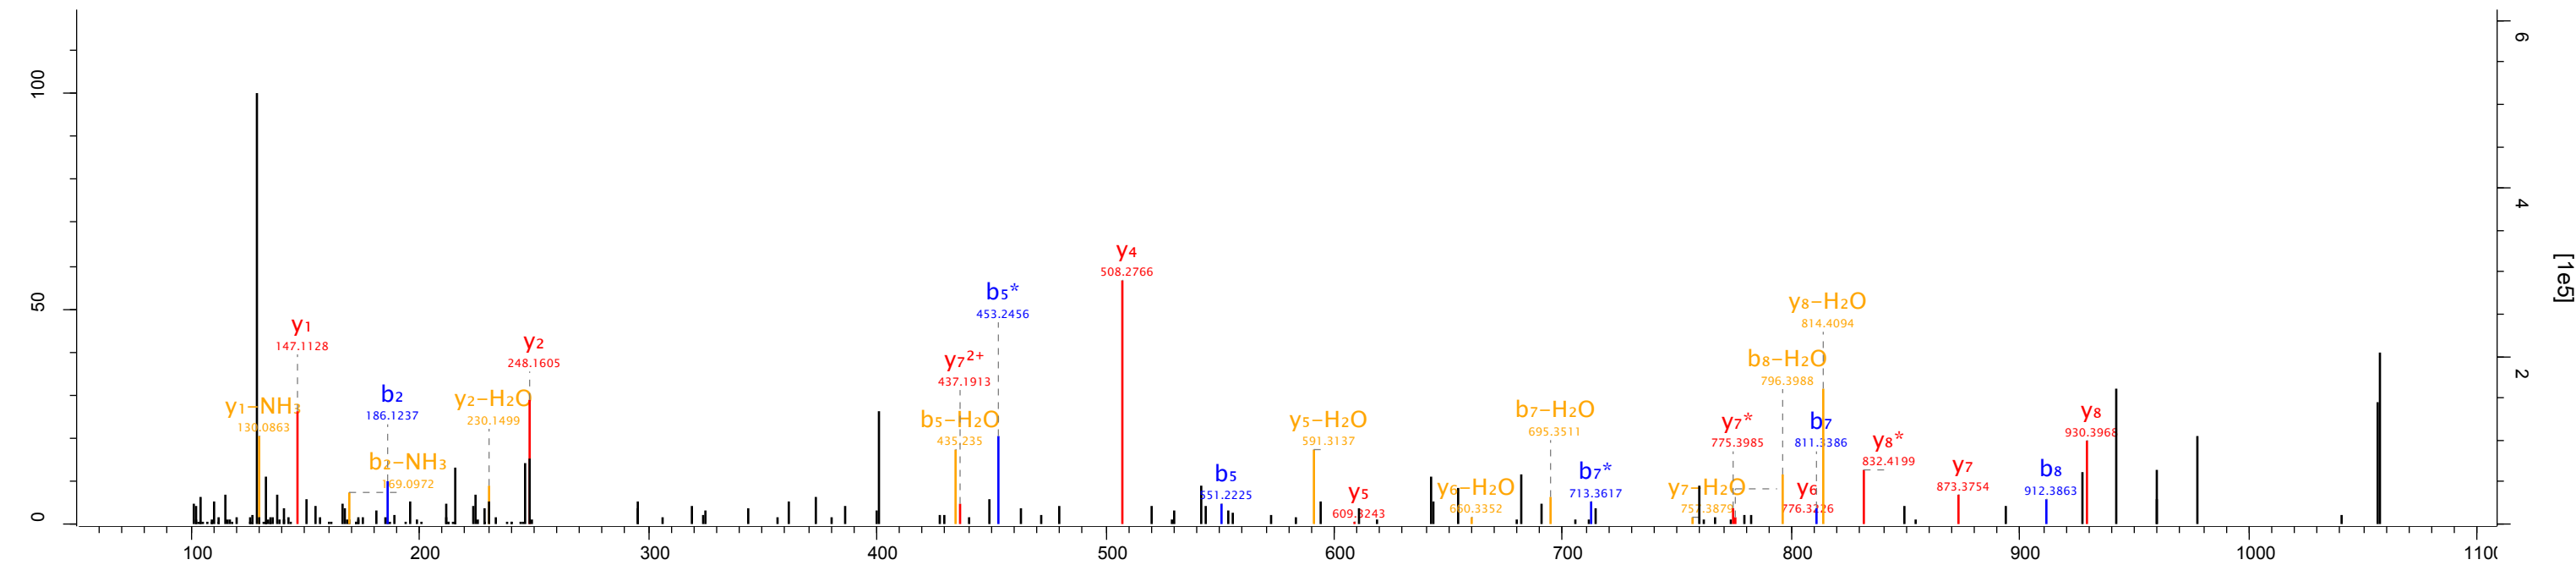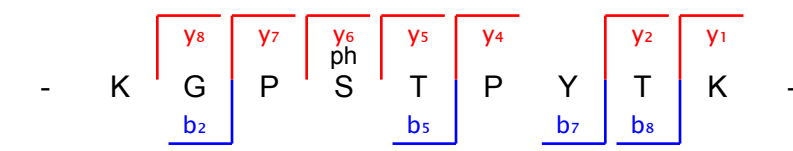

Raw file: 20150814\_A375SR\_Phospho\_BR2\_06  
 Scan: 26728 Method: FTMS; HCD Score: 114.11 m/z: 1231.25 Gene names: NEDD4L

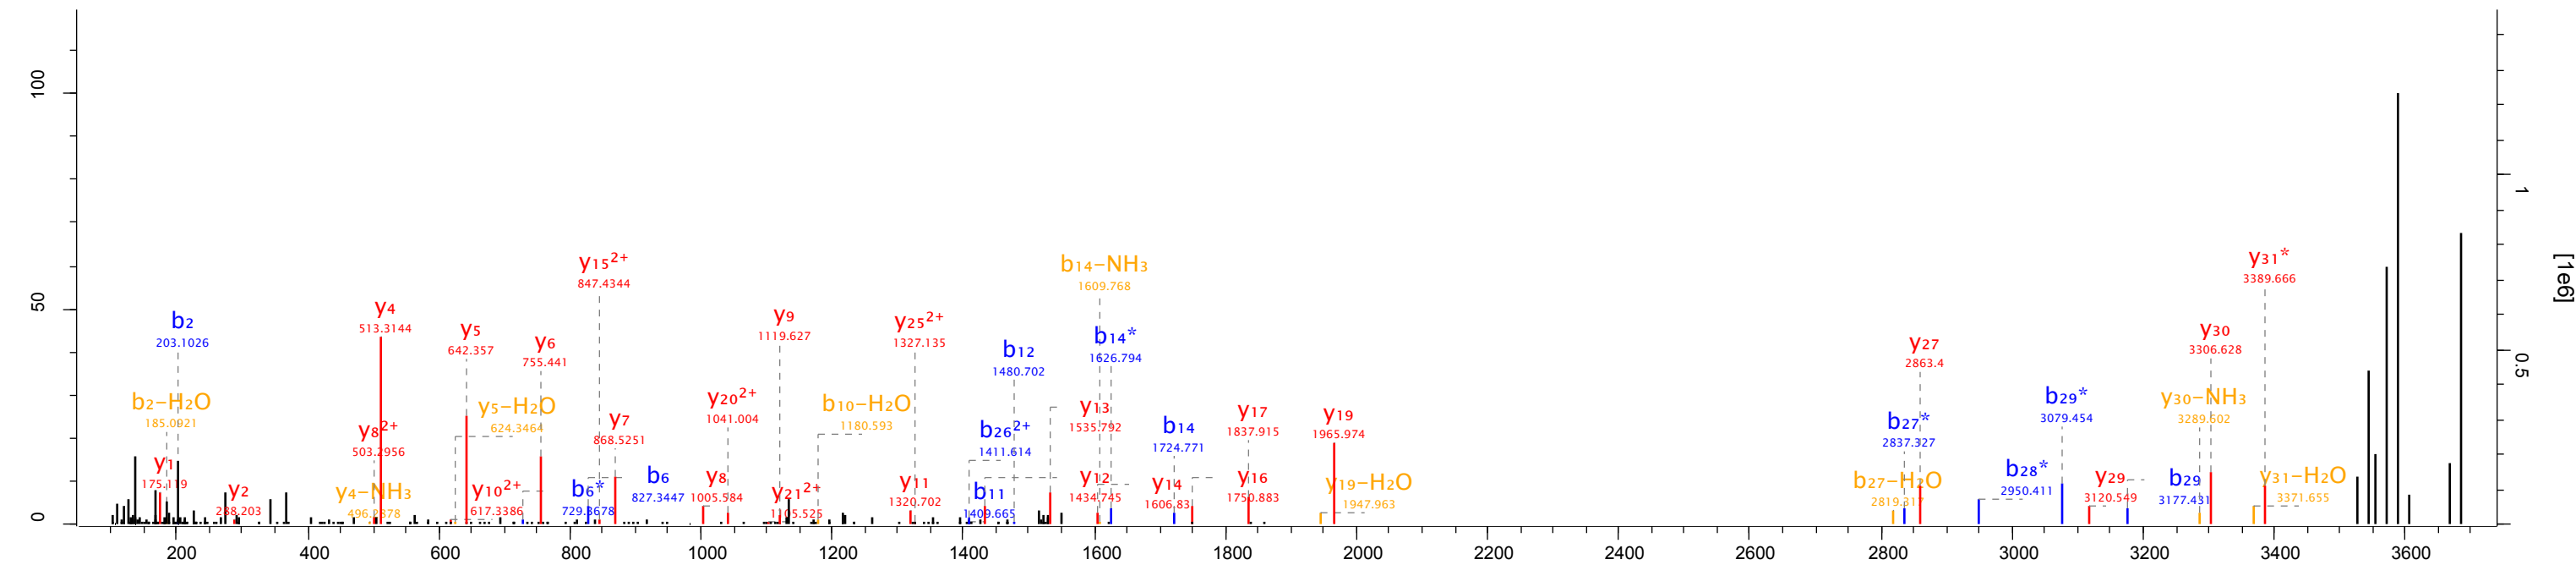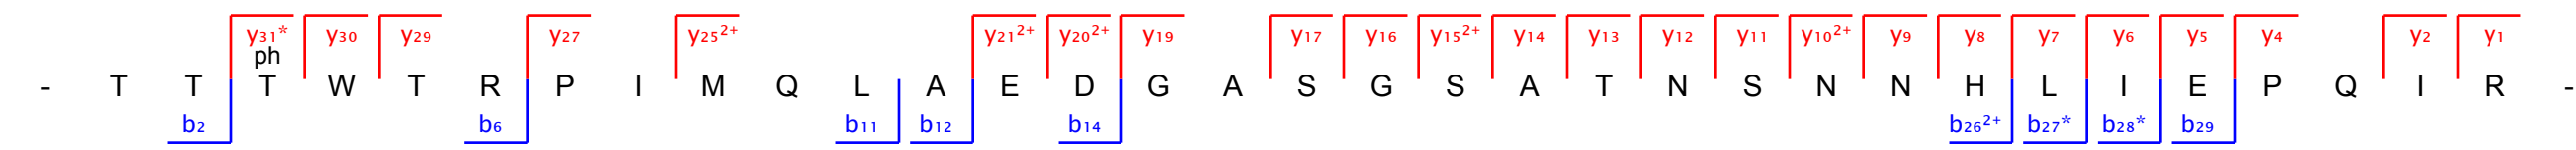

Raw file  
20150814\_A375SR\_Phospho\_BR2\_06

Scan Method Score m/z Gene names  
26898 FTMS; HCD 40.42 1066 SAMD4B

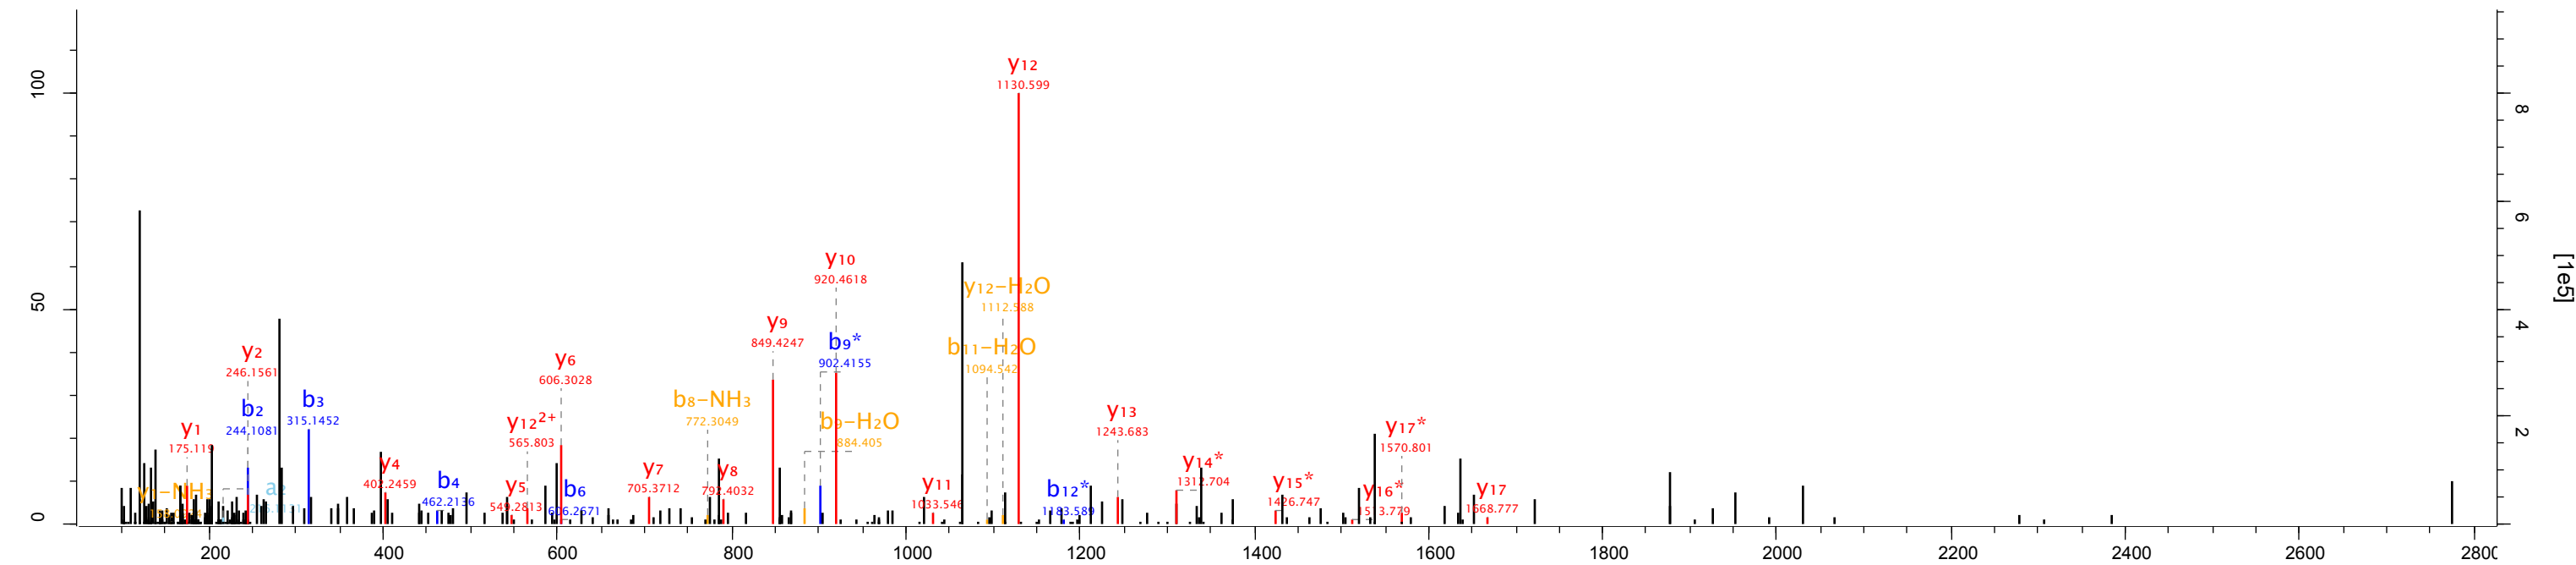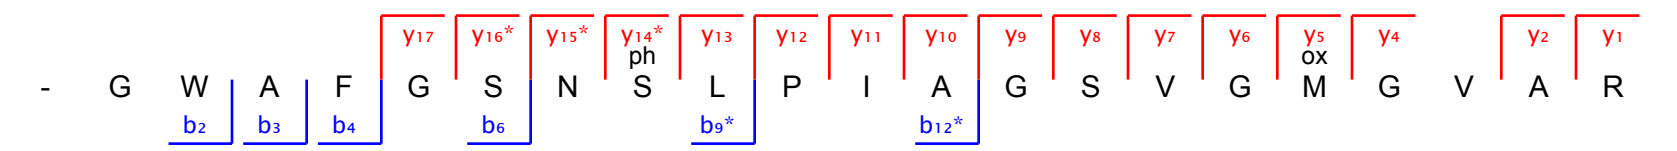

Raw file: 20150814\_A375SR\_Phospho\_BR2\_06  
 Scan: 27138 Method: FTMS; HCD Score: 57.83 m/z: 1001.5 Gene names: ZNF335

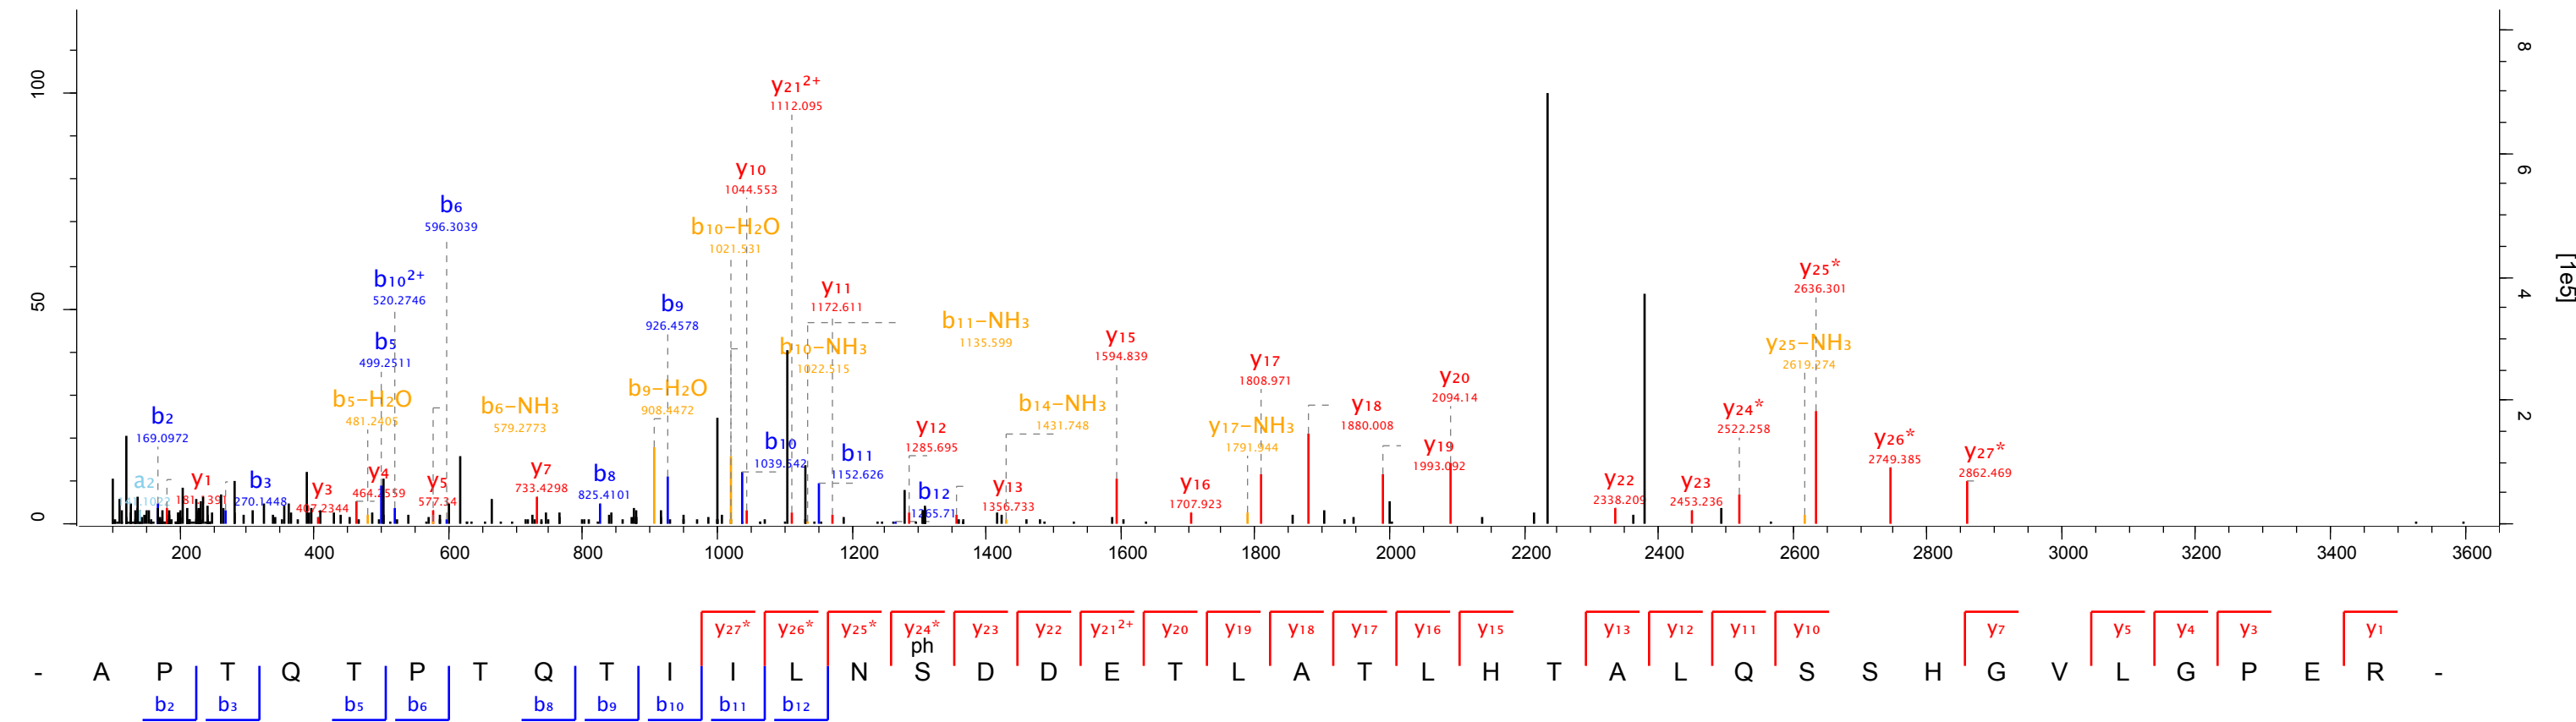

Raw file: 20150814\_A375SR\_Phospho\_BR2\_06  
 Scan: 2768 Method: FTMS; HCD Score: 147.66 m/z: 551.26 Gene names: SRRM2

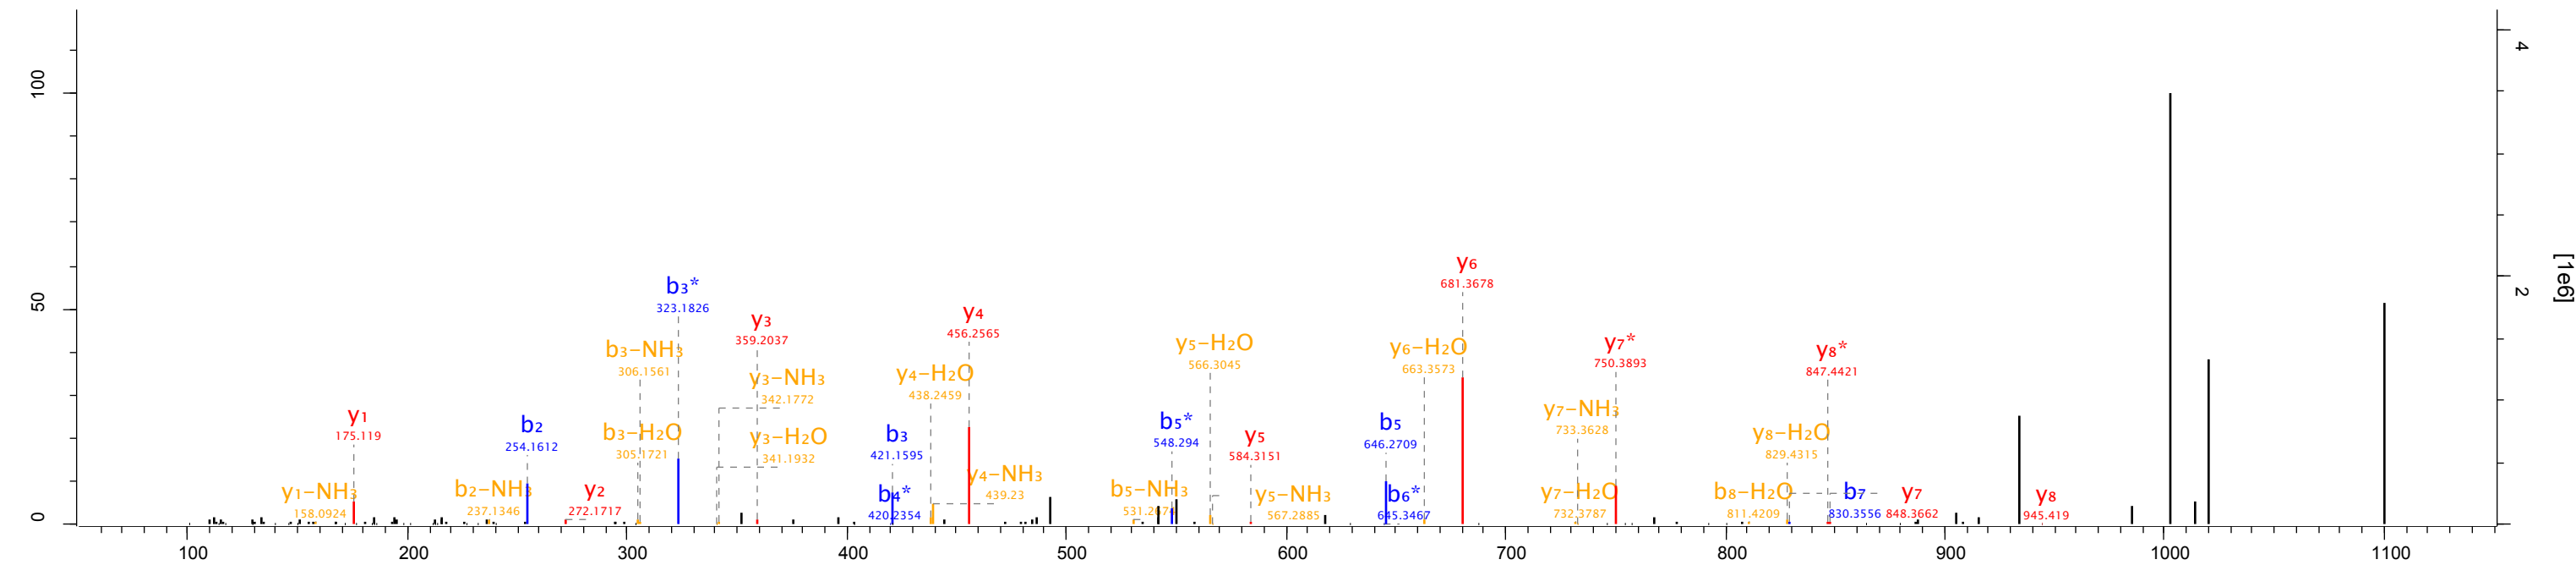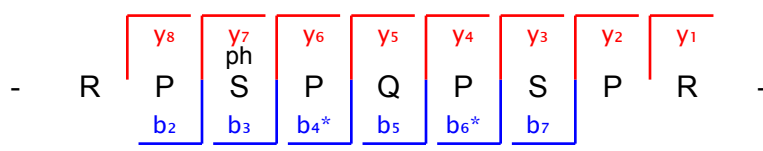



Raw file  
20150814\_A375SR\_Phospho\_BR2\_06

Scan 28258 Method FTMS; HCD Score 90.17 m/z 887.05 Gene names PPFIBP1

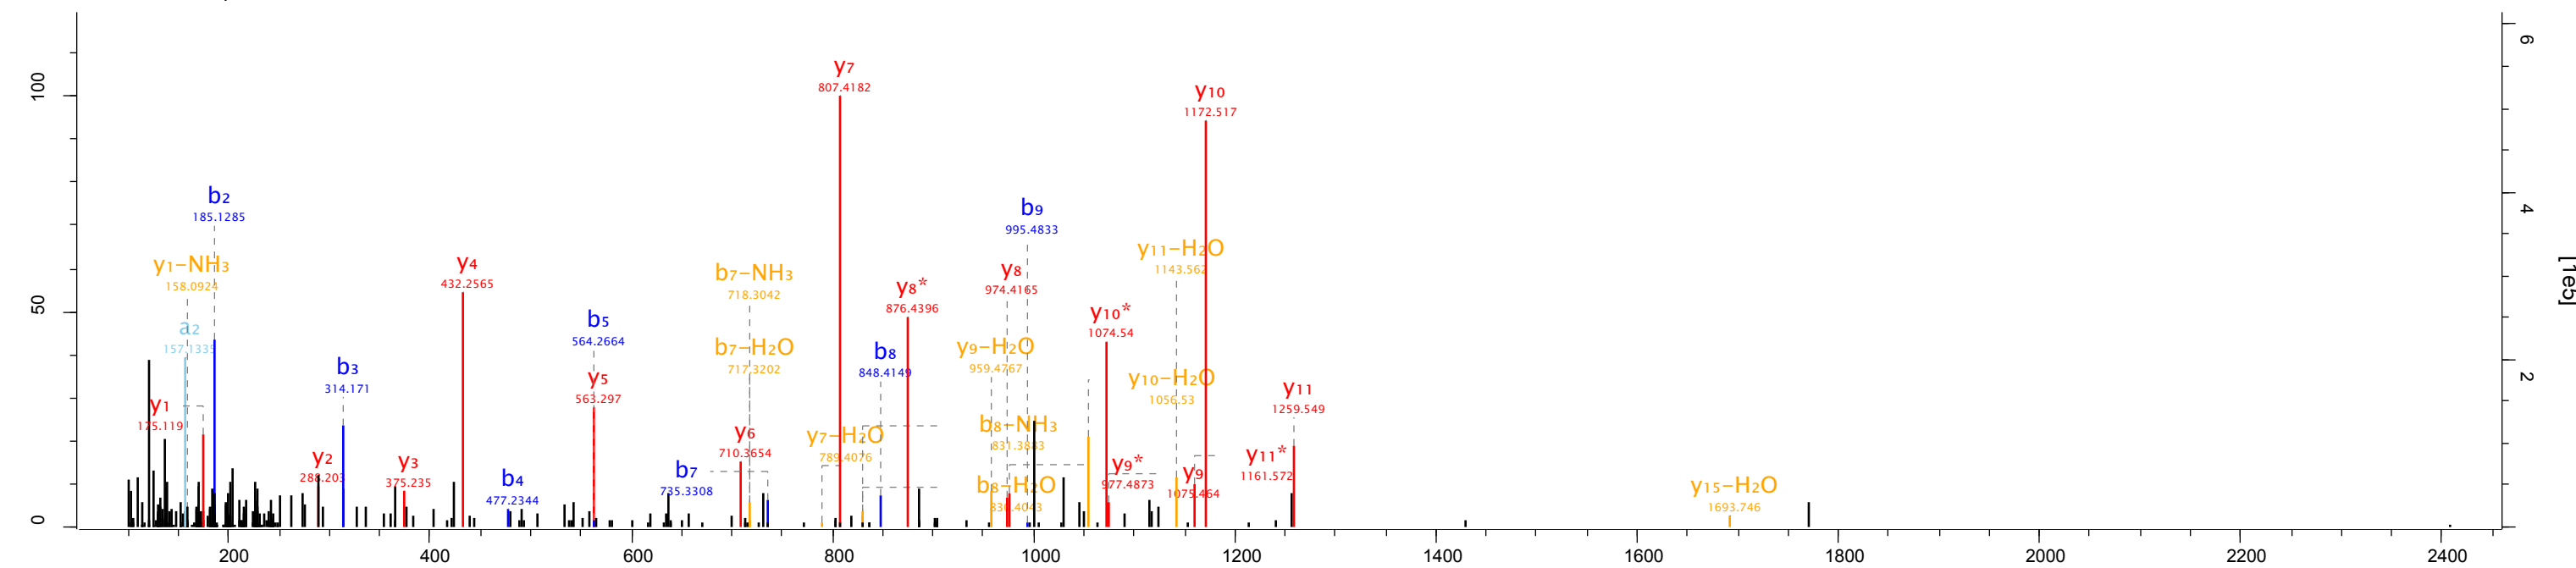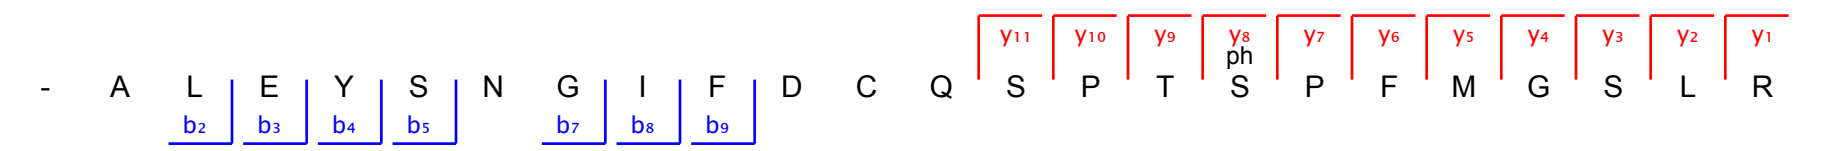

Raw file: 20150814\_A375SR\_Phospho\_BR2\_06  
 Scan: 28398 Method: FTMS; HCD Score: 70.4 m/z: 1093.2 Gene names: SUPT7L

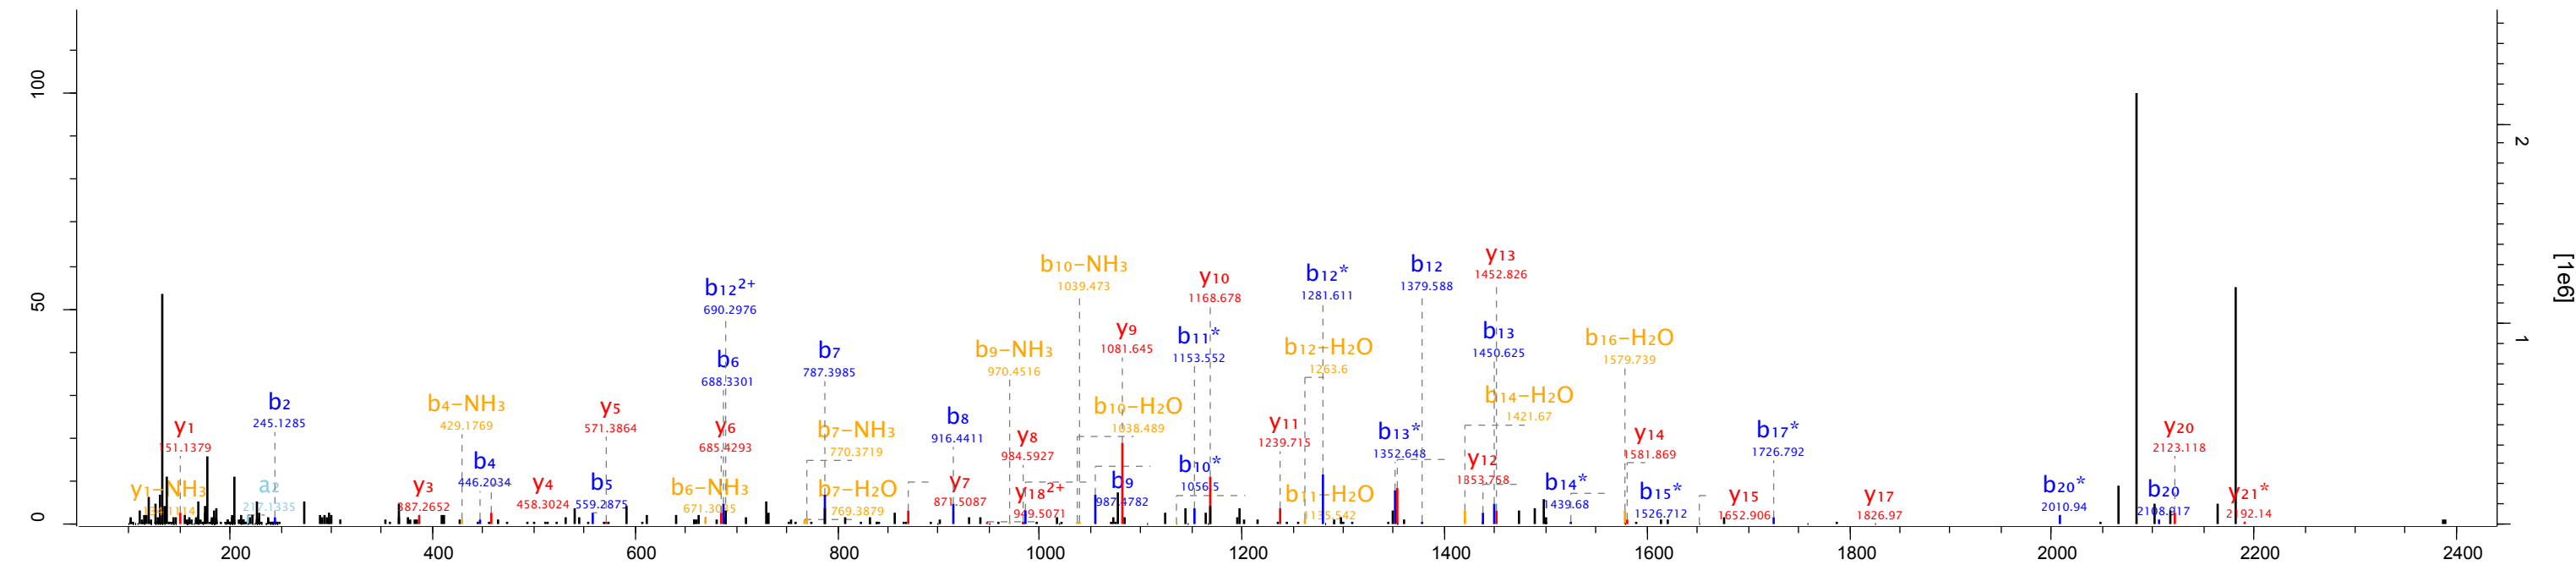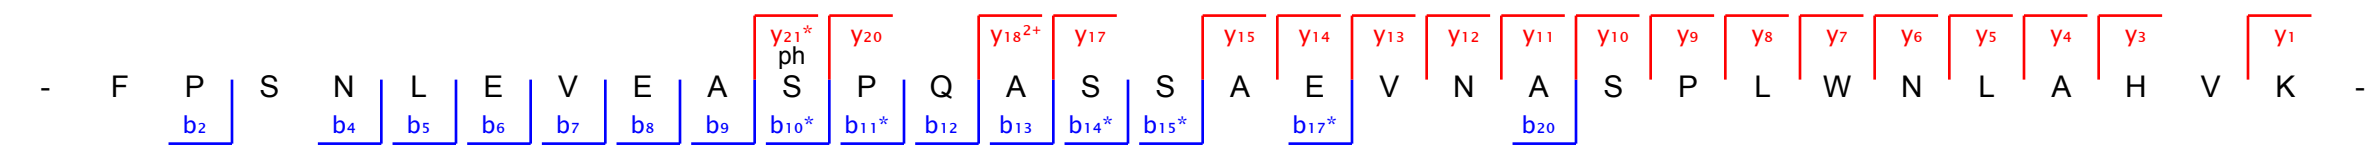

Raw file: 20150814\_A375SR\_Phospho\_BR2\_06  
 Scan: 28408 Method: FTMS; HCD Score: 205.44 m/z: 1067.82 Gene names: TJP2

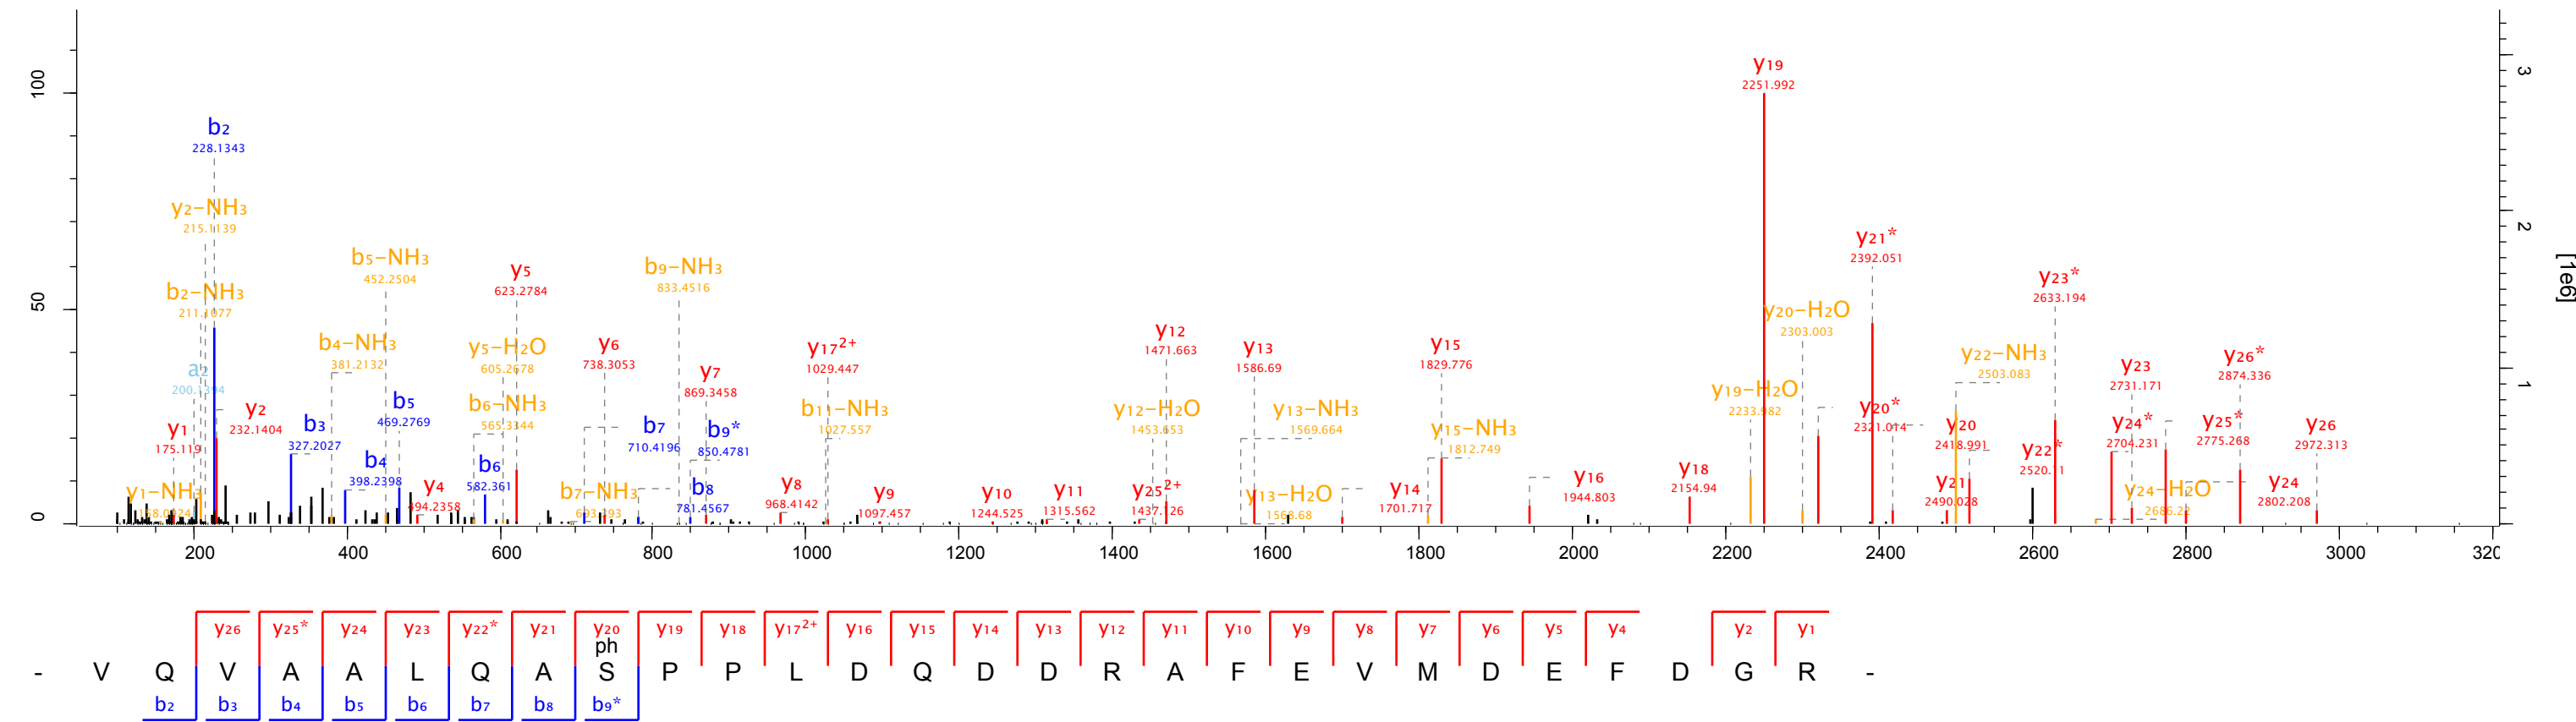

Raw file: 20150814\_A375SR\_Phospho\_BR2\_06  
 Scan: 28498 Method: FTMS; HCD Score: 129.13 m/z: 1087.16 Gene names: ARHGAP35

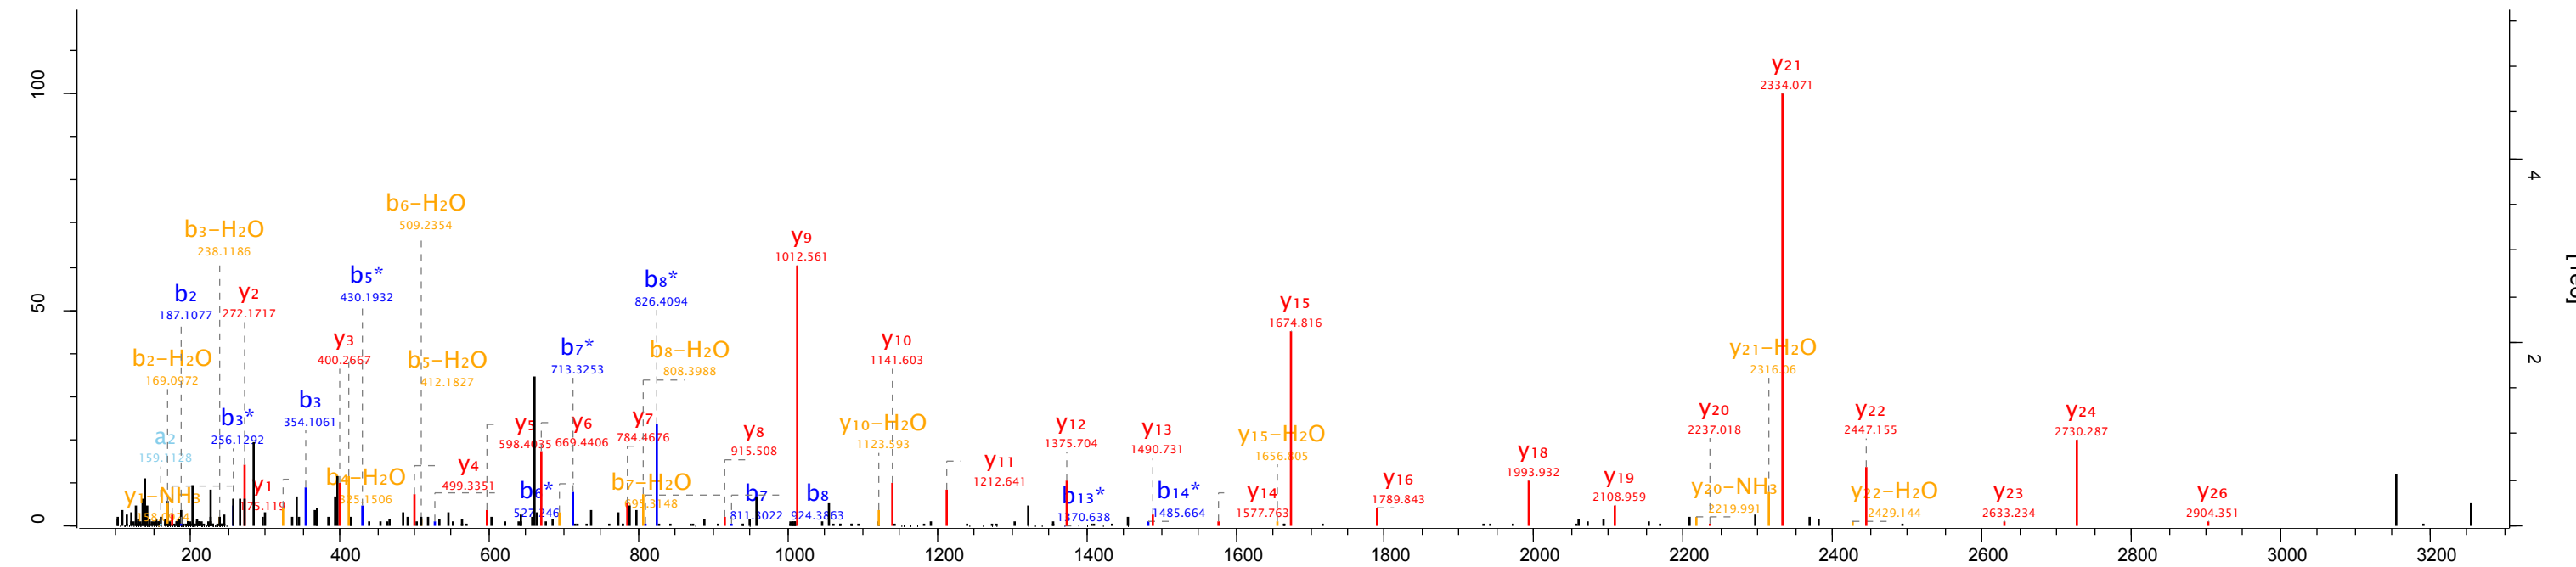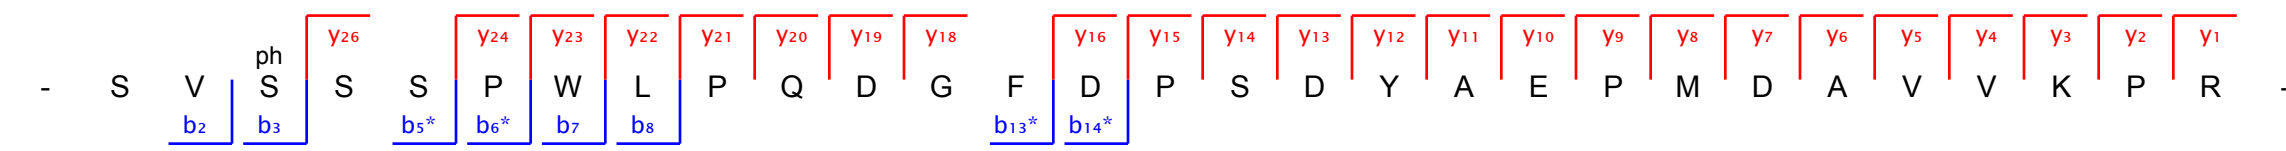

Raw file: 20150814\_A375SR\_Phospho\_BR2\_06  
 Scan: 3138 Method: FTMS; HCD Score: 96.76 m/z: 444.7 Gene names: PLEC

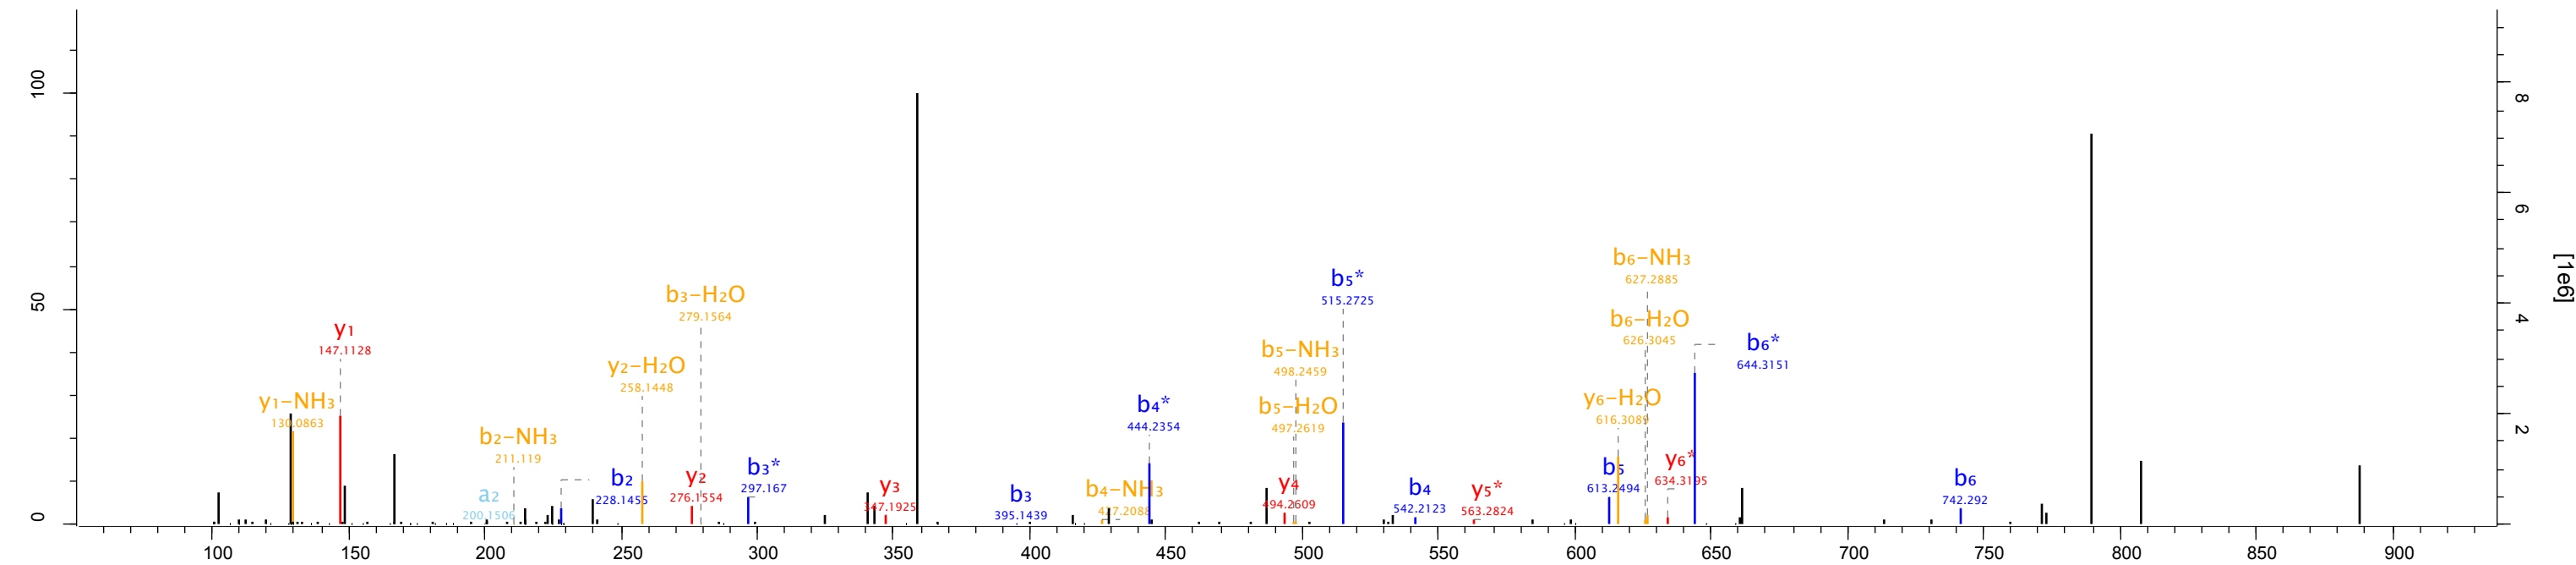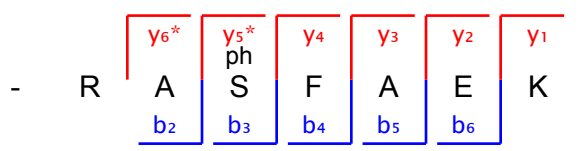

Raw file: 20150814\_A375SR\_Phospho\_BR2\_06  
 Scan: 4628 Method: FTMS; HCD Score: 140.27 m/z: 676.3 Gene names: GTF3C2

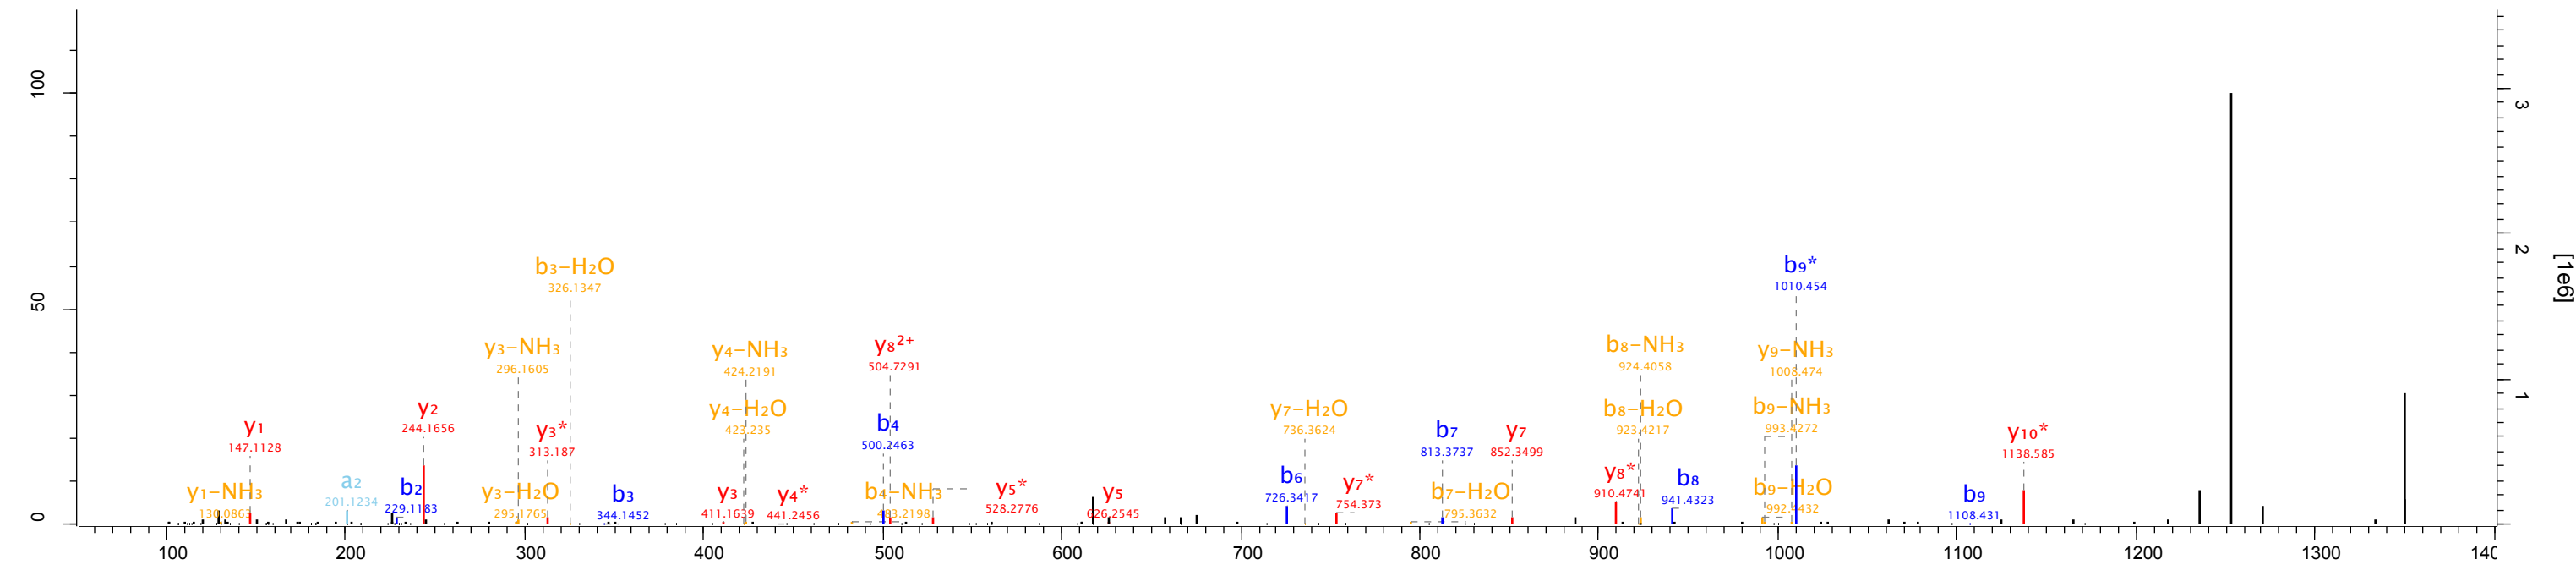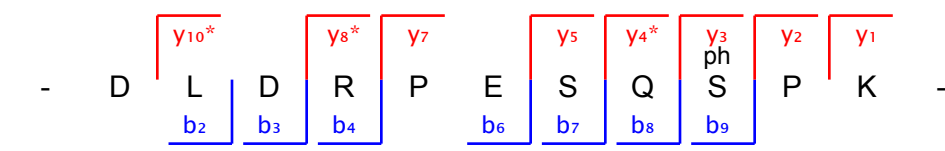

Raw file 20150814\_A375SR\_Phospho\_BR2\_06 Scan 5038 Method FTMS; HCD Score 86.95 m/z 603.78 Gene names AGAP3

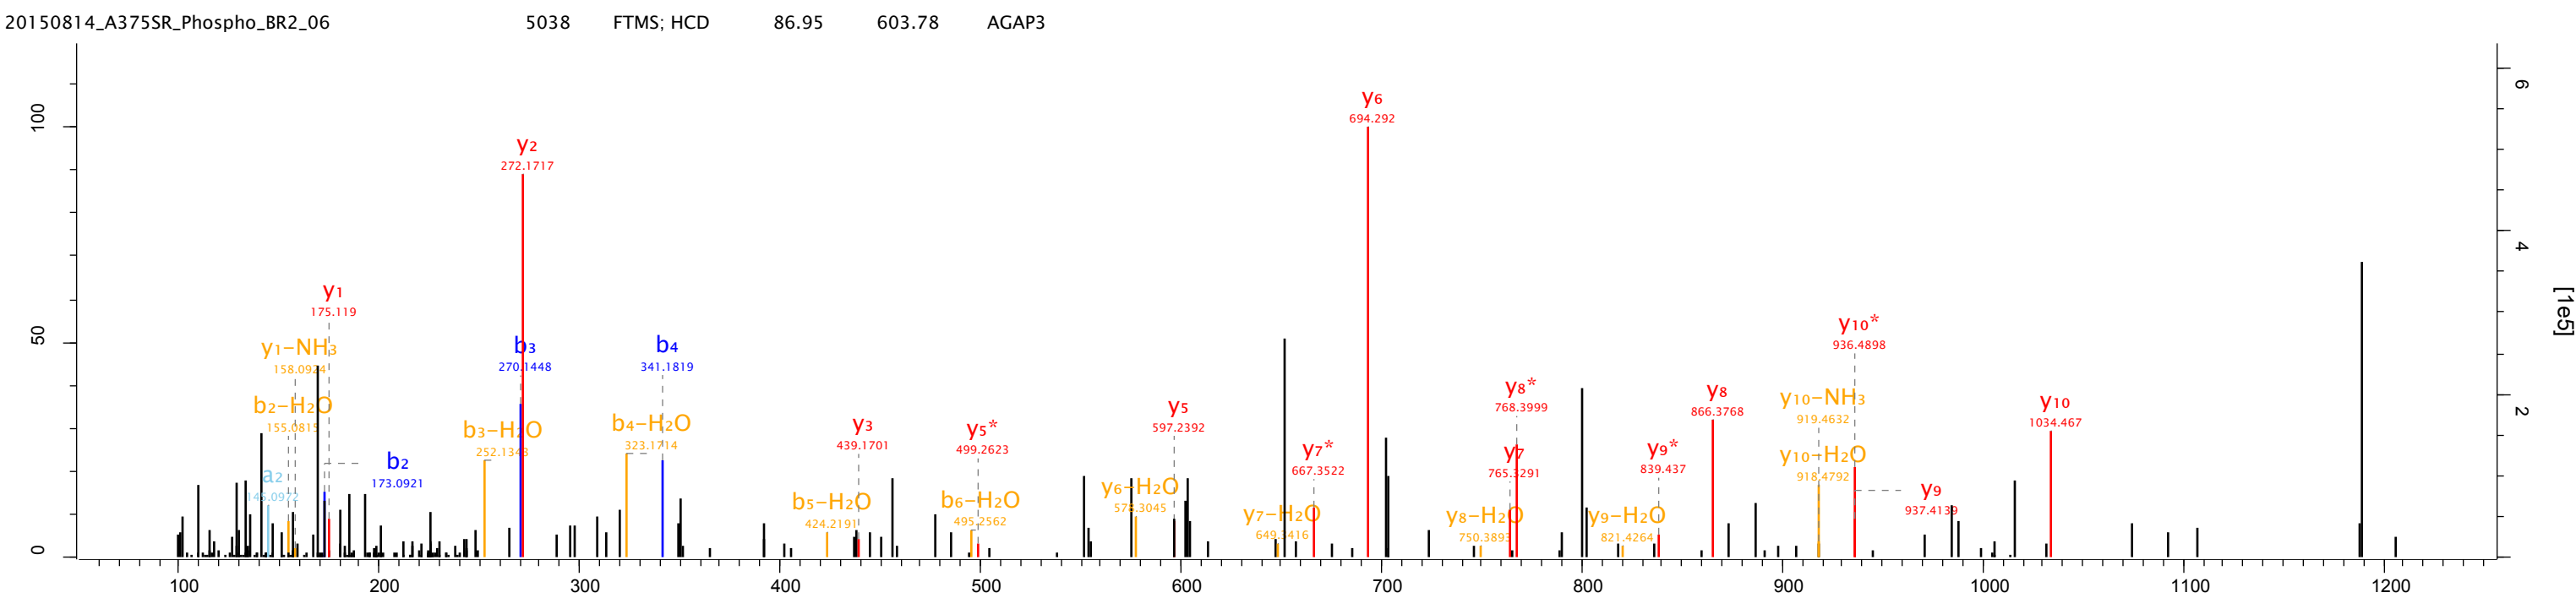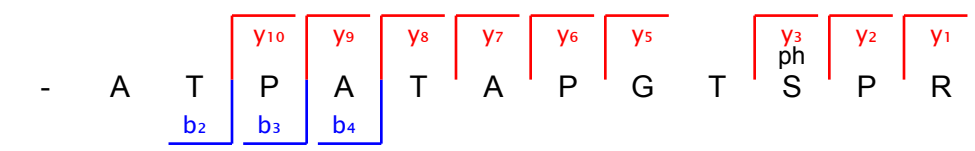

Raw file: 20150814\_A375SR\_Phospho\_BR2\_06  
 Scan: 6008 Method: FTMS; HCD Score: 128.46 m/z: 580.27 Gene names: RIN1

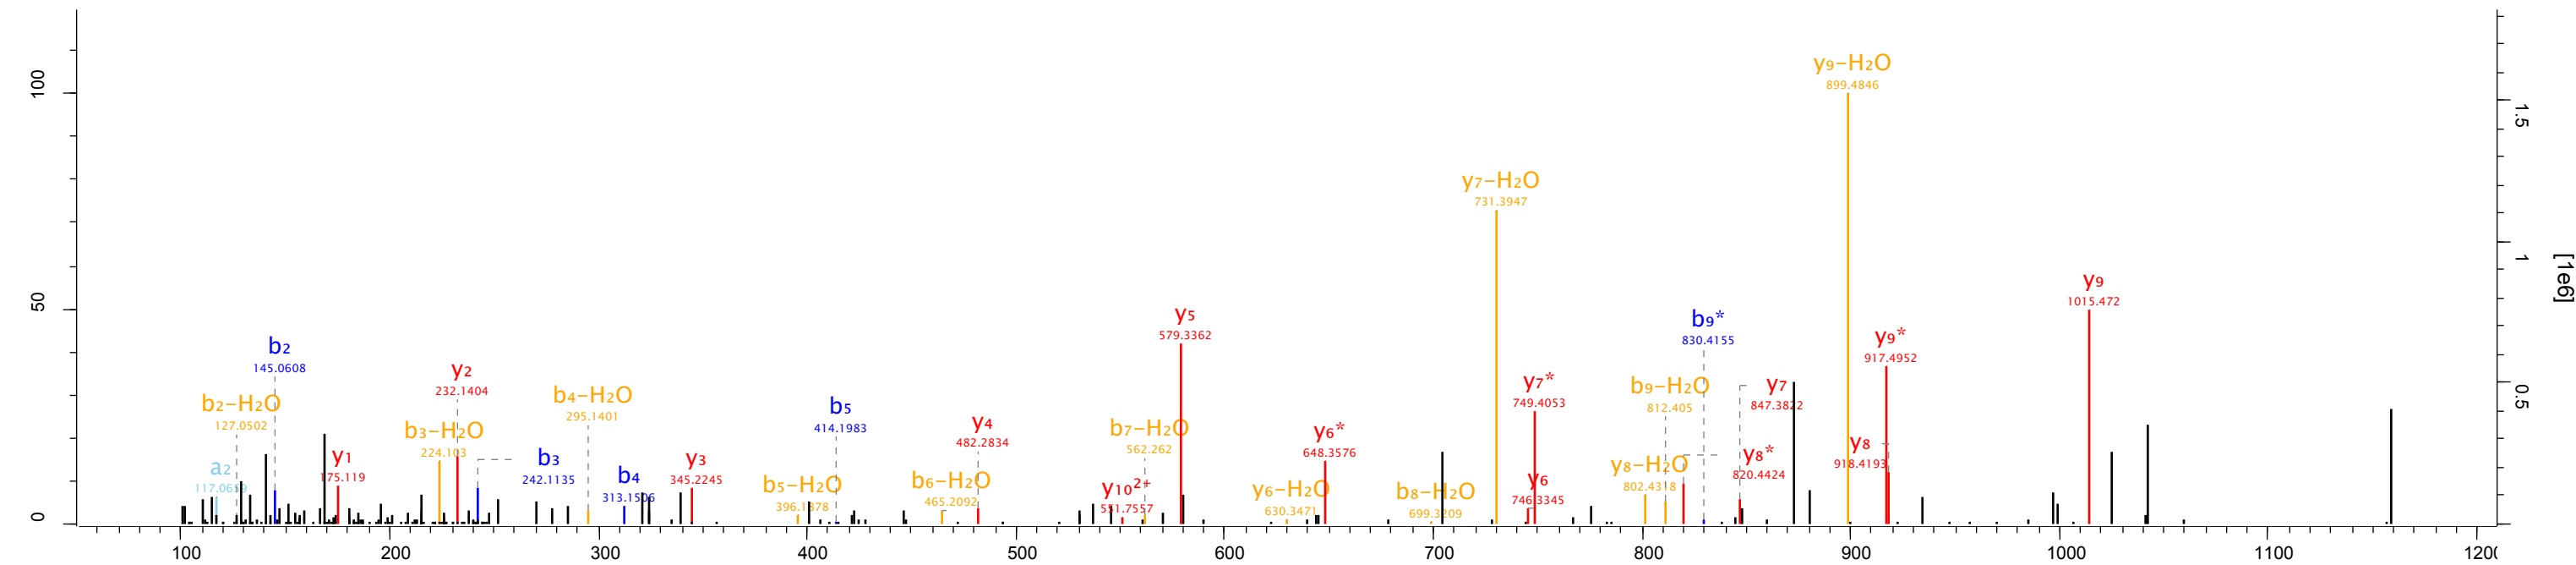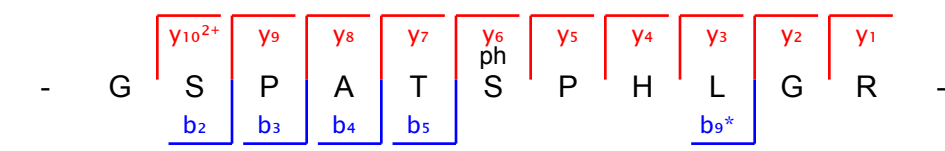



Raw file: 20150814\_A375SR\_Phospho\_BR2\_06  
 Scan: 7078 Method: FTMS; HCD Score: 204.5 m/z: 905.42 Gene names: CHAF1A

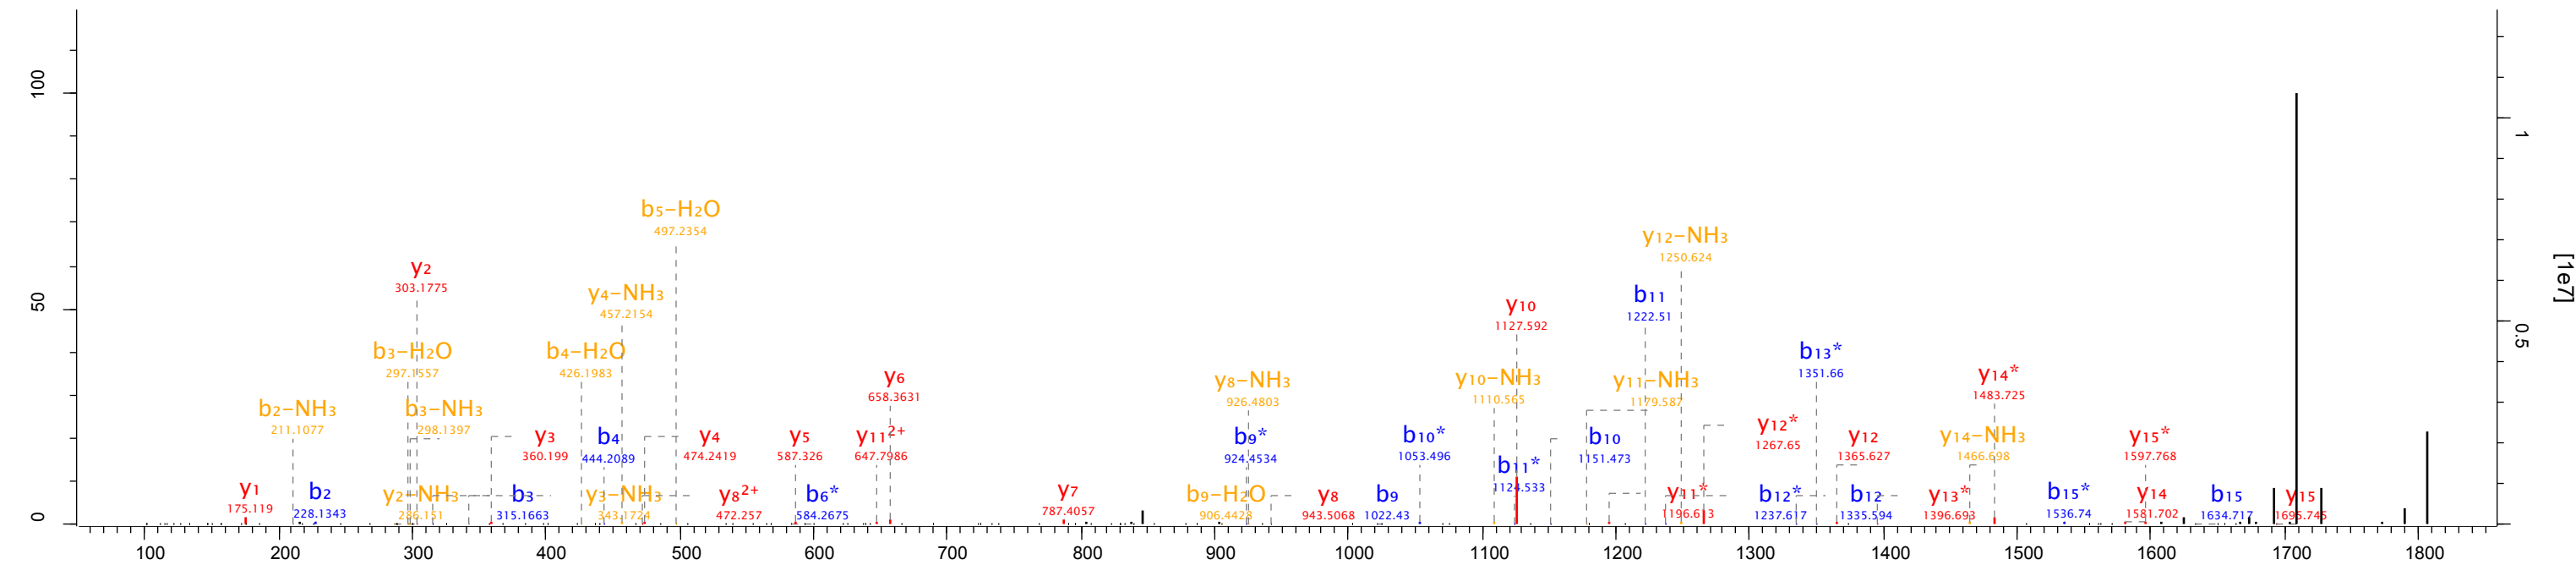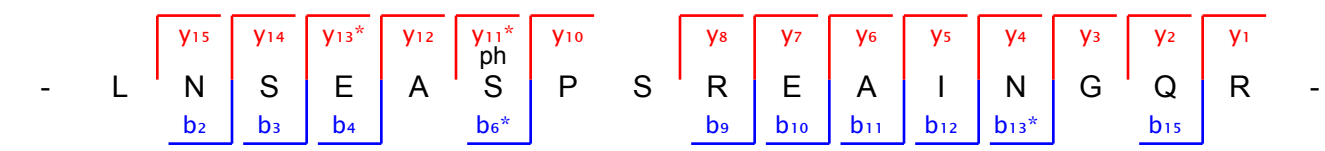

Raw file 20150814\_A375SR\_Phospho\_BR2\_06 Scan 7908 Method FTMS; HCD Score 49.33 m/z 587.81 Gene names CCDC14

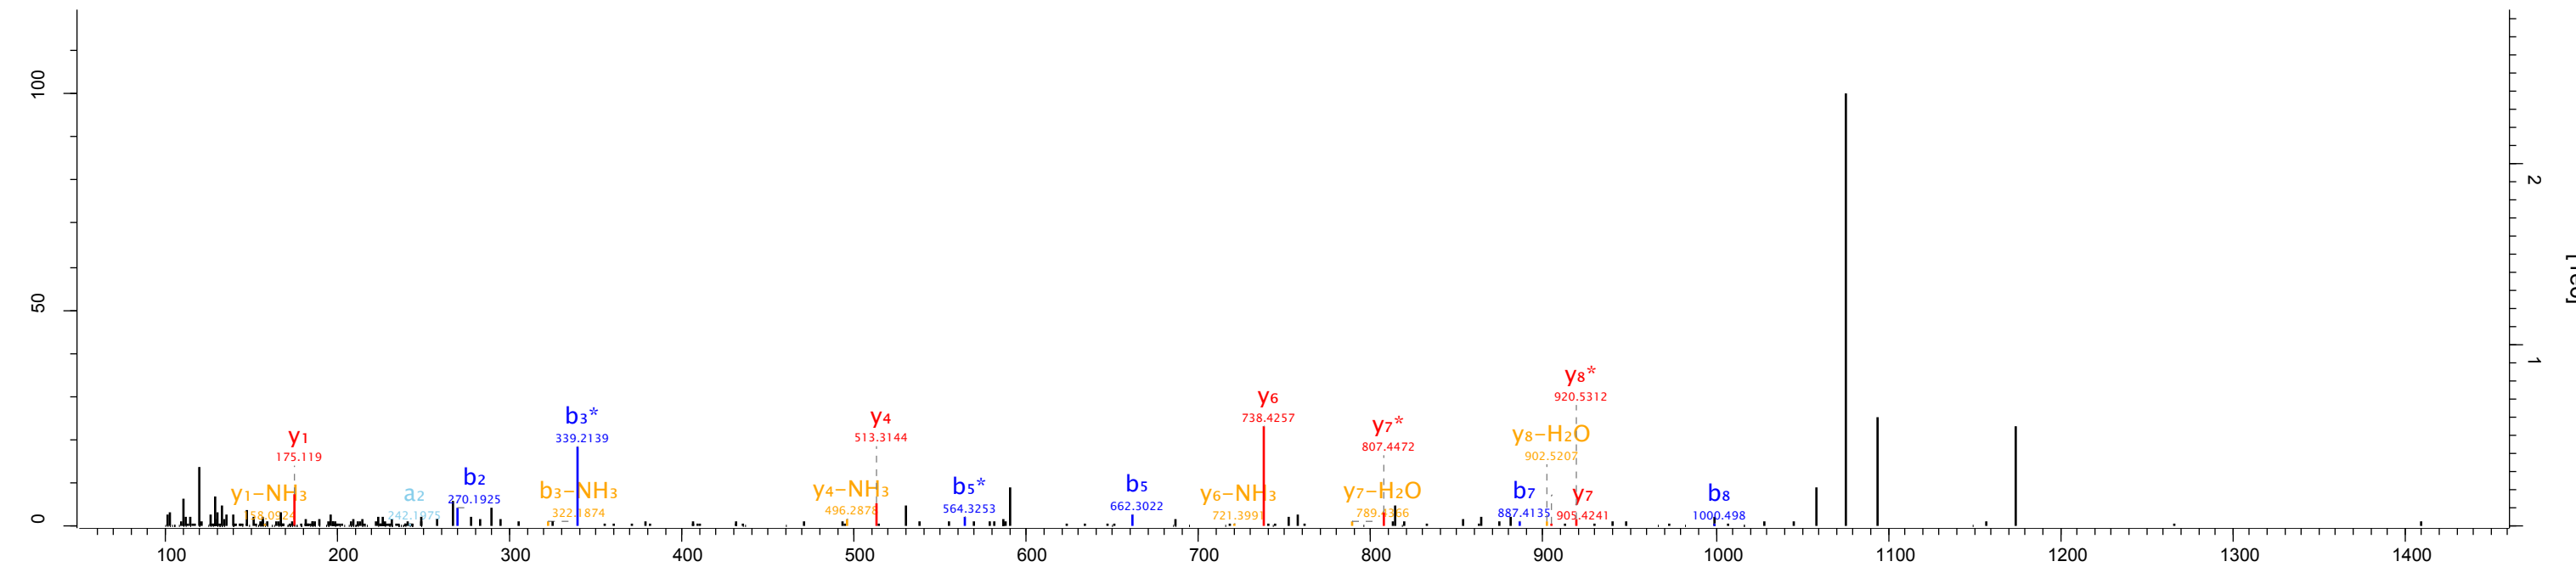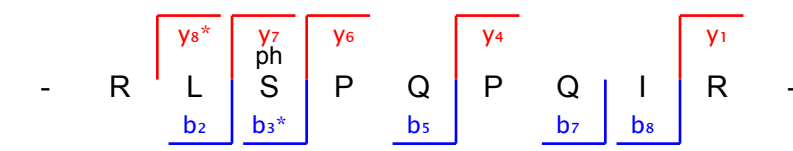

Raw file: 20150814\_A375SR\_Phospho\_BR2\_06  
 Scan: 8248 Method: FTMS; HCD Score: 152.32 m/z: 828.32 Gene names: NEXN

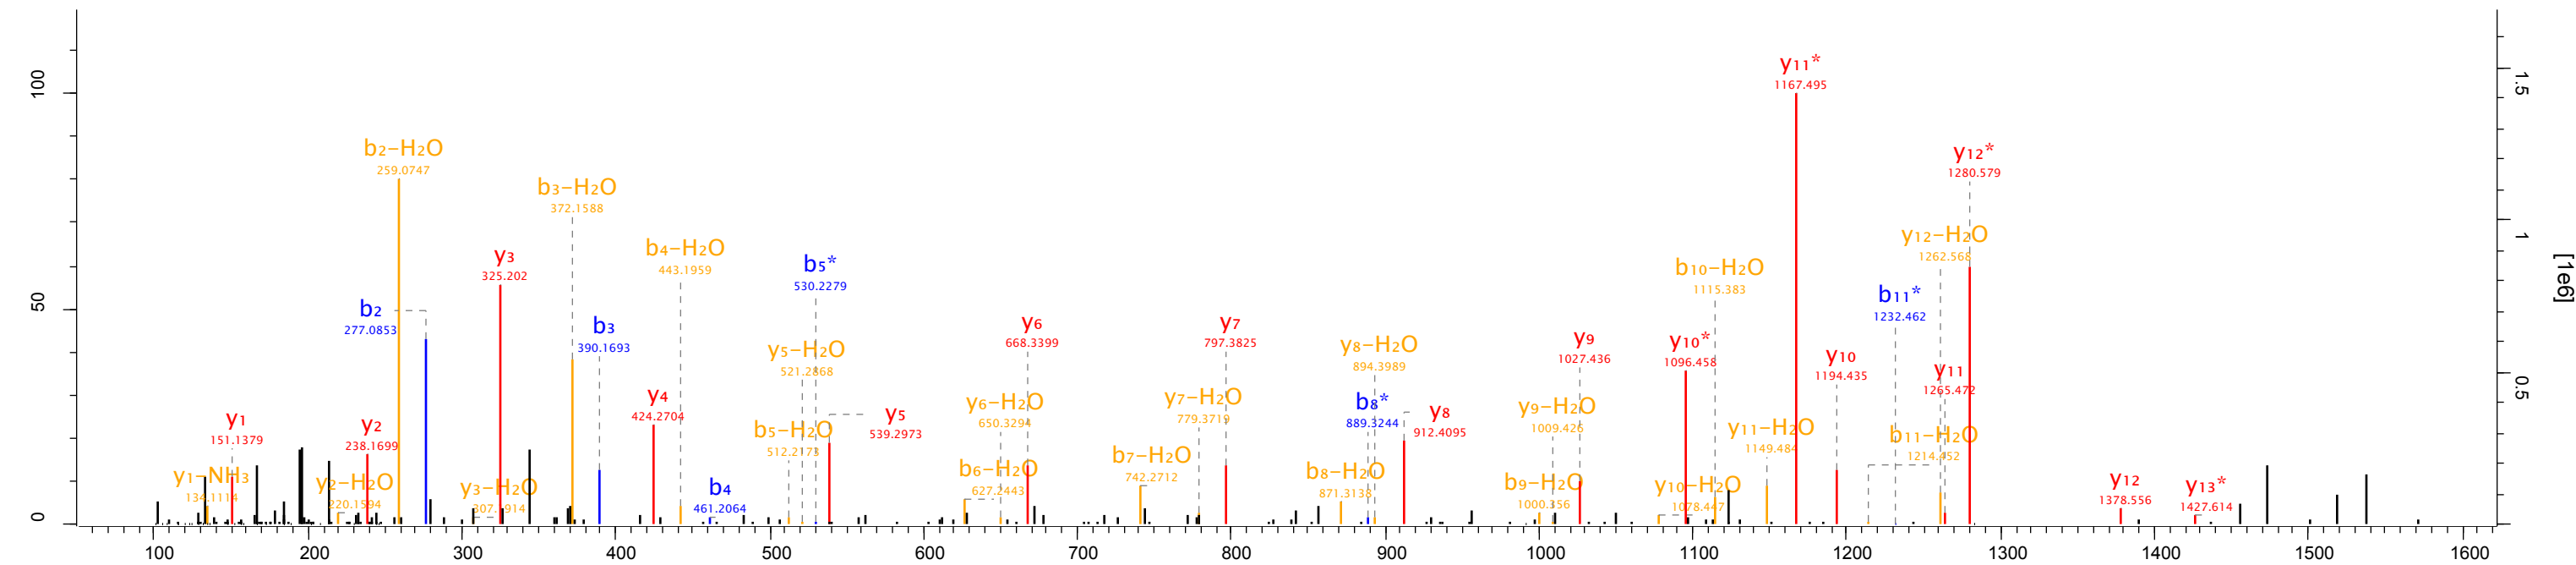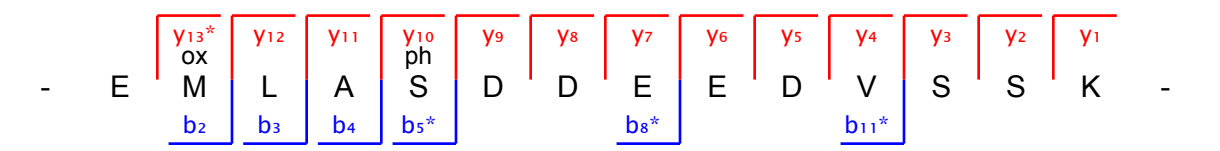

Raw file: 20150814\_A375SR\_Phospho\_BR2\_06  
 Scan: 8748 Method: FTMS; HCD Score: 103.13 m/z: 593.79 Gene names: GTF2F1

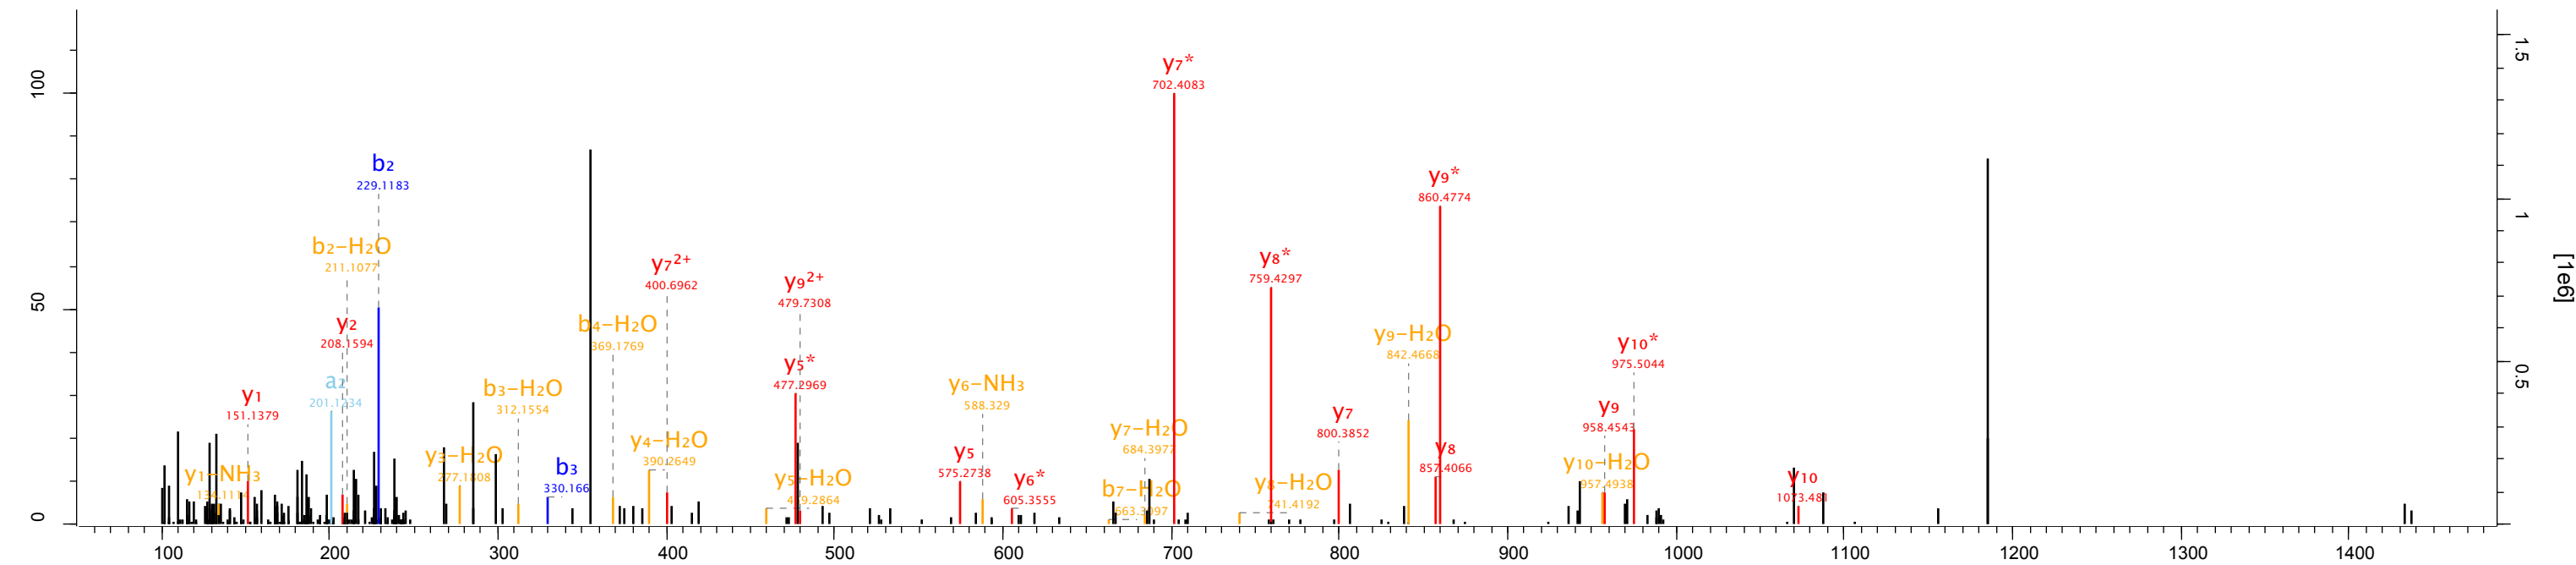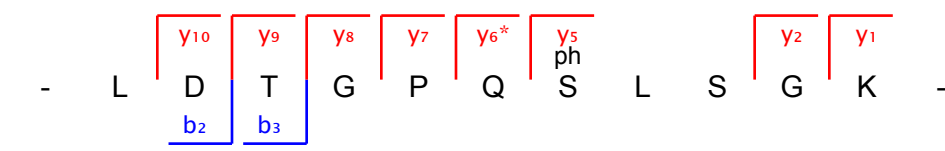

Raw file: 20150814\_A375SR\_Phospho\_BR2\_06  
 Scan: 9038 Method: FTMS; HCD Score: 128.15 m/z: 617.79 Gene names: SNRK

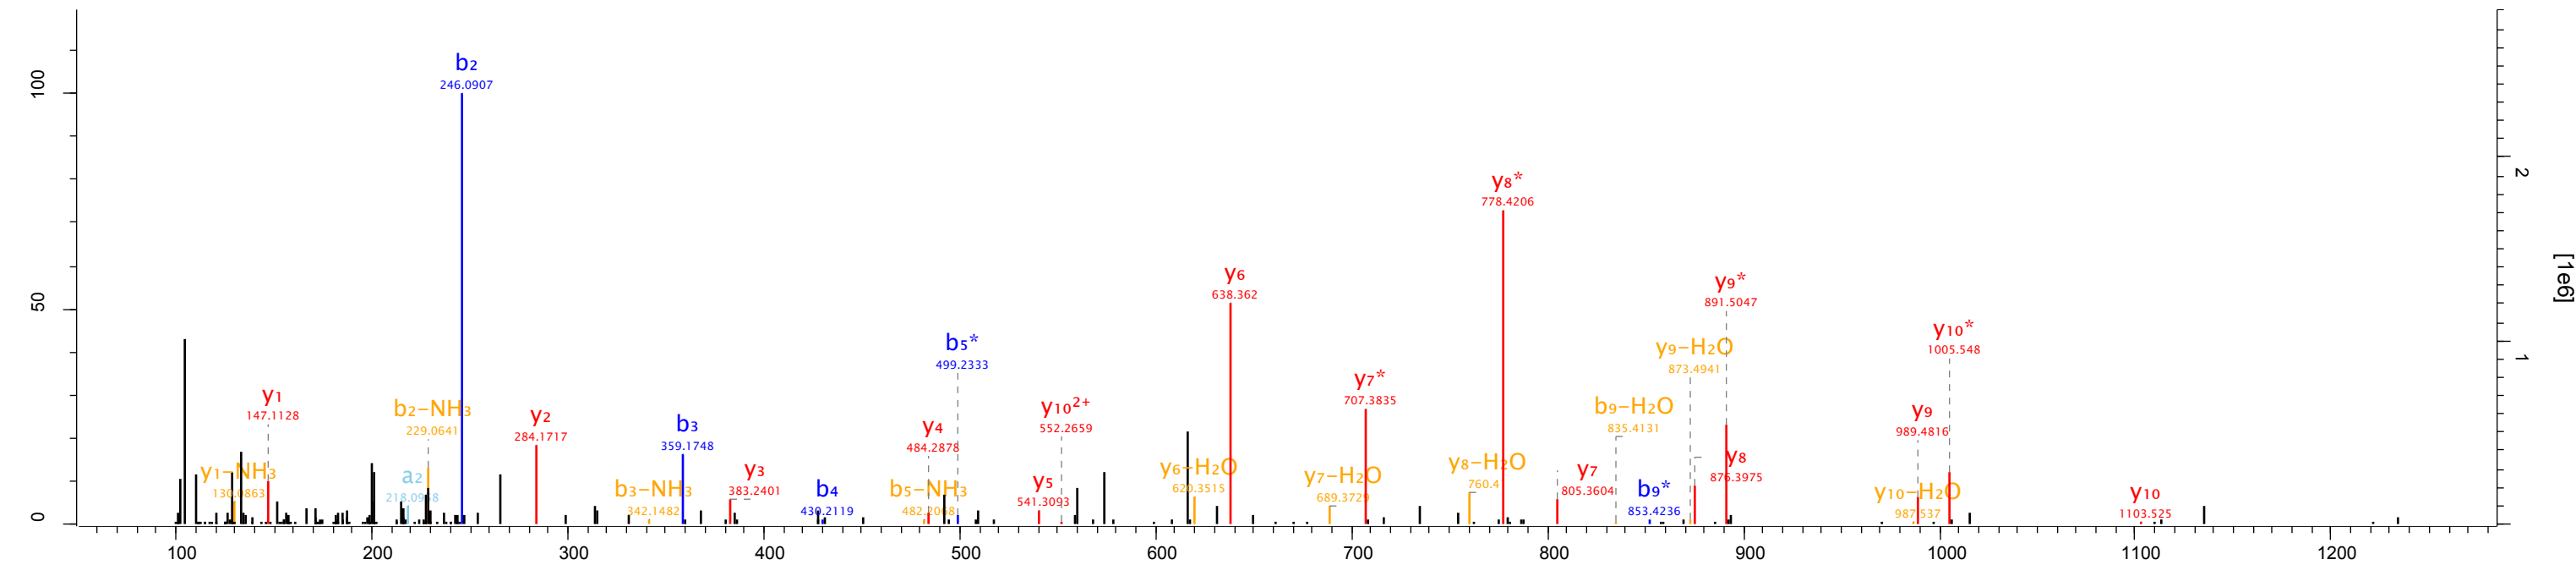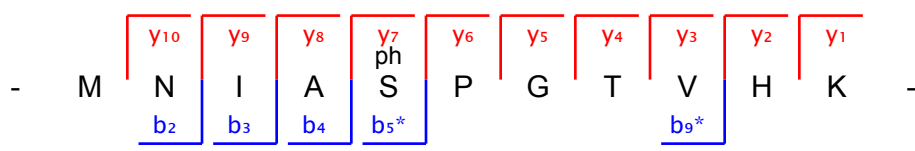

Raw file  
20150814\_A375SR\_Phospho\_BR2\_06

Scan 9818  
Method FTMS; HCD  
Score 232.96  
m/z 1005.44  
Gene names MECP2

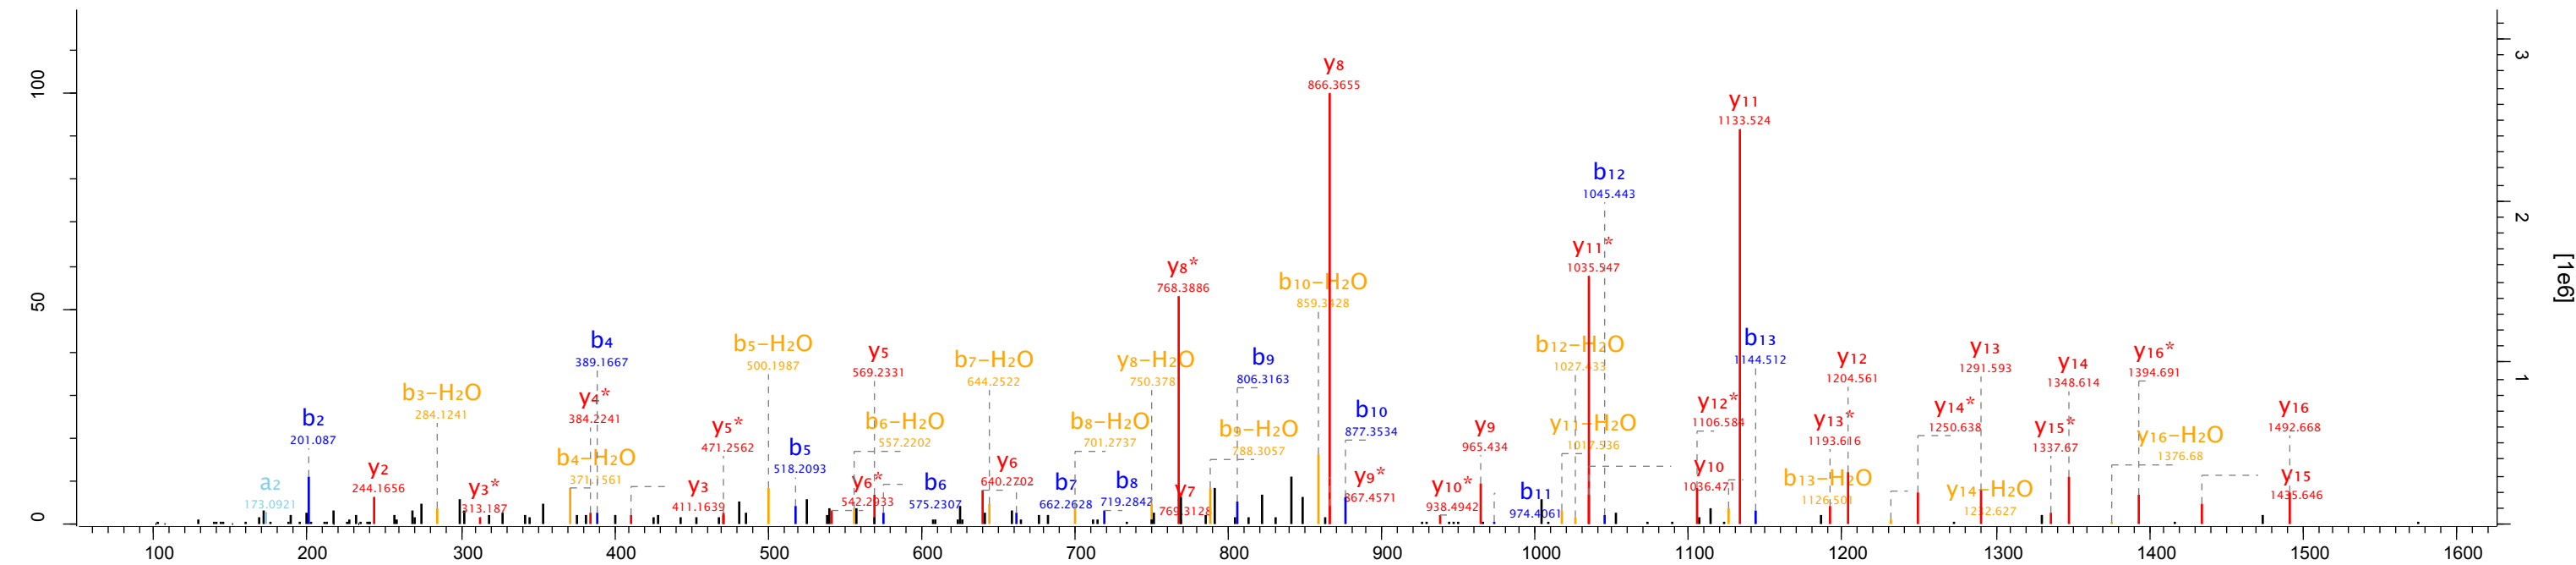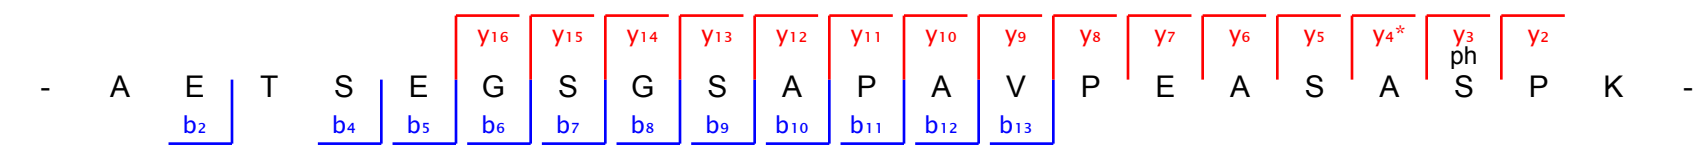

Raw file: 20150814\_A375SR\_Phospho\_BR2\_07  
 Scan: 10128 Method: FTMS; HCD Score: 112.96 m/z: 709.37 Gene names: HELLS

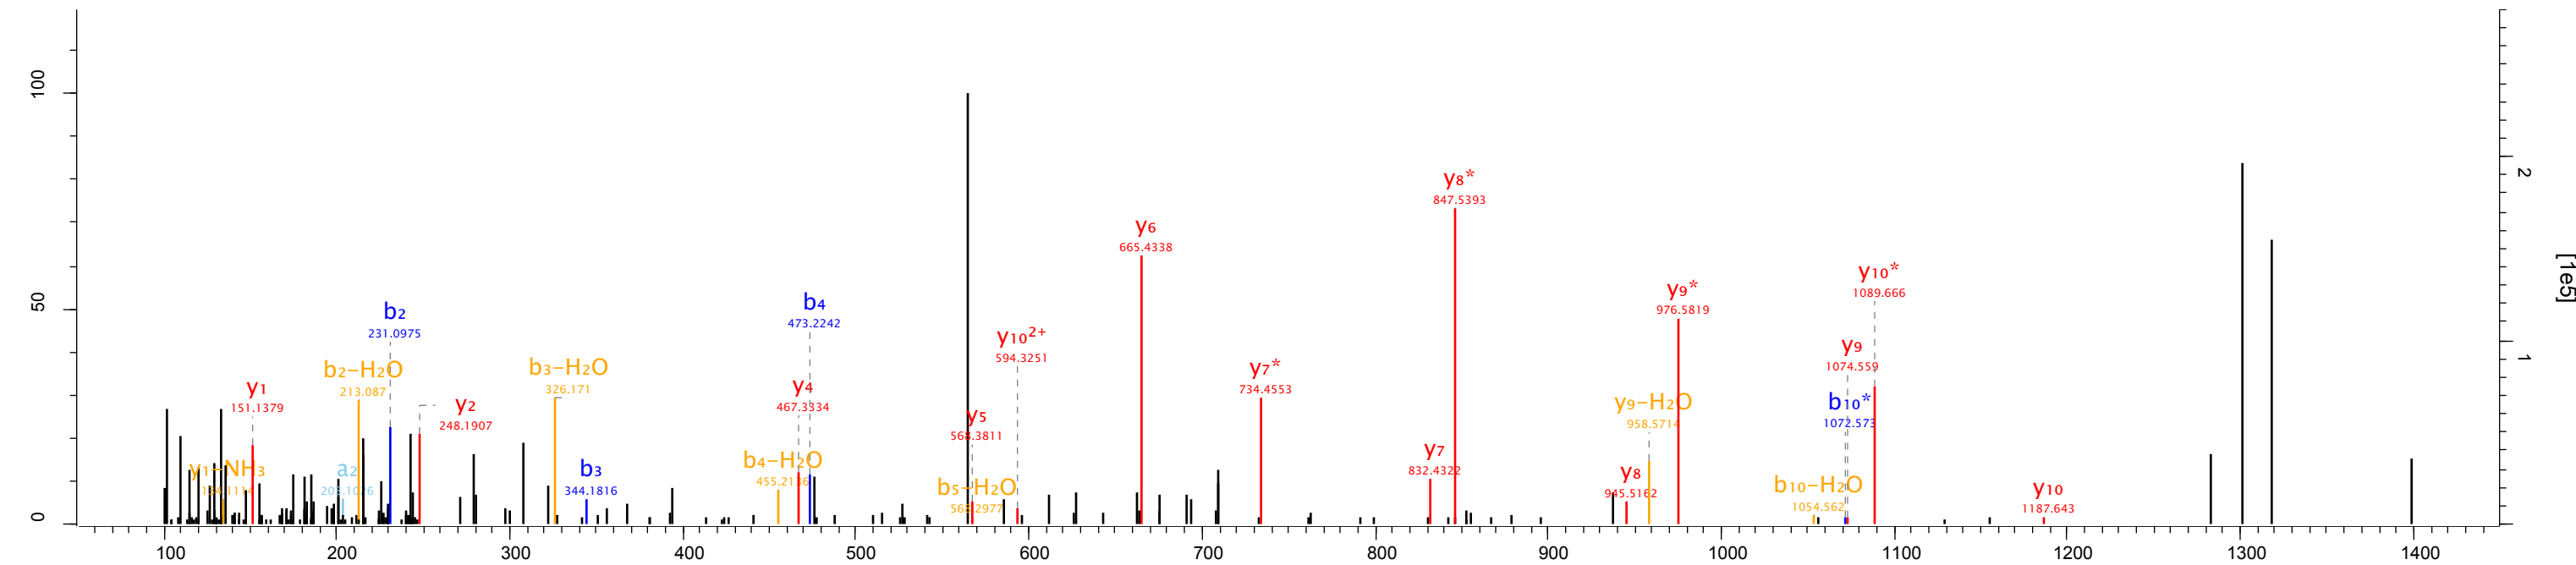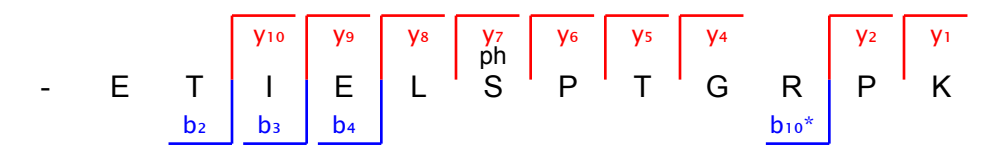

Raw file: 20150814\_A375SR\_Phospho\_BR2\_07  
 Scan: 11028 Method: FTMS; HCD Score: 100.66 m/z: 806.1 Gene names: ATAD1

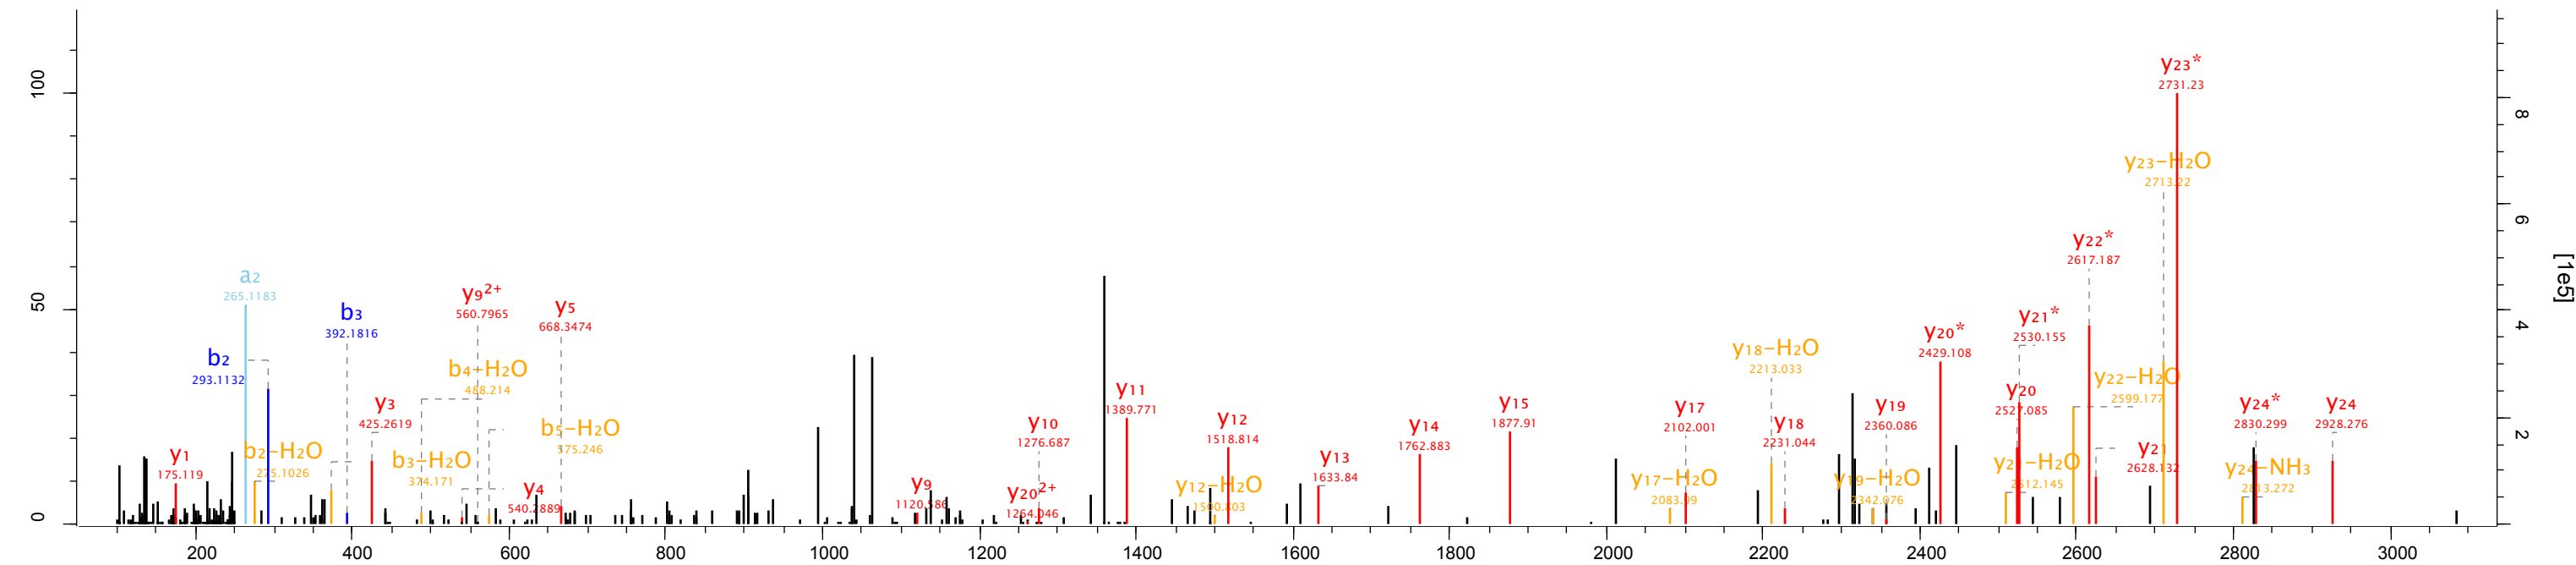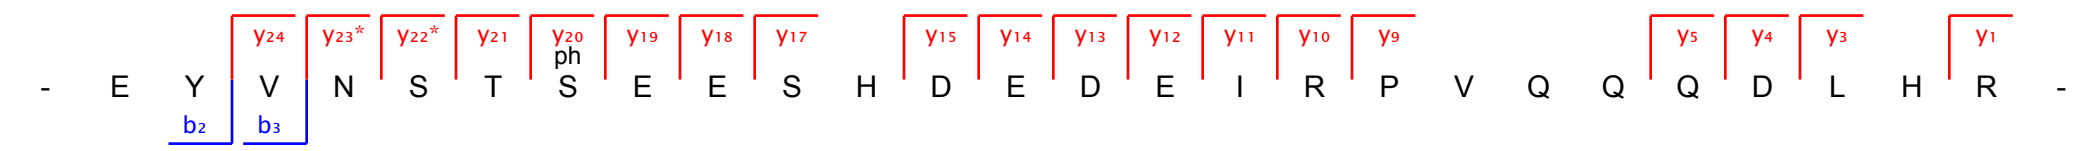



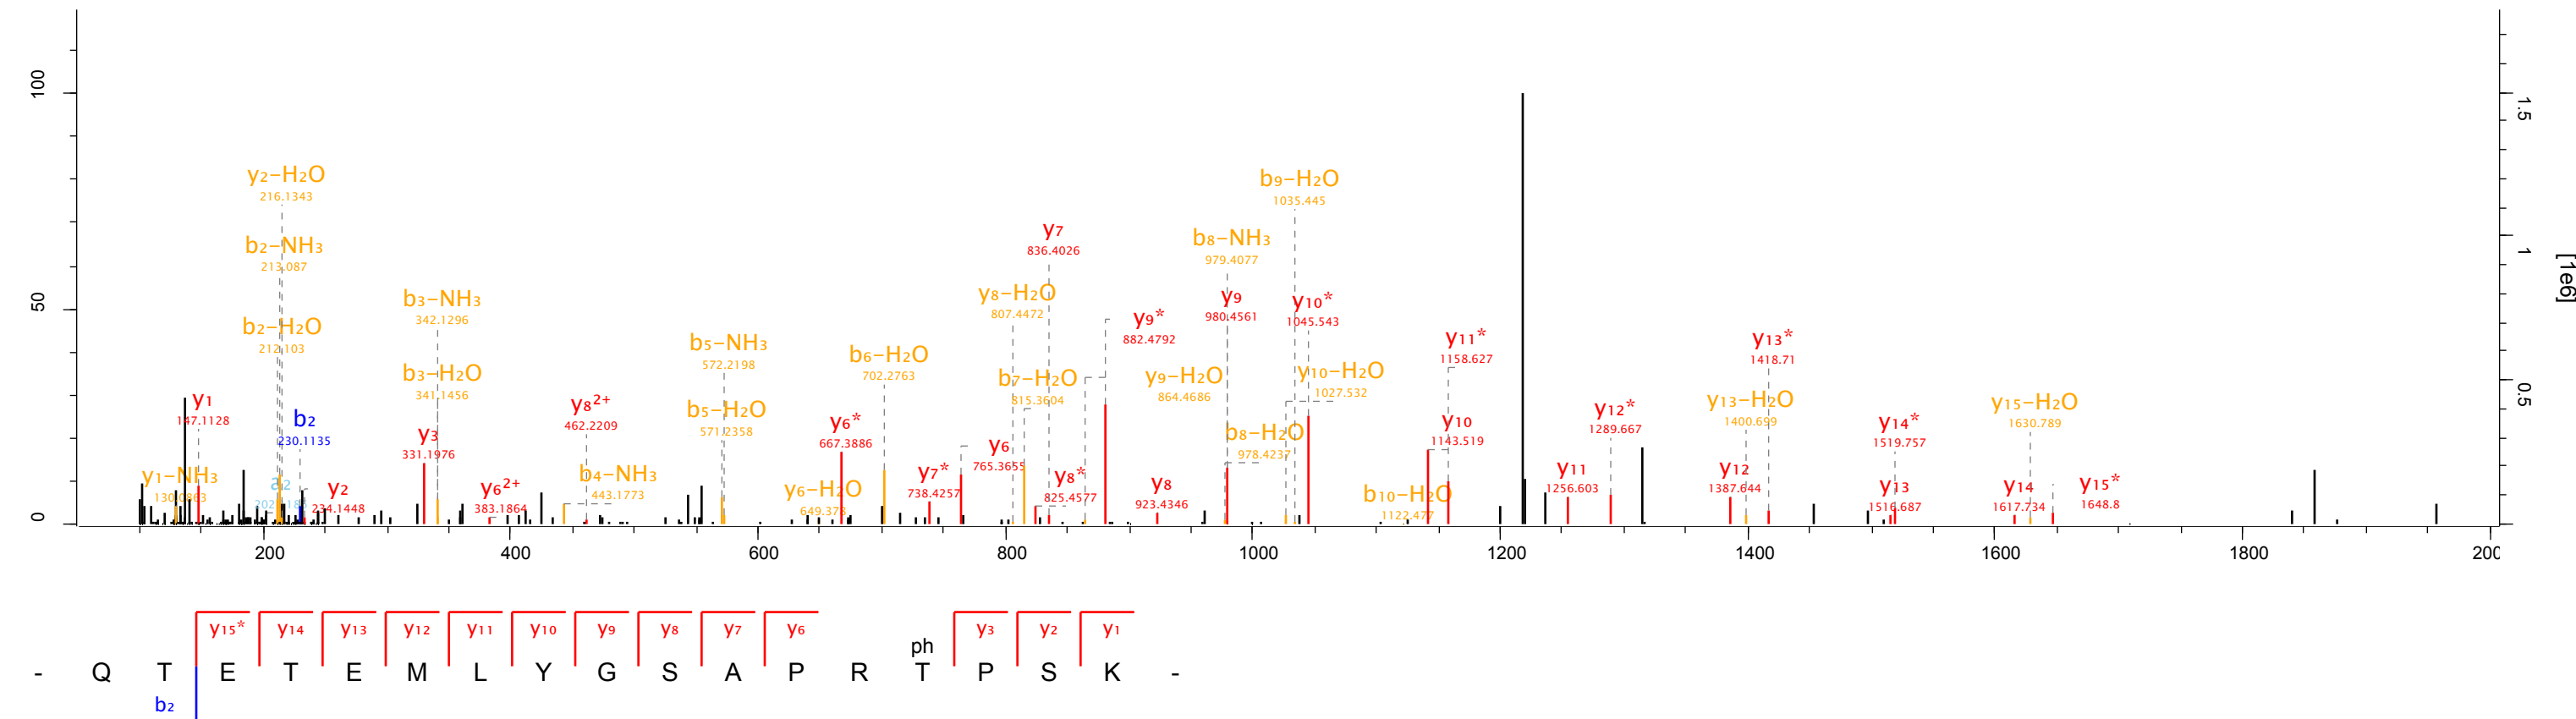

Raw file: 20150814\_A375SR\_Phospho\_BR2\_07  
 Scan: 12548 Method: FTMS; HCD Score: 143.74 m/z: 735.35 Gene names: RB1

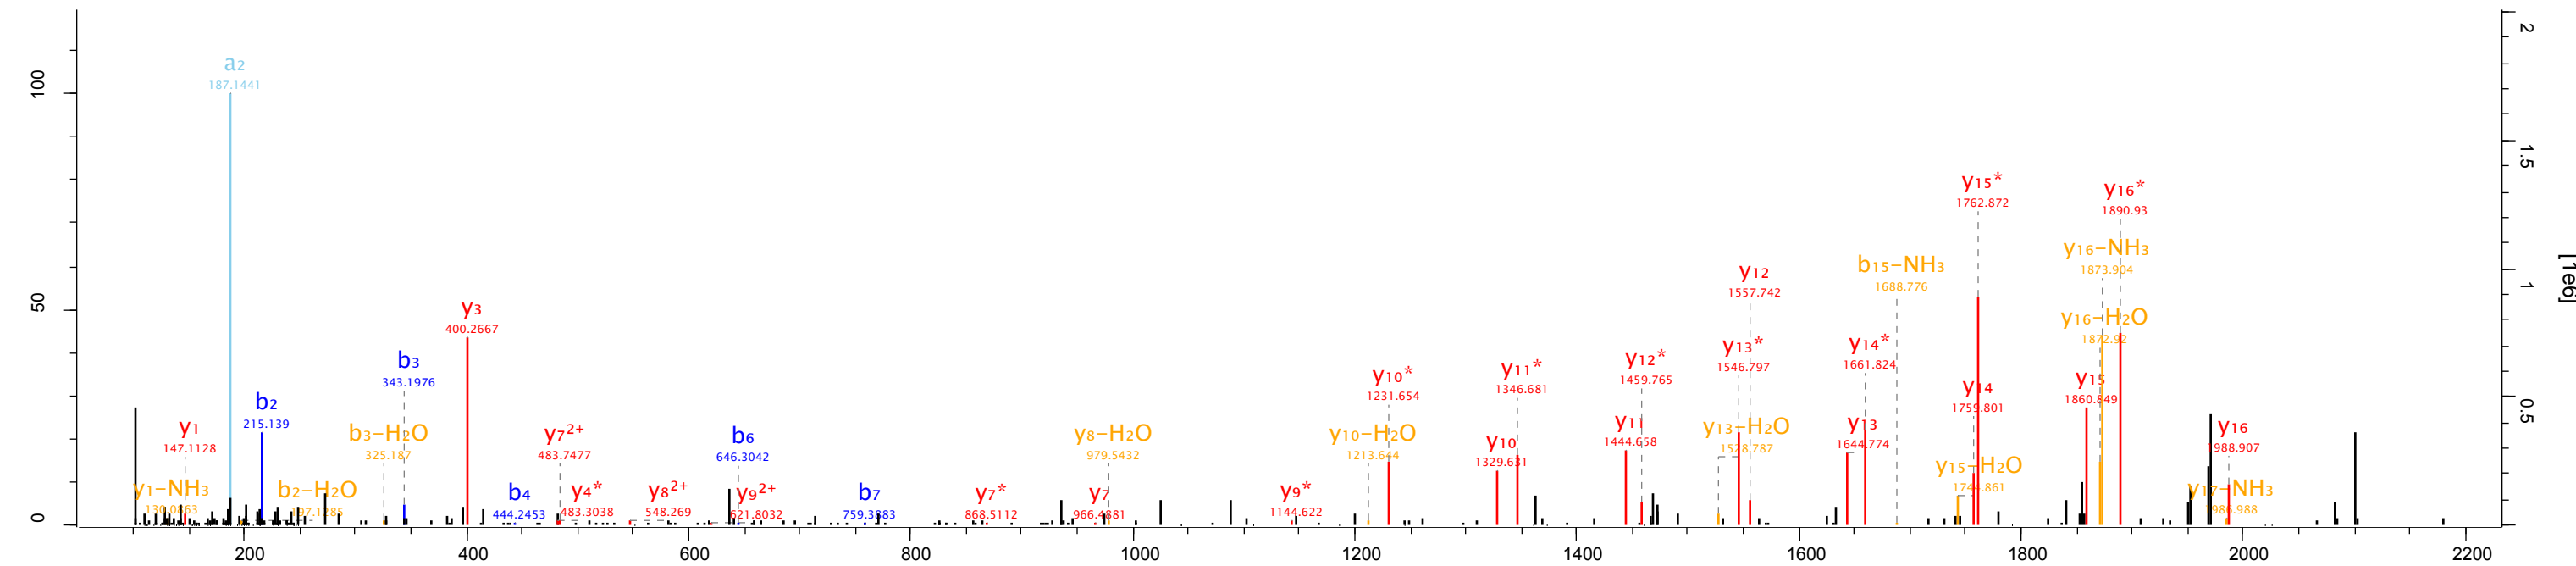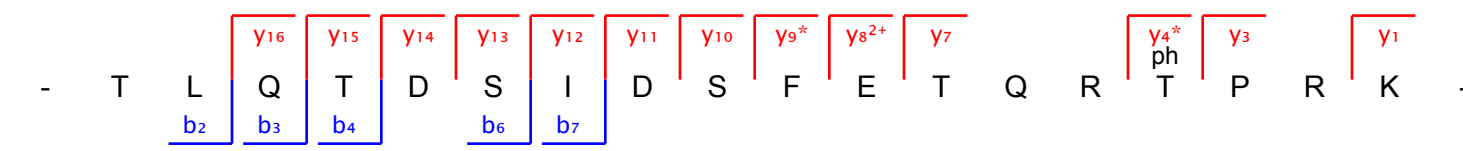

Raw file: 20150814\_A375SR\_Phospho\_BR2\_07  
 Scan: 13728 Method: FTMS; HCD Score: 160.67 m/z: 1178.01 Gene names: POLR2A

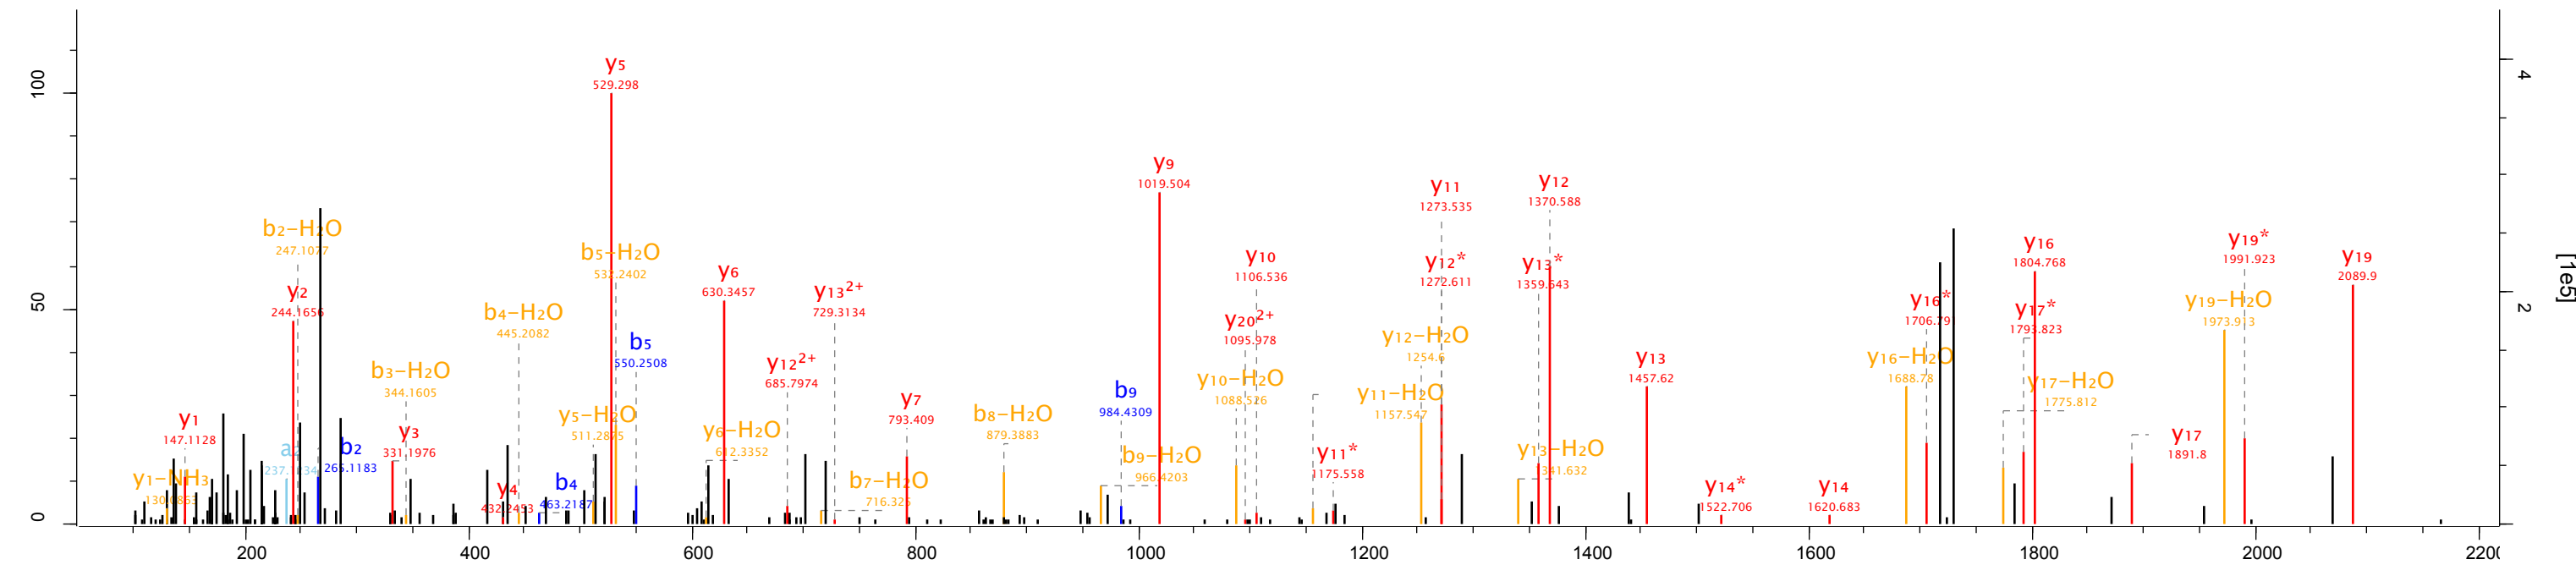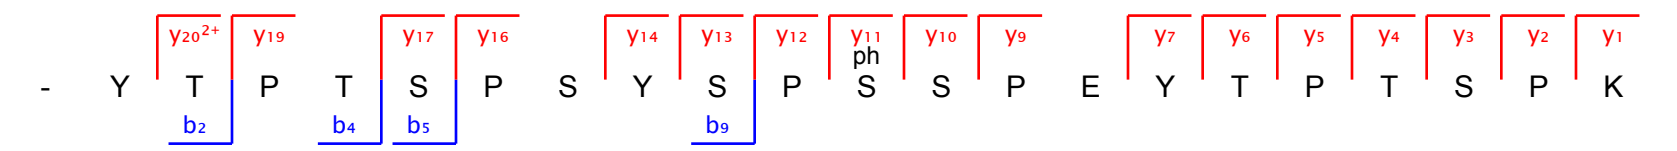

Raw file 20150814\_A375SR\_Phospho\_BR2\_07 Scan 13848 Method FTMS; HCD Score 78.95 m/z 794.4 Gene names VIM

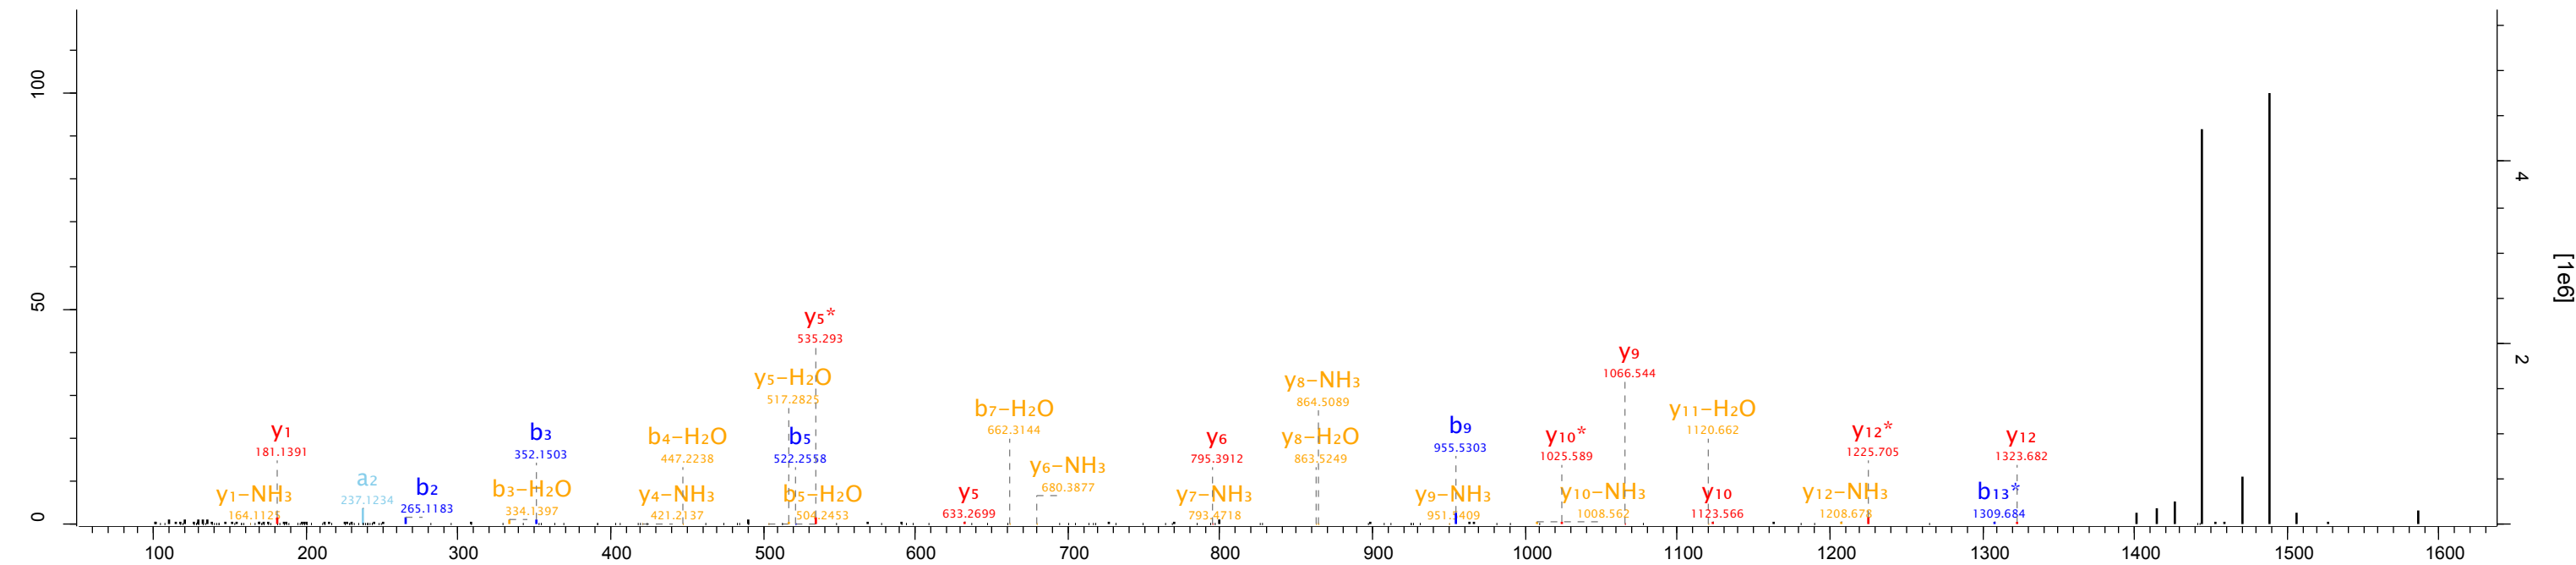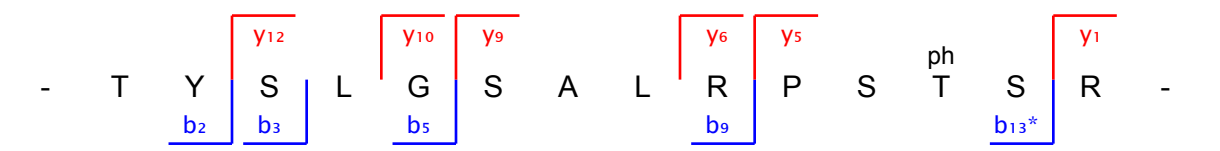

Raw file 20150814\_A375SR\_Phospho\_BR2\_07 Scan 15228 Method FTMS; HCD Score 47.73 m/z 700.69 Gene names PLK1

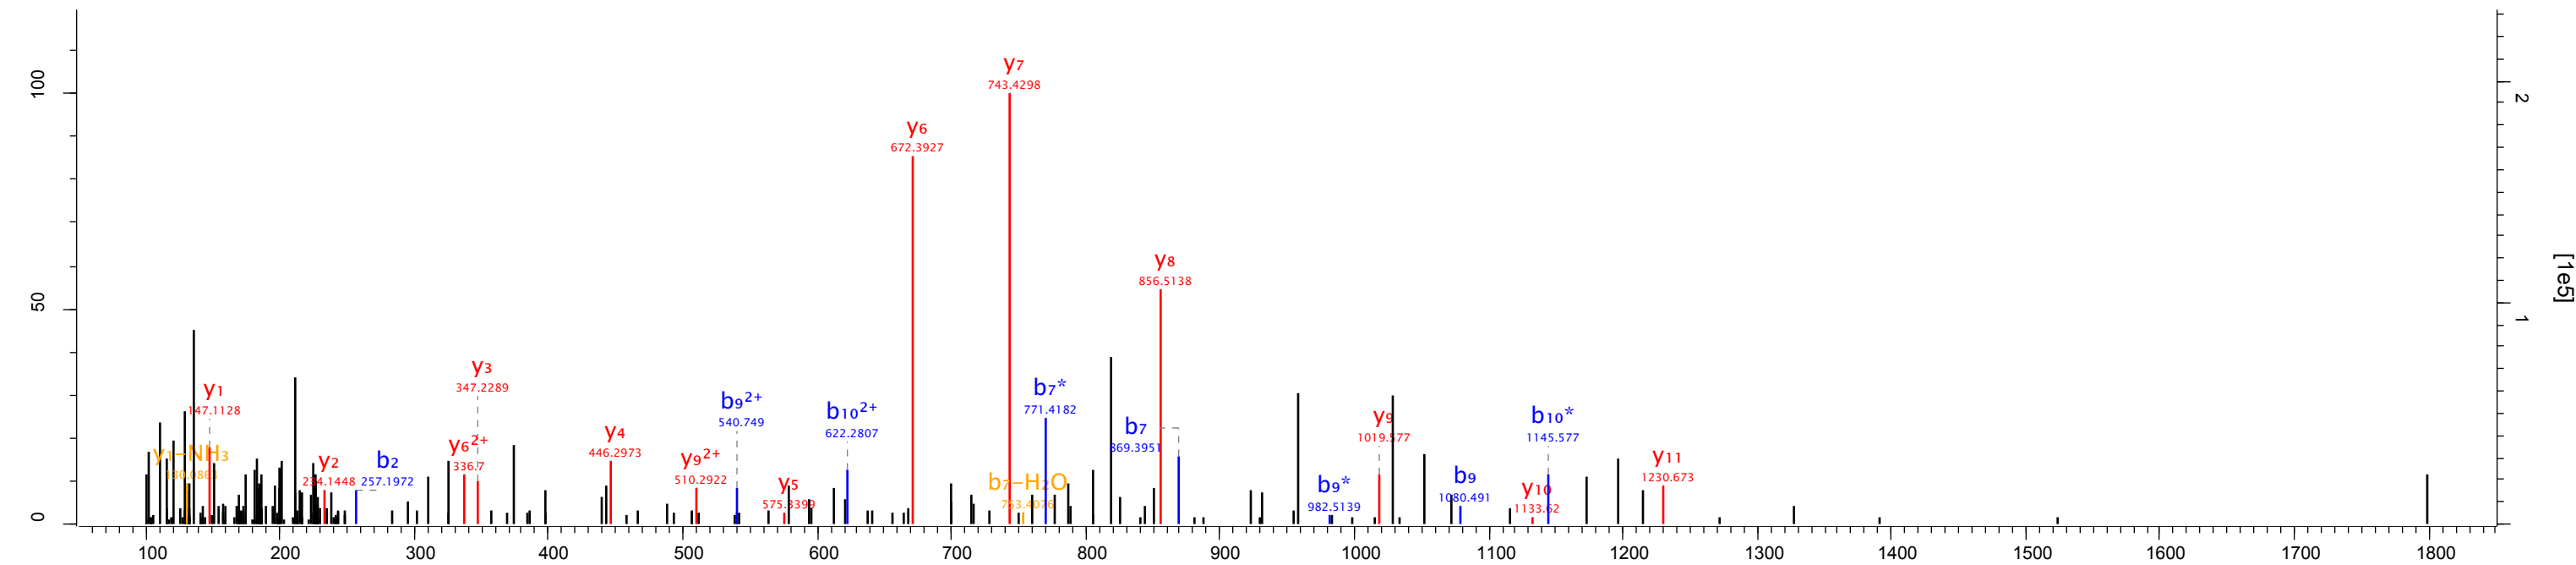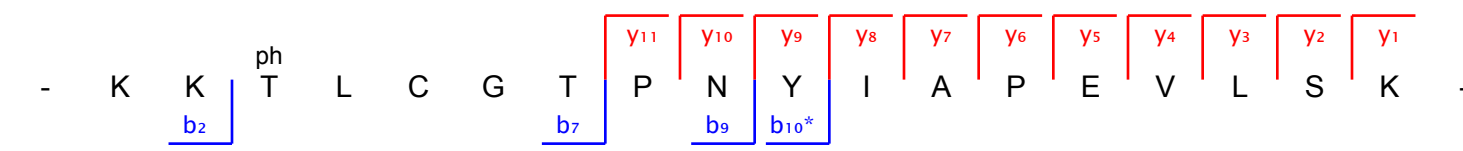

Raw file 20150814\_A375SR\_Phospho\_BR2\_07 Scan 15468 Method FTMS; HCD Score 102.09 m/z 998.46 Gene names RRBP1

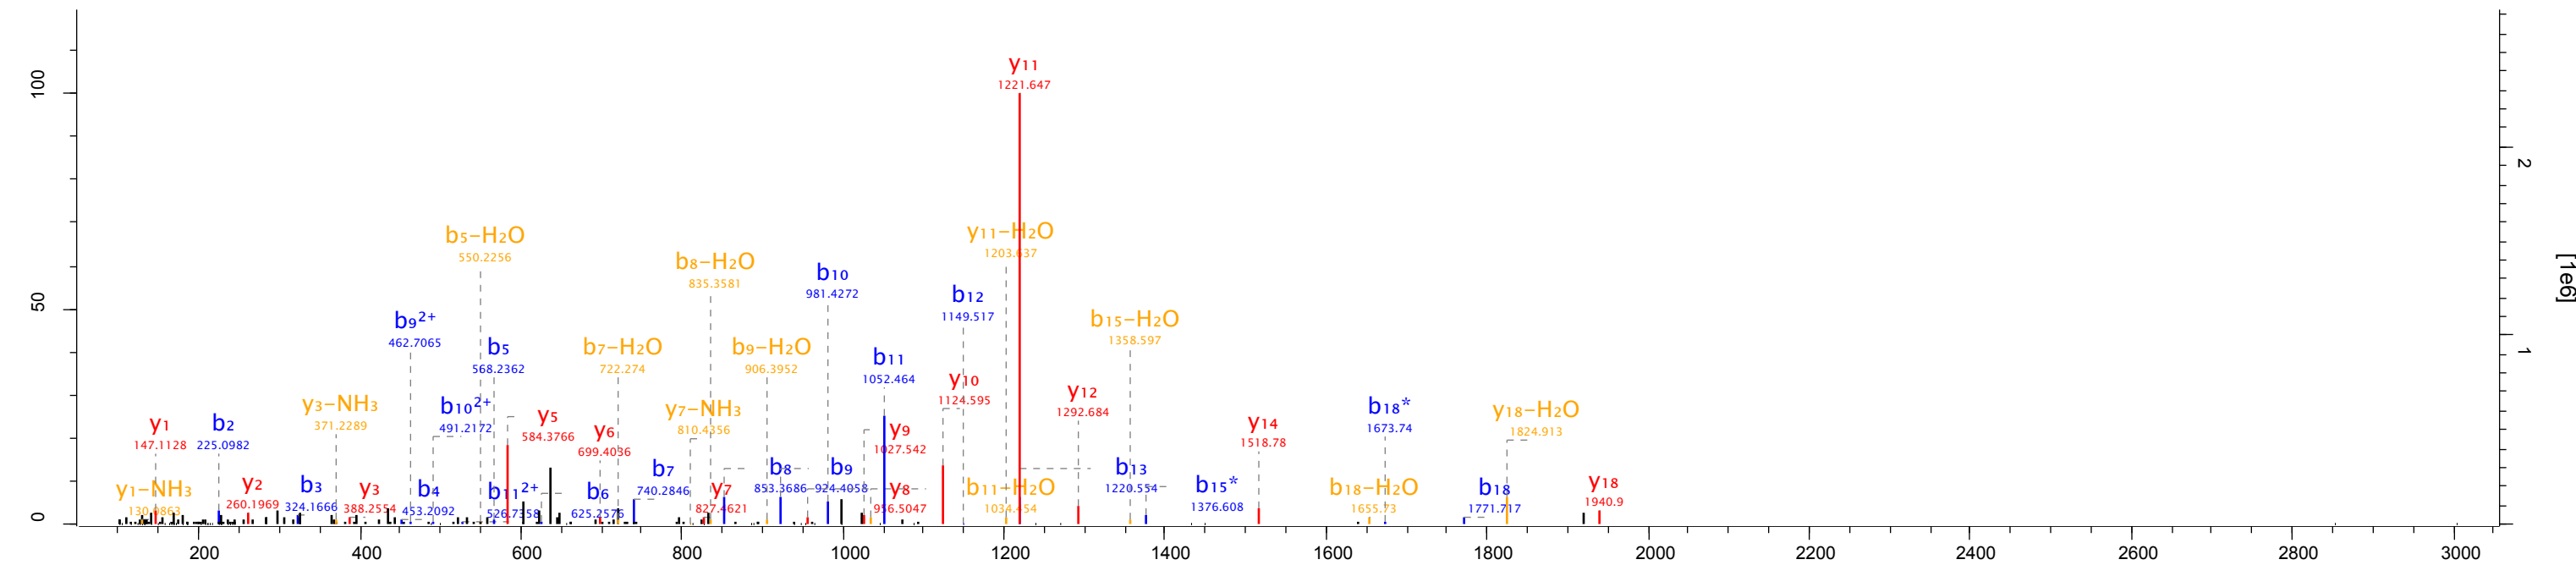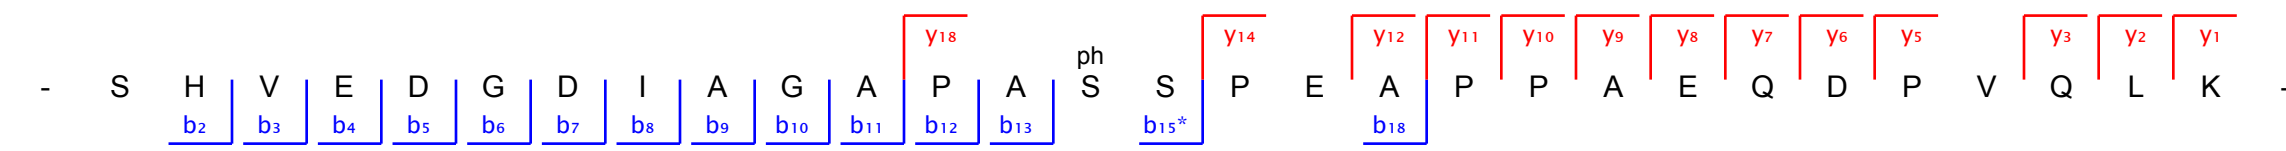

Raw file: 20150814\_A375SR\_Phospho\_BR2\_07  
 Scan: 19828 Method: FTMS; HCD Score: 177.08 m/z: 669.01 Gene names: RPS6KC1

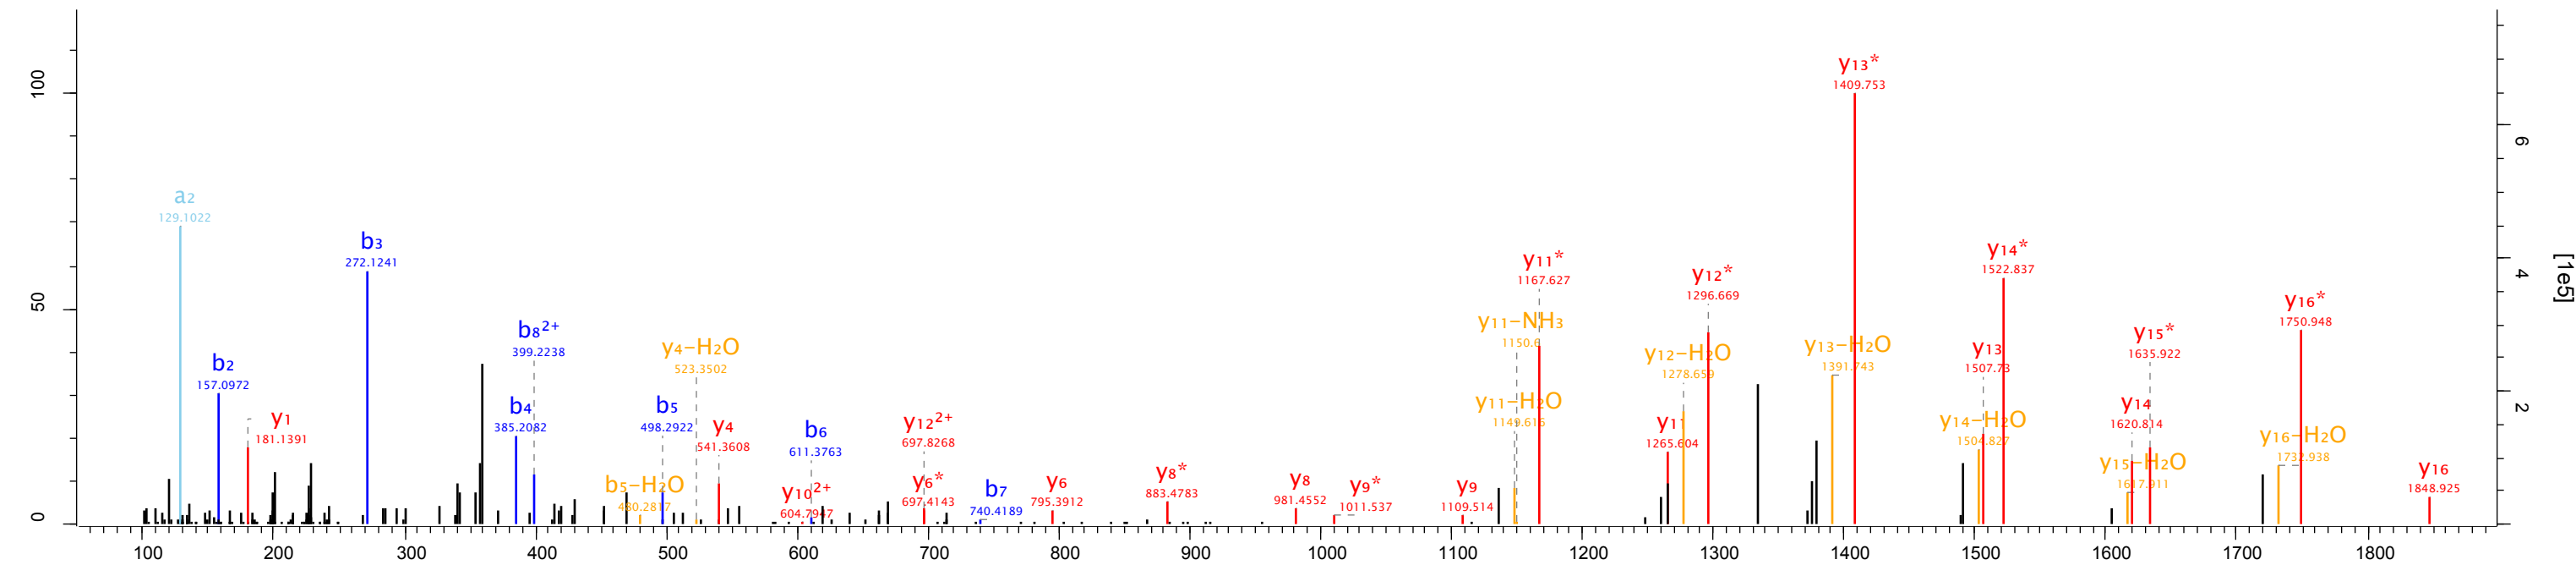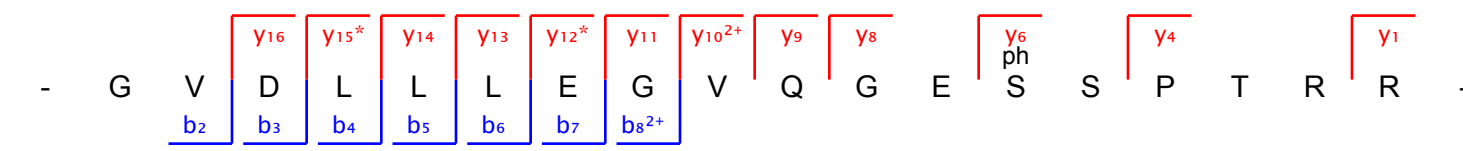

Raw file: 20150814\_A375SR\_Phospho\_BR2\_07  
 Scan: 20768 Method: FTMS; HCD Score: 41.98 m/z: 1073.86 Gene names: TBC1D10B

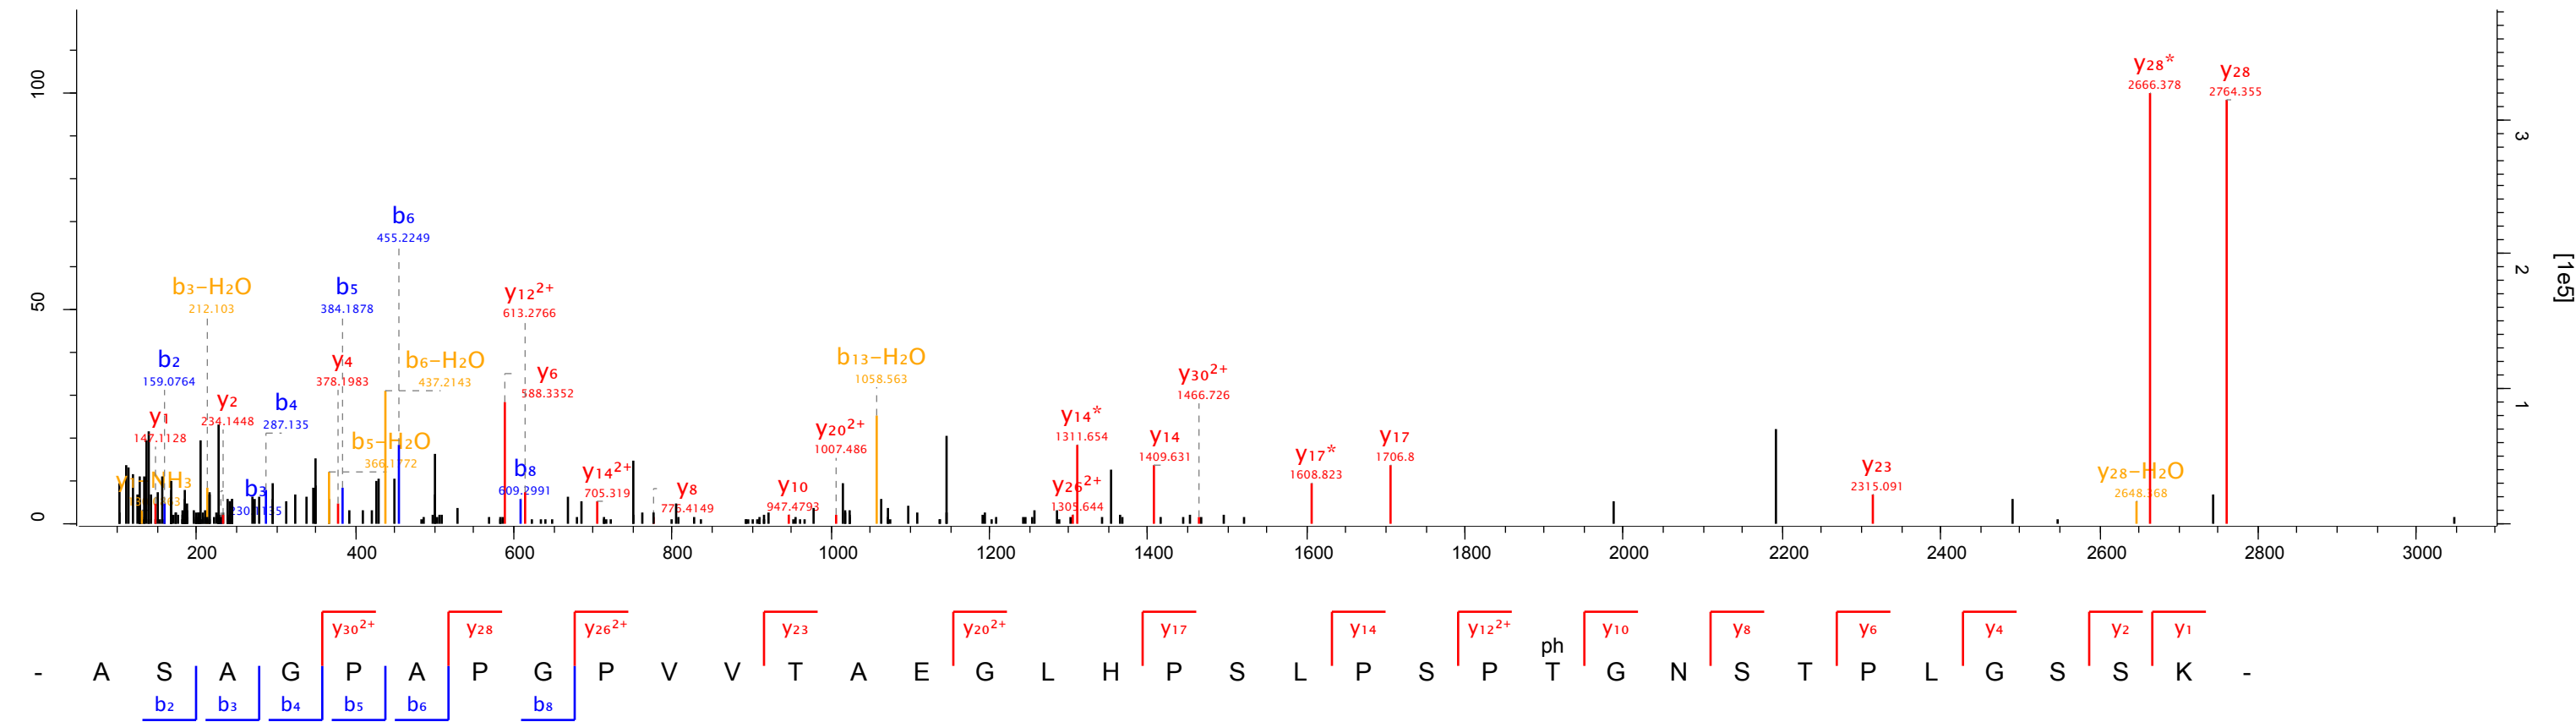



Raw file 20150814\_A375SR\_Phospho\_BR2\_07 Scan 21308 Method FTMS; HCD Score 46.56 m/z 933.17

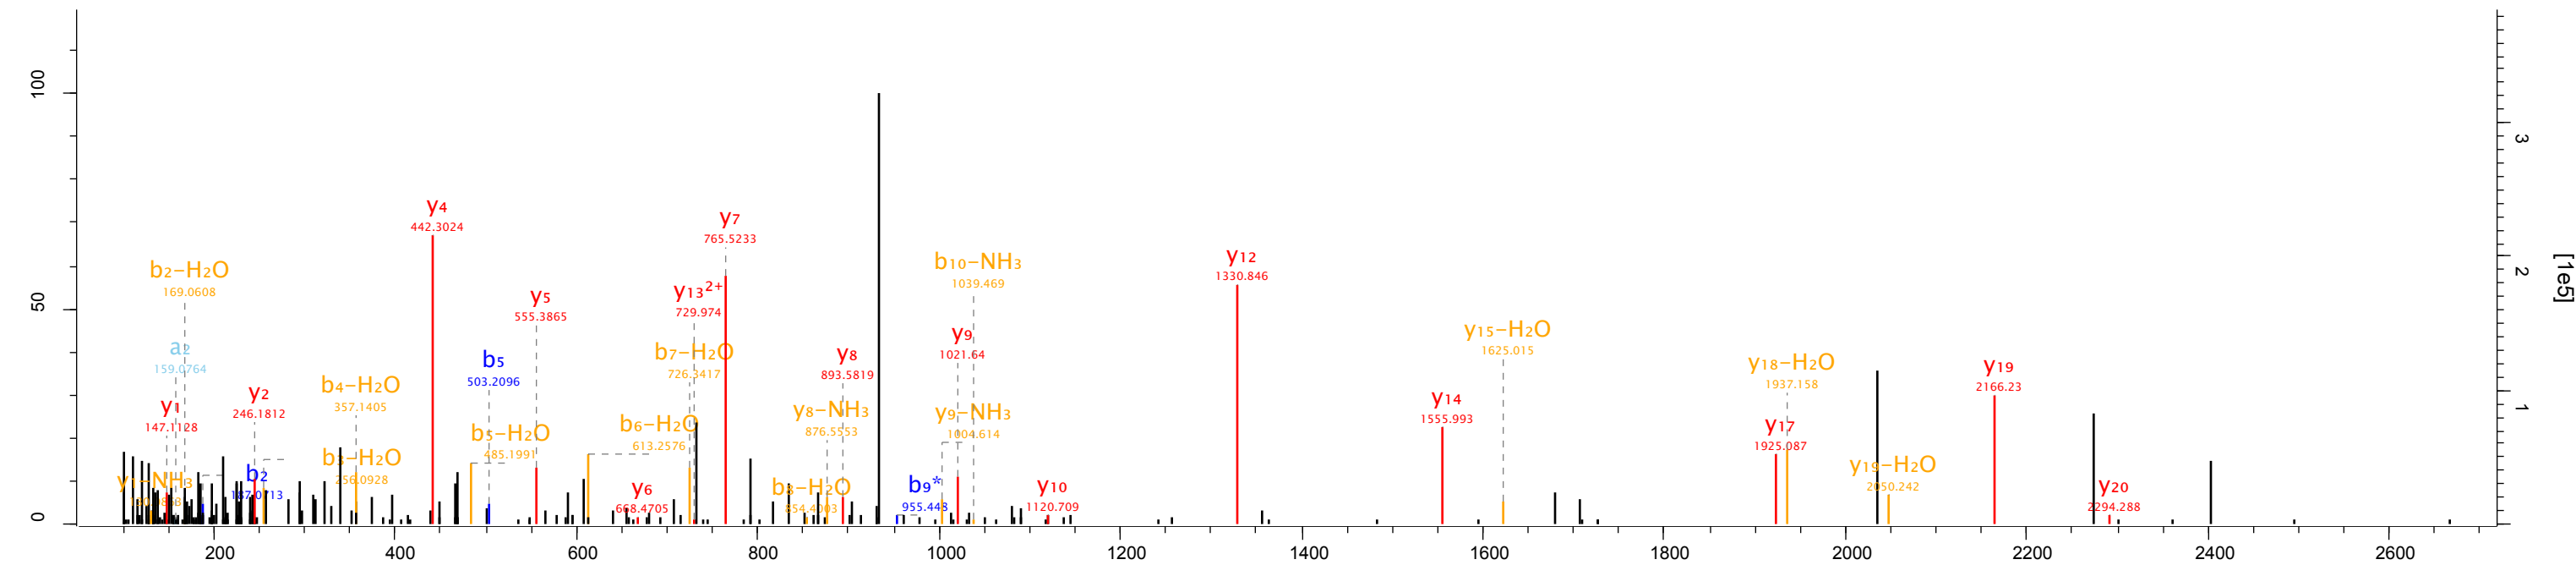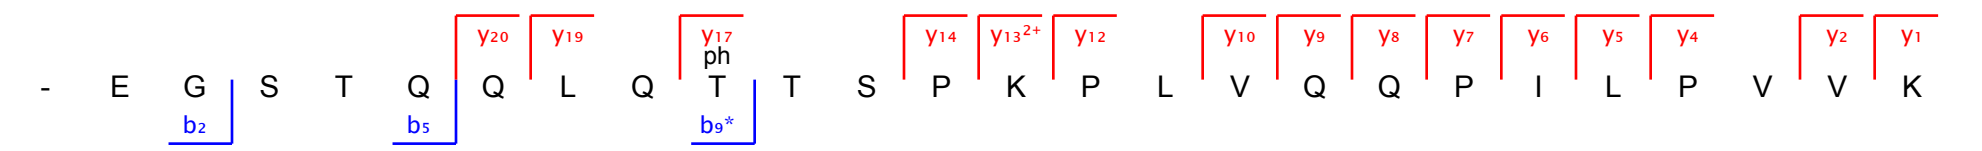

Raw file 20150814\_A375SR\_Phospho\_BR2\_07 Scan 22388 Method FTMS; HCD Score 71.73 m/z 1042.75 Gene names DDX24

20150814\_A375SR\_Phospho\_BR2\_07

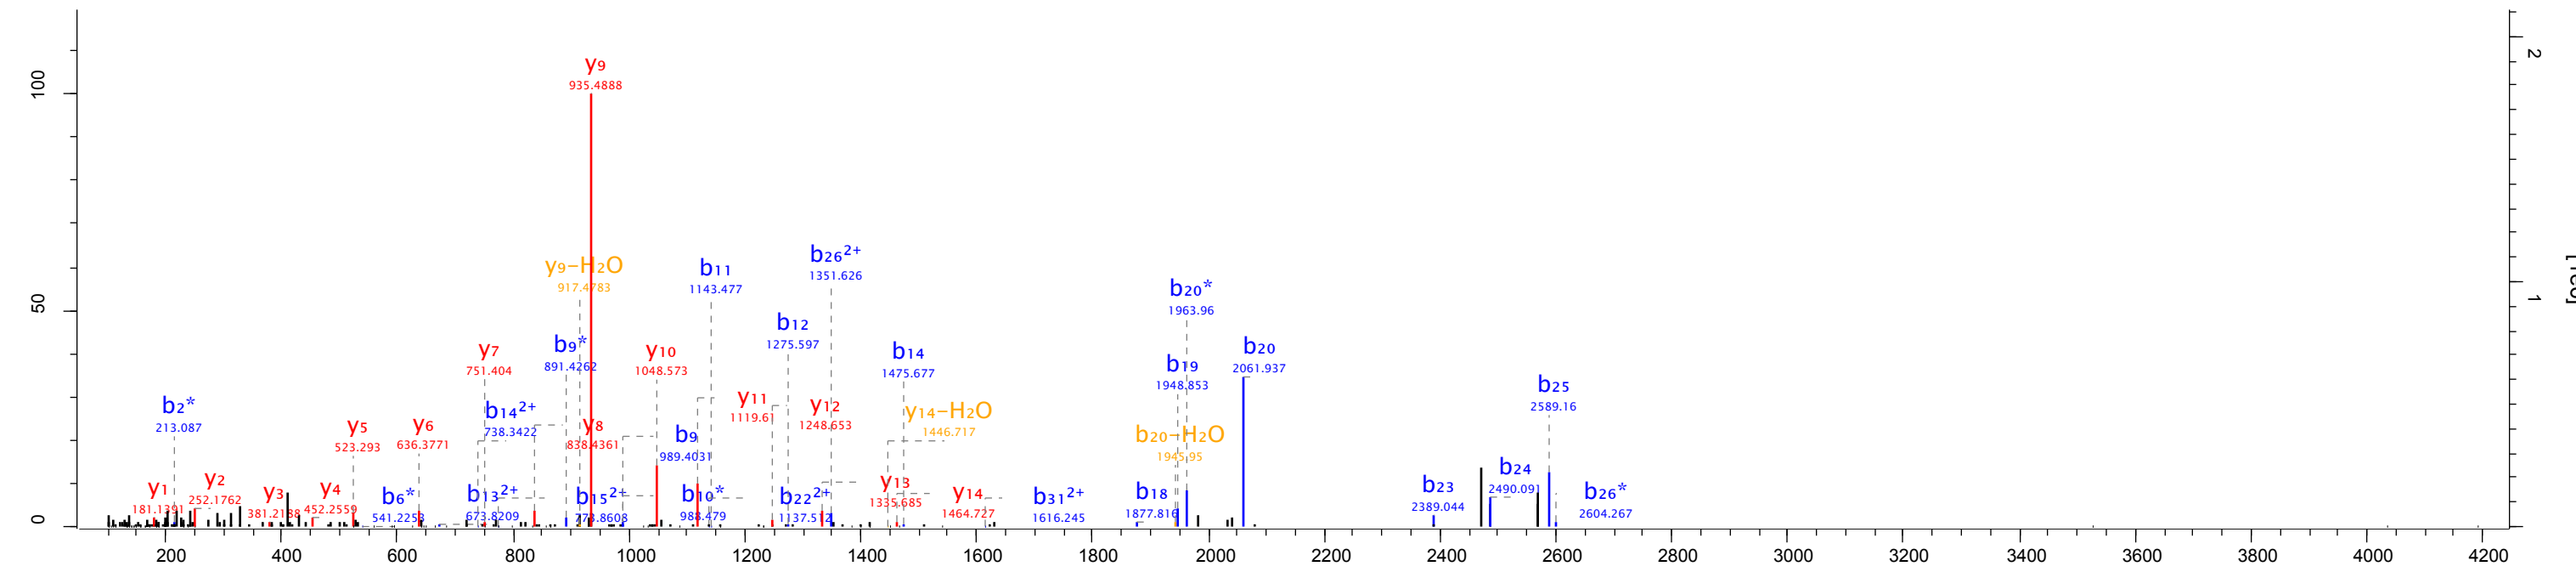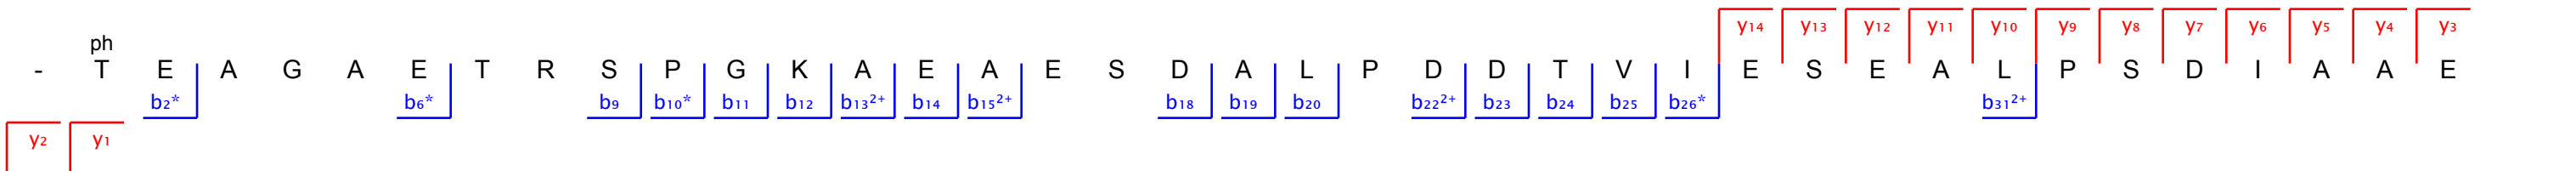

Raw file: 20150814\_A375SR\_Phospho\_BR2\_07  
 Scan: 23258 Method: FTMS; HCD Score: 52.72 m/z: 947.09 Gene names: RABGEF1

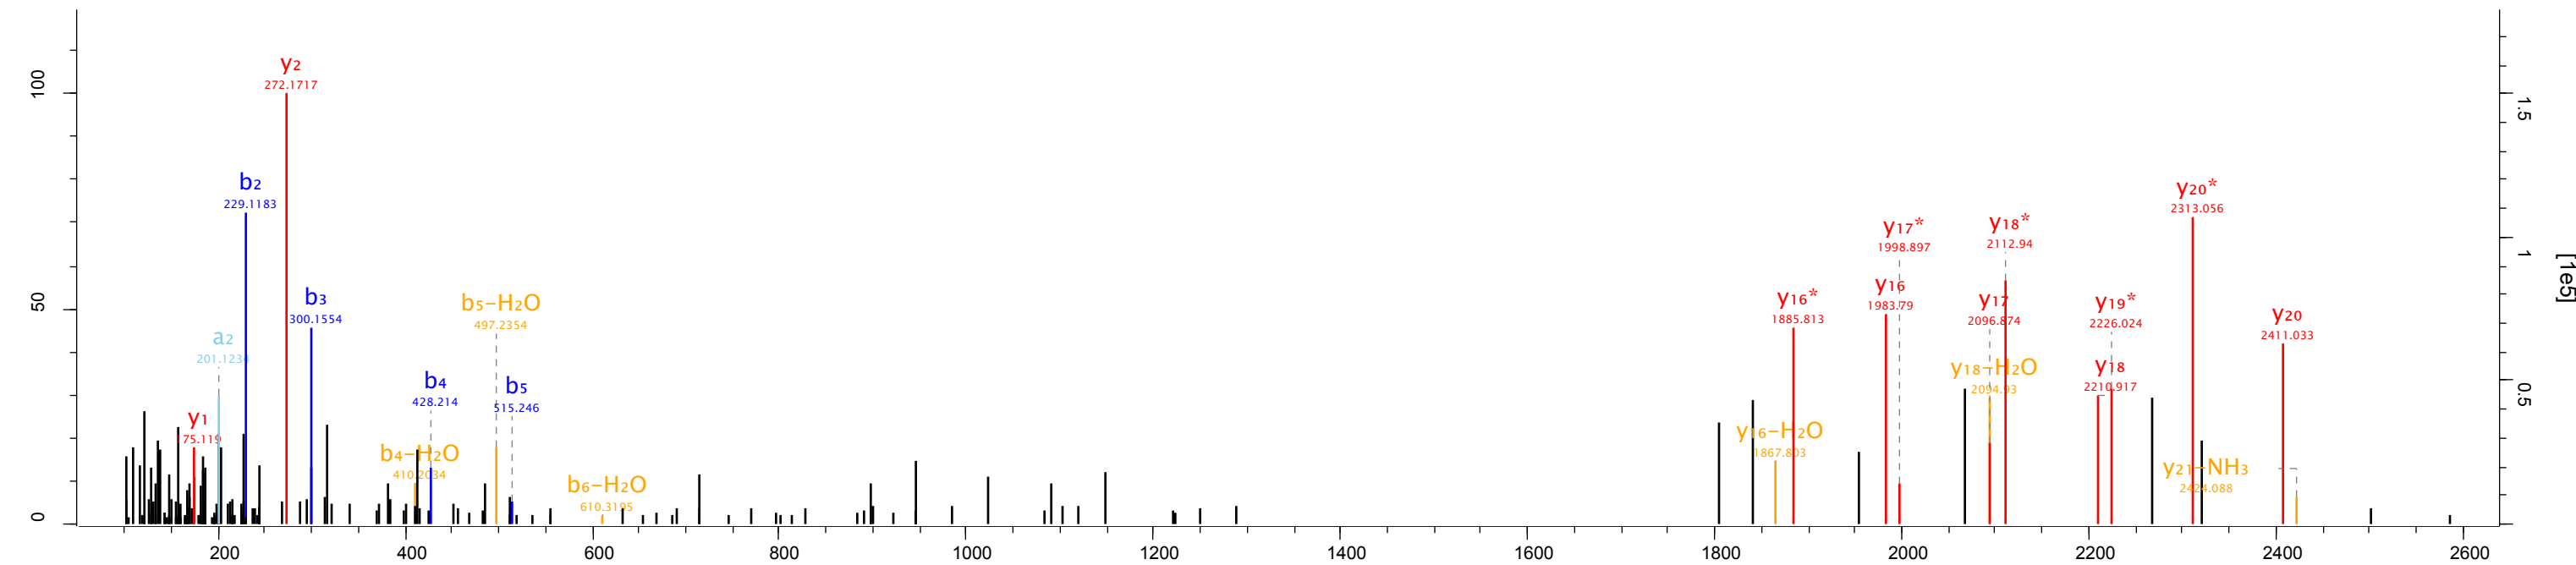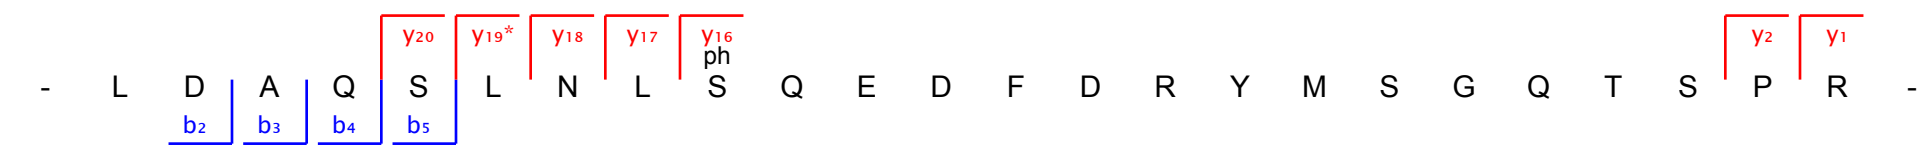

Raw file 20150814\_A375SR\_Phospho\_BR2\_07 Scan 23408 Method FTMS; HCD Score 57.15 m/z 1093.51 Gene names AIM1

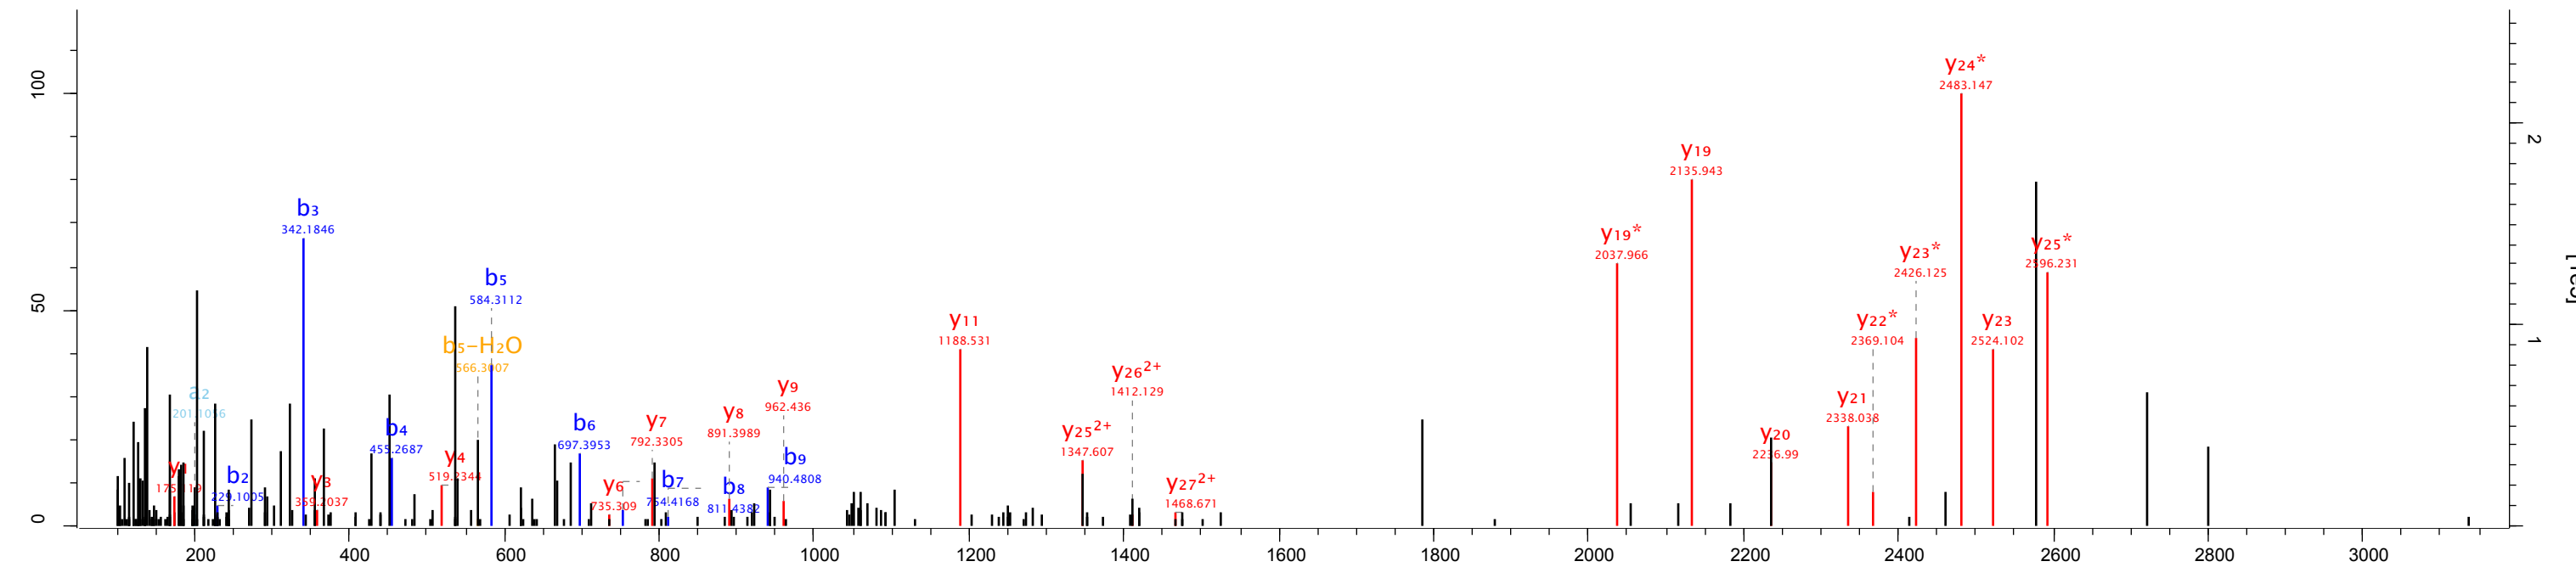

- M P L L E L G G E T T P P L S T E R S P E A V G S E C P S R -

Fragmentation mapping below the sequence:

- Red boxes above the sequence indicate y-ion fragments: y<sub>27</sub><sup>2+</sup> (L), y<sub>26</sub><sup>2+</sup> (LE), y<sub>25</sub>\* (LEL), y<sub>24</sub>\* (LELG), y<sub>23</sub> (LELG), y<sub>22</sub>\* (LELE), y<sub>21</sub> (LELET), y<sub>20</sub> (LEETT), y<sub>19</sub> (LEETP).
- Red boxes below the sequence indicate b-ion fragments: b<sub>2</sub> (P), b<sub>3</sub> (PL), b<sub>4</sub> (PLL), b<sub>5</sub> (PLE), b<sub>6</sub> (PLEL), b<sub>7</sub> (PLELG), b<sub>8</sub> (PLELGG), b<sub>9</sub> (PLELEGG).
- Red boxes above the sequence indicate other y-ion fragments: y<sub>11</sub> (P), y<sub>9</sub> (A), y<sub>8</sub> (AV), y<sub>7</sub> (AVG), y<sub>6</sub> (AVGS), y<sub>4</sub> (E), y<sub>3</sub> (EC), y<sub>1</sub> (ESR).

Raw file: 20150814\_A375SR\_Phospho\_BR2\_07  
 Scan: 25028 Method: FTMS; HCD Score: 107.05 m/z: 1125.5 Gene names: SMARCA5

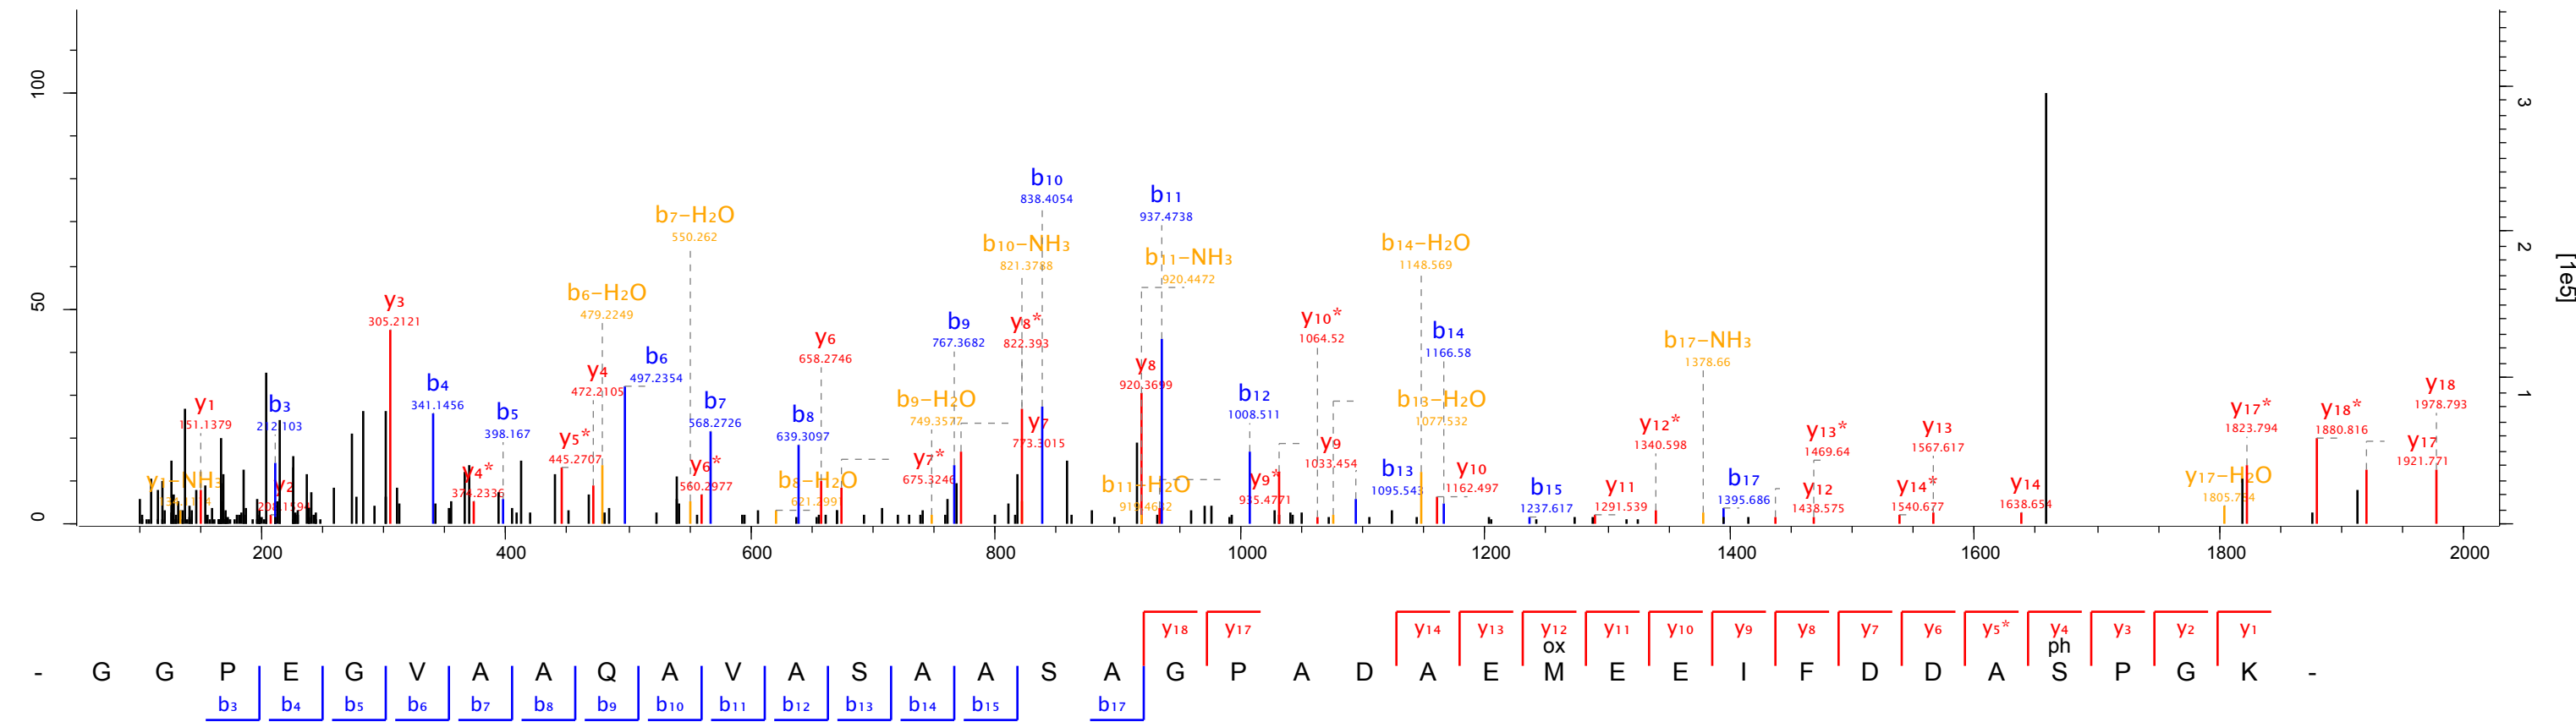

Raw file: 20150814\_A375SR\_Phospho\_BR2\_07  
 Scan: 2978 Method: FTMS; HCD Score: 135.15 m/z: 556.26 Gene names: TSC2

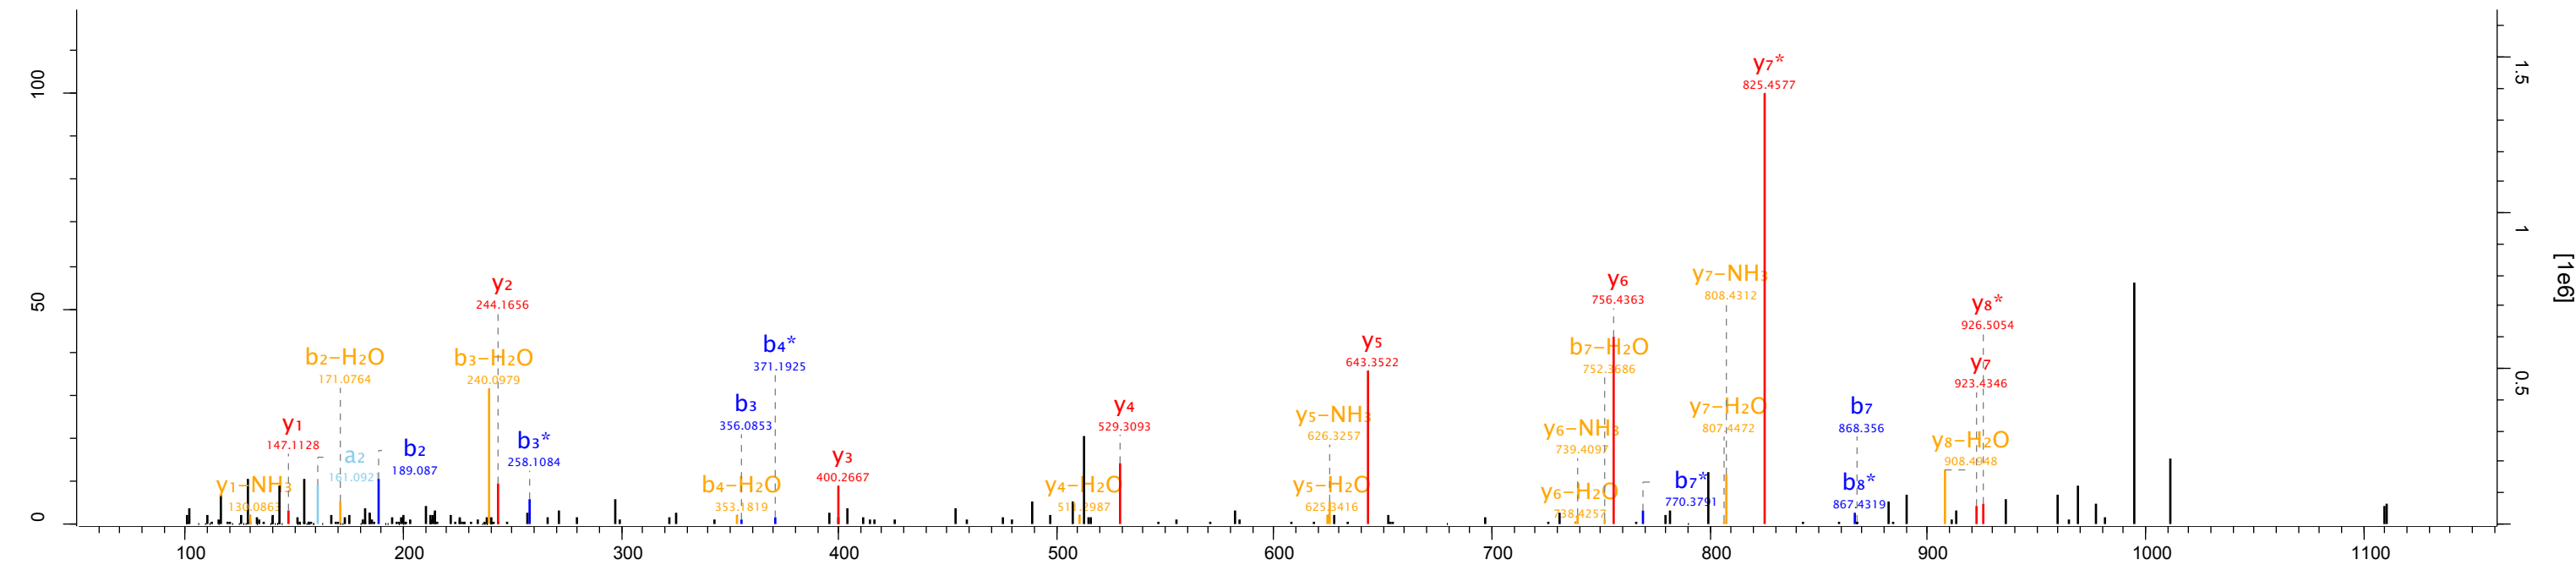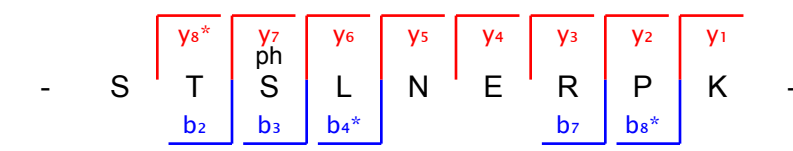

Raw file 20150814\_A375SR\_Phospho\_BR2\_07 Scan 3308 Method FTMS; HCD Score 84.97 m/z 868.42 Gene names TCEA1

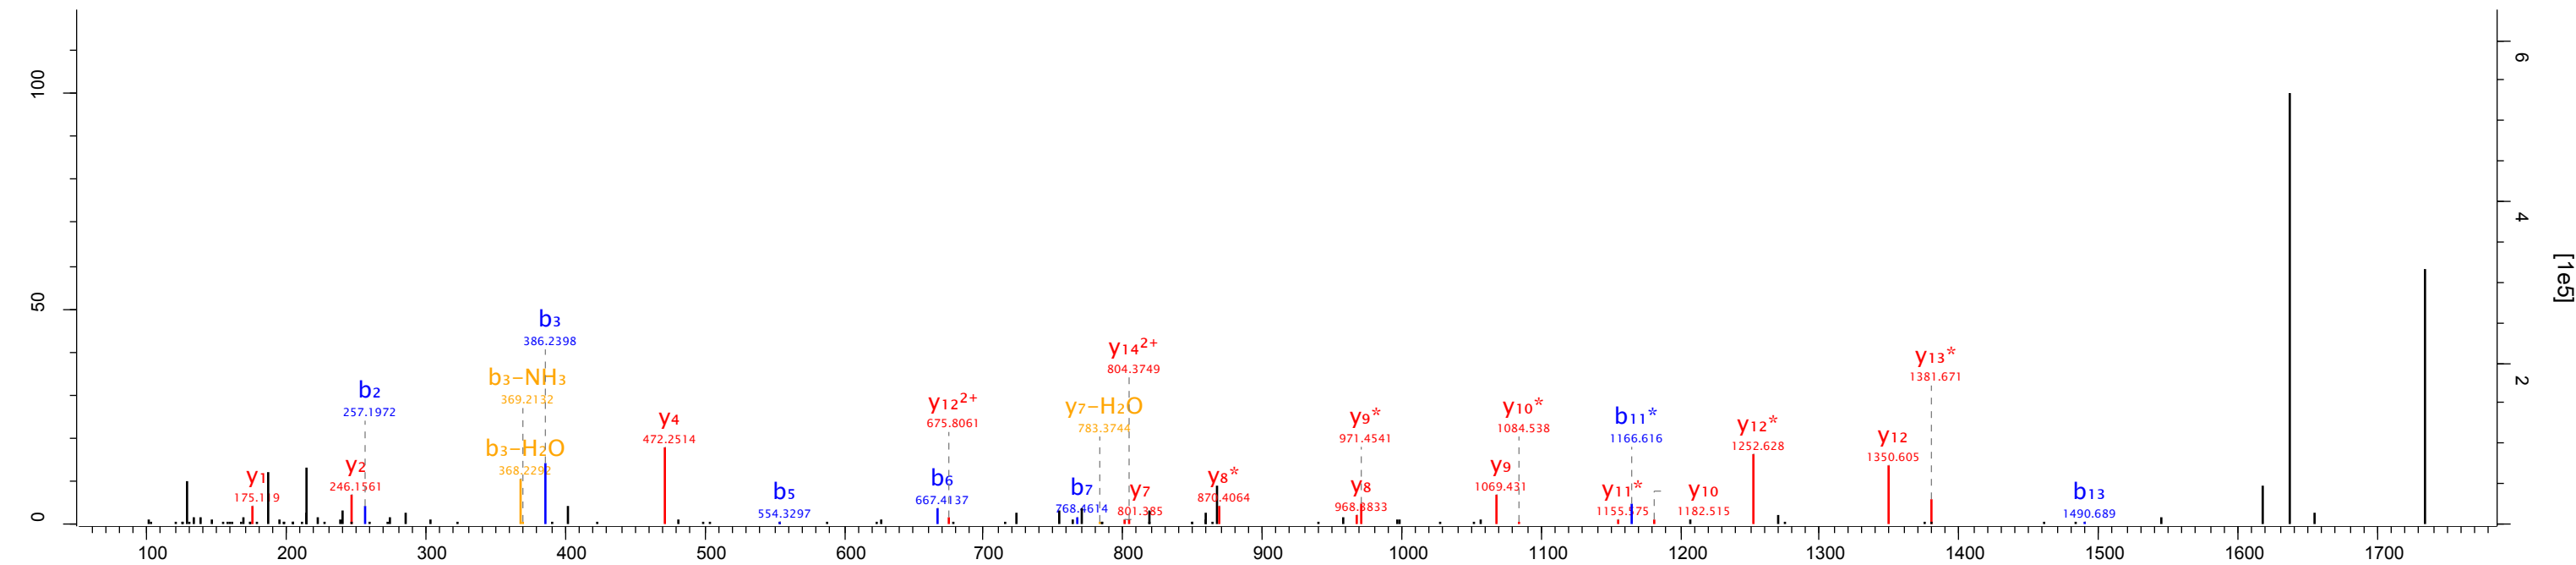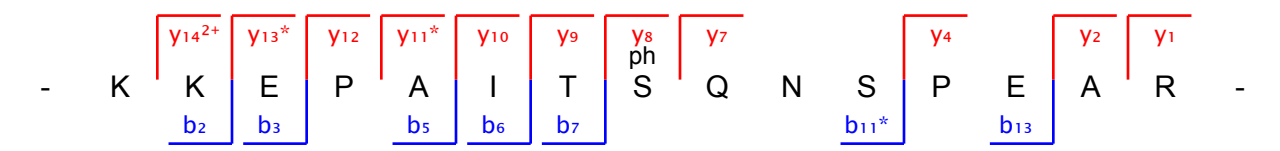

Raw file 20150814\_A375SR\_Phospho\_BR2\_07 Scan 3688 Method FTMS; HCD Score 45.35 m/z 409.69 Gene names SPEN

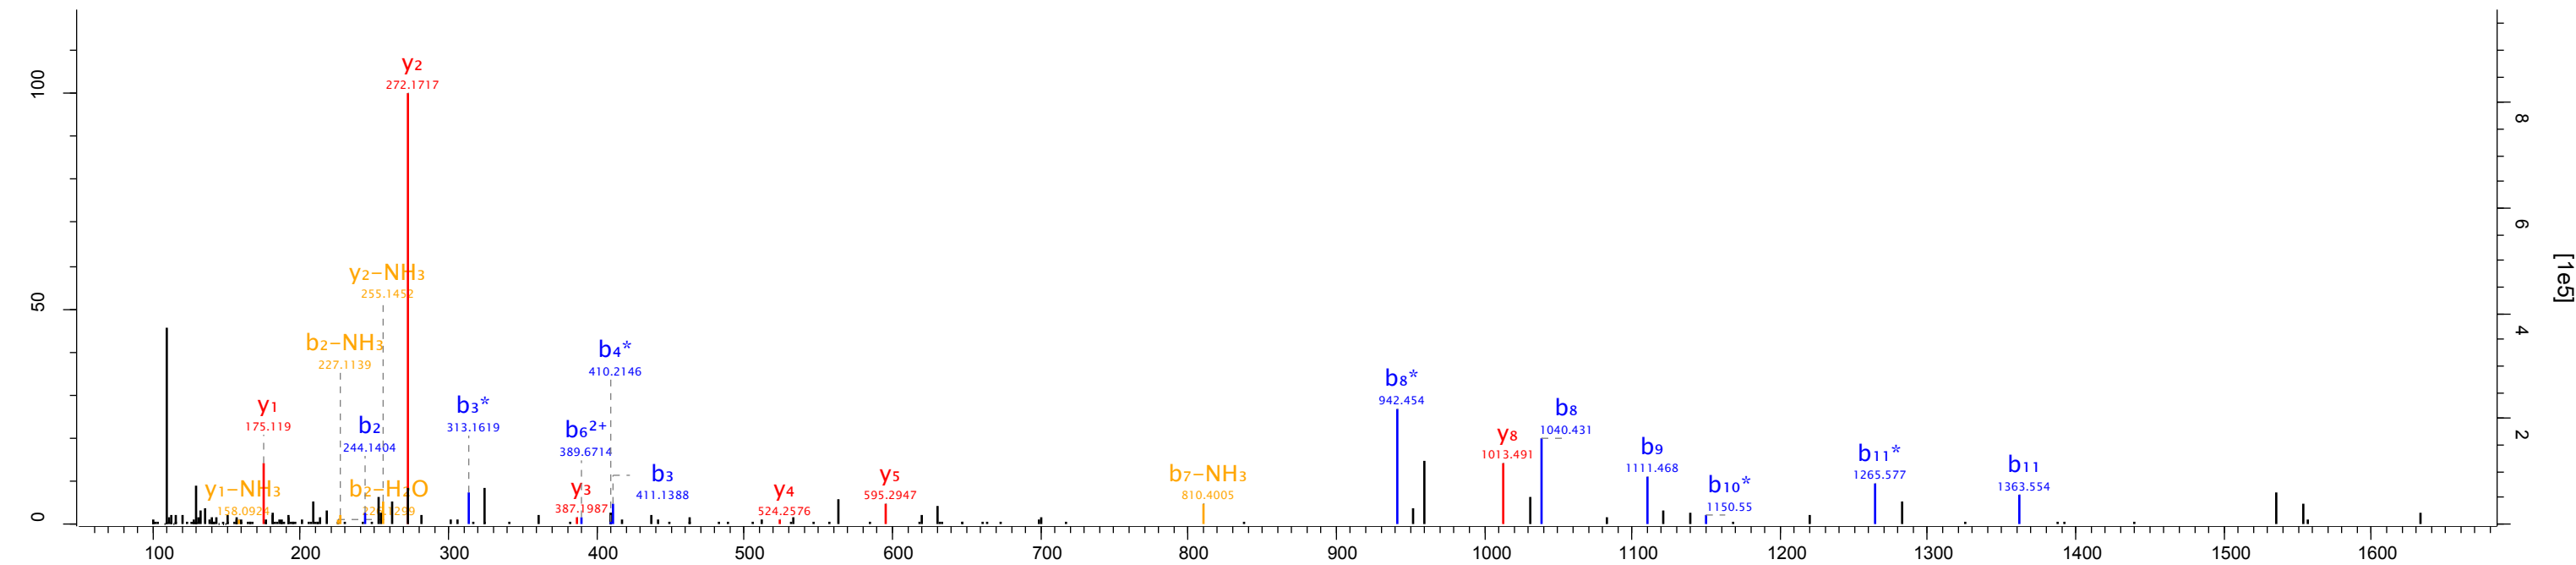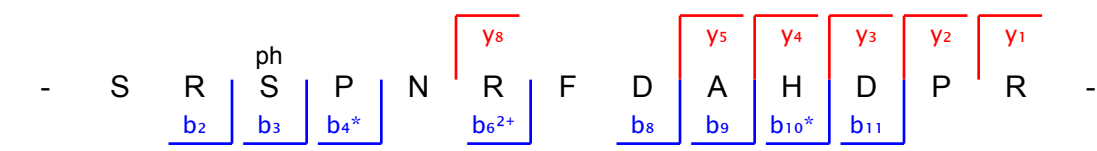



Raw file: 20150814\_A375SR\_Phospho\_BR2\_07  
 Scan: 4268 Method: FTMS; HCD Score: 130.95 m/z: 441.56 Gene names: SLC9A3R2

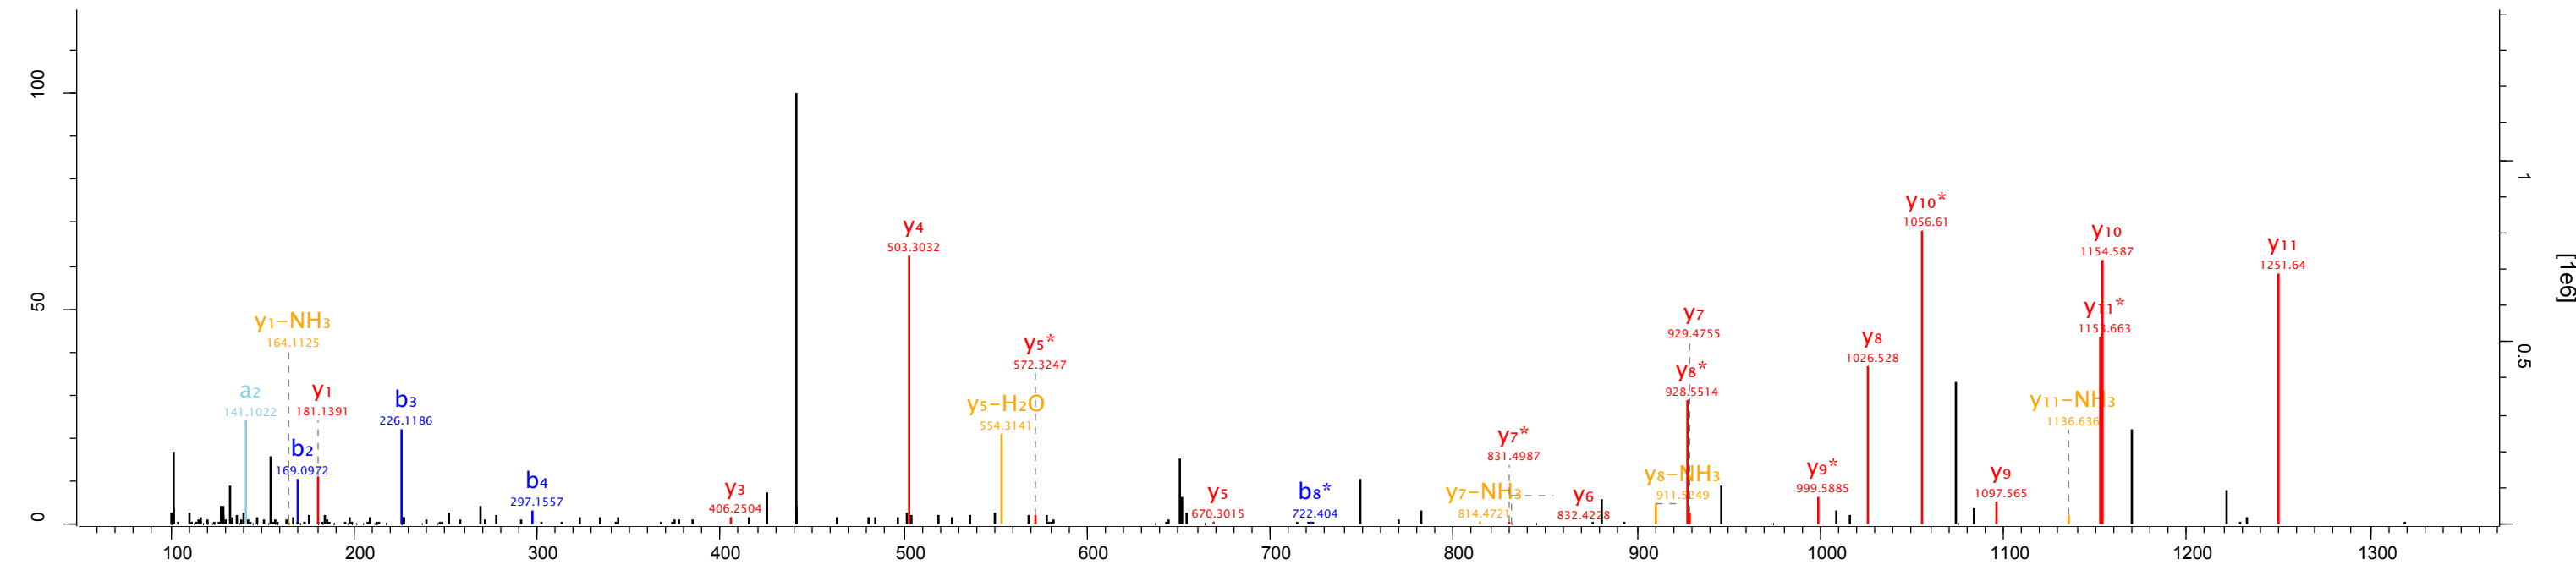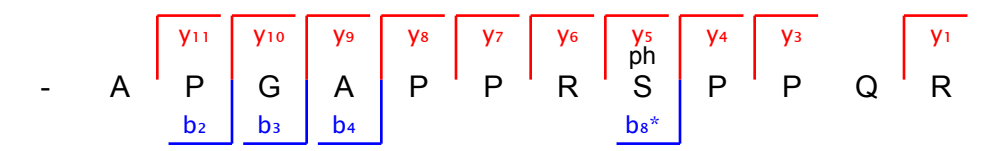

Raw file  
20150814\_A375SR\_Phospho\_BR2\_07

Scan Method Score m/z Gene names  
4978 FTMS; HCD 178.54 523.25 TNFAIP3

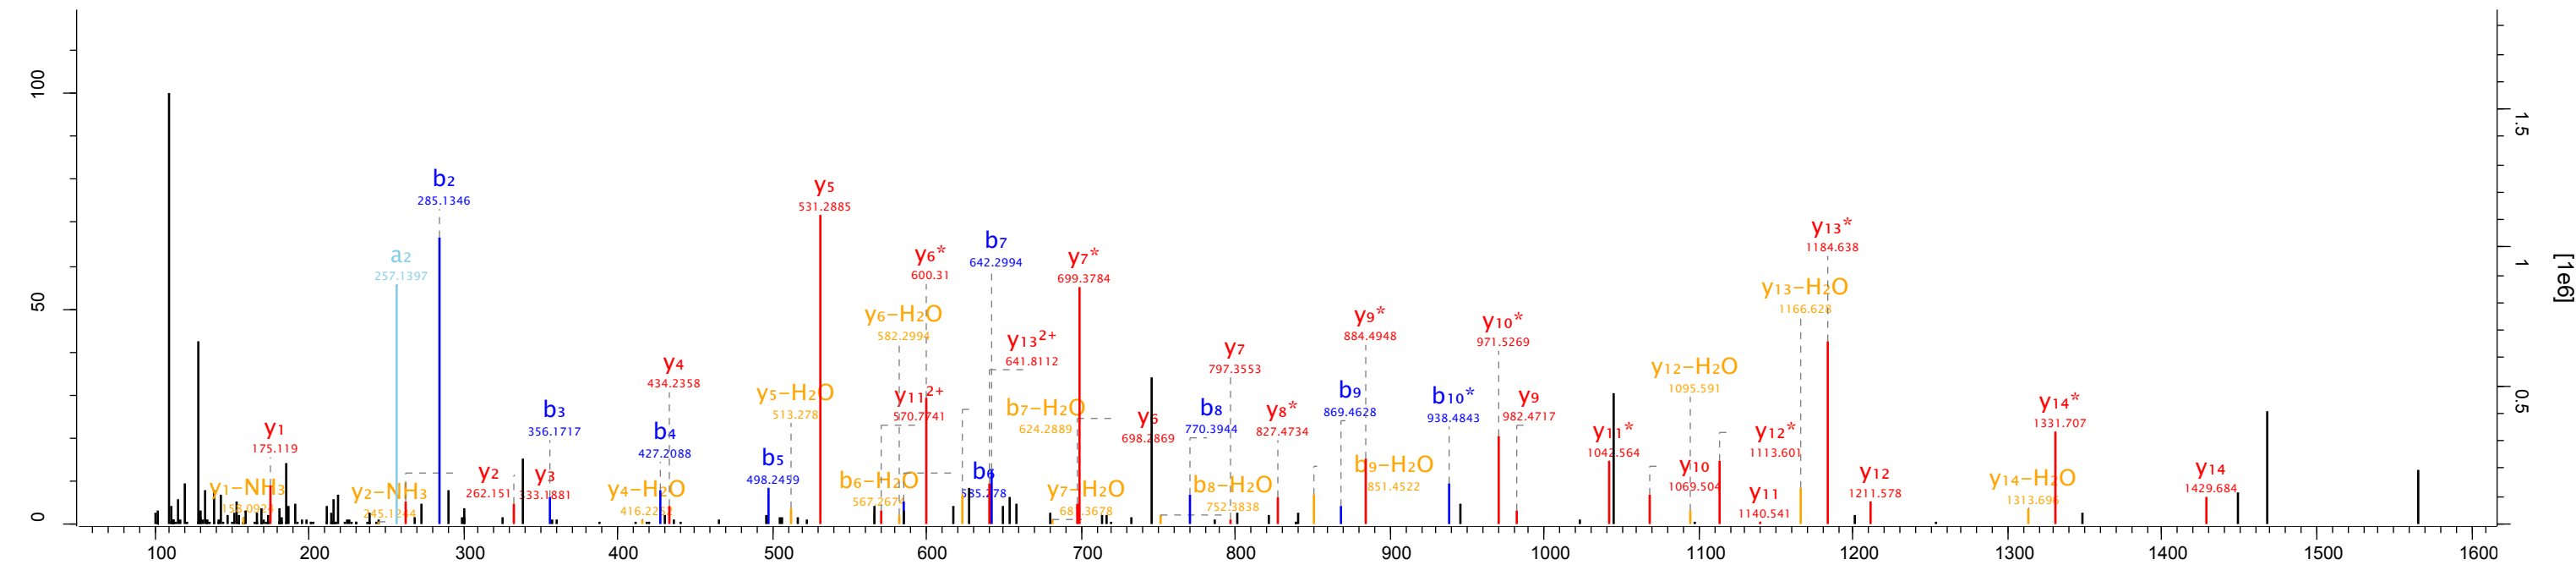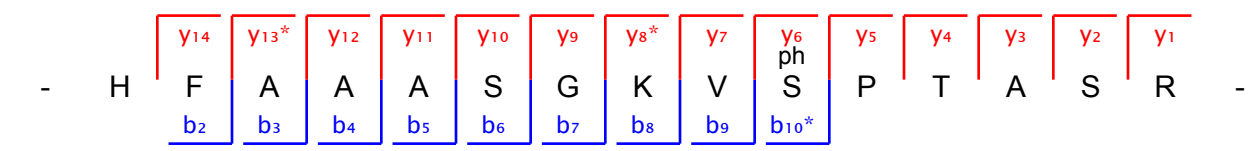

Raw file: 20150814\_A375SR\_Phospho\_BR2\_07  
 Scan: 5058 Method: FTMS; HCD Score: 113.61 m/z: 571.77 Gene names: AMOTL1

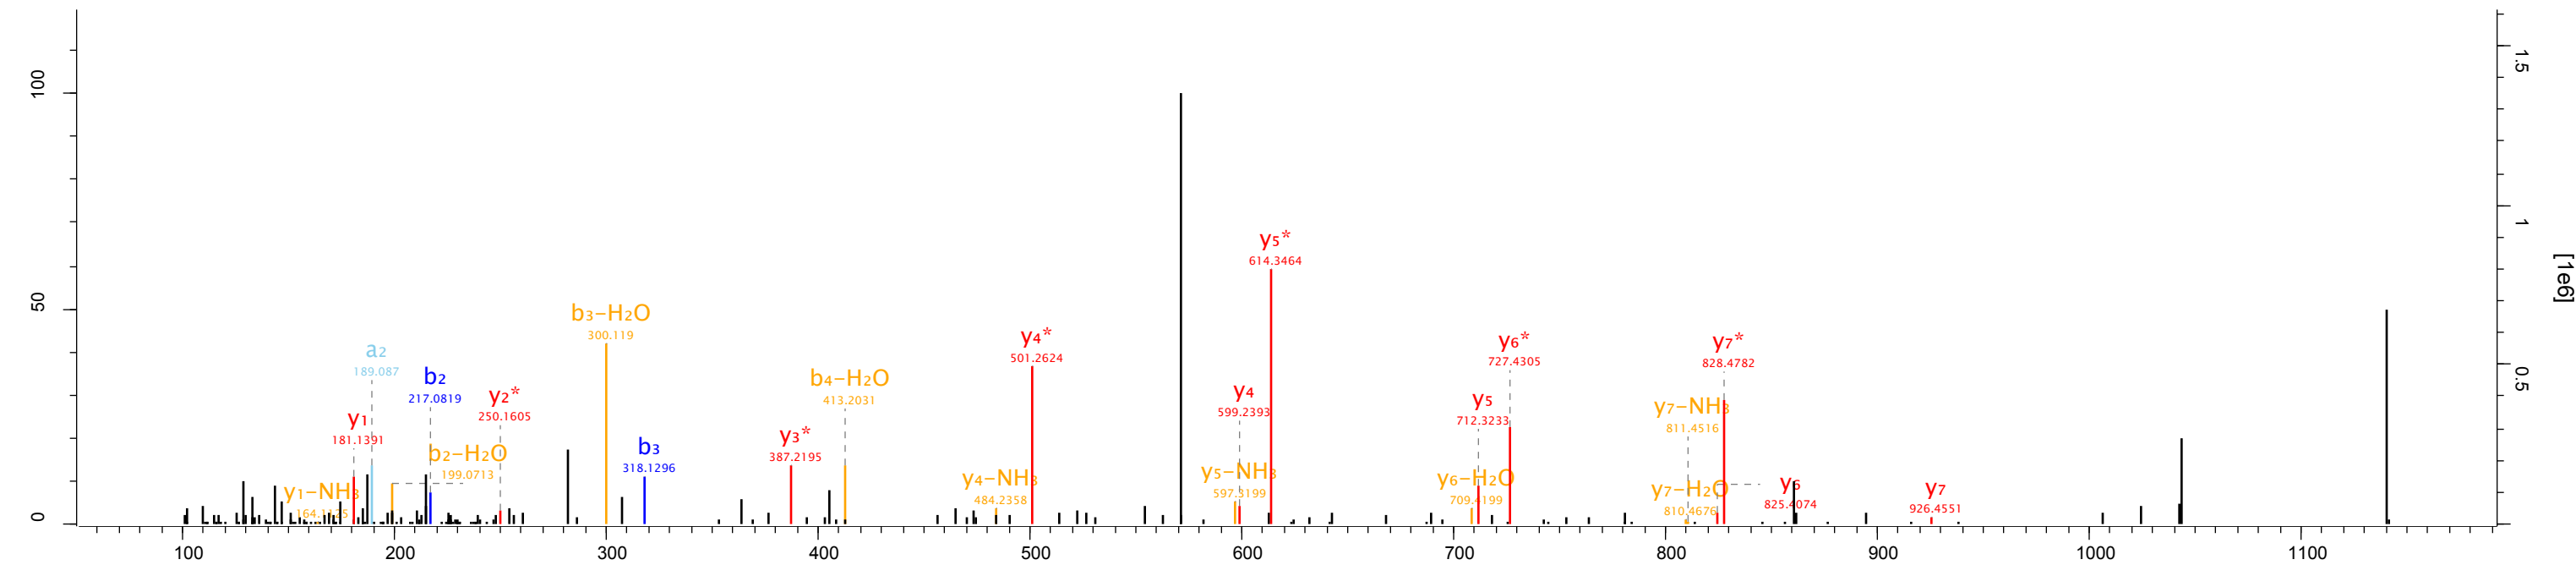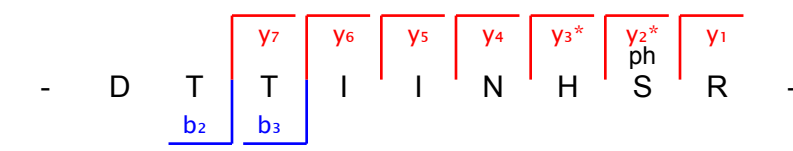

Raw file 20150814\_A375SR\_Phospho\_BR2\_07 Scan 6588 Method FTMS; HCD Score 47.71 m/z 634.8

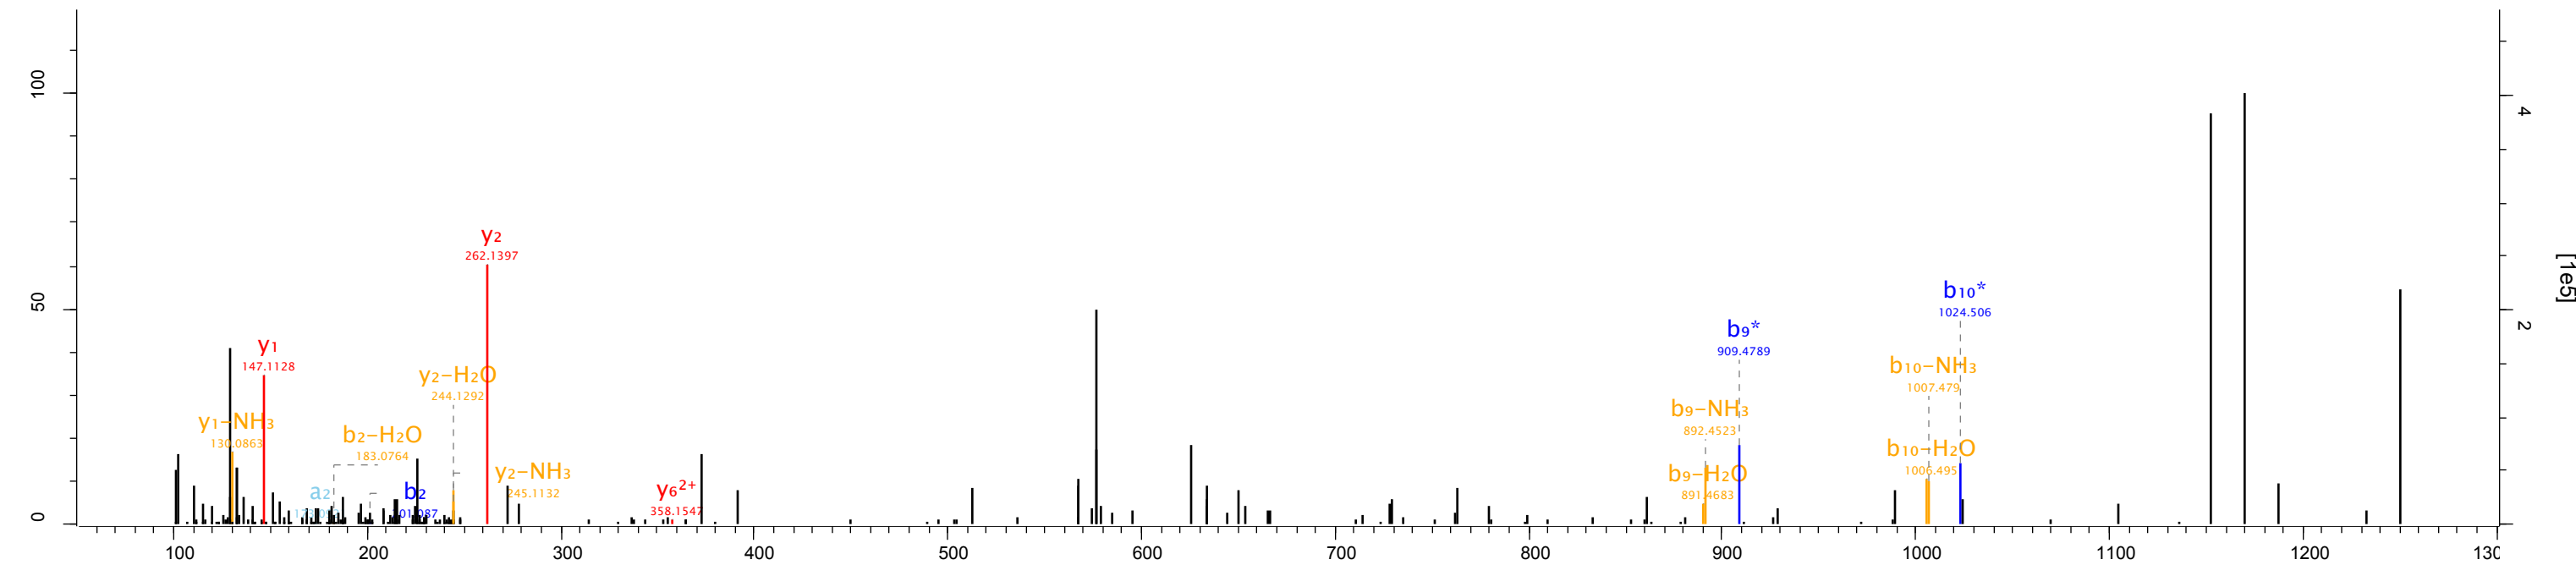

- A E Q P K T K G S D K -

Fragmentation mapping:

- b<sub>2</sub>** (blue box) covers E and Q.
- b<sub>9</sub>\*** (blue box) covers S.
- b<sub>10</sub>\*** (blue box) covers D.
- y<sub>6</sub><sup>2+</sup>** (red box) covers T.
- y<sub>2</sub>** (red box) covers D.
- y<sub>1</sub>** (red box) covers K.

Raw file: 20150814\_A375SR\_Phospho\_BR2\_07  
 Scan: 6608 Method: FTMS; HCD Score: 99.28 m/z: 440.73 Gene names: ZNF638

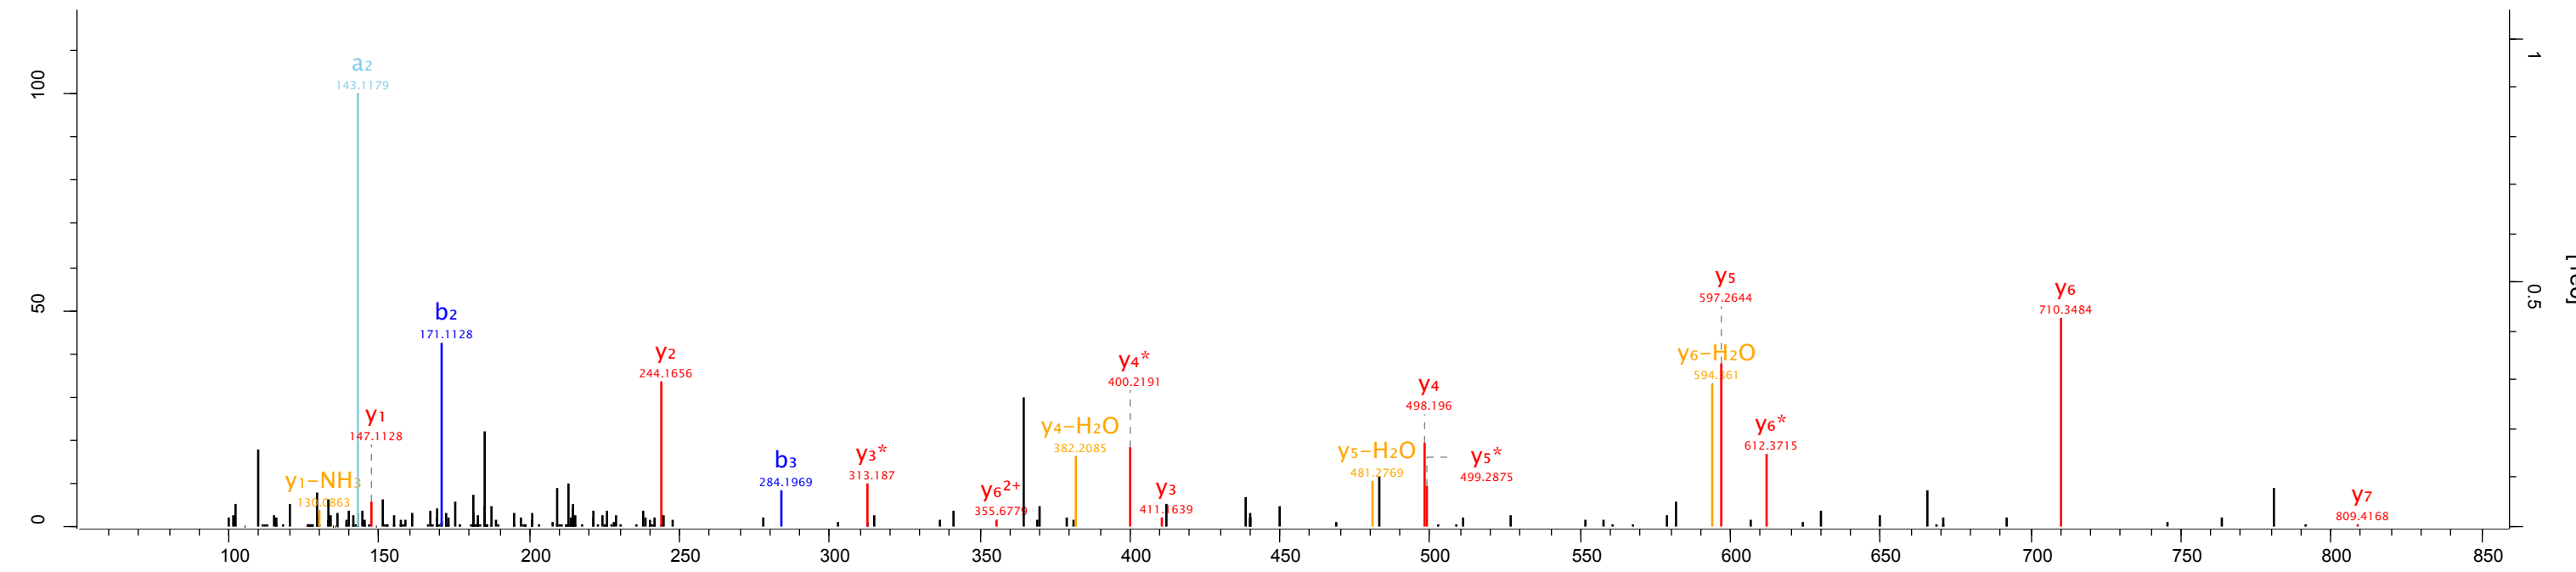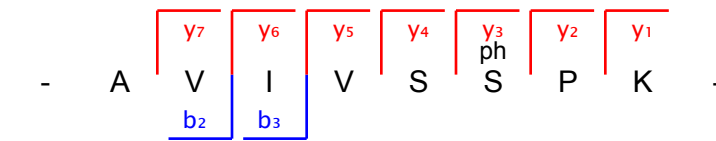

Raw file: 20150814\_A375SR\_Phospho\_BR2\_07  
 Scan: 8428 Method: FTMS; HCD Score: 96.14 m/z: 786.84 Gene names: DLC1

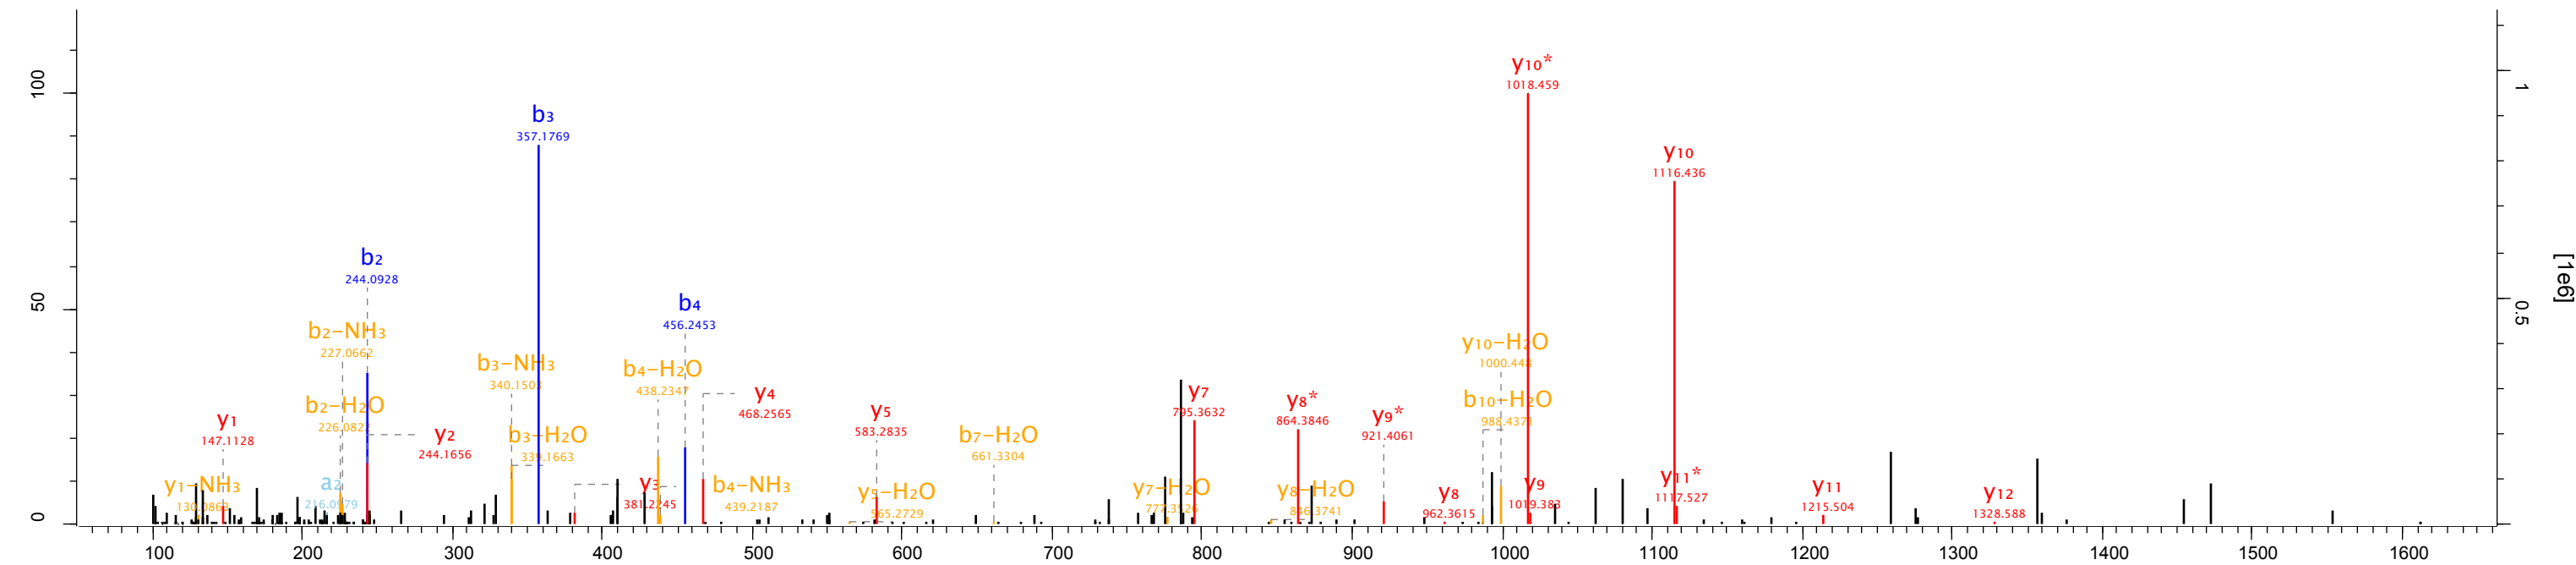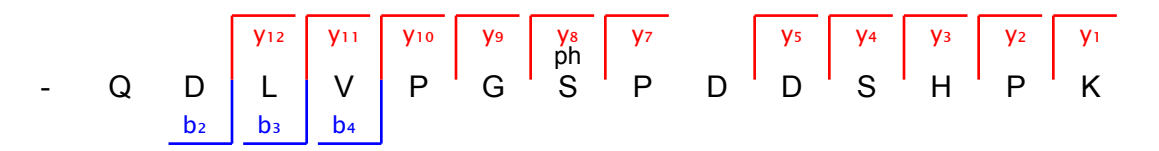

Raw file: 20150814\_A375SR\_Phospho\_BR2\_07  
 Scan: 8738 Method: FTMS; HCD Score: 158.07 m/z: 578.78 Gene names: DYRK1B;DYRK1A

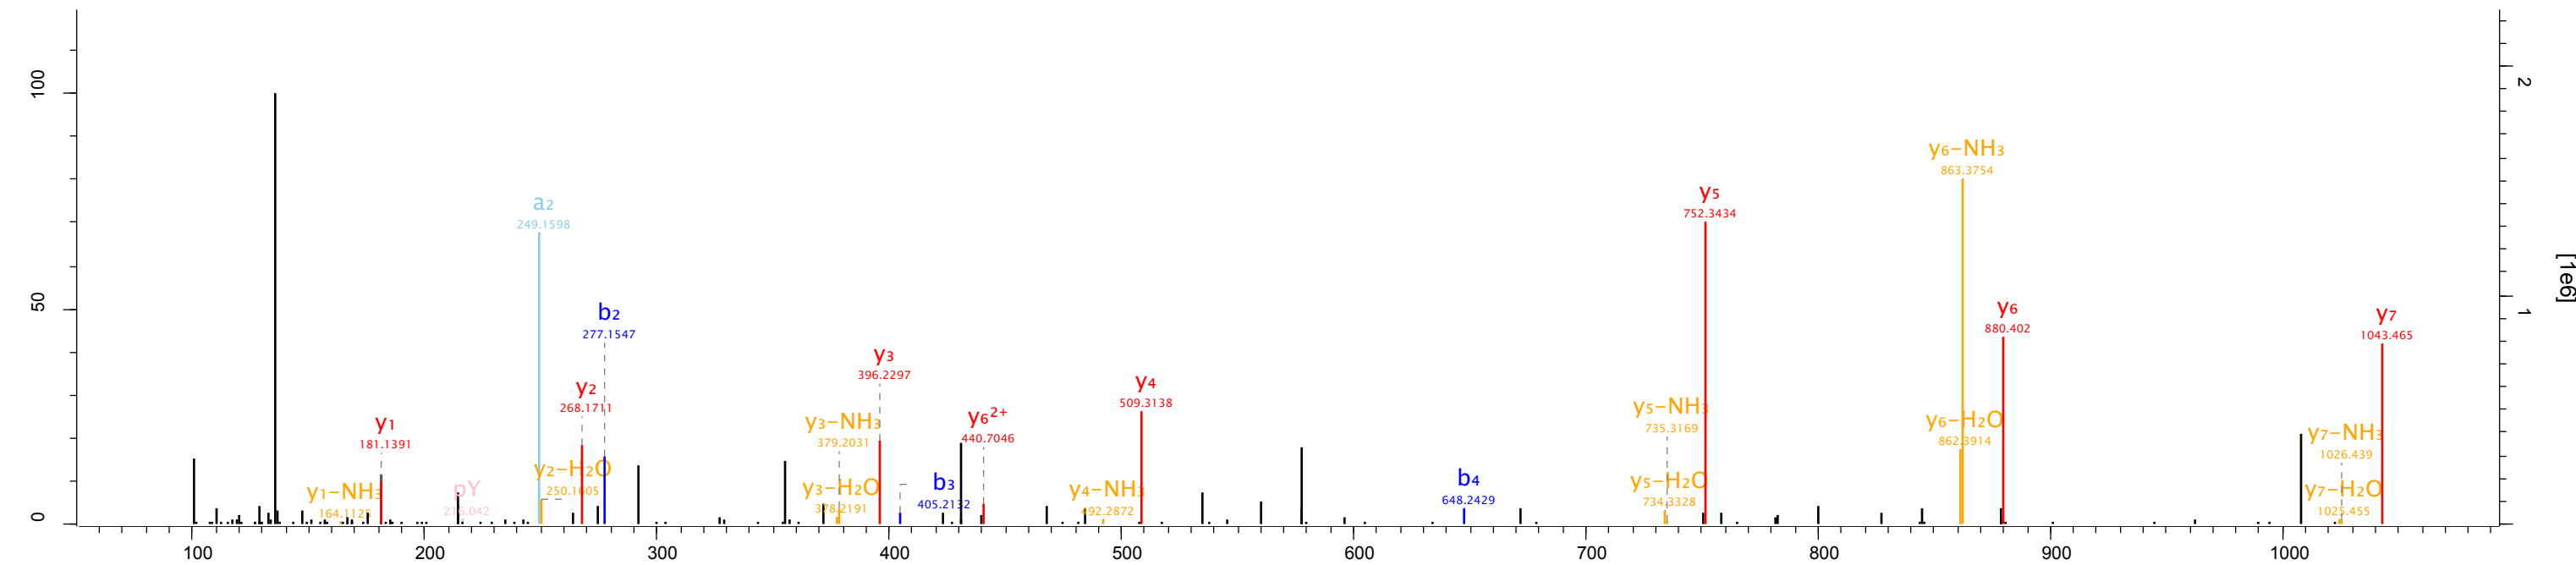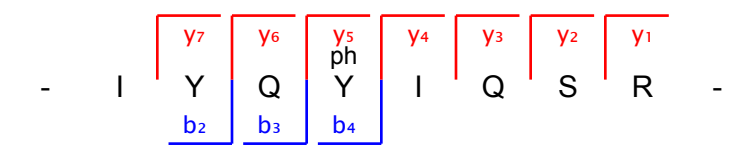

Raw file 20150814\_A375SR\_Phospho\_BR2\_07 Scan 9168 Method FTMS; HCD Score 62.16 m/z 537.77 Gene names DENND4C

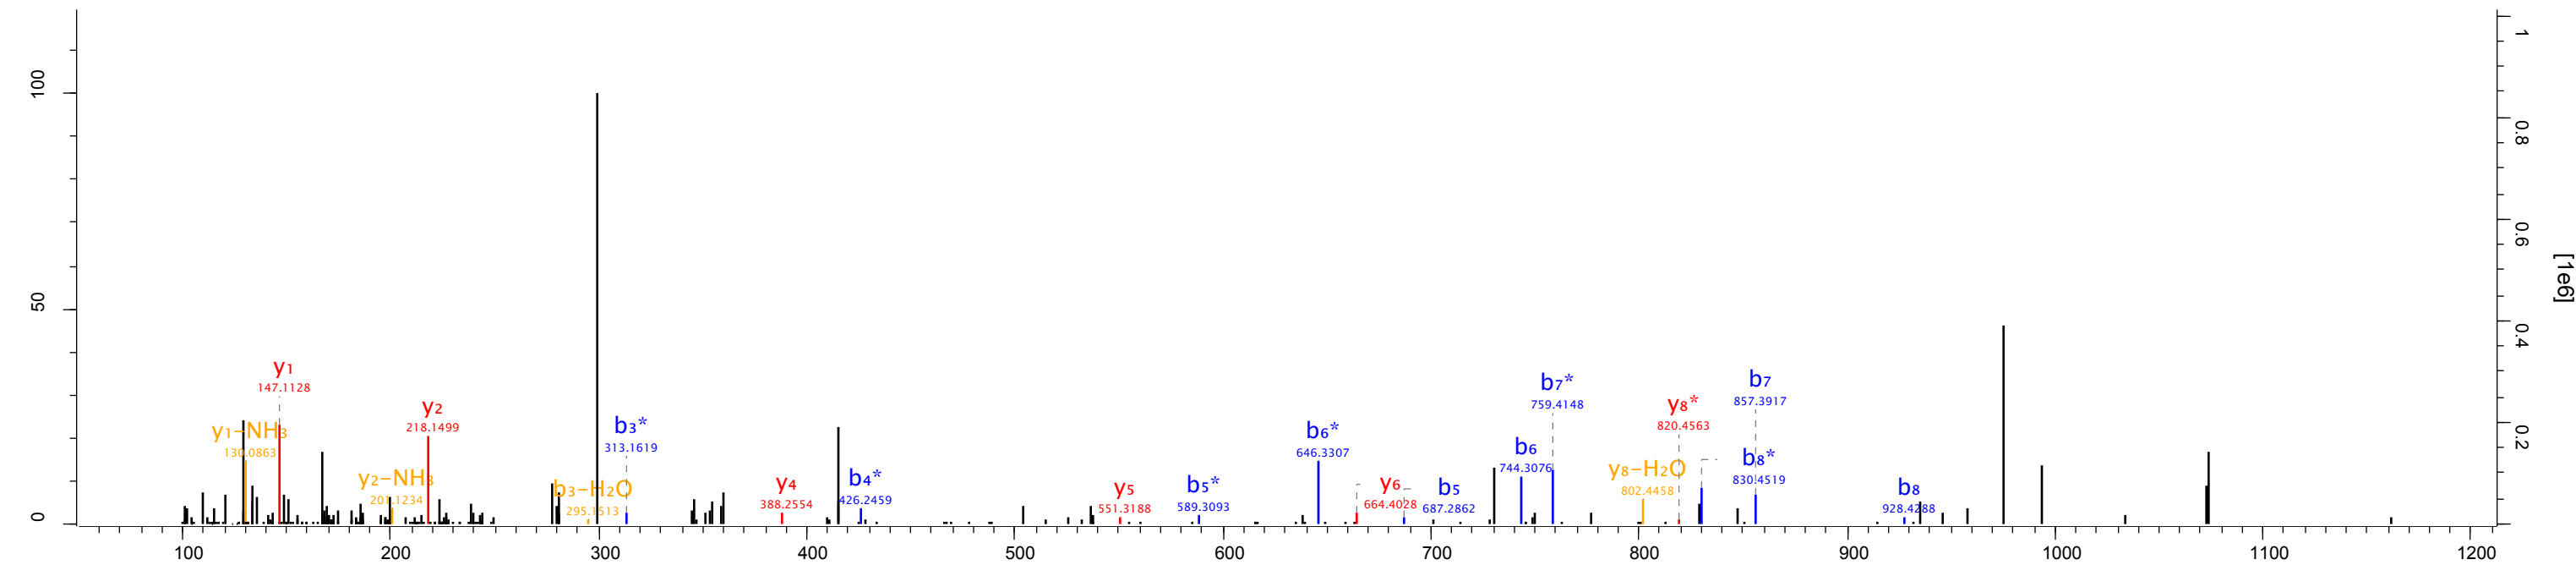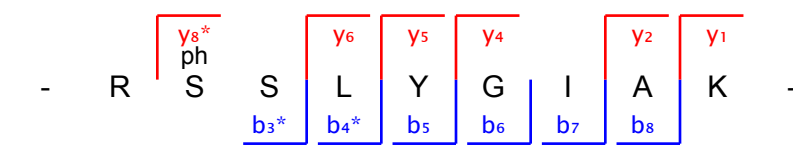



Raw file 20150814\_A375SR\_Phospho\_BR2\_07 Scan 9898 Method FTMS; HCD Score 60.13 m/z 577.28 Gene names RPS20

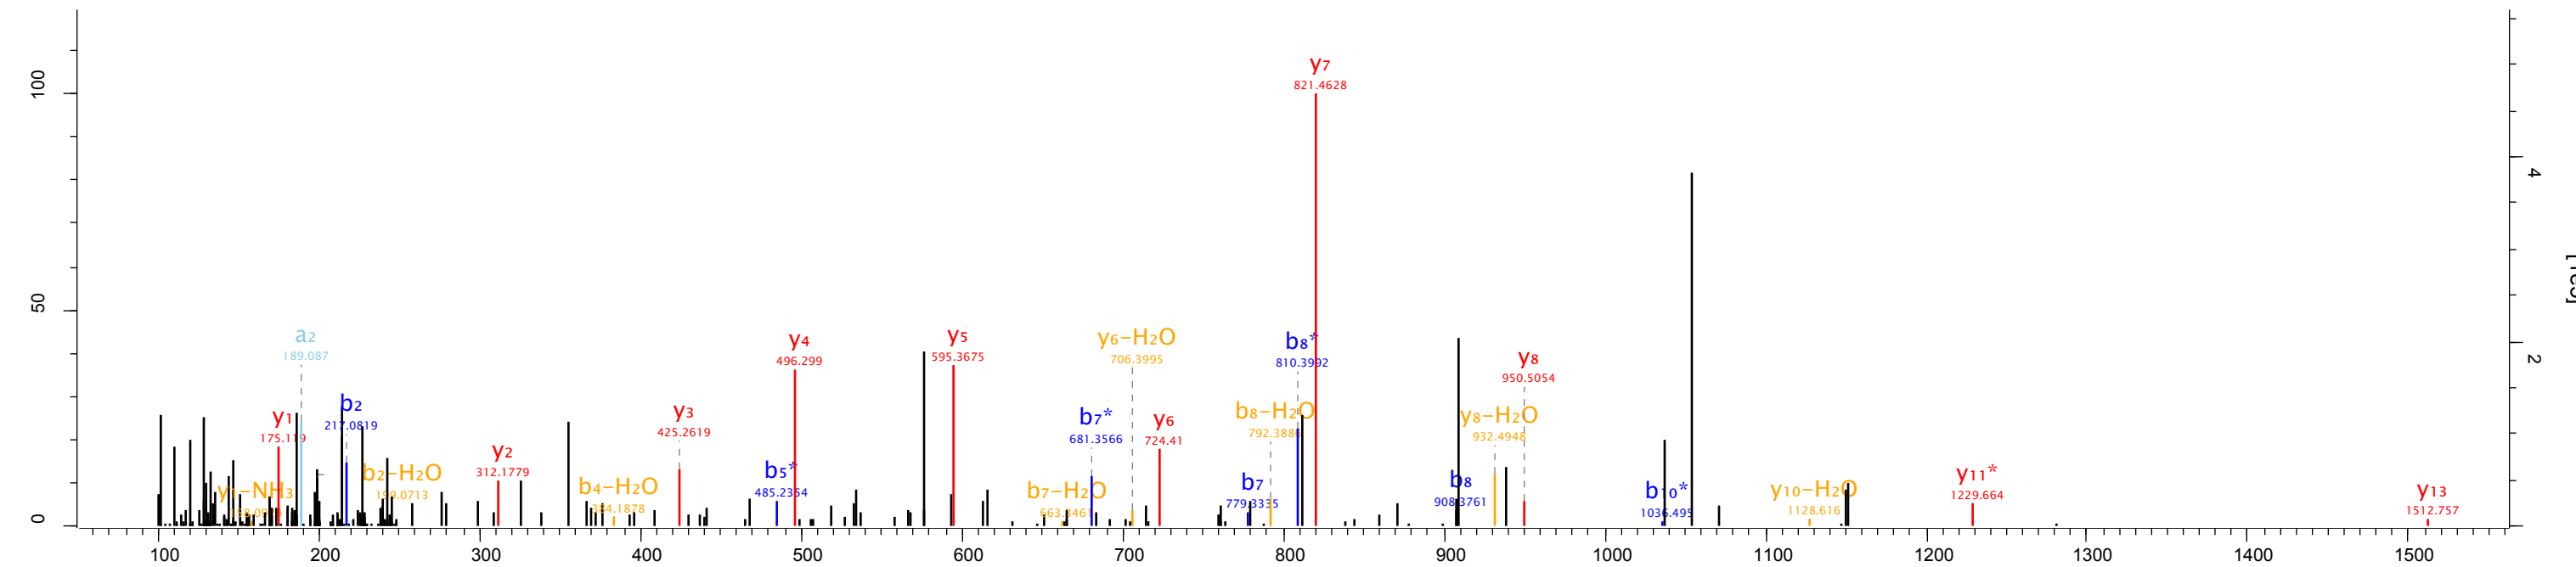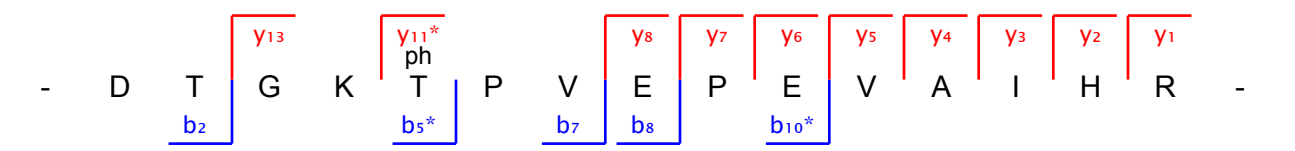

Raw file: 20150814\_A375SR\_Phospho\_BR2\_08  
 Scan: 10198 Method: FTMS; HCD Score: 146.28 m/z: 796.37 Gene names: RSRC2

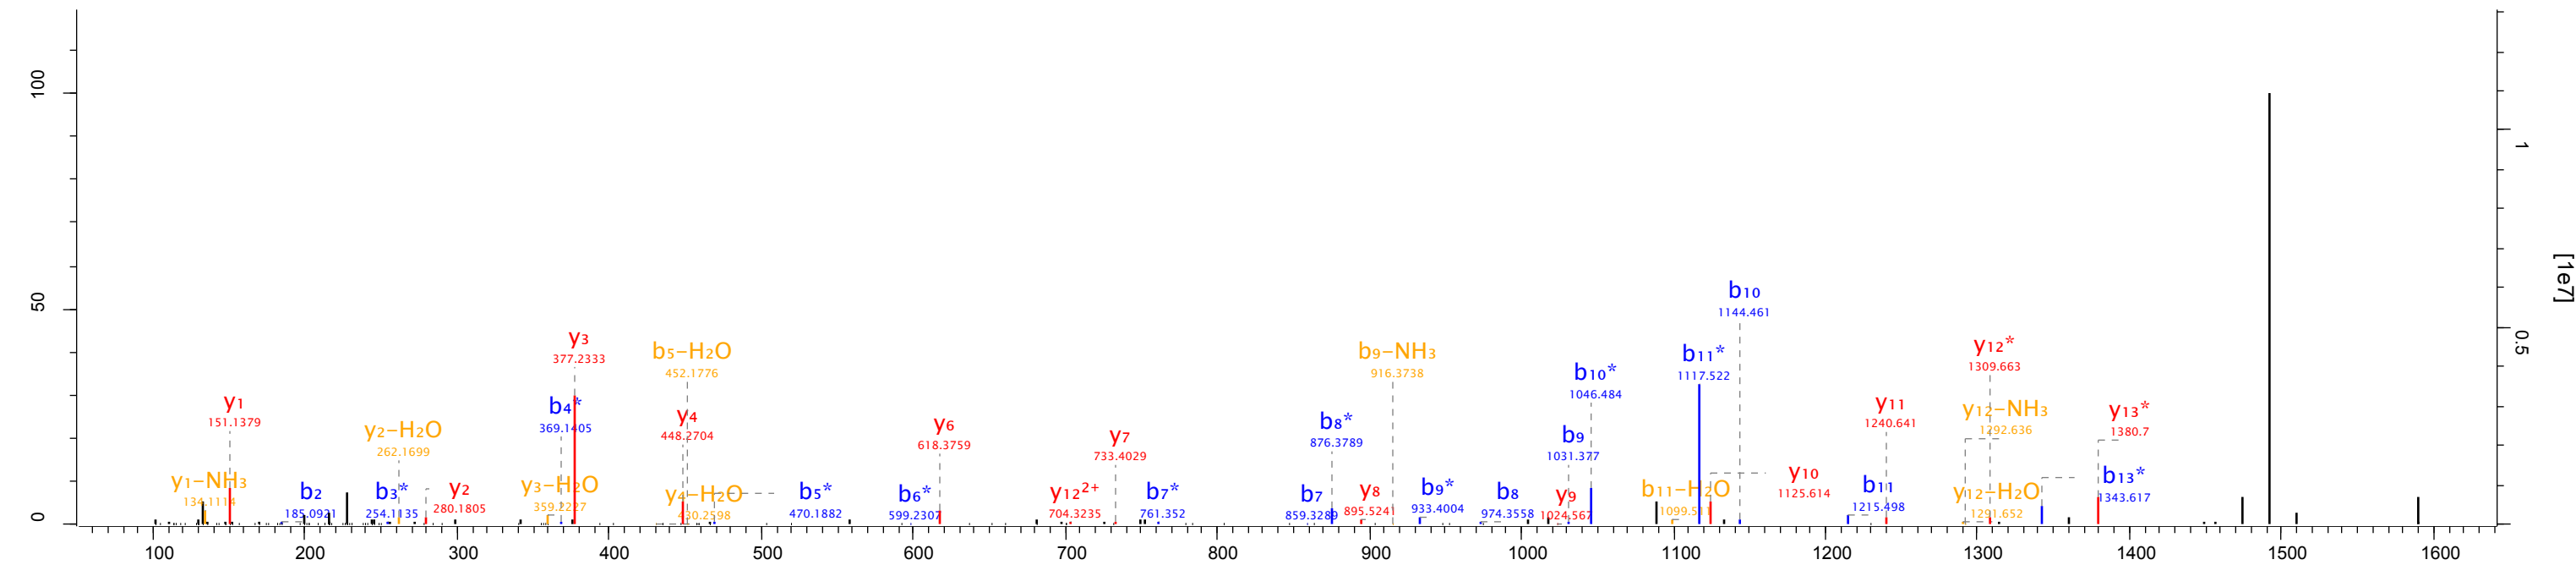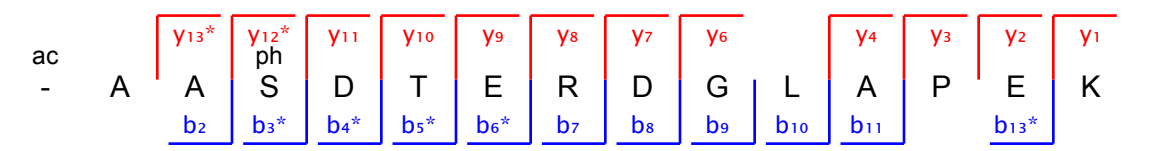

Raw file: 20150814\_A375SR\_Phospho\_BR2\_08  
 Scan: 11608 Method: FTMS; HCD Score: 138.46 m/z: 607.6 Gene names: AMOTL2

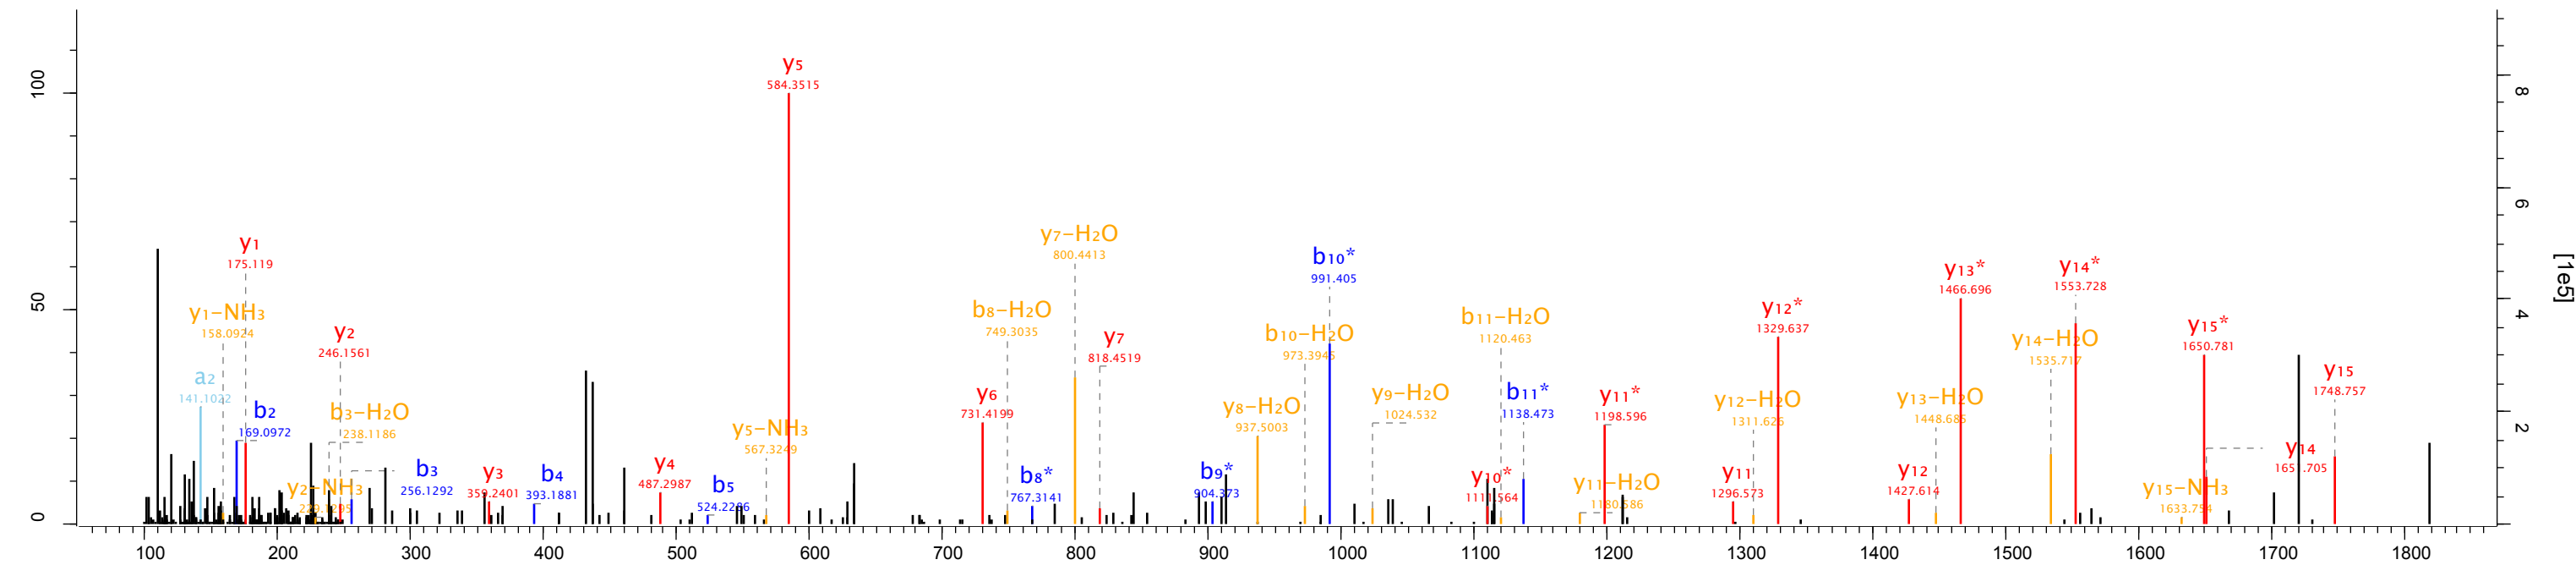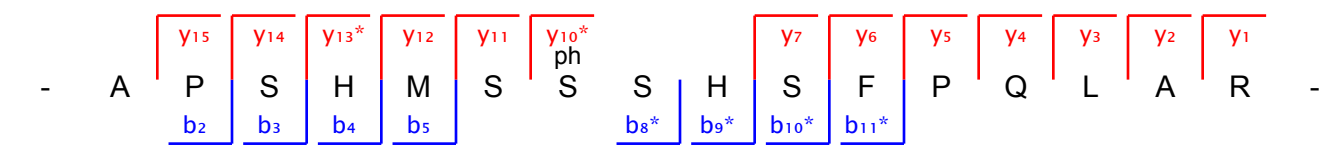

Raw file Scan Method Score m/z Gene names  
 20150814\_A375SR\_Phospho\_BR2\_08 11618 FTMS; HCD 166.43 851.4 DUT

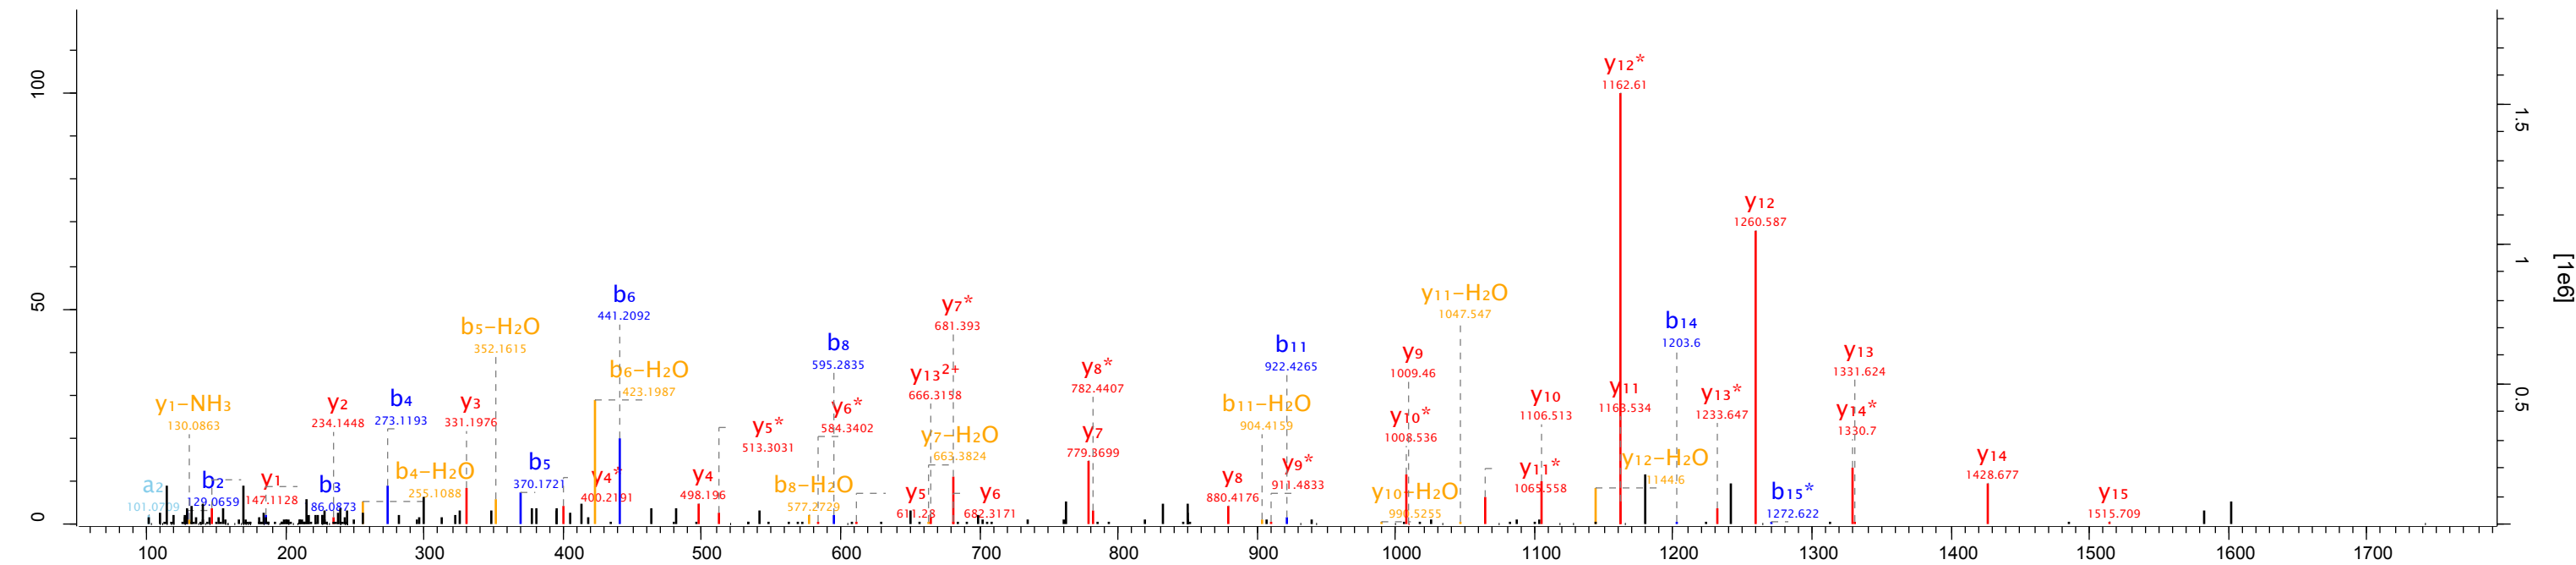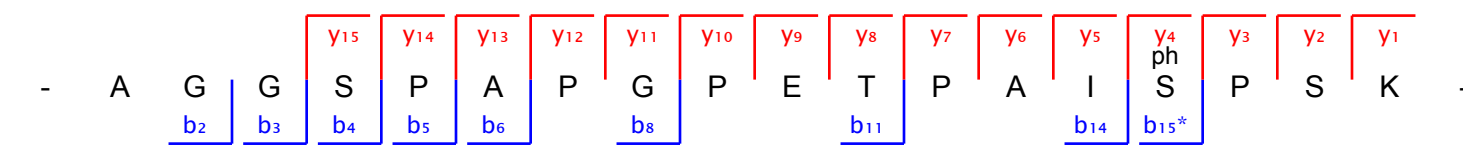

Raw file: 20150814\_A375SR\_Phospho\_BR2\_08  
 Scan: 11918 Method: FTMS; HCD Score: 111.89 m/z: 806.1 Gene names: ATAD1

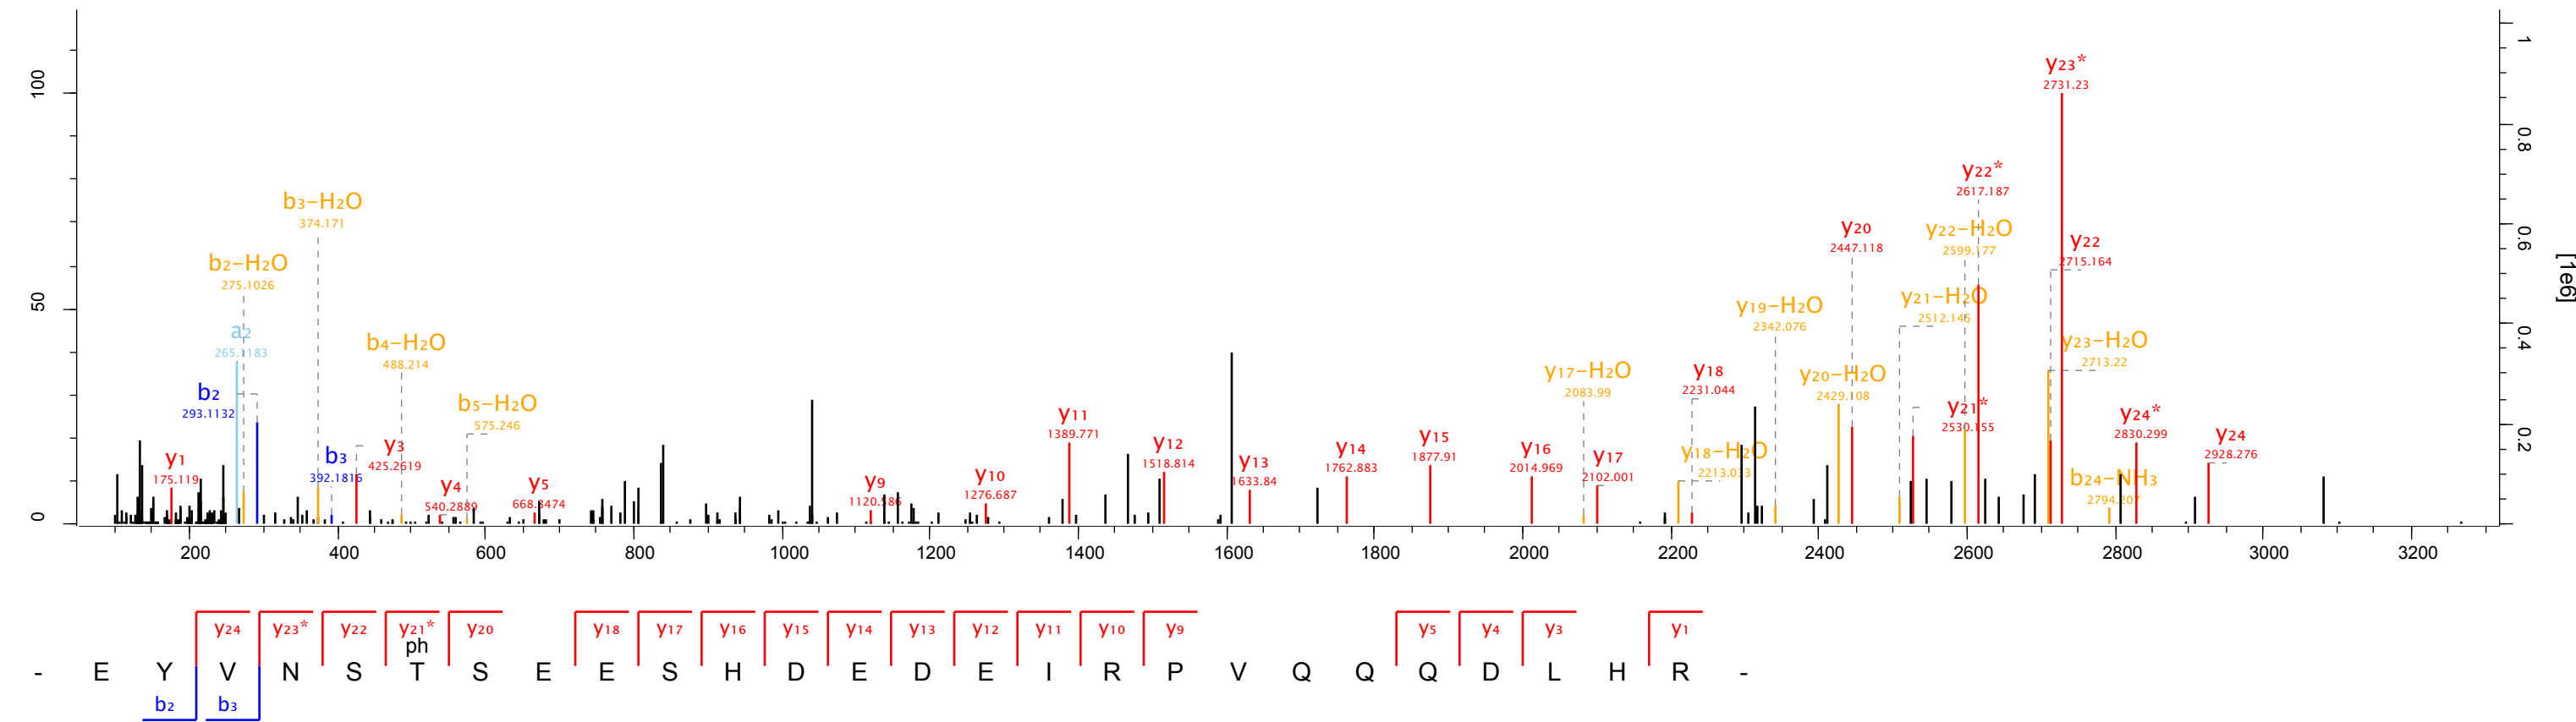

Raw file: 20150814\_A375SR\_Phospho\_BR2\_08  
 Scan: 12078 Method: FTMS; HCD Score: 50.47 m/z: 734.35 Gene names: RUNX2

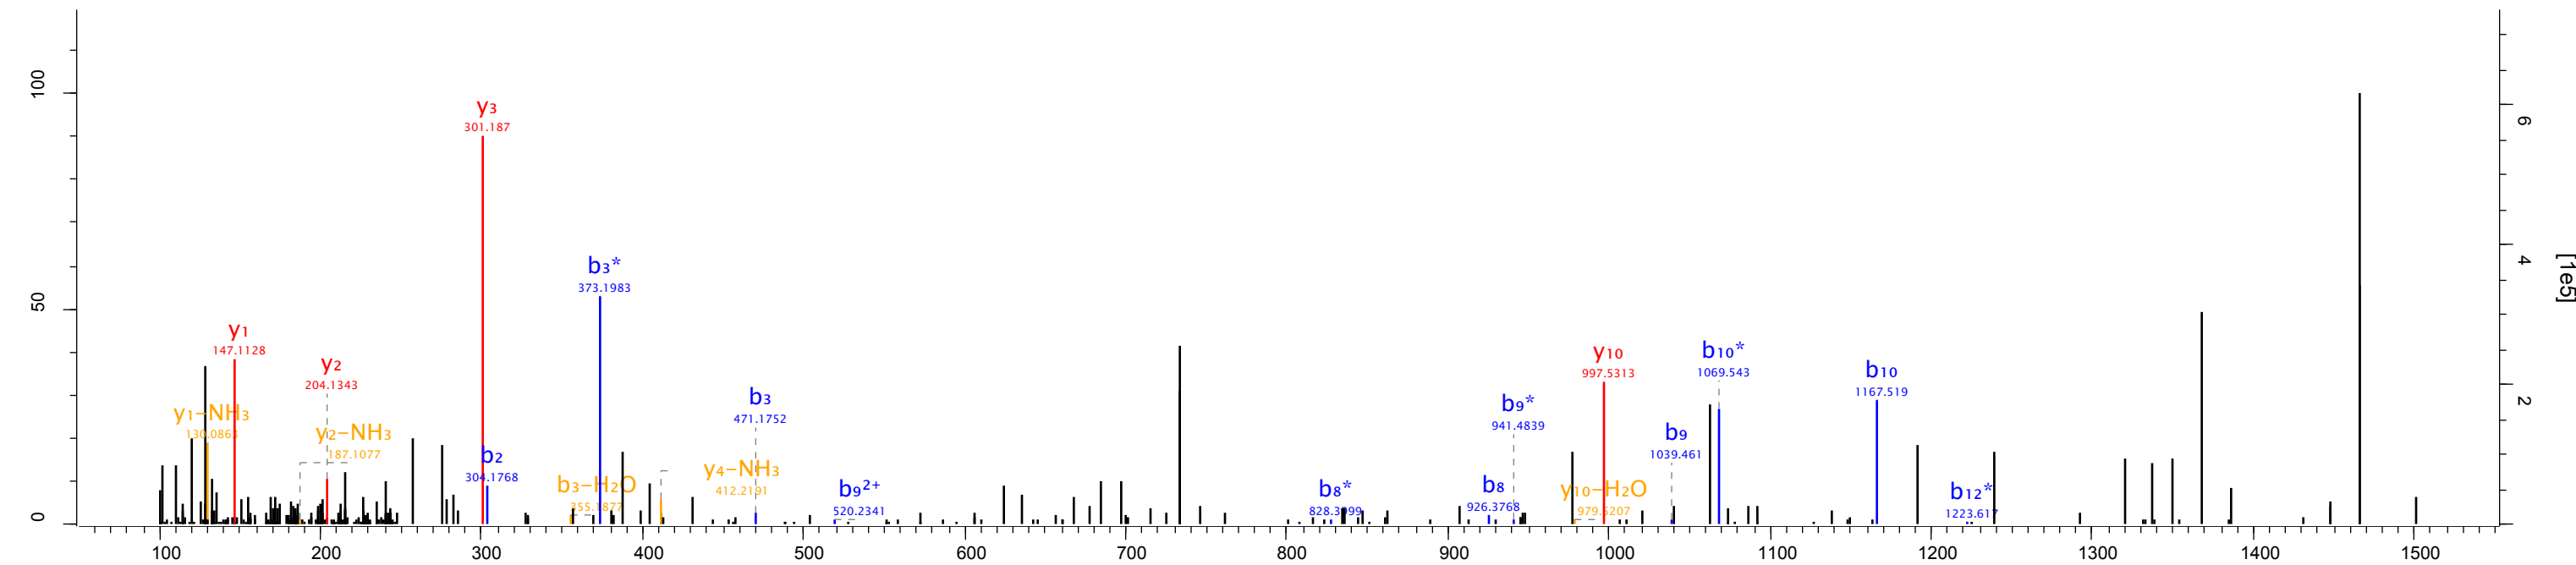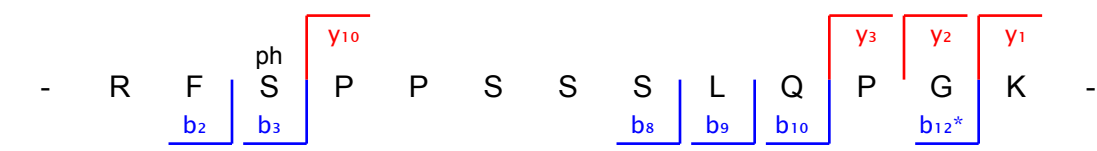

Raw file: 20150814\_A375SR\_Phospho\_BR2\_08  
 Scan: 1218 Method: FTMS; HCD Score: 75.5 m/z: 642.3 Gene names: GTF2I

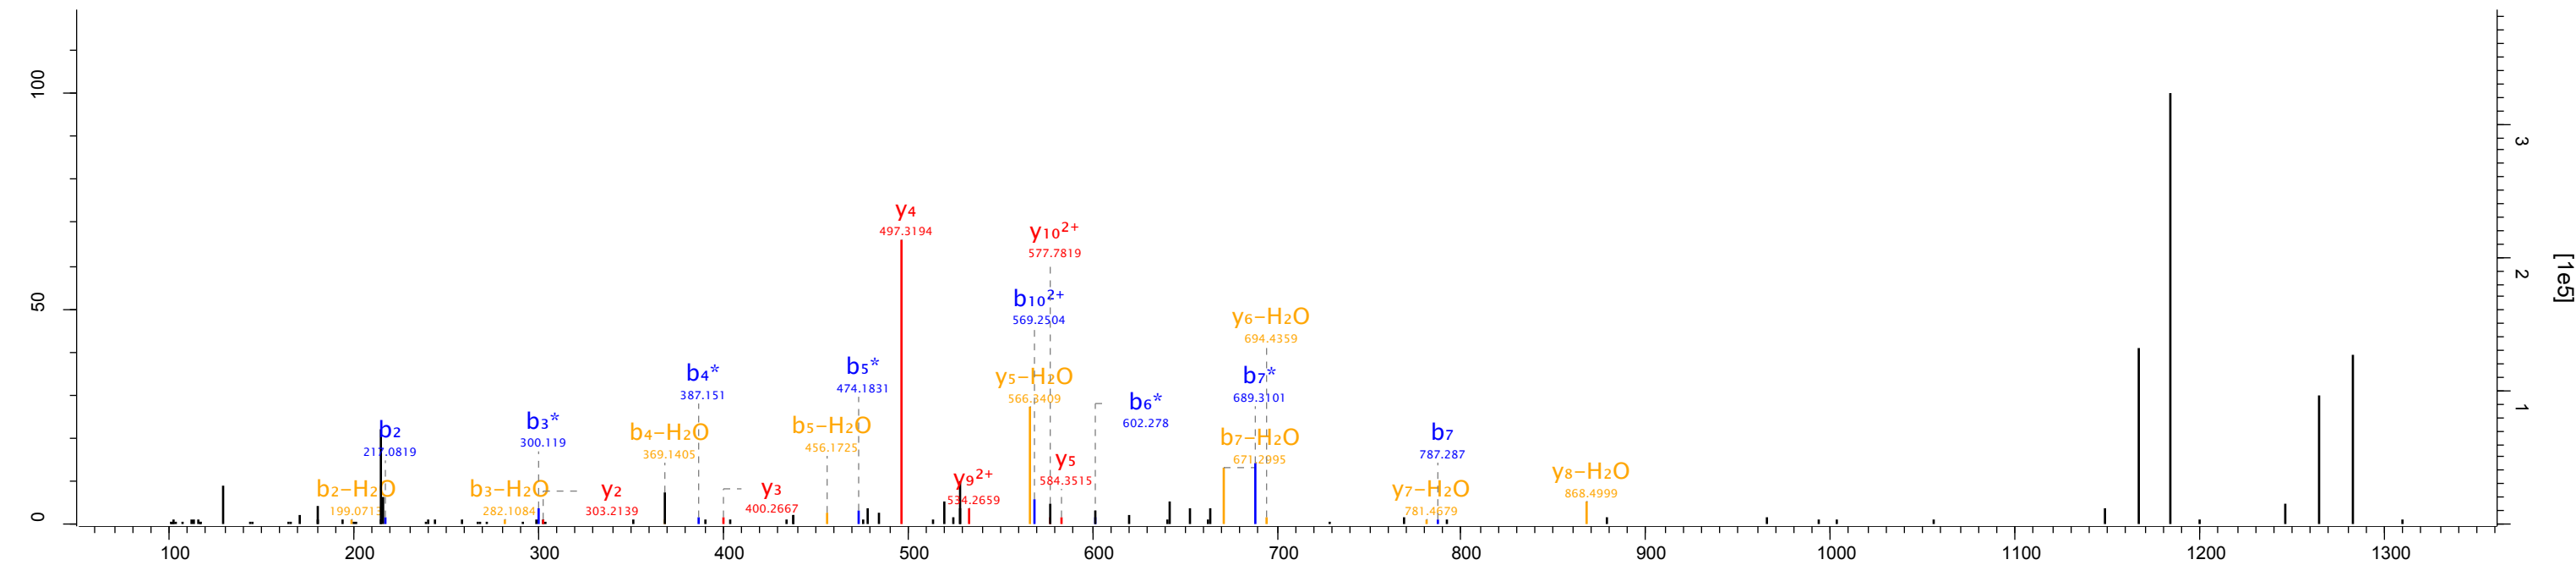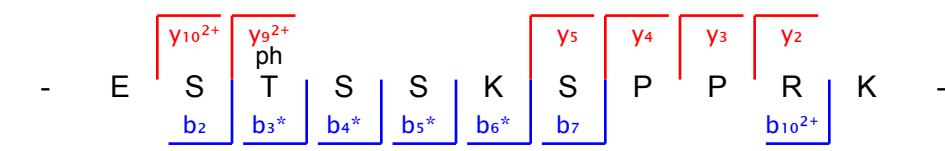

Raw file Scan Method Score m/z Gene names  
 20150814\_A375SR\_Phospho\_BR2\_08 12498 FTMS; HCD 70.83 482.56 DLC1

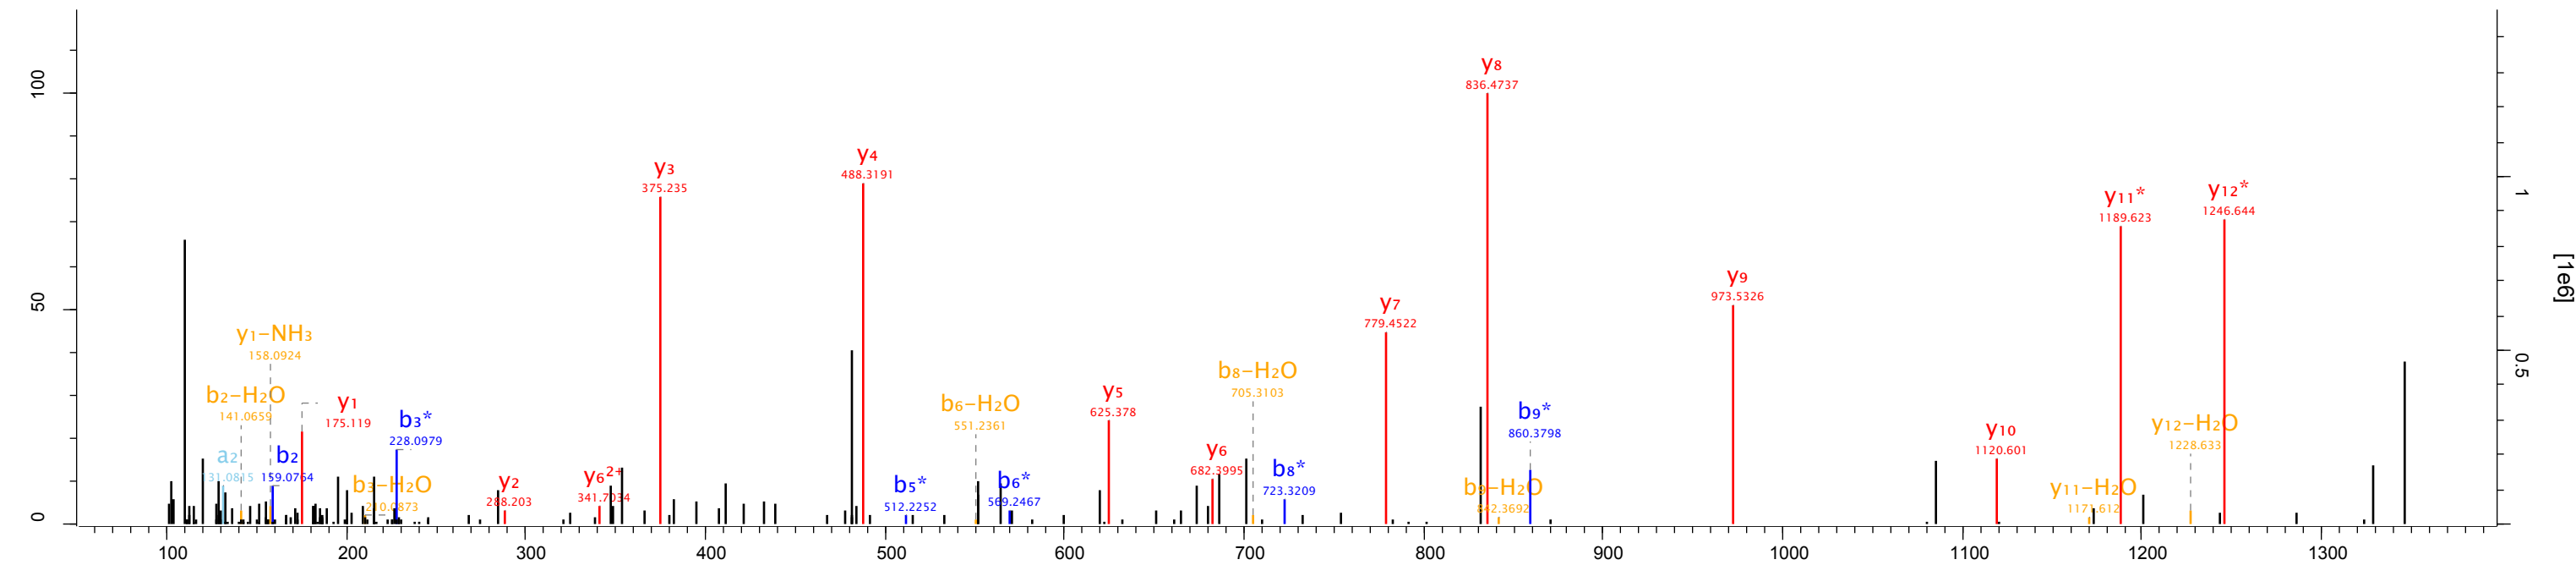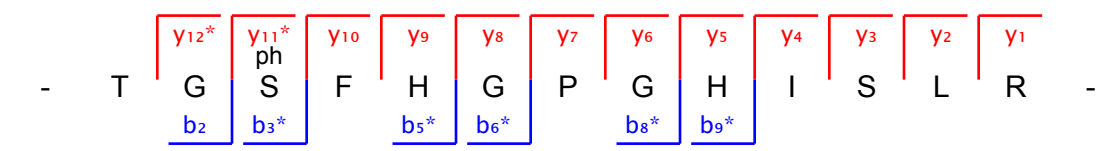



Raw file 20150814\_A375SR\_Phospho\_BR2\_08 Scan 13578 Method FTMS; HCD Score 282.62 m/z 923.92 Gene names PDLIM4

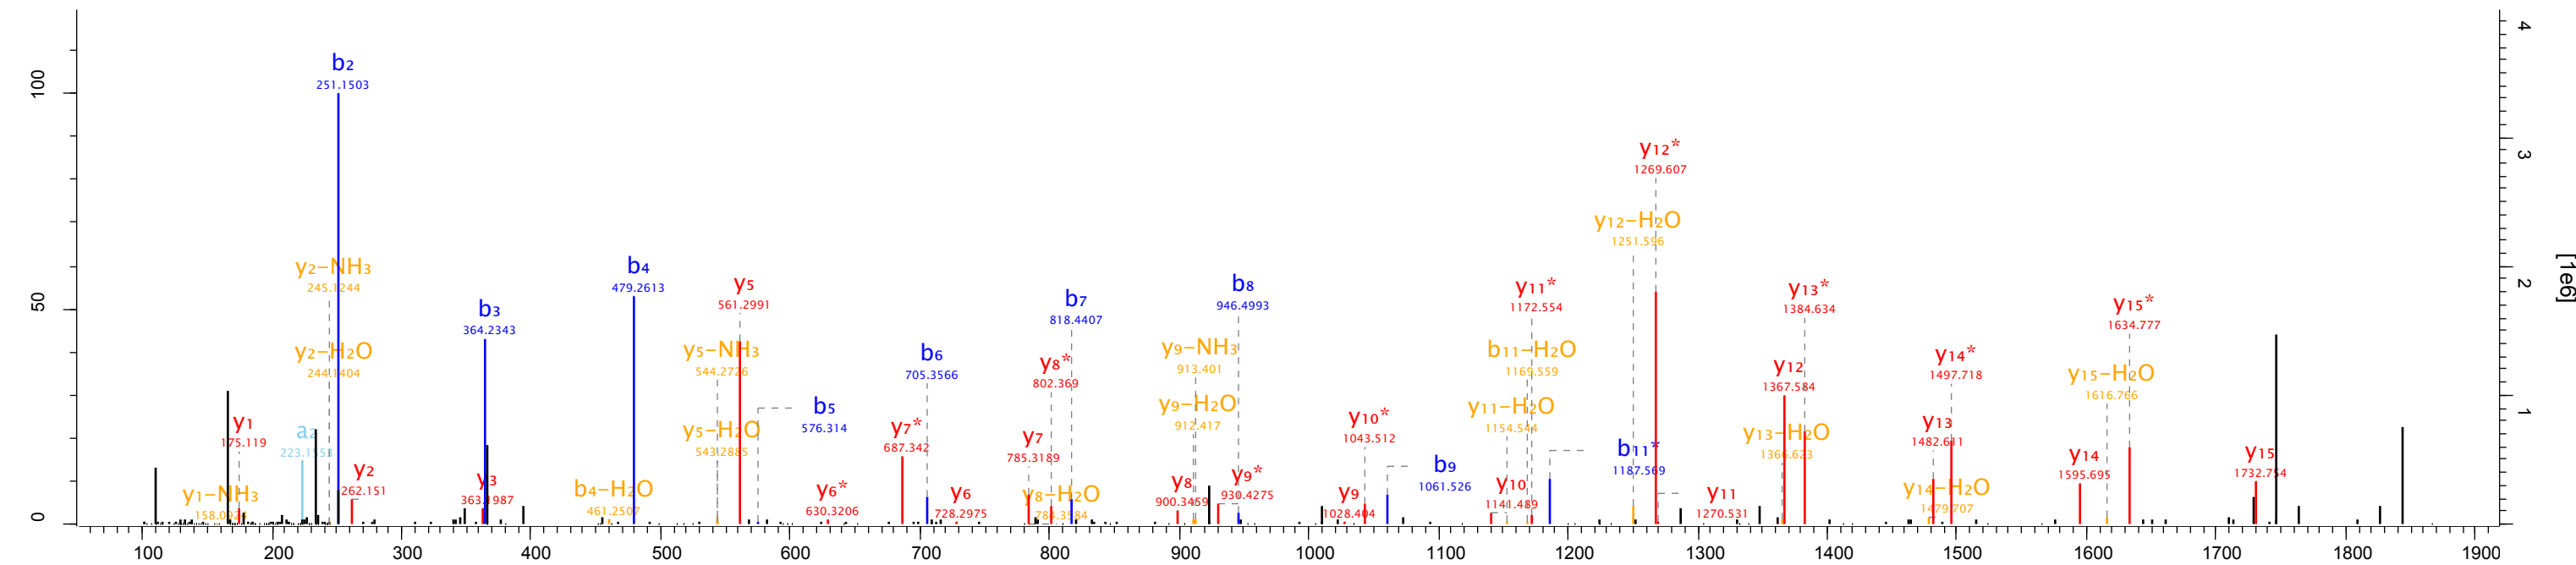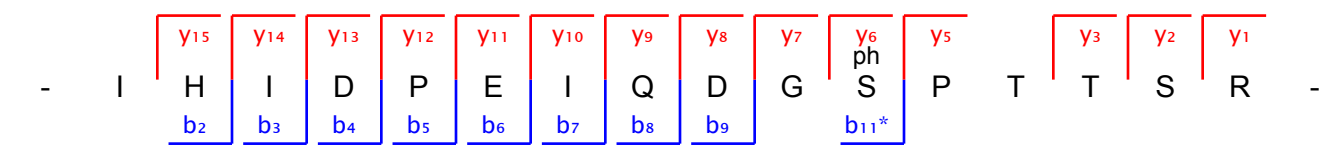

Raw file 20150814\_A375SR\_Phospho\_BR2\_08 Scan 14638 Method FTMS; HCD Score 58.89 m/z 665.83 Gene names BCL2L12

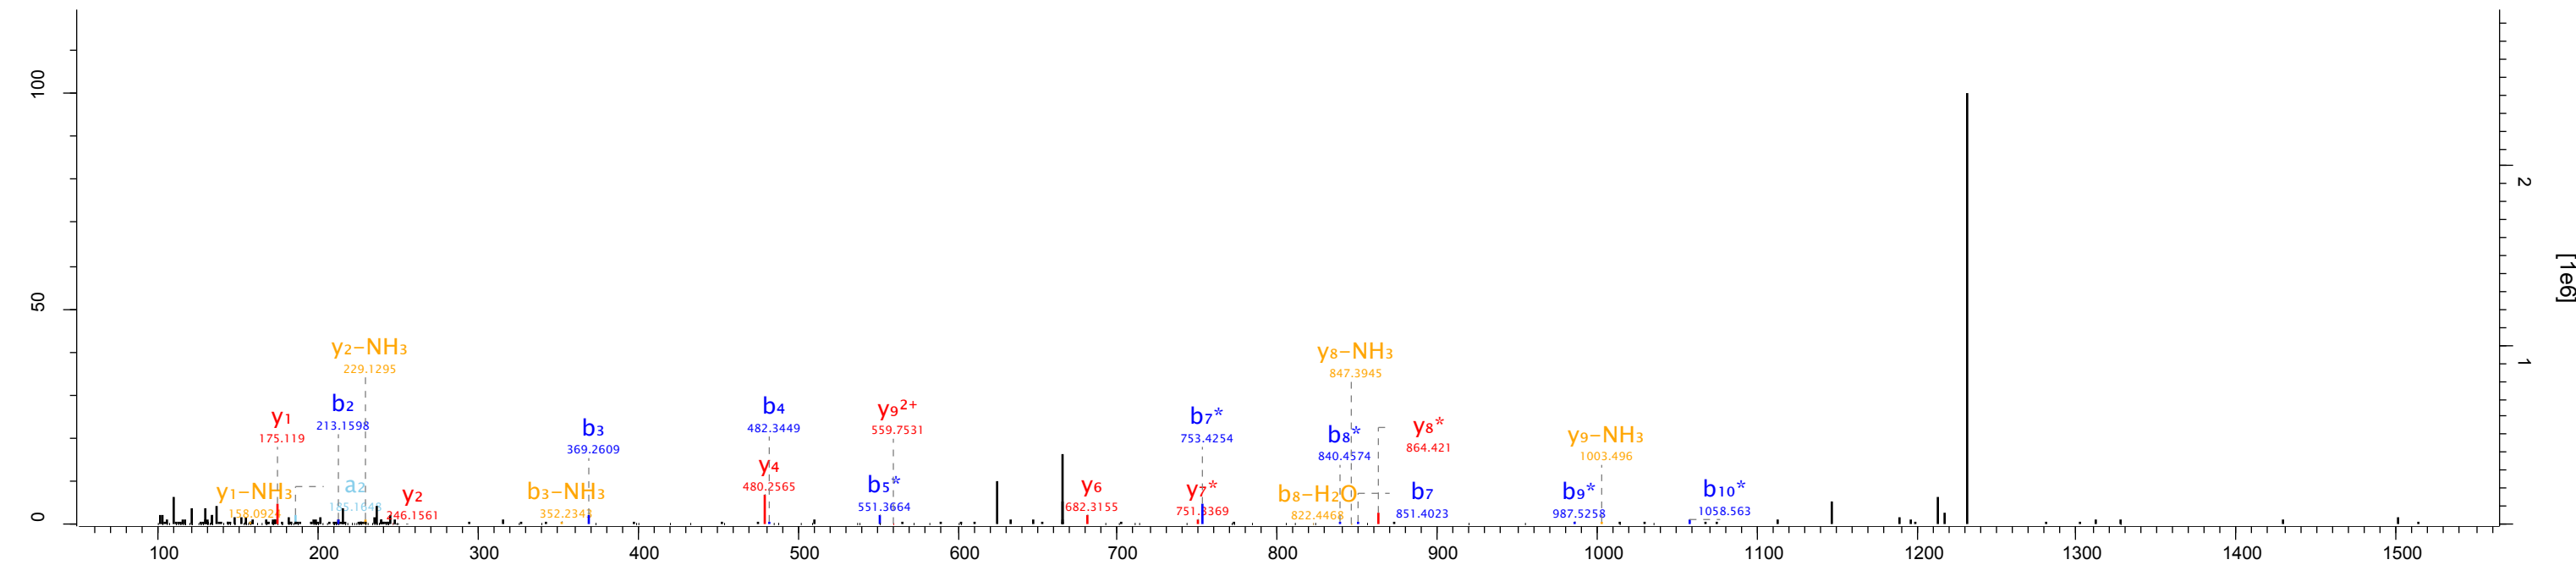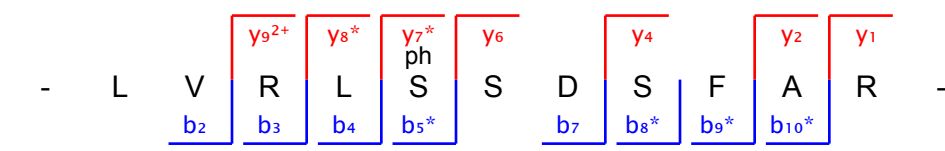

Raw file: 20150814\_A375SR\_Phospho\_BR2\_08  
 Scan: 14678 Method: FTMS; HCD Score: 58.94 m/z: 706 Gene names: BAIAP2L2

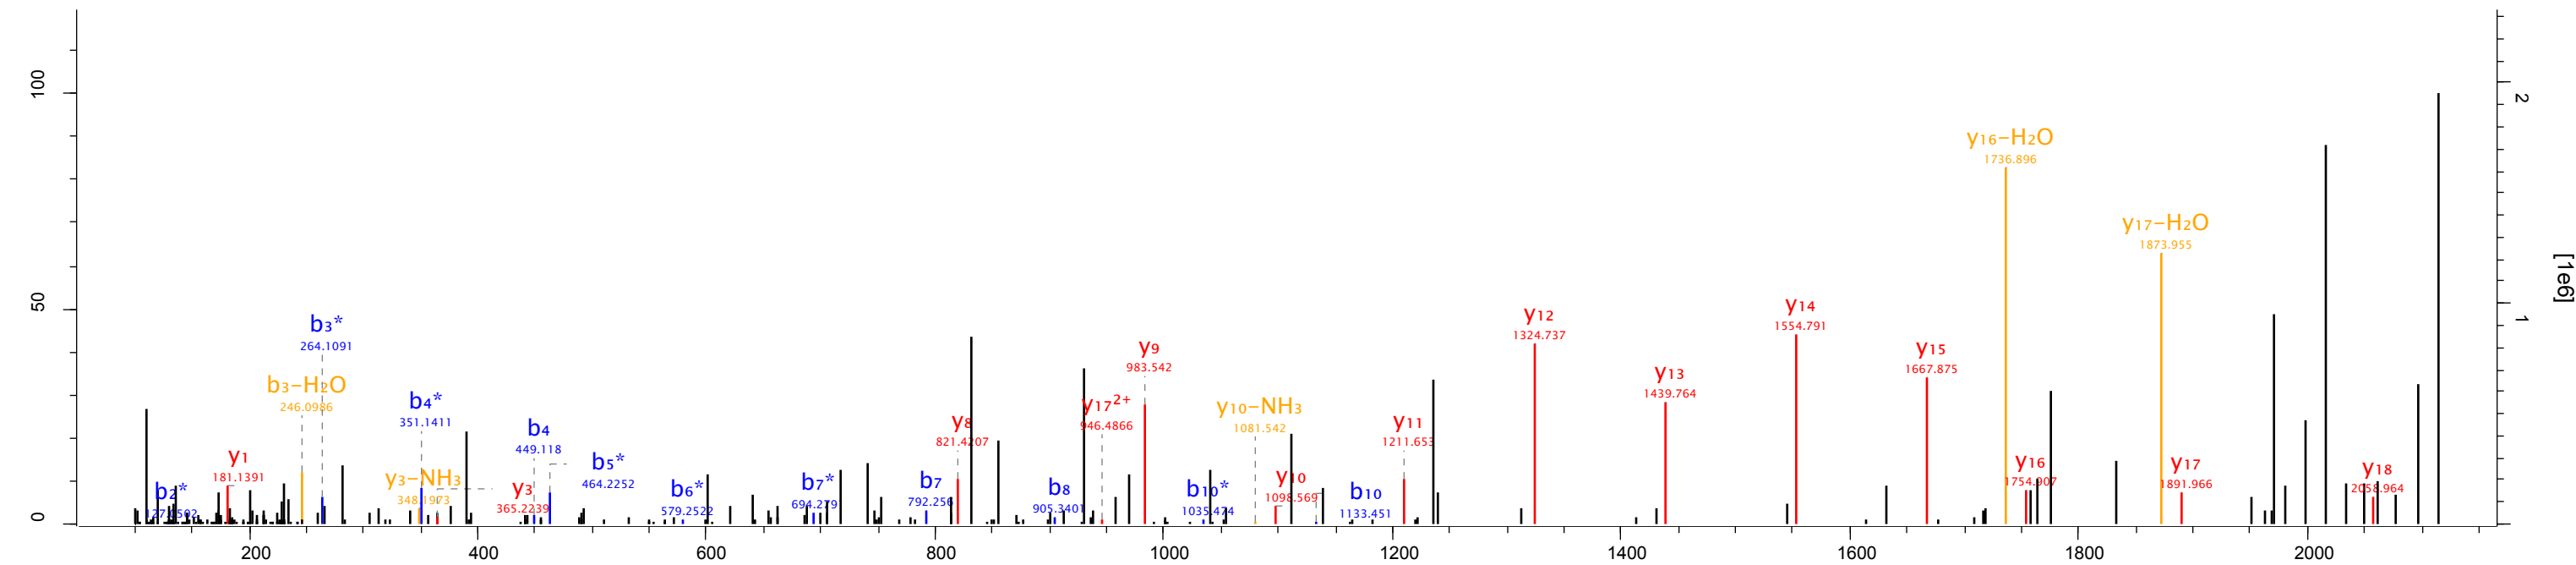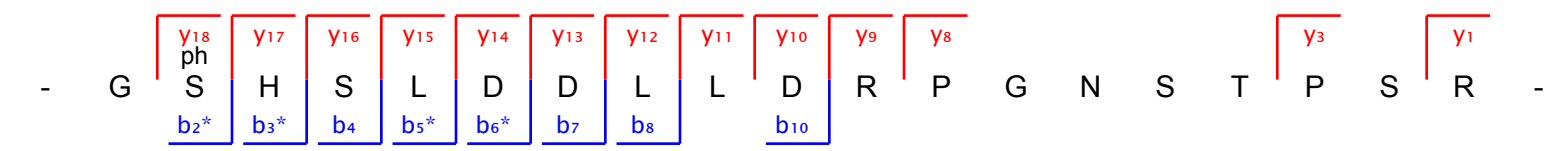

Raw file 20150814\_A375SR\_Phospho\_BR2\_08 Scan 15928 Method FTMS; HCD Score 122.16 m/z 768.86 Gene names SIPA1L1

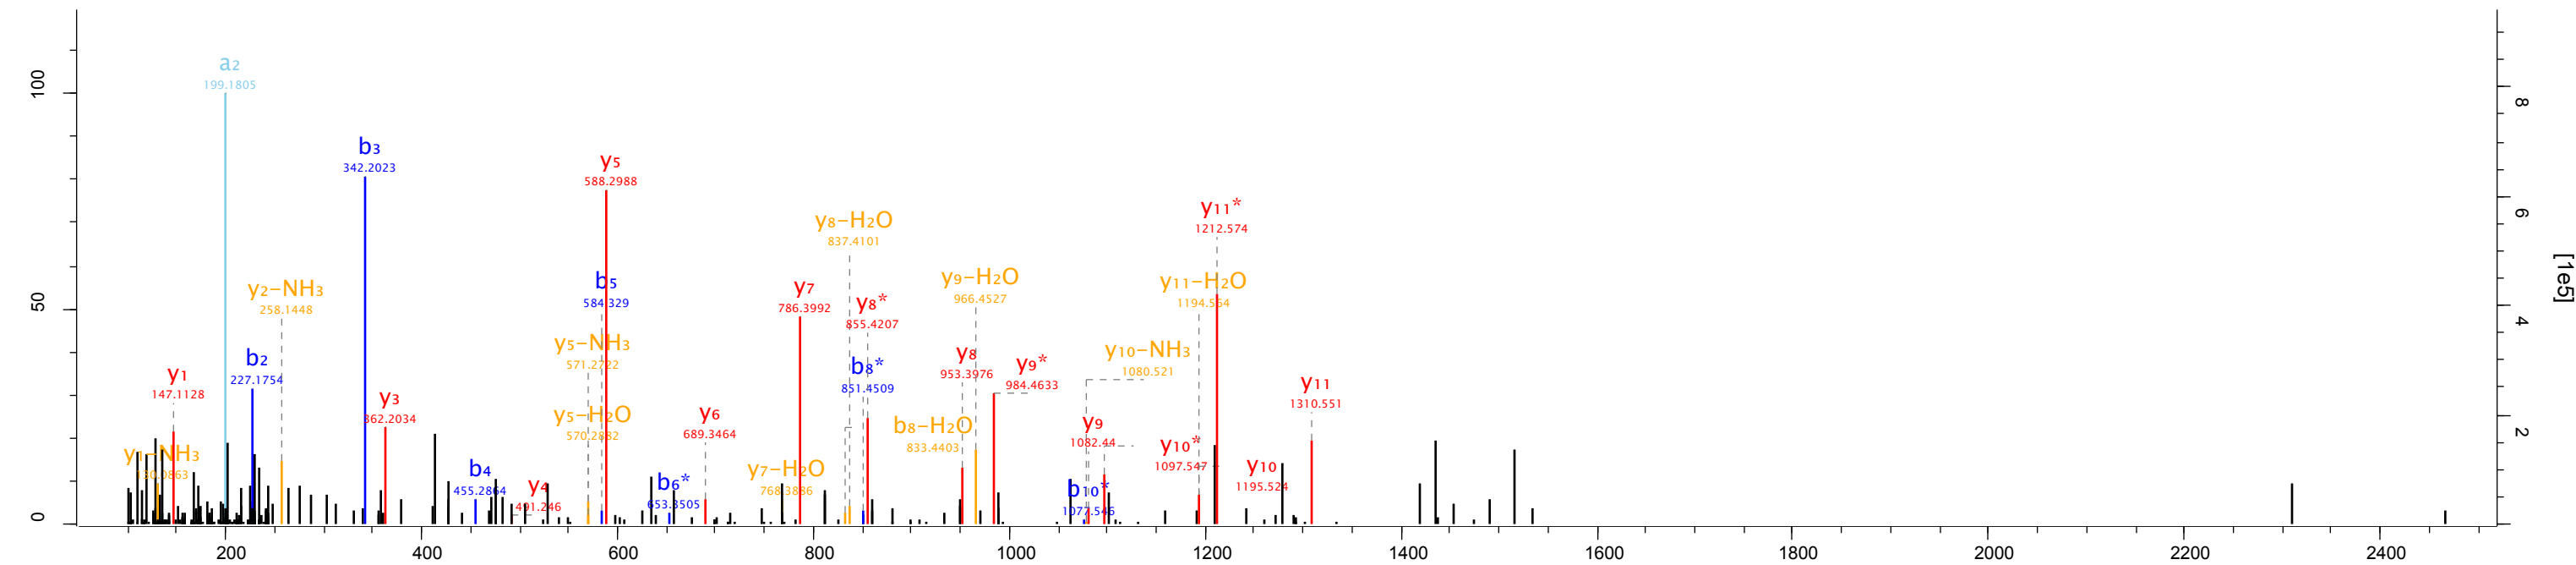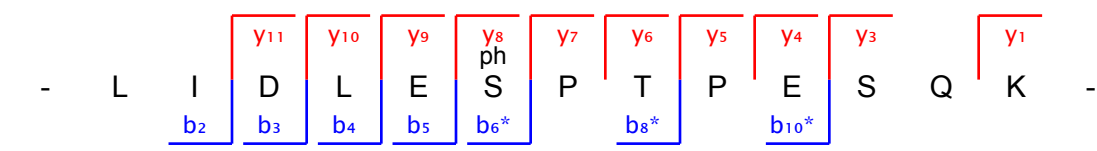

Raw file 20150814\_A375SR\_Phospho\_BR2\_08 Scan 16238 Method FTMS; HCD Score 131.99 m/z 780.87 Gene names PHLDA2

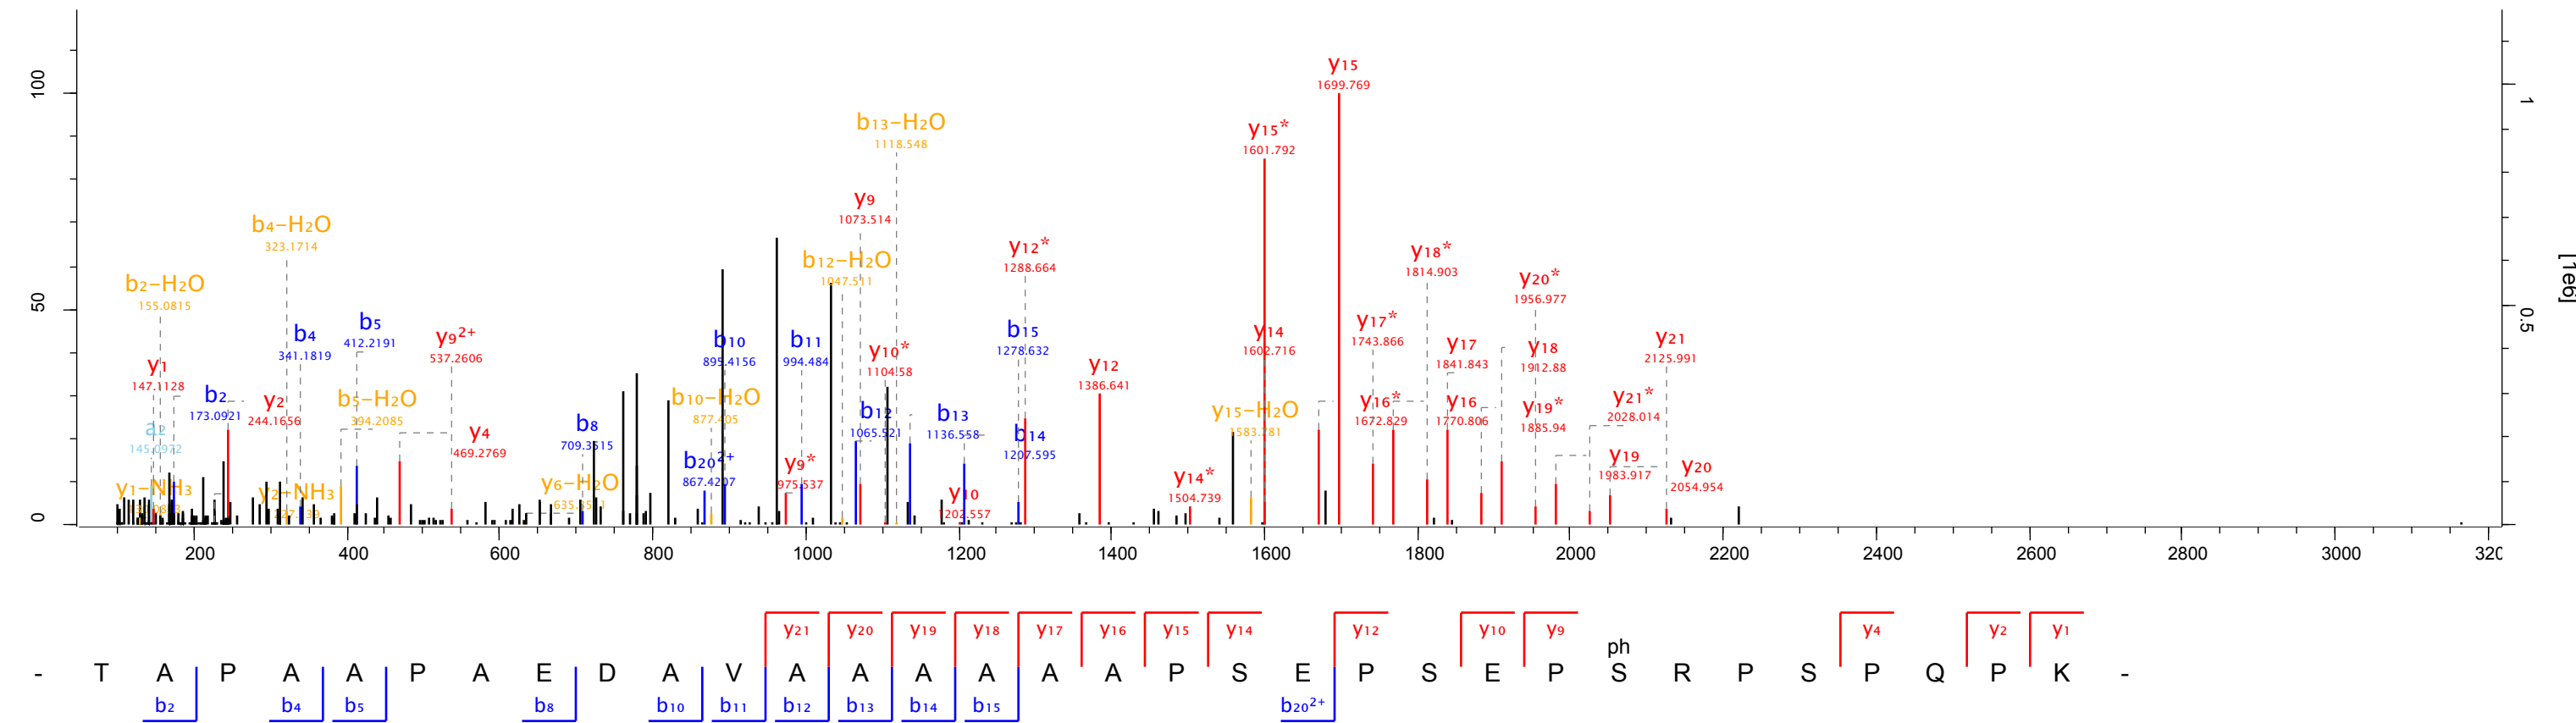

Raw file: 20150814\_A375SR\_Phospho\_BR2\_08  
 Scan: 16888 Method: FTMS; HCD Score: 87.95 m/z: 746.87 Gene names: AMOTL2

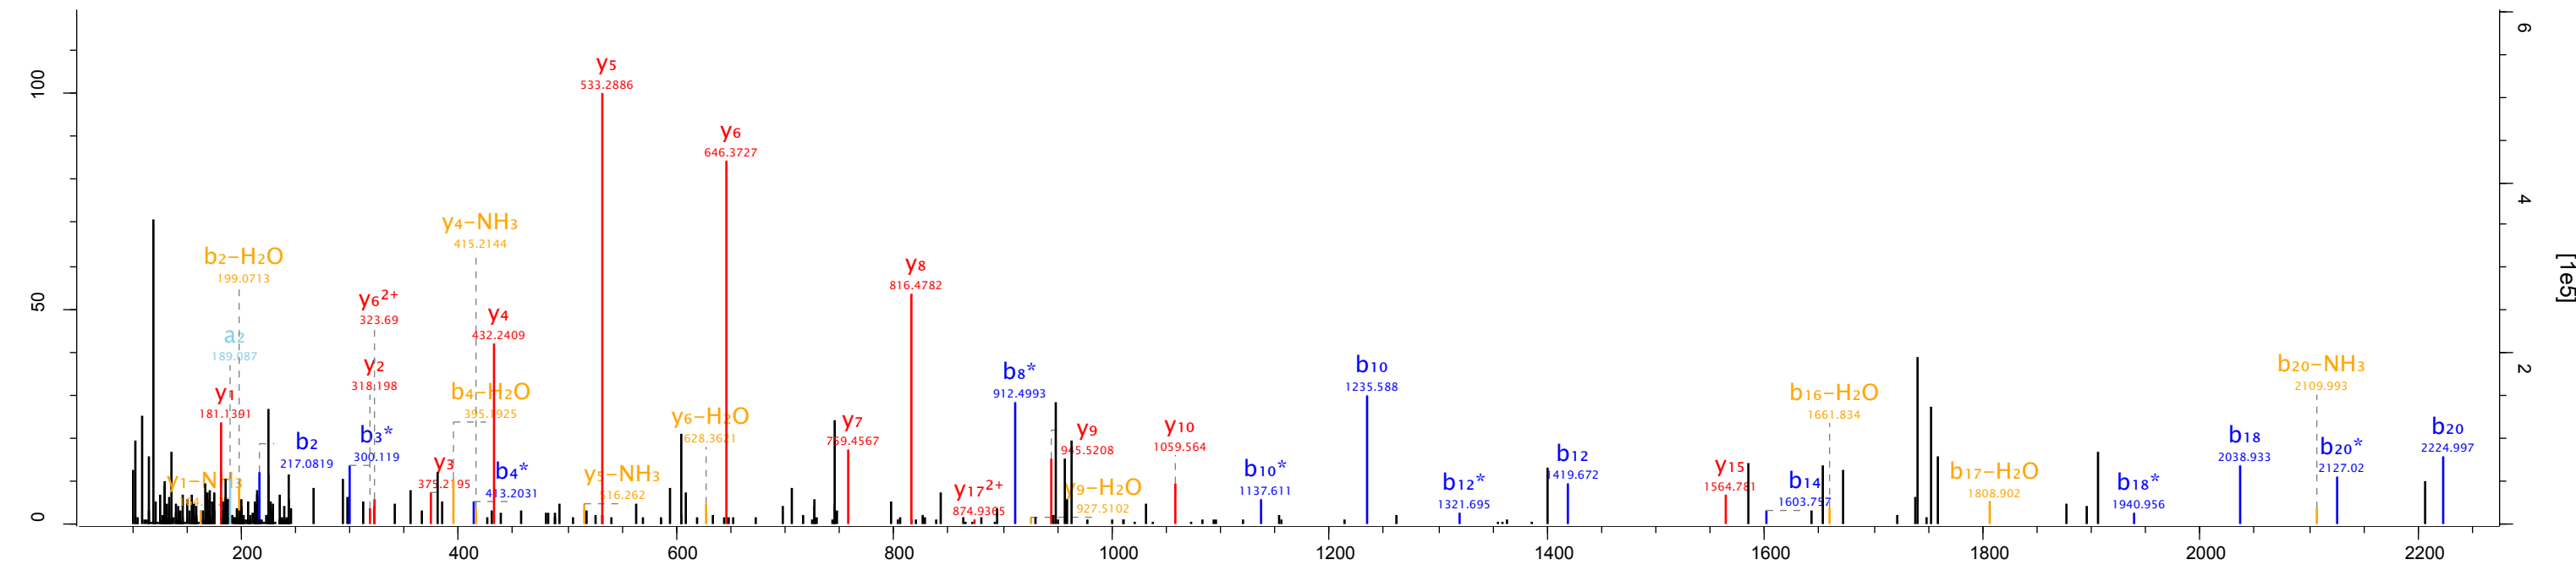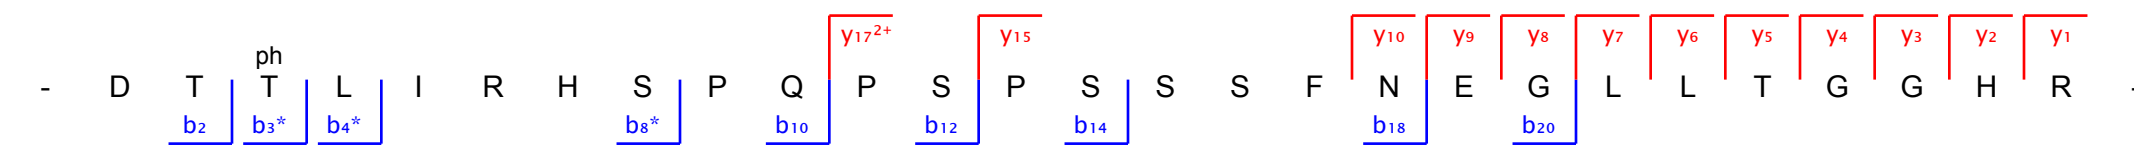

Raw file 20150814\_A375SR\_Phospho\_BR2\_08 Scan 17738 Method FTMS; HCD Score 50.24 m/z 726.32 Gene names GPBP1

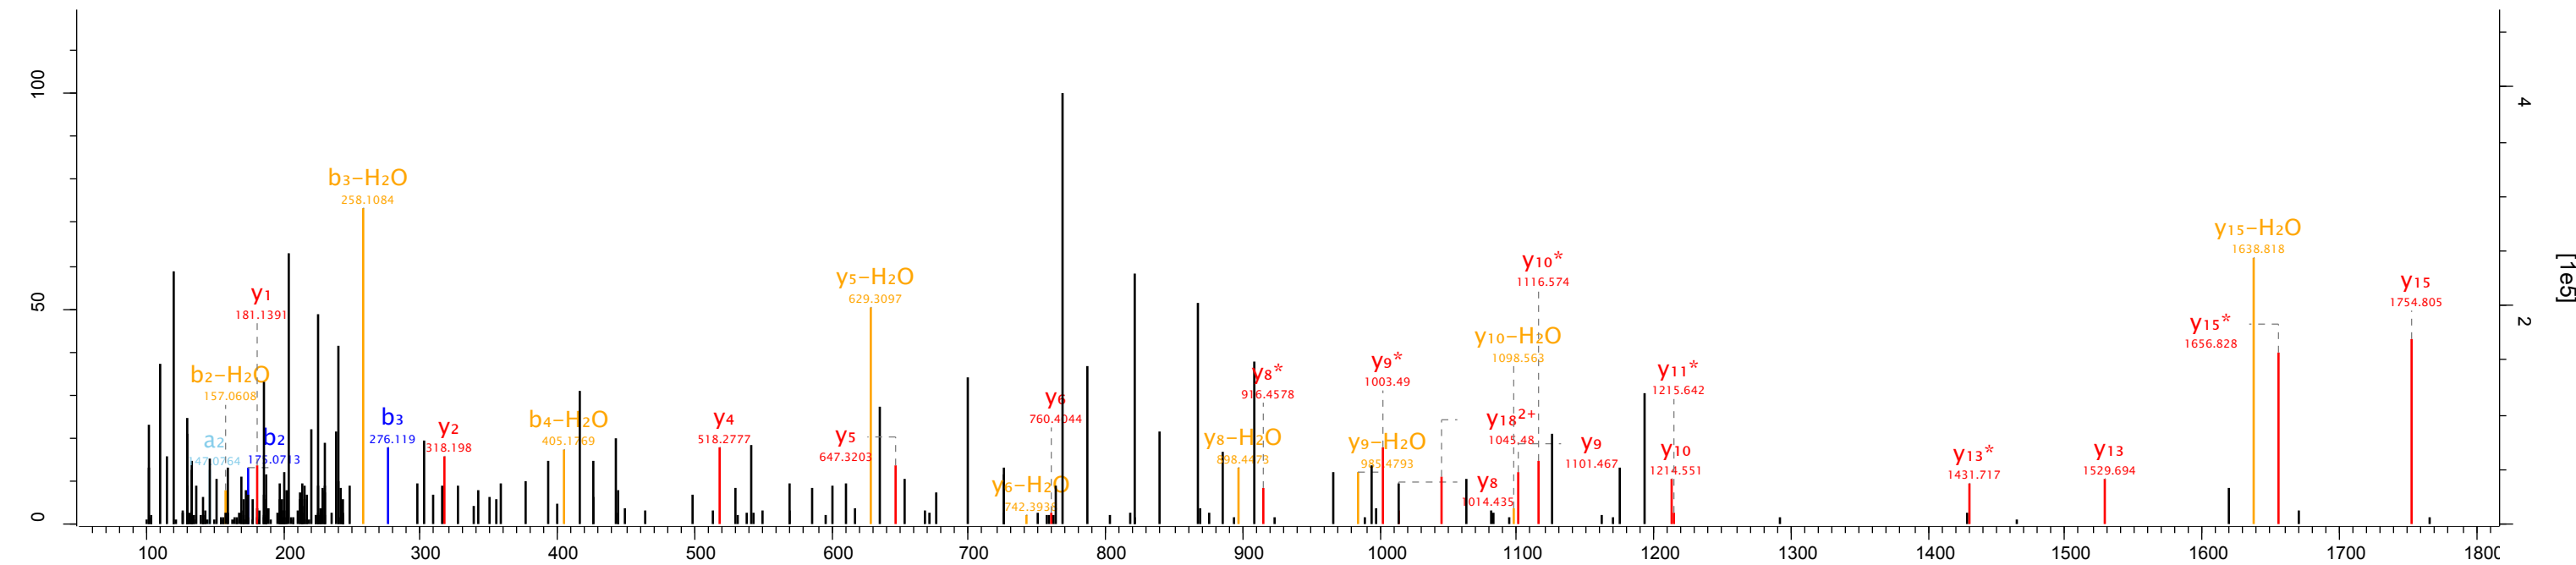

- S S T F P Q T D V L S S S L E A E H R -

Annotations below the sequence:

- Red boxes above the sequence: y<sub>18</sub><sup>2+</sup> (S), y<sub>15</sub> (P), y<sub>13</sub> (T), y<sub>11</sub>\* (V), y<sub>10</sub> (L), y<sub>9</sub> (S), y<sub>8</sub><sup>ph</sup> (S), y<sub>6</sub> (L), y<sub>5</sub> (E), y<sub>4</sub> (A), y<sub>2</sub> (H), y<sub>1</sub> (R).
- Blue boxes below the sequence: b<sub>2</sub> (S), b<sub>3</sub> (T).

Raw file 20150814\_A375SR\_Phospho\_BR2\_08 Scan 18008 Method FTMS; HCD Score 138.05 m/z 847.88 Gene names LASP1

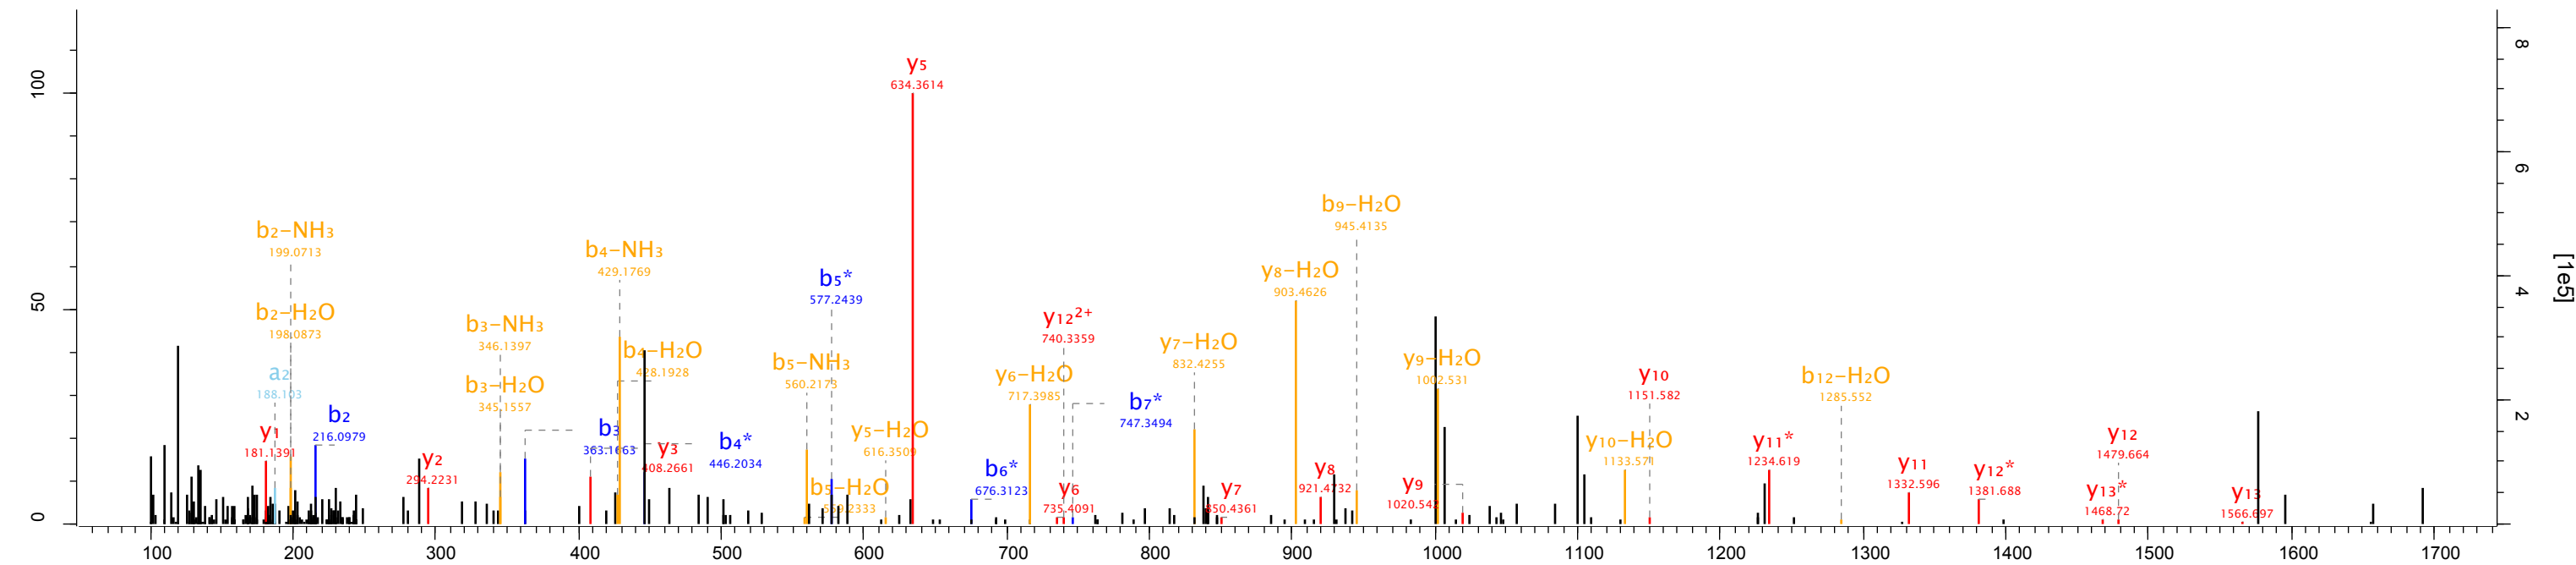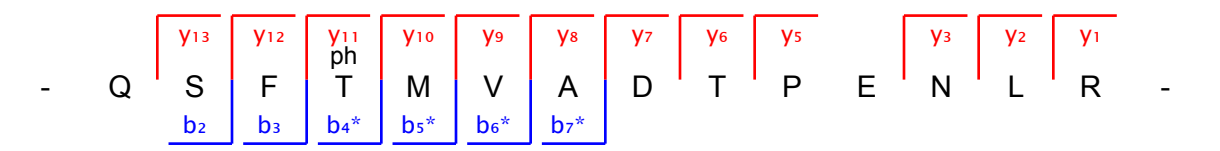



Raw file  
20150814\_A375SR\_Phospho\_BR2\_08

Scan 18038 Method FTMS; HCD Score 105.55 m/z 879.43 Gene names MPRIP

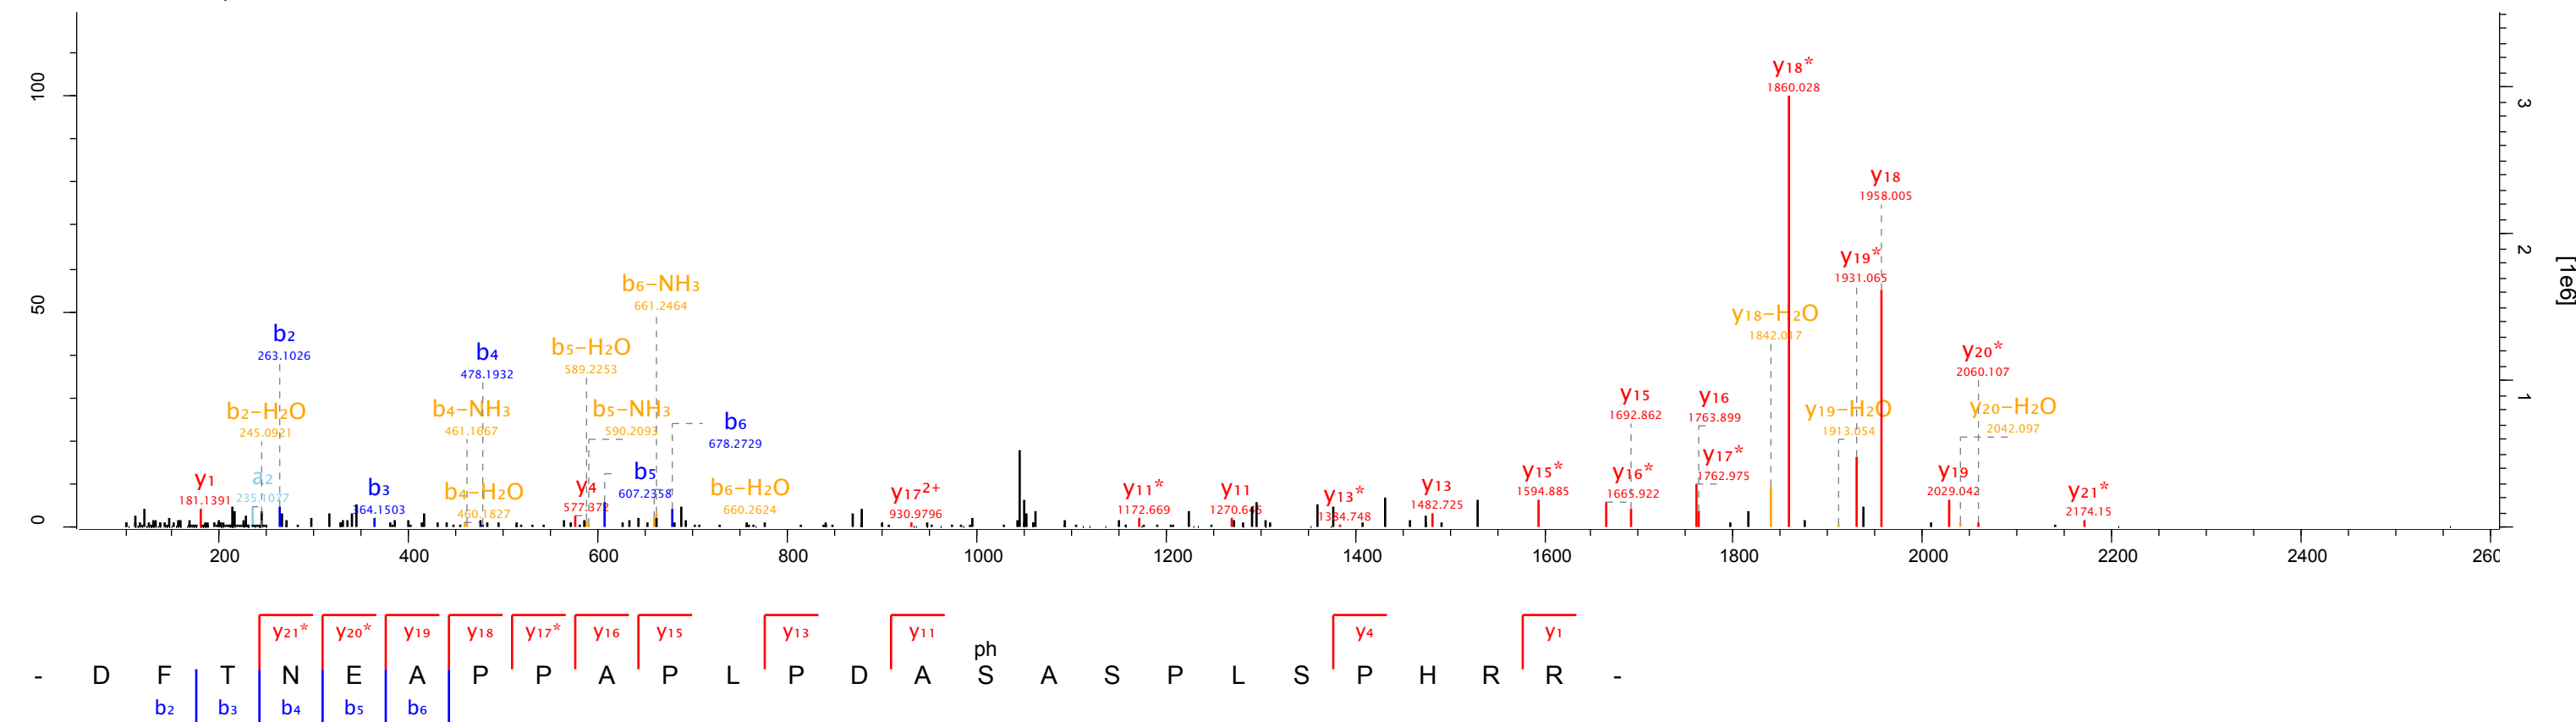

Raw file: 20150814\_A375SR\_Phospho\_BR2\_08  
 Scan: 18928 Method: FTMS; HCD Score: 77.87 m/z: 799.9 Gene names: NEK9

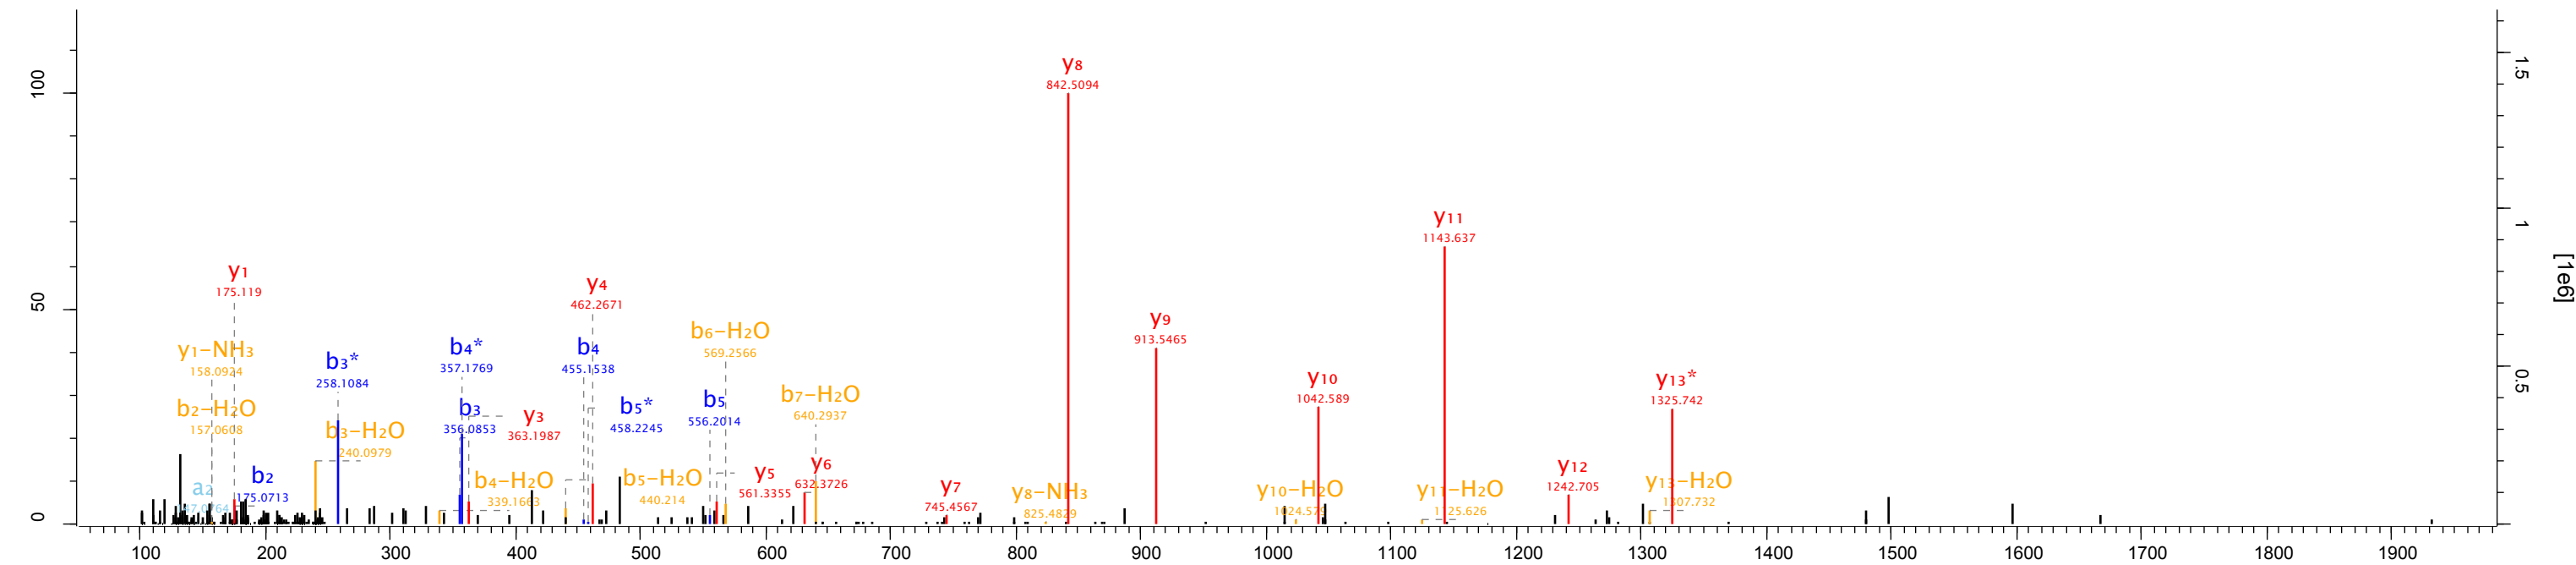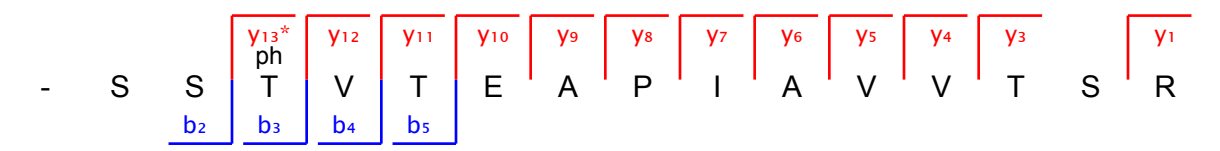

Raw file: 20150814\_A375SR\_Phospho\_BR2\_08  
 Scan: 20188 Method: FTMS; HCD Score: 94.33 m/z: 842.66 Gene names: EXOC2

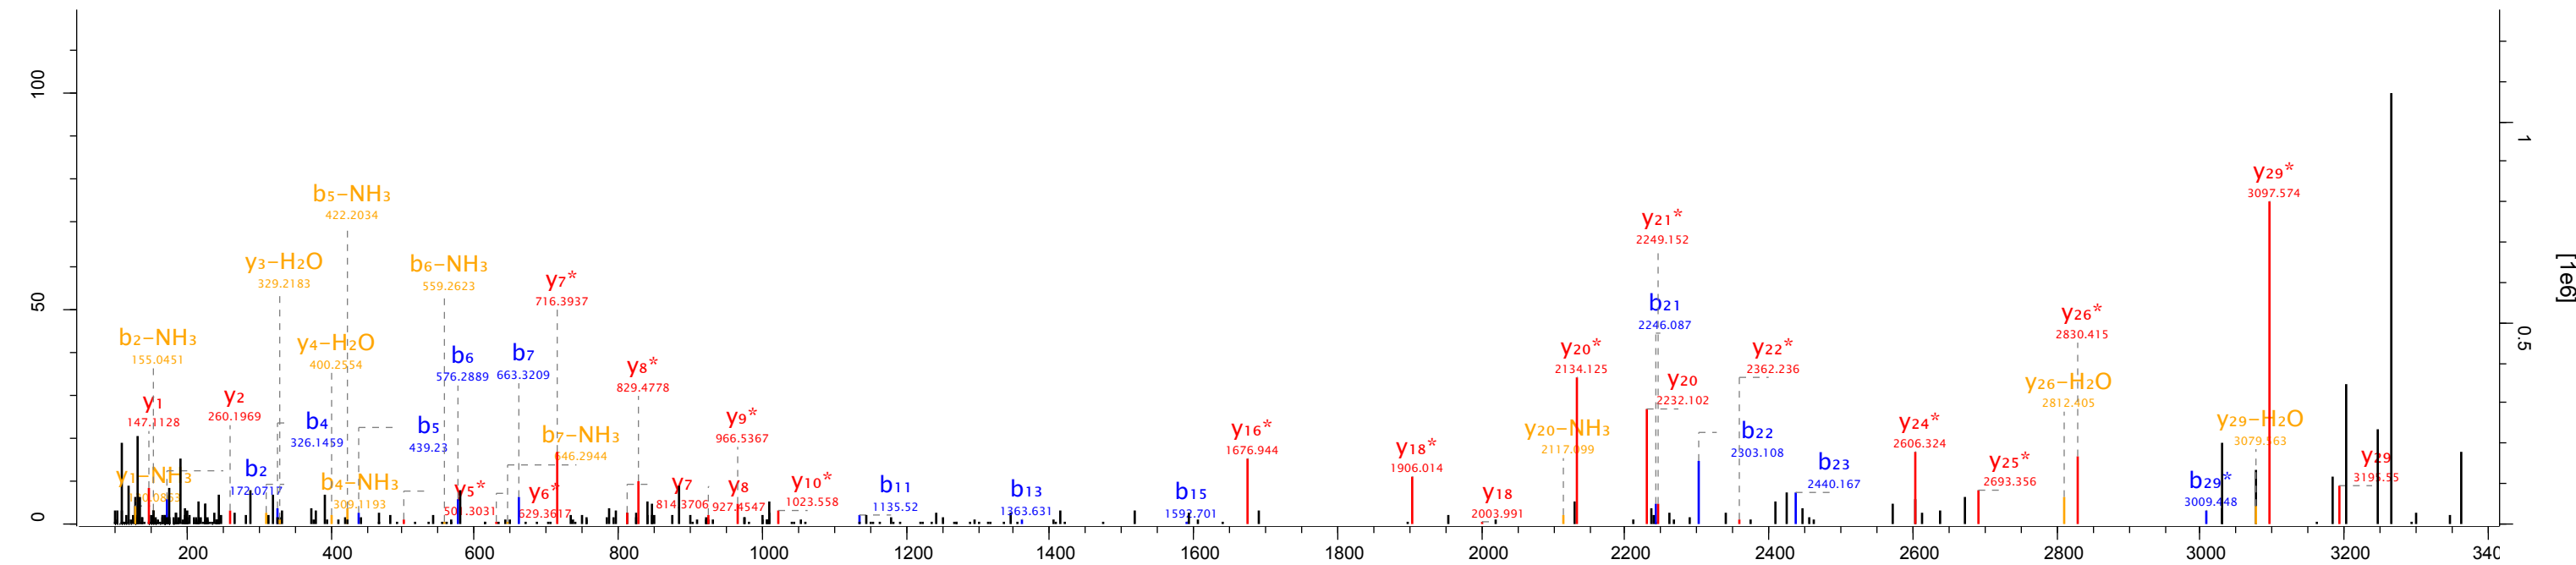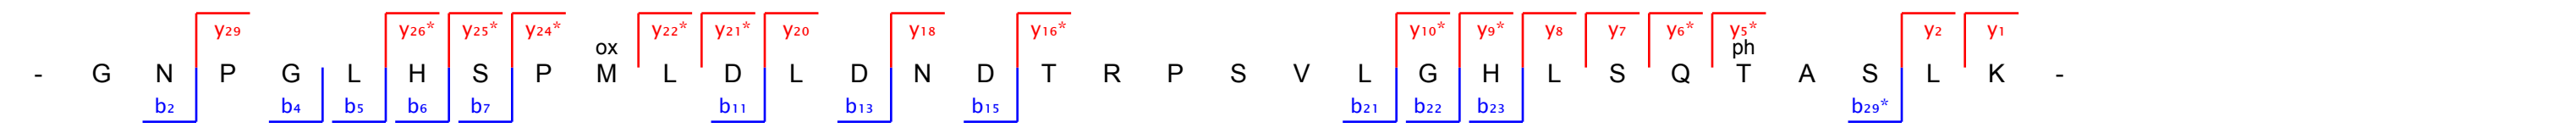

Raw file 20150814\_A375SR\_Phospho\_BR2\_08 Scan 2048 Method FTMS; HCD Score 142.4 m/z 757.86 Gene names TJP2

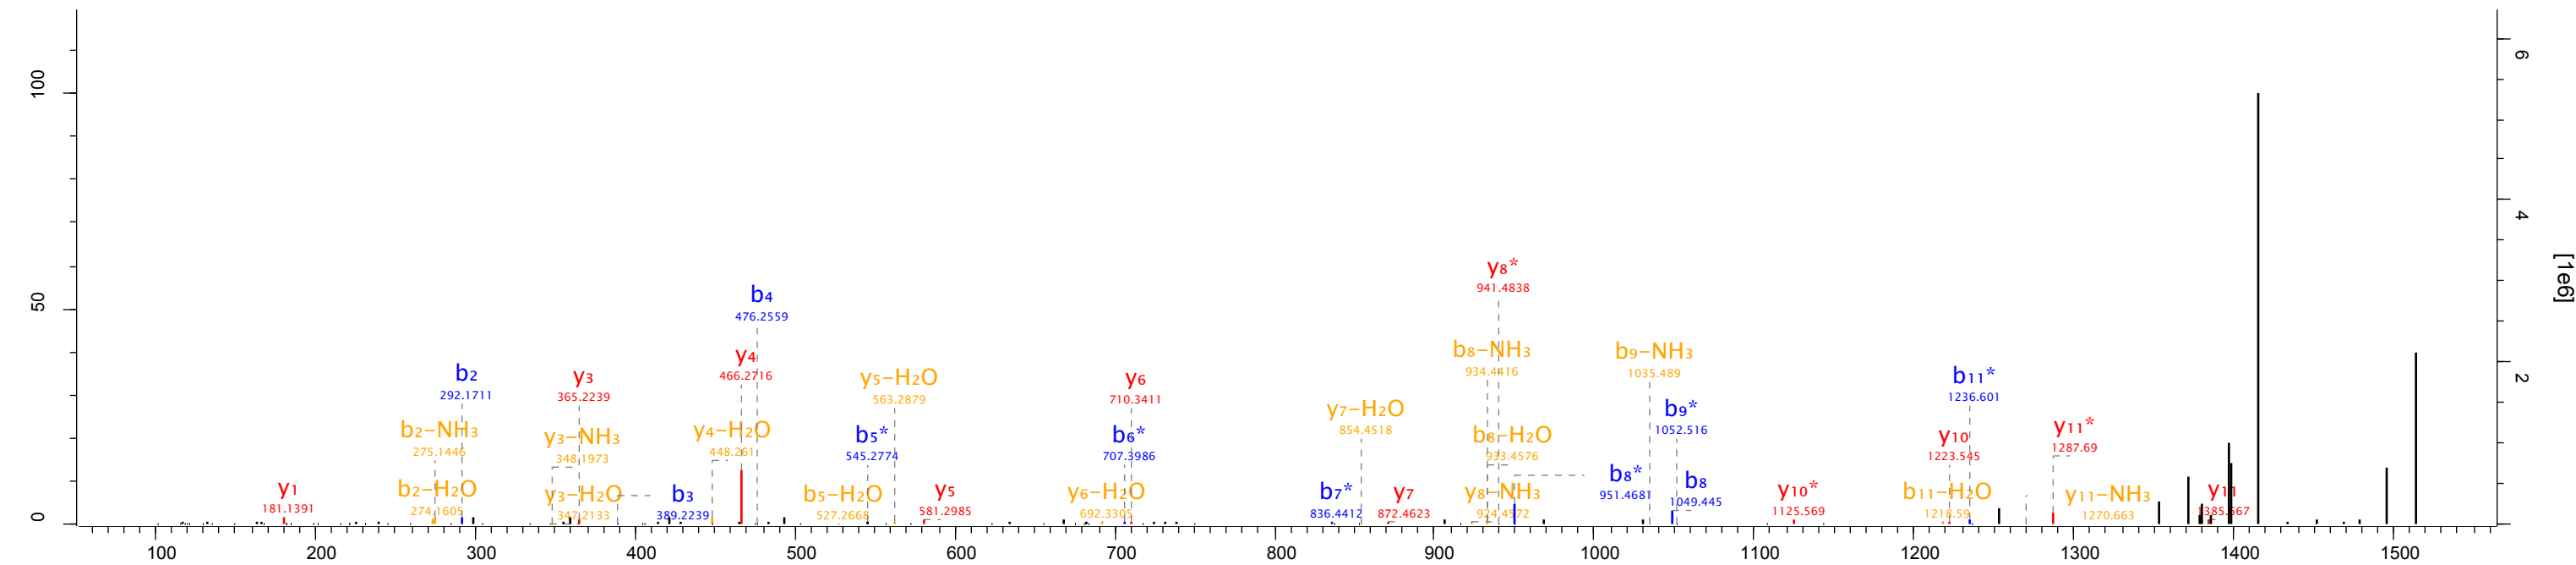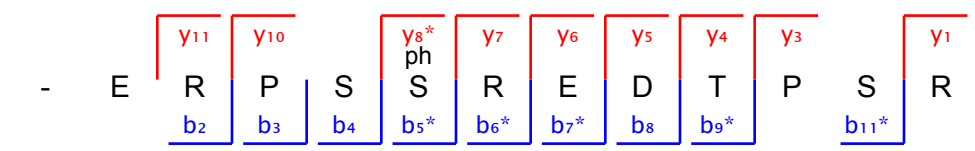

Raw file: 20150814\_A375SR\_Phospho\_BR2\_08  
 Scan: 21528 Method: FTMS; HCD Score: 117.42 m/z: 791.15 Gene names: ULK1

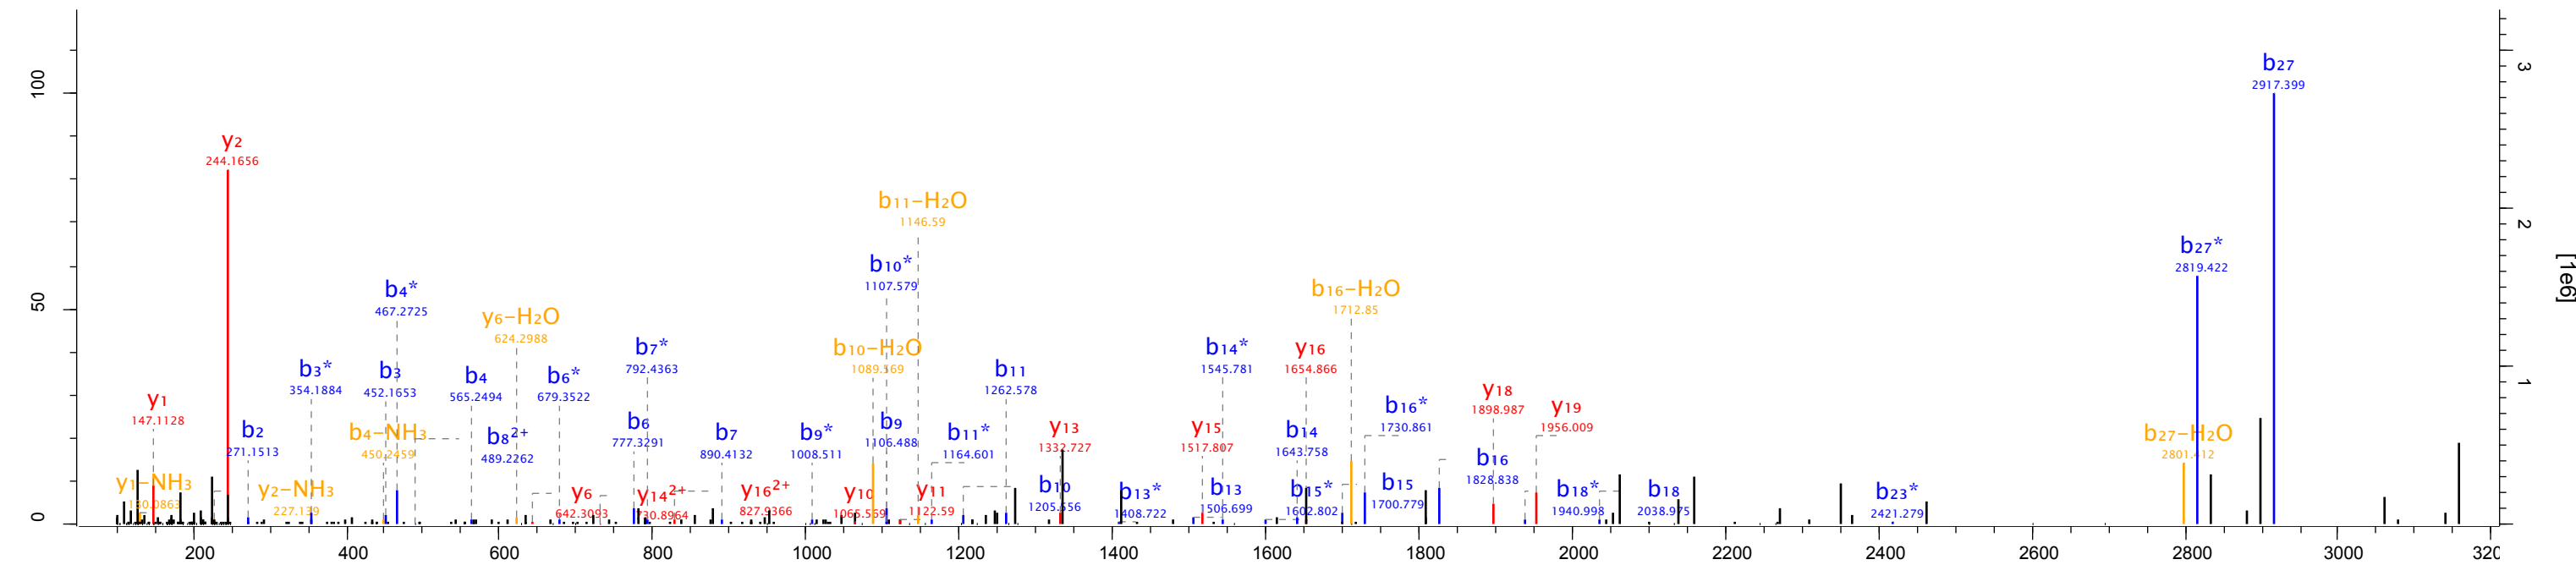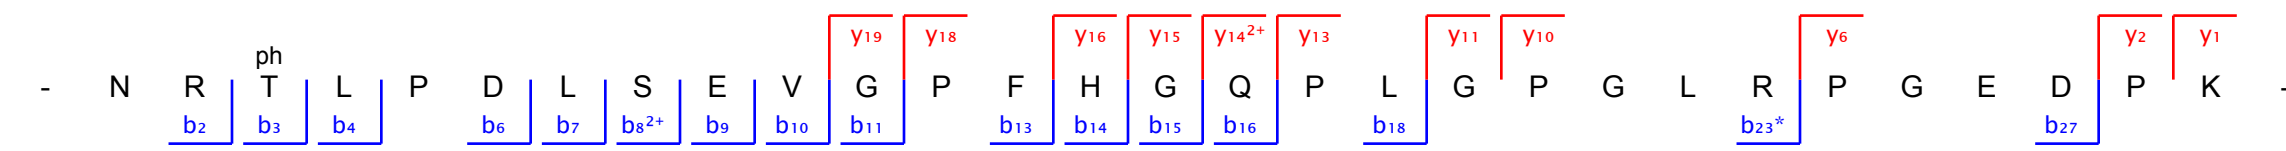

Raw file  
20150814\_A375SR\_Phospho\_BR2\_08

Scan 21788 Method FTMS; HCD Score 312.2 m/z 1205.95 Gene names YAP1

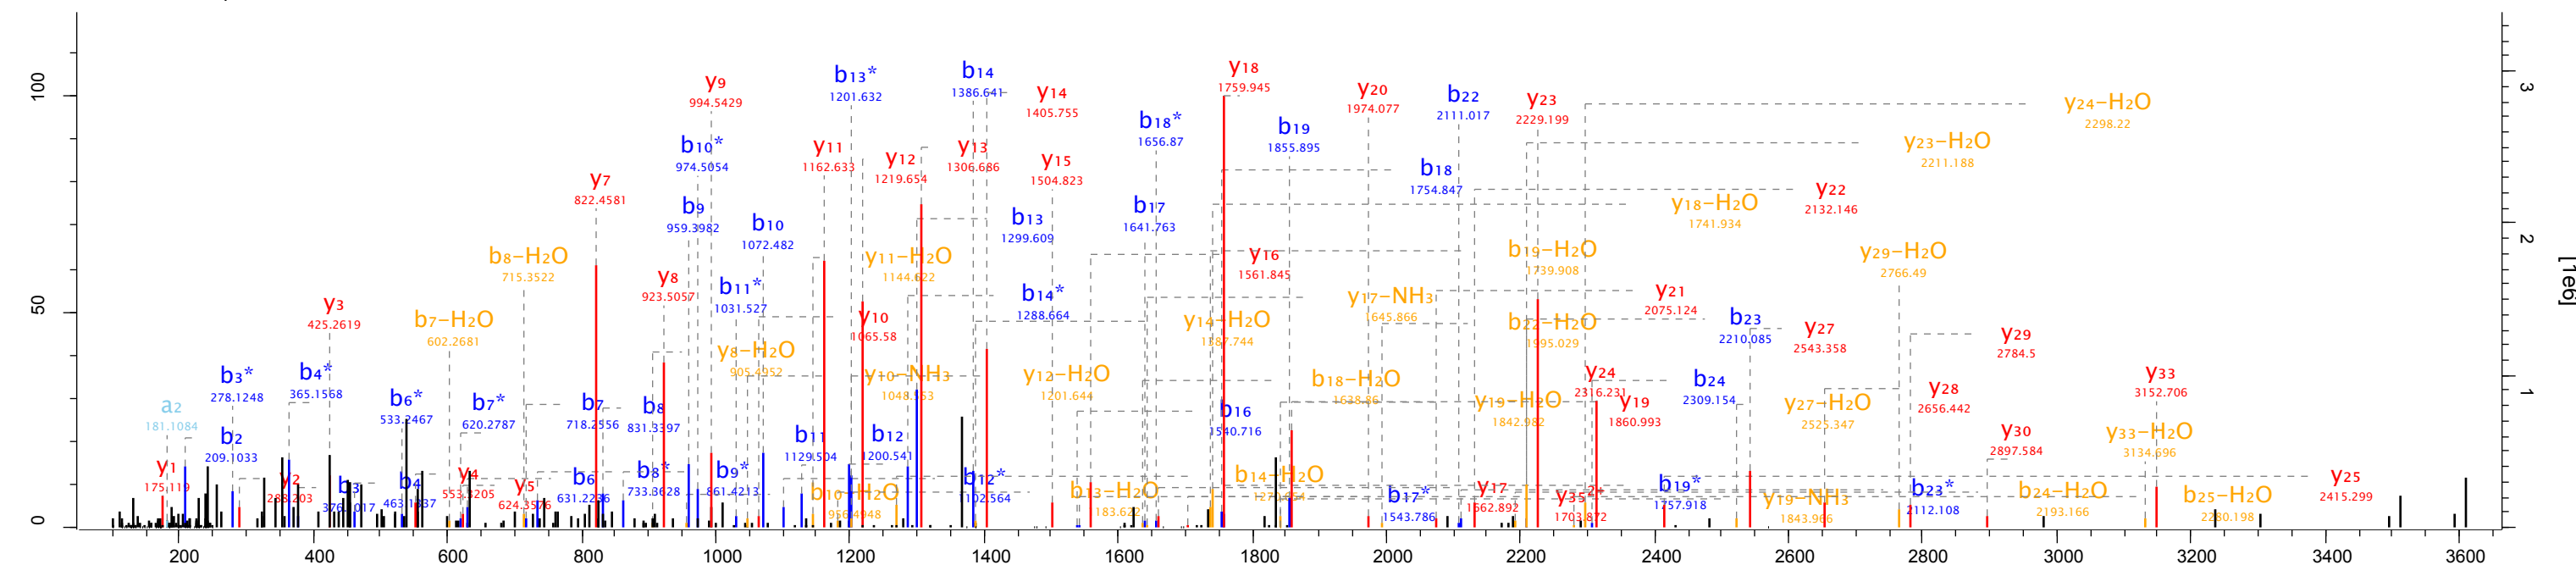

- A H S S P A S L Q L G A V S P G T L T P T G V V S G P A A T P T A Q H L R -

Peptide sequence: A H S S P A S L Q L G A V S P G T L T P T G V V S G P A A T P T A Q H L R

Fragmentation sites (b-ions): b2, b3, b4, b6, b7, b8, b9, b10, b11, b12, b13, b14, b16, b17, b18, b19, b22, b23, b24

Fragmentation sites (y-ions): y35<sup>2+</sup>, y33, y30, y29, y28, y27, y25, y24, y23, y22, y21, y20, y19, y18, y17, y16, y15, y14, y13, y12, y11, y10, y9, y8, y7, y5, y4, y3, y2, y1

Raw file: 20150814\_A375SR\_Phospho\_BR2\_08  
 Scan: 21828 Method: FTMS; HCD Score: 124.88 m/z: 1214.23 Gene names: TRIM28

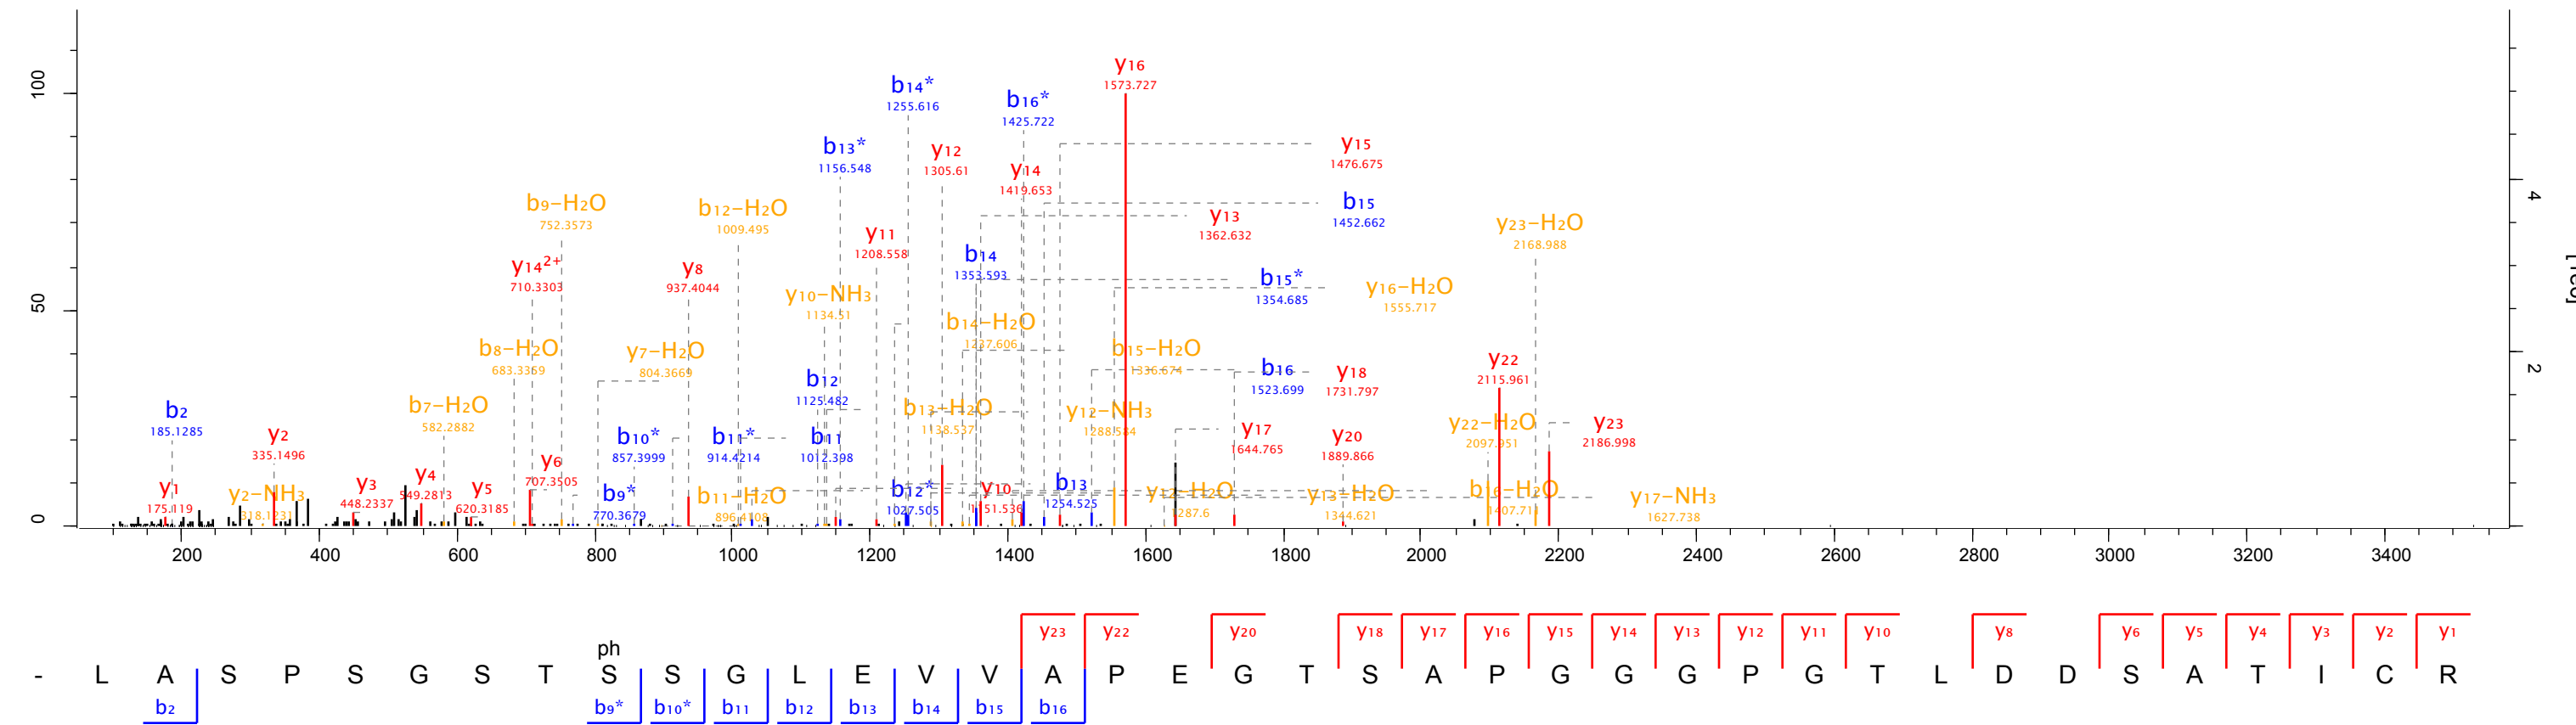

Raw file 20150814\_A375SR\_Phospho\_BR2\_08 Scan 22278 Method FTMS; HCD Score 71.73 m/z 1142.2 Gene names CRTC2

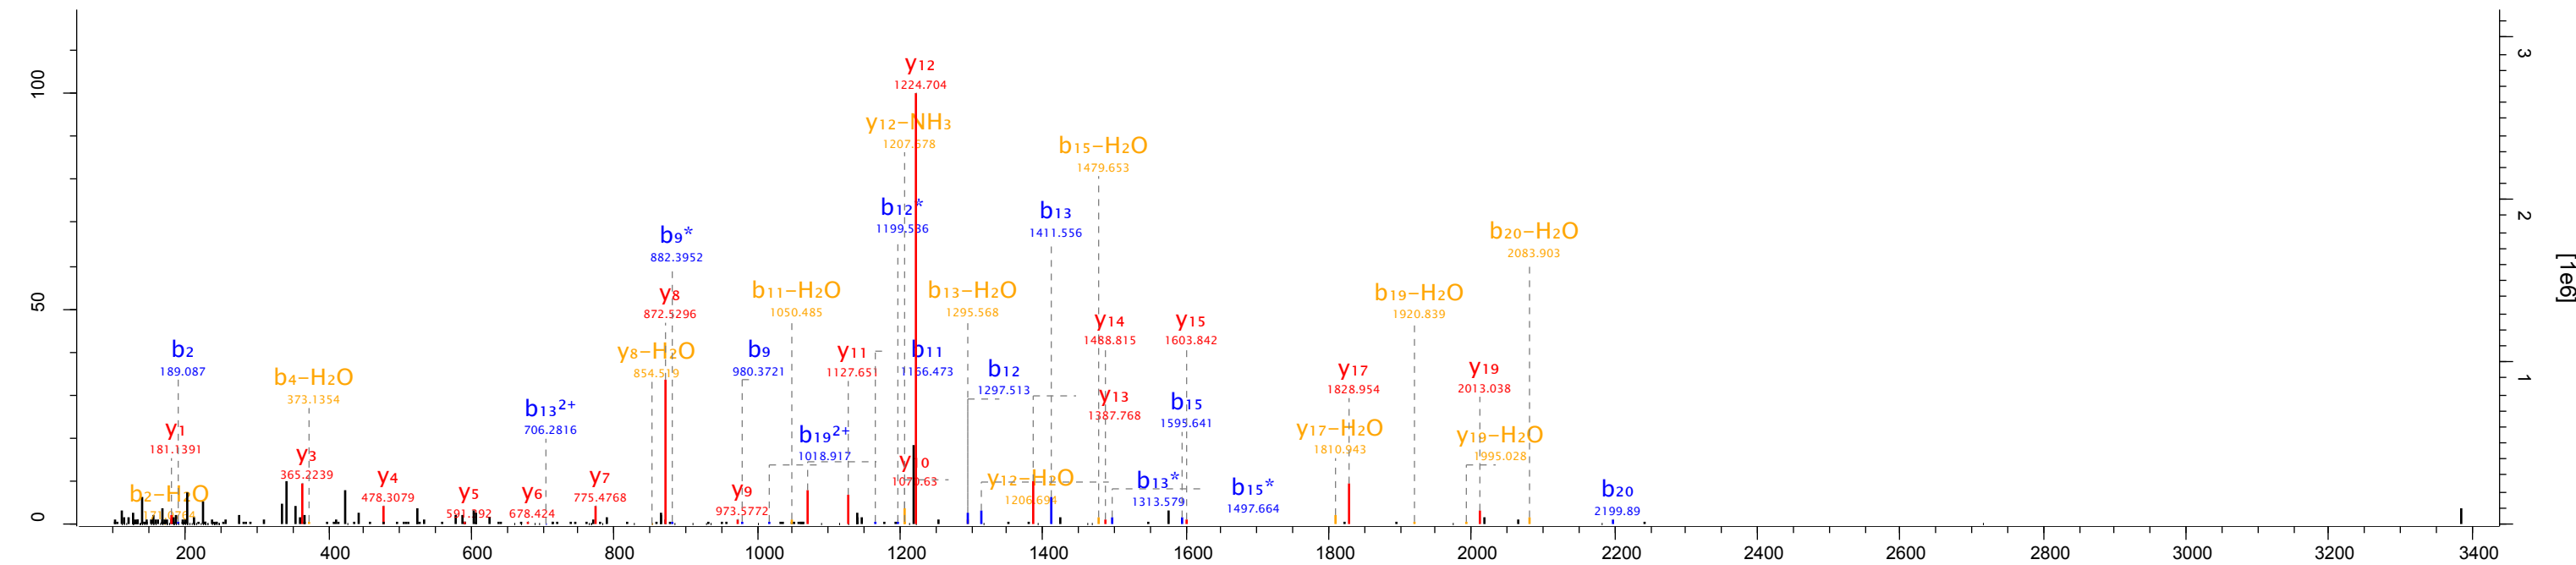

- T S S D S A L H ph T S V M N P S P Q D T Y P G P T P P S I L P S R -

b<sub>2</sub>
b<sub>9</sub>
b<sub>11</sub>
b<sub>12</sub>
b<sub>13</sub>
b<sub>15</sub>
b<sub>19</sub><sup>2+</sup>
b<sub>20</sub>
y<sub>1</sub>
y<sub>3</sub>
y<sub>4</sub>
y<sub>5</sub>
y<sub>6</sub>
y<sub>7</sub>
y<sub>8</sub>
y<sub>9</sub>
y<sub>10</sub>
y<sub>11</sub>
y<sub>12</sub>
y<sub>13</sub>
y<sub>14</sub>
y<sub>15</sub>
y<sub>17</sub>
y<sub>19</sub>



Raw file 20150814\_A375SR\_Phospho\_BR2\_08 Scan 24188 Method FTMS; HCD Score 85.65 m/z 877.92 Gene names KMT2D

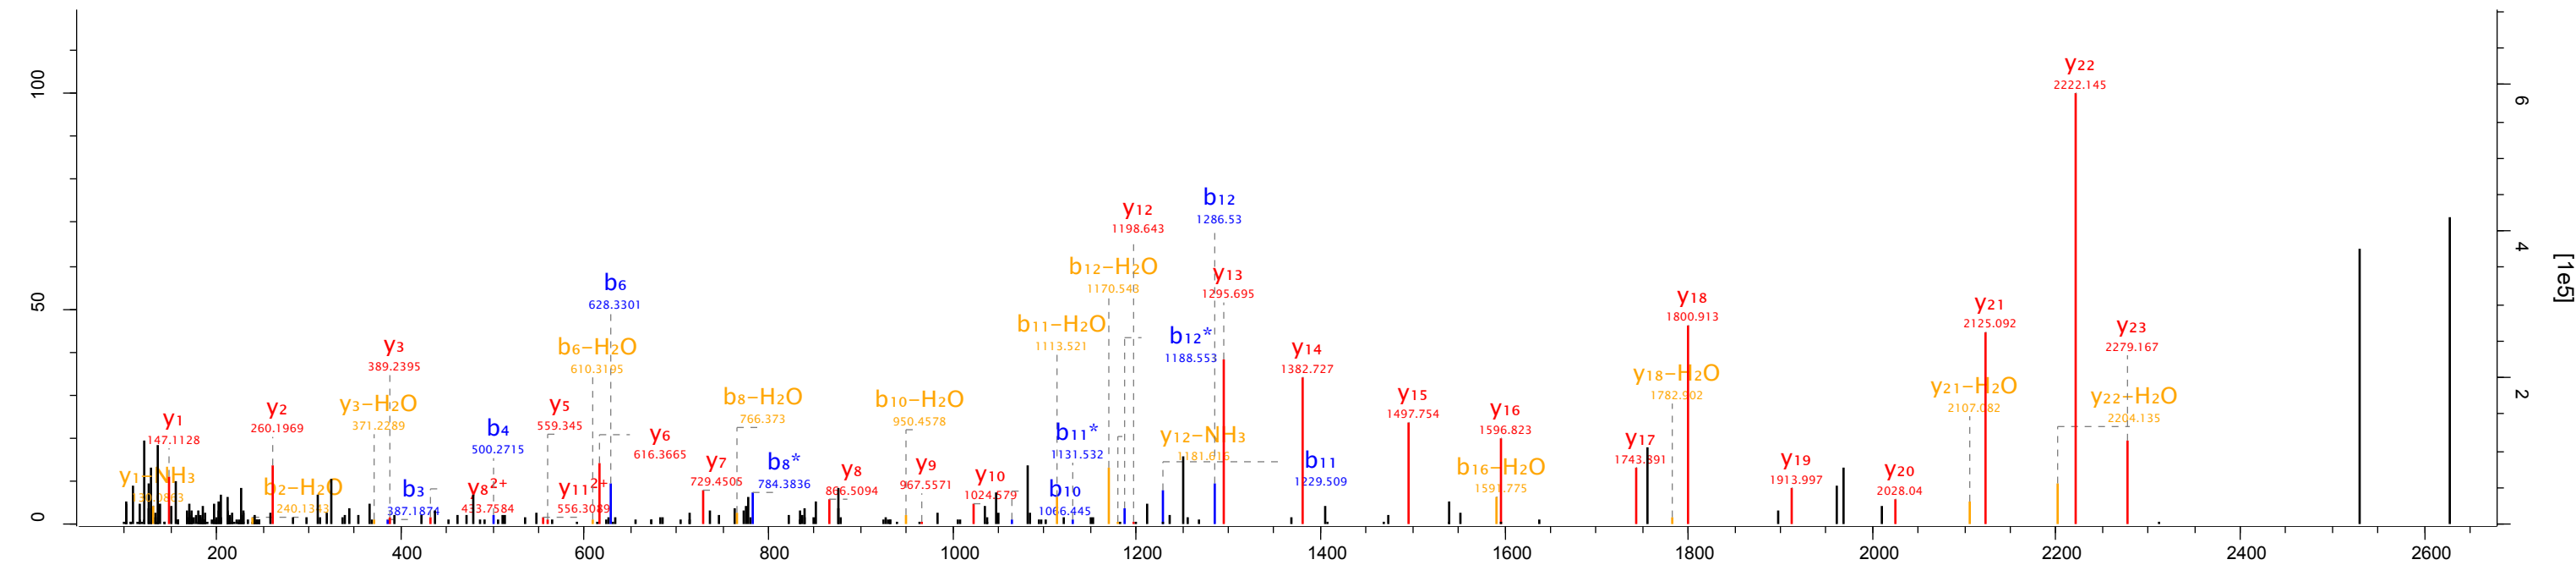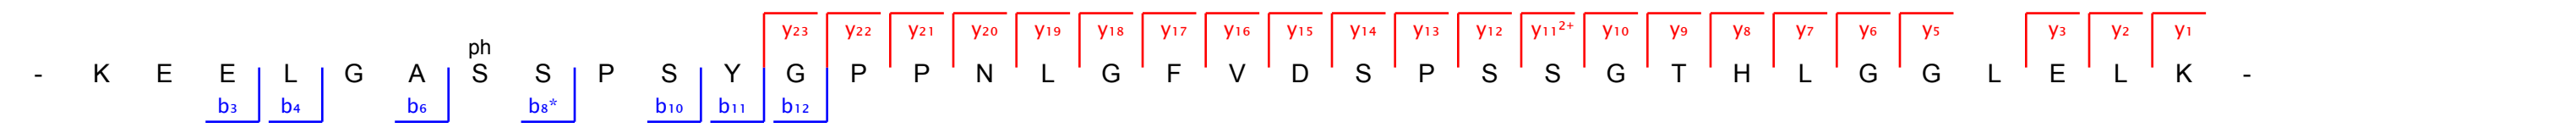

Raw file Scan Method m/z Gene names  
 20150814\_A375SR\_Phospho\_BR2\_08 24658 FTMS; HCD 147.35 968.47 SKP2

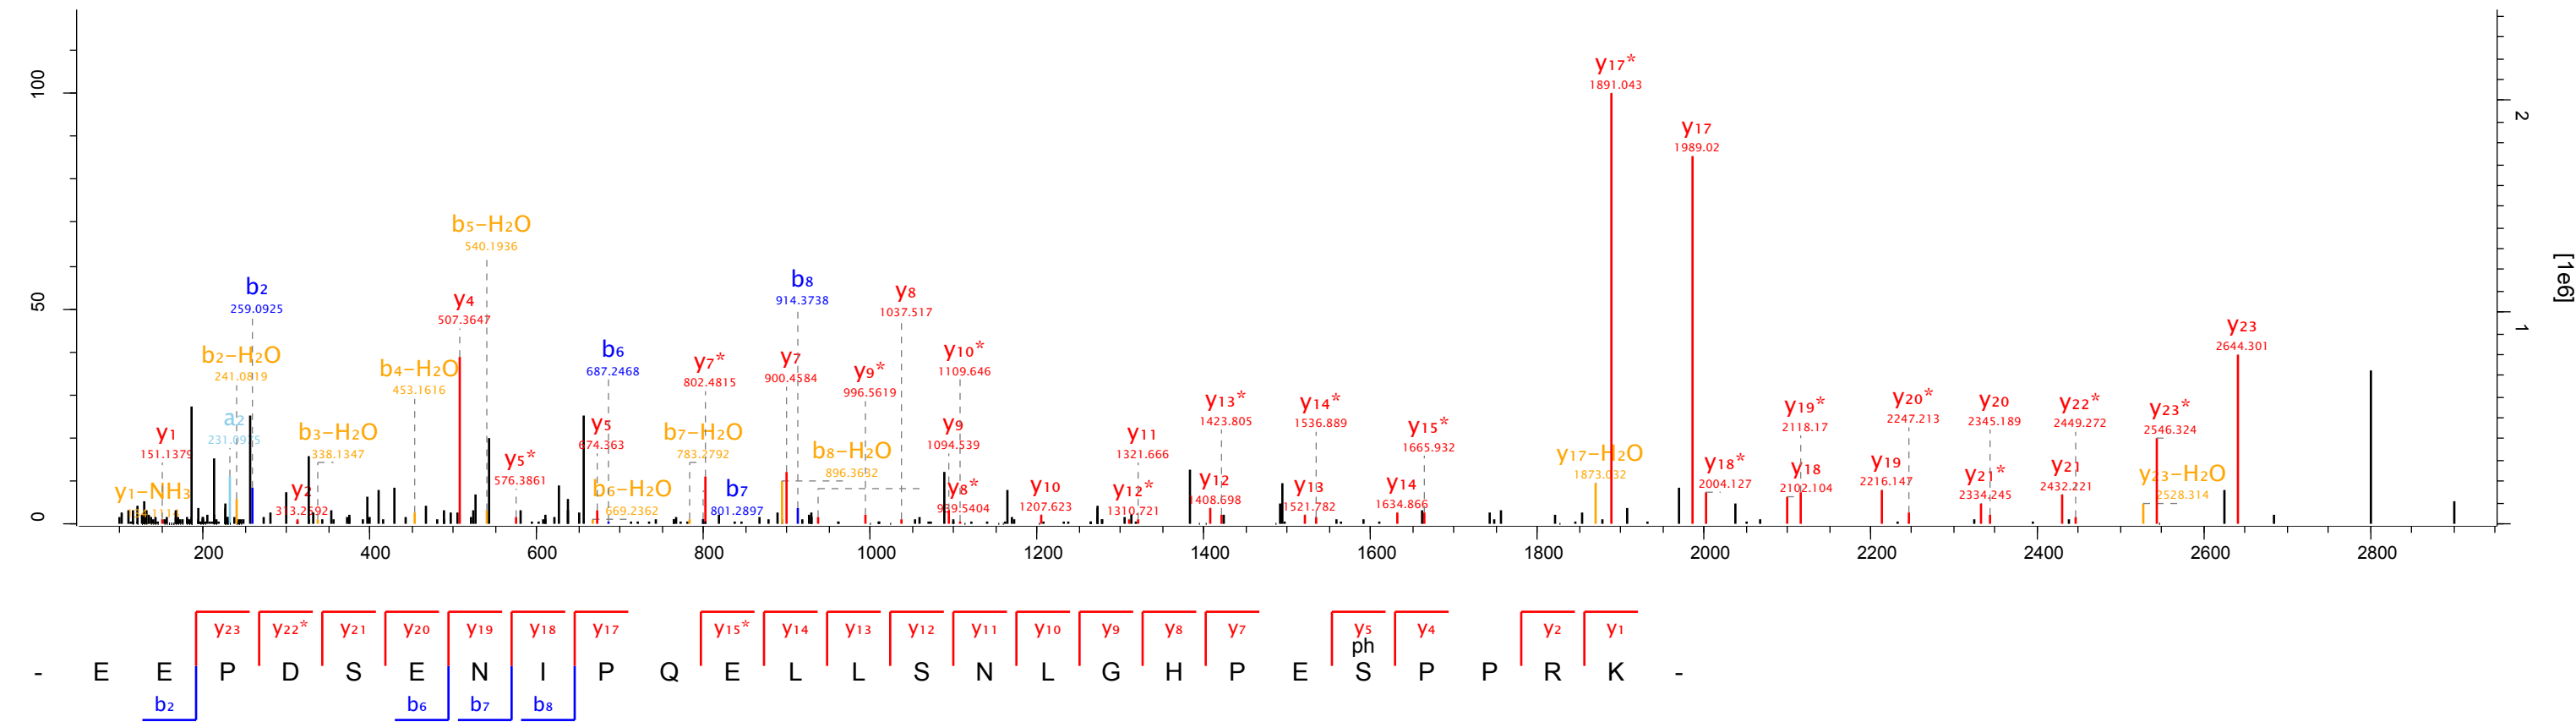

Raw file 20150814\_A375SR\_Phospho\_BR2\_08 Scan 24938 Method FTMS; HCD Score 90.3 m/z 886.77 Gene names EP400;EP400NL

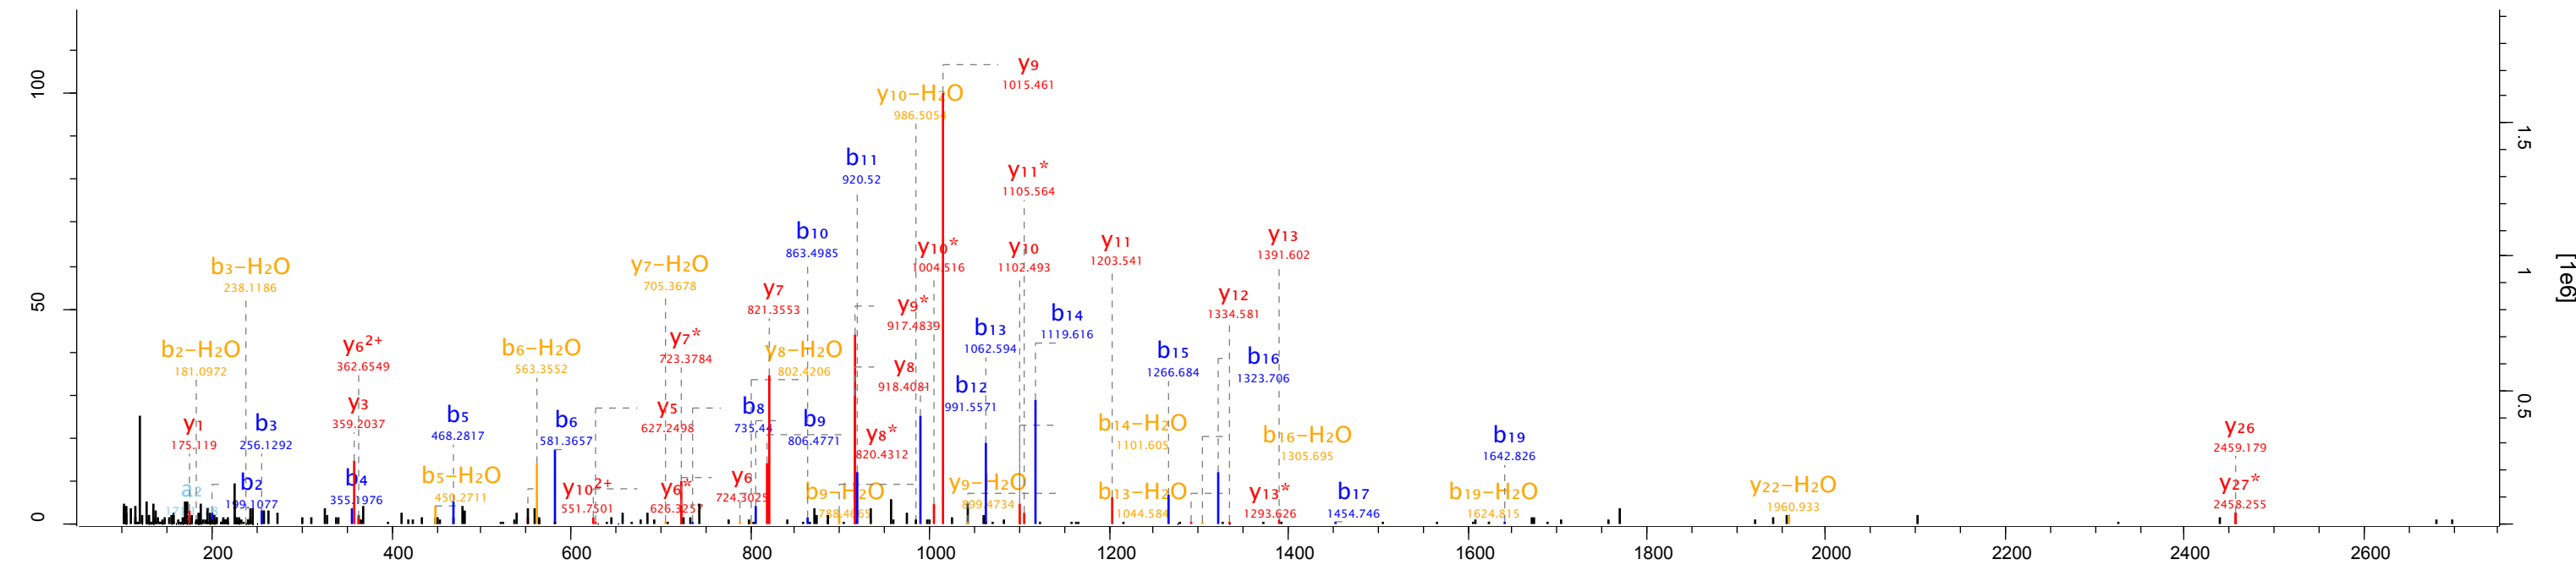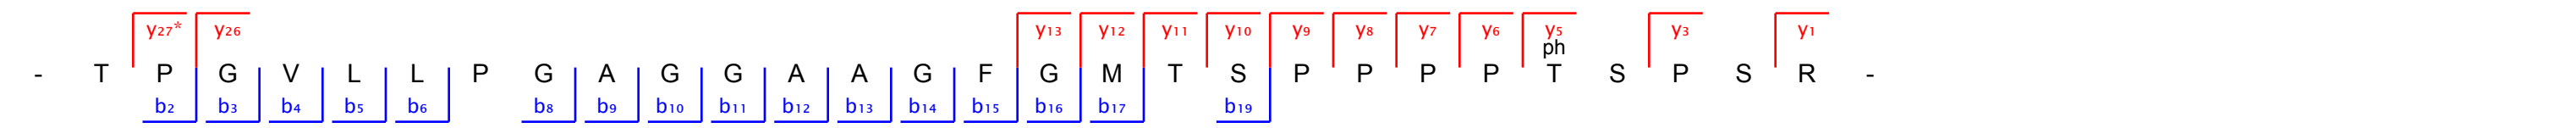

Raw file: 20150814\_A375SR\_Phospho\_BR2\_08  
 Scan: 3058 Method: FTMS; HCD Score: 80.24 m/z: 538.77 Gene names: ZNF592

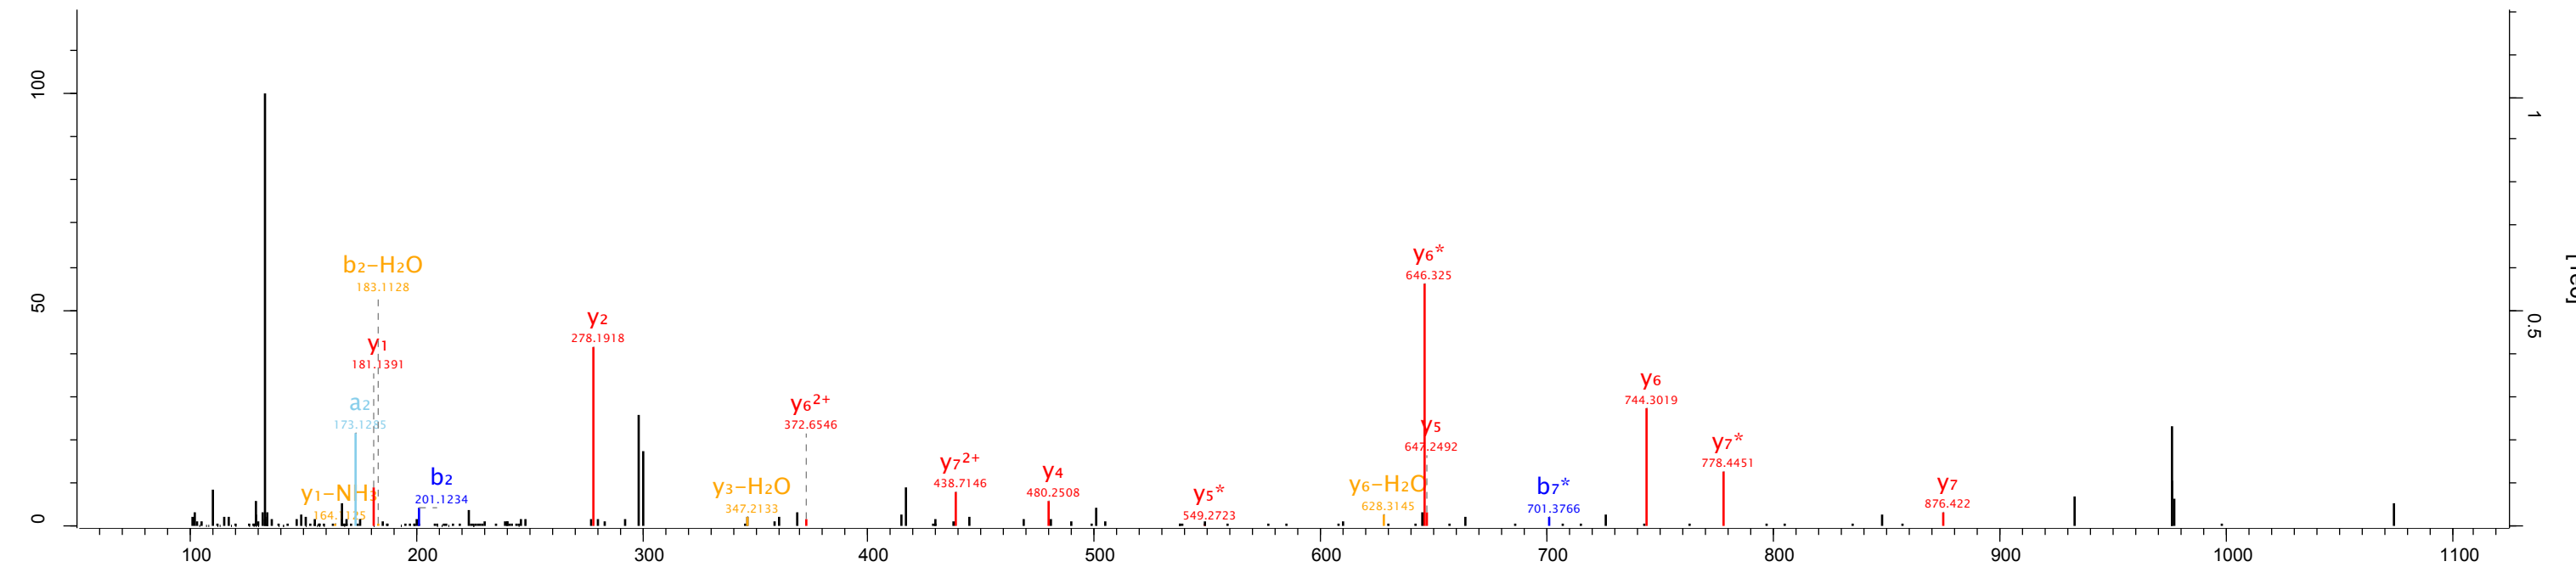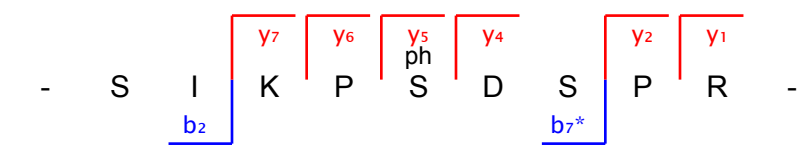

Raw file: 20150814\_A375SR\_Phospho\_BR2\_08  
 Scan: 3488 Method: FTMS; HCD Score: 107.73 m/z: 681.83 Gene names: SRRM2

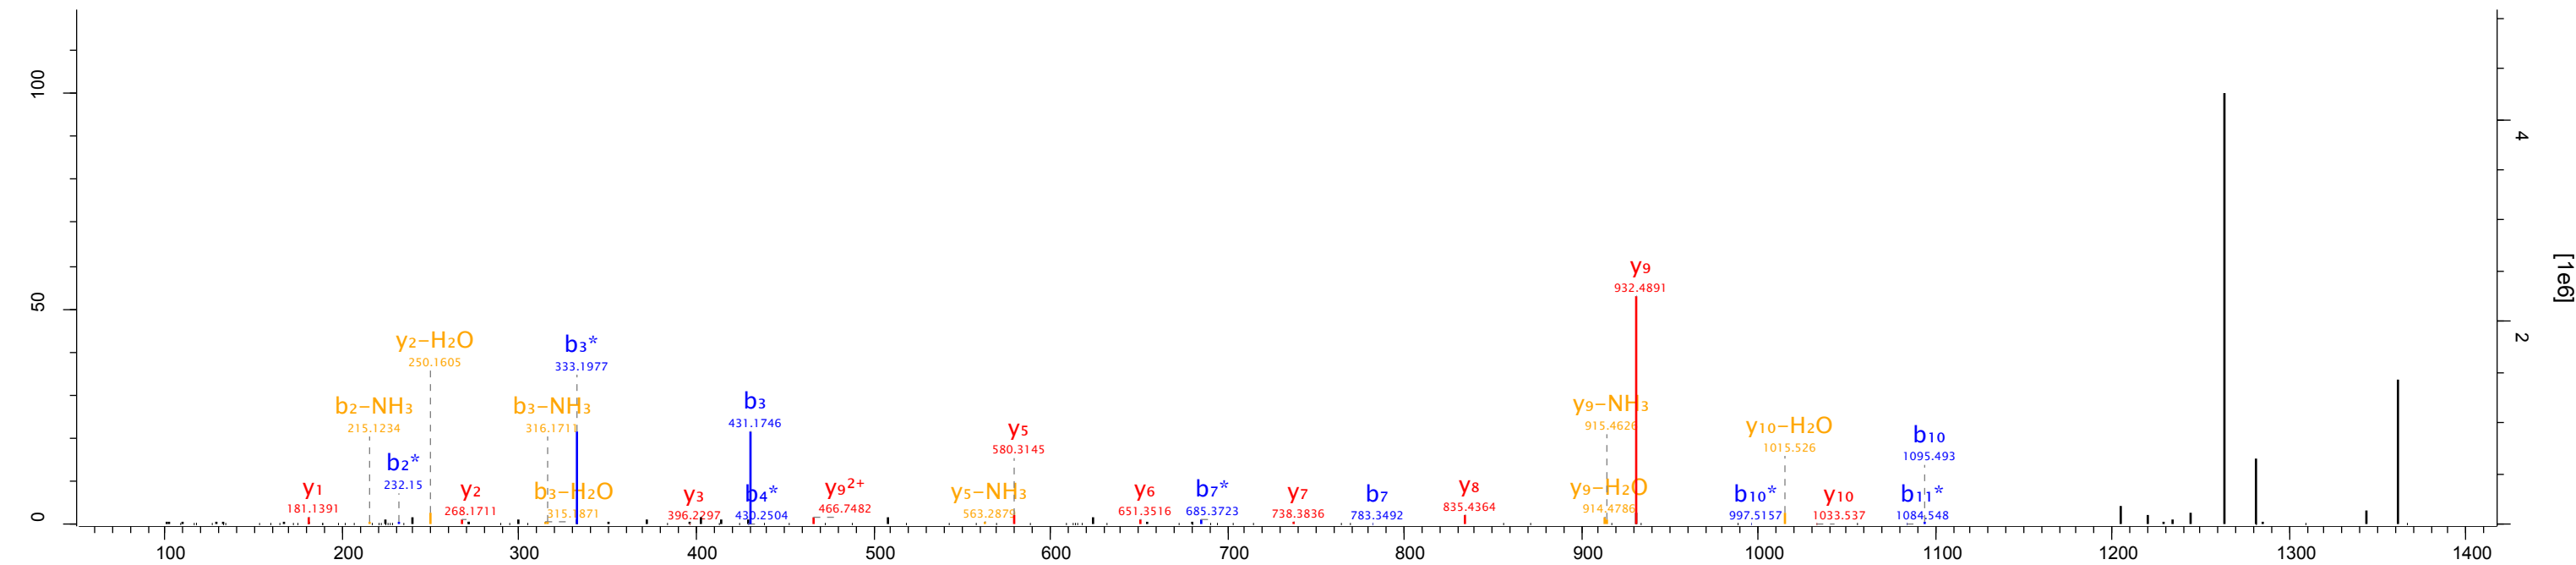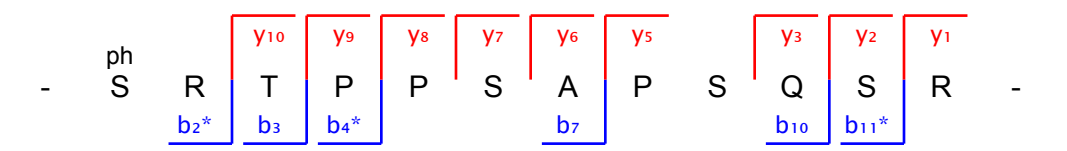

Raw file: 20150814\_A375SR\_Phospho\_BR2\_08  
 Scan: 3838 Method: FTMS; HCD Score: 88.28 m/z: 405.87 Gene names: SCRIB

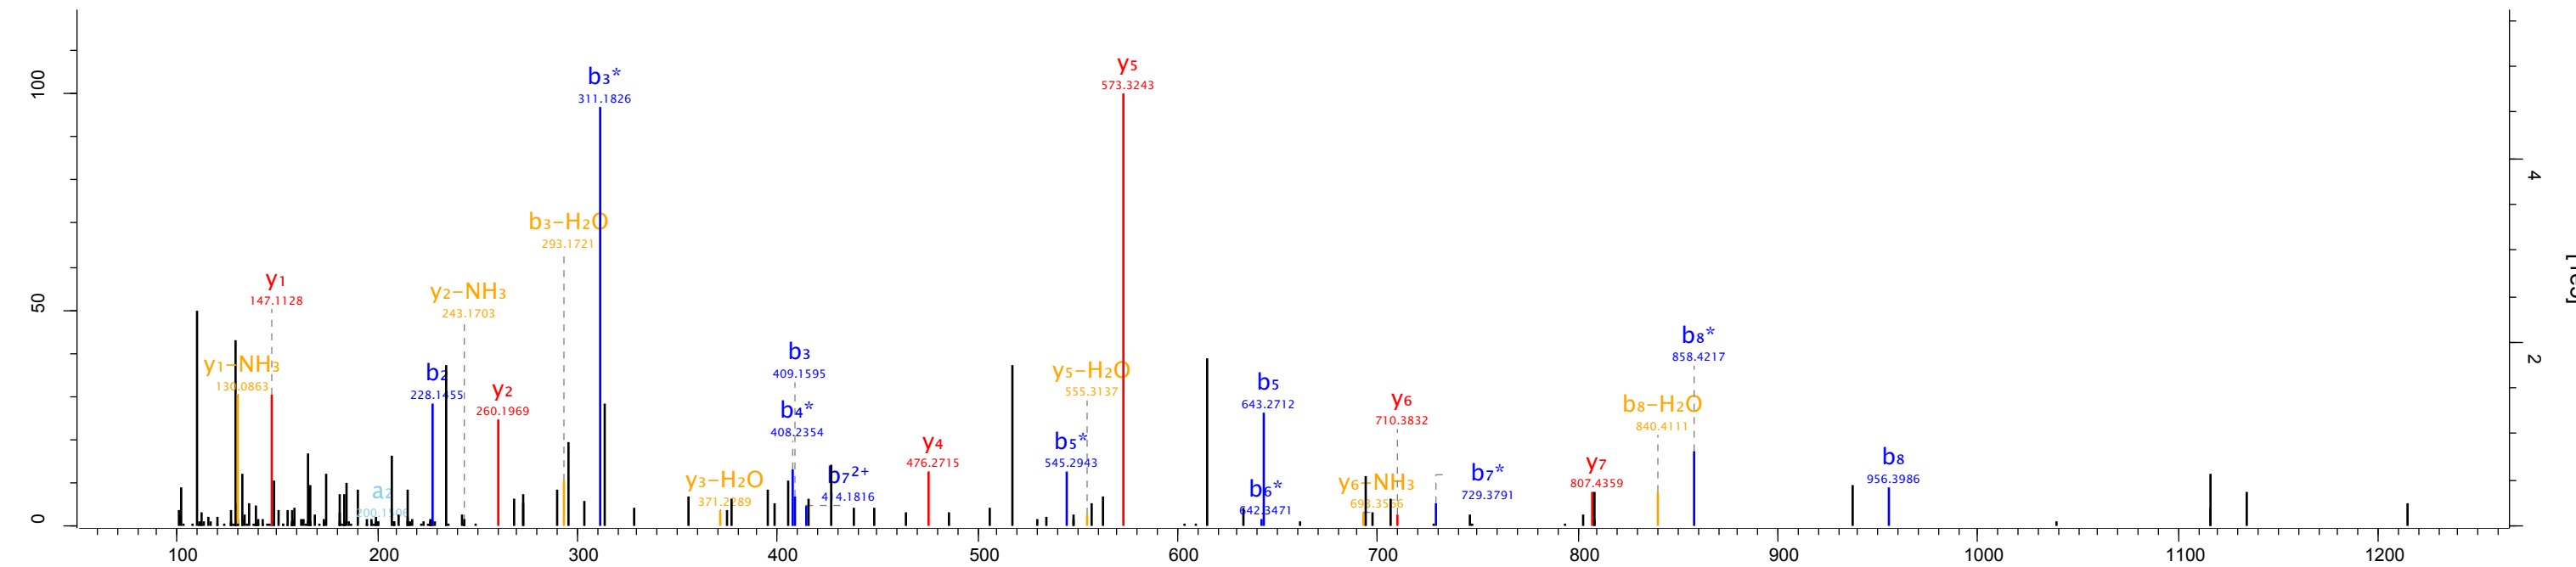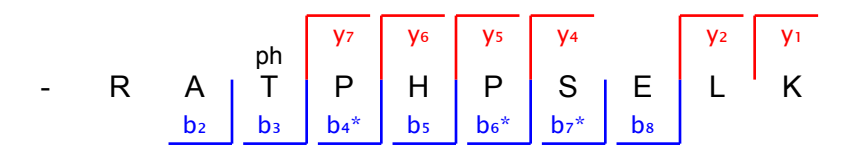

Raw file: 20150814\_A375SR\_Phospho\_BR2\_08  
 Scan: 4438 Method: FTMS; HCD Score: 76.33 m/z: 377.19 Gene names: LLGL1;SPATS2;LLGL2

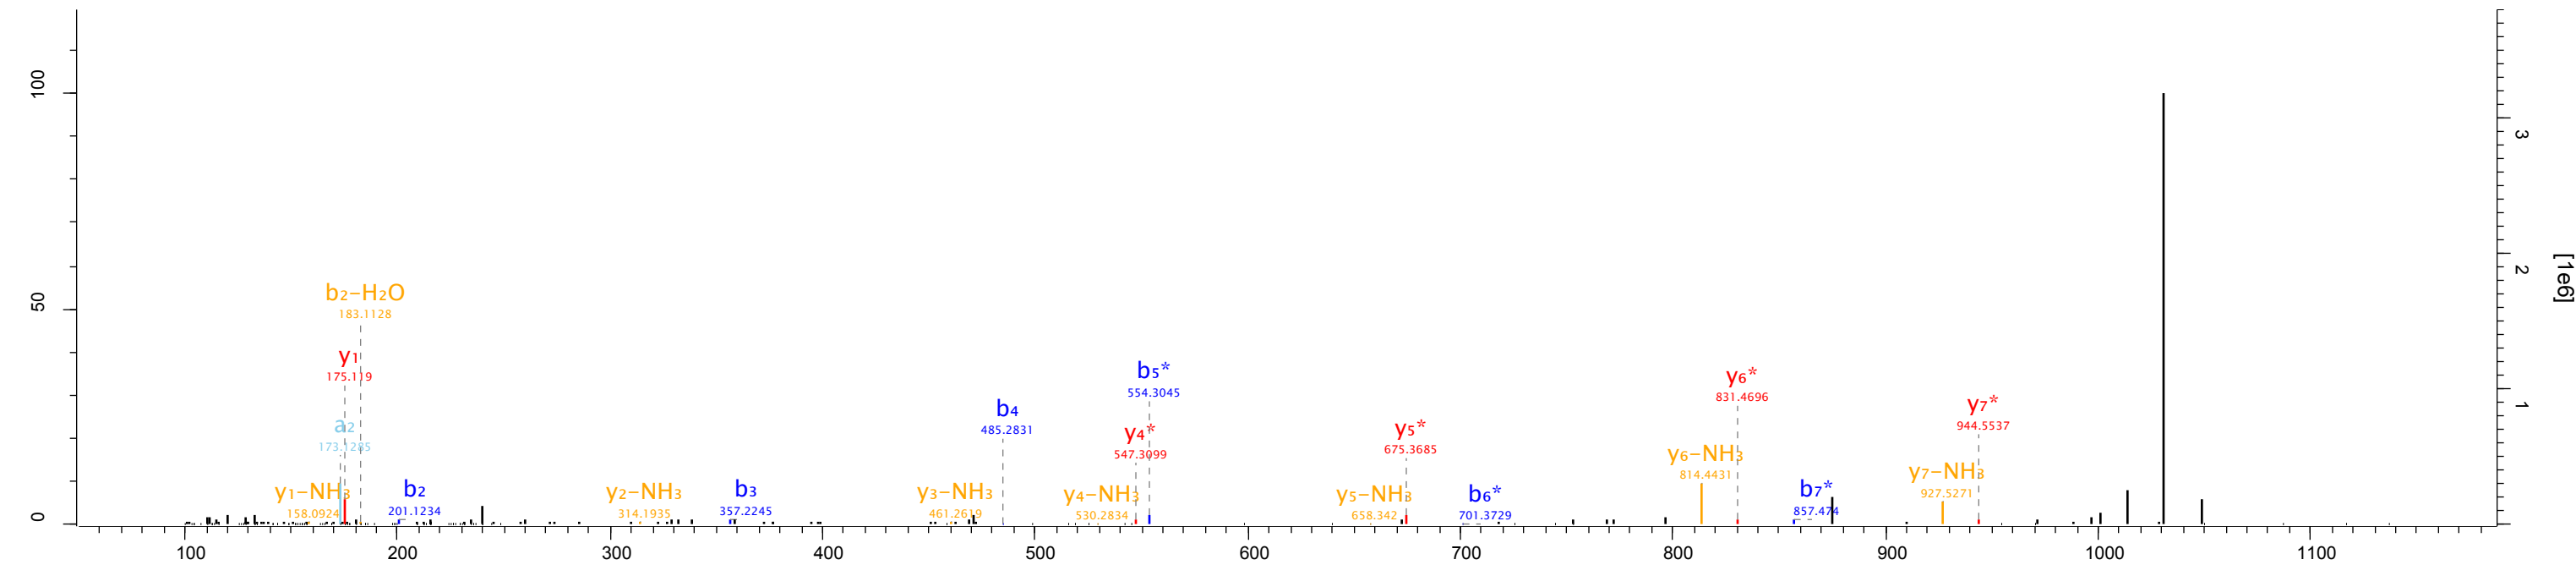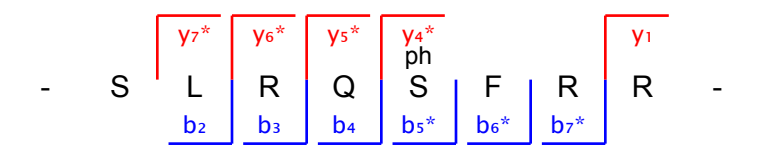

Raw file: 20150814\_A375SR\_Phospho\_BR2\_08  
 Scan: 4618 Method: FTMS; HCD Score: 106.31 m/z: 774.33 Gene names: ARHGEF1

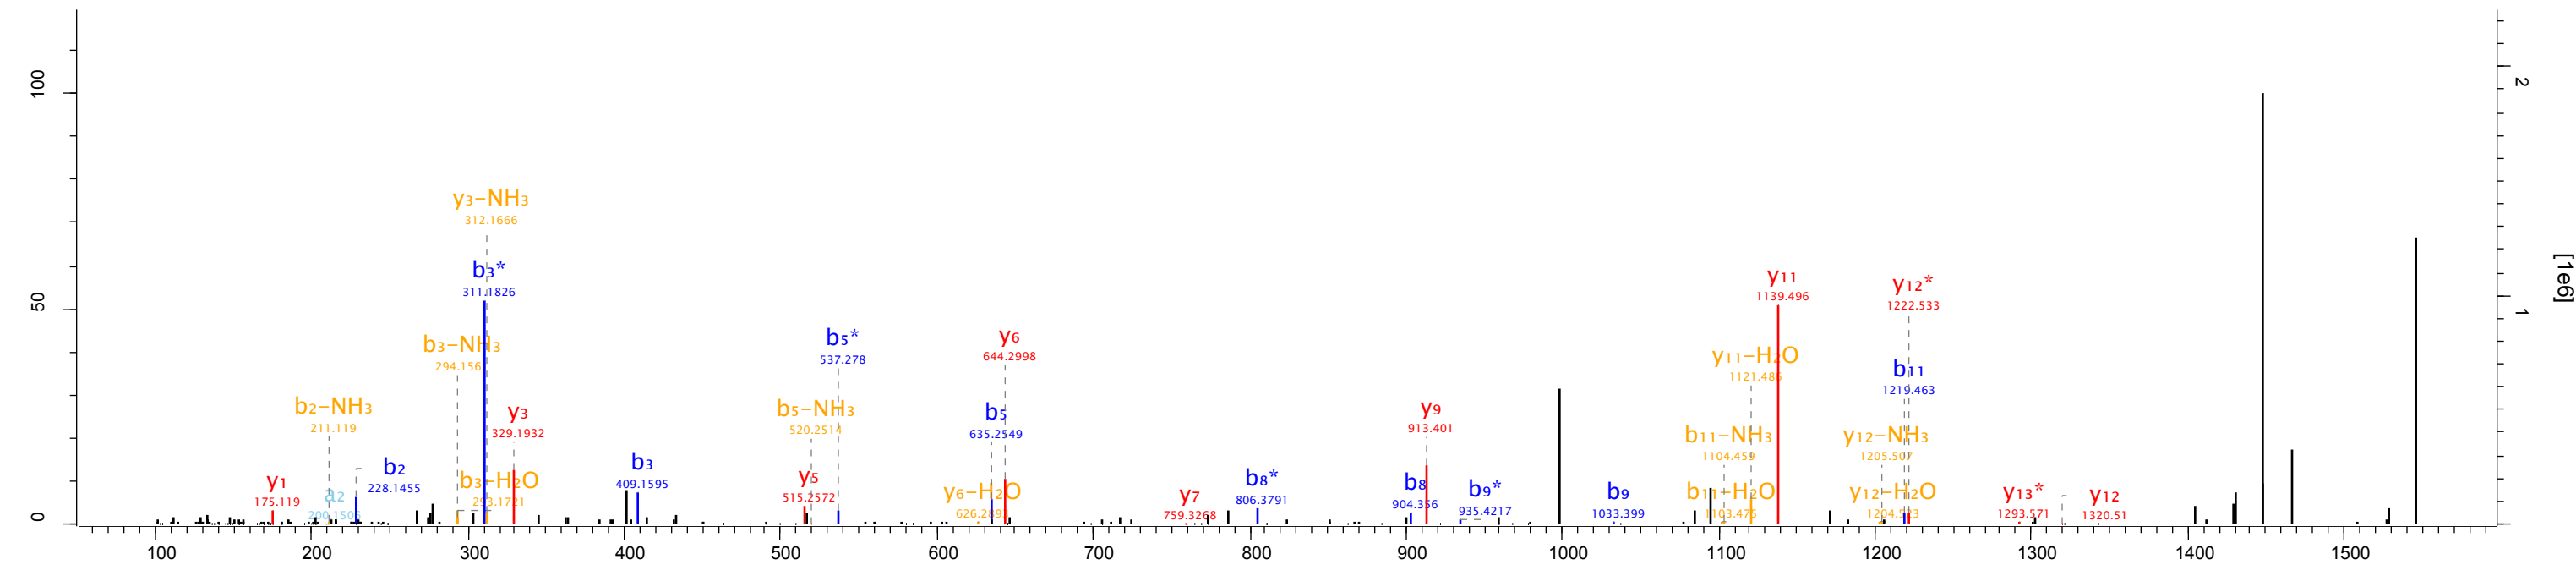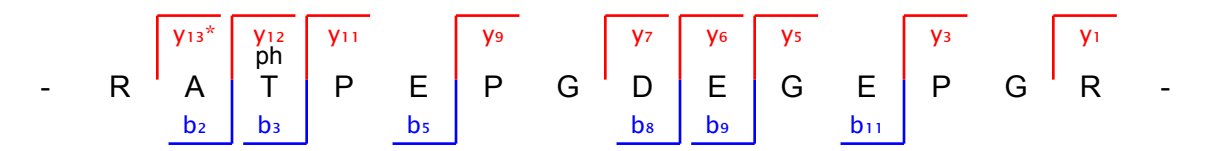



Raw file: 20150814\_A375SR\_Phospho\_BR2\_08  
 Scan: 5658 Method: FTMS; HCD Score: 82.35 m/z: 588.79 Gene names: NKX2-5

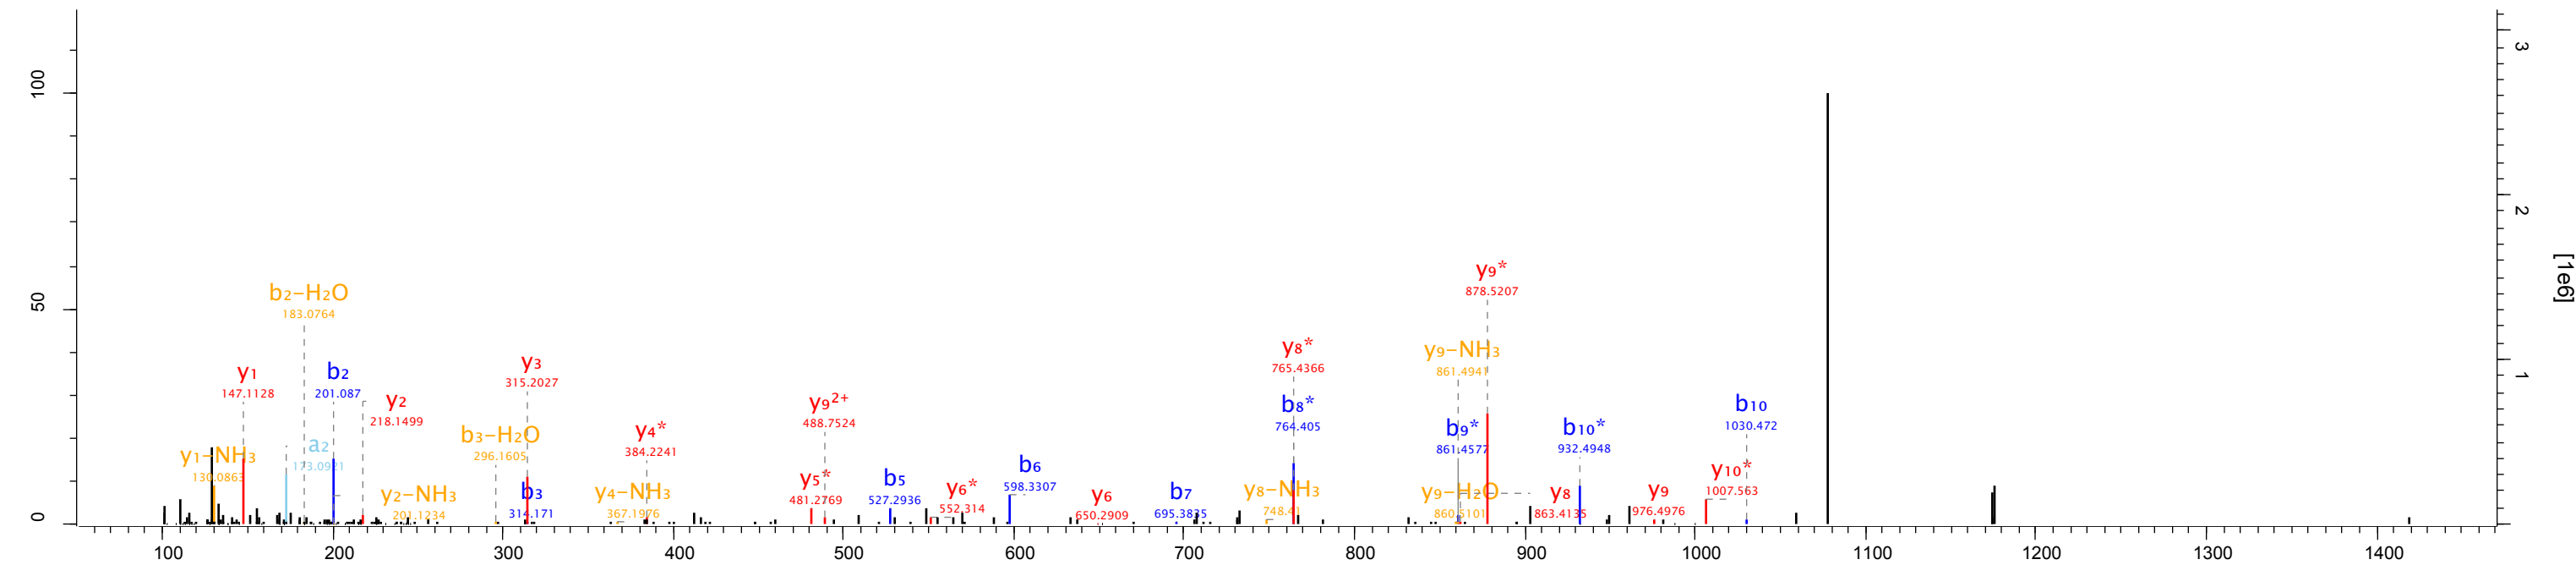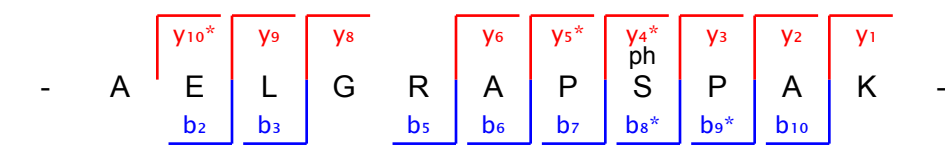

Raw file 20150814\_A375SR\_Phospho\_BR2\_08 Scan 5678 Method FTMS; HCD Score 78.6 m/z 480.24 Gene names PRR12

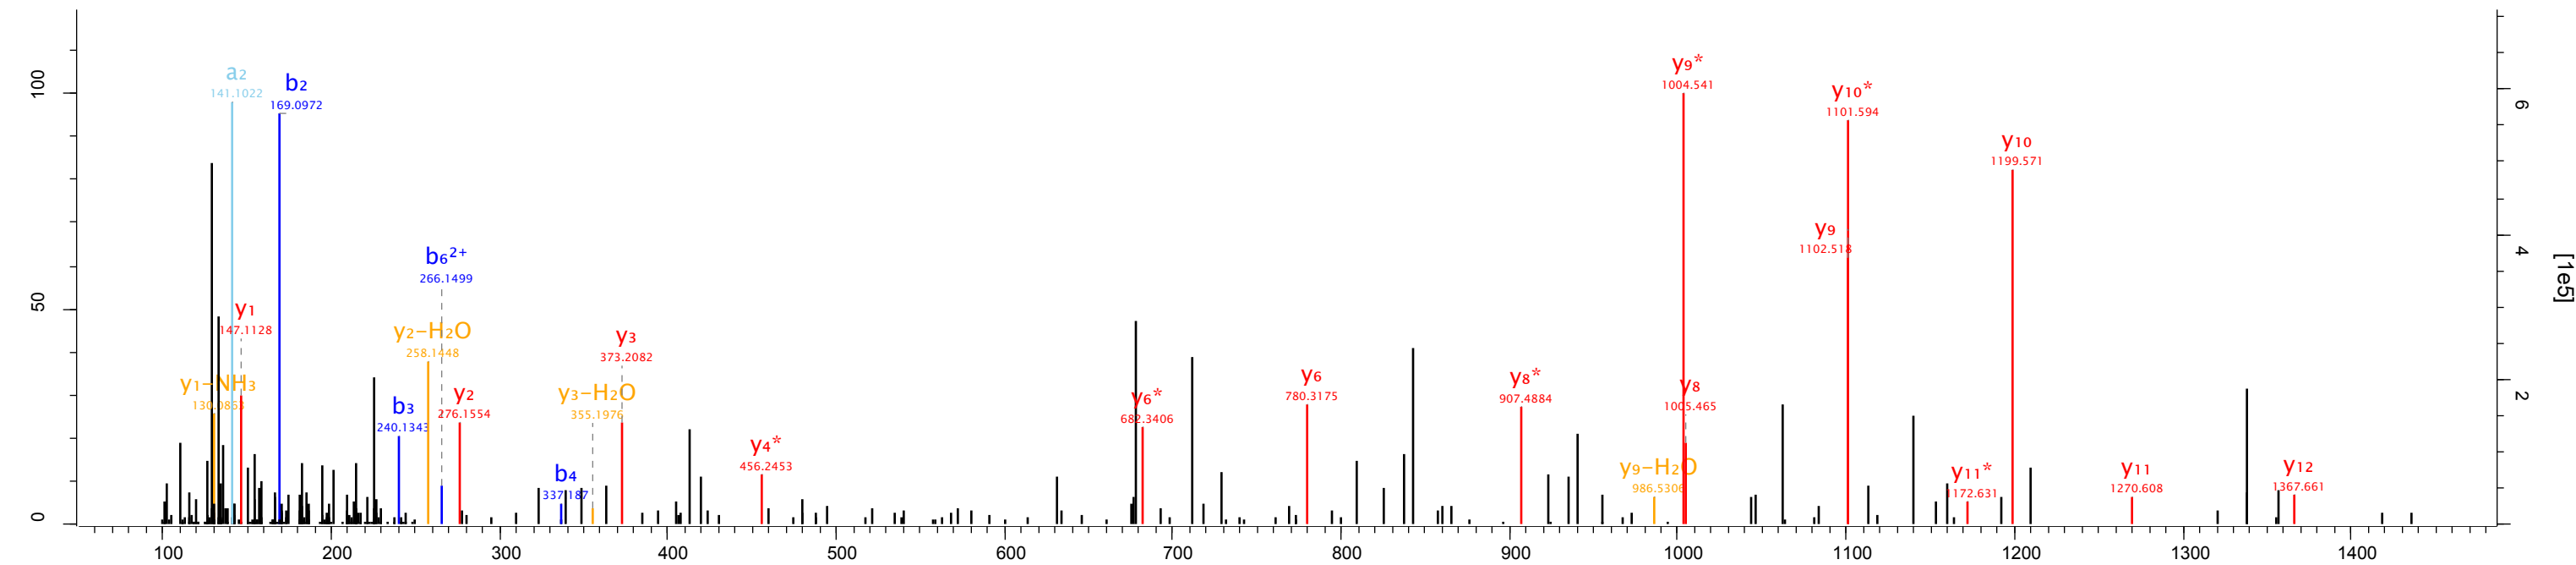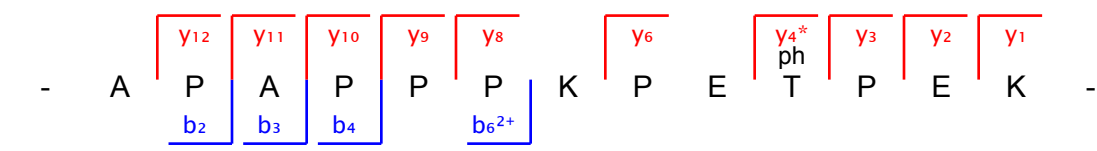

Raw file: 20150814\_A375SR\_Phospho\_BR2\_08  
 Scan: 6178 Method: FTMS; HCD Score: 95.51 m/z: 515.81 Gene names: RLTPR

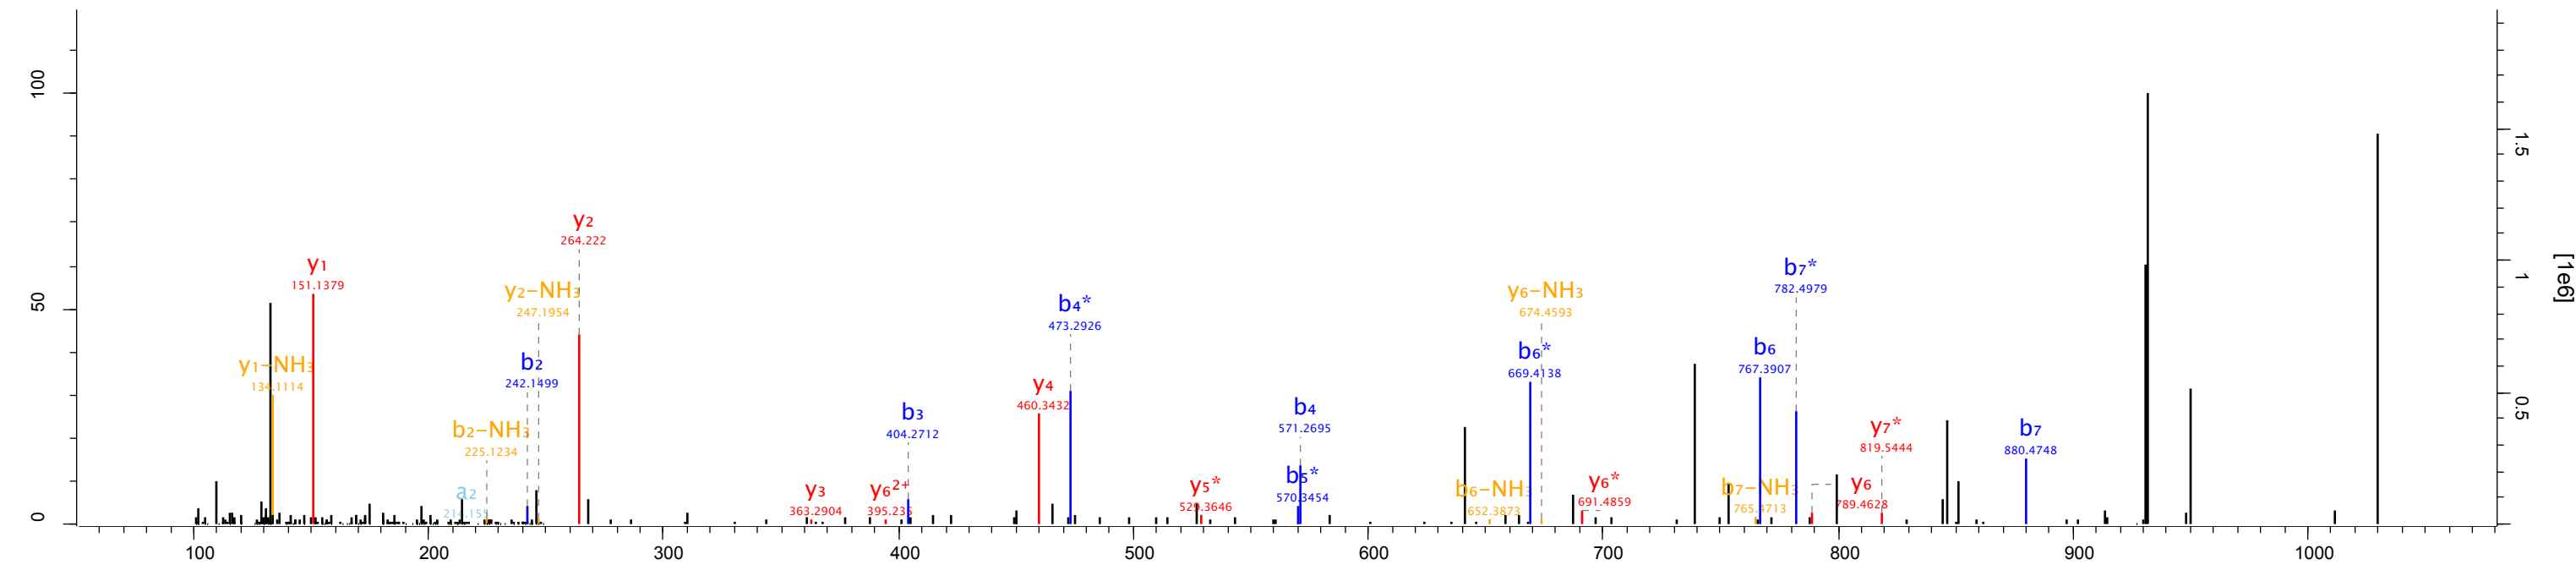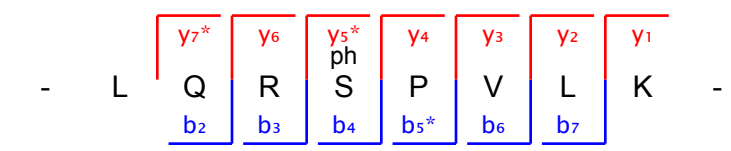

Raw file: 20150814\_A375SR\_Phospho\_BR2\_08  
 Scan: 6698 Method: FTMS; HCD Score: 187.78 m/z: 933.45 Gene names: BBX

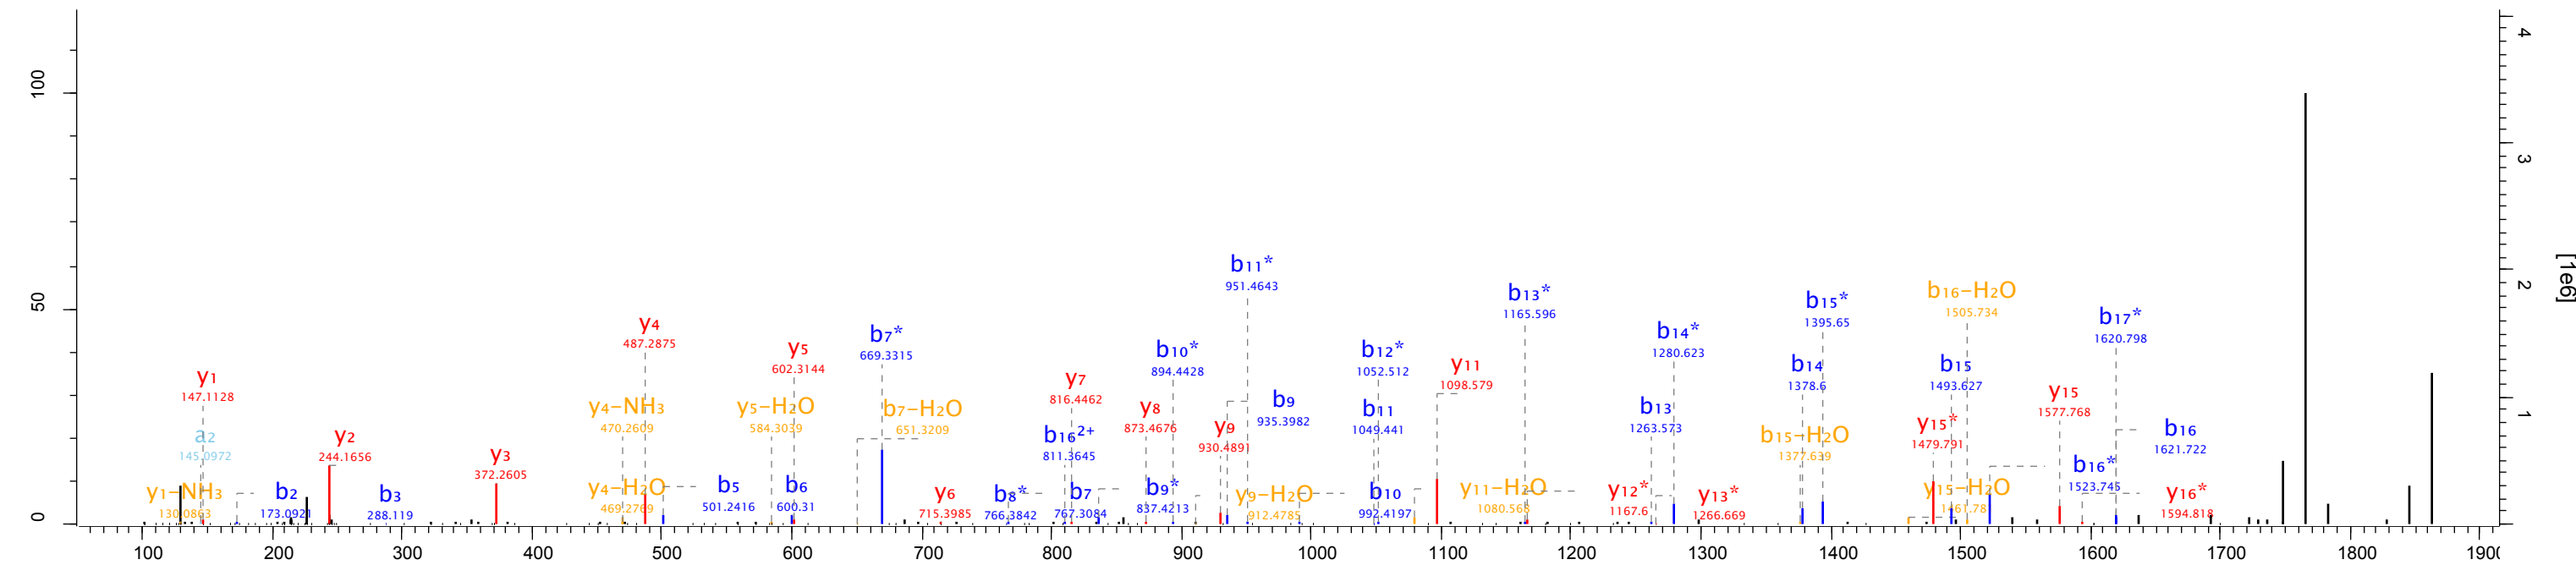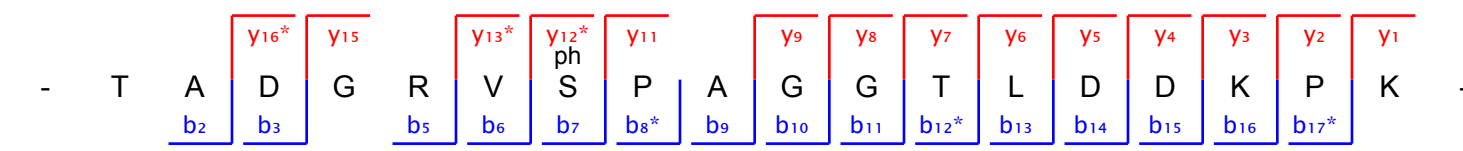

Raw file: 20150814\_A375SR\_Phospho\_BR2\_08  
 Scan: 7958 Method: FTMS; HCD Score: 148.46 m/z: 745.88 Gene names: TJP1

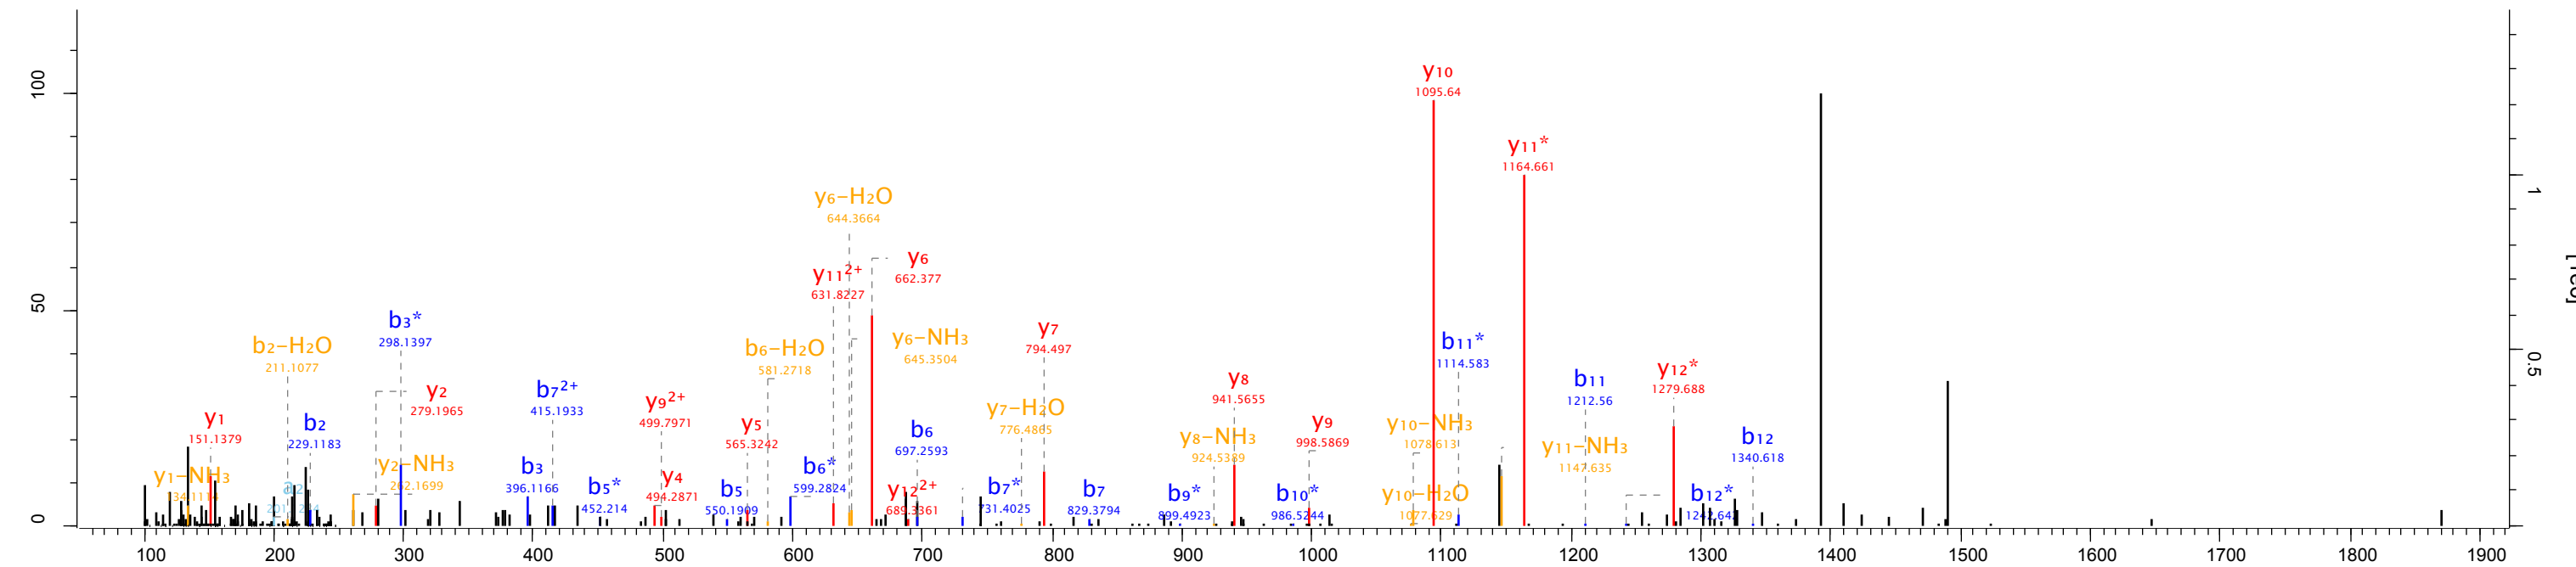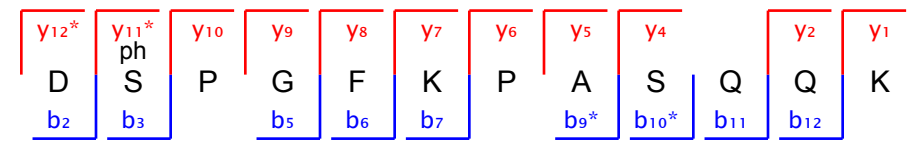

Raw file: 20150814\_A375SR\_Phospho\_BR2\_08  
 Scan: 8248 Method: FTMS; HCD Score: 98.87 m/z: 634.29 Gene names: MCMBP

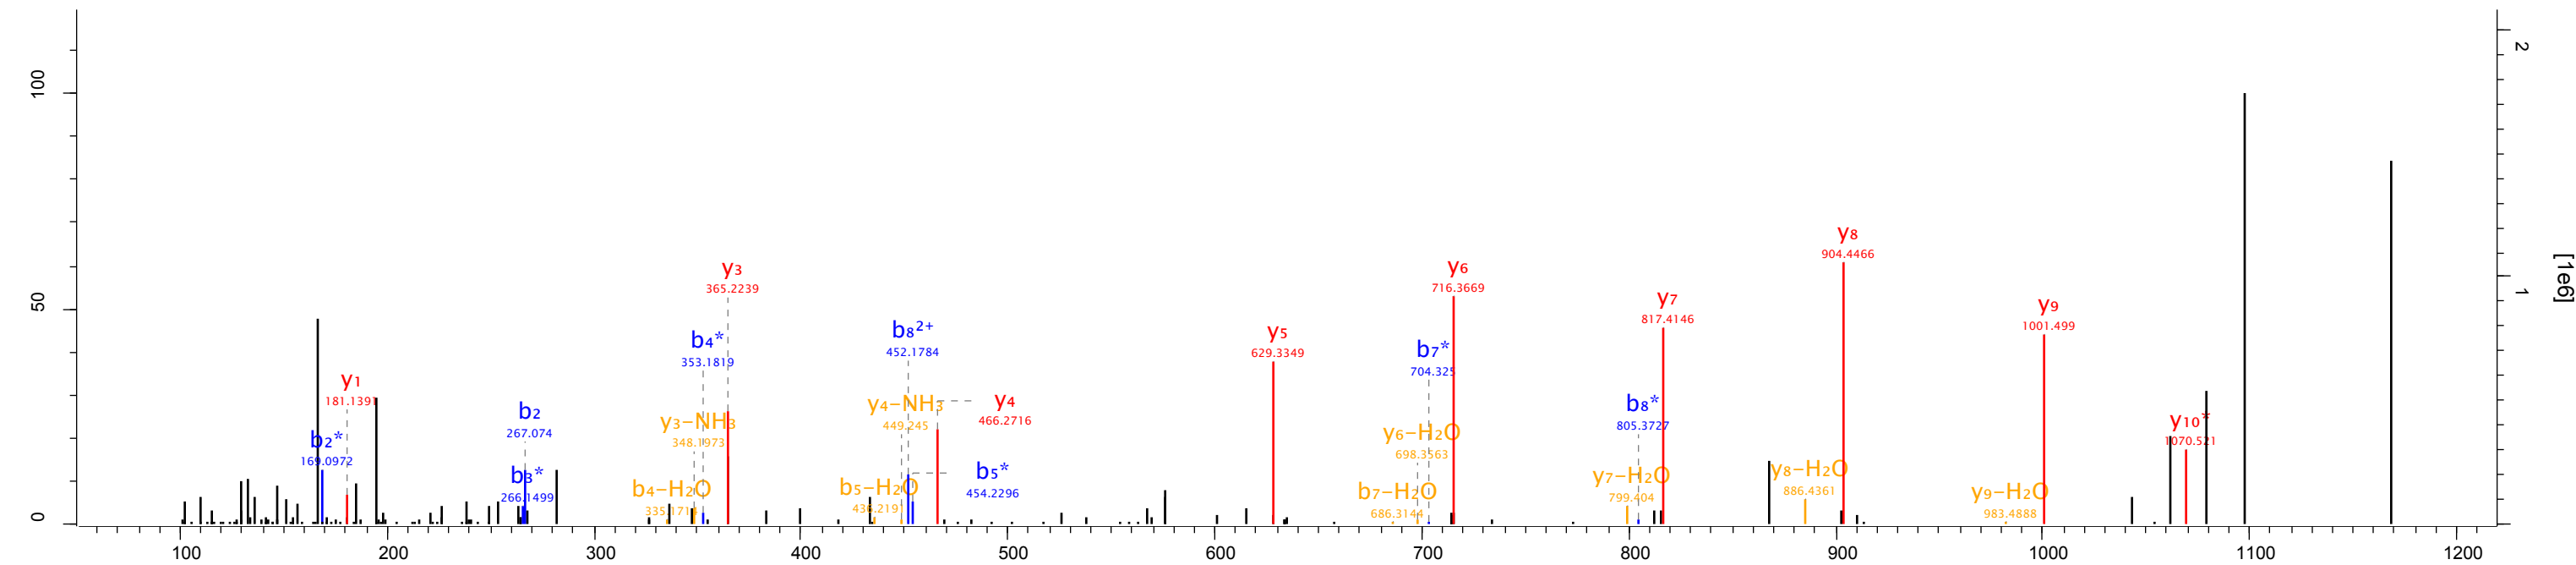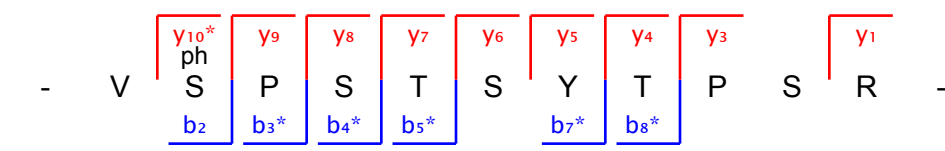

Raw file: 20150814\_A375SR\_Phospho\_BR2\_08  
 Scan: 9138 Method: FTMS; HCD Score: 103.43 m/z: 493.24 Gene names: SSH1

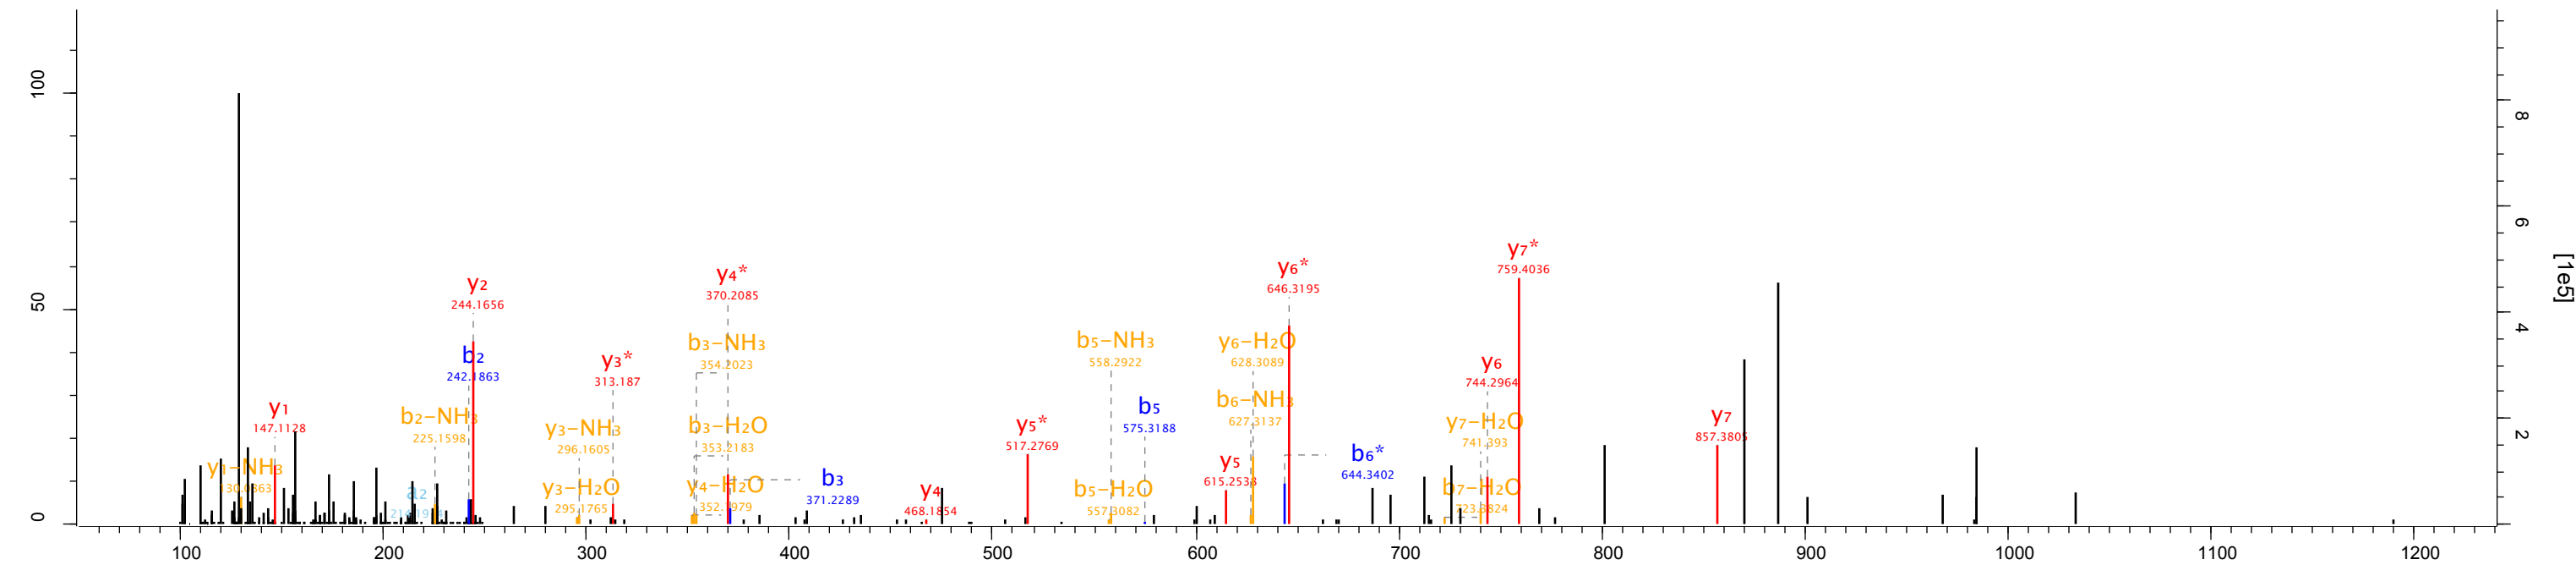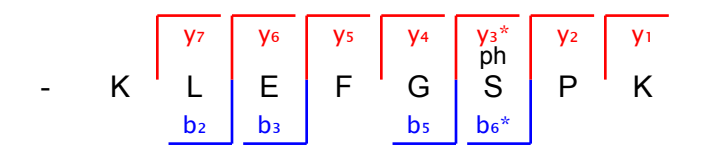

Raw file: 20150814\_A375SR\_Phospho\_BR2\_08  
 Scan: 9218 Method: FTMS; HCD Score: 52.87 m/z: 539.26 Gene names: SPANXC;SPANXD

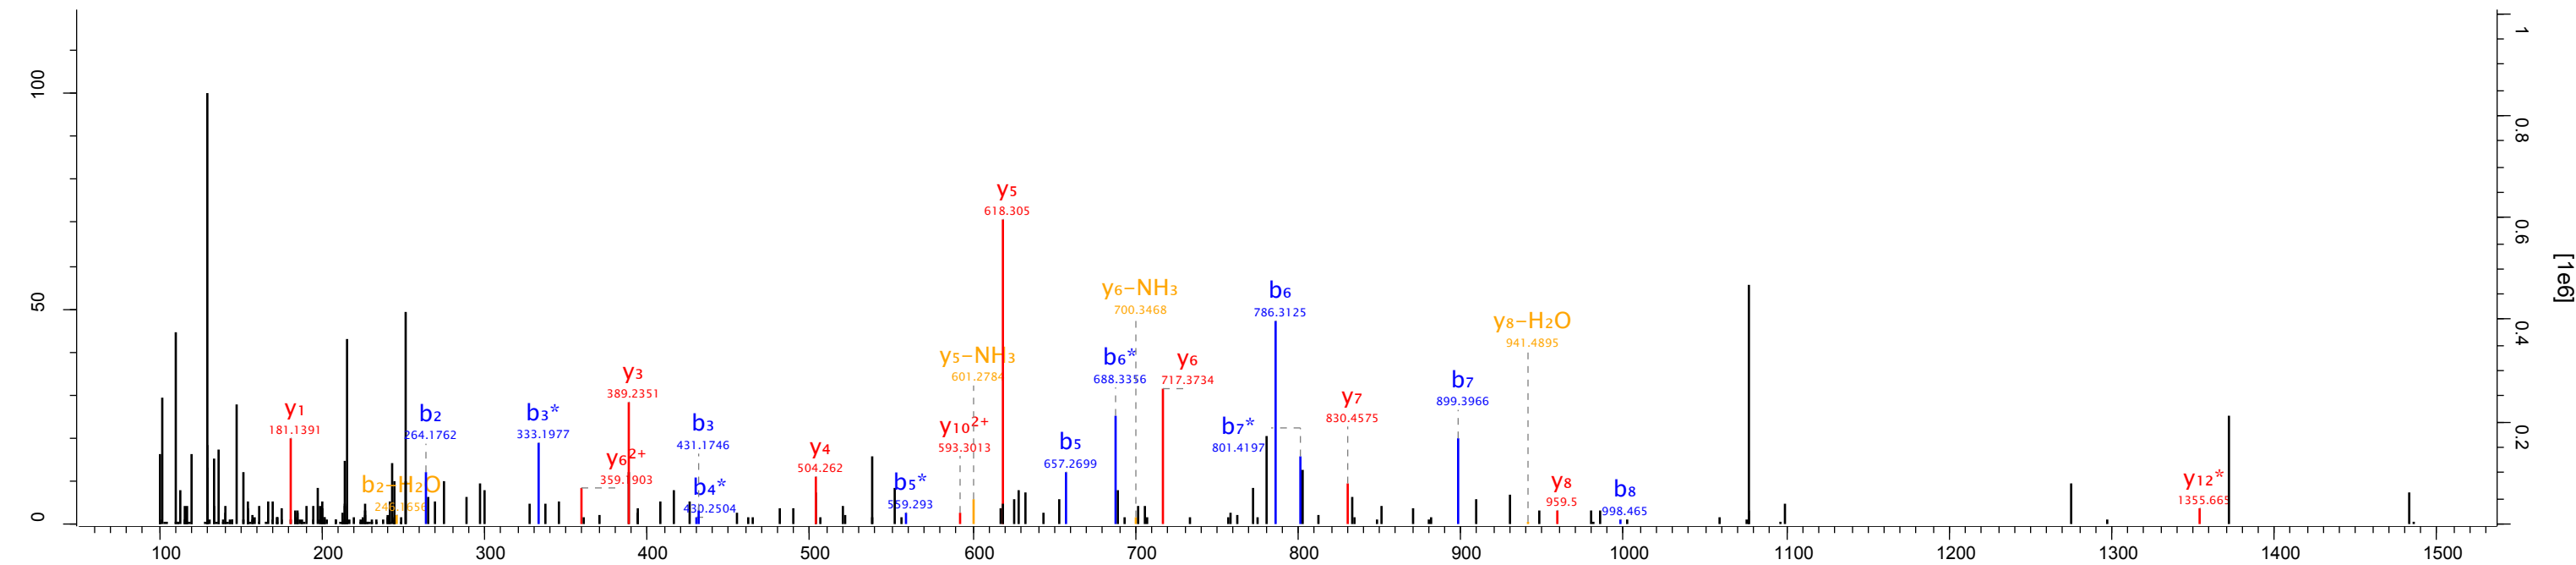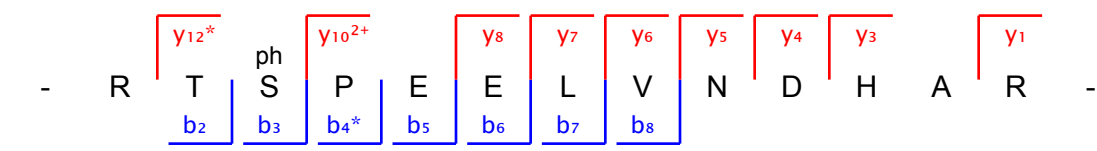



Raw file 20150814\_A375SR\_Phospho\_BR2\_09 Scan 10818 Method FTMS; HCD Score 121.73 m/z 436.22 Gene names SLX4

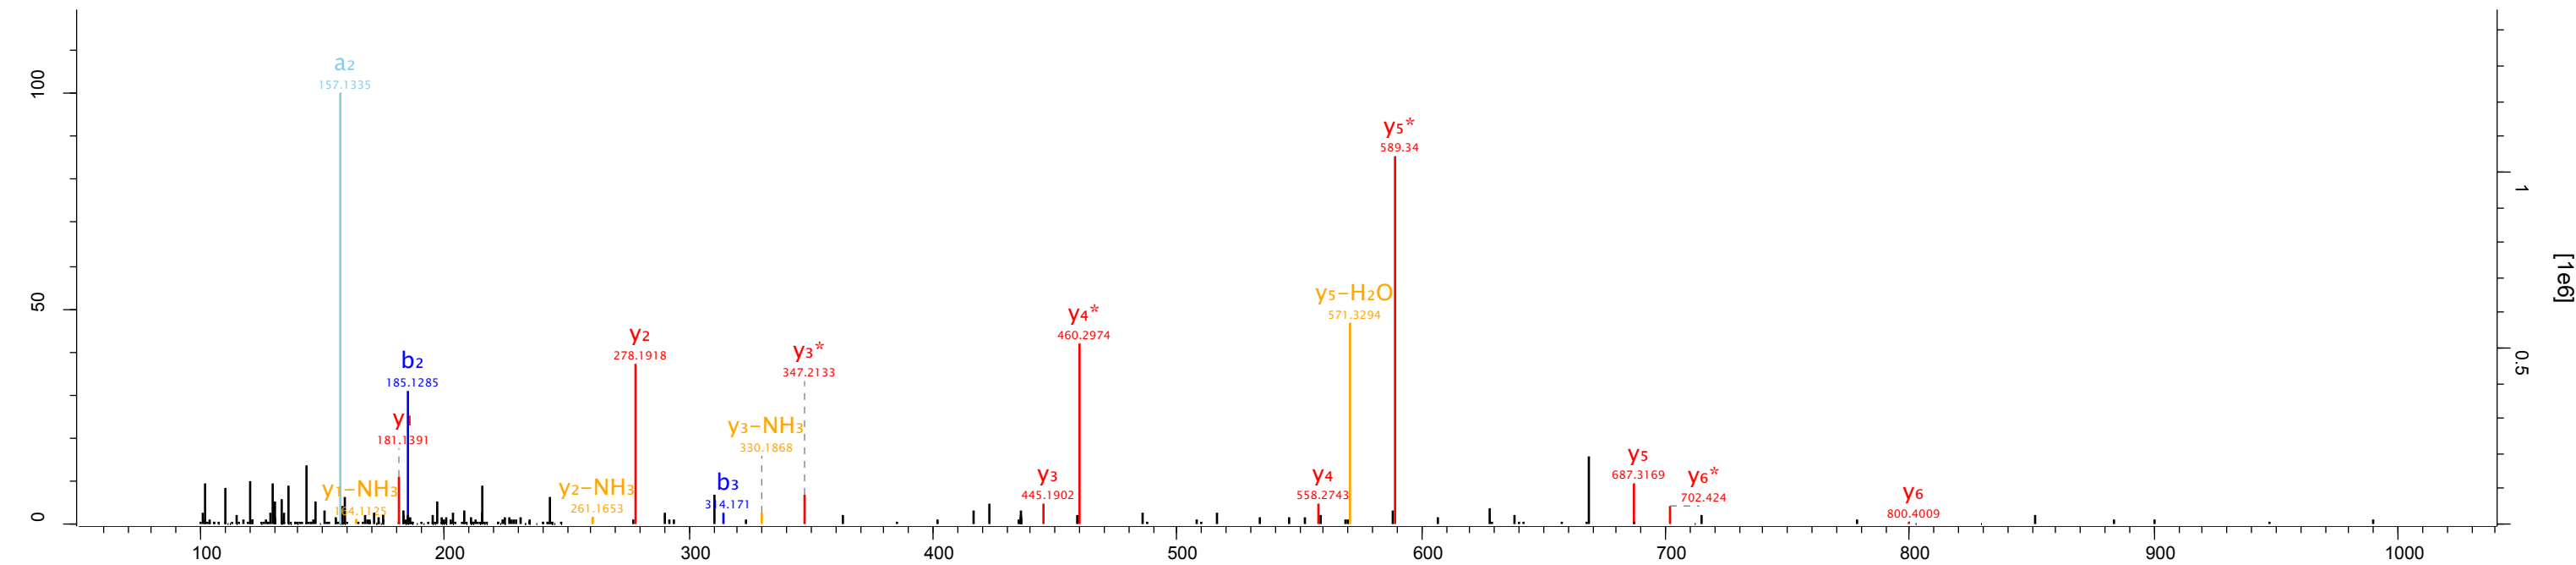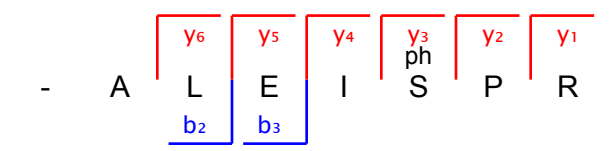

Raw file: 20150814\_A375SR\_Phospho\_BR2\_09  
 Scan: 10998 Method: FTMS; HCD Score: 205.8 m/z: 827.6 Gene names: ACIN1

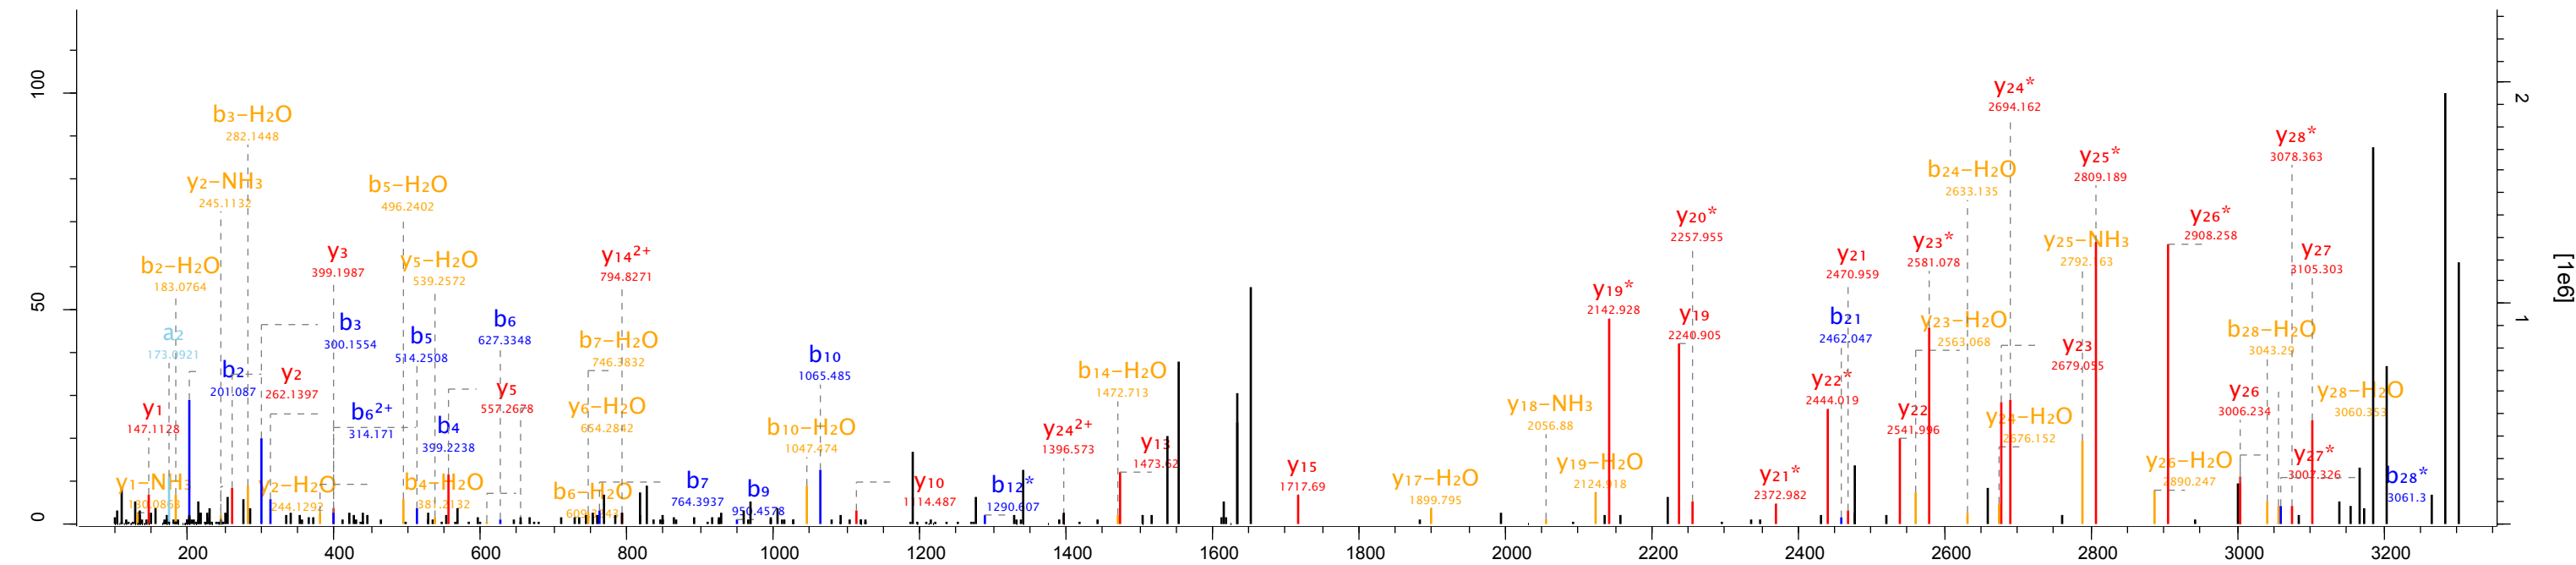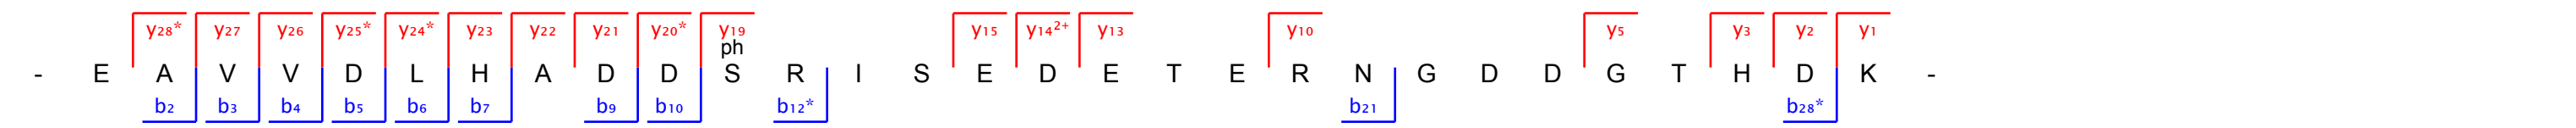

Raw file 20150814\_A375SR\_Phospho\_BR2\_09 Scan 11458 Method FTMS; HCD Score 58.71 m/z 594.95 Gene names TBC1D22A

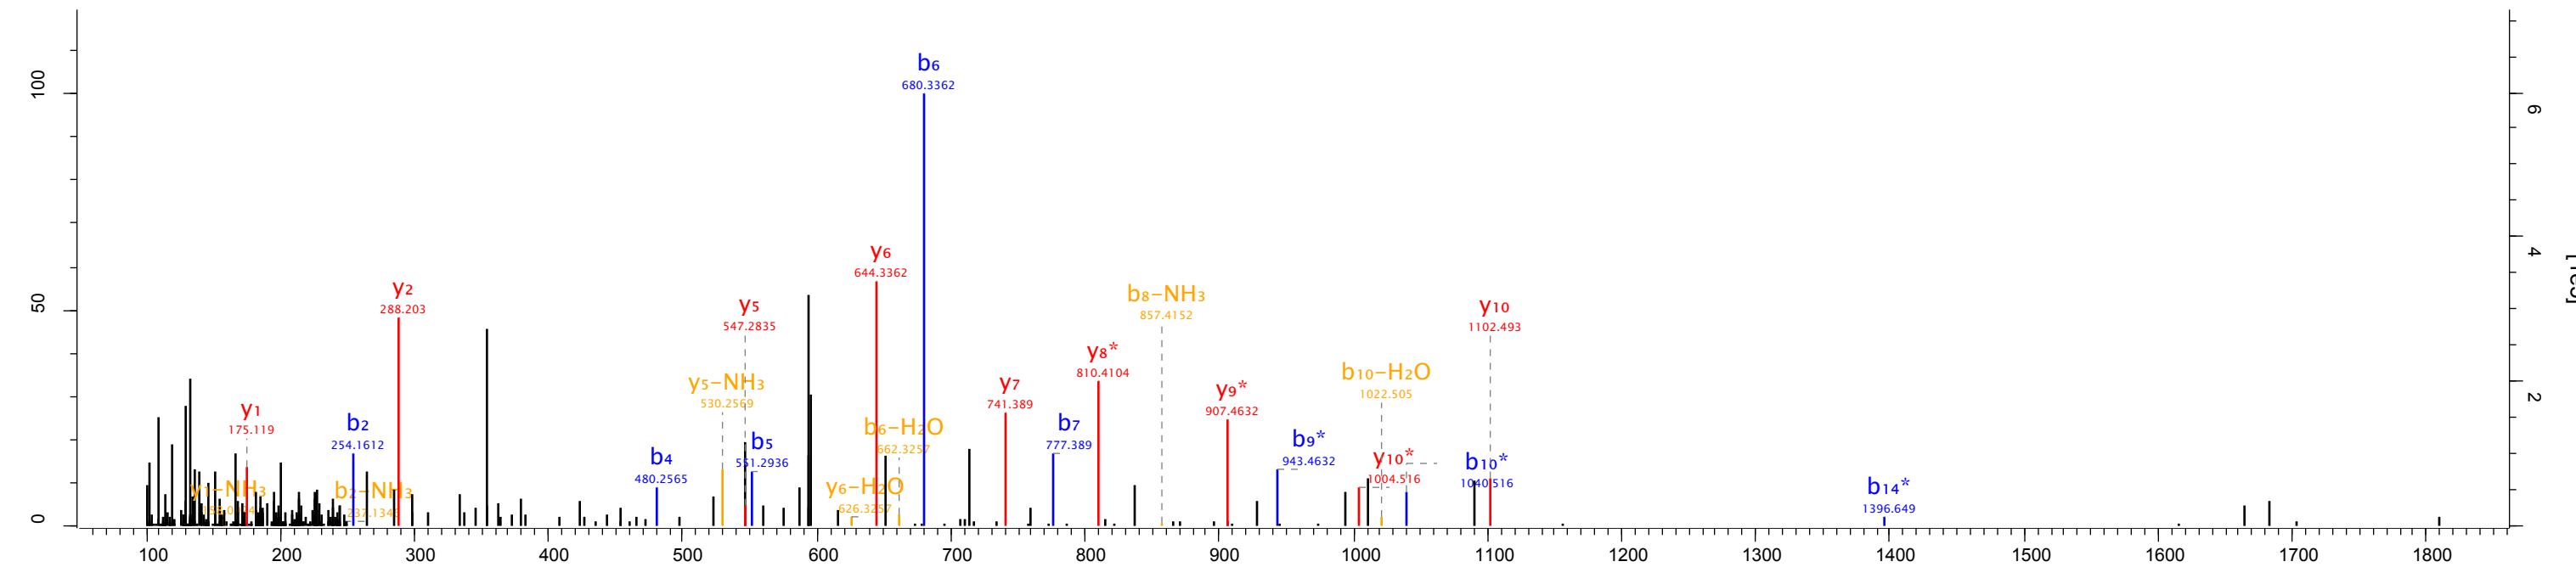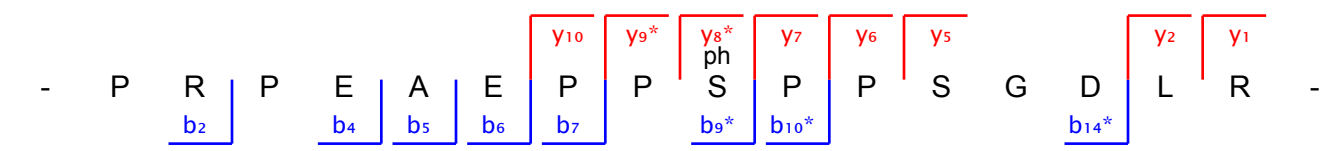

Raw file 20150814\_A375SR\_Phospho\_BR2\_09 Scan 13178 Method FTMS; HCD Score 178.76 m/z 835.87 Gene names HUWE1

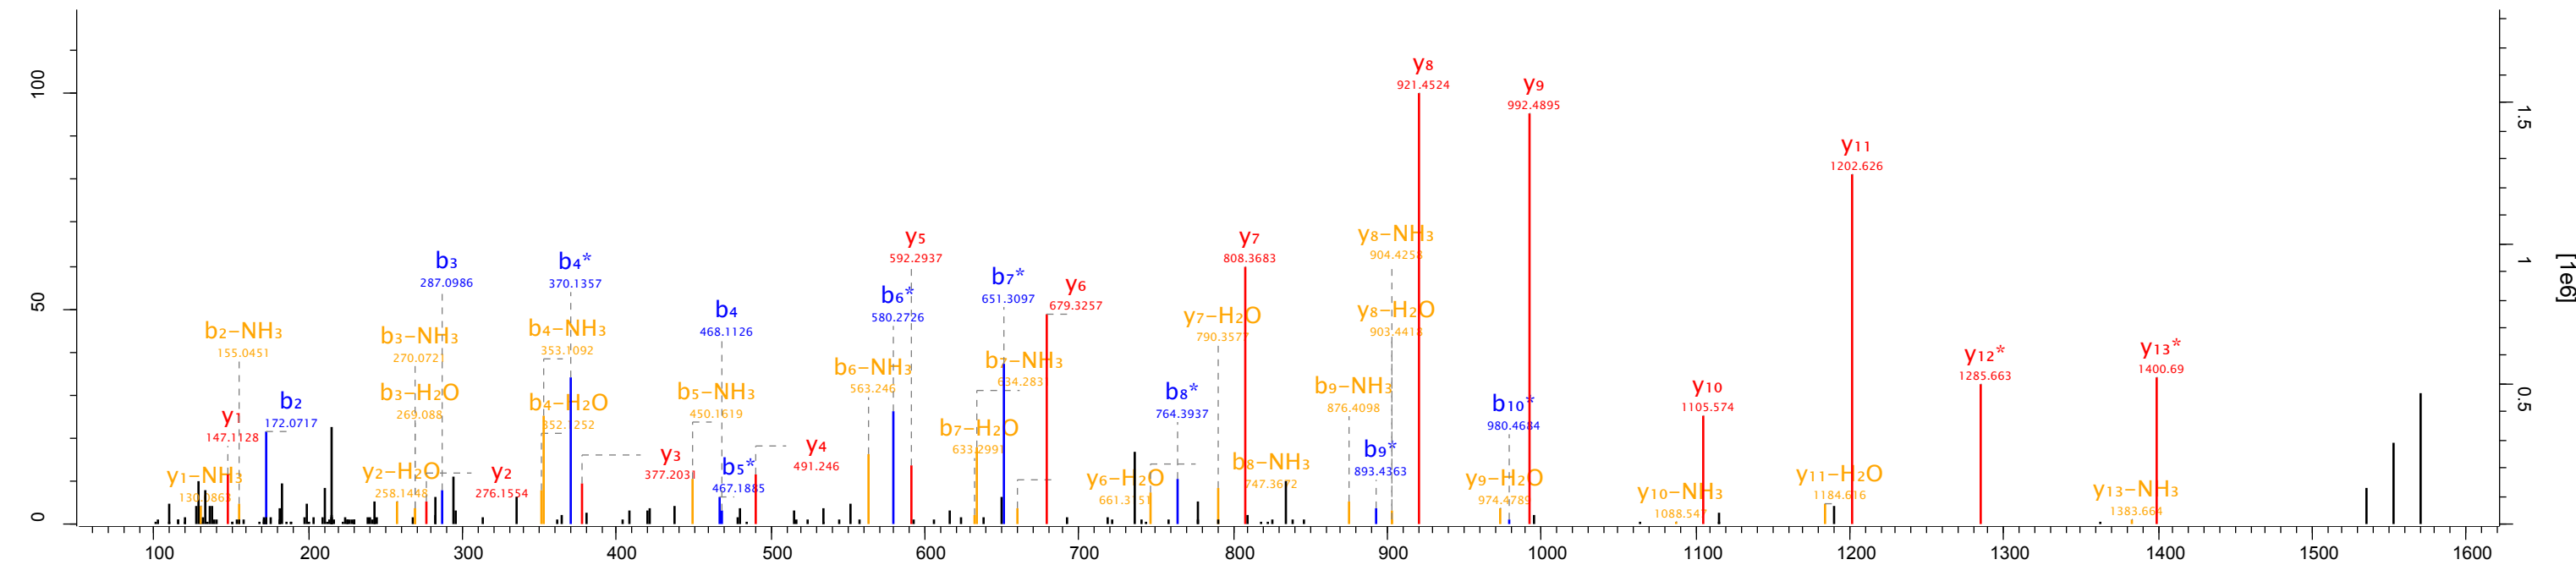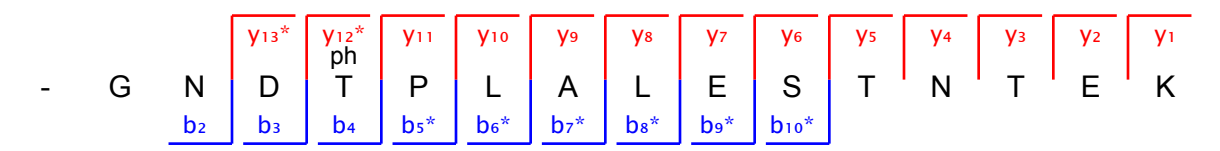

Raw file: 20150814\_A375SR\_Phospho\_BR2\_09  
 Scan: 13388 Method: FTMS; HCD Score: 71.26 m/z: 556.61 Gene names: CCNY

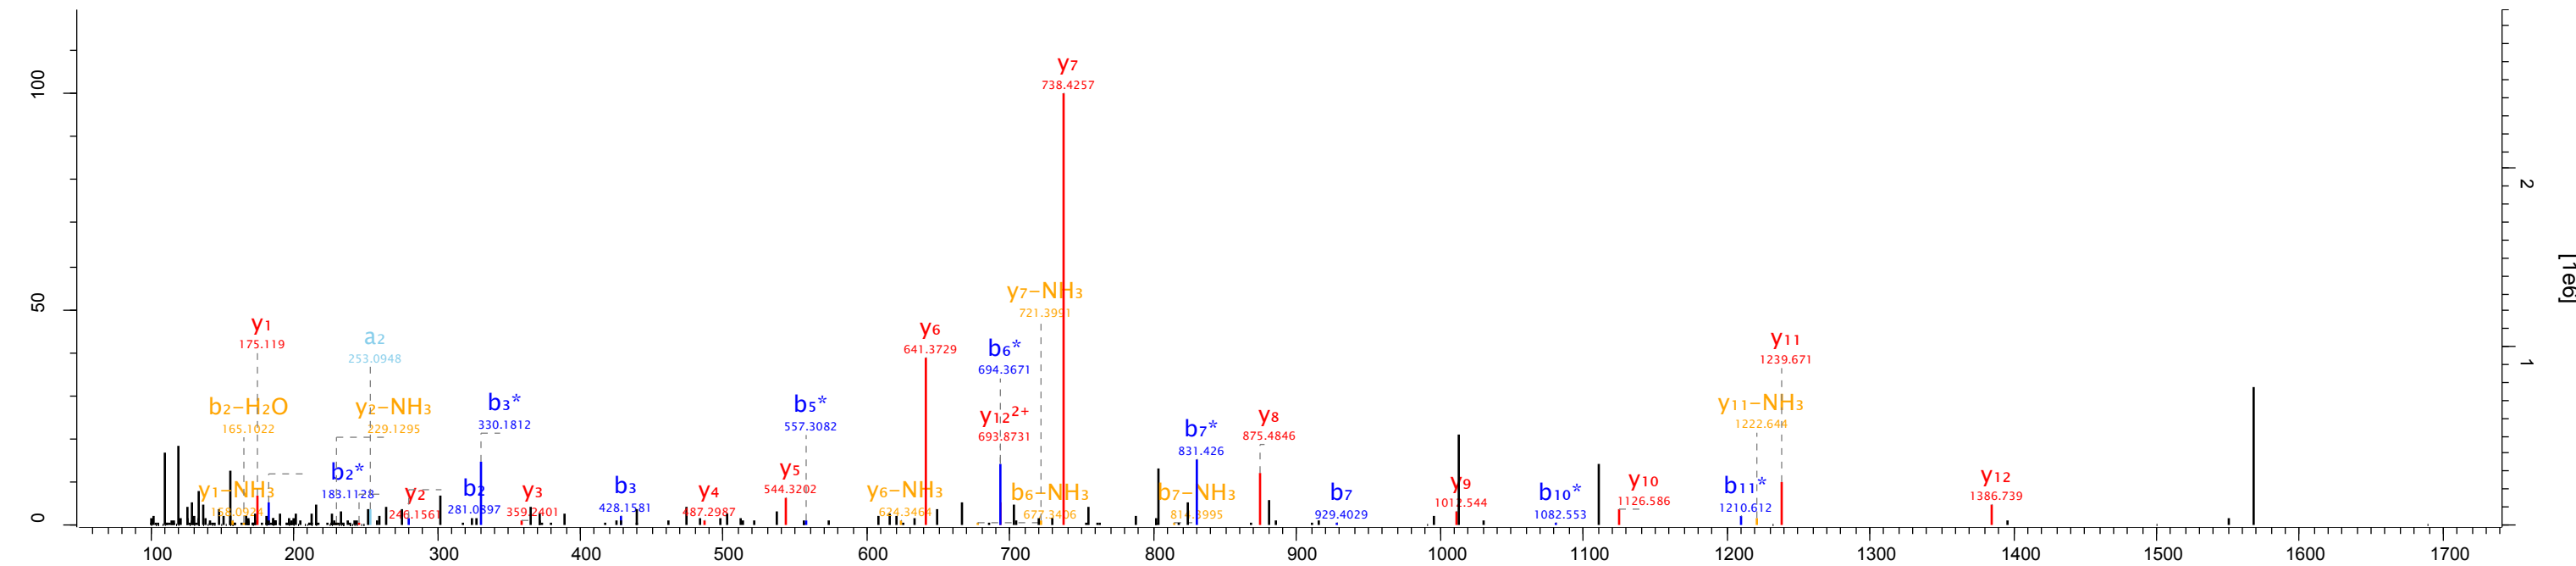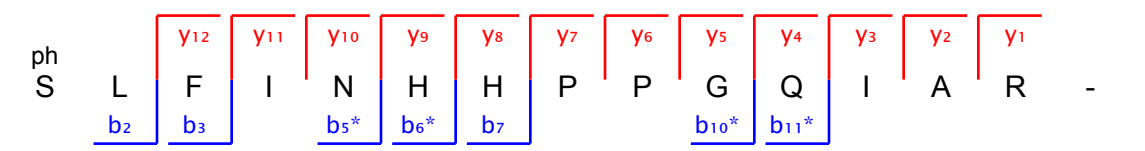

Raw file: 20150814\_A375SR\_Phospho\_BR2\_09  
 Scan: 15038 Method: FTMS; HCD Score: 41.09 m/z: 586.97 Gene names: ARHGAP39

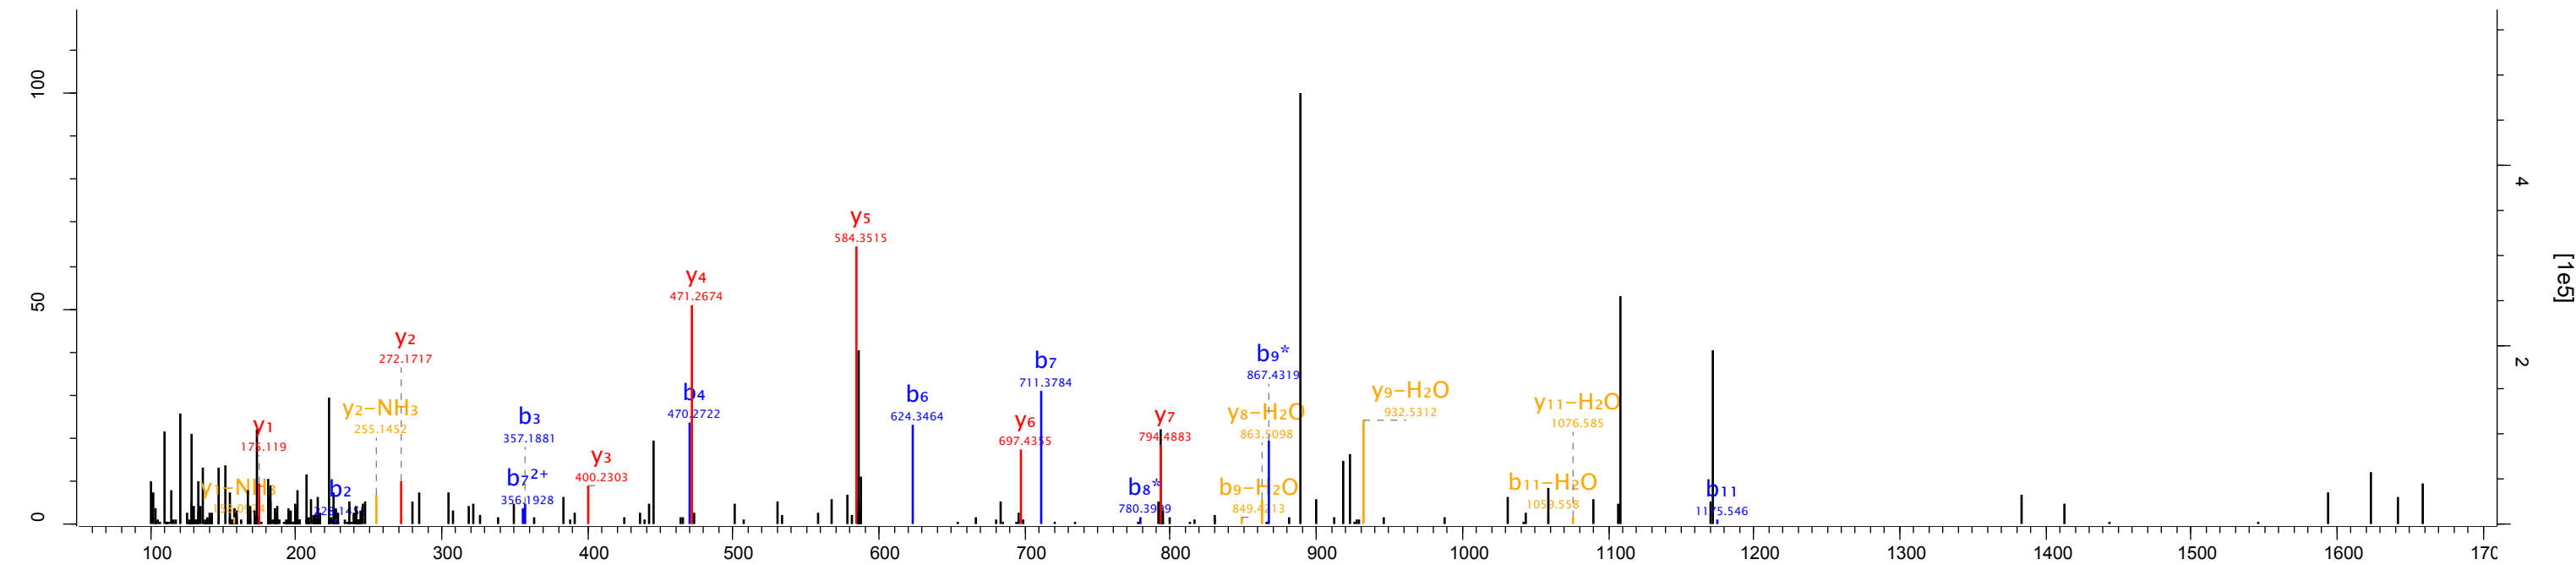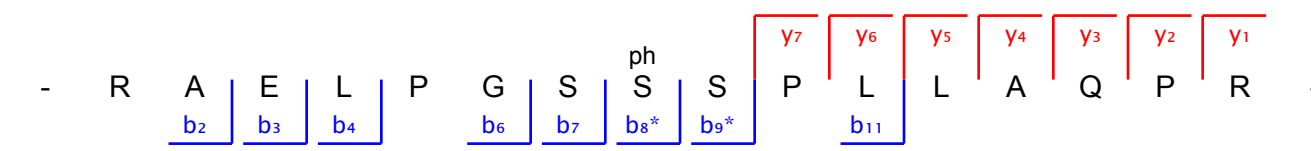

Raw file: 20150814\_A375SR\_Phospho\_BR2\_09  
 Scan: 15308 Method: FTMS; HCD Score: 162.07 m/z: 1121.55 Gene names: PSMD1

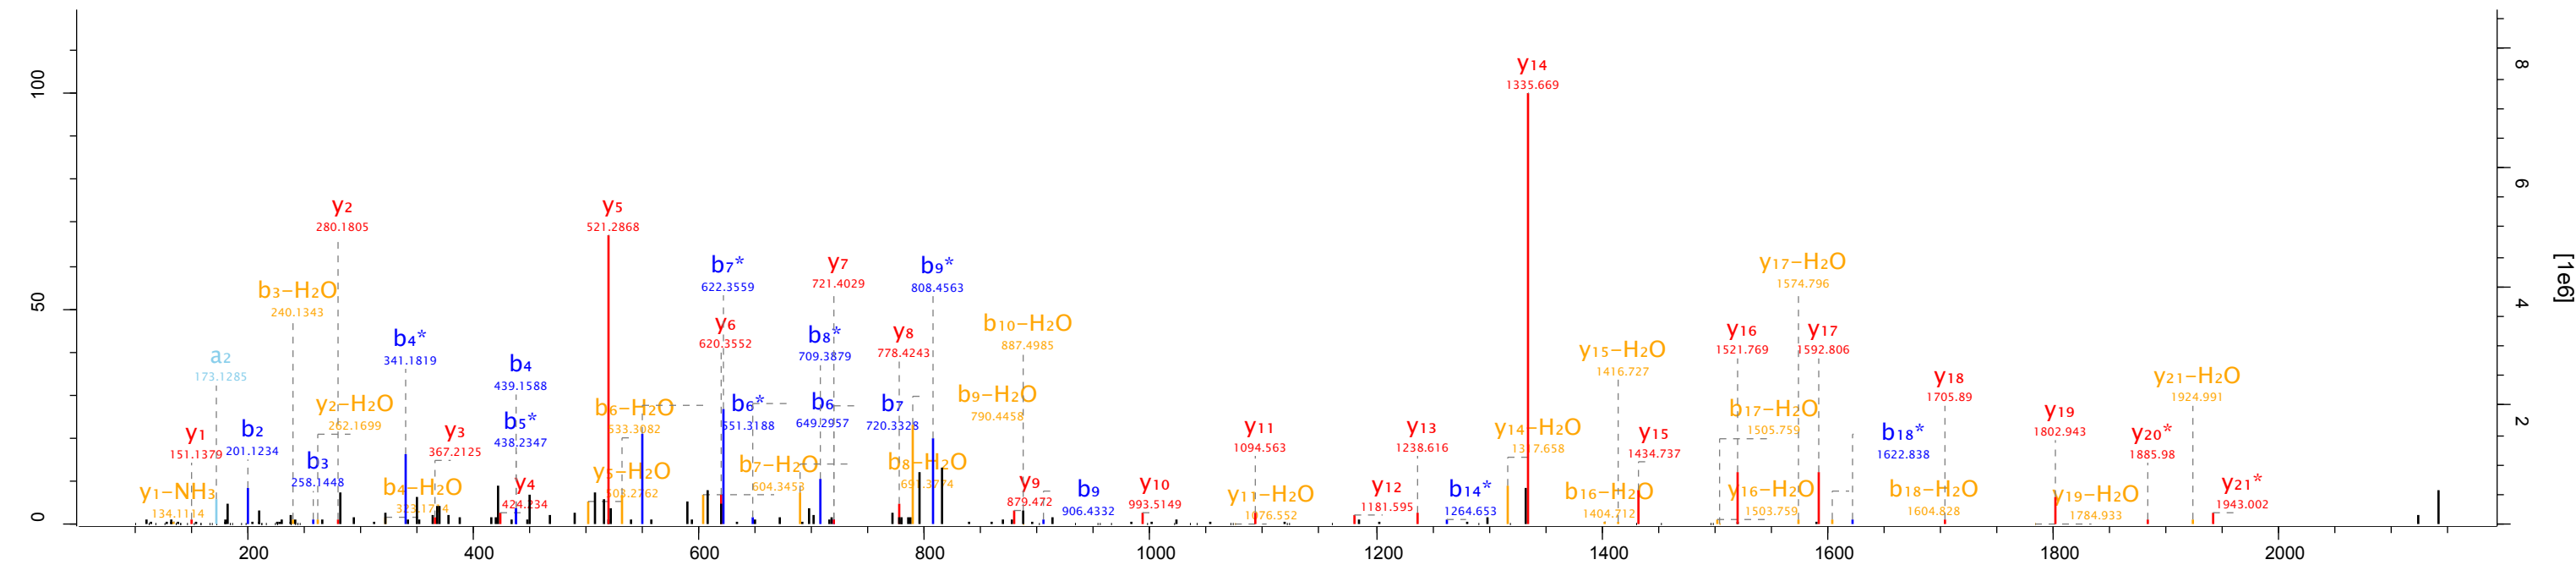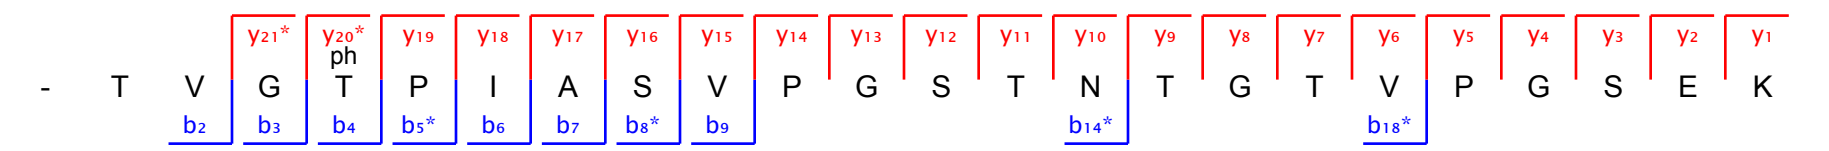

Raw file 20150814\_A375SR\_Phospho\_BR2\_09 Scan 15548 Method FTMS; HCD Score 129.04 m/z 718.02 Gene names TSSC4

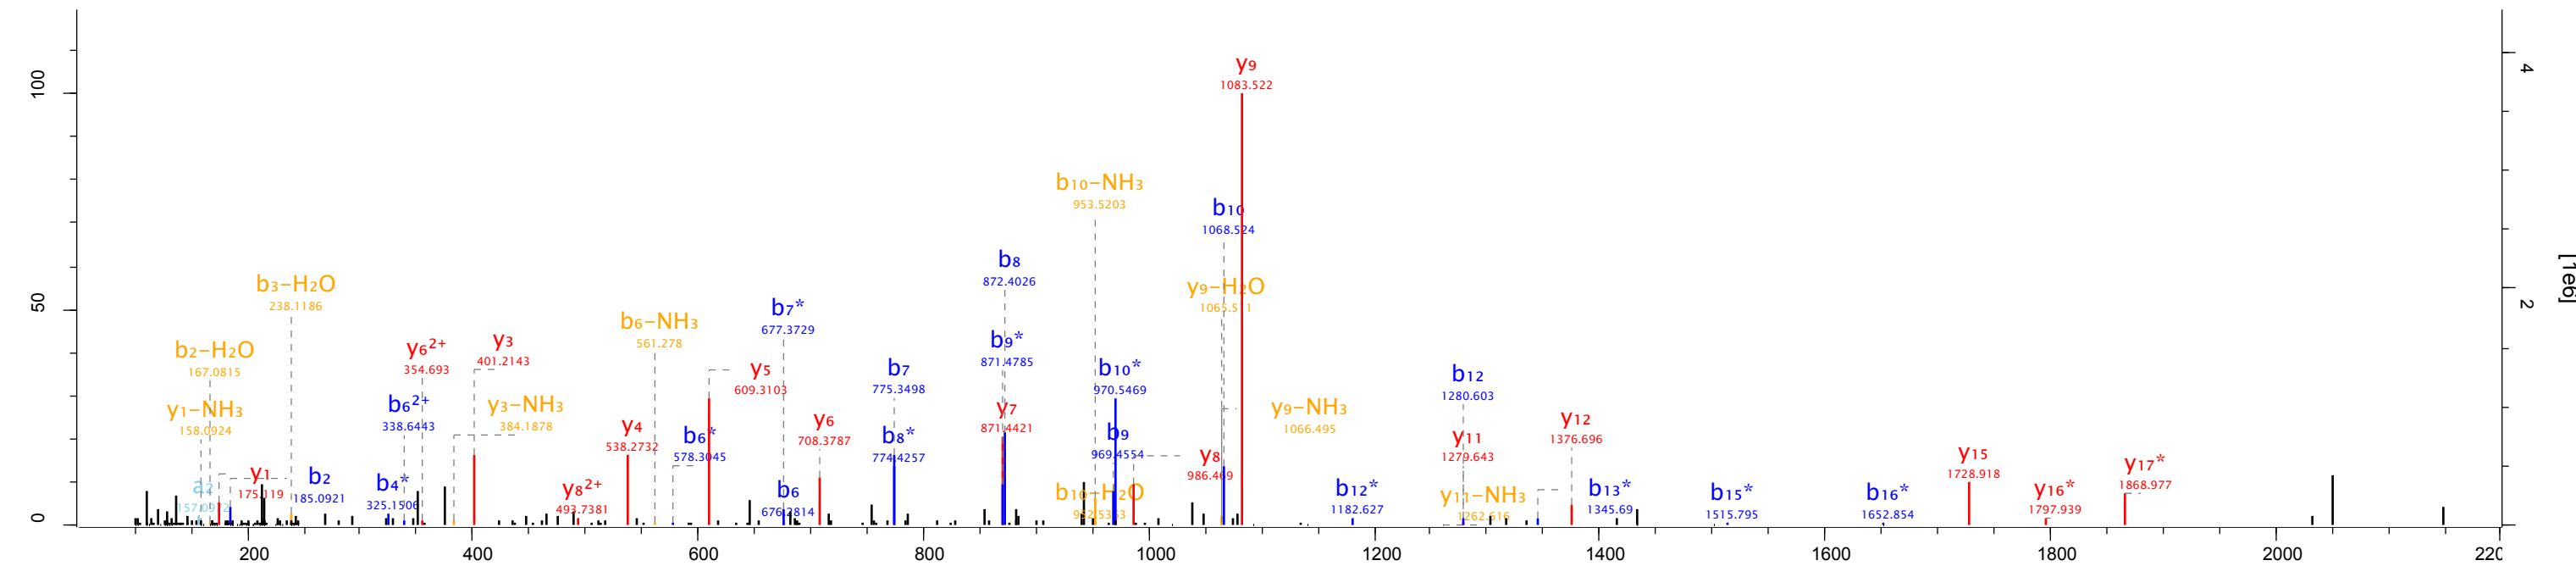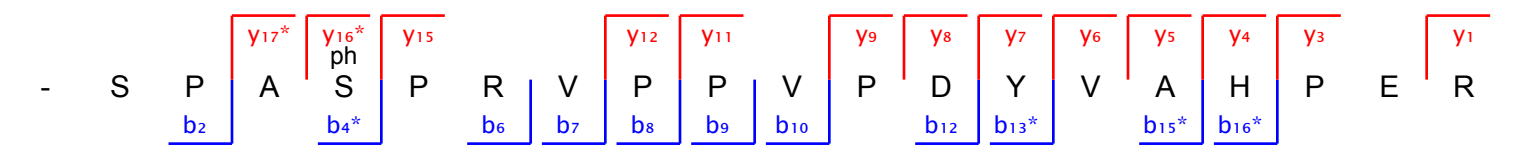



Raw file Scan Method Score m/z Gene names  
 20150814\_A375SR\_Phospho\_BR2\_09 15898 FTMS; HCD 115.79 578.31 DENND5B

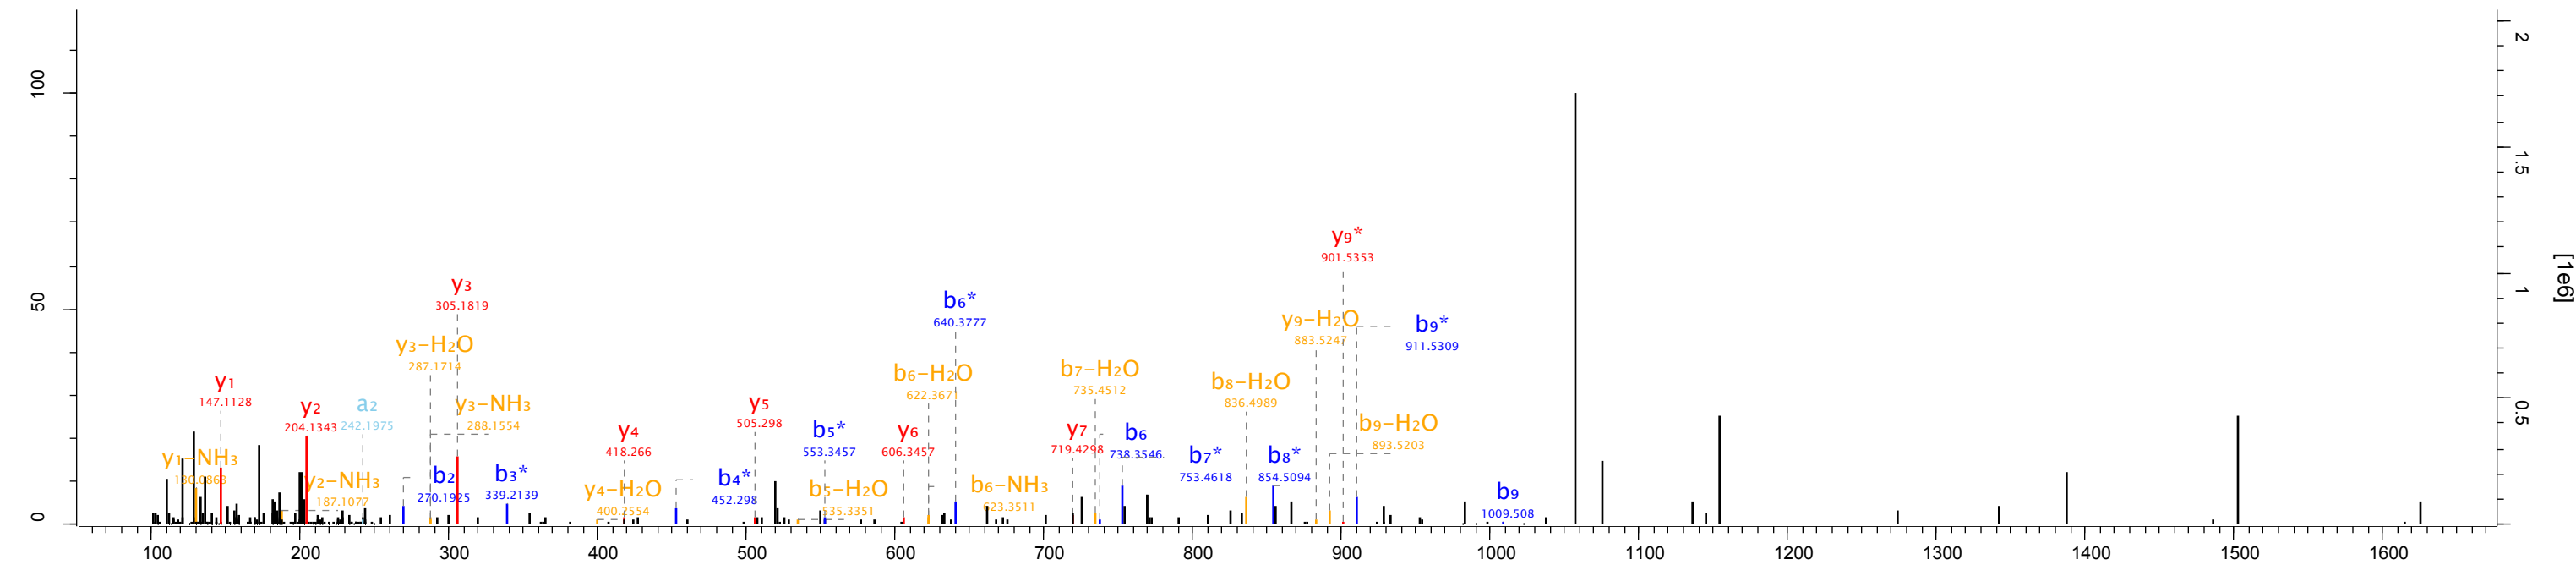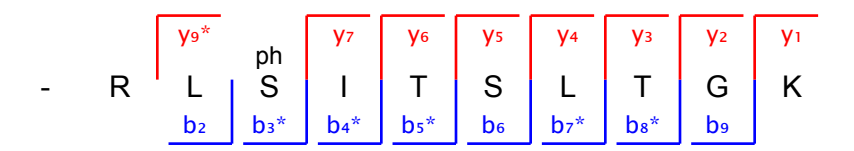

Raw file 20150814\_A375SR\_Phospho\_BR2\_09 Scan 16318 Method FTMS; HCD Score 96.16 m/z 962.78 Gene names SLC1A4

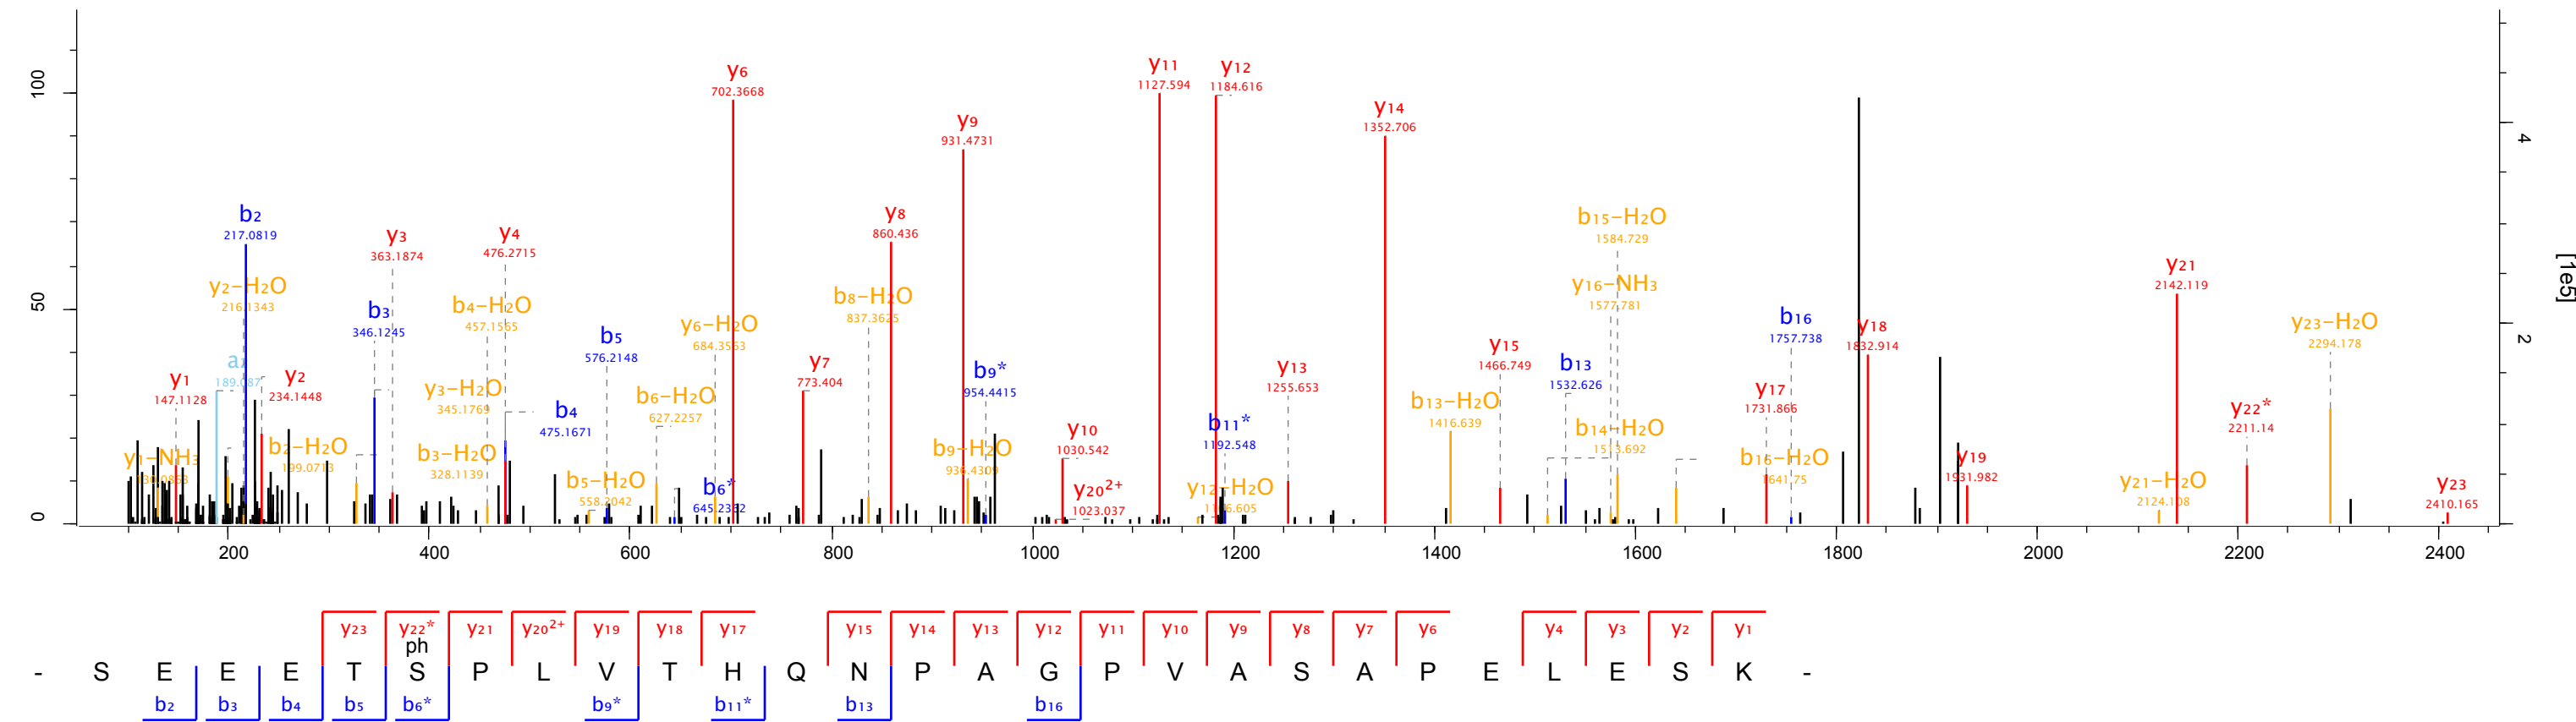

Raw file: 20150814\_A375SR\_Phospho\_BR2\_09  
 Scan: 16818 Method: FTMS; HCD Score: 112.58 m/z: 625.64 Gene names: SLC4A7

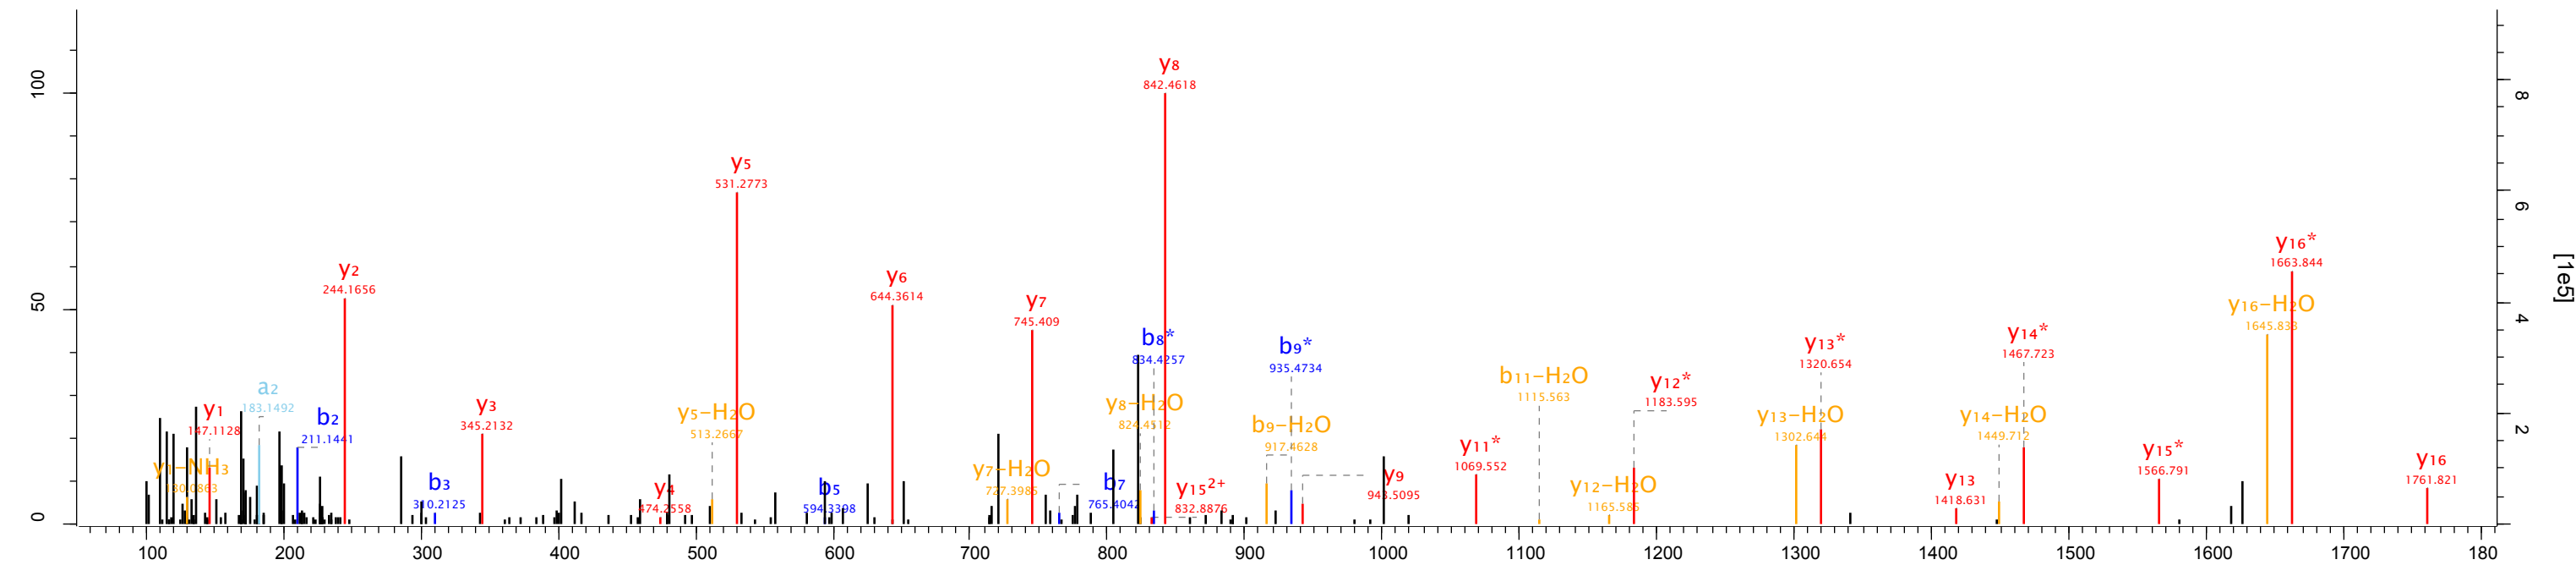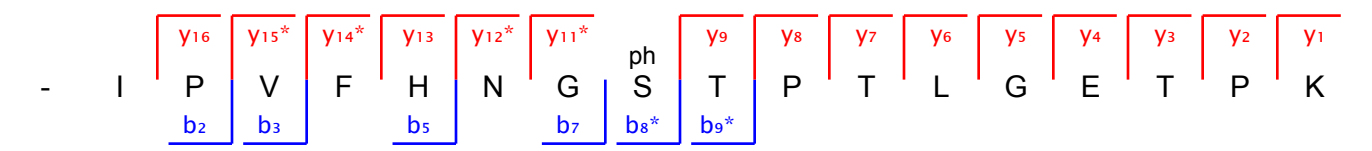

Raw file 20150814\_A375SR\_Phospho\_BR2\_09 Scan 17718 Method FTMS; HCD Score 145.92 m/z 664.27 Gene names FAM175A

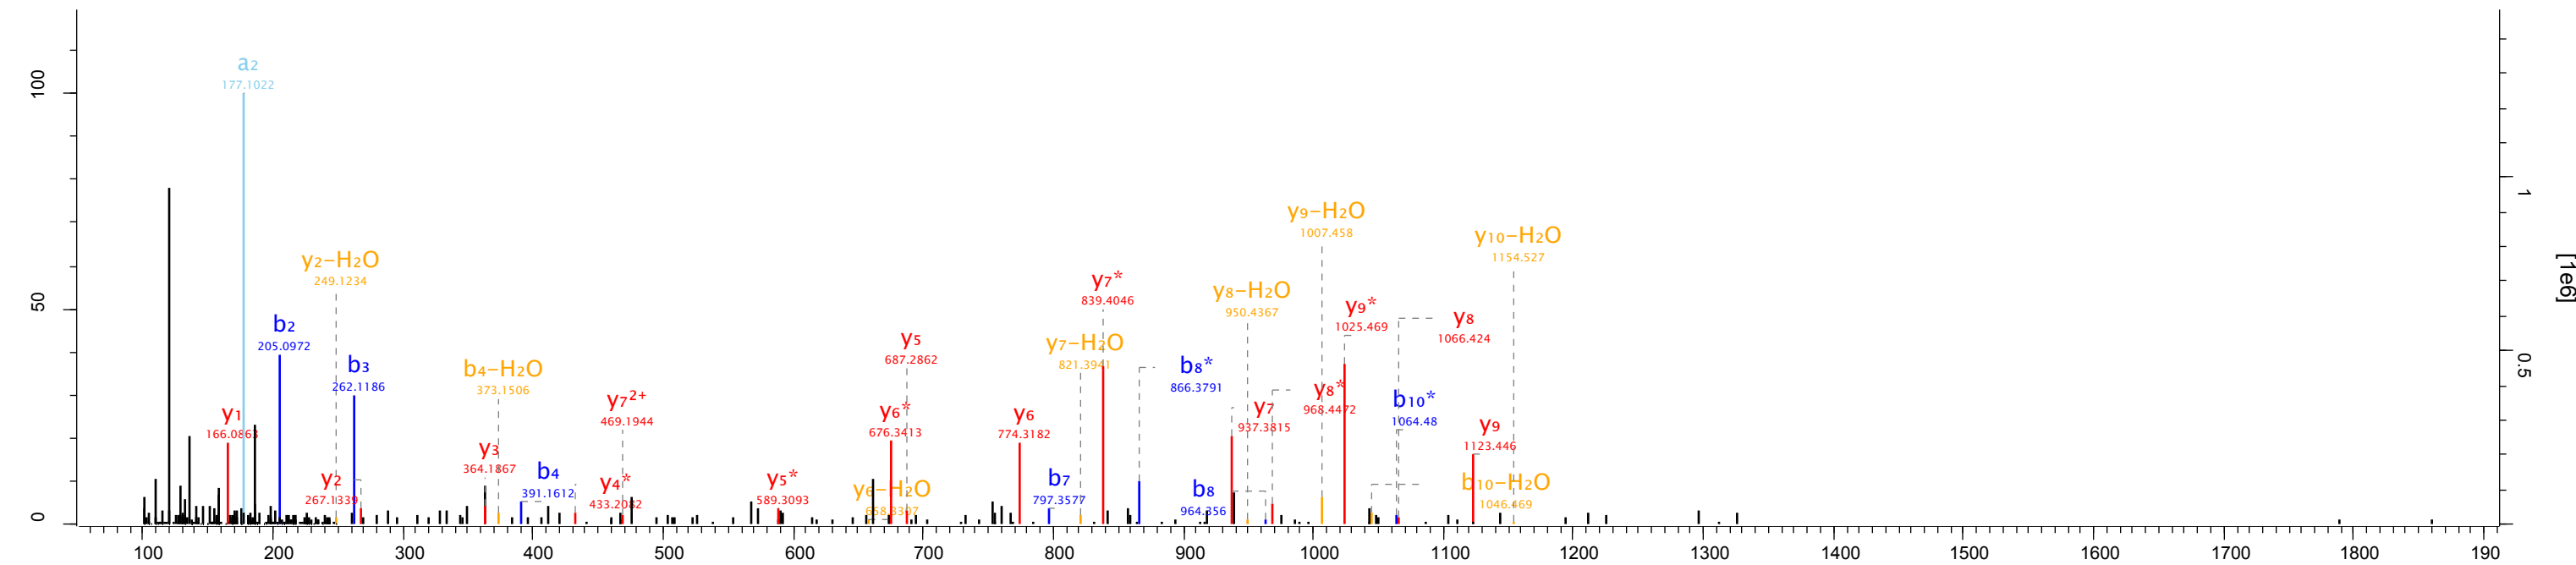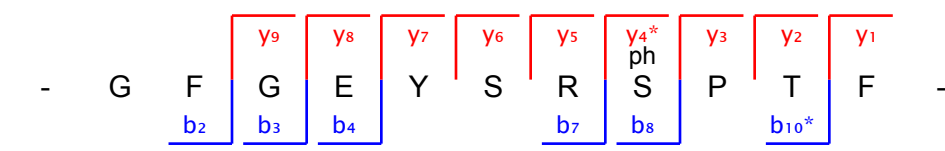

Raw file 20150814\_A375SR\_Phospho\_BR2\_09 Scan 17828 Method FTMS; HCD Score 220.5 m/z 1015.5 Gene names HS1BP3

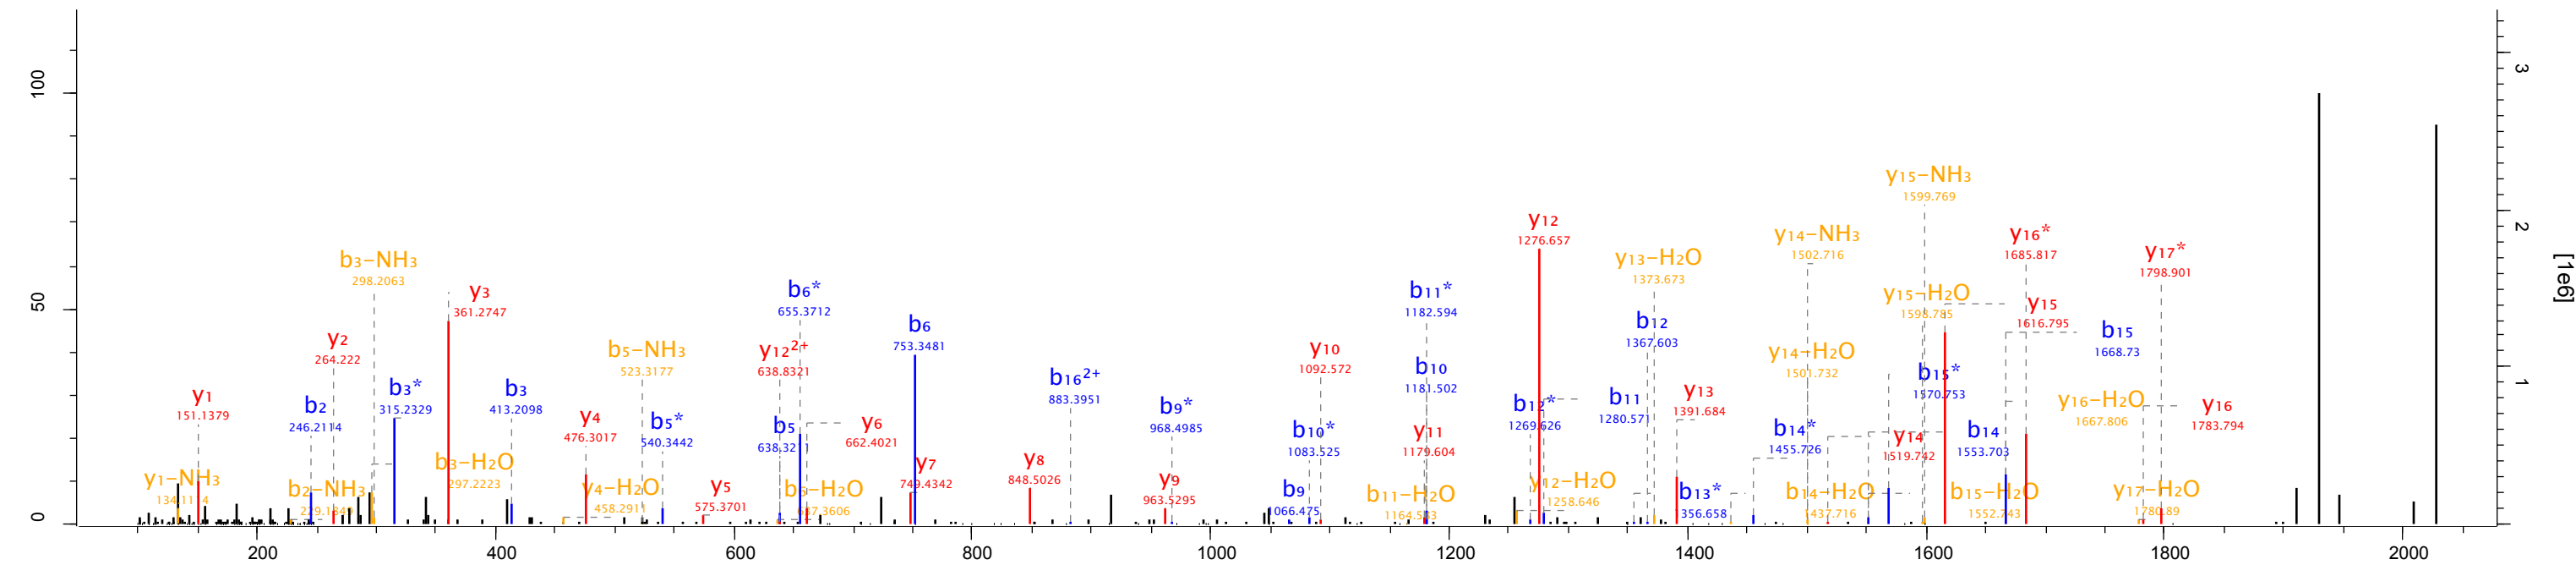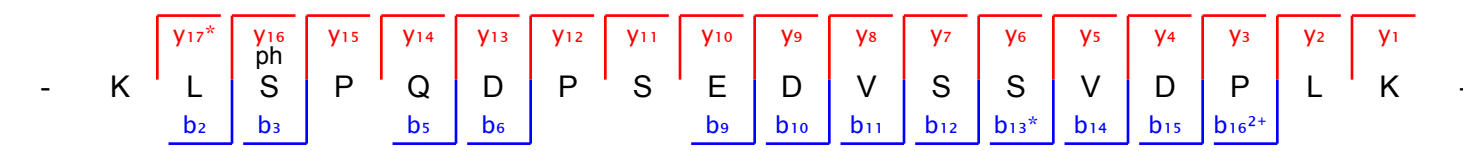

Raw file: 20150814\_A375SR\_Phospho\_BR2\_09  
 Scan: 18108 Method: FTMS; HCD Score: 84.36 m/z: 736.63 Gene names: SEC16A

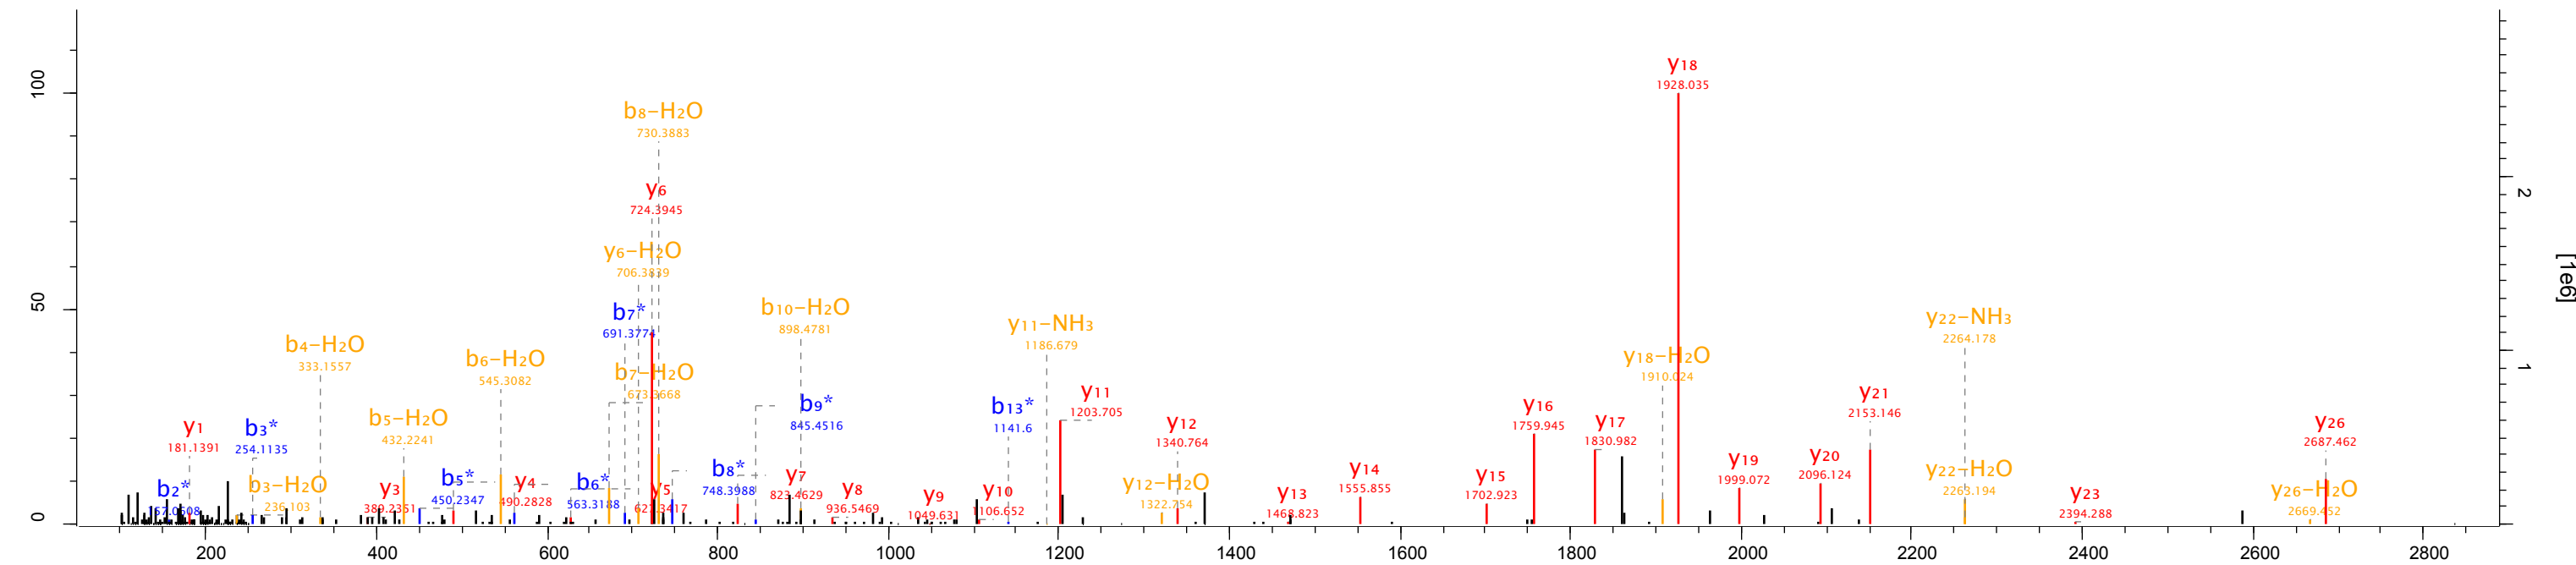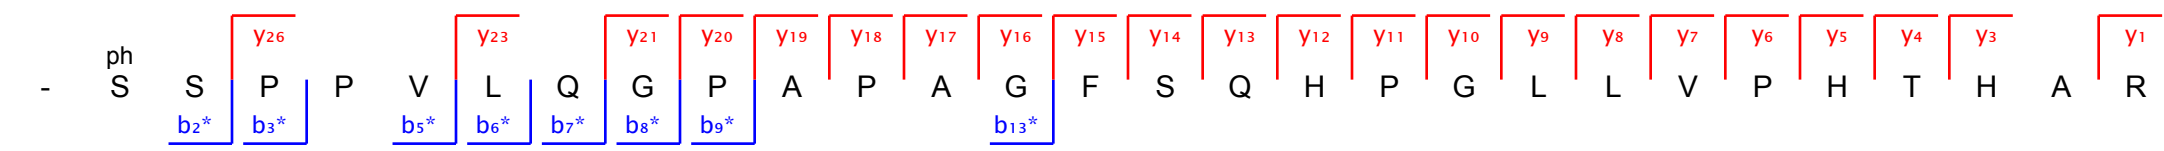

Raw file 20150814\_A375SR\_Phospho\_BR2\_09 Scan 18218 Method FTMS; HCD Score 218.14 m/z 878.43 Gene names MICALL1

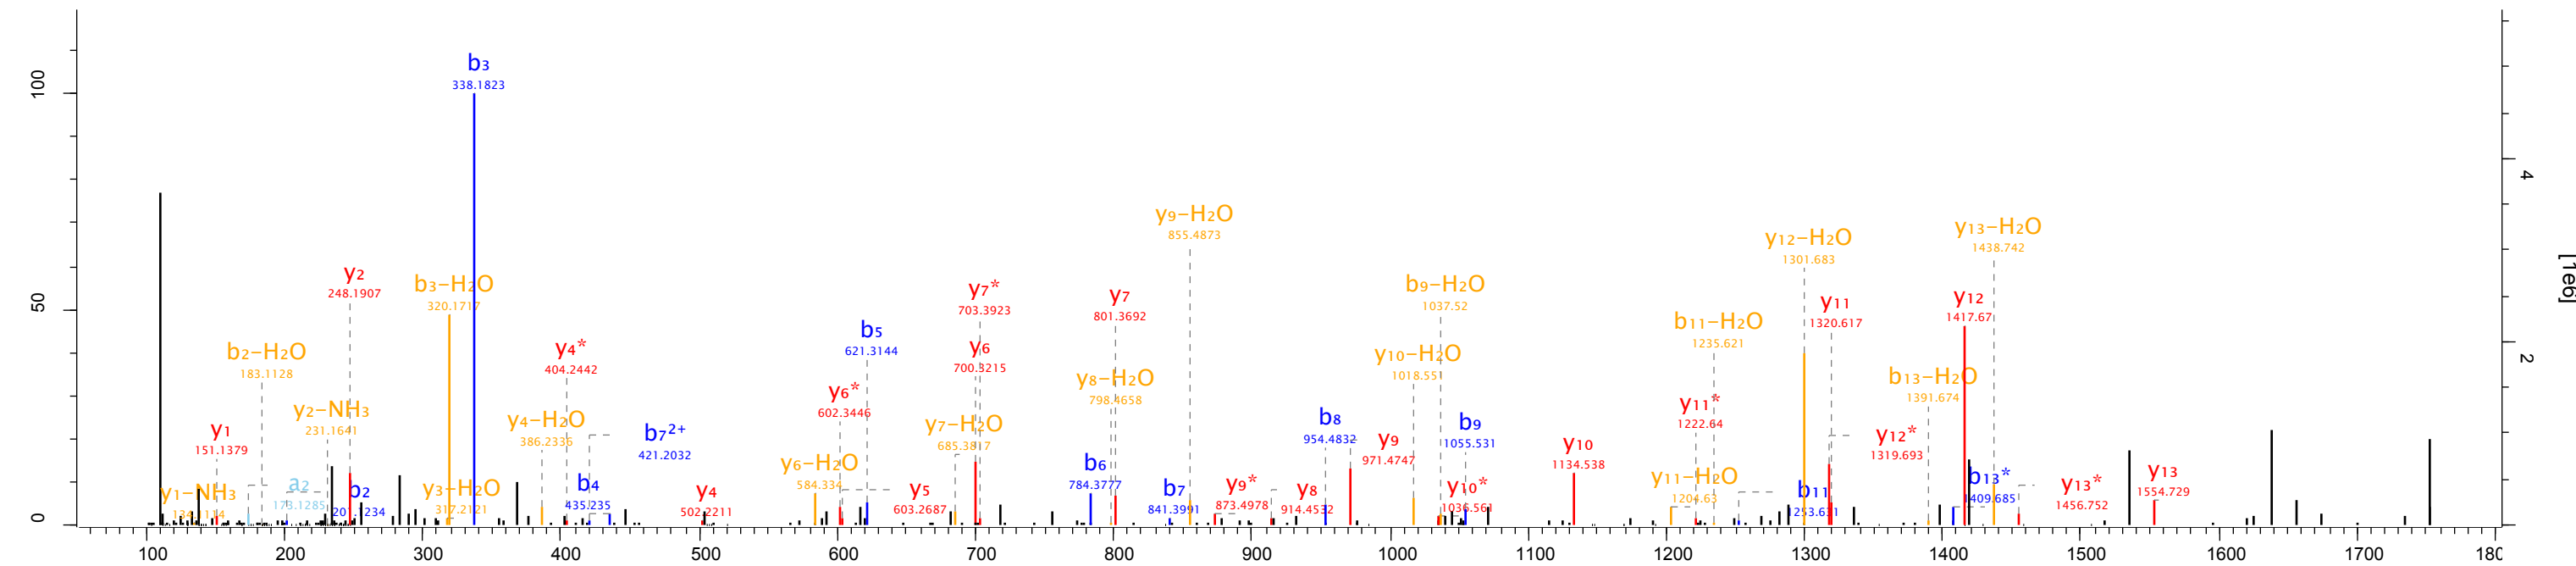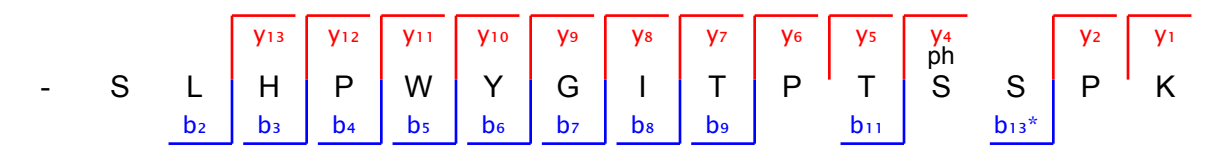

Raw file: 20150814\_A375SR\_Phospho\_BR2\_09  
 Scan: 20218  
 Method: FTMS; HCD  
 Score: 98.3  
 m/z: 664.66  
 Gene names: NAP1L4

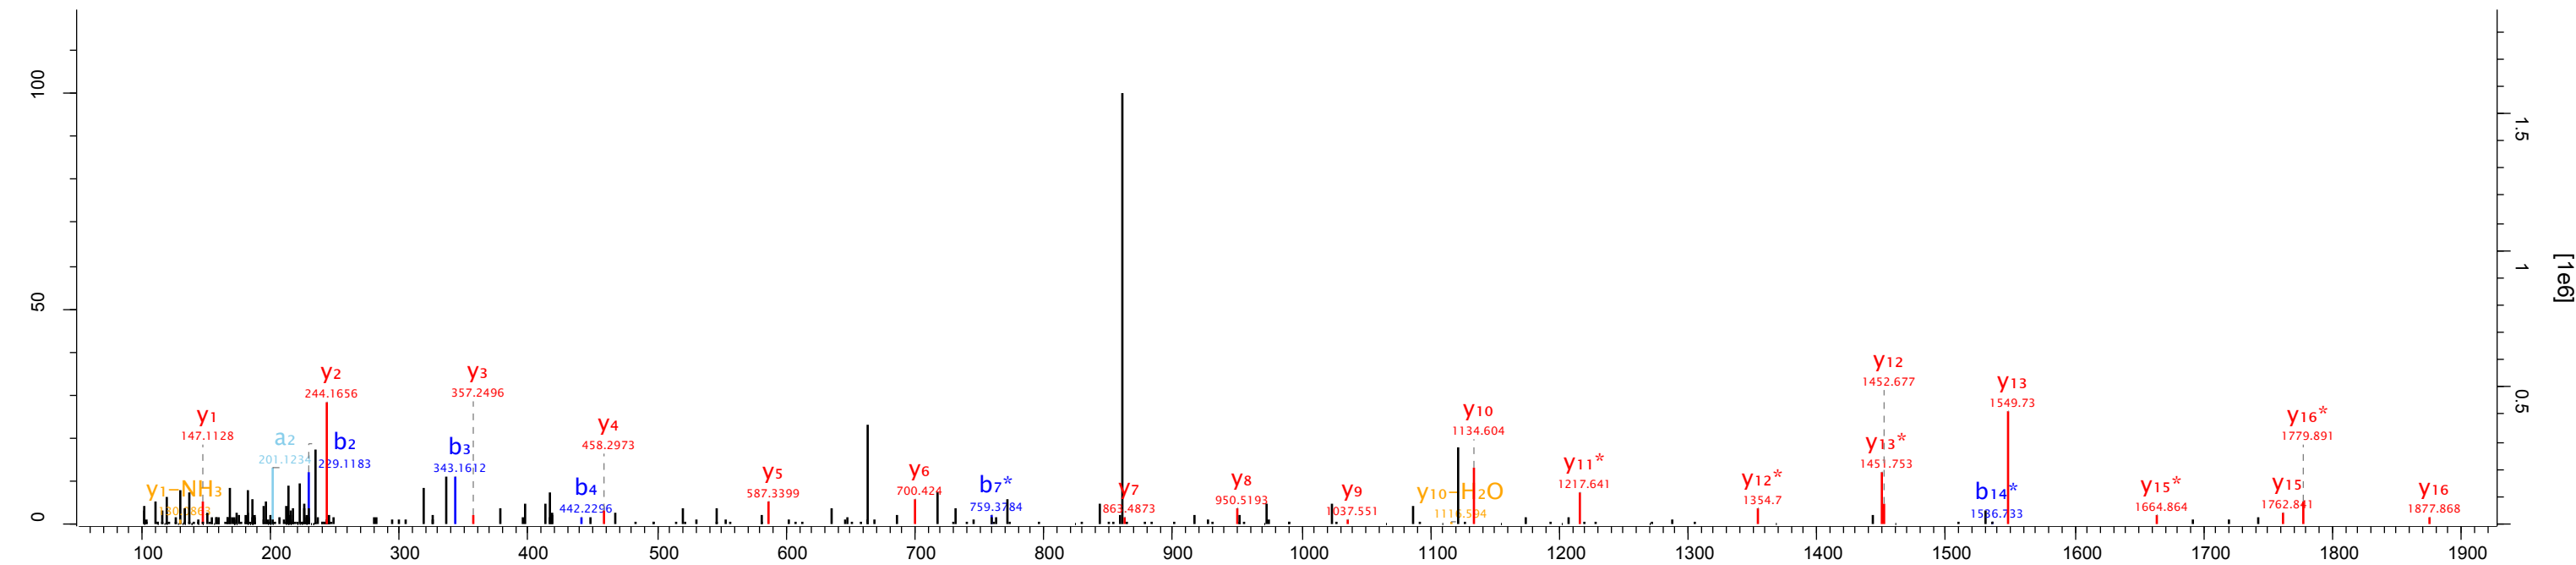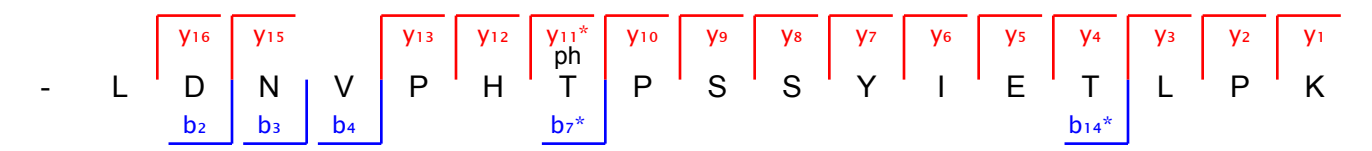



Raw file Scan Method Score m/z Gene names  
 20150814\_A375SR\_Phospho\_BR2\_09 20398 FTMS; HCD 119.62 632.32 HECTD1

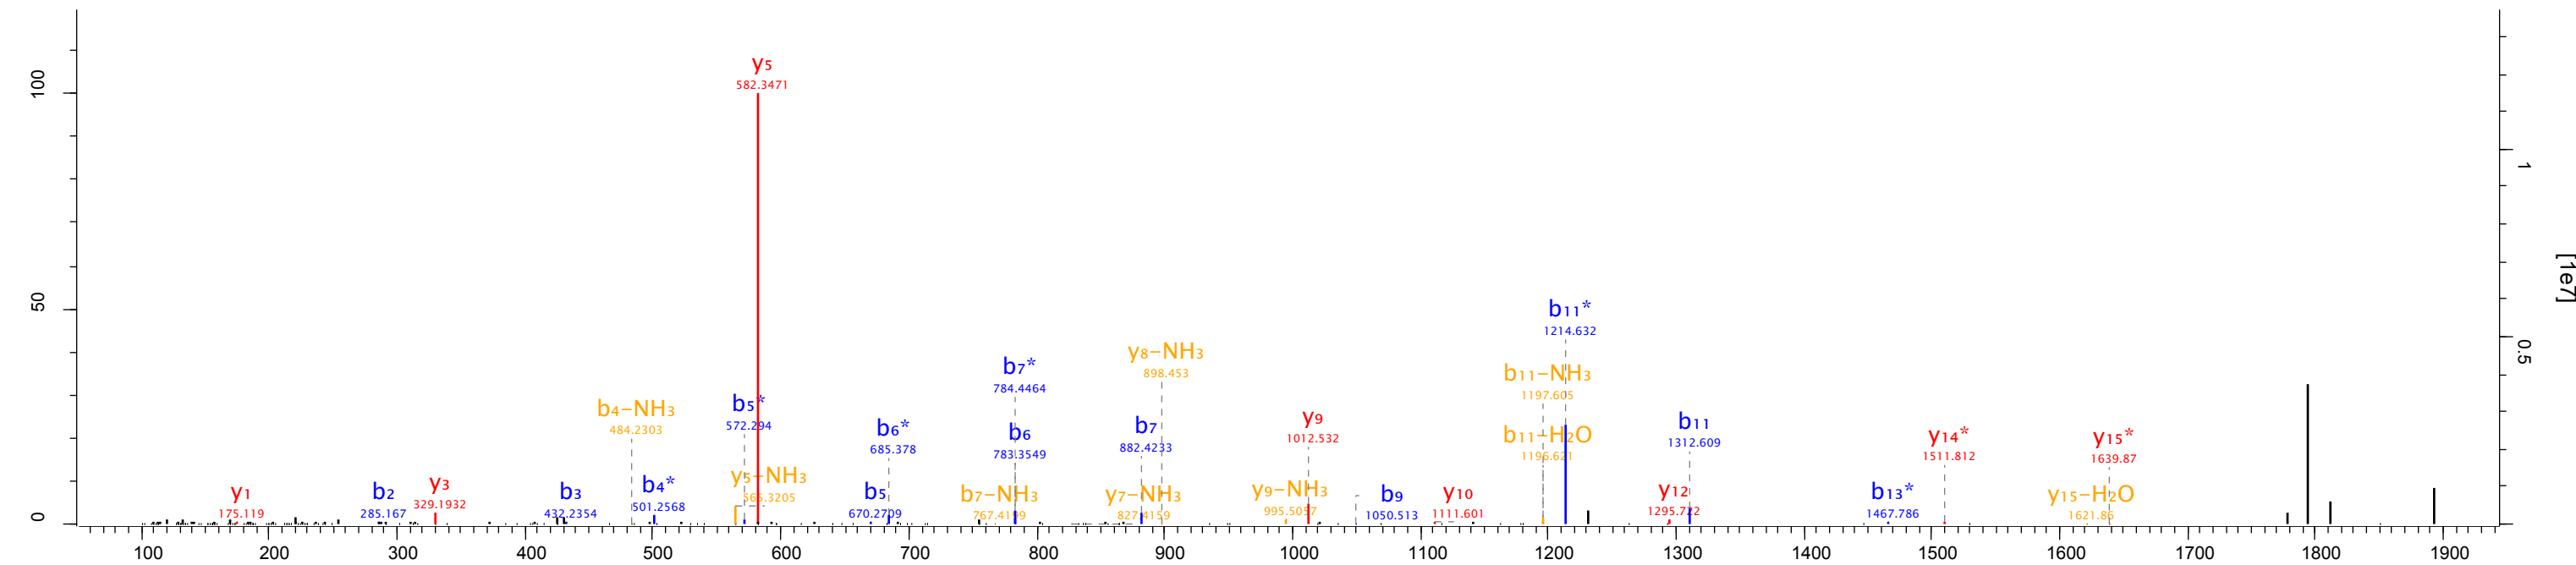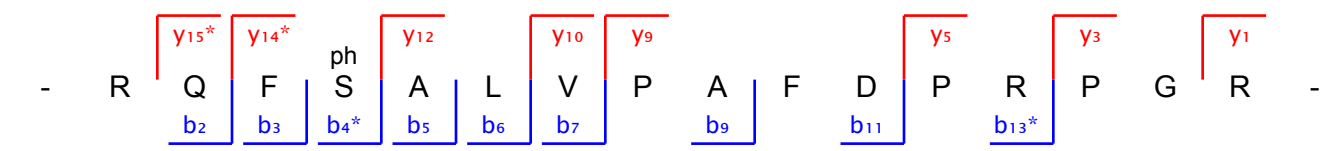

Raw file 20150814\_A375SR\_Phospho\_BR2\_09 Scan 20668 Method FTMS; HCD Score 105.03 m/z 573.83 Gene names ABL2

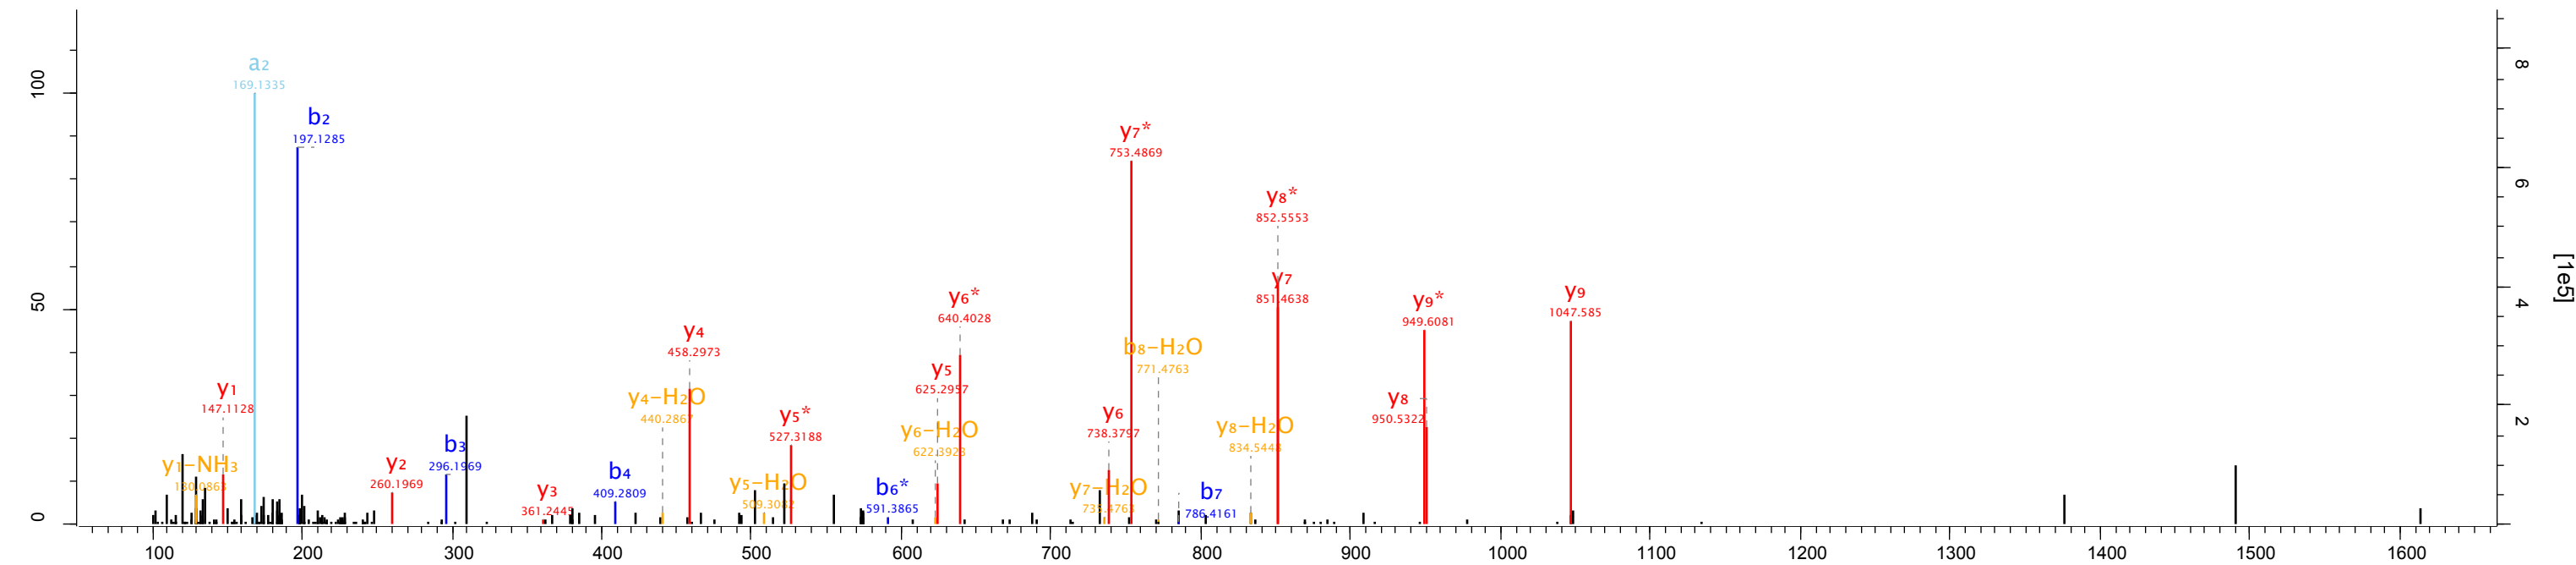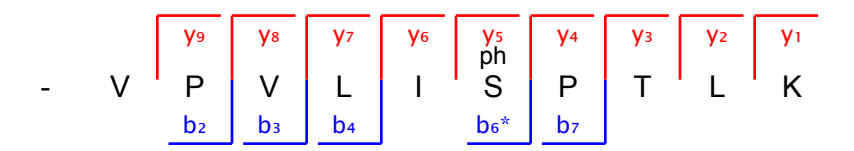

Raw file 20150814\_A375SR\_Phospho\_BR2\_09 Scan 21508 Method FTMS; HCD Score 90.4 m/z 799.72 Gene names AKAP12

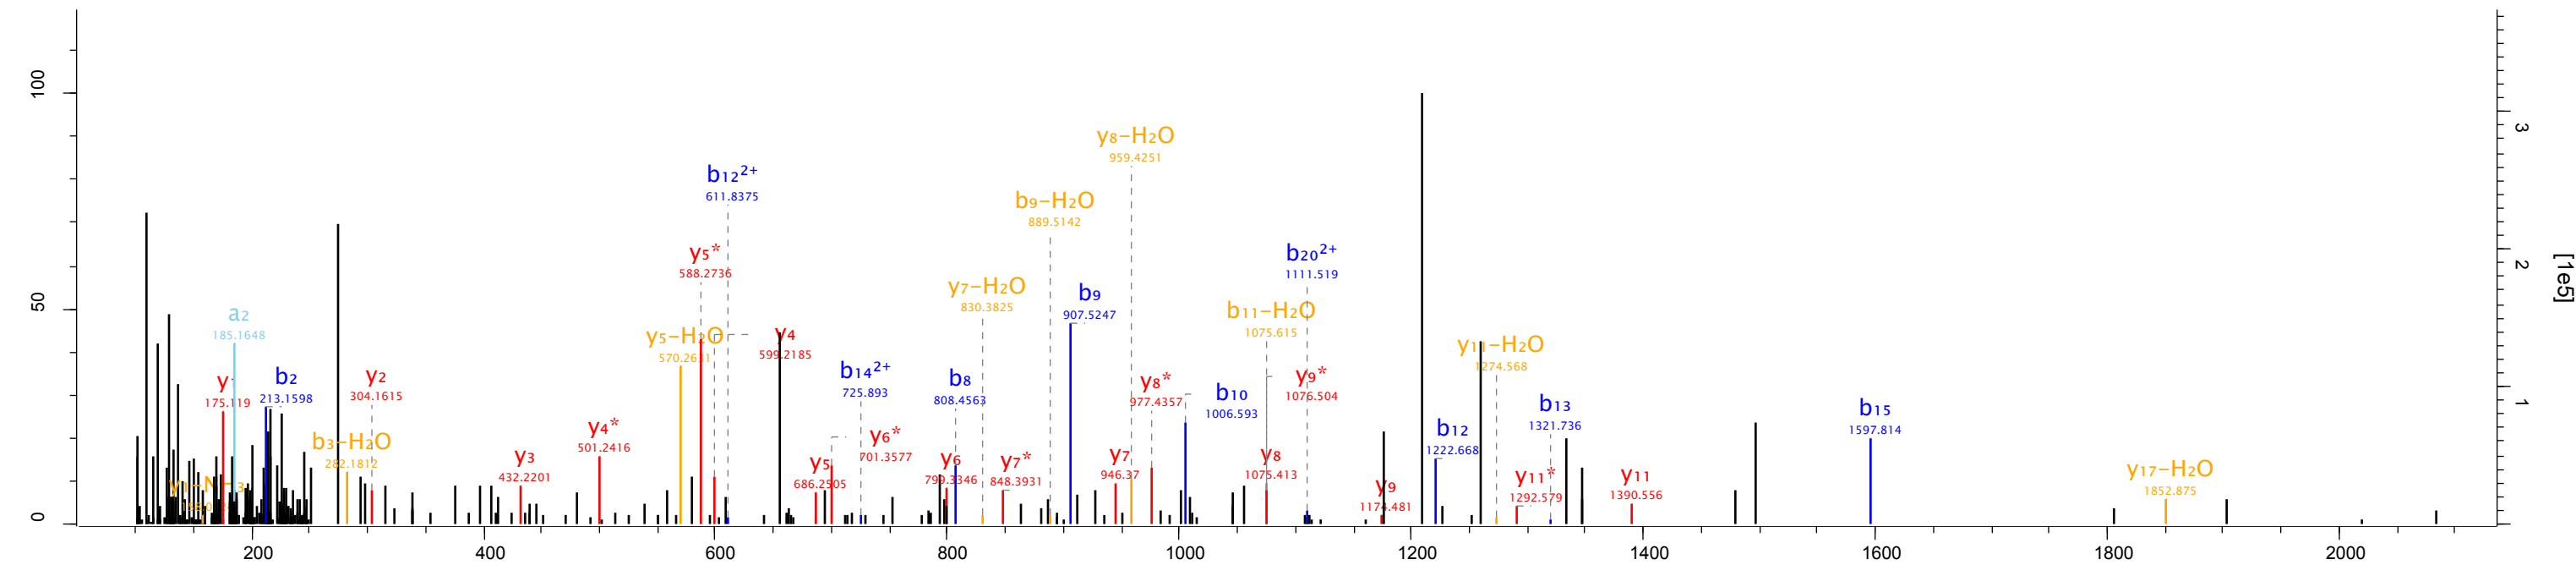

- V L S K P P E G V V S E V E M L S S Q E R -

Fragmentation sites are indicated by brackets below the sequence:

- b<sub>2</sub> (under L)
- b<sub>8</sub> (under G)
- b<sub>9</sub> (under V)
- b<sub>10</sub> (under V)
- b<sub>12</sub> (under S)
- b<sub>13</sub> (under V)
- b<sub>14</sub><sup>2+</sup> (under E)
- b<sub>15</sub> (under M)
- b<sub>20</sub><sup>2+</sup> (under E)

Fragmentation sites are also indicated by brackets above the sequence:

- y<sub>11</sub> (above S)
- y<sub>9</sub> (above V)
- y<sub>8</sub> (above E)
- y<sub>7</sub> (above M)
- y<sub>6</sub> (above L)
- y<sub>5</sub> (above S)
- y<sub>4</sub> (above S)
- y<sub>3</sub> (above Q)
- y<sub>2</sub> (above E)
- y<sub>1</sub> (above R)

Raw file: 20150814\_A375SR\_Phospho\_BR2\_09  
 Scan: 21638 Method: FTMS; HCD Score: 114.24 m/z: 577.79 Gene names: SKIV2L

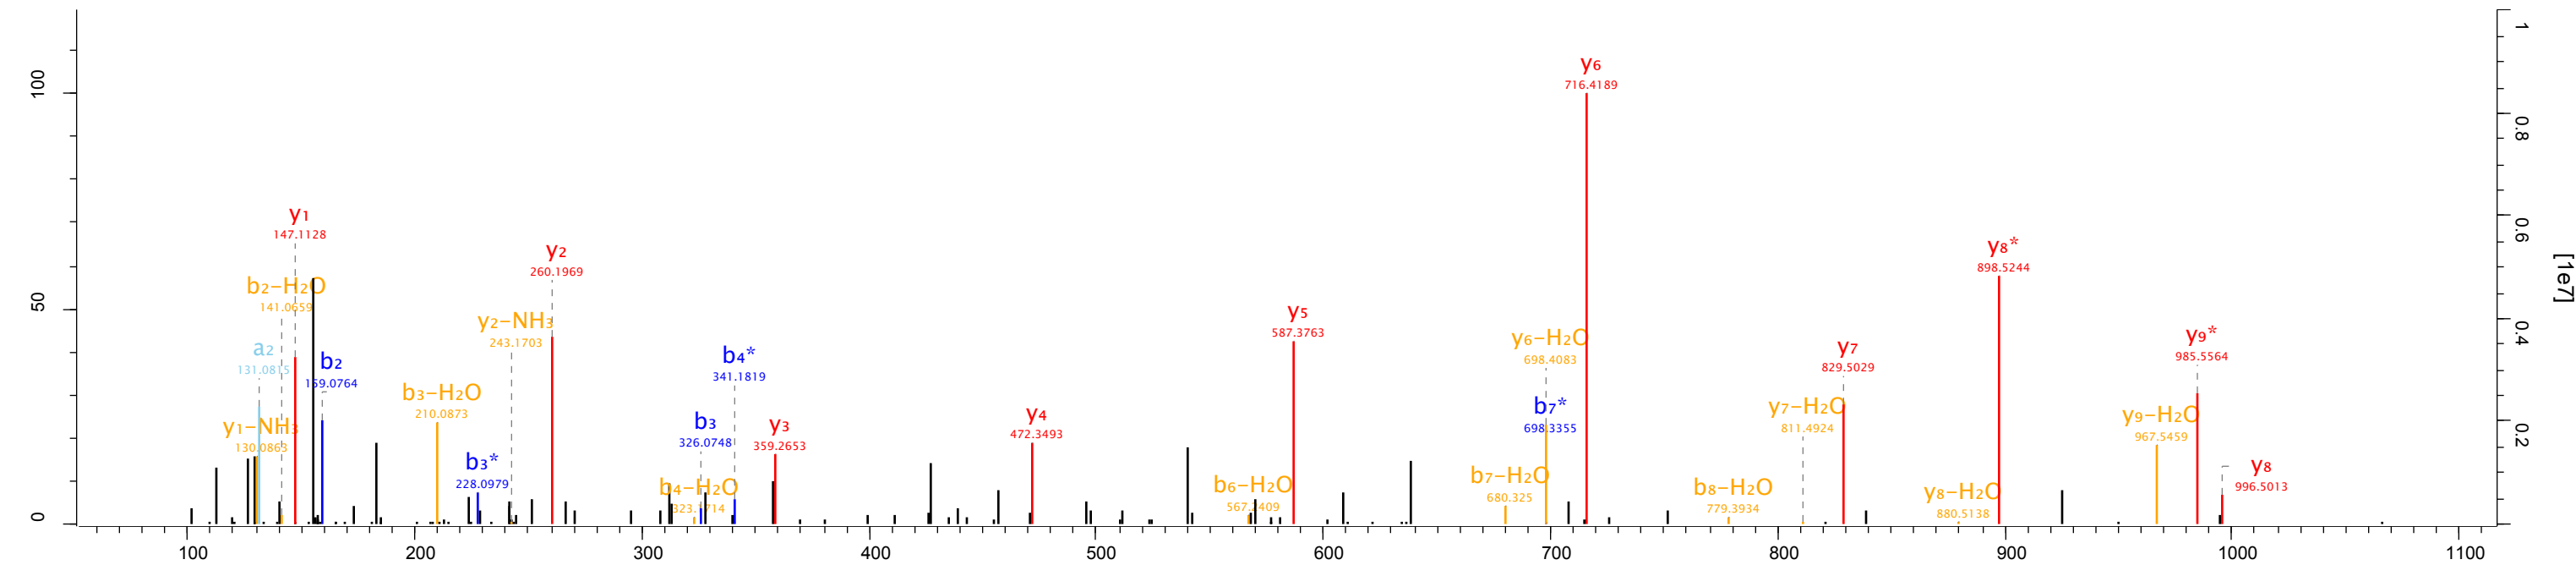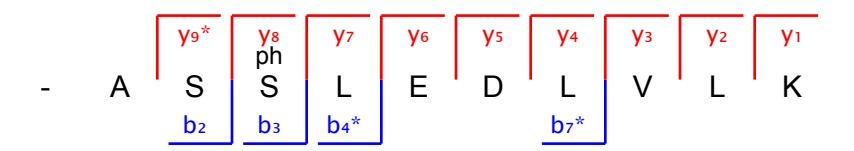

Raw file: 20150814\_A375SR\_Phospho\_BR2\_09  
 Scan: 22218 Method: FTMS; HCD Score: 118.57 m/z: 1242.57 Gene names: EPS15

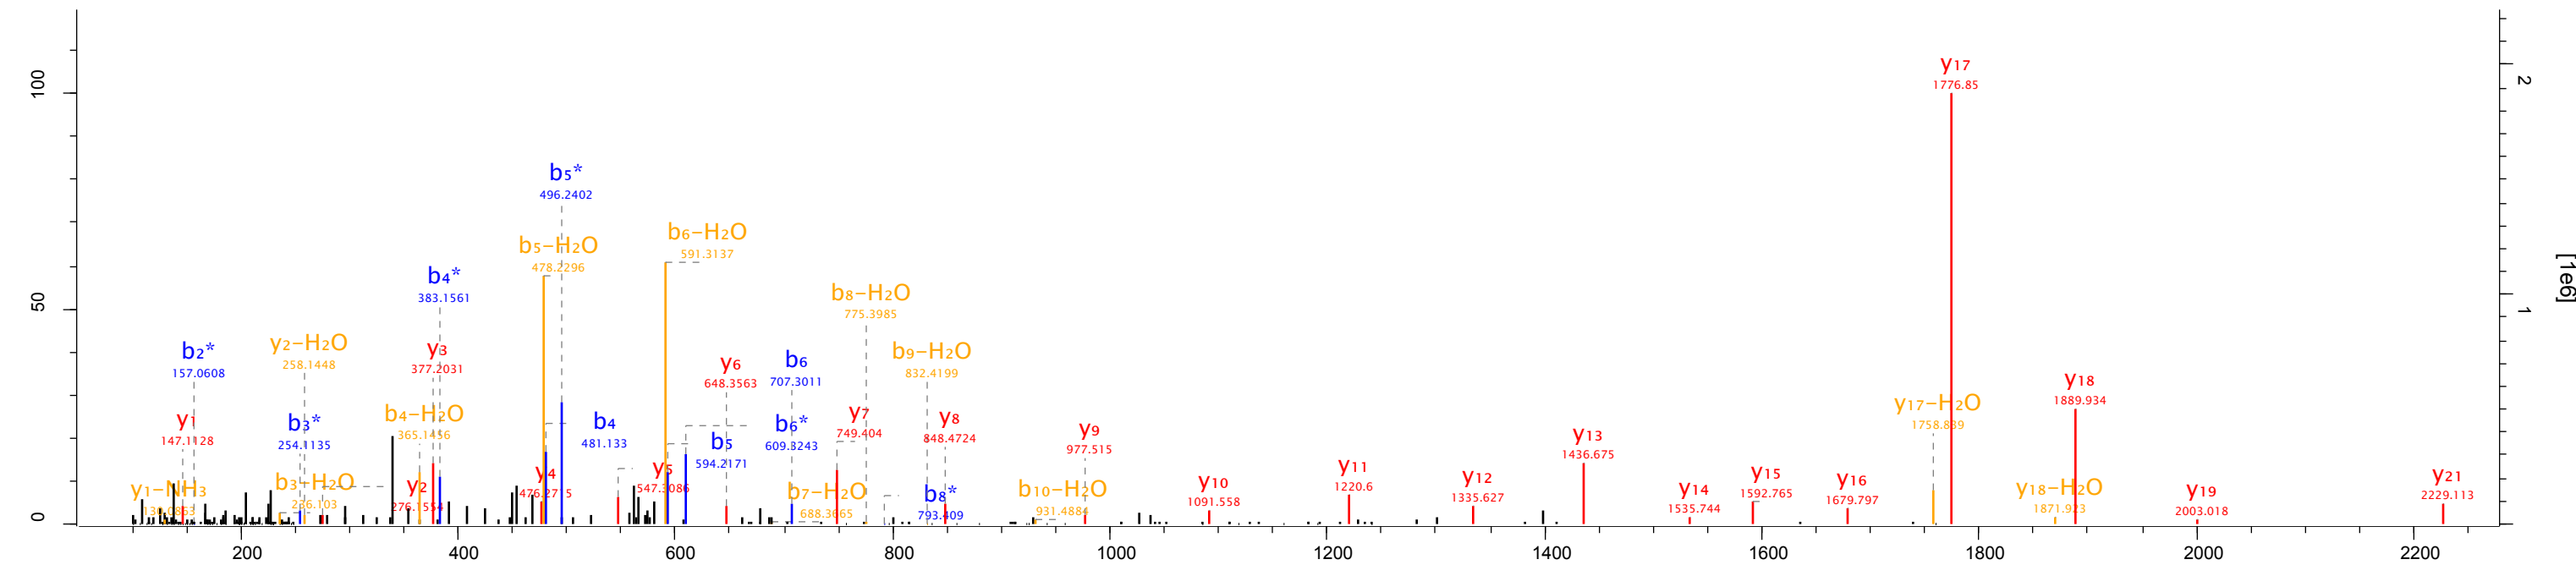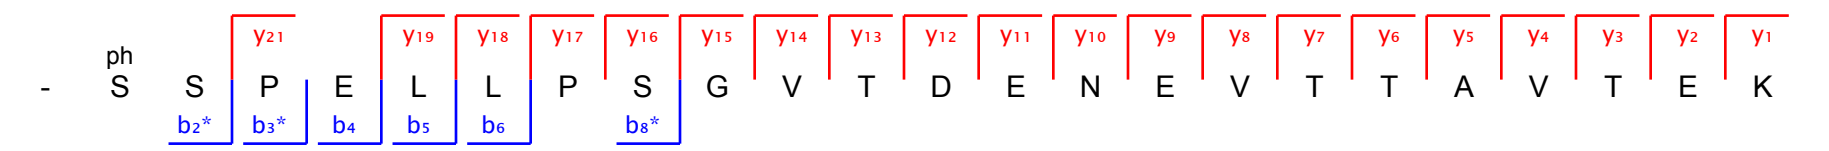



Raw file 20150814\_A375SR\_Phospho\_BR2\_09 Scan 23508 Method FTMS; HCD Score 112.26 m/z 1002.11 Gene names JUN

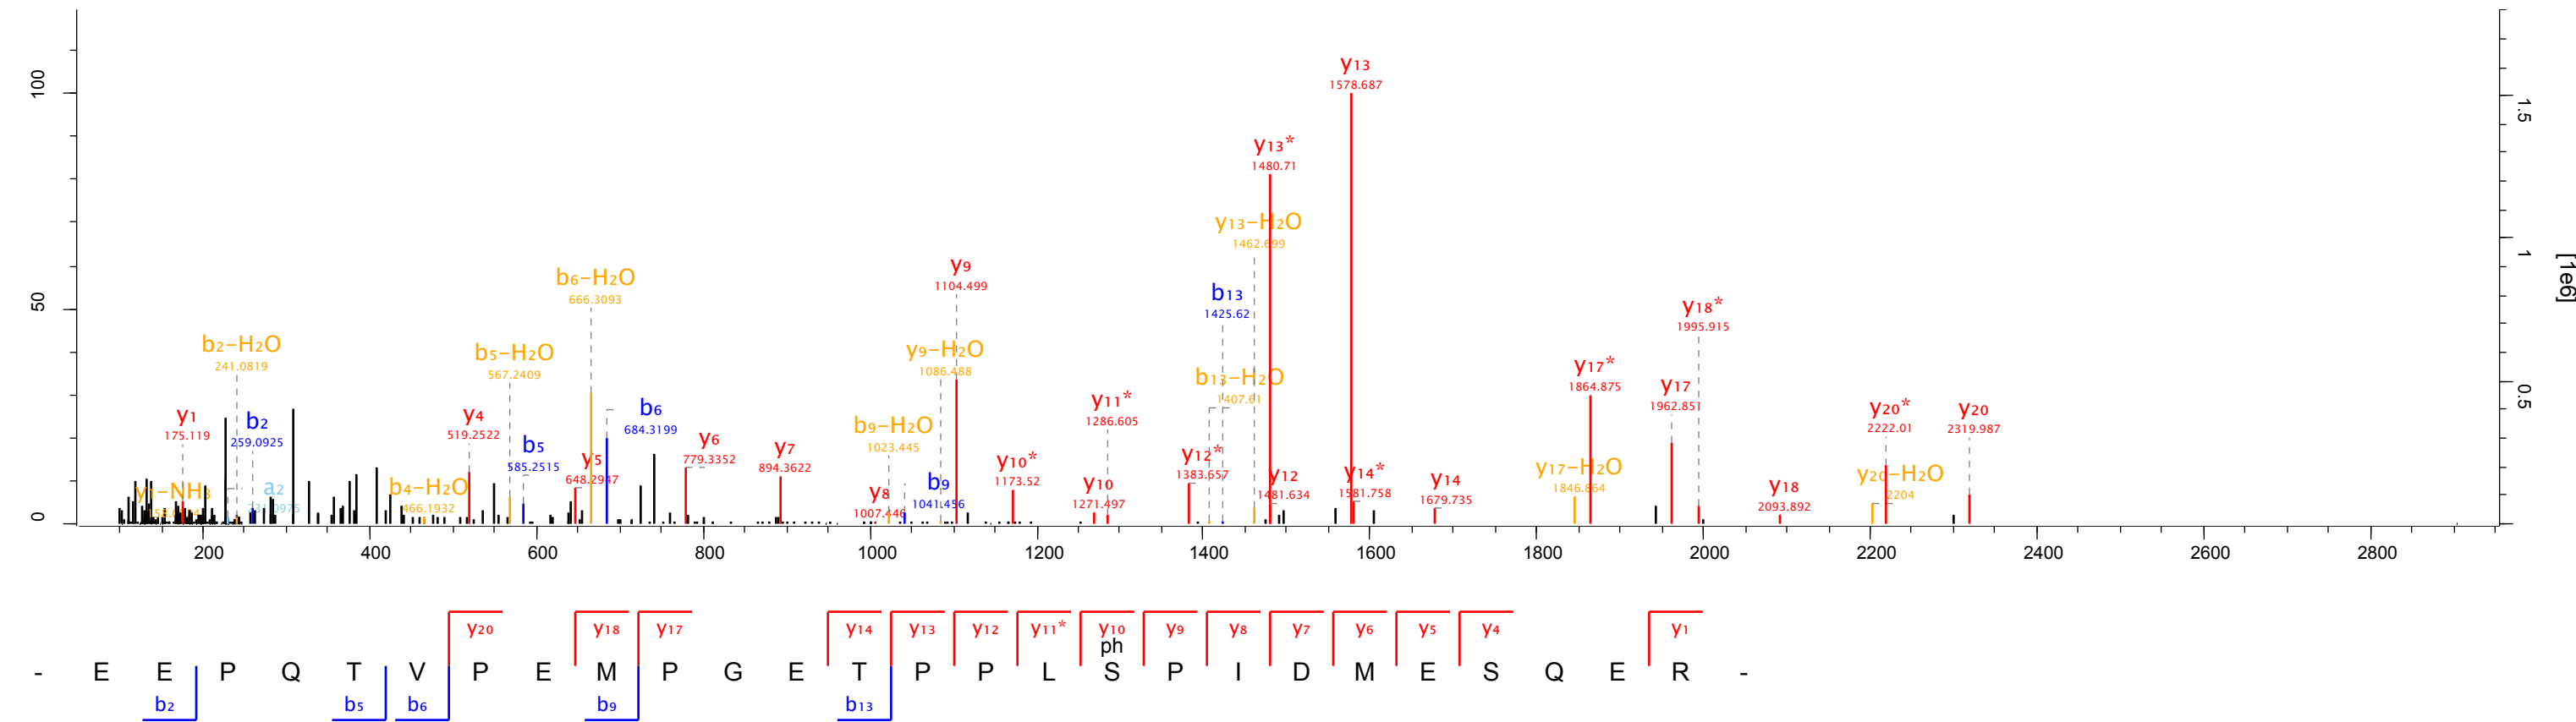

Raw file: 20150814\_A375SR\_Phospho\_BR2\_09  
 Scan: 24438 Method: FTMS; HCD Score: 64.21 m/z: 850.06 Gene names: FLNA

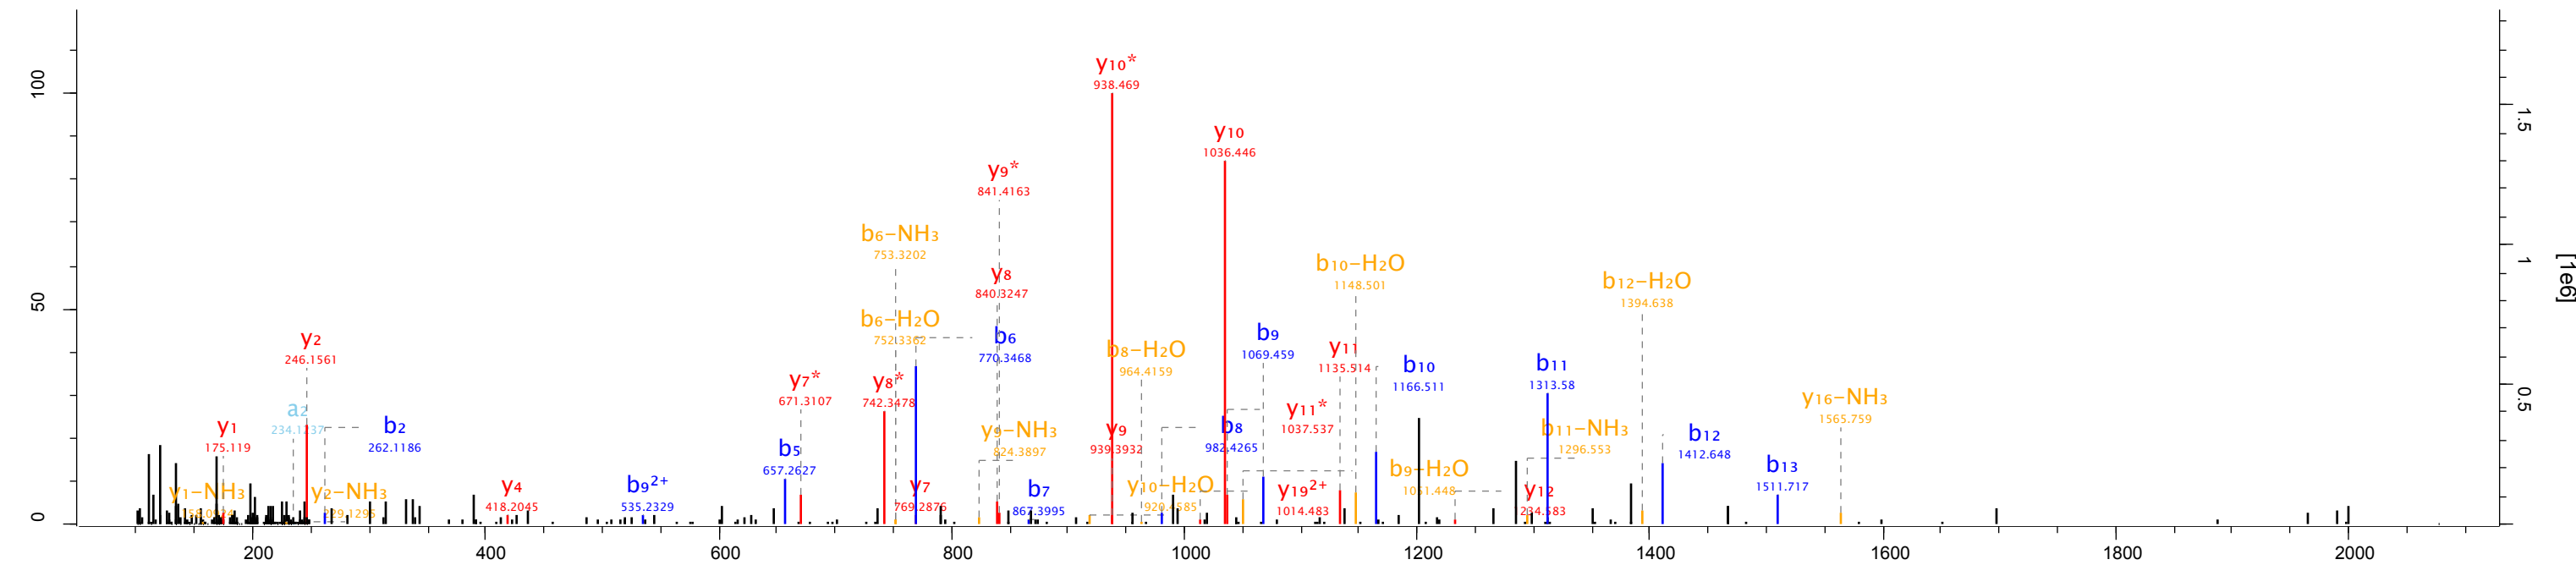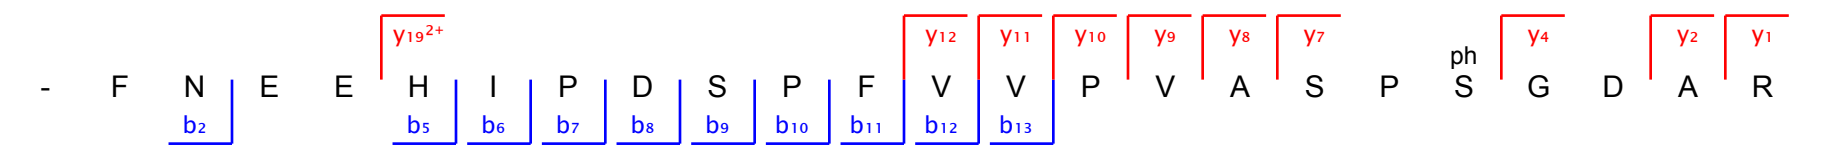



Raw file: 20150814\_A375SR\_Phospho\_BR2\_09  
 Scan: 2558 Method: FTMS; HCD Score: 92.68 m/z: 526.91 Gene names: SOS1

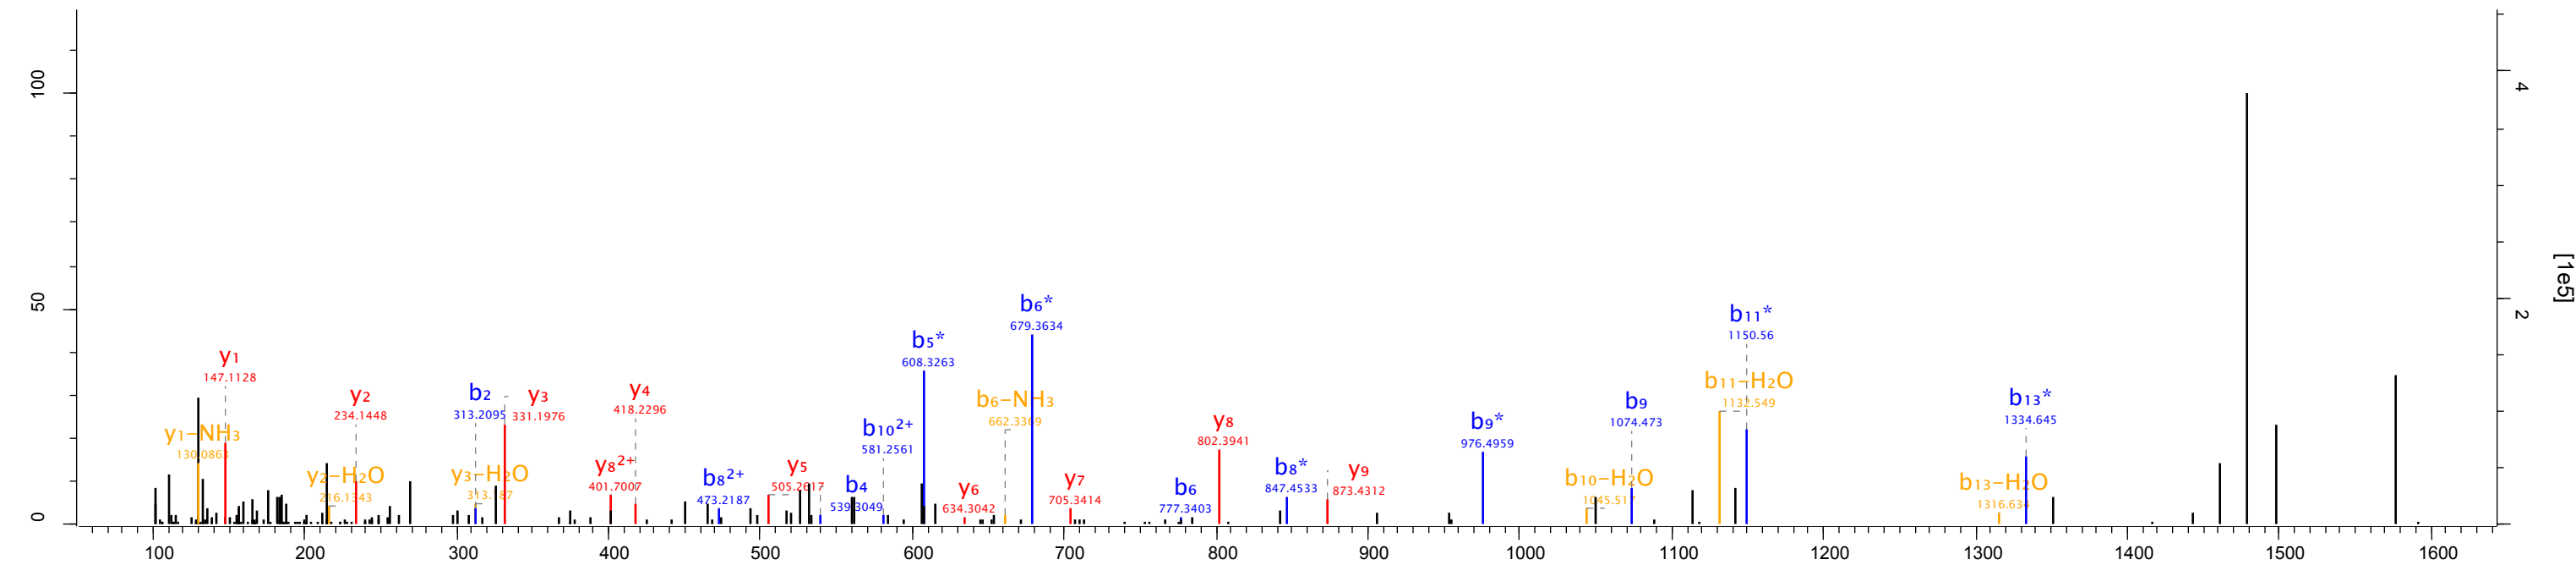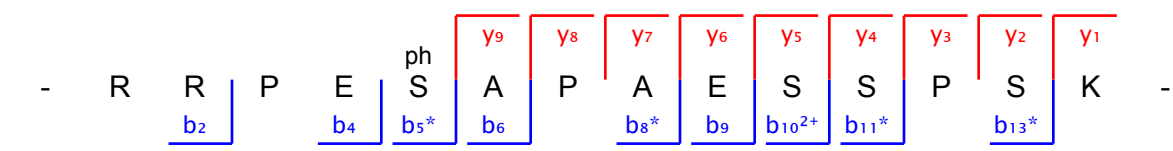

Raw file: 20150814\_A375SR\_Phospho\_BR2\_09  
 Scan: 26328 Method: FTMS; HCD Score: 126.73 m/z: 1241.56 Gene names: CAMSAP2

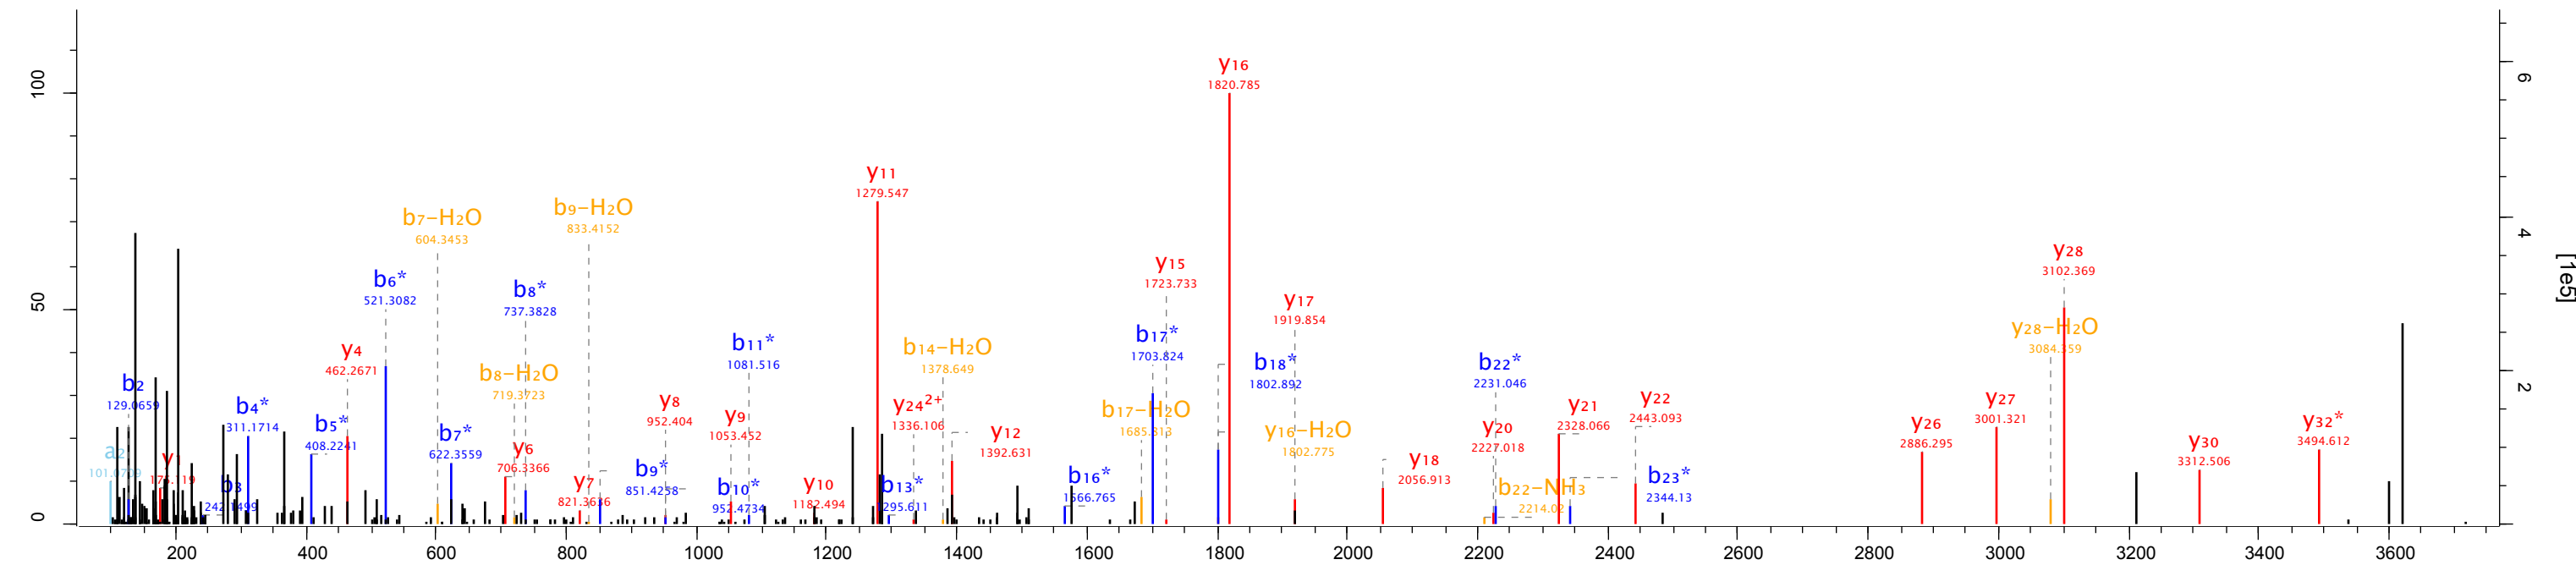

- G A L S P I T D N T E V D T G I H V P S E D I P E T M D E D S S L R -  
 (Fragmentation labels: b<sub>2</sub>, b<sub>3</sub>, b<sub>4</sub><sup>\*</sup>, b<sub>5</sub><sup>\*</sup>, b<sub>6</sub><sup>\*</sup>, b<sub>7</sub><sup>\*</sup>, b<sub>8</sub><sup>\*</sup>, b<sub>9</sub><sup>\*</sup>, b<sub>10</sub><sup>\*</sup>, b<sub>11</sub><sup>\*</sup>, b<sub>13</sub><sup>\*</sup>, b<sub>16</sub><sup>\*</sup>, b<sub>17</sub><sup>\*</sup>, b<sub>18</sub><sup>\*</sup>, b<sub>22</sub><sup>\*</sup>, b<sub>23</sub><sup>\*</sup> in blue; y<sub>1</sub>, y<sub>4</sub>, y<sub>6</sub>, y<sub>7</sub>, y<sub>8</sub>, y<sub>9</sub>, y<sub>10</sub>, y<sub>11</sub>, y<sub>12</sub>, y<sub>15</sub>, y<sub>16</sub>, y<sub>17</sub>, y<sub>18</sub>, y<sub>20</sub>, y<sub>21</sub>, y<sub>22</sub>, y<sub>24</sub><sup>2+</sup>, y<sub>26</sub>, y<sub>27</sub>, y<sub>28</sub>, y<sub>30</sub>, y<sub>32</sub><sup>\*</sup> in red)

Raw file 20150814\_A375SR\_Phospho\_BR2\_09 Scan 26528 Method FTMS; HCD Score 51.32 m/z 905.12 Gene names JUNB

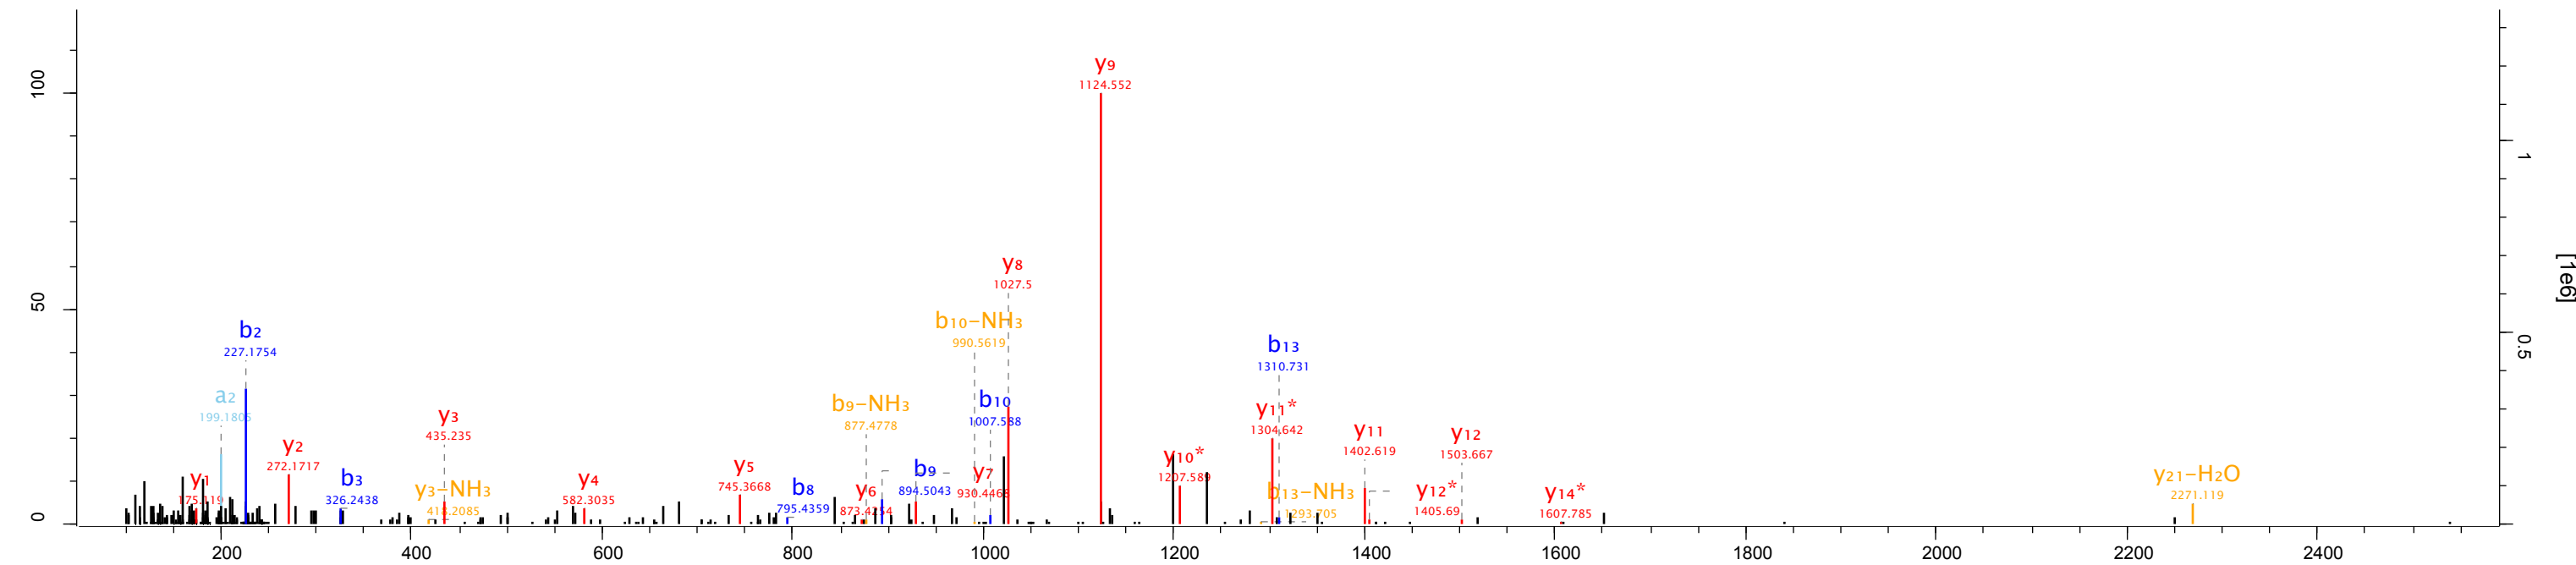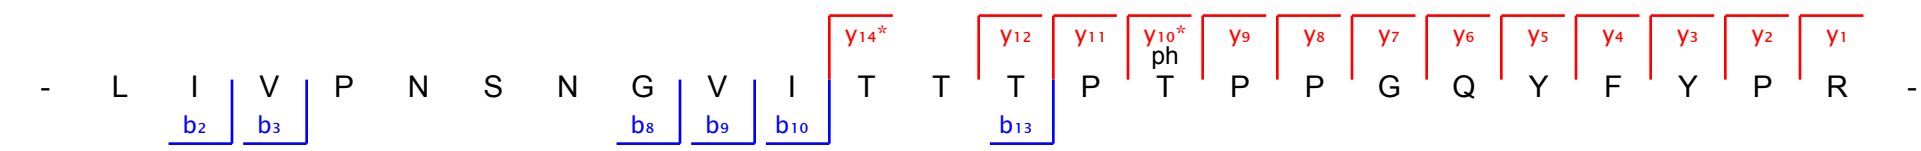

Raw file 20150814\_A375SR\_Phospho\_BR2\_09 Scan 26658 Method FTMS; HCD Score 67.9 m/z 771.72 Gene names EPN1

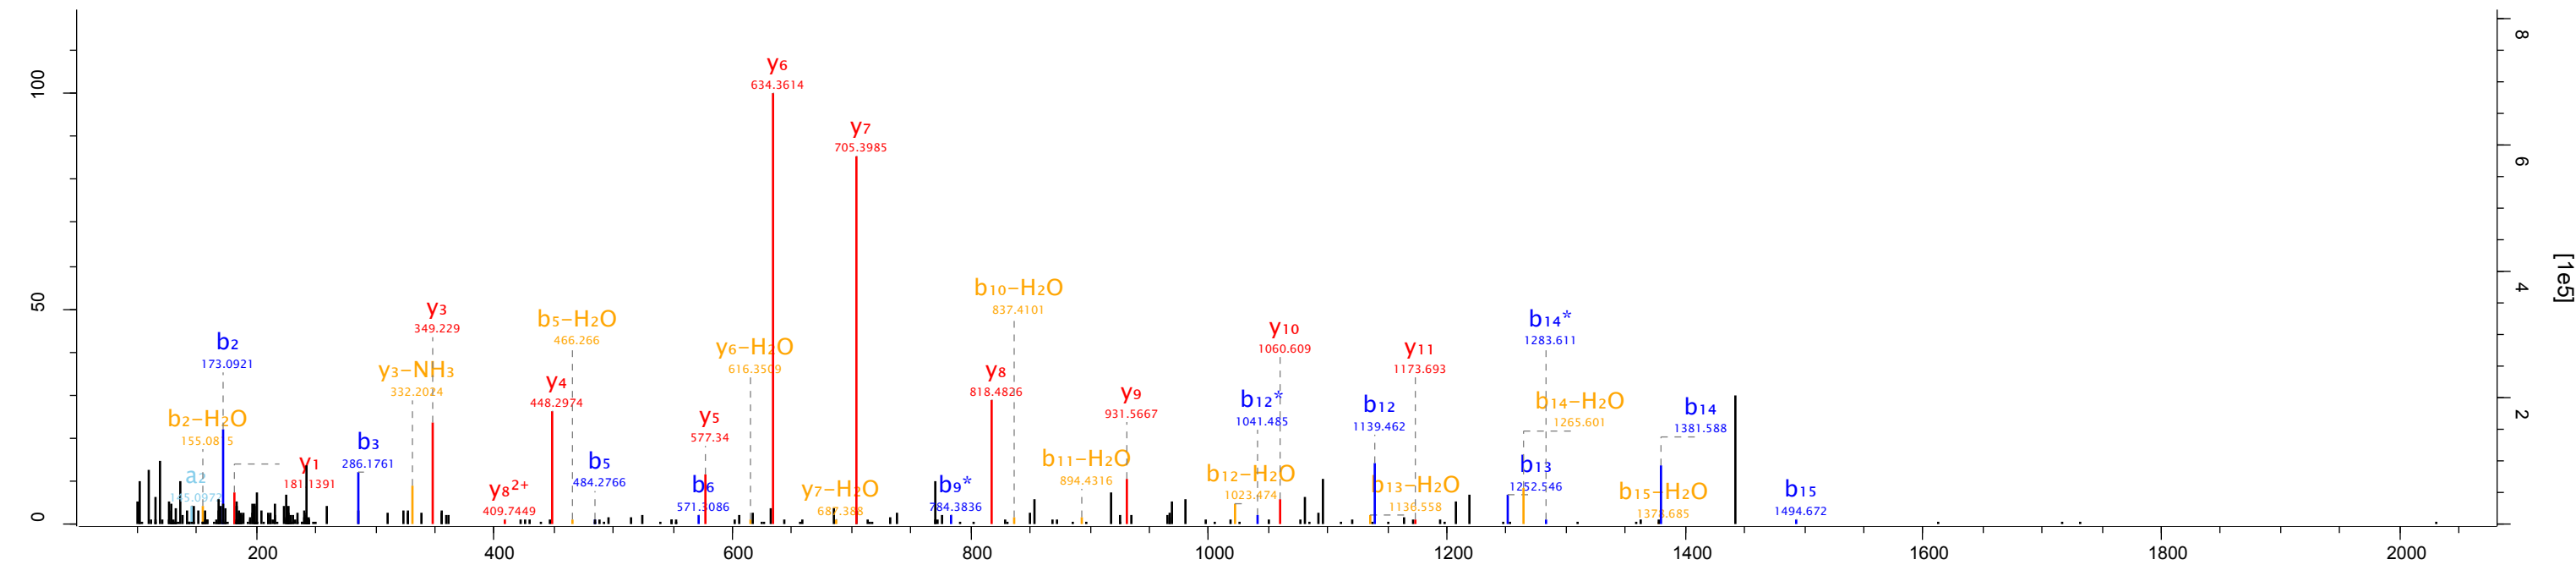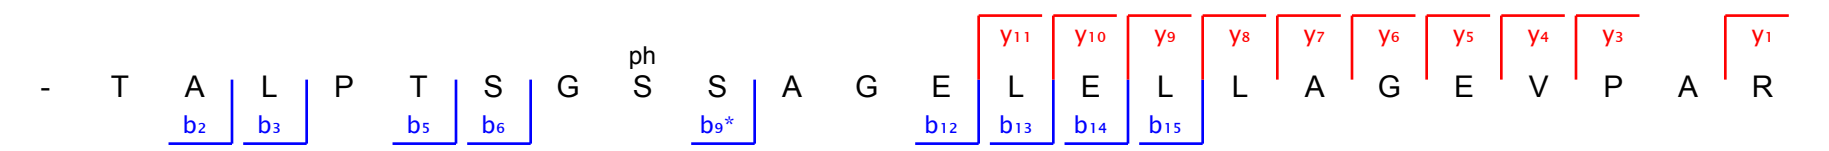

Raw file: 20150814\_A375SR\_Phospho\_BR2\_09  
 Scan: 27348 Method: FTMS; HCD Score: 124.55 m/z: 942.82 Gene names: KMT2D

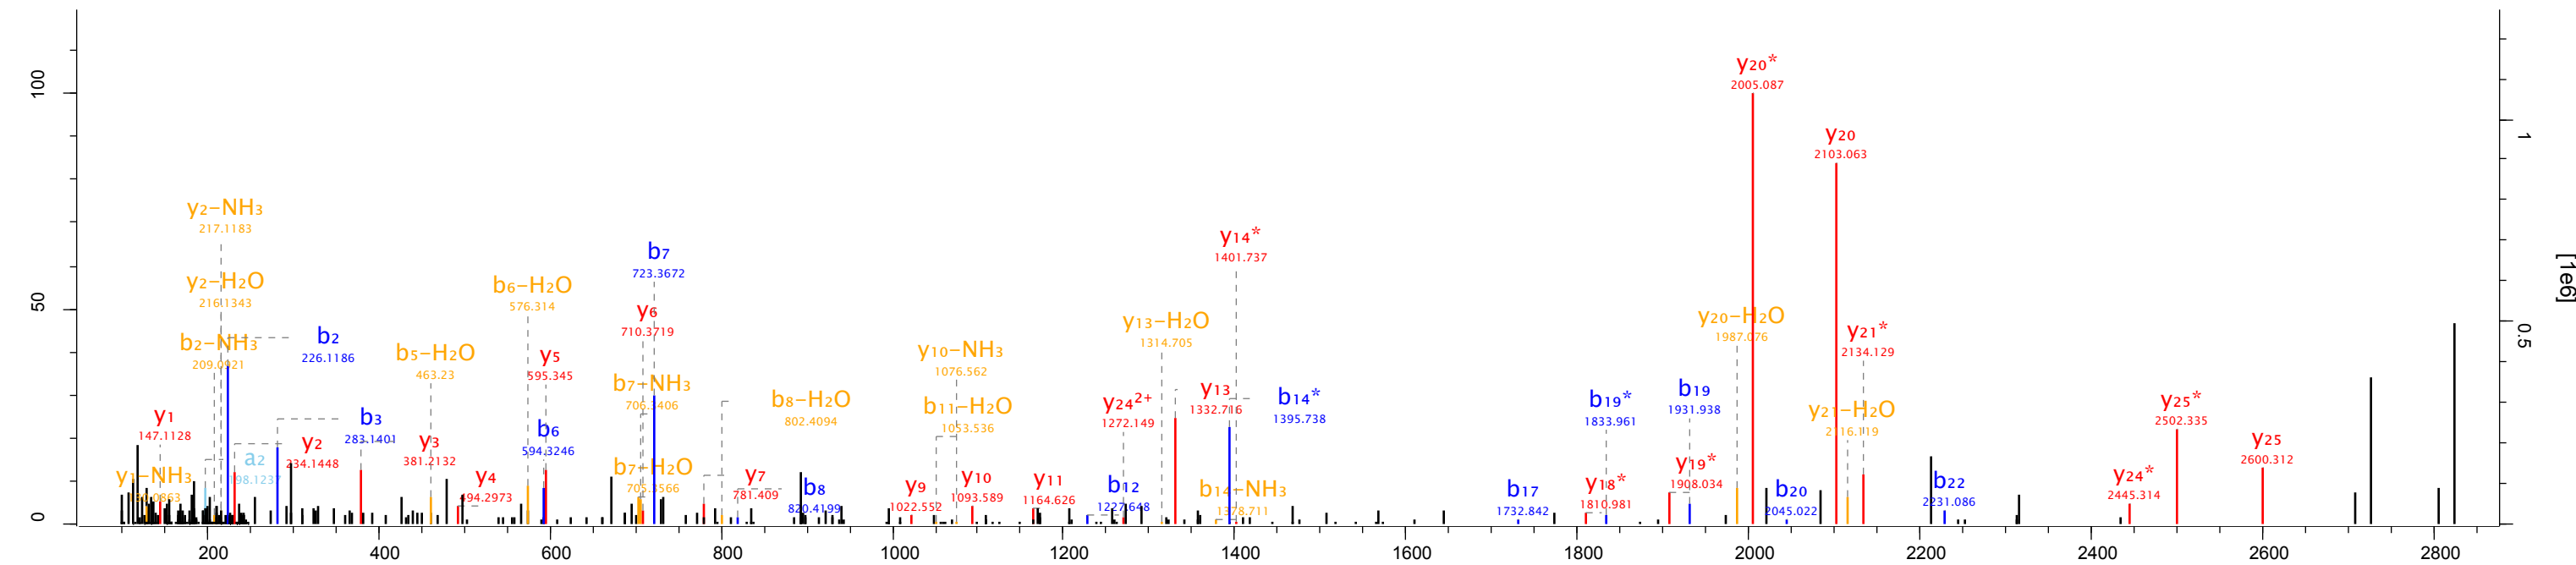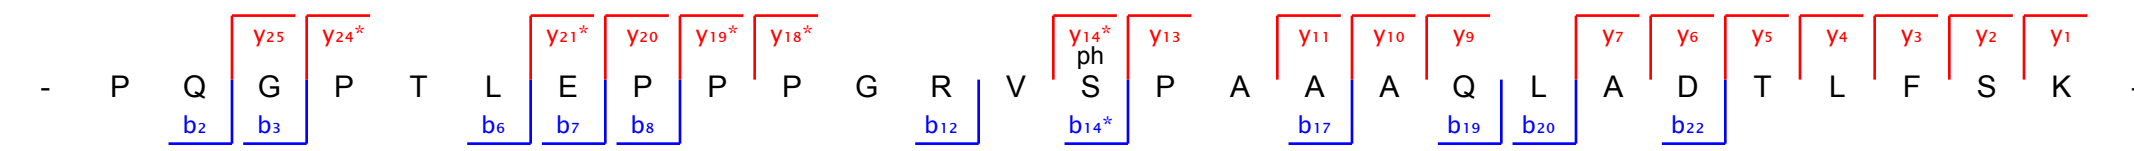

Raw file: 20150814\_A375SR\_Phospho\_BR2\_09  
 Scan: 28468 Method: FTMS; HCD Score: 125.26 m/z: 1445.69 Gene names: DYNC112

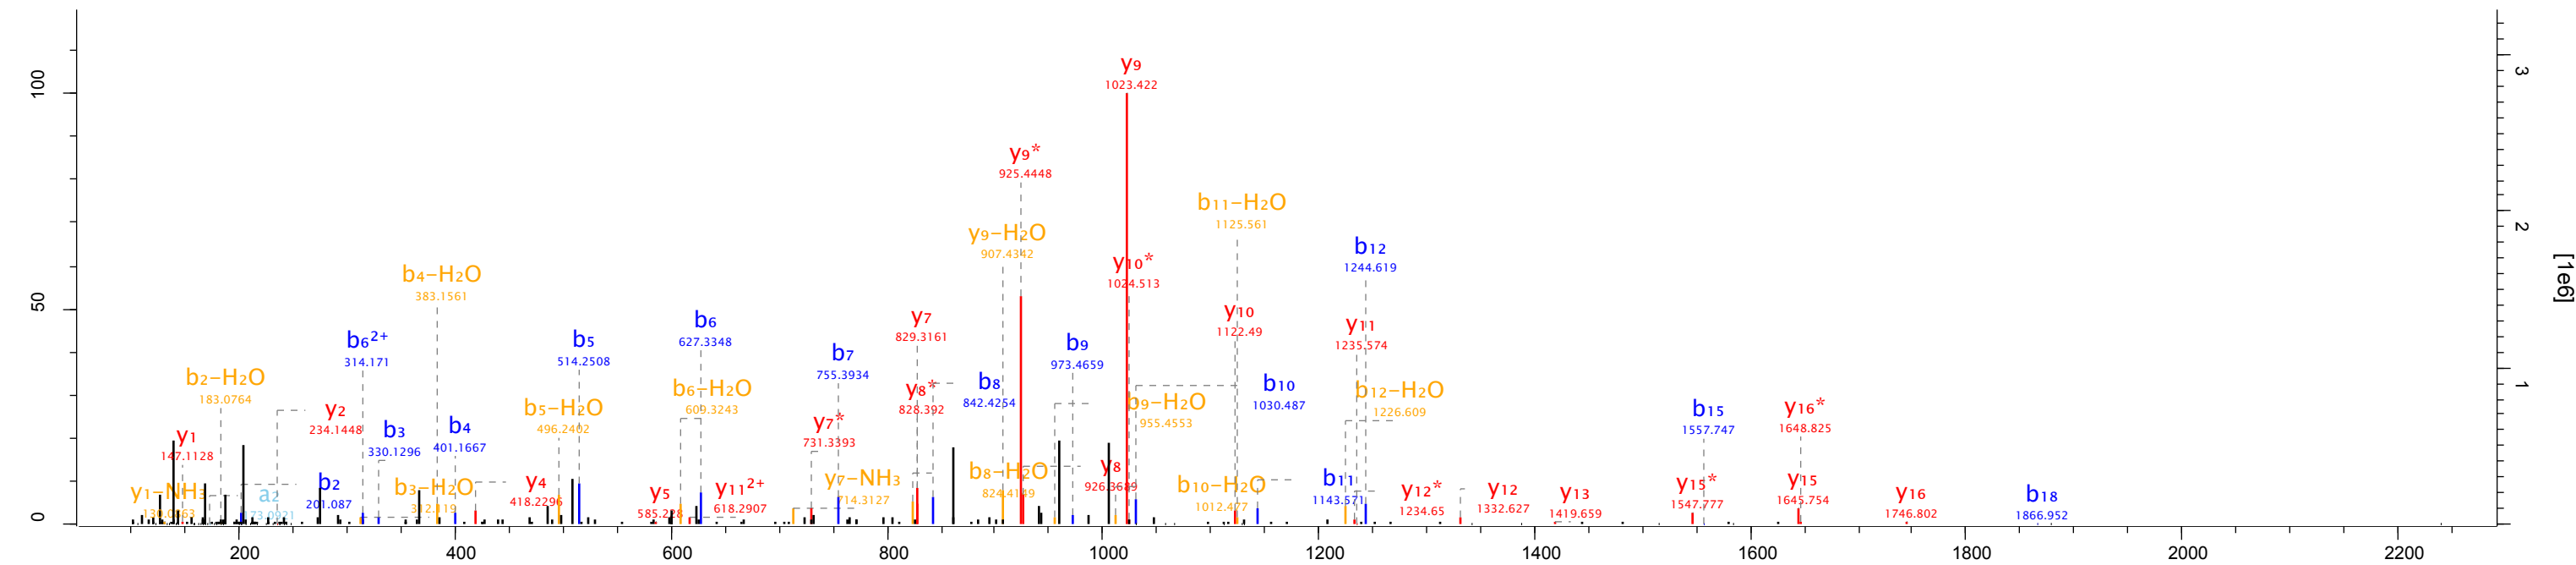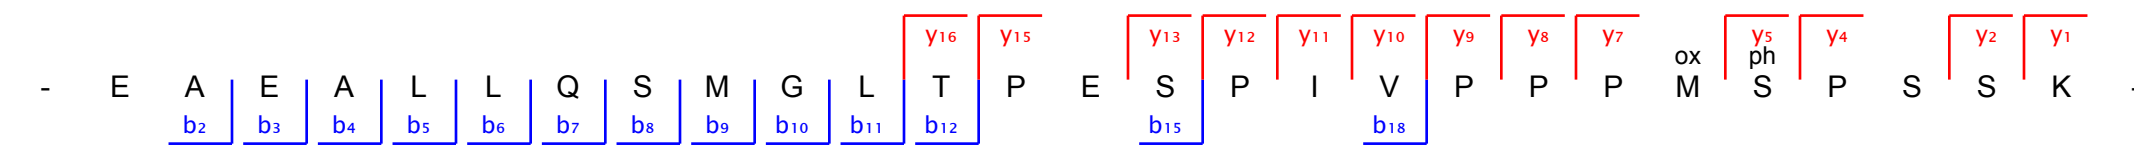

Raw file  
20150814\_A375SR\_Phospho\_BR2\_09

Scan 28578 Method FTMS; HCD Score 272.11 m/z 1422.71 Gene names HNRNPK

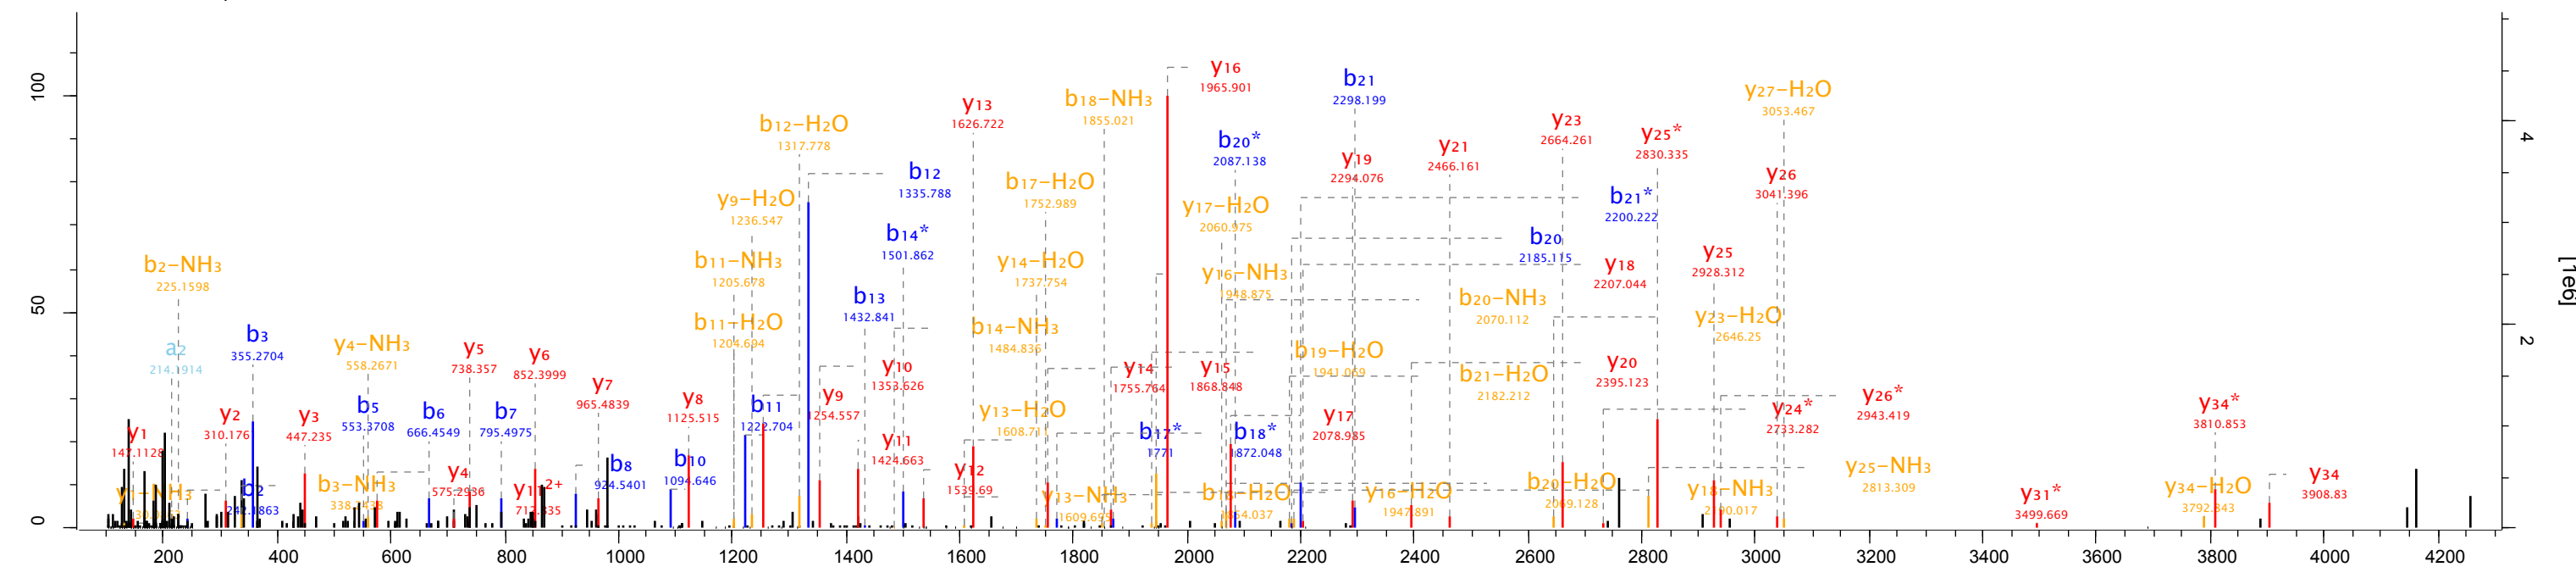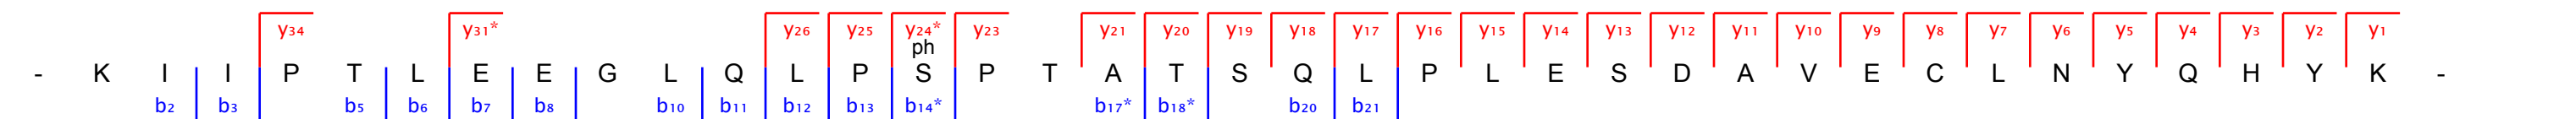

Raw file 20150814\_A375SR\_Phospho\_BR2\_09 Scan 2858 Method FTMS; HCD Score 84.5 m/z 655.29 Gene names TRIM25

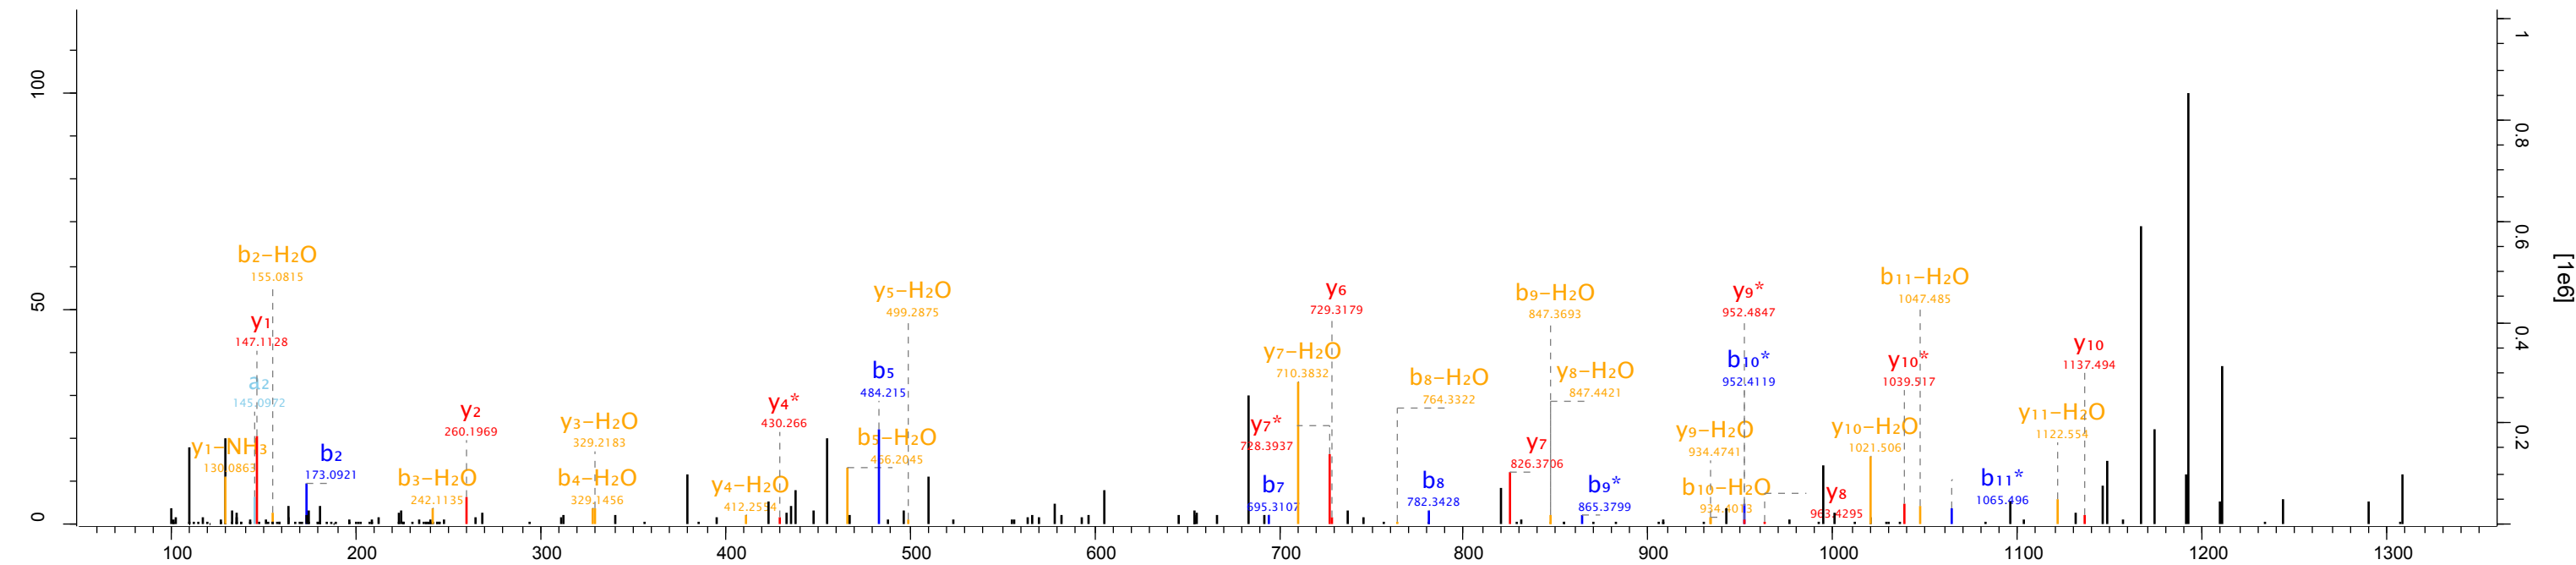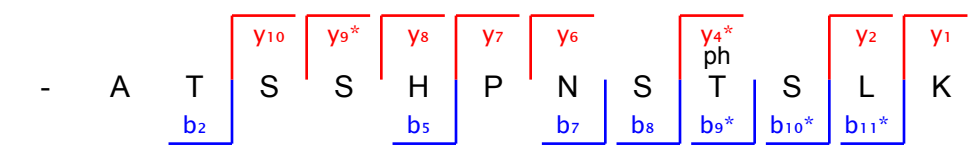



Raw file 20150814\_A375SR\_Phospho\_BR2\_09 Scan 6458 Method FTMS; HCD Score 250.7 m/z 985 Gene names TCOF1

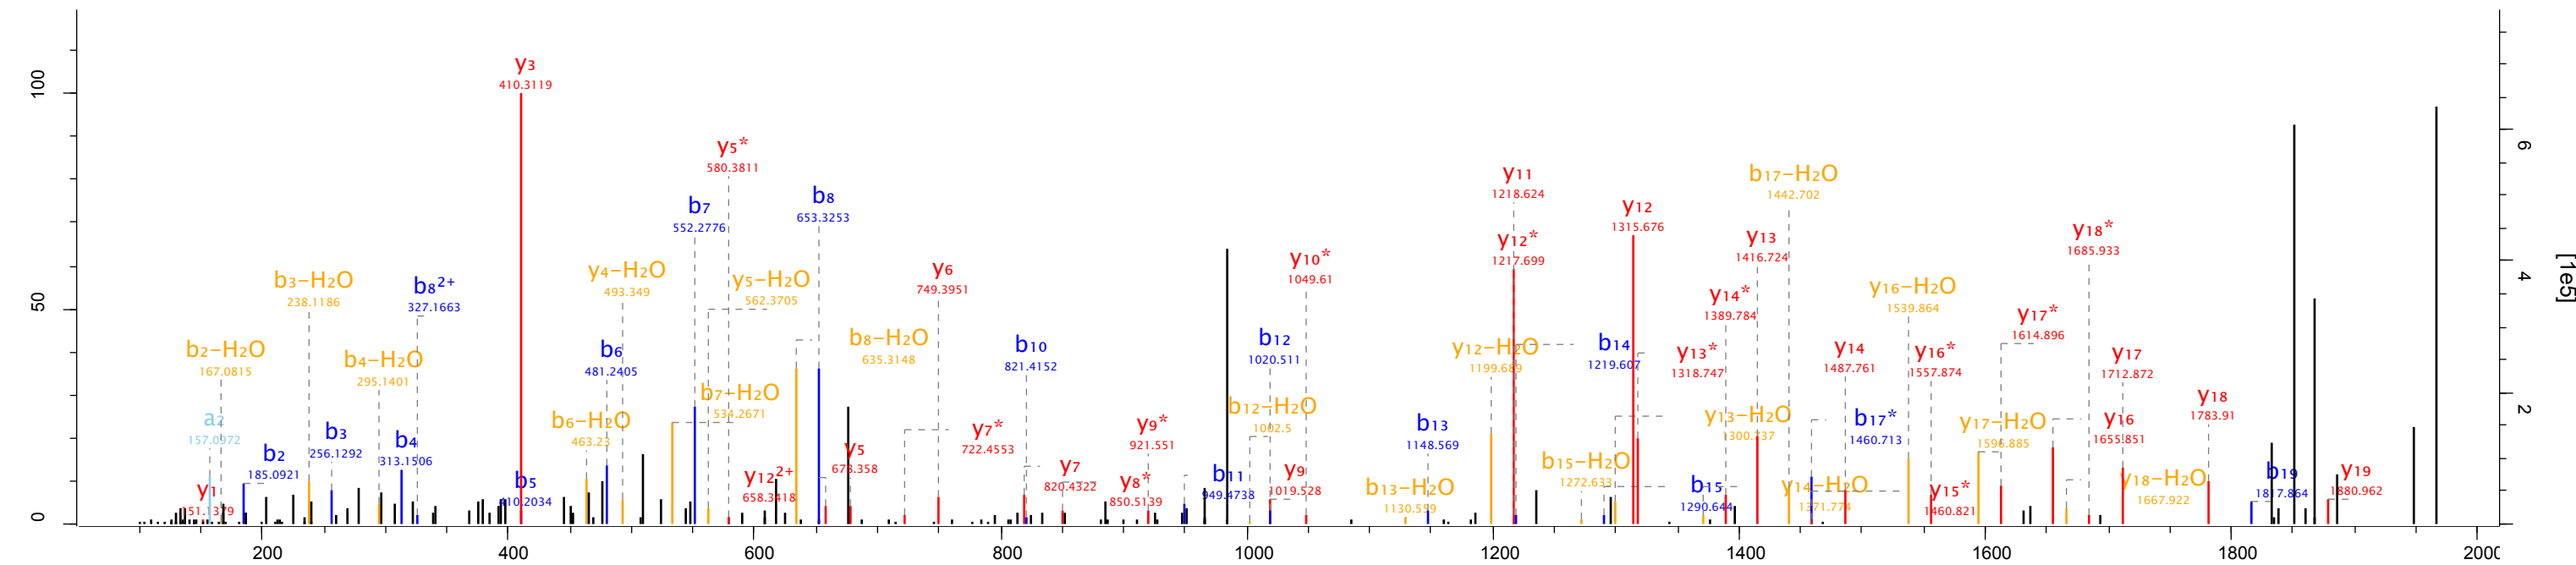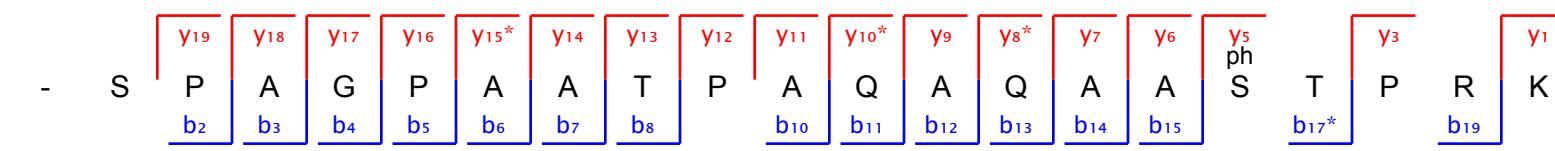

Raw file 20150814\_A375SR\_Phospho\_BR2\_09 Scan 6958 Method FTMS; HCD Score 73.93 m/z 472.74 Gene names LZTS2

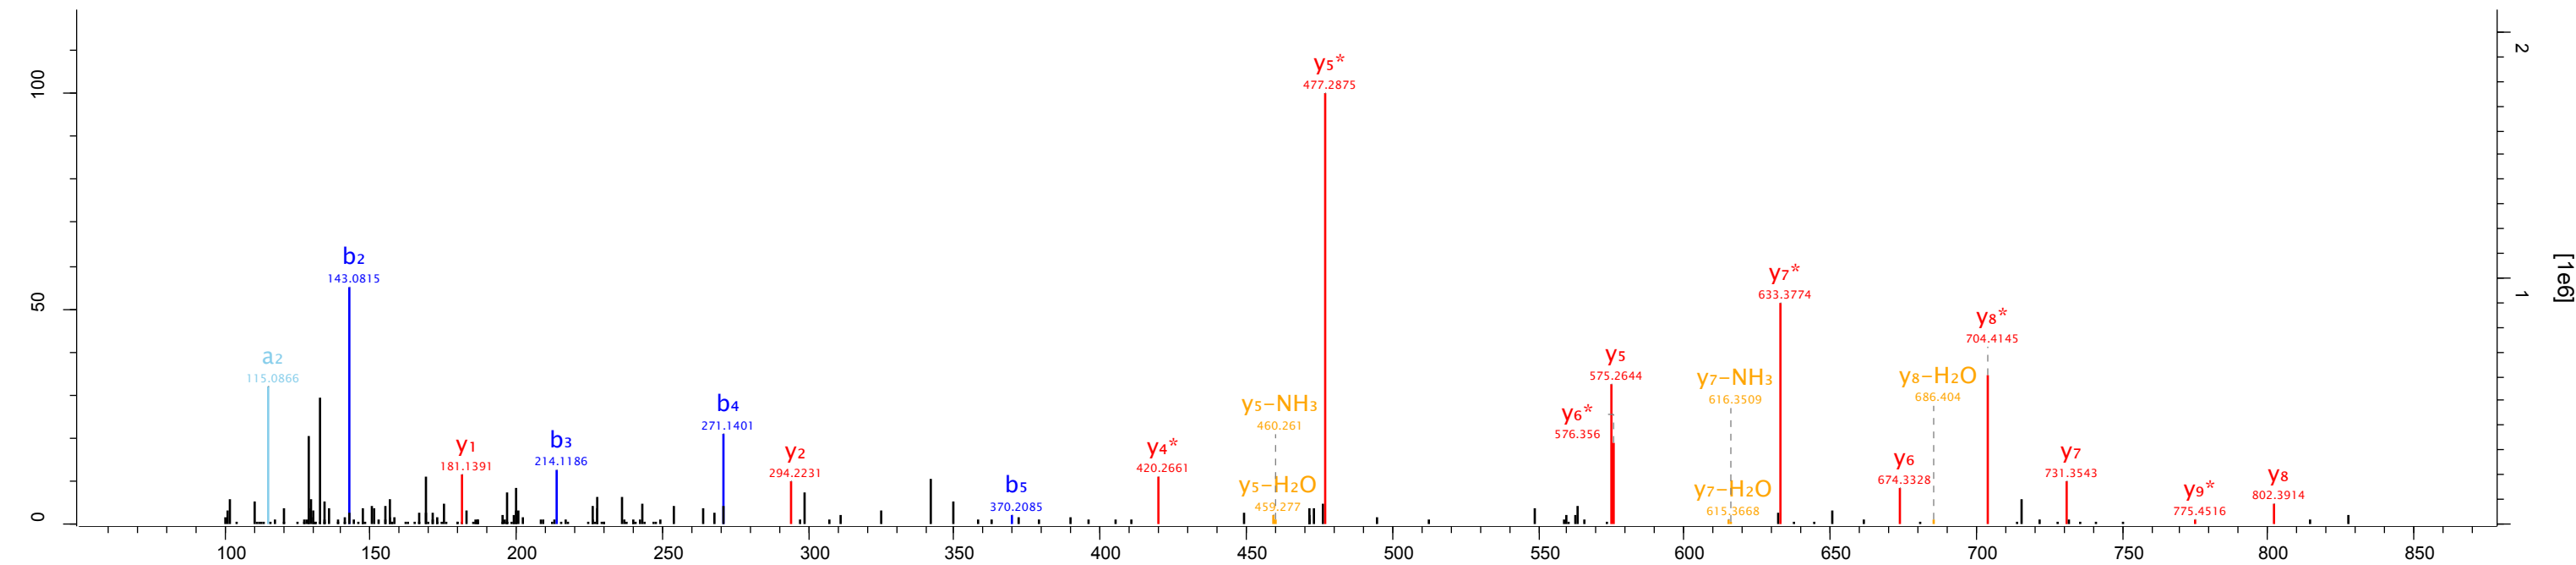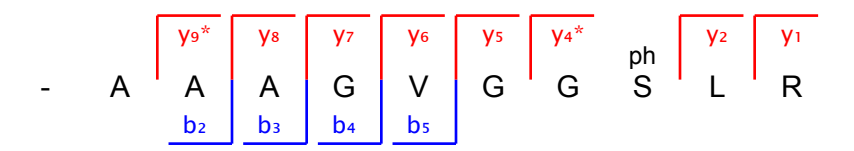

Raw file: 20150814\_A375SR\_Phospho\_BR2\_09  
 Scan: 9548 Method: FTMS; HCD Score: 137.61 m/z: 832.88 Gene names: KMT2A

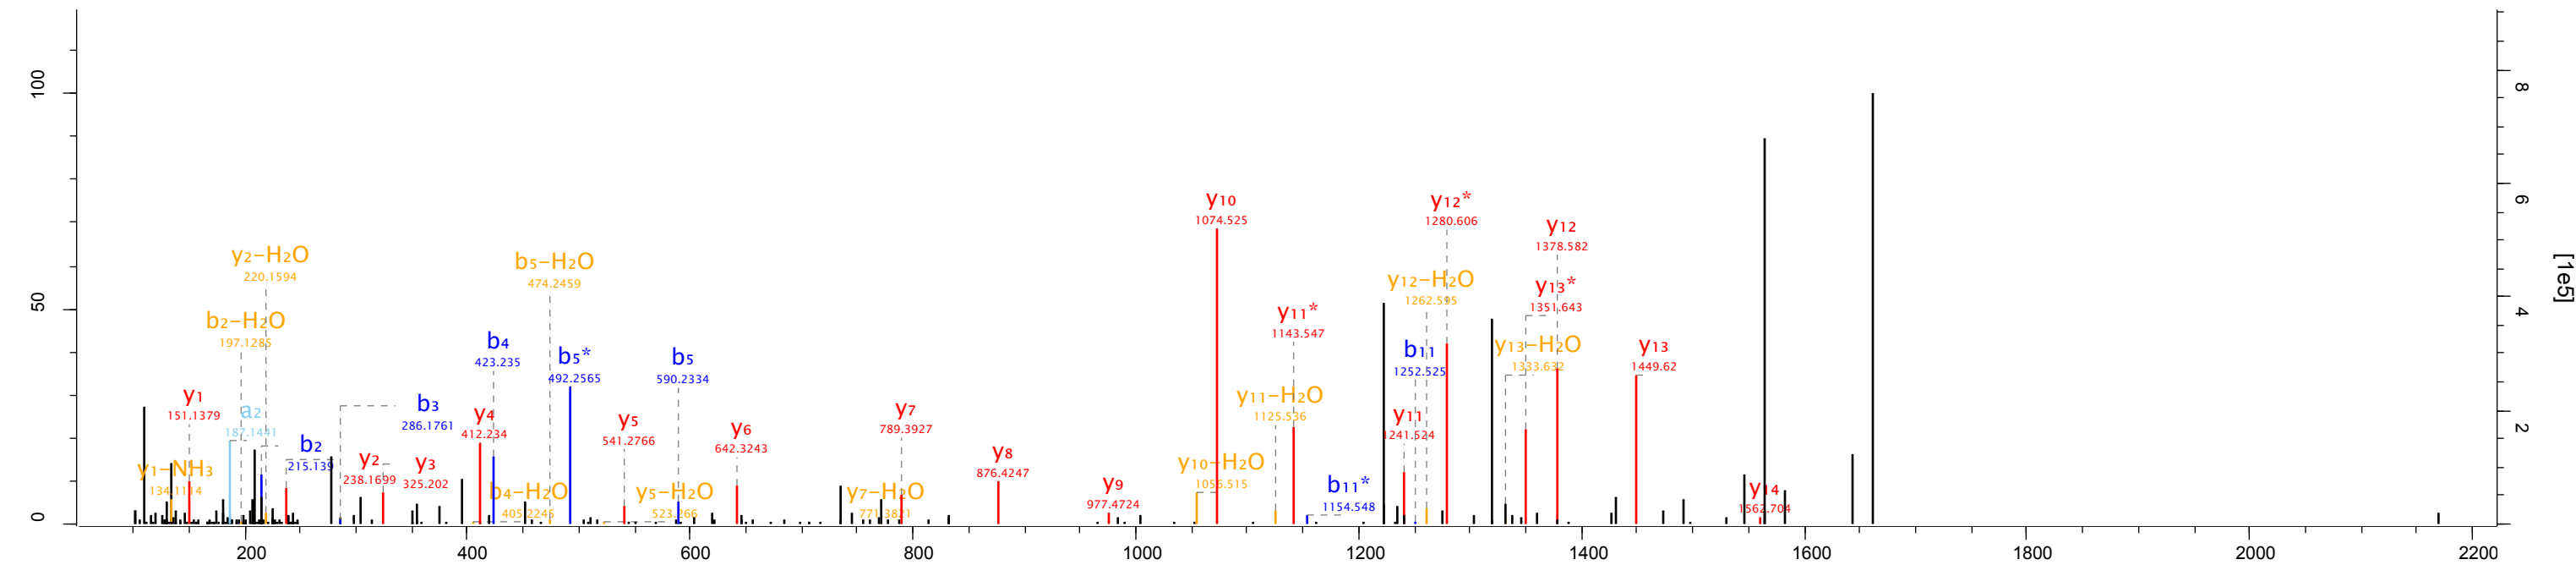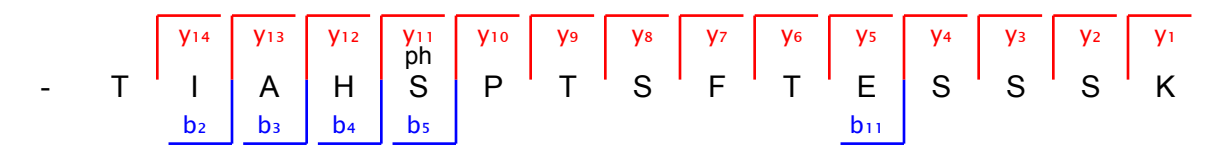

Raw file 20150814\_A375SR\_Phospho\_BR2\_09 Scan 9588 Method FTMS; HCD Score 110.38 m/z 544.73 Gene names BAIAP2;CCDC43

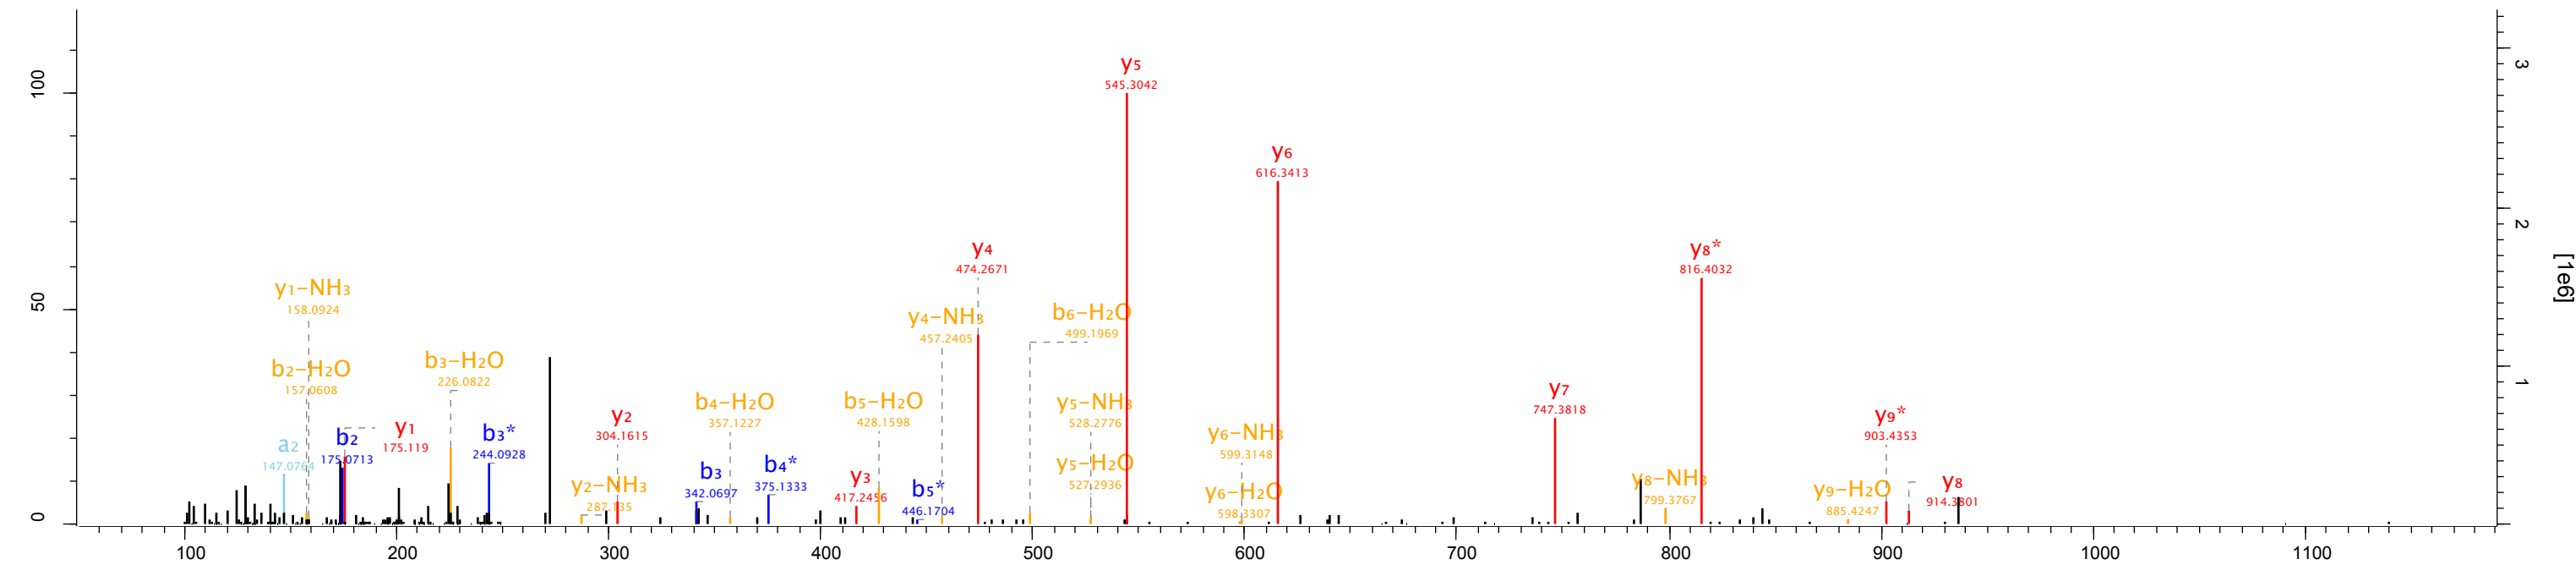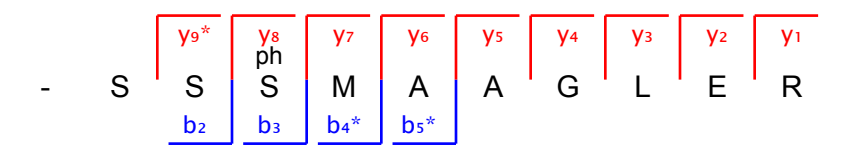

Raw file: 20150814\_A375SR\_Phospho\_BR2\_09  
 Scan: 9718 Method: FTMS; HCD Score: 184.44 m/z: 699.33 Gene names: WDR26

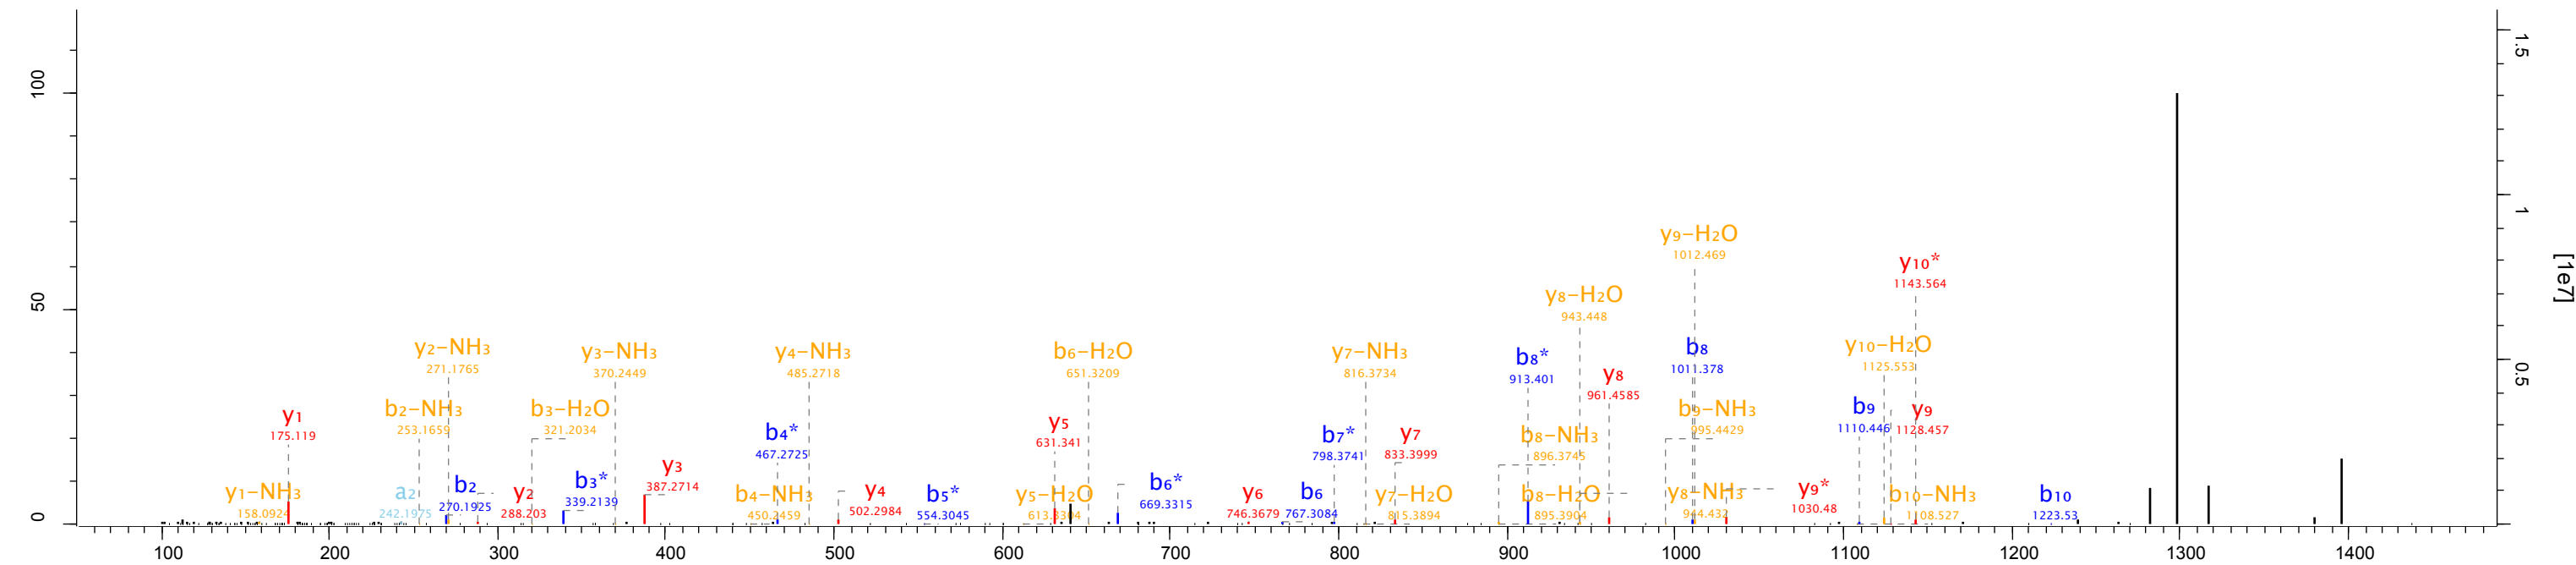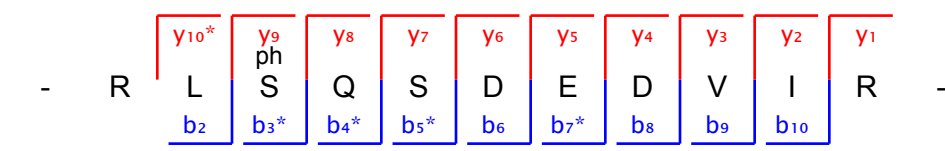

Raw file: 20150814\_A375SR\_Phospho\_BR2\_02  
 Scan: 10359 Method: FTMS; HCD Score: 77.03 m/z: 894.87 Gene names: POLR2A

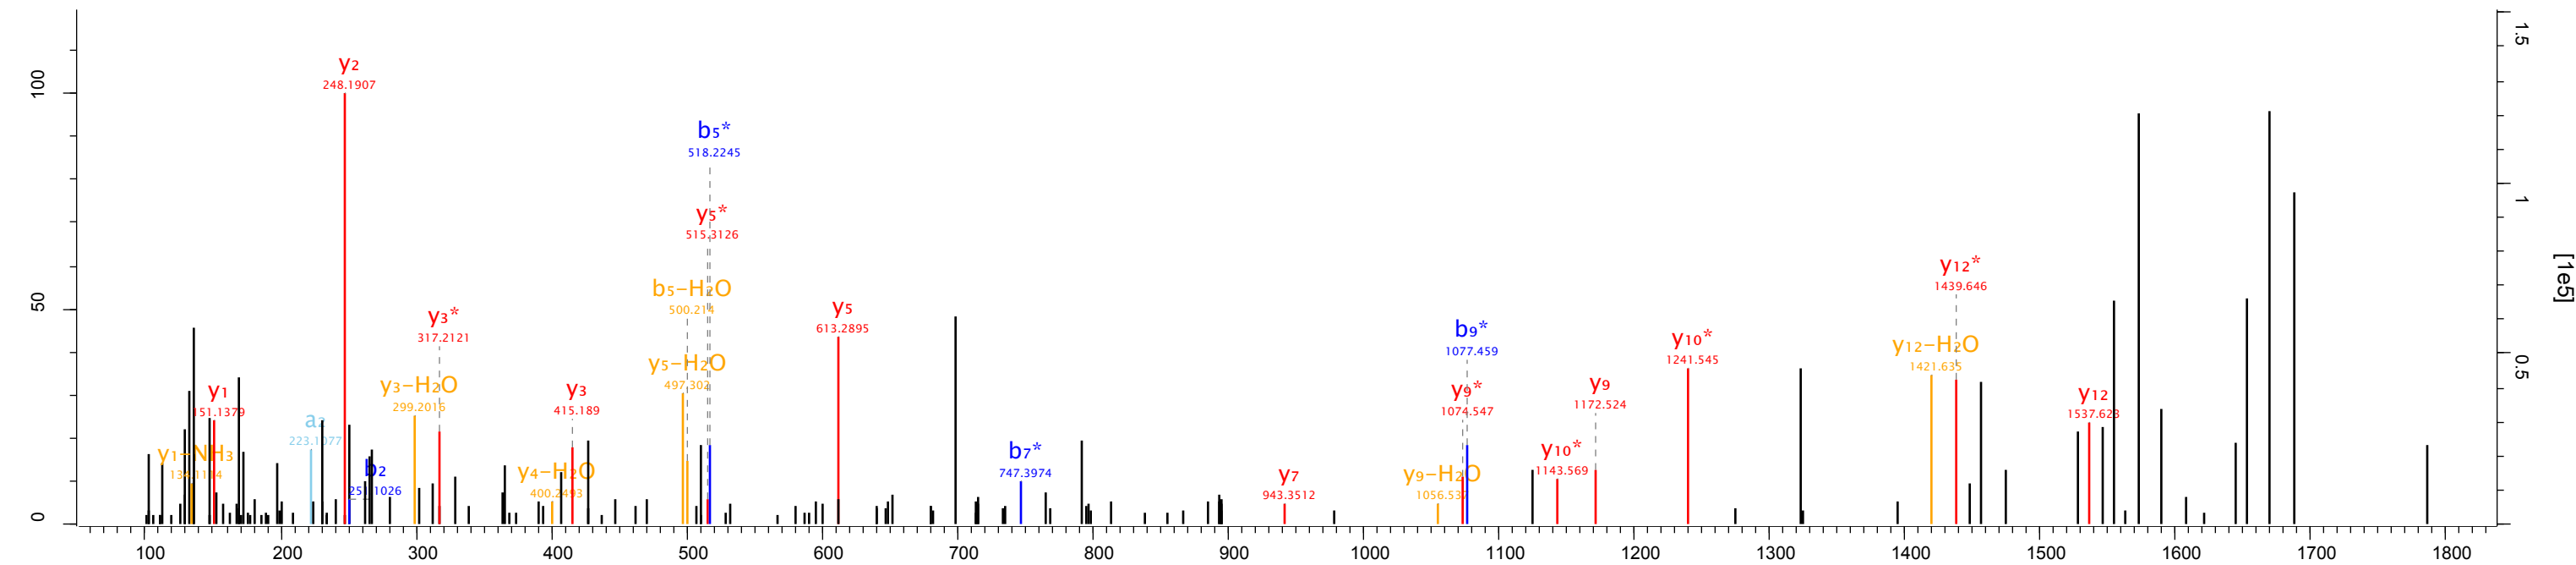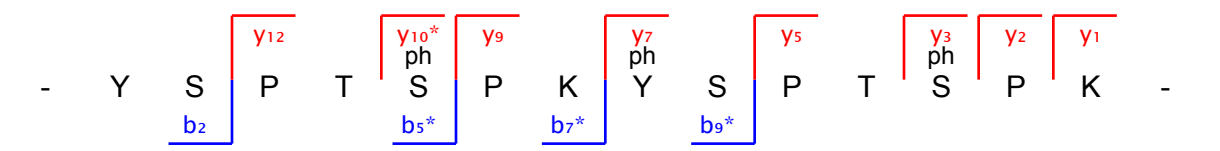

Raw file 20150814\_A375SR\_Phospho\_BR2\_02 Scan 10649 Method FTMS; HCD Score 133.94 m/z 763.31 Gene names PKN1

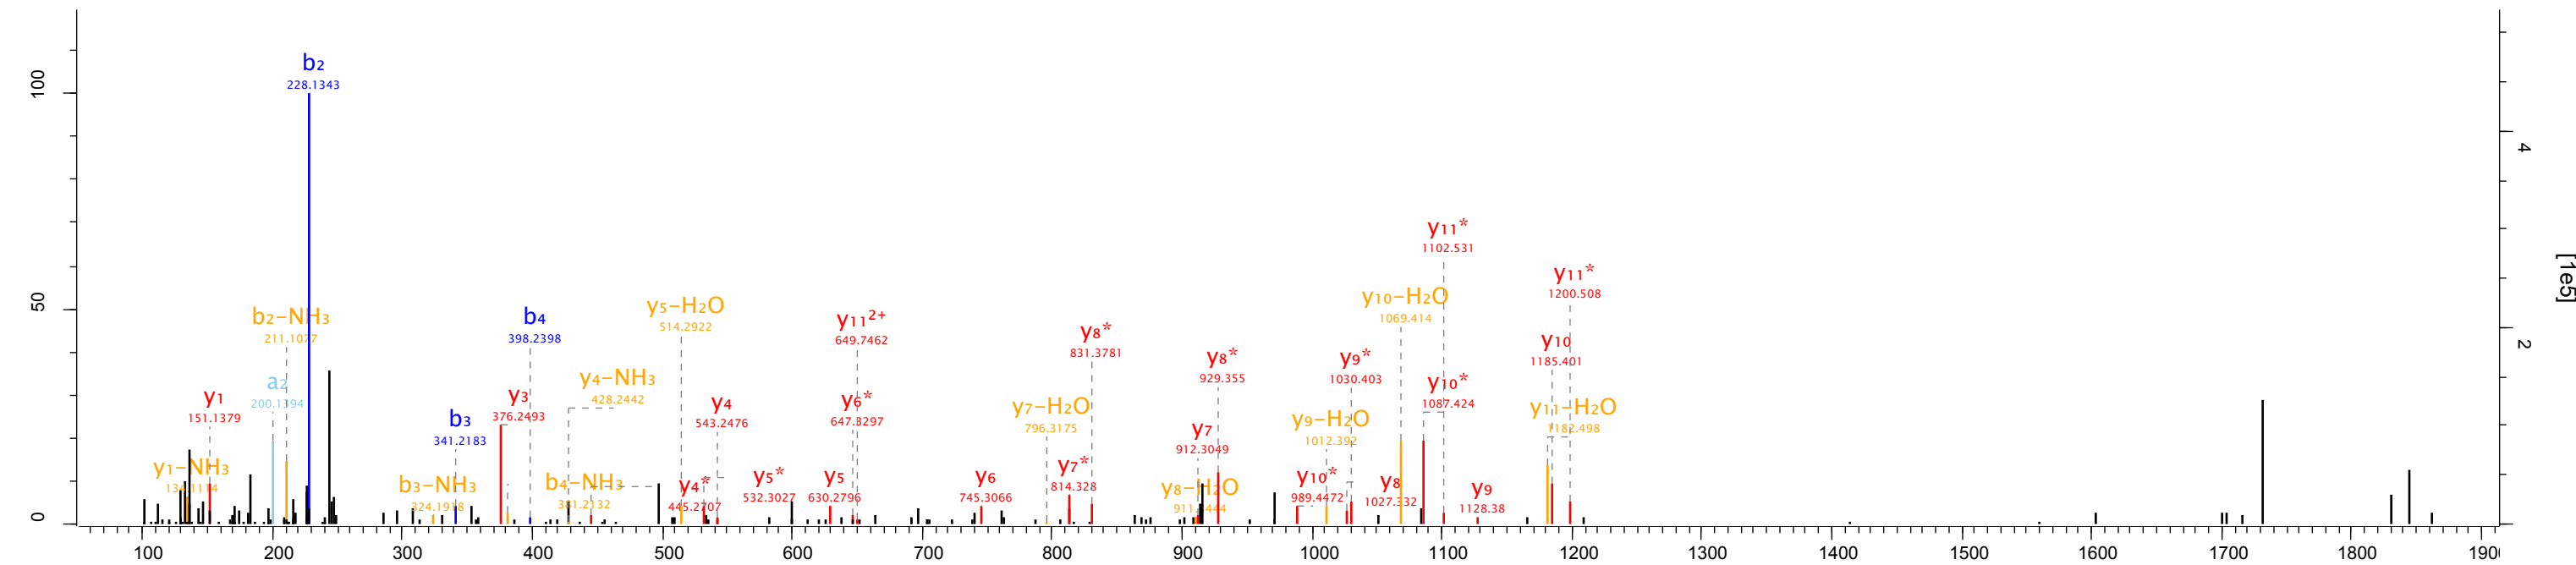

- L N L G T D S D S S P Q K -

b<sub>2</sub>
b<sub>3</sub>
b<sub>4</sub>
y<sub>11</sub><sup>\*</sup>
y<sub>10</sub>
y<sub>9</sub>
y<sub>8</sub>
y<sub>7</sub><sup>ph</sup>
y<sub>6</sub>
y<sub>5</sub>
y<sub>4</sub><sup>ph</sup>
y<sub>3</sub>
y<sub>1</sub>

Raw file: 20150814\_A375SR\_Phospho\_BR2\_02  
 Scan: 10949 Method: FTMS; HCD Score: 88.95 m/z: 655.25 Gene names: AAK1

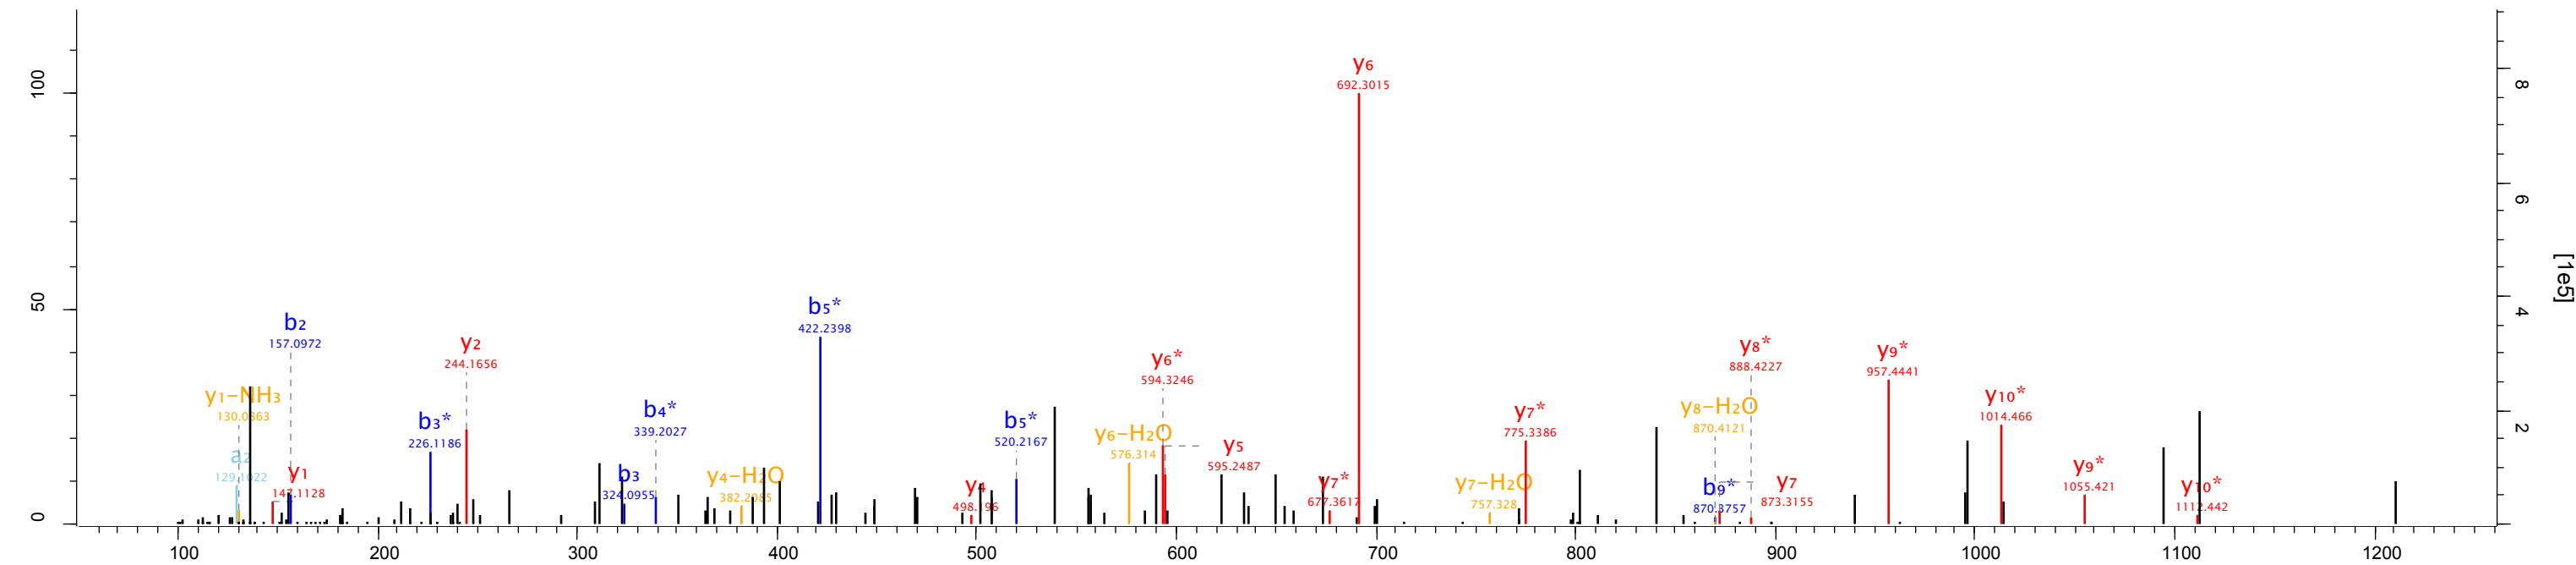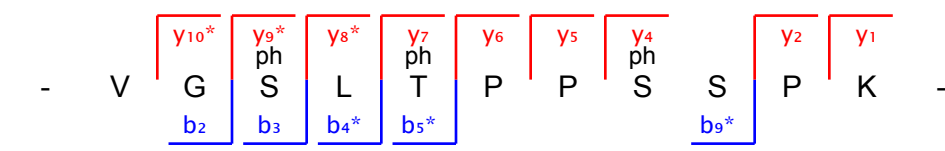



Raw file 20150814\_A375SR\_Phospho\_BR2\_02 Scan 11199 Method FTMS; HCD Score 76.78 m/z 897.81 Gene names ITGB4

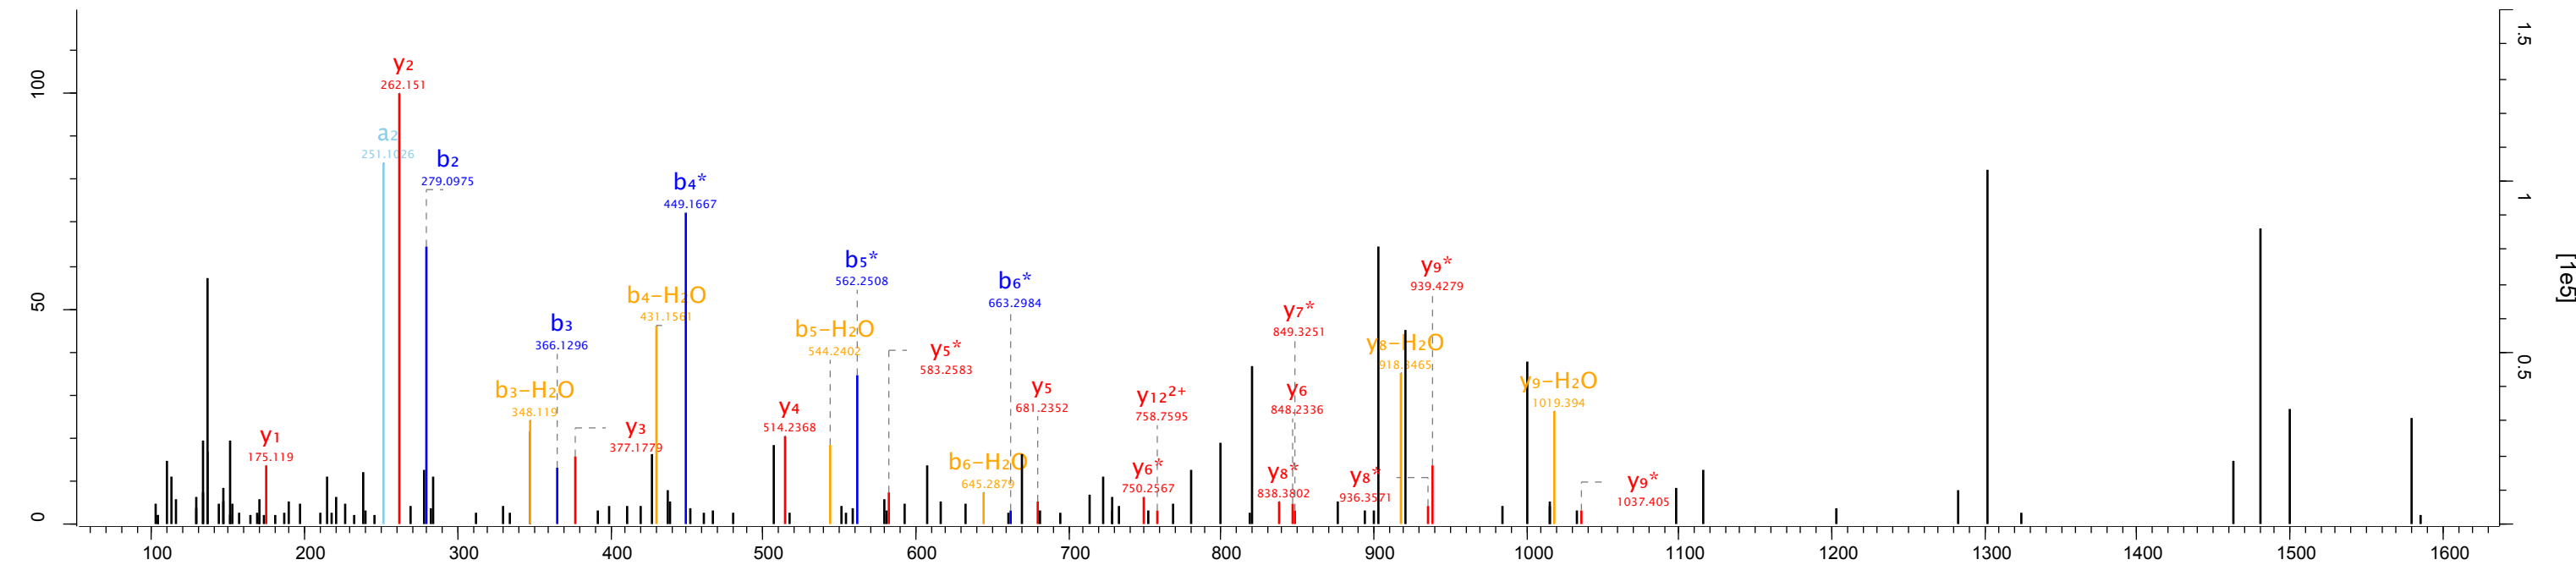

- D Y S T L T S V S S H D S R -

b<sub>2</sub>
b<sub>3</sub>
b<sub>4</sub>\*
b<sub>5</sub>\*
b<sub>6</sub>\*
y<sub>12</sub><sup>2+</sup>
y<sub>9</sub>\*
y<sub>8</sub>\*
y<sub>7</sub>\*
y<sub>6</sub><sub>ph</sub>
y<sub>5</sub><sub>ph</sub>
y<sub>4</sub>
y<sub>3</sub>
y<sub>2</sub>
y<sub>1</sub>

Raw file 20150814\_A375SR\_Phospho\_BR2\_02 Scan 11589 Method FTMS; HCD Score 84.15 m/z 850.02 Gene names KMT2A

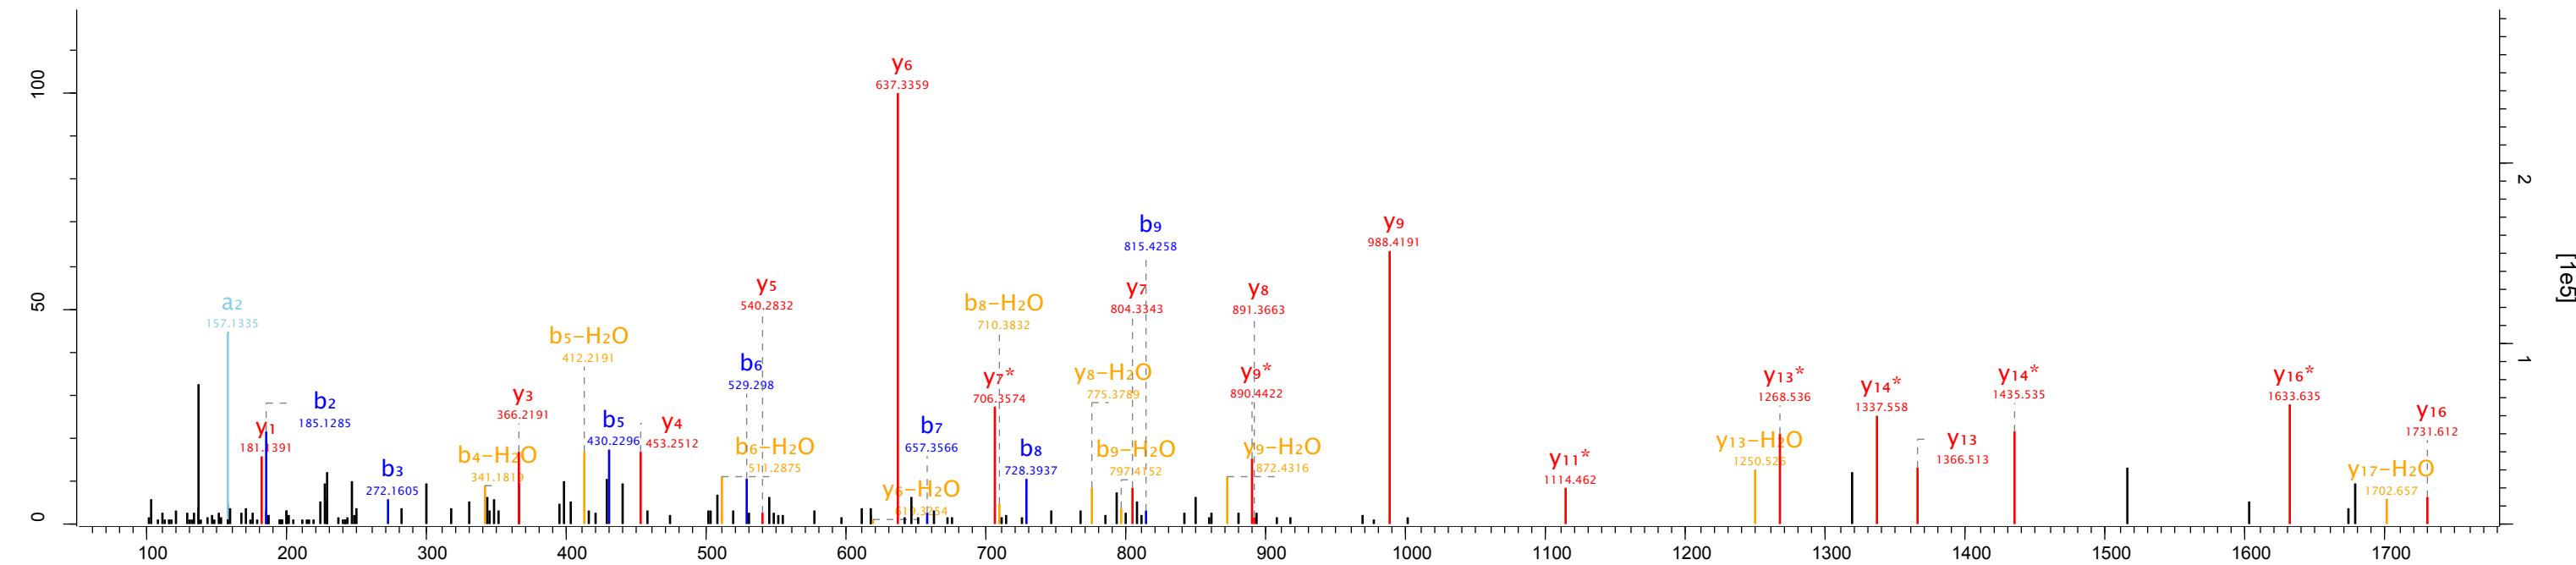

- A L S S A V Q A S P T S P G G S P S S P S S G Q R -

b<sub>2</sub>
b<sub>3</sub>
b<sub>5</sub>
b<sub>6</sub>
b<sub>7</sub>
b<sub>8</sub>
b<sub>9</sub>
y<sub>16</sub>
y<sub>14</sub>\*
y<sub>13</sub>
y<sub>11</sub>\*
y<sub>9</sub>
y<sub>8</sub>
y<sub>7</sub>
y<sub>6</sub>
y<sub>5</sub>
y<sub>4</sub>
y<sub>3</sub>
y<sub>1</sub>

Raw file: 20150814\_A375SR\_Phospho\_BR2\_02  
 Scan: 11709 Method: FTMS; HCD Score: 96.12 m/z: 1028.91 Gene names: IRS2

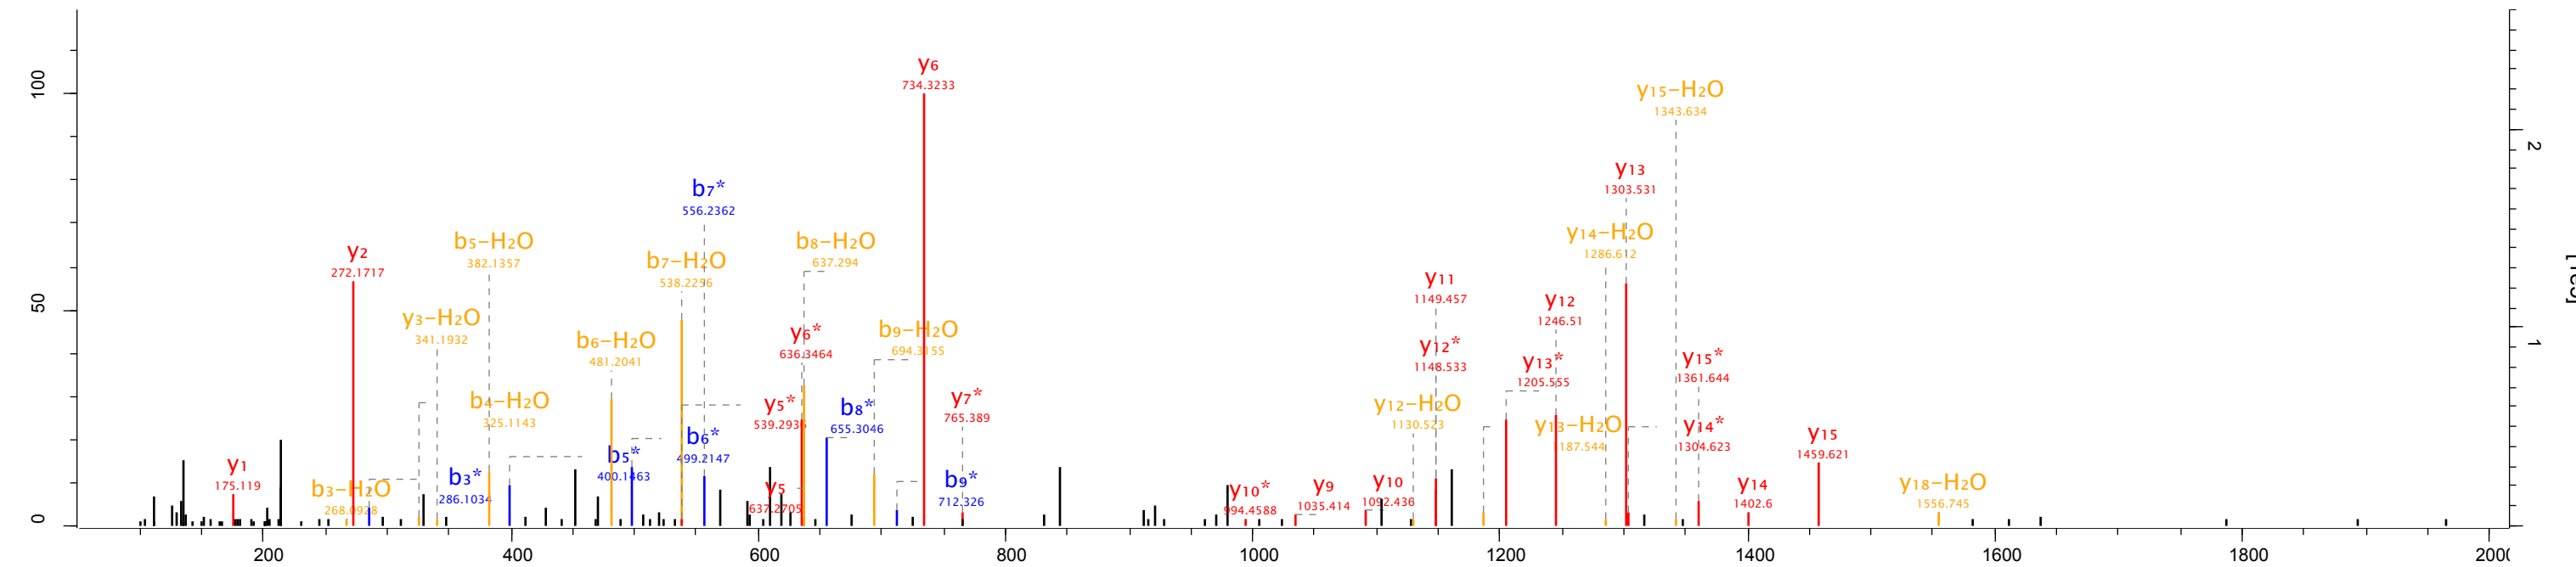

- S S ph E G G V G V G P G G G D E P P ph T S P R -  
b3\* b5\* b6\* b7\* b8\* b9\* y15 y14 y13 y12 y11 y10 y9 y7\* y6 y5 y2 y1

Raw file 20150814\_A375SR\_Phospho\_BR2\_02 Scan 12439 Method FTMS; HCD Score 103.67 m/z 739.82 Gene names KDM1A

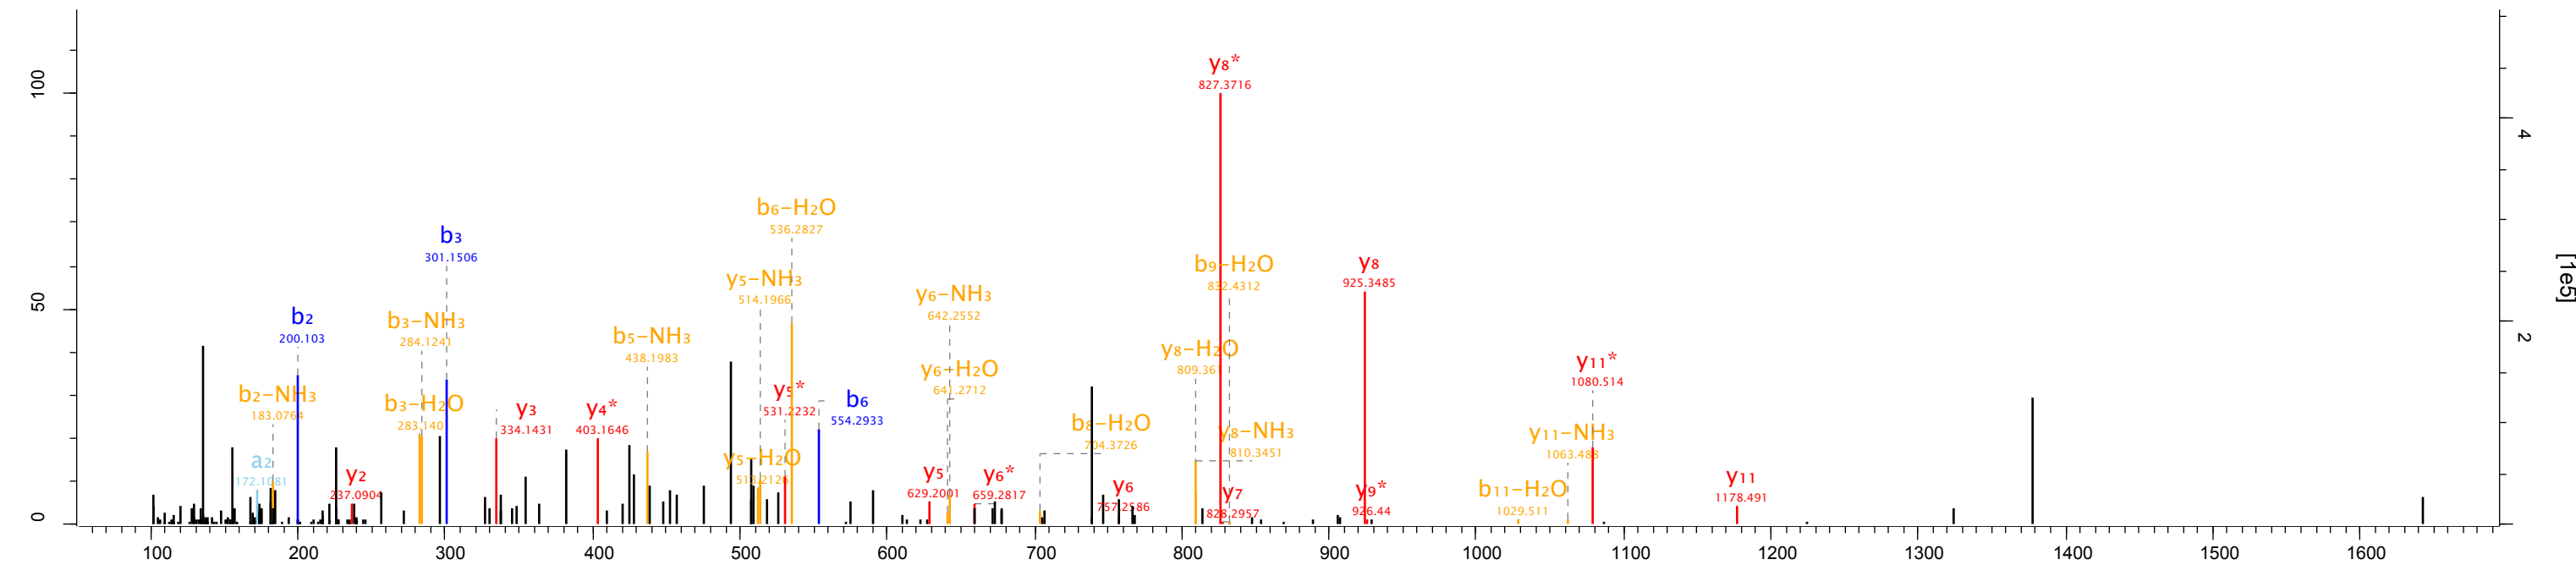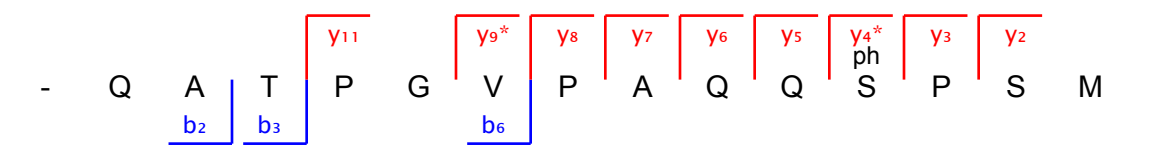

Raw file: 20150814\_A375SR\_Phospho\_BR2\_02  
 Scan: 12609 Method: FTMS; HCD Score: 57.96 m/z: 1361.61 Gene names: HSPH1

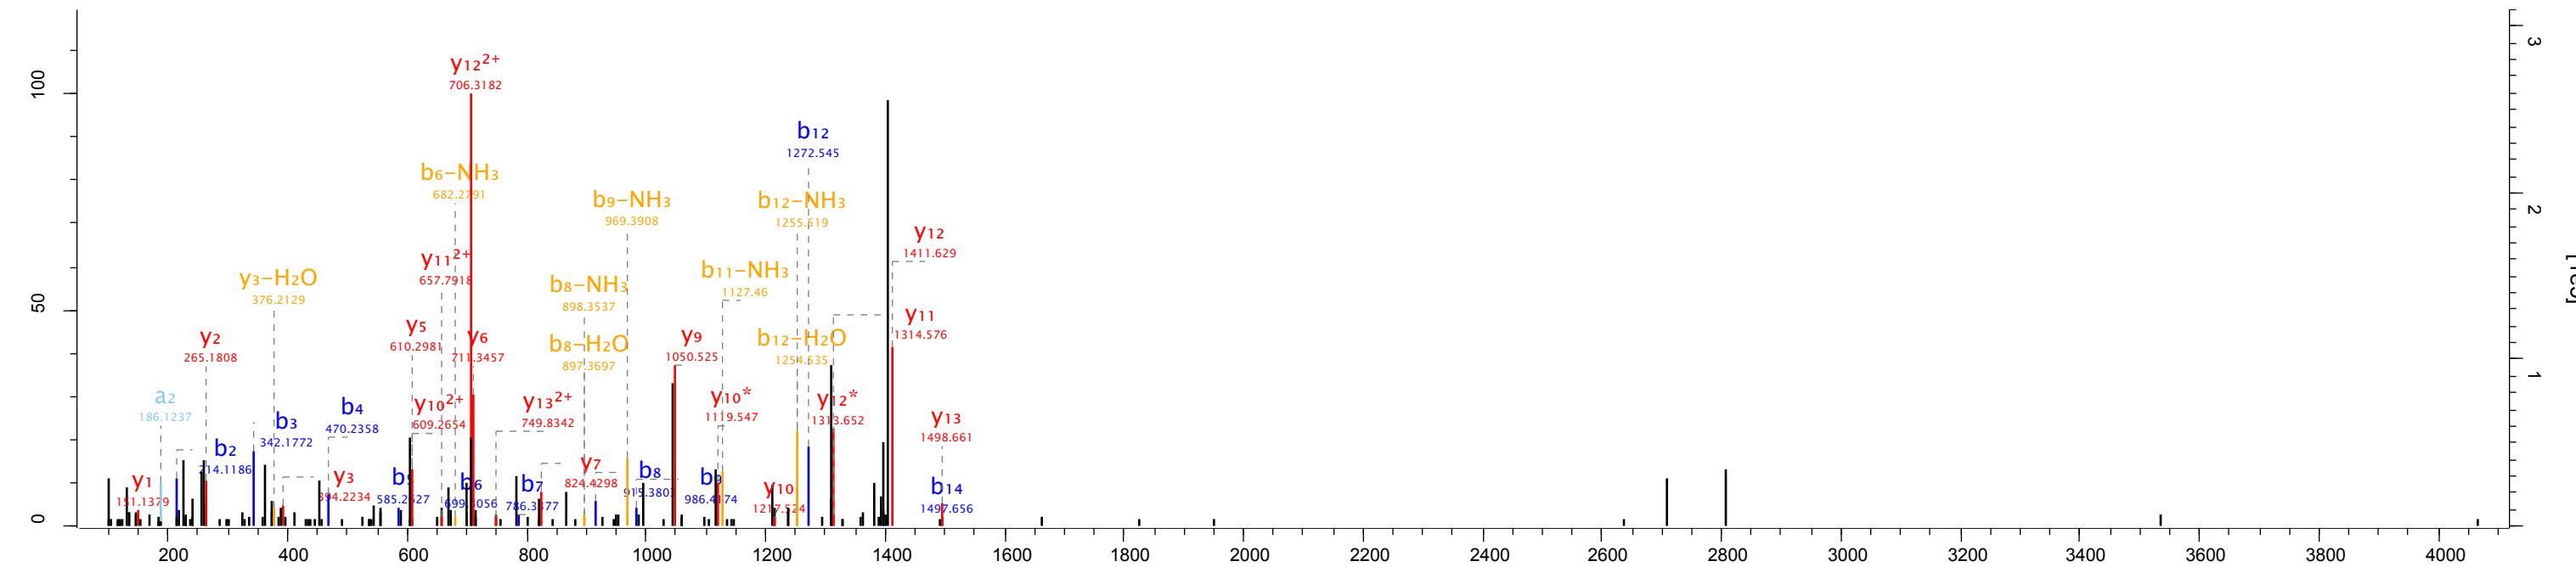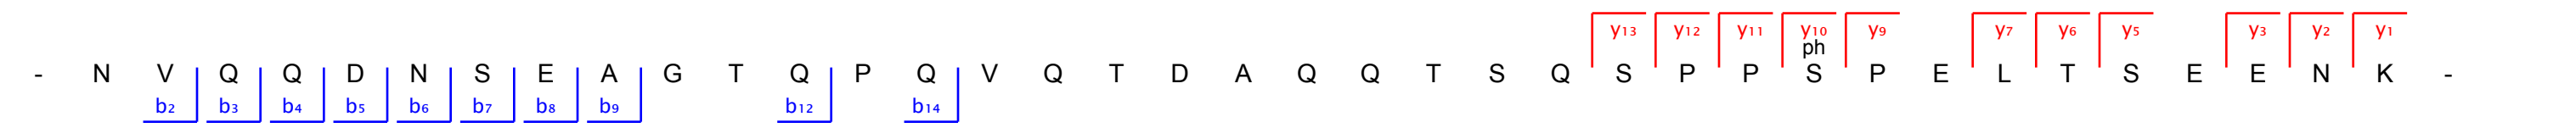

Raw file 20150814\_A375SR\_Phospho\_BR2\_02 Scan 13359 Method FTMS; HCD Score 53.5 m/z 917.35 Gene names AIM1

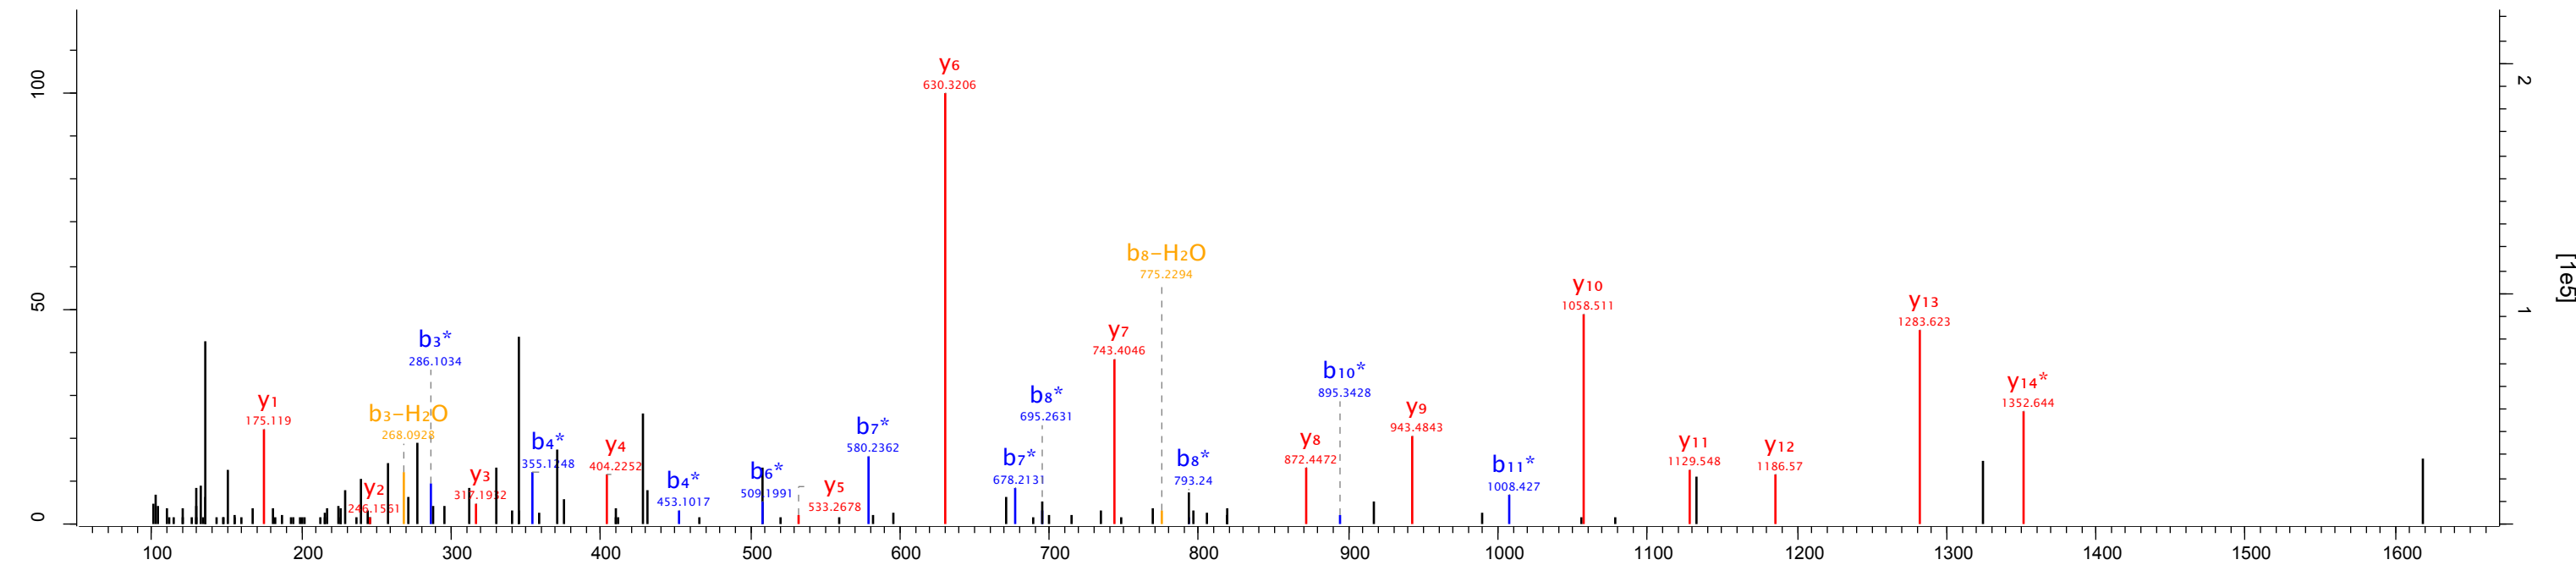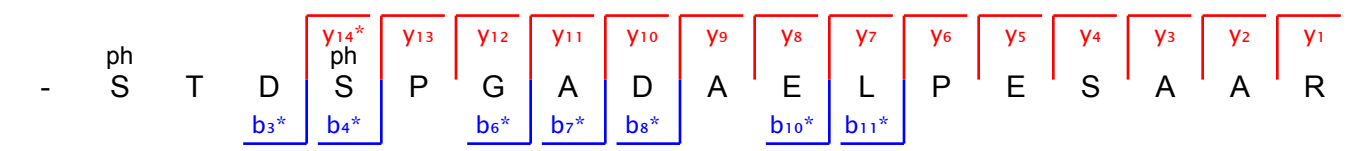

Raw file 20150814\_A375SR\_Phospho\_BR2\_02 Scan 13709 Method FTMS; HCD Score 196.22 m/z 1087.45 Gene names BAIAP2L1

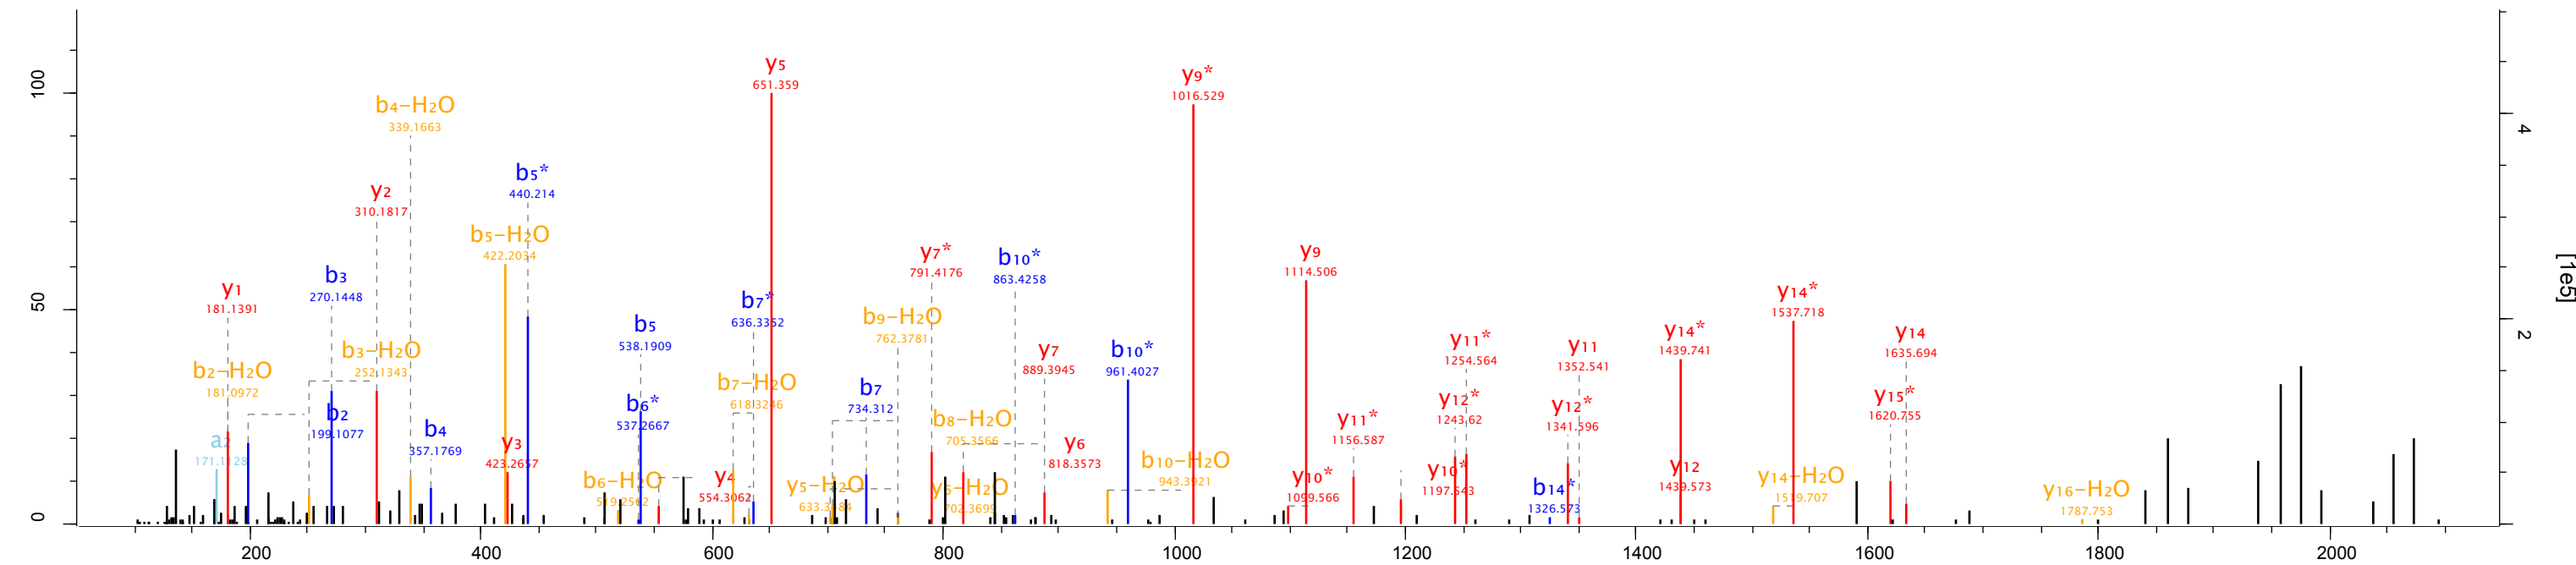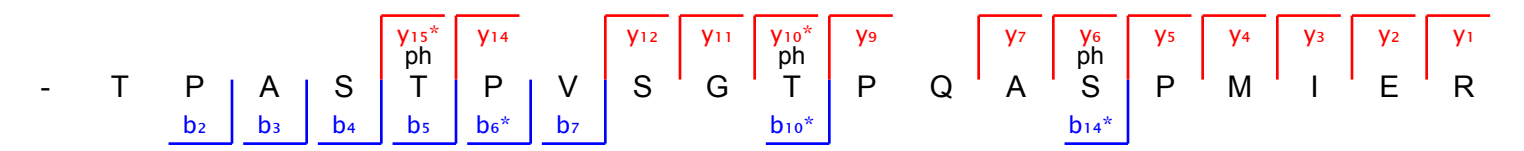

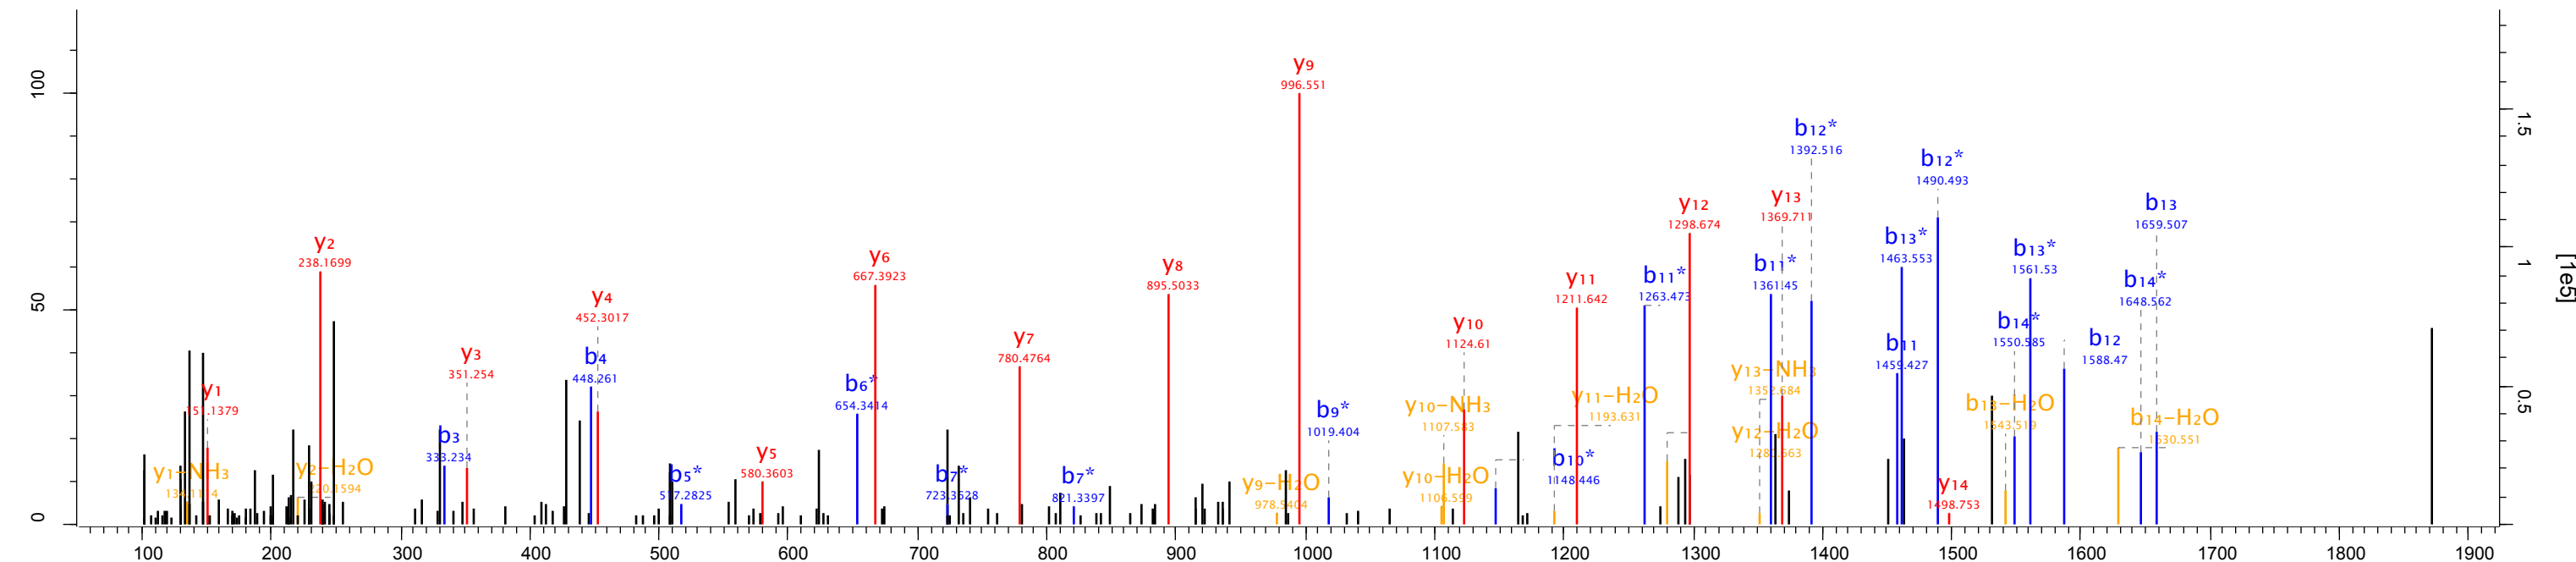

- G L R D S H S S E E D E A S S Q T D L S Q T I S K -

ph ph ph

b<sub>3</sub> b<sub>4</sub> b<sub>5</sub>\* b<sub>6</sub>\* b<sub>7</sub>\* b<sub>9</sub>\* b<sub>10</sub>\* b<sub>11</sub> b<sub>12</sub> b<sub>13</sub> b<sub>14</sub>\* y<sub>14</sub> y<sub>13</sub> y<sub>12</sub> y<sub>11</sub> y<sub>10</sub> y<sub>9</sub> y<sub>8</sub> y<sub>7</sub> y<sub>6</sub> y<sub>5</sub> y<sub>4</sub> y<sub>3</sub> y<sub>2</sub> y<sub>1</sub>



Raw file 20150814\_A375SR\_Phospho\_BR2\_02 Scan 13879 Method FTMS; HCD Score 134.52 m/z 888.06 Gene names FUBP1

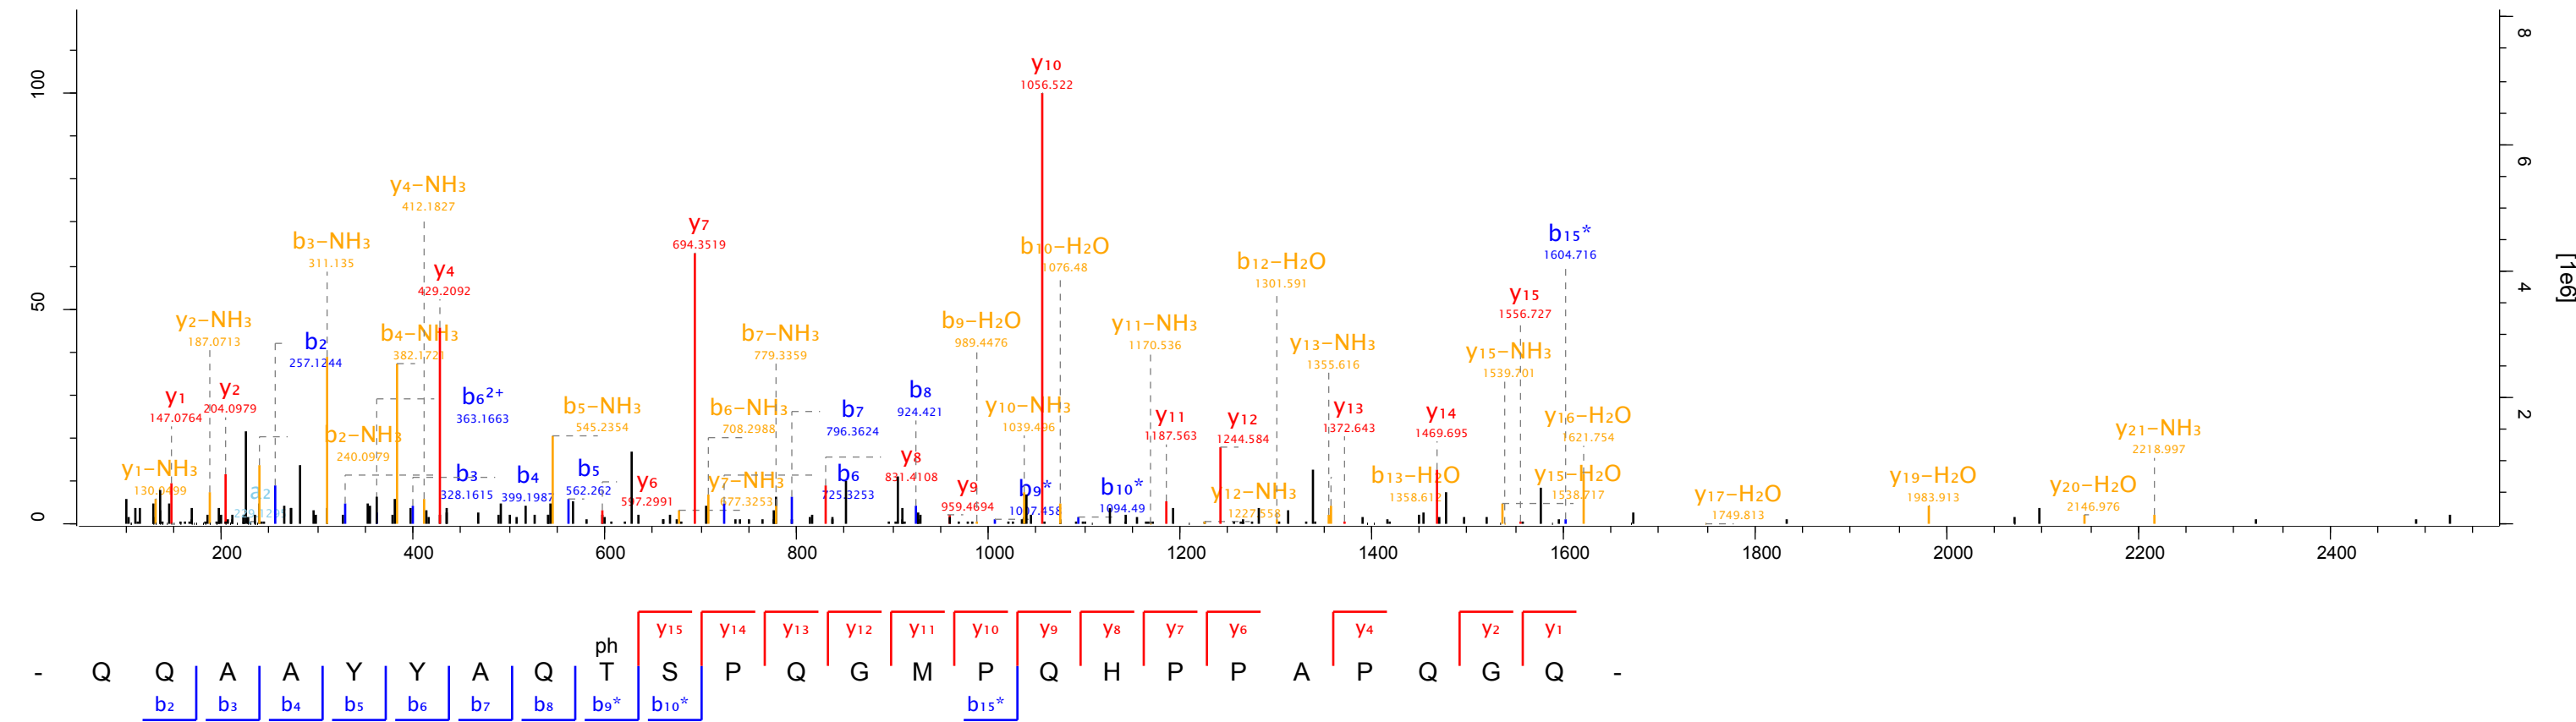

Raw file: 20150814\_A375SR\_Phospho\_BR2\_02  
 Scan: 13939 Method: FTMS; HCD Score: 51.04 m/z: 963.46 Gene names: SPEN

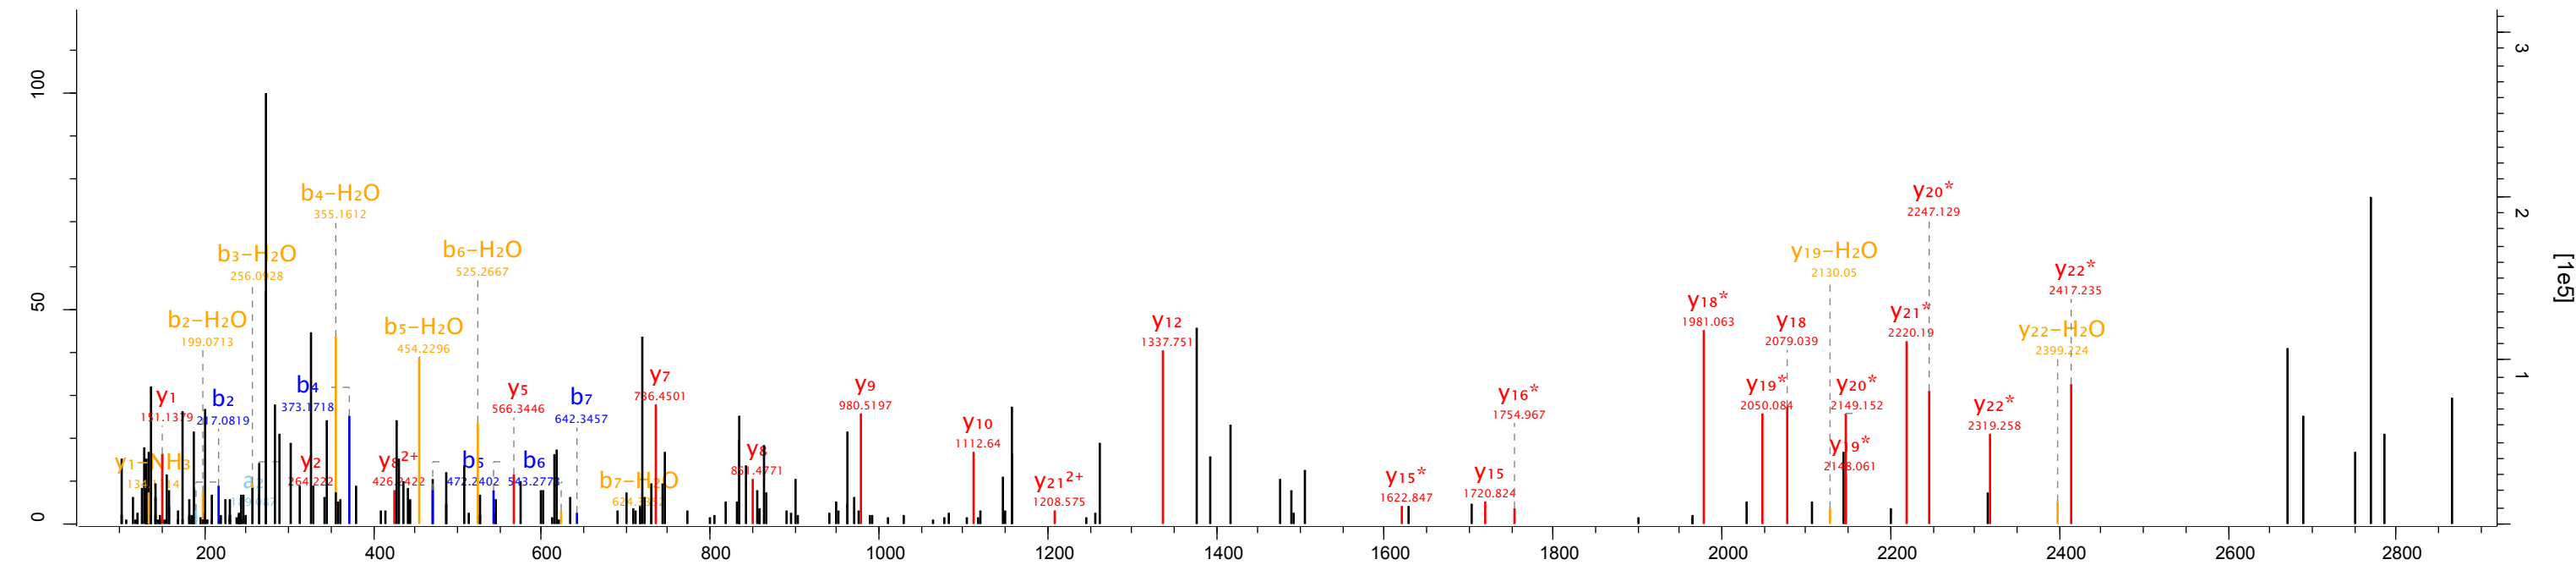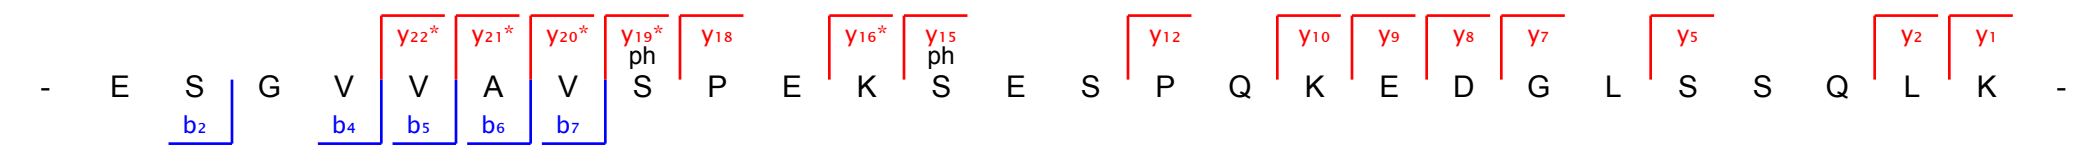

Raw file  
 20150814\_A375SR\_Phospho\_BR2\_02  
 Scan 14219 Method FTMS; HCD Score 54.1 m/z 697.34 Gene names MAP1B

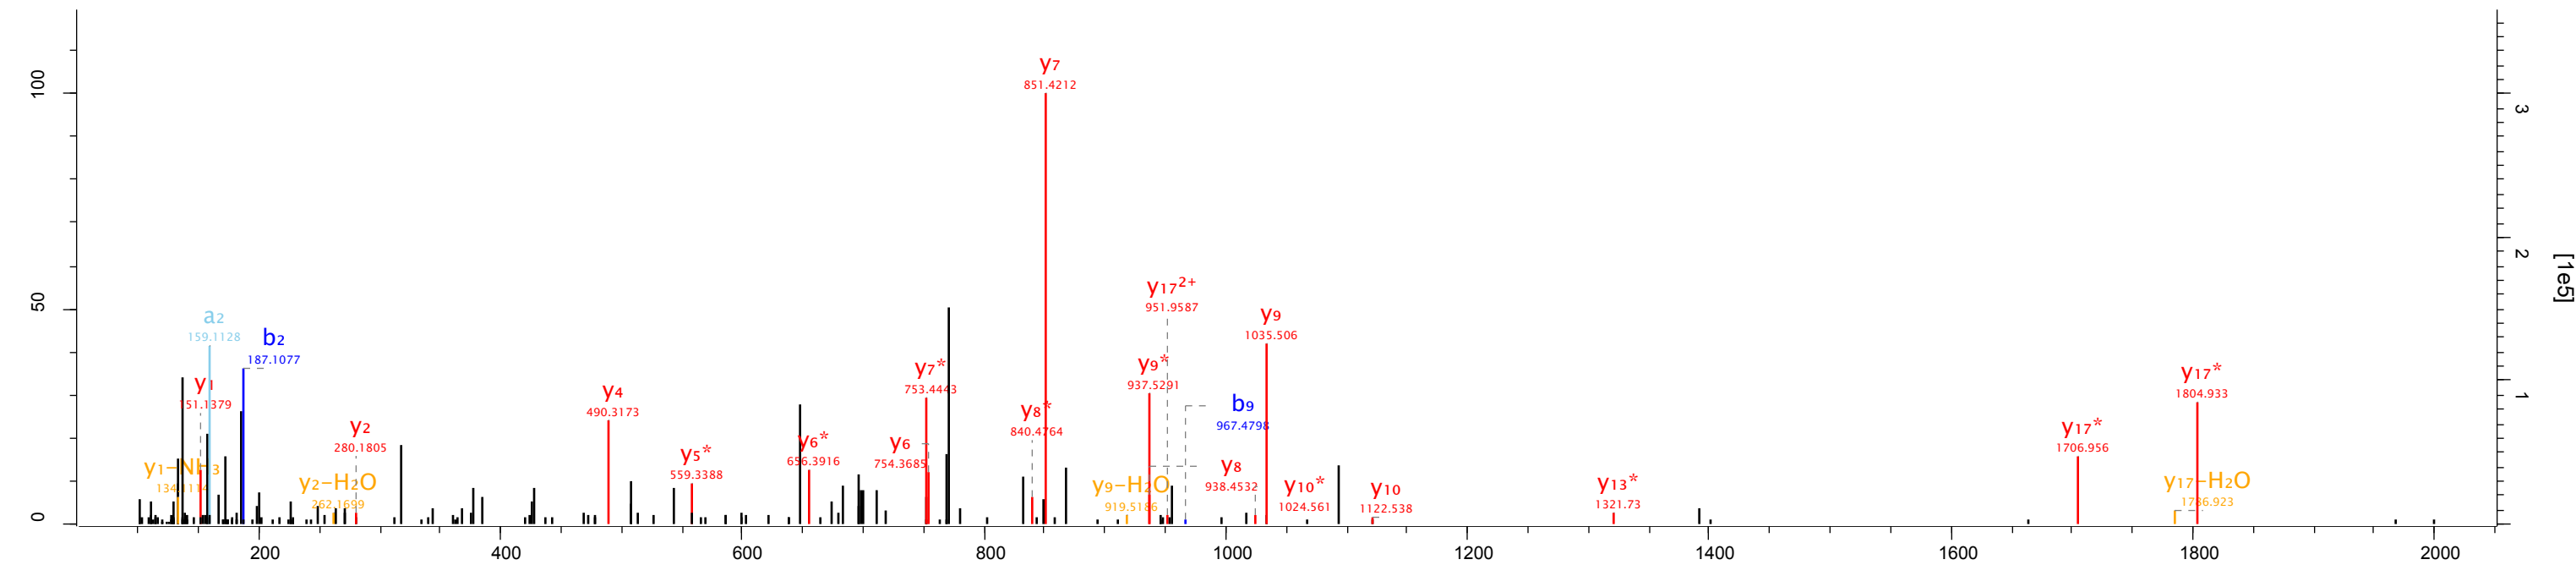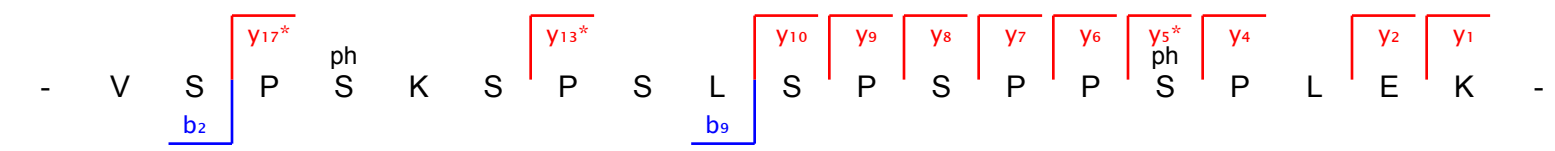

Raw file: 20150814\_A375SR\_Phospho\_BR2\_02  
 Scan: 15269 Method: FTMS; HCD Score: 166.28 m/z: 811.34 Gene names: PTMS

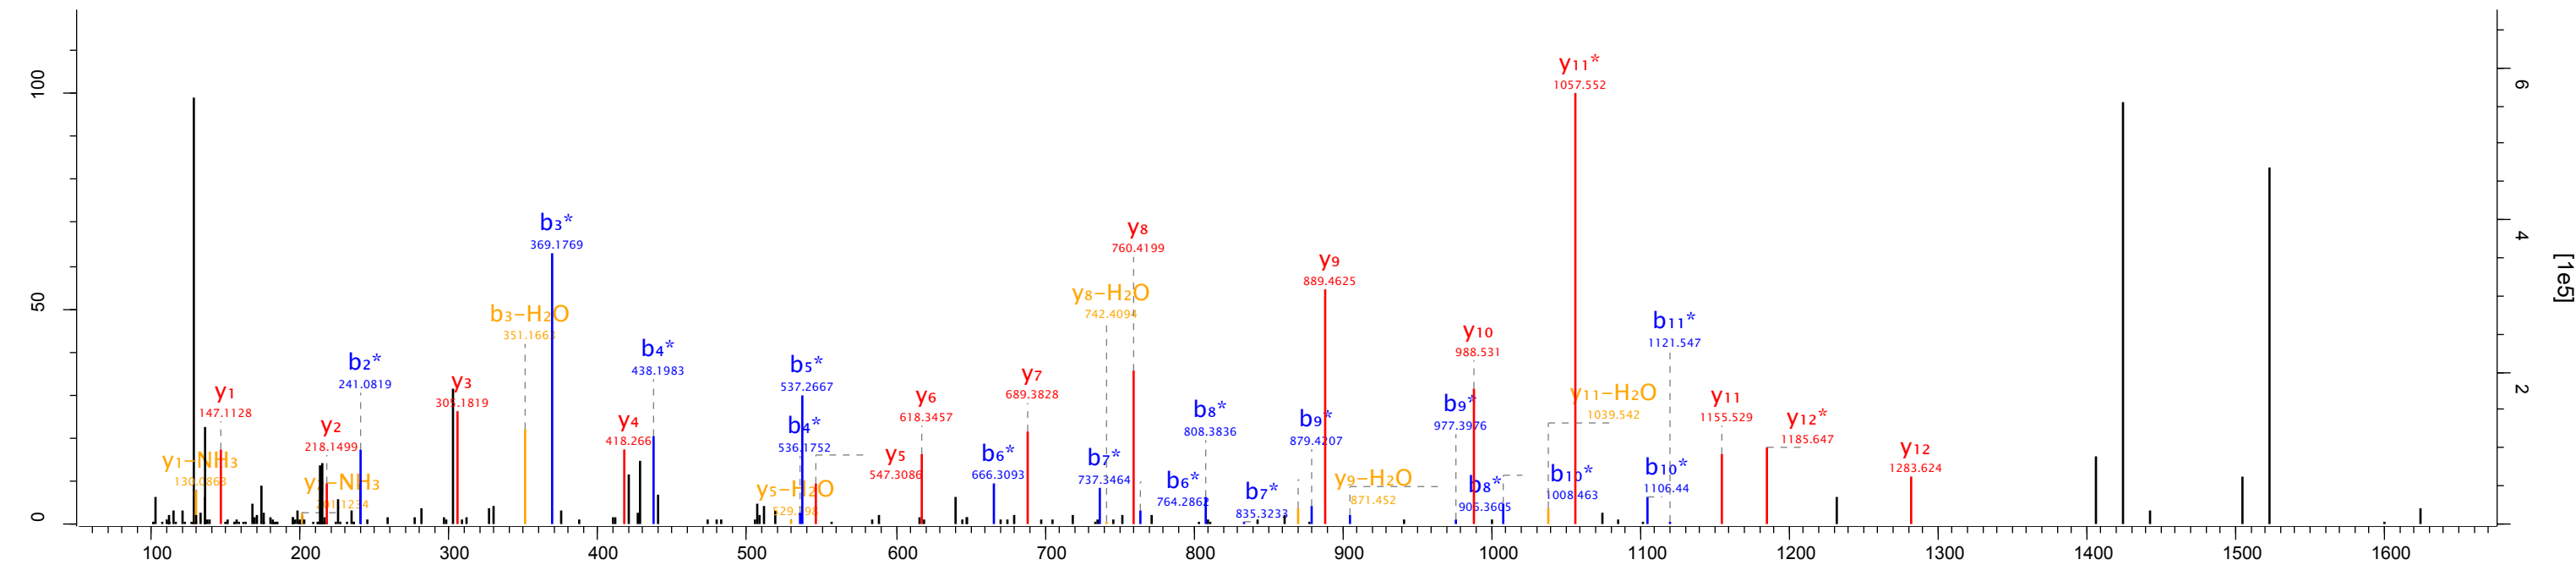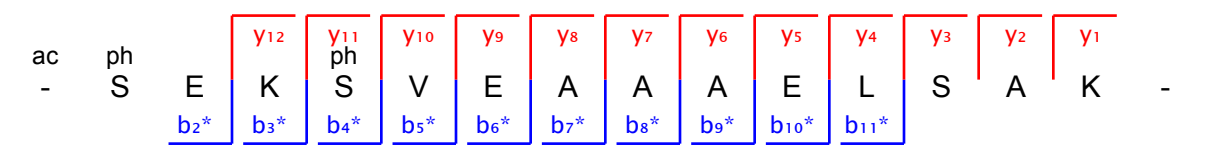

Raw file 20150814\_A375SR\_Phospho\_BR2\_02 Scan 16139 Method FTMS; HCD Score 215.51 m/z 857.31 Gene names ZCRB1

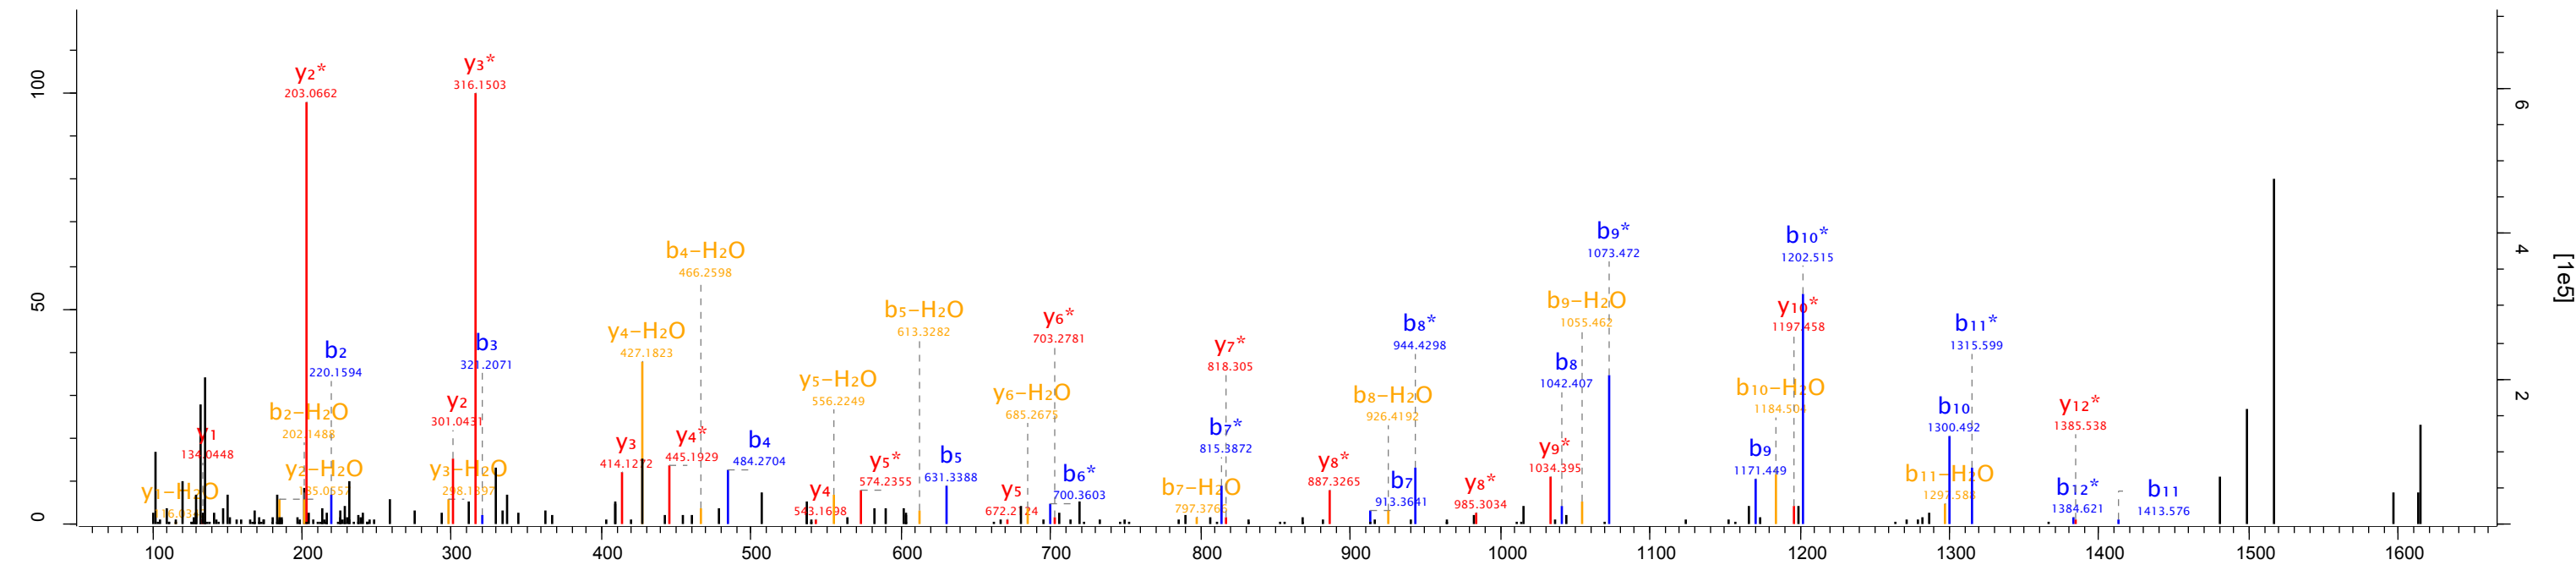

- K S T Y F S D E E E L S D -

Fragmentation mapping:

- b2: S
- b3: T
- b4: Y
- b5: F
- b6\*: S
- b7: D
- b8: E
- b9: E
- b10: E
- b11: L
- b12\*: S

Peptide sequence: S T Y F S D E E E L S D

Raw file 20150814\_A375SR\_Phospho\_BR2\_02 Scan 16699 Method FTMS; HCD Score 96 m/z 875.36 Gene names NUP153

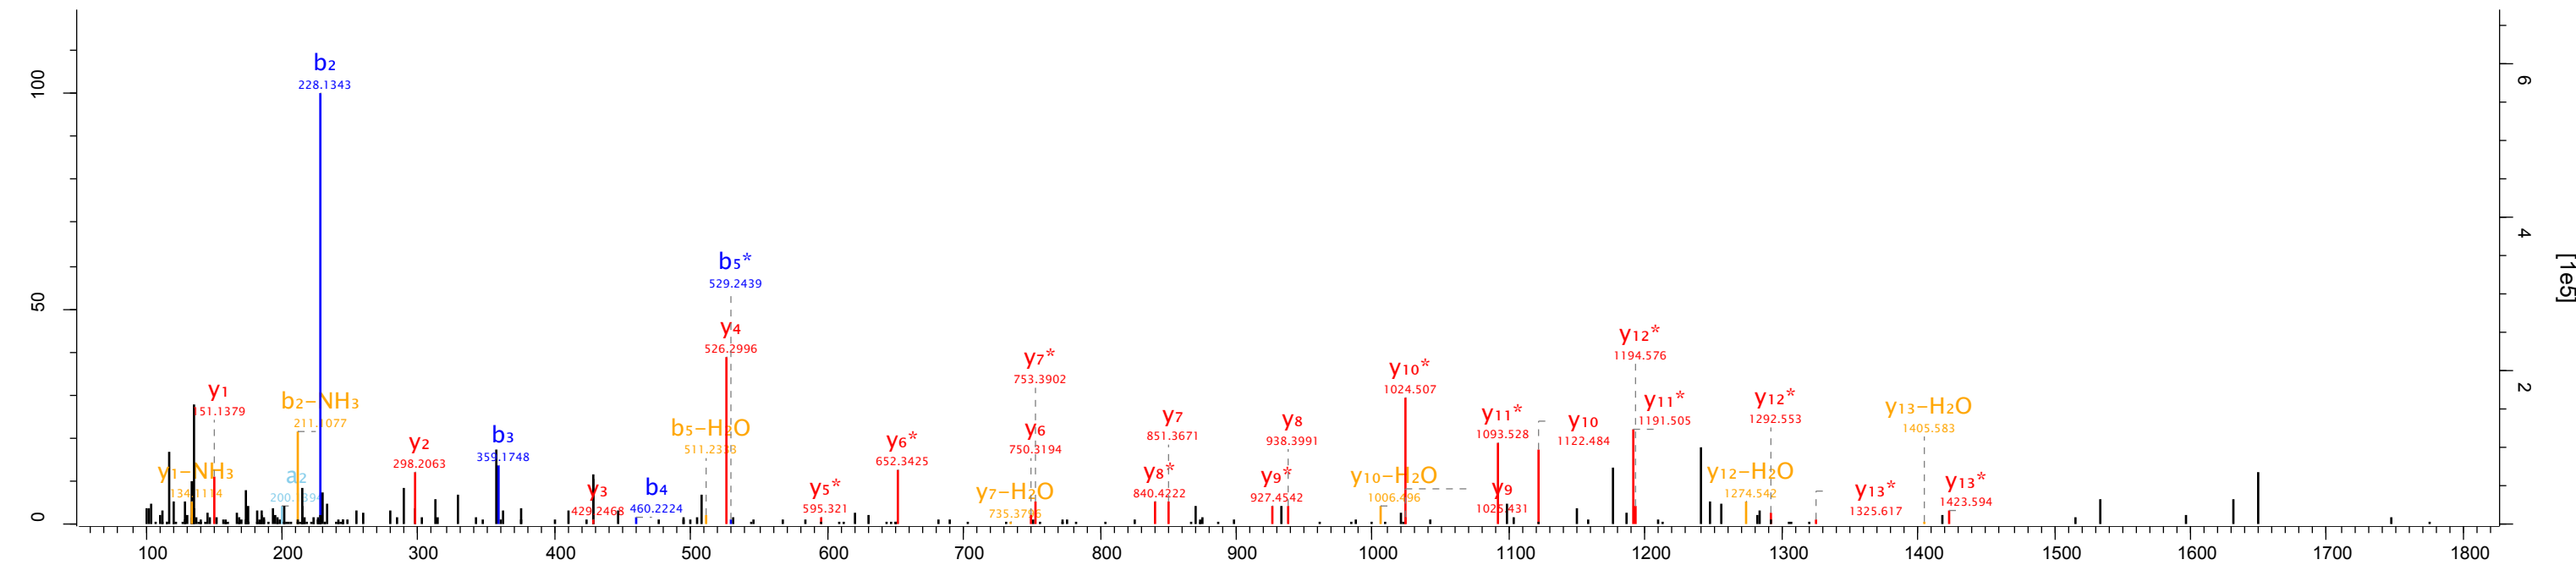

- V Q M T S P S S T G S P M F K -

b<sub>2</sub>
b<sub>3</sub>
b<sub>4</sub>
b<sub>5</sub>\*
y<sub>13</sub>\*
y<sub>12</sub>\*
y<sub>11</sub>\*
y<sub>10</sub>
y<sub>9</sub>
y<sub>8</sub>
y<sub>7</sub>
y<sub>6</sub>
y<sub>5</sub>\*
y<sub>4</sub>
y<sub>3</sub>
y<sub>2</sub>
y<sub>1</sub>

a<sub>2</sub>
b<sub>2</sub>-NH<sub>3</sub>
b<sub>3</sub>
b<sub>4</sub>
b<sub>5</sub>-H<sub>2</sub>O
b<sub>5</sub>\*
y<sub>1</sub>-NH<sub>3</sub>
y<sub>1</sub>
y<sub>2</sub>
y<sub>3</sub>
y<sub>4</sub>
y<sub>5</sub>\*
y<sub>6</sub>\*
y<sub>7</sub>-H<sub>2</sub>O
y<sub>7</sub>\*
y<sub>8</sub>\*
y<sub>8</sub>
y<sub>9</sub>\*
y<sub>9</sub>
y<sub>10</sub>-H<sub>2</sub>O
y<sub>10</sub>\*
y<sub>11</sub>\*
y<sub>11</sub>
y<sub>11</sub>-H<sub>2</sub>O
y<sub>12</sub>\*
y<sub>12</sub>
y<sub>12</sub>-H<sub>2</sub>O
y<sub>13</sub>-H<sub>2</sub>O
y<sub>13</sub>\*

Raw file: 20150814\_A375SR\_Phospho\_BR2\_02  
 Scan: 17019 Method: FTMS; HCD Score: 196.2 m/z: 1104.41 Gene names: AKAP12

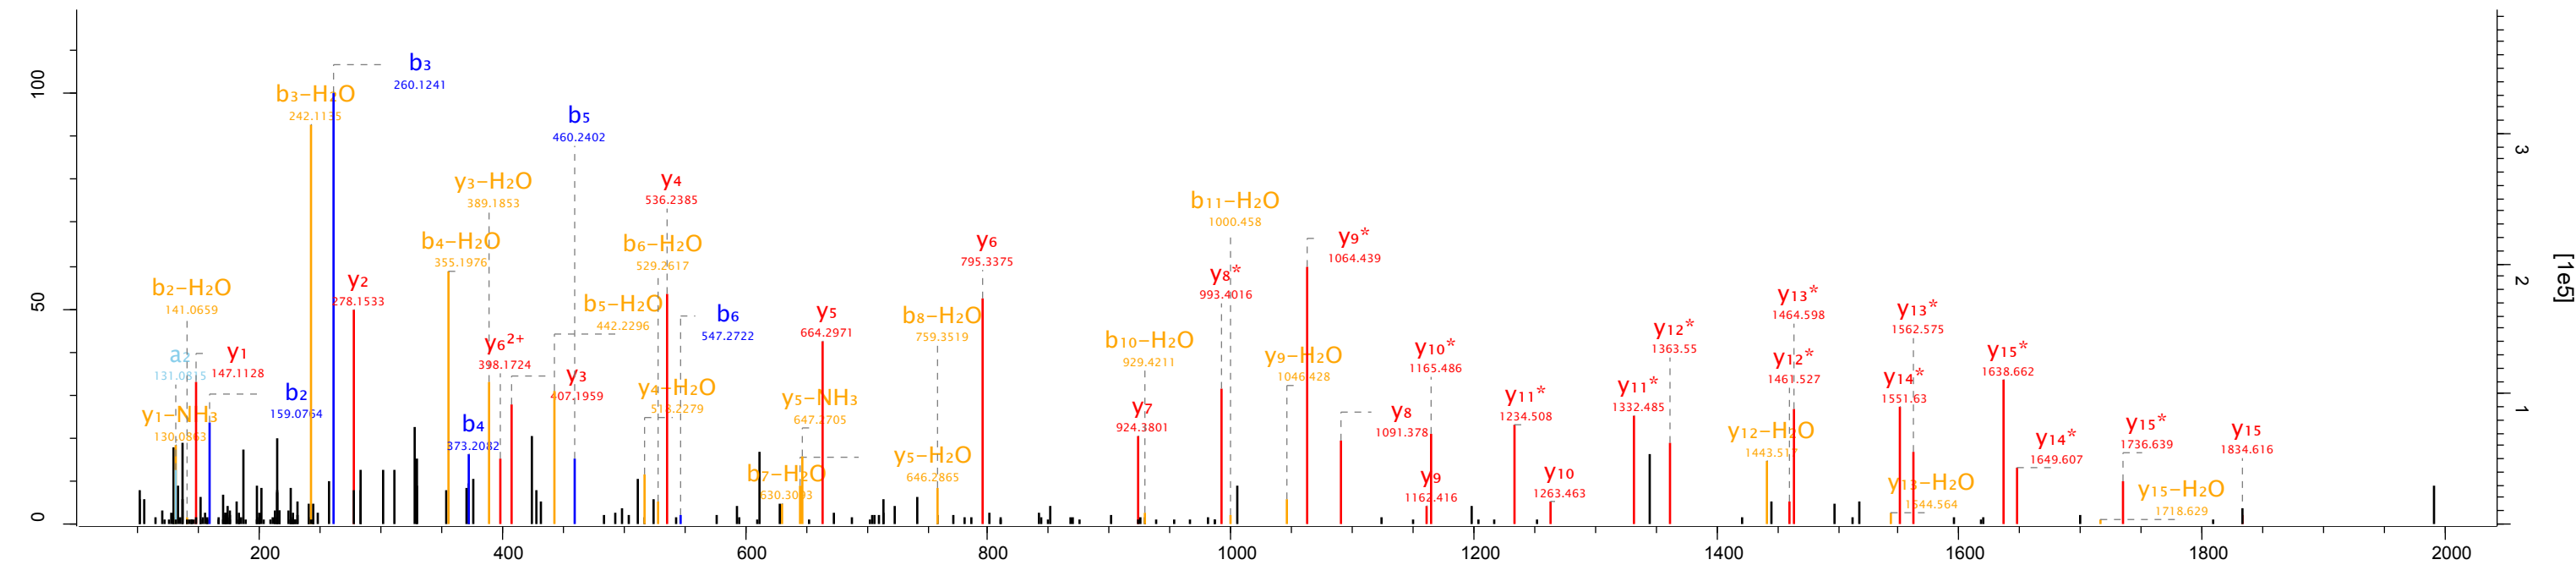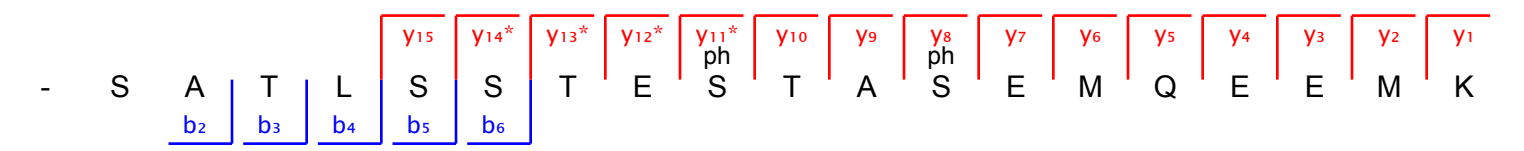

Raw file: 20150814\_A375SR\_Phospho\_BR2\_02  
 Scan: 18059 Method: FTMS; HCD Score: 123.35 m/z: 1102.92 Gene names: PRPF40A

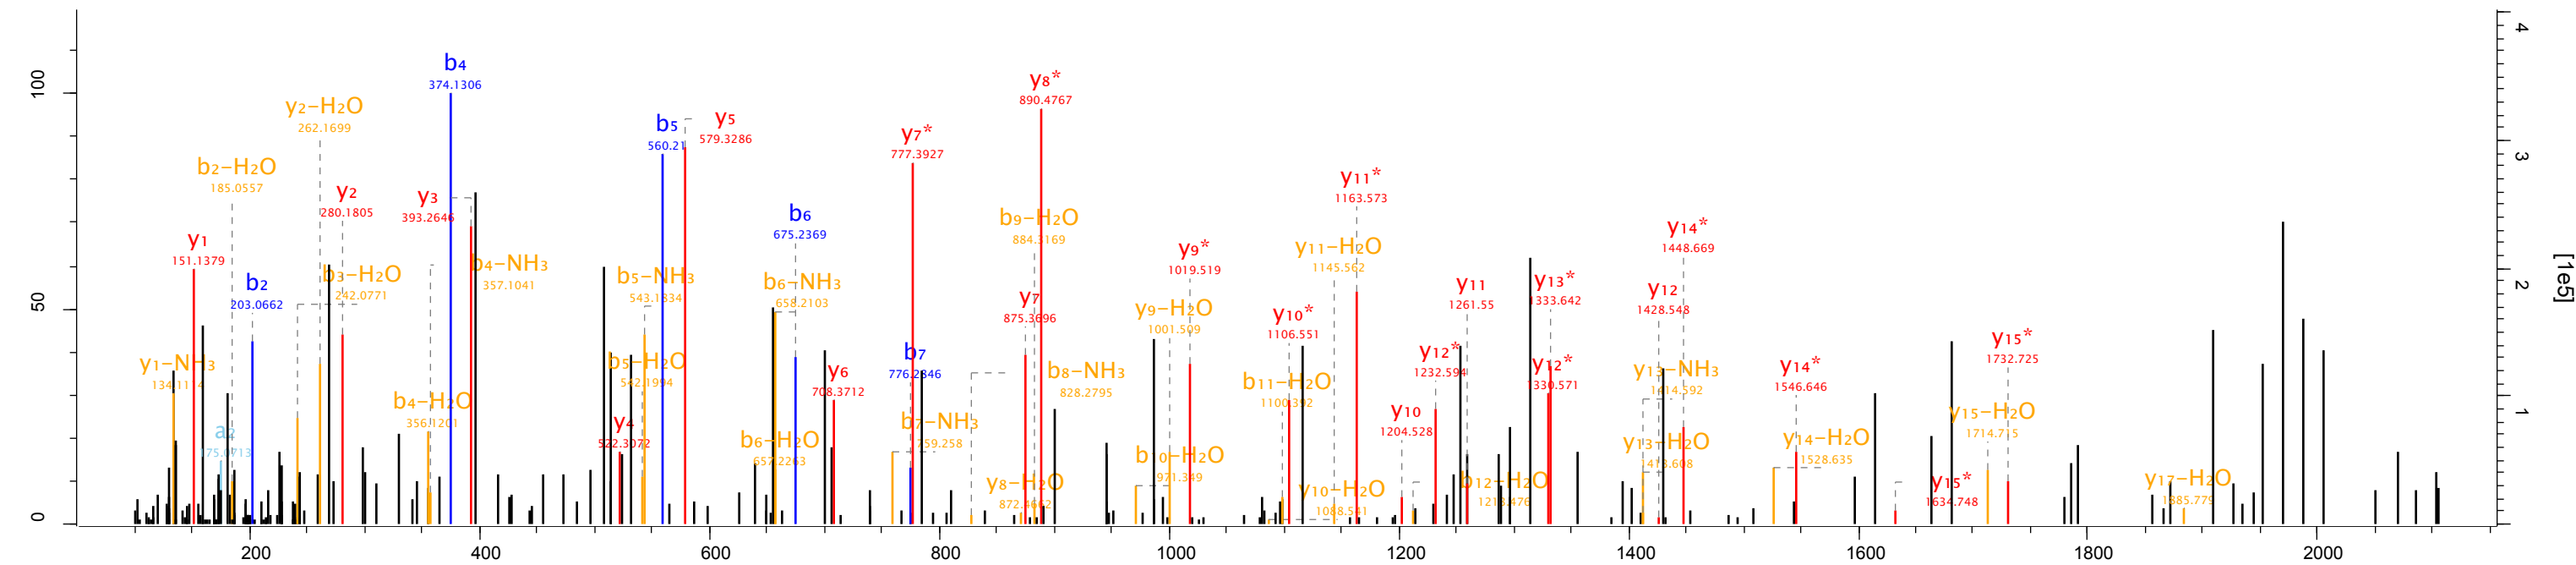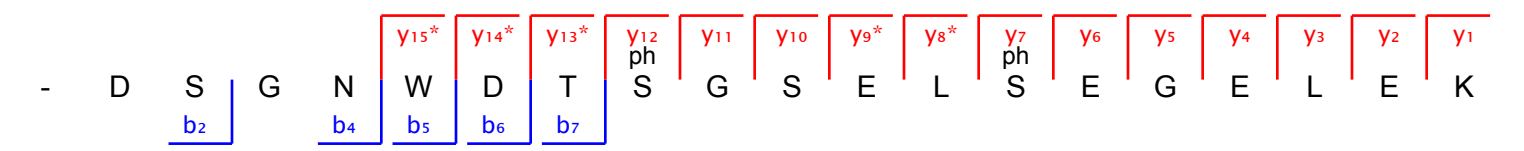



Raw file  
 20150814\_A375SR\_Phospho\_BR2\_02  
 Scan 18159 Method FTMS; HCD Score 68.07 m/z 1012.41 Gene names KLC2

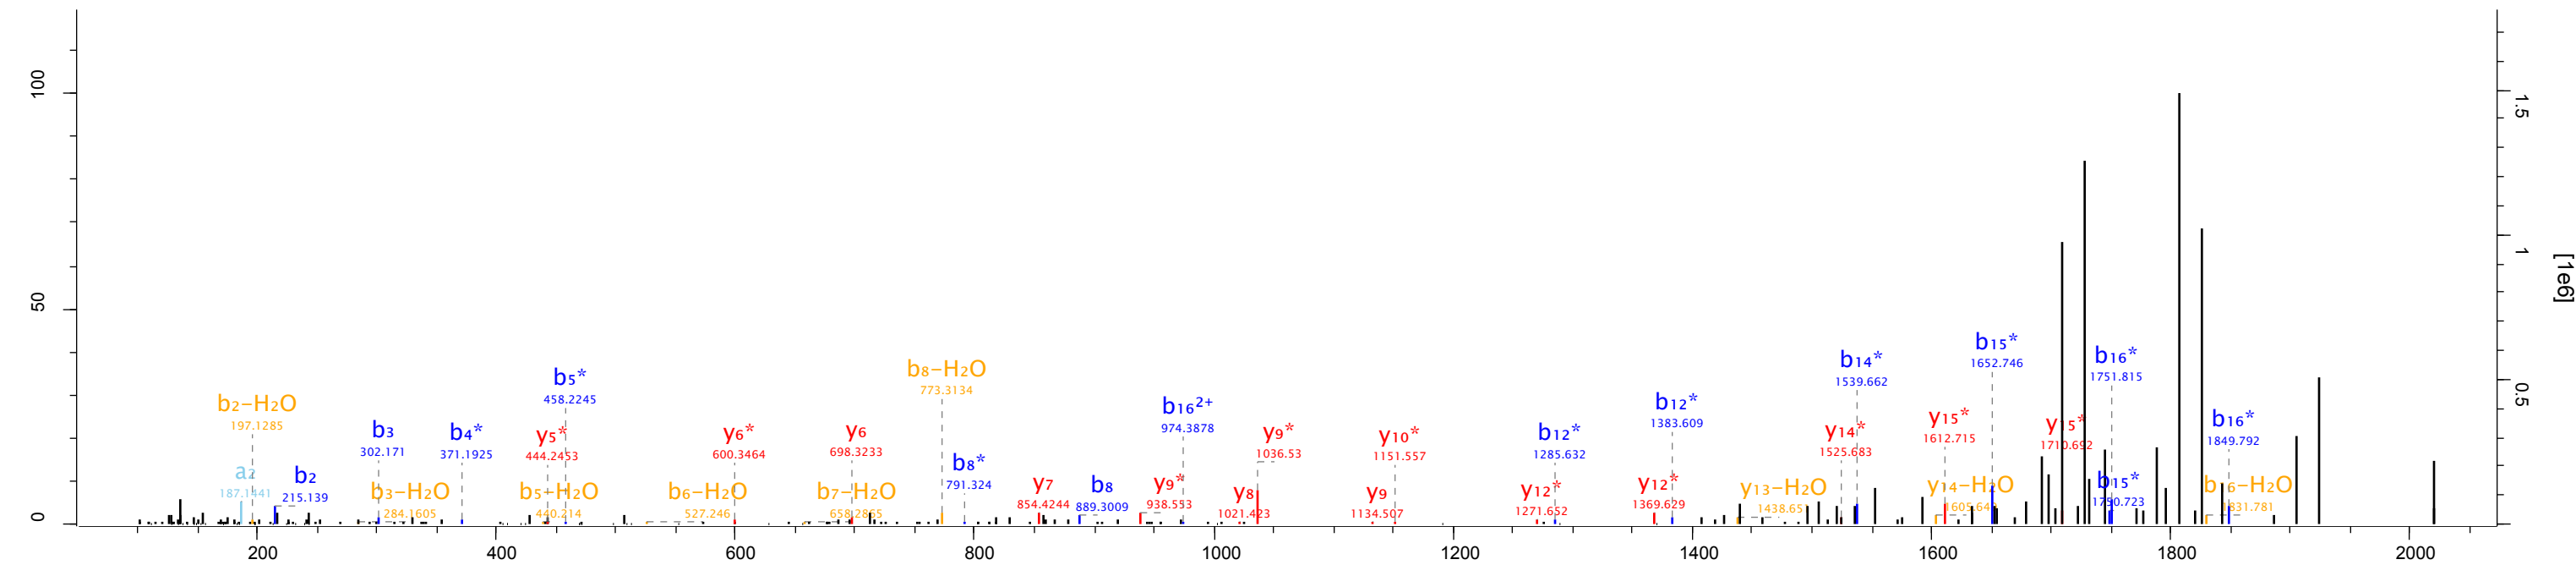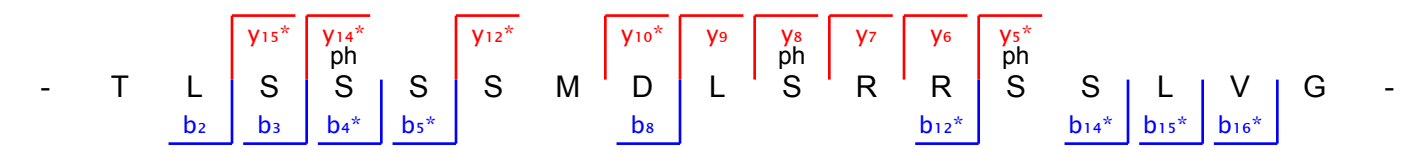

Raw file: 20150814\_A375SR\_Phospho\_BR2\_02  
 Scan: 18459 Method: FTMS; HCD Score: 67.91 m/z: 1240.03 Gene names: USP34

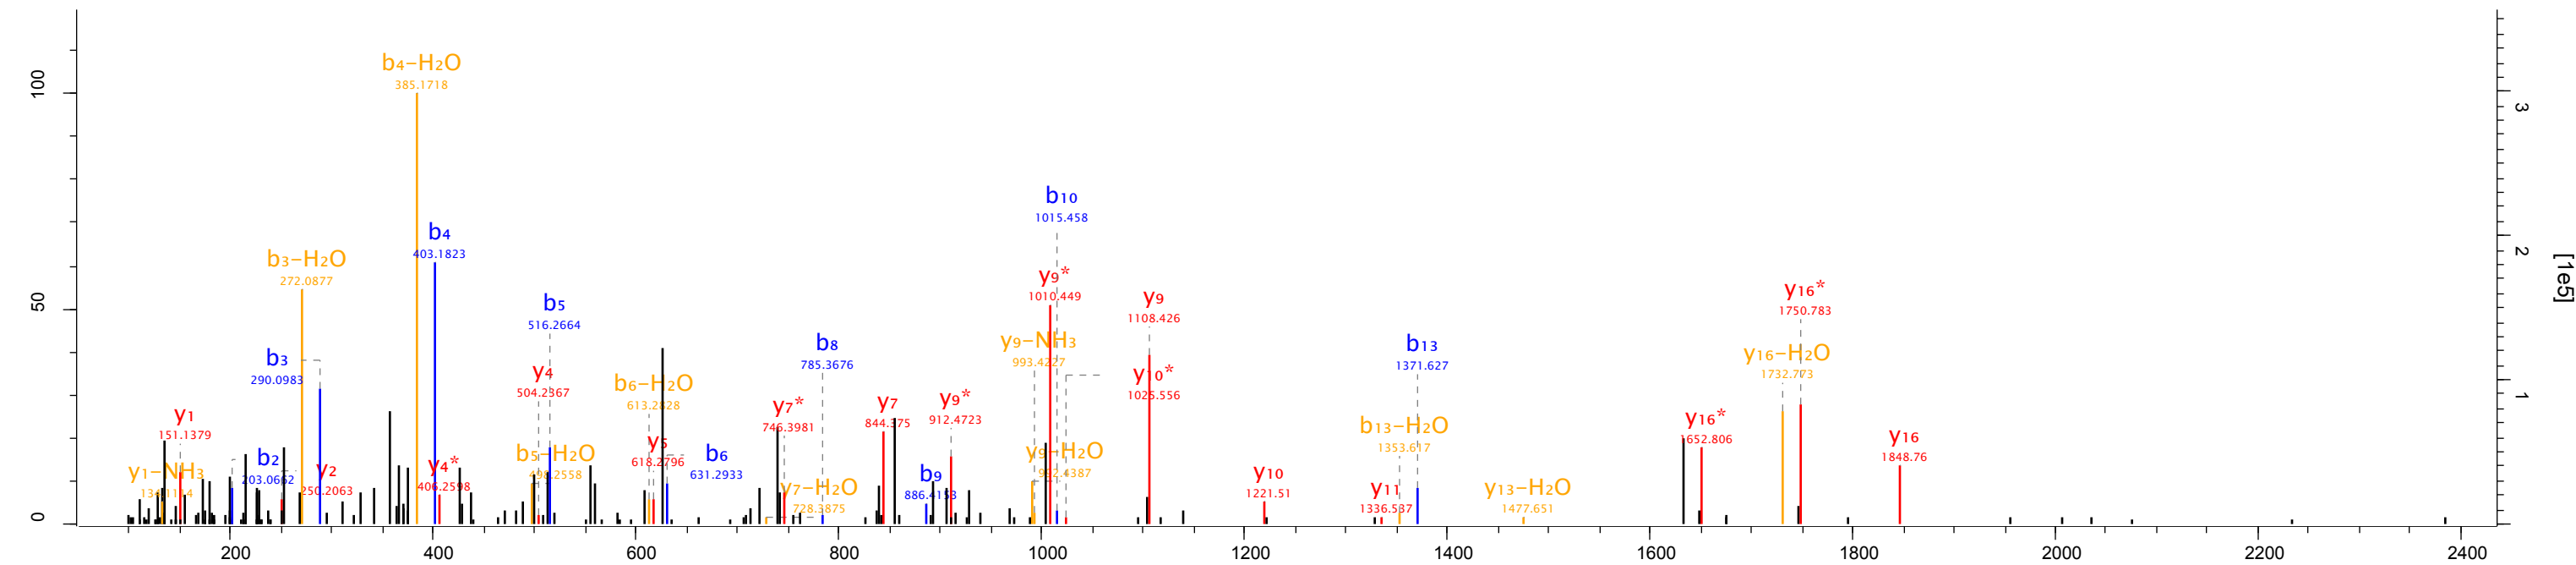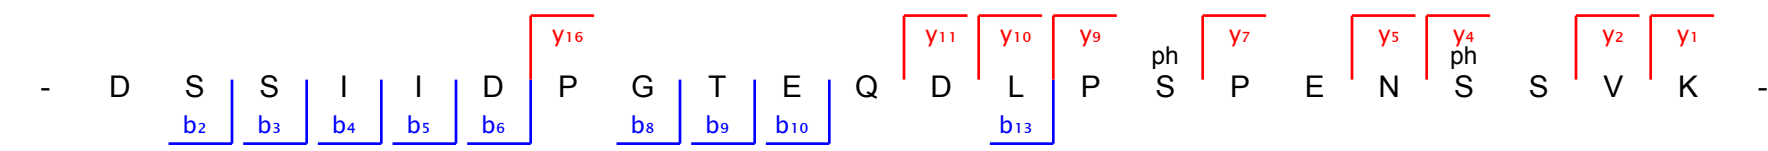



Raw file 20150814\_A375SR\_Phospho\_BR2\_02 Scan 19489 Method FTMS; HCD Score 109.44 m/z 1149.5 Gene names FXR2

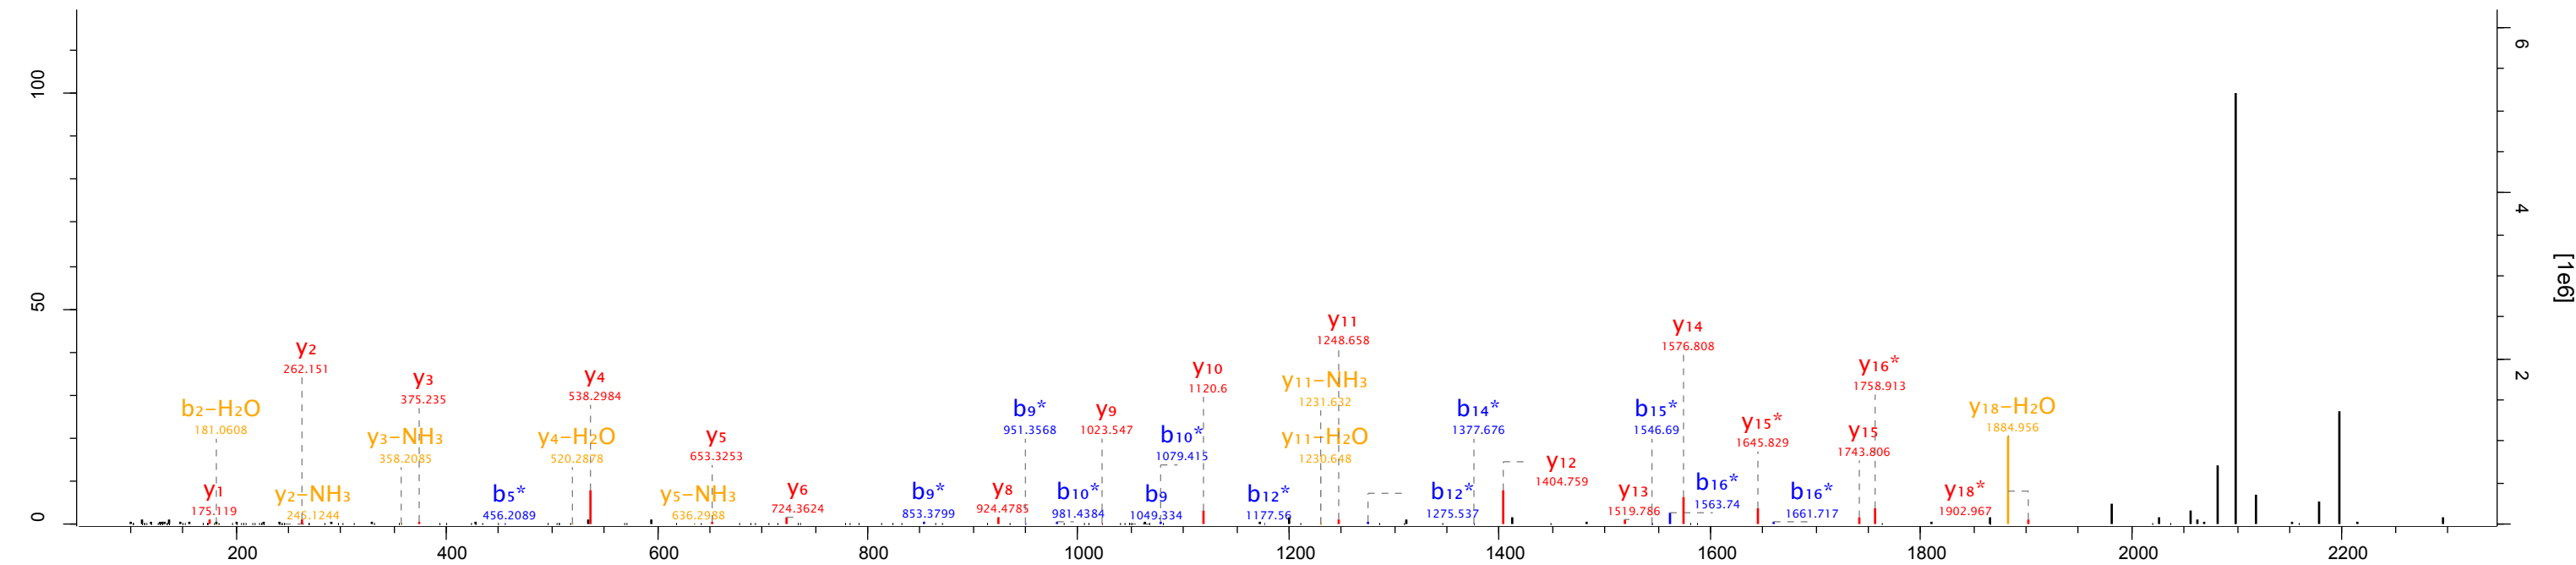

Sequence: - ph T D G S I S G D R Q P V T V A D Y I S R -

Fragmentation mapping (b and y ions):

- b<sub>5</sub>\*: I
- b<sub>9</sub>: R
- b<sub>10</sub>\*: Q
- b<sub>12</sub>\*: V
- b<sub>14</sub>\*: V
- b<sub>15</sub>\*: A
- b<sub>16</sub>\*: D
- y<sub>1</sub>: R
- y<sub>2</sub>: S
- y<sub>3</sub>: I
- y<sub>4</sub>: Y
- y<sub>5</sub>: D
- y<sub>6</sub>: A
- y<sub>8</sub>: T
- y<sub>9</sub>: V
- y<sub>10</sub>: P
- y<sub>11</sub>: Q
- y<sub>12</sub>: R
- y<sub>13</sub>: D
- y<sub>14</sub>: G
- y<sub>15</sub>: S
- y<sub>16</sub>\*: I
- y<sub>18</sub>\*: G

Raw file: 20150814\_A375SR\_Phospho\_BR2\_02  
 Scan: 21219 Method: FTMS; HCD Score: 186.4 m/z: 970.96 Gene names: GIGYF2

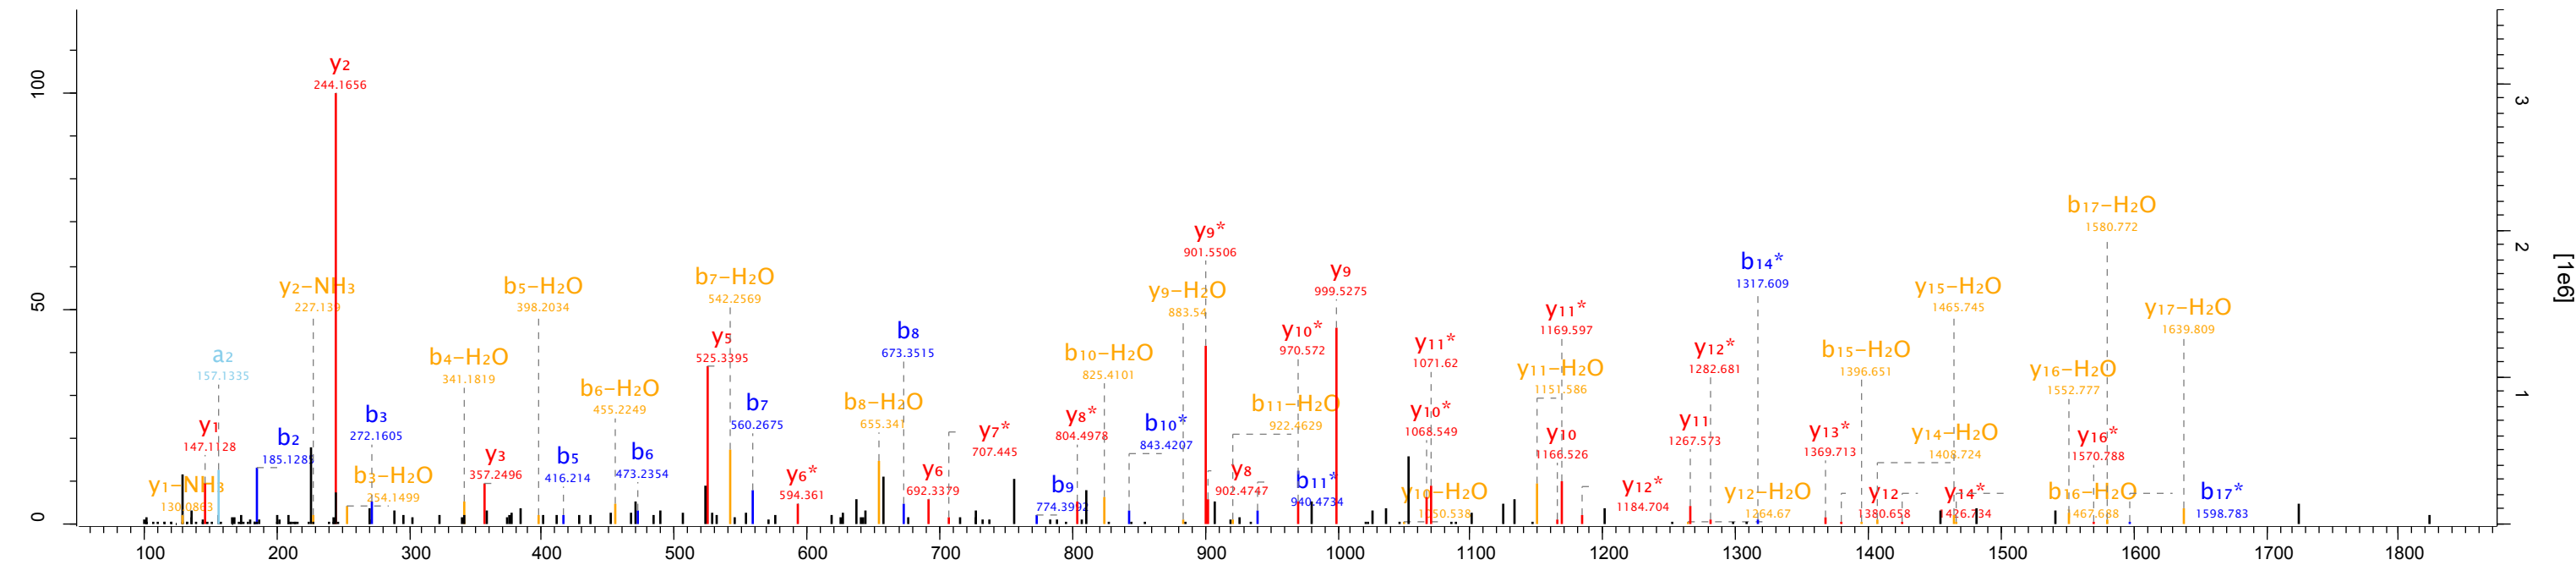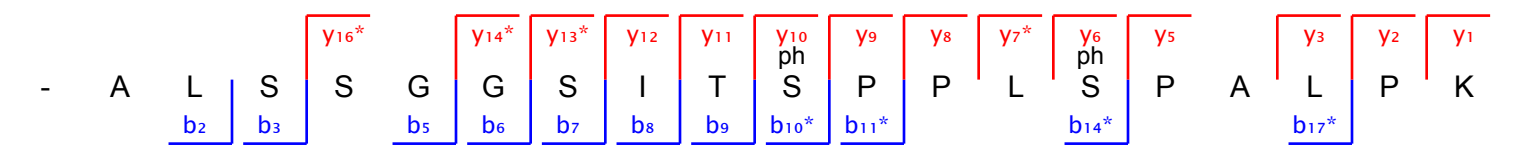

Raw file: 20150814\_A375SR\_Phospho\_BR2\_02  
 Scan: 3399 Method: FTMS; HCD Score: 139.49 m/z: 652.26 Gene names: CHD4

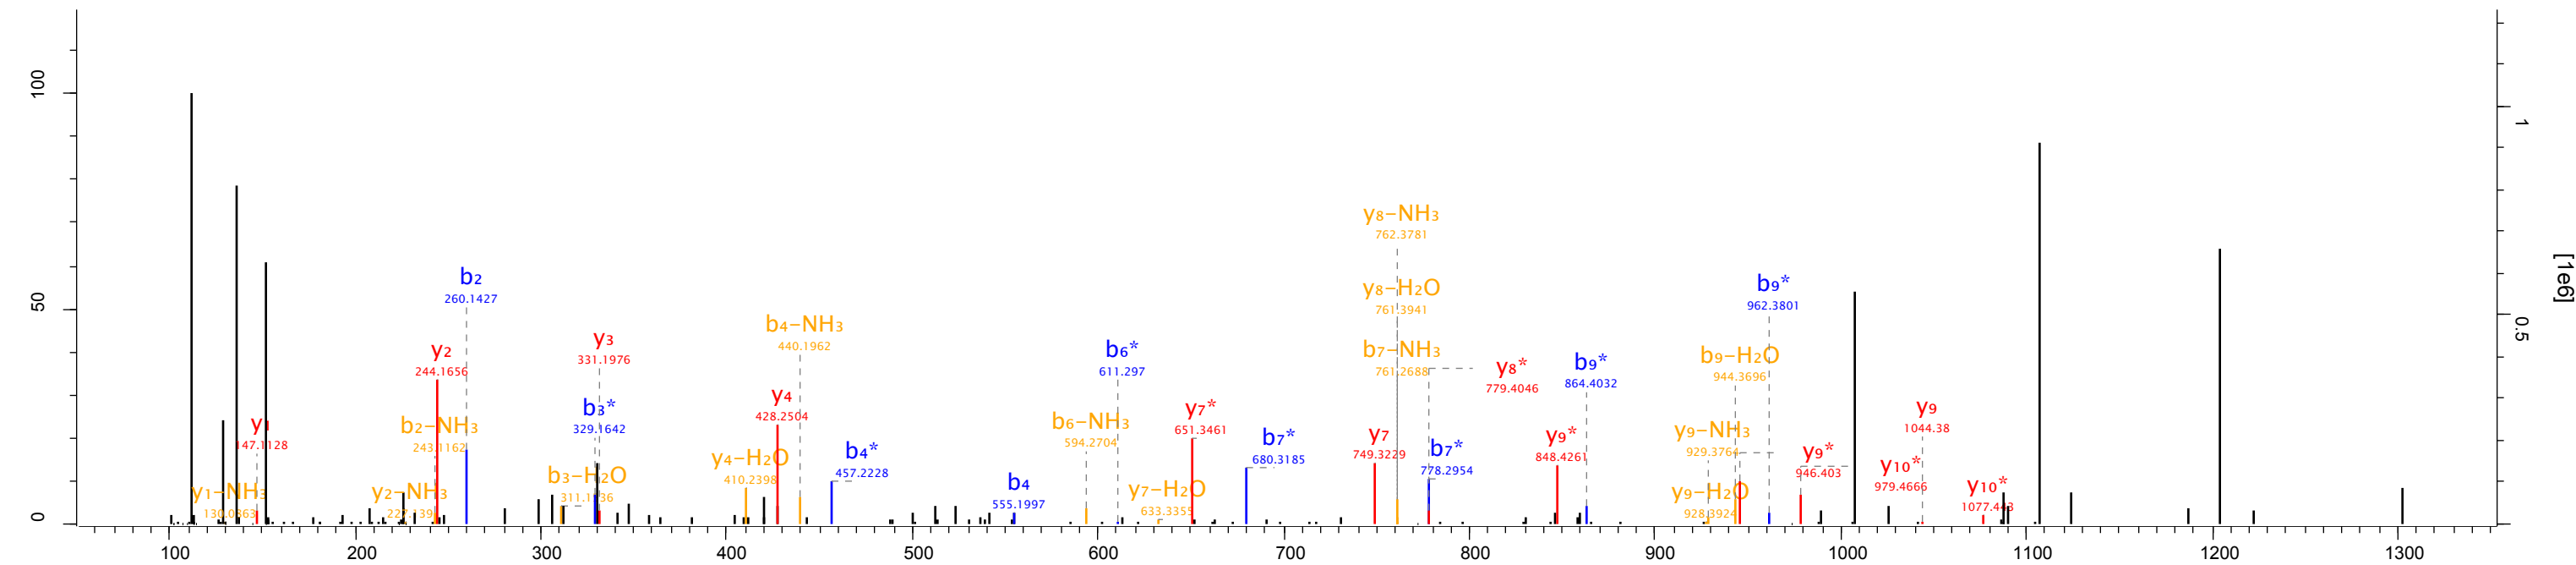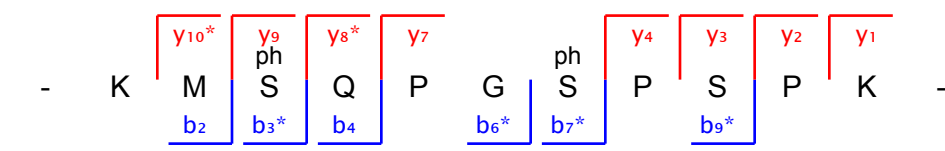

Raw file 20150814\_A375SR\_Phospho\_BR2\_02 Scan 3569 Method FTMS; HCD Score 46.46 m/z 875.76 Gene names C11orf57

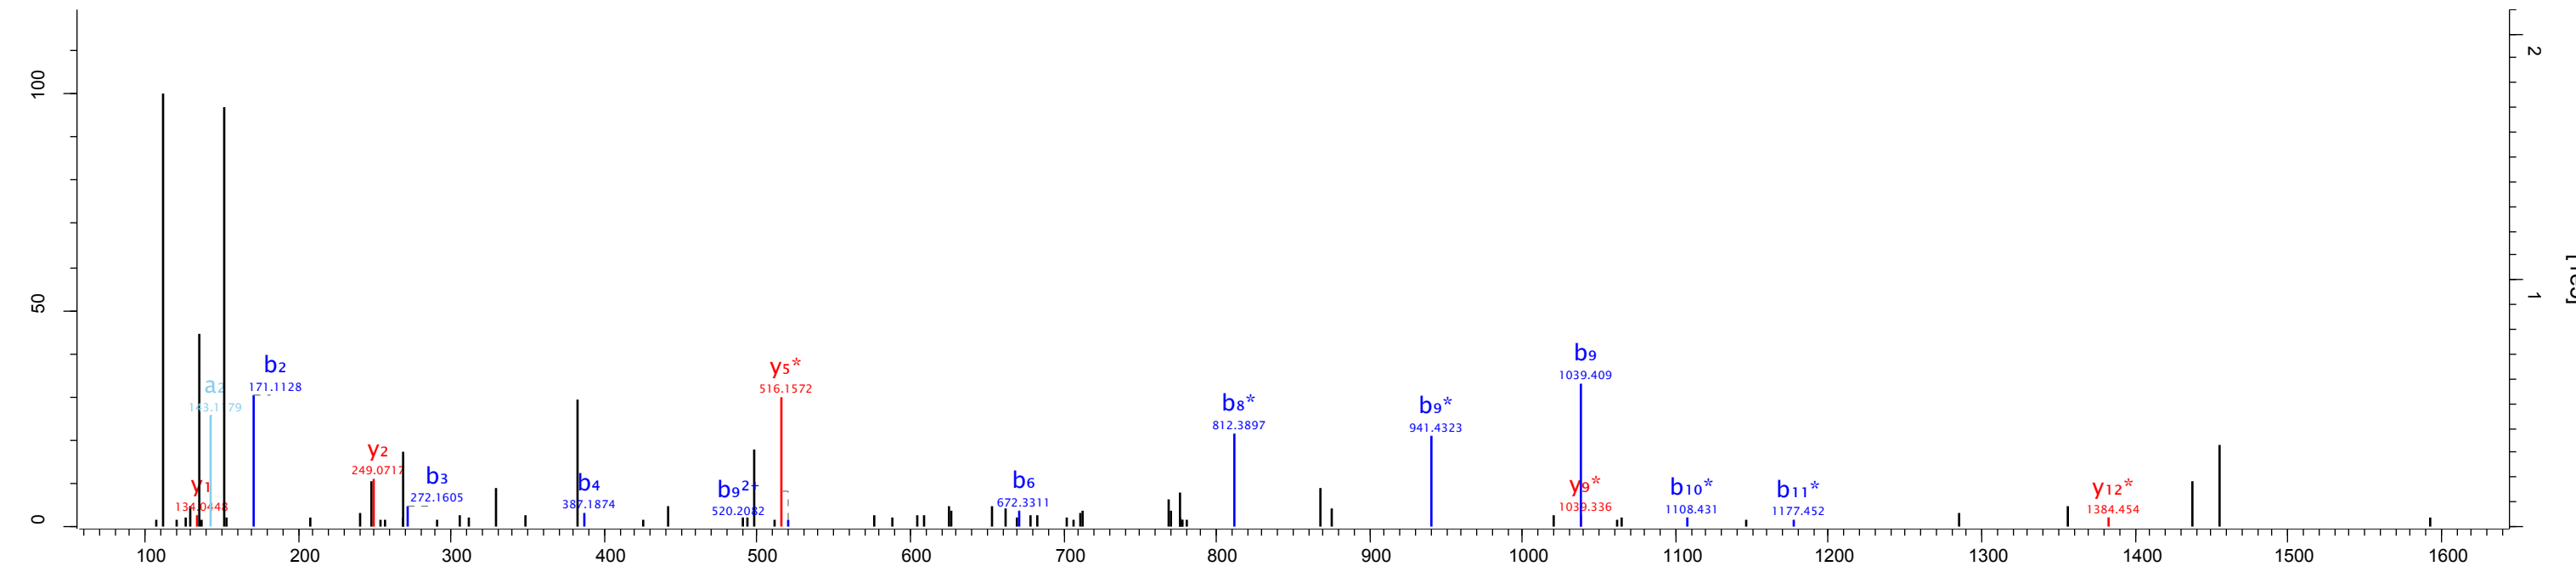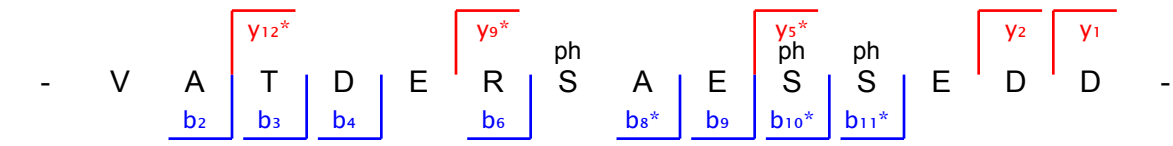

Raw file: 20150814\_A375SR\_Phospho\_BR2\_02  
 Scan: 4019 Method: FTMS; HCD Score: 56.91 m/z: 646.76 Gene names: VCIPI1

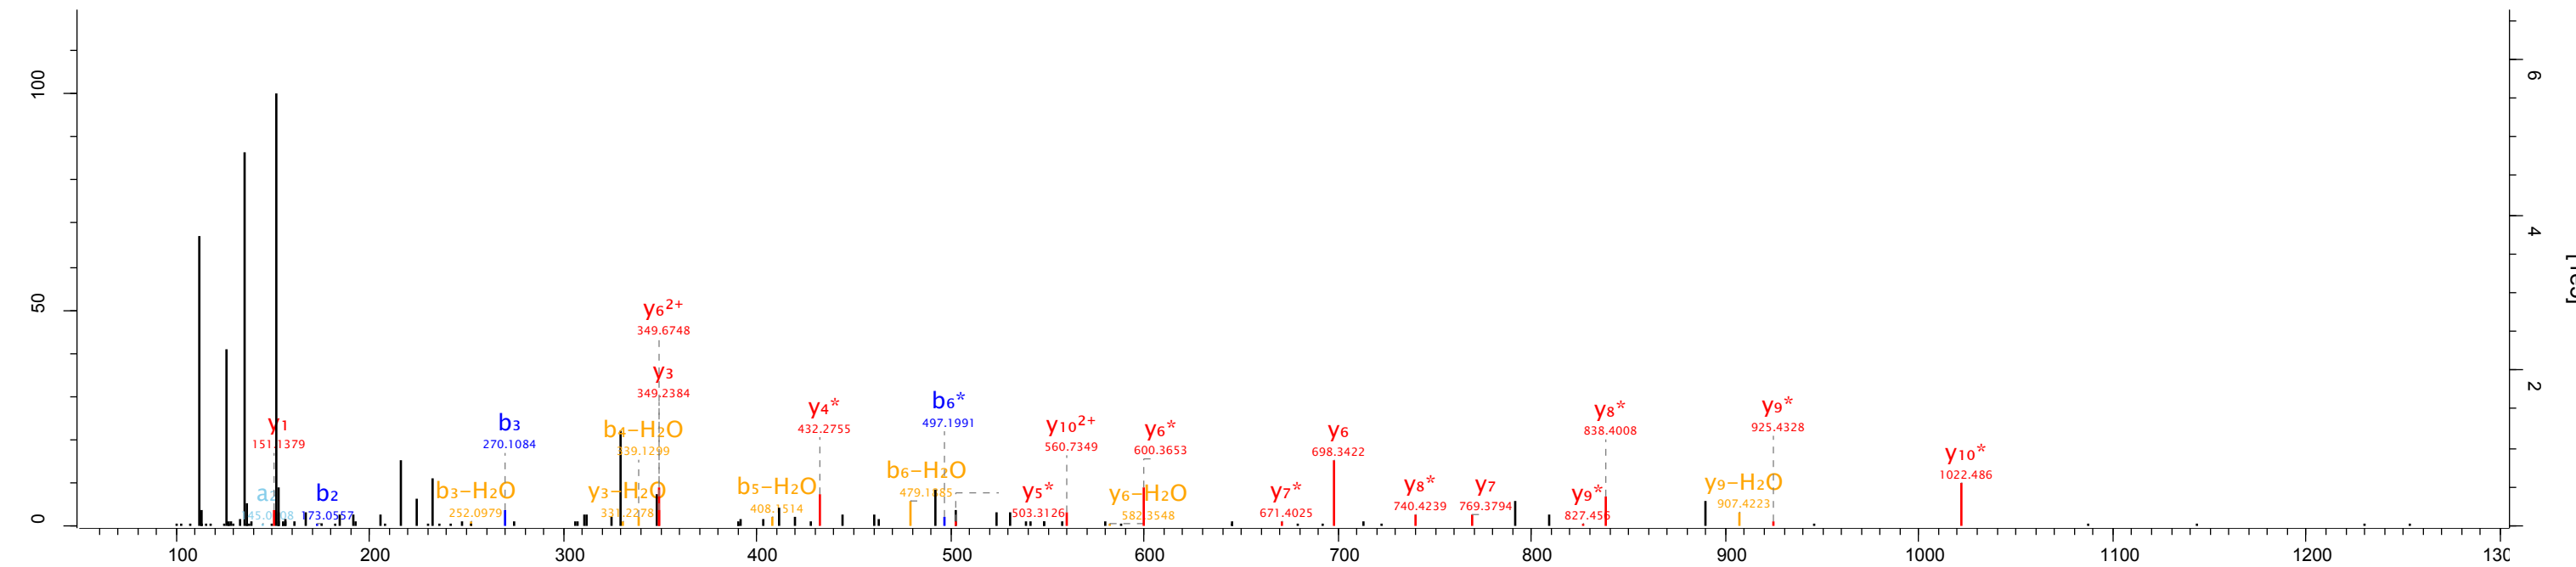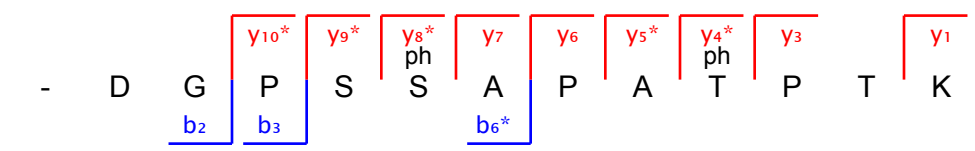



Raw file: 20150814\_A375SR\_Phospho\_BR2\_02  
 Scan: 5269 Method: FTMS; HCD Score: 178.06 m/z: 695.23 Gene names: SLBP

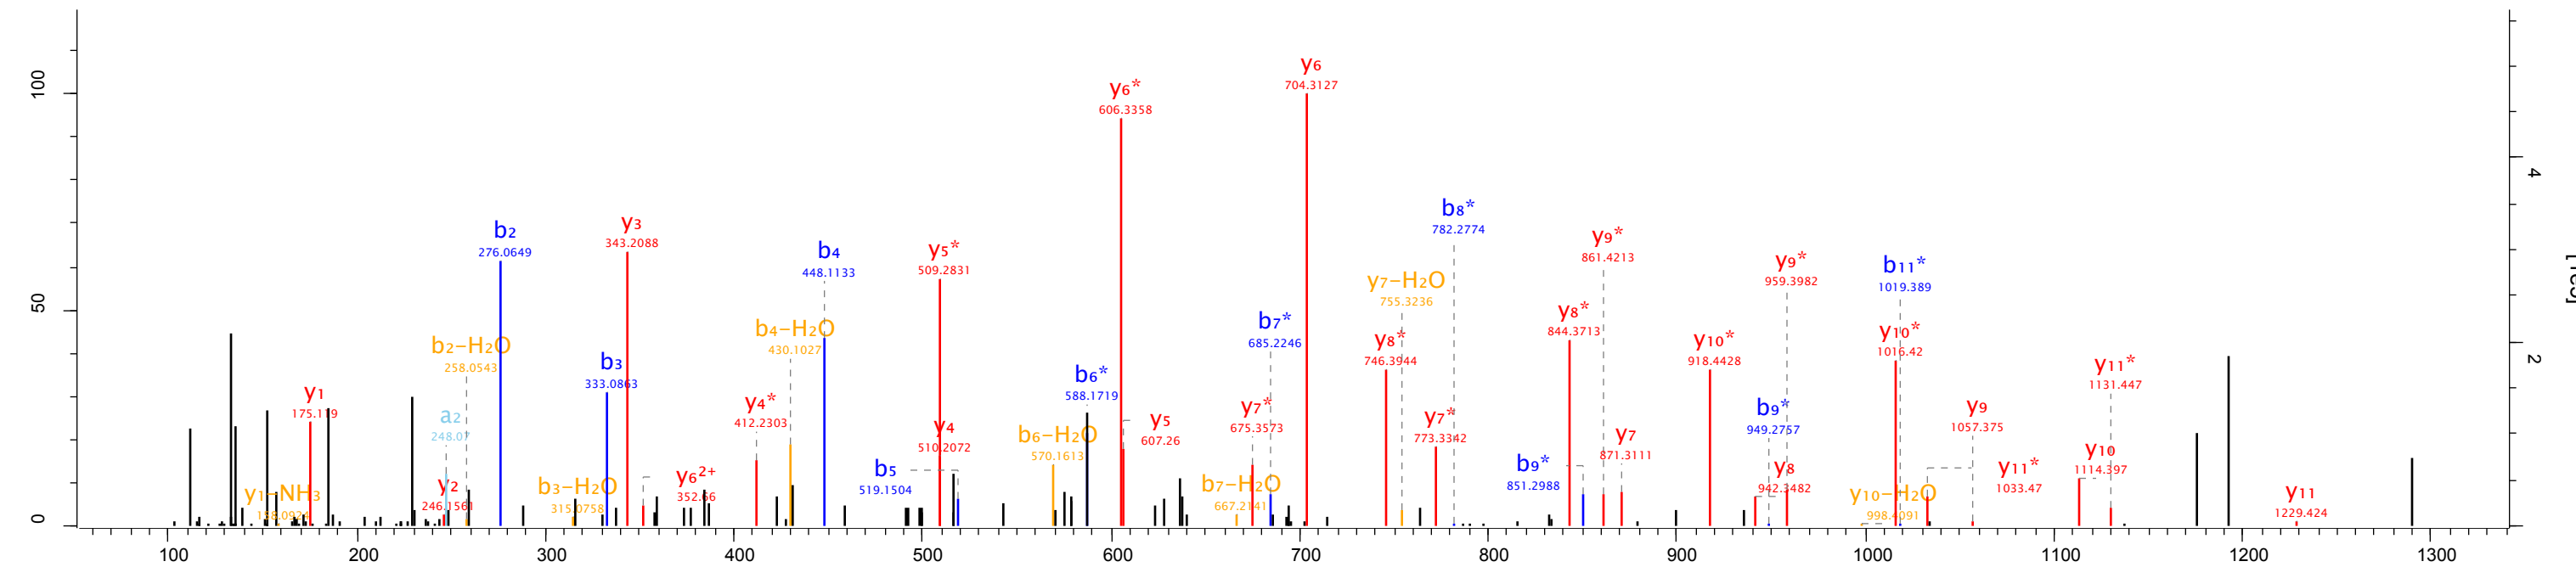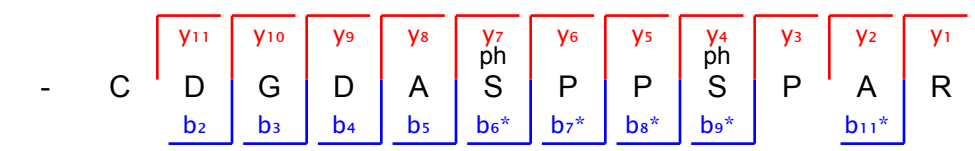

Raw file: 20150814\_A375SR\_Phospho\_BR2\_02  
 Scan: 5449 Method: FTMS; HCD Score: 128.85 m/z: 630.2 Gene names: SRRM2

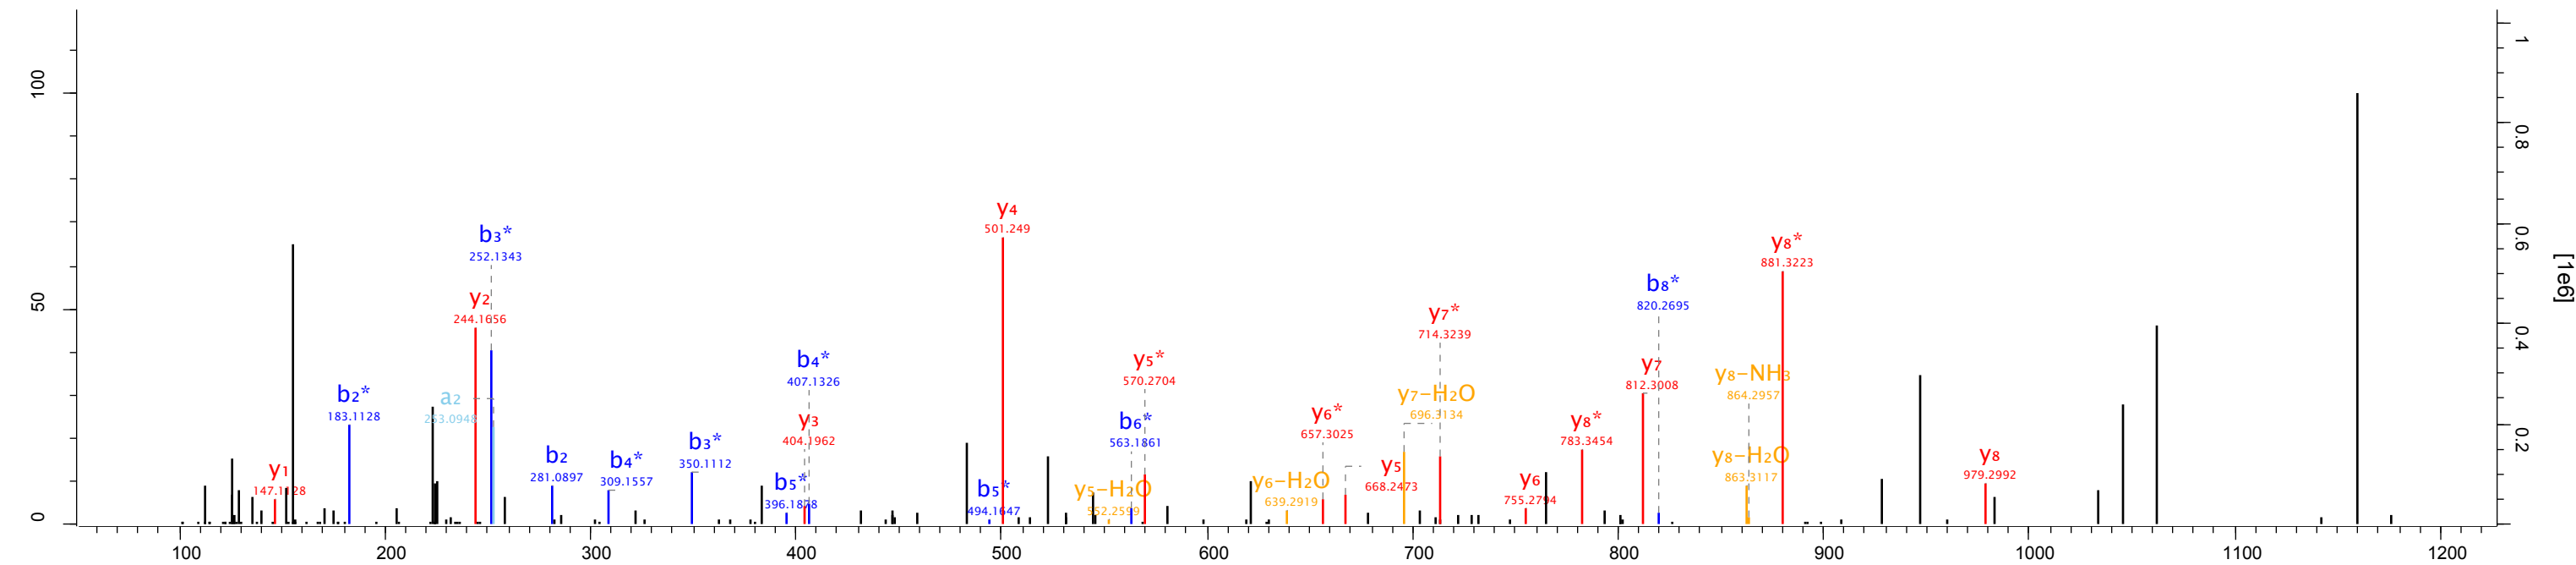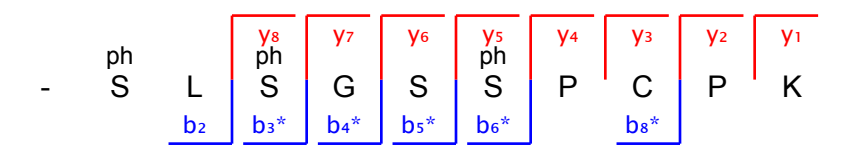

Raw file  
 20150814\_A375SR\_Phospho\_BR2\_02  
 Scan 6229 Method FTMS; HCD Score 82.01 m/z 1051.86 Gene names SNAPC5

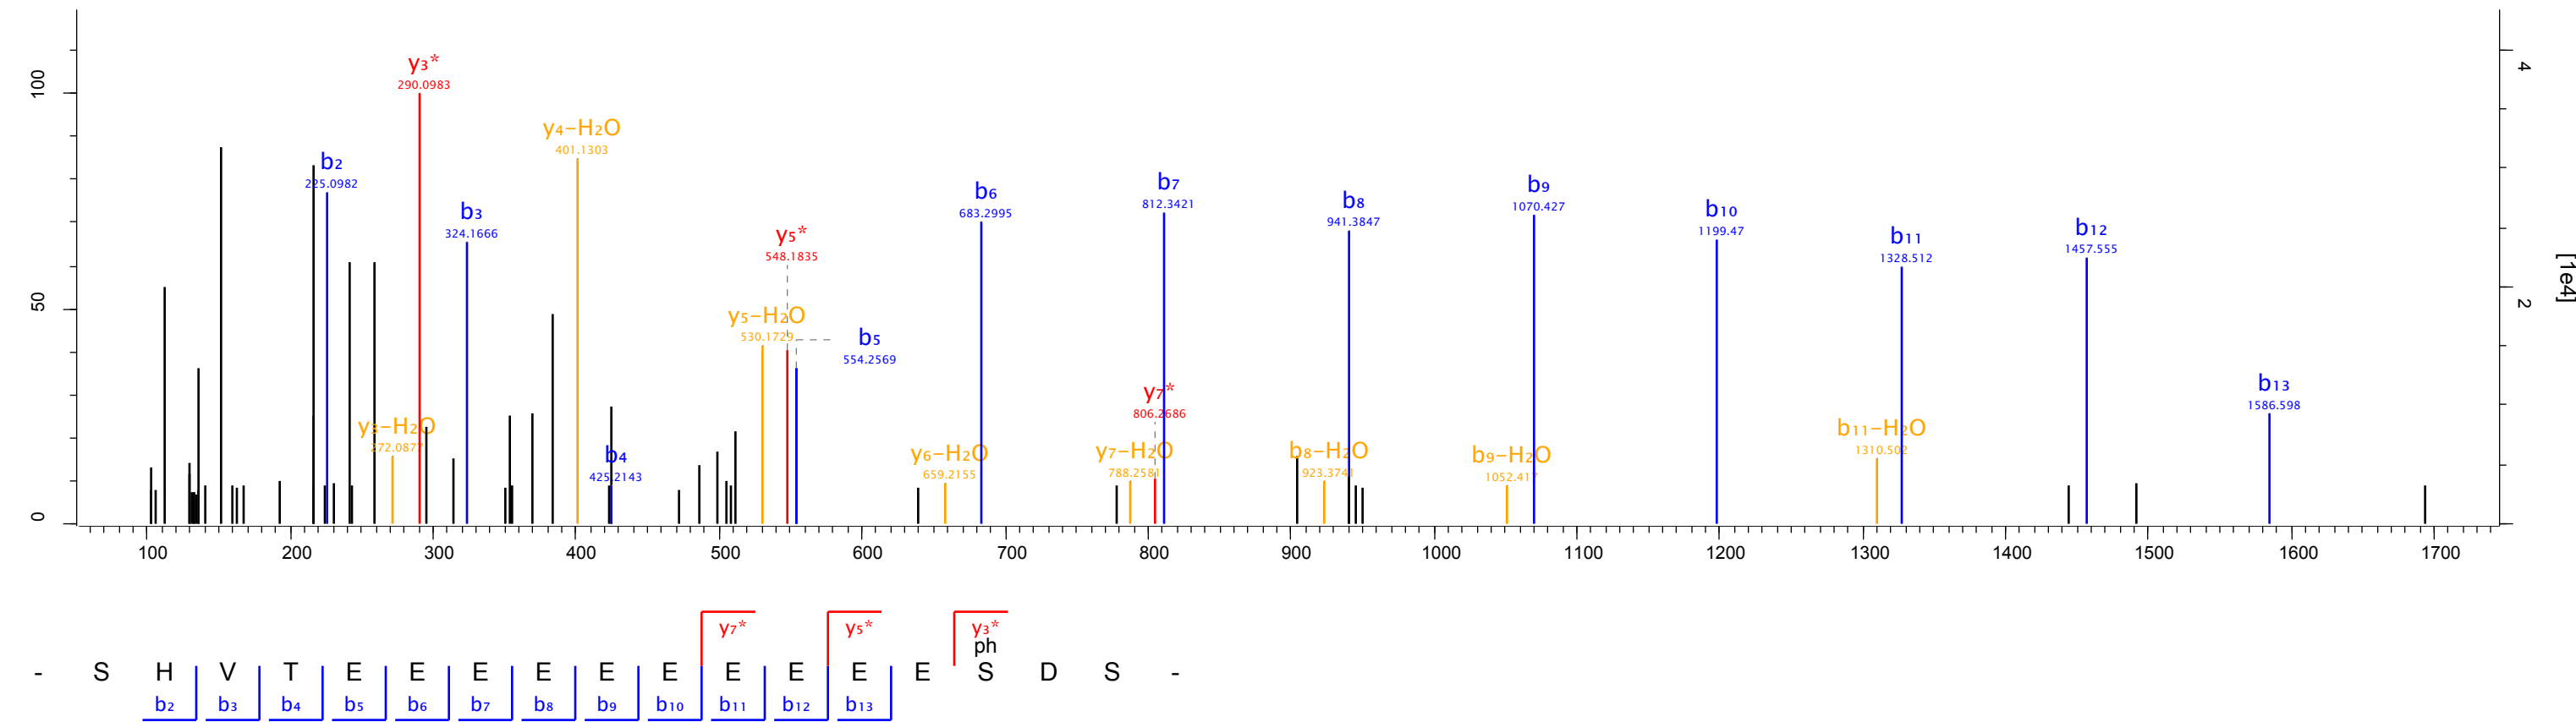

Raw file: 20150814\_A375SR\_Phospho\_BR2\_02  
 Scan: 6679 Method: FTMS; HCD Score: 234.57 m/z: 932.87 Gene names: SRSF2

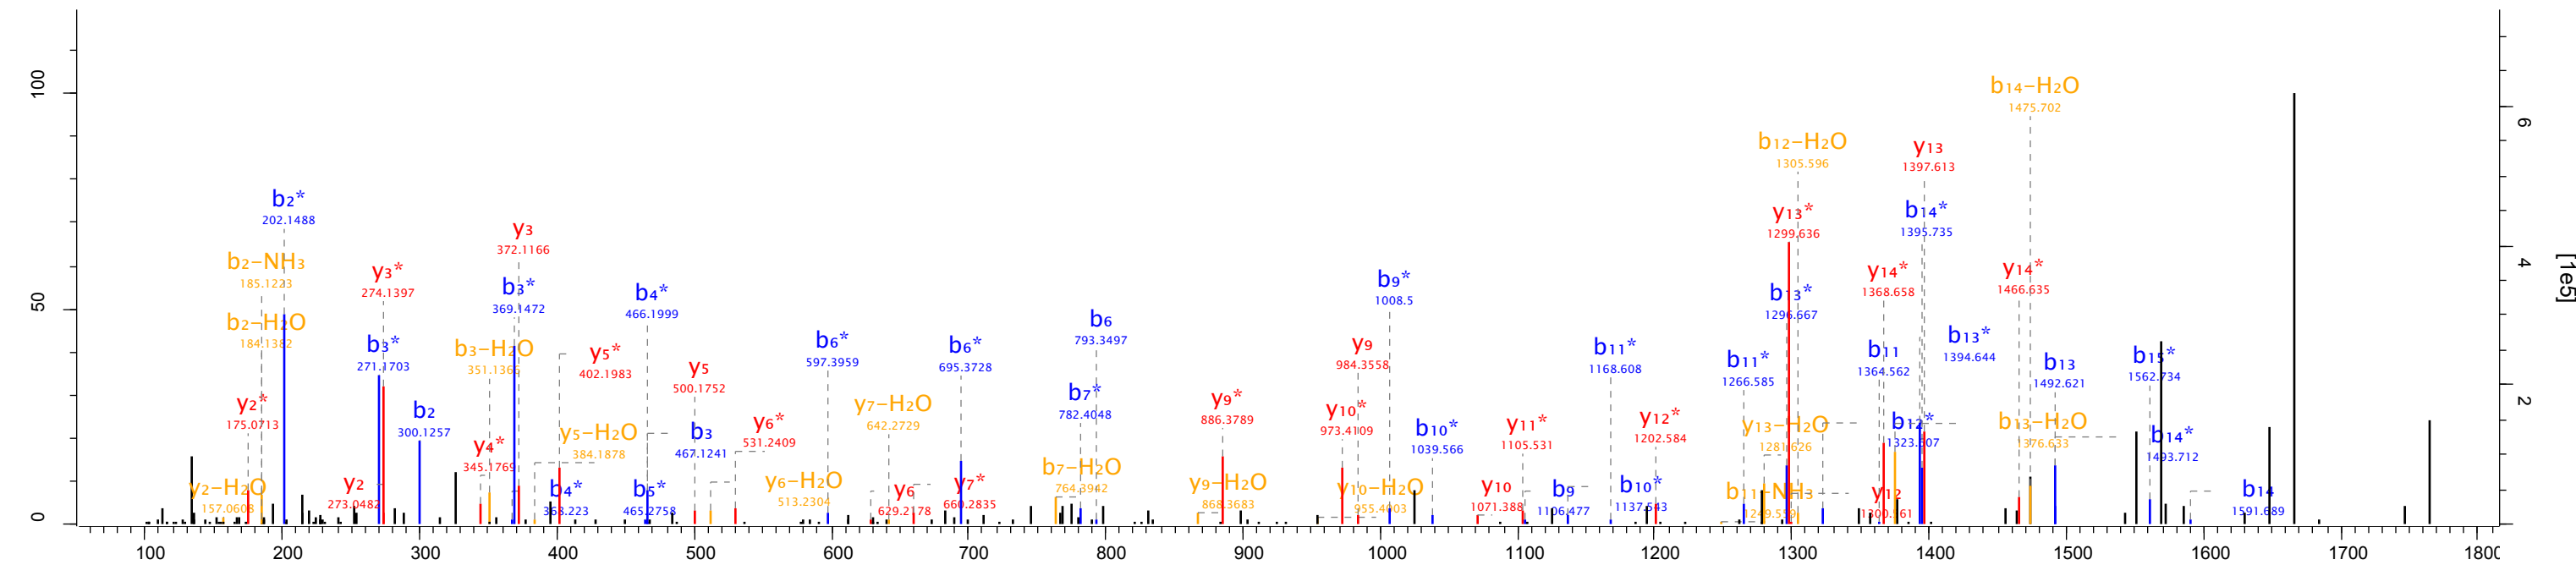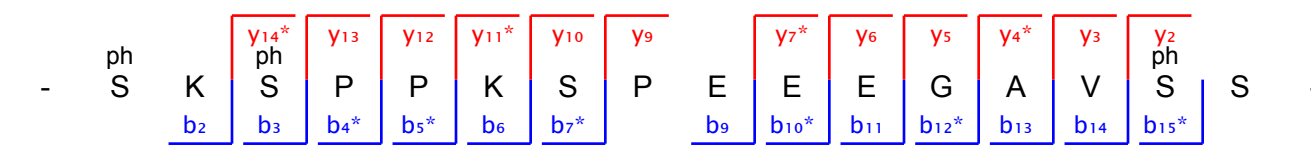

Raw file 20150814\_A375SR\_Phospho\_BR2\_02 Scan 6989 Method FTMS; HCD Score 84.62 m/z 709.77 Gene names VIM

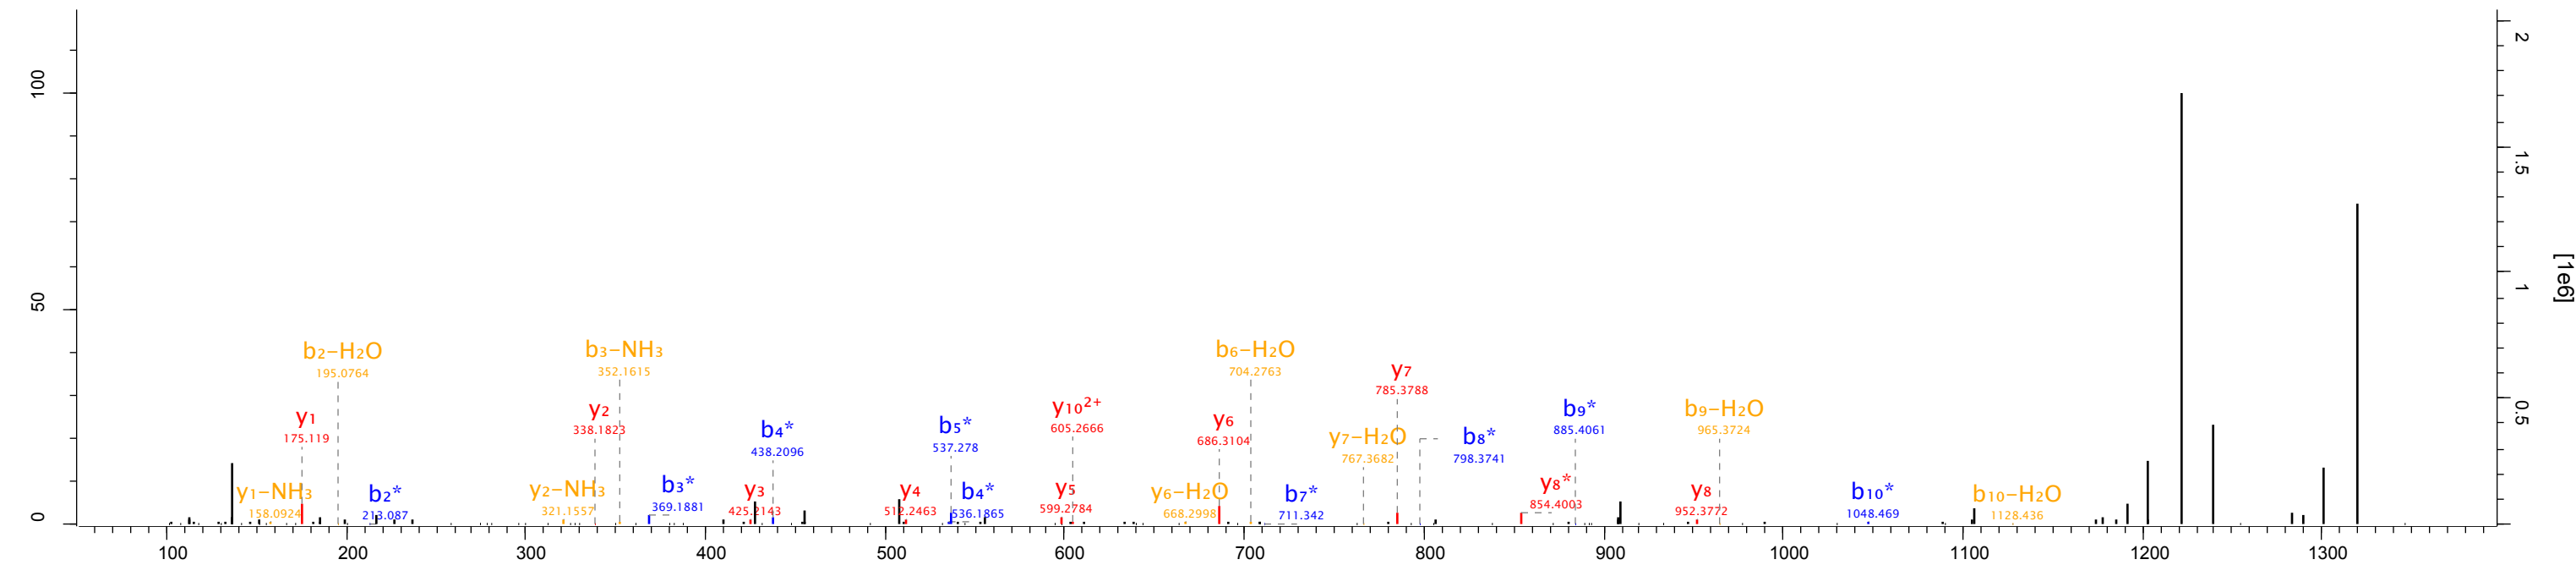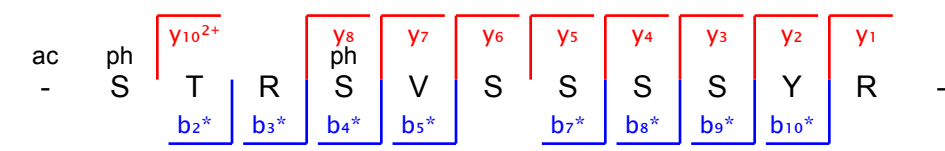

Raw file: 20150814\_A375SR\_Phospho\_BR2\_02  
 Scan: 7089 Method: FTMS; HCD Score: 135.23 m/z: 787.81 Gene names: DNAJC6

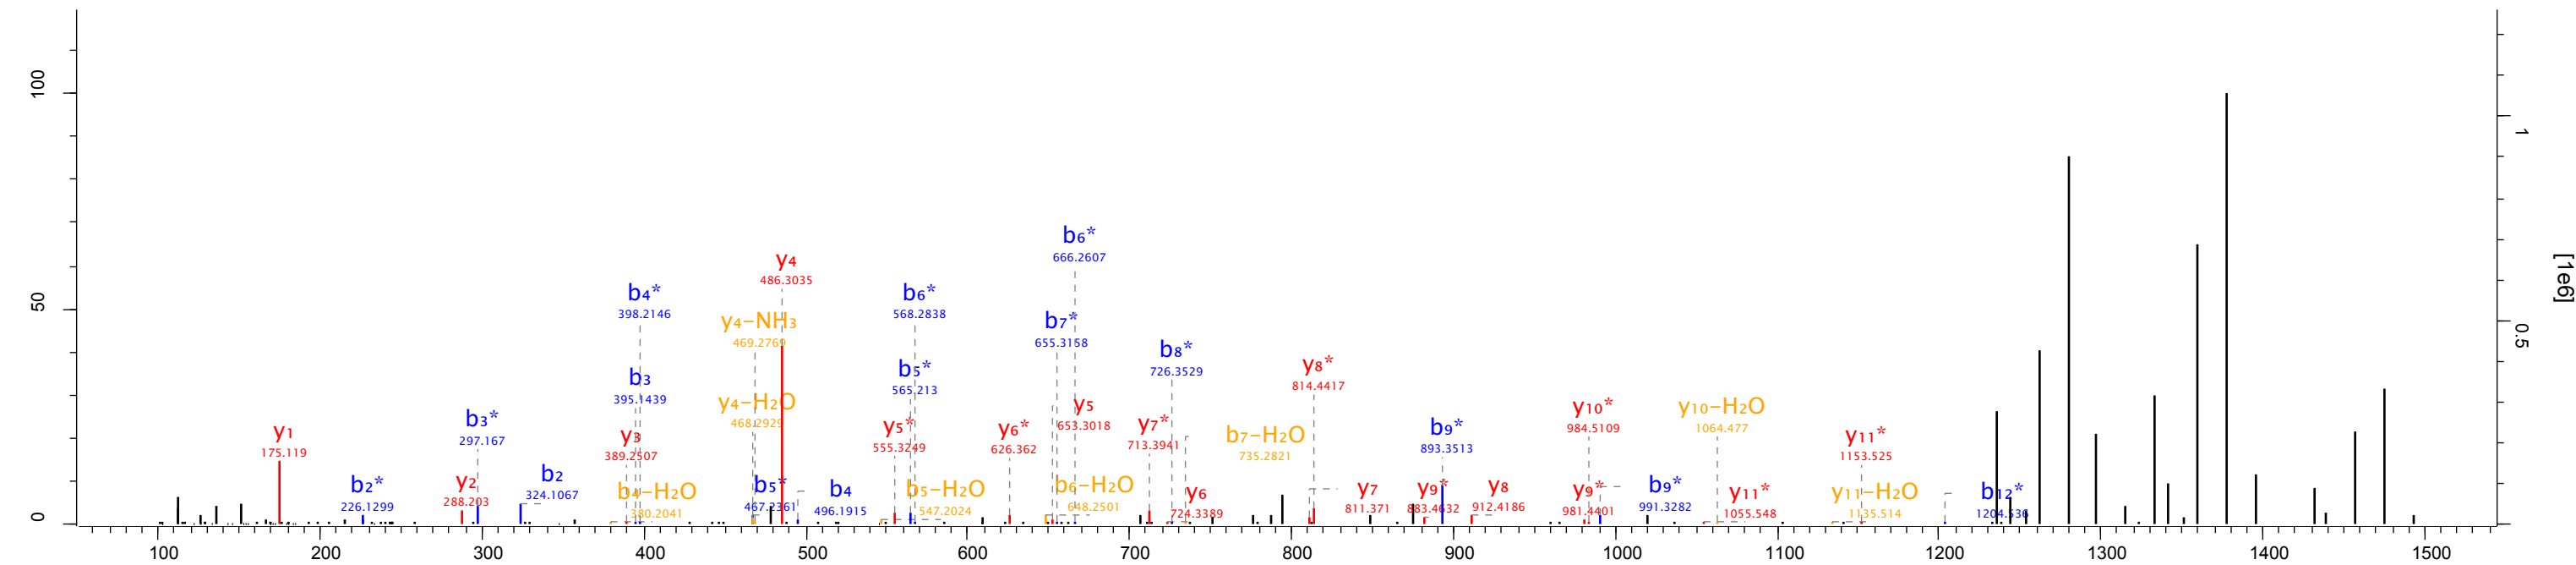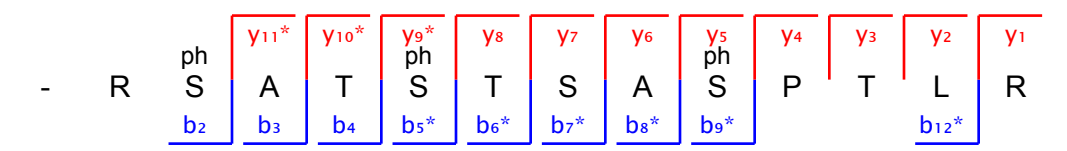

Raw file 20150814\_A375SR\_Phospho\_BR2\_02 Scan 7219 Method FTMS; HCD Score 91.18 m/z 804.3 Gene names FNBP4

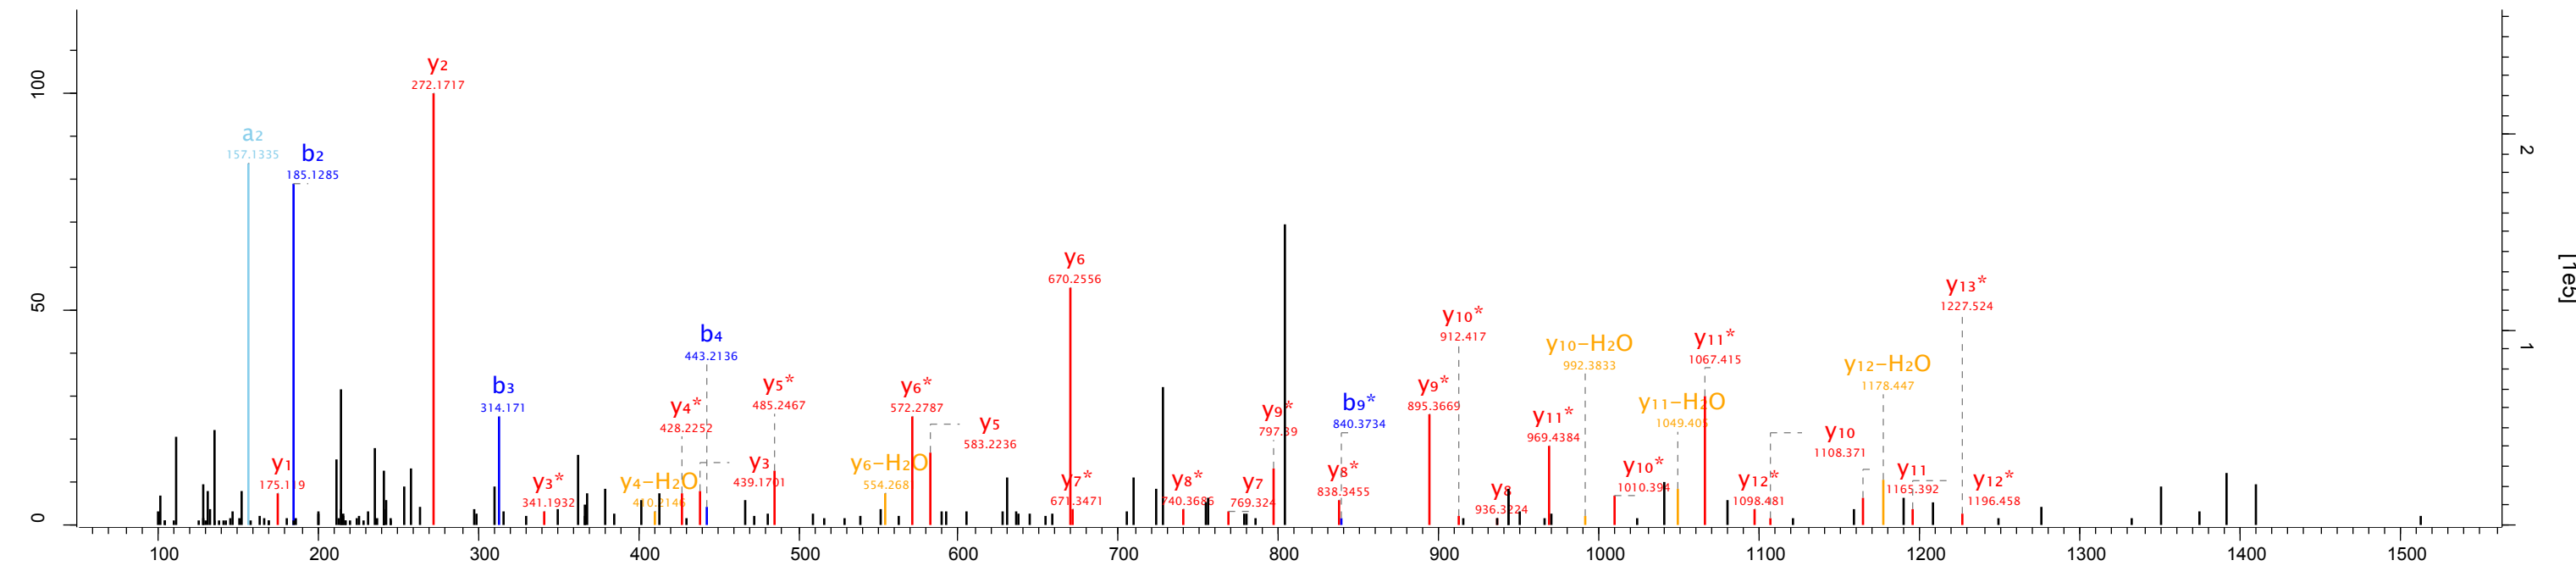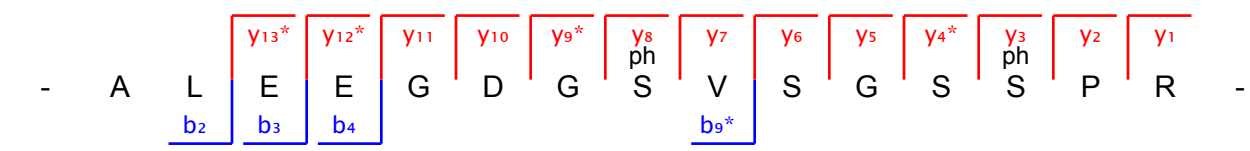

Raw file: 20150814\_A375SR\_Phospho\_BR2\_02  
 Scan: 7239 Method: FTMS; HCD Score: 45.92 m/z: 772.28 Gene names: PAWR

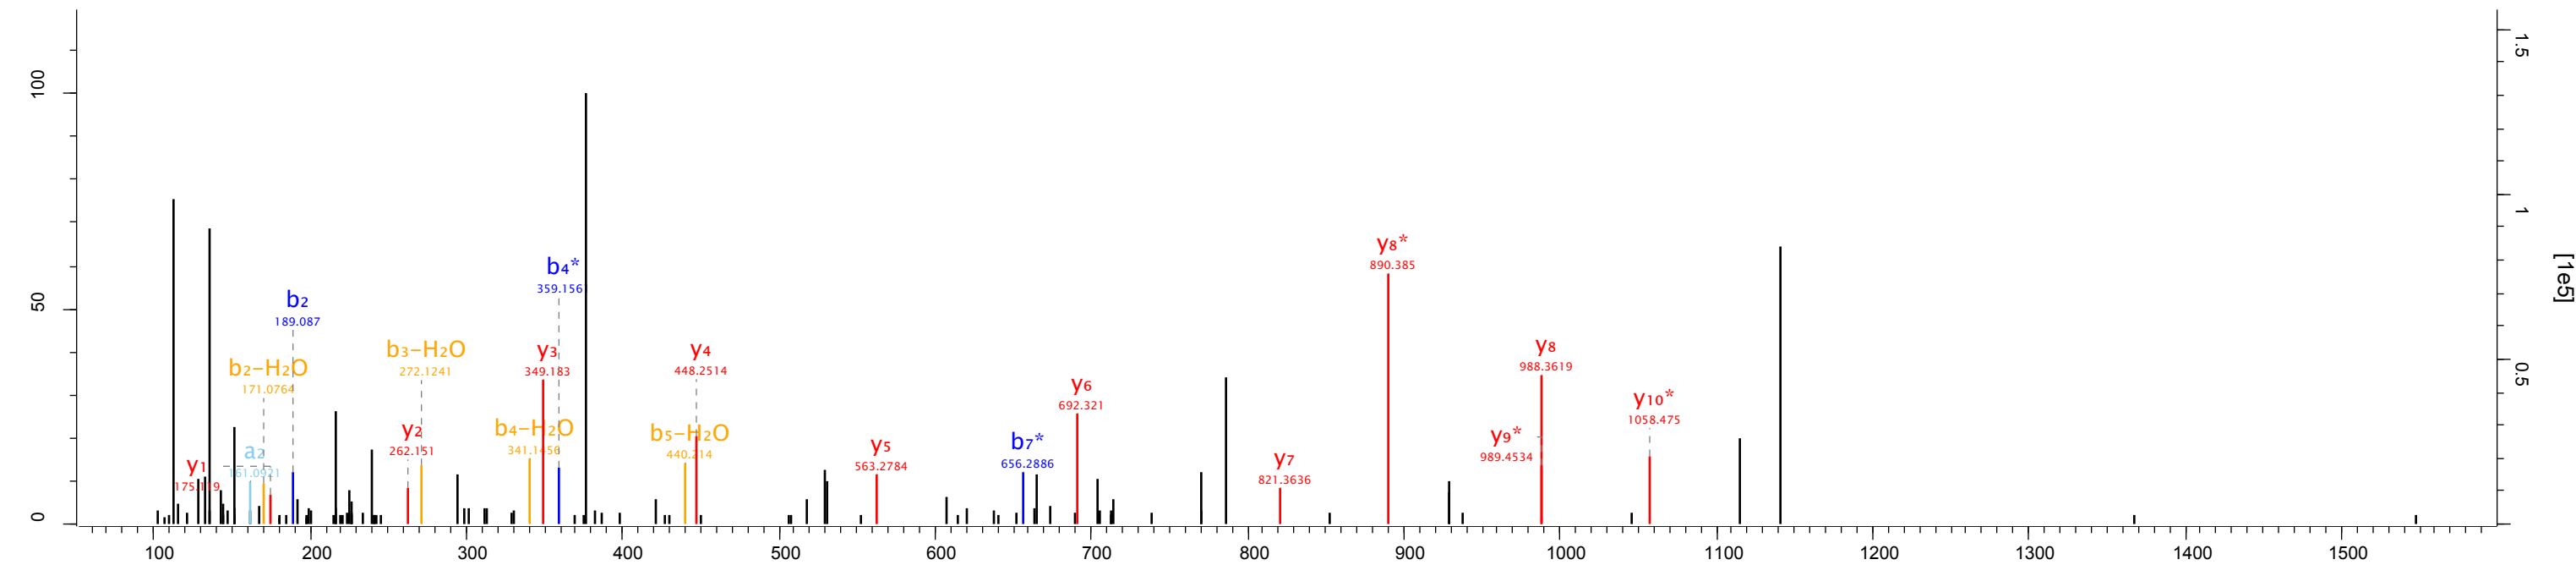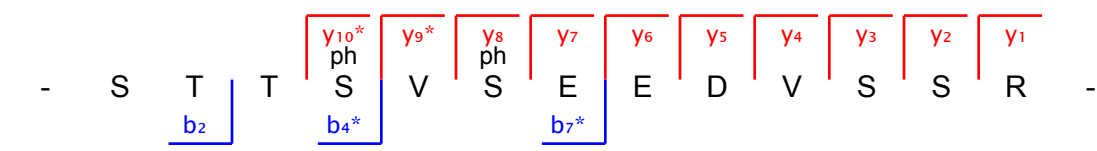



Raw file: 20150814\_A375SR\_Phospho\_BR2\_02  
 Scan: 7469 Method: FTMS; HCD Score: 84.3 m/z: 589.27 Gene names: E2F8

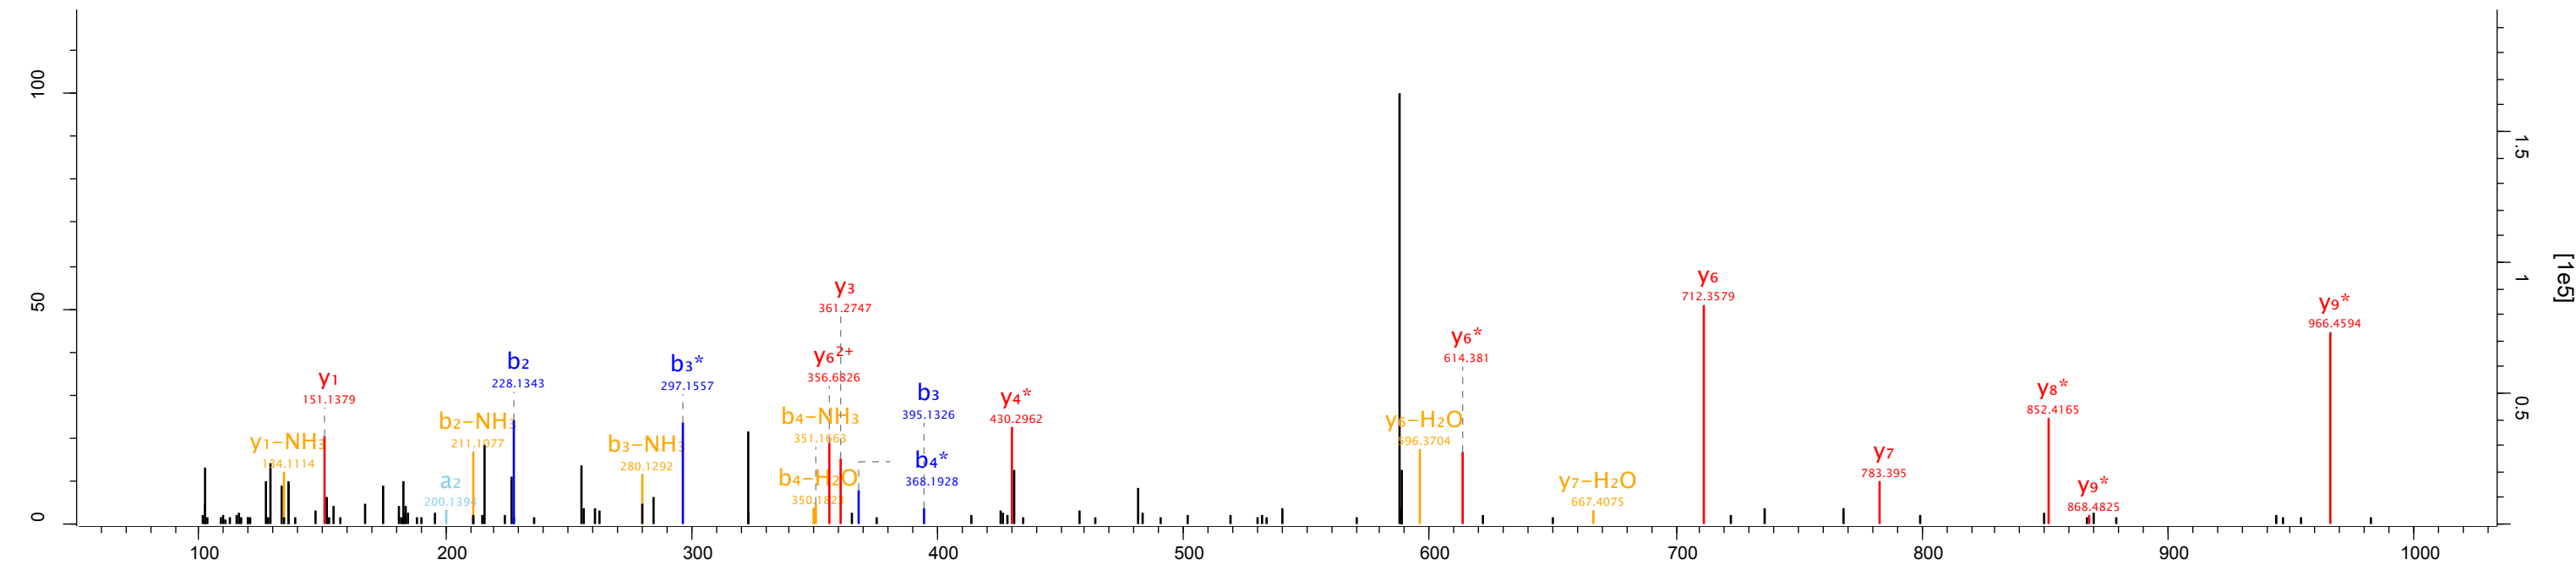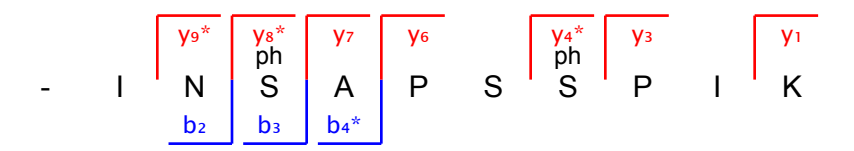

Raw file: 20150814\_A375SR\_Phospho\_BR2\_02  
 Scan: 7529 Method: FTMS; HCD Score: 65.3 m/z: 683.78 Gene names: NFIX

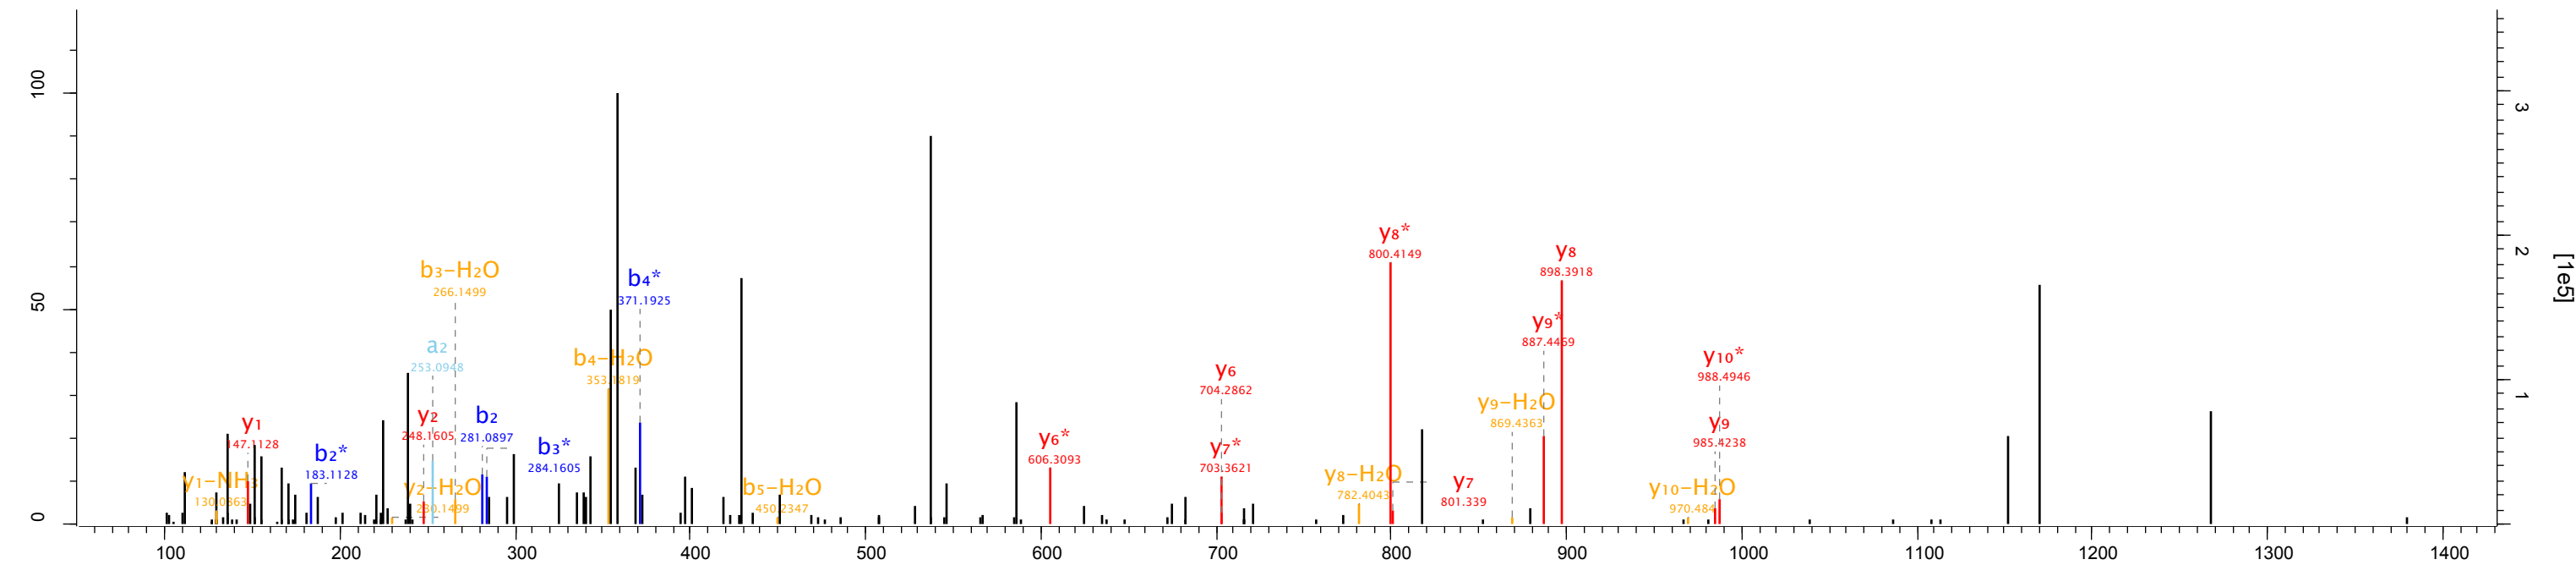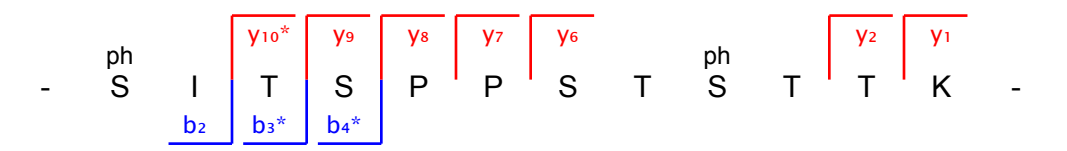

Raw file: 20150814\_A375SR\_Phospho\_BR2\_02  
 Scan: 7599 Method: FTMS; HCD Score: 58.17 m/z: 890.01 Gene names: JADE2

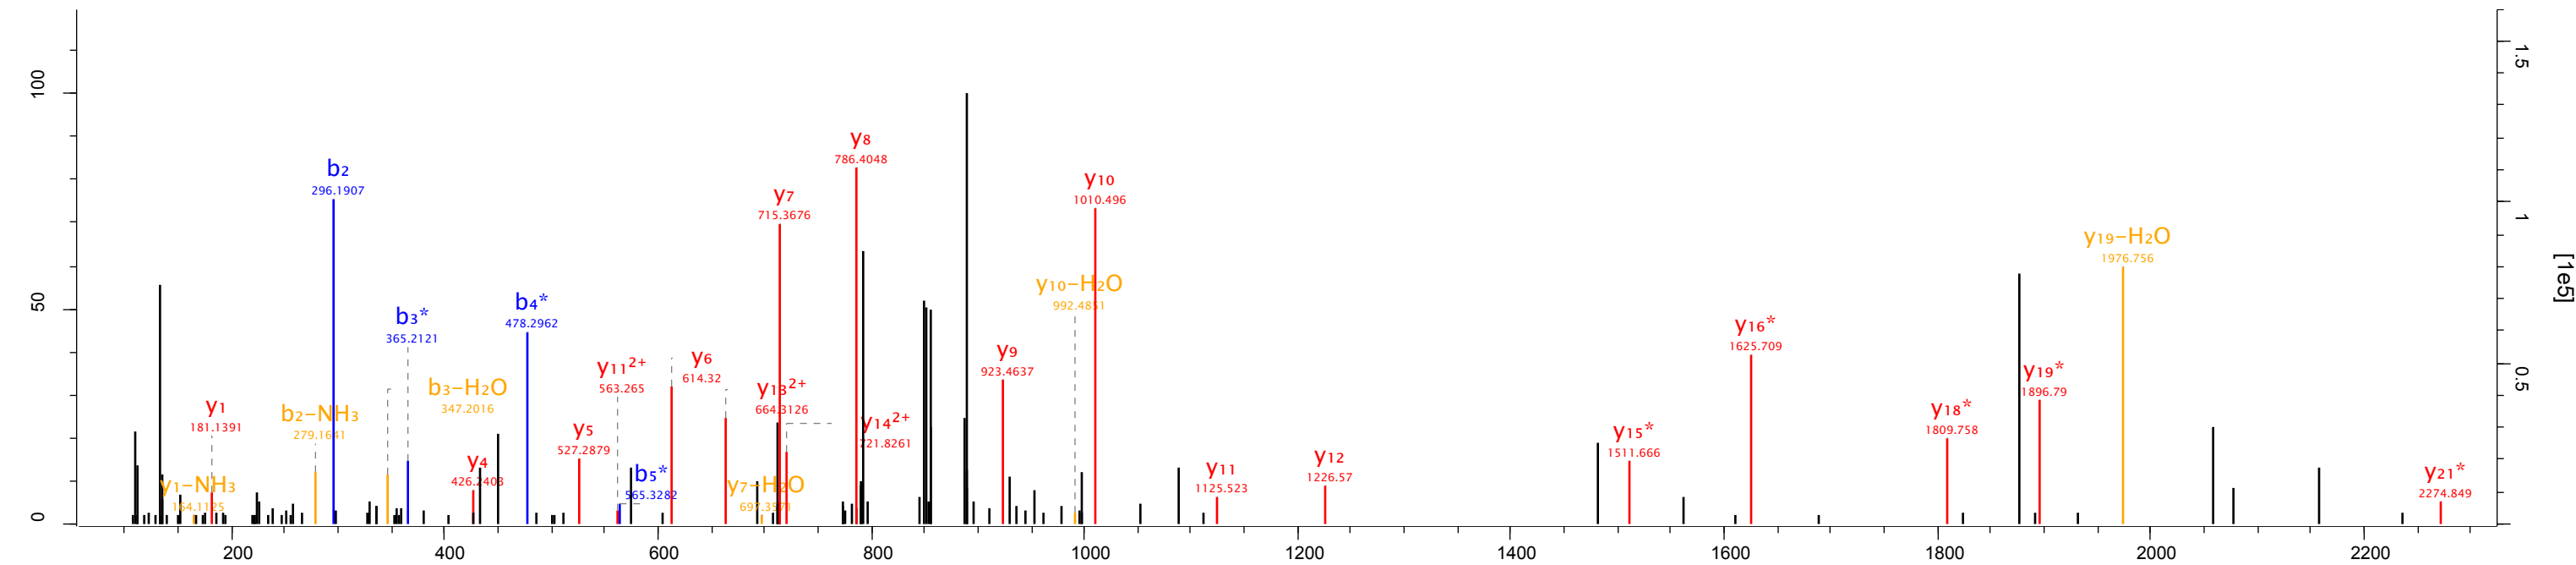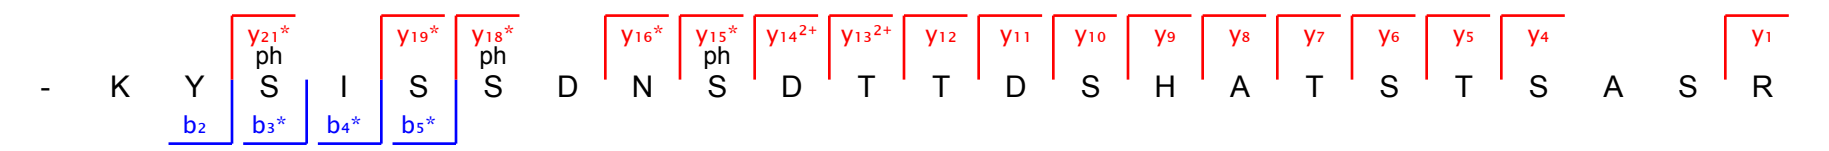

Raw file: 20150814\_A375SR\_Phospho\_BR2\_02  
 Scan: 7839 Method: FTMS; HCD Score: 179.75 m/z: 834.81 Gene names: IRF2BP2

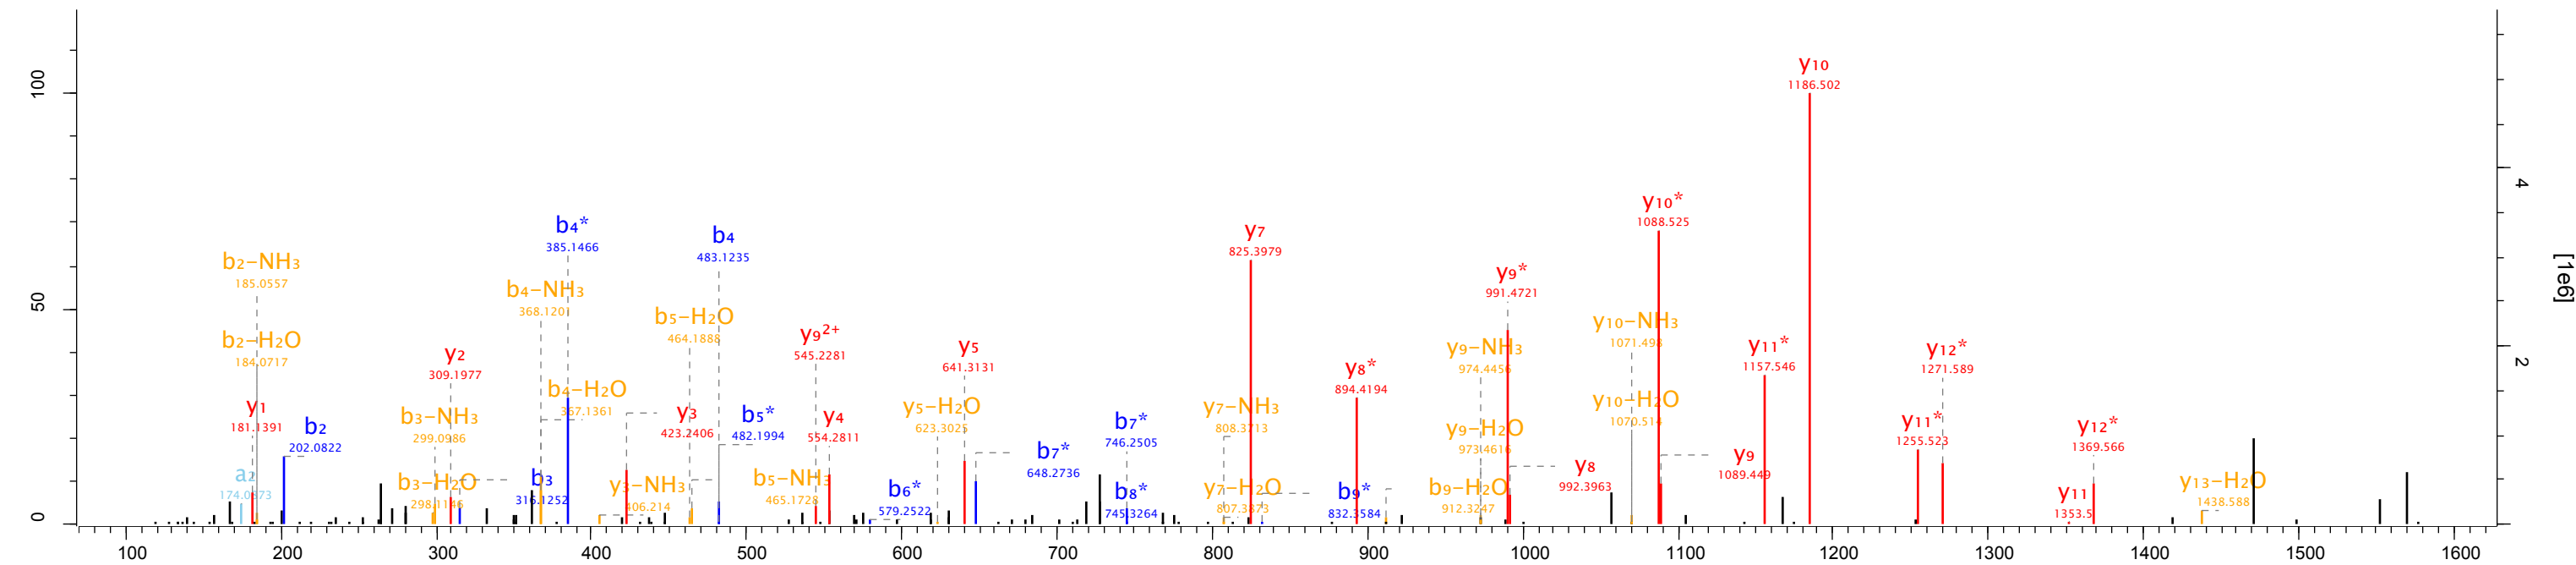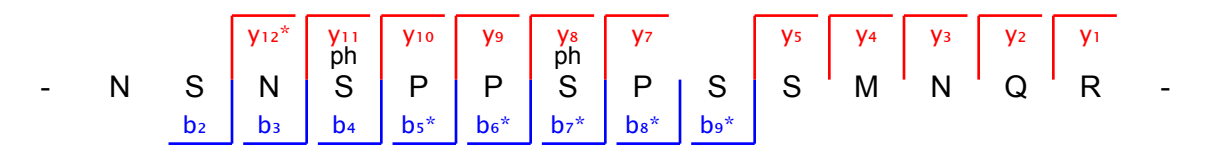

Raw file: 20150814\_A375SR\_Phospho\_BR2\_02  
 Scan: 8209 Method: FTMS; HCD Score: 144.08 m/z: 727.75 Gene names: ZMYM4

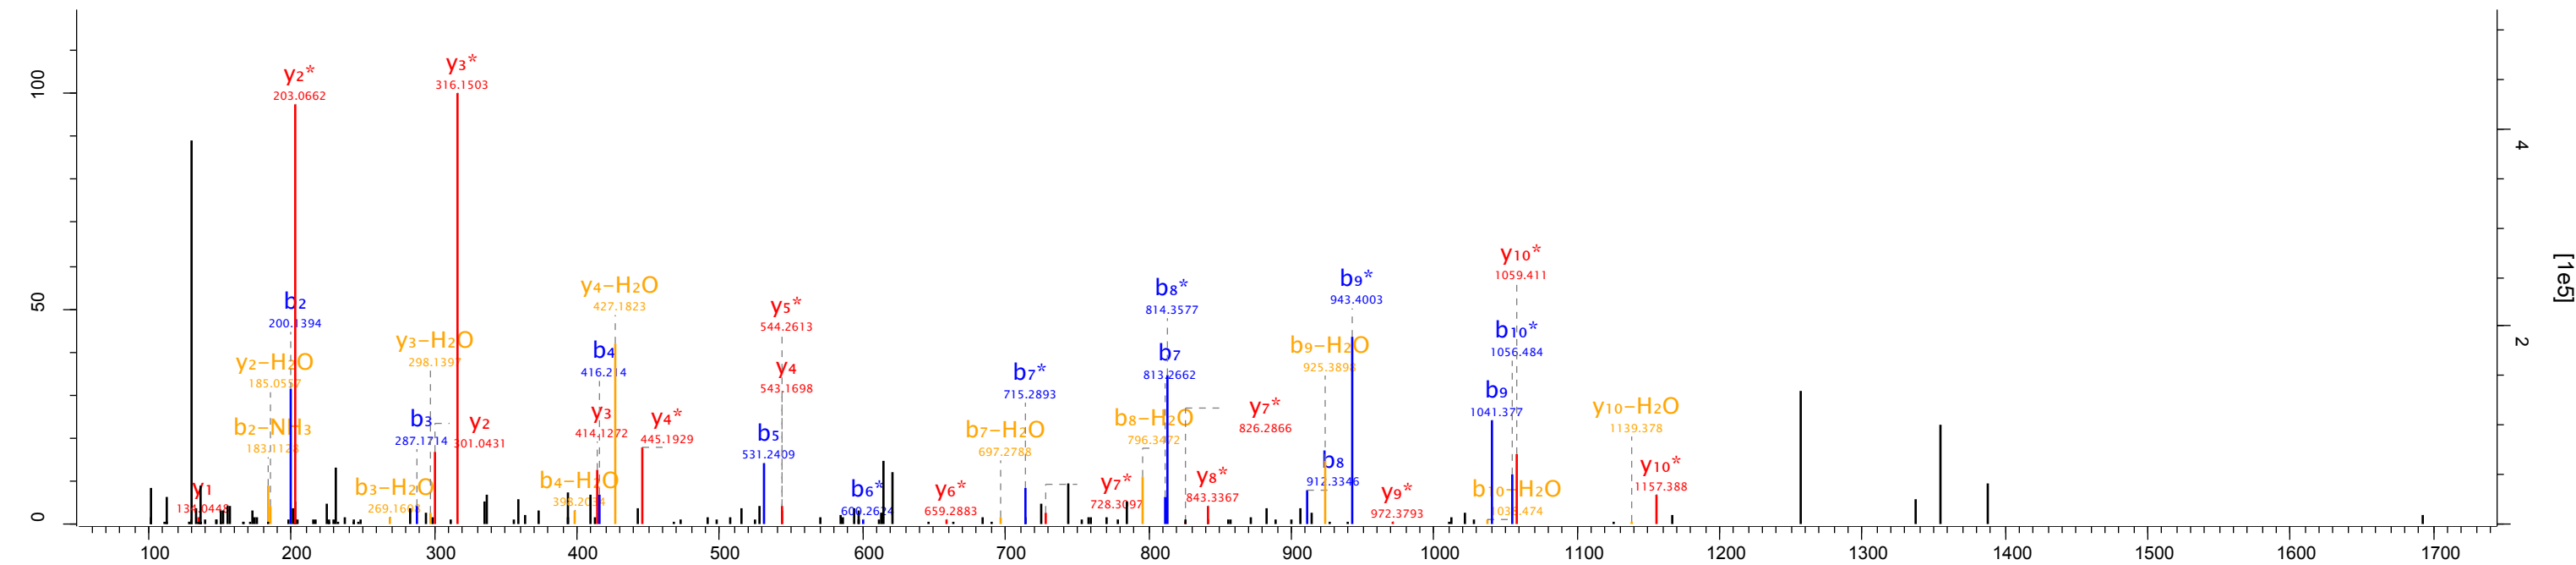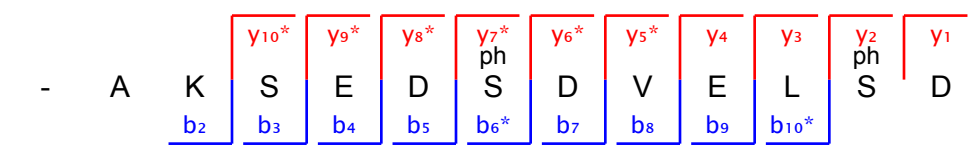

Raw file: 20150814\_A375SR\_Phospho\_BR2\_02  
 Scan: 9189 Method: FTMS; HCD Score: 100.45 m/z: 763.82 Gene names: GLCCI1

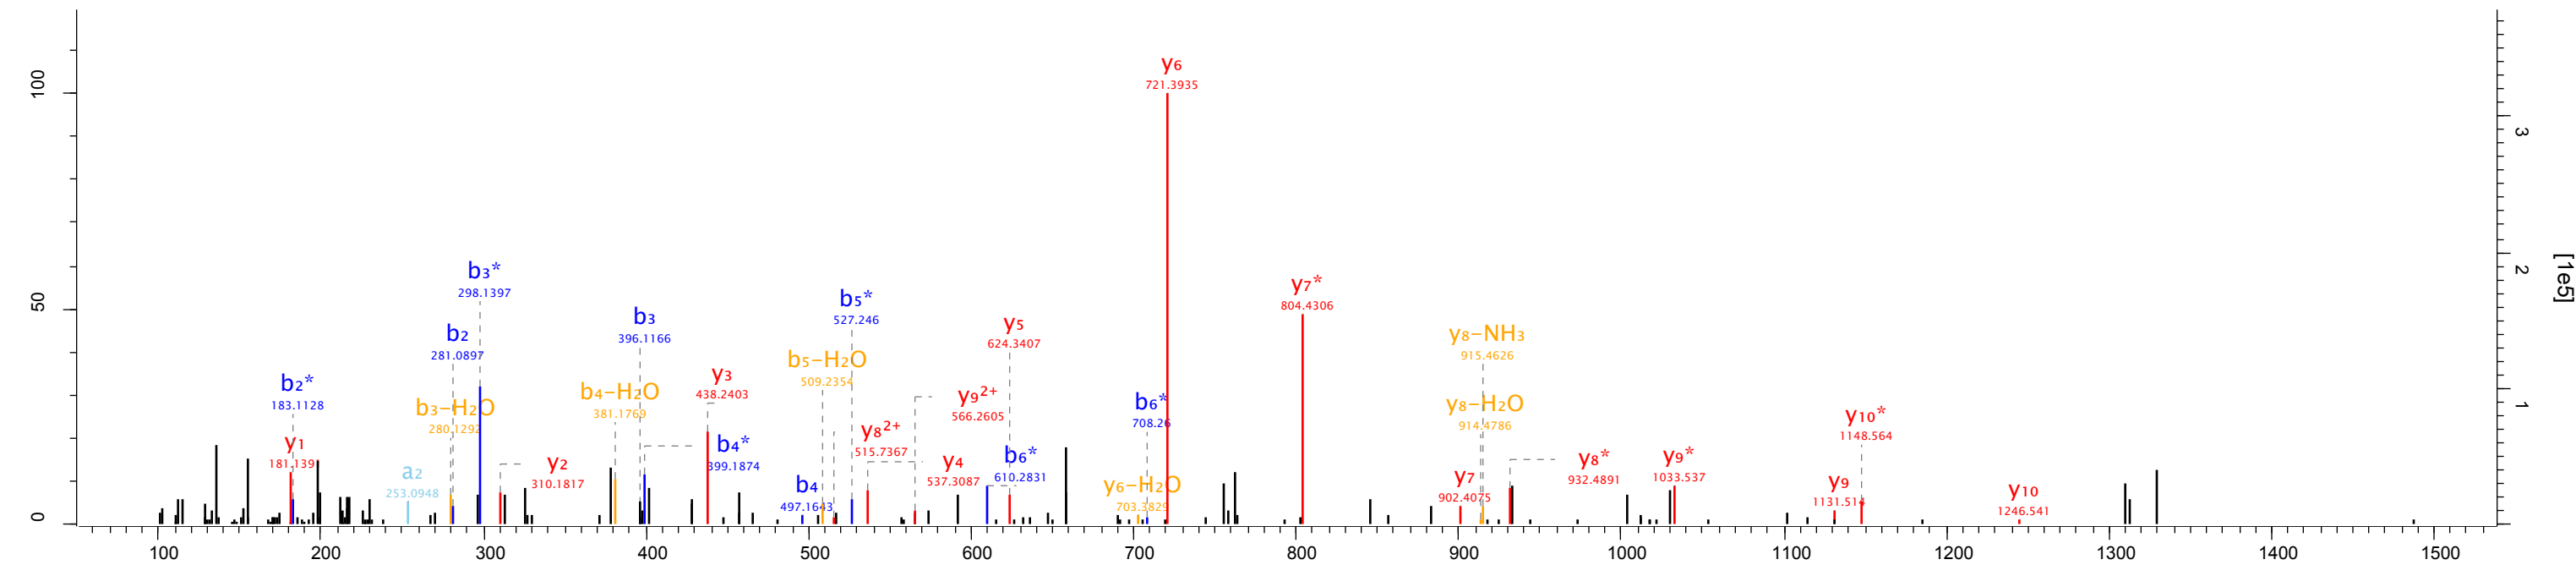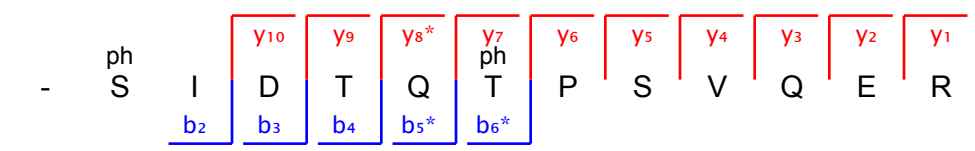

Raw file: 20150814\_A375SR\_Phospho\_BR2\_02  
 Scan: 9269 Method: FTMS; HCD Score: 57.53 m/z: 851.68 Gene names: CEP170

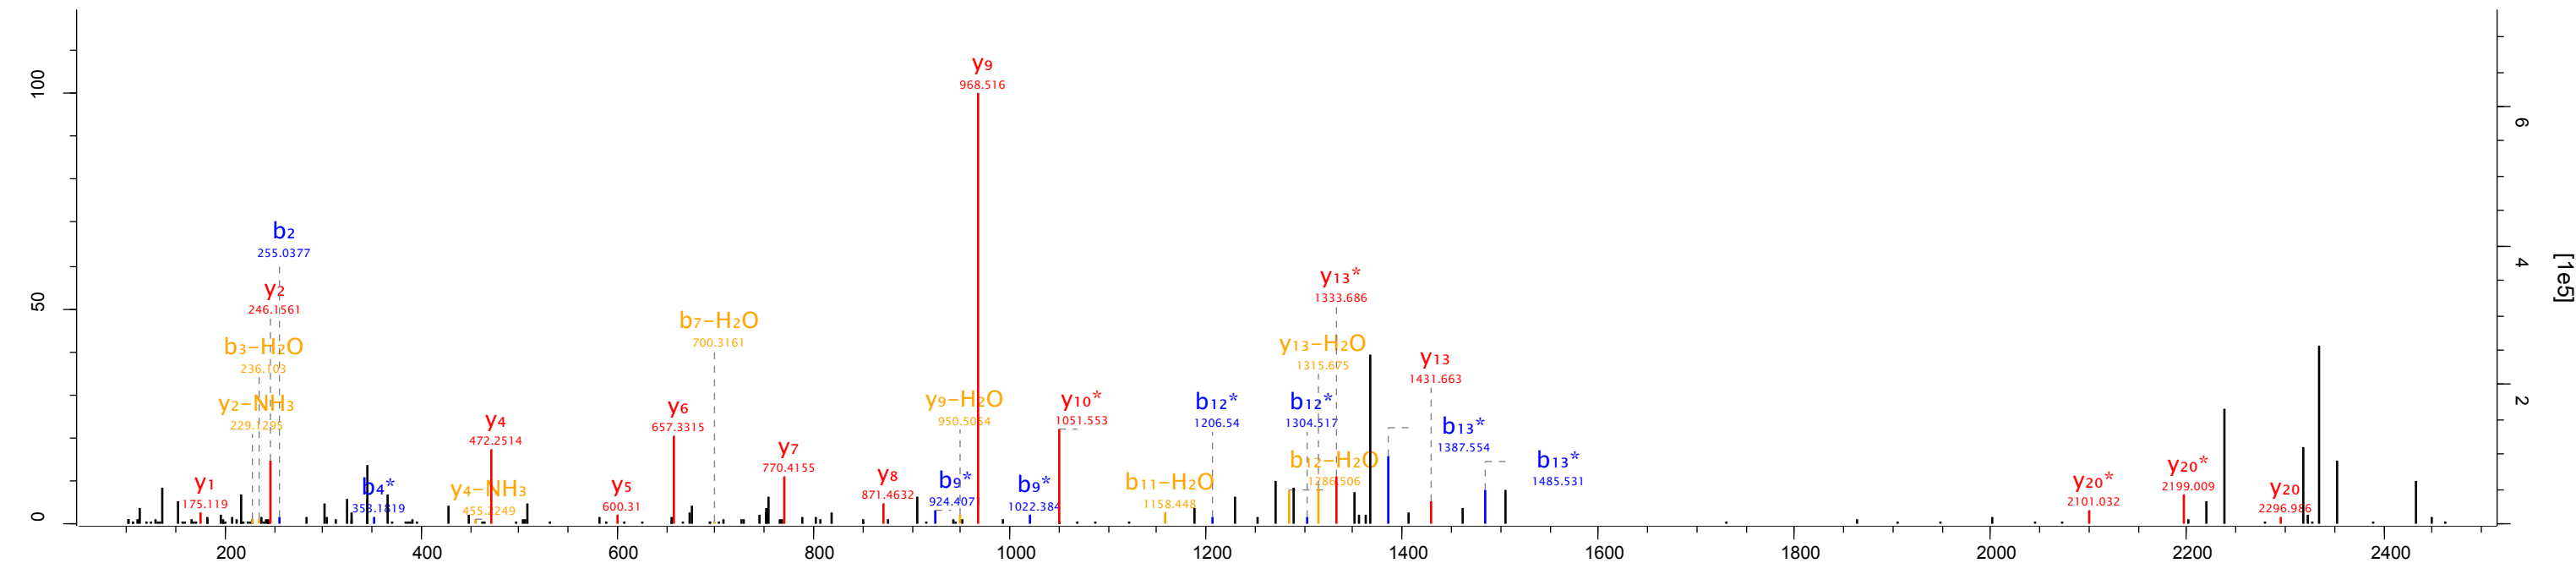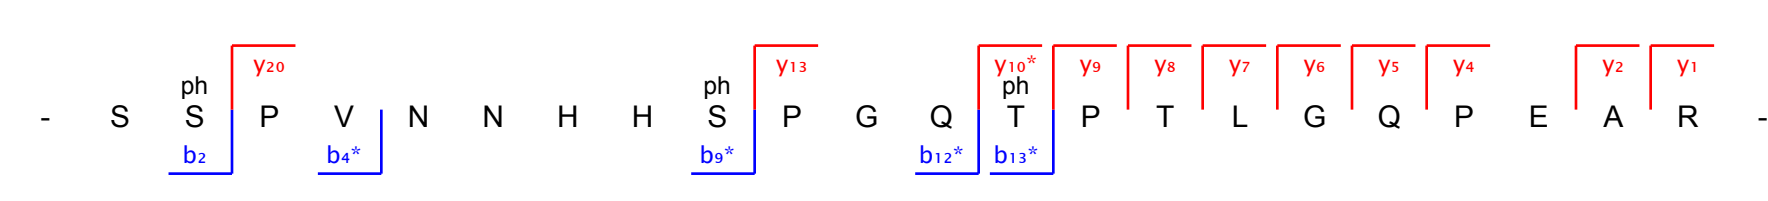

Raw file: 20150814\_A375SR\_Phospho\_BR2\_02  
 Scan: 9299 Method: FTMS; HCD Score: 78.43 m/z: 970.37 Gene names: ABCA2

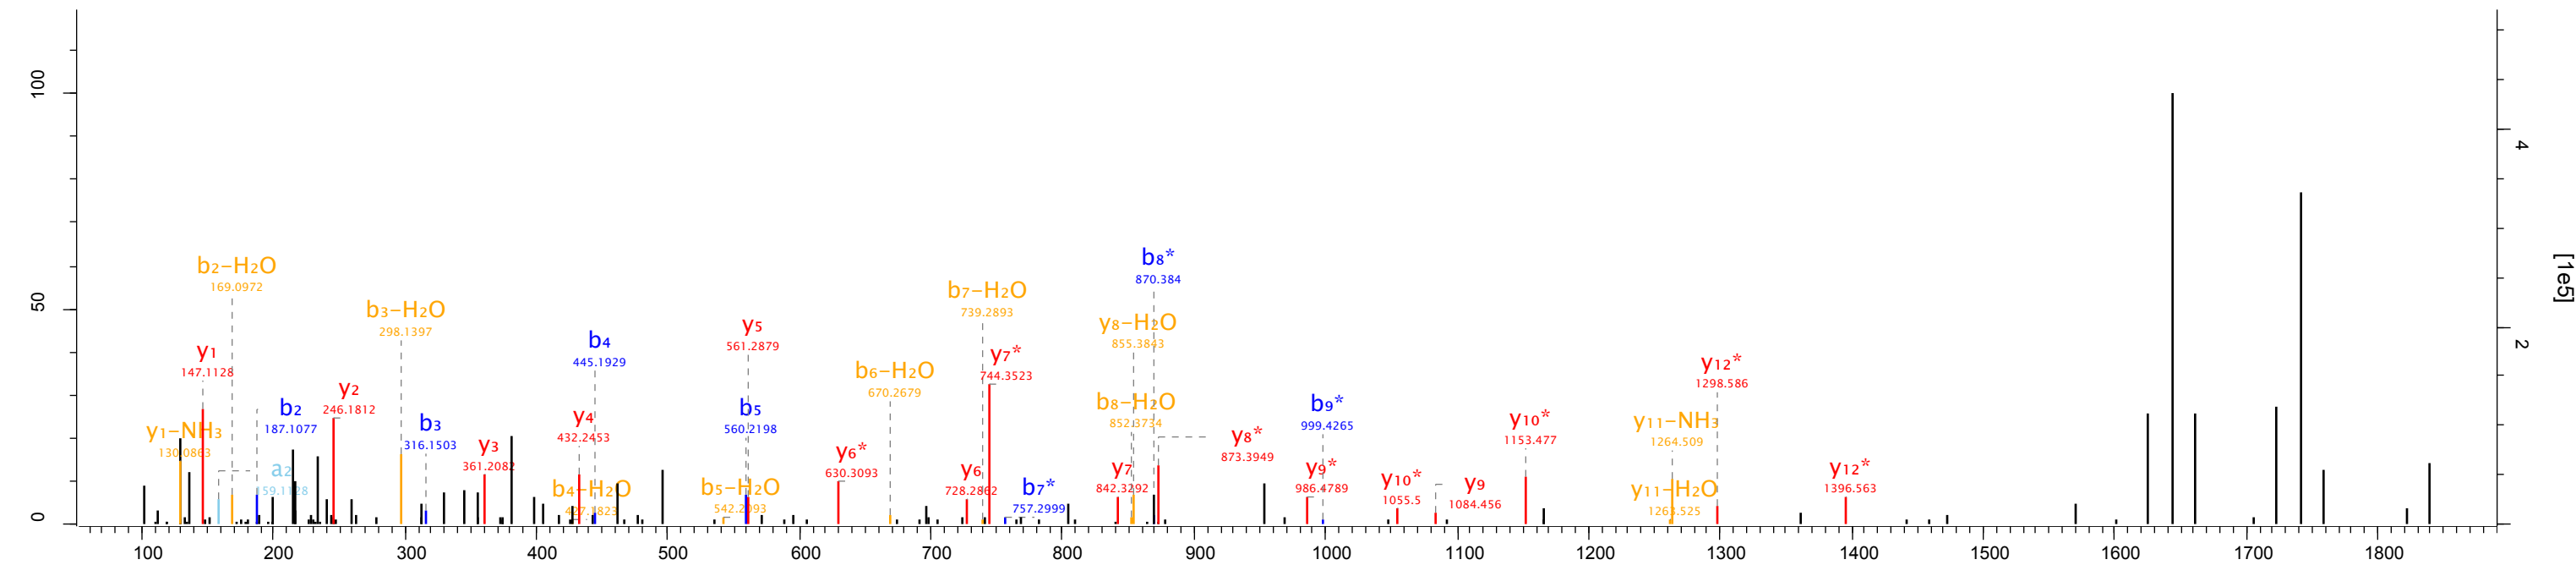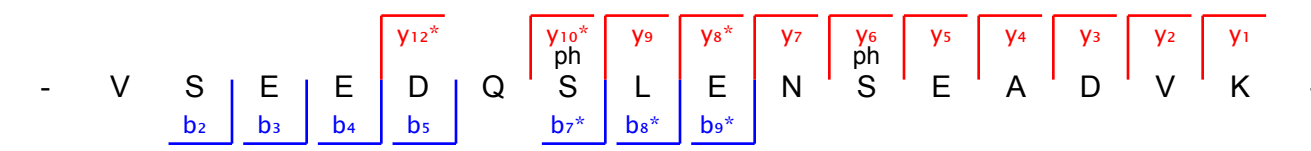



Raw file: 20150814\_A375SR\_Phospho\_BR2\_02  
 Scan: 9339 Method: FTMS; HCD Score: 63.69 m/z: 749.25 Gene names: SCAF1

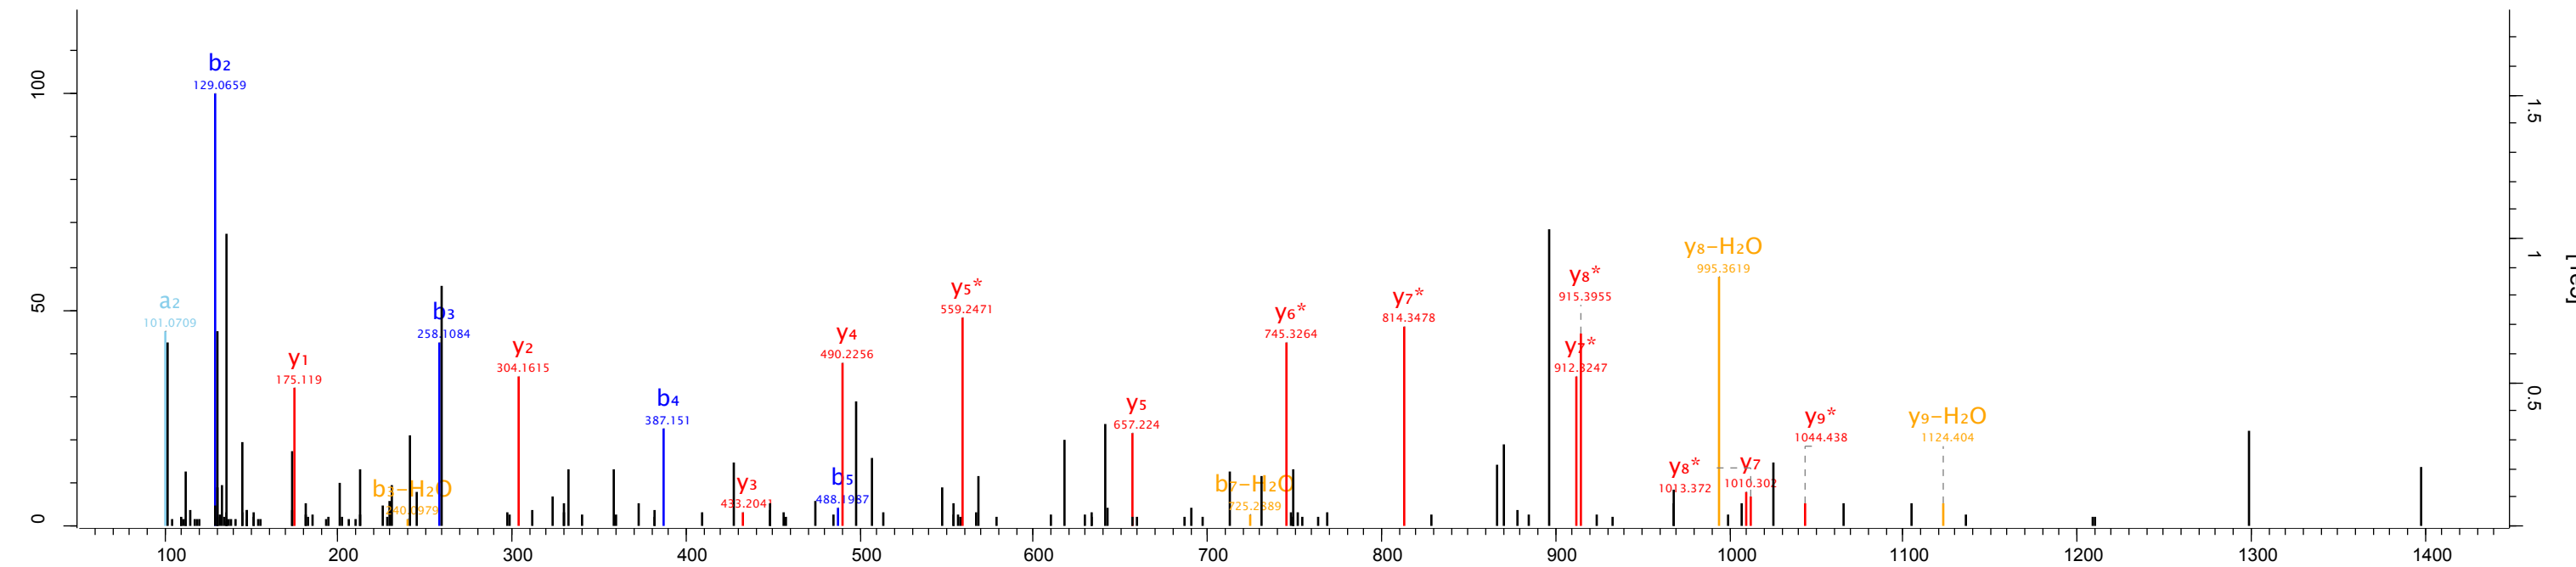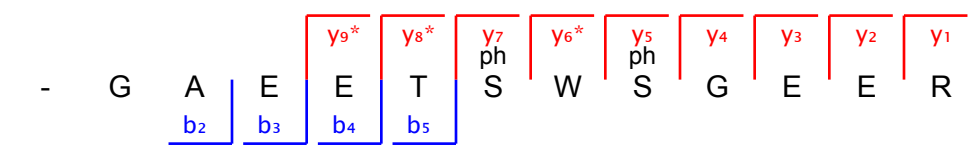

Raw file: 20150814\_A375SR\_Phospho\_BR2\_02  
 Scan: 9519 Method: FTMS; HCD Score: 40.1 m/z: 592.9 Gene names: SRRM2

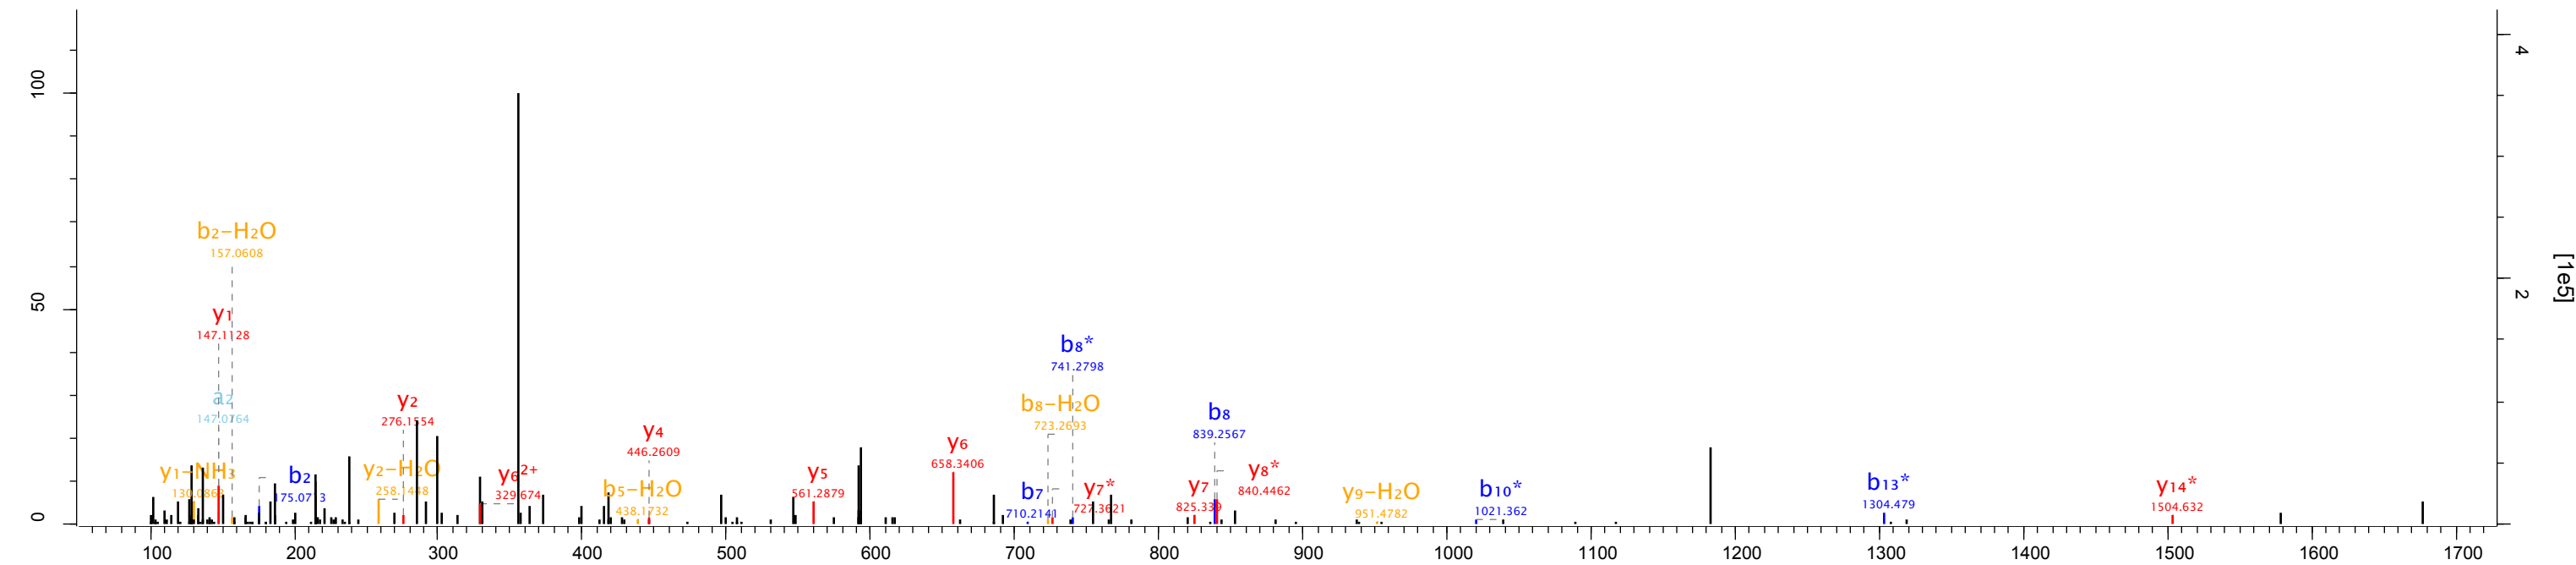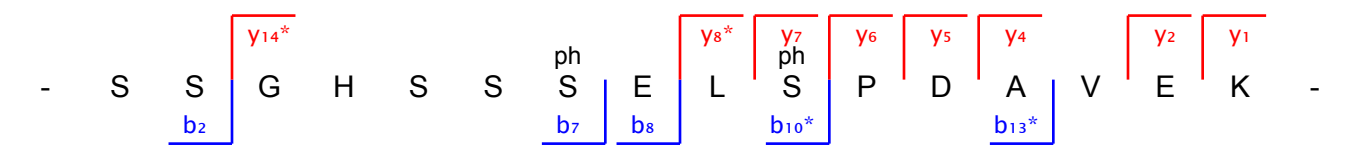

Raw file: 20150814\_A375SR\_Phospho\_BR2\_02  
 Scan: 9529 Method: FTMS; HCD Score: 195.48 m/z: 825.83 Gene names: SQSTM1

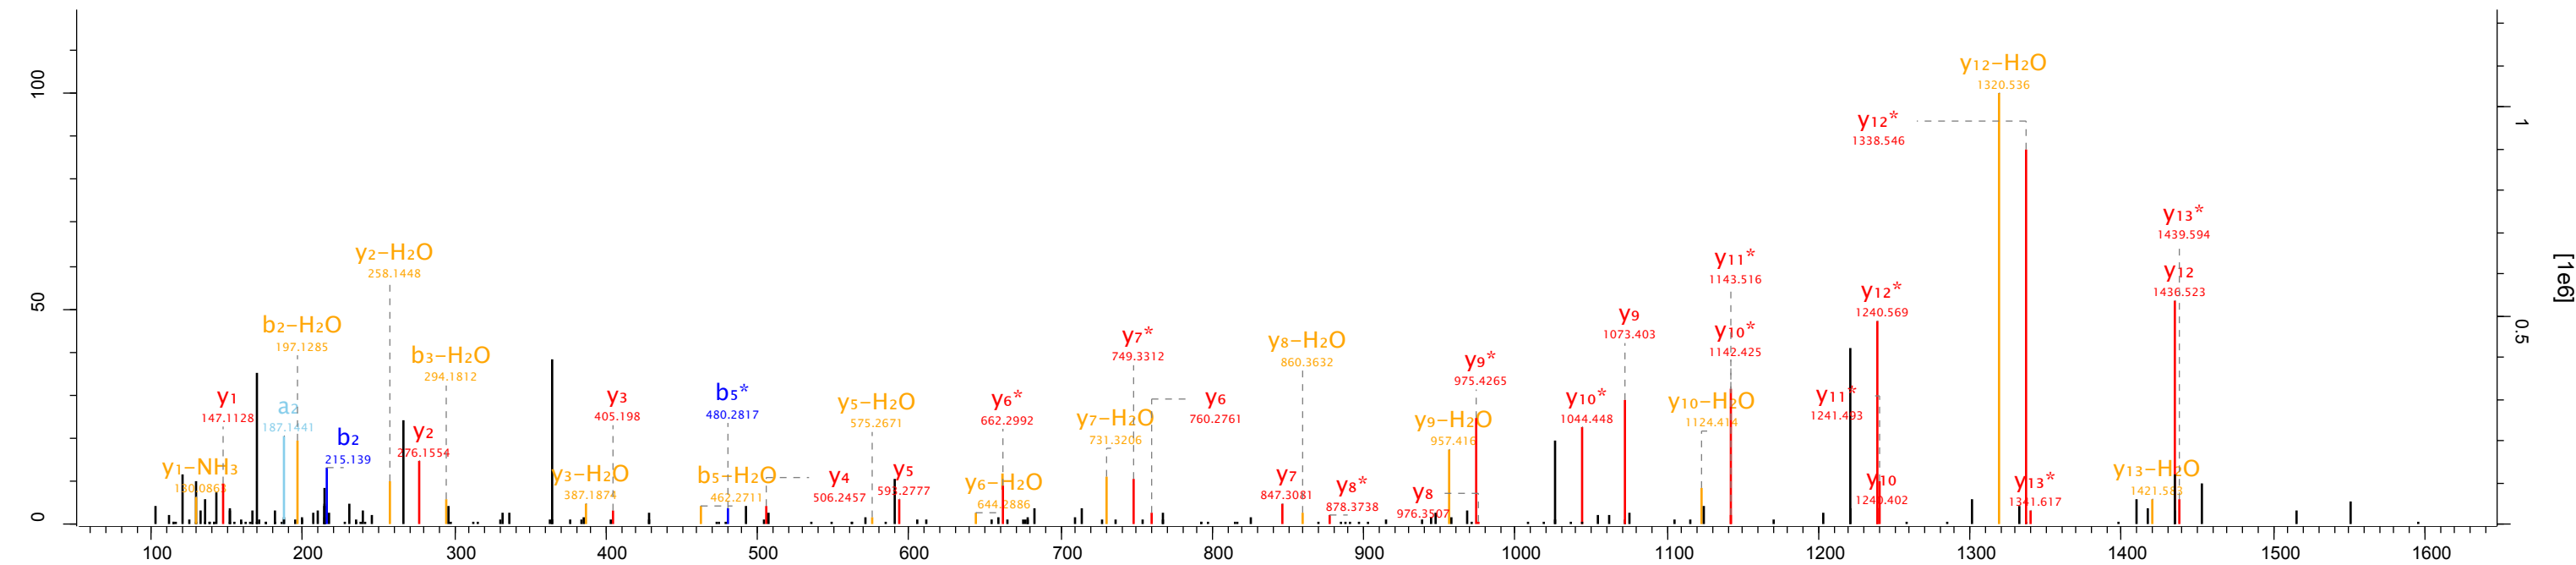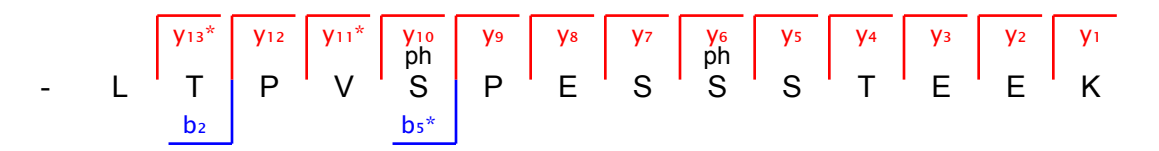

Raw file: 20150814\_A375SR\_Phospho\_BR2\_02  
 Scan: 9999 Method: FTMS; HCD Score: 113.11 m/z: 634.26 Gene names: BCL9L

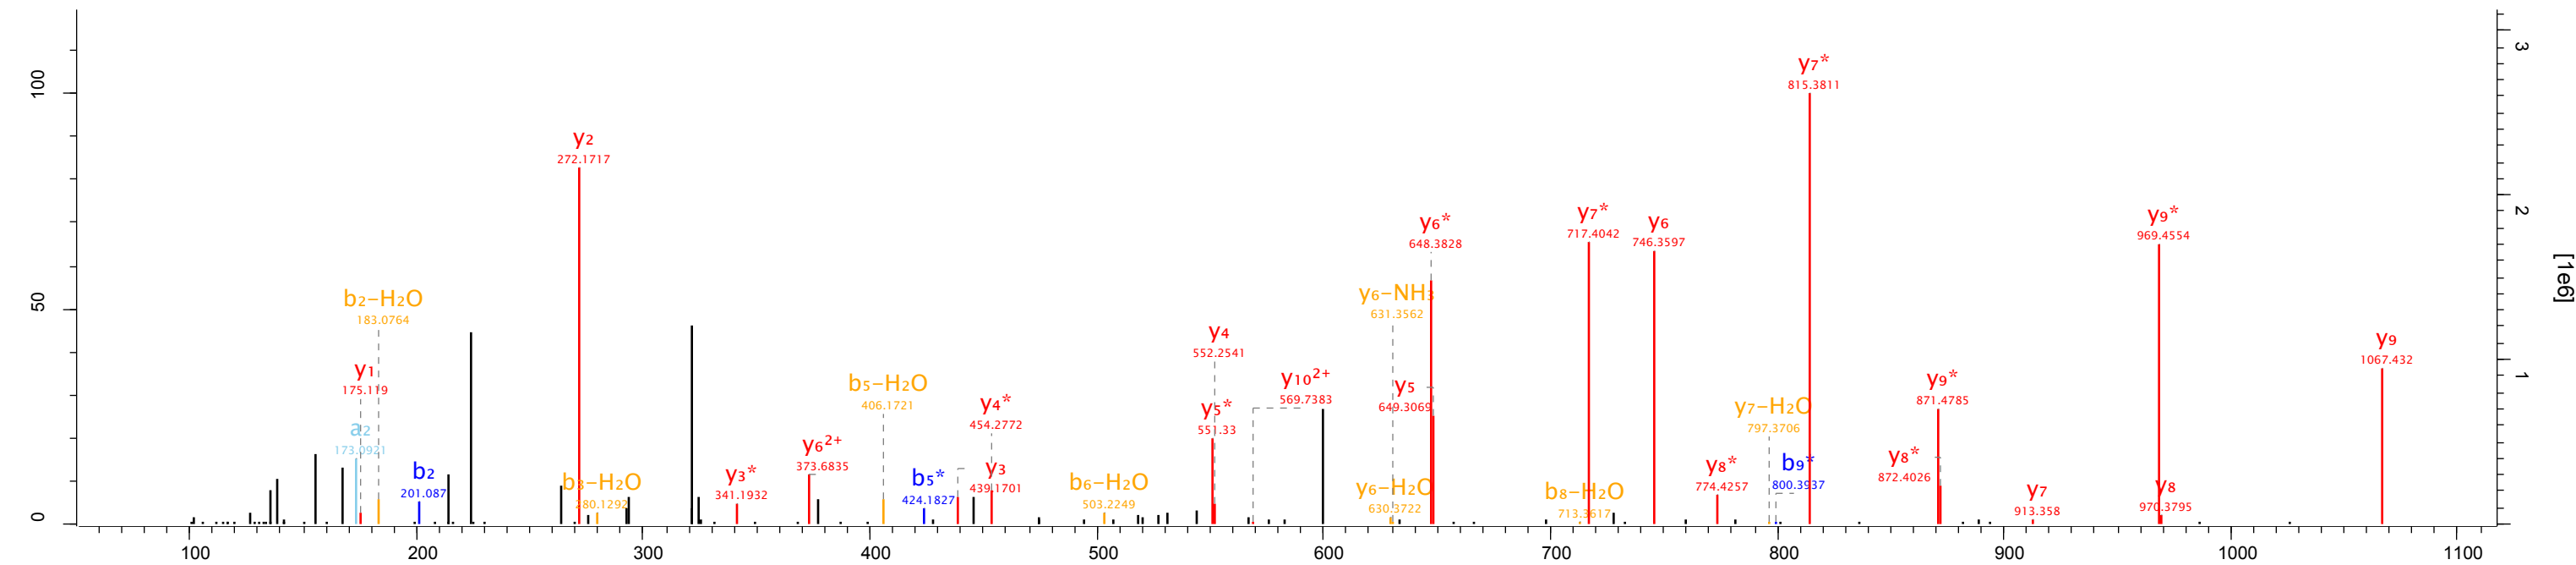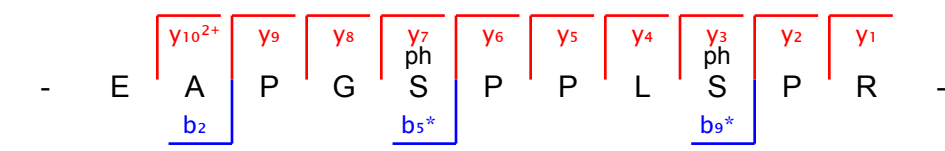

Raw file 20150814\_A375SR\_Phospho\_BR2\_03 Scan 10009 Method FTMS; HCD Score 54.8 m/z 746.84 Gene names MFF

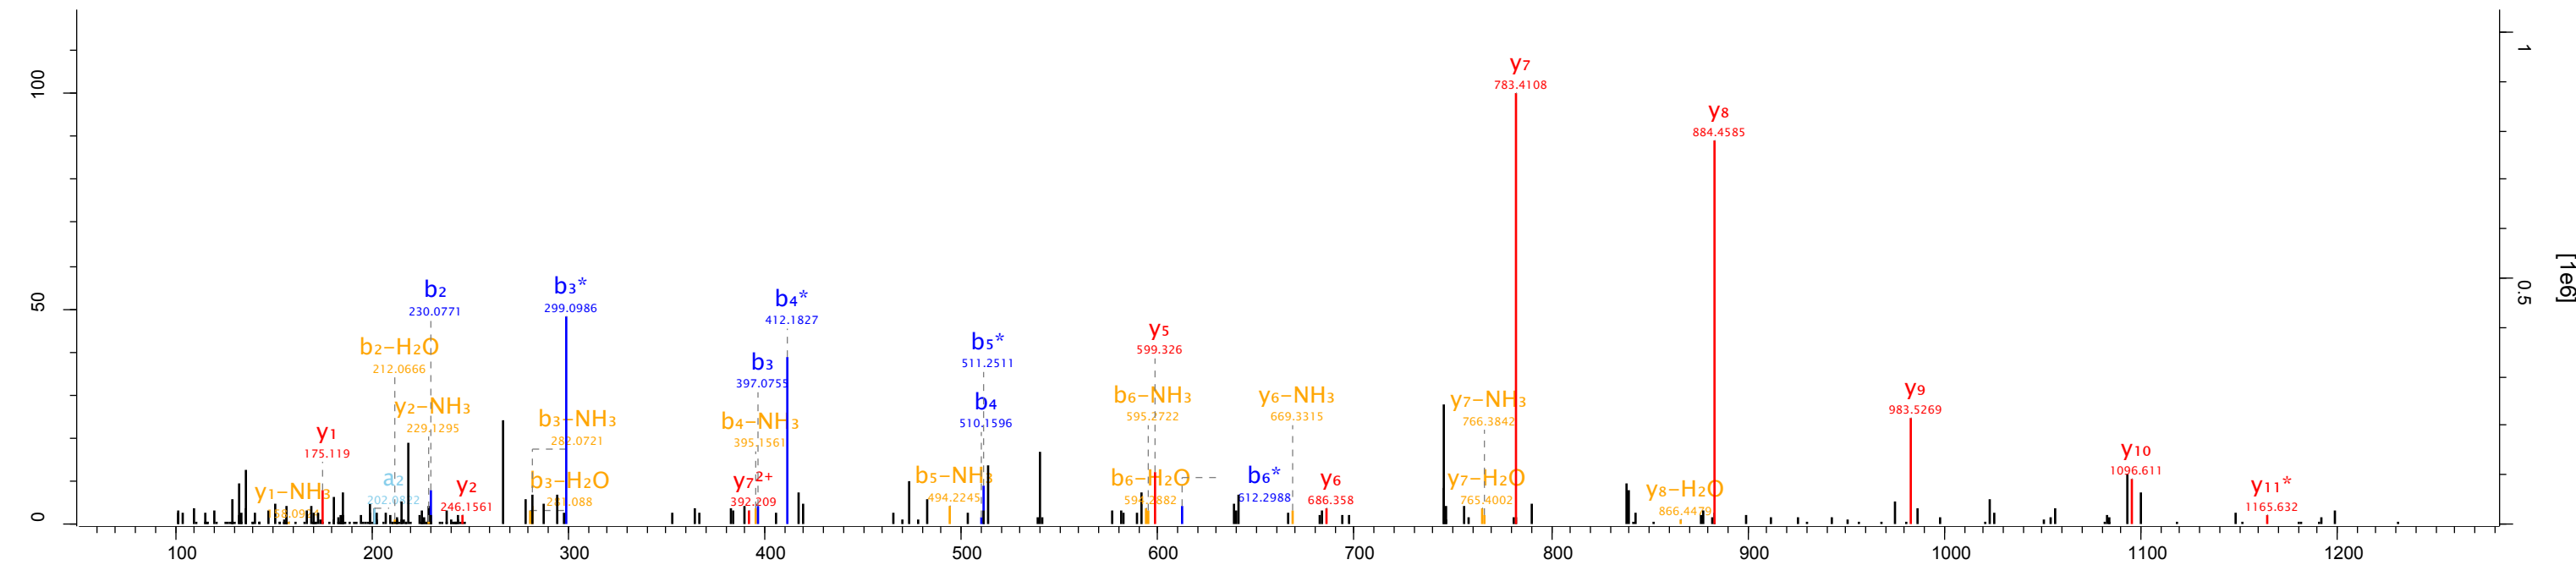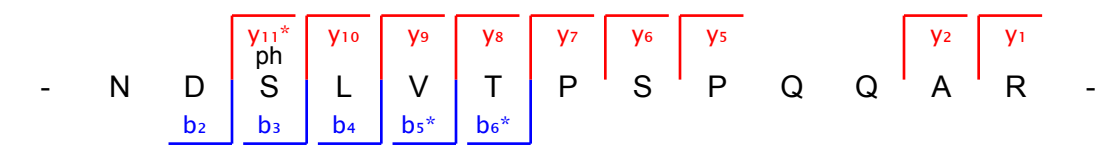

Raw file  
20150814\_A375SR\_Phospho\_BR2\_03

Scan 10179 Method FTMS; HCD Score 281.49 m/z 748.32 Gene names NFIC

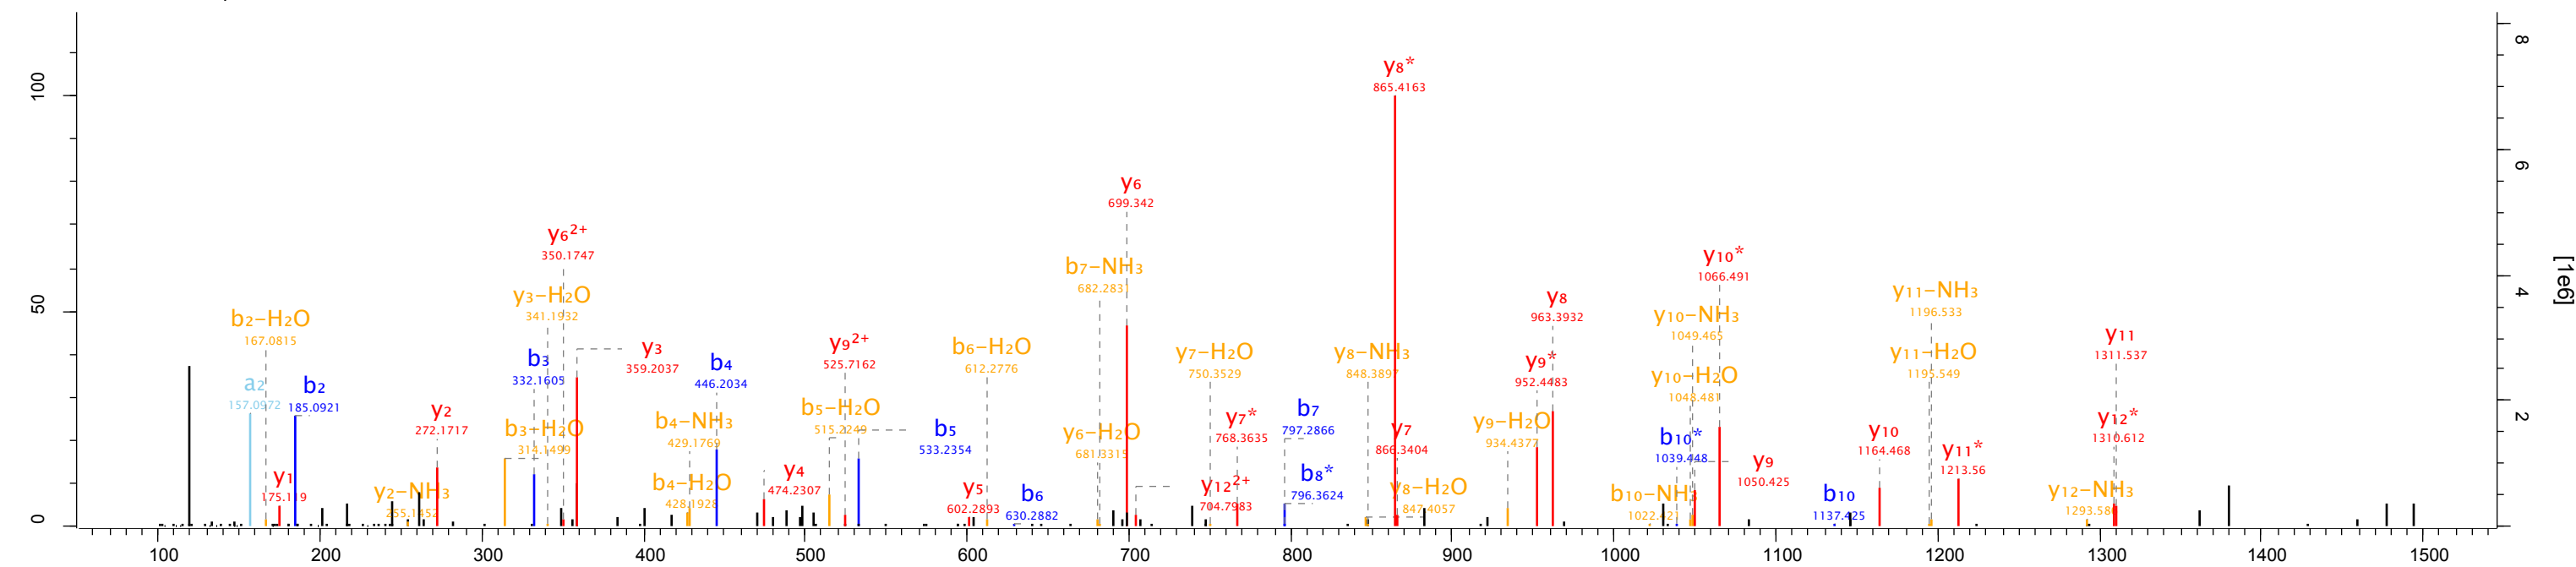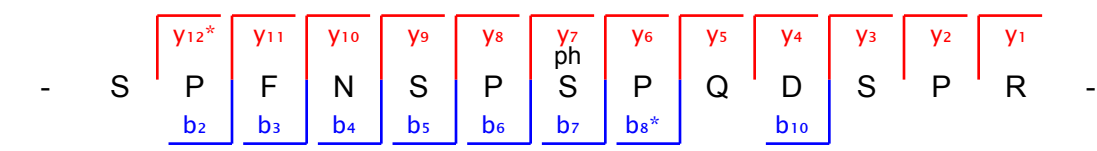

Raw file  
20150814\_A375SR\_Phospho\_BR2\_03

Scan 10469 Method FTMS; HCD Score 73.13 m/z 783.65 Gene names RBPJ

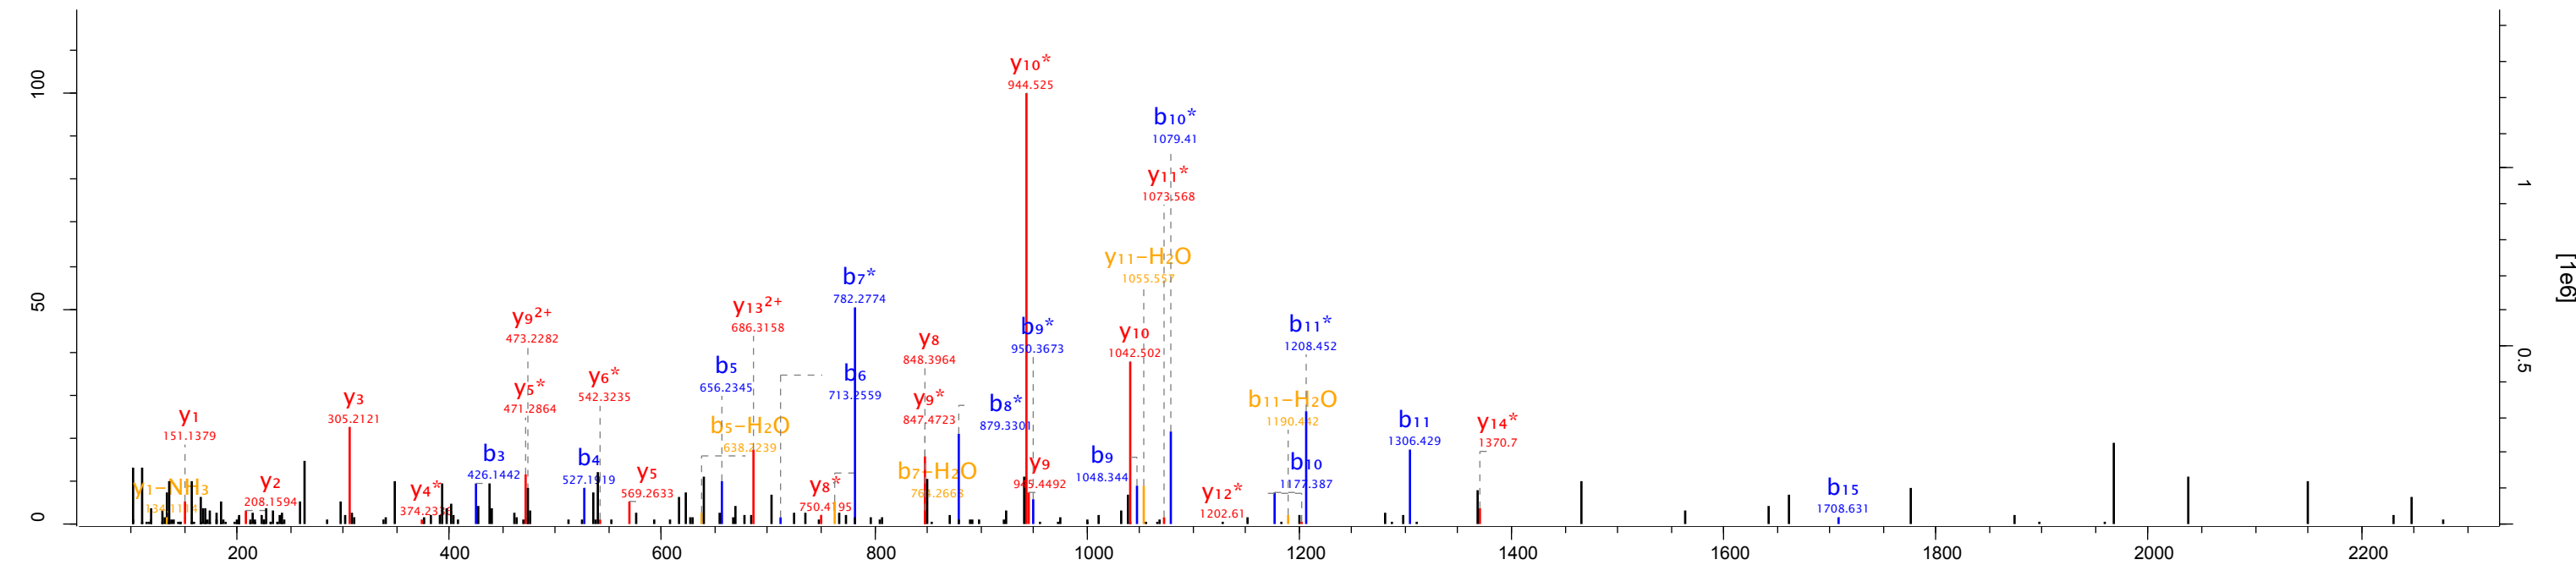

ac  
- M D H T E G S P A E E P P A H A P S P G K -  
          b3 b4 b5 b6 b7\* b8\* b9 b10 b11 b15

Raw file: 20150814\_A375SR\_Phospho\_BR2\_03  
 Scan: 10559 Method: FTMS; HCD Score: 105 m/z: 821.8 Gene names: YPEL5

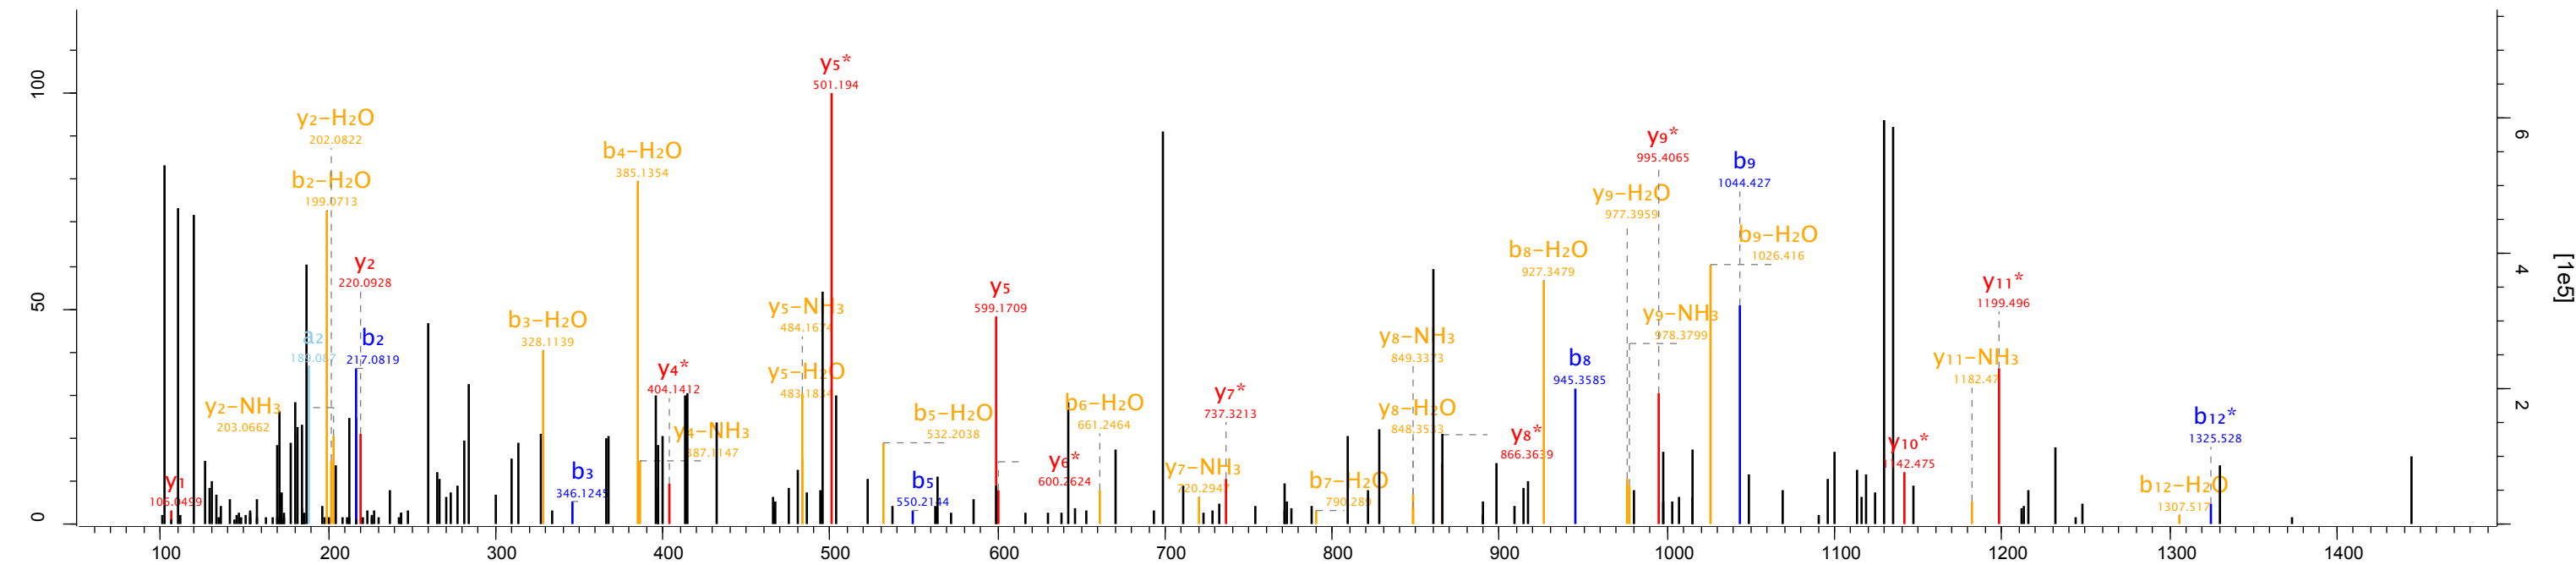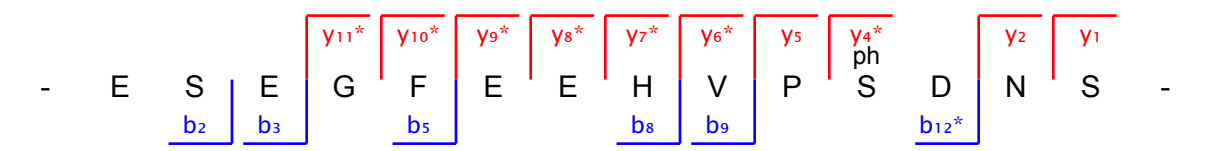



Raw file: 20150814\_A375SR\_Phospho\_BR2\_03  
 Scan: 10669 Method: FTMS; HCD Score: 119.38 m/z: 1007.43 Gene names: RERE

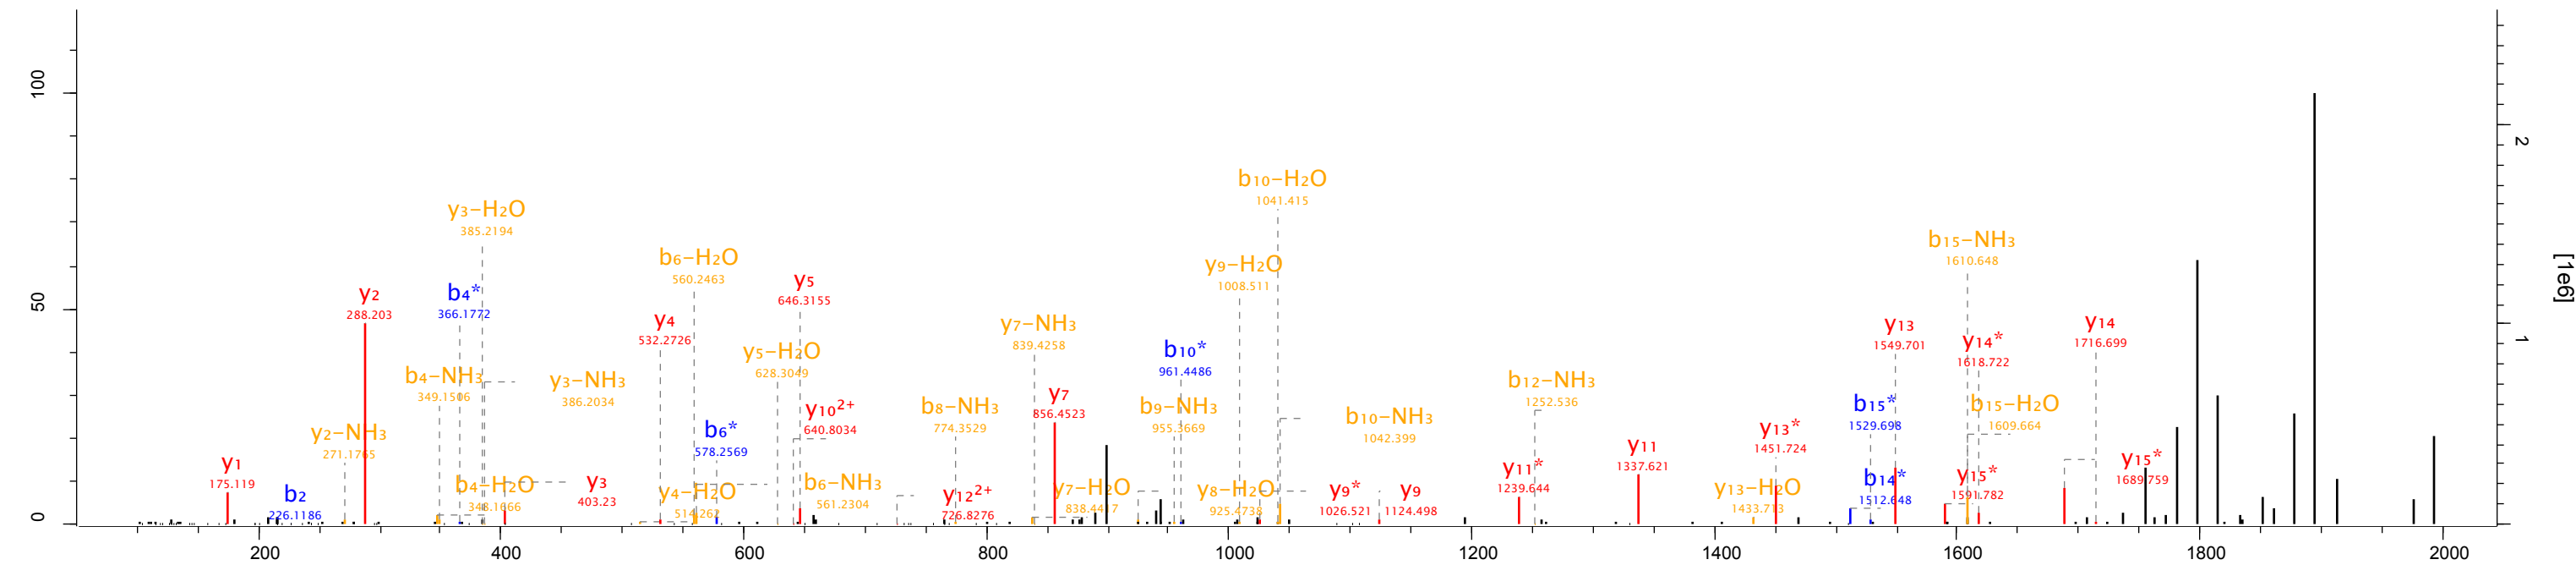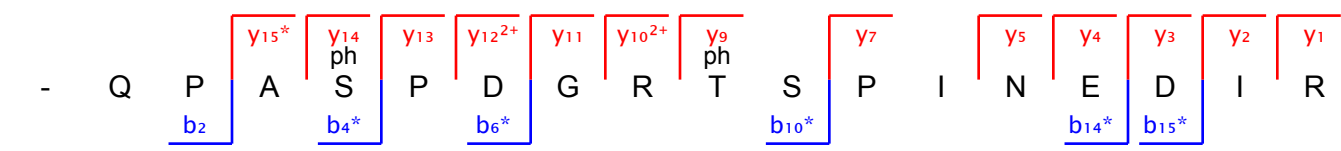

Raw file: 20150814\_A375SR\_Phospho\_BR2\_03  
 Scan: 10929 Method: FTMS; HCD Score: 111.81 m/z: 821.99 Gene names: RBM34

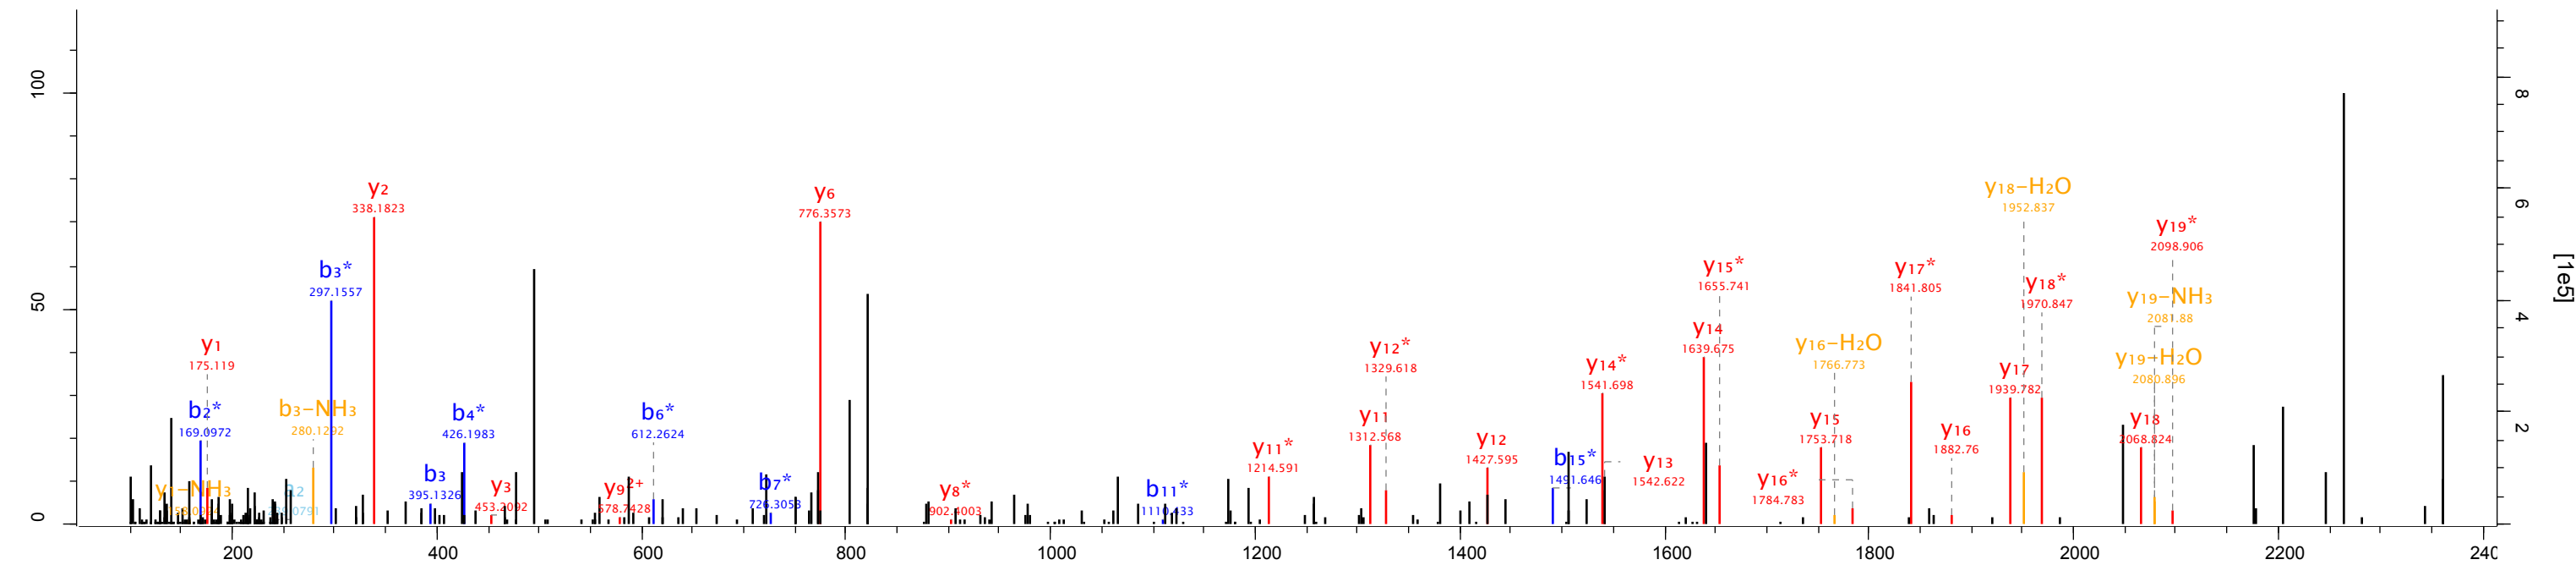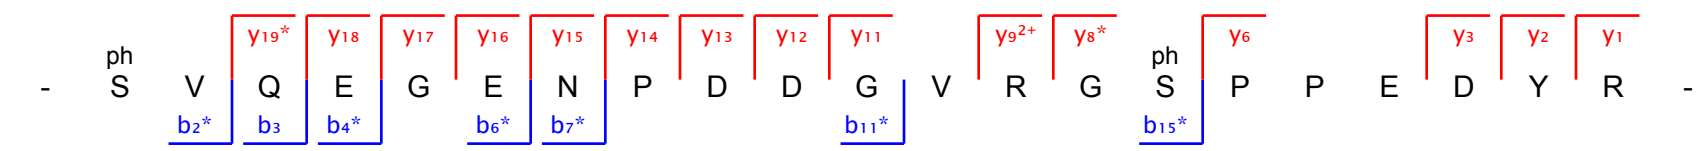

Raw file  
20150814\_A375SR\_Phospho\_BR2\_03

Scan 11099 Method FTMS; HCD Score 201.73 m/z 904.04 Gene names IRS1

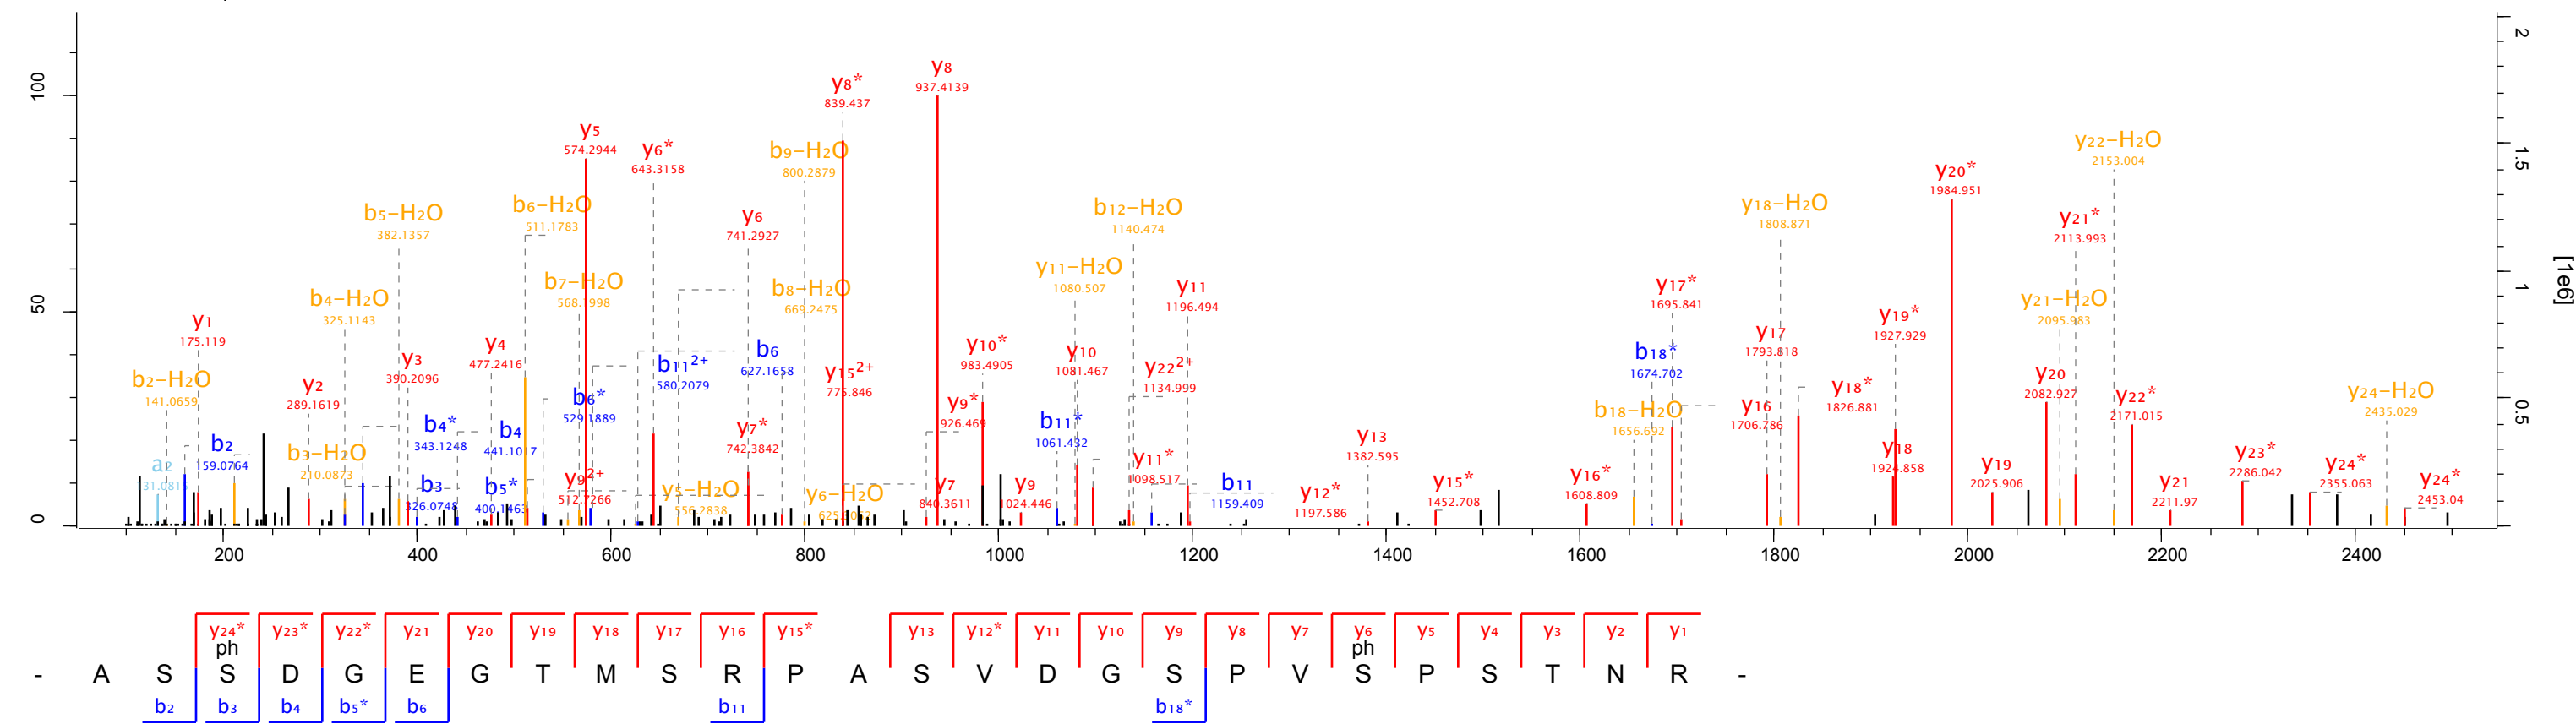

Raw file  
20150814\_A375SR\_Phospho\_BR2\_03

Scan 11259 Method FTMS; HCD Score 280.45 m/z 958.44 Gene names AHNAK

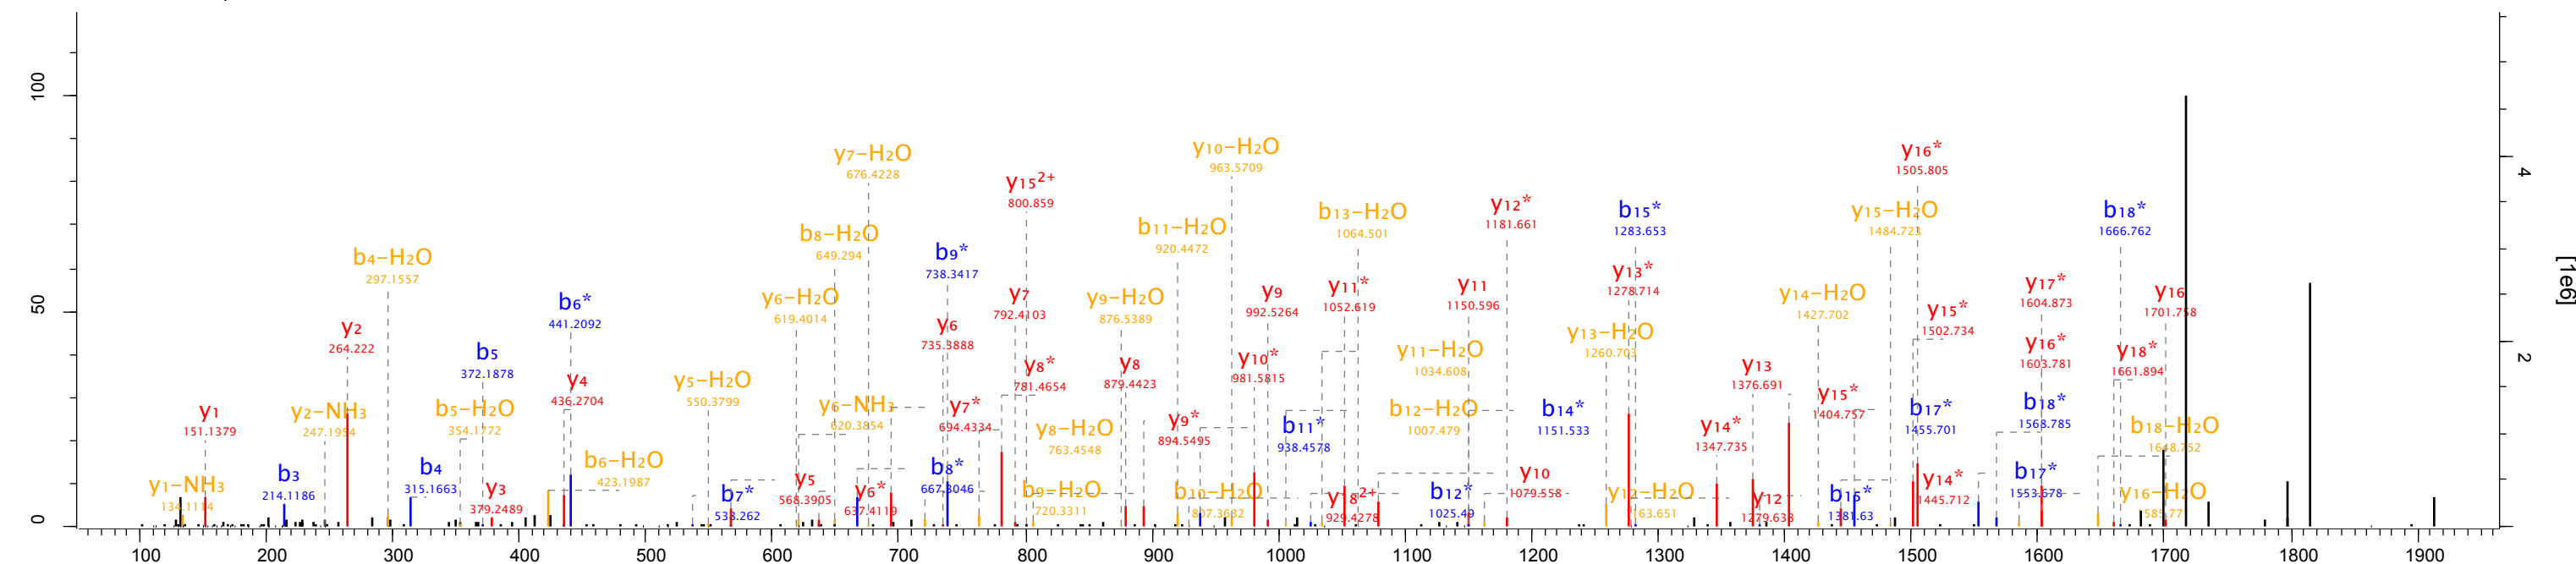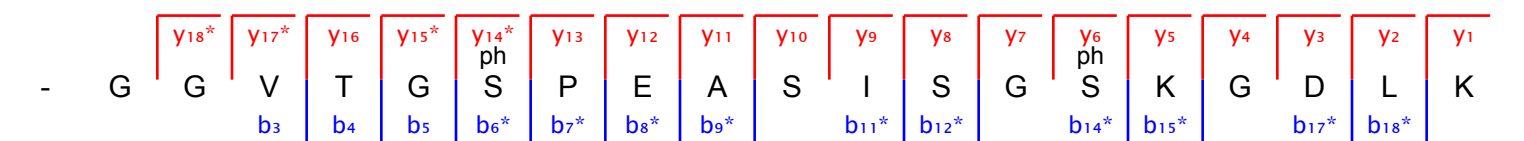

Raw file 20150814\_A375SR\_Phospho\_BR2\_03 Scan 11559 Method FTMS; HCD Score 177.88 m/z 919.92 Gene names PHLDB1

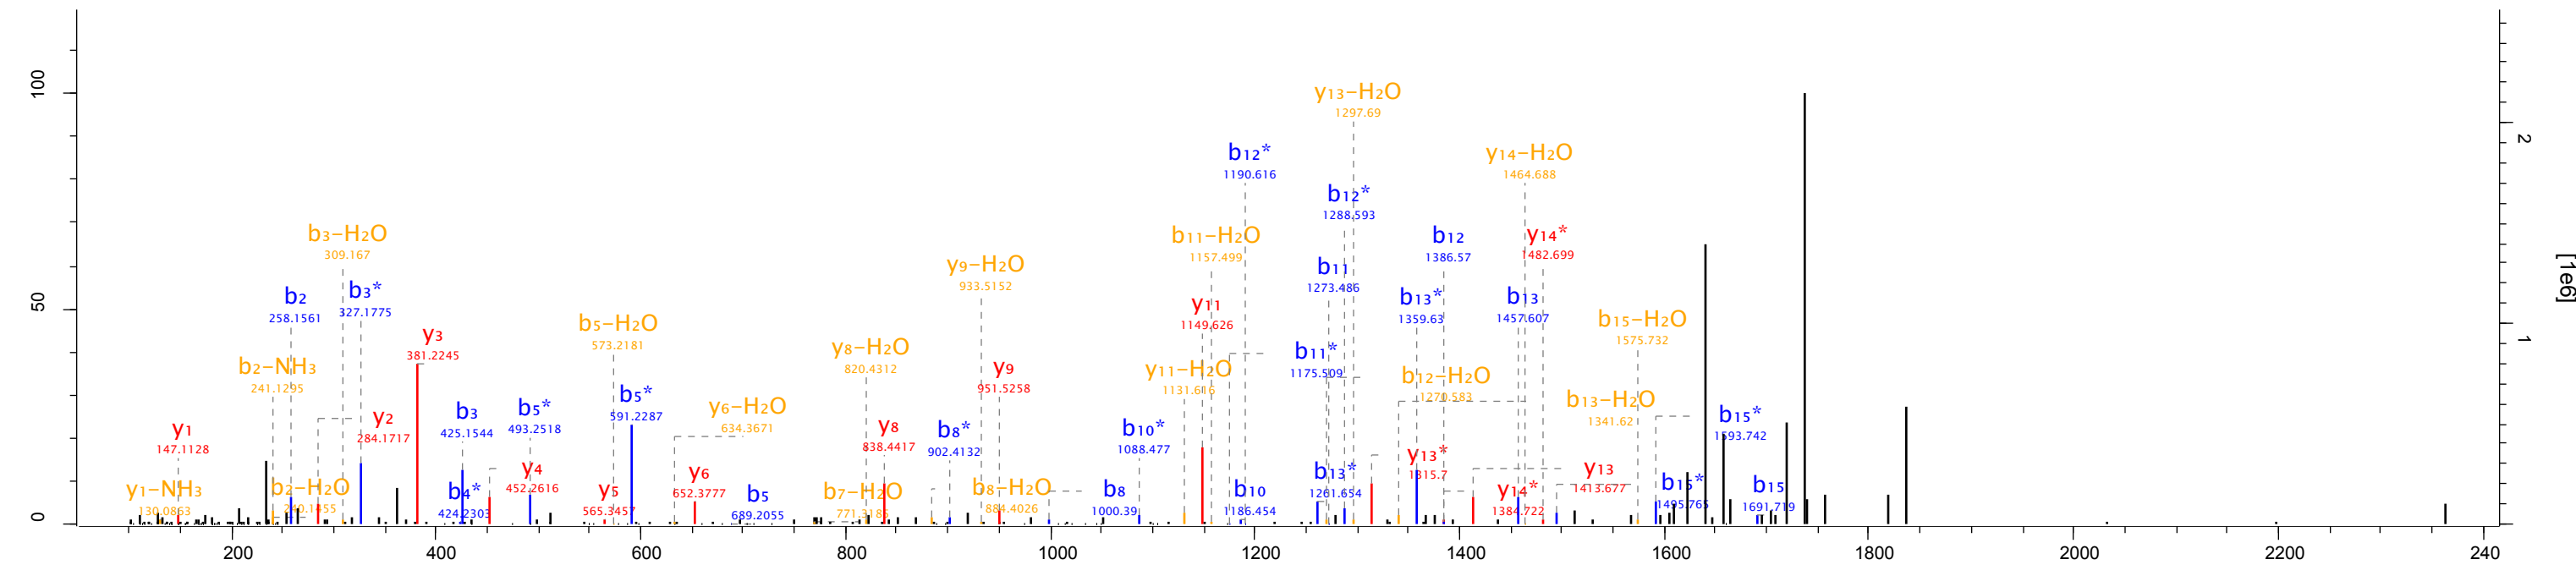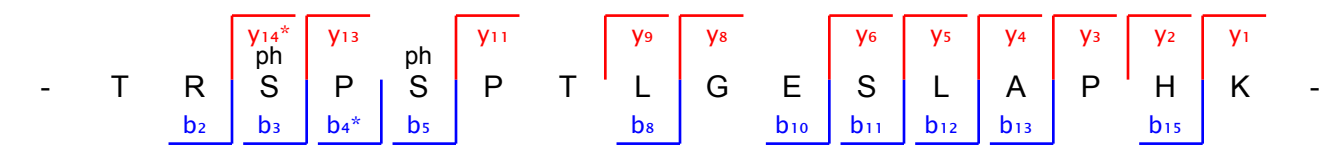

Raw file: 20150814\_A375SR\_Phospho\_BR2\_03  
 Scan: 11669 Method: FTMS; HCD Score: 85.55 m/z: 563.77 Gene names: BCOR

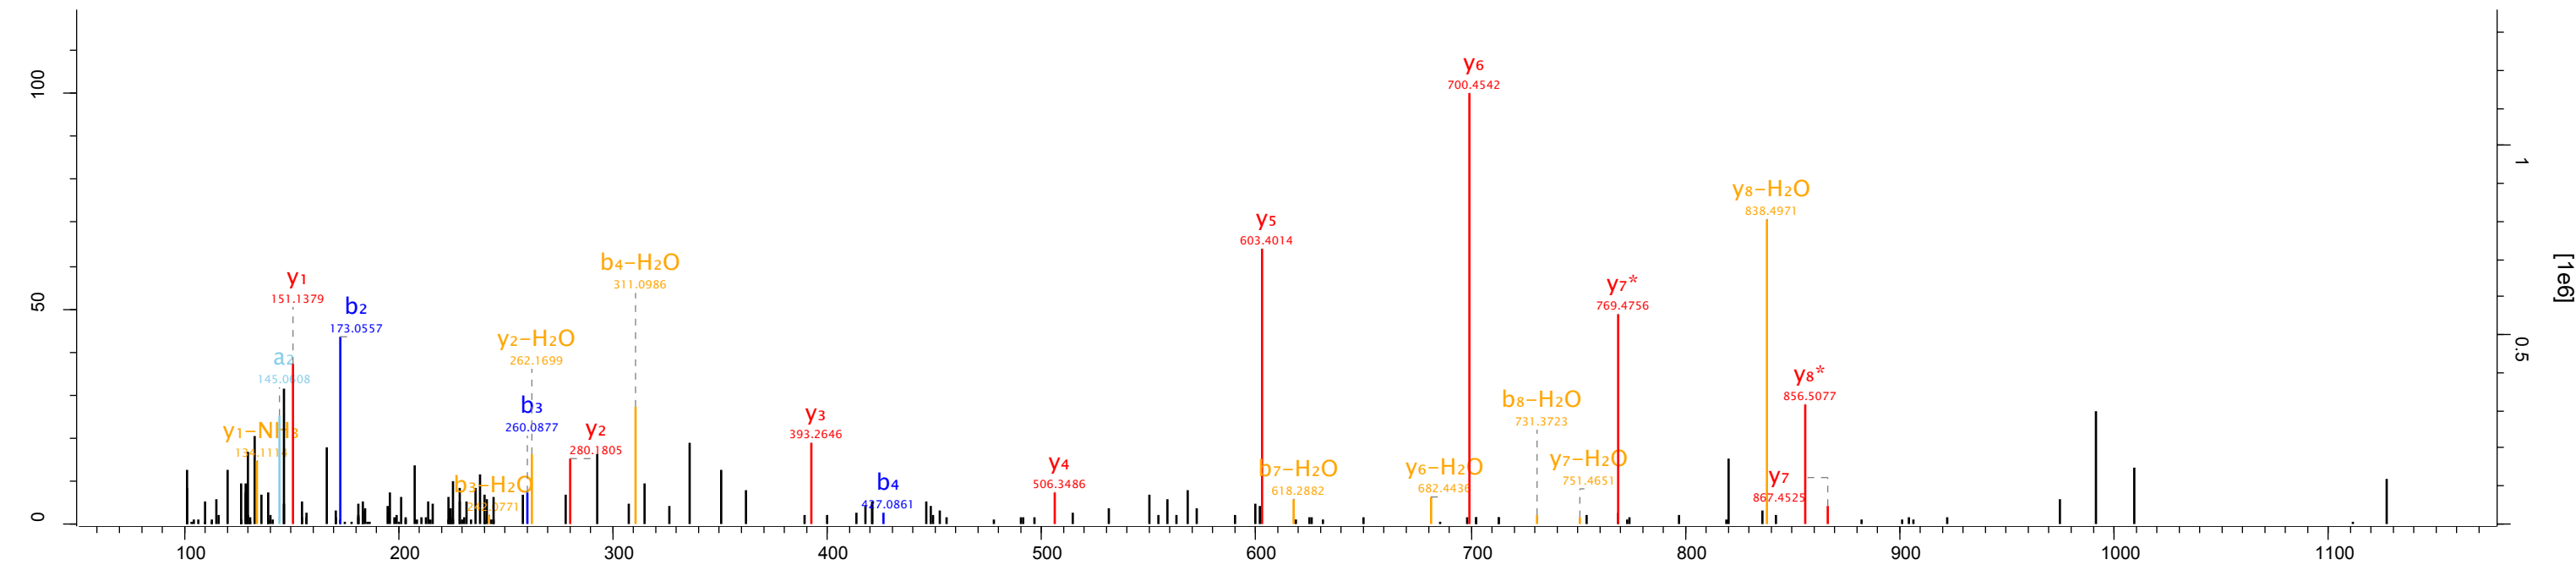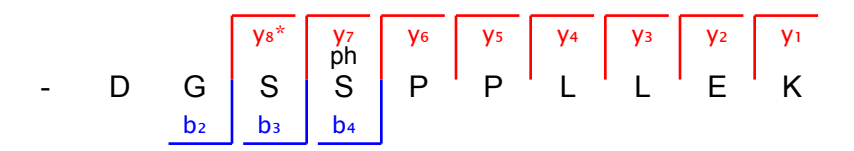

Raw file 20150814\_A375SR\_Phospho\_BR2\_03 Scan 11989 Method FTMS; HCD Score 152.37 m/z 752.36 Gene names SCAF11

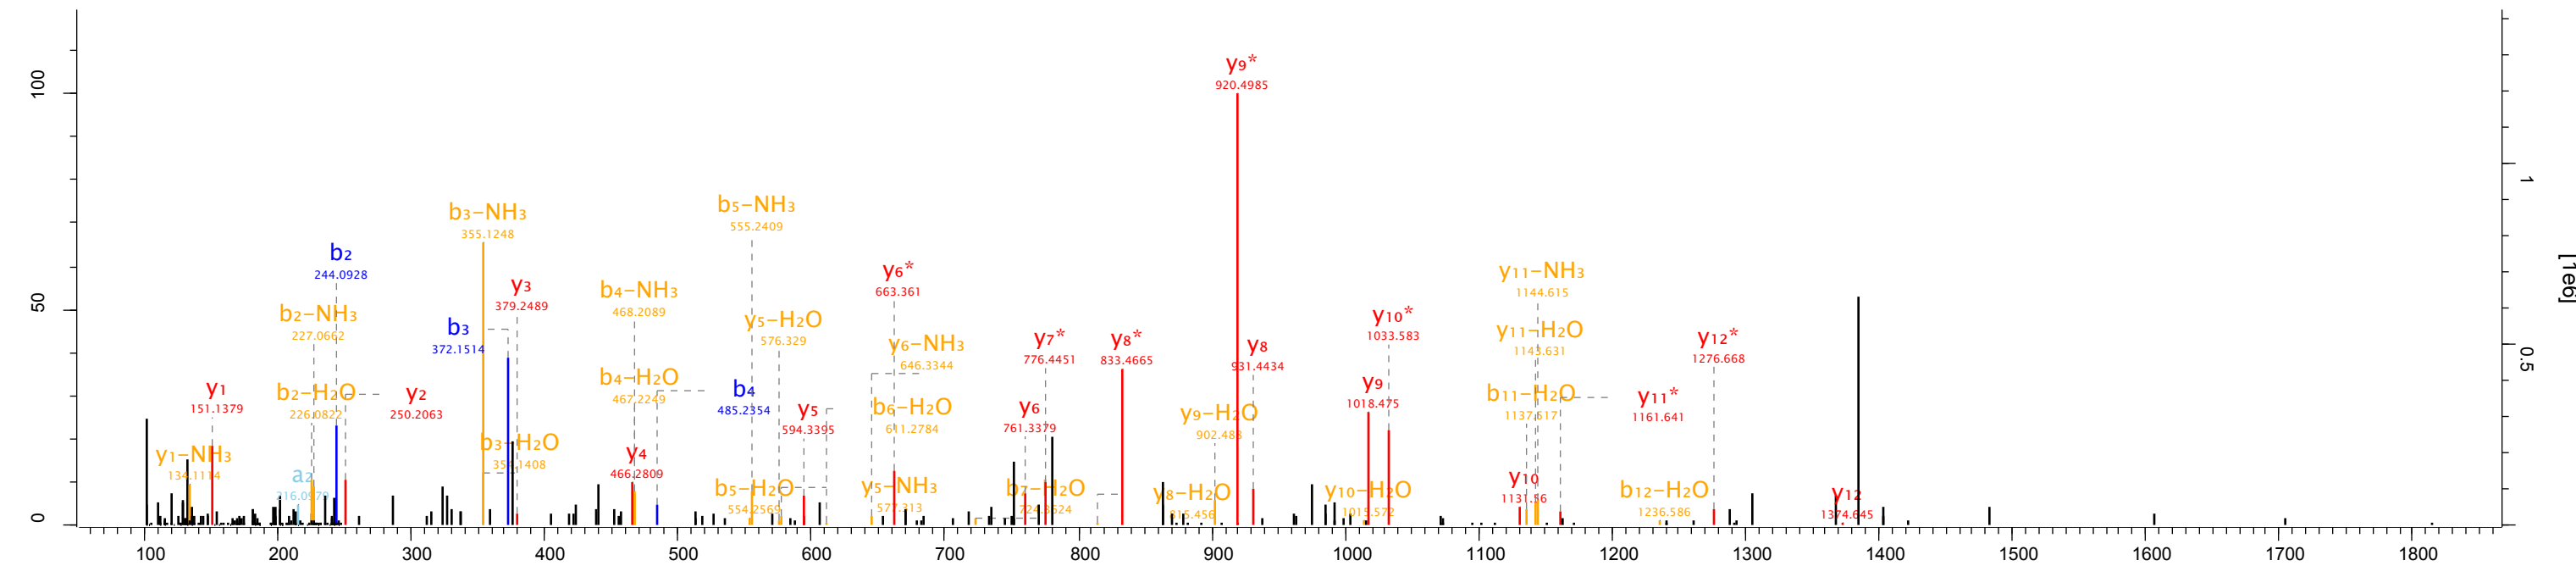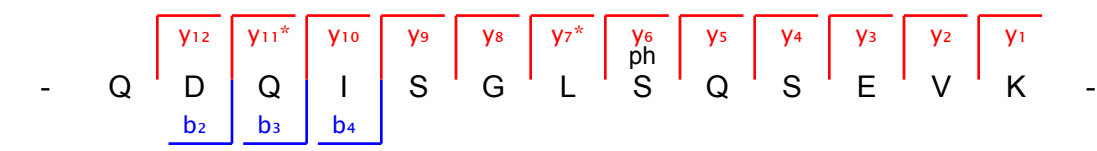

Raw file 20150814\_A375SR\_Phospho\_BR2\_03 Scan 12269 Method FTMS; HCD Score 153.27 m/z 1064.47 Gene names ZNF513

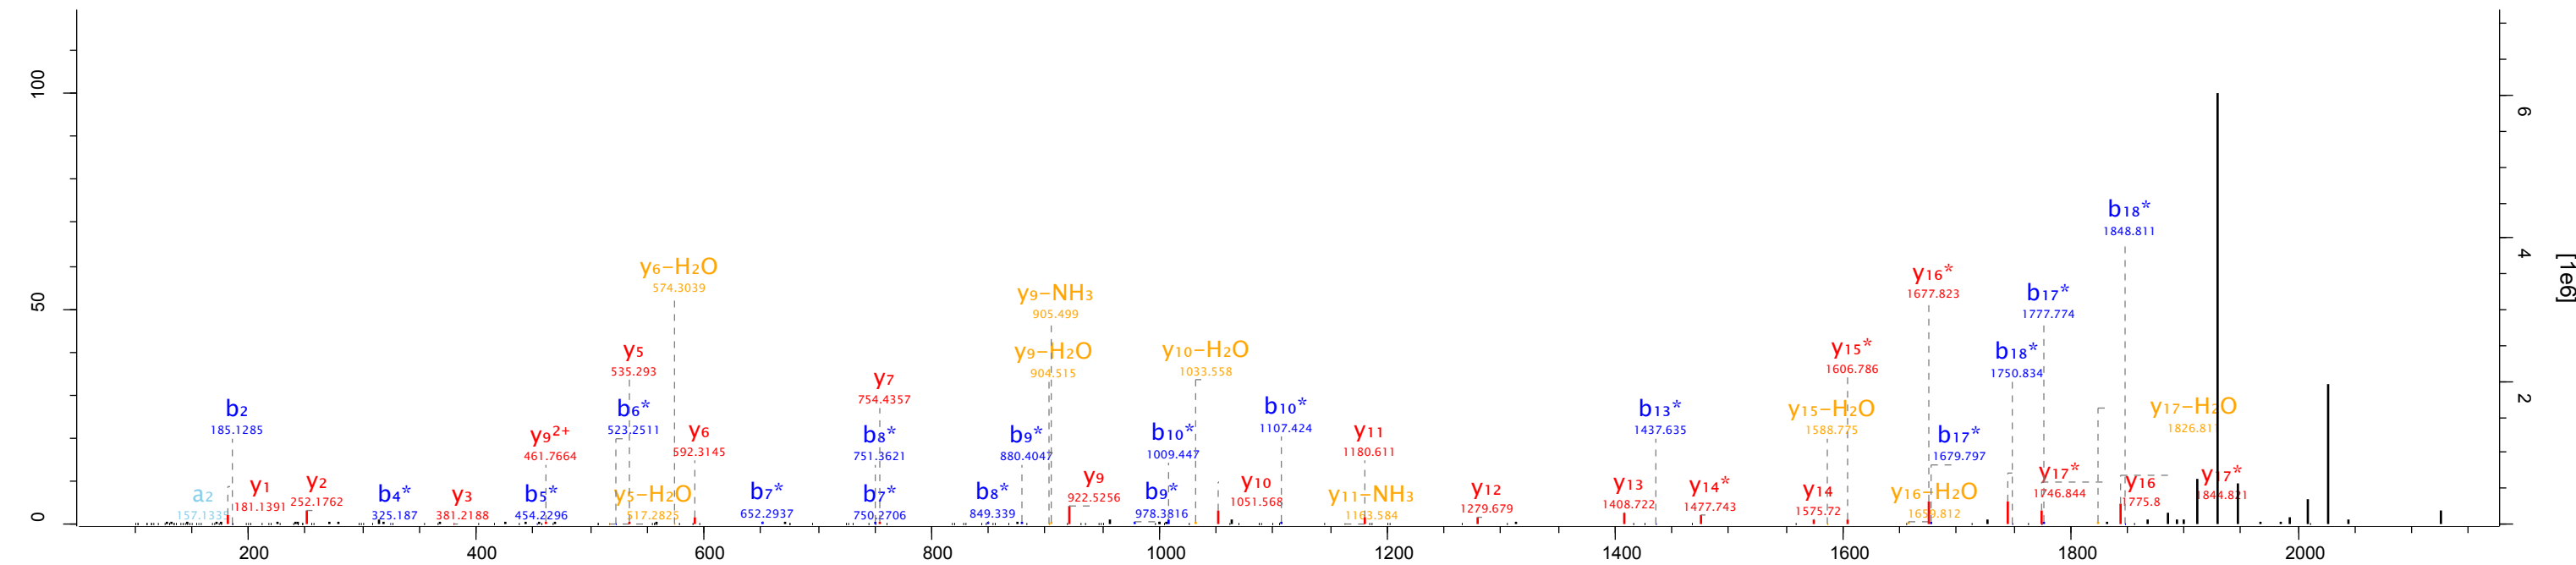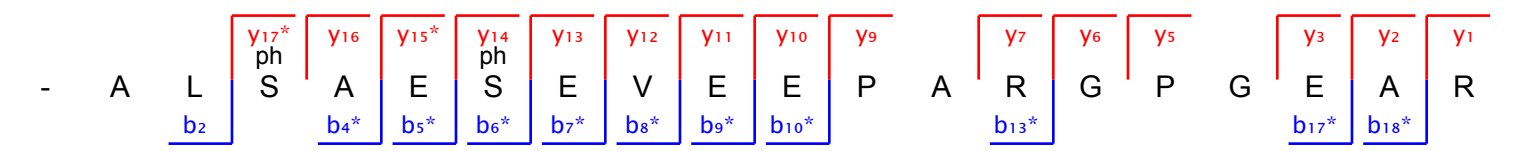



Raw file 20150814\_A375SR\_Phospho\_BR2\_03 Scan 12469 Method FTMS; HCD Score 170.1 m/z 800.67 Gene names PRRC2C

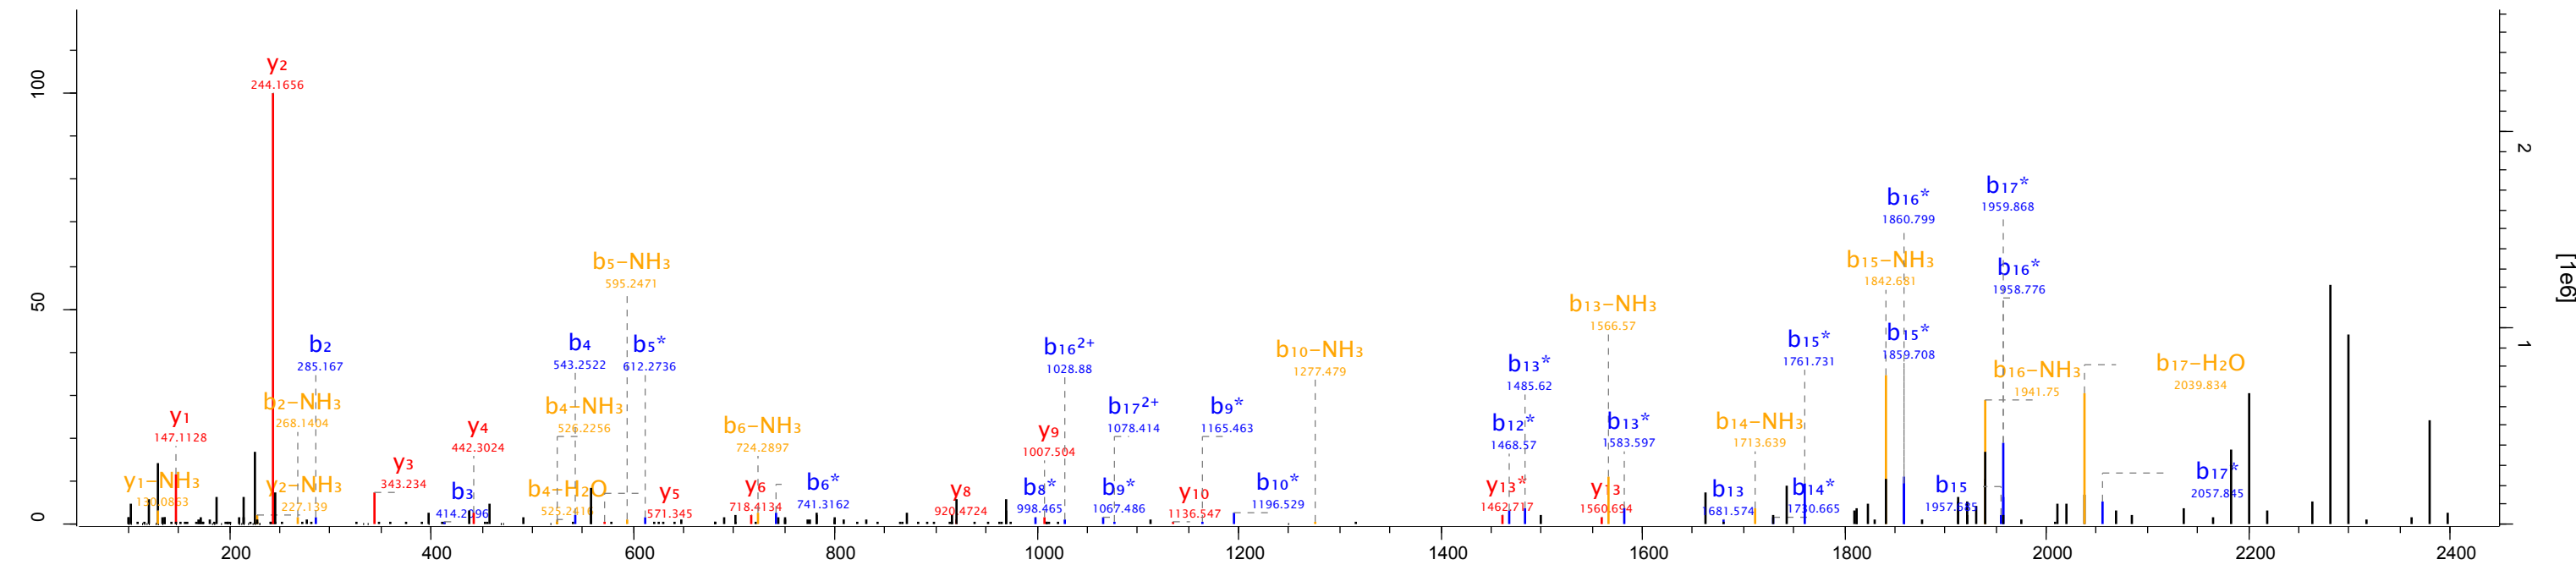

- Q R E E S<sup>ph</sup> E T R S<sup>ph</sup> E S S D F E V V P K -

b<sub>2</sub>
b<sub>3</sub>
b<sub>4</sub>
b<sub>5</sub><sup>\*</sup>
b<sub>6</sub><sup>\*</sup>
b<sub>8</sub><sup>\*</sup>
b<sub>9</sub><sup>\*</sup>
b<sub>10</sub><sup>\*</sup>
b<sub>12</sub><sup>\*</sup>
b<sub>13</sub>
b<sub>14</sub><sup>\*</sup>
b<sub>15</sub>
b<sub>16</sub><sup>\*</sup>
b<sub>17</sub><sup>\*</sup>

y<sub>13</sub>
y<sub>10</sub>
y<sub>9</sub>
y<sub>8</sub>
y<sub>6</sub>
y<sub>5</sub>
y<sub>4</sub>
y<sub>3</sub>
y<sub>2</sub>
y<sub>1</sub>

Raw file: 20150814\_A375SR\_Phospho\_BR2\_03  
 Scan: 12639 Method: FTMS; HCD Score: 180.03 m/z: 946.91 Gene names: FRMD6

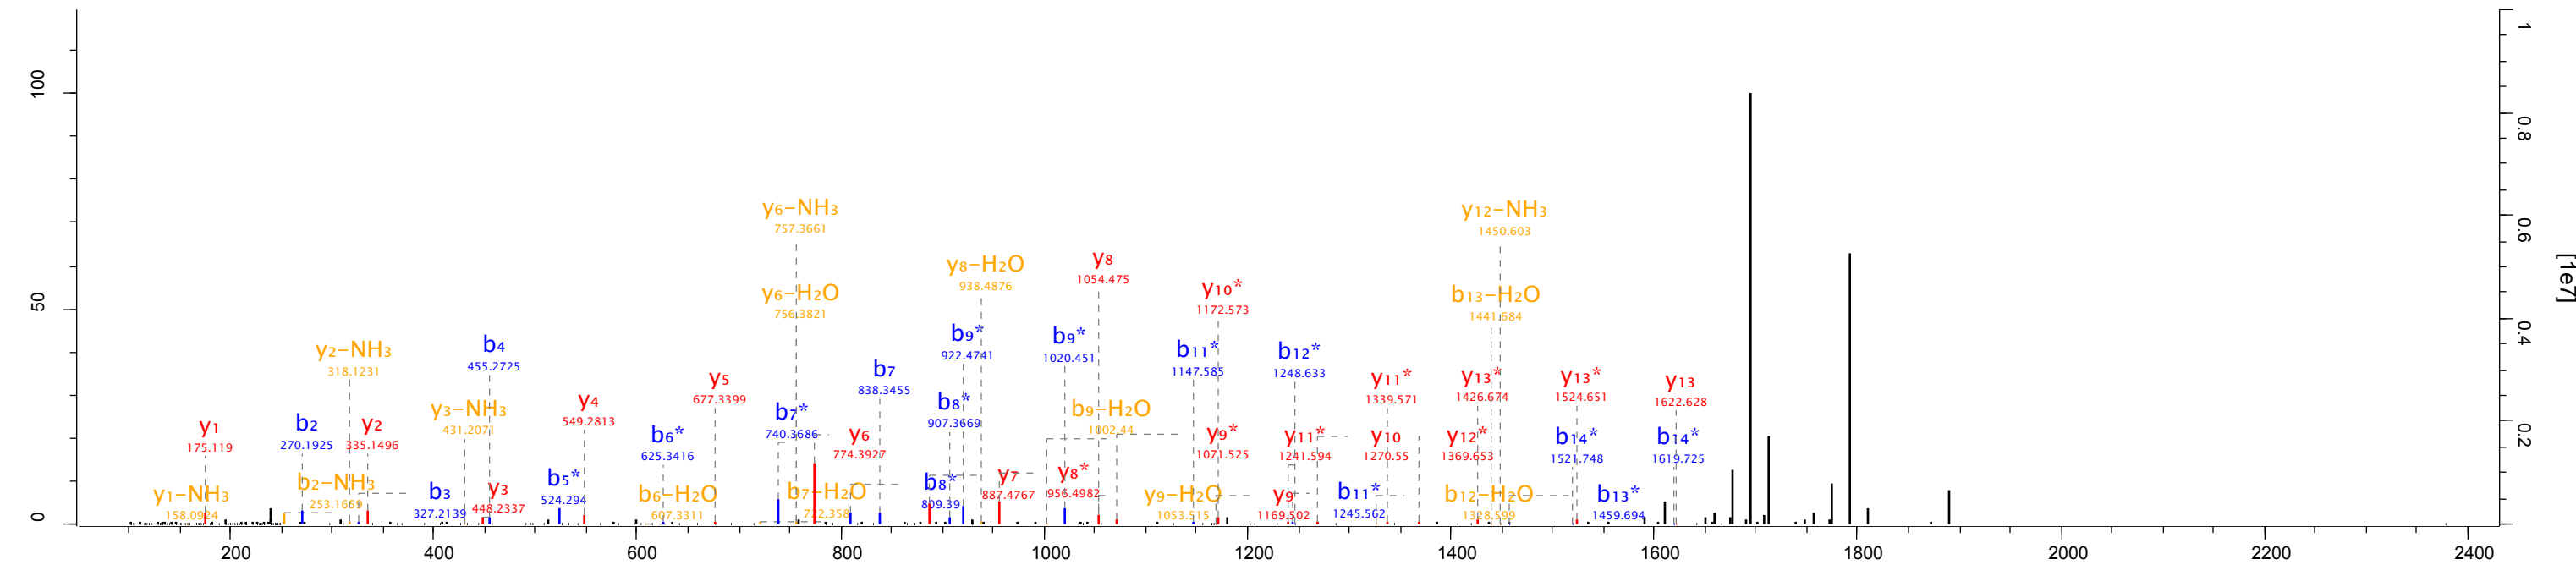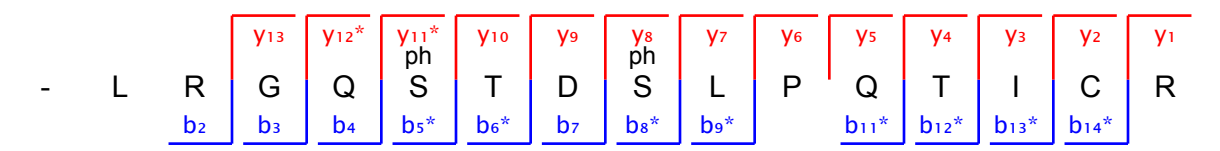

Raw file 20150814\_A375SR\_Phospho\_BR2\_03 Scan 12679 Method FTMS; HCD Score 101.57 m/z 564.29 Gene names ARFIP1

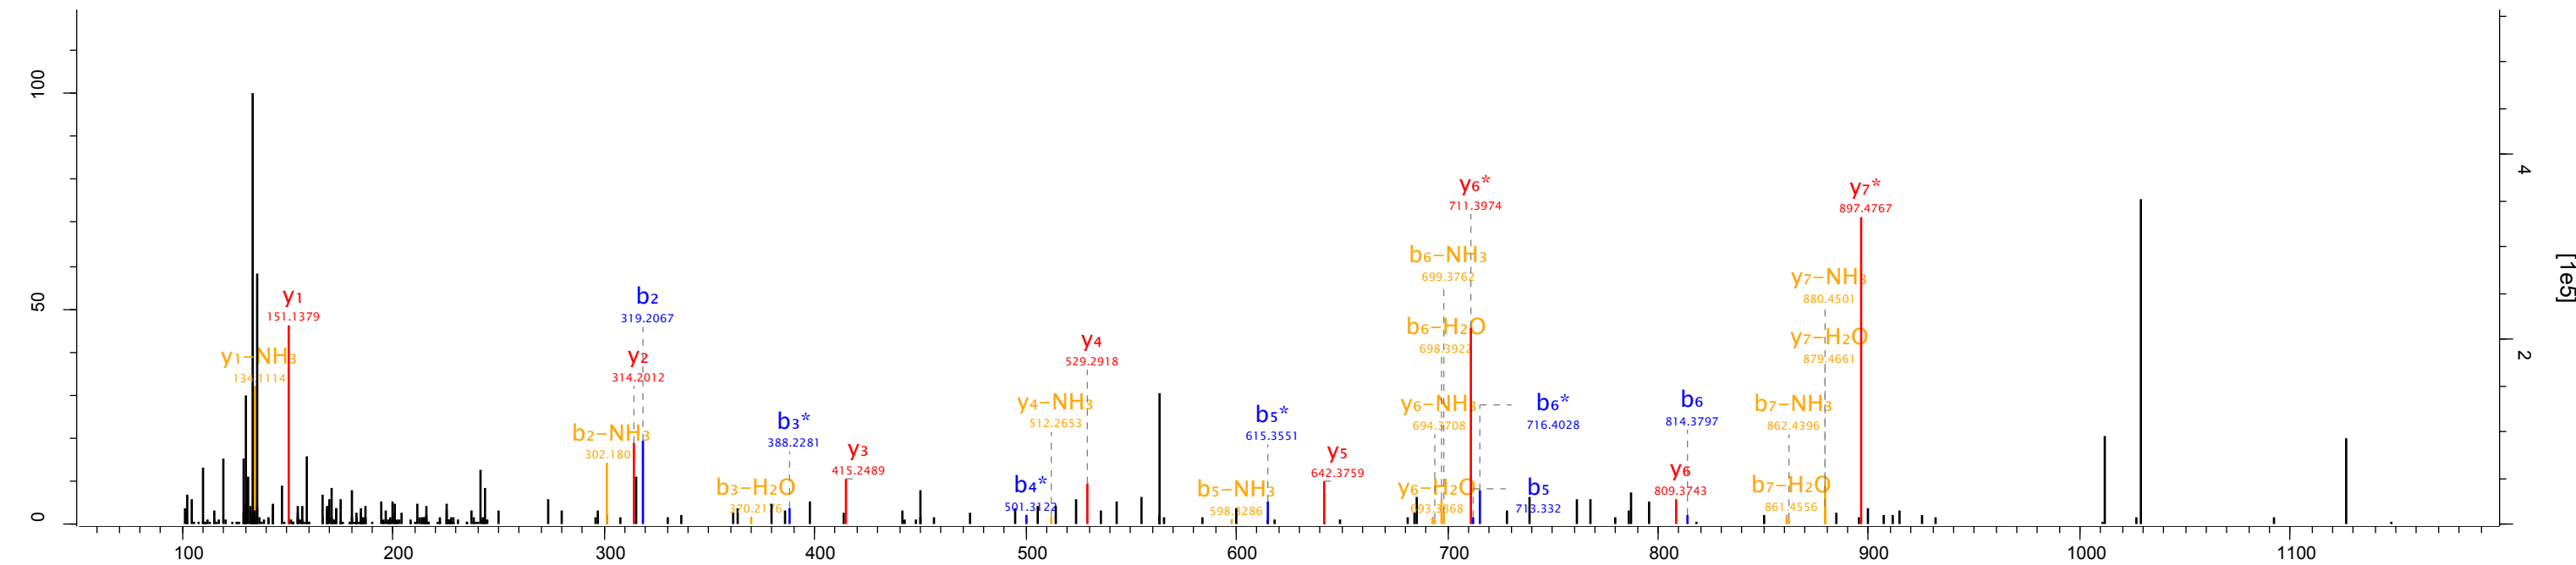

- K y7\* y6  
ph y5 y4 y3 y2 y1  
b2 b3\* b4\* b5 b6 Y K -

Raw file 20150814\_A375SR\_Phospho\_BR2\_03 Scan 13099 Method FTMS; HCD Score 260.96 m/z 725.85 Gene names FLII

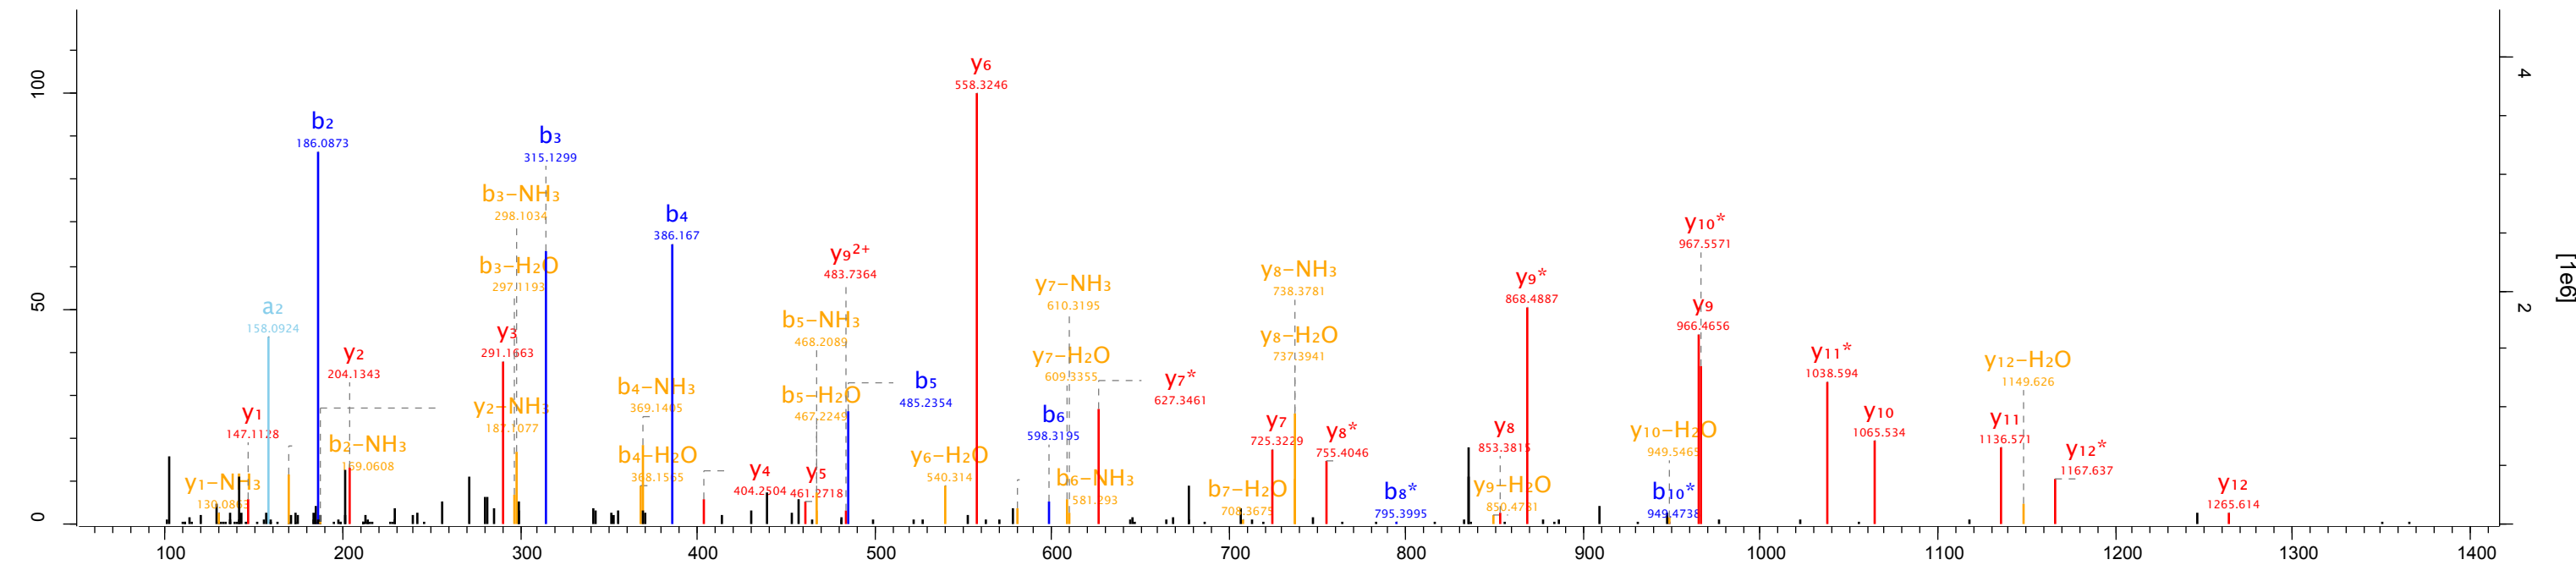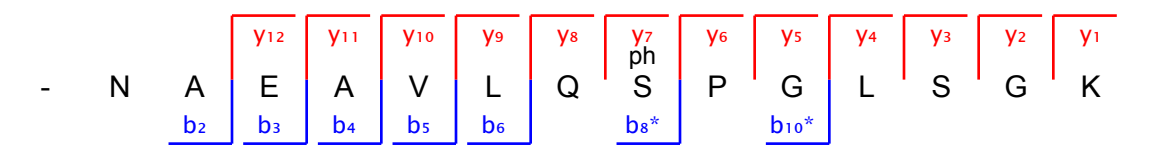

Raw file 20150814\_A375SR\_Phospho\_BR2\_03 Scan 13159 Method FTMS; HCD Score 102.47 m/z 1114.83 Gene names TBC1D9B

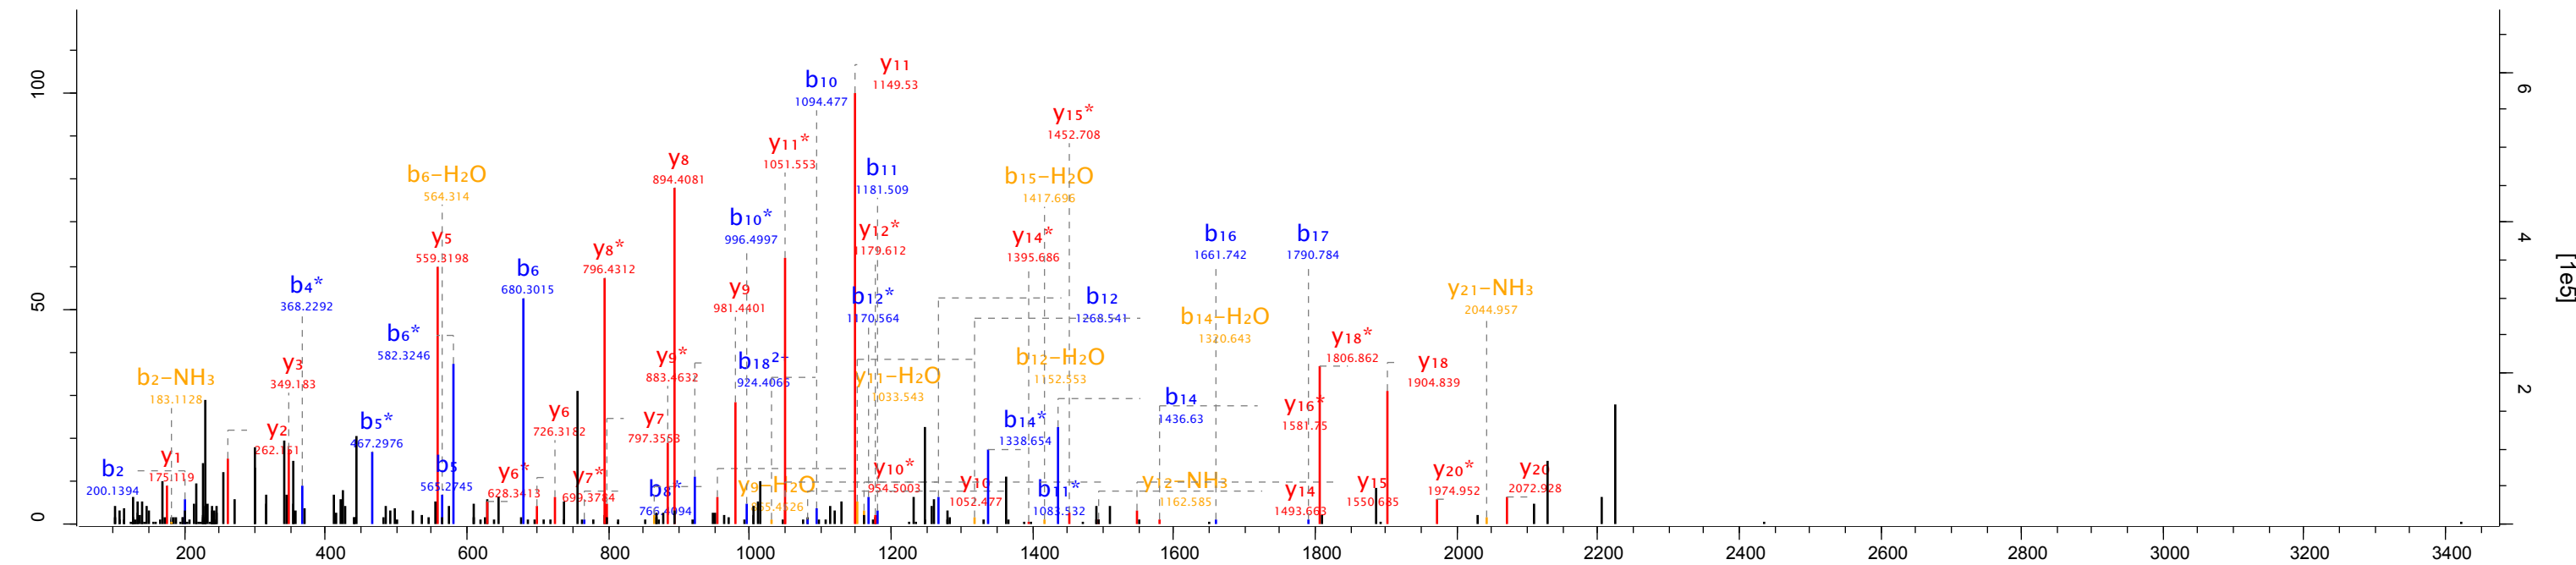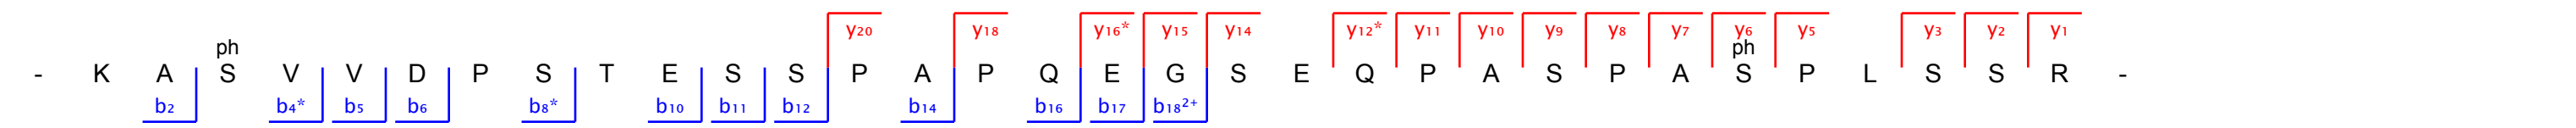

Raw file 20150814\_A375SR\_Phospho\_BR2\_03 Scan 13239 Method FTMS; HCD Score 114.64 m/z 1029.44 Gene names CTAG1A

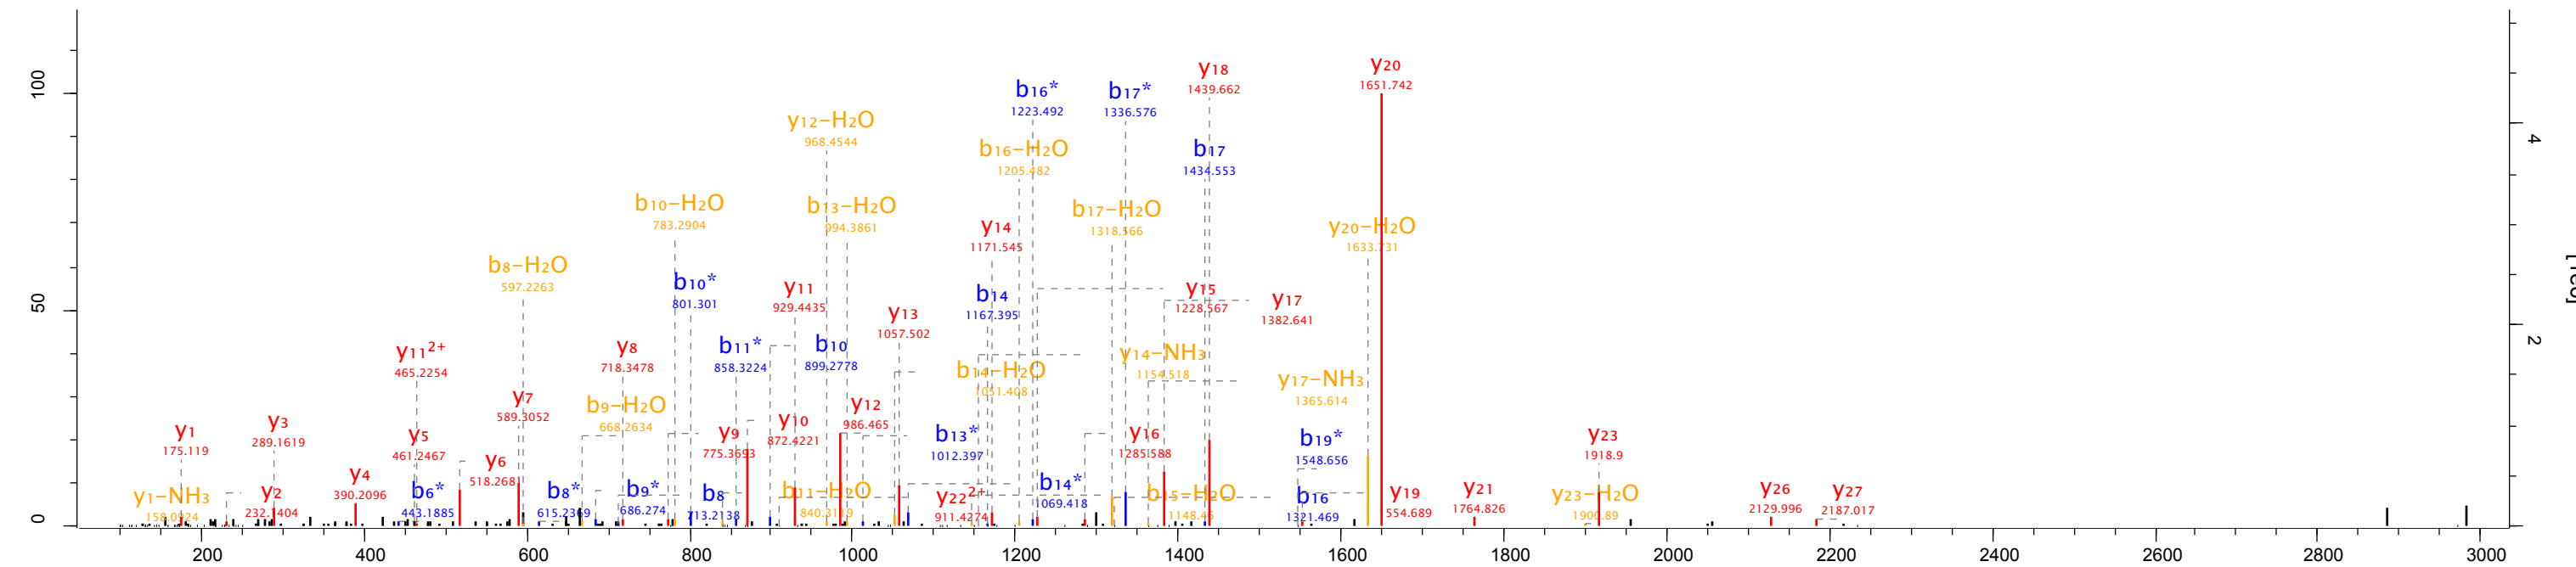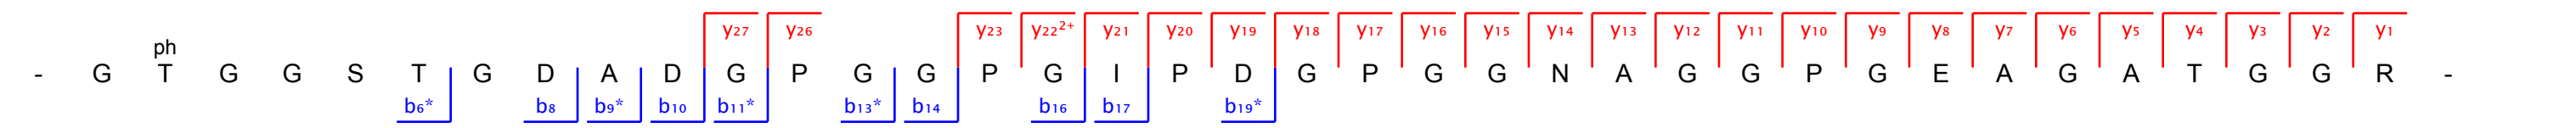

Raw file 20150814\_A375SR\_Phospho\_BR2\_03 Scan 13289 Method FTMS; HCD Score 174.76 m/z 873.83 Gene names FOXK1

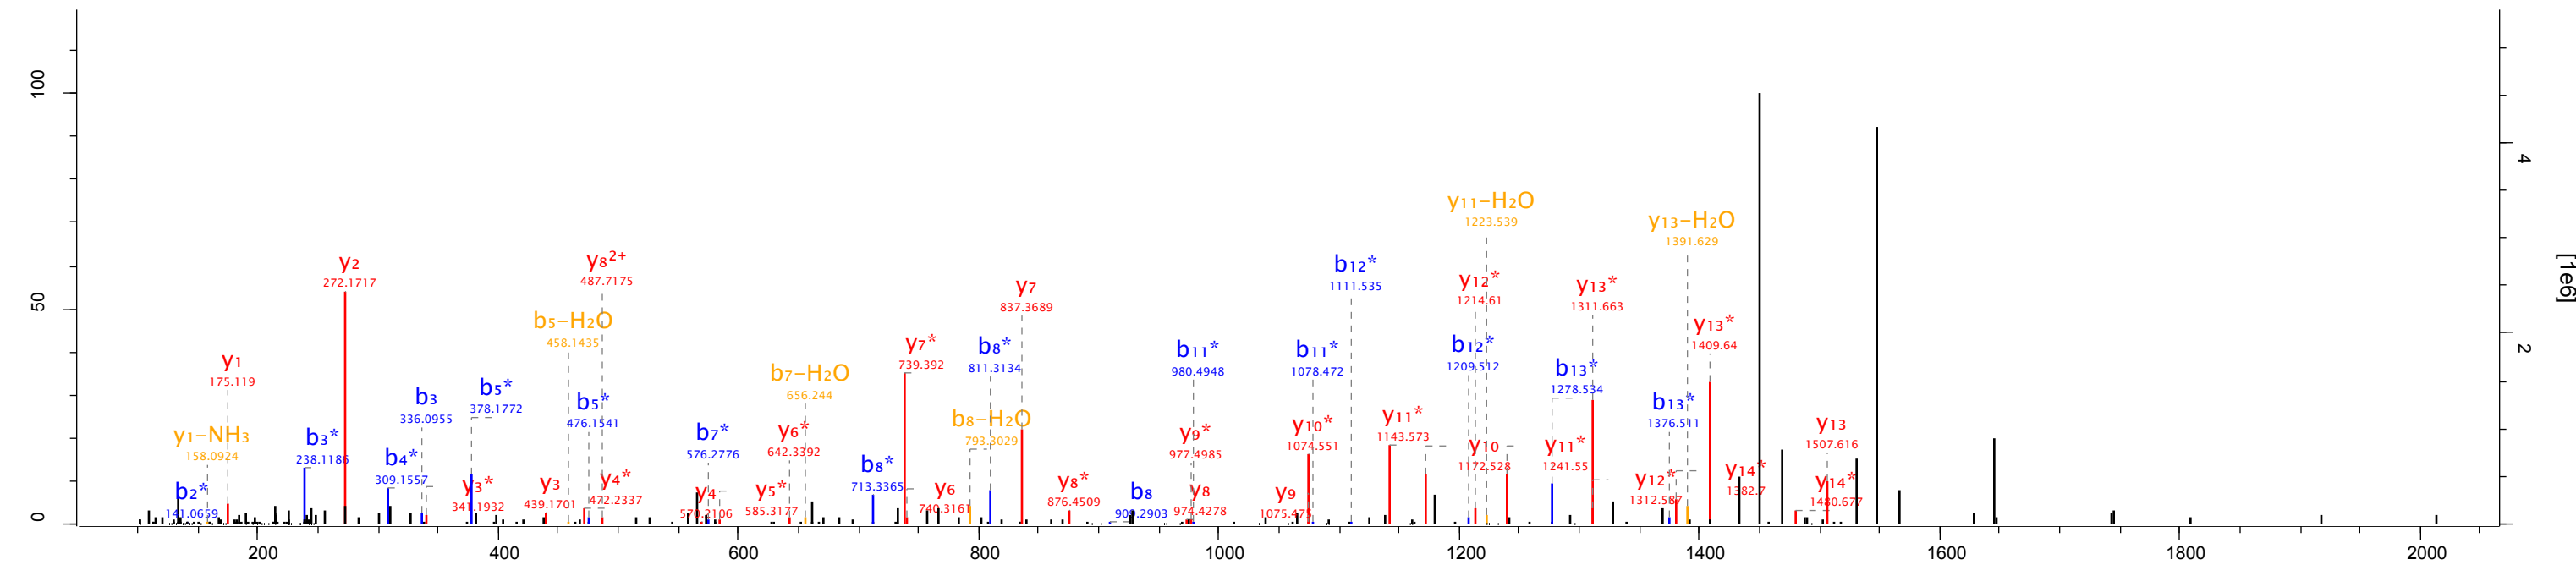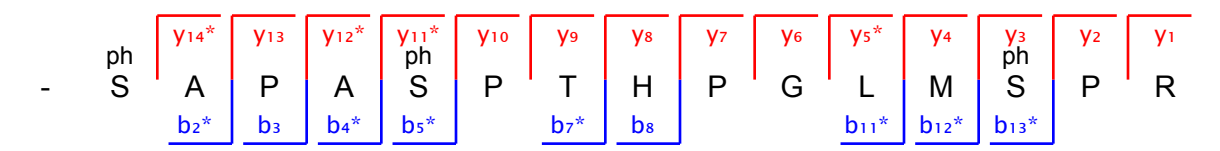

Raw file: 20150814\_A375SR\_Phospho\_BR2\_03  
 Scan: 13599 Method: FTMS; HCD Score: 212.32 m/z: 1331.59 Gene names: FUBP1

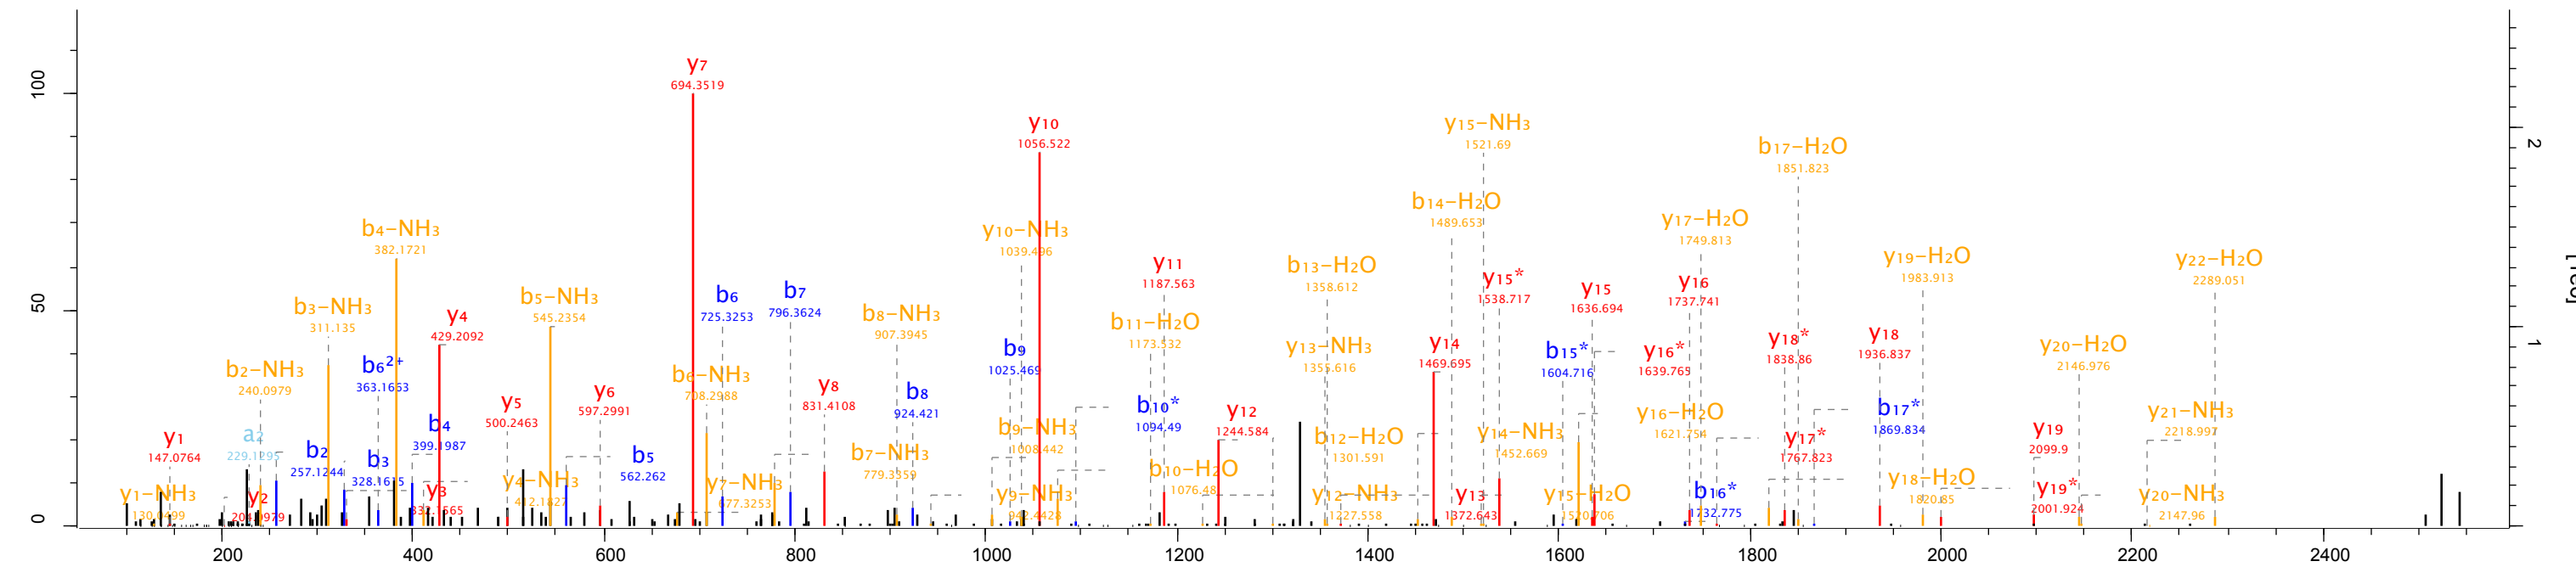

Protein sequence: - Q Q A A Y Y A Q T S P Q G M P Q H P P A P Q G Q -

Fragmentation mapping (b and y ions):

- Q (b2)
- Q (b3)
- A (b4)
- A (b5)
- Y (b6)
- A (b7)
- Q (b8)
- T (b9)
- S (b10\*)
- P (b15\*)
- Q (b16\*)
- H (b17\*)
- P (y1)
- P (y2)
- A (y3)
- P (y4)
- P (y5)
- A (y6)
- P (y7)
- P (y8)



Raw file: 20150814\_A375SR\_Phospho\_BR2\_03  
 Scan: 13679 Method: FTMS; HCD Score: 192.56 m/z: 1069.47 Gene names: PRKAR1A

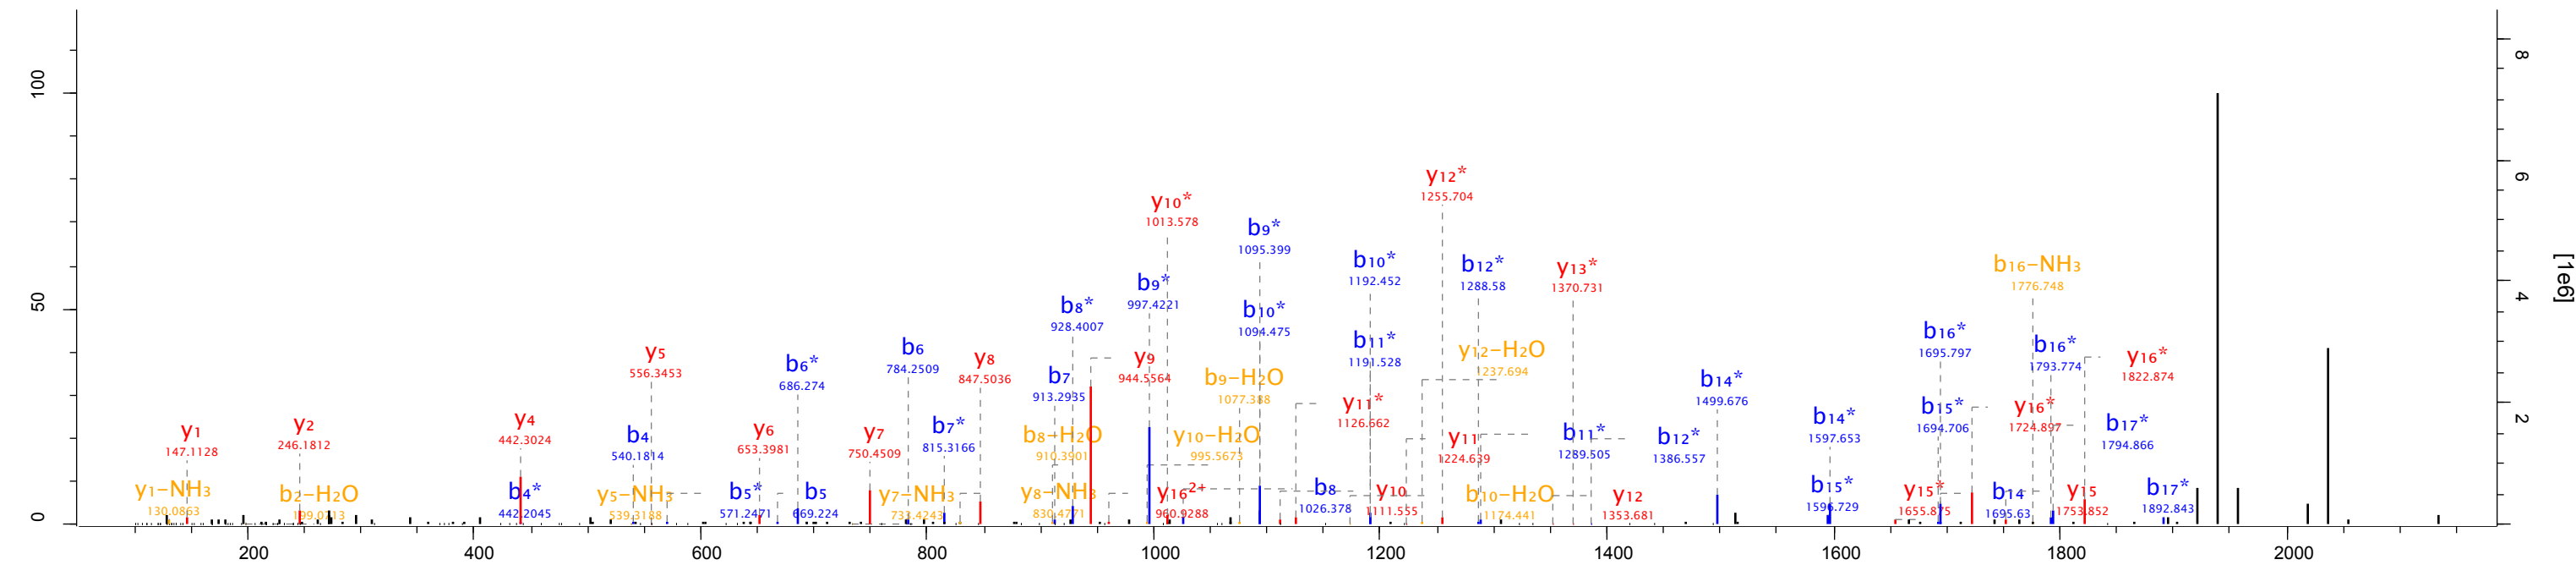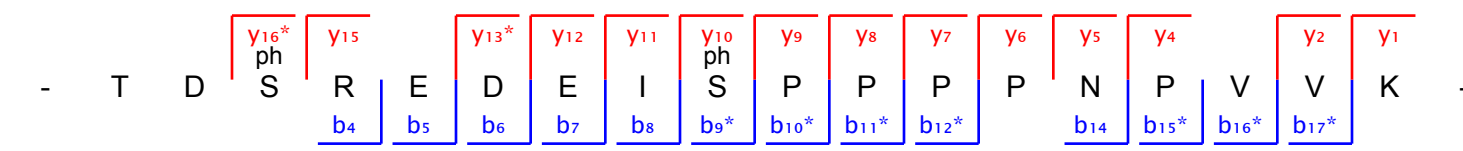

Raw file: 20150814\_A375SR\_Phospho\_BR2\_03  
 Scan: 13789 Method: FTMS; HCD Score: 170.22 m/z: 620.33 Gene names: KLC2

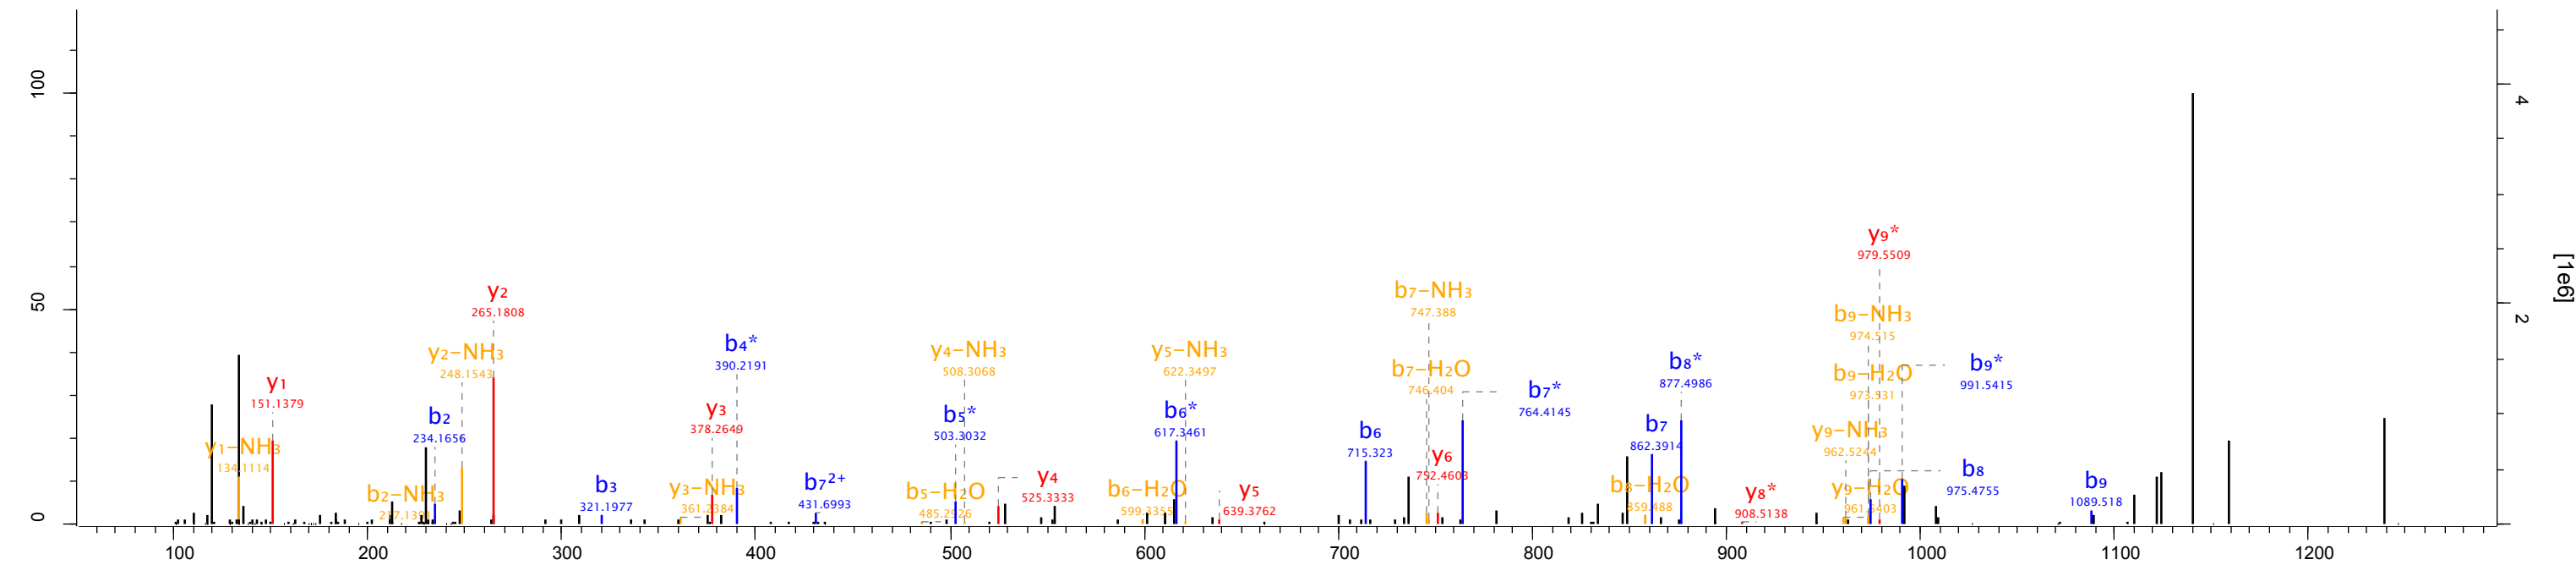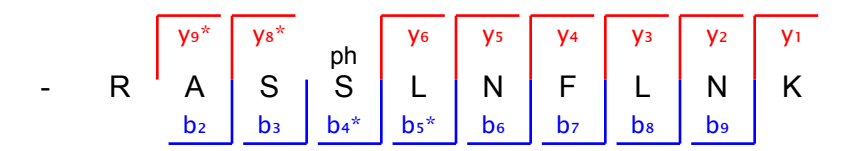

Raw file 20150814\_A375SR\_Phospho\_BR2\_03 Scan 13829 Method FTMS; HCD Score 109.46 m/z 947.39 Gene names SHROOM2

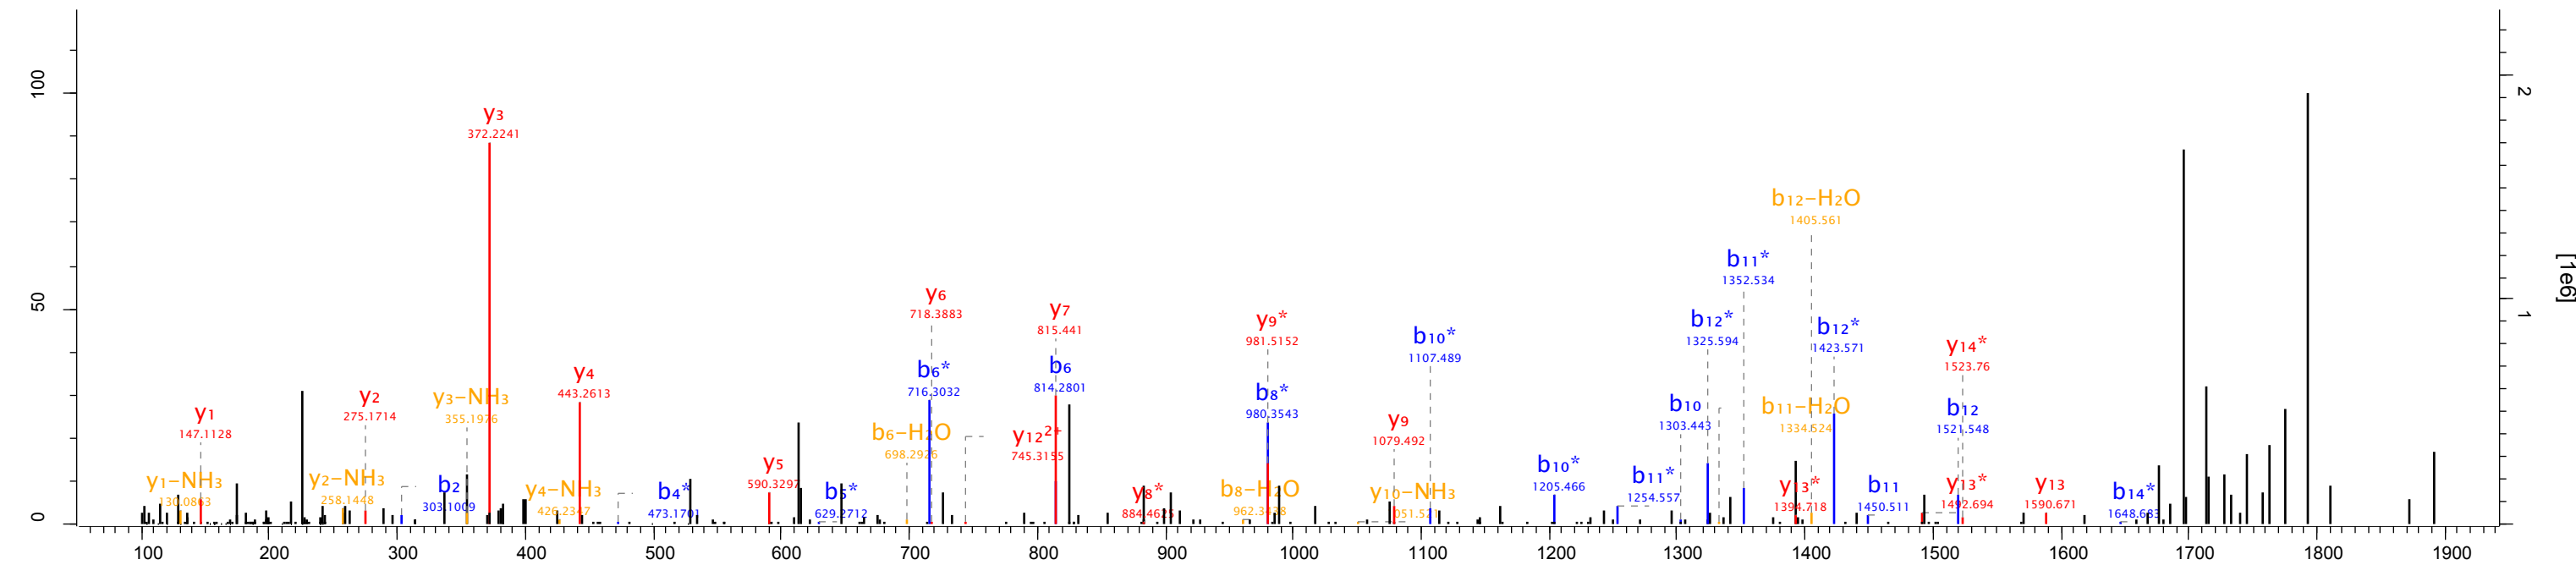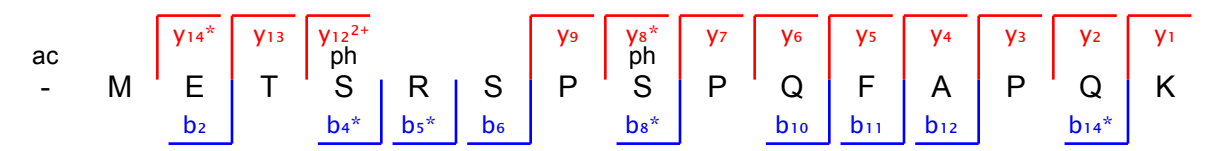

Raw file: 20150814\_A375SR\_Phospho\_BR2\_03  
 Scan: 13919 Method: FTMS; HCD Score: 292.27 m/z: 962.9 Gene names: LIG1

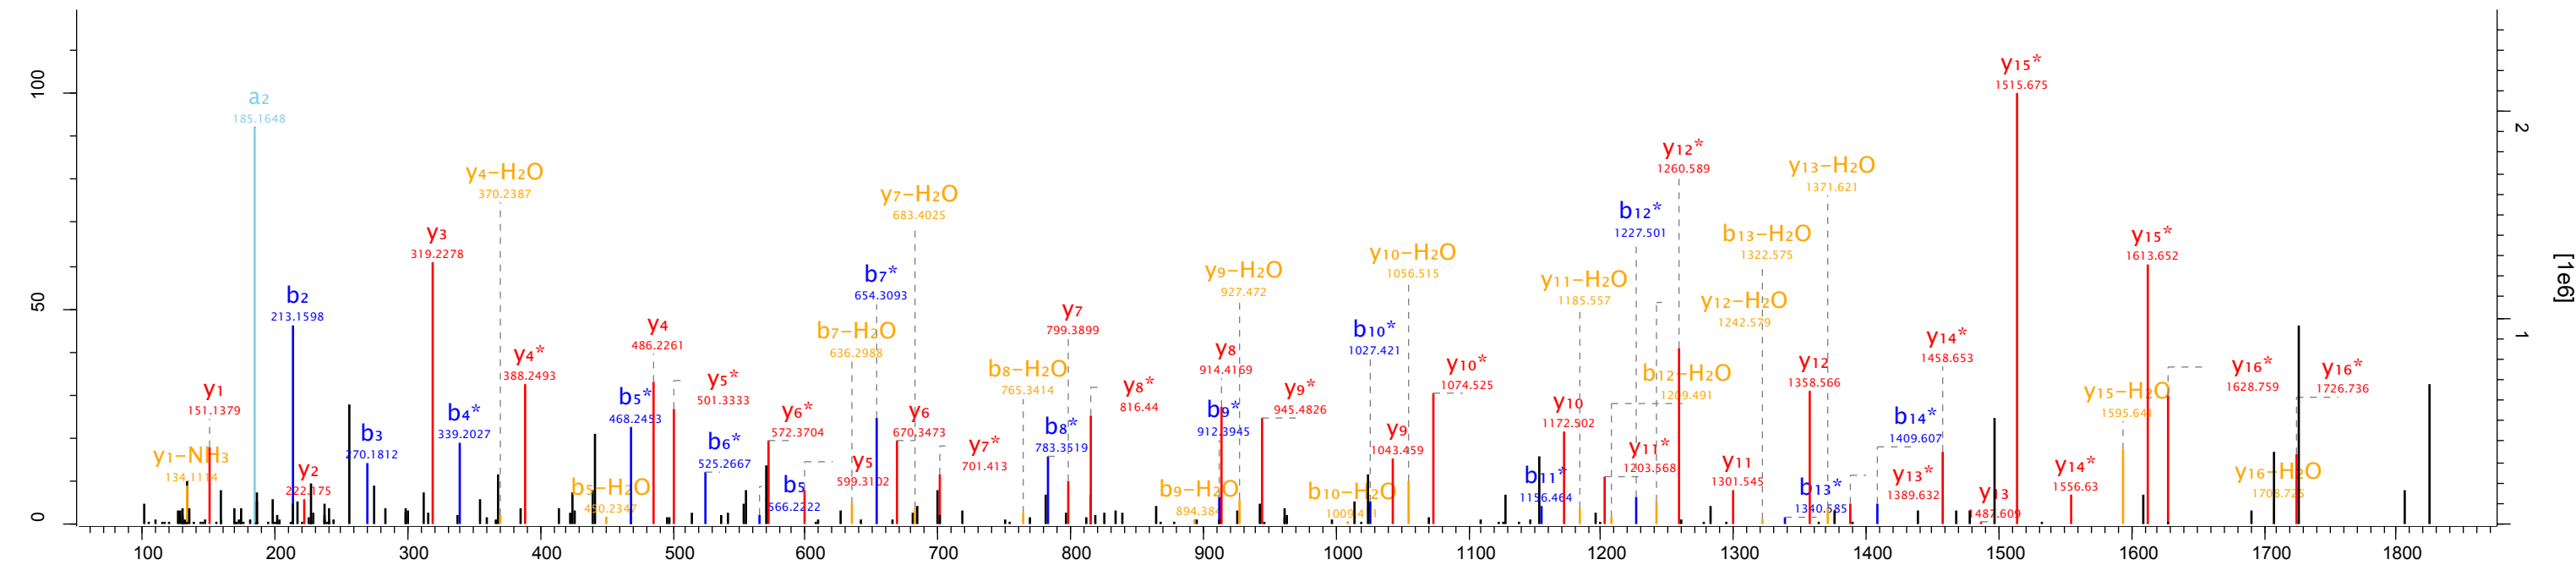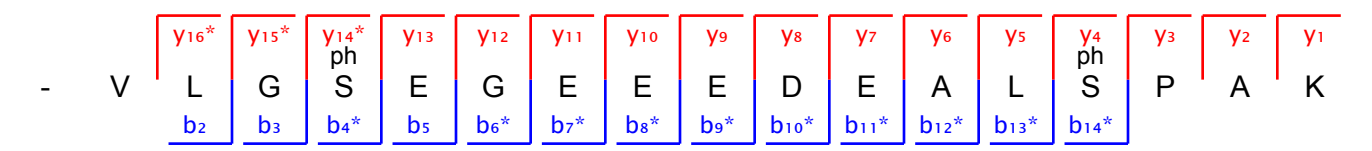

Raw file: 20150814\_A375SR\_Phospho\_BR2\_03  
 Scan: 14089 Method: FTMS; HCD Score: 49.59 m/z: 883.06 Gene names: REPS1

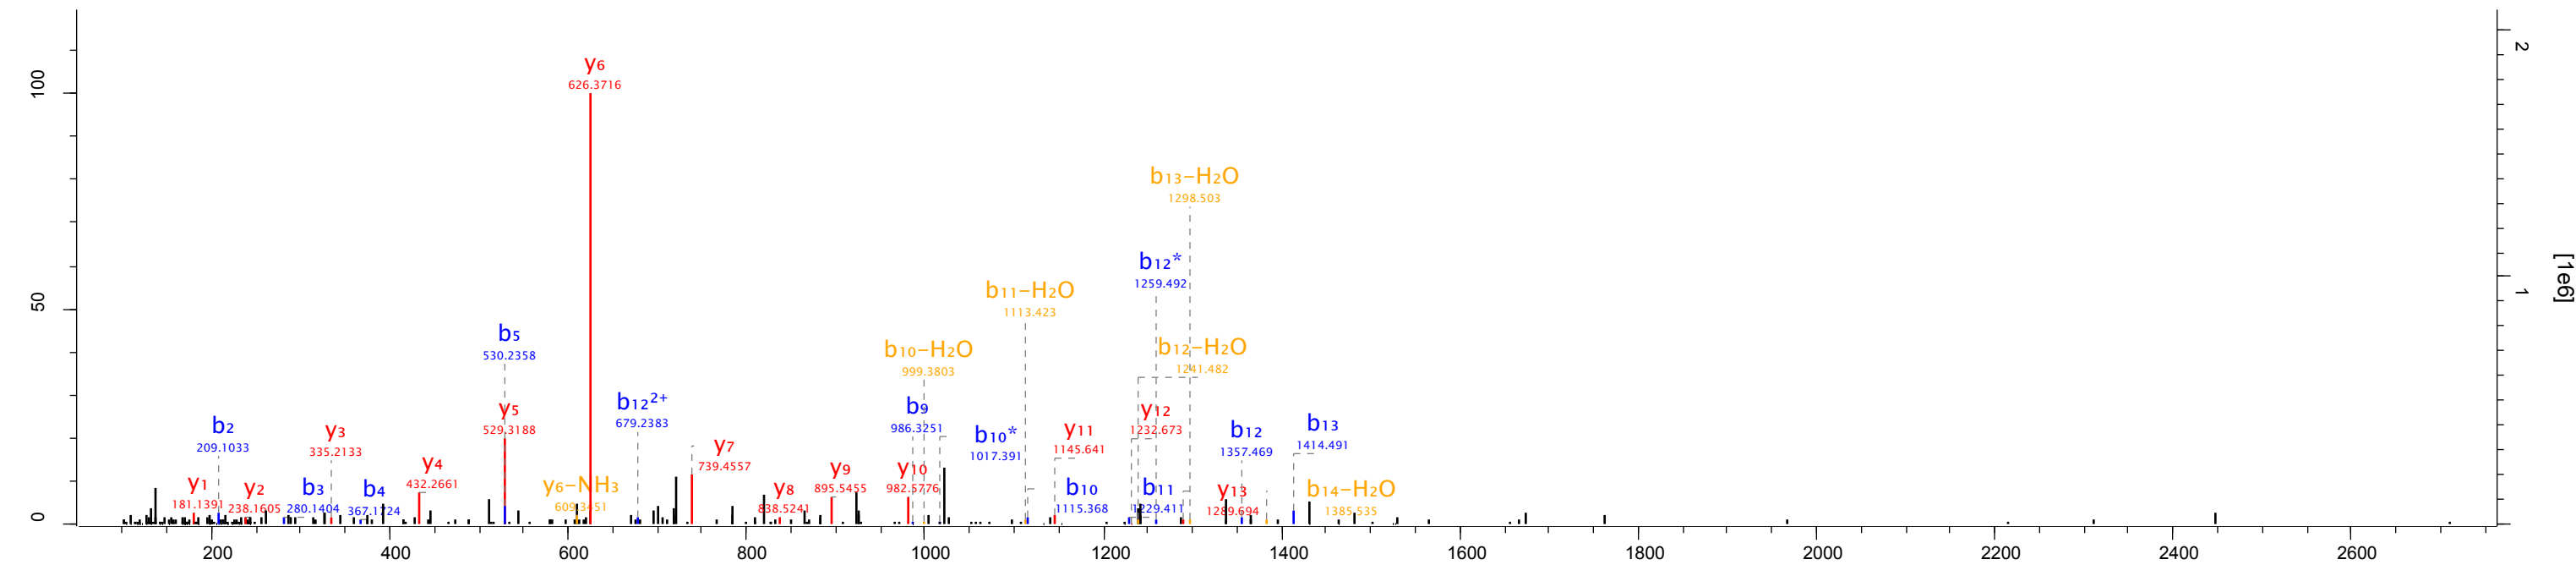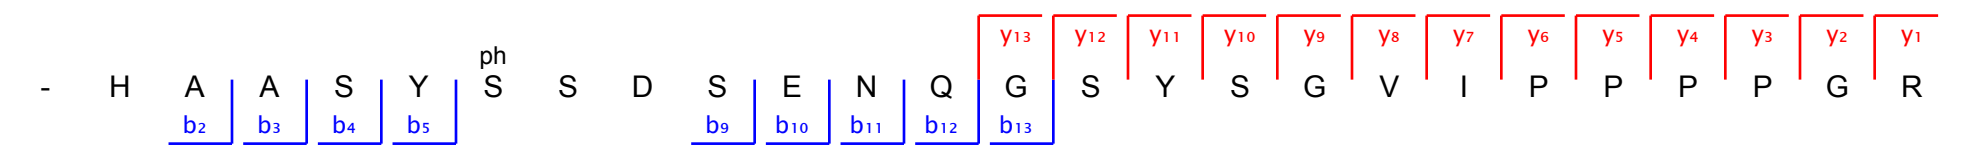

Raw file 20150814\_A375SR\_Phospho\_BR2\_03 Scan 14299 Method FTMS; HCD Score 116.55 m/z 963.9 Gene names HUWE1

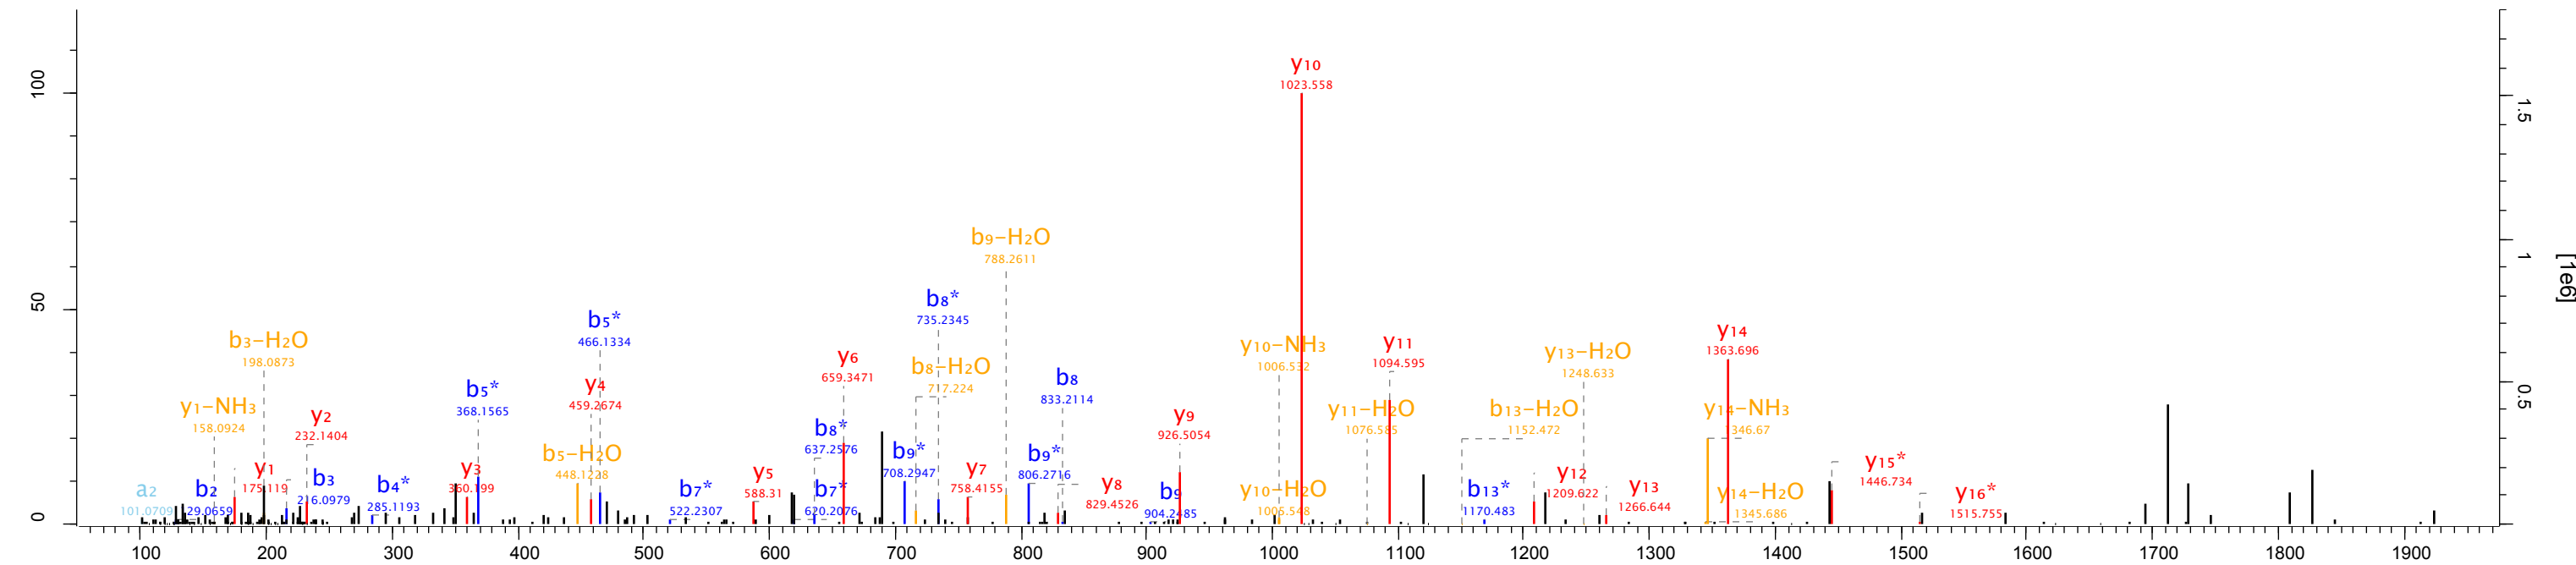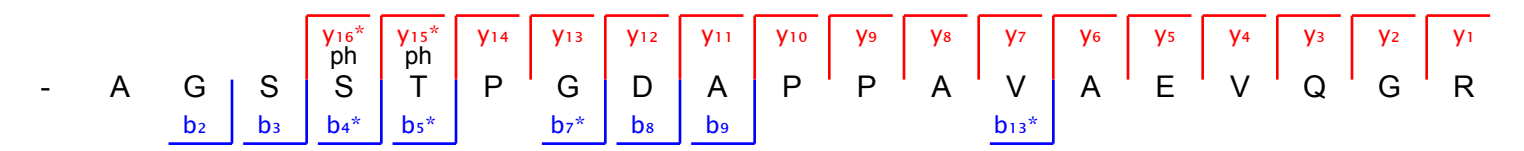

Raw file 20150814\_A375SR\_Phospho\_BR2\_03 Scan 14449 Method FTMS; HCD Score 75.18 m/z 653.62 Gene names KIF21B

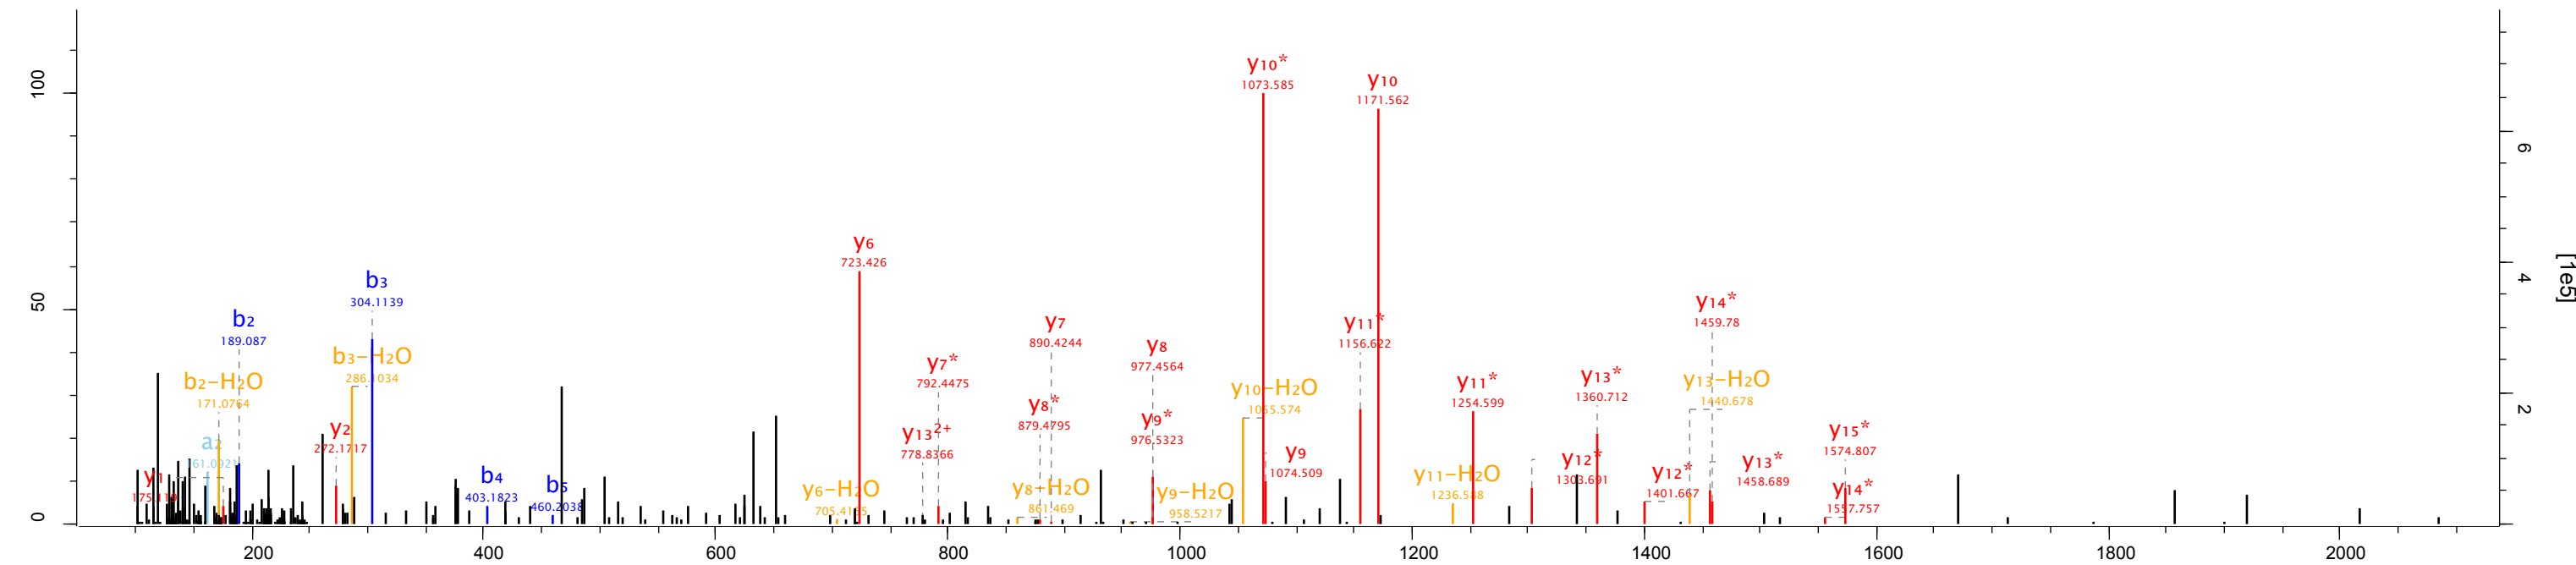

- S T D V G F T P P S S P P T R P R -

Fragmentation mapping (b-ions in blue, y-ions in red):

- b<sub>2</sub> (under T)
- b<sub>3</sub> (under D)
- b<sub>4</sub> (under V)
- b<sub>5</sub> (under G)
- y<sub>15</sub>\* (under D)
- y<sub>14</sub>\* (under V)
- y<sub>13</sub>\* (under G)
- y<sub>12</sub>\* (under F)
- y<sub>11</sub>\* (under T)
- y<sub>10</sub> (under P)
- y<sub>9</sub> (under P)
- y<sub>8</sub> (under S)
- y<sub>7</sub> (under S)
- y<sub>6</sub> (under P)
- y<sub>2</sub> (under P)
- y<sub>1</sub> (under R)

Raw file: 20150814\_A375SR\_Phospho\_BR2\_03  
 Scan: 14539 Method: FTMS; HCD Score: 154.88 m/z: 679.01 Gene names: ANLN

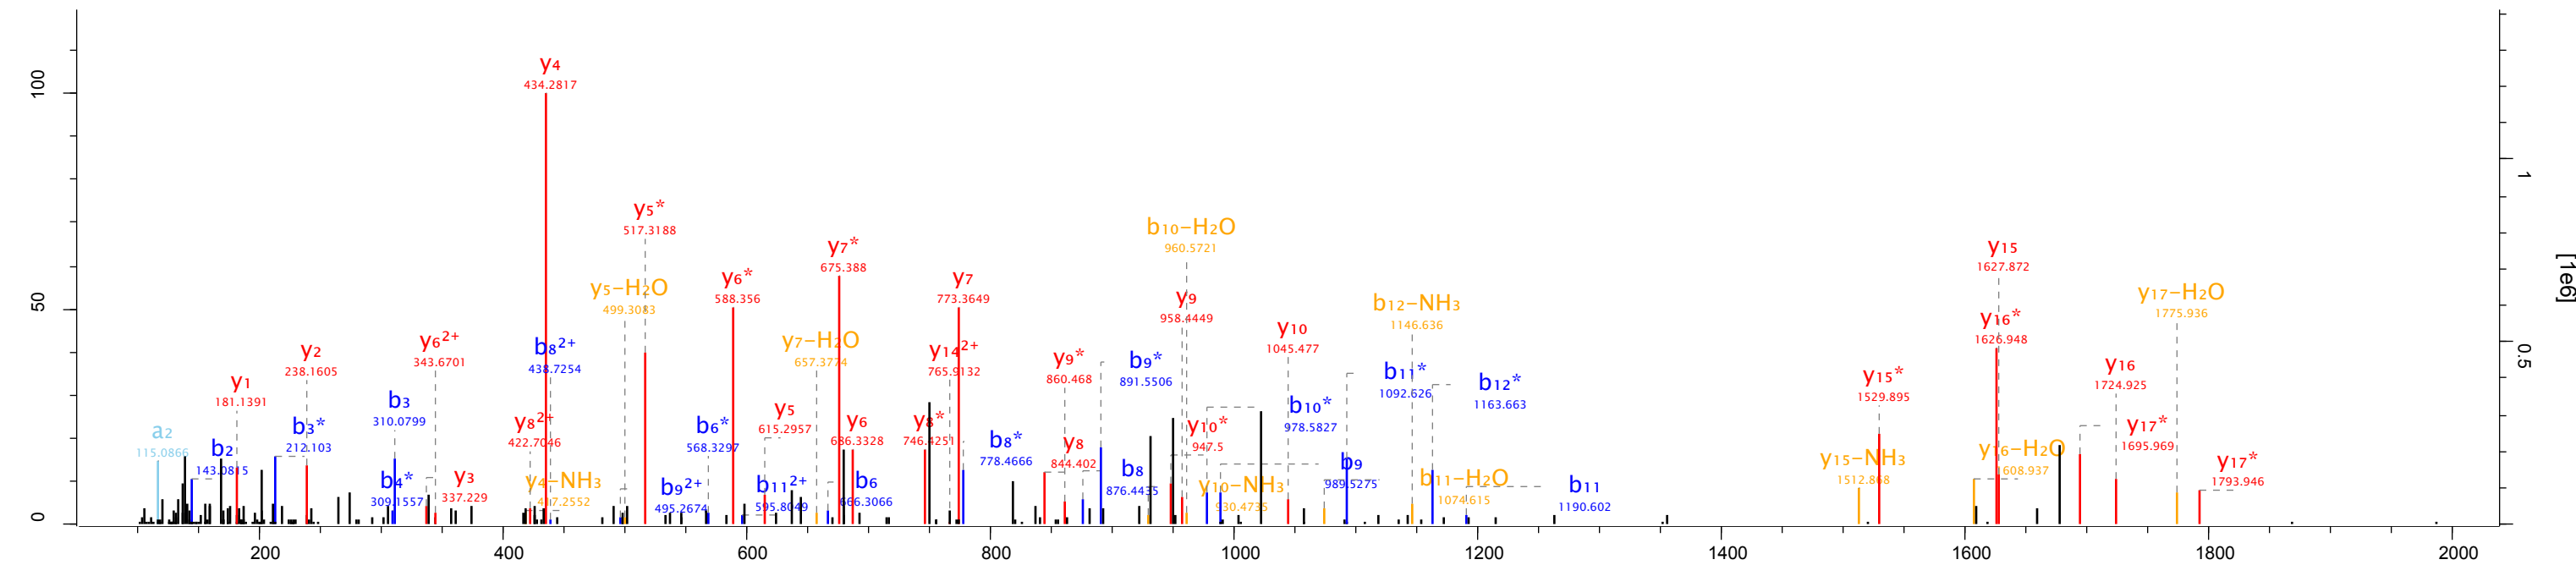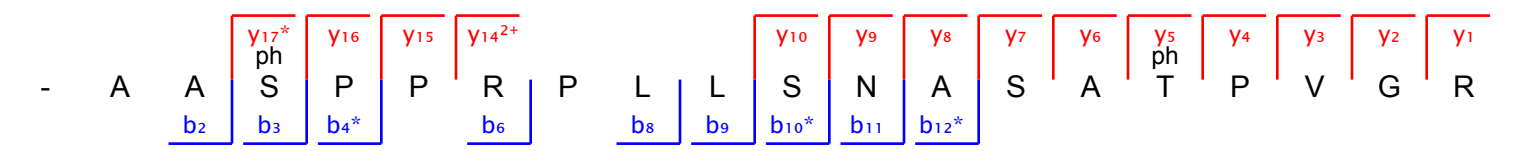



Raw file 20150814\_A375SR\_Phospho\_BR2\_03 Scan 14579 Method FTMS; HCD Score 280.78 m/z 904.9 Gene names AHNAK

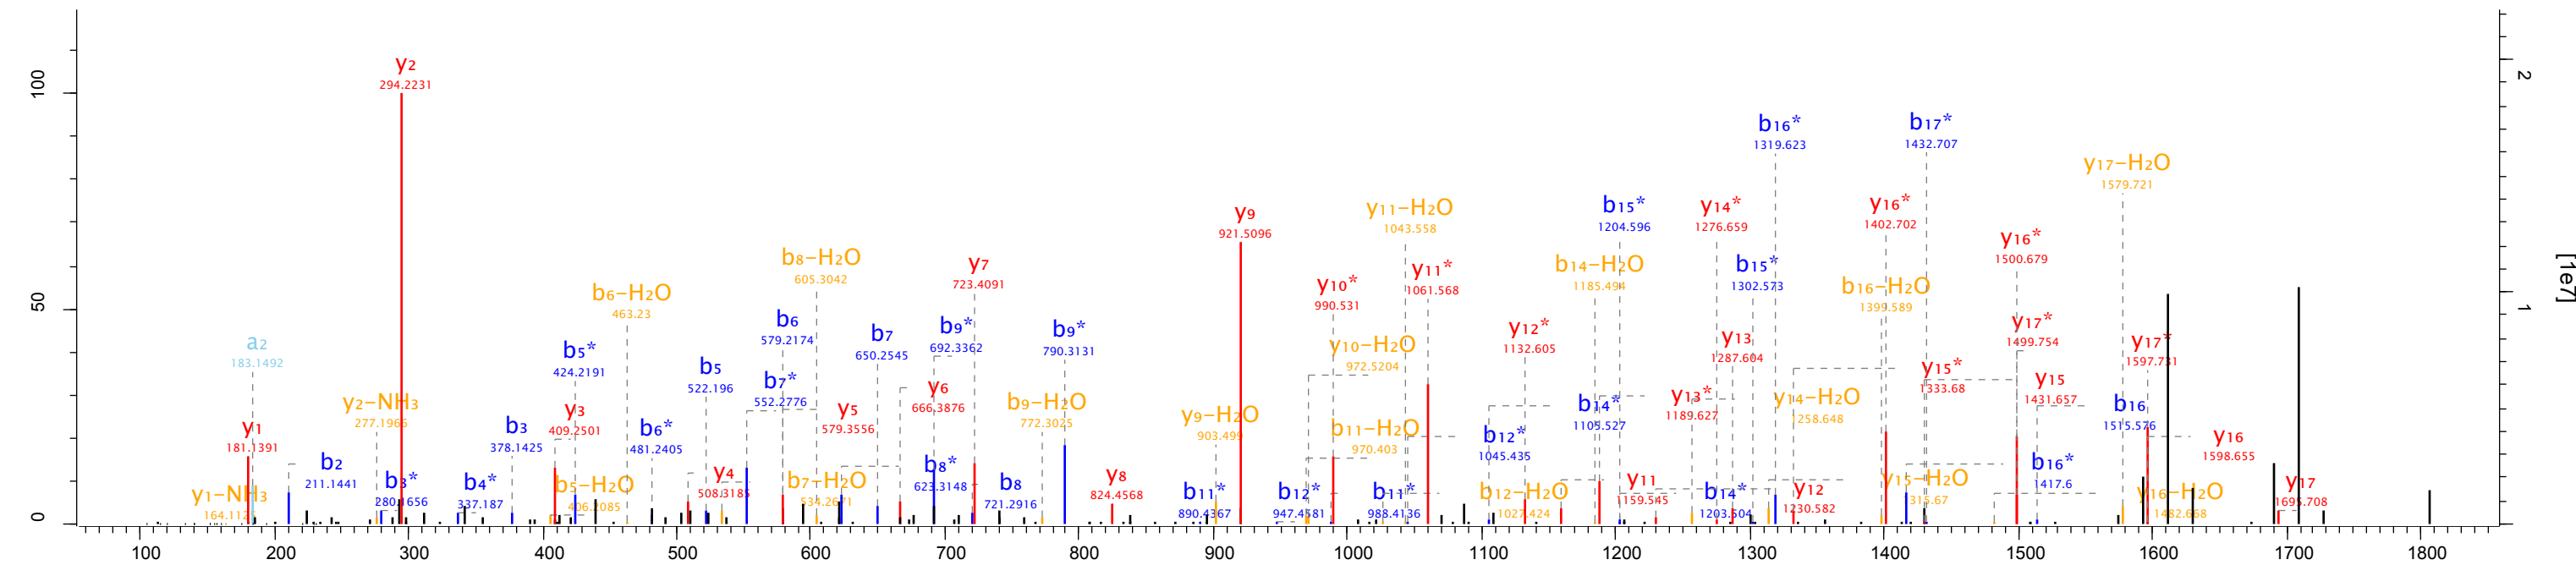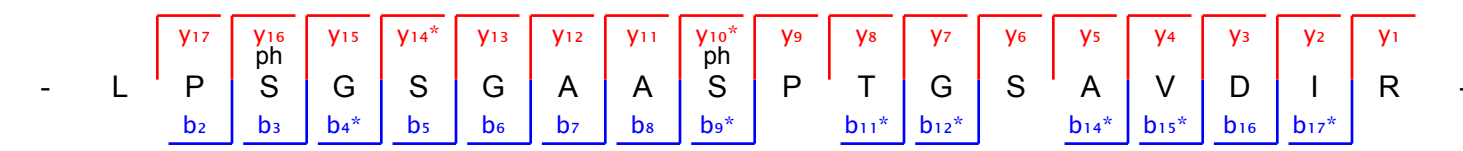

Raw file 20150814\_A375SR\_Phospho\_BR2\_03 Scan 14599 Method FTMS; HCD Score 229.6 m/z 1089.94 Gene names TSC2

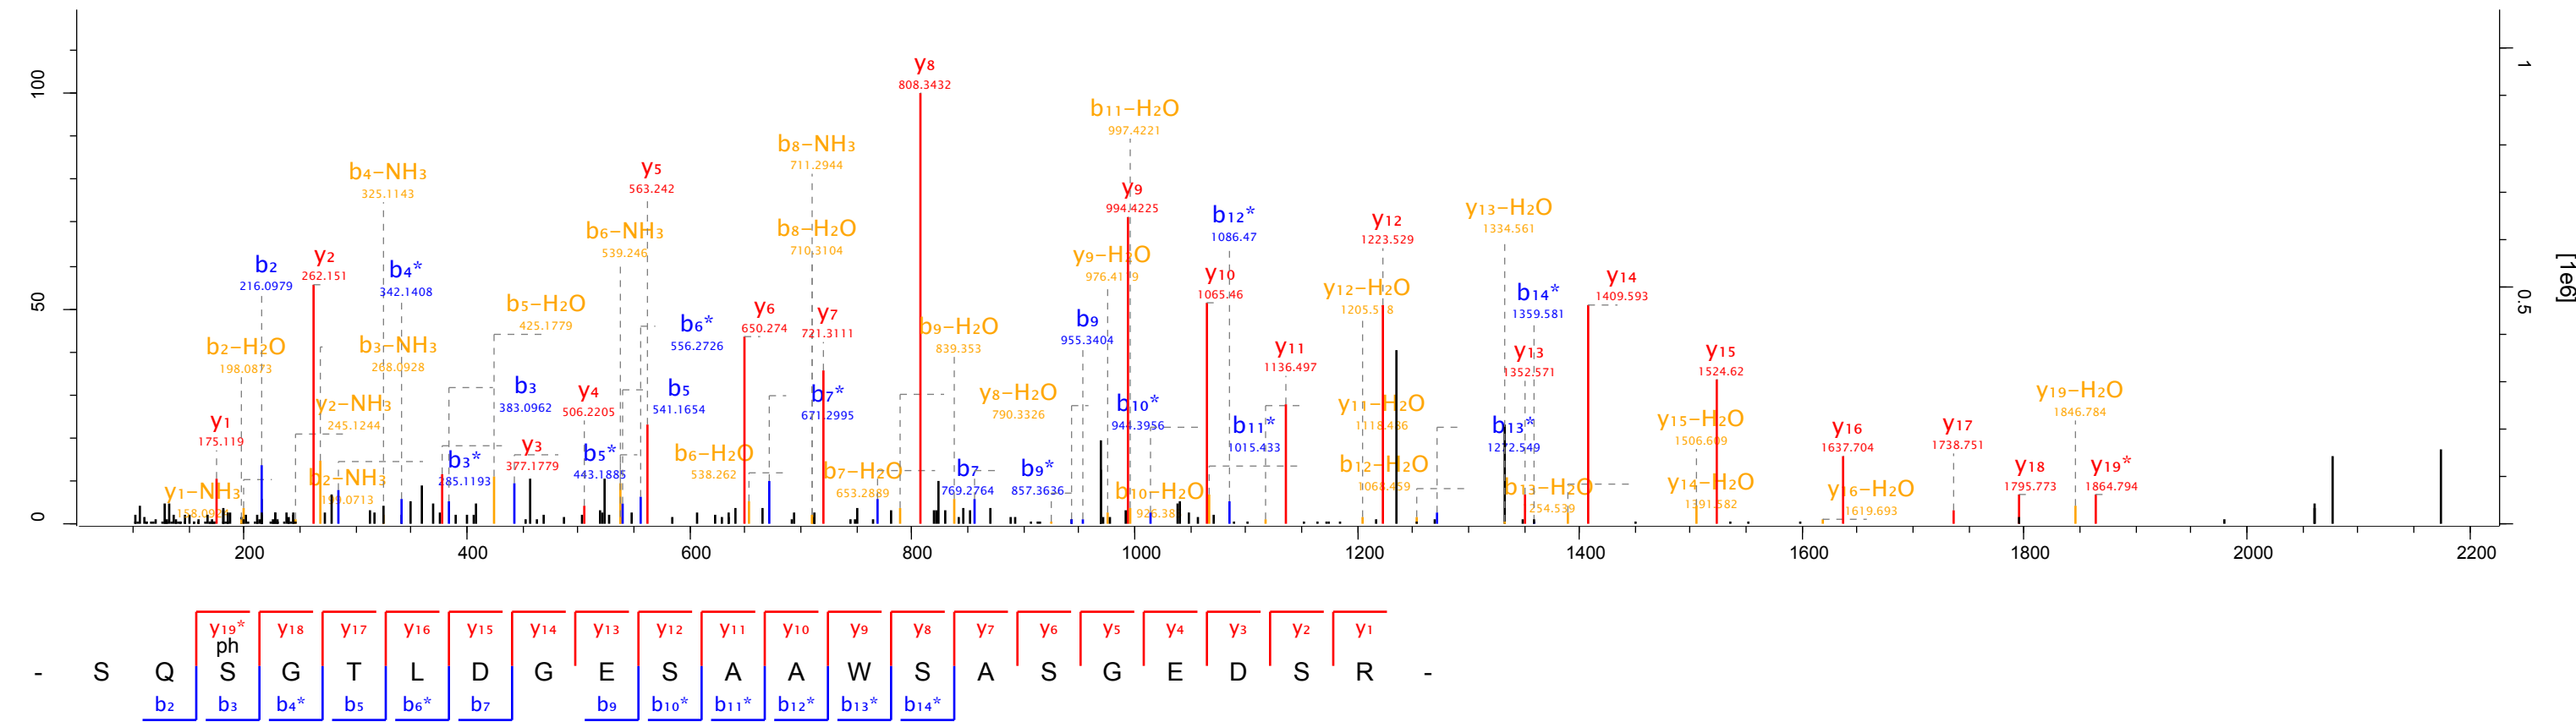

Raw file  
 20150814\_A375SR\_Phospho\_BR2\_03  
 Scan 14609 Method FTMS; HCD Score 168.74 m/z 997.47 Gene names ZYX

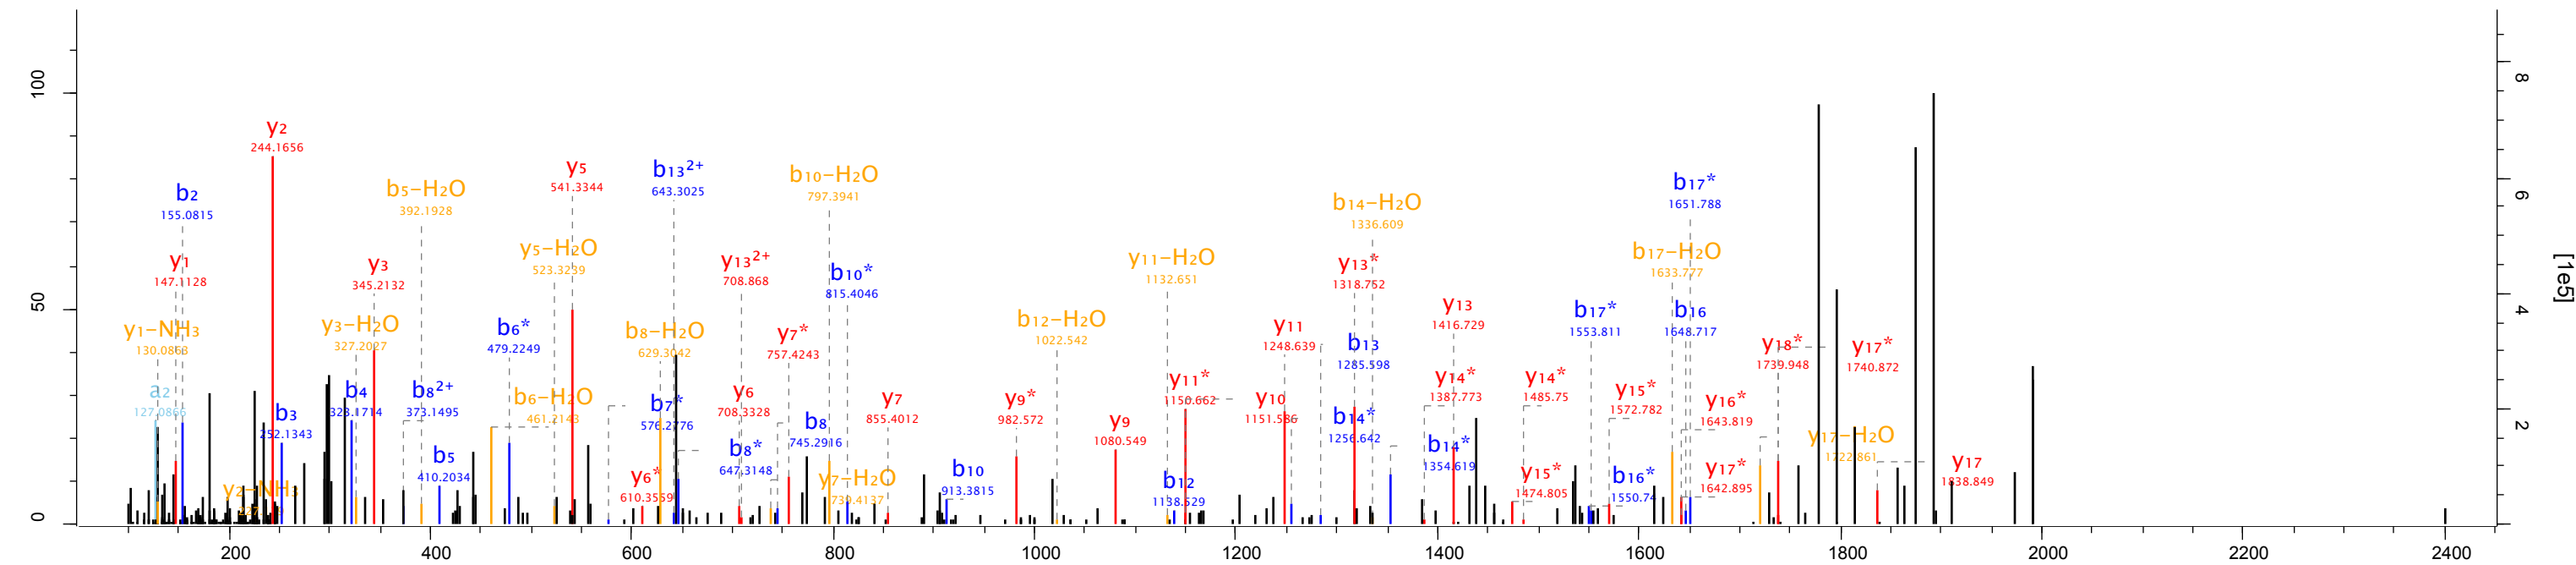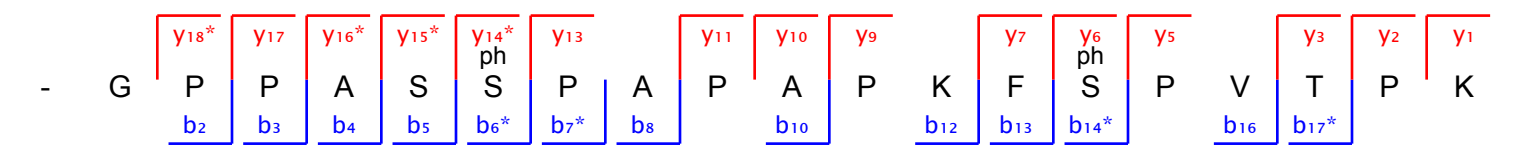

Raw file  
 20150814\_A375SR\_Phospho\_BR2\_03  
 Scan 15179 Method FTMS; HCD Score 139.47 m/z 858.01 Gene names TOX4

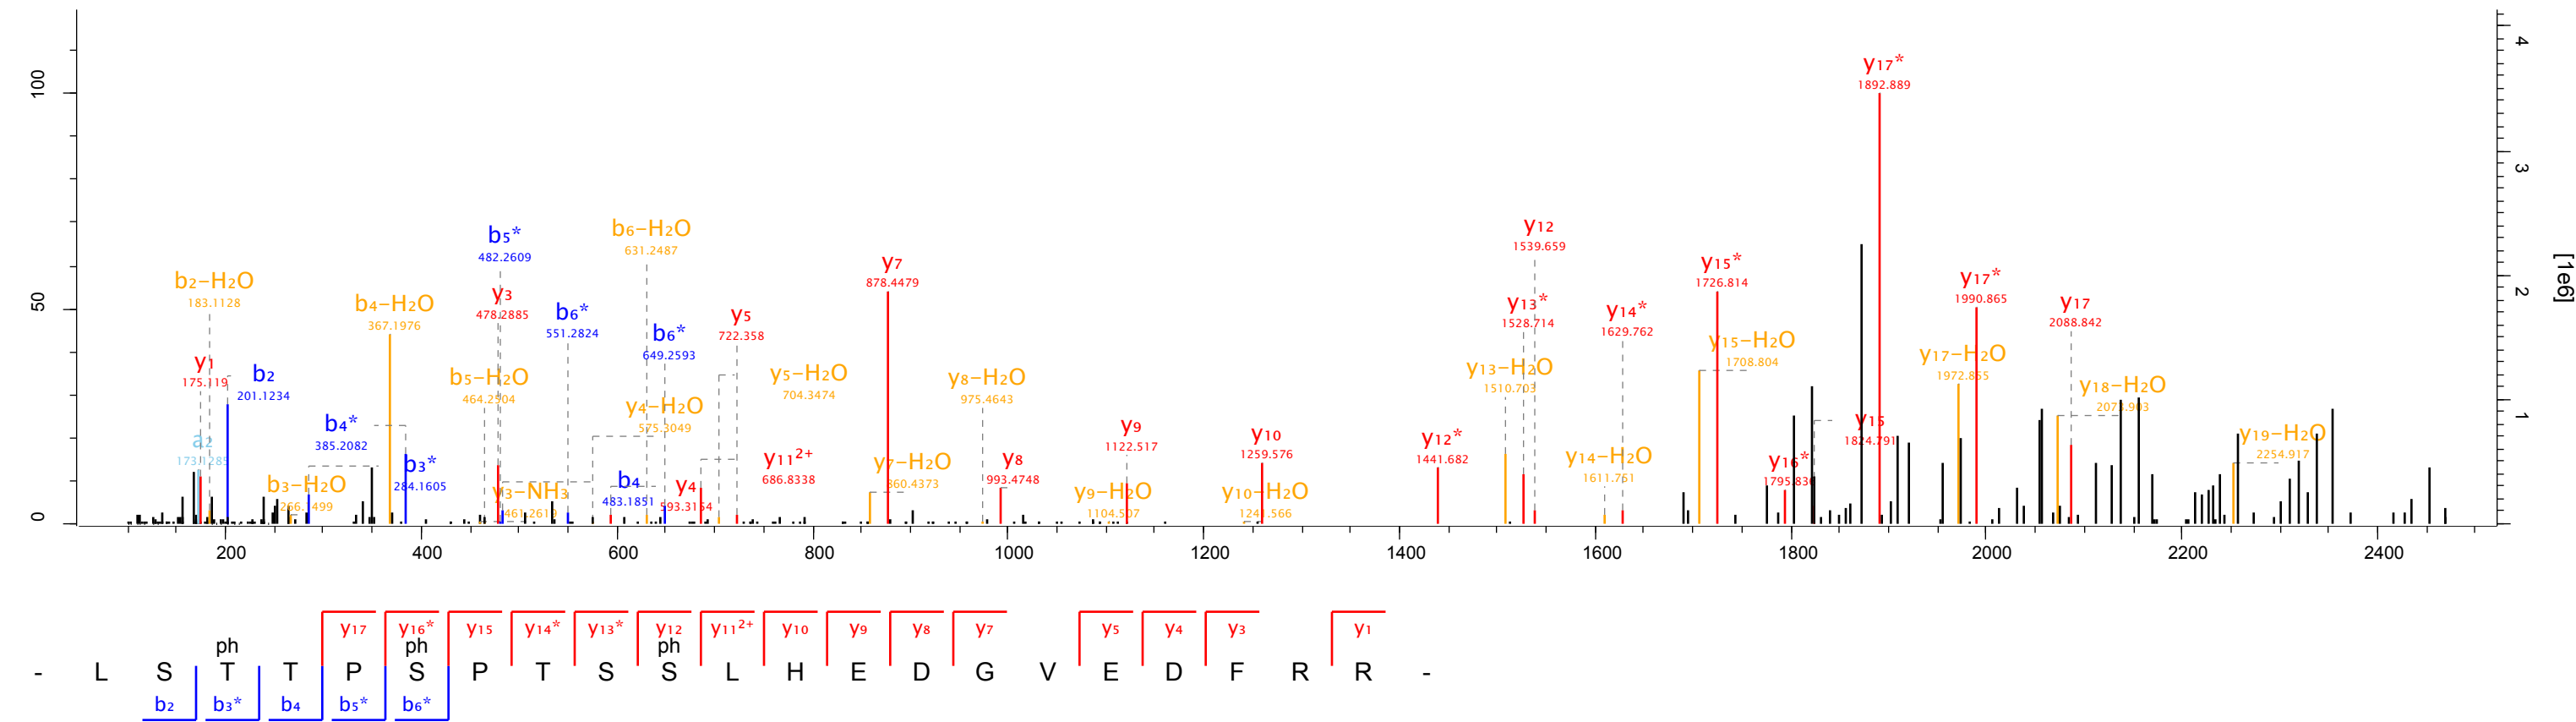

Raw file: 20150814\_A375SR\_Phospho\_BR2\_03  
 Scan: 15449 Method: FTMS; HCD Score: 88.38 m/z: 723.35 Gene names: PKM

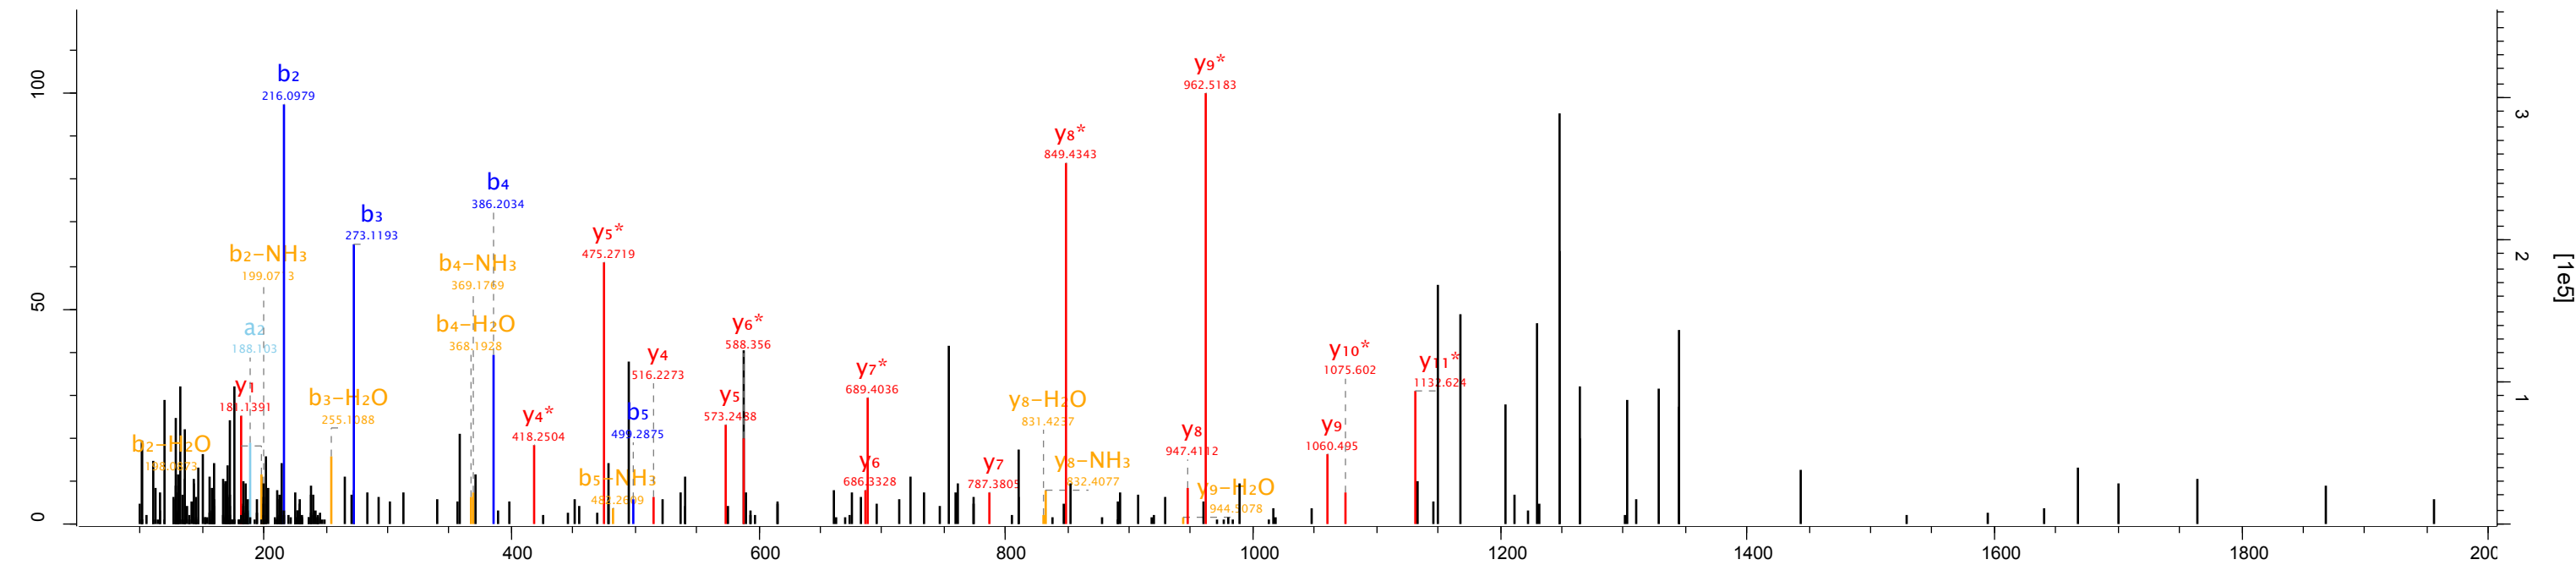

Protein sequence: - N T G I I C T I G P A S R -  
 Fragmentation sites are indicated by boxes below the sequence:  
 - b<sub>2</sub> (under T), b<sub>3</sub> (under G), b<sub>4</sub> (under I), b<sub>5</sub> (under I)  
 - y<sub>11</sub>\* (under G), y<sub>10</sub>\* (under I), y<sub>9</sub> (under I), y<sub>8</sub> (under C), y<sub>7</sub> (under T), y<sub>6</sub> (under I), y<sub>5</sub> (under G), y<sub>4</sub> (under P), y<sub>1</sub> (under R)

Raw file 20150814\_A375SR\_Phospho\_BR2\_03 Scan 15489 Method FTMS; HCD Score 137.73 m/z 727.34 Gene names CSNK1D

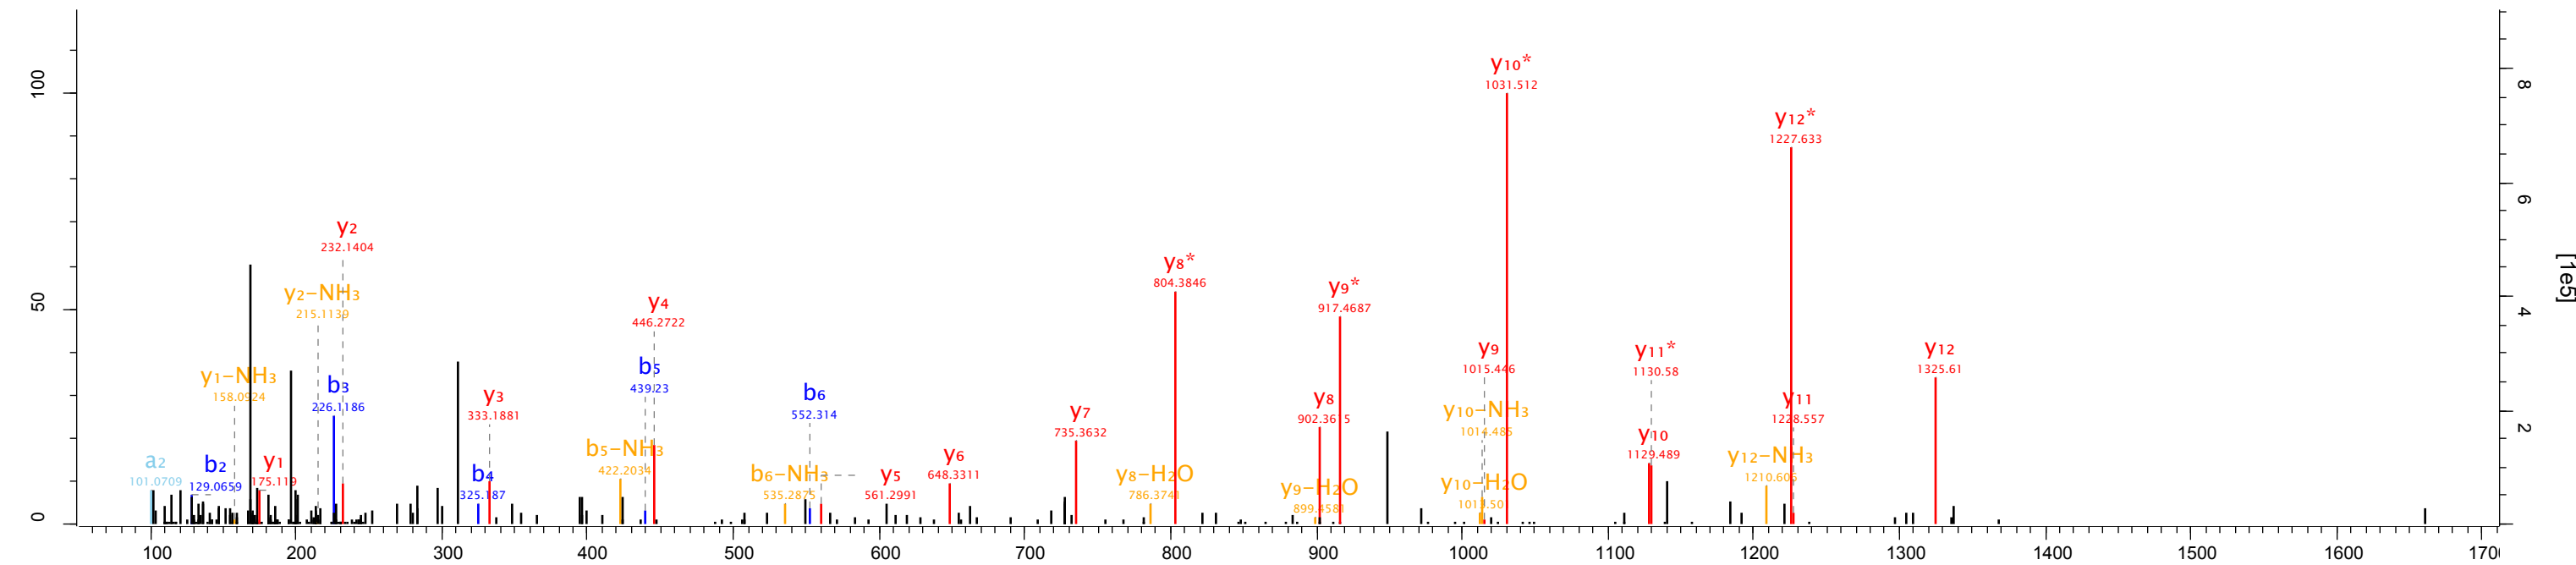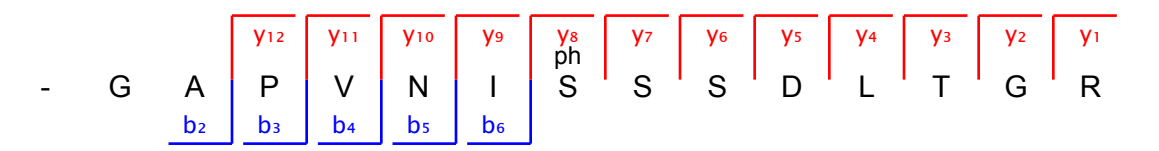

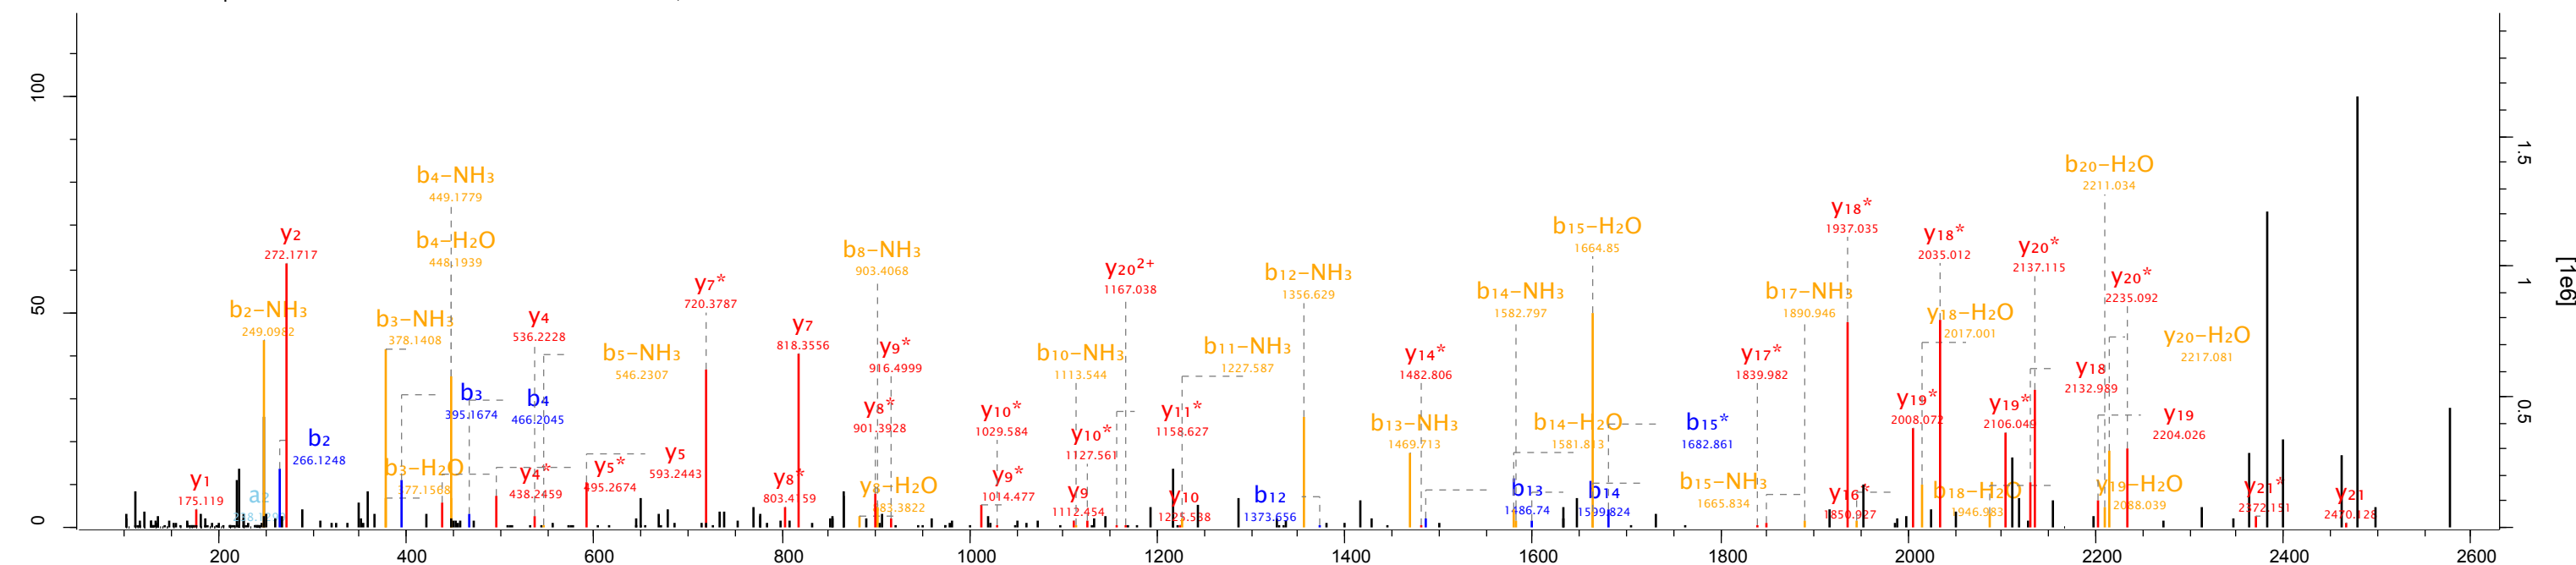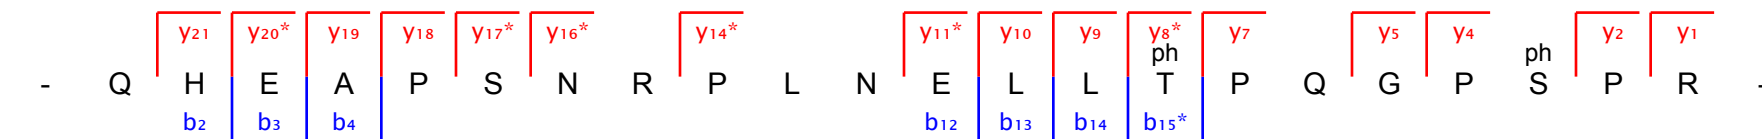

Raw file: 20150814\_A375SR\_Phospho\_BR2\_03  
 Scan: 15819 Method: FTMS; HCD Score: 107.58 m/z: 500.25 Gene names: MFF

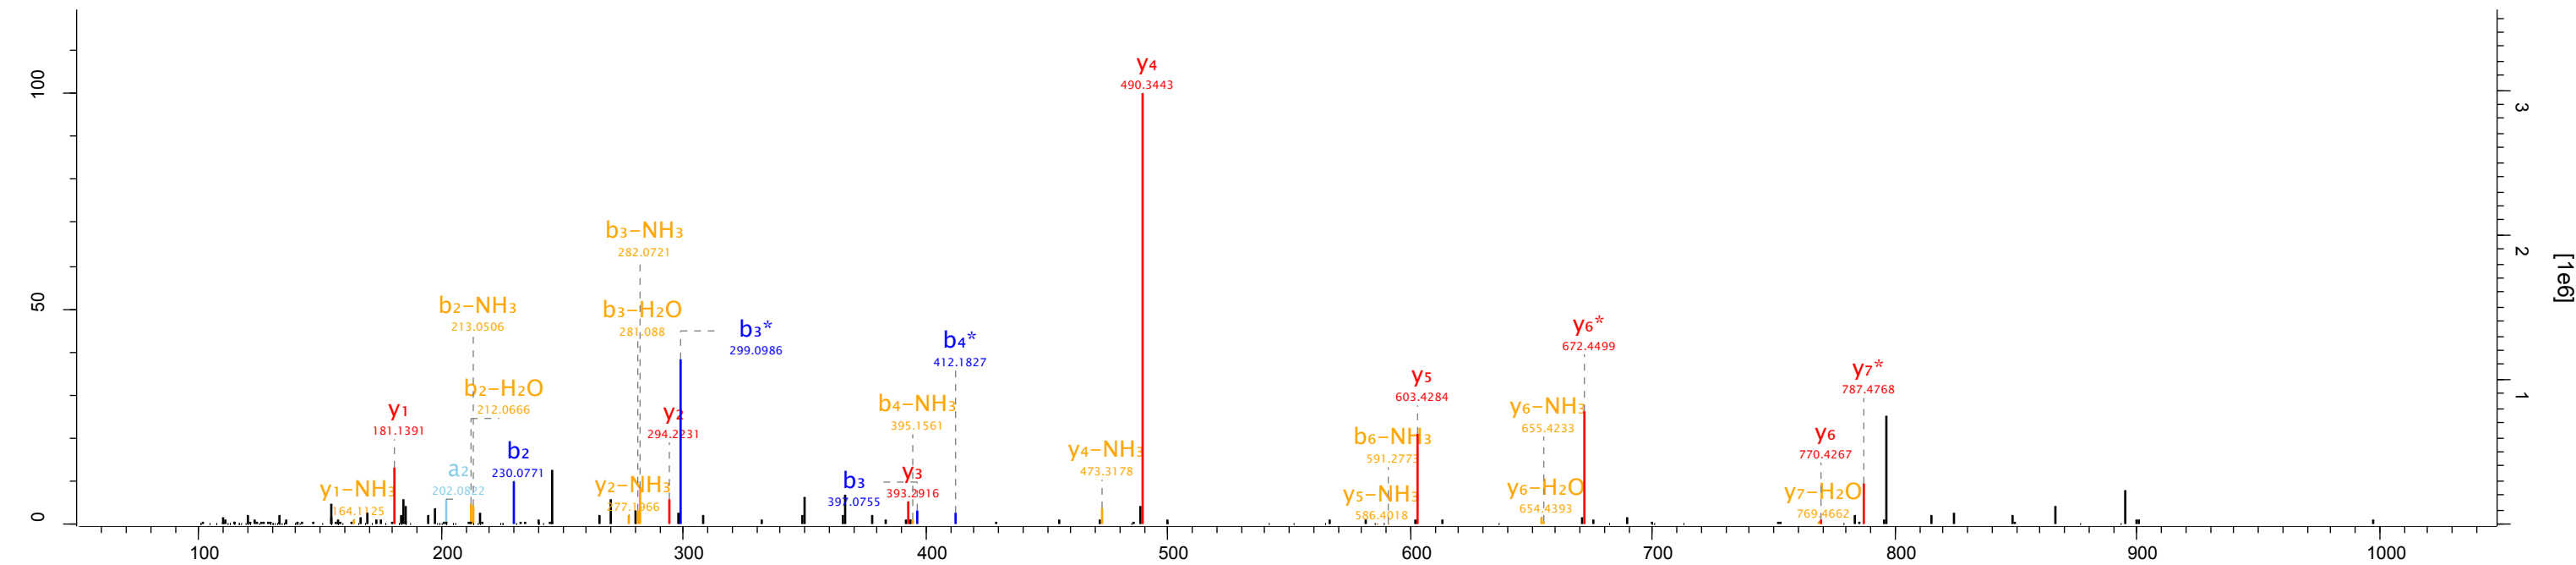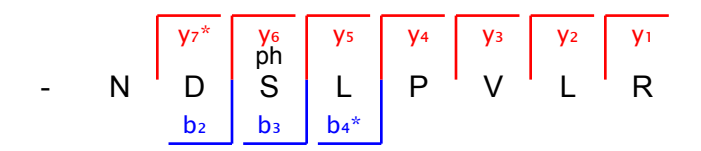



Raw file Scan Method m/z Gene names  
 20150814\_A375SR\_Phospho\_BR2\_03 15859 FTMS; HCD 238.69 786.35 TNRC6A

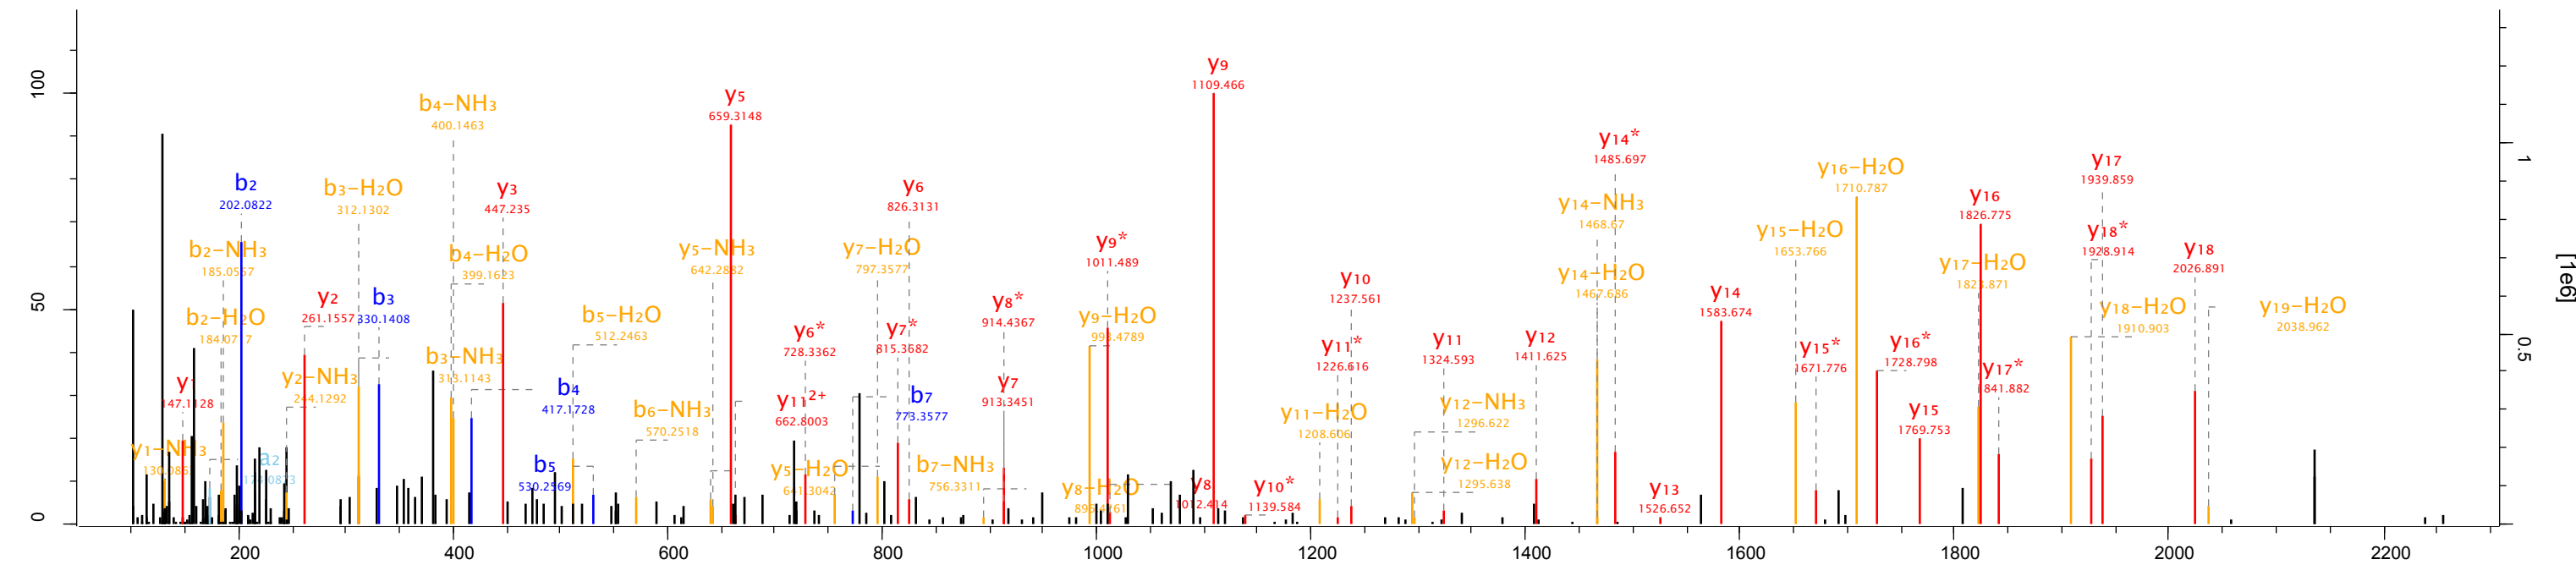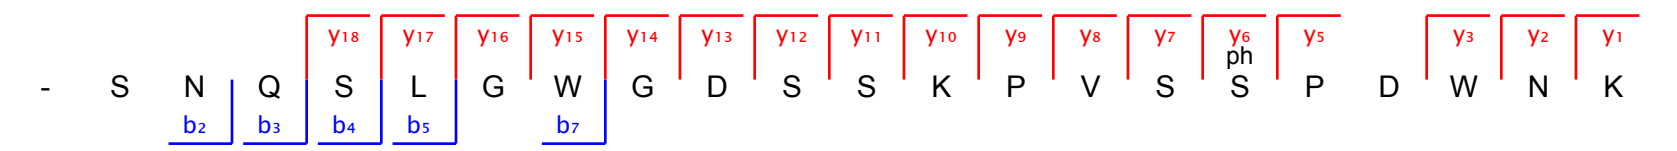



Raw file: 20150814\_A375SR\_Phospho\_BR2\_03  
 Scan: 16499 Method: FTMS; HCD Score: 187.39 m/z: 802.29 Gene names: ERCC5;BIVM-ERCC5

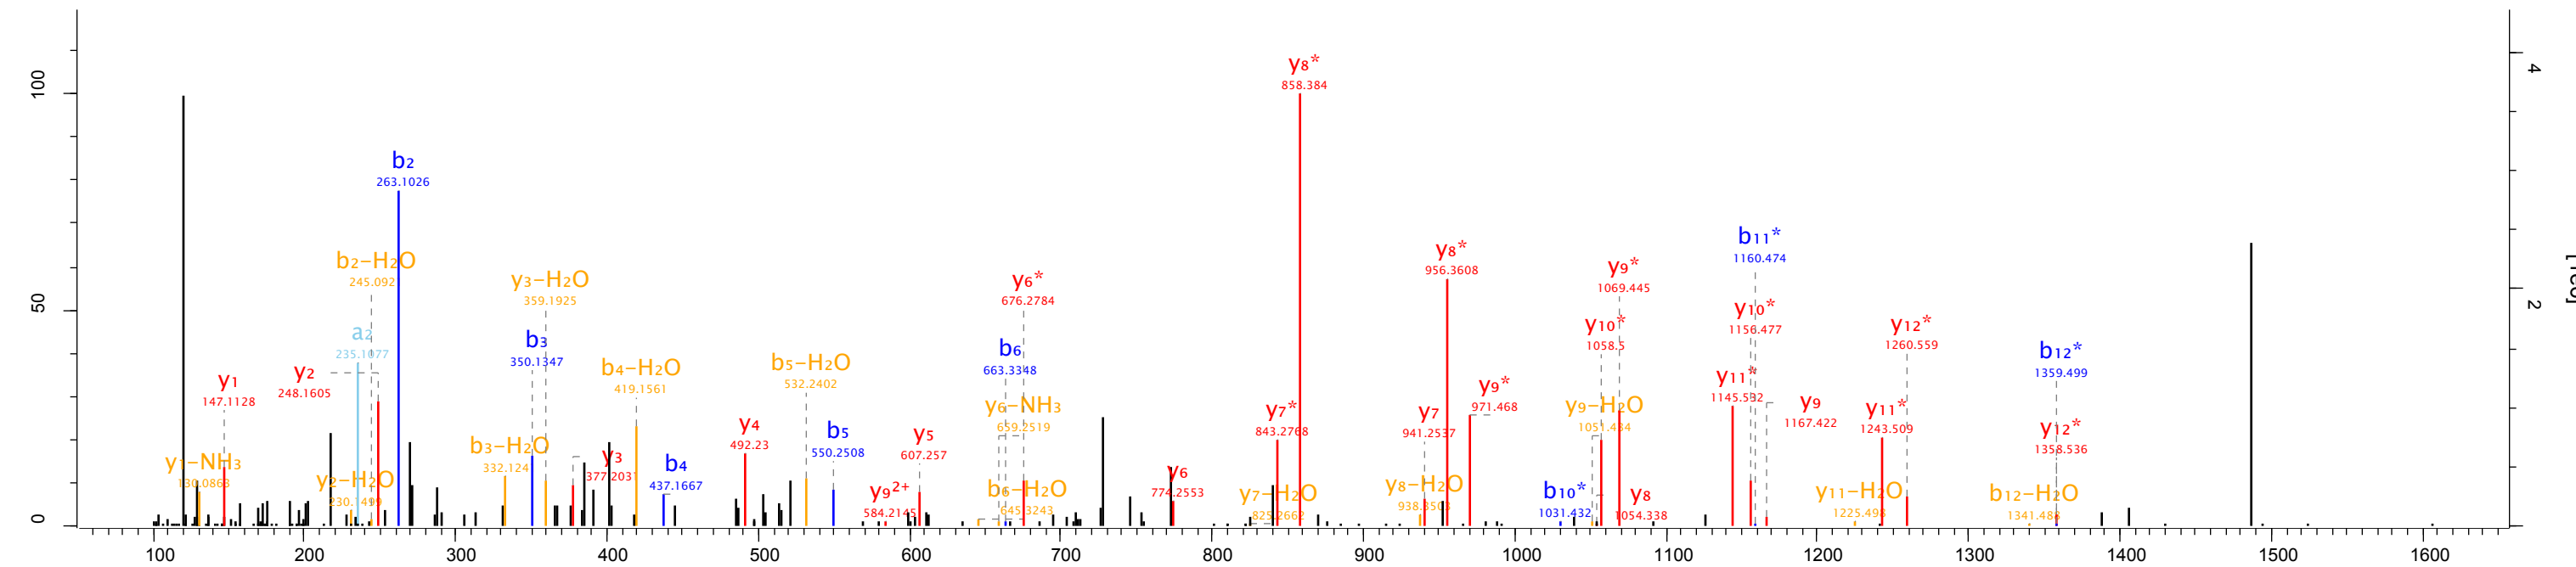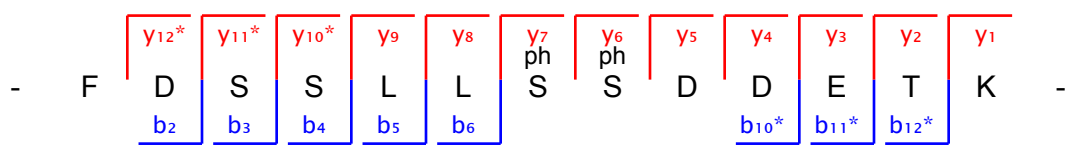

Raw file Scan Method Score m/z Gene names  
 20150814\_A375SR\_Phospho\_BR2\_03 16589 FTMS; HCD 184.97 637.81 MKI67

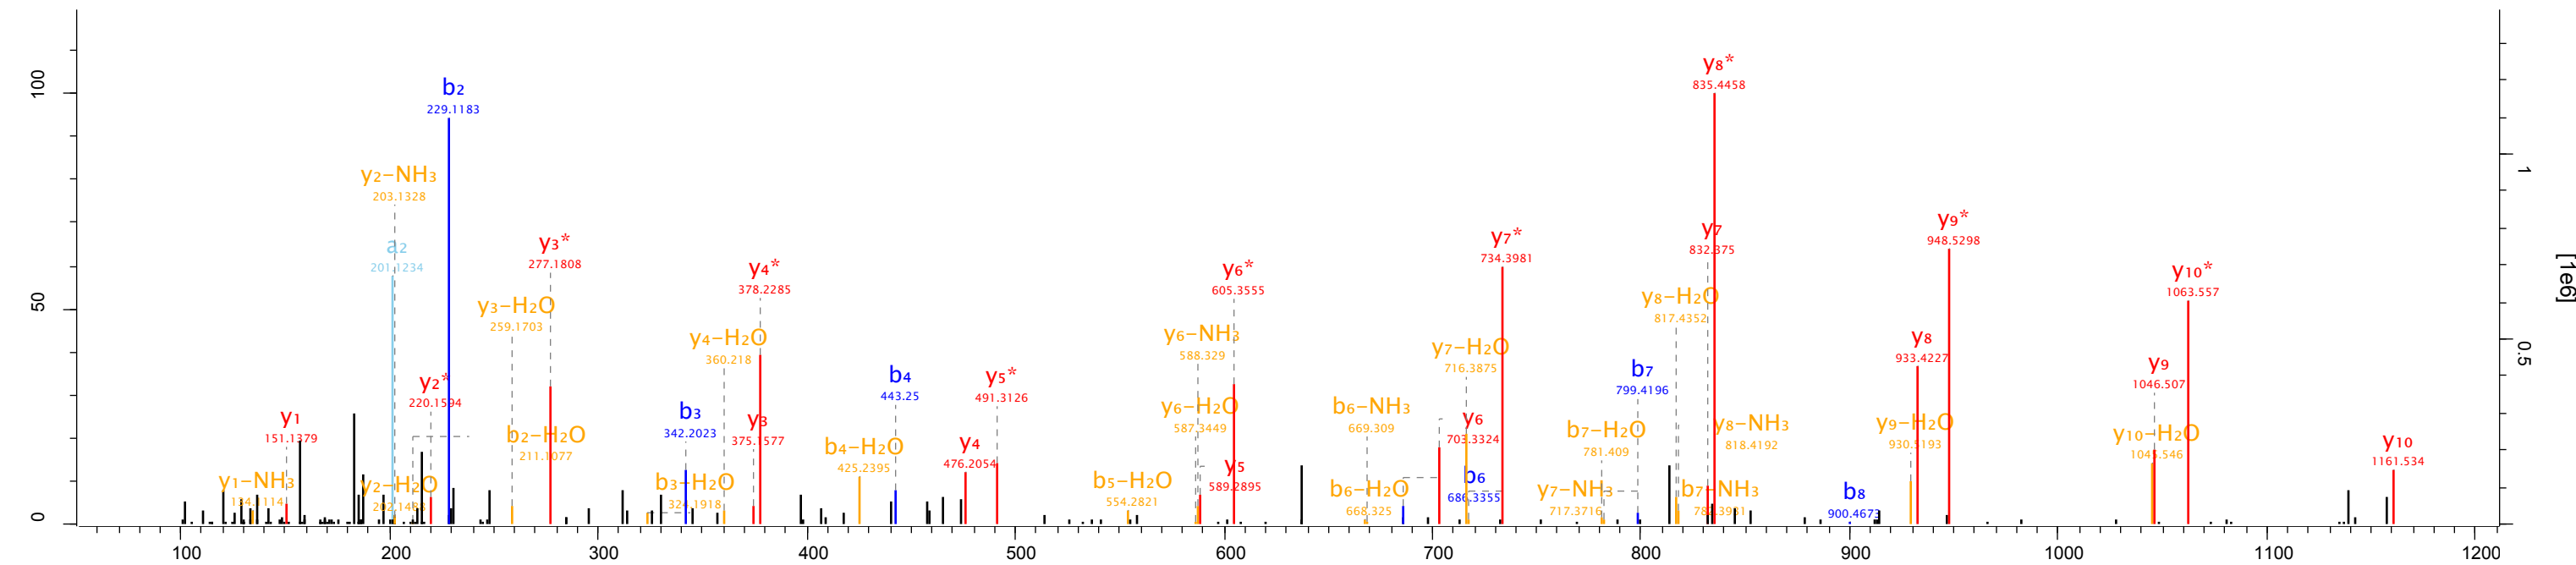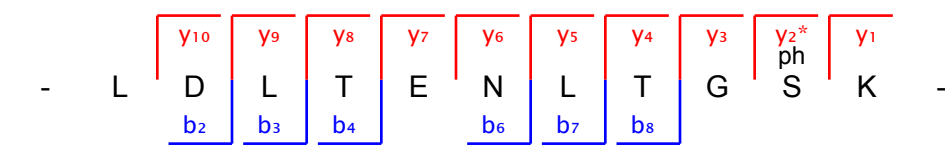

Raw file 20150814\_A375SR\_Phospho\_BR2\_03 Scan 16639 Method FTMS; HCD Score 92.46 m/z 649.3 Gene names CCDC86

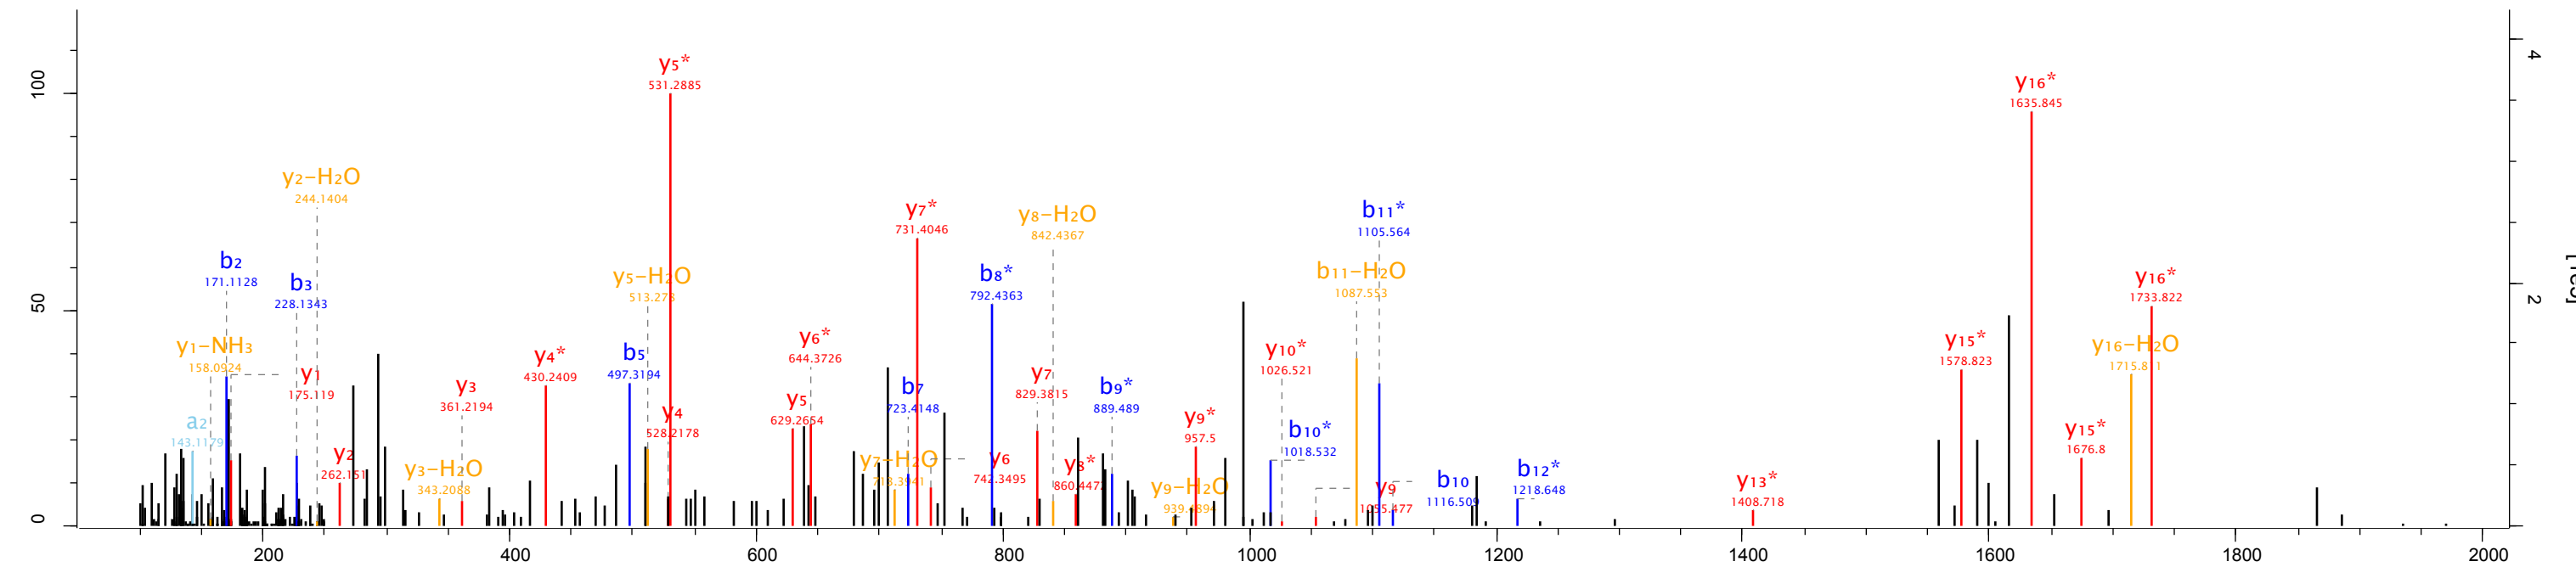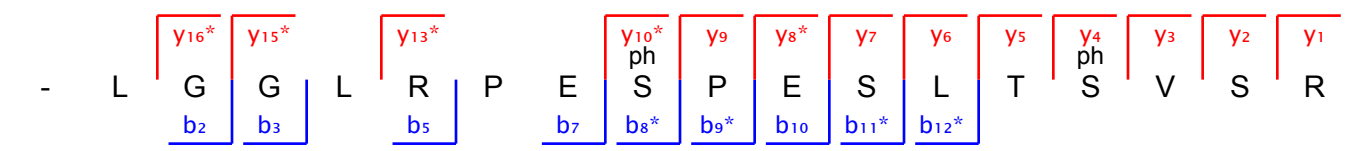

Raw file 20150814\_A375SR\_Phospho\_BR2\_03 Scan 16839 Method FTMS; HCD Score 252.54 m/z 1147.54 Gene names ITSN2

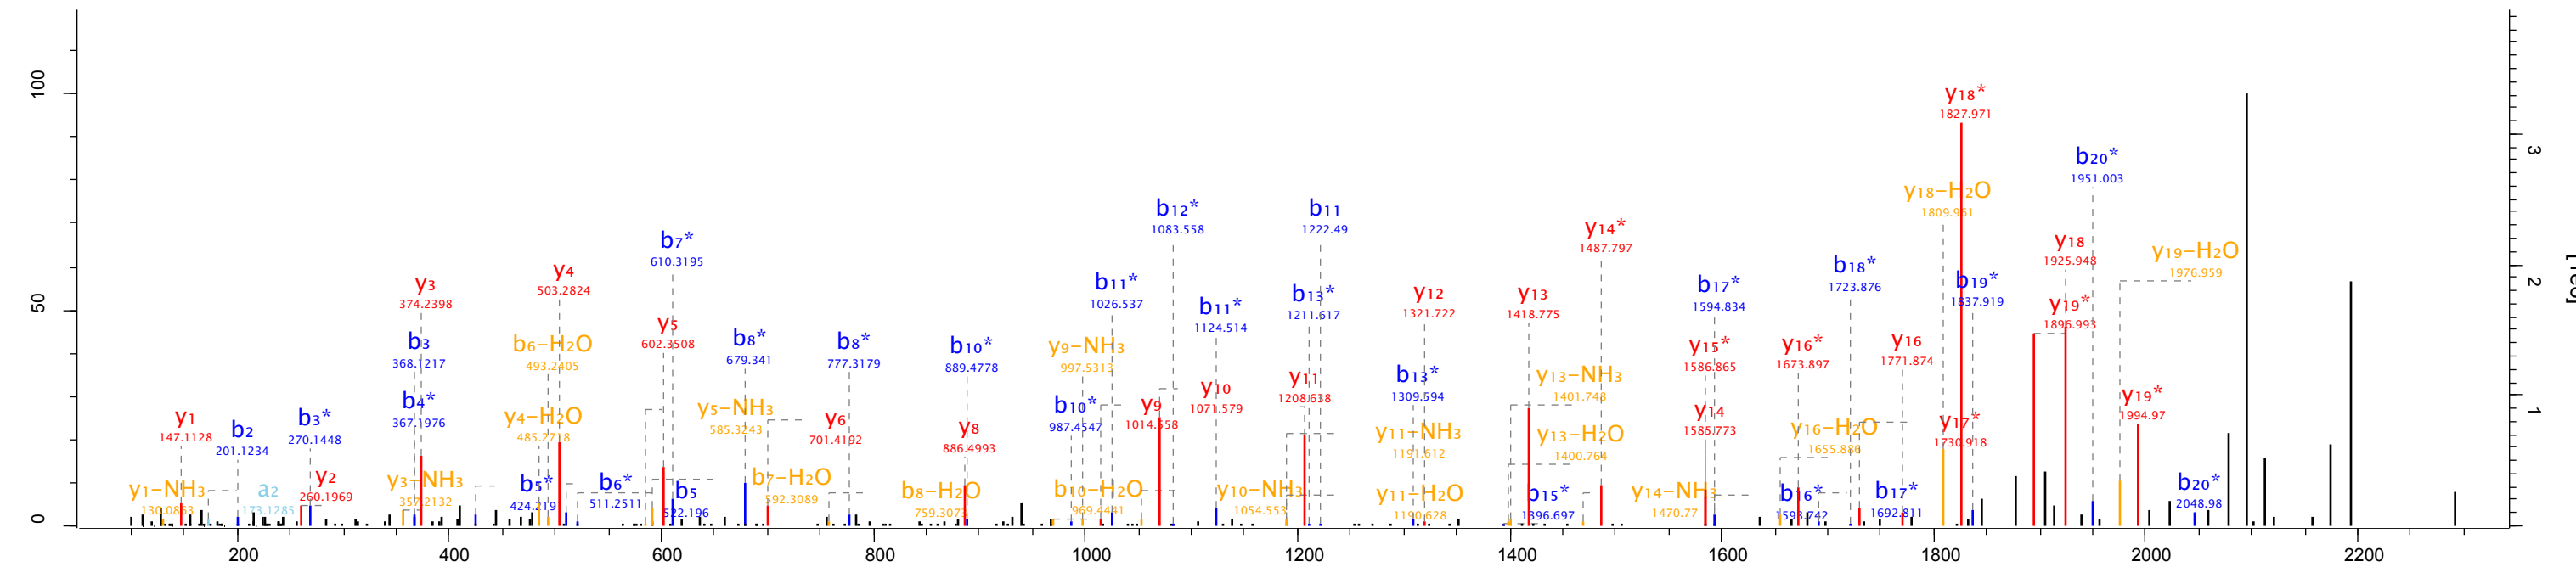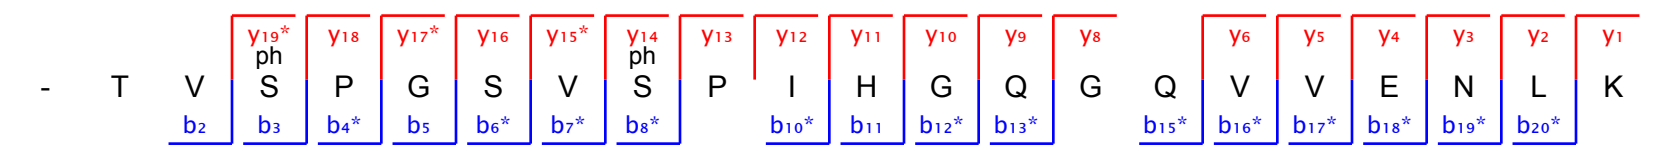

Raw file Scan Method Score m/z Gene names  
 20150814\_A375SR\_Phospho\_BR2\_03 16909 FTMS; HCD 218.79 947.05 ZC3H18

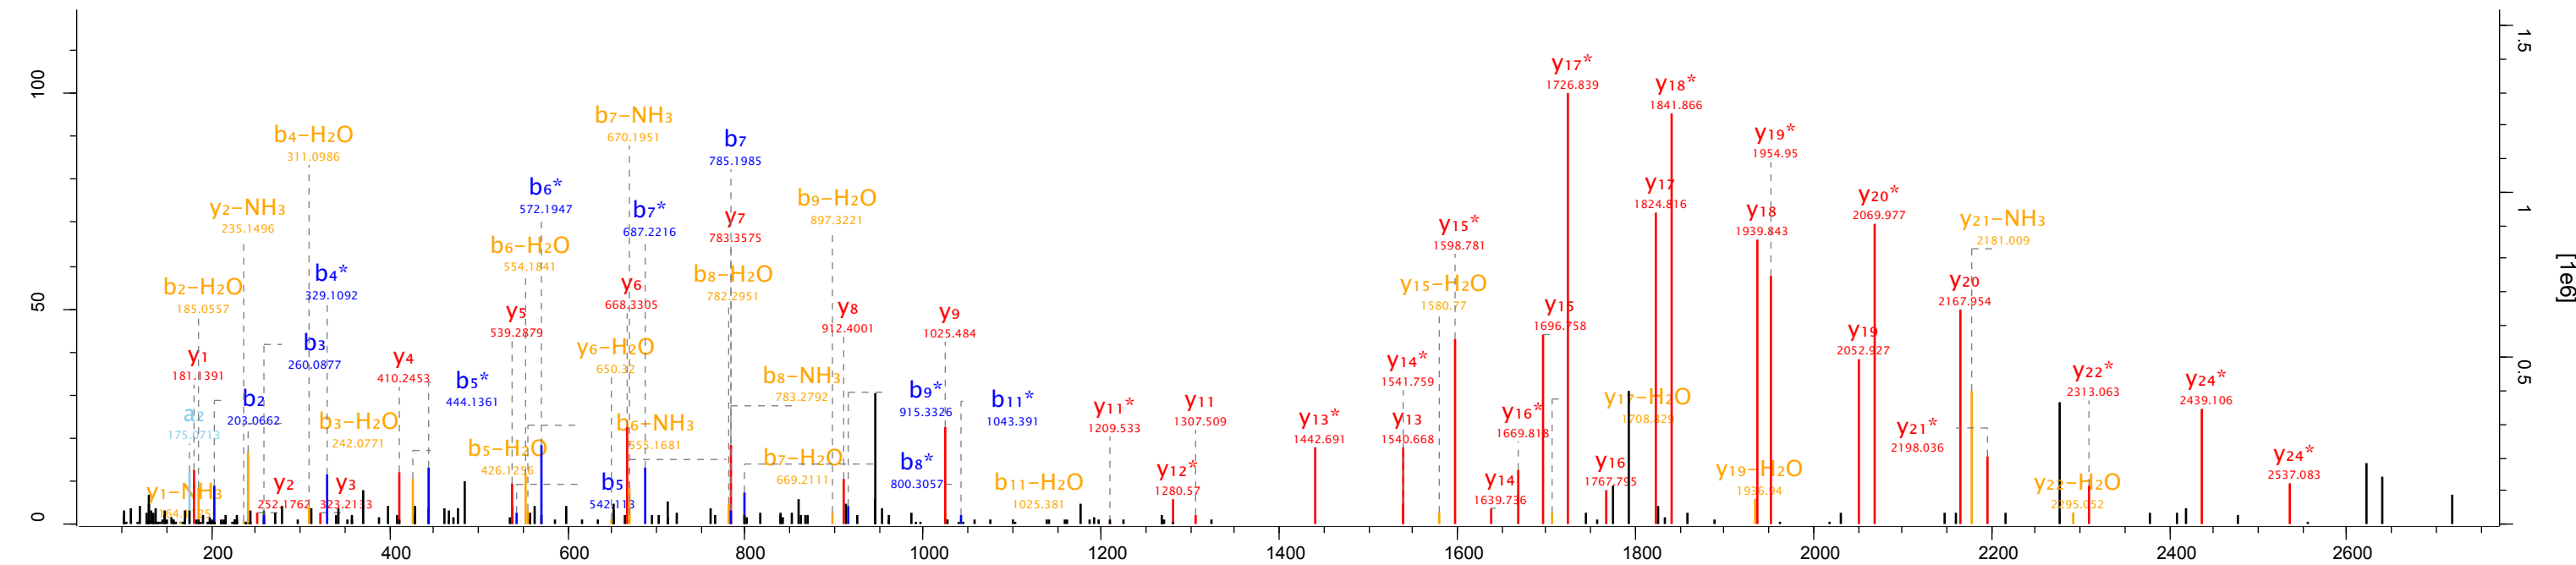

- D S G ph S D Q D L D G A G V R A S D L E D E E S A A R -

b<sub>2</sub>
b<sub>3</sub>
b<sub>4</sub><sup>\*</sup>
b<sub>5</sub>
b<sub>6</sub><sup>\*</sup>
b<sub>7</sub>
b<sub>8</sub><sup>\*</sup>
b<sub>9</sub><sup>\*</sup>
b<sub>11</sub><sup>\*</sup>

y<sub>24</sub><sup>\*</sup>
y<sub>22</sub><sup>\*</sup>
y<sub>21</sub><sup>\*</sup>
y<sub>20</sub>
y<sub>19</sub>
y<sub>18</sub>
y<sub>17</sub>
y<sub>16</sub>
y<sub>15</sub>
y<sub>14</sub>
y<sub>13</sub>
y<sub>12</sub><sup>\*</sup>
y<sub>11</sub>
y<sub>9</sub>
y<sub>8</sub>
y<sub>7</sub>
y<sub>6</sub>
y<sub>5</sub>
y<sub>4</sub>
y<sub>3</sub>
y<sub>2</sub>
y<sub>1</sub>

Raw file 20150814\_A375SR\_Phospho\_BR2\_03 Scan 17359 Method FTMS; HCD Score 162.73 m/z 649.3 Gene names CCDC86

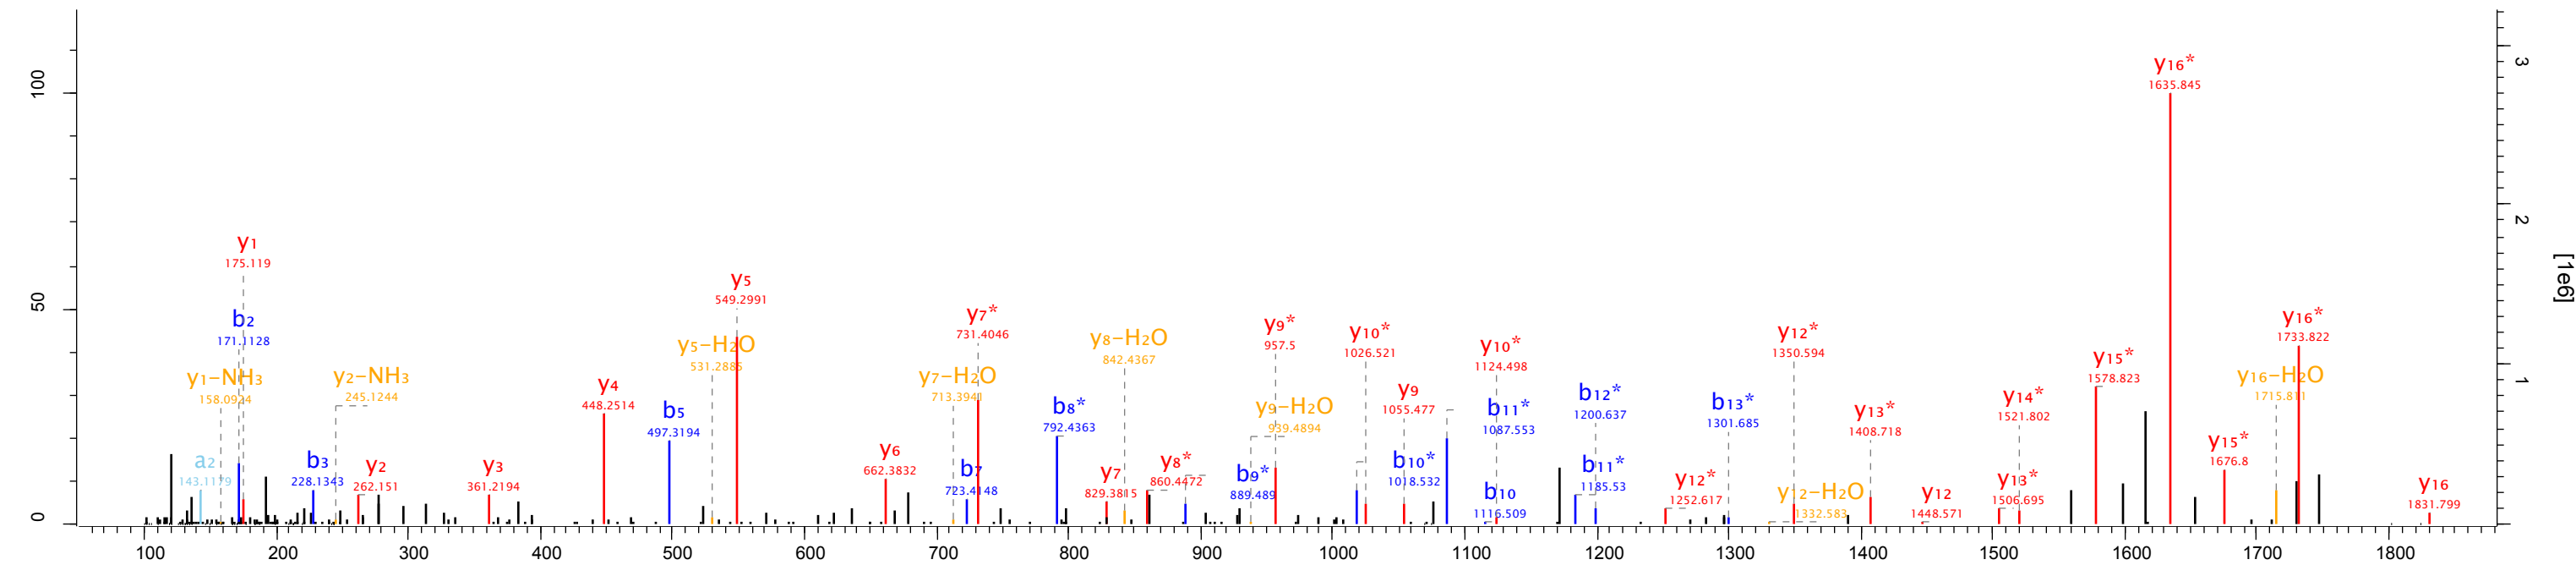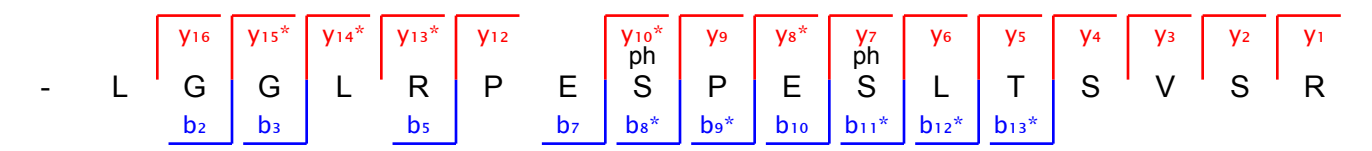



Raw file: 20150814\_A375SR\_Phospho\_BR2\_03  
 Scan: 17419 Method: FTMS; HCD Score: 79.51 m/z: 809.27 Gene names: ZNF609

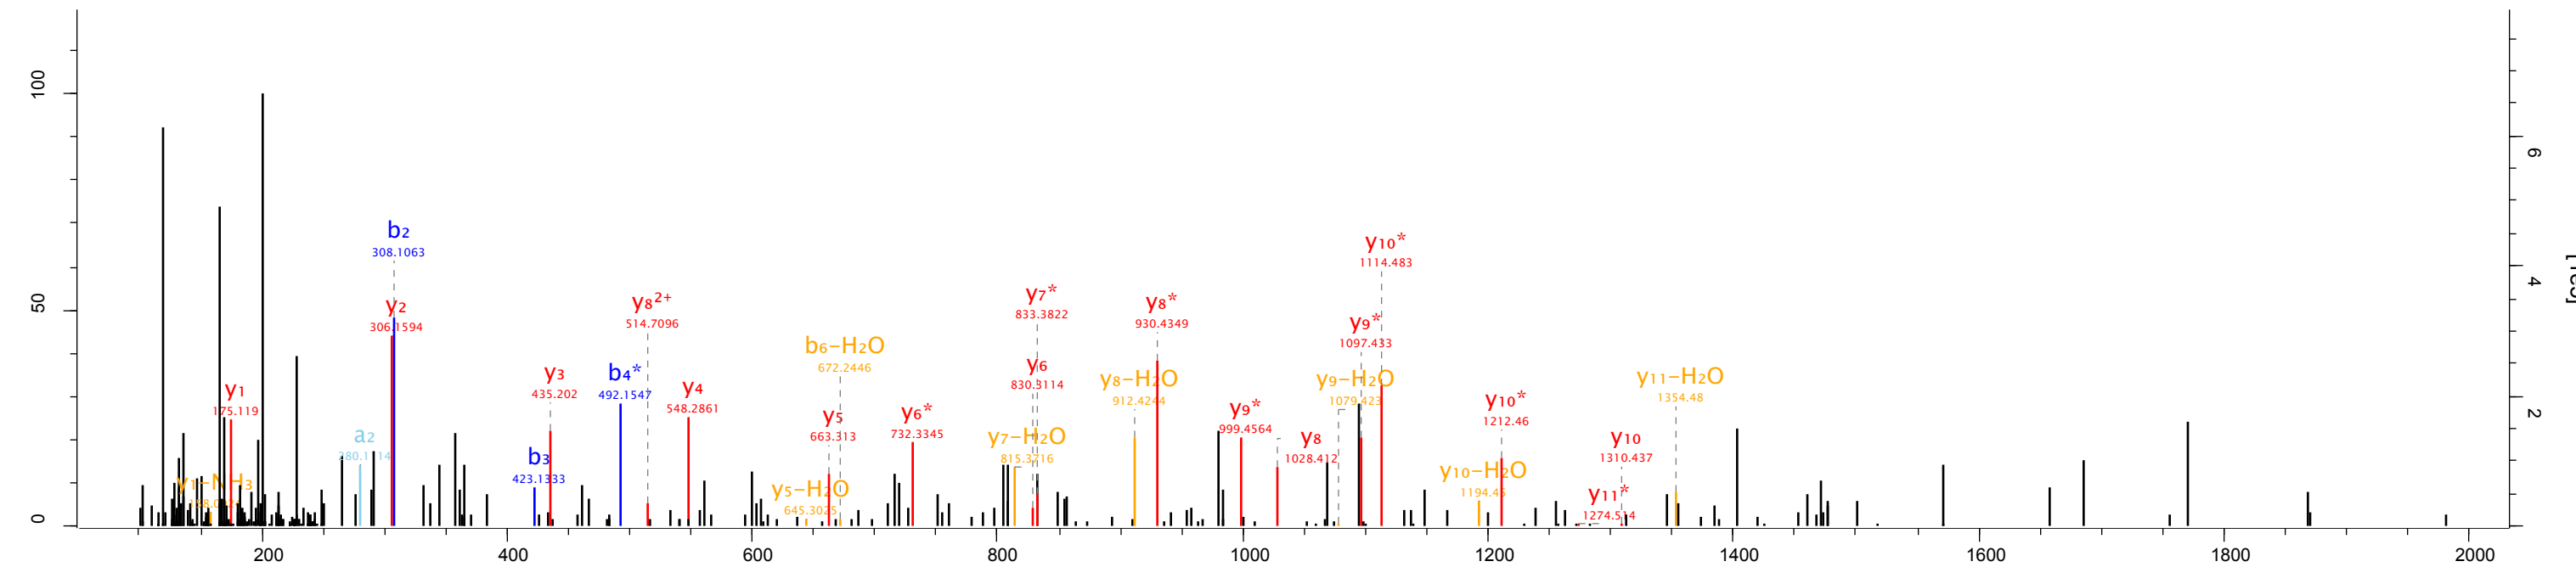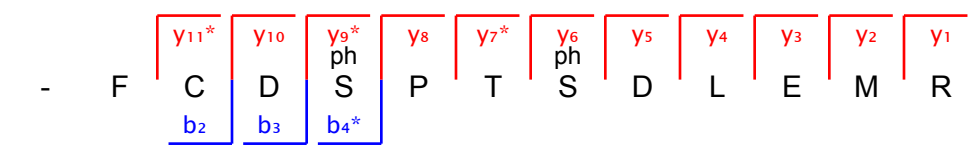

Raw file: 20150814\_A375SR\_Phospho\_BR2\_03  
 Scan: 17729 Method: FTMS; HCD Score: 92.8 m/z: 723.84 Gene names: PPP1R12C

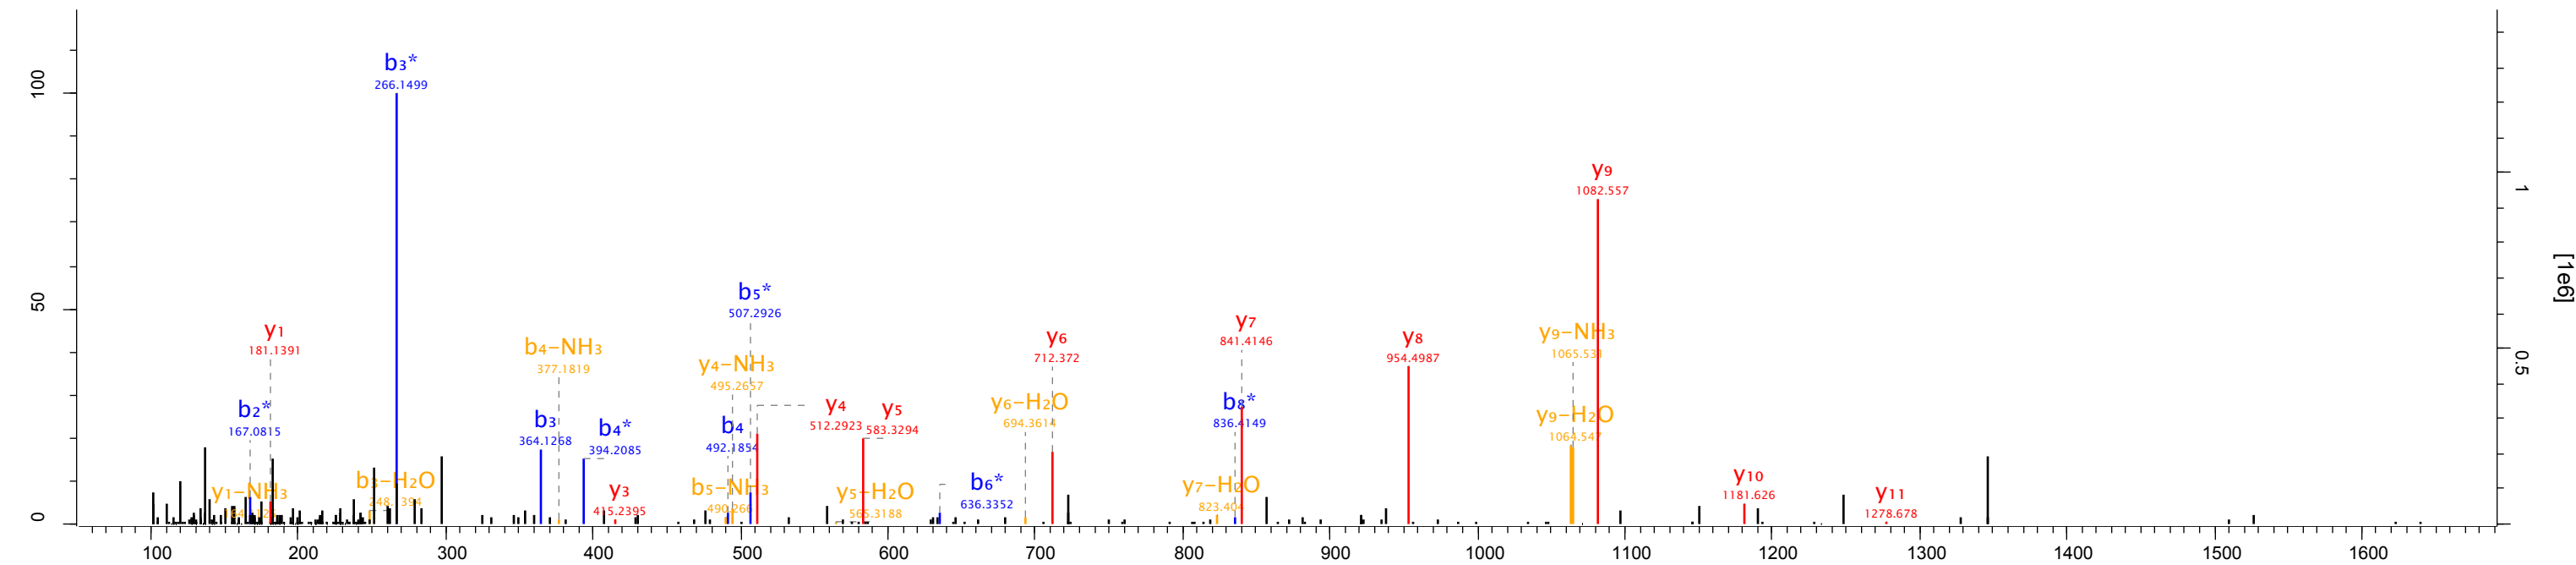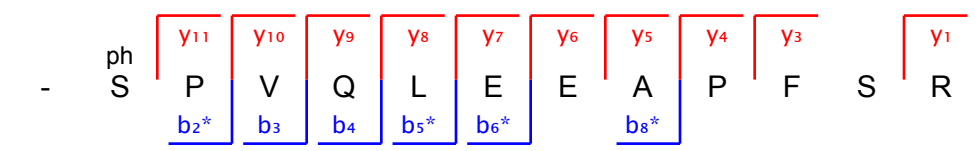

Raw file 20150814\_A375SR\_Phospho\_BR2\_03 Scan 17919 Method FTMS; HCD Score 199.58 m/z 784.86 Gene names NUP98

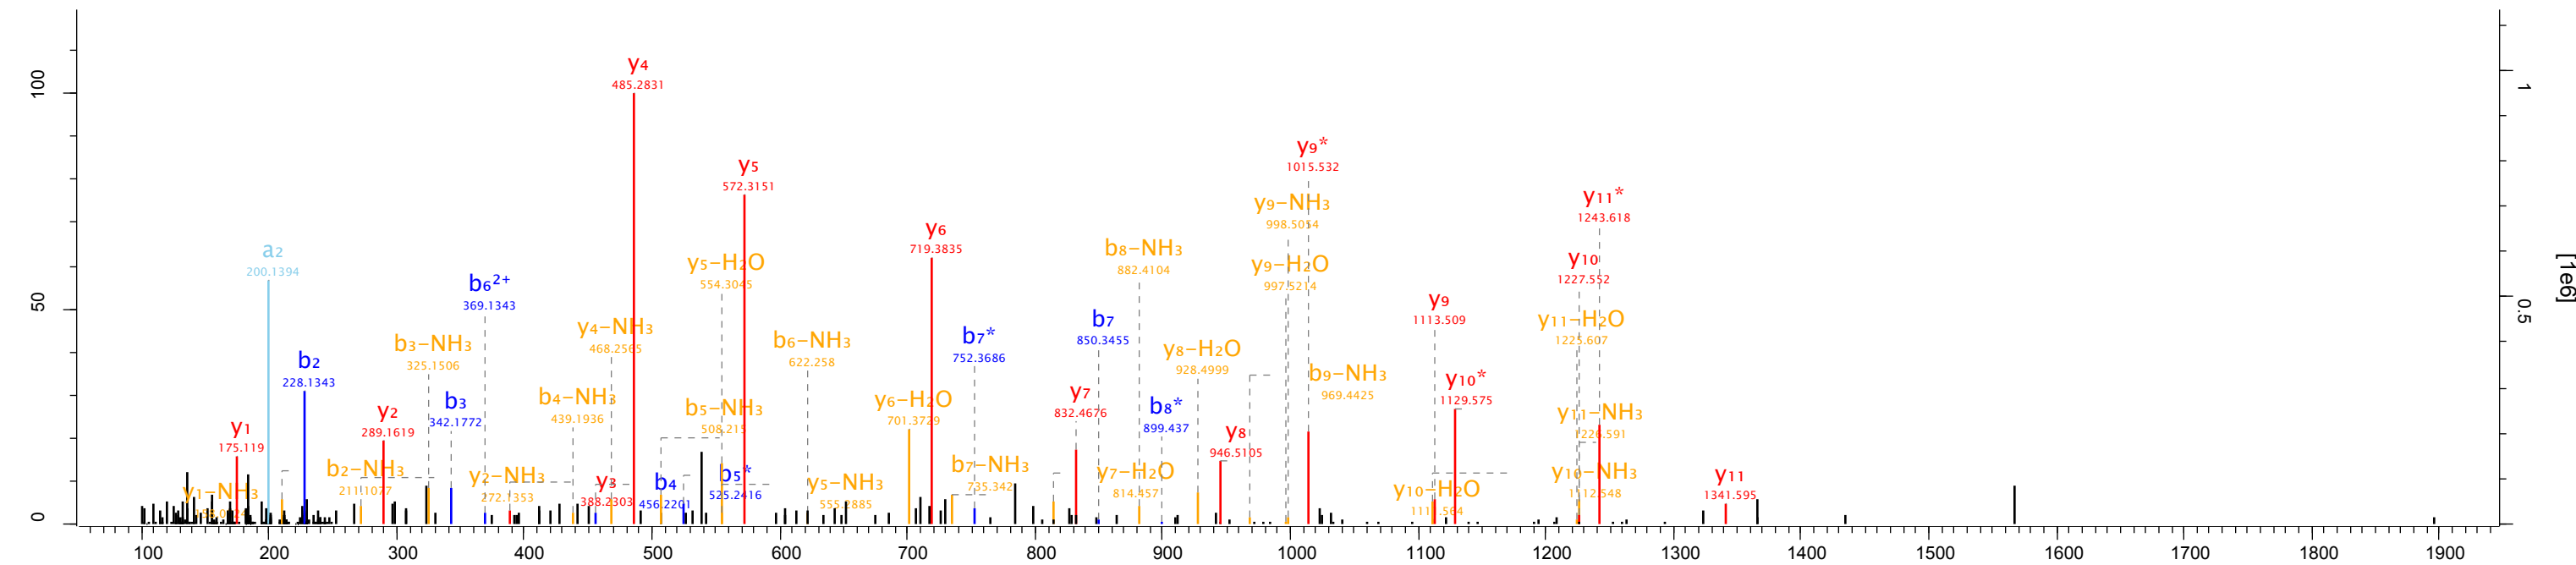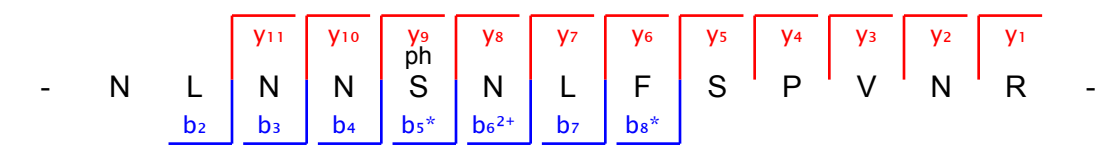

Raw file Scan Method m/z Gene names  
 20150814\_A375SR\_Phospho\_BR2\_03 18279 FTMS; HCD 134.45 1125.49 DHX9

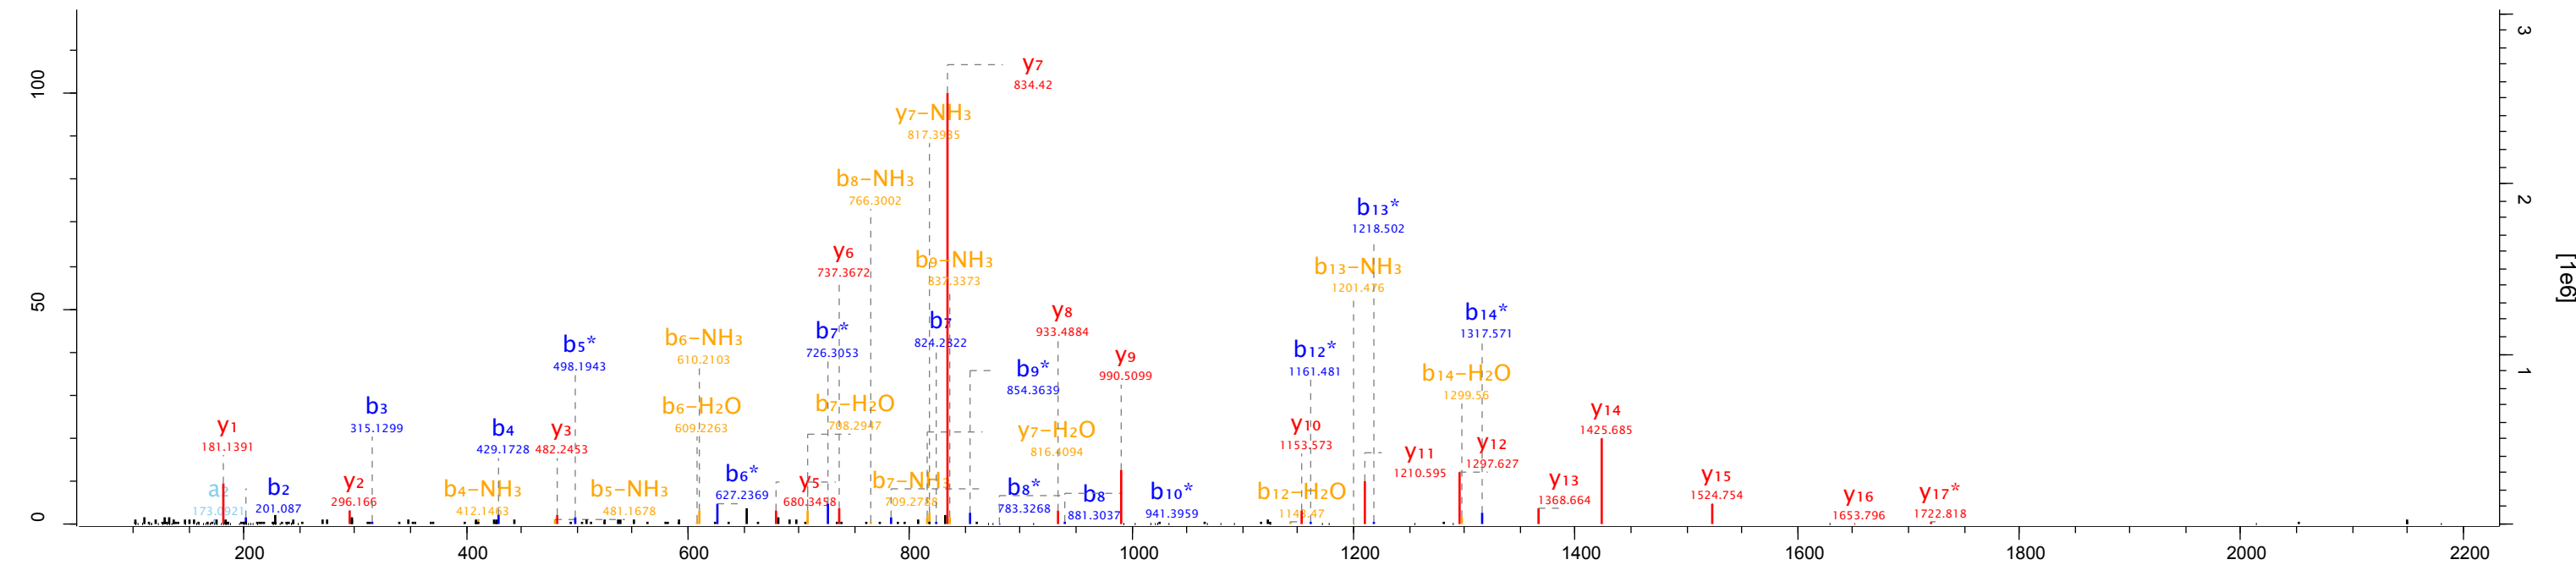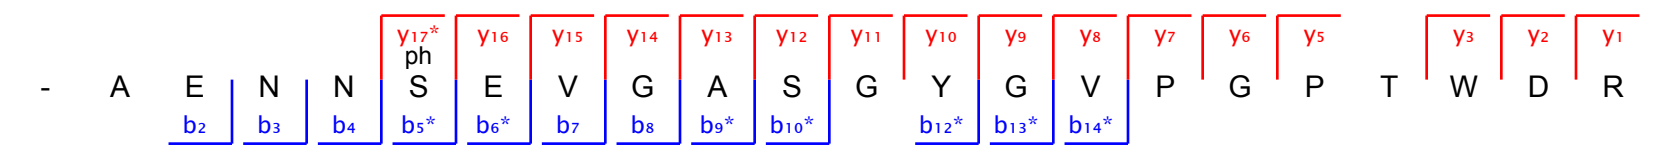

Raw file 20150814\_A375SR\_Phospho\_BR2\_03 Scan 18889 Method FTMS; HCD Score 100.7 m/z 797.35 Gene names WDHD1

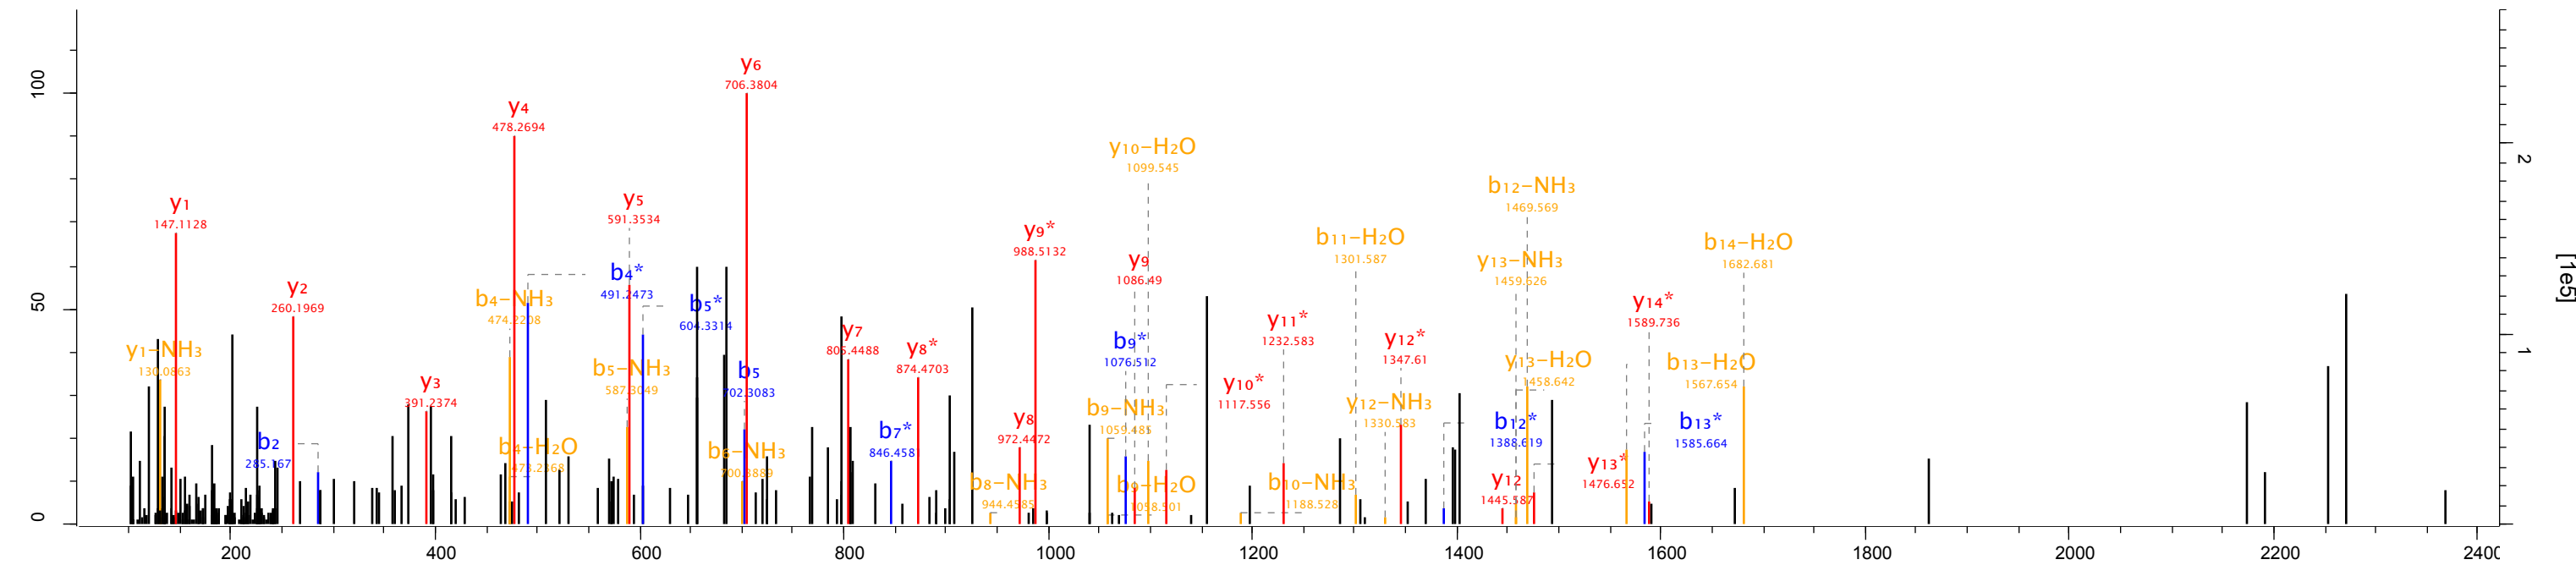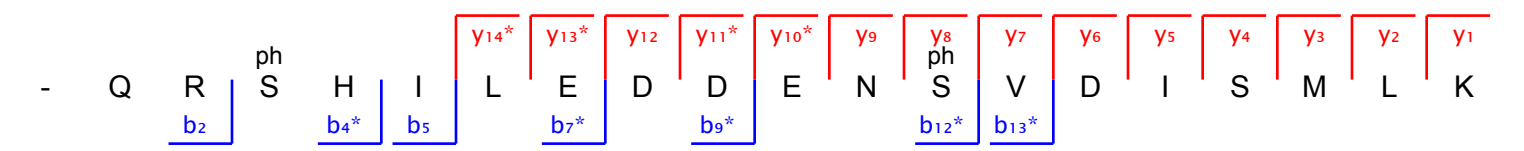

Raw file: 20150814\_A375SR\_Phospho\_BR2\_03  
 Scan: 18929 Method: FTMS; HCD Score: 116.99 m/z: 691.32 Gene names: MKI67

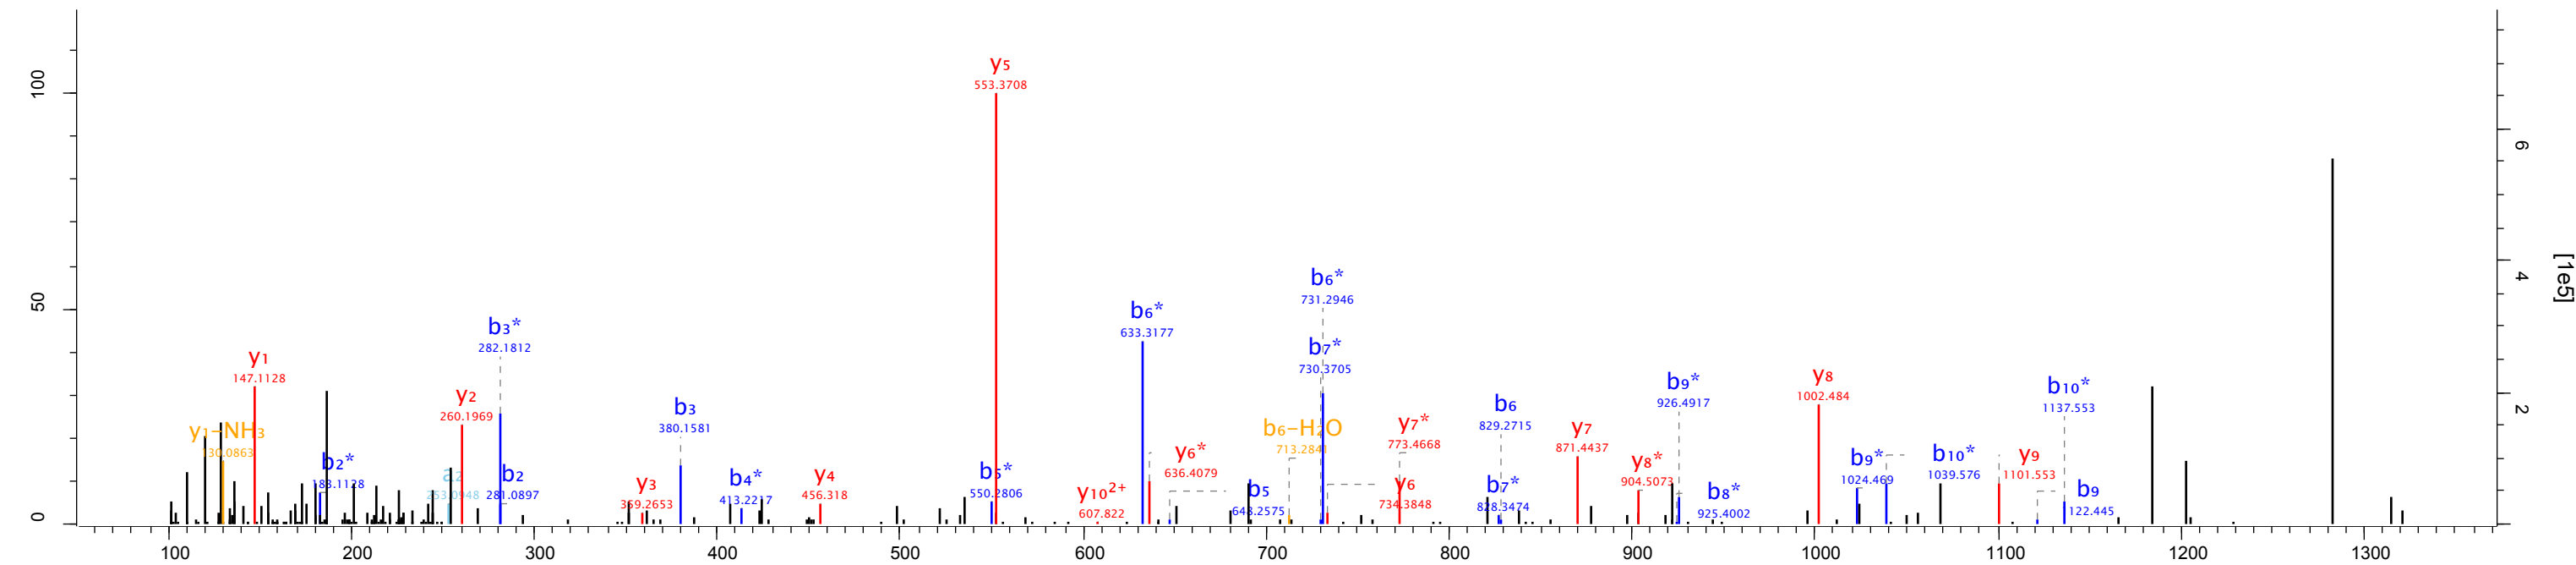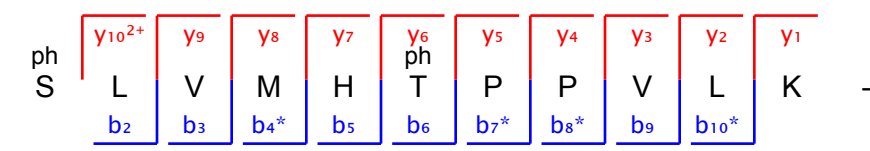

Raw file: 20150814\_A375SR\_Phospho\_BR2\_03  
 Scan: 19189 Method: FTMS; HCD Score: 94.4 m/z: 553.26 Gene names: ARHGEF18

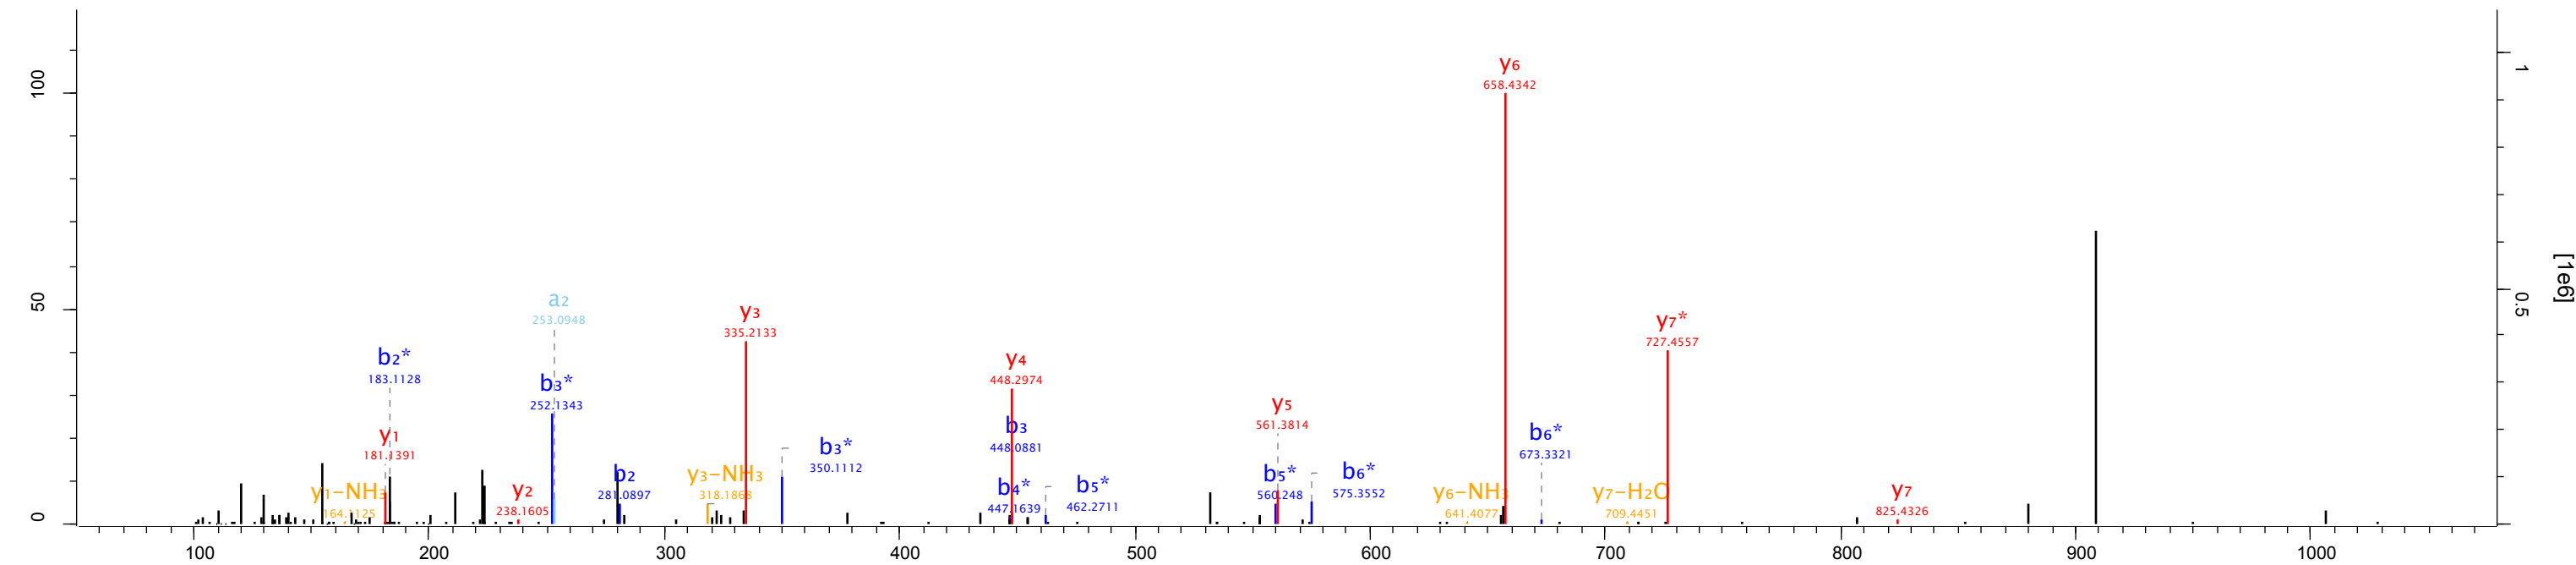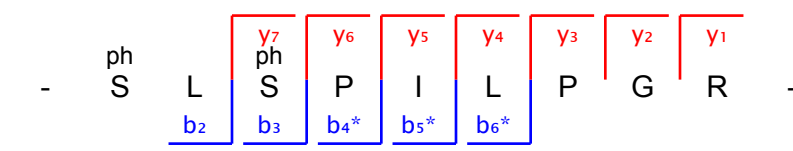

Raw file 20150814\_A375SR\_Phospho\_BR2\_03 Scan 19349 Method FTMS; HCD Score 232.32 m/z 862.91 Gene names RBL1

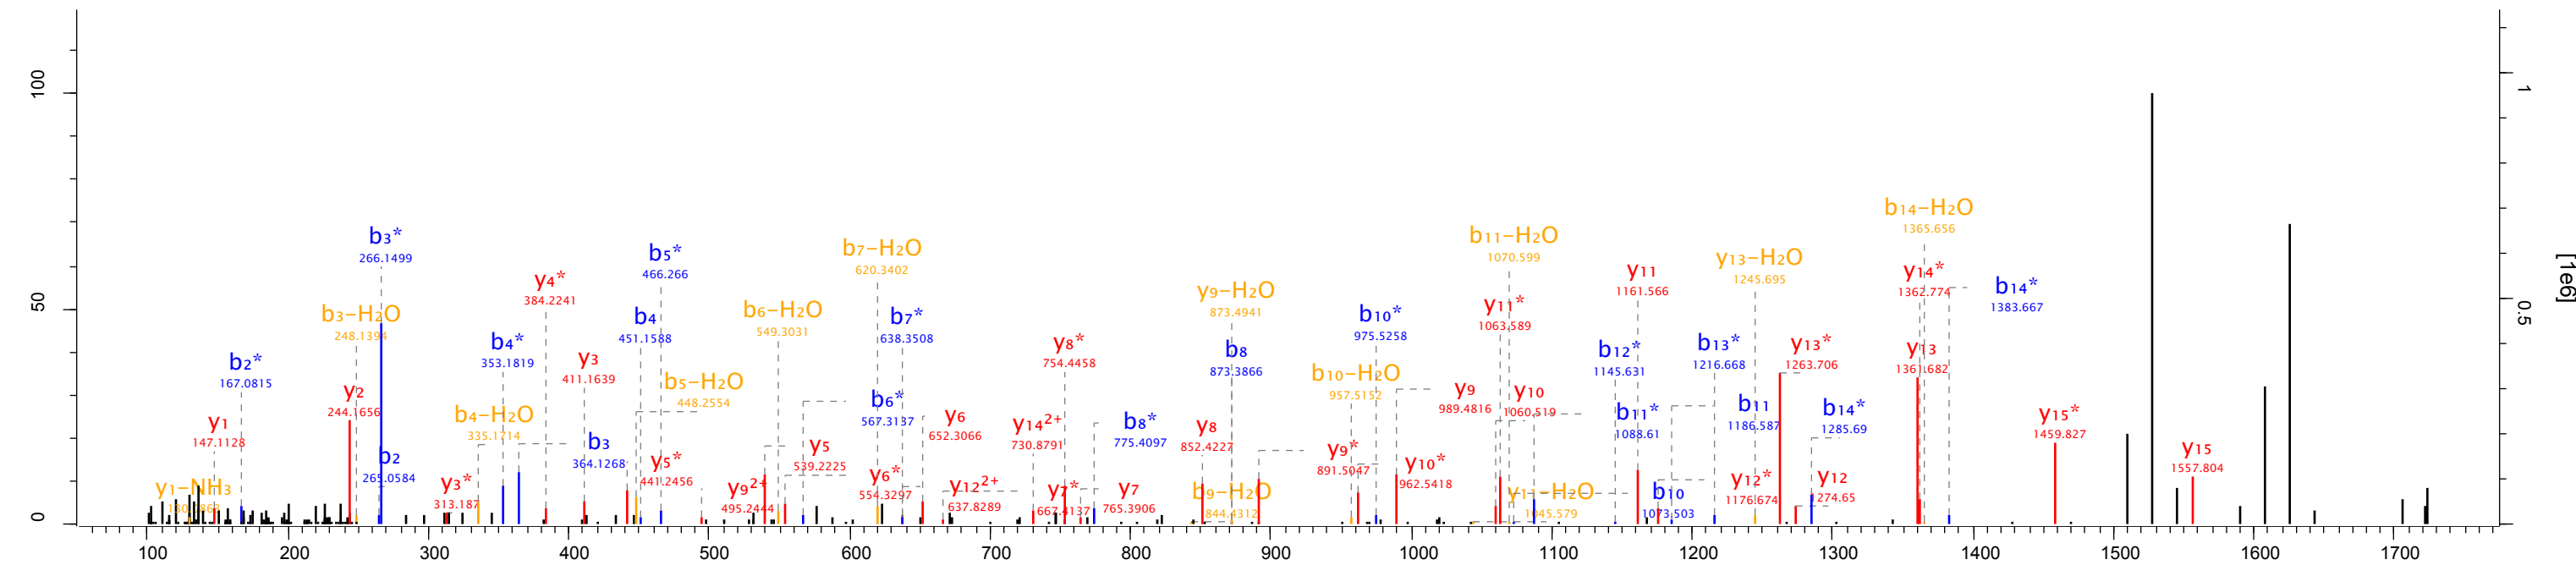

Sequence: P V S L T A H S L I G A S P K

Fragmentation mapping:

| Fragmentation Type | Residue |
|--------------------|---------|
| b2                 | P       |
| b3                 | V       |
| b4                 | S       |
| b5*                | L       |
| b6*                | T       |
| b7*                | A       |
| b8                 | H       |
| b10                | S       |
| b11                | L       |
| b12*               | I       |
| b13*               | G       |
| b14*               | A       |
| y1                 | K       |
| y2                 | P       |
| y3                 | S       |
| y4*                | A       |
| y5                 | G       |
| y6                 | I       |
| y7                 | L       |
| y8                 | S       |
| y9                 | H       |
| y10                | A       |
| y11                | T       |
| y12                | L       |
| y13                | S       |
| y14*               | V       |
| y15                | P       |



Raw file: 20150814\_A375SR\_Phospho\_BR2\_03  
 Scan: 19469 Method: FTMS; HCD Score: 326.21 m/z: 1238.48 Gene names: HTATSF1

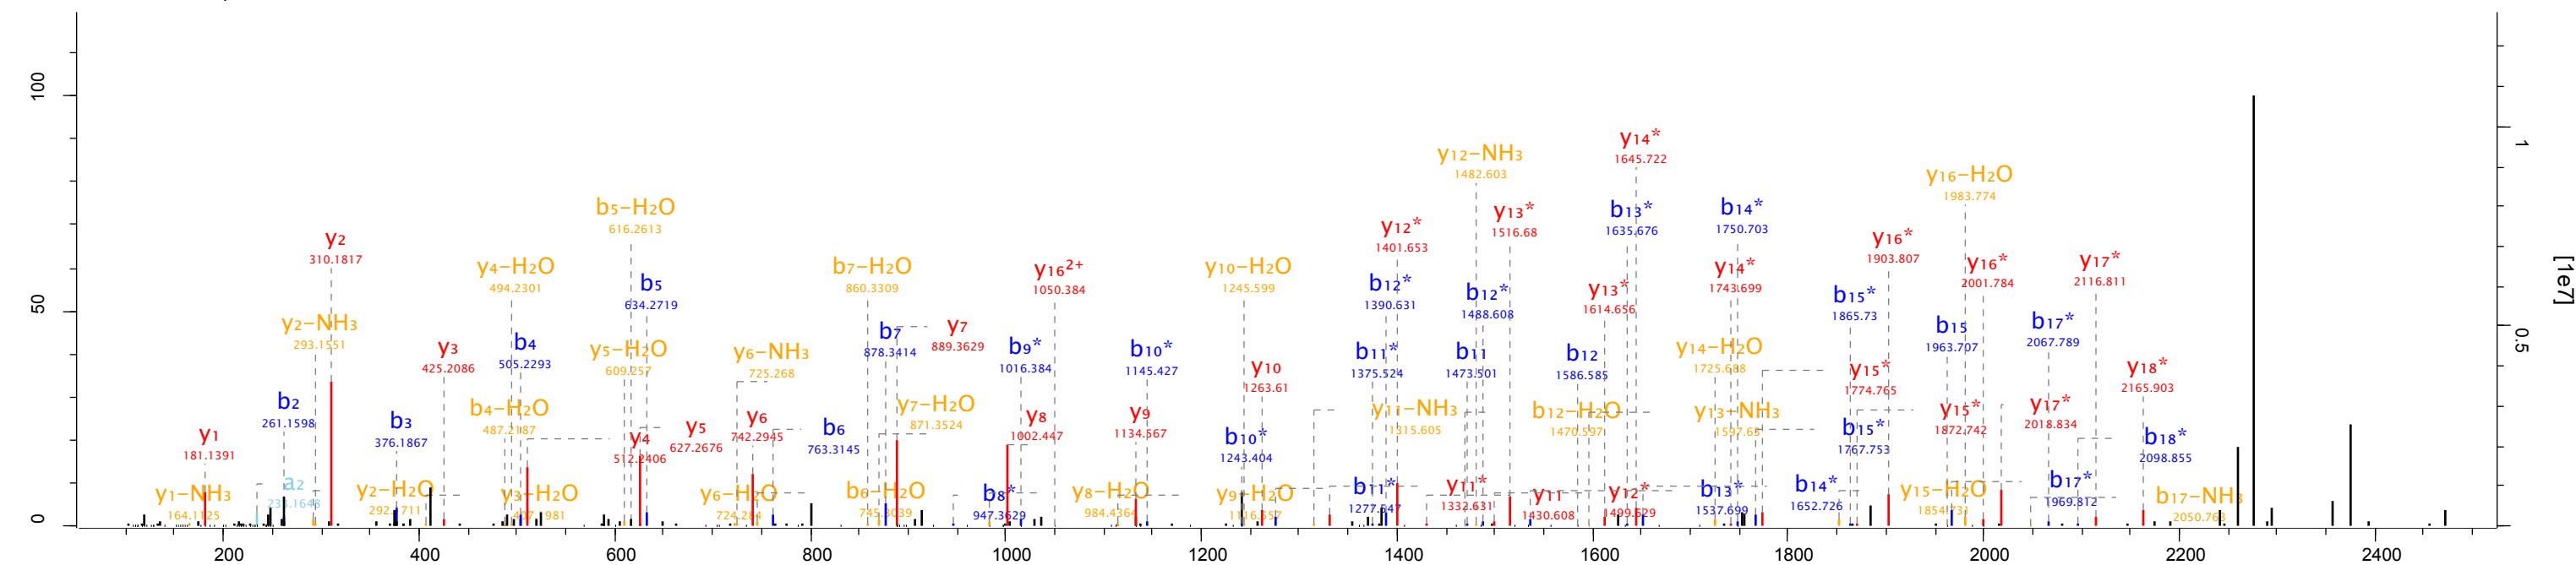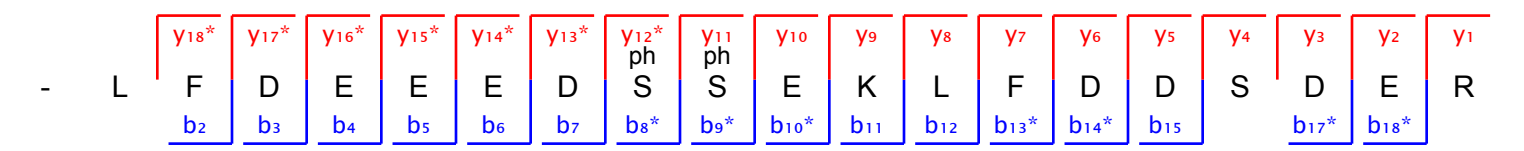

Raw file 20150814\_A375SR\_Phospho\_BR2\_03 Scan 19719 Method FTMS; HCD Score 123.22 m/z 660.95 Gene names CRK

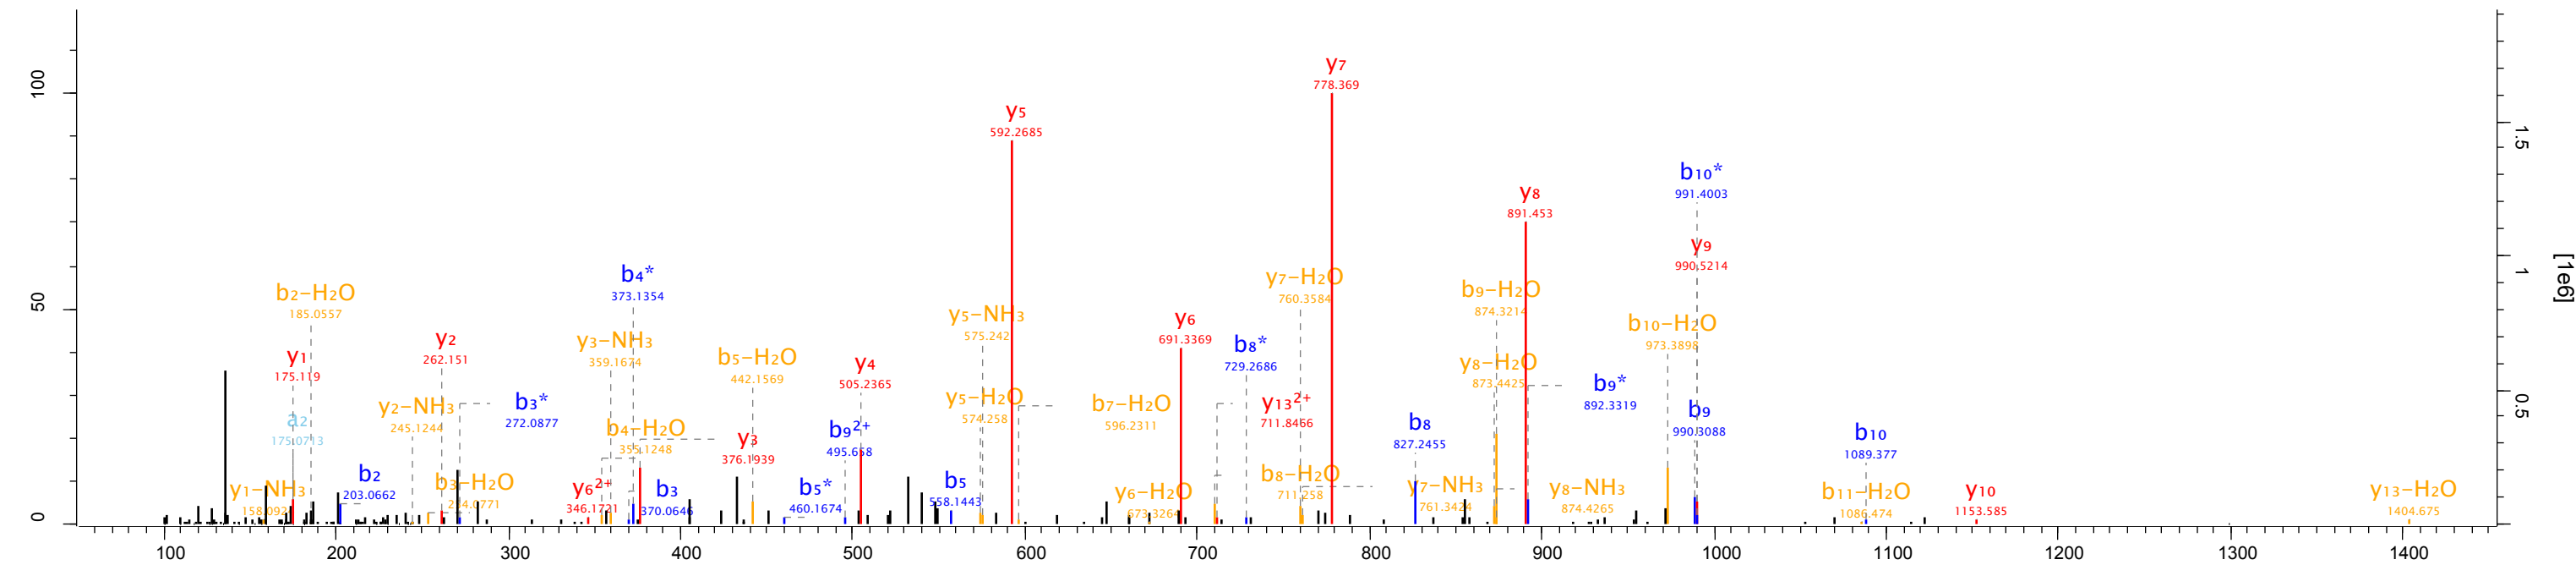

- D S S T S P G D Y V L S V S E N S R -

Fragmentation mapping: b2, b3, b4\*, b5 (under S, S, T, S); b8, b9, b10 (under Y, V); y10, y9, y8, y7, y6, y5, y4, y3, y2, y1 (under P, G, D, Y, V, L, S, V, S, E, N, S, R).

Raw file 20150814\_A375SR\_Phospho\_BR2\_03 Scan 19929 Method FTMS; HCD Score 75.52 m/z 951.42 Gene names SPACIA2;FAM122B

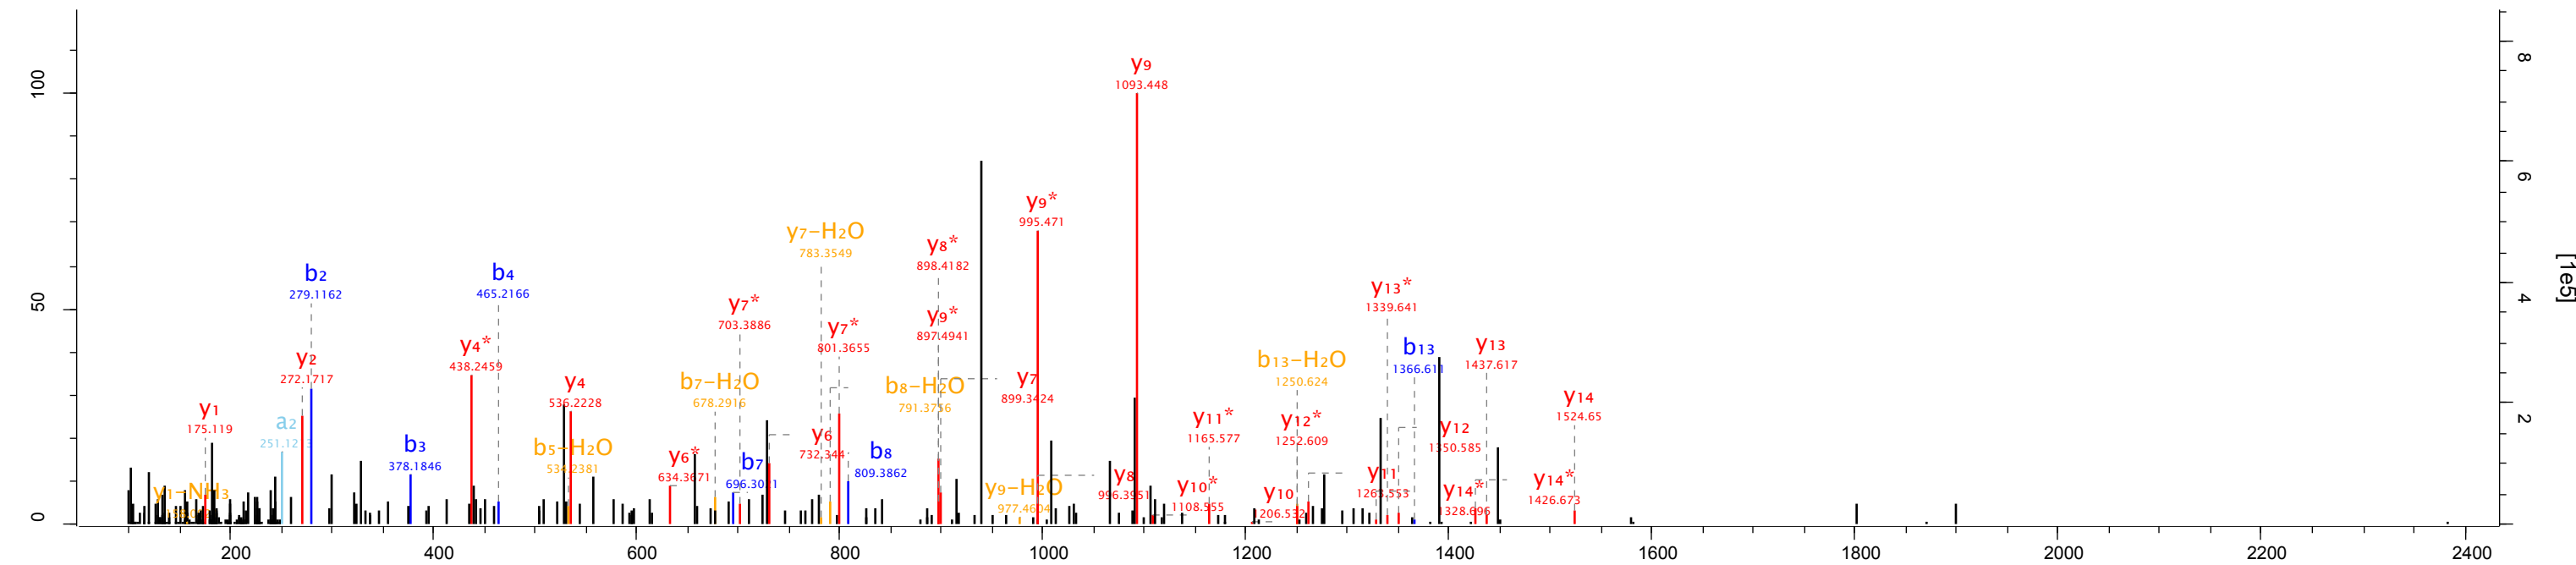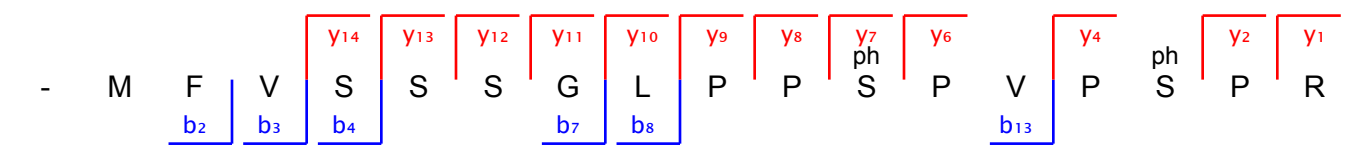

Raw file 20150814\_A375SR\_Phospho\_BR2\_03 Scan 20249 Method FTMS; HCD Score 102.55 m/z 964.78 Gene names XR2

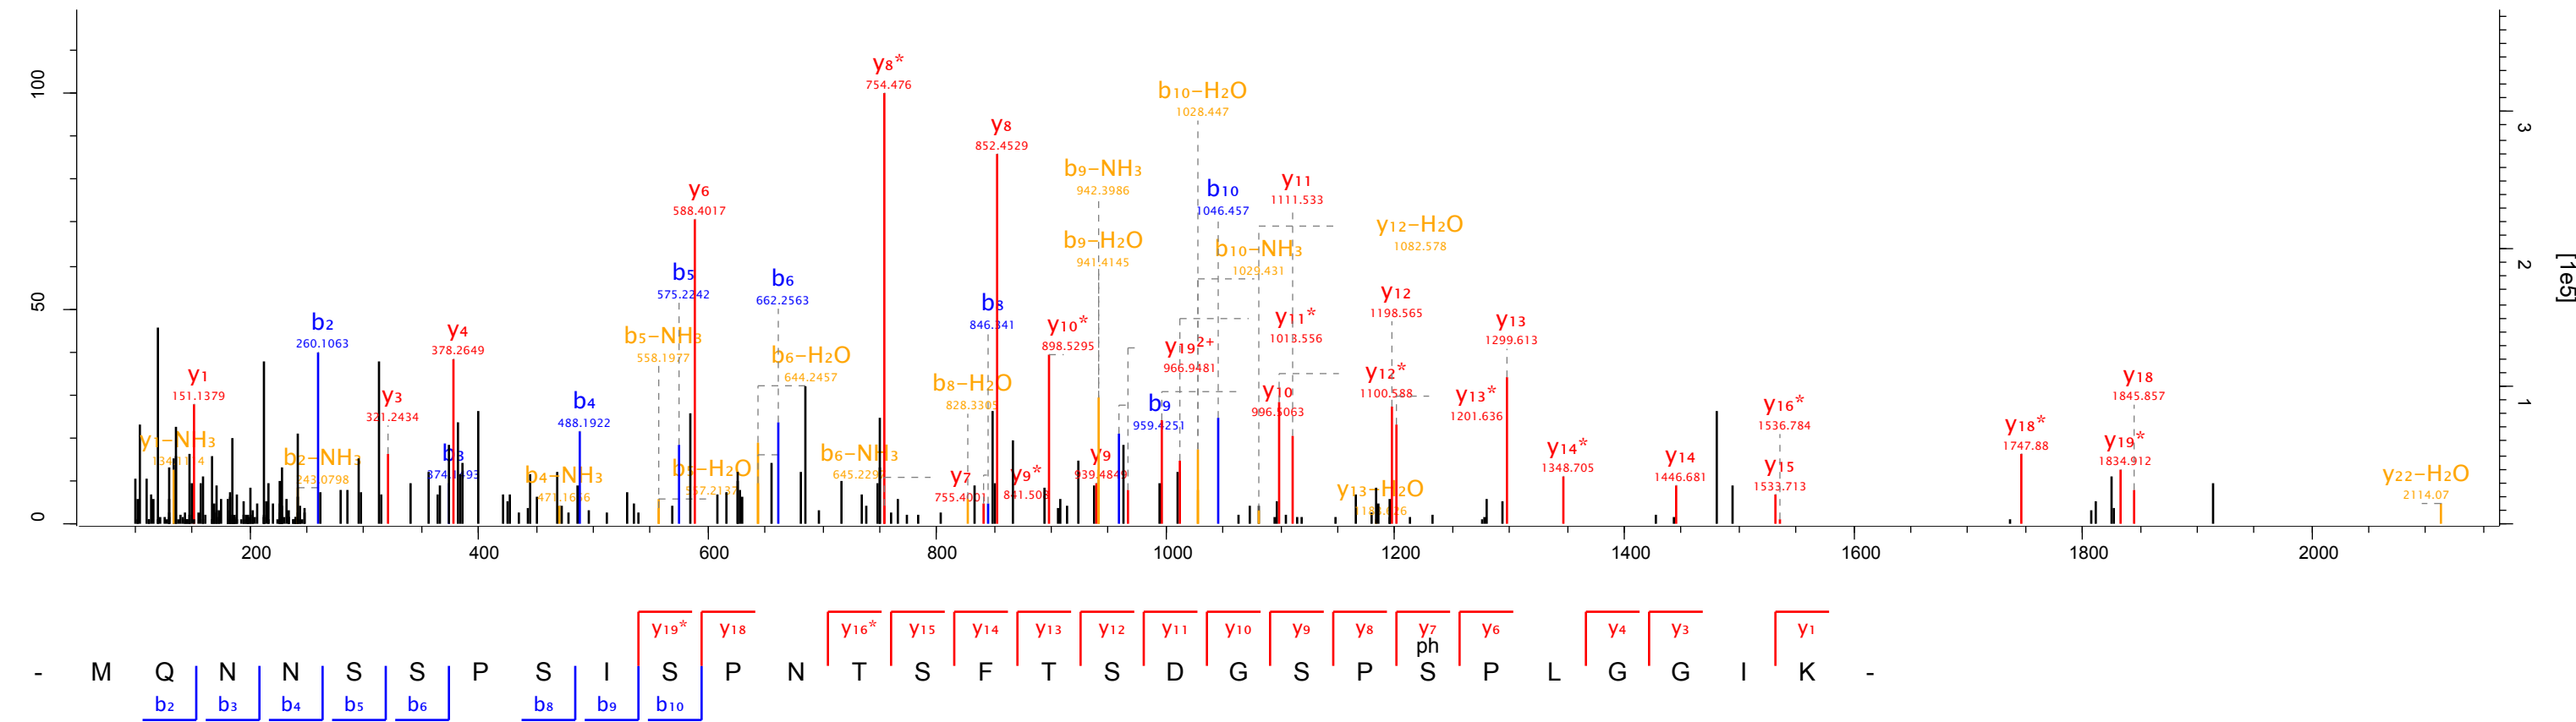

Raw file  
20150814\_A375SR\_Phospho\_BR2\_03

Scan 20319 Method FTMS; HCD Score 110.91 m/z 1067.4 Gene names TEAD1

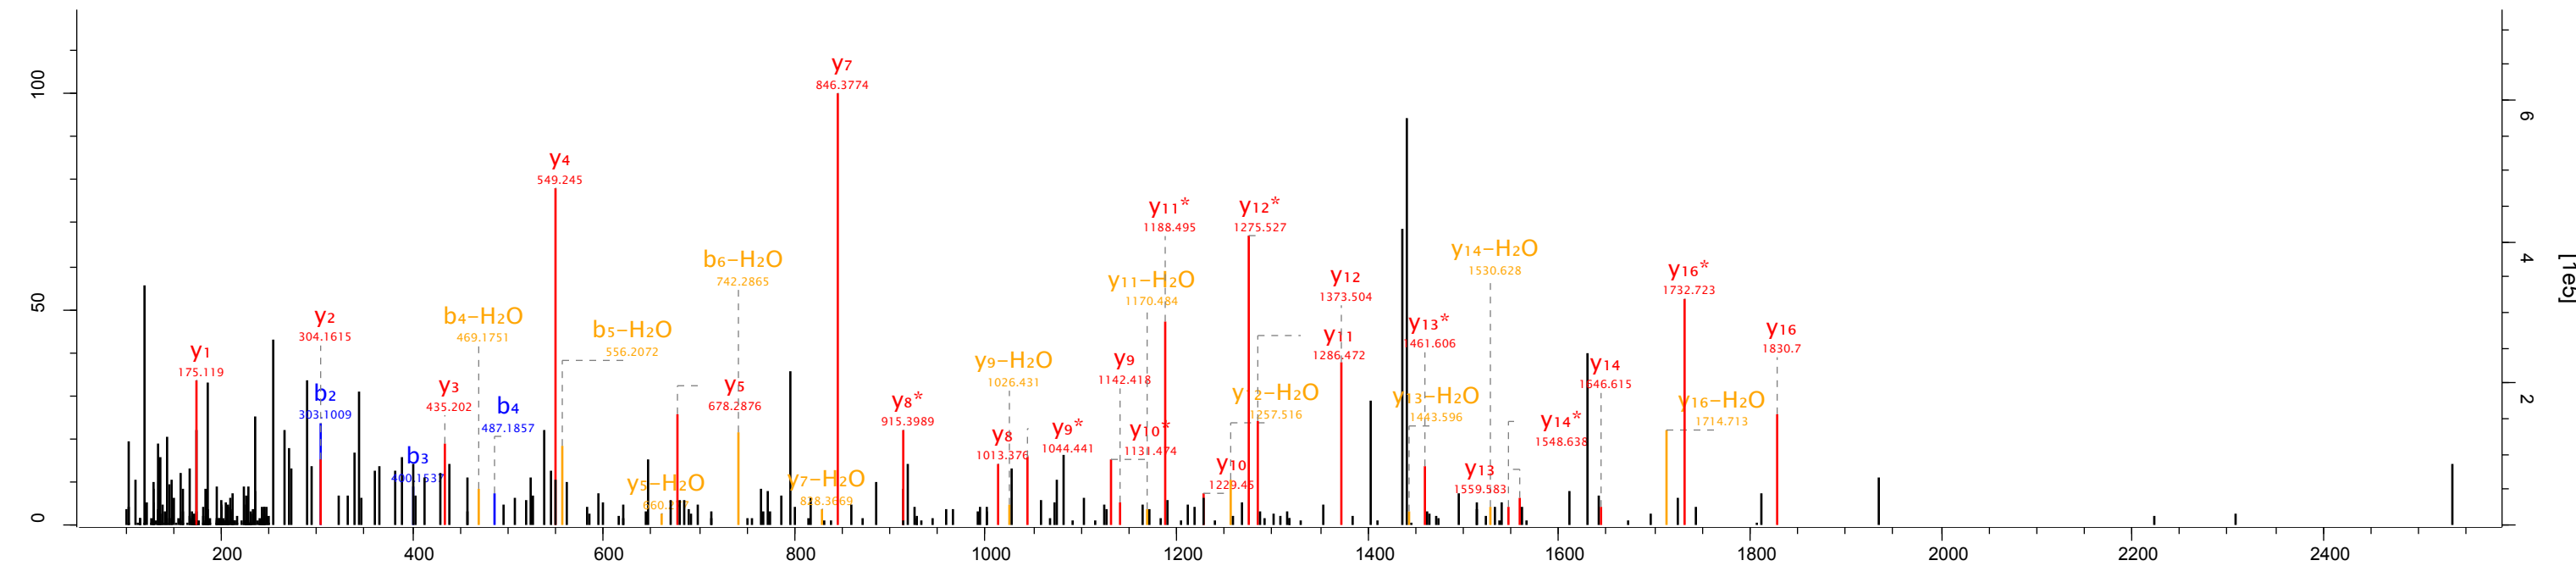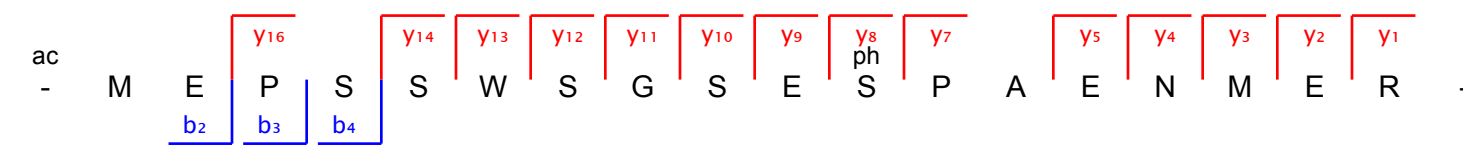

Raw file: 20150814\_A375SR\_Phospho\_BR2\_03  
 Scan: 20599  
 Method: FTMS; HCD  
 Score: 155.68  
 m/z: 1188.52  
 Gene names: HUWE1

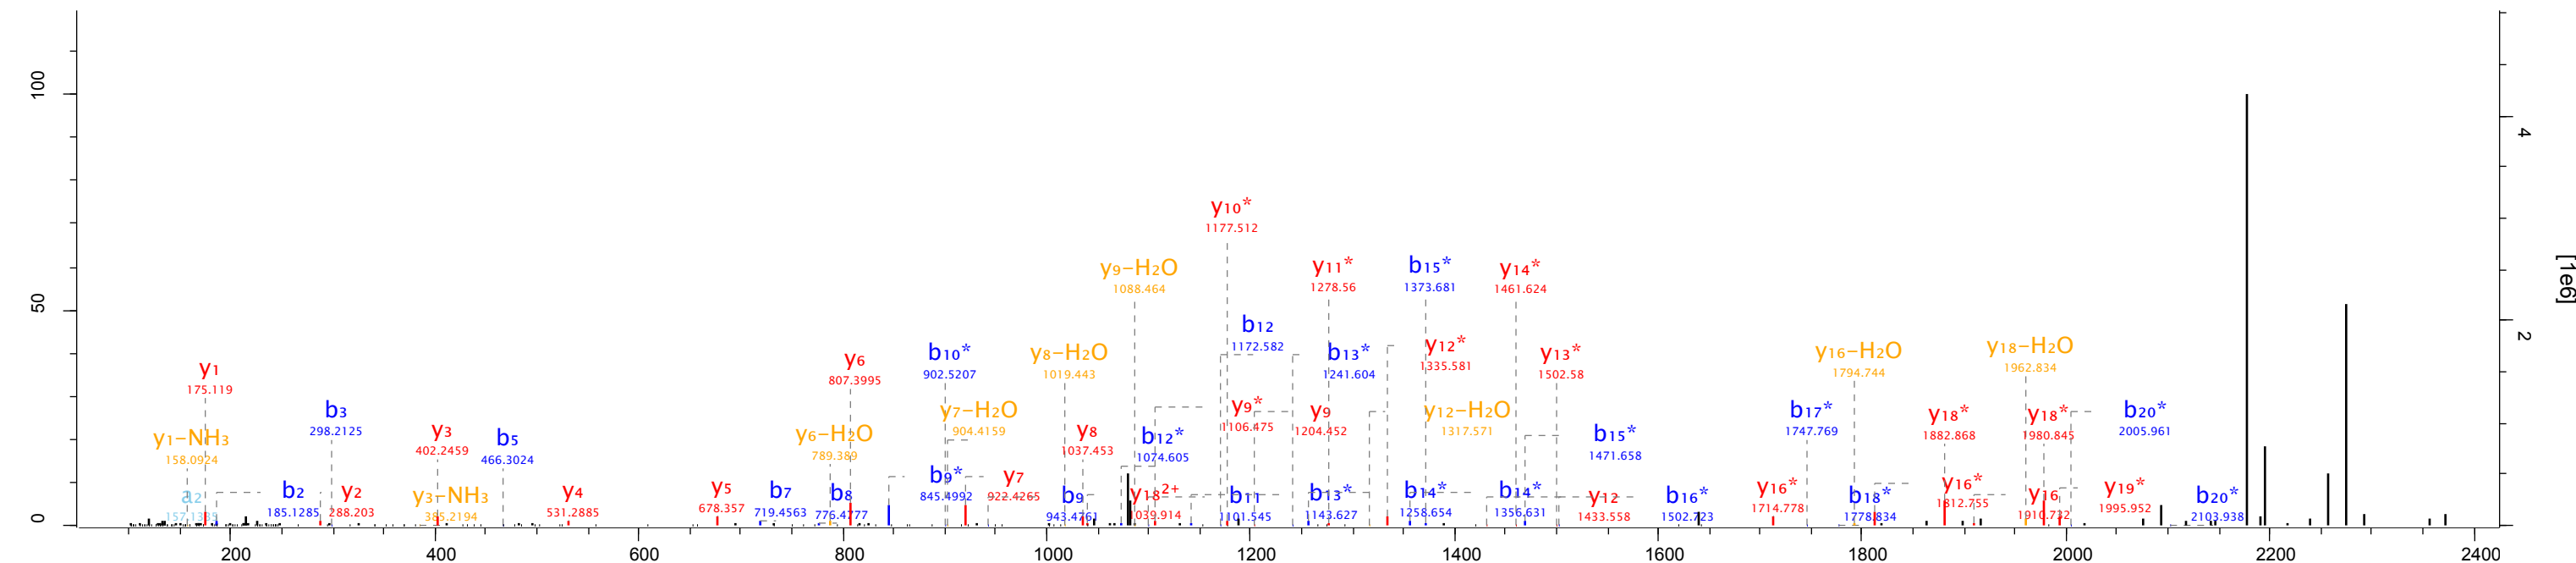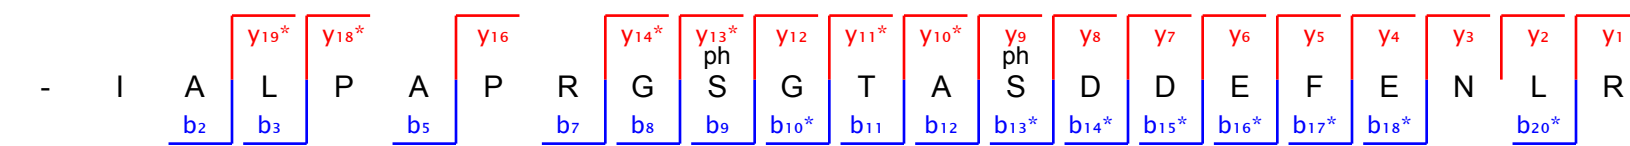

Raw file Scan Method Score m/z Gene names  
 20150814\_A375SR\_Phospho\_BR2\_03 20719 FTMS; HCD 197.51 769.86 NAPRT

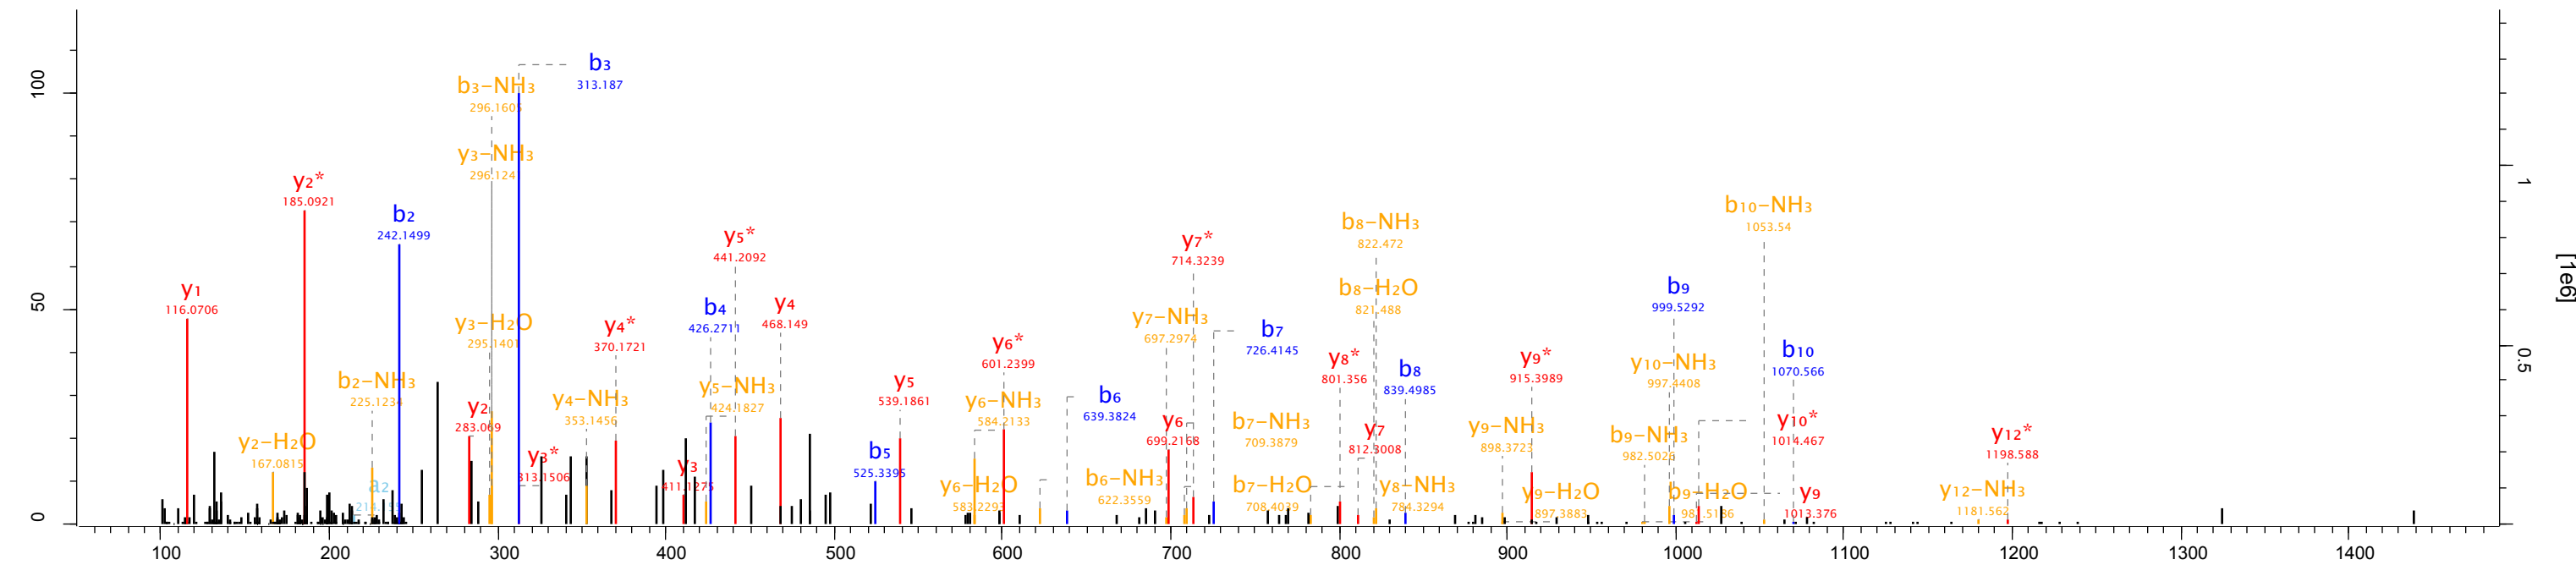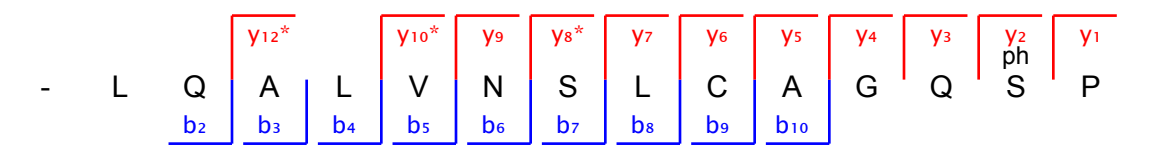

Raw file: 20150814\_A375SR\_Phospho\_BR2\_03  
 Scan: 2109 Method: FTMS; HCD Score: 62.94 m/z: 697.28 Gene names: IGF2BP3

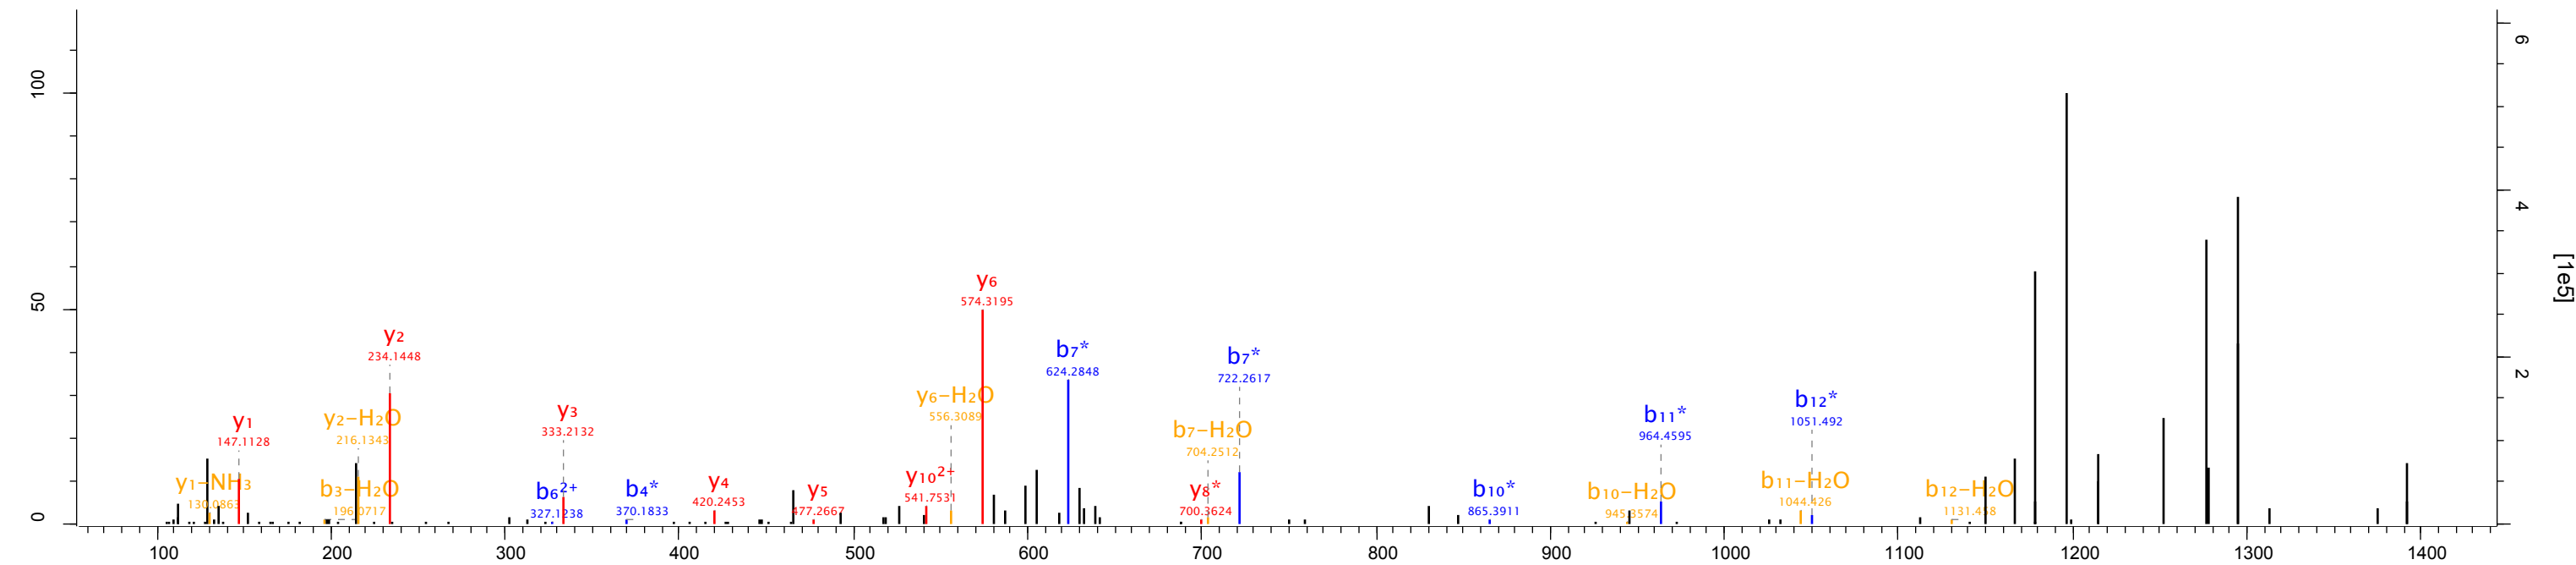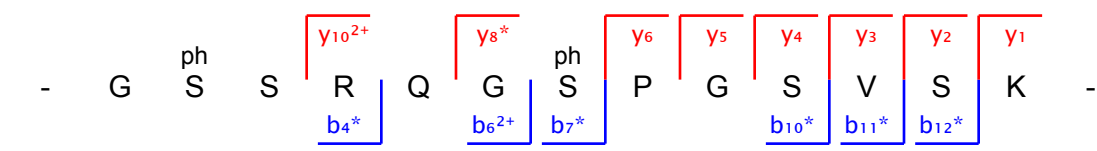



Raw file 20150814\_A375SR\_Phospho\_BR2\_03 Scan 21129 Method FTMS; HCD Score 140.63 m/z 933.71 Gene names TGS1

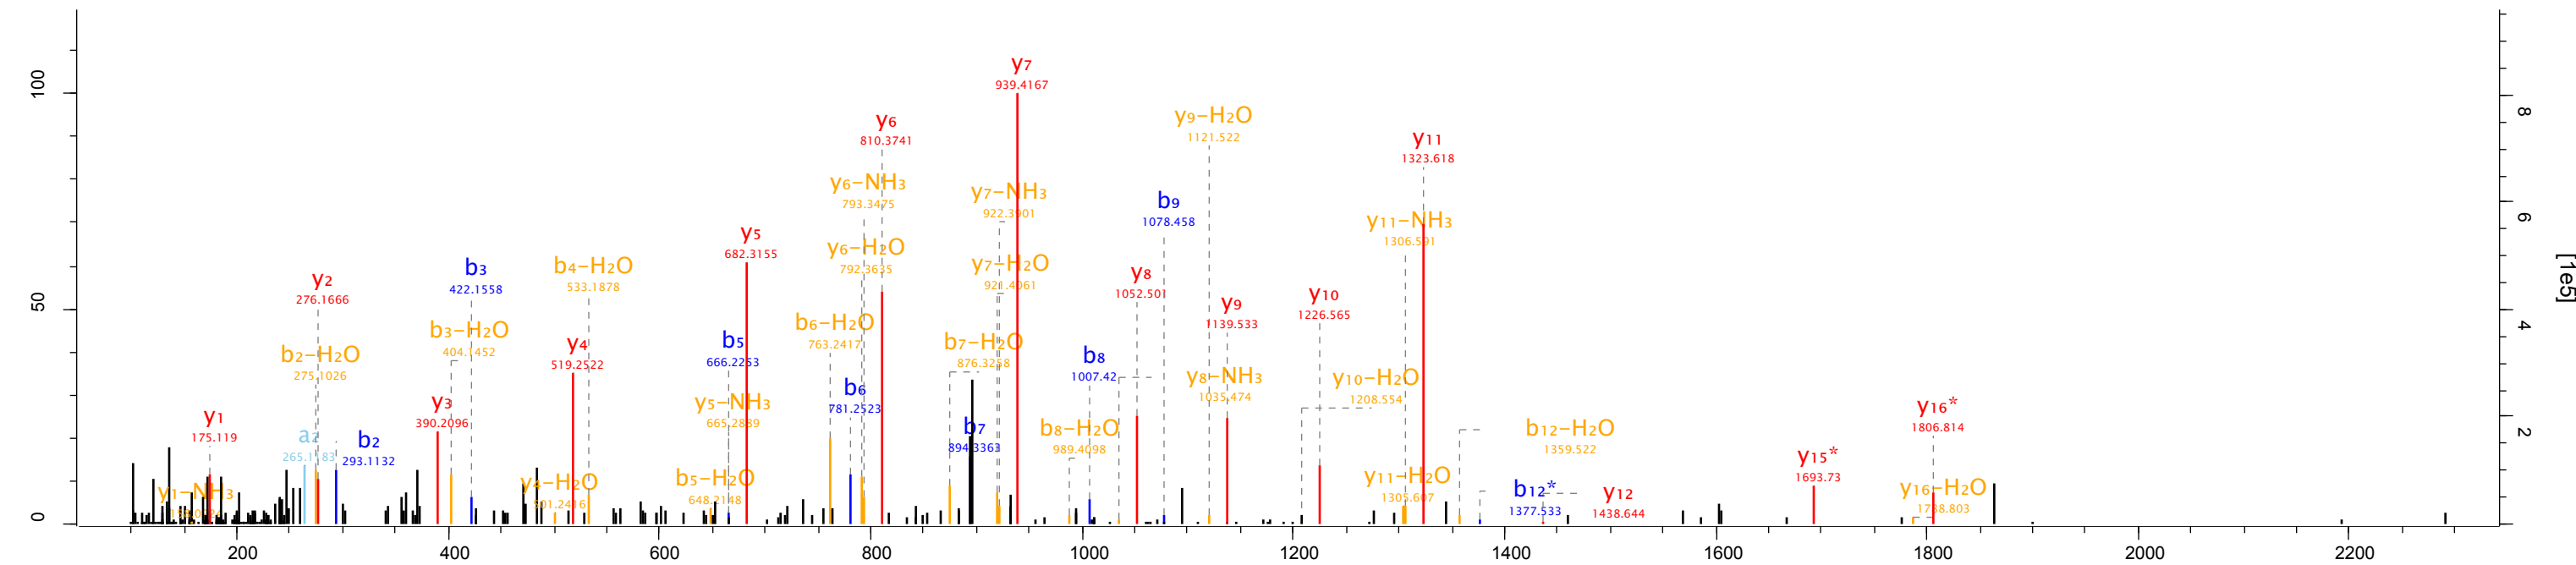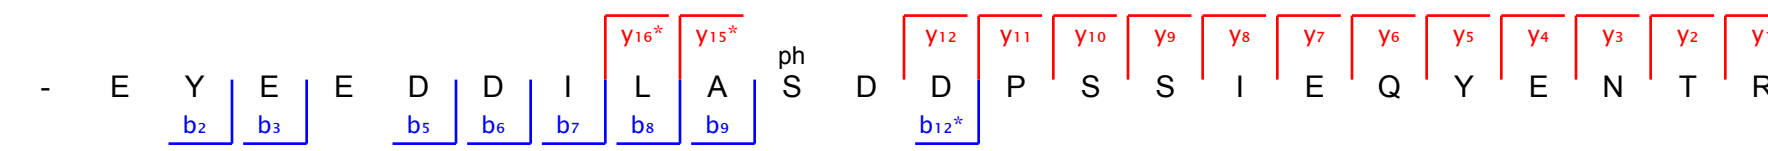

Raw file: 20150814\_A375SR\_Phospho\_BR2\_03  
 Scan: 21149 Method: FTMS; HCD Score: 136.92 m/z: 995.87 Gene names: RBM39

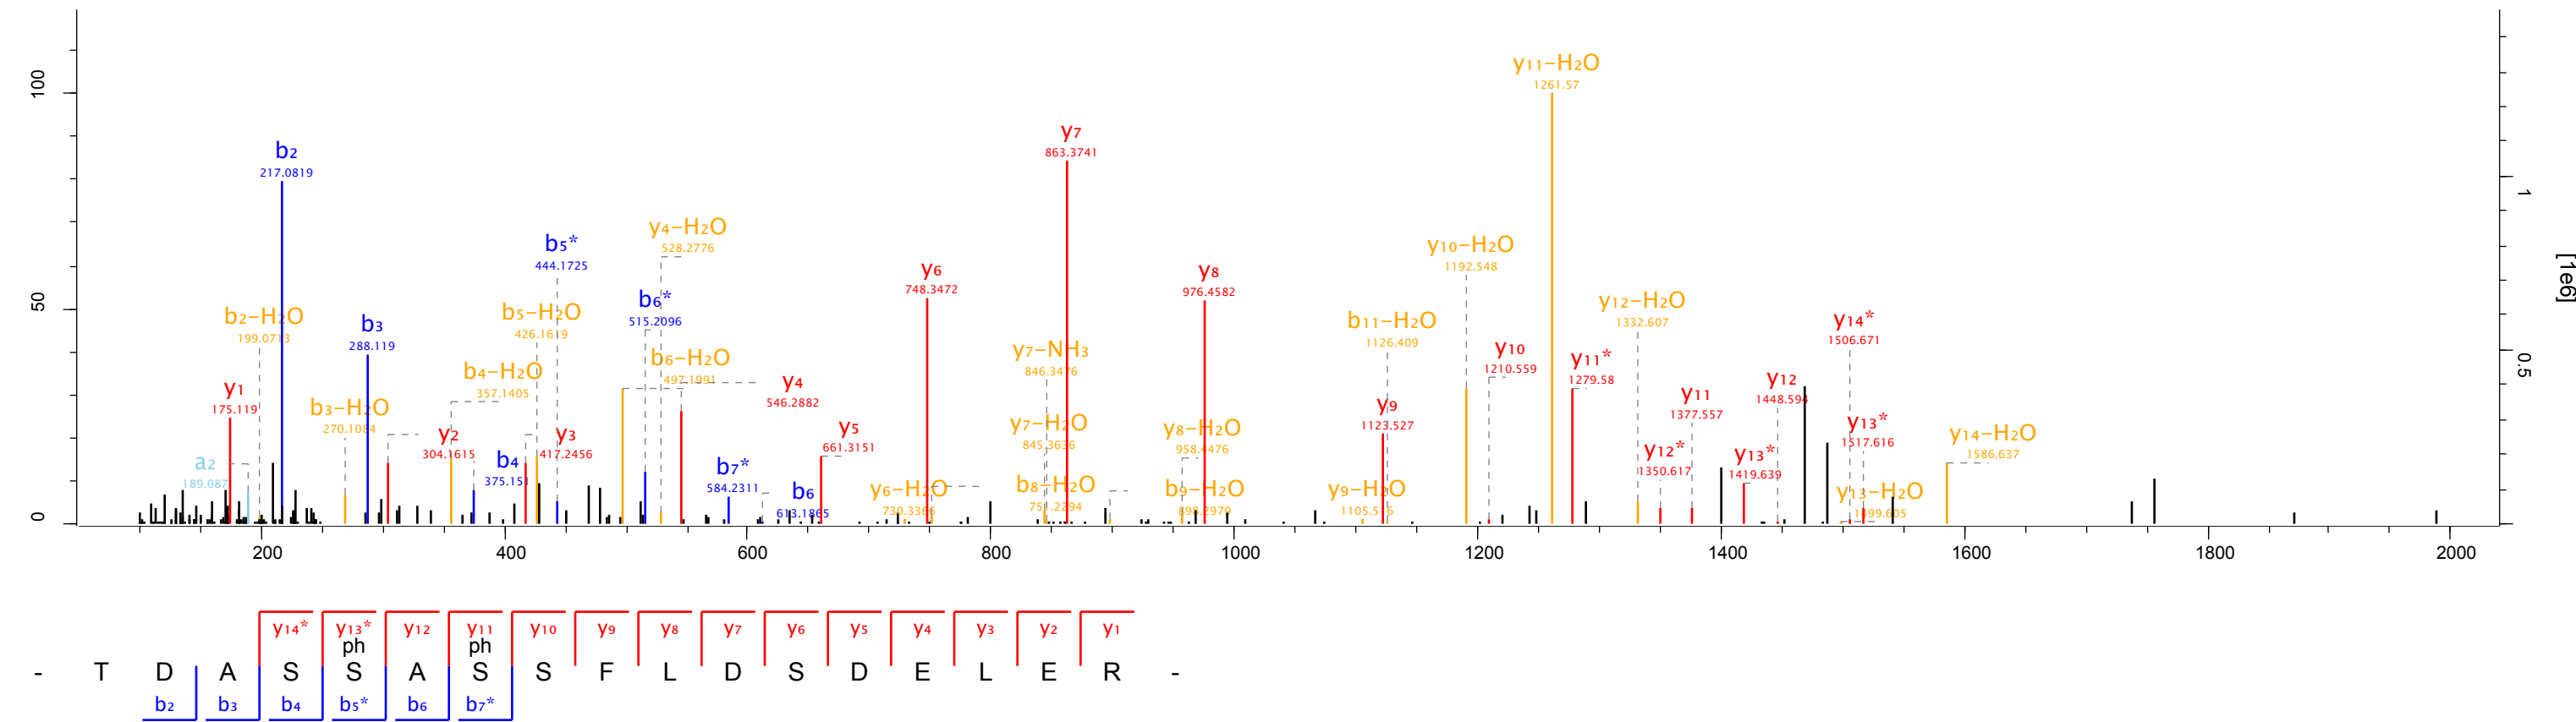



Raw file Scan Method Score m/z Gene names  
 20150814\_A375SR\_Phospho\_BR2\_03 21729 FTMS; HCD 48.18 995.03 WAPAL

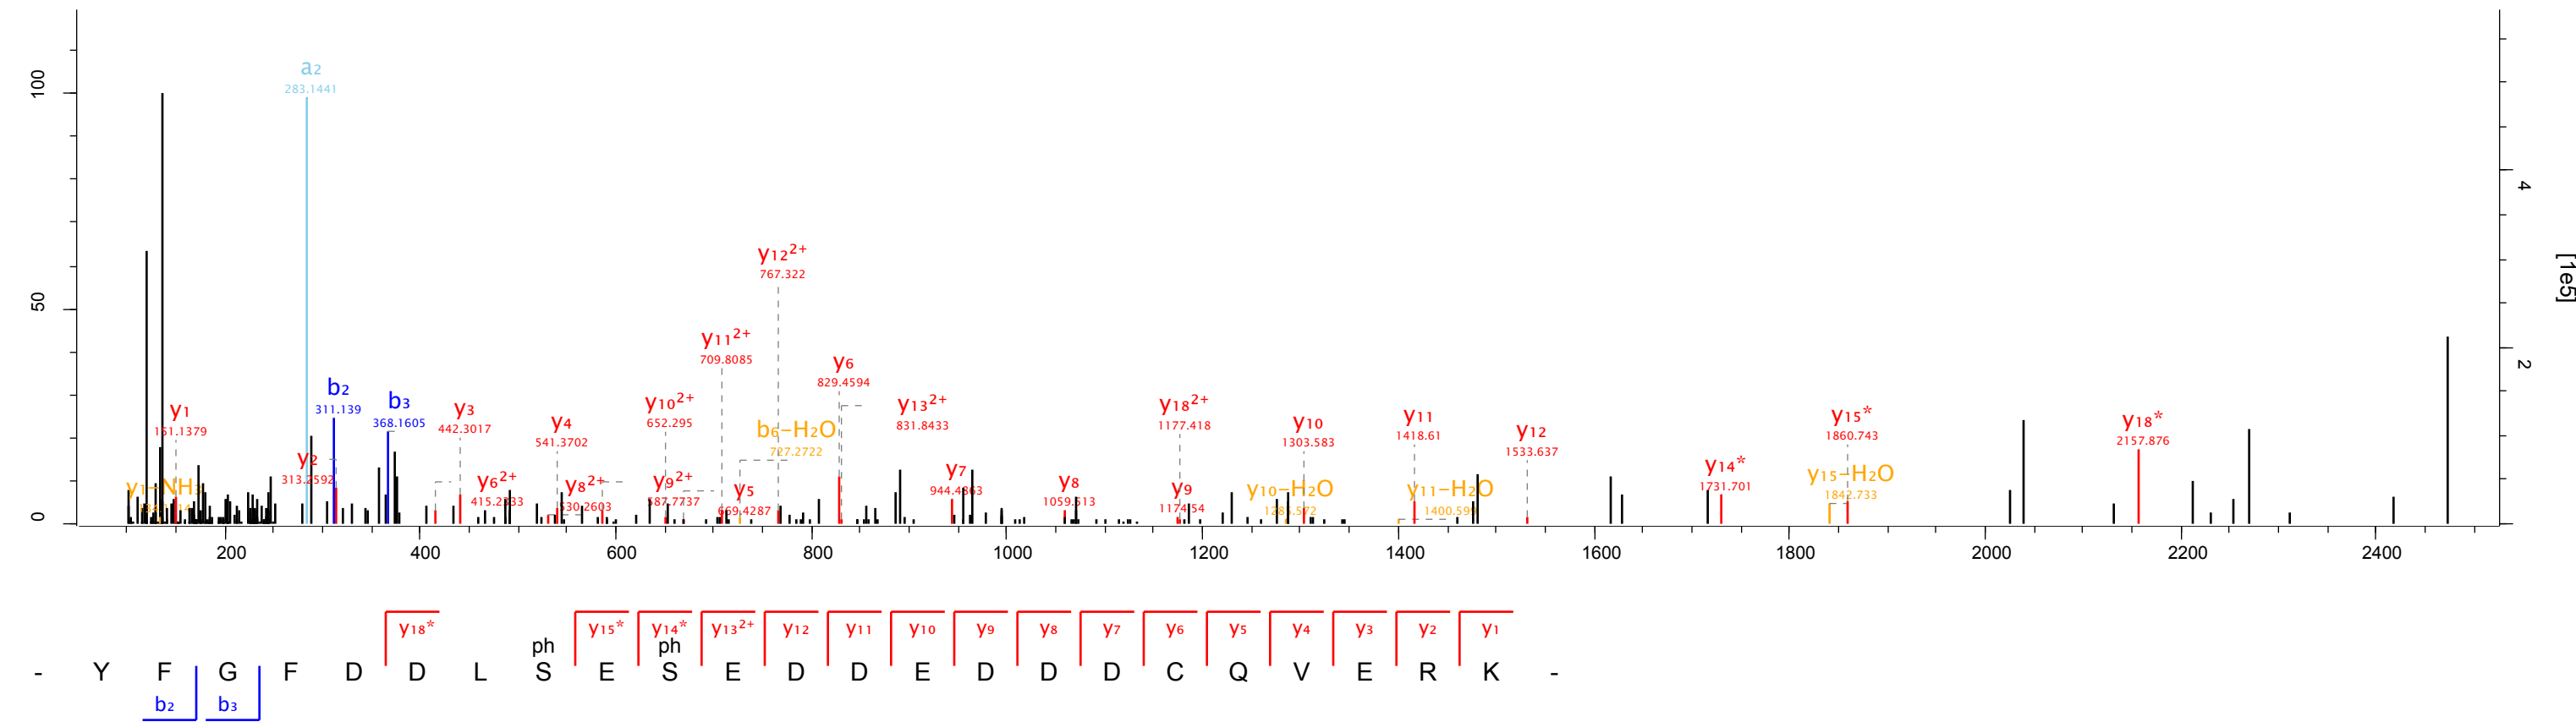

Raw file 20150814\_A375SR\_Phospho\_BR2\_03 Scan 22409 Method FTMS; HCD Score 139.34 m/z 938.5 Gene names SZRD1

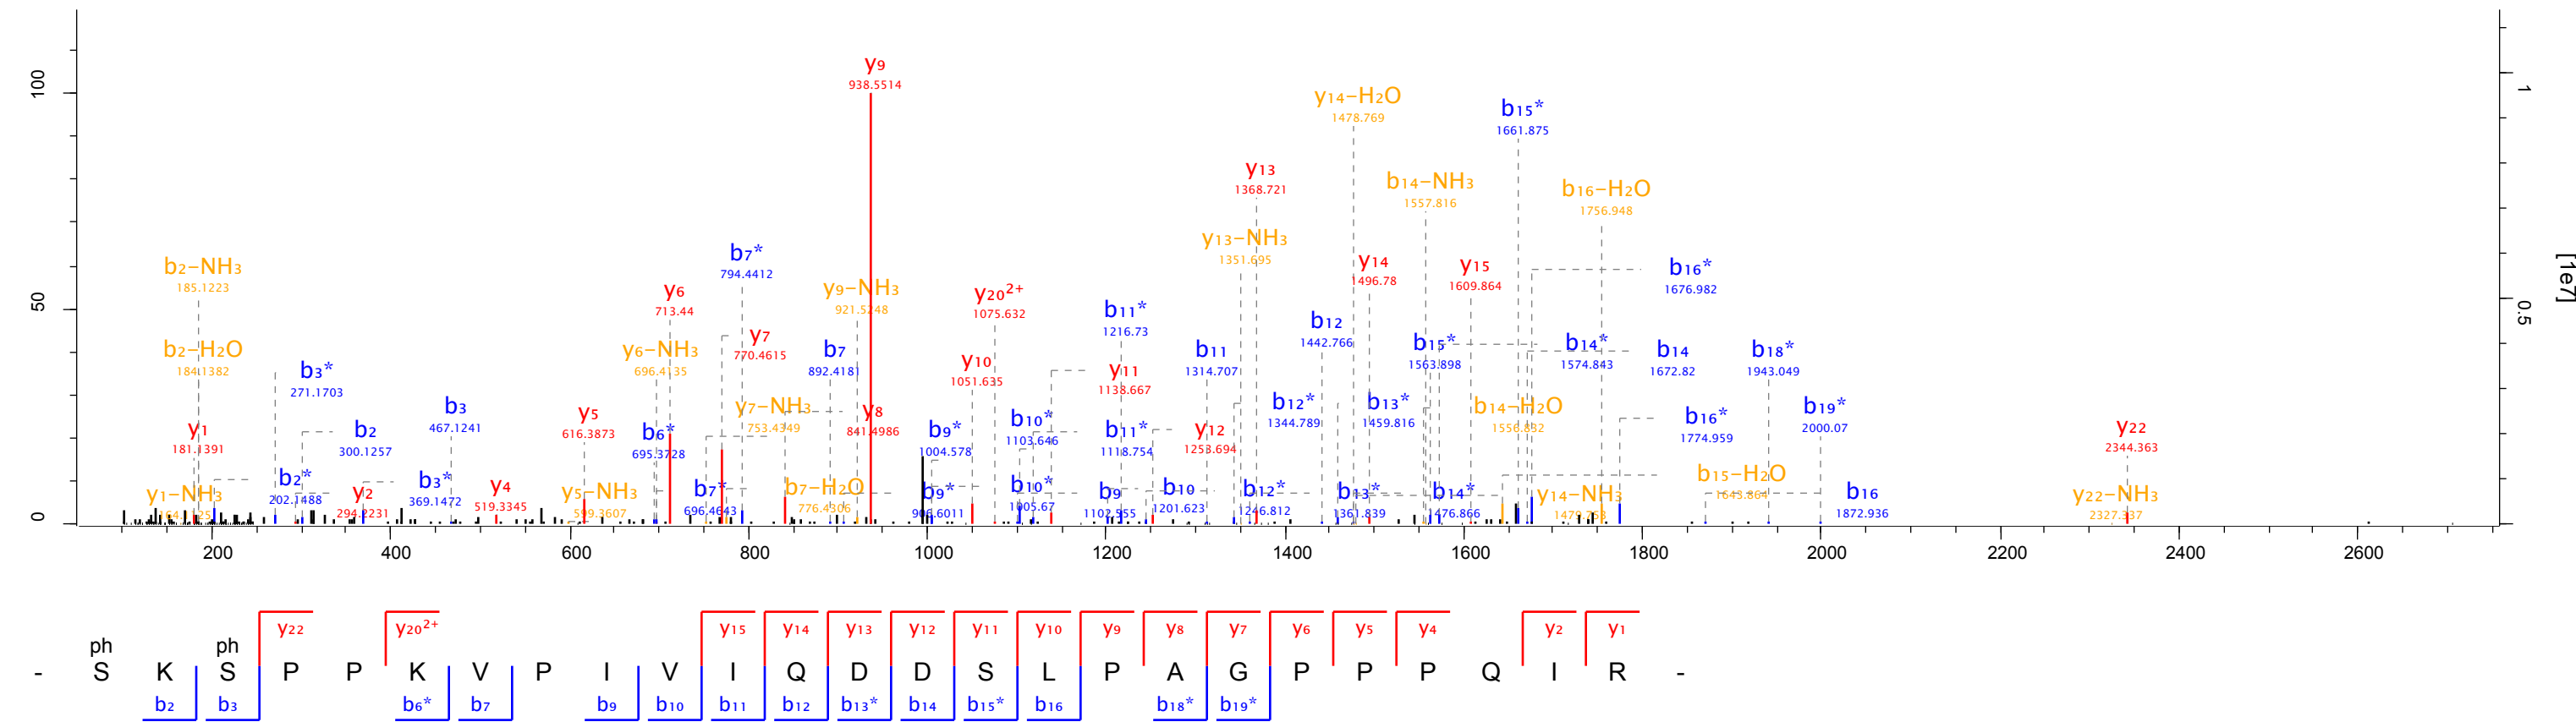

Raw file 20150814\_A375SR\_Phospho\_BR2\_03 Scan 22929 Method FTMS; HCD Score 92.93 m/z 1539.14 Gene names NFIB

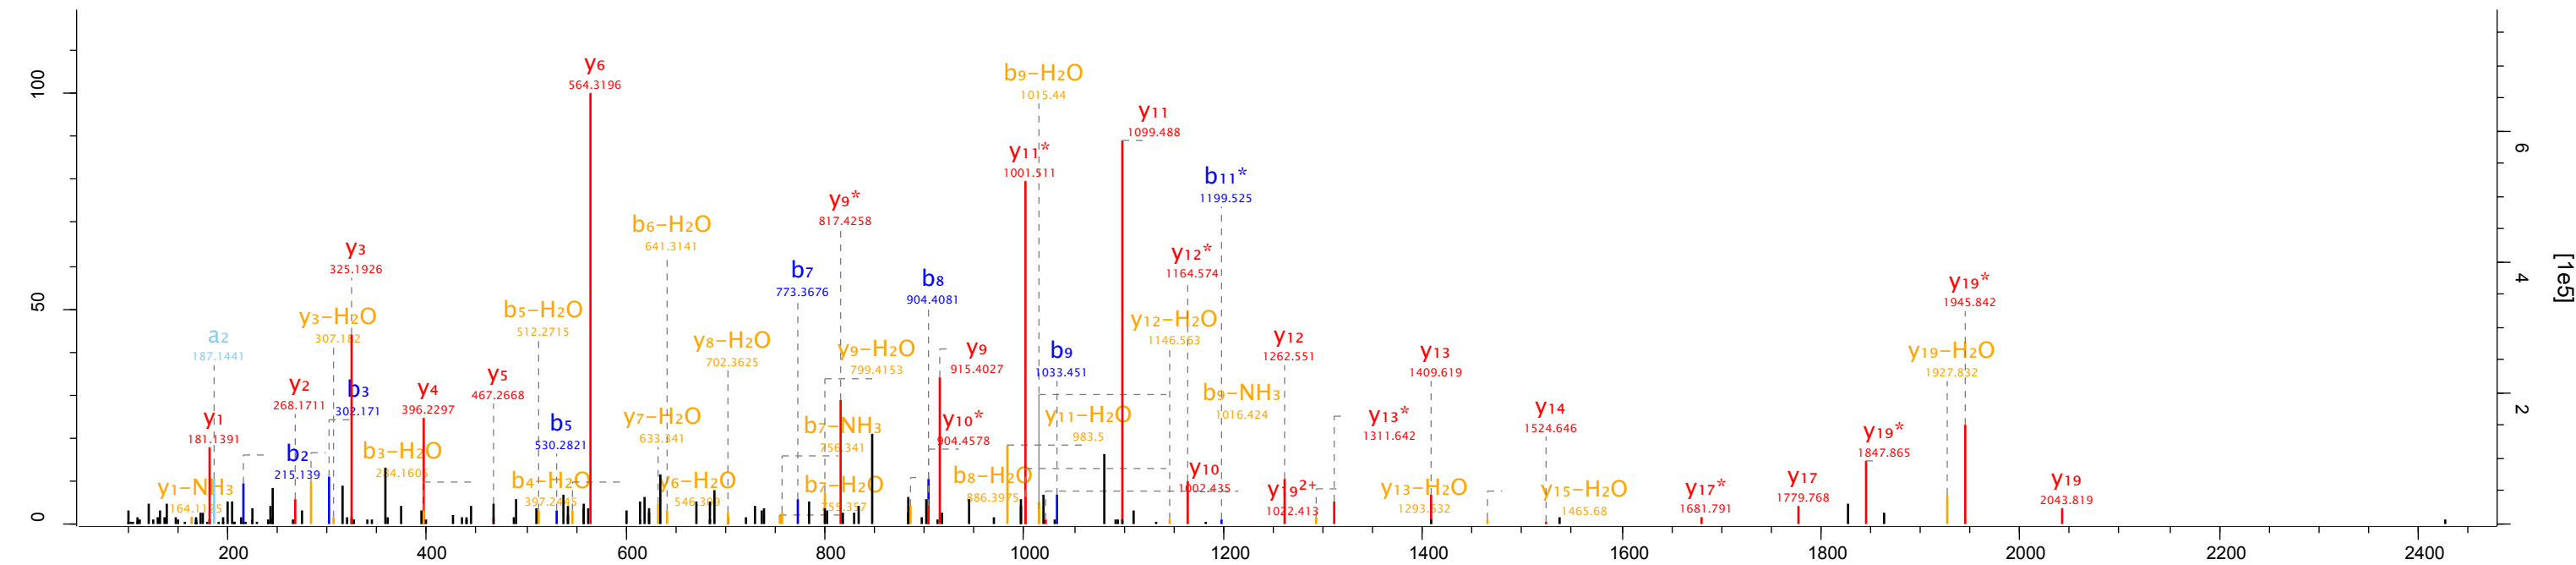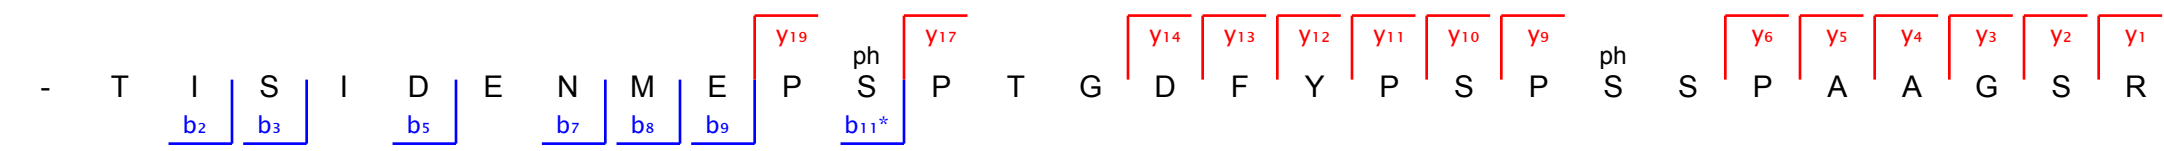

Raw file  
 20150814\_A375SR\_Phospho\_BR2\_03  
 Scan 23109 Method FTMS; HCD Score 123.73 m/z 1121.18 Gene names SPECC1

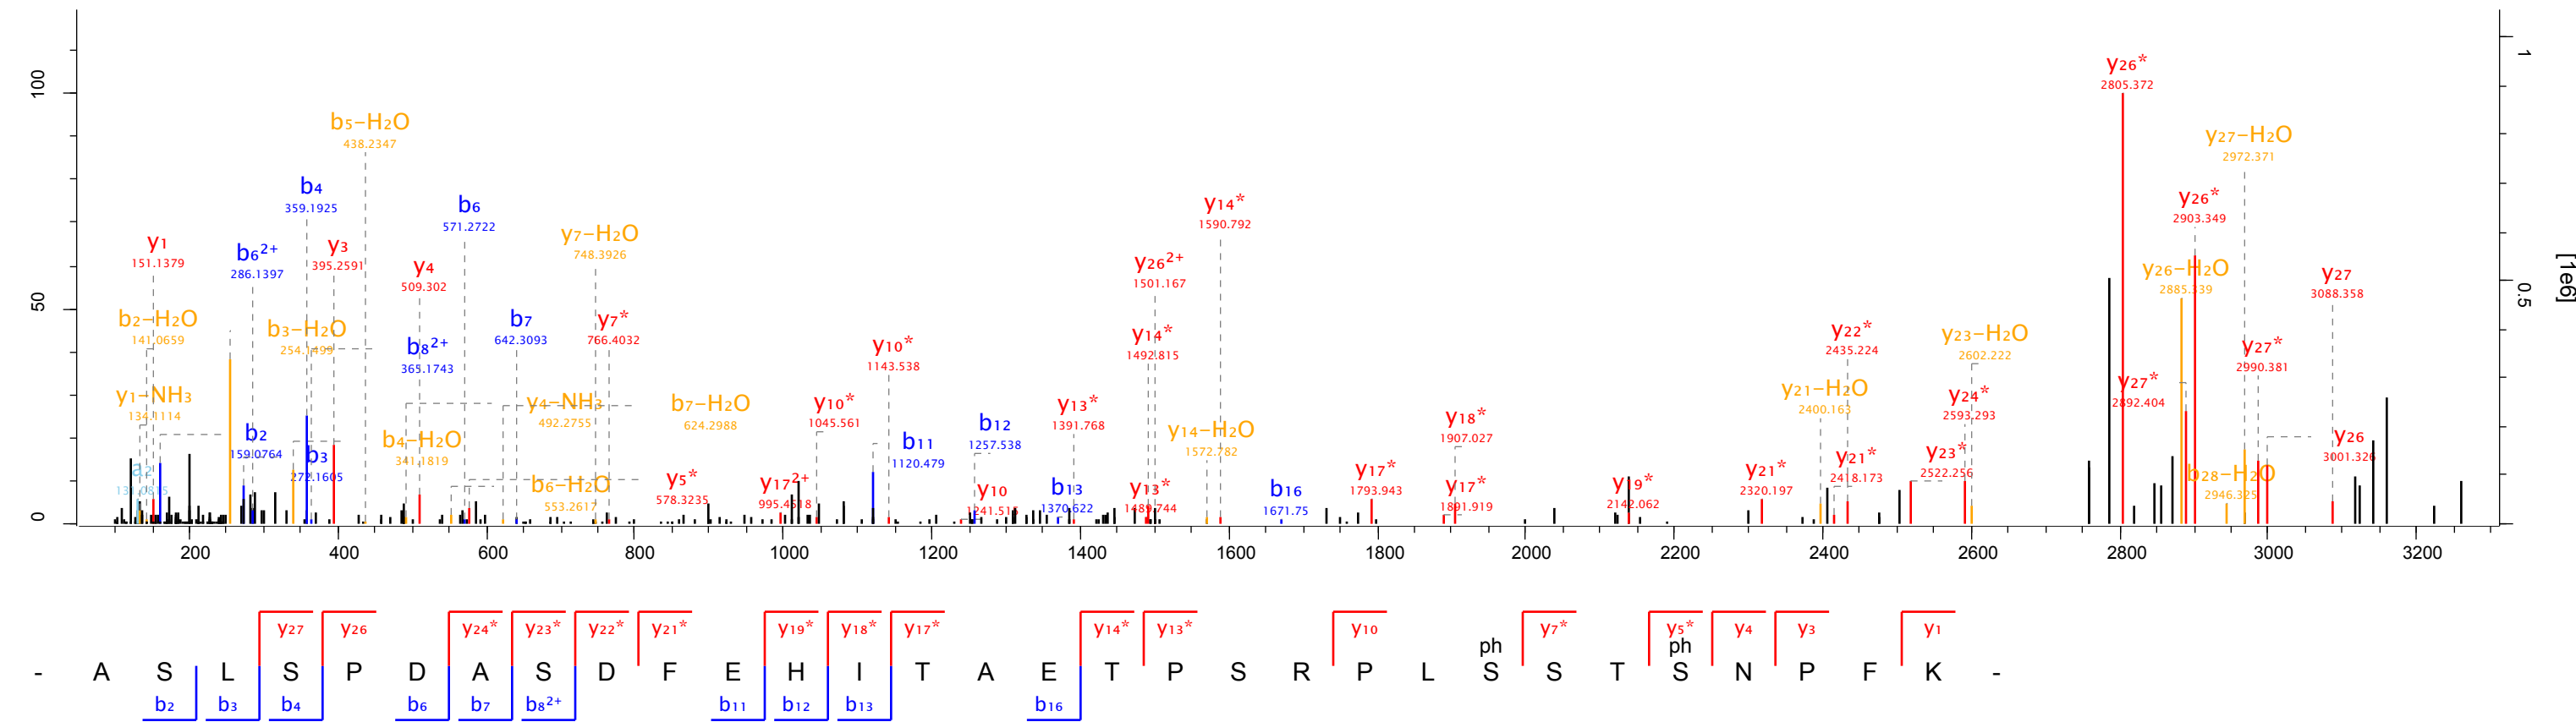

Raw file: 20150814\_A375SR\_Phospho\_BR2\_03  
 Scan: 23369 Method: FTMS; HCD Score: 103.14 m/z: 1023.52 Gene names: SIN3A

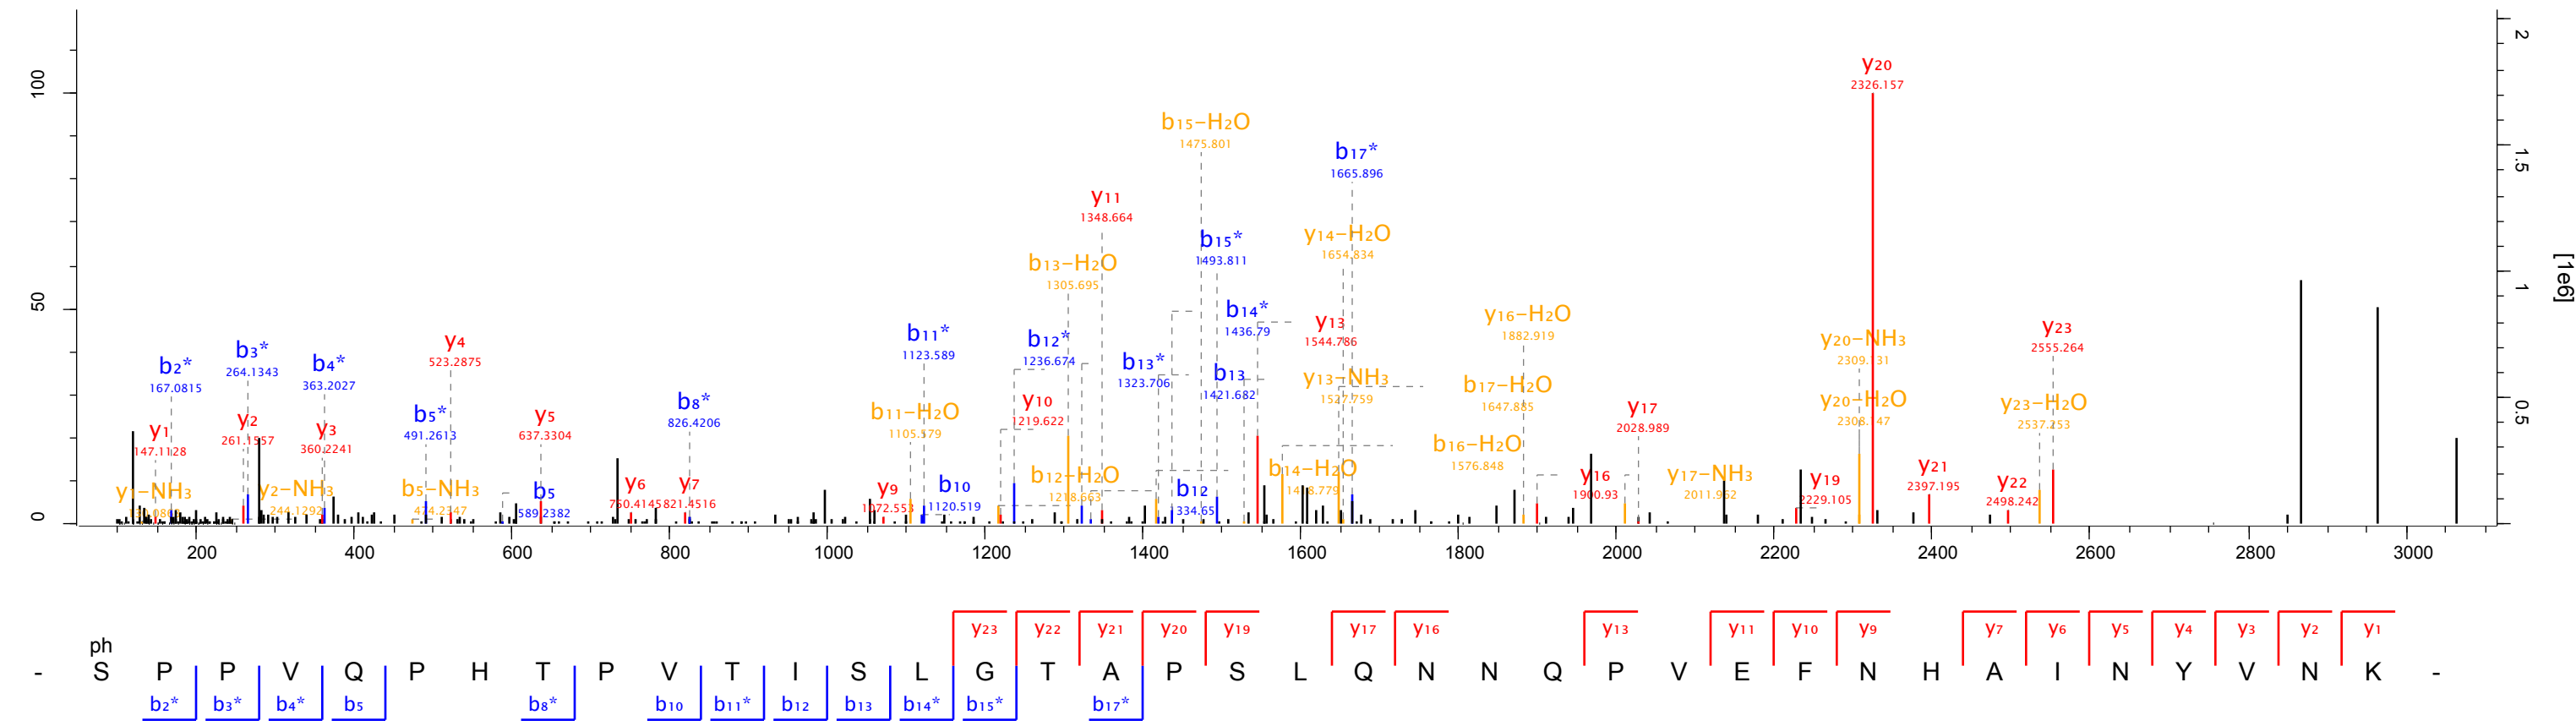





Raw file Scan Method Score m/z Gene names  
 20150814\_A375SR\_Phospho\_BR2\_03 23469 FTMS; HCD 203.71 1017.83 NCOR2

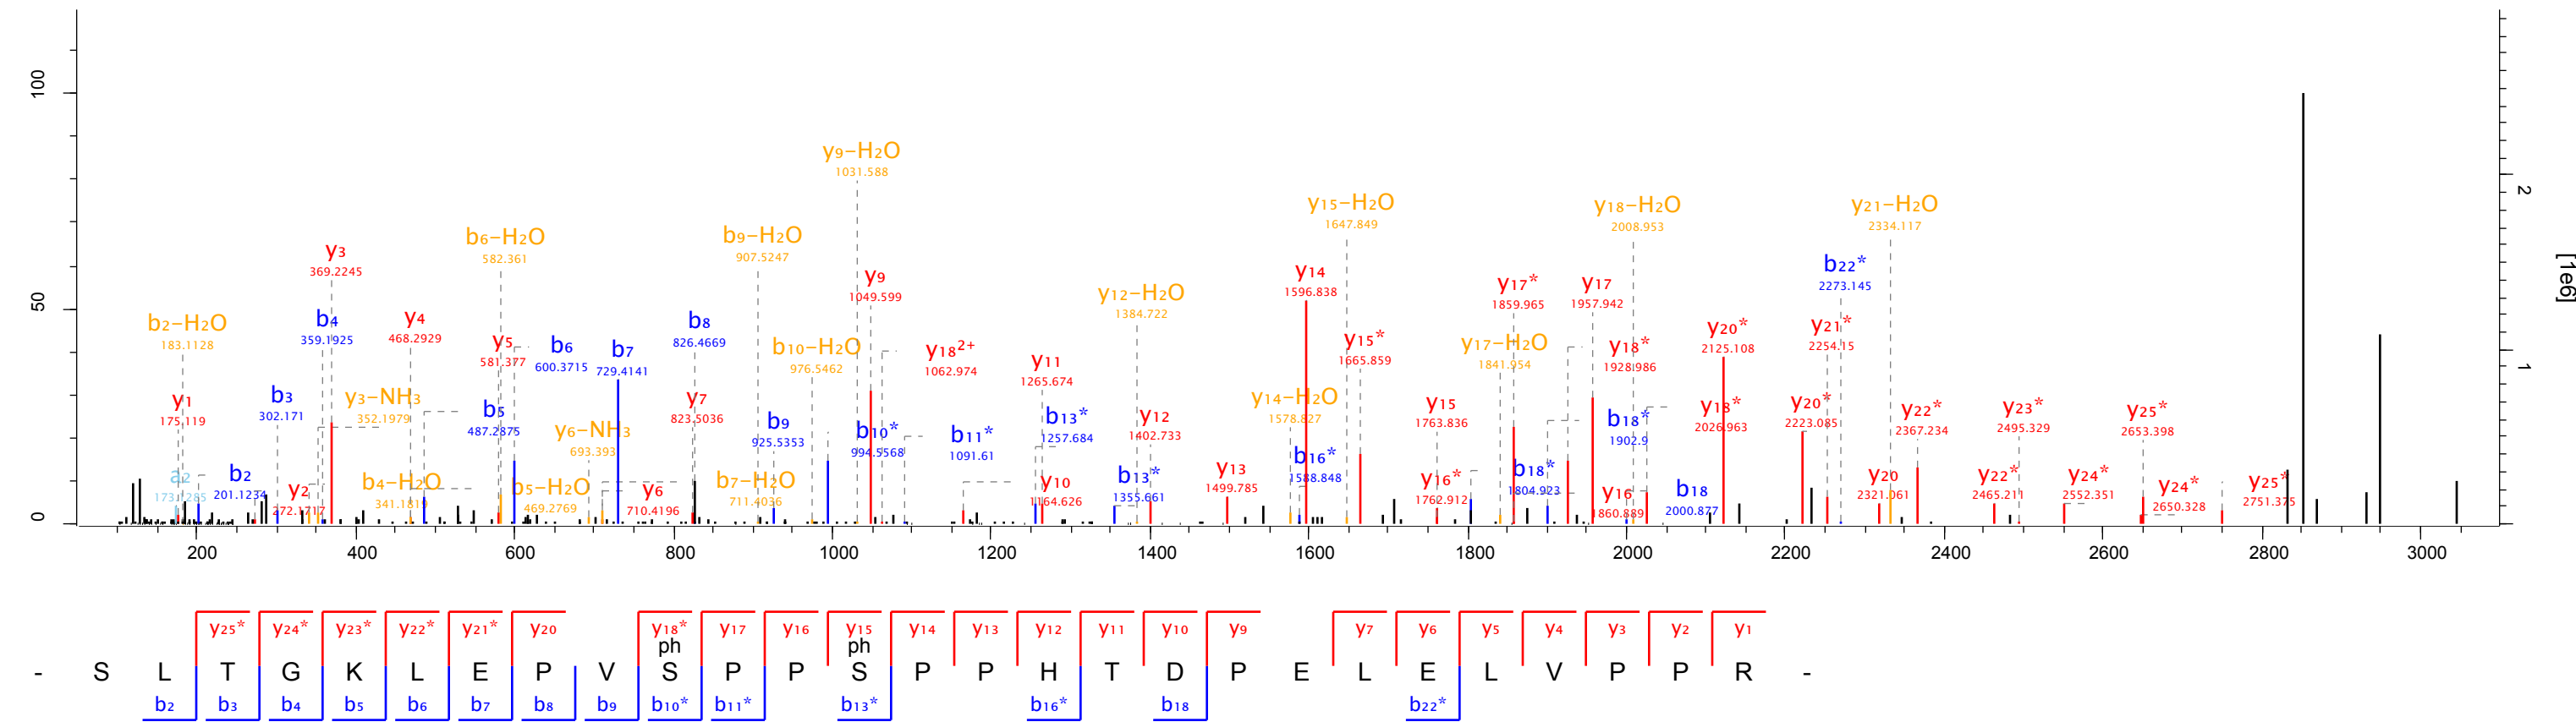

Raw file Scan Method Score m/z Gene names  
 20150814\_A375SR\_Phospho\_BR2\_03 23529 FTMS; HCD 50.9 1028.76 JUN

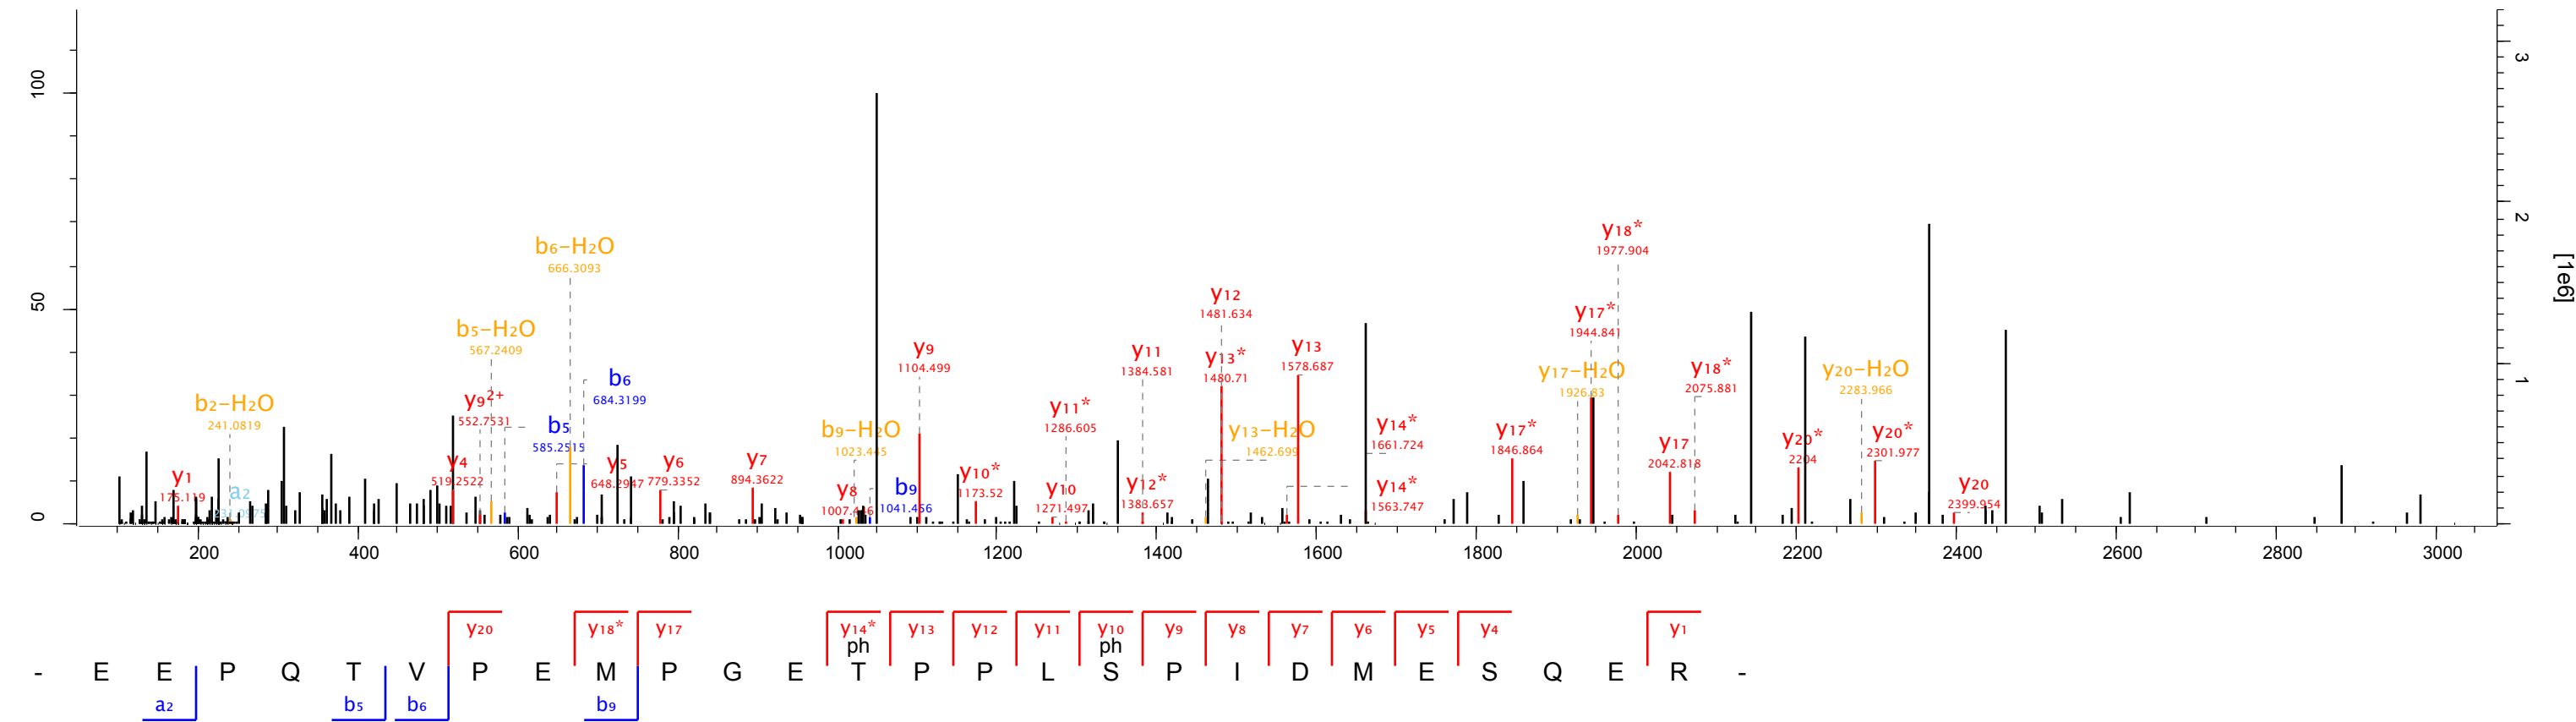

Raw file: 20150814\_A375SR\_Phospho\_BR2\_03  
 Scan: 23569 Method: FTMS; HCD Score: 58 m/z: 954.45 Gene names: LSM14B

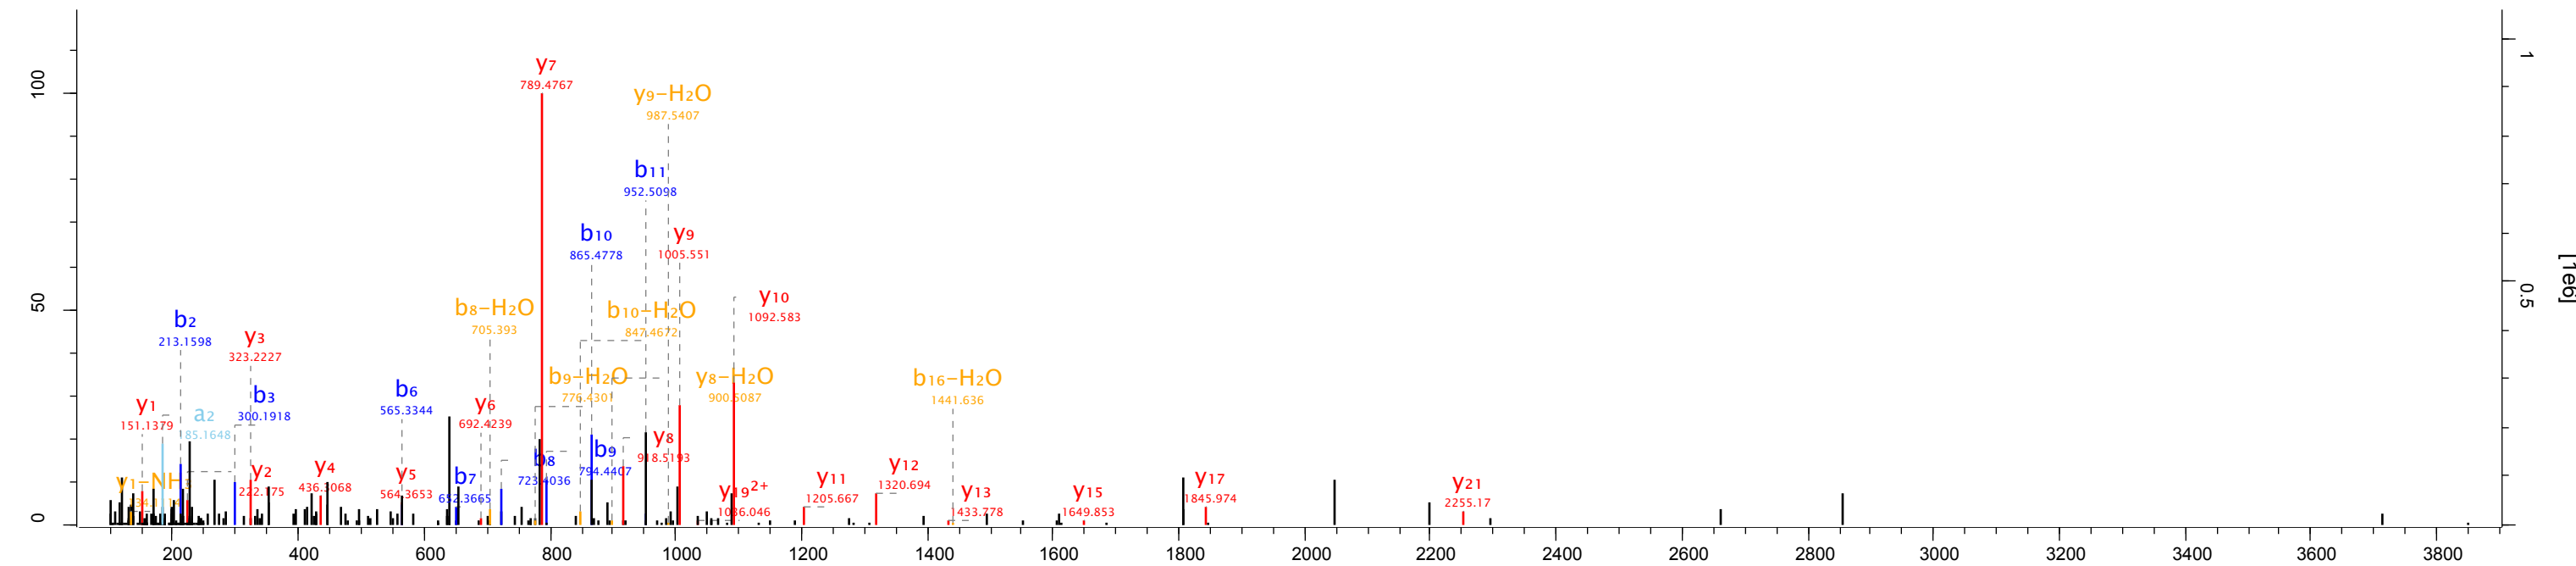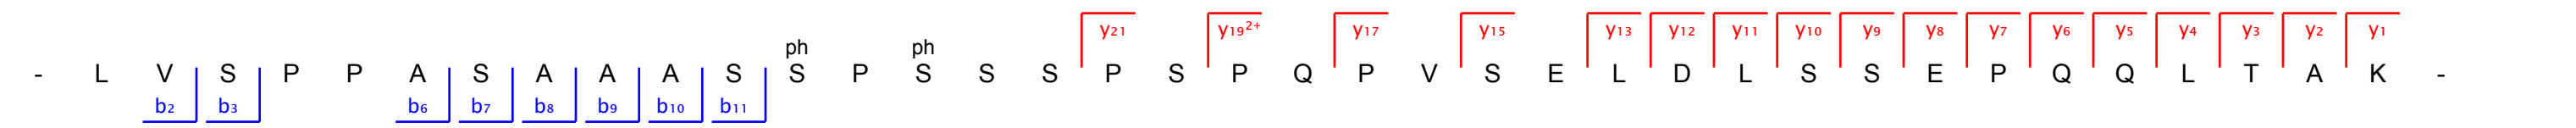

Raw file: 20150814\_A375SR\_Phospho\_BR2\_03  
 Scan: 23789 Method: FTMS; HCD Score: 168.12 m/z: 980.97 Gene names: TFDP2

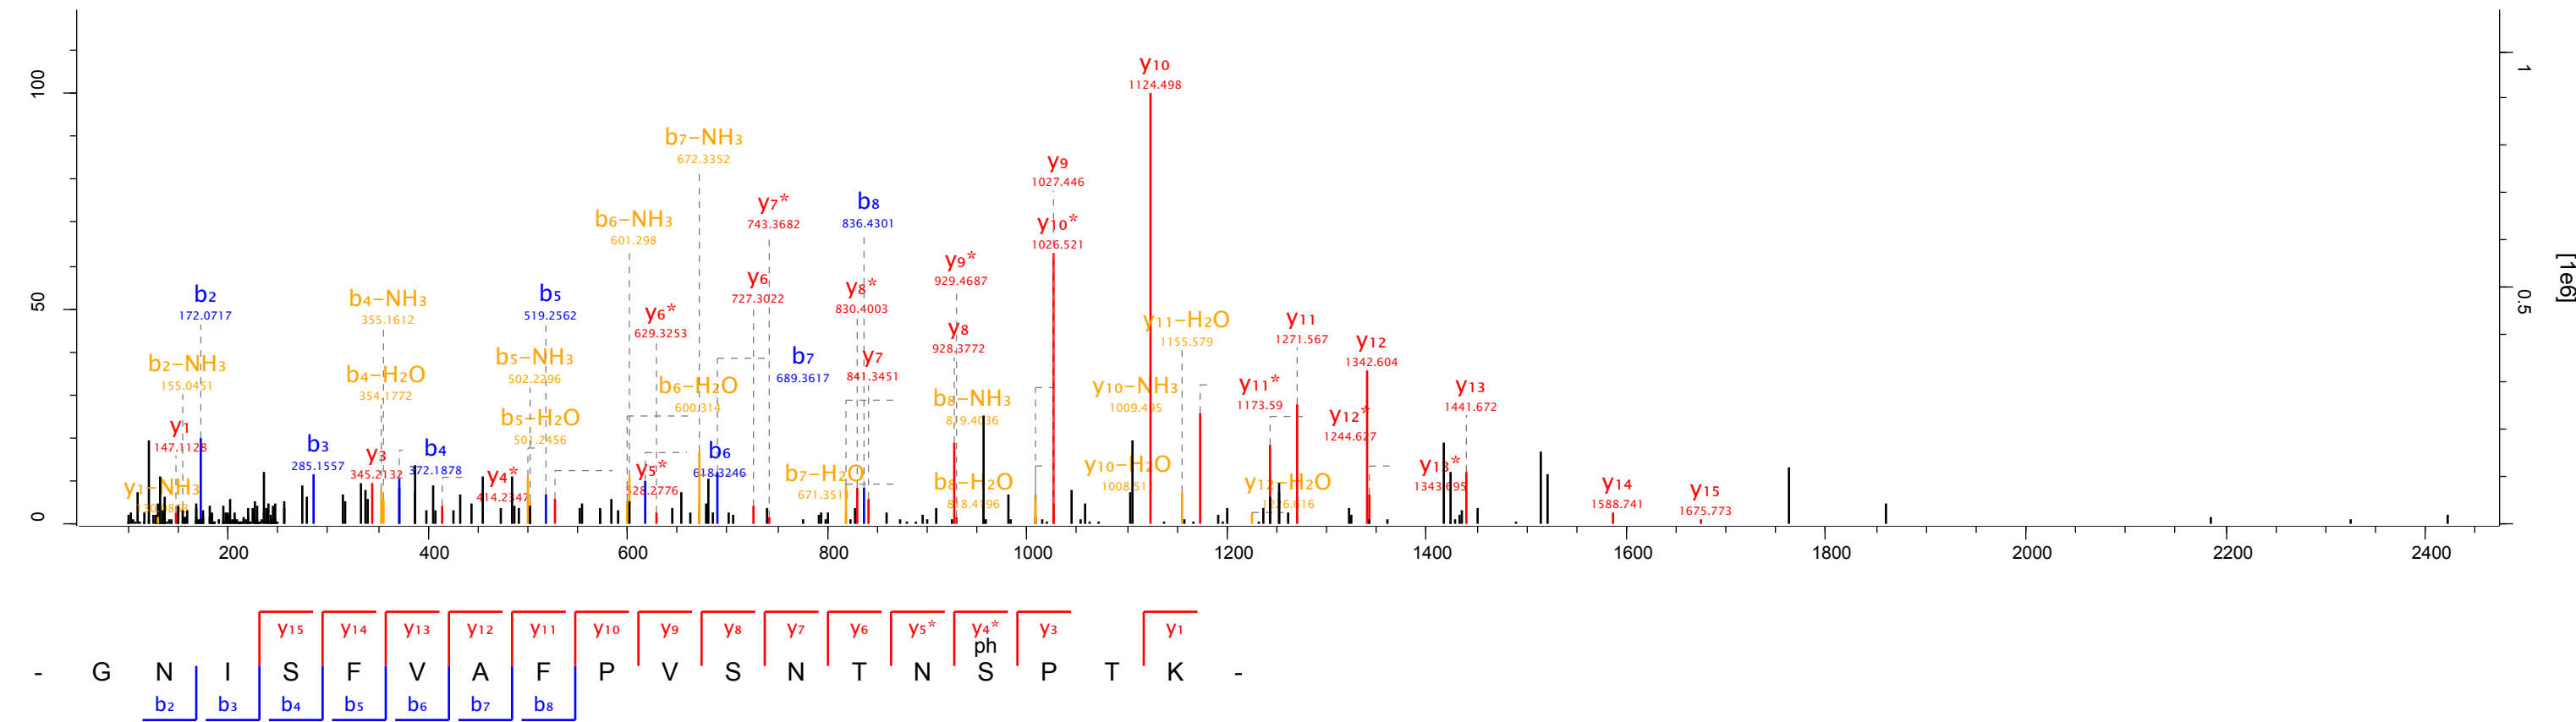

Raw file: 20150814\_A375SR\_Phospho\_BR2\_03  
 Scan: 23989 Method: FTMS; HCD Score: 185.41 m/z: 1117.92 Gene names: CTNND1

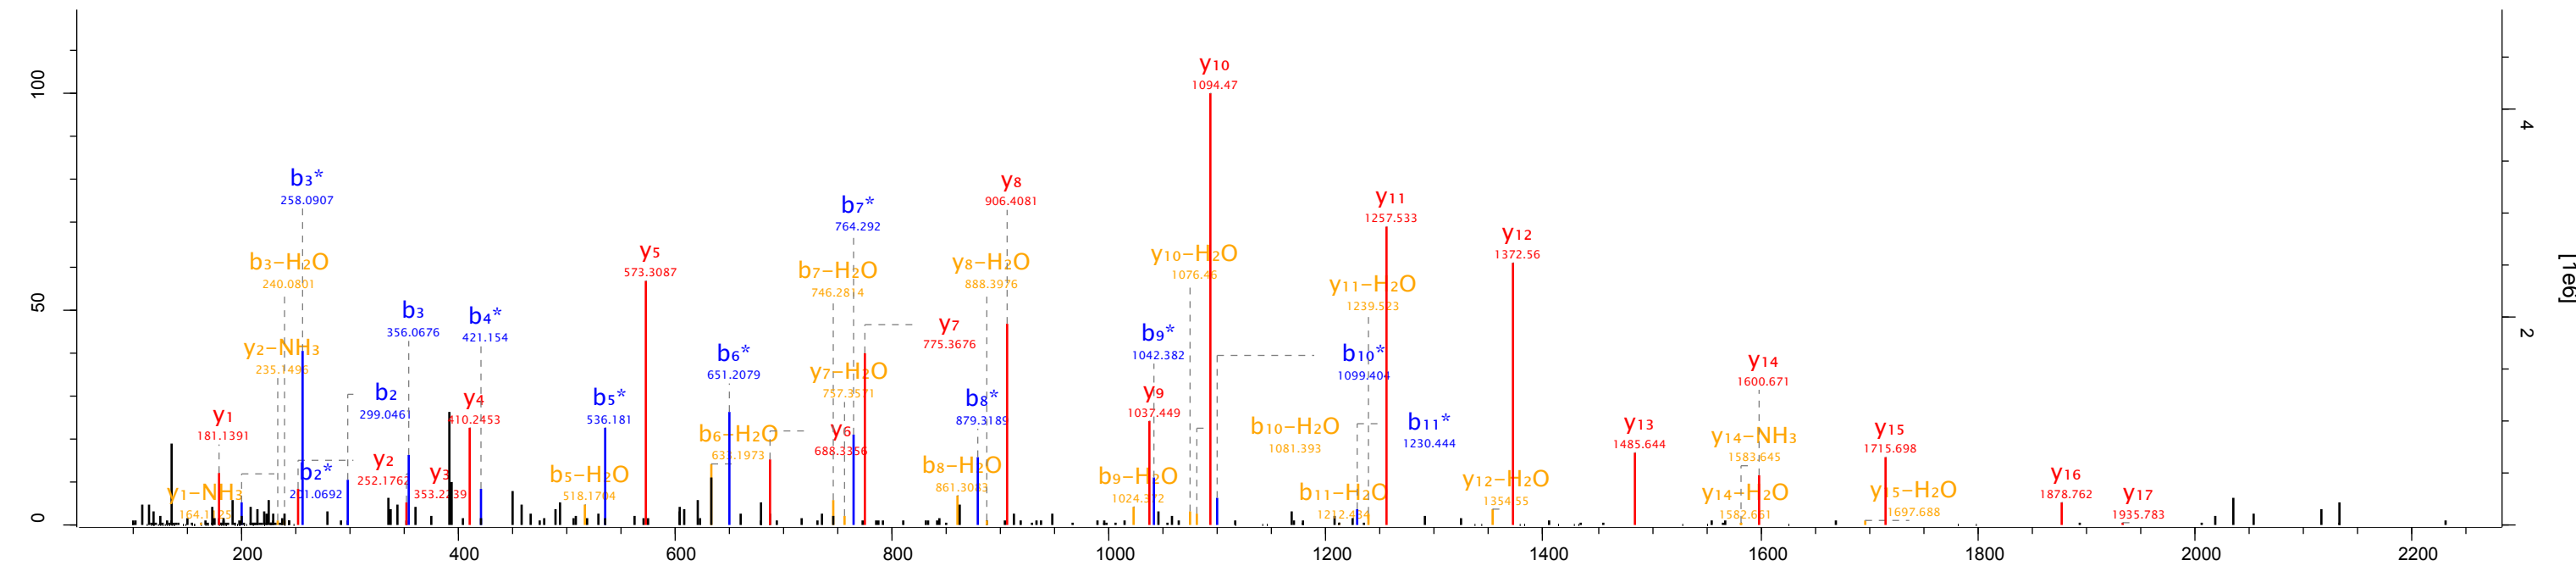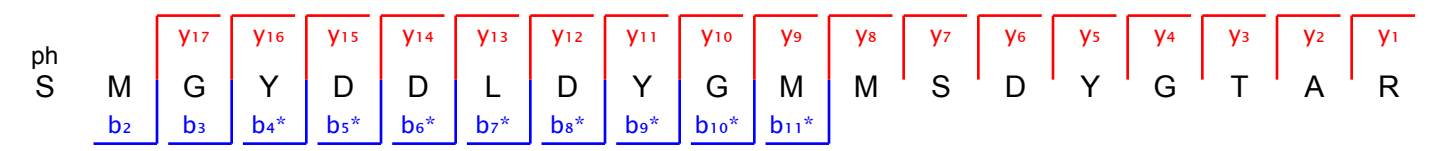

Raw file: 20150814\_A375SR\_Phospho\_BR2\_03  
 Scan: 24099 Method: FTMS; HCD Score: 142.27 m/z: 892.85 Gene names: CASP8AP2

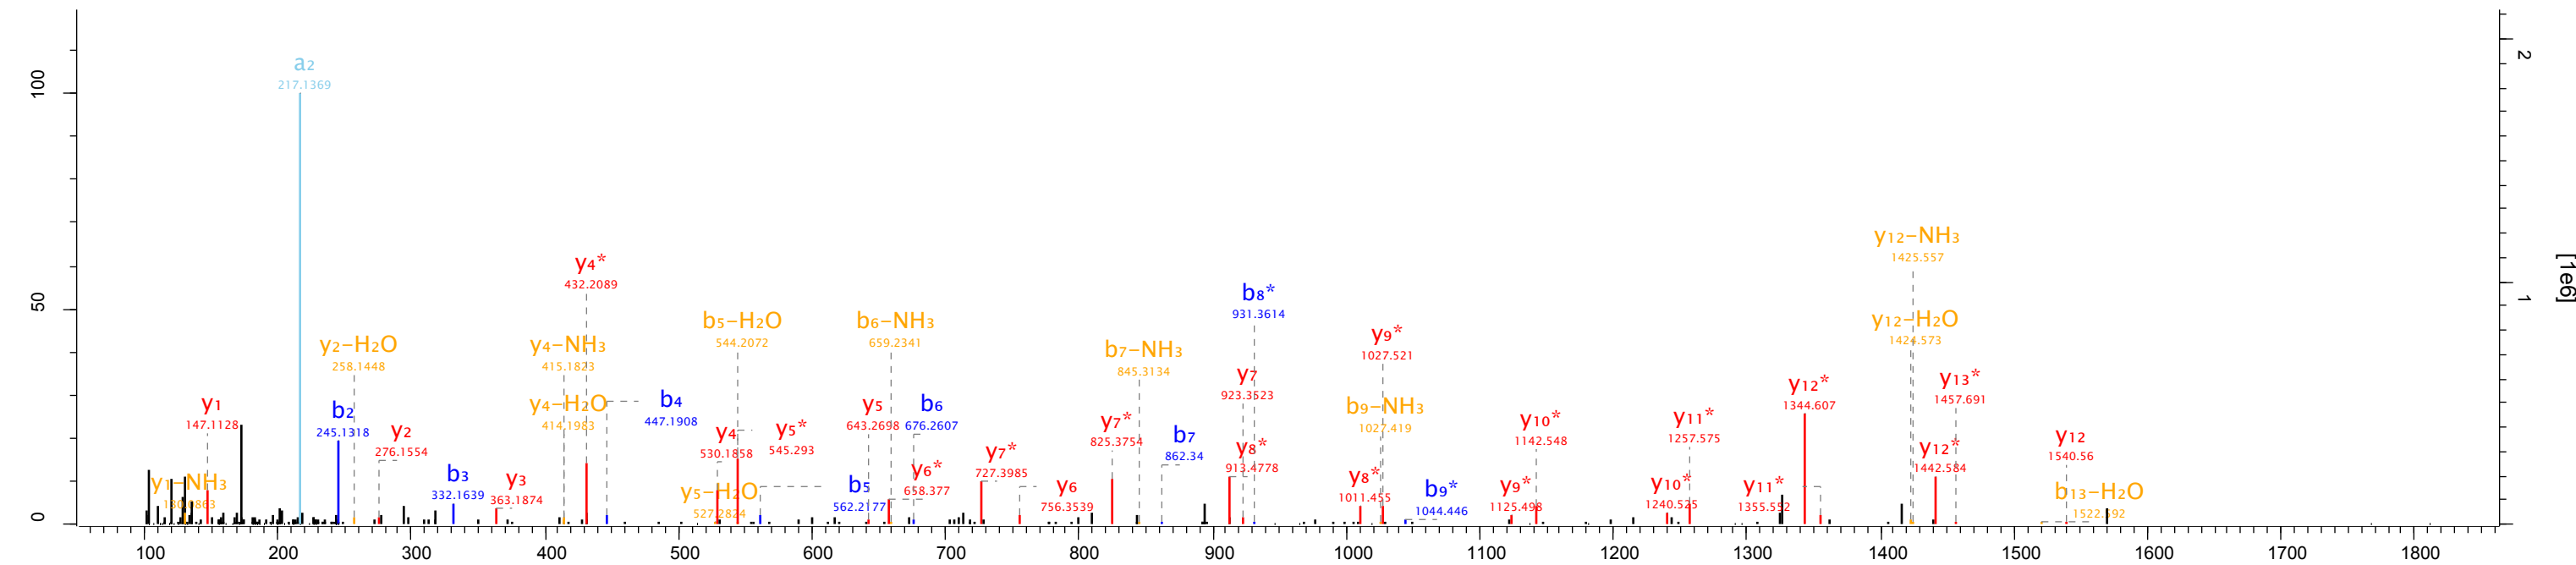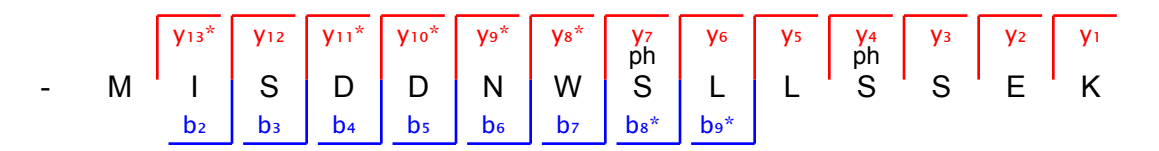

Raw file 20150814\_A375SR\_Phospho\_BR2\_03 Scan 24589 Method FTMS; HCD Score 128.36 m/z 741.34 Gene names C11orf84

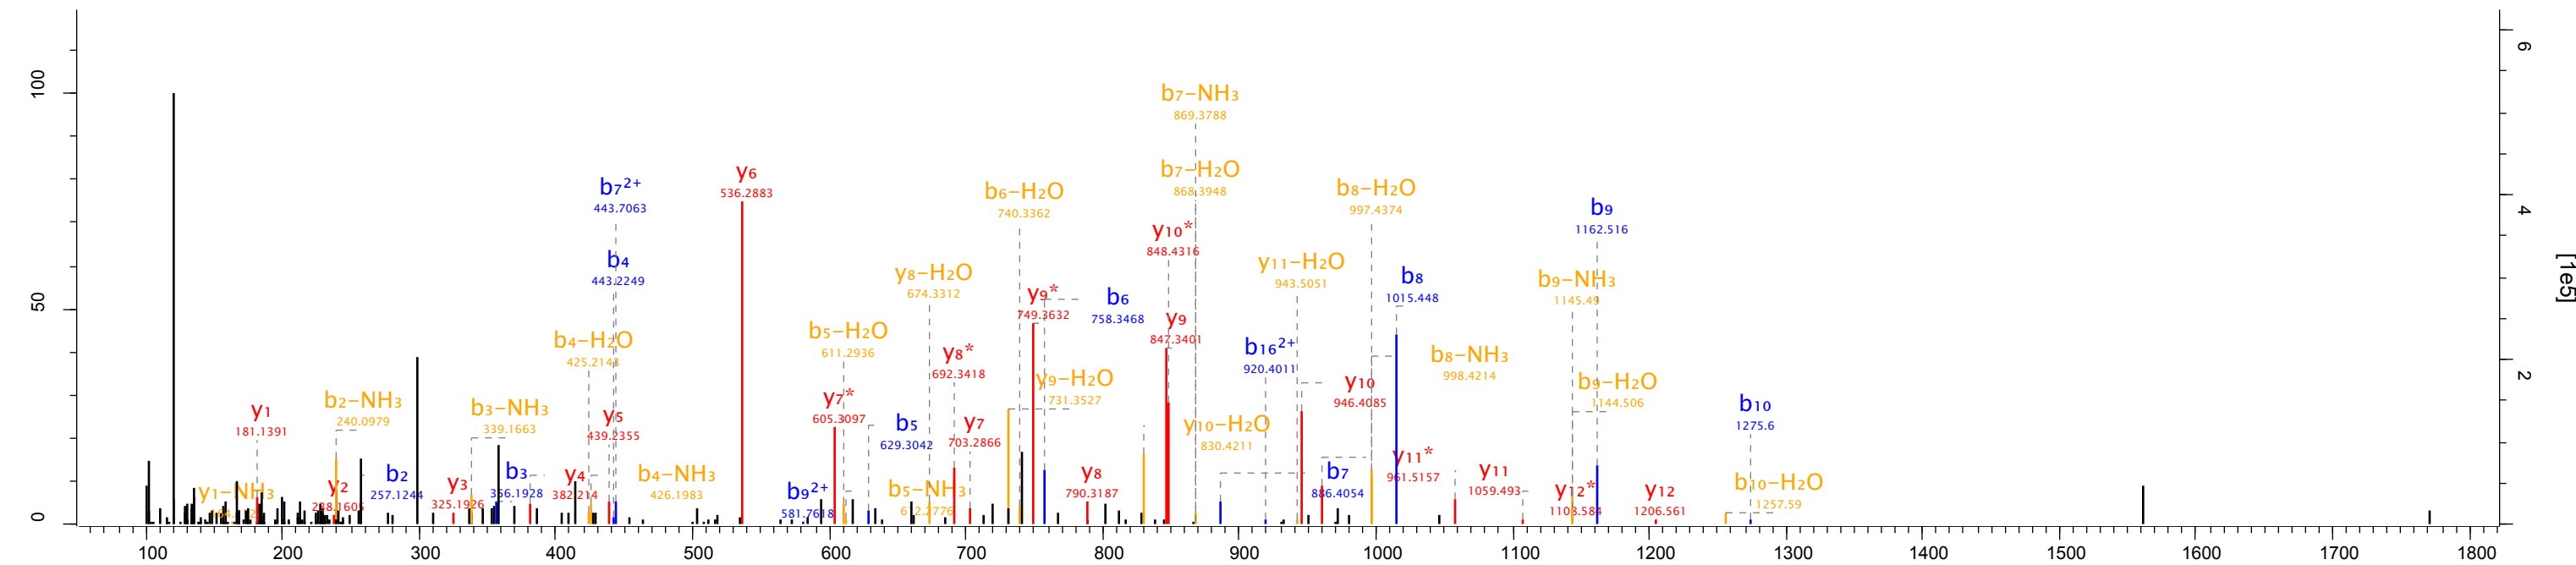

- Q Q V S W E Q E F L V G S S P G G S G R -

Fragmentation mapping (b and y ions):

- b<sub>2</sub> (Q), b<sub>3</sub> (V), b<sub>4</sub> (S), b<sub>5</sub> (W), b<sub>6</sub> (E), b<sub>7</sub> (Q), b<sub>8</sub> (E), b<sub>9</sub> (F), b<sub>10</sub> (L), b<sub>16</sub><sup>2+</sup> (G)
- y<sub>1</sub> (R), y<sub>2</sub> (G), y<sub>3</sub> (S), y<sub>4</sub> (G), y<sub>5</sub> (G), y<sub>6</sub> (P), y<sub>7</sub> (S), y<sub>8</sub> (S), y<sub>9</sub> (G), y<sub>10</sub> (V), y<sub>11</sub> (L), y<sub>12</sub> (F)



Raw file: 20150814\_A375SR\_Phospho\_BR2\_03  
 Scan: 24849 Method: FTMS; HCD Score: 150.14 m/z: 1014.47 Gene names: TRIP12

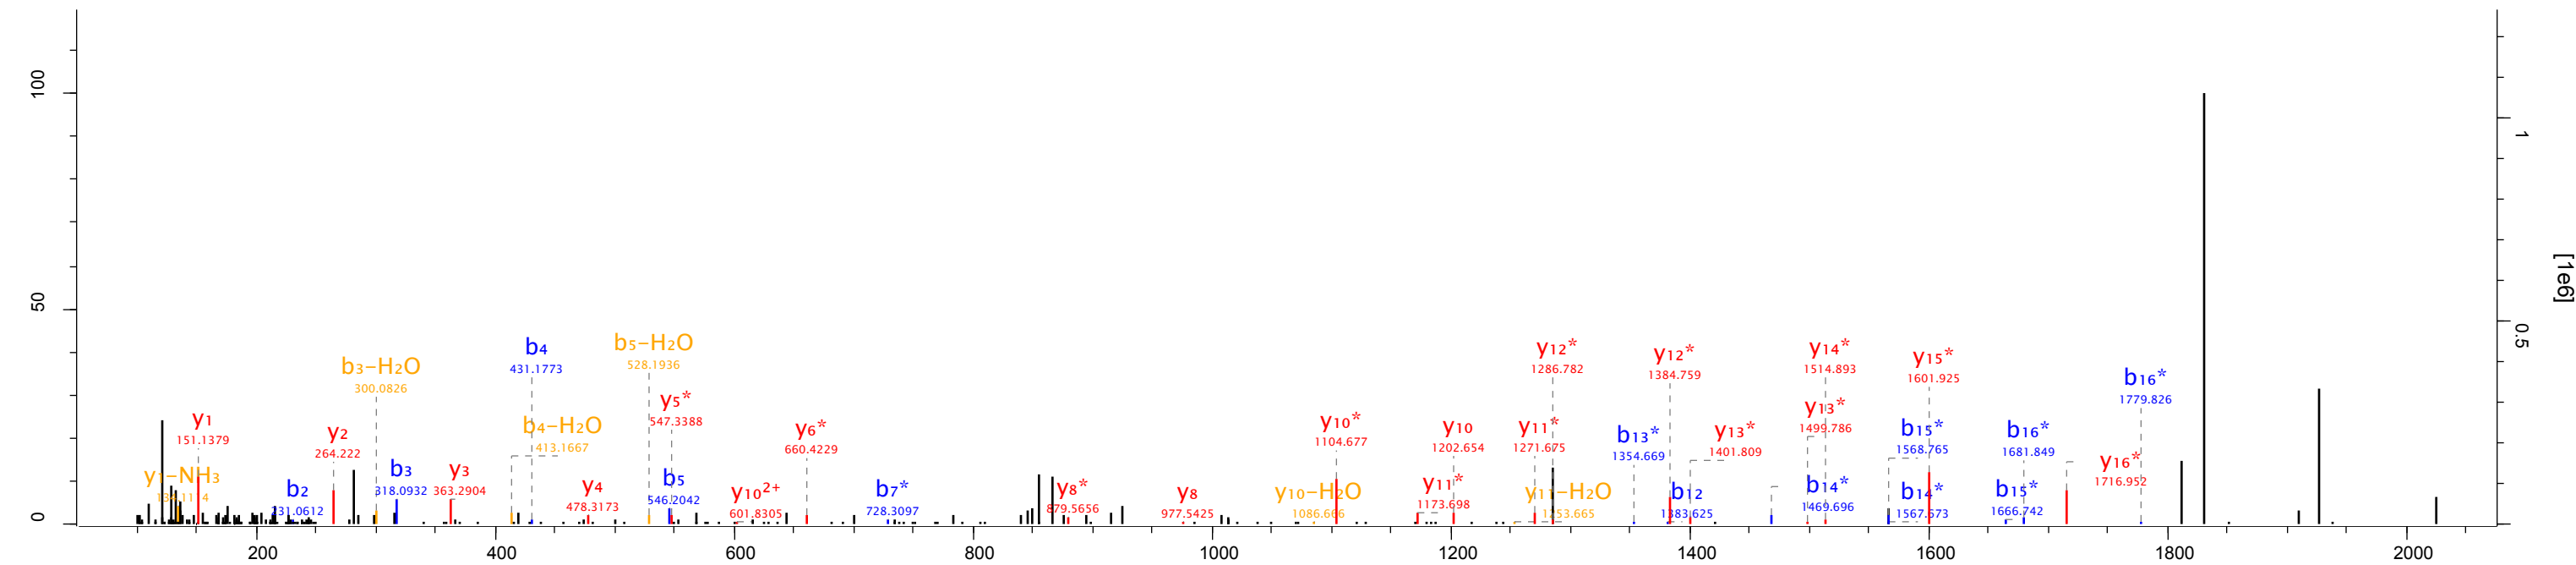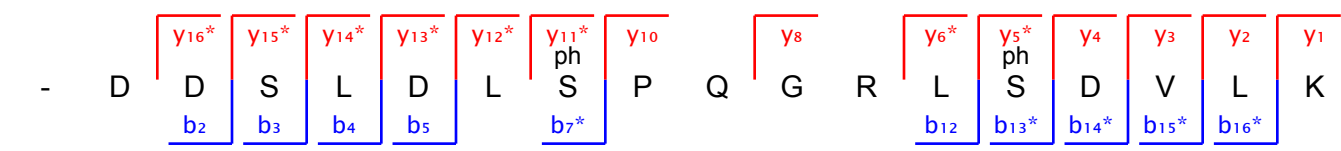

Raw file: 20150814\_A375SR\_Phospho\_BR2\_03  
 Scan: 25199 Method: FTMS; HCD Score: 269.57 m/z: 1583.63 Gene names: EIF2S2

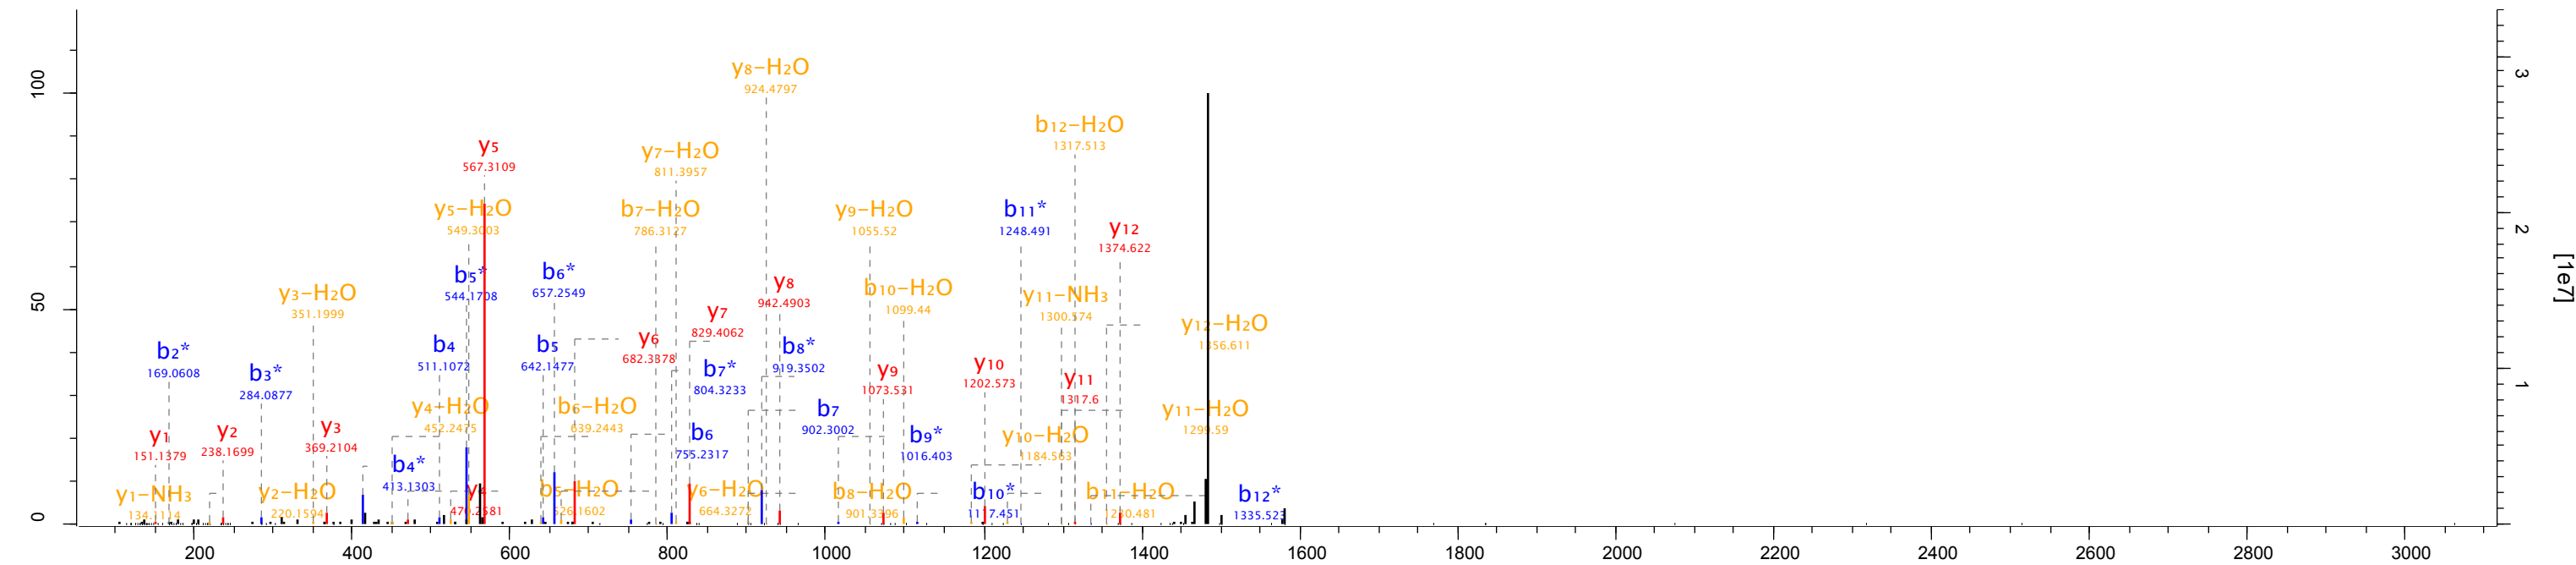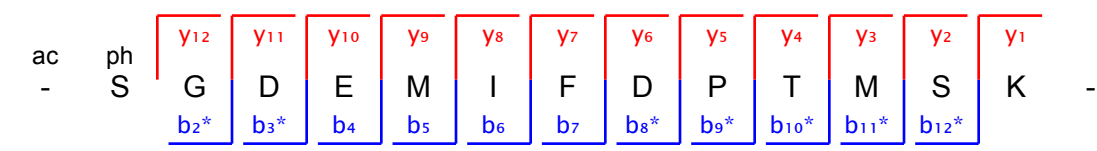

Raw file: 20150814\_A375SR\_Phospho\_BR2\_03  
 Scan: 25389 Method: FTMS; HCD Score: 142.56 m/z: 1068.46 Gene names: USP10

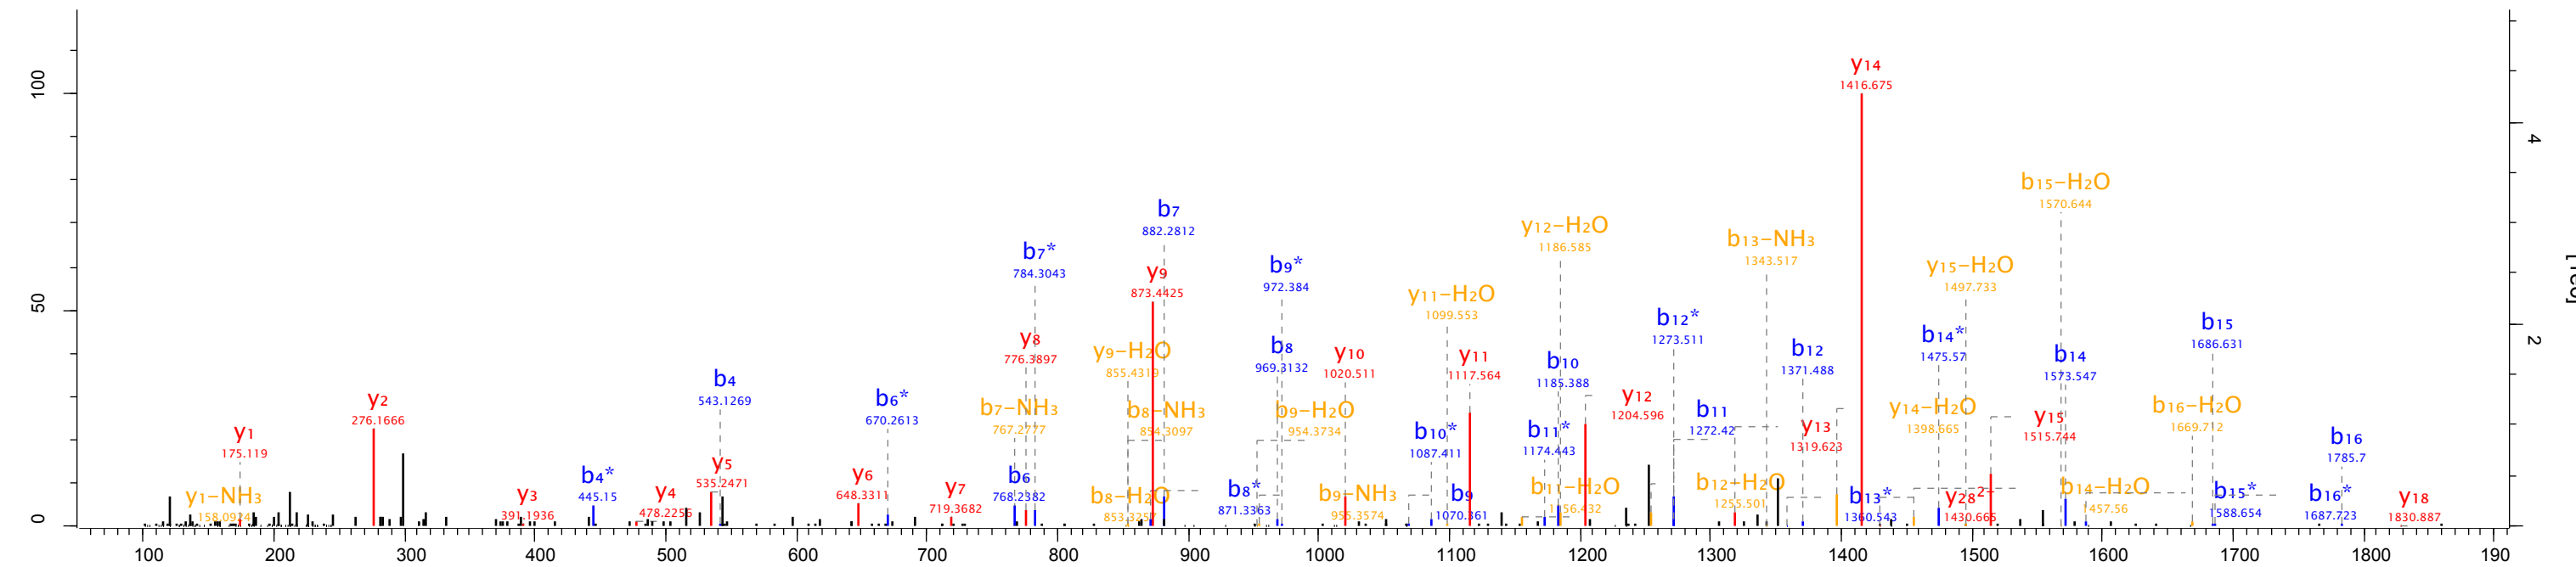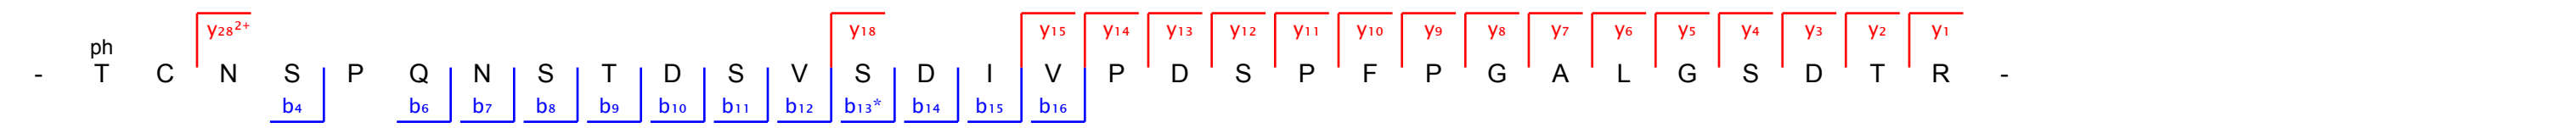

Raw file: 20150814\_A375SR\_Phospho\_BR2\_03  
 Scan: 25959 Method: FTMS; HCD Score: 94.38 m/z: 1030 Gene names: SPICE1

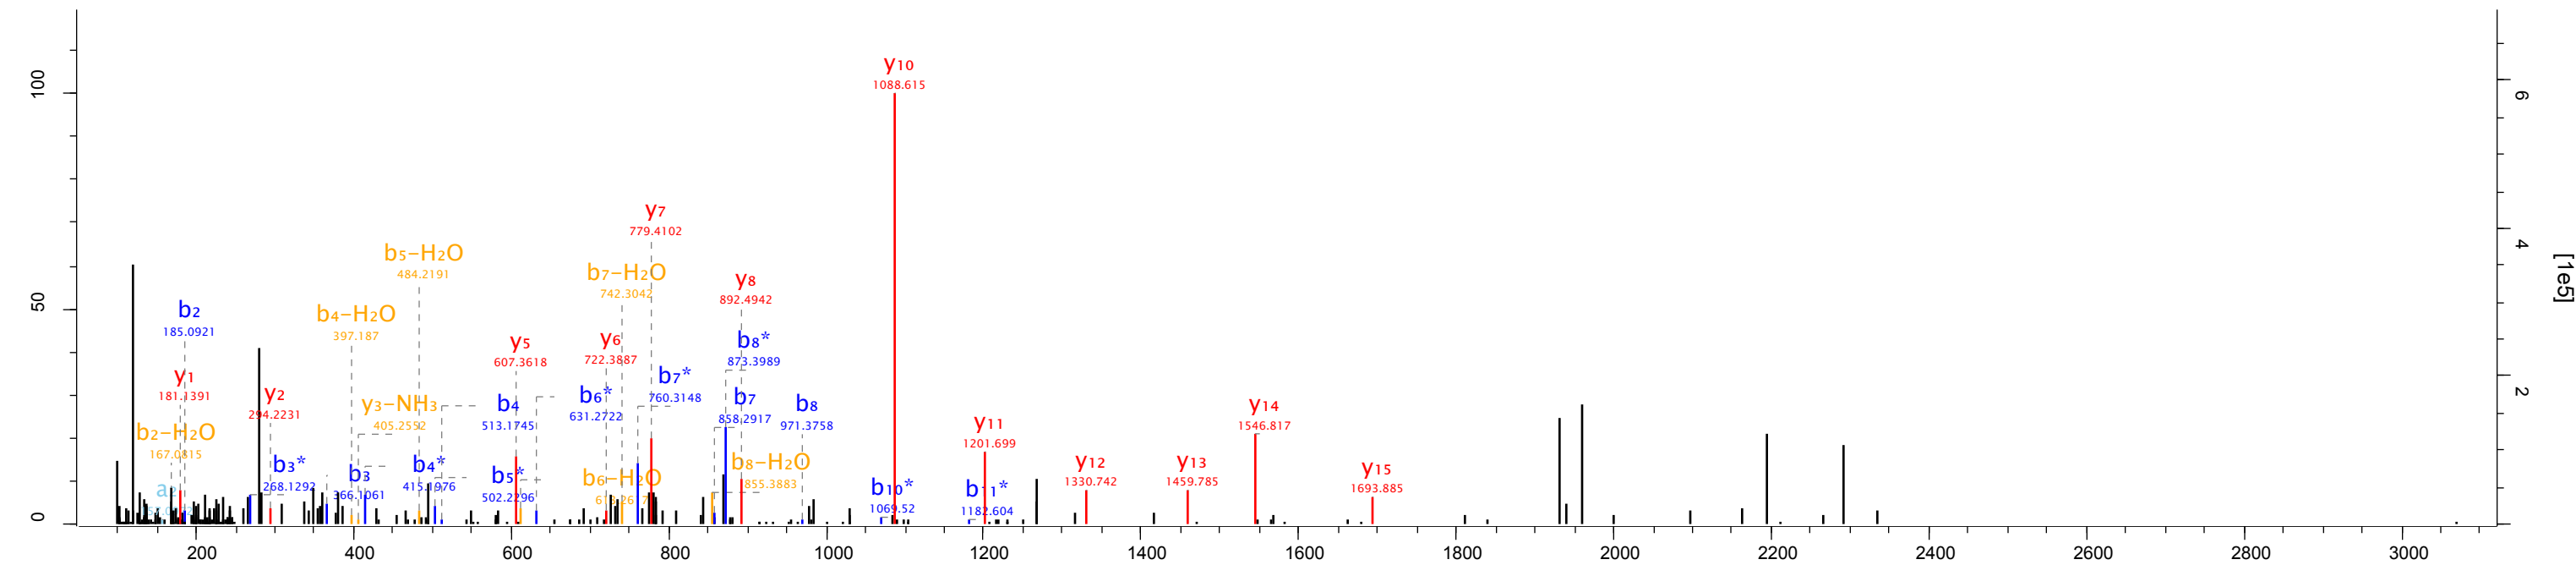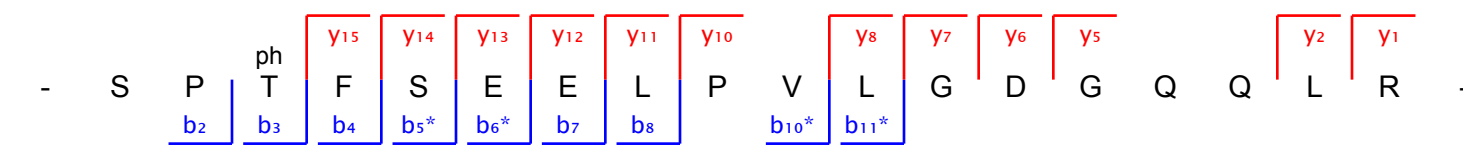

Raw file 20150814\_A375SR\_Phospho\_BR2\_03 Scan 26069 Method FTMS; HCD Score 61.52 m/z 914.76 Gene names CENPC

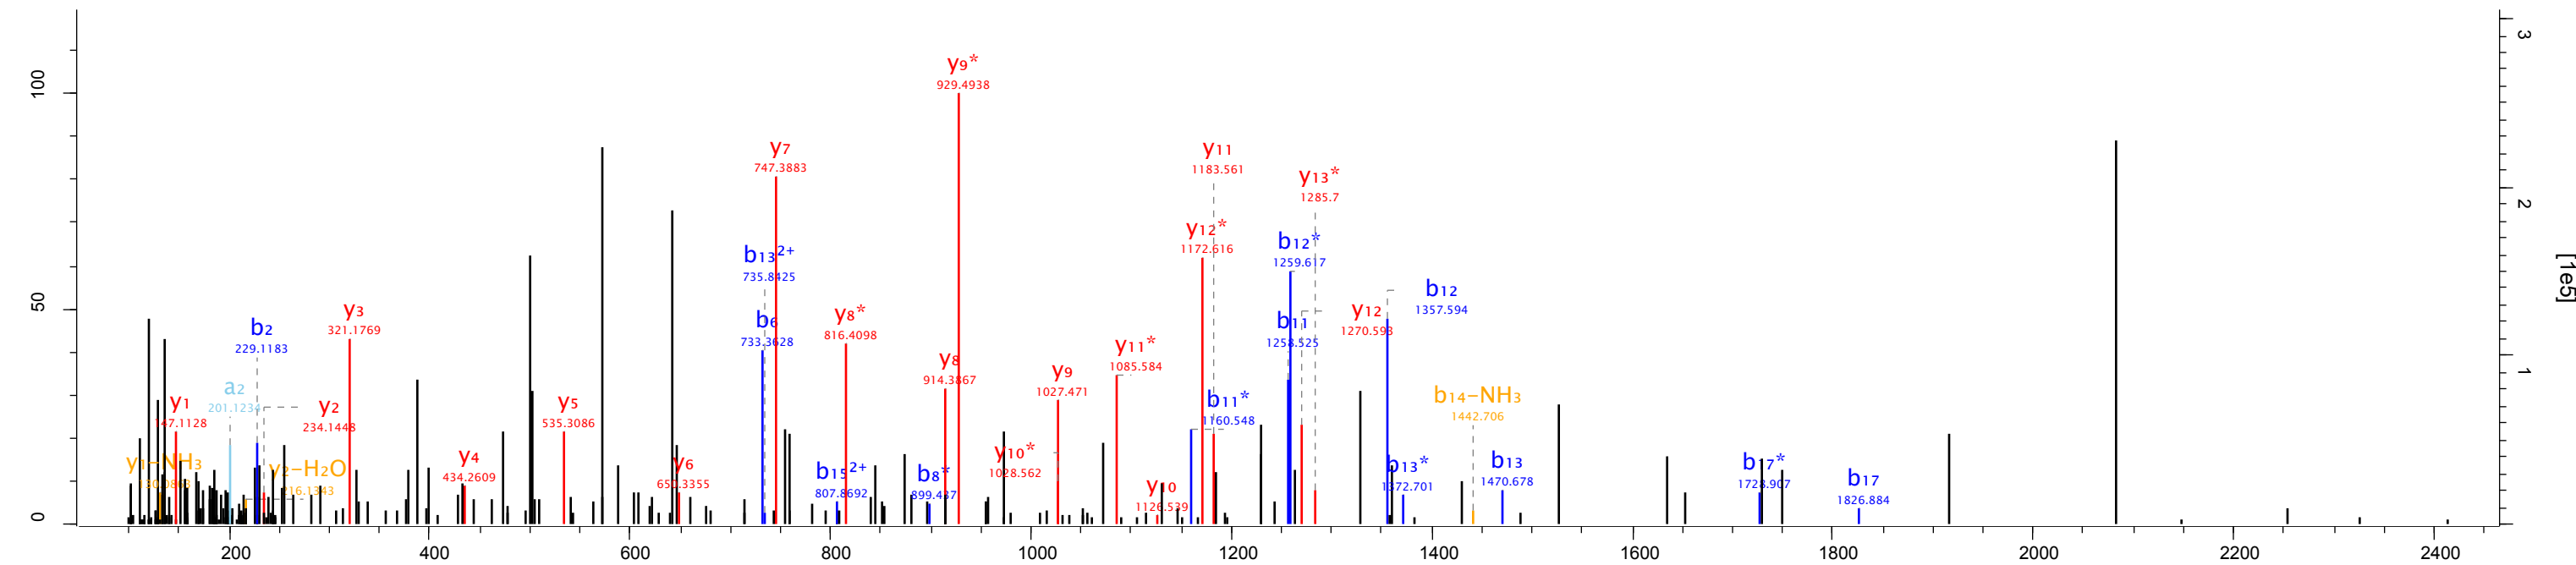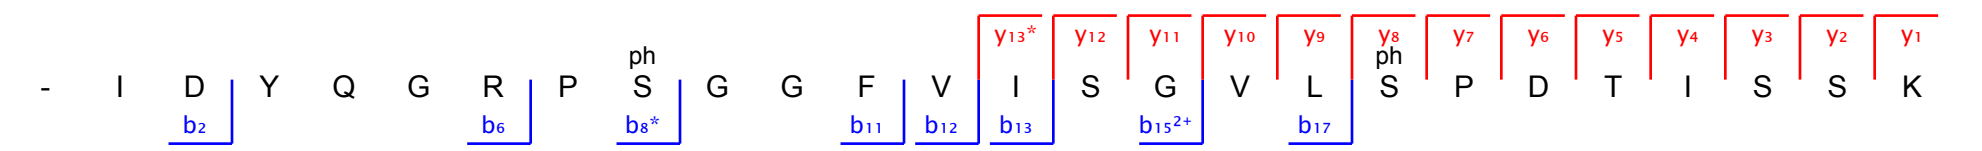

Raw file  
20150814\_A375SR\_Phospho\_BR2\_03

Scan Method Score m/z Gene names  
26669 FTMS; HCD 159.01 861.41 ACIN1

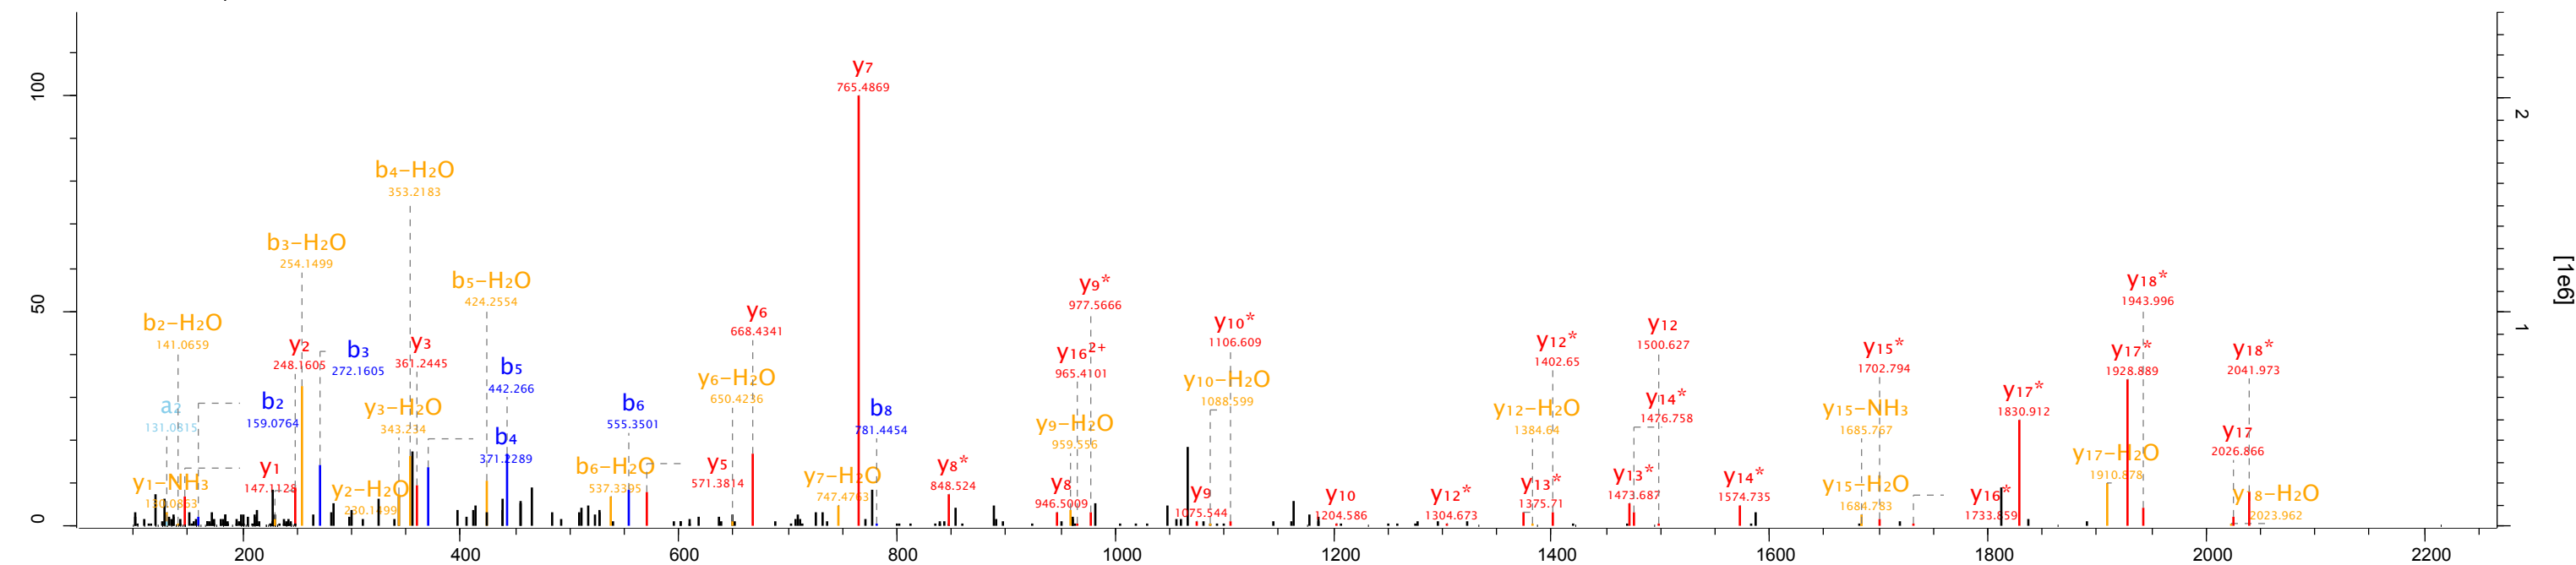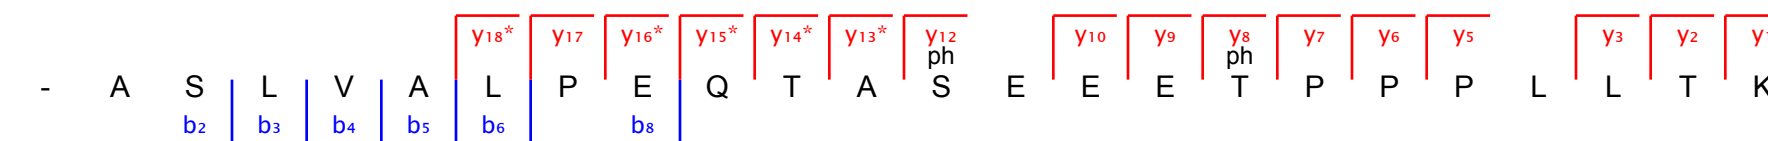

Raw file 20150814\_A375SR\_Phospho\_BR2\_03 Scan 26959 Method FTMS; HCD Score 156.67 m/z 740.87 Gene names KIF3A

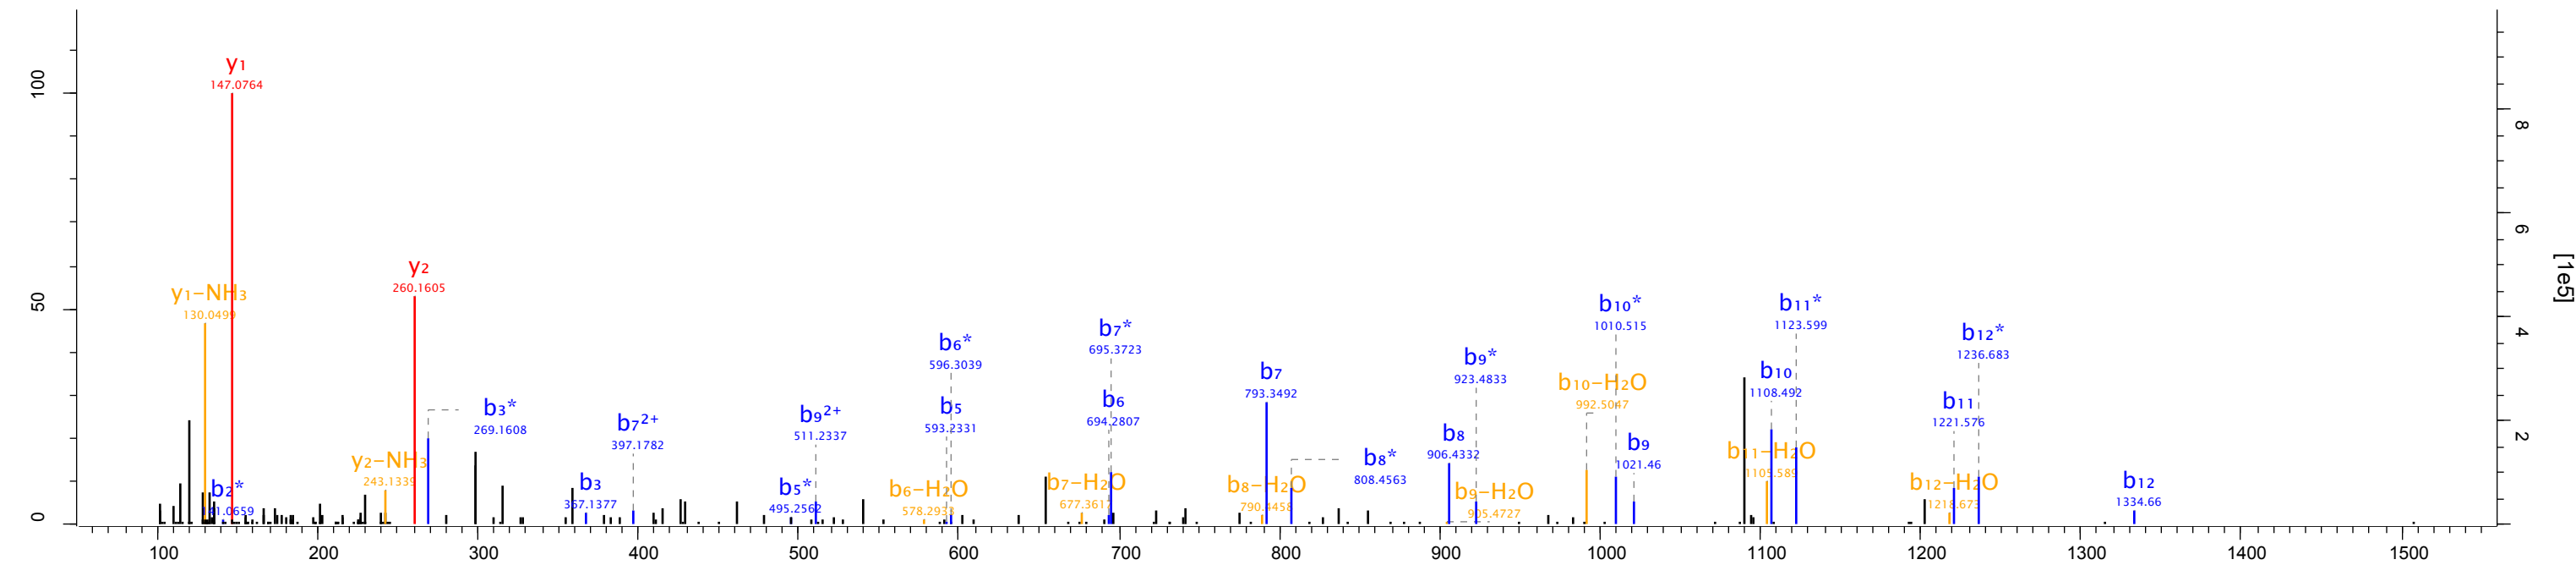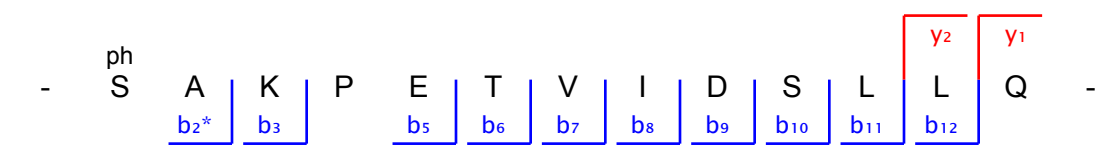

Raw file 20150814\_A375SR\_Phospho\_BR2\_03 Scan 27029 Method FTMS; HCD Score 152.84 m/z 1202.88 Gene names CRTC2

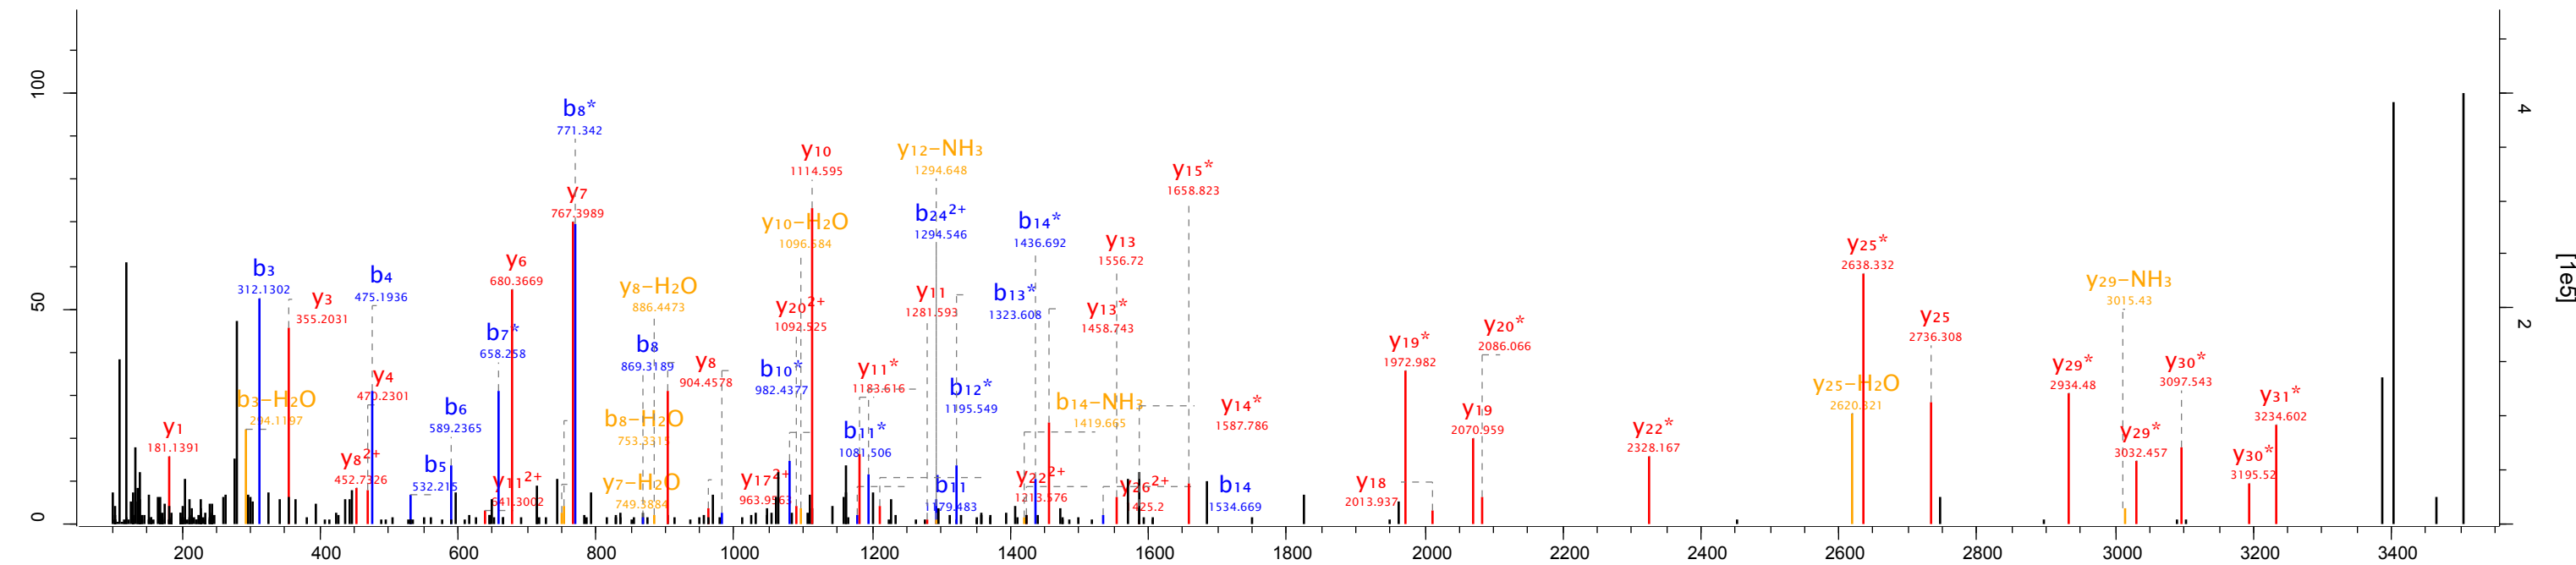

- S S H Y G G S L P N V N Q I G S G L A E F Q S P L H S P L D S S R -

y<sub>31</sub>\*
y<sub>30</sub>\*
y<sub>29</sub>\*
ph
y<sub>26</sub><sup>2+</sup>
y<sub>25</sub>
y<sub>22</sub>\*
y<sub>20</sub>\*
y<sub>19</sub>
y<sub>18</sub>
y<sub>17</sub><sup>2+</sup>
y<sub>15</sub>\*
y<sub>14</sub>\*
y<sub>13</sub>
y<sub>11</sub>
ph
y<sub>10</sub>
y<sub>8</sub>
y<sub>7</sub>
y<sub>6</sub>
y<sub>4</sub>
y<sub>3</sub>
y<sub>1</sub>

b<sub>3</sub>
b<sub>4</sub>
b<sub>5</sub>
b<sub>6</sub>
b<sub>7</sub>\*
b<sub>8</sub>
b<sub>10</sub>\*
b<sub>11</sub>
b<sub>12</sub>\*
b<sub>13</sub>\*
b<sub>14</sub>
b<sub>24</sub><sup>2+</sup>



Raw file  
20150814\_A375SR\_Phospho\_BR2\_03

Scan Method Score m/z Gene names  
27049 FTMS; HCD 196.95 1012.4 TGS1

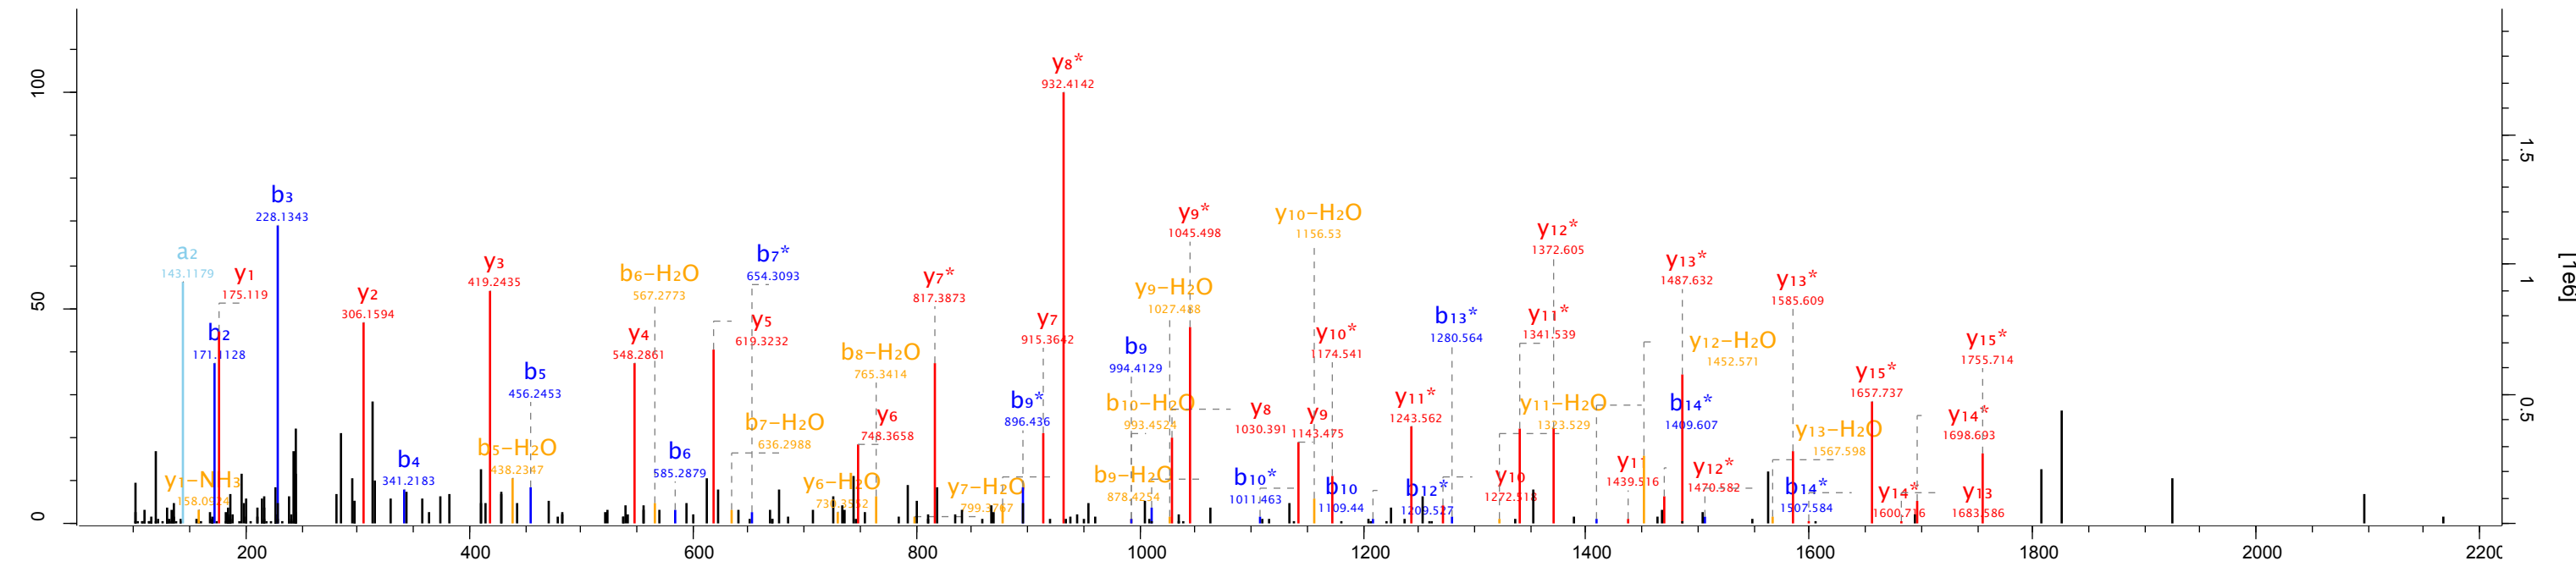

- G I G L D E S E L D S E A E L M R -  
b2 b3 b4 b5 b6 b7\* b9 b10 b12\* b13\* b14\*

Raw file Scan Method Score m/z Gene names  
 20150814\_A375SR\_Phospho\_BR2\_03 27069 FTMS; HCD 218.98 1246.13 BRAF

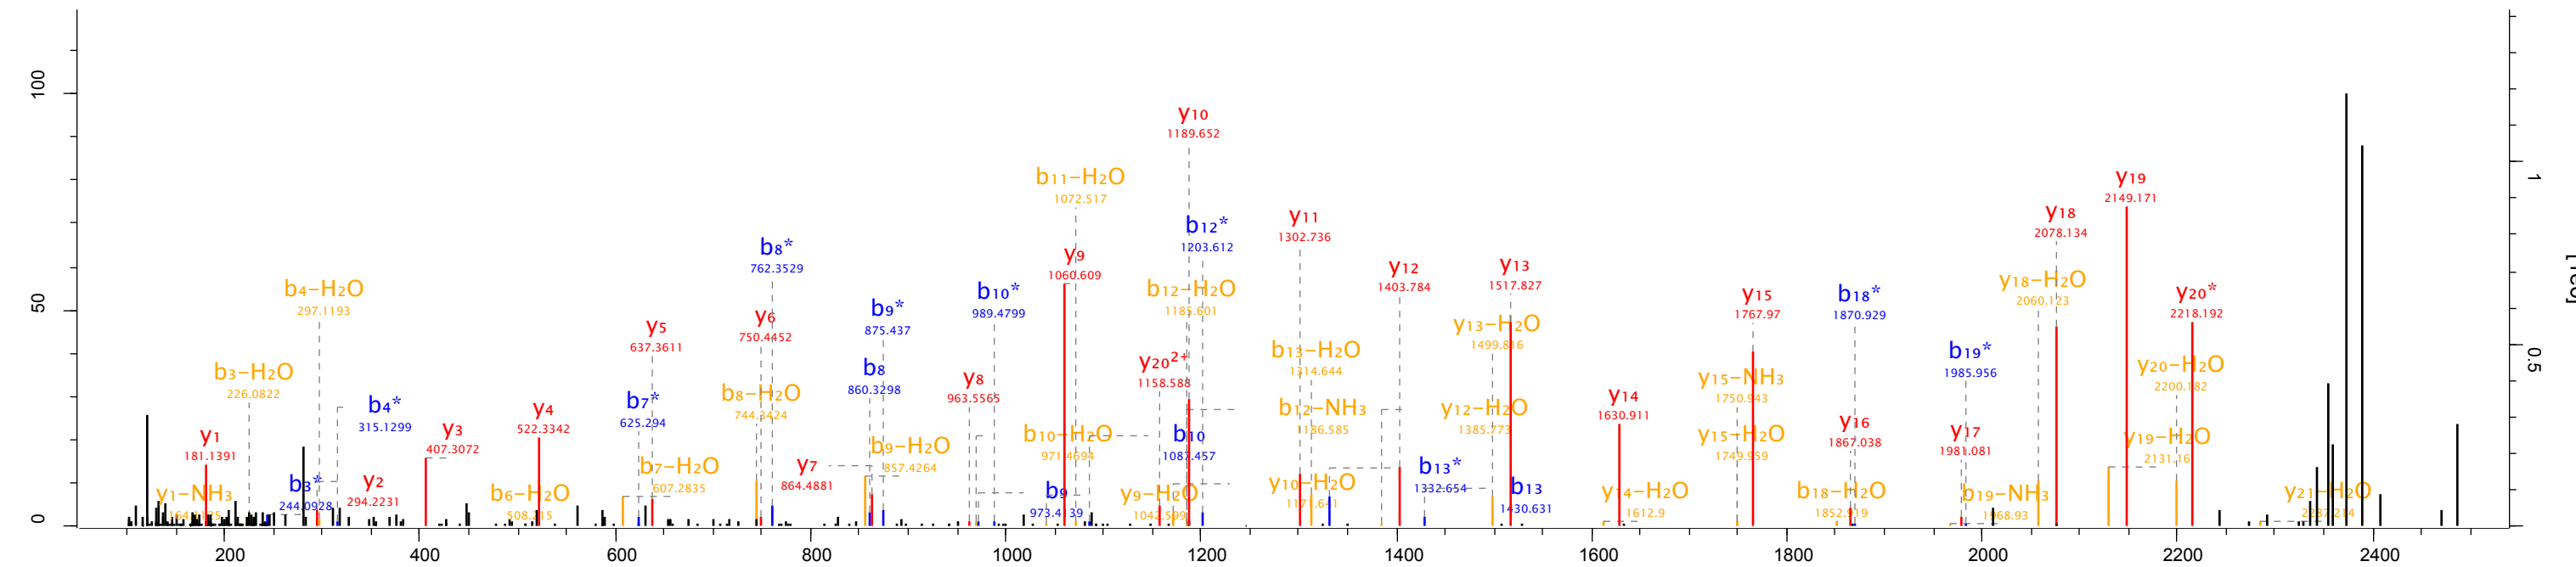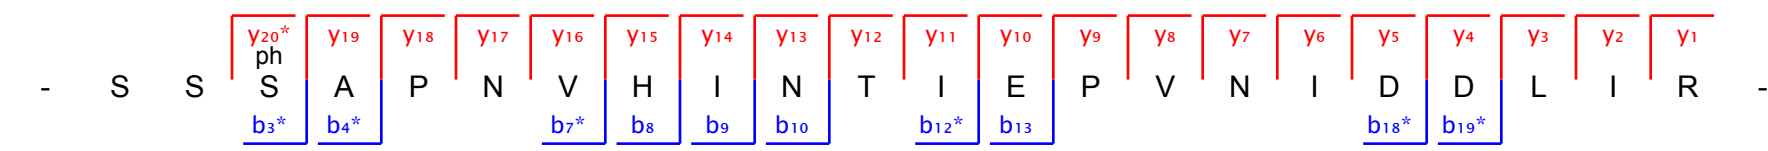

Raw file Scan Method Score m/z Gene names  
 20150814\_A375SR\_Phospho\_BR2\_03 27079 FTMS; HCD 130.85 1184.21 PHAX

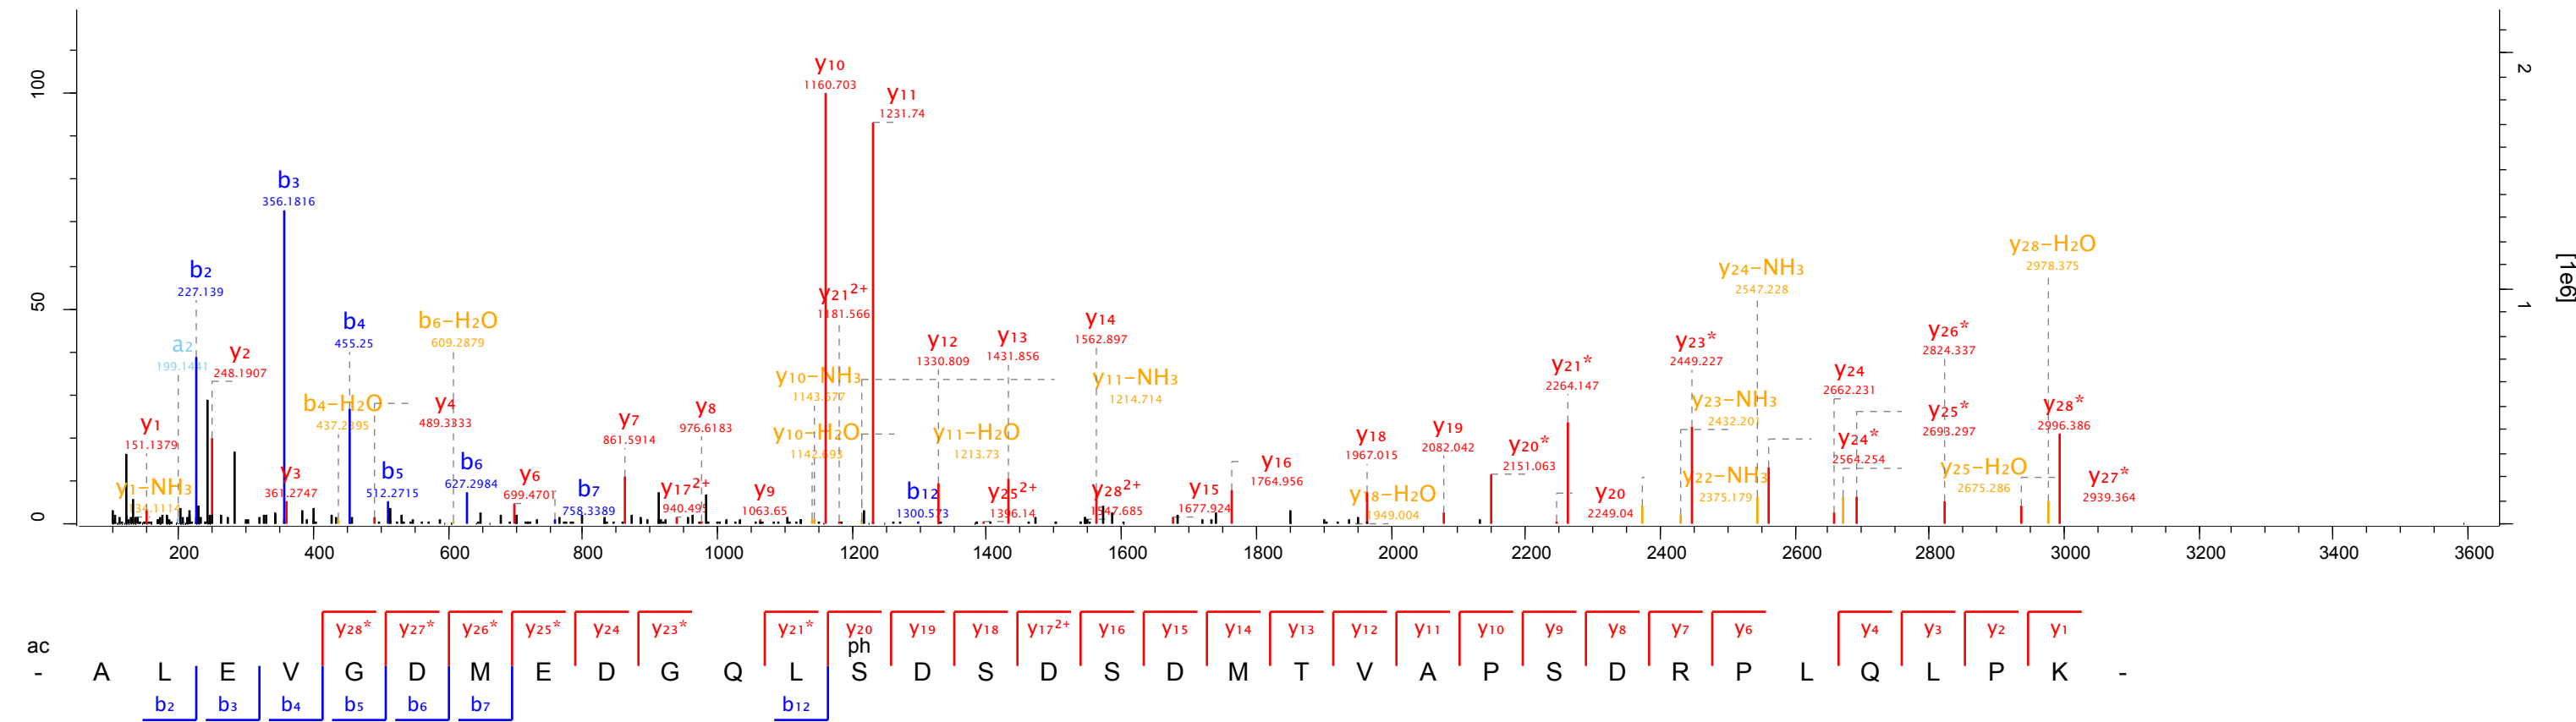

Raw file 20150814\_A375SR\_Phospho\_BR2\_03 Scan 27109 Method FTMS; HCD Score 54.22 m/z 885.04 Gene names BYSL

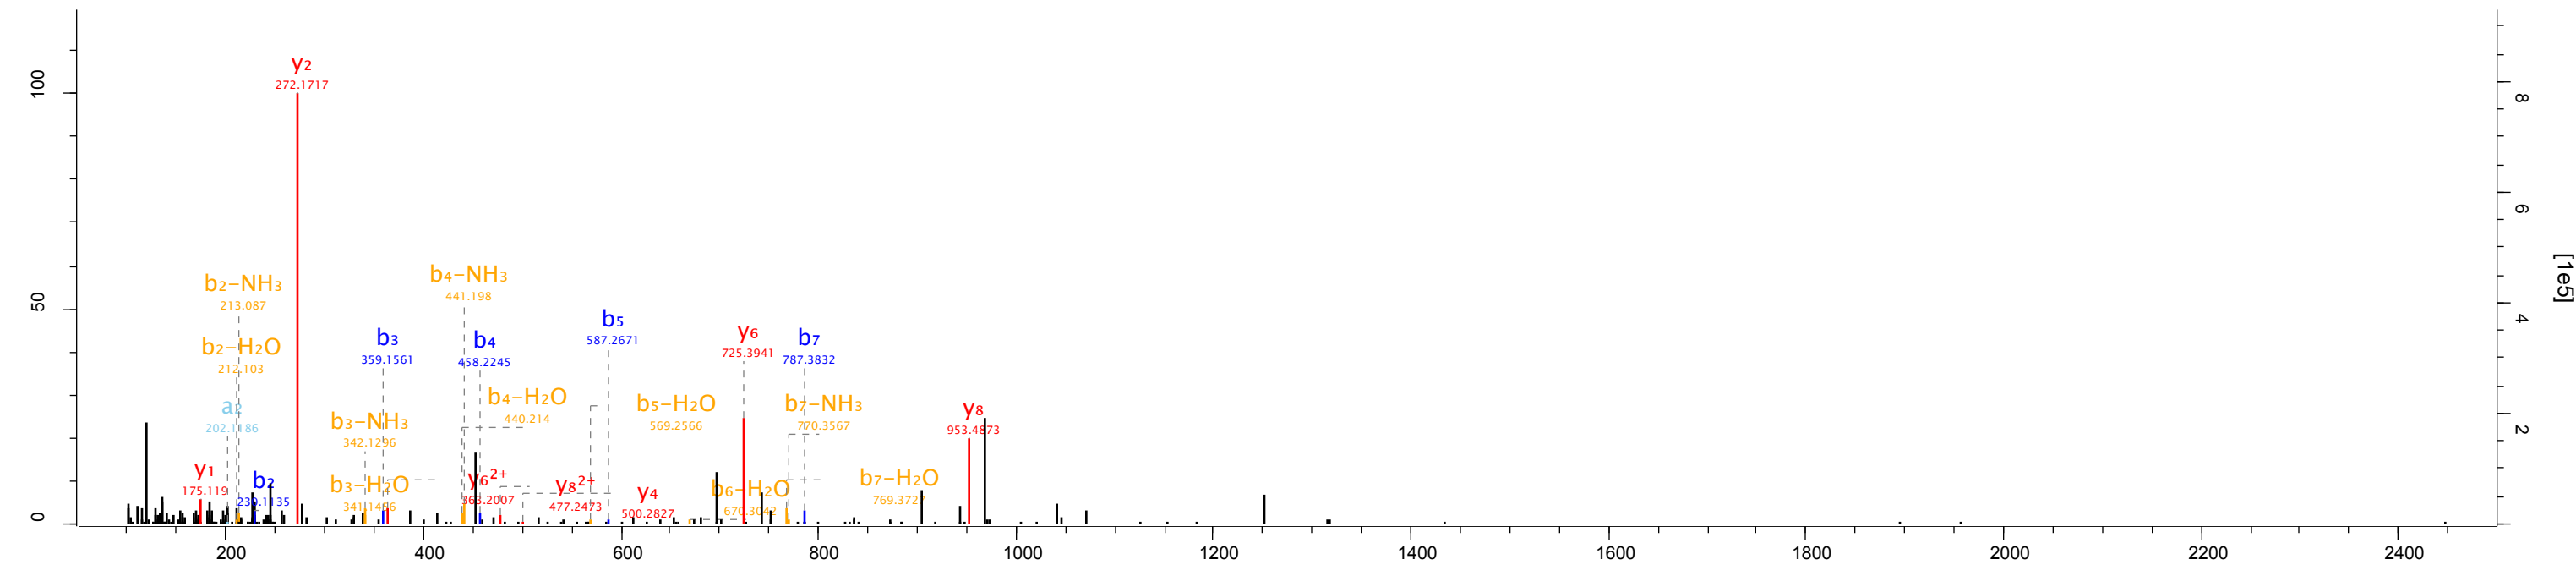

- Q T E V E T V ox ph M S E V ph S G F P M P Q L D P R -

b<sub>2</sub>
b<sub>3</sub>
b<sub>4</sub>
b<sub>5</sub>
b<sub>7</sub>
y<sub>8</sub>
y<sub>6</sub>
y<sub>4</sub>
y<sub>2</sub>
y<sub>1</sub>

Raw file: 20150814\_A375SR\_Phospho\_BR2\_03  
 Scan: 27279 Method: FTMS; HCD Score: 71.86 m/z: 1358.62 Gene names: SP4

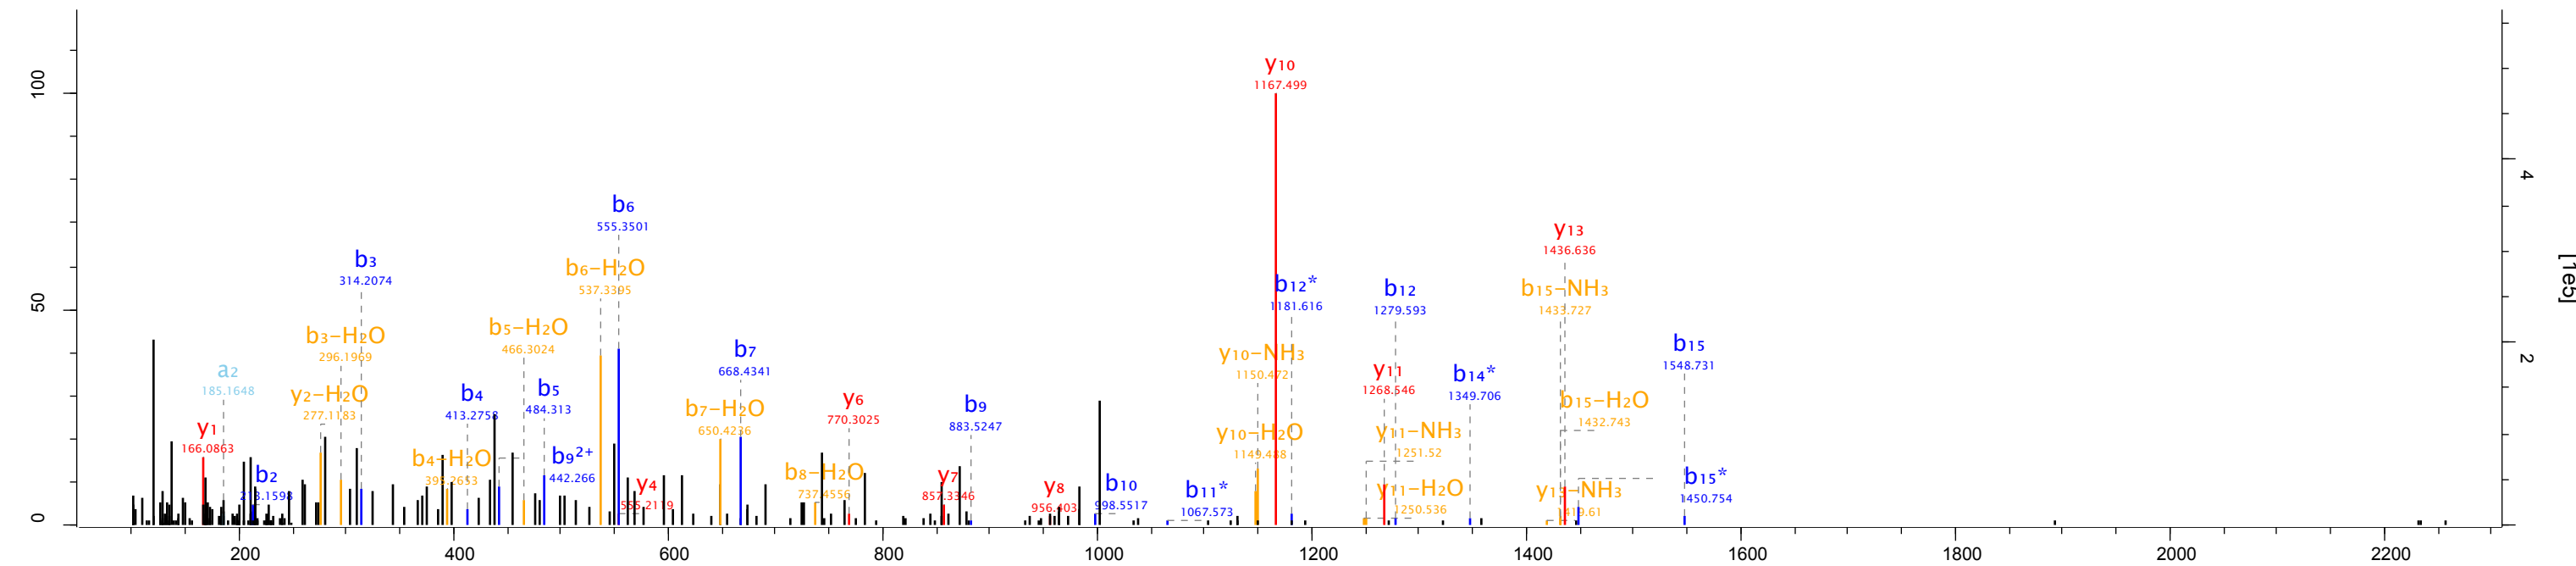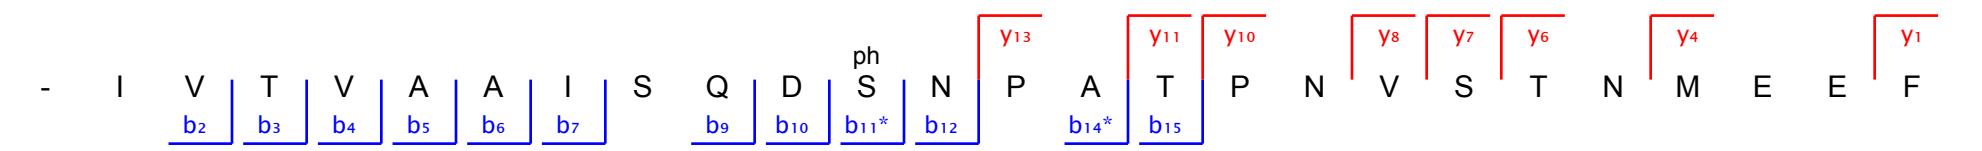

Raw file: 20150814\_A375SR\_Phospho\_BR2\_03  
 Scan: 27709 Method: FTMS; HCD Score: 110.26 m/z: 921.9 Gene names: WEE1

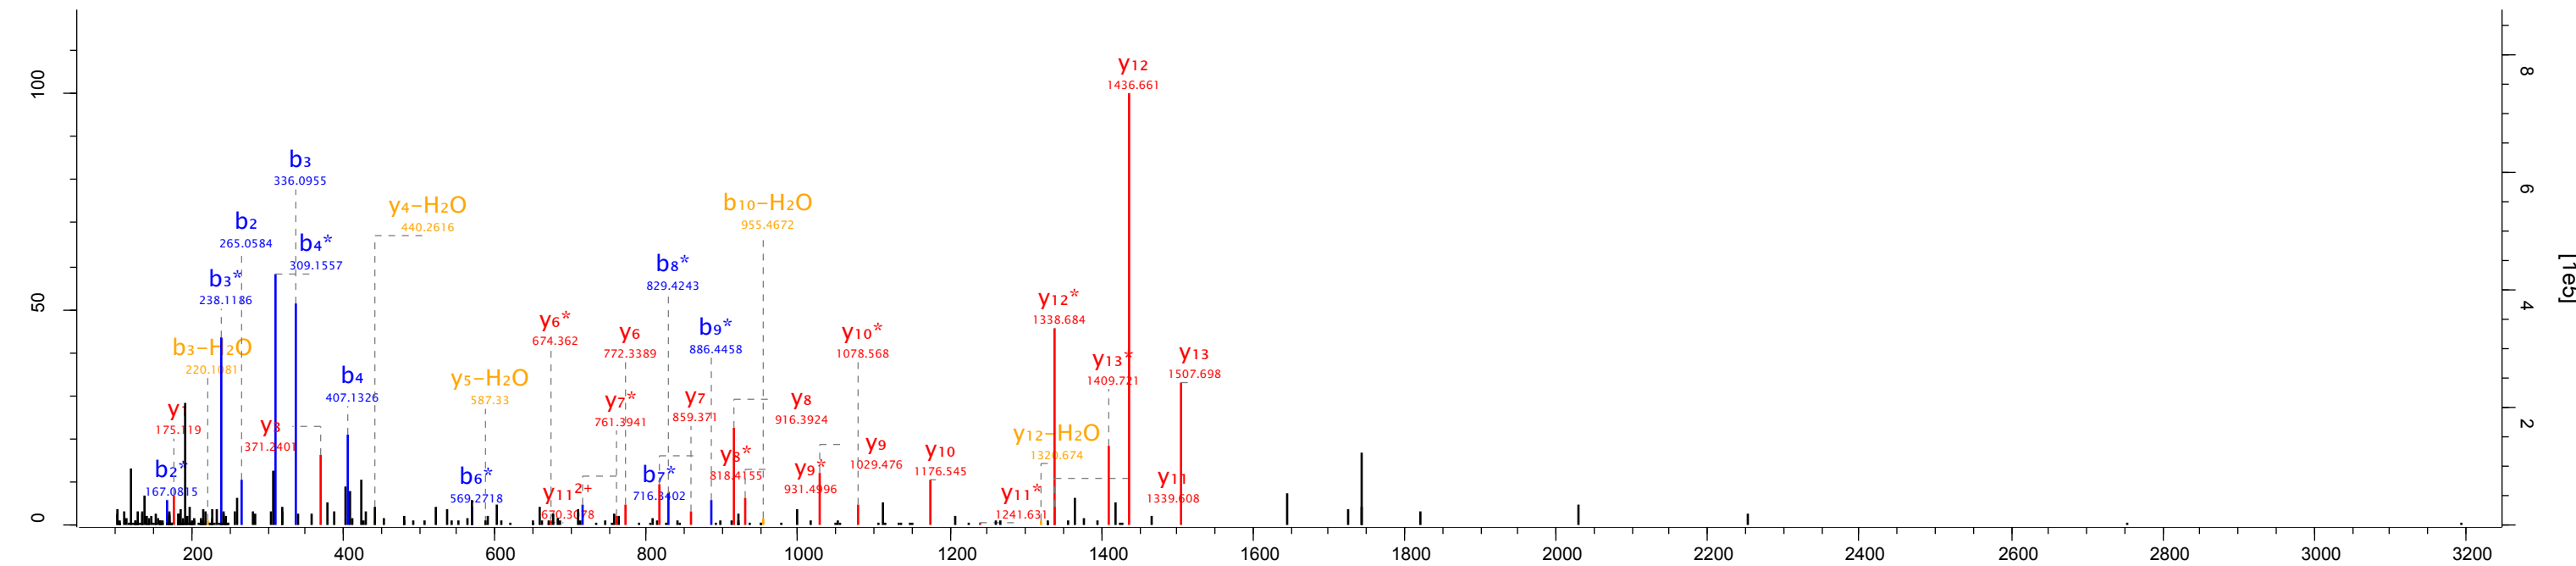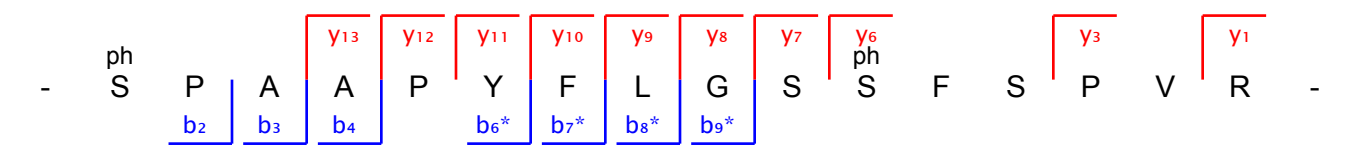

Raw file 20150814\_A375SR\_Phospho\_BR2\_03 Scan 27749 Method FTMS; HCD Score 94.06 m/z 905.12 Gene names CIC

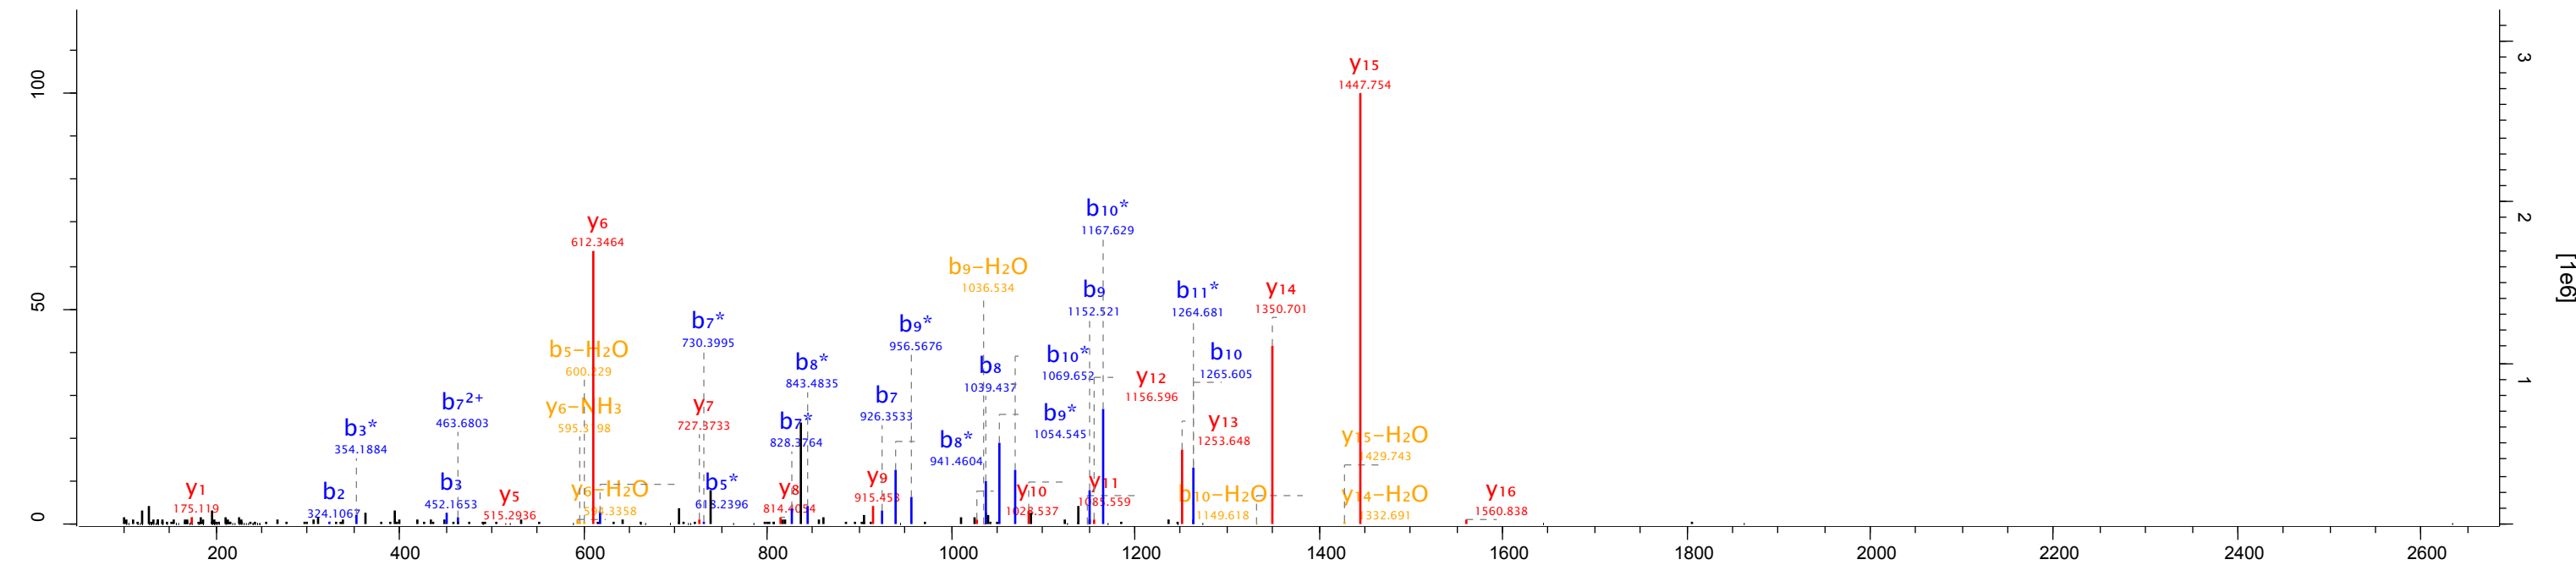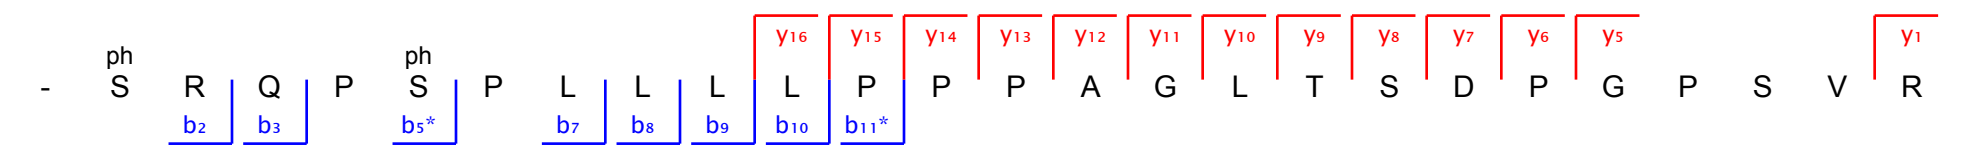

Raw file 20150814\_A375SR\_Phospho\_BR2\_03 Scan 27809 Method FTMS; HCD Score 81.76 m/z 1230.86 Gene names TBC1D5

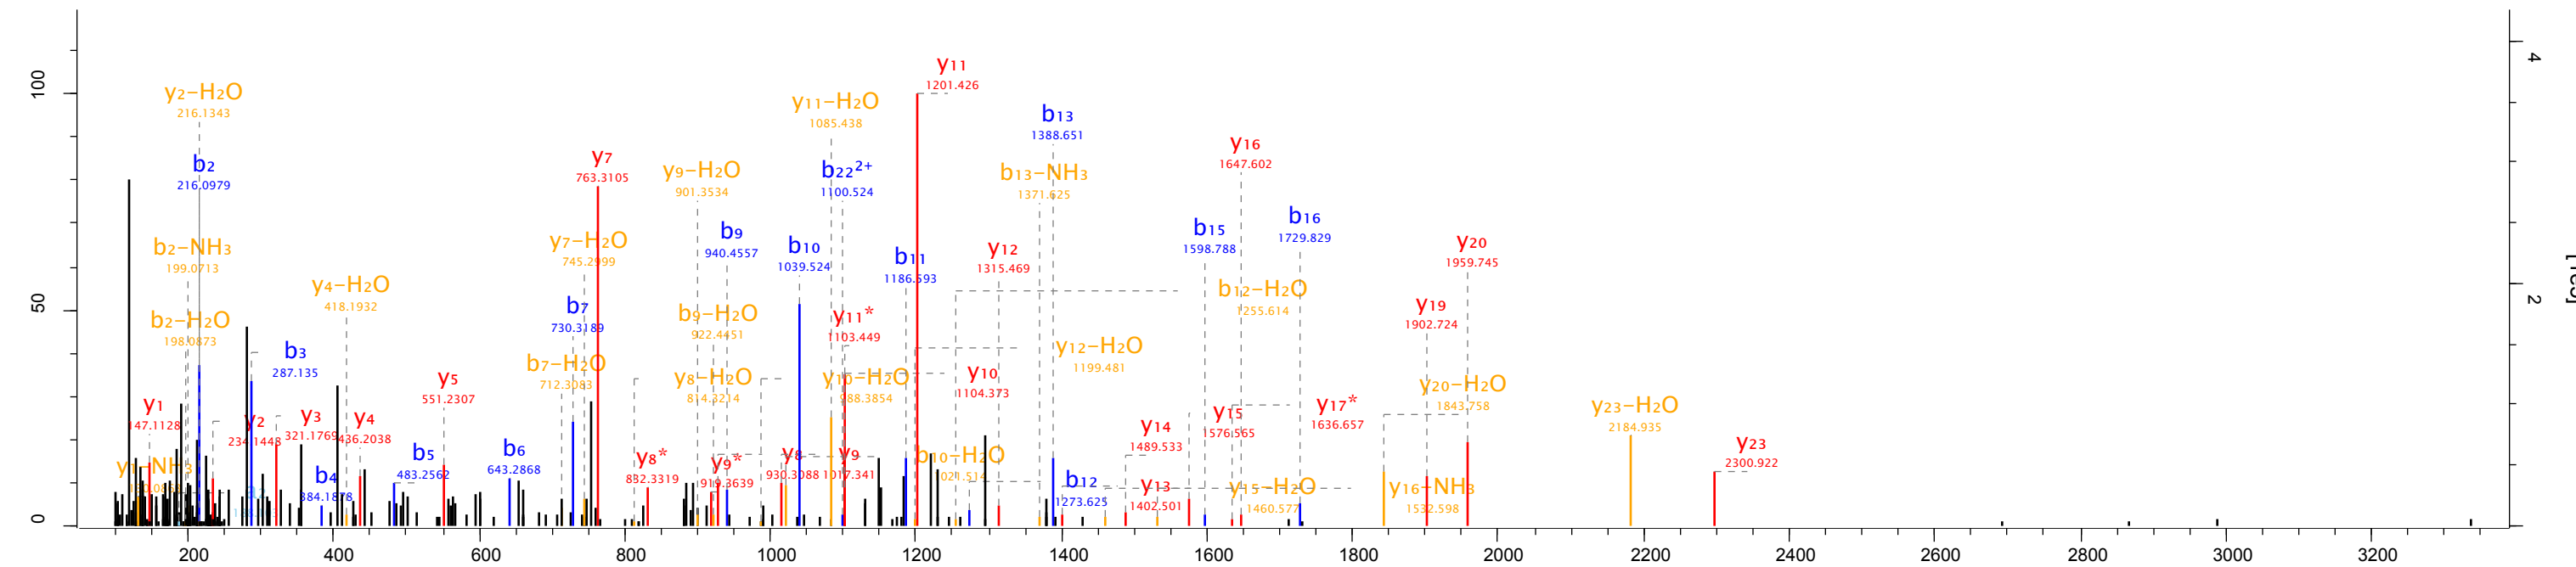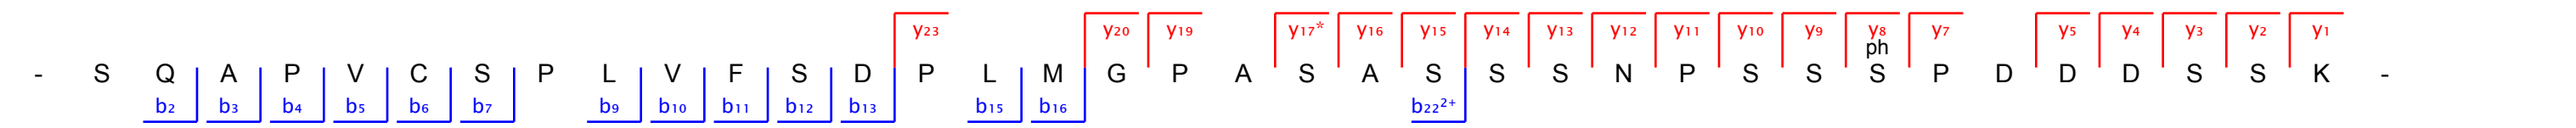



Raw file  
20150814\_A375SR\_Phospho\_BR2\_03

Scan Method Score m/z Gene names  
28019 FTMS; HCD 98.89 938.78 CEP192

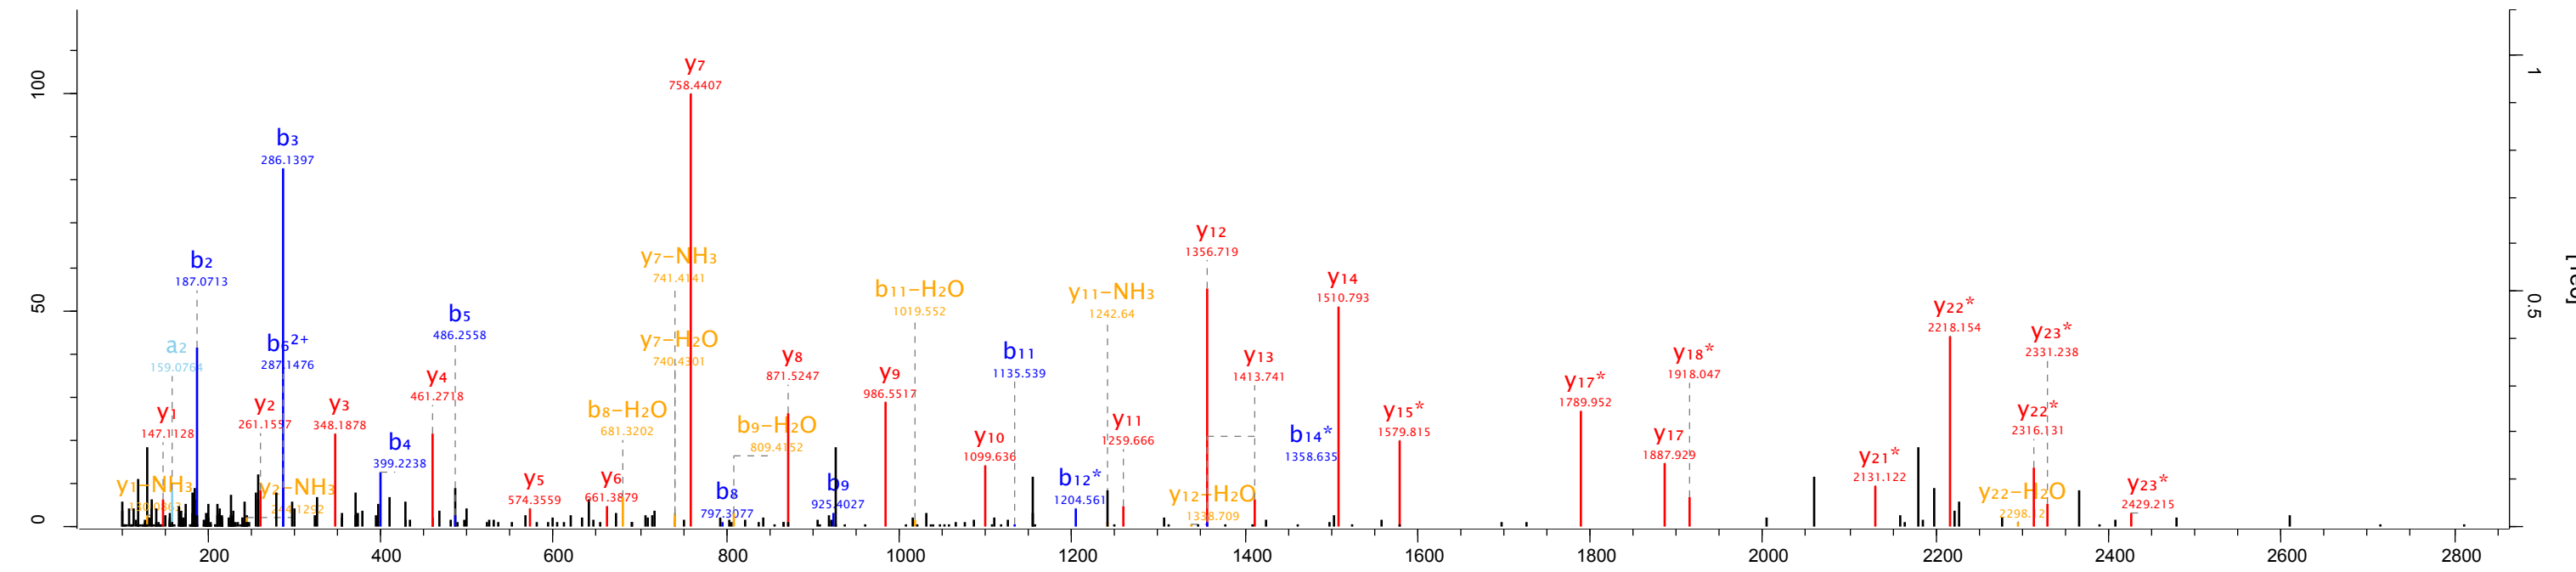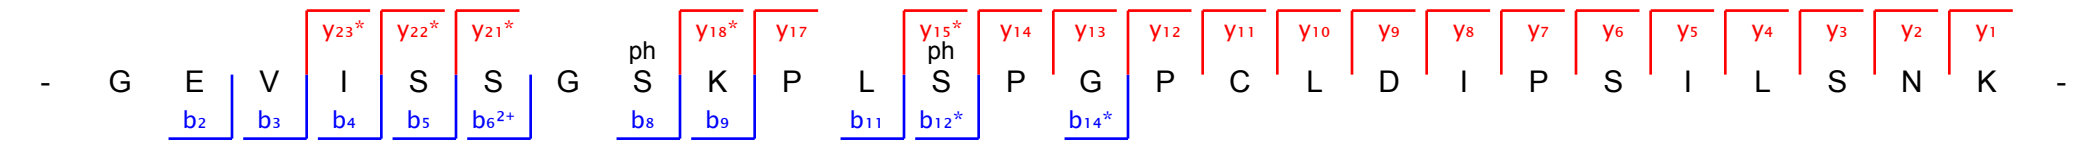

Raw file: 20150814\_A375SR\_Phospho\_BR2\_03  
 Scan: 28569 Method: FTMS; HCD Score: 242.2 m/z: 1241.91 Gene names: FAM129B

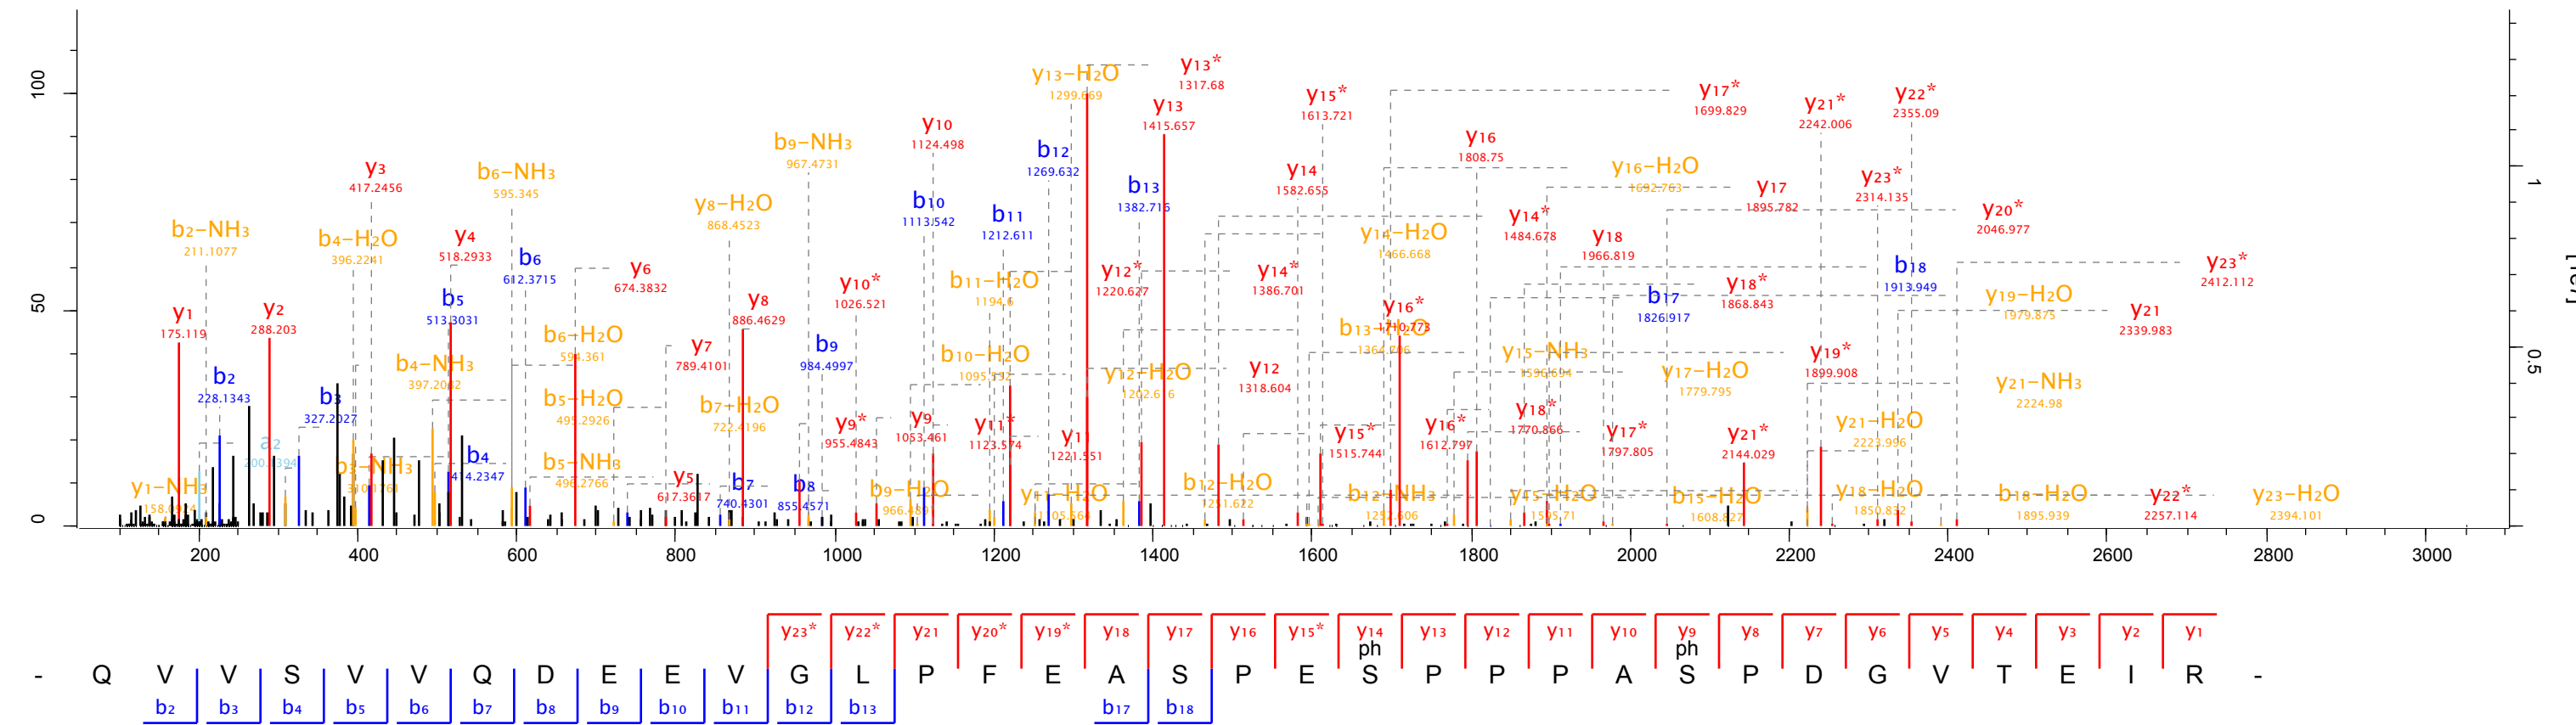

Raw file: 20150814\_A375SR\_Phospho\_BR2\_03  
 Scan: 28669 Method: FTMS; HCD Score: 72.21 m/z: 886.77 Gene names: KANK2

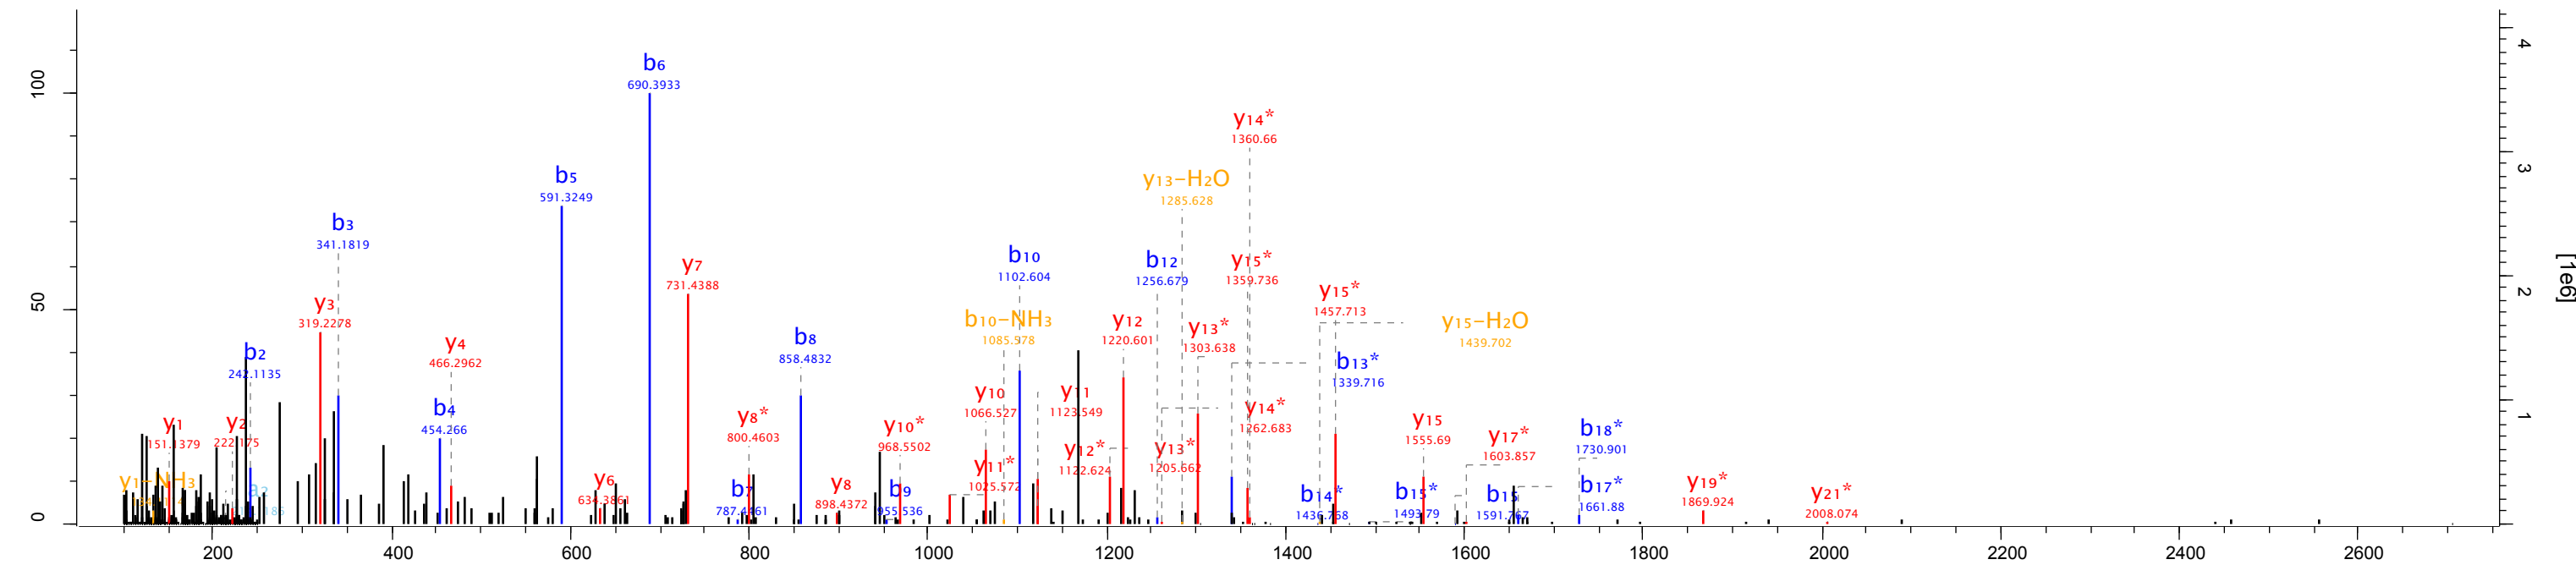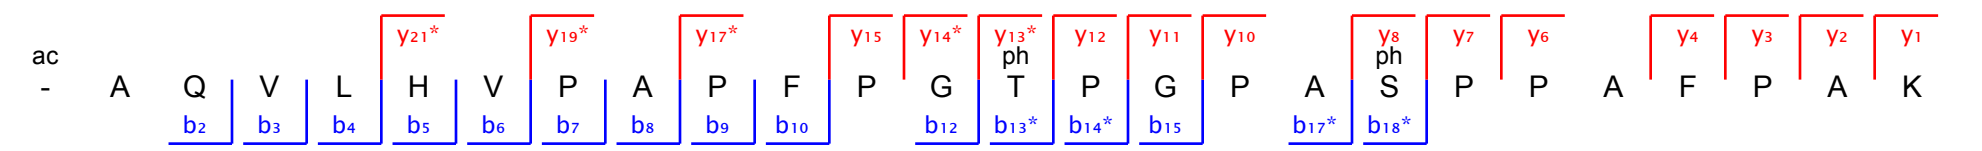

Raw file 20150814\_A375SR\_Phospho\_BR2\_03 Scan 28739 Method FTMS; HCD Score 141.64 m/z 833.38 Gene names C1orf226

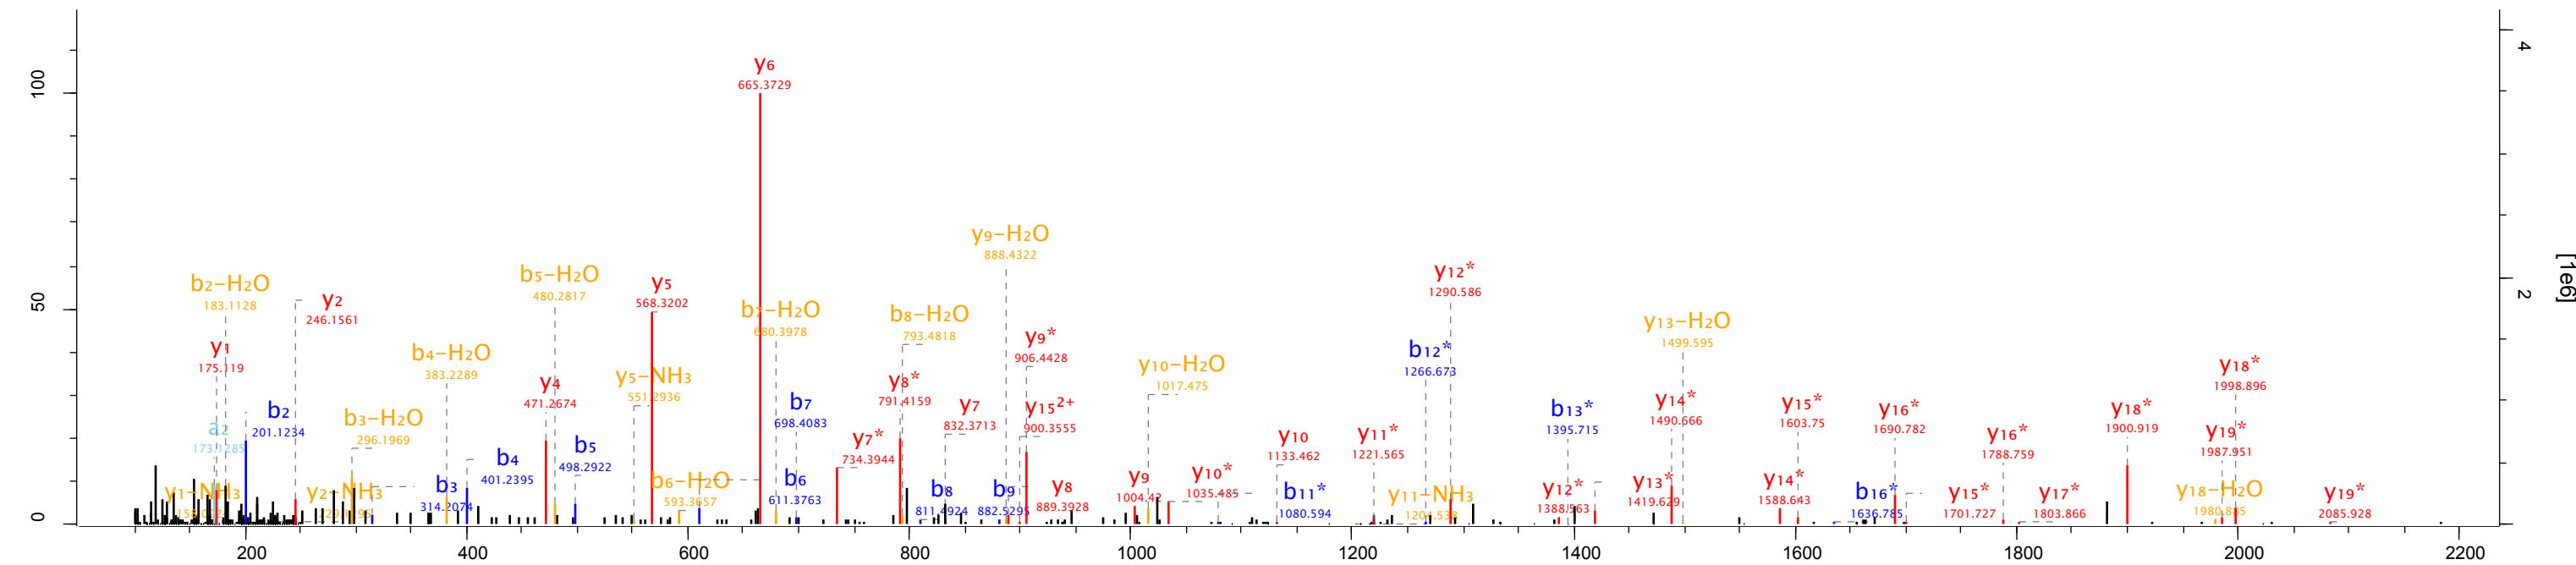

- L S L S P I S L A E S W E D G S P P P Q A R -

b<sub>2</sub>
b<sub>3</sub>
b<sub>4</sub>
b<sub>5</sub>
b<sub>6</sub>
b<sub>7</sub>
b<sub>8</sub>
b<sub>9</sub>
b<sub>11</sub>\*
b<sub>12</sub>\*
b<sub>13</sub>\*
b<sub>16</sub>\*
y<sub>1</sub>
y<sub>2</sub>
y<sub>4</sub>
y<sub>5</sub>
y<sub>6</sub>
y<sub>7</sub>
y<sub>7</sub> ph
y<sub>8</sub>
y<sub>9</sub>
y<sub>10</sub>
y<sub>11</sub>\*
y<sub>11</sub>\*
y<sub>12</sub>\*
y<sub>12</sub> ph
y<sub>13</sub>\*
y<sub>14</sub>\*
y<sub>14</sub>\*
y<sub>15</sub>\*
y<sub>15</sub>\*
y<sub>16</sub>\*
y<sub>16</sub>\*
y<sub>16</sub>\*
y<sub>17</sub>\*
y<sub>18</sub>\*
y<sub>18</sub>\*
y<sub>19</sub>\*
y<sub>19</sub>\*

Raw file Scan Method Score m/z Gene names  
 20150814\_A375SR\_Phospho\_BR2\_03 28899 FTMS; HCD 340.48 1032.82 AEBP2

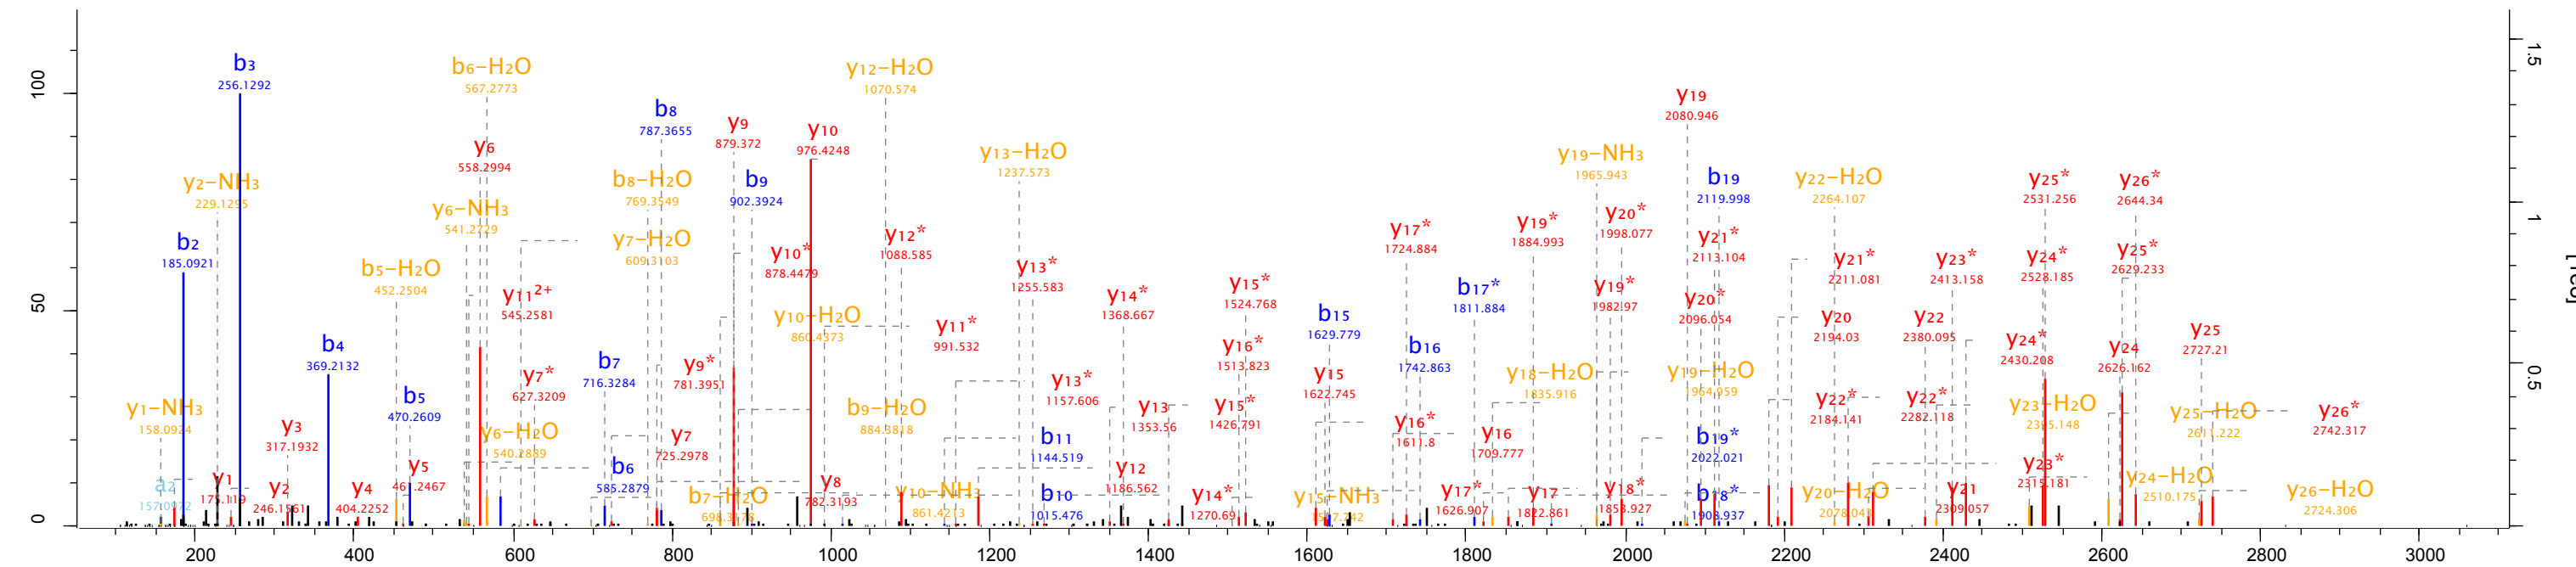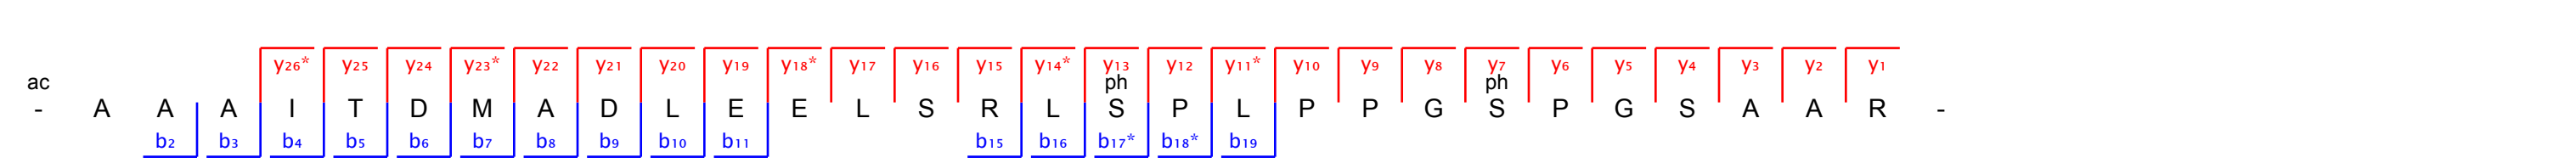

Raw file: 20150814\_A375SR\_Phospho\_BR2\_03  
 Scan: 2989 Method: FTMS; HCD Score: 198.95 m/z: 865.33 Gene names: DNAJC17

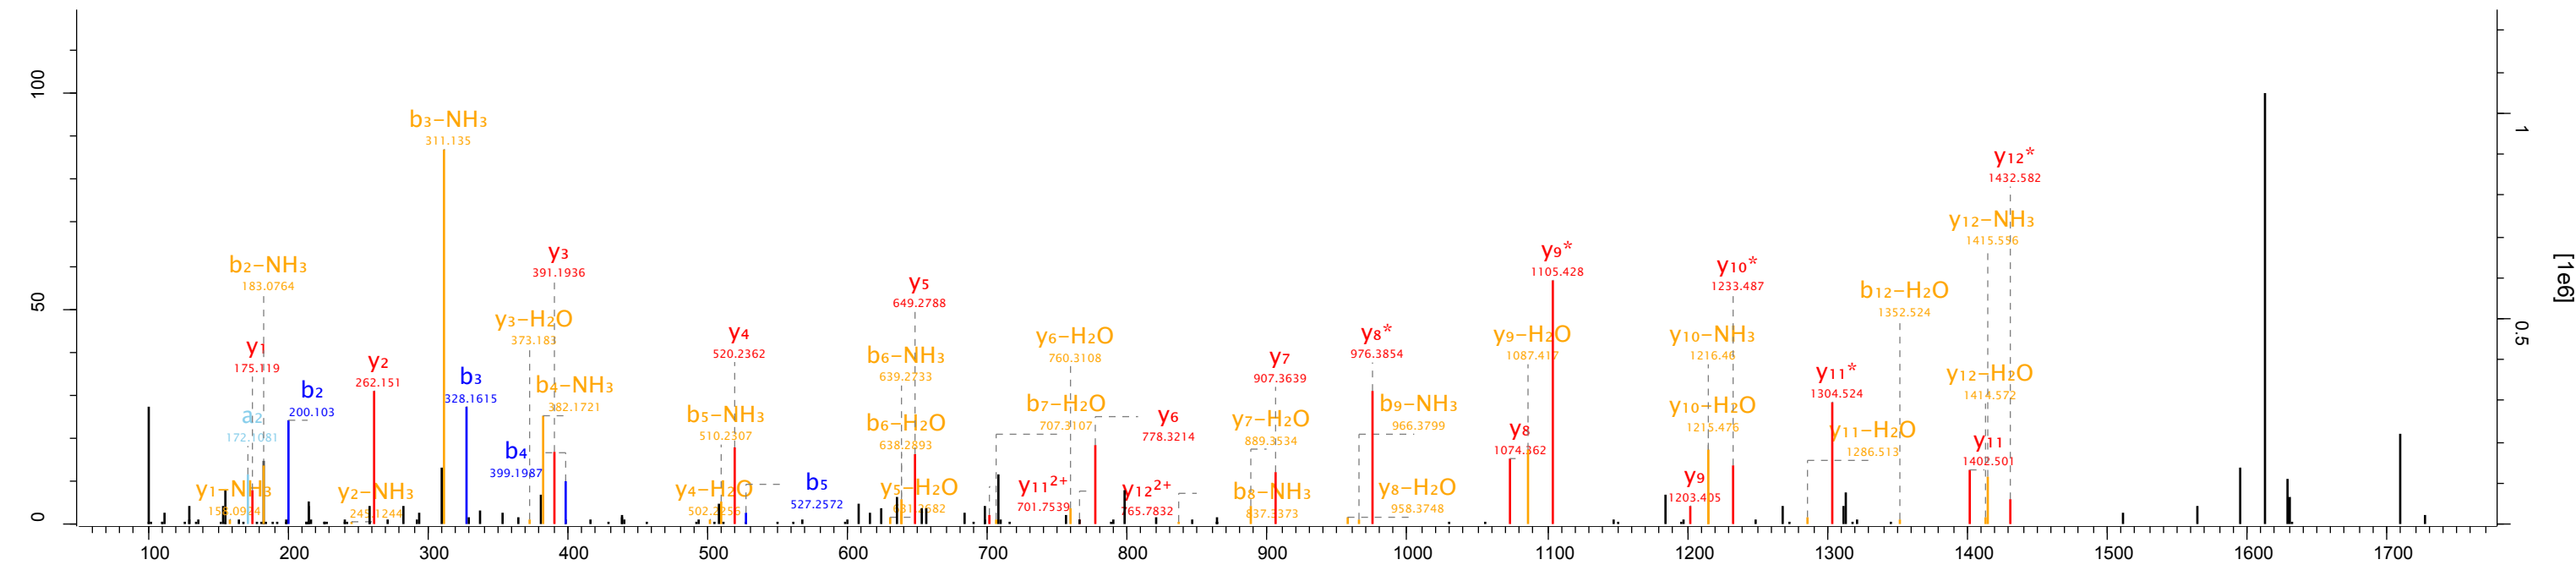

- Q A Q A Q E S E E E E E S R -  
 b2 b3 b4 b5

Raw file: 20150814\_A375SR\_Phospho\_BR2\_03  
 Scan: 3129 Method: FTMS; HCD Score: 155.06 m/z: 607.25 Gene names: PARVA

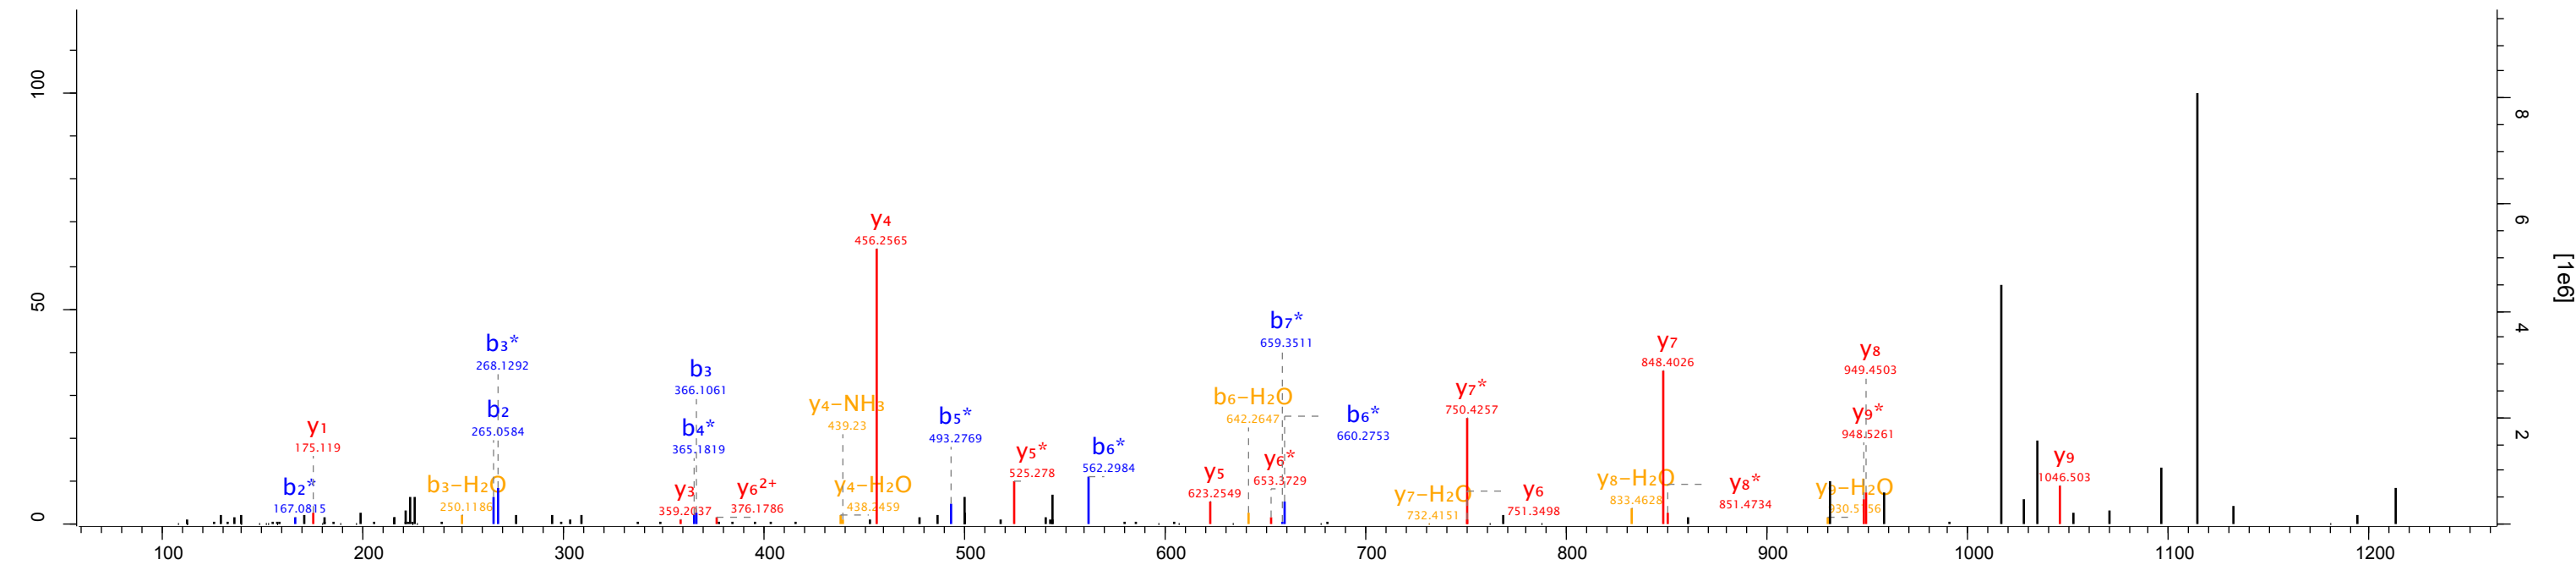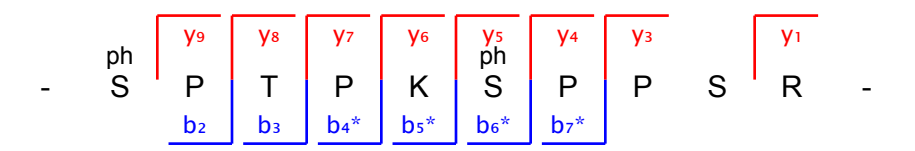

Raw file: 20150814\_A375SR\_Phospho\_BR2\_03  
 Scan: 3499 Method: FTMS; HCD Score: 60.55 m/z: 492.9 Gene names: EIF4G1

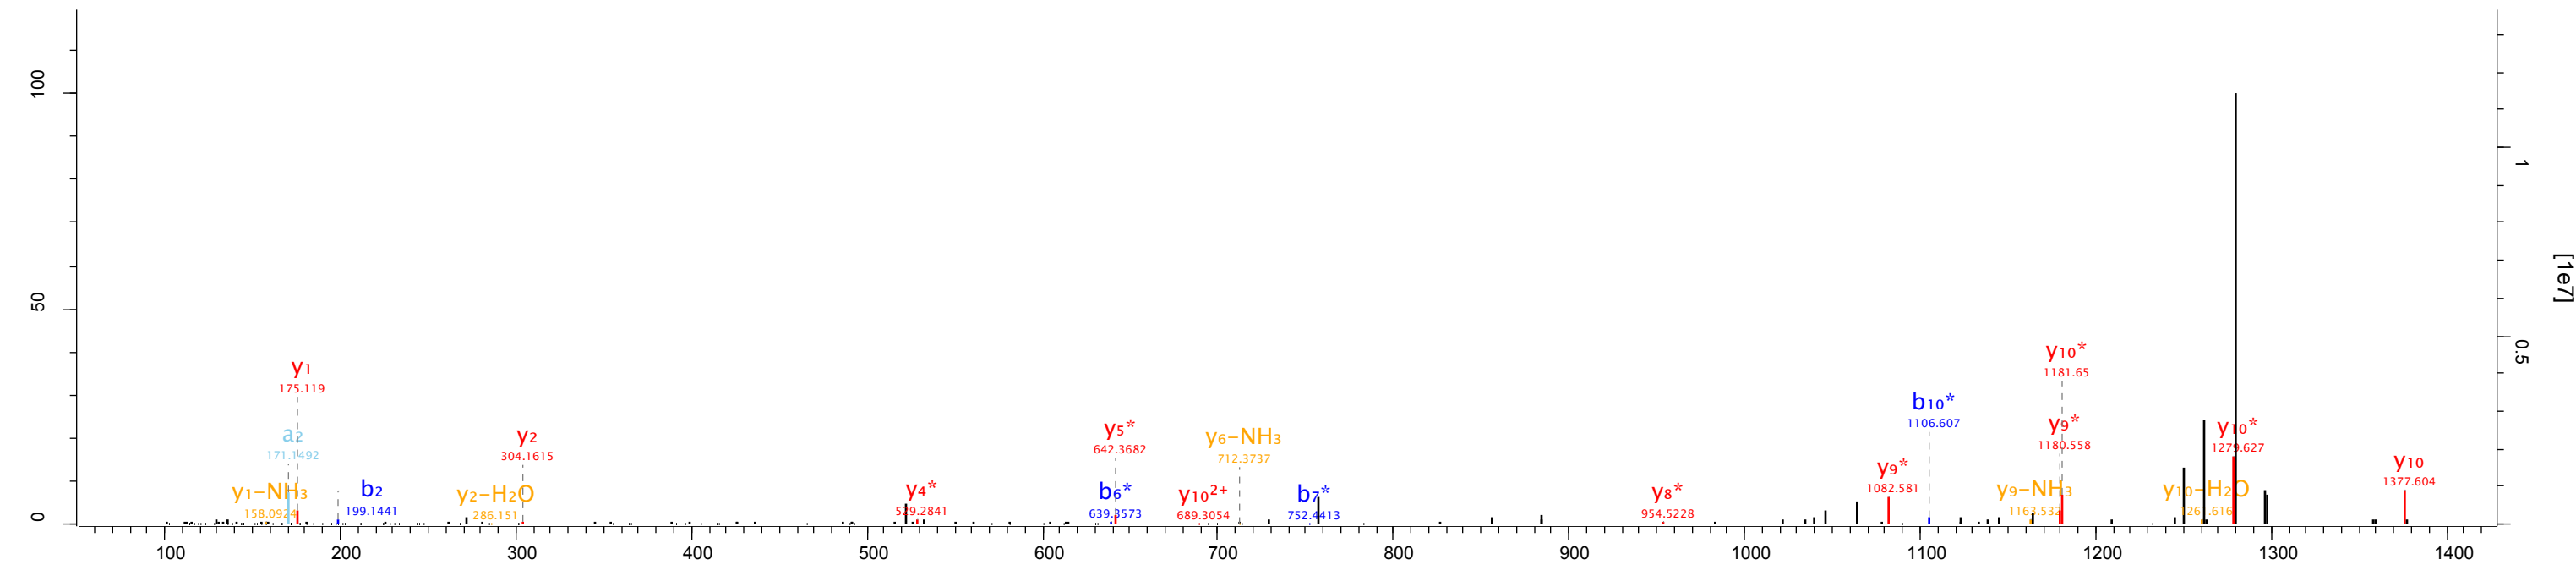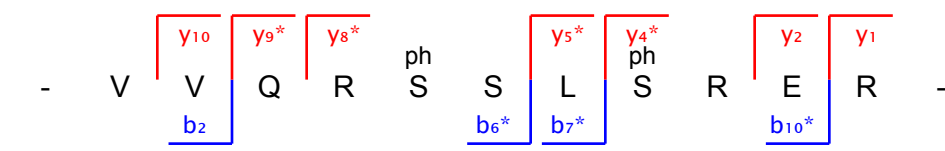



Raw file: 20150814\_A375SR\_Phospho\_BR2\_03  
 Scan: 4439 Method: FTMS; HCD Score: 128.07 m/z: 691.98 Gene names: TCF20

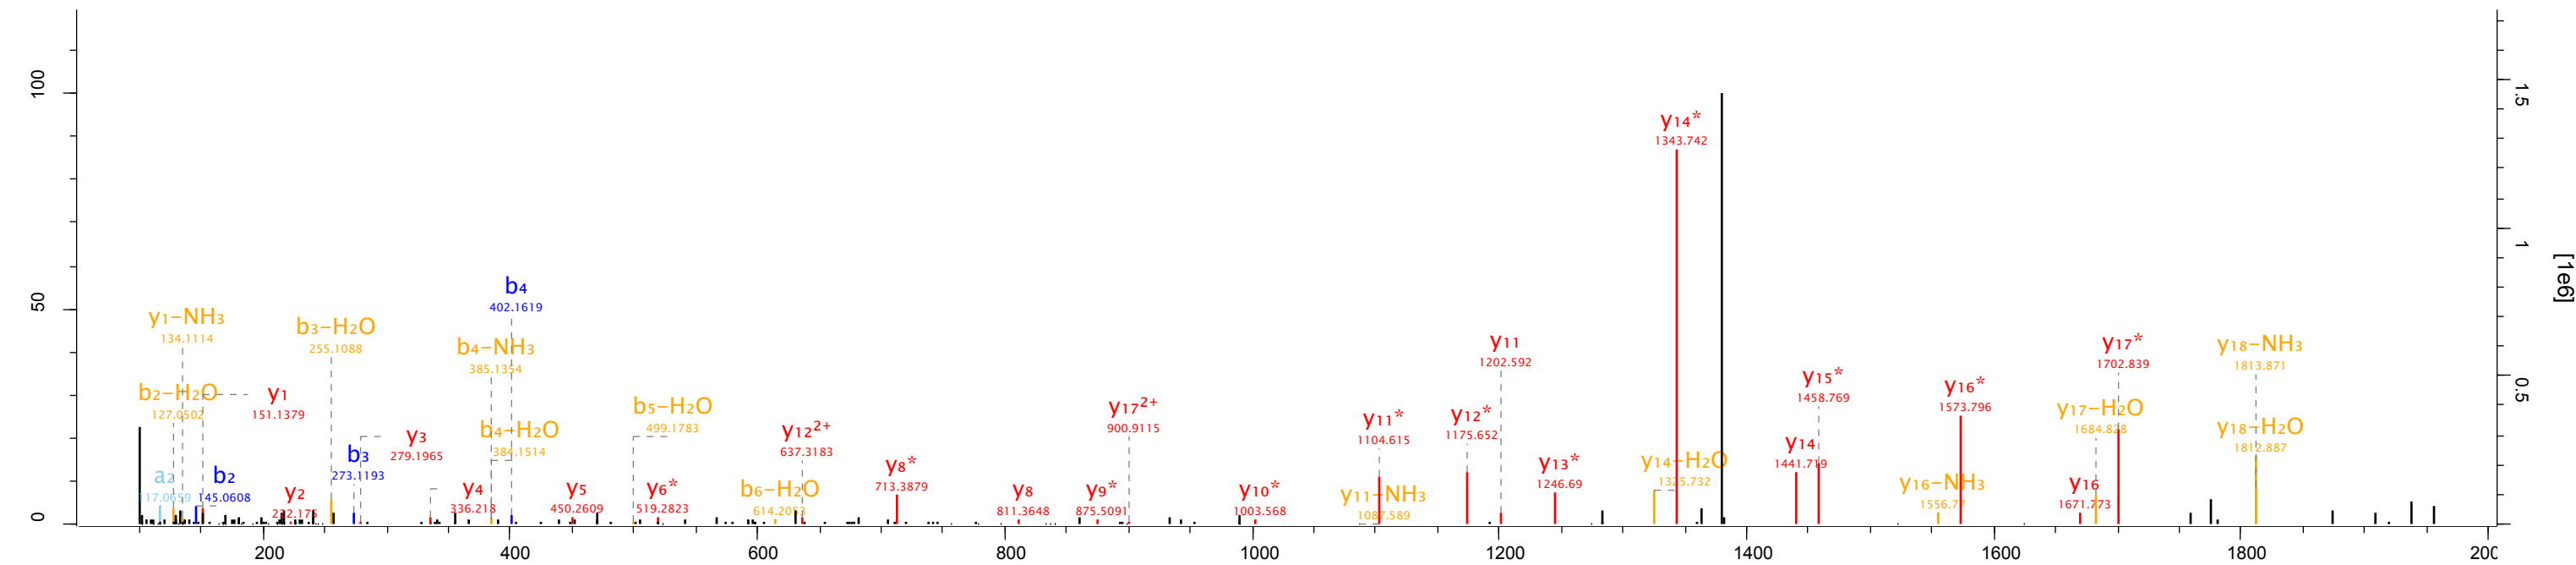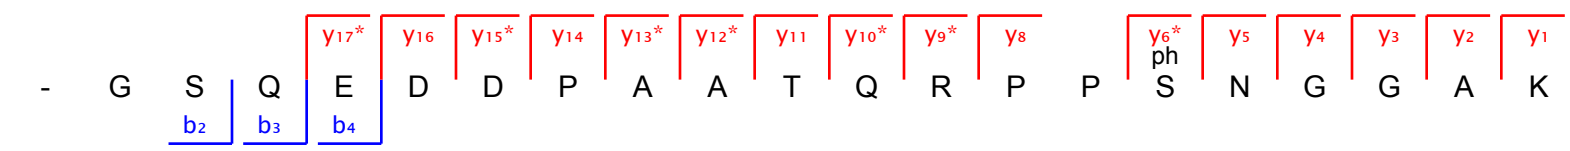

Raw file: 20150814\_A375SR\_Phospho\_BR2\_03  
 Scan: 4599 Method: FTMS; HCD Score: 131.82 m/z: 646.31 Gene names: PCF11

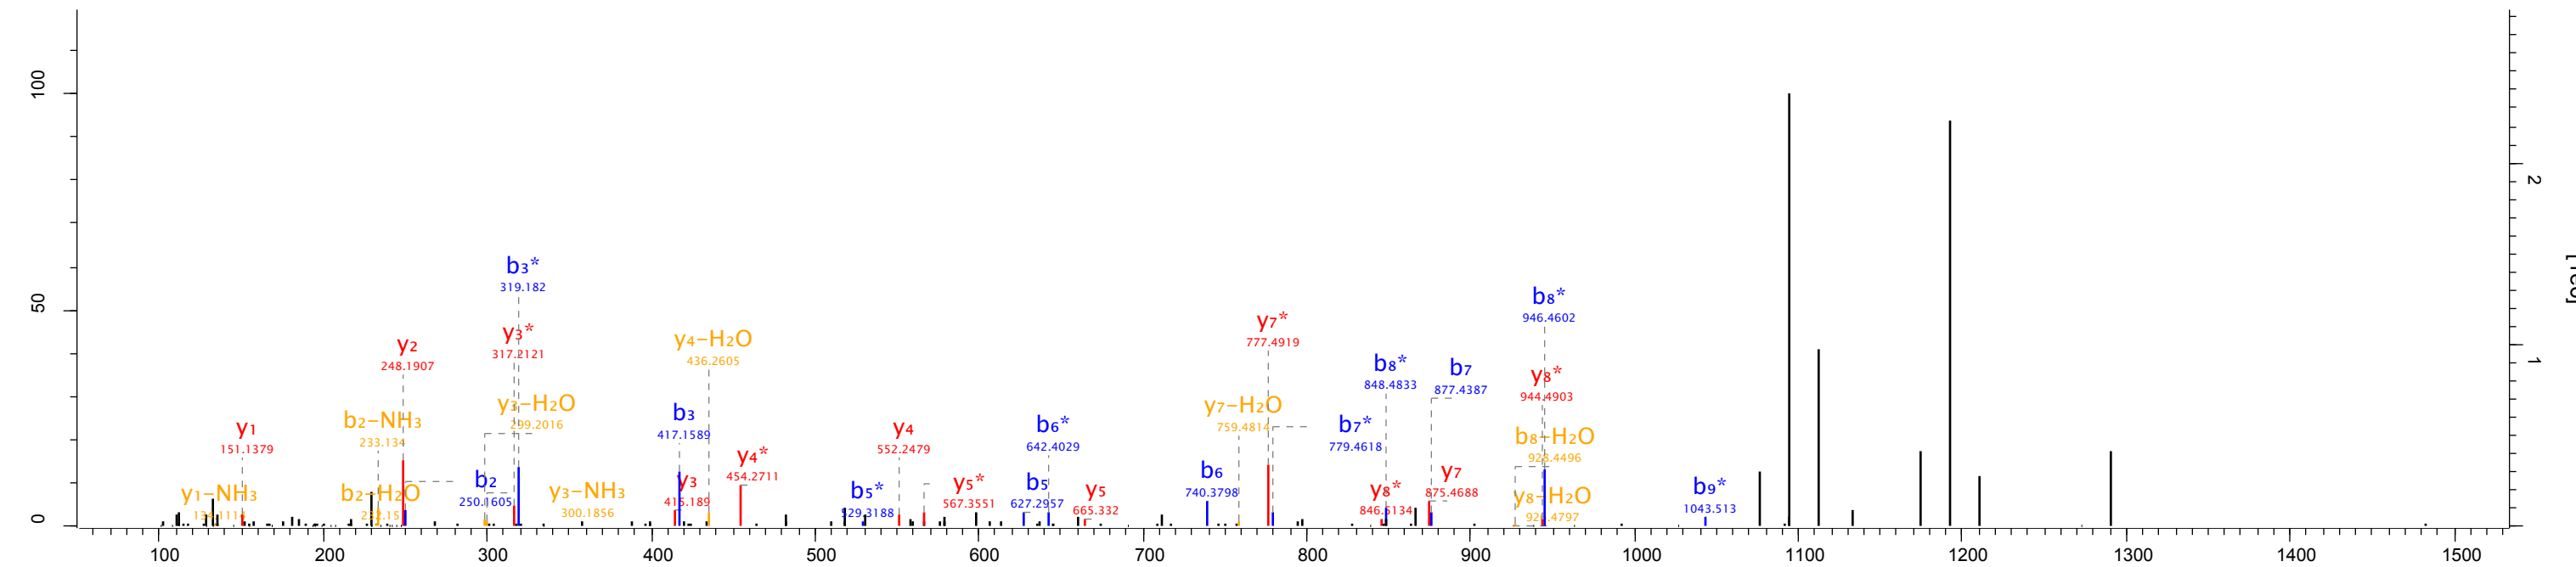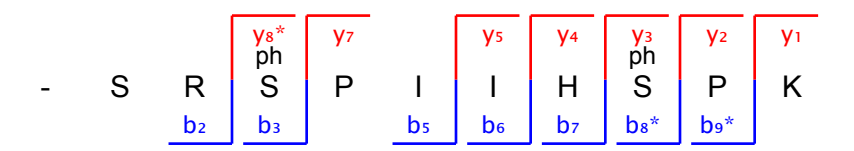

Raw file: 20150814\_A375SR\_Phospho\_BR2\_03  
 Scan: 4929 Method: FTMS; HCD Score: 150.39 m/z: 730.32 Gene names: UBE3A

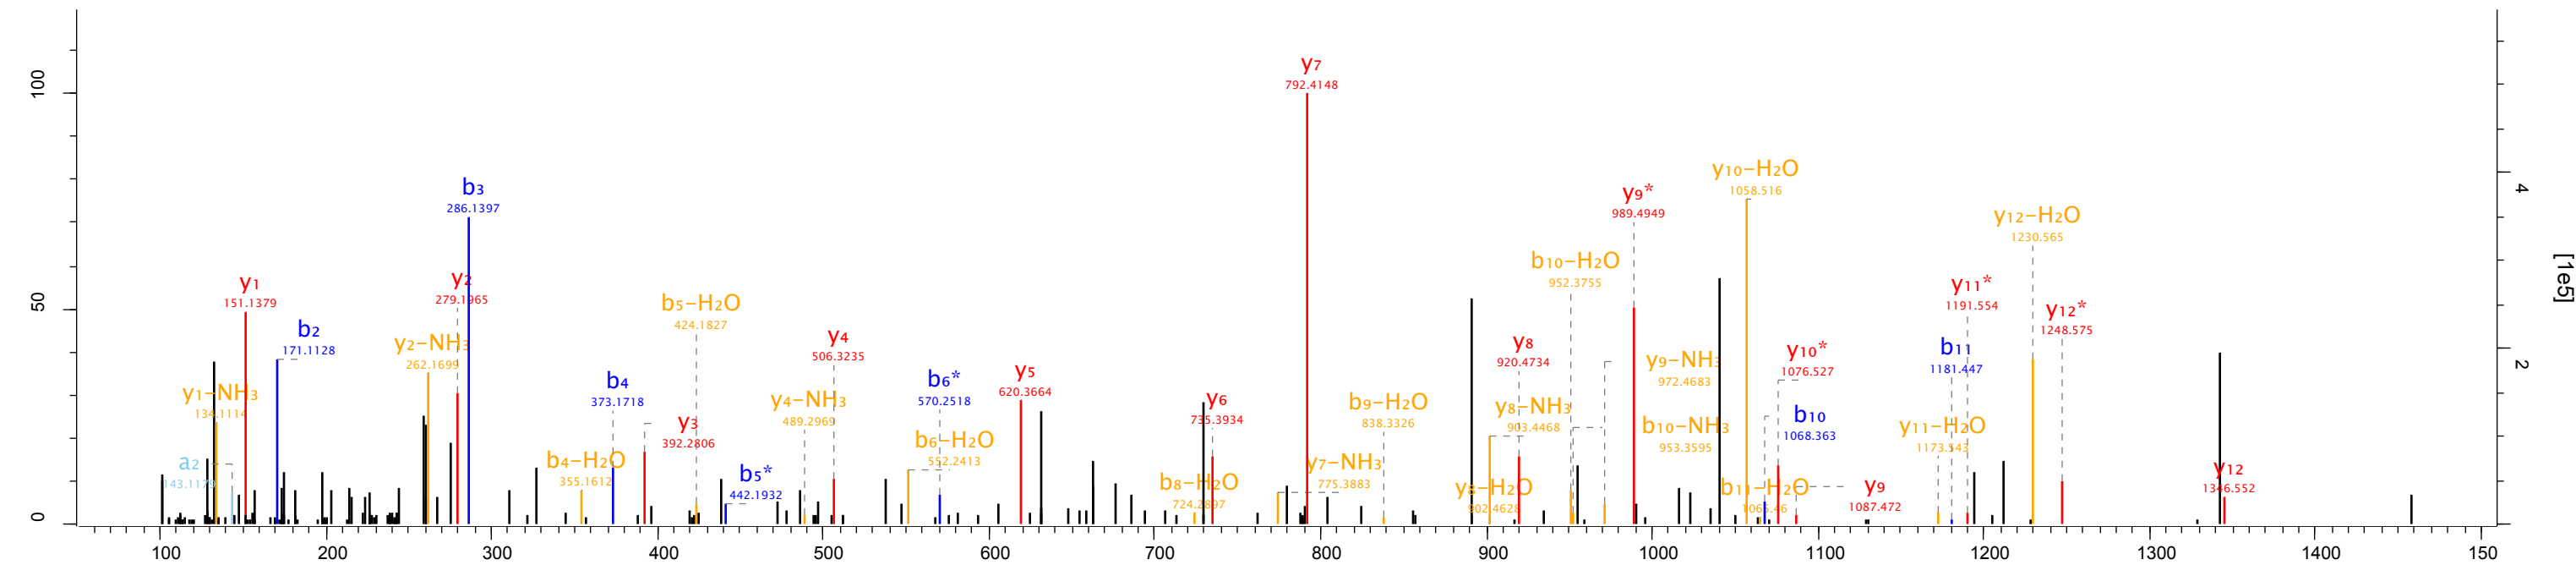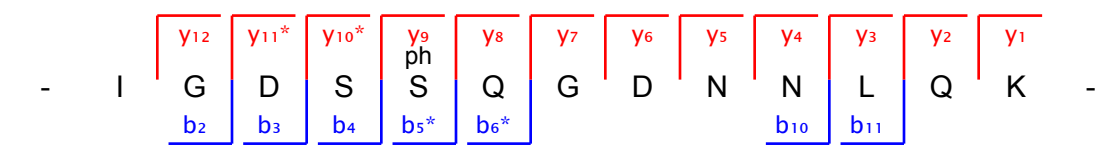

Raw file: 20150814\_A375SR\_Phospho\_BR2\_03  
 Scan: 4959 Method: FTMS; HCD Score: 67.88 m/z: 479.22 Gene names: CHMP2B

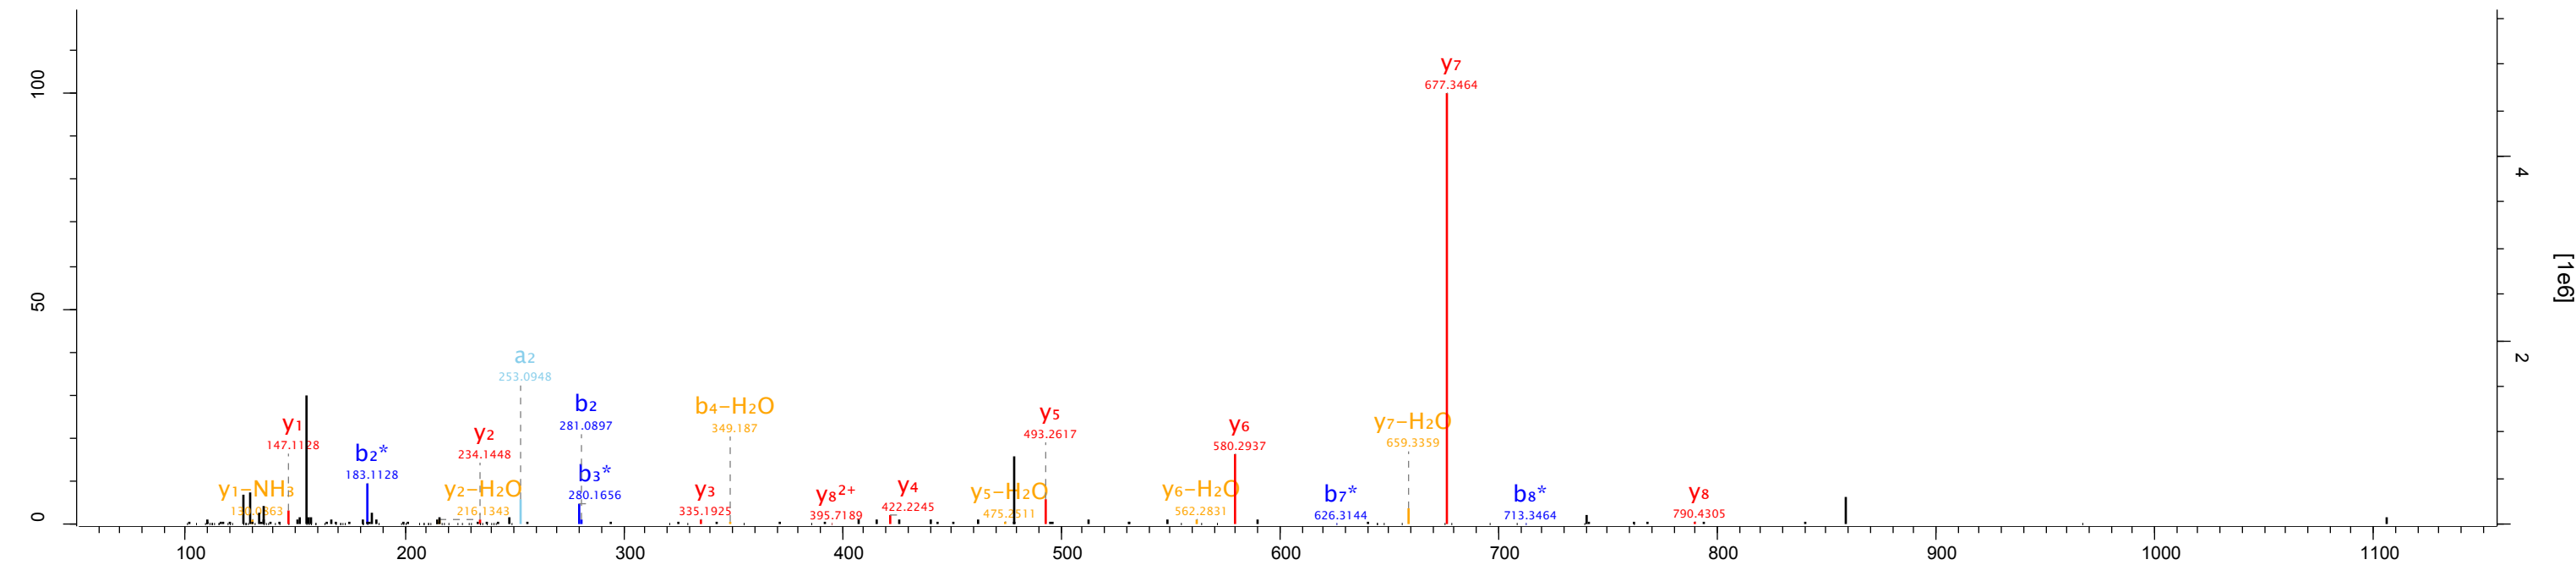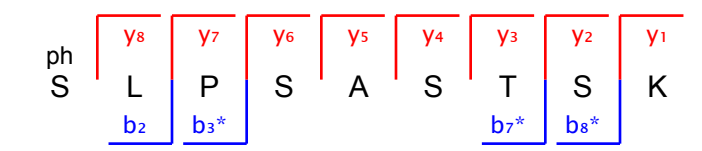

Raw file: 20150814\_A375SR\_Phospho\_BR2\_03  
 Scan: 5089 Method: FTMS; HCD Score: 75.48 m/z: 646.27 Gene names: RPS6

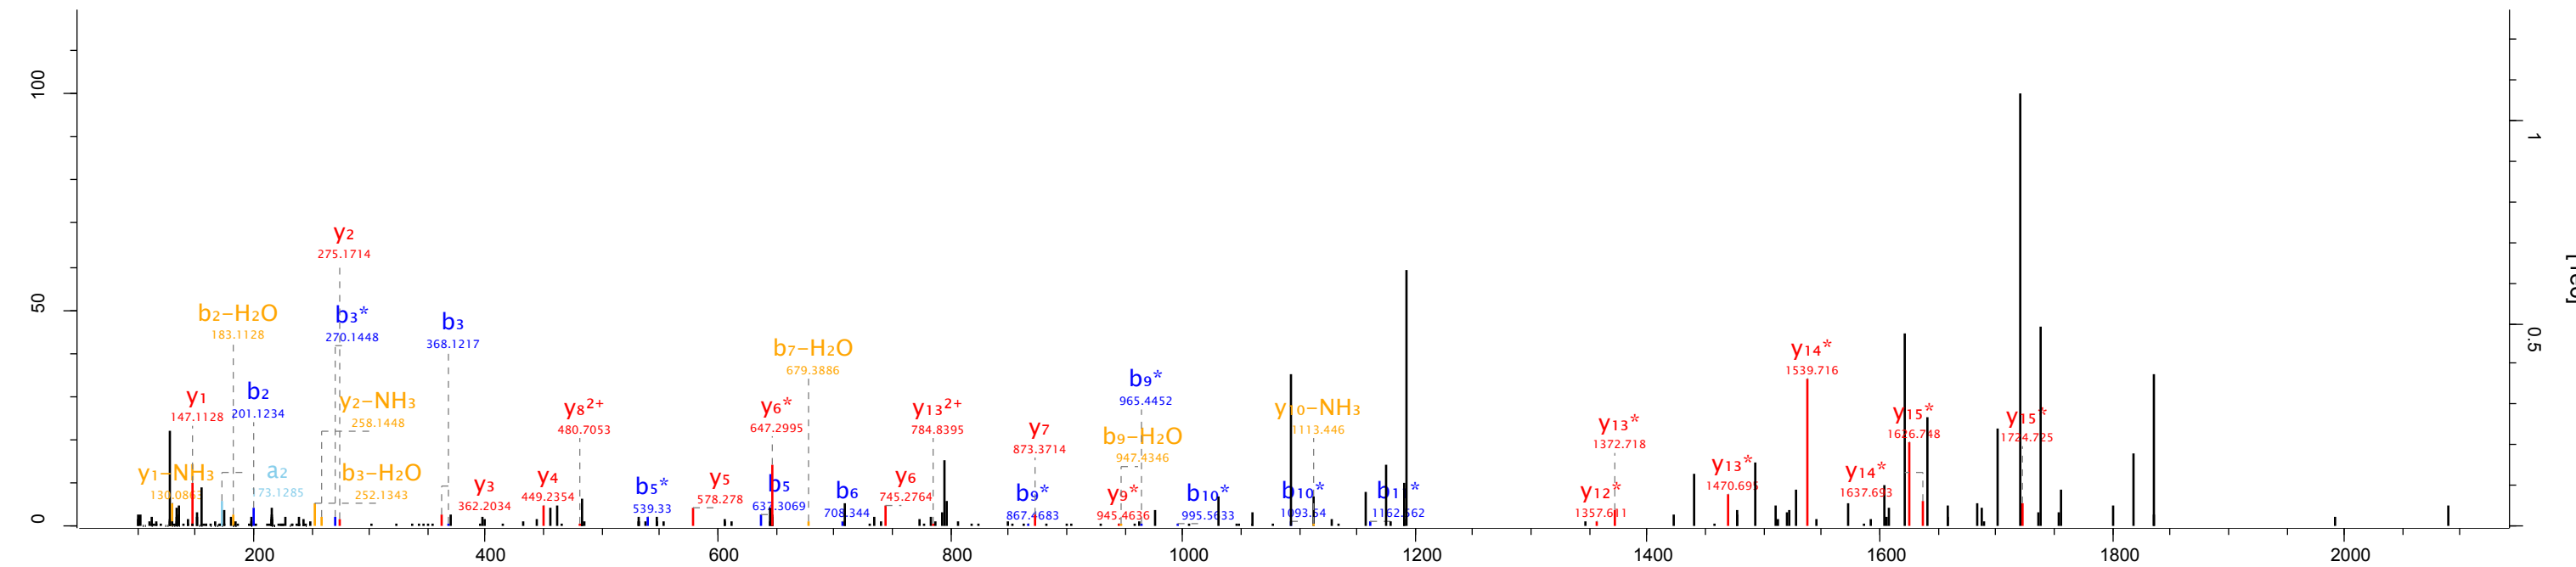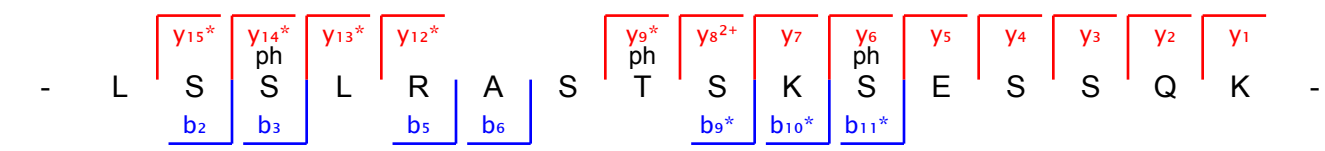

Raw file: 20150814\_A375SR\_Phospho\_BR2\_03  
 Scan: 5549 Method: FTMS; HCD Score: 141.34 m/z: 458.54 Gene names: PRPF4B

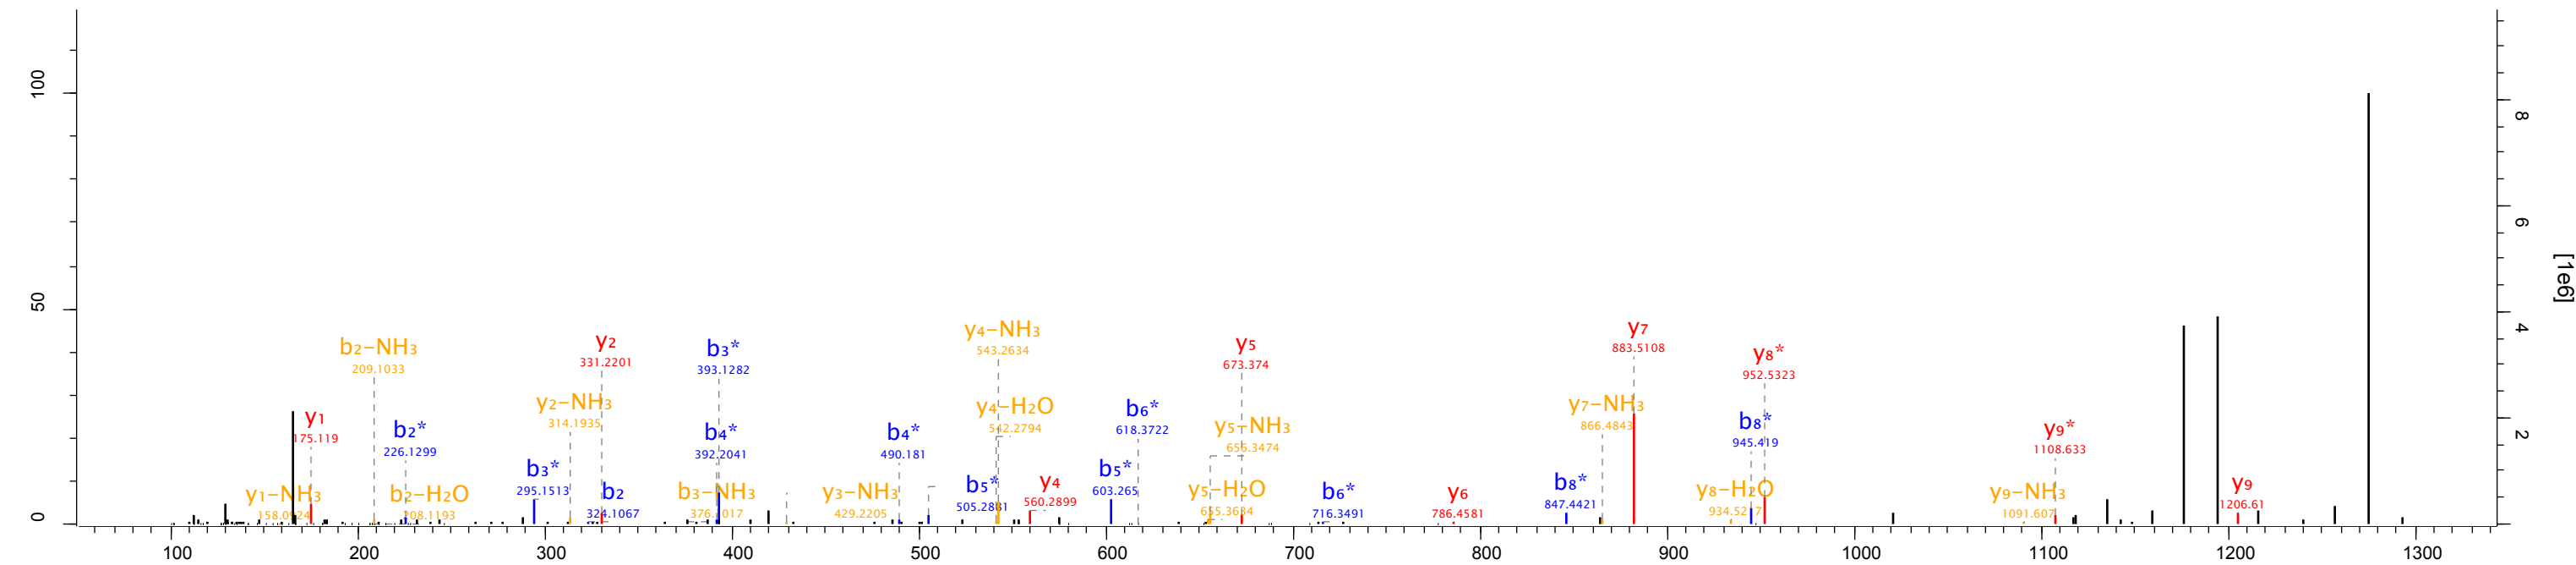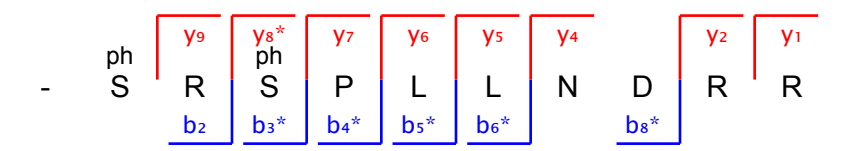

Raw file: 20150814\_A375SR\_Phospho\_BR2\_03  
 Scan: 5619 Method: FTMS; HCD Score: 153.97 m/z: 498.2 Gene names: REPS1

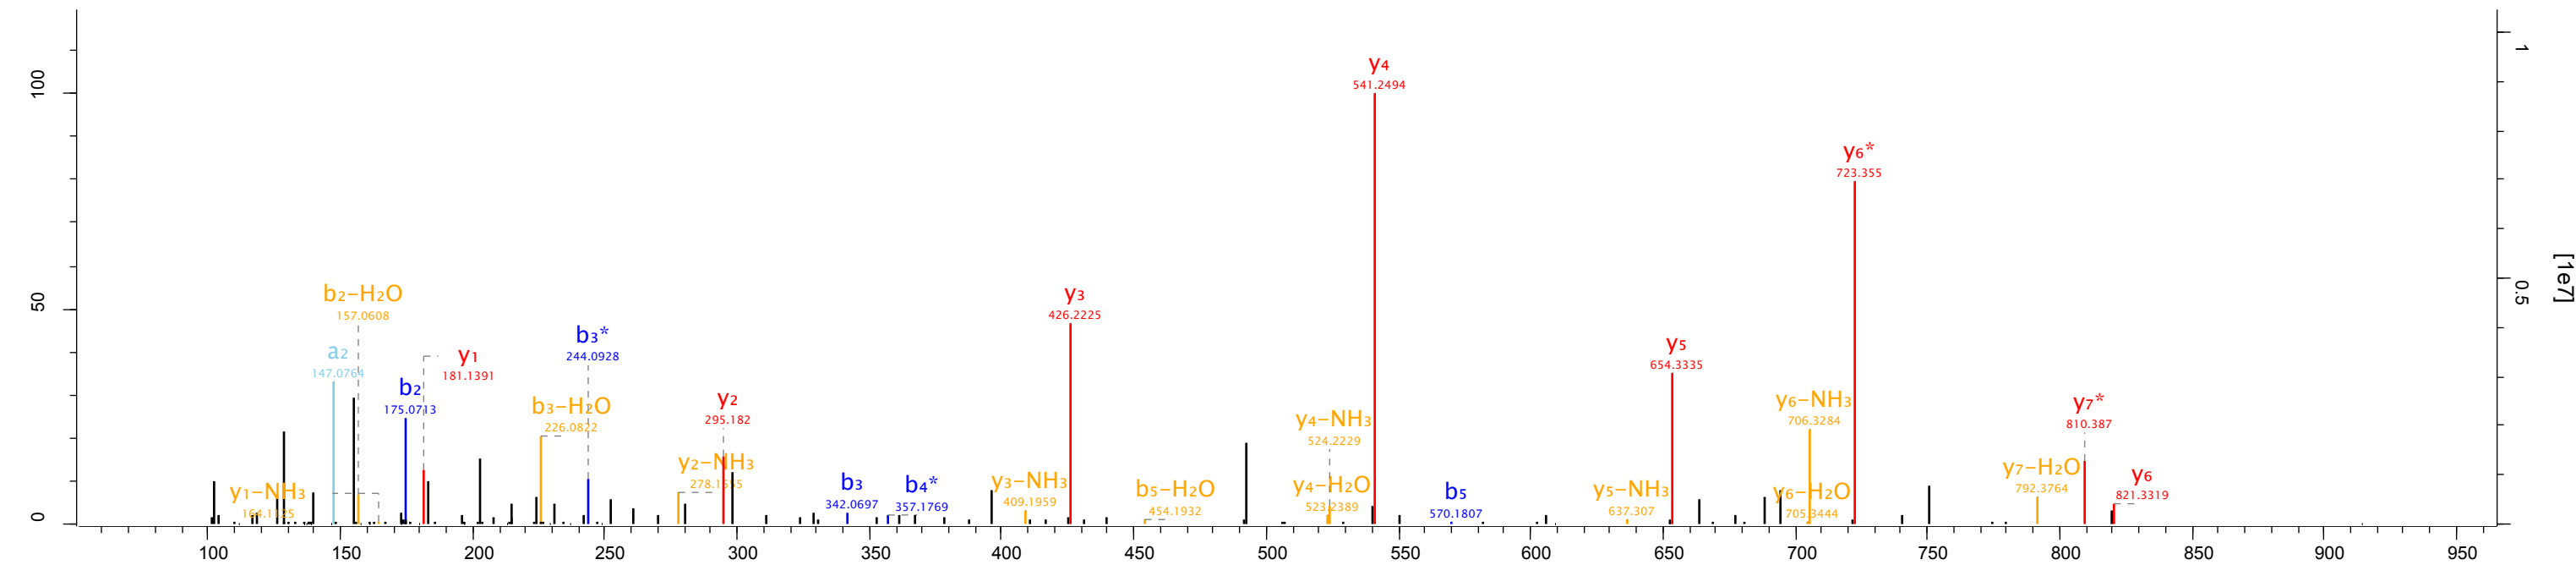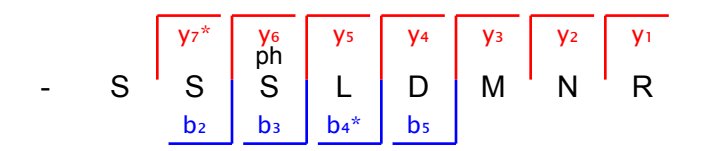

Raw file: 20150814\_A375SR\_Phospho\_BR2\_03  
 Scan: 6089 Method: FTMS; HCD Score: 178.57 m/z: 800.83 Gene names: COL4A3BP

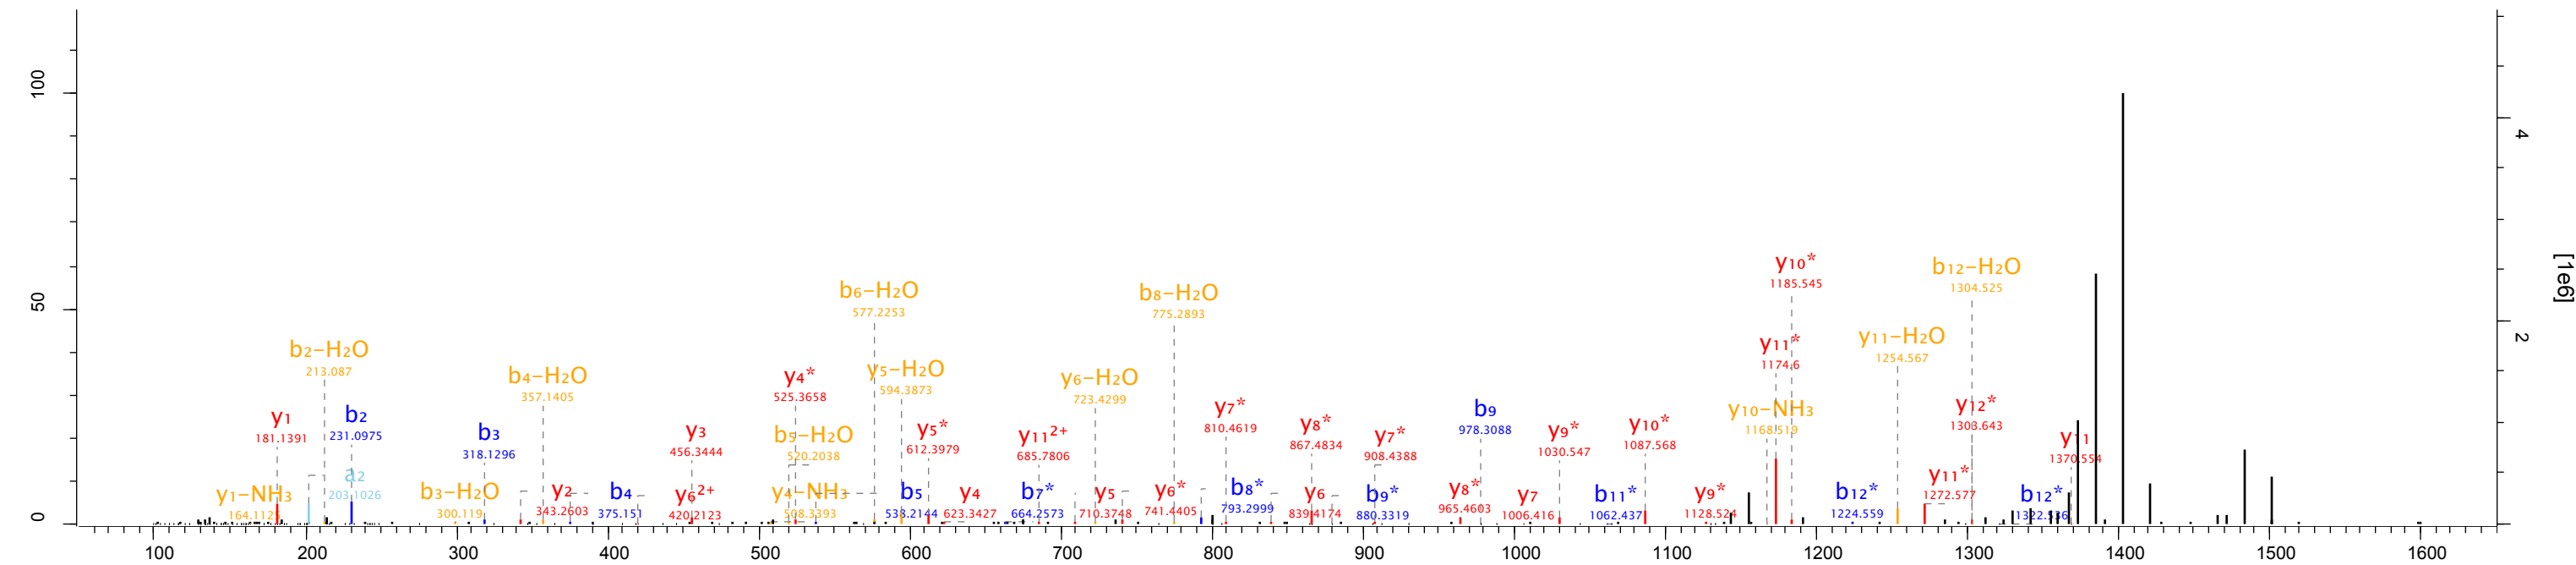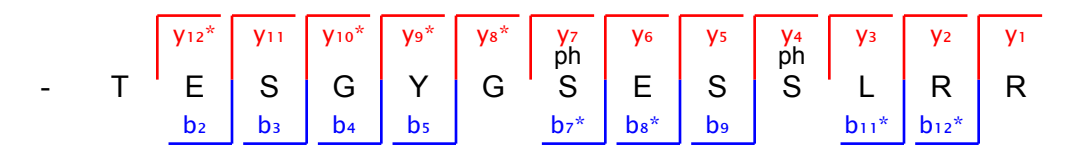



20150814\_A375SR\_Phospho\_BR2\_03 6119 FTMS; HCD 207.85 656.77 CEP95

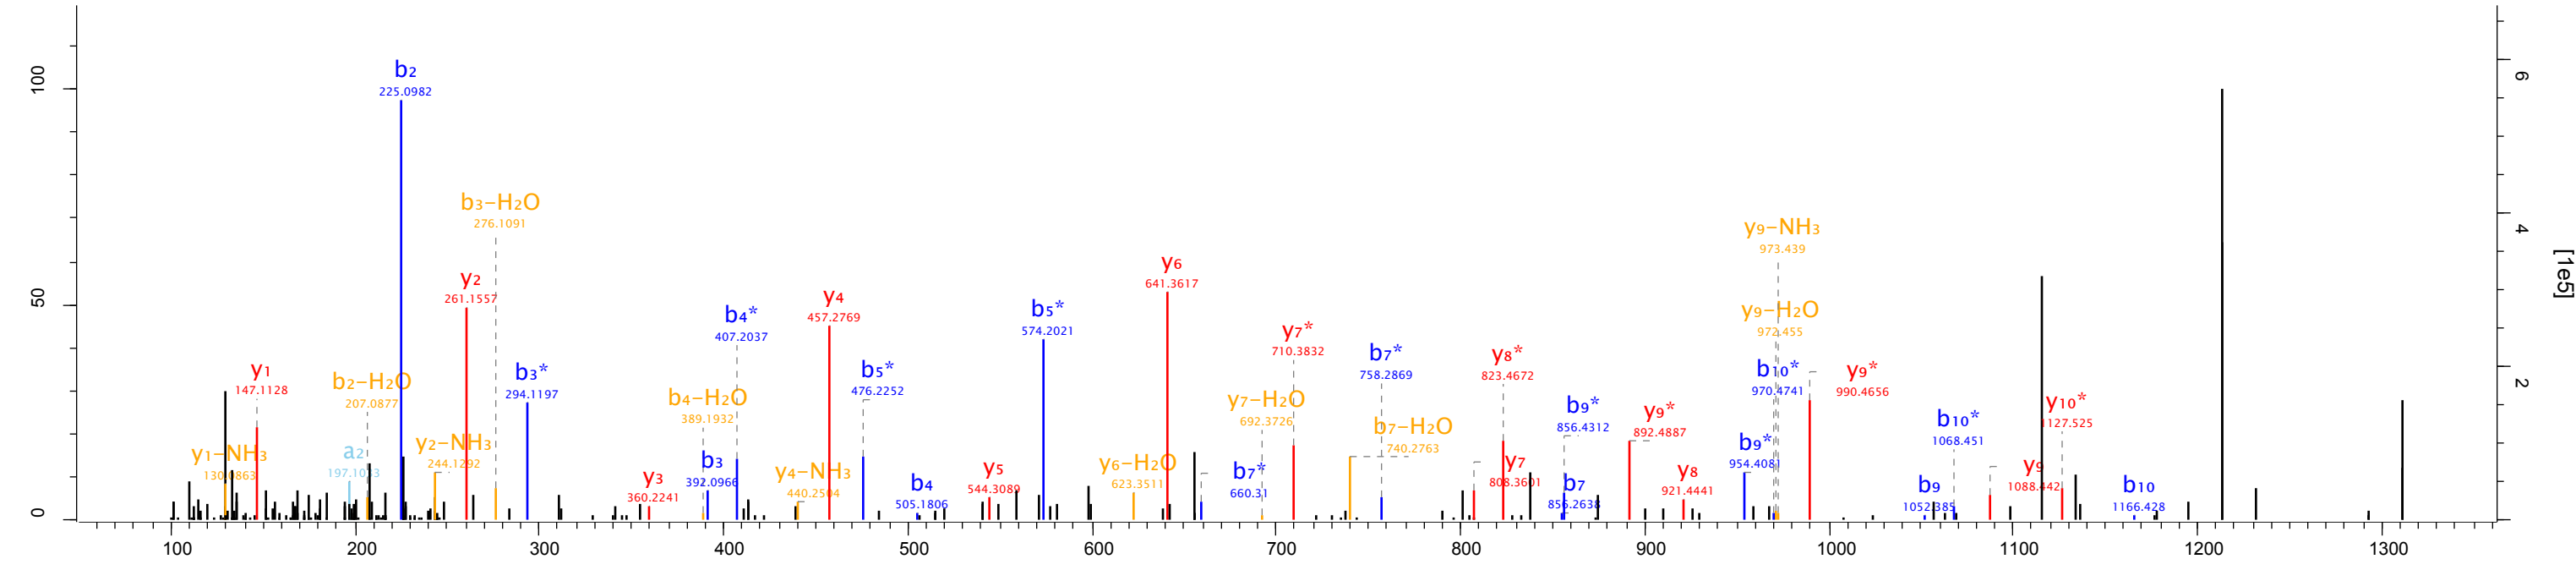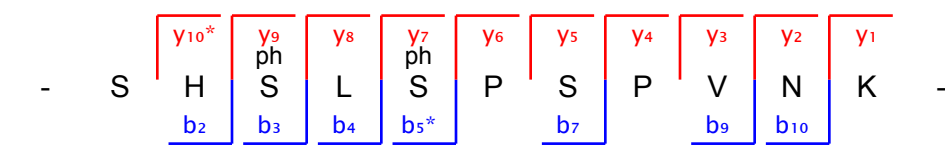

Raw file: 20150814\_A375SR\_Phospho\_BR2\_03  
 Scan: 6139 Method: FTMS; HCD Score: 244.05 m/z: 728.84 Gene names: PCIF1

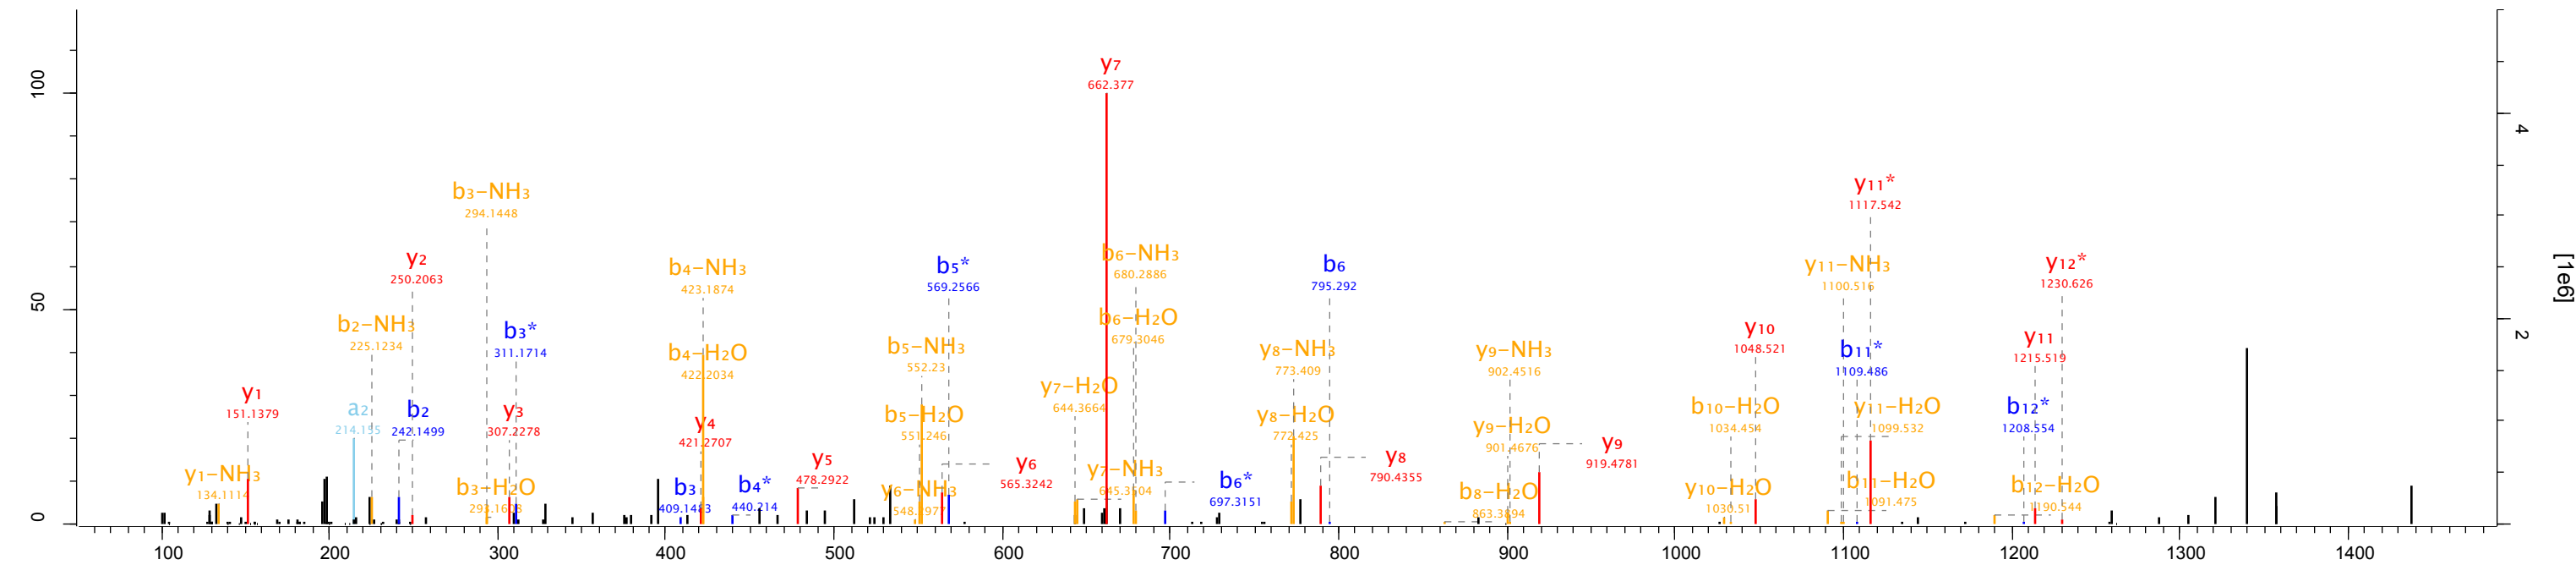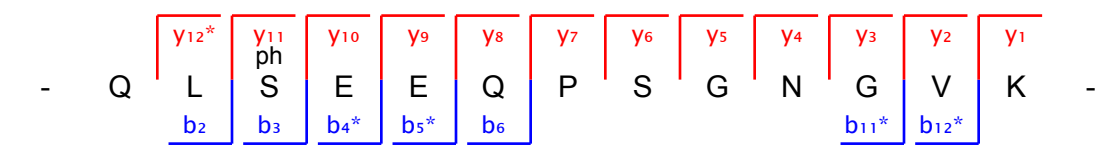

Raw file: 20150814\_A375SR\_Phospho\_BR2\_03  
 Scan: 6289 Method: FTMS; HCD Score: 111.94 m/z: 497.24 Gene names: LIN52

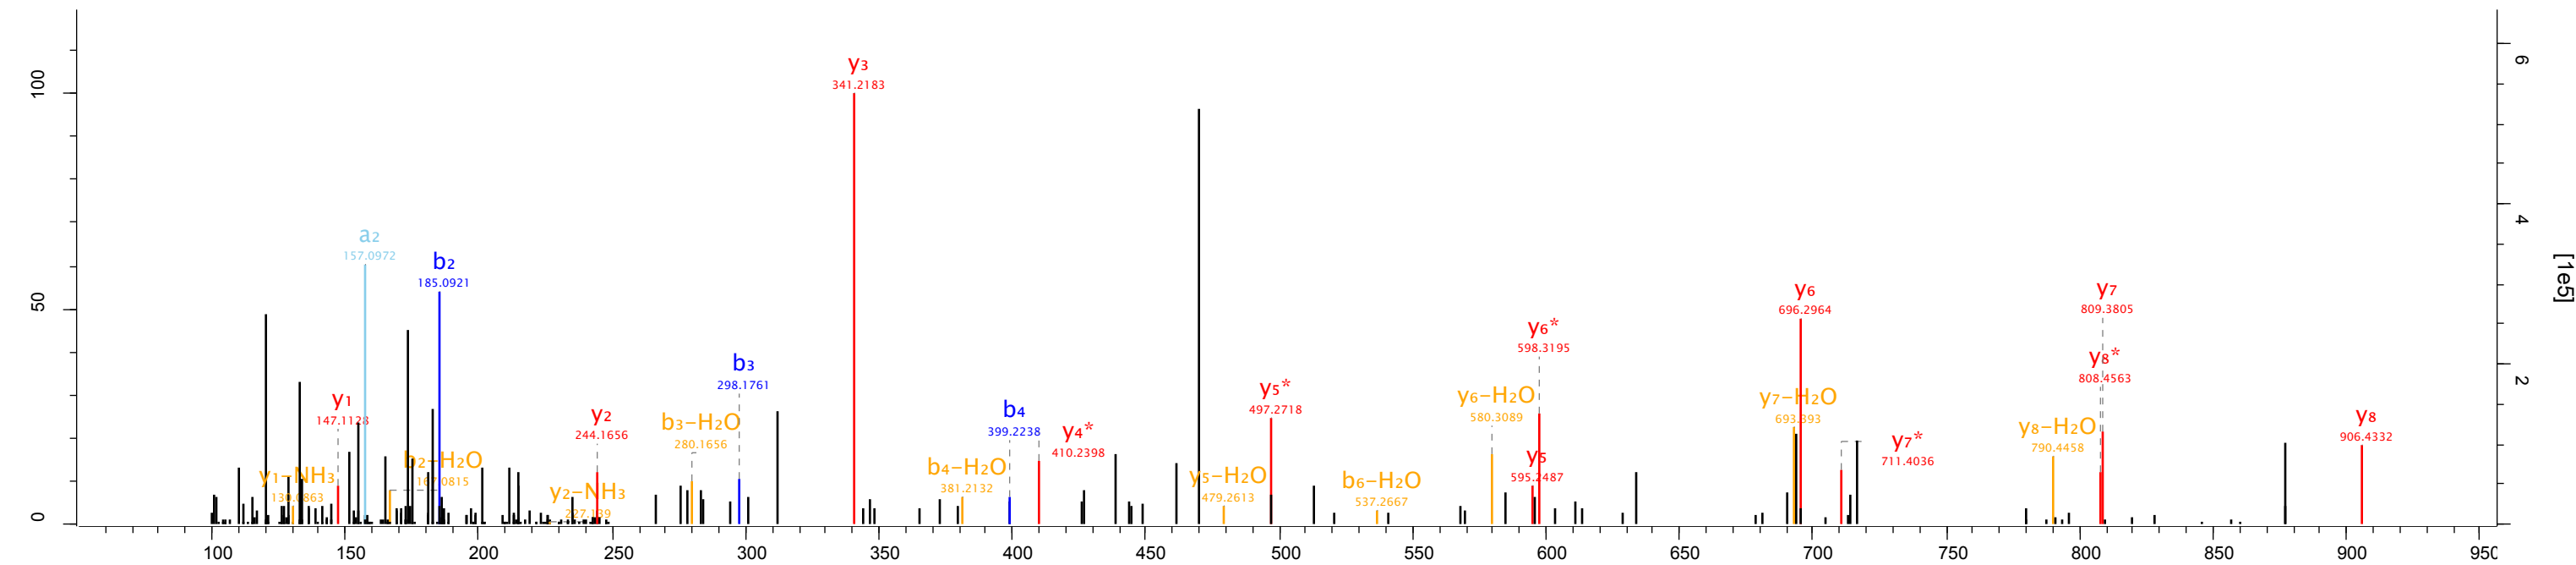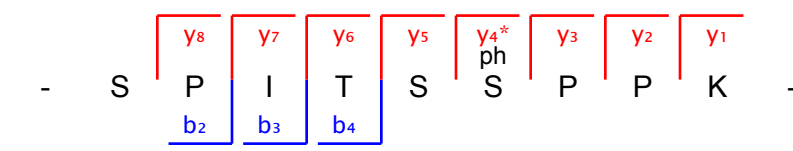

Raw file  
20150814\_A375SR\_Phospho\_BR2\_03

Scan 6359 Method FTMS; HCD Score 139.63 m/z 915.9 Gene names TCF20

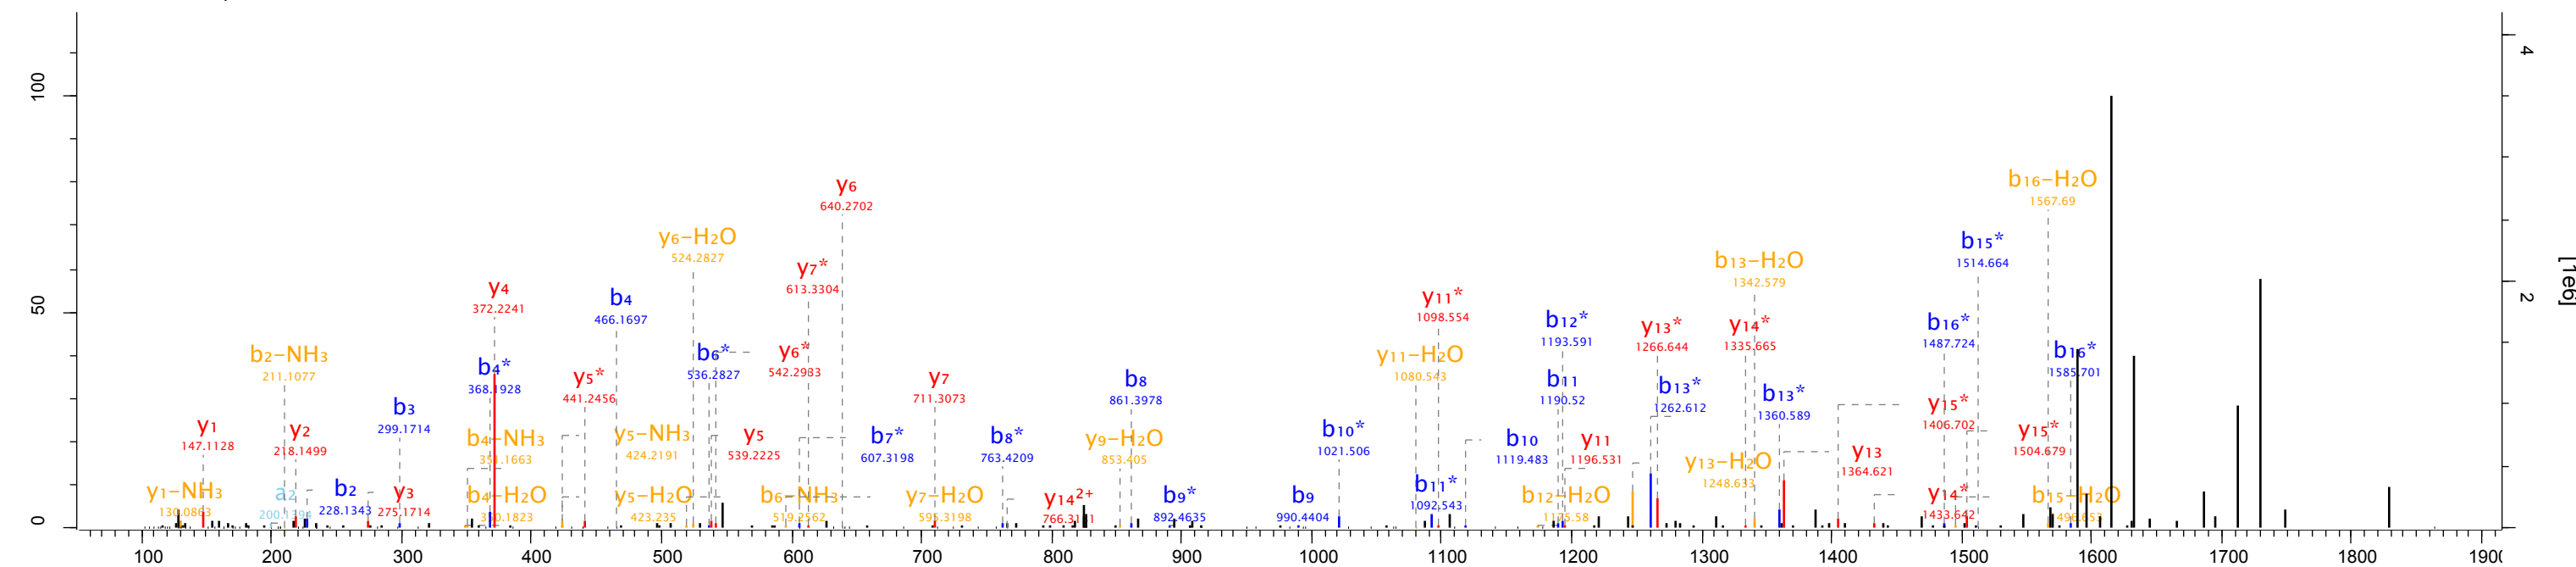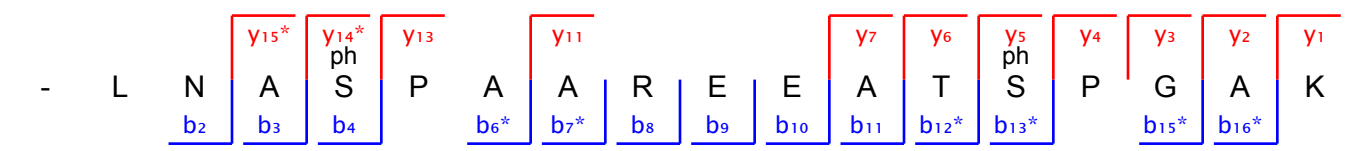

Raw file: 20150814\_A375SR\_Phospho\_BR2\_03  
 Scan: 6679 Method: FTMS; HCD Score: 90.58 m/z: 742.31 Gene names: KAT5

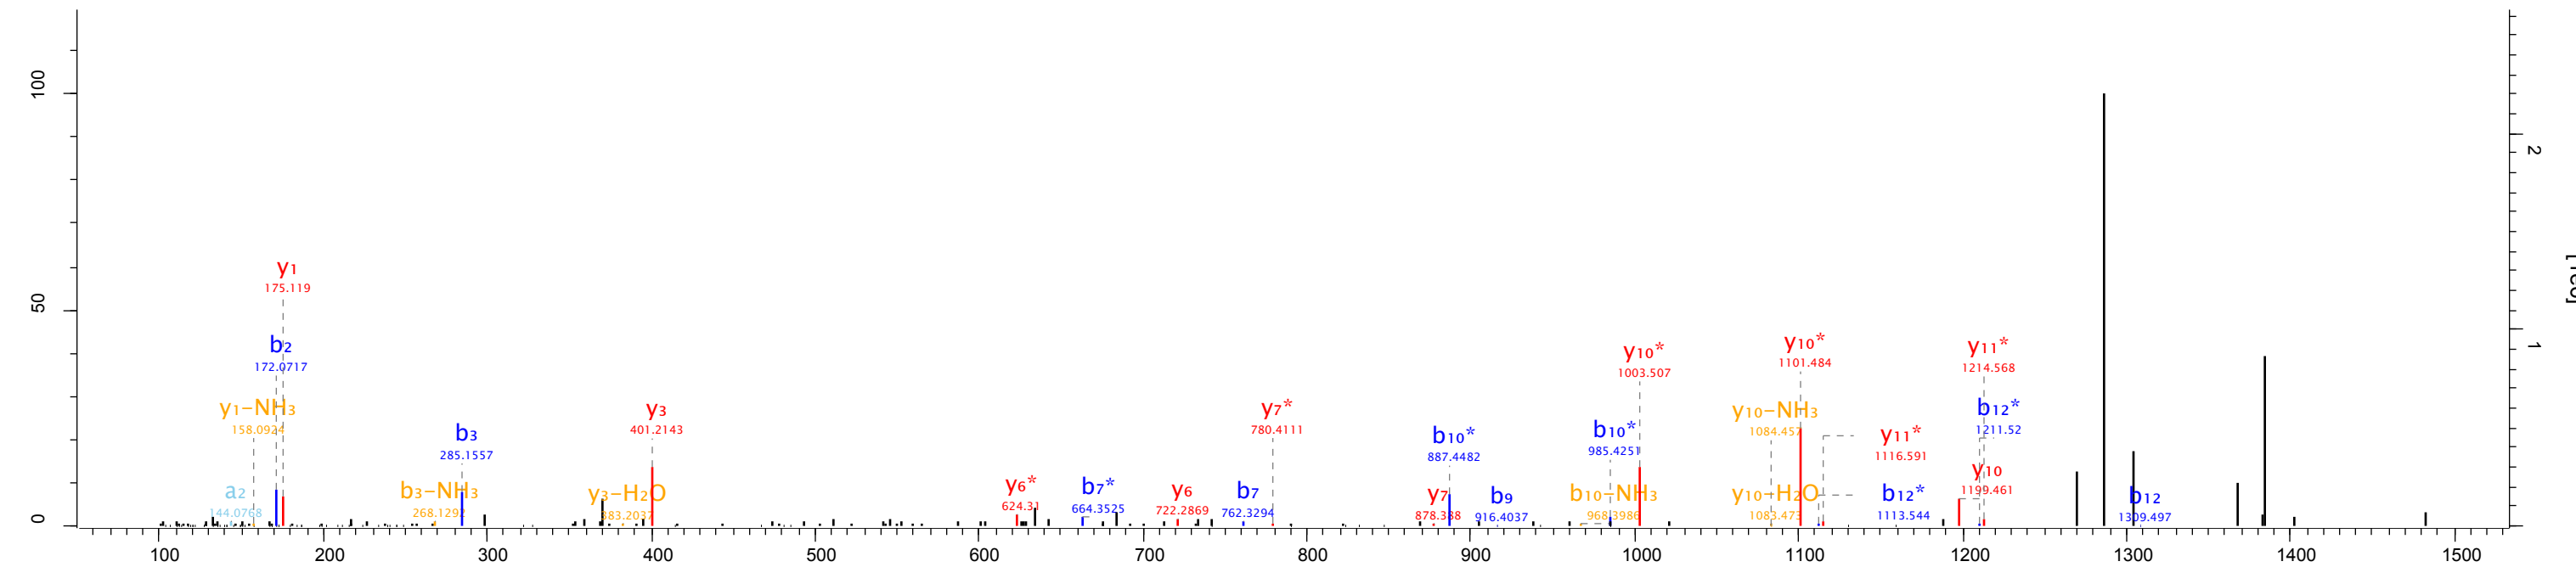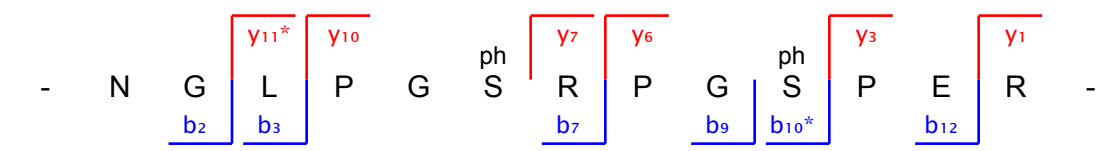

Raw file 20150814\_A375SR\_Phospho\_BR2\_03  
 Scan 6889 Method FTMS; HCD Score 52.17 m/z 706.81 Gene names CROCC

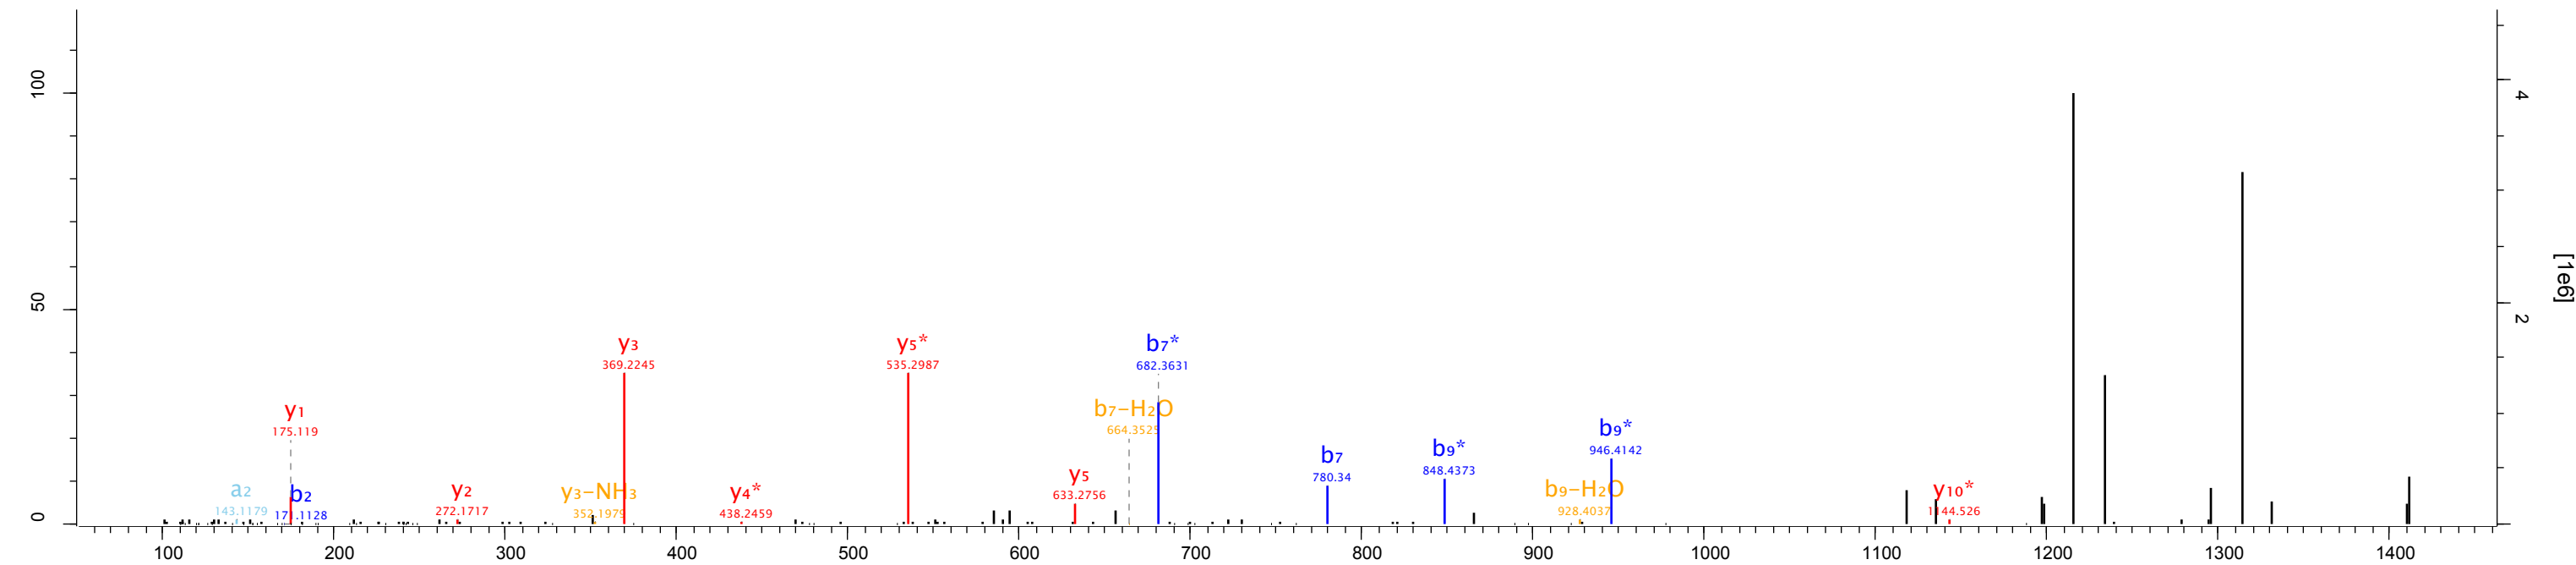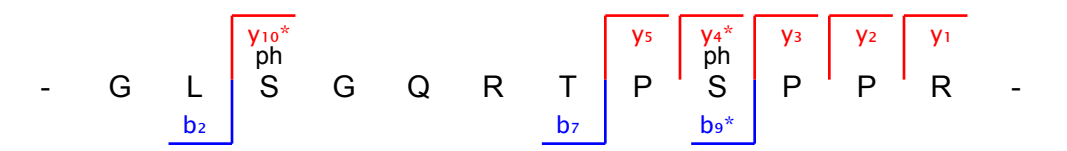

Raw file: 20150814\_A375SR\_Phospho\_BR2\_03  
 Scan: 7069 Method: FTMS; HCD Score: 112.13 m/z: 522.68 Gene names: SRSF7

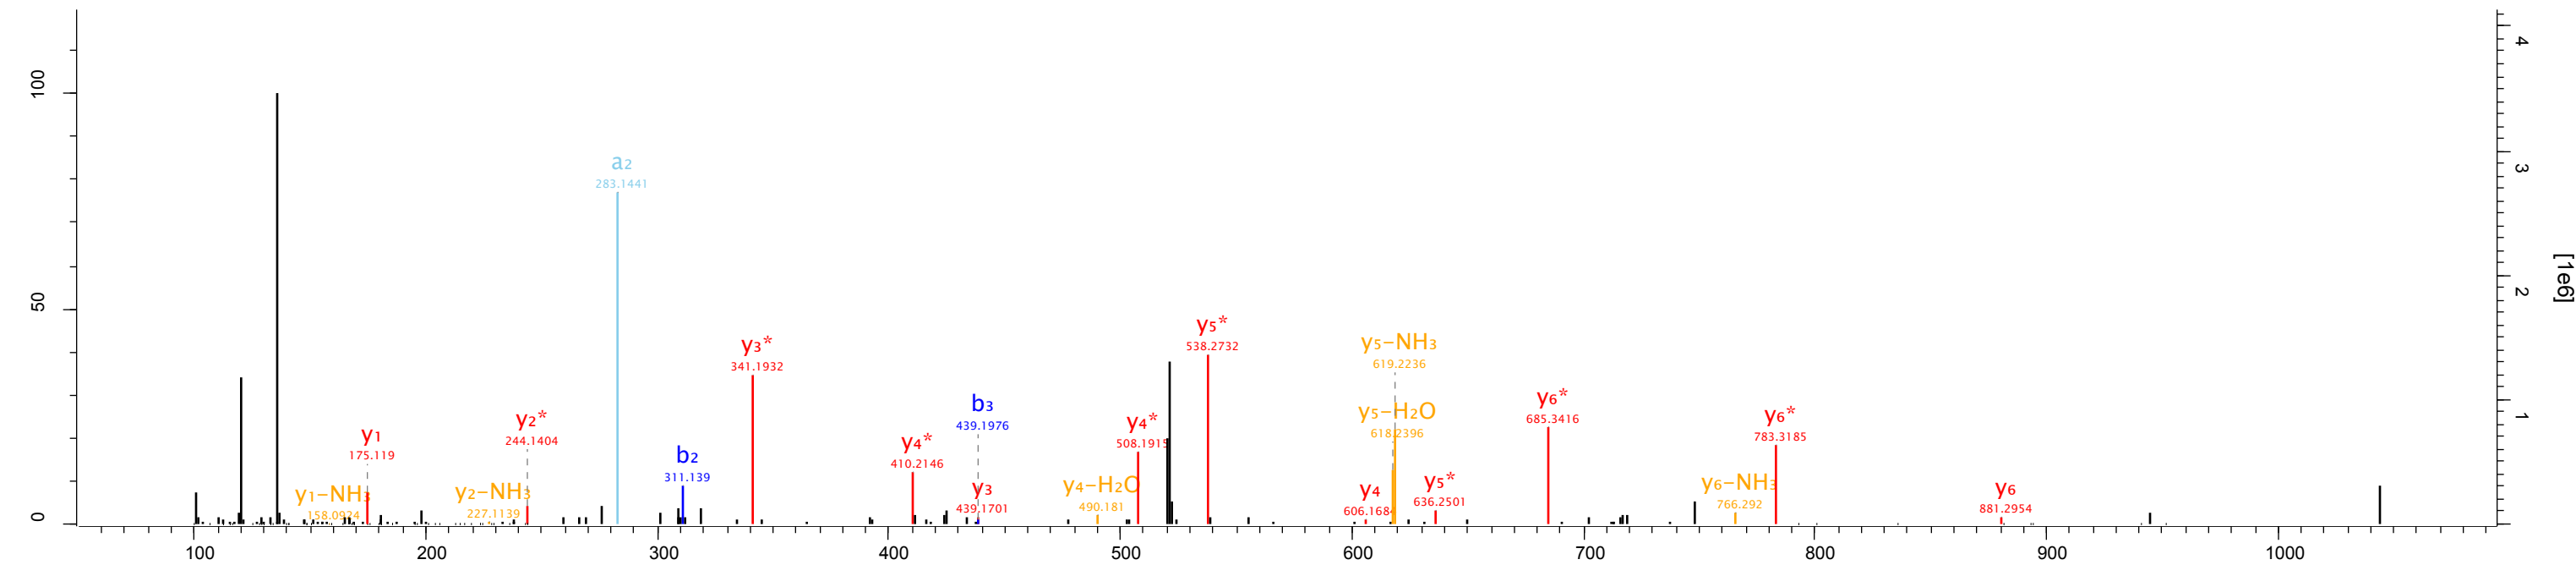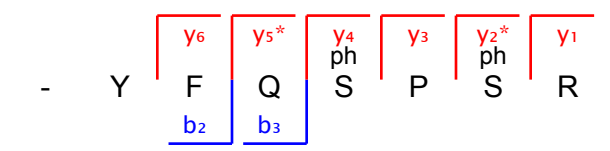

Raw file: 20150814\_A375SR\_Phospho\_BR2\_03  
 Scan: 7159 Method: FTMS; HCD Score: 118.41 m/z: 418.21 Gene names: EIF4G3

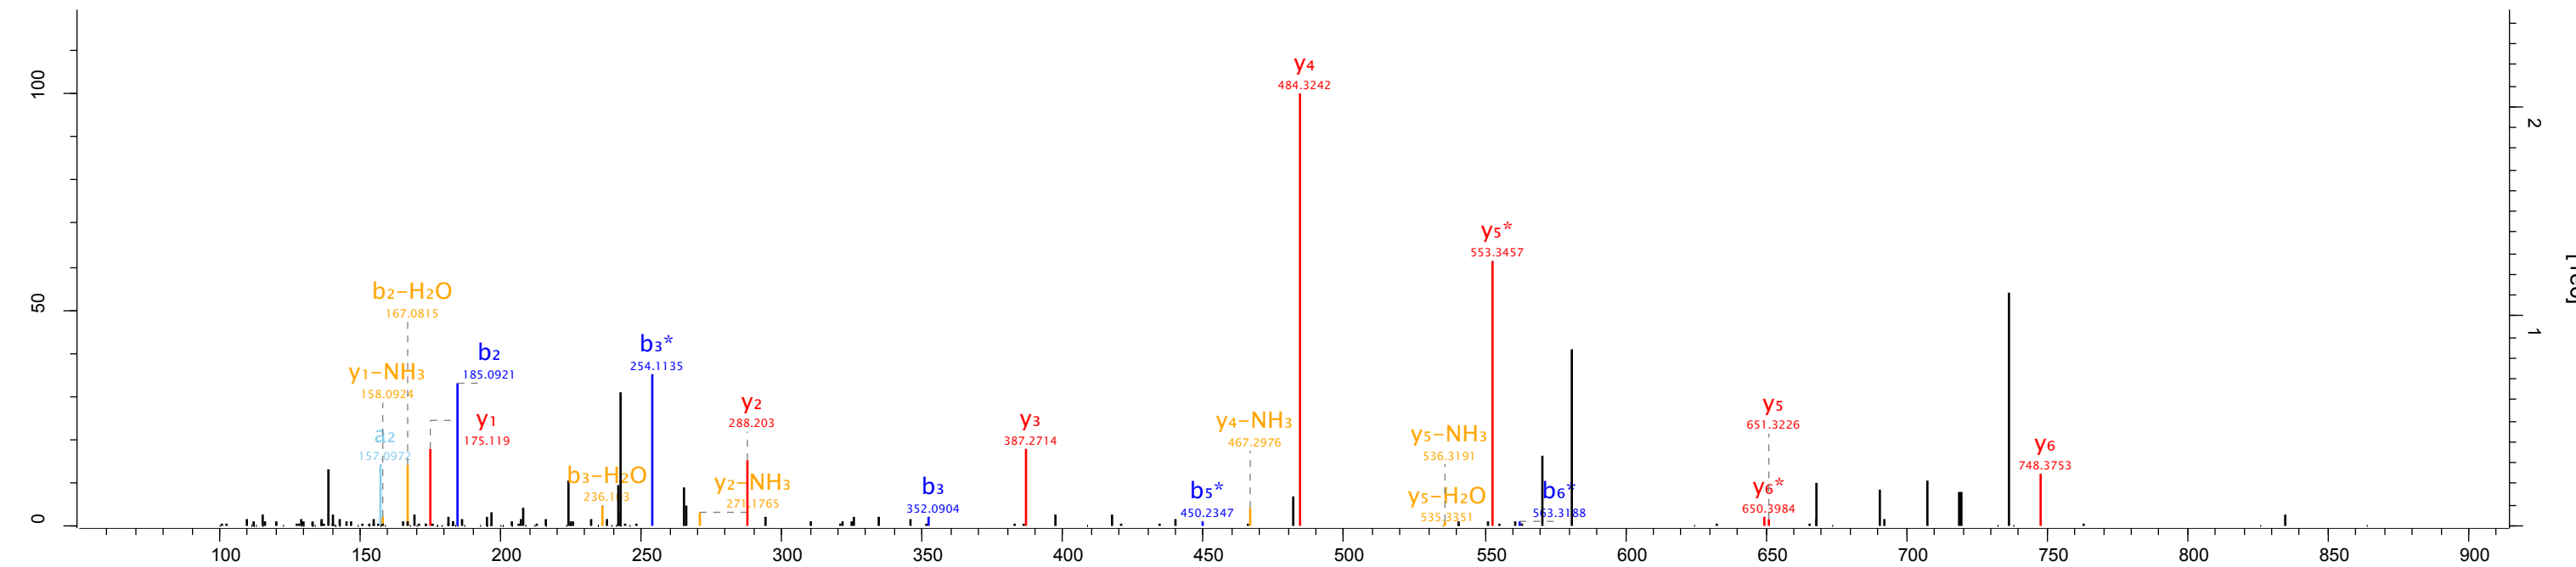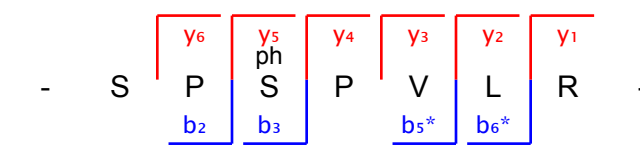



Raw file: 20150814\_A375SR\_Phospho\_BR2\_03  
 Scan: 7229 Method: FTMS; HCD Score: 103.14 m/z: 640.29 Gene names: PDE1C

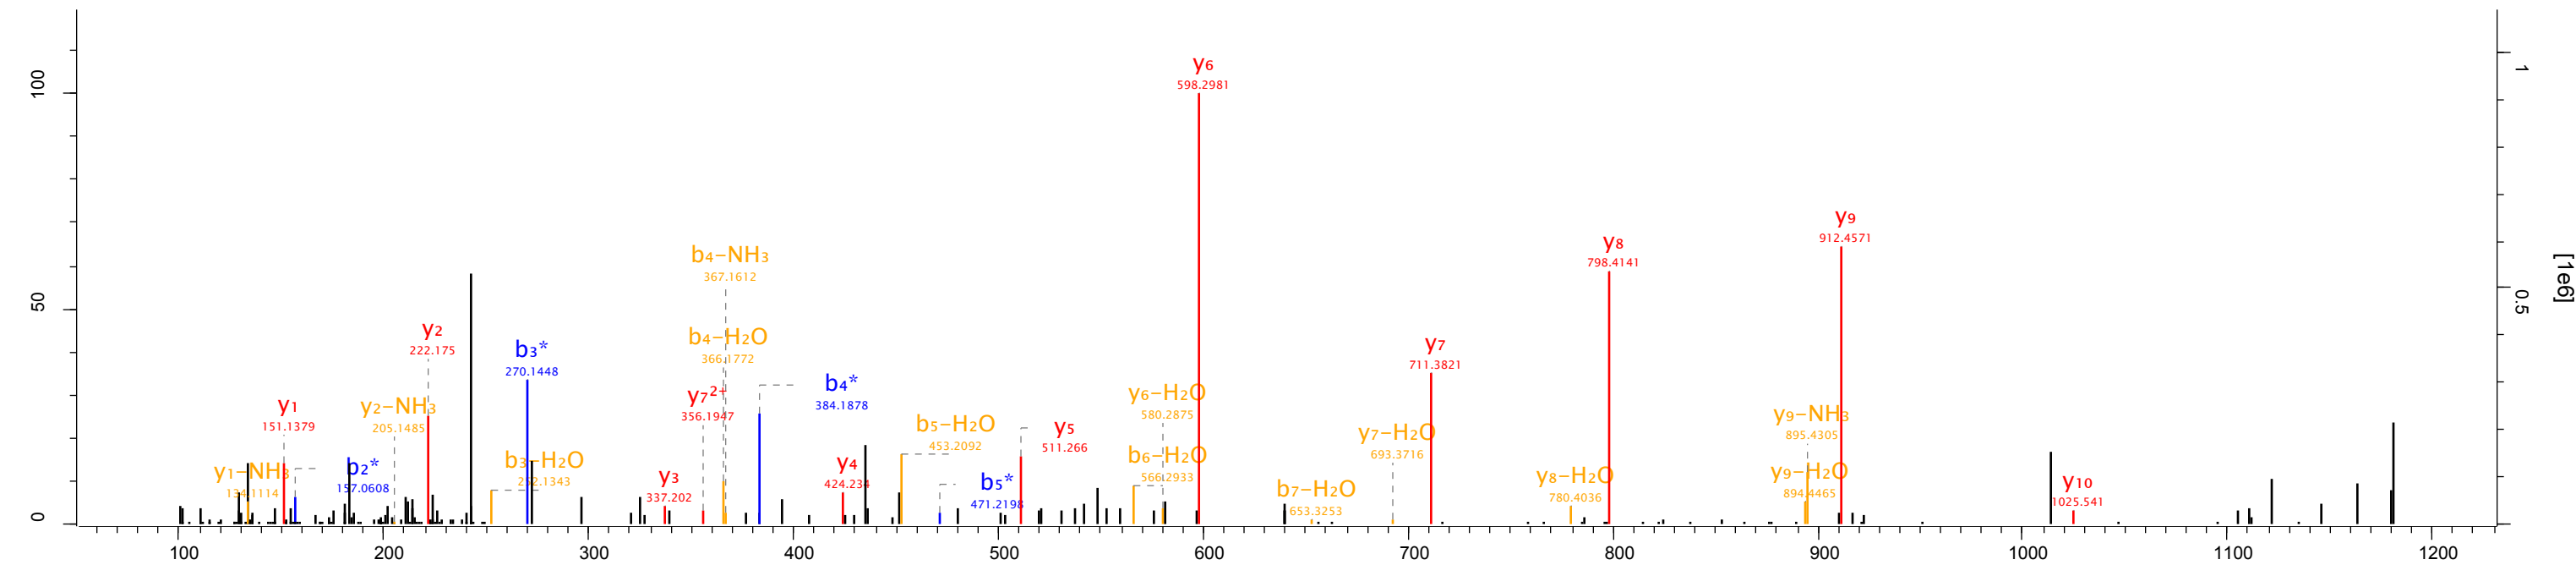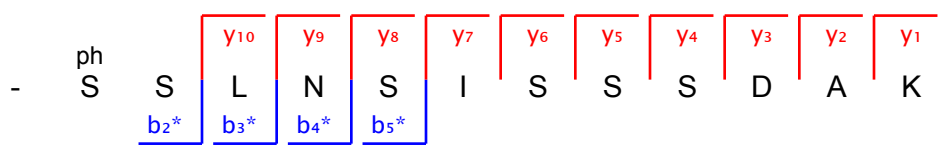

Raw file: 20150814\_A375SR\_Phospho\_BR2\_03  
 Scan: 7419 Method: FTMS; HCD Score: 112.82 m/z: 549.26 Gene names: ACIN1

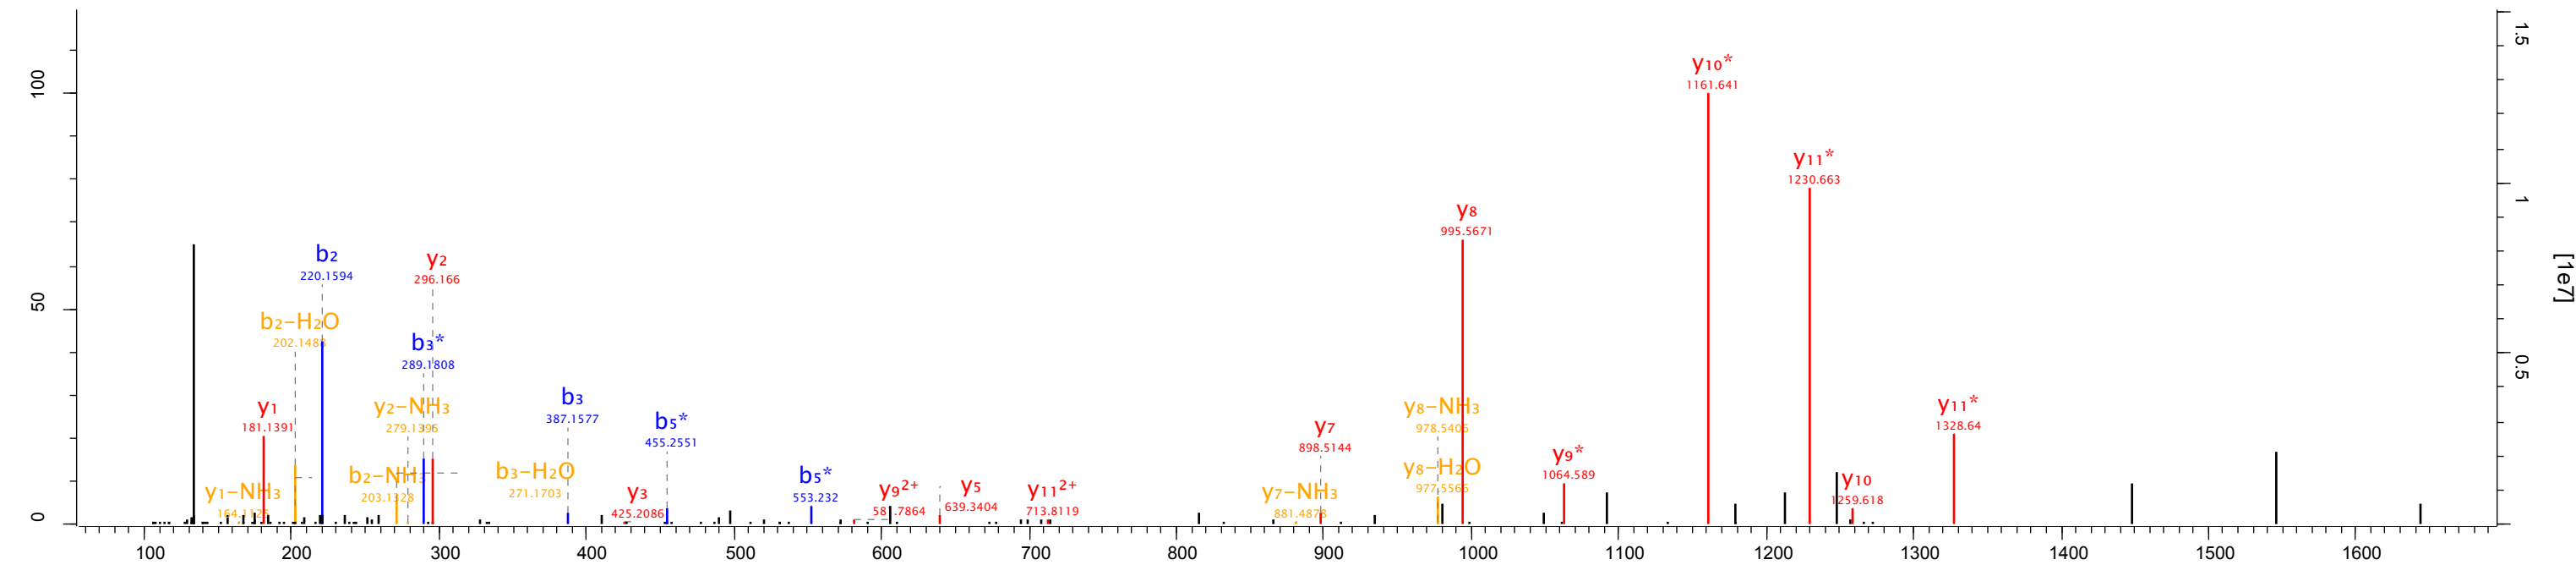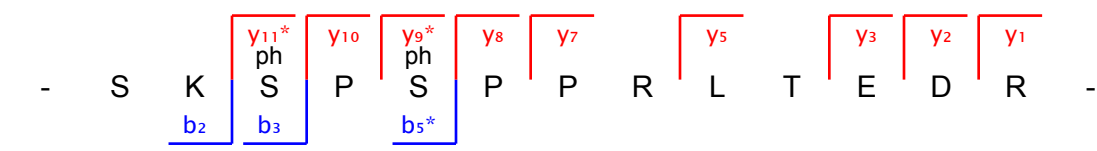

Raw file 20150814\_A375SR\_Phospho\_BR2\_03 Scan 7509 Method FTMS; HCD Score 80.54 m/z 839.34 Gene names NUDT5

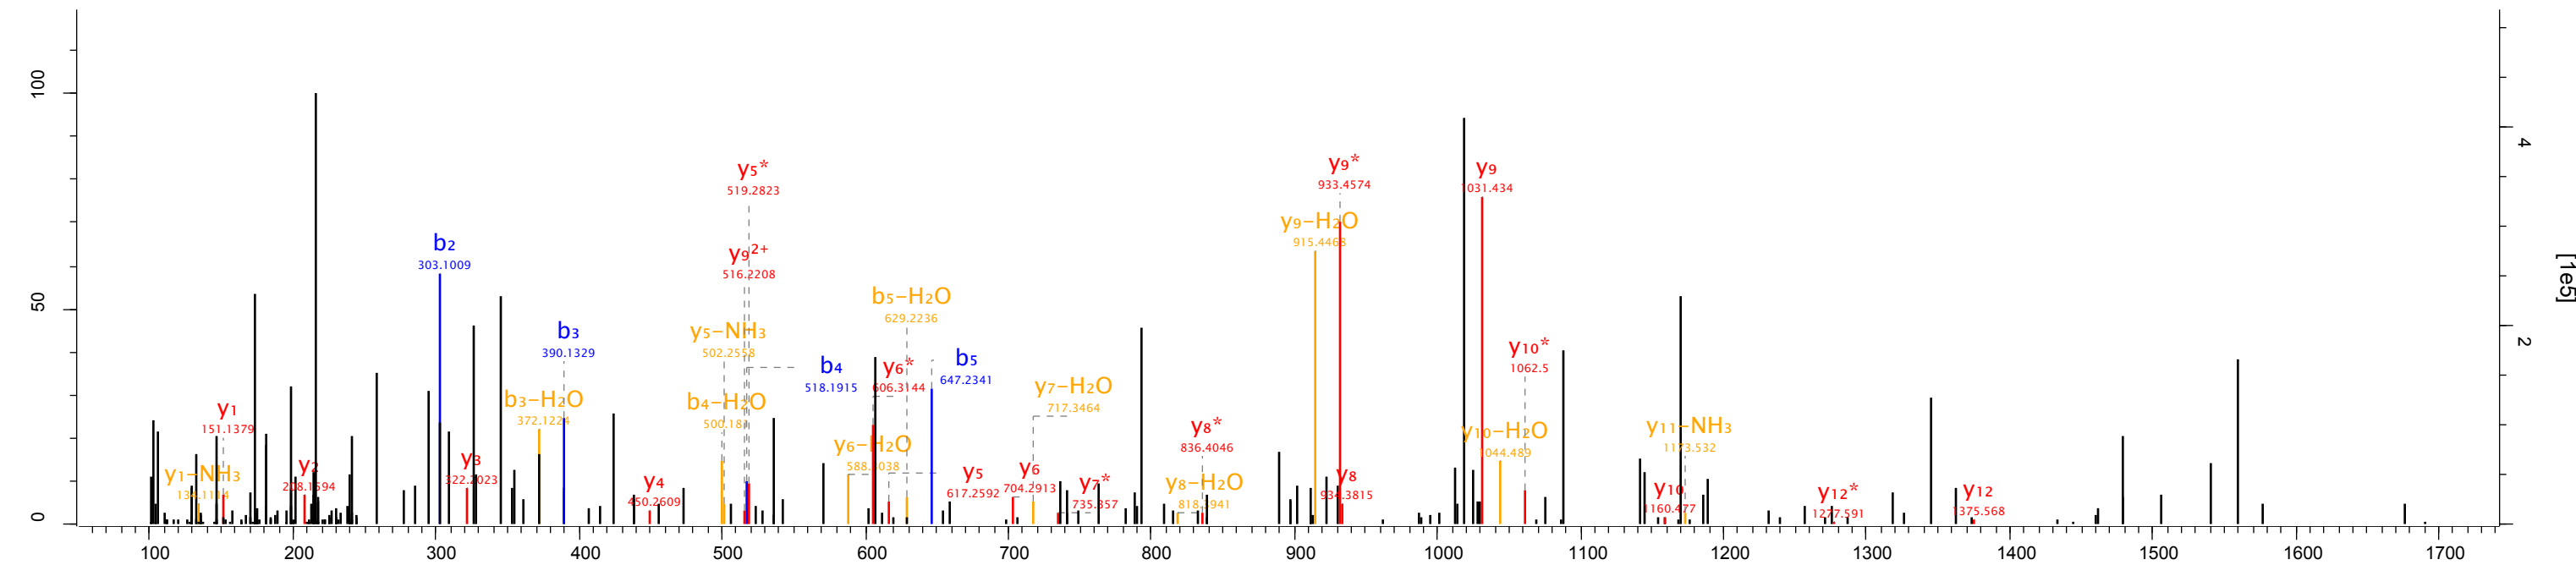

ac - M E S Q E P T E S S Q N G K -

b<sub>2</sub>
b<sub>3</sub>
b<sub>4</sub>
b<sub>5</sub>
y<sub>12</sub>
y<sub>10</sub>
y<sub>9</sub>
y<sub>8</sub>
y<sub>7</sub>\*
y<sub>6</sub>
y<sub>5</sub><sup>ph</sup>
y<sub>4</sub>
y<sub>3</sub>
y<sub>2</sub>
y<sub>1</sub>

Raw file: 20150814\_A375SR\_Phospho\_BR2\_03  
 Scan: 7889 Method: FTMS; HCD Score: 54.15 m/z: 829.36 Gene names: HN1

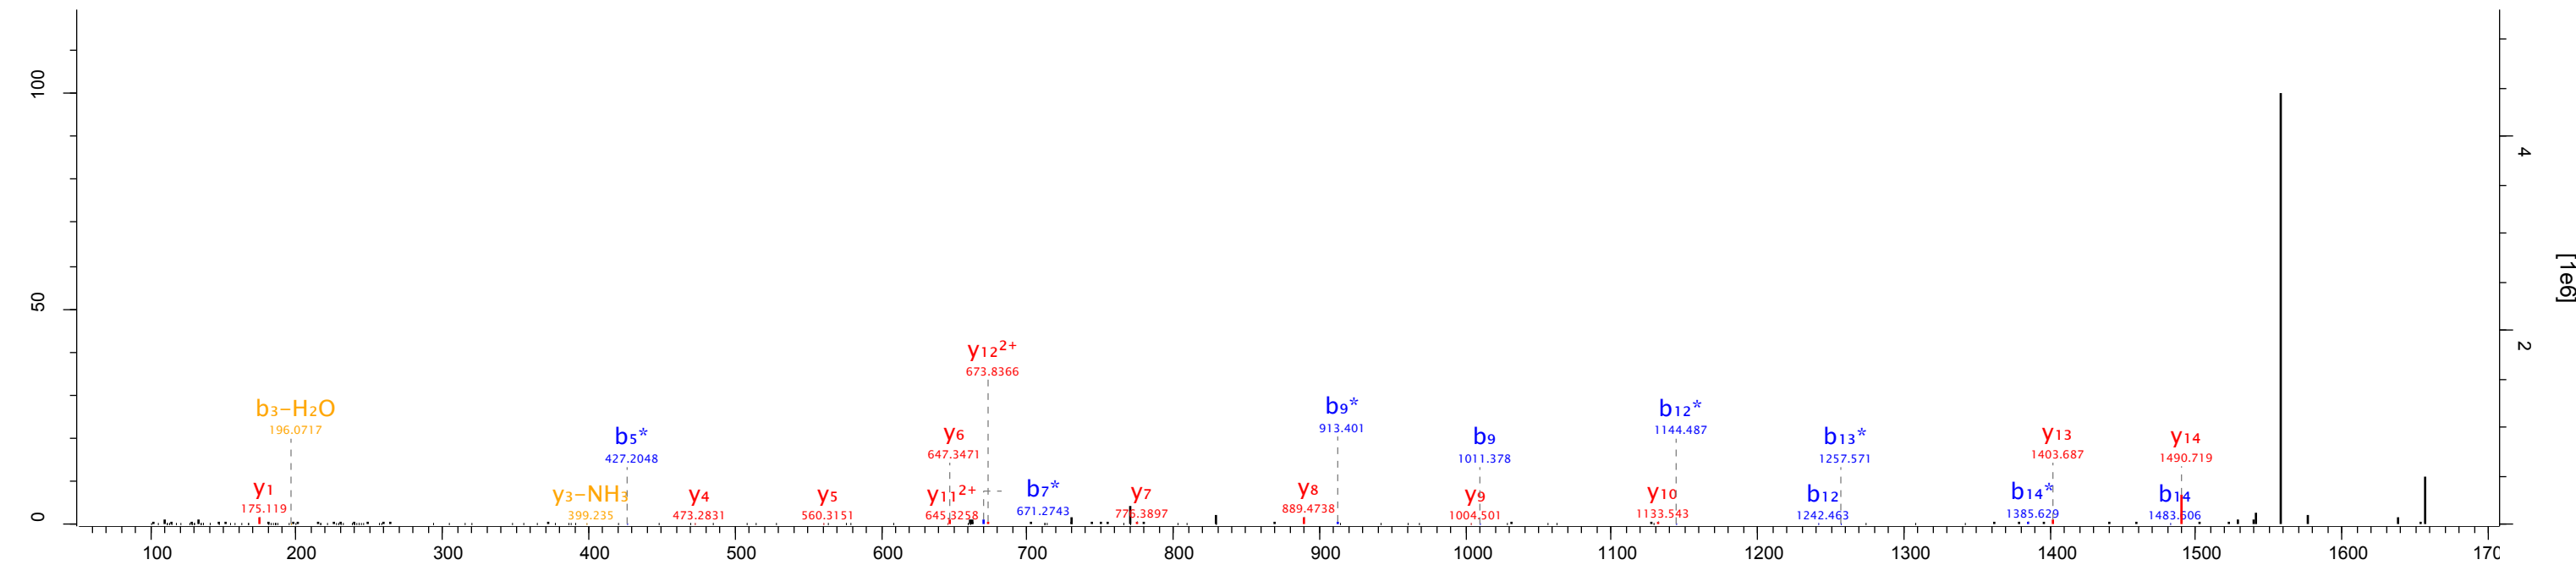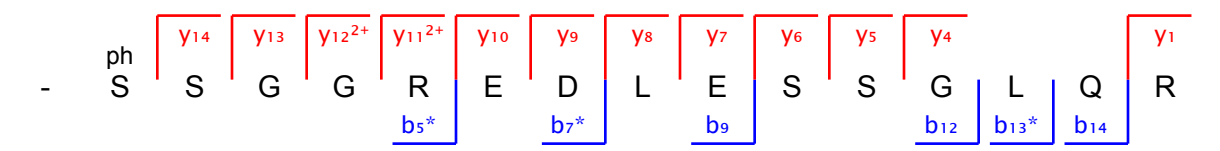

Raw file: 20150814\_A375SR\_Phospho\_BR2\_03  
 Scan: 7899 Method: FTMS; HCD Score: 51.47 m/z: 617.62 Gene names: SFSWAP

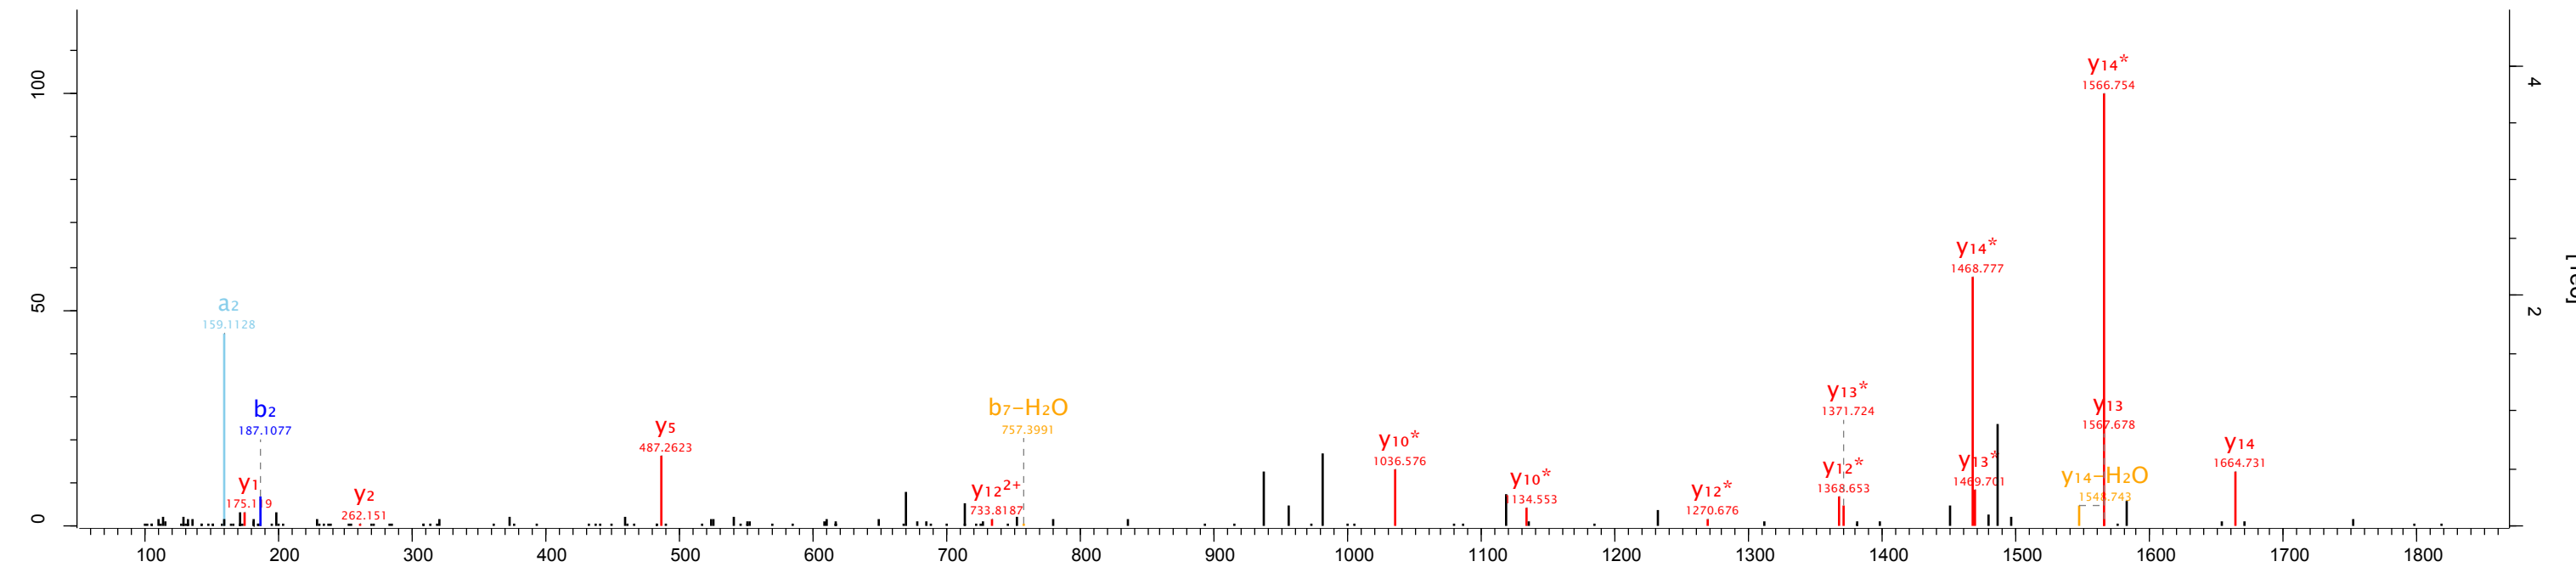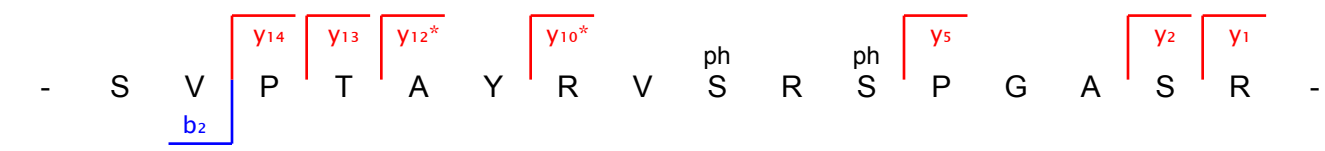

Raw file: 20150814\_A375SR\_Phospho\_BR2\_03  
 Scan: 8159 Method: FTMS; HCD Score: 135.23 m/z: 657.32 Gene names: AKAP10

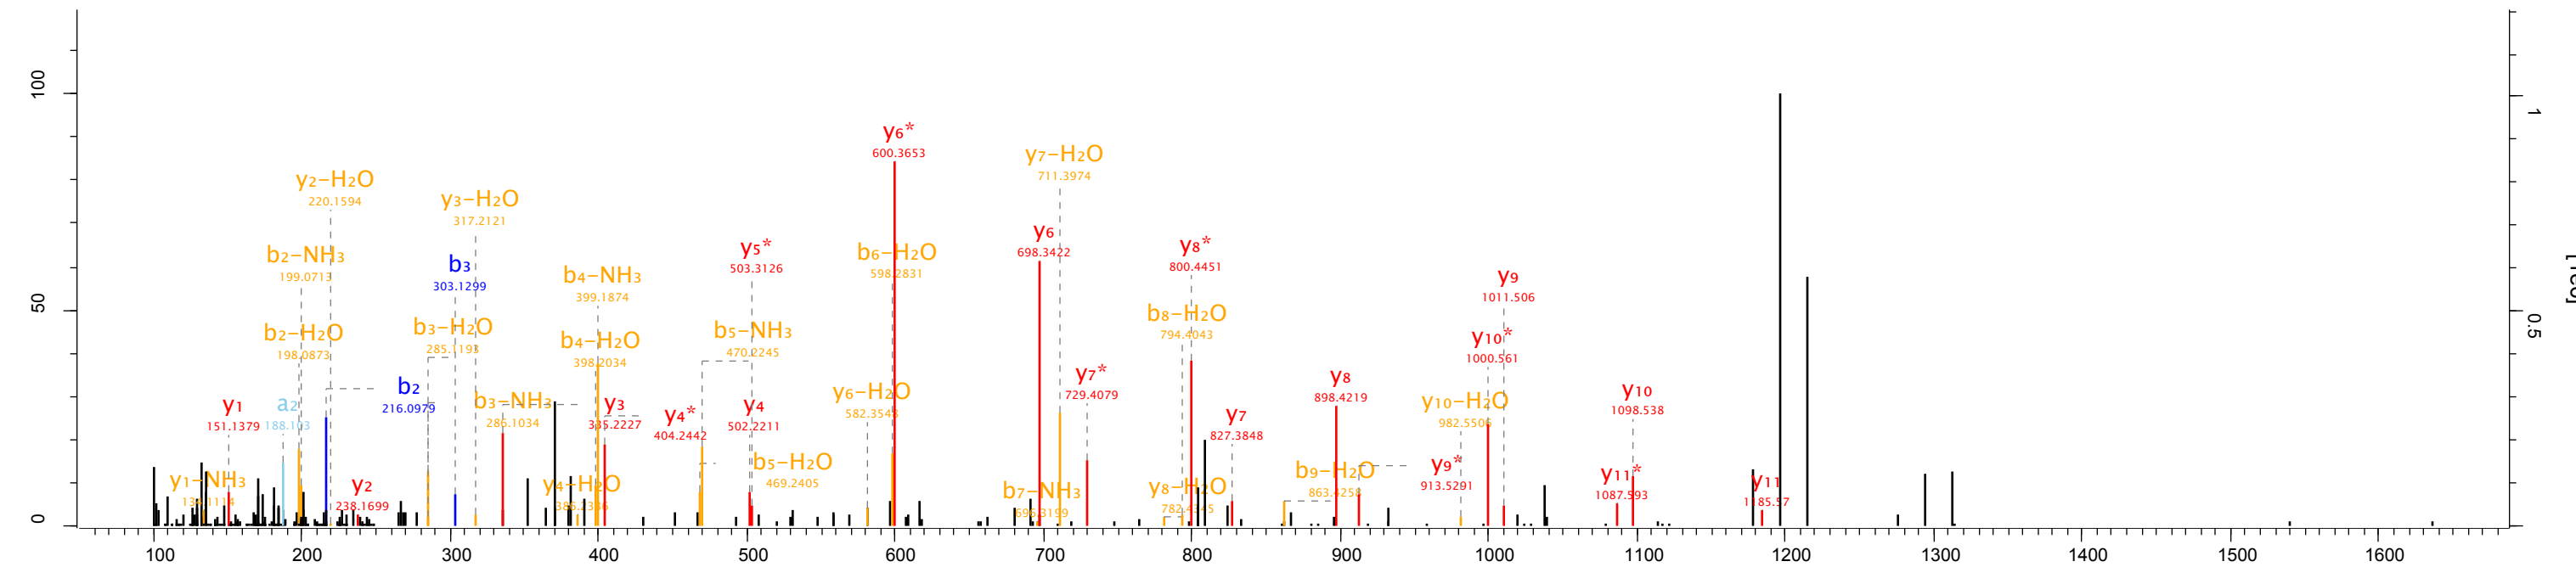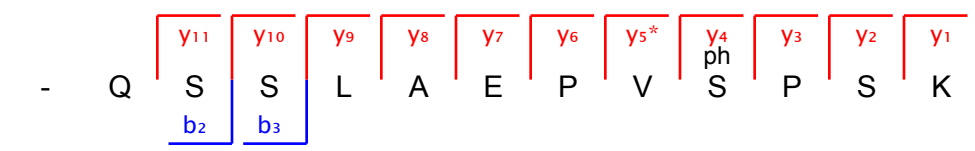

Raw file: 20150814\_A375SR\_Phospho\_BR2\_03  
 Scan: 8349 Method: FTMS; HCD Score: 92.97 m/z: 585.78 Gene names: SHROOM2

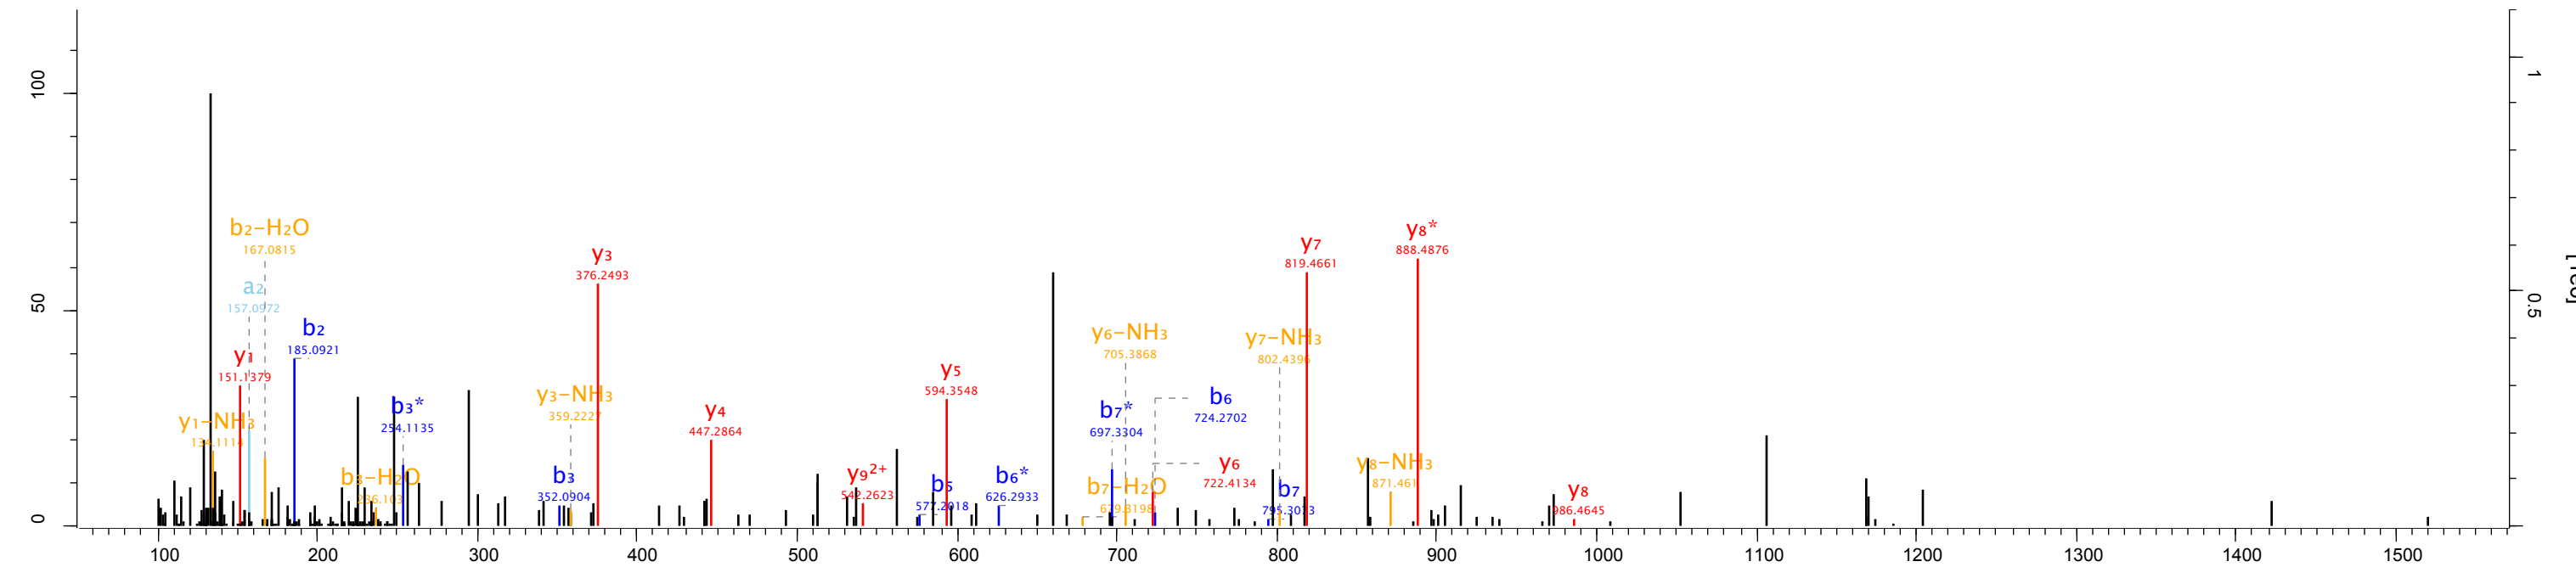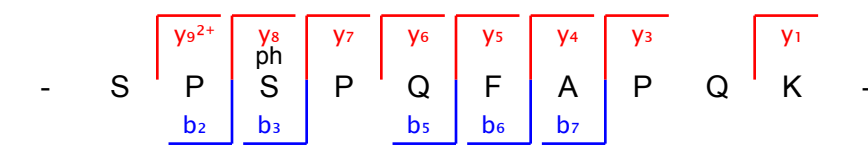

Raw file: 20150814\_A375SR\_Phospho\_BR2\_03  
 Scan: 8599 Method: FTMS; HCD Score: 100.02 m/z: 803.86 Gene names: STAU2

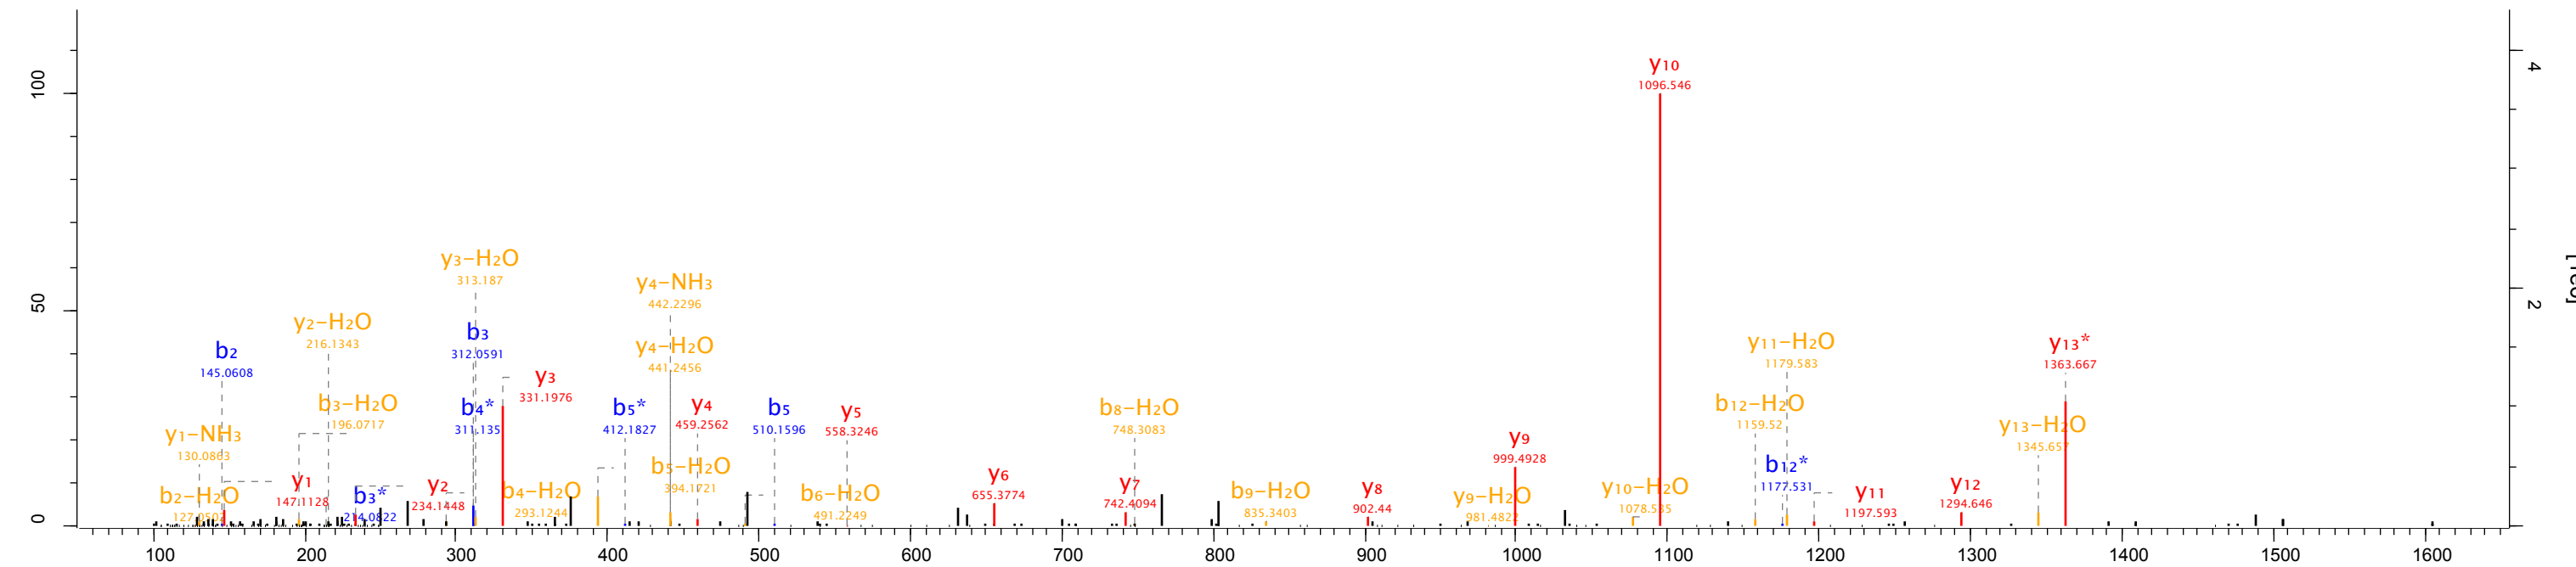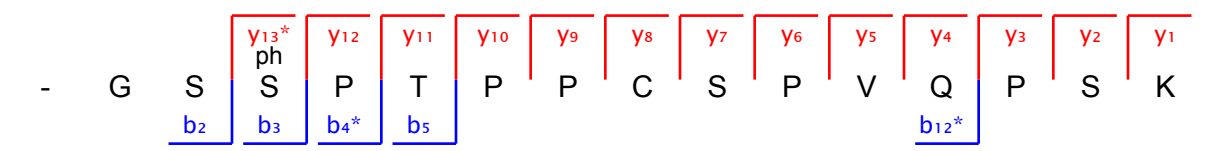



Raw file: 20150814\_A375SR\_Phospho\_BR2\_03  
 Scan: 8619 Method: FTMS; HCD Score: 296.07 m/z: 996.38 Gene names: HNRNPA3

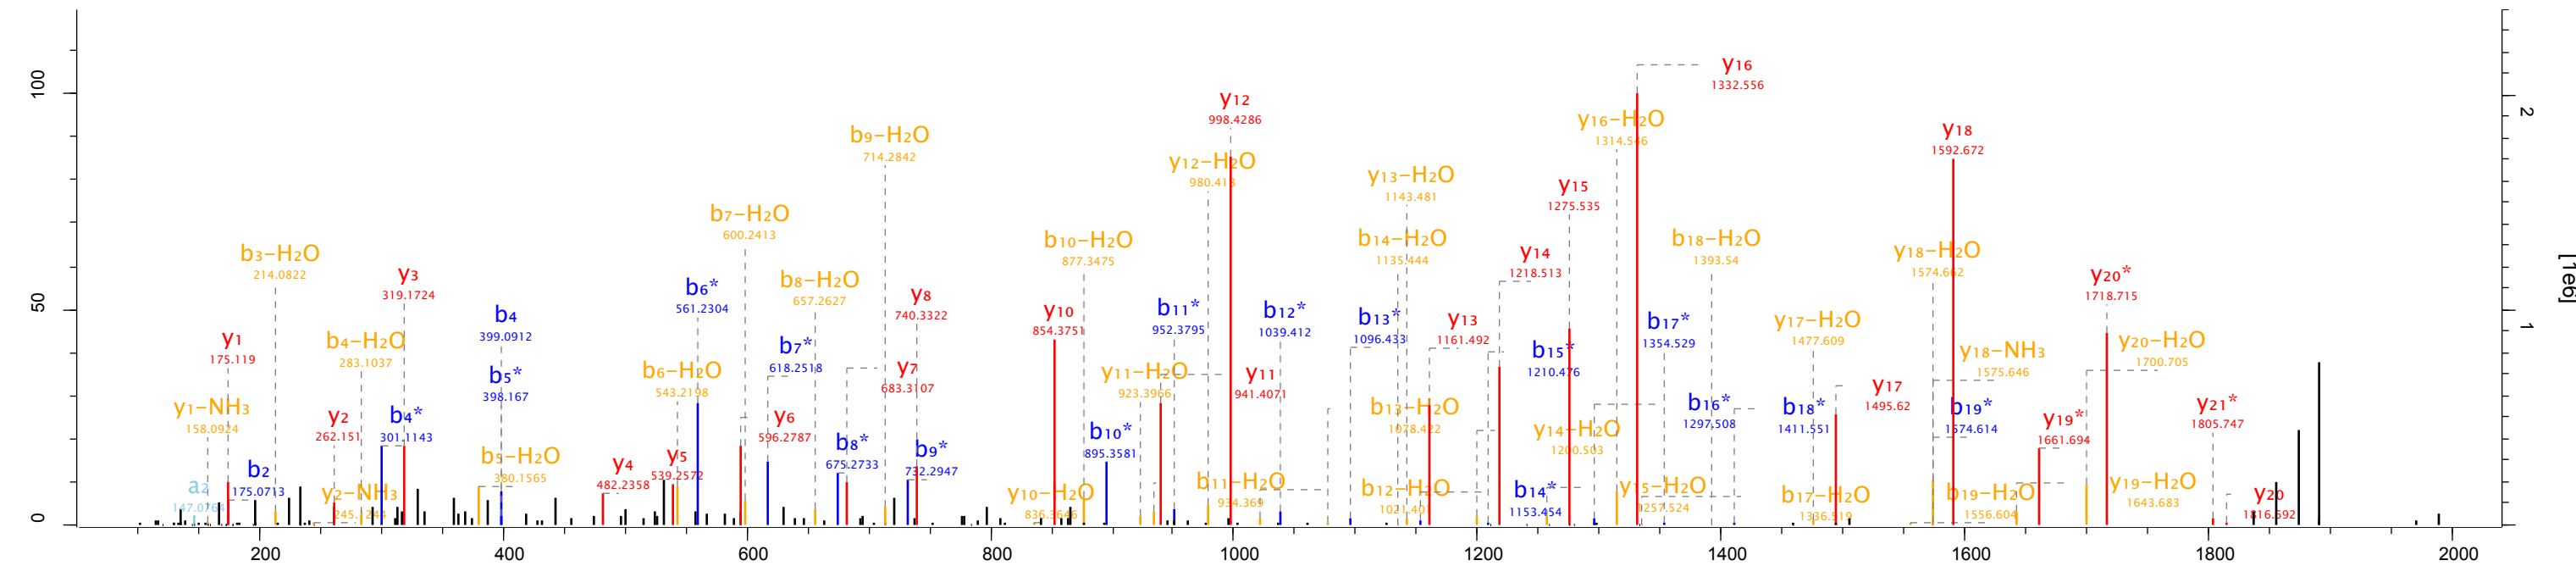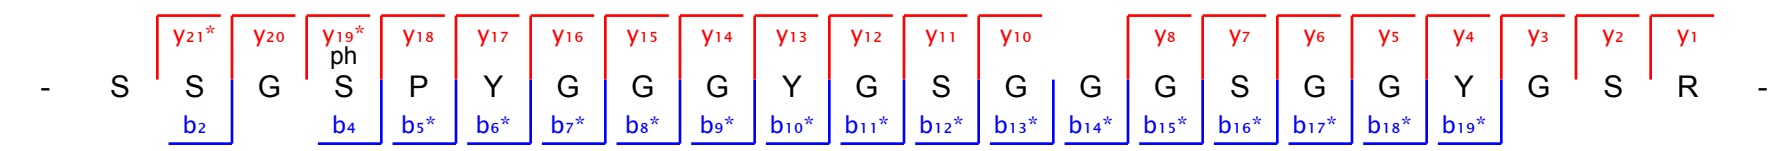

Raw file: 20150814\_A375SR\_Phospho\_BR2\_03  
 Scan: 9029 Method: FTMS; HCD Score: 325.44 m/z: 1014.93 Gene names: PXN

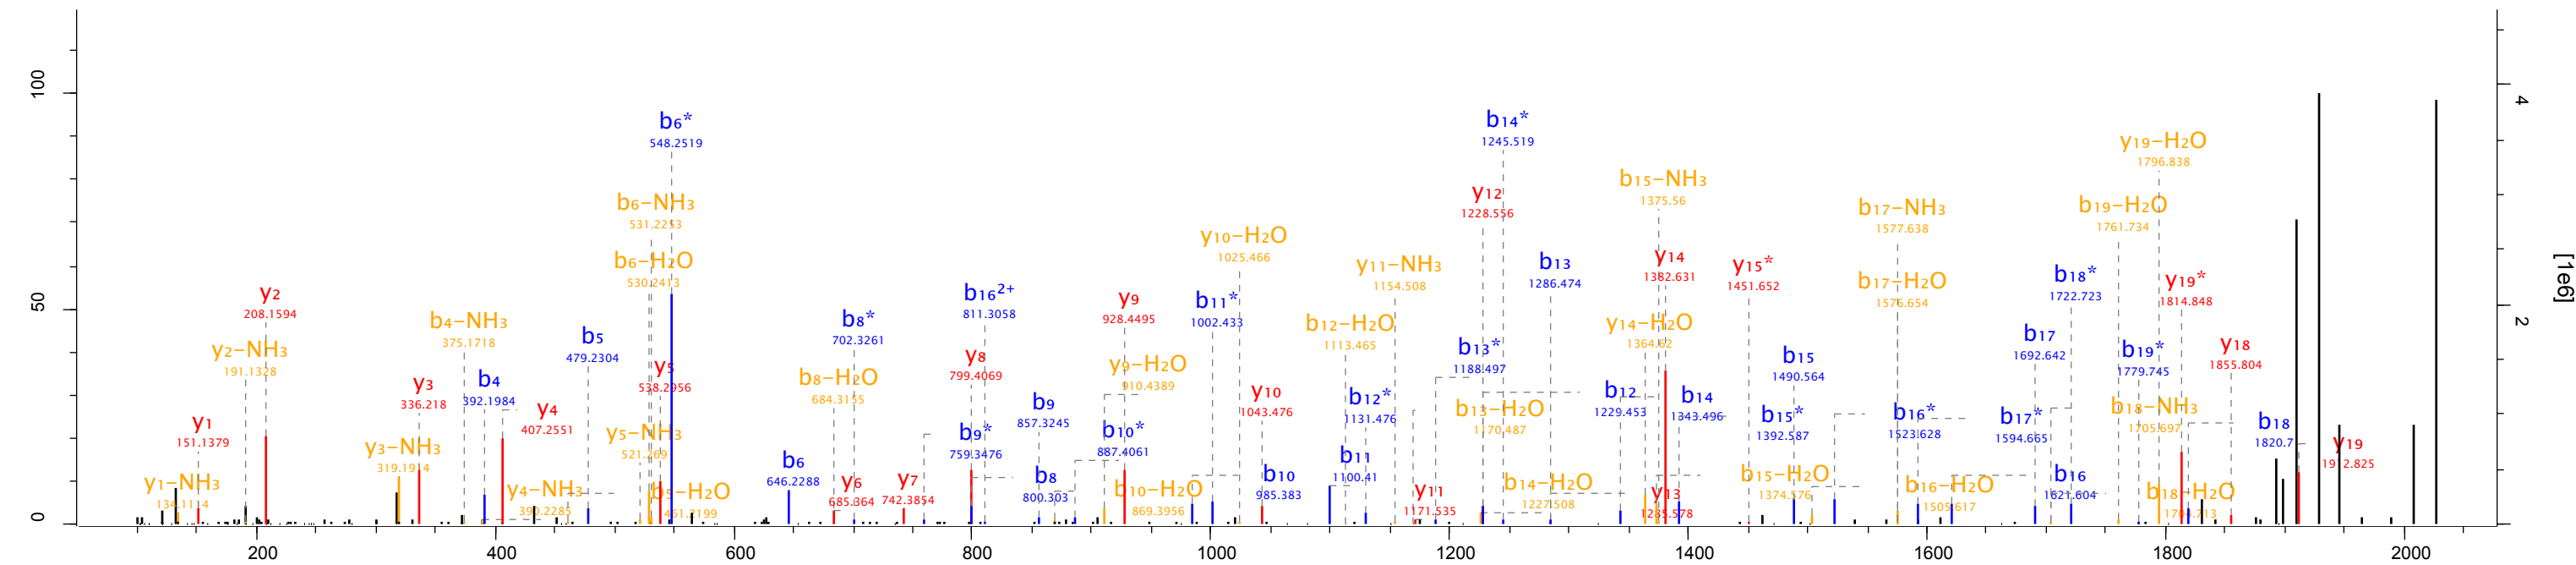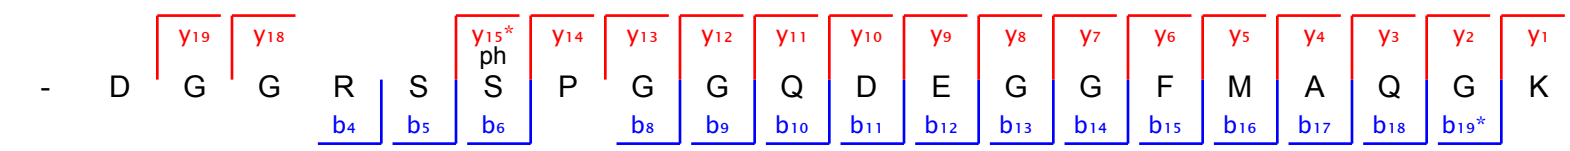

Raw file: 20150814\_A375SR\_Phospho\_BR2\_03  
 Scan: 9149 Method: FTMS; HCD Score: 90.97 m/z: 576.75 Gene names: PARN

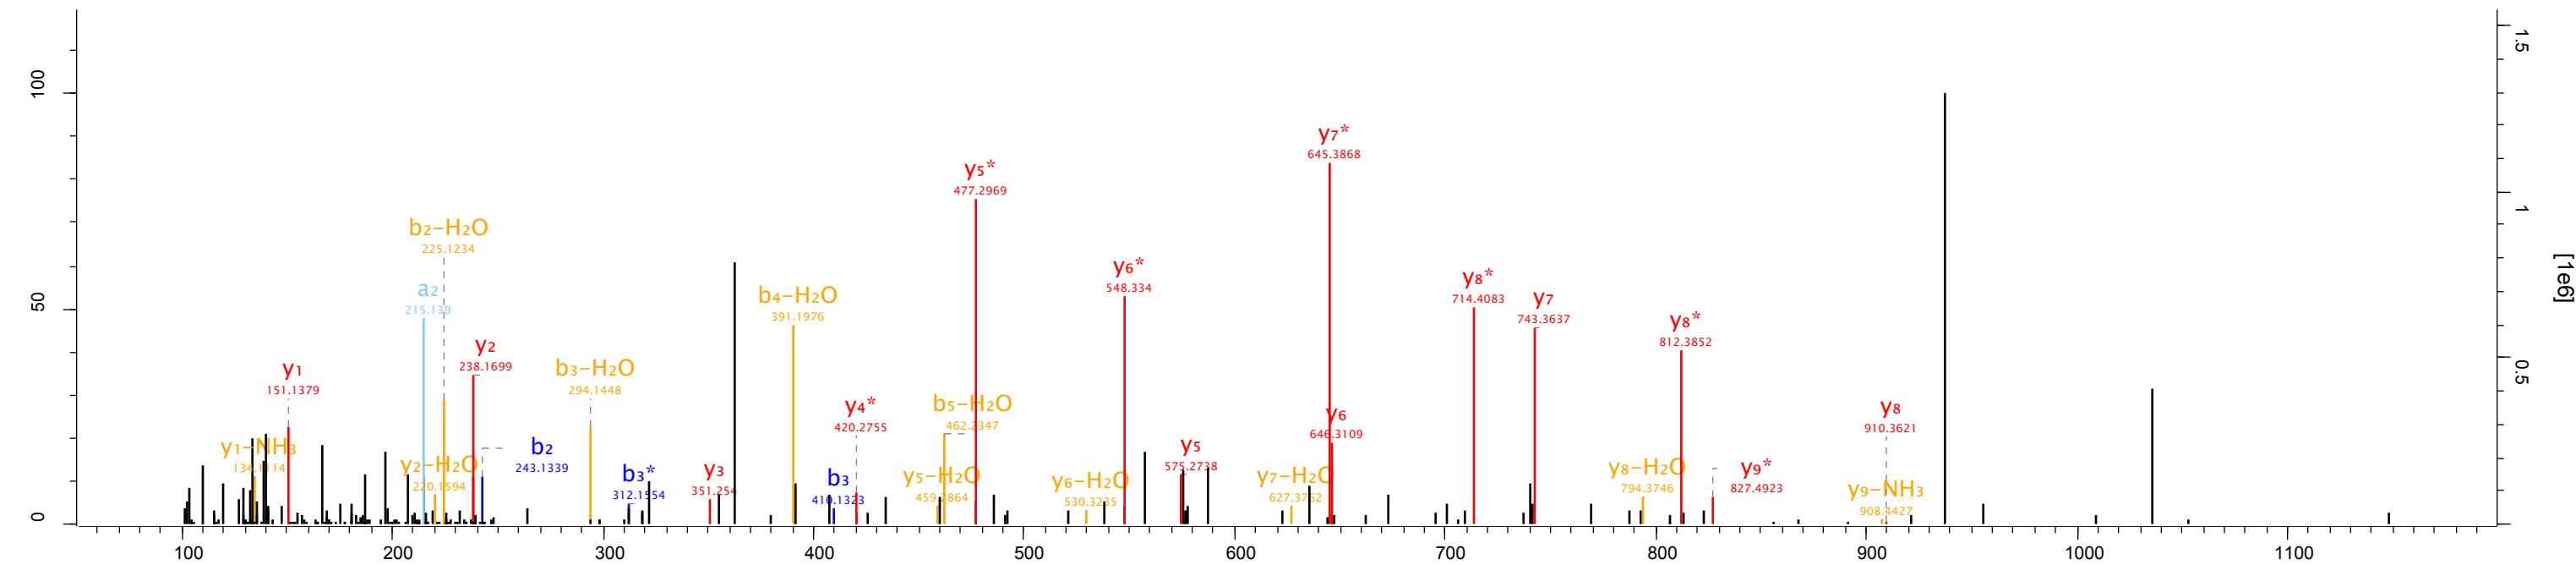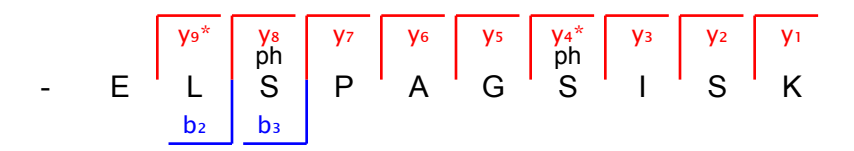

Raw file: 20150814\_A375SR\_Phospho\_BR2\_03  
 Scan: 9189 Method: FTMS; HCD Score: 180.48 m/z: 667.78 Gene names: LARP7

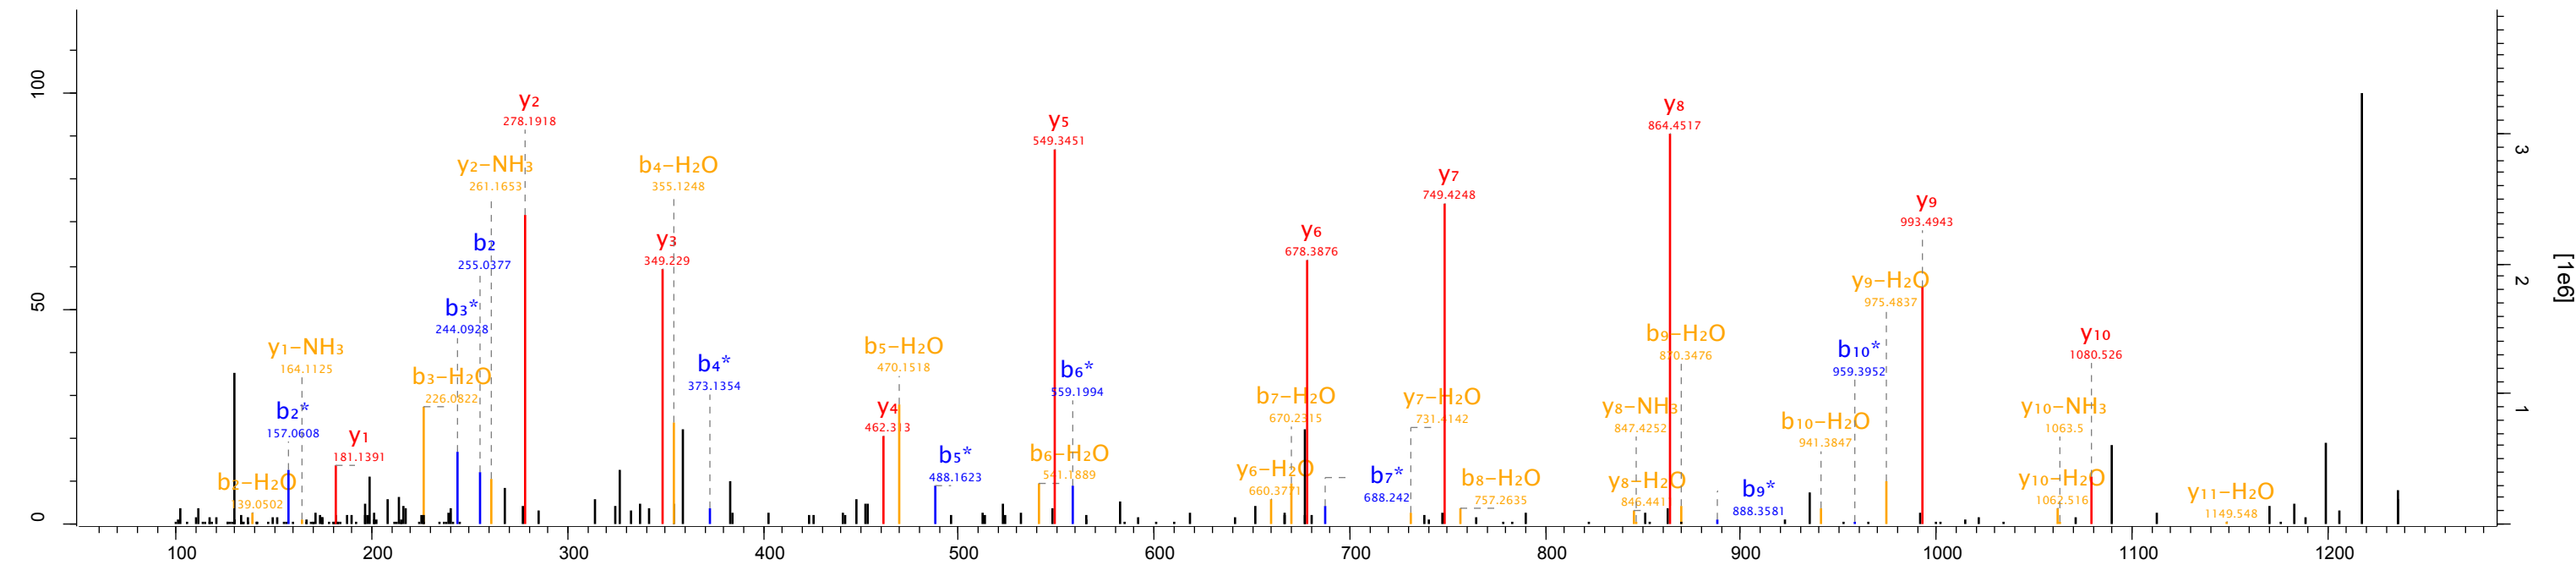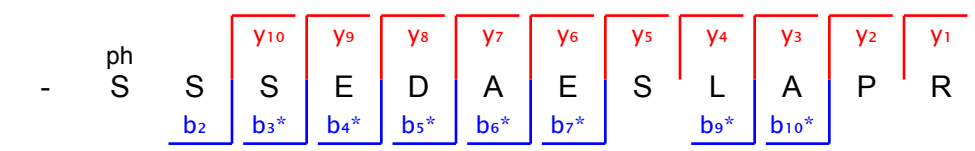

Raw file 20150814\_A375SR\_Phospho\_BR2\_03 Scan 9309 Method FTMS; HCD Score 360.95 m/z 1104.01 Gene names NEDD1

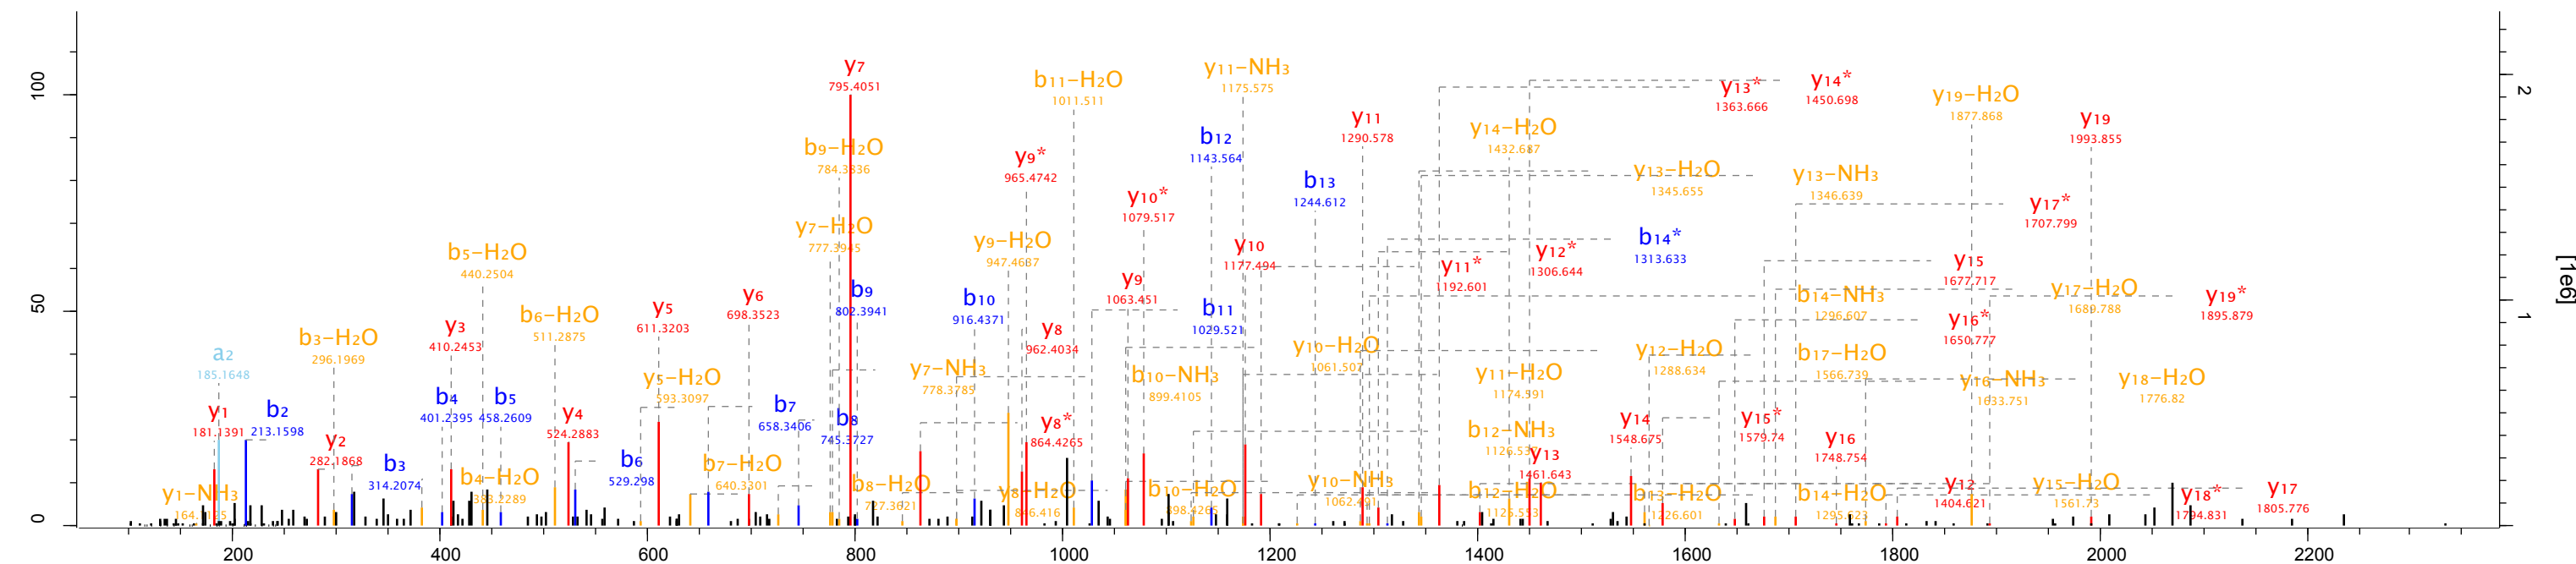

- L V T S G A E S G N L N T S P S S N Q T R -

Fragmentation mapping: b2, b3, b4, b5, b6, b7, b8, b9, b10, b11, b12, b13, b14\* (blue boxes); y1, y18\*, y17, y16, y15, y14, y13, y12, y11, y10, y9, y8 ph, y7, y6, y5, y4, y3, y2, y1 (red boxes).

Raw file: 20150814\_A375SR\_Phospho\_BR2\_03  
 Scan: 9459 Method: FTMS; HCD Score: 147.4 m/z: 526.22 Gene names: ARHGAP23

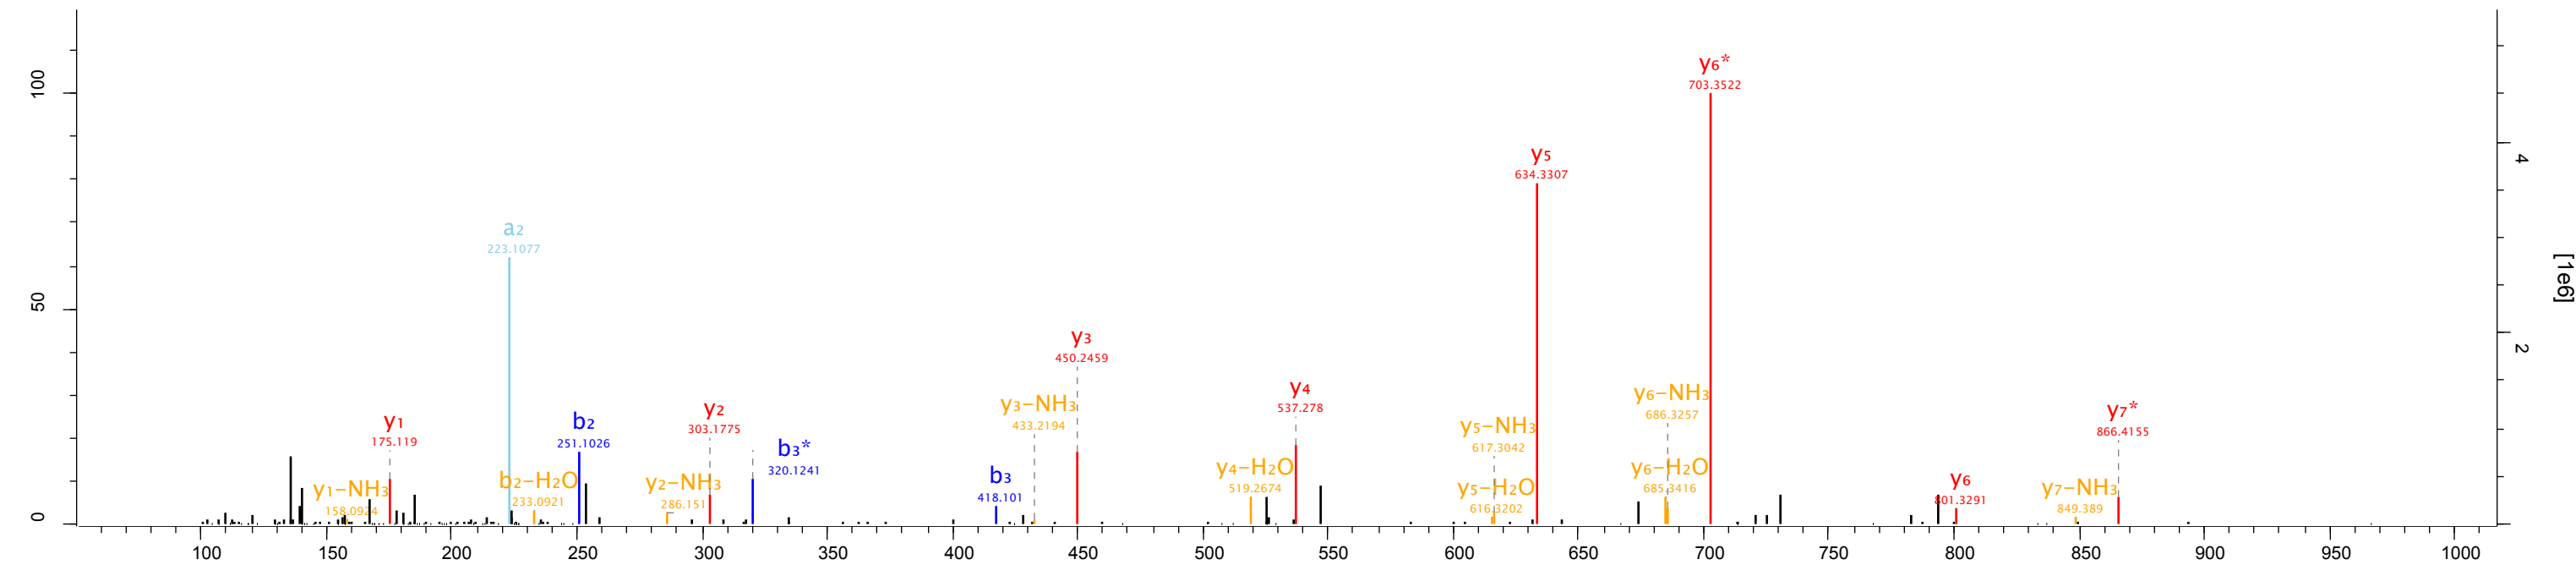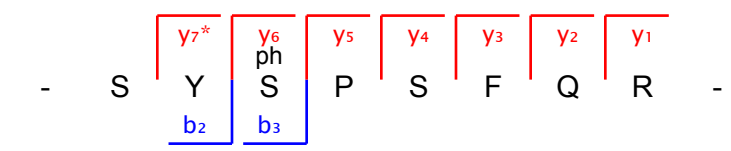

Raw file: 20150814\_A375SR\_Phospho\_BR2\_03  
 Scan: 9759 Method: FTMS; HCD Score: 113.06 m/z: 977.07 Gene names: ARHGEF2

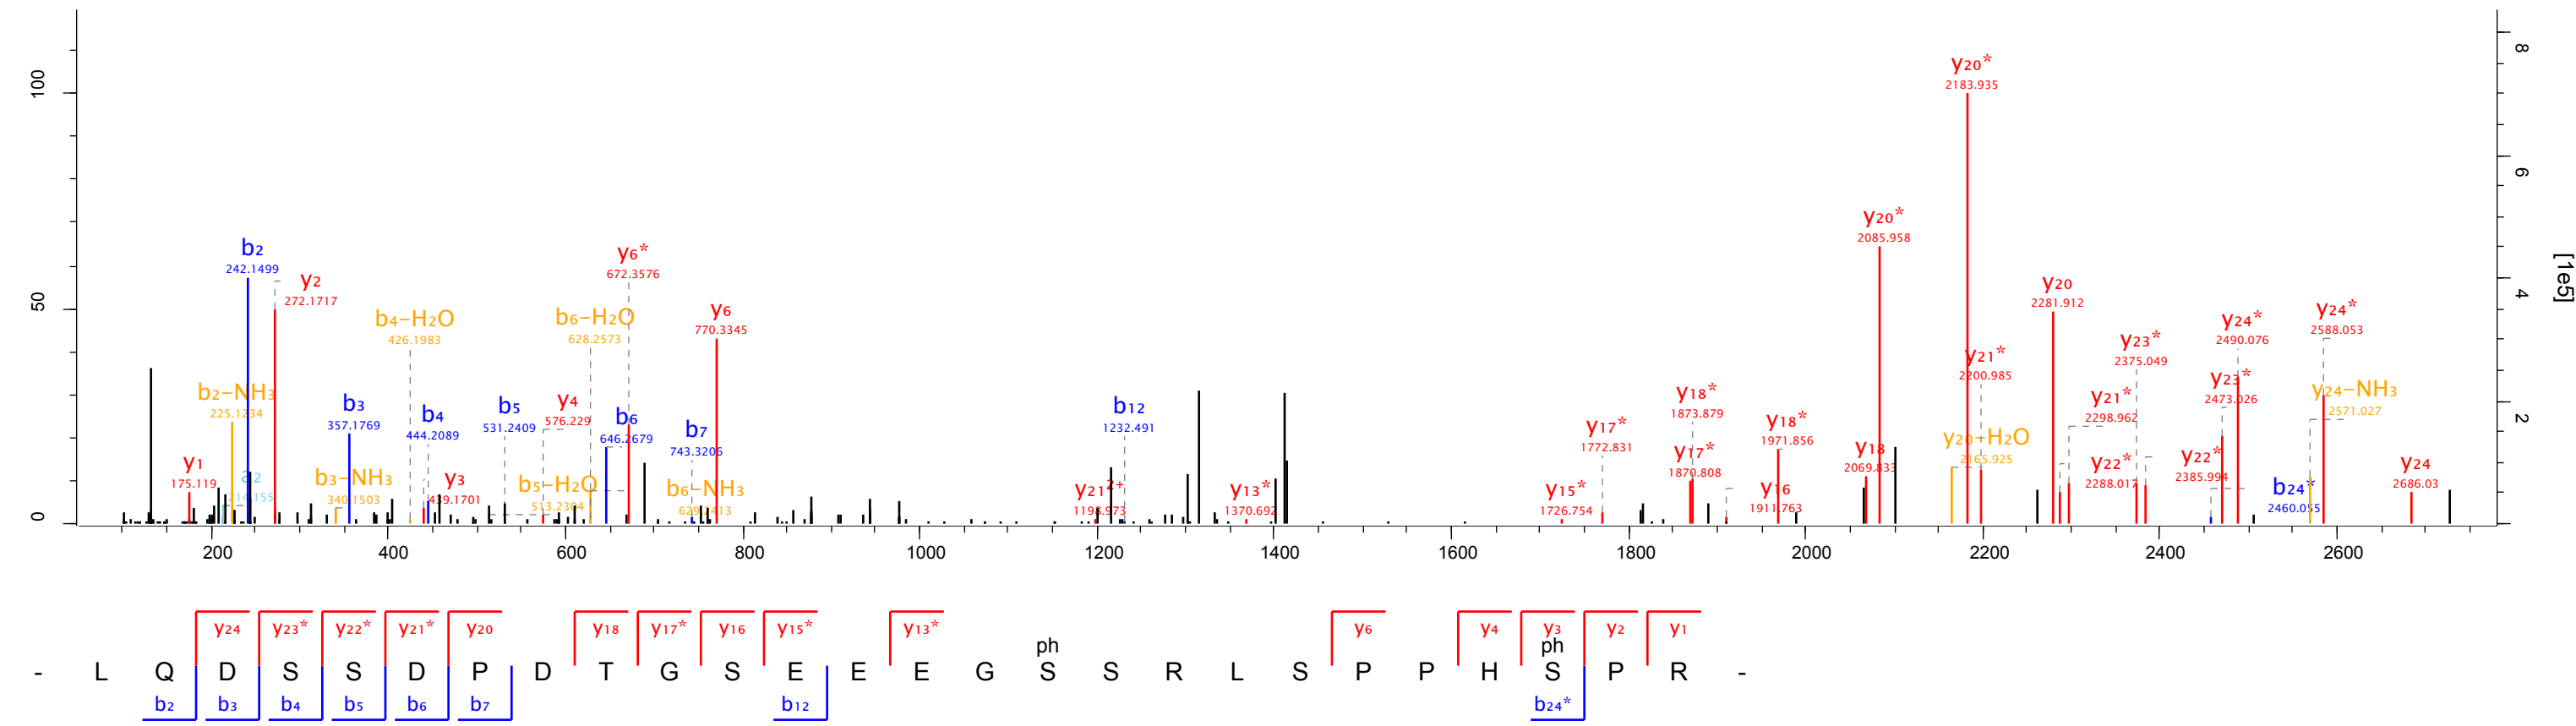

Raw file: 20150814\_A375SR\_Phospho\_BR2\_03  
 Scan: 9959 Method: FTMS; HCD Score: 128.29 m/z: 923.44 Gene names: PDLIM5

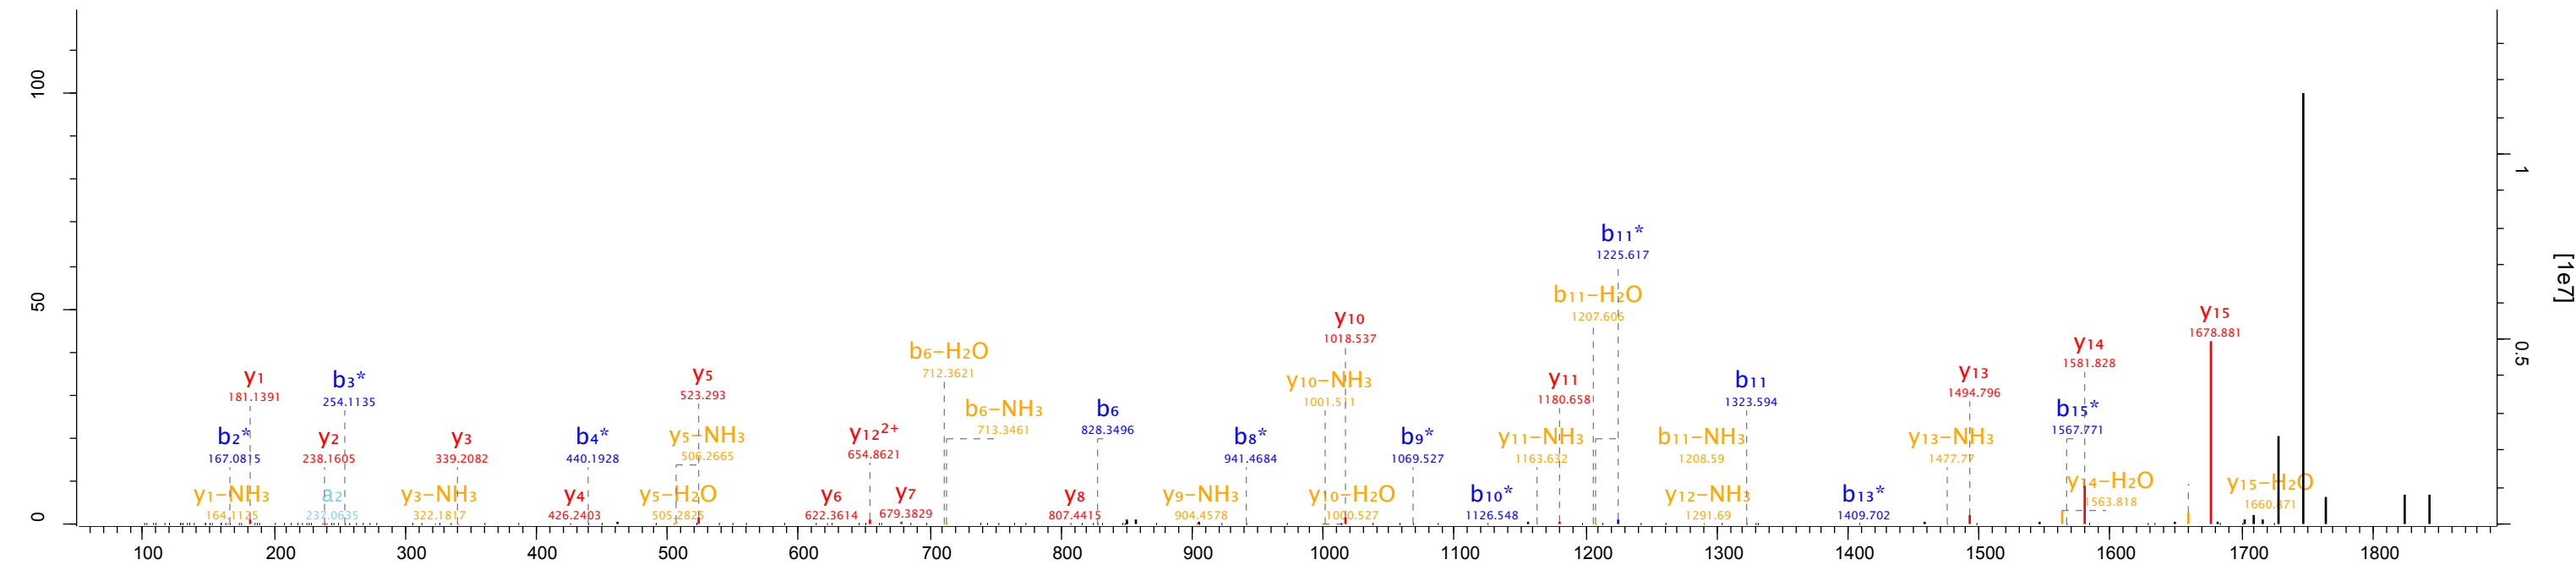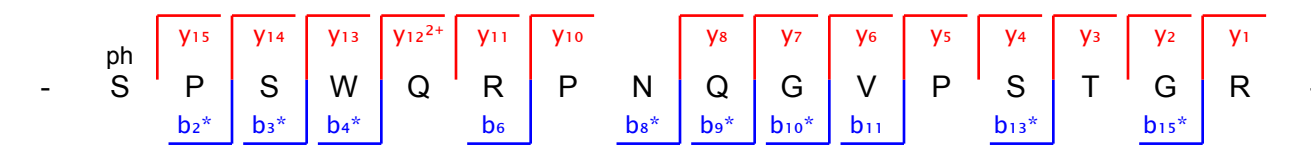



Raw file: 20150814\_A375SR\_Phospho\_BR2\_04  
 Scan: 10119 Method: FTMS; HCD Score: 153.05 m/z: 679.32 Gene names: PHLDB2

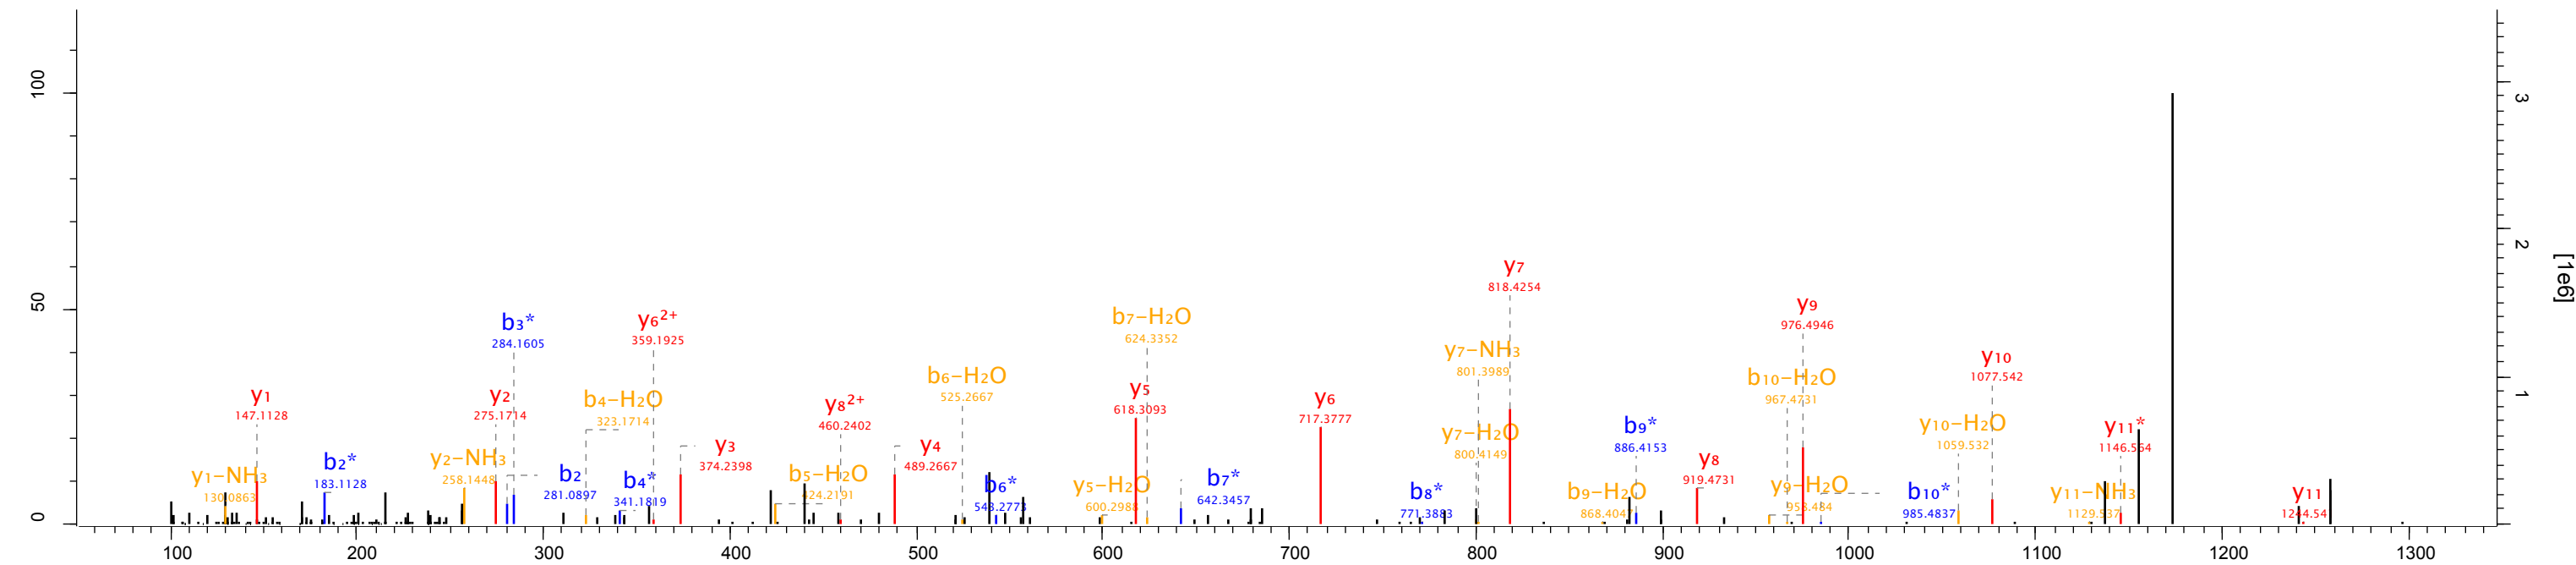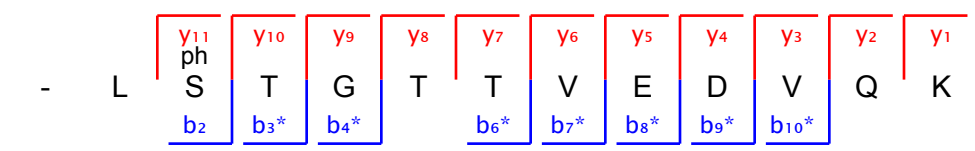

Raw file: 20150814\_A375SR\_Phospho\_BR2\_04  
 Scan: 10139 Method: FTMS; HCD Score: 73.98 m/z: 770.33 Gene names: UTP14A

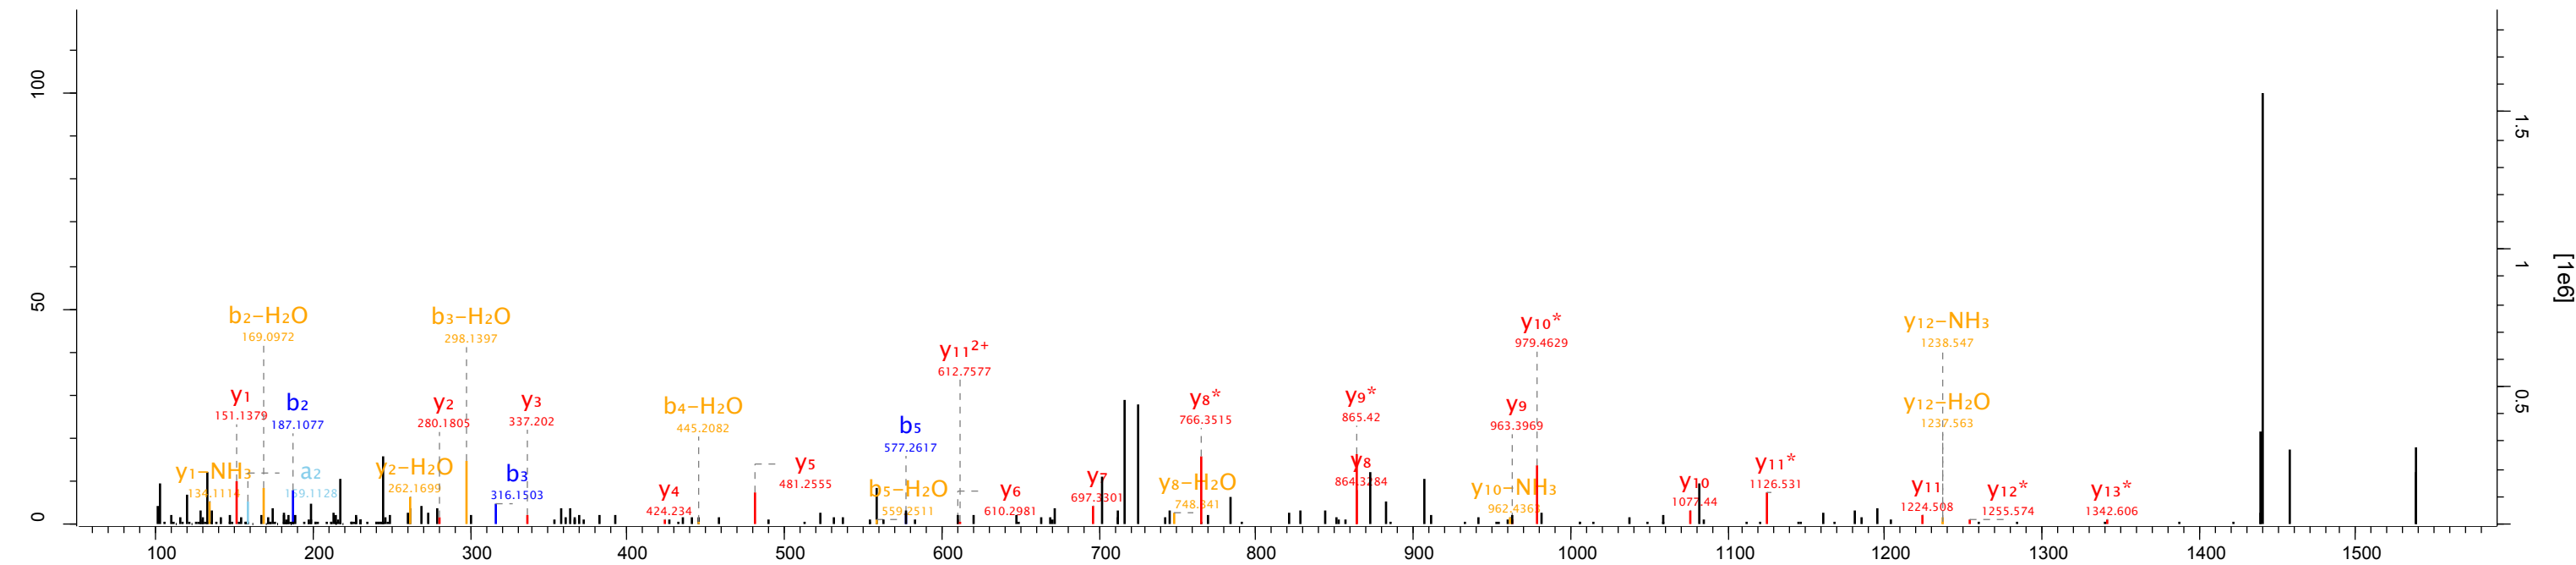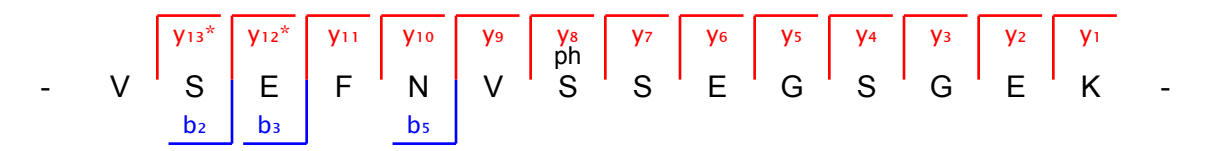

Raw file: 20150814\_A375SR\_Phospho\_BR2\_04  
 Scan: 10399 Method: FTMS; HCD Score: 173.44 m/z: 713.31 Gene names: SEPT7

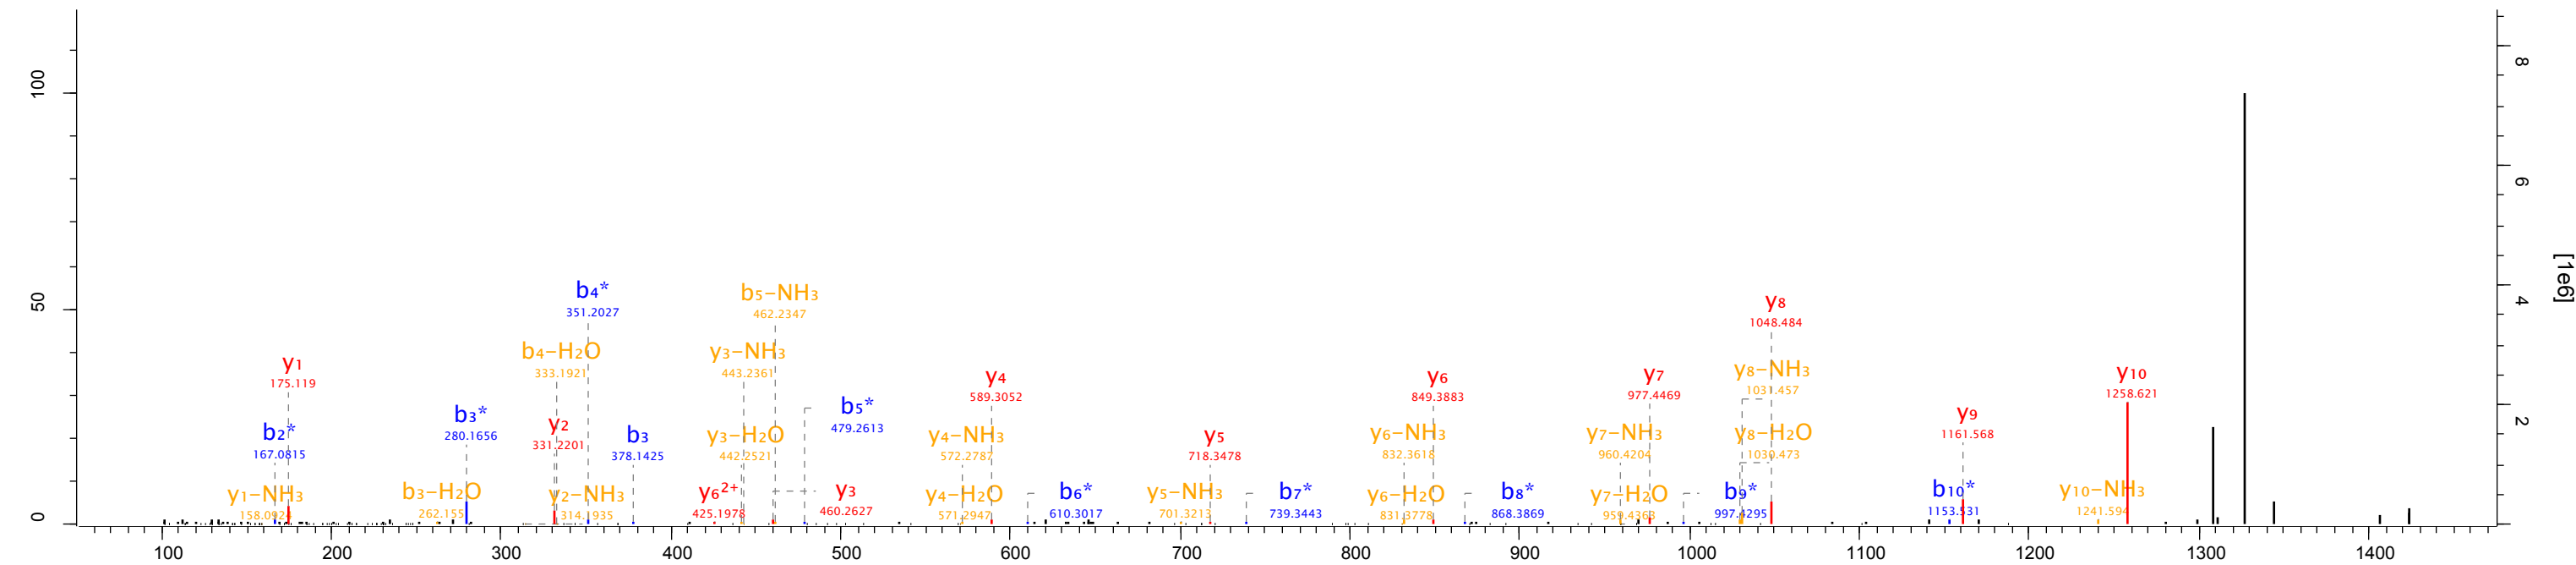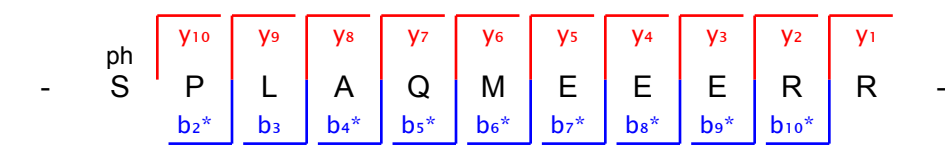

Raw file: 20150814\_A375SR\_Phospho\_BR2\_04  
 Scan: 10719 Method: FTMS; HCD Score: 90.55 m/z: 850.9 Gene names: DUT

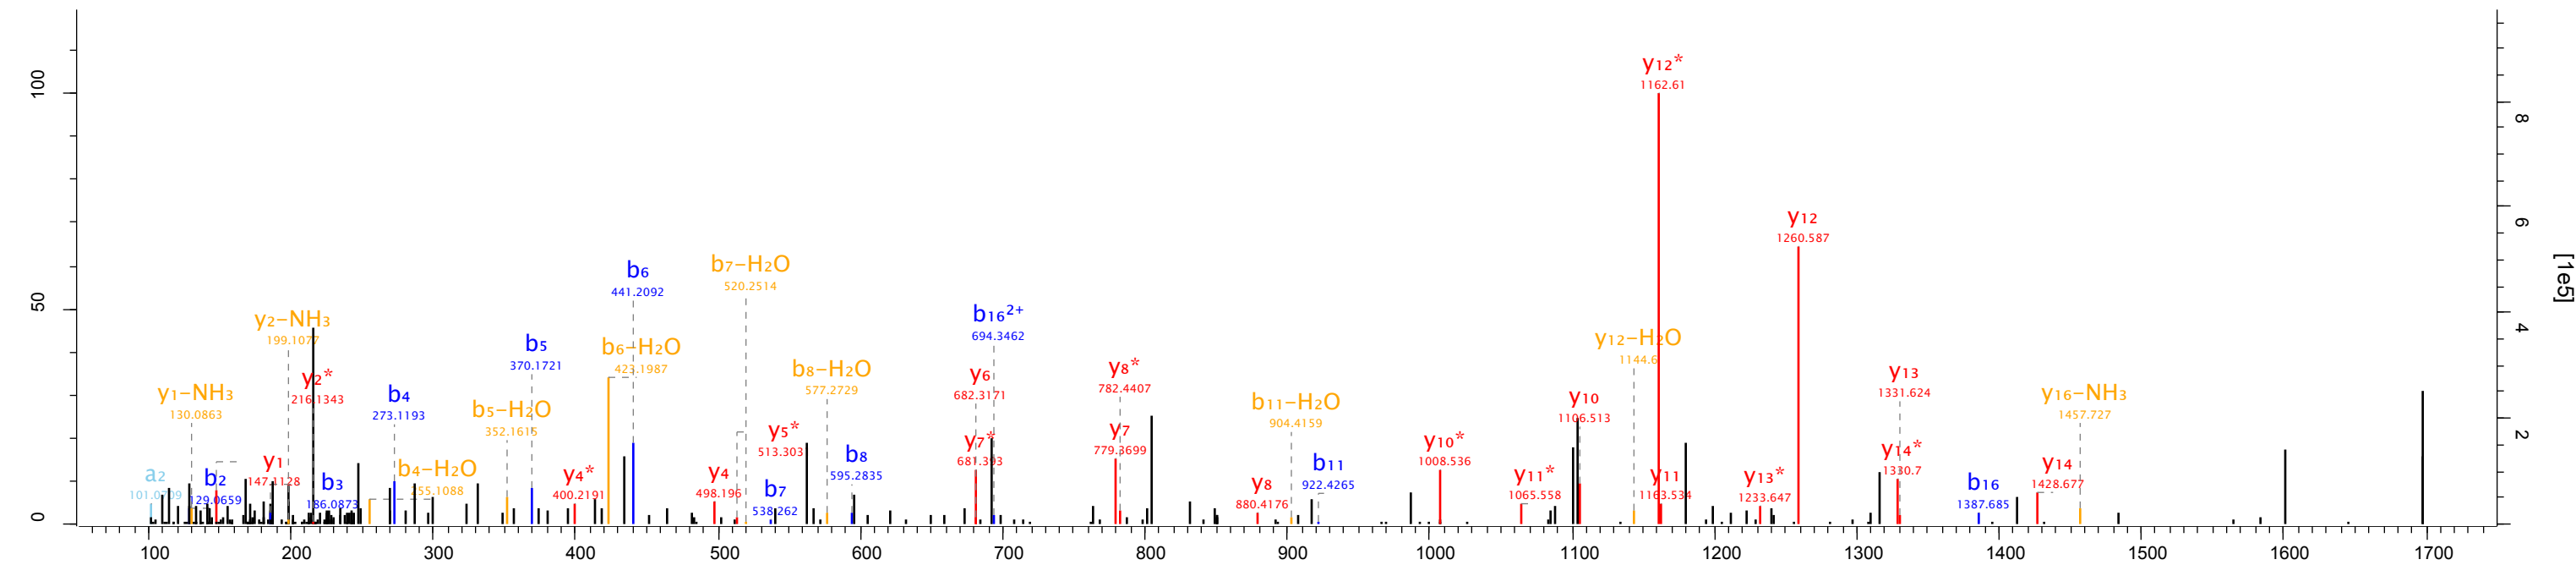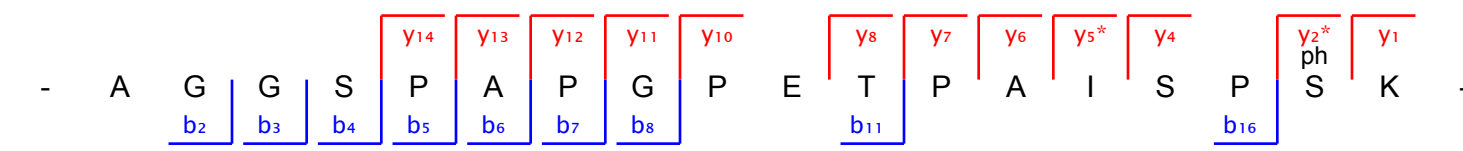

Raw file: 20150814\_A375SR\_Phospho\_BR2\_04  
 Scan: 11069 Method: FTMS; HCD Score: 71.55 m/z: 530.9 Gene names: OPTN

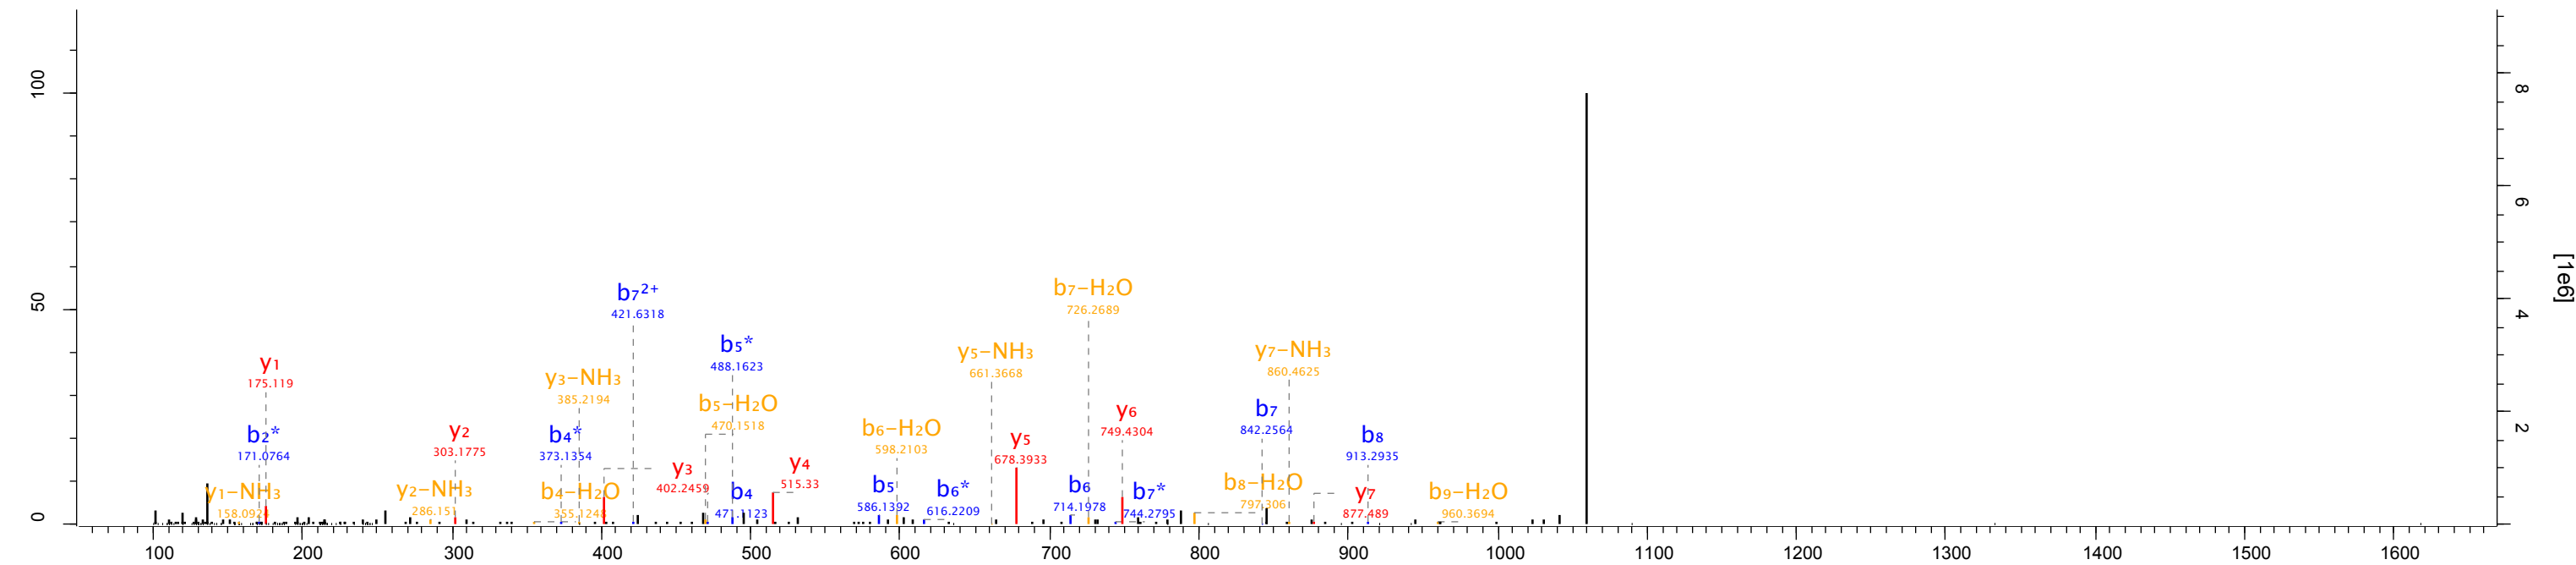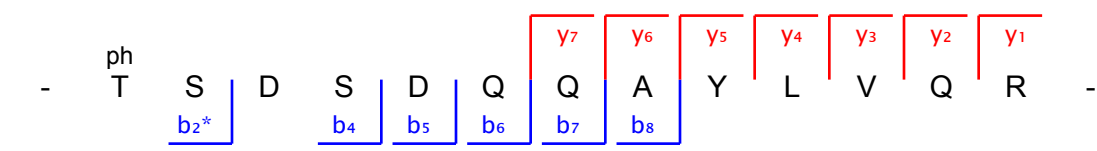

Raw file 20150814\_A375SR\_Phospho\_BR2\_04 Scan 11149 Method FTMS; HCD Score 140.22 m/z 712.33 Gene names CD44

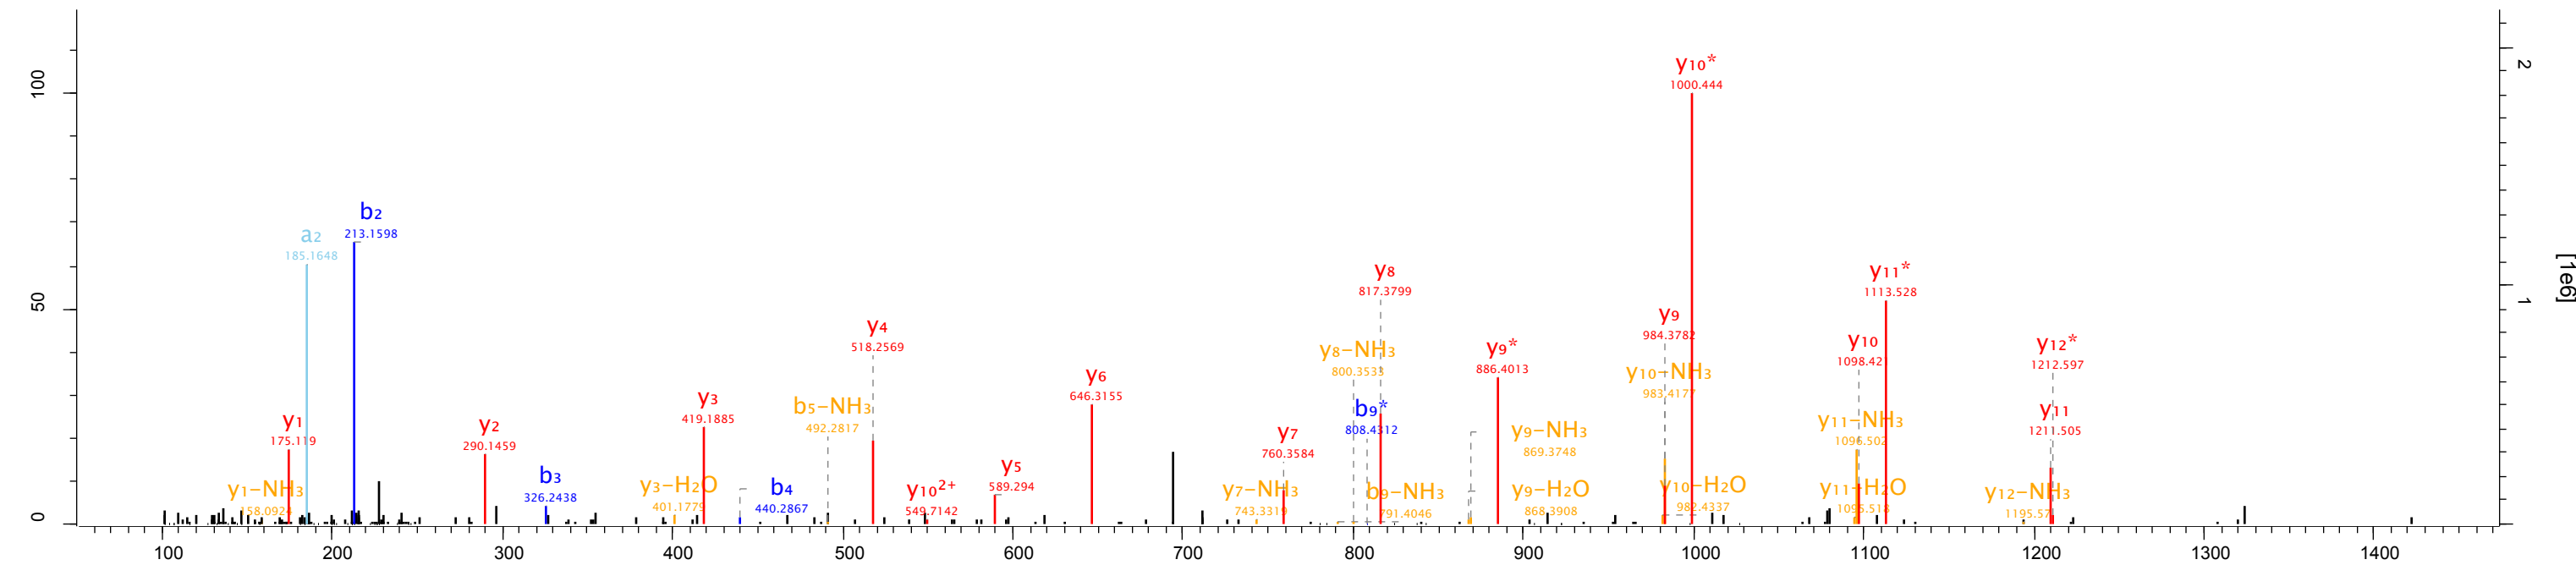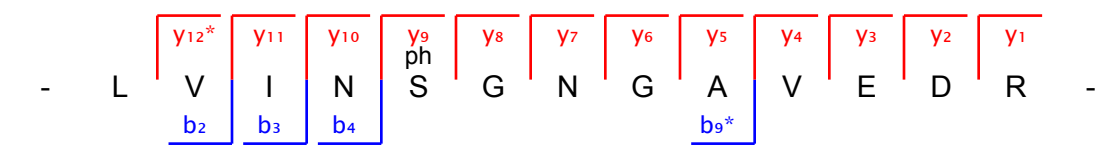

Raw file 20150814\_A375SR\_Phospho\_BR2\_04 Scan 11229 Method FTMS; HCD Score 153.41 m/z 774.71 Gene names MYO9B

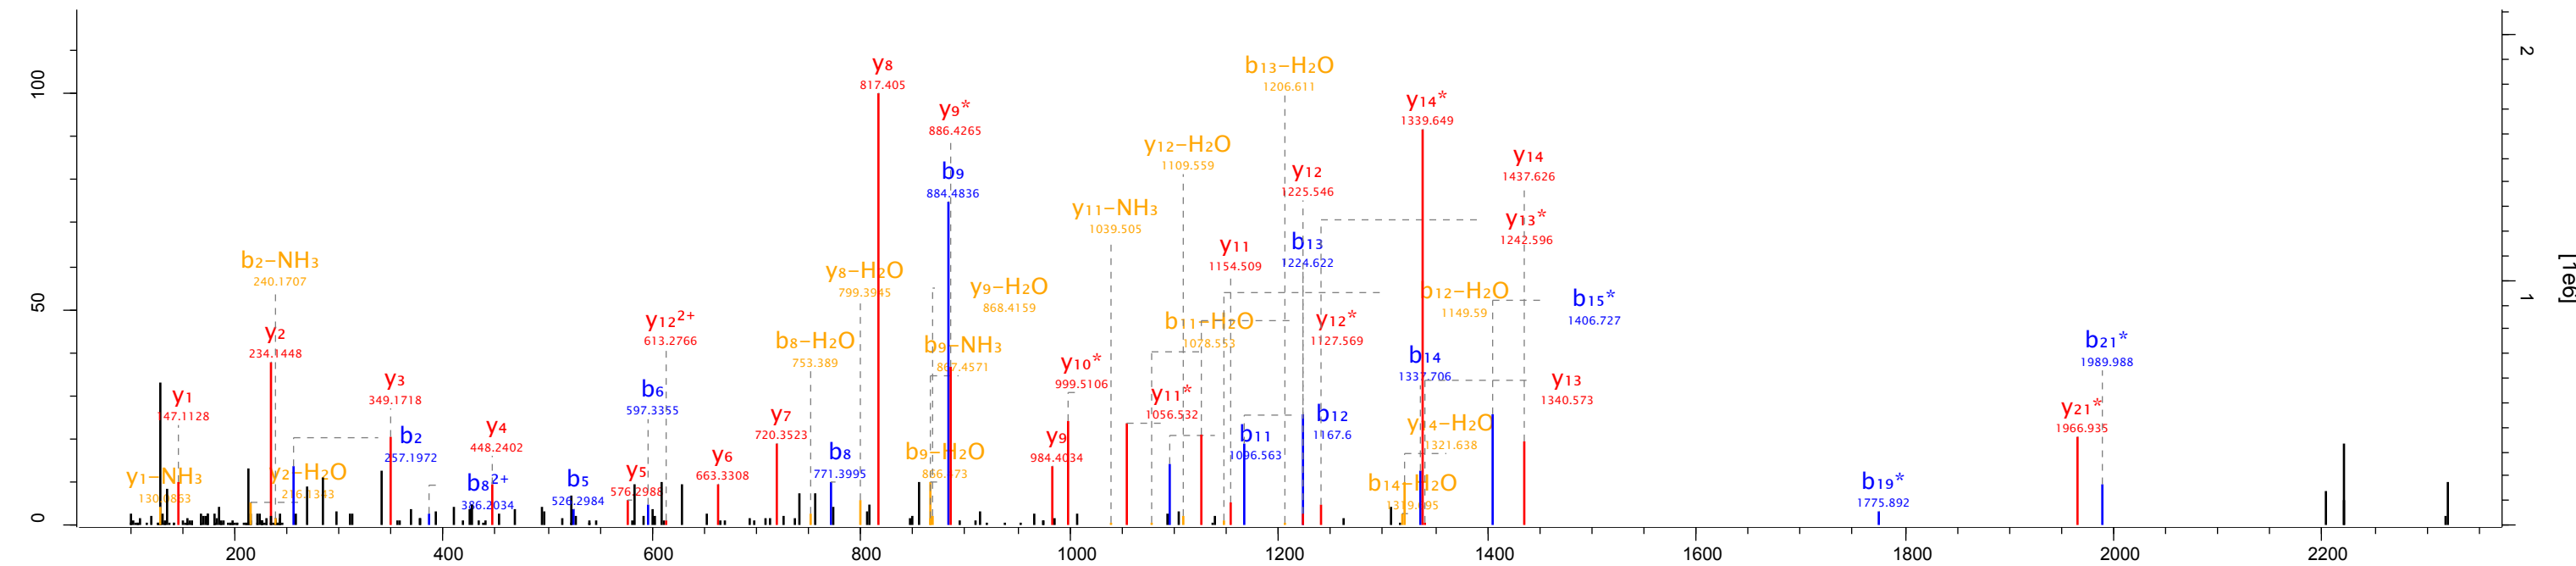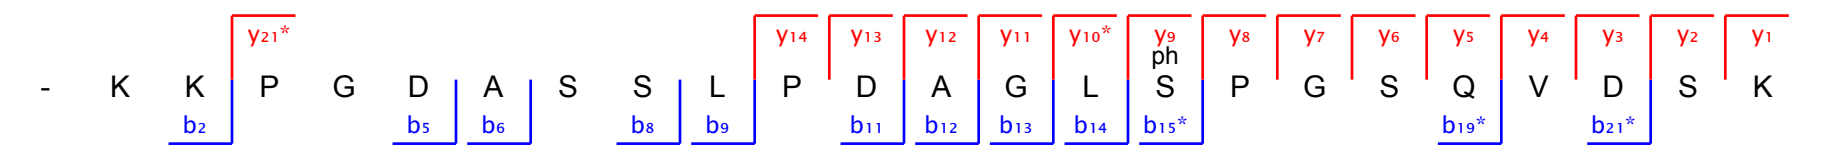

Raw file 20150814\_A375SR\_Phospho\_BR2\_04 Scan 11359 Method FTMS; HCD Score 120.56 m/z 911.86 Gene names YTHDC2

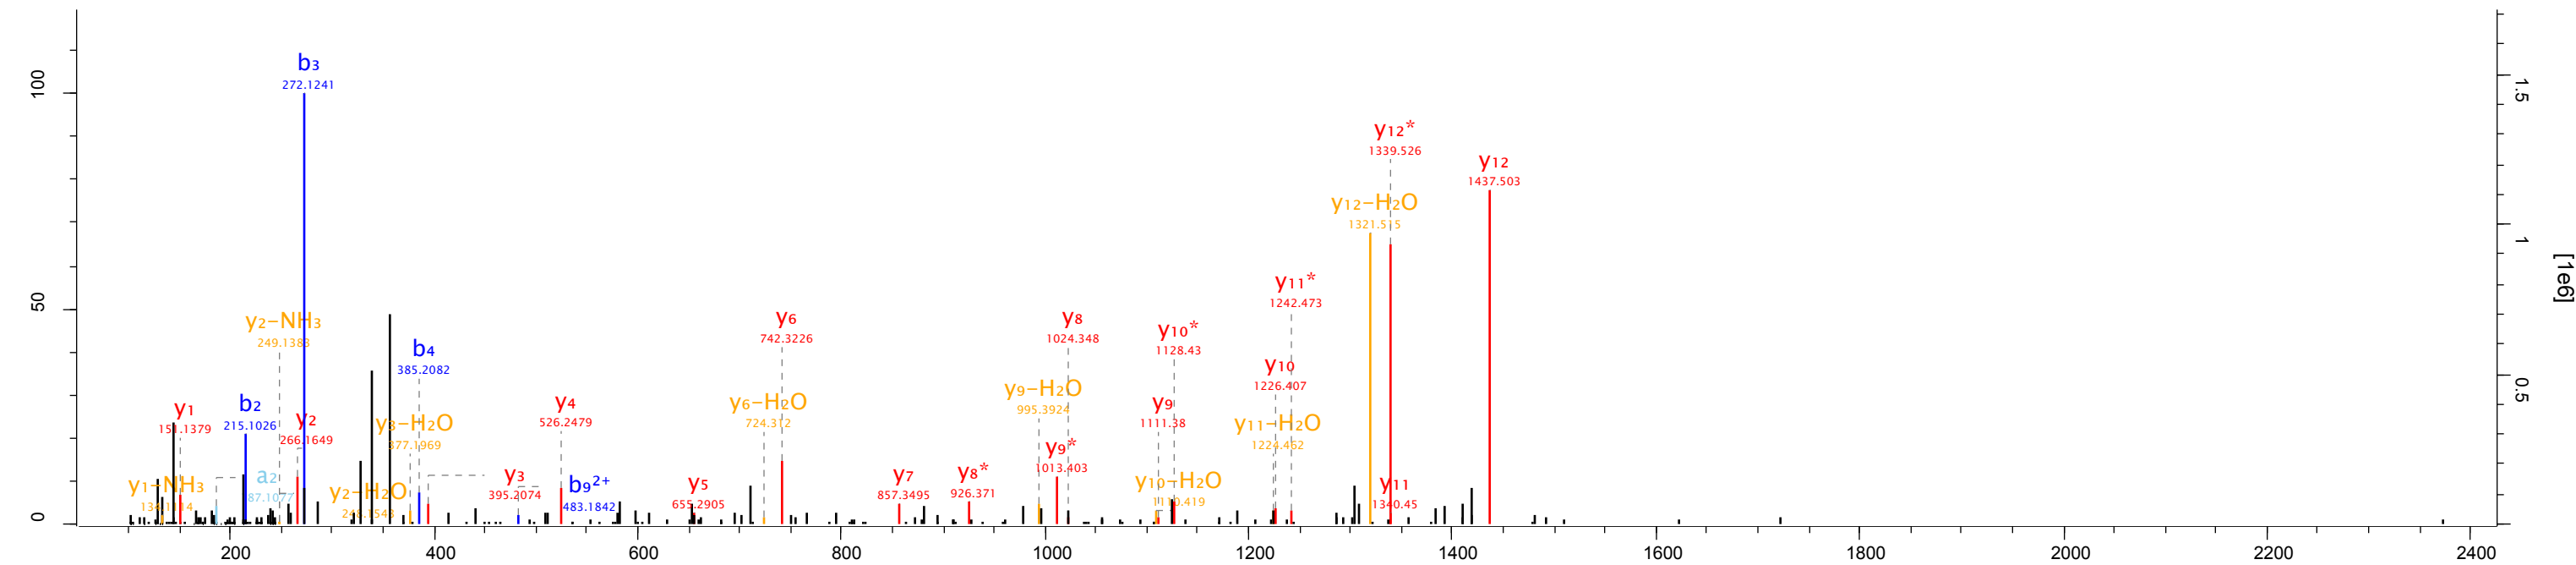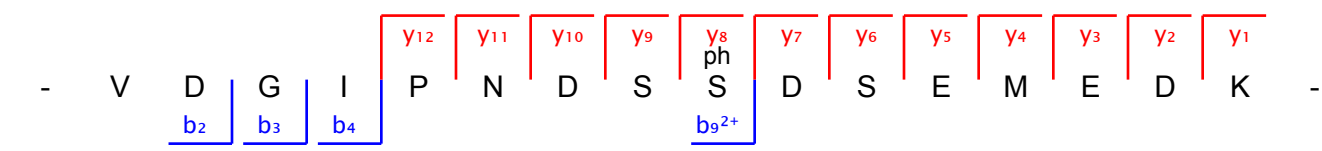



Raw file: 20150814\_A375SR\_Phospho\_BR2\_04  
 Scan: 11469 Method: FTMS; HCD Score: 187.56 m/z: 1051.43 Gene names: TCF12

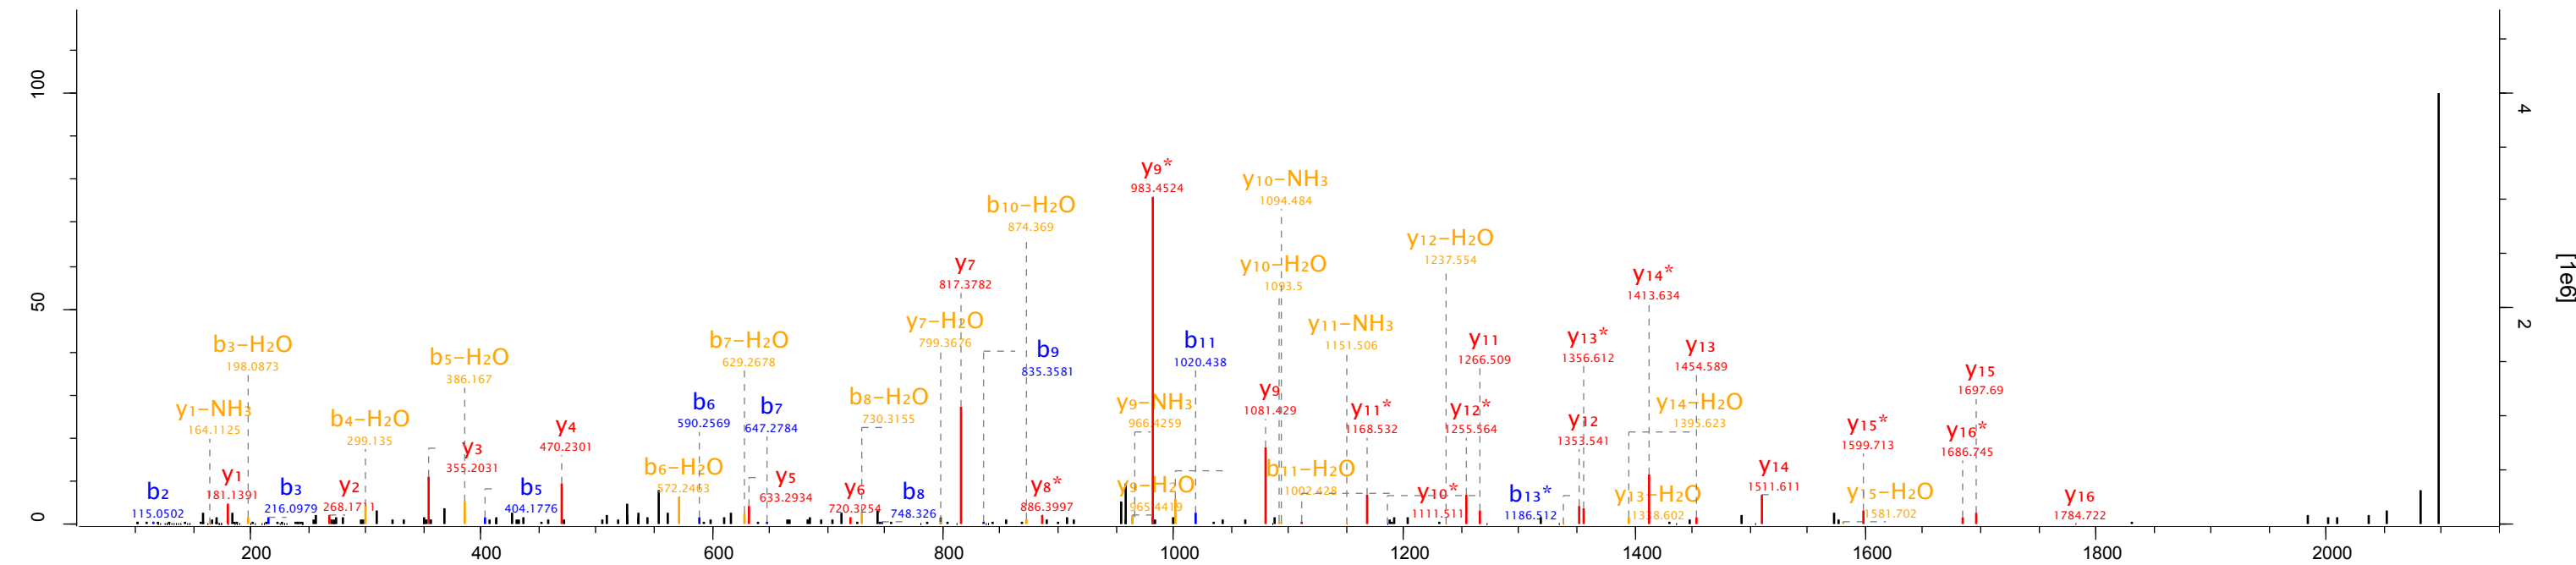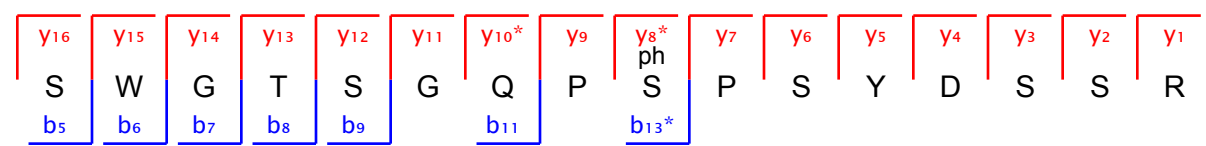

Raw file 20150814\_A375SR\_Phospho\_BR2\_04 Scan 11579 Method FTMS; HCD Score 146.19 m/z 883.36 Gene names ARHGAP21

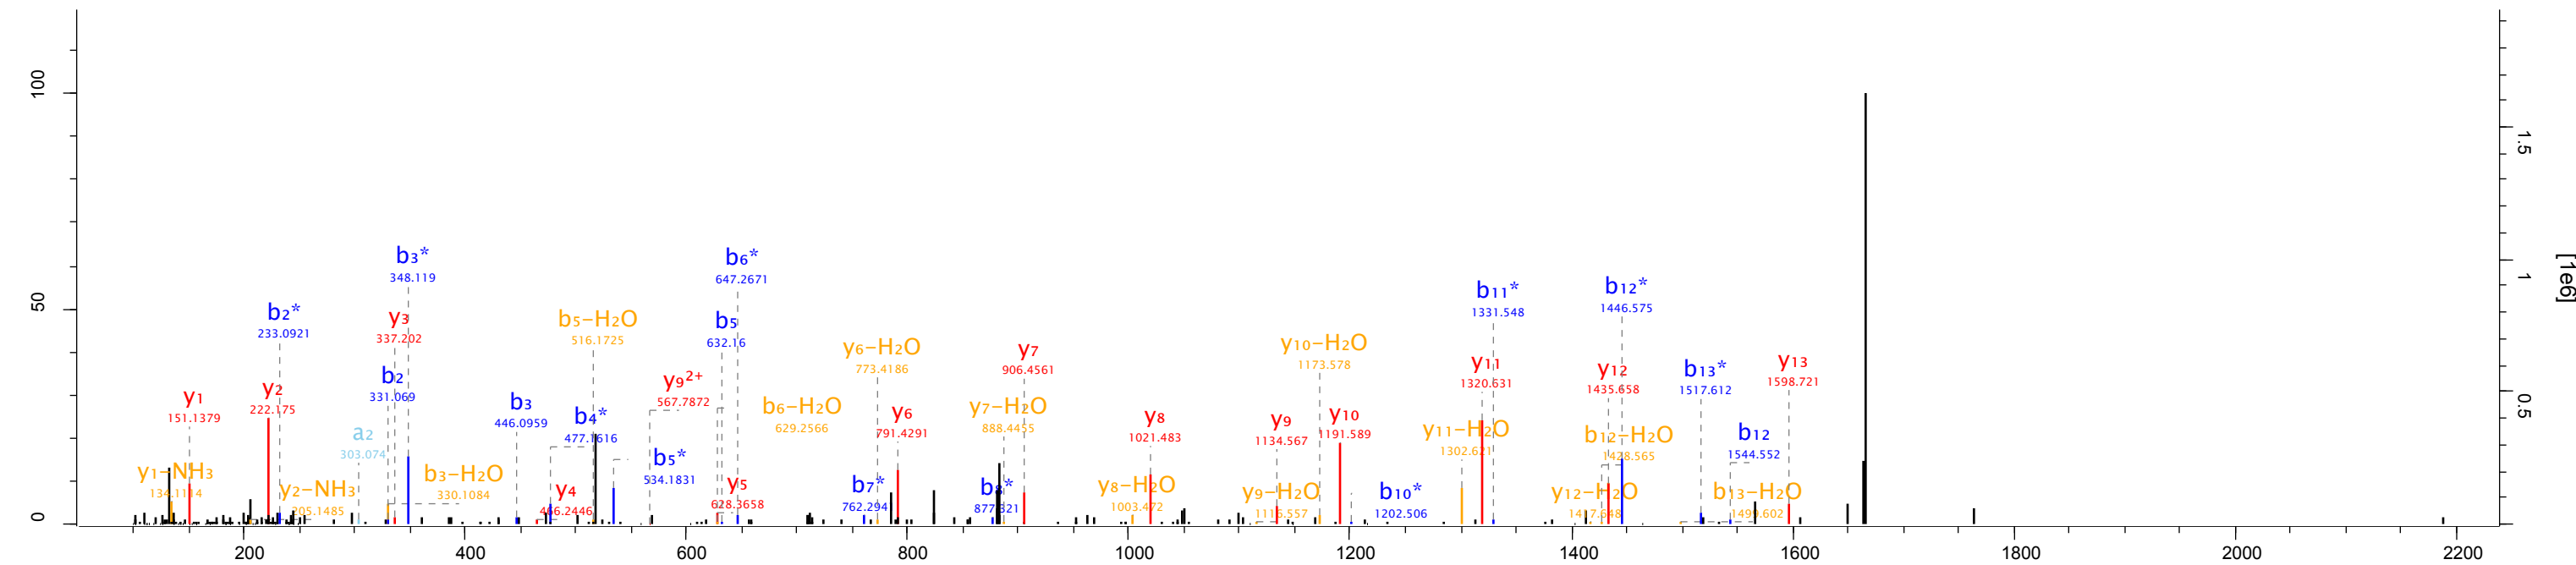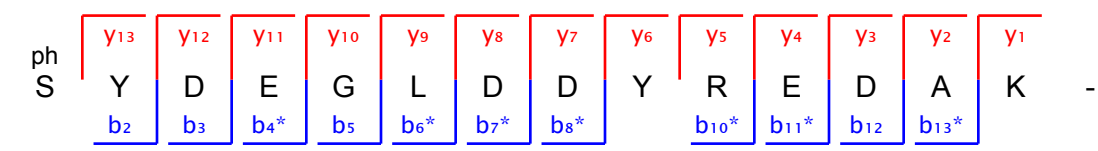

Raw file 20150814\_A375SR\_Phospho\_BR2\_04 Scan 11699 Method FTMS; HCD Score 56.13 m/z 730.64 Gene names RPRD2

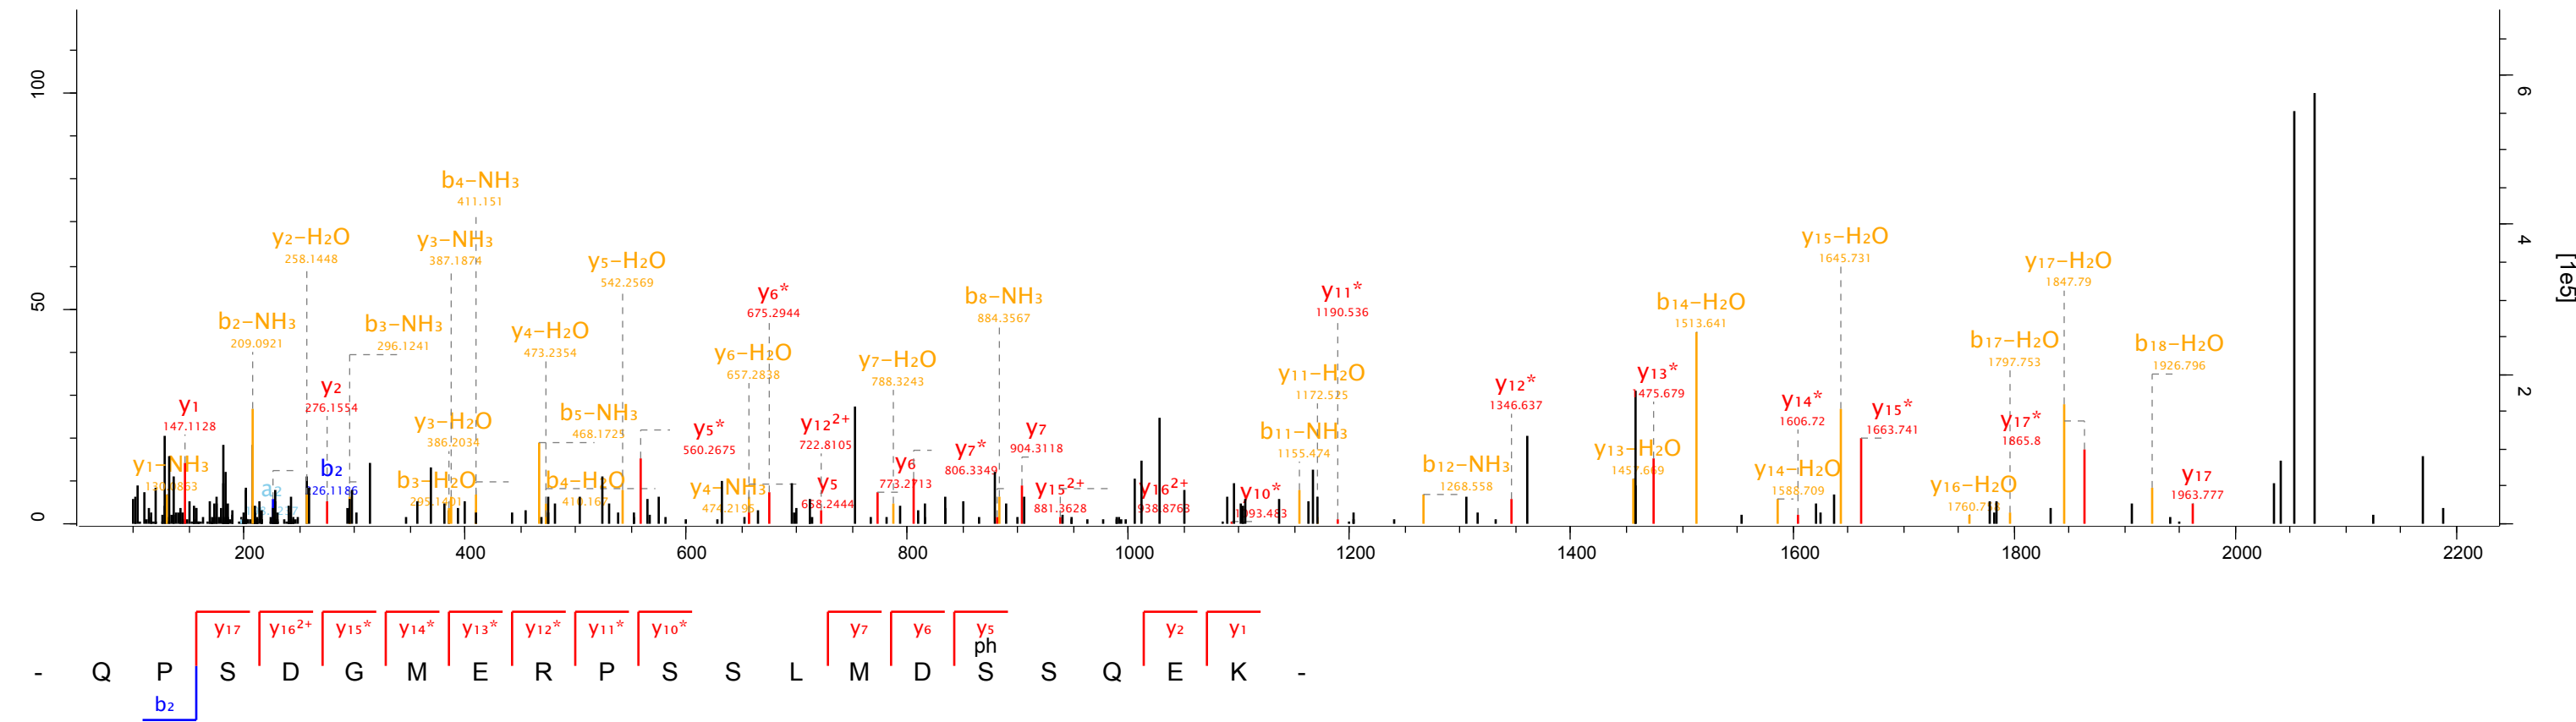

Raw file 20150814\_A375SR\_Phospho\_BR2\_04 Scan 11779 Method FTMS; HCD Score 120.56 m/z 888.35 Gene names SETD2

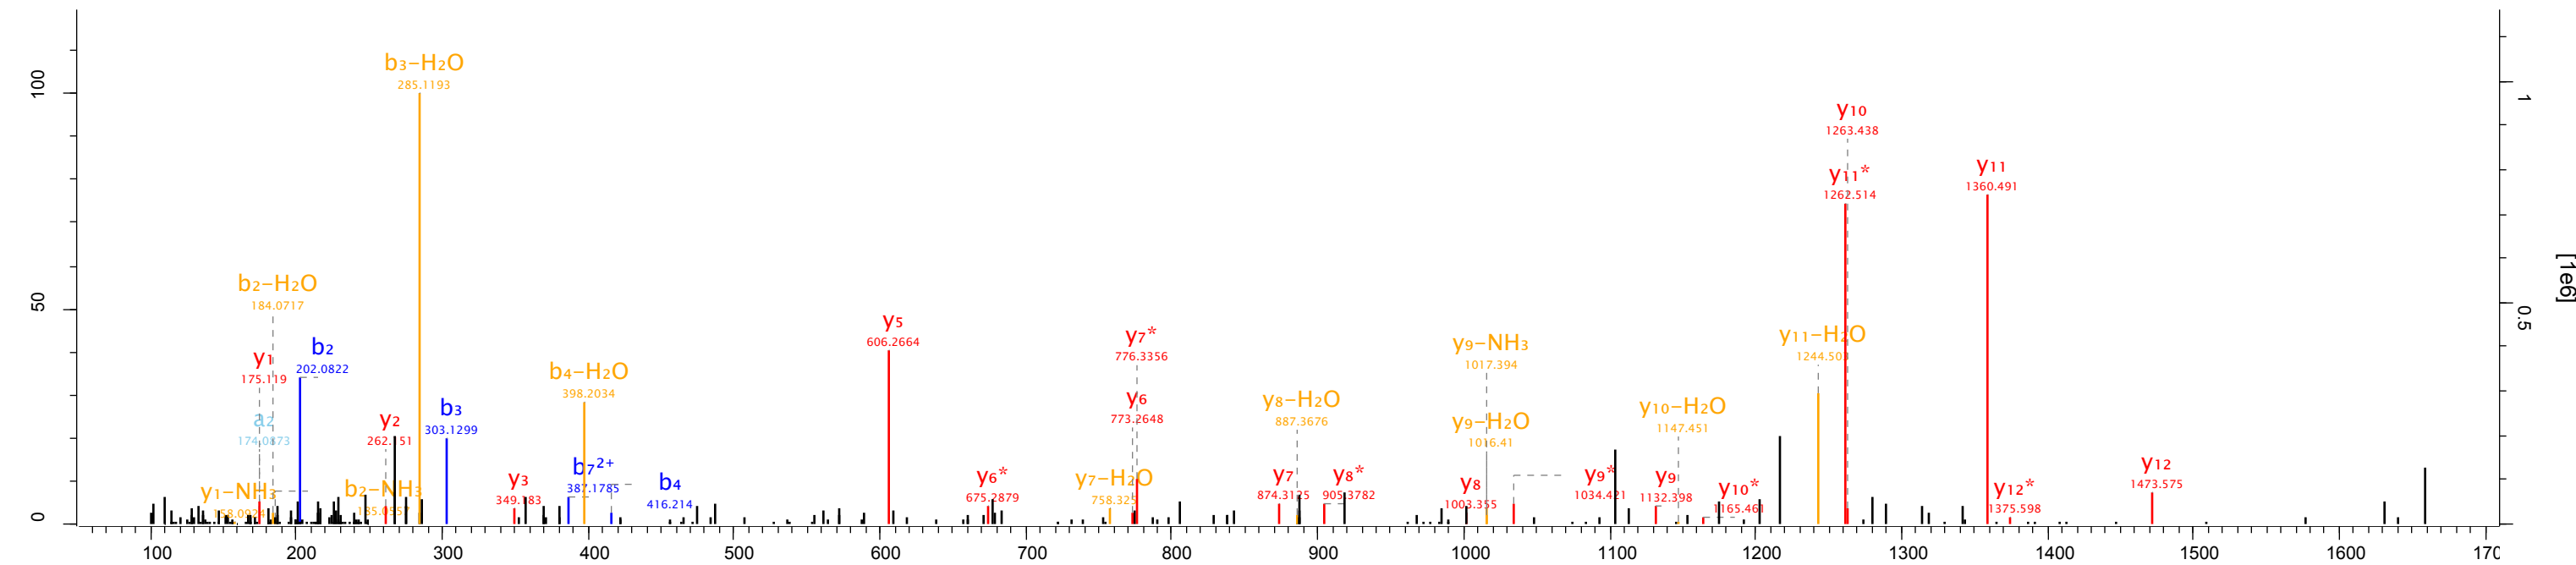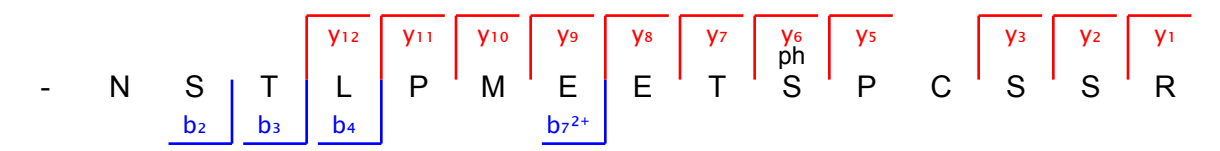

Raw file: 20150814\_A375SR\_Phospho\_BR2\_04  
 Scan: 12079 Method: FTMS; HCD Score: 150.91 m/z: 943.96 Gene names: FOXR2

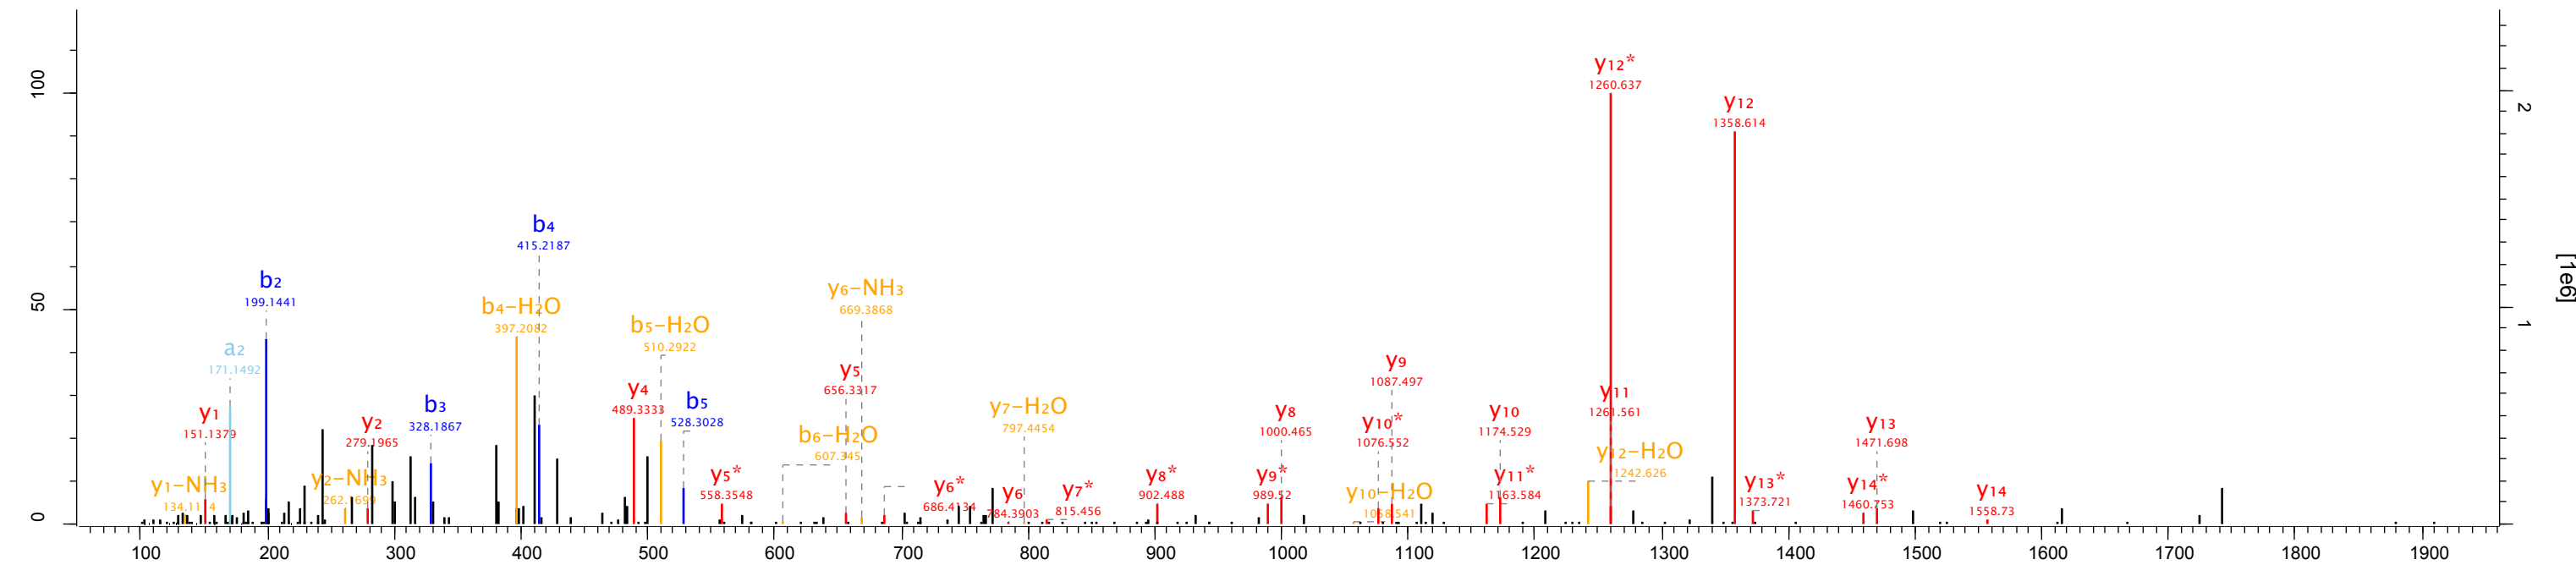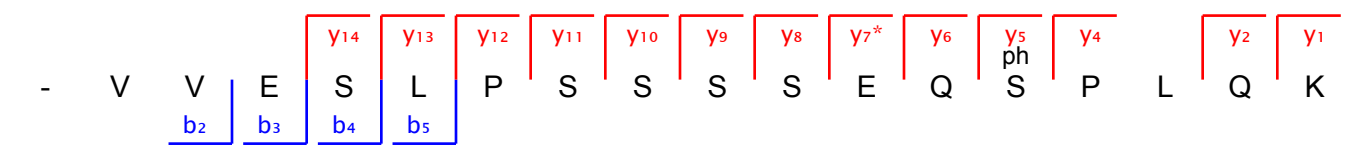

Raw file: 20150814\_A375SR\_Phospho\_BR2\_04  
 Scan: 12139 Method: FTMS; HCD Score: 245.61 m/z: 876.37 Gene names: DLG1

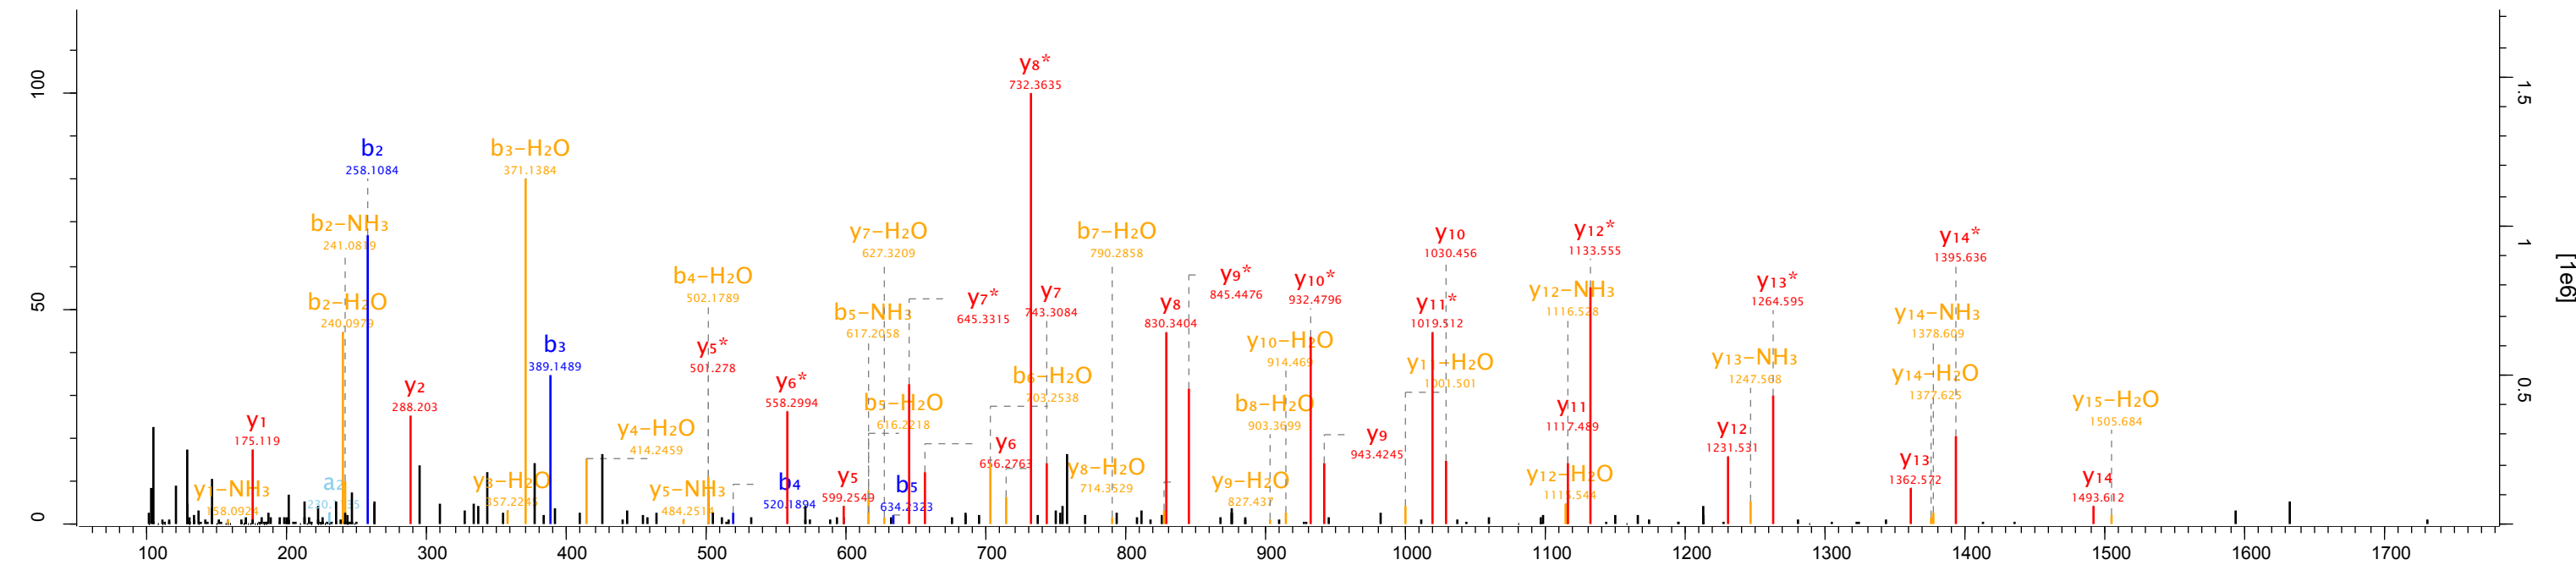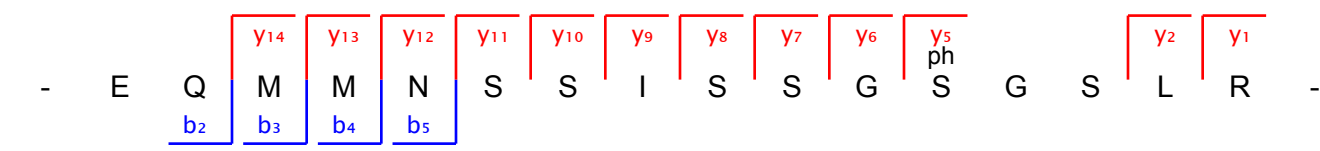

Raw file: 20150814\_A375SR\_Phospho\_BR2\_04  
 Scan: 12229 Method: FTMS; HCD Score: 172.61 m/z: 583.28 Gene names: UBB;UBC;UBA52;RPS27A

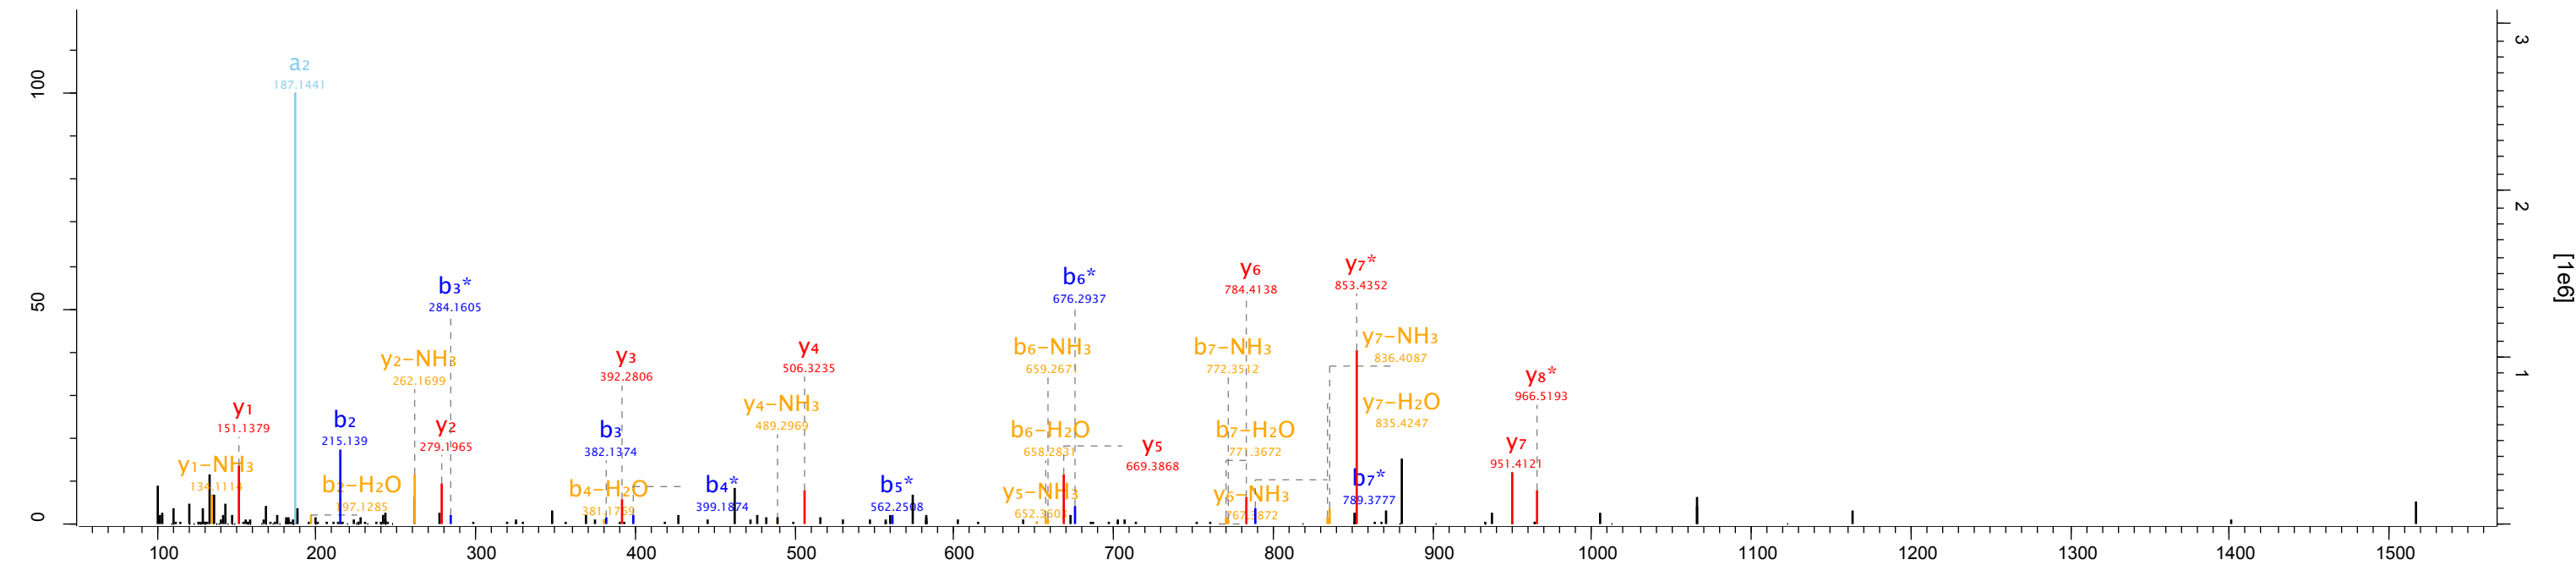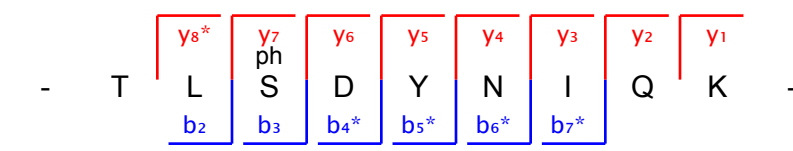





Raw file: 20150814\_A375SR\_Phospho\_BR2\_04  
 Scan: 12559 Method: FTMS; HCD Score: 189.87 m/z: 824.36 Gene names: ARFGEF2

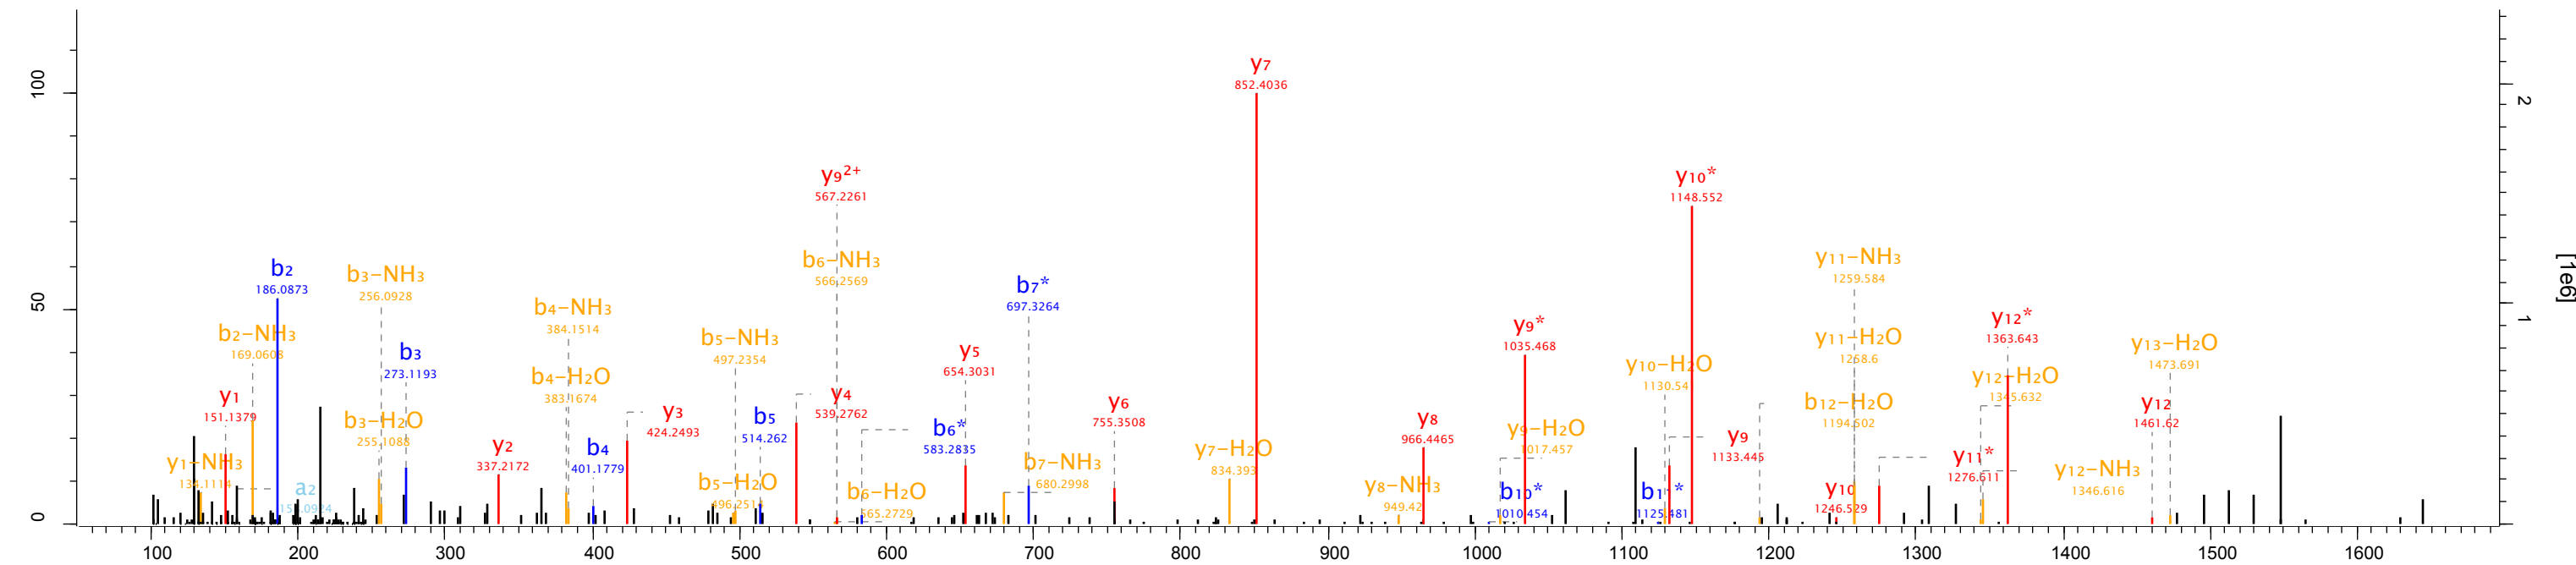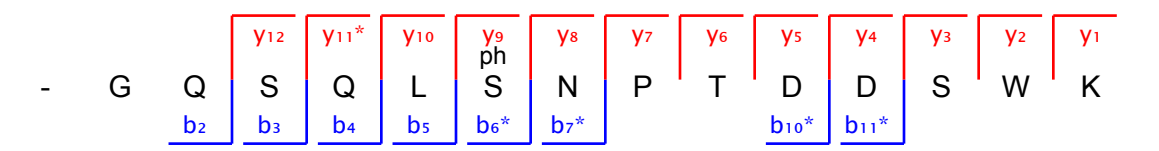

Raw file 20150814\_A375SR\_Phospho\_BR2\_04 Scan 12659 Method FTMS; HCD Score 196.31 m/z 968.39 Gene names BOD1L1

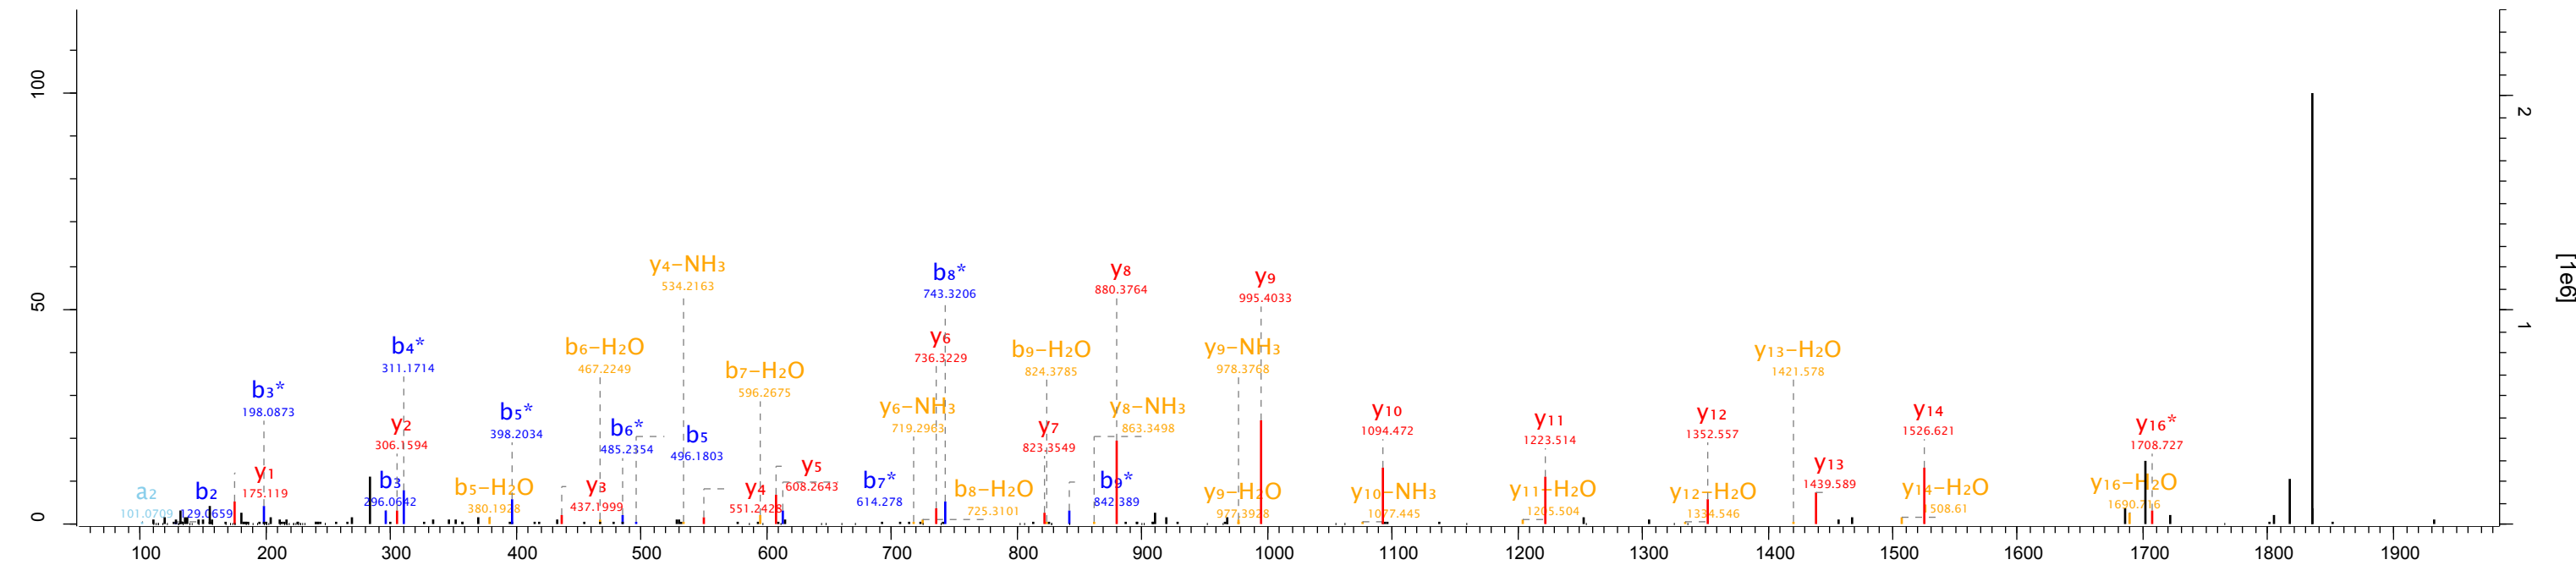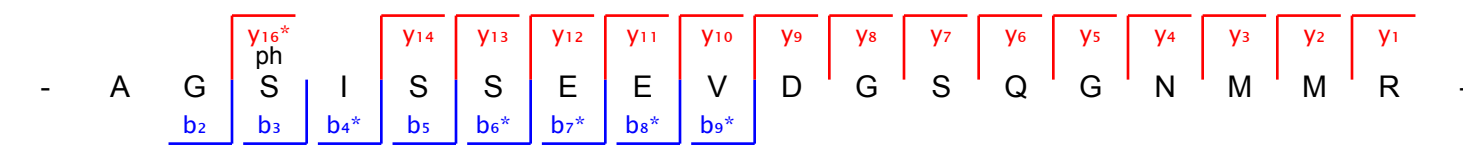

Raw file: 20150814\_A375SR\_Phospho\_BR2\_04  
 Scan: 1279 Method: FTMS; HCD Score: 103.83 m/z: 580.75 Gene names: AKAP2

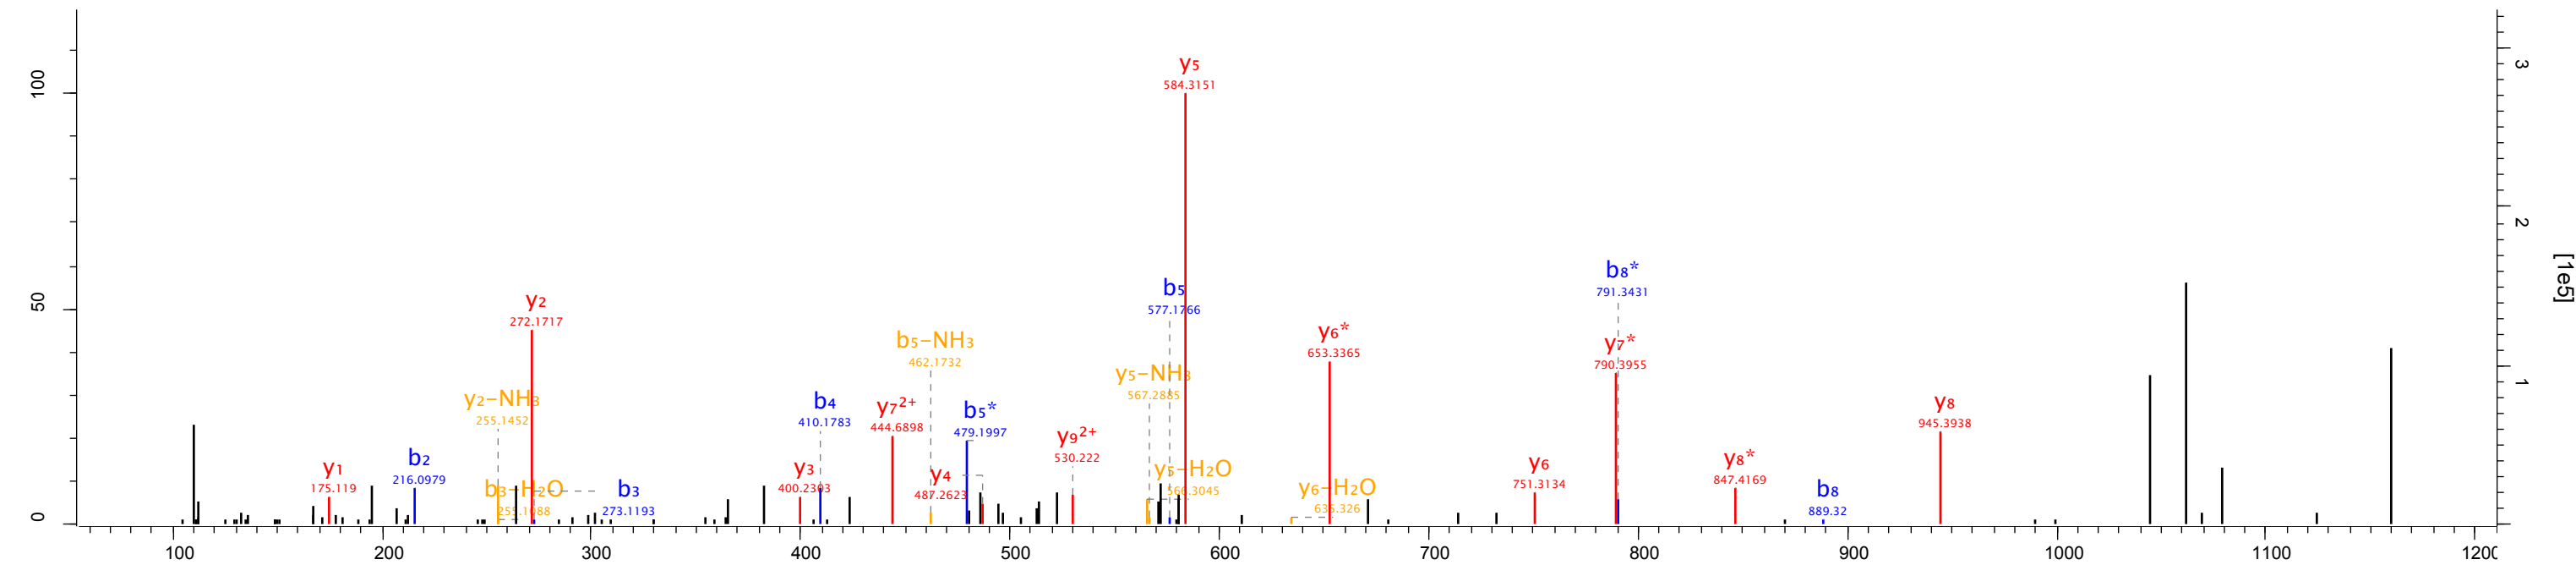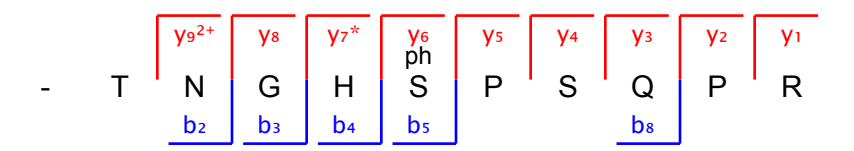

Raw file: 20150814\_A375SR\_Phospho\_BR2\_04  
 Scan: 13379 Method: FTMS; HCD Score: 183.74 m/z: 840.36 Gene names: NF1

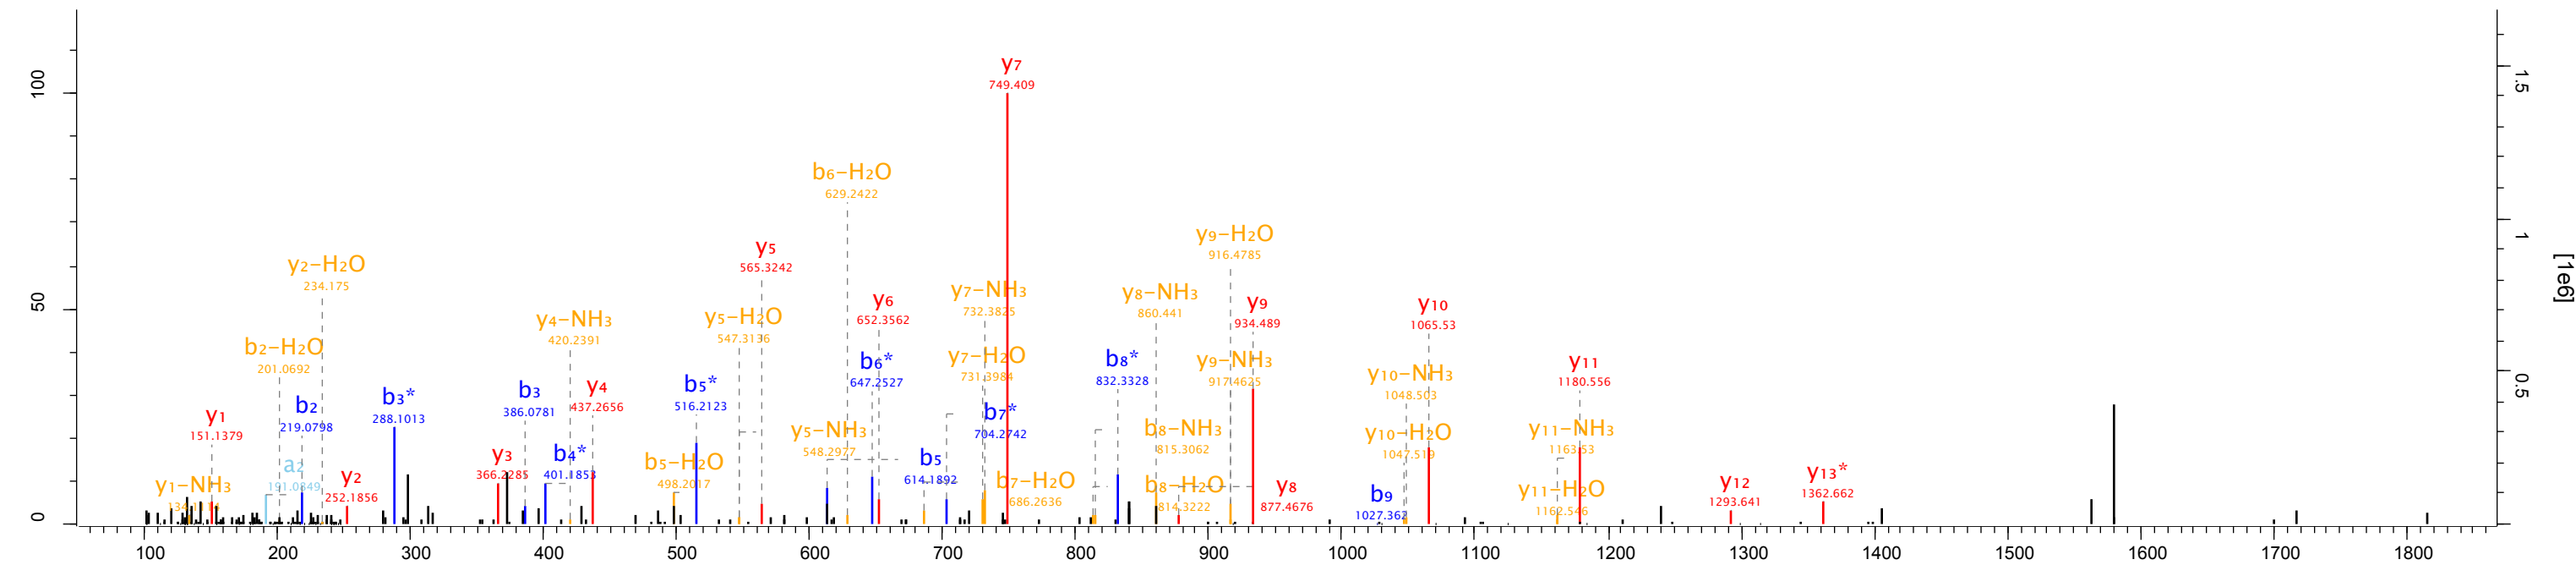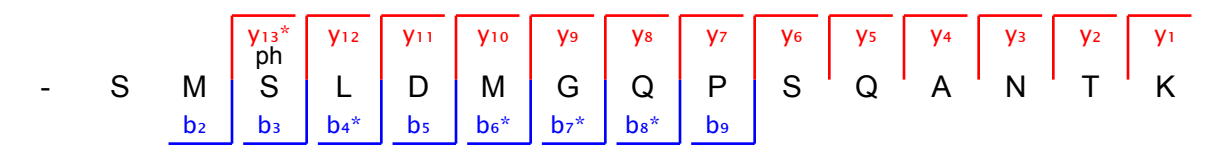

Raw file: 20150814\_A375SR\_Phospho\_BR2\_04  
 Scan: 13389 Method: FTMS; HCD Score: 162.88 m/z: 657.83 Gene names: RBM14

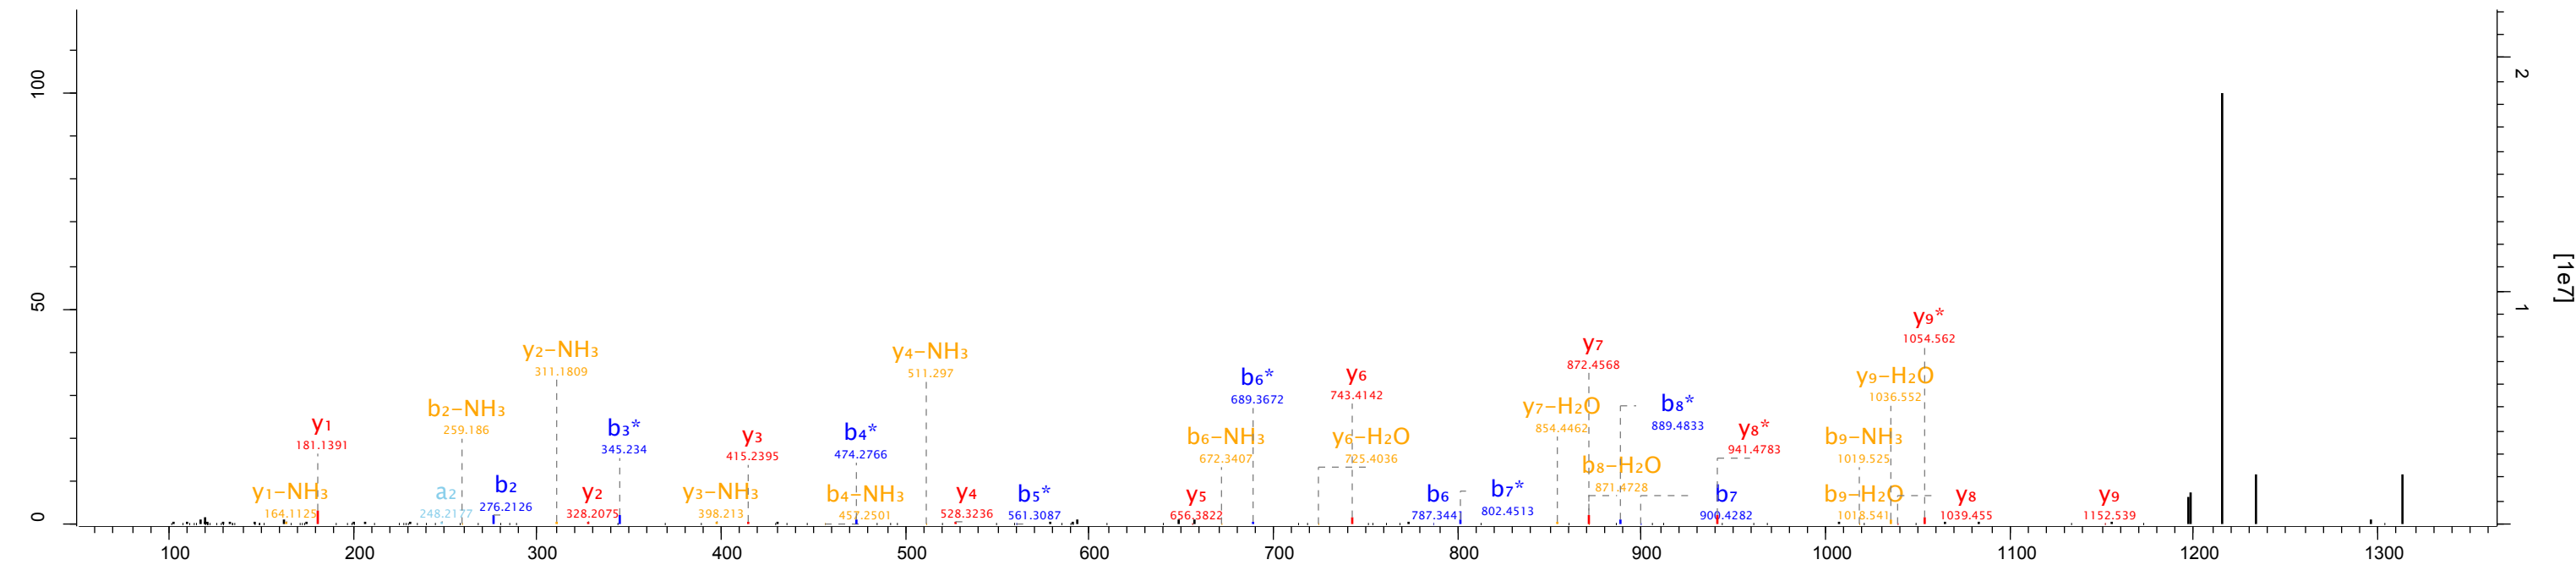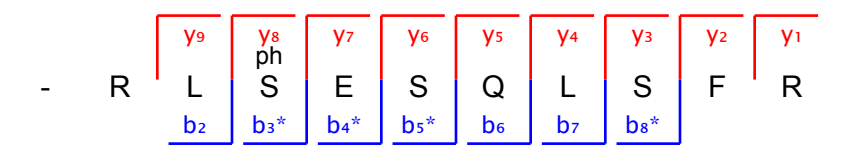

Raw file: 20150814\_A375SR\_Phospho\_BR2\_04  
 Scan: 13919 Method: FTMS; HCD Score: 89.91 m/z: 482.76 Gene names: EPB41L2

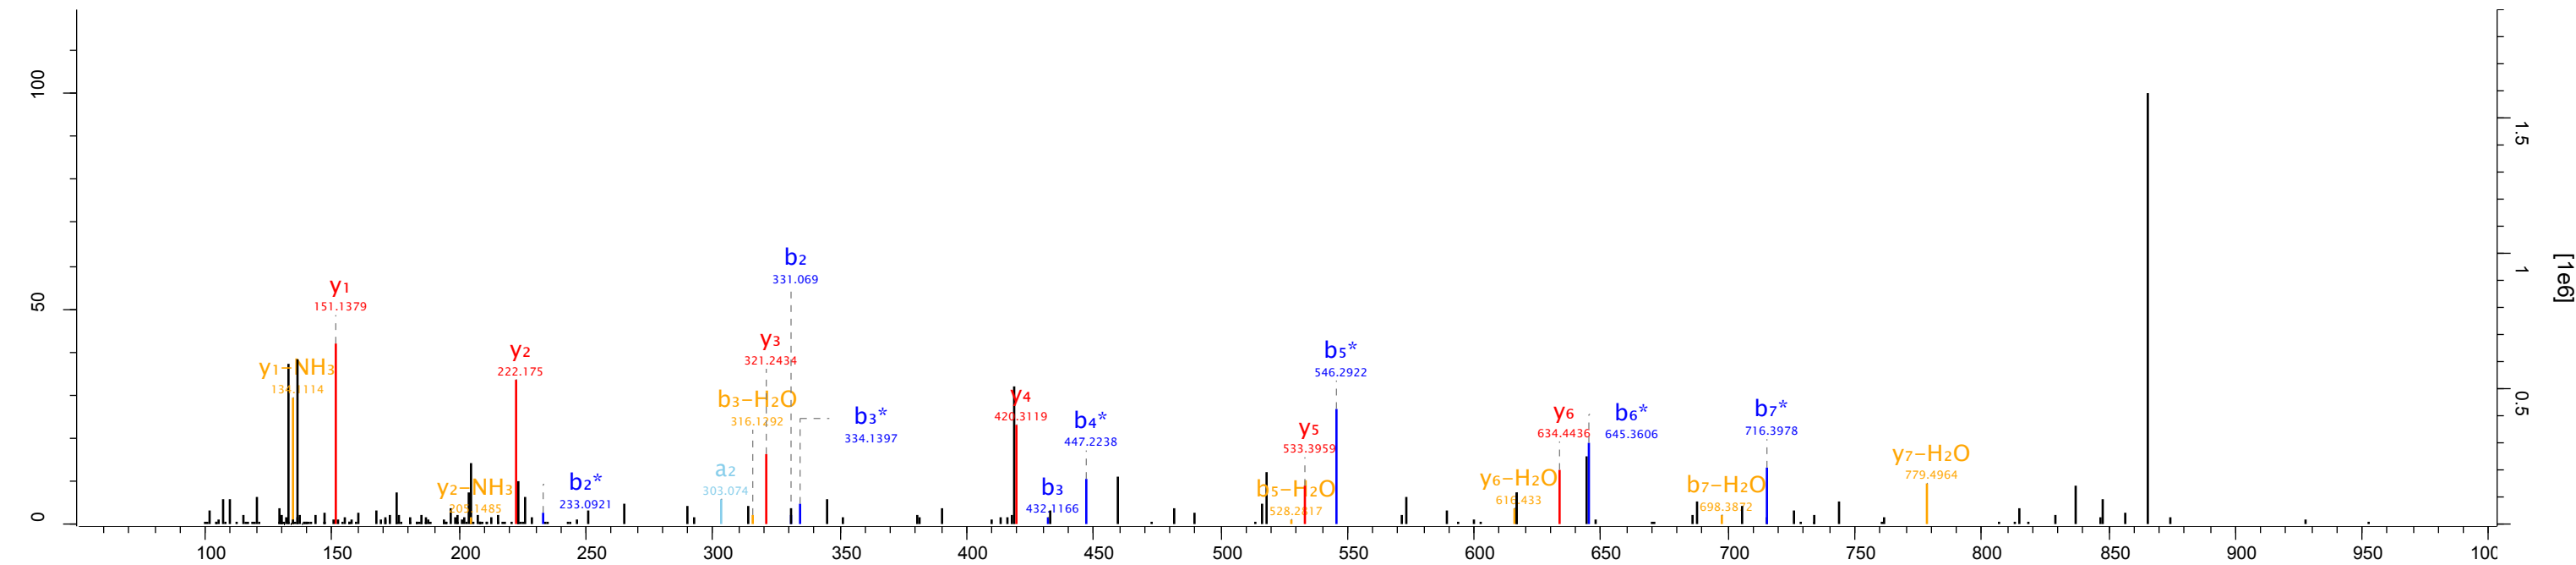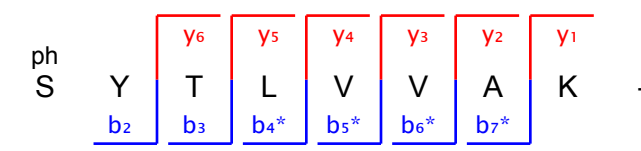

Raw file: 20150814\_A375SR\_Phospho\_BR2\_04  
 Scan: 14229 Method: FTMS; HCD Score: 113.13 m/z: 615.29 Gene names: PCF11

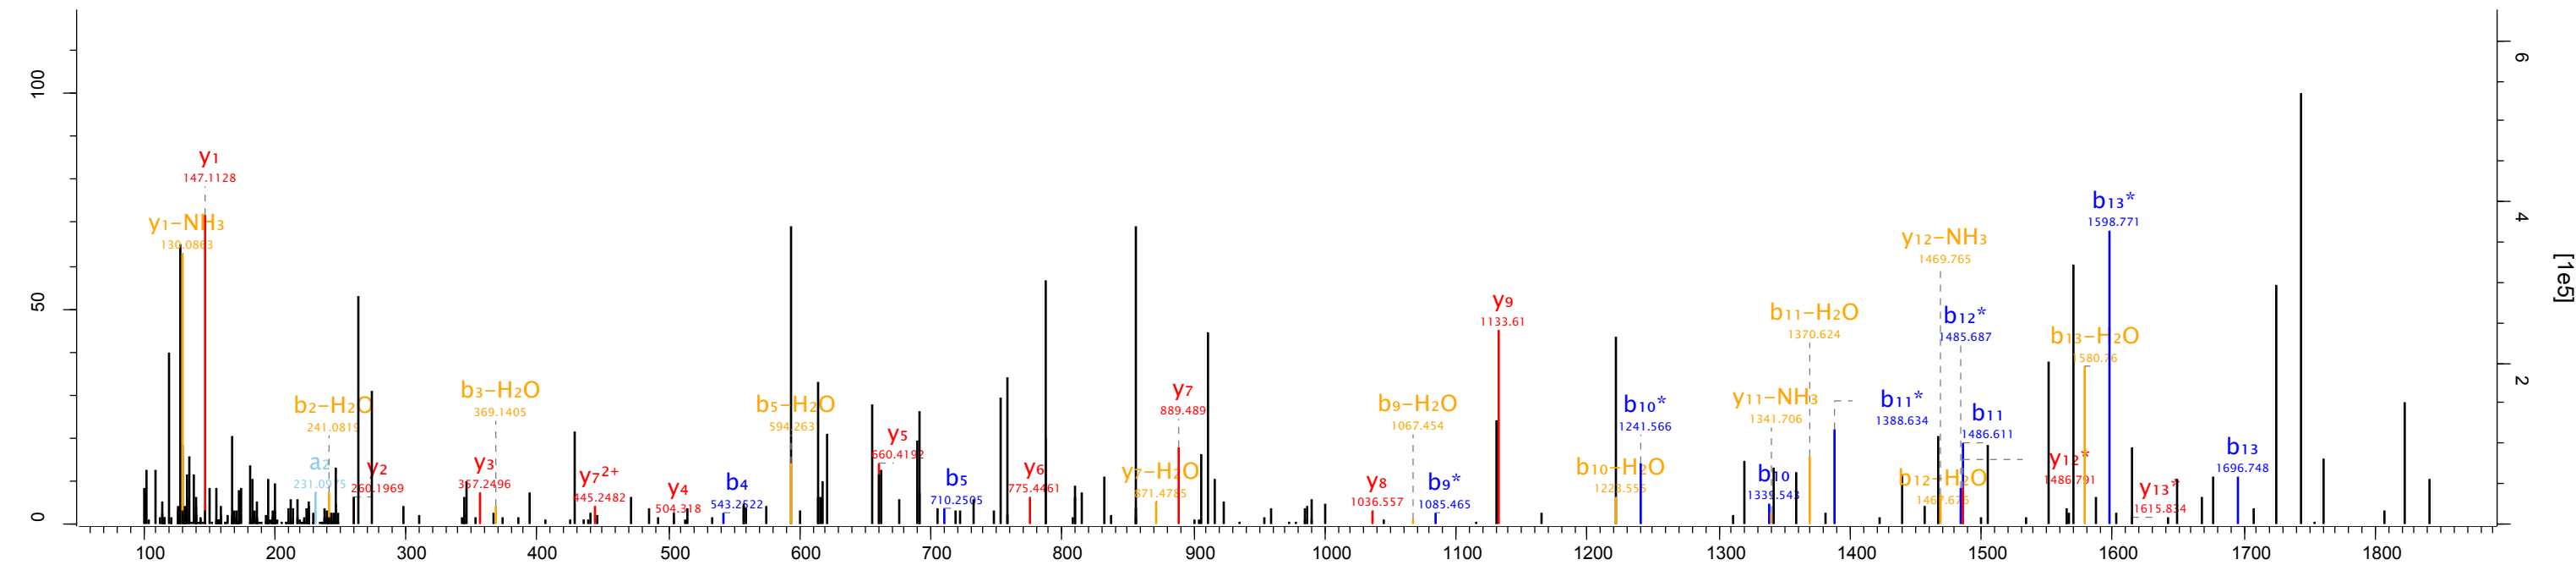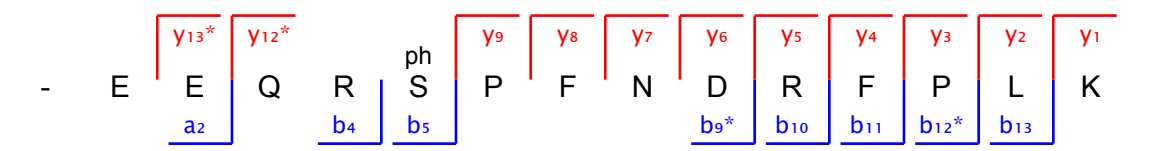

Raw file 20150814\_A375SR\_Phospho\_BR2\_04 Scan 14339 Method FTMS; HCD Score 155.09 m/z 625.3 Gene names ORC1

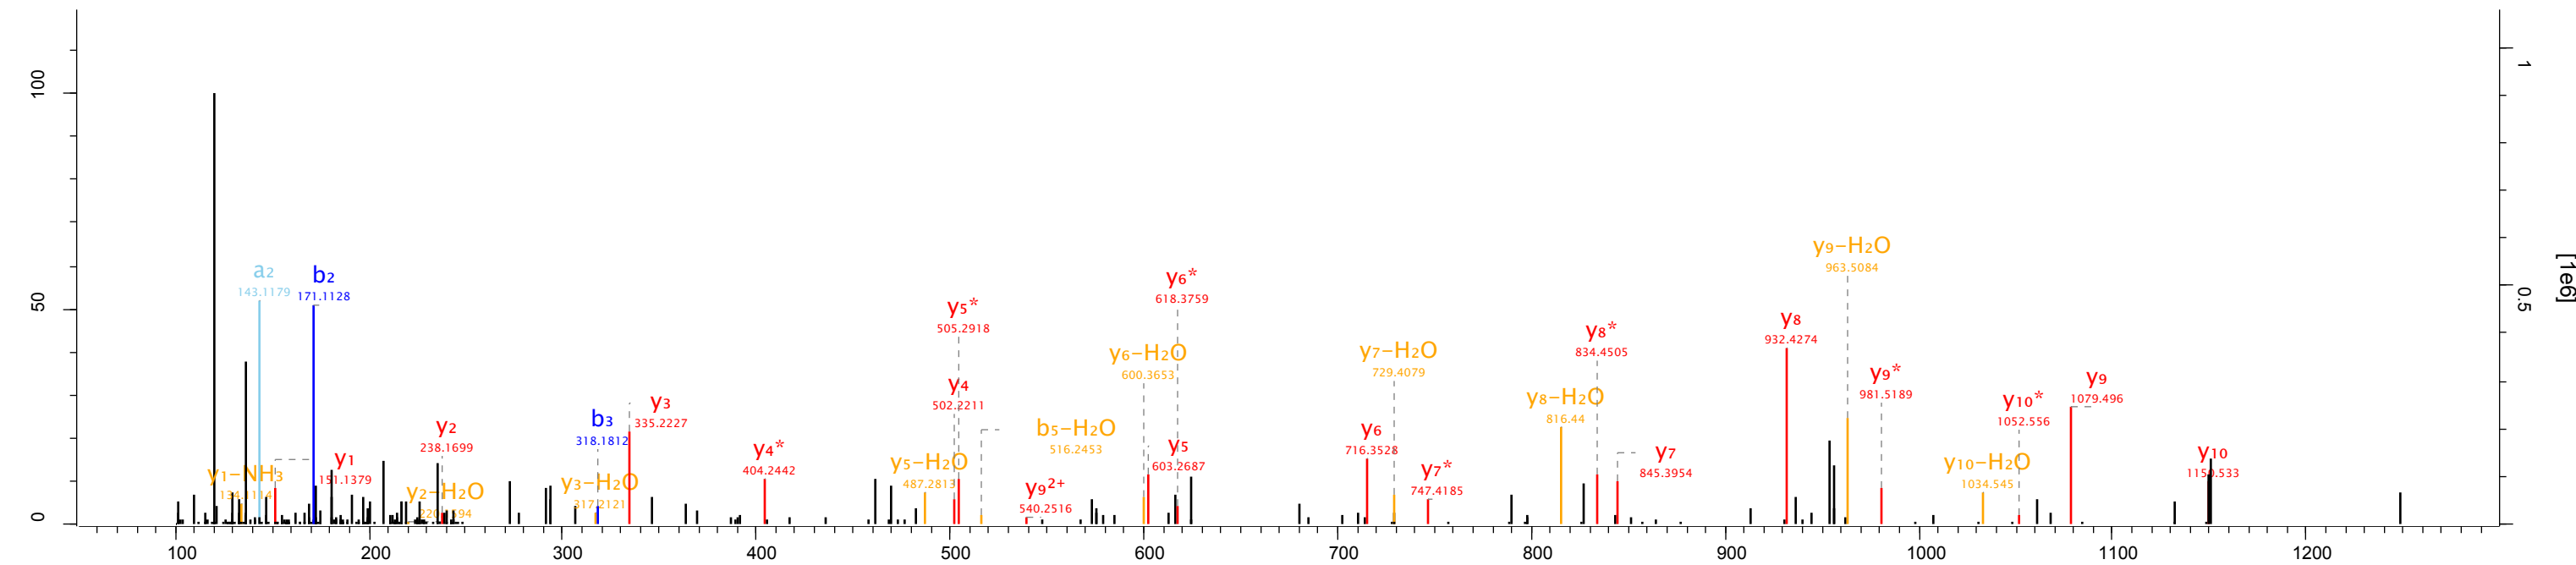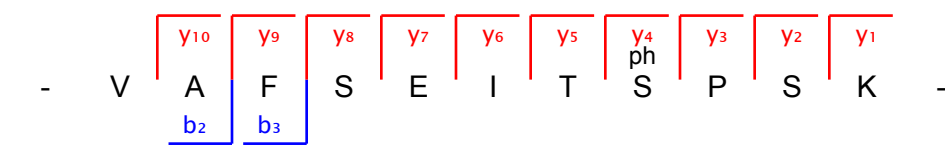



Raw file: 20150814\_A375SR\_Phospho\_BR2\_04  
 Scan: 14349 Method: FTMS; HCD Score: 57.8 m/z: 730.83 Gene names: ZNF462

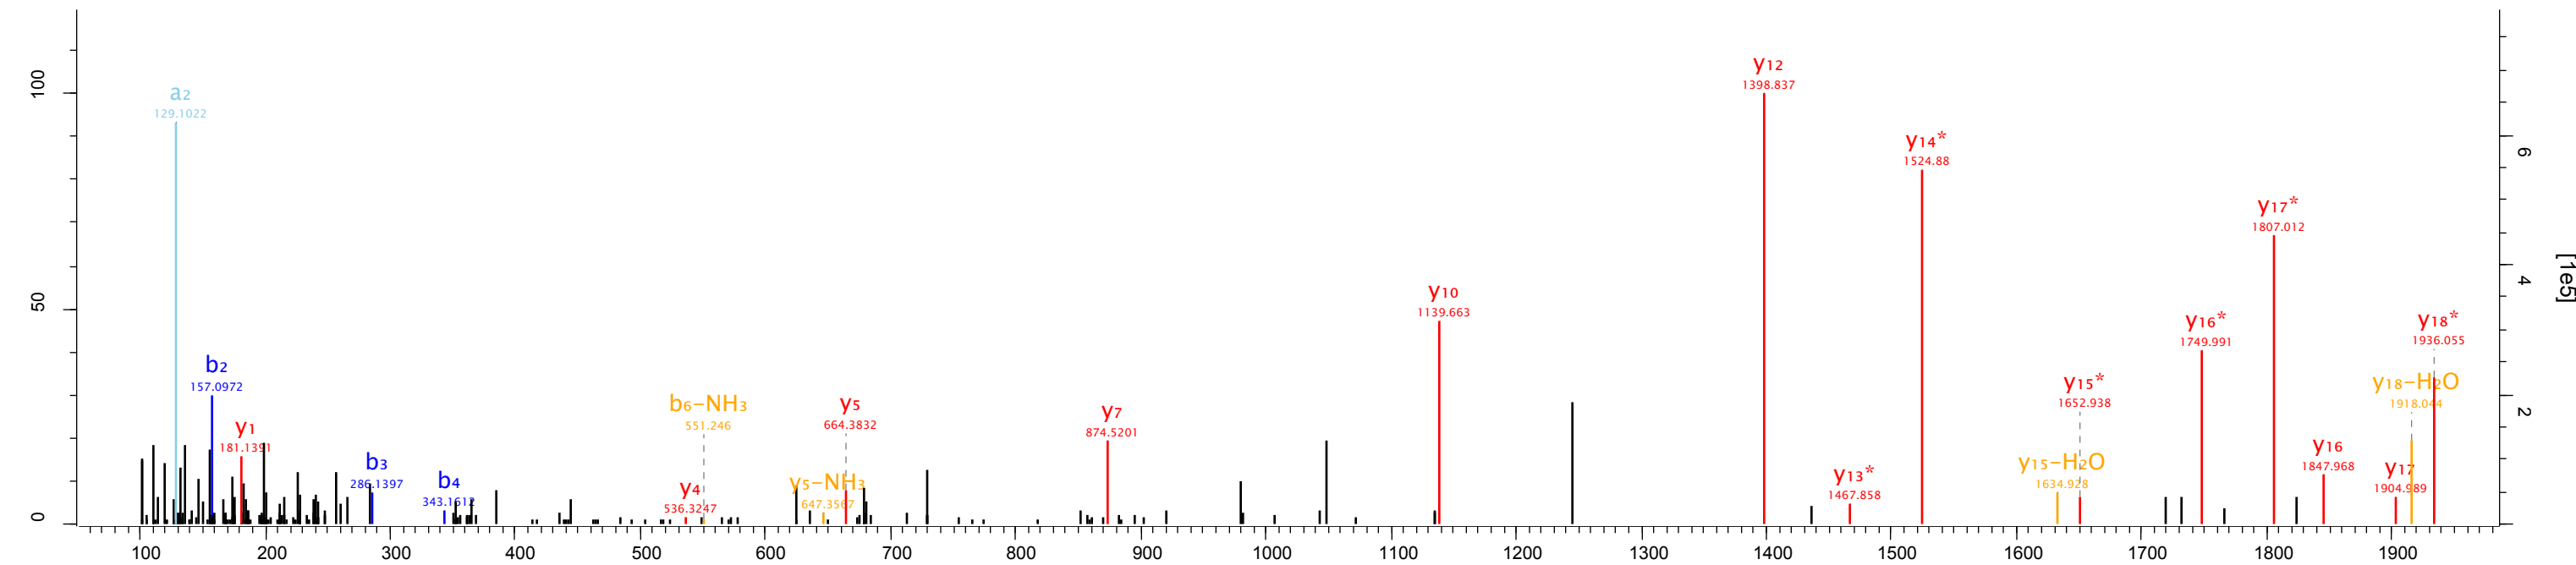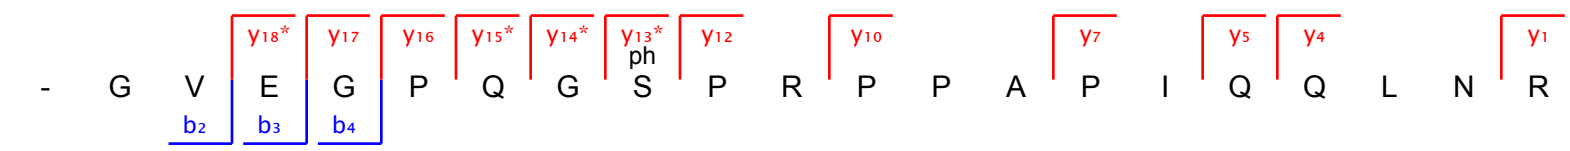

Raw file  
20150814\_A375SR\_Phospho\_BR2\_04

Scan Method Score m/z Gene names  
14589 FTMS; HCD 235.21 868.93 SPAG9

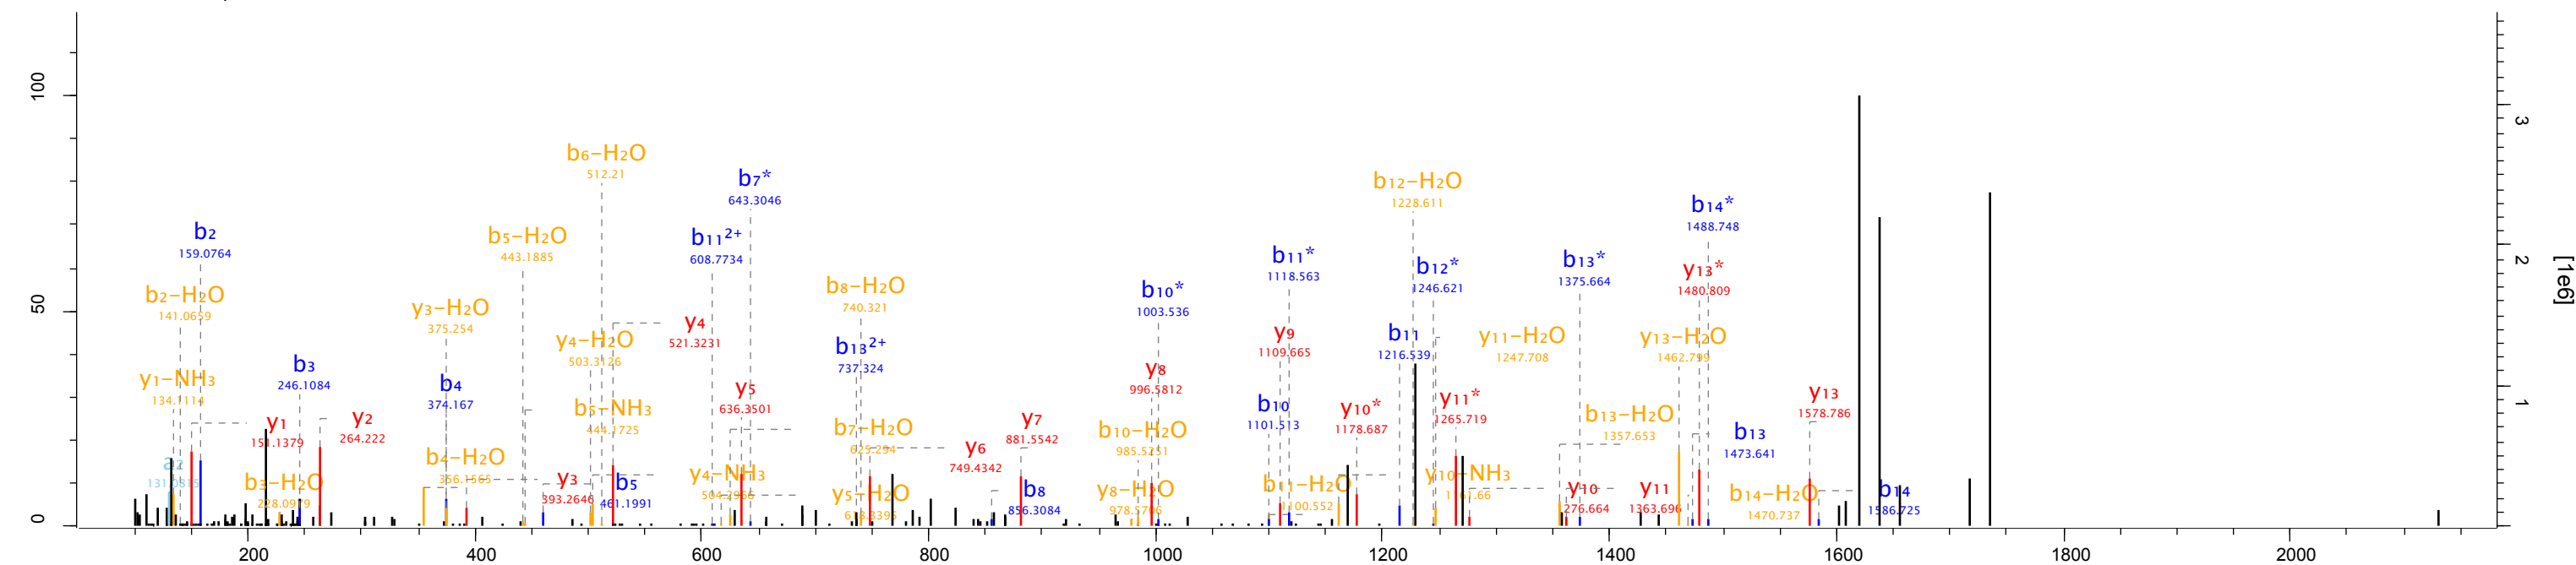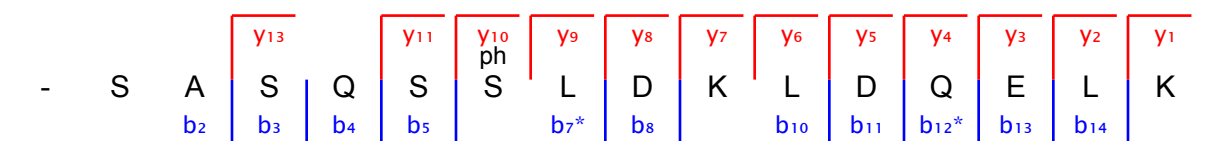

Raw file: 20150814\_A375SR\_Phospho\_BR2\_04  
 Scan: 15589 Method: FTMS; HCD Score: 111.81 m/z: 616.33 Gene names: KIAA1430

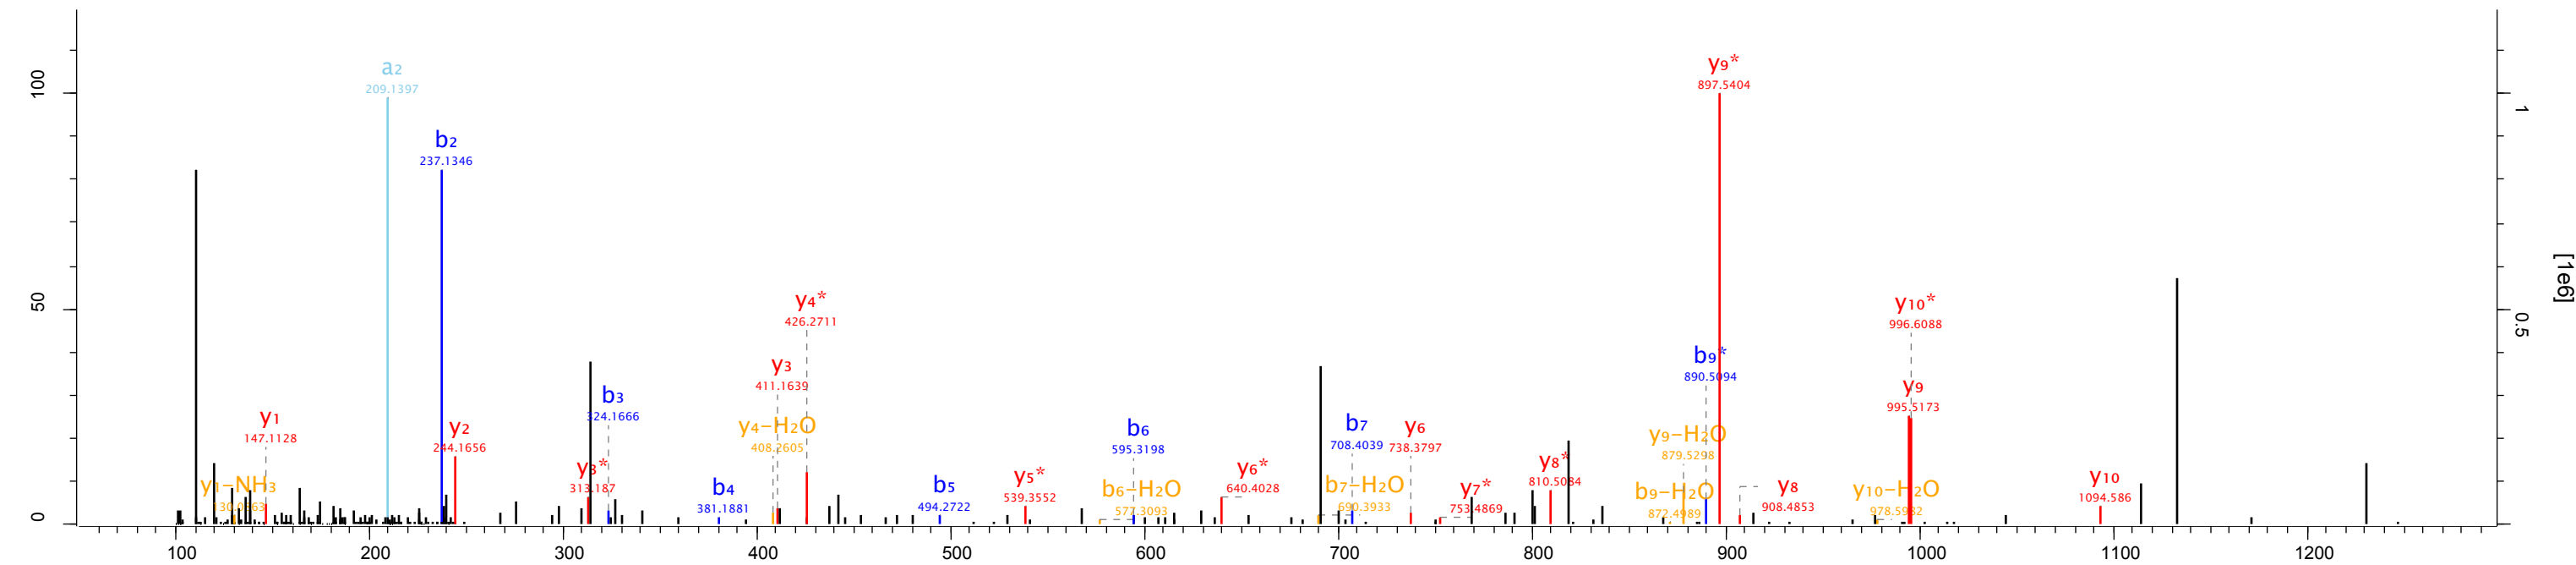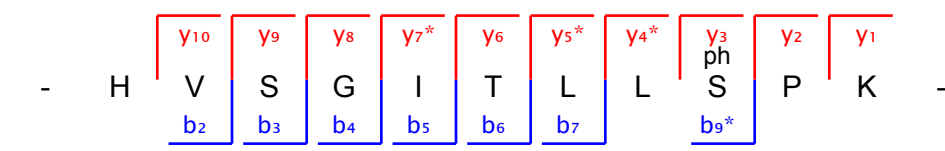

Raw file Scan Method Score m/z Gene names  
 20150814\_A375SR\_Phospho\_BR2\_04 16269 FTMS; HCD 112.29 934.12 NUP88

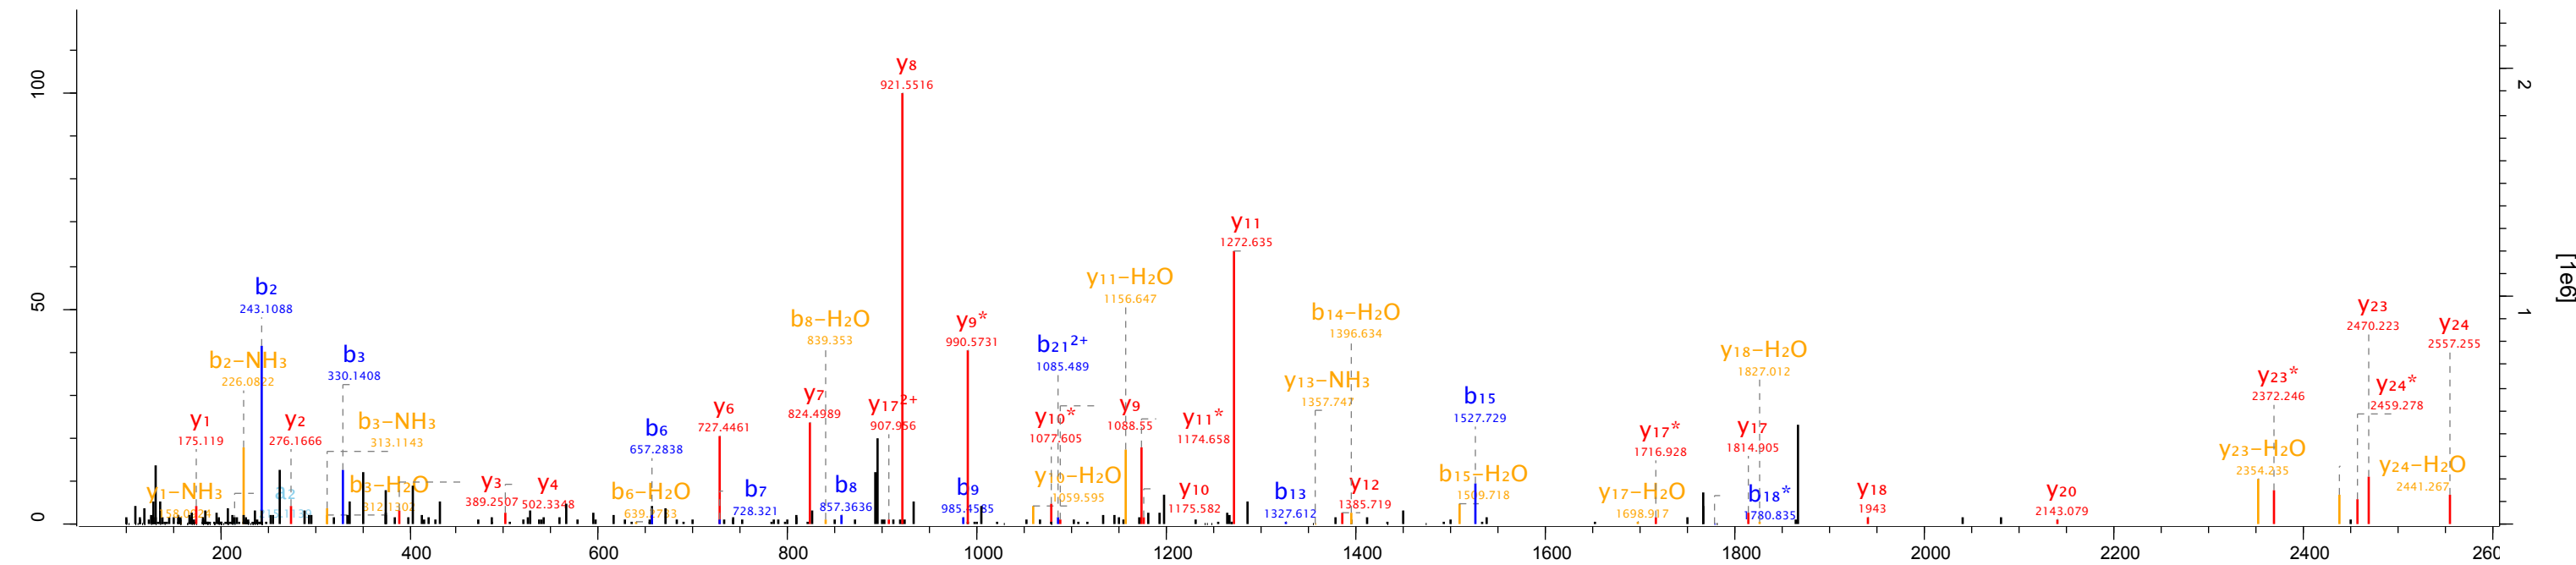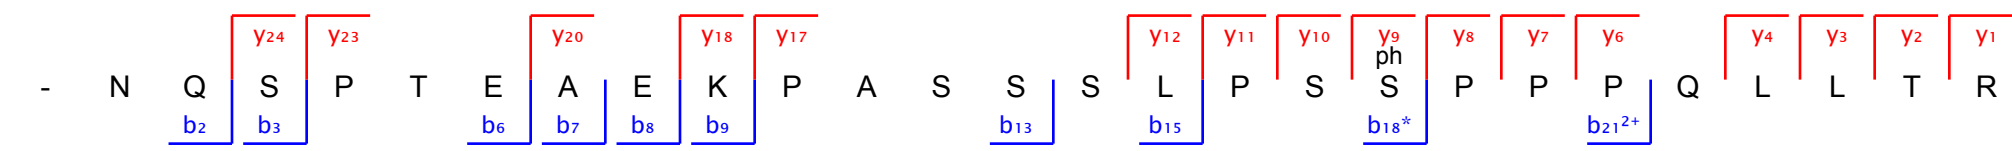

Raw file 20150814\_A375SR\_Phospho\_BR2\_04 Scan 1669 Method FTMS; HCD Score 54.9 m/z 655.25 Gene names MAP1B

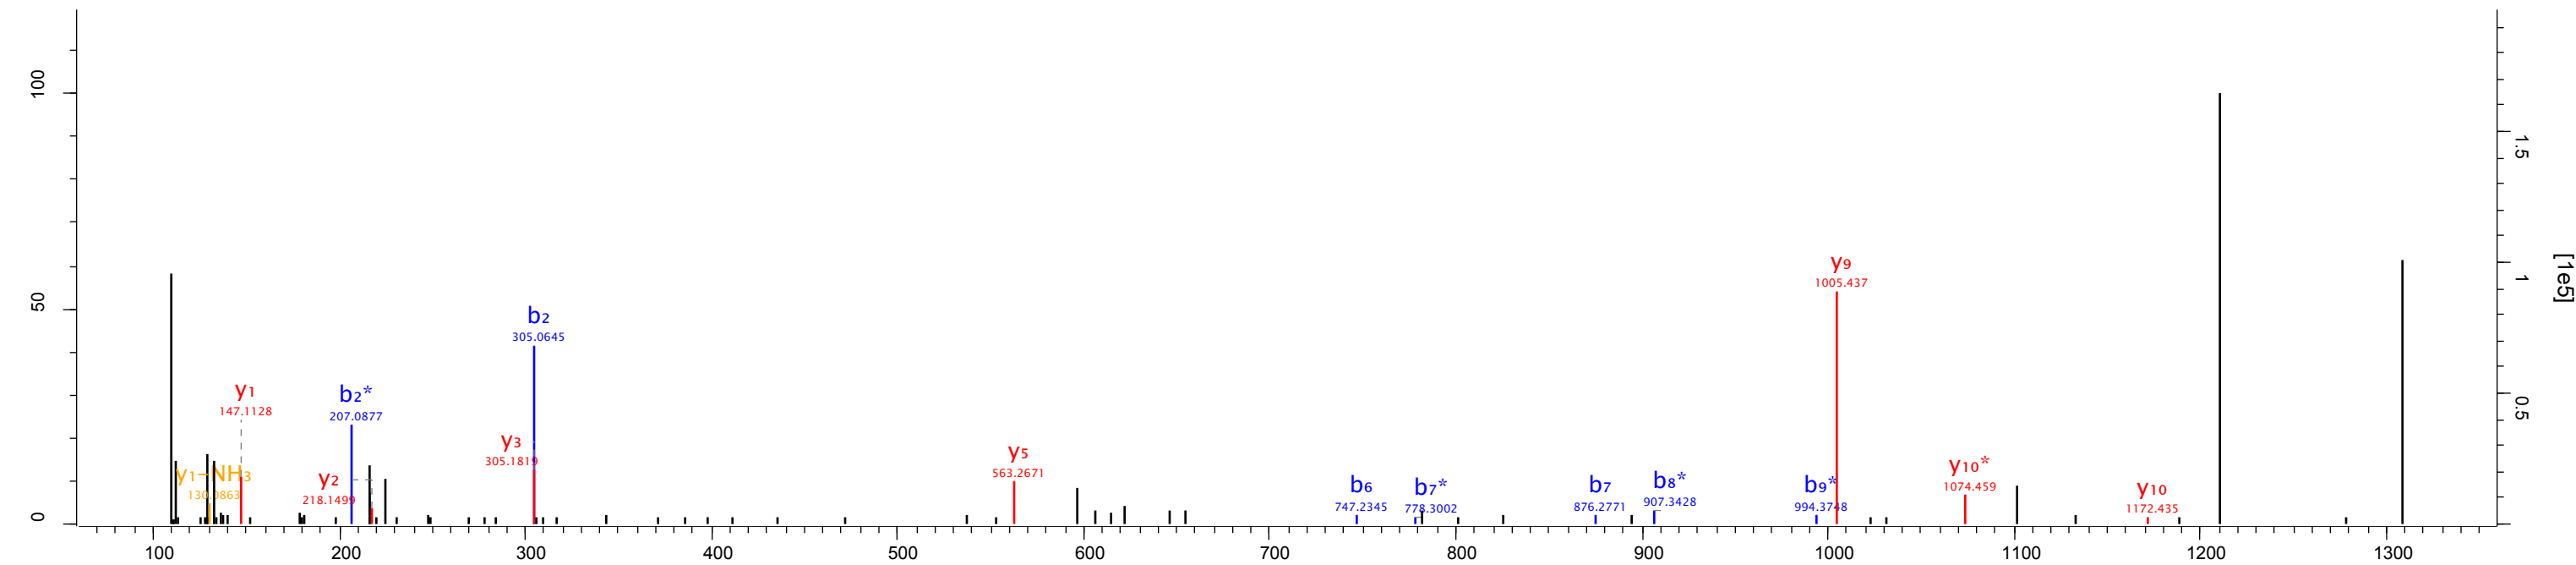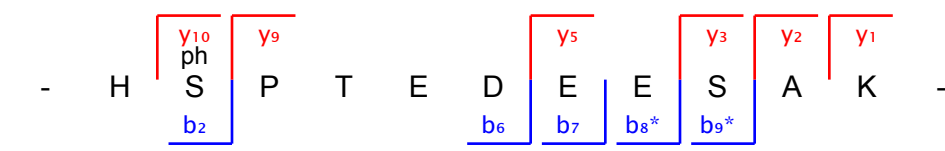

Raw file Scan Method Score m/z Gene names  
 20150814\_A375SR\_Phospho\_BR2\_04 16959 FTMS; HCD 136.56 635.94 ARFGAP1

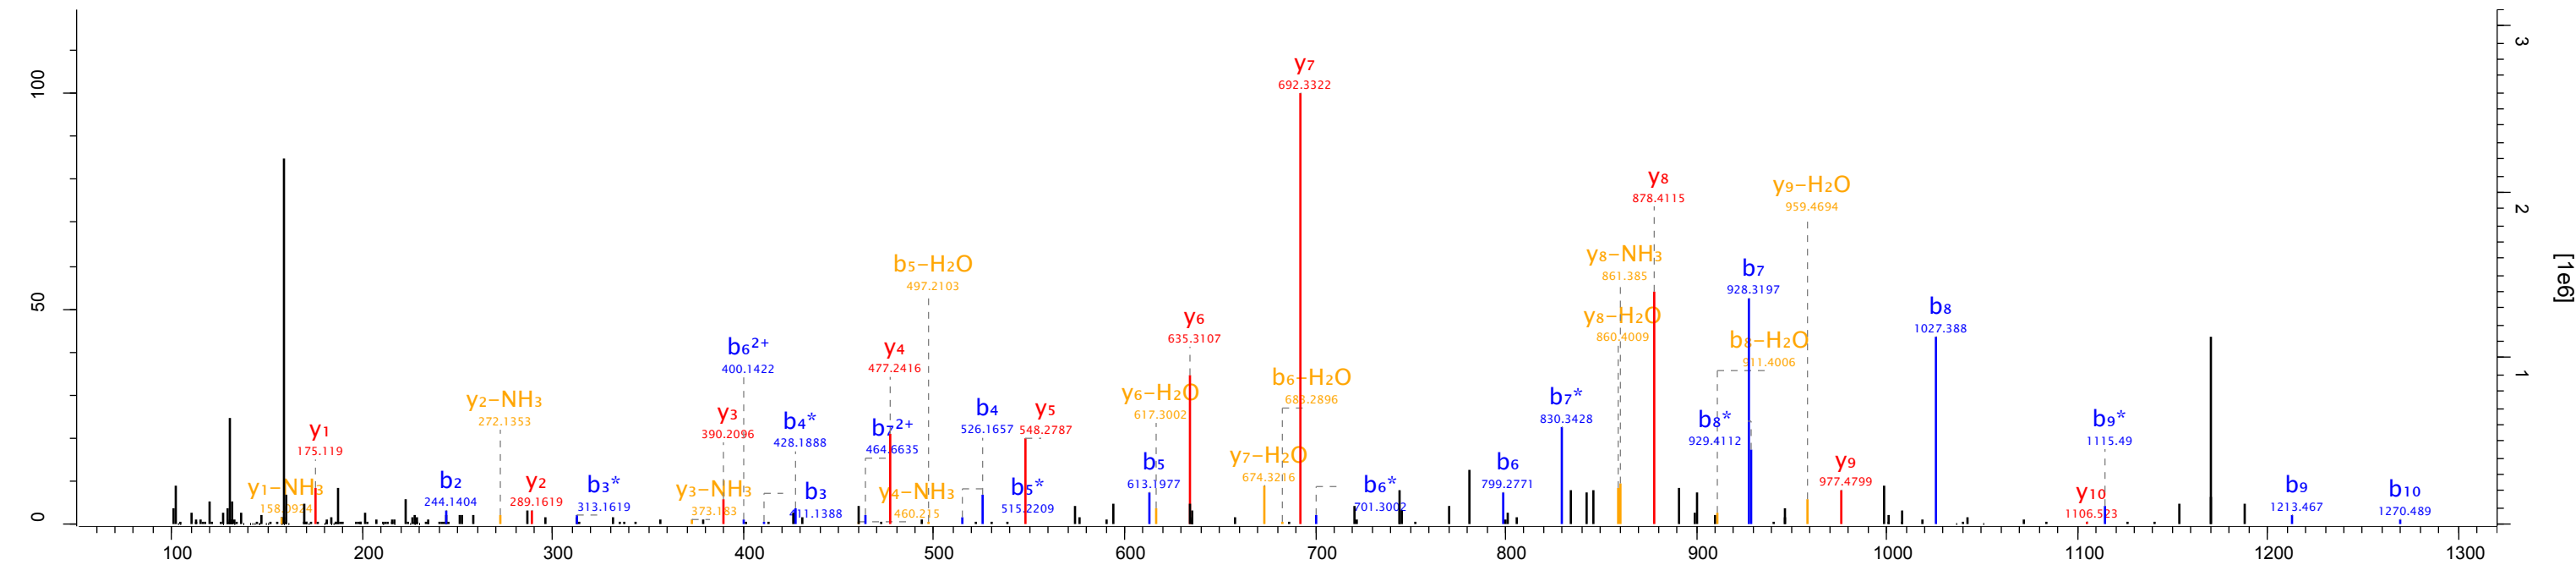

- R S S<sup>ph</sup> D S W E V W G S A S T N R -

b<sub>2</sub>
b<sub>3</sub>
b<sub>4</sub>
b<sub>5</sub>
b<sub>6</sub>
b<sub>7</sub>
b<sub>8</sub>
b<sub>9</sub>
b<sub>10</sub>
y<sub>10</sub>
y<sub>9</sub>
y<sub>8</sub>
y<sub>7</sub>
y<sub>6</sub>
y<sub>5</sub>
y<sub>4</sub>
y<sub>3</sub>
y<sub>2</sub>
y<sub>1</sub>

Raw file: 20150814\_A375SR\_Phospho\_BR2\_04  
 Scan: 16989 Method: FTMS; HCD Score: 231.38 m/z: 848.39 Gene names: CEP55

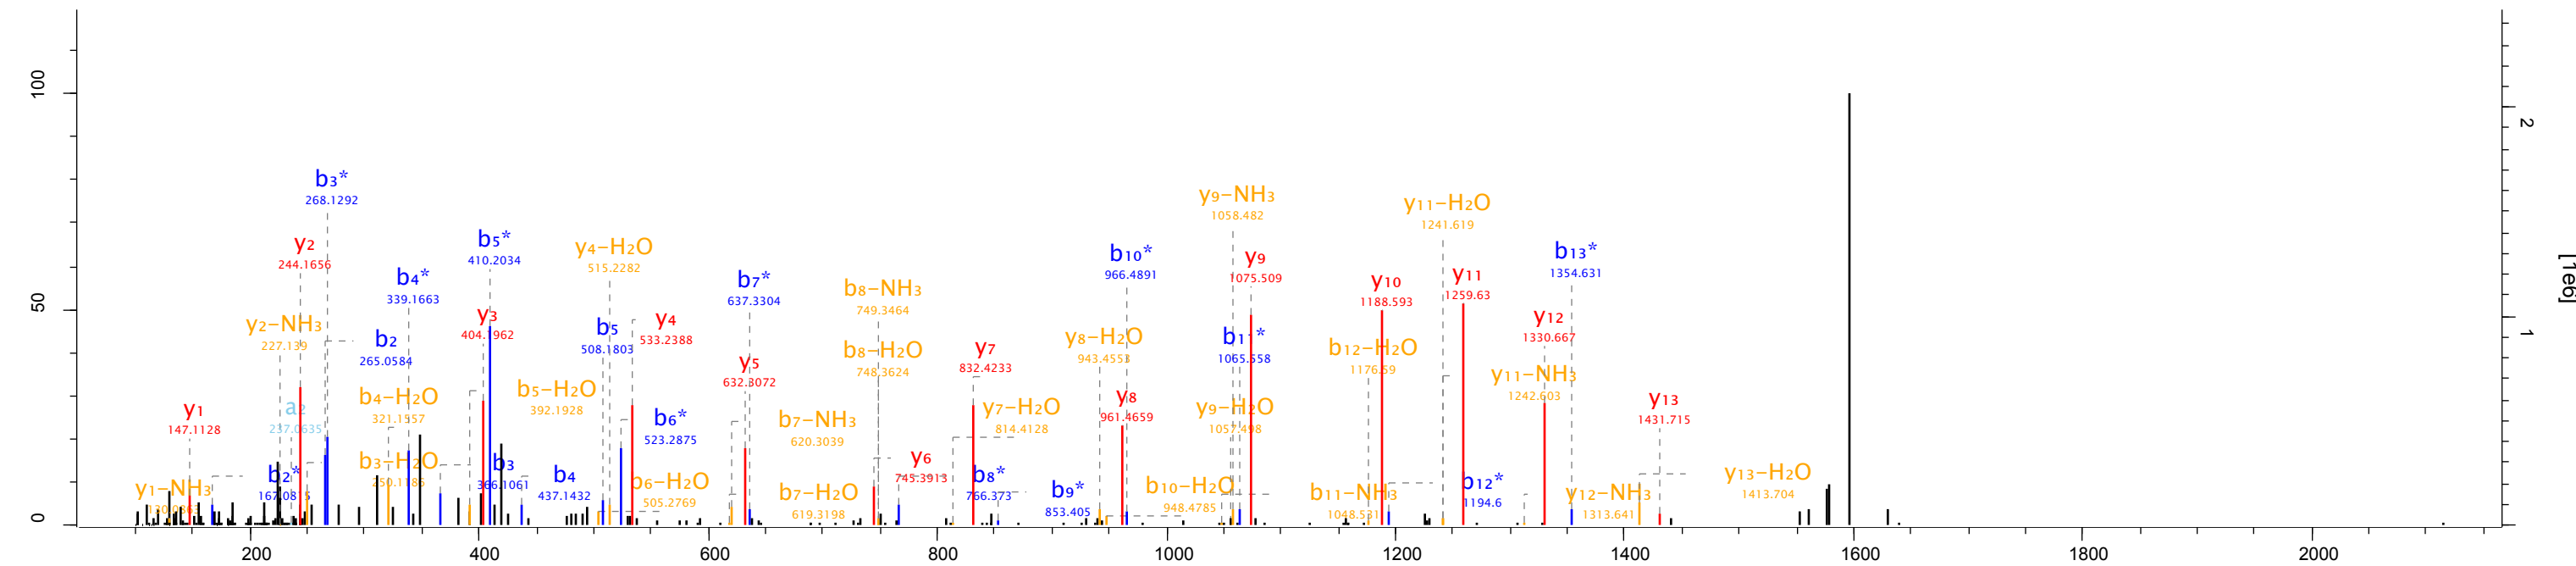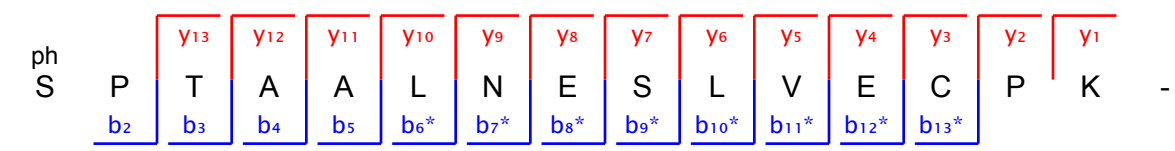

Raw file: 20150814\_A375SR\_Phospho\_BR2\_04  
 Scan: 16999 Method: FTMS; HCD Score: 163.45 m/z: 830.39 Gene names: LUZP1

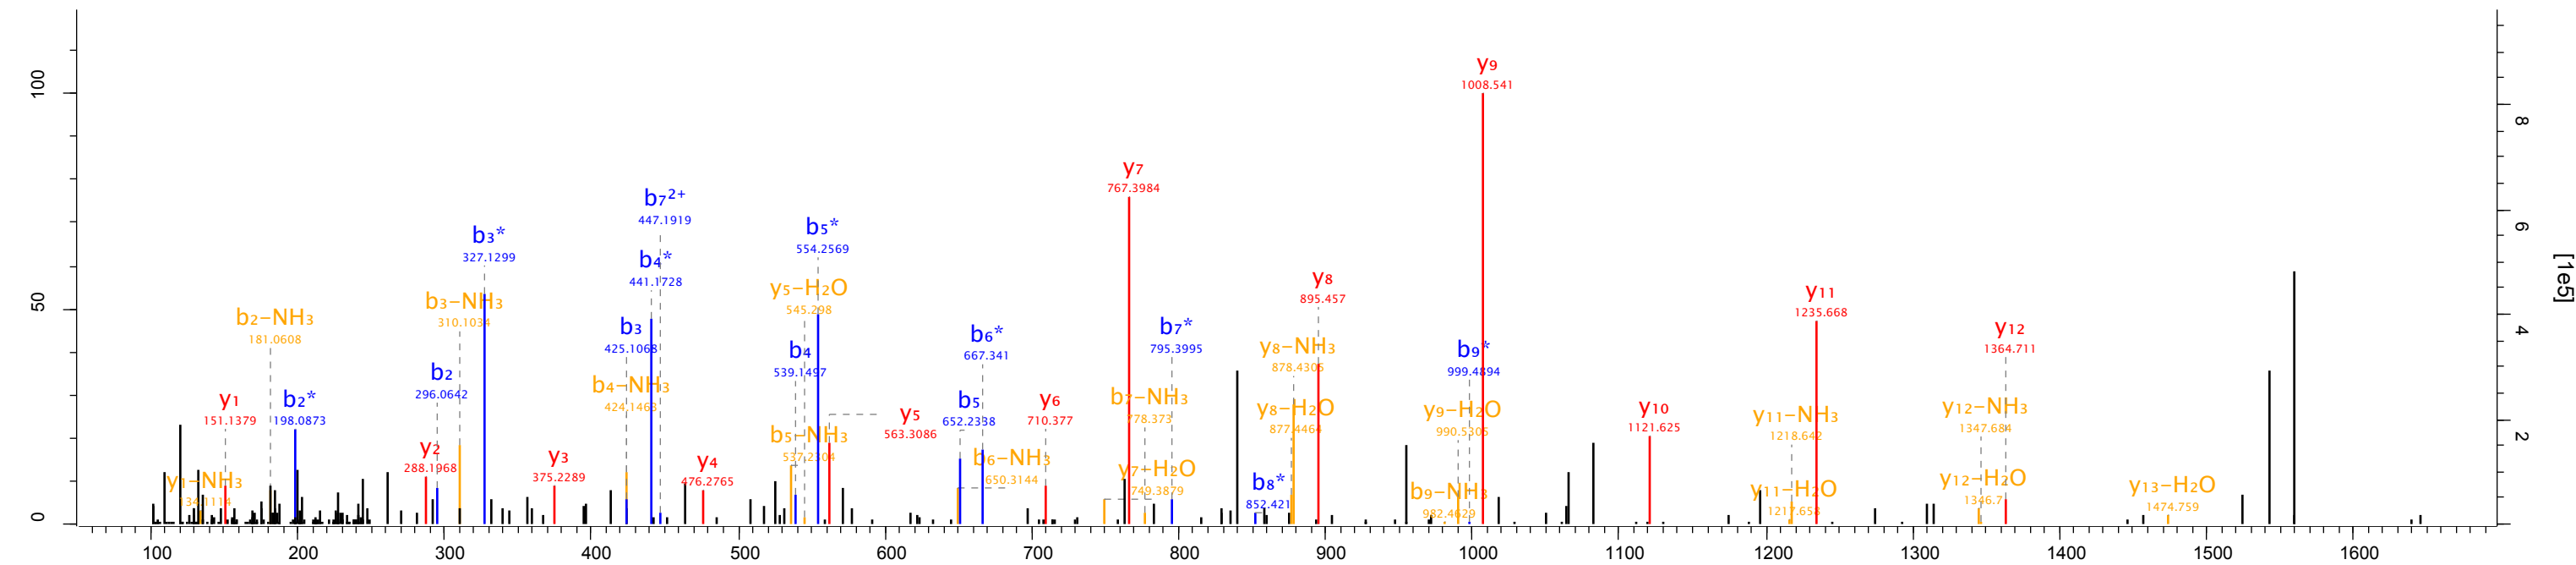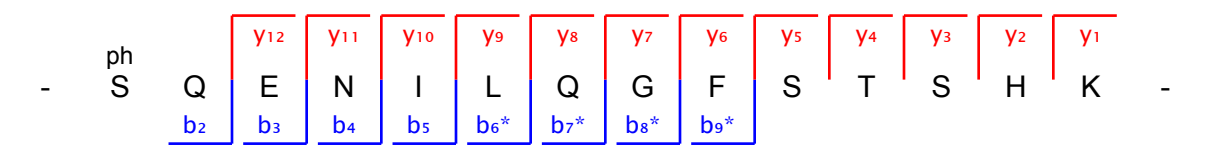



Raw file 20150814\_A375SR\_Phospho\_BR2\_04 Scan 17069 Method FTMS; HCD Score 189.84 m/z 911.44 Gene names TNFRSF21

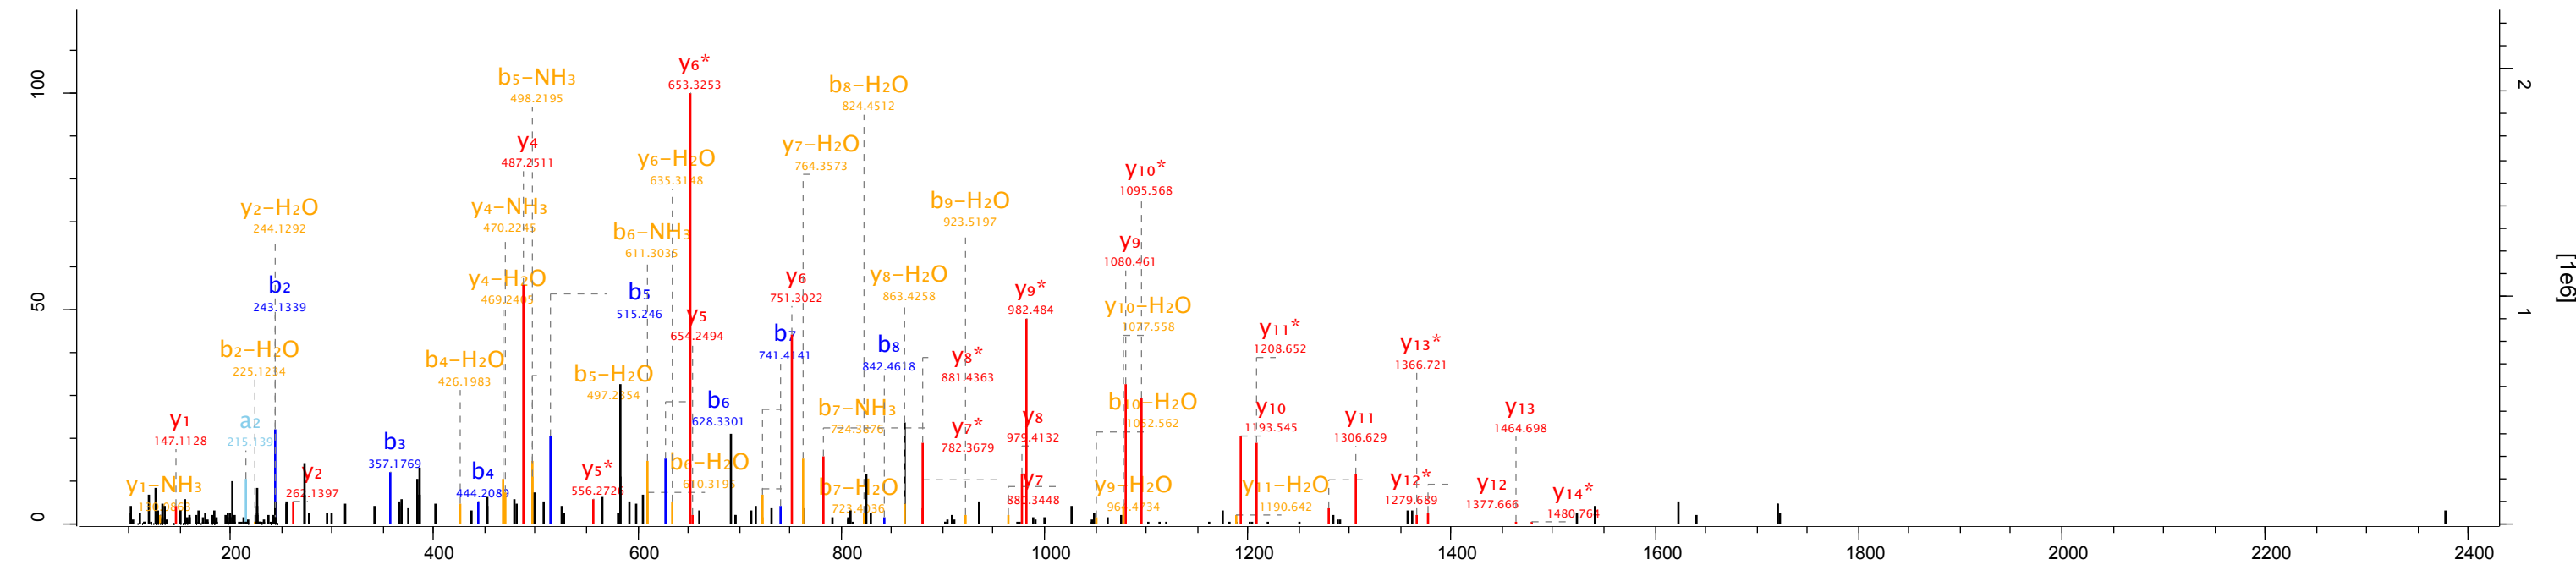

- L E N S A L T V E P S P Q D K -

b<sub>2</sub>
b<sub>3</sub>
b<sub>4</sub>
b<sub>5</sub>
b<sub>6</sub>
b<sub>7</sub>
b<sub>8</sub>
y<sub>14</sub>\*
y<sub>13</sub>
y<sub>12</sub>
y<sub>11</sub>
y<sub>10</sub>
y<sub>9</sub>
y<sub>8</sub>
y<sub>7</sub>
y<sub>6</sub>
y<sub>5</sub>
y<sub>4</sub>
y<sub>2</sub>
y<sub>1</sub>

Raw file 20150814\_A375SR\_Phospho\_BR2\_04 Scan 17079 Method FTMS; HCD Score 187.47 m/z 961.89 Gene names HSPBP1

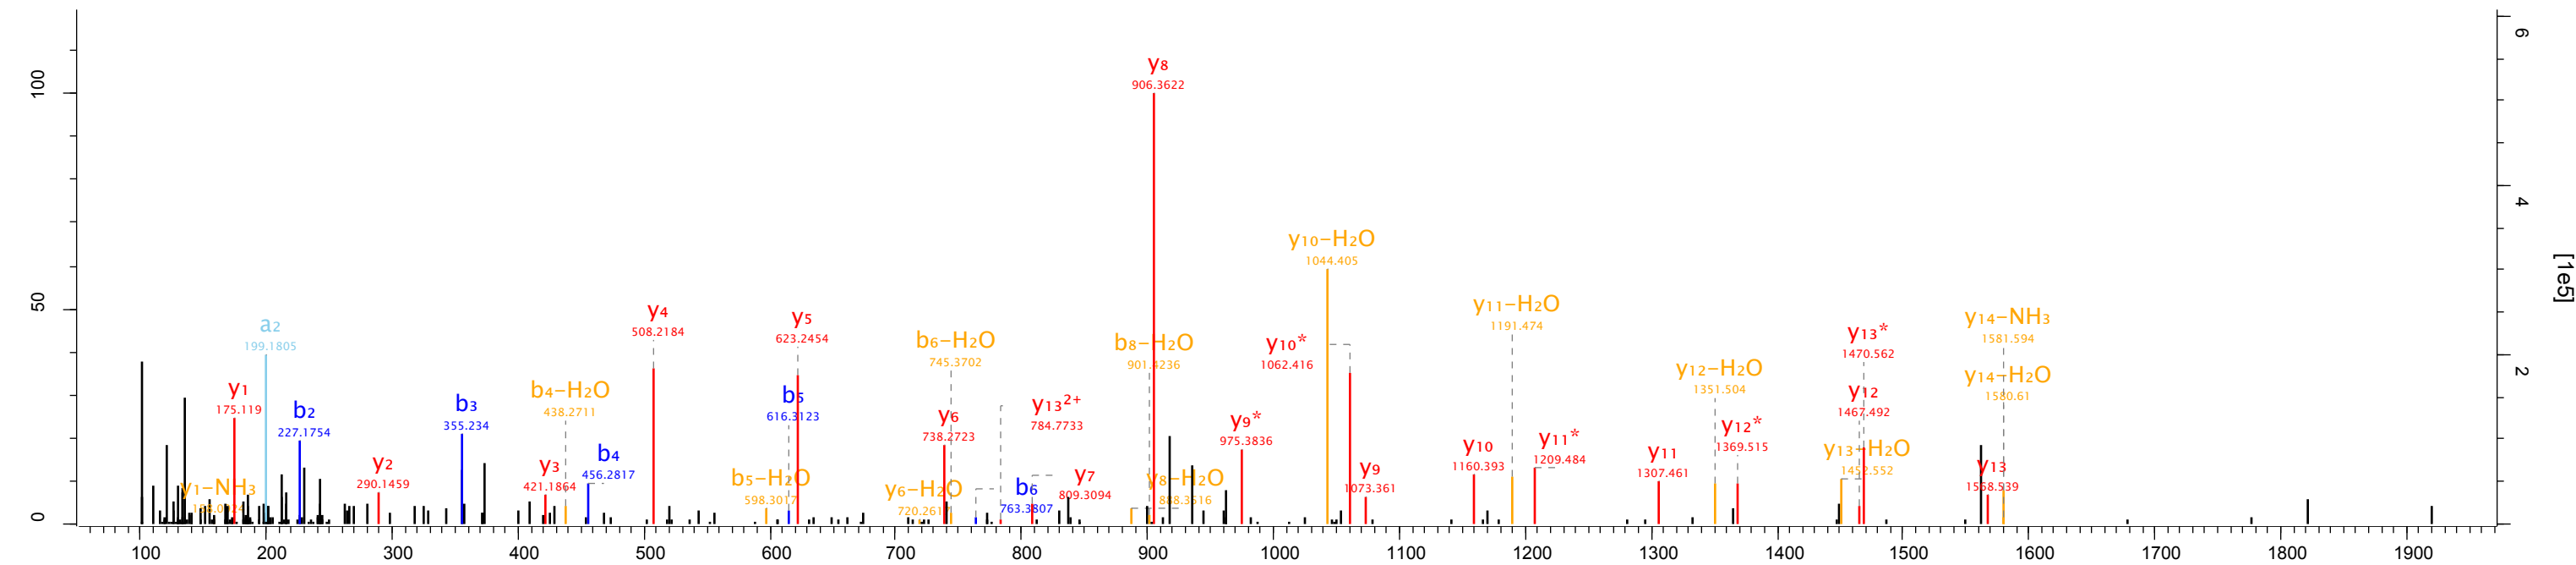

- L L Q T C F S S<sup>ph</sup> P A D D S M D R -

Fragmentation scheme showing b-ions (b<sub>2</sub> to b<sub>6</sub>) and y-ions (y<sub>1</sub> to y<sub>13</sub>) corresponding to the peptide sequence. The b-ions are highlighted in blue, and the y-ions are highlighted in red.

Raw file 20150814\_A375SR\_Phospho\_BR2\_04 Scan 17589 Method FTMS; HCD Score 101.28 m/z 573.3 Gene names KANK2

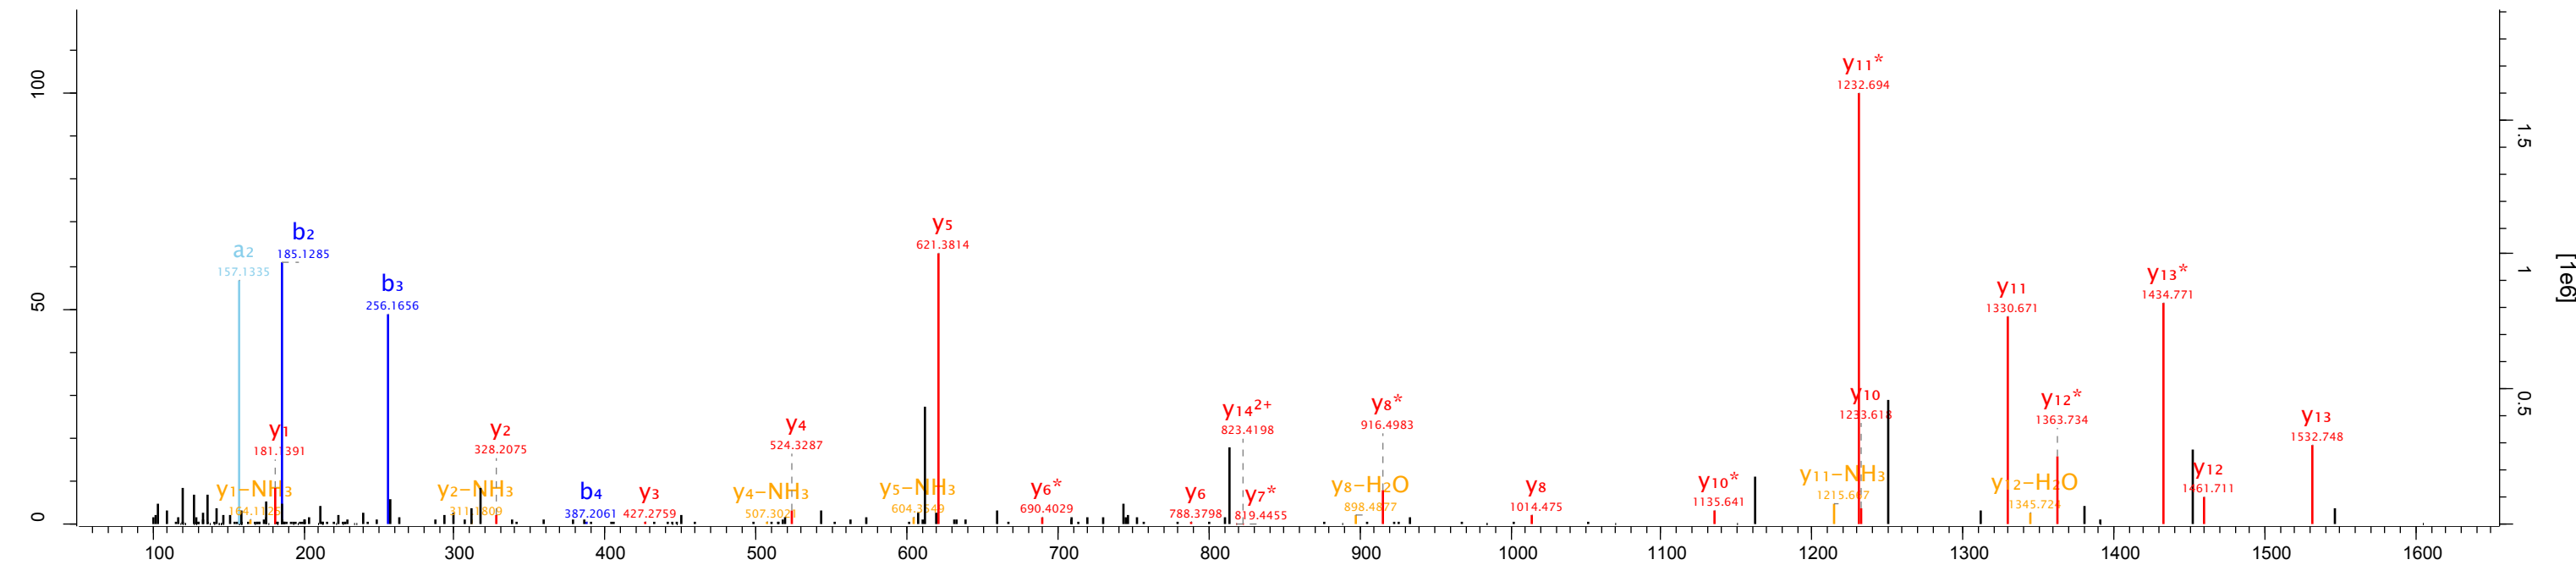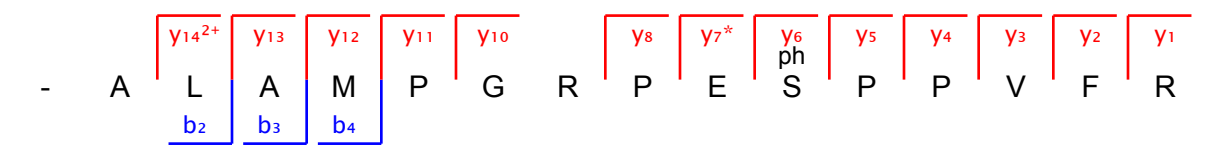

Raw file Scan Method m/z Gene names  
 20150814\_A375SR\_Phospho\_BR2\_04 17879 FTMS; HCD 154.33 820.73 SIPA1L3

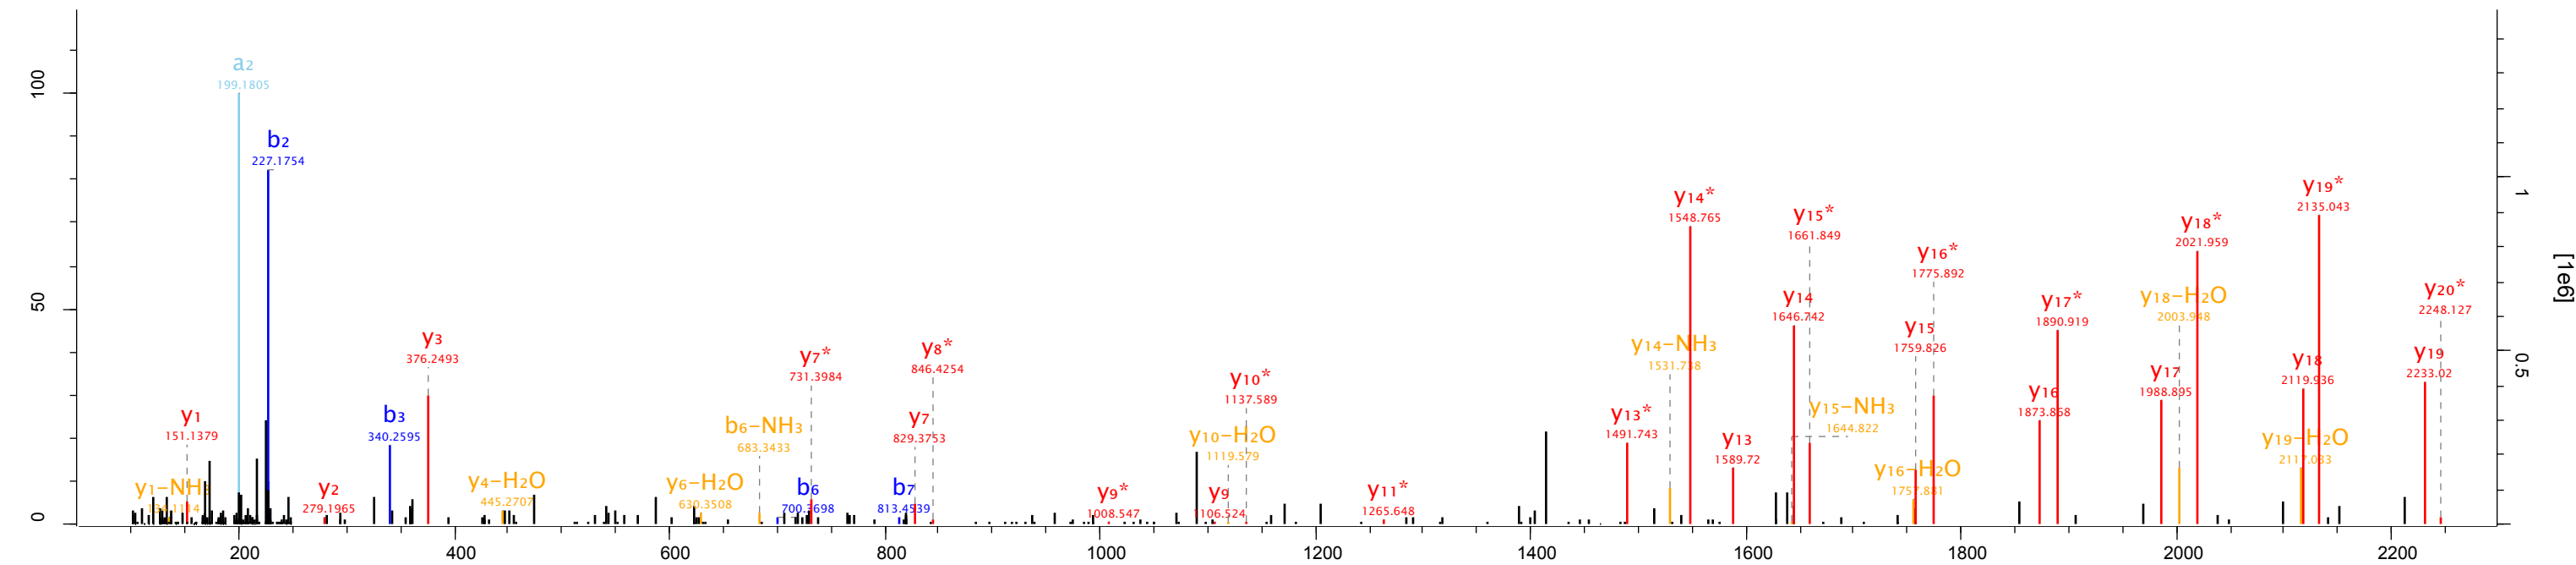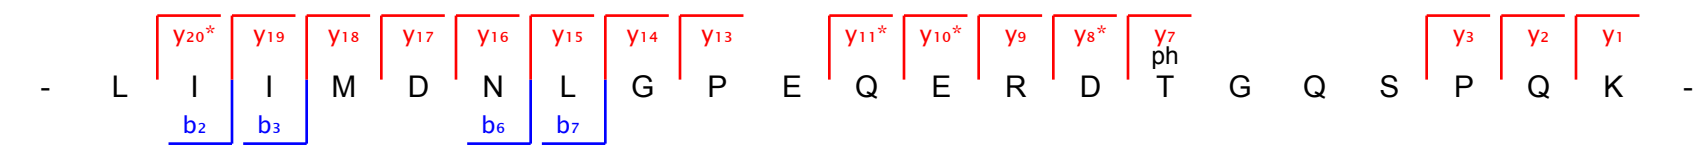

Raw file 20150814\_A375SR\_Phospho\_BR2\_04 Scan 18279 Method FTMS; HCD Score 135.81 m/z 830.9

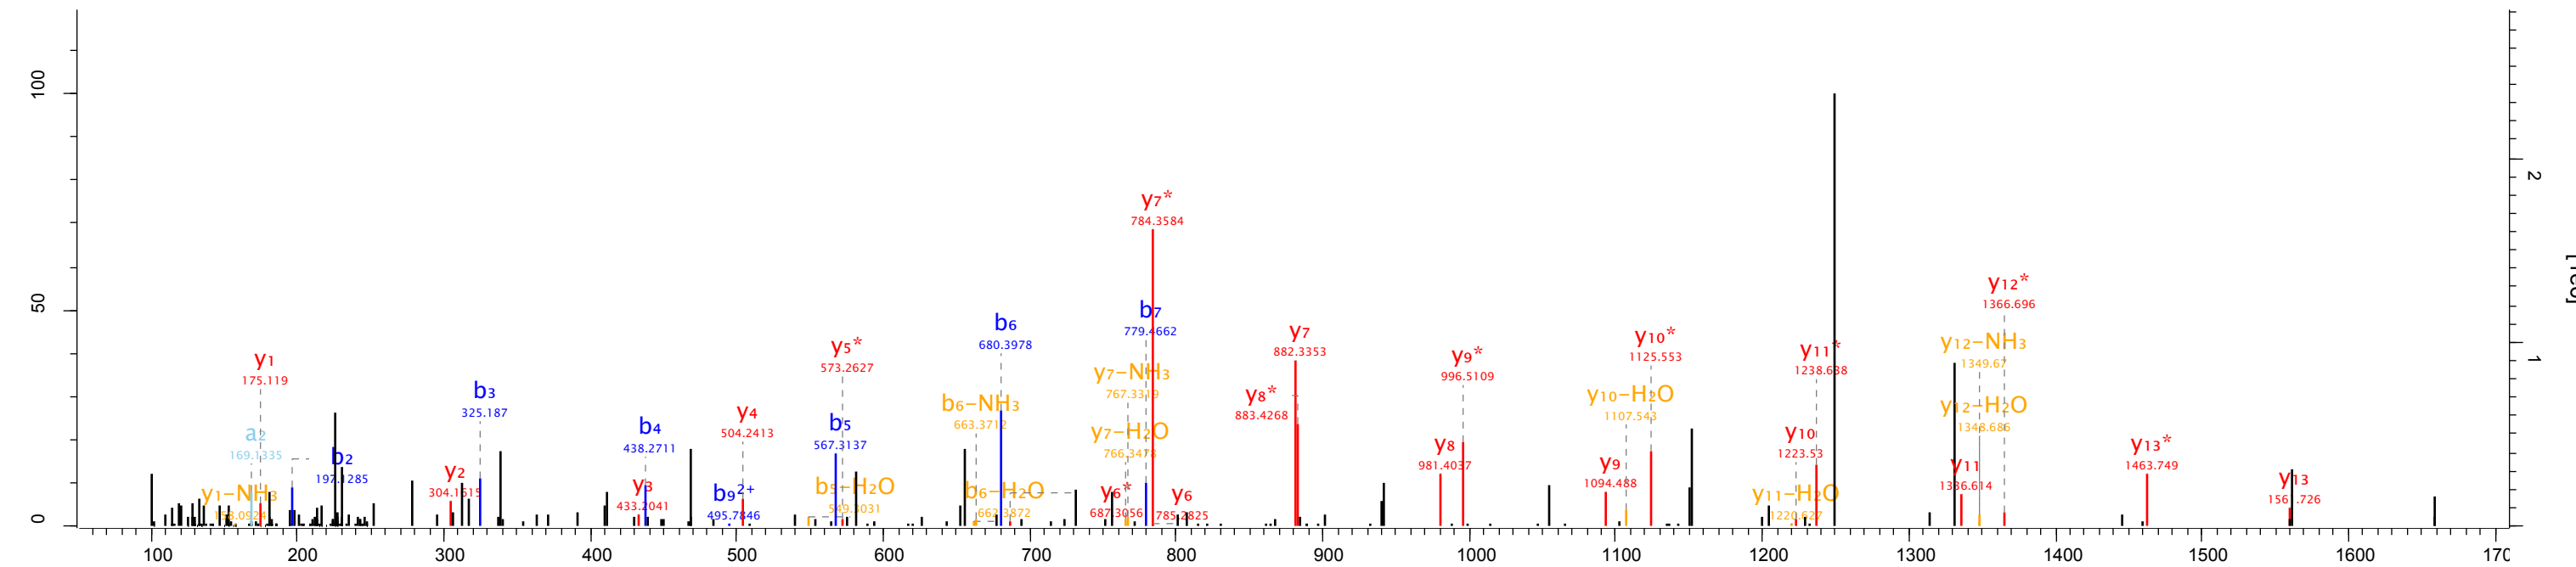

- V P Q L E I V P N S A E E R -

Fragmentation mapping (b and y ions) for the peptide sequence: P Q L E I V P N S A E E R

- b<sub>2</sub> (P)
- b<sub>3</sub> (PQ)
- b<sub>4</sub> (PQL)
- b<sub>5</sub> (PQLE)
- b<sub>6</sub> (PQLEI)
- b<sub>7</sub> (PQLEIV)
- b<sub>9</sub><sup>2+</sup> (PQN)
- y<sub>1</sub> (R)
- y<sub>2</sub> (ER)
- y<sub>3</sub> (EER)
- y<sub>4</sub> (EAER)
- y<sub>5</sub><sup>\*</sup> (ES)
- y<sub>6</sub> (NS)
- y<sub>7</sub> (PNS)
- y<sub>8</sub> (VPS)
- y<sub>9</sub> (IVPS)
- y<sub>10</sub> (LEIVPS)
- y<sub>11</sub> (LQLEIVPS)
- y<sub>12</sub><sup>\*</sup> (LQLEIVPSN)
- y<sub>13</sub> (LQLEIVPSNA)

Raw file 20150814\_A375SR\_Phospho\_BR2\_04 Scan 18289 Method FTMS; HCD Score 46.52 m/z 1010.99 Gene names WIPF2

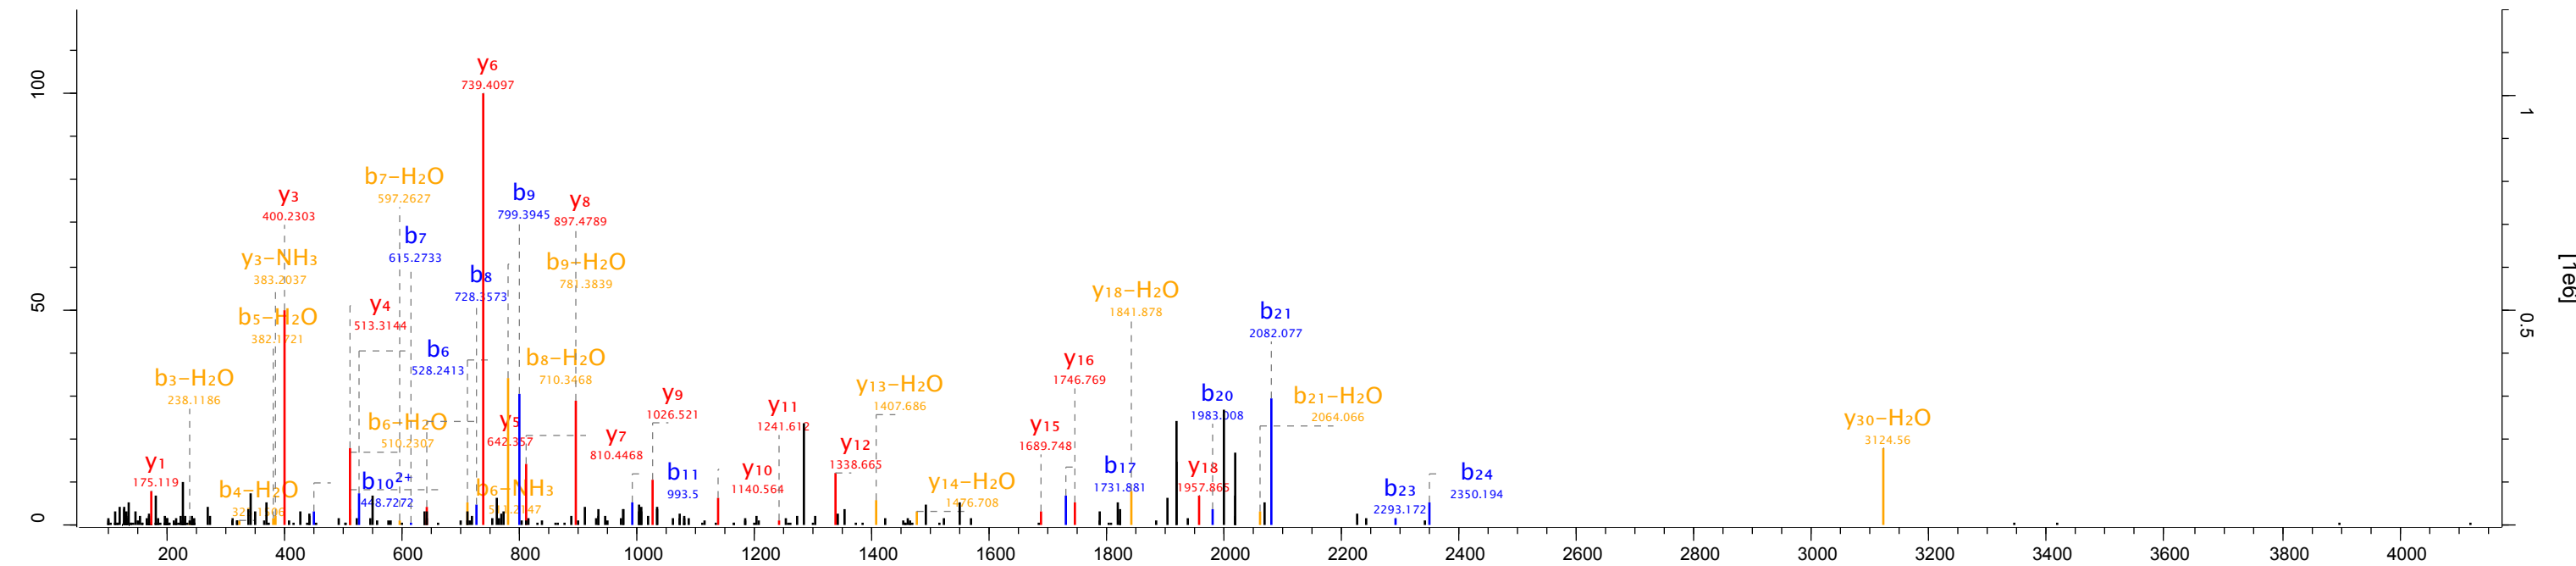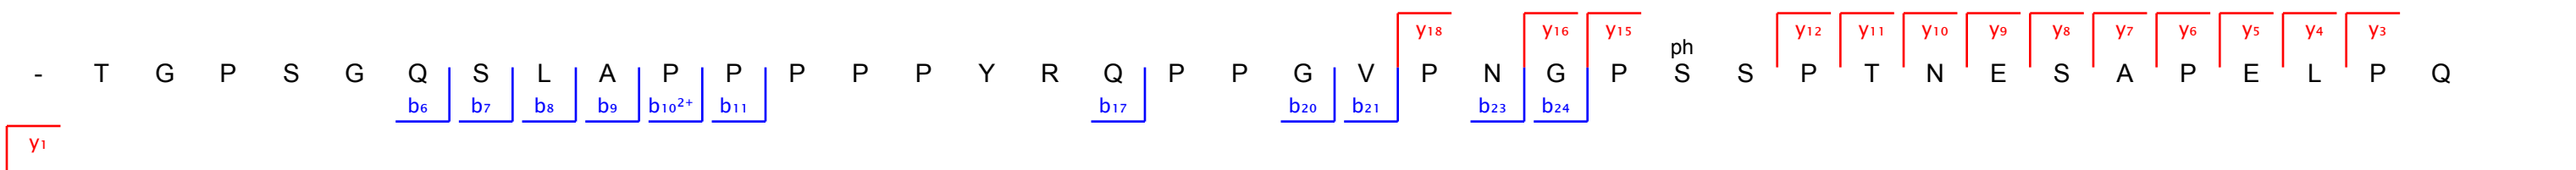

Raw file: 20150814\_A375SR\_Phospho\_BR2\_04  
 Scan: 18609 Method: FTMS; HCD Score: 201.76 m/z: 1127.04 Gene names: RAB31P

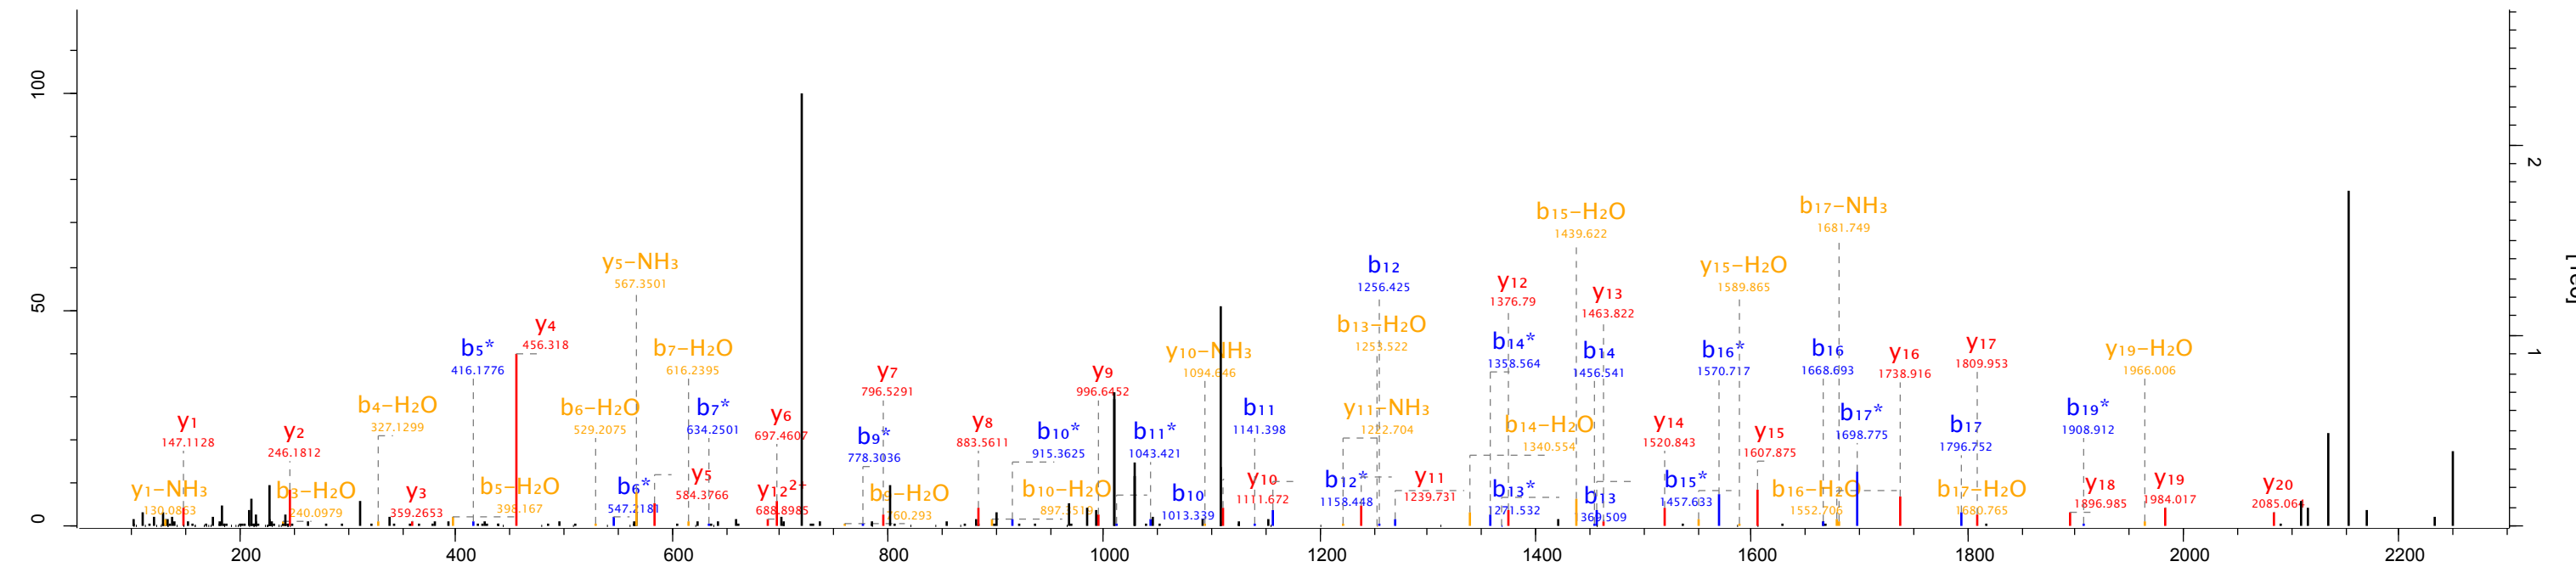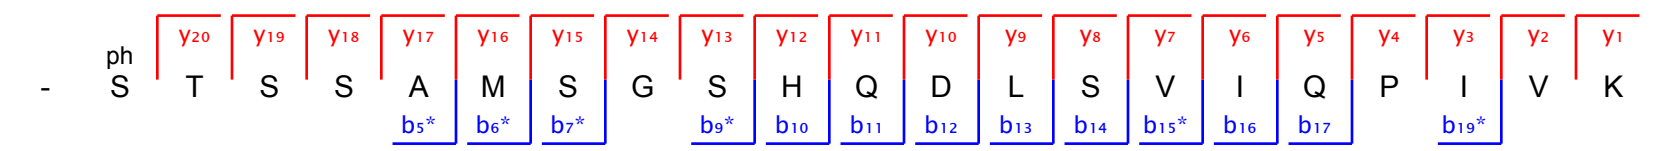

Raw file 20150814\_A375SR\_Phospho\_BR2\_04 Scan 18729 Method FTMS; HCD Score 197.17 m/z 687.35 Gene names CLSPN

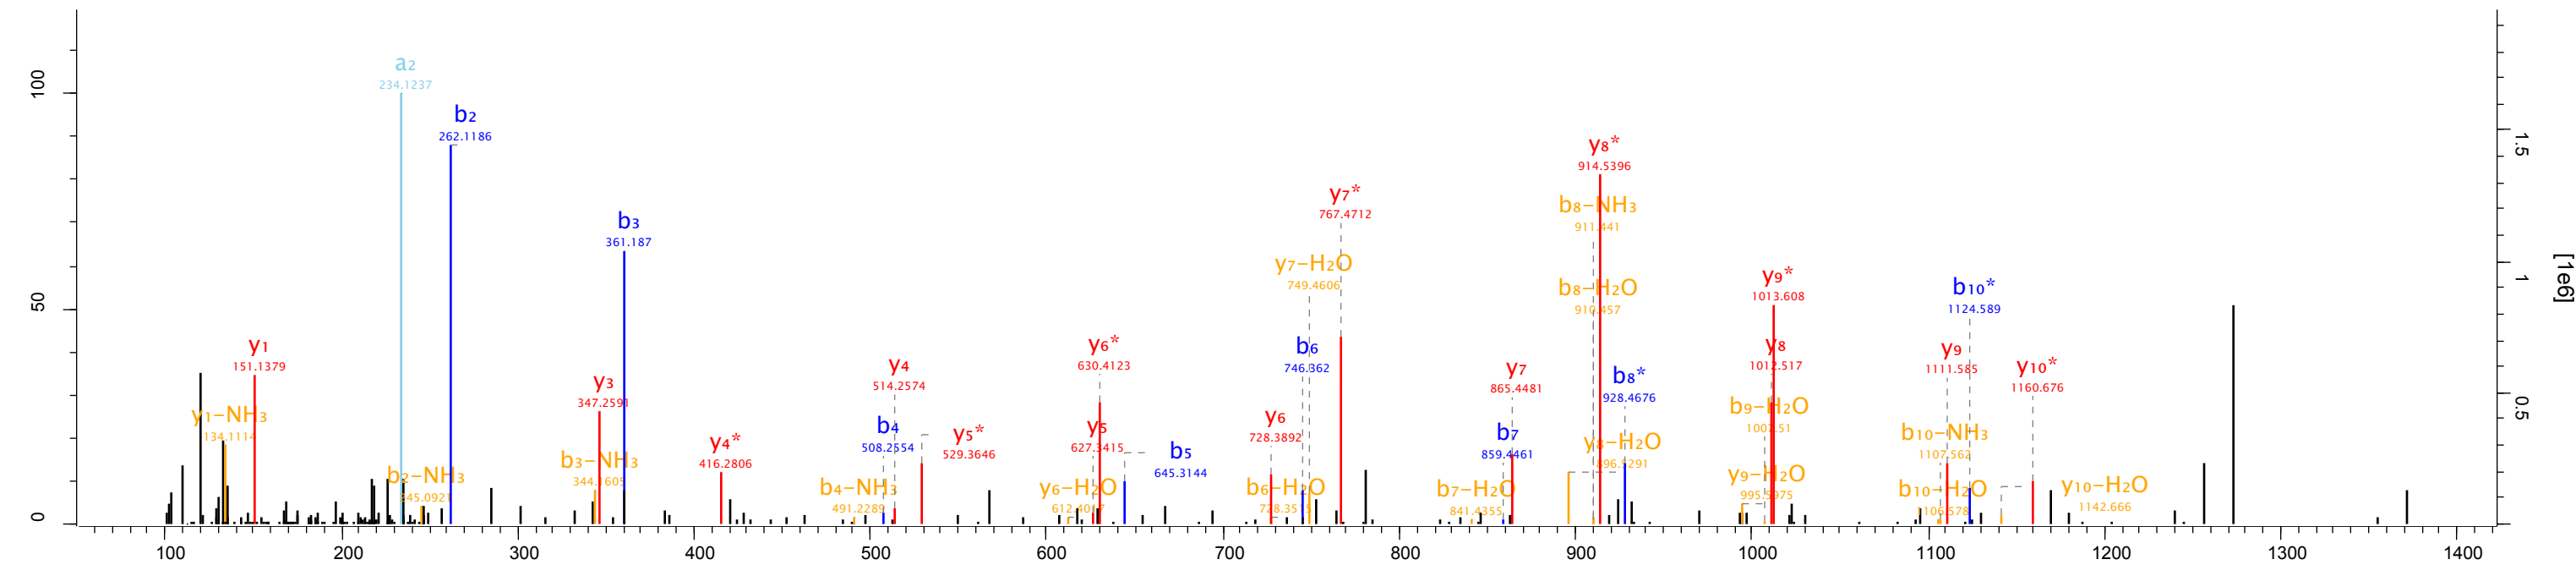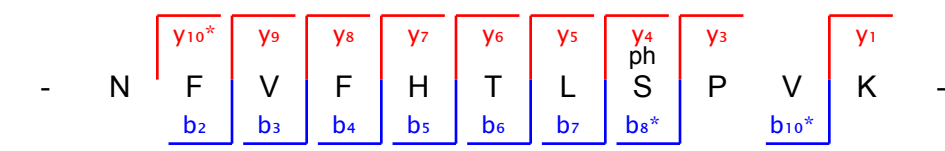



Raw file: 20150814\_A375SR\_Phospho\_BR2\_04  
 Scan: 18959 Method: FTMS; HCD Score: 264.08 m/z: 1204.56 Gene names: TP53BP1

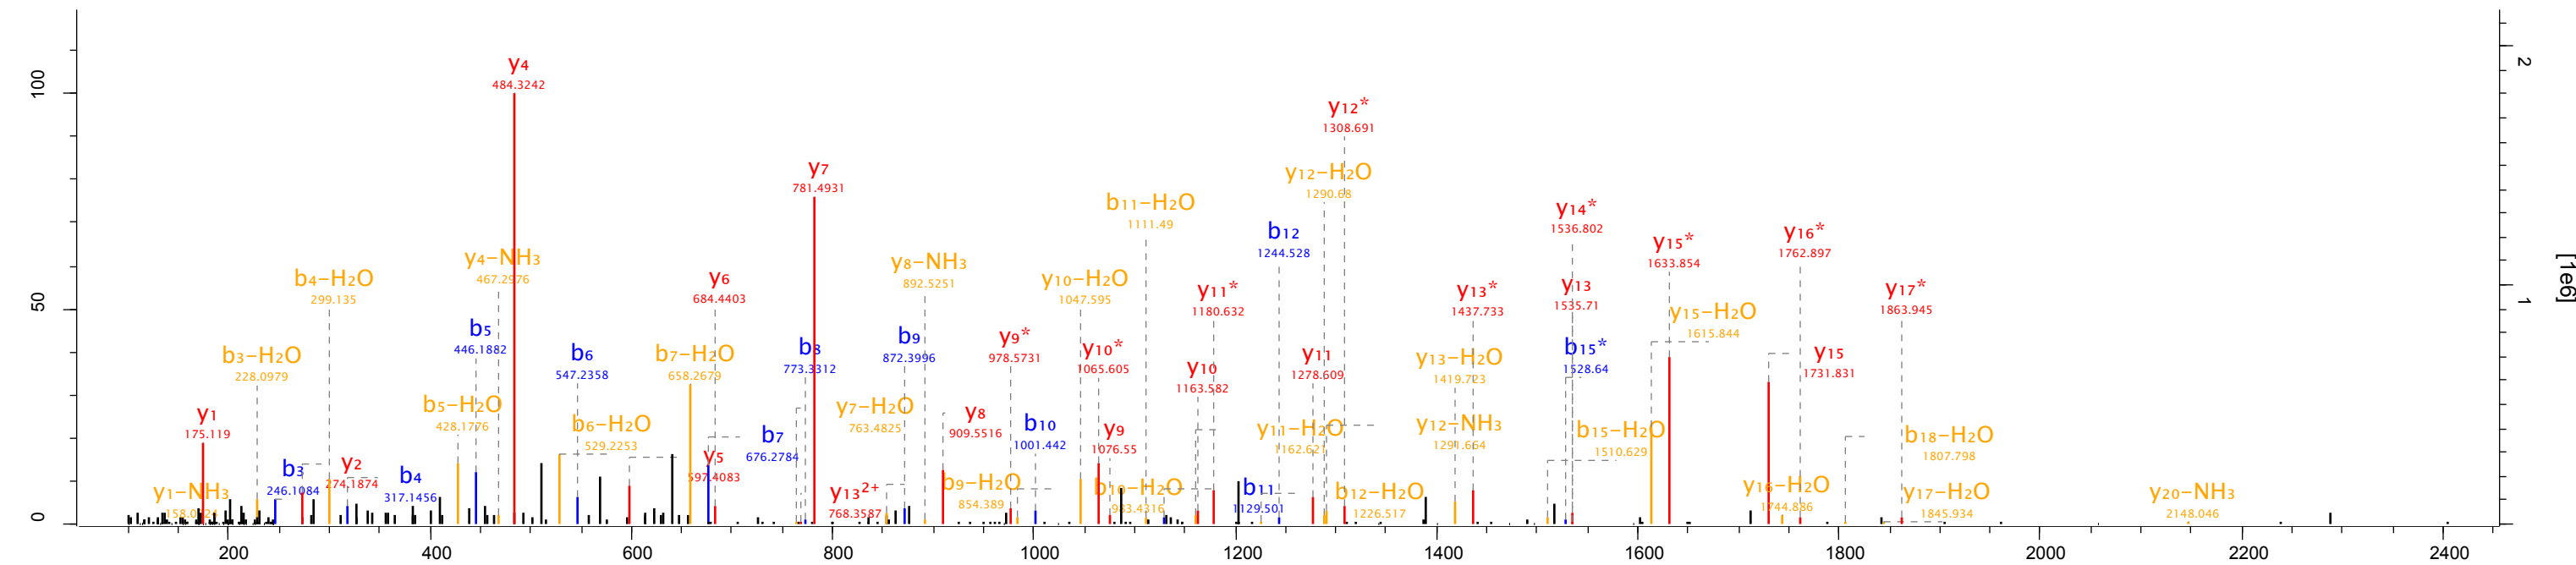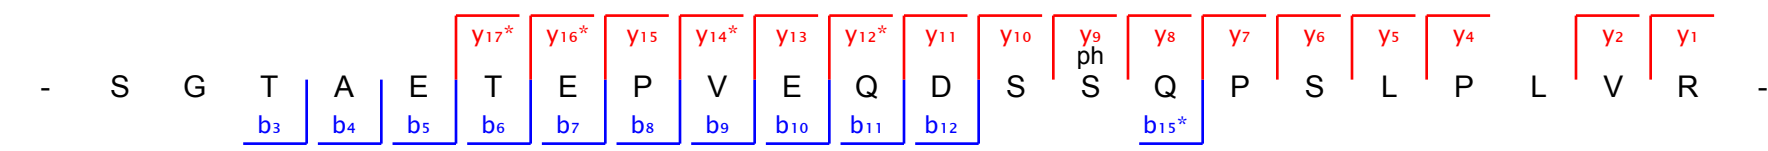

Raw file: 20150814\_A375SR\_Phospho\_BR2\_04  
 Scan: 19289 Method: FTMS; HCD Score: 95.35 m/z: 658.28 Gene names: ATP13A3

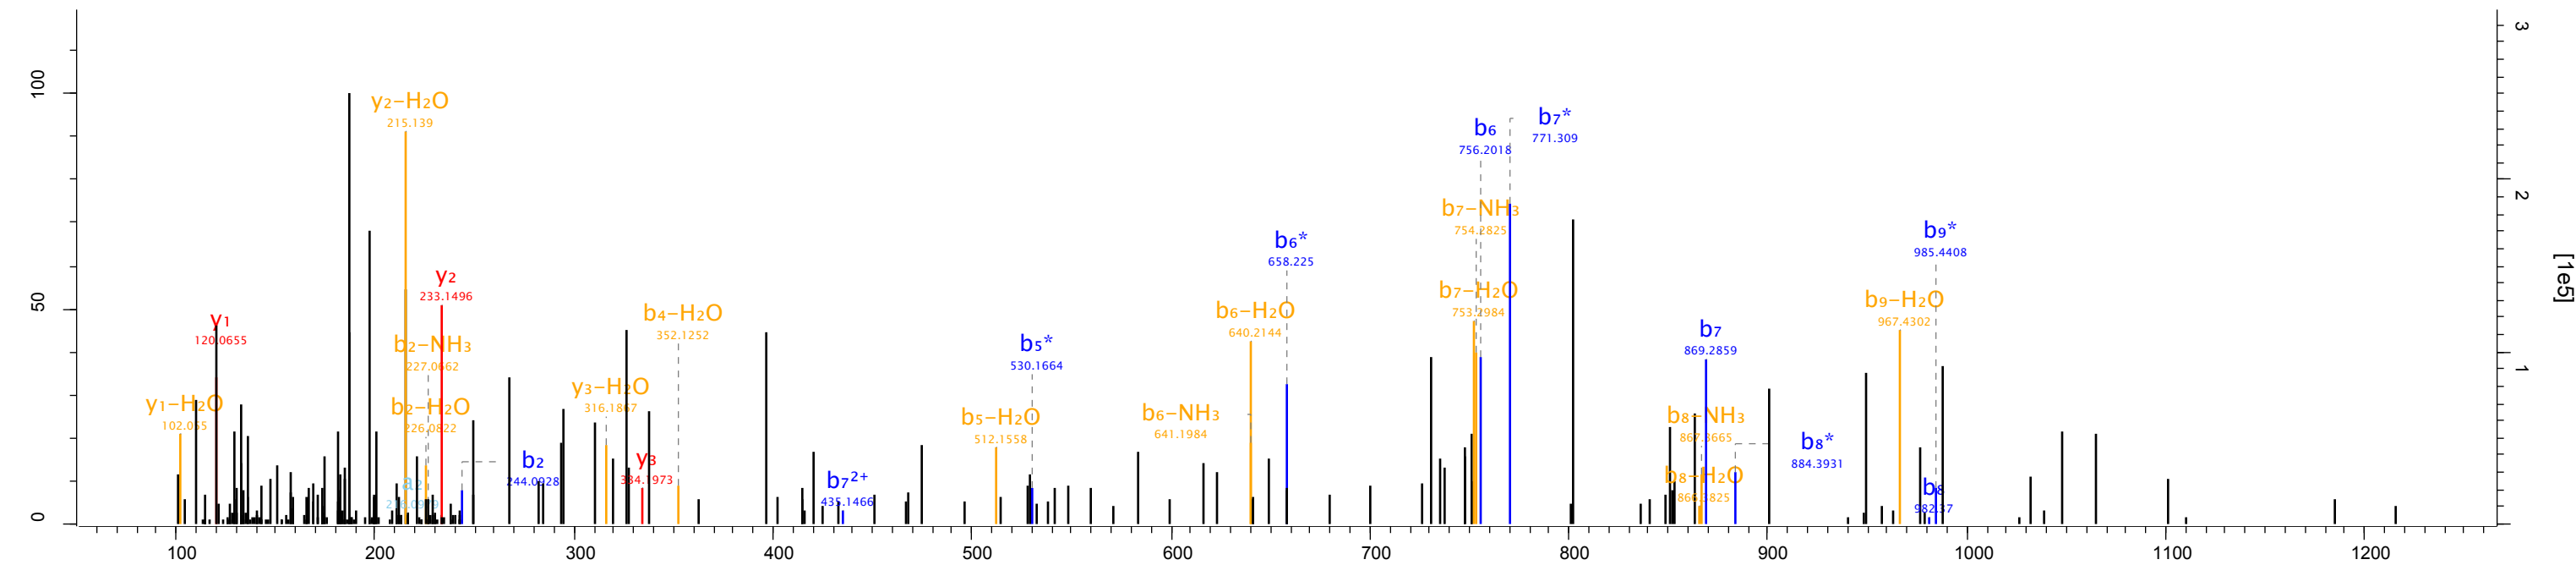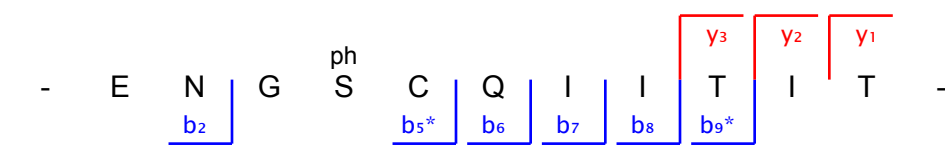

Raw file 20150814\_A375SR\_Phospho\_BR2\_04 Scan 19399 Method FTMS; HCD Score 226.32 m/z 855.39 Gene names FAM76B

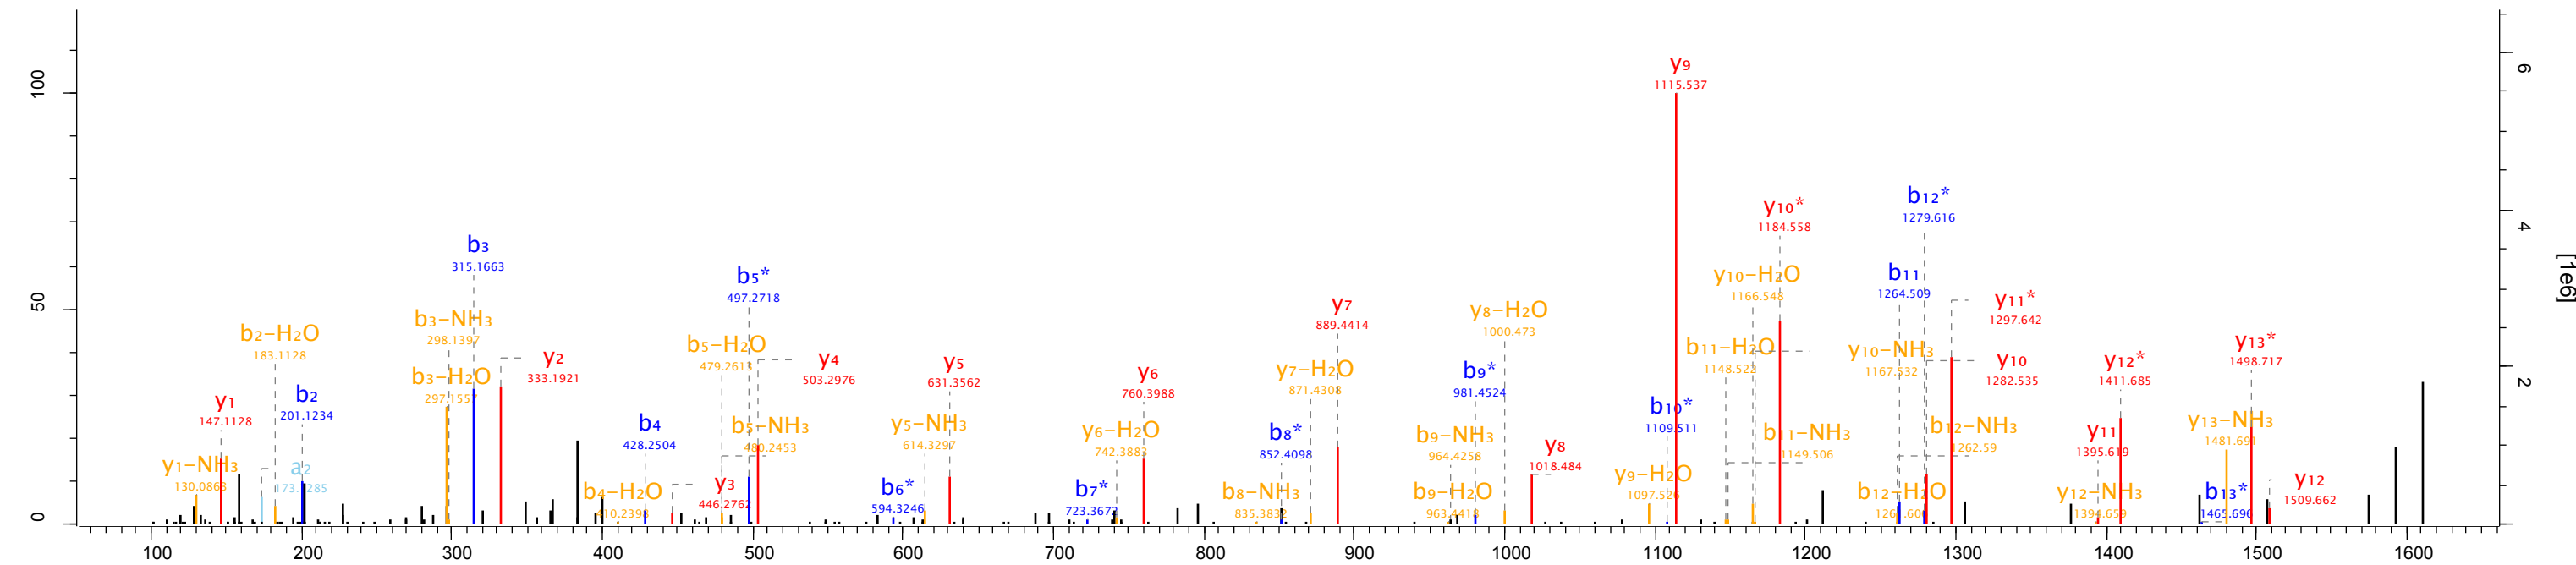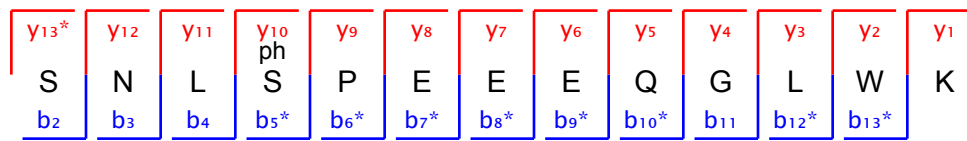

Raw file  
 20150814\_A375SR\_Phospho\_BR2\_04  
 Scan 19439 Method FTMS; HCD Score 248.76 m/z 1127.99 Gene names BRAF

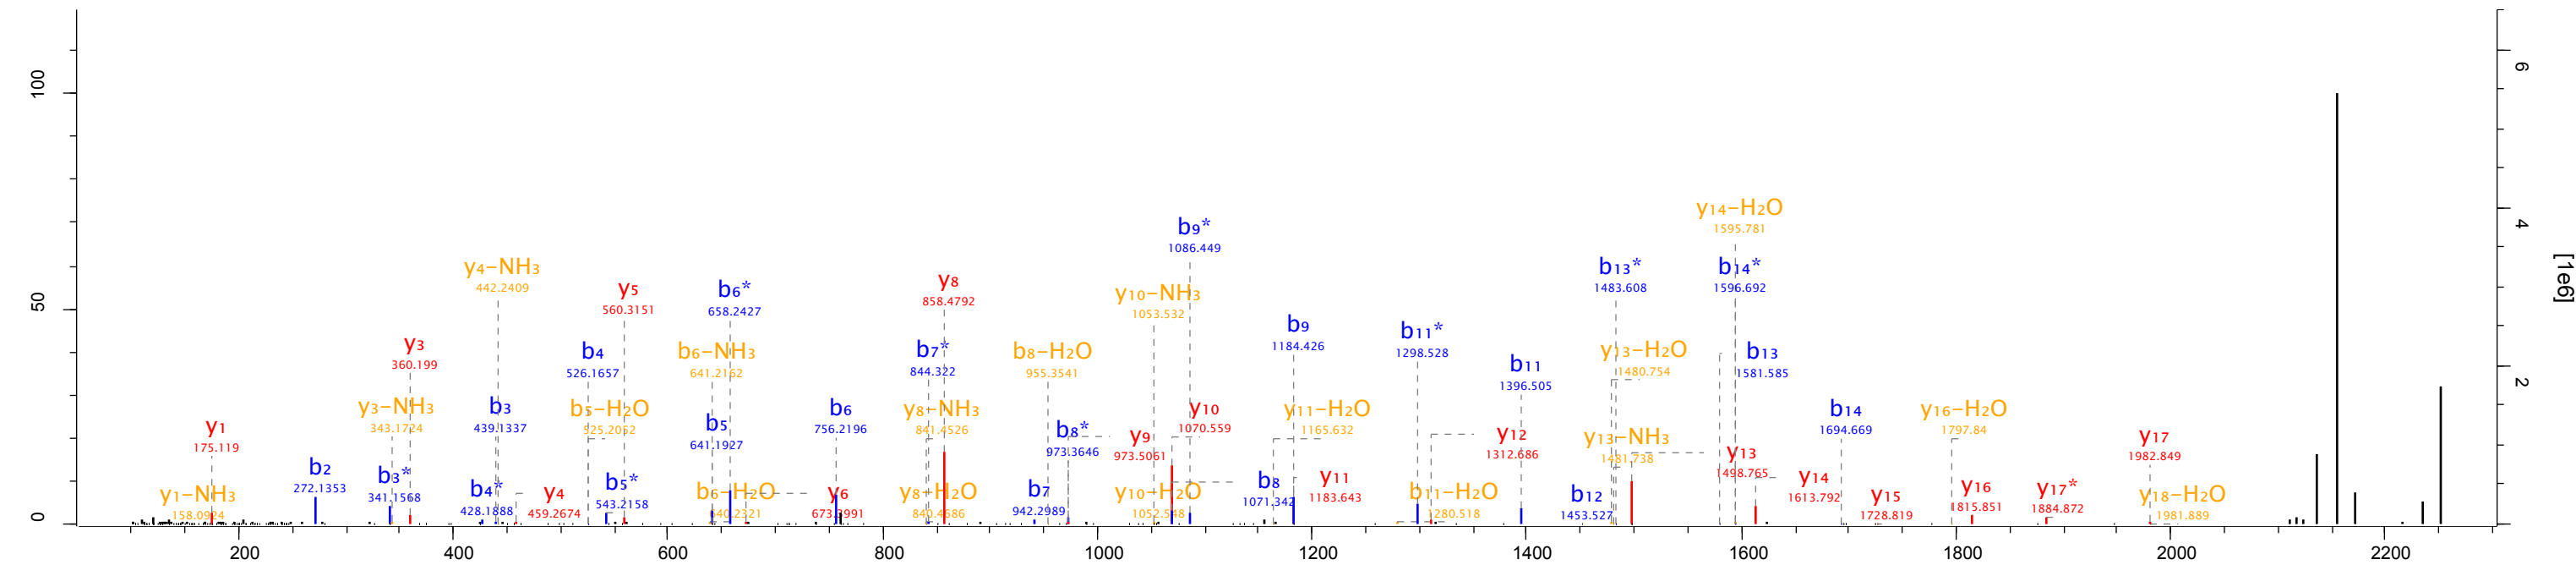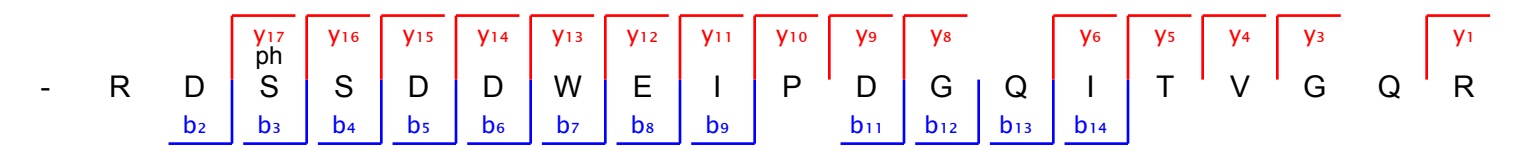

Raw file 20150814\_A375SR\_Phospho\_BR2\_04 Scan 2059 Method FTMS; HCD Score 64.24 m/z 586.29 Gene names RPS6KA4

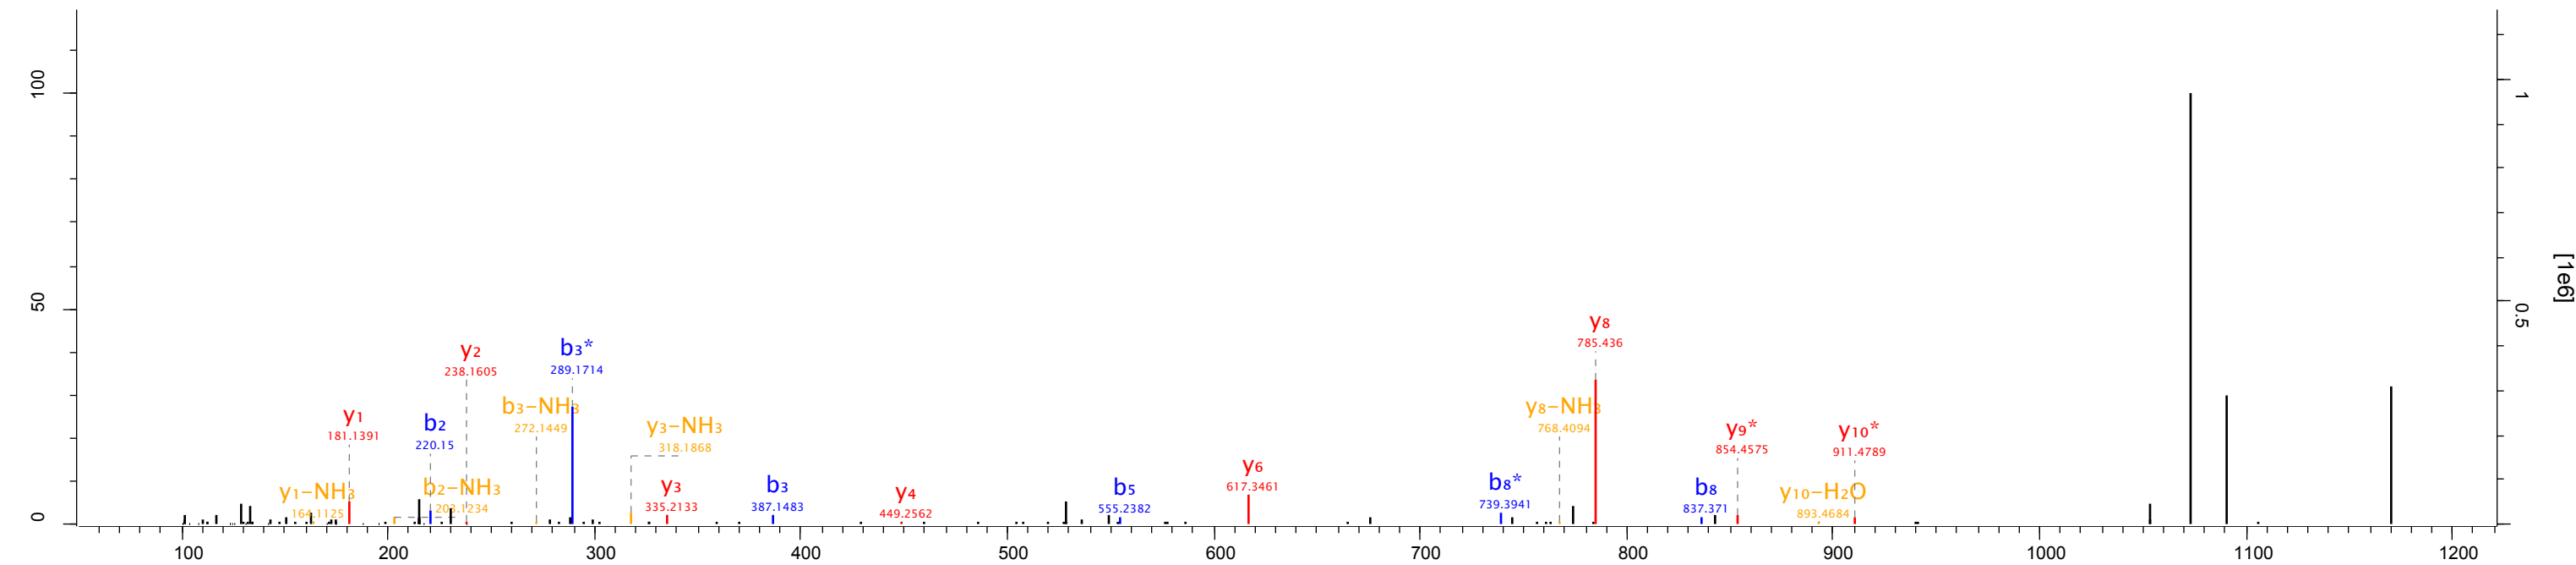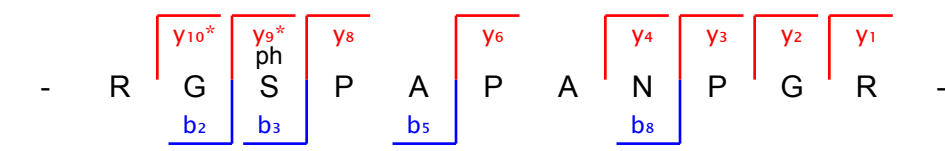

Raw file: 20150814\_A375SR\_Phospho\_BR2\_04  
 Scan: 20689 Method: FTMS; HCD Score: 141.24 m/z: 691.38 Gene names: MYBBP1A

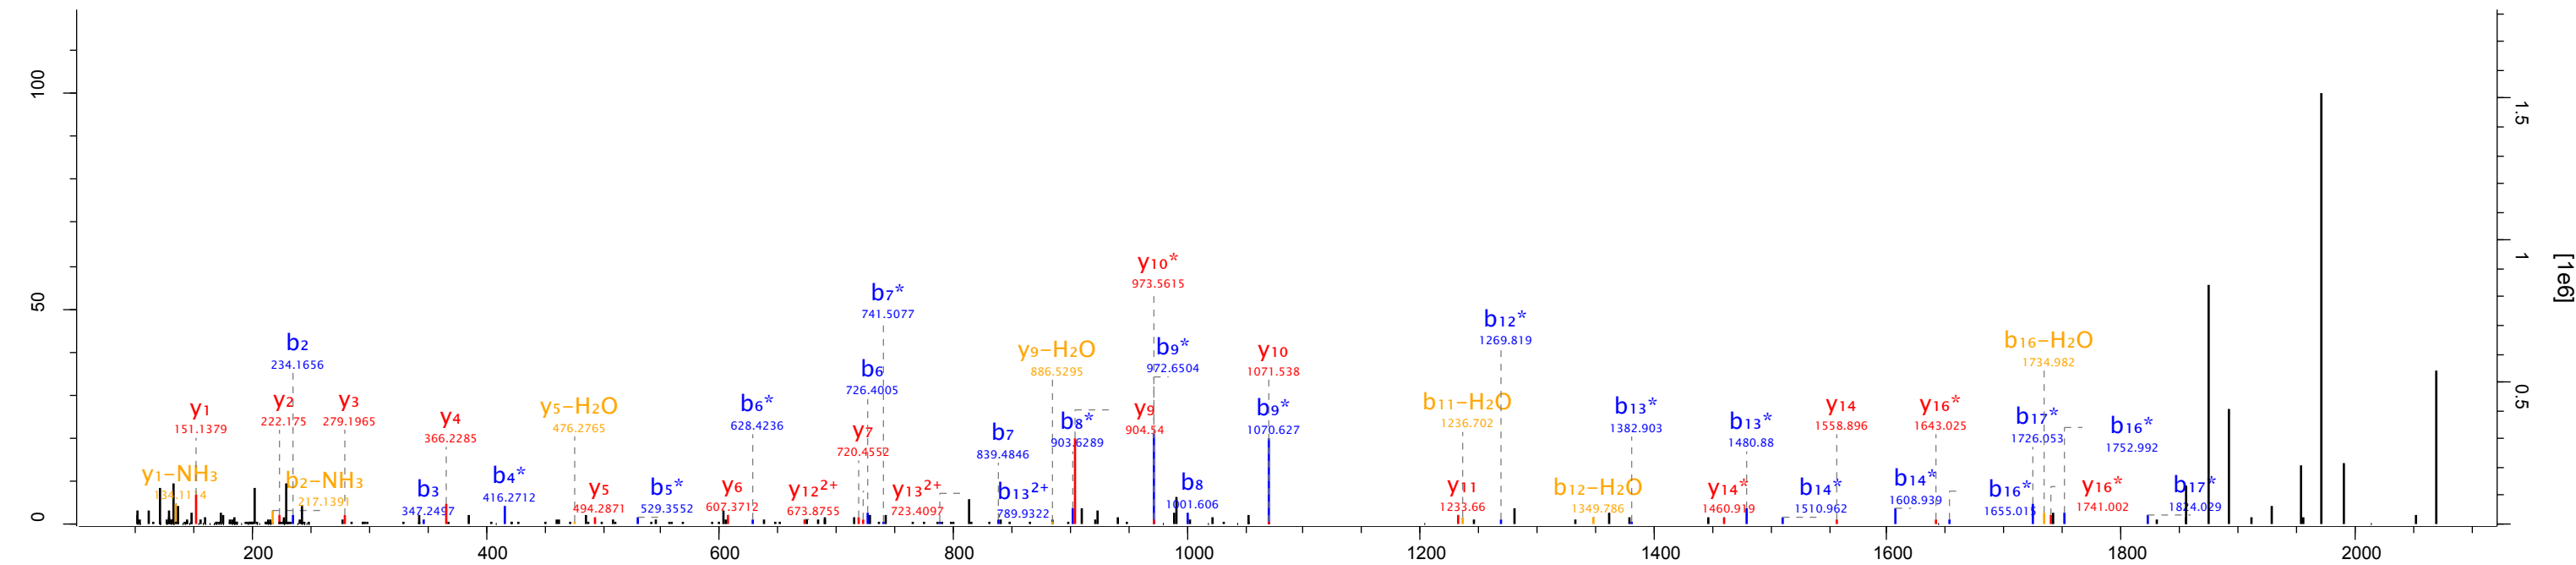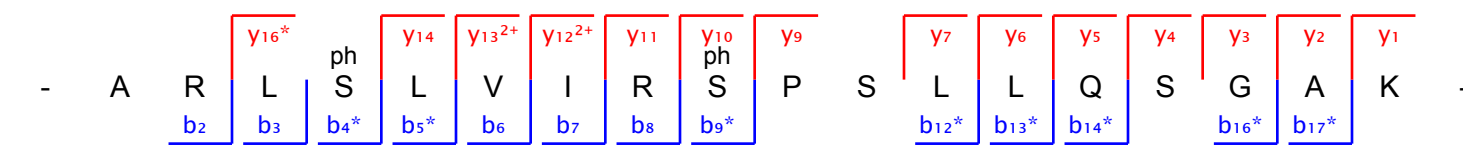

Raw file Scan Method Score m/z Gene names  
 20150814\_A375SR\_Phospho\_BR2\_04 20969 FTMS; HCD 202.58 1100.81 GAPVD1

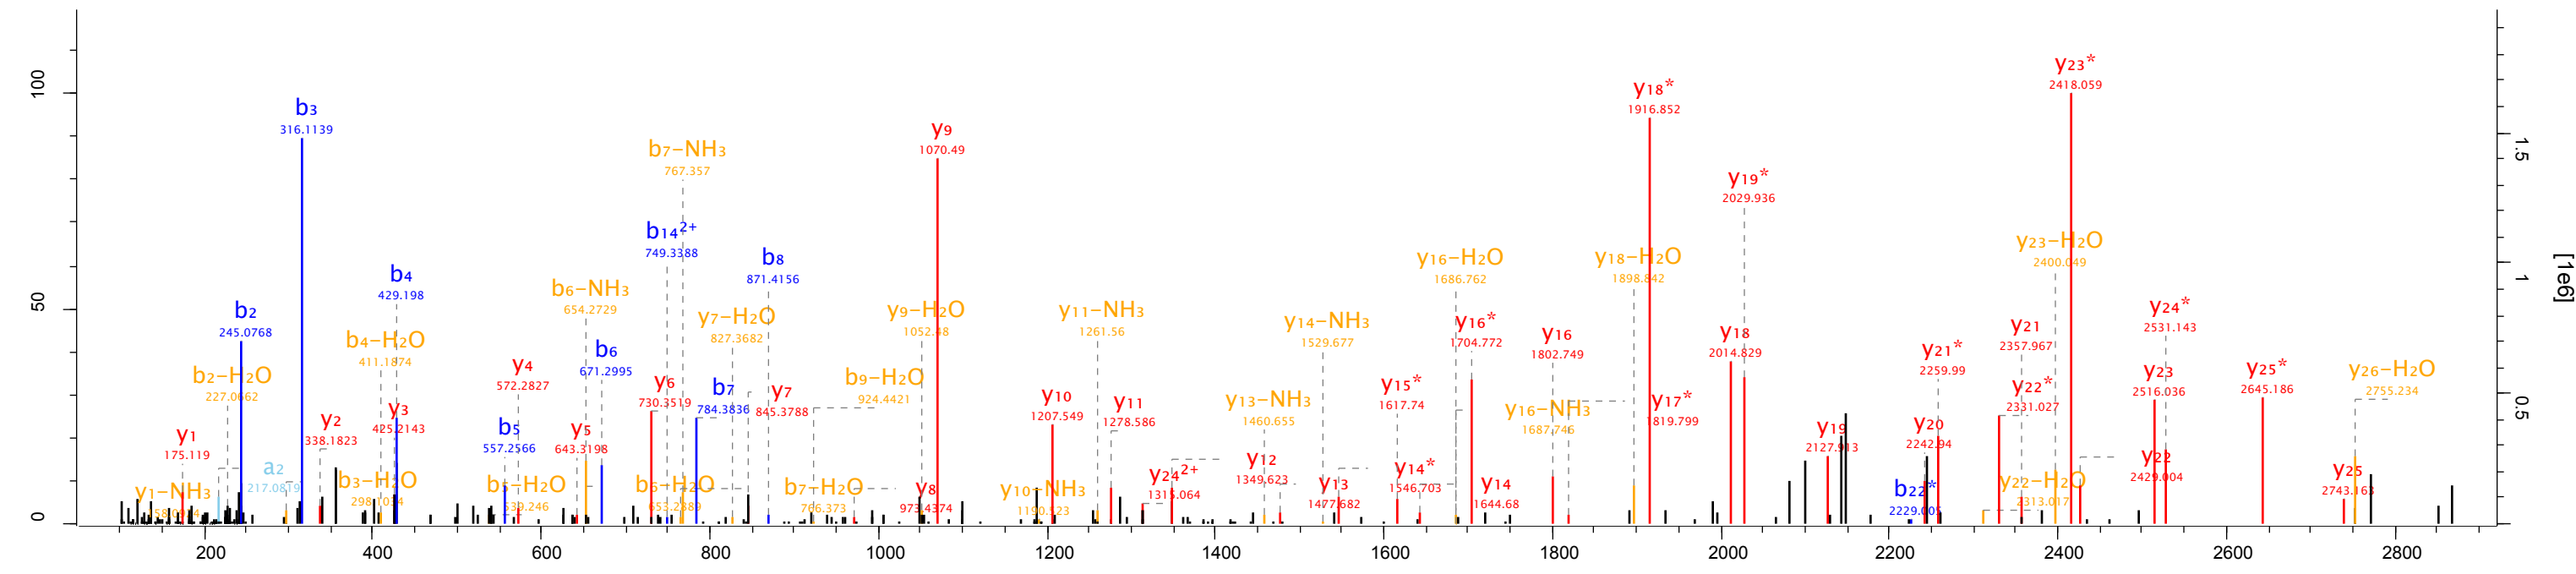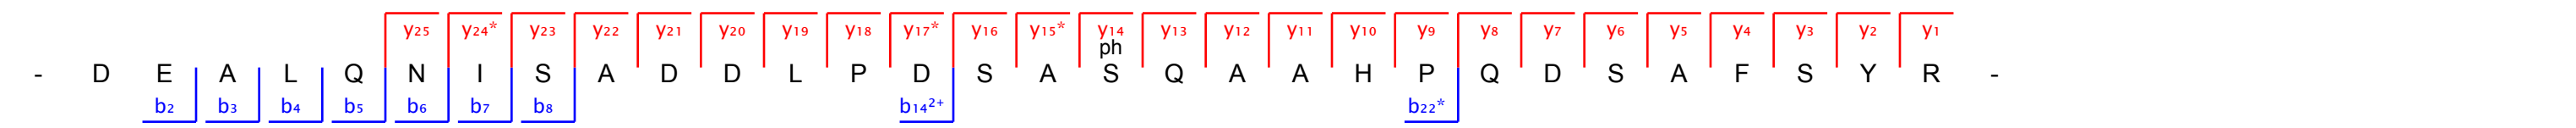

Raw file 20150814\_A375SR\_Phospho\_BR2\_04 Scan 21399 Method FTMS; HCD Score 98.63 m/z 822.76 Gene names C2orf49

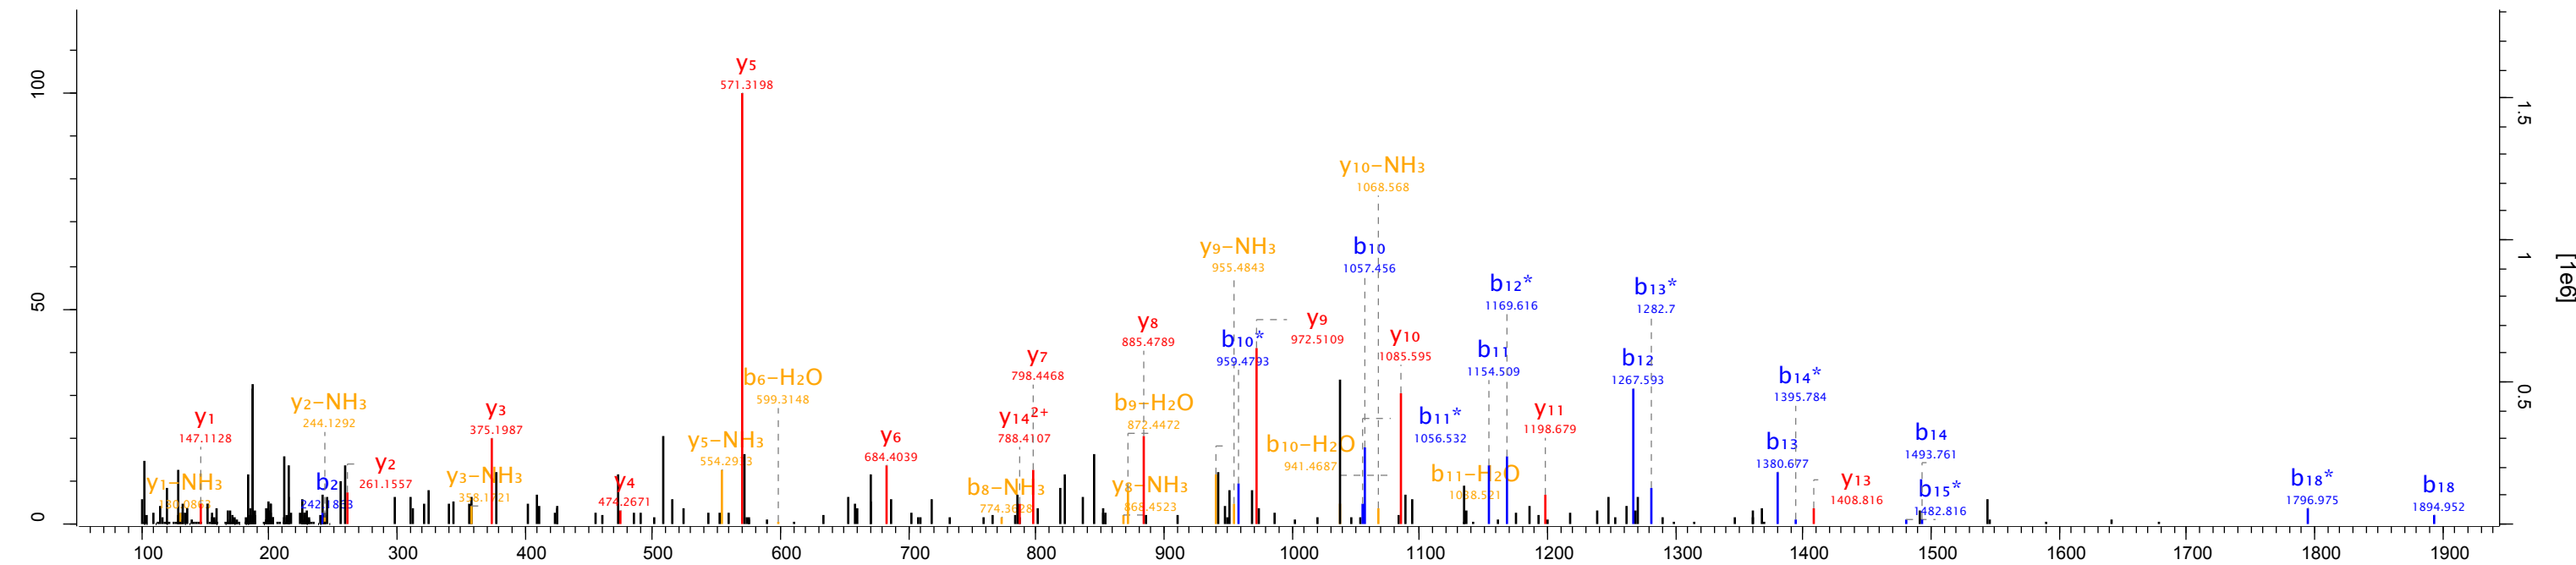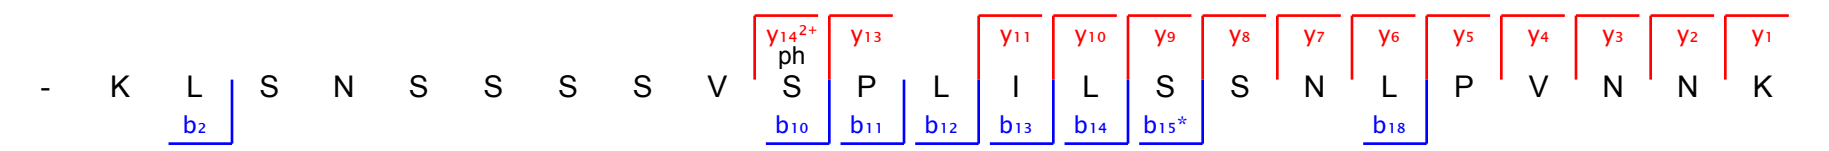



Raw file Scan Method Score m/z Gene names  
 20150814\_A375SR\_Phospho\_BR2\_04 21469 FTMS; HCD 61.43 842.06 LGALS1

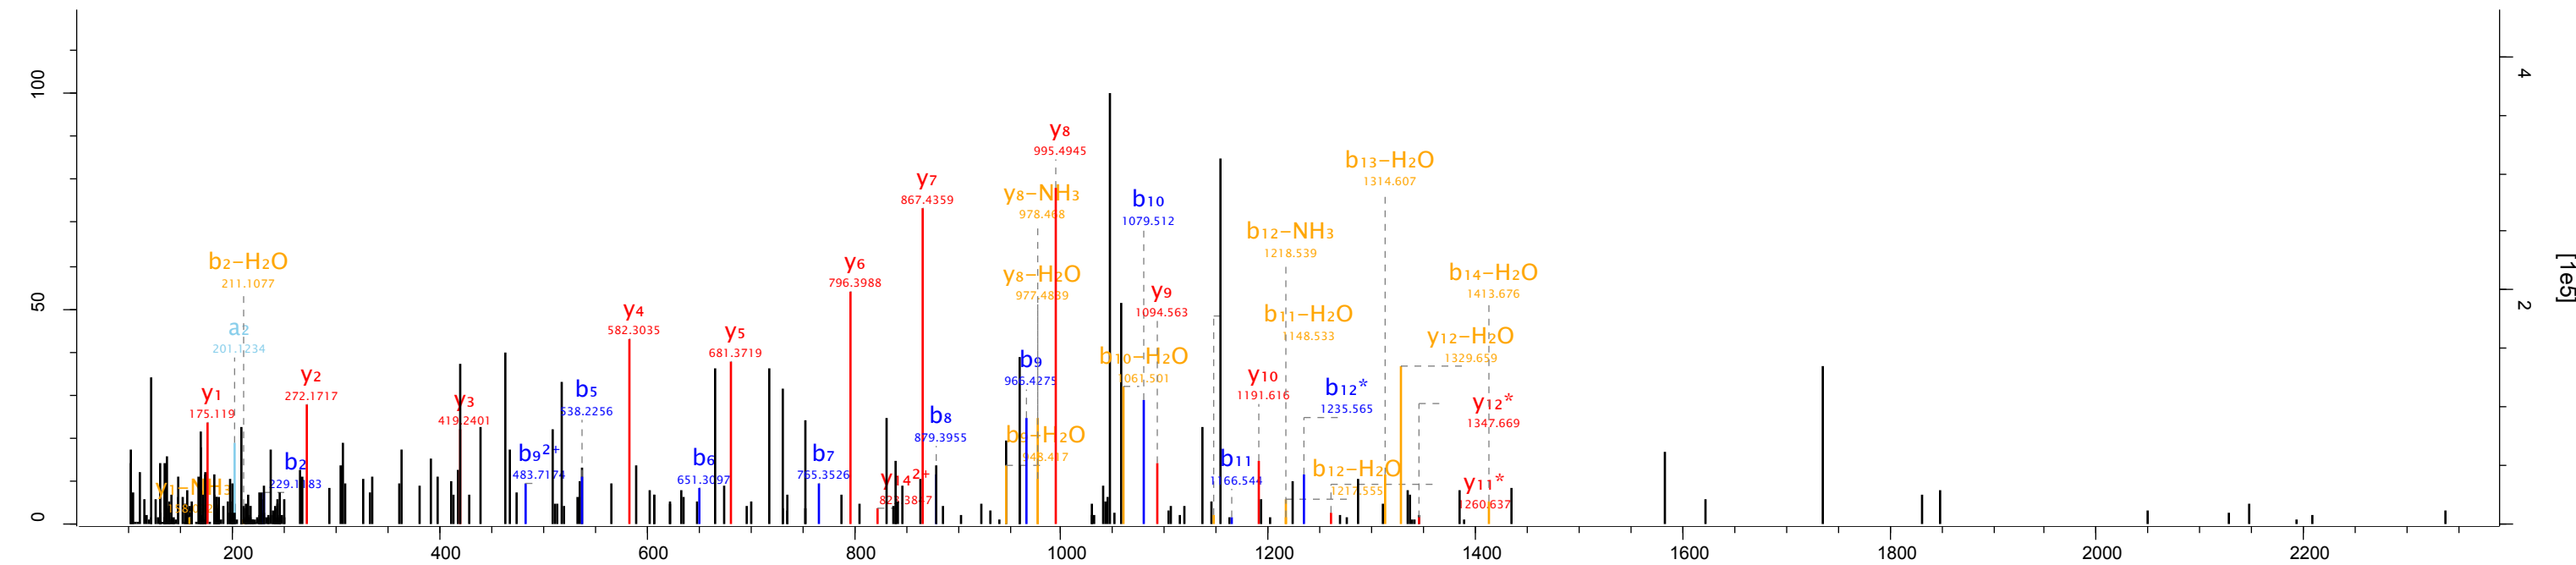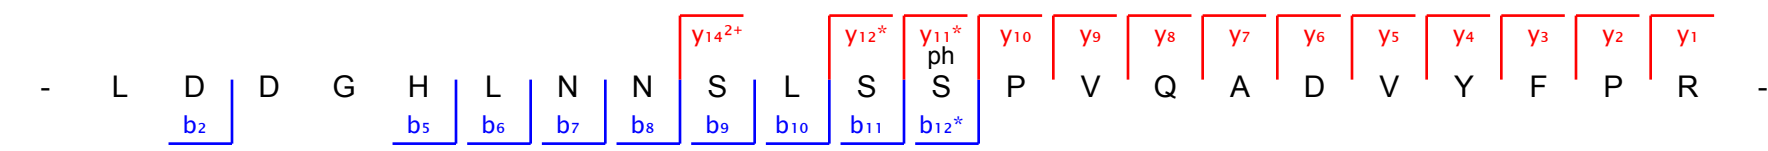

Raw file: 20150814\_A375SR\_Phospho\_BR2\_04  
 Scan: 21609 Method: FTMS; HCD Score: 119.17 m/z: 606.84 Gene names: MARCKSL1

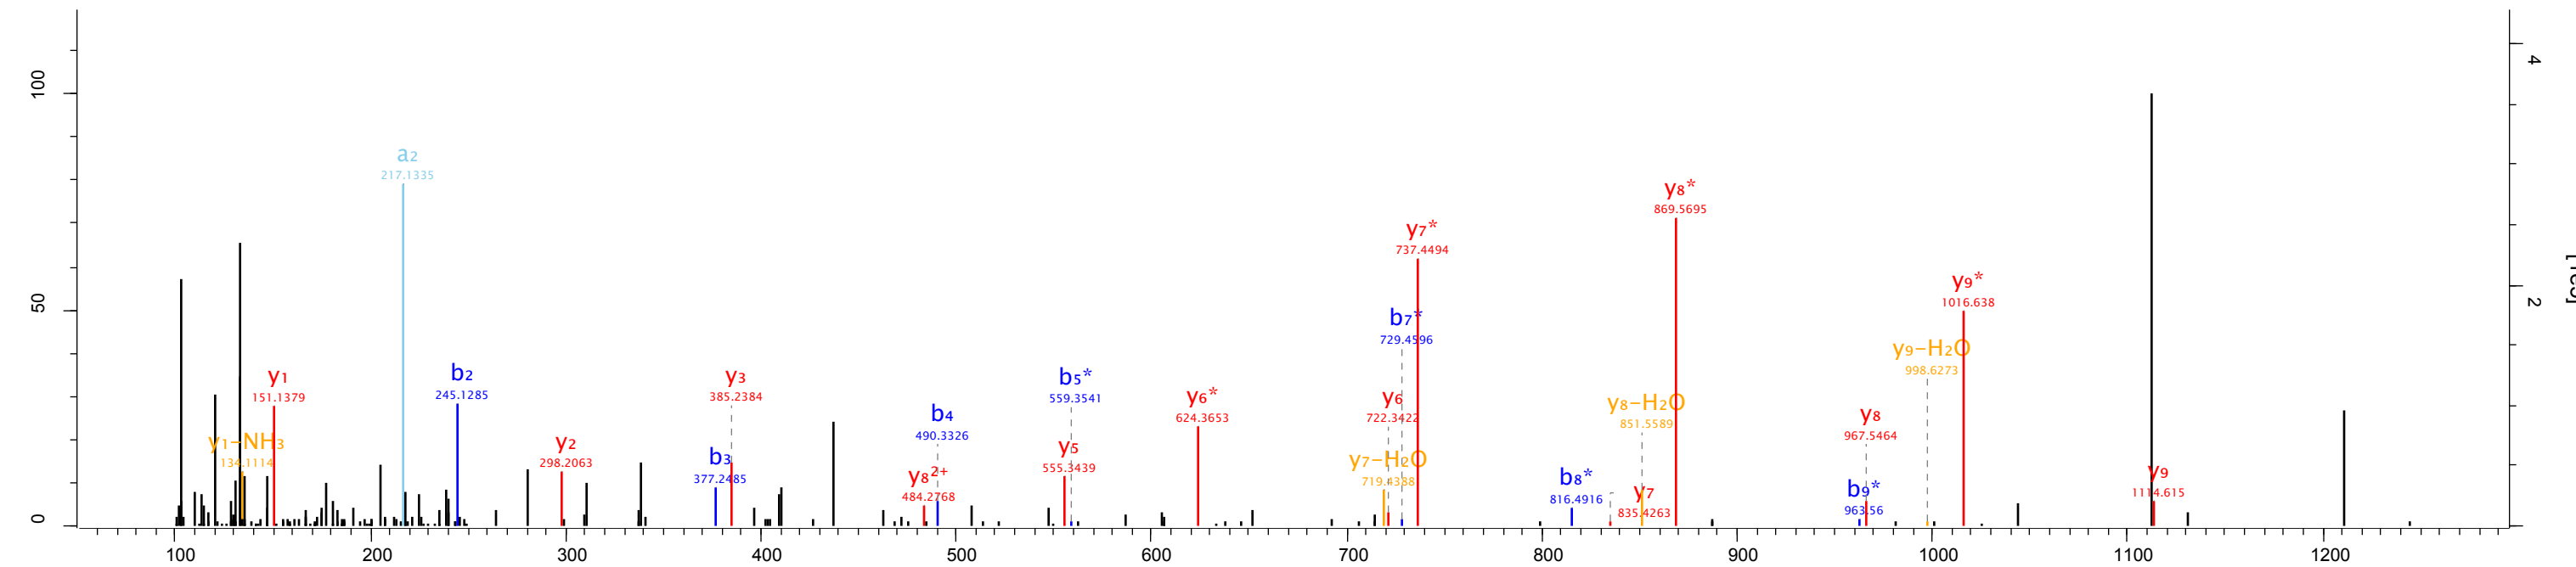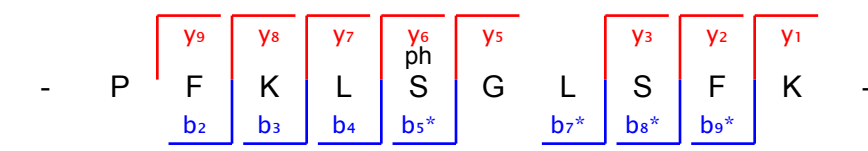

Raw file: 20150814\_A375SR\_Phospho\_BR2\_04  
 Scan: 21919 Method: FTMS; HCD Score: 250.7 m/z: 1146.53 Gene names: PRKAB1

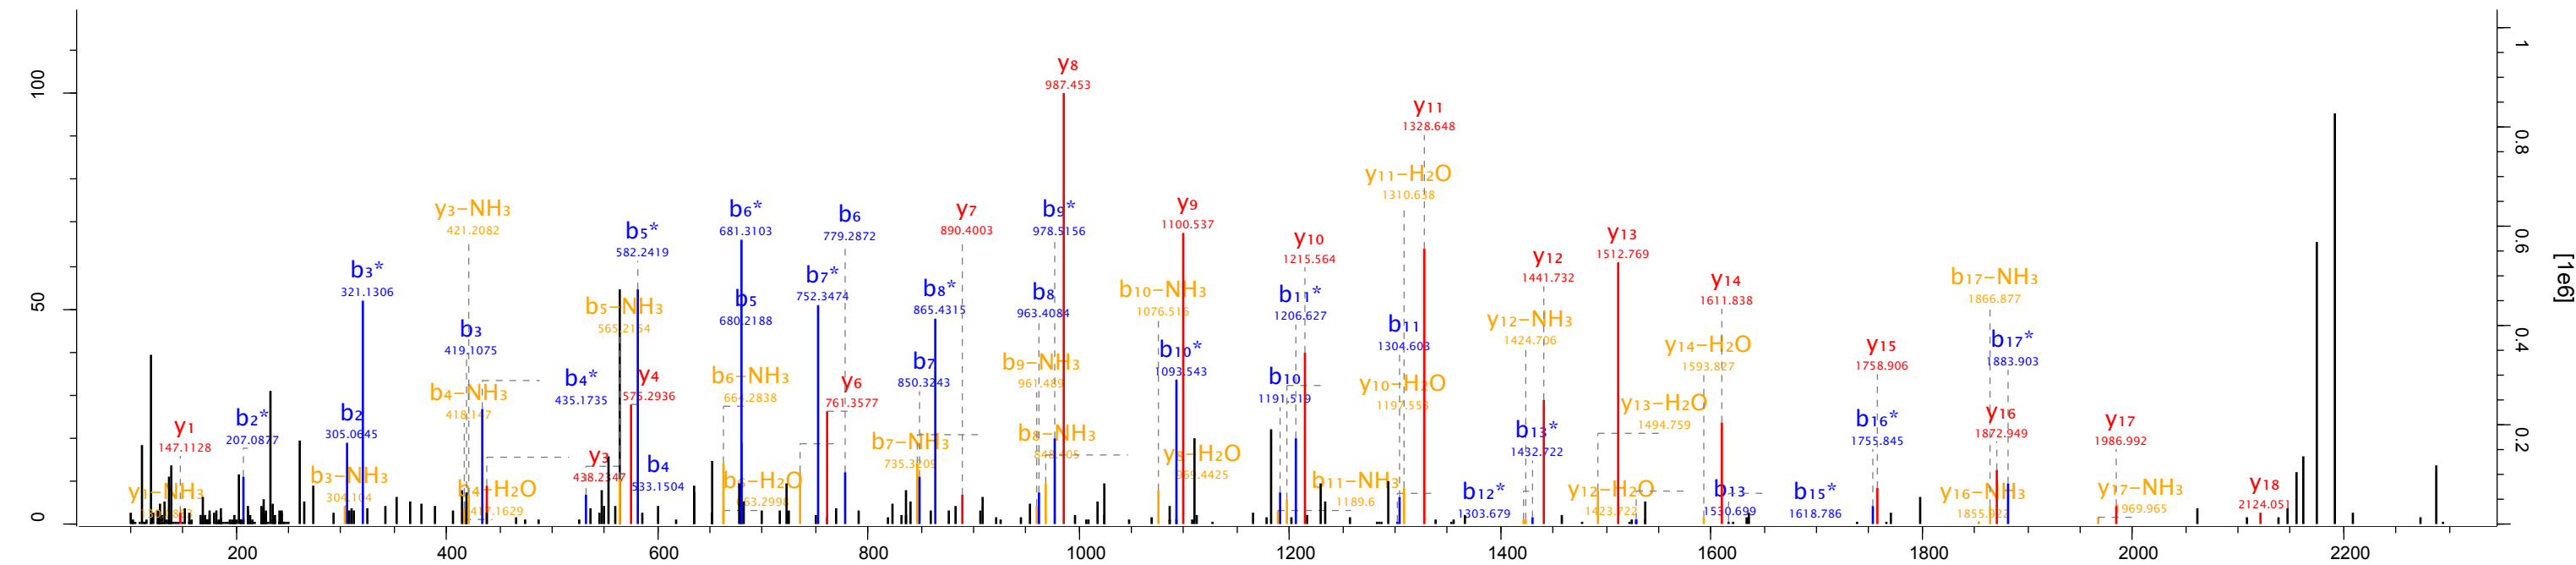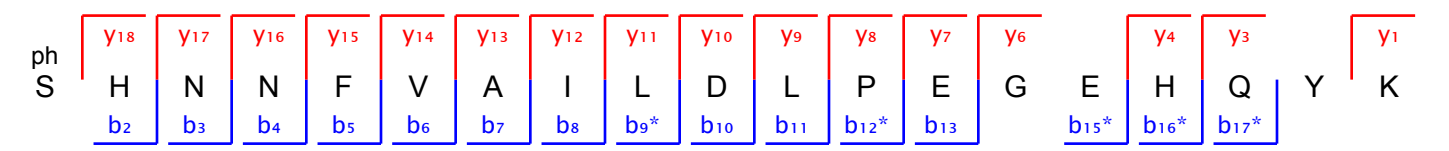

Raw file: 20150814\_A375SR\_Phospho\_BR2\_04  
 Scan: 22509 Method: FTMS; HCD Score: 116.62 m/z: 1095.13 Gene names: TACC2

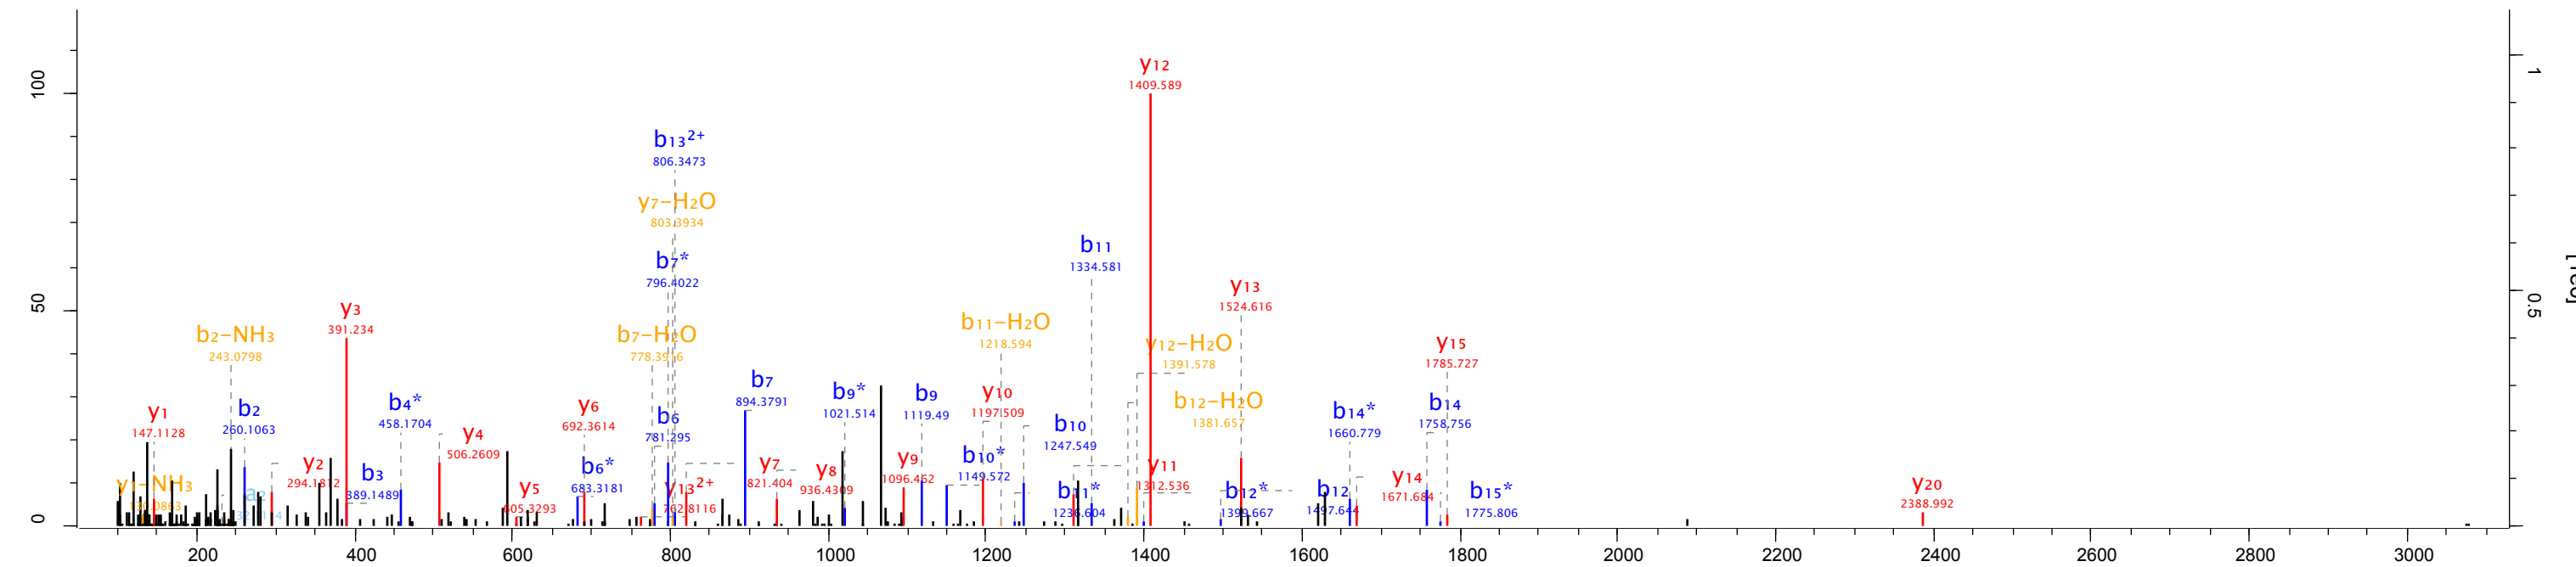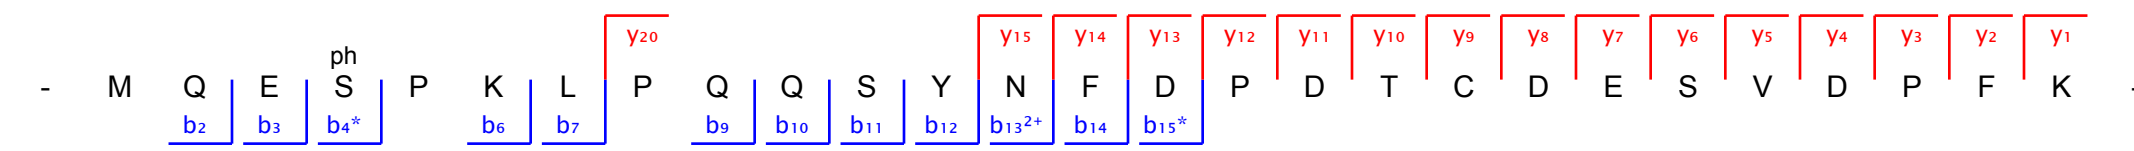

Raw file: 20150814\_A375SR\_Phospho\_BR2\_04  
 Scan: 22919 Method: FTMS; HCD Score: 141.21 m/z: 764.68 Gene names: PRKAB2

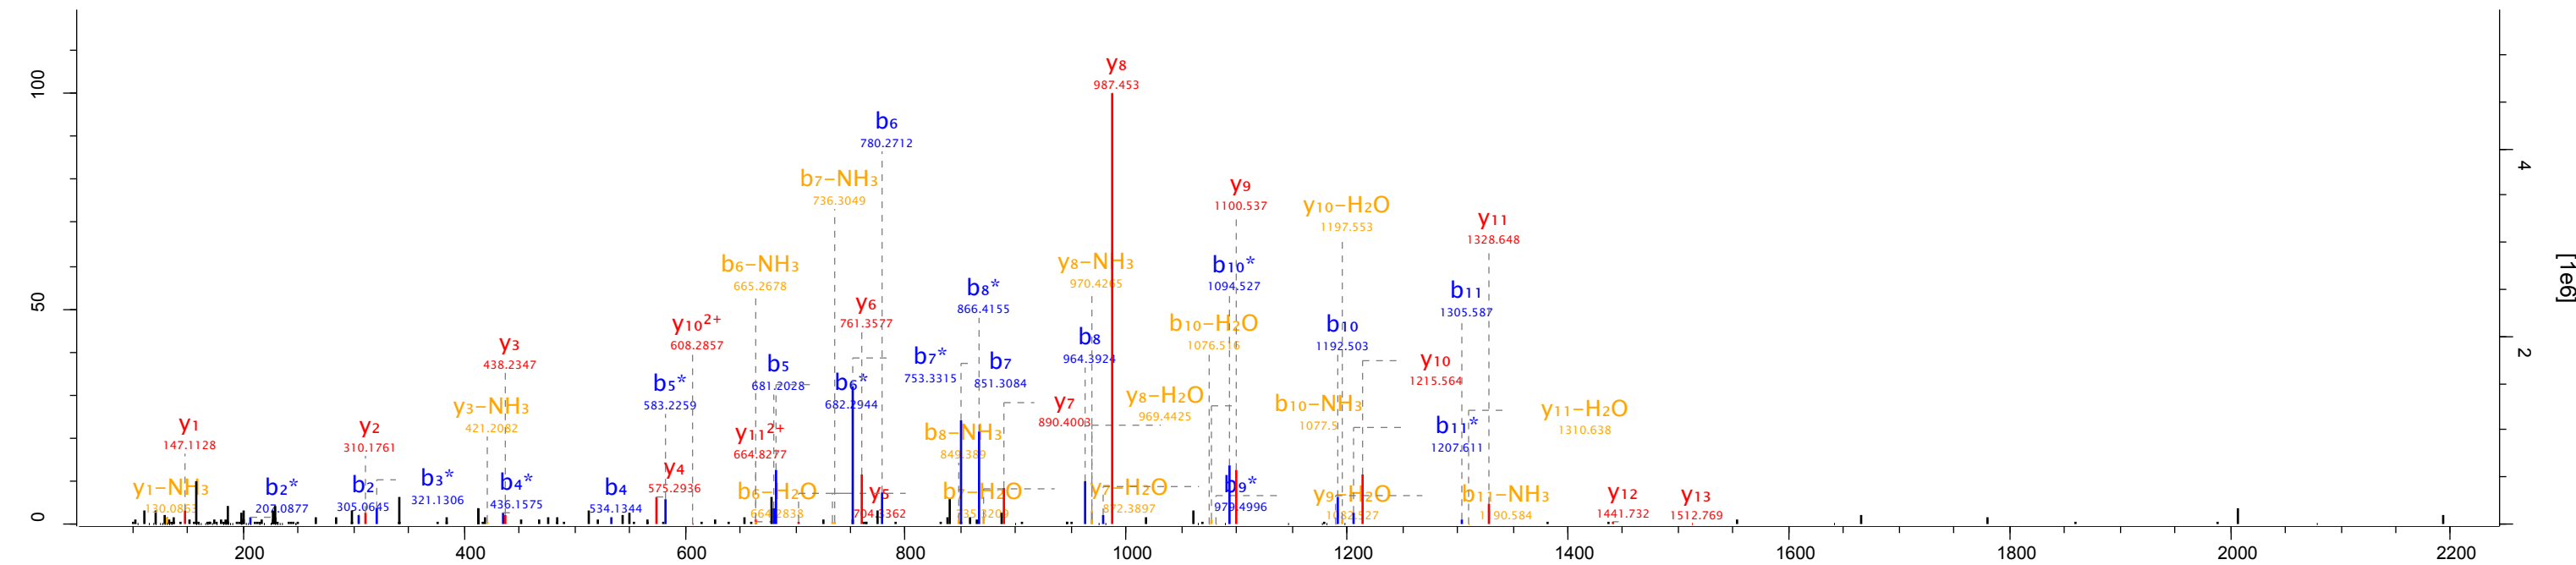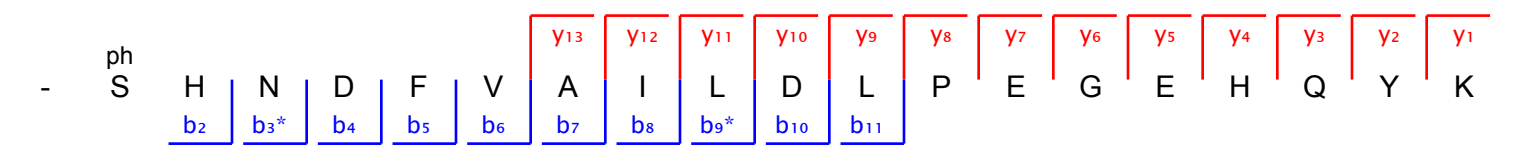

Raw file 20150814\_A375SR\_Phospho\_BR2\_04 Scan 22949 Method FTMS; HCD Score 142.9 m/z 980.78 Gene names HERC2

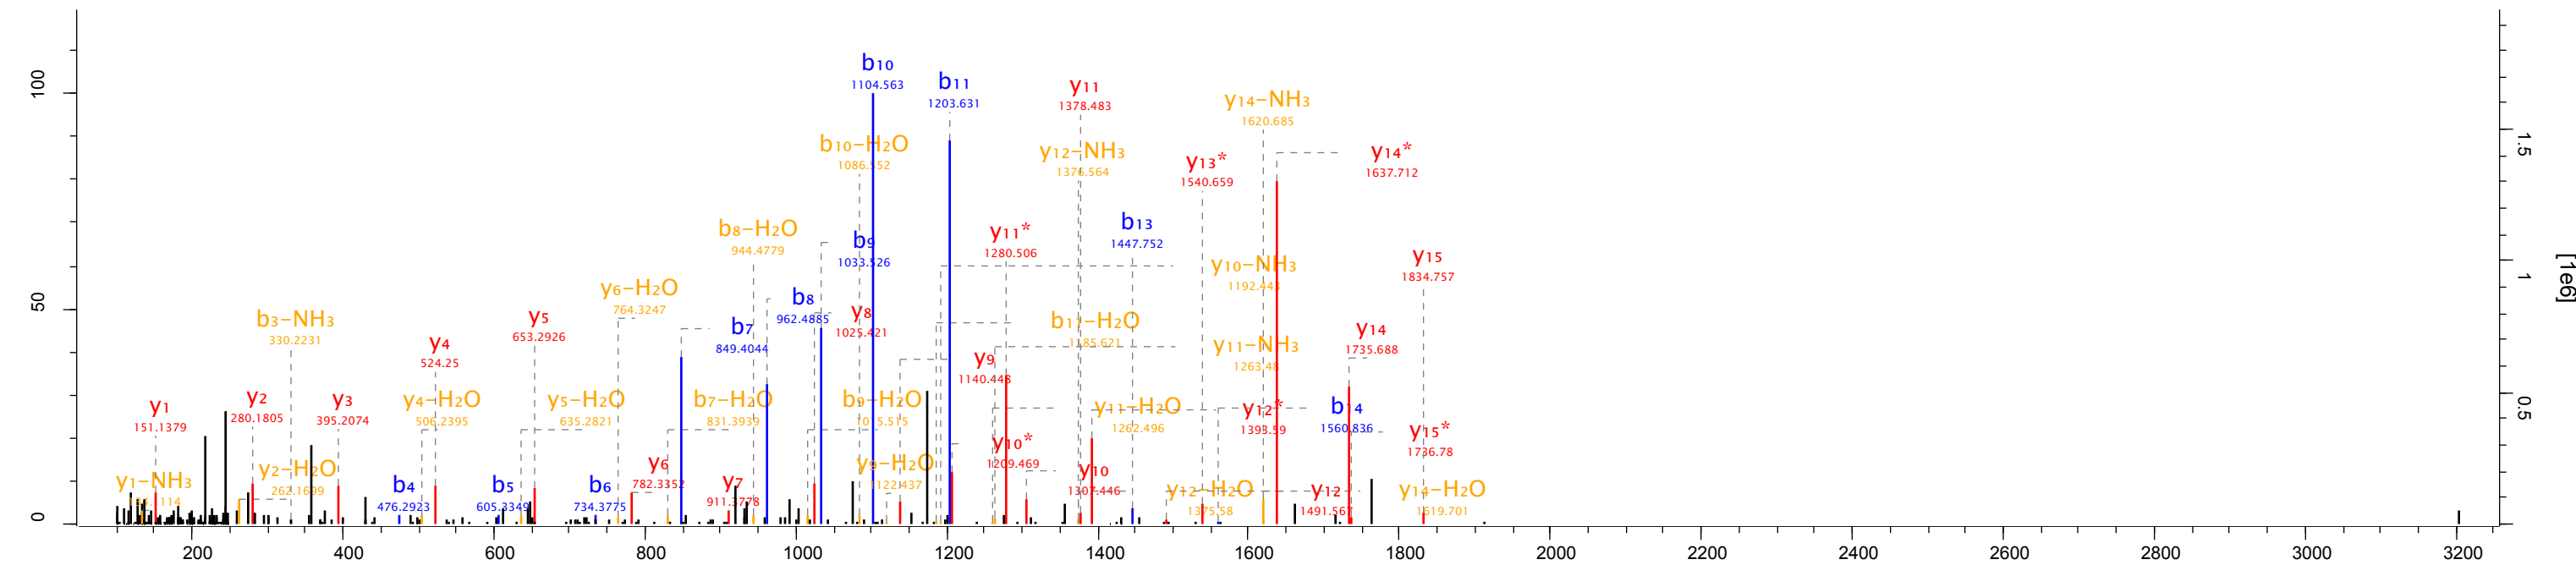

- I R A E E E D L A A V P F L A S D N E E E E D E K -

b<sub>4</sub>
b<sub>5</sub>
b<sub>6</sub>
b<sub>7</sub>
b<sub>8</sub>
b<sub>9</sub>
b<sub>10</sub>
b<sub>11</sub>
b<sub>13</sub>
b<sub>14</sub>
y<sub>15</sub>
y<sub>14</sub>
y<sub>13</sub>\*
y<sub>12</sub>
y<sub>11</sub>
y<sub>10</sub>ph
y<sub>9</sub>
y<sub>8</sub>
y<sub>7</sub>
y<sub>6</sub>
y<sub>5</sub>
y<sub>4</sub>
y<sub>3</sub>
y<sub>2</sub>
y<sub>1</sub>

Raw file 20150814\_A375SR\_Phospho\_BR2\_04 Scan 23009 Method FTMS; HCD Score 119.48 m/z 1200.08 Gene names CEP97

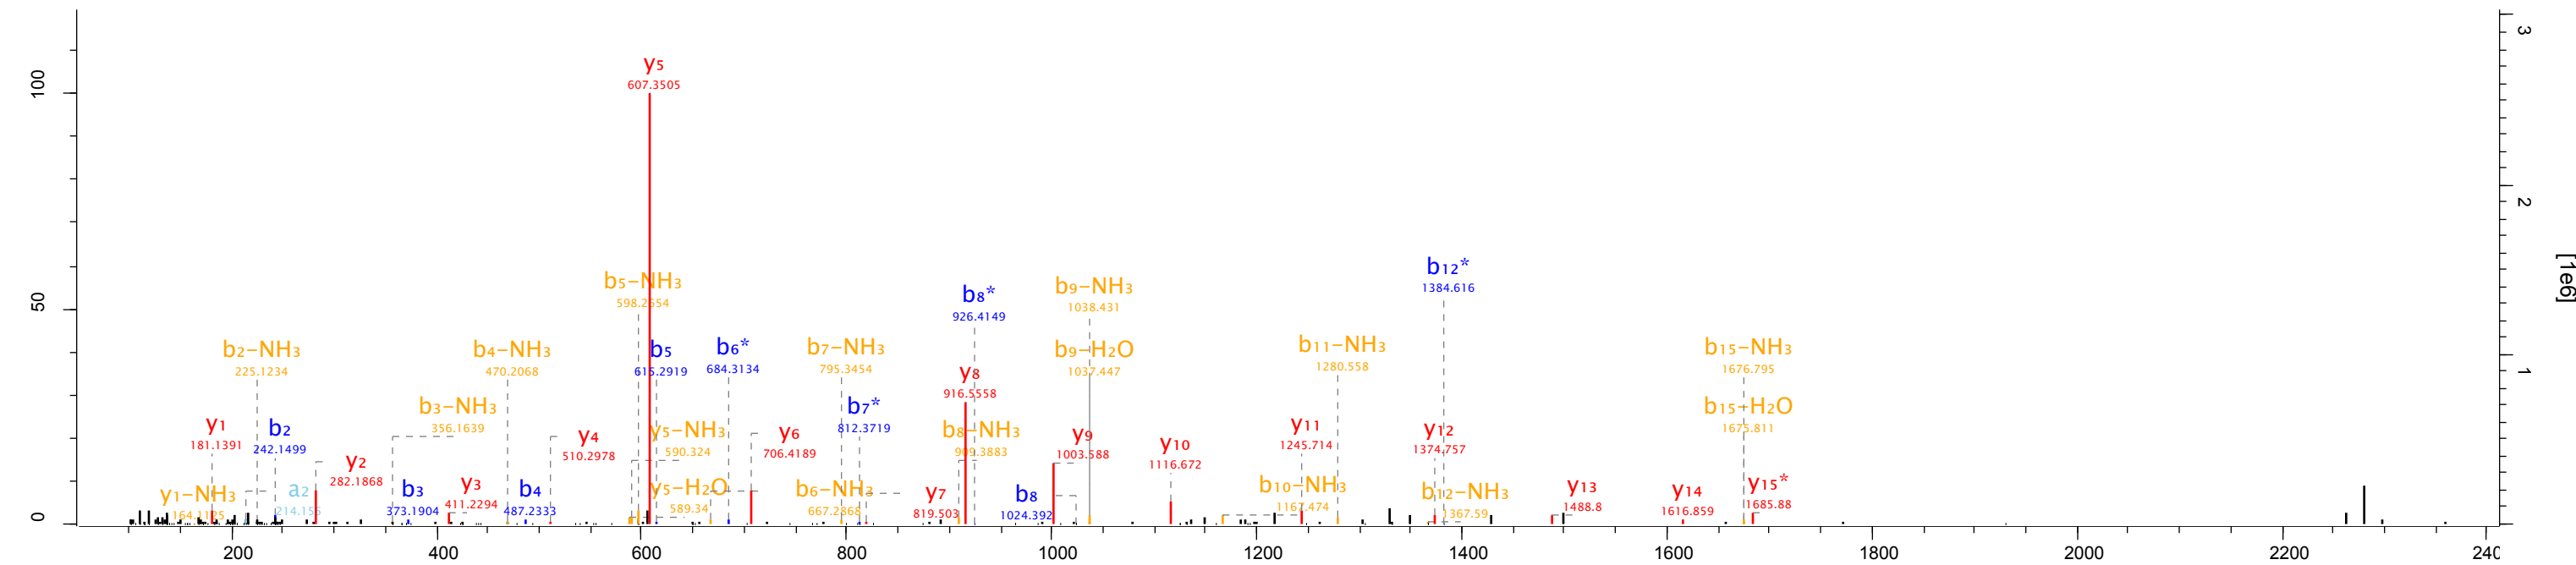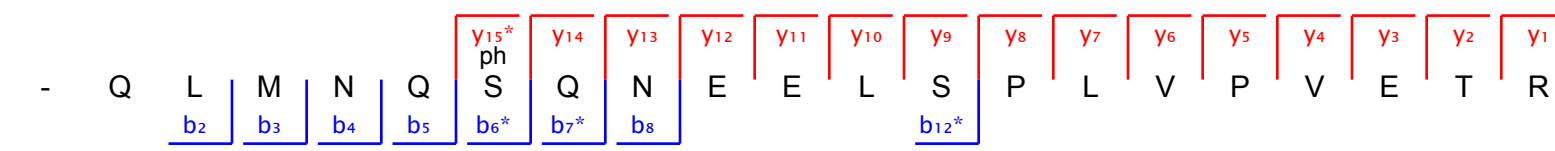

Raw file 20150814\_A375SR\_Phospho\_BR2\_04 Scan 24079 Method FTMS; HCD Score 117.96 m/z 1093.81 Gene names YY1

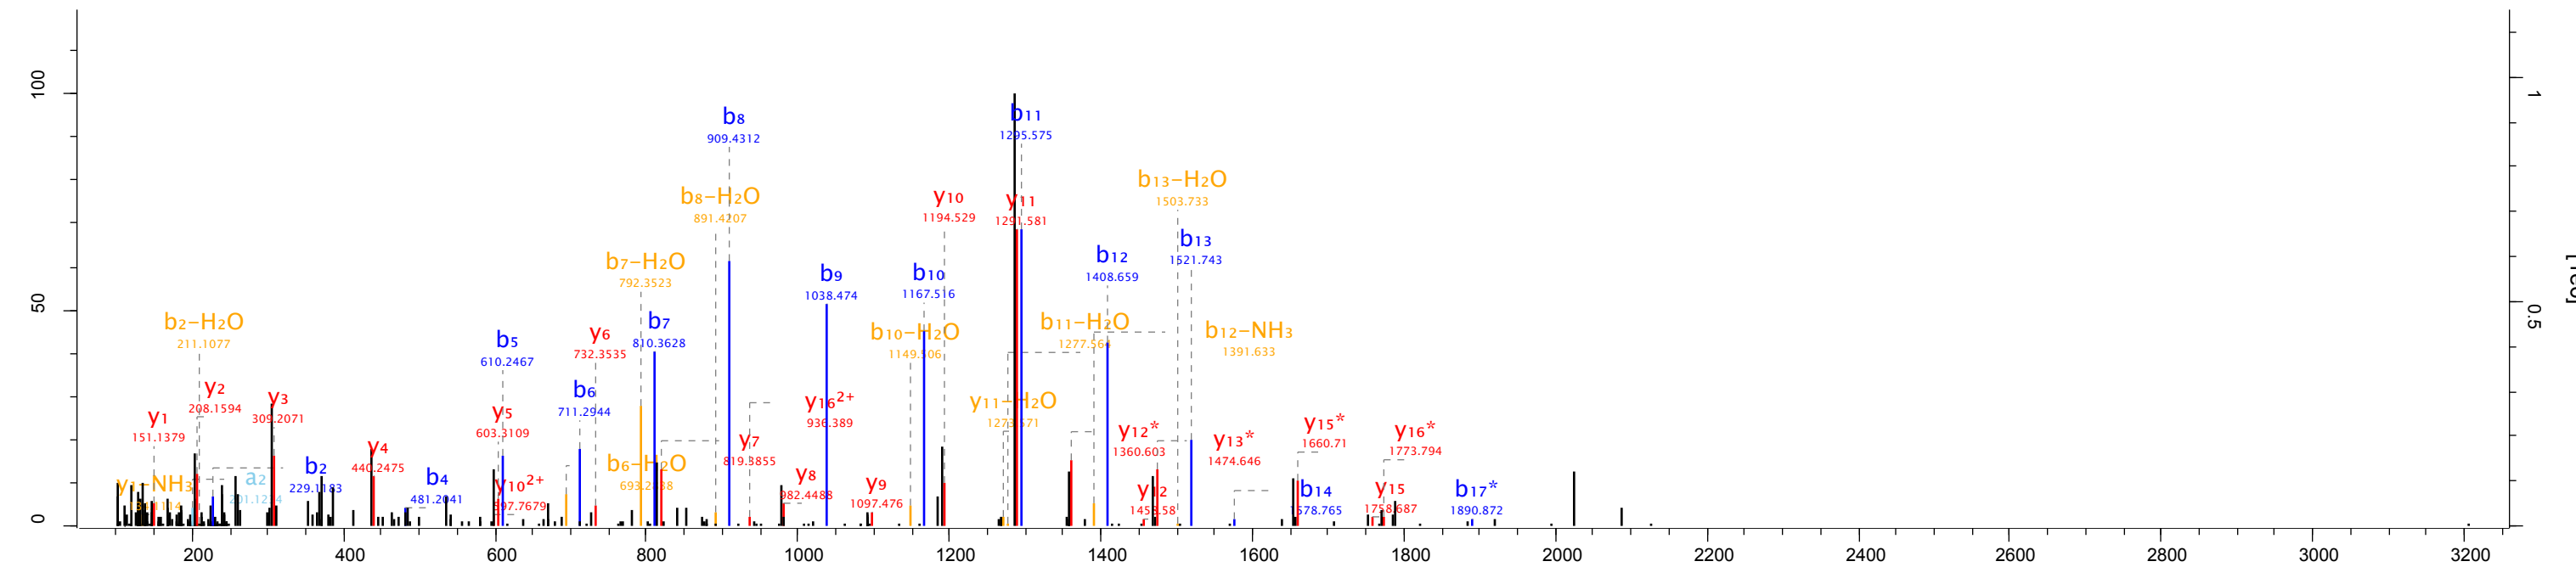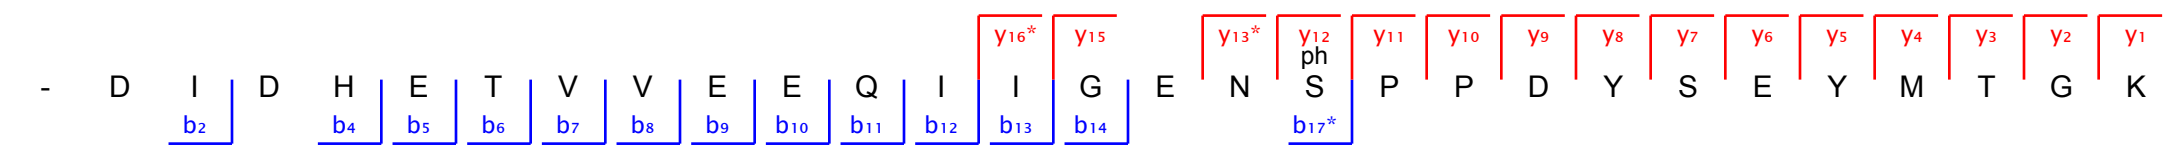



Raw file: 20150814\_A375SR\_Phospho\_BR2\_04  
 Scan: 25249 Method: FTMS; HCD Score: 69.35 m/z: 713.33 Gene names: MAPK6

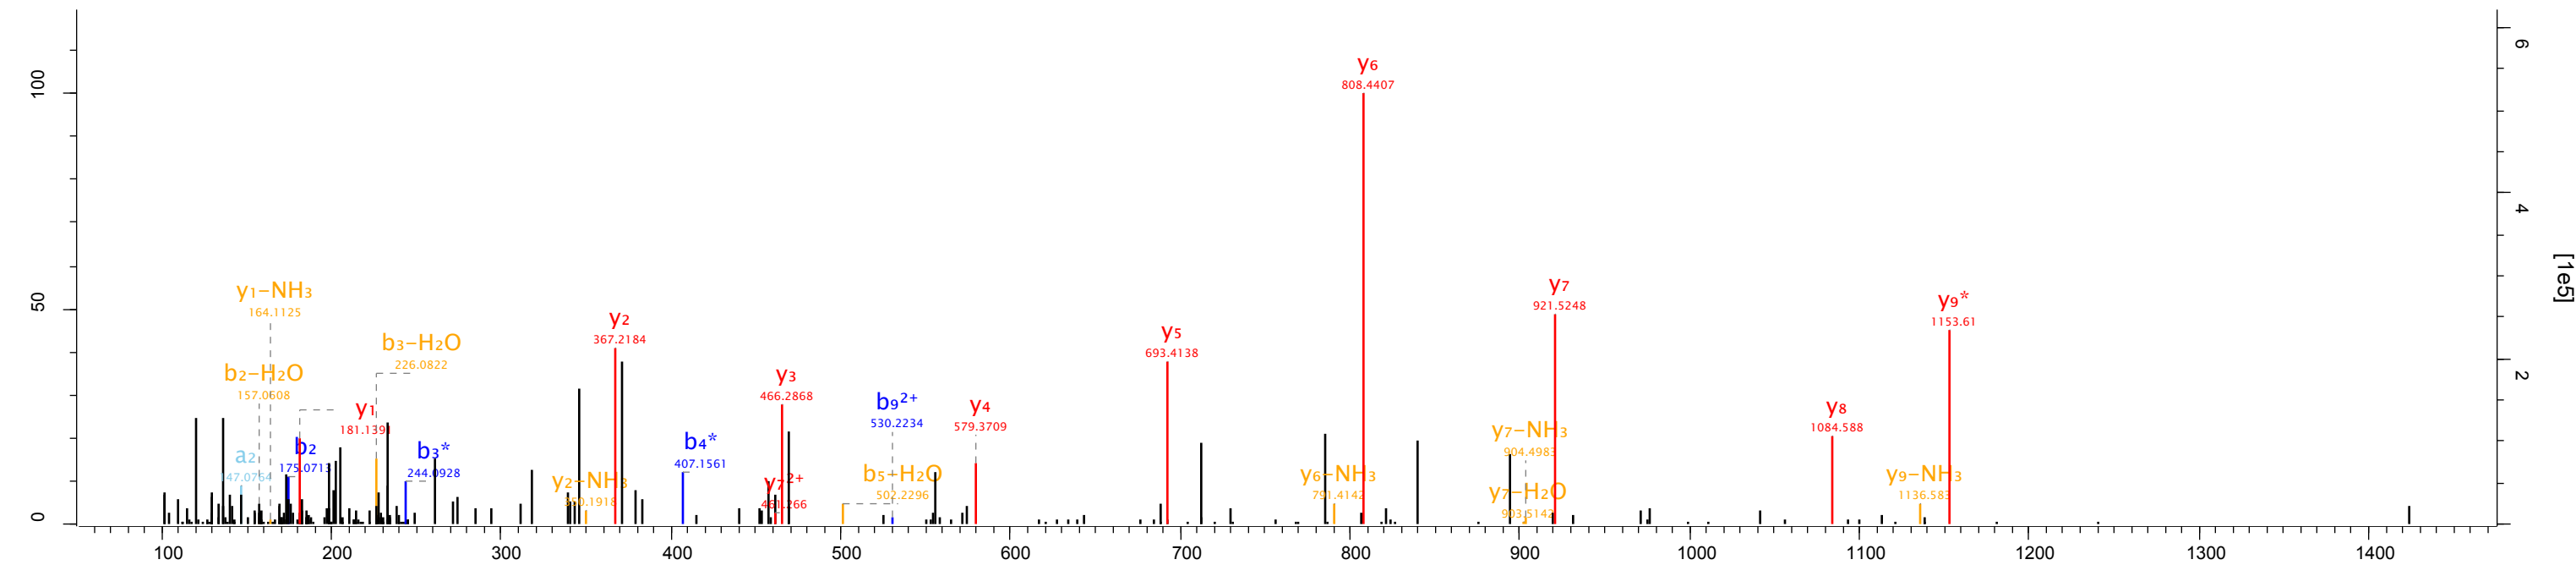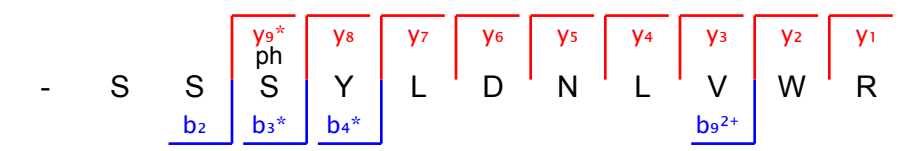

Raw file: 20150814\_A375SR\_Phospho\_BR2\_04  
 Scan: 2549 Method: FTMS; HCD Score: 239.51 m/z: 714.26 Gene names: NAA15

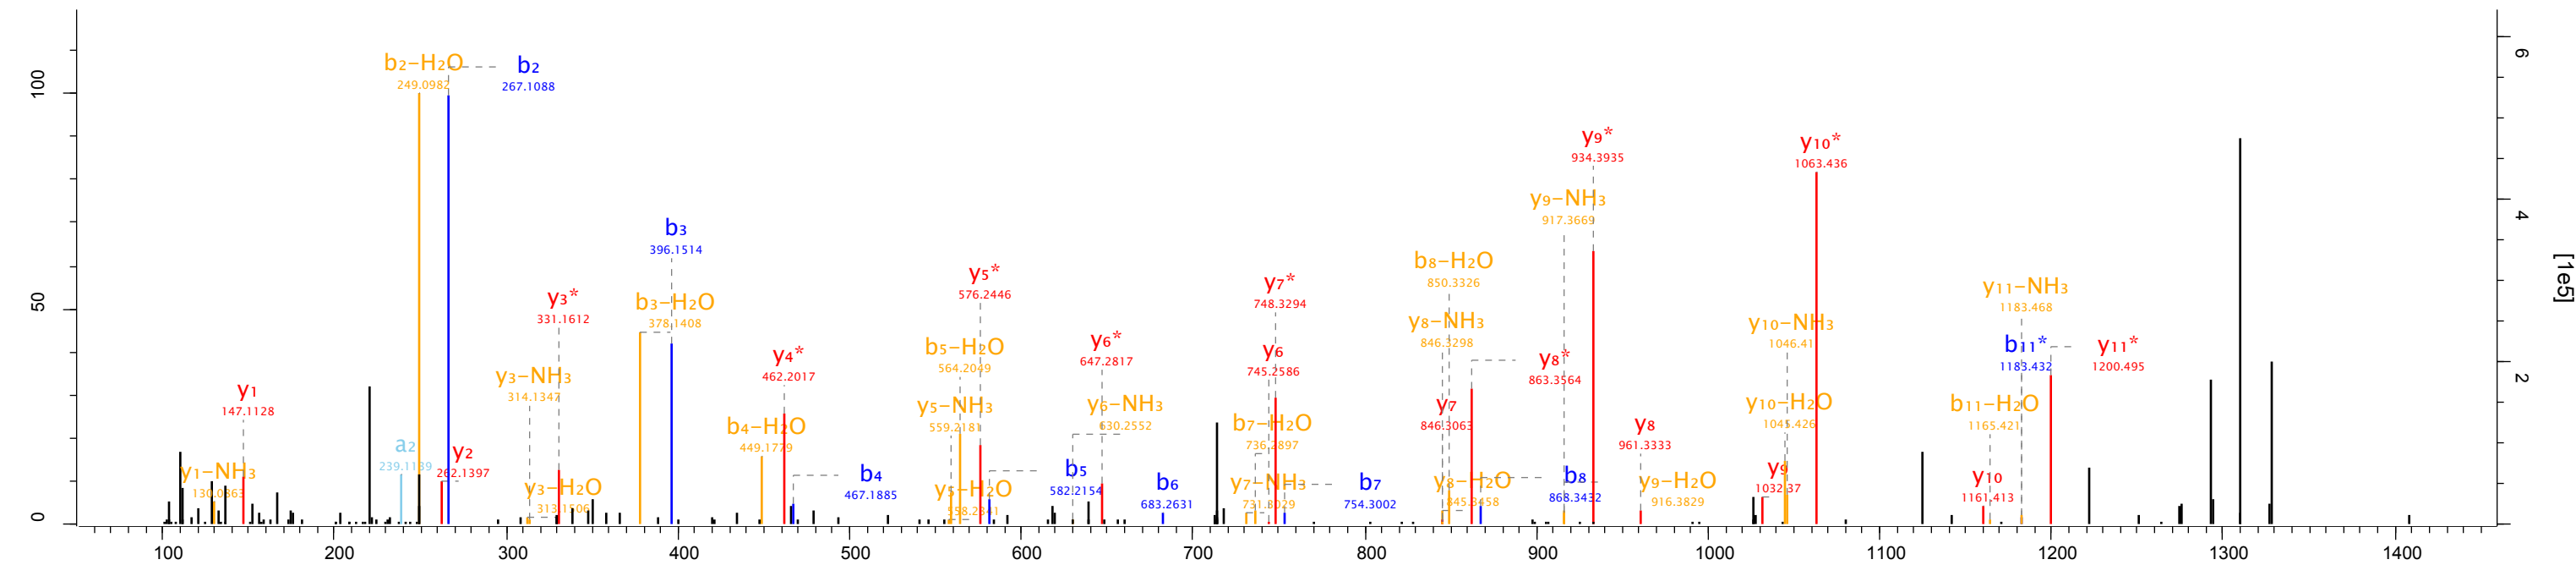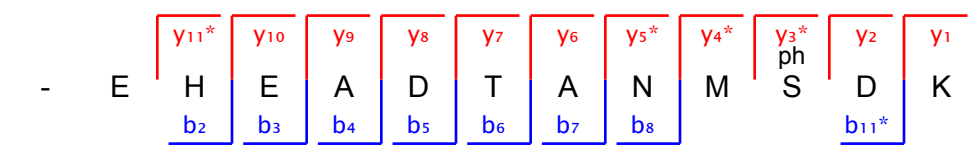

Raw file: 20150814\_A375SR\_Phospho\_BR2\_04  
 Scan: 25659 Method: FTMS; HCD Score: 103.1 m/z: 1119.13 Gene names: MAF1

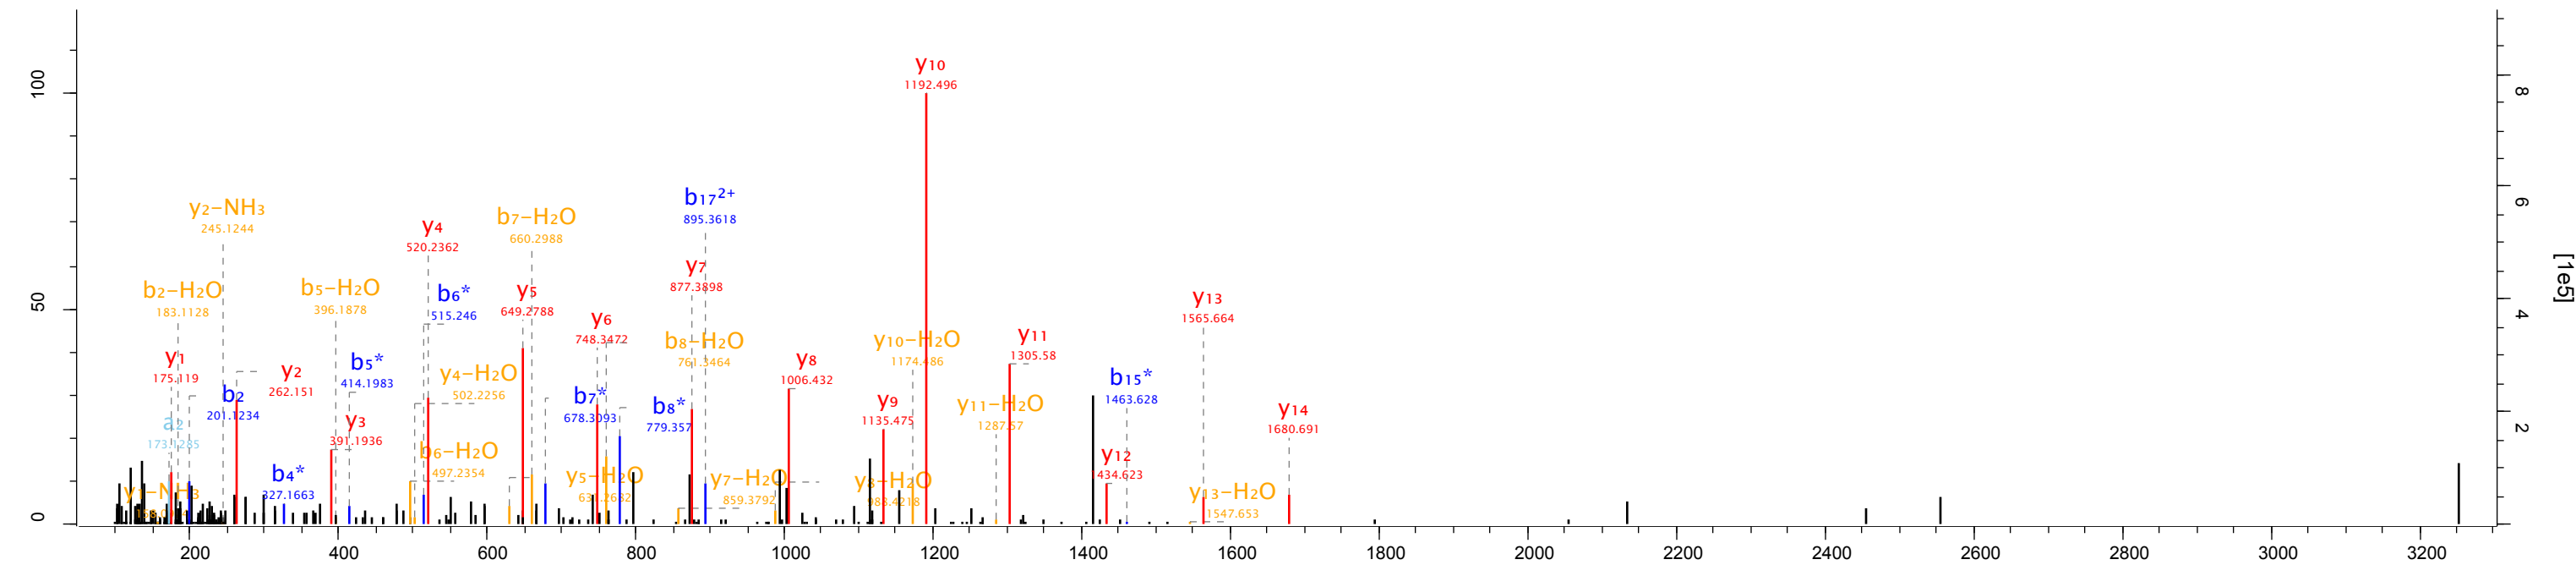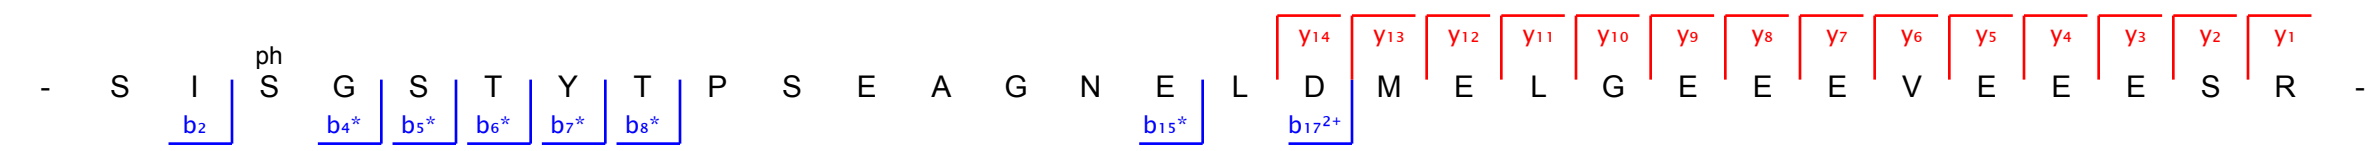

Raw file: 20150814\_A375SR\_Phospho\_BR2\_04  
 Scan: 25779 Method: FTMS; HCD Score: 262.21 m/z: 1086.96 Gene names: RPS6KA1;RPS6KA3;RPS6KA6

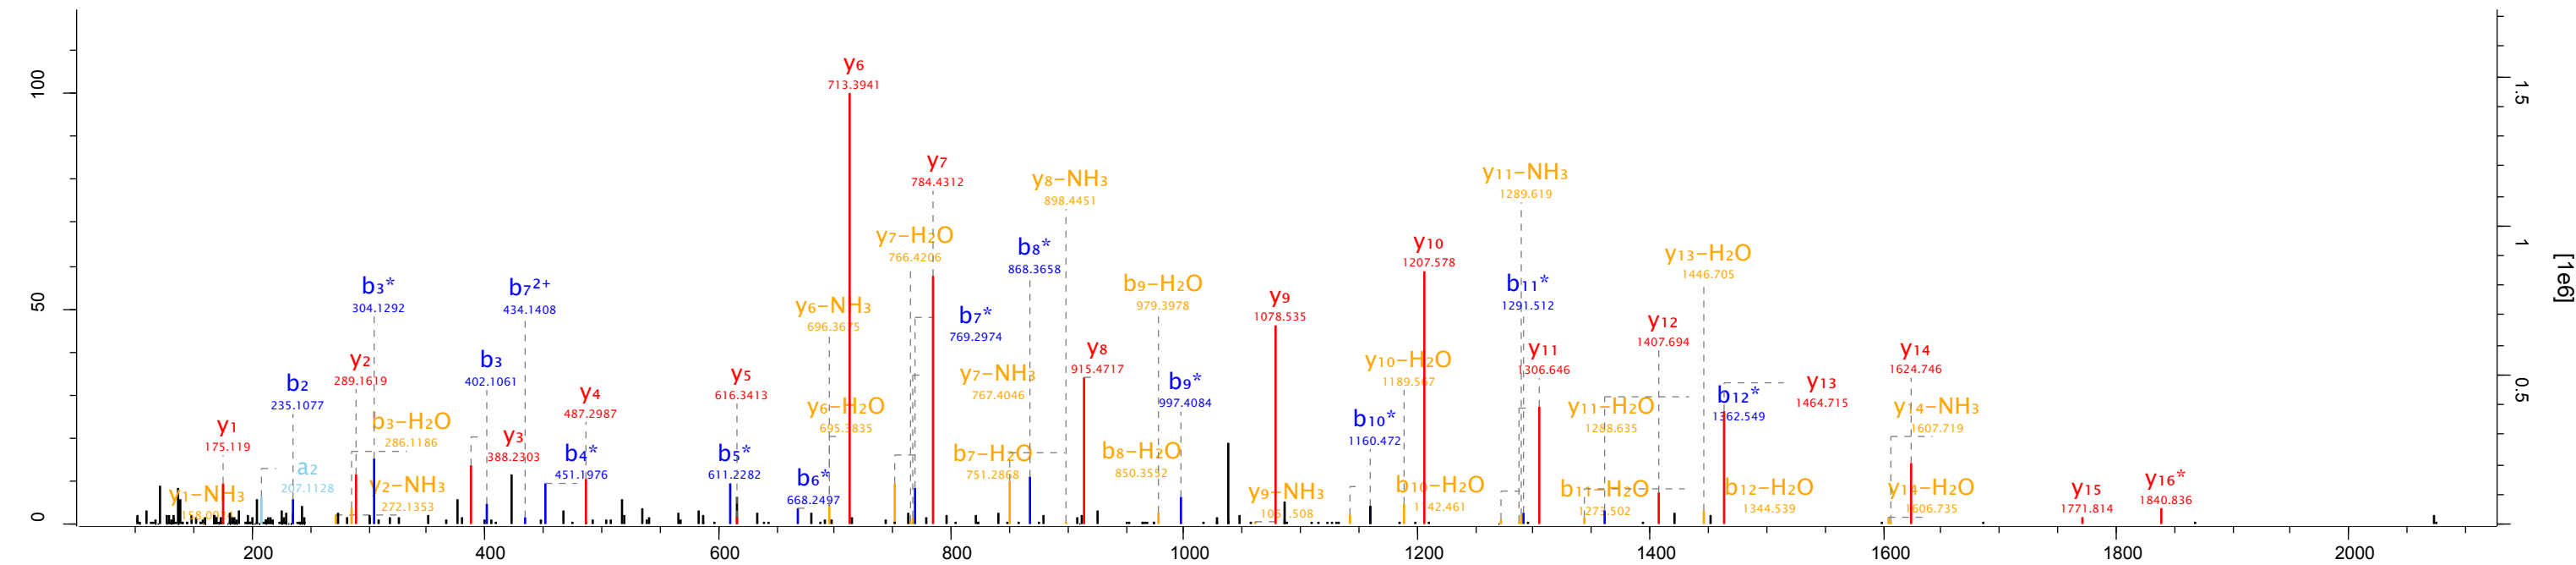

Protein sequence: - A Y Y<sub>16</sub>\*<sup>ph</sup> S Y<sub>15</sub> F Y<sub>14</sub> C Y<sub>13</sub> G Y<sub>12</sub> T Y<sub>11</sub> V Y<sub>10</sub> E Y<sub>9</sub> Y M A Y<sub>8</sub> P Y<sub>7</sub> E Y<sub>6</sub> V Y<sub>5</sub> V Y<sub>4</sub> V Y<sub>3</sub> N Y<sub>2</sub> R -

Fragmentation sites (b and y ions) are indicated by boxes below the sequence:

- Blue boxes (b ions): b<sub>2</sub>, b<sub>3</sub>, b<sub>4</sub>\*, b<sub>5</sub>\*, b<sub>6</sub>\*, b<sub>7</sub>\*, b<sub>8</sub>\*, b<sub>9</sub>\*, b<sub>10</sub>\*, b<sub>11</sub>\*, b<sub>12</sub>\*
- Red boxes (y ions): y<sub>1</sub>, y<sub>2</sub>, y<sub>3</sub>, y<sub>4</sub>, y<sub>5</sub>, y<sub>6</sub>, y<sub>7</sub>, y<sub>8</sub>, y<sub>9</sub>, y<sub>10</sub>, y<sub>11</sub>, y<sub>12</sub>, y<sub>13</sub>, y<sub>14</sub>, y<sub>15</sub>, y<sub>16</sub>\*

Raw file: 20150814\_A375SR\_Phospho\_BR2\_04  
 Scan: 25979 Method: FTMS; HCD Score: 197.54 m/z: 961.75 Gene names: ERBB2IP

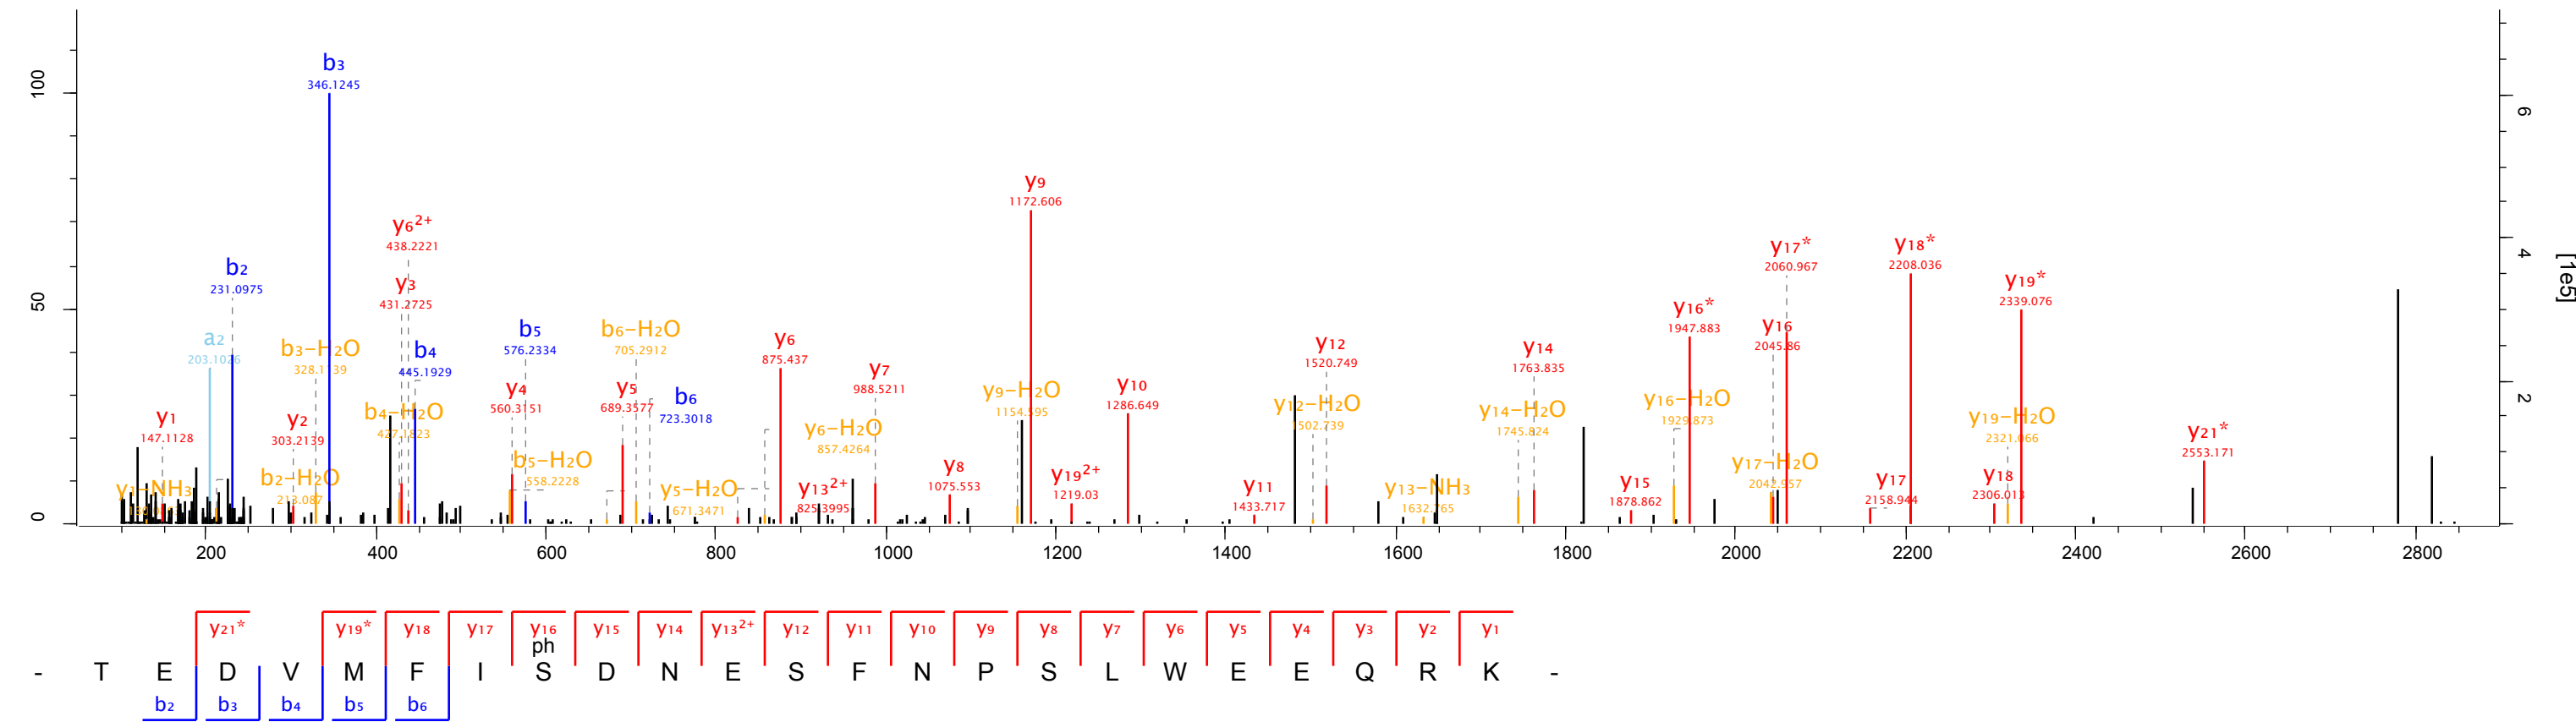

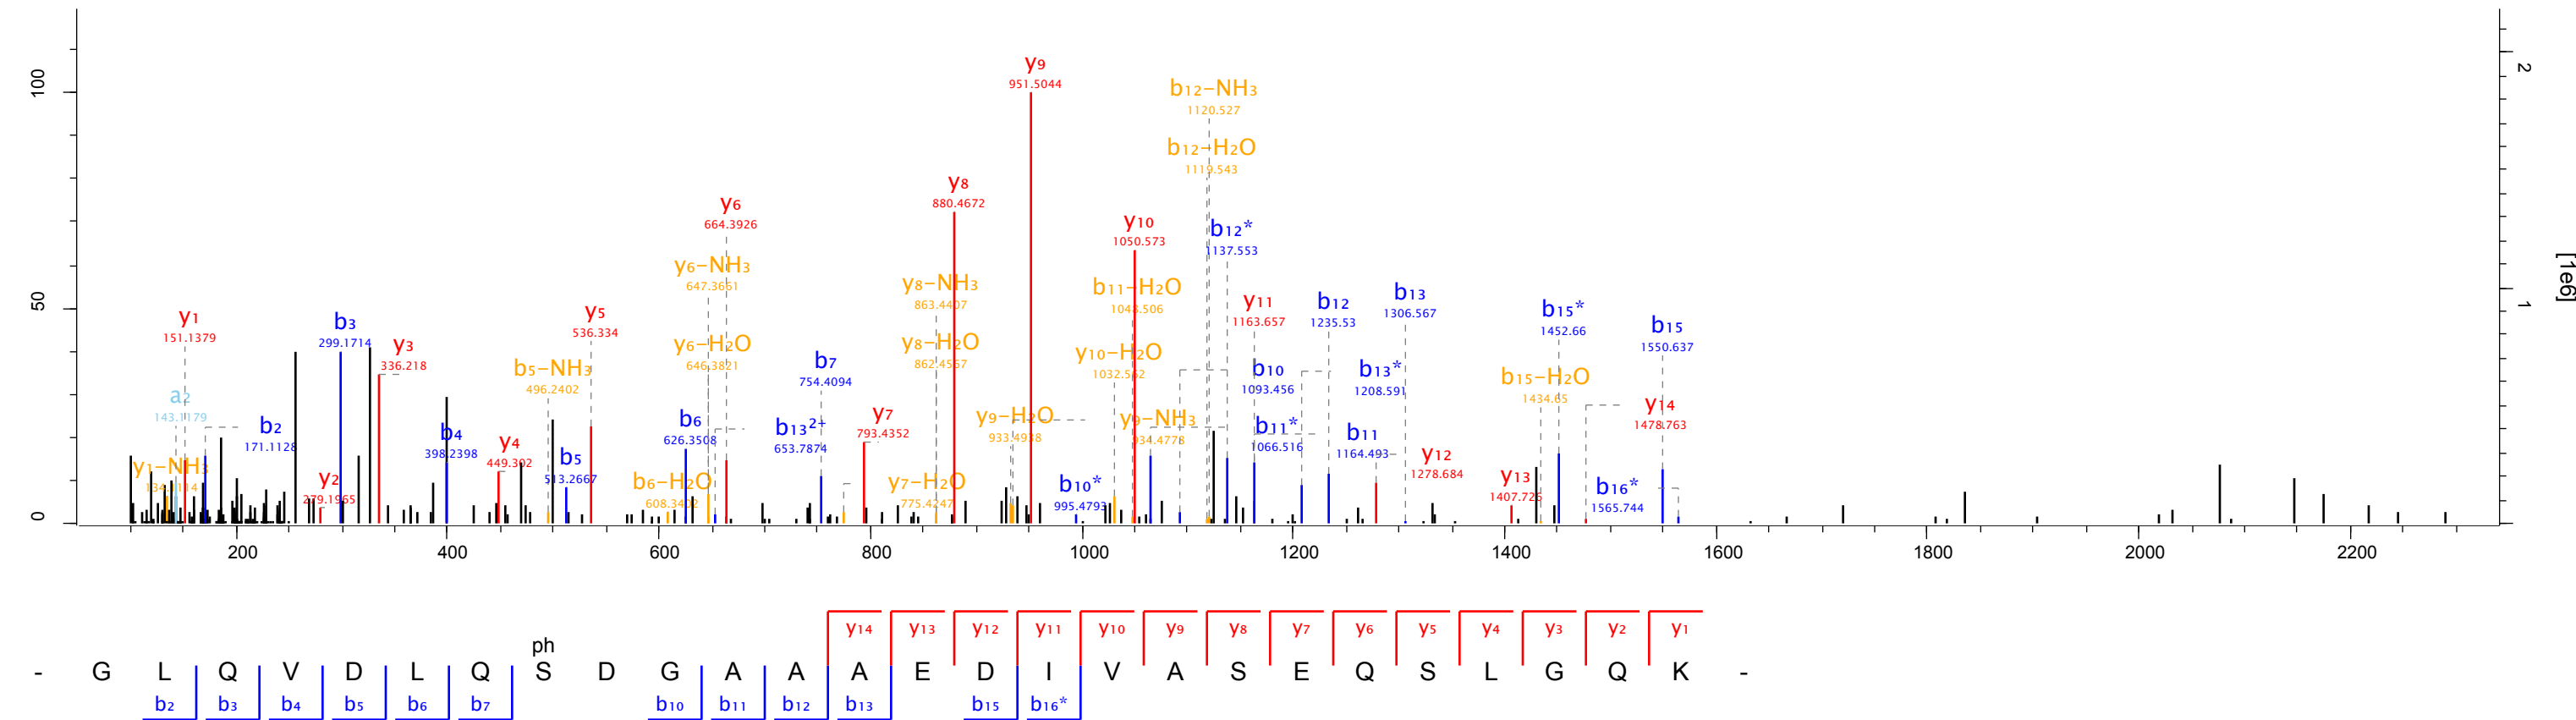

Raw file 20150814\_A375SR\_Phospho\_BR2\_04 Scan 26629 Method FTMS; HCD Score 64.55 m/z 845.06 Gene names TXNDC9

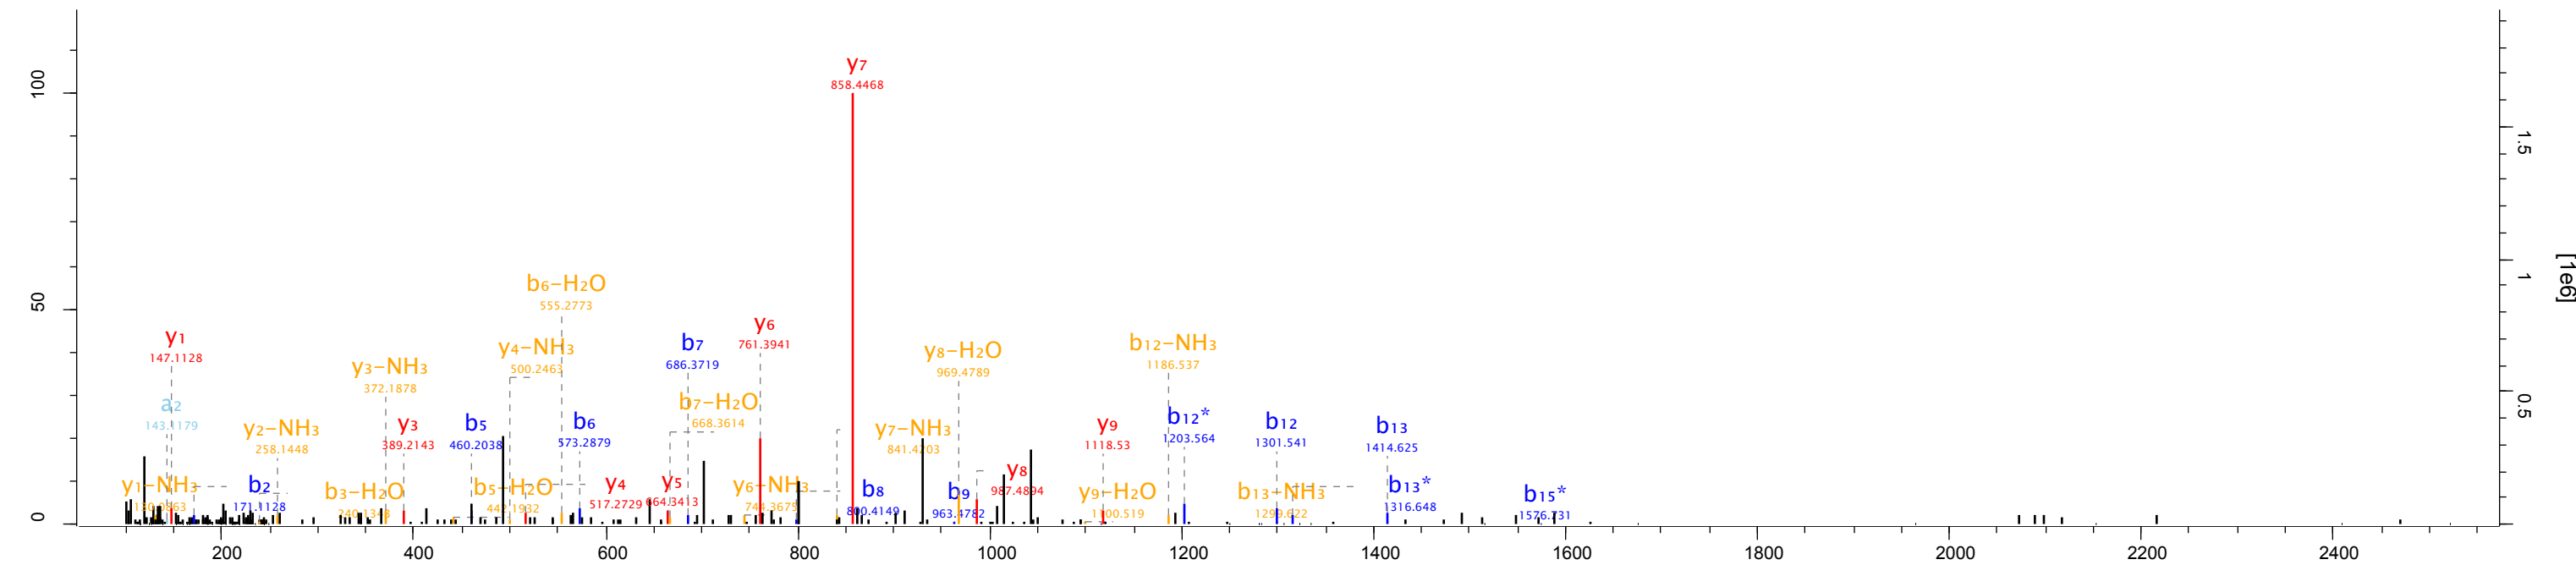

- L G S S D I L N Y ph S G N L M E P P F Q N Q K -

Fragmentation mapping: b2 (L), b5 (D), b6 (I), b7 (L), b8 (N), b9 (Y), b12 (N), b13 (L), b15\* (M), y1 (K), y3 (N), y4 (Q), y5 (F), y6 (P), y7 (P), y8 (E), y9 (M).

Raw file 20150814\_A375SR\_Phospho\_BR2\_04 Scan 26659 Method FTMS; HCD Score 45.36 m/z 933.44 Gene names ANKIB1

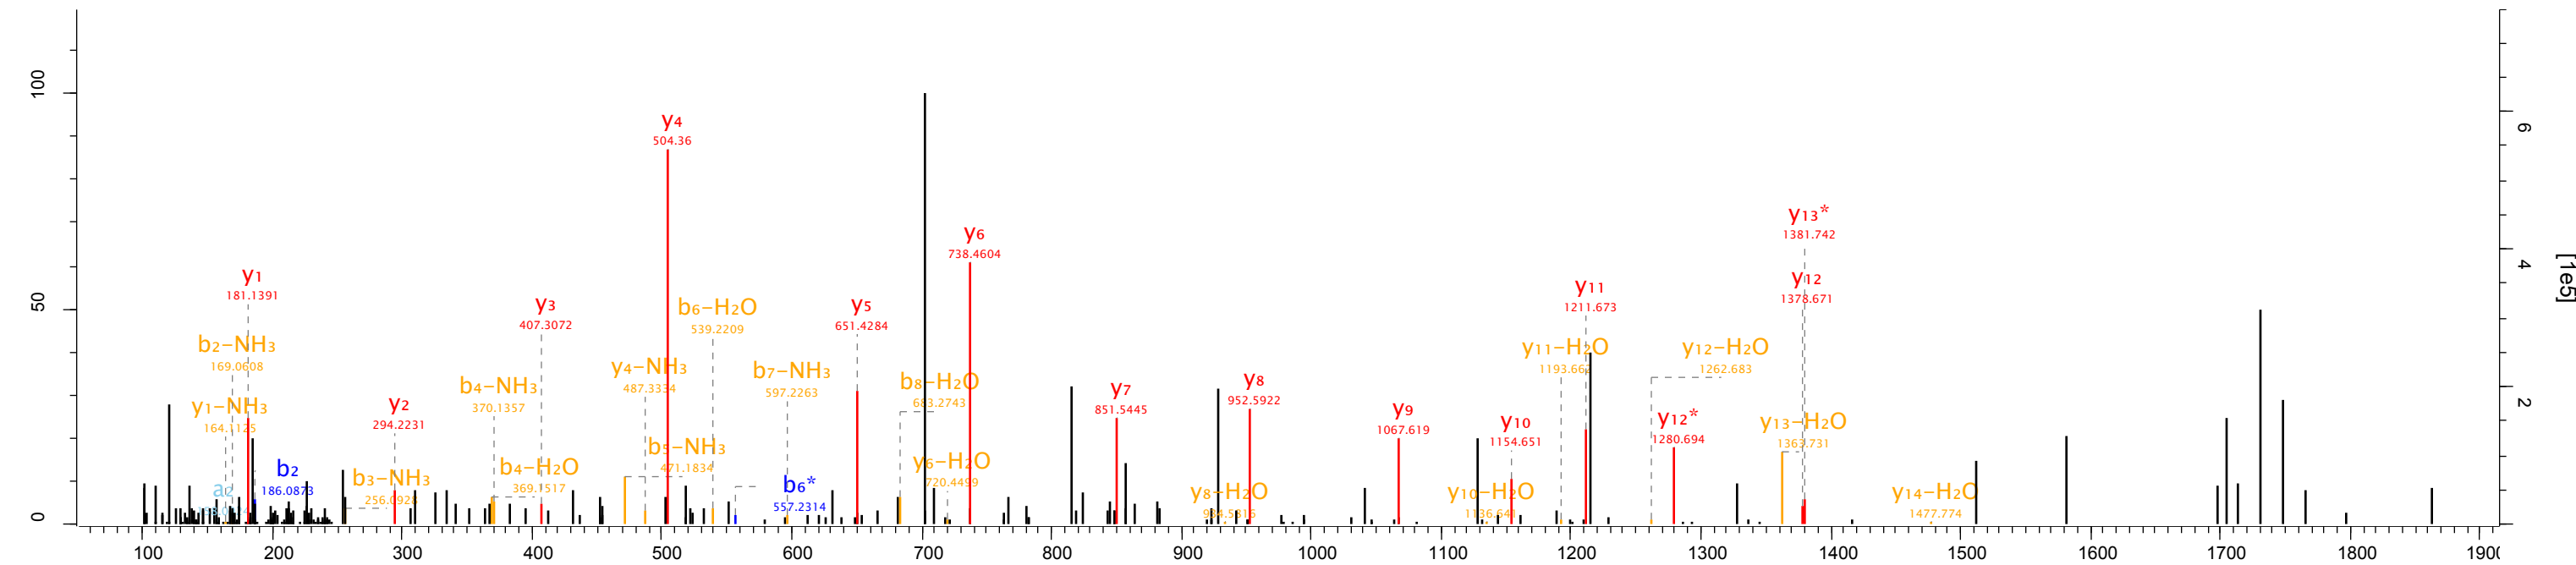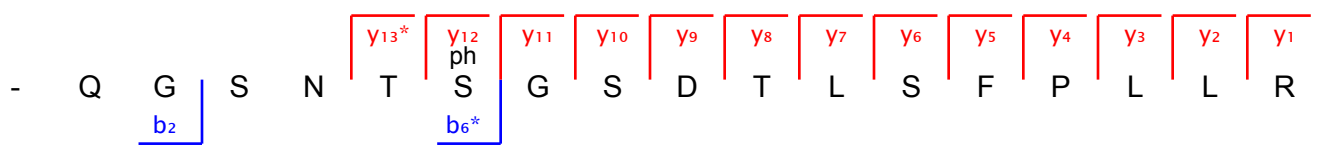



Raw file 20150814\_A375SR\_Phospho\_BR2\_04 Scan 26669 Method FTMS; HCD Score 89.66 m/z 973.41 Gene names FUNDC1

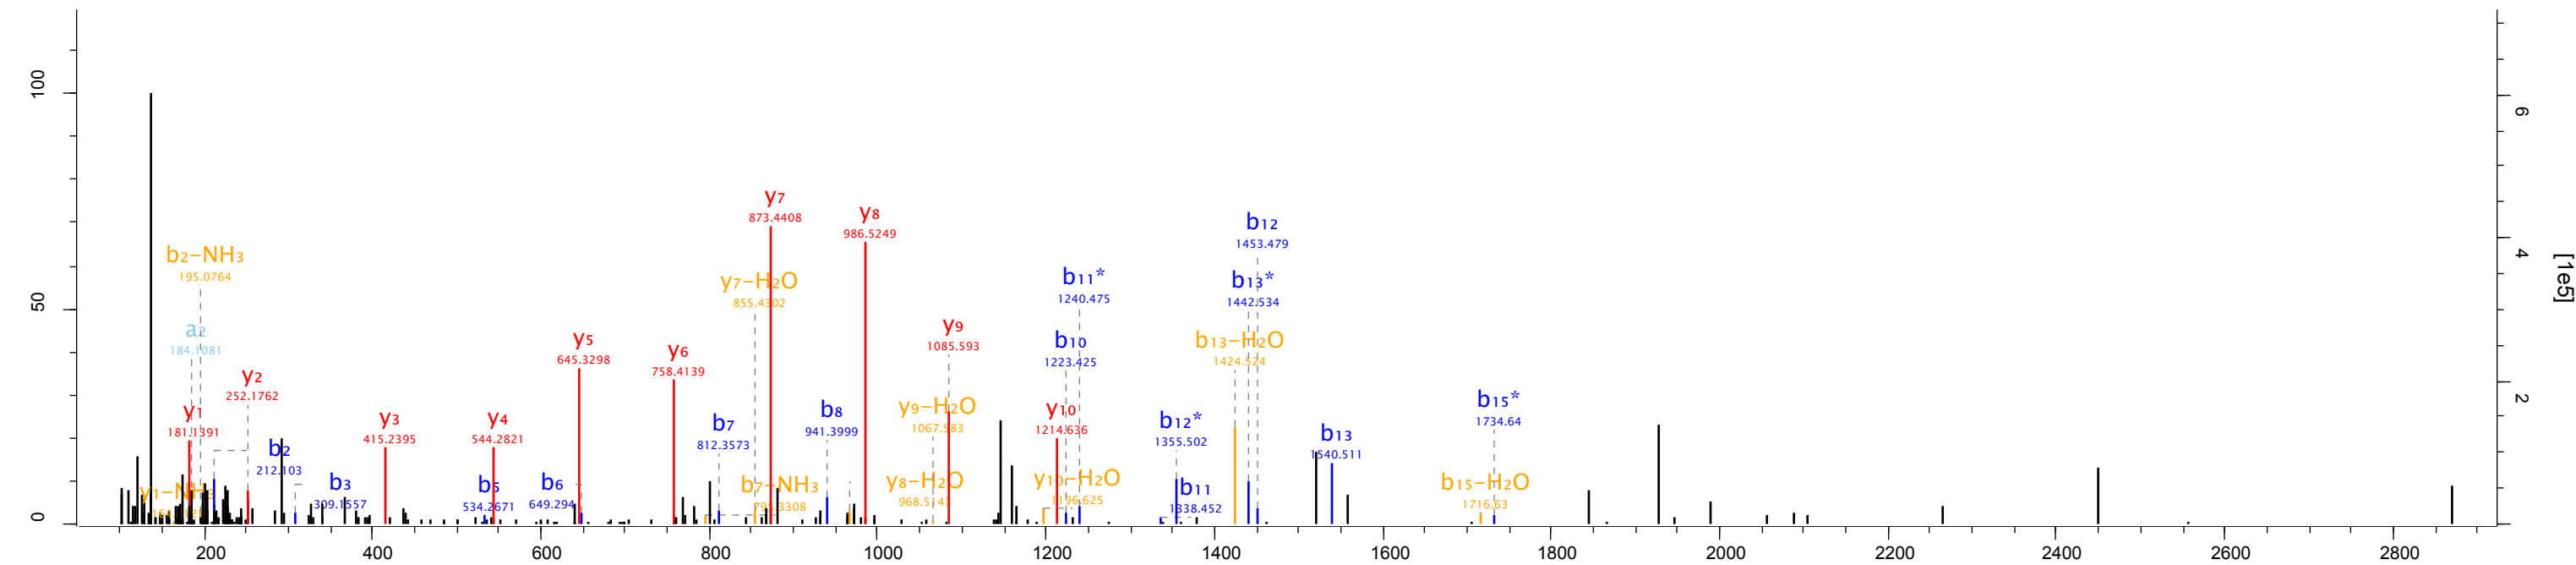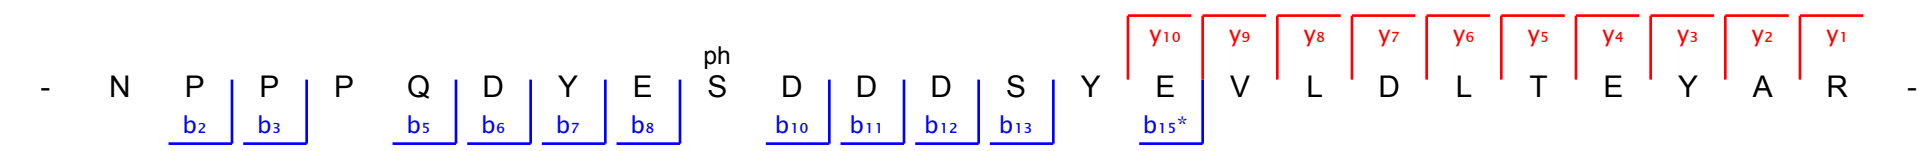

Raw file 20150814\_A375SR\_Phospho\_BR2\_04 Scan 26779 Method FTMS; HCD Score 115.58 m/z 852.72 Gene names RAF1

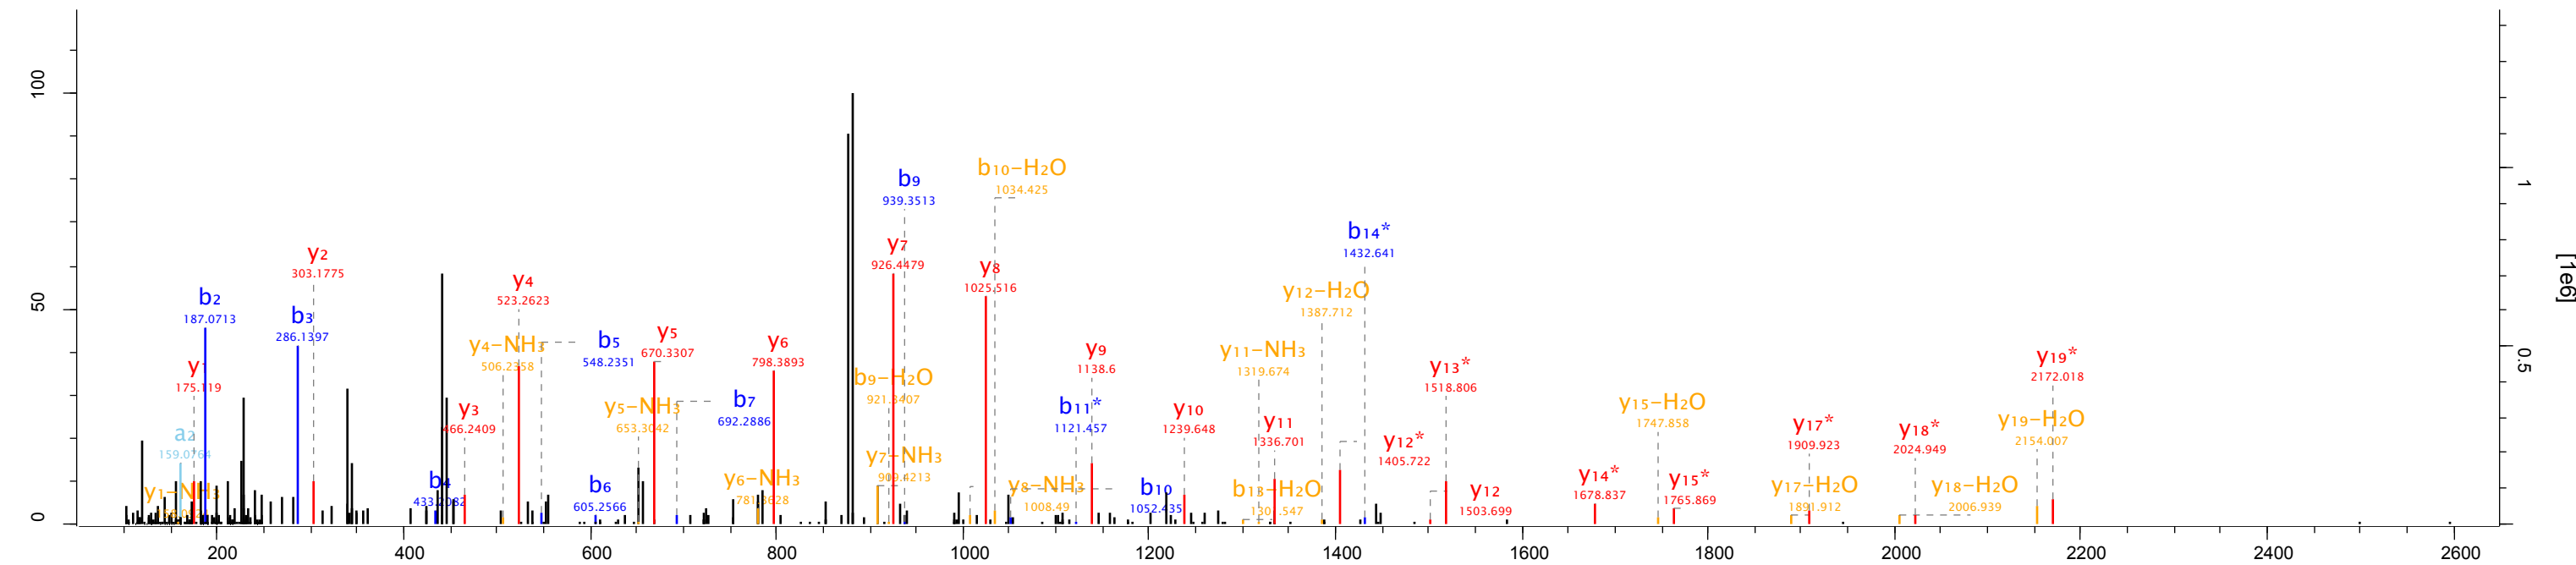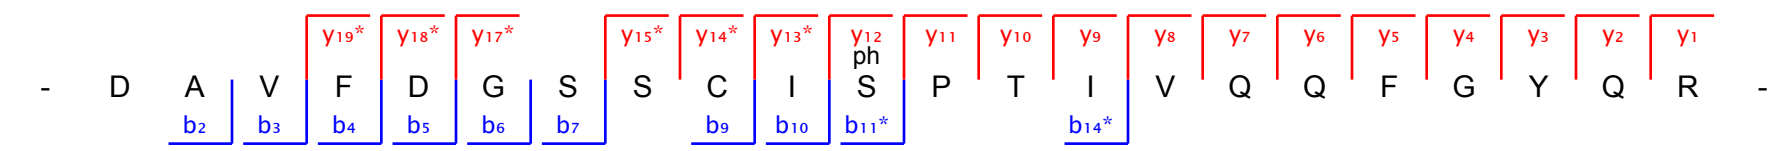

Raw file 20150814\_A375SR\_Phospho\_BR2\_04 Scan 26789 Method FTMS; HCD Score 56 m/z 973.12 Gene names MAP3K4

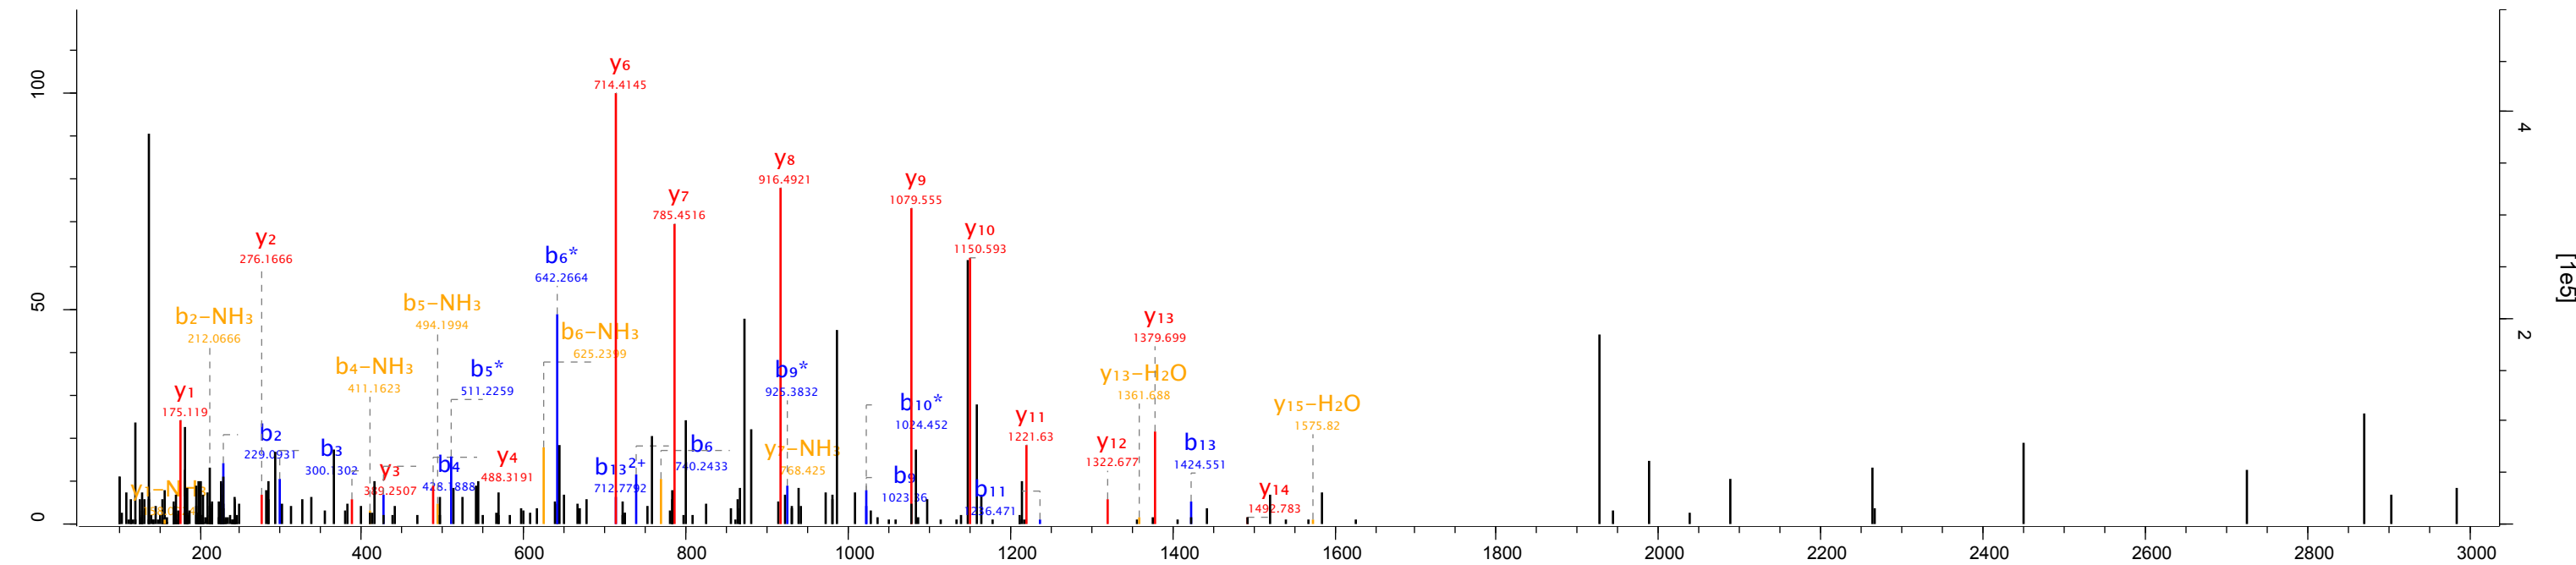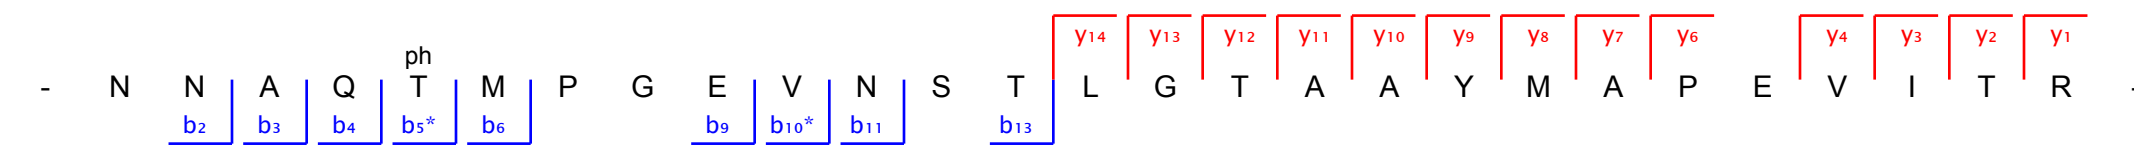

Raw file  
 20150814\_A375SR\_Phospho\_BR2\_04  
 Scan 26859 Method FTMS; HCD Score 62.02 m/z 801.65 Gene names PPP1R35

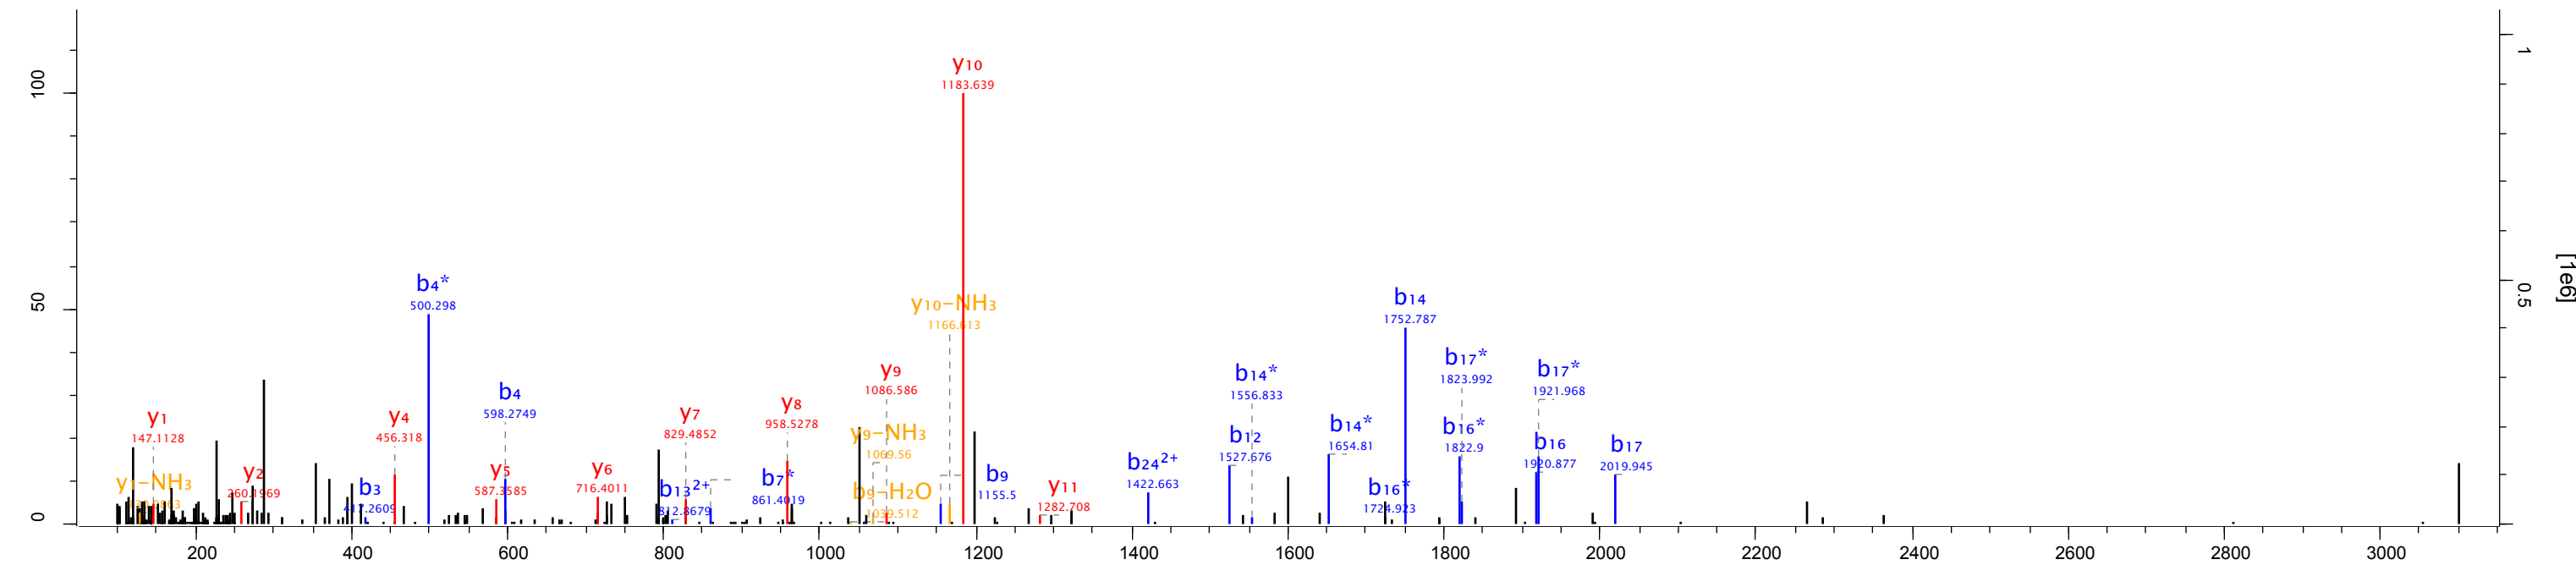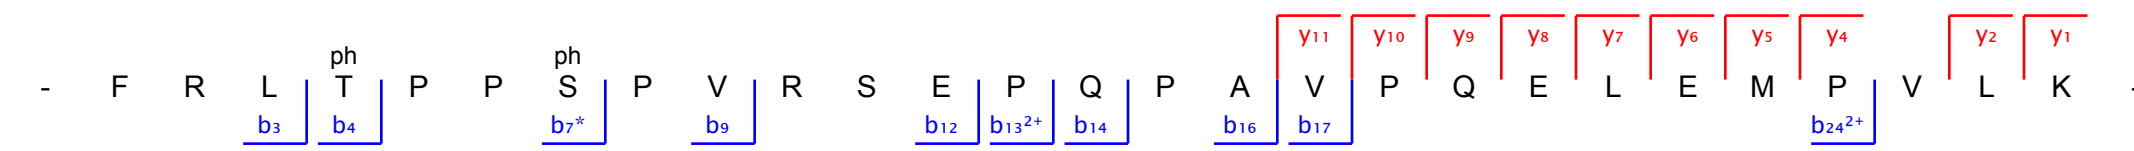



Raw file 20150814\_A375SR\_Phospho\_BR2\_04 Scan 2719 Method FTMS; HCD Score 306.41 m/z 810.4 Gene names MED1

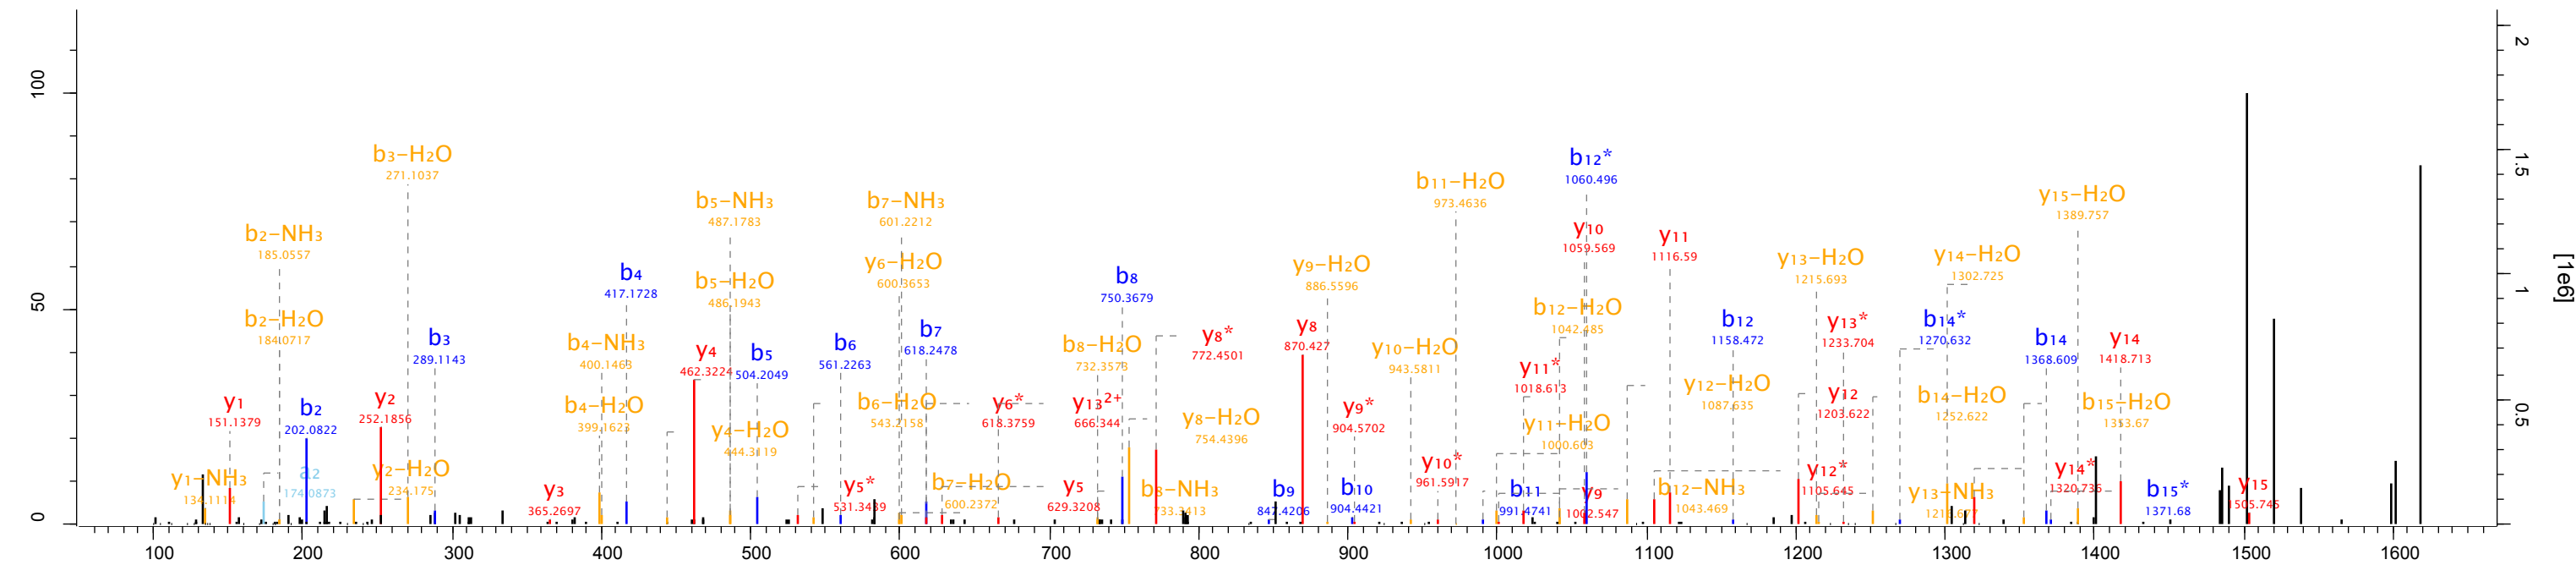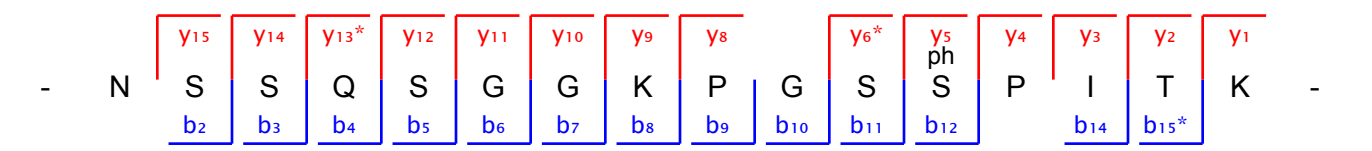

Raw file 20150814\_A375SR\_Phospho\_BR2\_04 Scan 27329 Method FTMS; HCD Score 79.57 m/z 1216.59 Gene names NES

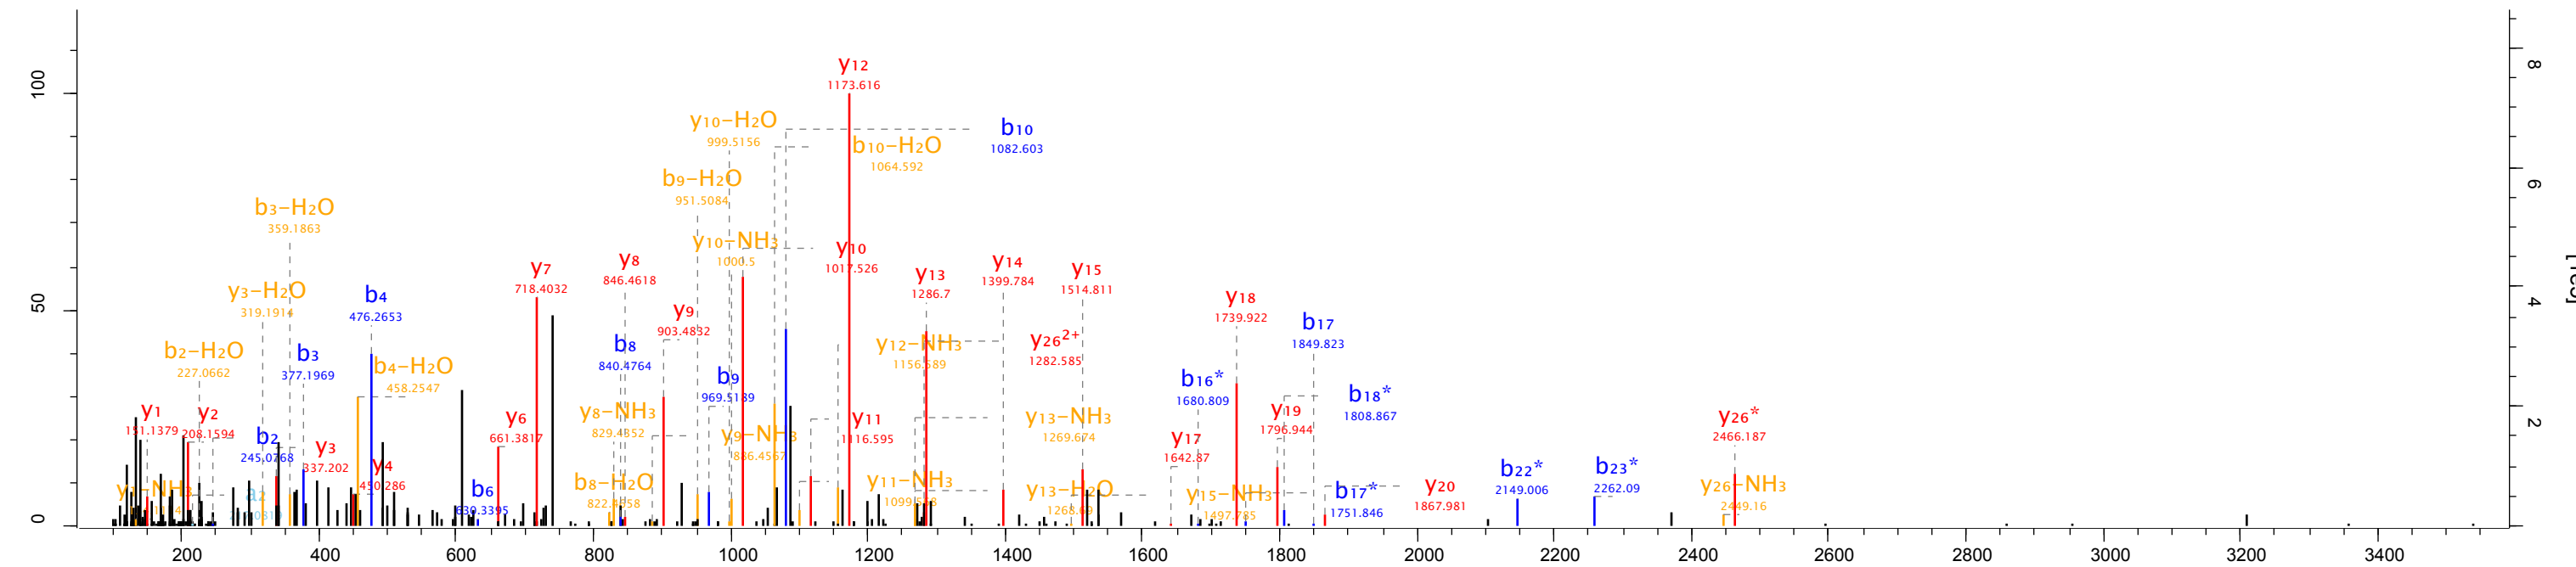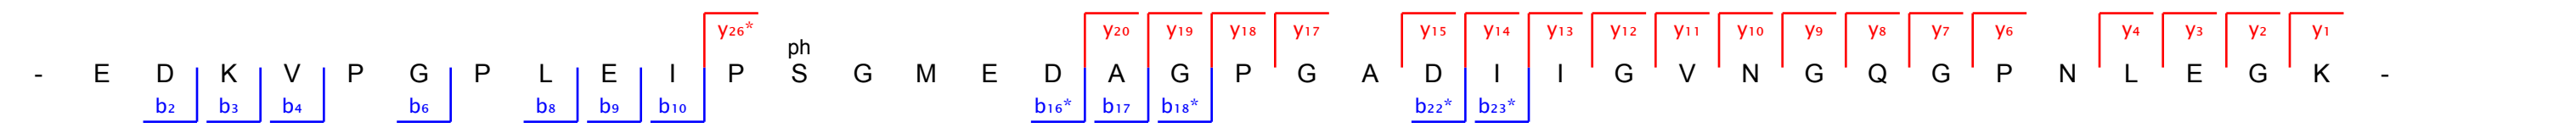

Raw file: 20150814\_A375SR\_Phospho\_BR2\_04  
 Scan: 27379 Method: FTMS; HCD Score: 127.45 m/z: 1136.9 Gene names: BCAR2;TRERF1

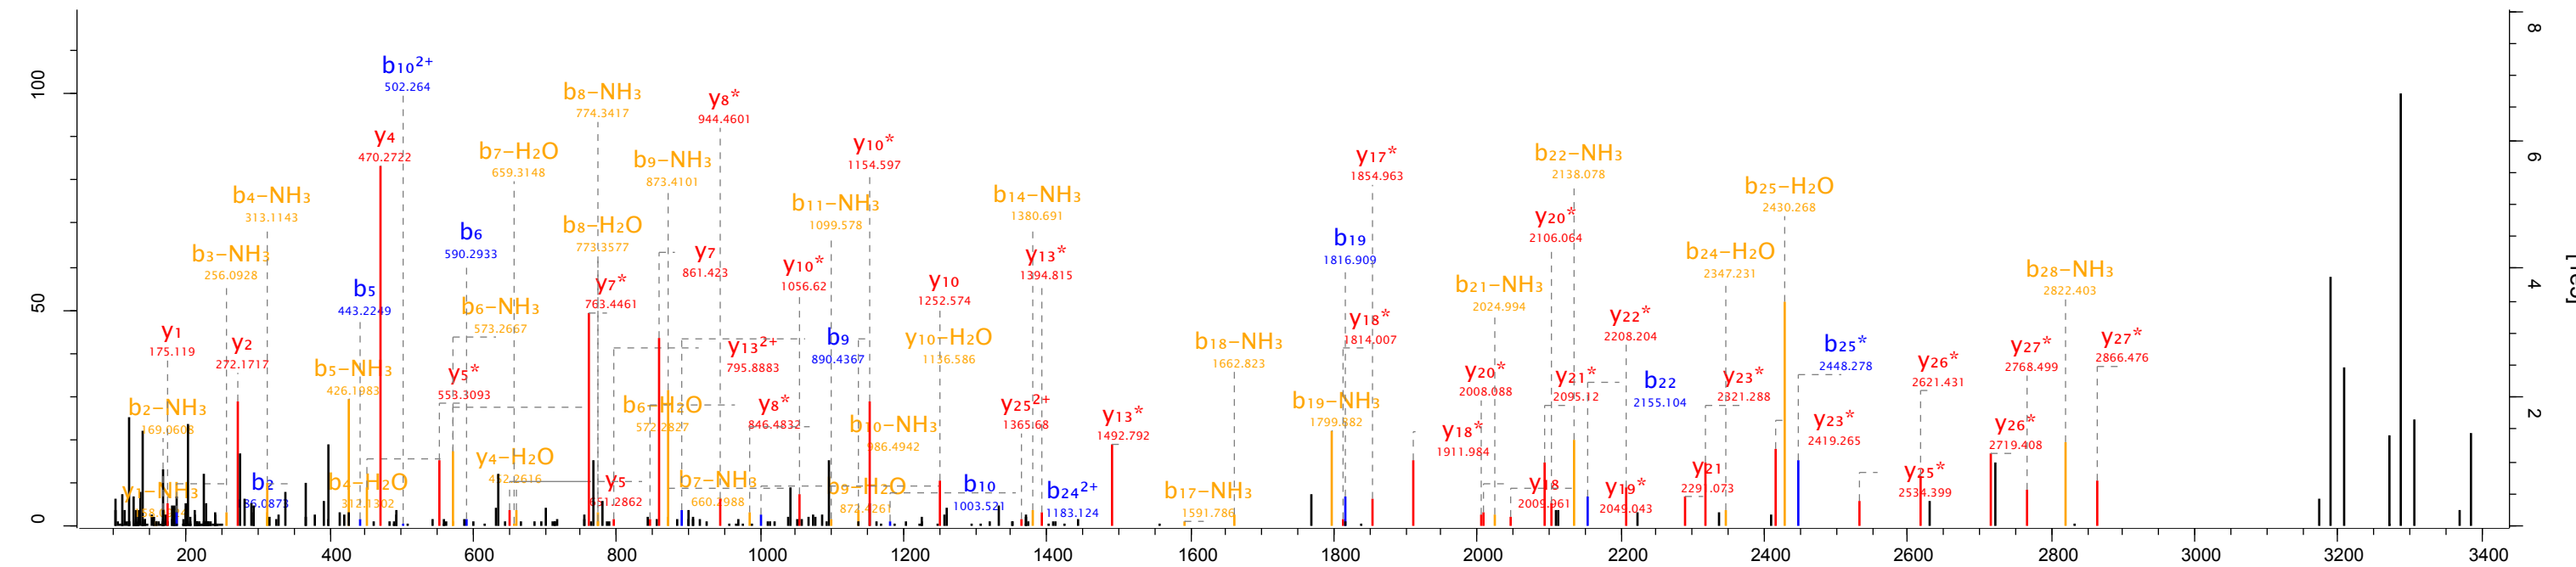

Protein sequence: - Q G S G L F S N V L I S G H G P G A H P Q L P L T P L T P T P R -

Fragmentation sites (b and y ions) are indicated by brackets below the sequence:

- Blue brackets (b ions): b<sub>2</sub> (G), b<sub>5</sub> (L), b<sub>6</sub> (F), b<sub>9</sub> (V), b<sub>10</sub> (L), b<sub>19</sub> (H), b<sub>22</sub> (L), b<sub>24</sub><sup>2+</sup> (L), b<sub>25</sub><sup>\*</sup> (T)
- Red brackets (y ions): y<sub>17</sub><sup>\*</sup> (P), y<sub>18</sub><sup>\*</sup> (G), y<sub>19</sub><sup>\*</sup> (H), y<sub>20</sub><sup>\*</sup> (G), y<sub>21</sub><sup>\*</sup> (S), y<sub>22</sub><sup>\*</sup> (I), y<sub>23</sub><sup>\*</sup> (L), y<sub>25</sub><sup>\*</sup> (N), y<sub>26</sub><sup>\*</sup> (S), y<sub>27</sub><sup>\*</sup> (F)



Raw file  
 20150814\_A375SR\_Phospho\_BR2\_04  
 Scan 27489 Method FTMS; HCD Score 231.42 m/z 917.92 Gene names GRIPAP1

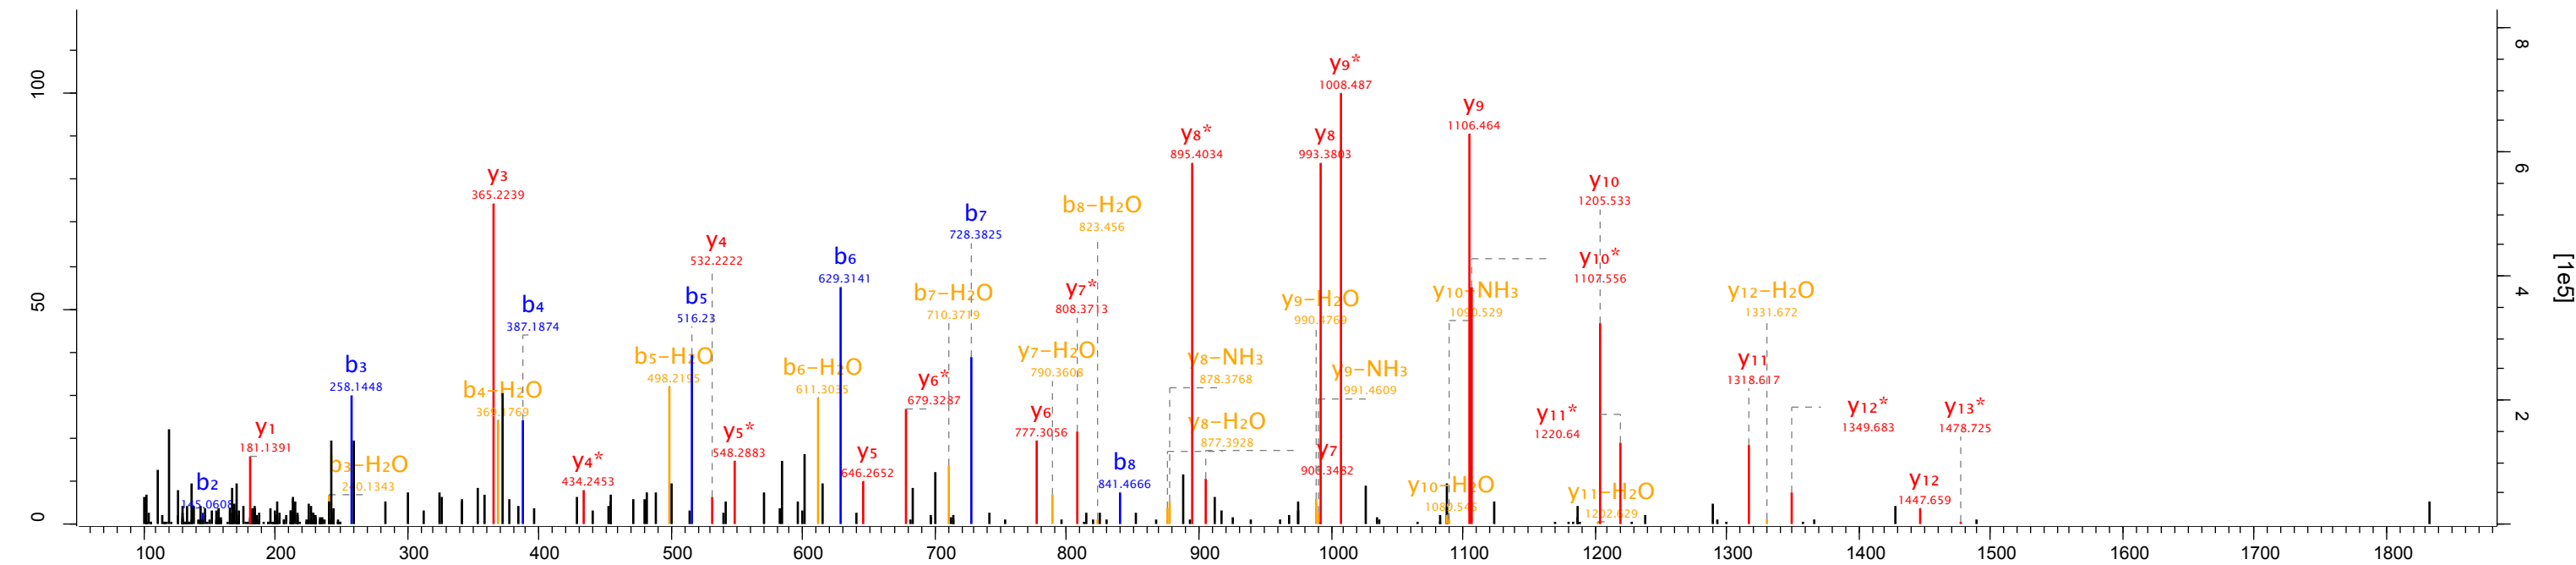

- S G L E E L V L S E M N S P S R -  
 b<sub>2</sub> b<sub>3</sub> b<sub>4</sub> b<sub>5</sub> b<sub>6</sub> b<sub>7</sub> b<sub>8</sub> y<sub>13</sub>\* y<sub>12</sub> y<sub>11</sub> y<sub>10</sub> y<sub>9</sub> y<sub>8</sub> y<sub>7</sub> y<sub>6</sub> y<sub>5</sub> y<sub>4</sub> y<sub>3</sub> y<sub>1</sub>  
 ph

Raw file 20150814\_A375SR\_Phospho\_BR2\_04 Scan 27579 Method FTMS; HCD Score 127.24 m/z 870.06 Gene names MAGEA11

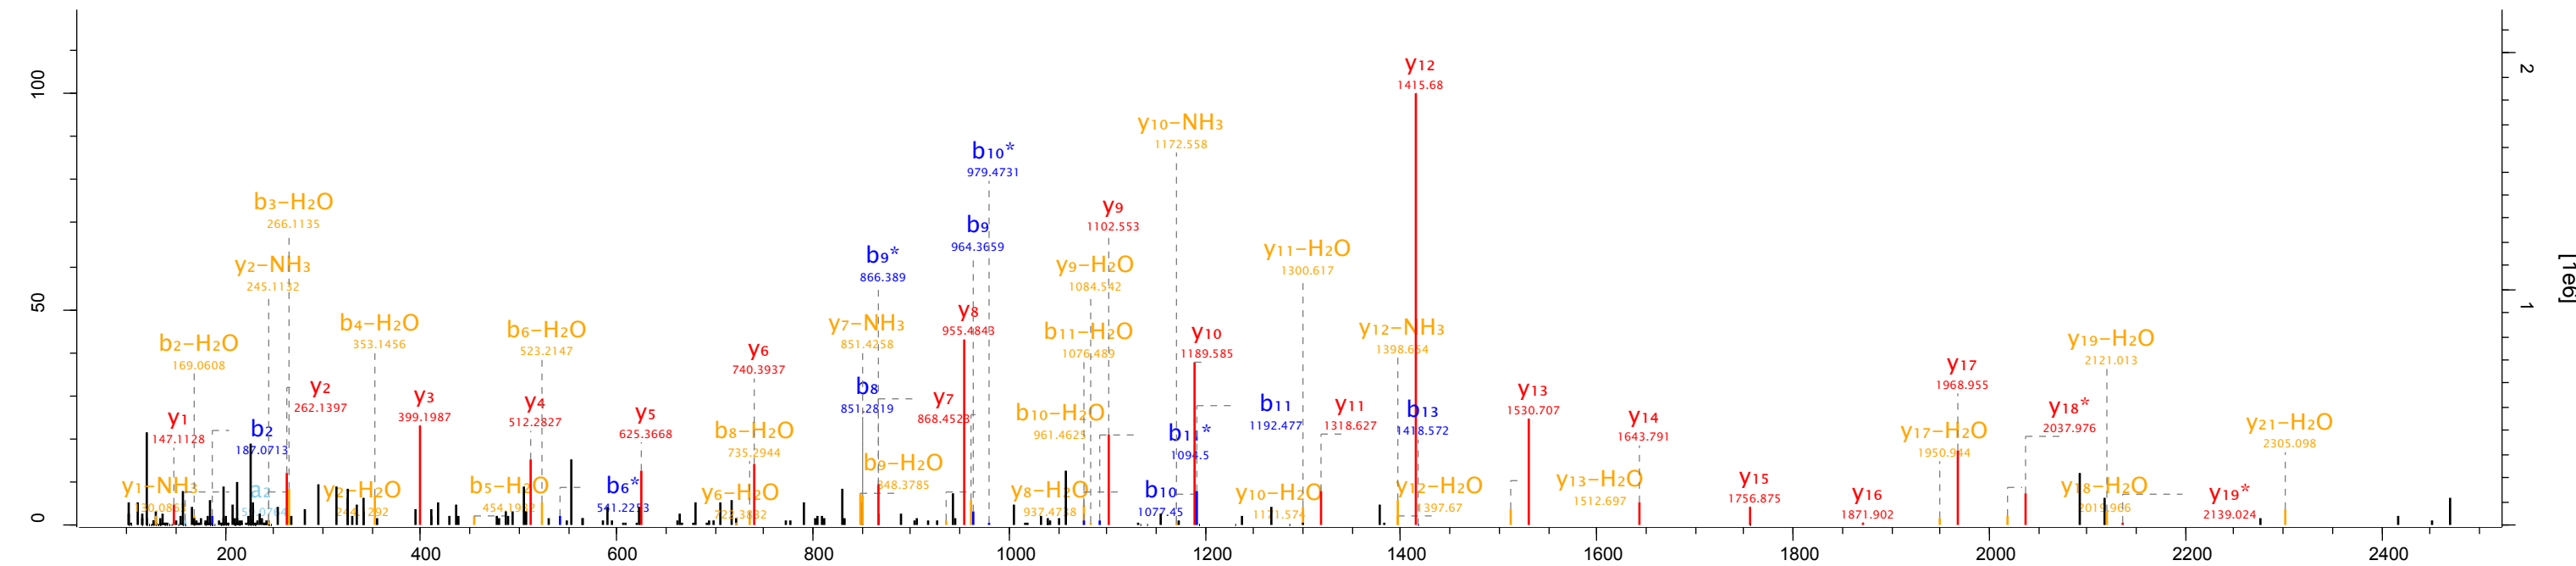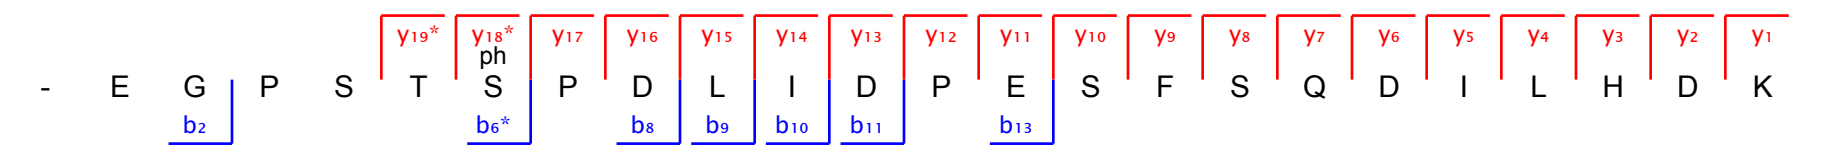

Raw file 20150814\_A375SR\_Phospho\_BR2\_04 Scan 27609 Method FTMS; HCD Score 45.94 m/z 777.37 Gene names ERFF1

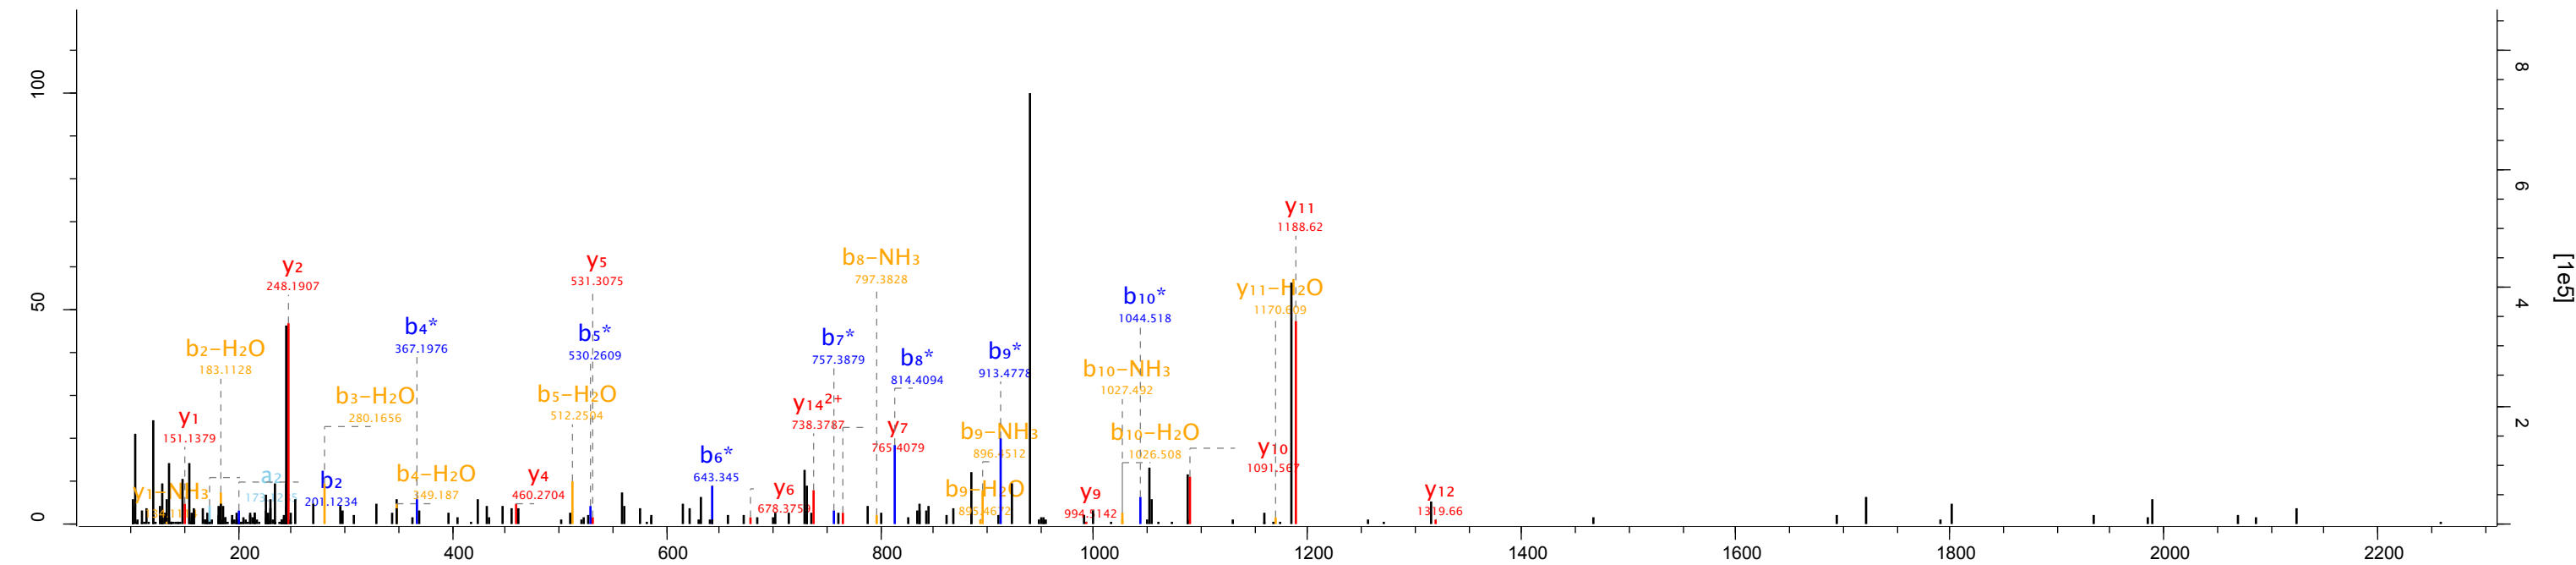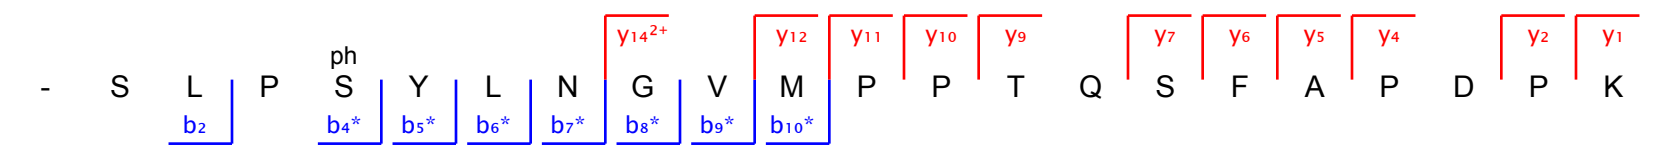

Raw file: 20150814\_A375SR\_Phospho\_BR2\_04  
 Scan: 28009 Method: FTMS; HCD Score: 55.5 m/z: 1256.22 Gene names: TJP2

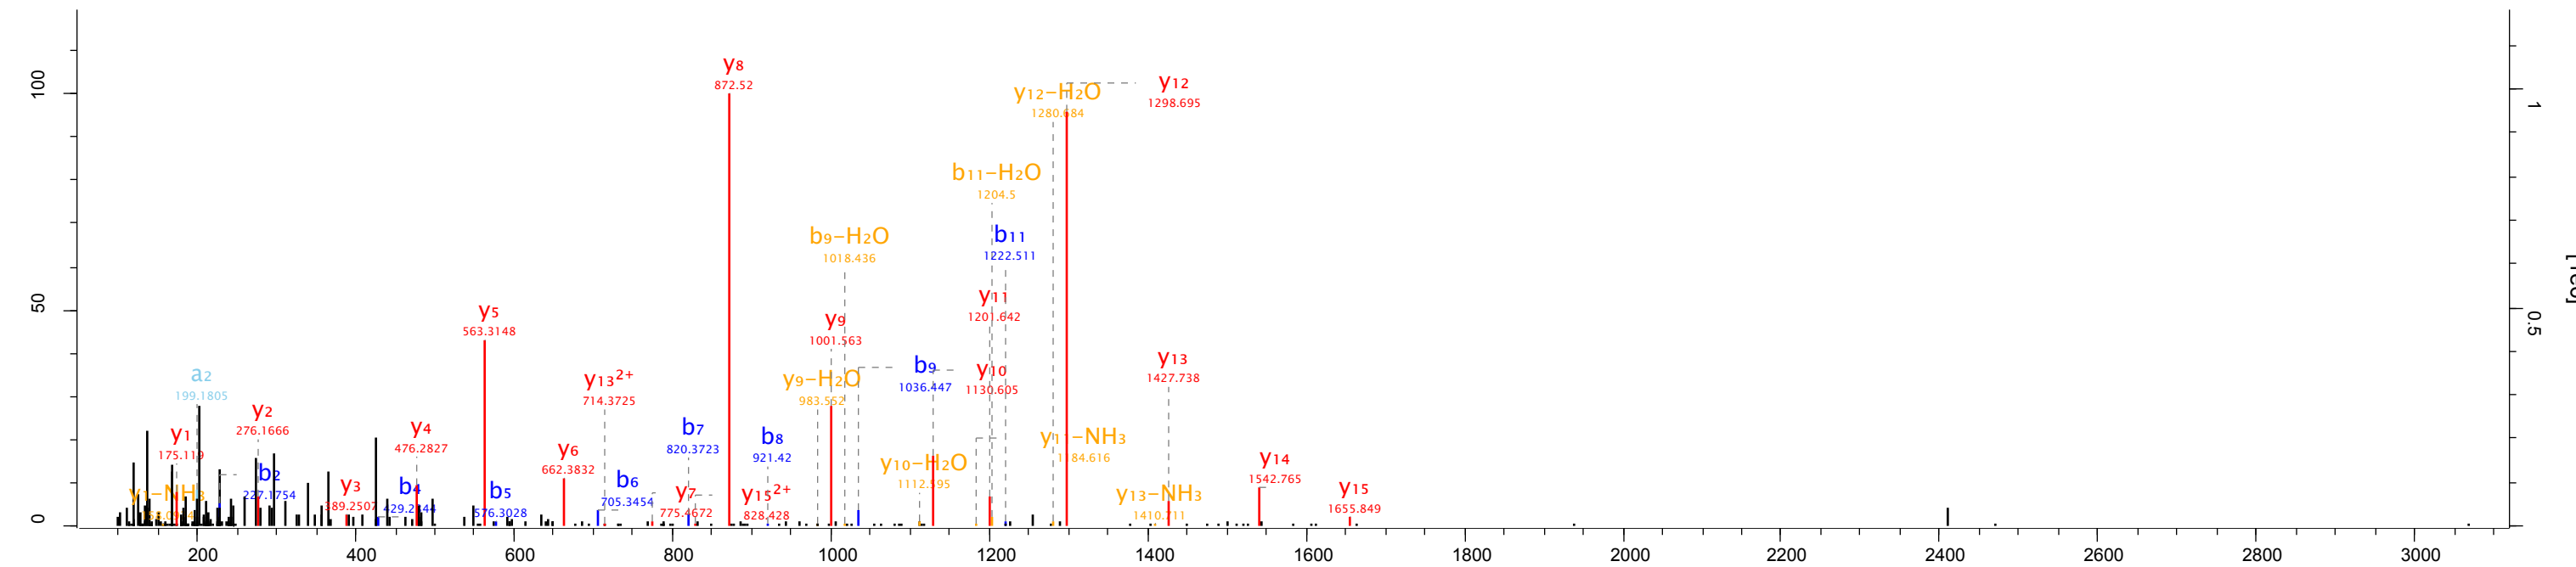

Sequence: - L I S D F E D T D G E G G A Y T D N E L D E P A E E P L V S S I T R -

Fragmentation mapping (b and y ions):

- b<sub>2</sub>: I
- b<sub>4</sub>: D
- b<sub>5</sub>: F
- b<sub>6</sub>: E
- b<sub>7</sub>: D
- b<sub>8</sub>: T
- b<sub>9</sub>: D
- b<sub>11</sub>: E
- y<sub>1</sub>: R
- y<sub>2</sub>: T
- y<sub>3</sub>: I
- y<sub>4</sub>: S
- y<sub>5</sub>: V
- y<sub>6</sub>: L
- y<sub>7</sub>: P
- y<sub>8</sub>: E
- y<sub>9</sub>: E
- y<sub>10</sub>: A
- y<sub>11</sub>: P
- y<sub>12</sub>: D
- y<sub>13</sub>: E
- y<sub>14</sub>: L
- y<sub>15</sub>: N

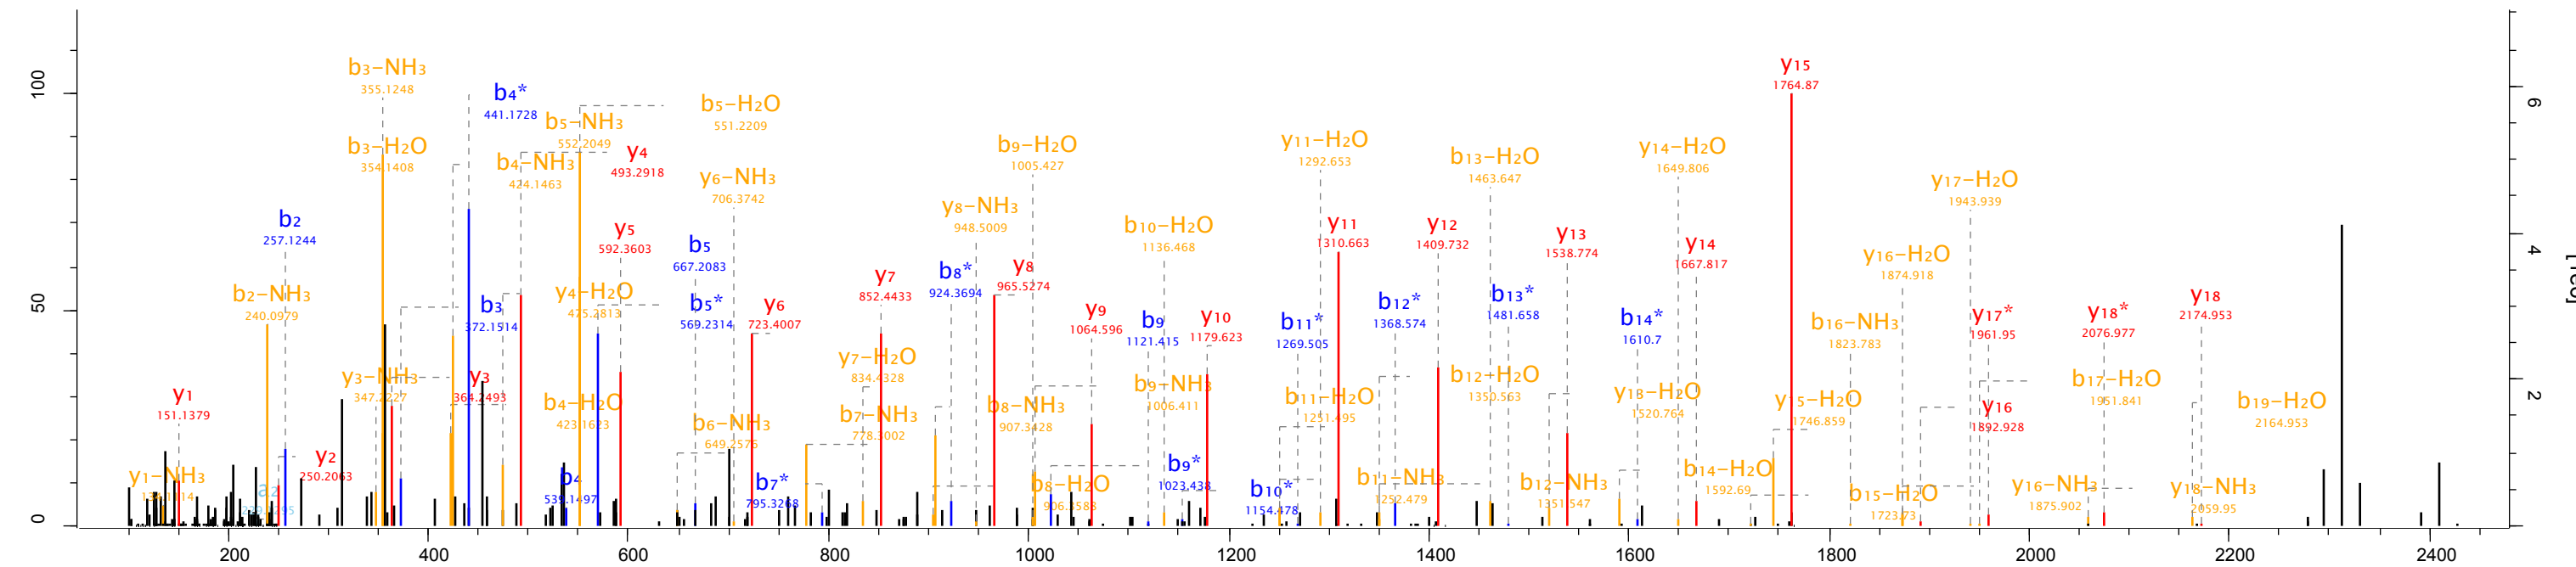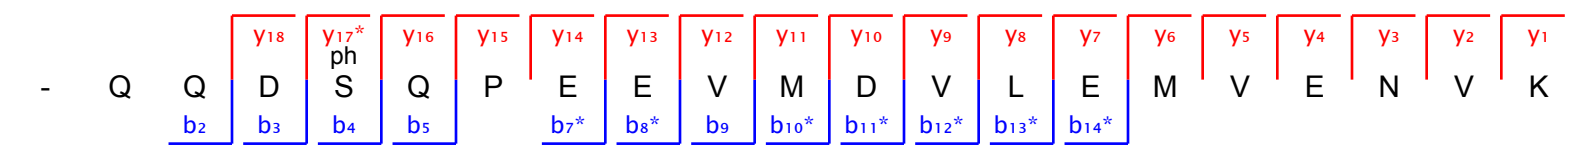

Raw file: 20150814\_A375SR\_Phospho\_BR2\_04  
 Scan: 3059 Method: FTMS; HCD Score: 54.09 m/z: 628.8 Gene names: HNRNPUL2;HNRNPUL2-BSCL2

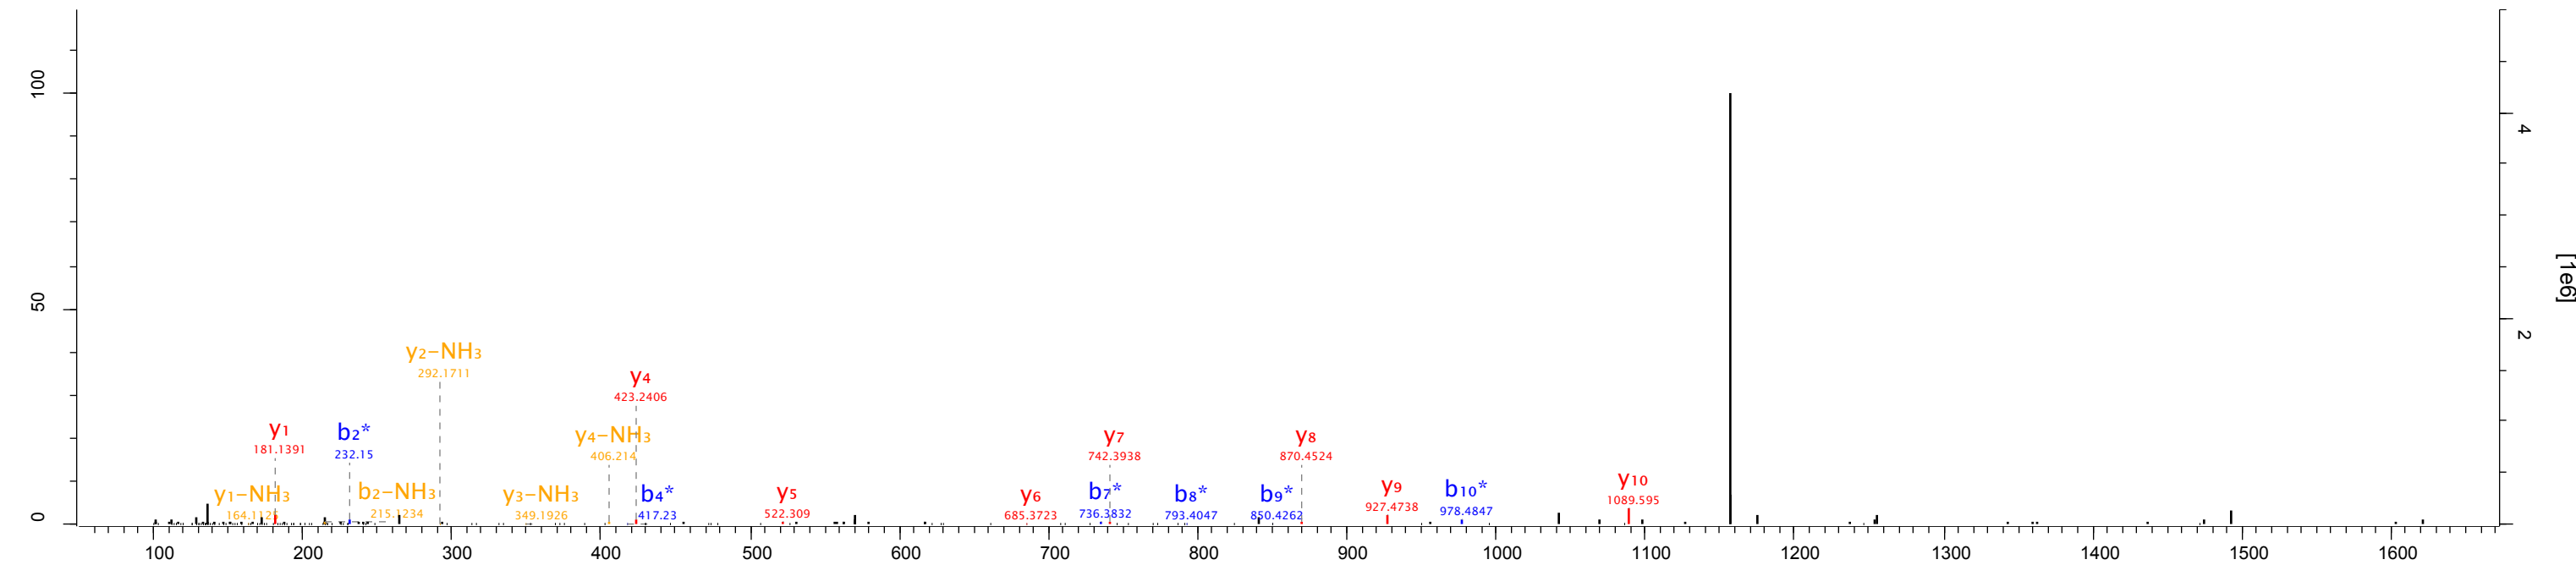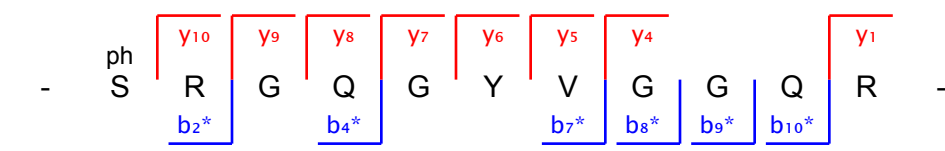

Raw file 20150814\_A375SR\_Phospho\_BR2\_04 Scan 3259 Method FTMS; HCD Score 134.2 m/z 544.23 Gene names SRGAP1

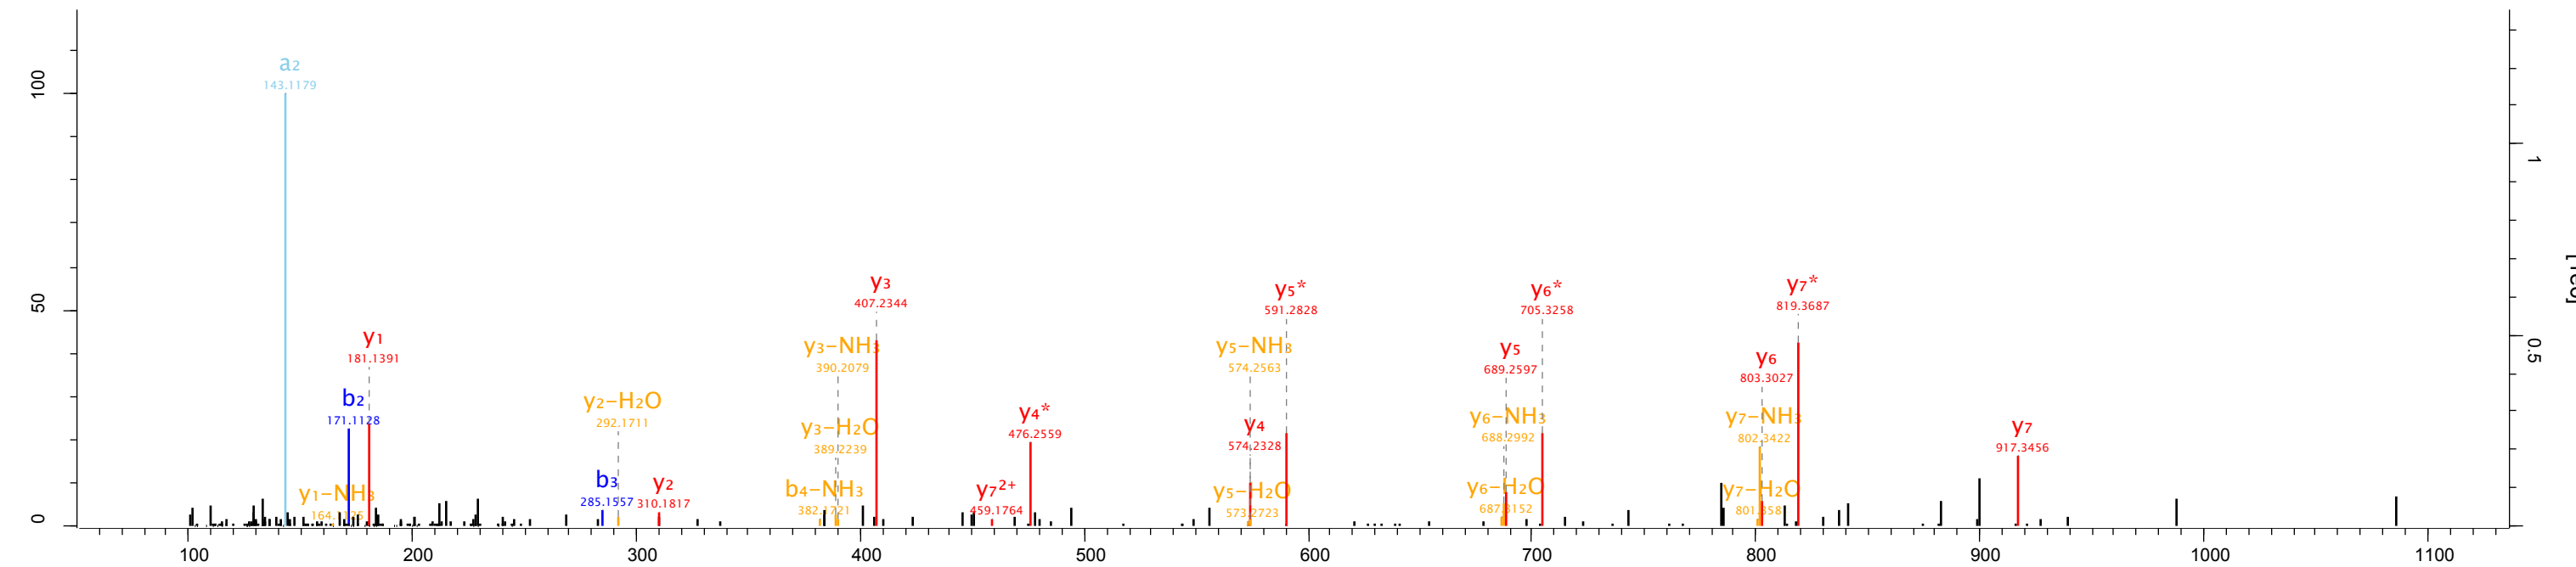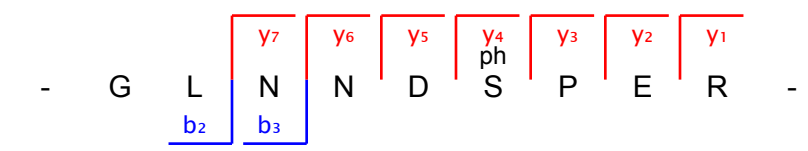

Raw file: 20150814\_A375SR\_Phospho\_BR2\_04  
 Scan: 3619 Method: FTMS; HCD Score: 101.62 m/z: 682.3 Gene names: PAPOLA

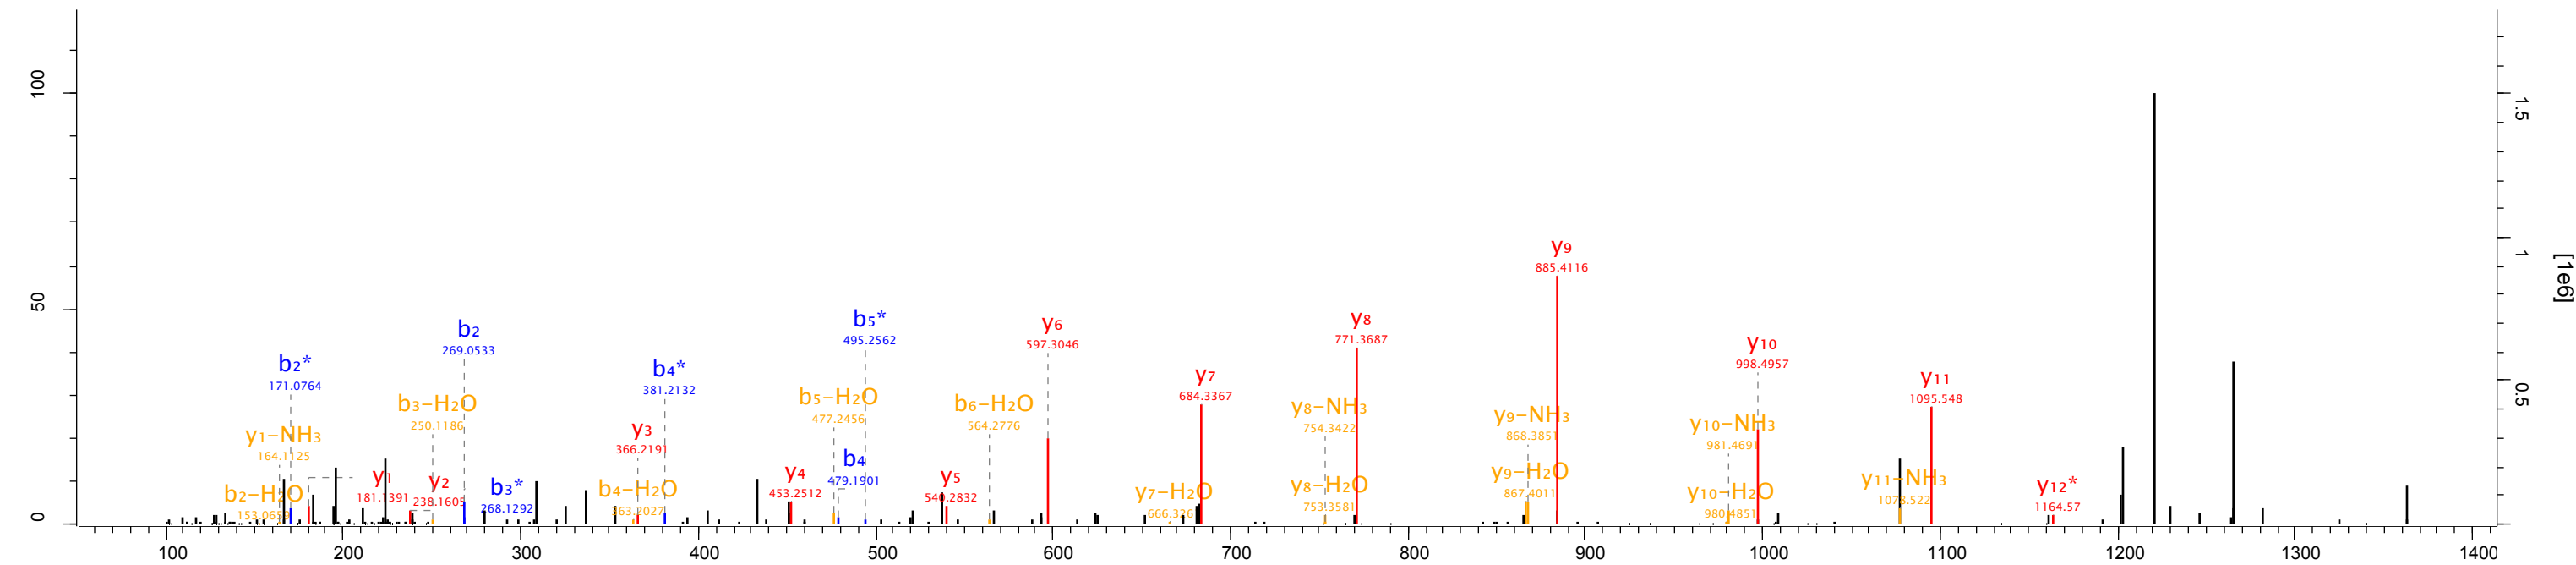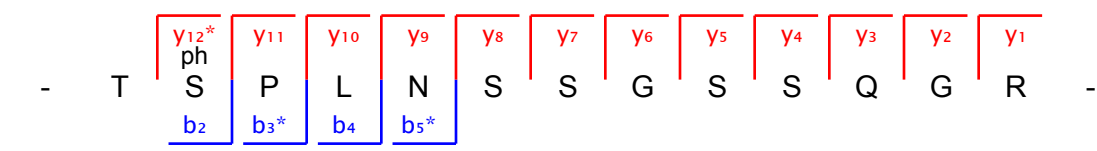



Raw file 20150814\_A375SR\_Phospho\_BR2\_04 Scan 3829 Method FTMS; HCD Score 150.27 m/z 712.34 Gene names ATXN2L

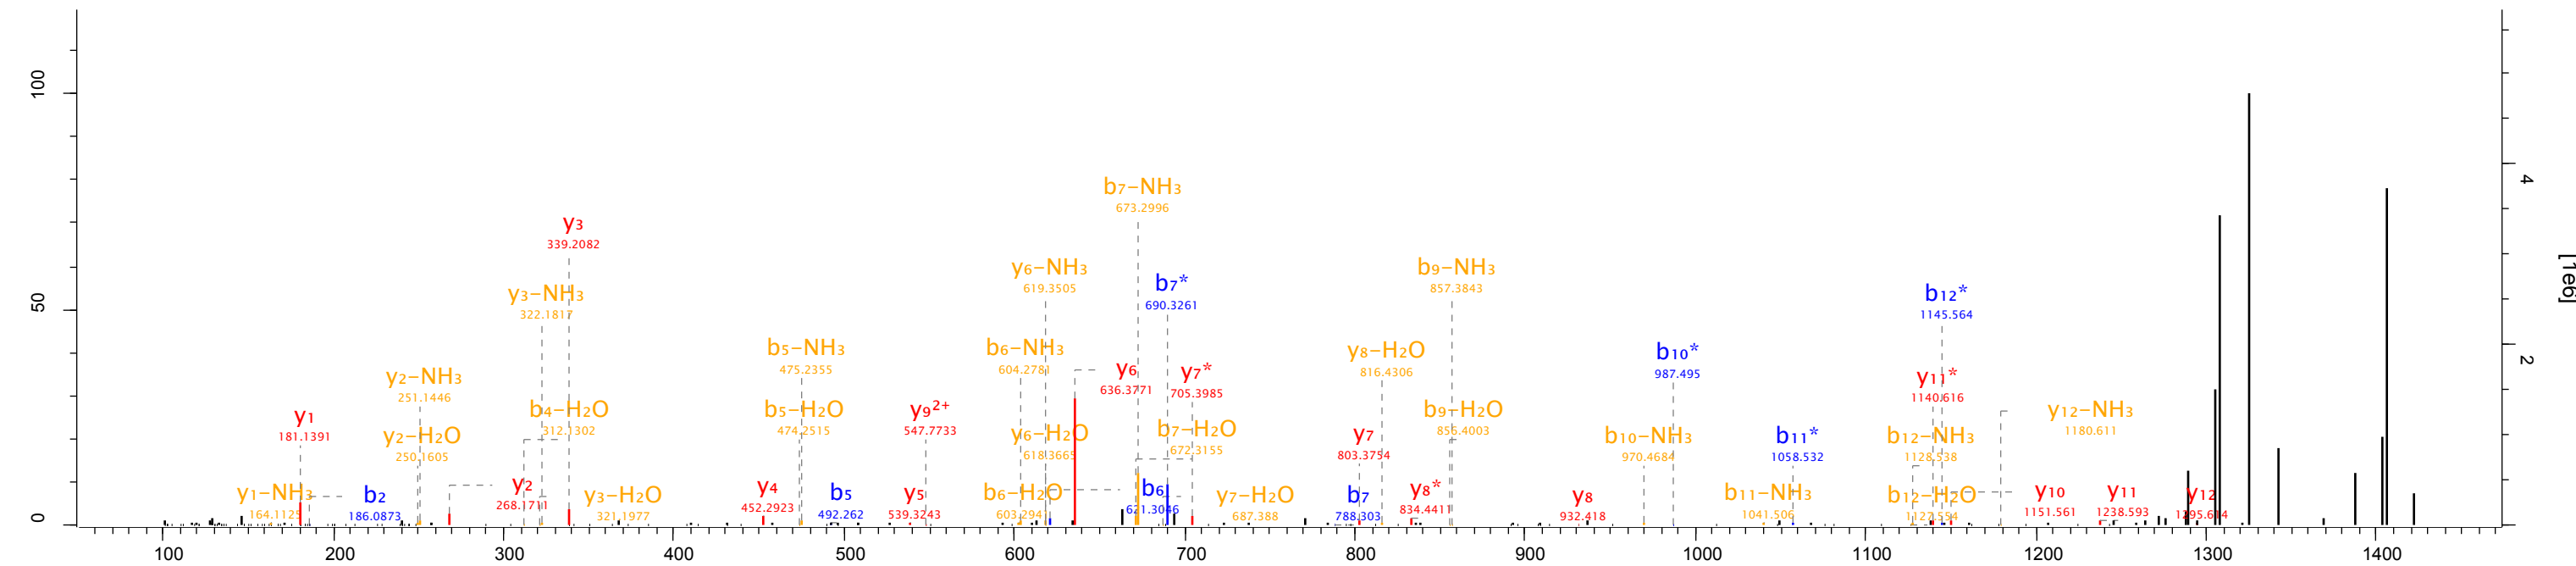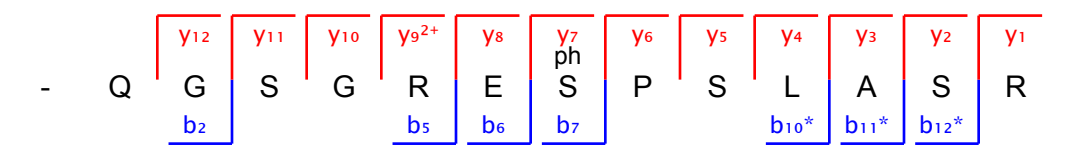

Raw file: 20150814\_A375SR\_Phospho\_BR2\_04  
 Scan: 4459 Method: FTMS; HCD Score: 86.34 m/z: 494.23 Gene names: PTPN14

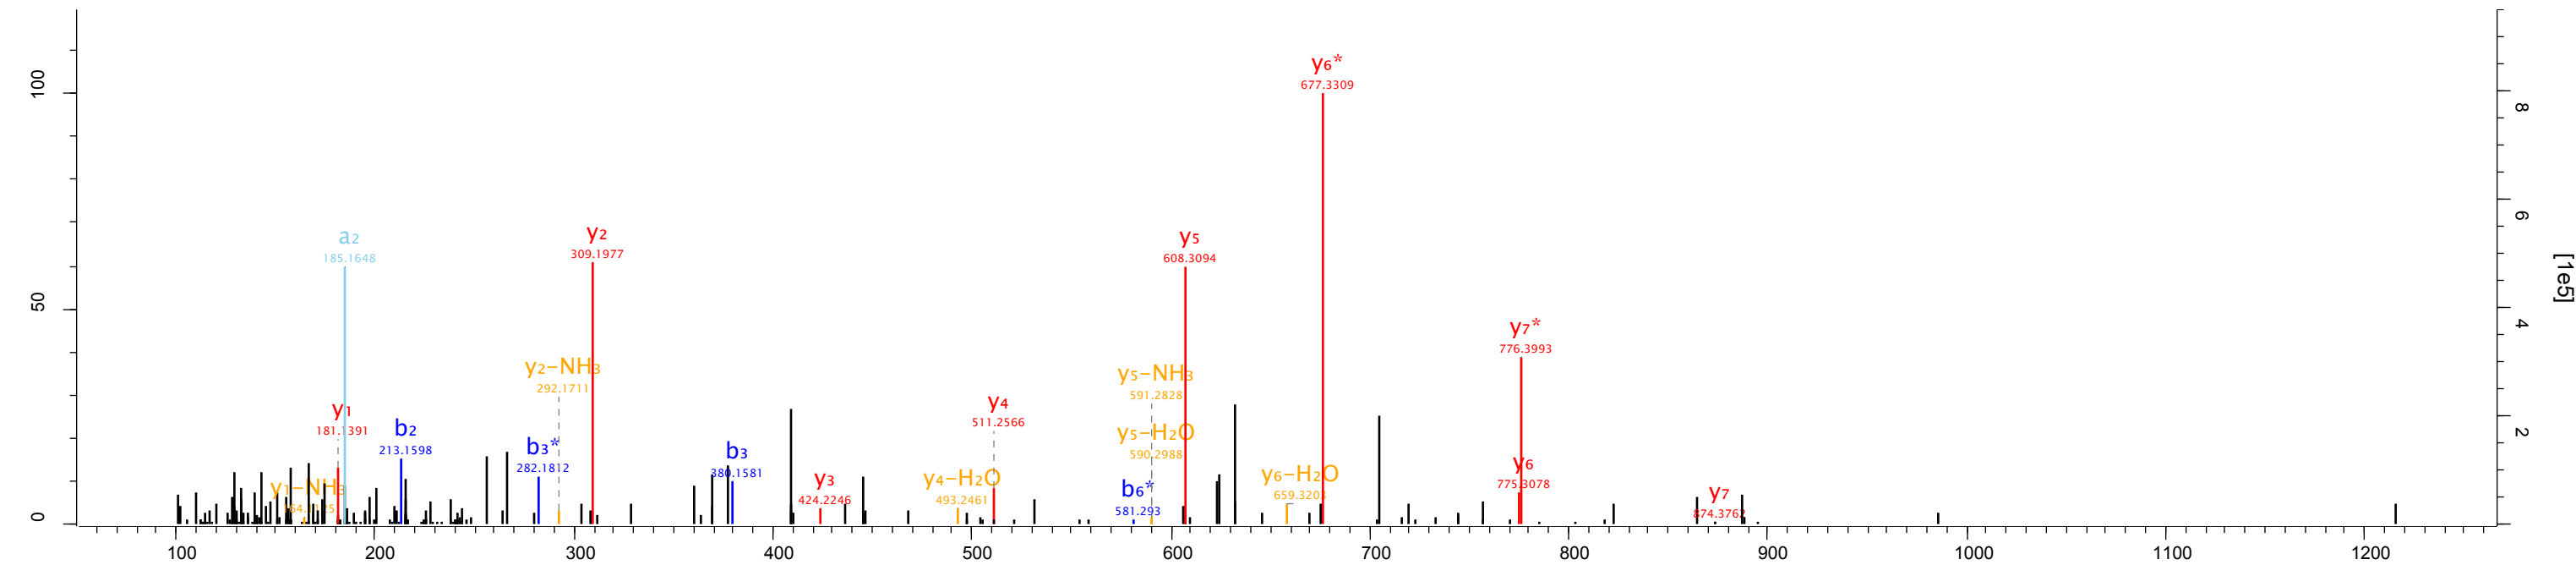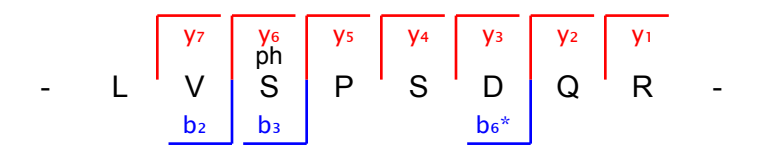

Raw file 20150814\_A375SR\_Phospho\_BR2\_04 Scan 4469 Method FTMS; HCD Score 236.11 m/z 925.43 Gene names SEC61B

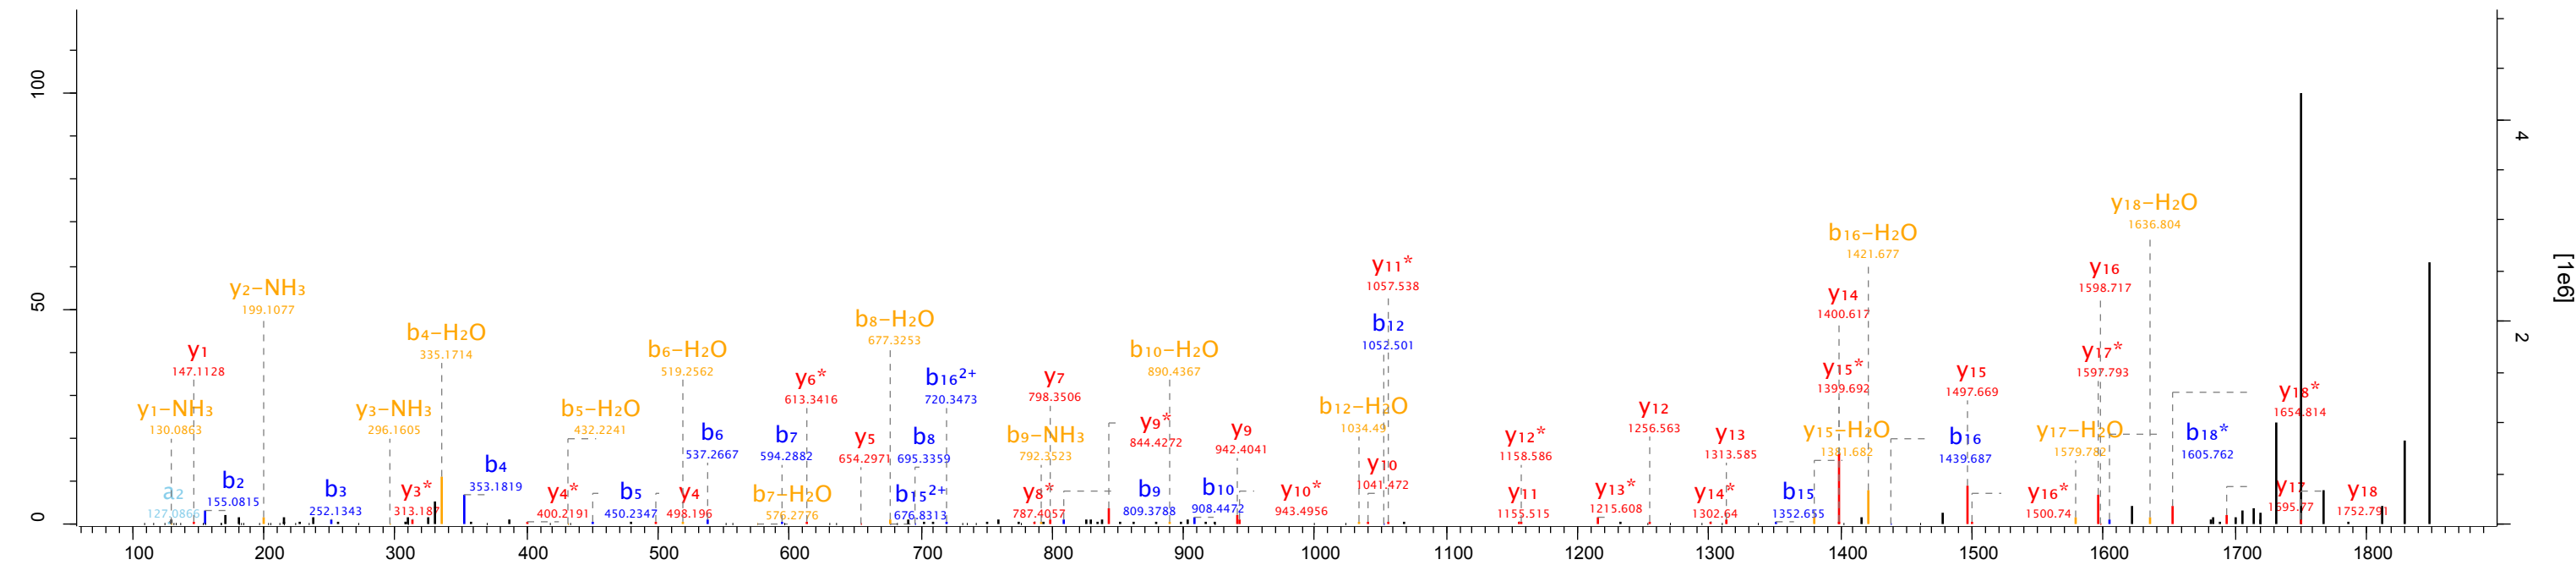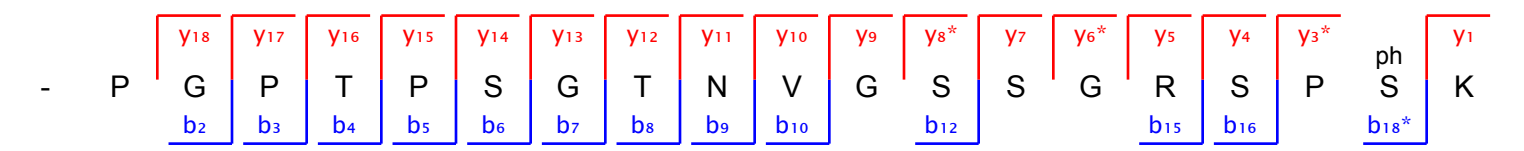

Raw file: 20150814\_A375SR\_Phospho\_BR2\_04  
 Scan: 4499 Method: FTMS; HCD Score: 217.5 m/z: 943.89 Gene names: EIF3B

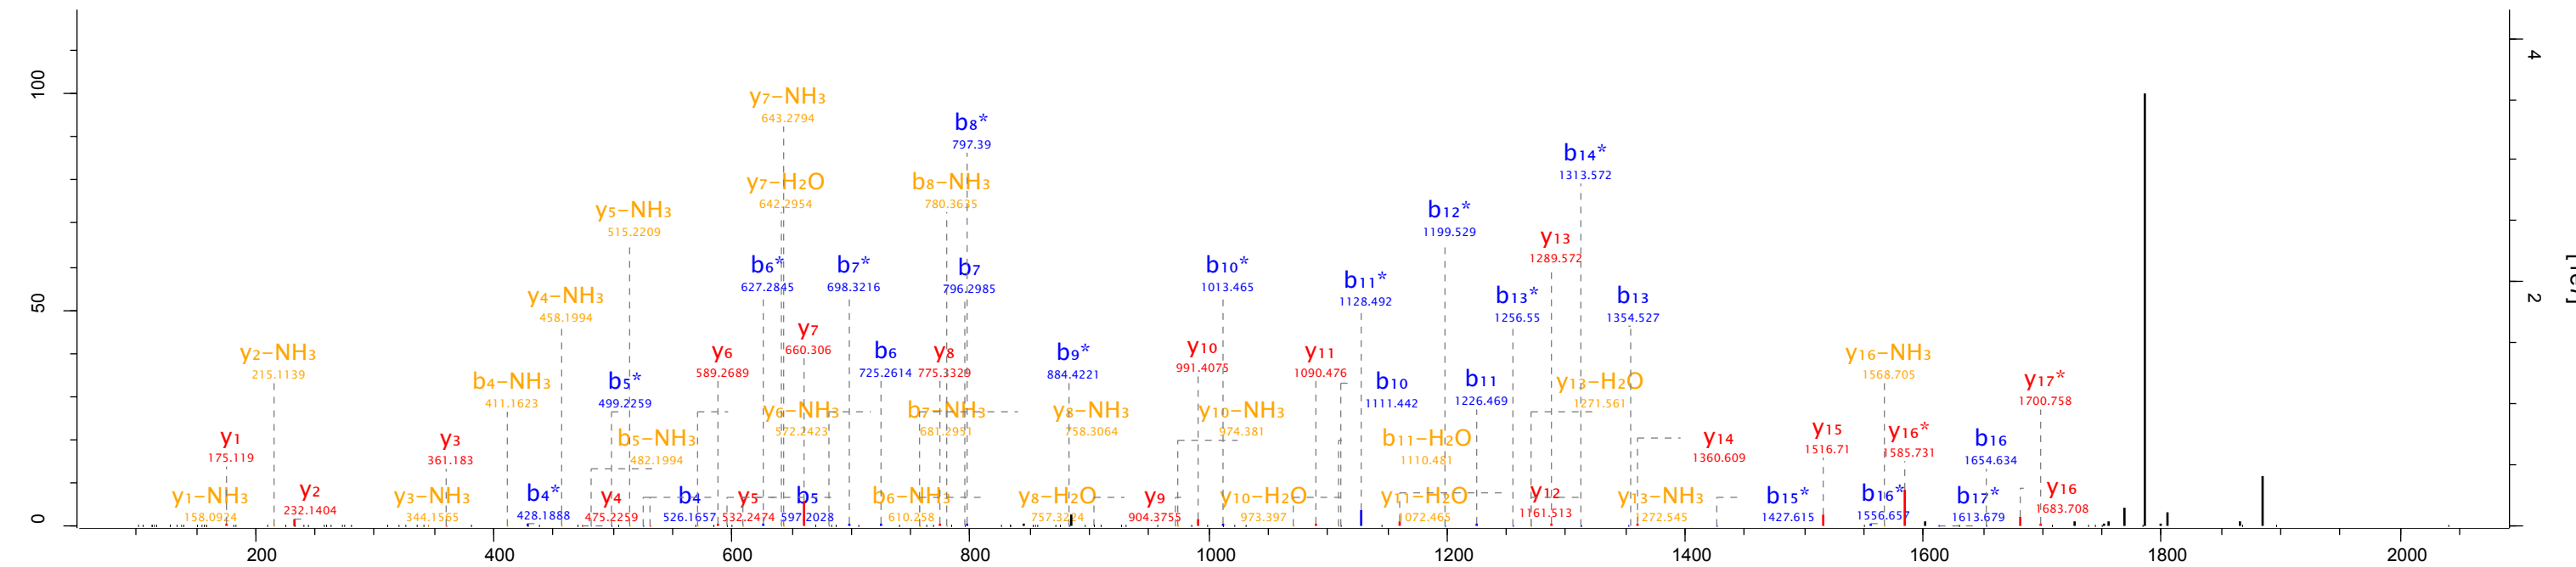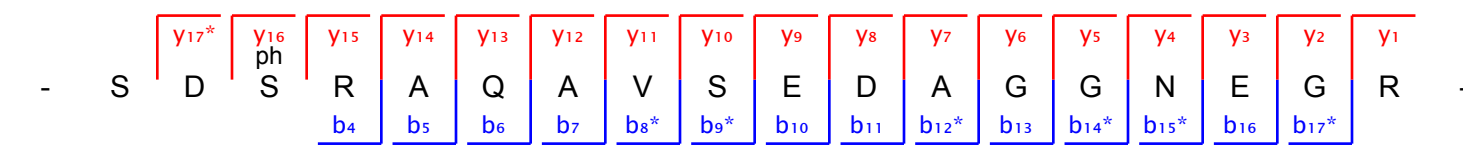

Raw file: 20150814\_A375SR\_Phospho\_BR2\_04  
 Scan: 4759 Method: FTMS; HCD Score: 143.05 m/z: 626.79 Gene names: PAN2

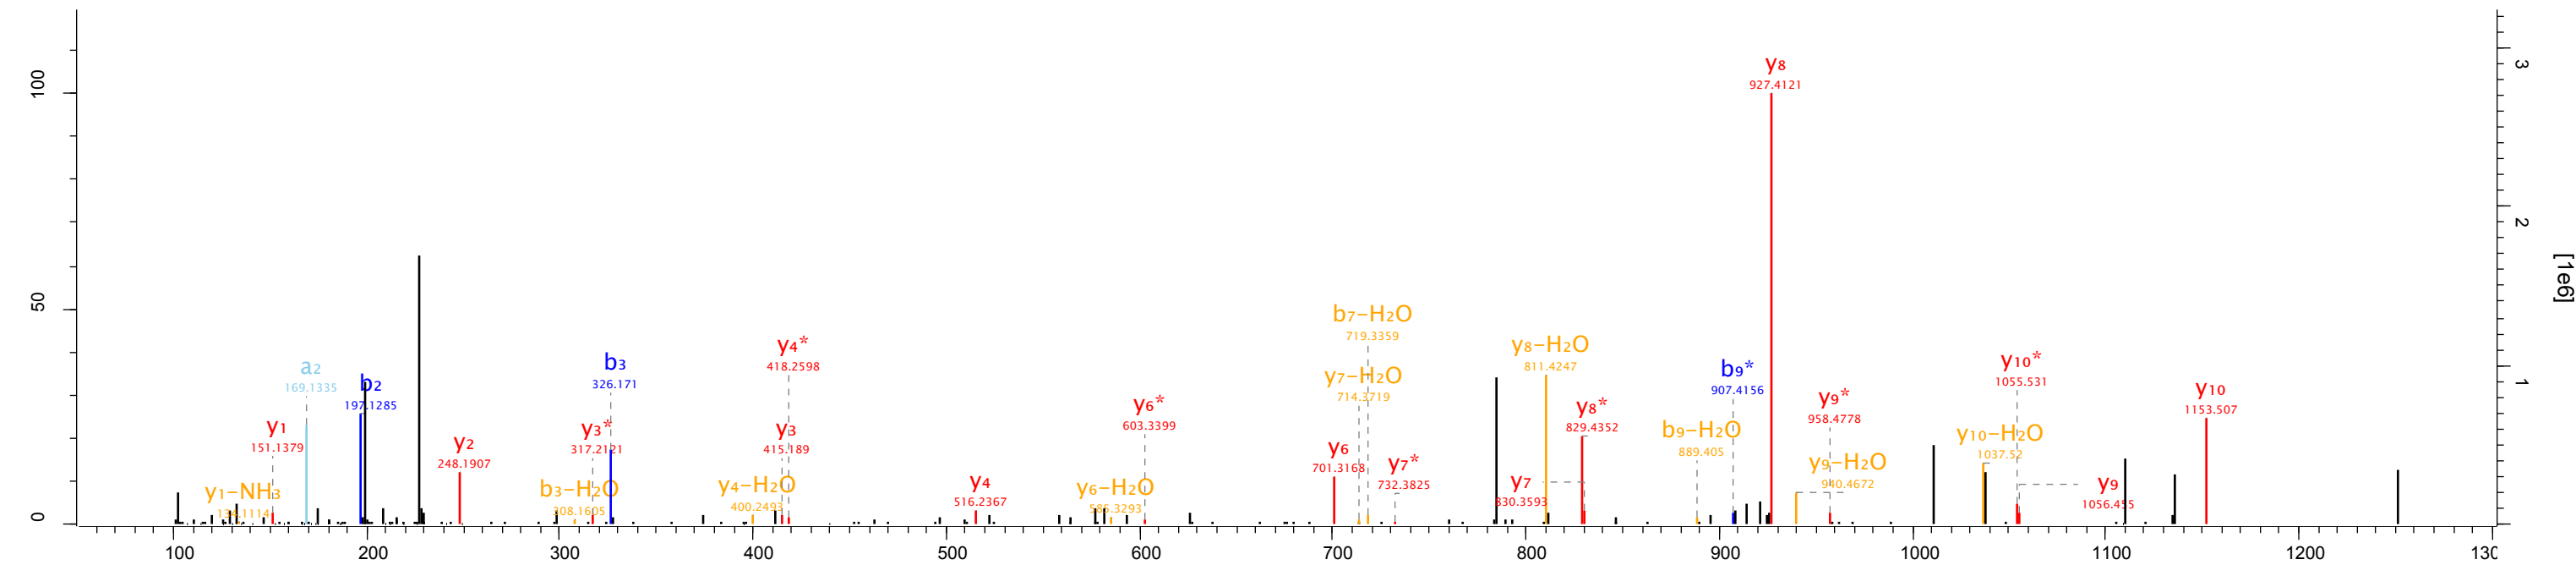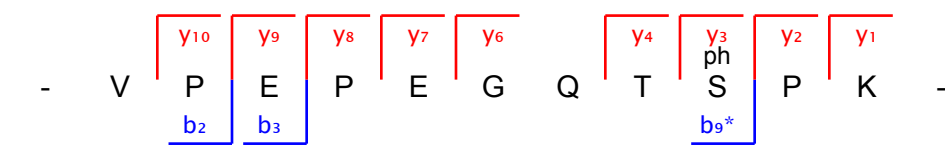

Raw file: 20150814\_A375SR\_Phospho\_BR2\_04  
 Scan: 5029 Method: FTMS; HCD Score: 61.66 m/z: 627.3 Gene names: AJUBA

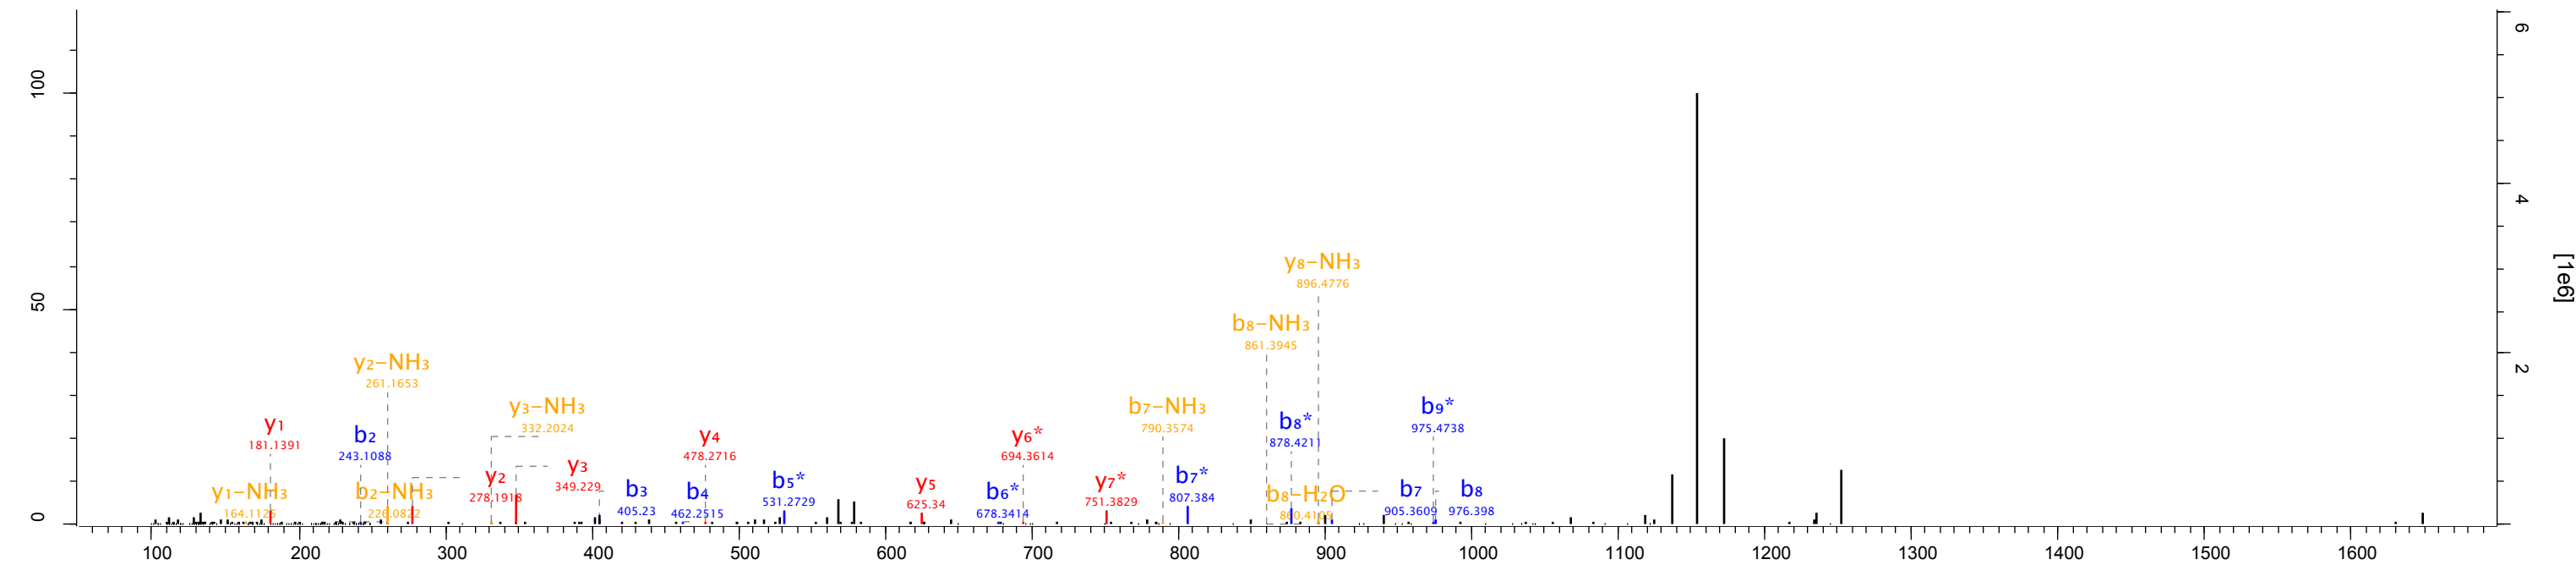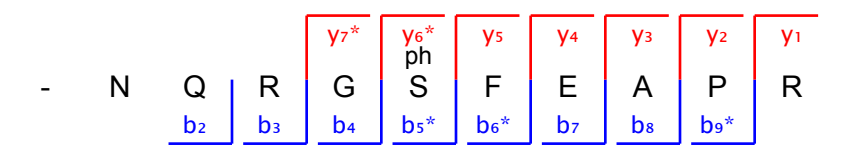

Raw file 20150814\_A375SR\_Phospho\_BR2\_04 Scan 5119 Method FTMS; HCD Score 98.28 m/z 364.43 Gene names LARP1

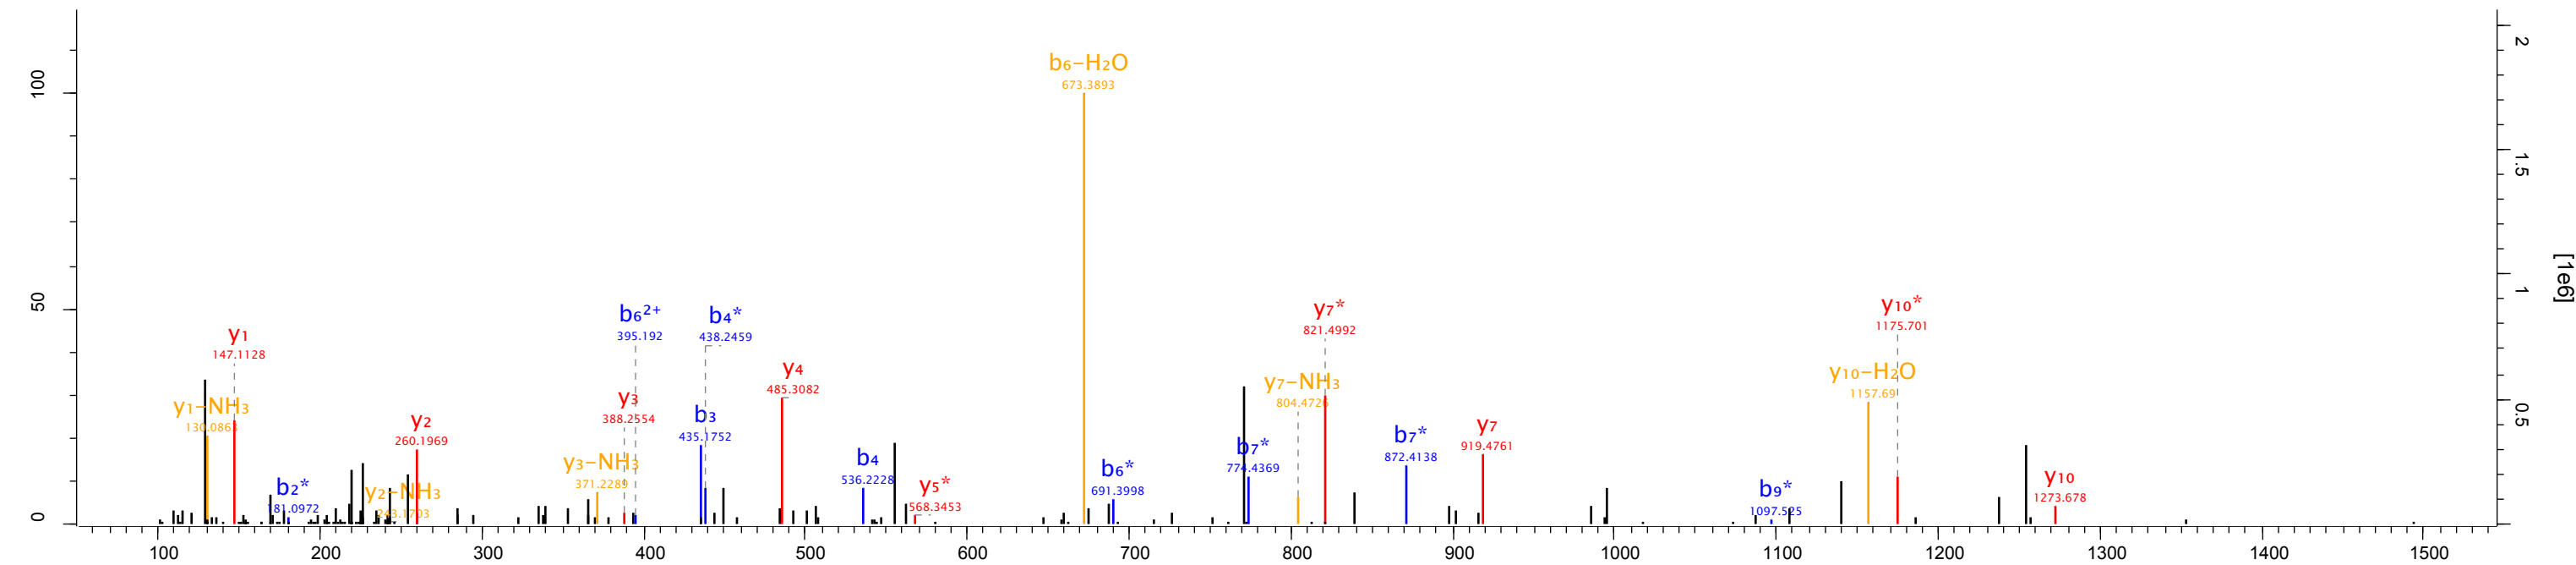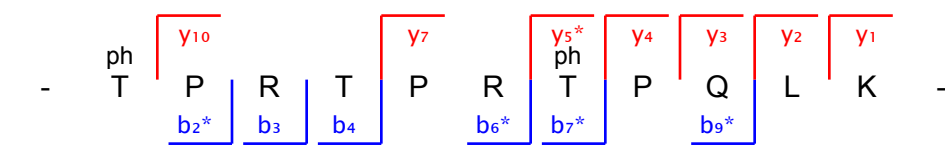

Raw file 20150814\_A375SR\_Phospho\_BR2\_04 Scan 5189 Method FTMS; HCD Score 234.51 m/z 810.36 Gene names CHAF1B

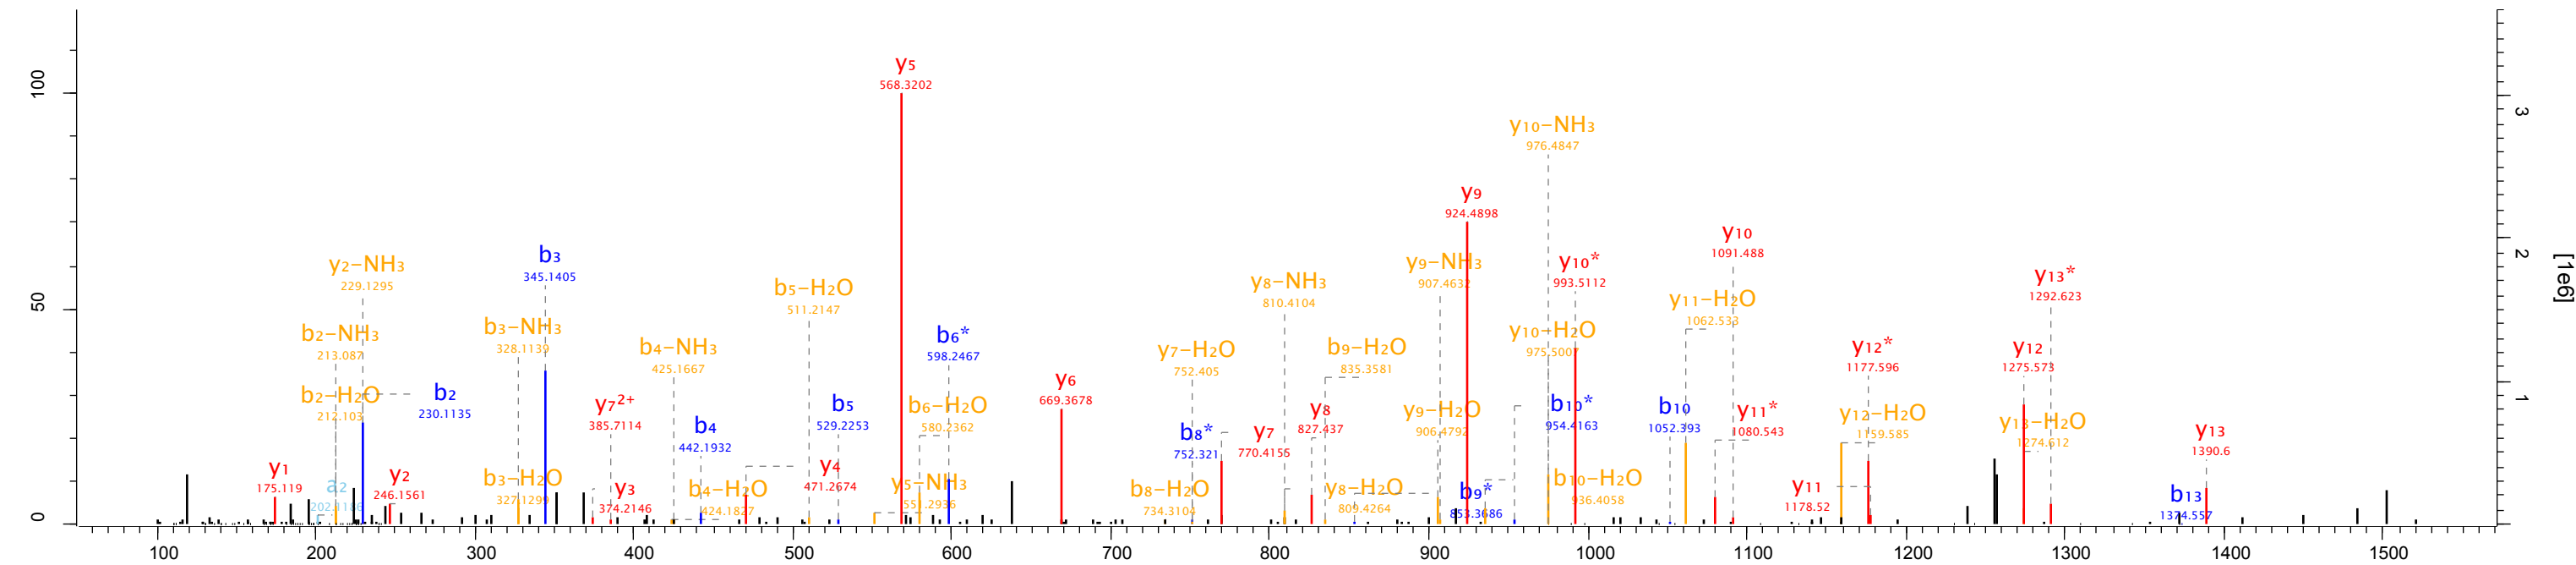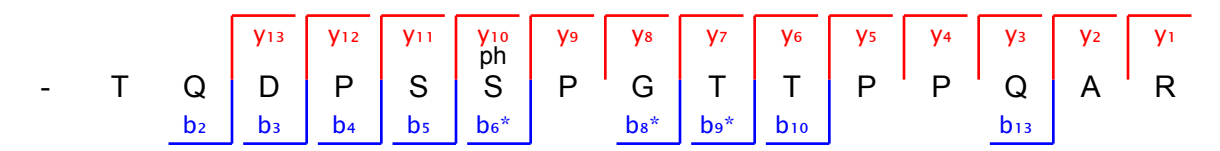



Raw file: 20150814\_A375SR\_Phospho\_BR2\_04  
 Scan: 5919 Method: FTMS; HCD Score: 203.87 m/z: 704.29 Gene names: SLC39A6

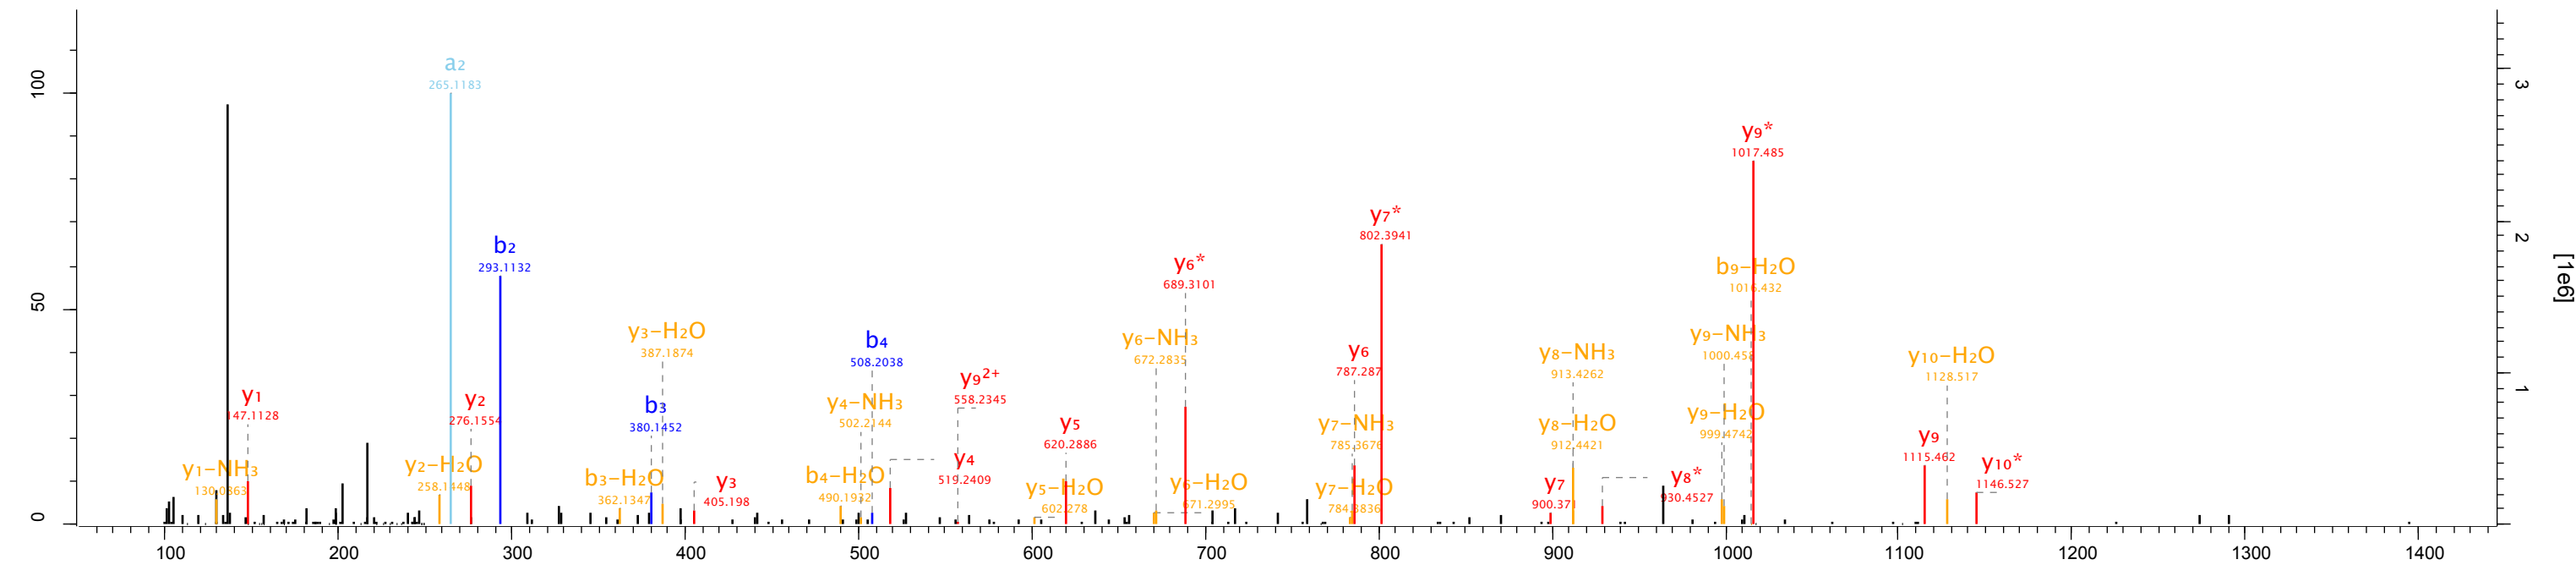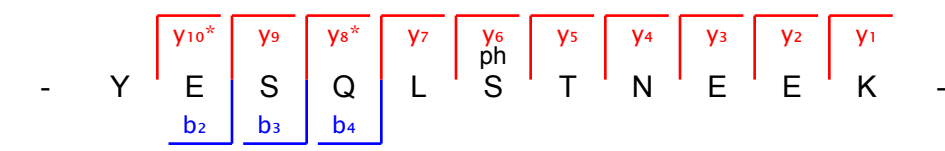

Raw file: 20150814\_A375SR\_Phospho\_BR2\_04  
 Scan: 5999 Method: FTMS; HCD Score: 97.2 m/z: 556.27 Gene names: KMT2A

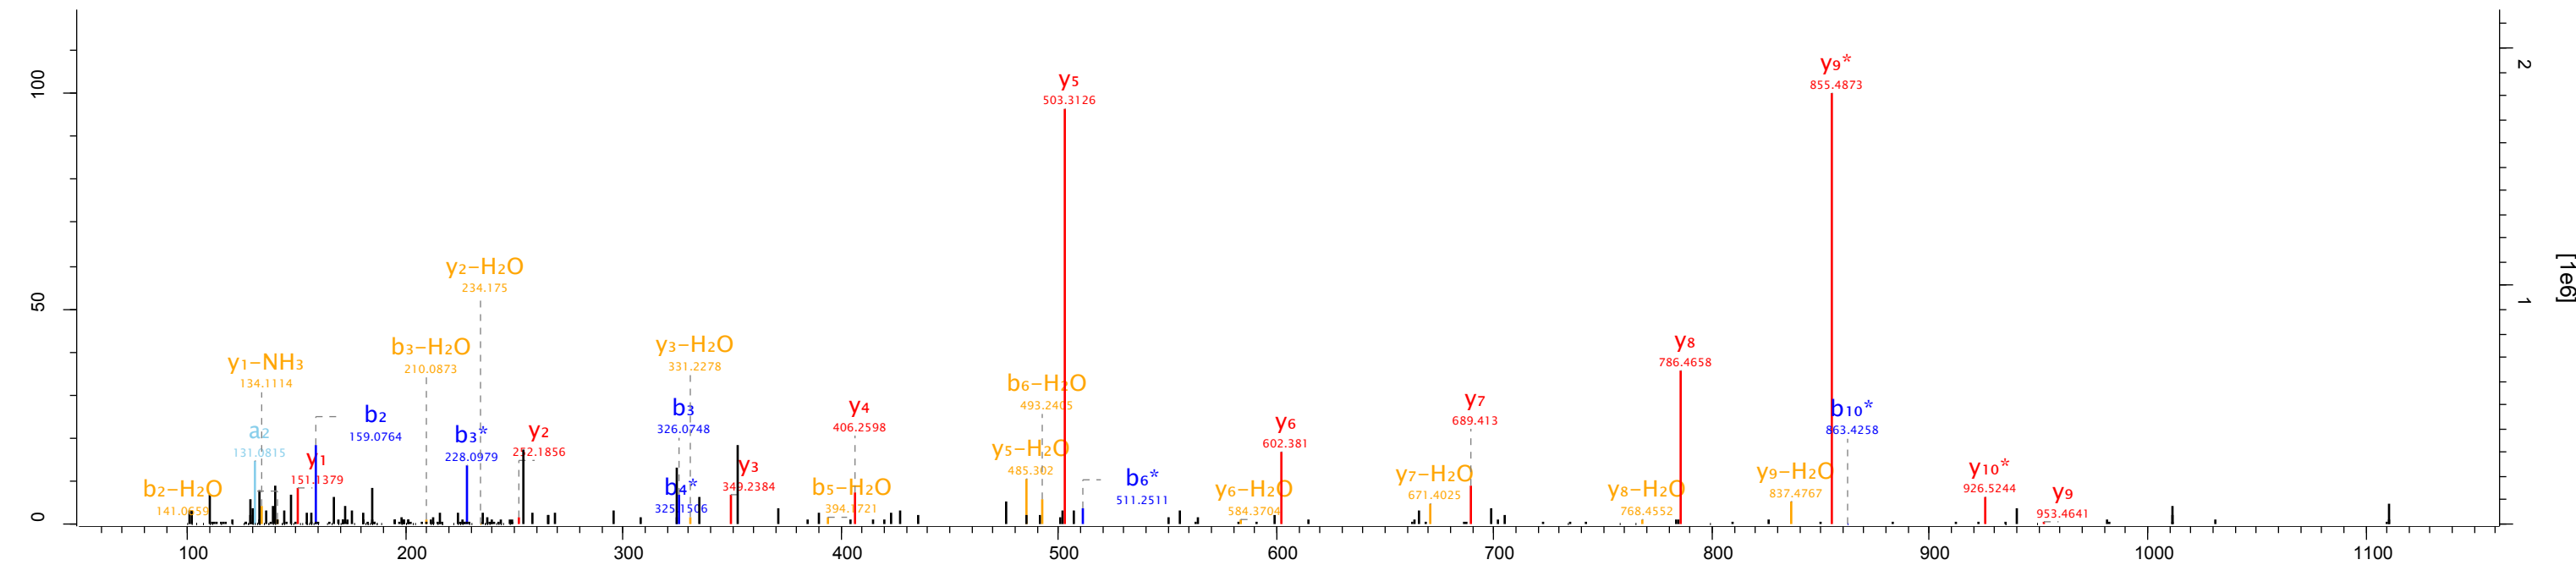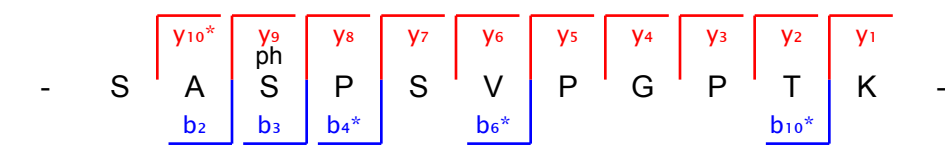

Raw file: 20150814\_A375SR\_Phospho\_BR2\_04  
 Scan: 6219 Method: FTMS; HCD Score: 74.85 m/z: 607.76 Gene names: RECQL

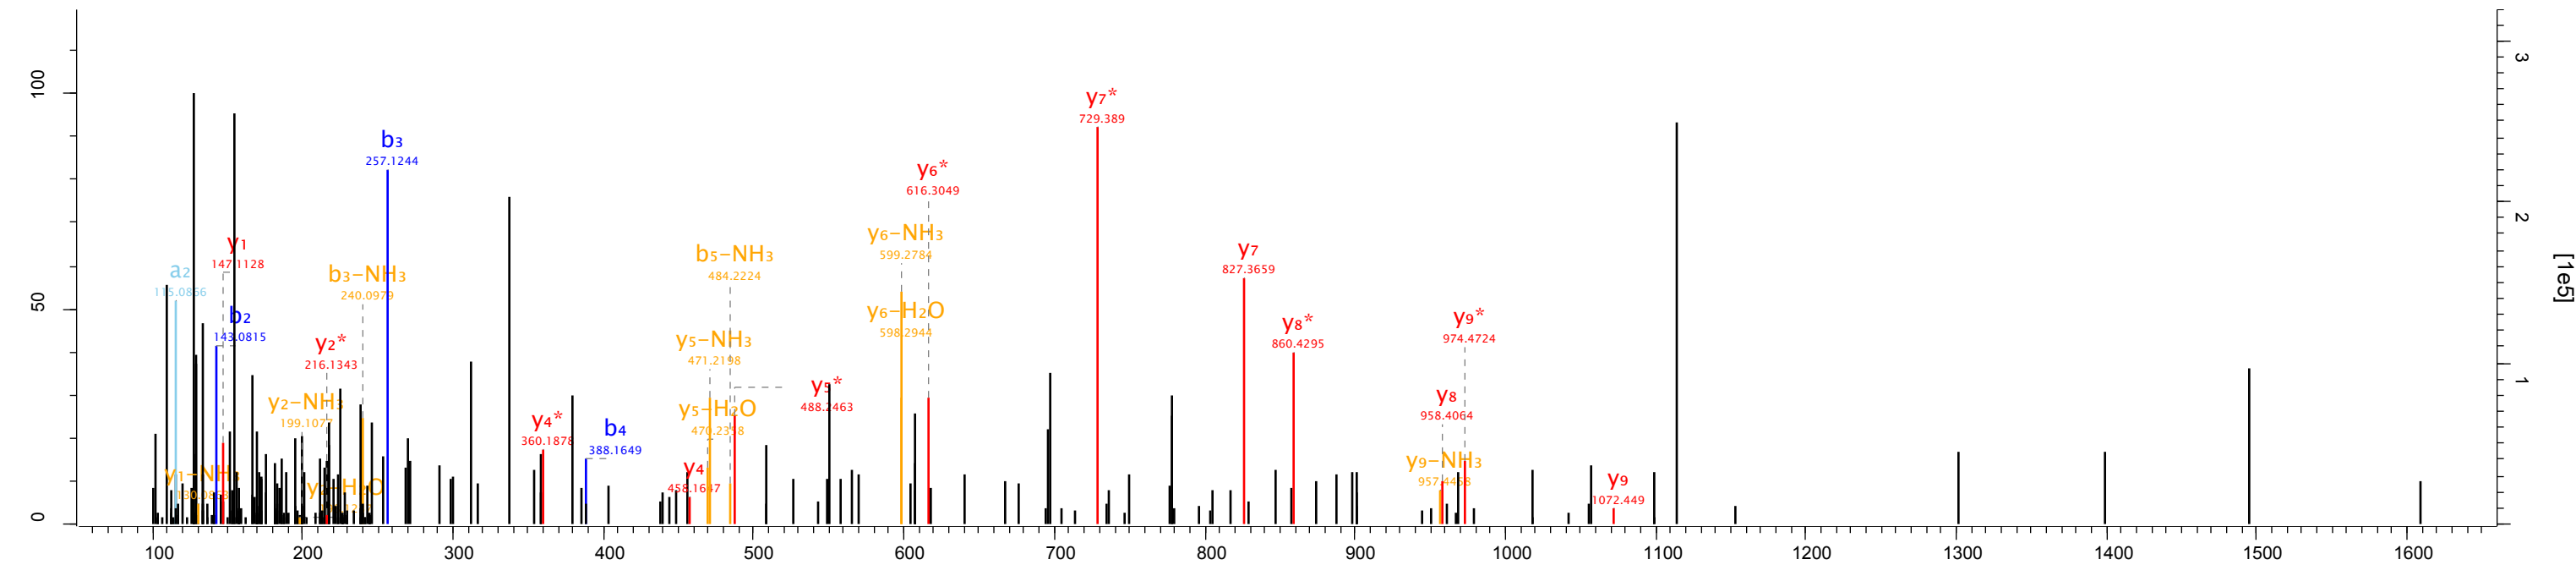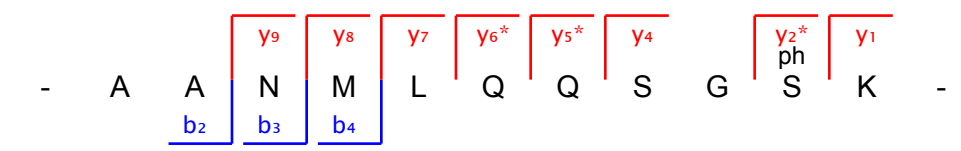

Raw file: 20150814\_A375SR\_Phospho\_BR2\_04  
 Scan: 6319 Method: FTMS; HCD Score: 62.09 m/z: 663.29 Gene names: RBMX2

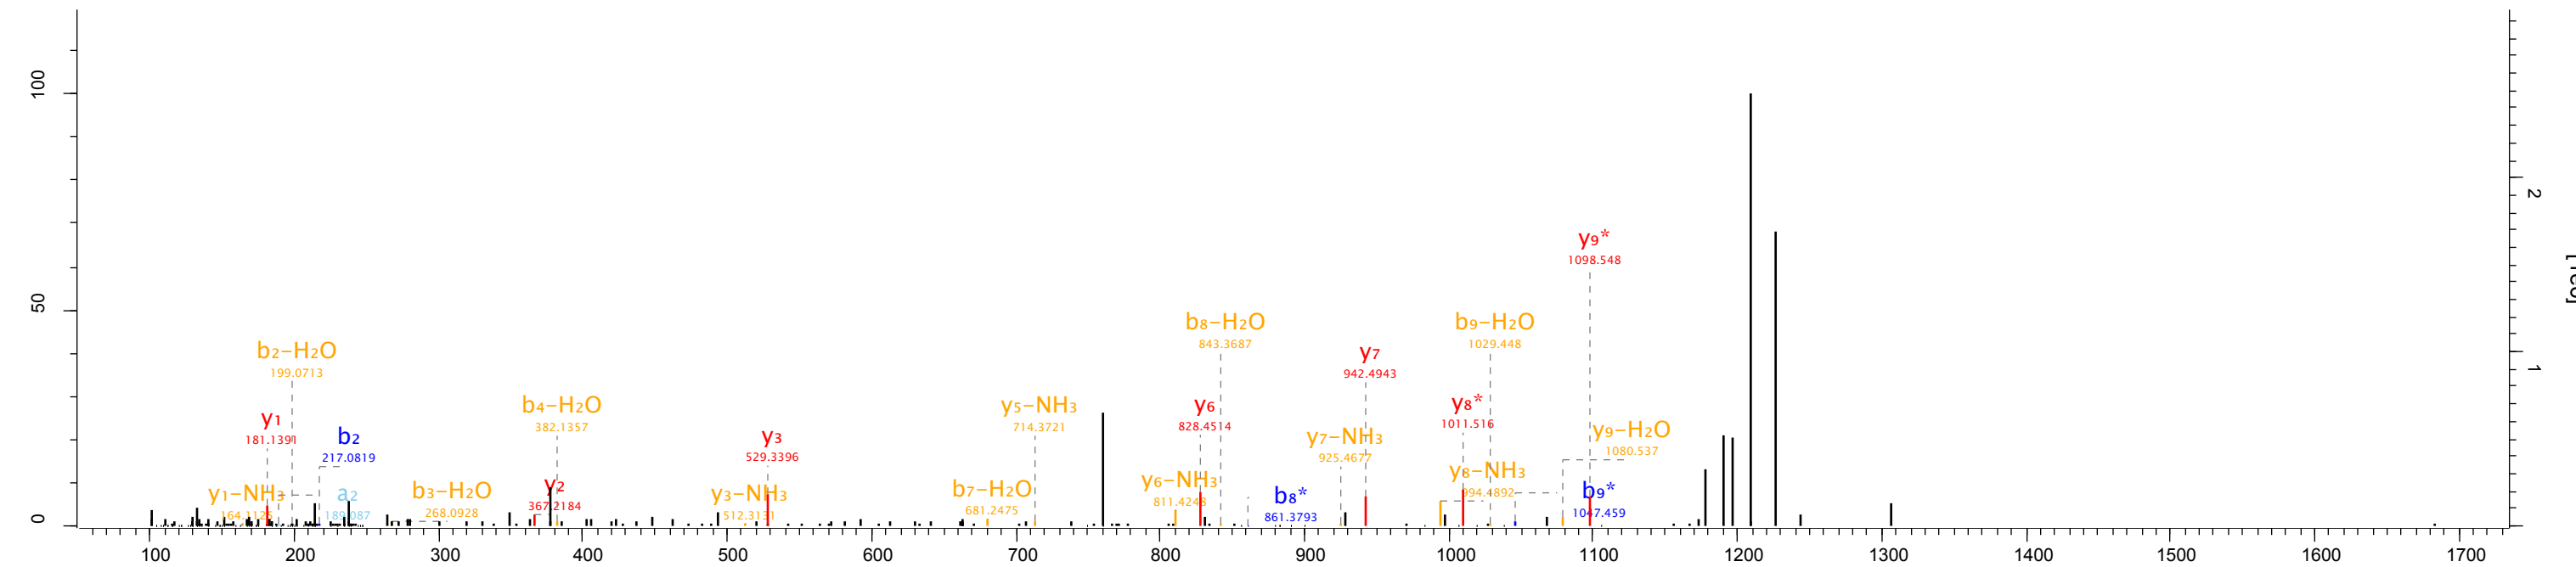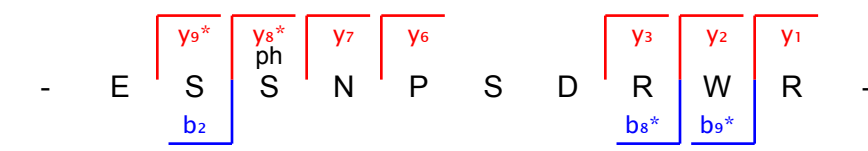

Raw file: 20150814\_A375SR\_Phospho\_BR2\_04  
 Scan: 6389 Method: FTMS; HCD Score: 188.71 m/z: 763.37 Gene names: RBMX

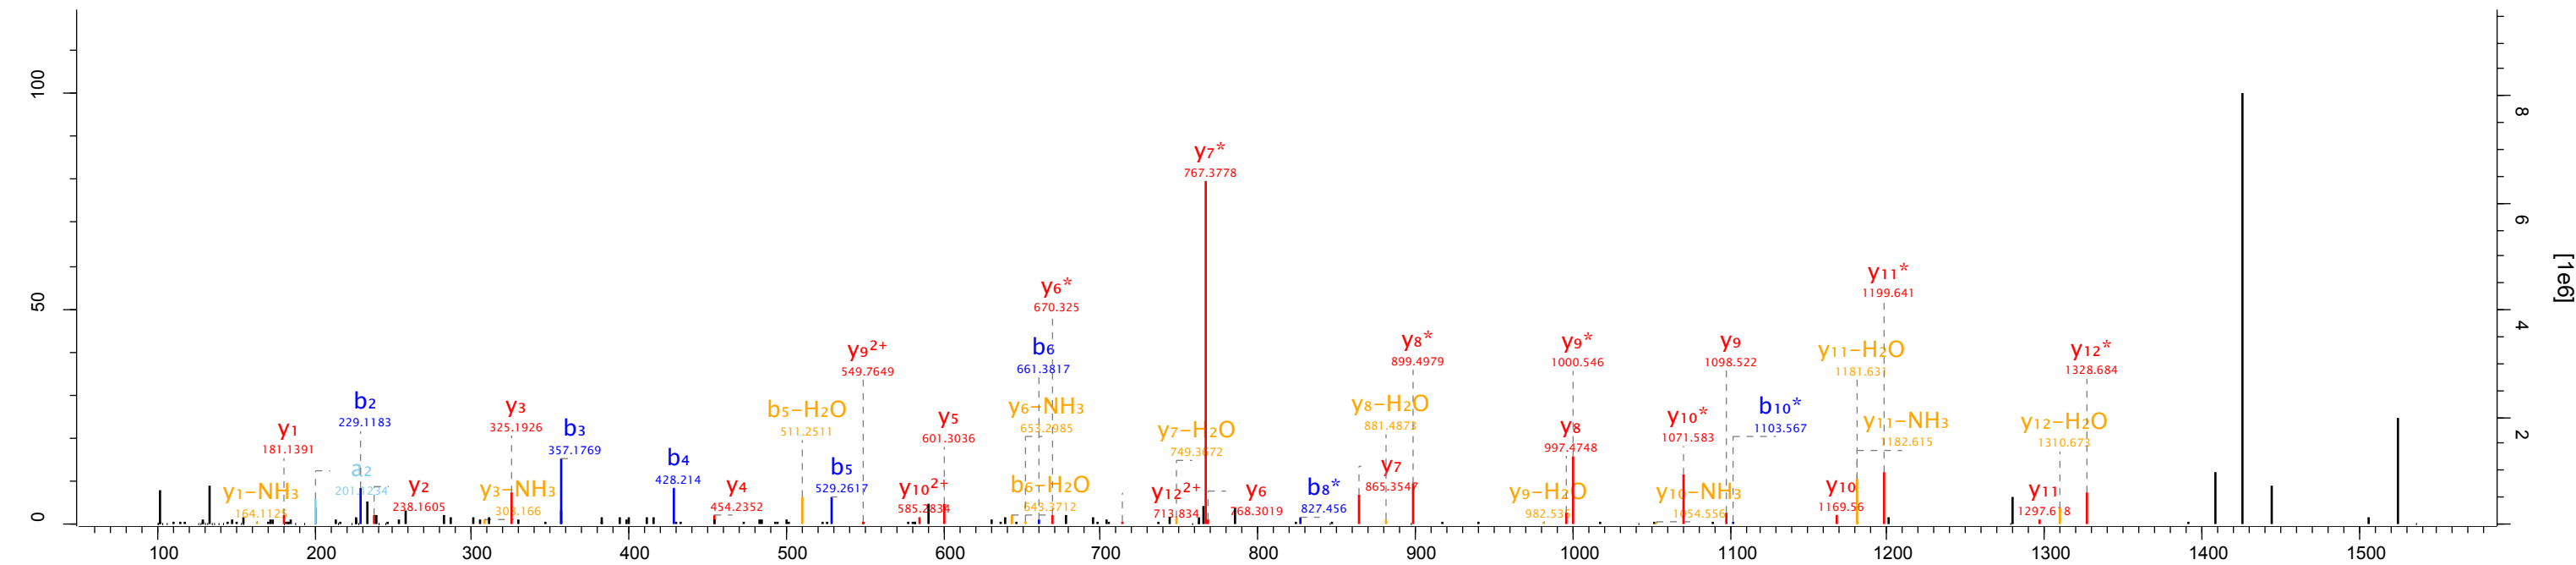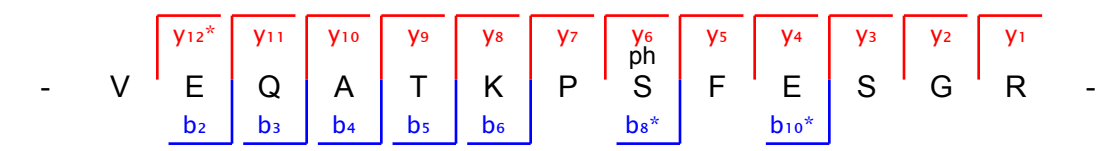



Raw file 20150814\_A375SR\_Phospho\_BR2\_04 Scan 6779 Method FTMS; HCD Score 169.43 m/z 676.3 Gene names LIMK1

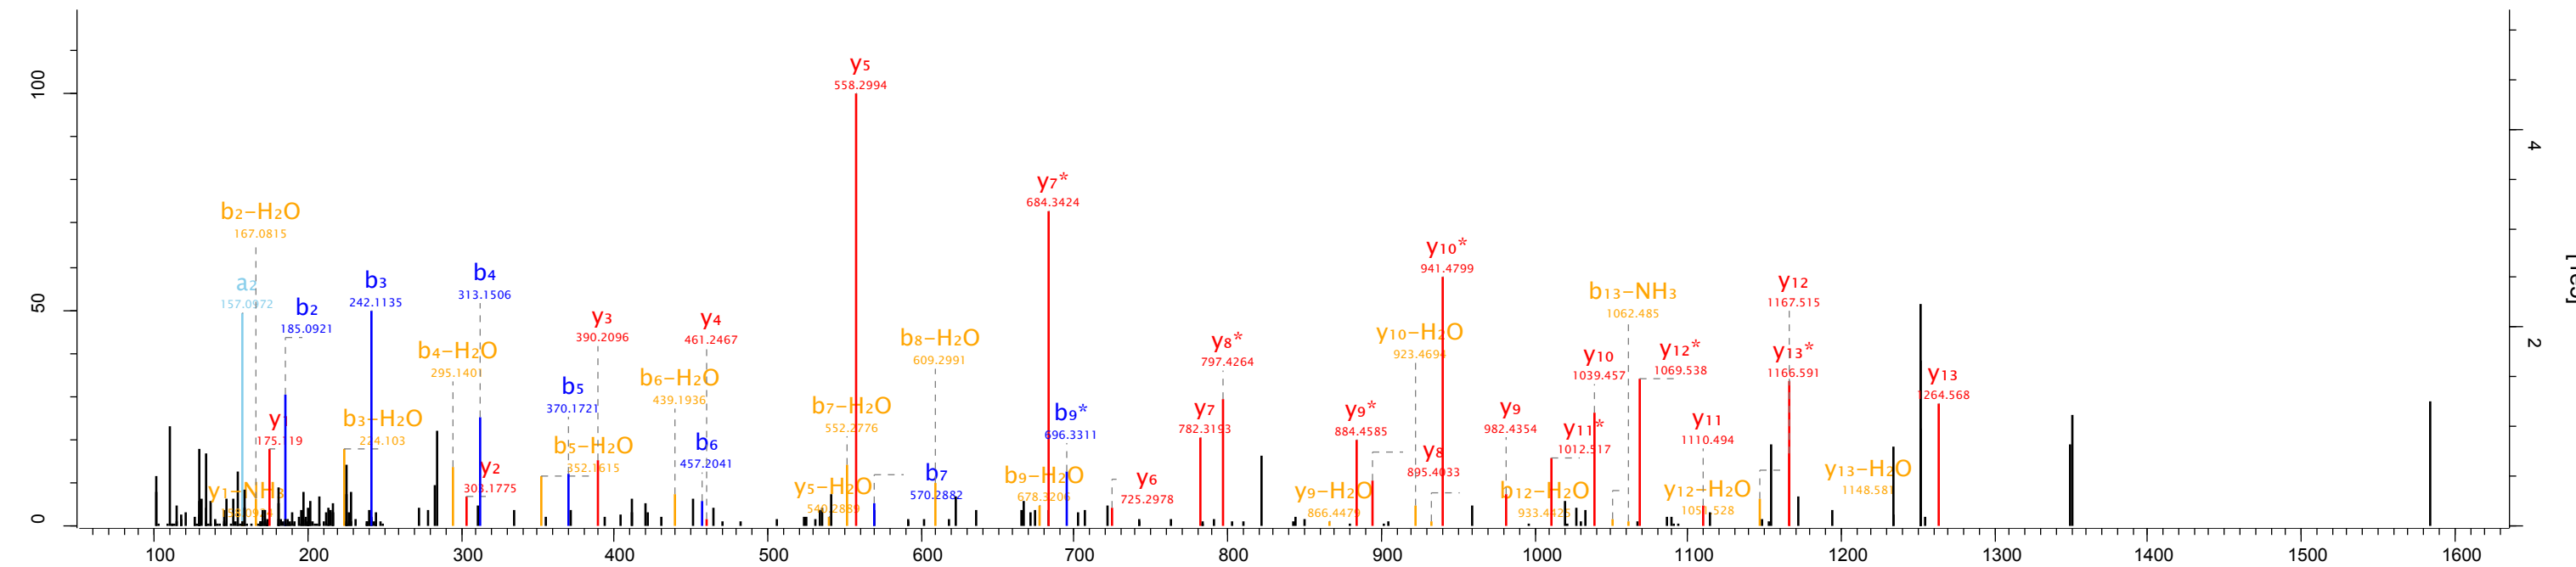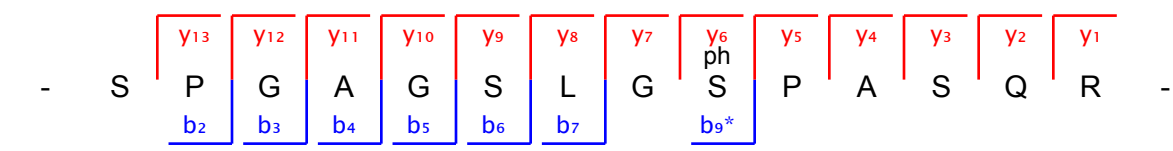

20150814\_A375SR\_Phospho\_BR2\_04 6919 FTMS; HCD 118.48 516.91 IRS2

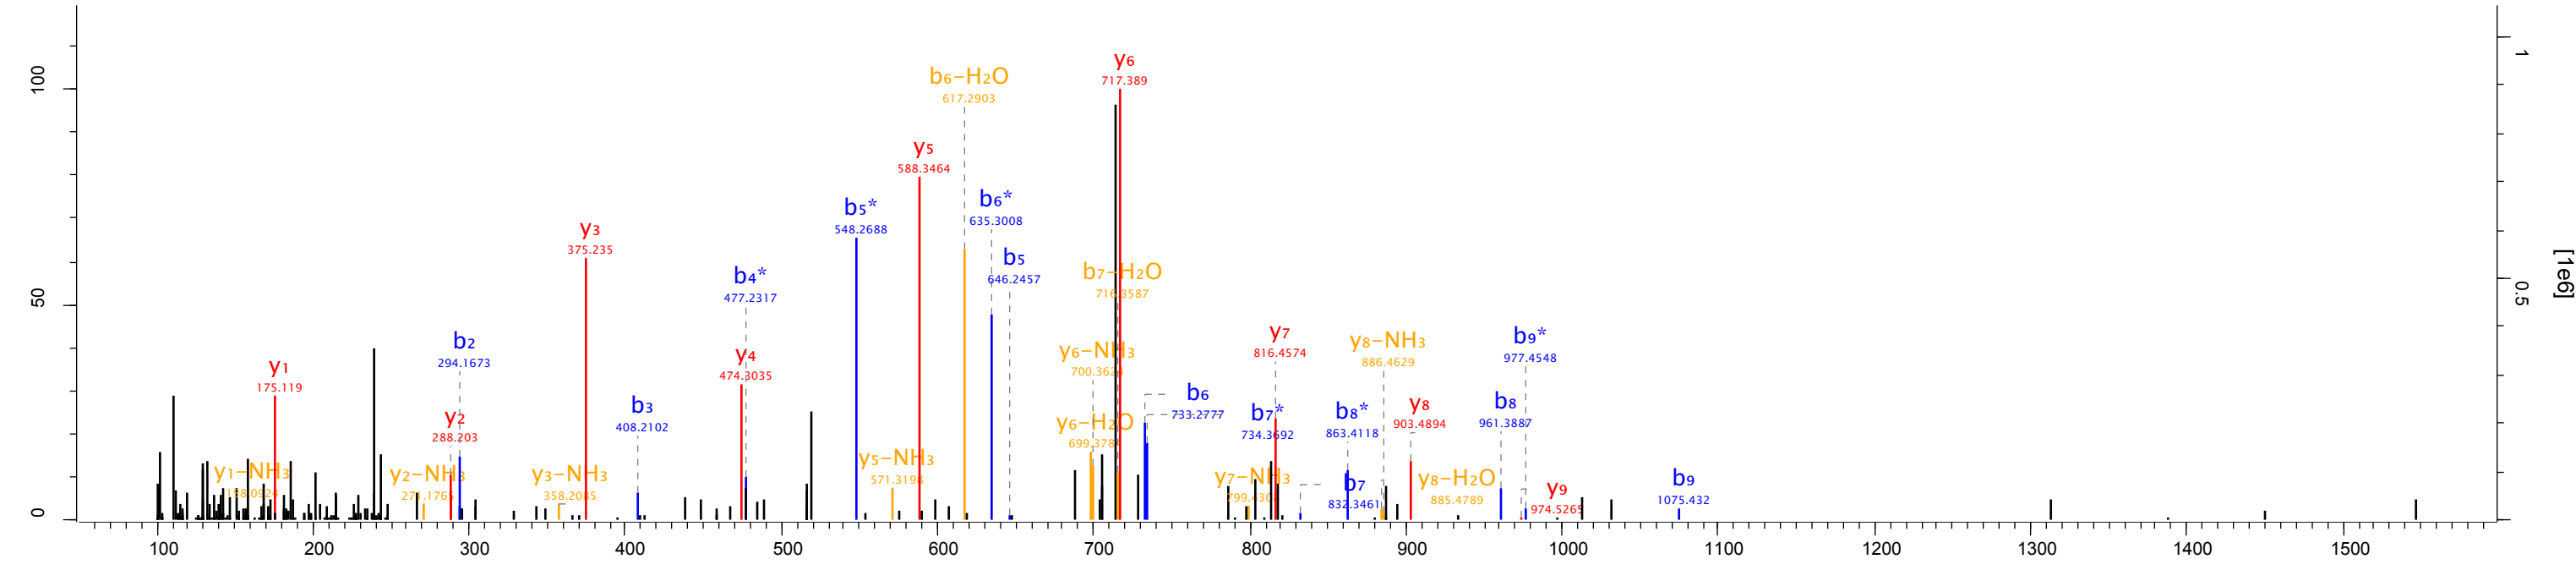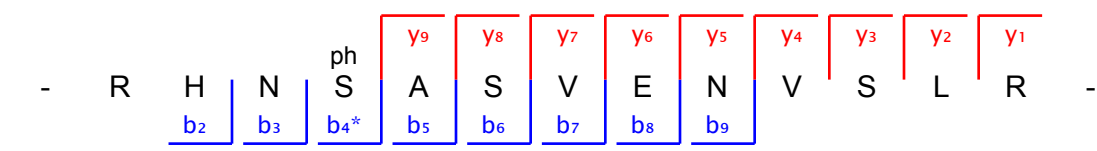



Raw file: 20150814\_A375SR\_Phospho\_BR2\_04  
 Scan: 7179 Method: FTMS; HCD Score: 50.16 m/z: 659.81 Gene names: NUP98

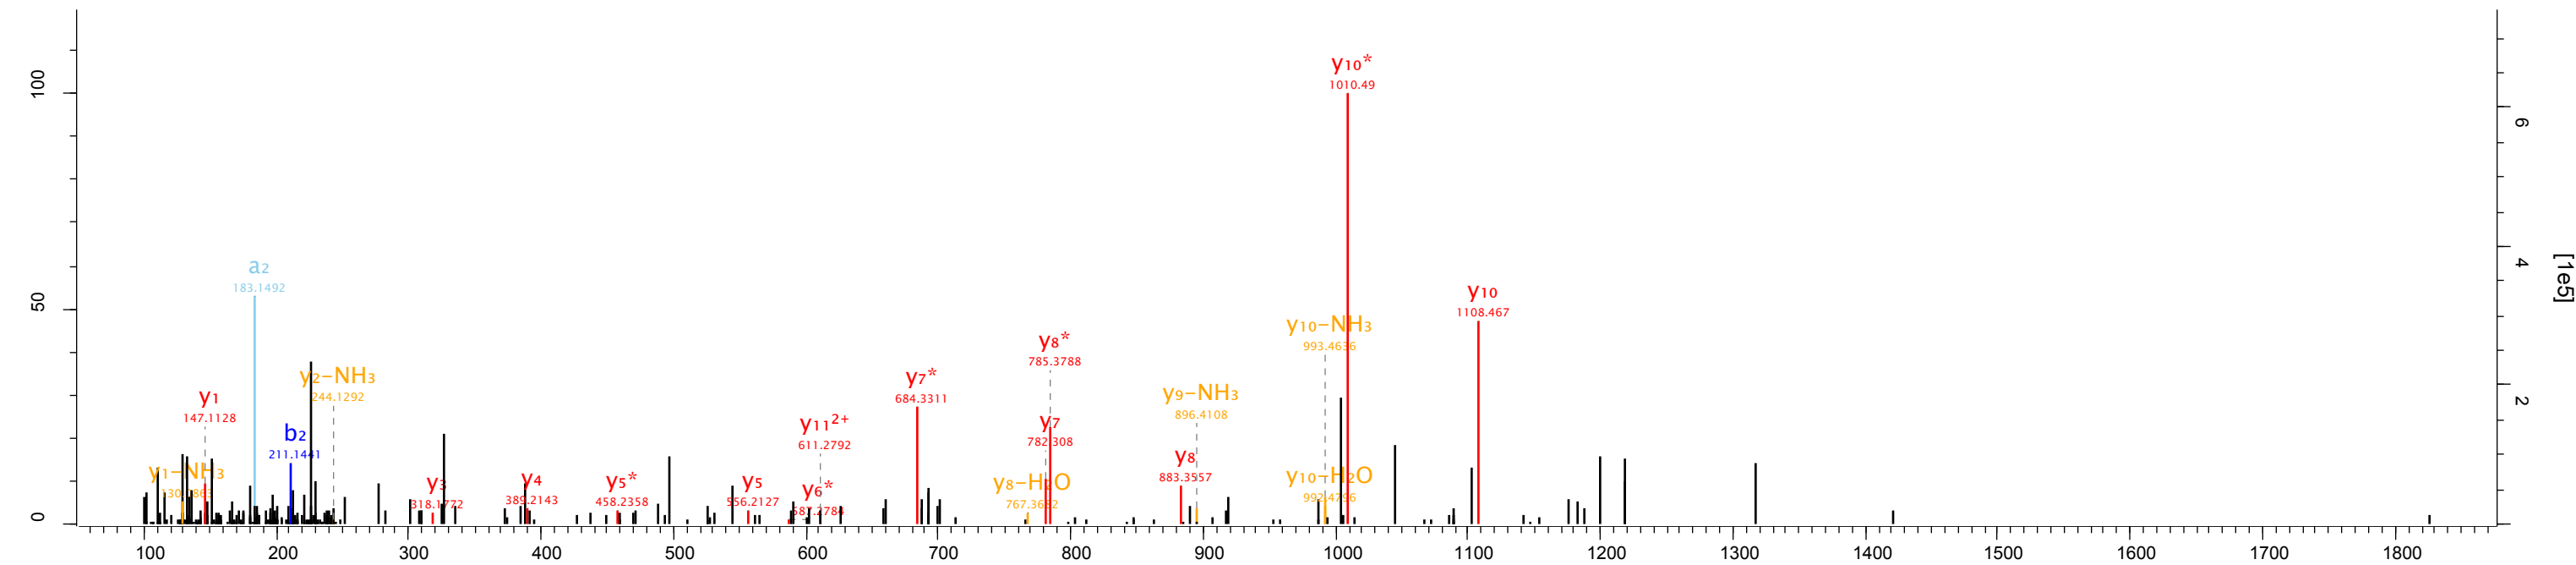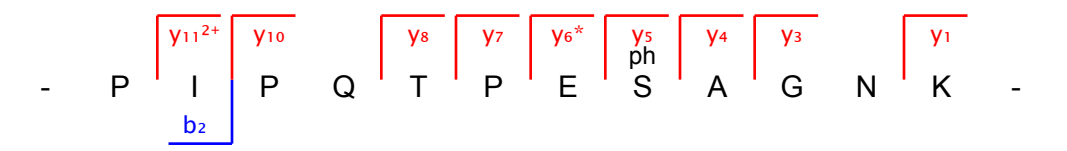



Raw file 20150814\_A375SR\_Phospho\_BR2\_04 Scan 7899 Method FTMS; HCD Score 93.75 m/z 723.74 Gene names LMNA

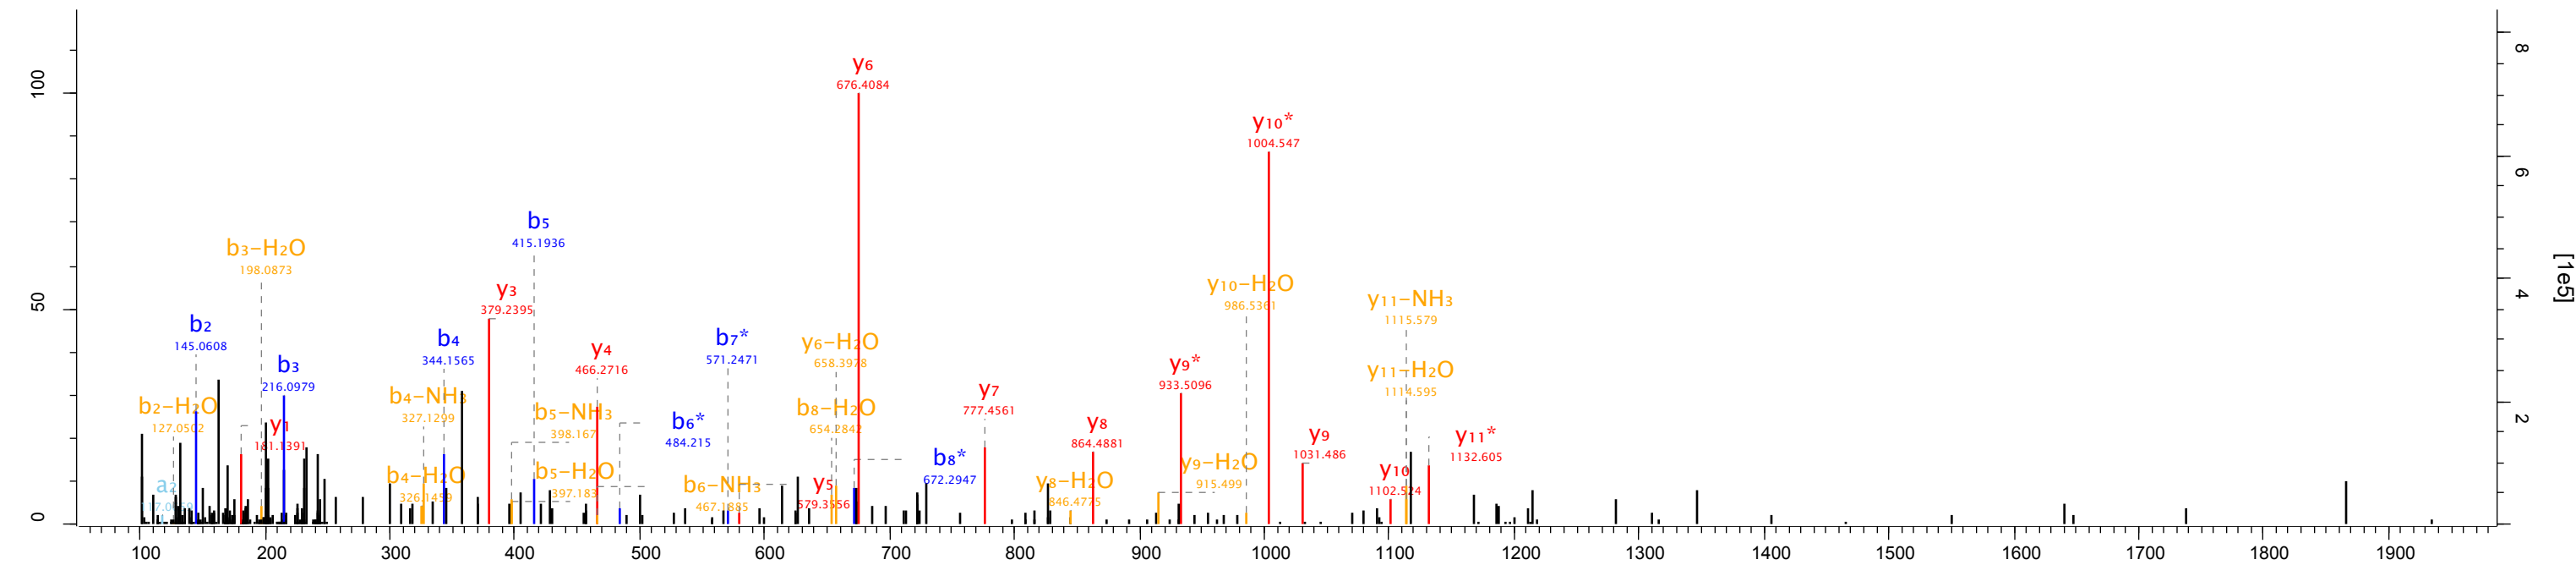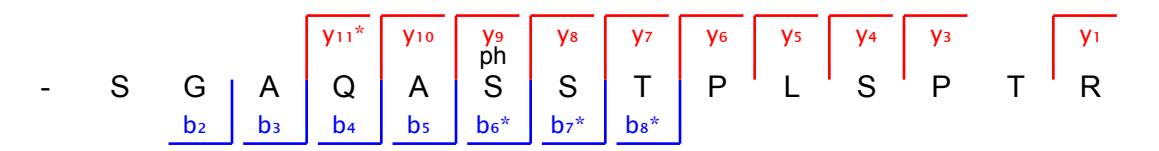

Raw file: 20150814\_A375SR\_Phospho\_BR2\_04  
 Scan: 8079 Method: FTMS; HCD Score: 105.38 m/z: 549.82 Gene names: TP53BP2

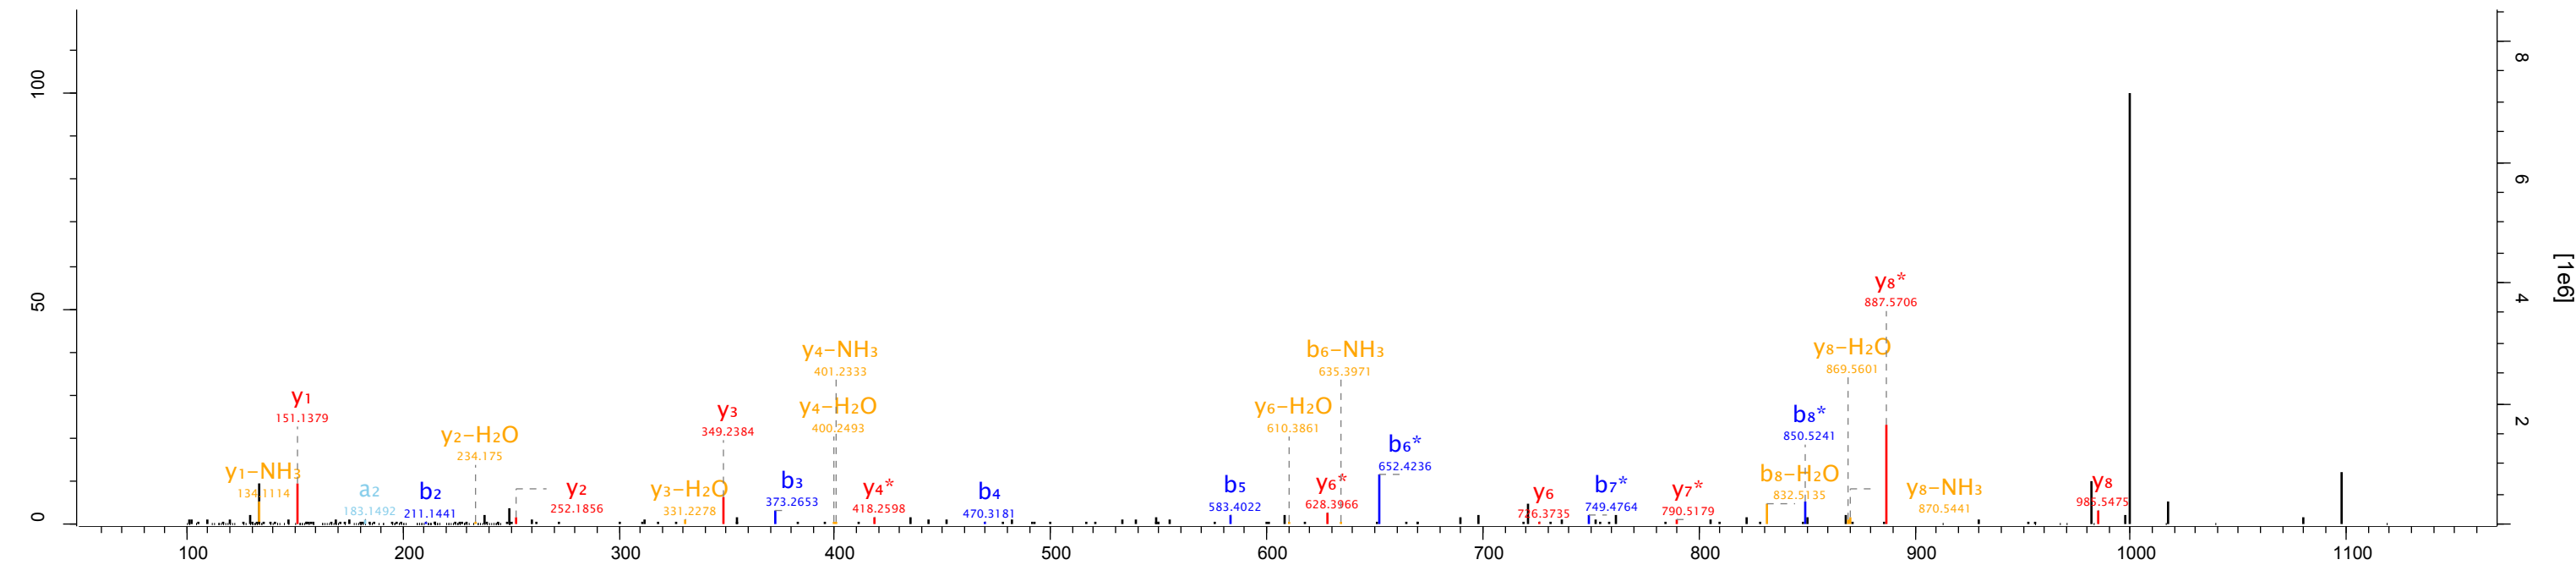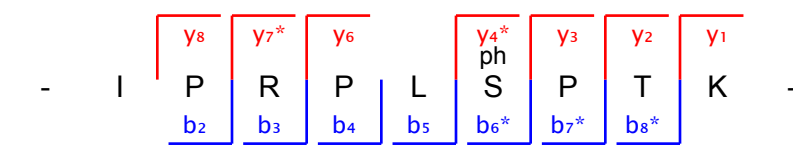

Raw file: 20150814\_A375SR\_Phospho\_BR2\_04  
 Scan: 8459 Method: FTMS; HCD Score: 141.1 m/z: 509.22 Gene names: SAP30BP

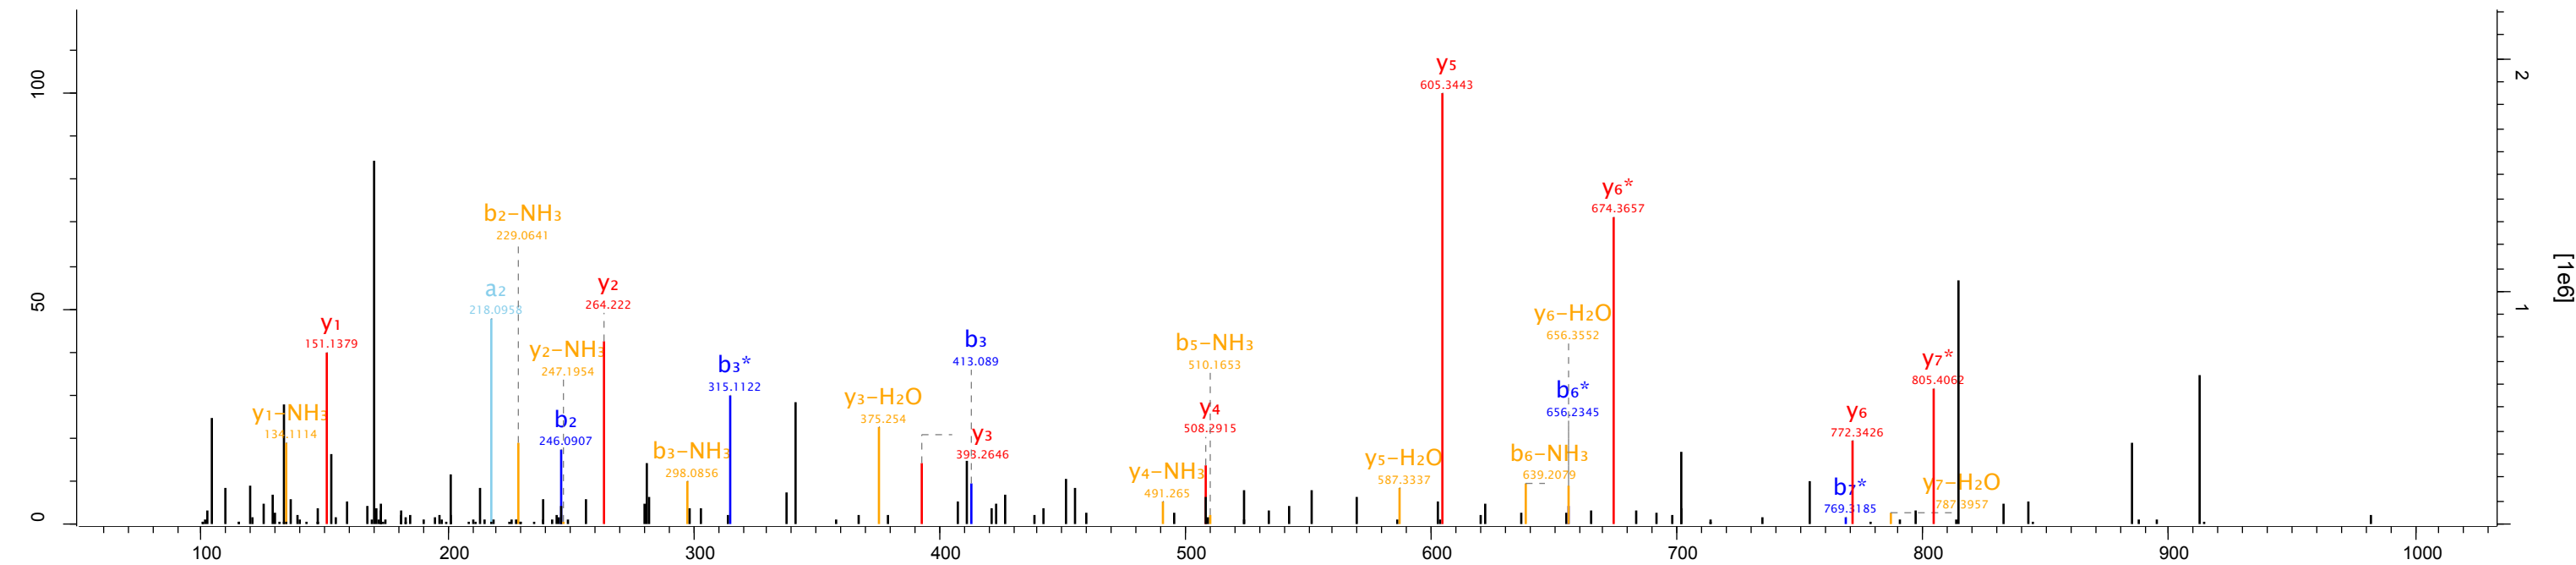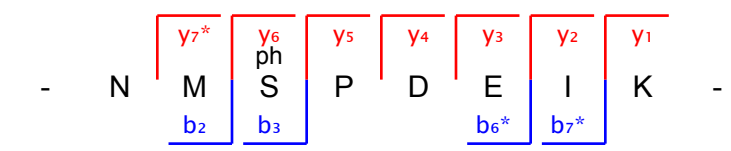

Raw file  
20150814\_A375SR\_Phospho\_BR2\_04

Scan Method Score m/z Gene names  
8669 FTMS; HCD 241.44 1029.93 CTDSPL2

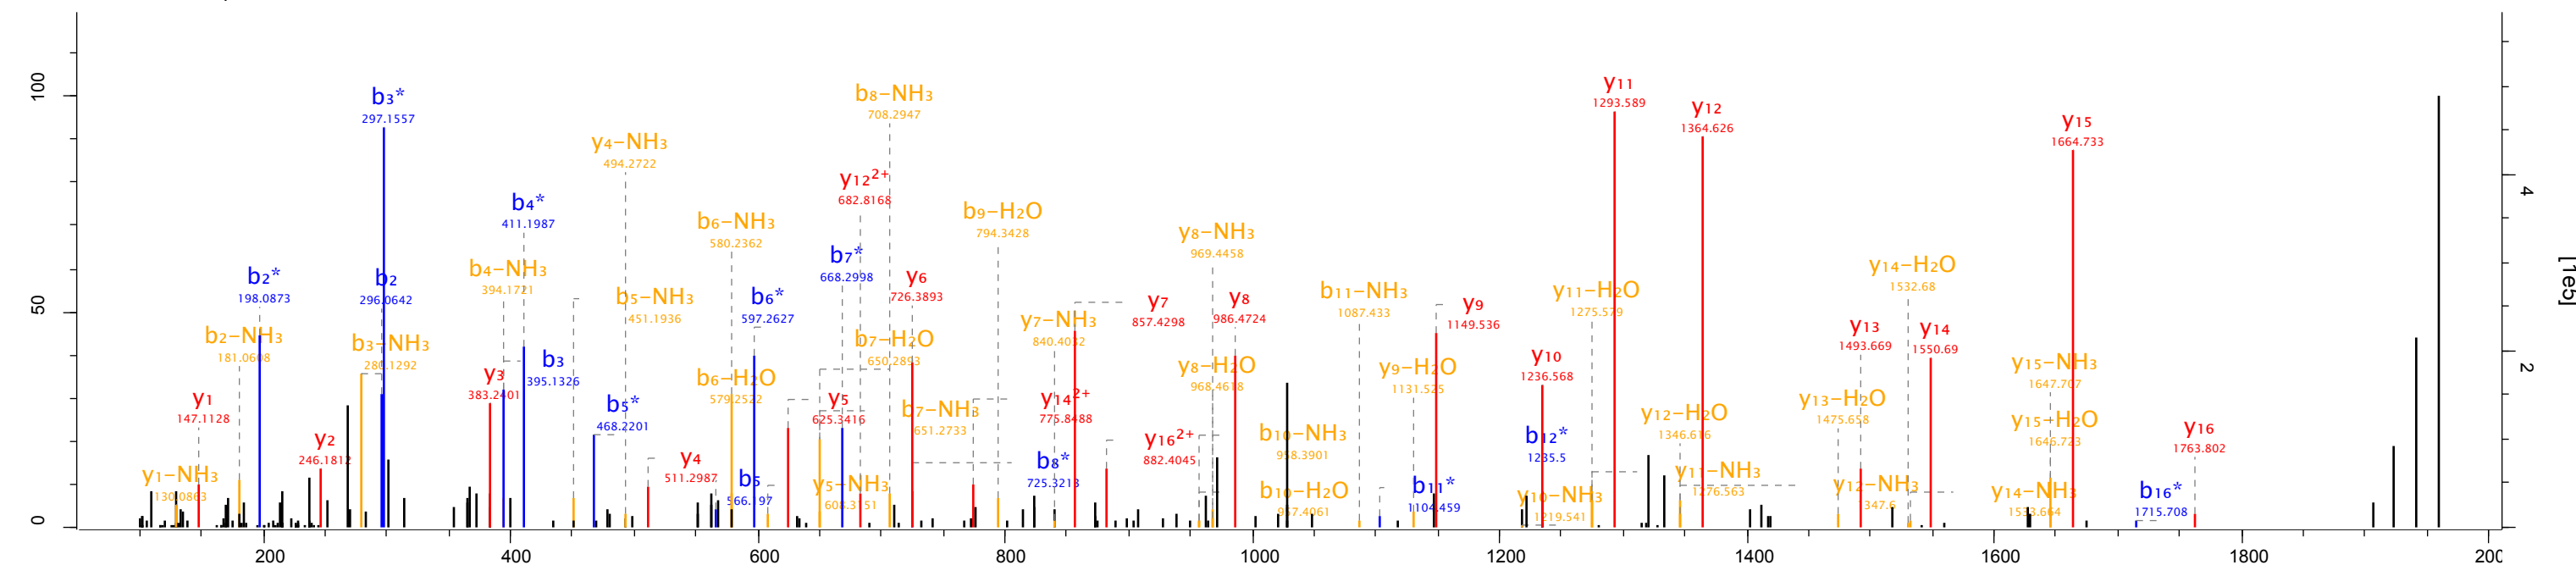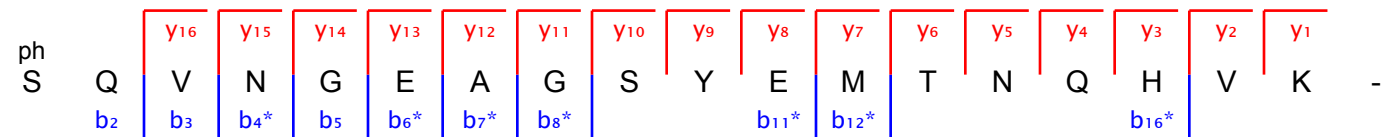

Raw file 20150814\_A375SR\_Phospho\_BR2\_04 Scan 9029 Method FTMS; HCD Score 158.83 m/z 673.61 Gene names PXN

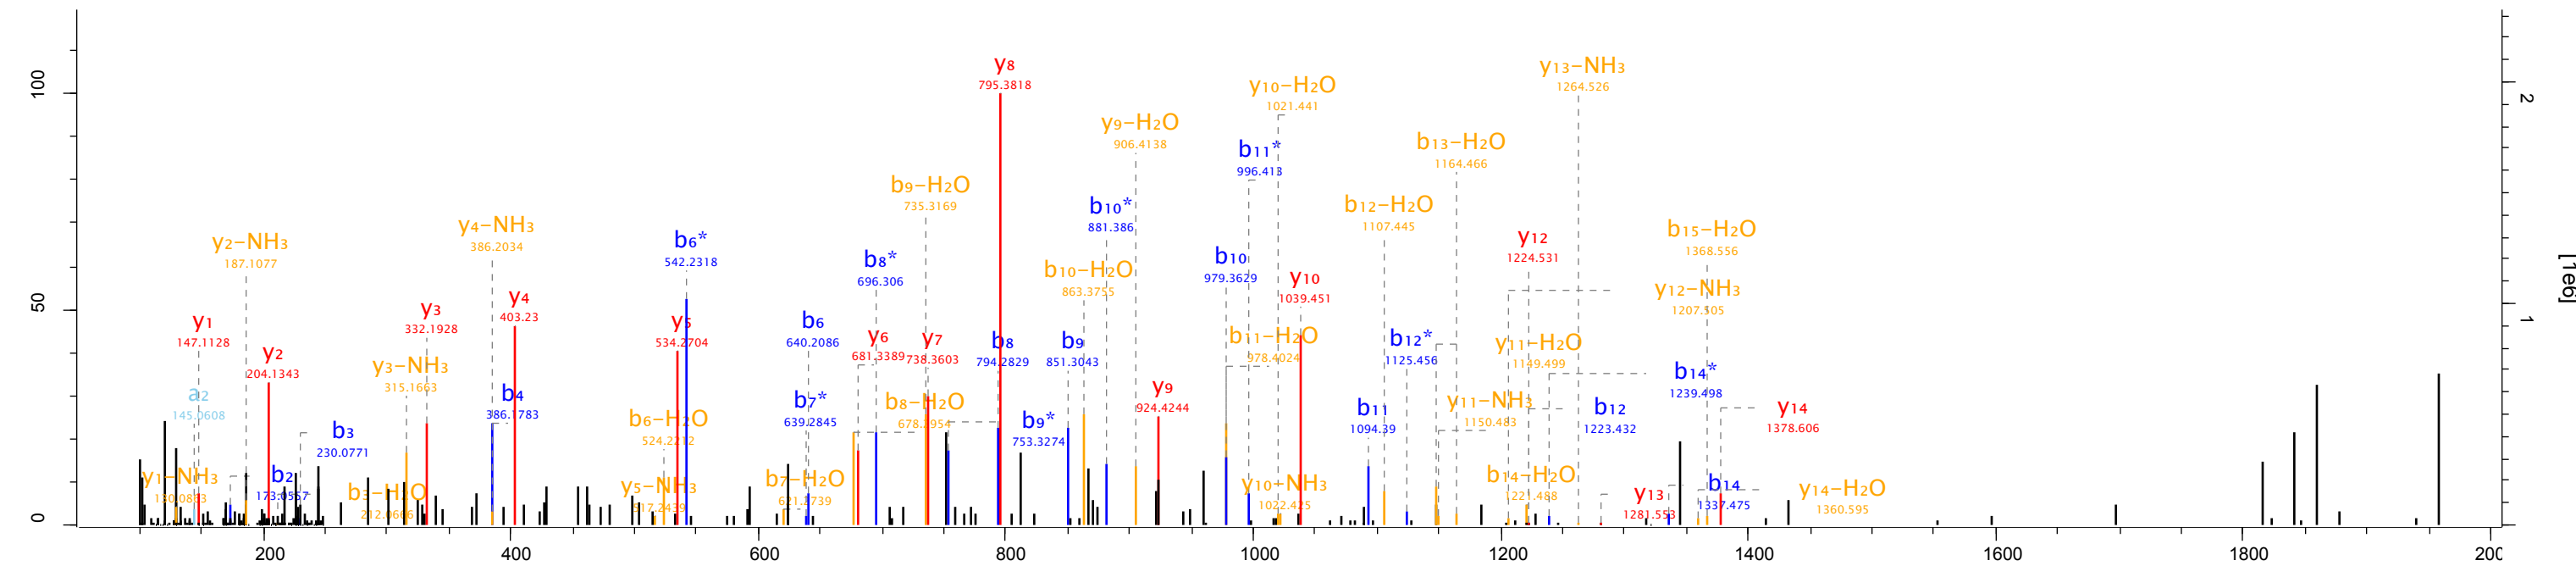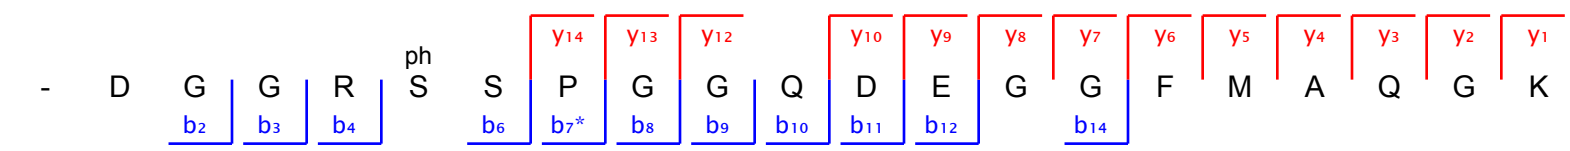

Raw file: 20150814\_A375SR\_Phospho\_BR2\_04  
 Scan: 9699 Method: FTMS; HCD Score: 234.18 m/z: 947.41 Gene names: PSMD1

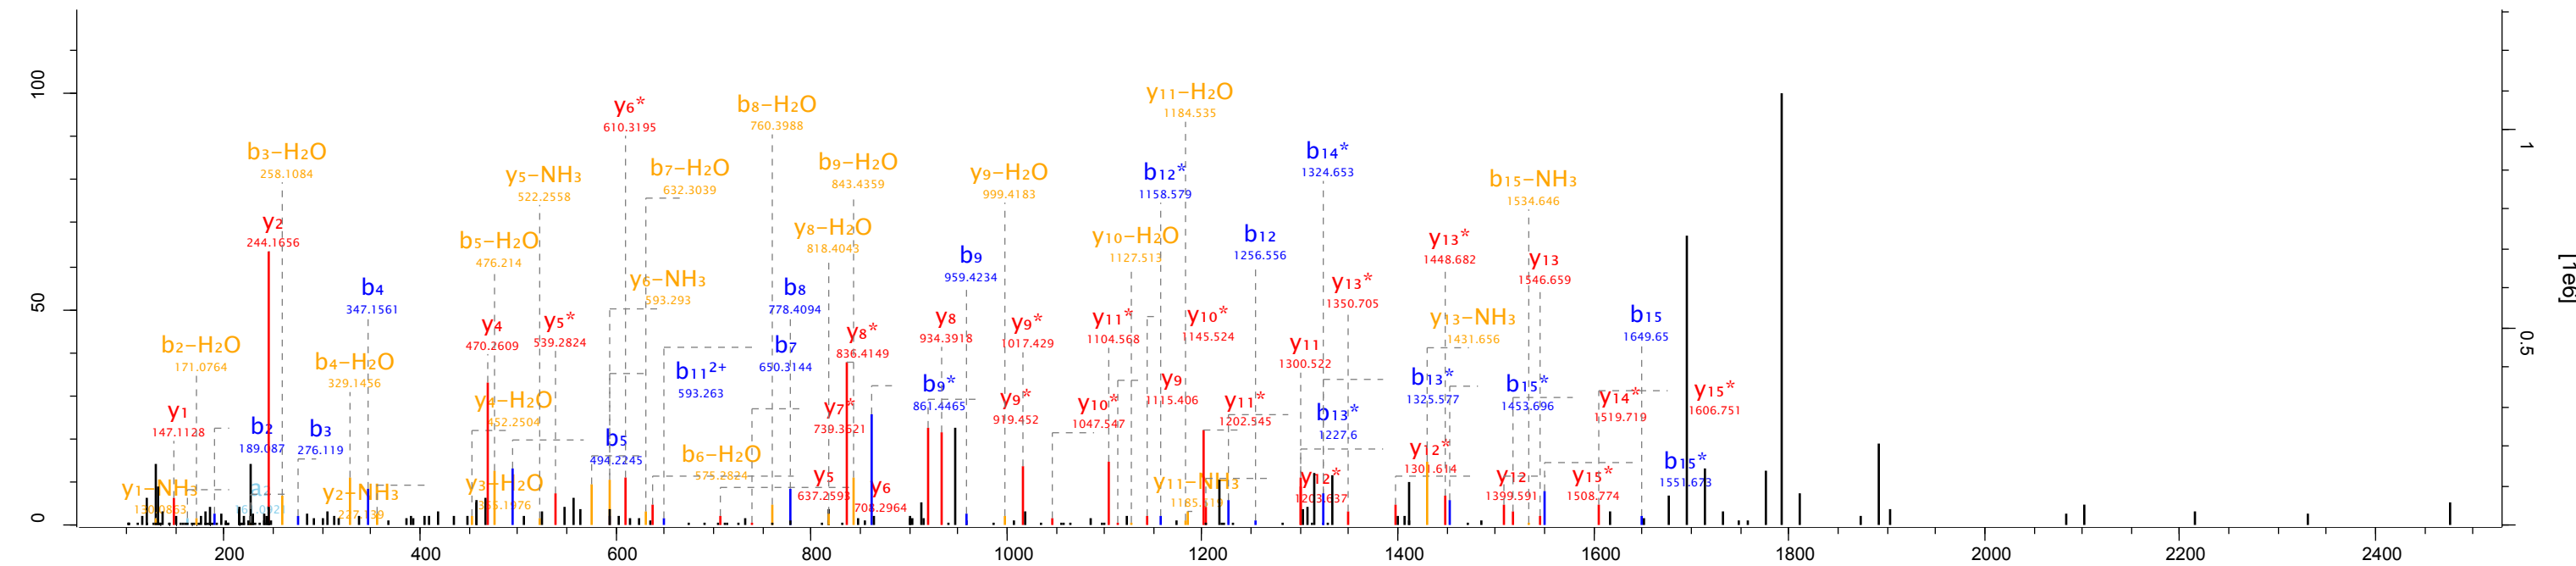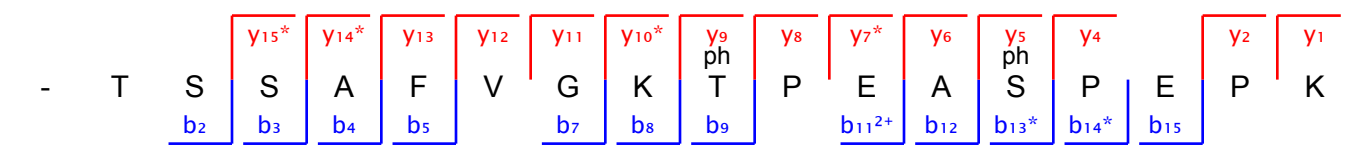



Raw file: 20150814\_A375SR\_Phospho\_BR2\_04  
 Scan: 9839 Method: FTMS; HCD Score: 46.8 m/z: 578.78 Gene names: ATAD2B

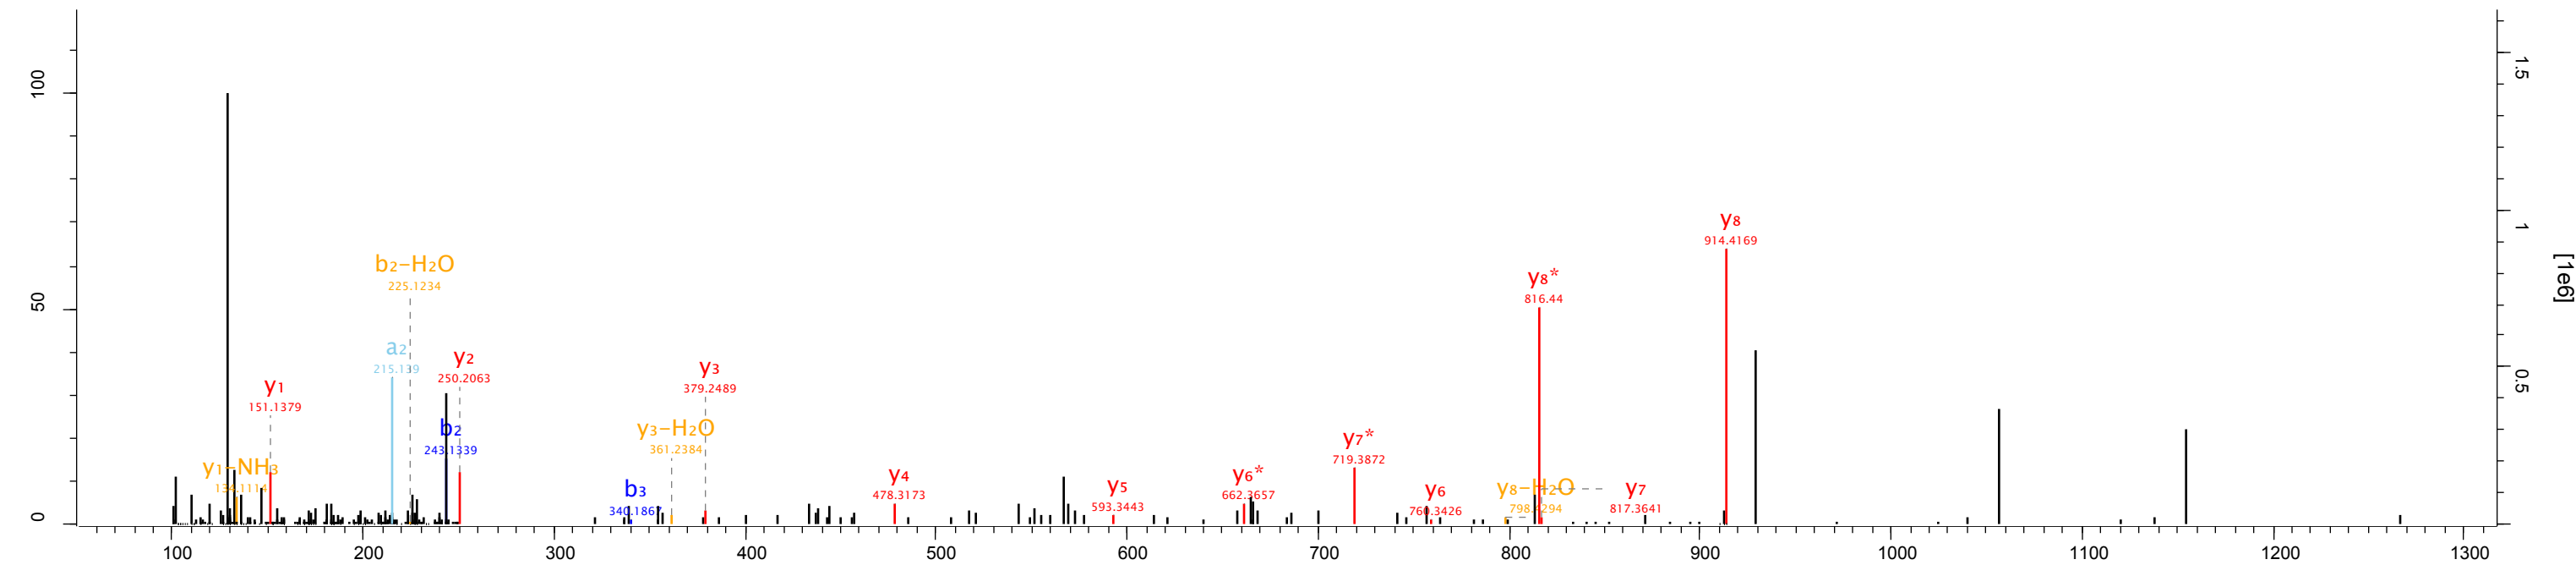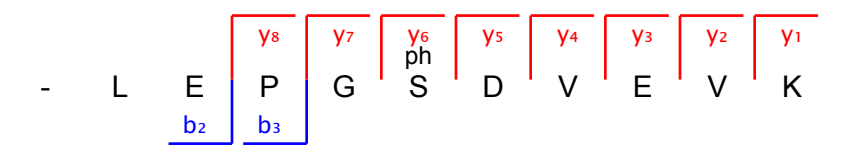

Raw file: 20150814\_A375SR\_Phospho\_BR2\_04  
 Scan: 9909 Method: FTMS; HCD Score: 165.44 m/z: 742.3 Gene names: ARID1A

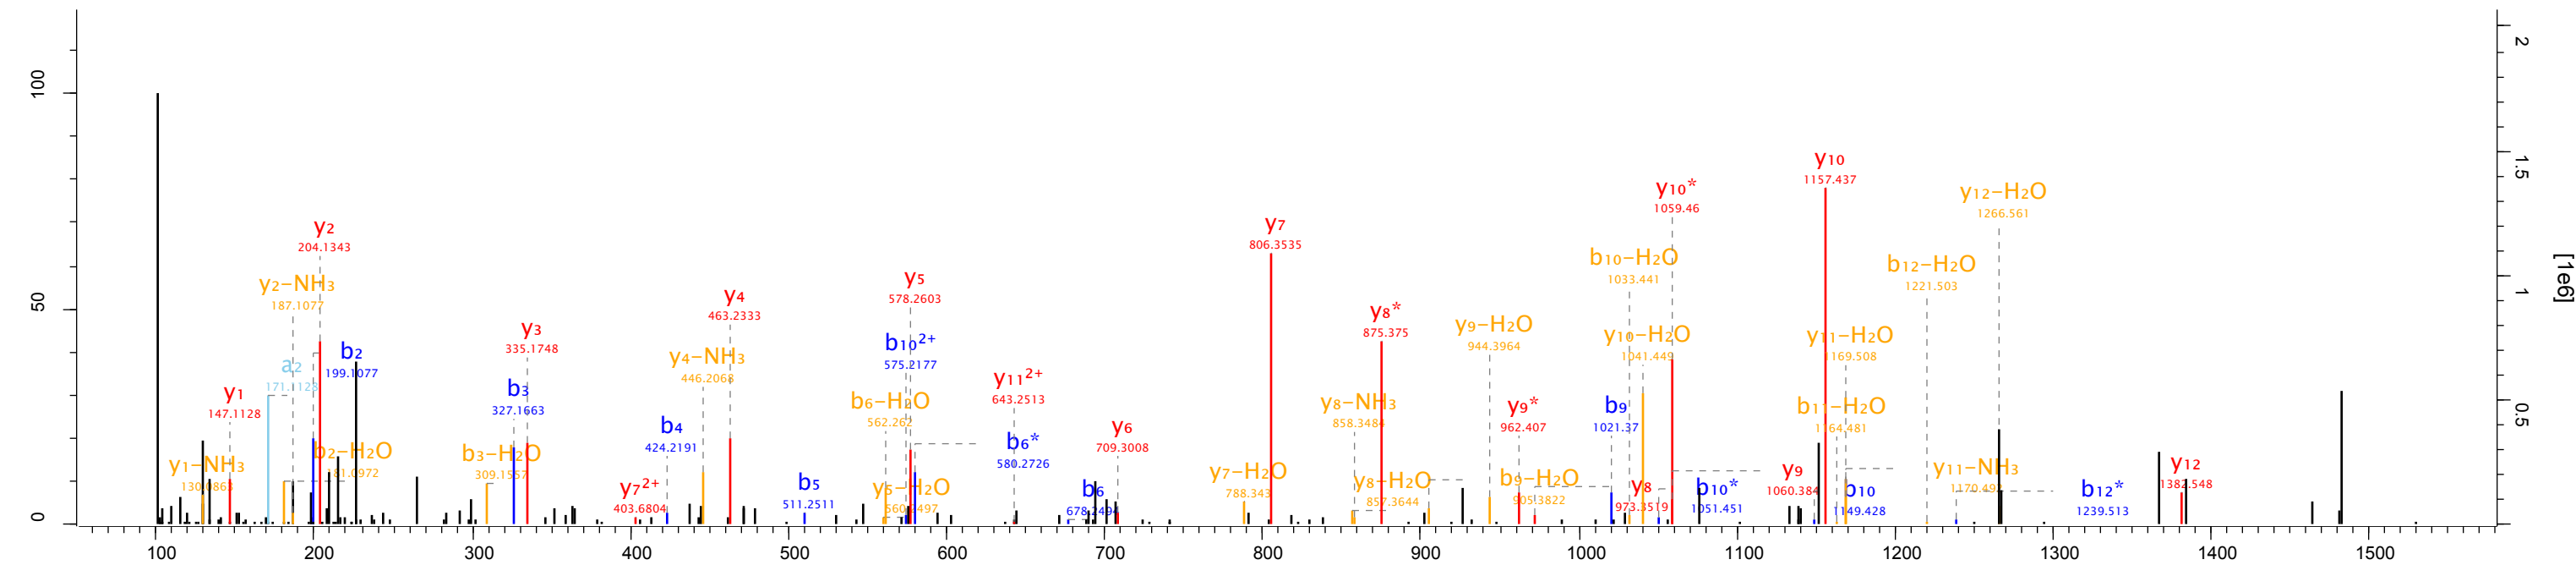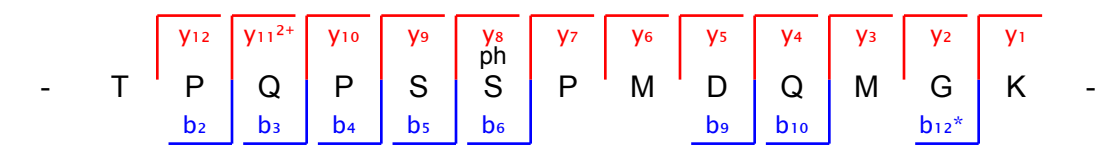

Raw file 20150814\_A375SR\_Phospho\_BR2\_05 Scan 10319 Method FTMS; HCD Score 152.94 m/z 740.32 Gene names CDYL

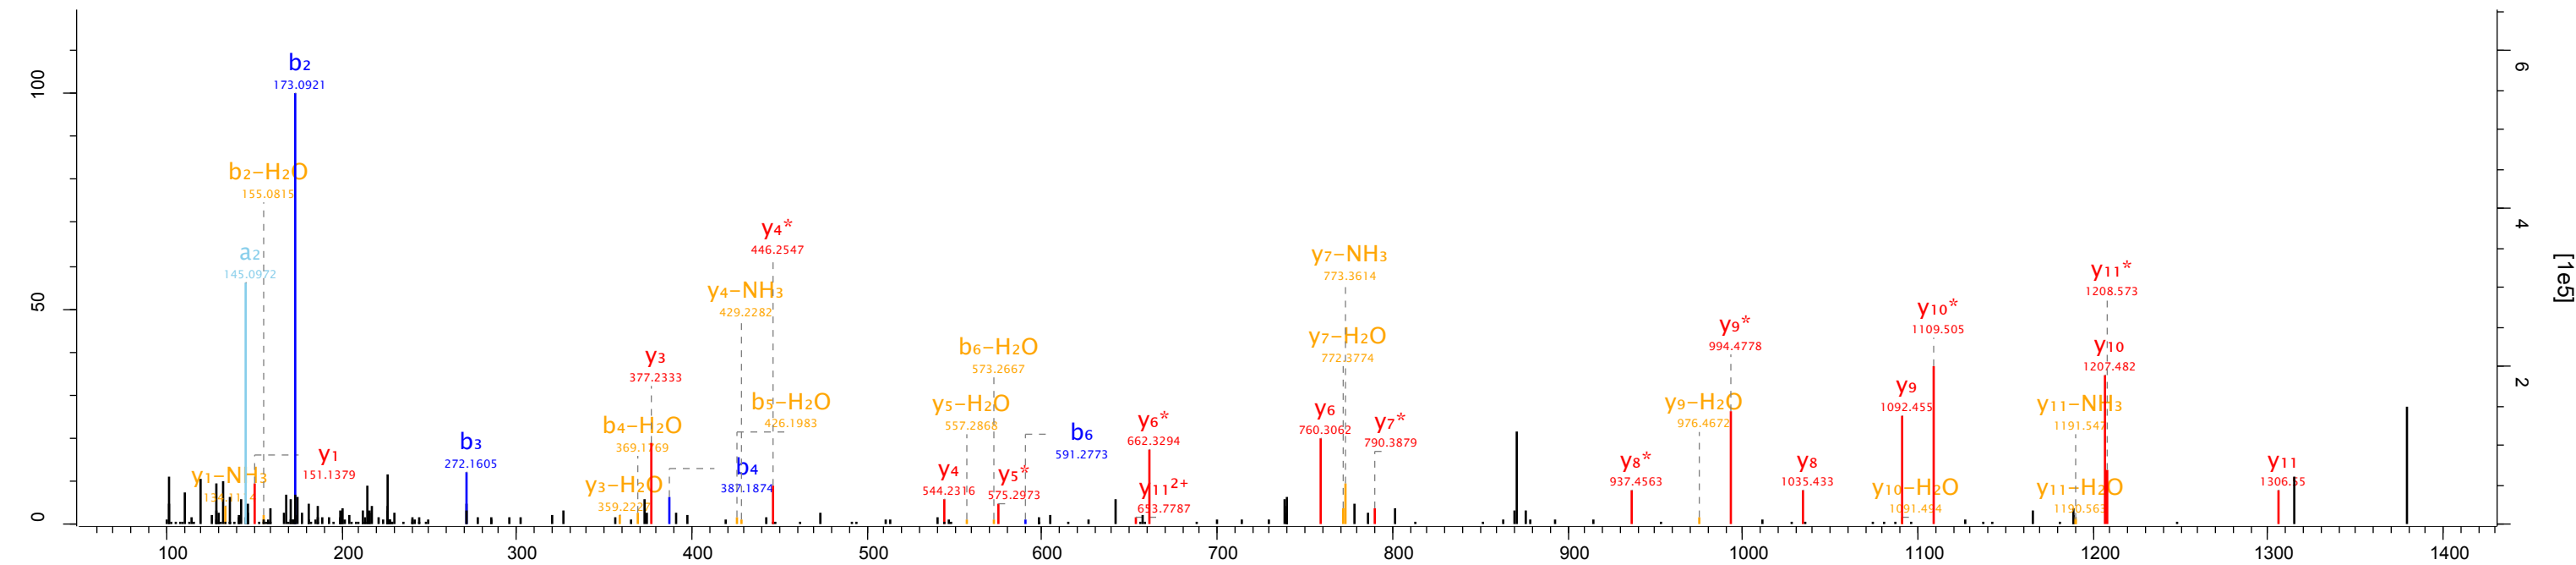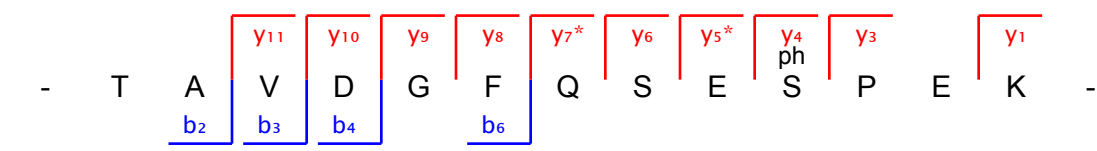

Raw file Scan Method Score m/z Gene names  
 20150814\_A375SR\_Phospho\_BR2\_05 10439 FTMS; HCD 102.61 800.41 DNMT1

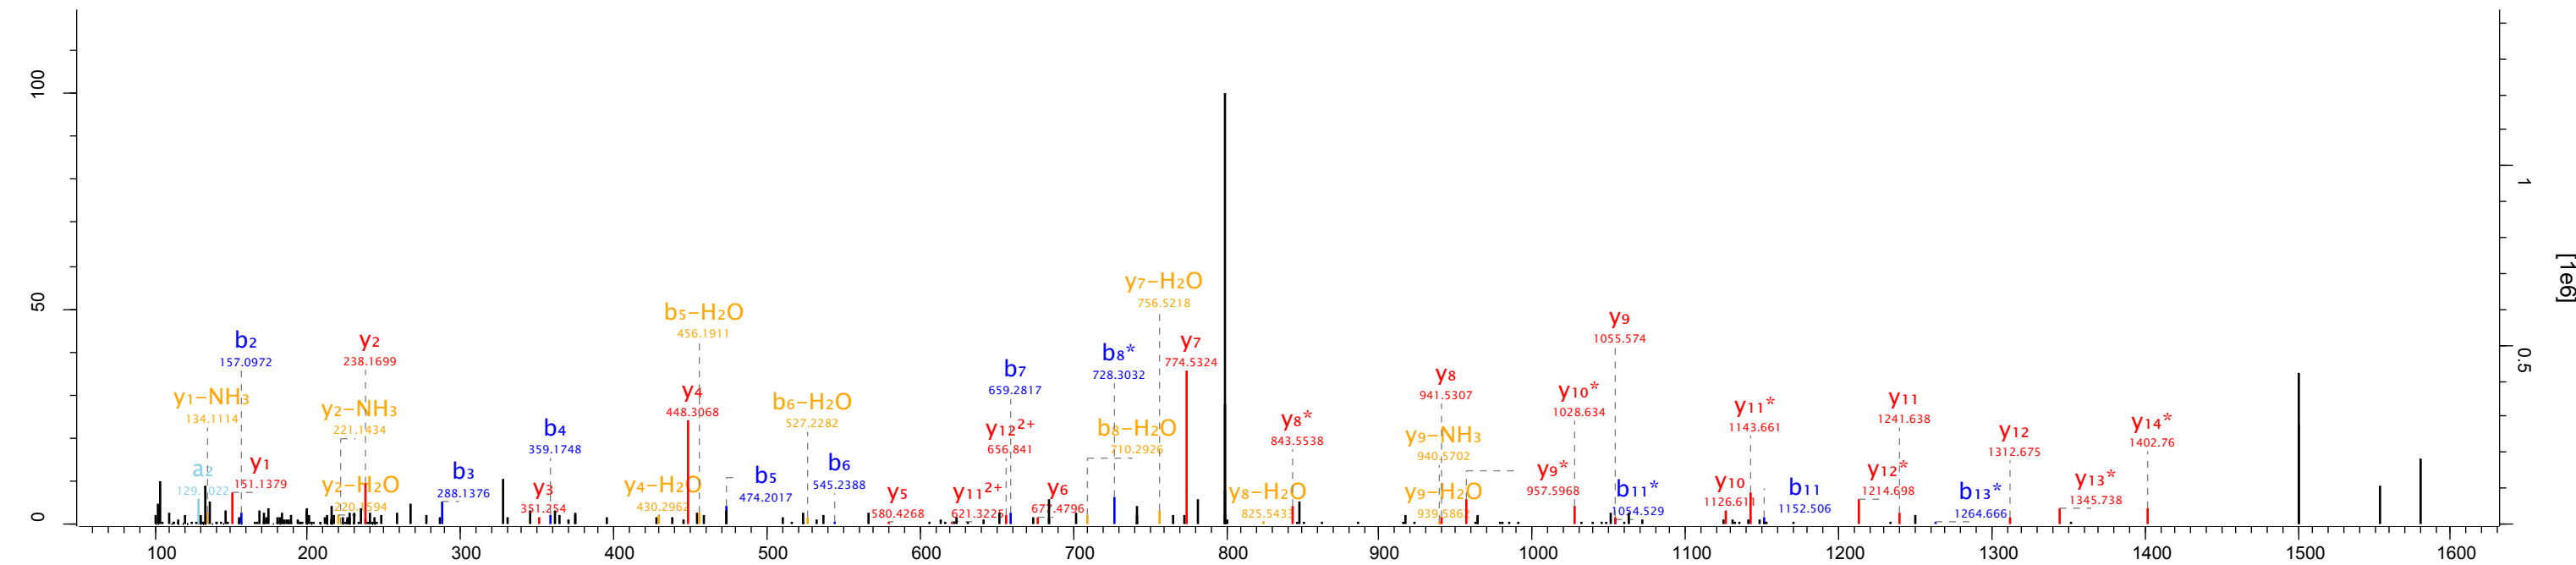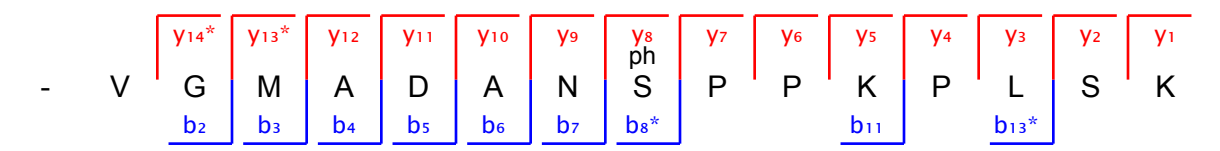

Raw file: 20150814\_A375SR\_Phospho\_BR2\_05  
 Scan: 10819 Method: FTMS; HCD Score: 131.04 m/z: 884.71 Gene names: PBRM1

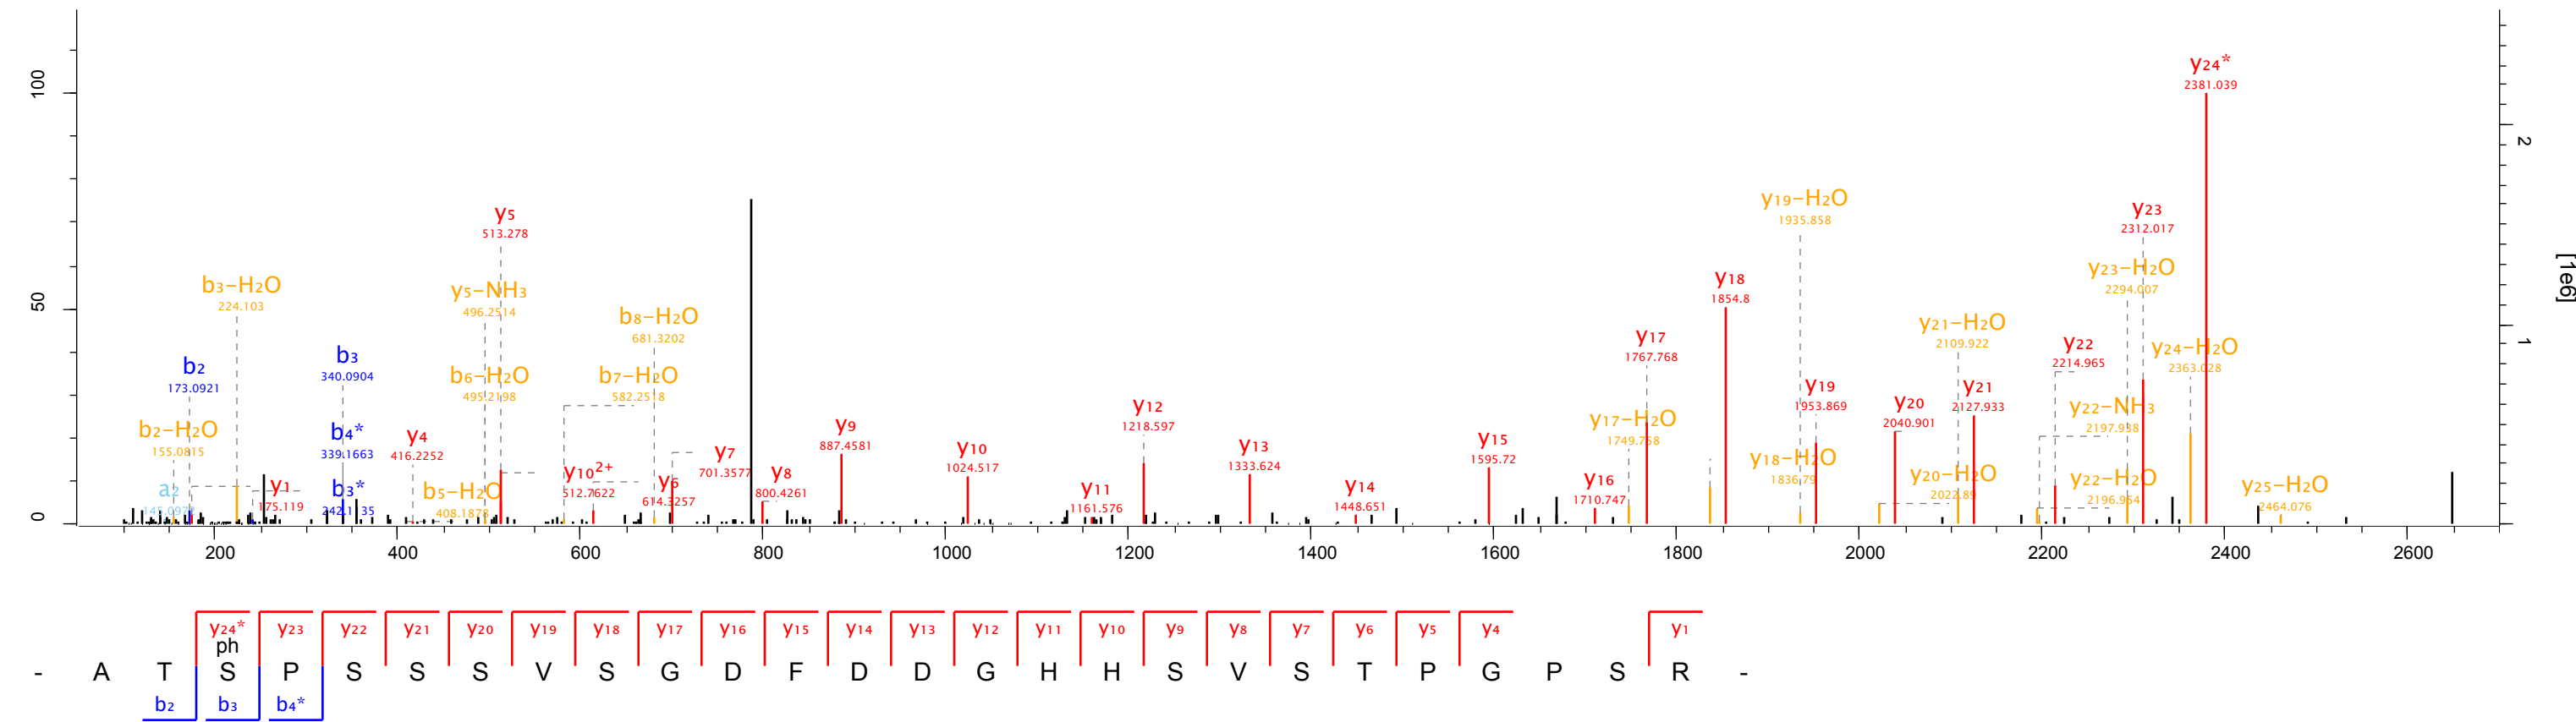

Raw file 20150814\_A375SR\_Phospho\_BR2\_05 Scan 10899 Method FTMS; HCD Score 162.31 m/z 420.23 Gene names ANLN

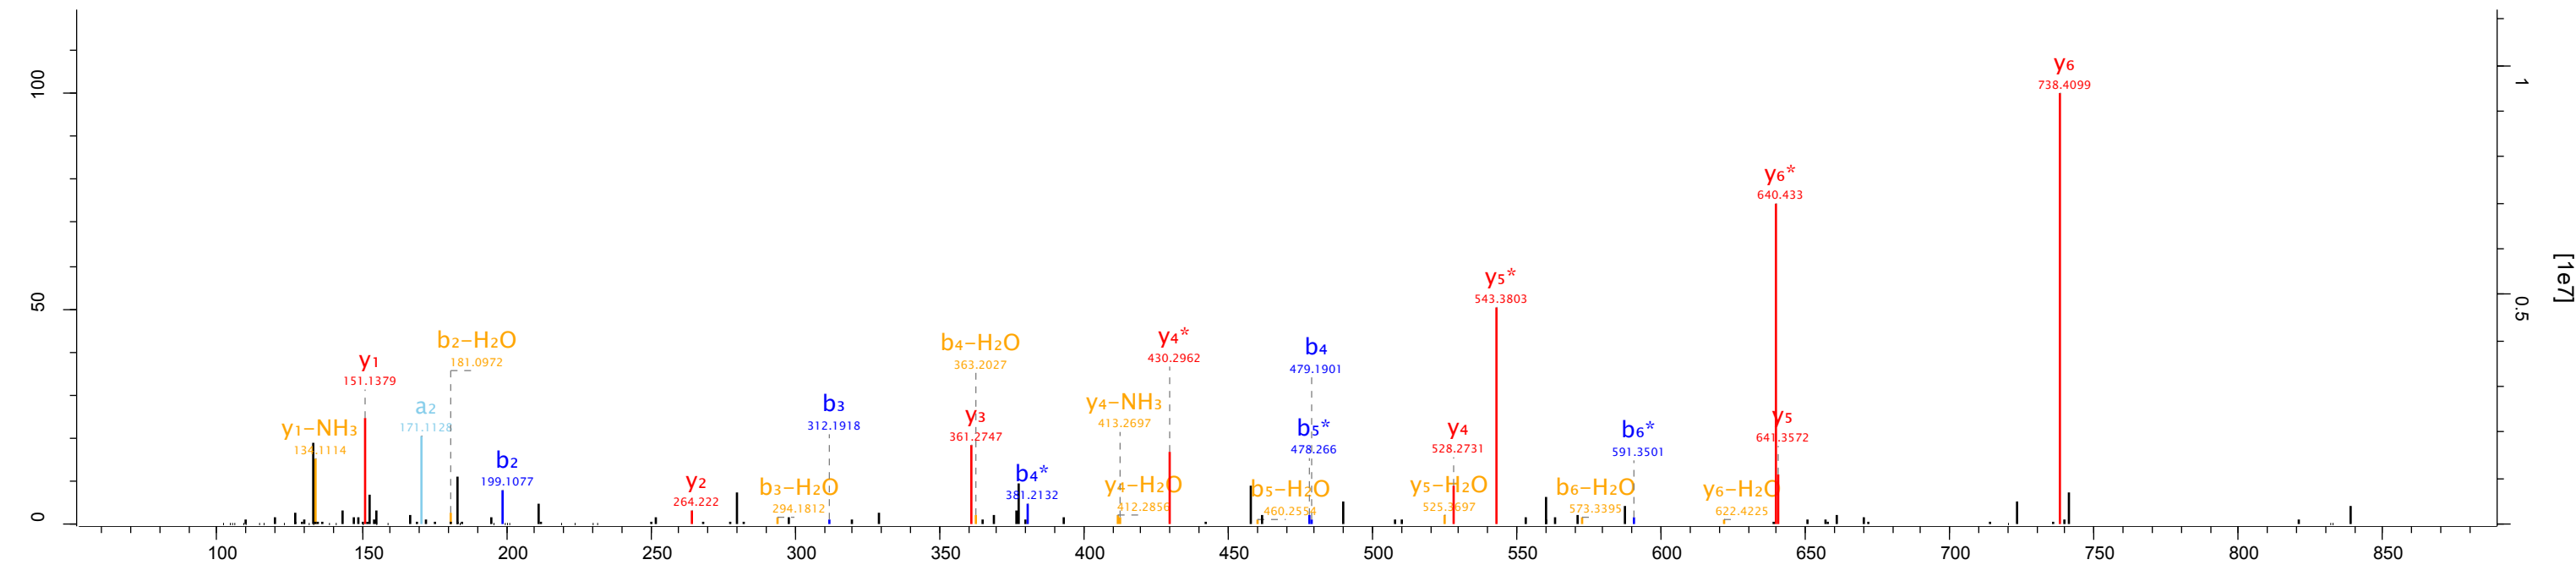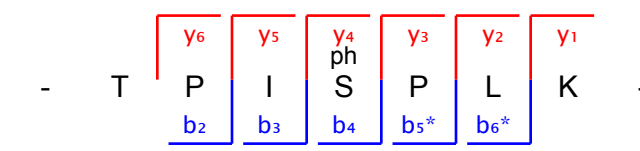

Raw file 20150814\_A375SR\_Phospho\_BR2\_05 Scan 11139 Method FTMS; HCD Score 70.2 m/z 461.23 Gene names CCNY

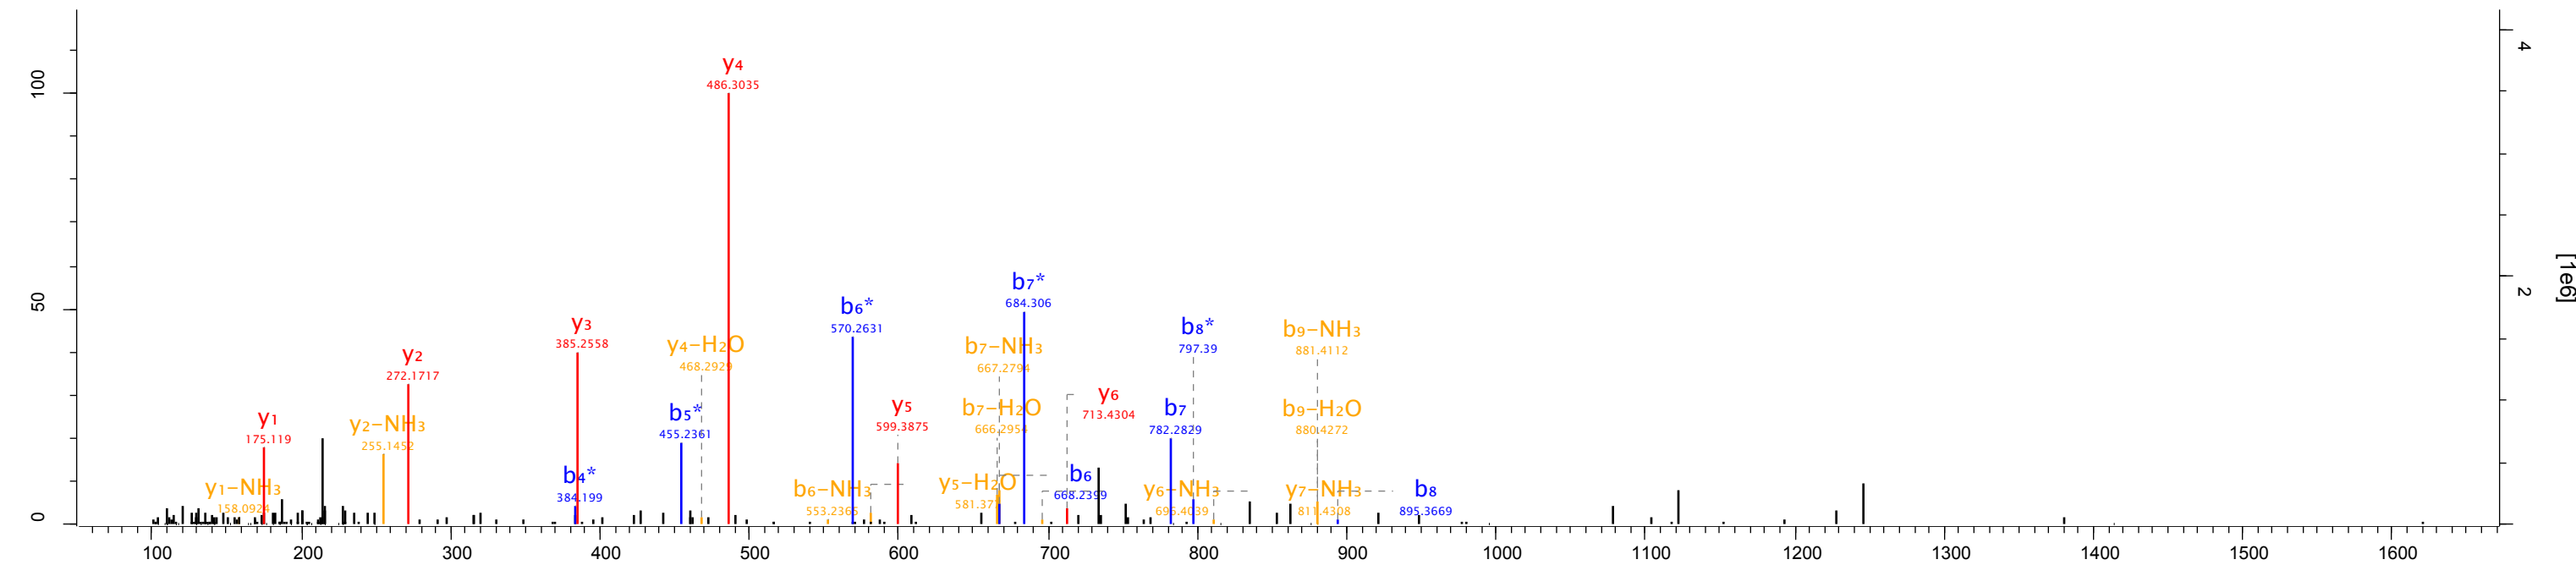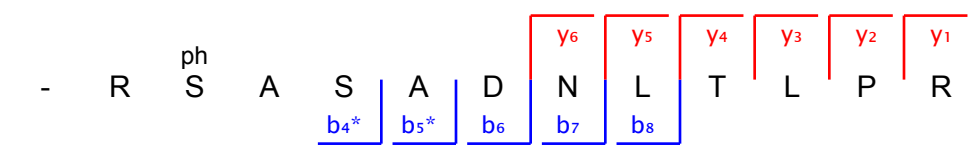

Raw file: 20150814\_A375SR\_Phospho\_BR2\_05  
 Scan: 11249 Method: FTMS; HCD Score: 110.44 m/z: 646.82 Gene names: STK10

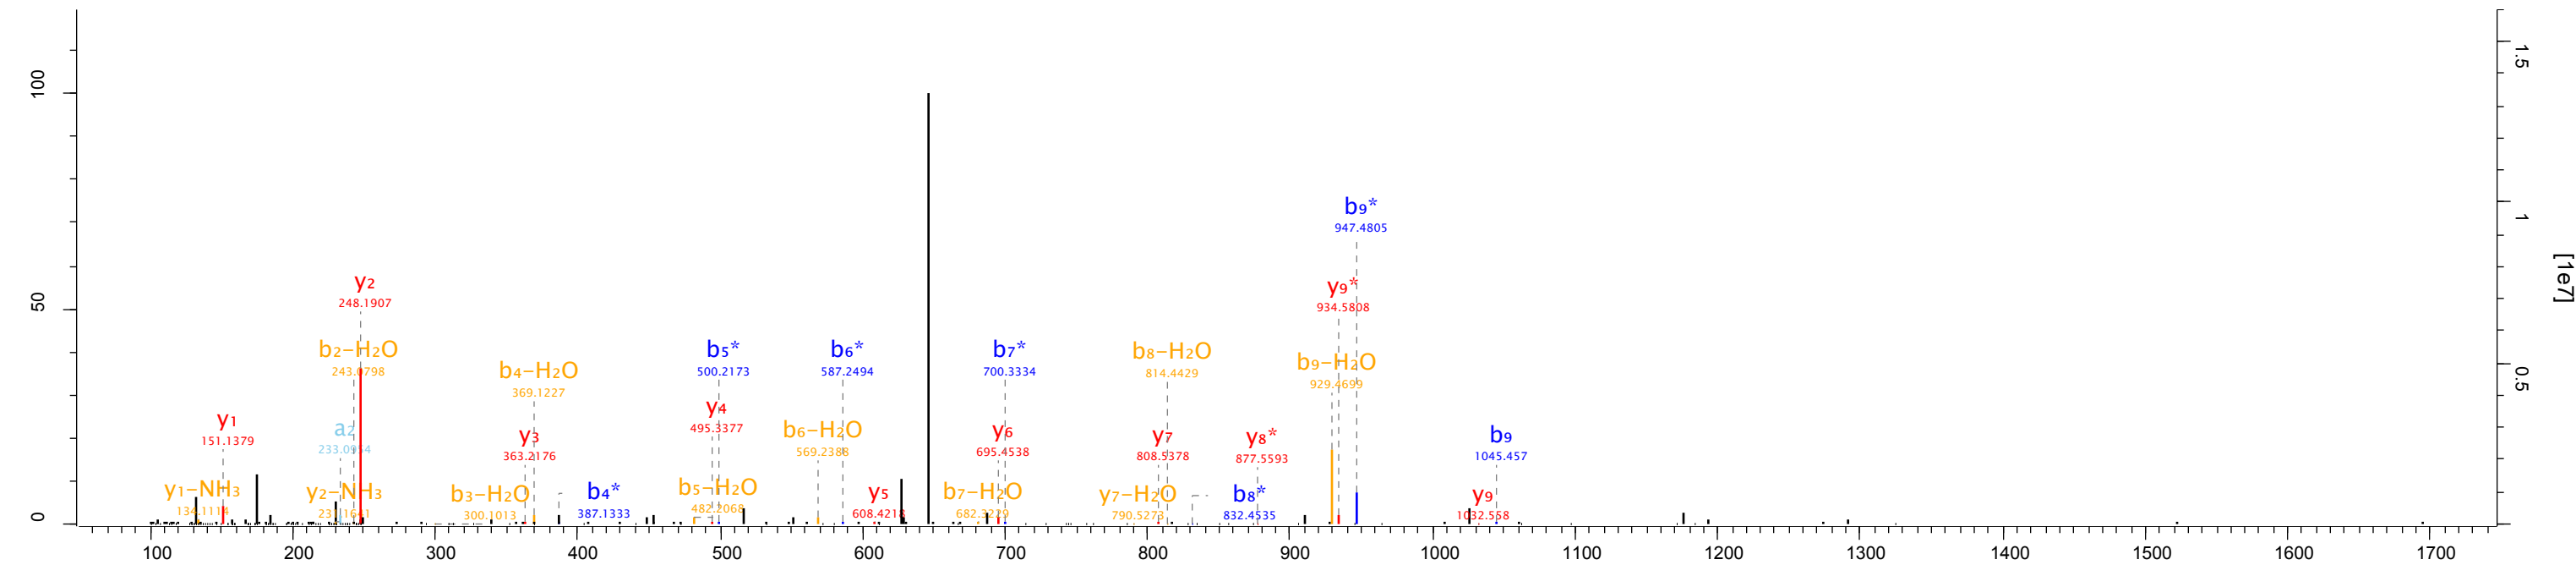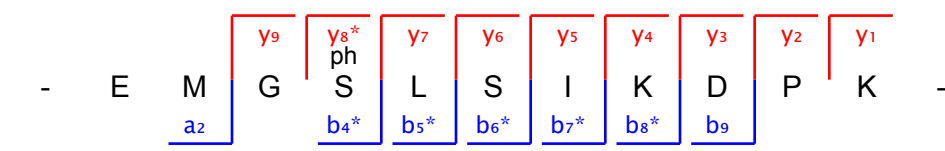



Raw file  
 20150814\_A375SR\_Phospho\_BR2\_05  
 Scan 11399 Method FTMS; HCD Score 93.34 m/z 745.36 Gene names PAK1IP1

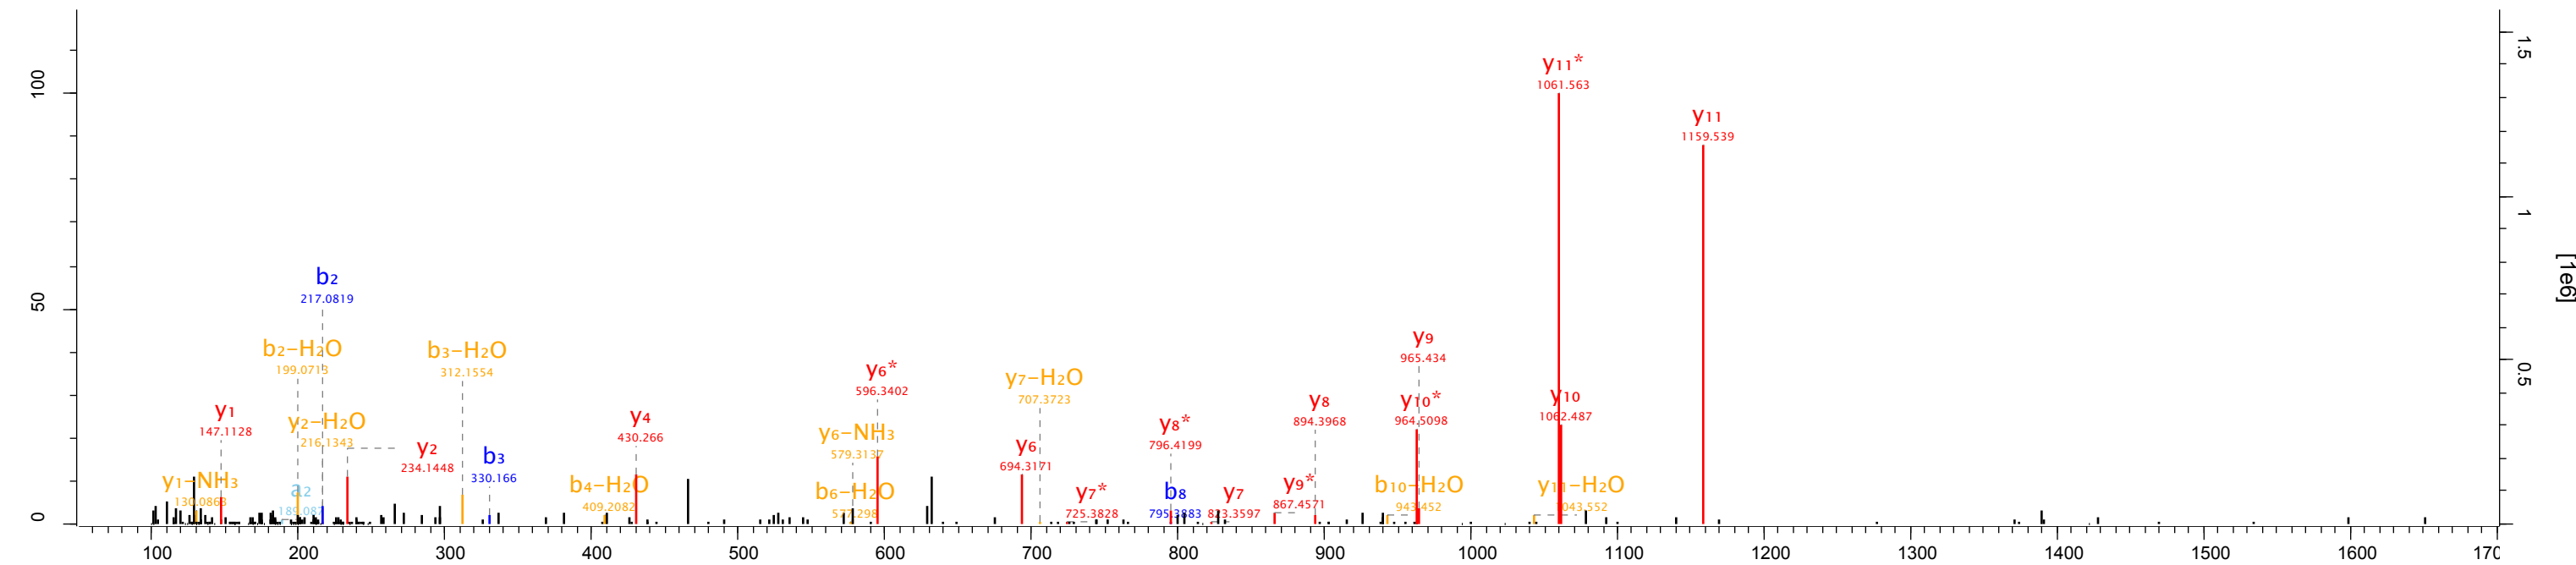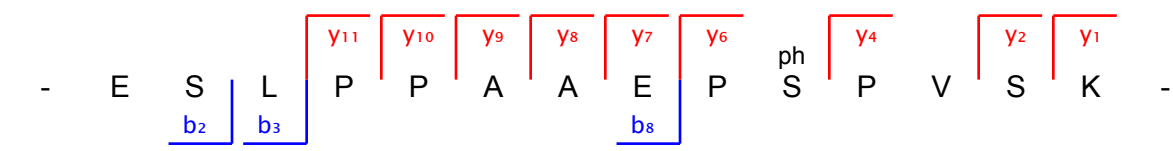

Raw file 20150814\_A375SR\_Phospho\_BR2\_05 Scan 11639 Method FTMS; HCD Score 114.39 m/z 657.95 Gene names TAF7

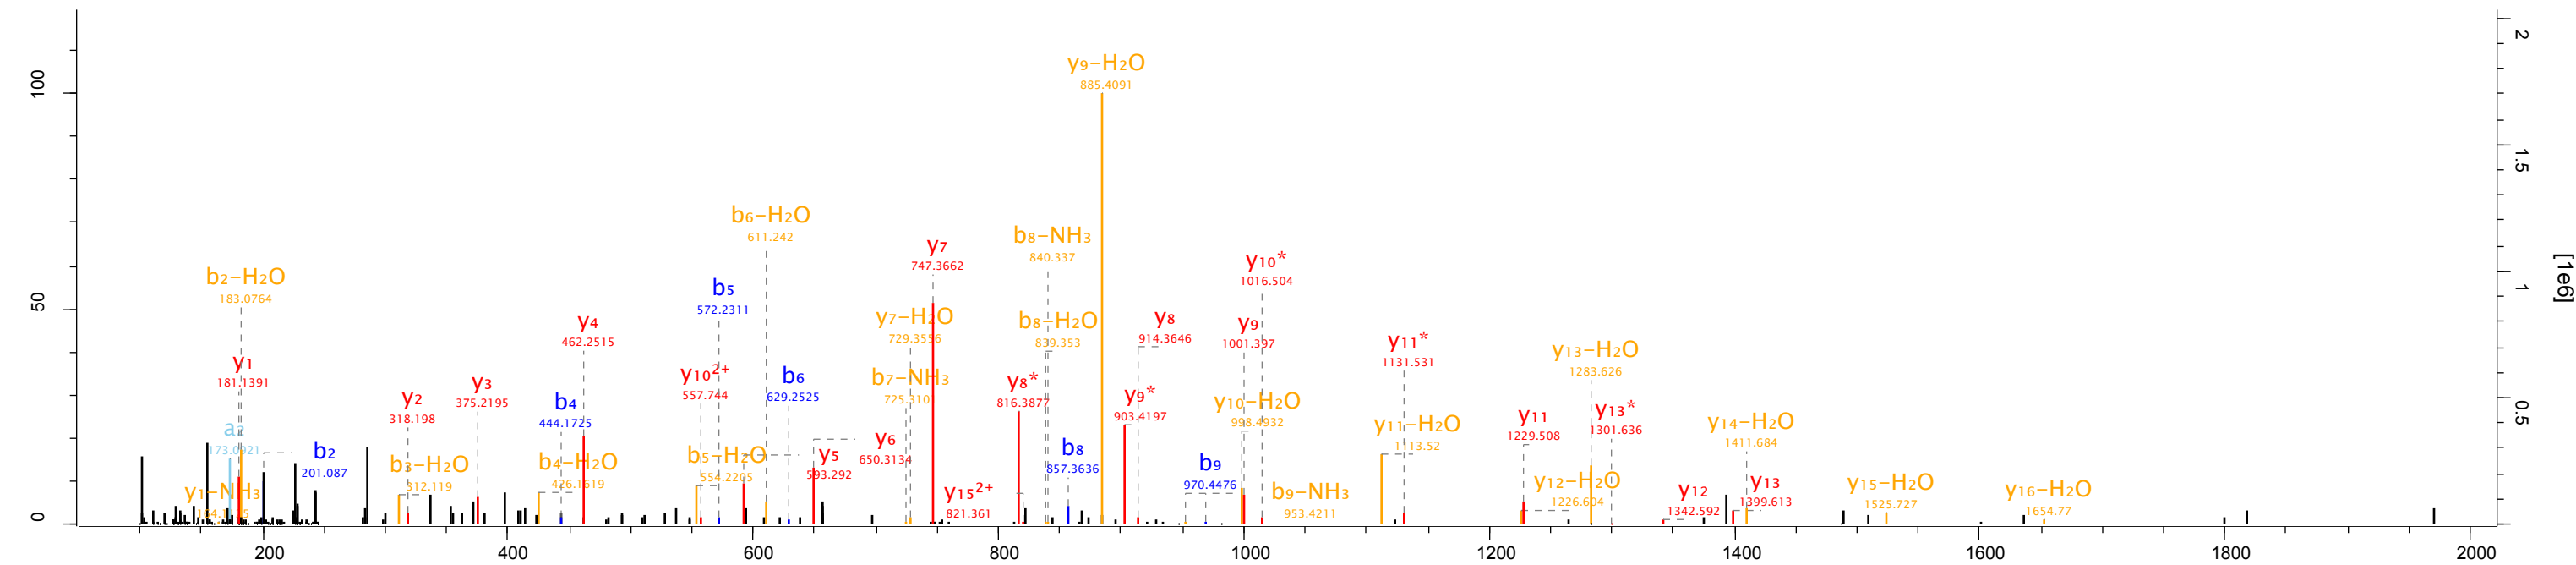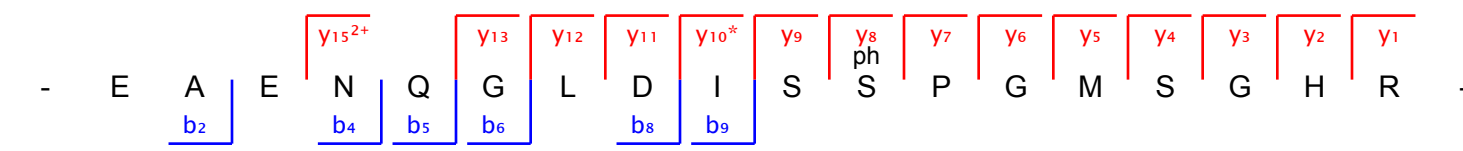

Raw file: 20150814\_A375SR\_Phospho\_BR2\_05  
 Scan: 1219 Method: FTMS; HCD Score: 143.28 m/z: 496.76 Gene names: SRRM1

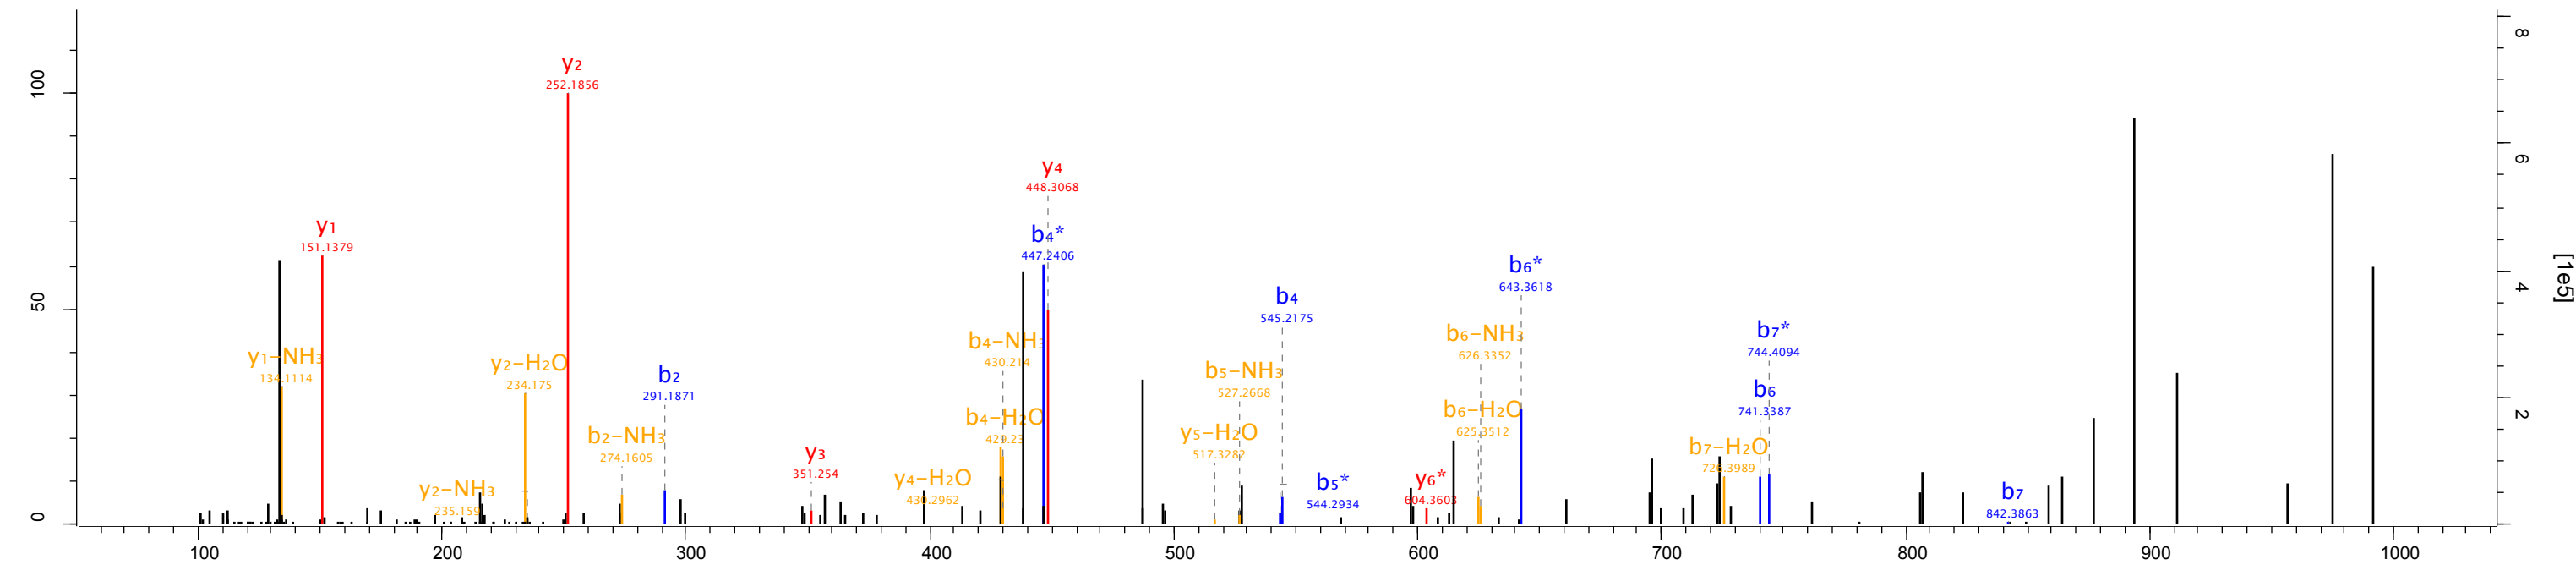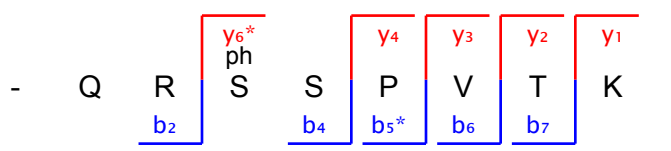

Raw file 20150814\_A375SR\_Phospho\_BR2\_05 Scan 12359 Method FTMS; HCD Score 118.52 m/z 665.31 Gene names NUP88

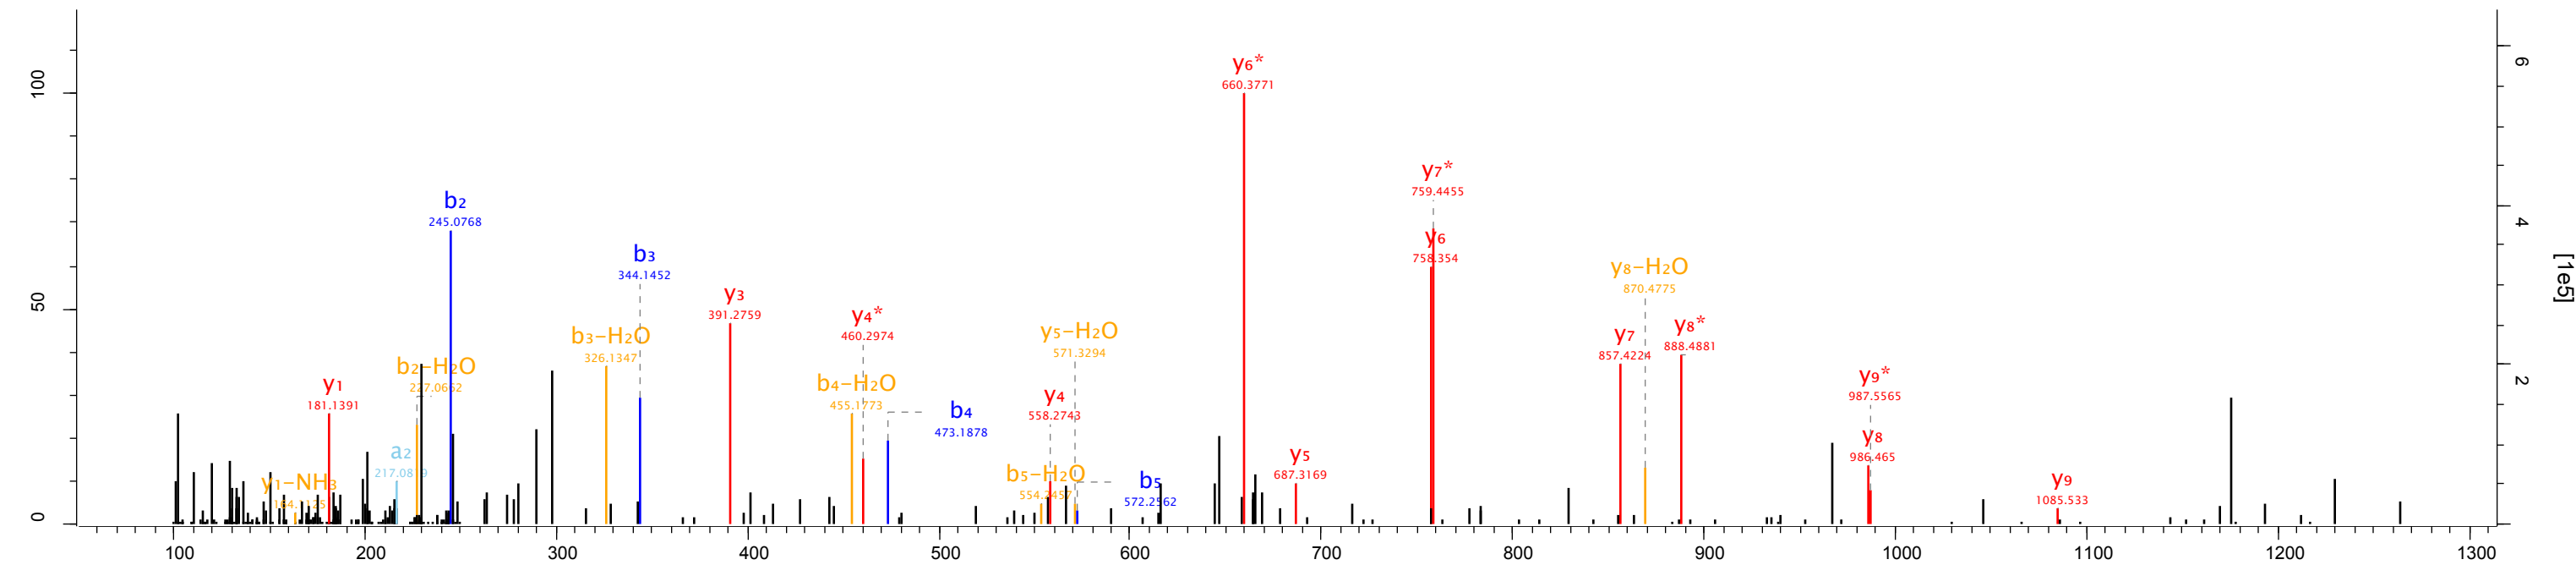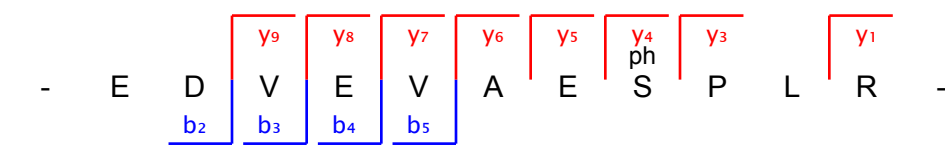

Raw file: 20150814\_A375SR\_Phospho\_BR2\_05  
 Scan: 12409 Method: FTMS; HCD Score: 224.8 m/z: 876.36 Gene names: DLG1

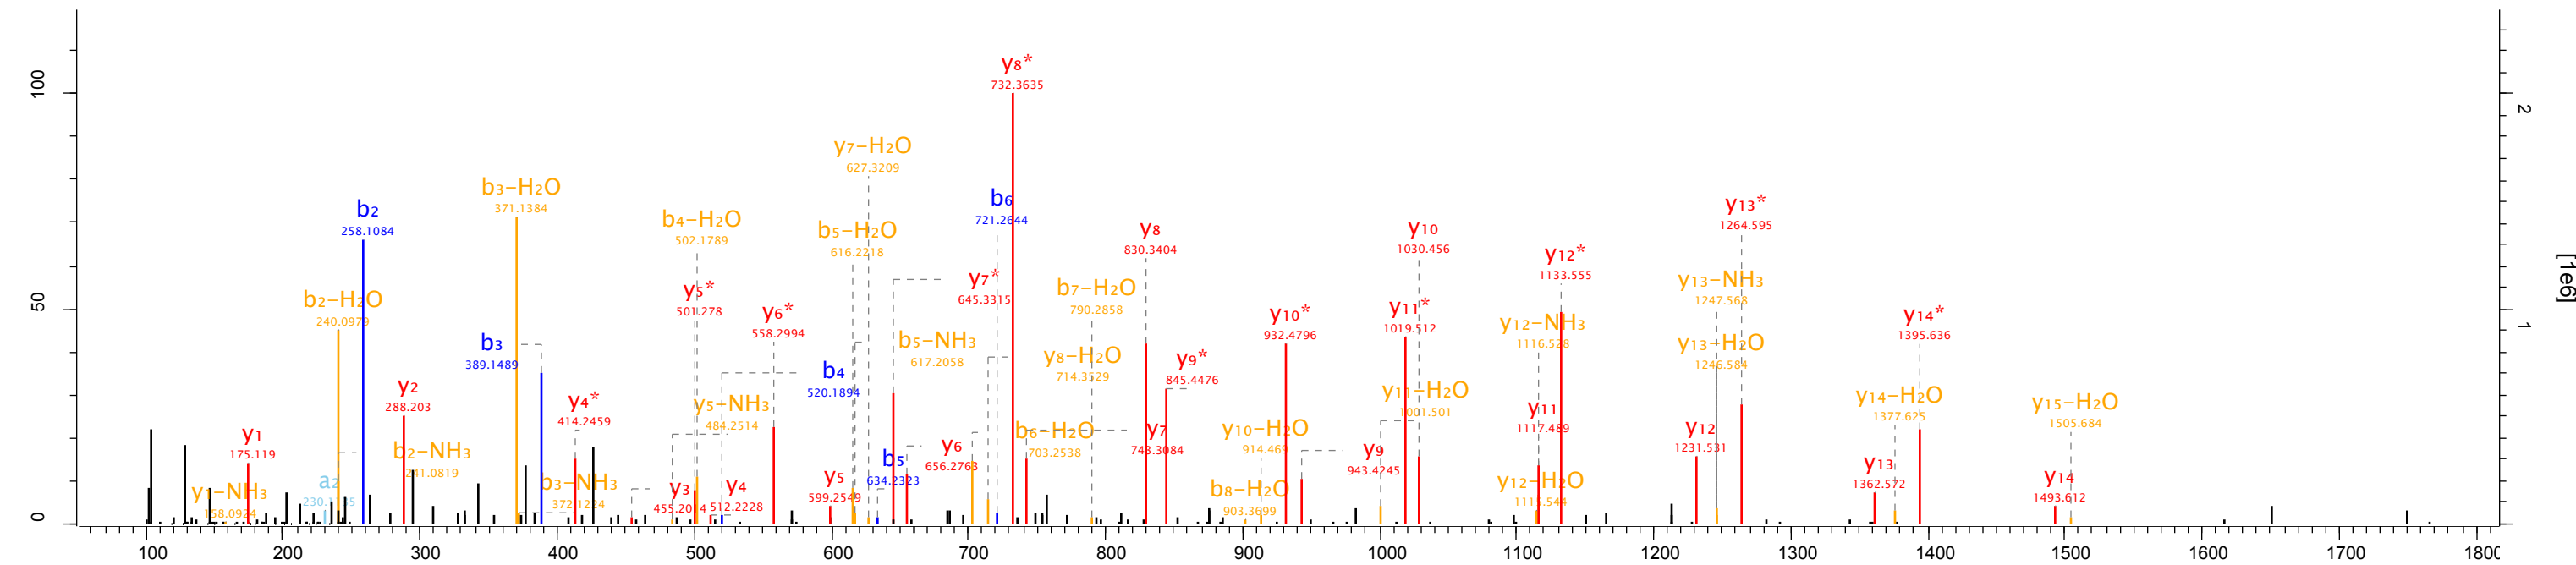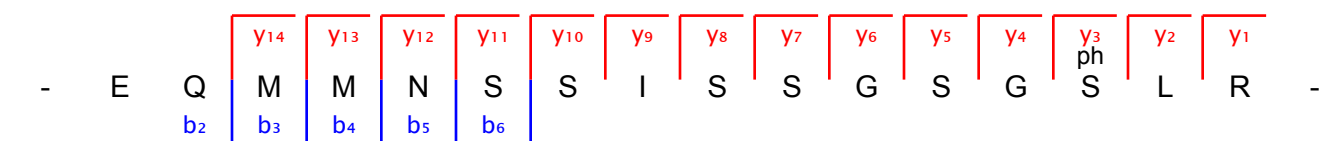

Raw file 20150814\_A375SR\_Phospho\_BR2\_05 Scan 12819 Method FTMS; HCD Score 185.46 m/z 895.39 Gene names ARAF

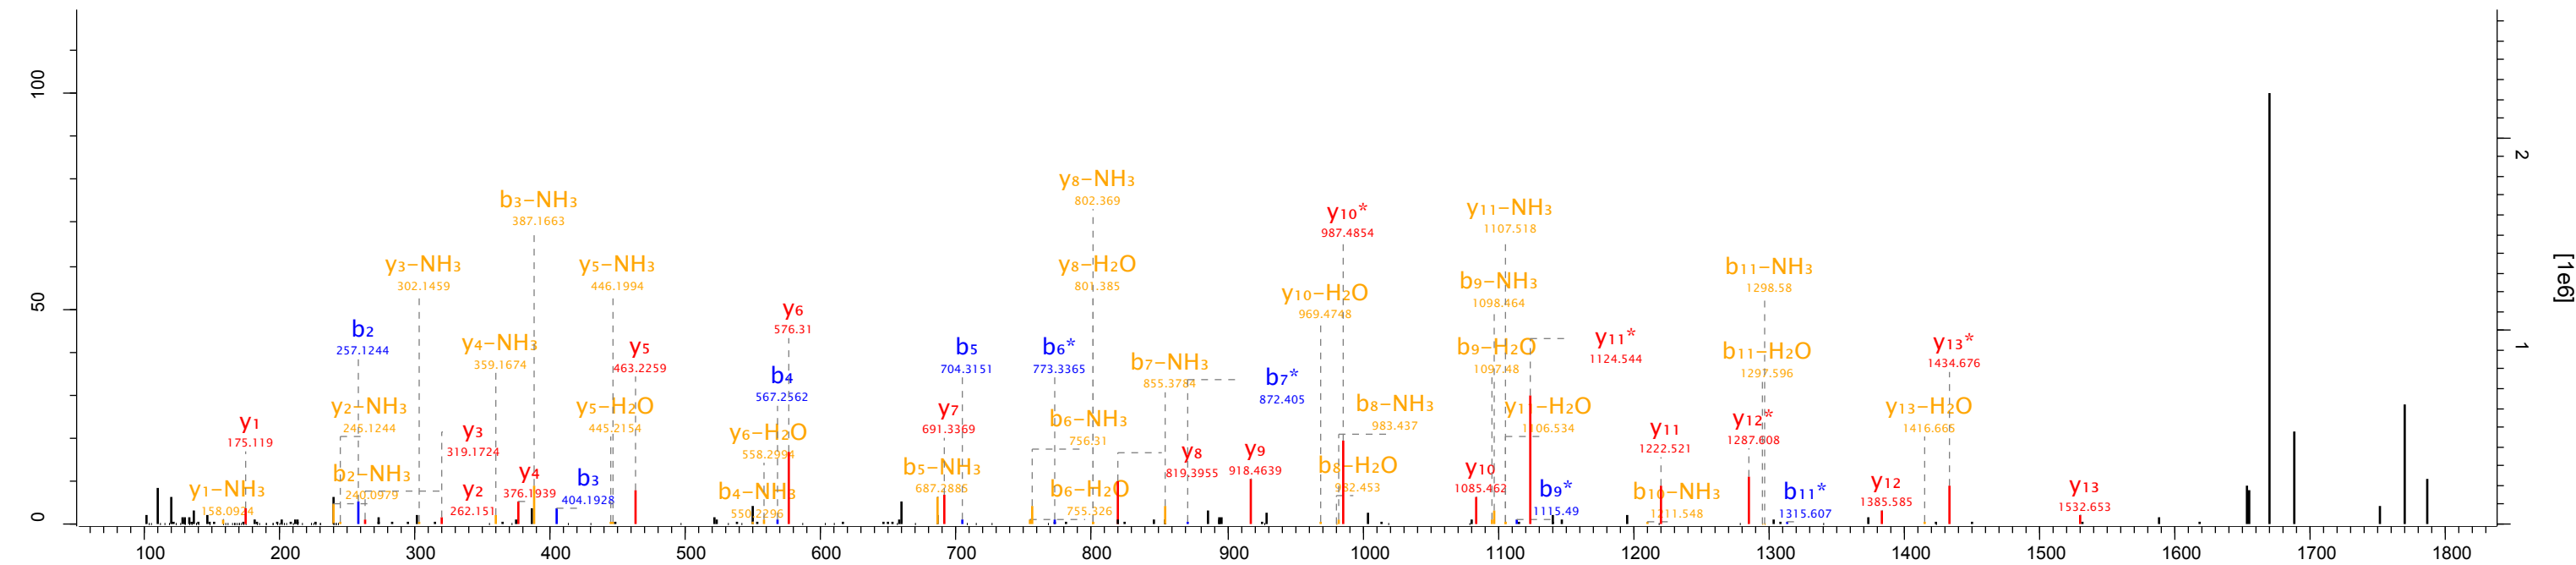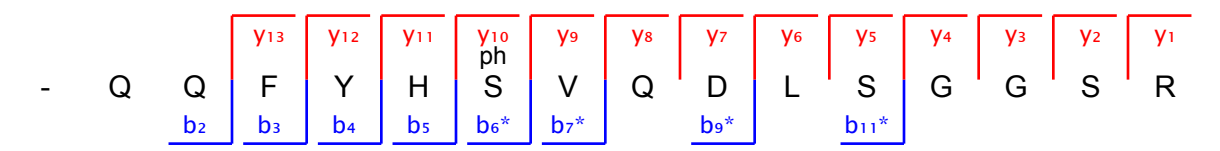

Raw file: 20150814\_A375SR\_Phospho\_BR2\_05  
 Scan: 13039 Method: FTMS; HCD Score: 59.66 m/z: 537.77 Gene names: ARHGAP19

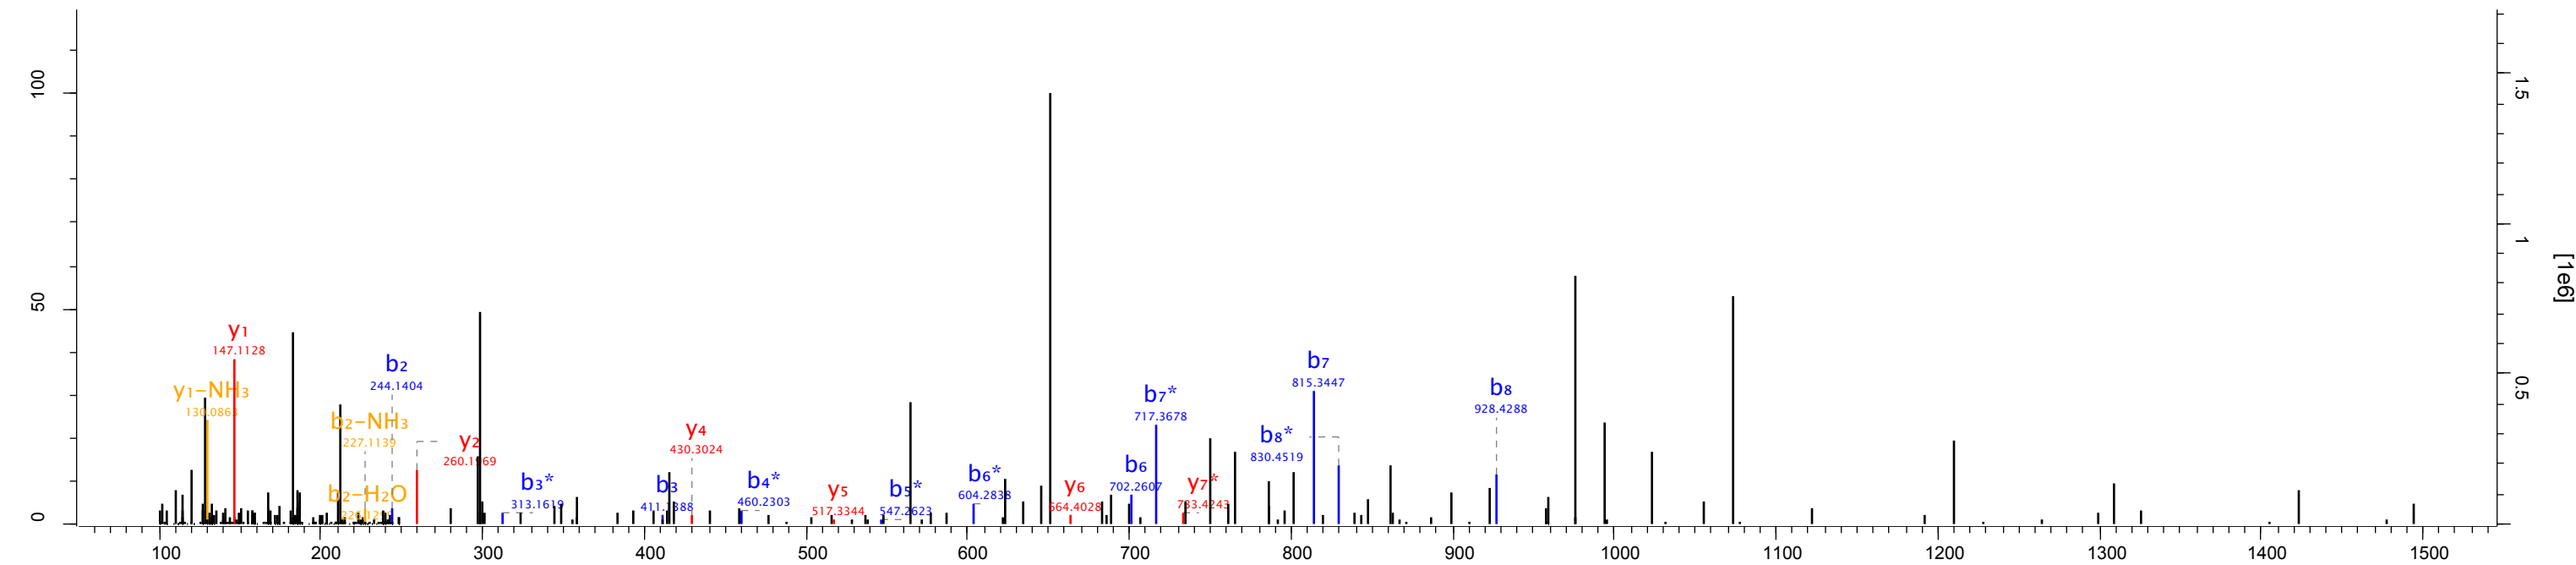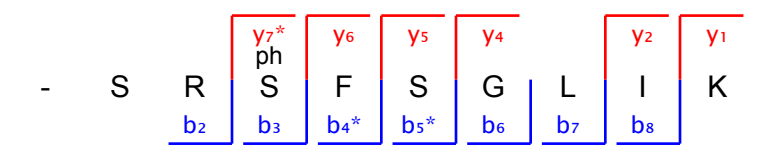

Raw file 20150814\_A375SR\_Phospho\_BR2\_05 Scan 13439 Method FTMS; HCD Score 119.48 m/z 703.86 Gene names OCIAD1

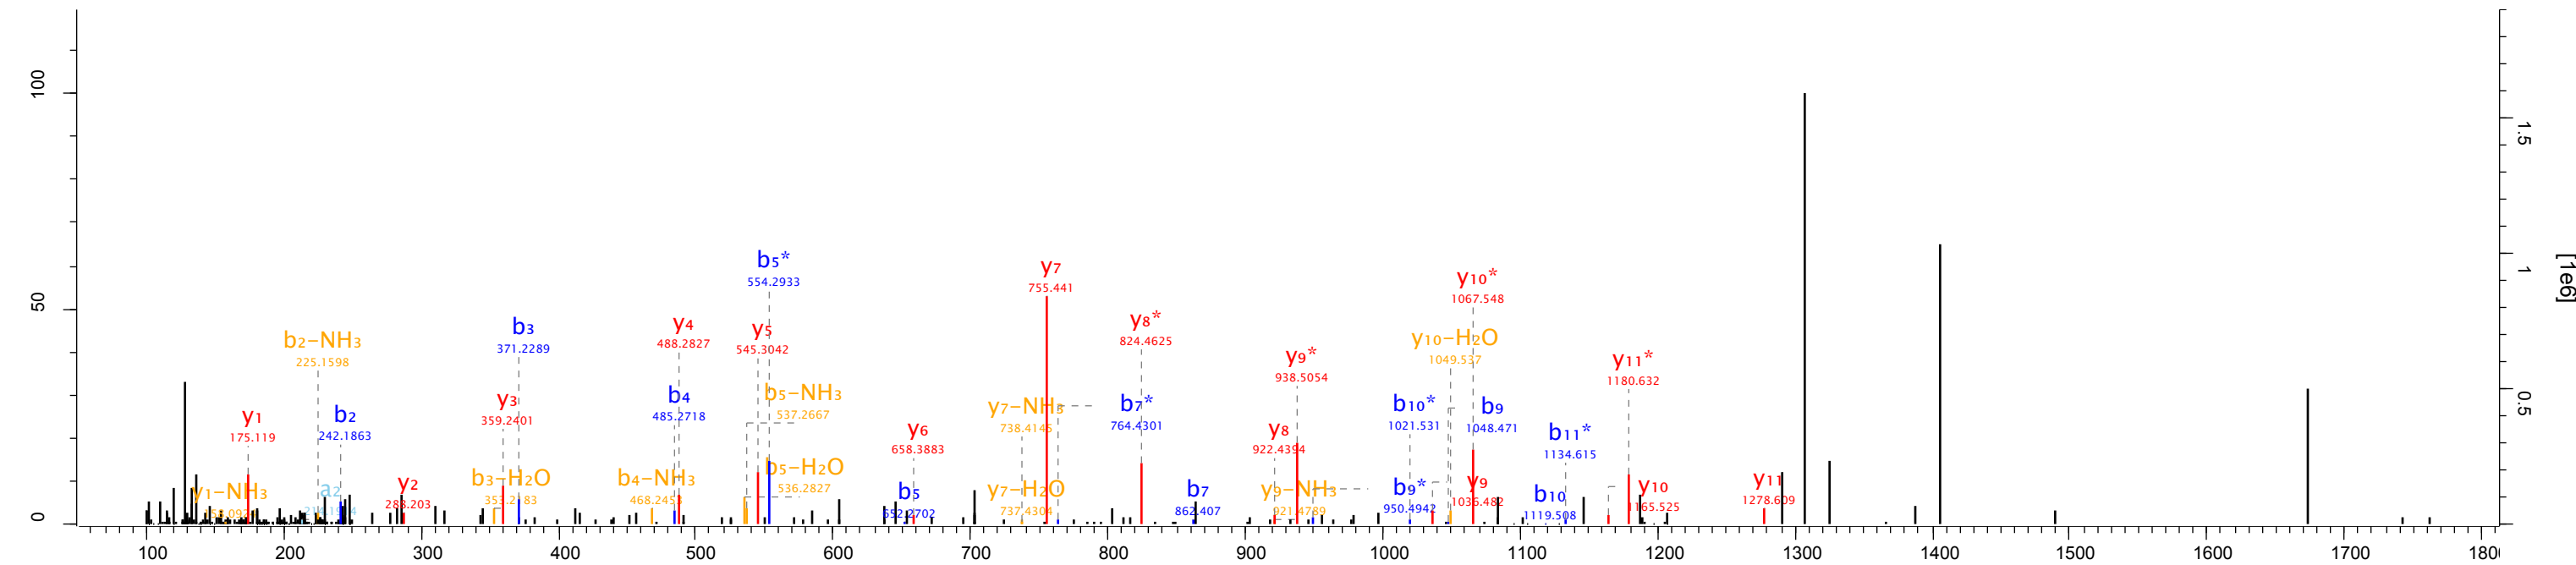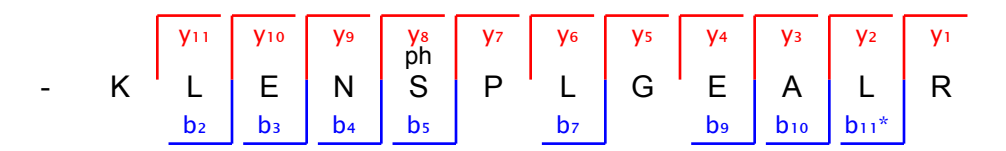



Raw file 20150814\_A375SR\_Phospho\_BR2\_05 Scan 13769 Method FTMS; HCD Score 294.21 m/z 1091.5 Gene names NSUN2

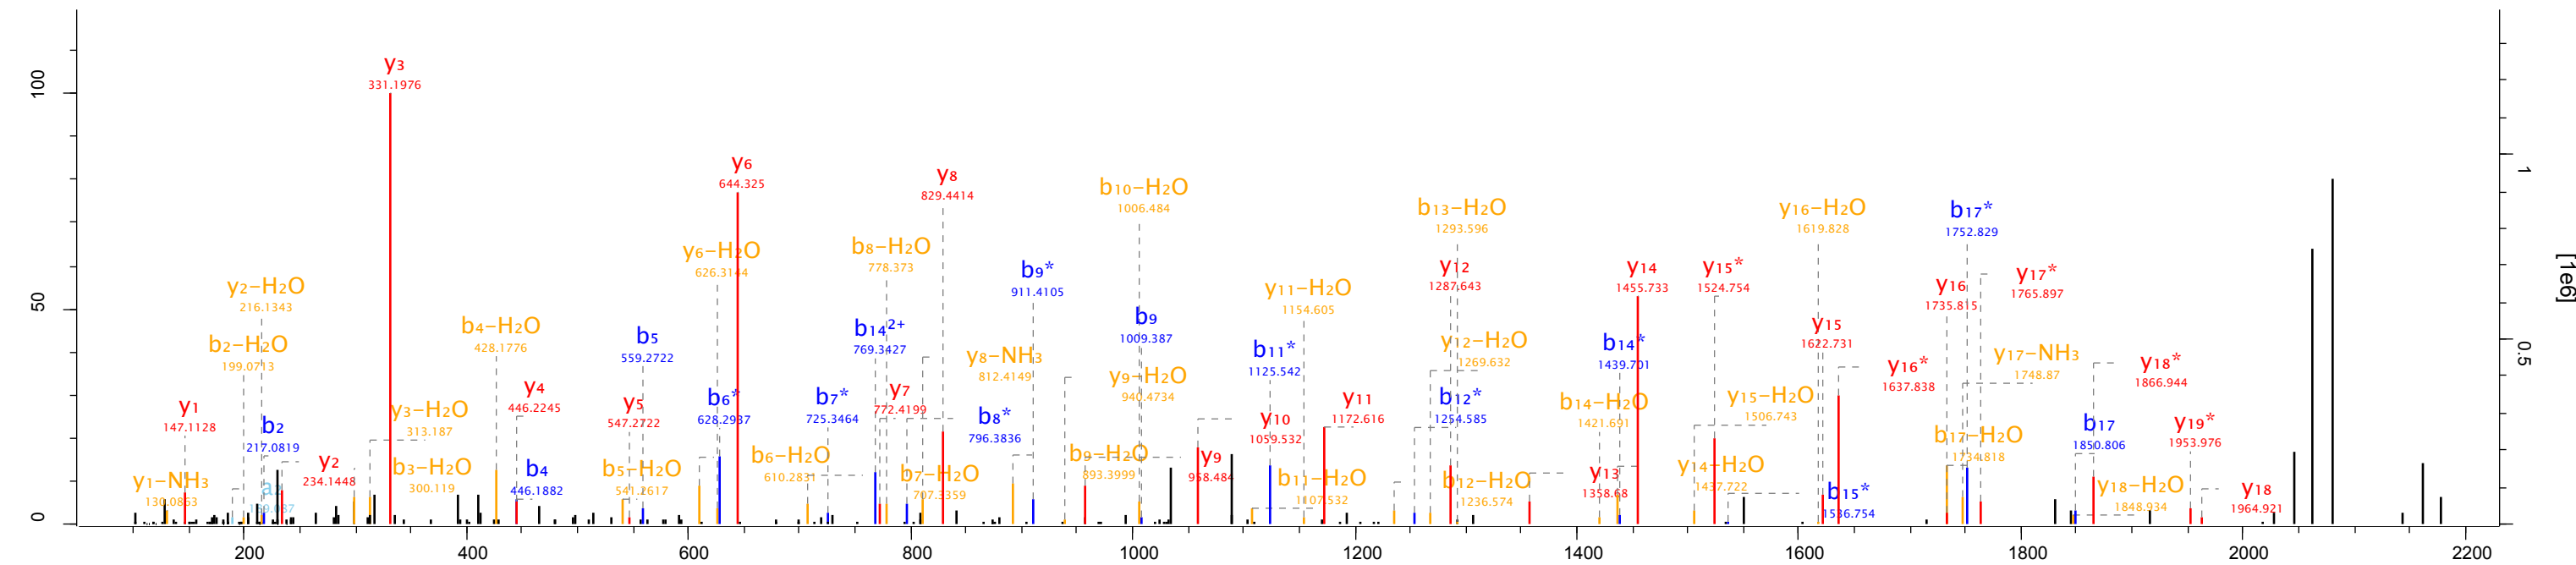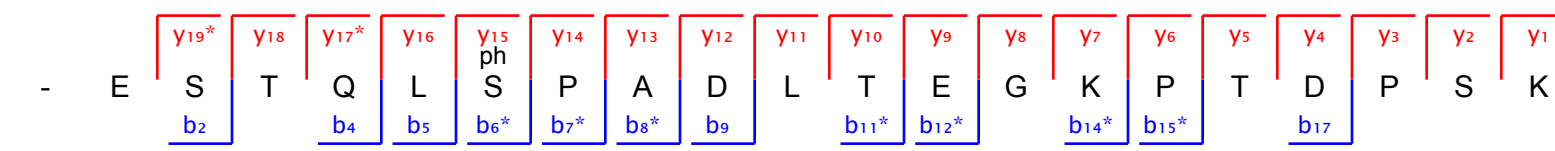

Raw file 20150814\_A375SR\_Phospho\_BR2\_05 Scan 14359 Method FTMS; HCD Score 66.88 m/z 951.14 Gene names NOL12

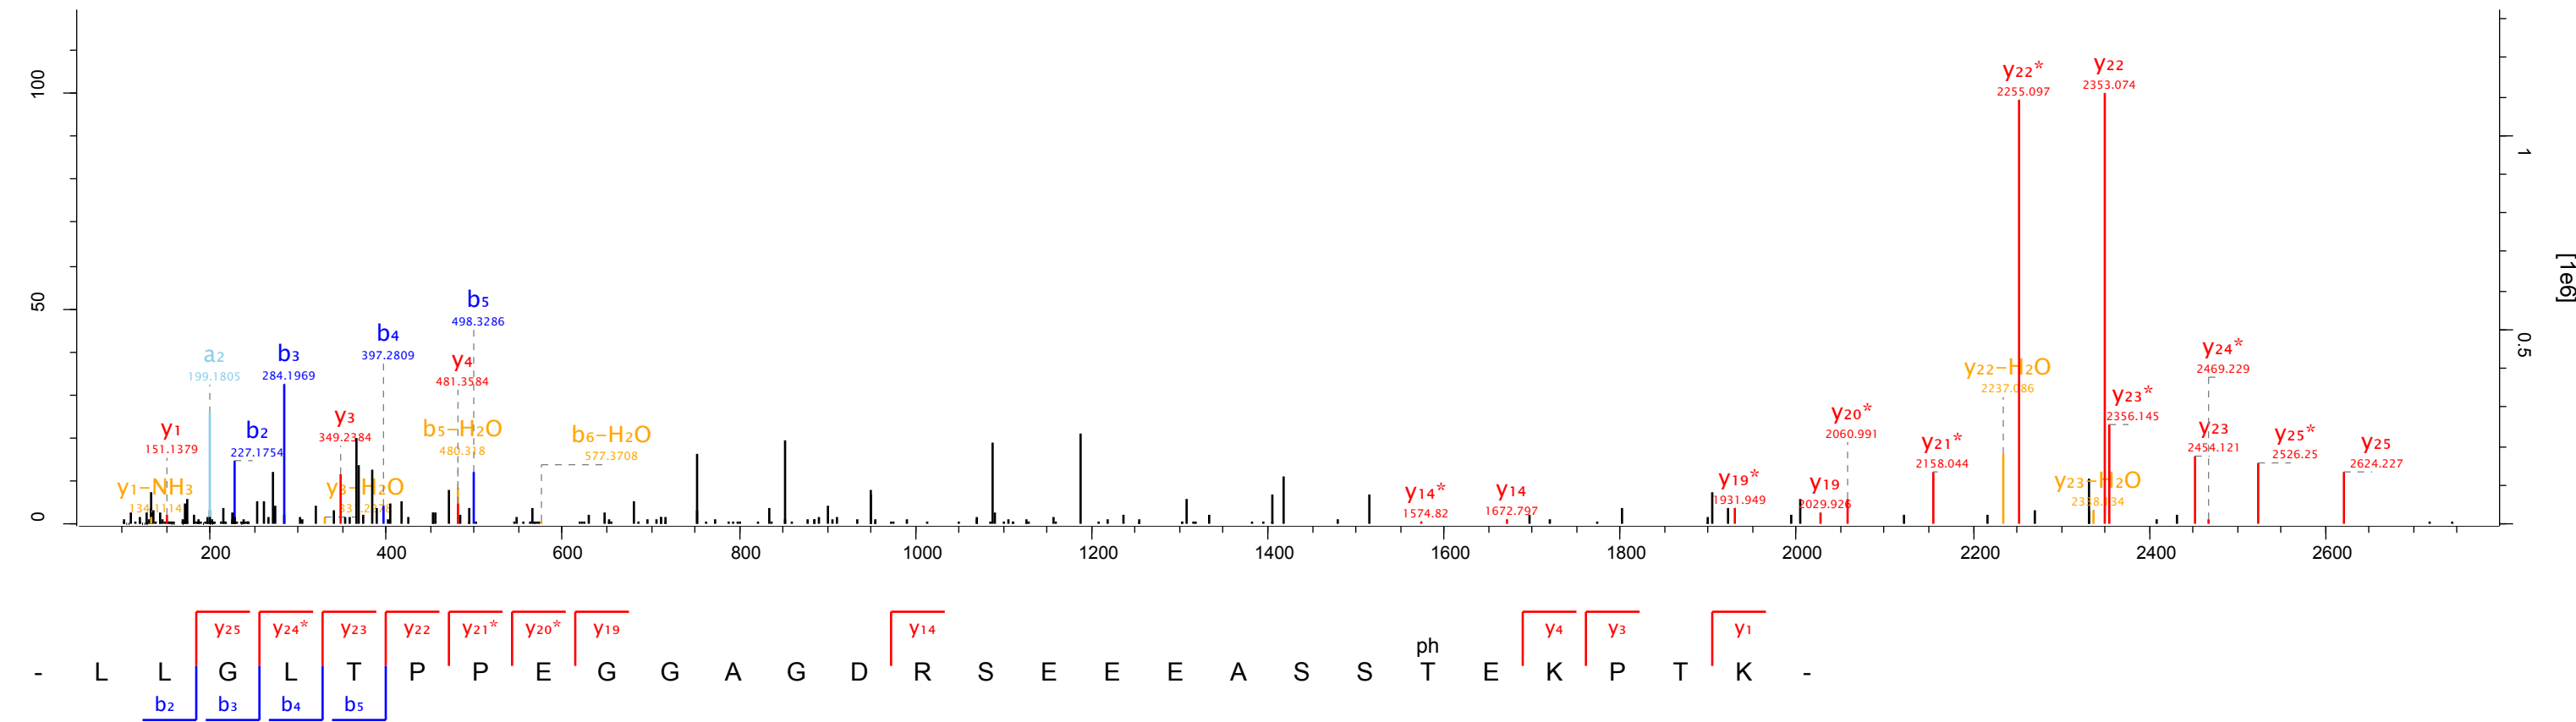

Raw file: 20150814\_A375SR\_Phospho\_BR2\_05  
 Scan: 14899 Method: FTMS; HCD Score: 120.63 m/z: 737.83 Gene names: PARP4

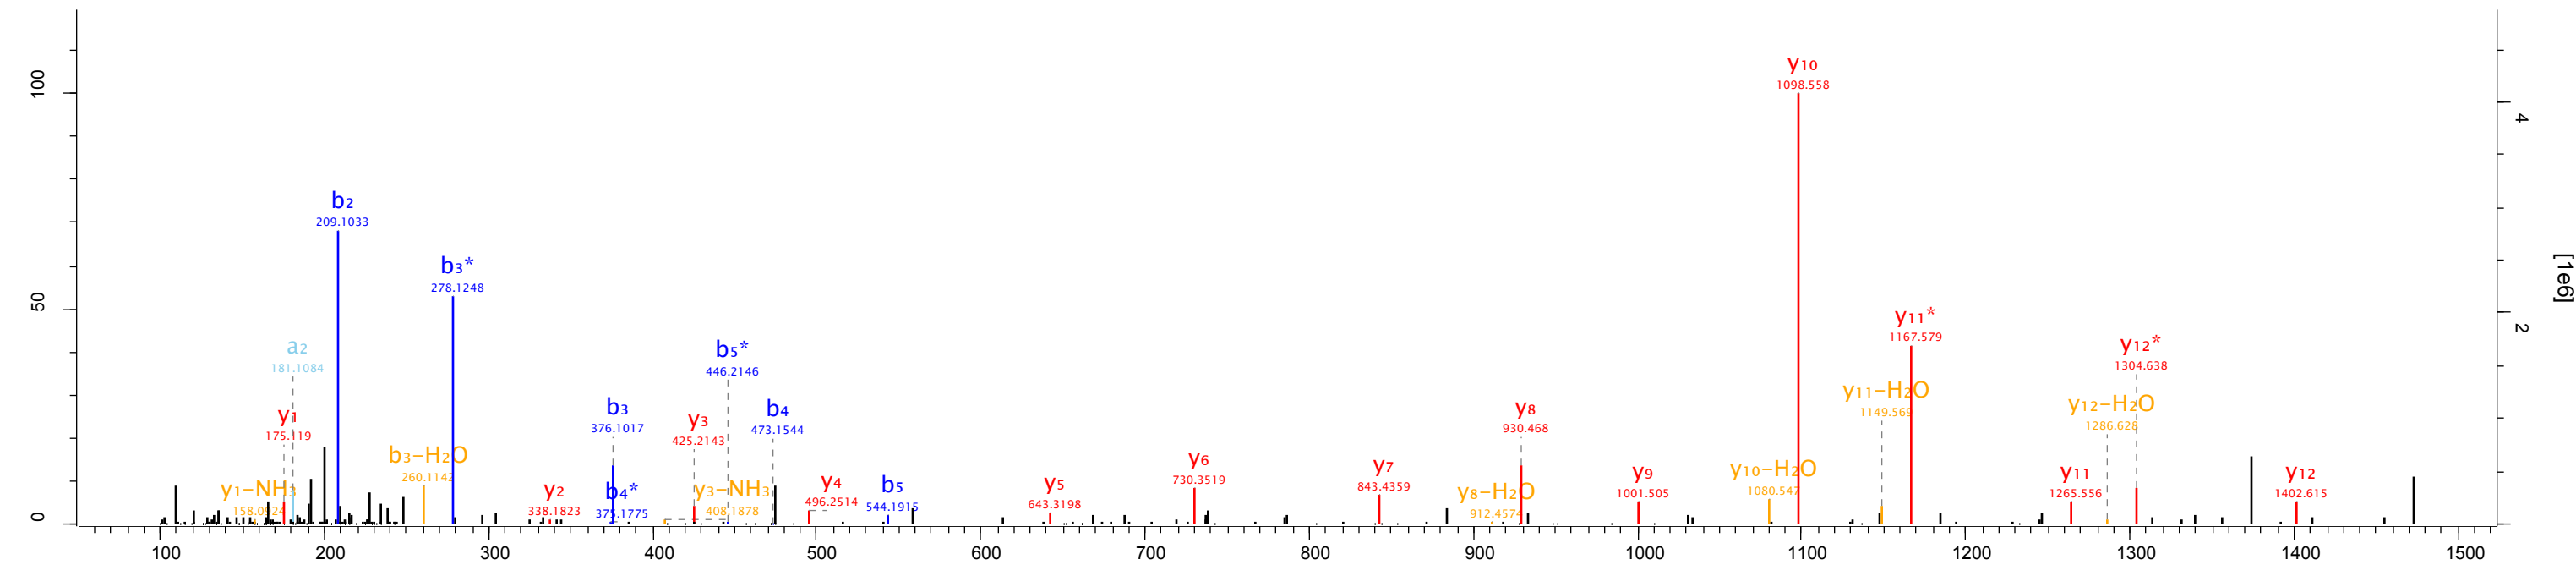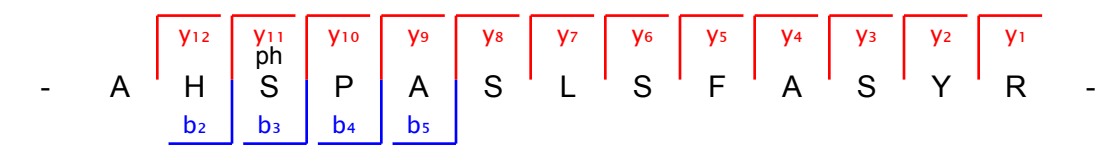

Raw file 20150814\_A375SR\_Phospho\_BR2\_05 Scan 14929 Method FTMS; HCD Score 140.96 m/z 737.37 Gene names MKI67

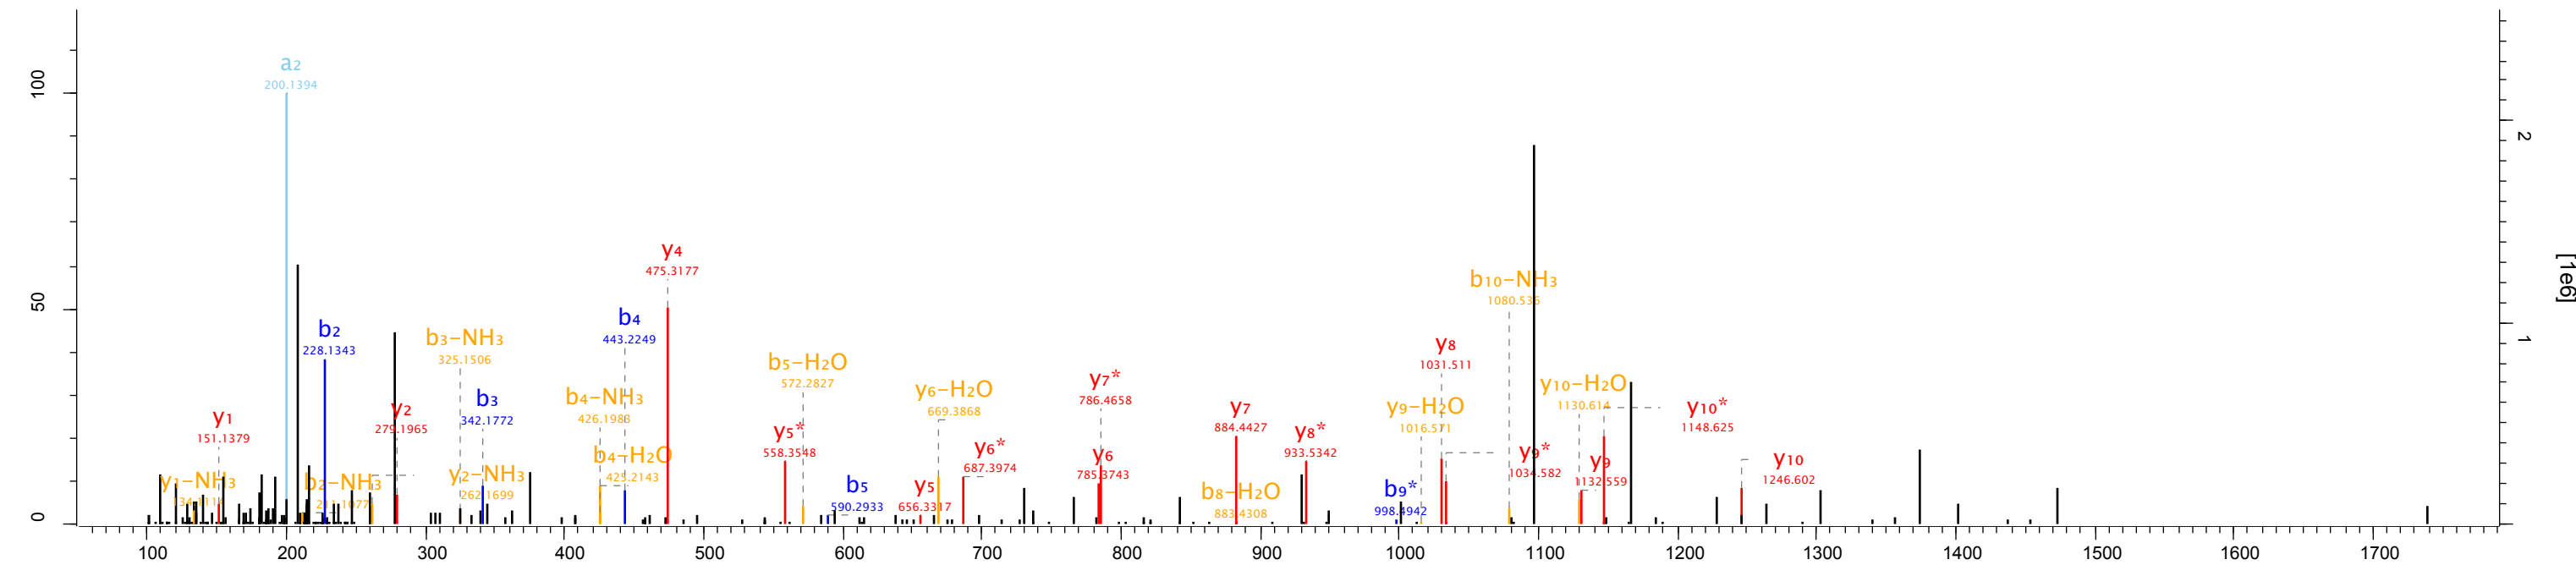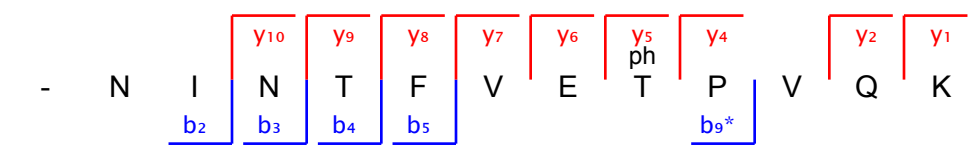

Raw file 20150814\_A375SR\_Phospho\_BR2\_05 Scan 15009 Method FTMS; HCD Score 208.83 m/z 700.33 Gene names SH2D4A

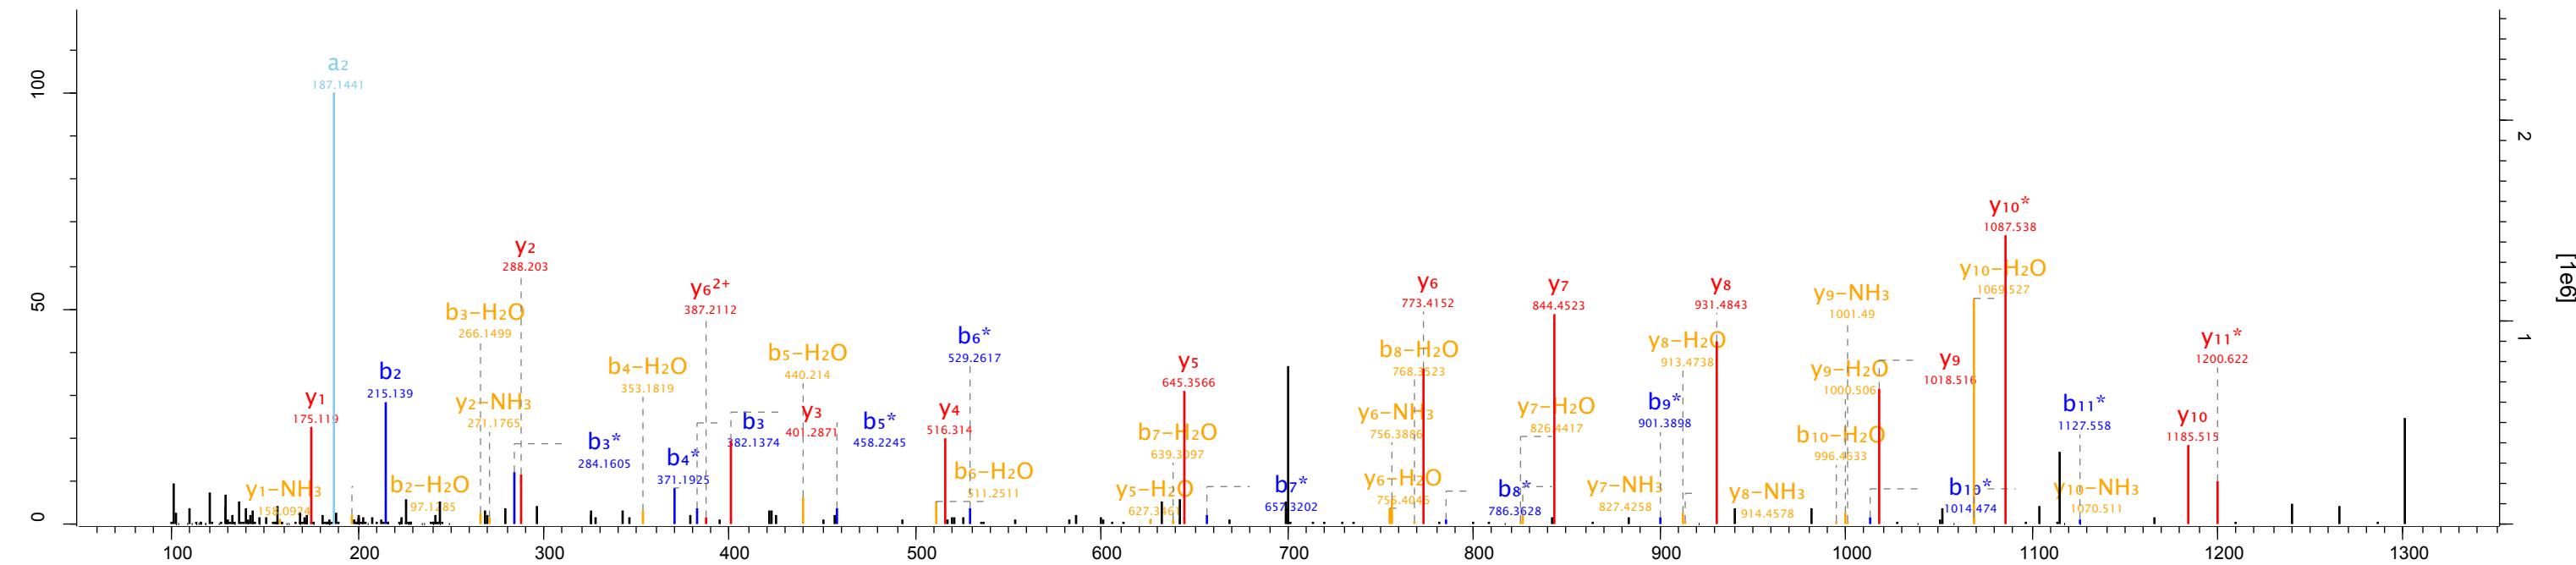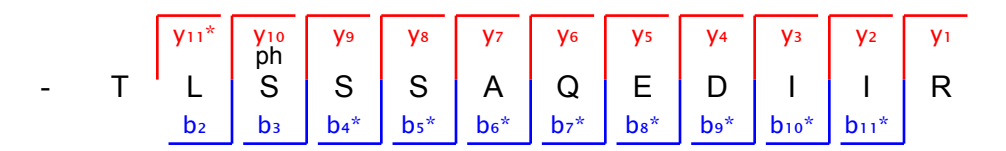

Raw file  
 20150814\_A375SR\_Phospho\_BR2\_05  
 Scan 16059 Method FTMS; HCD Score 67.87 m/z 728.36 Gene names ELF4

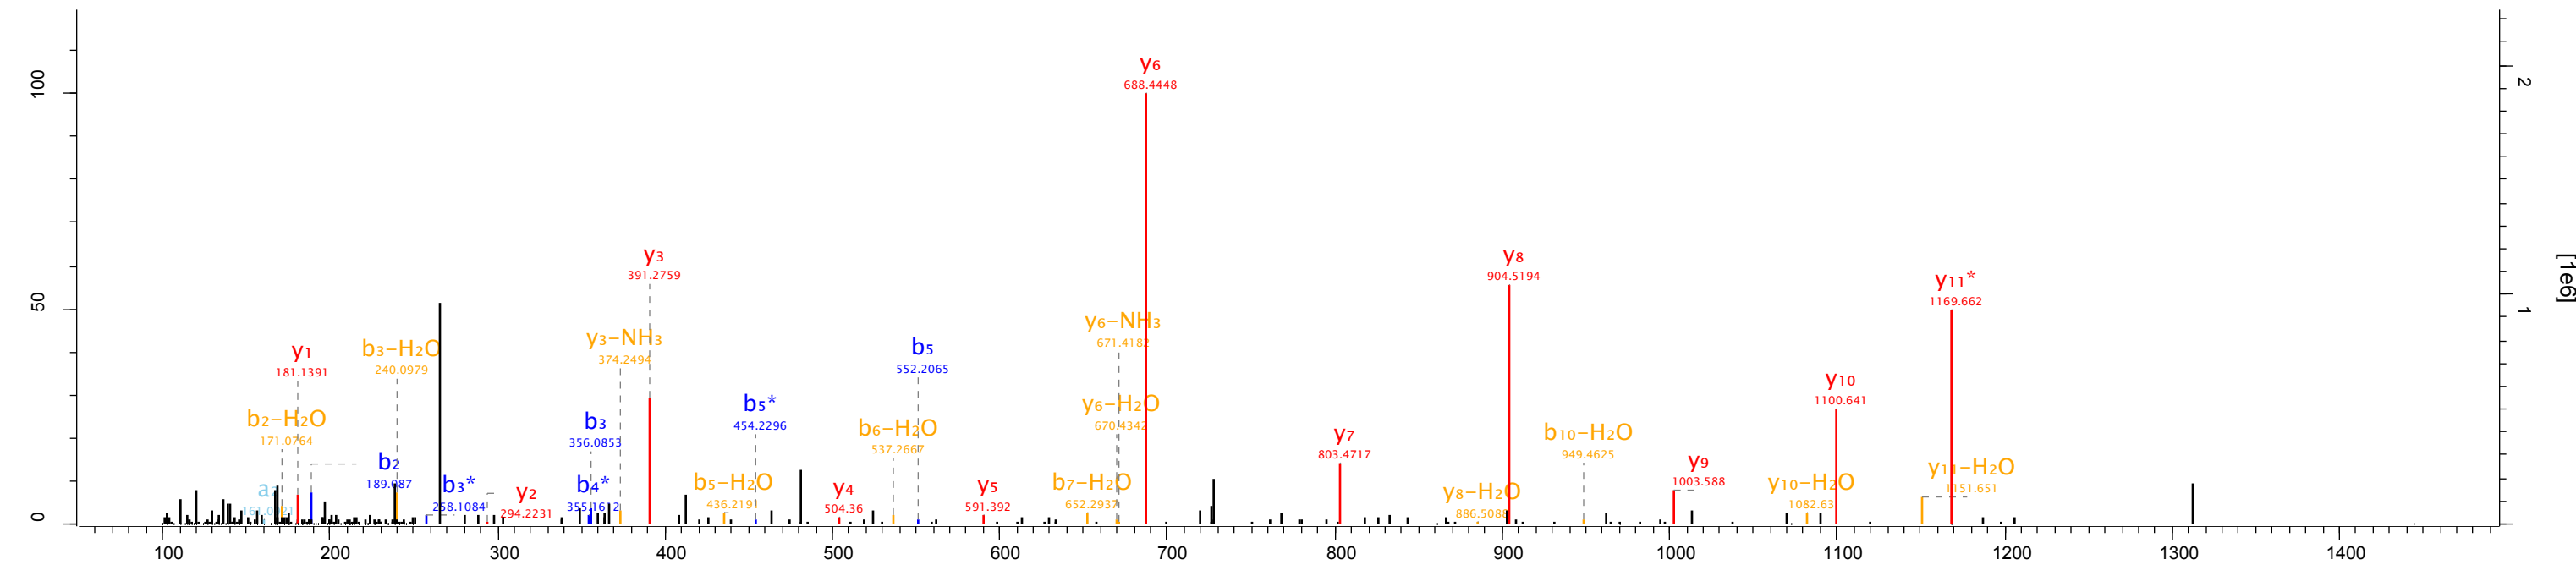

- S T S P V T D P S I P I R -

Fragmentation mapping (b and y ions):

- b2: T
- b3: S
- b4\*: P
- b5: V
- y1: R
- y2: I
- y3: P
- y4: I
- y5: S
- y6: P
- y7: D
- y8: T
- y9: V
- y10: P
- y11\*: S

Raw file 20150814\_A375SR\_Phospho\_BR2\_05 Scan 16219 Method FTMS; HCD Score 159.18 m/z 746.79 Gene names FAM53B

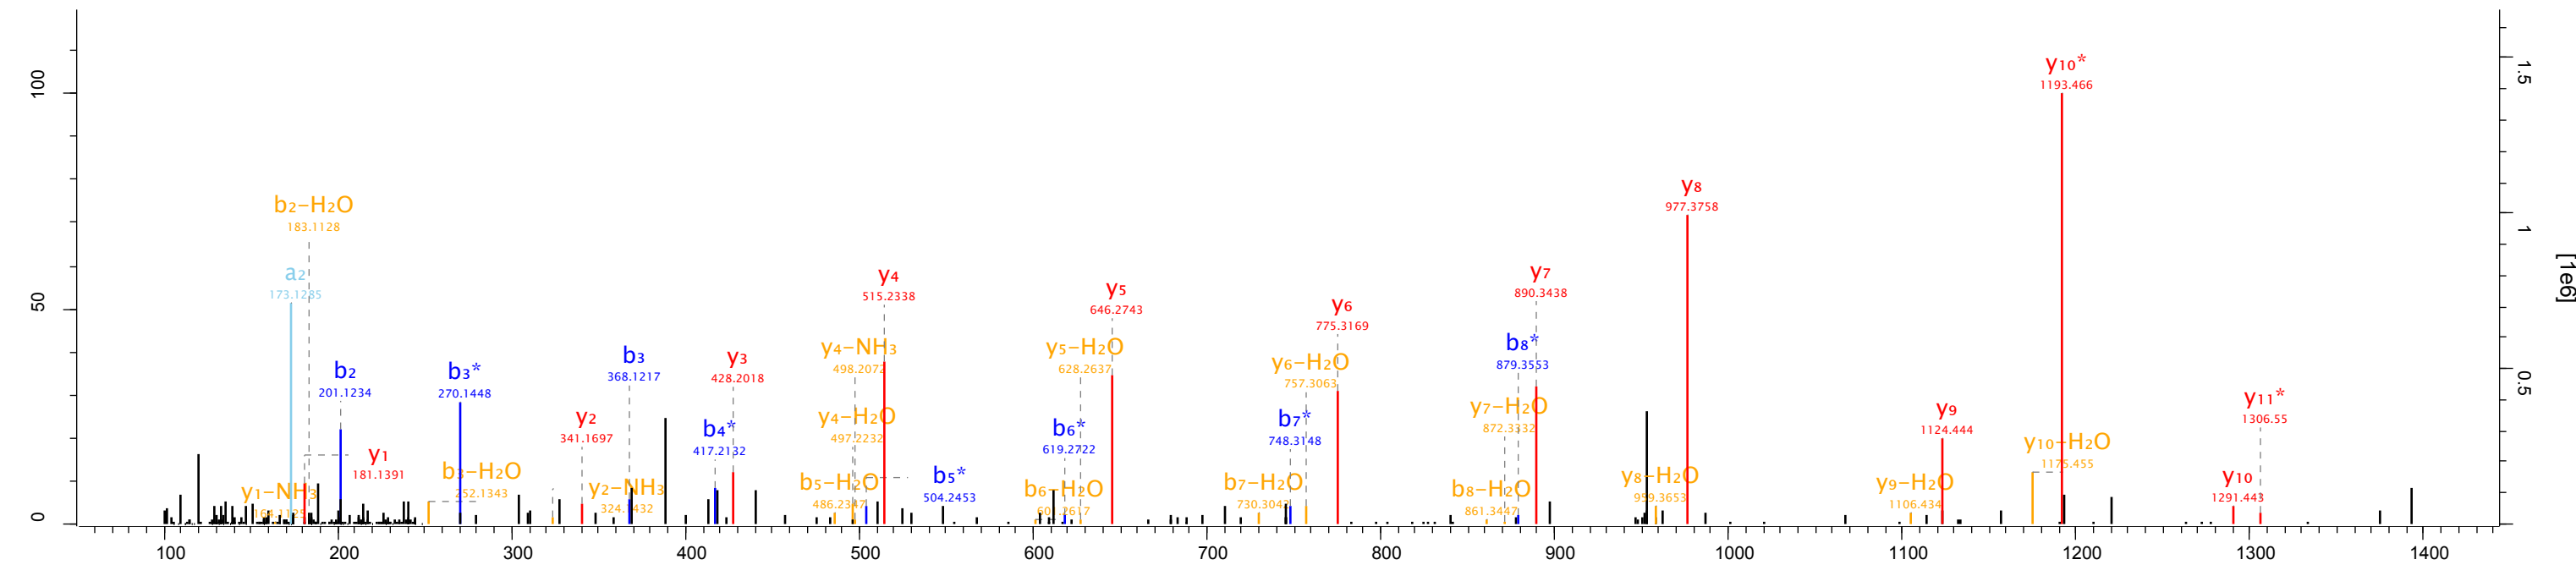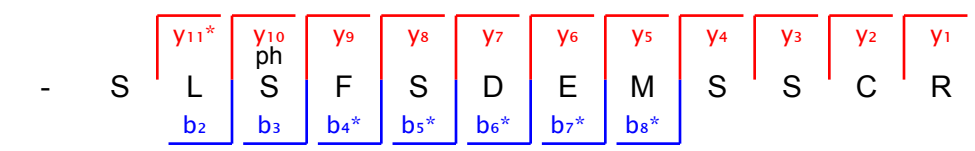

Raw file: 20150814\_A375SR\_Phospho\_BR2\_05  
 Scan: 16419 Method: FTMS; HCD Score: 89.83 m/z: 503.71 Gene names: MLF1

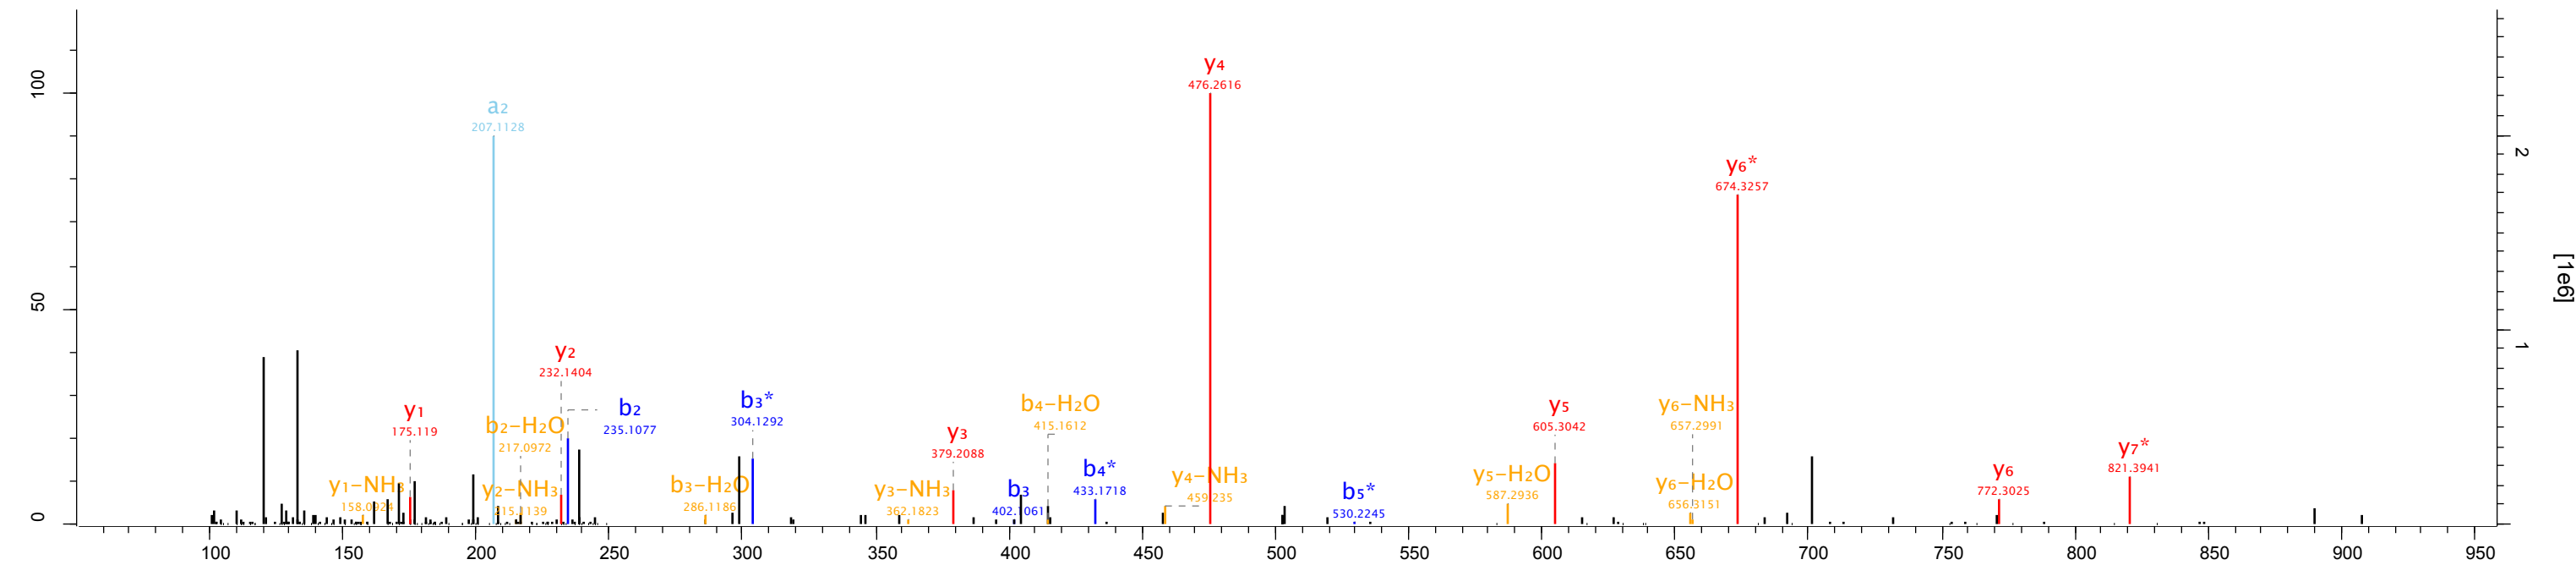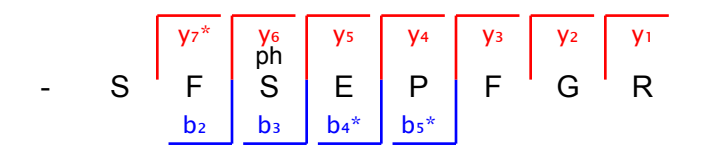



Raw file: 20150814\_A375SR\_Phospho\_BR2\_05  
 Scan: 17319 Method: FTMS; HCD Score: 40.09 m/z: 671.34 Gene names: KIF13B

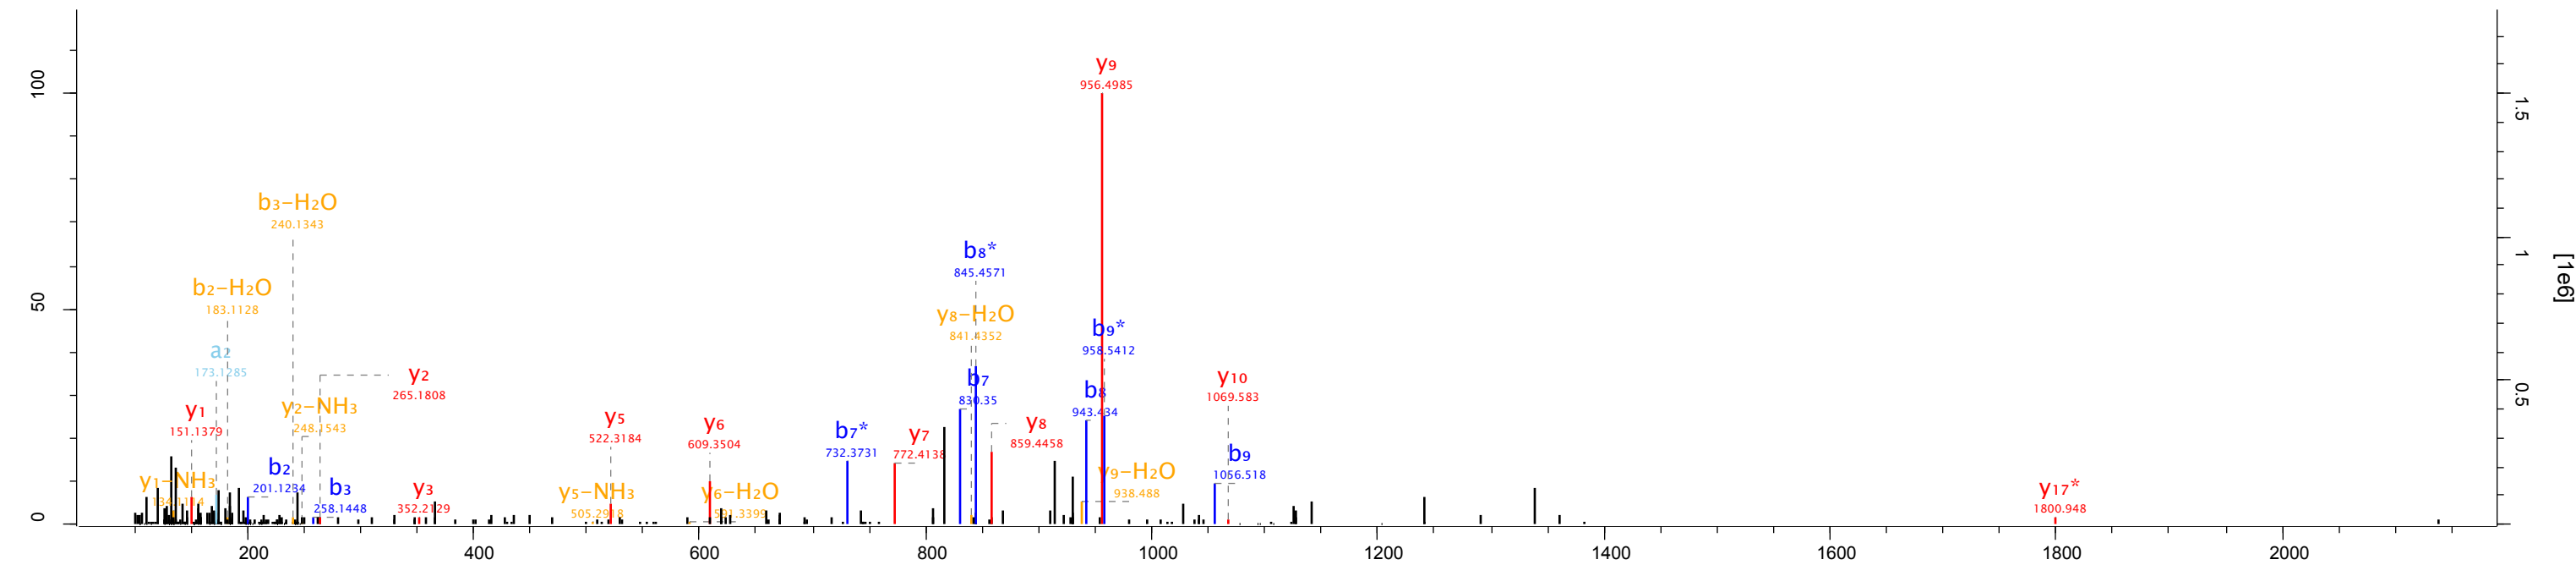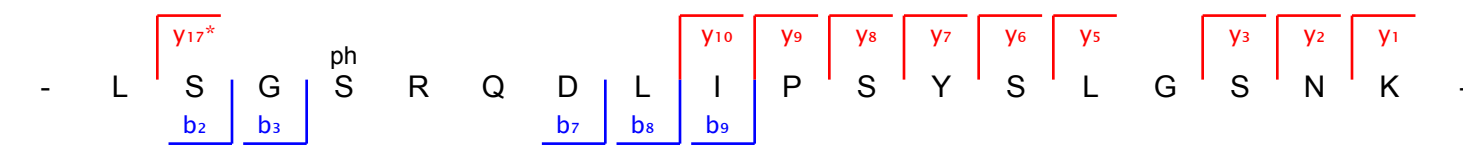

Raw file 20150814\_A375SR\_Phospho\_BR2\_05 Scan 17369 Method FTMS; HCD Score 337.17 m/z 763.39 Gene names RAD18

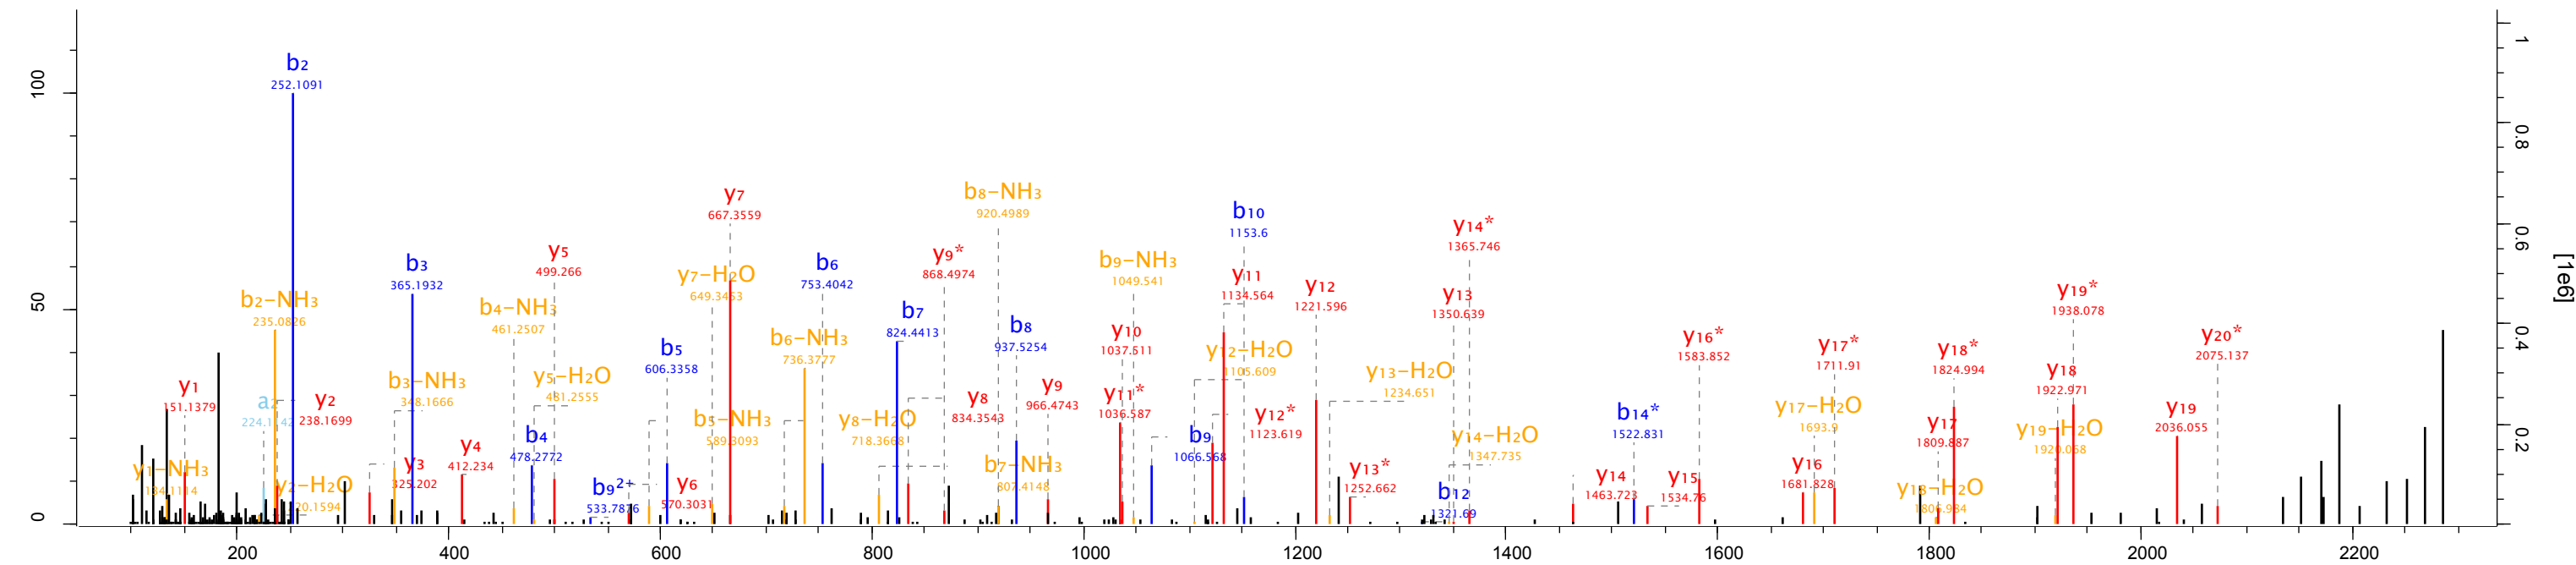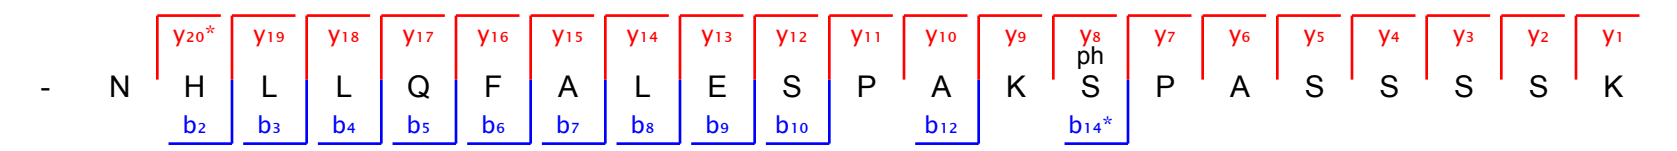

Raw file: 20150814\_A375SR\_Phospho\_BR2\_05  
 Scan: 19299 Method: FTMS; HCD Score: 267.26 m/z: 965.45 Gene names: RAB11FIP1

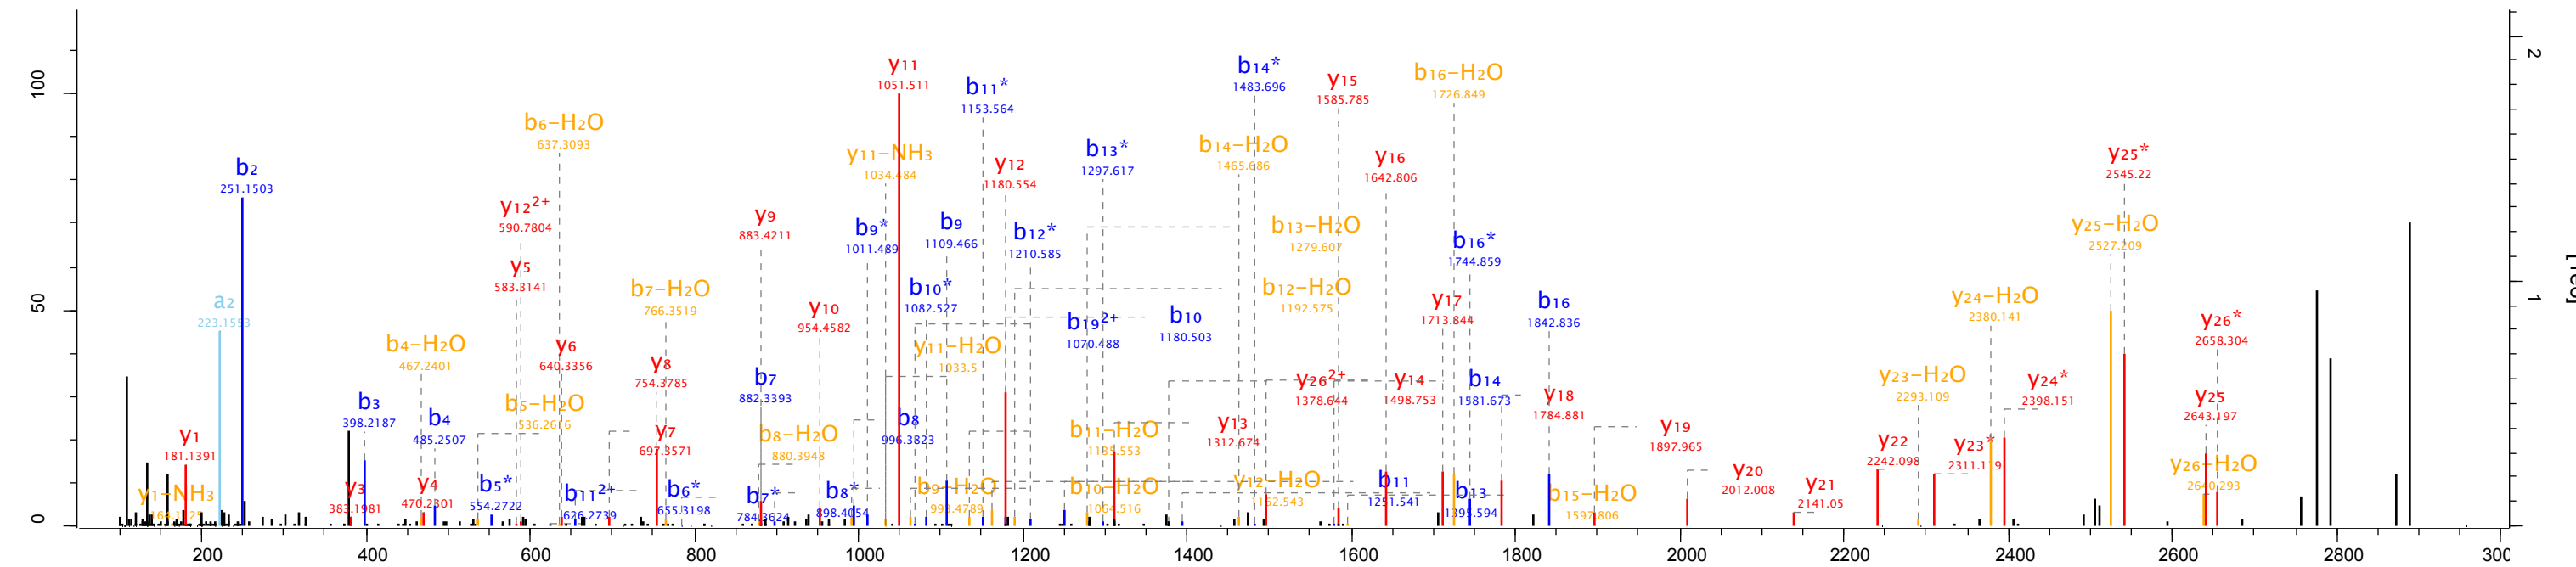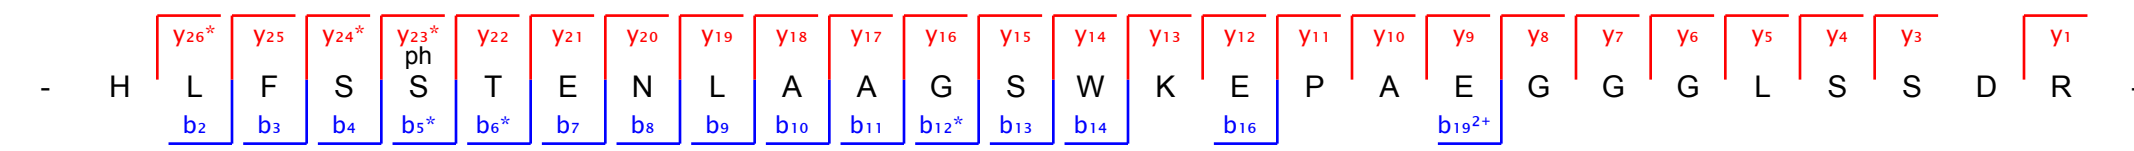

Raw file: 20150814\_A375SR\_Phospho\_BR2\_05  
 Scan: 1939 Method: FTMS; HCD Score: 49.08 m/z: 367.84 Gene names: ZFC3H1

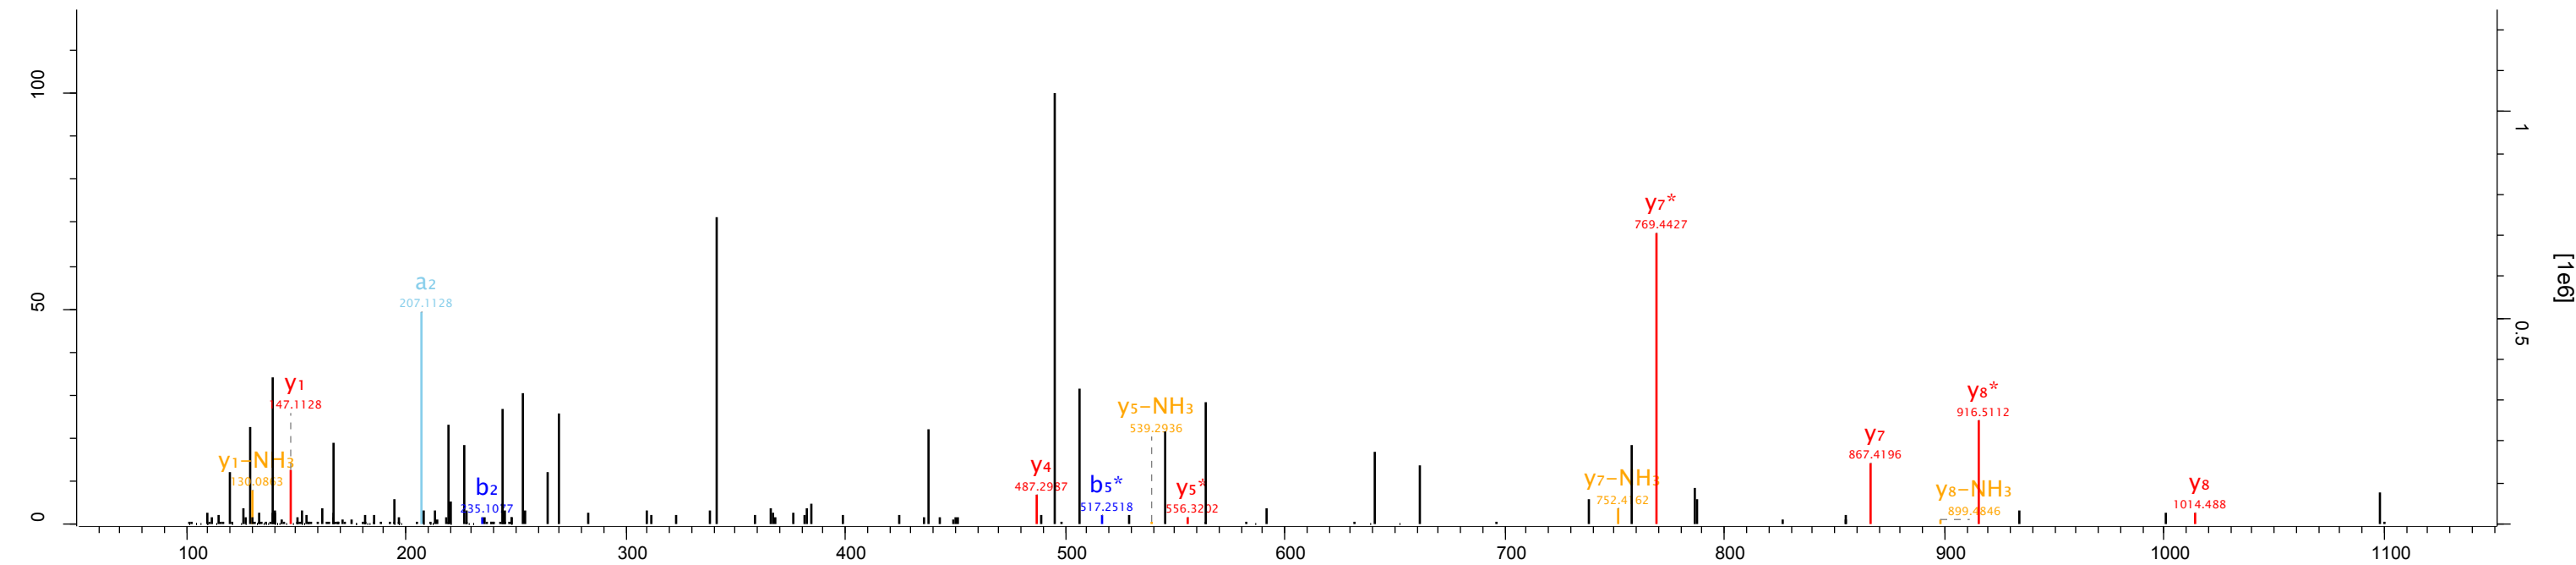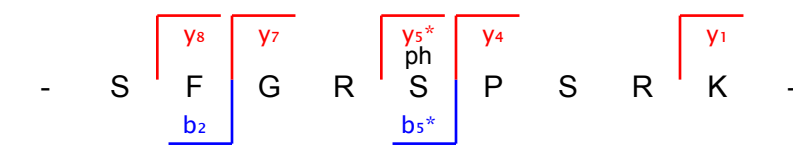

Raw file 20150814\_A375SR\_Phospho\_BR2\_05 Scan 19779 Method FTMS; HCD Score 224.49 m/z 1015.46 Gene names WDHD1

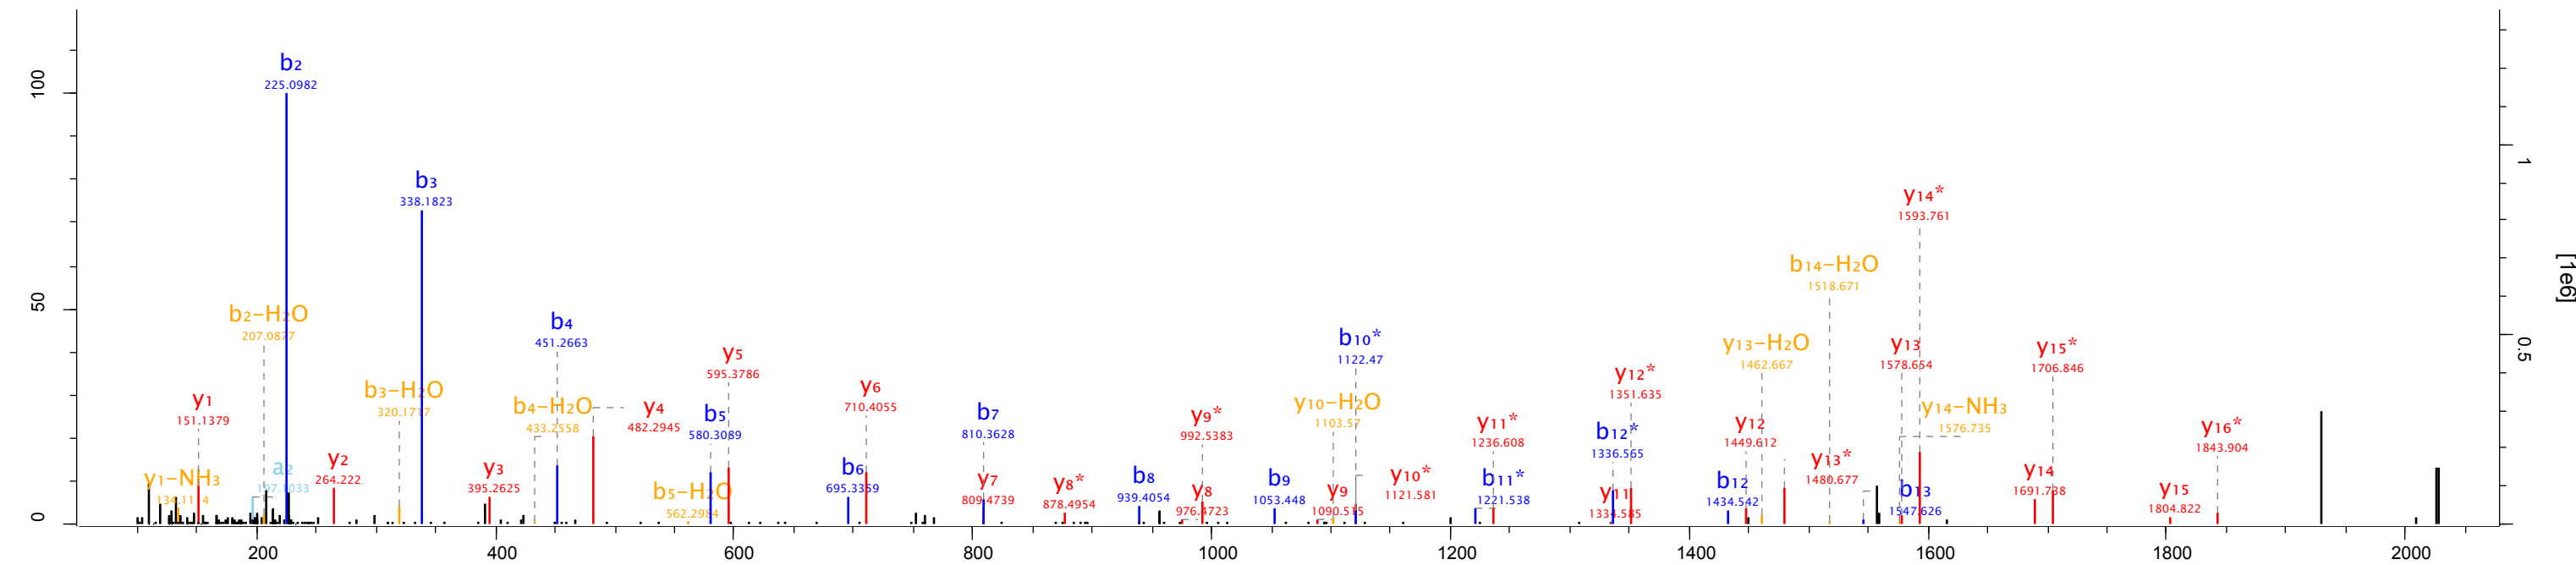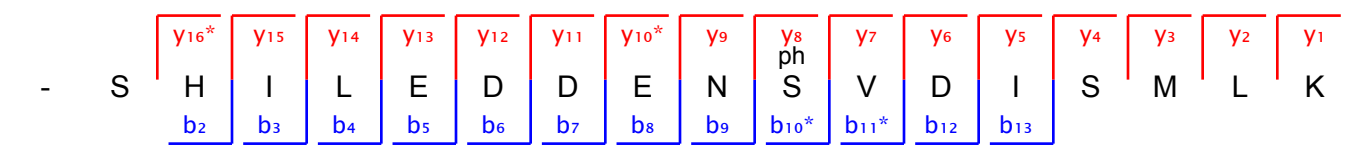

Raw file: 20150814\_A375SR\_Phospho\_BR2\_05  
 Scan: 19869 Method: FTMS; HCD Score: 180.79 m/z: 879.08 Gene names: PHKB

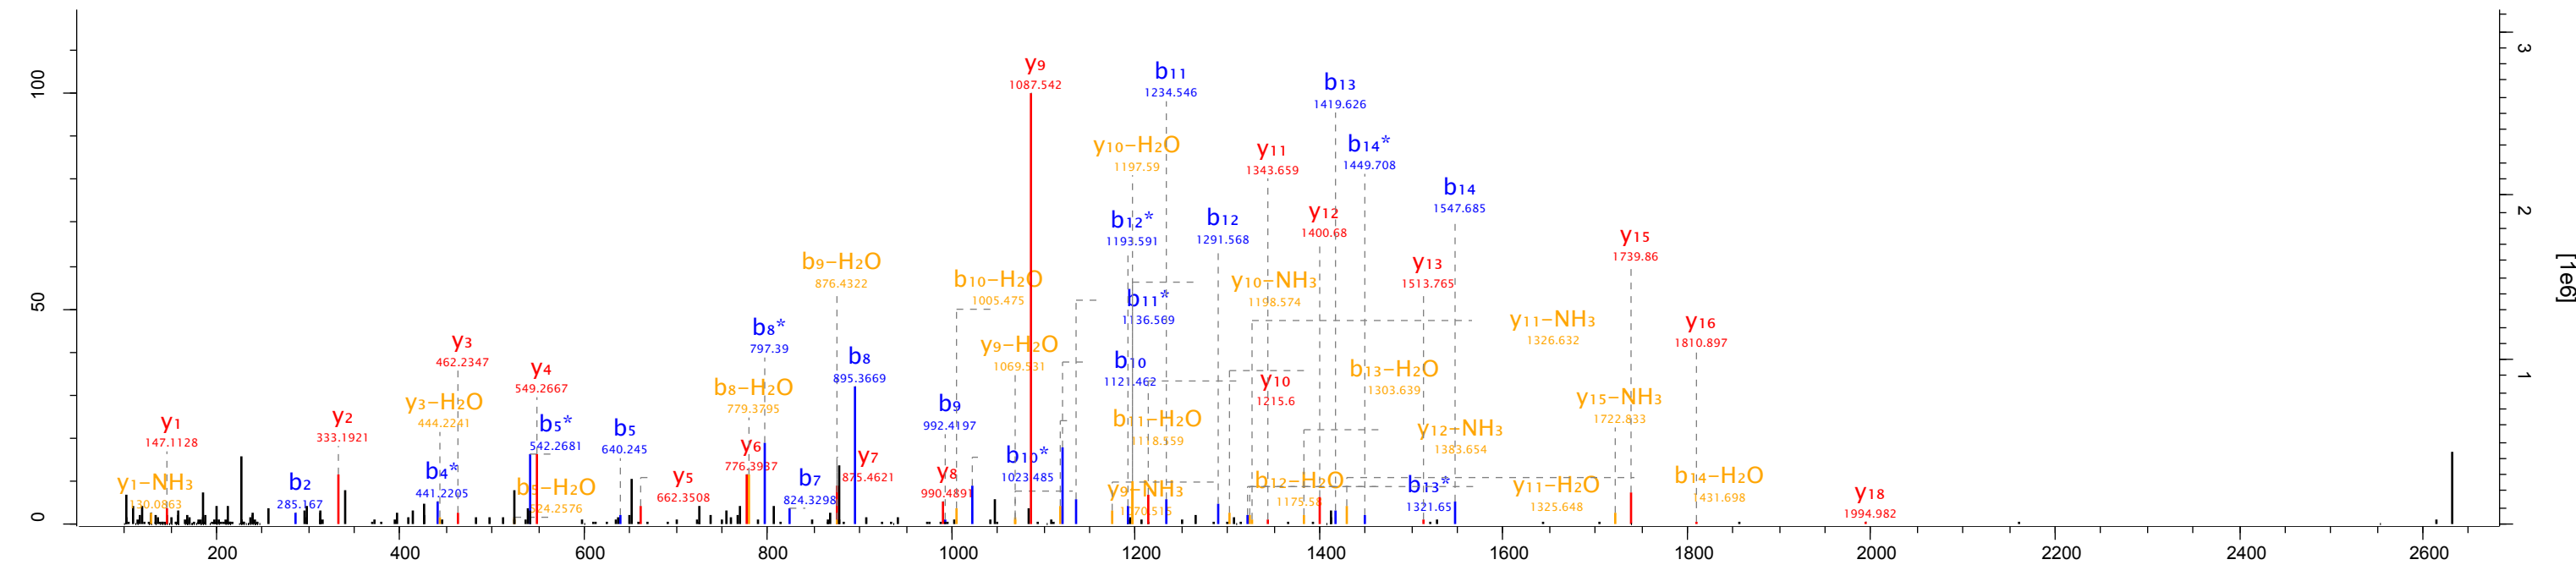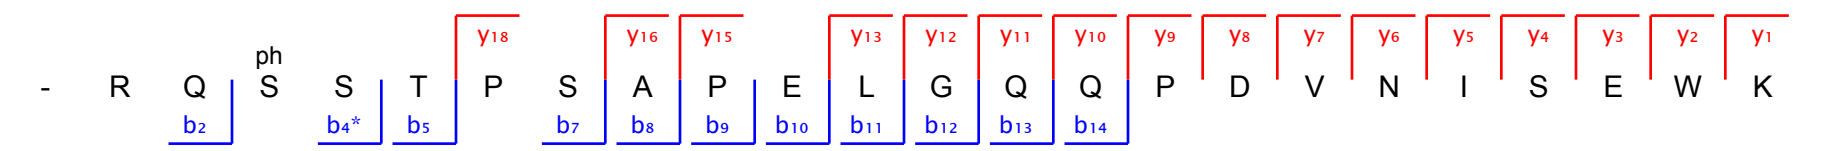

Raw file Scan Method Score m/z Gene names  
 20150814\_A375SR\_Phospho\_BR2\_05 20329 FTMS; HCD 180.4 838.75 GAPVD1

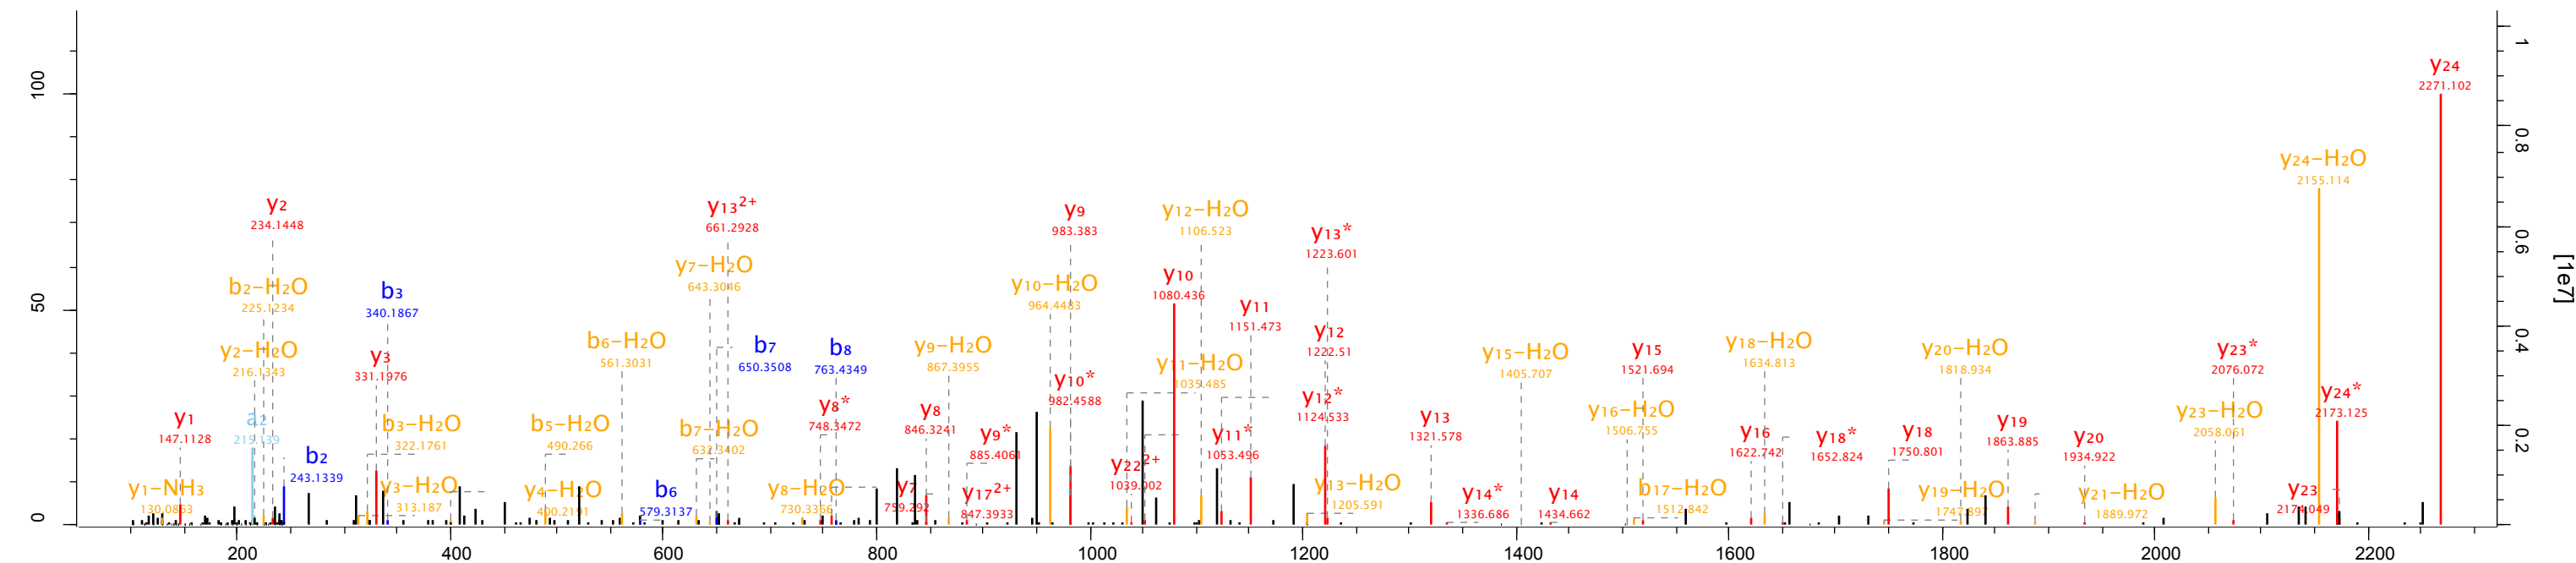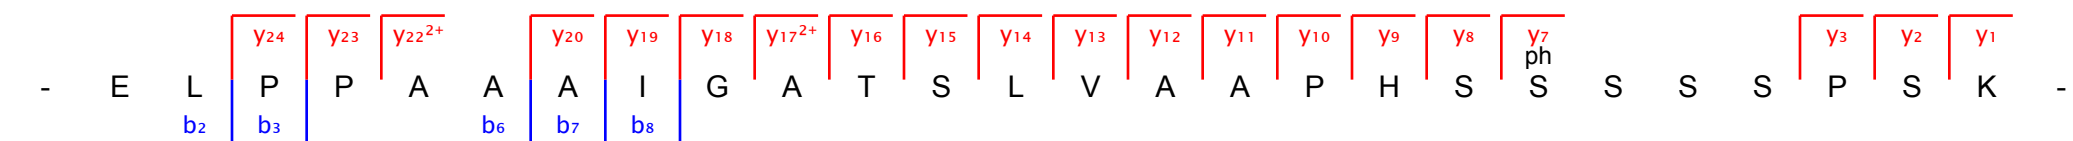

Raw file: 20150814\_A375SR\_Phospho\_BR2\_05  
 Scan: 20749 Method: FTMS; HCD Score: 121.45 m/z: 636.82 Gene names: RAB11FIP1

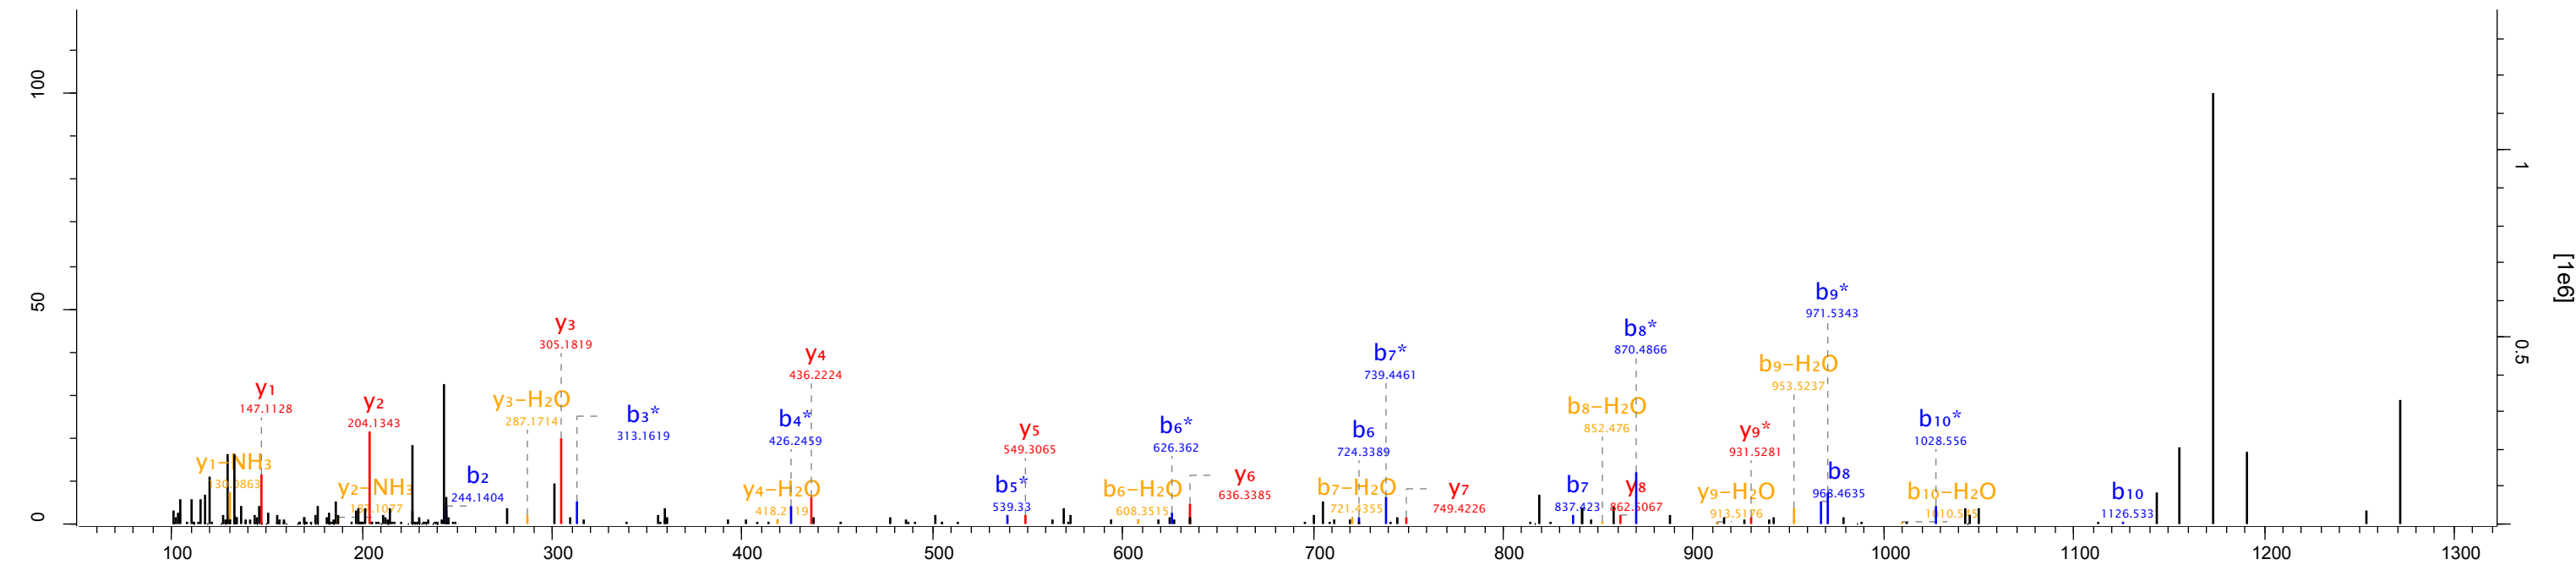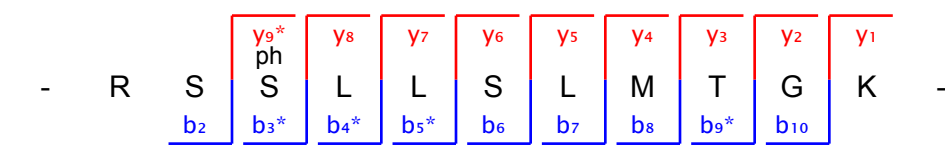



Raw file  
 20150814\_A375SR\_Phospho\_BR2\_05  
 Scan 20819 Method FTMS; HCD Score 147.69 m/z 799.41 Gene names EHD2

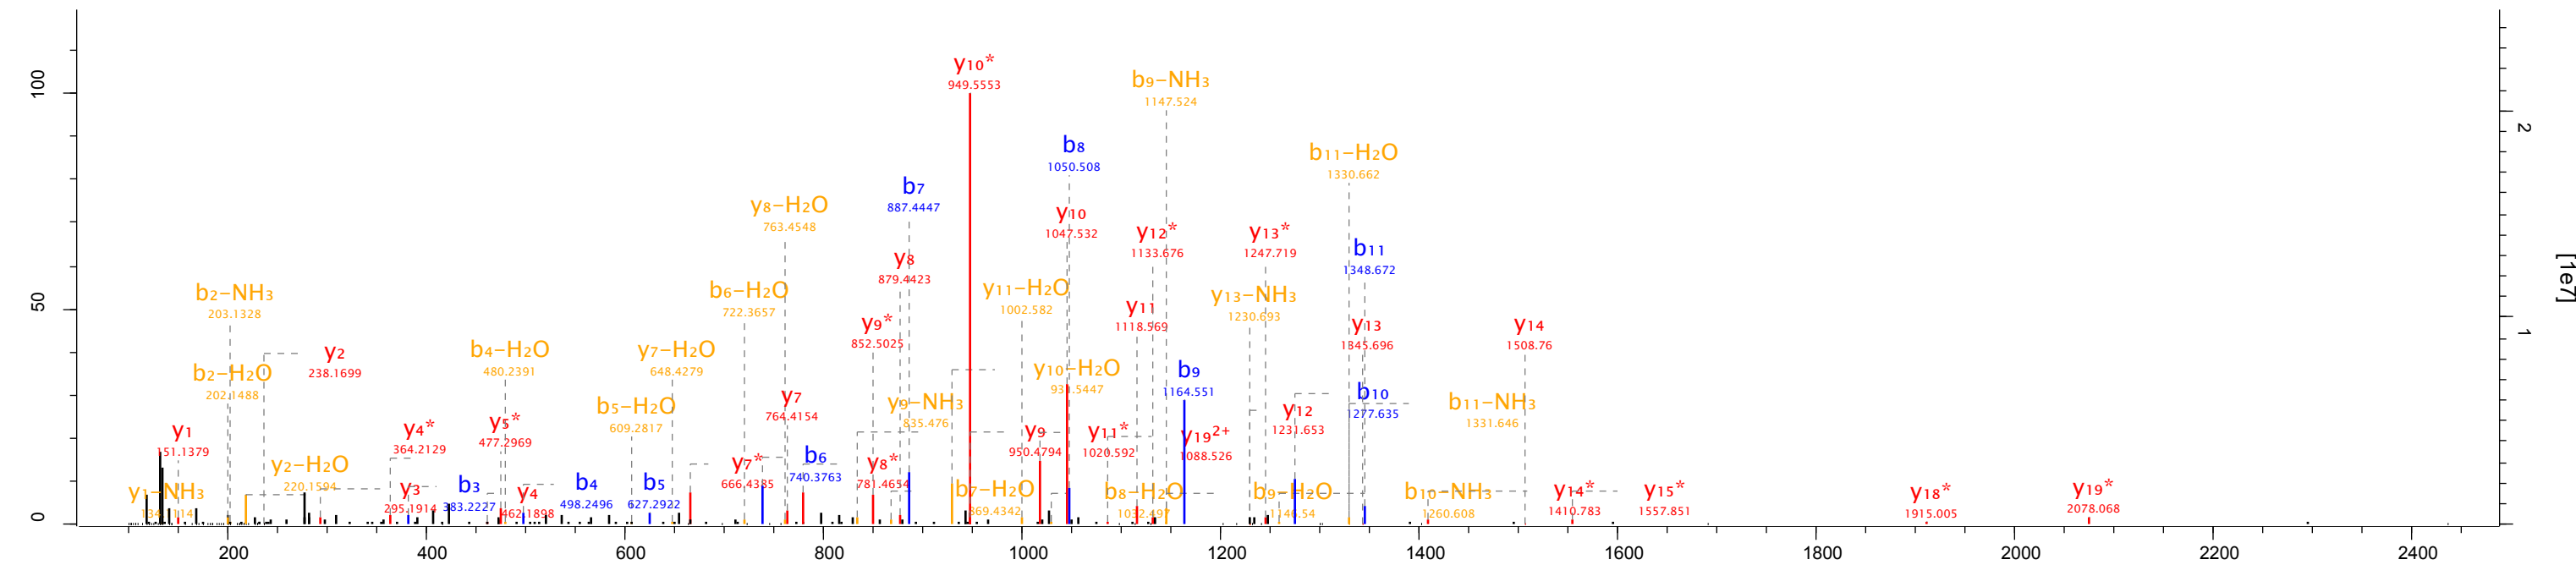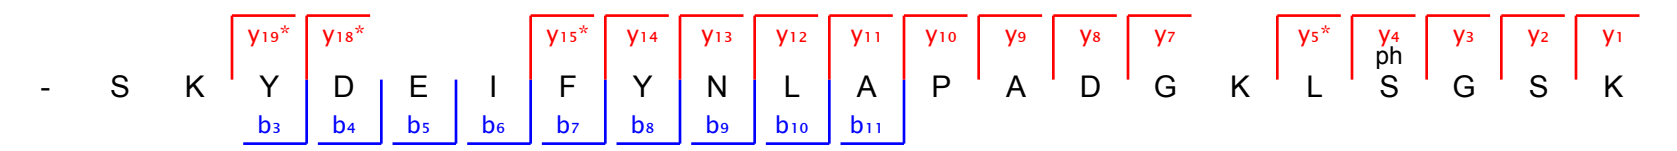

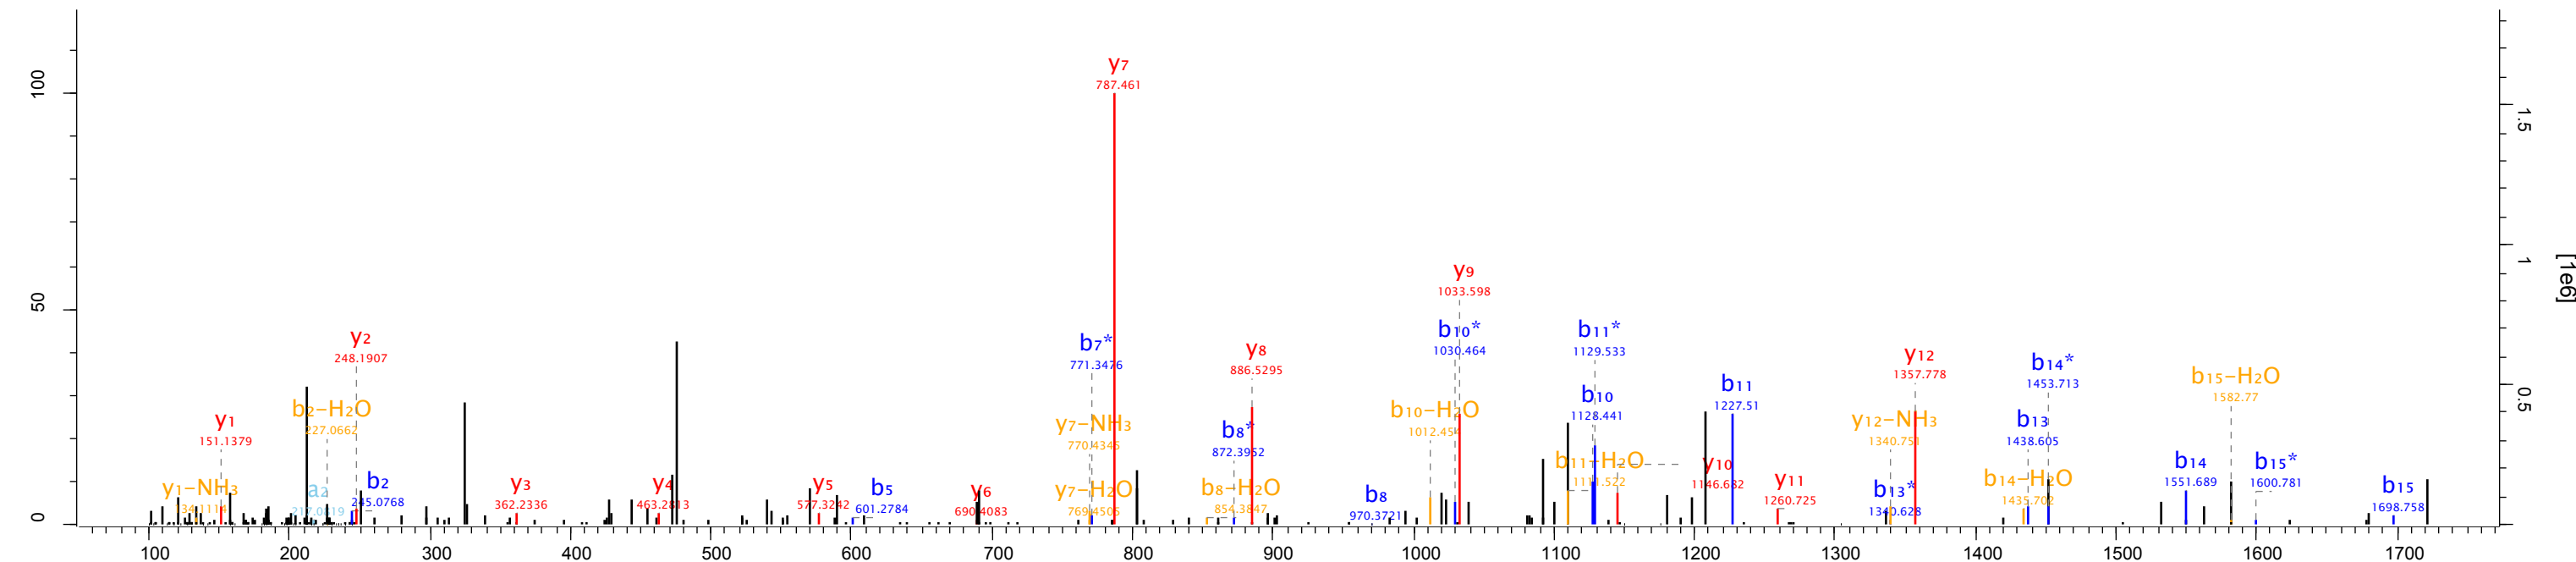

- E D G H R T S T S A V P N L F V P L N T N P K -

Fragmentation scheme (b and y ions) shown below the sequence:

- b2 (D), b5 (R), b7\* (P), b8 (N), b10 (A), b11 (V), b13 (N), b14 (L), b15 (F)
- y1 (K), y2 (P), y3 (T), y4 (N), y5 (L), y6 (P), y7 (V), y8 (F), y9 (L), y10 (N), y11 (P), y12 (A)

Raw file: 20150814\_A375SR\_Phospho\_BR2\_05  
 Scan: 21019 Method: FTMS; HCD Score: 143.14 m/z: 851.4 Gene names: TPI1

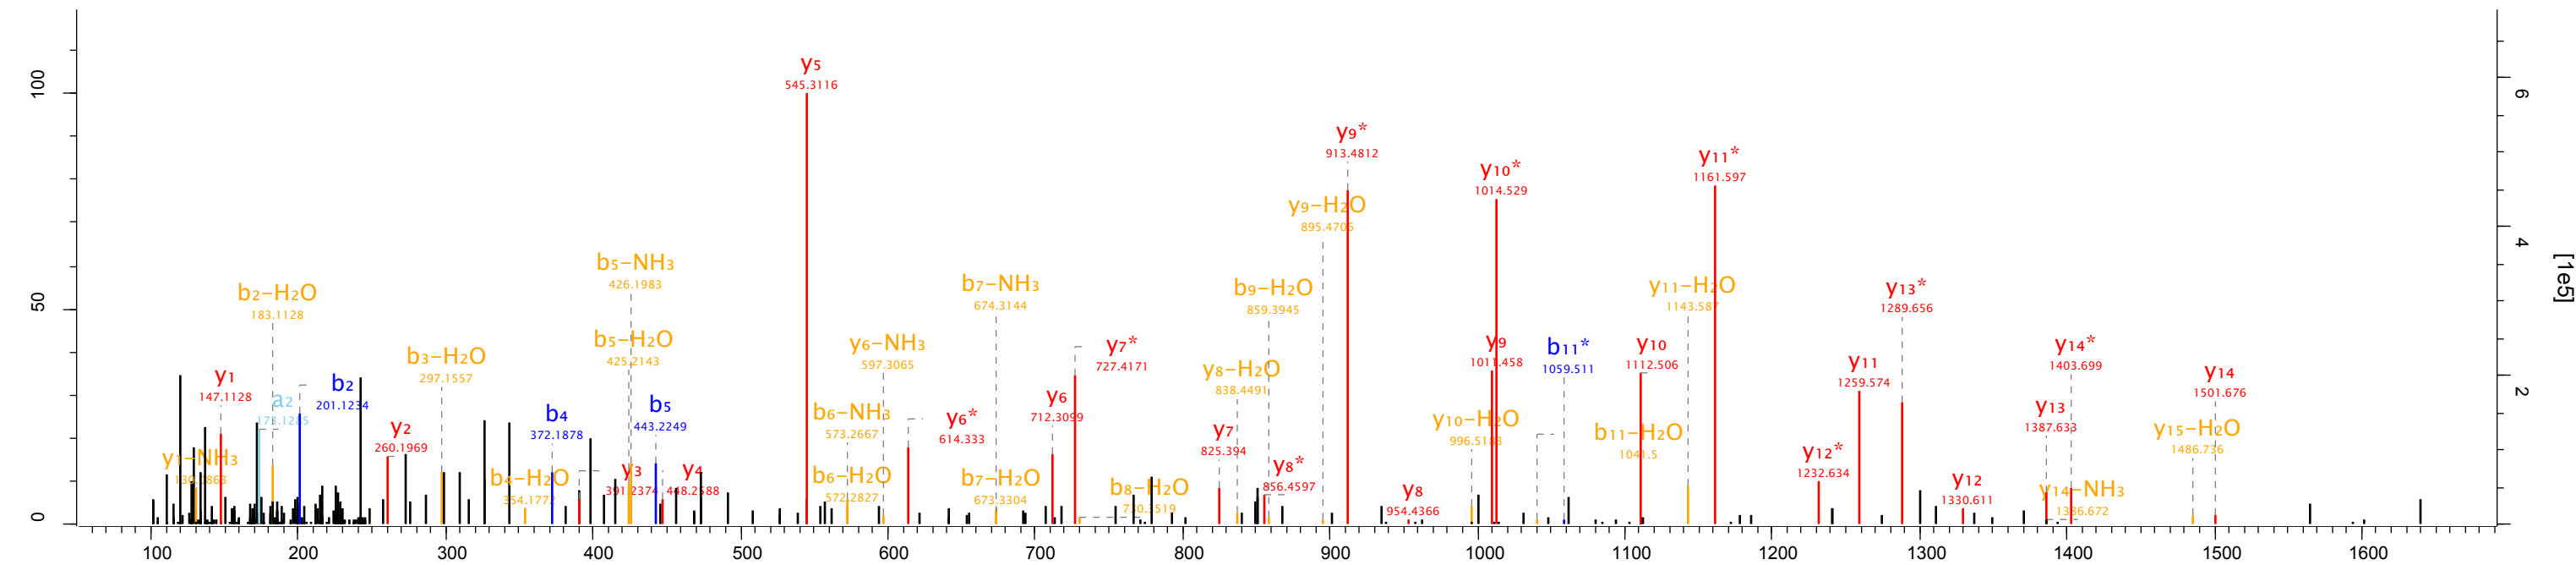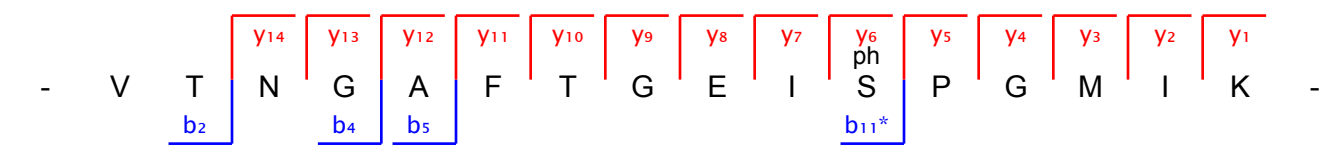

Raw file: 20150814\_A375SR\_Phospho\_BR2\_05  
 Scan: 21029 Method: FTMS; HCD Score: 98.57 m/z: 599.97 Gene names: SHROOM3

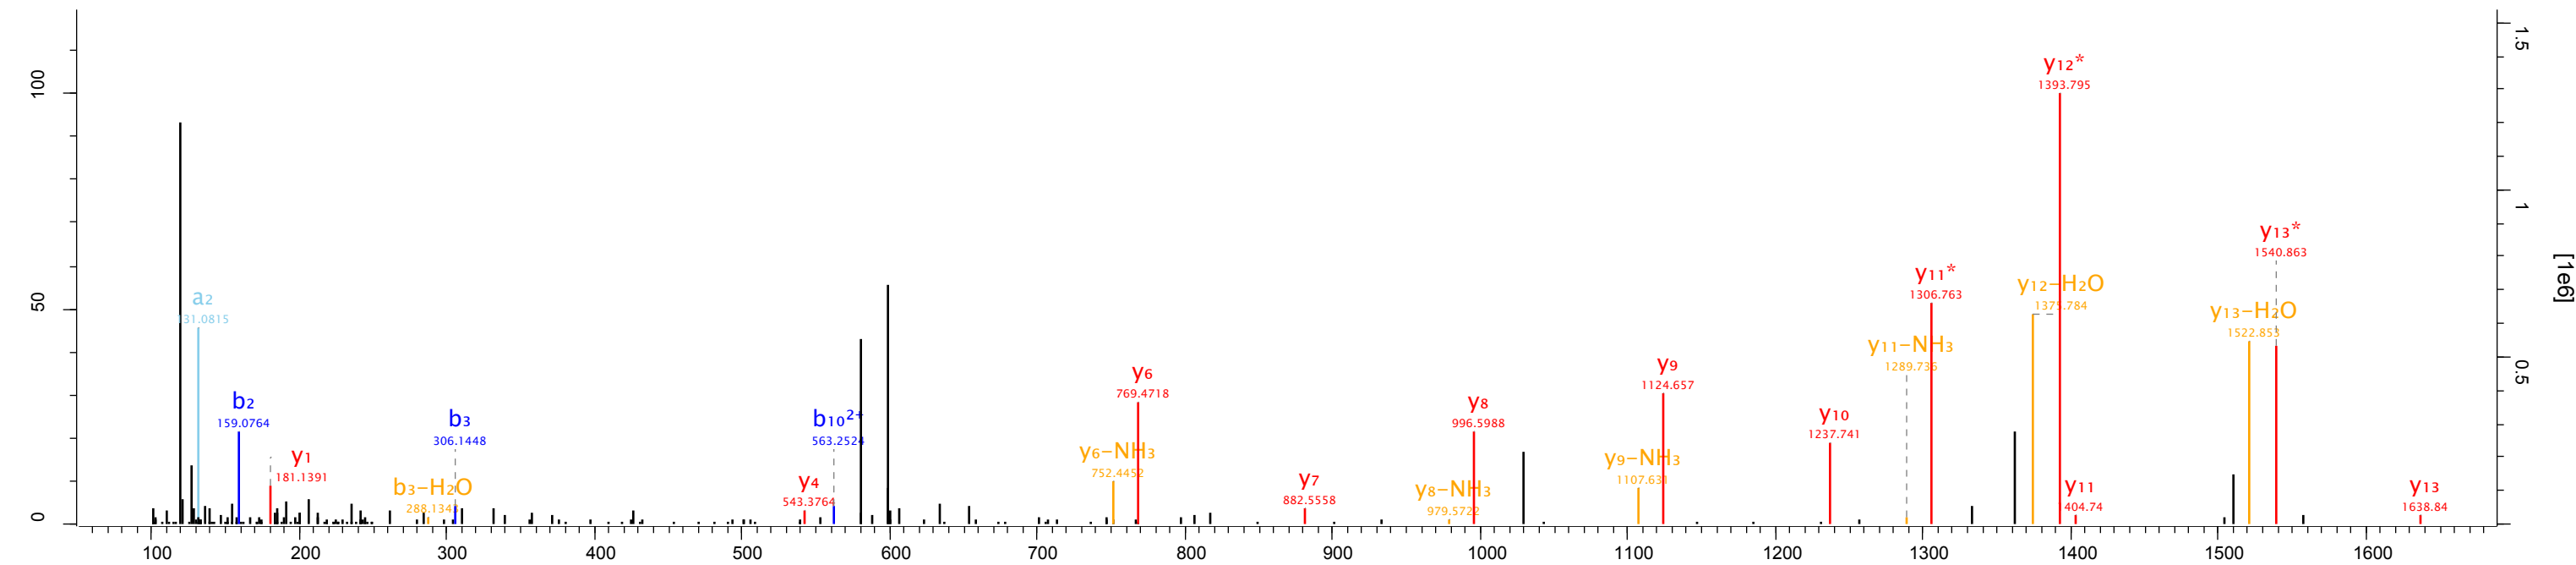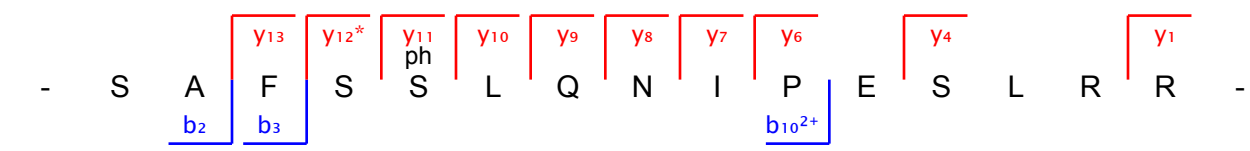

Raw file Scan Method Score m/z Gene names  
 20150814\_A375SR\_Phospho\_BR2\_05 21089 FTMS; HCD 93.28 919.05 DNTTIP2

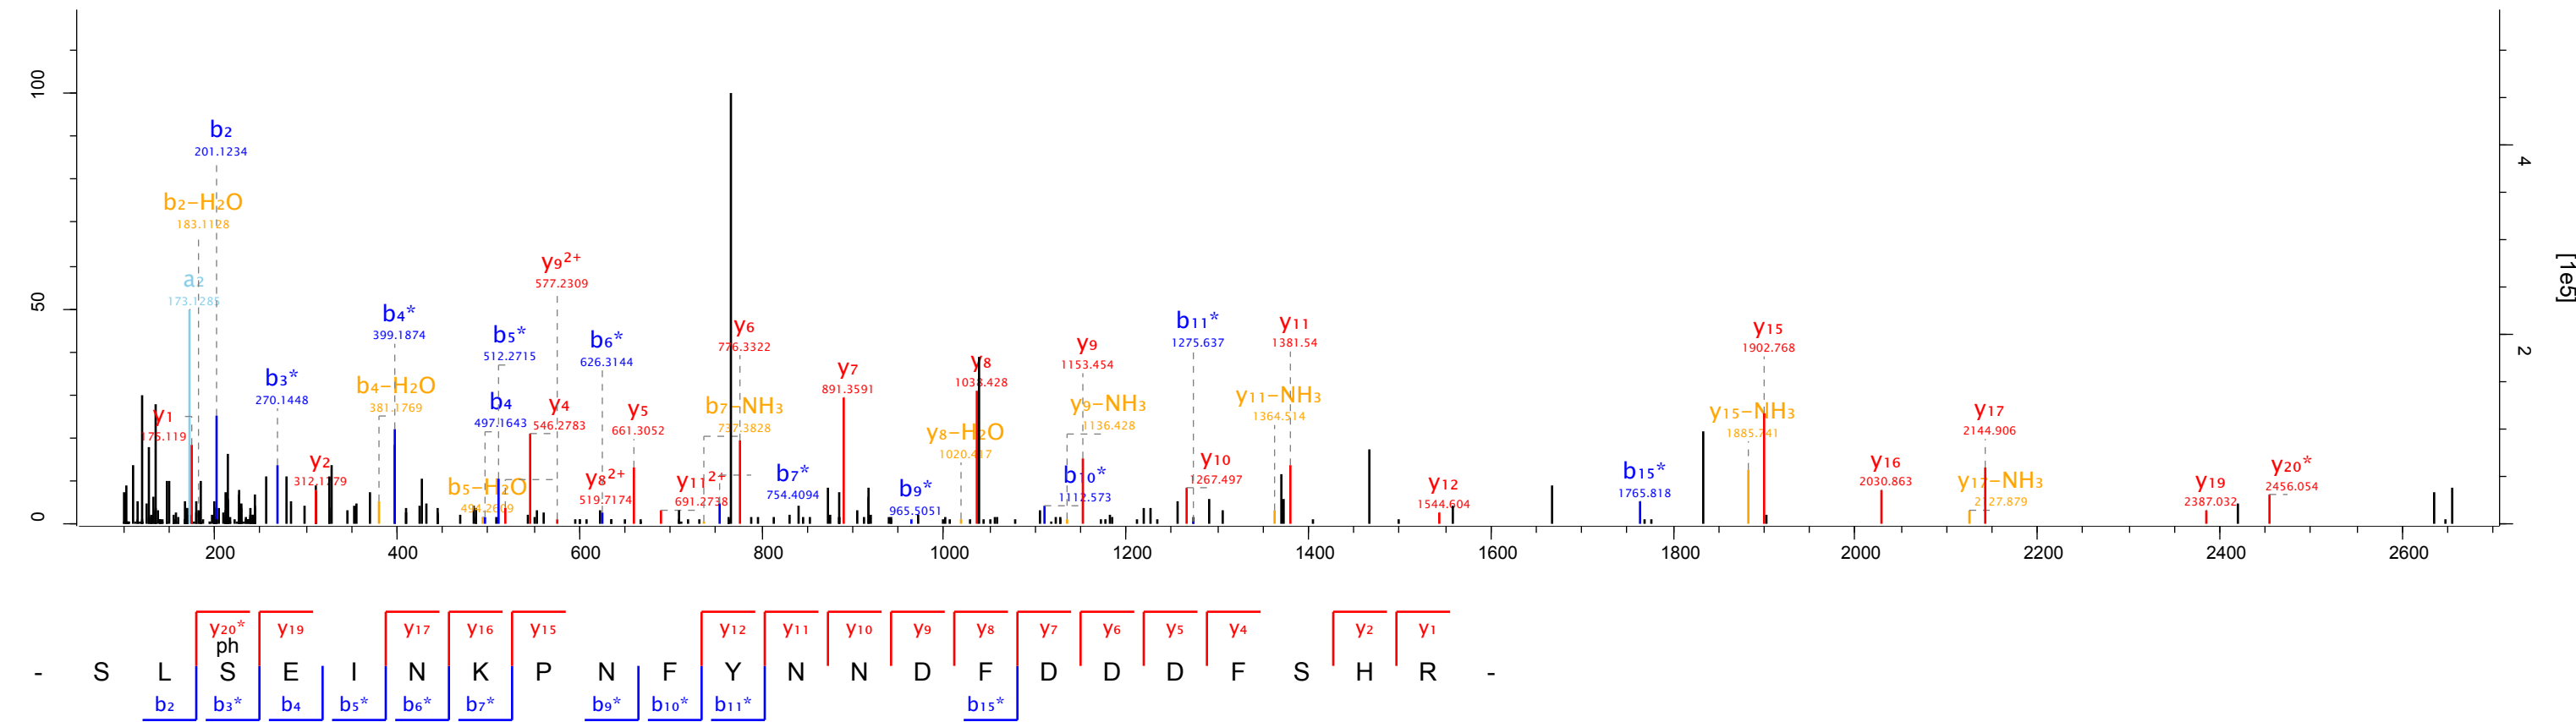

Raw file: 20150814\_A375SR\_Phospho\_BR2\_05  
 Scan: 21269 Method: FTMS; HCD Score: 222.79 m/z: 1156.55 Gene names: SF3A1

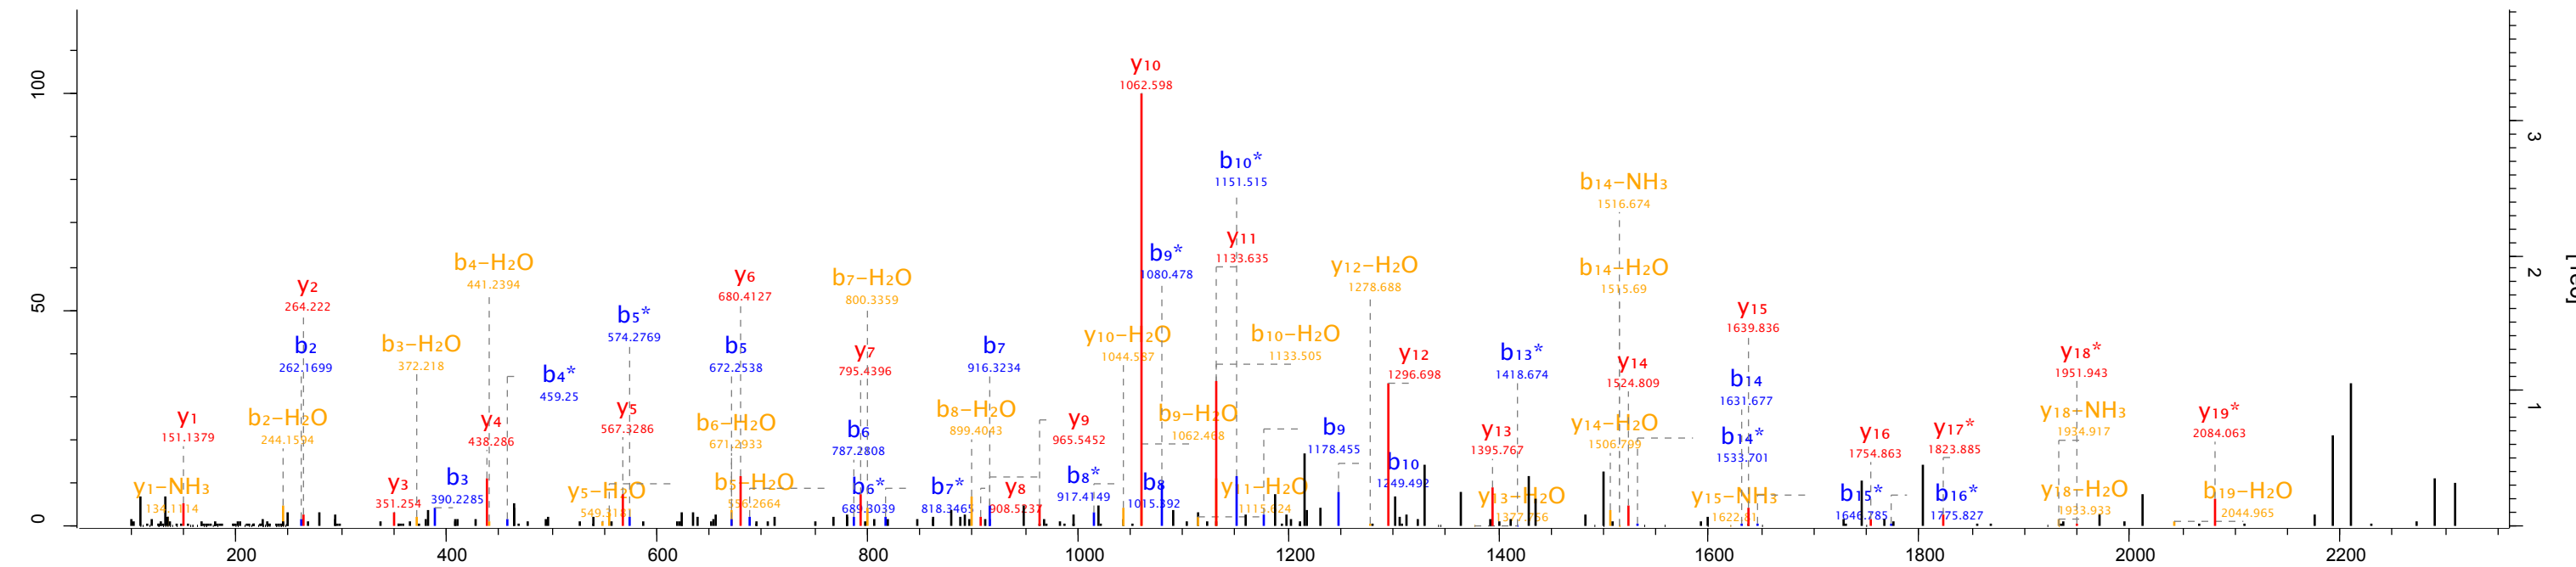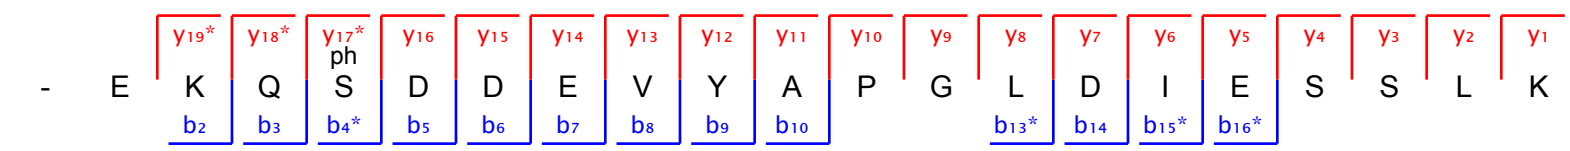

Raw file: 20150814\_A375SR\_Phospho\_BR2\_05  
 Scan: 2209 Method: FTMS; HCD Score: 119.77 m/z: 642.78 Gene names: IWS1

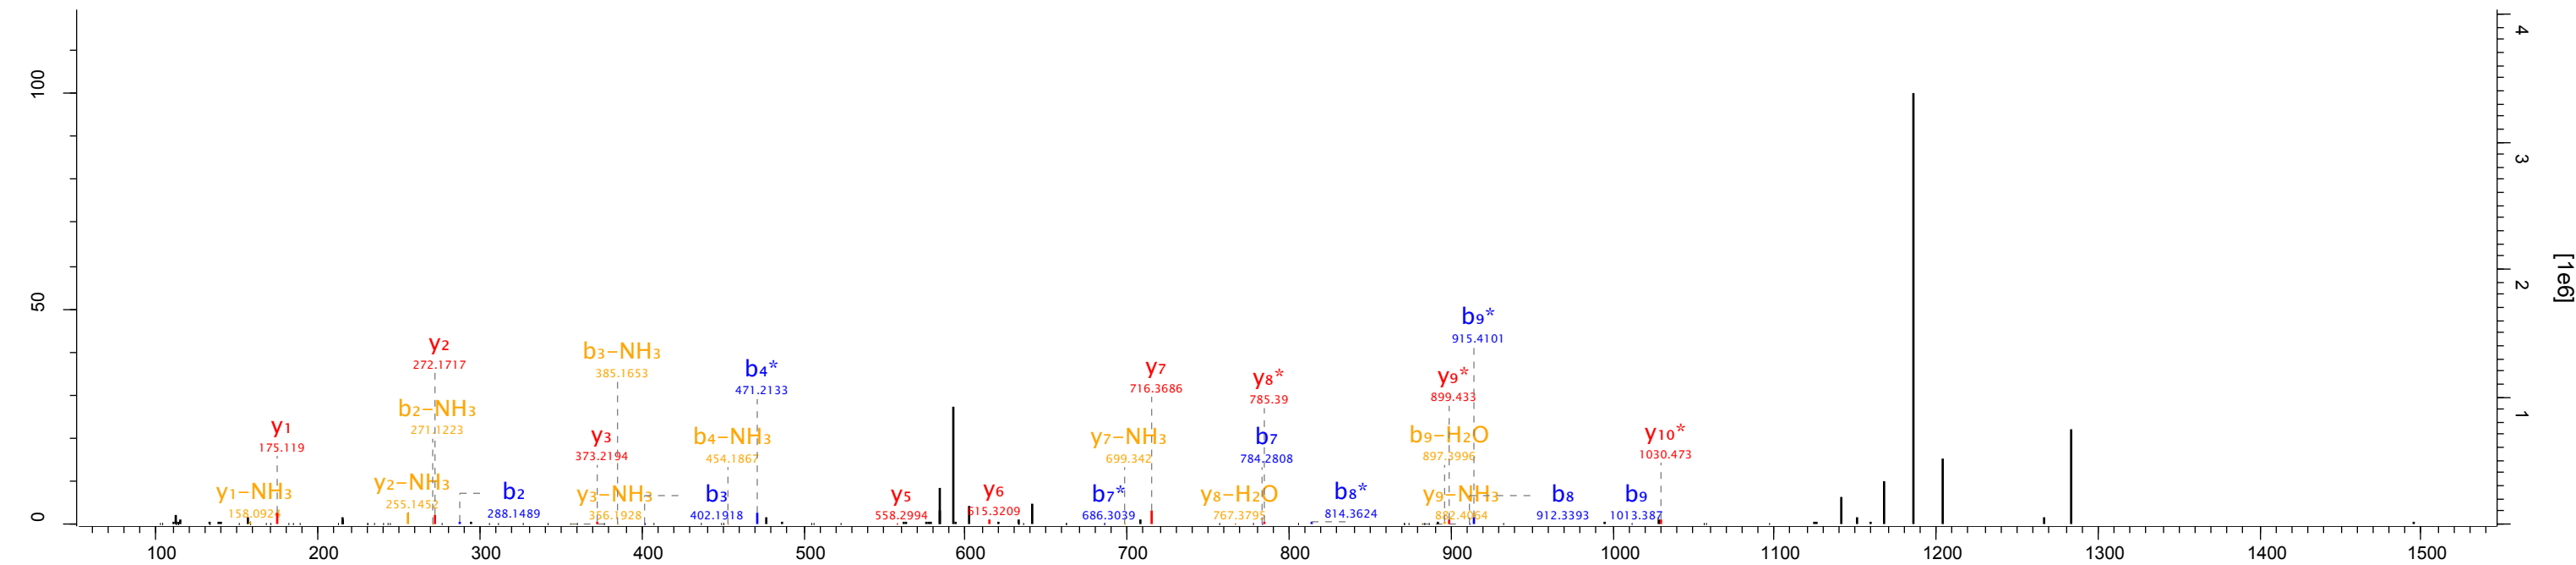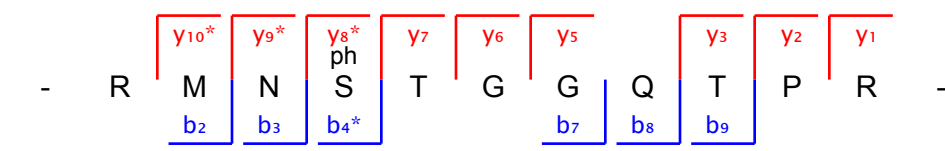

Raw file 20150814\_A375SR\_Phospho\_BR2\_05 Scan 22169 Method FTMS; HCD Score 136.39 m/z 685.36 Gene names RHPN2;RHPN2P1

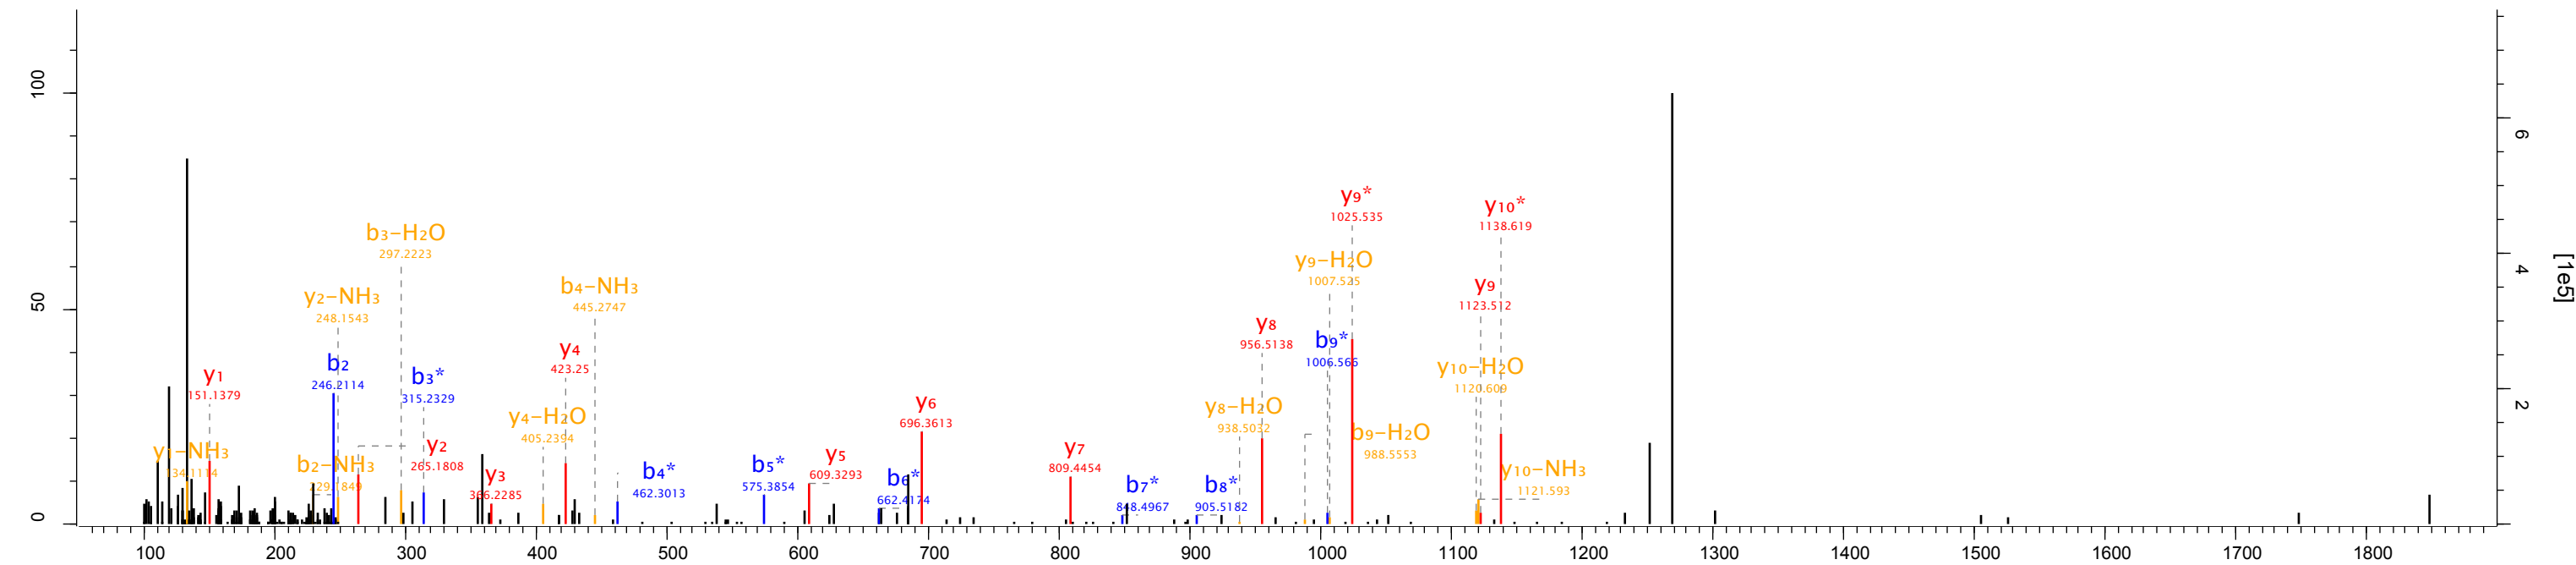

- K y10\* y9 y8 y7 y6 y5 y4 y3 y2 y1  
L S F L S W G T N K -  
b2 b3\* b4\* b5\* b6\* b7\* b8\* b9\*



Raw file 20150814\_A375SR\_Phospho\_BR2\_05 Scan 22179 Method FTMS; HCD Score 123.29 m/z 790.33 Gene names PTPLAD1

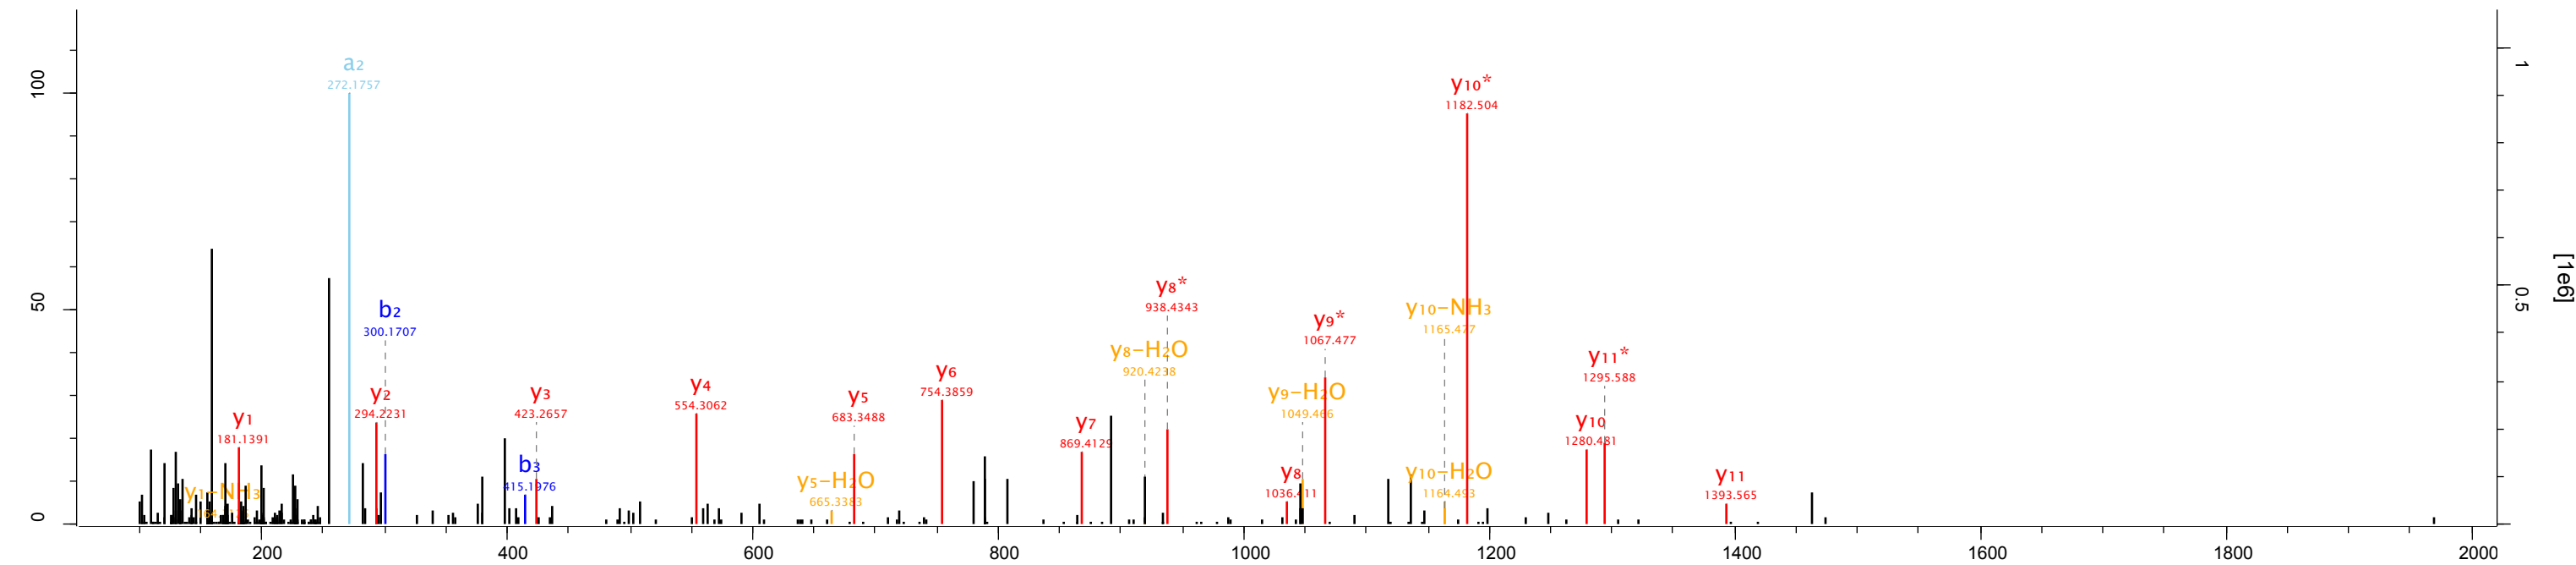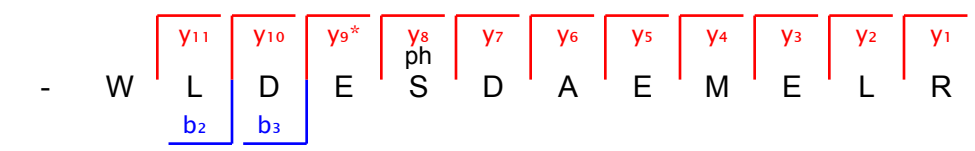

Raw file: 20150814\_A375SR\_Phospho\_BR2\_05  
 Scan: 22749 Method: FTMS; HCD Score: 145.65 m/z: 1278.58 Gene names: PCBP1

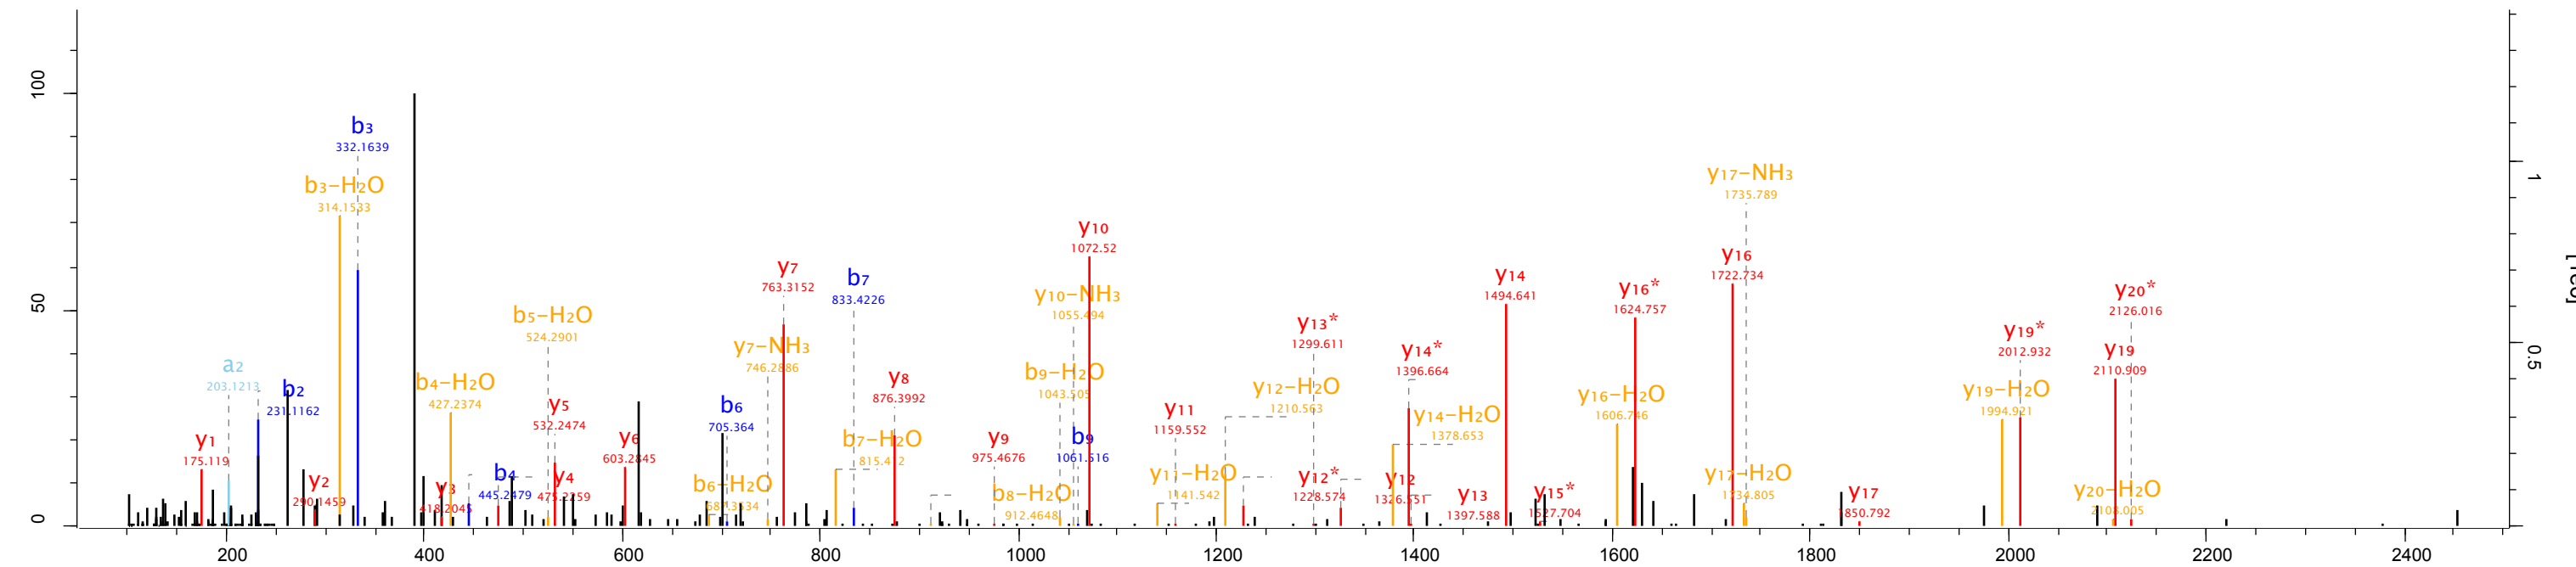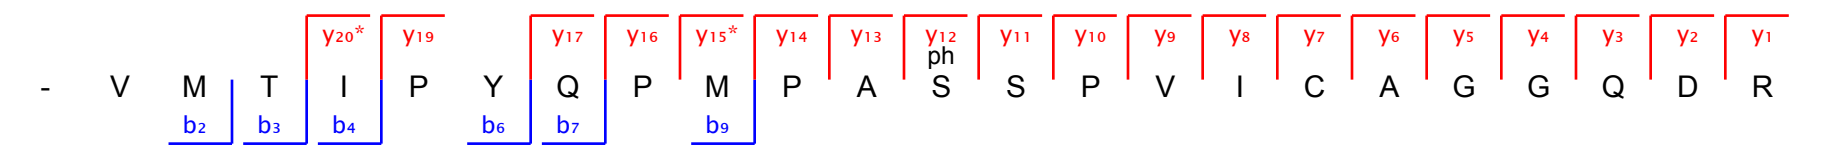

Raw file 20150814\_A375SR\_Phospho\_BR2\_05 Scan 22849 Method FTMS; HCD Score 154.99 m/z 761.32 Gene names TAF1D

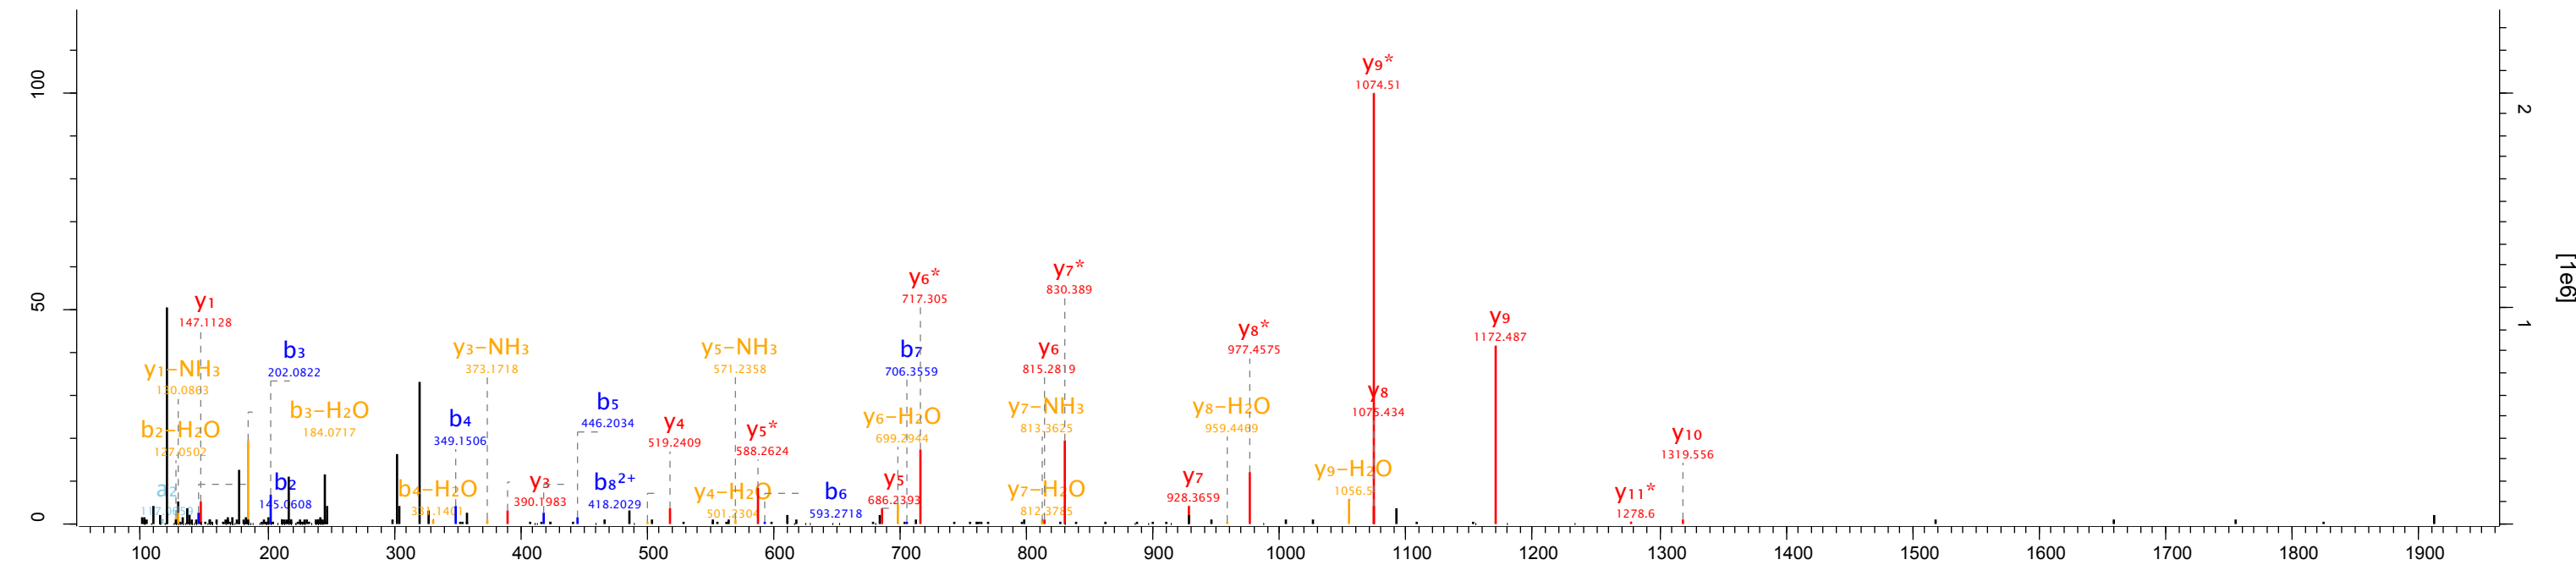

- G S G F P F L E S E N E K -

b<sub>2</sub>
b<sub>3</sub>
b<sub>4</sub>
b<sub>5</sub>
b<sub>6</sub>
b<sub>7</sub>
b<sub>8</sub><sup>2+</sup>
y<sub>11</sub><sup>\*</sup>
y<sub>10</sub>
y<sub>9</sub>
y<sub>8</sub>
y<sub>7</sub>
y<sub>6</sub>
y<sub>5</sub><sub>ph</sub>
y<sub>4</sub>
y<sub>3</sub>
y<sub>1</sub>

Raw file  
20150814\_A375SR\_Phospho\_BR2\_05

Scan 23209 Method FTMS; HCD Score 153.66 m/z 828.18 Gene names HDAC4

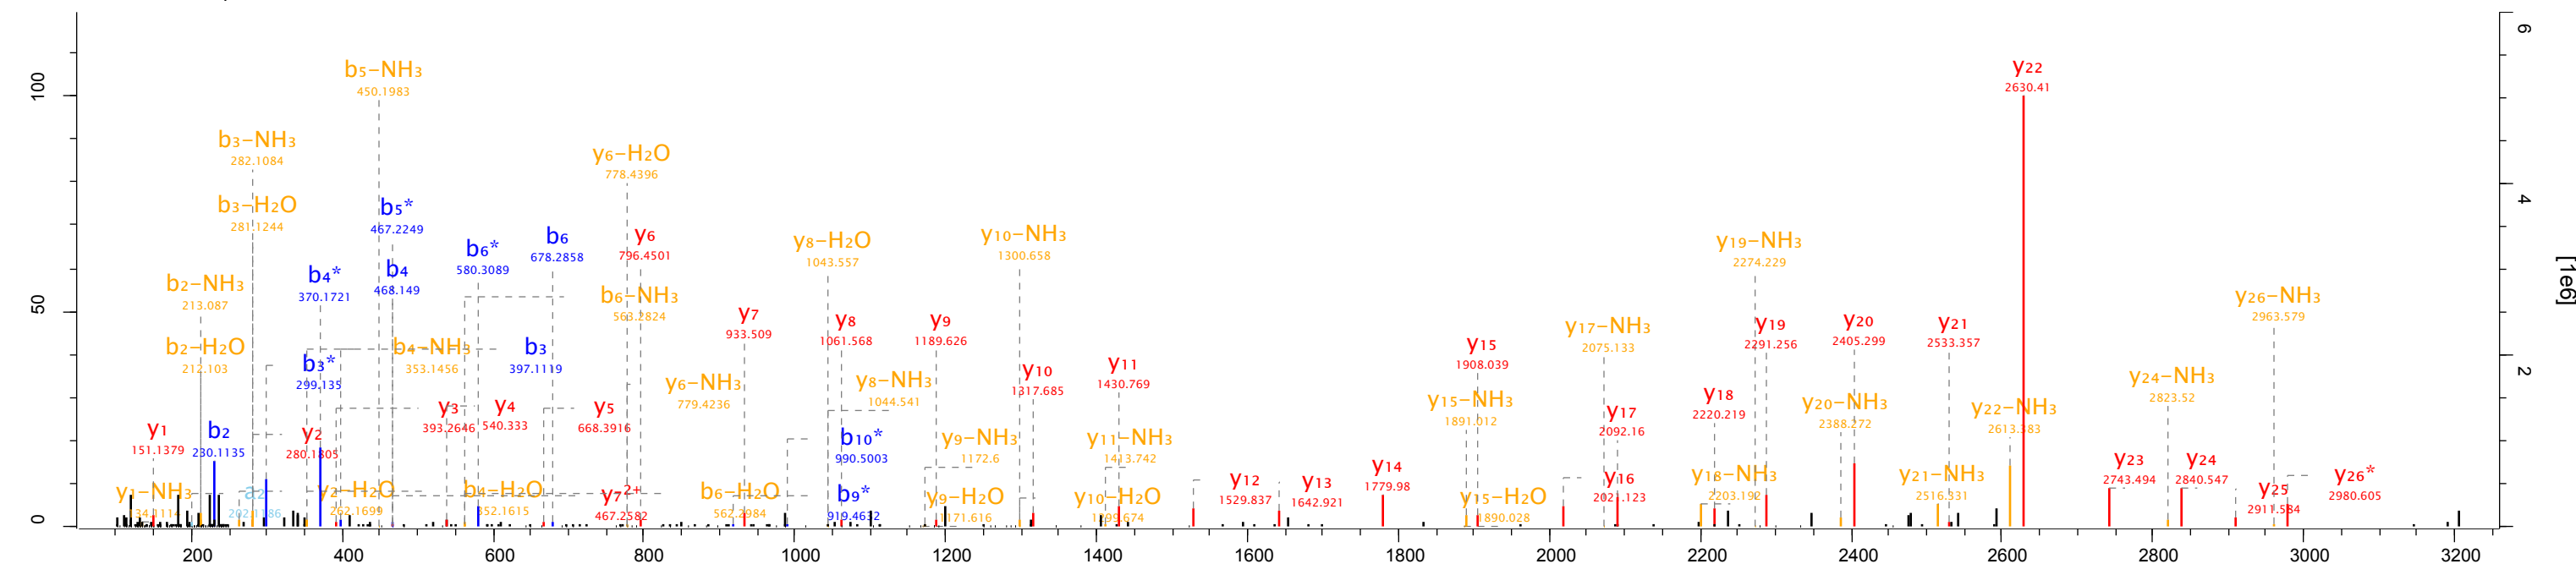

- T Q **Q** **S** **A** **P** **L** P Q **N** **A** Q A L Q H L V I Q Q Q H Q Q F L E K -

Fragmentation labels below the sequence:  
b2 (under Q), b3 (under S), b4 (under A), b5\* (under P), b6 (under L), b9\* (under N), b10\* (under A)

Raw file: 20150814\_A375SR\_Phospho\_BR2\_05  
 Scan: 23299 Method: FTMS; HCD Score: 168.08 m/z: 853.4 Gene names: TNKS1BP1

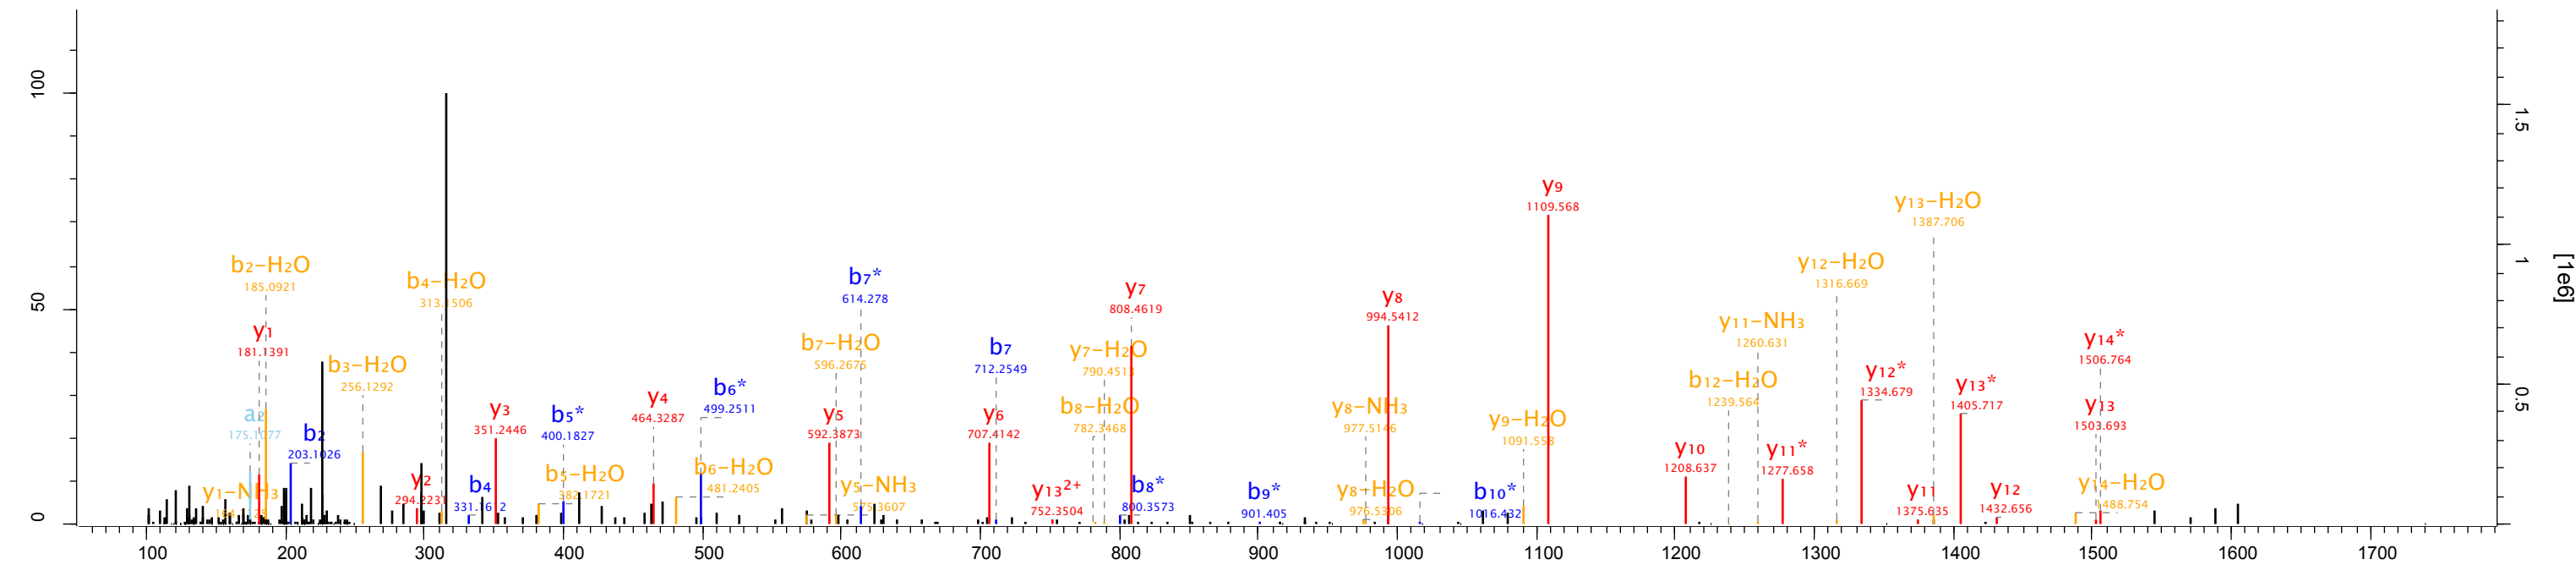

Peptide sequence: T T A G S V D W T D Q L G L R

Fragmentation sites (b and y ions) are indicated by boxes below the sequence:

- Red boxes (y ions): y<sub>14</sub>\*, y<sub>13</sub>, y<sub>12</sub>, y<sub>11</sub> ph, y<sub>10</sub>, y<sub>9</sub>, y<sub>8</sub>, y<sub>7</sub>, y<sub>6</sub>, y<sub>5</sub>, y<sub>4</sub>, y<sub>3</sub>, y<sub>2</sub>, y<sub>1</sub>
- Blue boxes (b ions): b<sub>2</sub>, b<sub>4</sub>, b<sub>5</sub>\*, b<sub>6</sub>\*, b<sub>7</sub>, b<sub>8</sub>\*, b<sub>9</sub>\*, b<sub>10</sub>\*

Raw file 20150814\_A375SR\_Phospho\_BR2\_05 Scan 23869 Method FTMS; HCD Score 151.19 m/z 1139.04 Gene names SYNPO

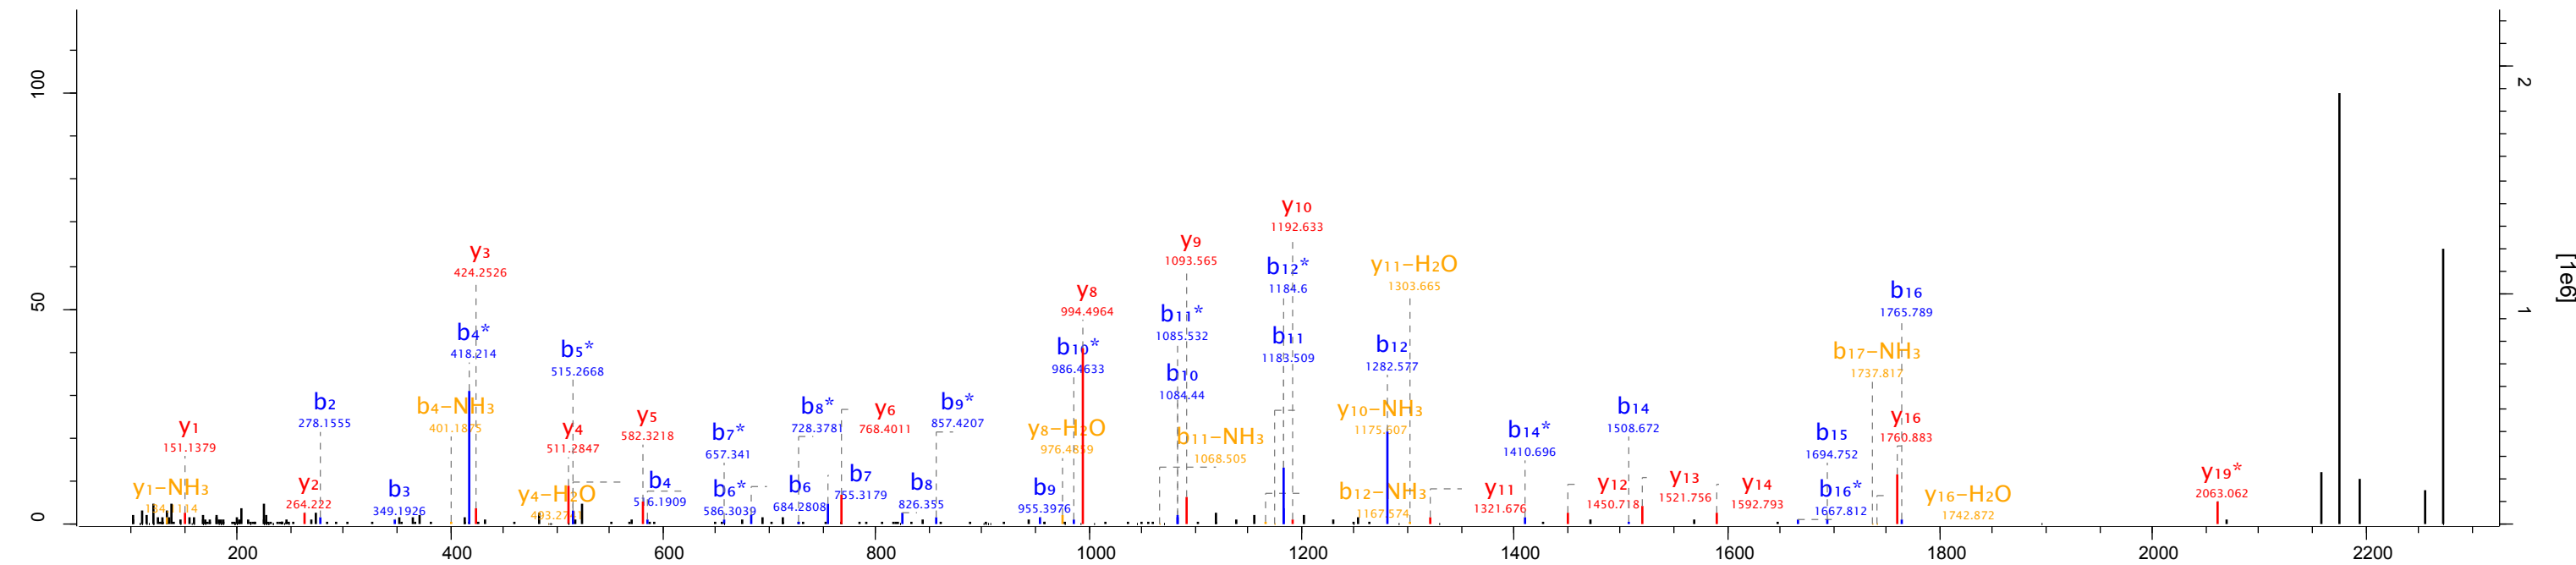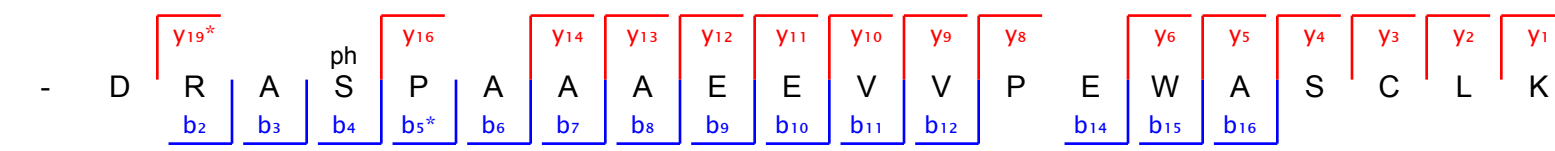

Raw file: 20150814\_A375SR\_Phospho\_BR2\_05  
 Scan: 24099 Method: FTMS; HCD Score: 122.46 m/z: 606.26 Gene names: SGK223

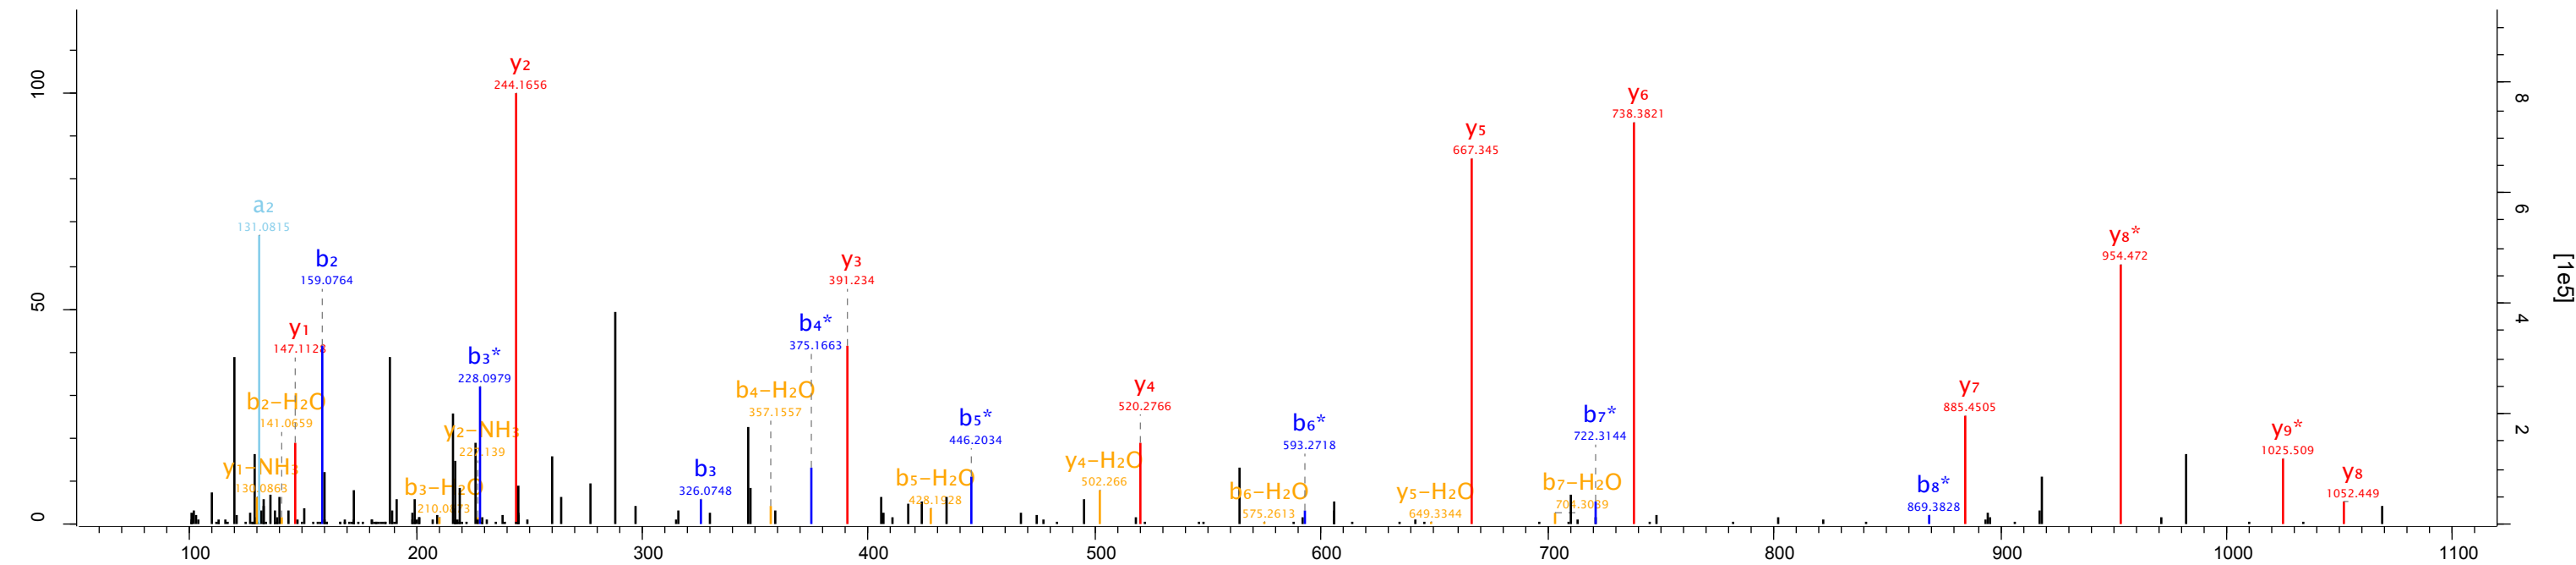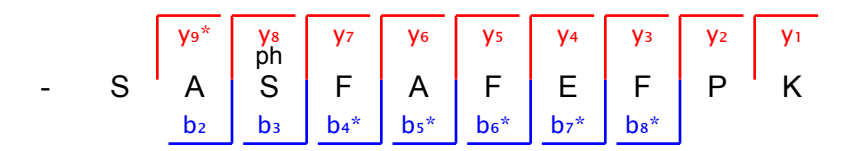

Raw file: 20150814\_A375SR\_Phospho\_BR2\_05  
 Scan: 24489 Method: FTMS; HCD Score: 197.13 m/z: 1102.46 Gene names: G3BP1

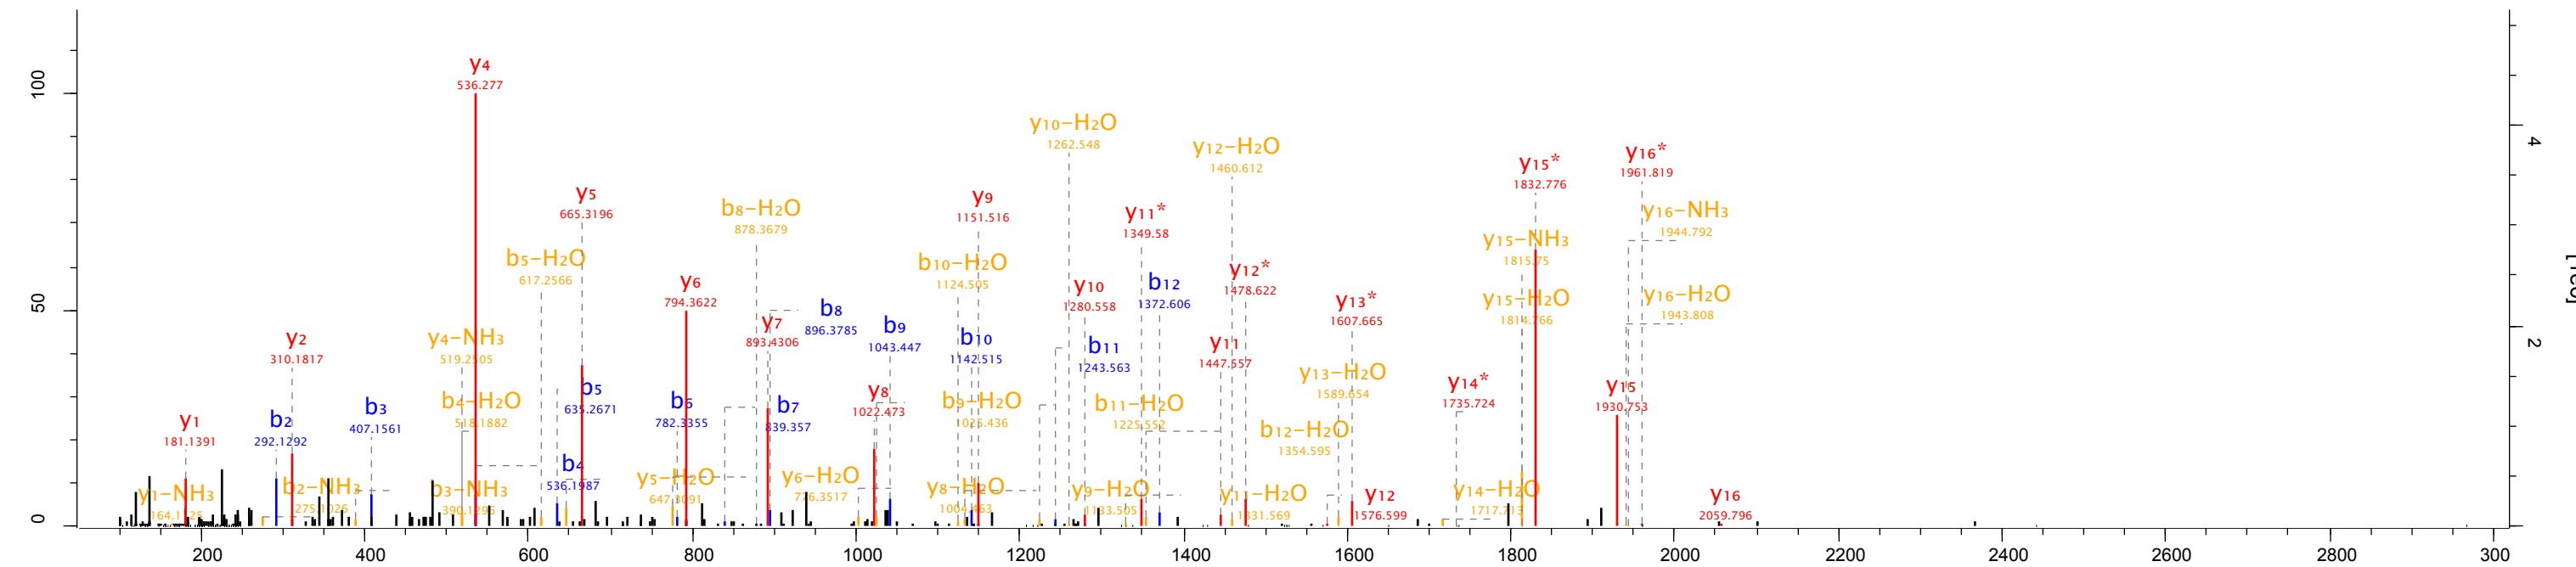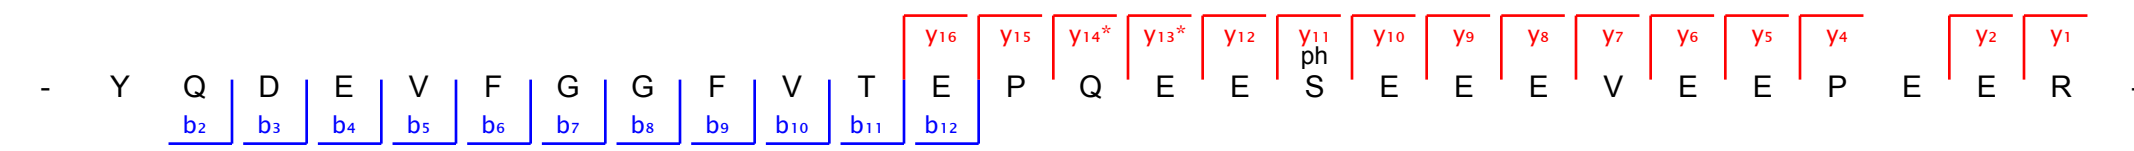



Raw file: 20150814\_A375SR\_Phospho\_BR2\_05  
 Scan: 24579 Method: FTMS; HCD Score: 145.31 m/z: 625.8 Gene names: PREX1

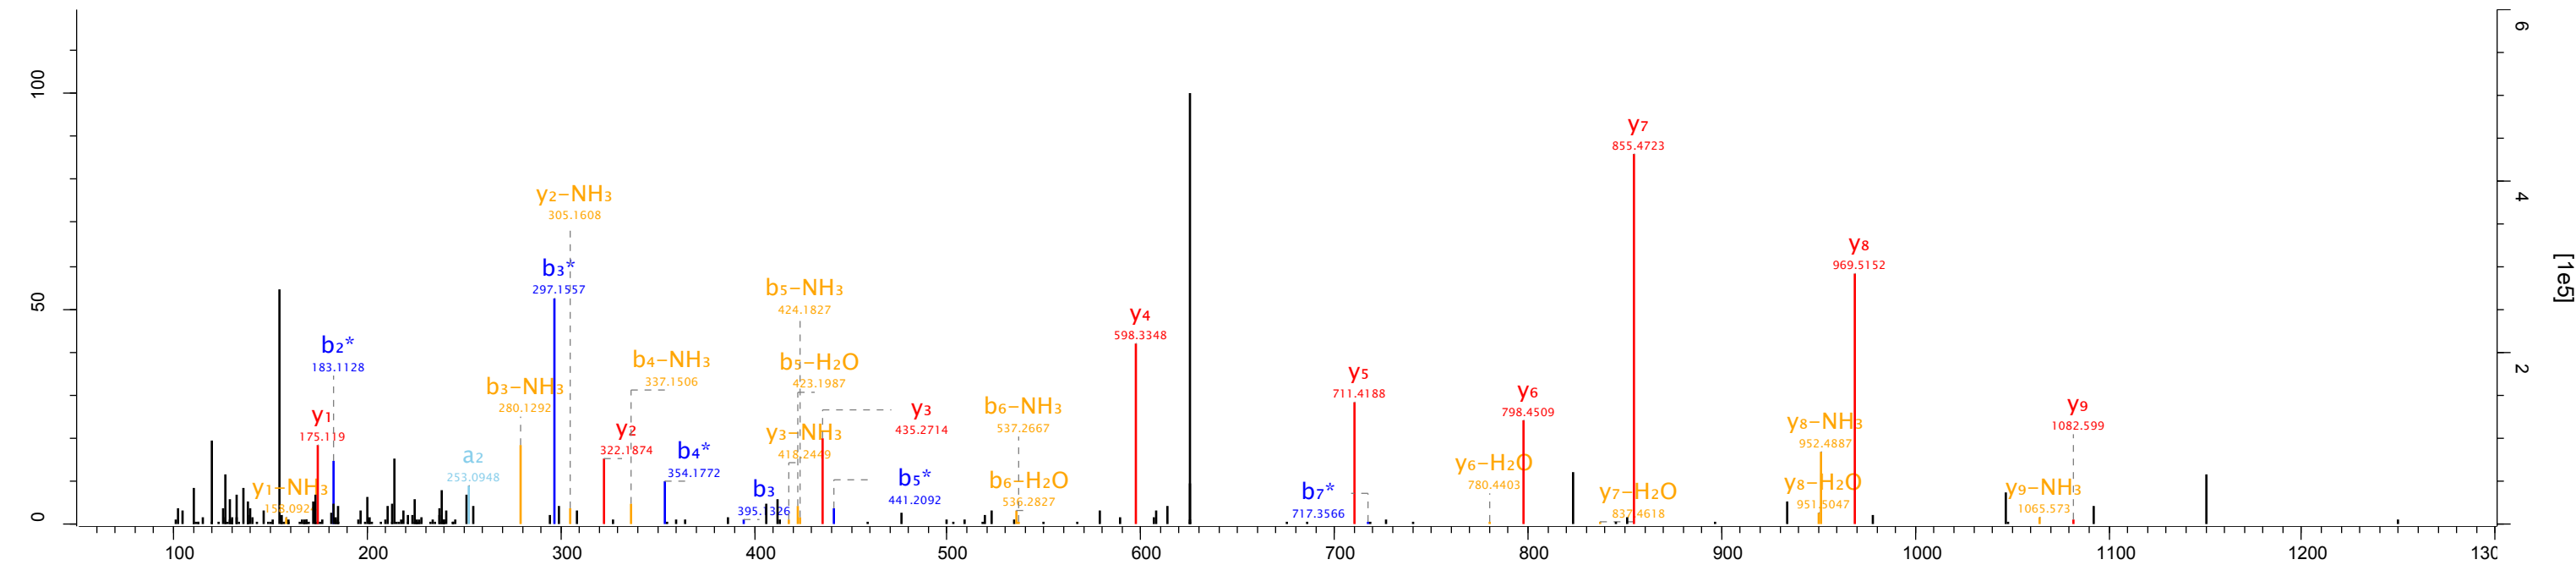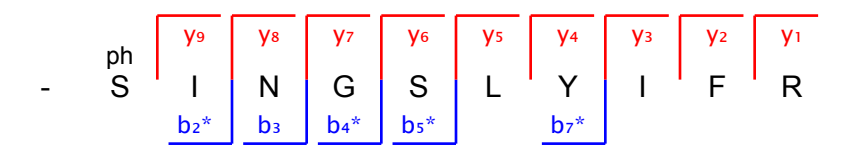



Raw file 20150814\_A375SR\_Phospho\_BR2\_05 Scan 25789 Method FTMS; HCD Score 73.92 m/z 968.41 Gene names MTF1

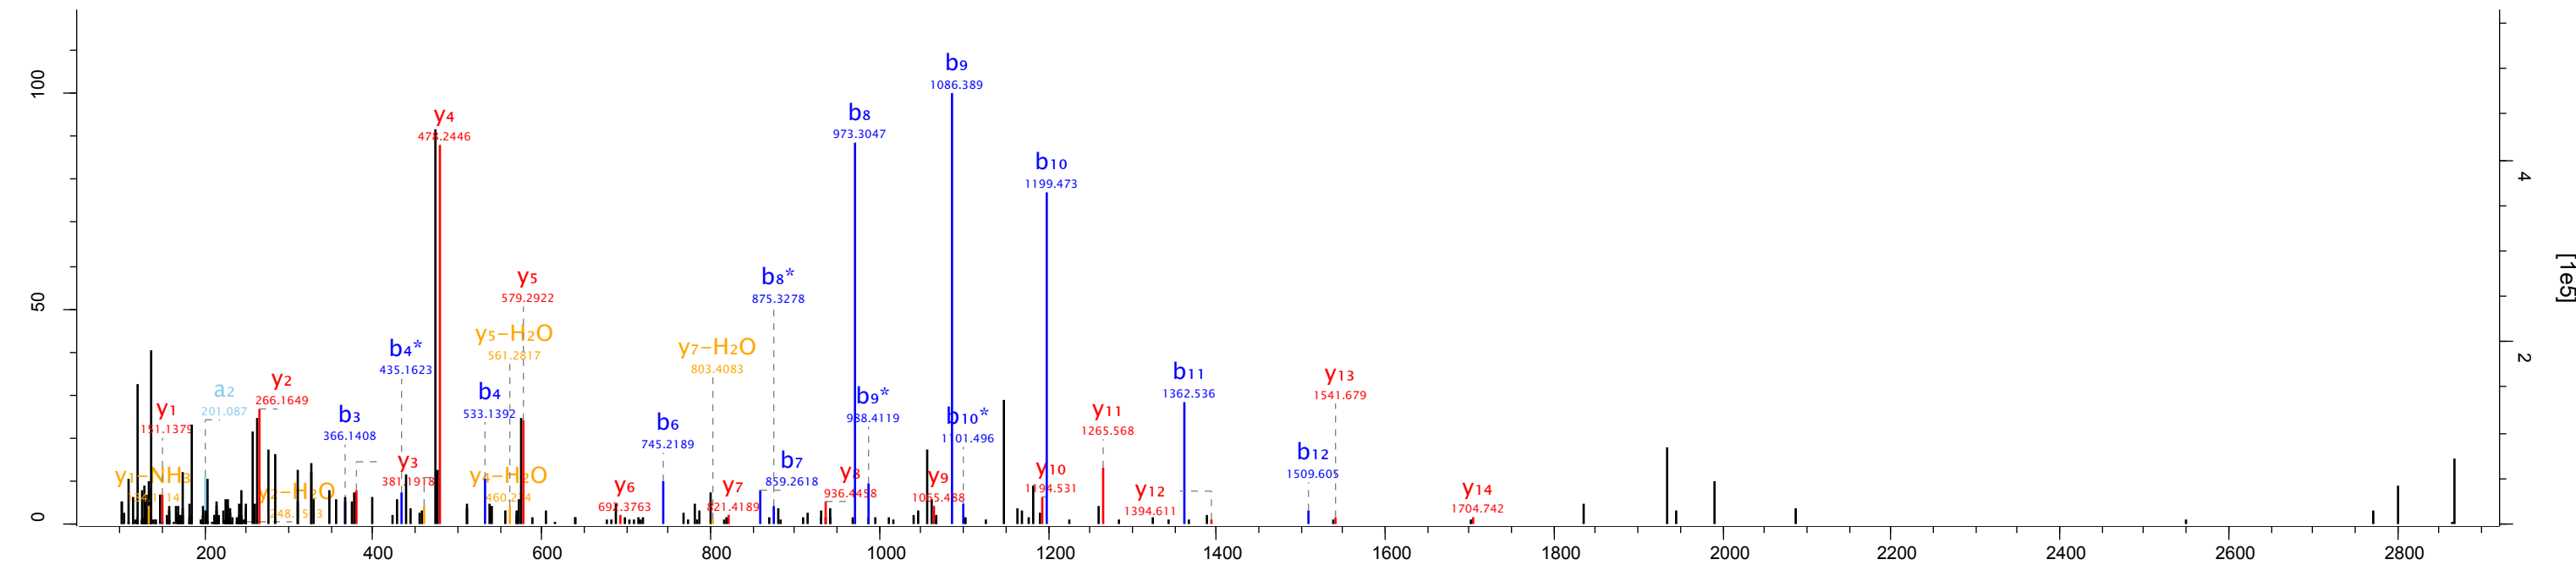

ac - G E H S P D N N I I Y F E A E E D E L T P D D K -

Fragmentation mapping: Blue boxes (b1-b12) are under E, H, S, D, N, N, I, I, Y, F. Red boxes (y1-y14) are under Y, F, E, A, E, E, D, E, L, T, P, D, D, K.

Raw file: 20150814\_A375SR\_Phospho\_BR2\_05  
 Scan: 26049 Method: FTMS; HCD Score: 85.45 m/z: 883.41 Gene names: SET

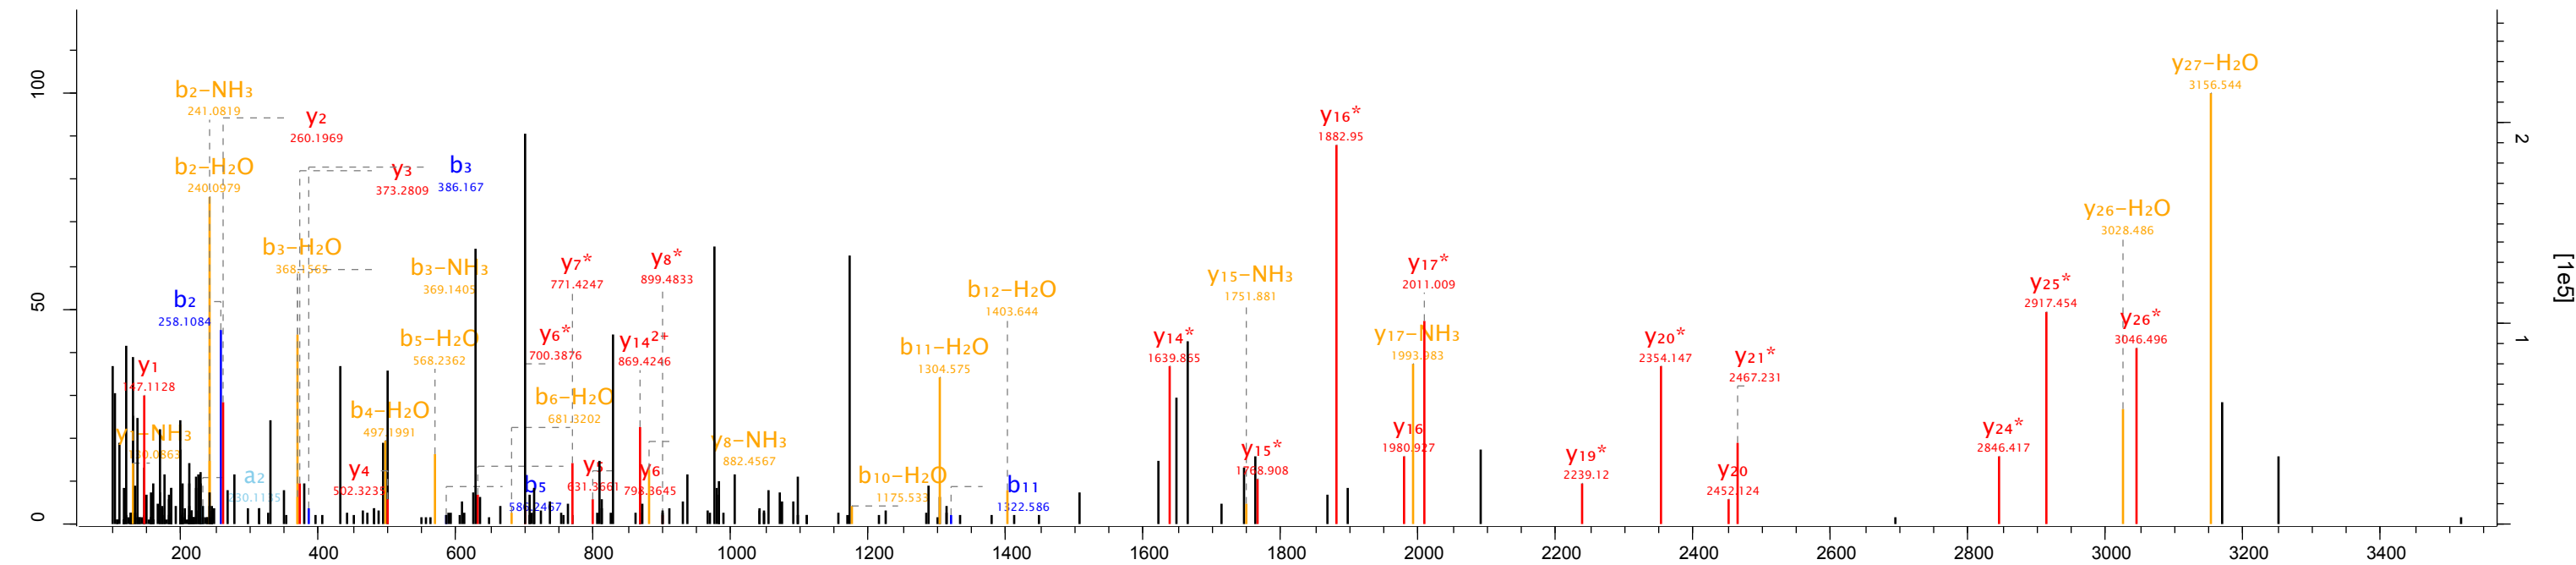

- E Q Q E A I E H I D E V Q N E I D R L N E Q A S E E I L K -

Fragmentation mapping (b and y ions):

- b<sub>2</sub> (under Q)
- b<sub>3</sub> (under Q)
- b<sub>5</sub> (under A)
- b<sub>11</sub> (under E)
- y<sub>1</sub> (under I)
- y<sub>2</sub> (under I)
- y<sub>3</sub> (under I)
- y<sub>4</sub> (under E)
- y<sub>5</sub> (under E)
- y<sub>6</sub> (under S)
- y<sub>7</sub> (under A)
- y<sub>8</sub> (under Q)
- y<sub>14</sub>\* (under I)
- y<sub>15</sub>\* (under E)
- y<sub>16</sub> (under N)
- y<sub>17</sub>\* (under Q)
- y<sub>19</sub>\* (under E)
- y<sub>20</sub> (under D)
- y<sub>21</sub>\* (under I)
- y<sub>24</sub>\* (under I)
- y<sub>25</sub>\* (under E)
- y<sub>26</sub>\* (under I)

Raw file Scan Method Score m/z Gene names  
 20150814\_A375SR\_Phospho\_BR2\_05 26219 FTMS; HCD 67.5 1138.09 DCLRE1A

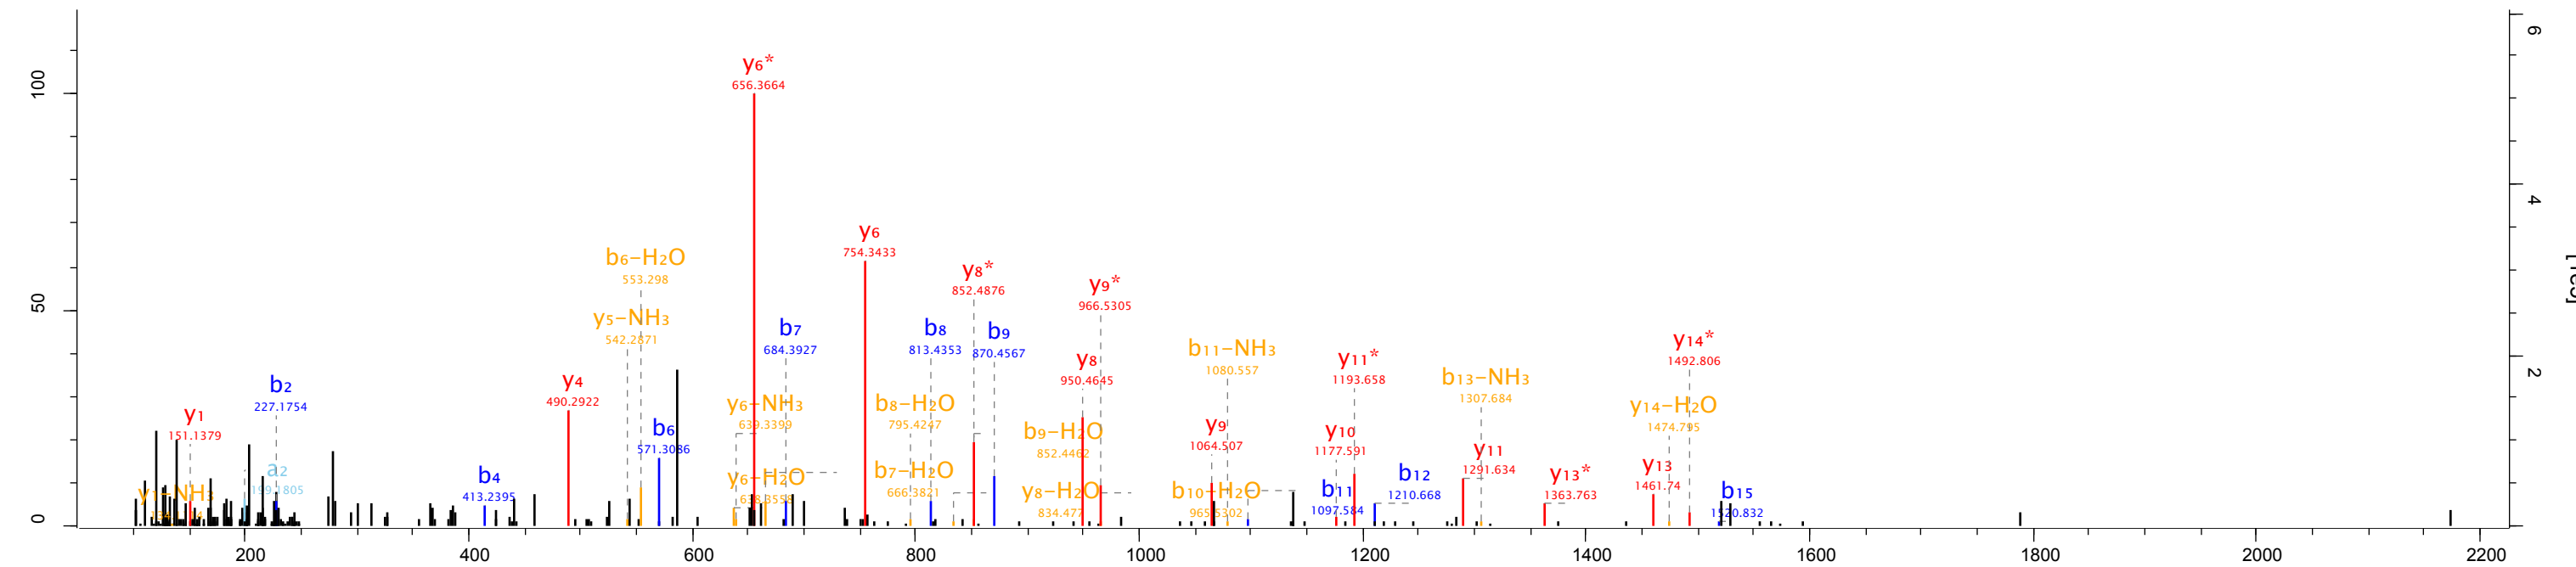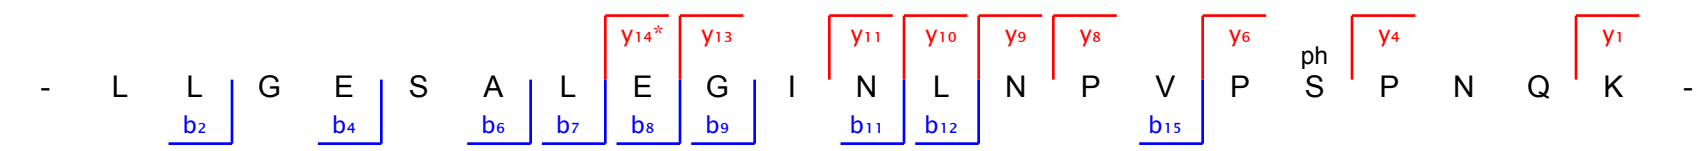

Raw file 20150814\_A375SR\_Phospho\_BR2\_05 Scan 26769 Method FTMS; HCD Score 139.11 m/z 712.34 Gene names GOLGA2

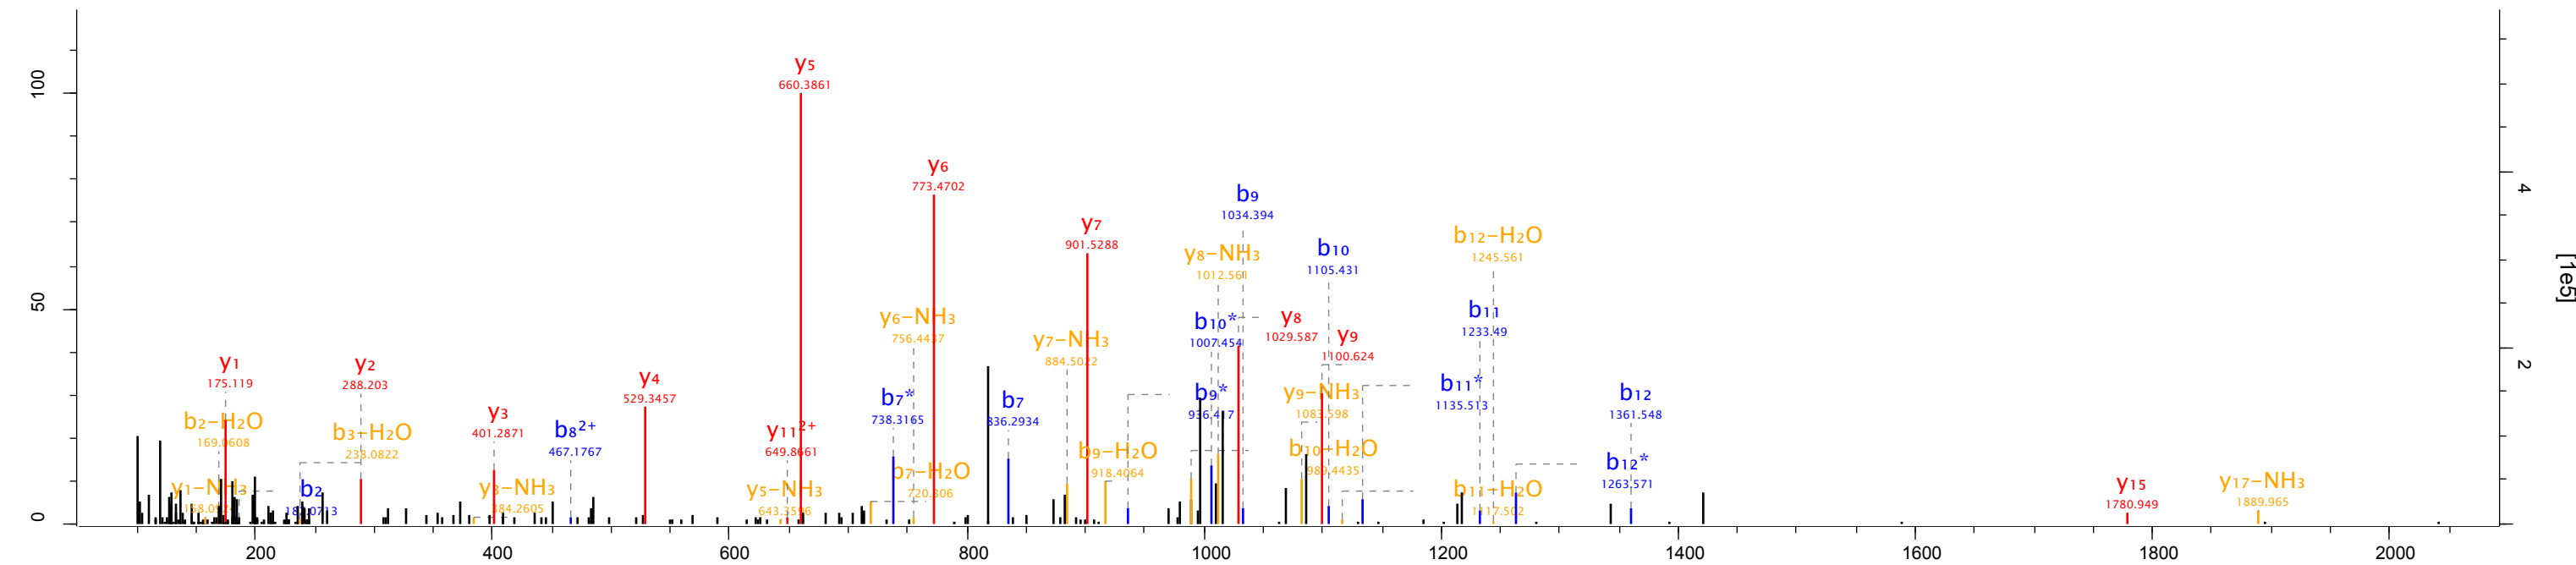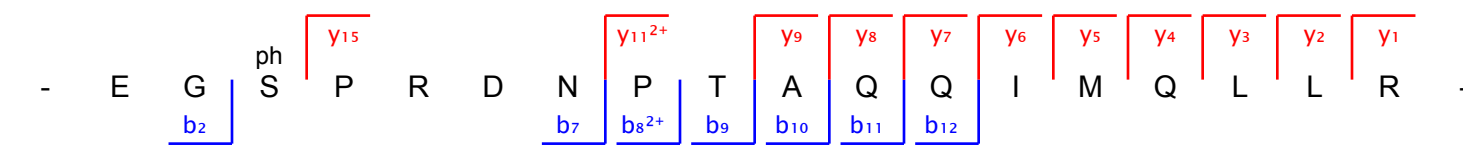

Raw file 20150814\_A375SR\_Phospho\_BR2\_05 Scan 26919 Method FTMS; HCD Score 118.04 m/z 1068.98 Gene names NUPL2

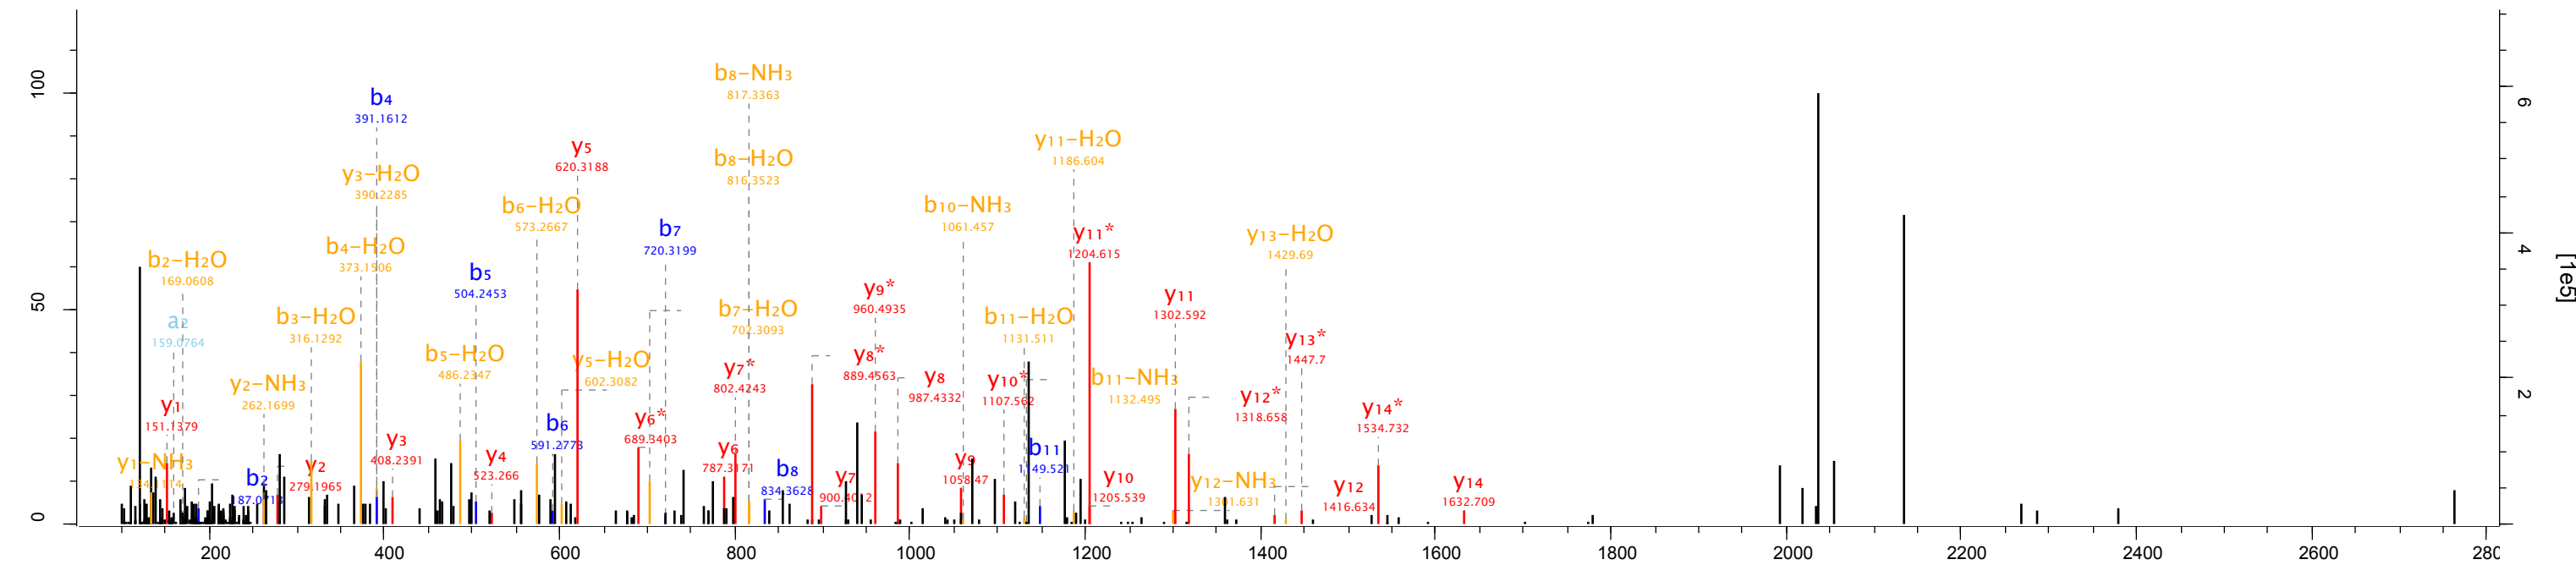

- E G F G L S E N P F A S L S P D E Q K -

Fragmentation mapping (b and y ions) is shown below the amino acid sequence:

- b<sub>2</sub> (under G)
- b<sub>4</sub> (under G)
- b<sub>5</sub> (under L)
- b<sub>6</sub> (under S)
- b<sub>7</sub> (under E)
- b<sub>8</sub> (under N)
- b<sub>11</sub> (under A)
- y<sub>1</sub> (under K)
- y<sub>2</sub> (under Q)
- y<sub>3</sub> (under E)
- y<sub>4</sub> (under D)
- y<sub>5</sub> (under P)
- y<sub>6</sub> (under S)
- y<sub>7</sub> (under L)
- y<sub>8</sub> (under S)
- y<sub>9</sub> (under A)
- y<sub>10</sub> (under F)
- y<sub>11</sub> (under P)
- y<sub>12</sub> (under N)
- y<sub>13</sub>\* (under E)
- y<sub>14</sub> (under S)

Raw file Scan Method Score m/z Gene names  
 20150814\_A375SR\_Phospho\_BR2\_05 27099 FTMS; HCD 171.78 1136.05 TPX2

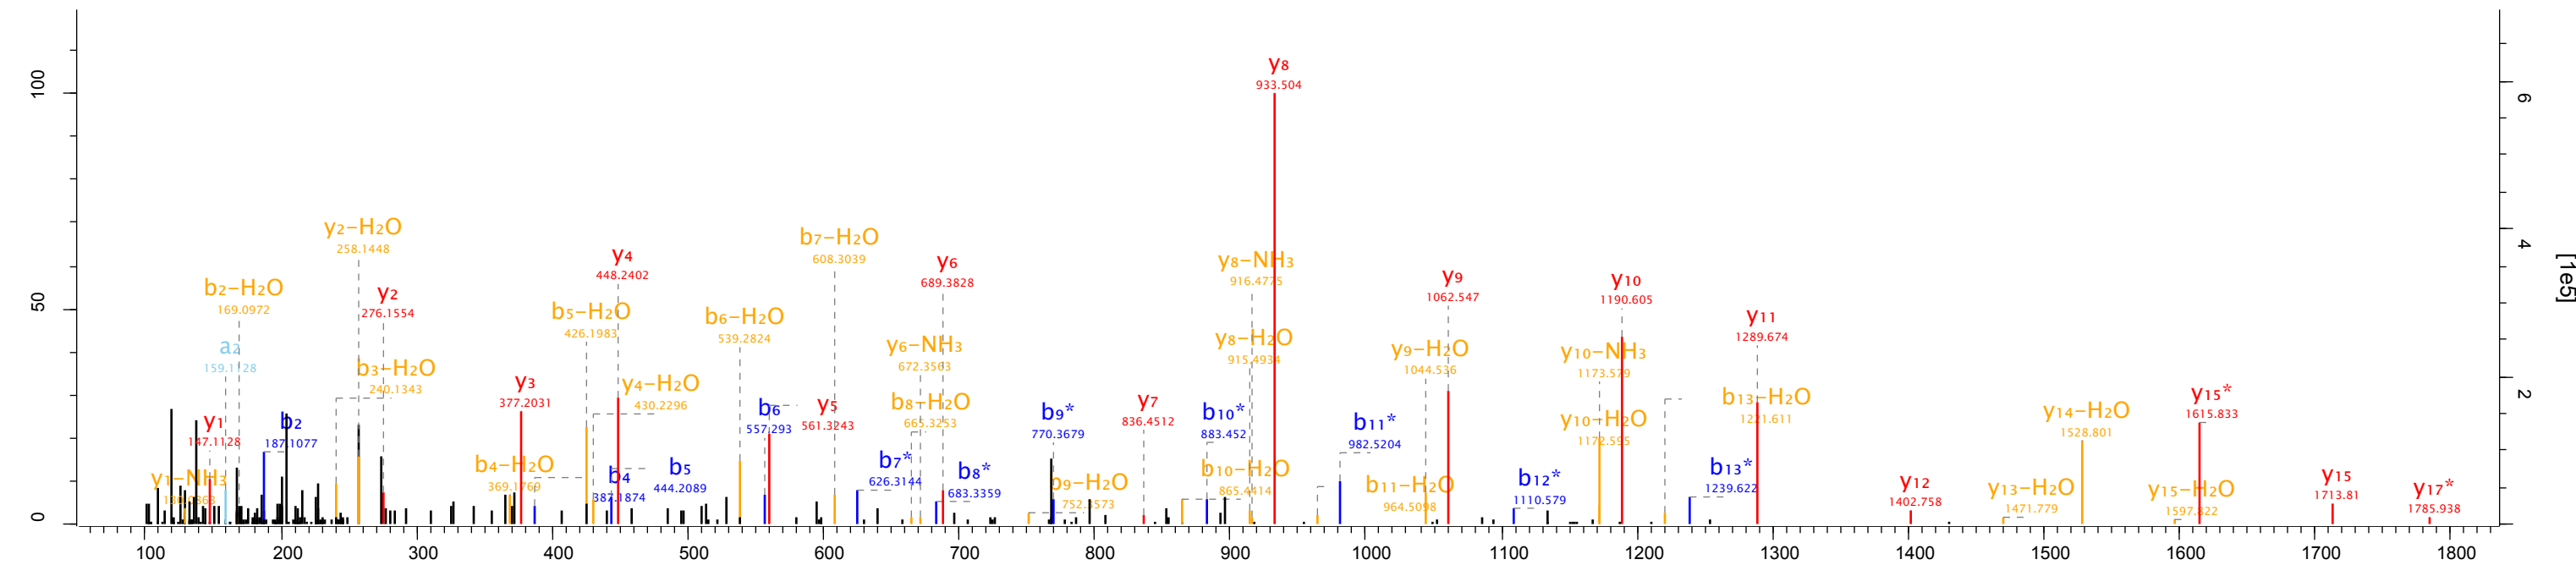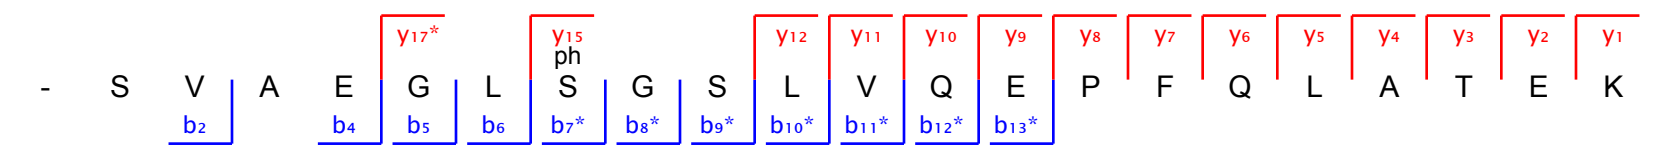



Raw file 20150814\_A375SR\_Phospho\_BR2\_05 Scan 27209 Method FTMS; HCD Score 156.58 m/z 1044.81 Gene names SRPK2

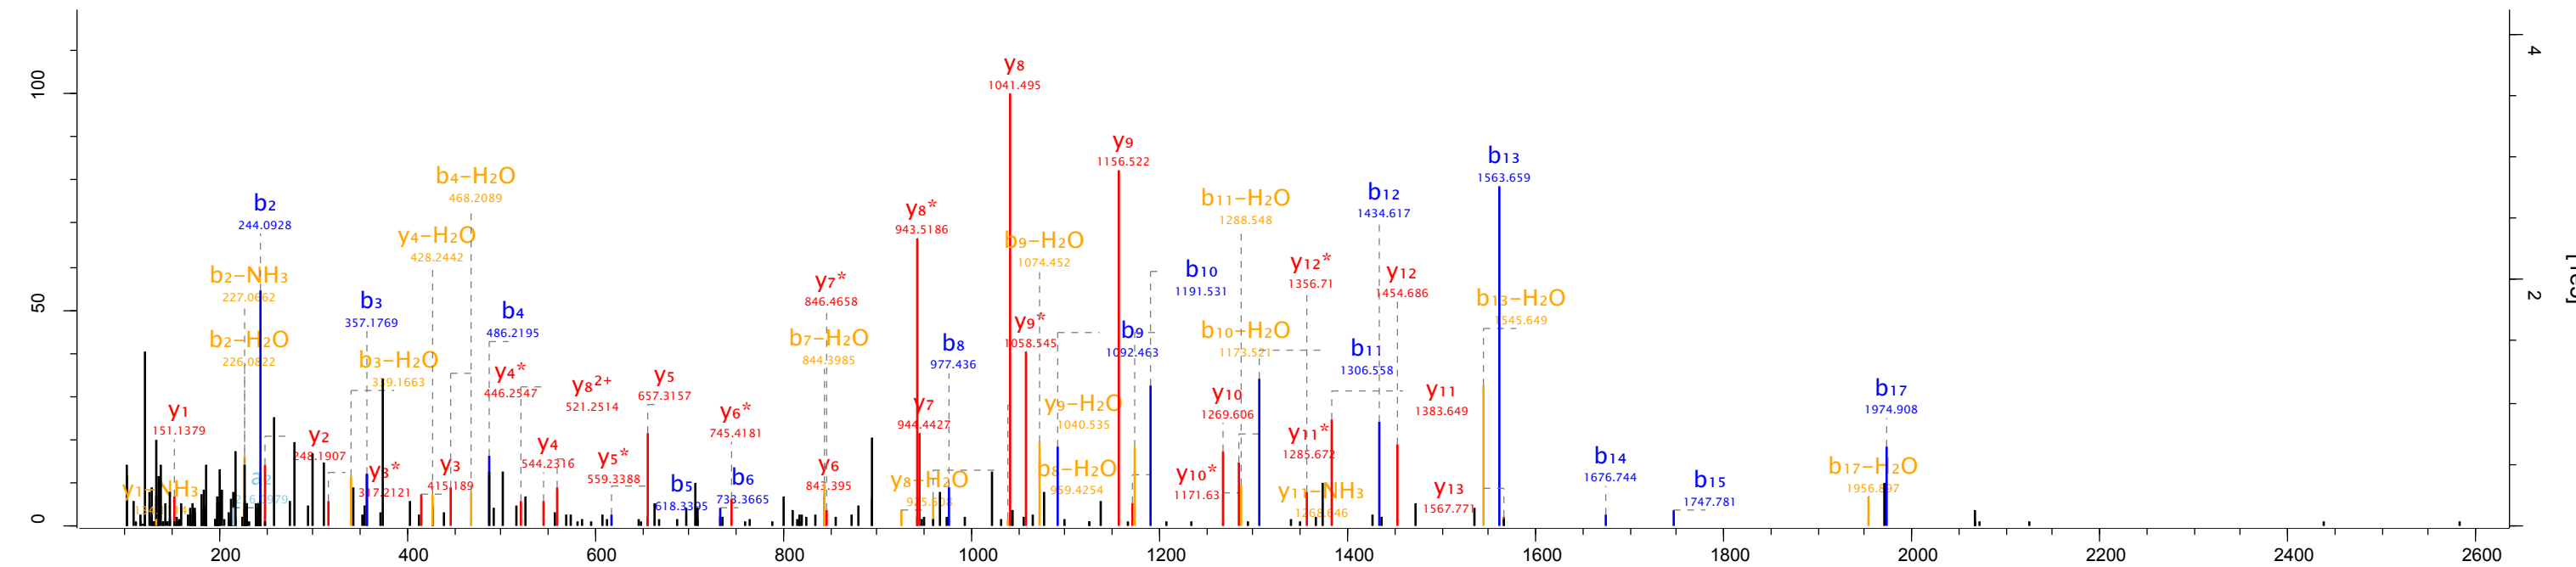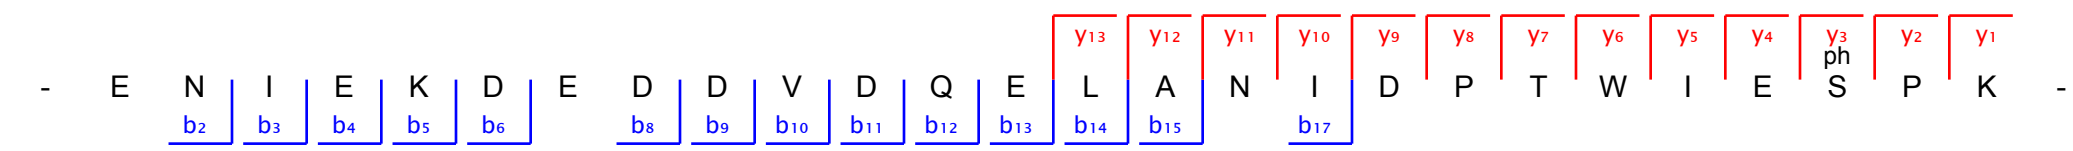

Raw file 20150814\_A375SR\_Phospho\_BR2\_05 Scan 27329 Method FTMS; HCD Score 82.99 m/z 917.05 Gene names DAB2

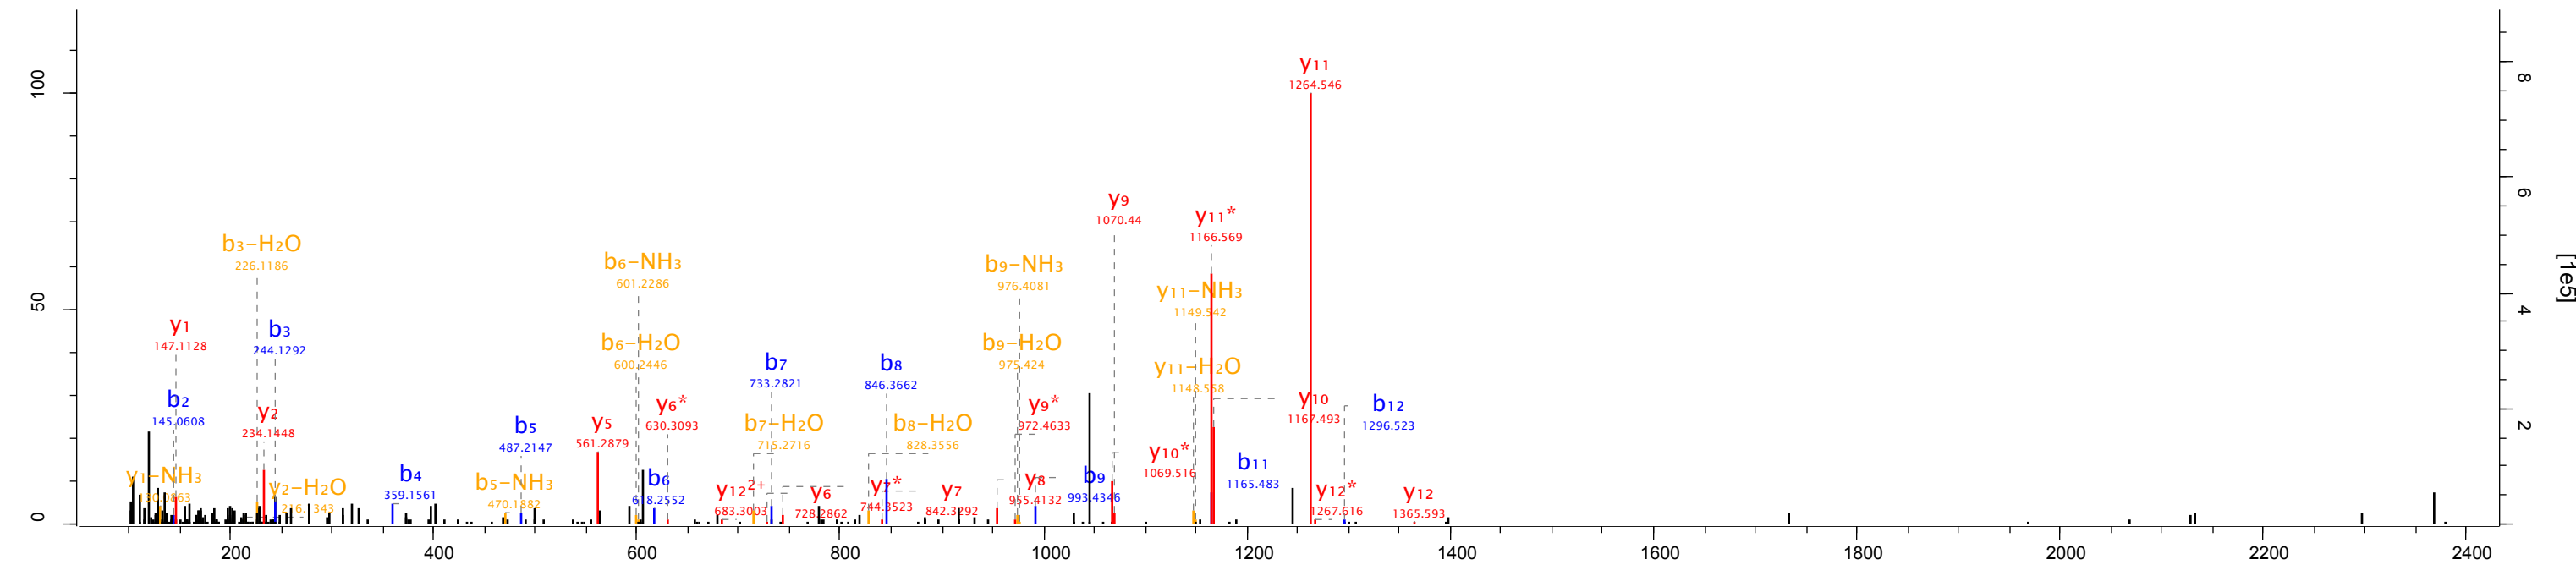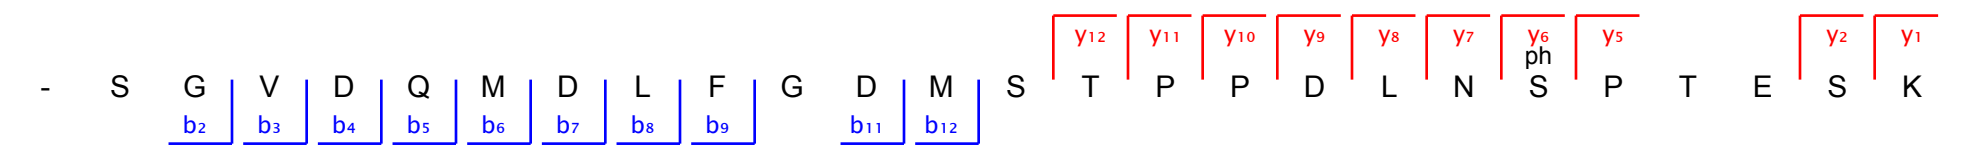



Raw file 20150814\_A375SR\_Phospho\_BR2\_05 Scan 28049 Method FTMS; HCD Score 99.22 m/z 878.07 Gene names CAMSAP2

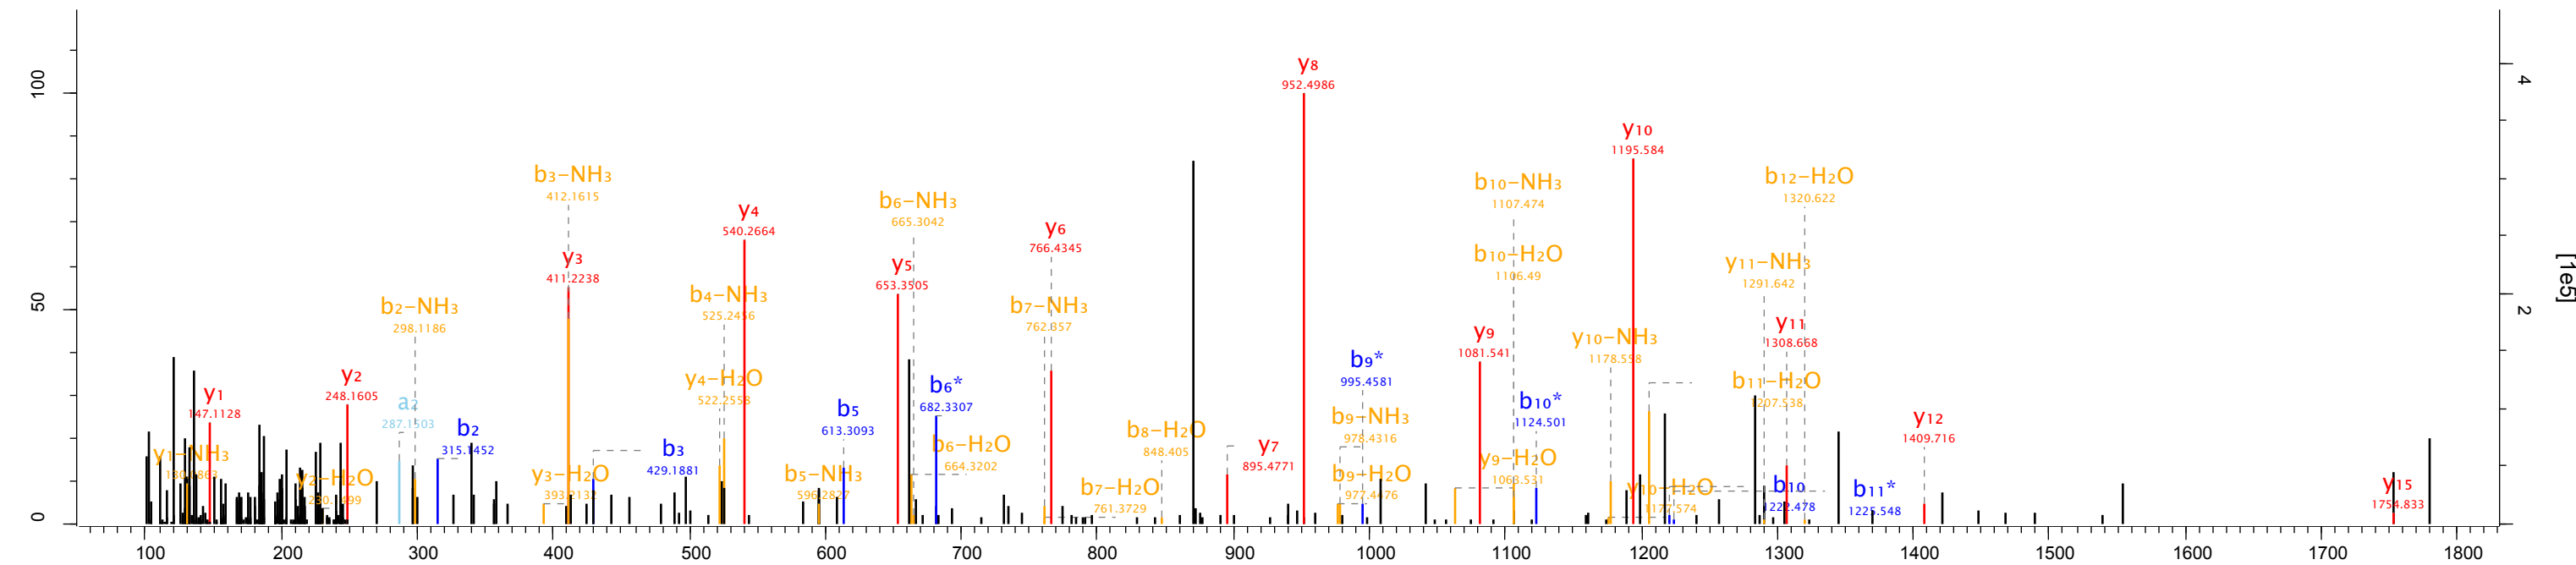

- Q W N L A S<sup>ph</sup> P S E E T L N E N G E I E Y T K -

b<sub>2</sub>
b<sub>3</sub>
b<sub>5</sub>
b<sub>6</sub><sup>\*</sup>
y<sub>15</sub>
y<sub>12</sub>
y<sub>11</sub>
y<sub>10</sub>
y<sub>9</sub>
y<sub>8</sub>
y<sub>7</sub>
y<sub>6</sub>
y<sub>5</sub>
y<sub>4</sub>
y<sub>3</sub>
y<sub>2</sub>
y<sub>1</sub>
b<sub>9</sub><sup>\*</sup>
b<sub>10</sub>
b<sub>11</sub><sup>\*</sup>

Raw file: 20150814\_A375SR\_Phospho\_BR2\_05  
 Scan: 2819 Method: FTMS; HCD Score: 65.16 m/z: 490.25 Gene names: CCDC88A

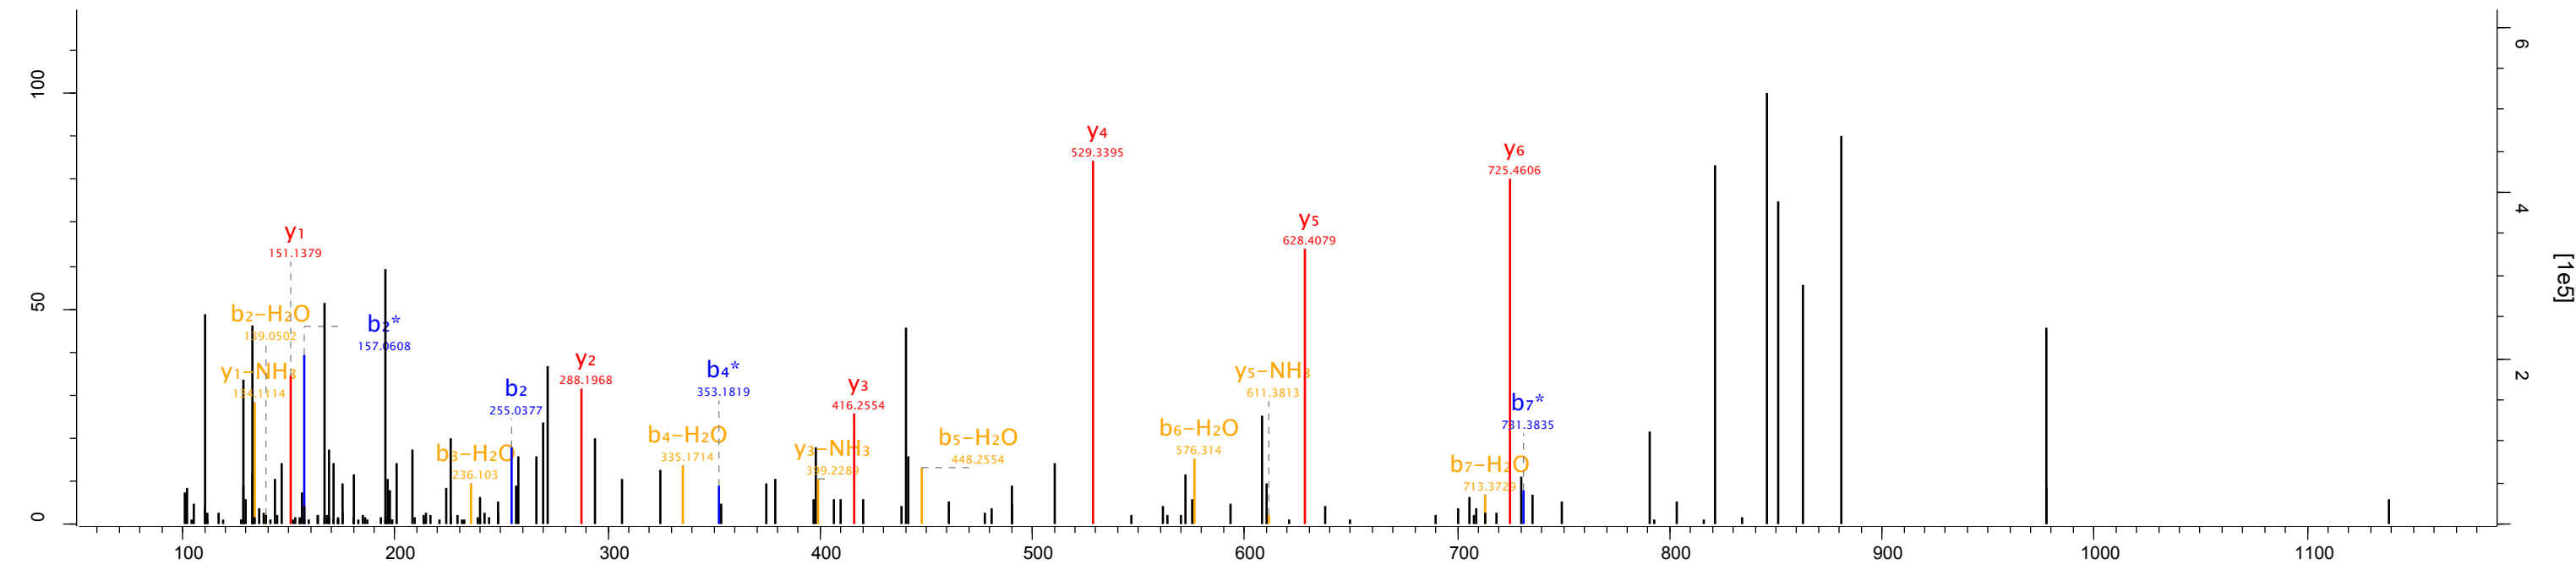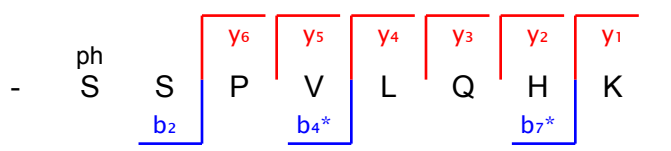

Raw file: 20150814\_A375SR\_Phospho\_BR2\_05  
 Scan: 28379 Method: FTMS; HCD Score: 123.62 m/z: 1127.22 Gene names: EIF4ENIF1

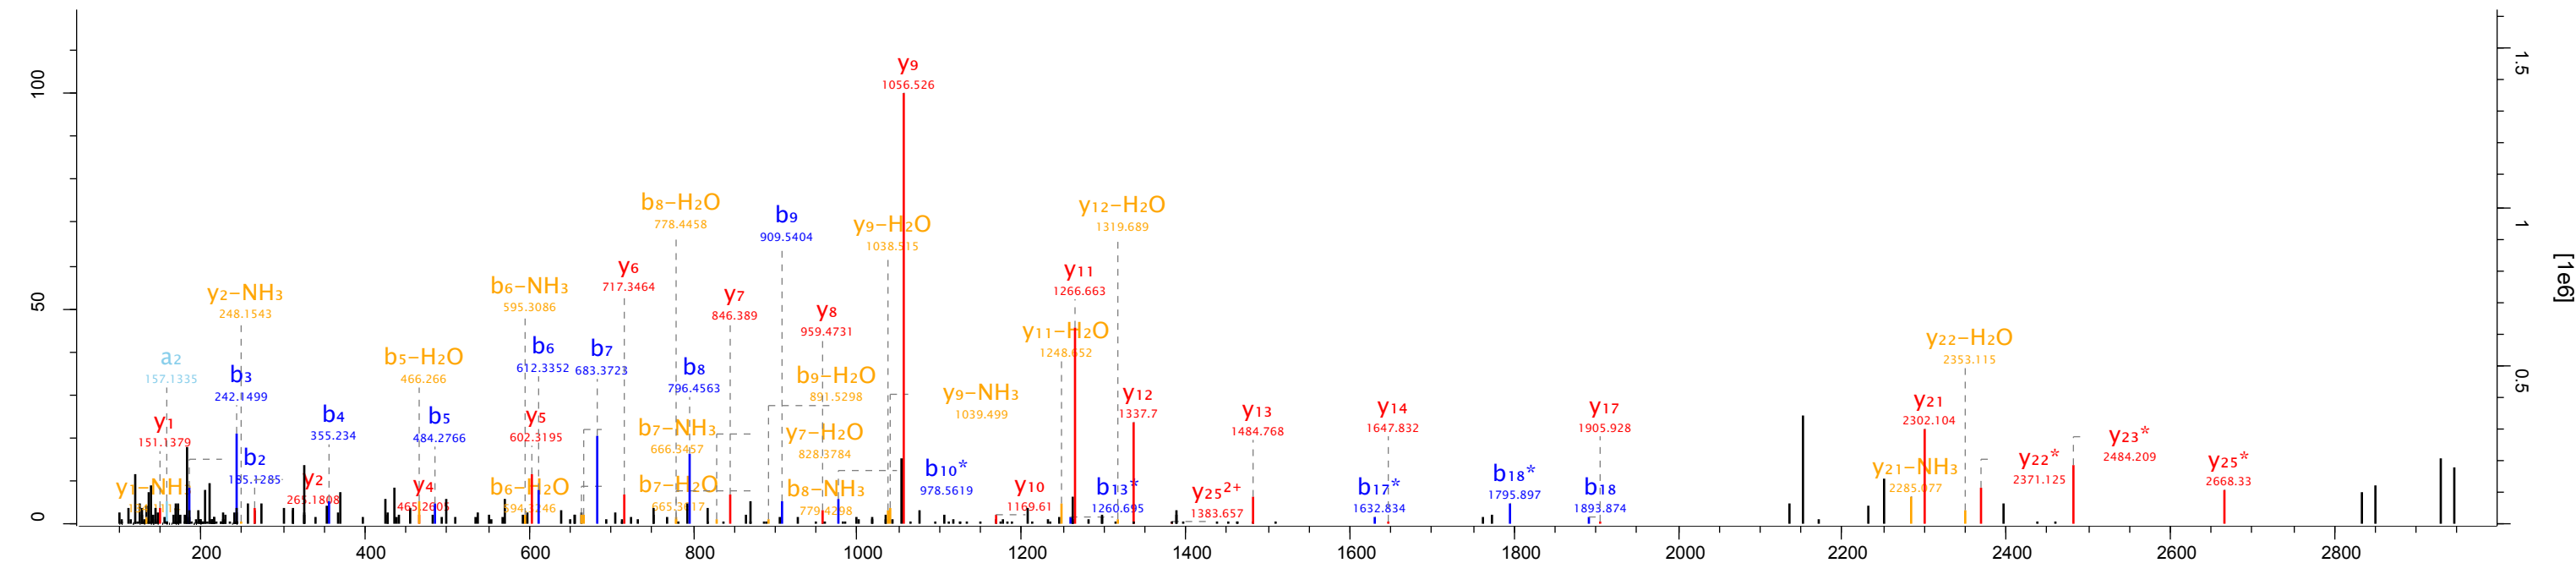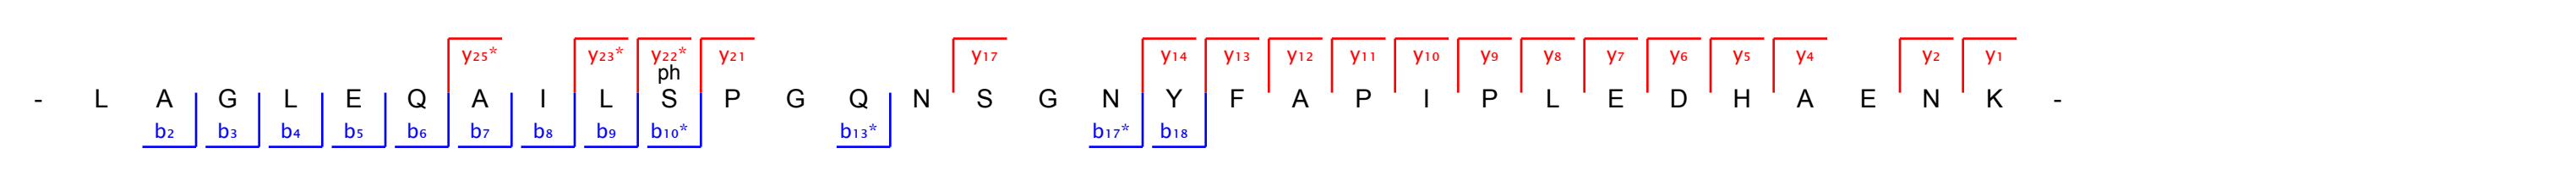

Raw file: 20150814\_A375SR\_Phospho\_BR2\_05  
 Scan: 28559 Method: FTMS; HCD Score: 163.48 m/z: 1086.82 Gene names: ARHGAP35

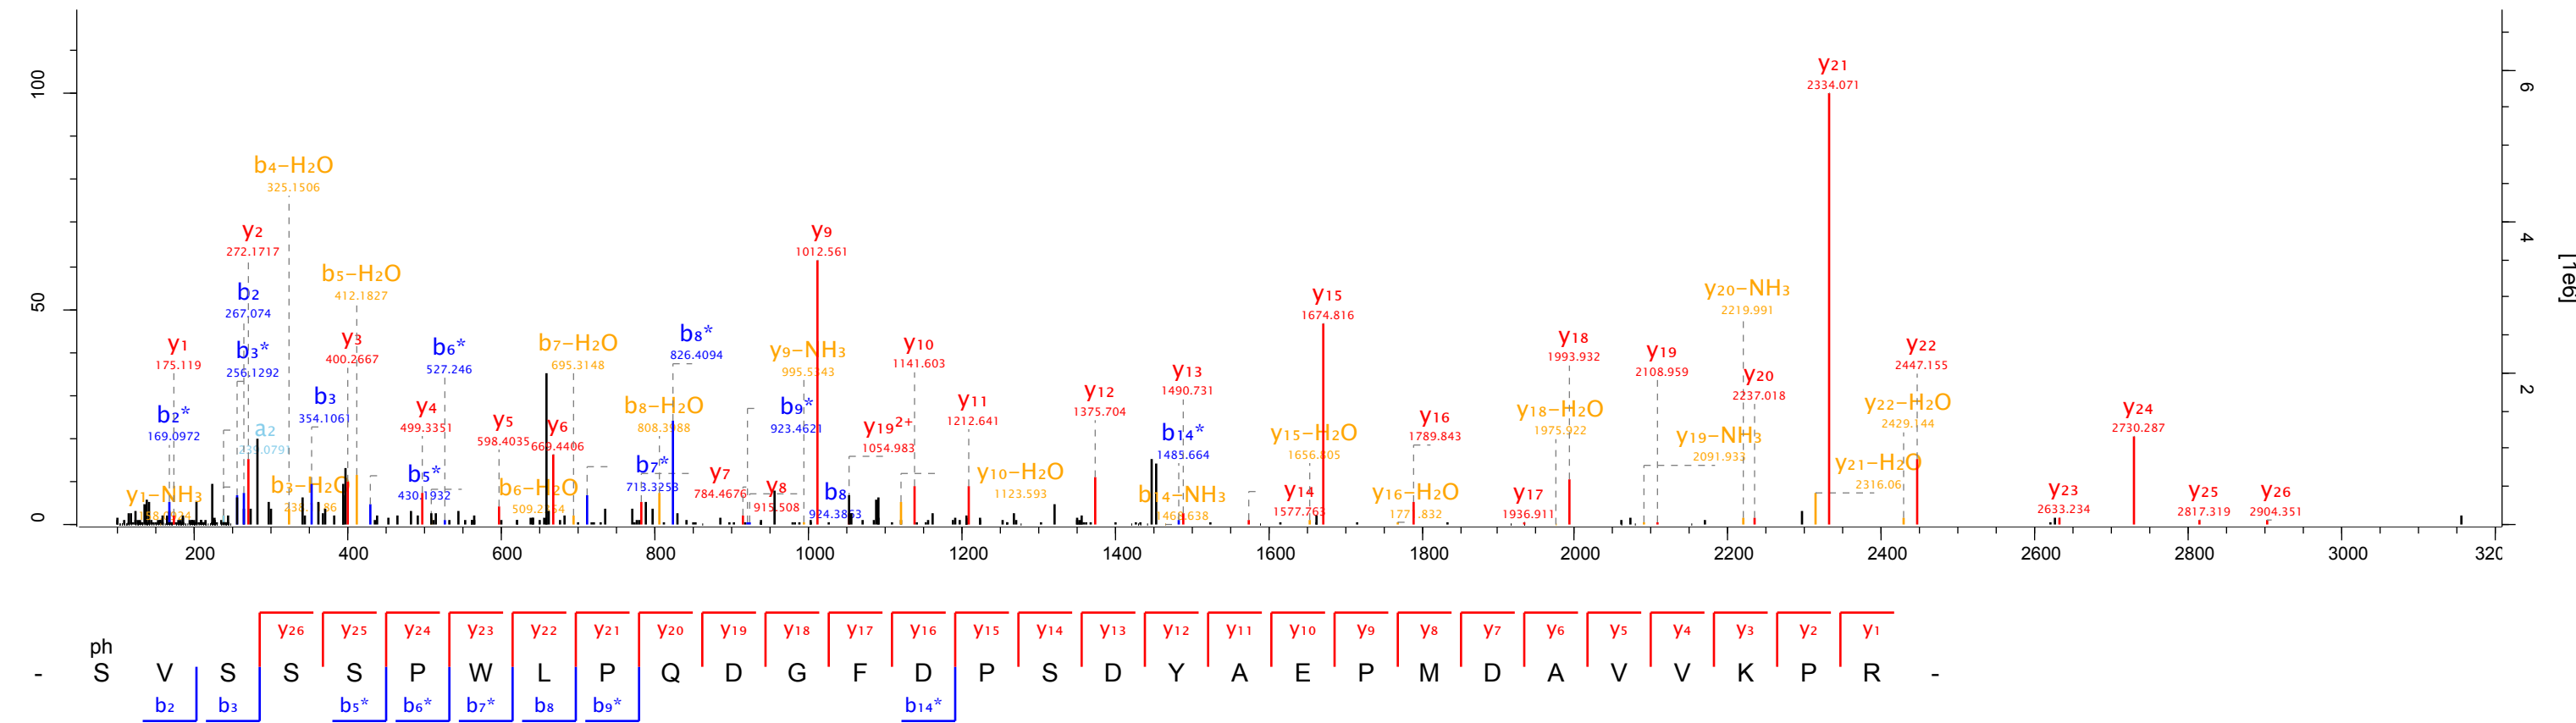

Raw file  
20150814\_A375SR\_Phospho\_BR2\_05

Scan 28569 Method FTMS; HCD Score 281.91 m/z 873.9 Gene names PURB

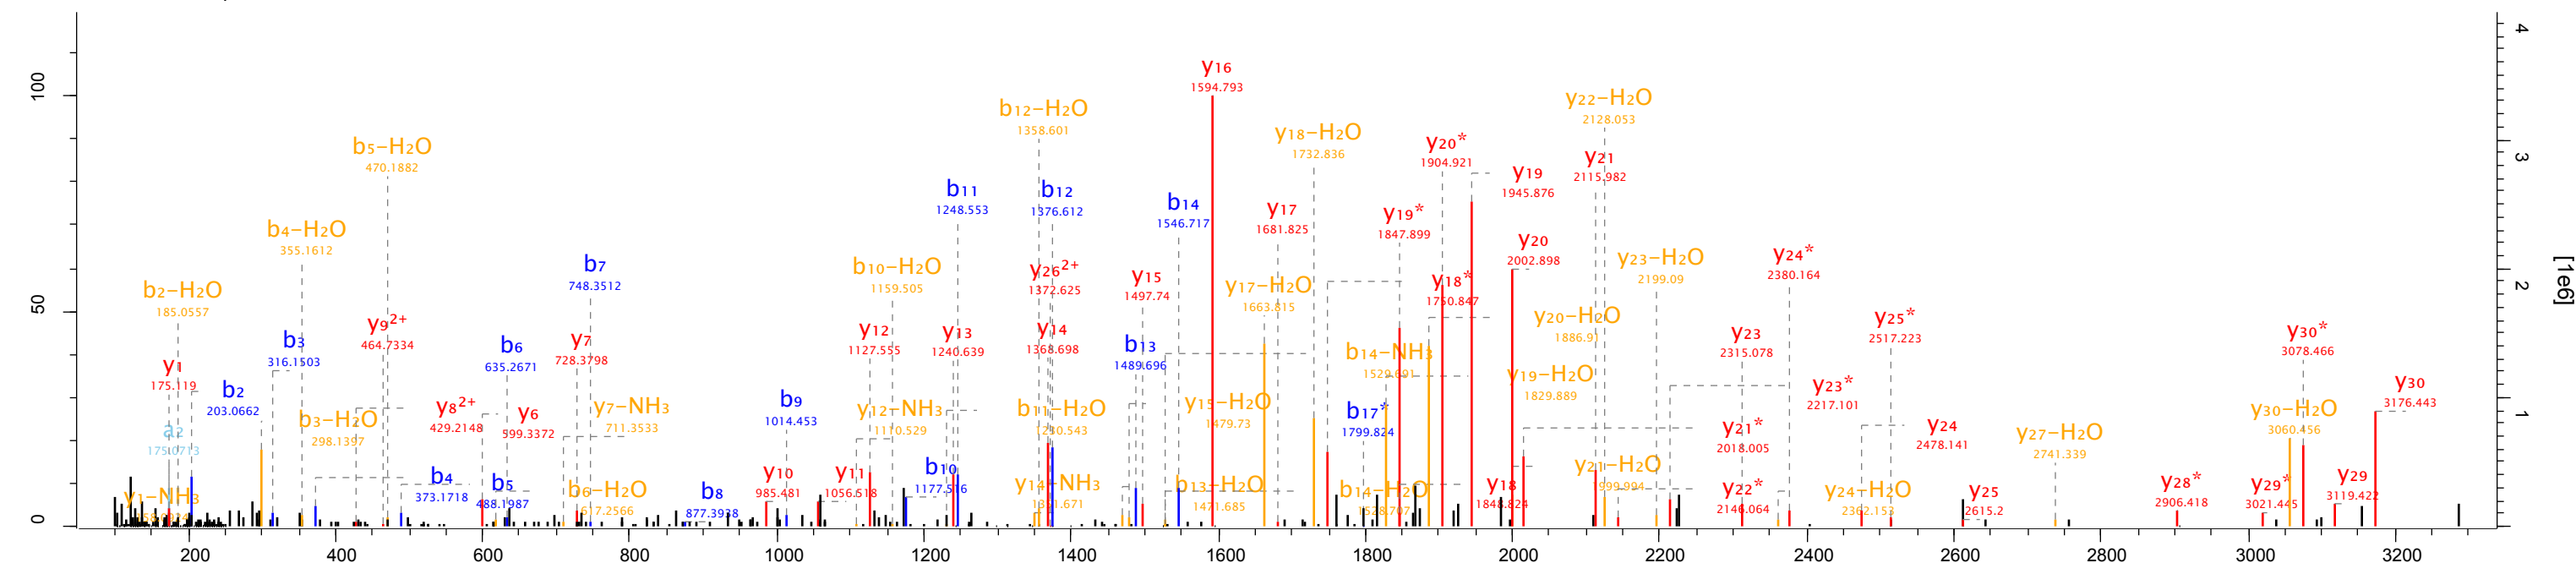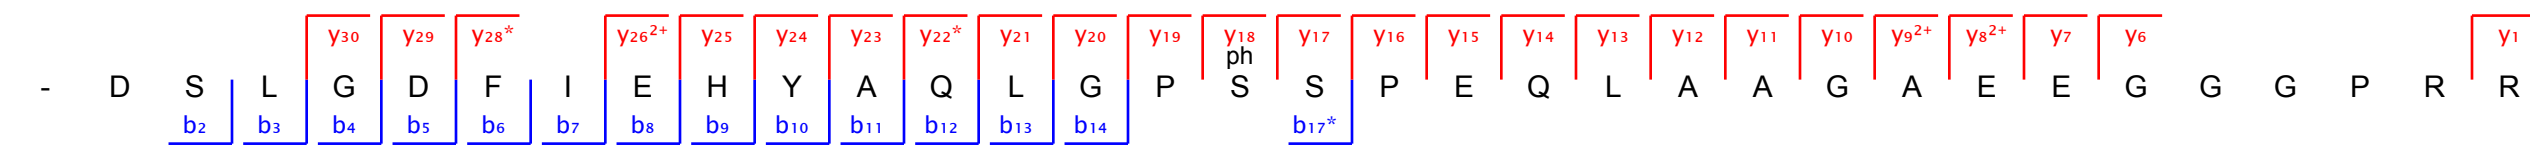



Raw file: 20150814\_A375SR\_Phospho\_BR2\_05  
 Scan: 28799 Method: FTMS; HCD Score: 195.52 m/z: 1070.88 Gene names: EDC4

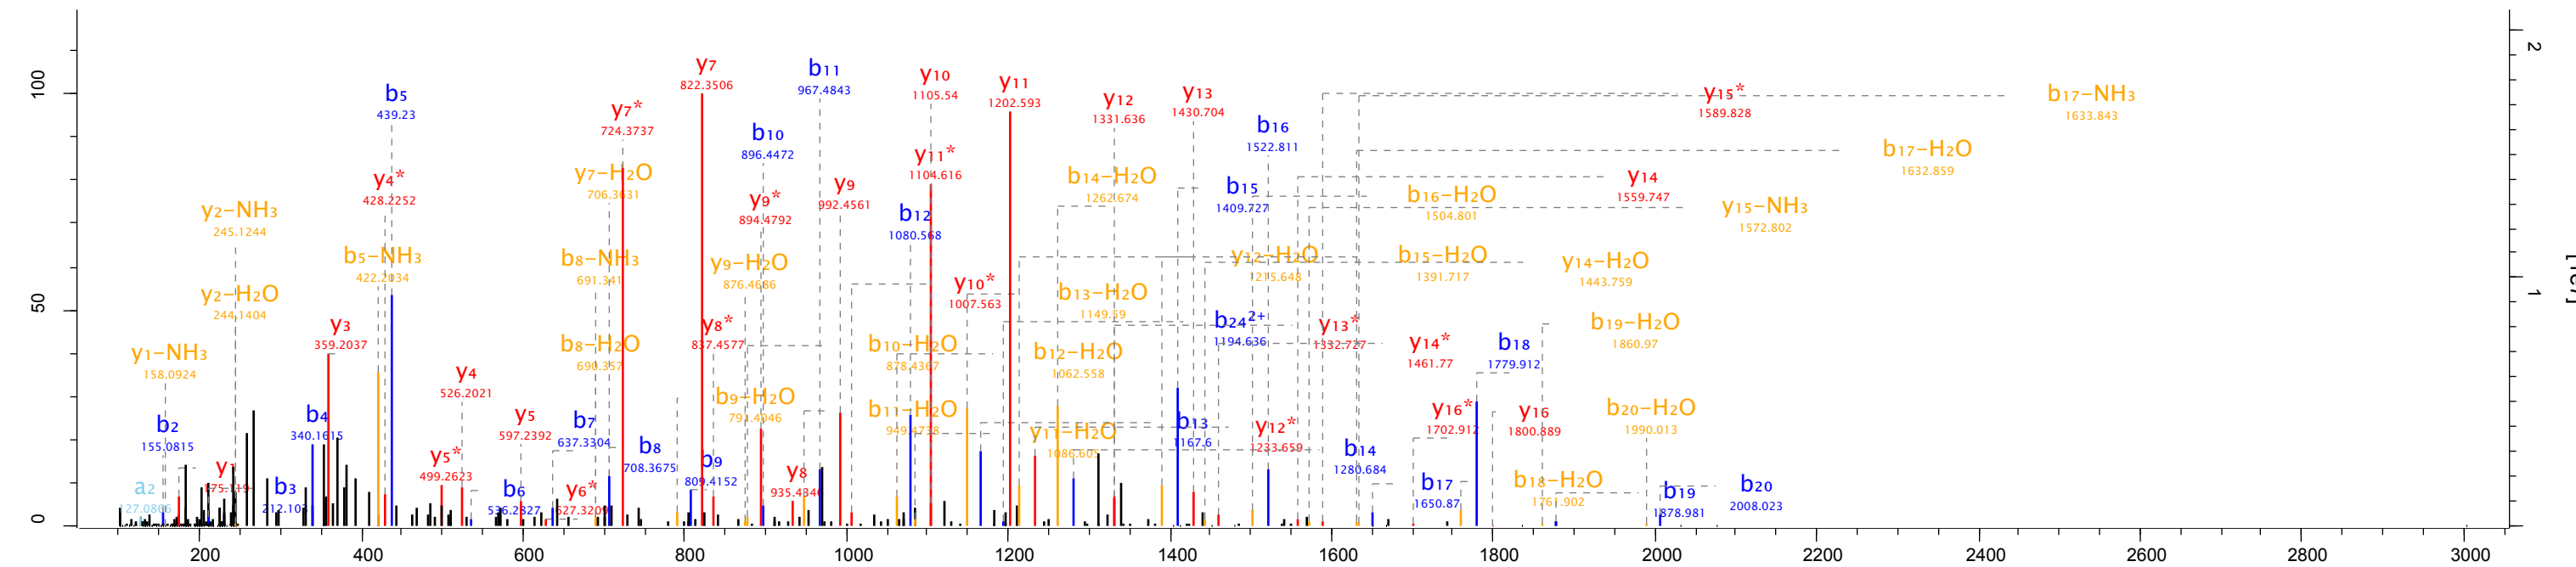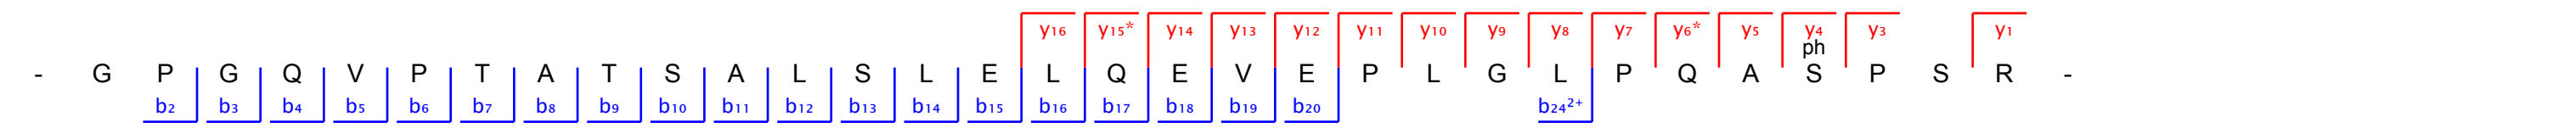

Raw file 20150814\_A375SR\_Phospho\_BR2\_05 Scan 28949 Method FTMS; HCD Score 202.26 m/z 880.91 Gene names PSME3

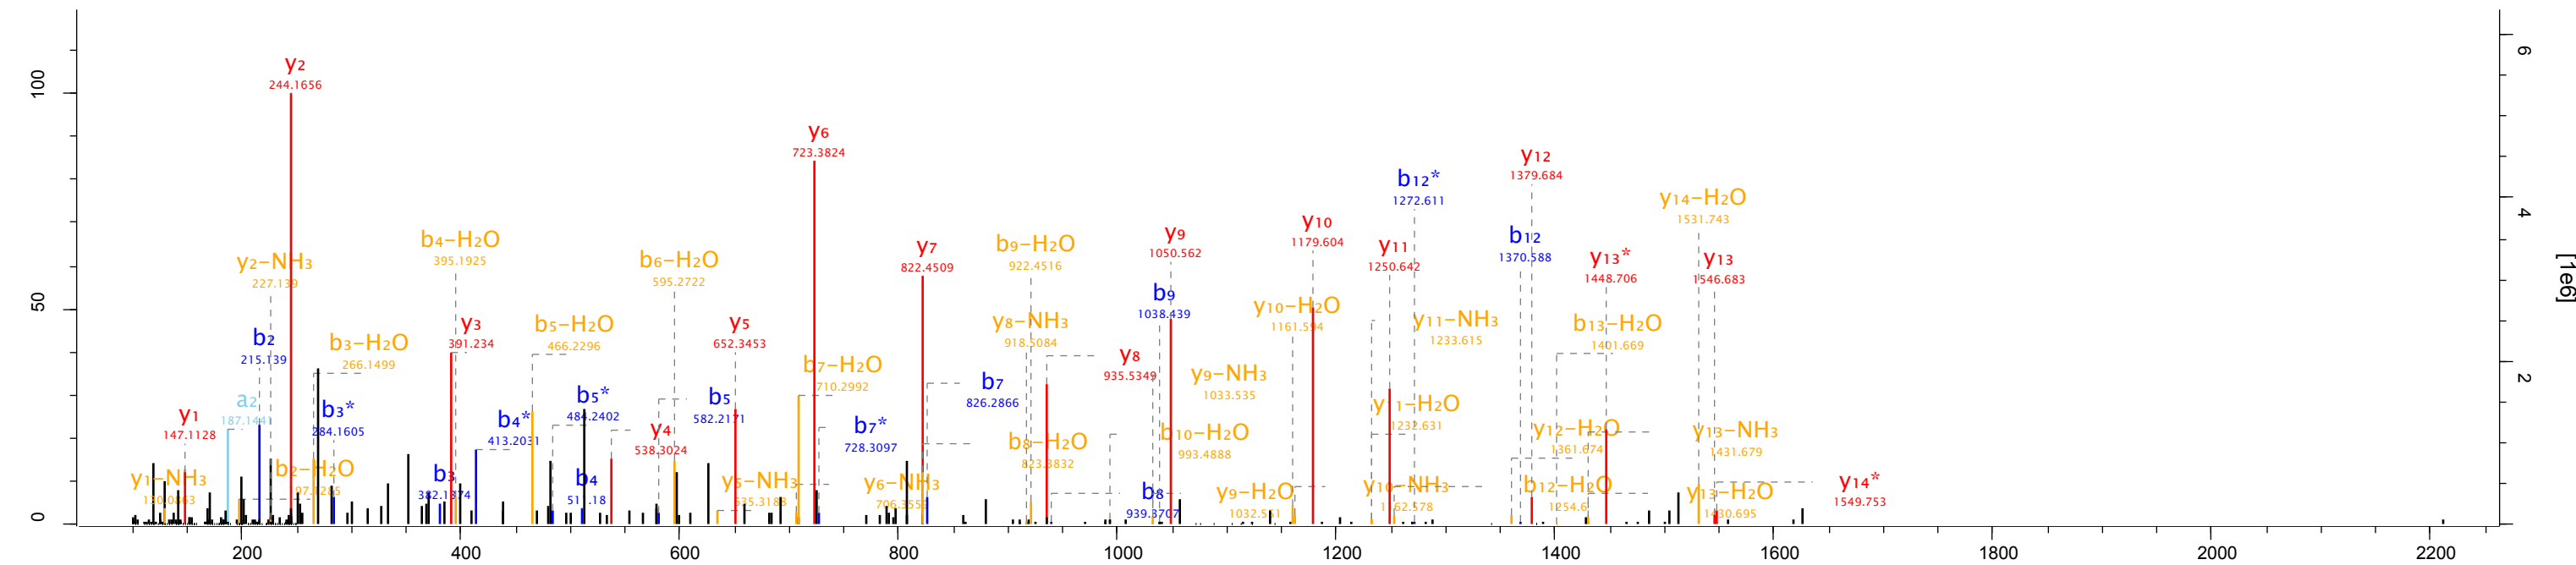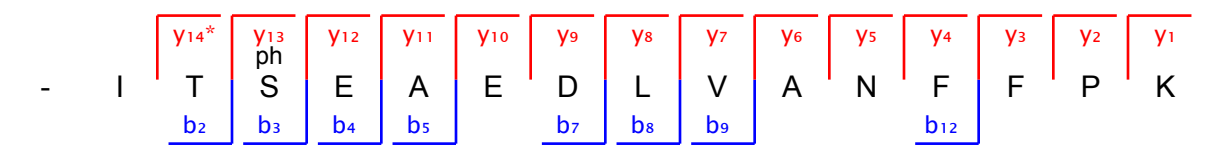

Raw file: 20150814\_A375SR\_Phospho\_BR2\_05  
 Scan: 3849 Method: FTMS; HCD Score: 90.15 m/z: 502.77 Gene names: BRAF

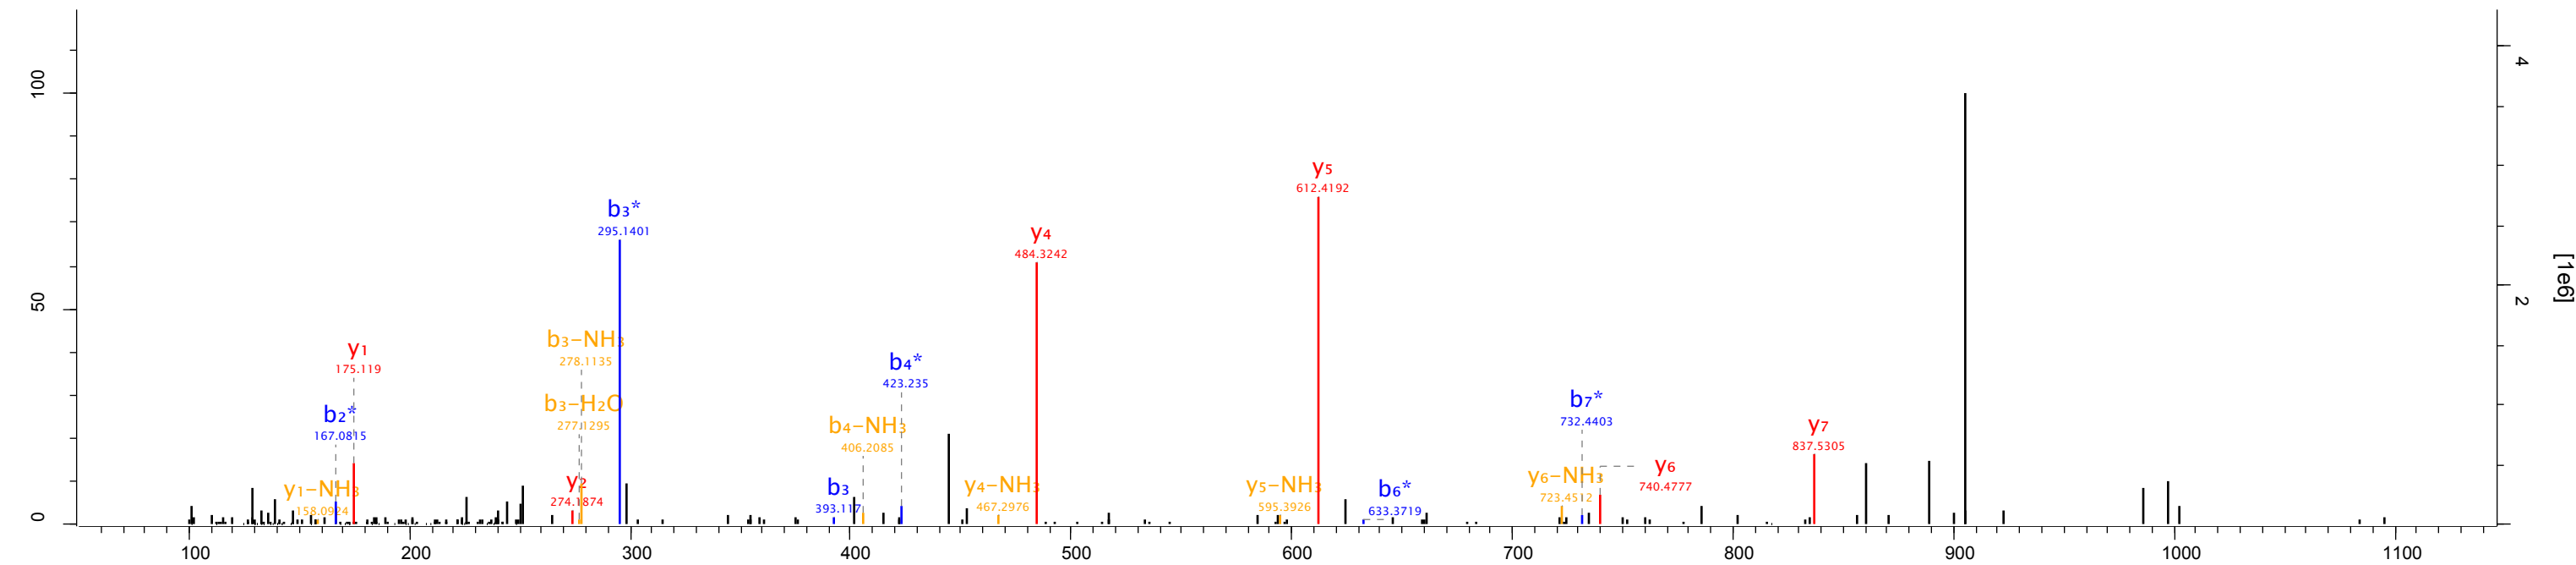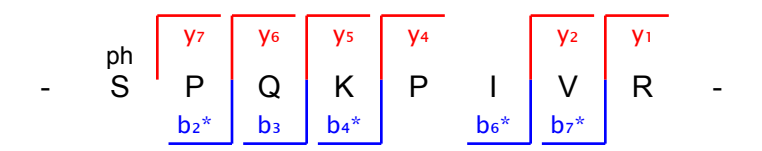

Raw file: 20150814\_A375SR\_Phospho\_BR2\_05  
 Scan: 3979 Method: FTMS; HCD Score: 370.75 m/z: 809.8 Gene names: EIF5B

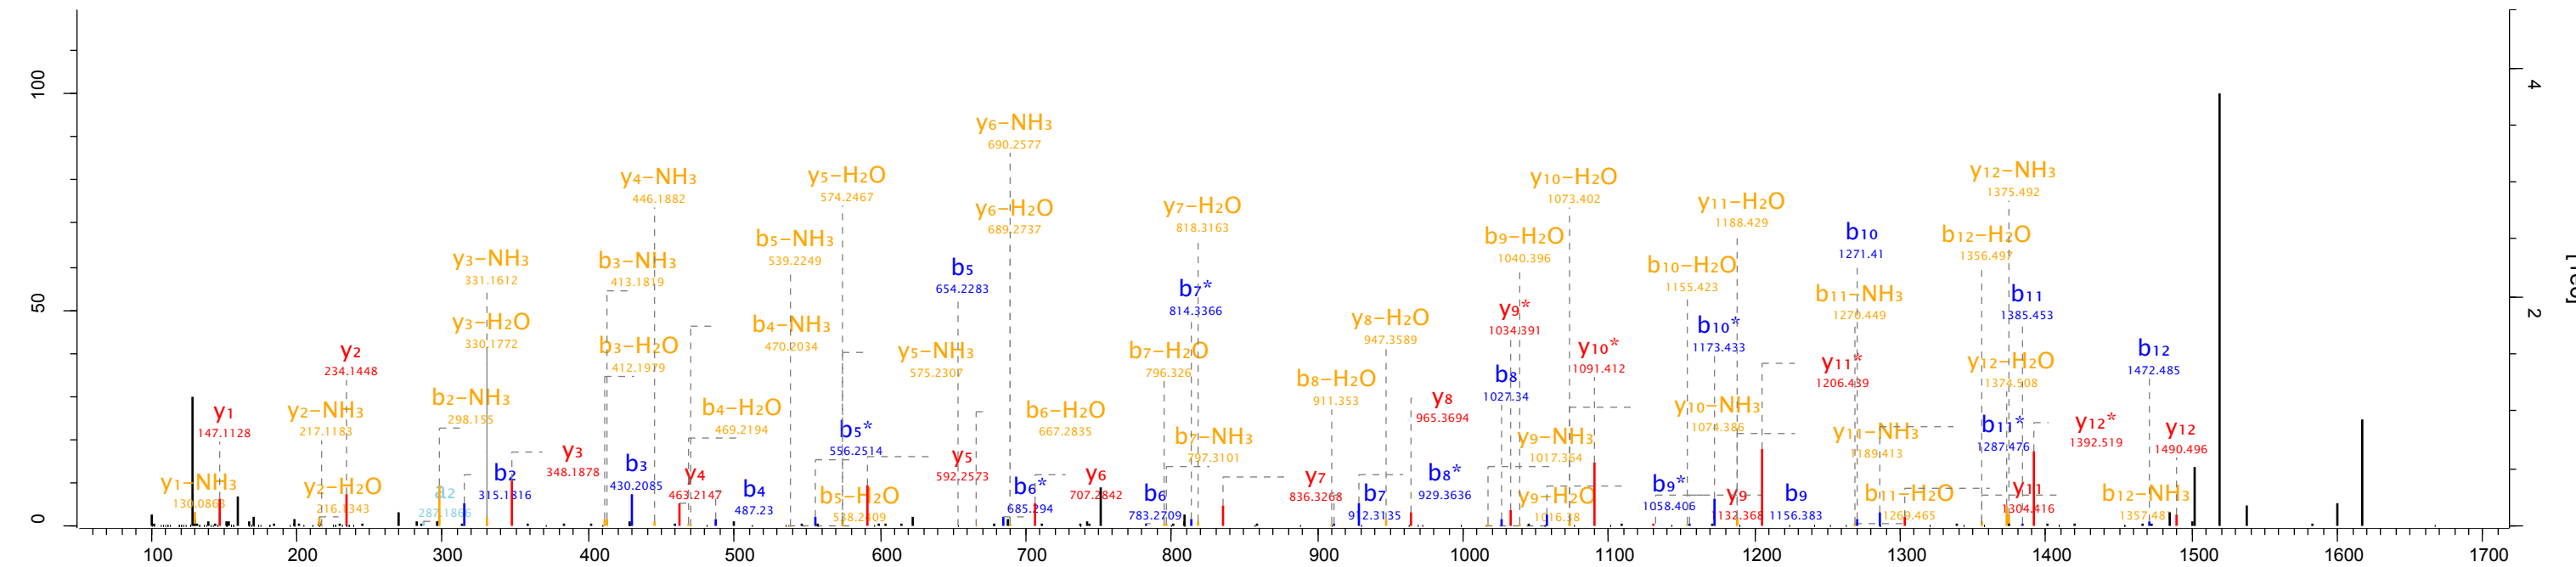

- K W D G S E E D N S K -  
 b2 b3 b4 b5 b6 b7 b8 b9 b10 b11 b12

Raw file: 20150814\_A375SR\_Phospho\_BR2\_05  
 Scan: 4119 Method: FTMS; HCD Score: 147.7 m/z: 685.77 Gene names: CLSPN

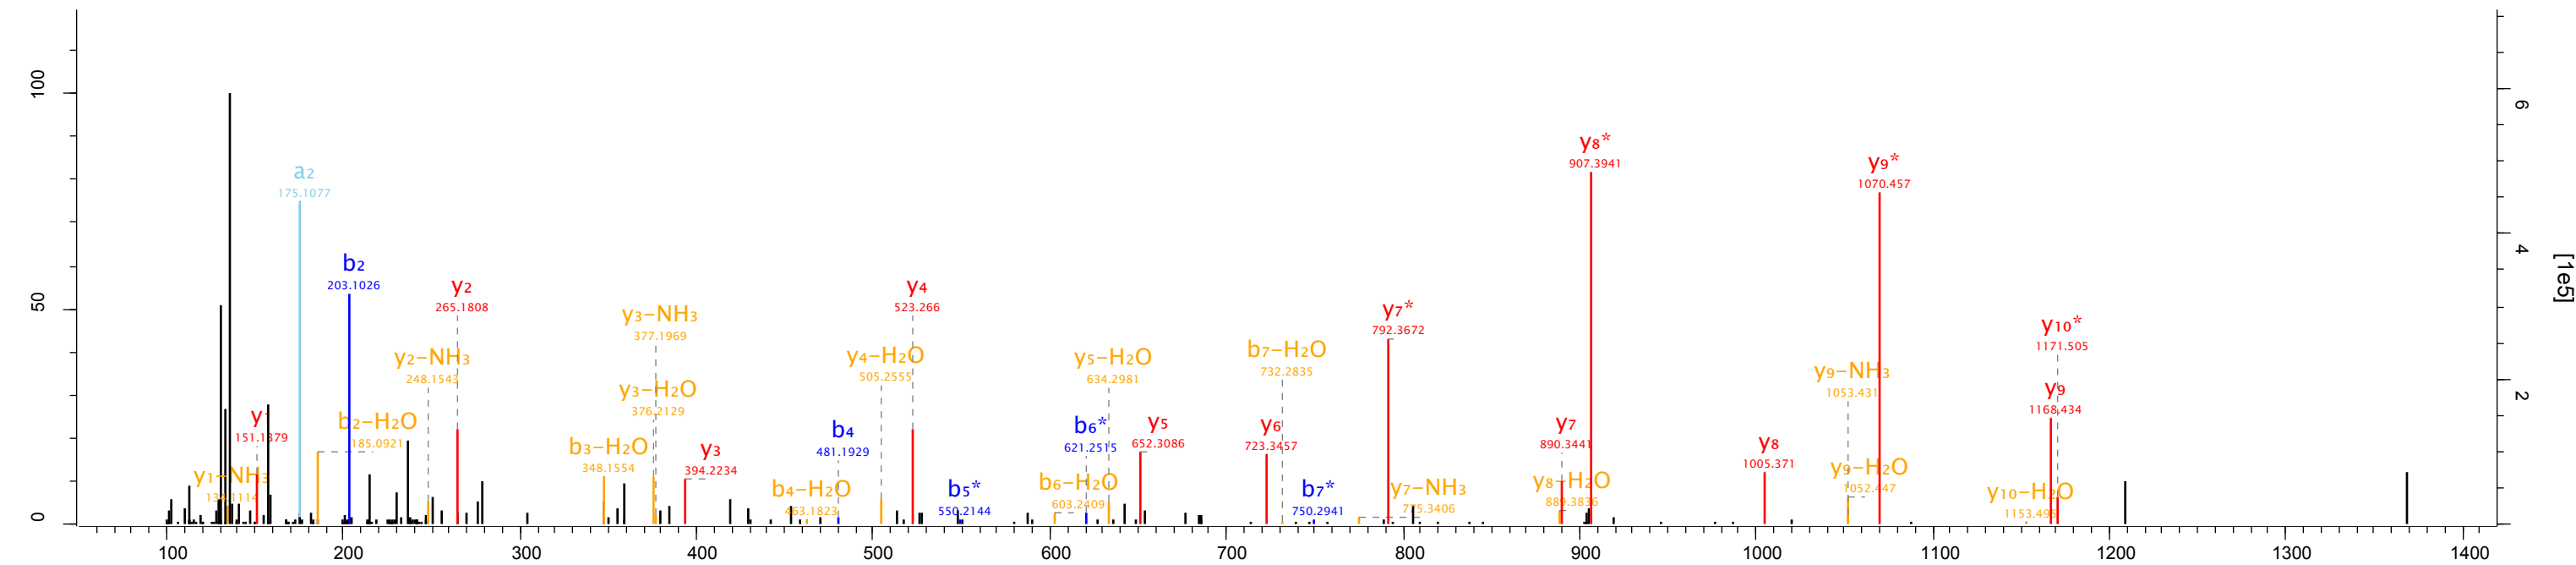

- T T Y D S A E E E N K -

Fragmentation mapping (b and y ions):

- b2 (under T)
- b4 (under D)
- b5\* (under S)
- b6\* (under A)
- b7\* (under E)
- y10\* (under T)
- y9 (under Y)
- y8 (under D)
- y7-ph (under S)
- y6 (under A)
- y5 (under E)
- y4 (under E)
- y3 (under E)
- y2 (under N)
- y1 (under K)

Raw file 20150814\_A375SR\_Phospho\_BR2\_05 Scan 4289 Method FTMS; HCD Score 251 m/z 808.35 Gene names CUL4B

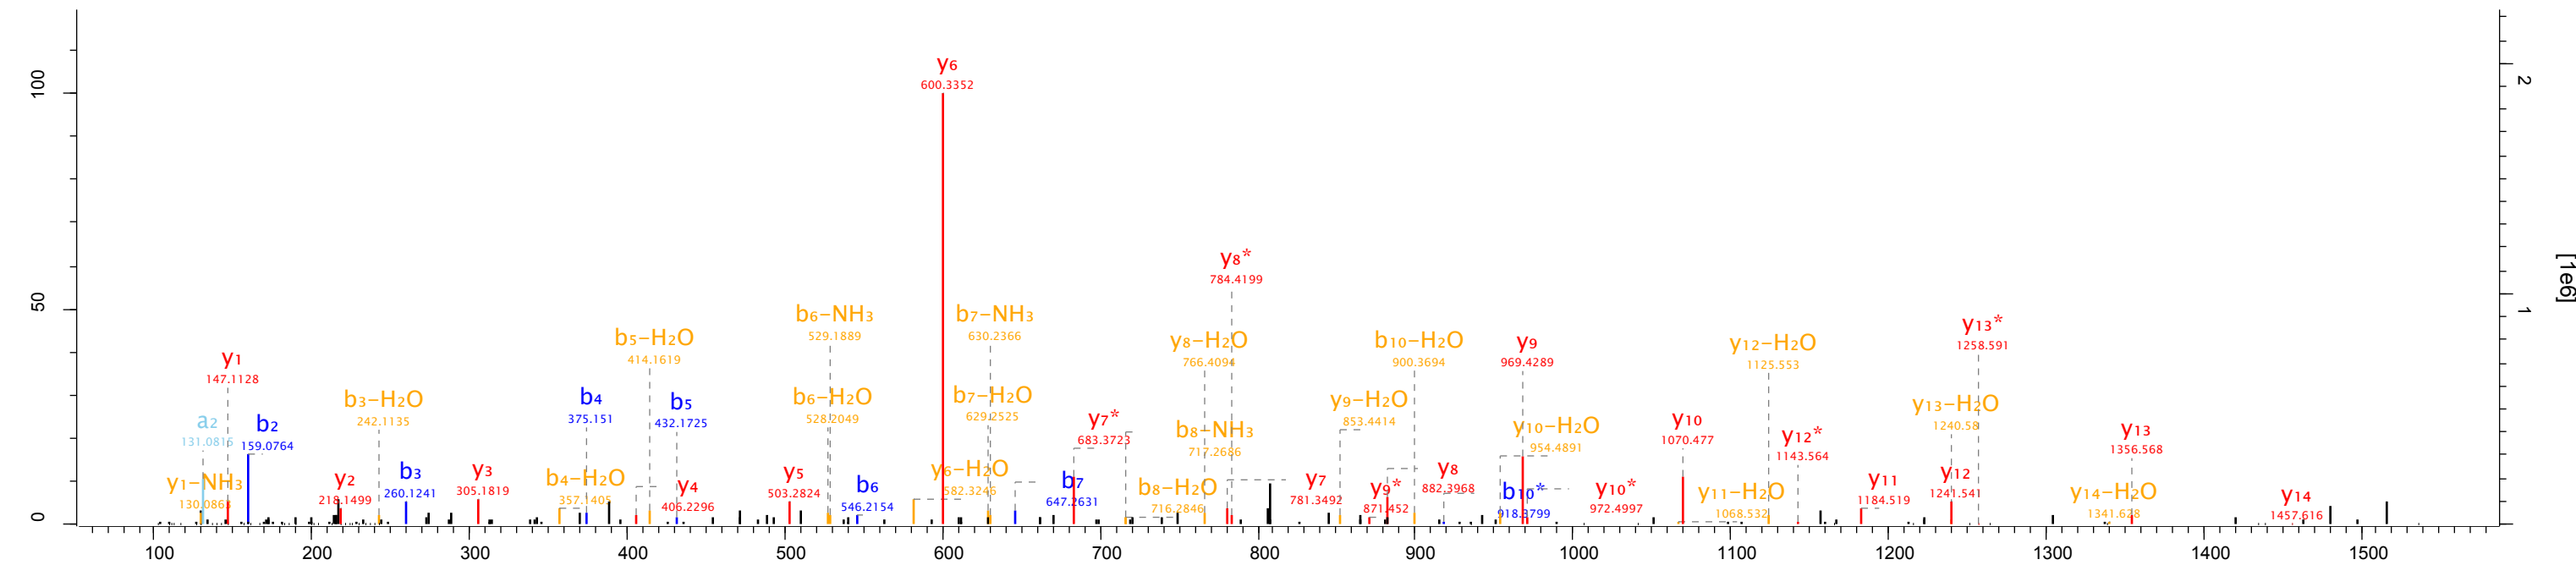

- S A T D G N T S T T P P T S A K -

b2 b3 b4 b5 b6 b7 b10\*

y14 y13 y12 y11 y10 y9 y8 y7 ph y6 y5 y4 y3 y2 y1

Raw file: 20150814\_A375SR\_Phospho\_BR2\_05  
 Scan: 5739 Method: FTMS; HCD Score: 71.08 m/z: 533.77 Gene names: LUZP1

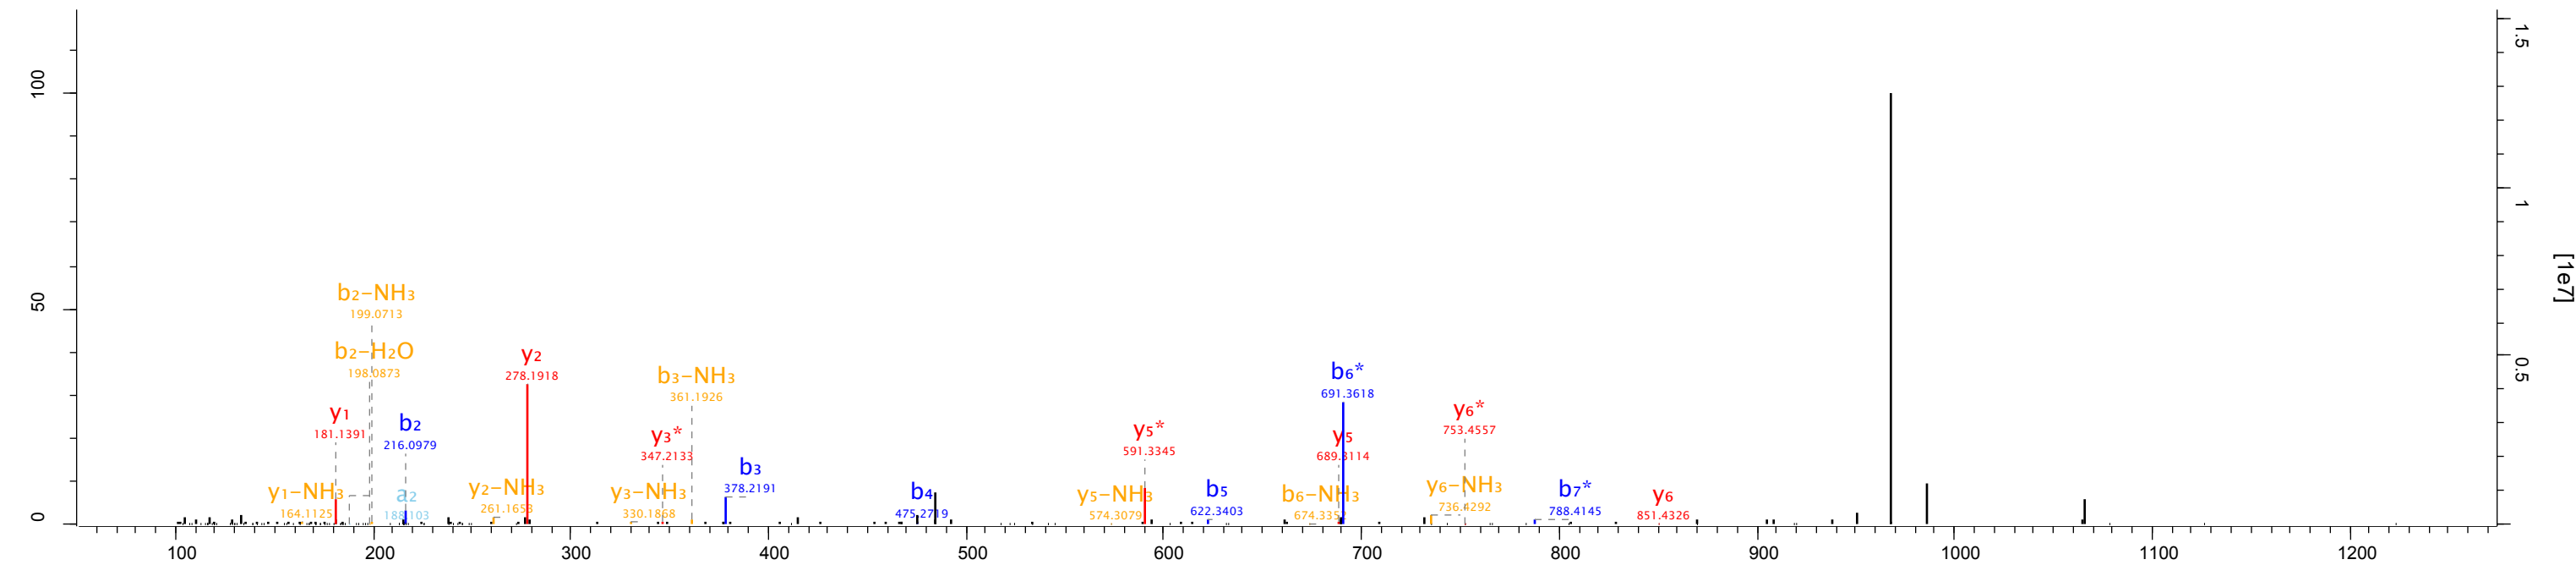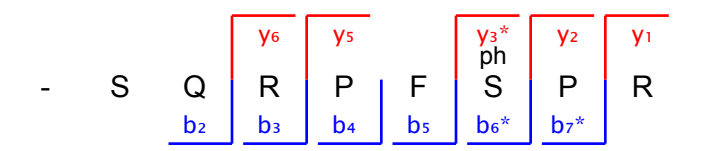

Raw file: 20150814\_A375SR\_Phospho\_BR2\_05  
 Scan: 6009 Method: FTMS; HCD Score: 185.74 m/z: 684.3 Gene names: SRRM2

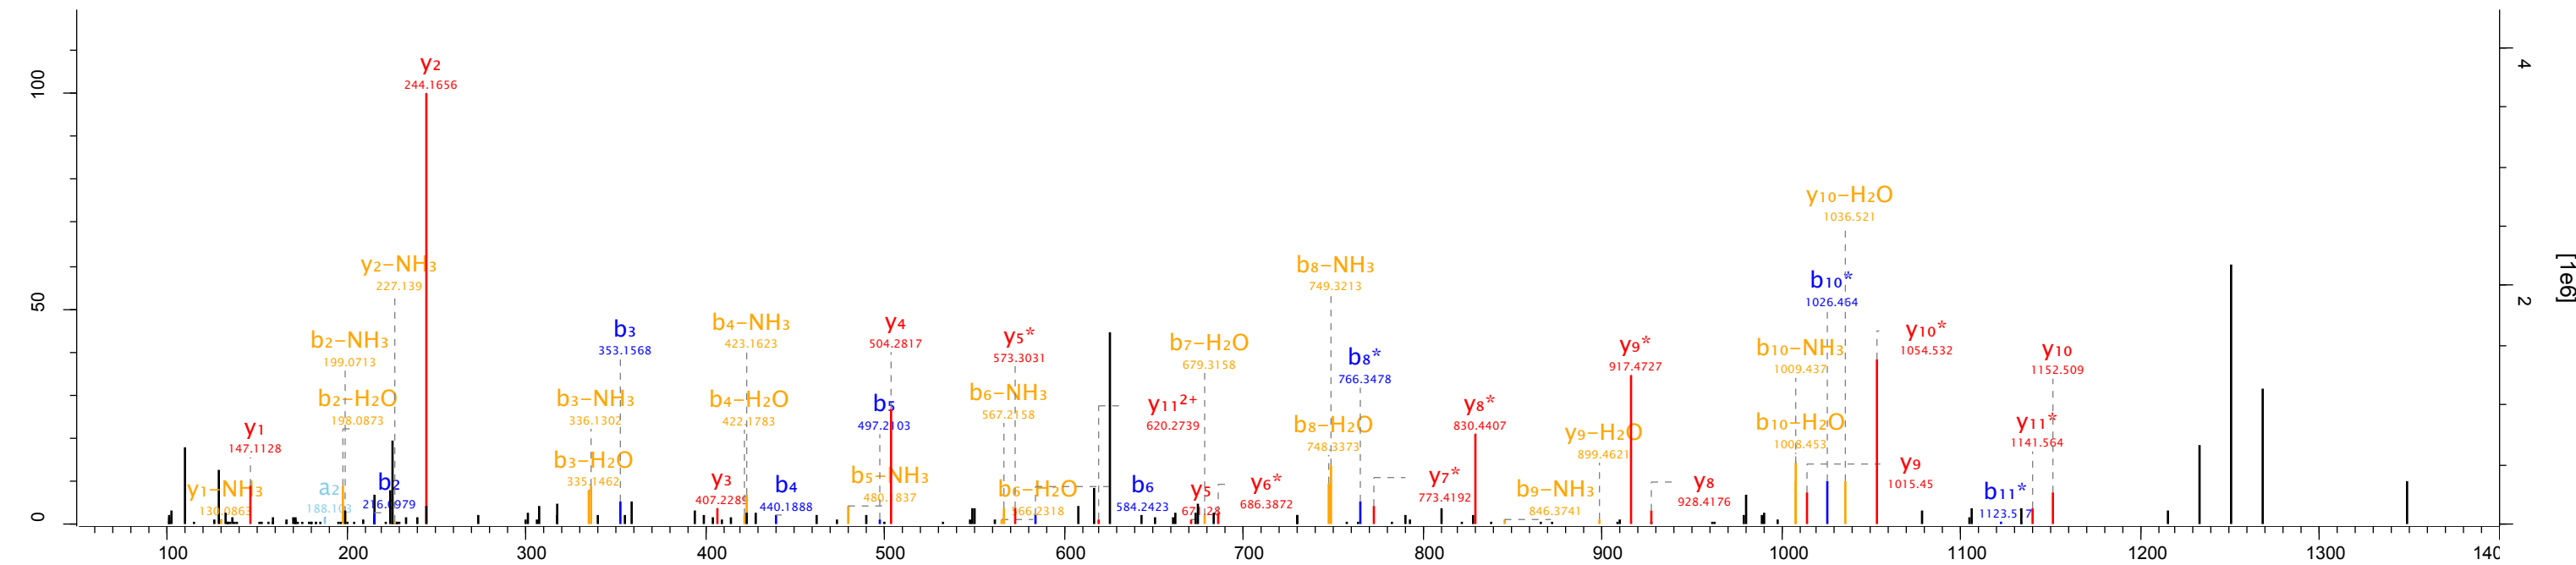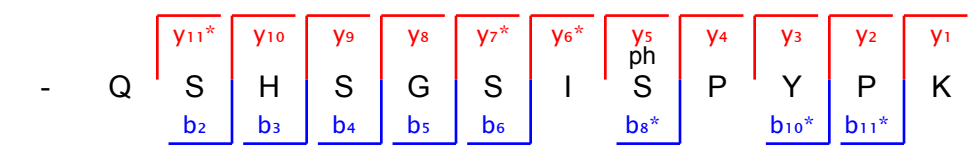



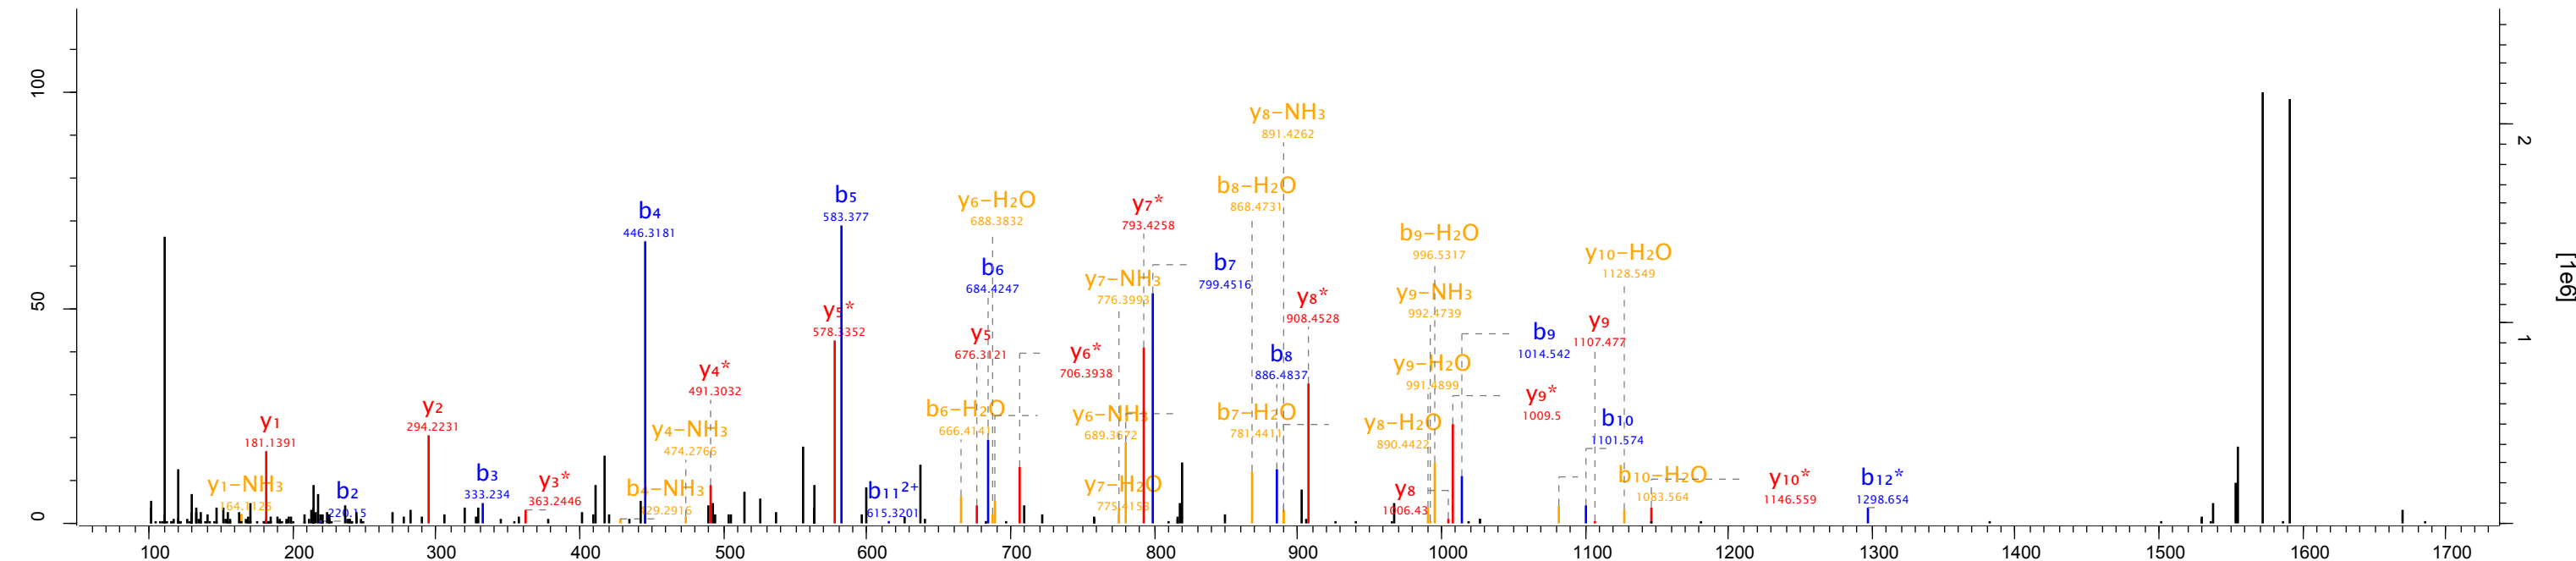

- R G I L H T D S Q S Q S ph S L R -

b<sub>2</sub>
b<sub>3</sub>
b<sub>4</sub>
b<sub>5</sub>
b<sub>6</sub>
b<sub>7</sub>
b<sub>8</sub>
b<sub>9</sub>
b<sub>10</sub>
b<sub>11</sub><sup>2+</sup>
b<sub>12</sub><sup>\*</sup>

Raw file: 20150814\_A375SR\_Phospho\_BR2\_05  
 Scan: 7809 Method: FTMS; HCD Score: 132.74 m/z: 793.86 Gene names: VIM

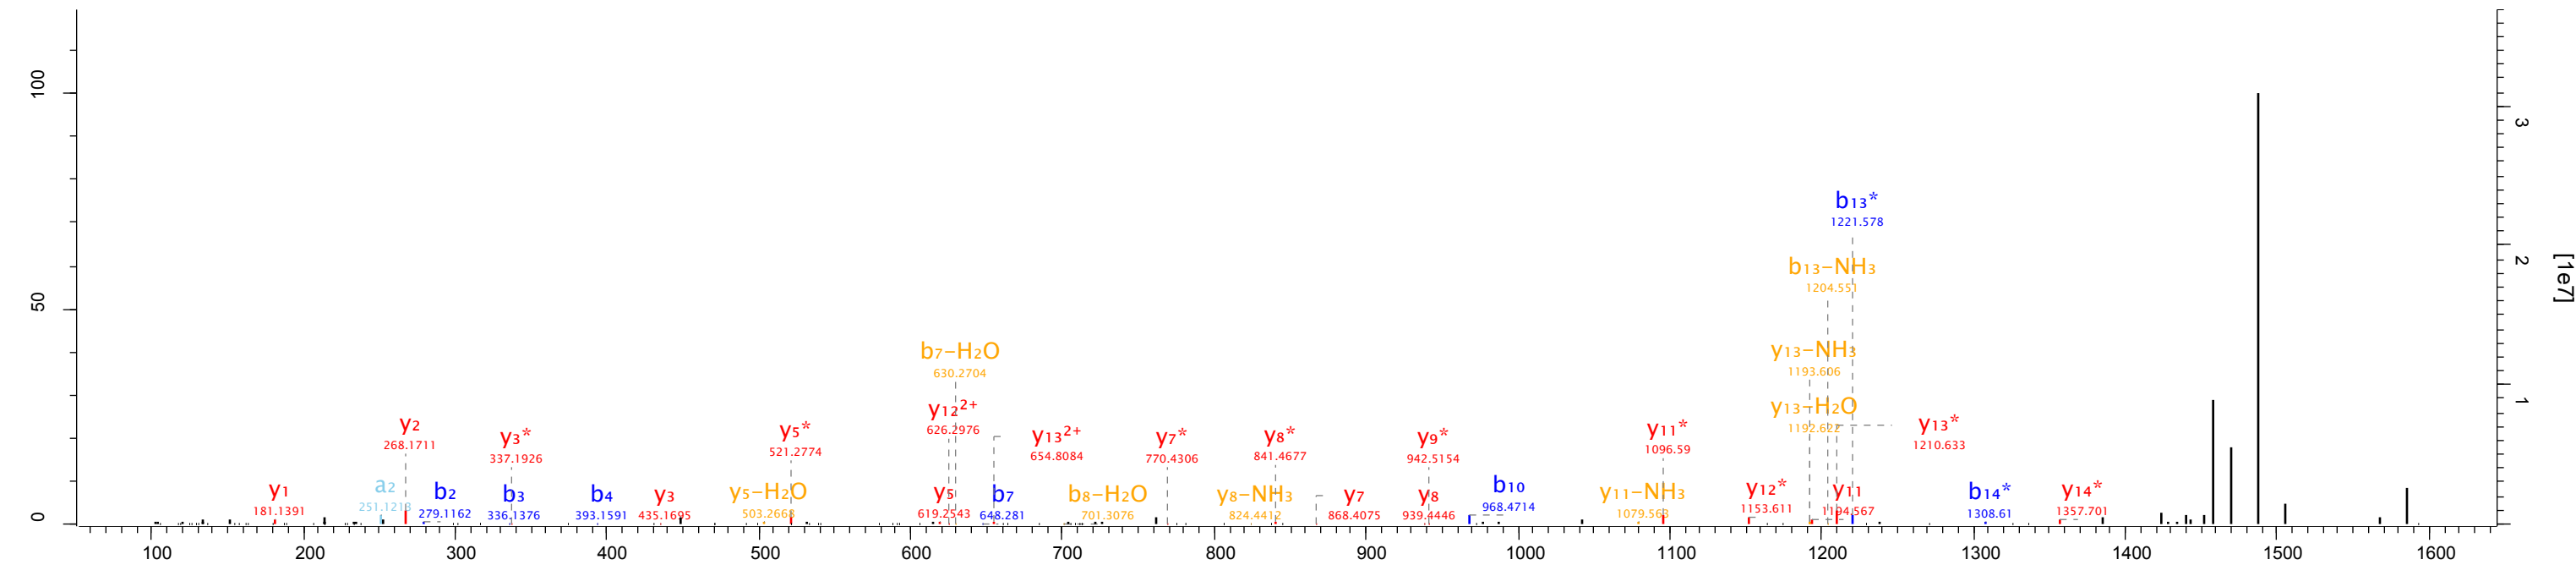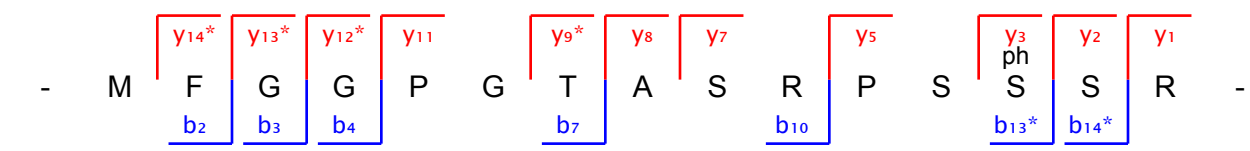

Raw file: 20150814\_A375SR\_Phospho\_BR2\_05  
 Scan: 8009 Method: FTMS; HCD Score: 89.43 m/z: 529.8 Gene names: NUP214

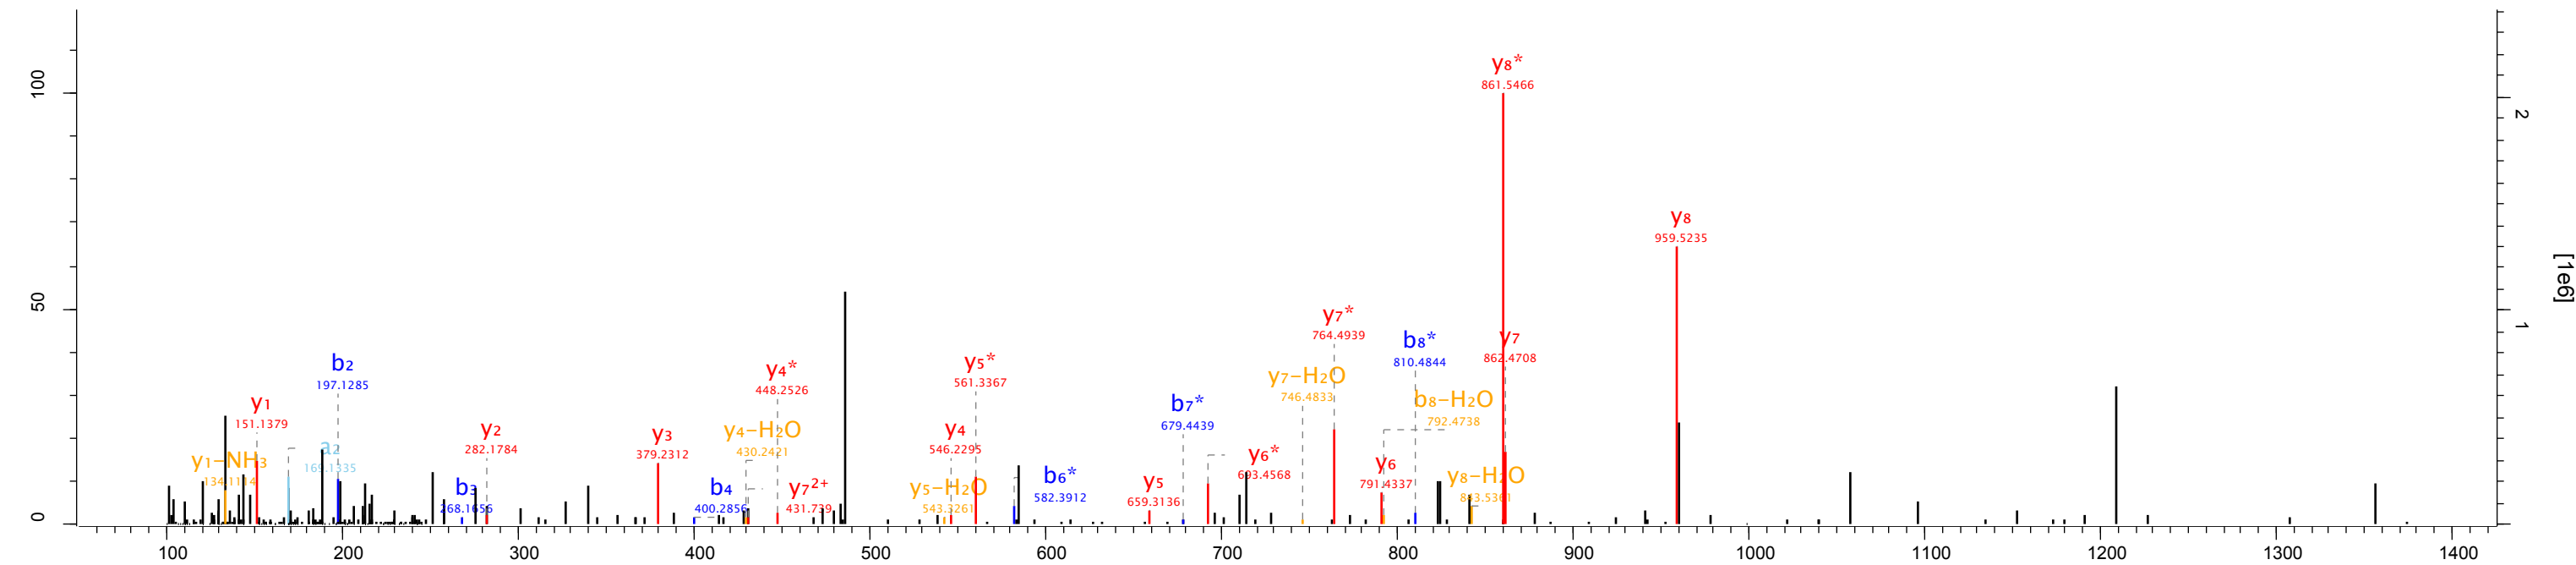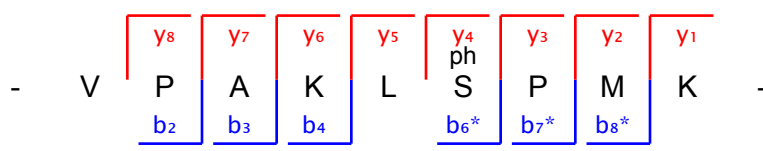

Raw file Scan Method Score m/z Gene names

20150814\_A375SR\_Phospho\_BR2\_05 8079 FTMS; HCD 156.08 629.79 NKTR

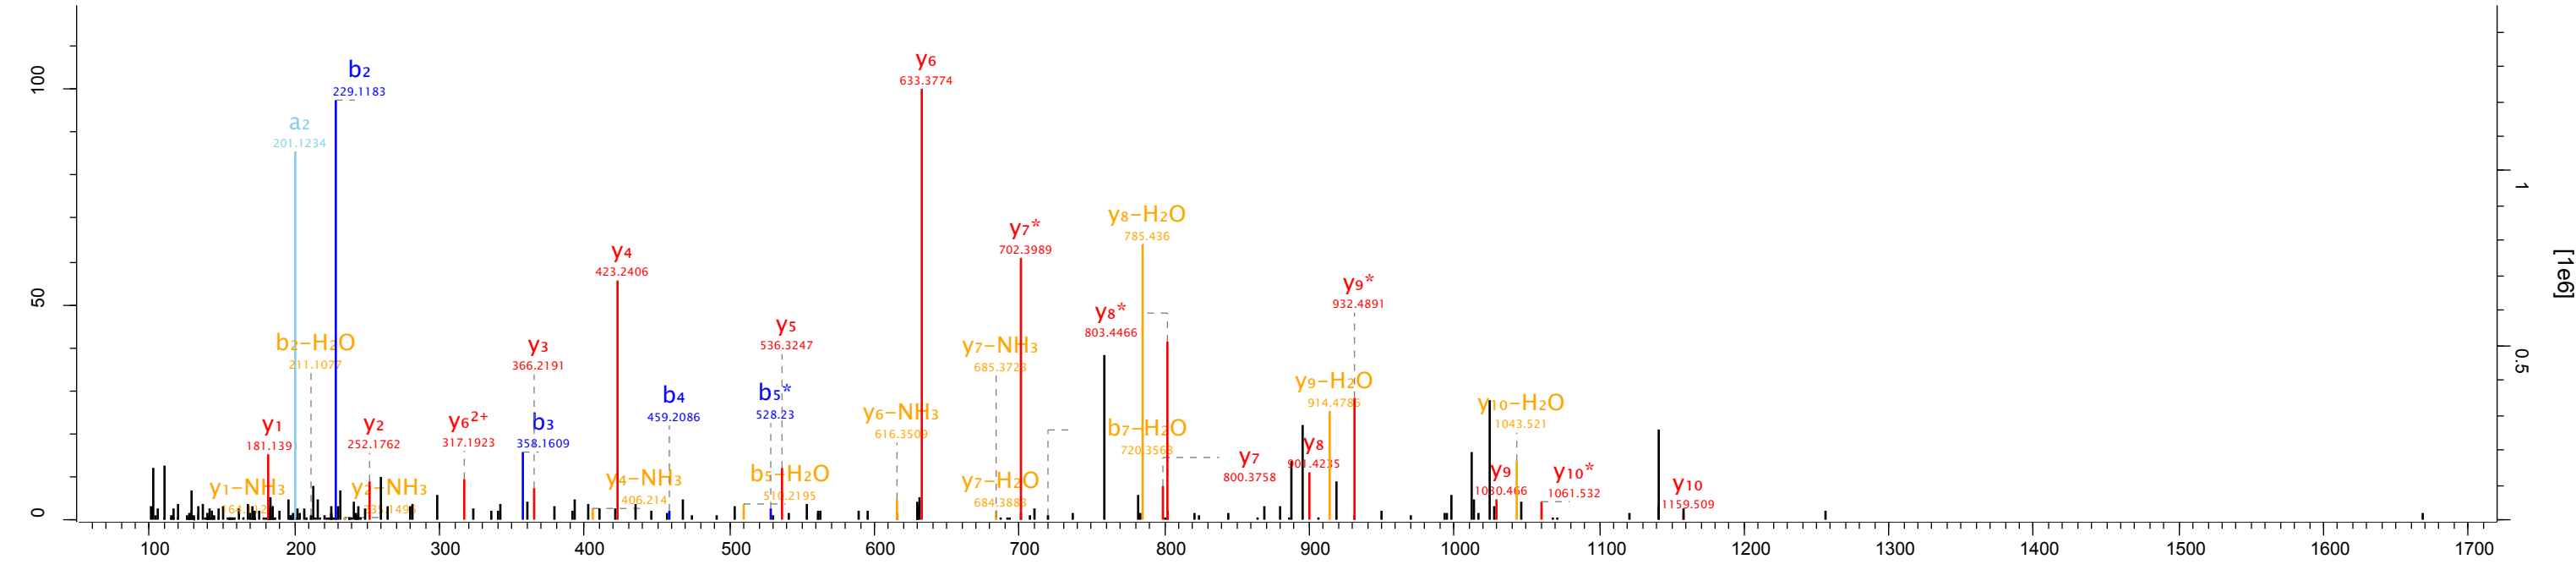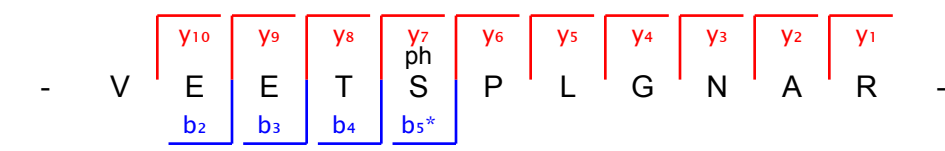

Raw file 20150814\_A375SR\_Phospho\_BR2\_06 Scan 10069 Method FTMS; HCD Score 48.48 m/z 725.36 Gene names NCOR2

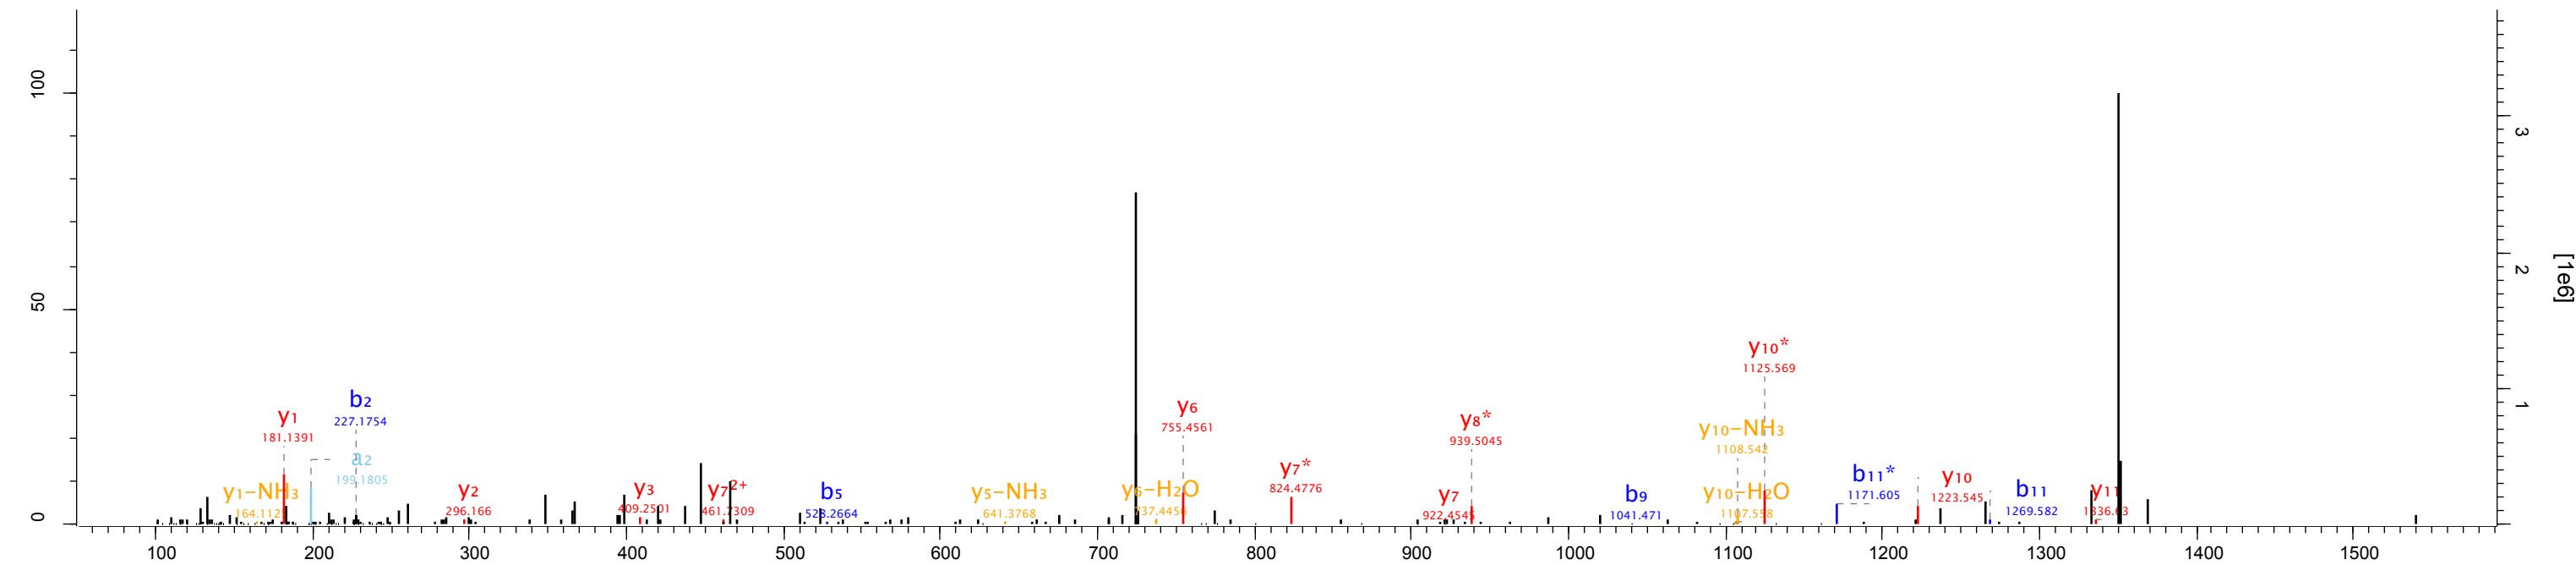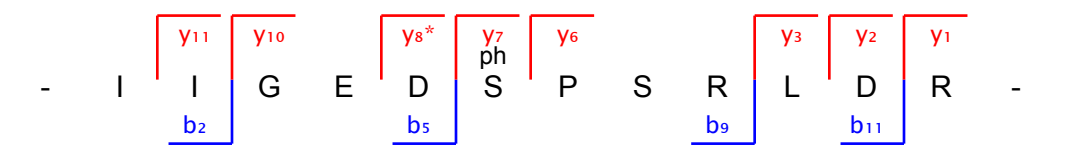

Raw file 20150814\_A375SR\_Phospho\_BR2\_06 Scan 10289 Method FTMS; HCD Score 107.65 m/z 646 Gene names DTL

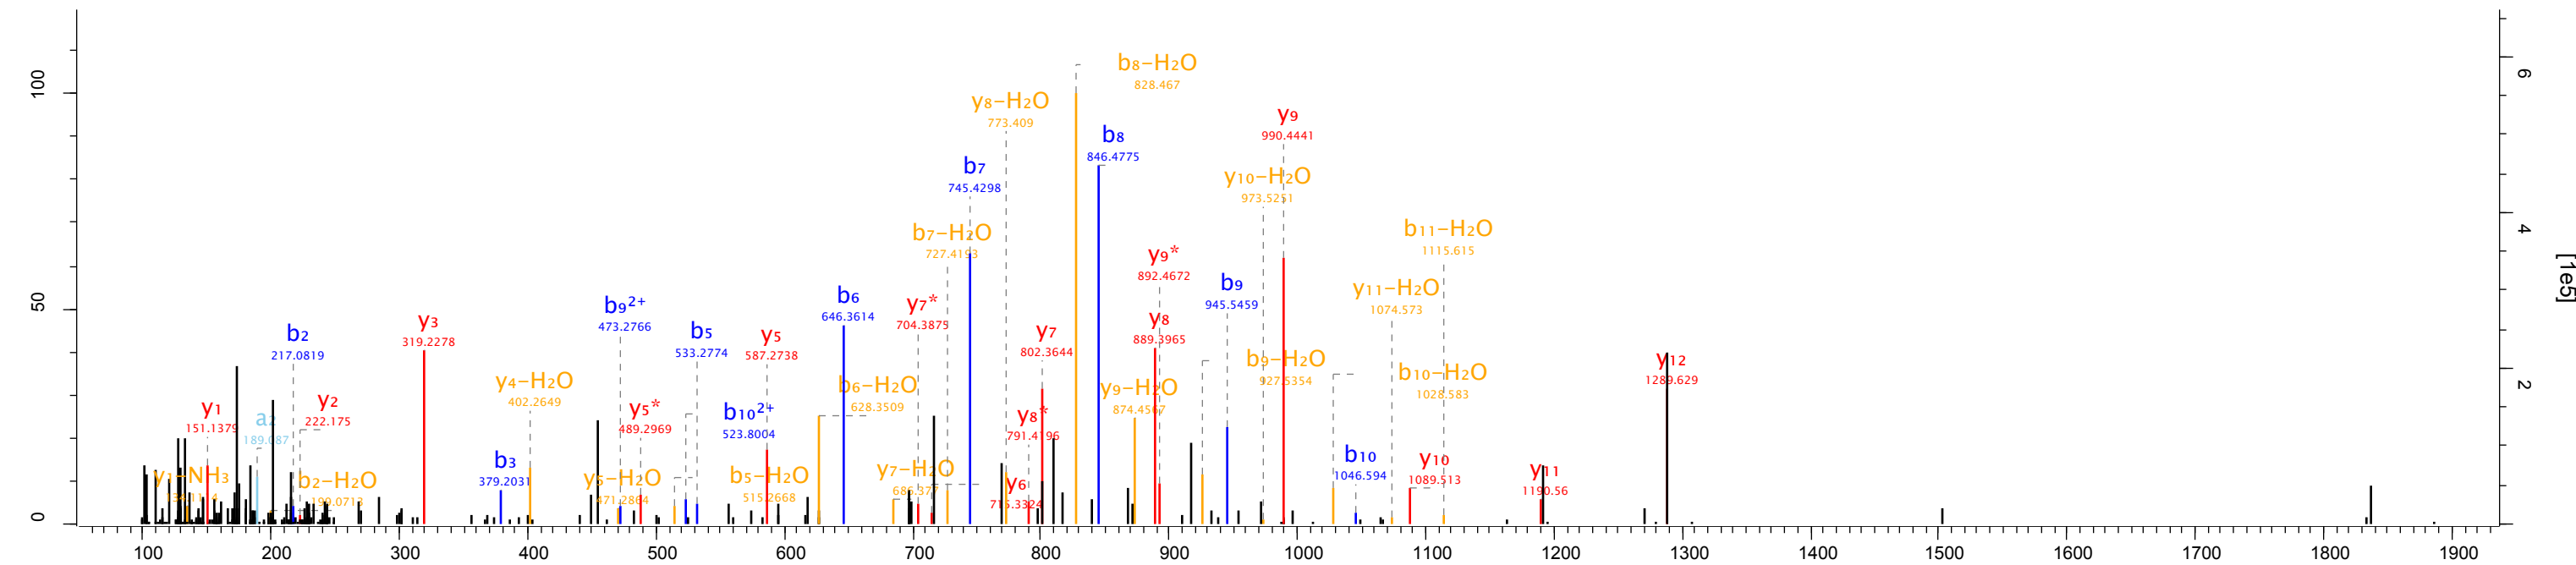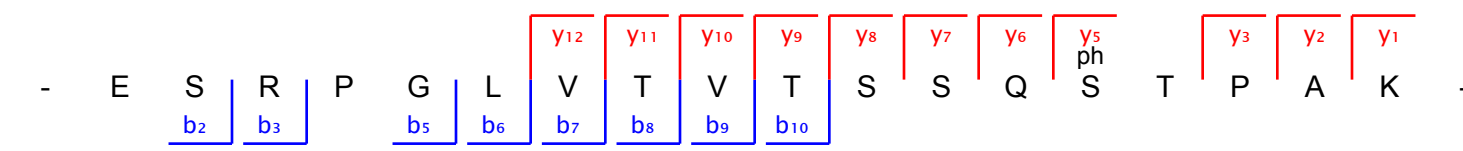

Raw file  
20150814\_A375SR\_Phospho\_BR2\_06

Scan 10429 Method FTMS; HCD Score 164.69 m/z 682.66 Gene names TBC1D5

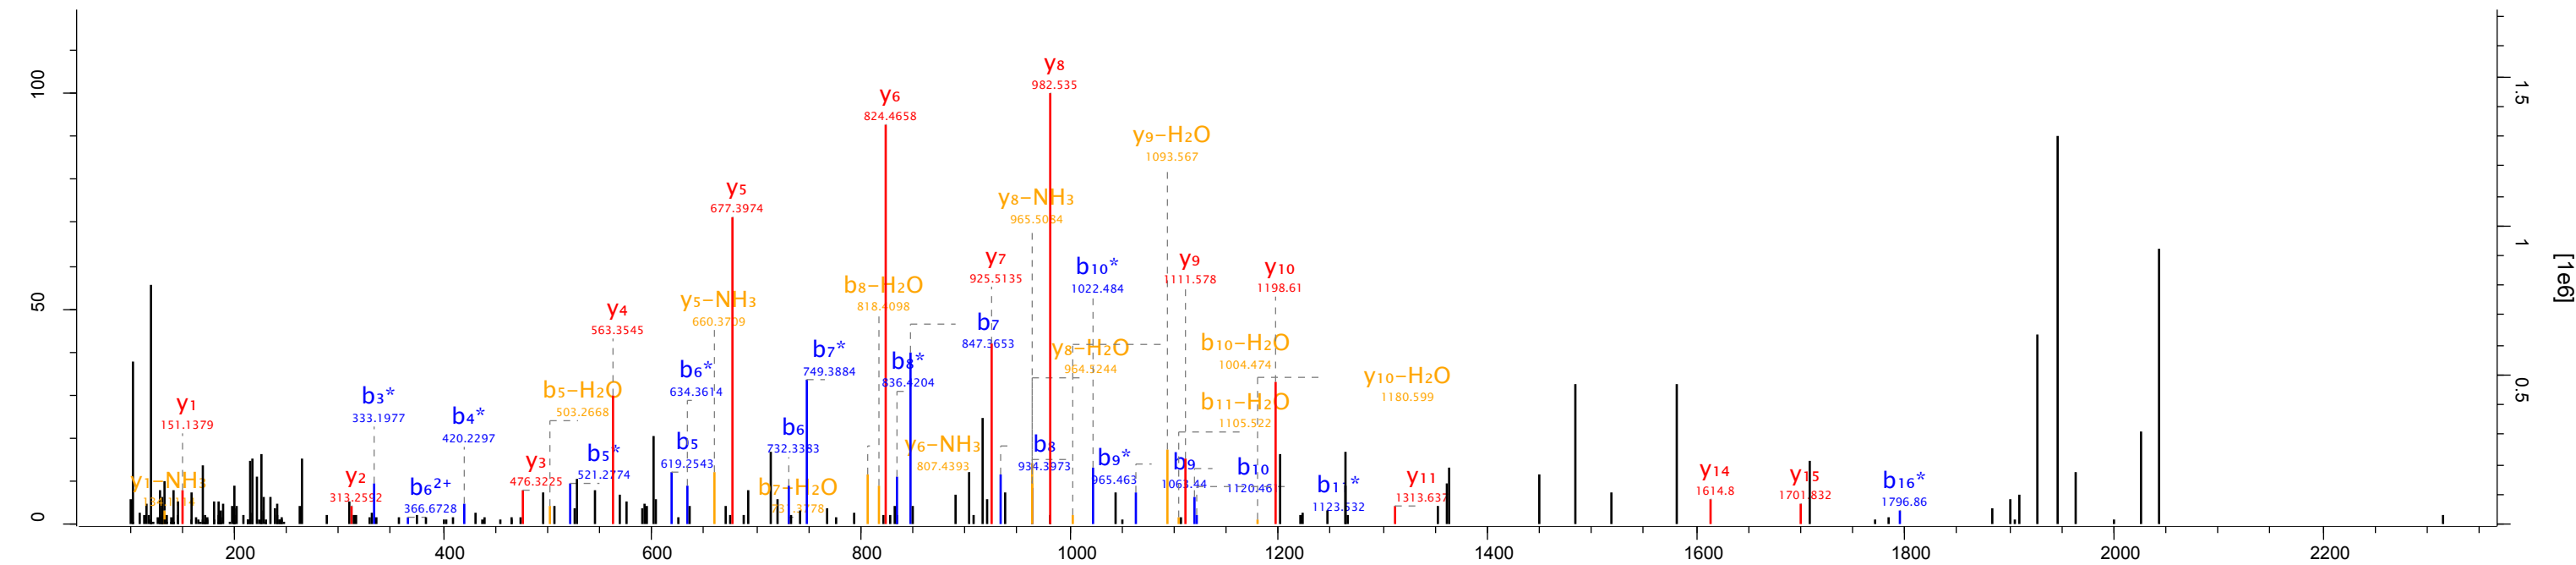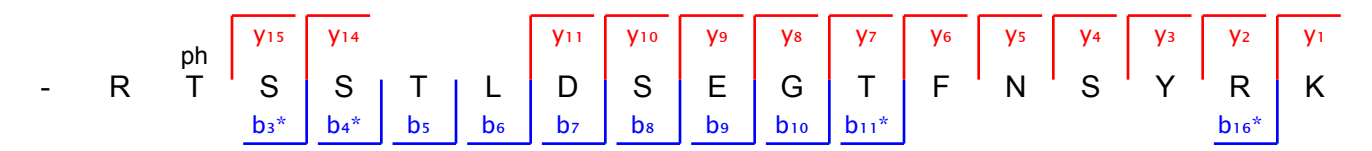

Raw file: 20150814\_A375SR\_Phospho\_BR2\_06  
 Scan: 11019 Method: FTMS; HCD Score: 119.62 m/z: 573.32 Gene names: BRD8

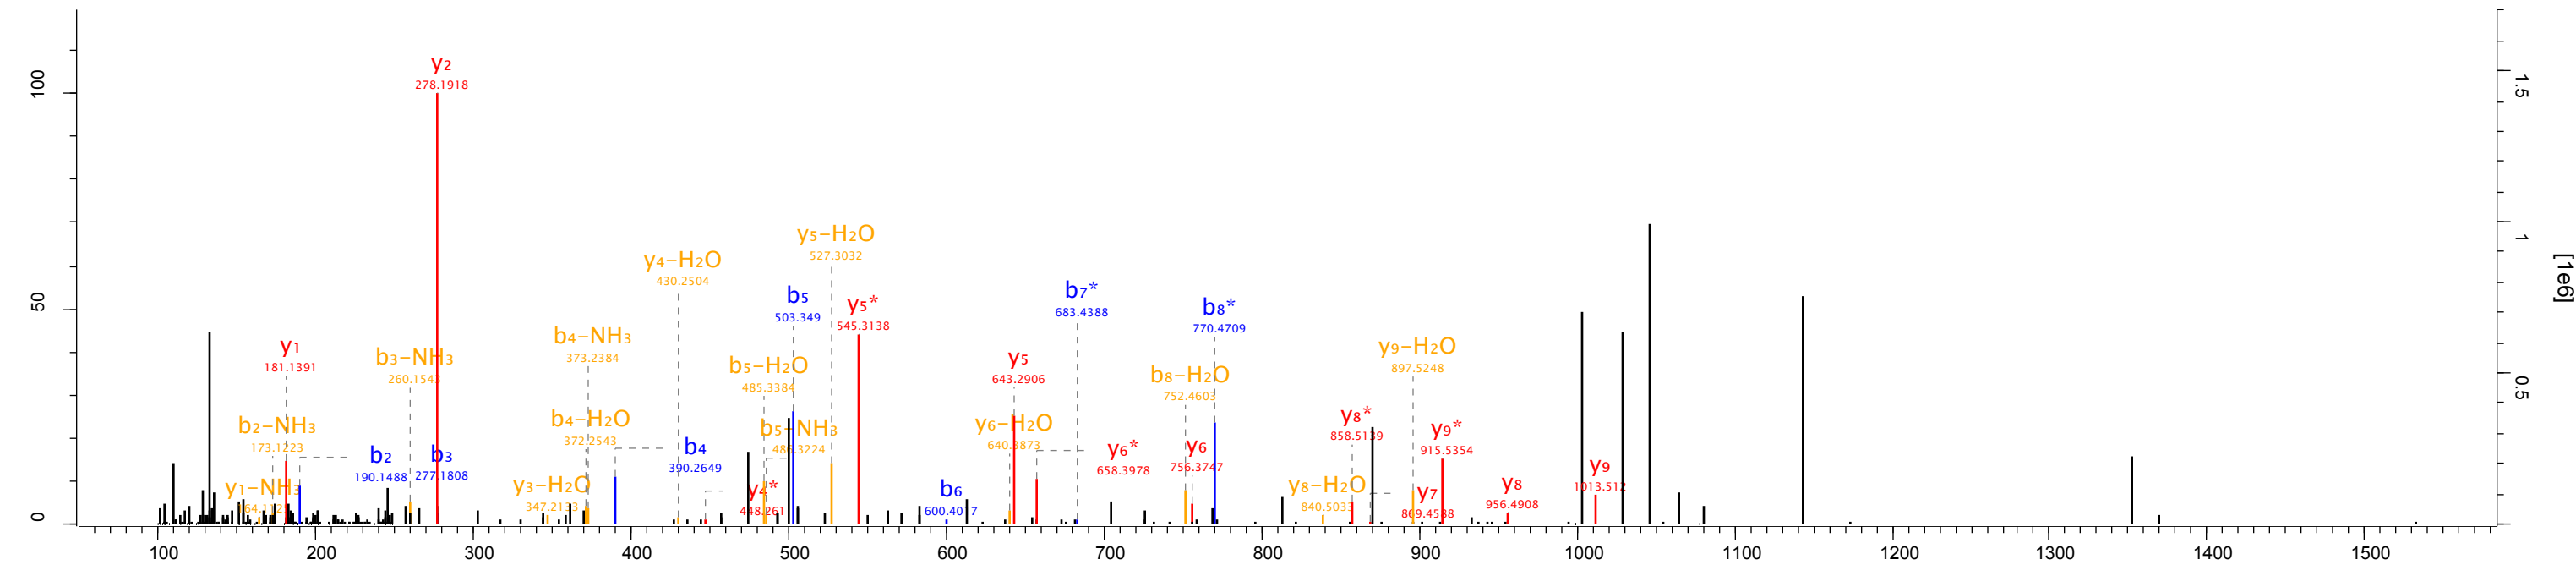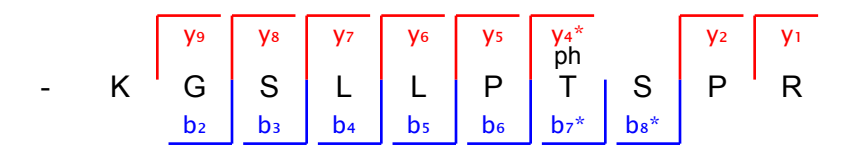



Raw file: 20150814\_A375SR\_Phospho\_BR2\_06  
 Scan: 11389 Method: FTMS; HCD Score: 91.87 m/z: 428.2 Gene names: ANKRD11

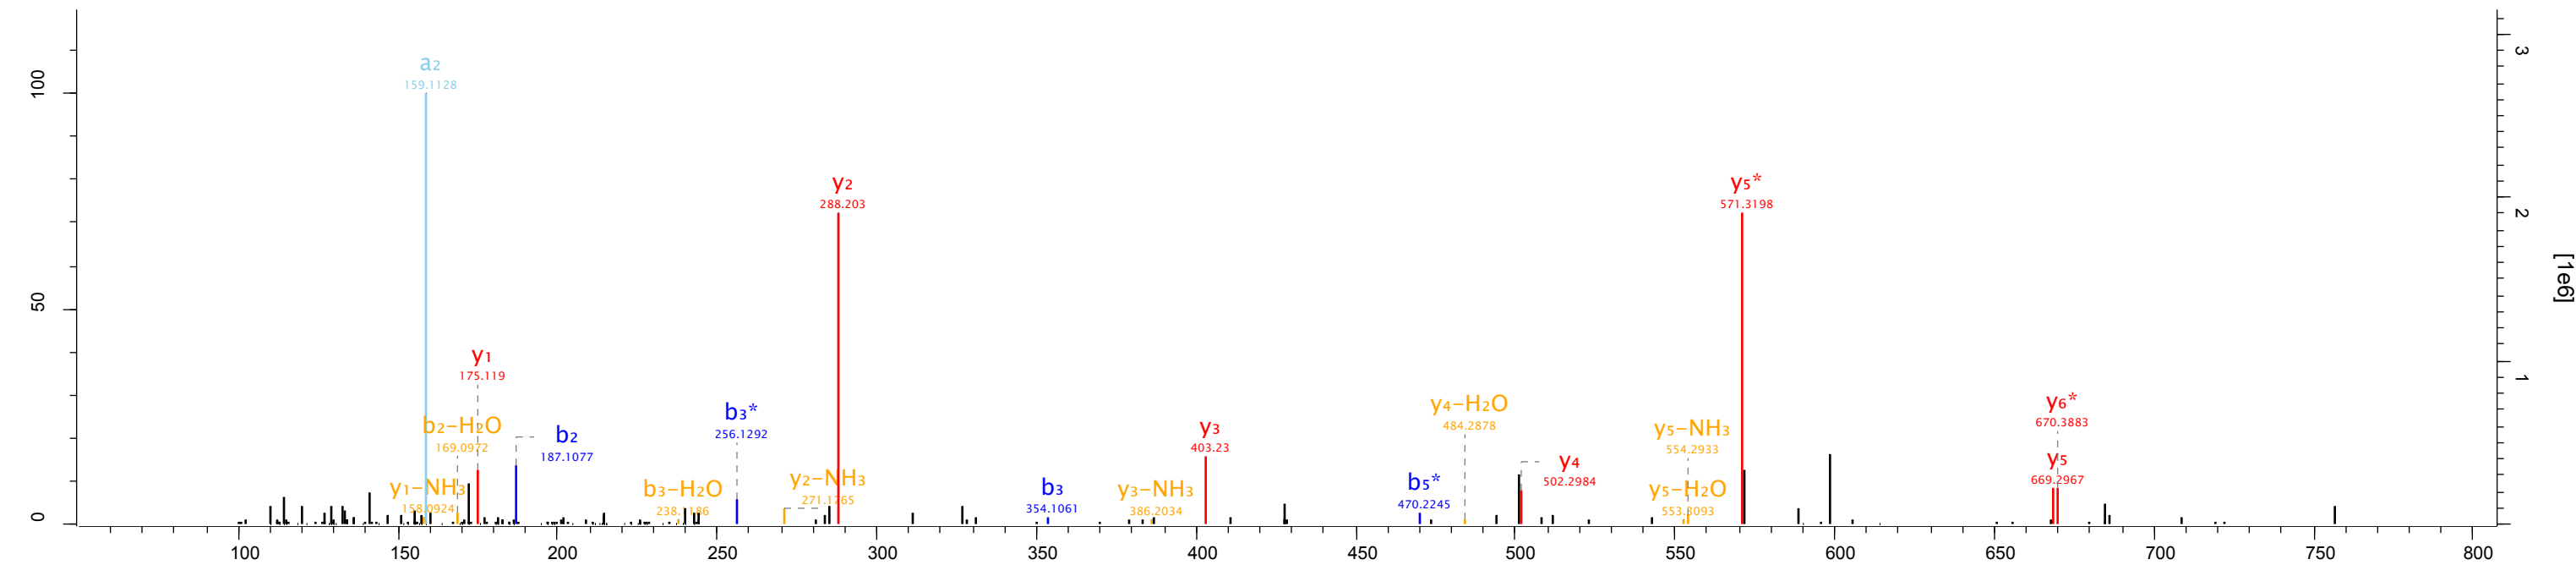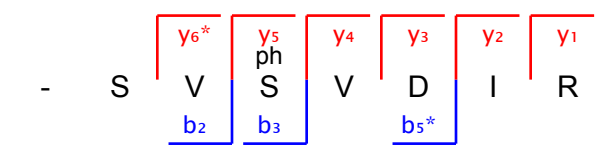

Raw file 20150814\_A375SR\_Phospho\_BR2\_06 Scan 11849 Method FTMS; HCD Score 154.69 m/z 737.82 Gene names INPLP1

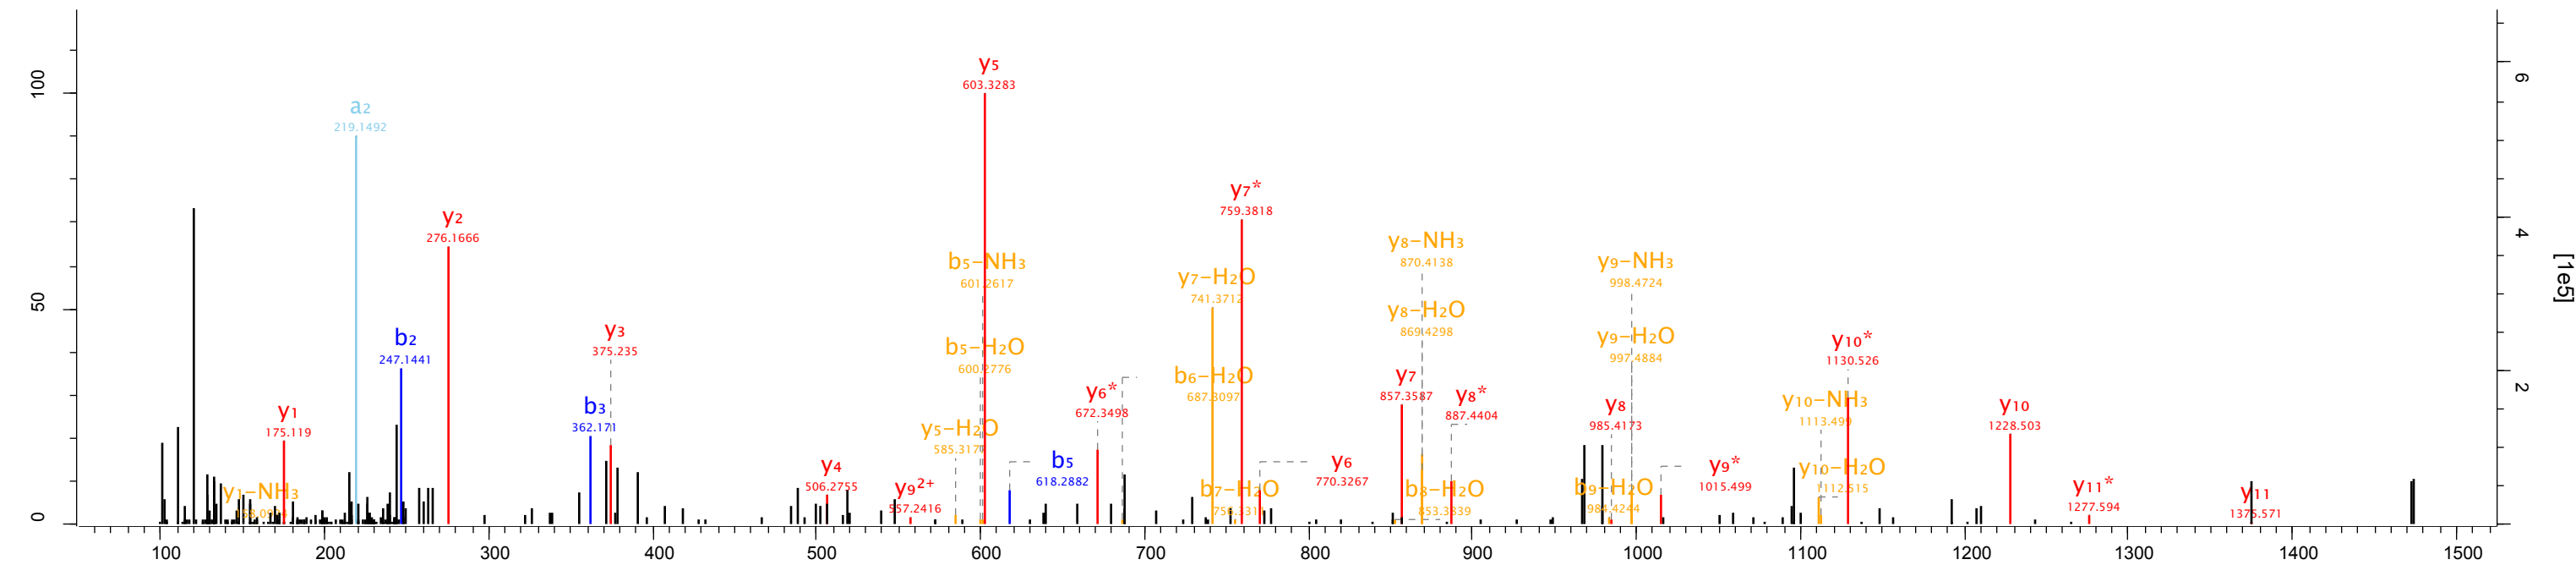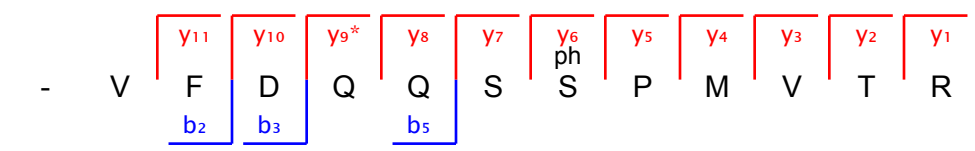

Raw file 20150814\_A375SR\_Phospho\_BR2\_06 Scan 13189 Method FTMS; HCD Score 145.69 m/z 800.84 Gene names EEF2K

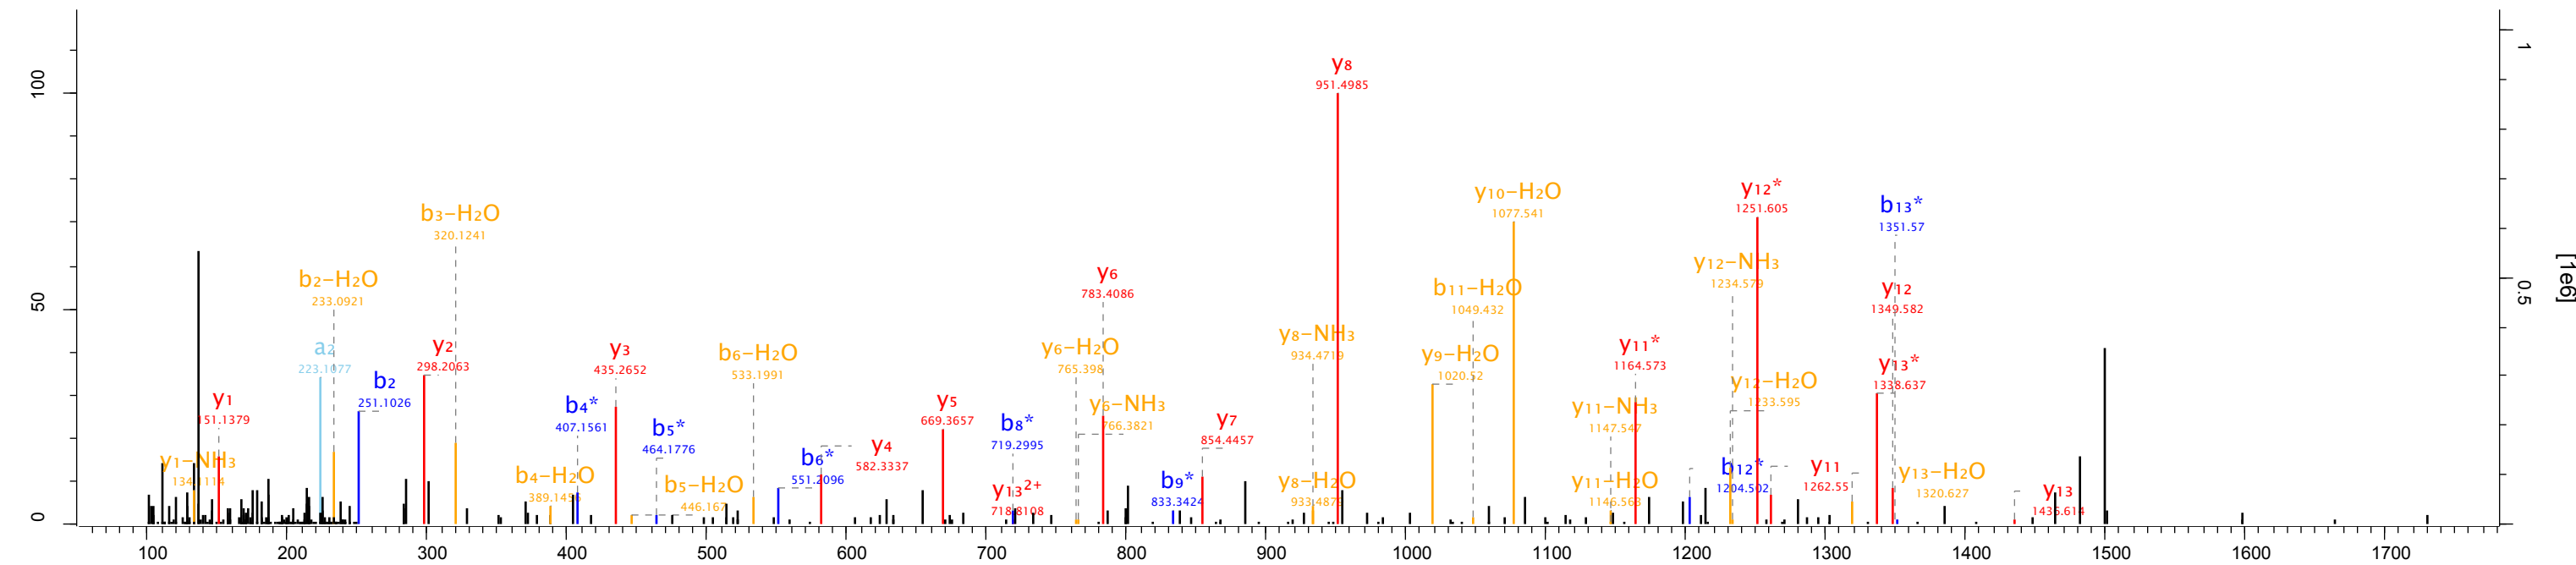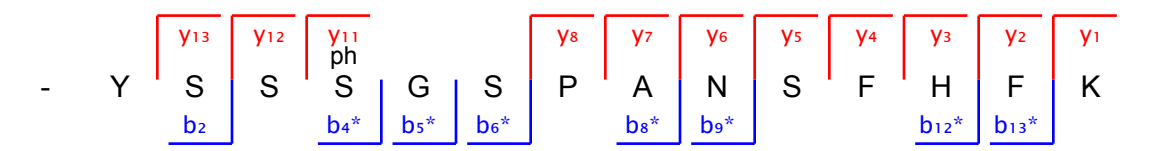

Raw file 20150814\_A375SR\_Phospho\_BR2\_06 Scan 13219 Method FTMS; HCD Score 121.56 m/z 628.35 Gene names ZC3HC1

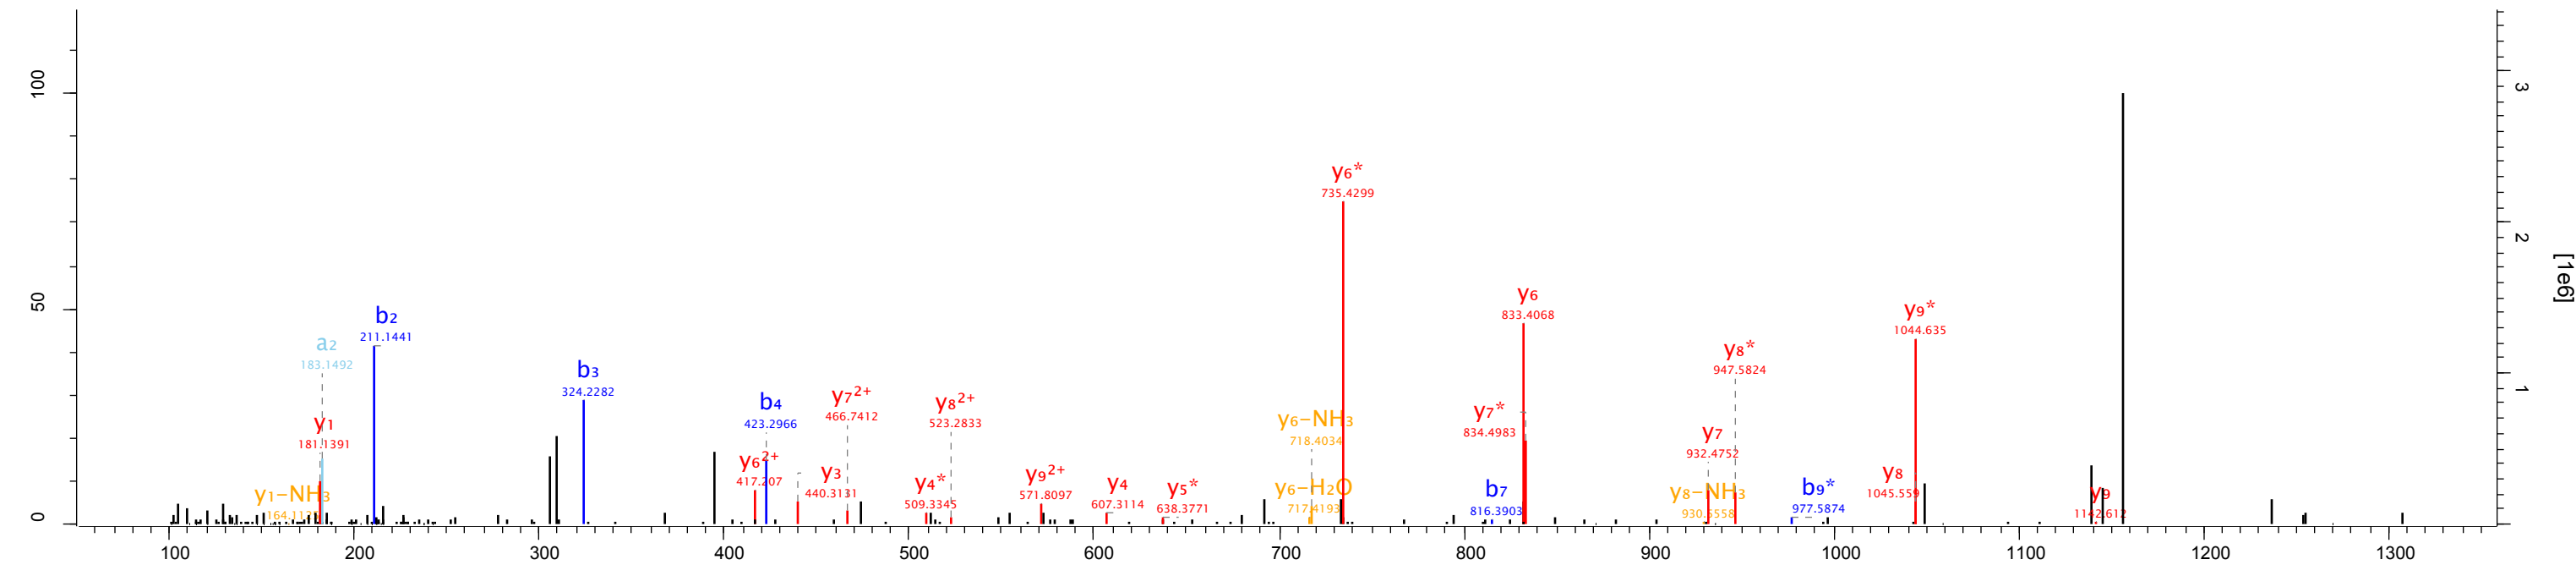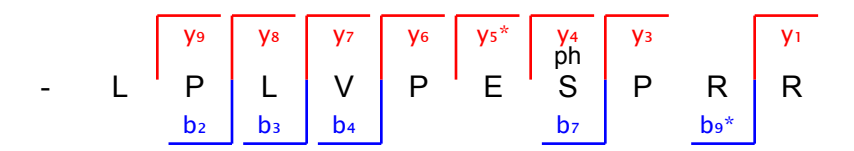

Raw file 20150814\_A375SR\_Phospho\_BR2\_06 Scan 13389 Method FTMS; HCD Score 51.8 m/z 800.88 Gene names ARHGEF2

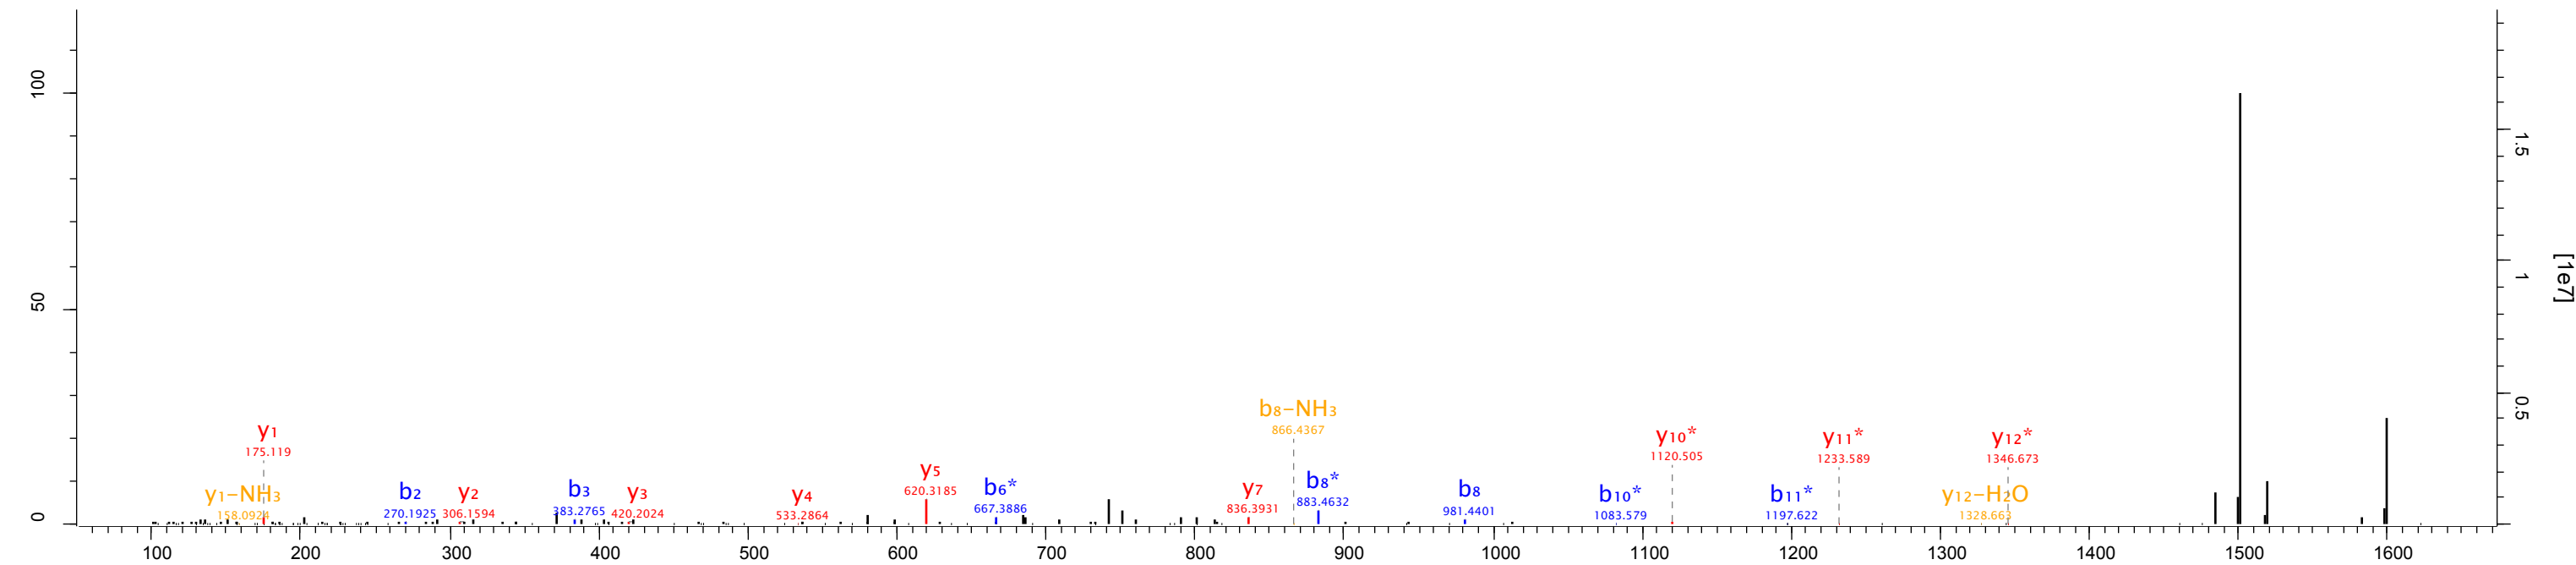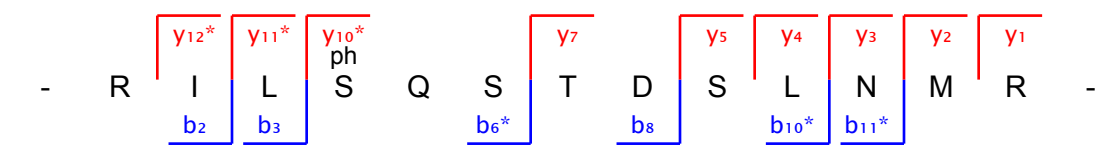

Raw file: 20150814\_A375SR\_Phospho\_BR2\_06  
 Scan: 13589 Method: FTMS; HCD Score: 264.32 m/z: 1134.99 Gene names: DOCK7

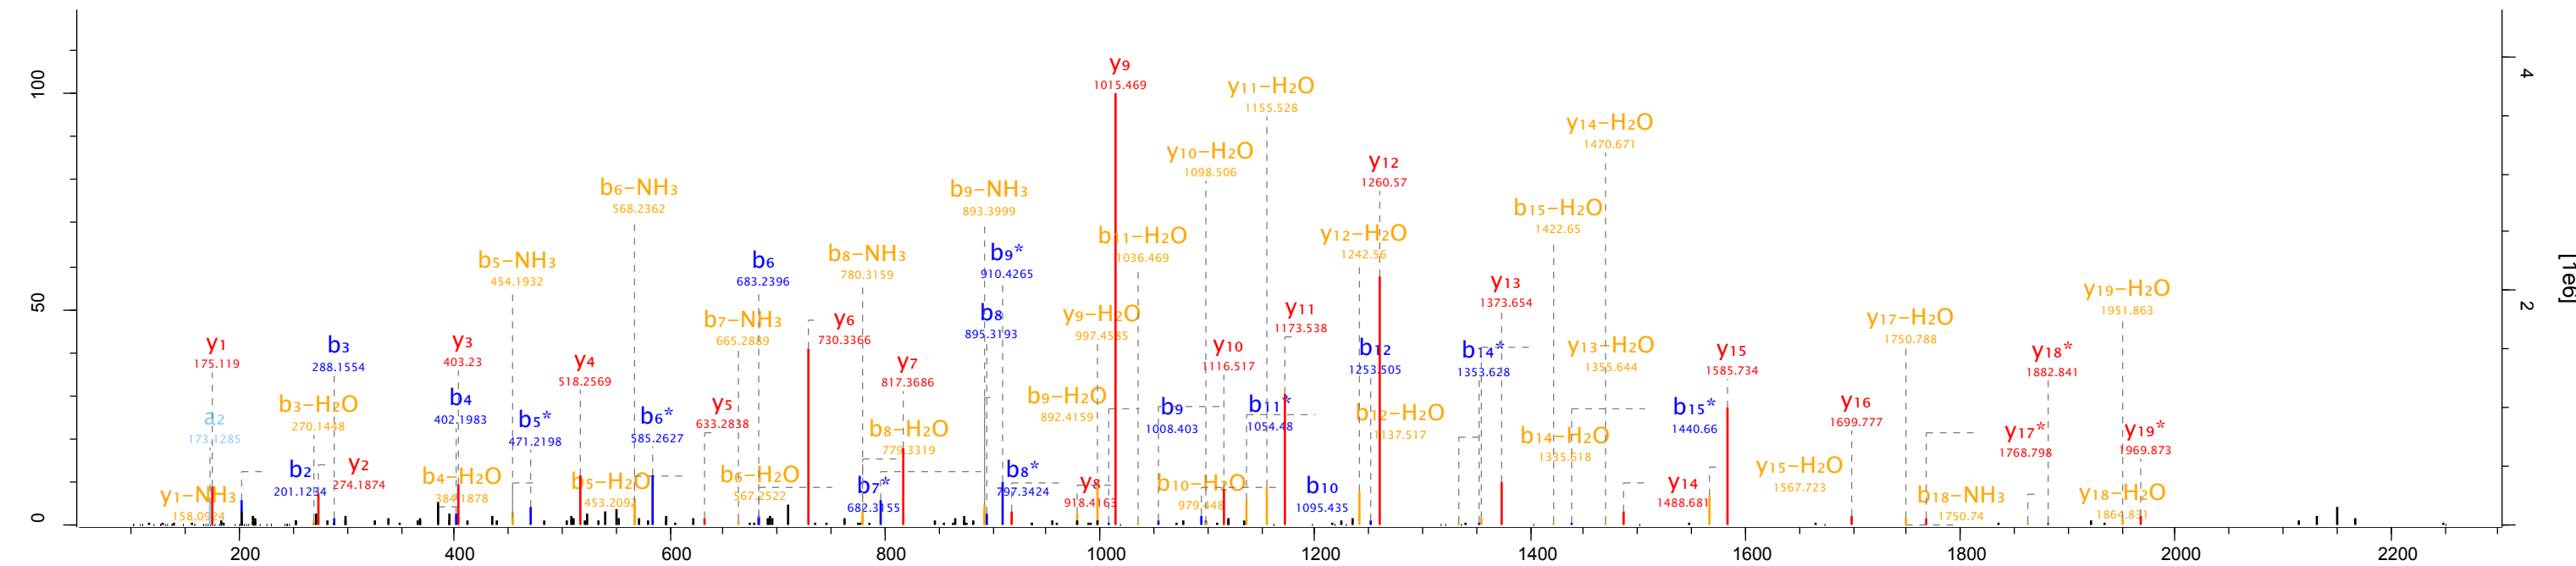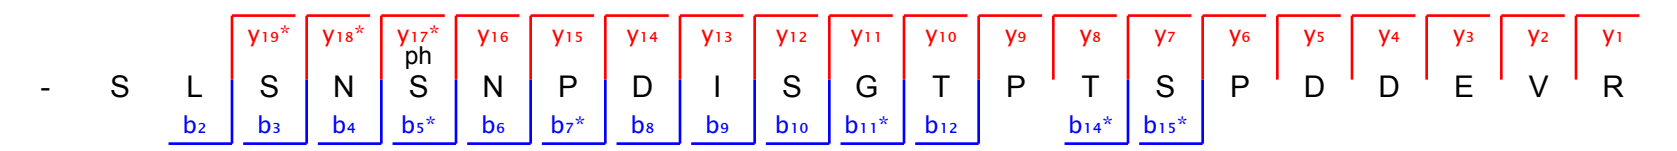

Raw file 20150814\_A375SR\_Phospho\_BR2\_06 Scan 13709 Method FTMS; HCD Score 175.48 m/z 798.85 Gene names C7orf50

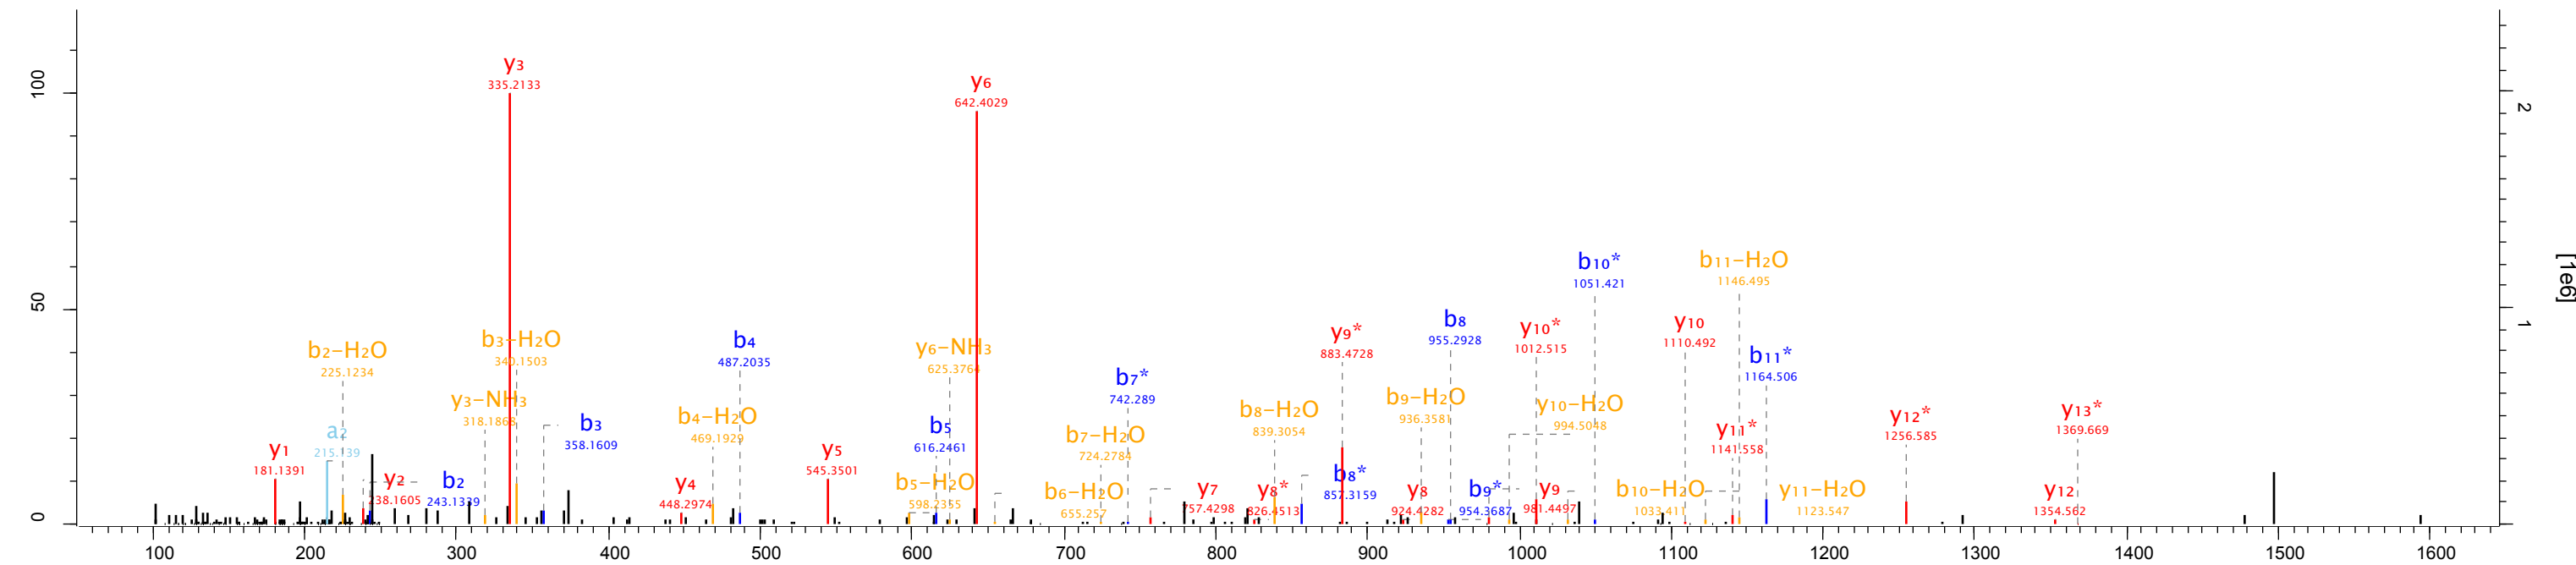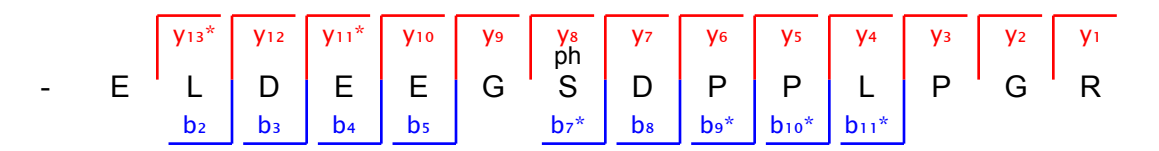

Raw file: 20150814\_A375SR\_Phospho\_BR2\_06  
 Scan: 13929 Method: FTMS; HCD Score: 214.95 m/z: 844.91 Gene names: PI4KB

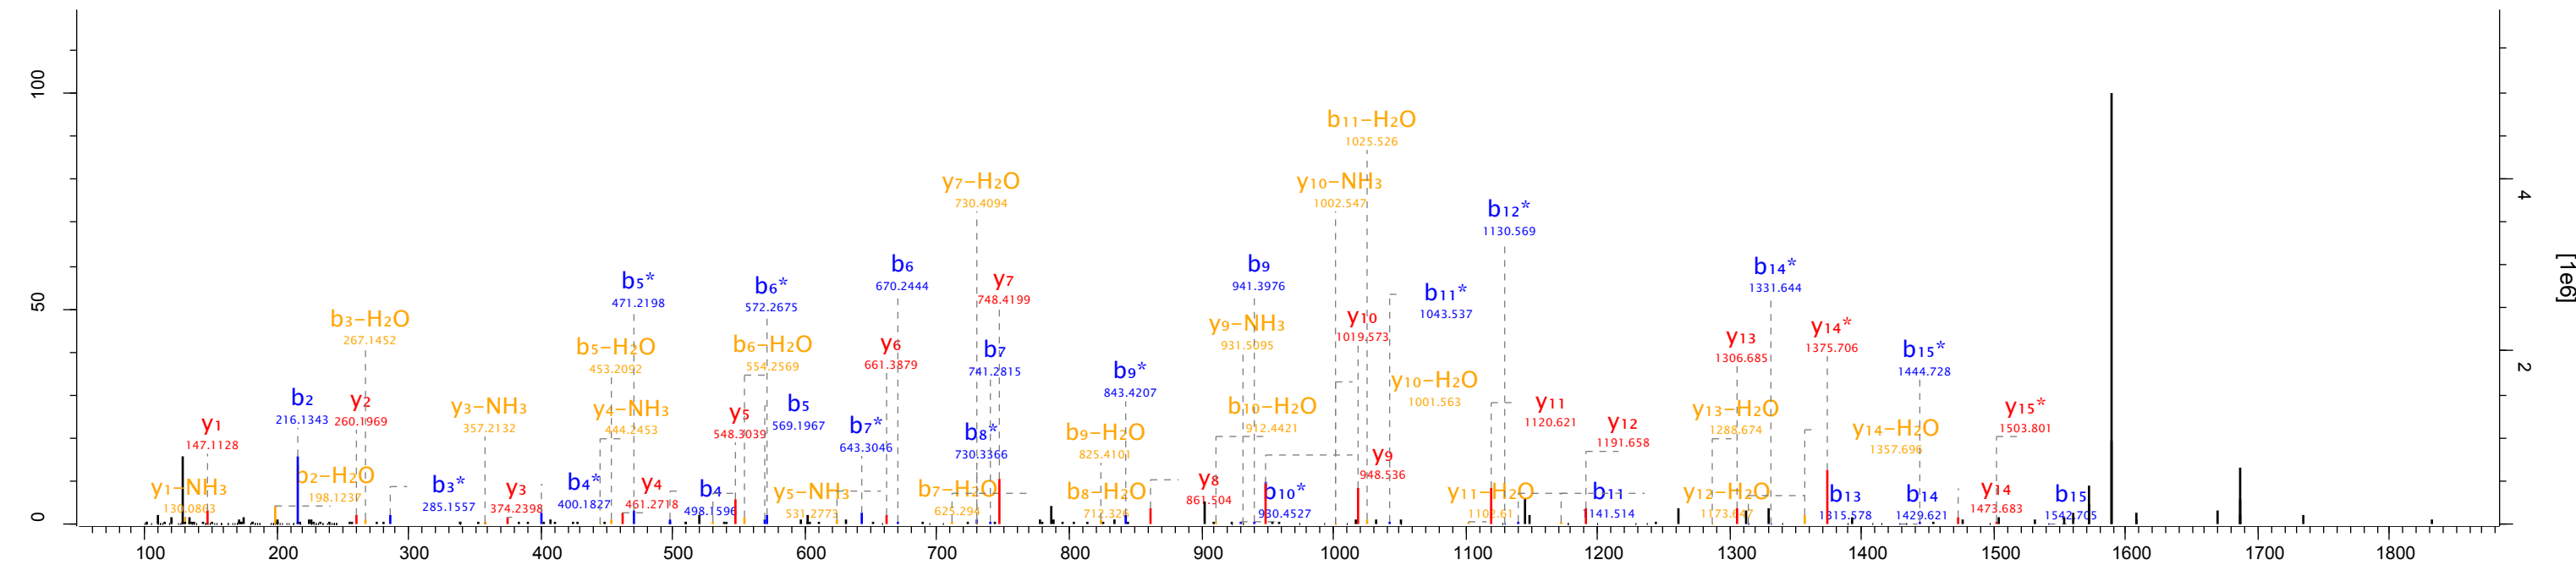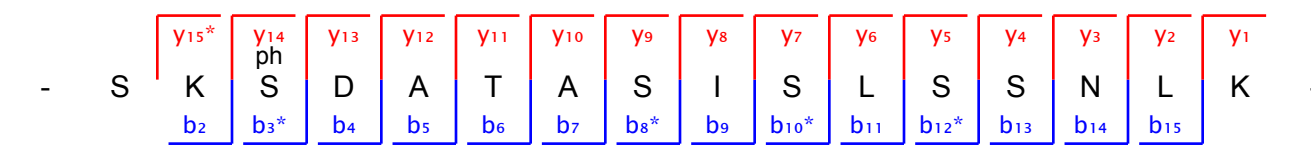



Raw file 20150814\_A375SR\_Phospho\_BR2\_06 Scan 14829 Method FTMS; HCD Score 243.23 m/z 878.92 Gene names KDM5C

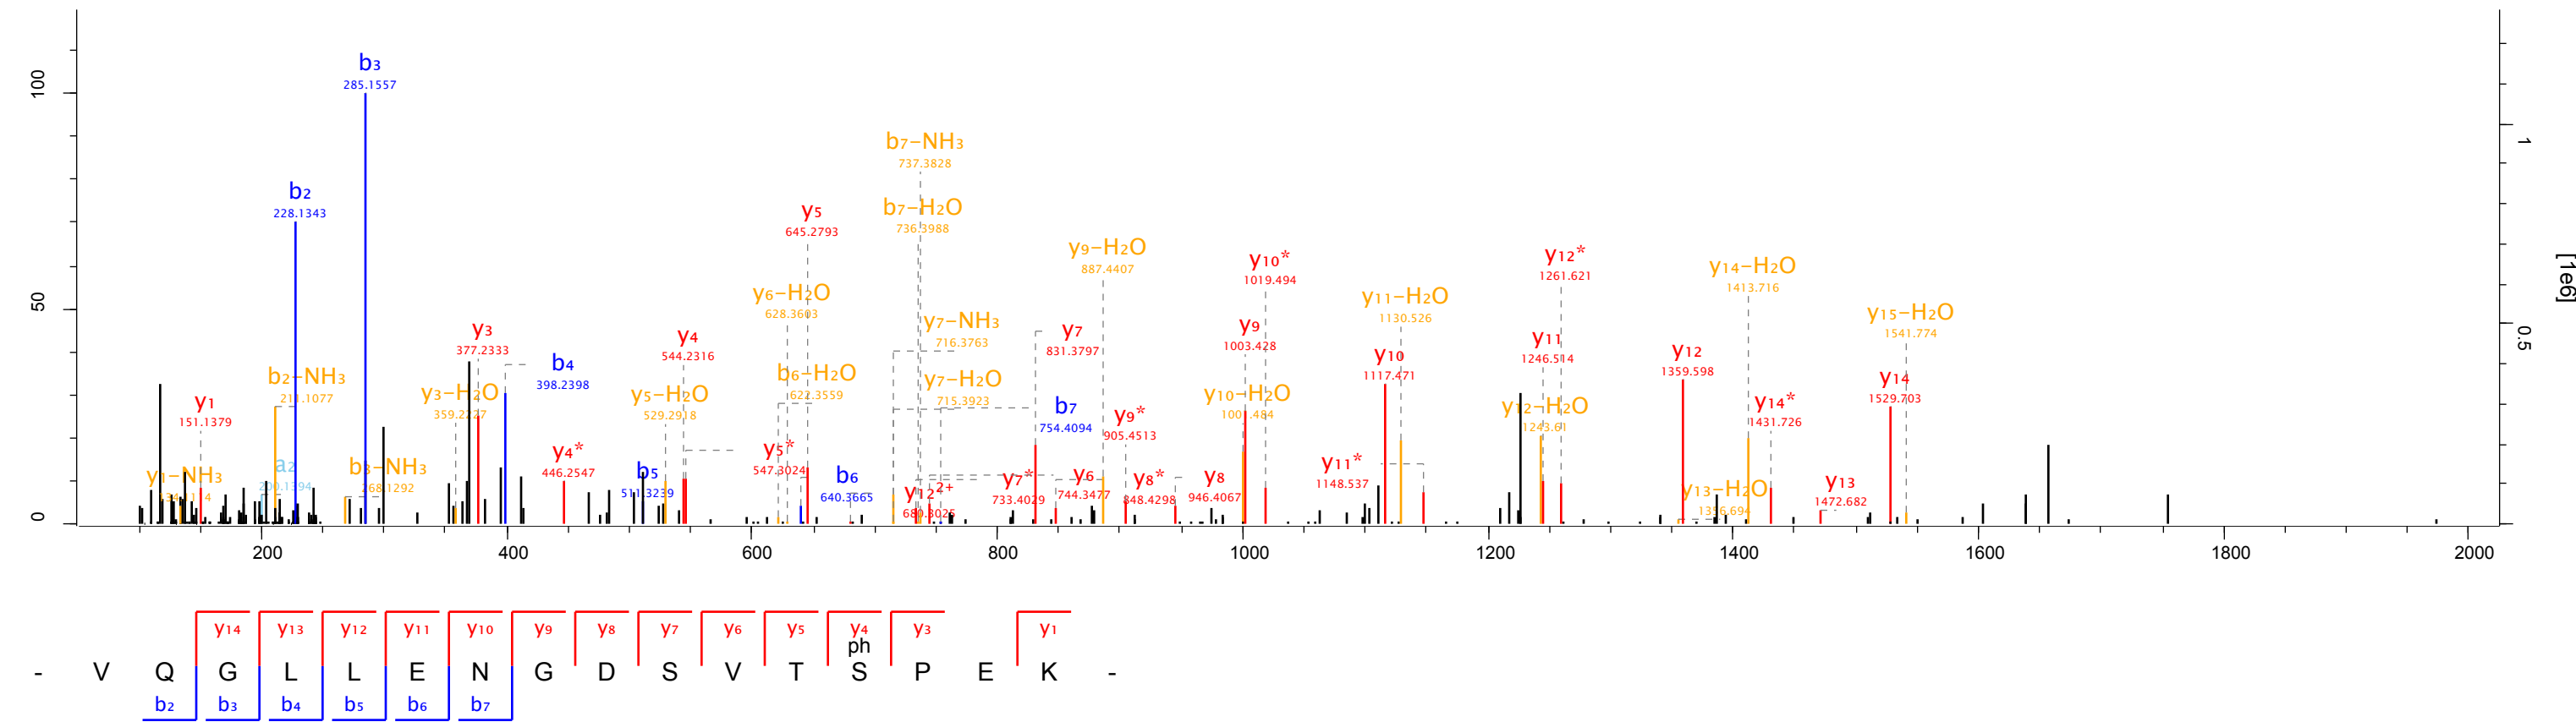

Raw file: 20150814\_A375SR\_Phospho\_BR2\_06  
 Scan: 15069 Method: FTMS; HCD Score: 99.27 m/z: 844.38 Gene names: RB1

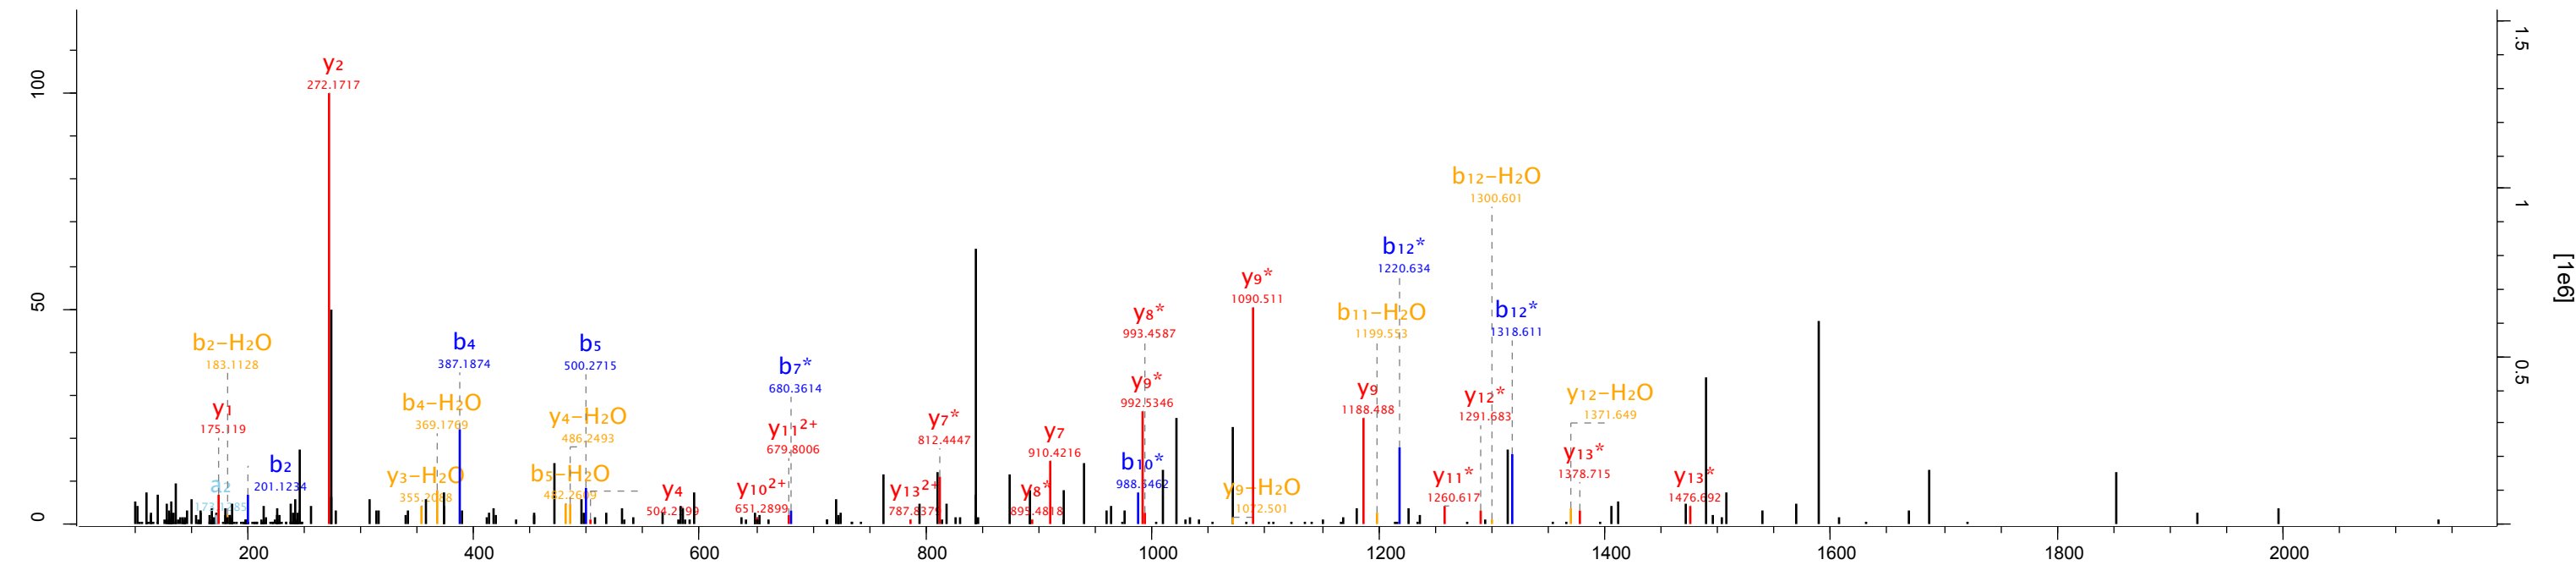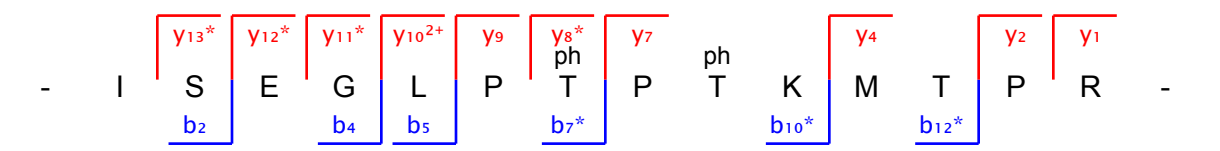

Raw file 20150814\_A375SR\_Phospho\_BR2\_06 Scan 15289 Method FTMS; HCD Score 153.83 m/z 859.41 Gene names SSFA2

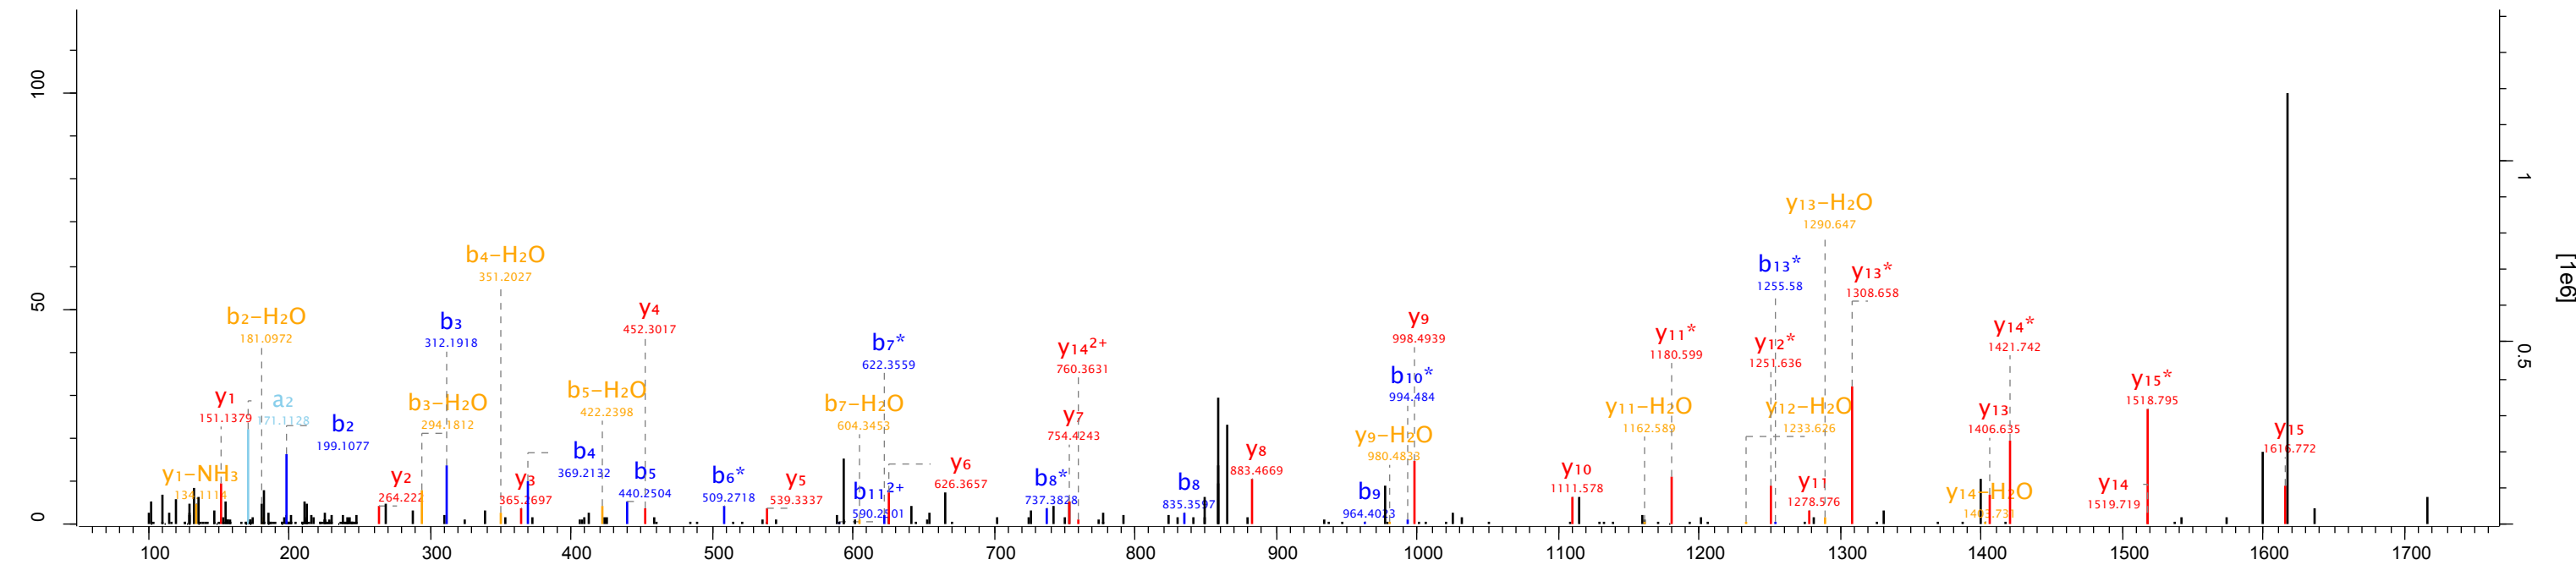

- T P L G A S L D E Q S S S T L K -

Fragmentation mapping (b and y ions) is shown below the sequence:

|     |     |     |      |           |     |    |    |      |                   |    |      |    |    |    |
|-----|-----|-----|------|-----------|-----|----|----|------|-------------------|----|------|----|----|----|
| y15 | y14 | y13 | y12* | y11<br>ph | y10 | y9 | y8 | y7   | y6                | y5 | y4   | y3 | y2 | y1 |
| b2  | b3  | b4  | b5   | b6*       | b7* | b8 | b9 | b10* | b11 <sup>2+</sup> |    | b13* |    |    |    |

Raw file: 20150814\_A375SR\_Phospho\_BR2\_06  
 Scan: 16209  
 Method: FTMS; HCD  
 Score: 101.6  
 m/z: 1136.53  
 Gene names: IRS2

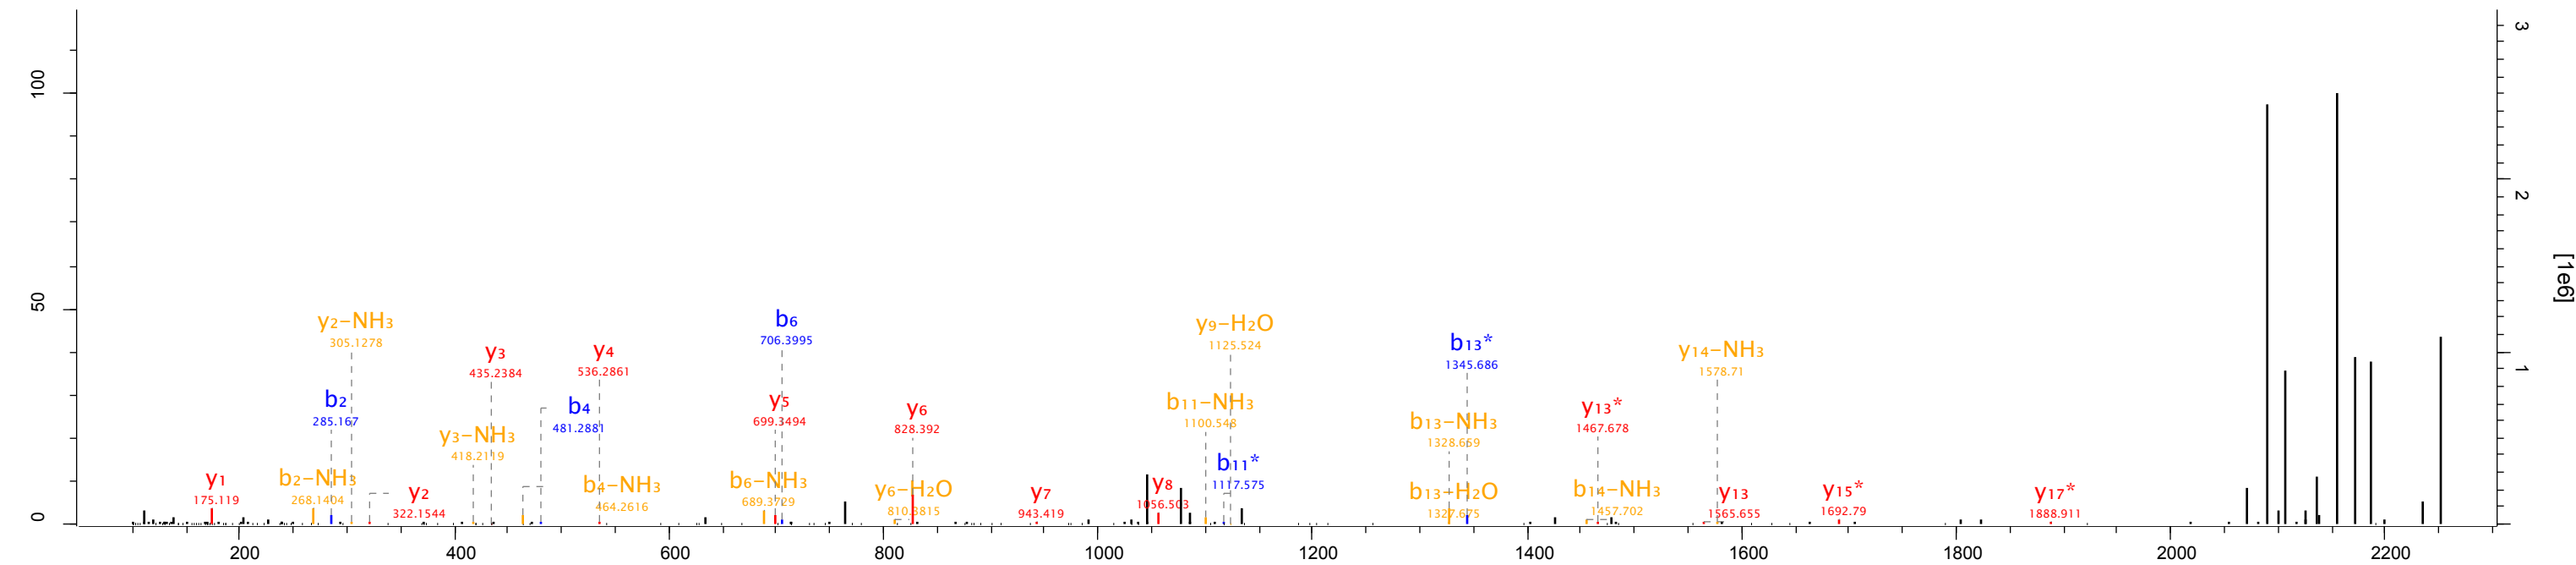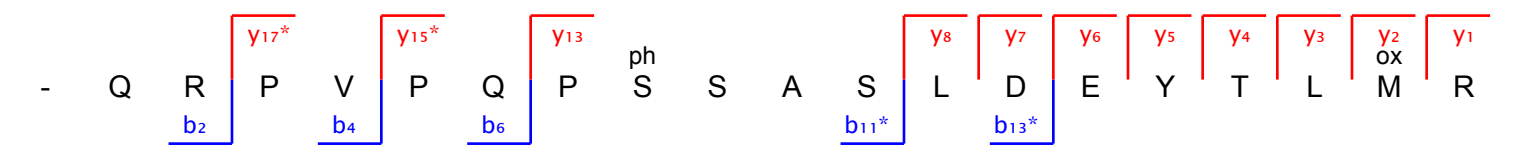

Raw file 20150814\_A375SR\_Phospho\_BR2\_06 Scan 16339 Method FTMS; HCD Score 148.21 m/z 642.33 Gene names THRAP3

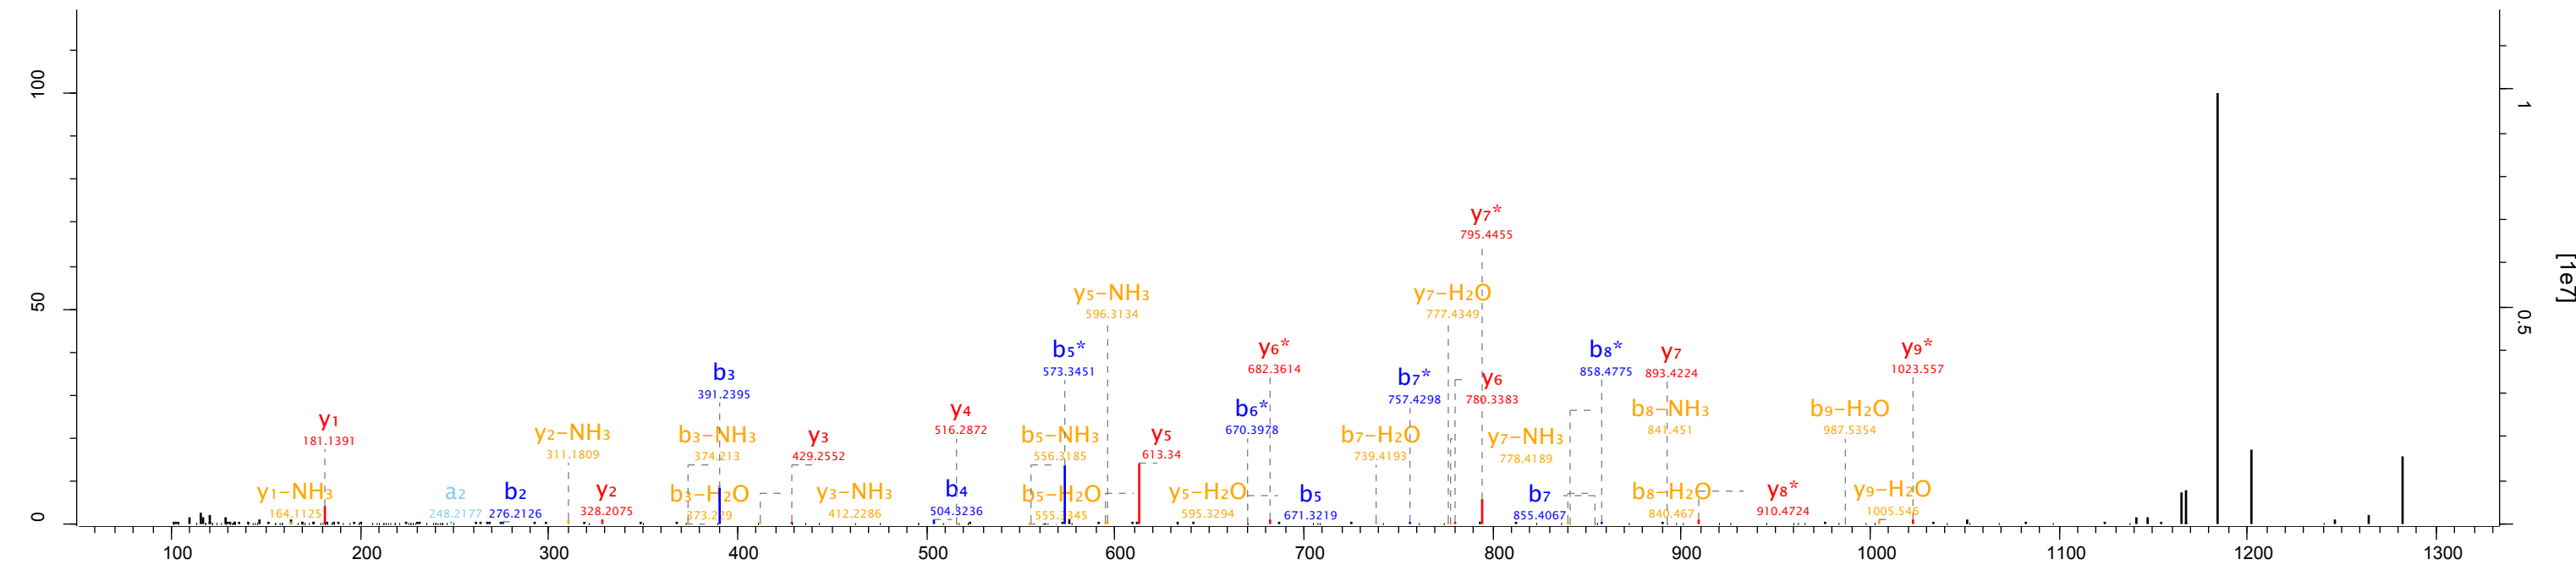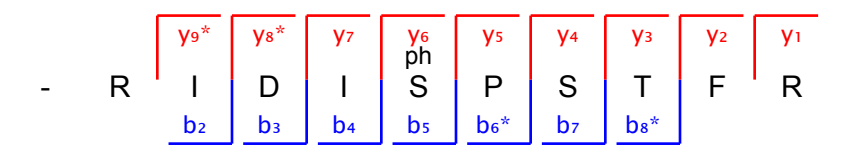

Raw file 20150814\_A375SR\_Phospho\_BR2\_06 Scan 16449 Method FTMS; HCD Score 85.53 m/z 476.74 Gene names CDK12

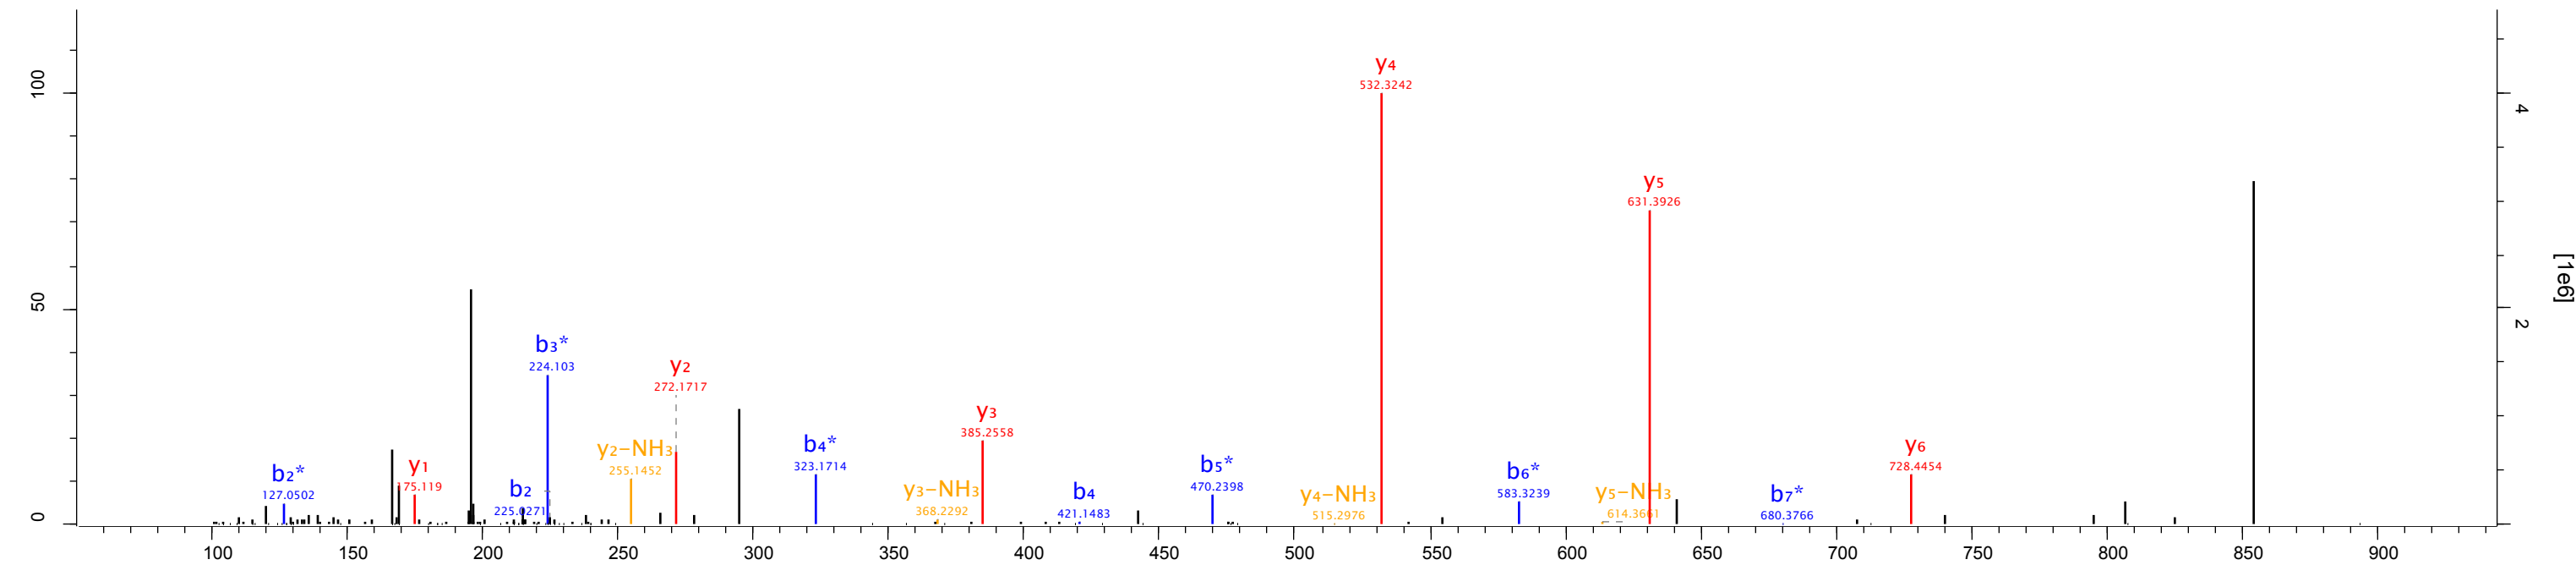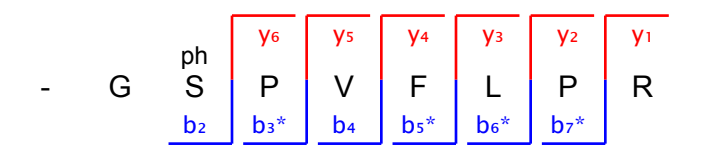

Raw file Scan Method Score m/z Gene names  
 20150814\_A375SR\_Phospho\_BR2\_06 17209 FTMS; HCD 336.14 1017.46 MED24

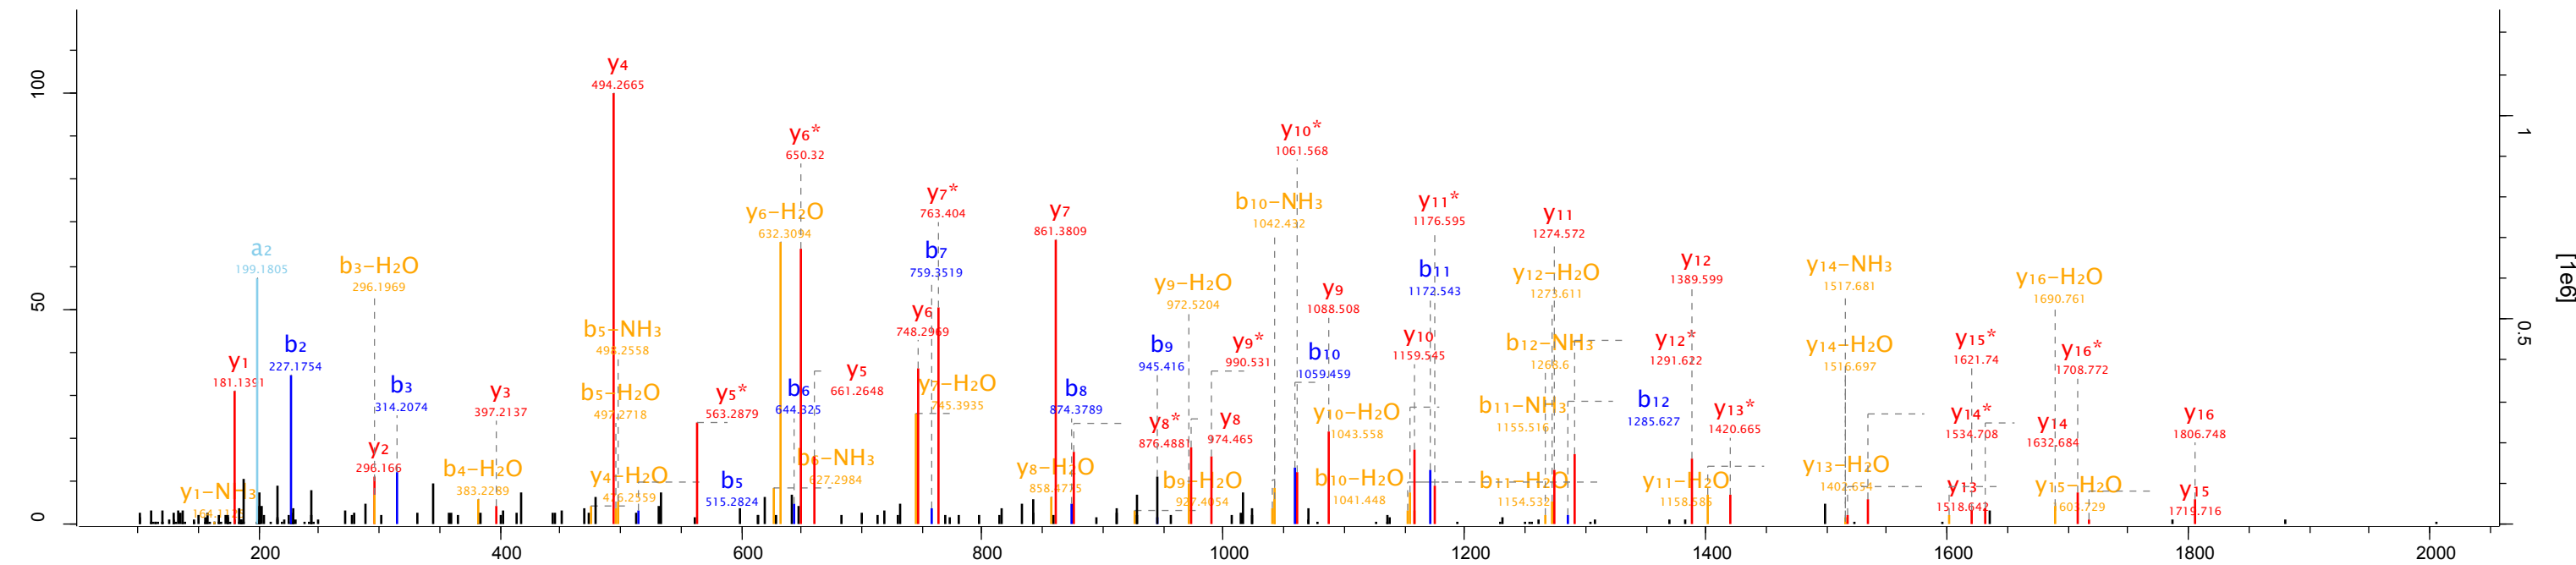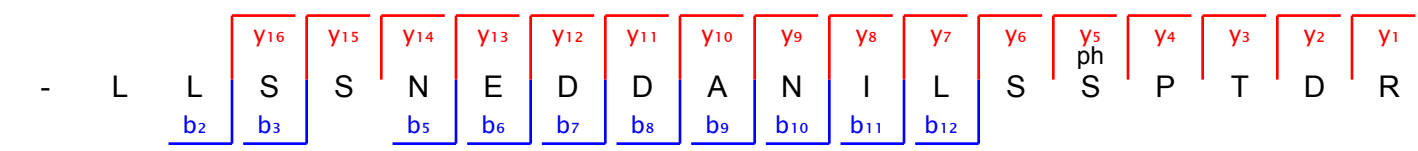

Raw file  
20150814\_A375SR\_Phospho\_BR2\_06

Scan 17229 Method FTMS; HCD Score 289.6 m/z 1070.54 Gene names SPTBN1

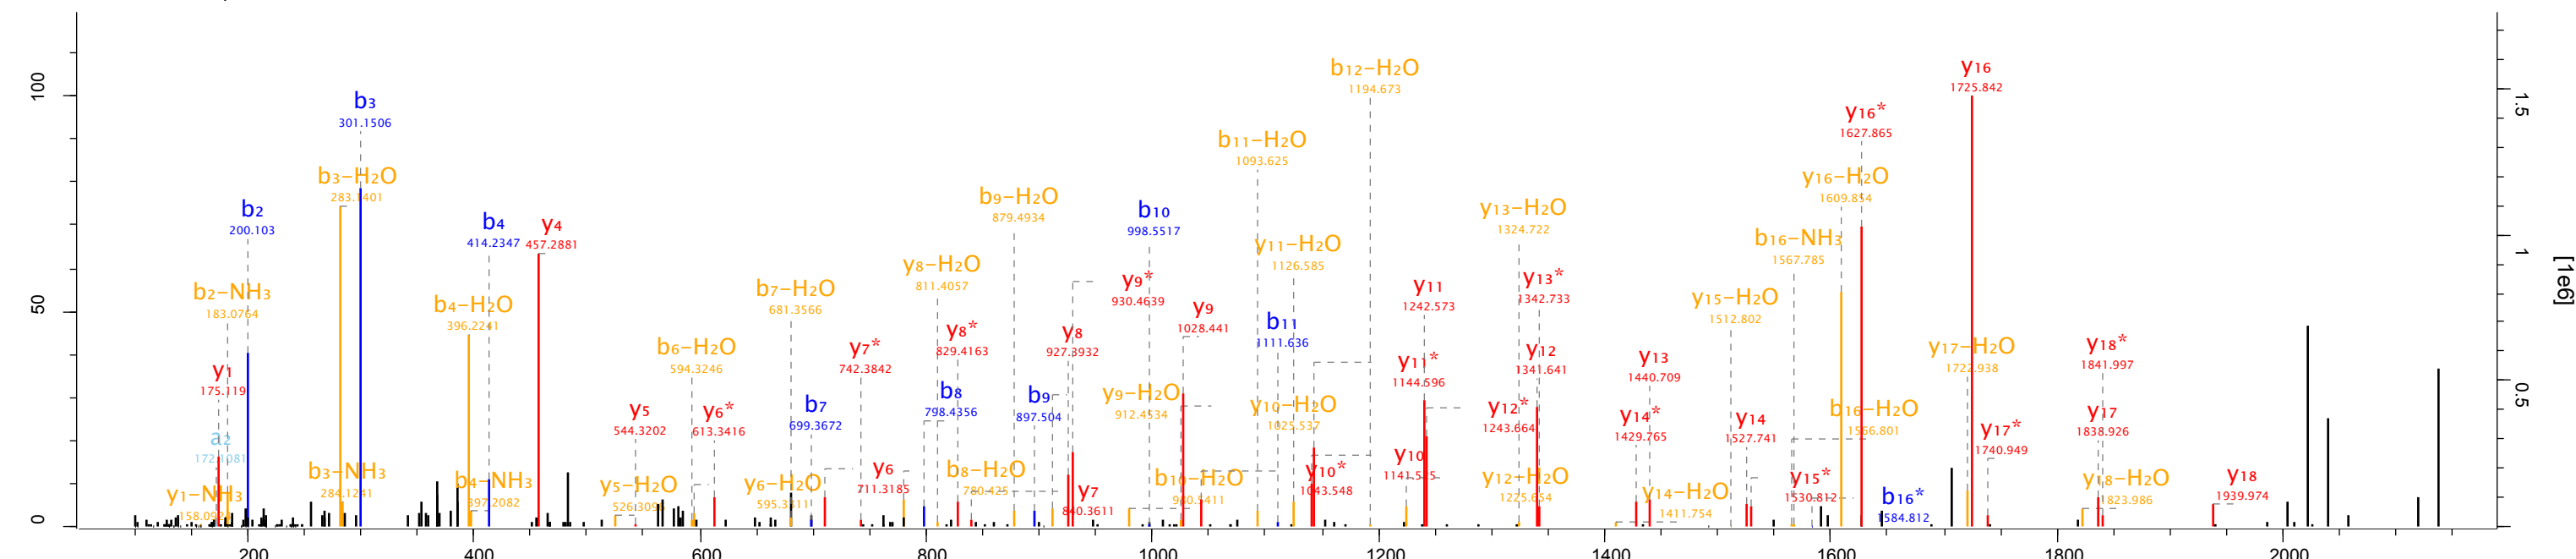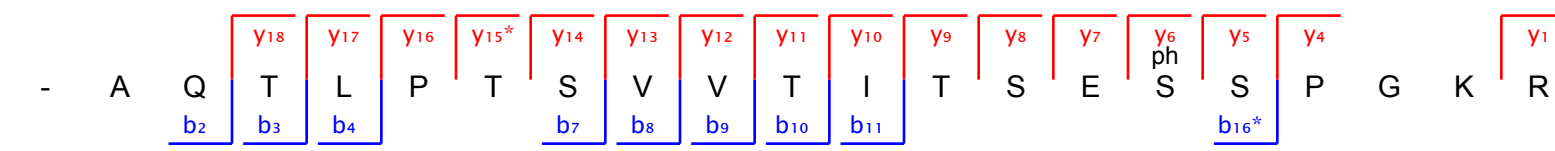





Raw file 20150814\_A375SR\_Phospho\_BR2\_06 Scan 18839 Method FTMS; HCD Score 122.09 m/z 927.09 Gene names NCOR2

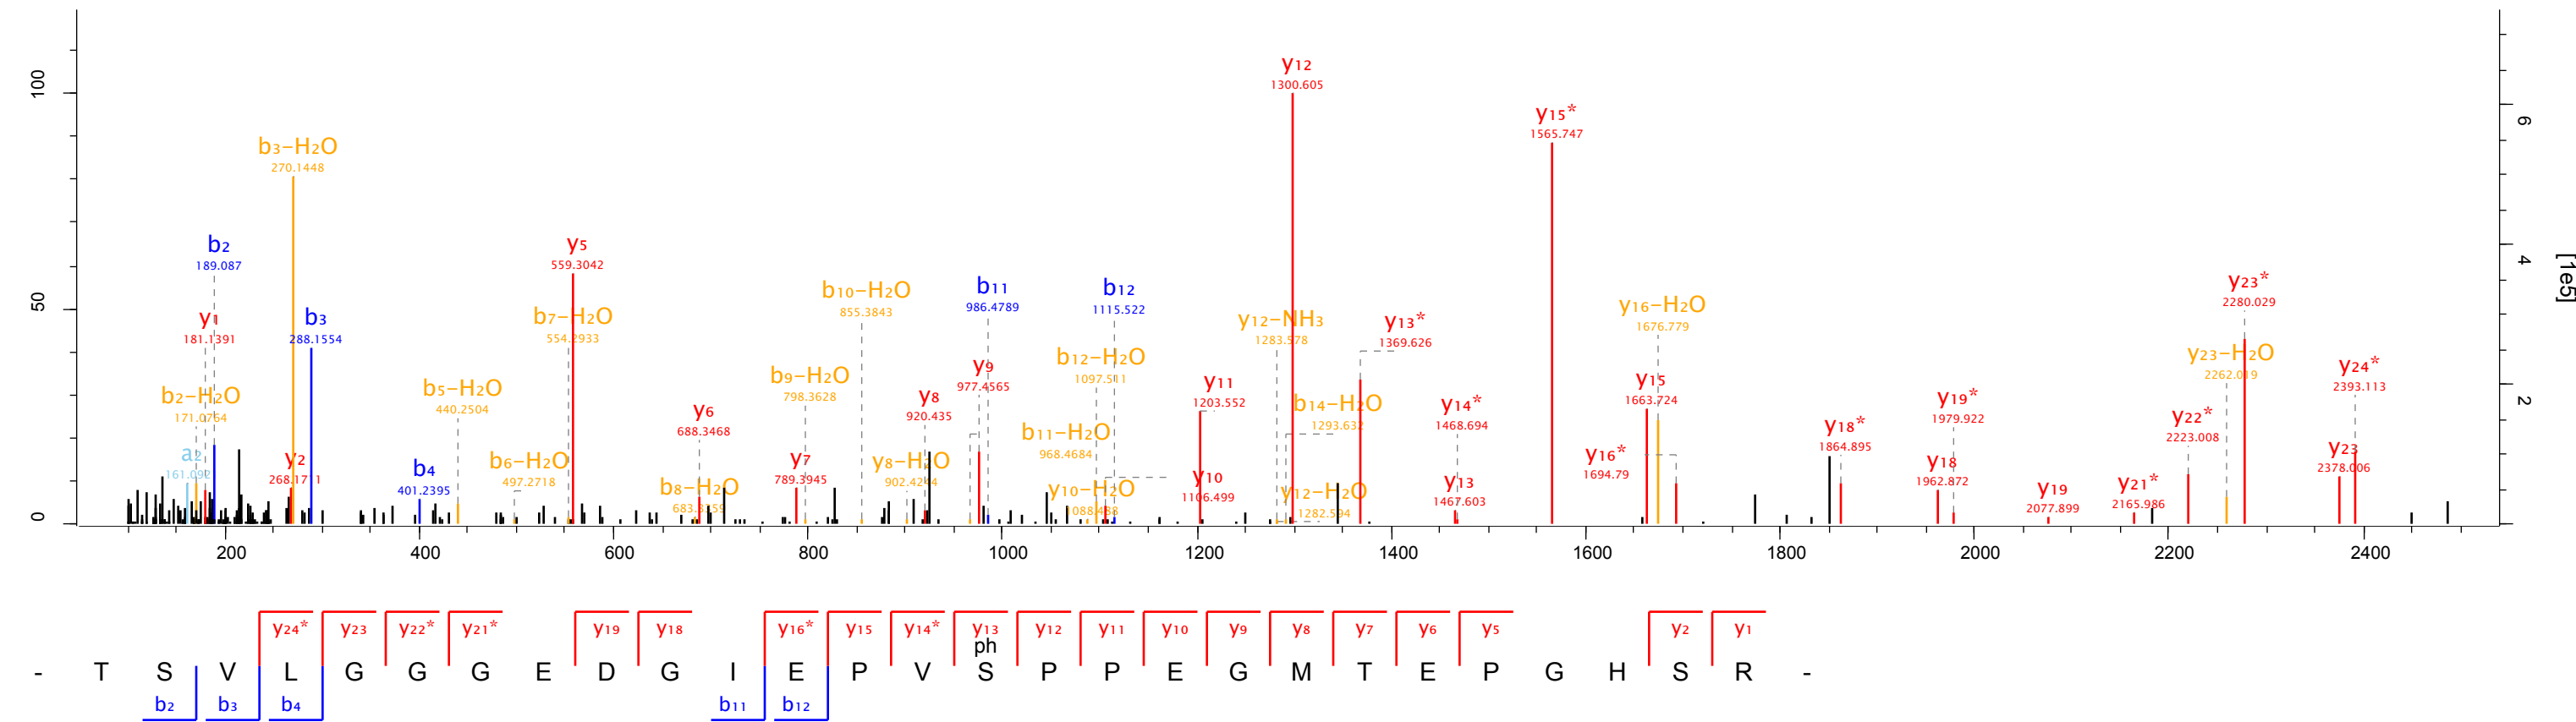

Raw file 20150814\_A375SR\_Phospho\_BR2\_06 Scan 19059 Method FTMS; HCD Score 64.04 m/z 701.85 Gene names MAP7D3

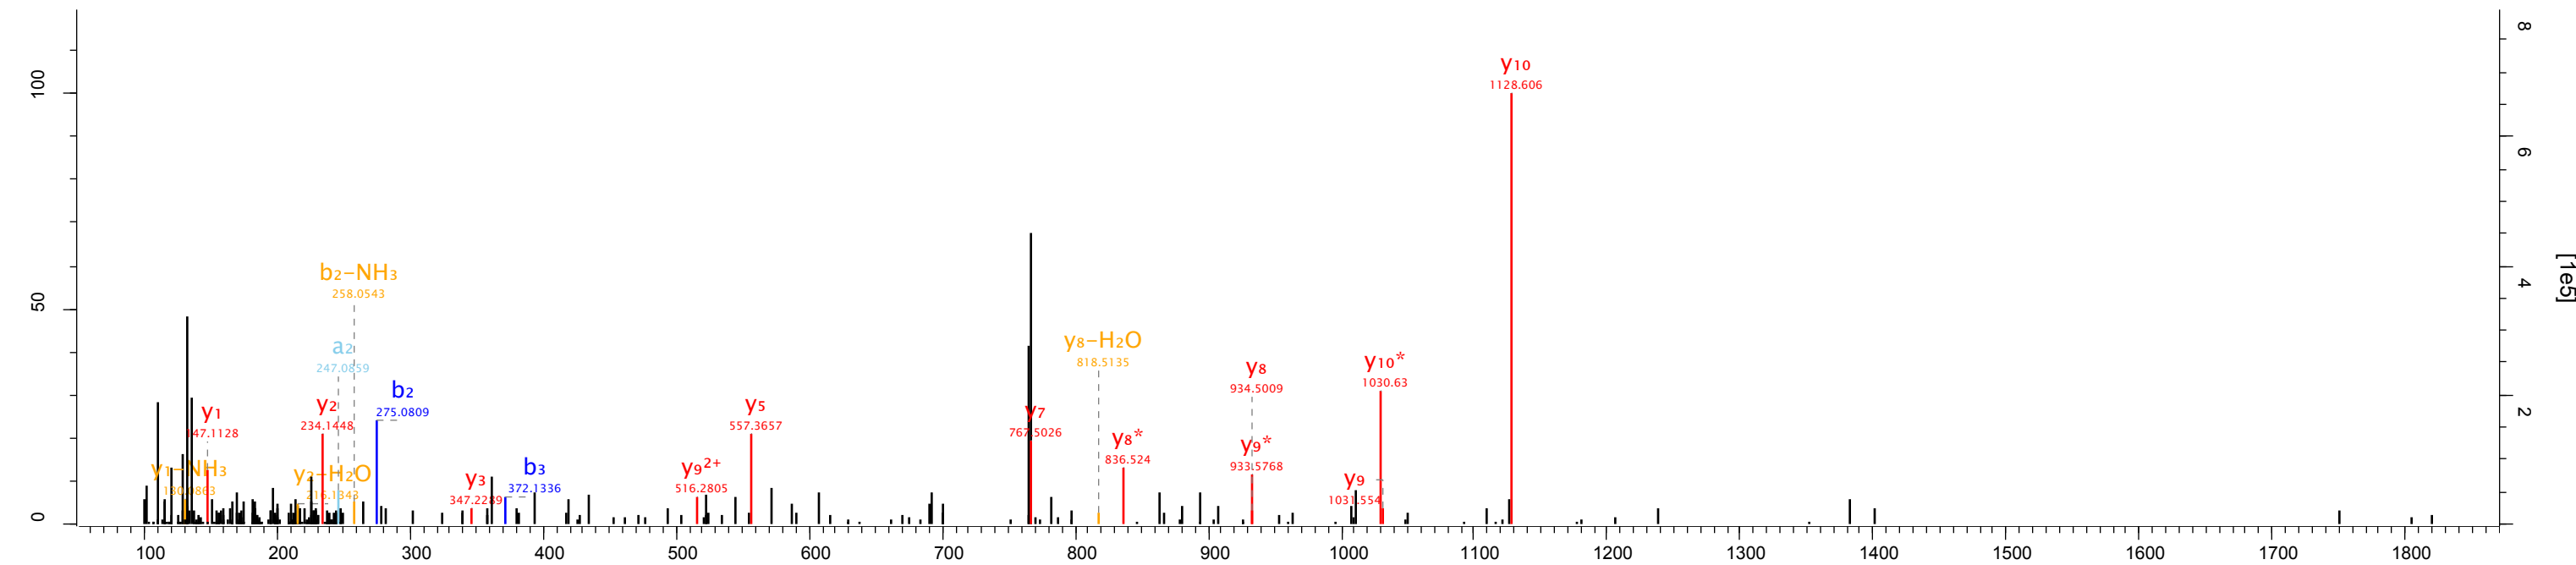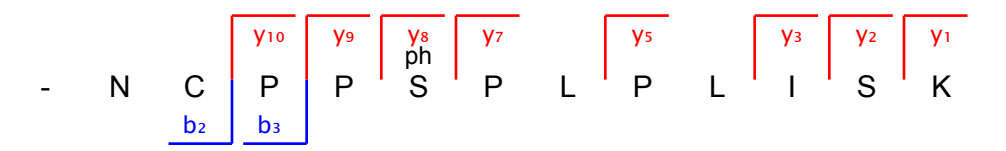

Raw file: 20150814\_A375SR\_Phospho\_BR2\_06  
 Scan: 19259 Method: FTMS; HCD Score: 76.82 m/z: 774.04 Gene names: BCL9L

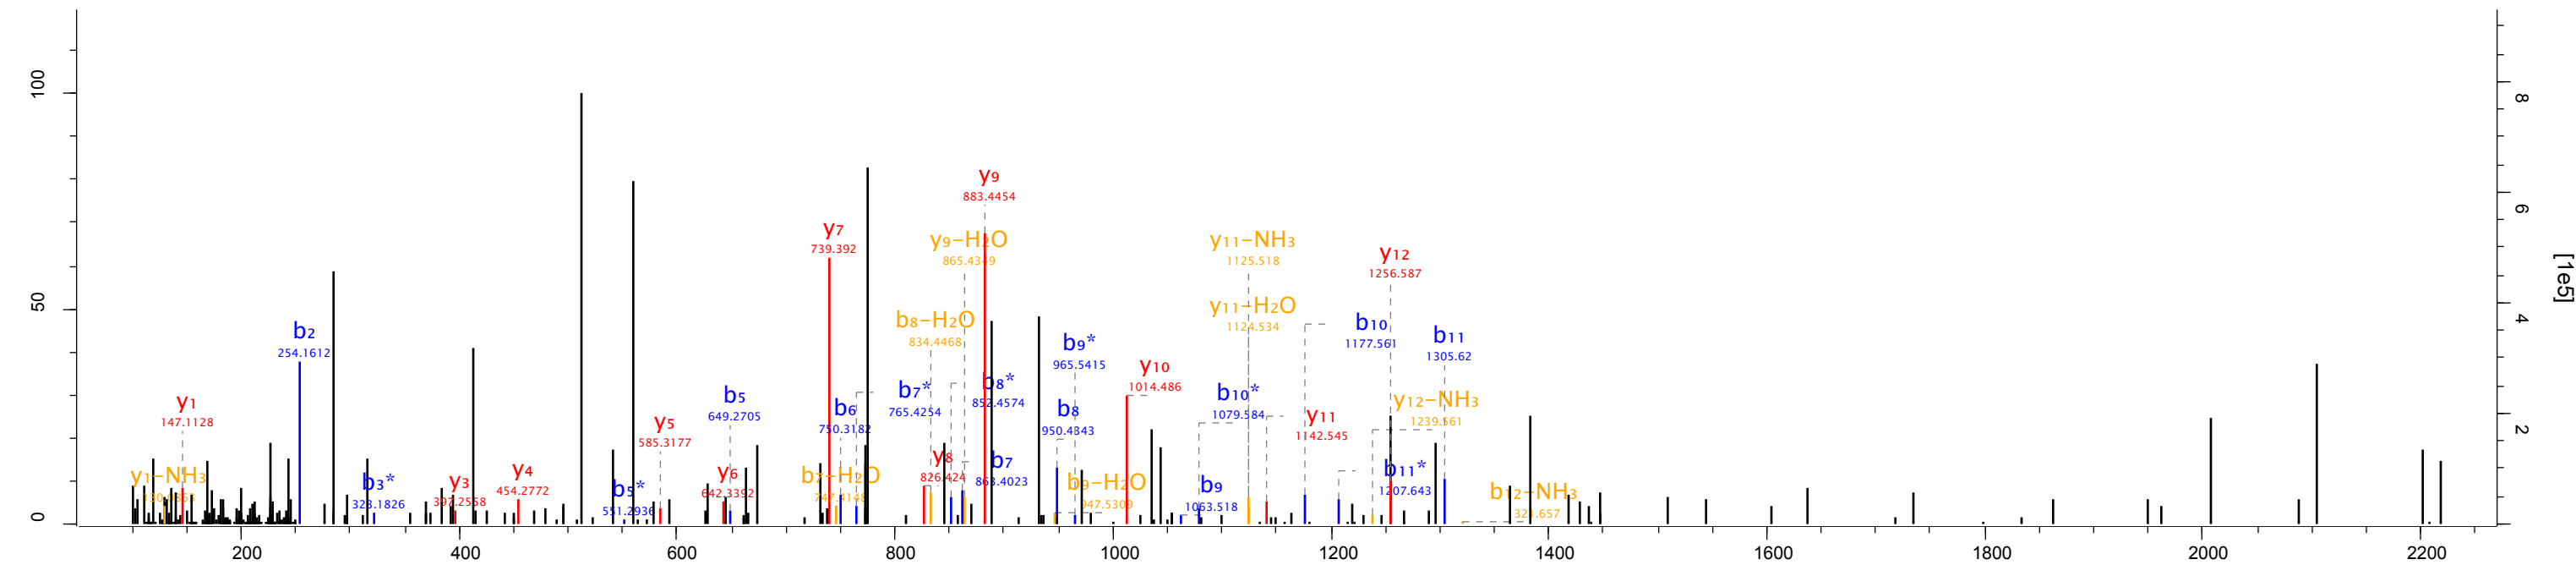

- R P S<sup>ph</sup> D L T I S I N Q M G S P G M G H L K -

Fragmentation mapping (b and y ions):

- b ions (blue boxes):** b<sub>2</sub> (P), b<sub>3</sub><sup>\*</sup> (S), b<sub>5</sub> (L), b<sub>6</sub> (T), b<sub>7</sub> (I), b<sub>8</sub> (S), b<sub>9</sub> (I), b<sub>10</sub> (N), b<sub>11</sub> (Q).
- y ions (red boxes):** y<sub>1</sub> (K), y<sub>3</sub> (H), y<sub>4</sub> (G), y<sub>5</sub> (M), y<sub>6</sub> (G), y<sub>7</sub> (P), y<sub>8</sub> (S), y<sub>9</sub> (G), y<sub>10</sub> (M), y<sub>11</sub> (Q), y<sub>12</sub> (N).

Raw file 20150814\_A375SR\_Phospho\_BR2\_06 Scan 19269 Method FTMS; HCD Score 157.08 m/z 908.1 Gene names DDX54

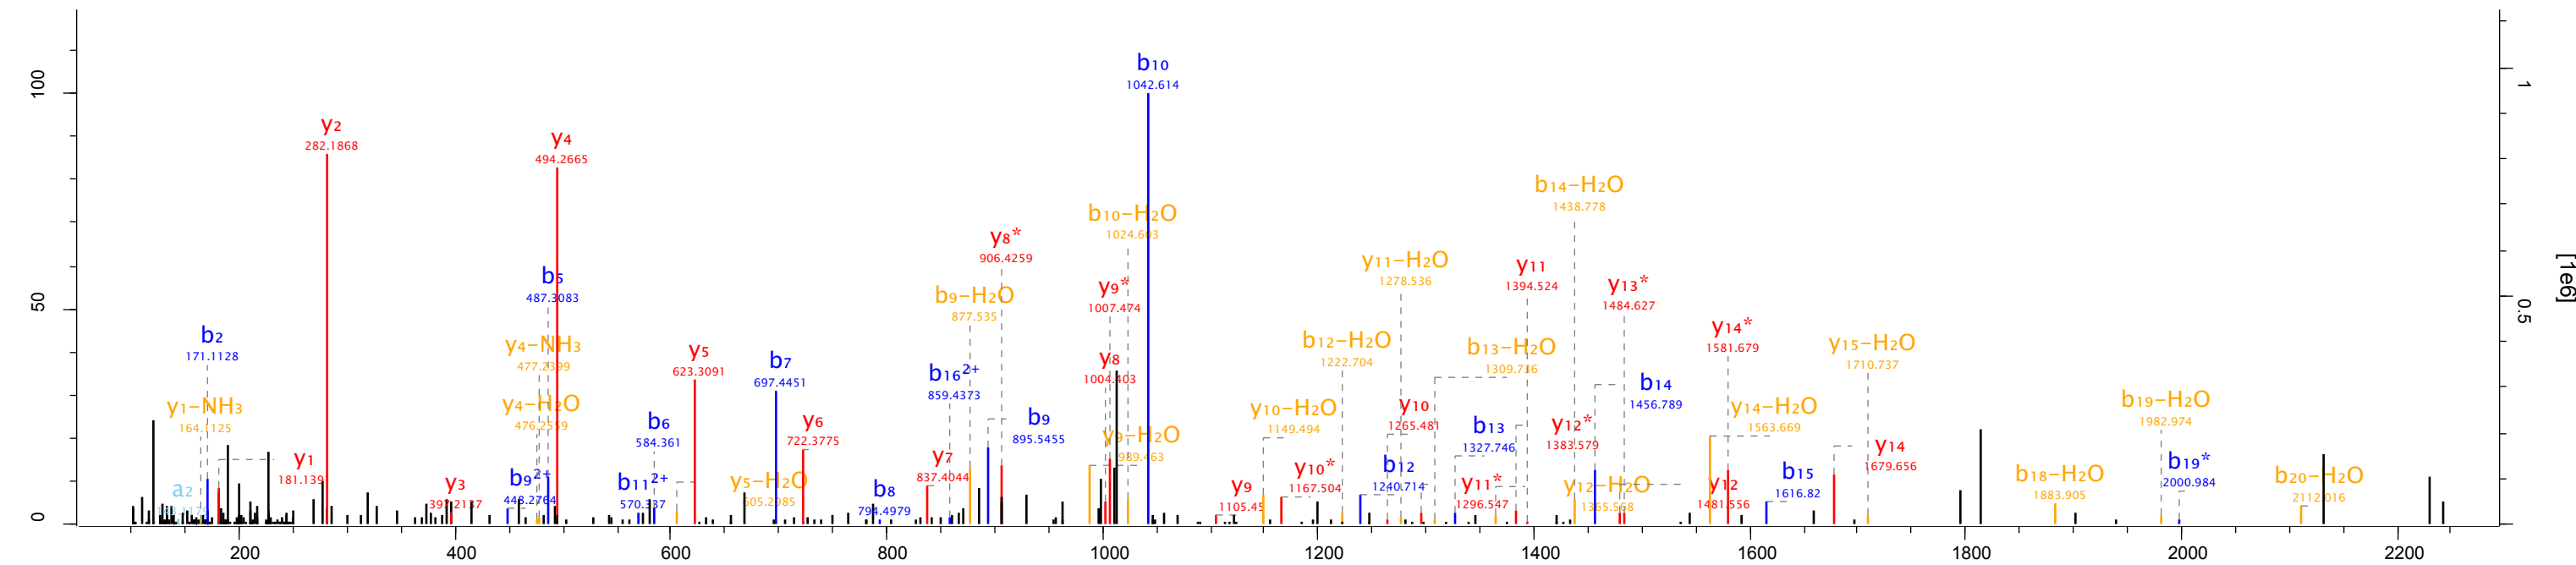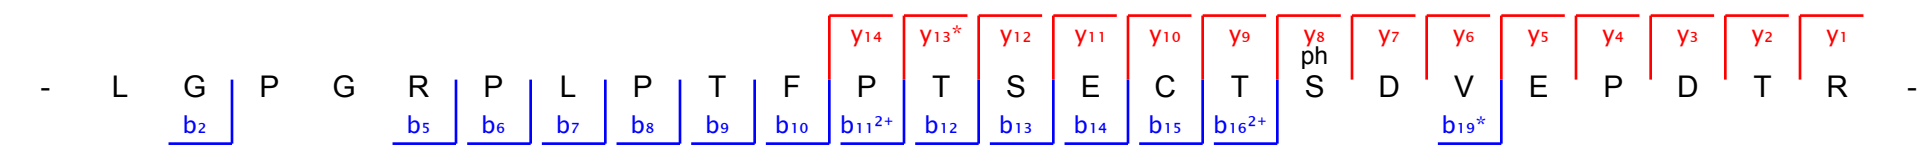

Raw file: 20150814\_A375SR\_Phospho\_BR2\_06  
 Scan: 19479 Method: FTMS; HCD Score: 284.41 m/z: 947.5 Gene names: NBN

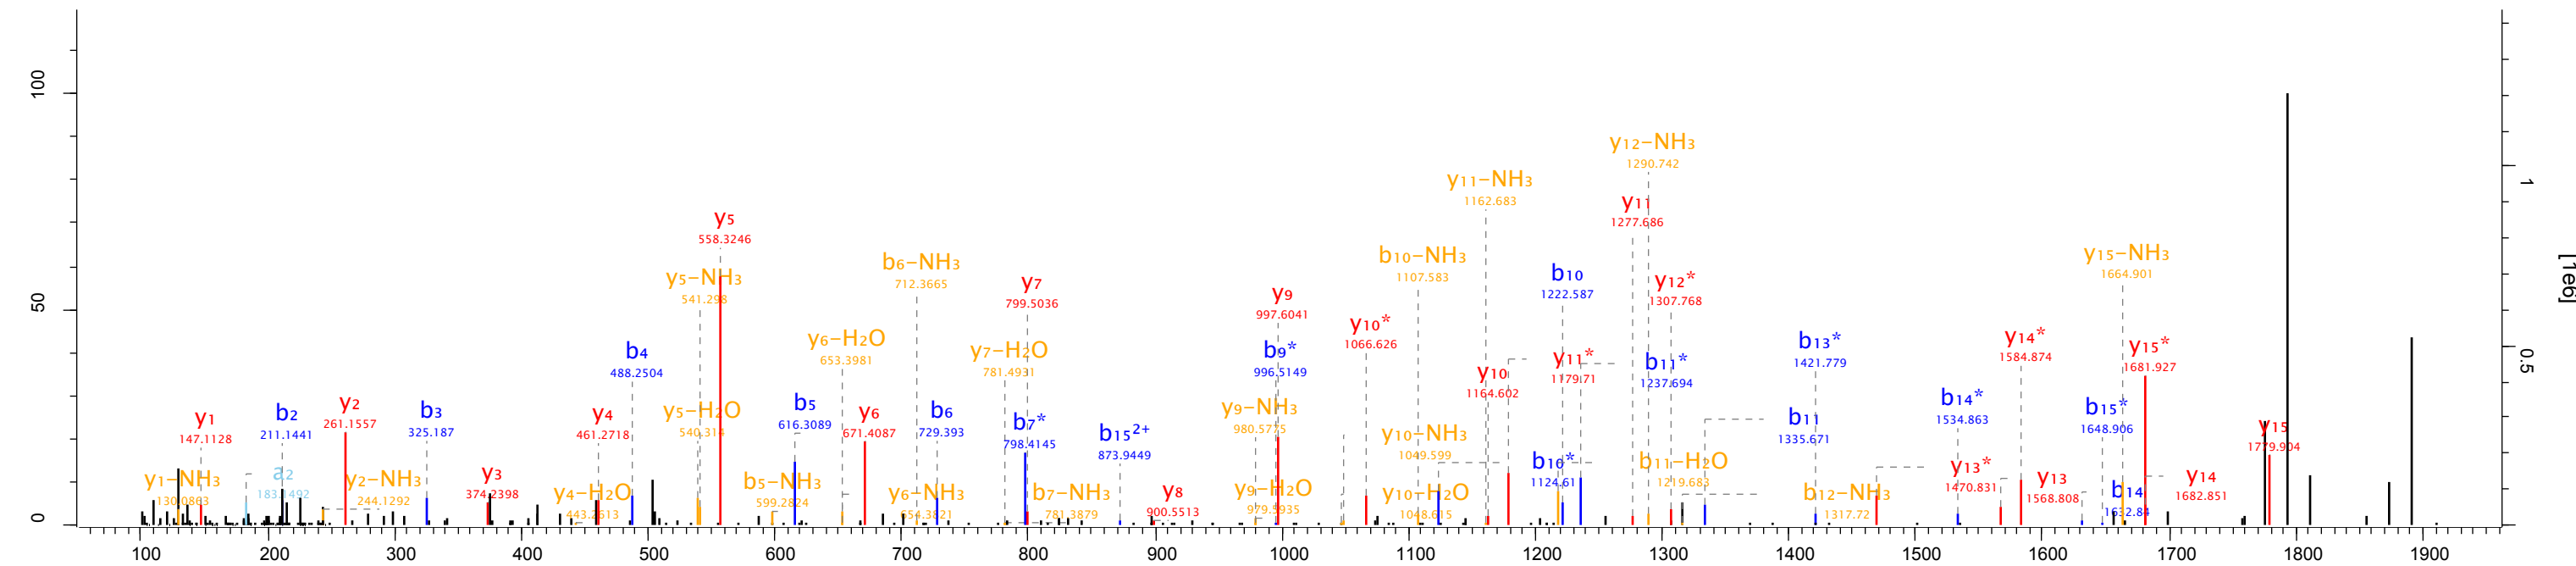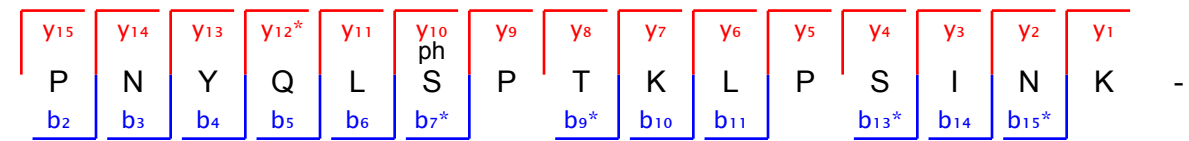

Raw file 20150814\_A375SR\_Phospho\_BR2\_06 Scan 19989 Method FTMS; HCD Score 85.82 m/z 494.25 Gene names YWHAZ;YWHAB;YWHAQ;YWHAH;YWHAE;YWHAG;SFN

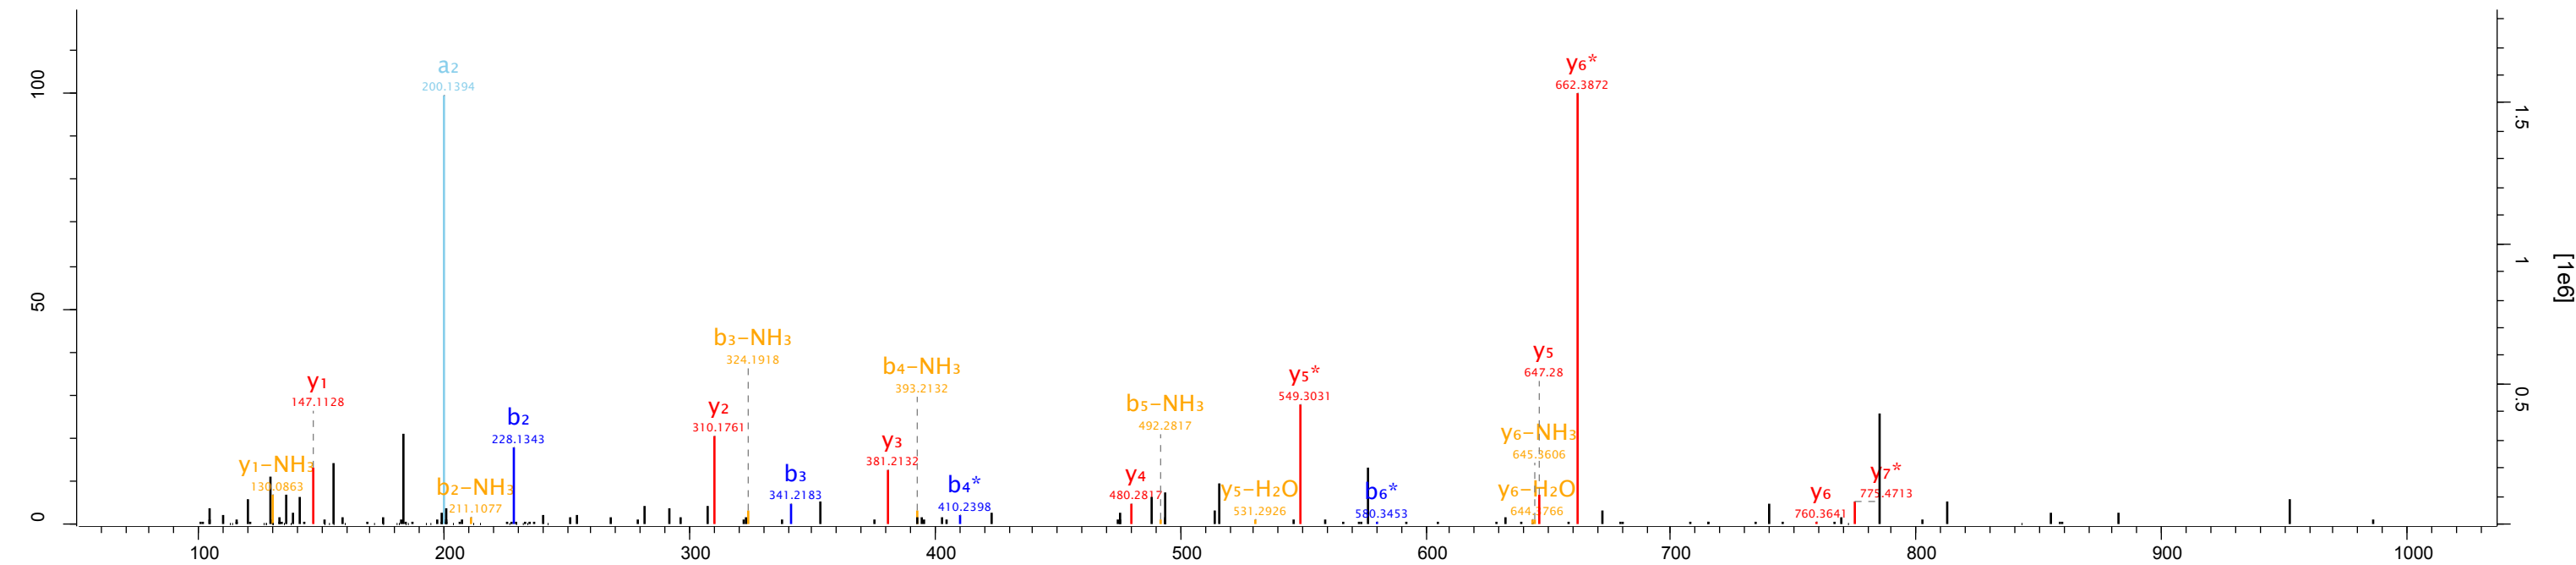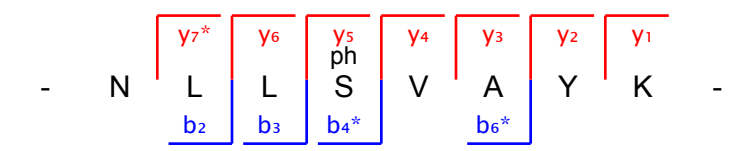

Raw file: 20150814\_A375SR\_Phospho\_BR2\_06  
 Scan: 20499 Method: FTMS; HCD Score: 182.24 m/z: 819.76 Gene names: ARHGEF11

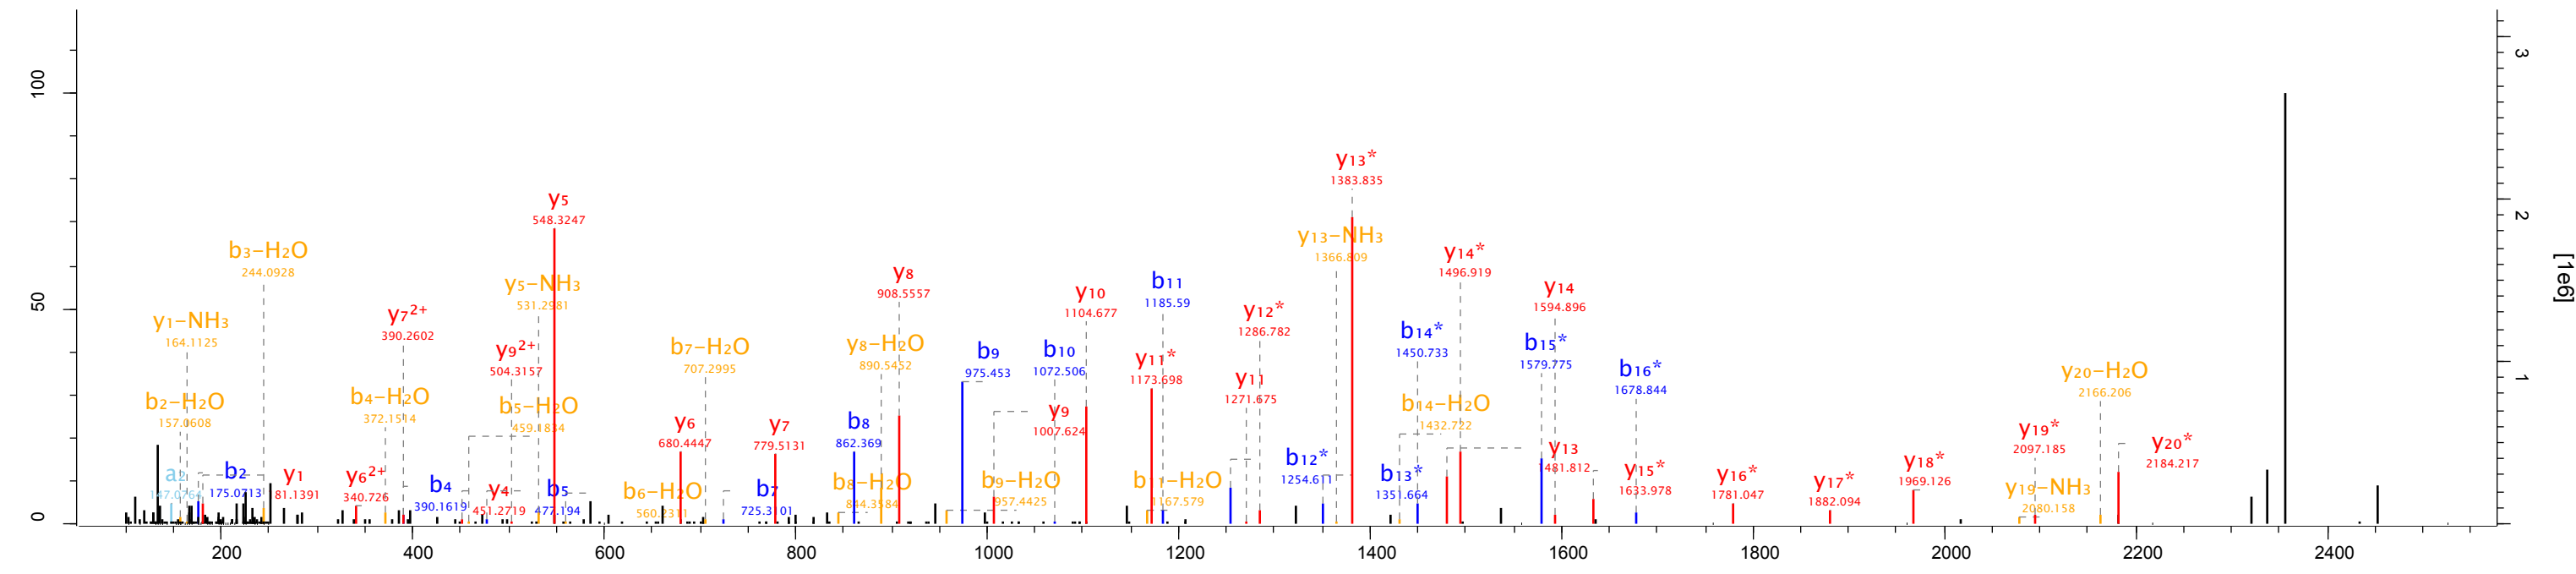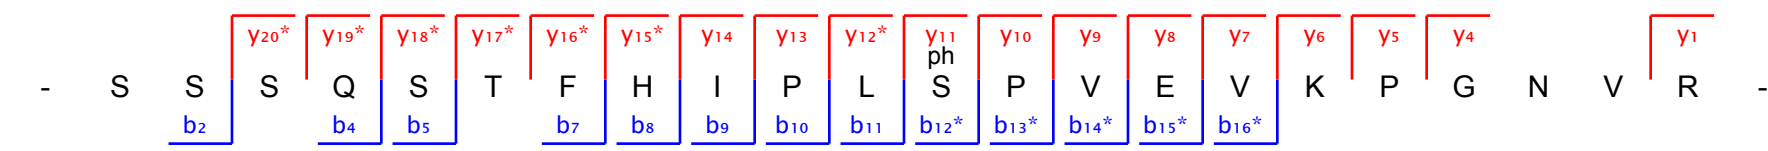



Raw file 20150814\_A375SR\_Phospho\_BR2\_06 Scan 20819 Method FTMS; HCD Score 81.53 m/z 865.39 Gene names SH2B3;BZRAP1

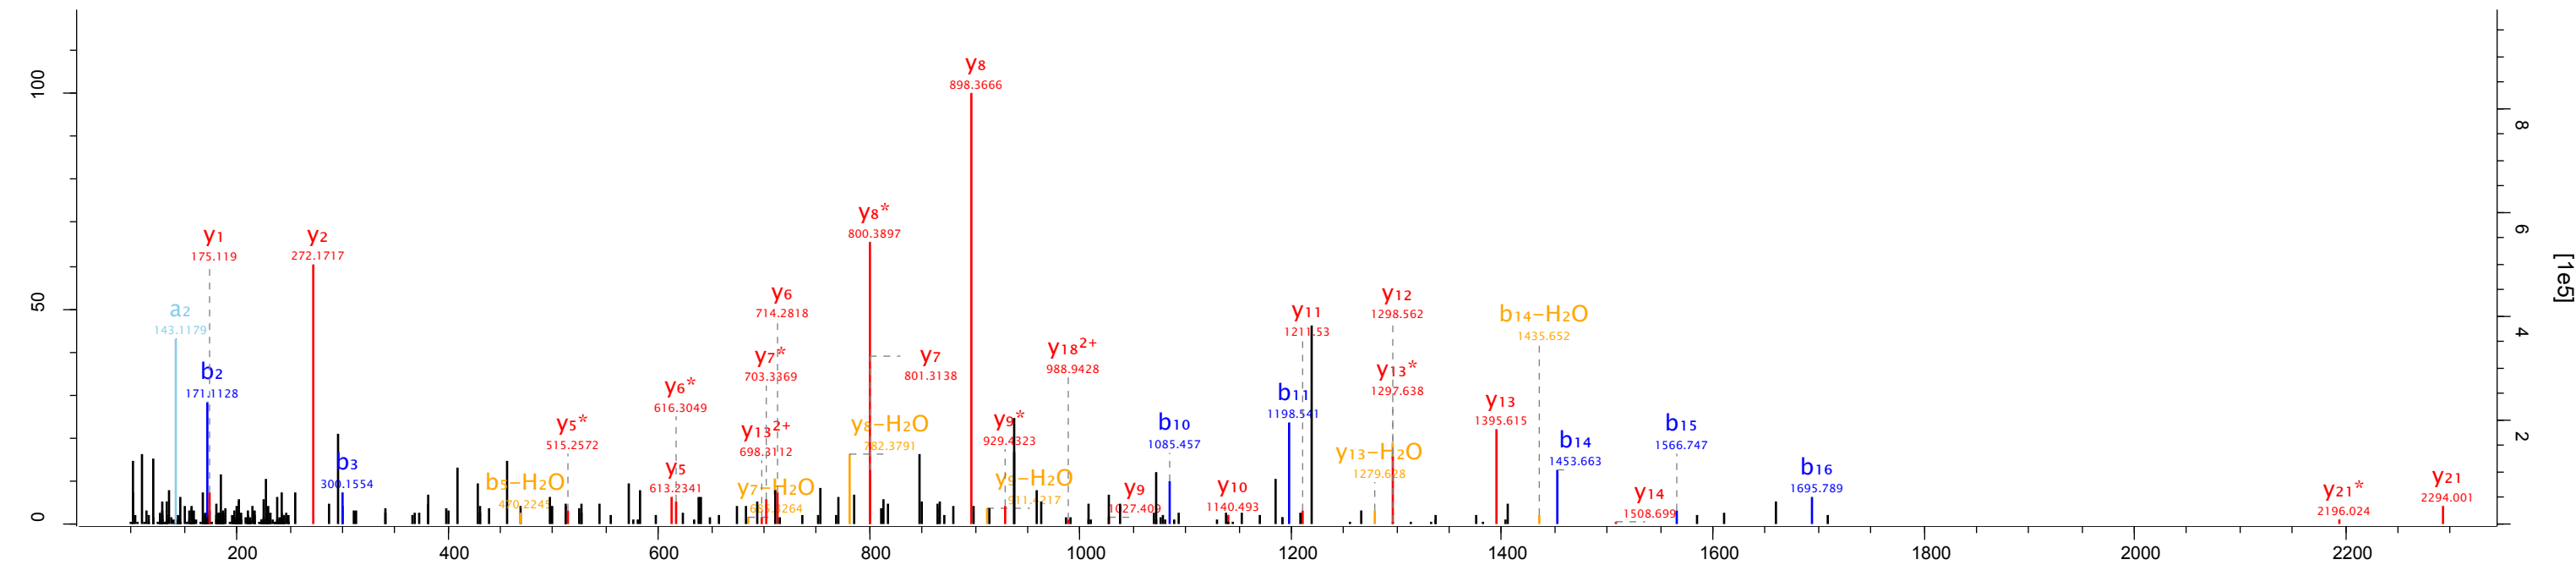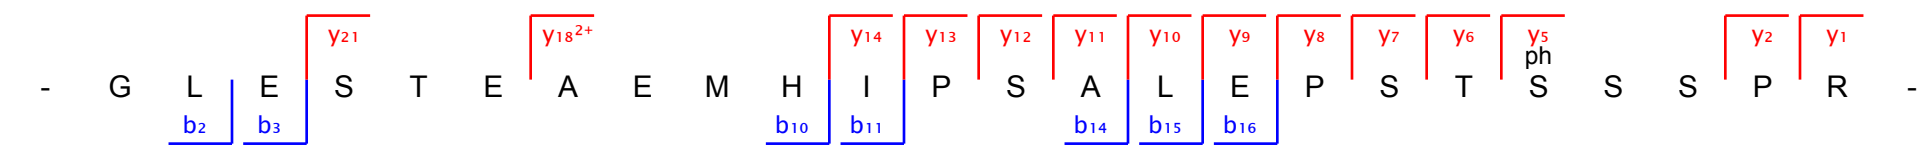

Raw file: 20150814\_A375SR\_Phospho\_BR2\_06  
 Scan: 2169 Method: FTMS; HCD Score: 57.7 m/z: 558.28 Gene names: NCOR2

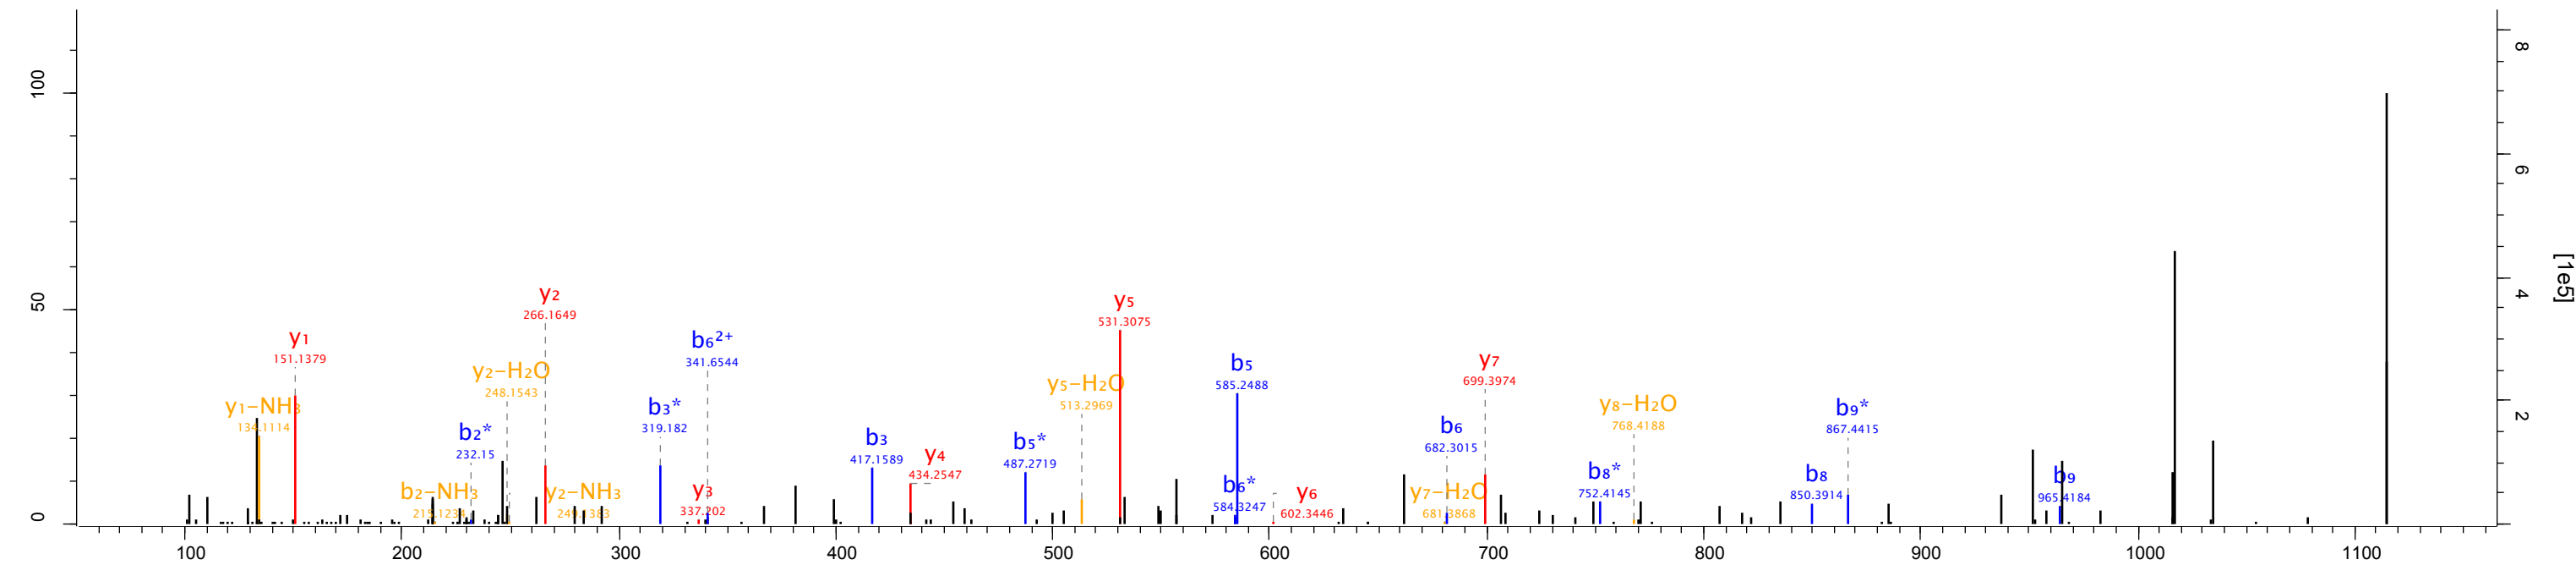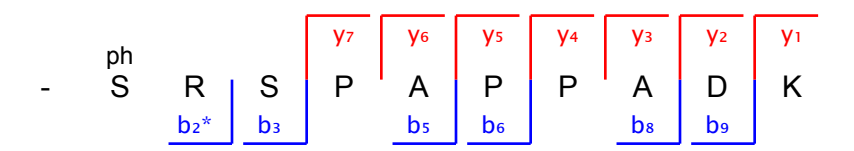

Raw file: 20150814\_A375SR\_Phospho\_BR2\_06  
 Scan: 22139 Method: FTMS; HCD Score: 57.02 m/z: 1189.59 Gene names: ANKRD17

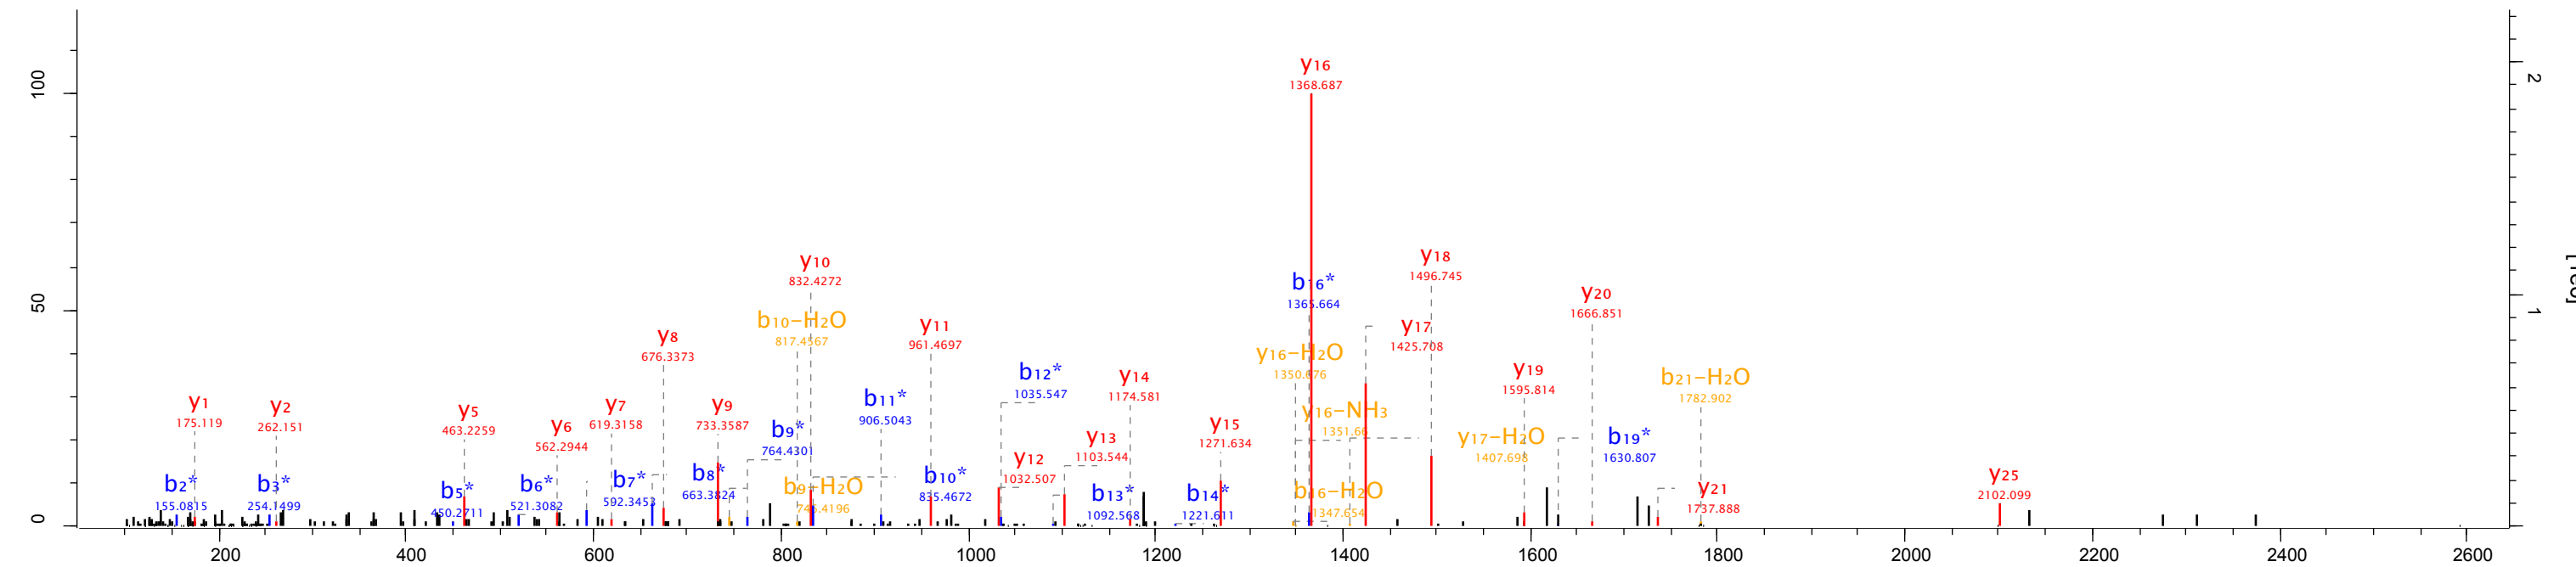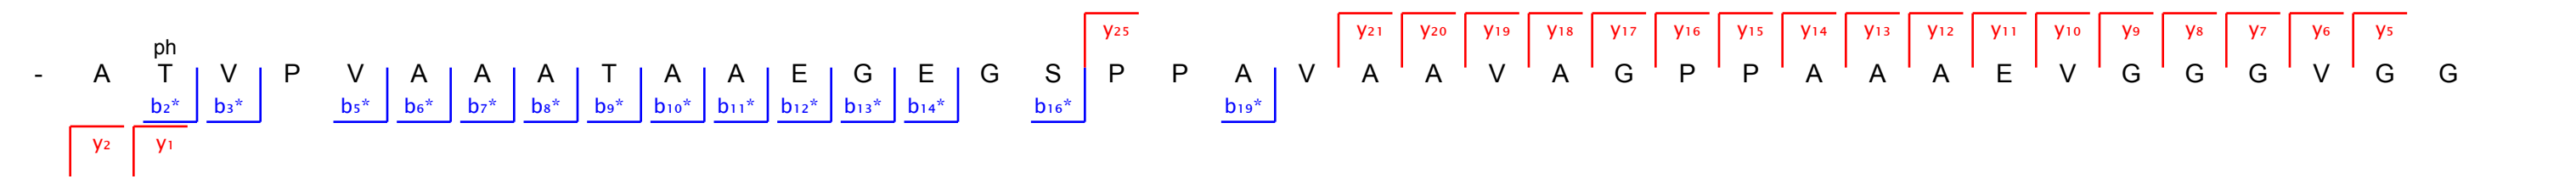

Raw file 20150814\_A375SR\_Phospho\_BR2\_06 Scan 22399 Method FTMS; HCD Score 55.59 m/z 691.69 Gene names KLHL42

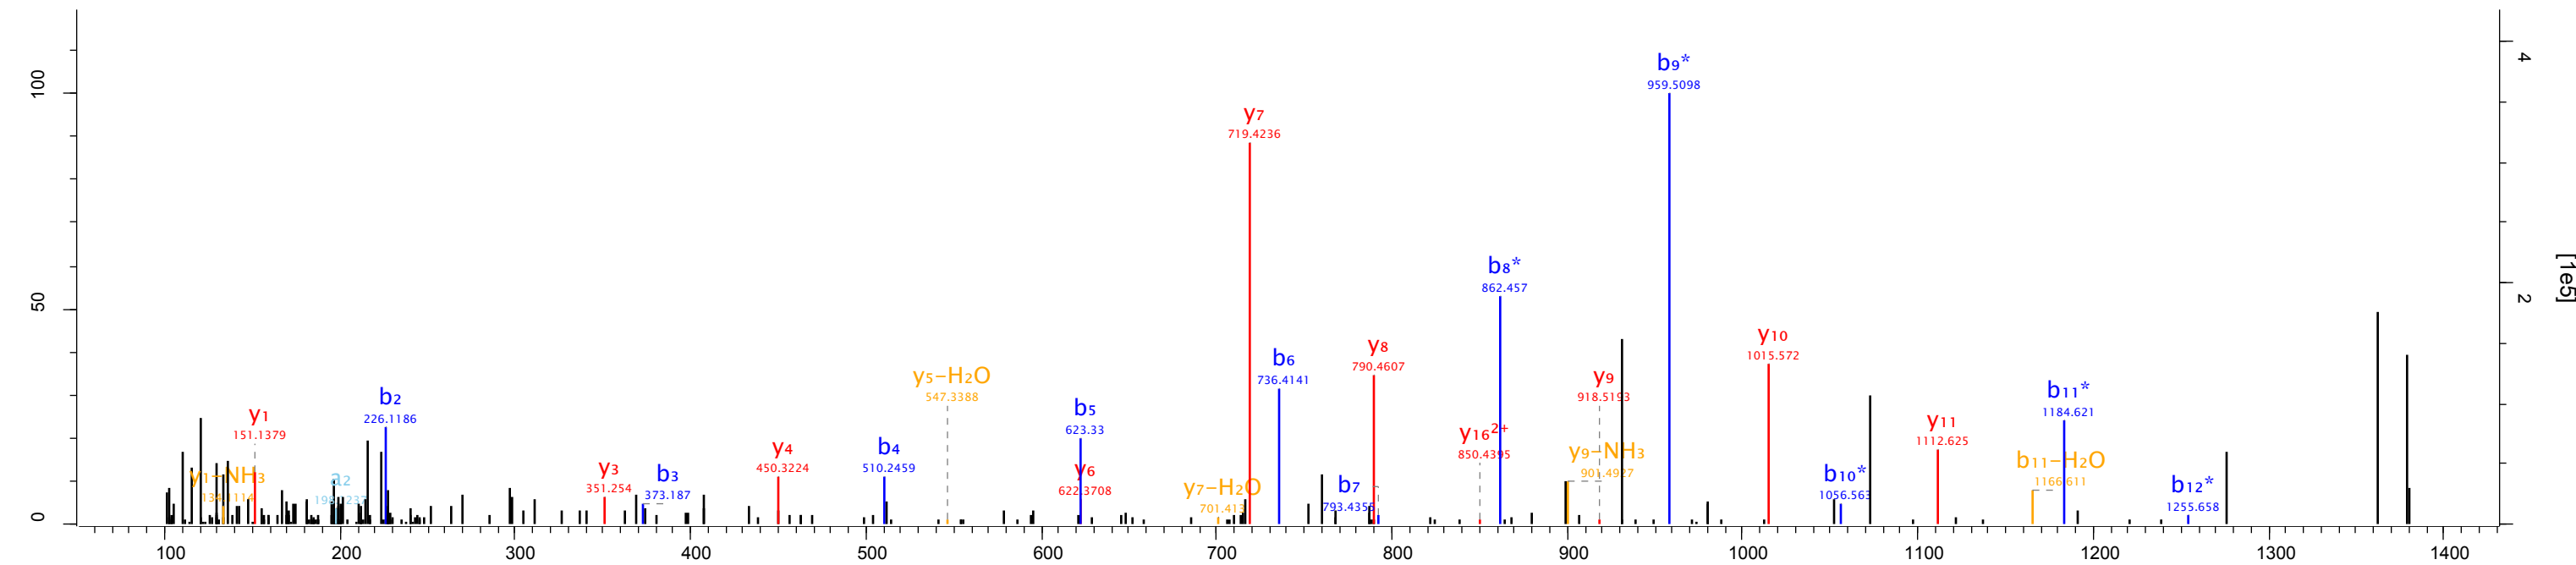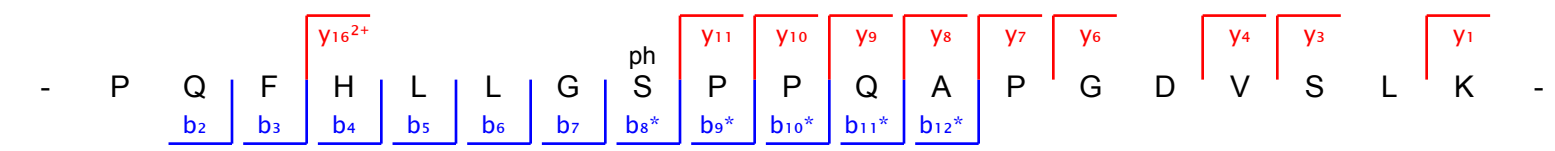

Raw file 20150814\_A375SR\_Phospho\_BR2\_06 Scan 22539 Method FTMS; HCD Score 106.88 m/z 885.11 Gene names TRIM28

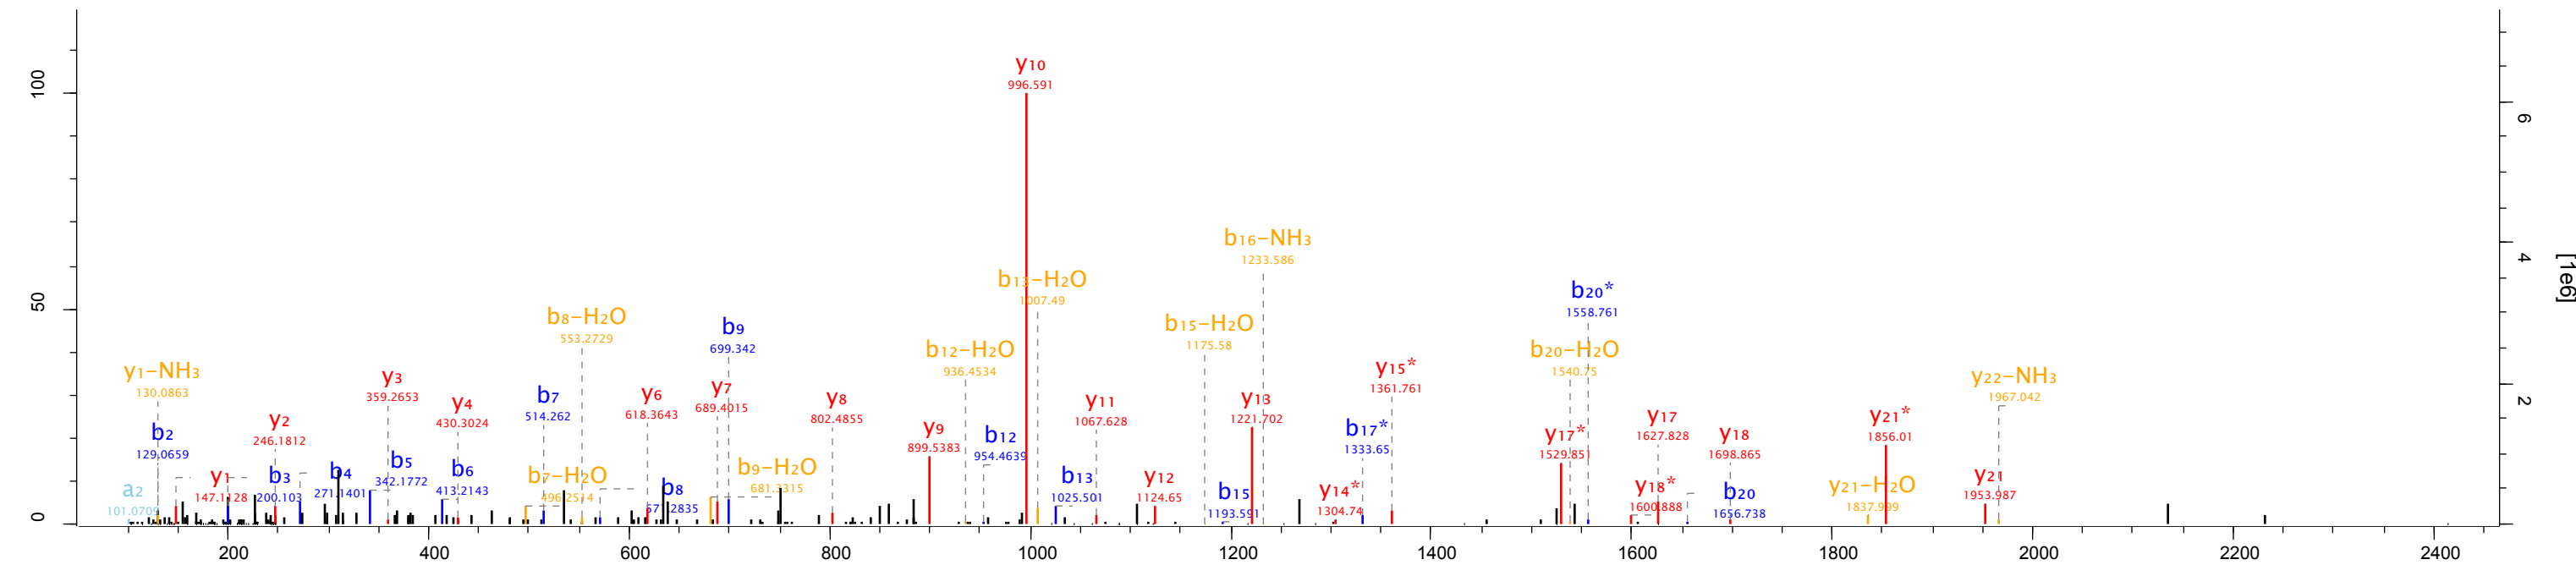

- G A A A A T G Q P G T A P A G T P G A P P L A G M A I V K -

Fragmentation mapping (b and y ions) is shown below the sequence:

- Red boxes above the sequence indicate y ions: y21 (P), y18 (A), y17 (P), y15\* (G), y14\* (T), y13 (P), y12 (G), y11 (A), y10 (P), y9 (P), y8 (L), y7 (A), y6 (G), y4 (A), y3 (I), y2 (V), y1 (K).
- Blue boxes below the sequence indicate b ions: b2 (A), b3 (A), b4 (A), b5 (A), b6 (A), b7 (T), b8 (G), b9 (Q), b12 (T), b13 (A), b15 (A), b17\* (T), b20 (A).

Raw file  
 20150814\_A375SR\_Phospho\_BR2\_06  
 Scan 23439 Method FTMS; HCD Score 201.17 m/z 1199.57 Gene names MAD1L1

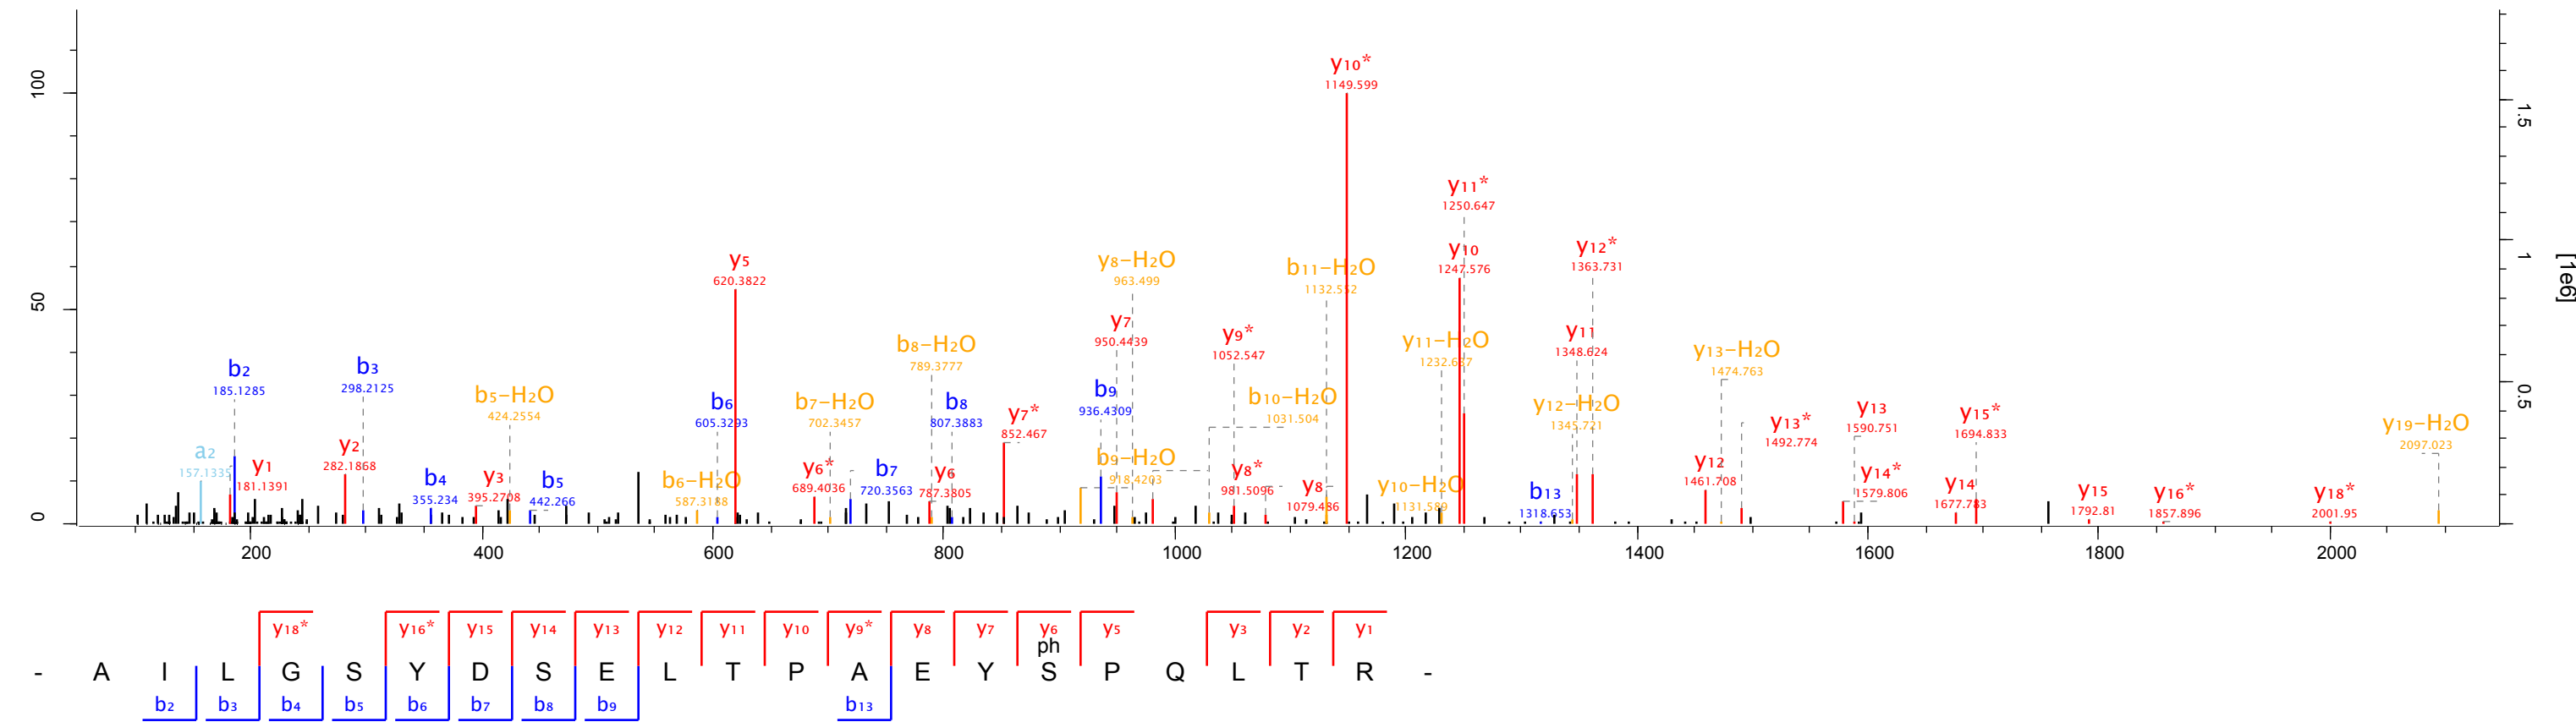

Raw file 20150814\_A375SR\_Phospho\_BR2\_06 Scan 23779 Method FTMS; HCD Score 140 m/z 981.74 Gene names RBM8A

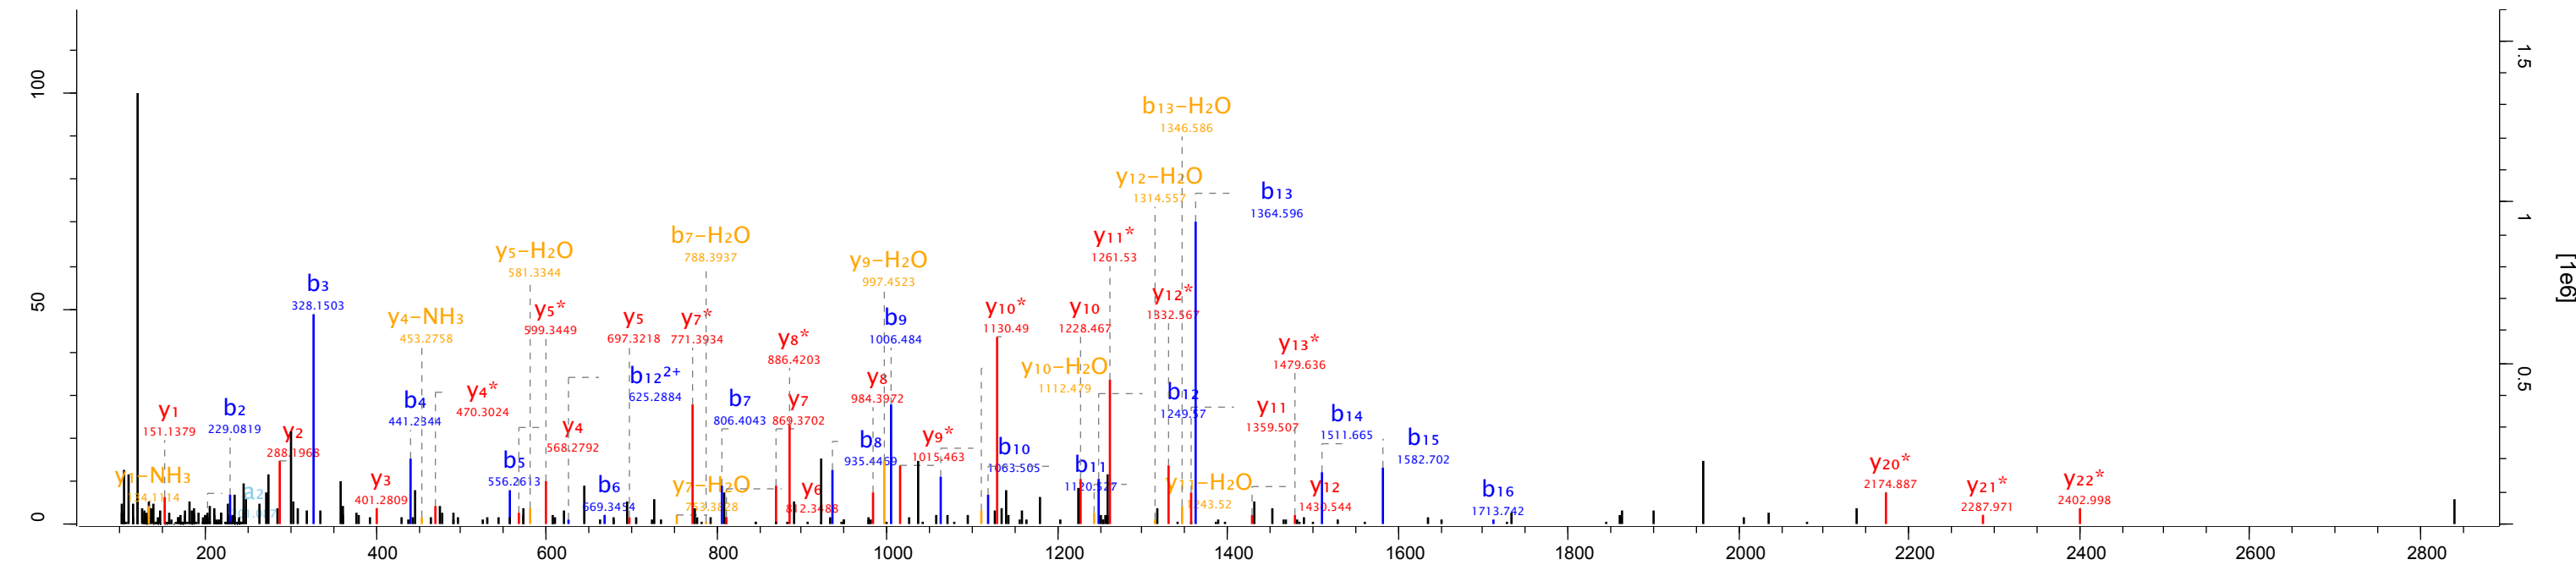

ac - A D V L D L H E A G G E D F A M D E D G D E S I H K -

Fragmentation mapping: b2 (D), b3 (V), b4 (L), b5 (D), b6 (L), b7 (H), b8 (E), b9 (A), b10 (G), b11 (G), b12 (E), b13 (D), b14 (F), b15 (A), b16 (M). y ions correspond to the complementary sequence: y1 (K), y2 (H), y3 (I), y4 (S), y5 (E), y6 (D), y7 (G), y8 (D), y9 (E), y10 (D), y11 (M), y12 (A), y13 (F), y20 (E), y21 (L), y22 (D).

Raw file: 20150814\_A375SR\_Phospho\_BR2\_06  
 Scan: 23949 Method: FTMS; HCD Score: 73.06 m/z: 789.39 Gene names: RAPGEF2

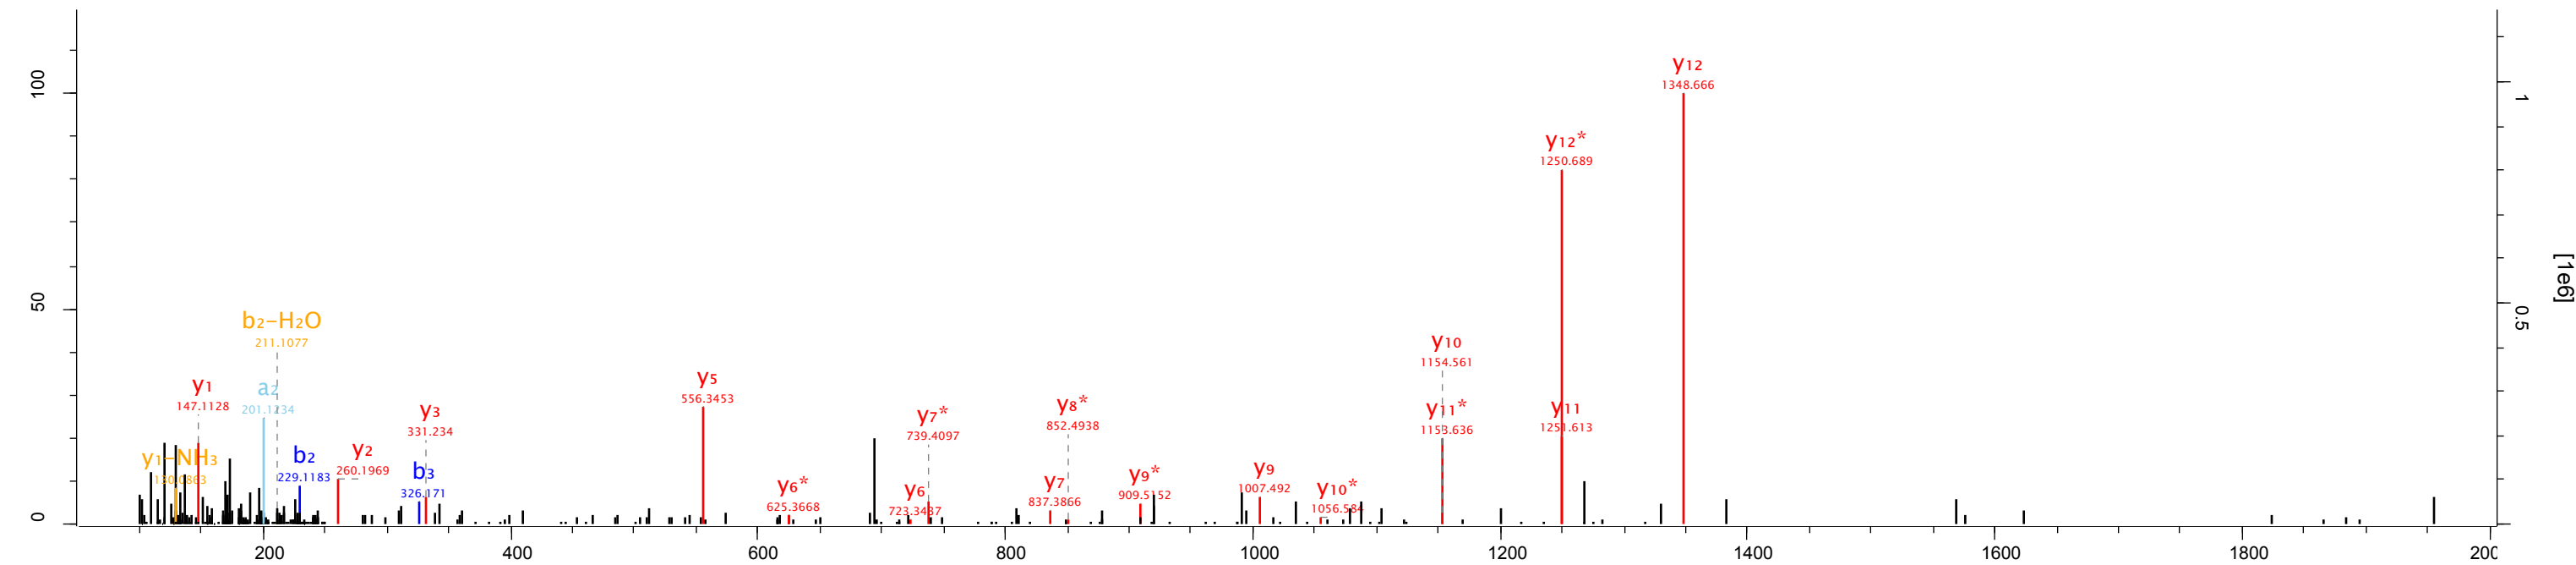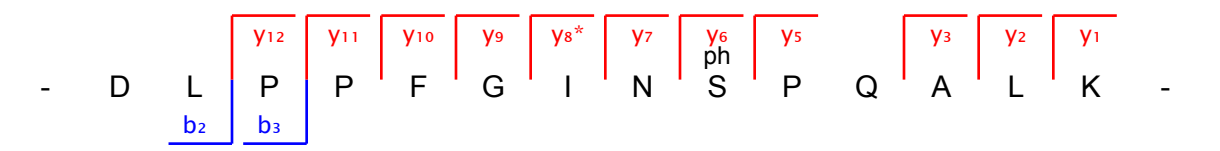



Raw file: 20150814\_A375SR\_Phospho\_BR2\_06  
 Scan: 24299 Method: FTMS; HCD Score: 54.68 m/z: 1138.94 Gene names: EIF4G2

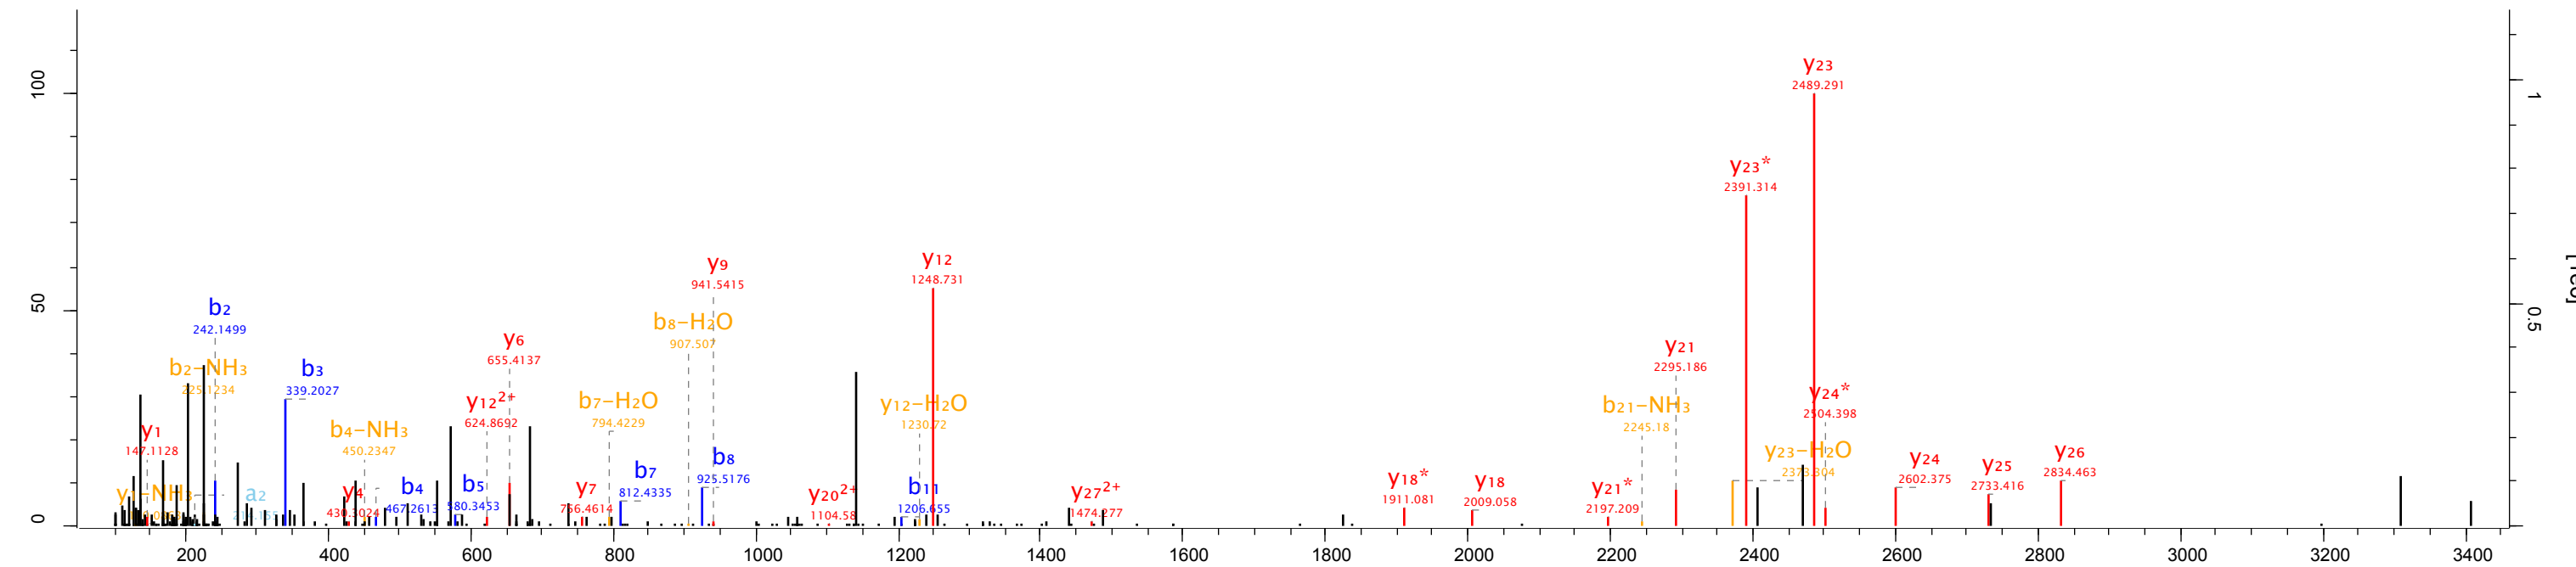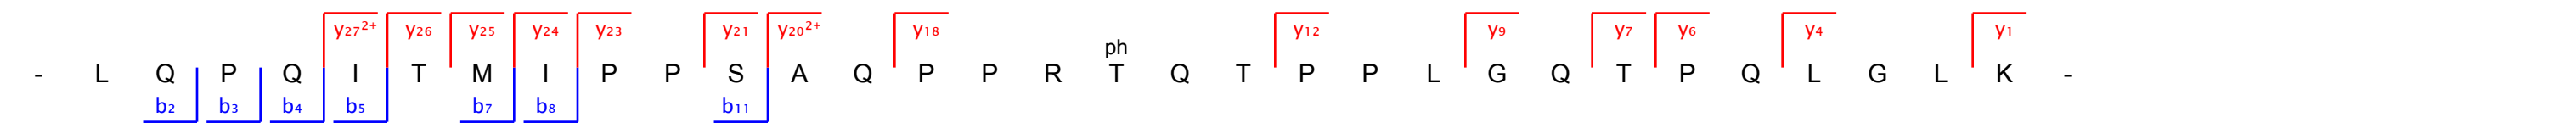

Raw file: 20150814\_A375SR\_Phospho\_BR2\_06  
 Scan: 24499 Method: FTMS; HCD Score: 189.12 m/z: 1089.5 Gene names: COPE

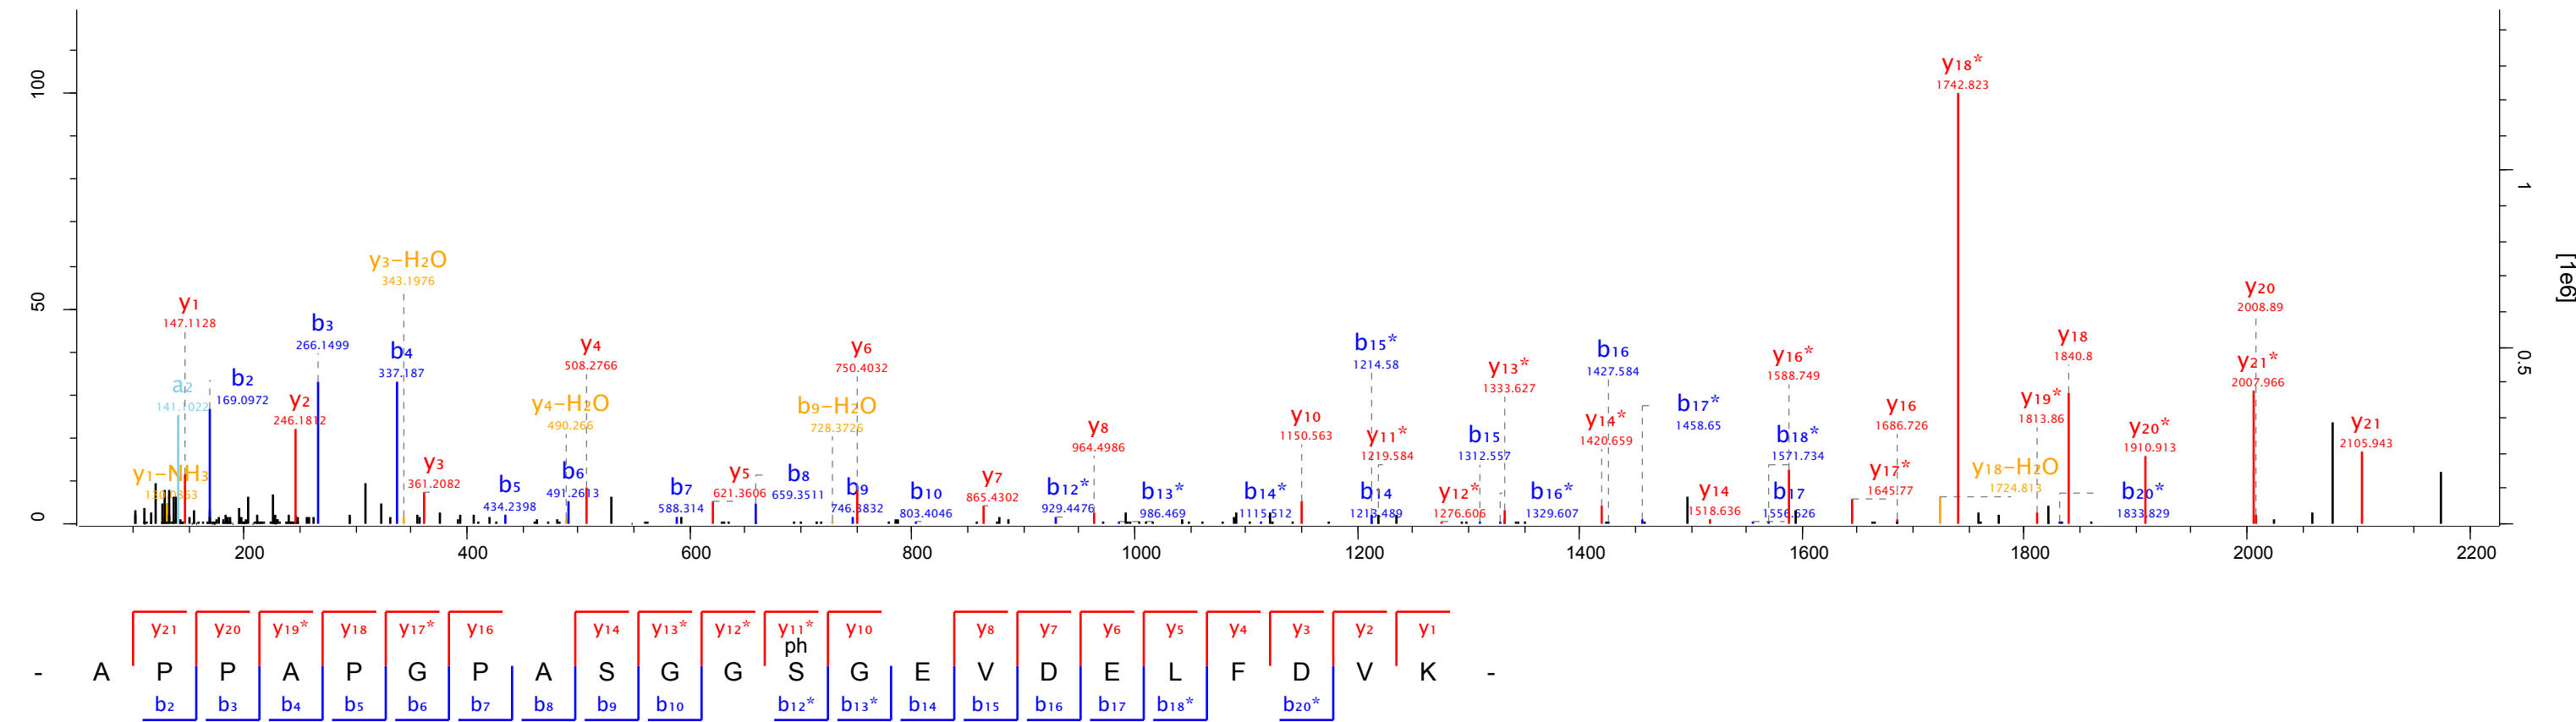

Raw file 20150814\_A375SR\_Phospho\_BR2\_06 Scan 24669 Method FTMS; HCD Score 175.65 m/z 933.47 Gene names INCENP

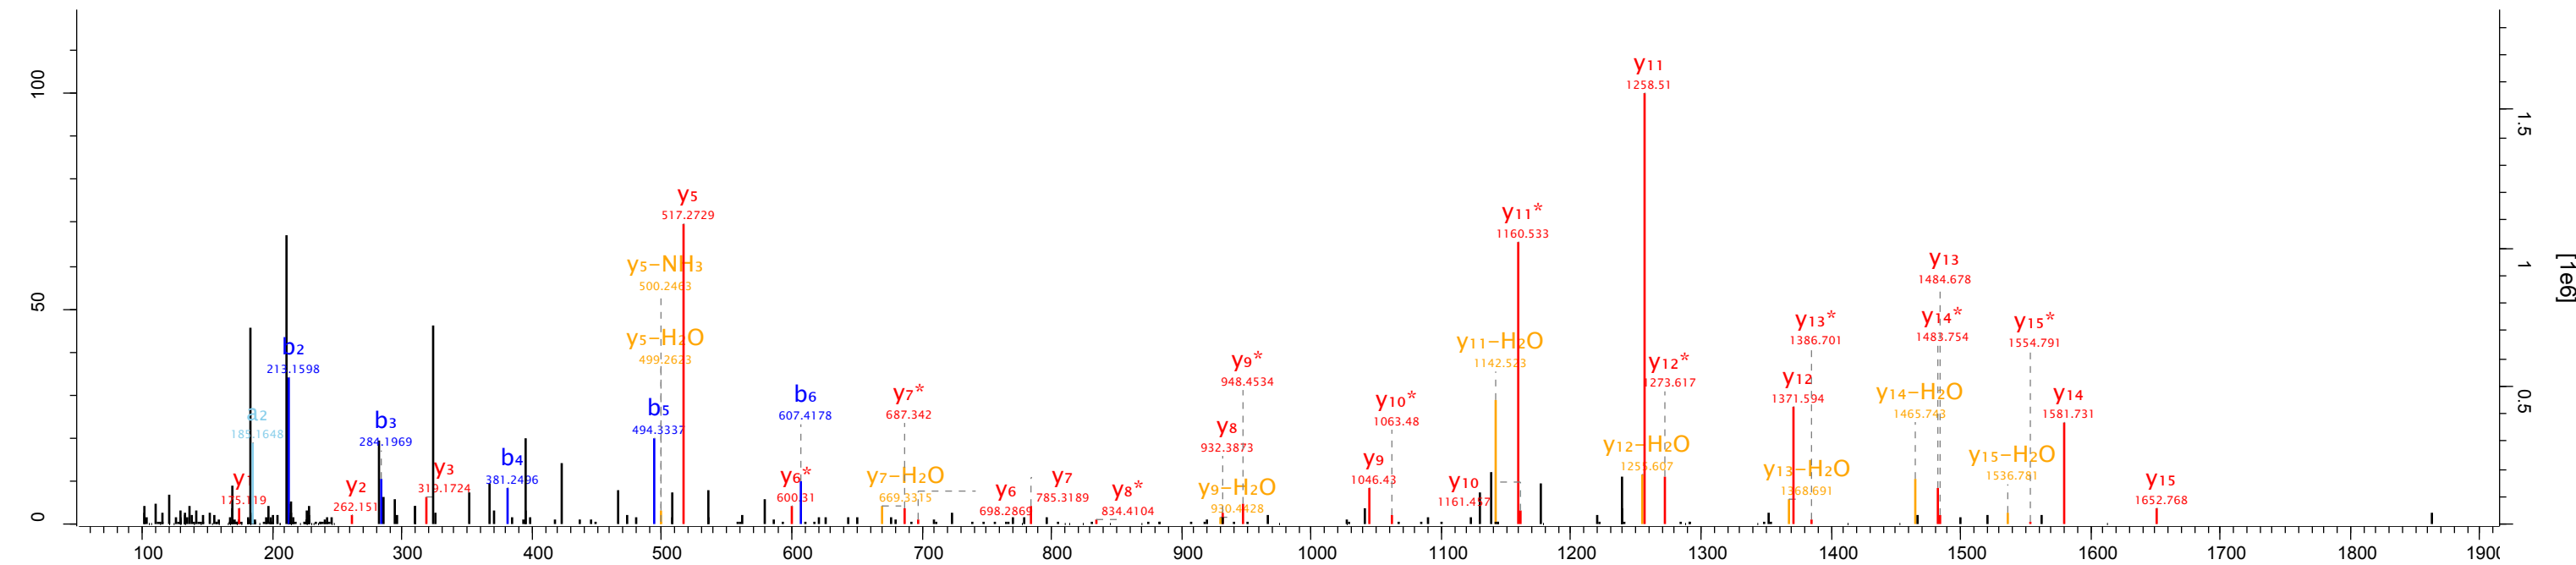

- V L A P I L P D N F S T P T G S R -

b<sub>2</sub>
y<sub>15</sub>
y<sub>14</sub>
y<sub>13</sub>
y<sub>12</sub>
y<sub>11</sub>
y<sub>10</sub>
y<sub>9</sub>
y<sub>8</sub>
y<sub>7</sub>
y<sub>6</sub>
ph
y<sub>5</sub>

b<sub>3</sub>
b<sub>4</sub>
b<sub>5</sub>
b<sub>6</sub>

Raw file 20150814\_A375SR\_Phospho\_BR2\_06 Scan 24909 Method FTMS; HCD Score 66.85 m/z 900.96 Gene names HNRNPU

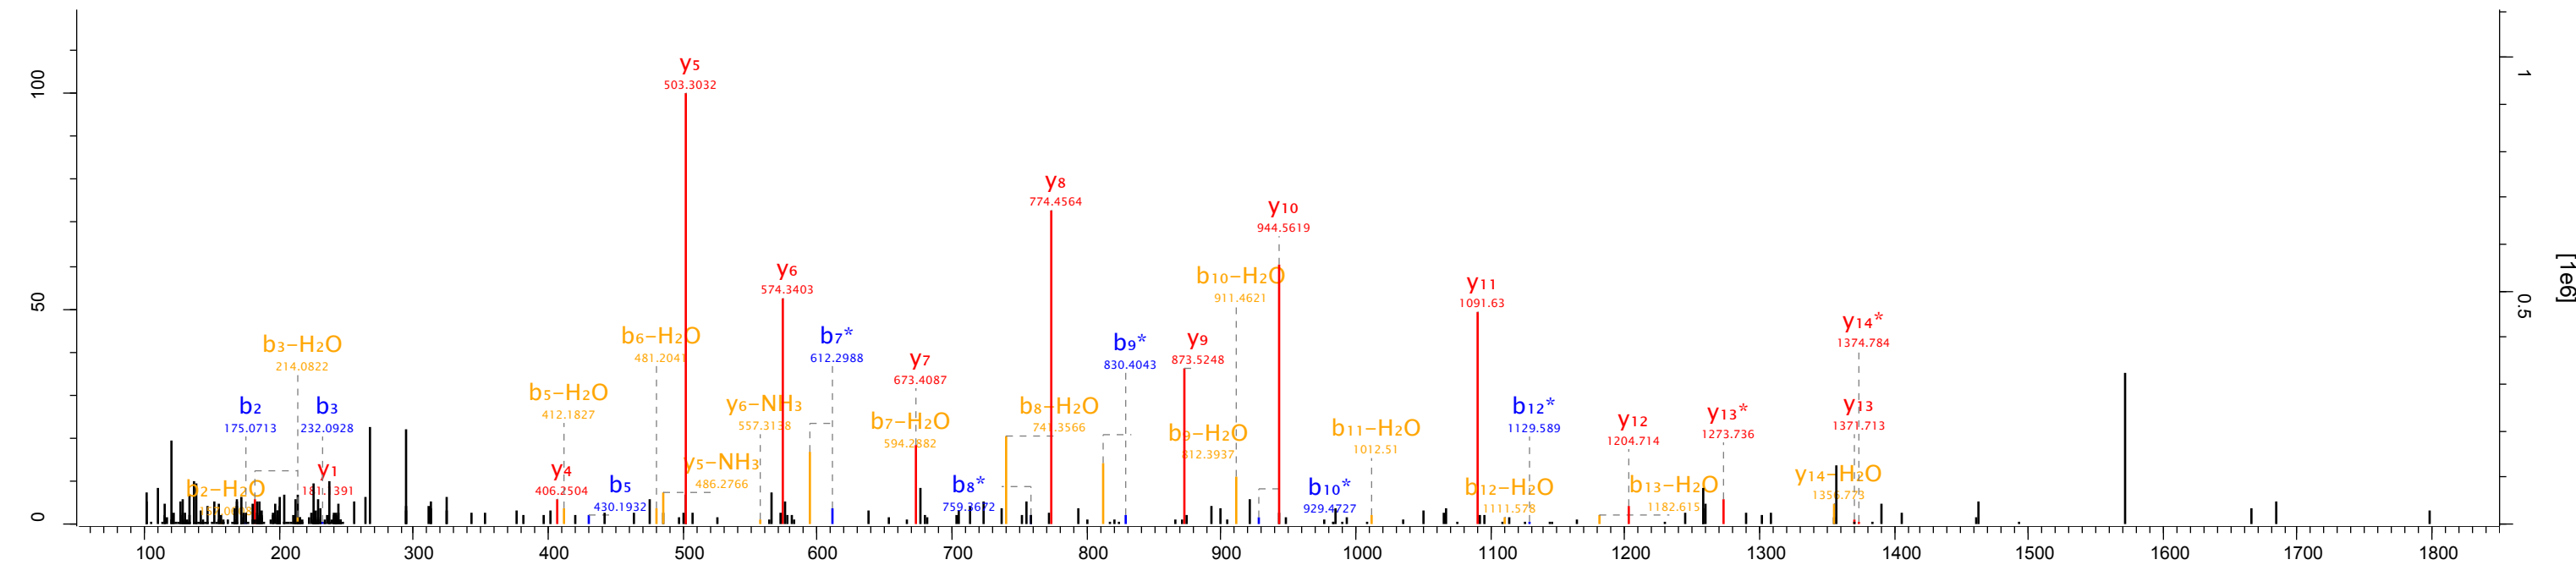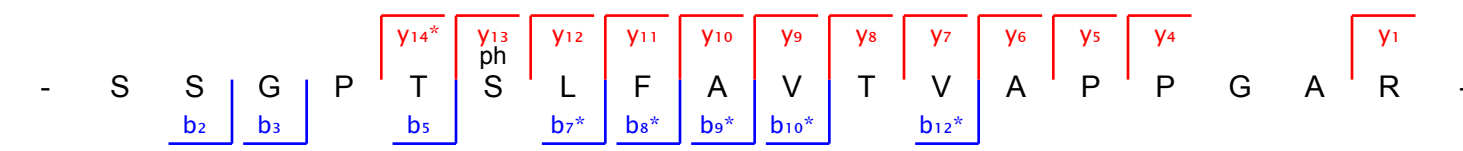

Raw file  
20150814\_A375SR\_Phospho\_BR2\_06

Scan Method Score m/z Gene names  
24939 FTMS; HCD 116.51 846.19 TPRN

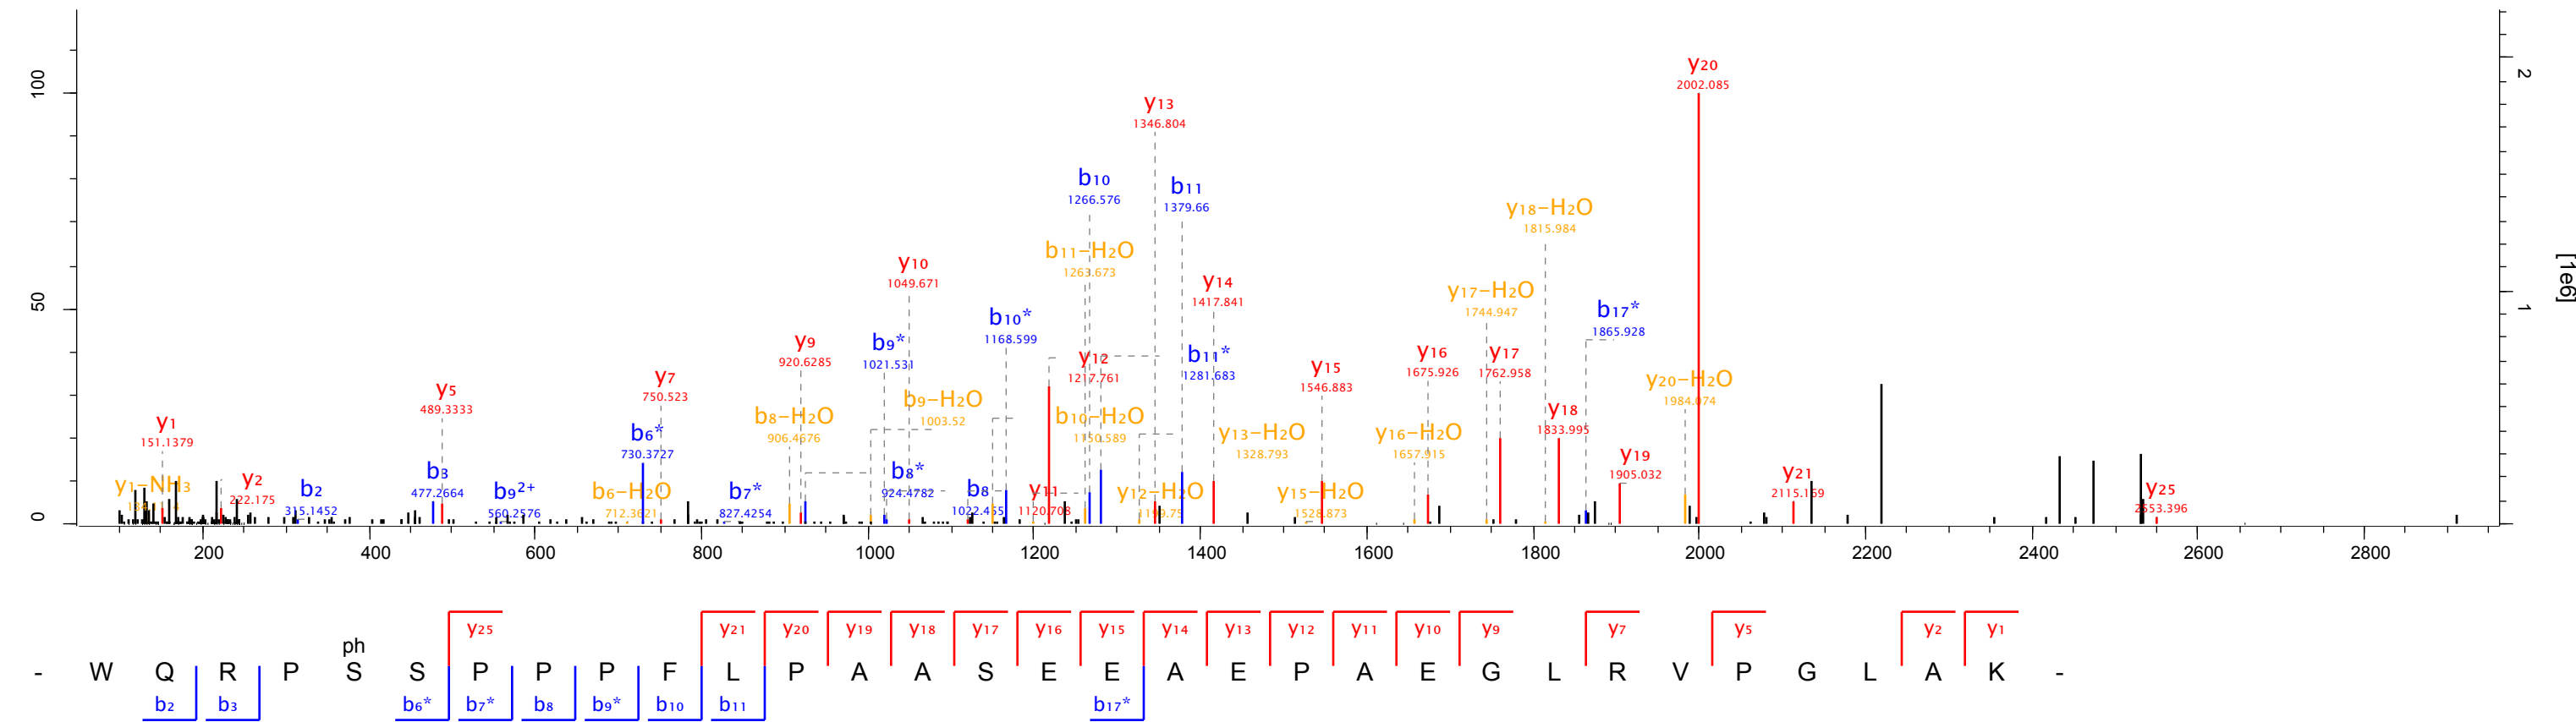

Raw file Scan Method Score m/z Gene names  
 20150814\_A375SR\_Phospho\_BR2\_06 25239 FTMS; HCD 181.31 914.73 SCAF1

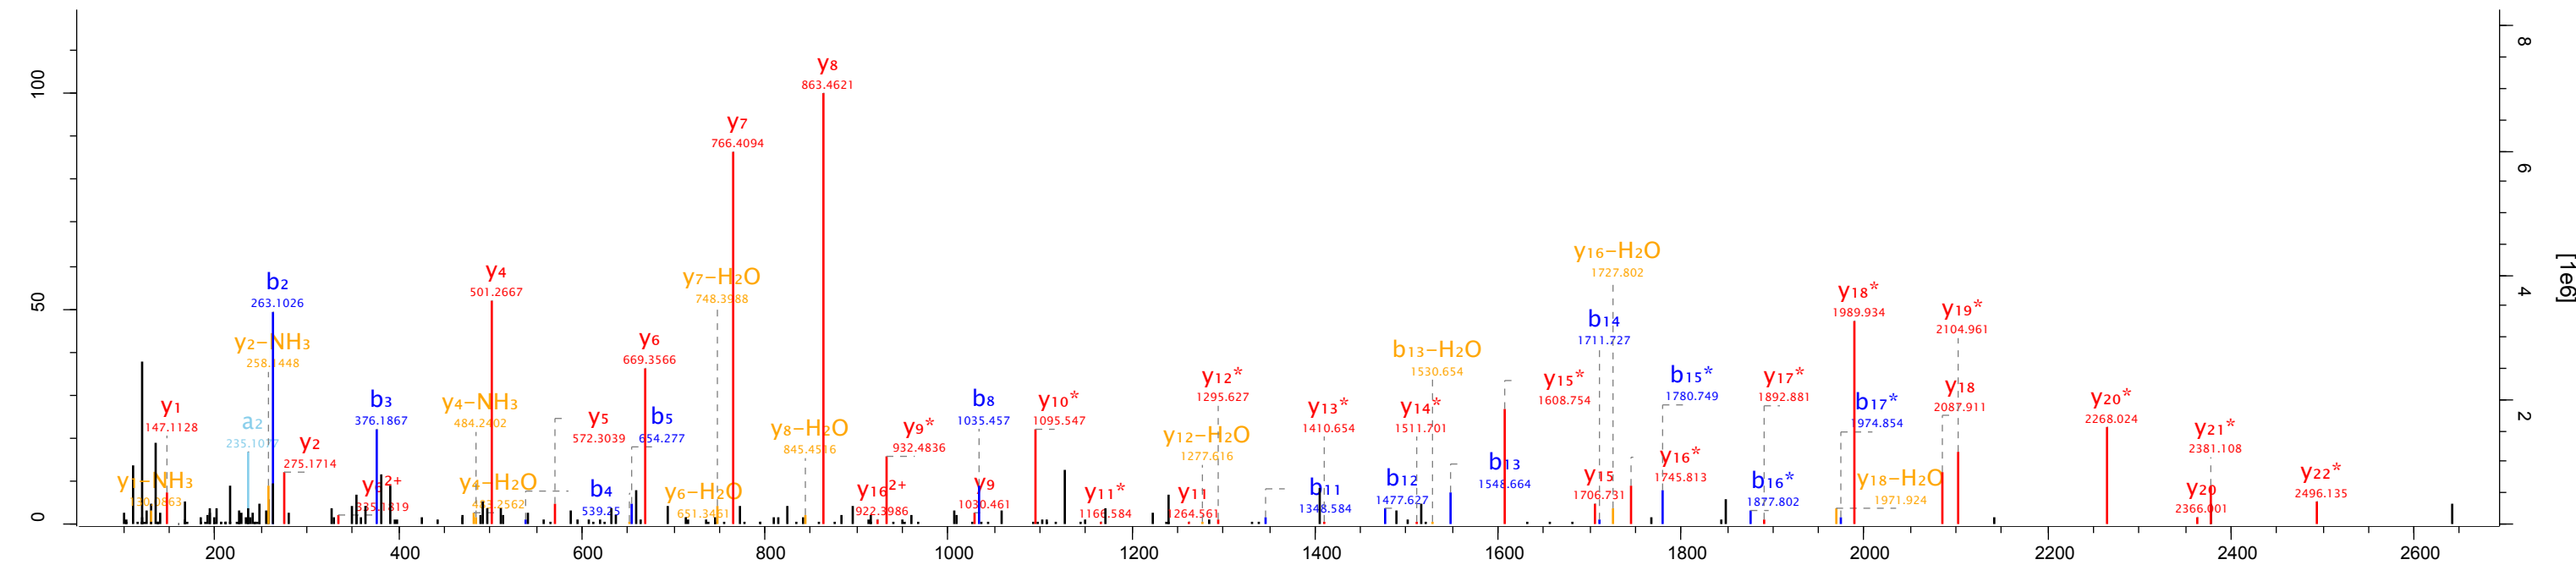

- F D I Y D P F H P T D E A Y S P P P A P E Q K -

b<sub>2</sub>
b<sub>3</sub>
b<sub>4</sub>
b<sub>5</sub>
b<sub>8</sub>
b<sub>11</sub>
b<sub>12</sub>
b<sub>13</sub>
b<sub>14</sub>
b<sub>15</sub>\*
b<sub>16</sub>\*
b<sub>17</sub>\*

y<sub>22</sub>\*
y<sub>21</sub>\*
y<sub>20</sub>
y<sub>19</sub>\*
y<sub>18</sub>
y<sub>17</sub>\*
y<sub>16</sub>\*
y<sub>15</sub>
y<sub>14</sub>\*
y<sub>13</sub>\*
y<sub>12</sub>\*
y<sub>11</sub>
y<sub>10</sub>\*
y<sub>9</sub><sup>ph</sup>
y<sub>8</sub>
y<sub>7</sub>
y<sub>6</sub>
y<sub>5</sub>
y<sub>4</sub>
y<sub>2</sub>
y<sub>1</sub>

Raw file 20150814\_A375SR\_Phospho\_BR2\_06 Scan 25319 Method FTMS; HCD Score 68.67 m/z 877.92 Gene names BIRC2

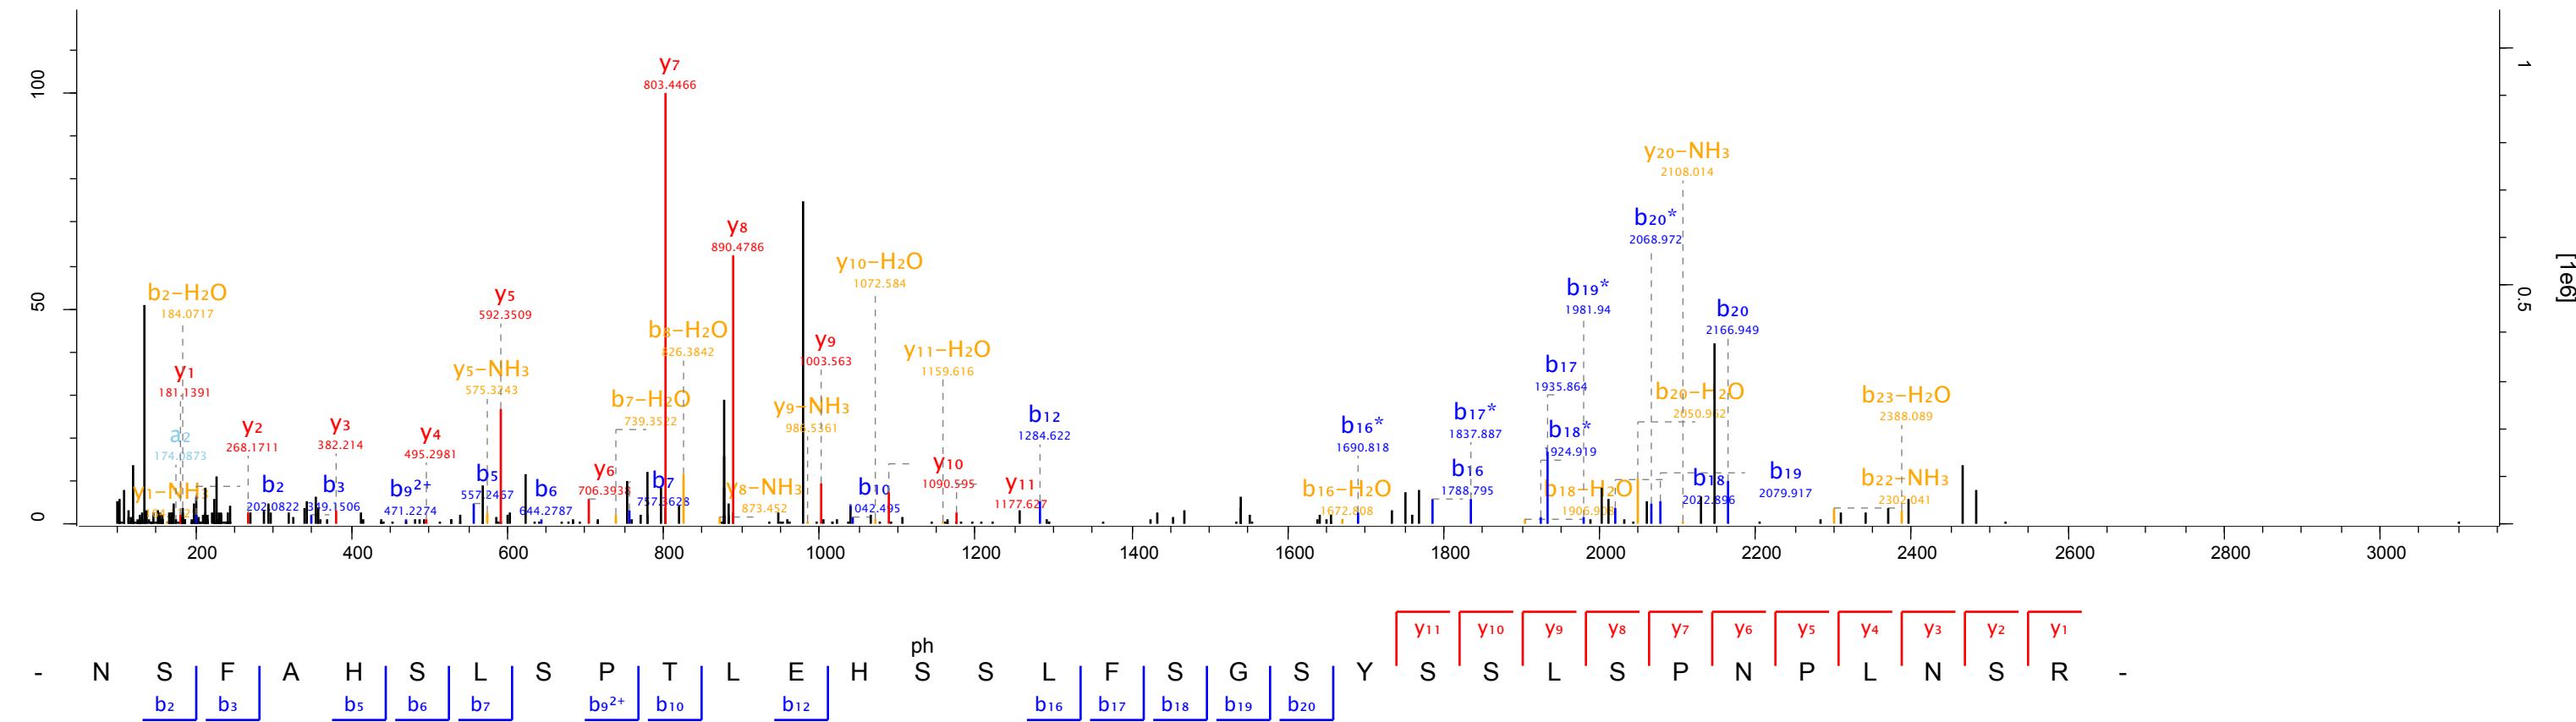

Raw file: 20150814\_A375SR\_Phospho\_BR2\_06  
 Scan: 2589 Method: FTMS; HCD Score: 127.51 m/z: 468.75 Gene names: AKAP12

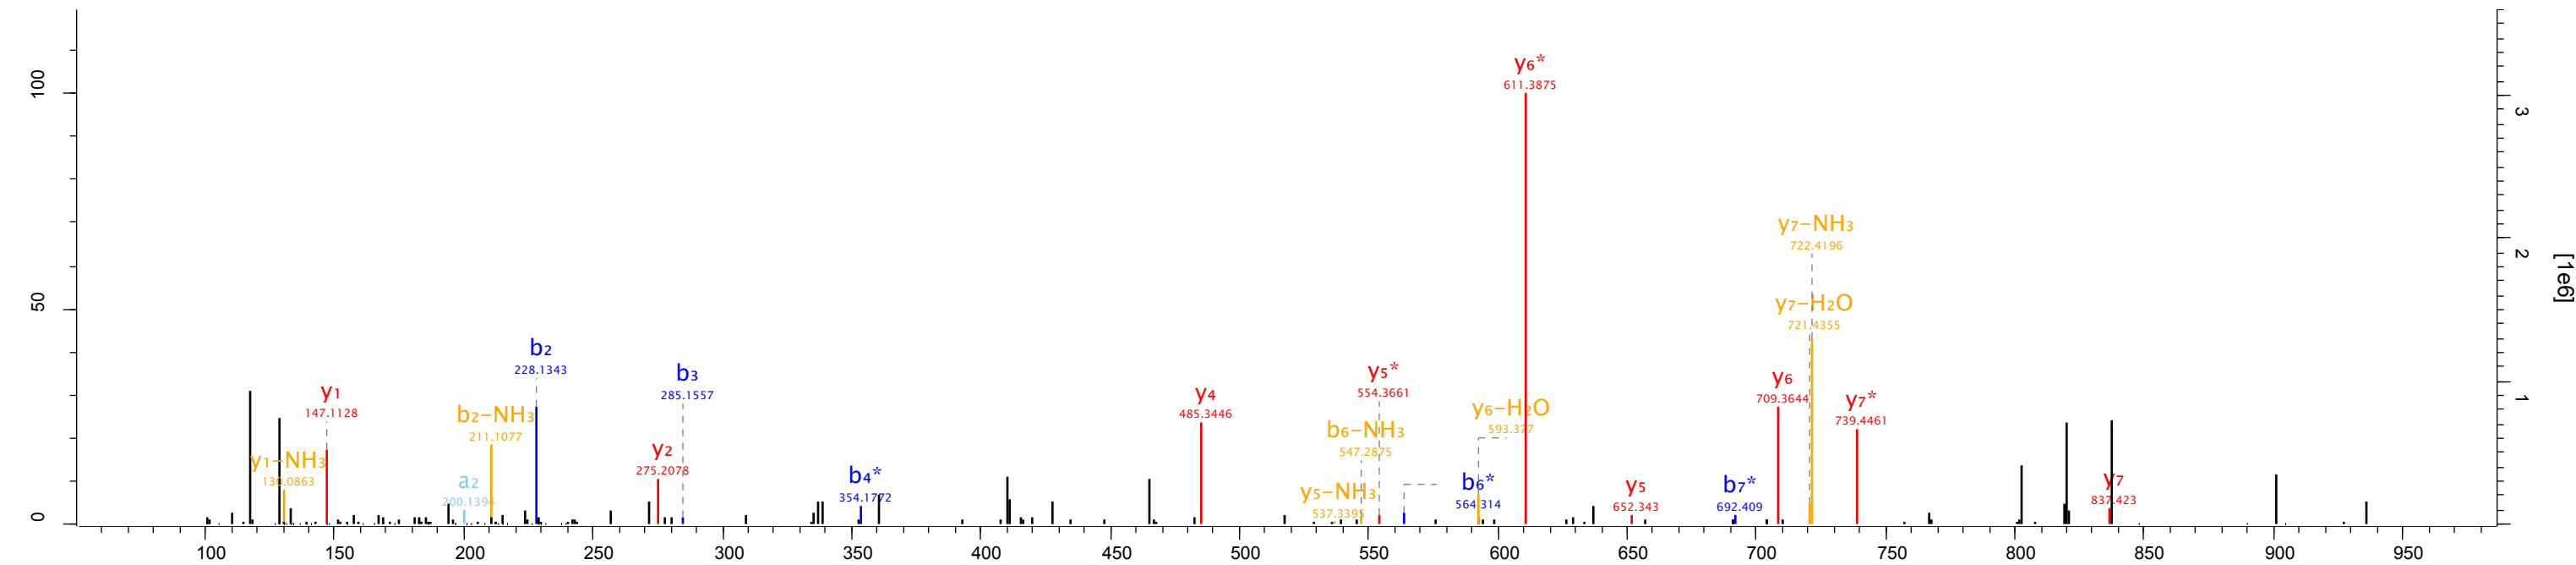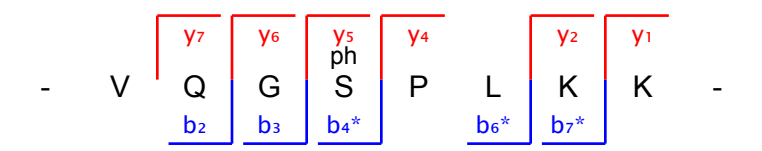



Raw file  
 20150814\_A375SR\_Phospho\_BR2\_06  
 Scan 26089 Method FTMS; HCD Score 195.61 m/z 1261.57 Gene names SCAF1

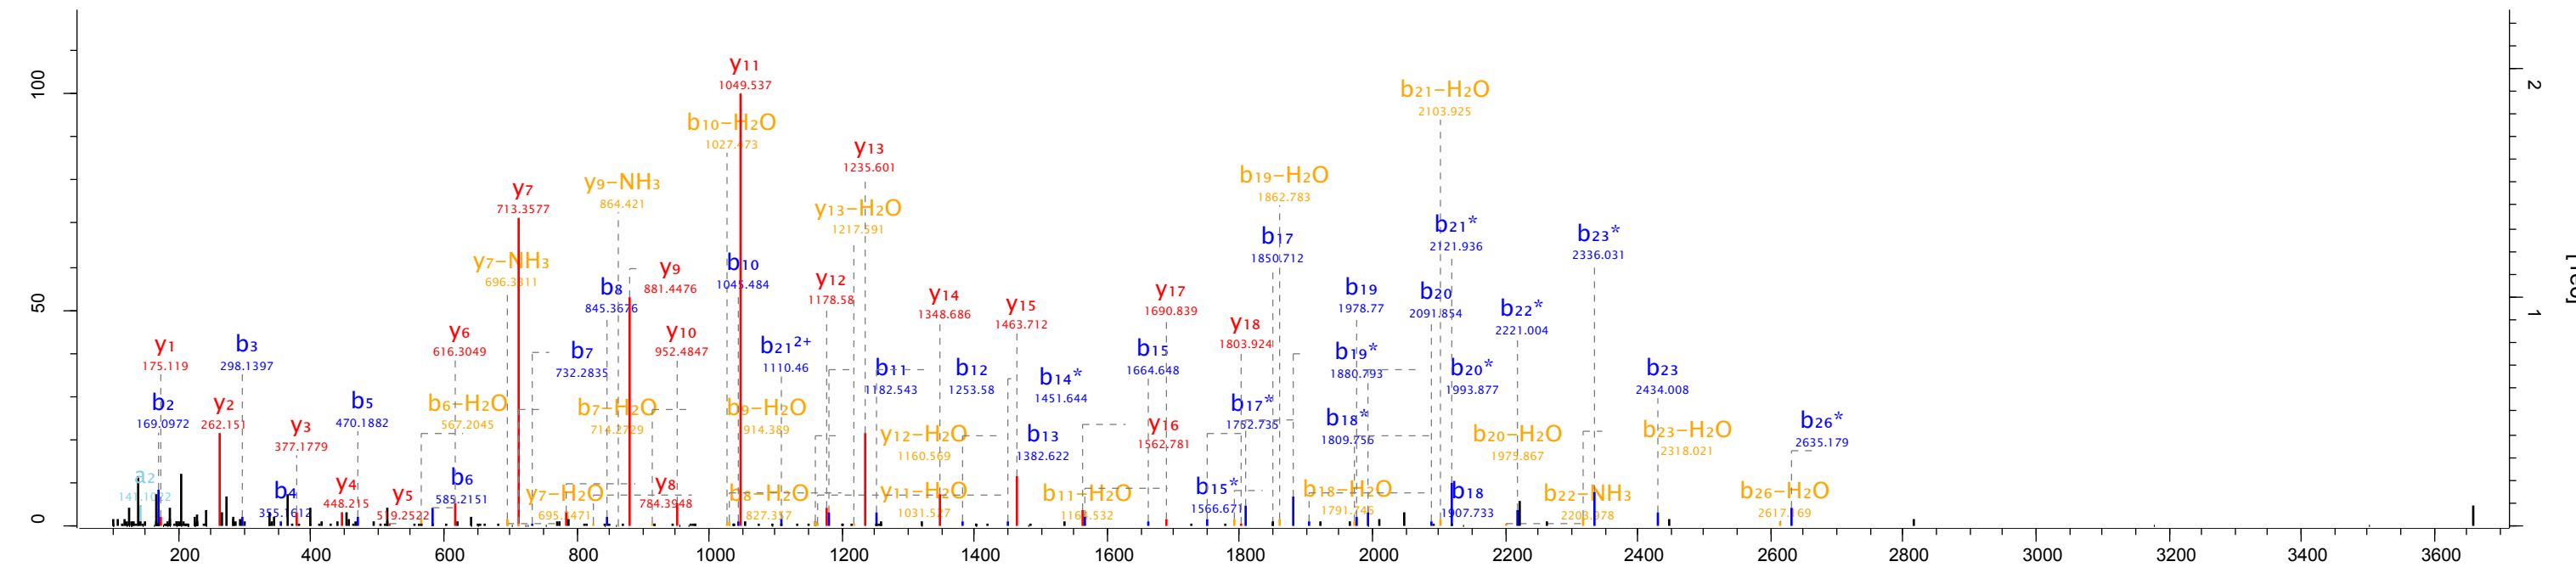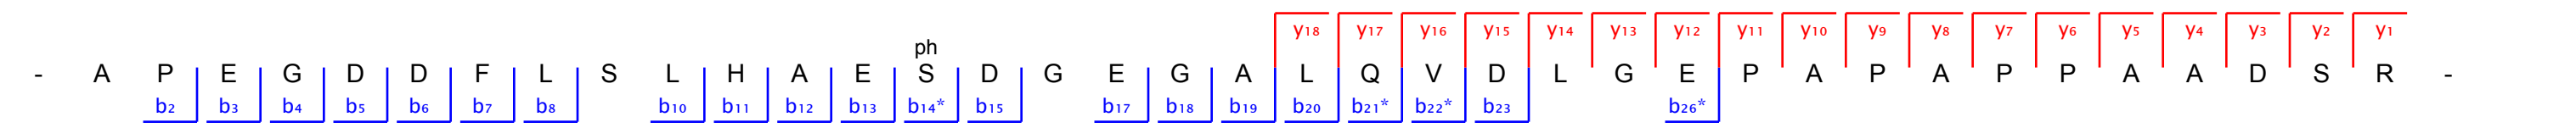

Raw file 20150814\_A375SR\_Phospho\_BR2\_06 Scan 26939 Method FTMS; HCD Score 112.86 m/z 897.77 Gene names STARD13

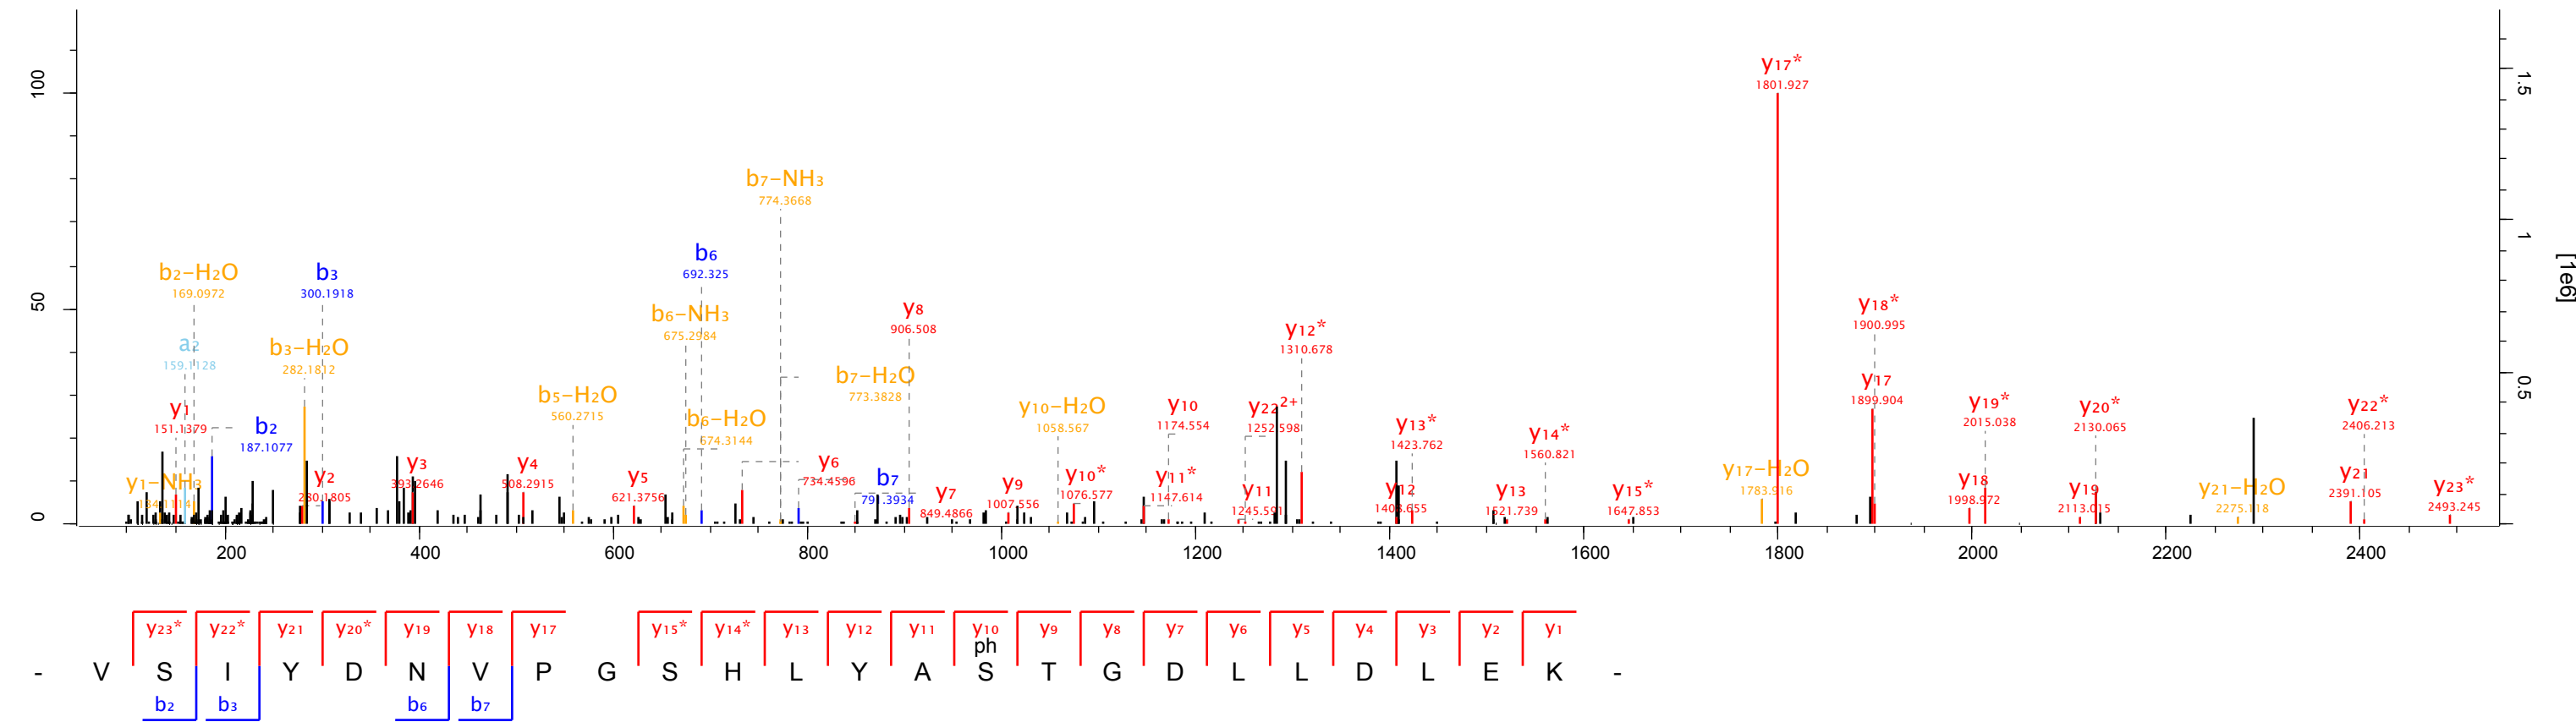

Raw file 20150814\_A375SR\_Phospho\_BR2\_06 Scan 27079 Method FTMS; HCD Score 125.51 m/z 784.92 Gene names DMXL2

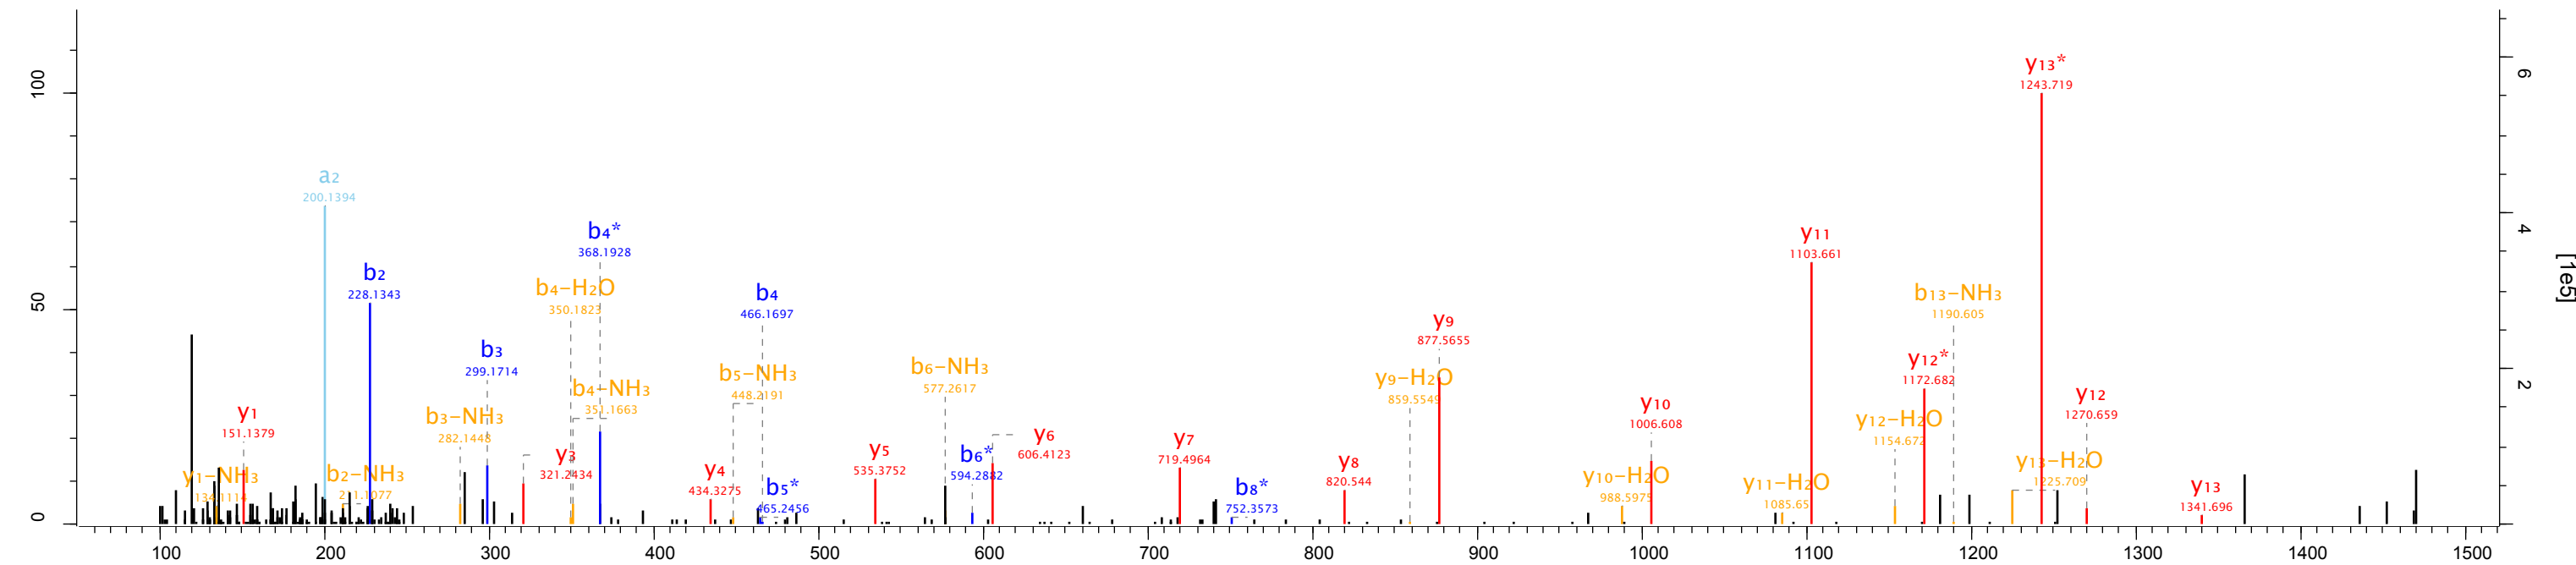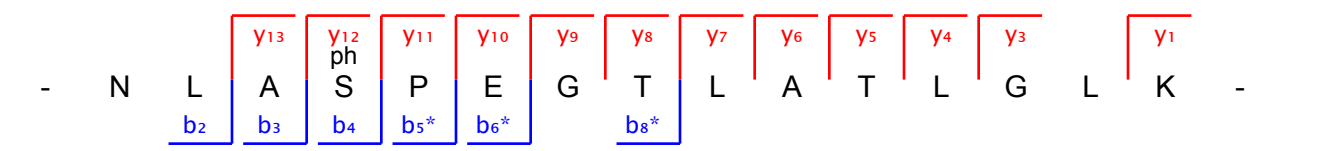

20150814\_A375SR\_Phospho\_BR2\_06 2749 FTMS; HCD 153.14 637.29 NKAP

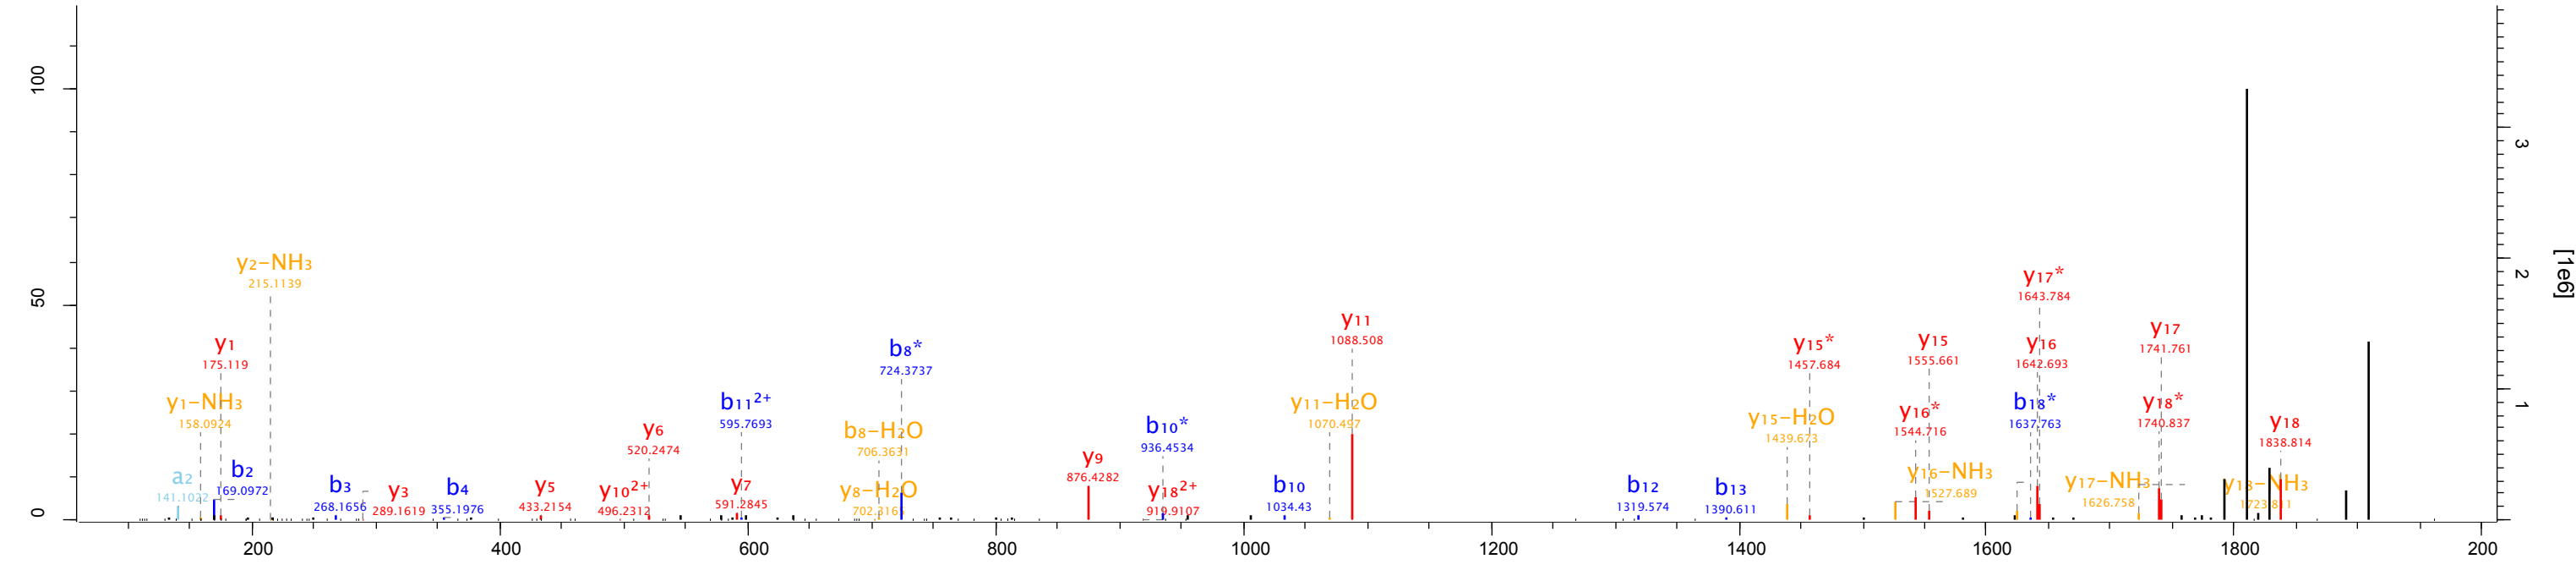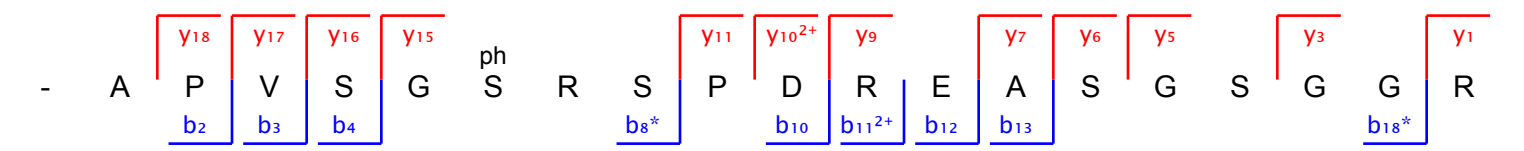

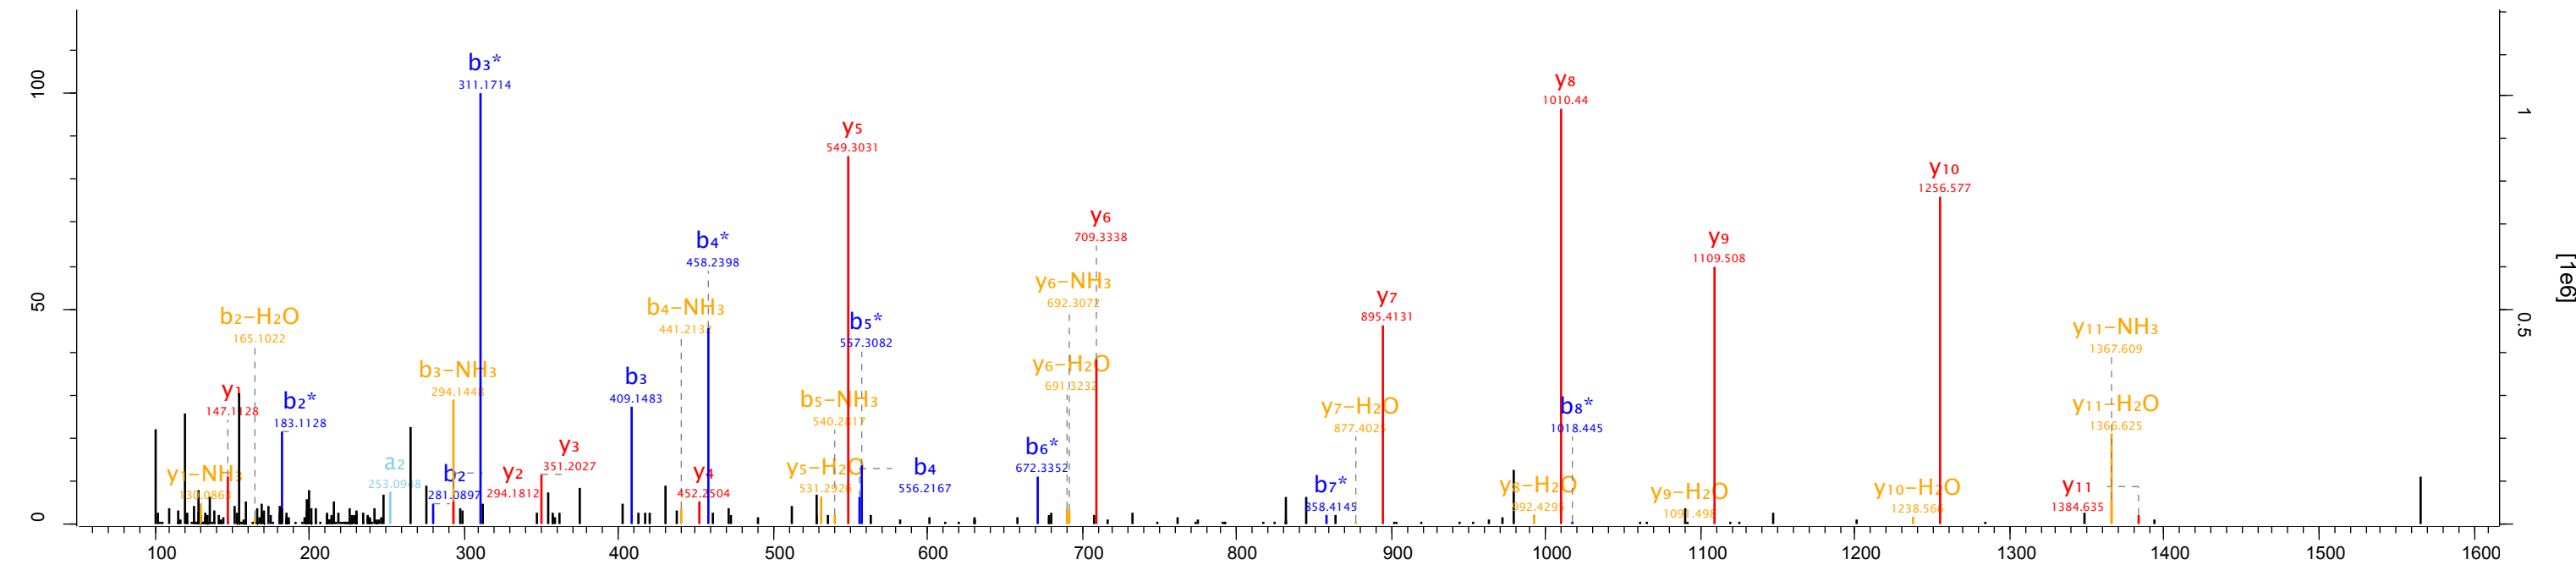pH  
S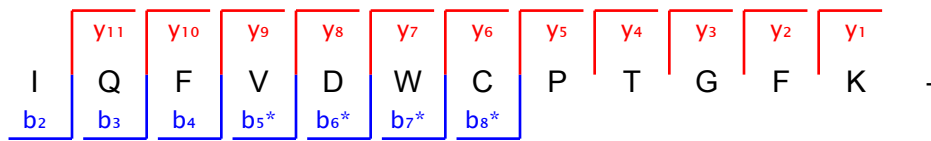

Raw file: 20150814\_A375SR\_Phospho\_BR2\_06  
 Scan: 28159 Method: FTMS; HCD Score: 183.18 m/z: 973.99 Gene names: NAP1L1

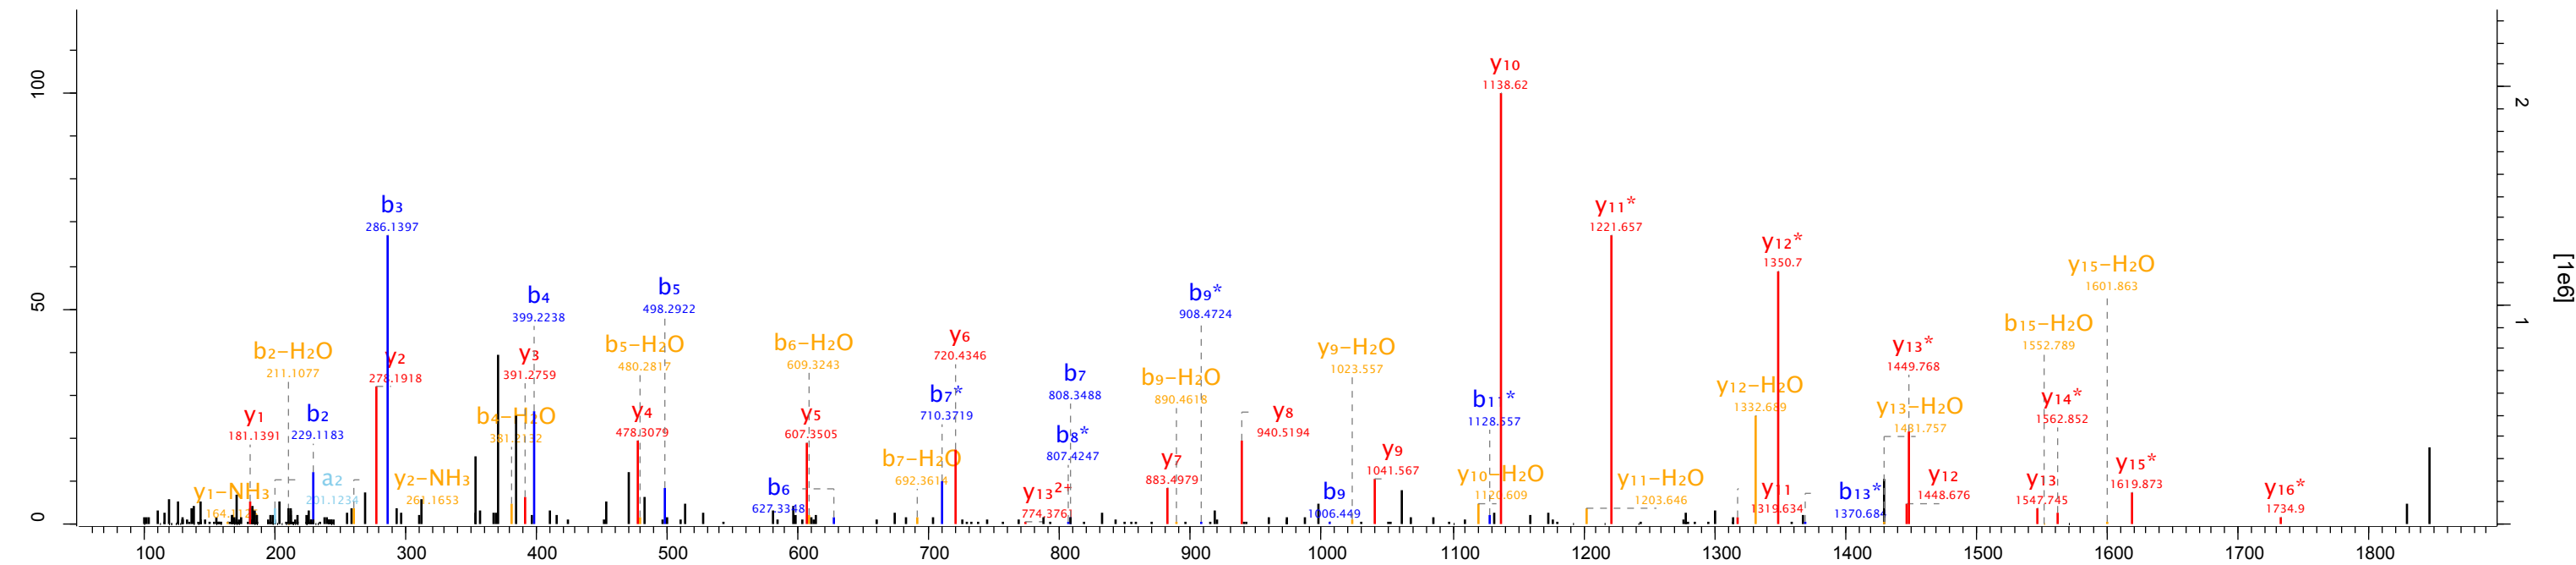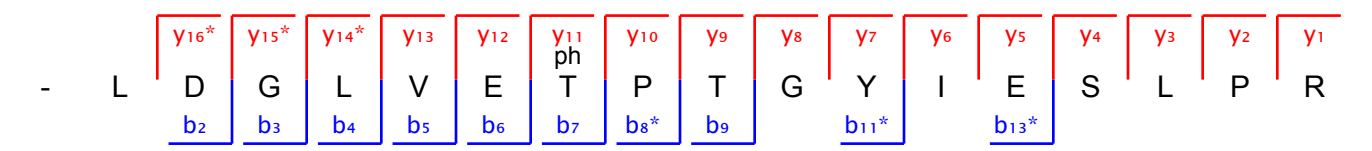

Raw file: 20150814\_A375SR\_Phospho\_BR2\_06  
 Scan: 28219 Method: FTMS; HCD Score: 45.54 m/z: 1367.28 Gene names: TNFAIP3

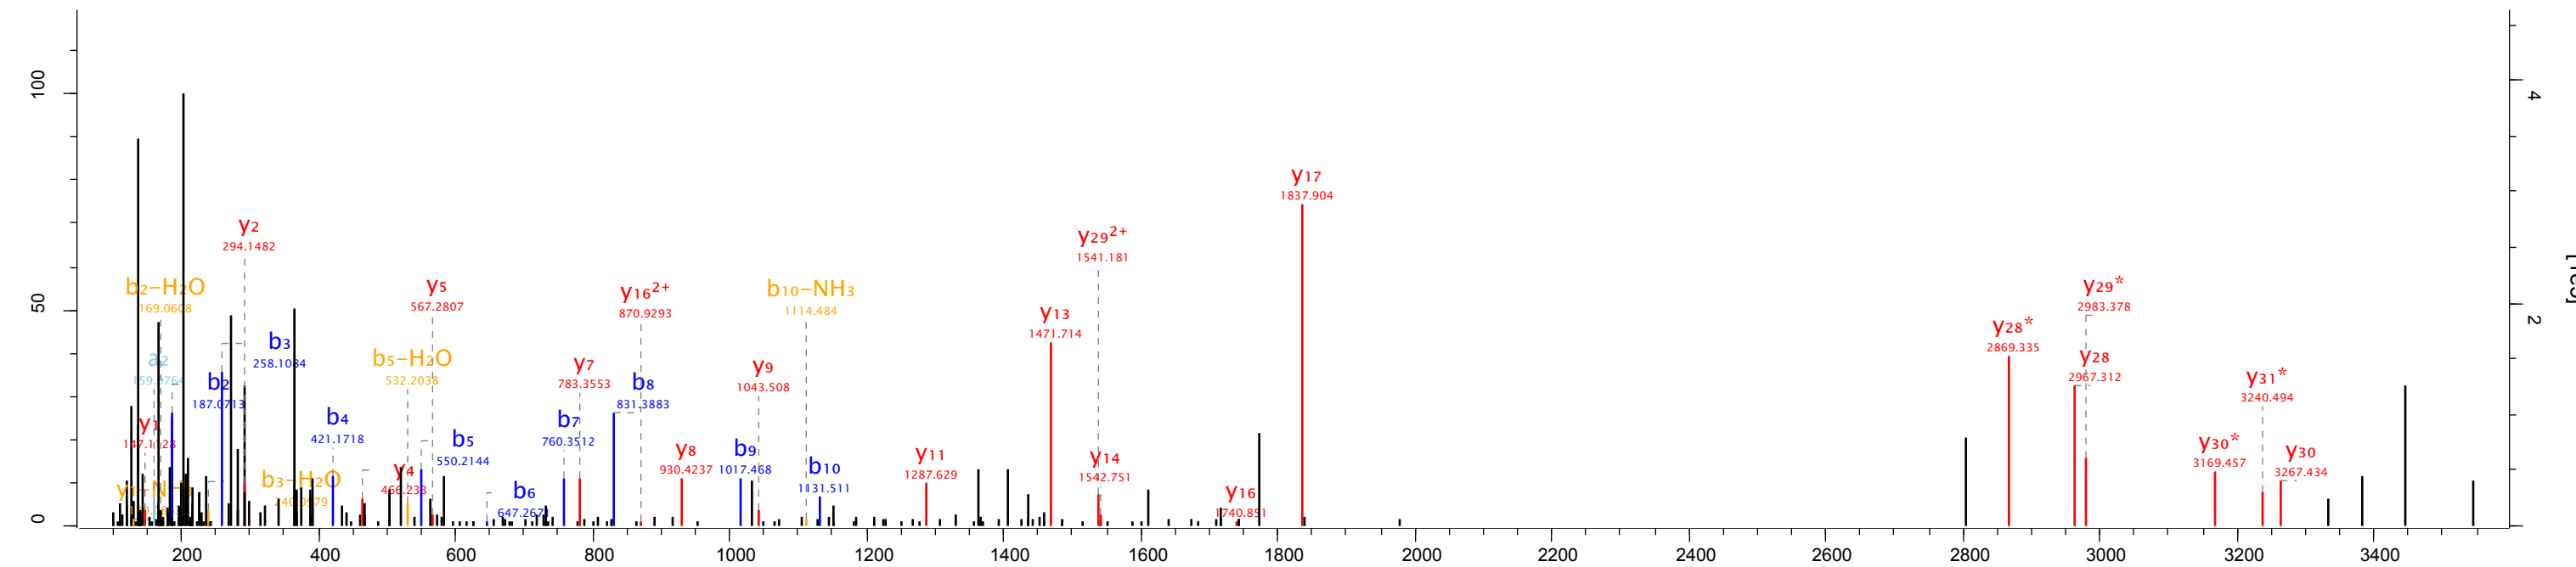

- G E A Y E P L A W N P E E S T G G P H S A P P T A P S P F L F S E T T A M K

b<sub>2</sub>
b<sub>3</sub>
b<sub>4</sub>
b<sub>5</sub>
b<sub>6</sub>
b<sub>7</sub>
b<sub>8</sub>
b<sub>9</sub>
b<sub>10</sub>
y<sub>31</sub>\*
y<sub>30</sub>
y<sub>29</sub>\*
y<sub>28</sub>
y<sub>17</sub>
y<sub>16</sub>
y<sub>14</sub>
y<sub>13</sub>
y<sub>11</sub>
y<sub>9</sub>
y<sub>8</sub>
y<sub>7</sub>
y<sub>5</sub>
y<sub>4</sub>
y<sub>2</sub>  
OX
y<sub>1</sub>

Raw file: 20150814\_A375SR\_Phospho\_BR2\_06  
 Scan: 28369 Method: FTMS; HCD Score: 87.63 m/z: 1123.21 Gene names: ANKHD1;ANKHD1-EIF4EBP3

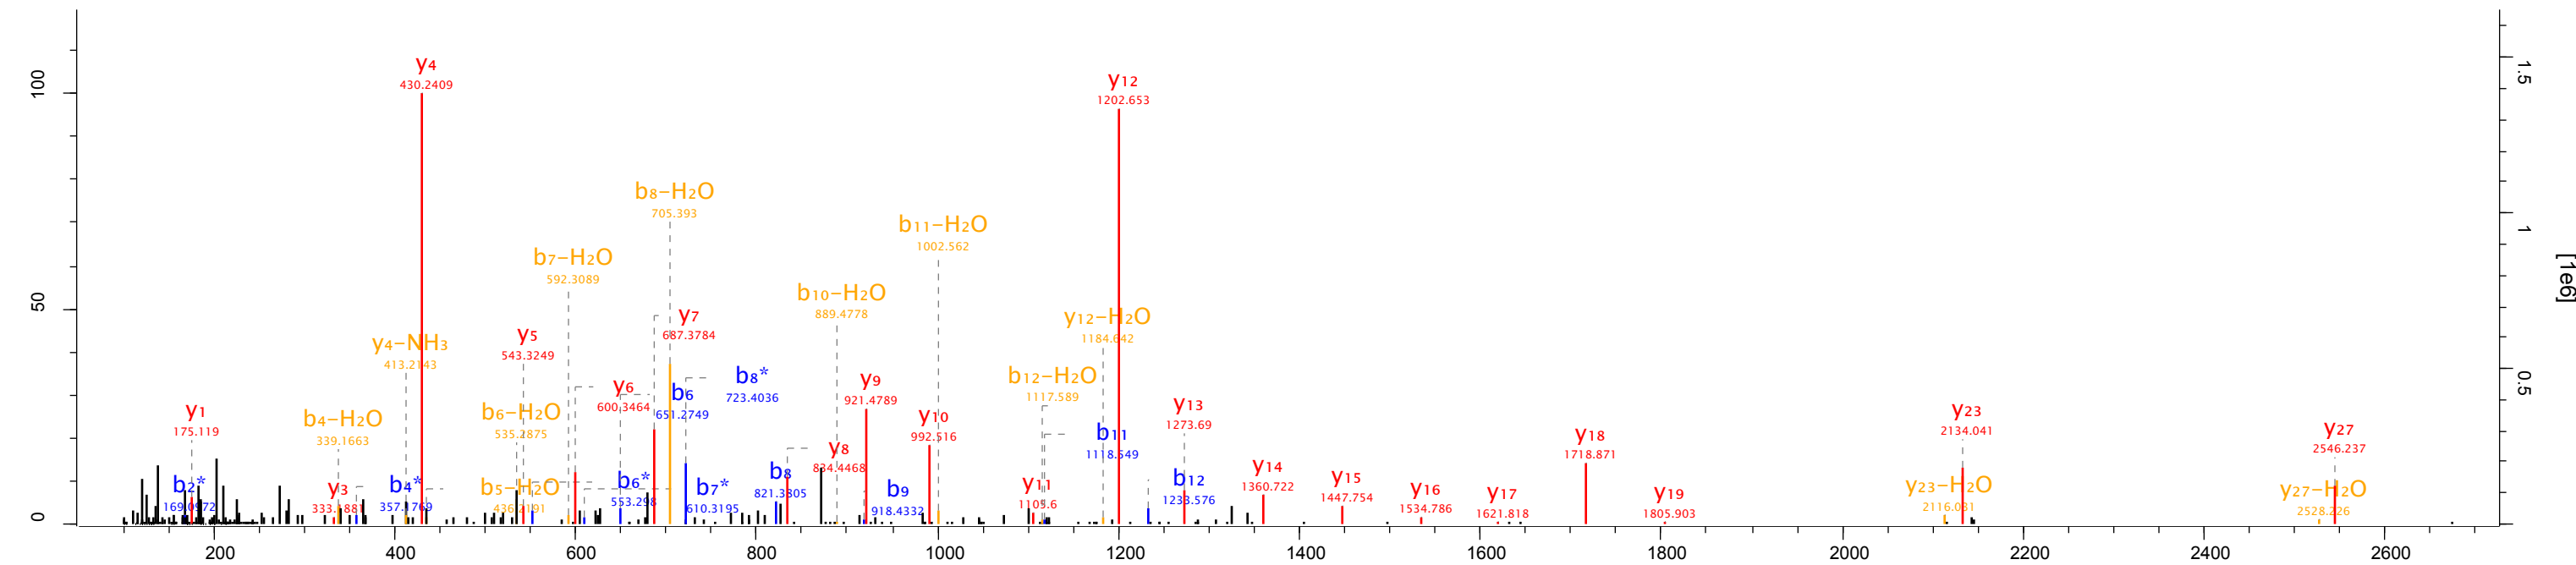

Sequence: - V S T S P V G L P S I D P S G S S P S S S S A P L A S F S G I P G T R -

Fragmentation sites (b ions): b2\* (S), b4\* (S), b6 (V), b7\* (G), b8 (L), b9 (P), b11 (I), b12 (D)

Fragmentation sites (y ions): y1 (R), y3 (G), y4 (P), y5 (I), y6 (G), y7 (S), y8 (F), y9 (S), y10 (A), y11 (L), y12 (P), y13 (A), y14 (S), y15 (S), y16 (S), y17 (S), y18 (P), y19 (S), y23 (P), y27 (P)



Raw file Scan Method Score m/z Gene names  
 20150814\_A375SR\_Phospho\_BR2\_06 28499 FTMS; HCD 417.7 1165.2 PURB

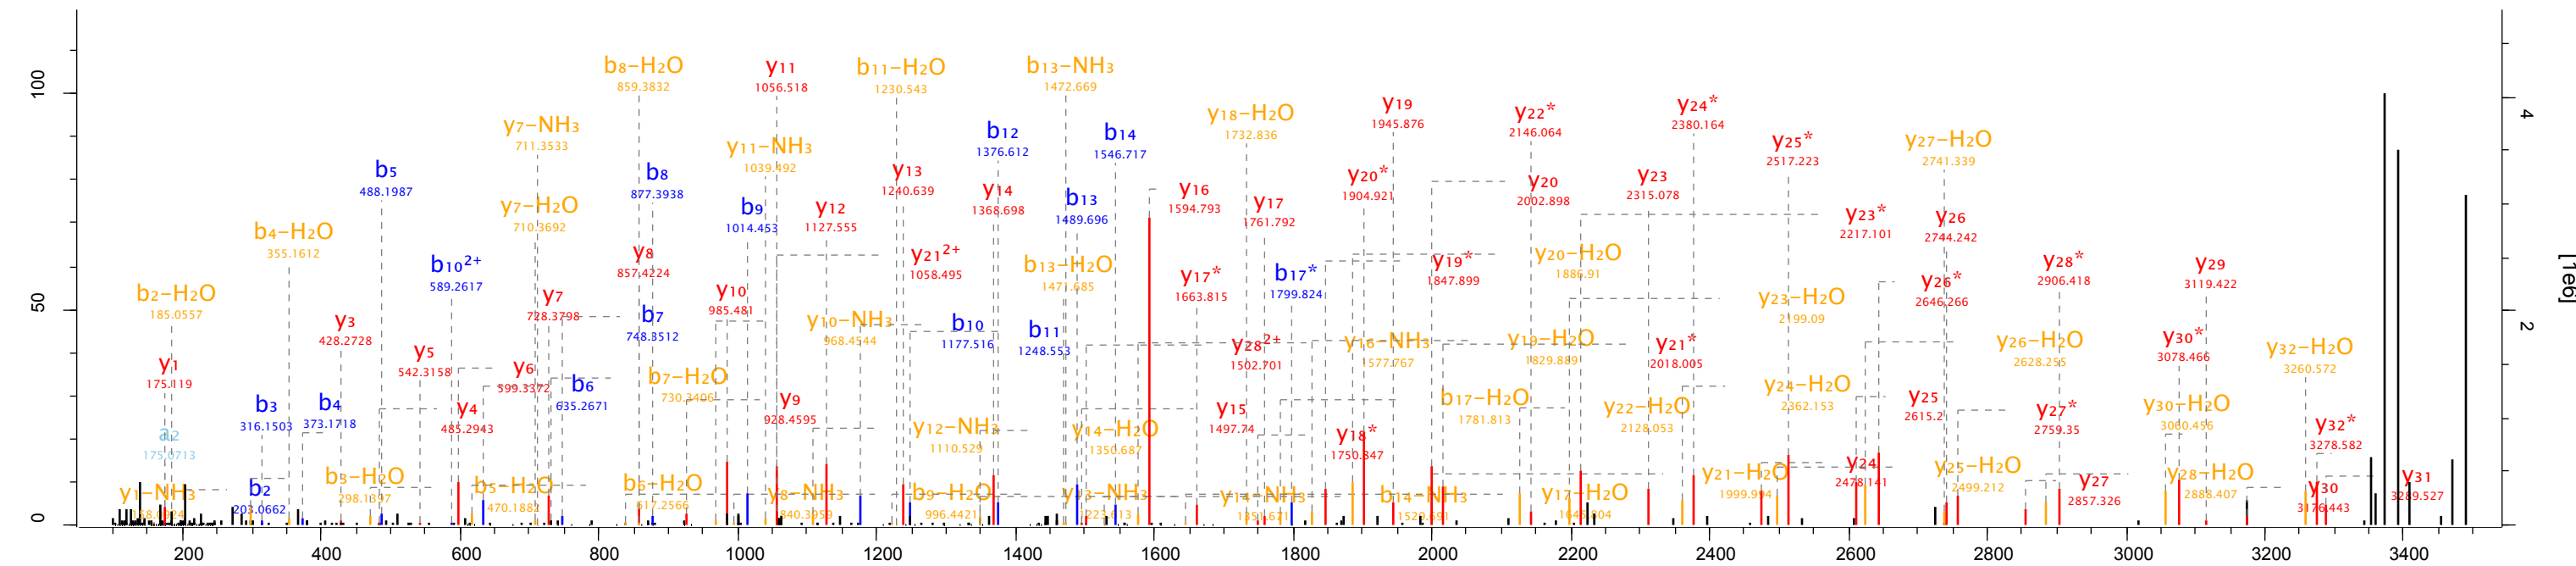

- D S L G D F I E H Y A Q L G P S **ph** S P E Q L A A G A E E G G G P R R -

Fragmentation mapping: b<sub>2</sub> (S), b<sub>3</sub> (L), b<sub>4</sub> (G), b<sub>5</sub> (D), b<sub>6</sub> (F), b<sub>7</sub> (I), b<sub>8</sub> (E), b<sub>9</sub> (H), b<sub>10</sub> (Y), b<sub>11</sub> (A), b<sub>12</sub> (Q), b<sub>13</sub> (L), b<sub>14</sub> (G), b<sub>17</sub>\* (S).

Raw file 20150814\_A375SR\_Phospho\_BR2\_06 Scan 4699 Method FTMS; HCD Score 102.07 m/z 338.52 Gene names RNPS1

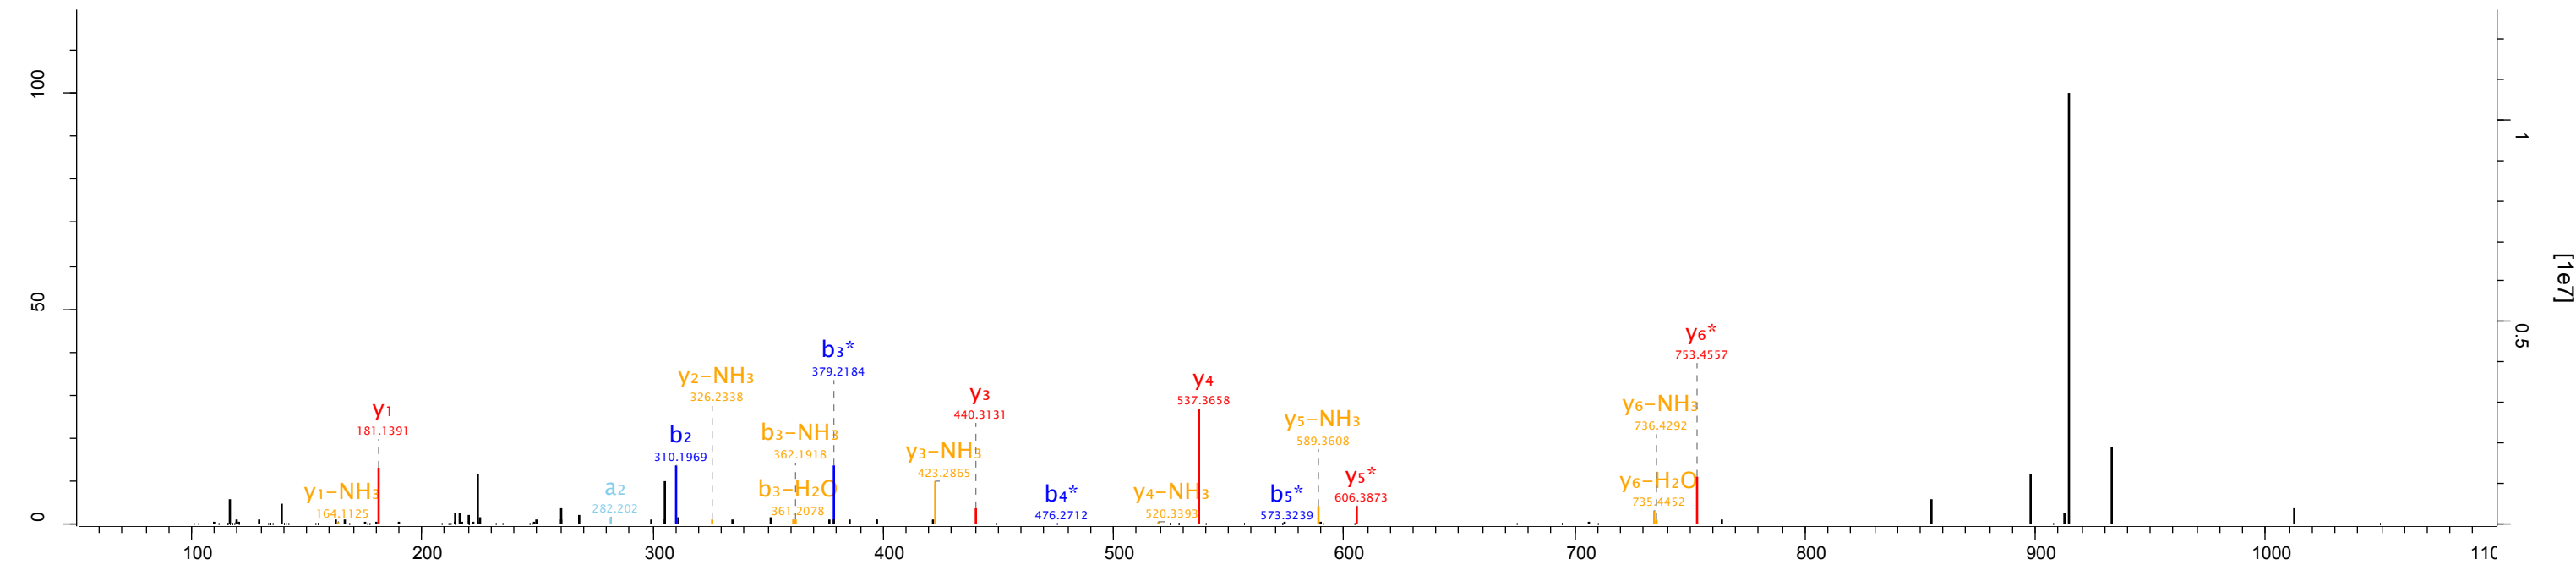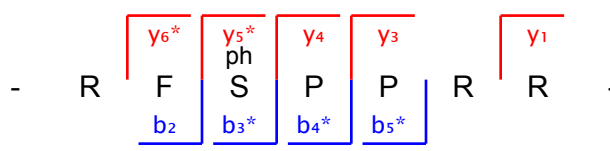

Raw file: 20150814\_A375SR\_Phospho\_BR2\_06  
 Scan: 5249 Method: FTMS; HCD Score: 186.08 m/z: 782.31 Gene names: GPR84;MGRN1

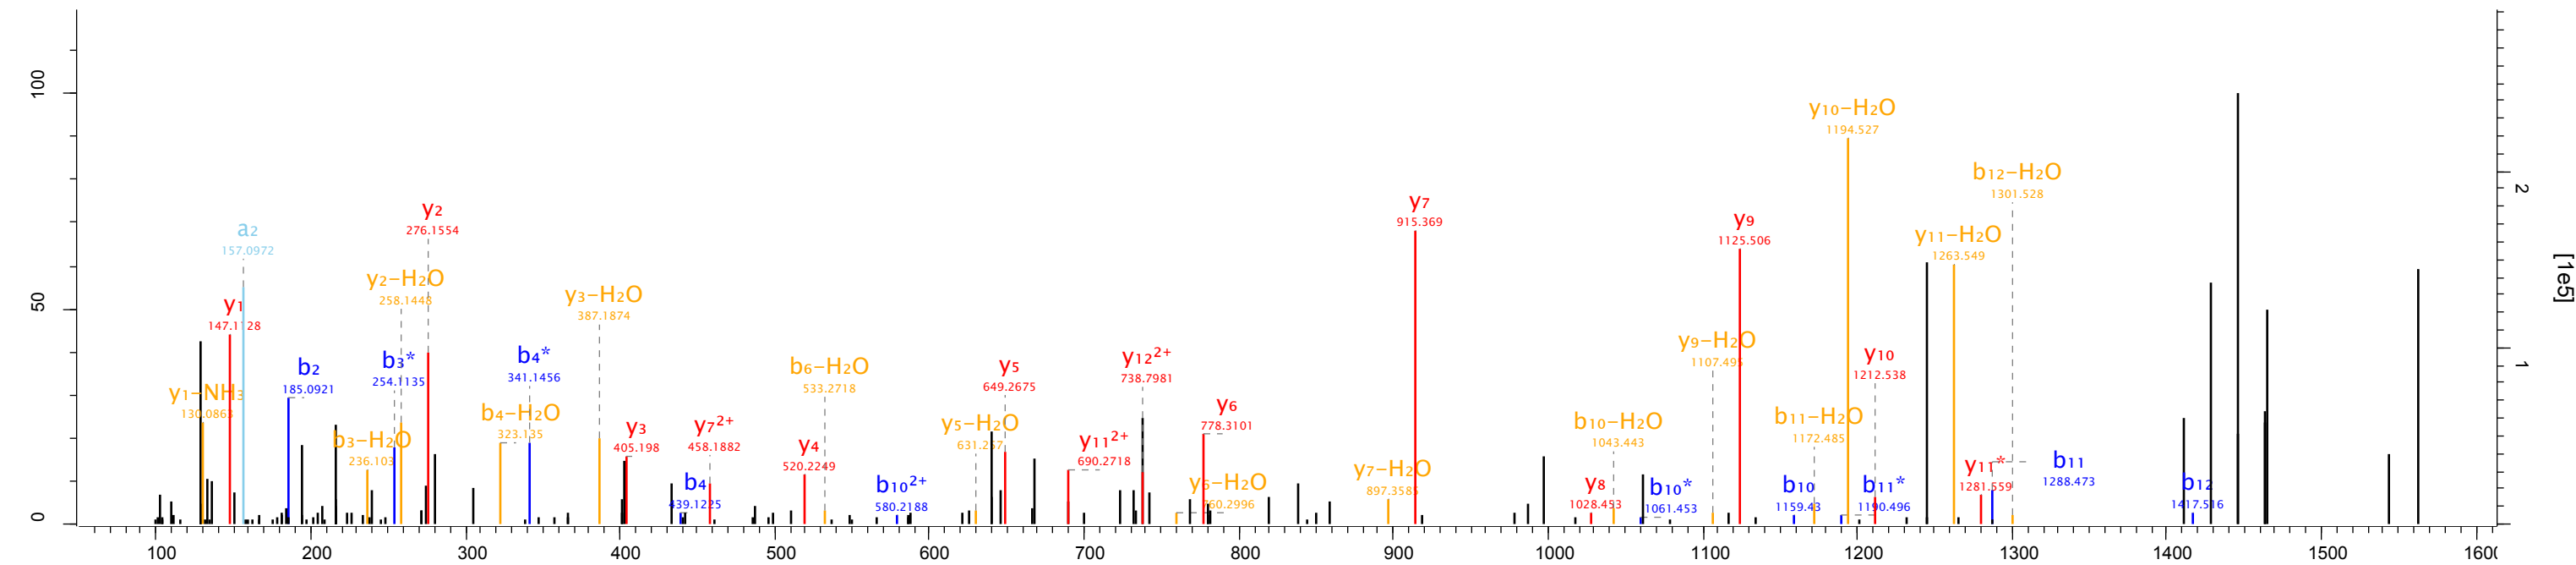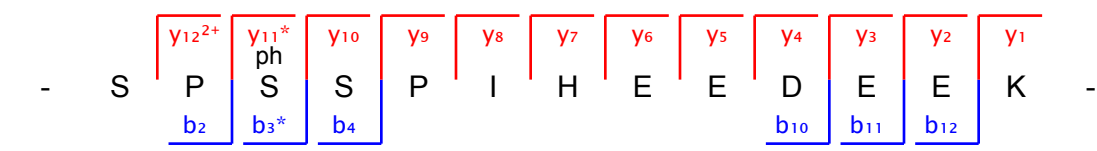

Raw file: 20150814\_A375SR\_Phospho\_BR2\_06  
 Scan: 5449 Method: FTMS; HCD Score: 139.71 m/z: 737.84 Gene names: CD2BP2

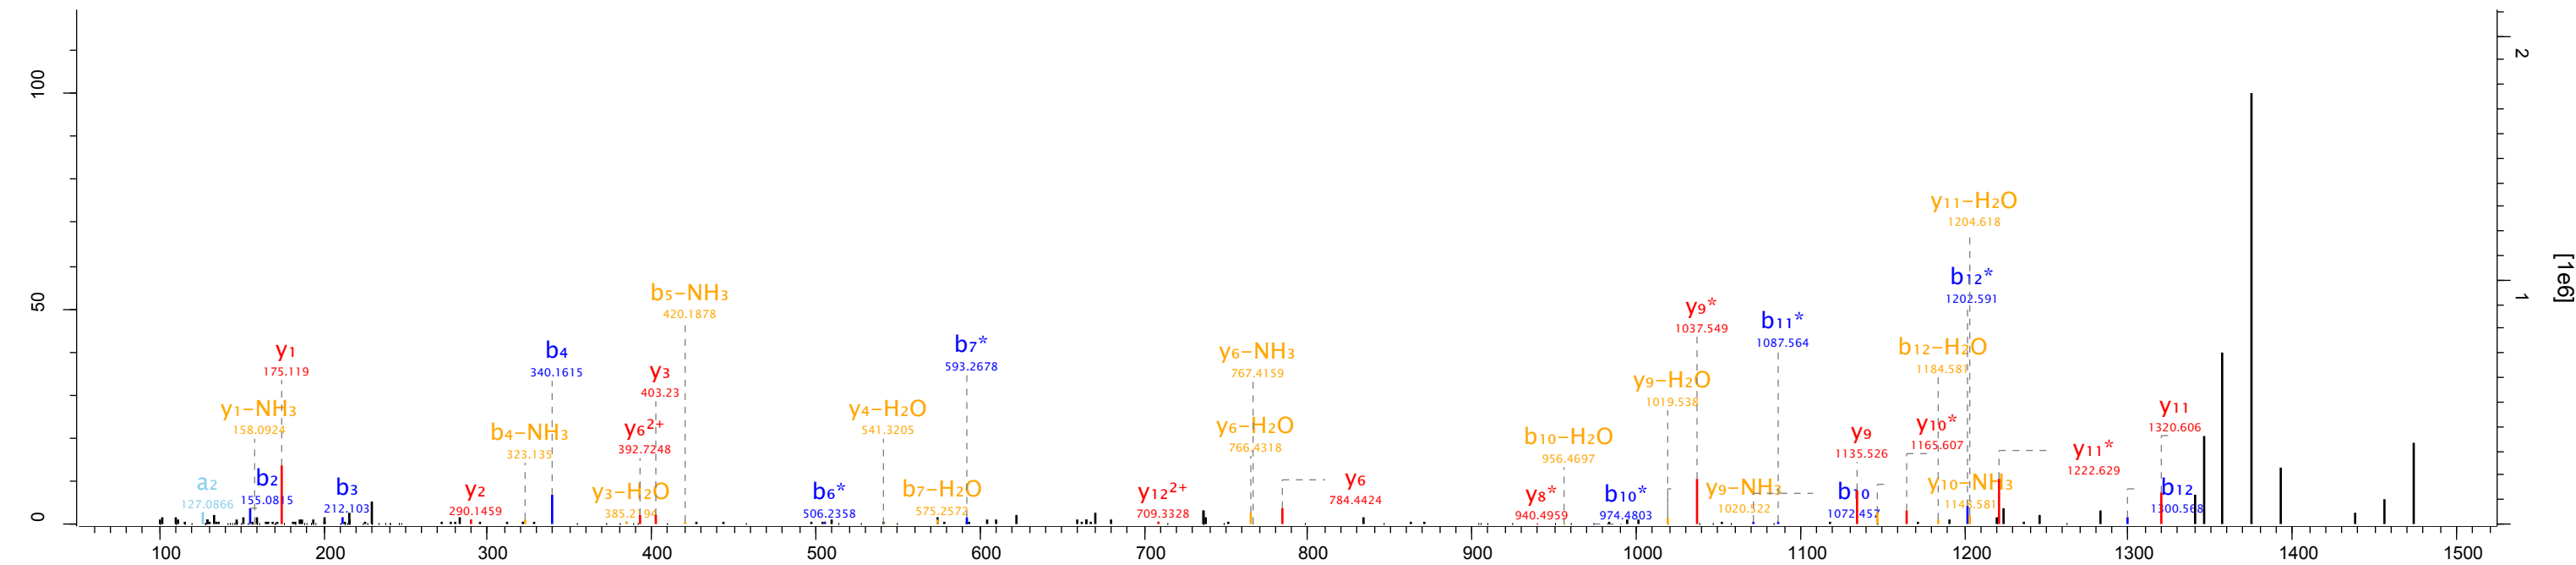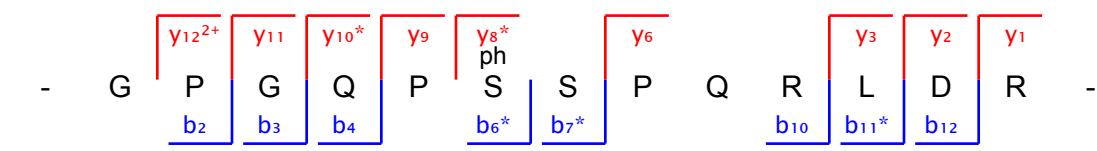

Raw file: 20150814\_A375SR\_Phospho\_BR2\_06  
 Scan: 6099 Method: FTMS; HCD Score: 92.24 m/z: 453.73 Gene names: RBM14

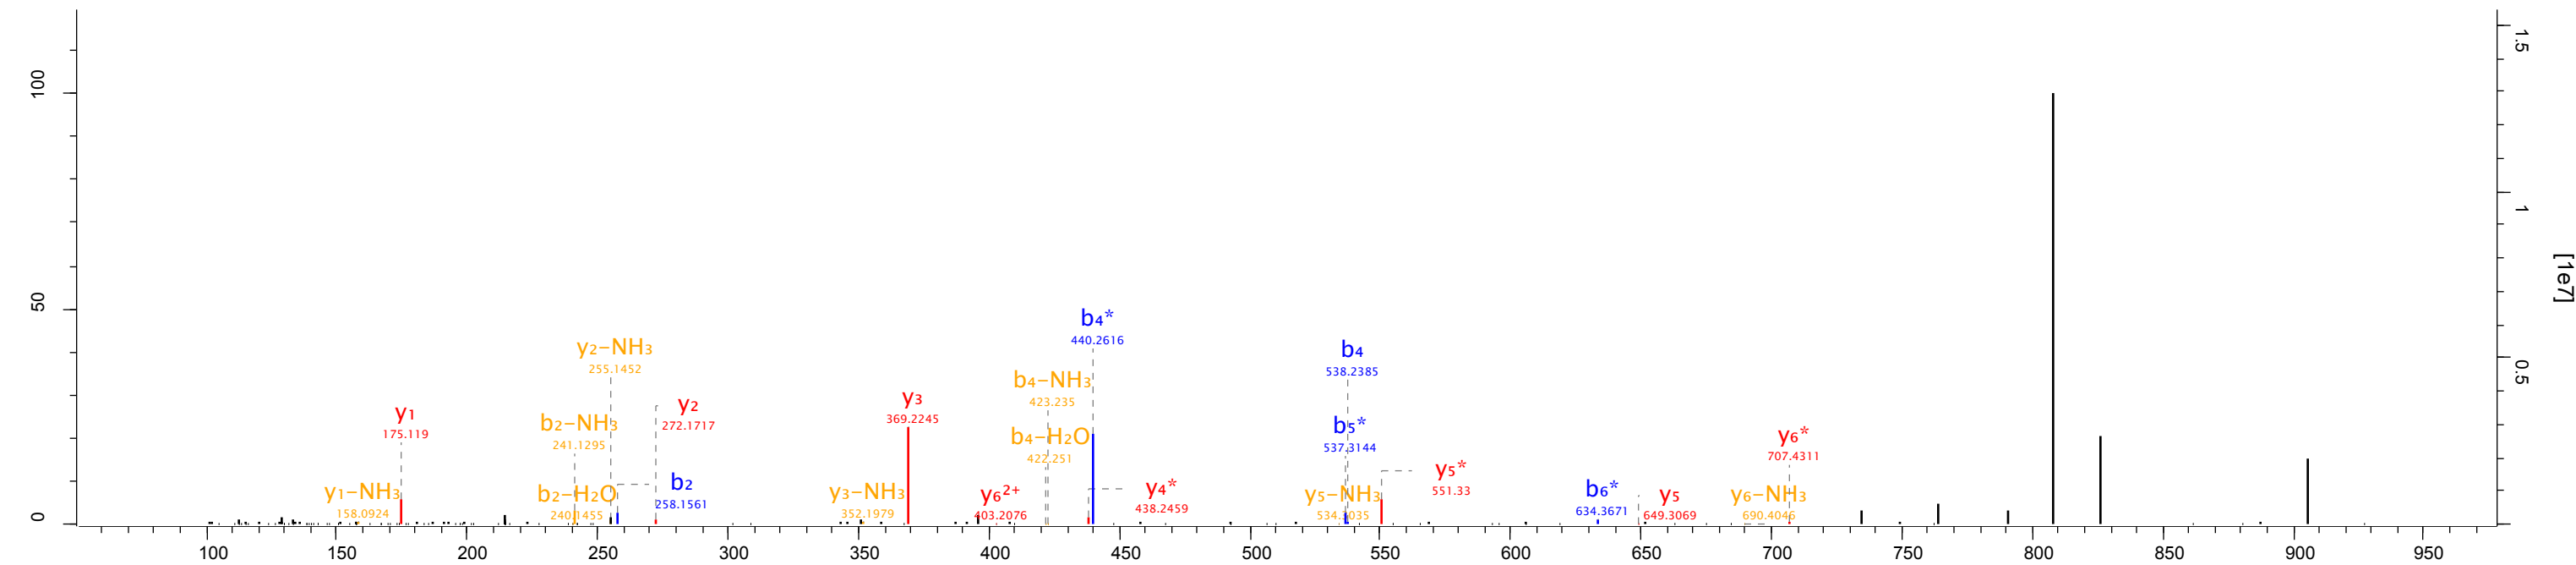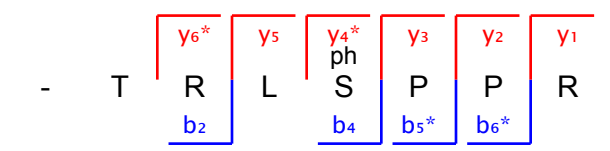

Raw file 20150814\_A375SR\_Phospho\_BR2\_06 Scan 6569 Method FTMS; HCD Score 77.37 m/z 590.28 Gene names CHAMP1

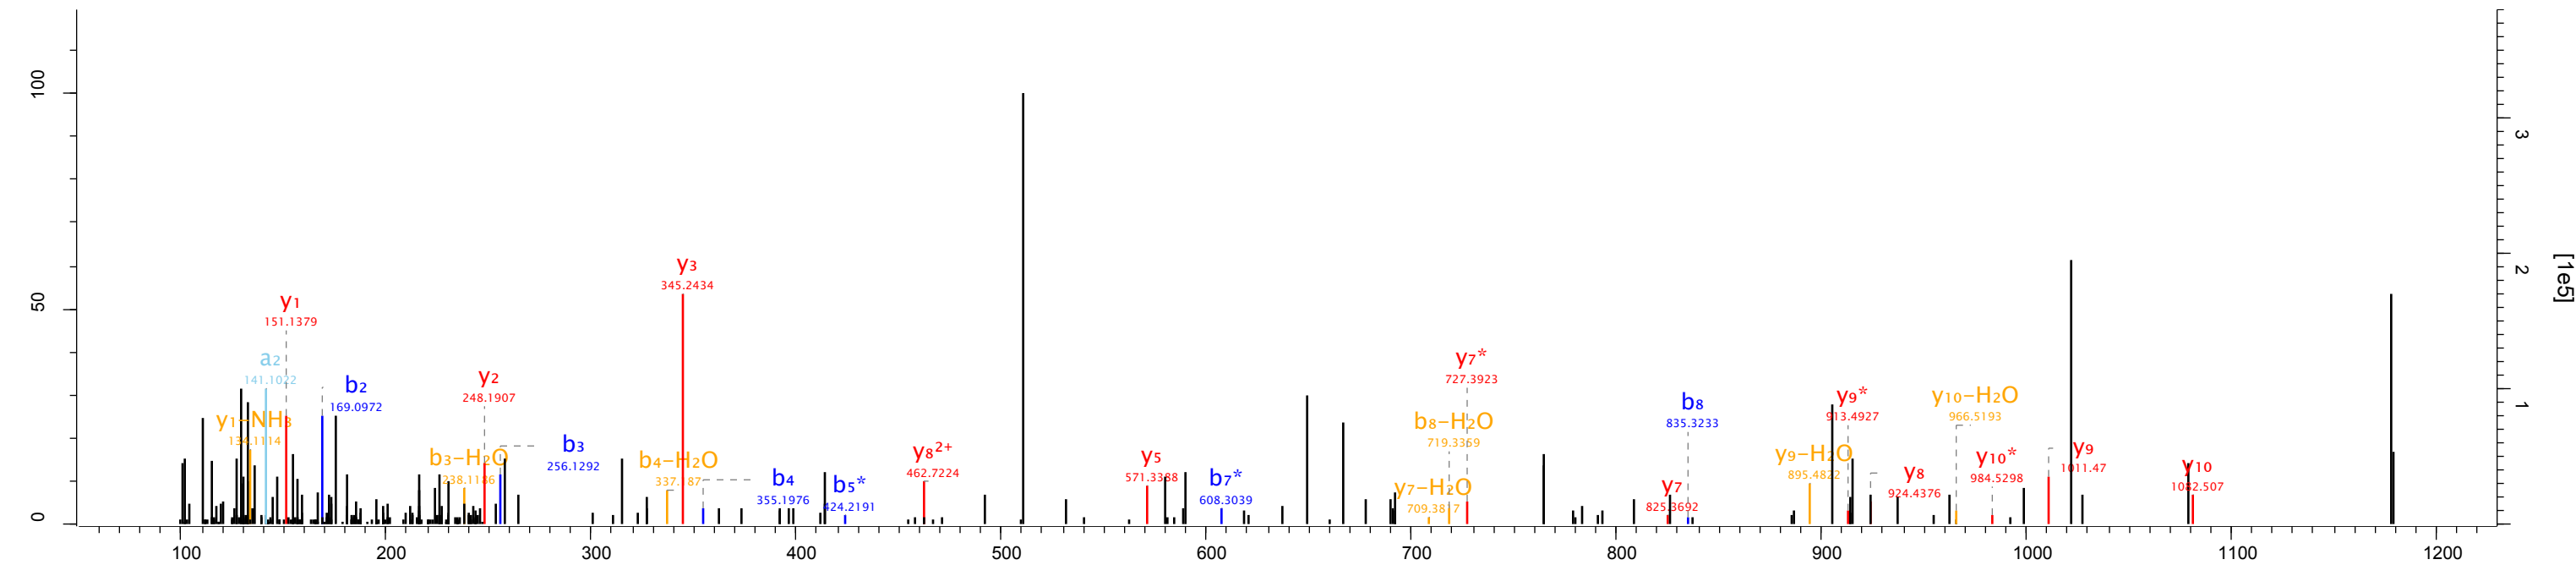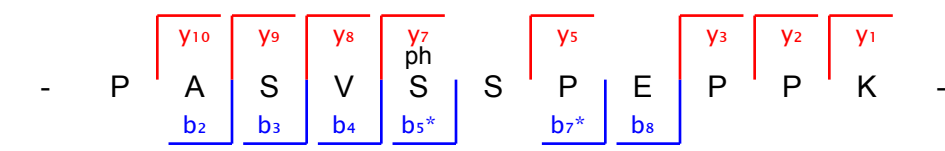

Raw file: 20150814\_A375SR\_Phospho\_BR2\_06  
 Scan: 6589 Method: FTMS; HCD Score: 117.67 m/z: 544.3 Gene names: CCNL2

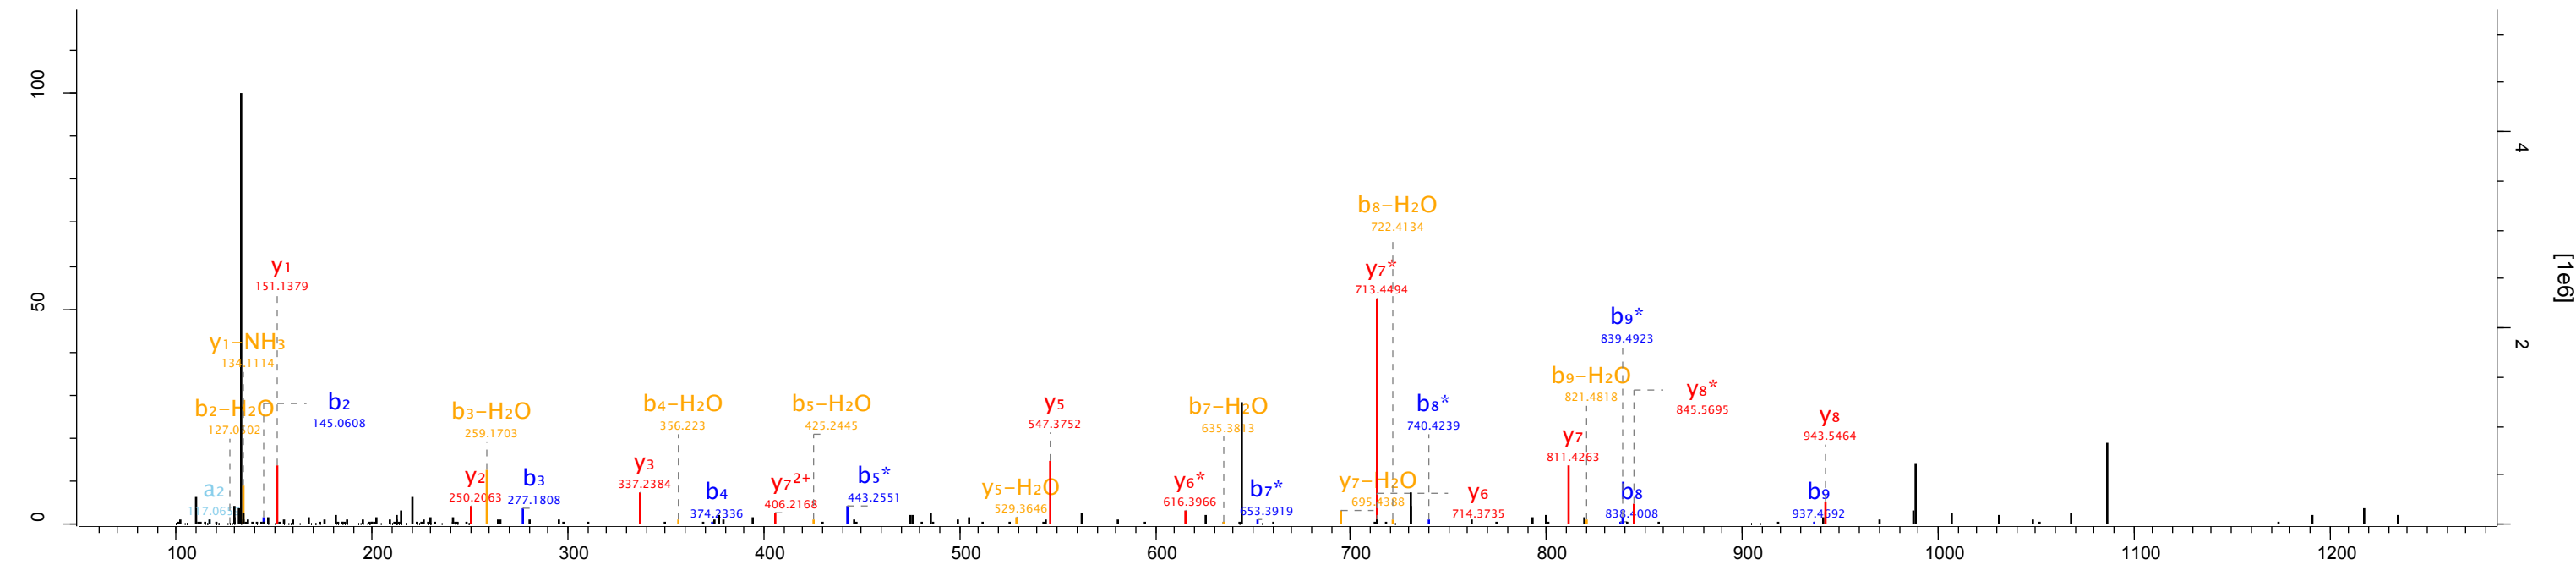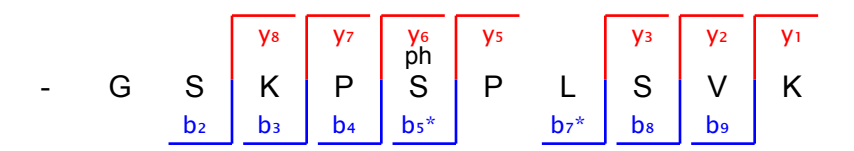

Raw file: 20150814\_A375SR\_Phospho\_BR2\_06  
 Scan: 7089 Method: FTMS; HCD Score: 89.91 m/z: 623.78 Gene names: ANKIB1

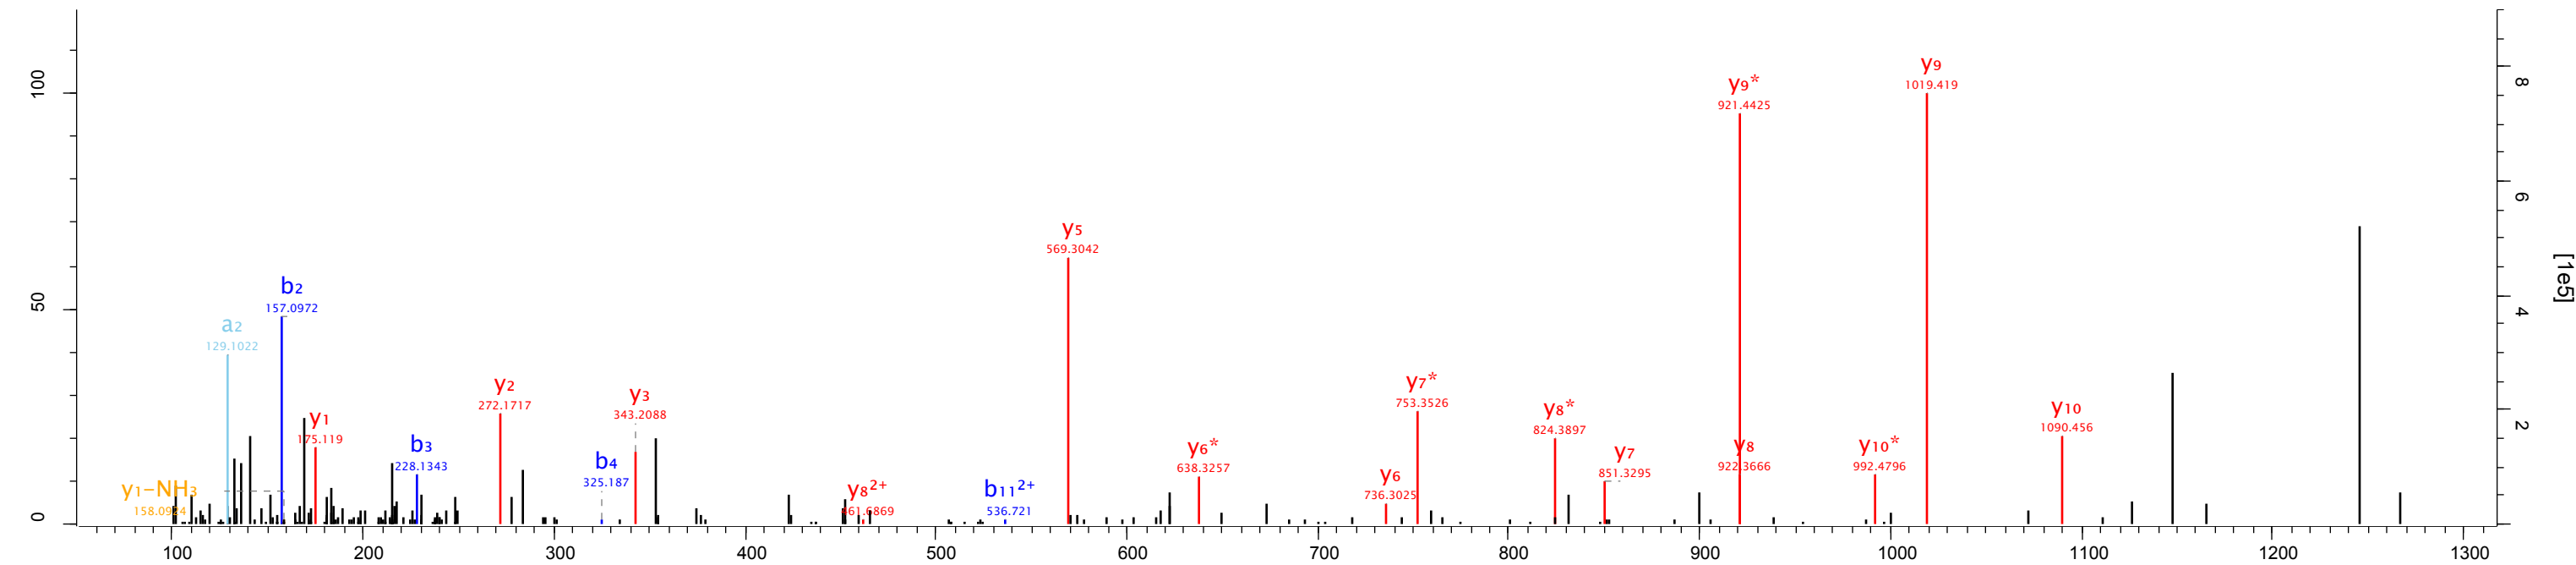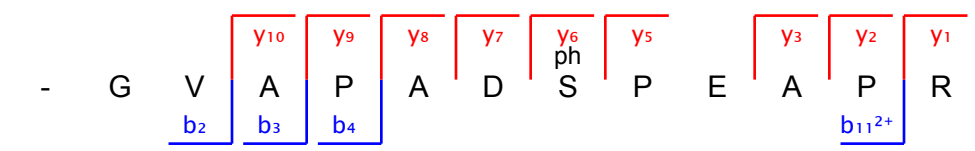



Raw file: 20150814\_A375SR\_Phospho\_BR2\_06  
 Scan: 8009 Method: FTMS; HCD Score: 190.94 m/z: 848.91 Gene names: CAD

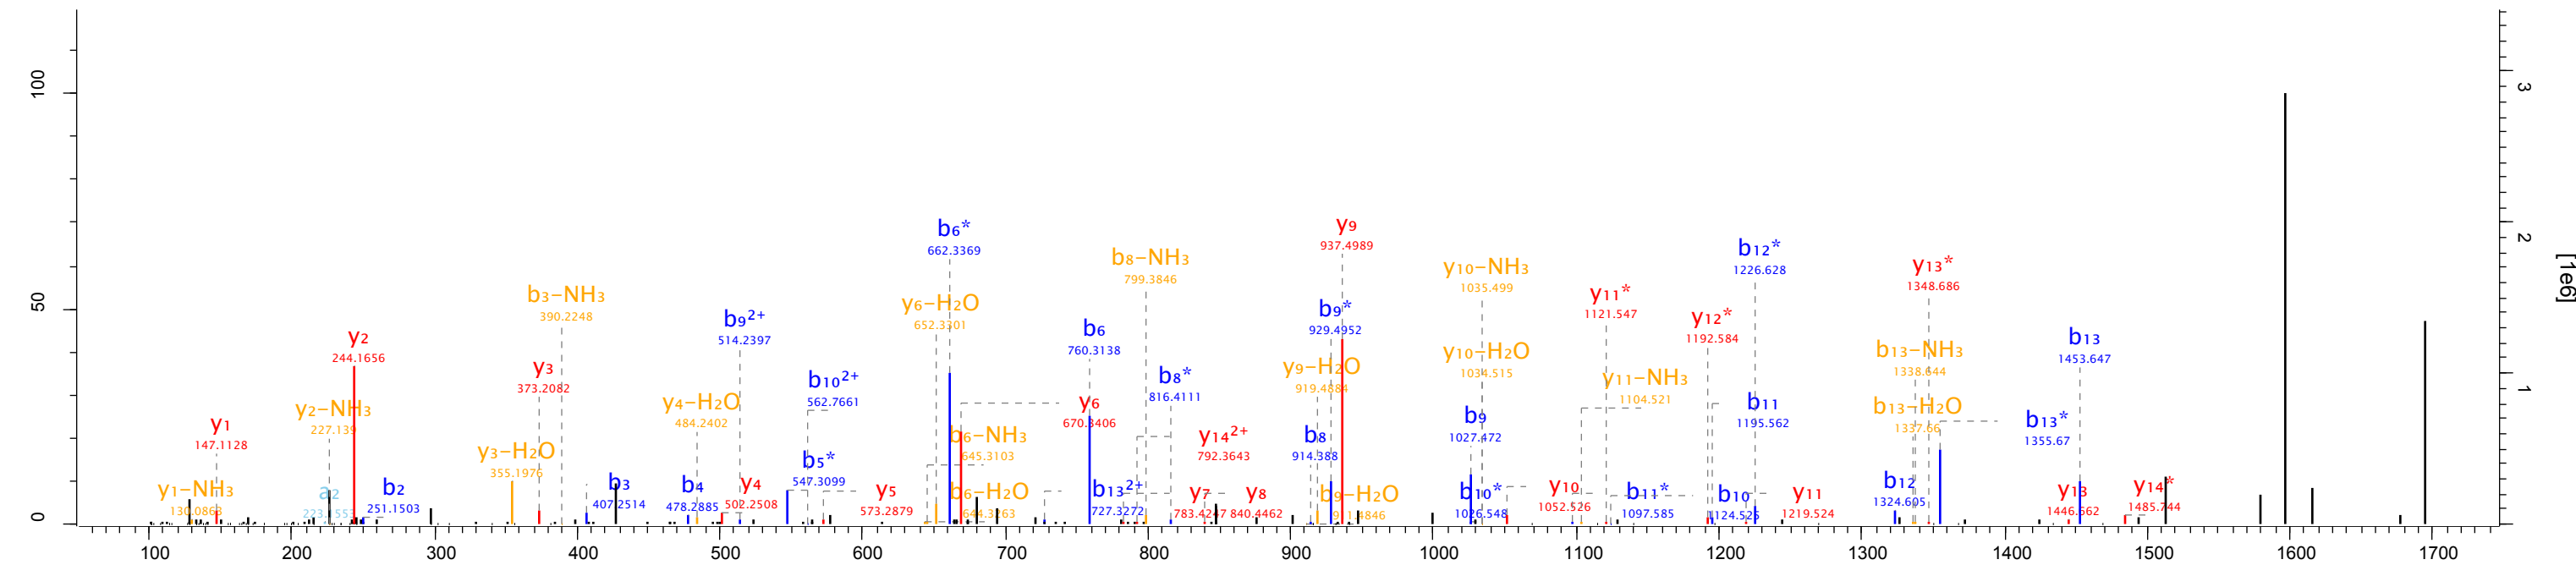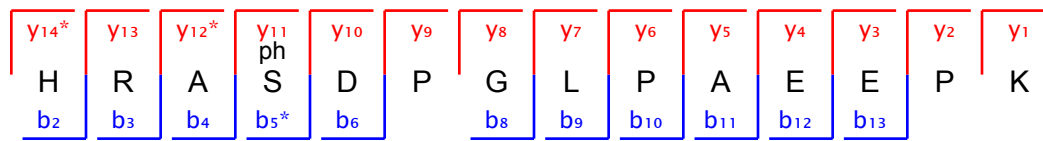

Raw file 20150814\_A375SR\_Phospho\_BR2\_06 Scan 8649 Method FTMS; HCD Score 89.48 m/z 487.93 Gene names PRKCDBP

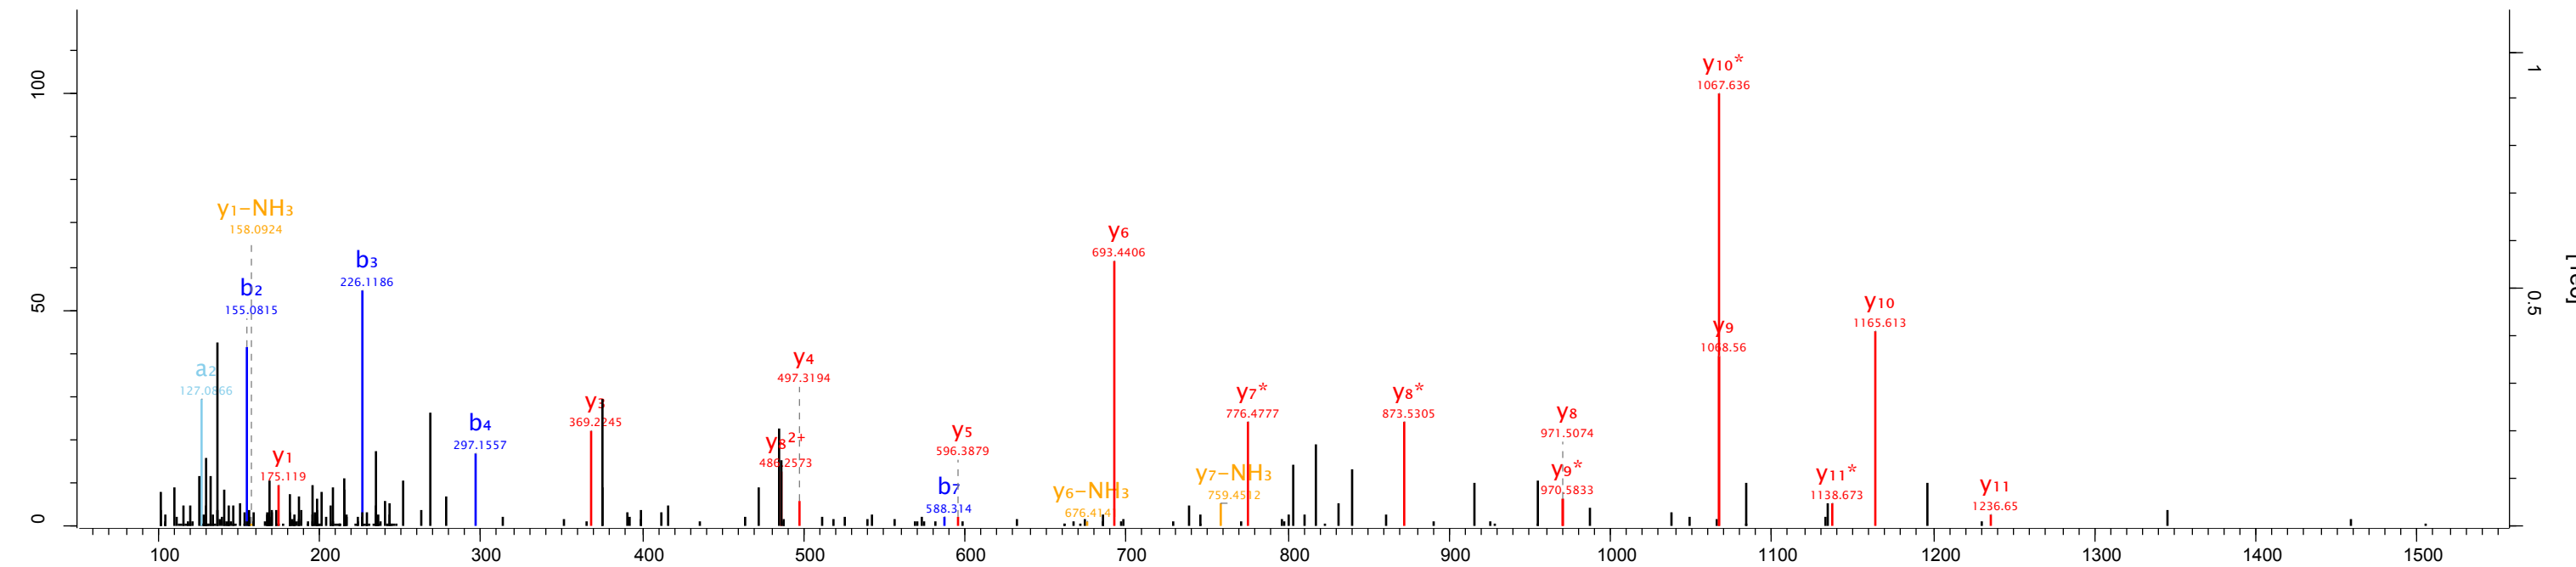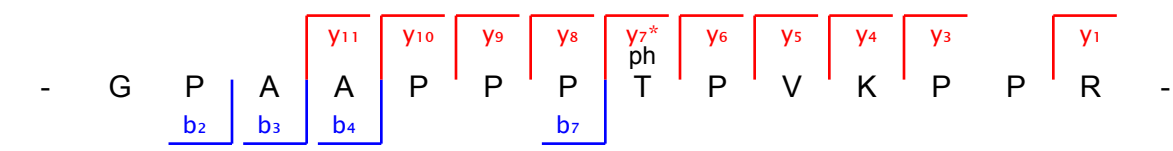

Raw file: 20150814\_A375SR\_Phospho\_BR2\_06  
 Scan: 9109 Method: FTMS; HCD Score: 176.99 m/z: 562.29 Gene names: MPRIP

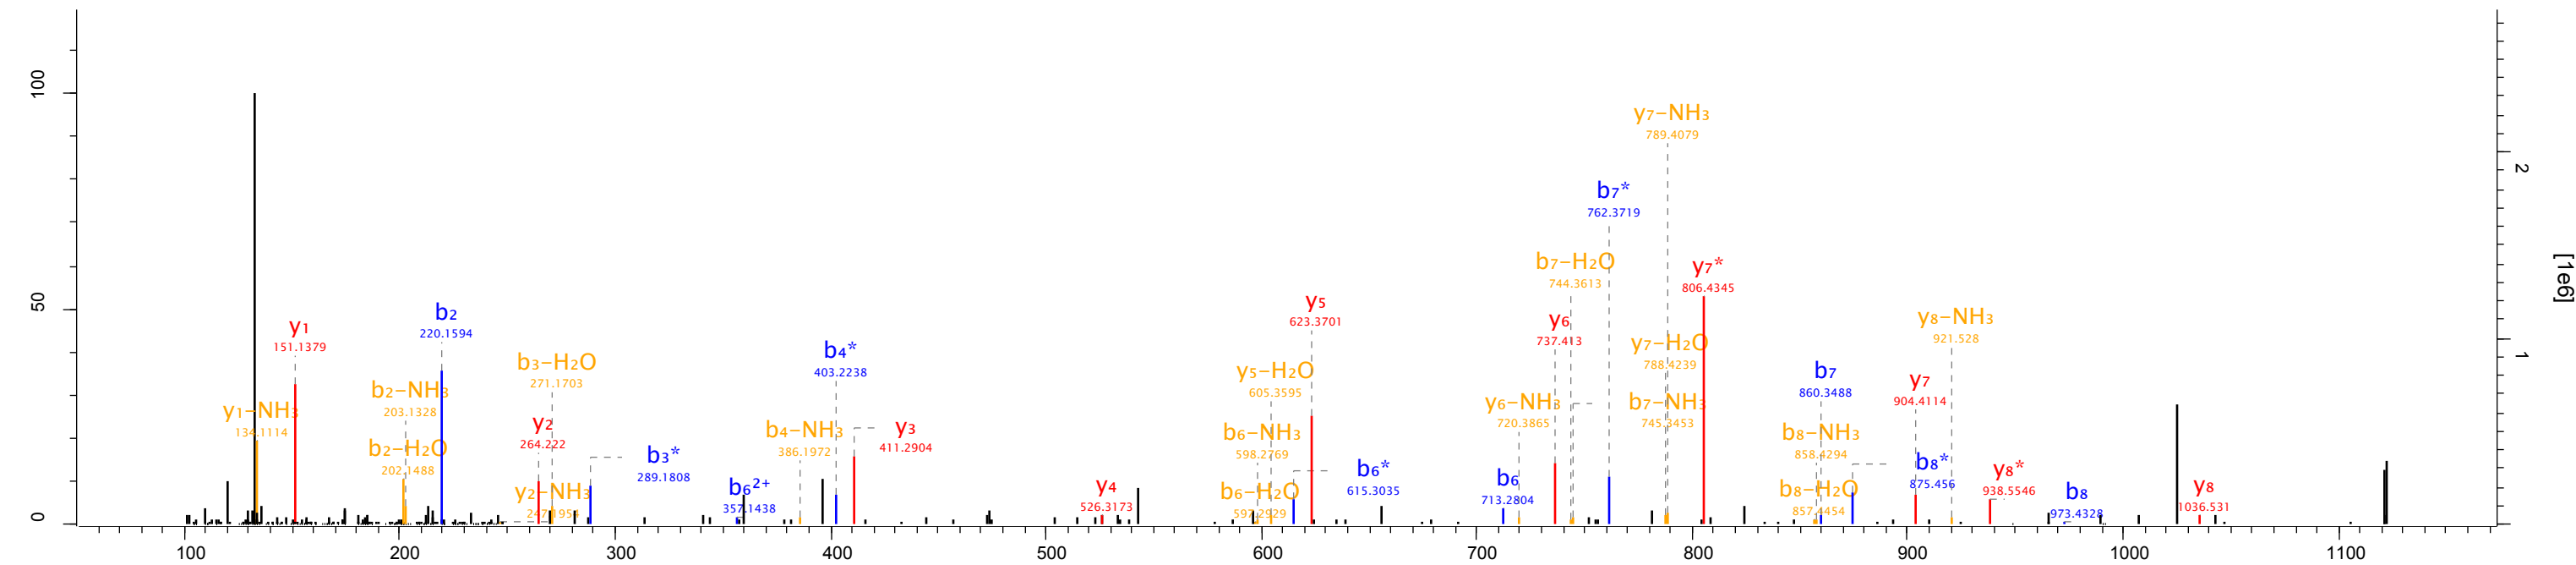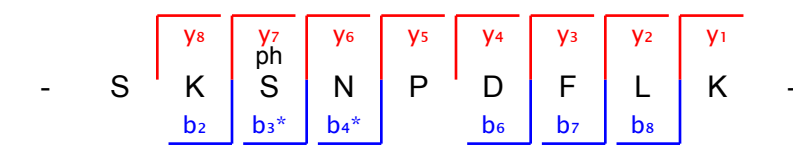

Raw file: 20150814\_A375SR\_Phospho\_BR2\_06  
 Scan: 9229 Method: FTMS; HCD Score: 102.87 m/z: 544.78 Gene names: MLLT4

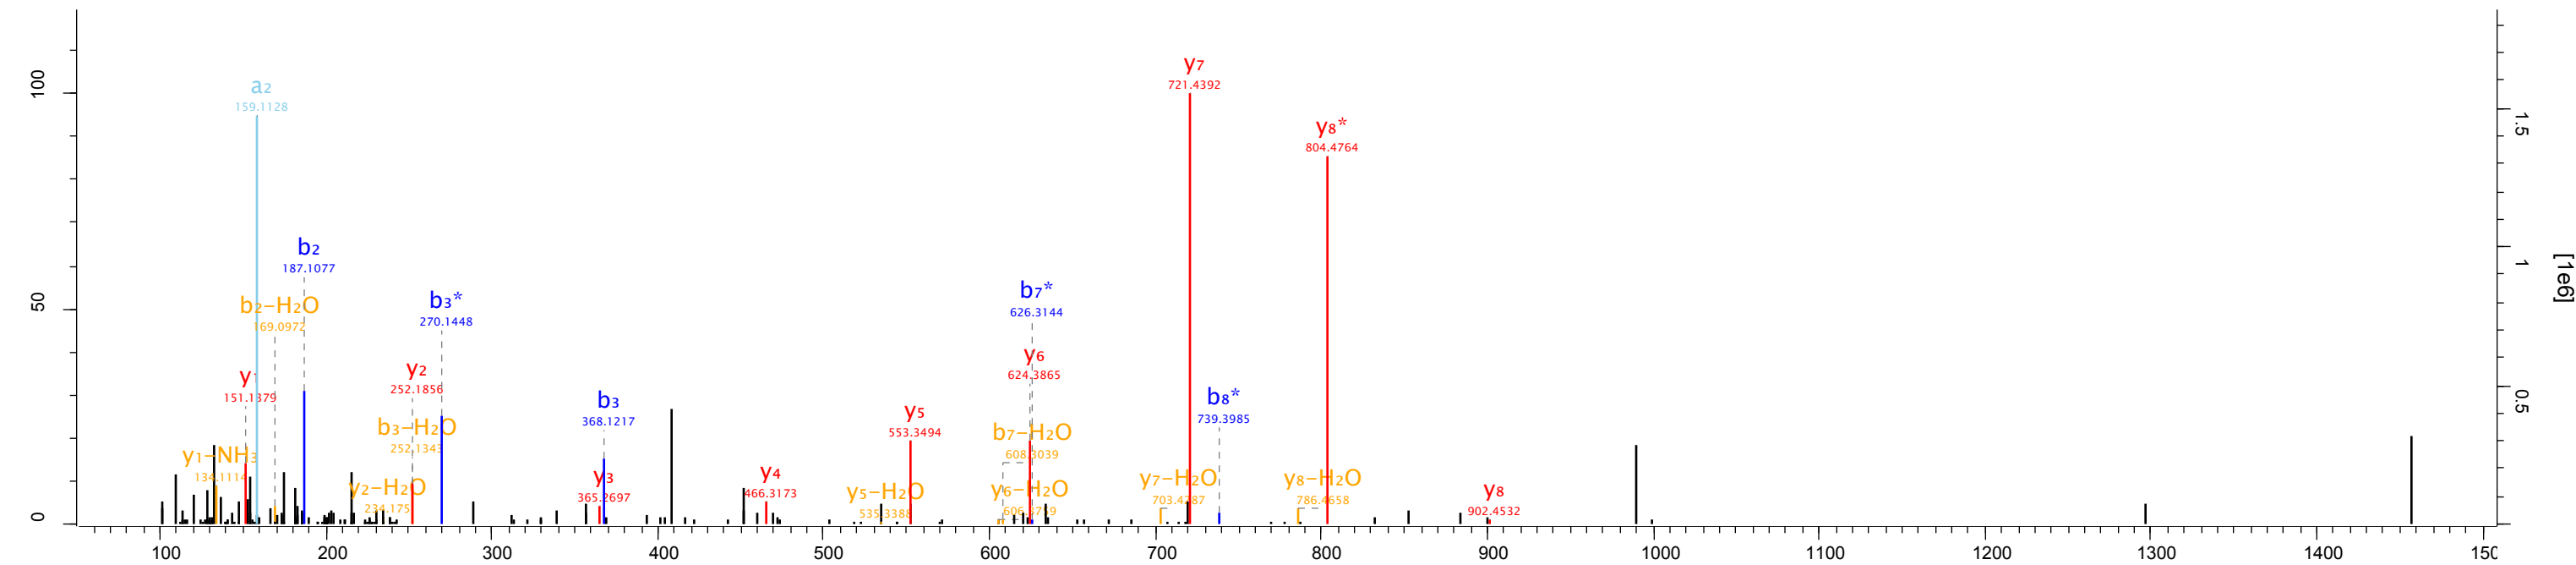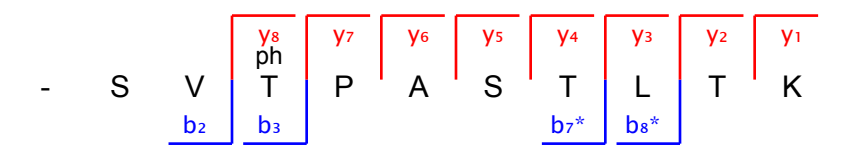

Raw file: 20150814\_A375SR\_Phospho\_BR2\_06  
 Scan: 9339 Method: FTMS; HCD Score: 178.19 m/z: 918.45 Gene names: SAMD1

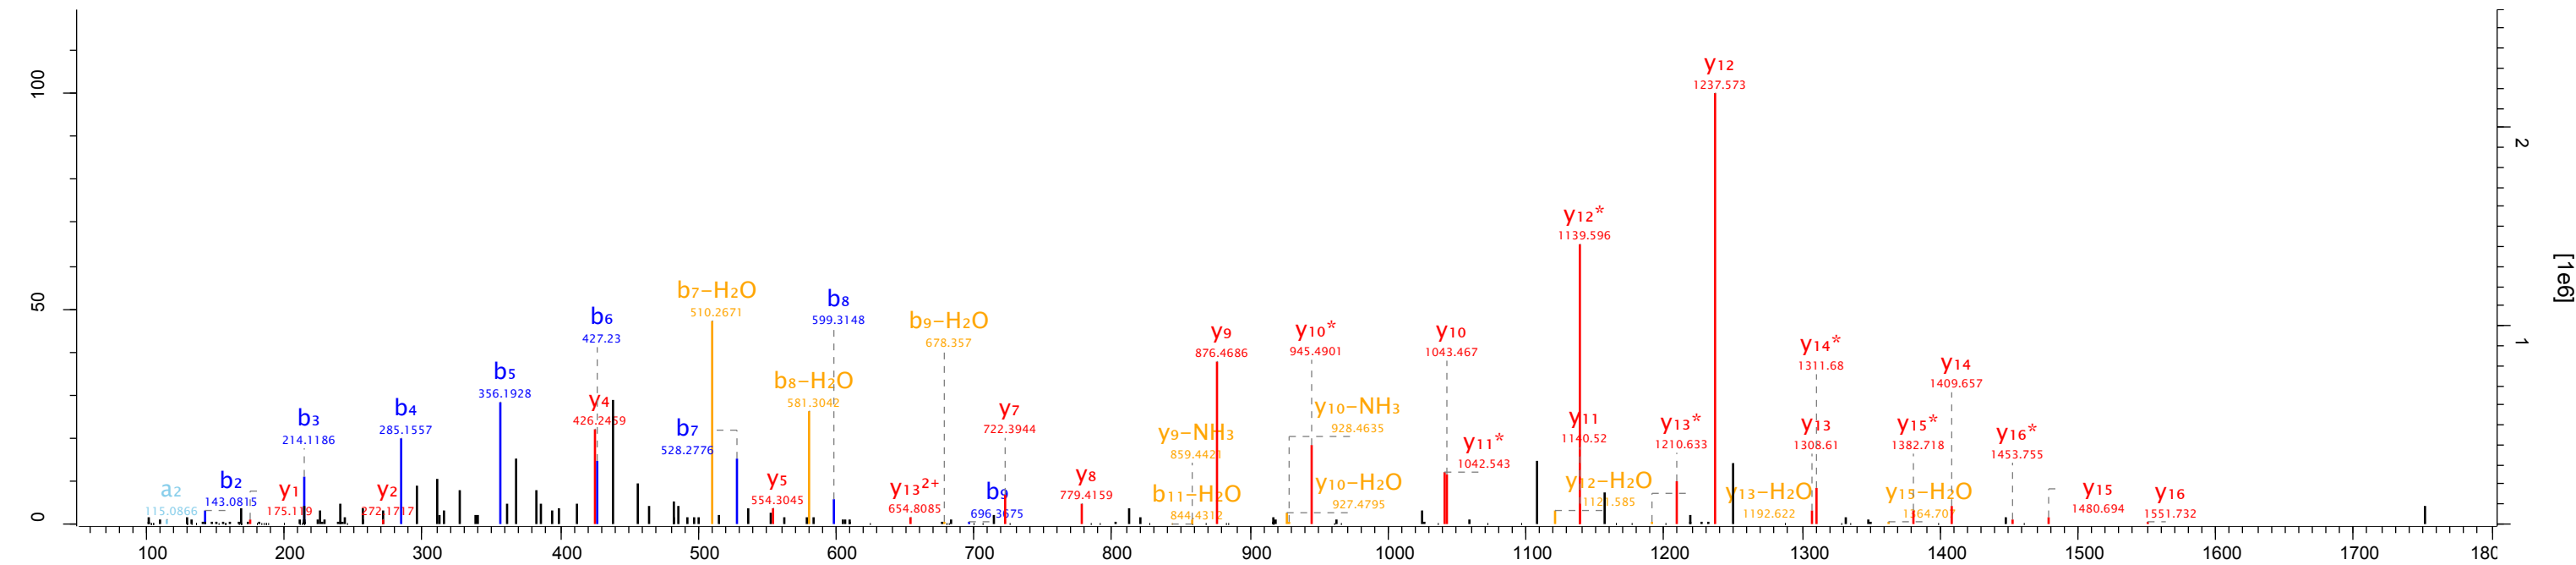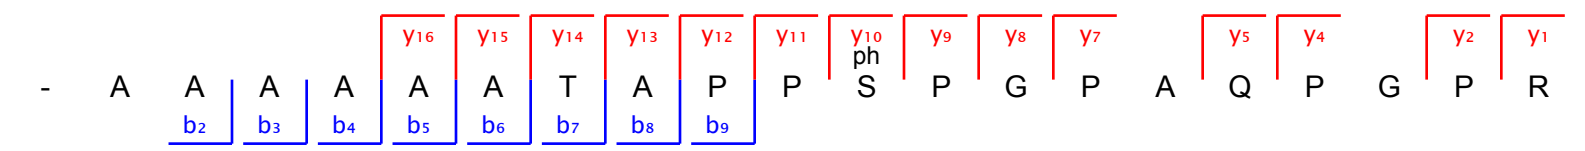

Raw file: 20150814\_A375SR\_Phospho\_BR2\_06  
 Scan: 9859 Method: FTMS; HCD Score: 115.04 m/z: 610.79 Gene names: DDX3X

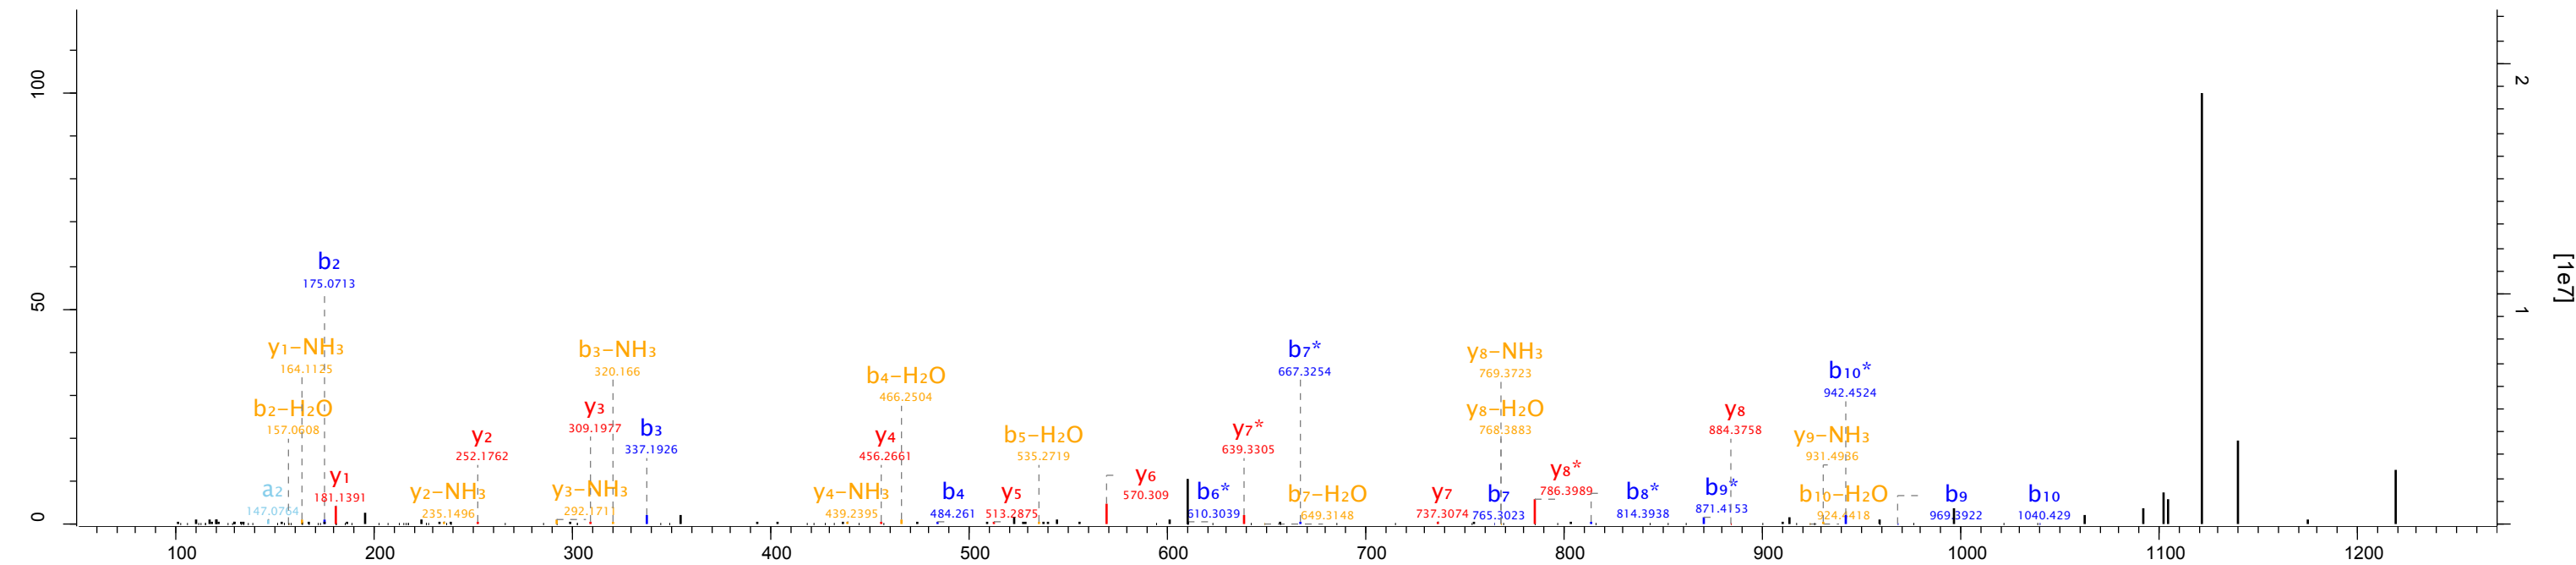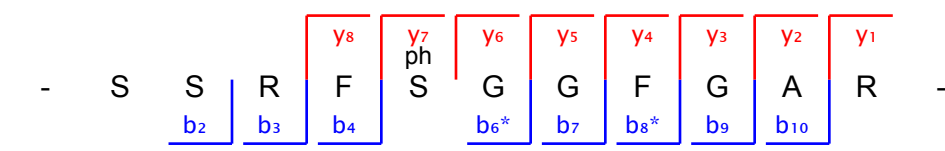

Raw file 20150814\_A375SR\_Phospho\_BR2\_07 Scan 10149 Method FTMS; HCD Score 65.2 m/z 732 Gene names PI4KB

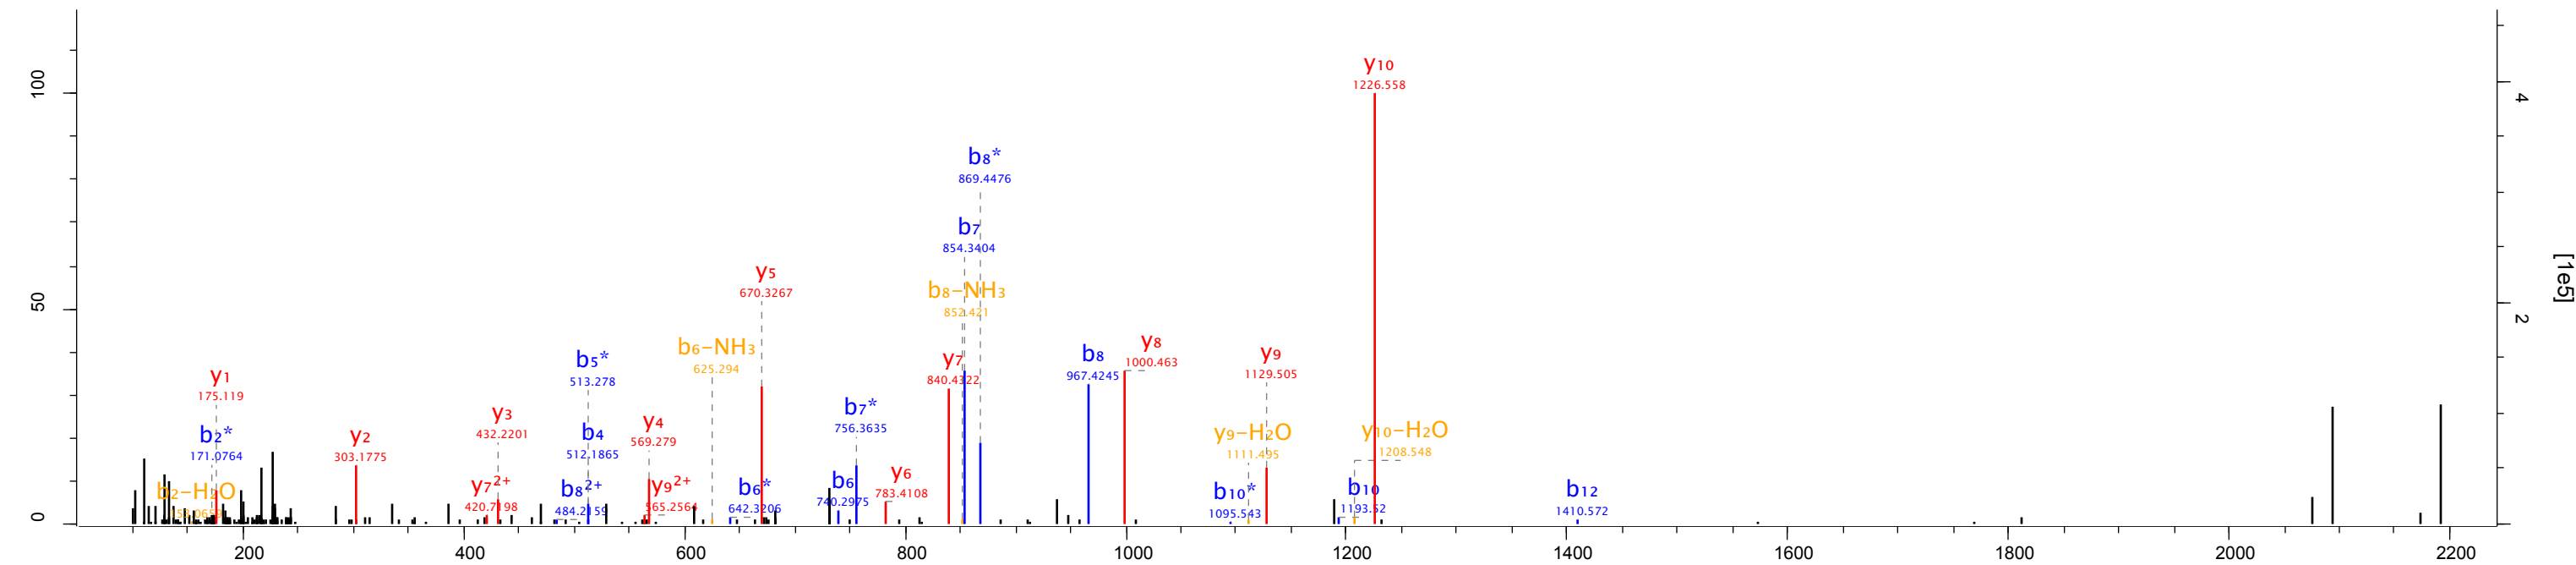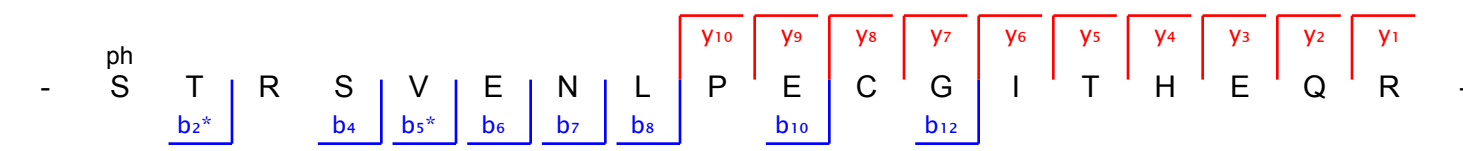

Raw file 20150814\_A375SR\_Phospho\_BR2\_07 Scan 10599 Method FTMS; HCD Score 52.32 m/z 553.26 Gene names ZDHHC5

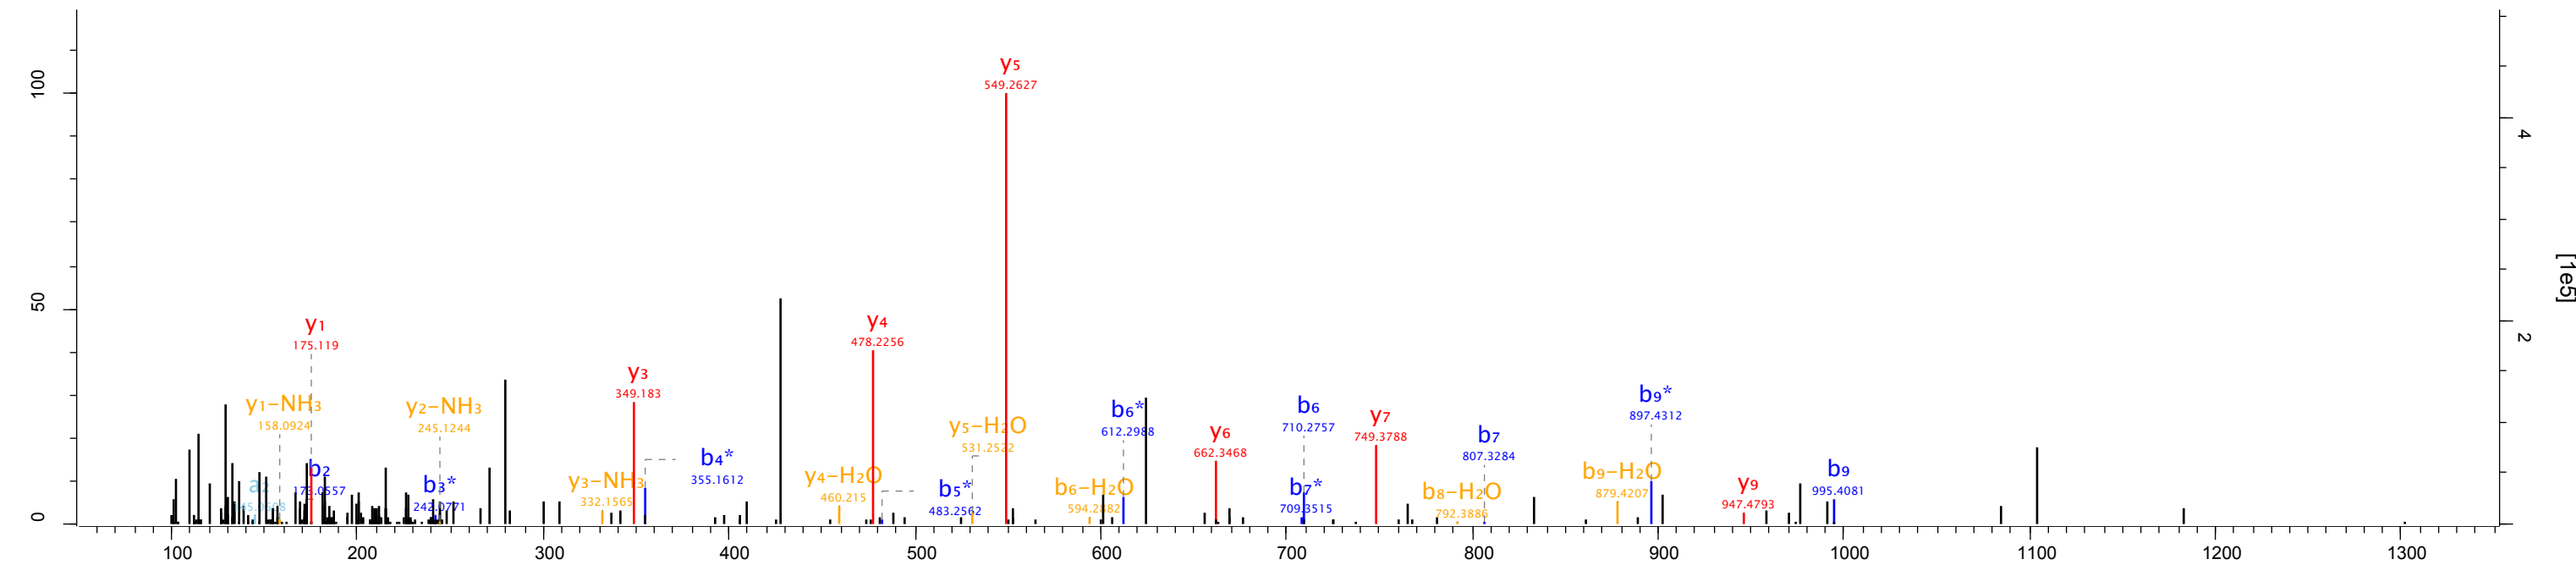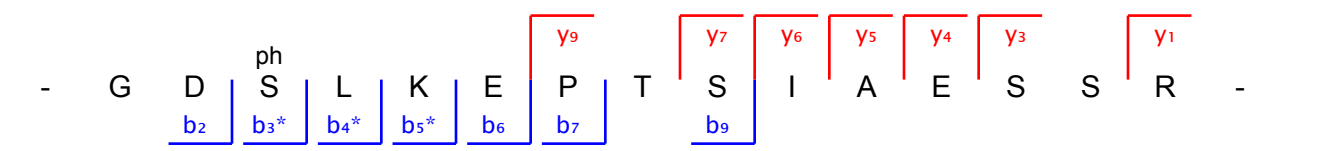



Raw file 20150814\_A375SR\_Phospho\_BR2\_07 Scan 10709 Method FTMS; HCD Score 234.48 m/z 831.74 Gene names CD44

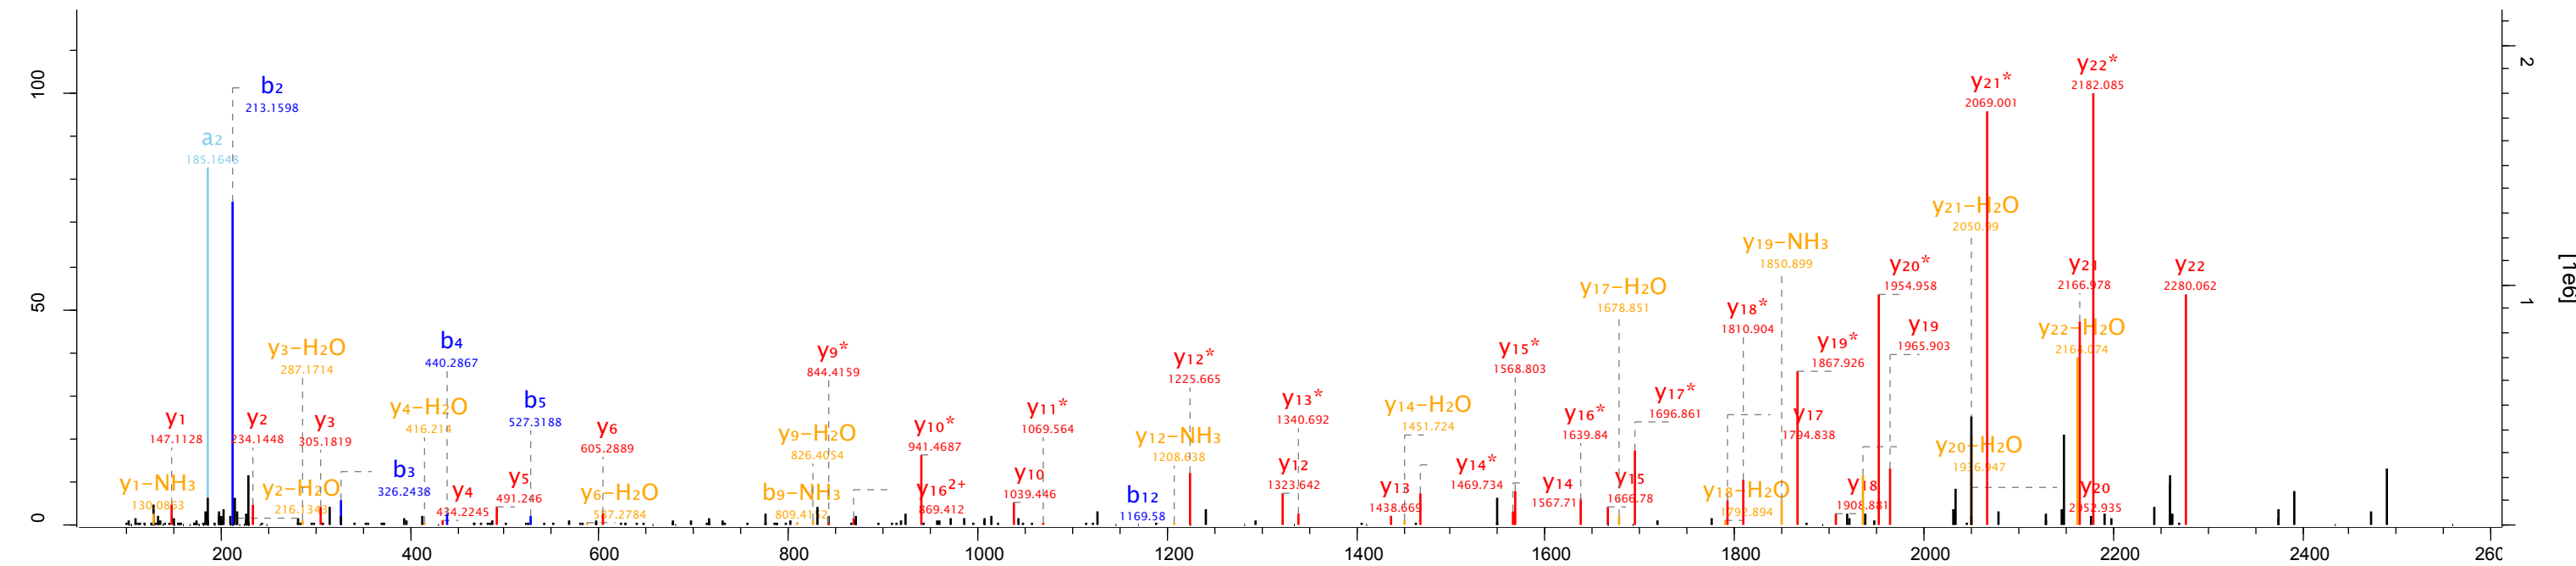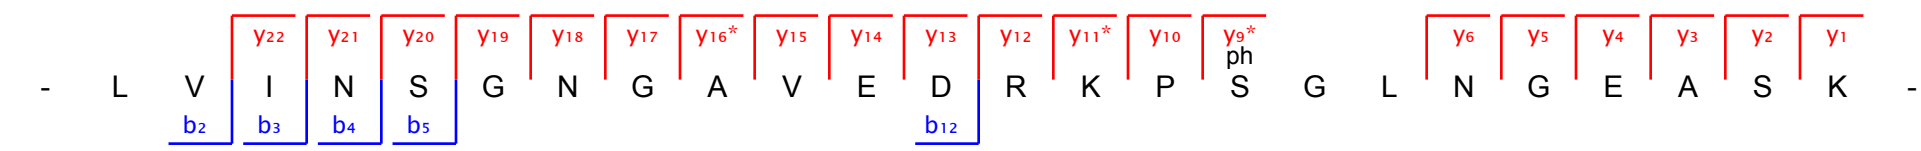

Raw file: 20150814\_A375SR\_Phospho\_BR2\_07  
 Scan: 10719 Method: FTMS; HCD Score: 90.3 m/z: 624.06 Gene names: CD44

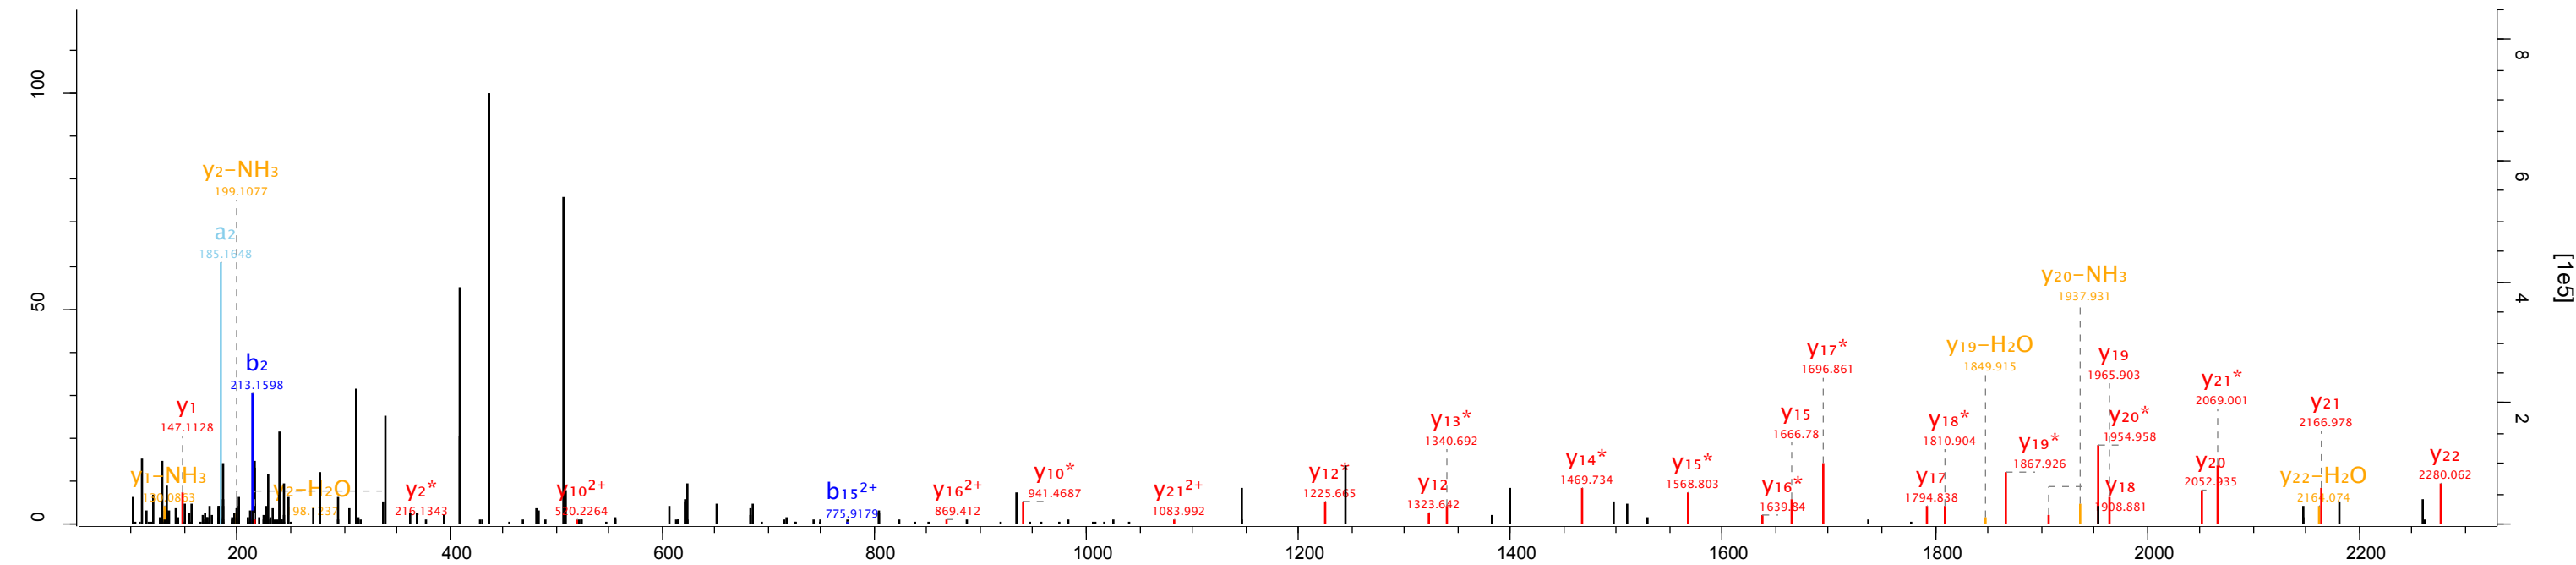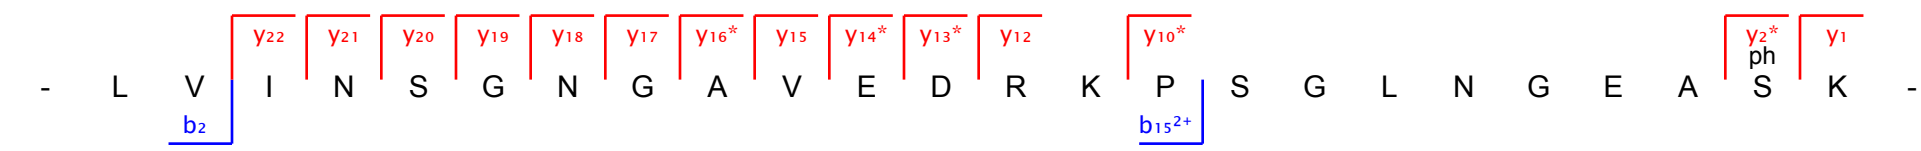

Raw file: 20150814\_A375SR\_Phospho\_BR2\_07  
 Scan: 11849 Method: FTMS; HCD Score: 216.26 m/z: 775.84 Gene names: PTMA

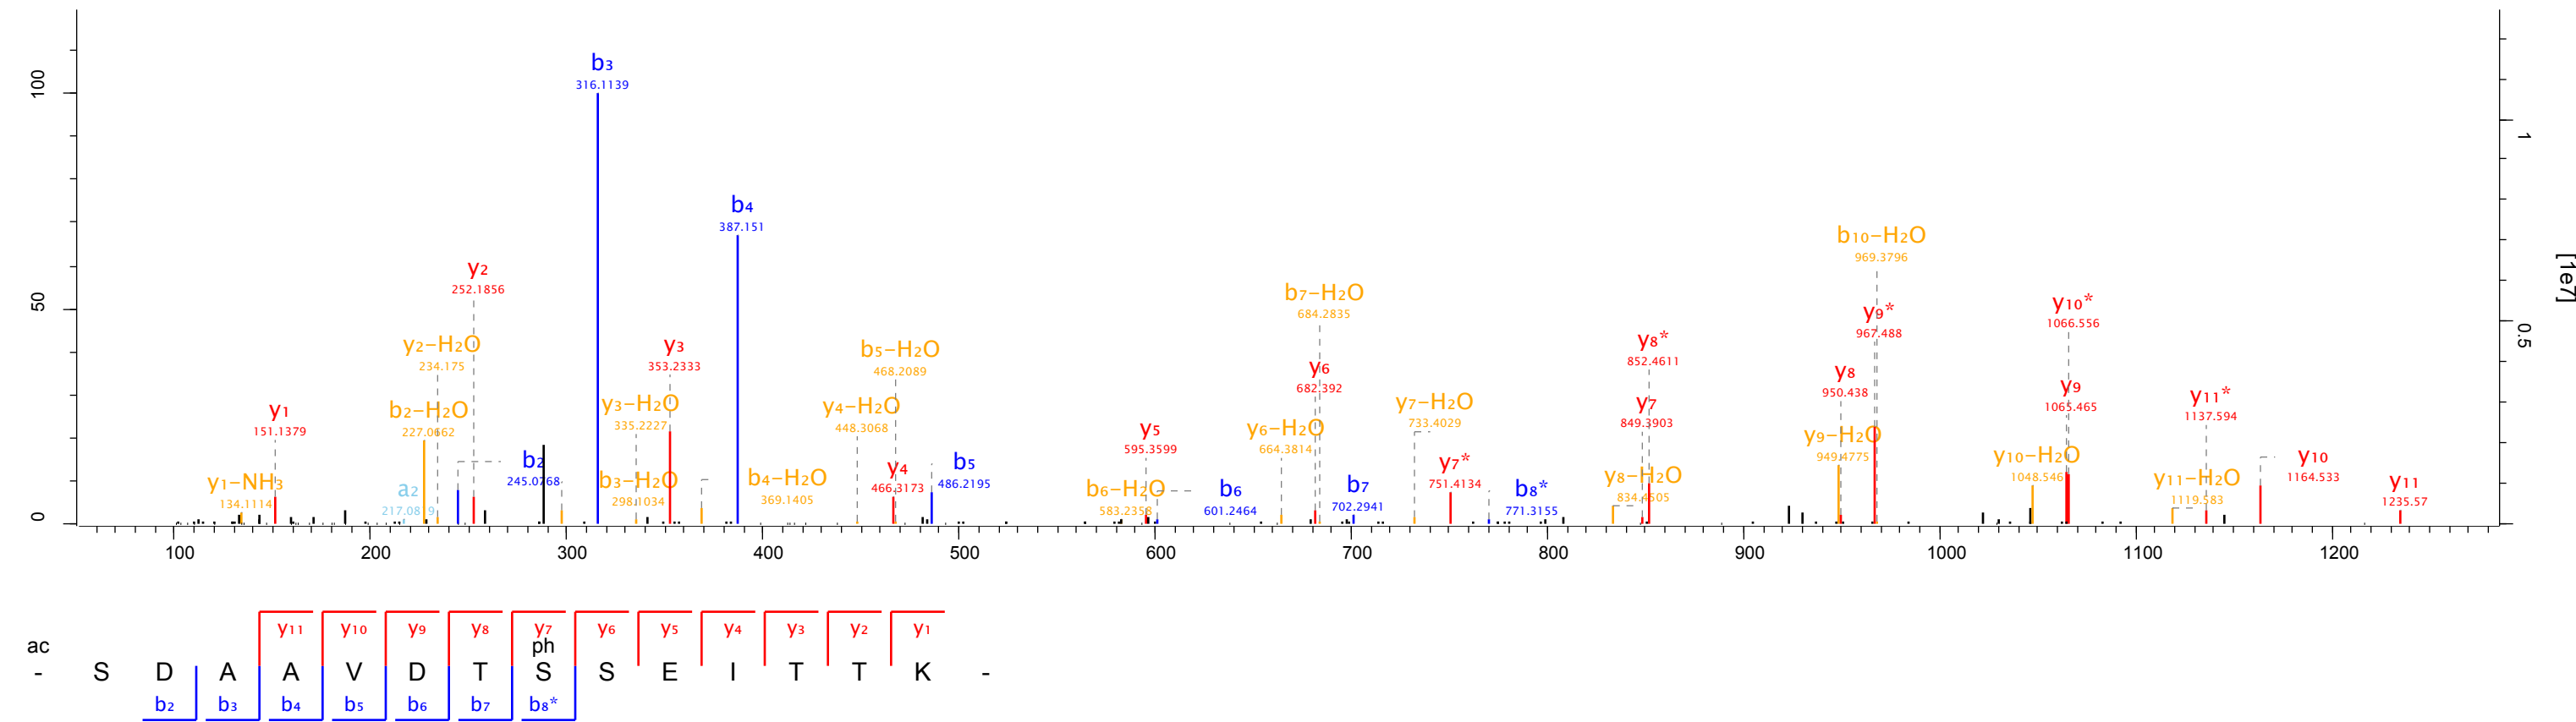

Raw file 20150814\_A375SR\_Phospho\_BR2\_07 Scan 12529 Method FTMS; HCD Score 174.65 m/z 820.47 Gene names PDLIM5

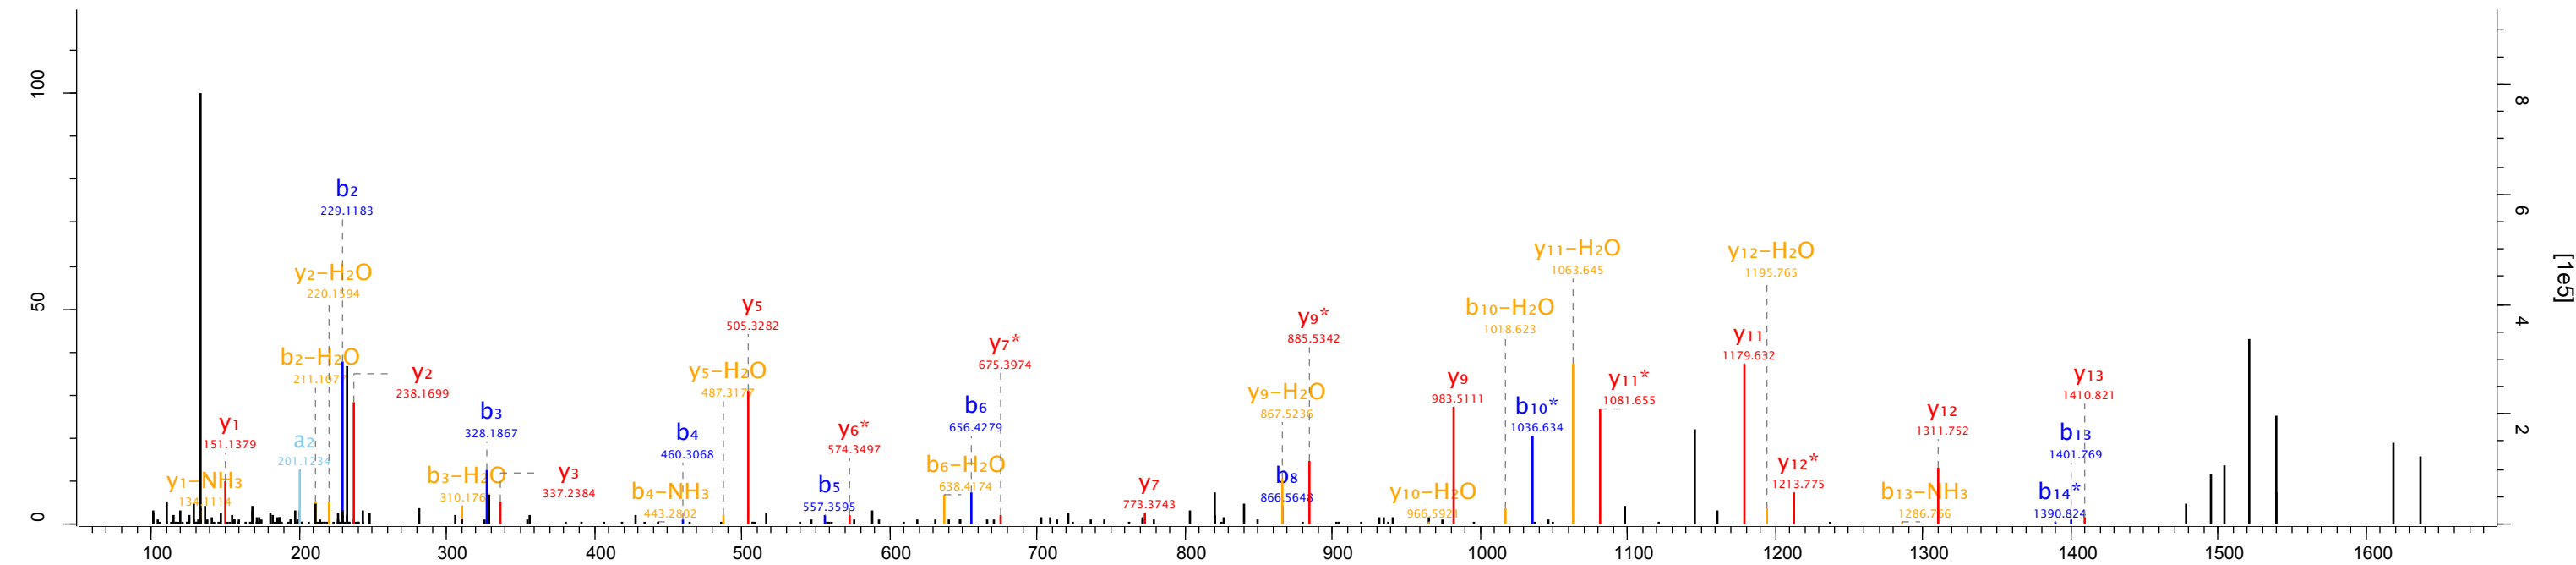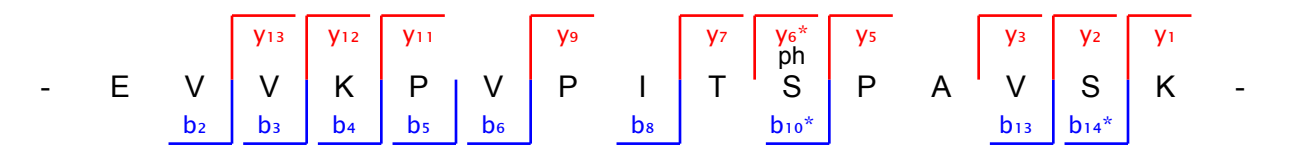

Raw file 20150814\_A375SR\_Phospho\_BR2\_07 Scan 13979 Method FTMS; HCD Score 116 m/z 700.83 Gene names MED1

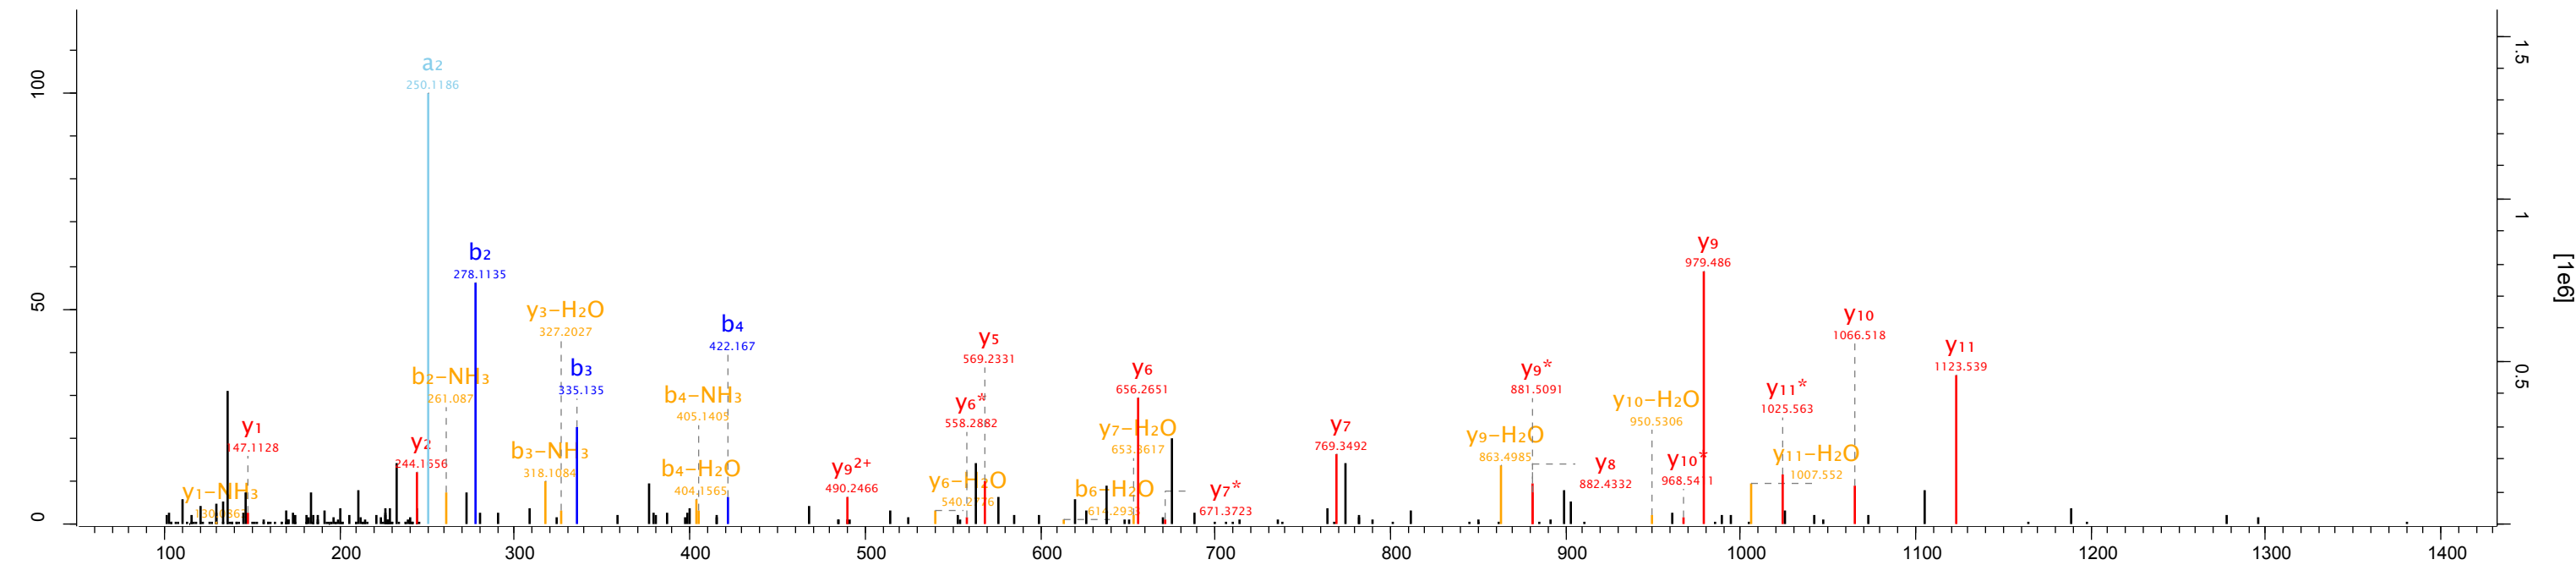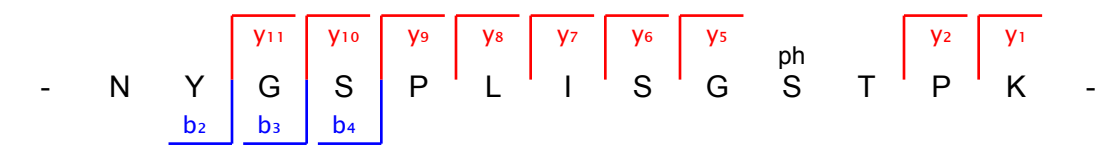

Raw file: 20150814\_A375SR\_Phospho\_BR2\_07  
 Scan: 14179 Method: FTMS; HCD Score: 98.3 m/z: 762.05 Gene names: CDR2L

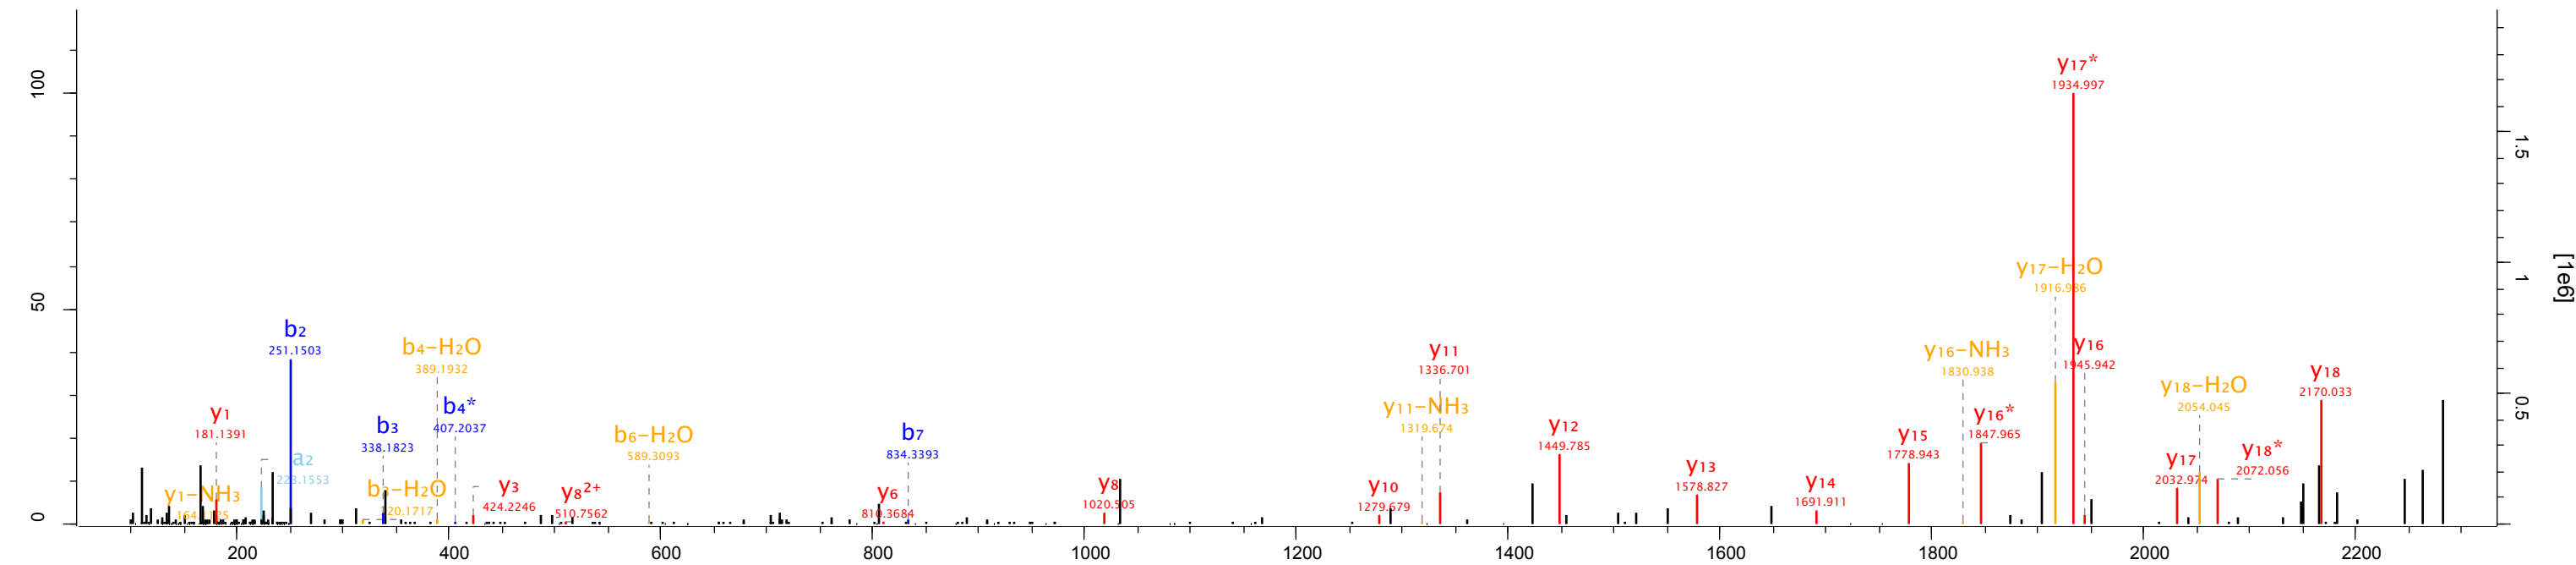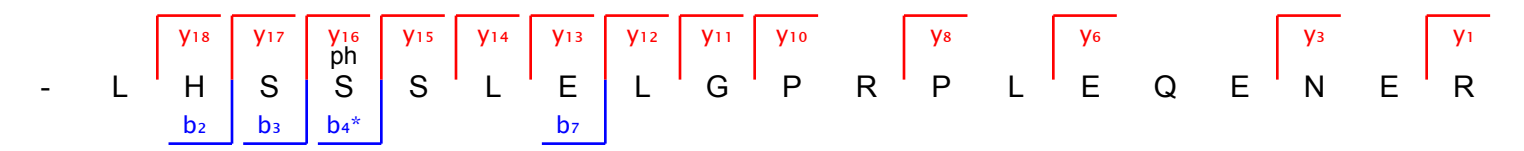

Raw file 20150814\_A375SR\_Phospho\_BR2\_07 Scan 15279 Method FTMS; HCD Score 159.84 m/z 853.92 Gene names CHAF1A

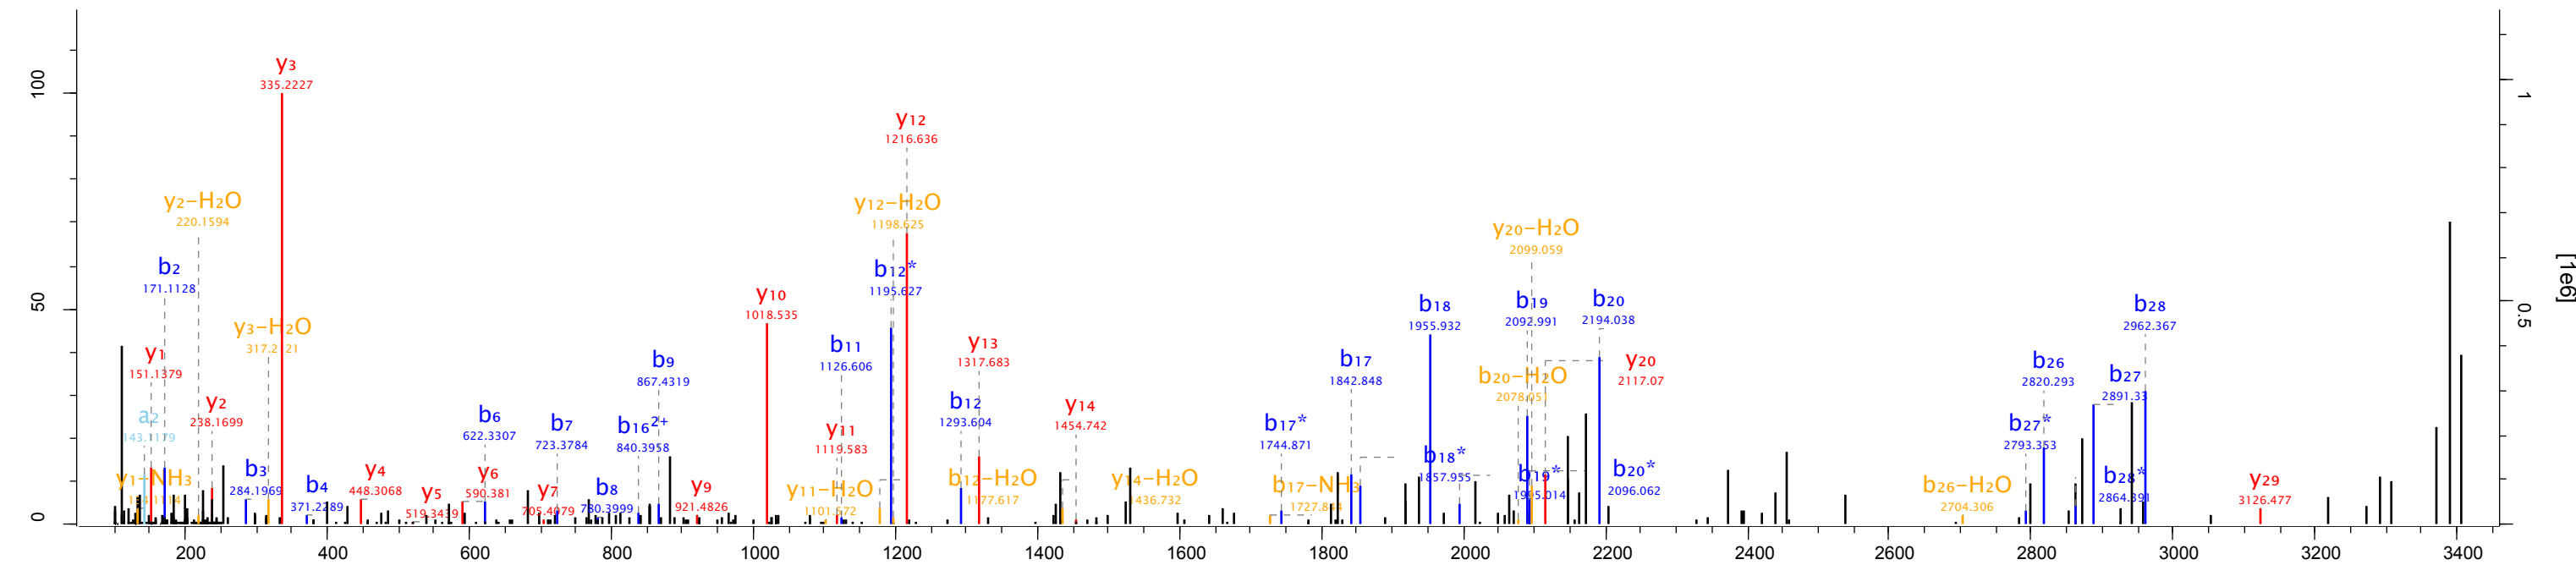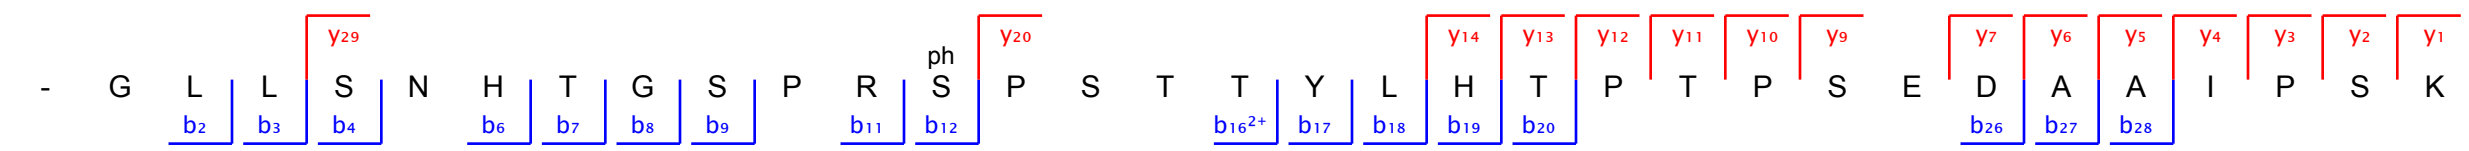

Raw file 20150814\_A375SR\_Phospho\_BR2\_07 Scan 15779 Method FTMS; HCD Score 117.83 m/z 883.76 Gene names DCTN2

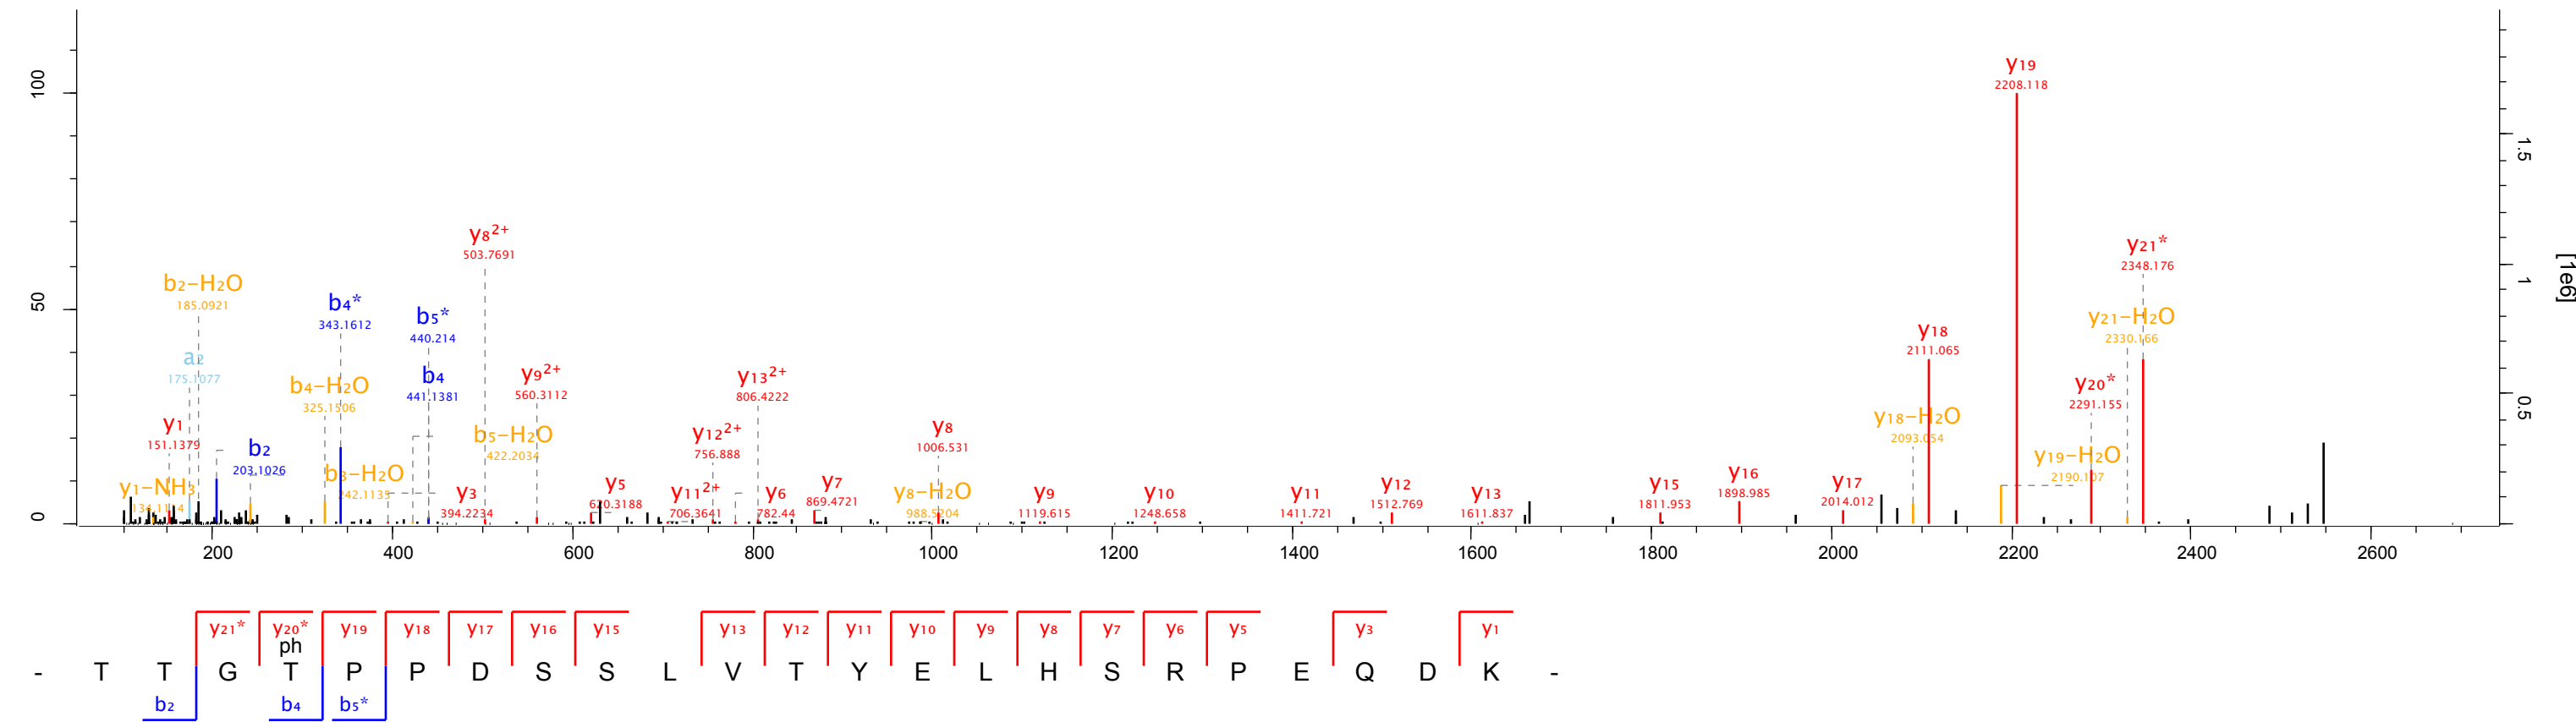



Raw file 20150814\_A375SR\_Phospho\_BR2\_07 Scan 16269 Method FTMS; HCD Score 100.7 m/z 743.61 Gene names AMOTL2

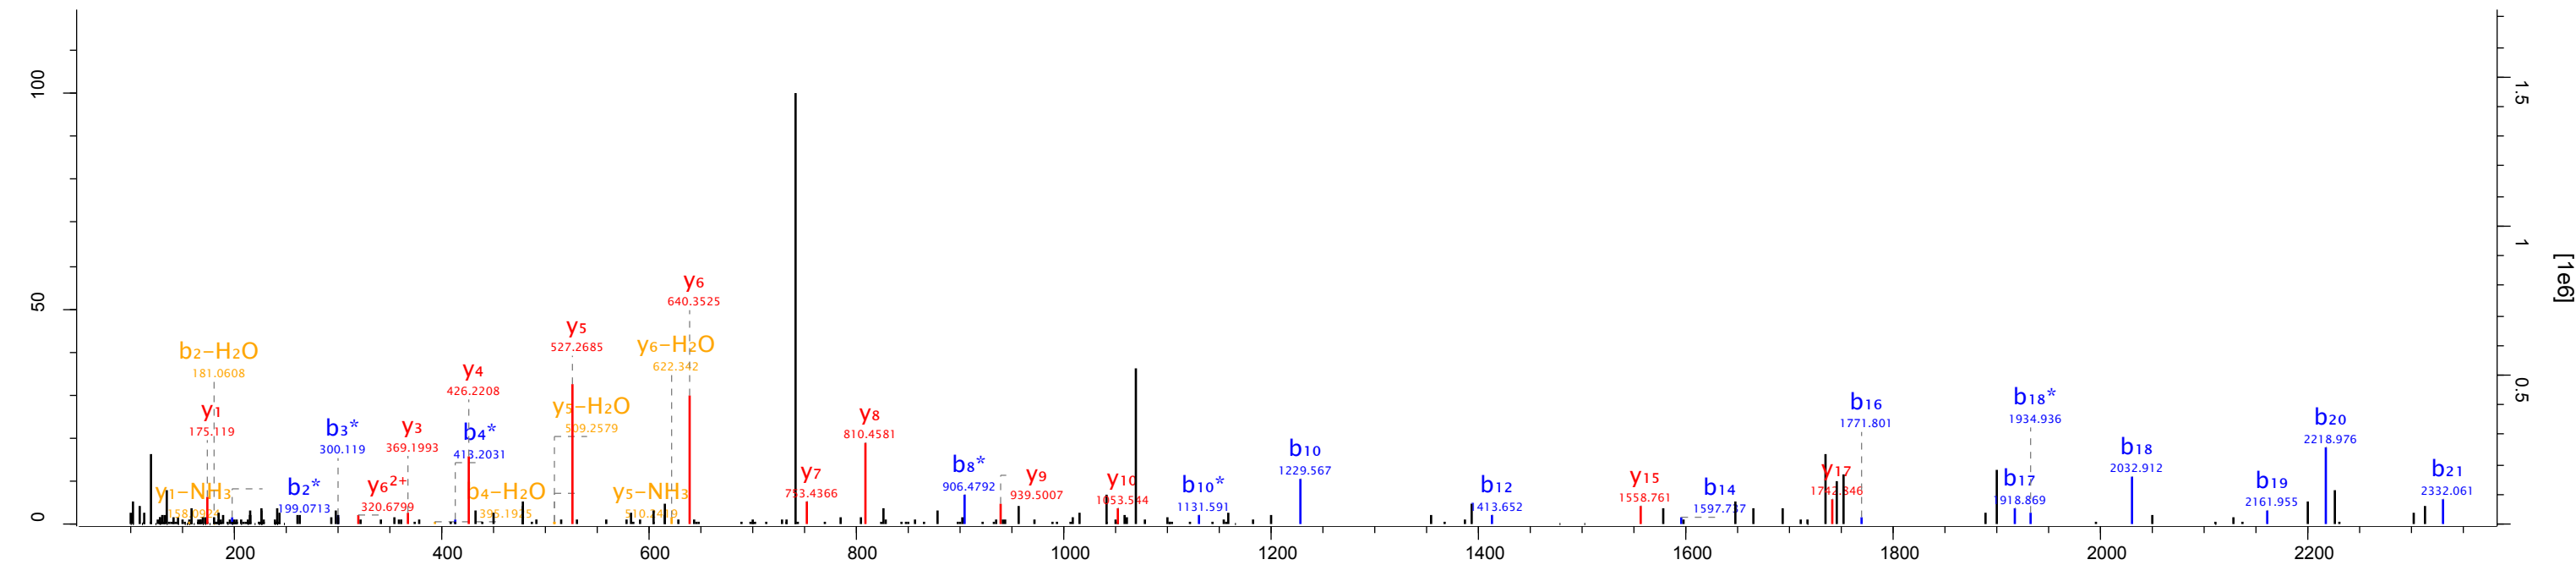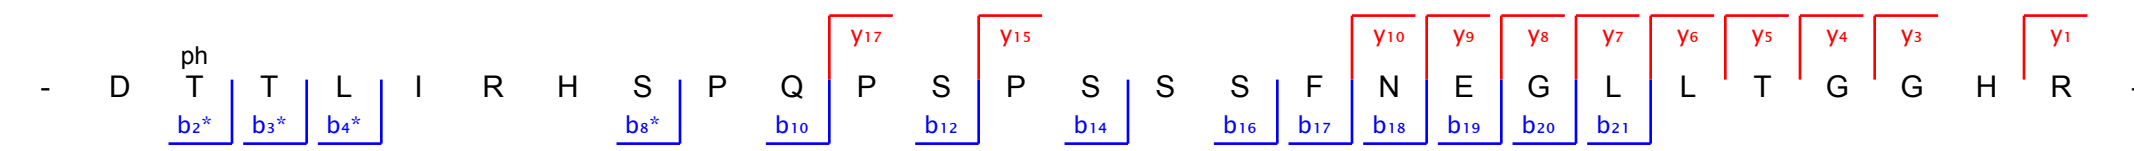

Raw file: 20150814\_A375SR\_Phospho\_BR2\_07  
 Scan: 17039 Method: FTMS; HCD Score: 57.79 m/z: 597.81 Gene names: MKI67

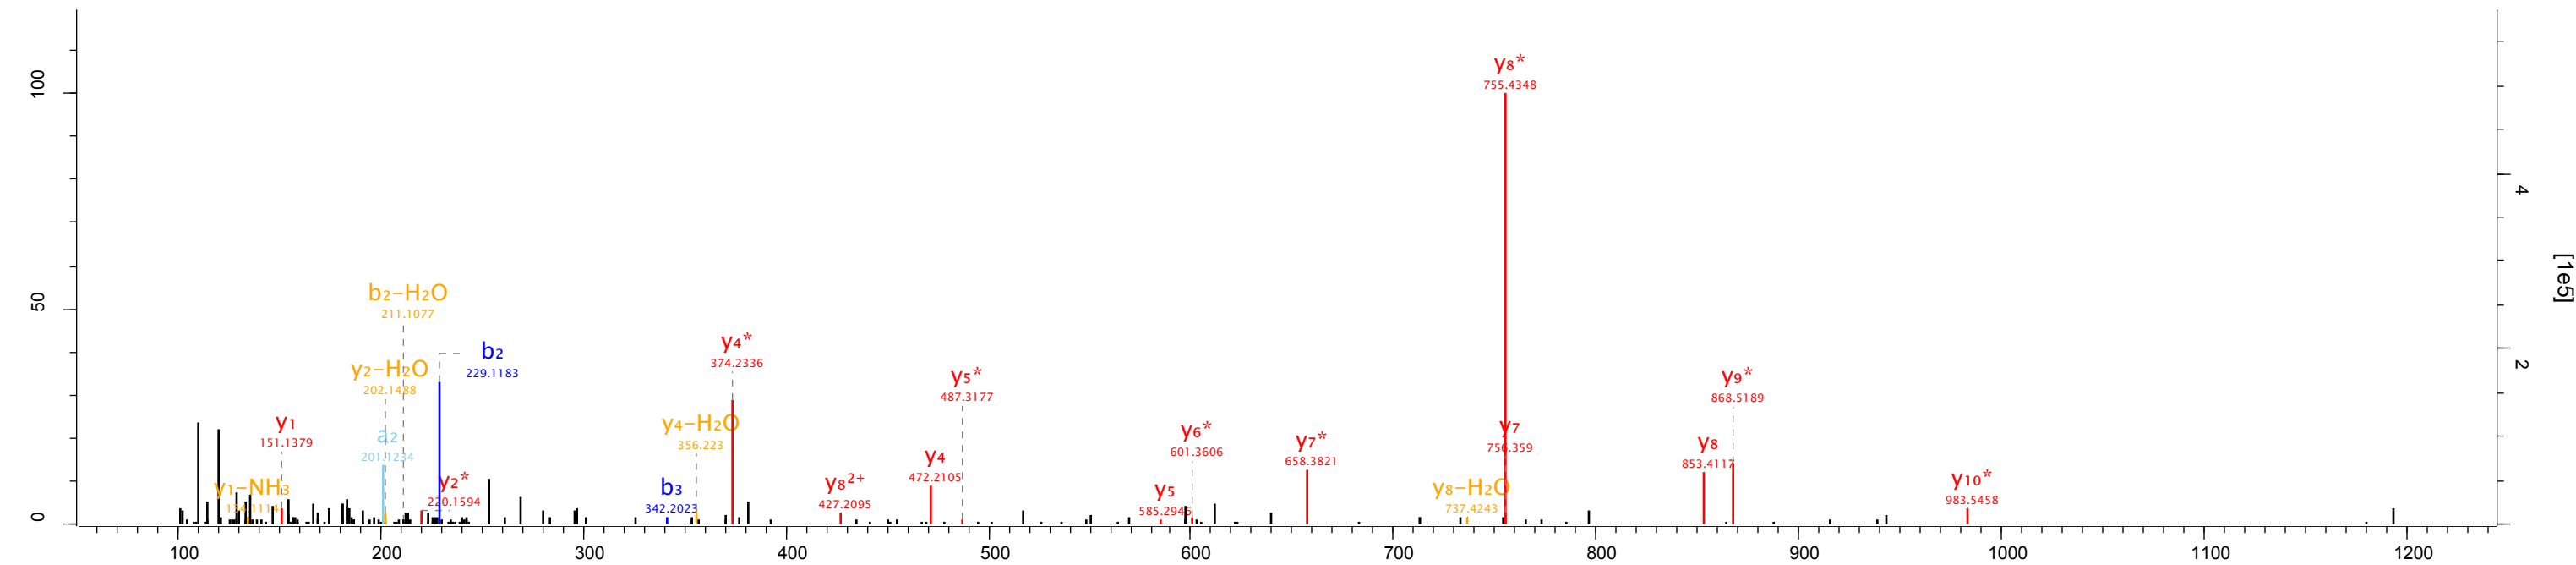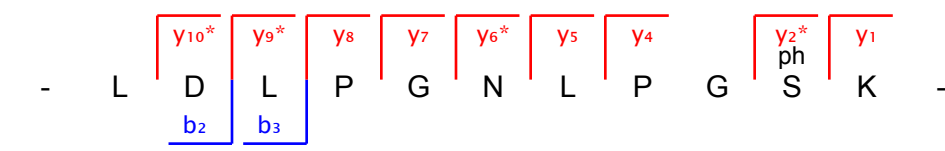

Raw file: 20150814\_A375SR\_Phospho\_BR2\_07  
 Scan: 1809 Method: FTMS; HCD Score: 205.66 m/z: 662.29 Gene names: BABAM1

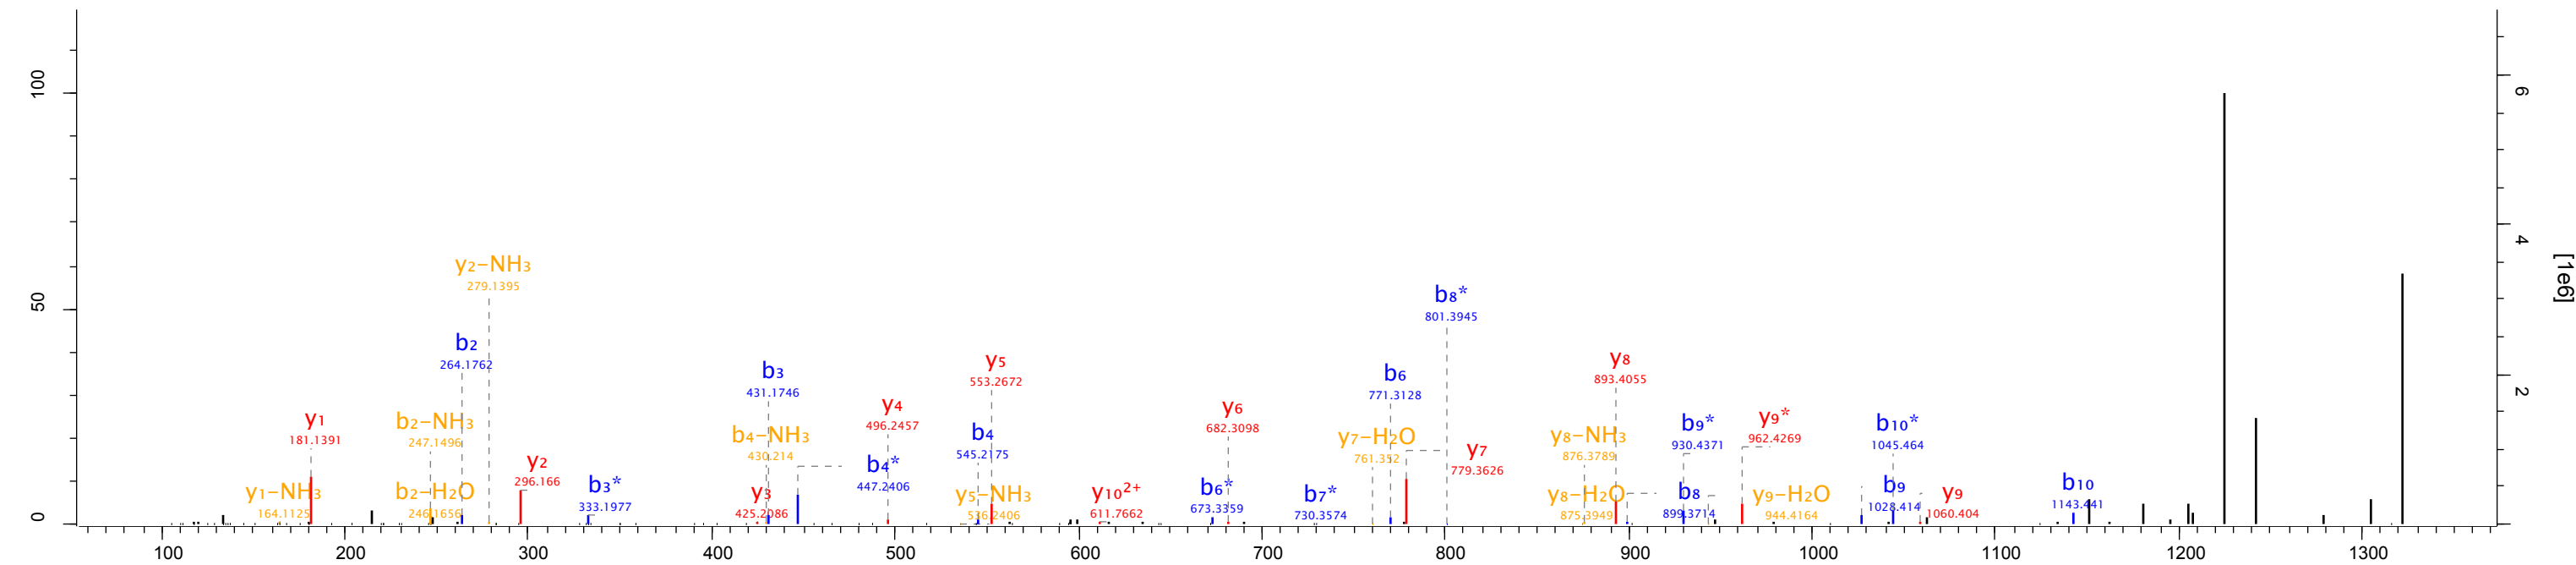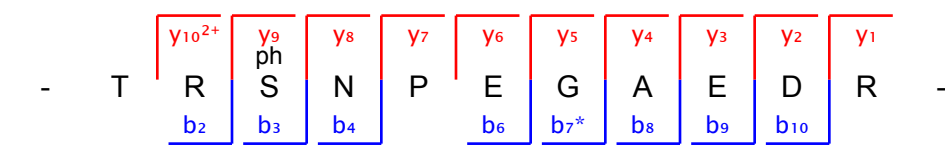

Raw file 20150814\_A375SR\_Phospho\_BR2\_07 Scan 19159 Method FTMS; HCD Score 95.32 m/z 790.37 Gene names FTSJ1

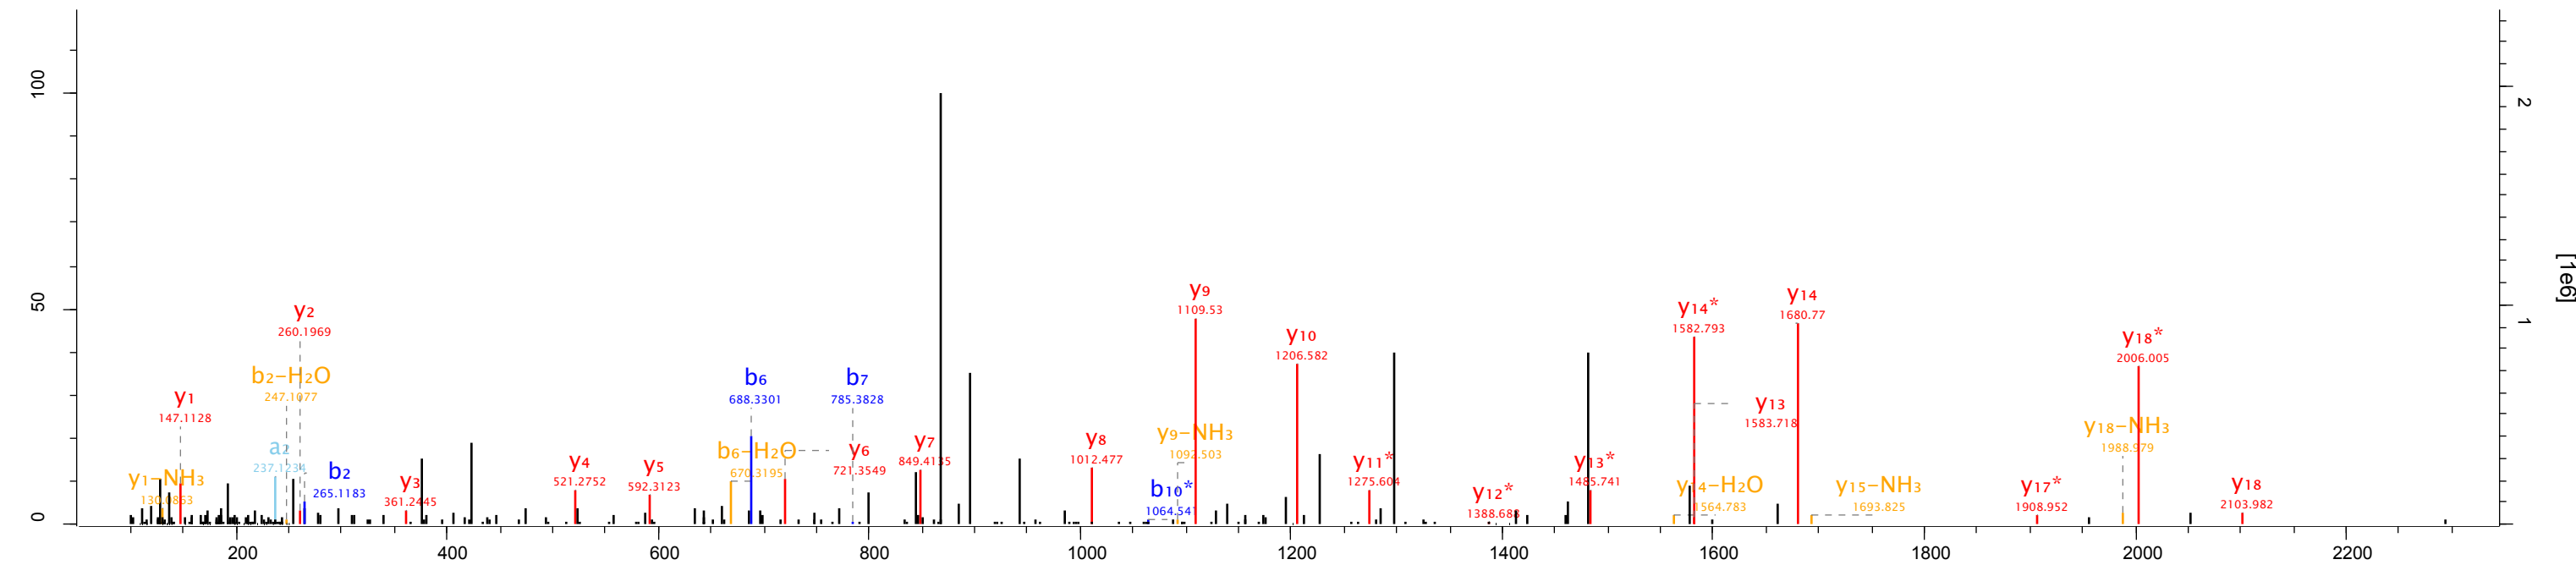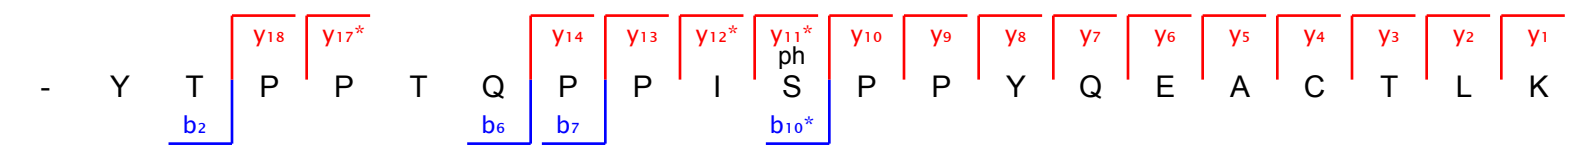

Raw file: 20150814\_A375SR\_Phospho\_BR2\_07  
 Scan: 20399 Method: FTMS; HCD Score: 107.04 m/z: 929.11 Gene names: TOP2A

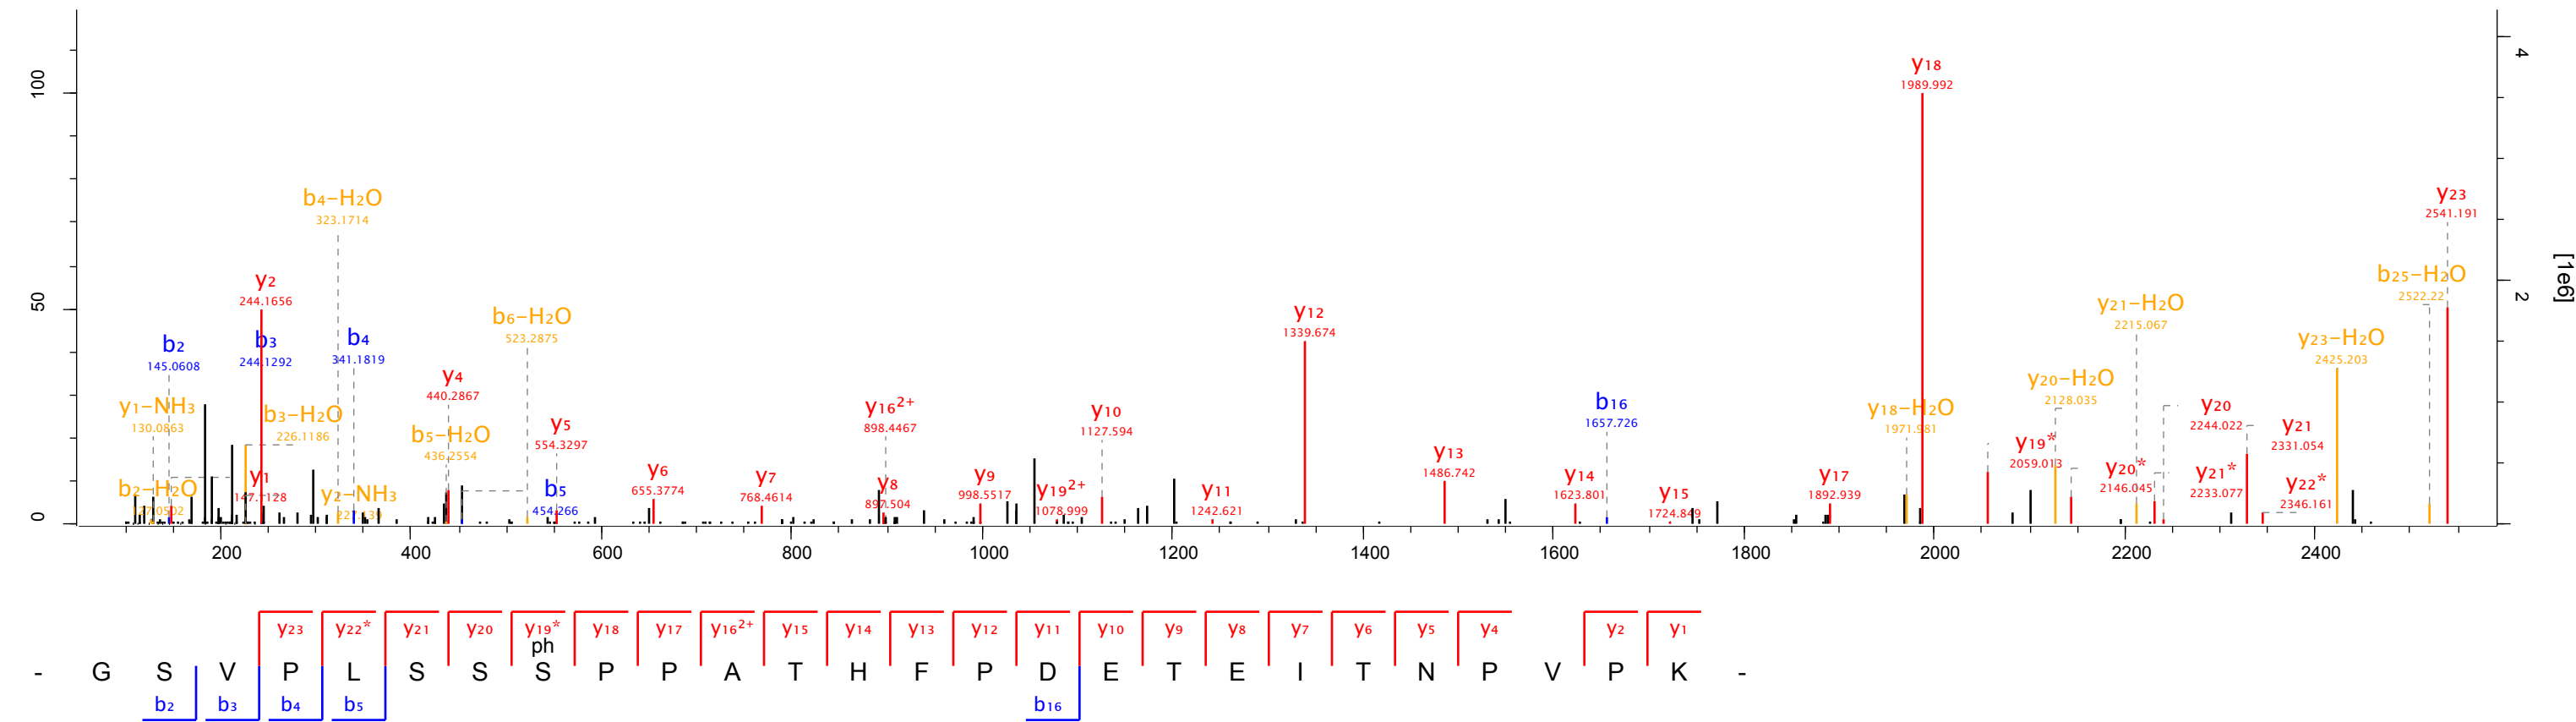

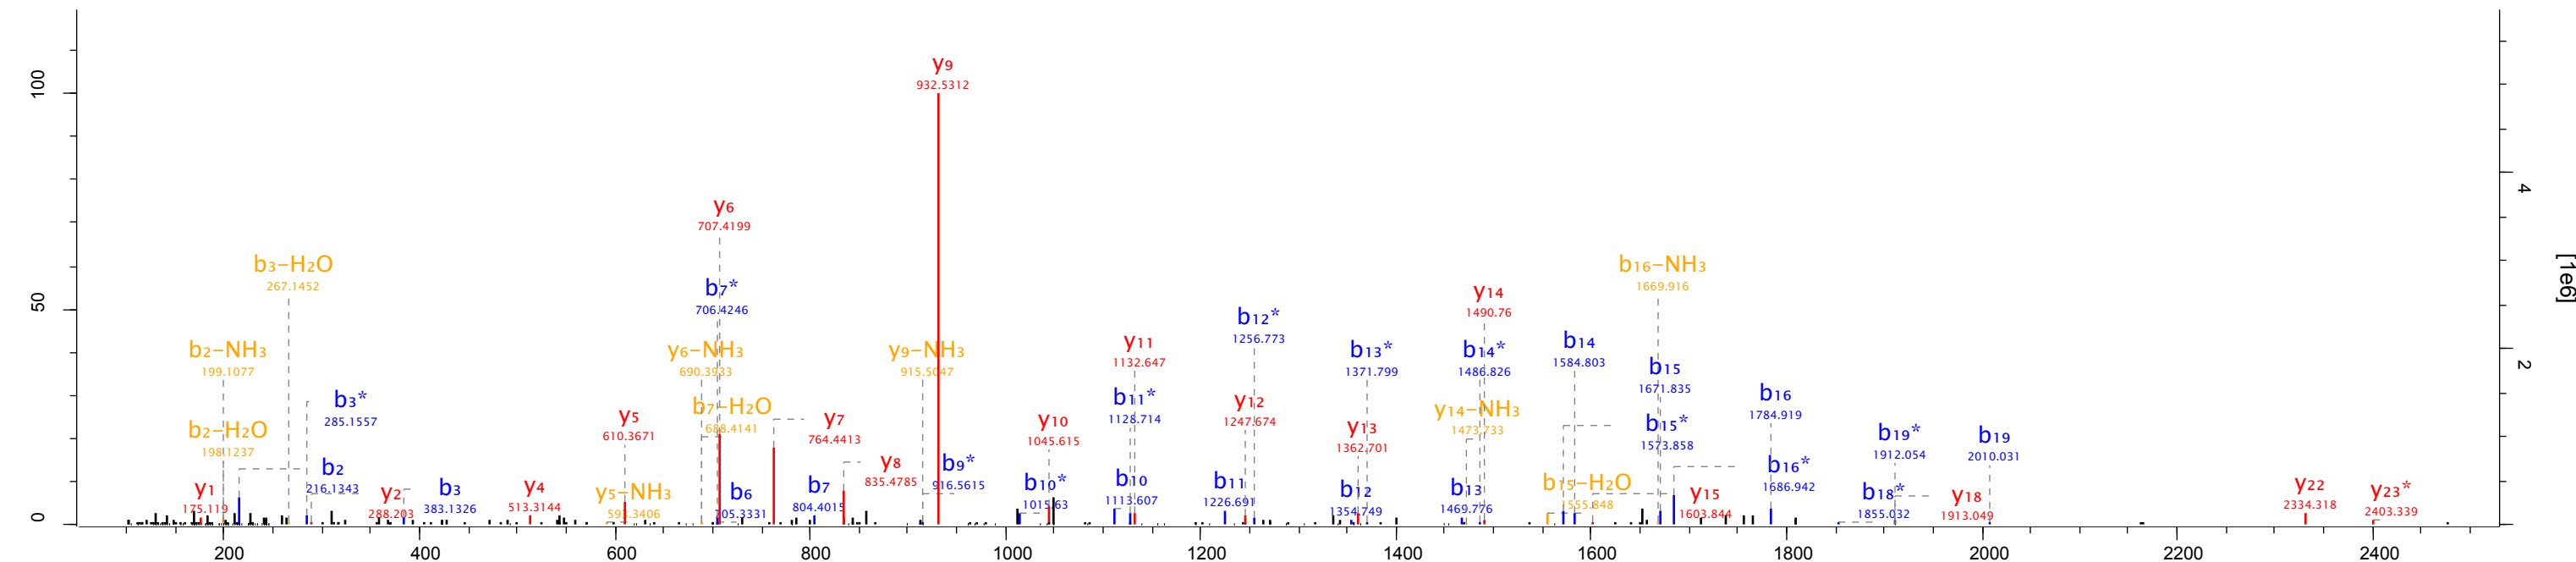

- S K  $\begin{matrix} \text{y}_{23}^* \\ \text{ph} \\ \text{S} \end{matrix}$   $\text{y}_{22}$  P P K V P I V  $\begin{matrix} \text{y}_{15} \\ \text{I} \end{matrix}$   $\begin{matrix} \text{y}_{14} \\ \text{Q} \end{matrix}$   $\begin{matrix} \text{y}_{13} \\ \text{D} \end{matrix}$   $\begin{matrix} \text{y}_{12} \\ \text{D} \end{matrix}$   $\begin{matrix} \text{y}_{11} \\ \text{S} \end{matrix}$   $\begin{matrix} \text{y}_{10} \\ \text{L} \end{matrix}$  P  $\begin{matrix} \text{y}_9 \\ \text{A} \end{matrix}$   $\begin{matrix} \text{y}_8 \\ \text{G} \end{matrix}$  P  $\begin{matrix} \text{y}_6 \\ \text{P} \end{matrix}$   $\begin{matrix} \text{y}_5 \\ \text{P} \end{matrix}$   $\begin{matrix} \text{y}_4 \\ \text{P} \end{matrix}$  Q  $\begin{matrix} \text{y}_2 \\ \text{I} \end{matrix}$   $\begin{matrix} \text{y}_1 \\ \text{R} \end{matrix}$  -

$\text{b}_2$   $\text{b}_3$   $\text{b}_6$   $\text{b}_7$   $\text{b}_9^*$   $\text{b}_{10}$   $\text{b}_{11}$   $\text{b}_{12}$   $\text{b}_{13}$   $\text{b}_{14}$   $\text{b}_{15}$   $\text{b}_{16}$   $\text{b}_{18}^*$   $\text{b}_{19}$

Raw file  
 20150814\_A375SR\_Phospho\_BR2\_07  
 Scan 22189 Method FTMS; HCD Score 102.55 m/z 957.78 Gene names PELP1

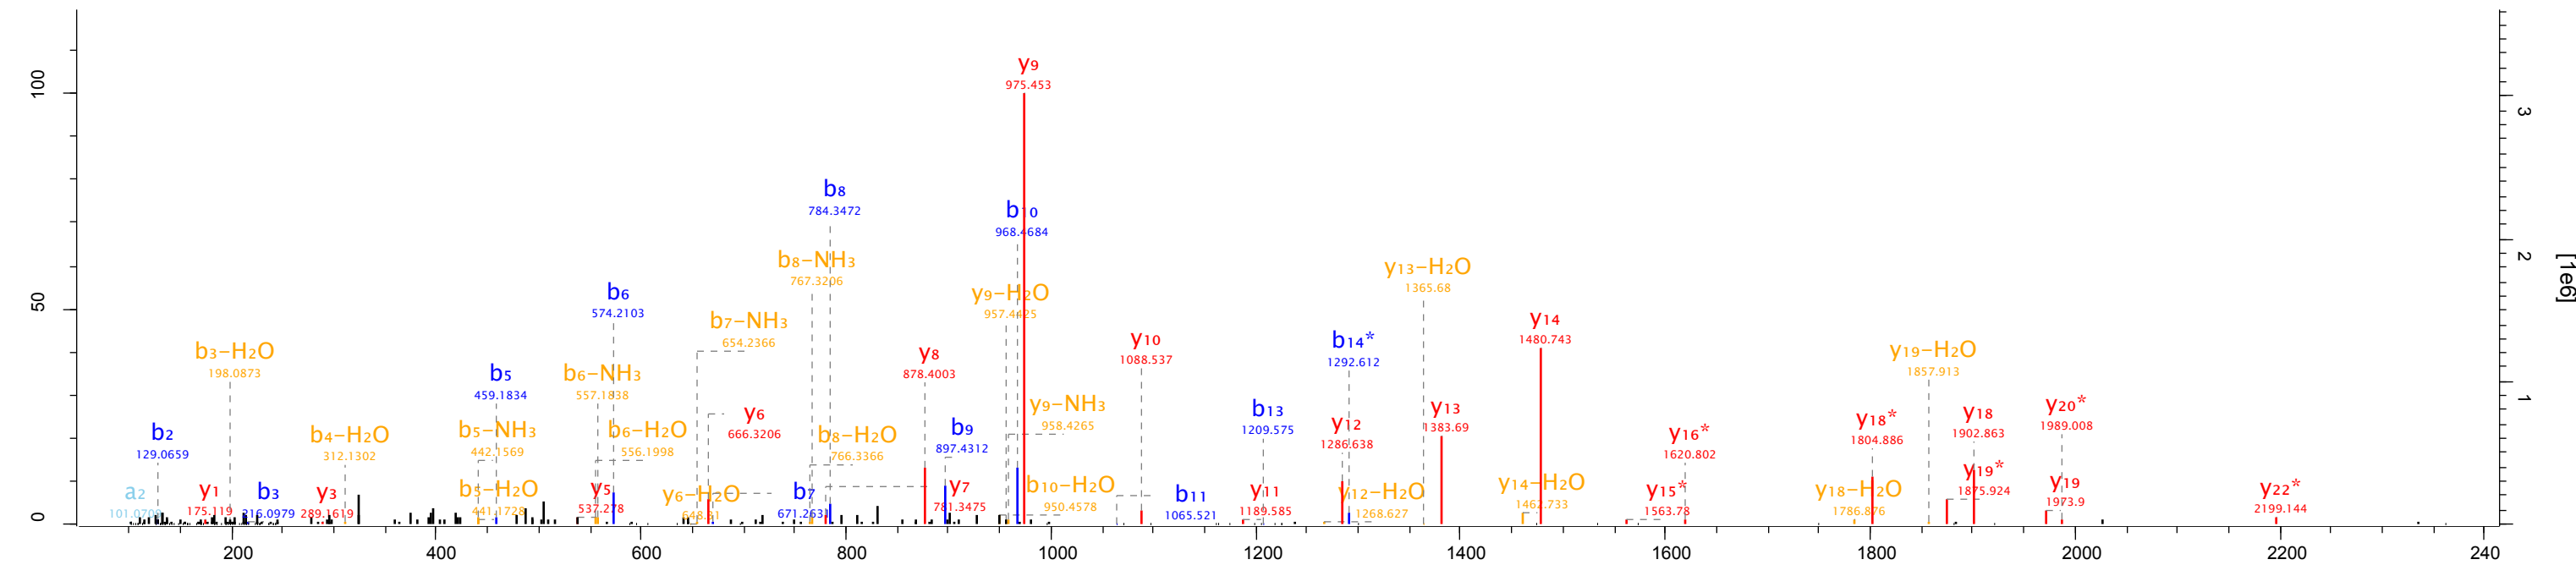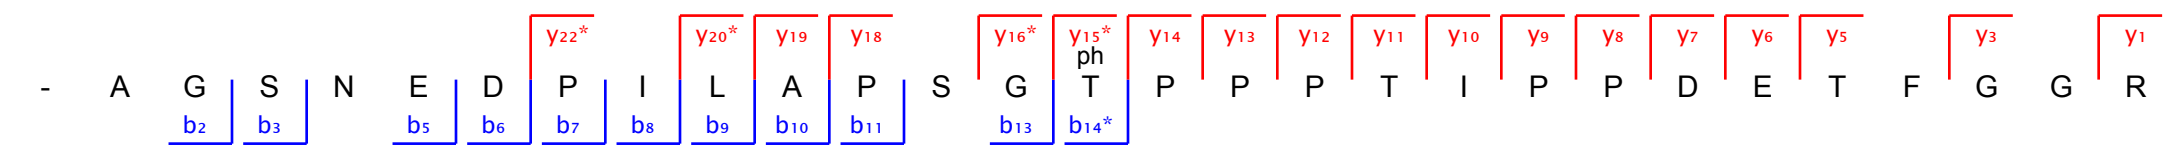

Raw file: 20150814\_A375SR\_Phospho\_BR2\_07  
 Scan: 2249 Method: FTMS; HCD Score: 148.82 m/z: 661.81 Gene names: CDC20

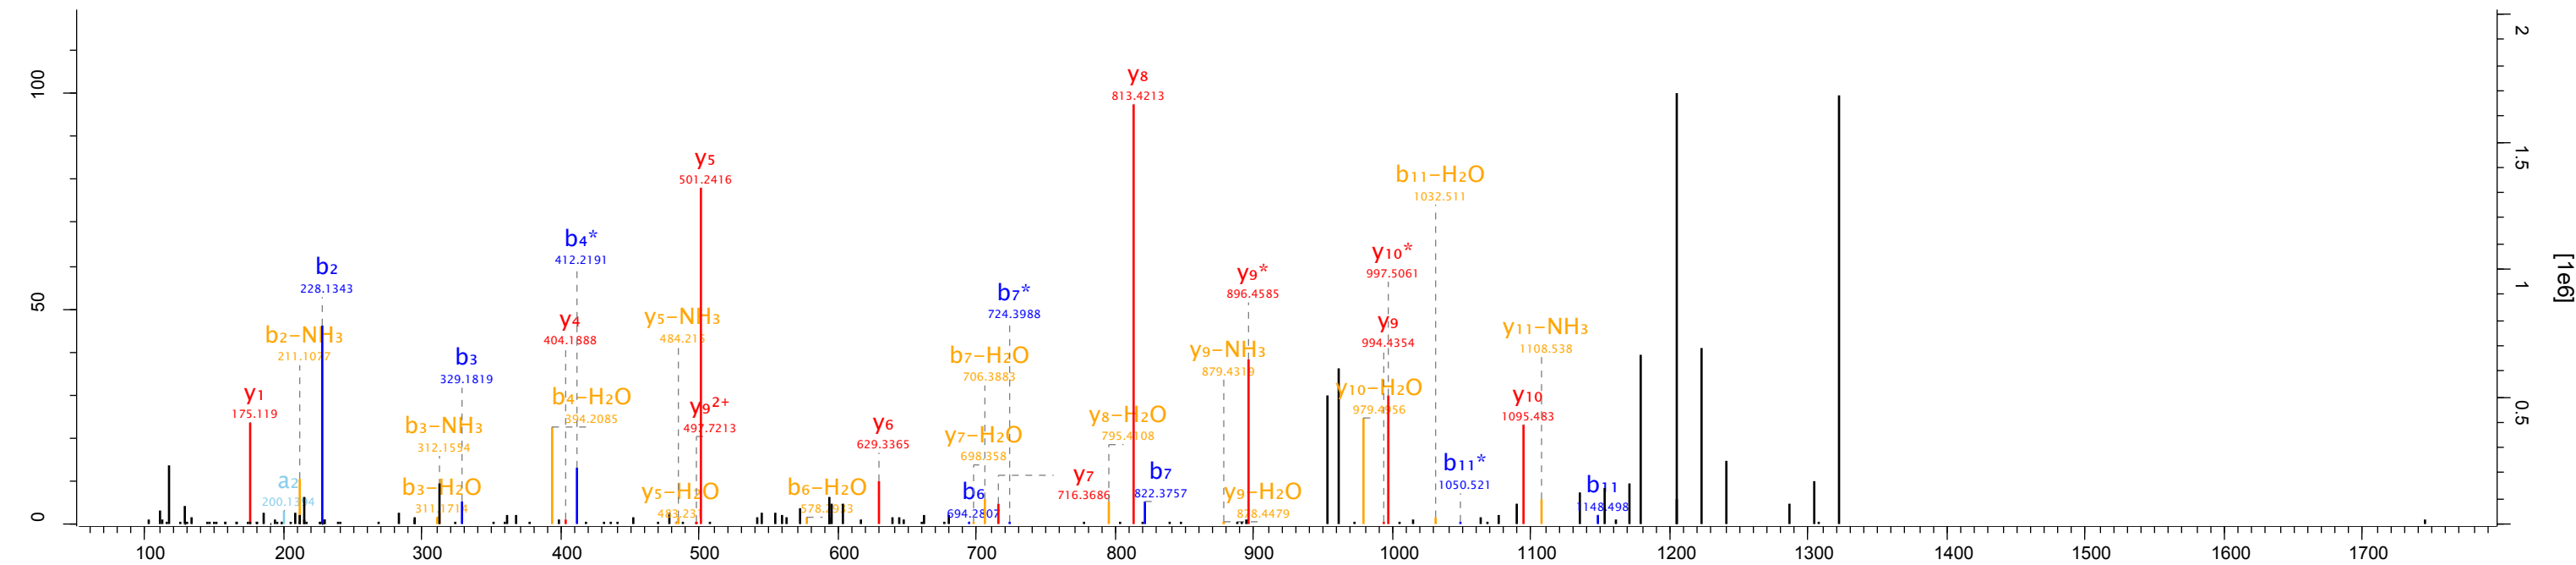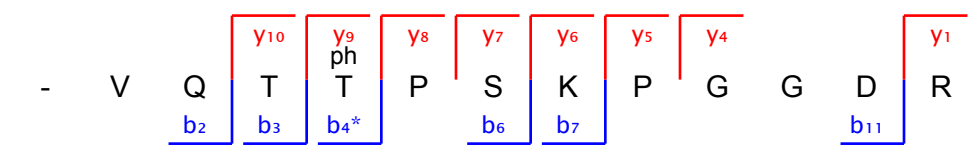



Raw file: 20150814\_A375SR\_Phospho\_BR2\_07  
 Scan: 2609 Method: FTMS; HCD Score: 115.33 m/z: 499.24 Gene names: SRRM2

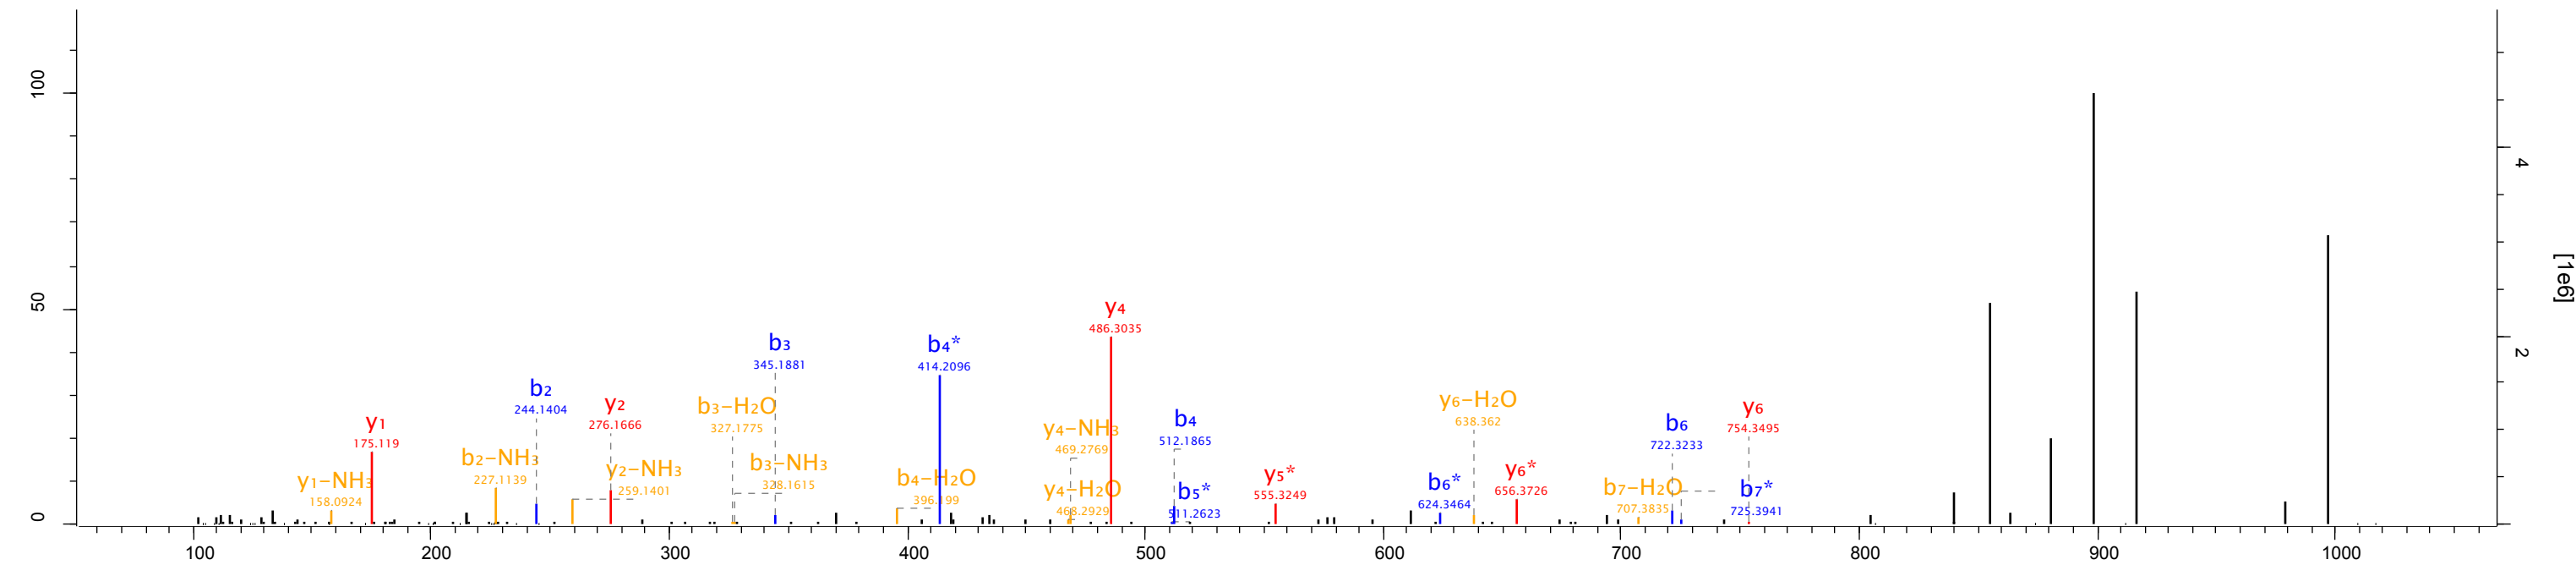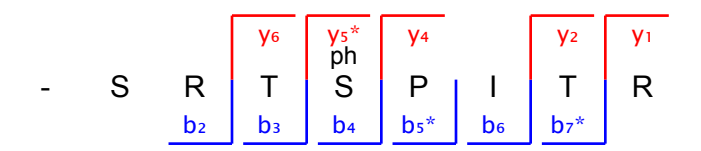

Raw file  
 20150814\_A375SR\_Phospho\_BR2\_07  
 Scan 3159 Method FTMS; HCD Score 44.31 m/z 467.24 Gene names RAI1

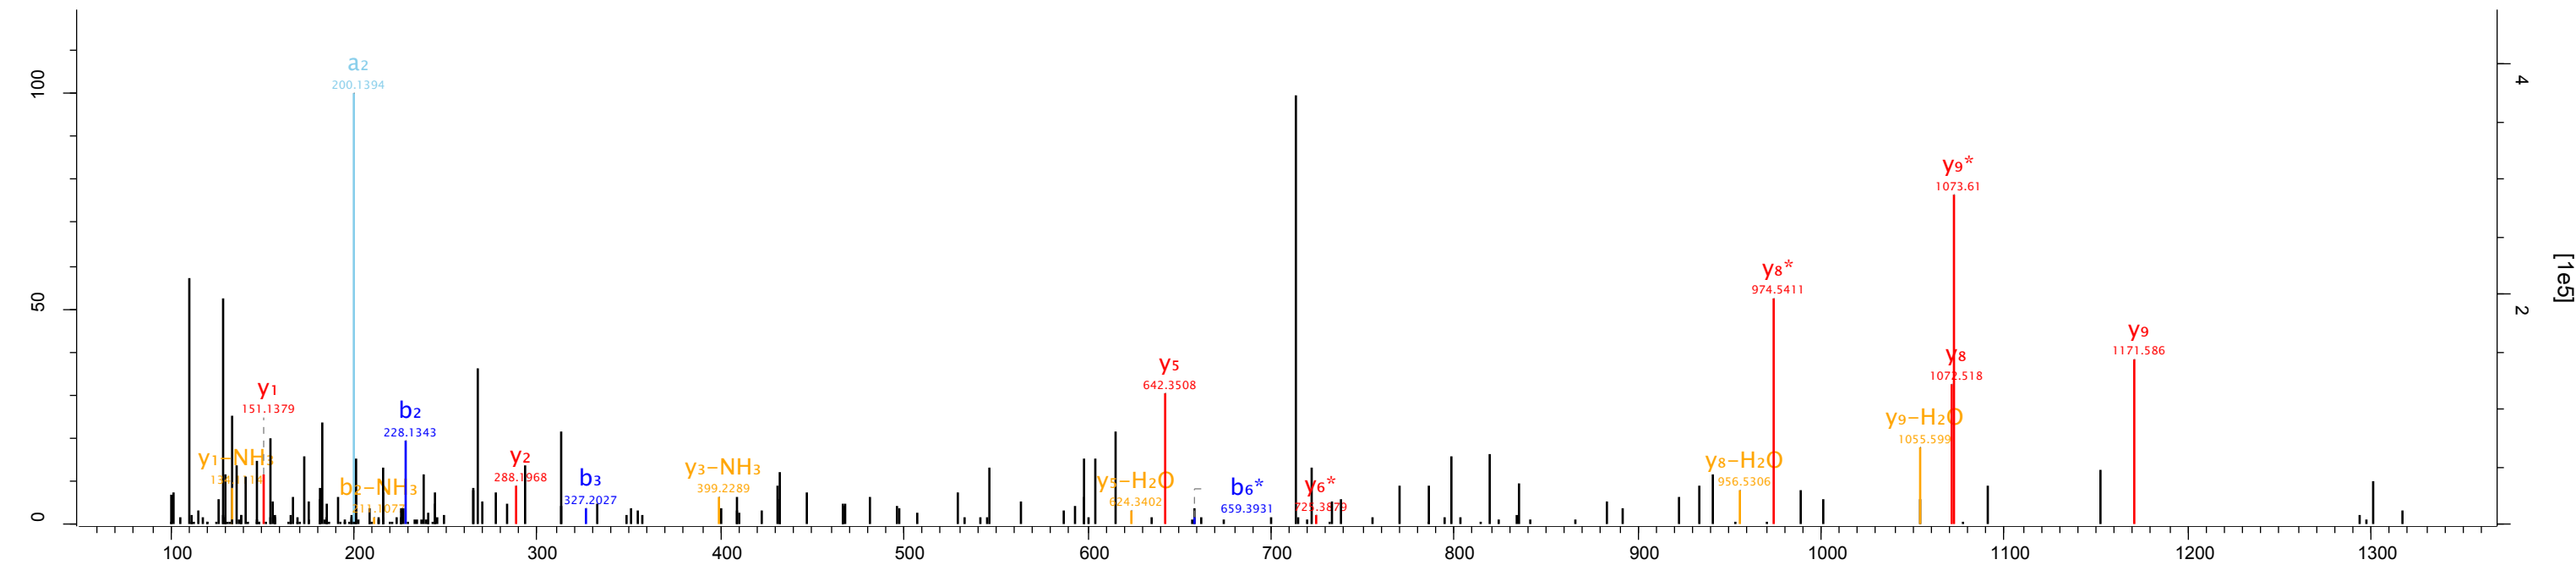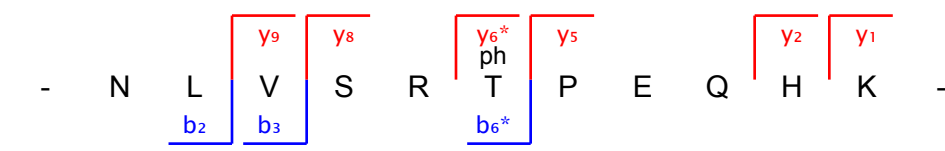

Raw file: 20150814\_A375SR\_Phospho\_BR2\_07  
 Scan: 3269 Method: FTMS; HCD Score: 122.29 m/z: 767.33 Gene names: DNMT1

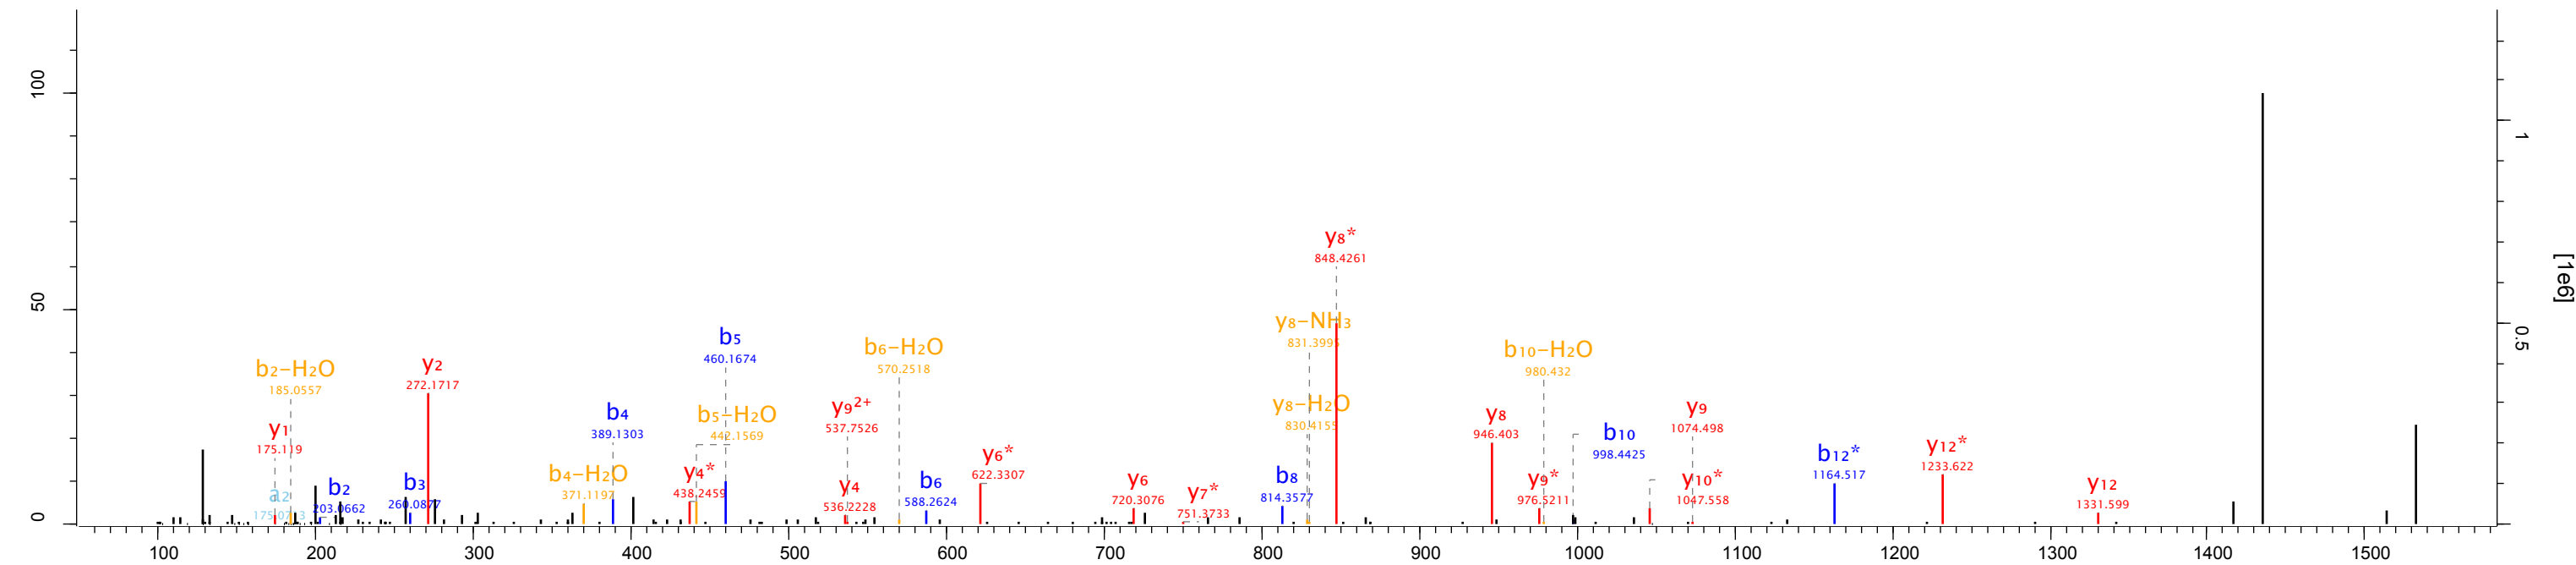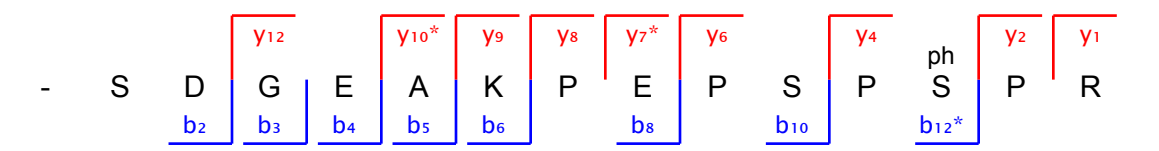

Raw file 20150814\_A375SR\_Phospho\_BR2\_07 Scan 3699 Method FTMS; HCD Score 98.57 m/z 741.32 Gene names RBMX2

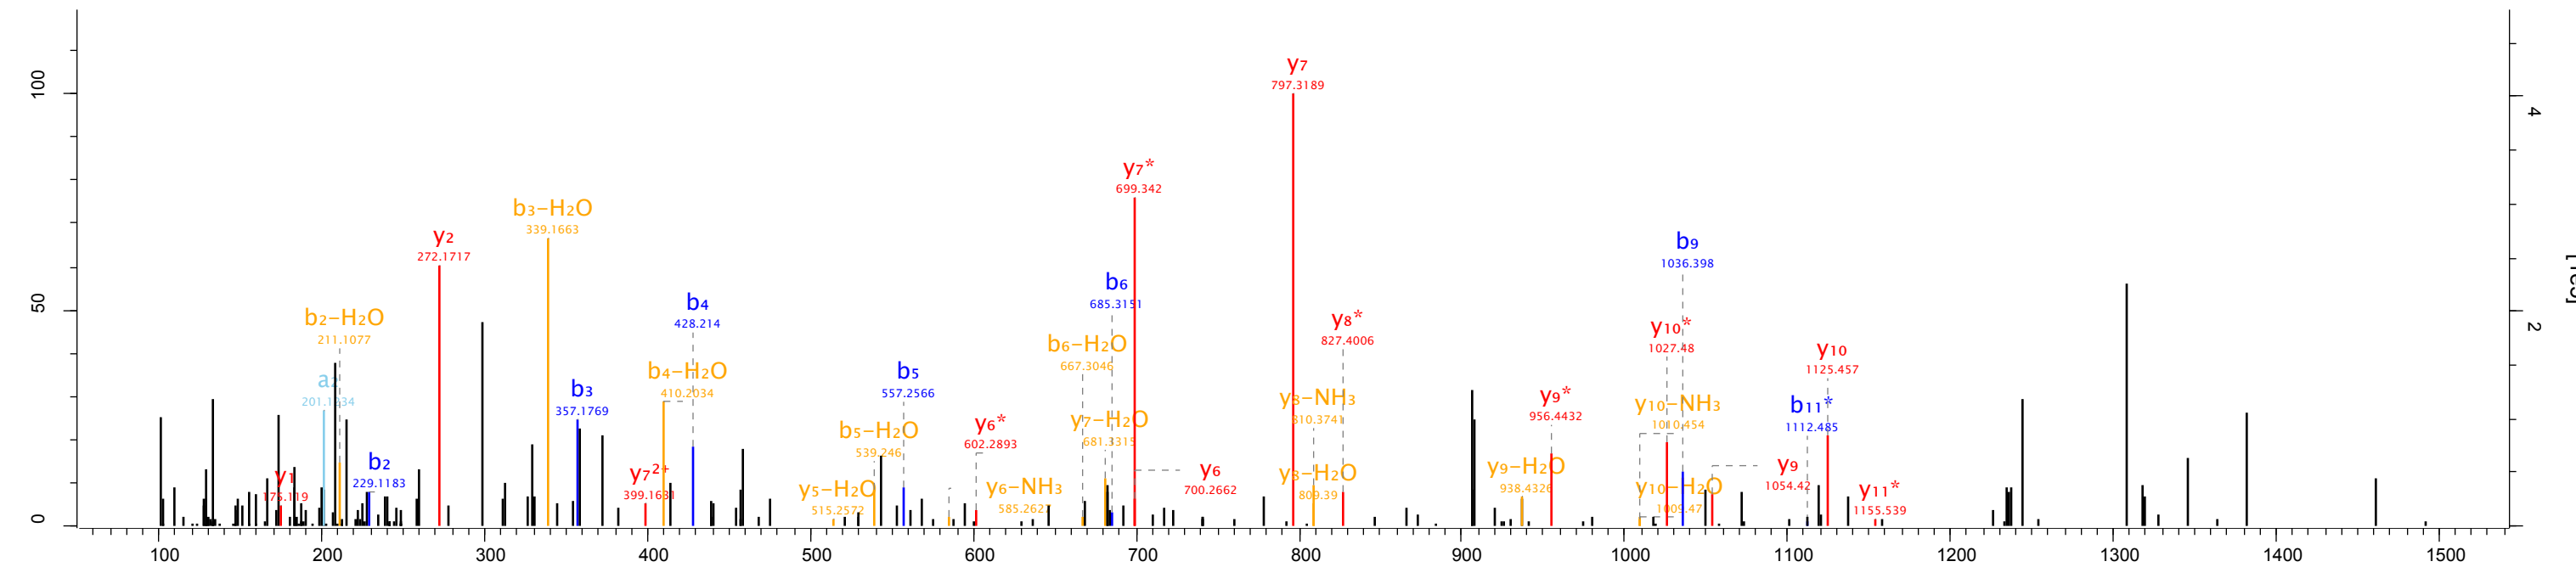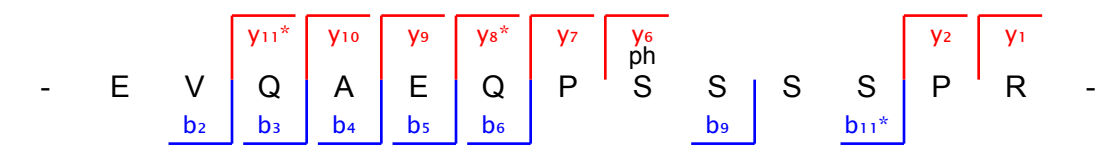

Raw file 20150814\_A375SR\_Phospho\_BR2\_07 Scan 3909 Method FTMS; HCD Score 92.7 m/z 627.8 Gene names FRA10AC1

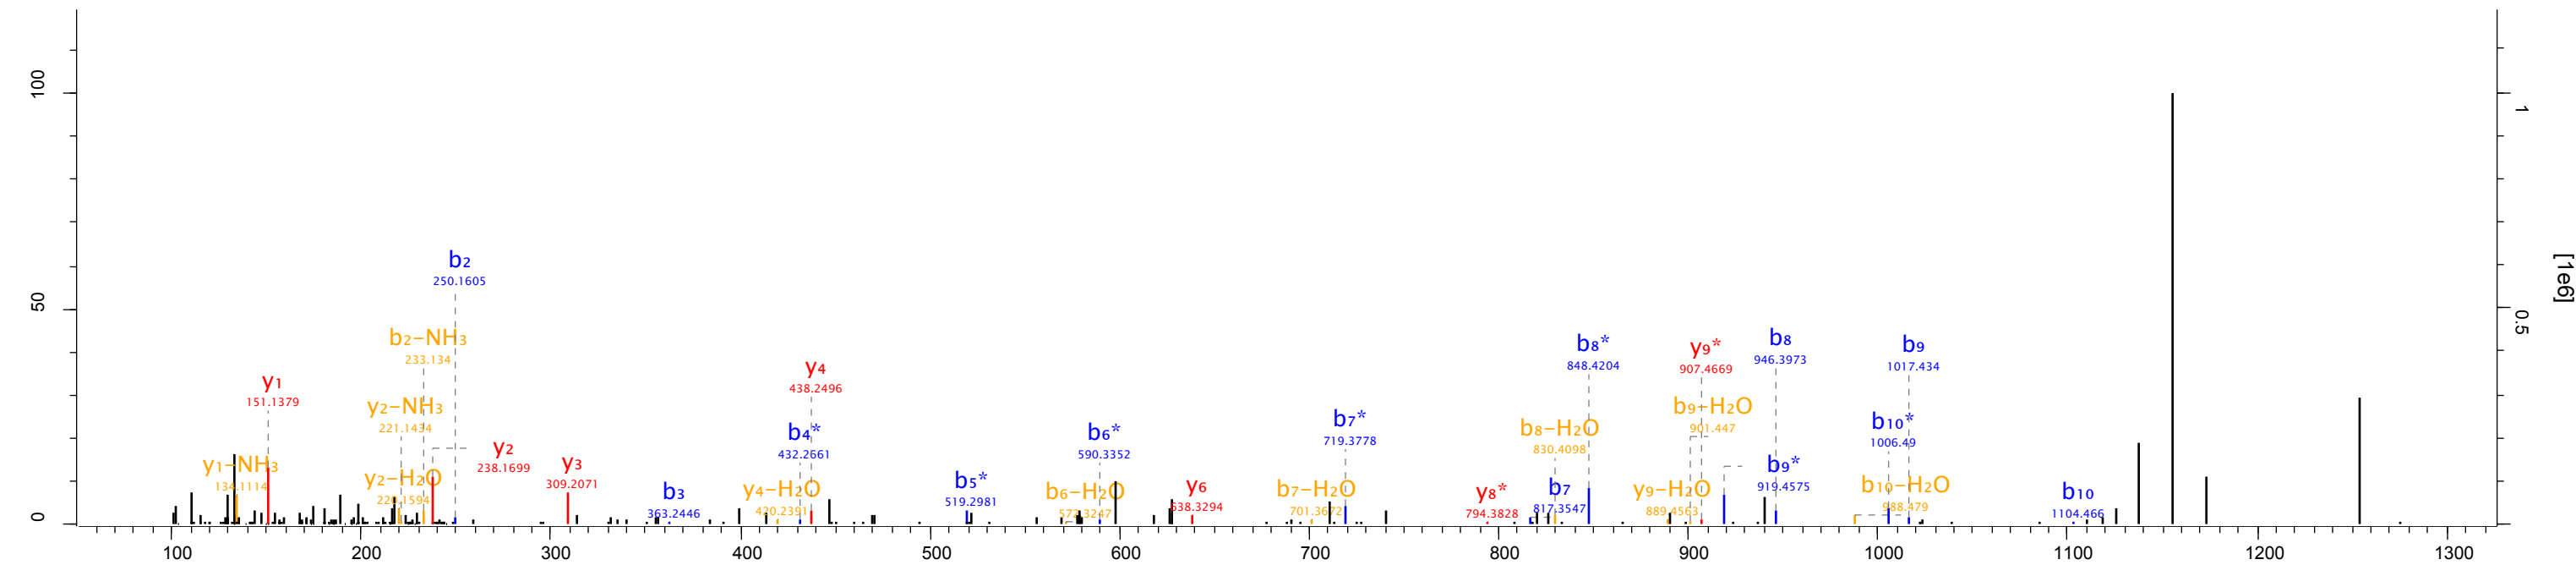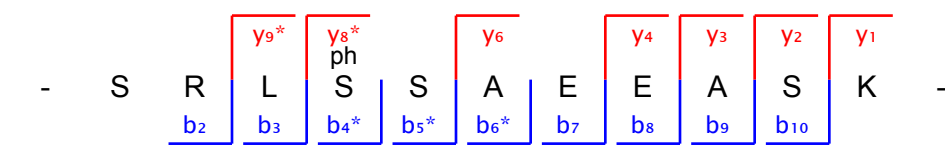

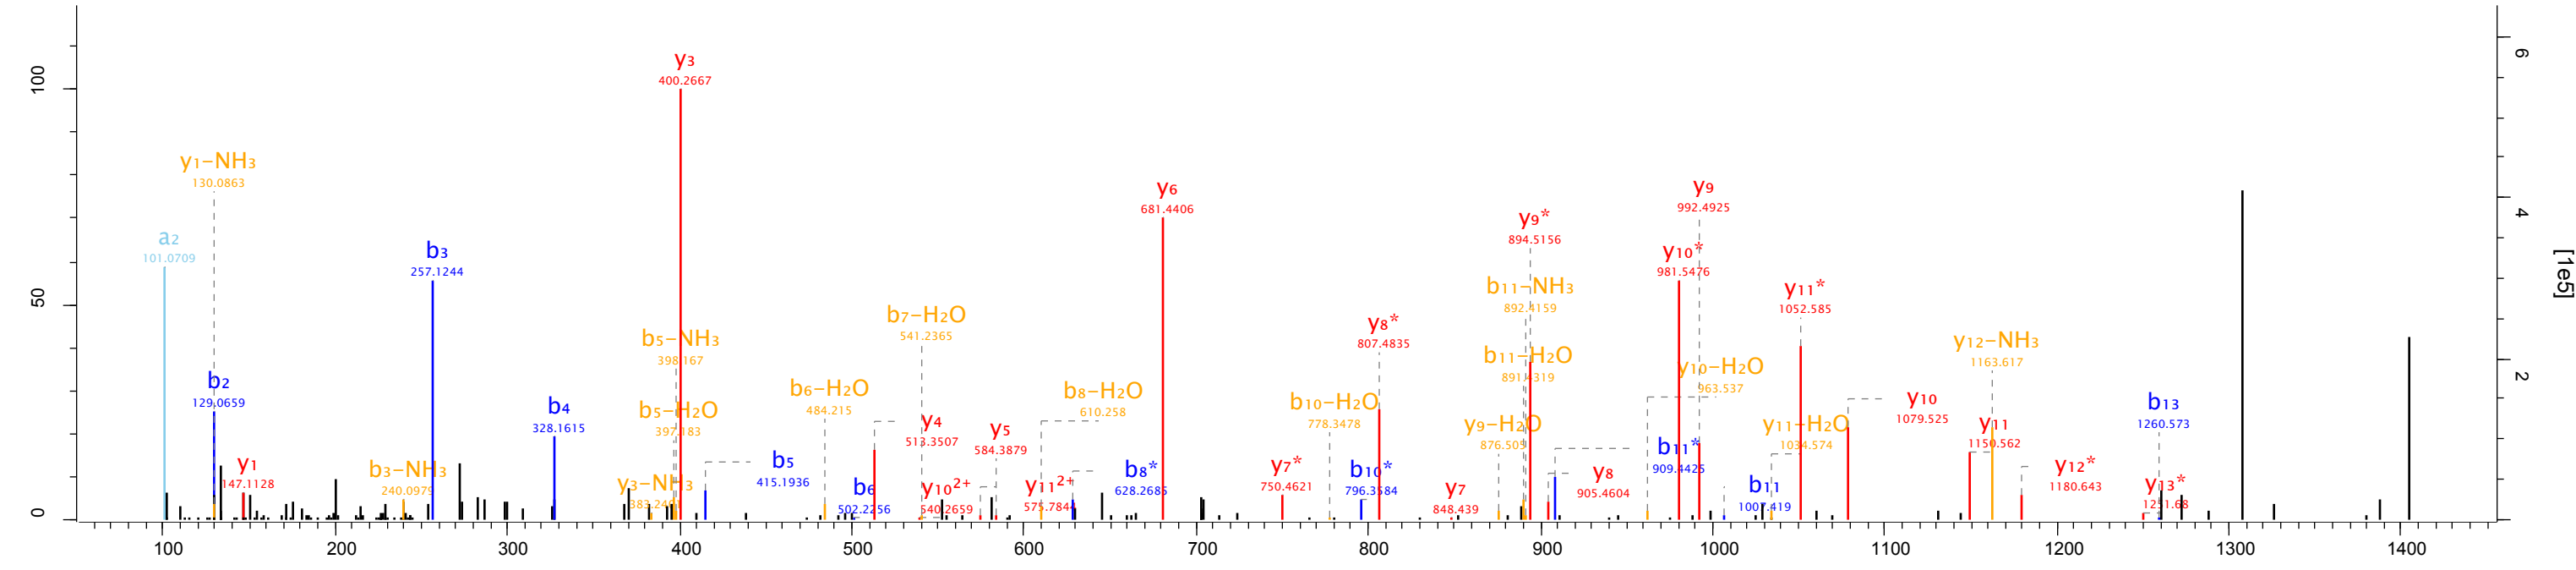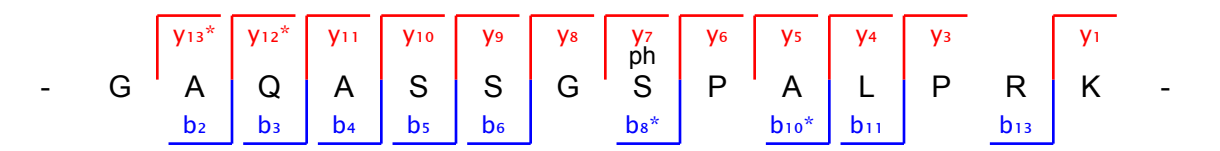

Raw file: 20150814\_A375SR\_Phospho\_BR2\_07  
 Scan: 5119 Method: FTMS; HCD Score: 135.91 m/z: 419.87 Gene names: DPYSL3

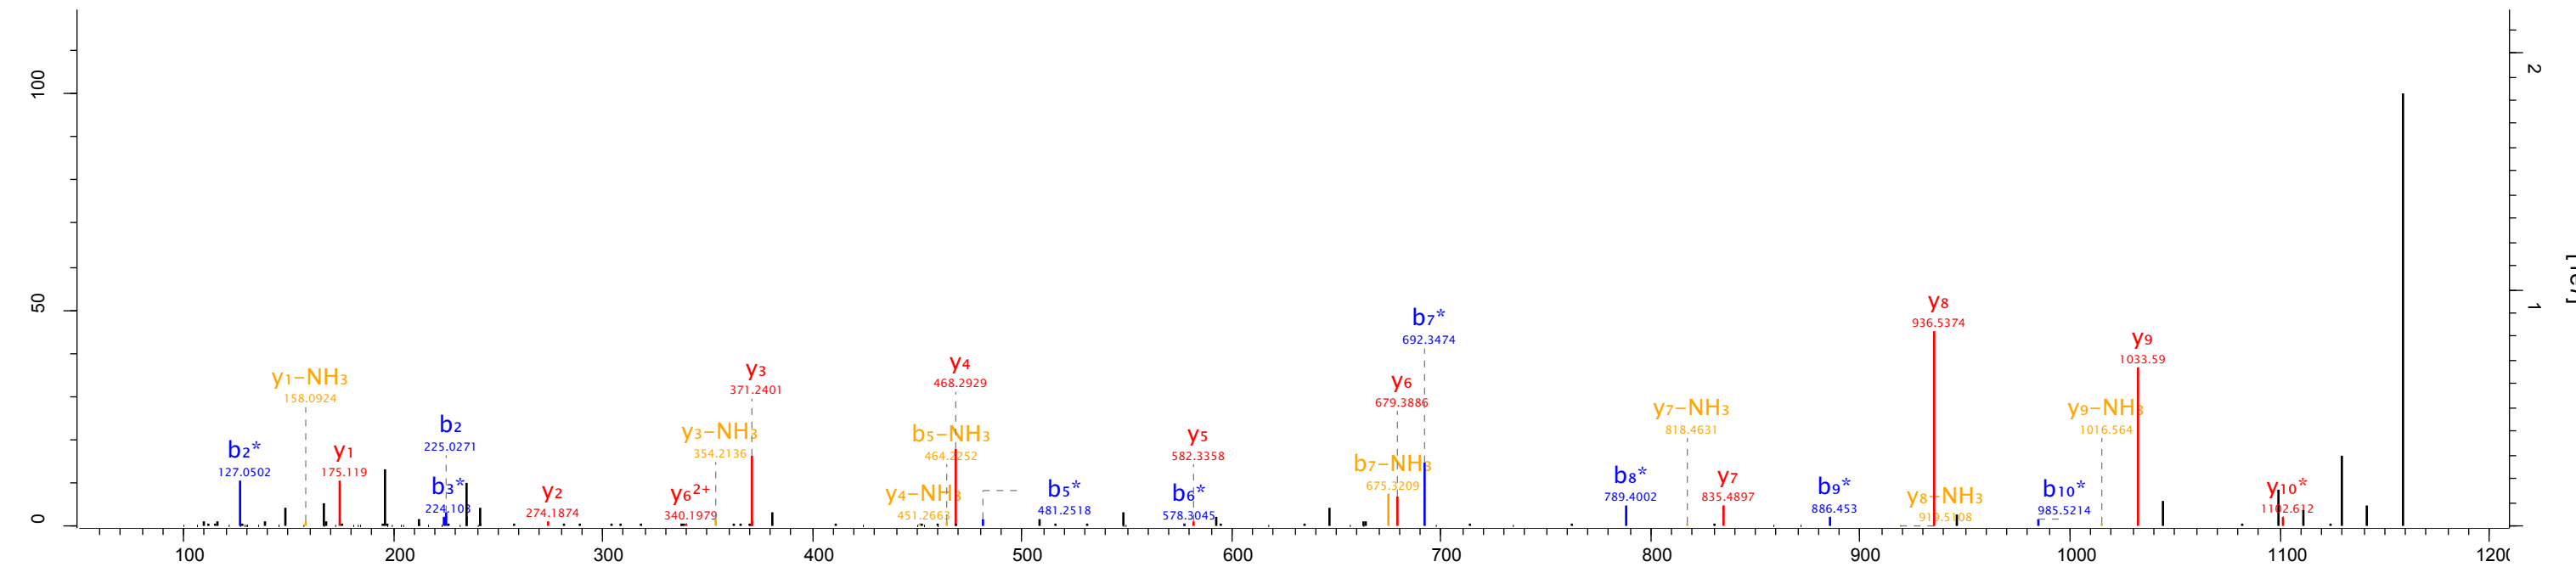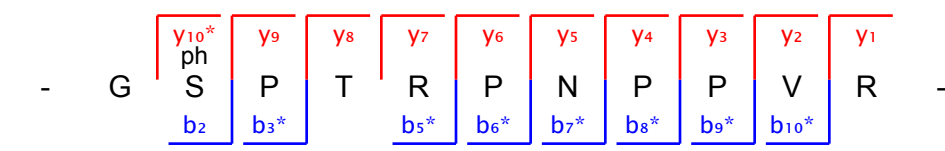

Raw file: 20150814\_A375SR\_Phospho\_BR2\_07  
 Scan: 5569 Method: FTMS; HCD Score: 121.45 m/z: 748.84 Gene names: RBBP6

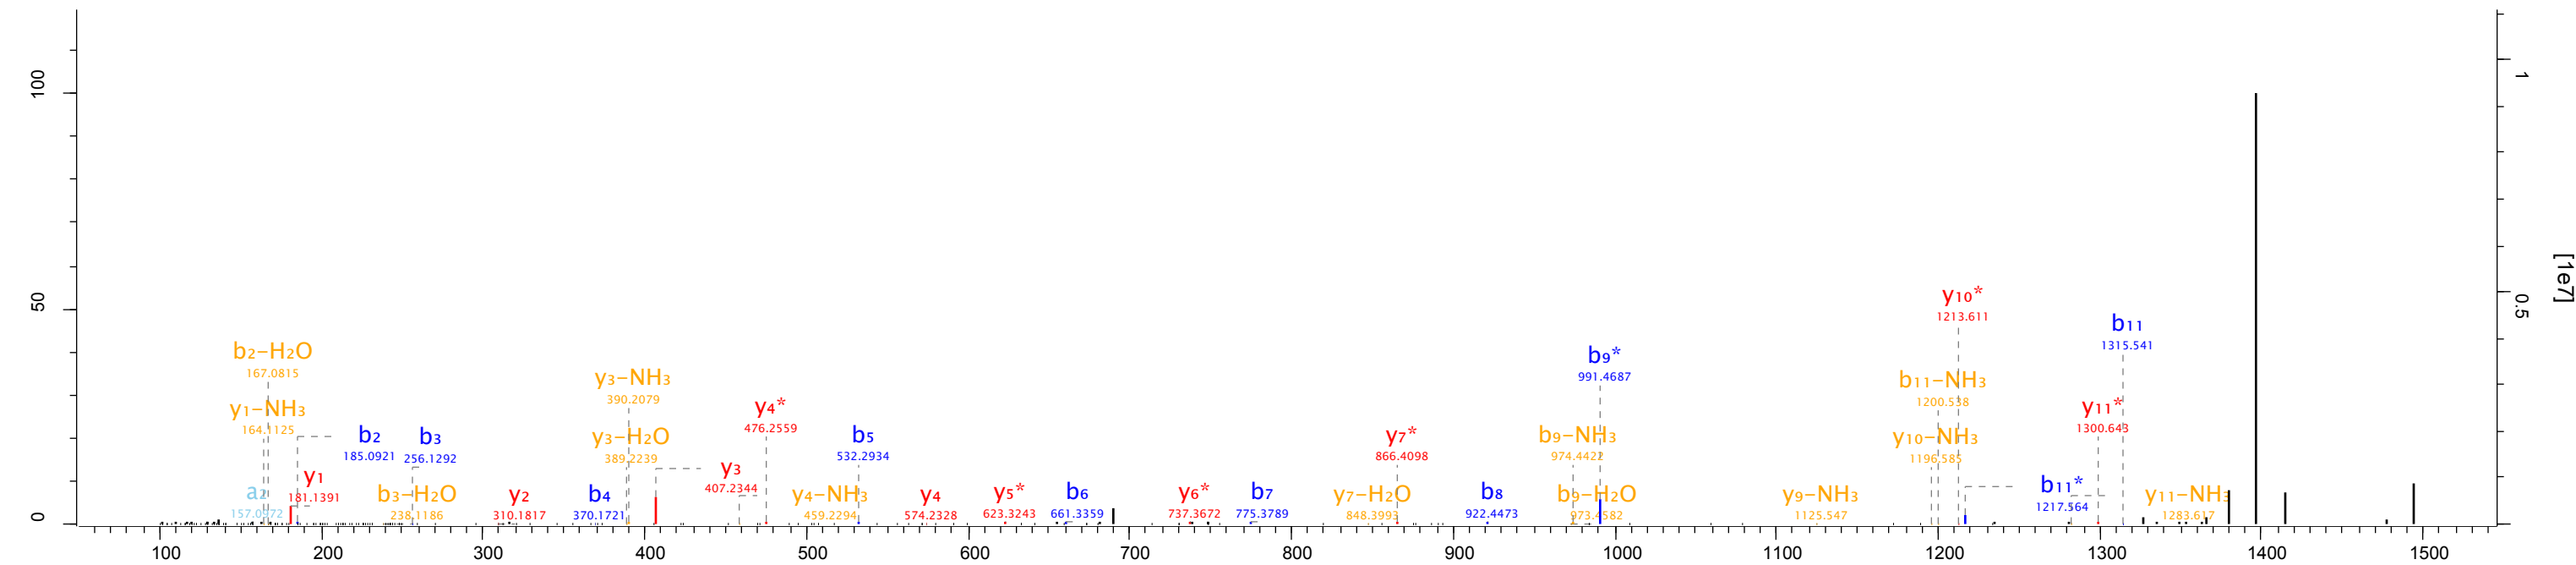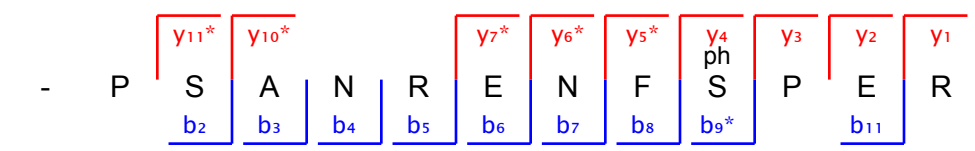



Raw file: 20150814\_A375SR\_Phospho\_BR2\_07  
 Scan: 5699 Method: FTMS; HCD Score: 142.23 m/z: 540.27 Gene names: GPATCH8

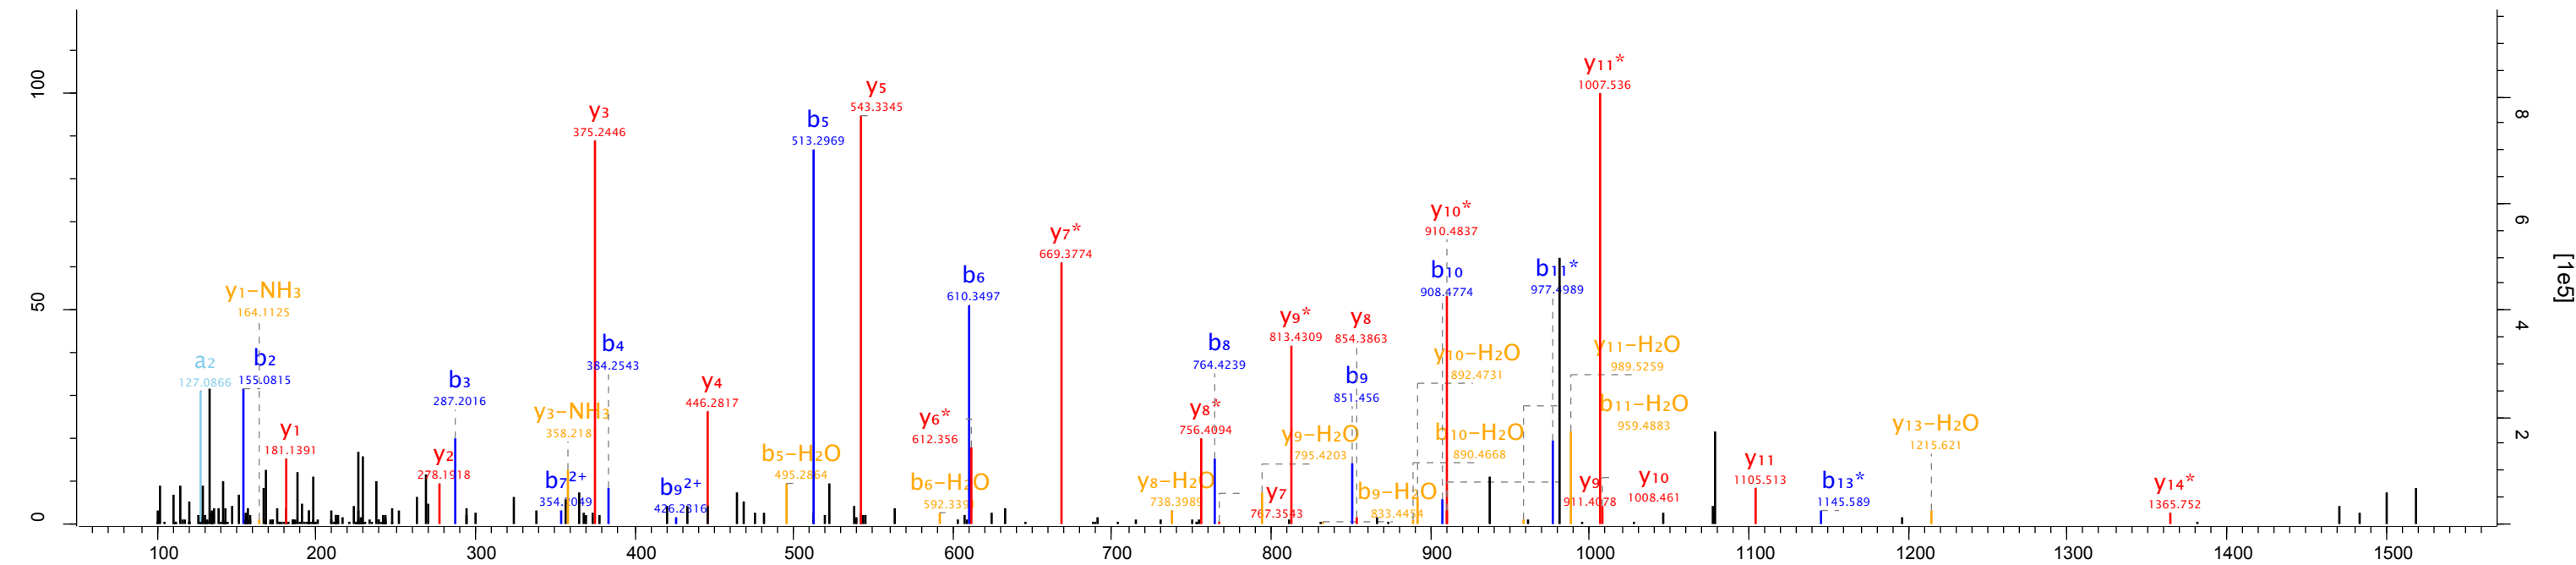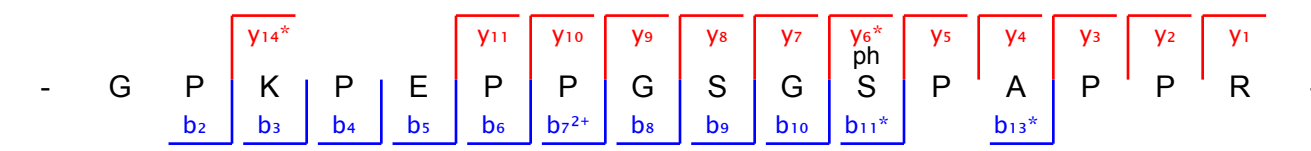

Raw file: 20150814\_A375SR\_Phospho\_BR2\_07  
 Scan: 6759 Method: FTMS; HCD Score: 190.82 m/z: 664.81 Gene names: PPP1R12A

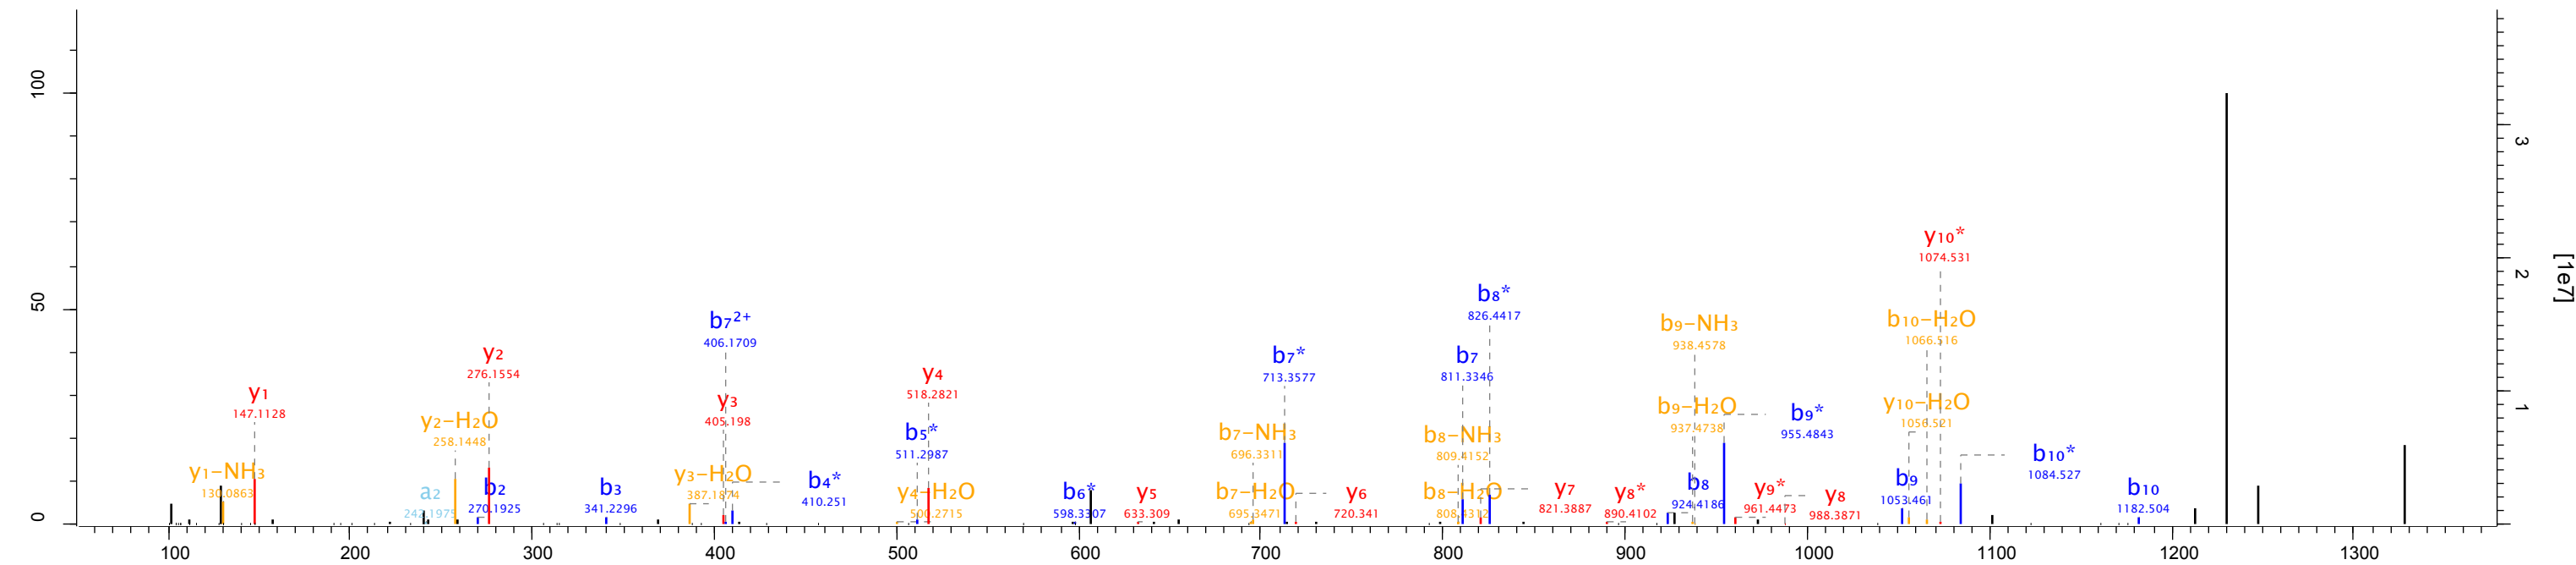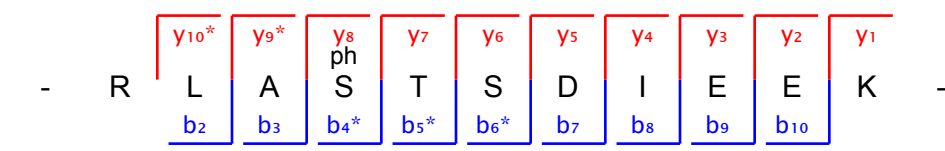

Raw file: 20150814\_A375SR\_Phospho\_BR2\_07  
 Scan: 7369 Method: FTMS; HCD Score: 172.56 m/z: 542.69 Gene names: HNRNPK

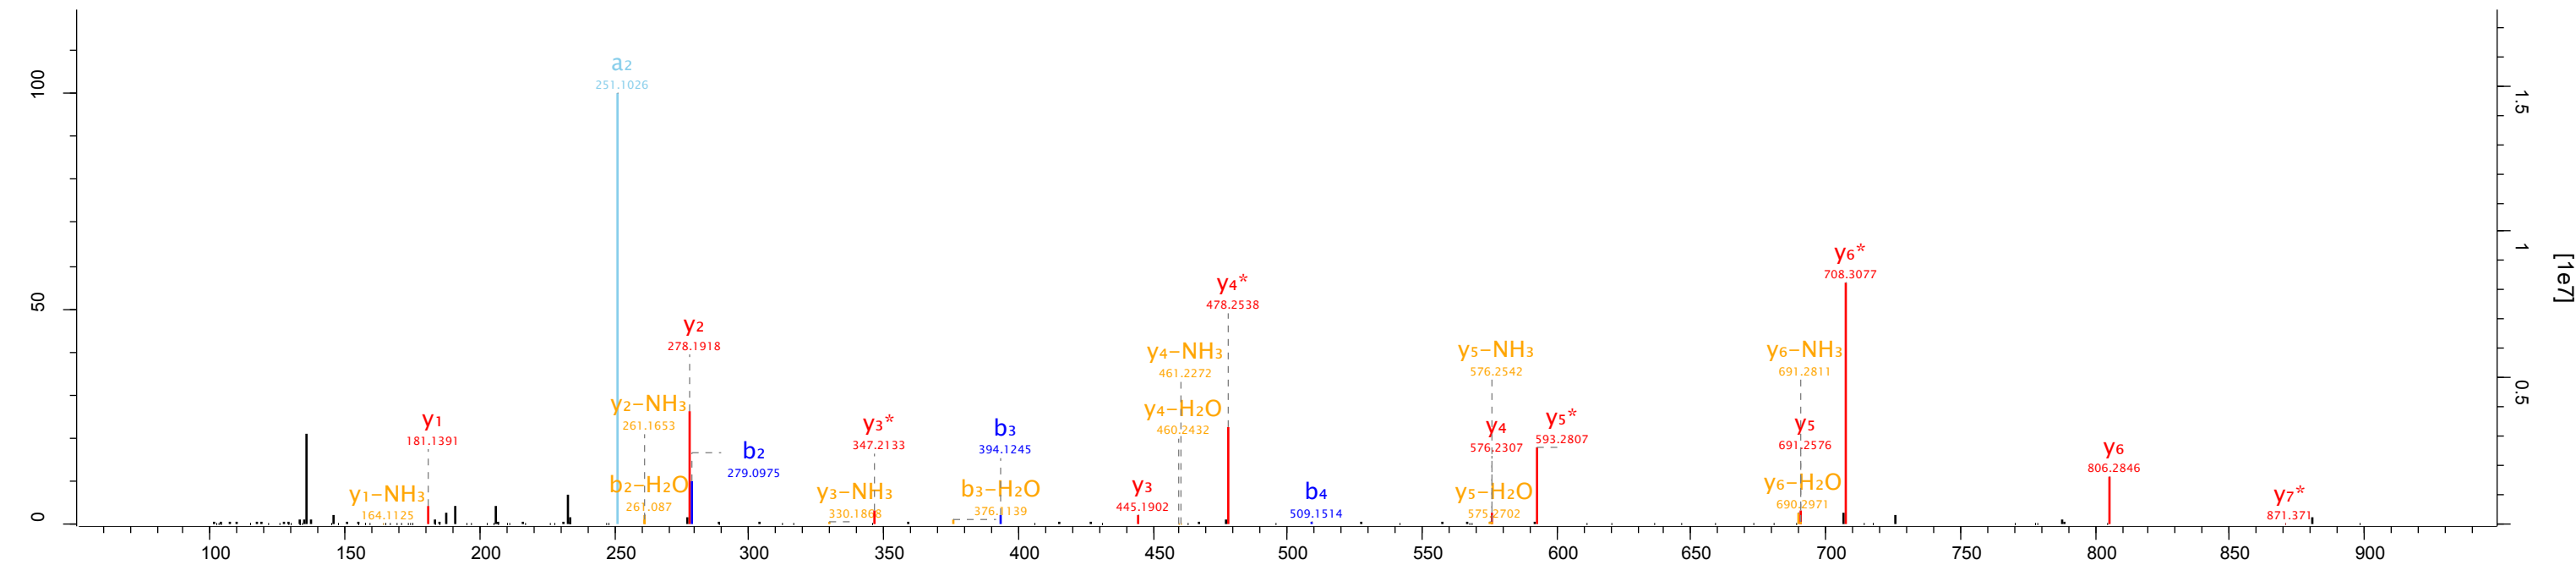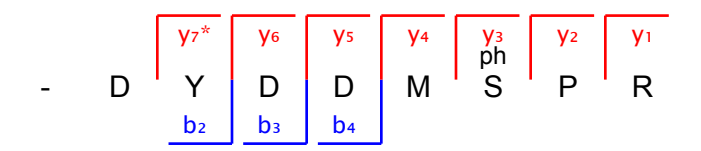

Raw file: 20150814\_A375SR\_Phospho\_BR2\_07  
 Scan: 7429 Method: FTMS; HCD Score: 99.34 m/z: 490.73 Gene names: SGOL1

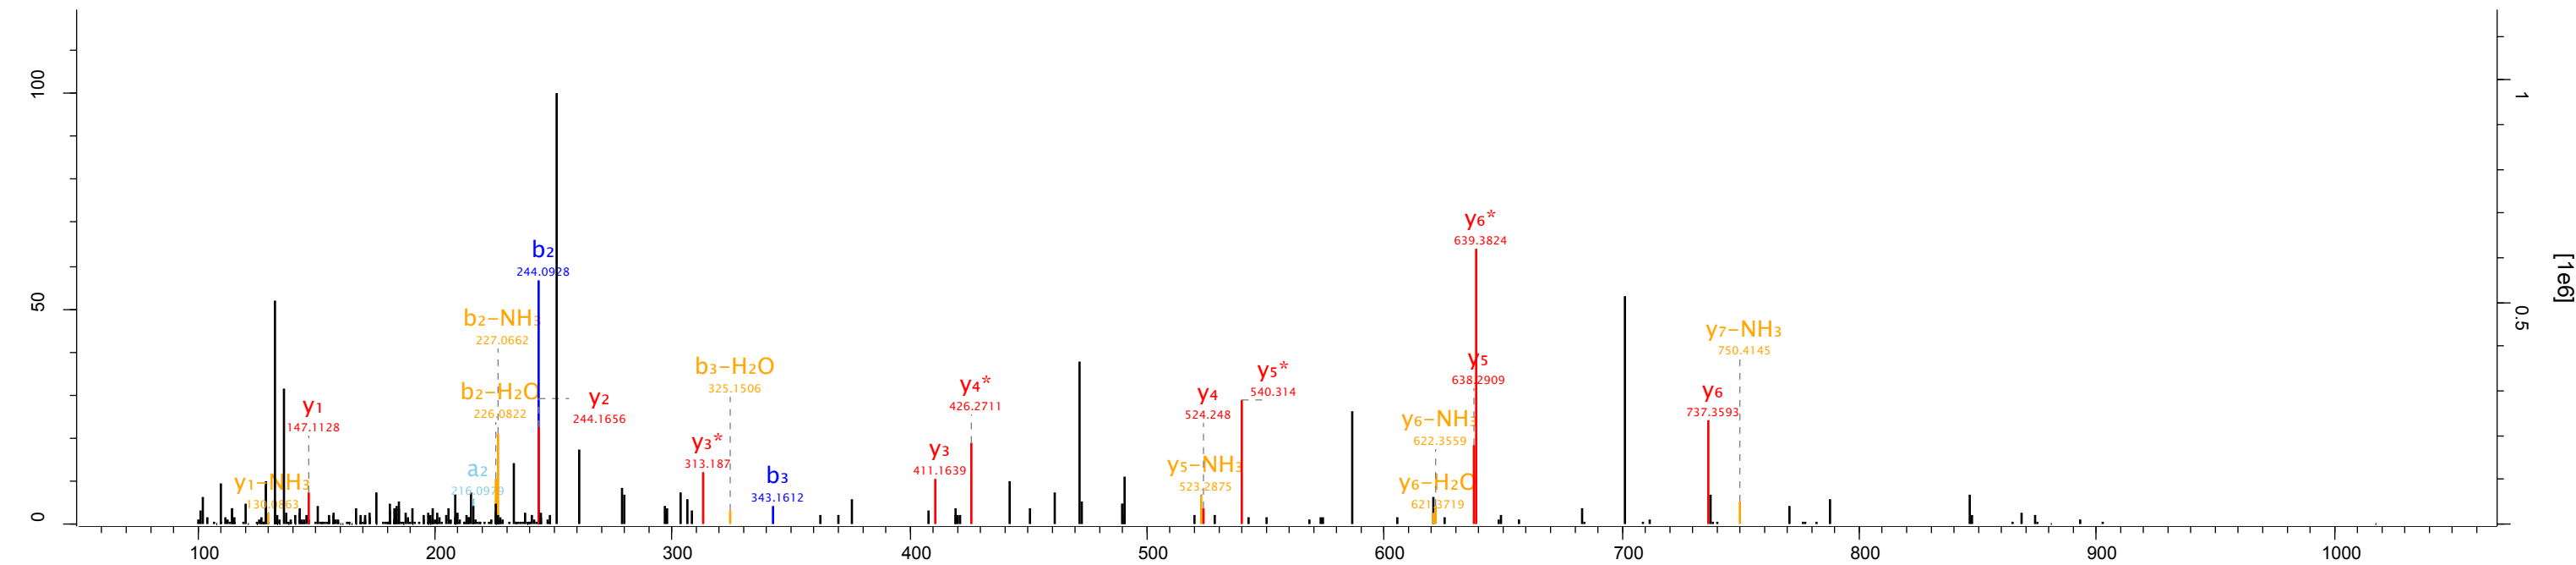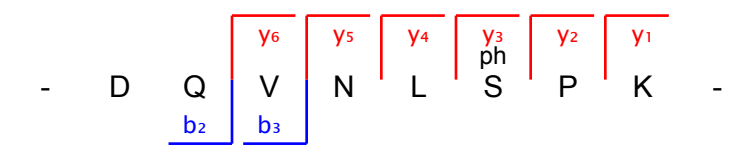

Raw file: 20150814\_A375SR\_Phospho\_BR2\_07  
 Scan: 8659 Method: FTMS; HCD Score: 104.95 m/z: 654.69 Gene names: SSH1

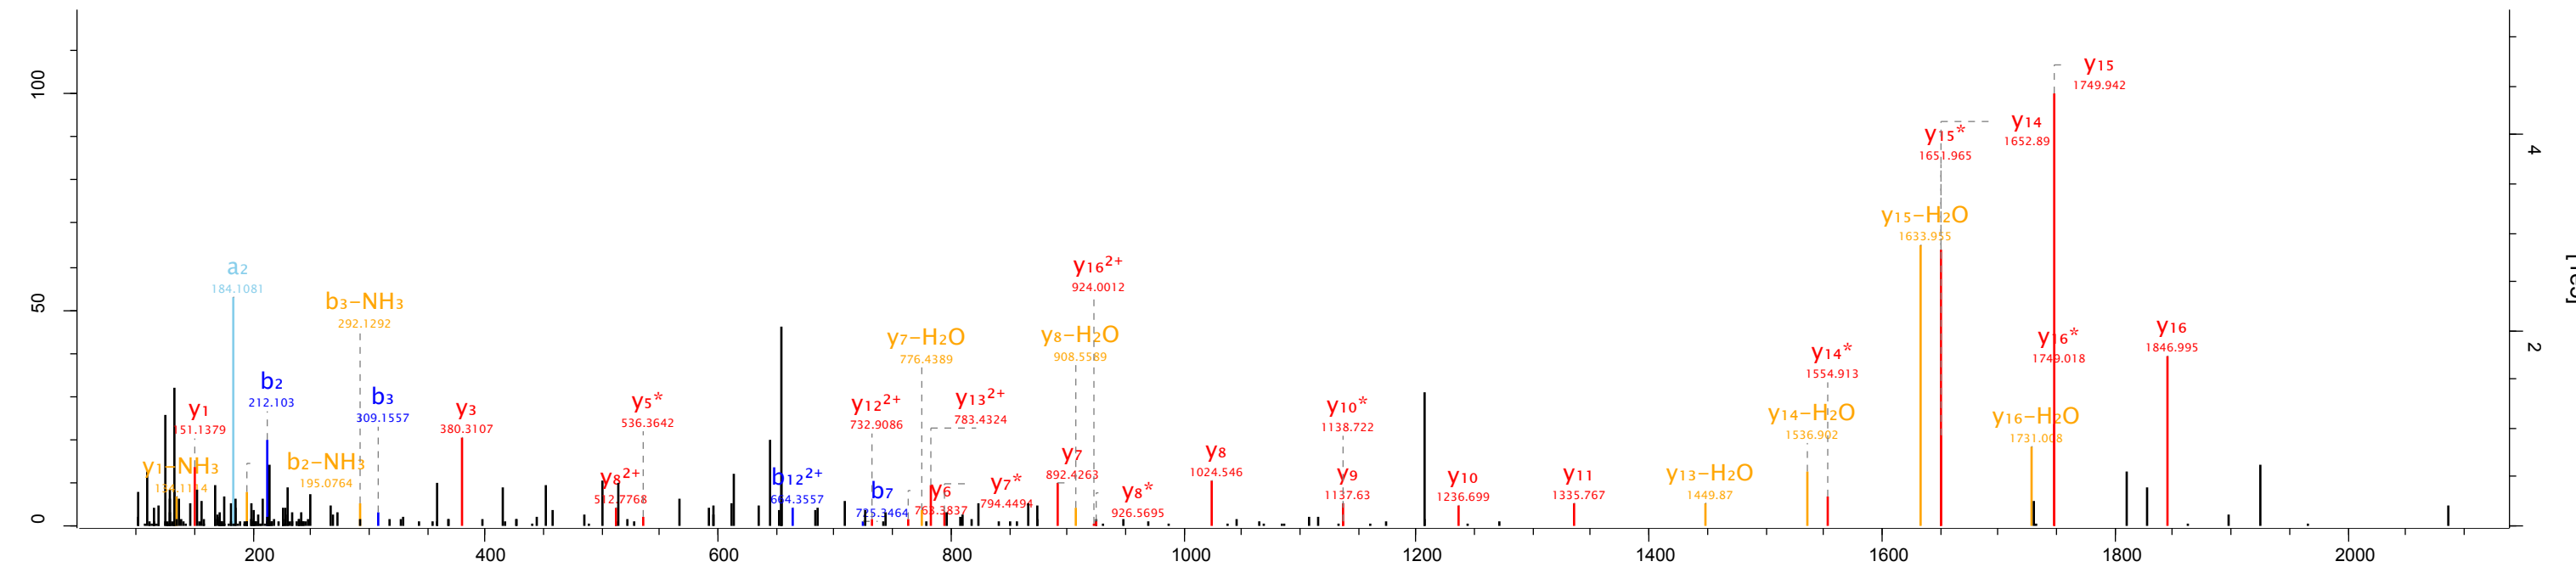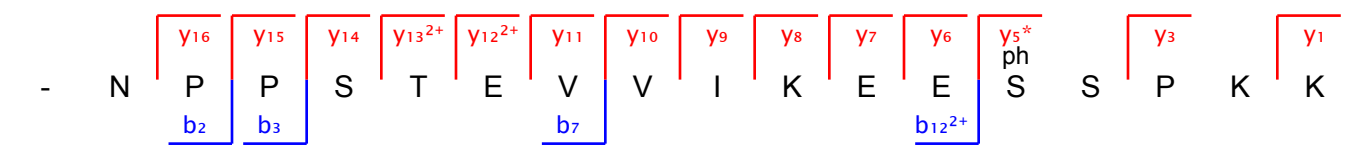

Raw file: 20150814\_A375SR\_Phospho\_BR2\_07  
 Scan: 9079 Method: FTMS; HCD Score: 204.7 m/z: 1011.47 Gene names: SCFD1

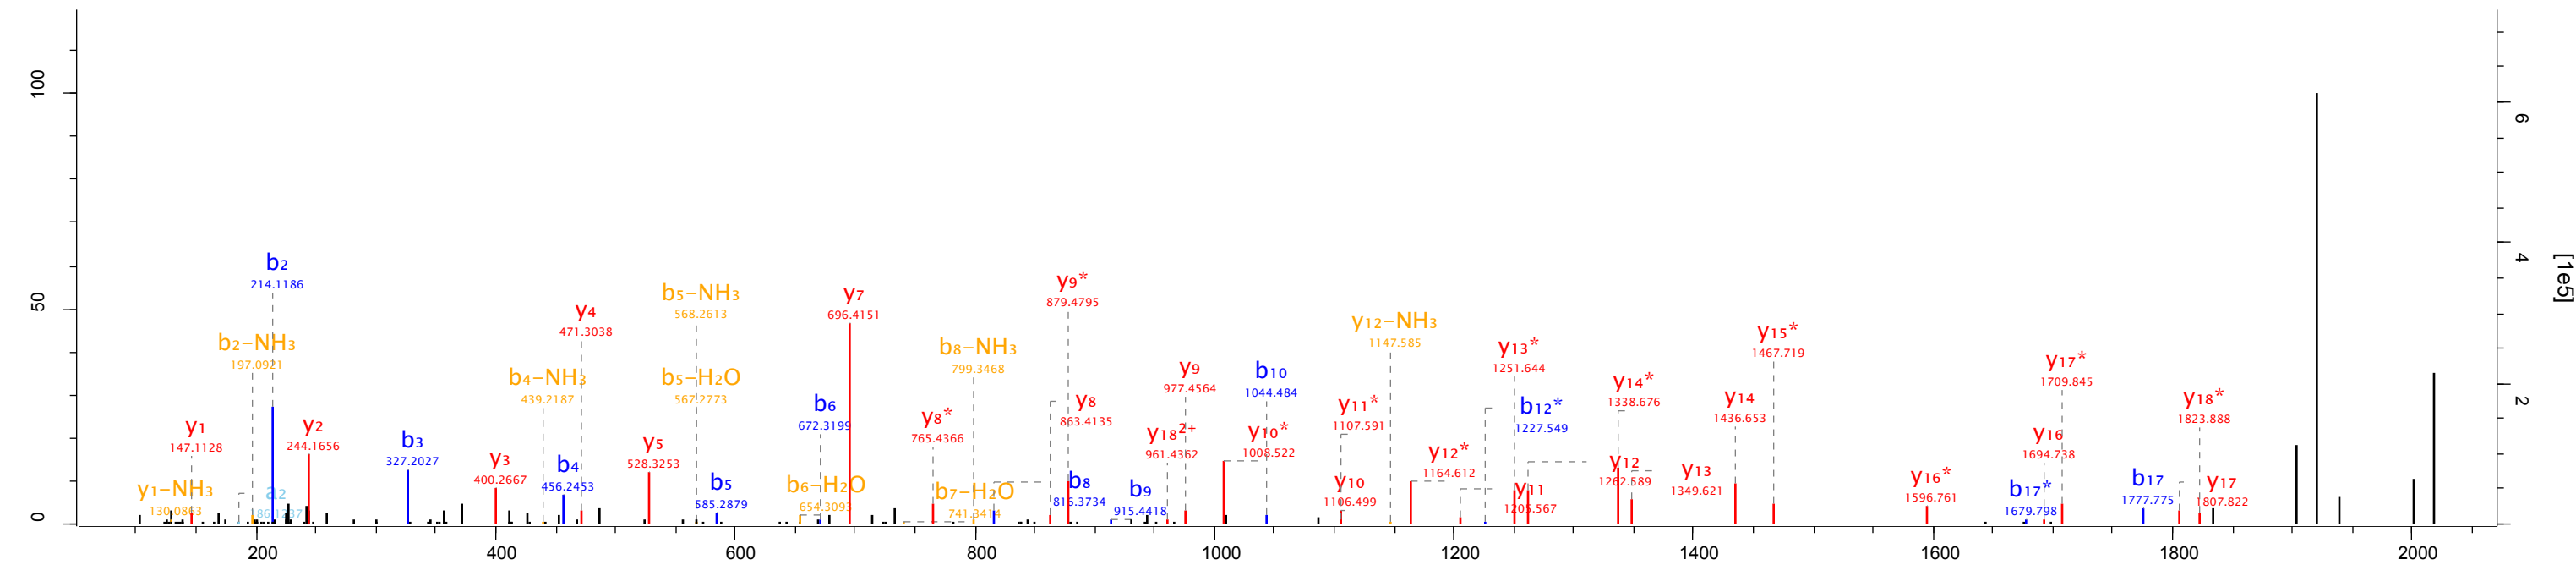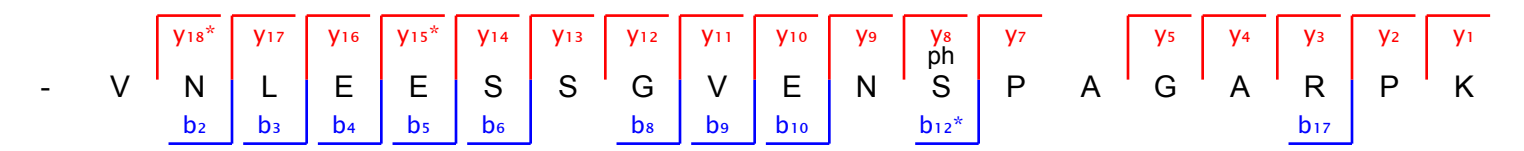

Raw file: 20150814\_A375SR\_Phospho\_BR2\_07  
 Scan: 9389 Method: FTMS; HCD Score: 40.53 m/z: 981.46 Gene names: EYA3

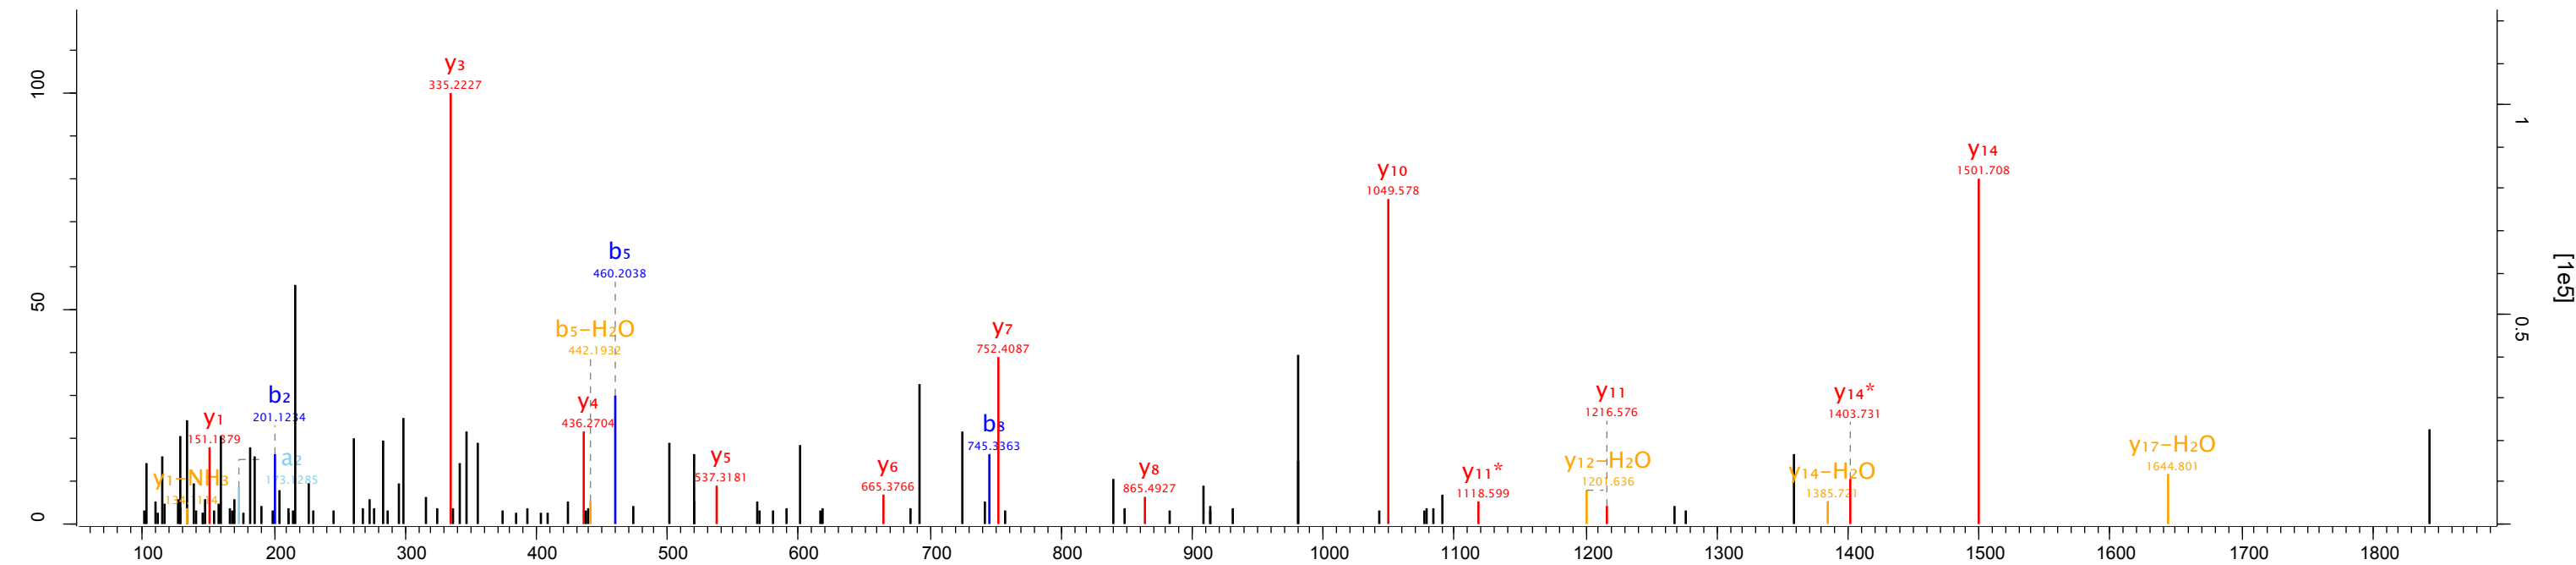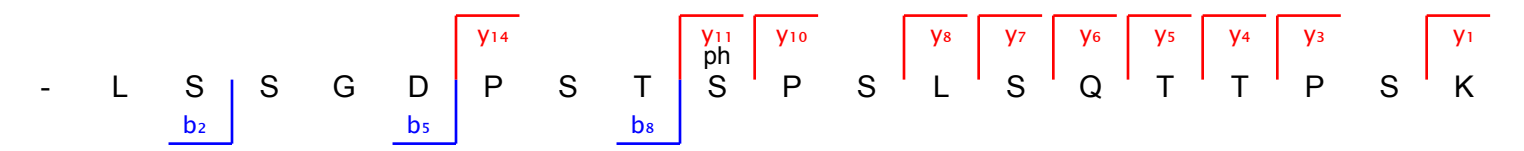

Raw file: 20150814\_A375SR\_Phospho\_BR2\_08  
 Scan: 10059  
 Method: FTMS; HCD  
 Score: 145.88  
 m/z: 587.29  
 Gene names: DENND4C

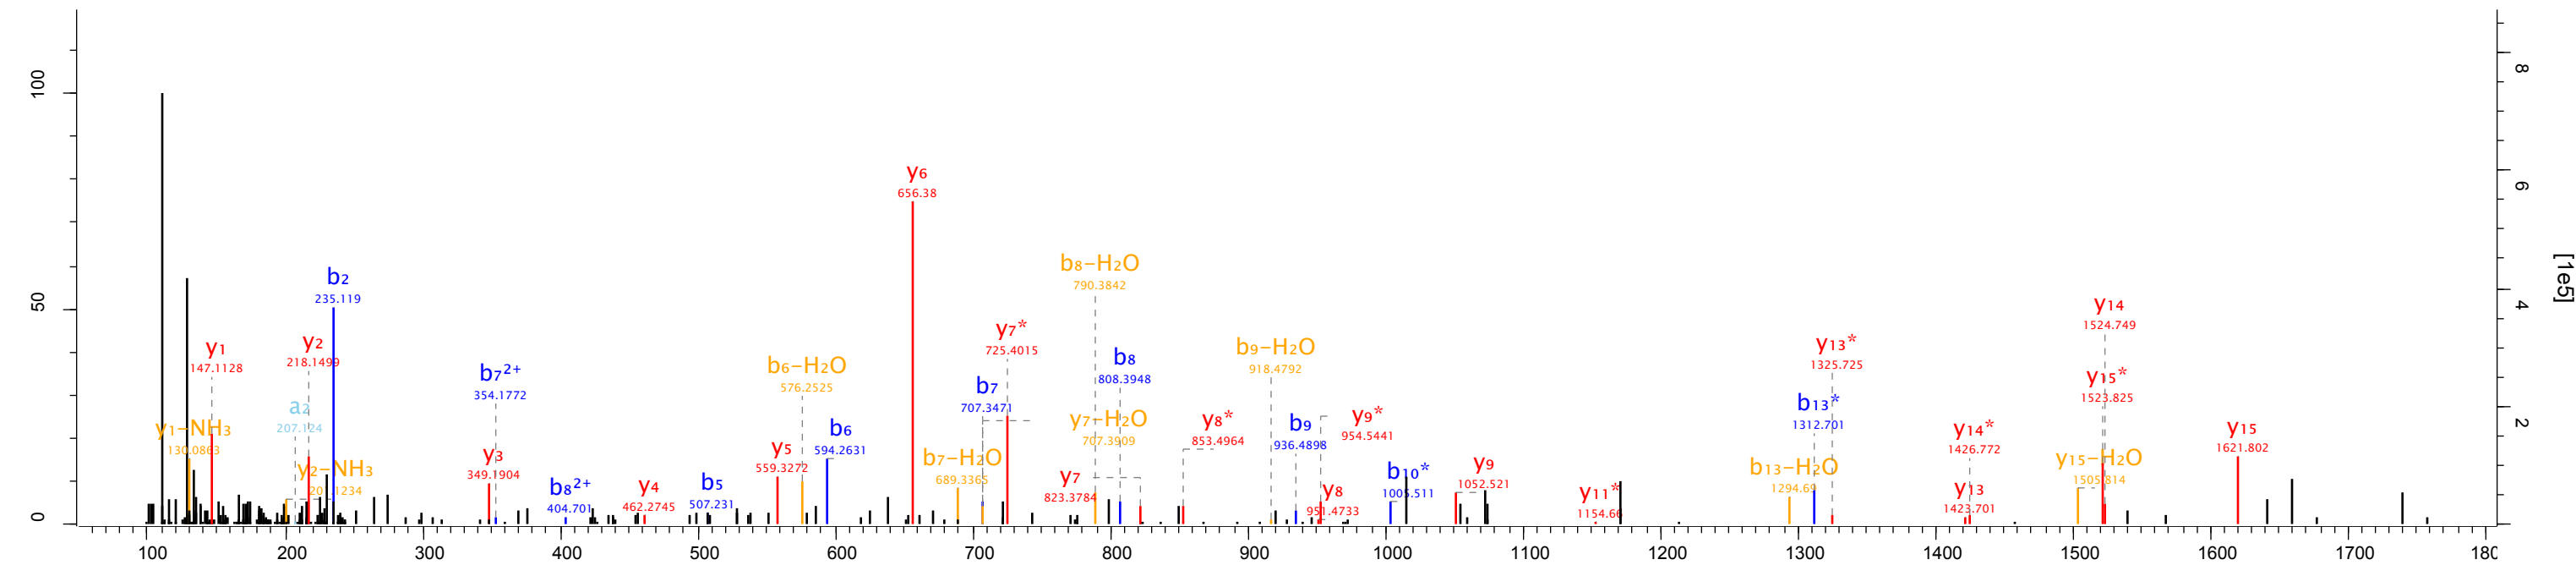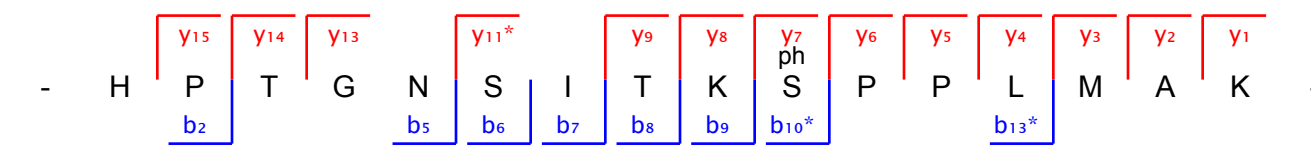



Raw file 20150814\_A375SR\_Phospho\_BR2\_08 Scan 10299 Method FTMS; HCD Score 130.02 m/z 650.83 Gene names ATRIP

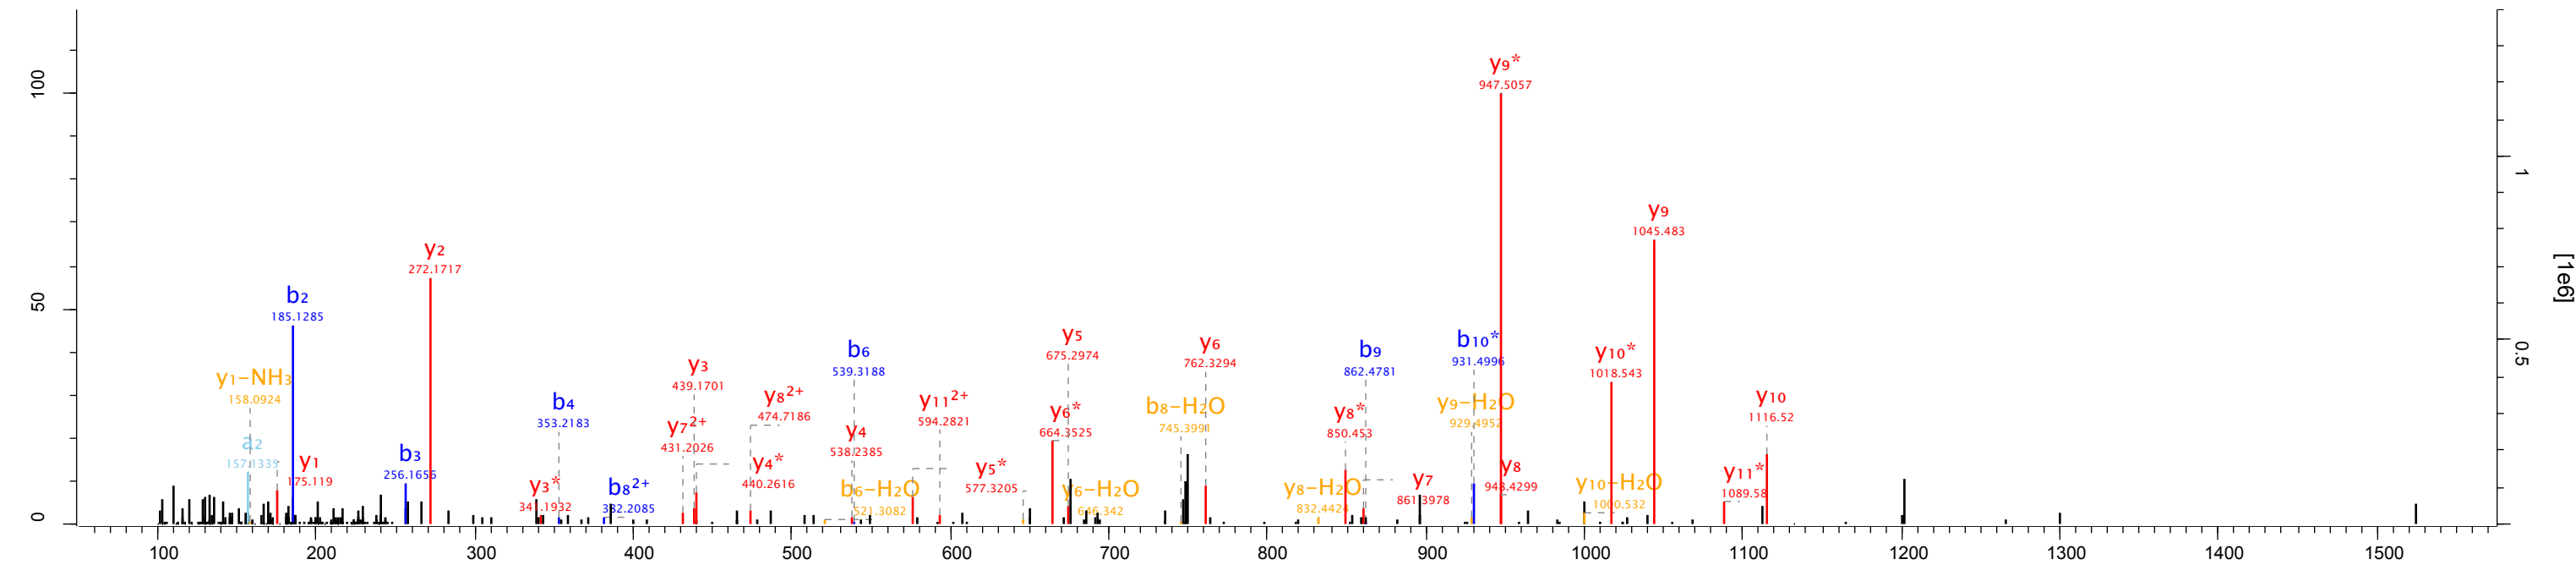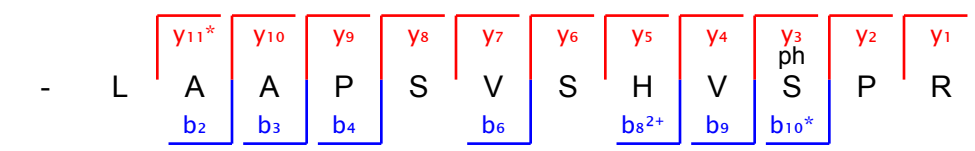

Raw file 20150814\_A375SR\_Phospho\_BR2\_08 Scan 11259 Method FTMS; HCD Score 221.78 m/z 719.85 Gene names KIF20A

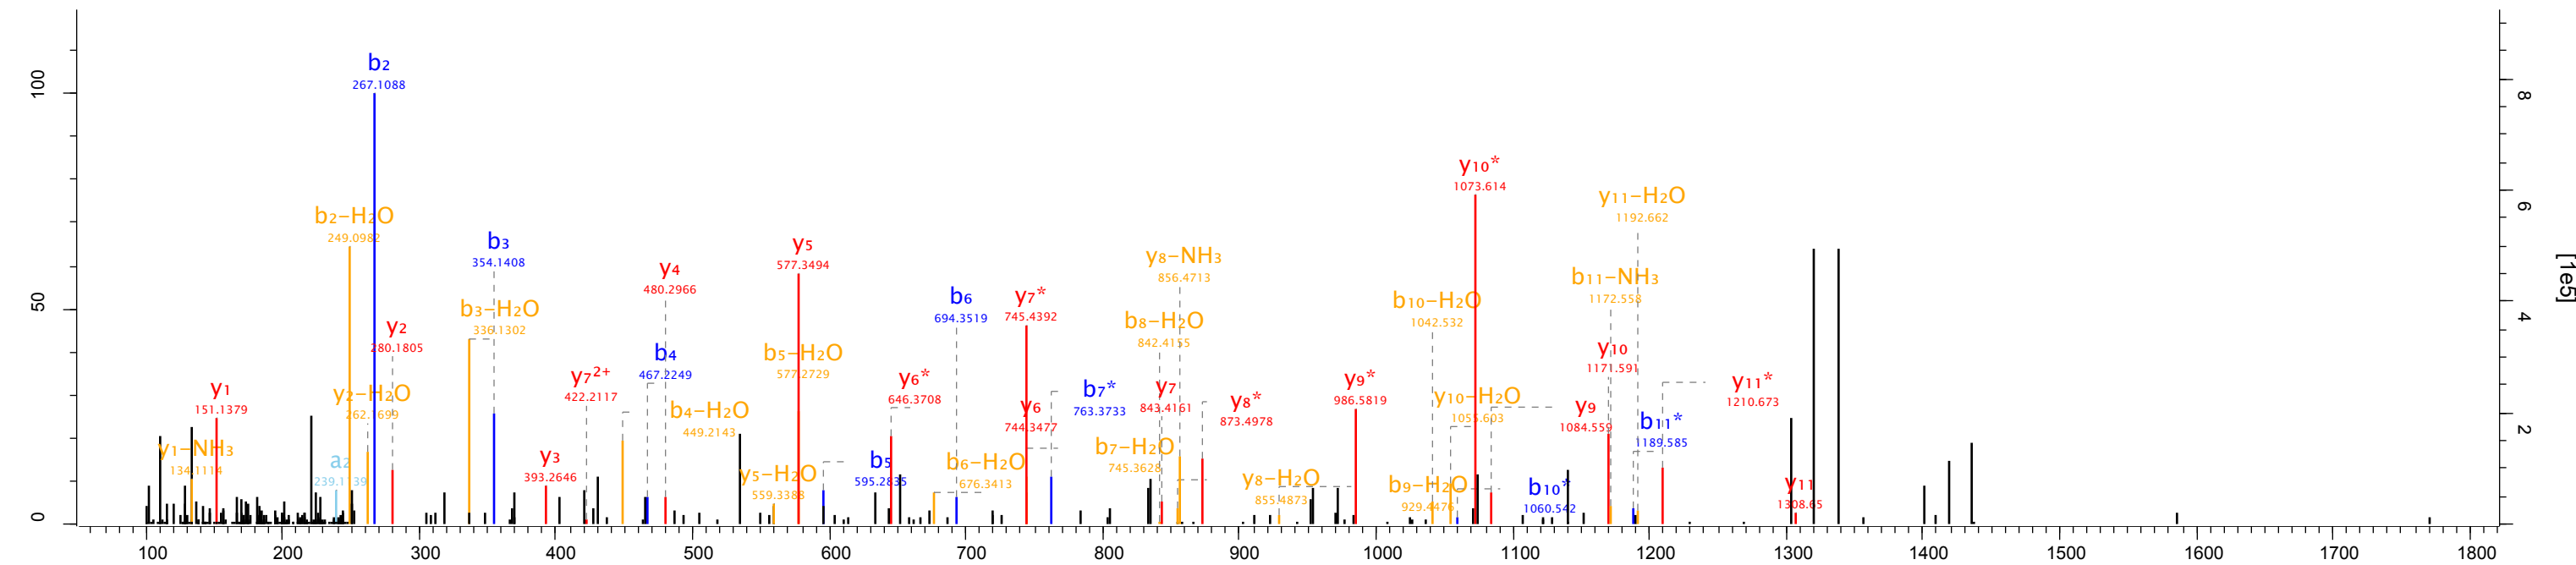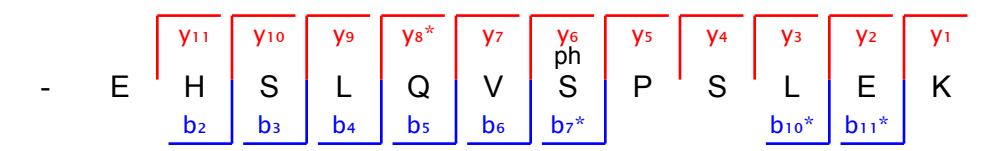

Raw file: 20150814\_A375SR\_Phospho\_BR2\_08  
 Scan: 11509  
 Method: FTMS; HCD  
 Score: 67.76  
 m/z: 714.27  
 Gene names: BAZ1A

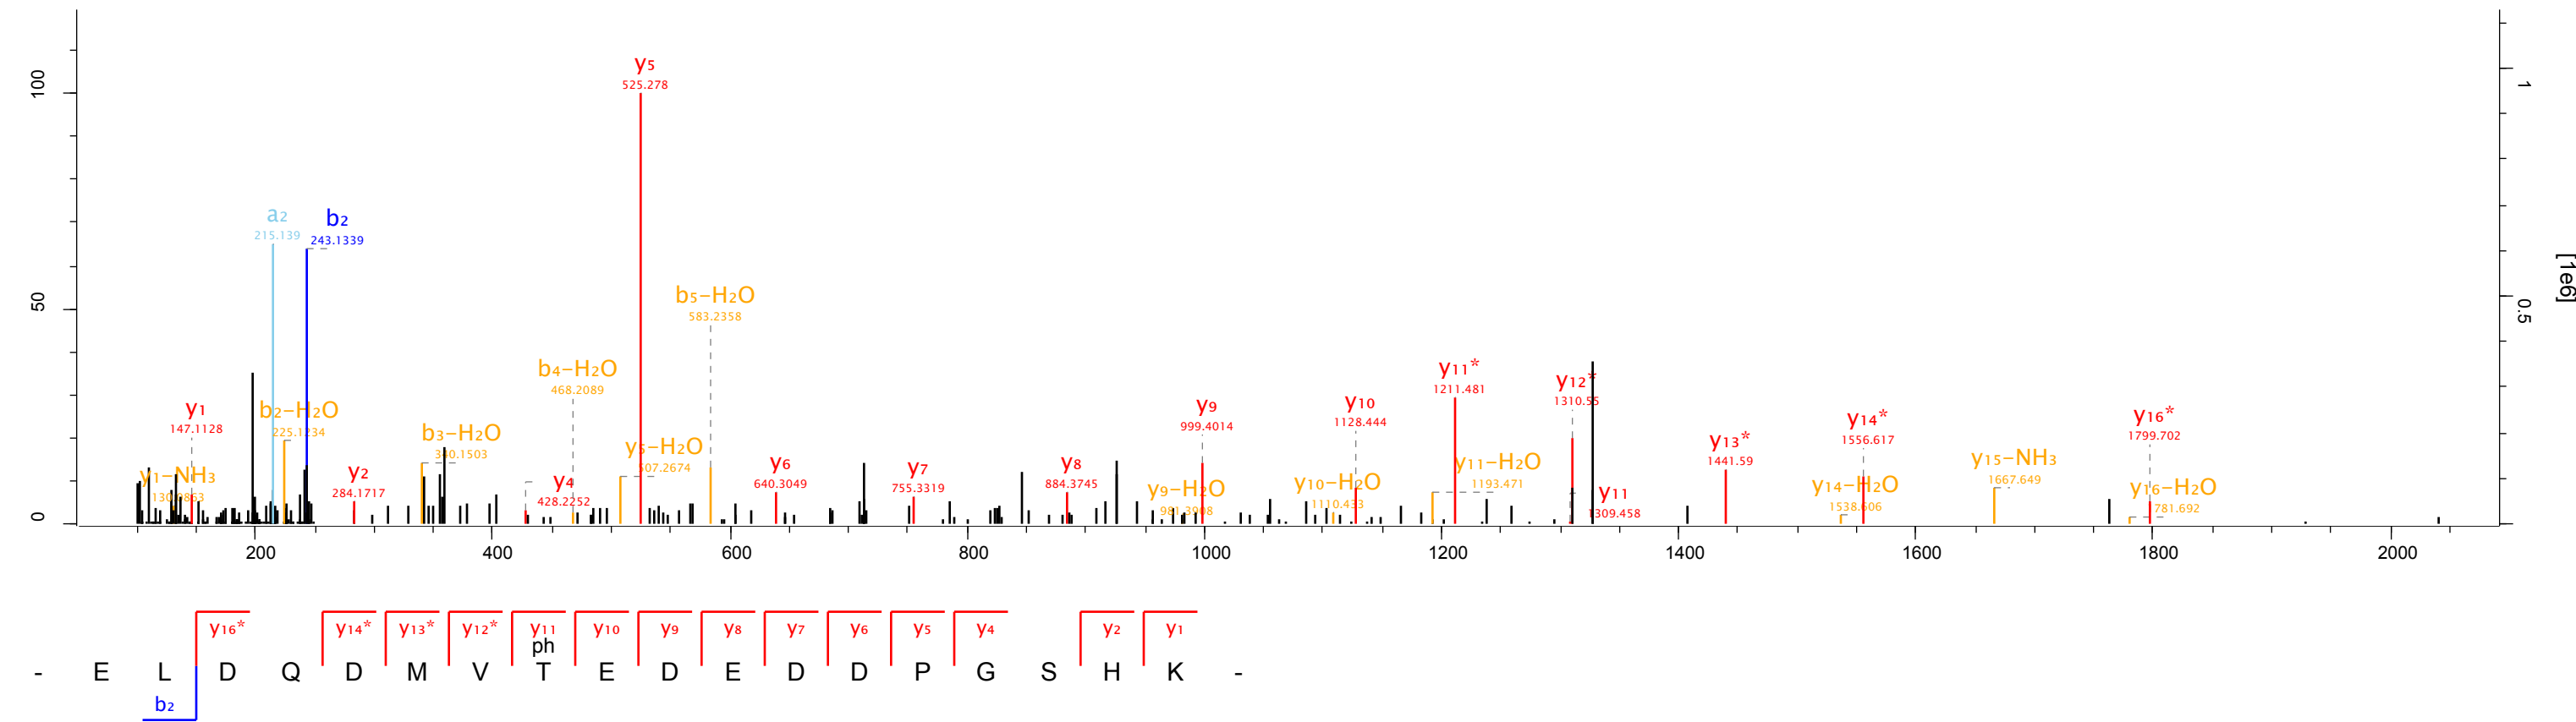

Raw file 20150814\_A375SR\_Phospho\_BR2\_08 Scan 13069 Method FTMS; HCD Score 130.56 m/z 720.89 Gene names NFRKB

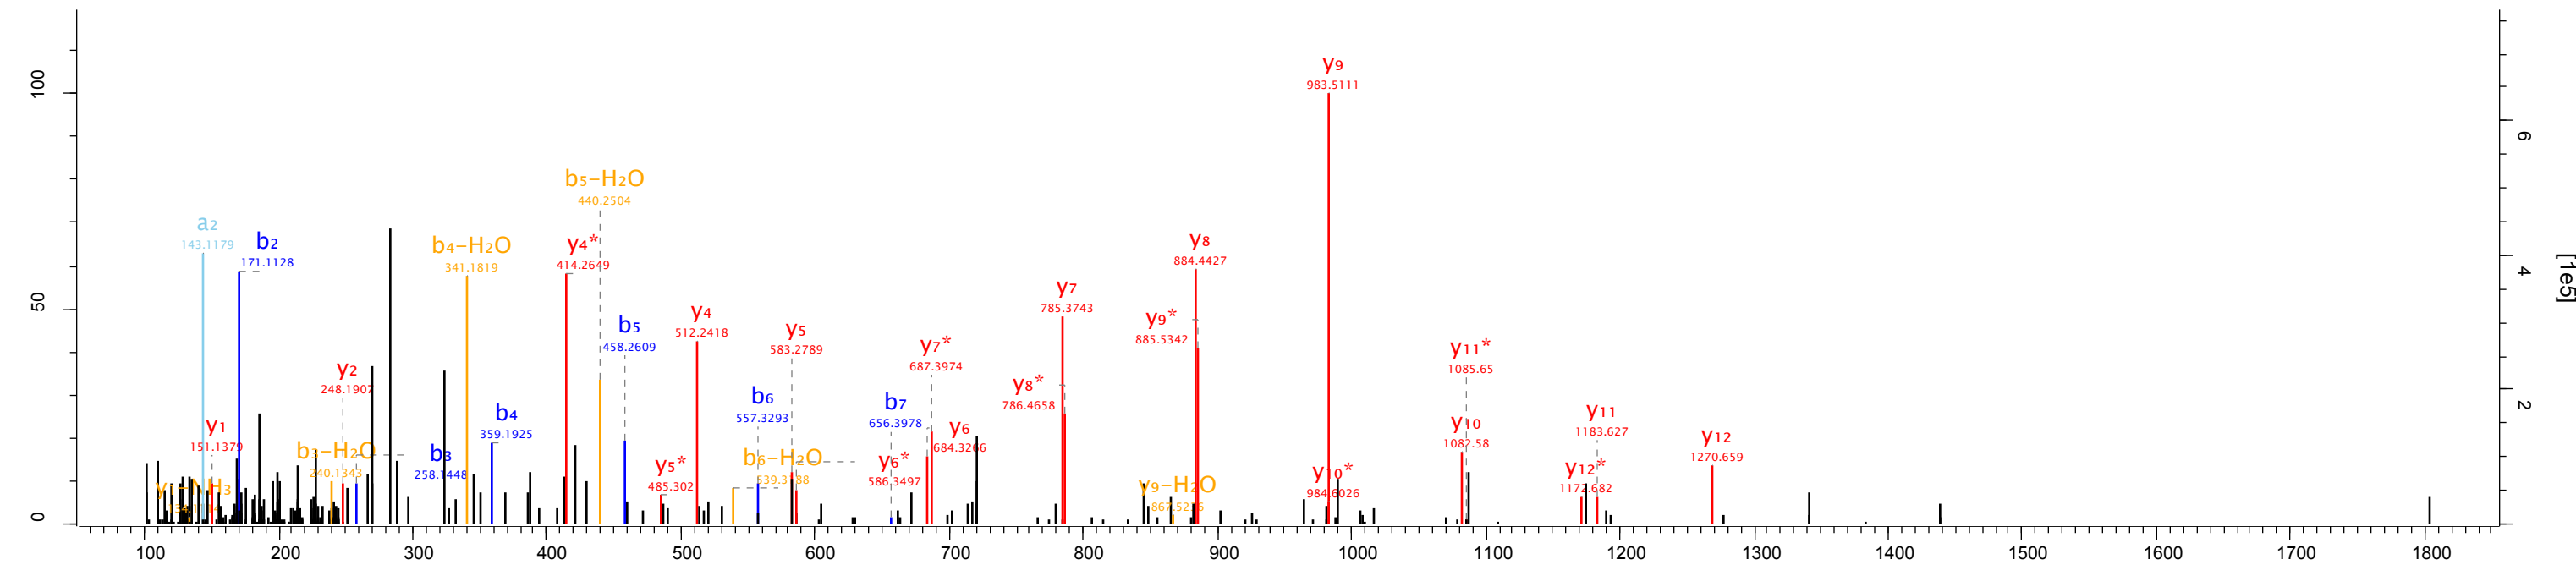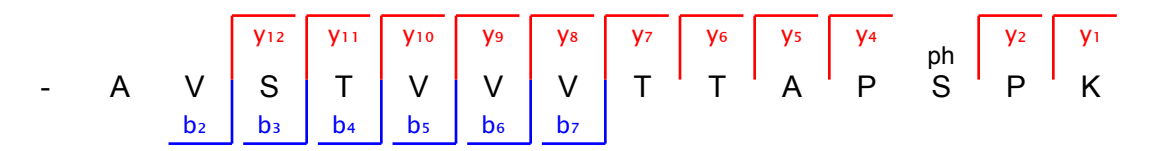

Raw file 20150814\_A375SR\_Phospho\_BR2\_08 Scan 13289 Method FTMS; HCD Score 92.04 m/z 646.31 Gene names APC

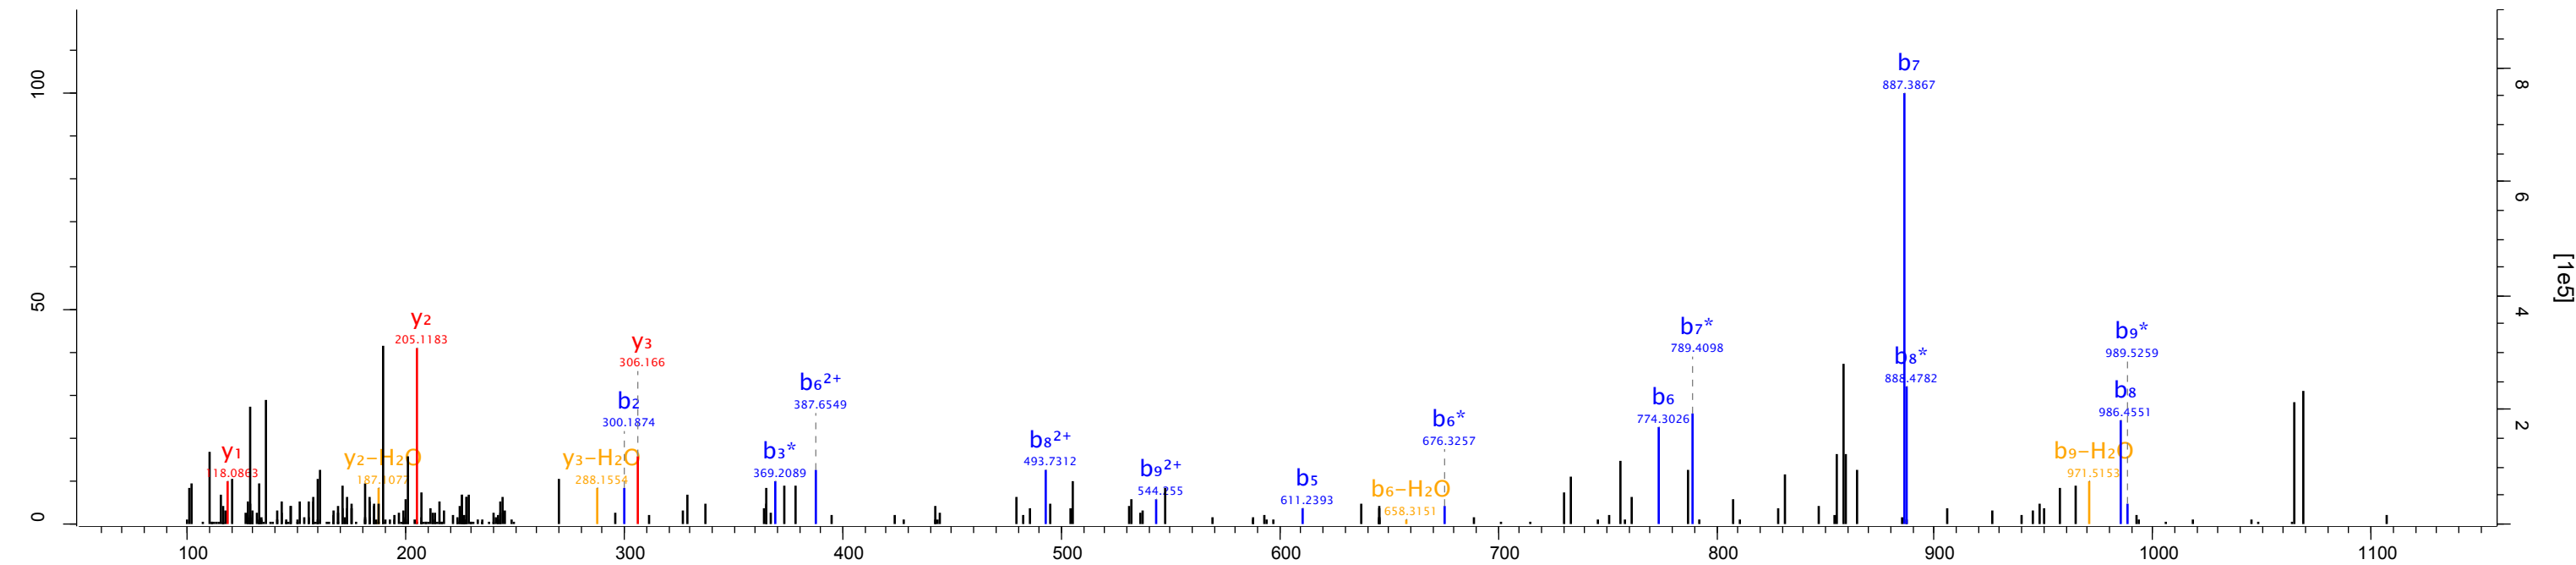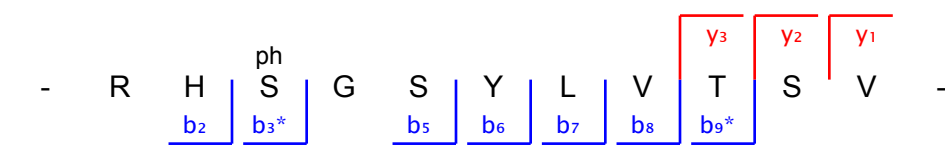

Raw file: 20150814\_A375SR\_Phospho\_BR2\_08  
 Scan: 13409  
 Method: FTMS; HCD  
 Score: 95.52  
 m/z: 700.68  
 Gene names: EHP1L1

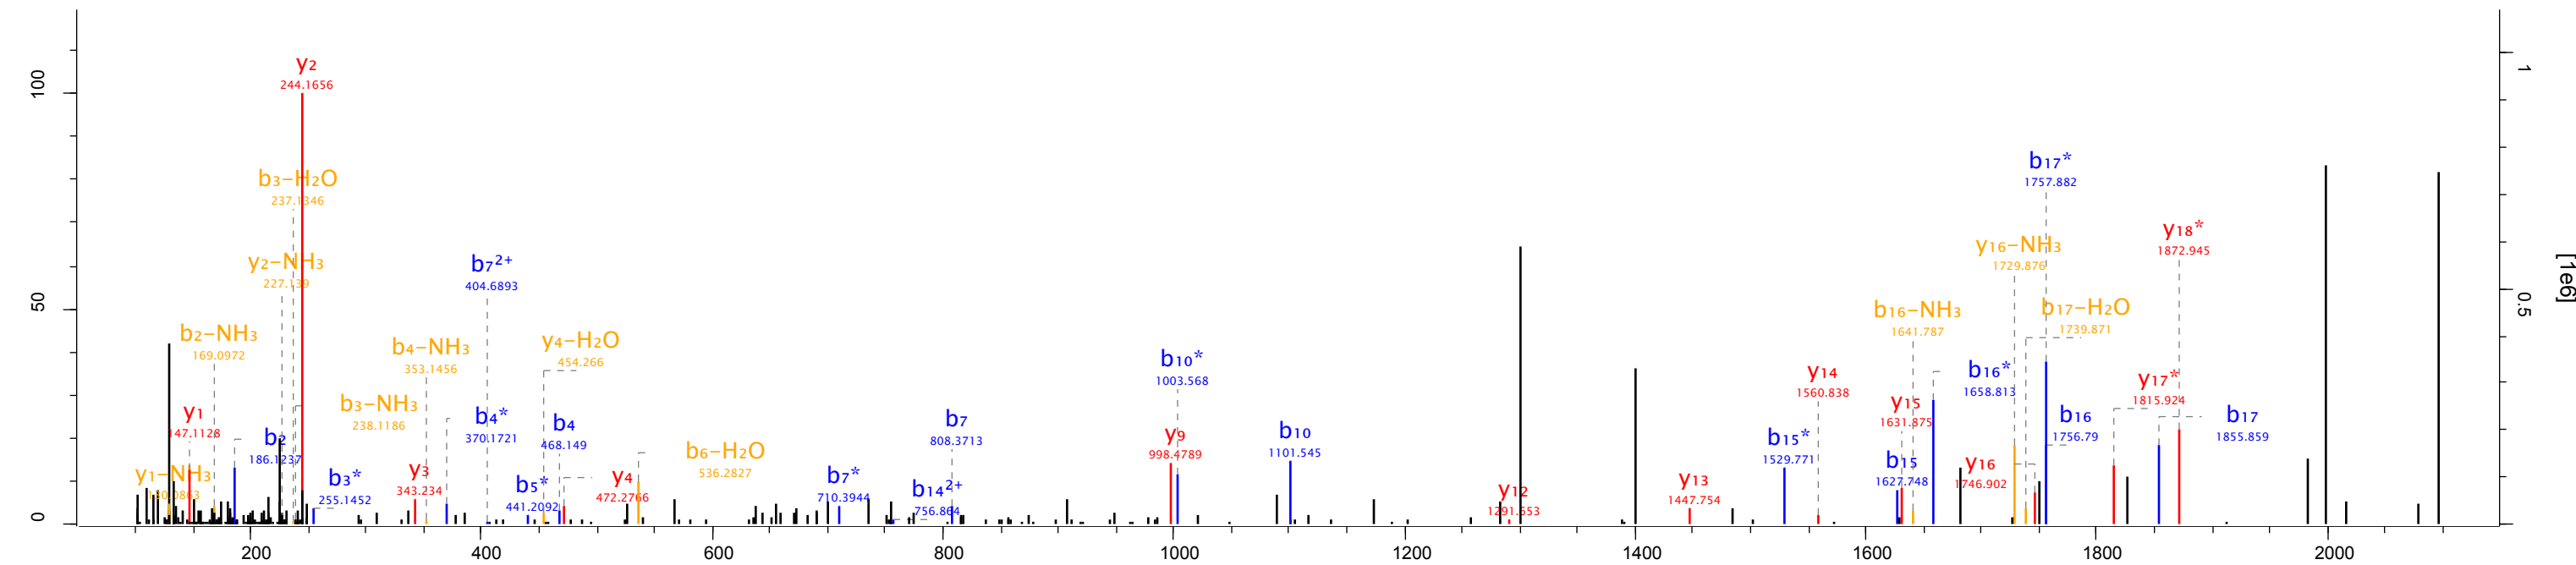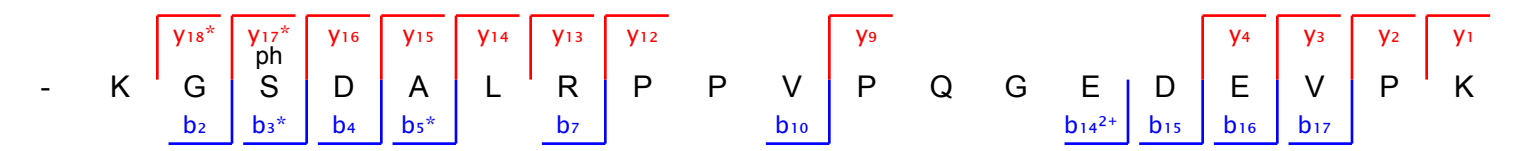

Raw file: 20150814\_A375SR\_Phospho\_BR2\_08  
 Scan: 13709 Method: FTMS; HCD Score: 124.51 m/z: 545.31 Gene names: RPL12

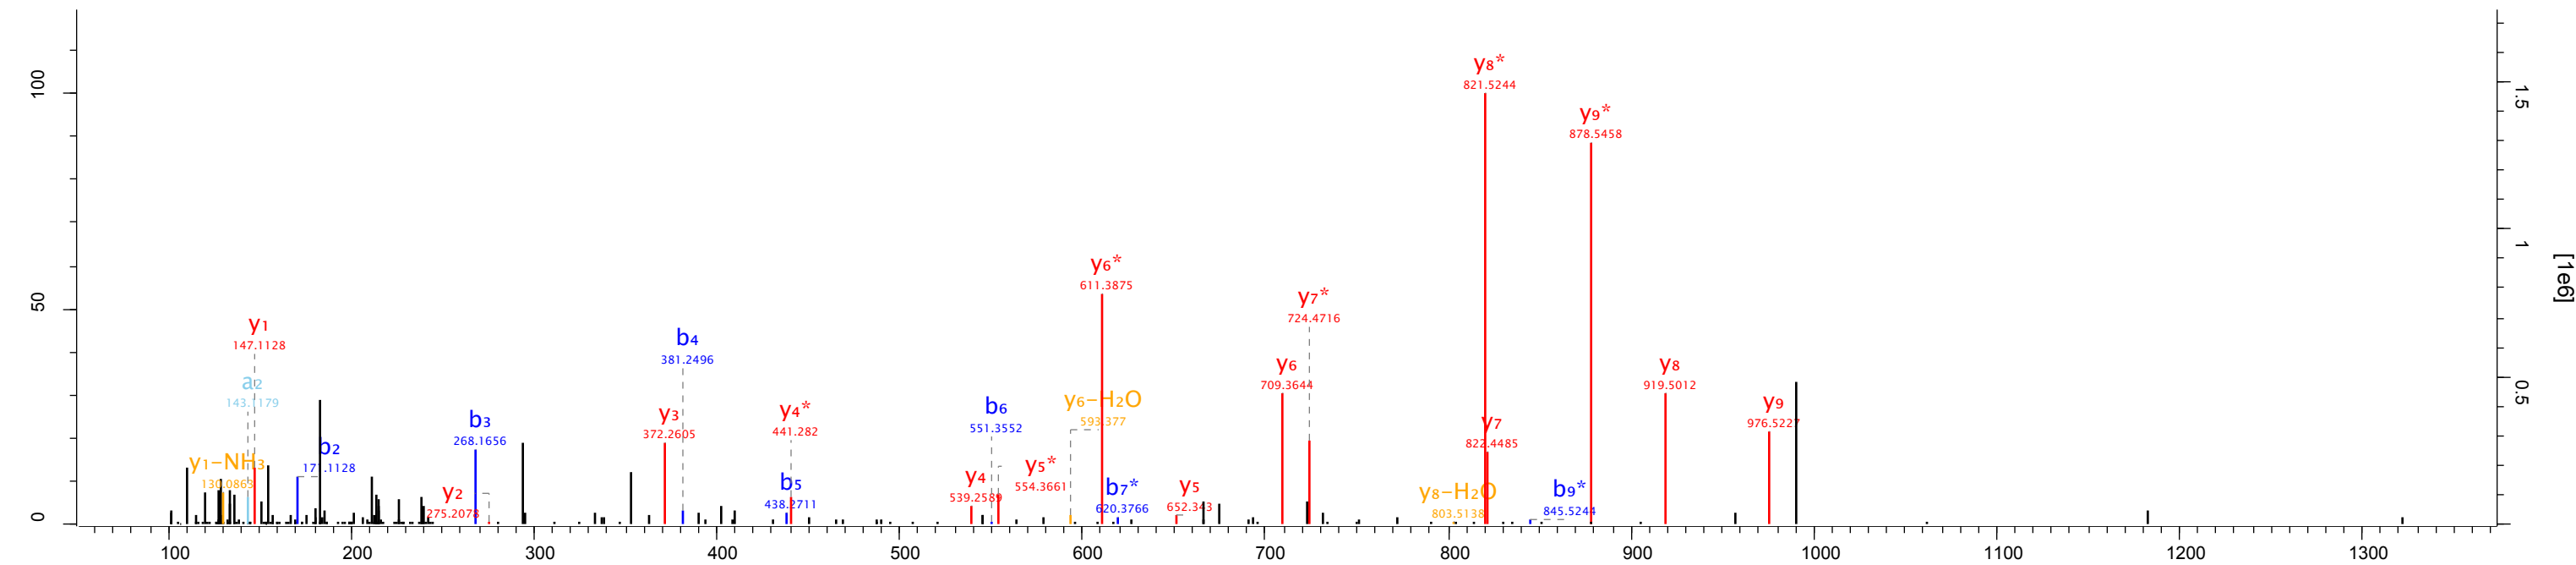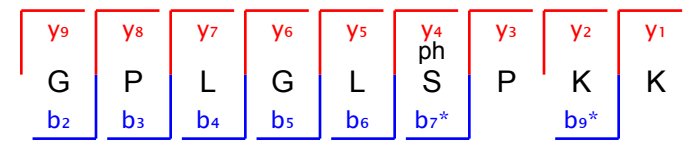

Raw file 20150814\_A375SR\_Phospho\_BR2\_08 Scan 14079 Method FTMS; HCD Score 119.65 m/z 598.63 Gene names MPST

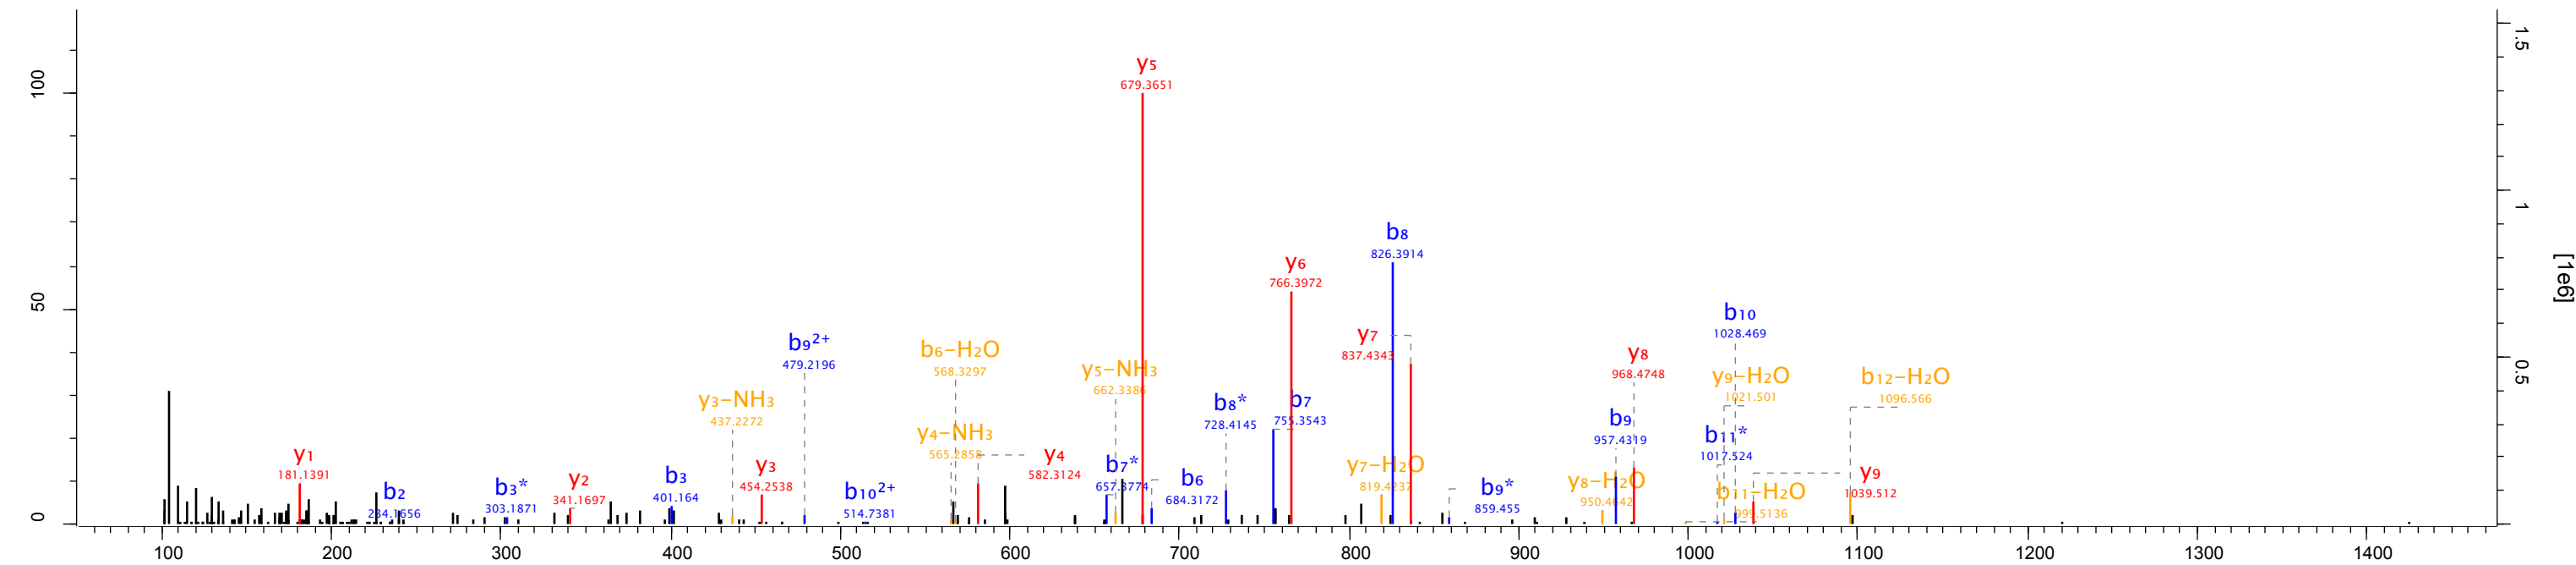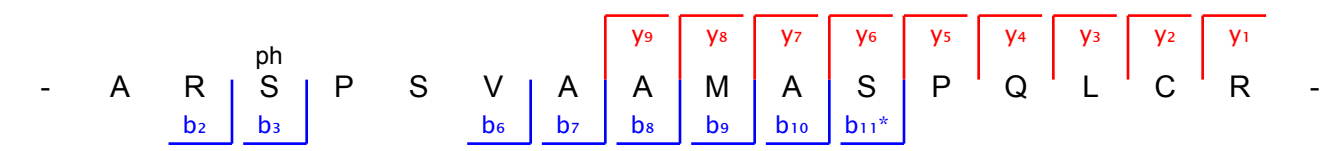



Raw file: 20150814\_A375SR\_Phospho\_BR2\_08  
 Scan: 14529 Method: FTMS; HCD Score: 162.44 m/z: 876.92 Gene names: SLC4A7

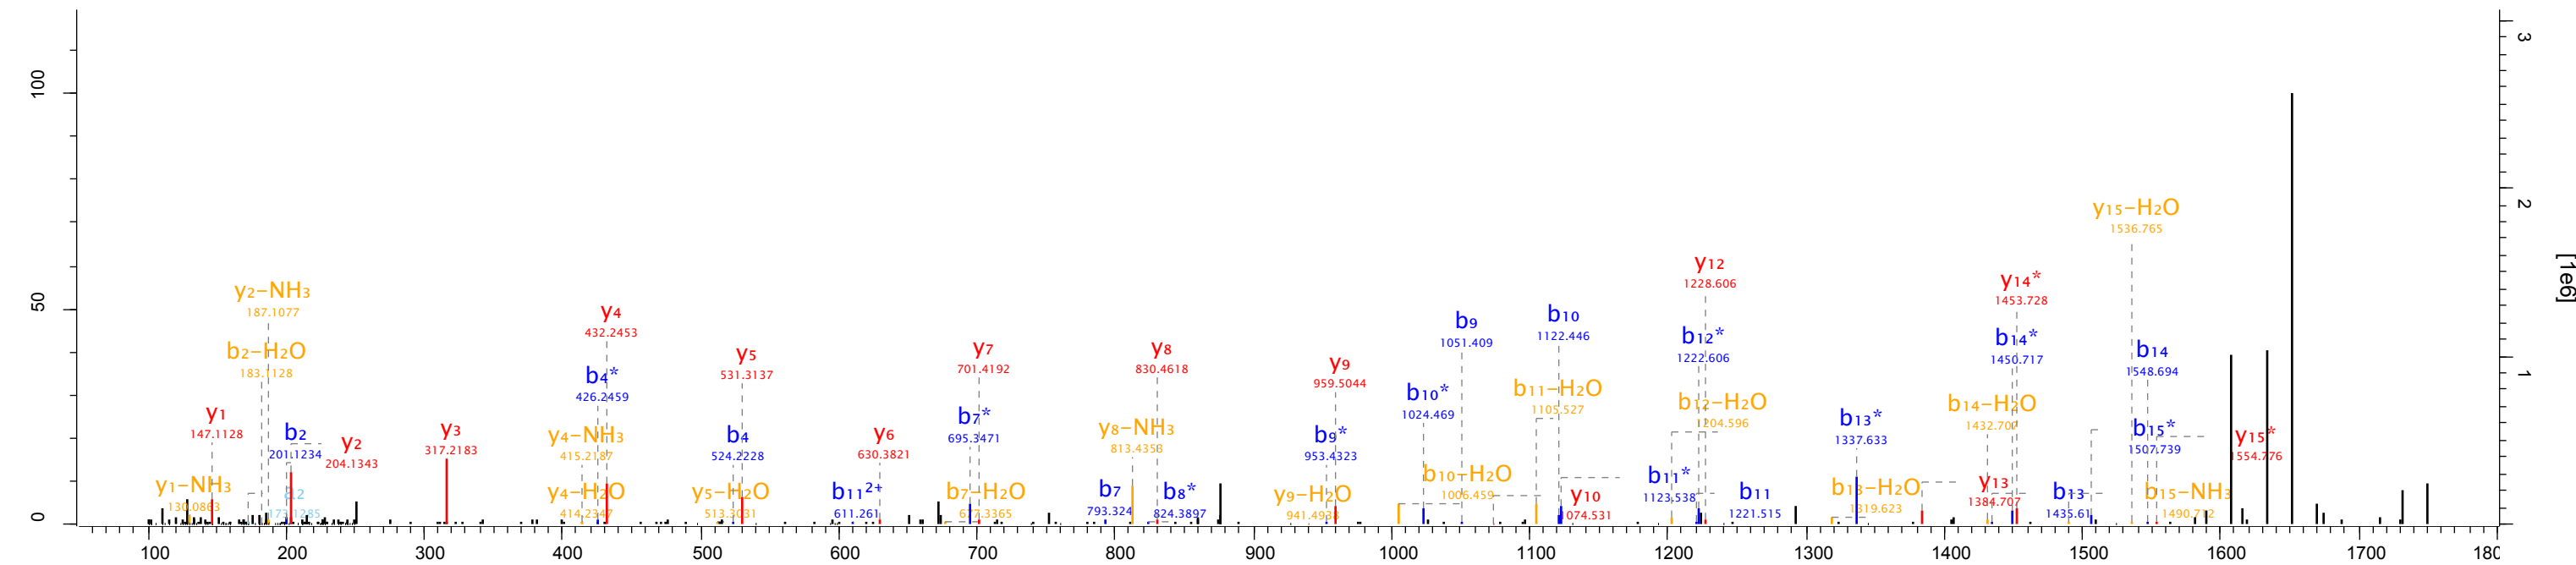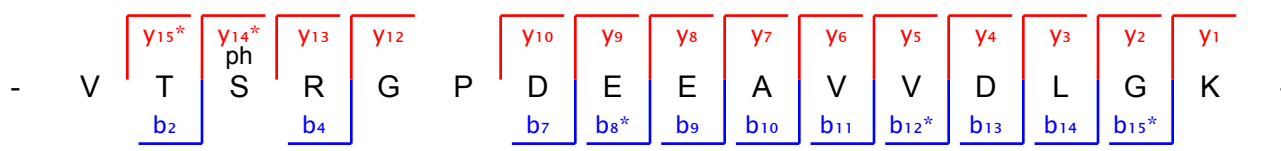

Raw file 20150814\_A375SR\_Phospho\_BR2\_08 Scan 14829 Method FTMS; HCD Score 80.28 m/z 597.64 Gene names UBR4

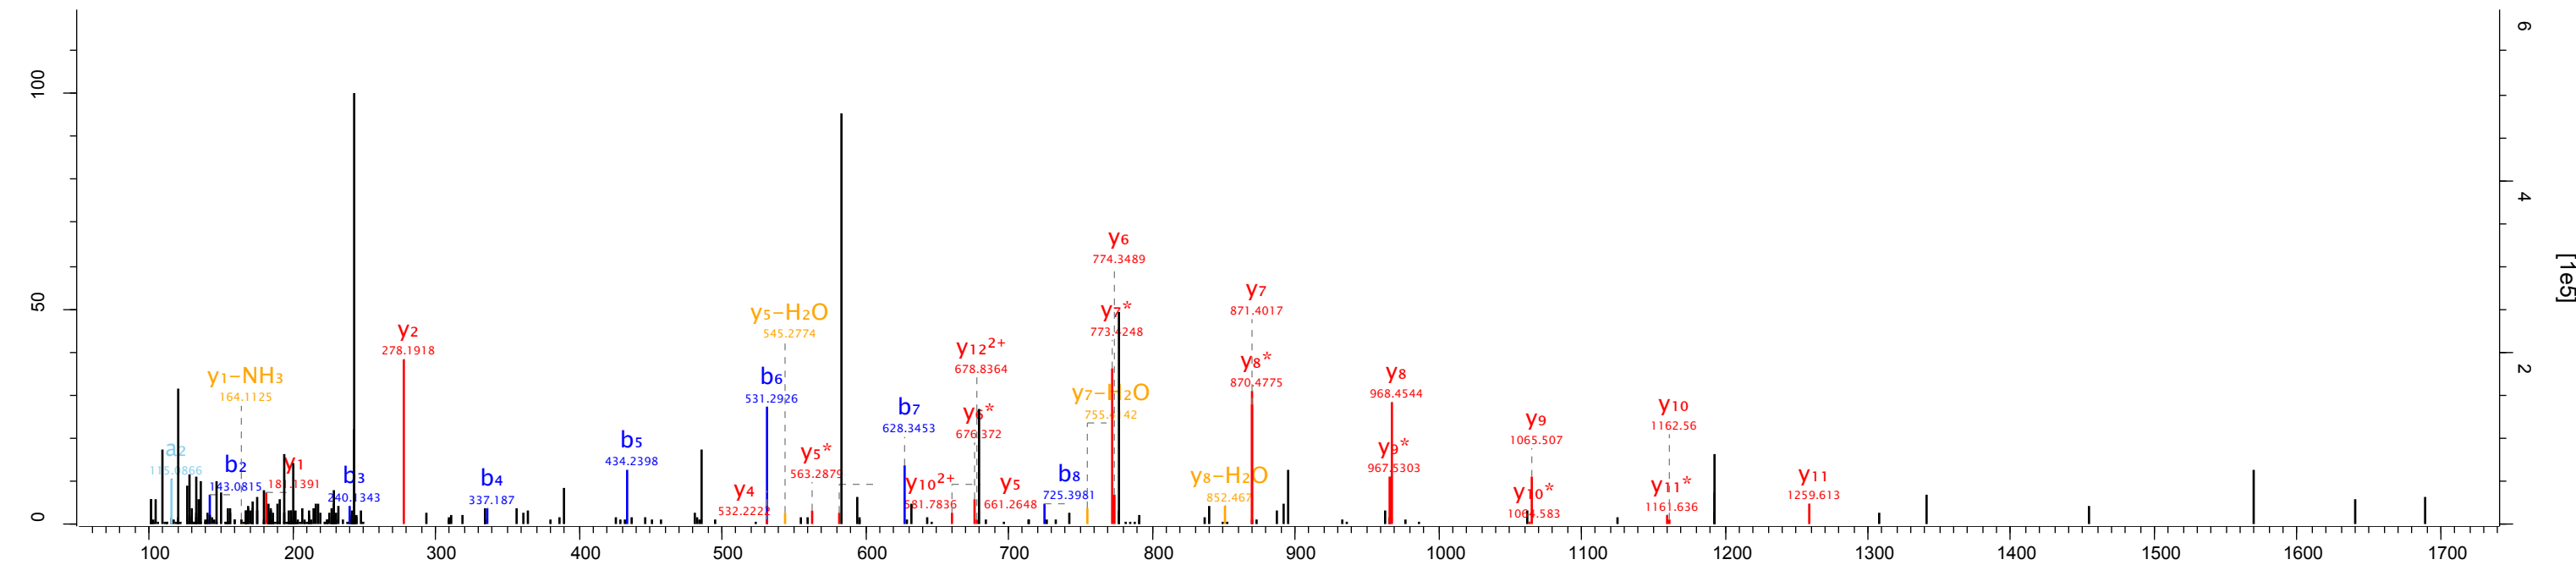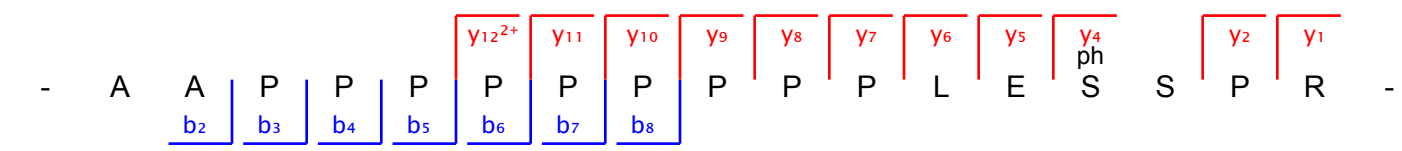

Raw file: 20150814\_A375SR\_Phospho\_BR2\_08  
 Scan: 15469 Method: FTMS; HCD Score: 93.23 m/z: 542.9 Gene names: ARHGAP29

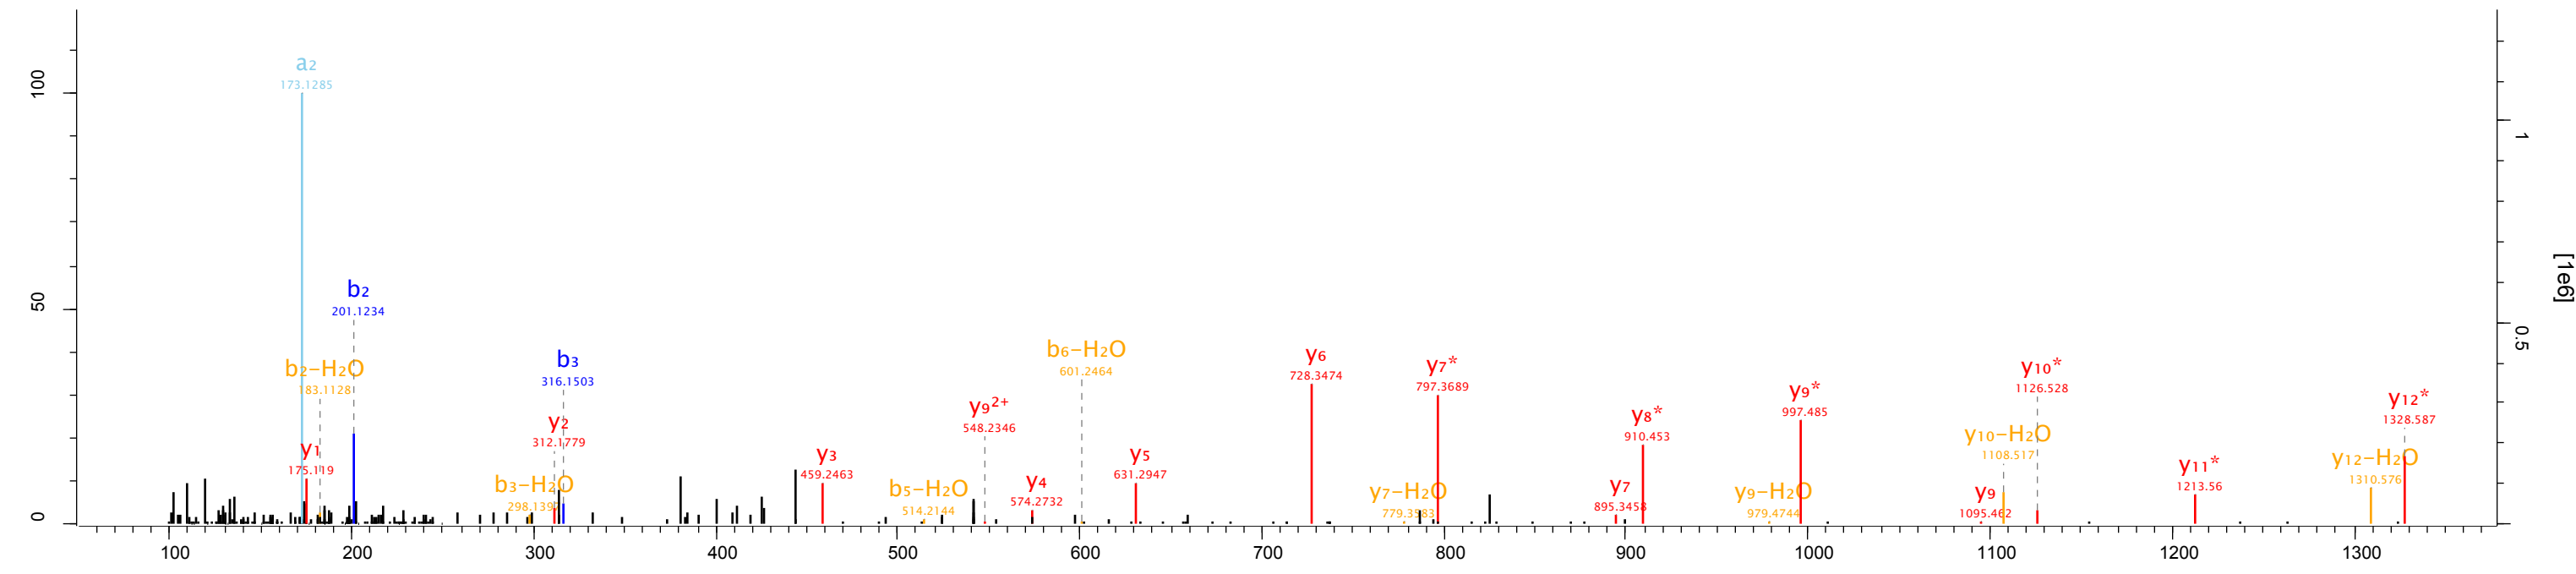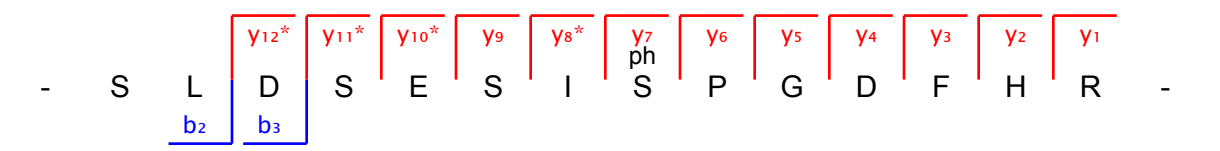

Raw file: 20150814\_A375SR\_Phospho\_BR2\_08  
 Scan: 15789 Method: FTMS; HCD Score: 165.17 m/z: 764.4 Gene names: MAP4

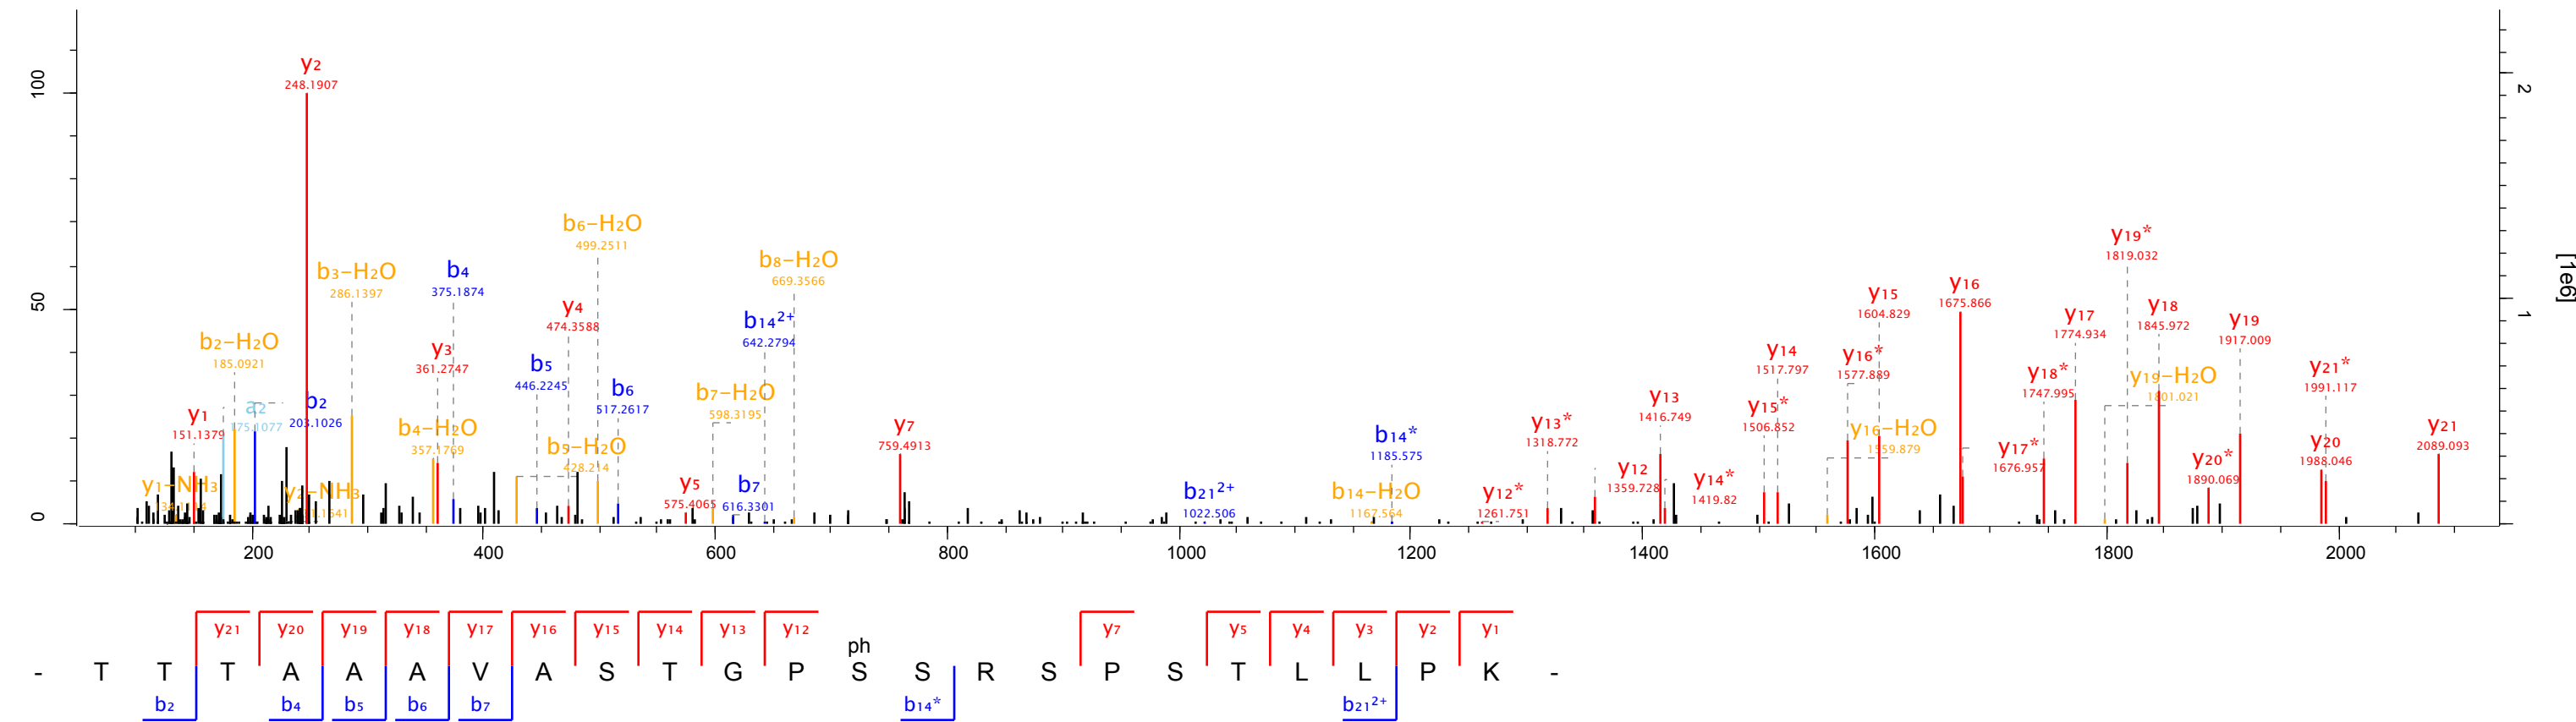

Raw file: 20150814\_A375SR\_Phospho\_BR2\_08  
 Scan: 15839 Method: FTMS; HCD Score: 127.51 m/z: 555.74 Gene names: ARHGEF7; ARHGEF6

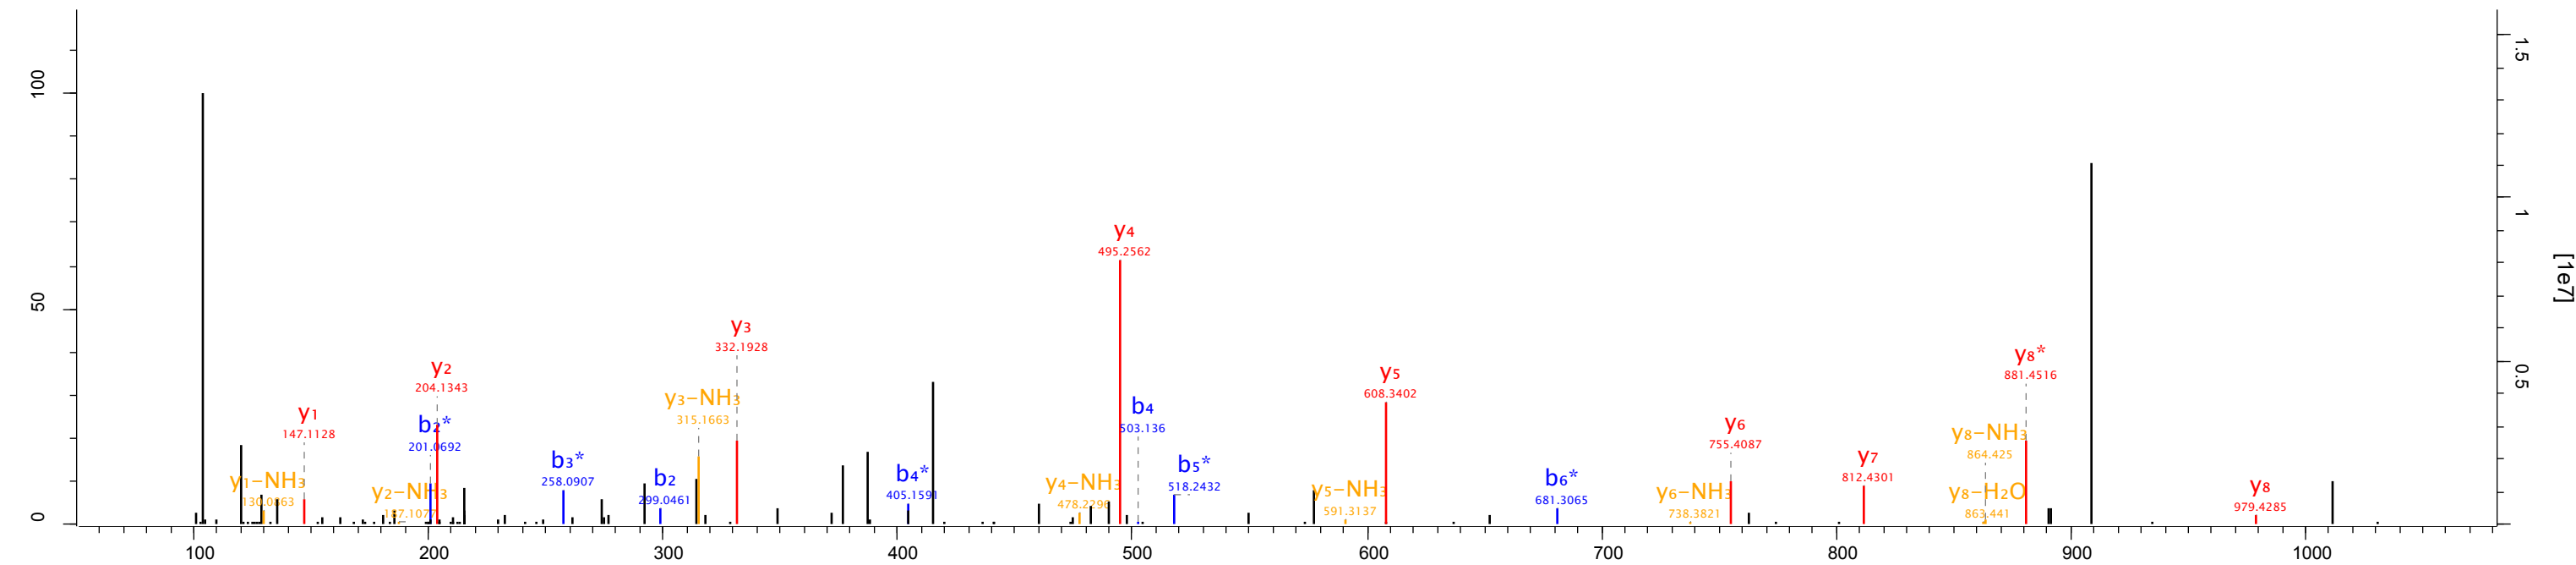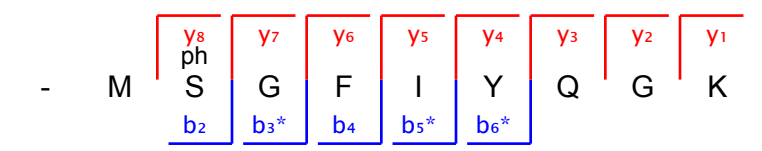

Raw file: 20150814\_A375SR\_Phospho\_BR2\_08  
 Scan: 15869 Method: FTMS; HCD Score: 89.23 m/z: 715.8 Gene names: TACC2

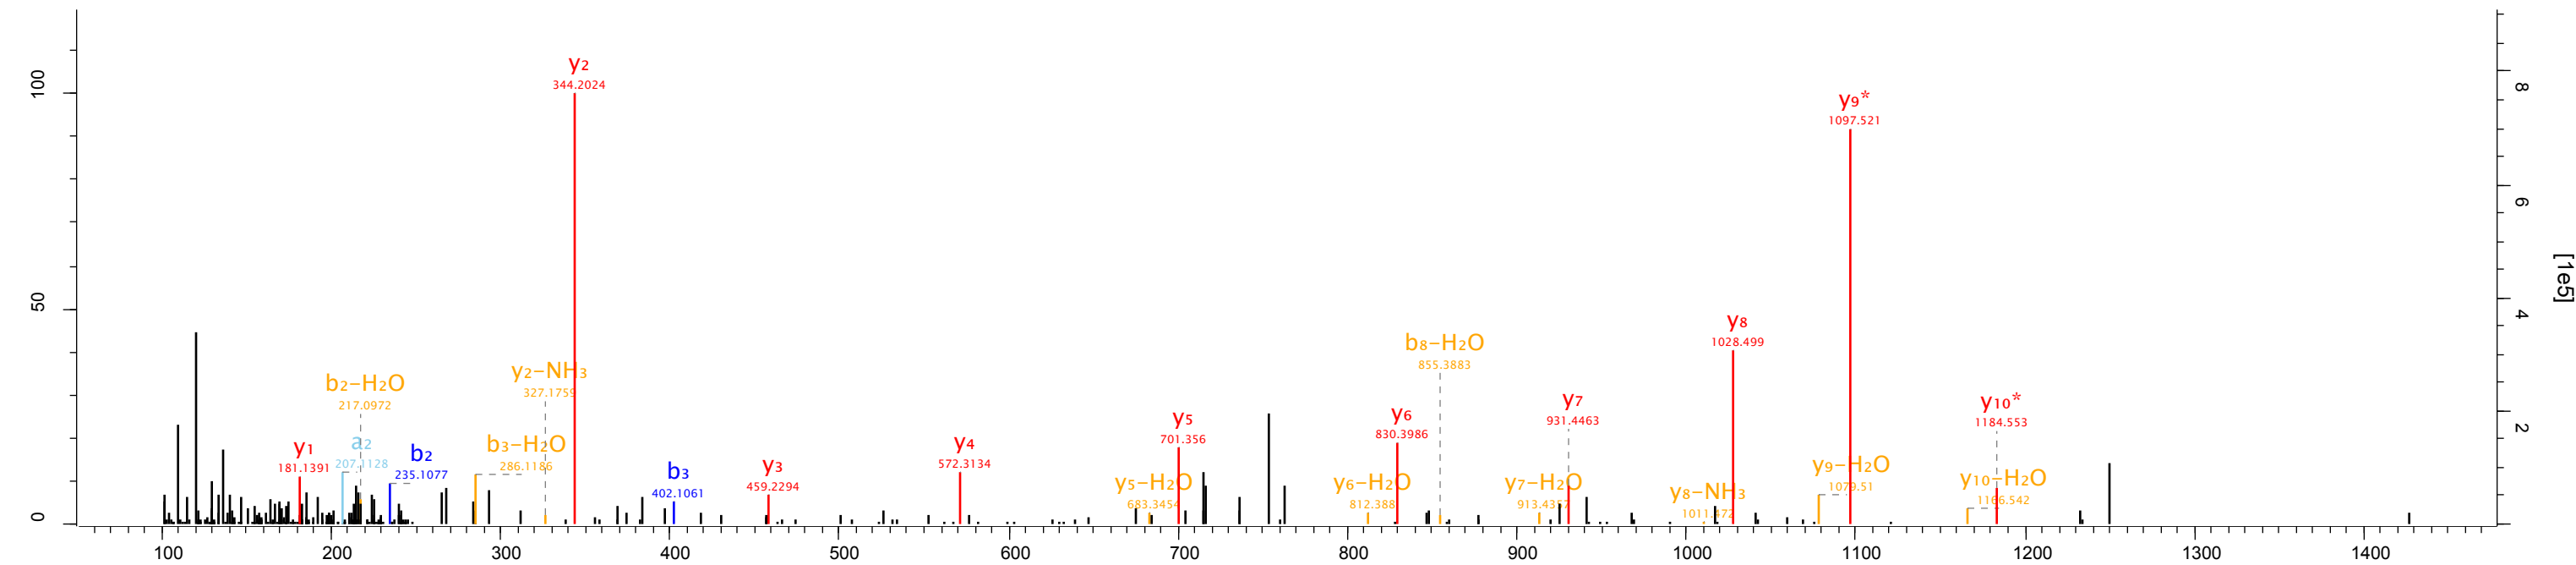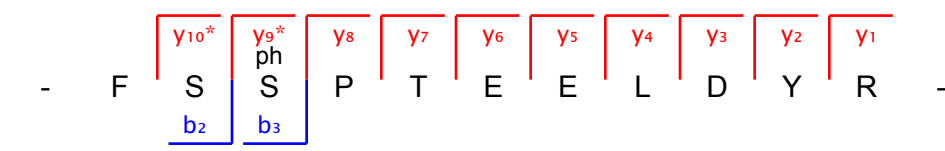

Raw file 20150814\_A375SR\_Phospho\_BR2\_08 Scan 16839 Method FTMS; HCD Score 139.51 m/z 724.4 Gene names CLIP1;CLIP2

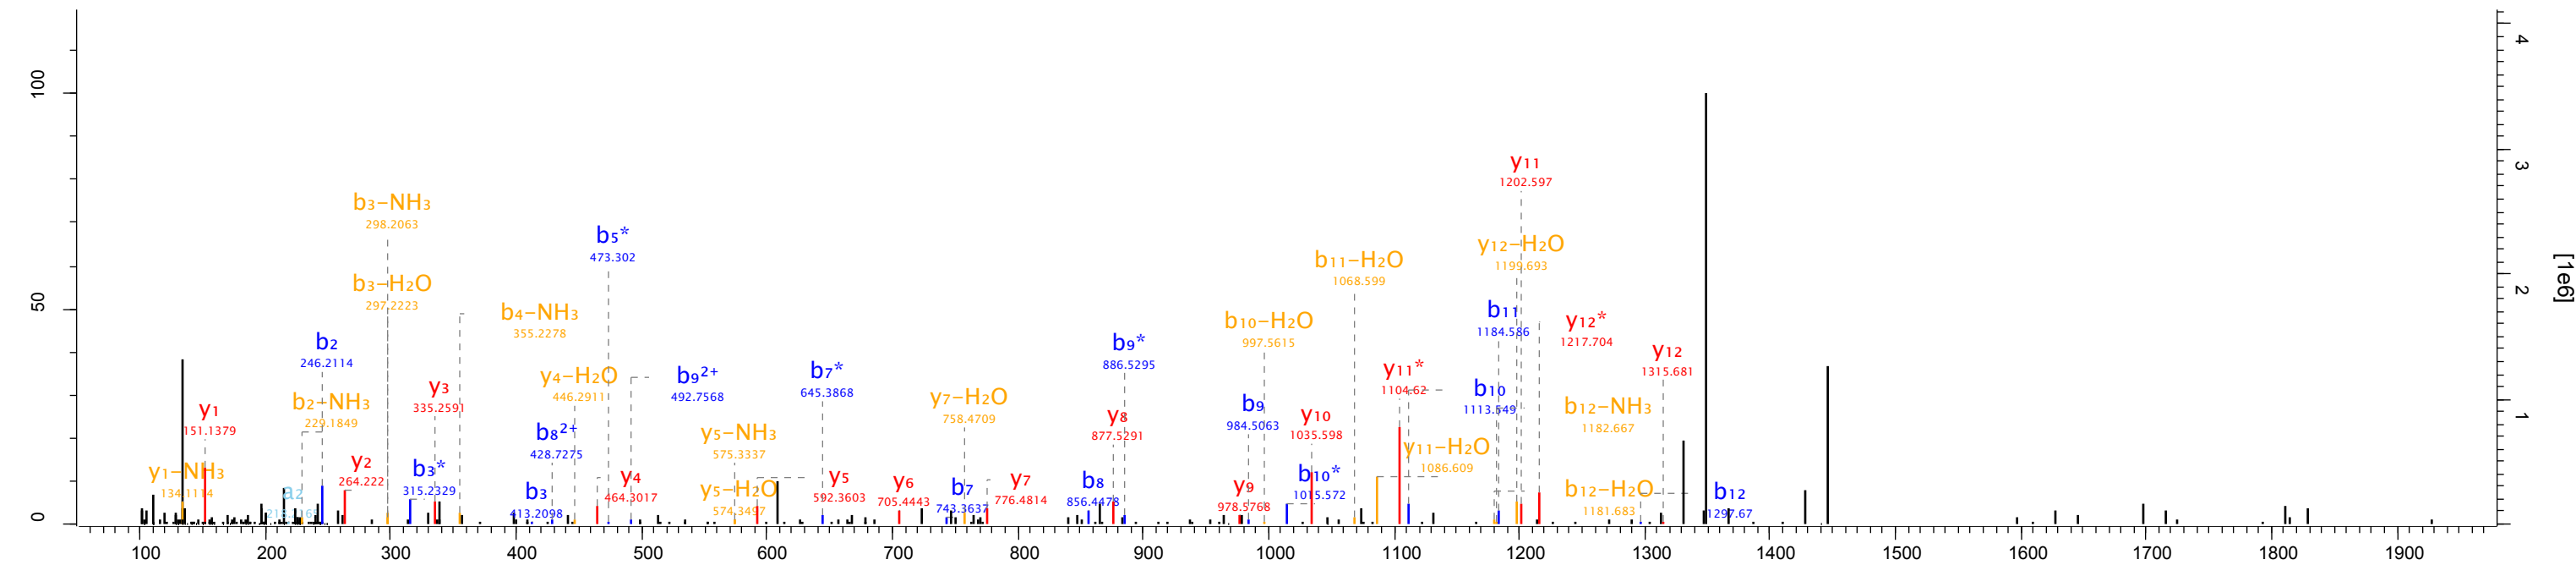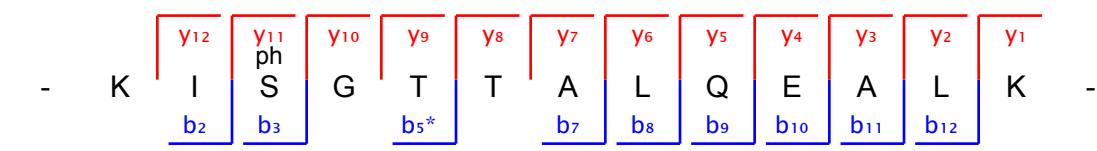

Raw file: 20150814\_A375SR\_Phospho\_BR2\_08  
 Scan: 17339 Method: FTMS; HCD Score: 75.1 m/z: 1101.04 Gene names: SRCAP

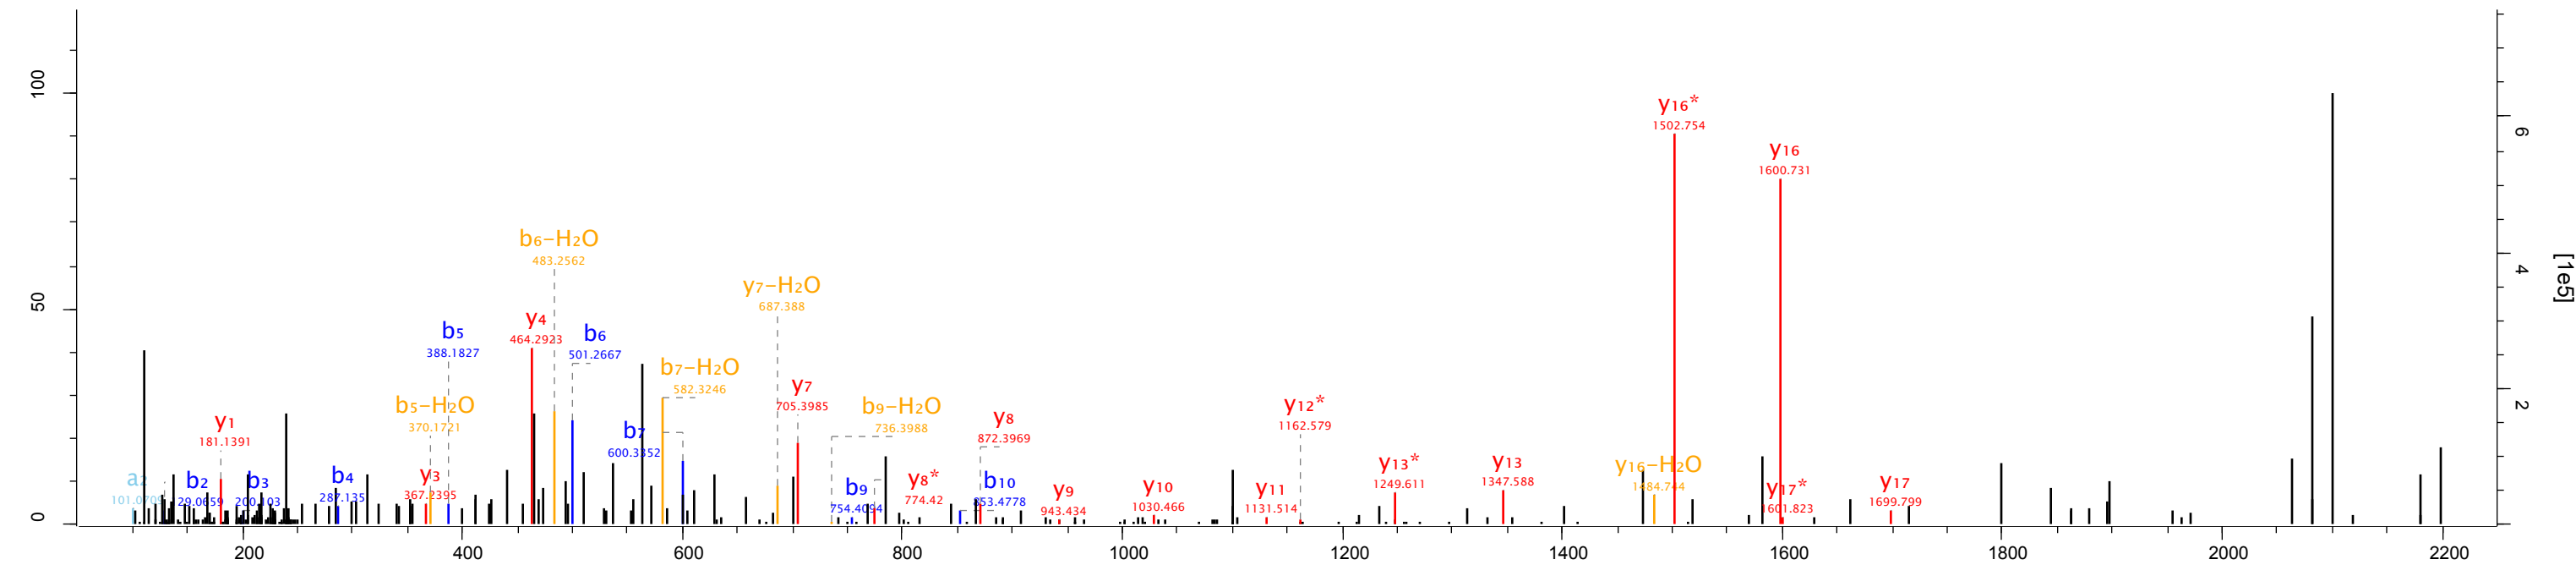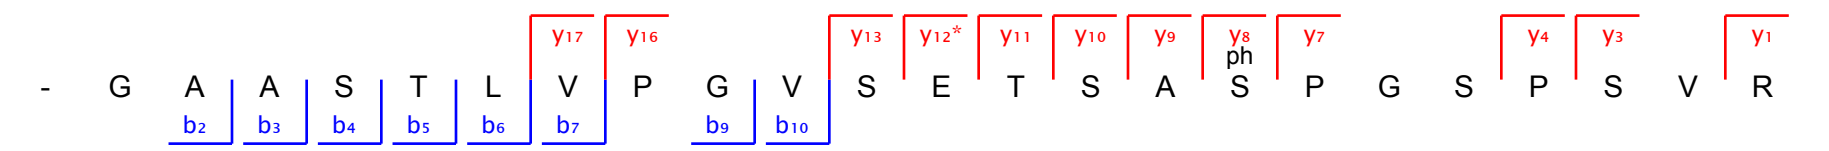



Raw file 20150814\_A375SR\_Phospho\_BR2\_08 Scan 18369 Method FTMS; HCD Score 142.17 m/z 703.35 Gene names U2SURP

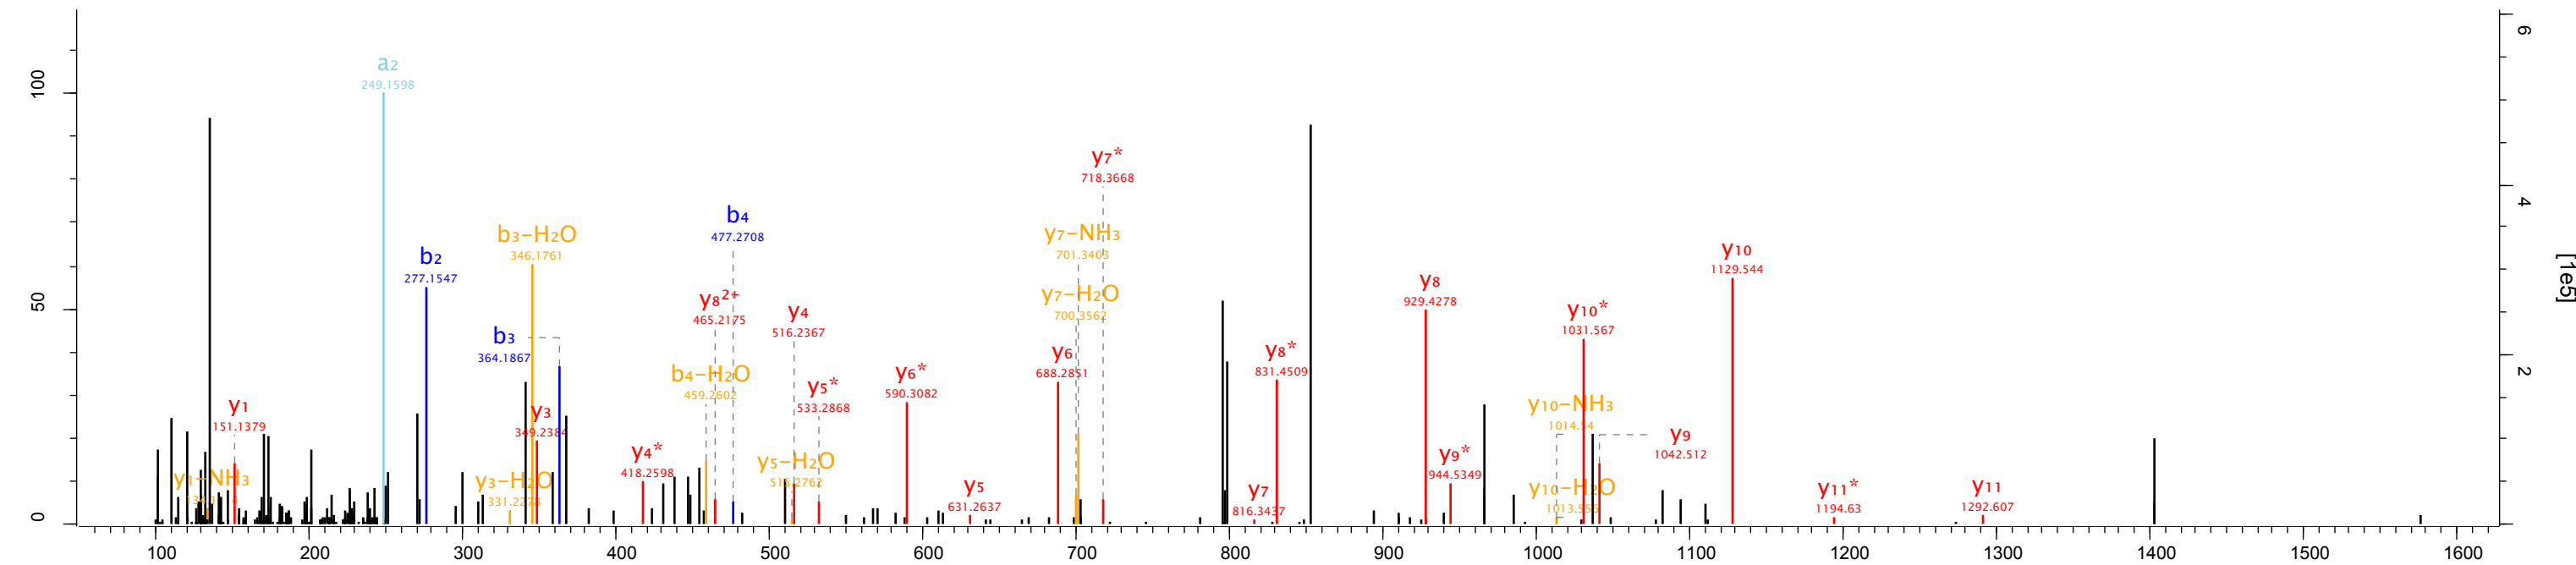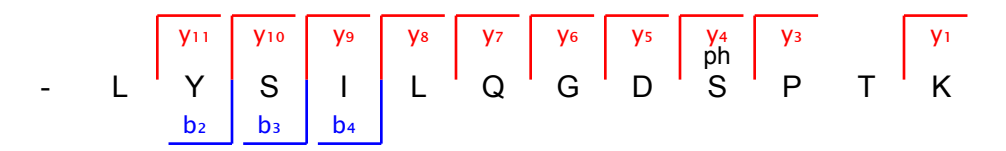

Raw file: 20150814\_A375SR\_Phospho\_BR2\_08  
 Scan: 19329 Method: FTMS; HCD Score: 113.89 m/z: 956 Gene names: GAS2L3

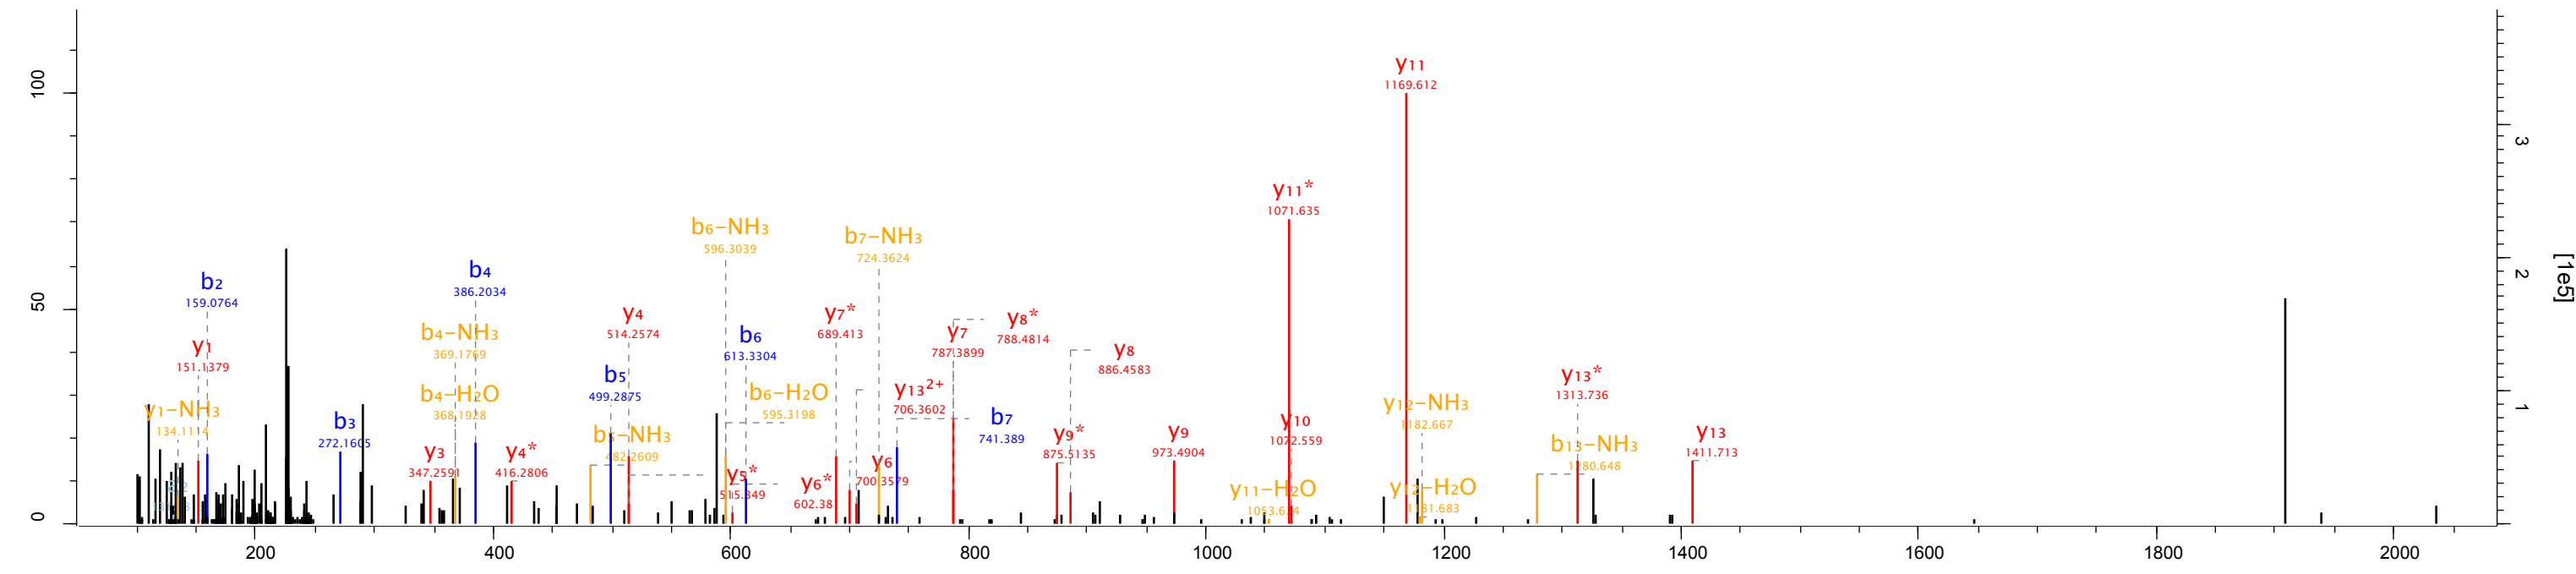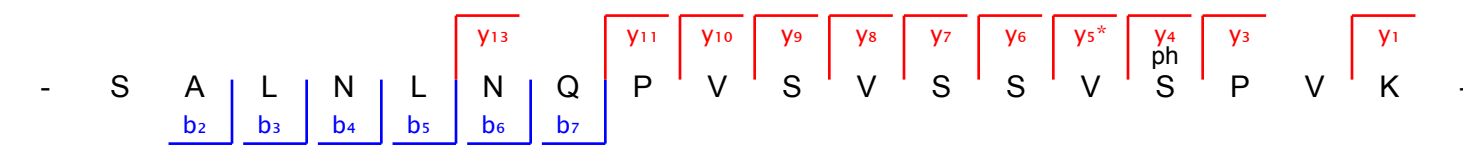

Raw file  
20150814\_A375SR\_Phospho\_BR2\_08

Scan 20979 Method FTMS; HCD Score 225.29 m/z 948.46 Gene names YLPM1

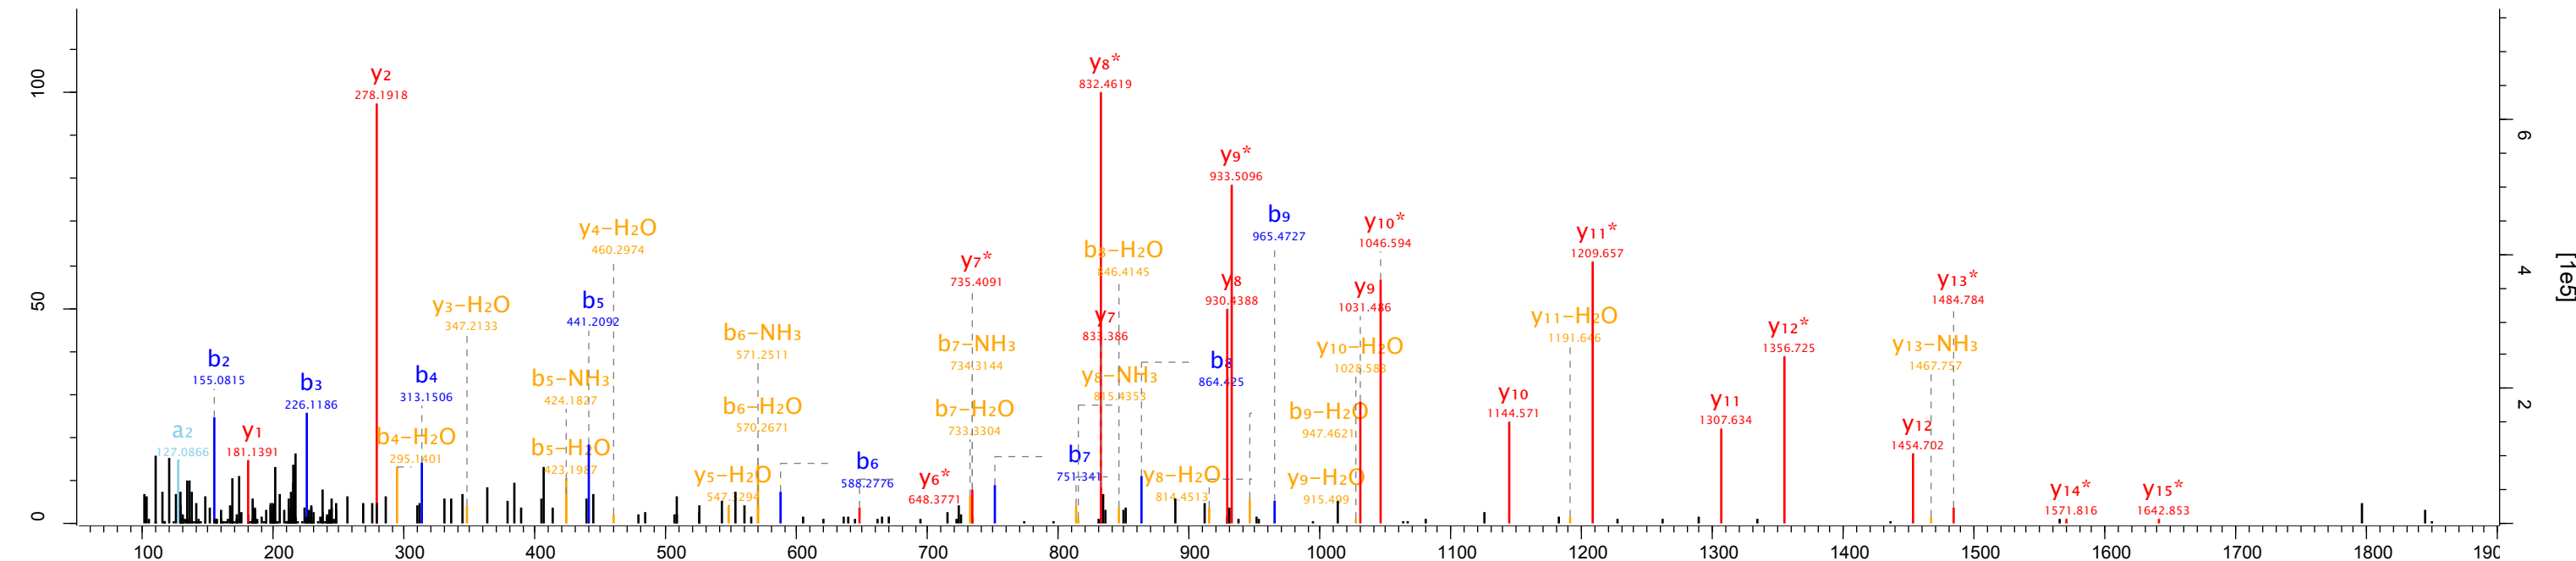

- G P A S Q F Y I T P S T S L S P R -

Peptide sequence: - G P A S Q F Y I T P S T S L S P R -

Fragmentation sites are indicated by boxes below the sequence:

- Red boxes: y15\*, y14\*, y13\*, y12, y11, y10, y9, y8, y7, y6\*ph, y2, y1
- Blue boxes: b2, b3, b4, b5, b6, b7, b8, b9

Raw file: 20150814\_A375SR\_Phospho\_BR2\_08  
 Scan: 22429 Method: FTMS; HCD Score: 59.57 m/z: 846.06 Gene names: CLASP1

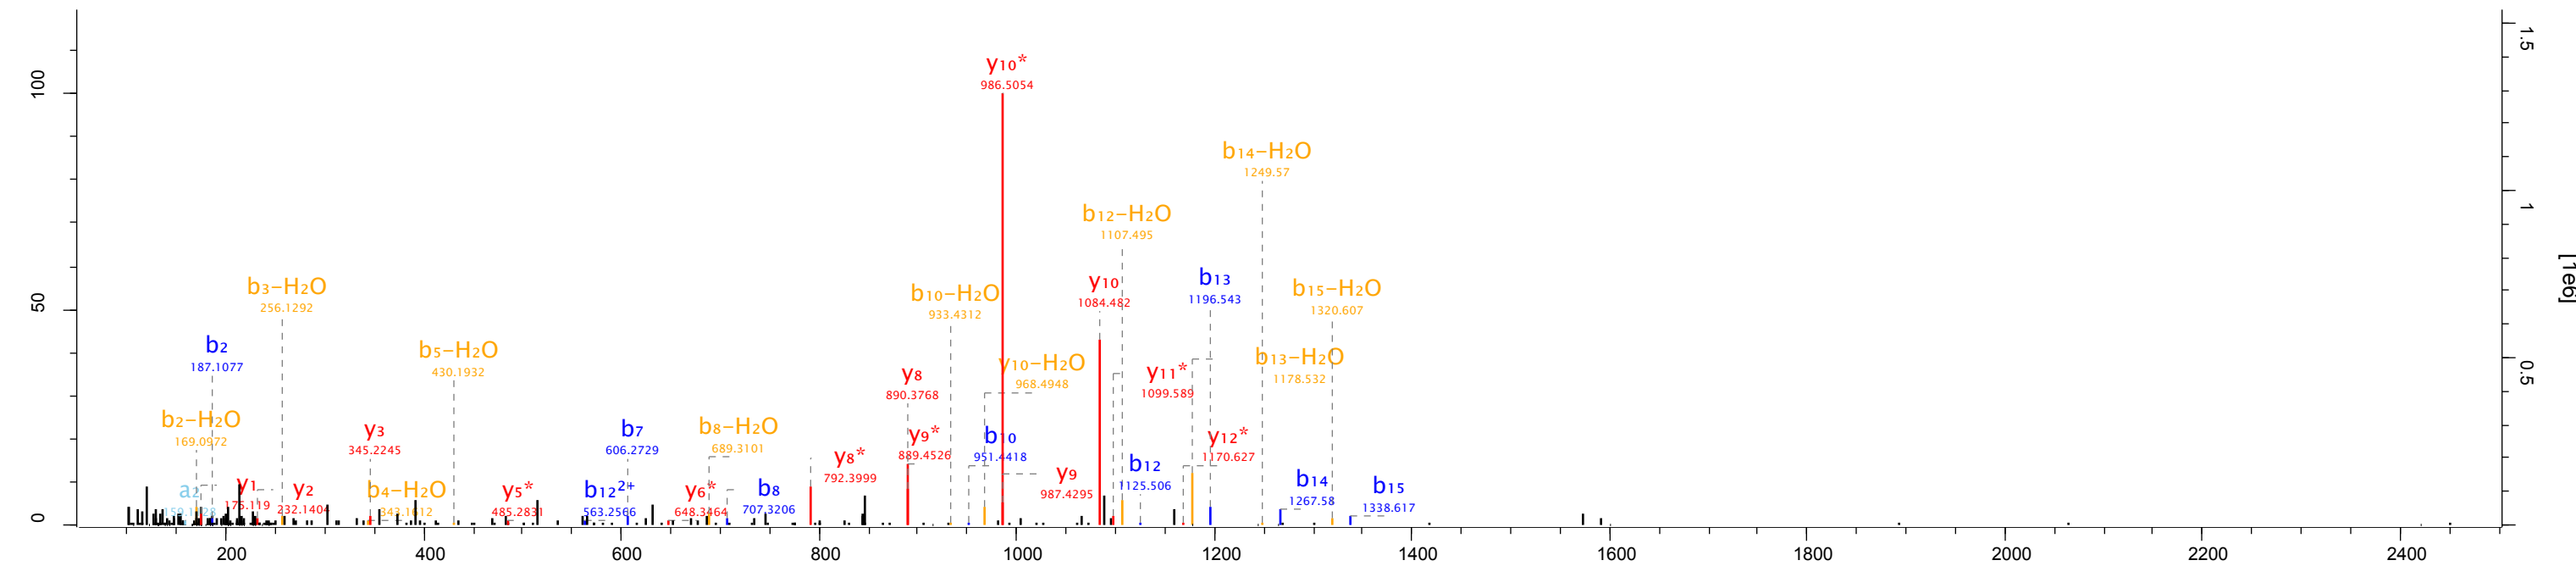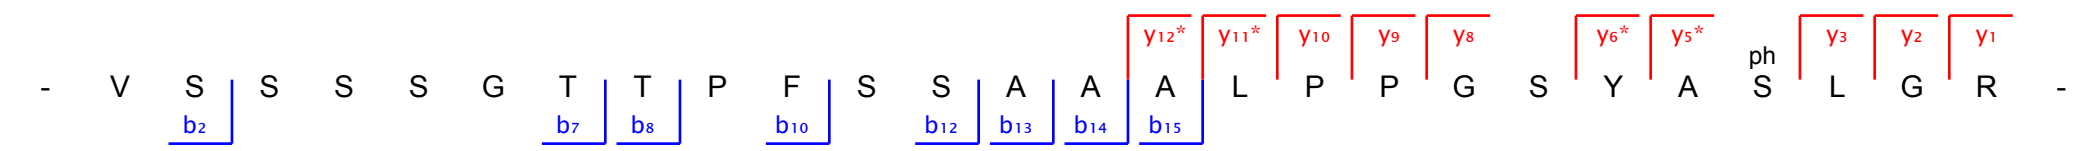

Raw file 20150814\_A375SR\_Phospho\_BR2\_08 Scan 23749 Method FTMS; HCD Score 88.29 m/z 1321.3 Gene names PPP1R18

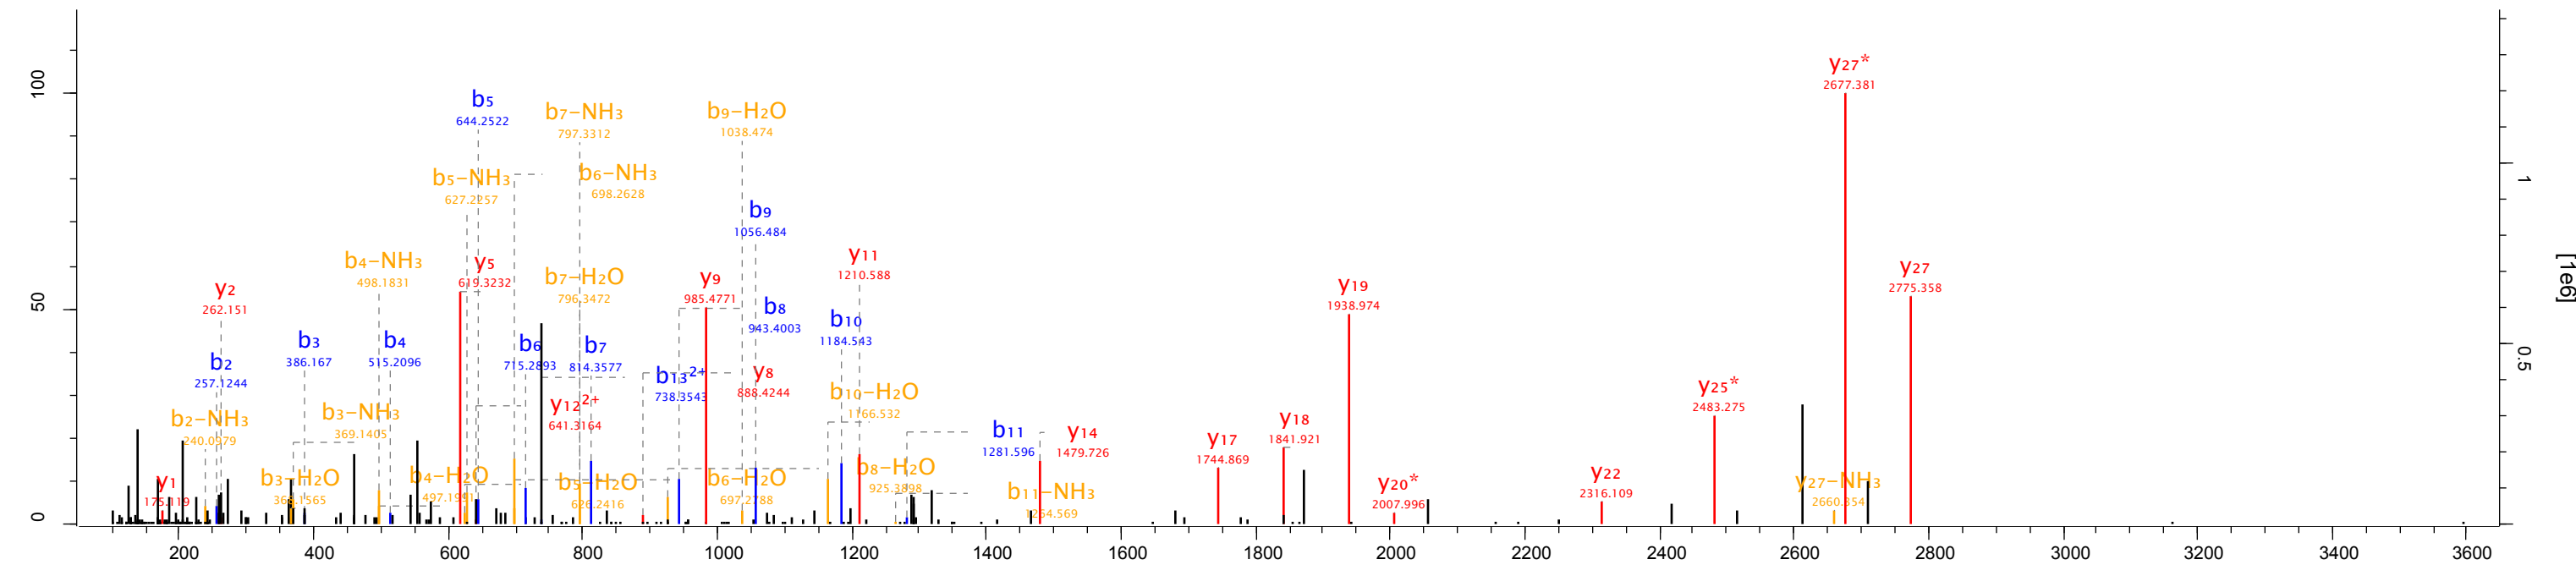

- Q Q E E E A V E L Q P P P A P L S P P P P A P T A P Q P P G D P L M ox S R -

Fragmentation labels below the sequence: b2, b3, b4, b5, b6, b7, b8, b9, b10, b11, b13<sup>2+</sup>, y27, y25\*, y22, y20\*<sub>ph</sub>, y19, y18, y17, y14, y12<sup>2+</sup>, y11, y9, y8, y5, y2, y1.

Raw file  
 20150814\_A375SR\_Phospho\_BR2\_08  
 Scan 2549 Method FTMS; HCD Score 76.07 m/z 554.28 Gene names C15orf39

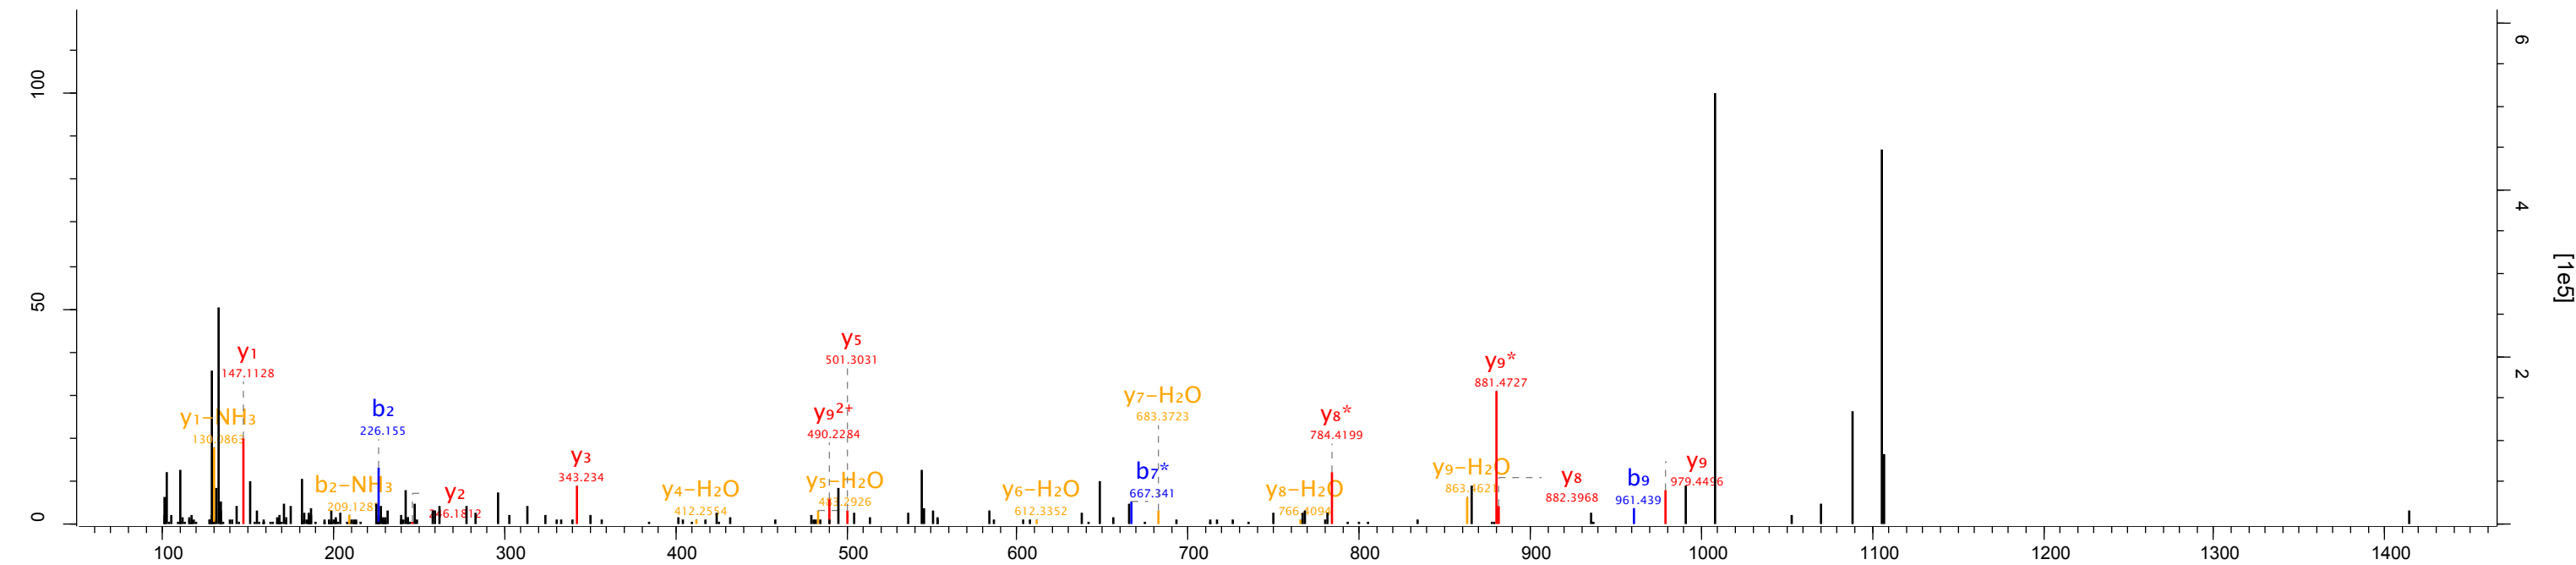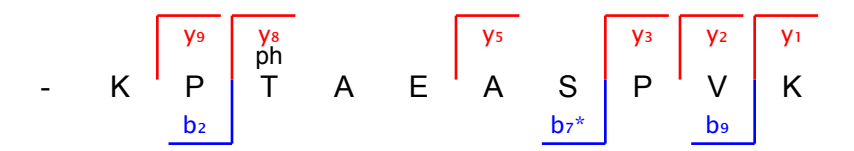

Raw file 20150814\_A375SR\_Phospho\_BR2\_08 Scan 27339 Method FTMS; HCD Score 239.96 m/z 1273.16 Gene names EIF3G

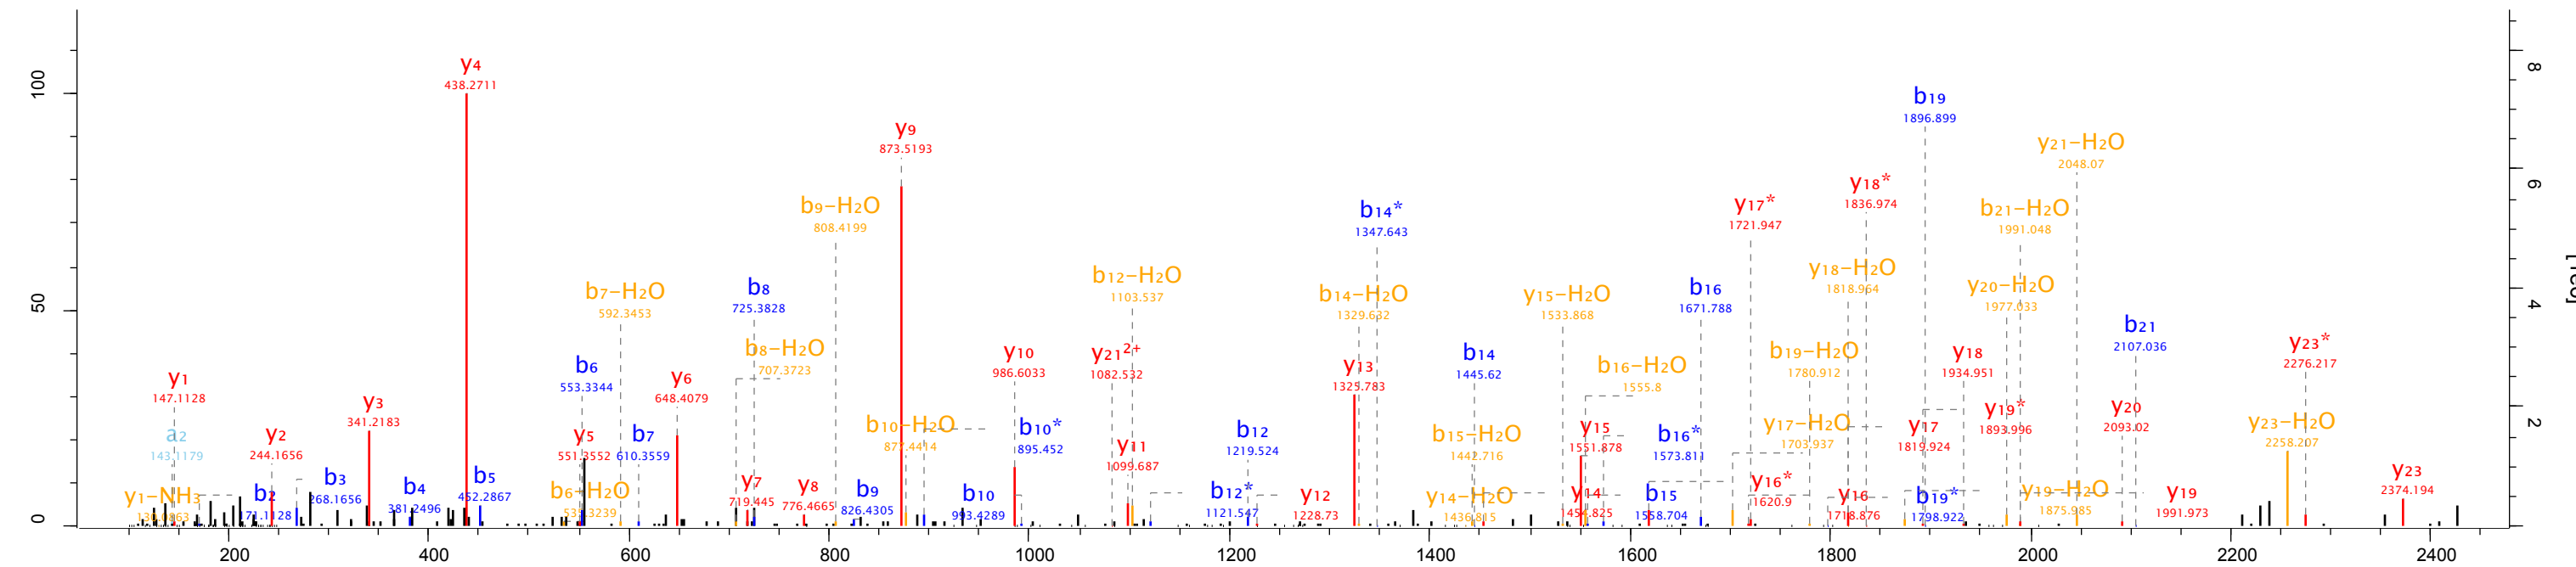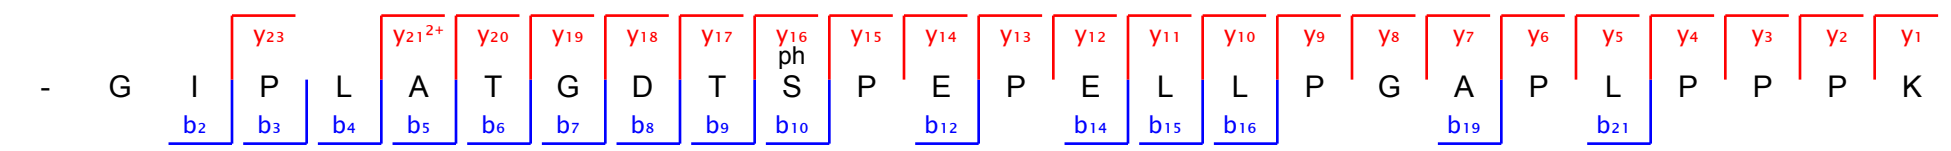

Raw file: 20150814\_A375SR\_Phospho\_BR2\_08  
 Scan: 28649 Method: FTMS; HCD Score: 282.86 m/z: 1211.57 Gene names: EIF4B

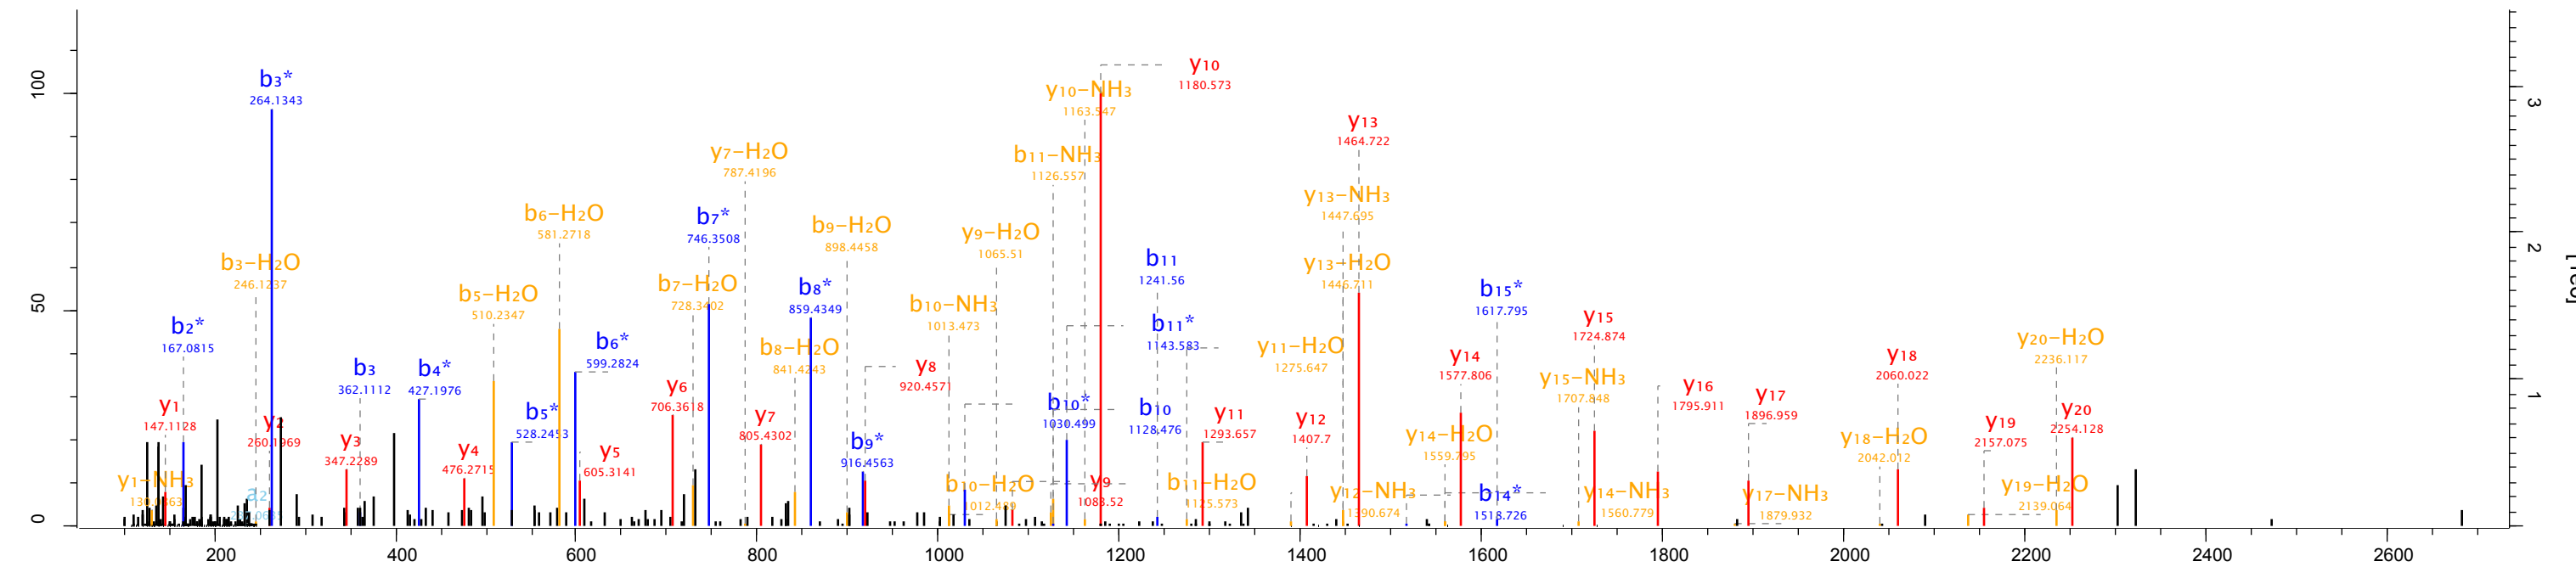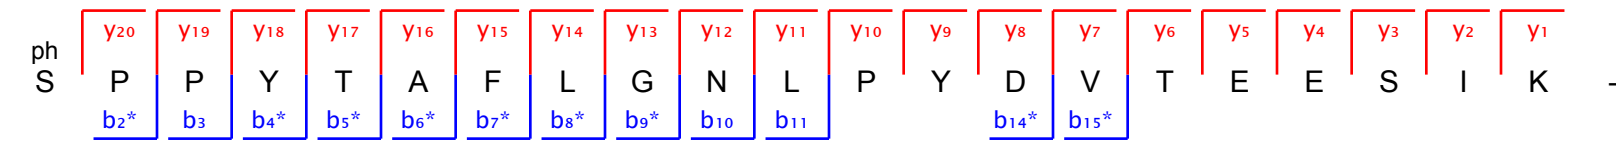



Raw file: 20150814\_A375SR\_Phospho\_BR2\_08  
 Scan: 3249 Method: FTMS; HCD Score: 93.94 m/z: 493.69 Gene names: LMNA

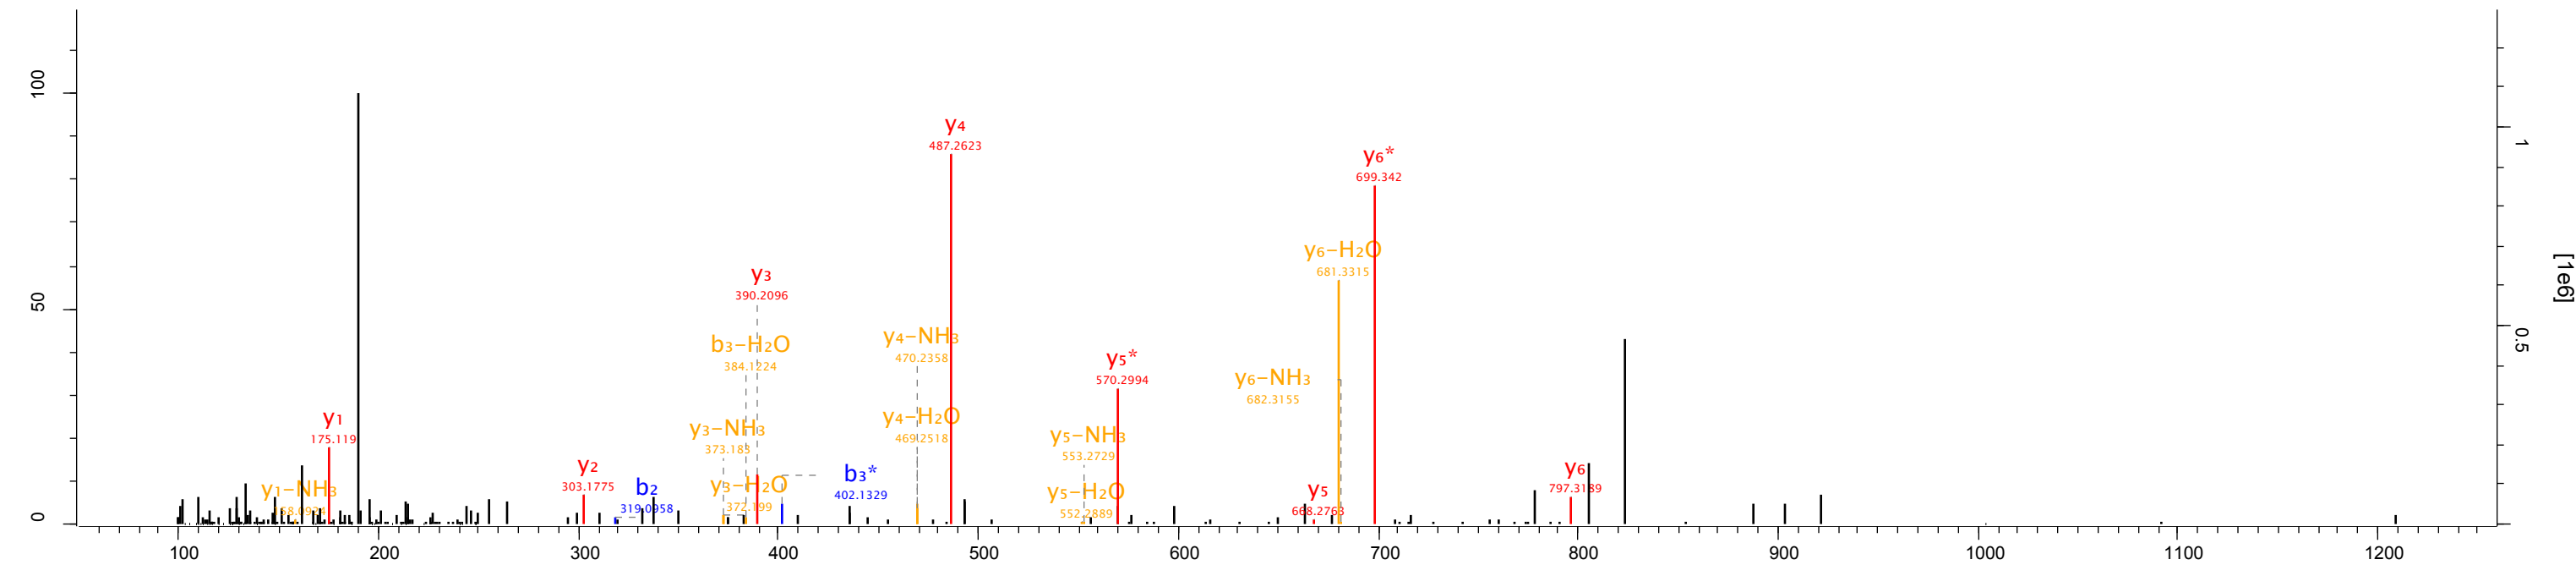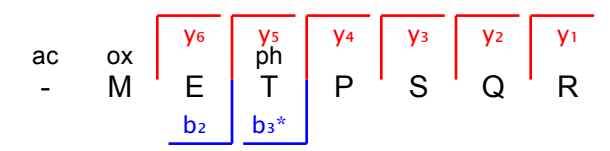

Raw file: 20150814\_A375SR\_Phospho\_BR2\_08  
 Scan: 3569 Method: FTMS; HCD Score: 54.09 m/z: 454.55 Gene names: EEF2

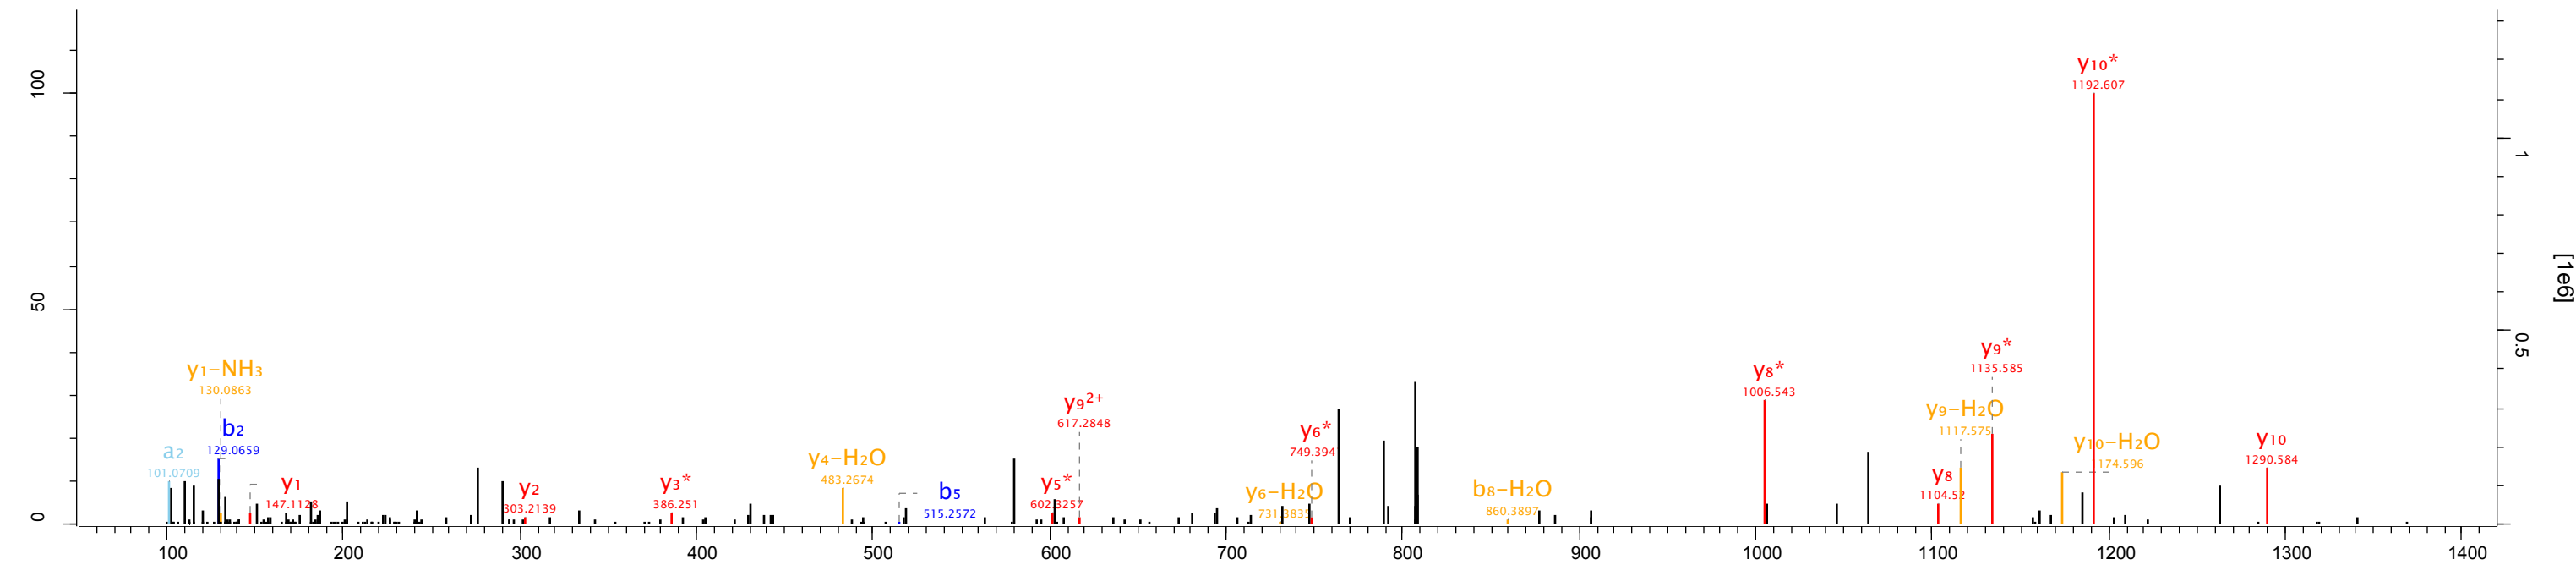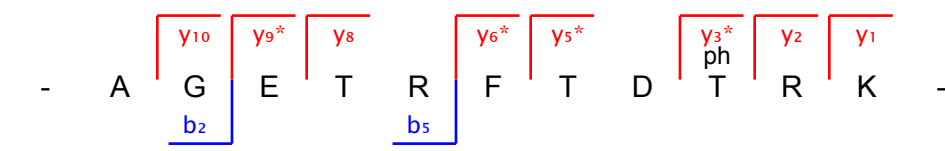

Raw file: 20150814\_A375SR\_Phospho\_BR2\_08  
 Scan: 3579 Method: FTMS; HCD Score: 122.08 m/z: 697.34 Gene names: SETD2

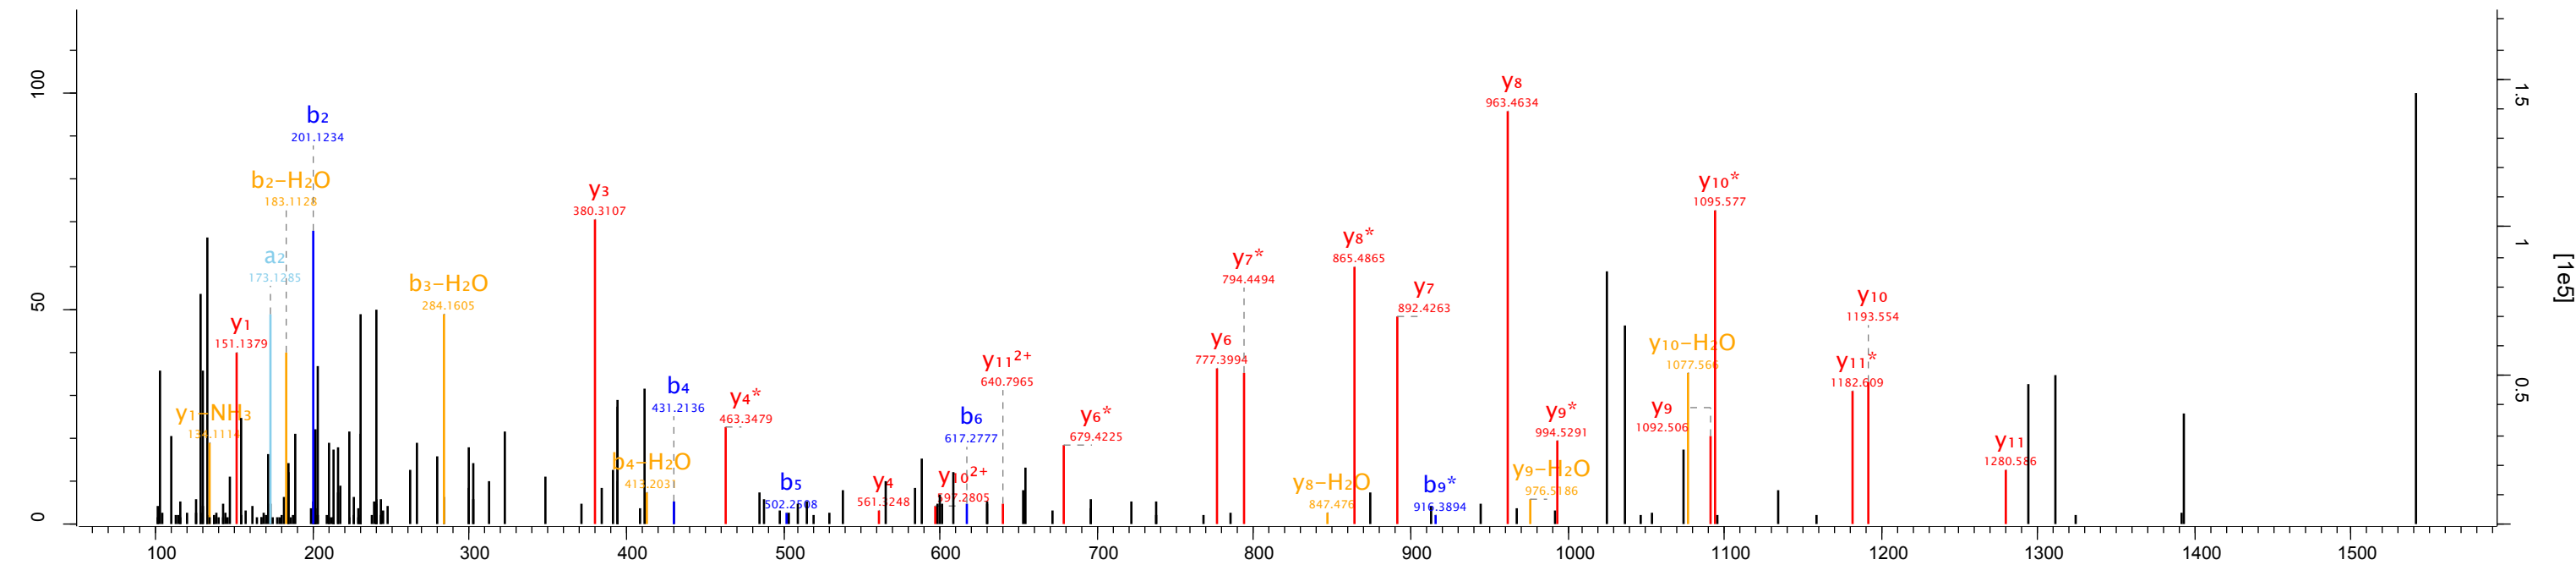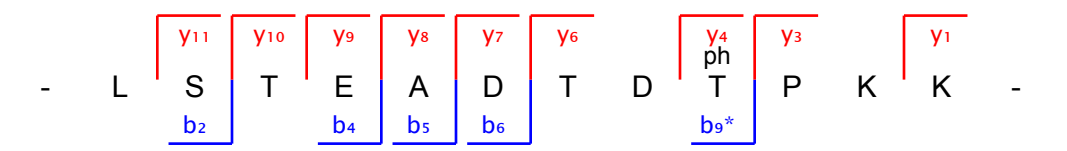

Raw file: 20150814\_A375SR\_Phospho\_BR2\_08  
 Scan: 3629 Method: FTMS; HCD Score: 66.78 m/z: 427.56 Gene names: SIN3A

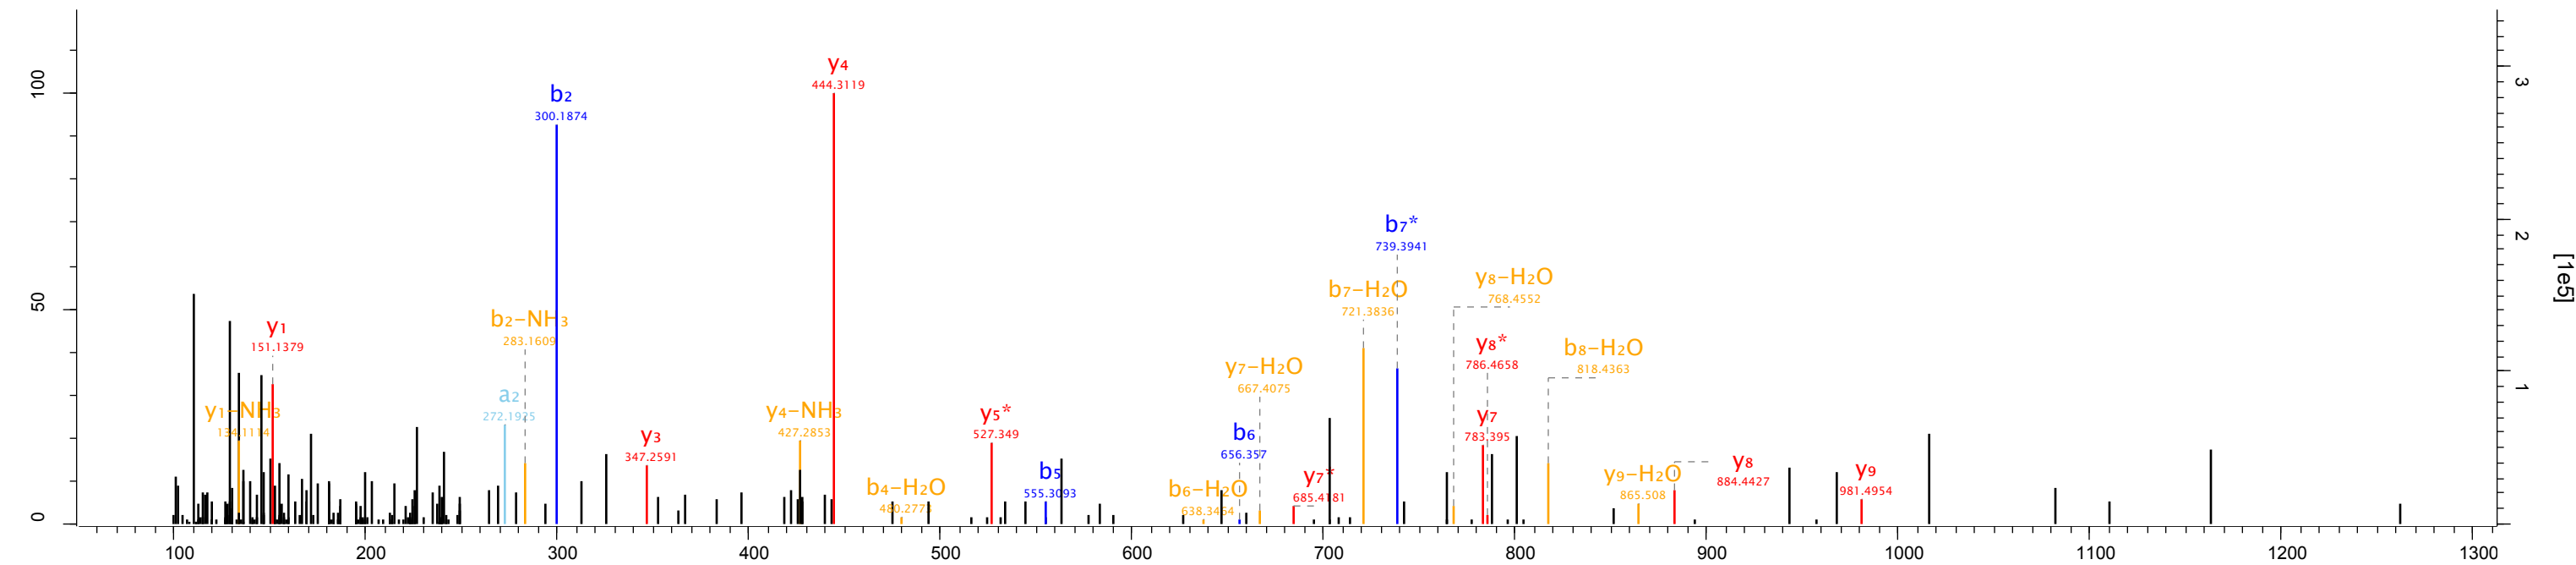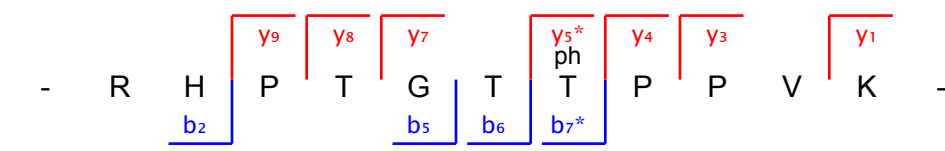

Raw file 20150814\_A375SR\_Phospho\_BR2\_08 Scan 4339 Method FTMS; HCD Score 82.66 m/z 666.8 Gene names TBC1D1

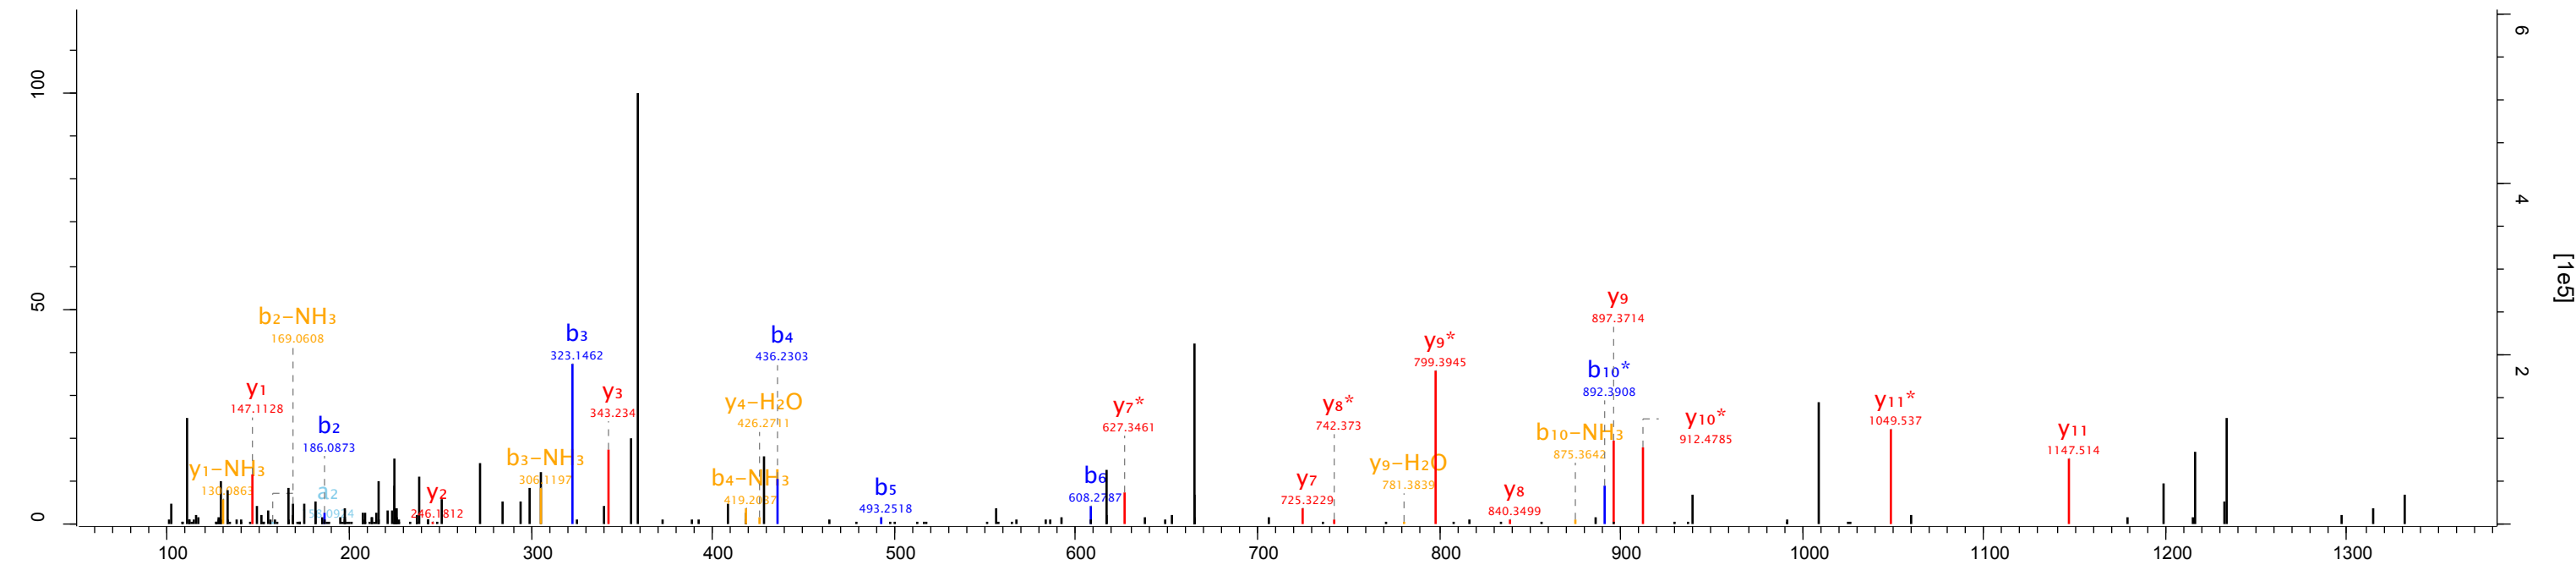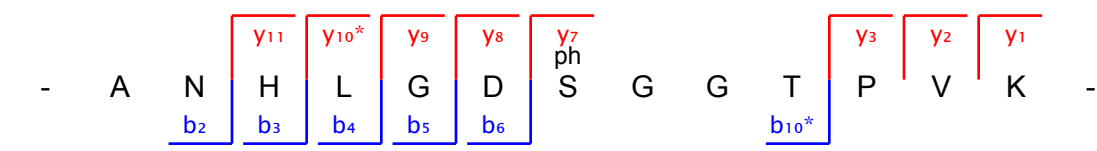

Raw file: 20150814\_A375SR\_Phospho\_BR2\_08  
 Scan: 4989 Method: FTMS; HCD Score: 172.56 m/z: 474.71 Gene names: AKAP12

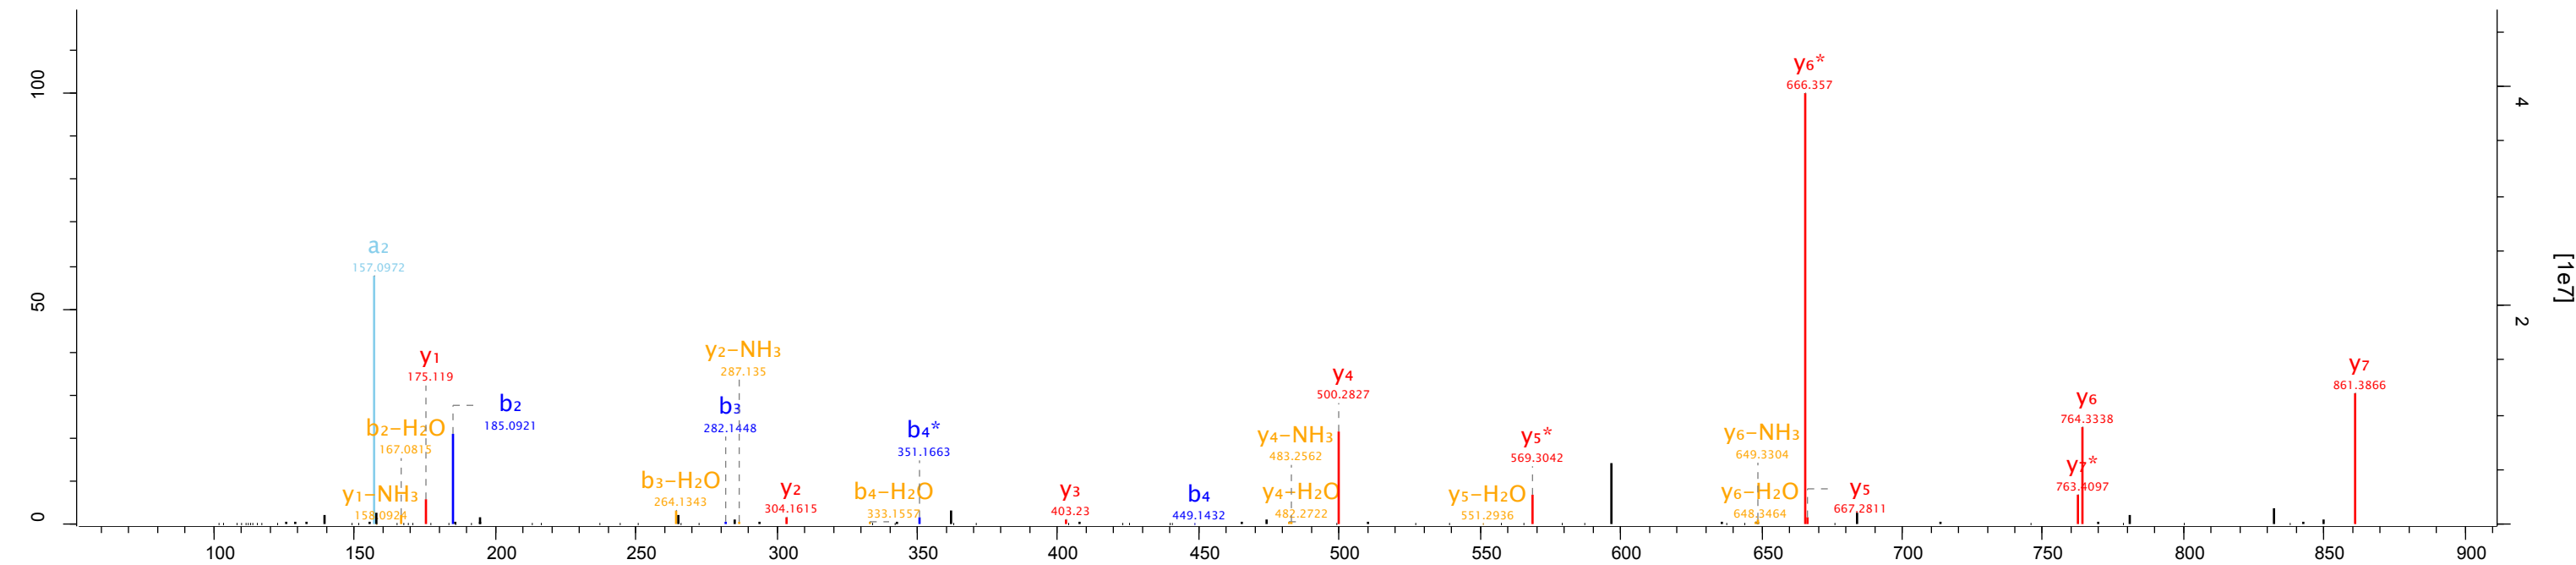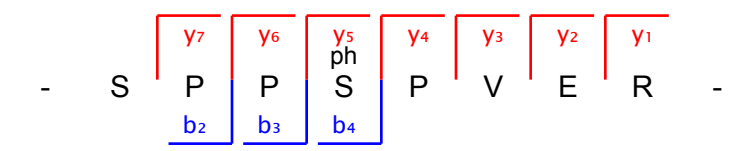

Raw file: 20150814\_A375SR\_Phospho\_BR2\_08  
 Scan: 5319 Method: FTMS; HCD Score: 197.47 m/z: 672.82 Gene names: ZNF609

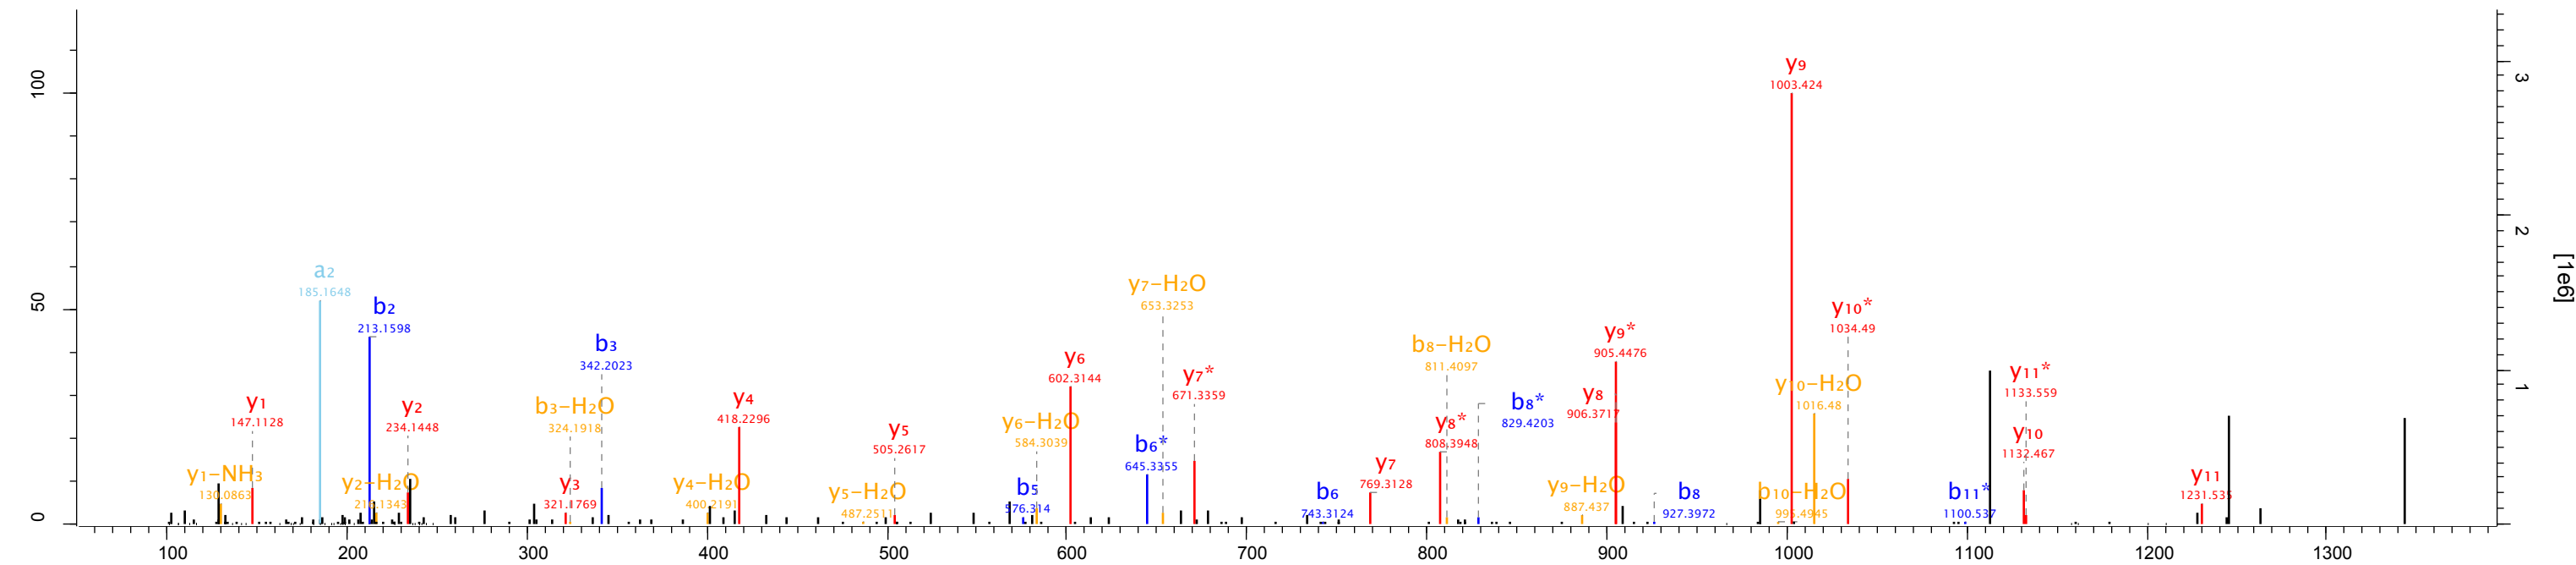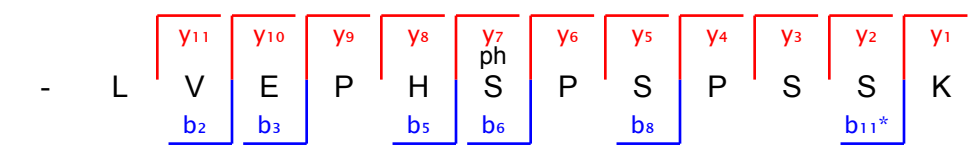

Raw file 20150814\_A375SR\_Phospho\_BR2\_08 Scan 5579 Method FTMS; HCD Score 67.23 m/z 459.23 Gene names MICAL3

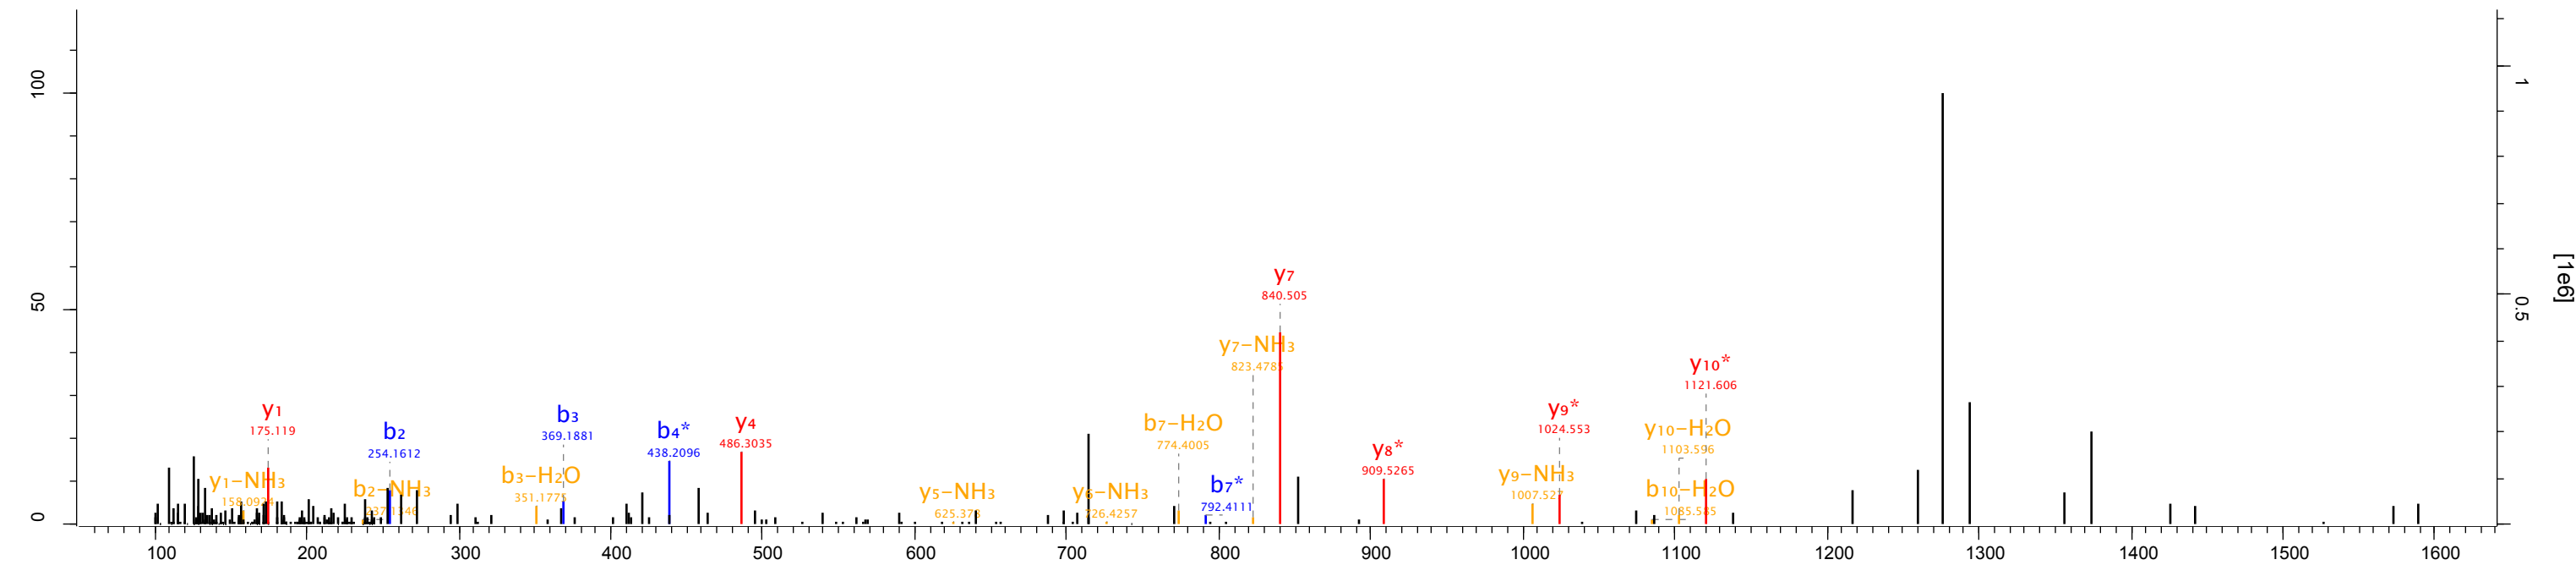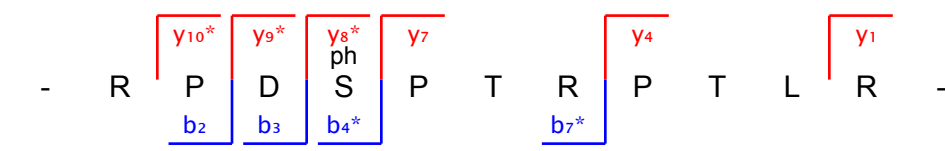



Raw file: 20150814\_A375SR\_Phospho\_BR2\_08  
 Scan: 5629 Method: FTMS; HCD Score: 197.17 m/z: 703.33 Gene names: MAP1B

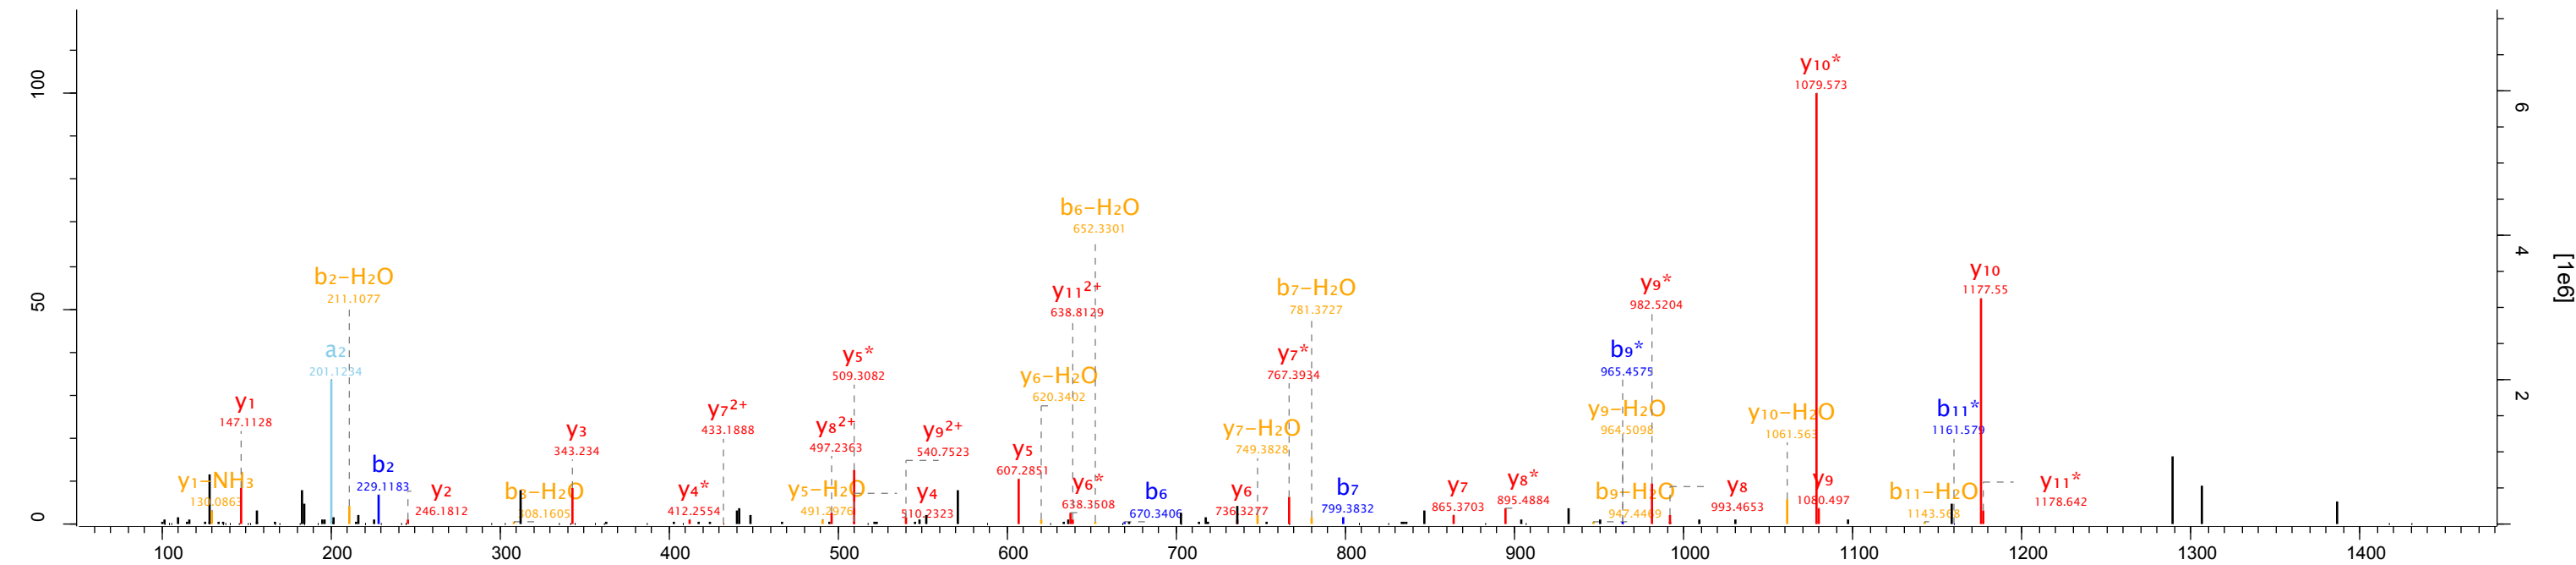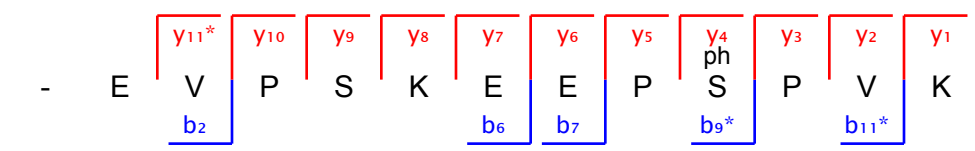

Raw file: 20150814\_A375SR\_Phospho\_BR2\_08  
 Scan: 6099 Method: FTMS; HCD Score: 89.86 m/z: 396.58 Gene names: PIP5L;PIP5K1A

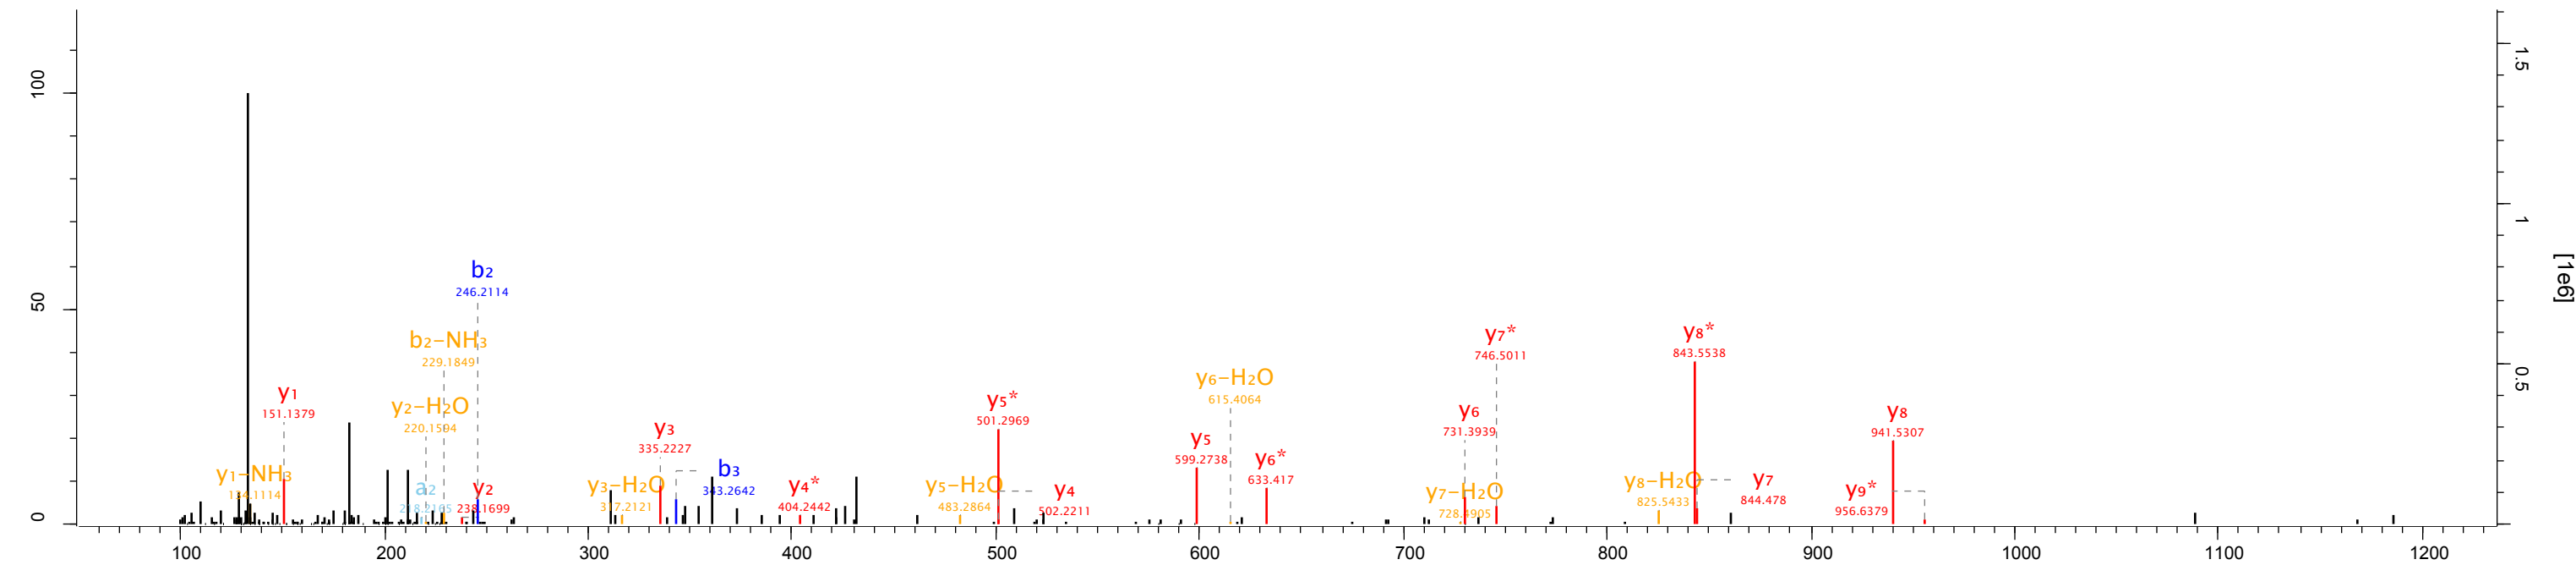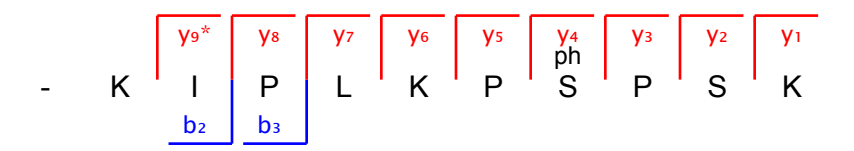

Raw file 20150814\_A375SR\_Phospho\_BR2\_08 Scan 6739 Method FTMS; HCD Score 134.26 m/z 485.71 Gene names SRSF7

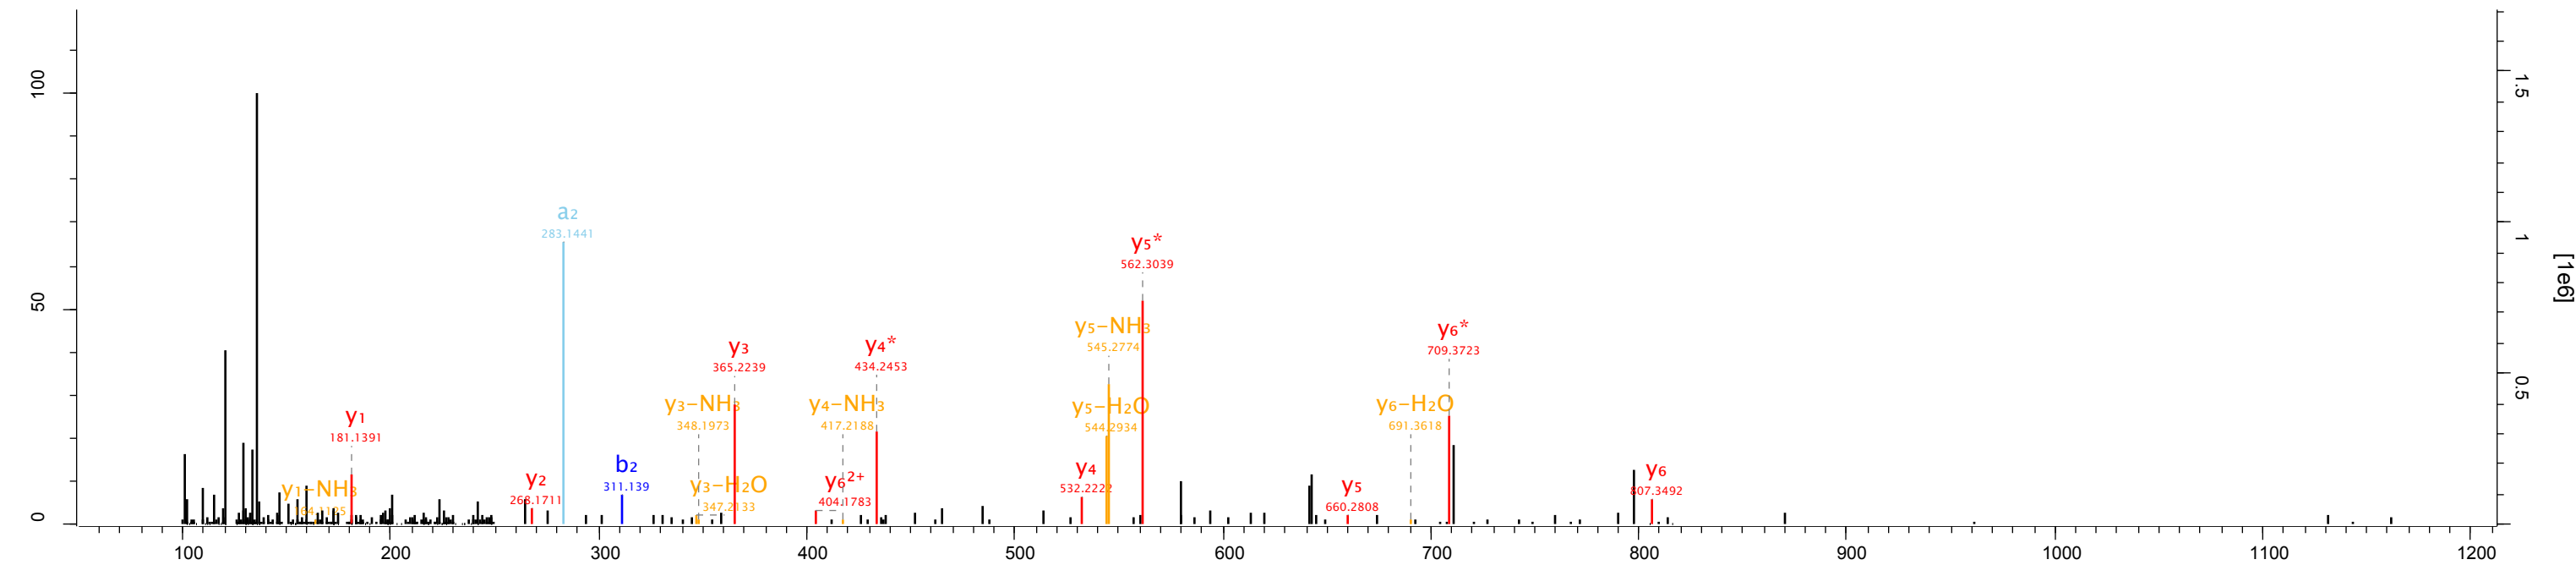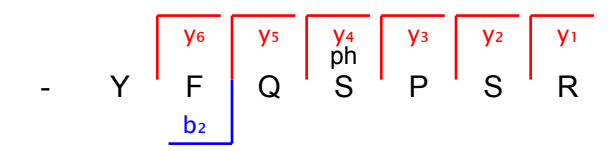

Raw file 20150814\_A375SR\_Phospho\_BR2\_08 Scan 7709 Method FTMS; HCD Score 70.09 m/z 676.82

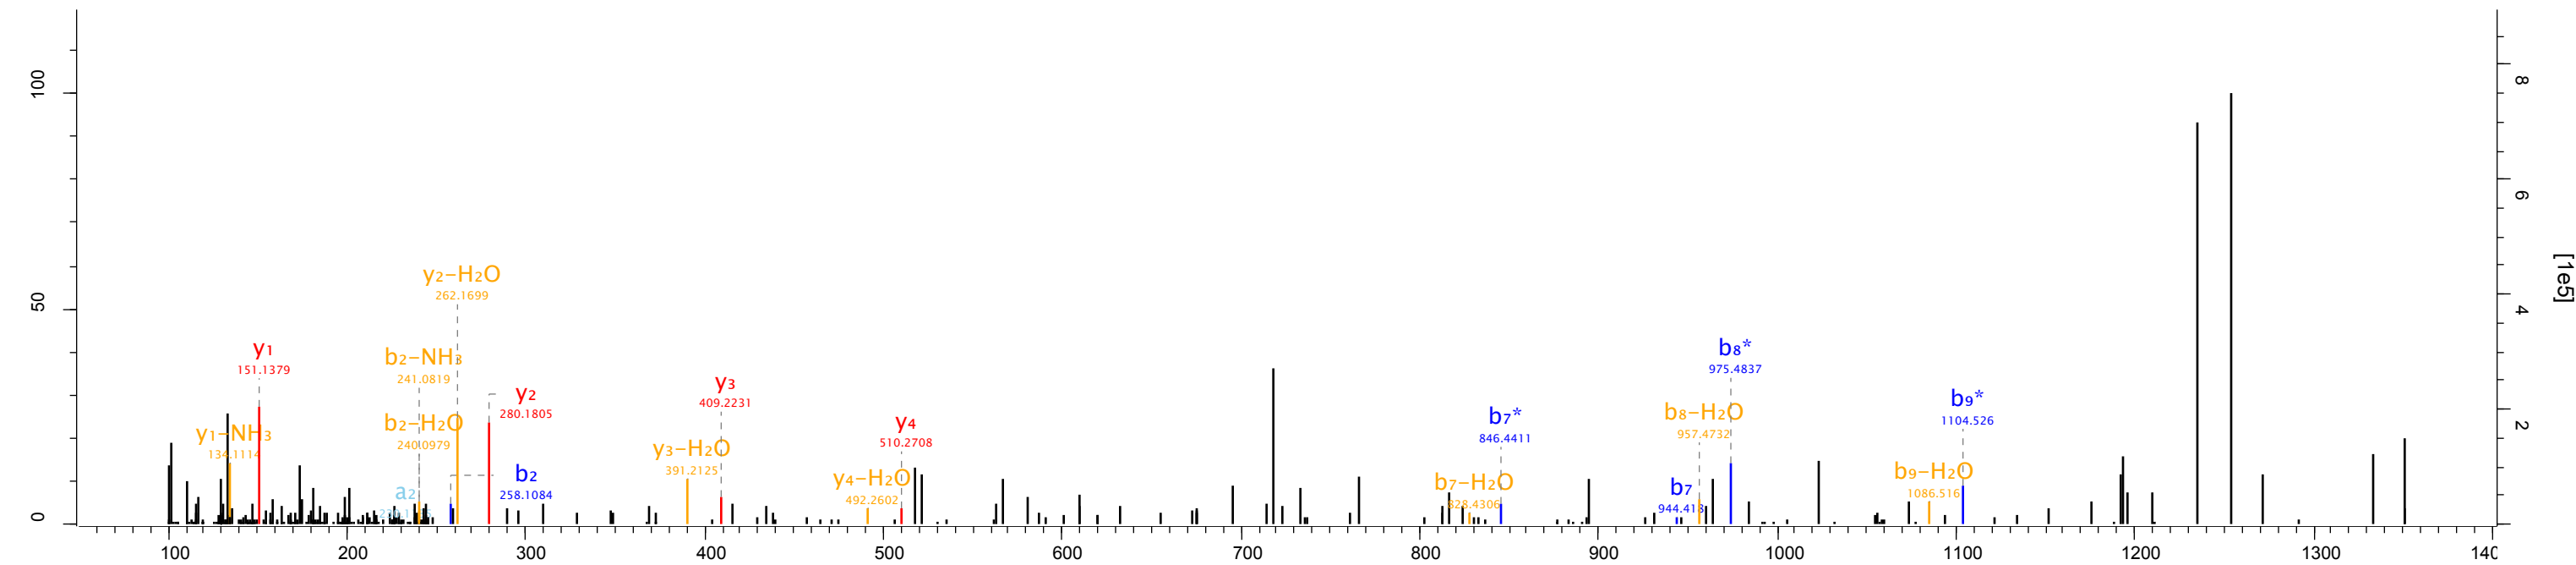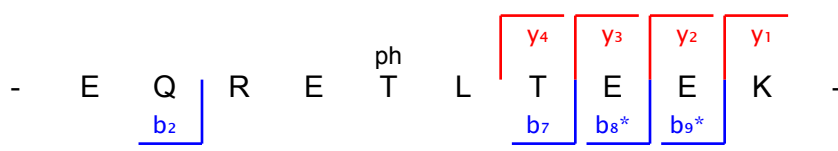

Raw file 20150814\_A375SR\_Phospho\_BR2\_08 Scan 7739 Method FTMS; HCD Score 74.44 m/z 537.9 Gene names IRS2

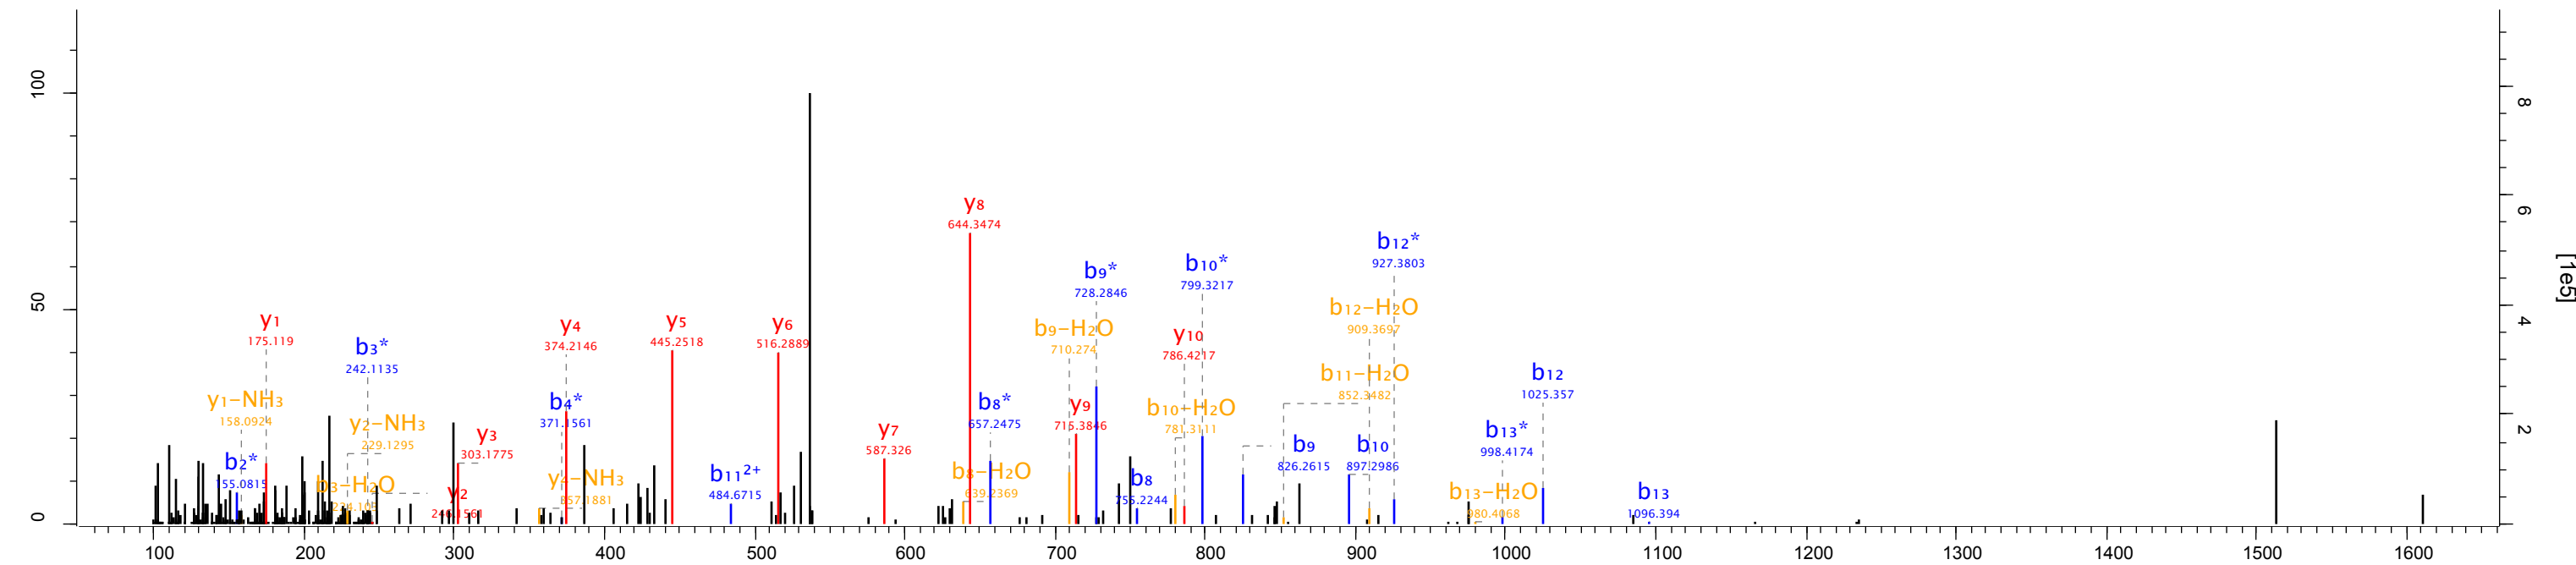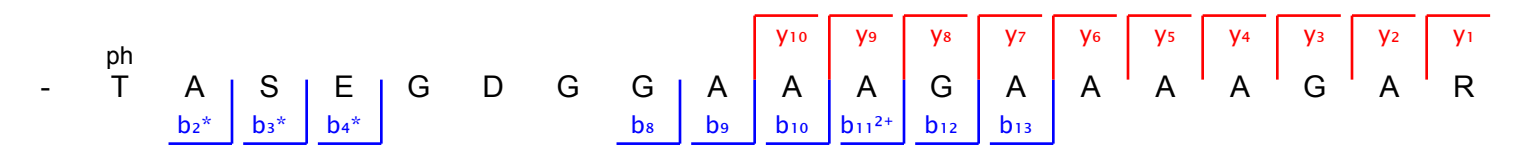

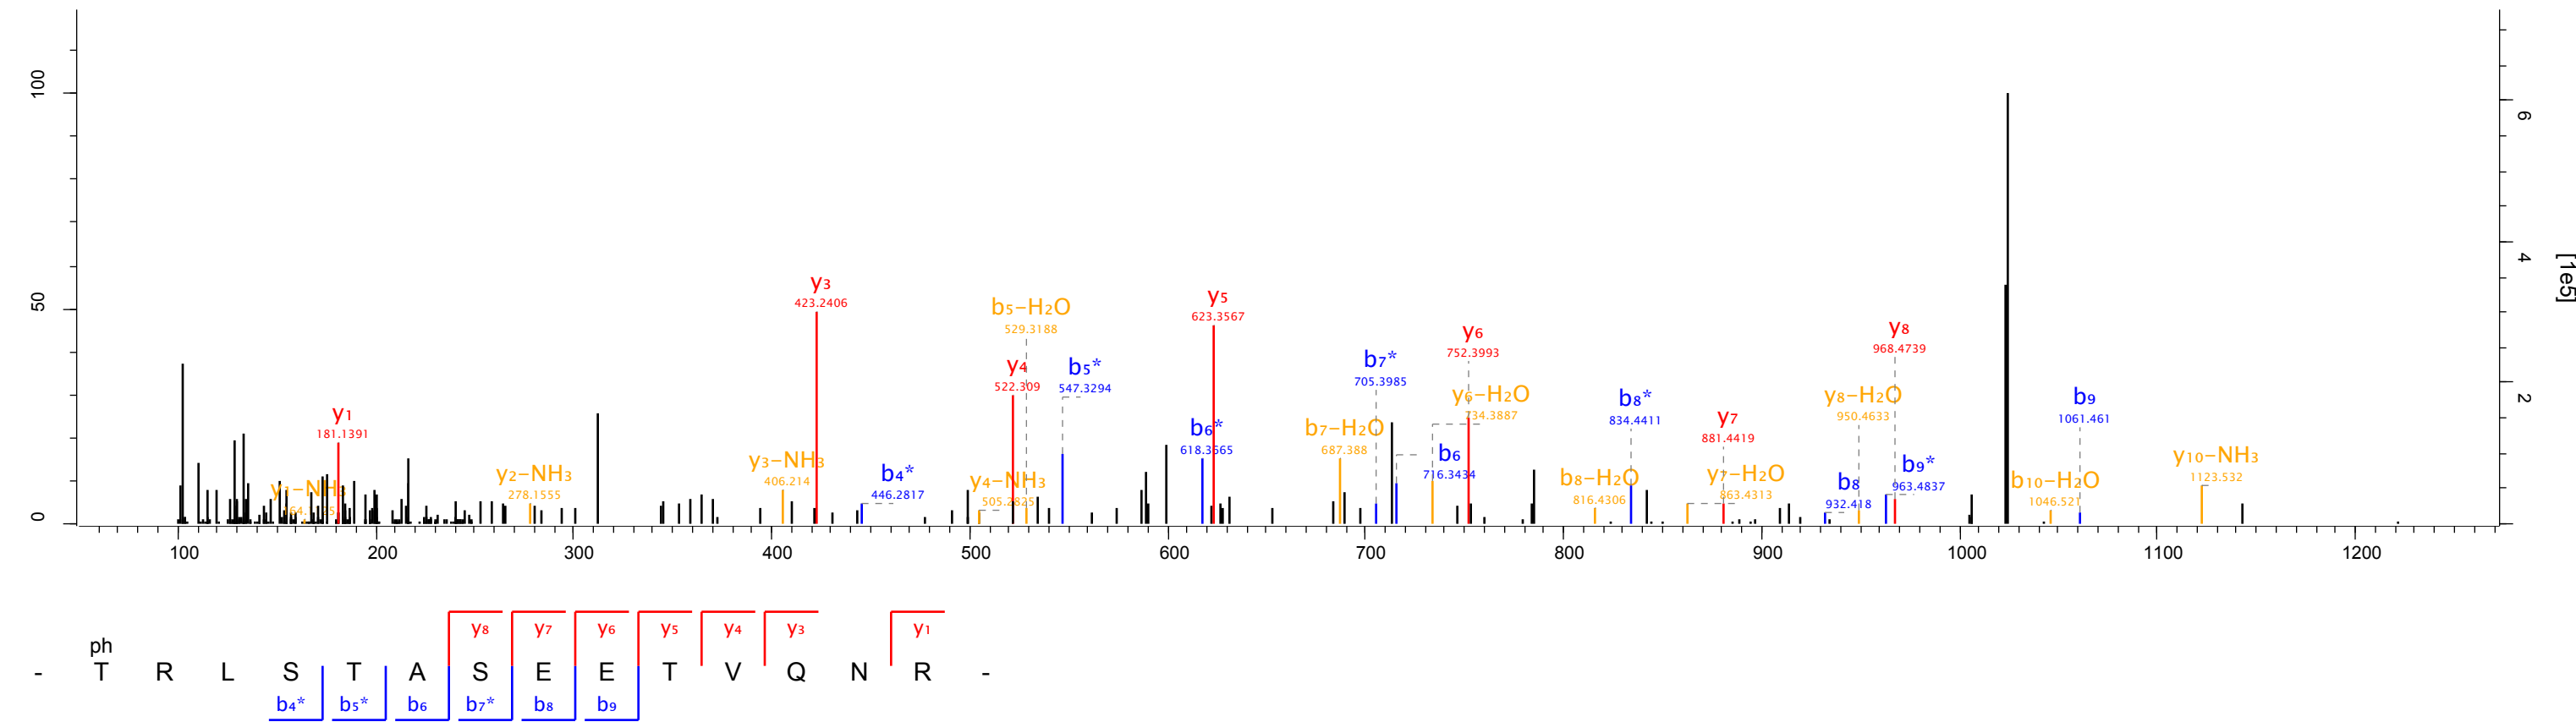

20150814\_A375SR\_Phospho\_BR2\_08 8209 FTMS; HCD 116.13 774.36 SPAG9

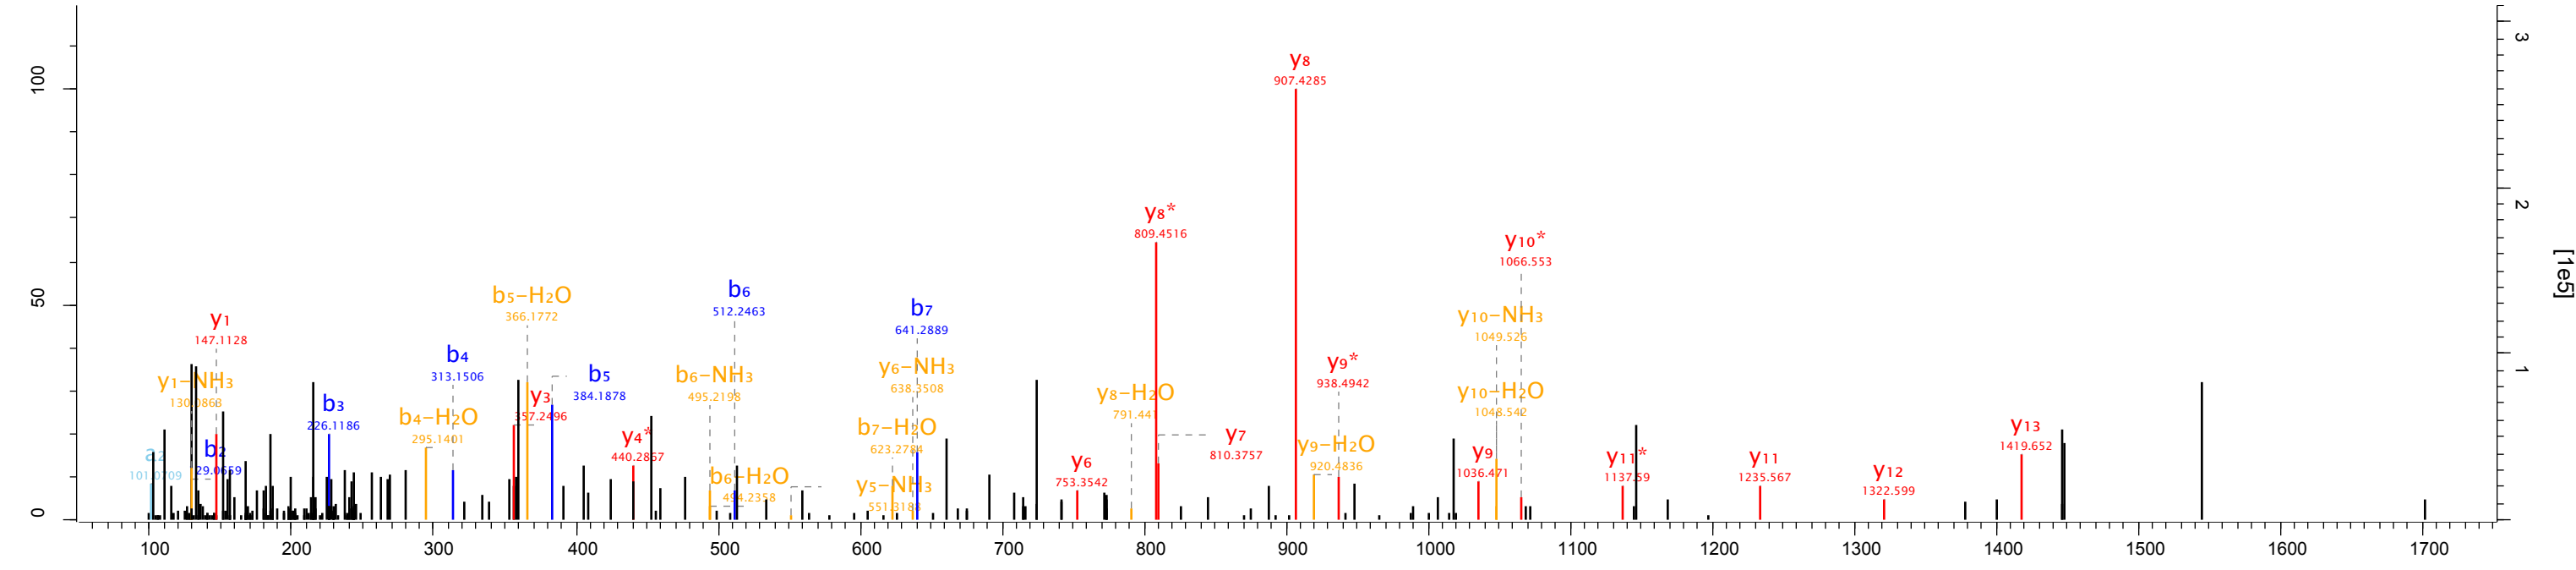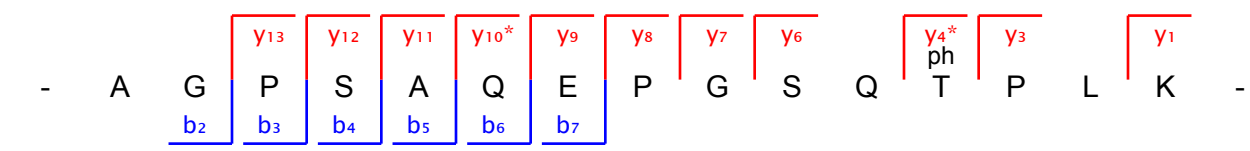

Raw file: 20150814\_A375SR\_Phospho\_BR2\_08  
 Scan: 9899 Method: FTMS; HCD Score: 176.23 m/z: 993.96 Gene names: MARK2

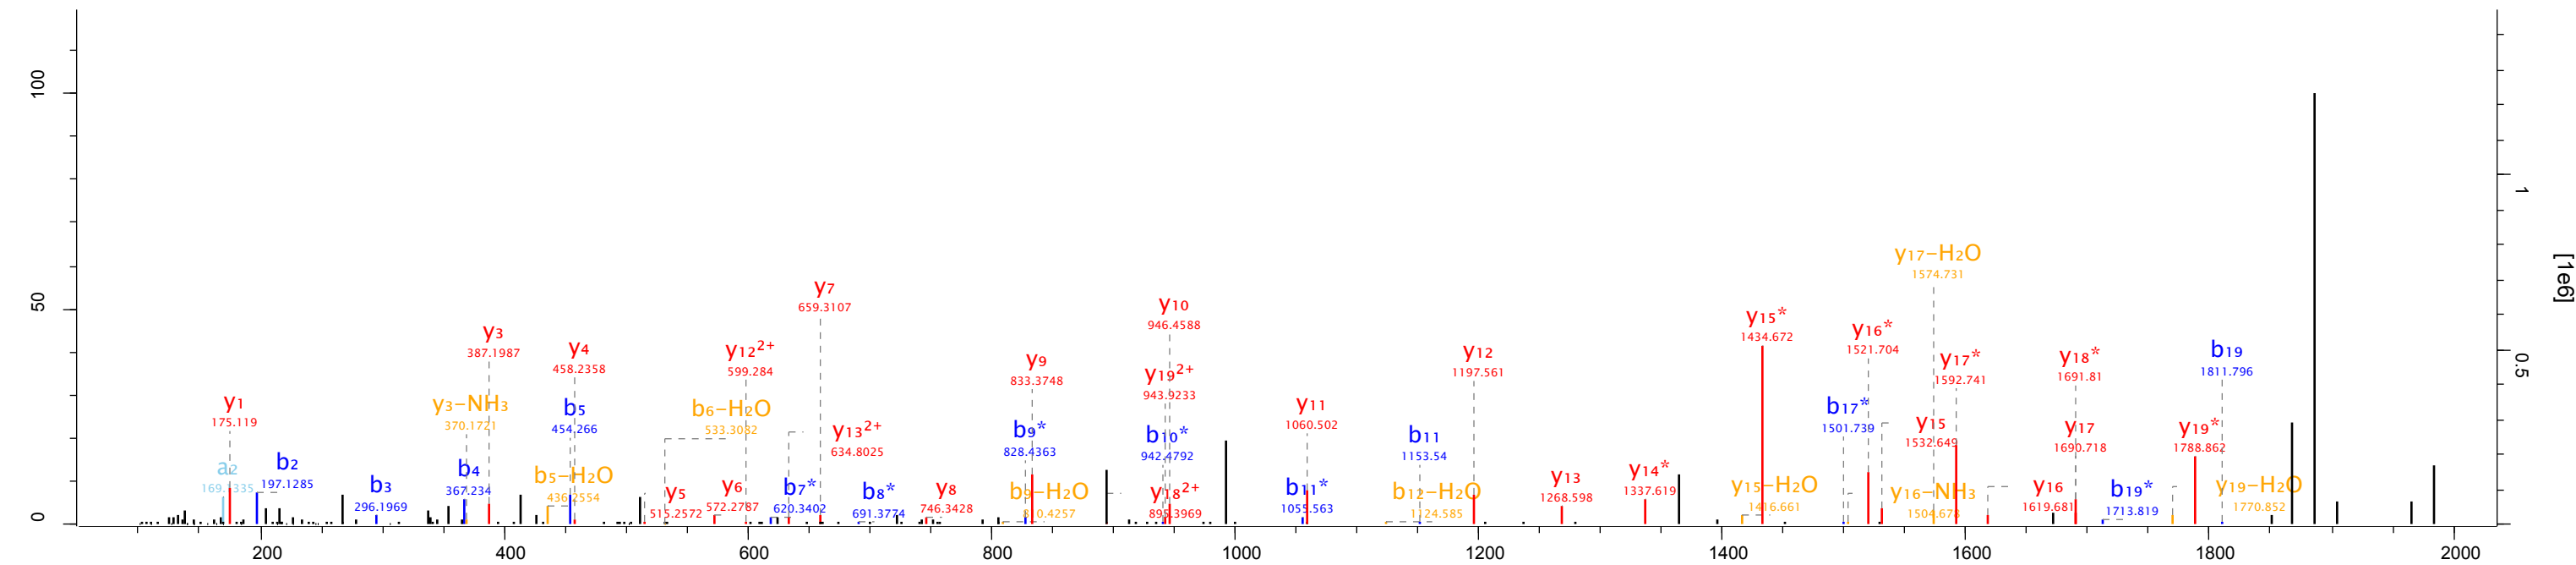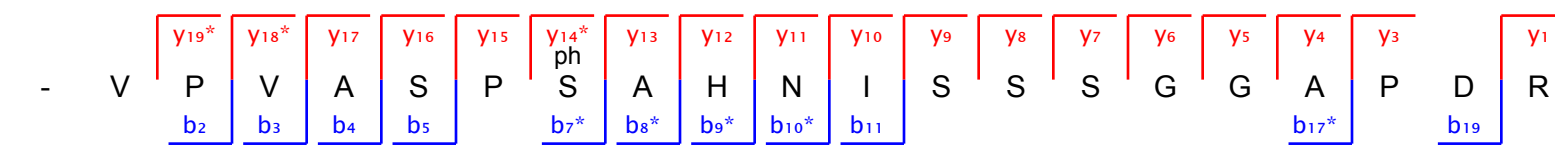



Raw file: 20150814\_A375SR\_Phospho\_BR2\_09  
 Scan: 11449 Method: FTMS; HCD Score: 197.69 m/z: 867.42 Gene names: NFKB1

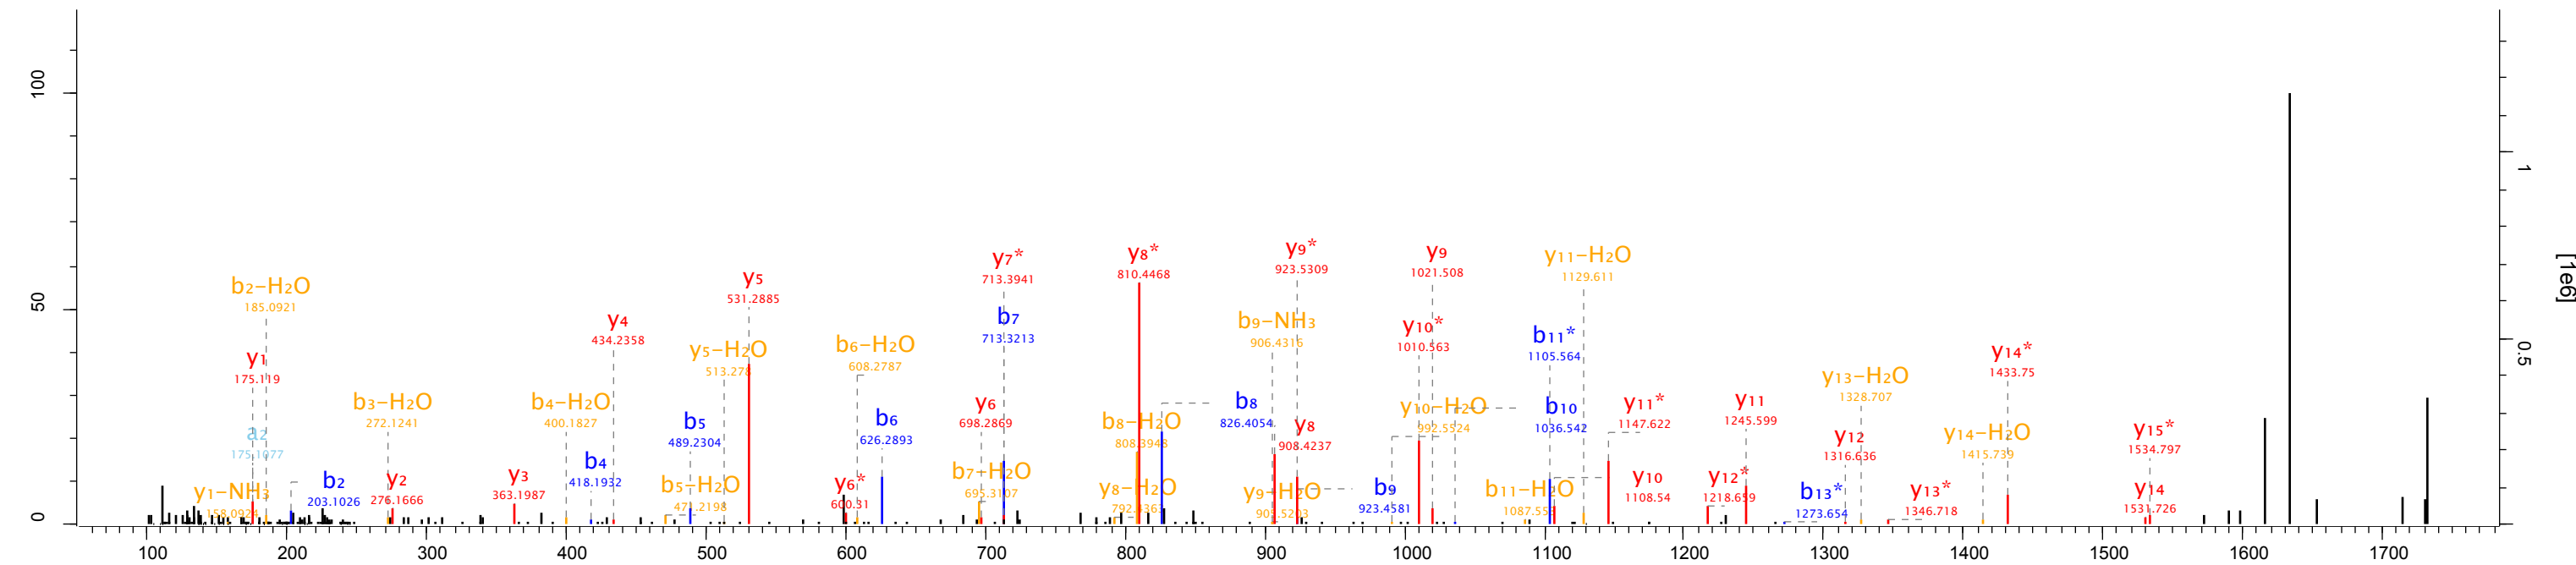

Sequence: - T T S Q A H S L P L S P A S T R -

Fragmentation mapping:

- Red boxes (y-ions): y15\* (T), y14 (S), y13\* (Q), y12 (A), y11 (H), y10 (S), y9 (L), y8 (P), y7\* (L), y6<sup>ph</sup> (S), y5 (P), y4 (A), y3 (S), y2 (T), y1 (R)
- Blue boxes (b-ions): b2 (T), b4 (Q), b5 (A), b6 (H), b7 (S), b8 (L), b9 (P), b10 (L), b11\* (S), b13\* (A)

Raw file: 20150814\_A375SR\_Phospho\_BR2\_09  
 Scan: 11769 Method: FTMS; HCD Score: 133.84 m/z: 630.98 Gene names: ASAP1

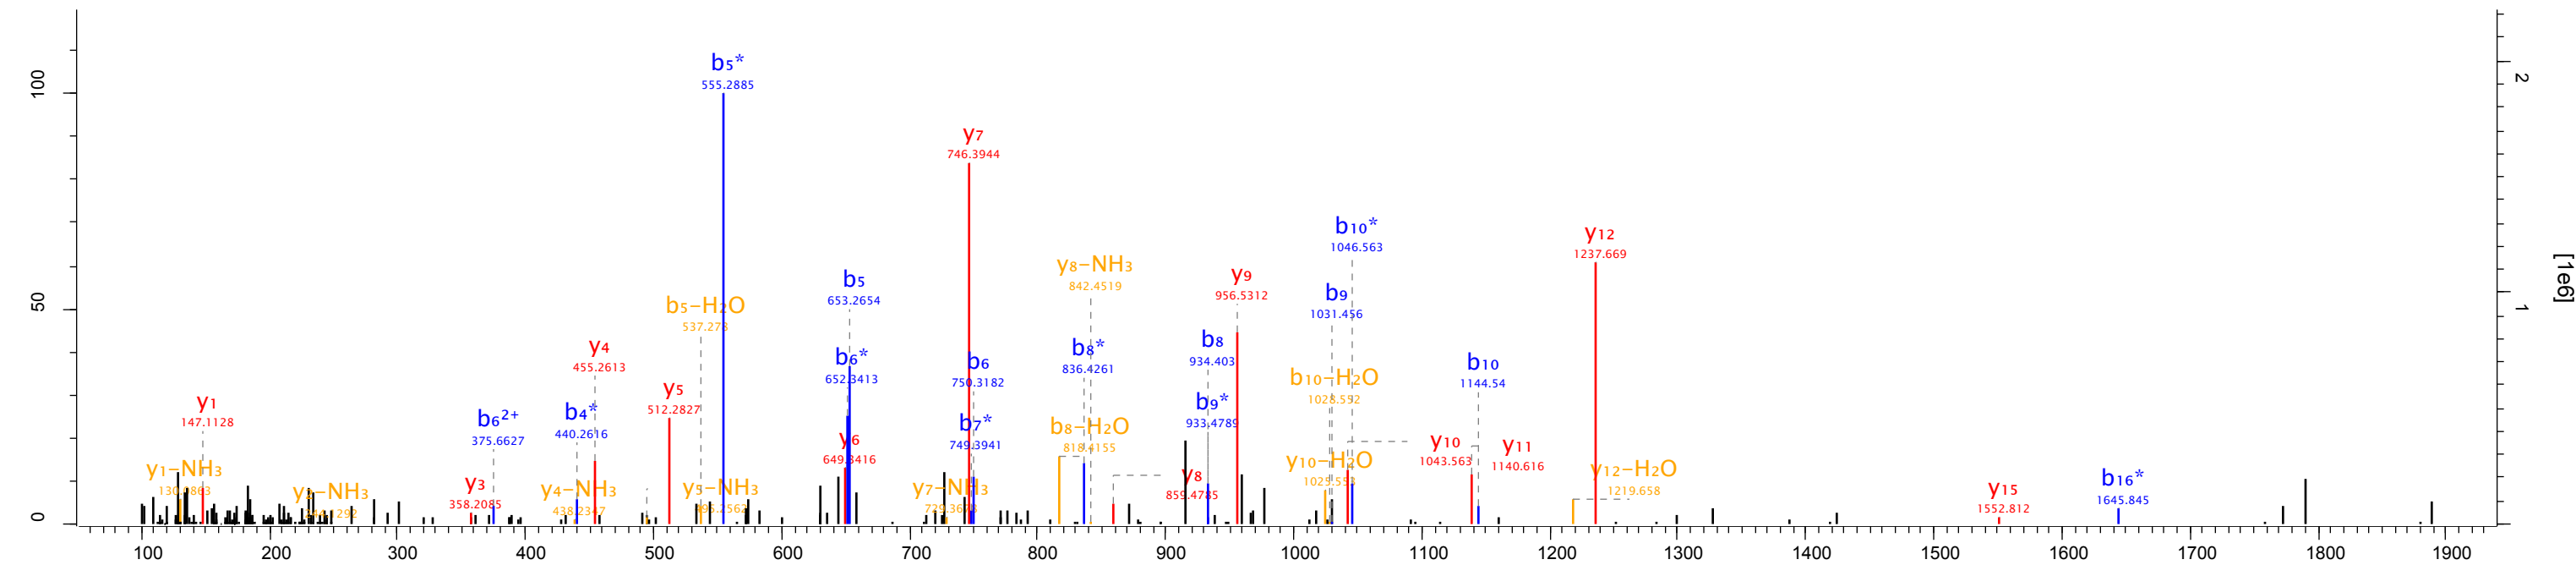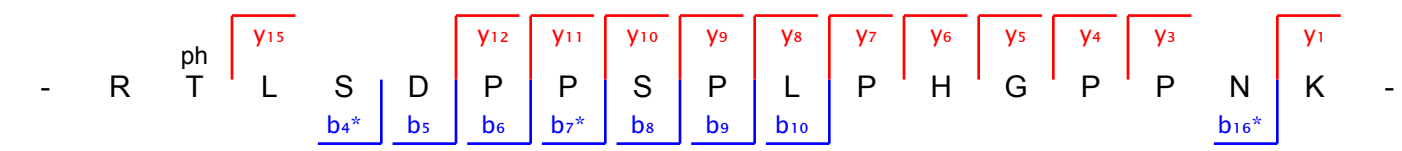

Raw file 20150814\_A375SR\_Phospho\_BR2\_09 Scan 13839 Method FTMS; HCD Score 84.75 m/z 597.3 Gene names RRP1B

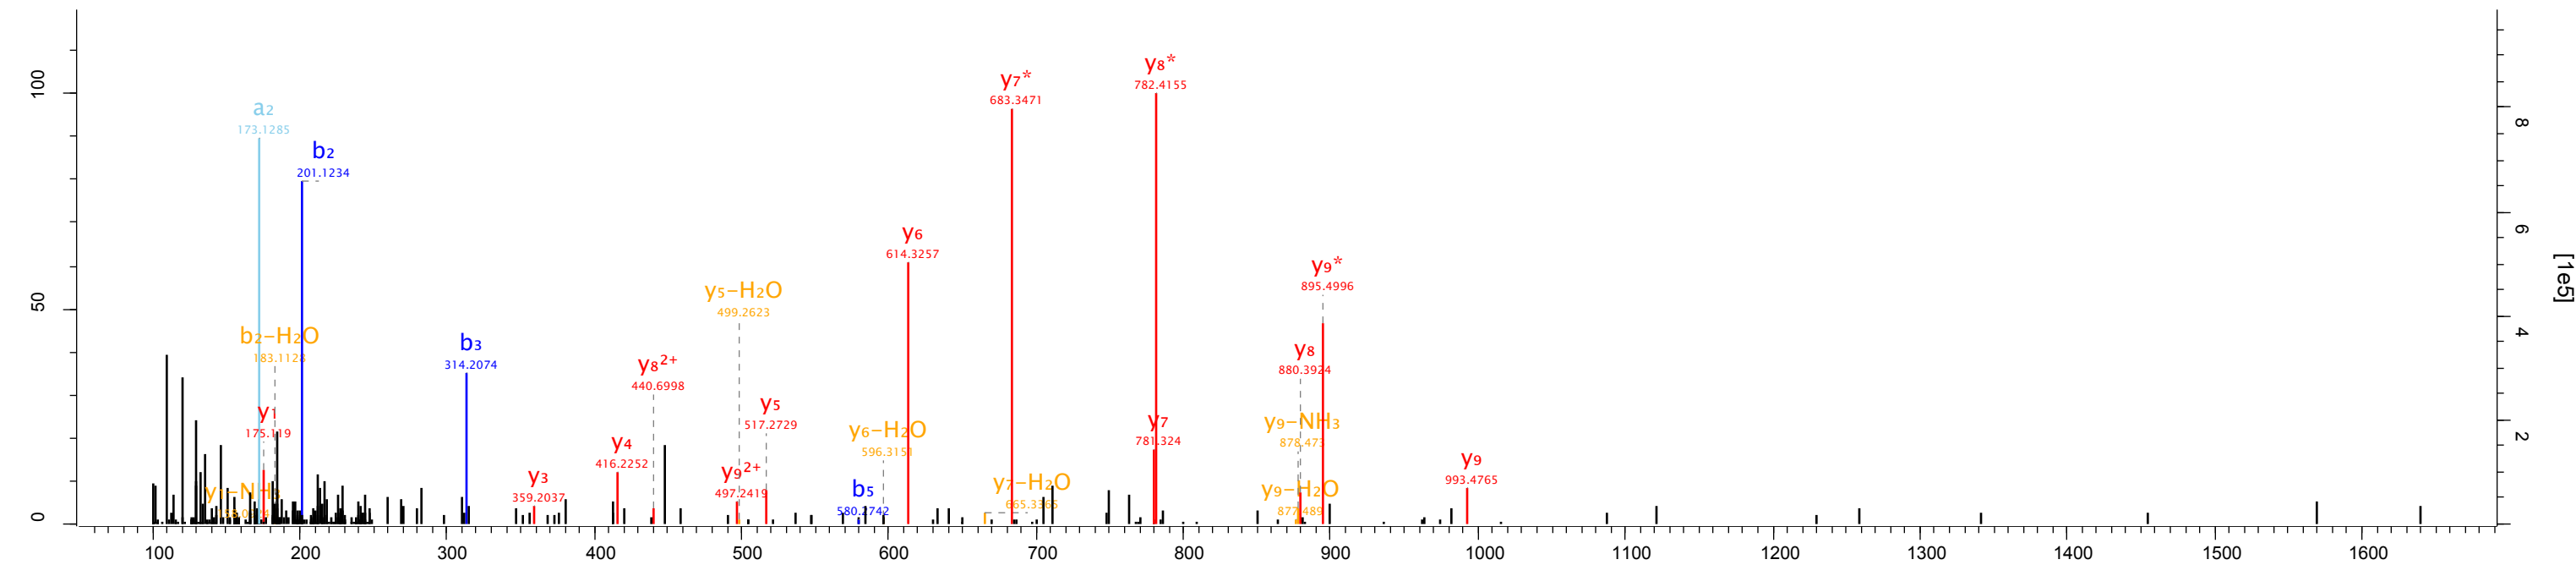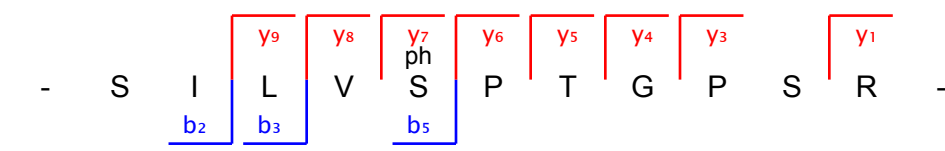

Raw file 20150814\_A375SR\_Phospho\_BR2\_09 Scan 15609 Method FTMS; HCD Score 116.94 m/z 881.91 Gene names TAF3

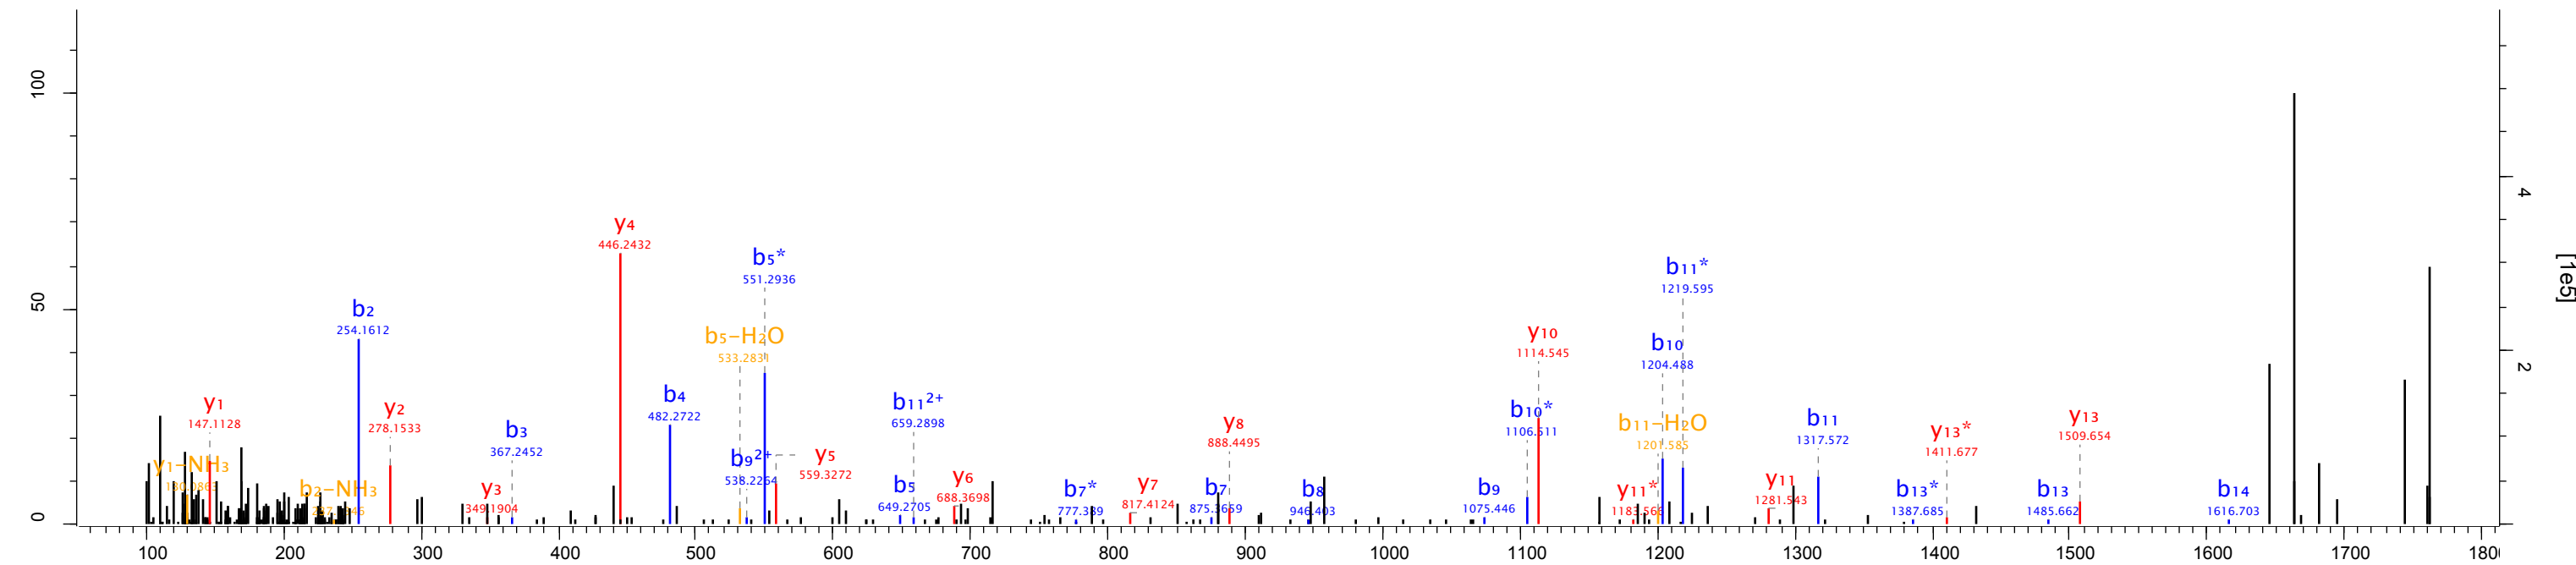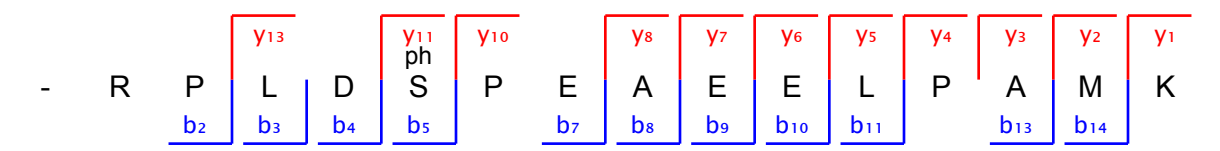

Raw file: 20150814\_A375SR\_Phospho\_BR2\_09  
 Scan: 15879 Method: FTMS; HCD Score: 89.01 m/z: 955.91 Gene names: FAM21C;FAM21A

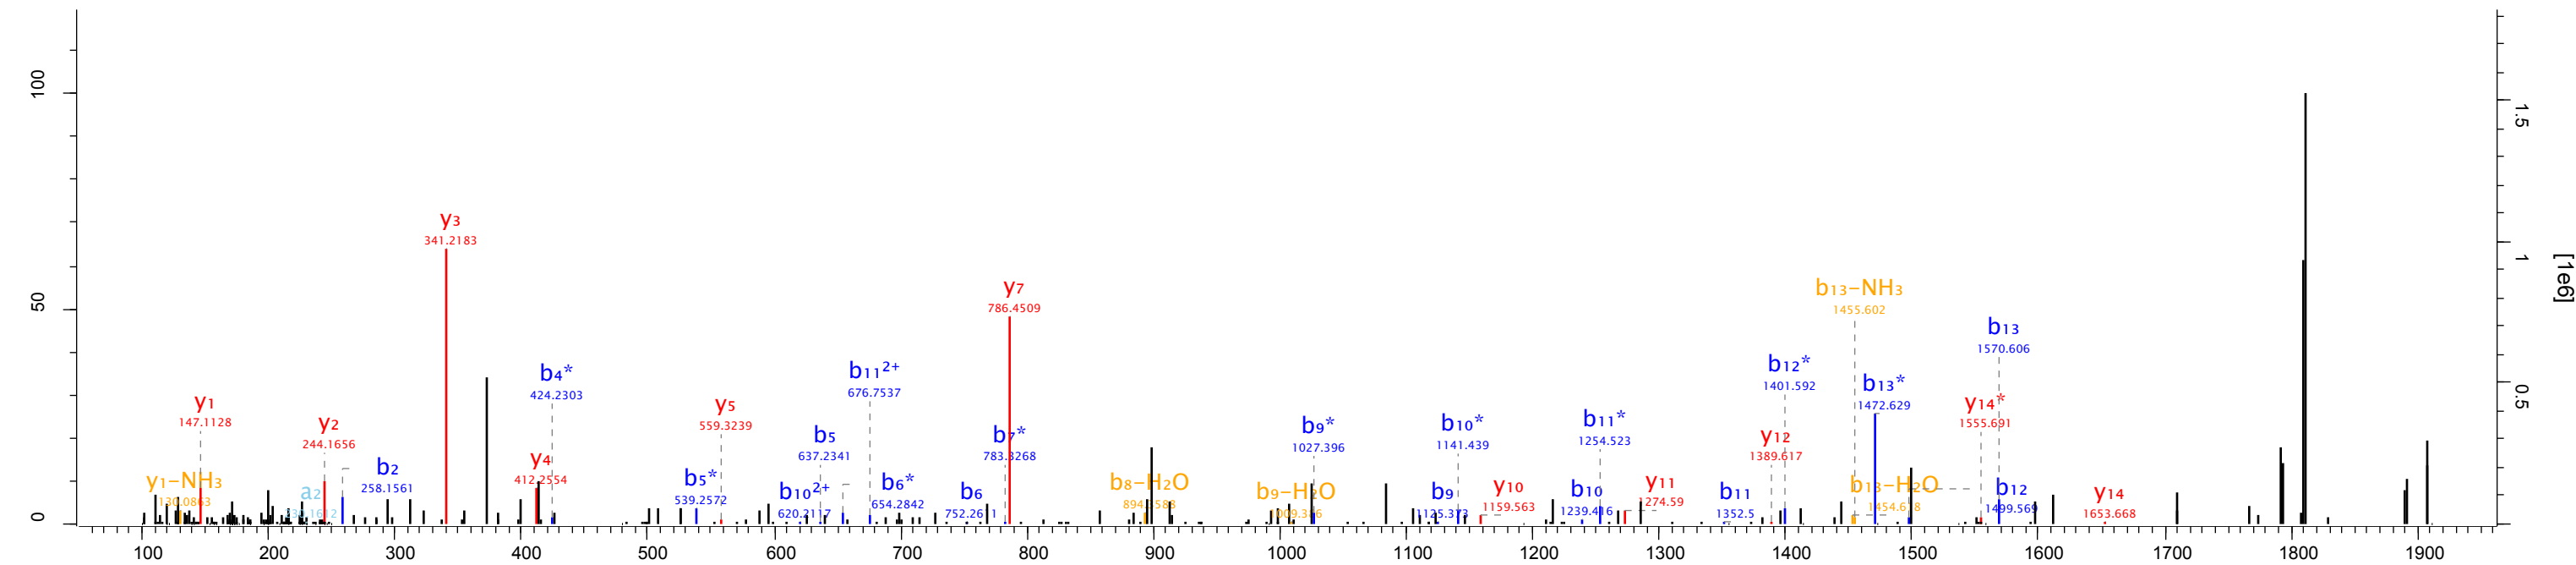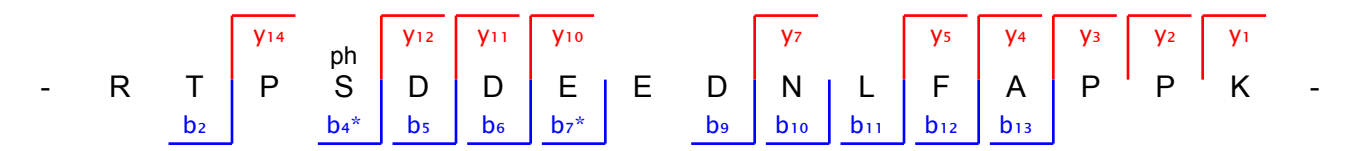

Raw file 20150814\_A375SR\_Phospho\_BR2\_09 Scan 16259 Method FTMS; HCD Score 217.82 m/z 626.32 Gene names CCDC86

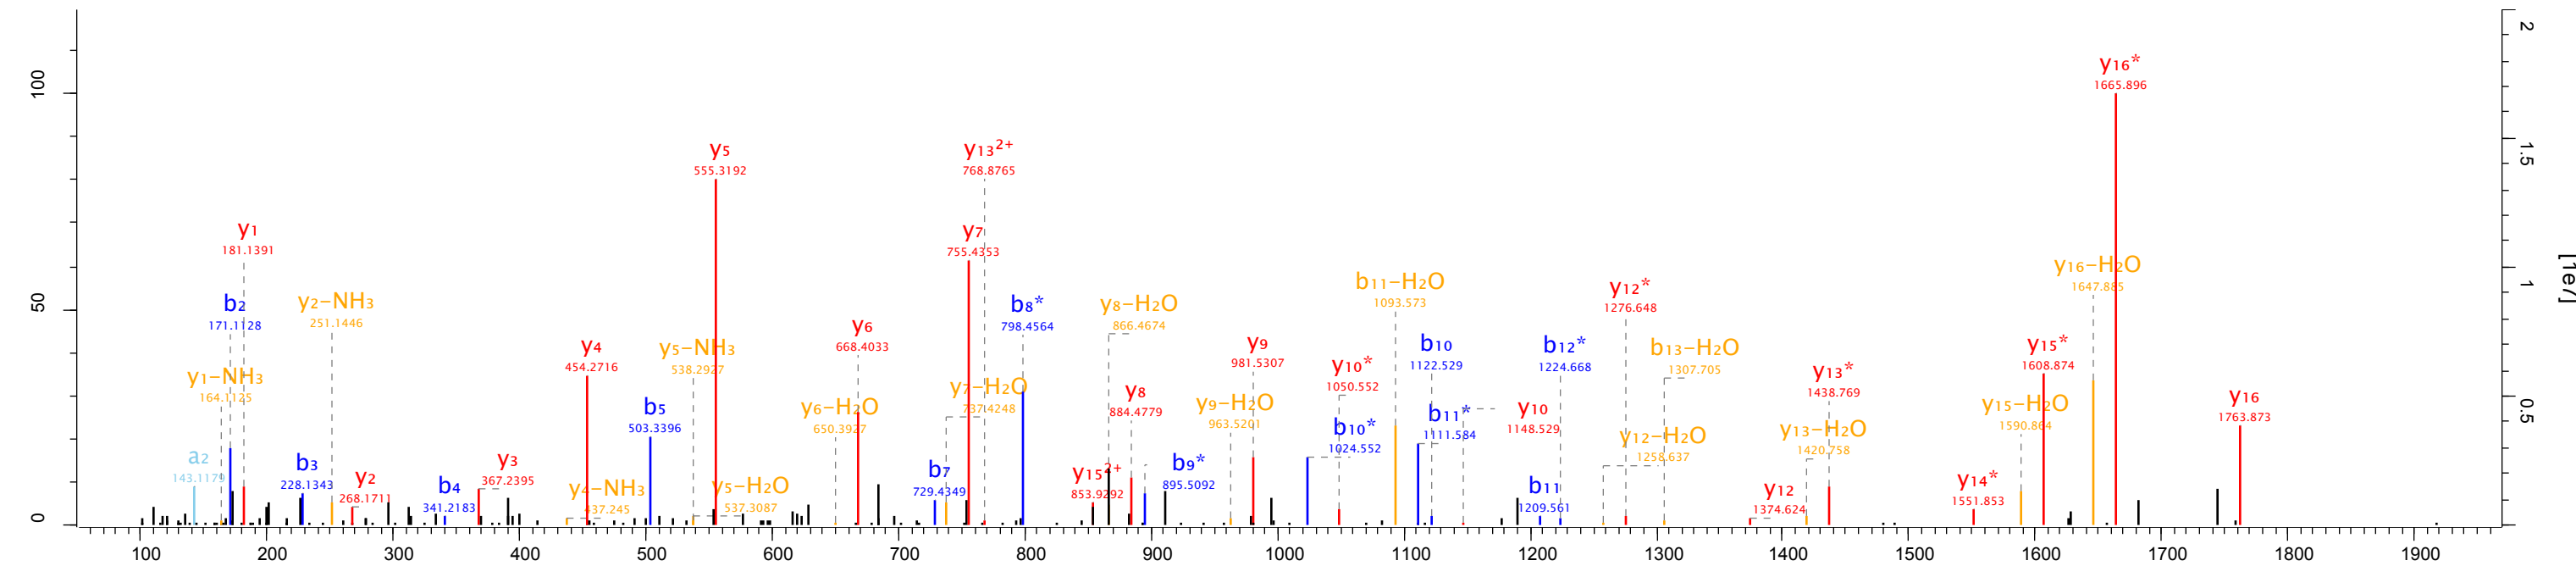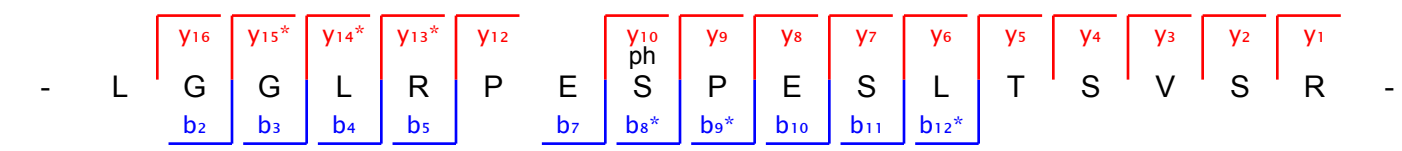

Raw file 20150814\_A375SR\_Phospho\_BR2\_09 Scan 16389 Method FTMS; HCD Score 220.53 m/z 1043.48 Gene names SOX5

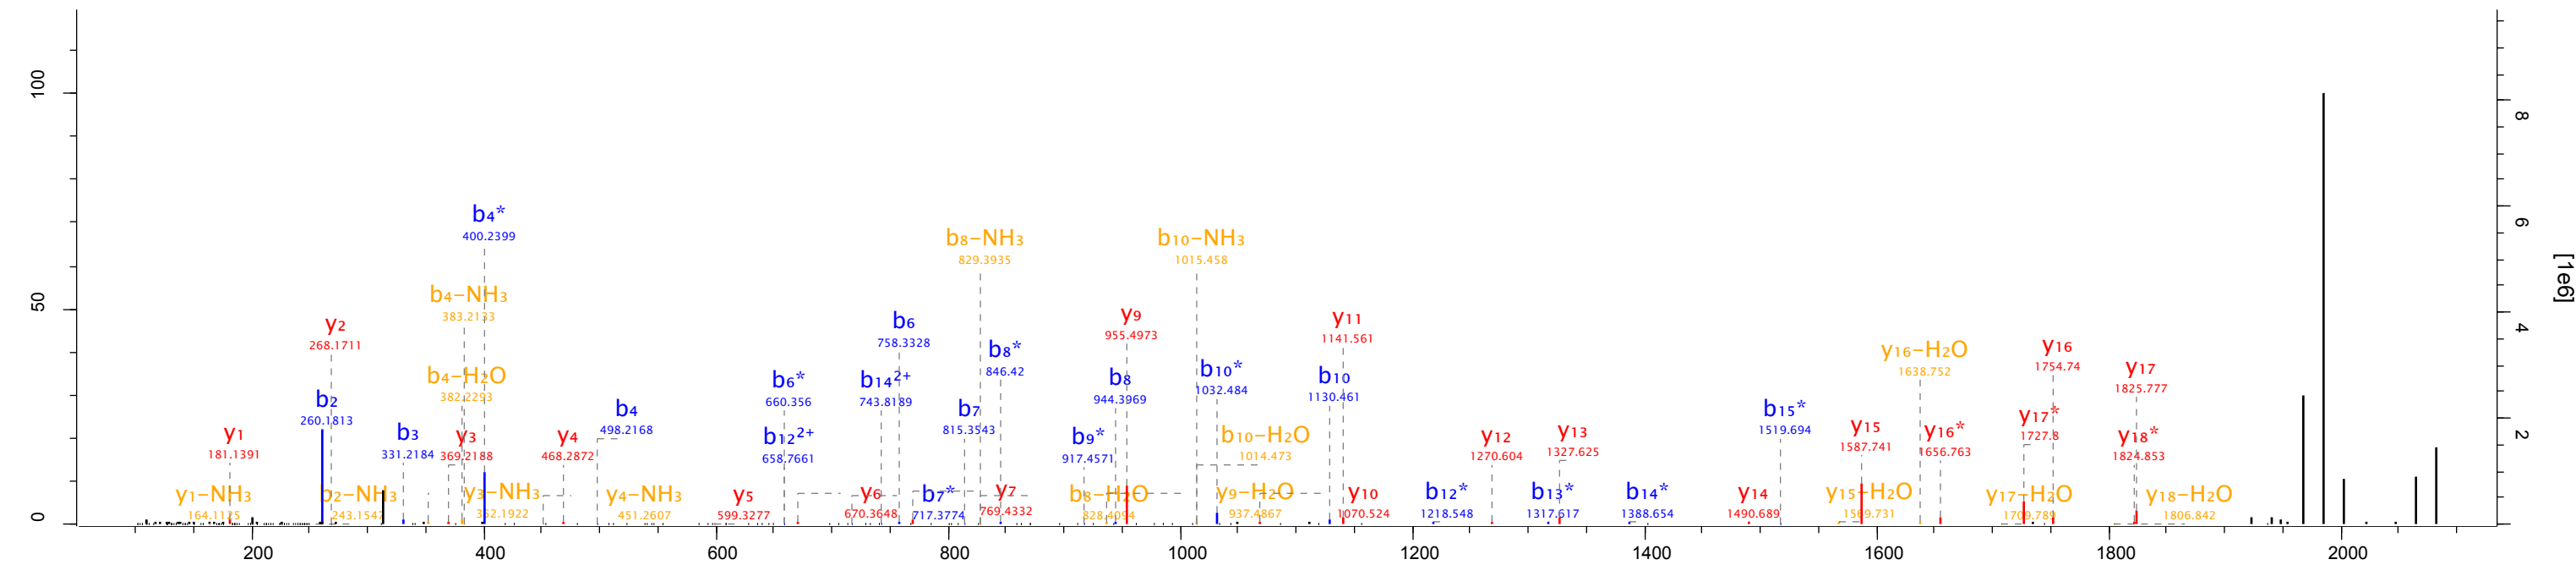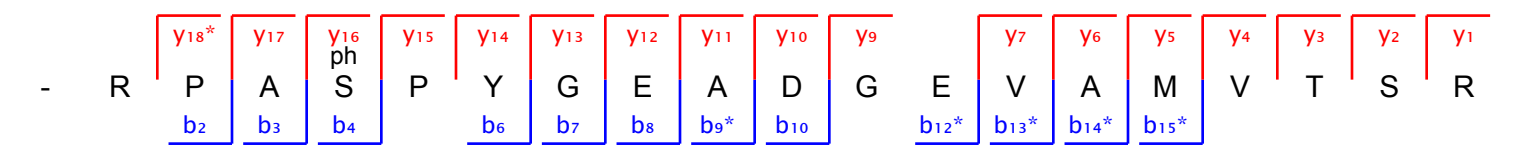

Raw file Scan Method Score m/z Gene names  
 20150814\_A375SR\_Phospho\_BR2\_09 16439 FTMS; HCD 305.61 1001.44 CTNND1

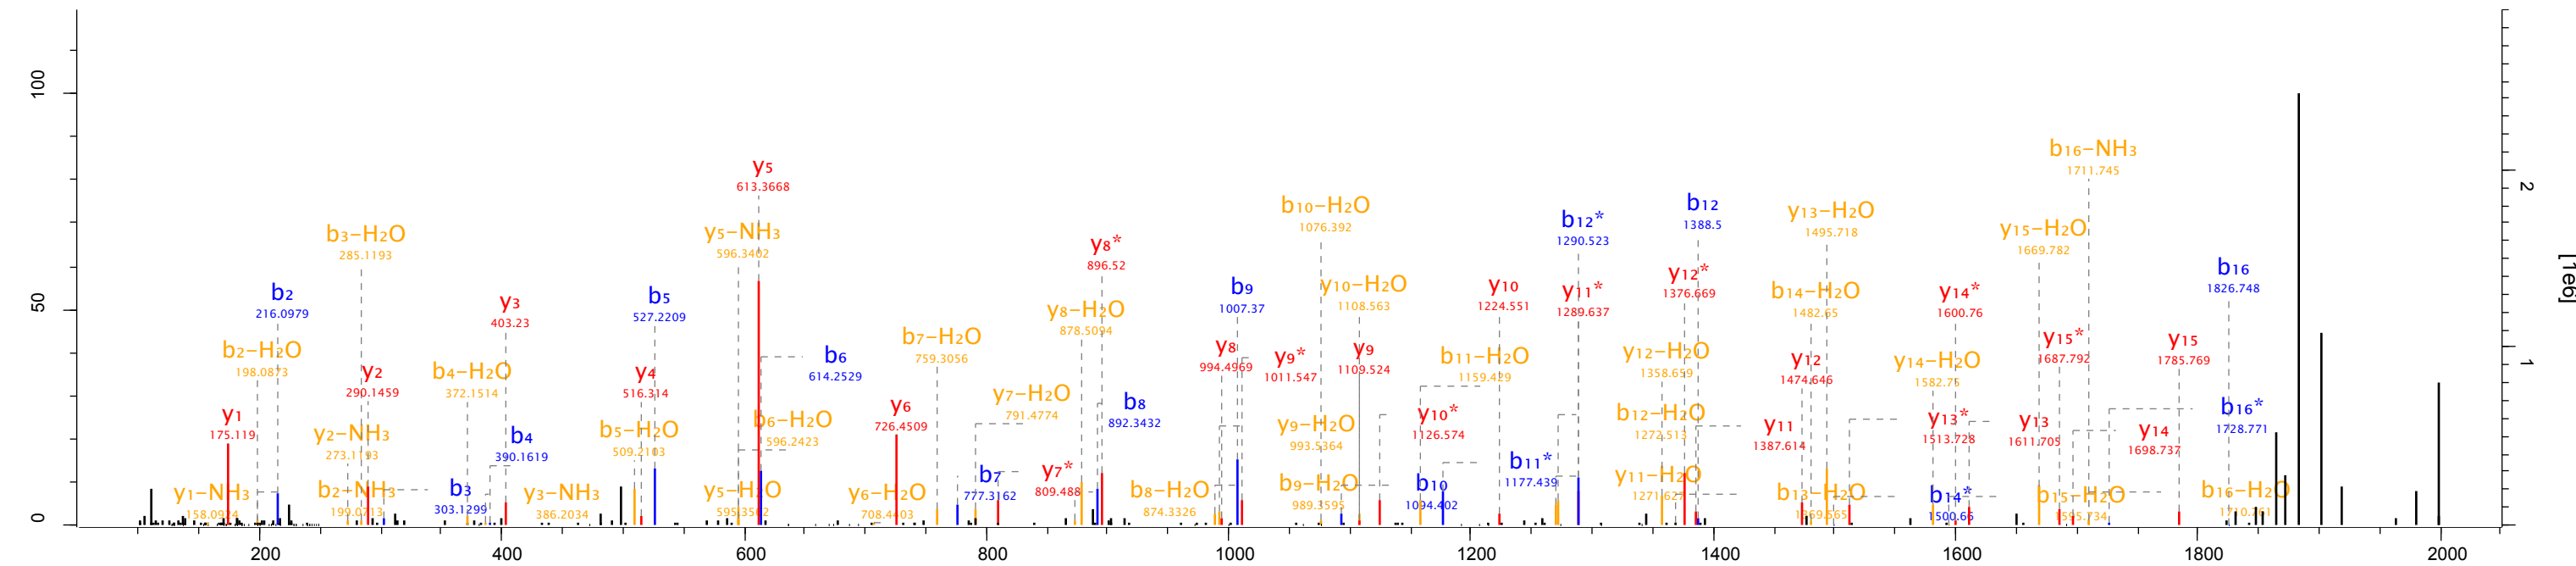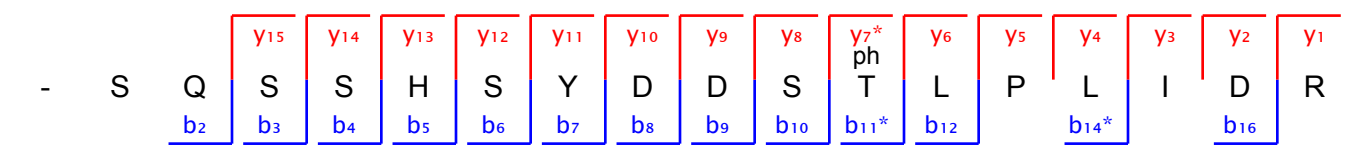



Raw file 20150814\_A375SR\_Phospho\_BR2\_09 Scan 17049 Method FTMS; HCD Score 70.03 m/z 828.42 Gene names SYNPO

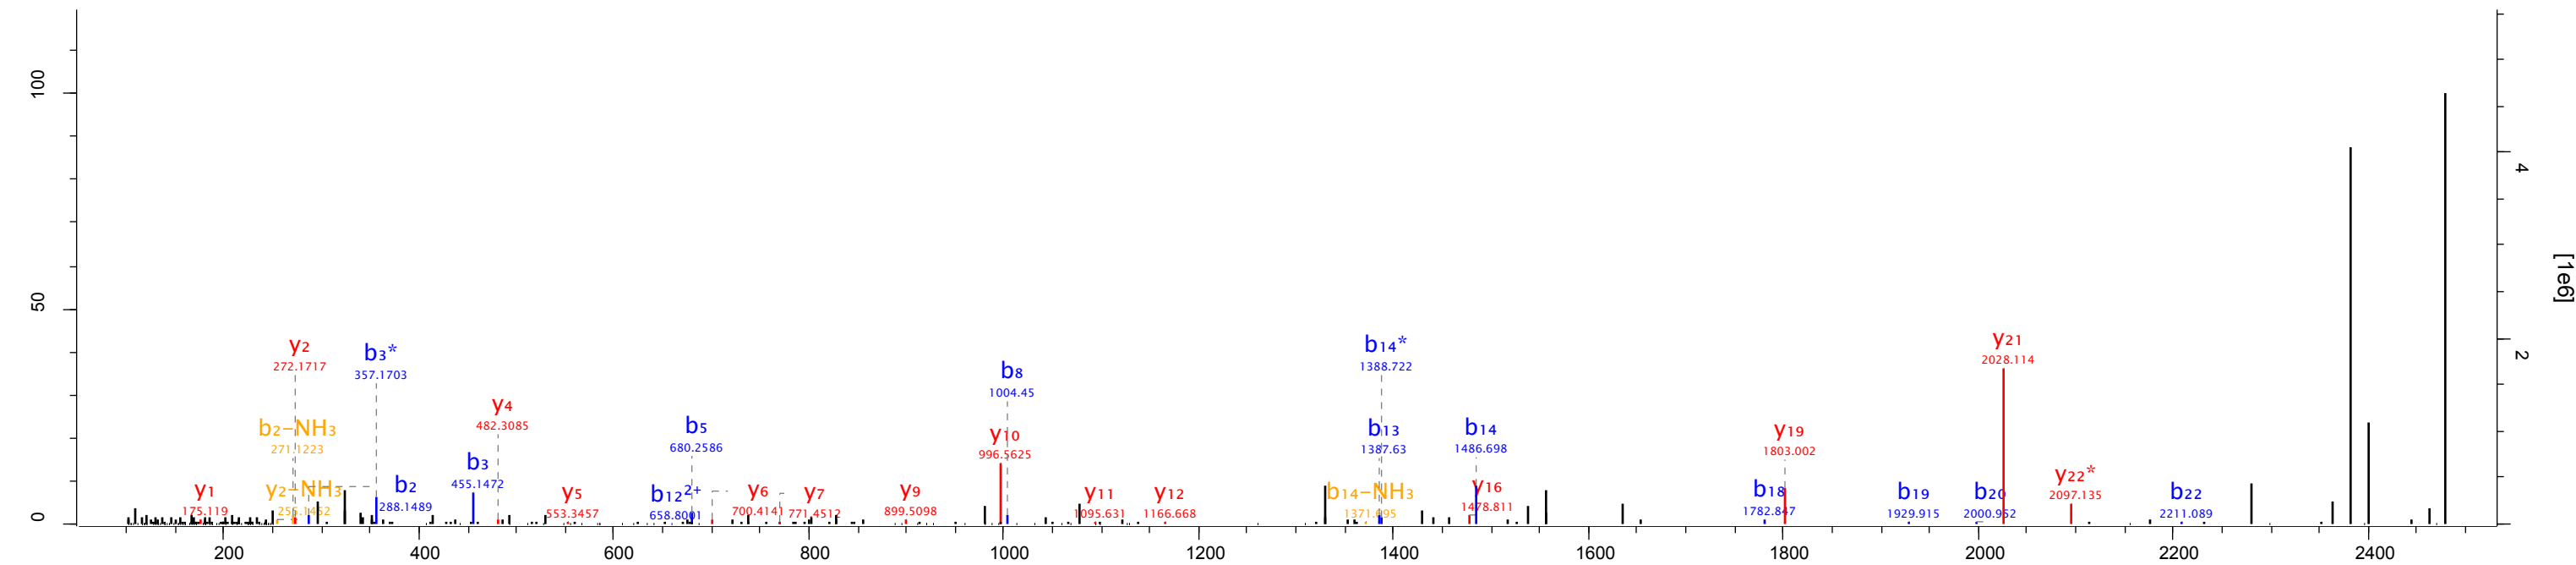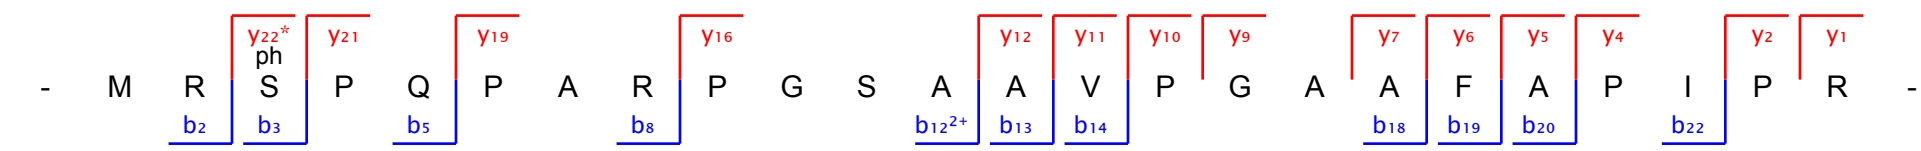

Raw file 20150814\_A375SR\_Phospho\_BR2\_09 Scan 18269 Method FTMS; HCD Score 197.6 m/z 853.43 Gene names NCOA3

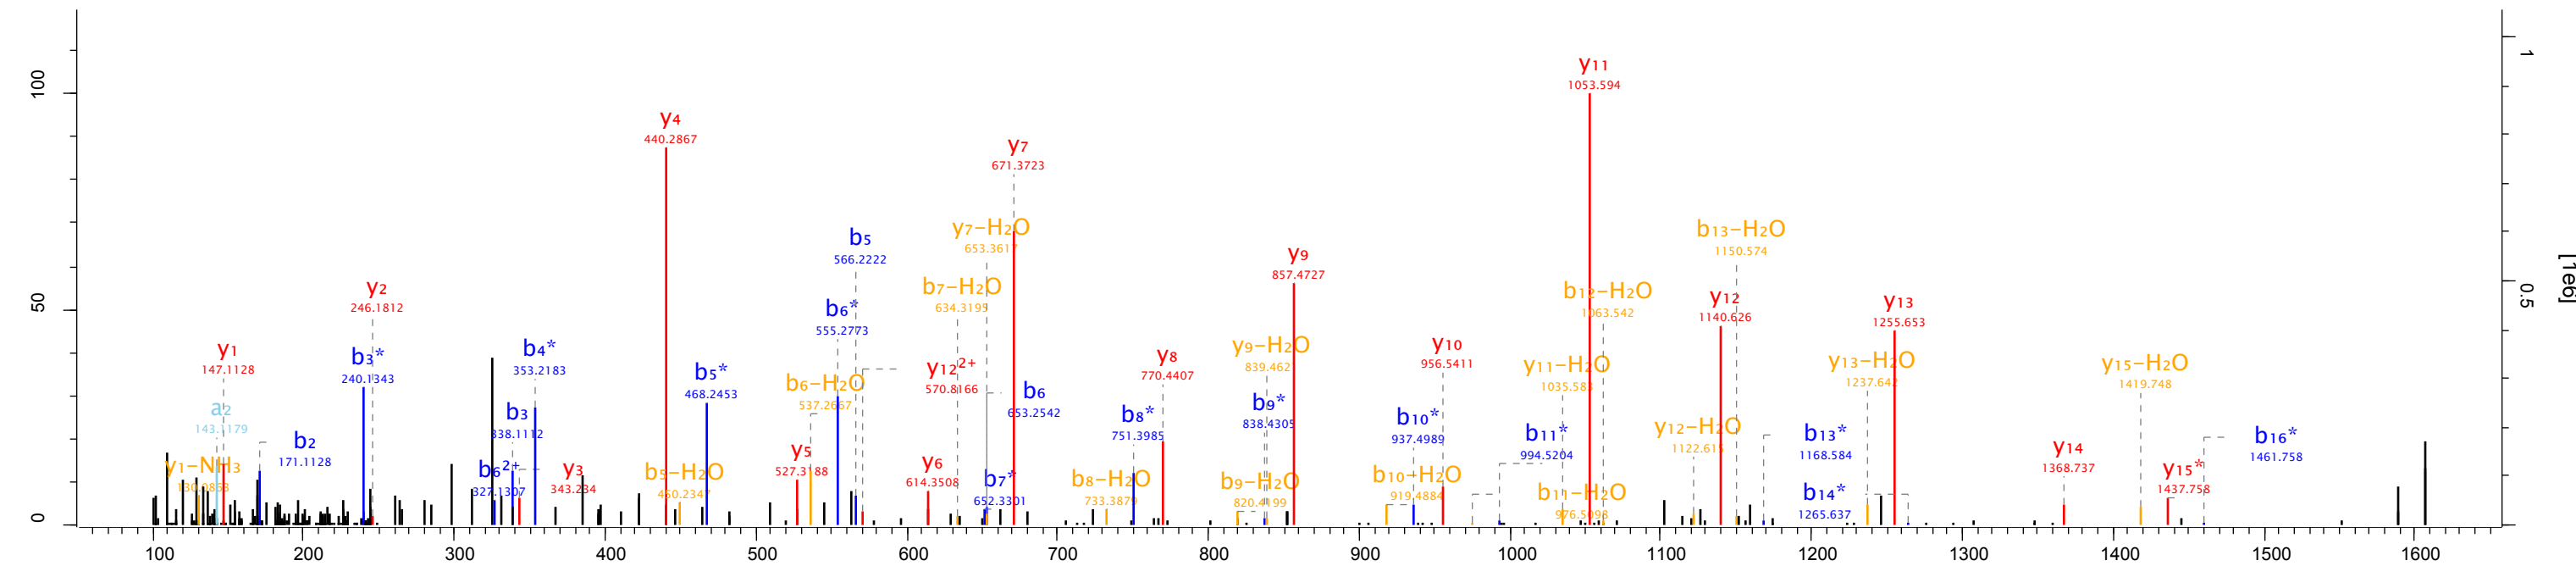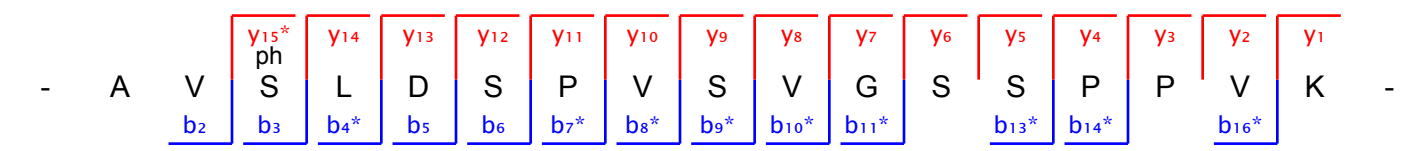

Raw file 20150814\_A375SR\_Phospho\_BR2\_09 Scan 19239 Method FTMS; HCD Score 143.98 m/z 690.81 Gene names EVA1A

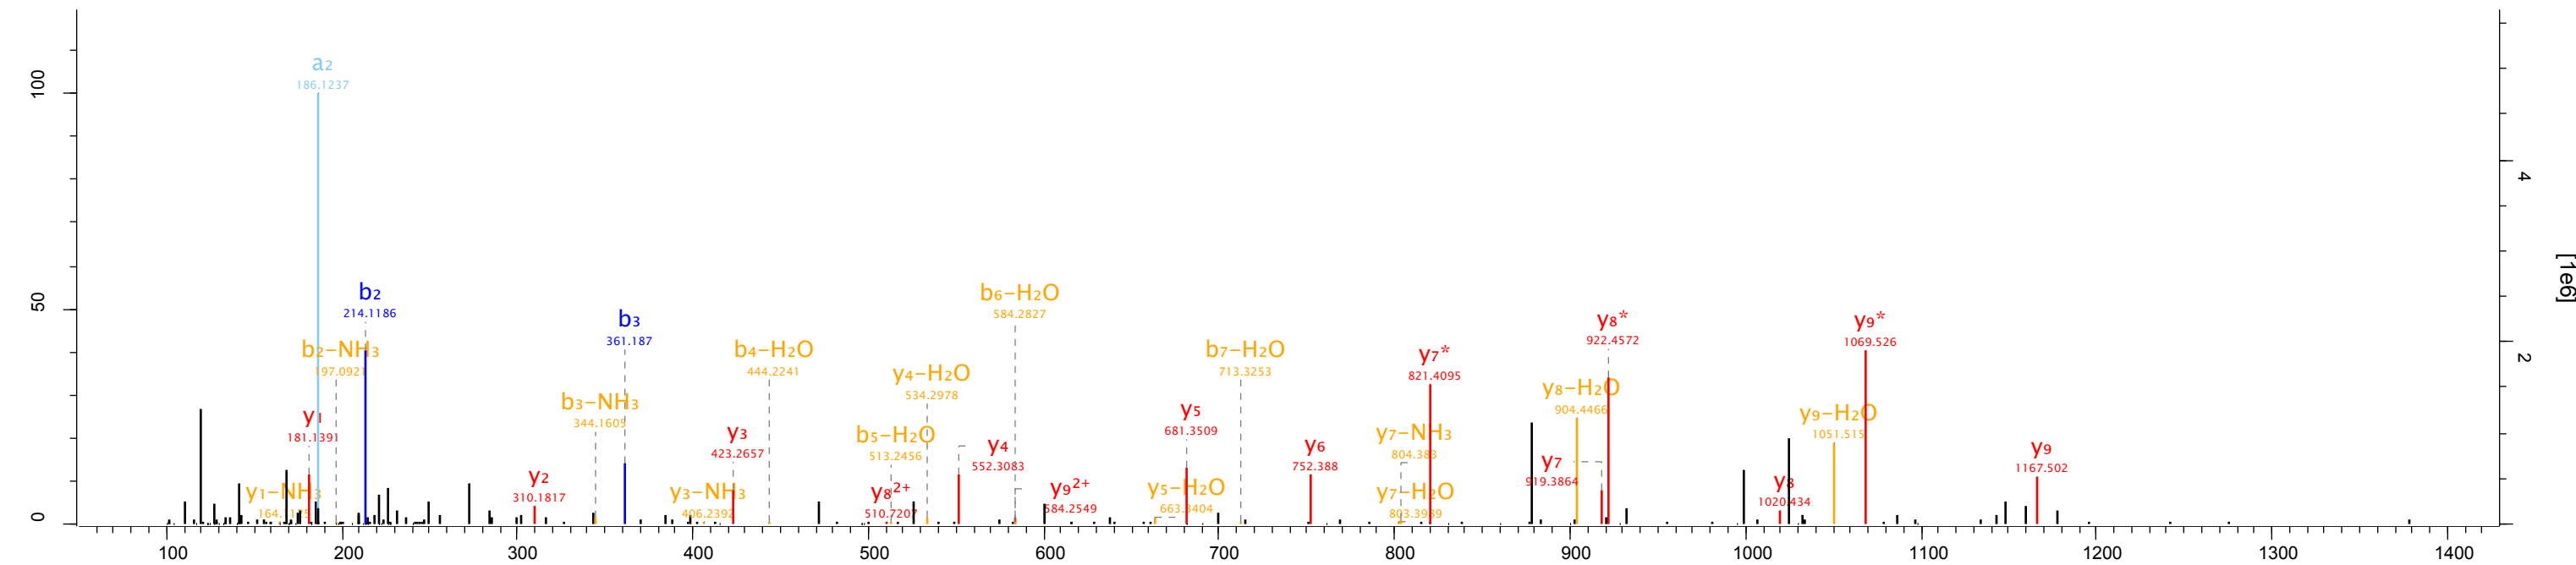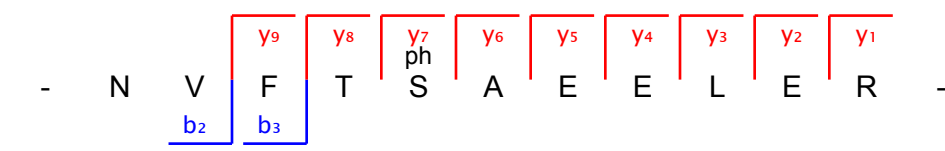

Raw file

20150814\_A375SR\_Phospho\_BR2\_09

| Scan  | Method    | Score | m/z | Gene names                                |
|-------|-----------|-------|-----|-------------------------------------------|
| 19769 | FTMS; HCD | 38    | 609 | TUBA1C;TUBA4A;TUBA1A;TUBA3C;TUBA3E;TUBA1B |

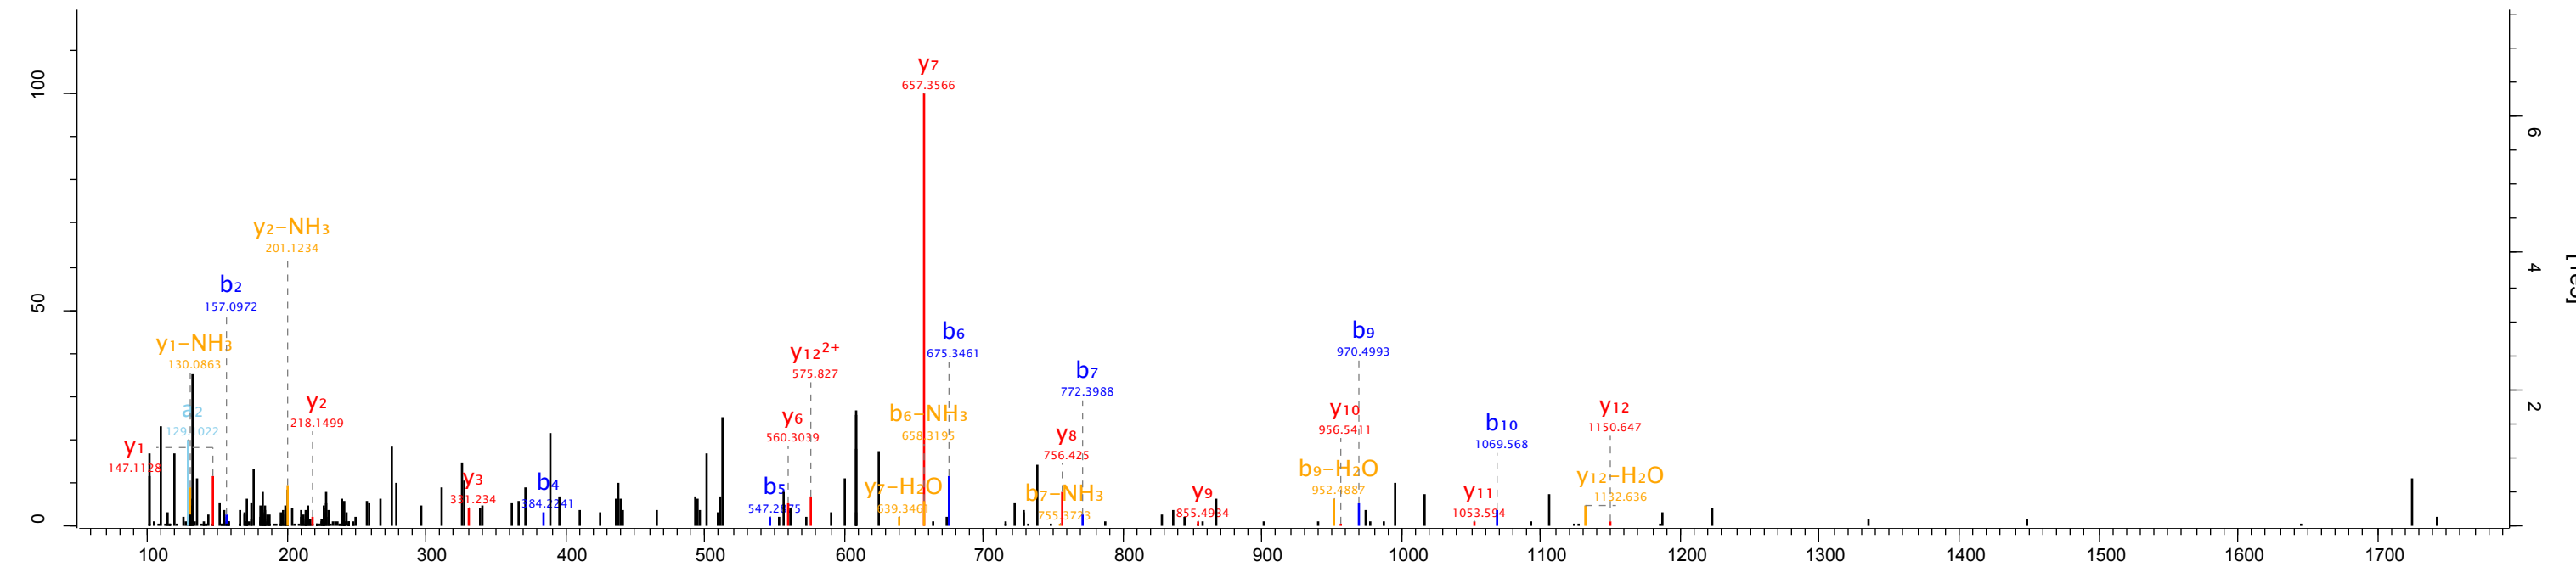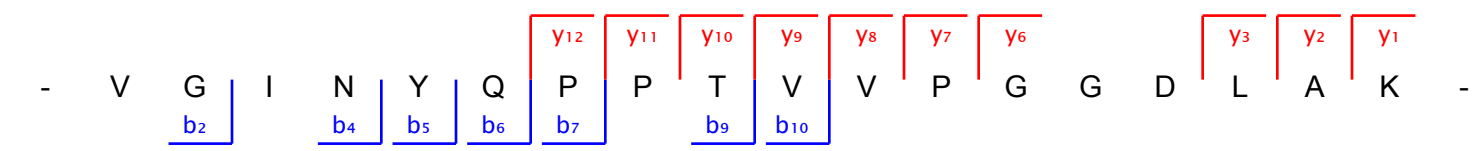

Raw file: 20150814\_A375SR\_Phospho\_BR2\_09  
 Scan: 20399 Method: FTMS; HCD Score: 91.24 m/z: 737.98 Gene names: UBB;UBC;RPS27A;UBA52

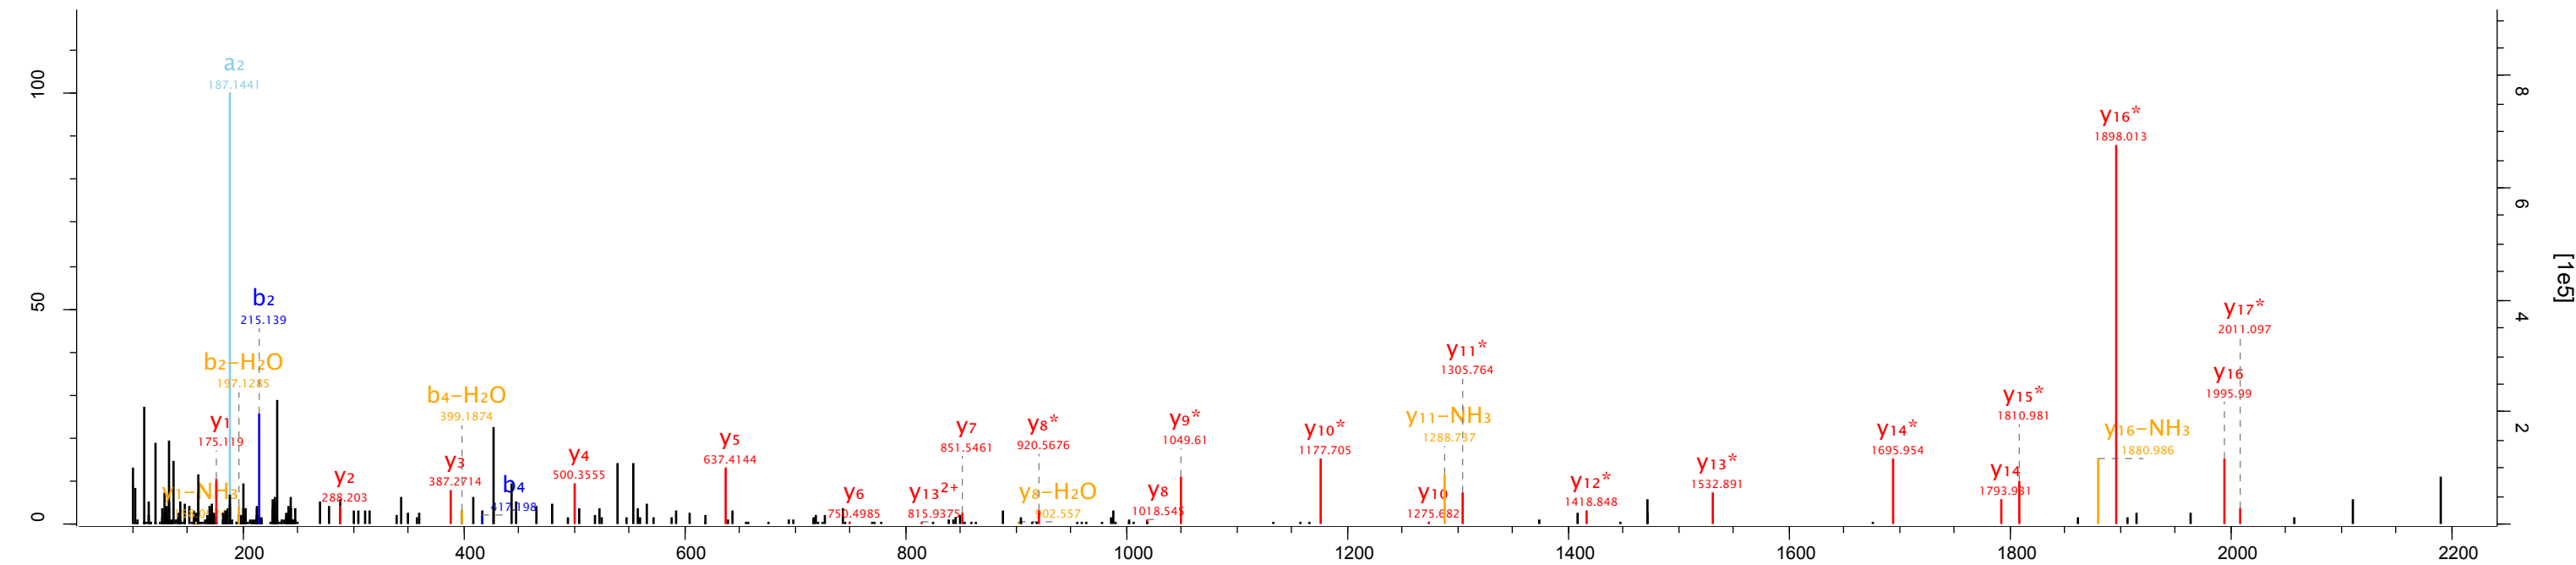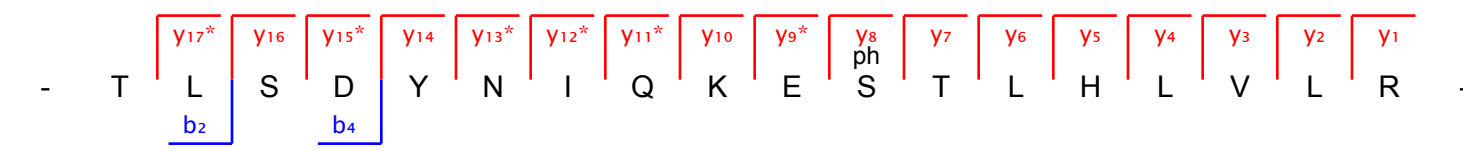

Raw file: 20150814\_A375SR\_Phospho\_BR2\_09  
 Scan: 20639 Method: FTMS; HCD Score: 145.63 m/z: 587.98 Gene names: STXBP5

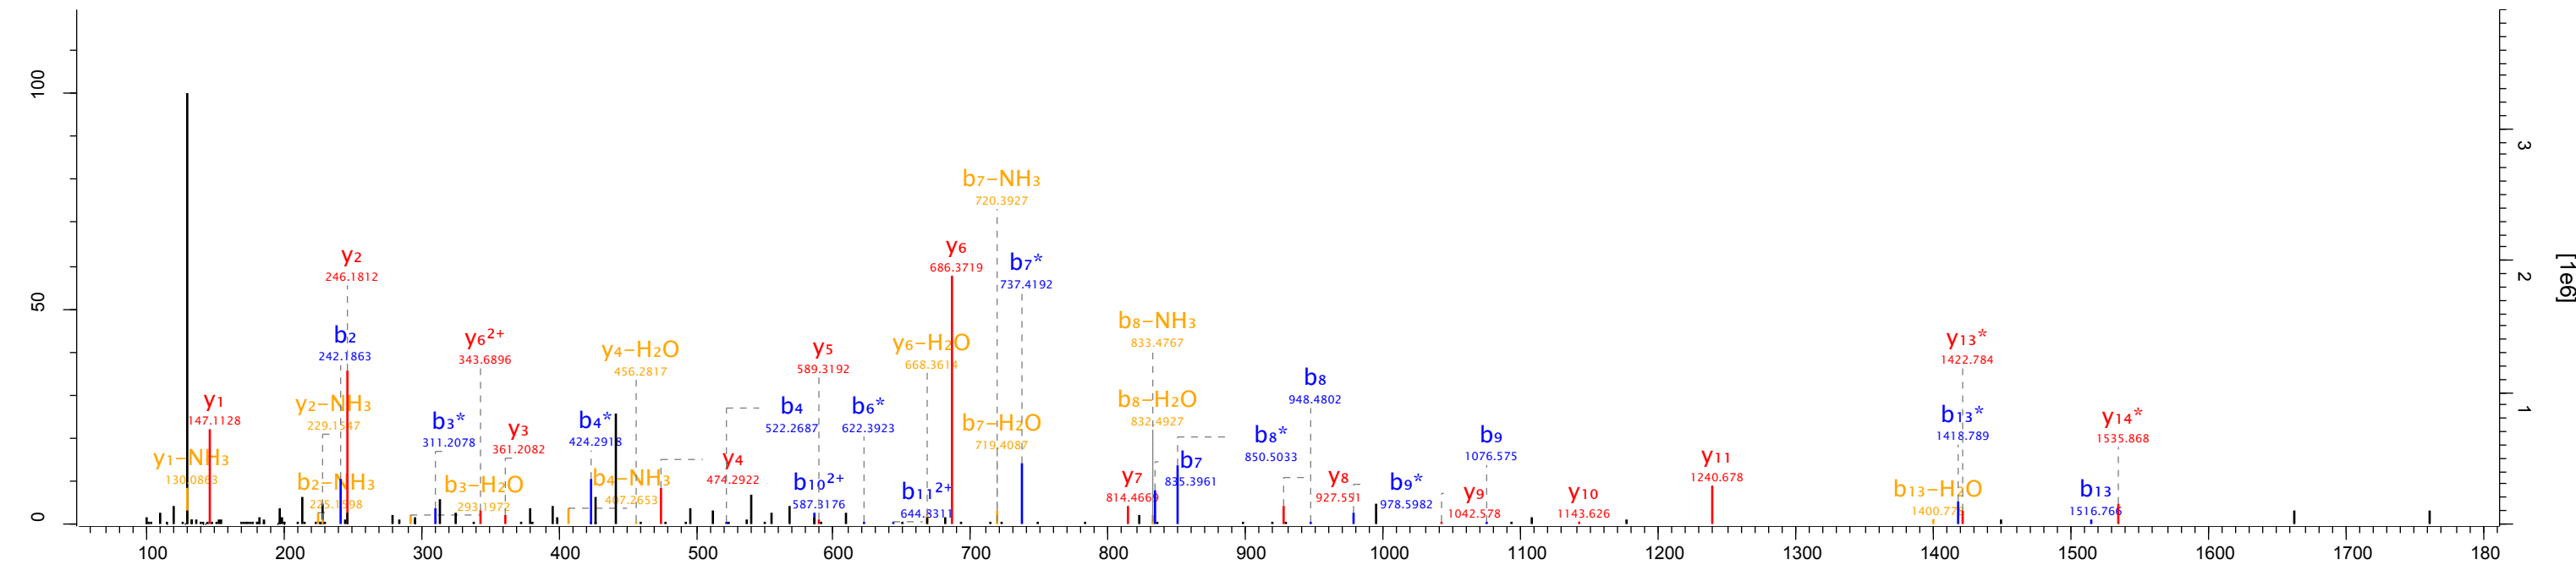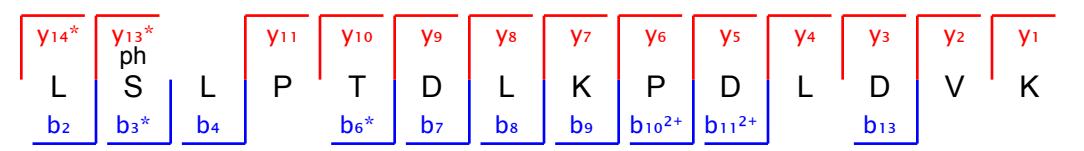

Raw file 20150814\_A375SR\_Phospho\_BR2\_09 Scan 21129 Method FTMS; HCD Score 134.37 m/z 683.33 Gene names TTF1

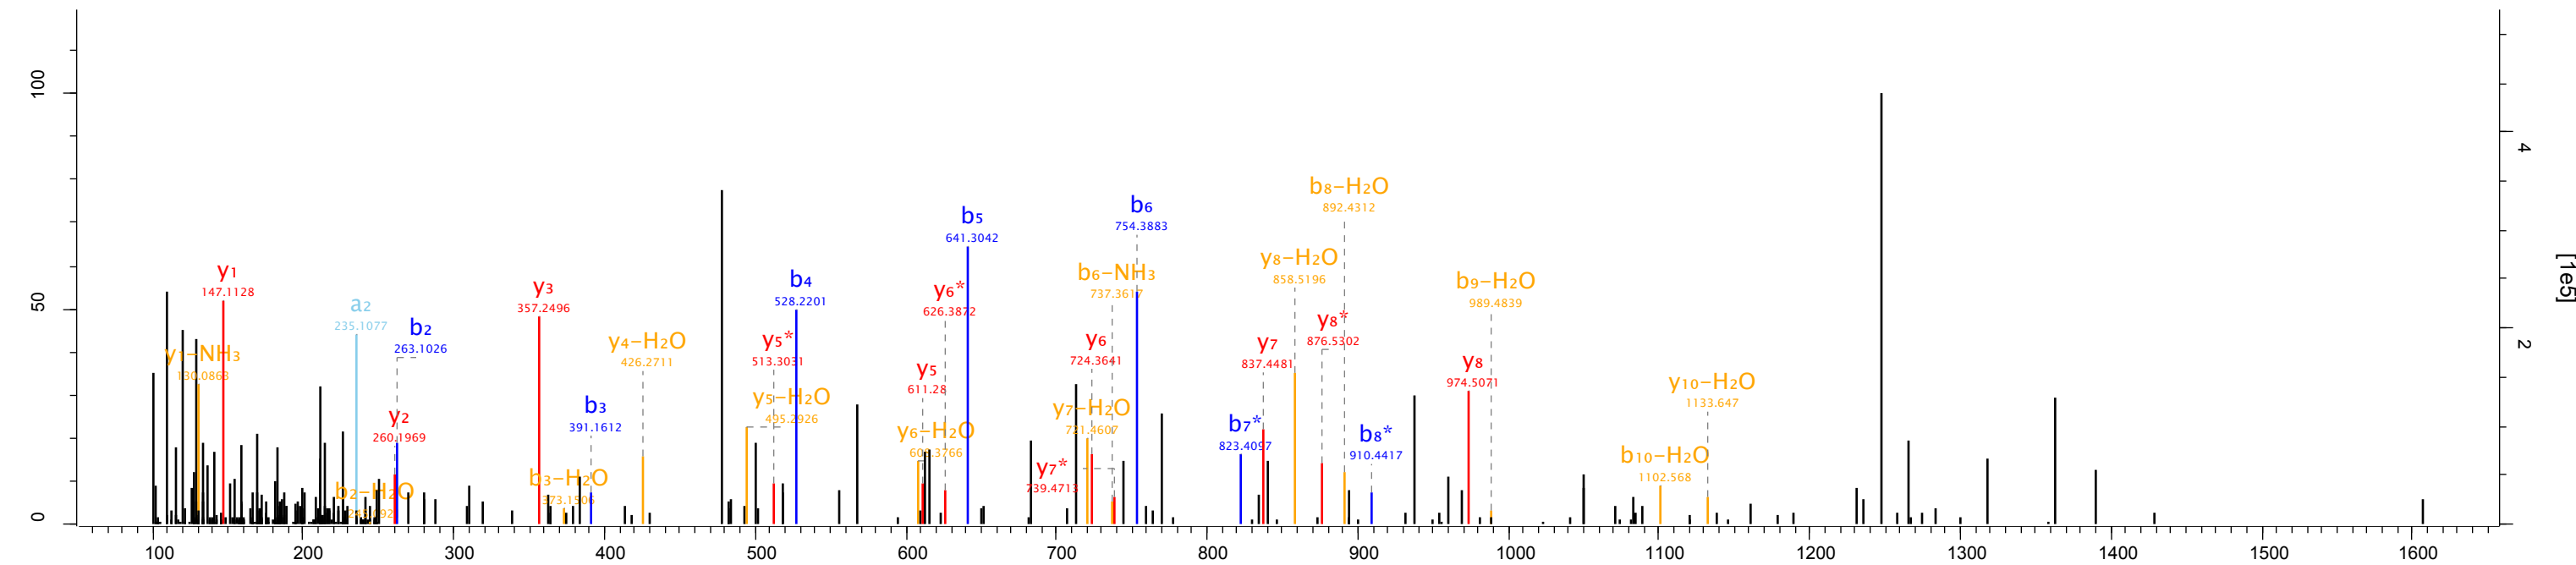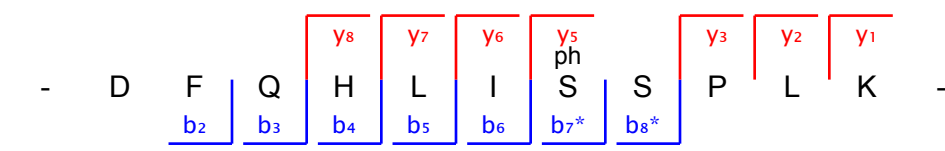

Raw file Scan Method Score m/z Gene names  
 20150814\_A375SR\_Phospho\_BR2\_09 21959 FTMS; HCD 41.4 789.41 DBF4

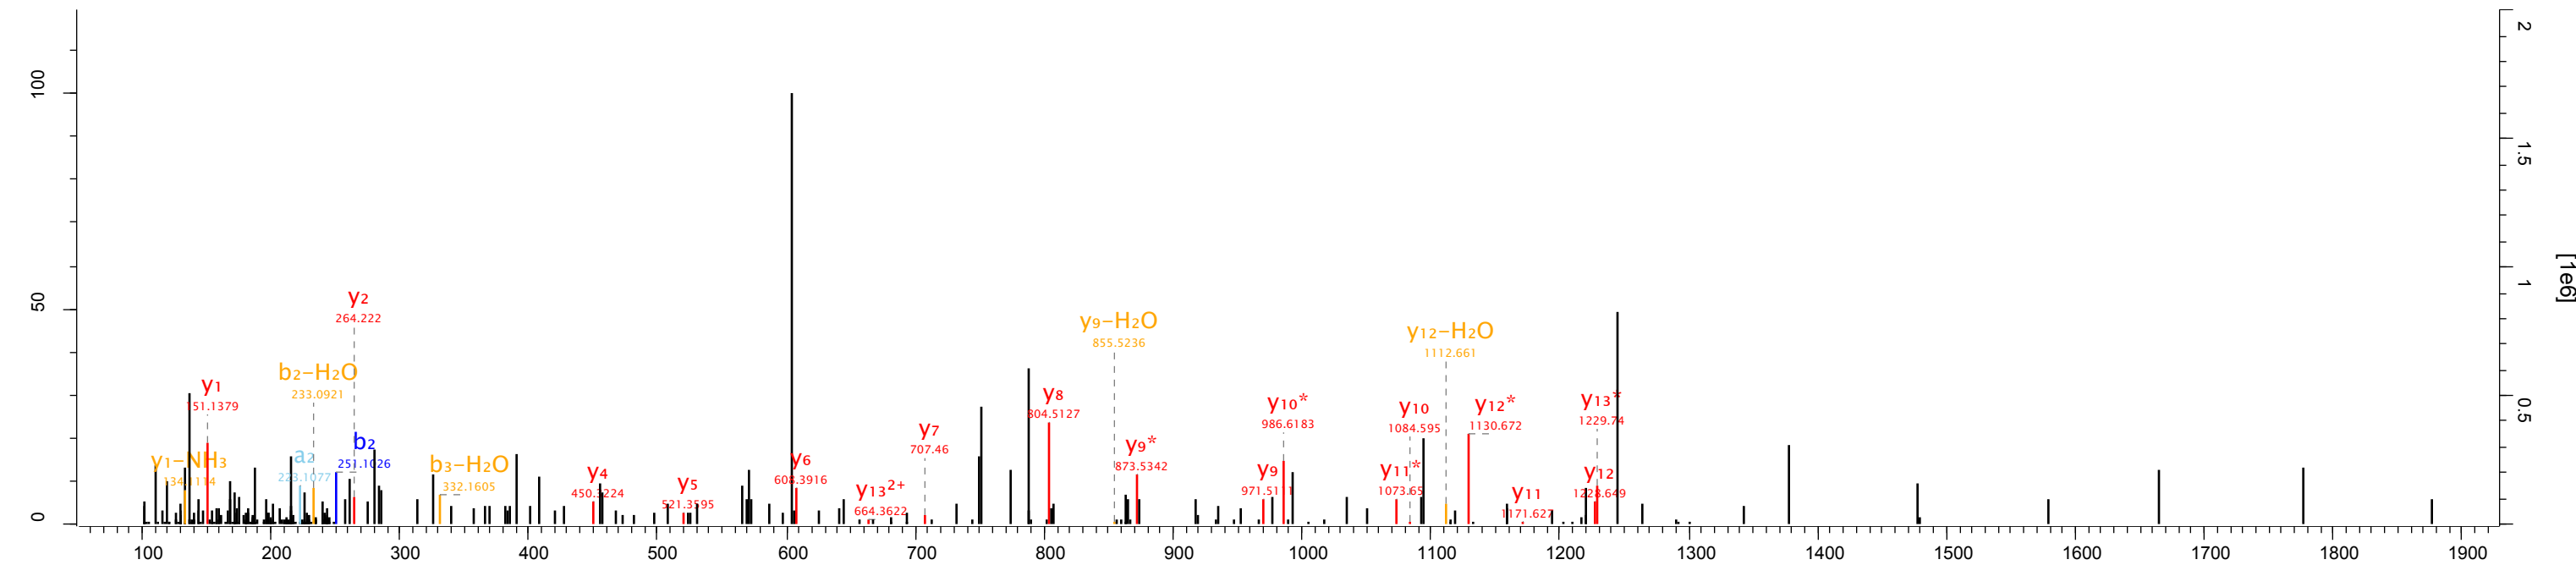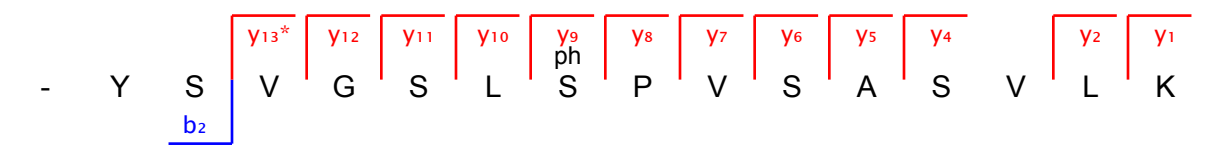



Raw file: 20150814\_A375SR\_Phospho\_BR2\_09  
 Scan: 21999 Method: FTMS; HCD Score: 242.6 m/z: 1036.55 Gene names: FAM129B

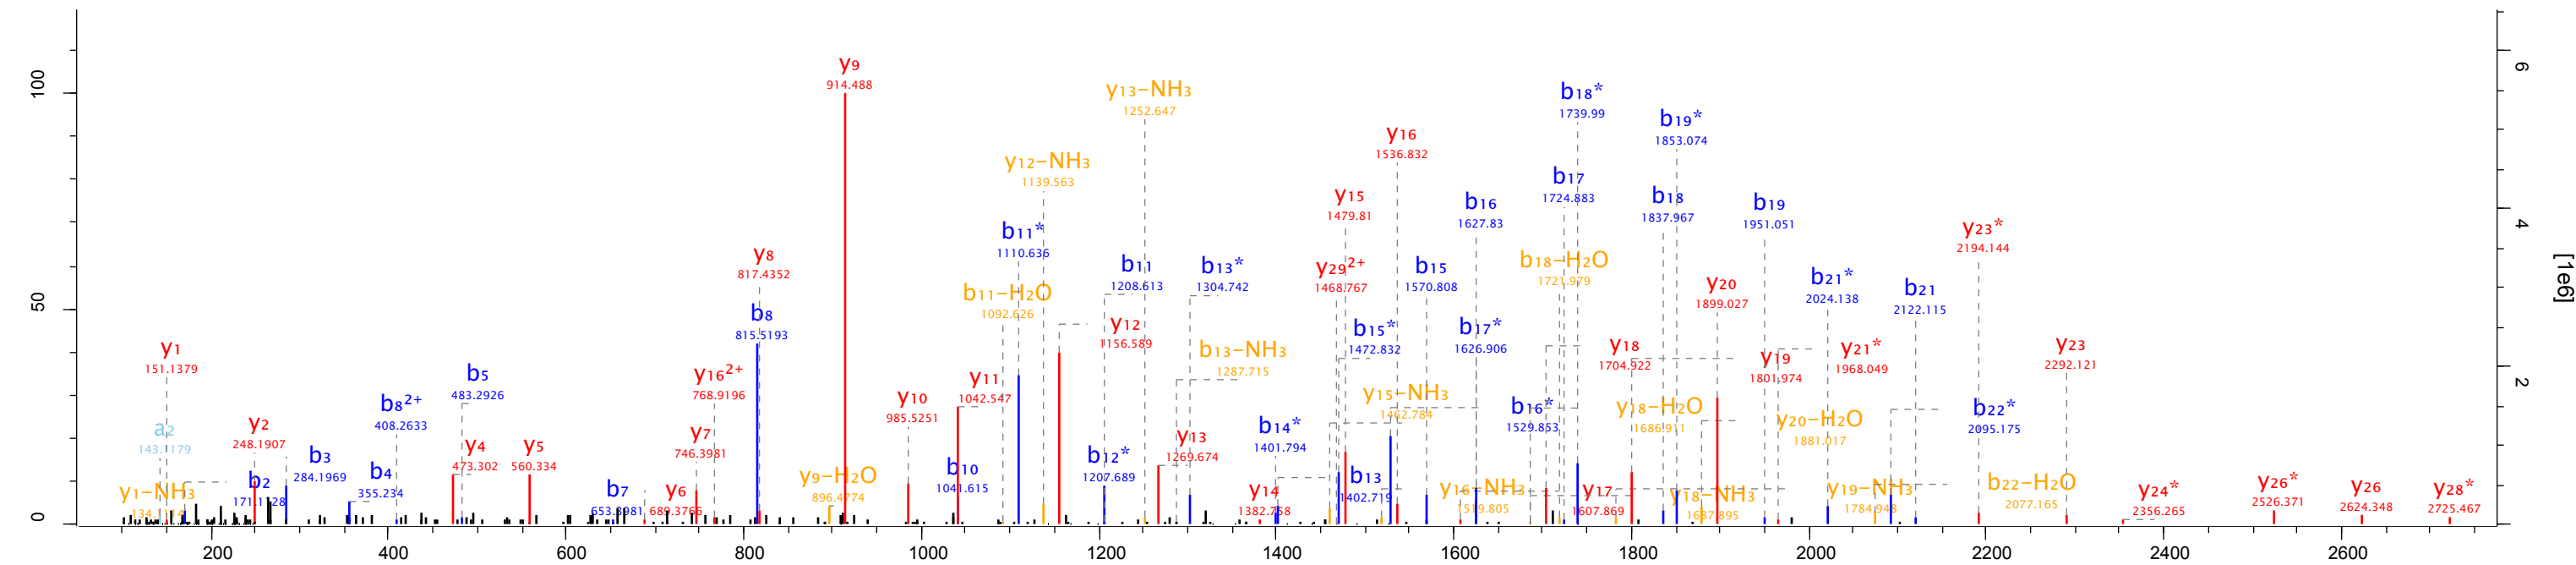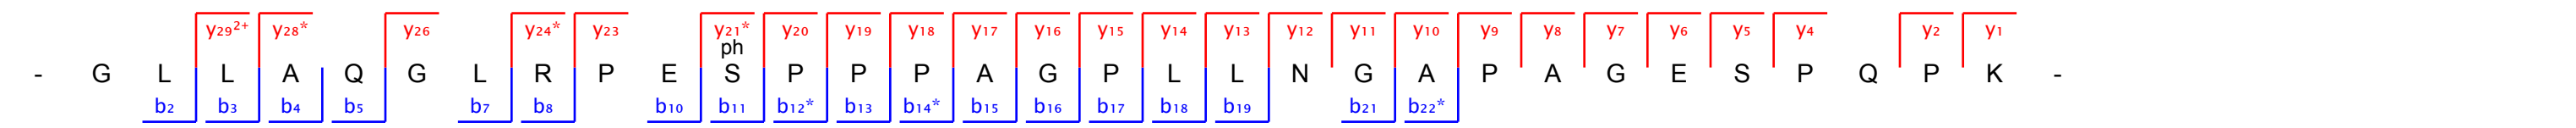

Raw file 20150814\_A375SR\_Phospho\_BR2\_09 Scan 22029 Method FTMS; HCD Score 65.21 m/z 1054.03 Gene names TKT

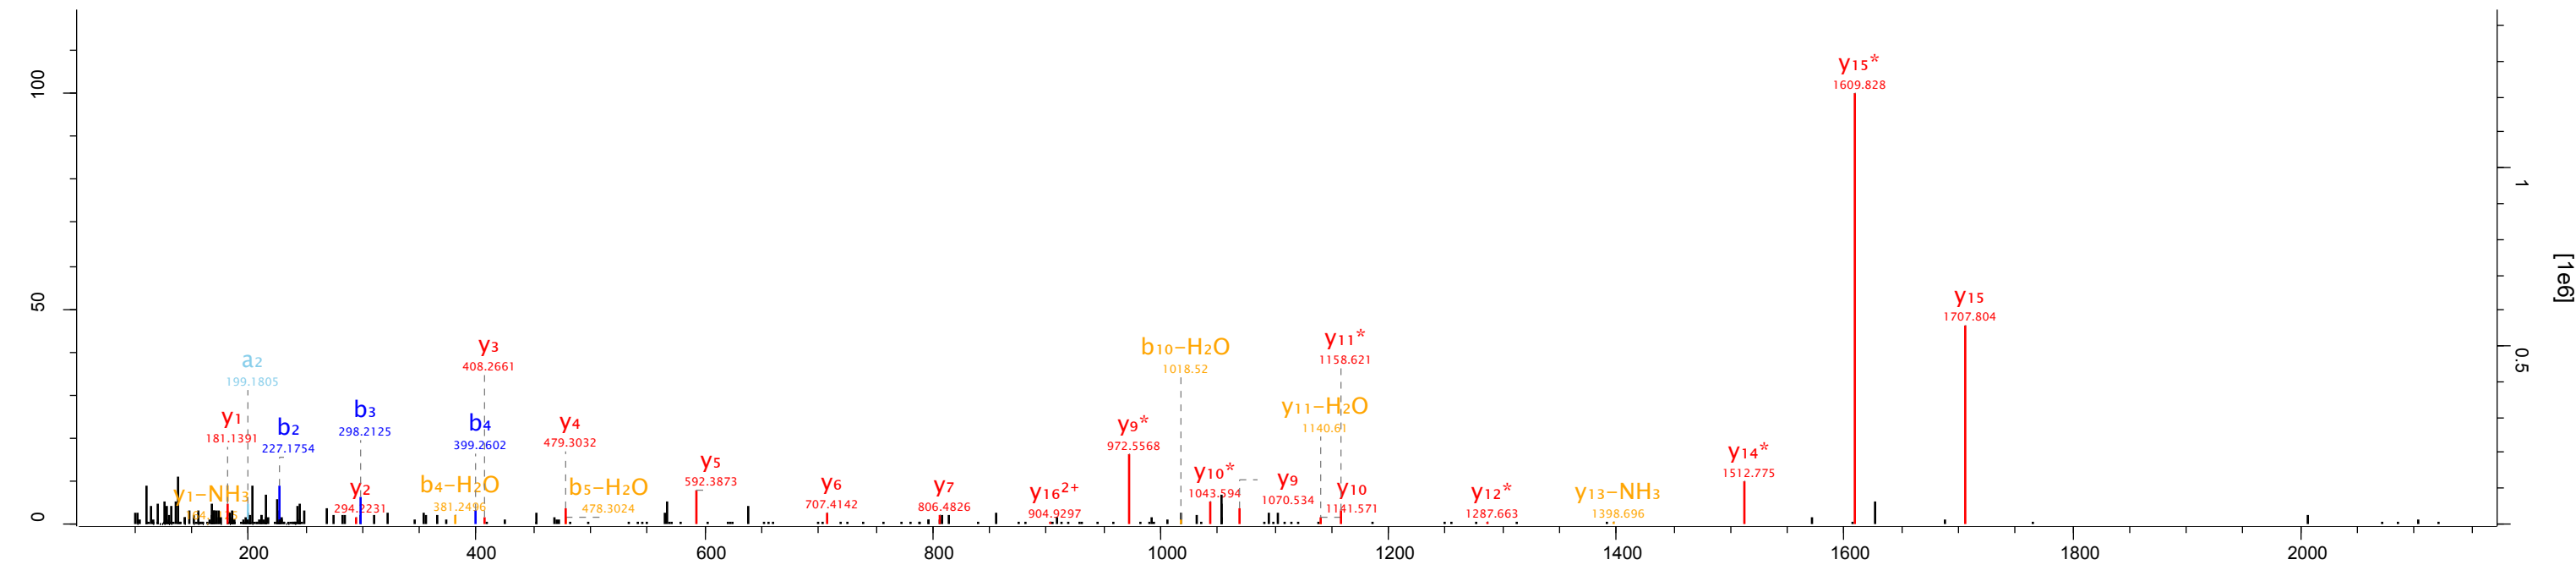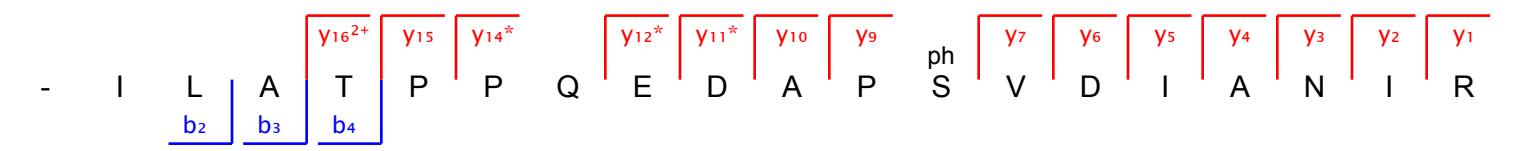

Raw file: 20150814\_A375SR\_Phospho\_BR2\_09  
 Scan: 2279 Method: FTMS; HCD Score: 96.06 m/z: 526.75 Gene names: RRAGC

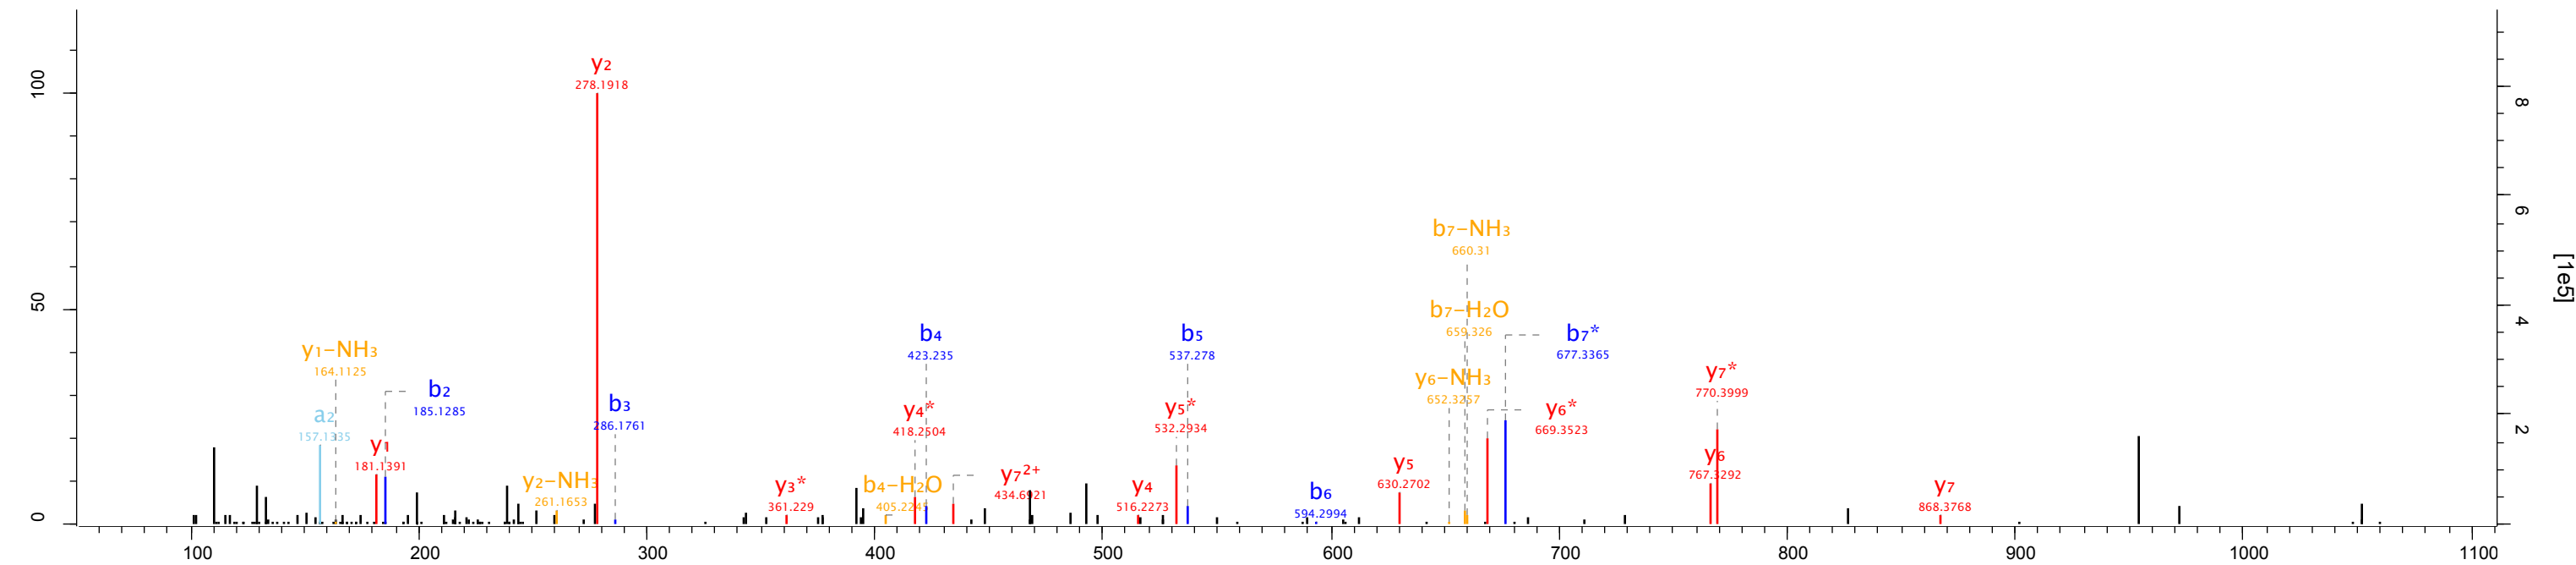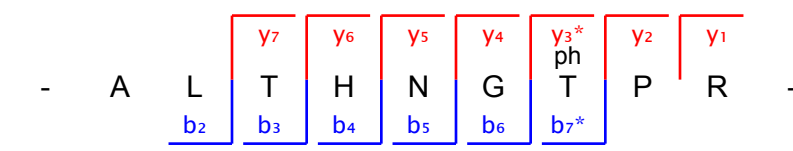

Raw file 20150814\_A375SR\_Phospho\_BR2\_09 Scan 22829 Method FTMS; HCD Score 137.91 m/z 720.39 Gene names MPDZ

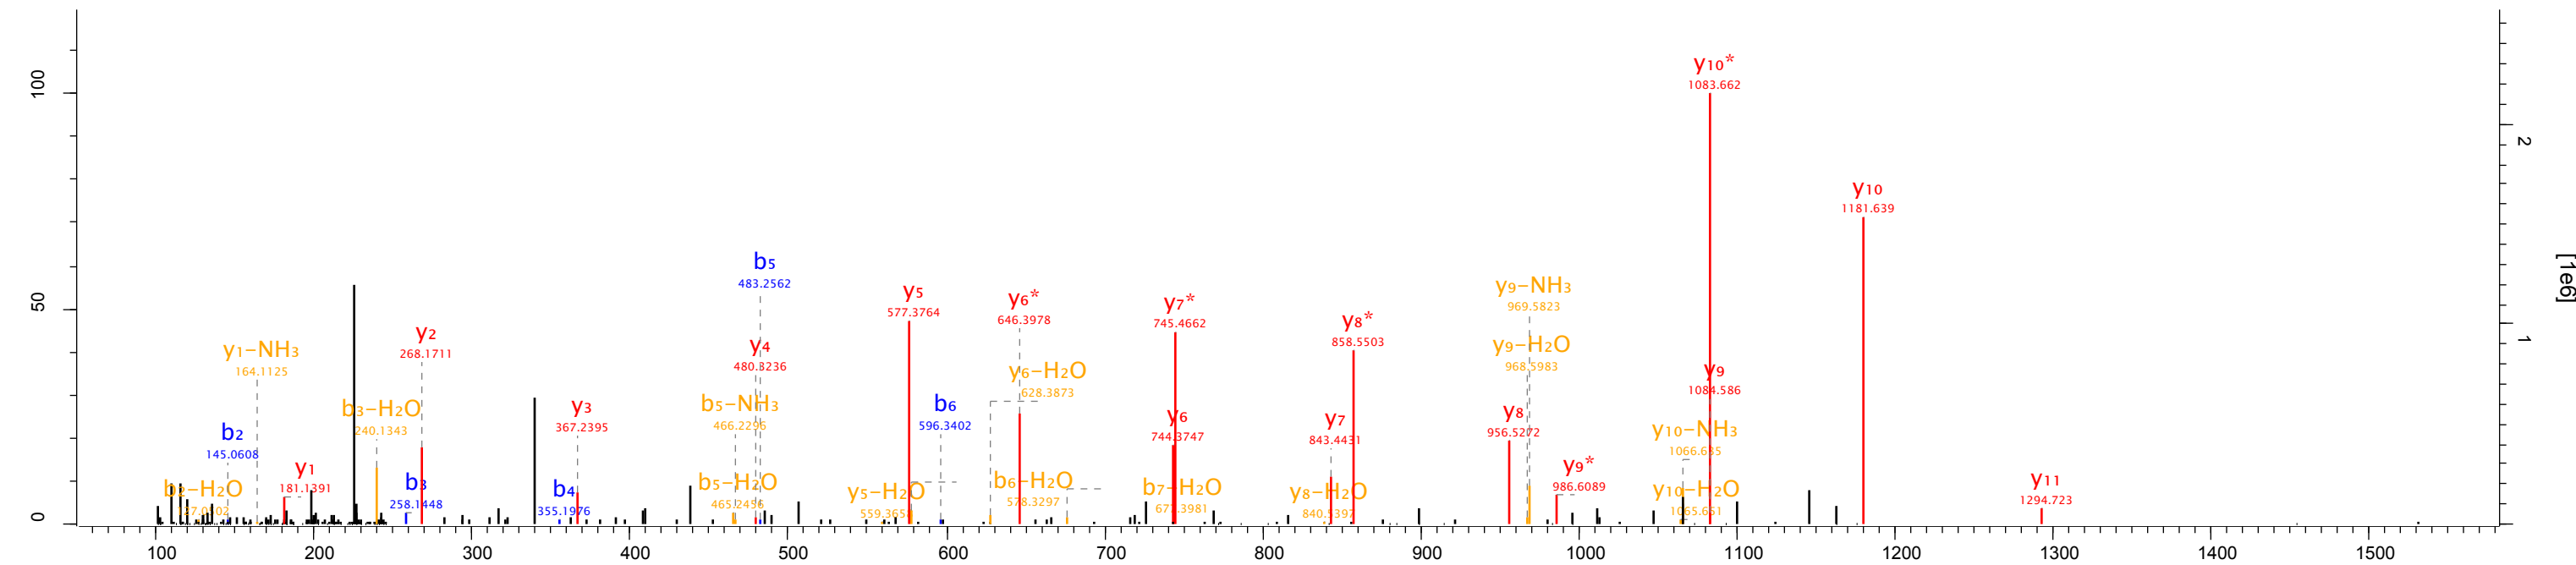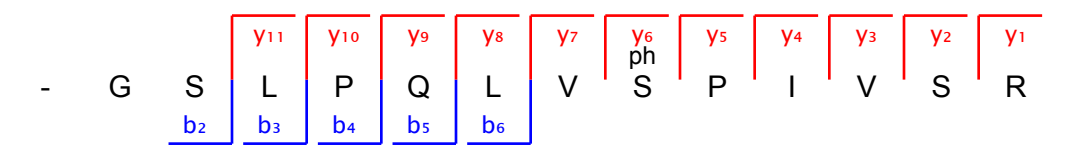

Raw file: 20150814\_A375SR\_Phospho\_BR2\_09  
 Scan: 23029 Method: FTMS; HCD Score: 156.03 m/z: 888.79 Gene names: PQBP1

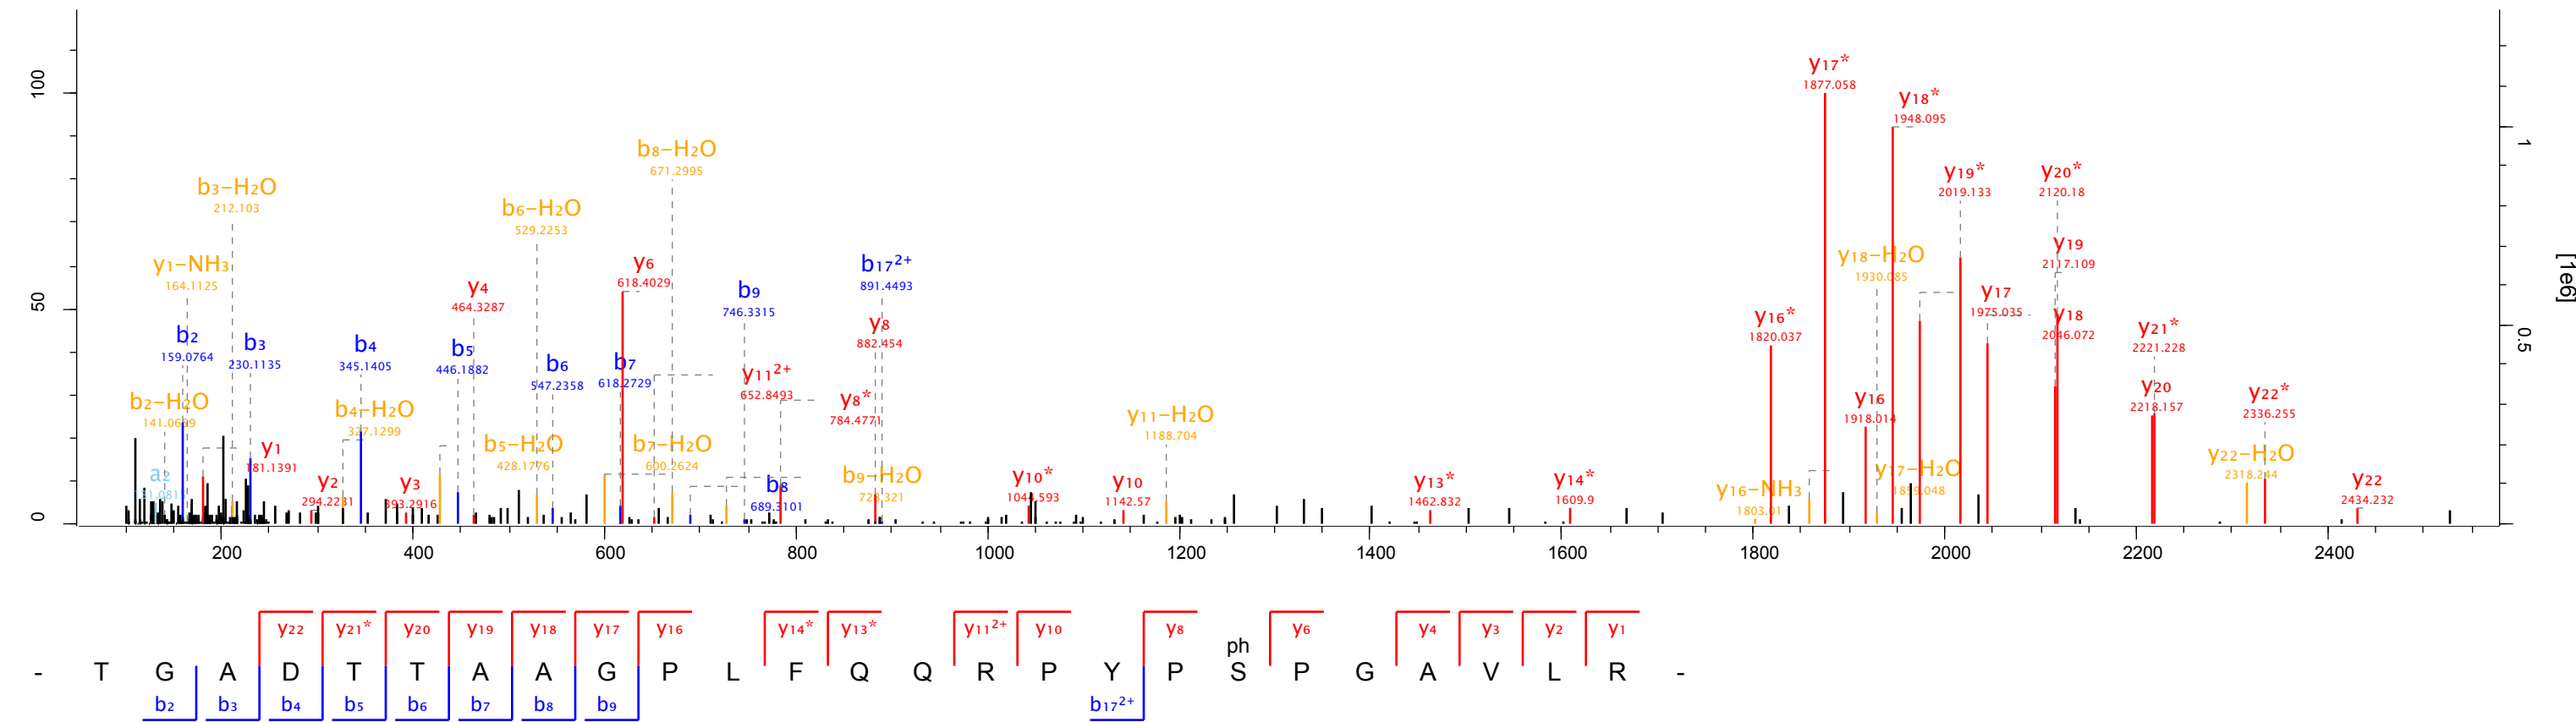

Raw file 20150814\_A375SR\_Phospho\_BR2\_09 Scan 23319 Method FTMS; HCD Score 130.55 m/z 934.46 Gene names USP10

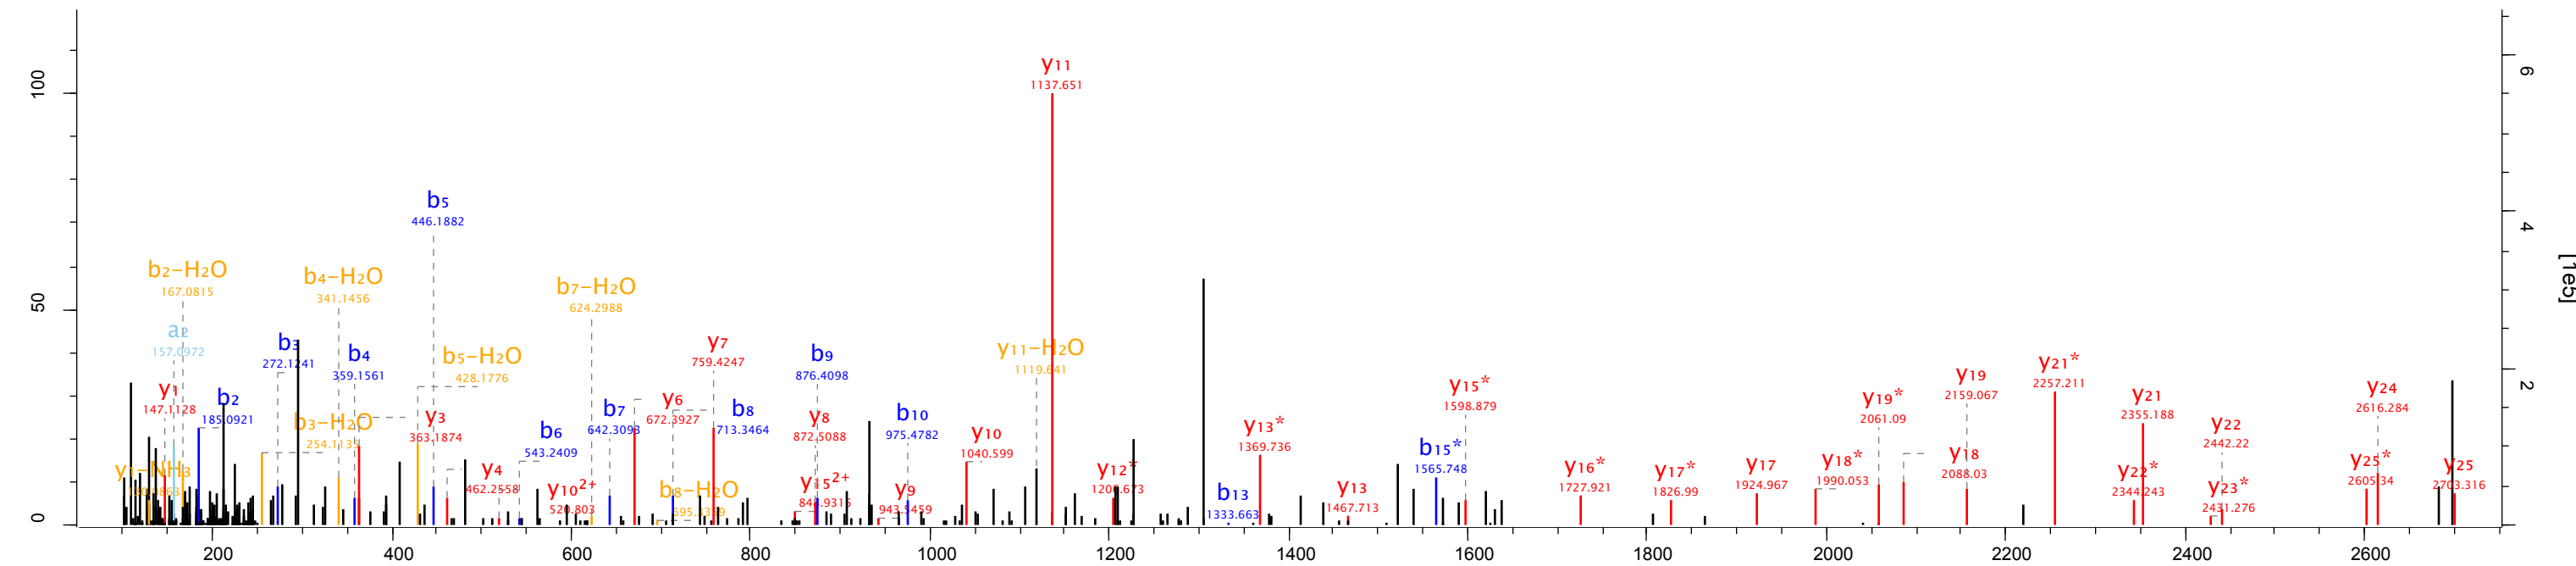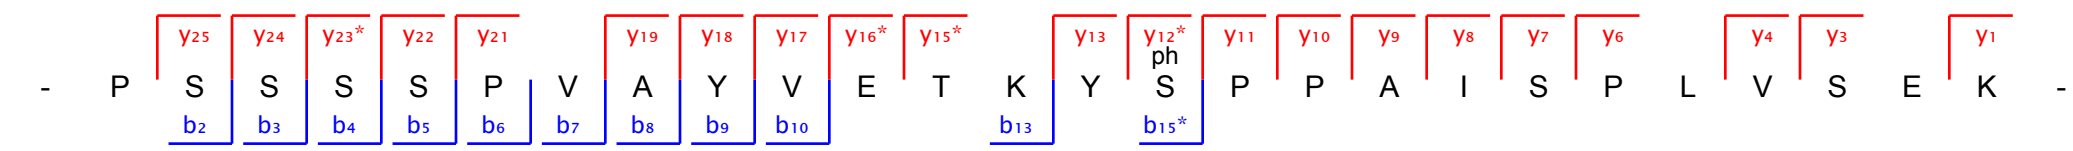

Raw file 20150814\_A375SR\_Phospho\_BR2\_09 Scan 24629 Method FTMS; HCD Score 263.17 m/z 1232.64 Gene names MAP2K2

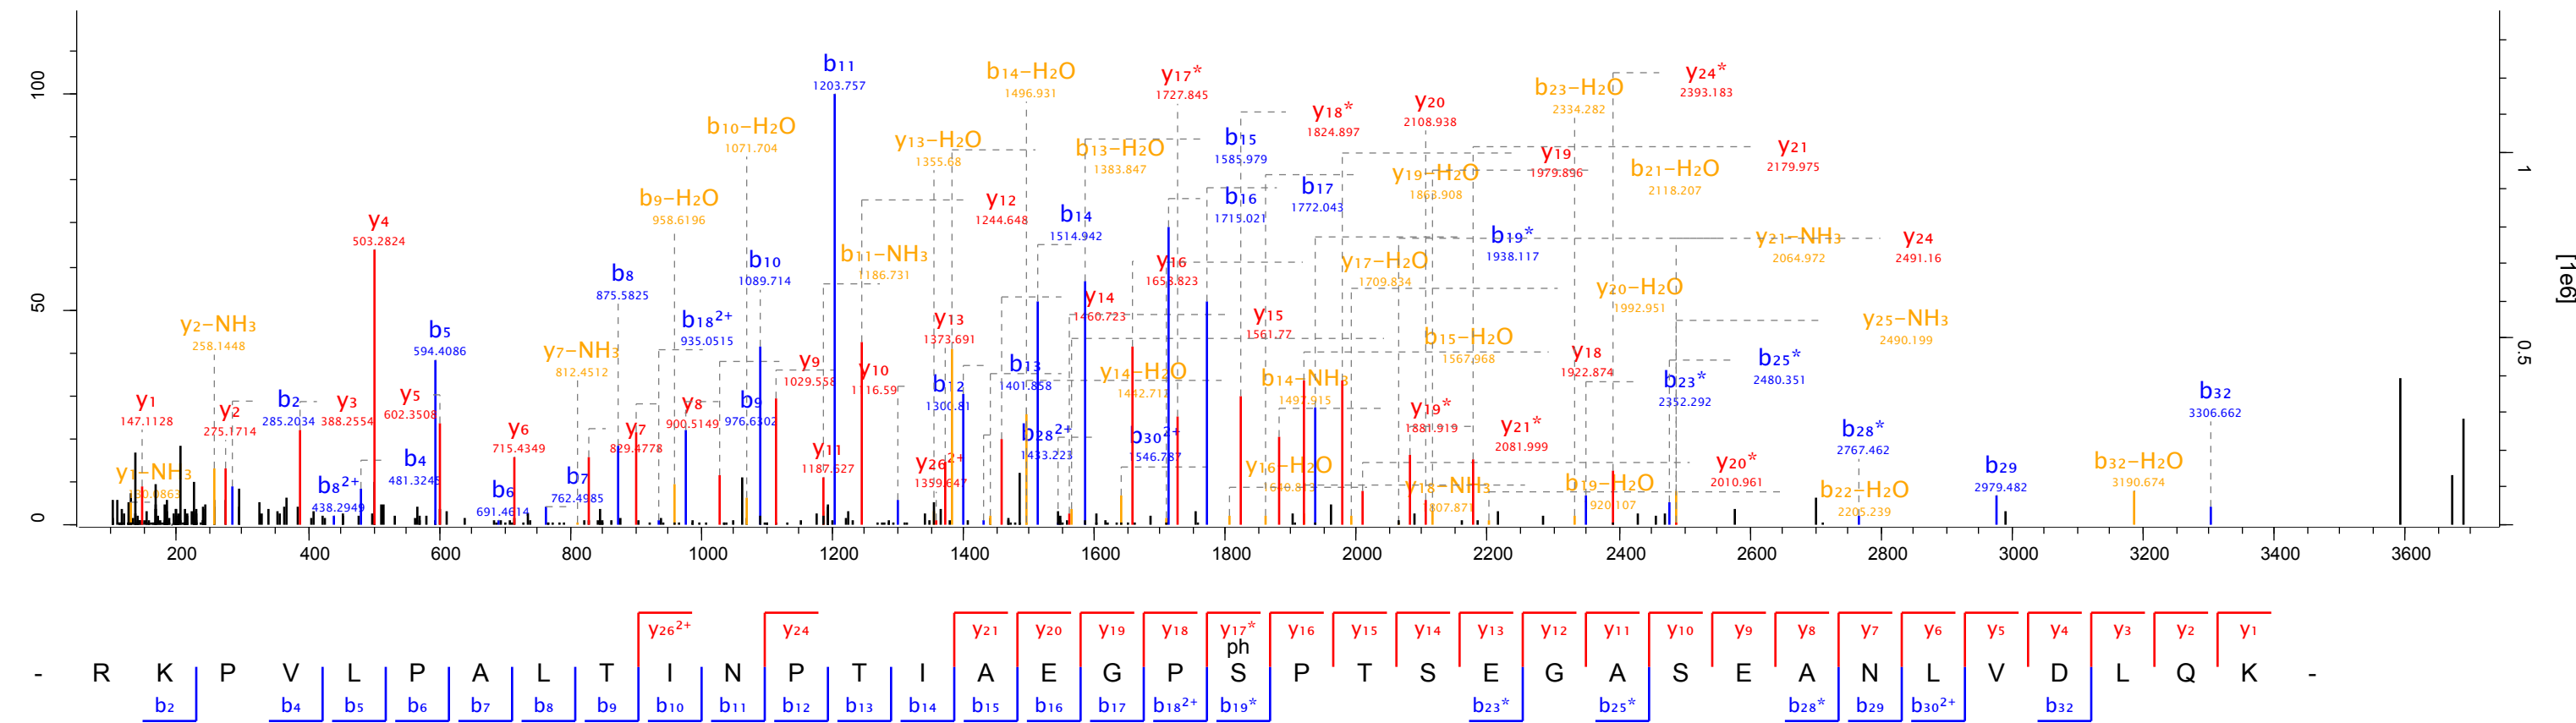

Raw file: 20150814\_A375SR\_Phospho\_BR2\_09  
 Scan: 25599 Method: FTMS; HCD Score: 70.34 m/z: 675.7 Gene names: PLEKHG5

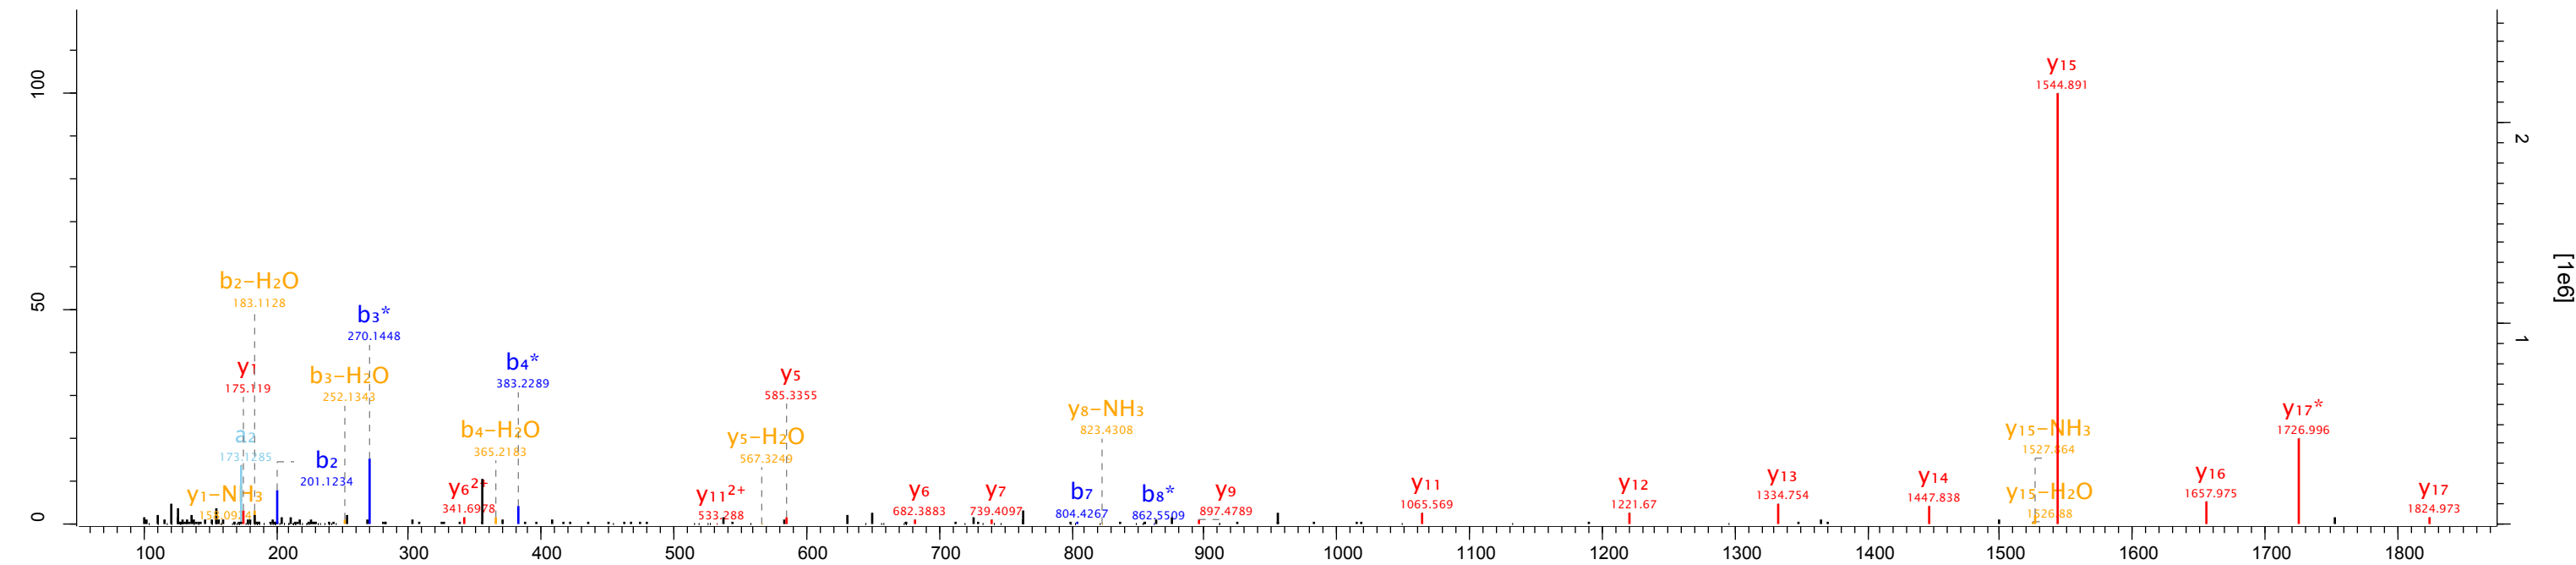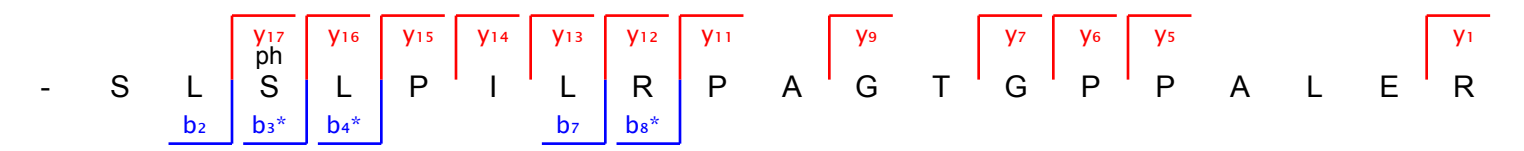



Raw file 20150814\_A375SR\_Phospho\_BR2\_09 Scan 26319 Method FTMS; HCD Score 71.7 m/z 1003 Gene names SH3BP4

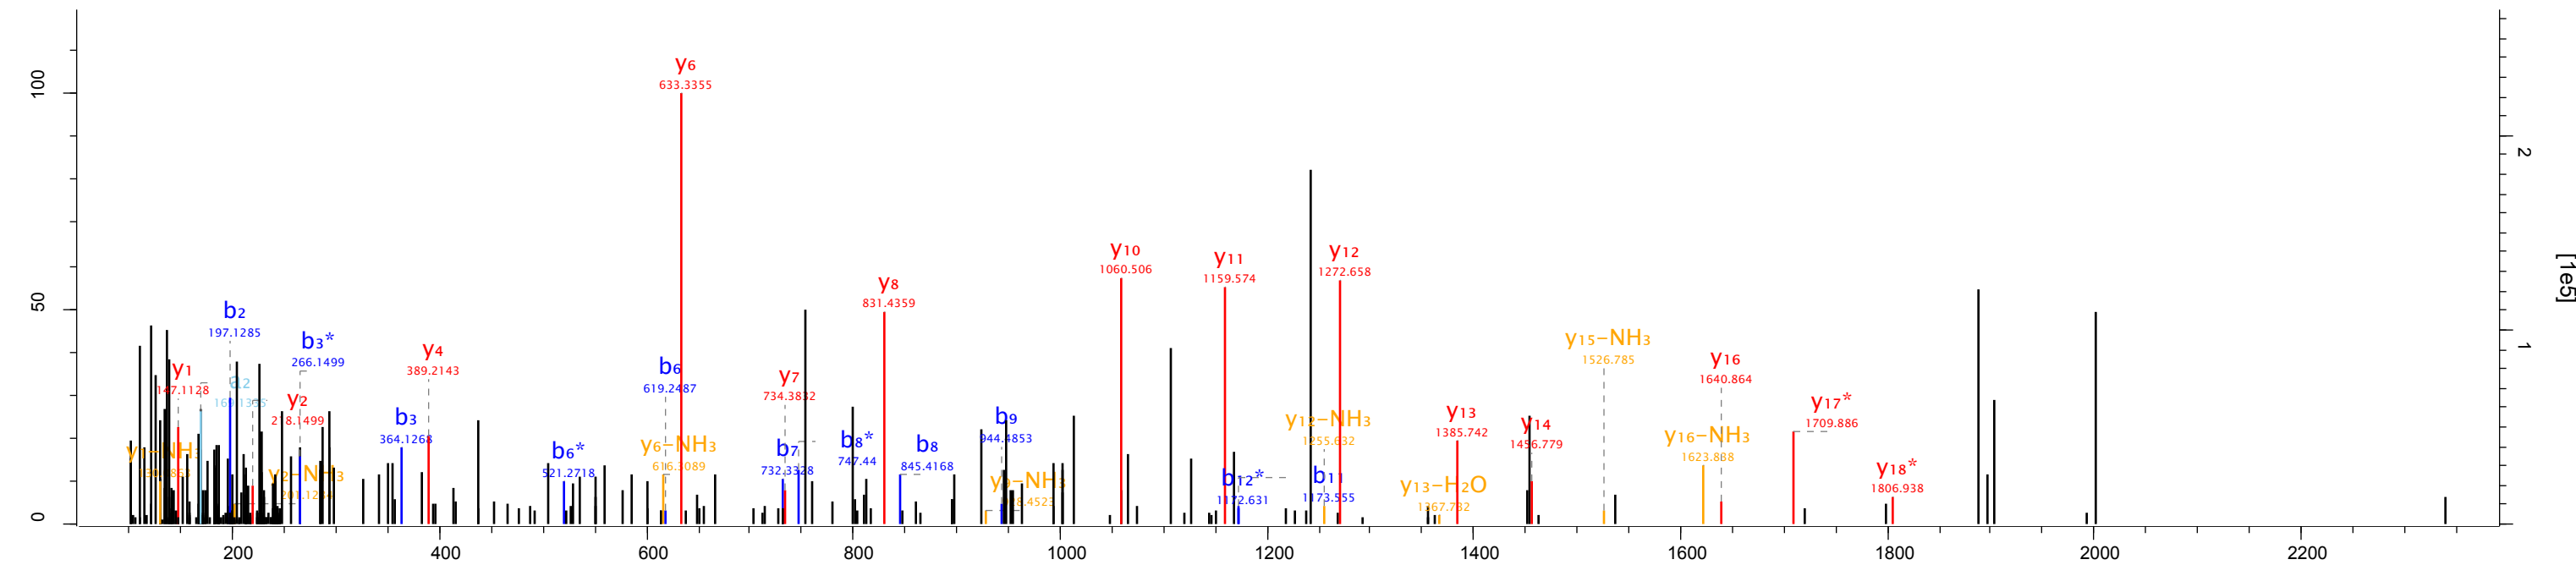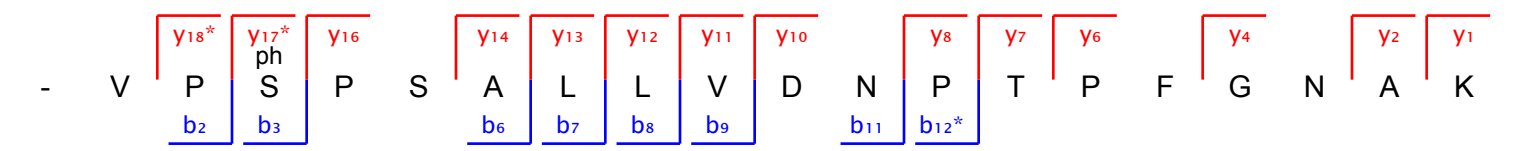

Raw file  
 20150814\_A375SR\_Phospho\_BR2\_09  
 Scan 26689 Method FTMS; HCD Score 250.79 m/z 955.96 Gene names PCBP2

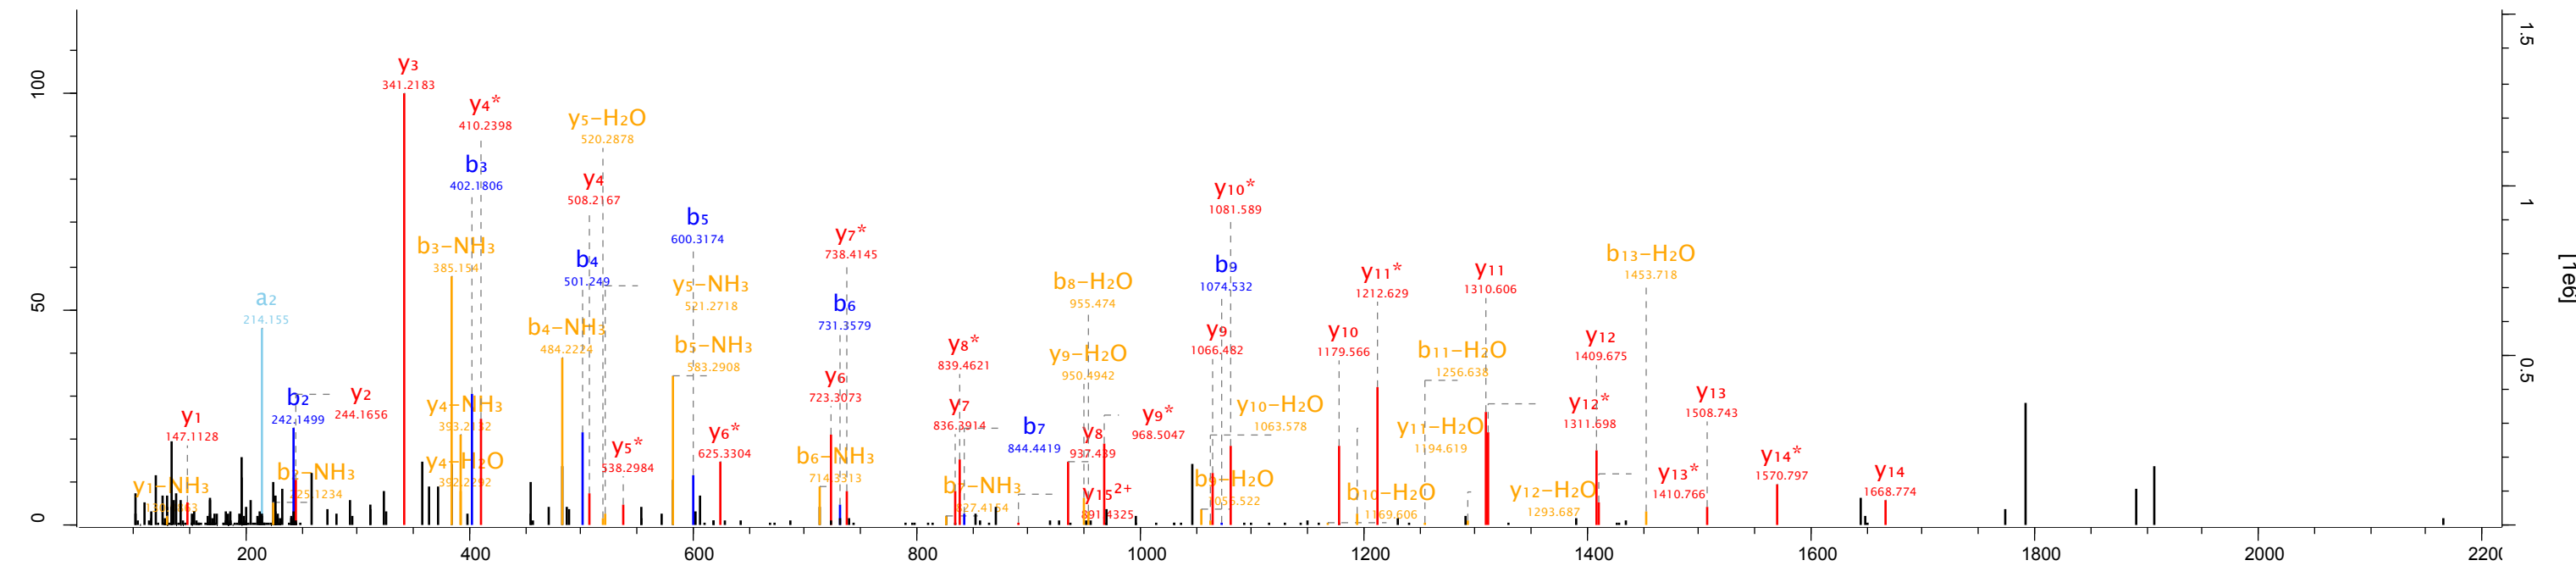

- Q I C V V M L E T L S Q S P P K -

y<sub>15</sub><sup>2+</sup>
y<sub>14</sub>
y<sub>13</sub>
y<sub>12</sub>
y<sub>11</sub>
y<sub>10</sub>
y<sub>9</sub>
y<sub>8</sub>
y<sub>7</sub>
y<sub>6</sub>
y<sub>5</sub><sup>\*</sup>
y<sub>4</sub><sub>ph</sub>
y<sub>3</sub>
y<sub>2</sub>
y<sub>1</sub>

b<sub>2</sub>
b<sub>3</sub>
b<sub>4</sub>
b<sub>5</sub>
b<sub>6</sub>
b<sub>7</sub>
b<sub>9</sub>

Raw file Scan Method Score m/z Gene names  
 20150814\_A375SR\_Phospho\_BR2\_09 27739 FTMS; HCD 94.81 983.86 MMACHC

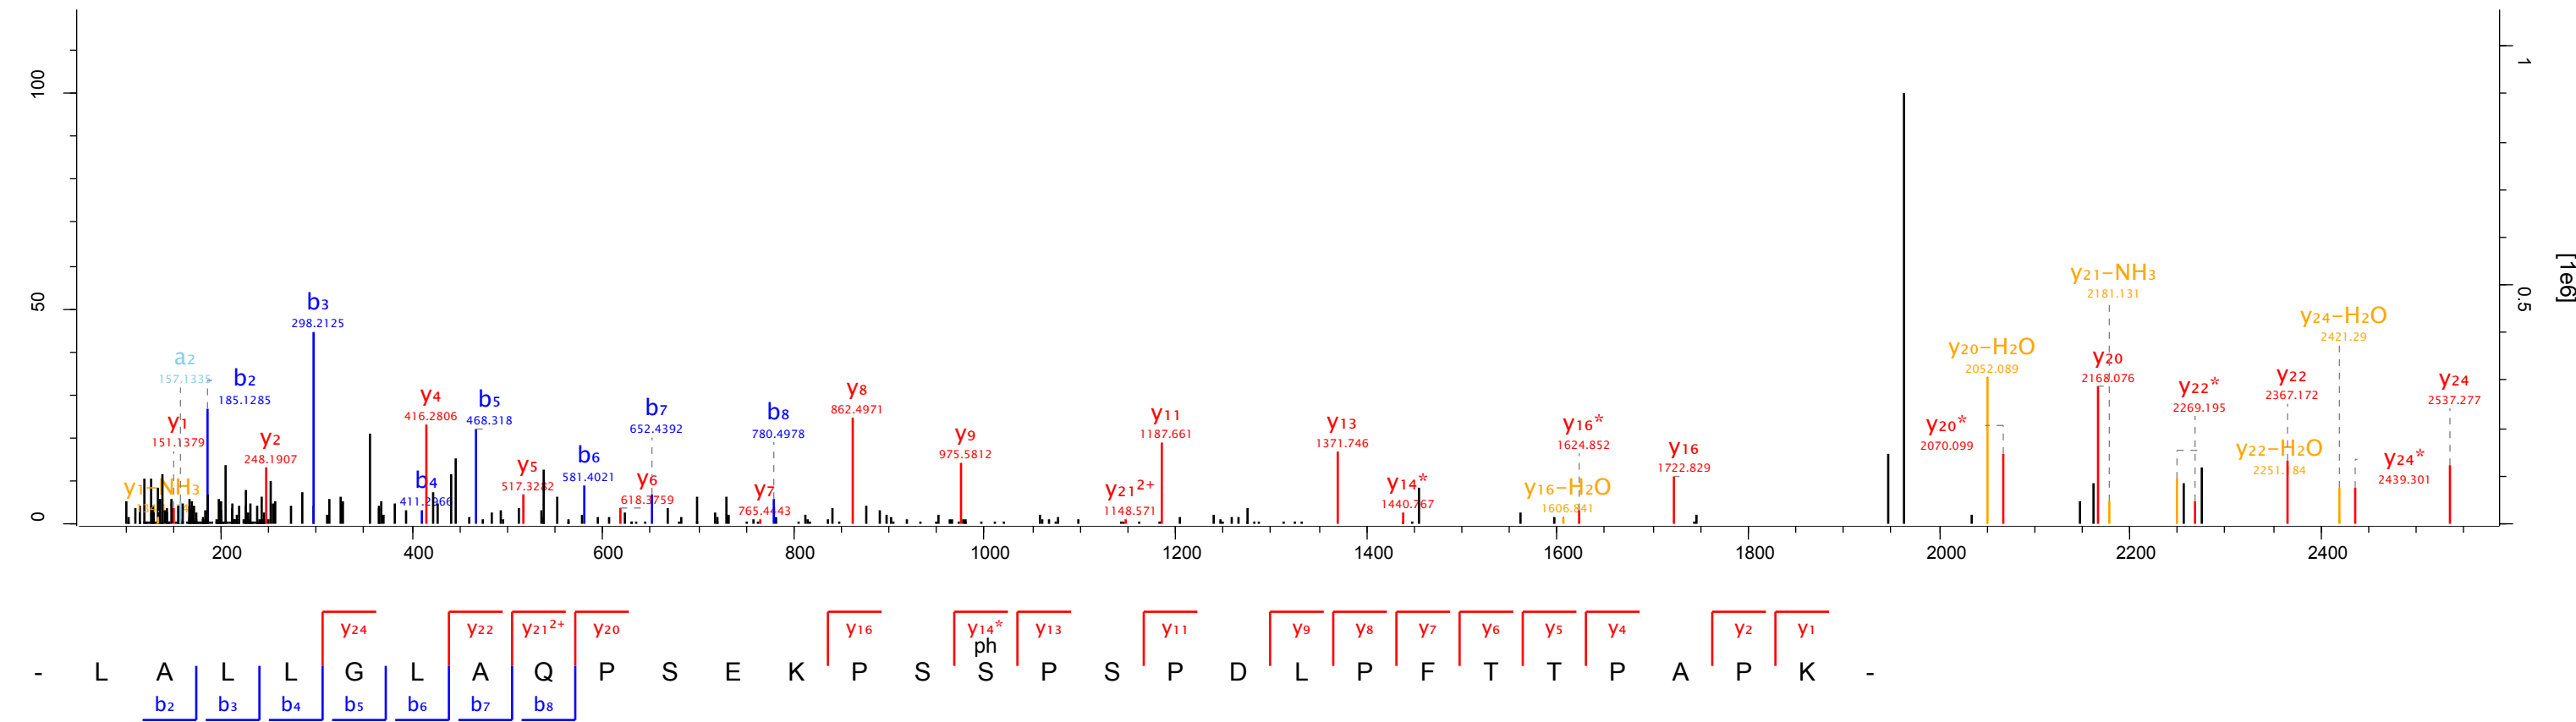

Raw file Scan Method Score m/z Gene names  
 20150814\_A375SR\_Phospho\_BR2\_09 28529 FTMS; HCD 122.13 1297.96 PPAN

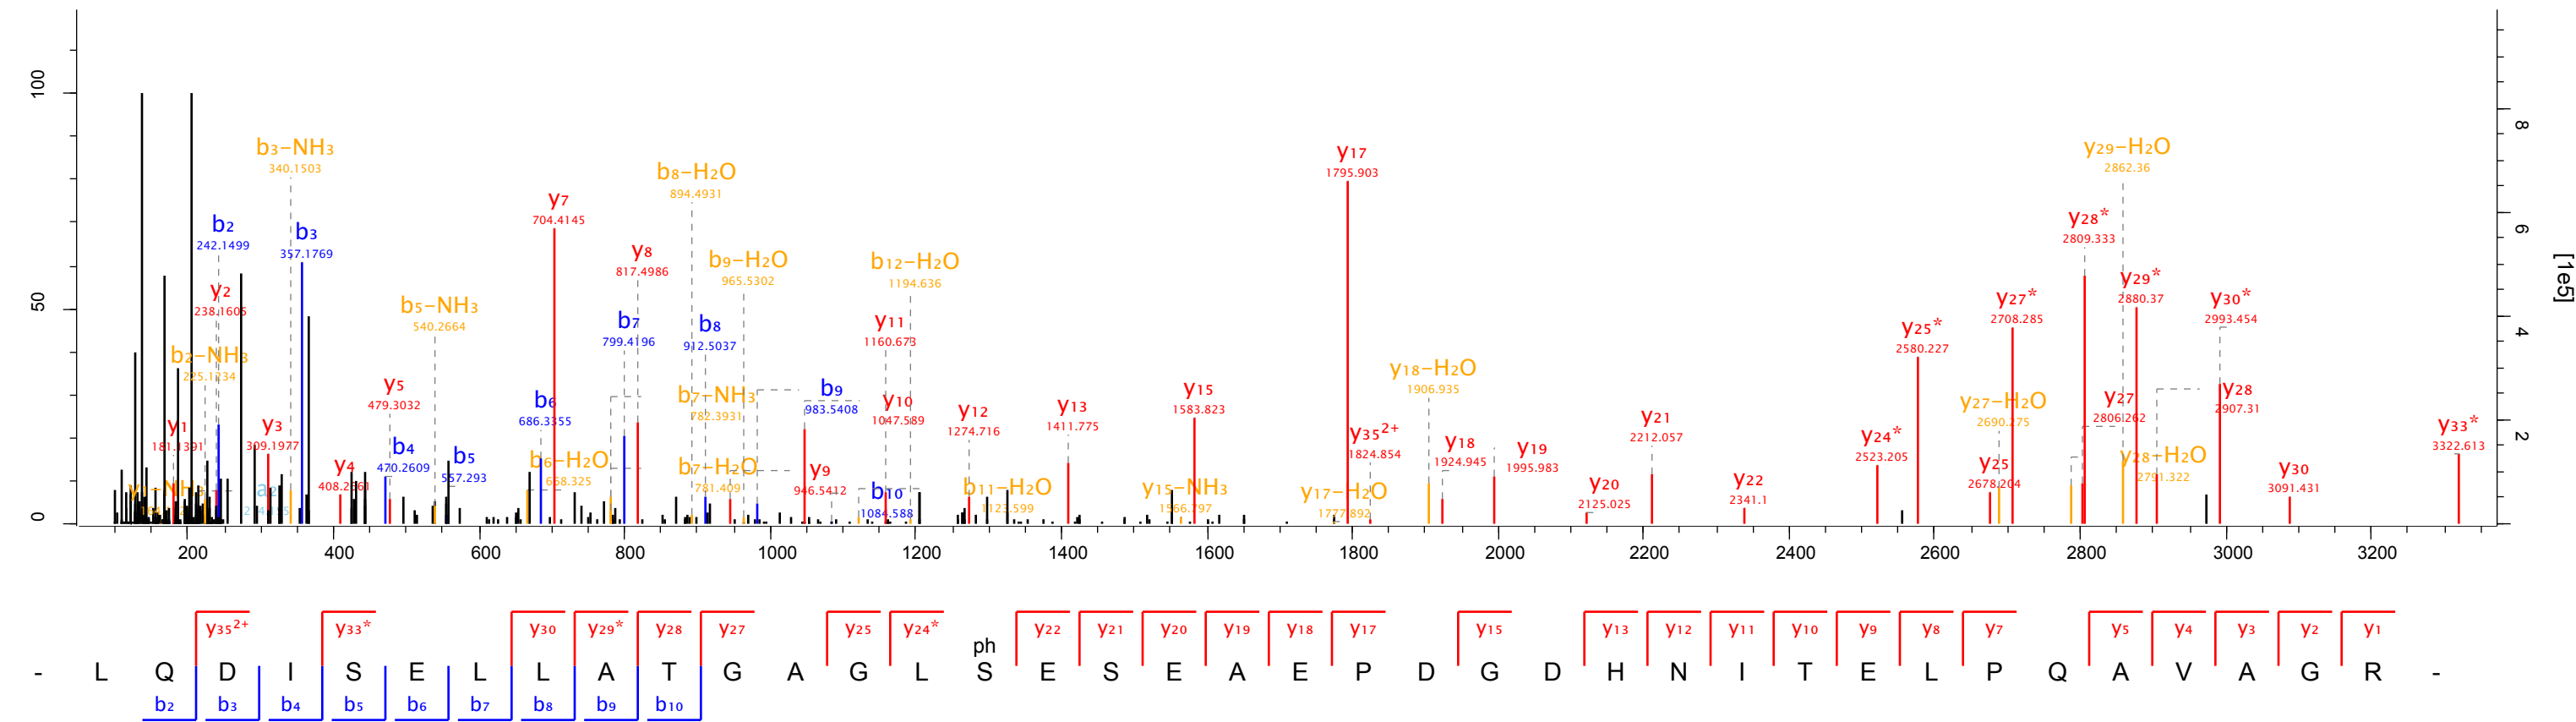

Raw file 20150814\_A375SR\_Phospho\_BR2\_09 Scan 28779 Method FTMS; HCD Score 84.1 m/z 892.44 Gene names CLASP1

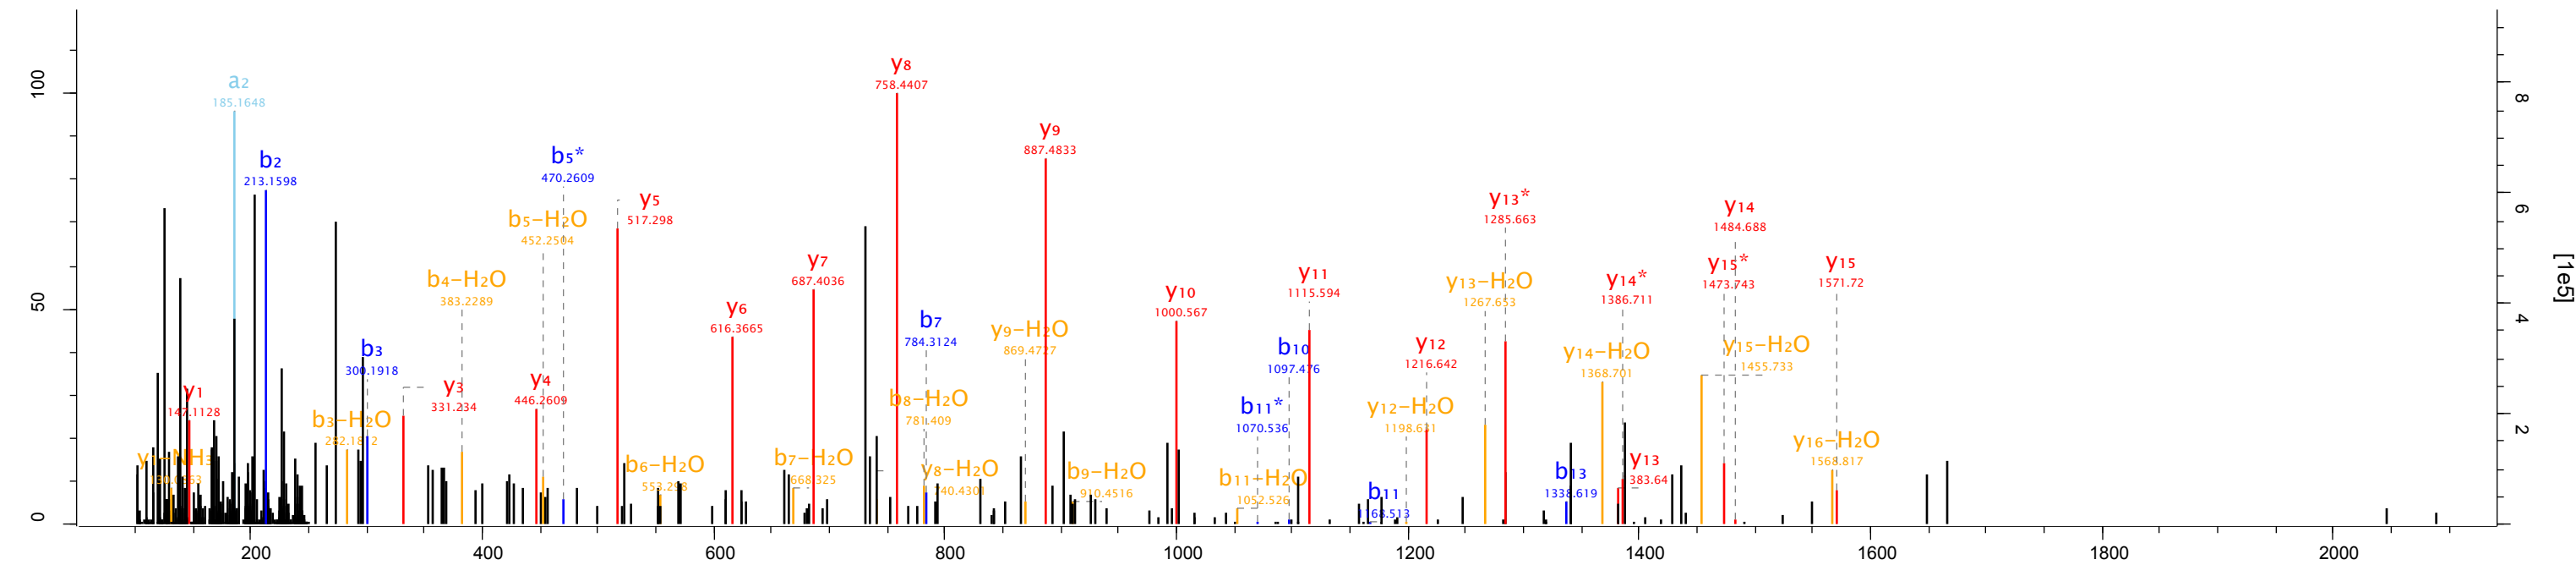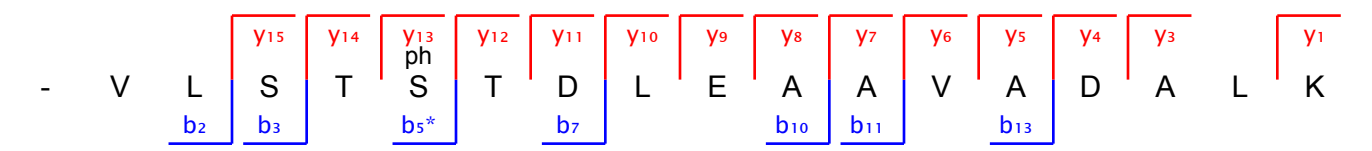

Raw file: 20150814\_A375SR\_Phospho\_BR2\_09  
 Scan: 3119 Method: FTMS; HCD Score: 265.27 m/z: 788.83 Gene names: RERE

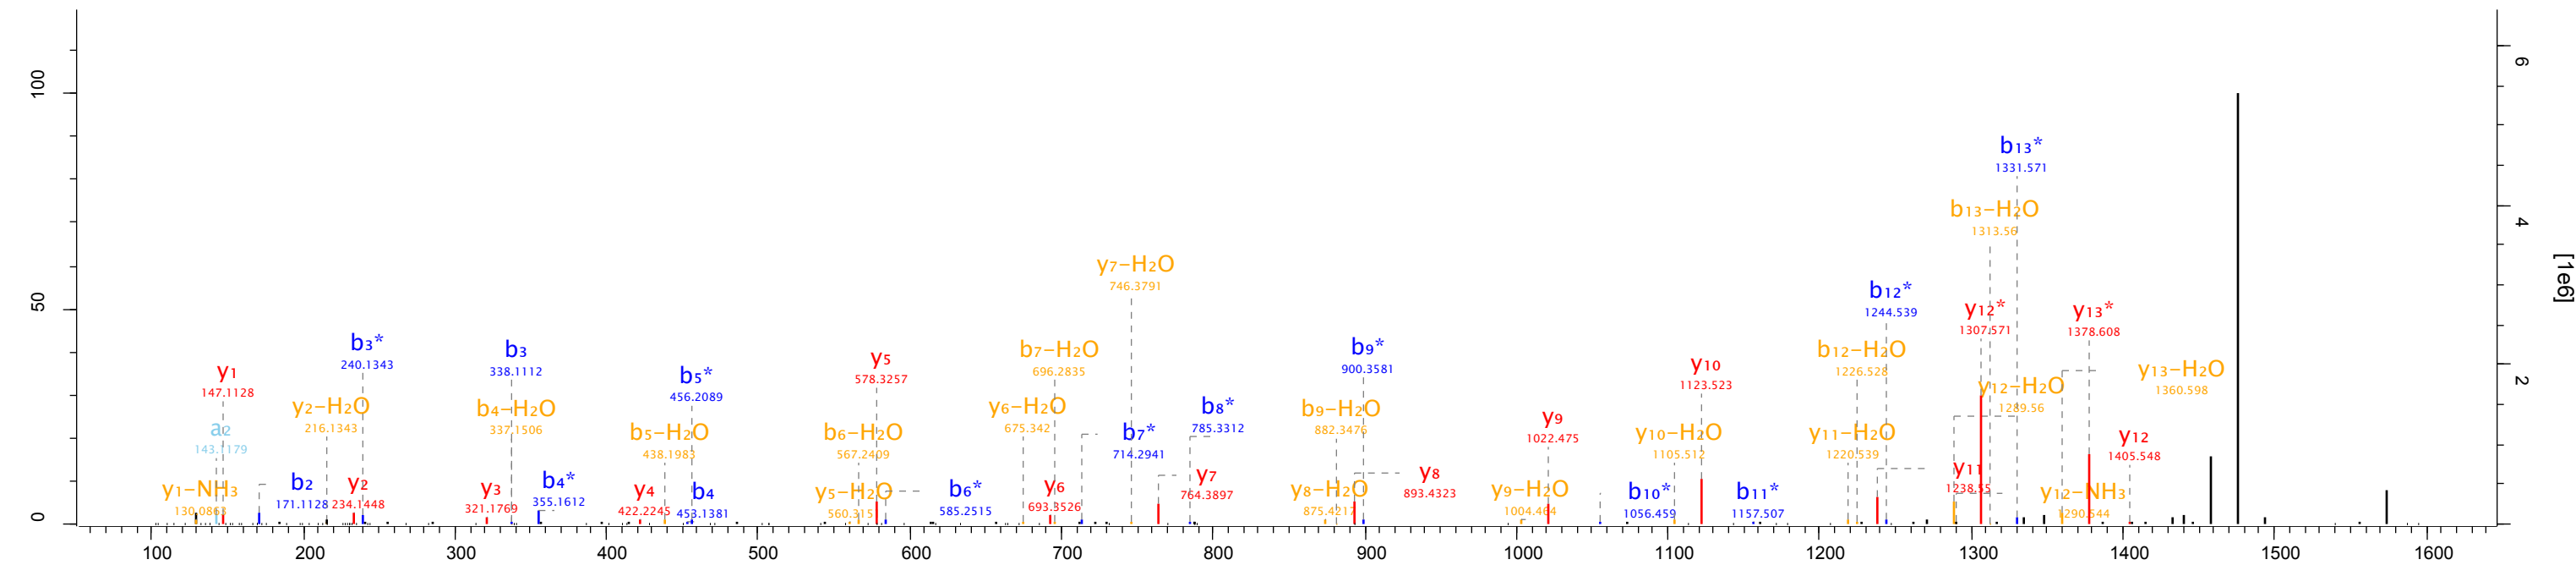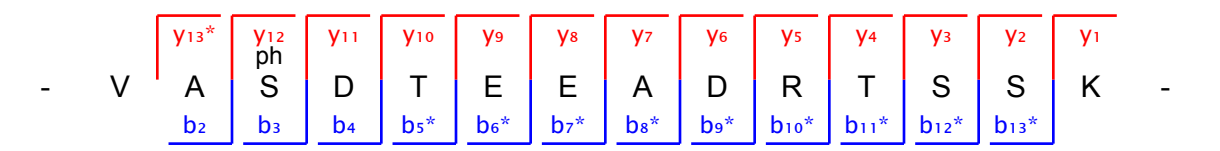

Raw file: 20150814\_A375SR\_Phospho\_BR2\_09  
 Scan: 4639 Method: FTMS; HCD Score: 187.08 m/z: 637.85 Gene names: CIC

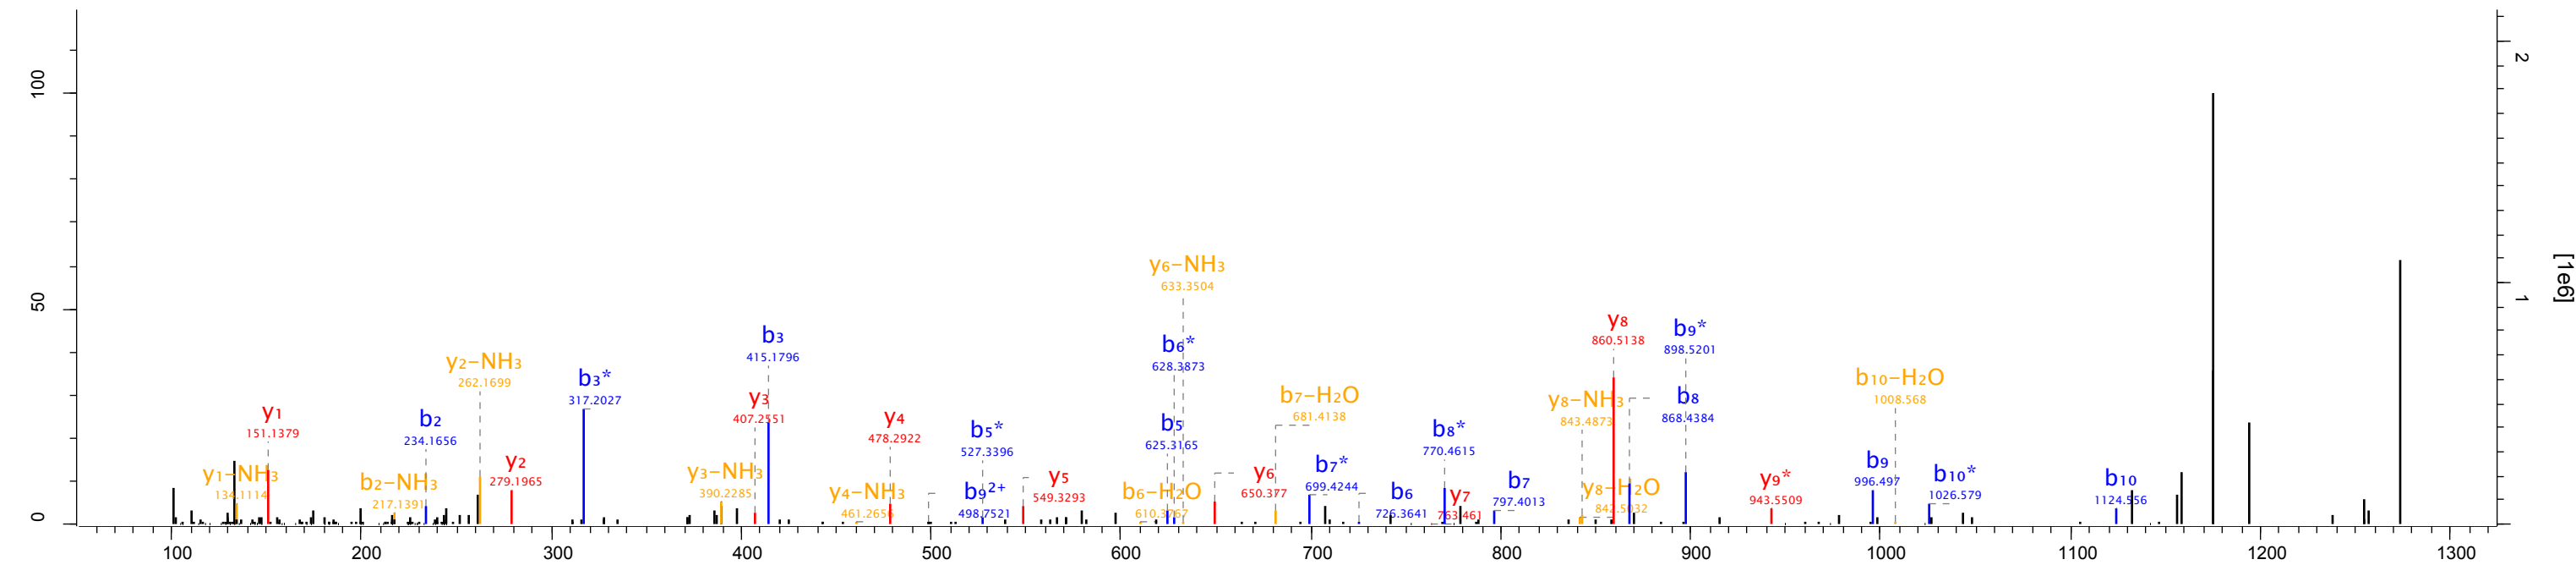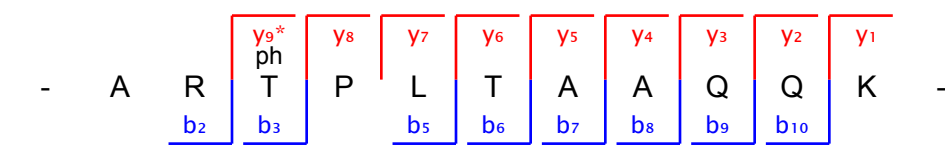

Raw file: 20150814\_A375SR\_Phospho\_BR2\_09  
 Scan: 4869 Method: FTMS; HCD Score: 125.22 m/z: 601.32 Gene names: ZFP36L1

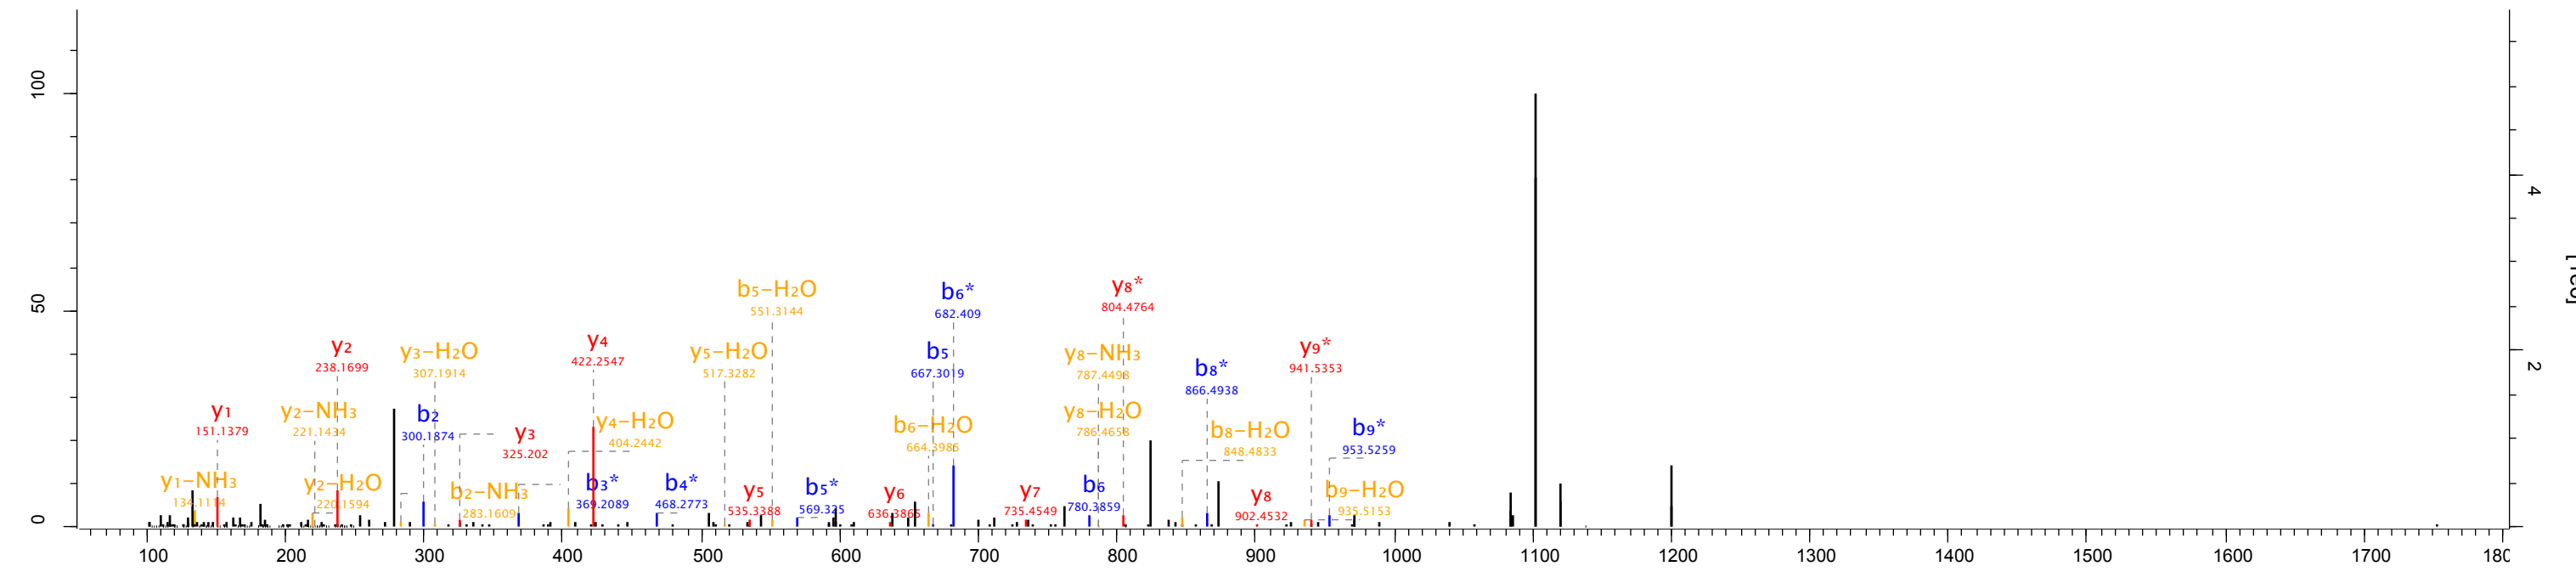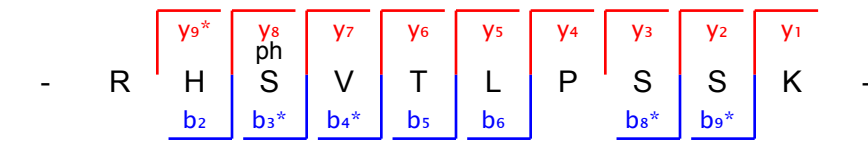



Raw file: 20150814\_A375SR\_Phospho\_BR2\_09  
 Scan: 5639 Method: FTMS; HCD Score: 78.14 m/z: 513.25 Gene names: ARHGEF10

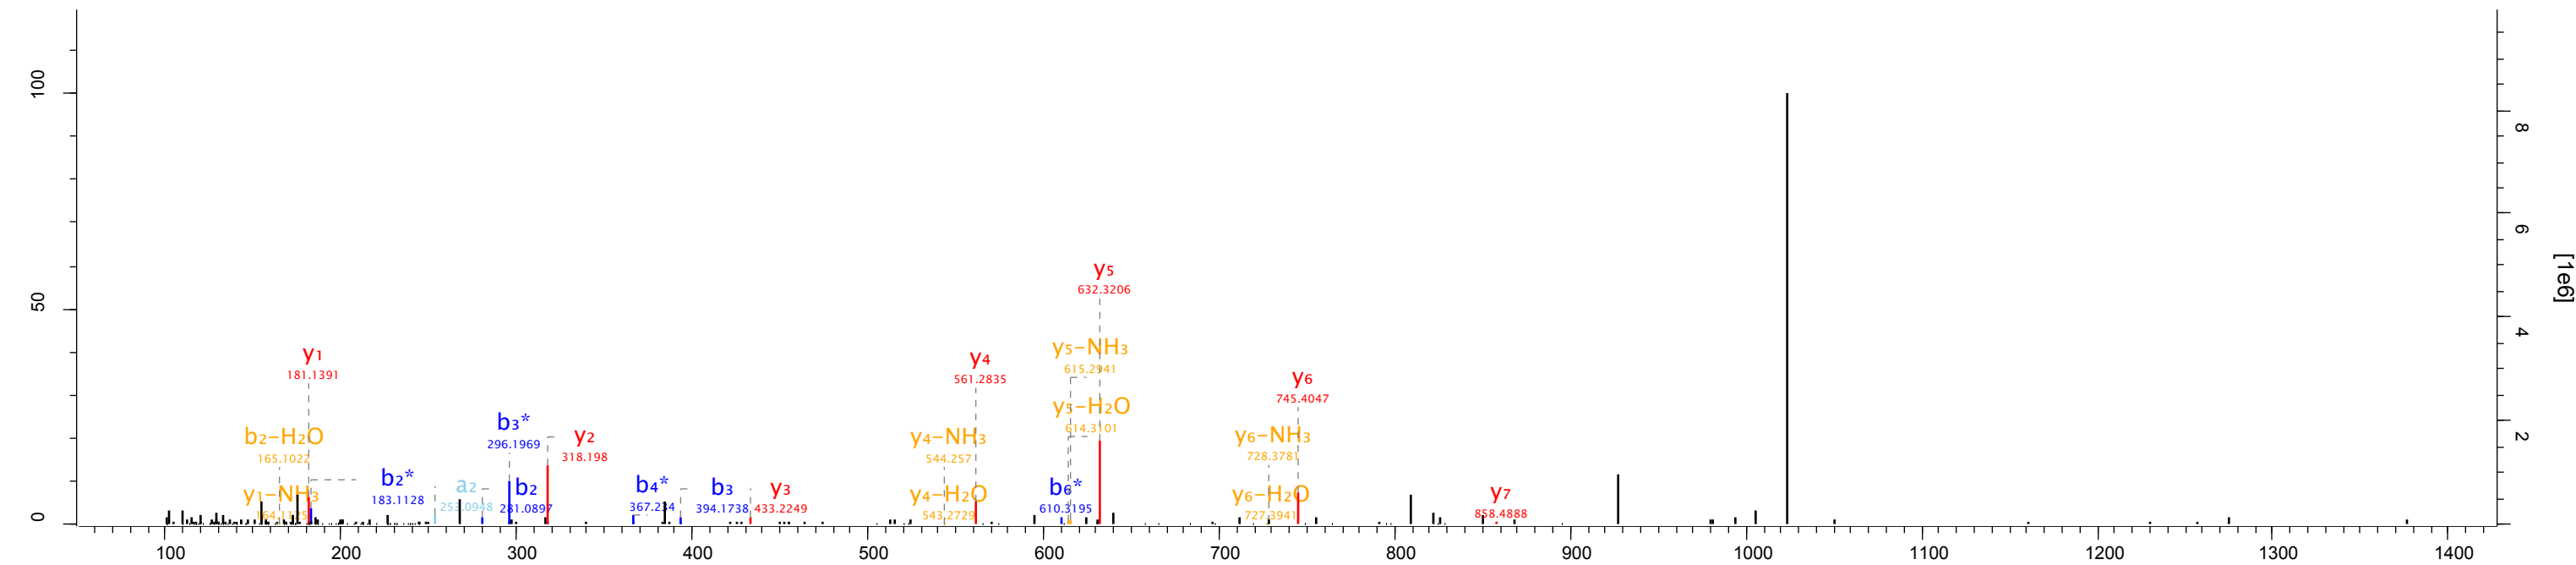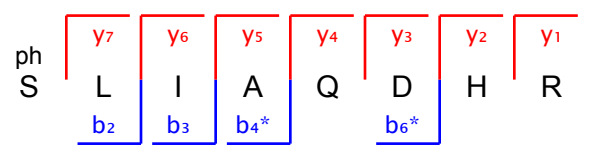

Raw file: 20150814\_A375SR\_Phospho\_BR2\_09  
 Scan: 5839 Method: FTMS; HCD Score: 44.66 m/z: 529.59 Gene names: SAFB2

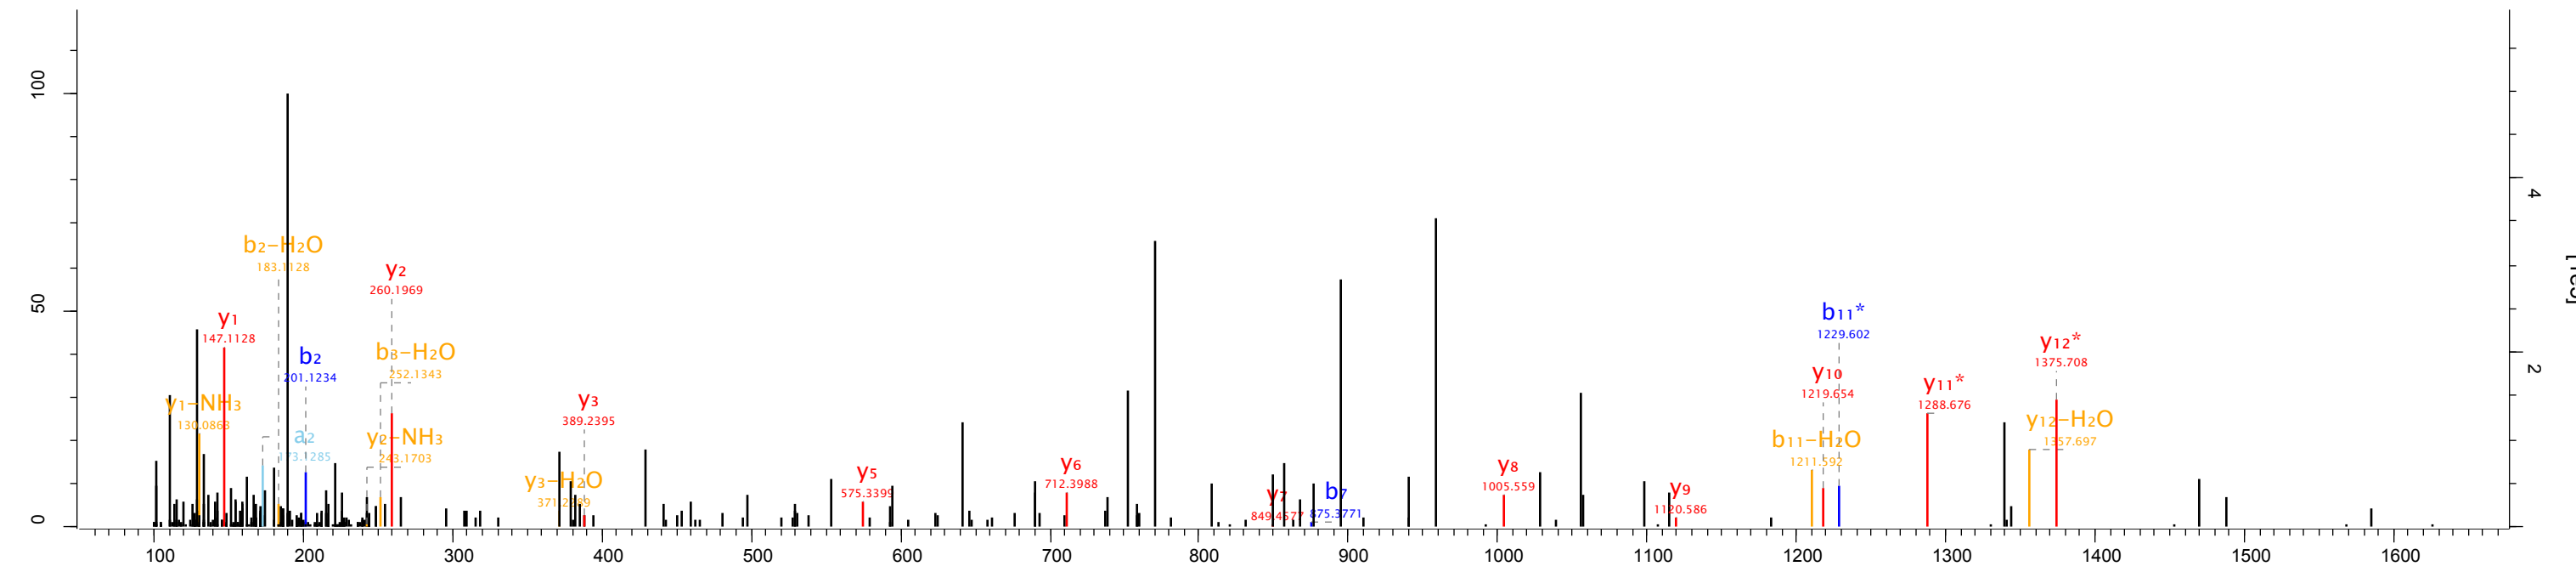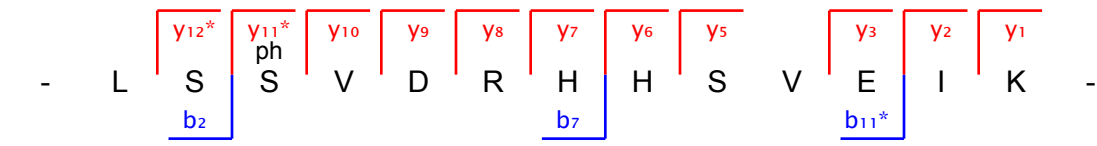

Raw file: 20150814\_A375SR\_Phospho\_BR2\_09  
 Scan: 7639 Method: FTMS; HCD Score: 60.31 m/z: 539.28 Gene names: ARPC5L

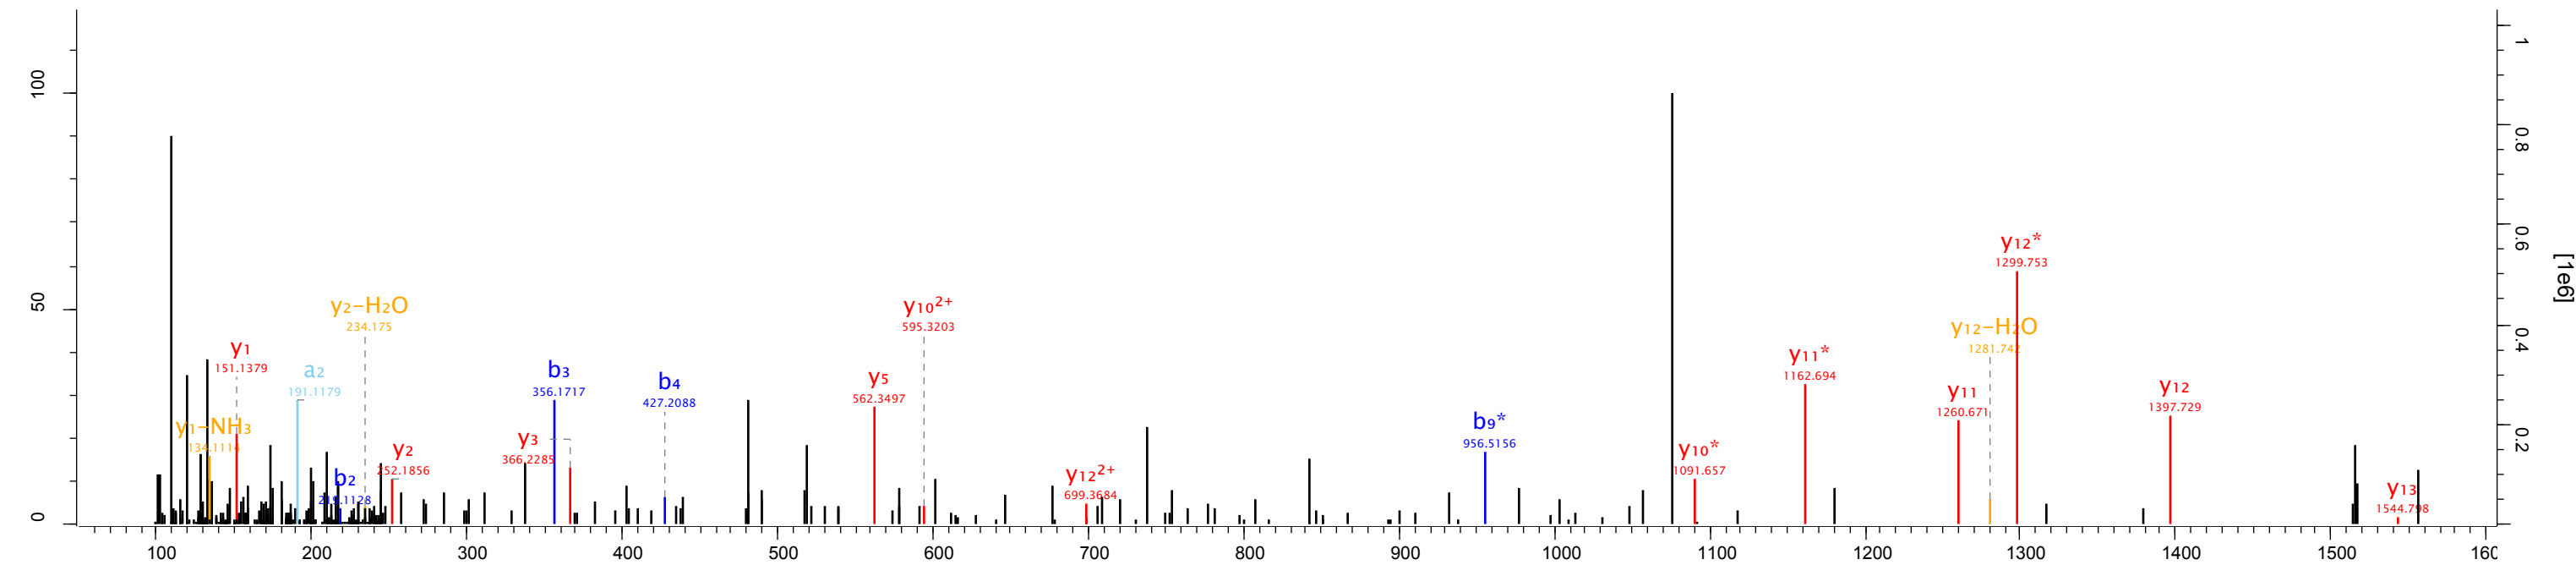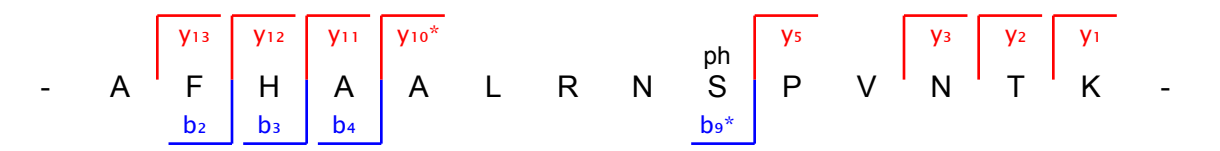

Raw file Scan Method Score m/z Gene names

20150814\_A375SR\_Phospho\_BR2\_09 7749 FTMS; HCD 146.79 570.73 ATF7IP

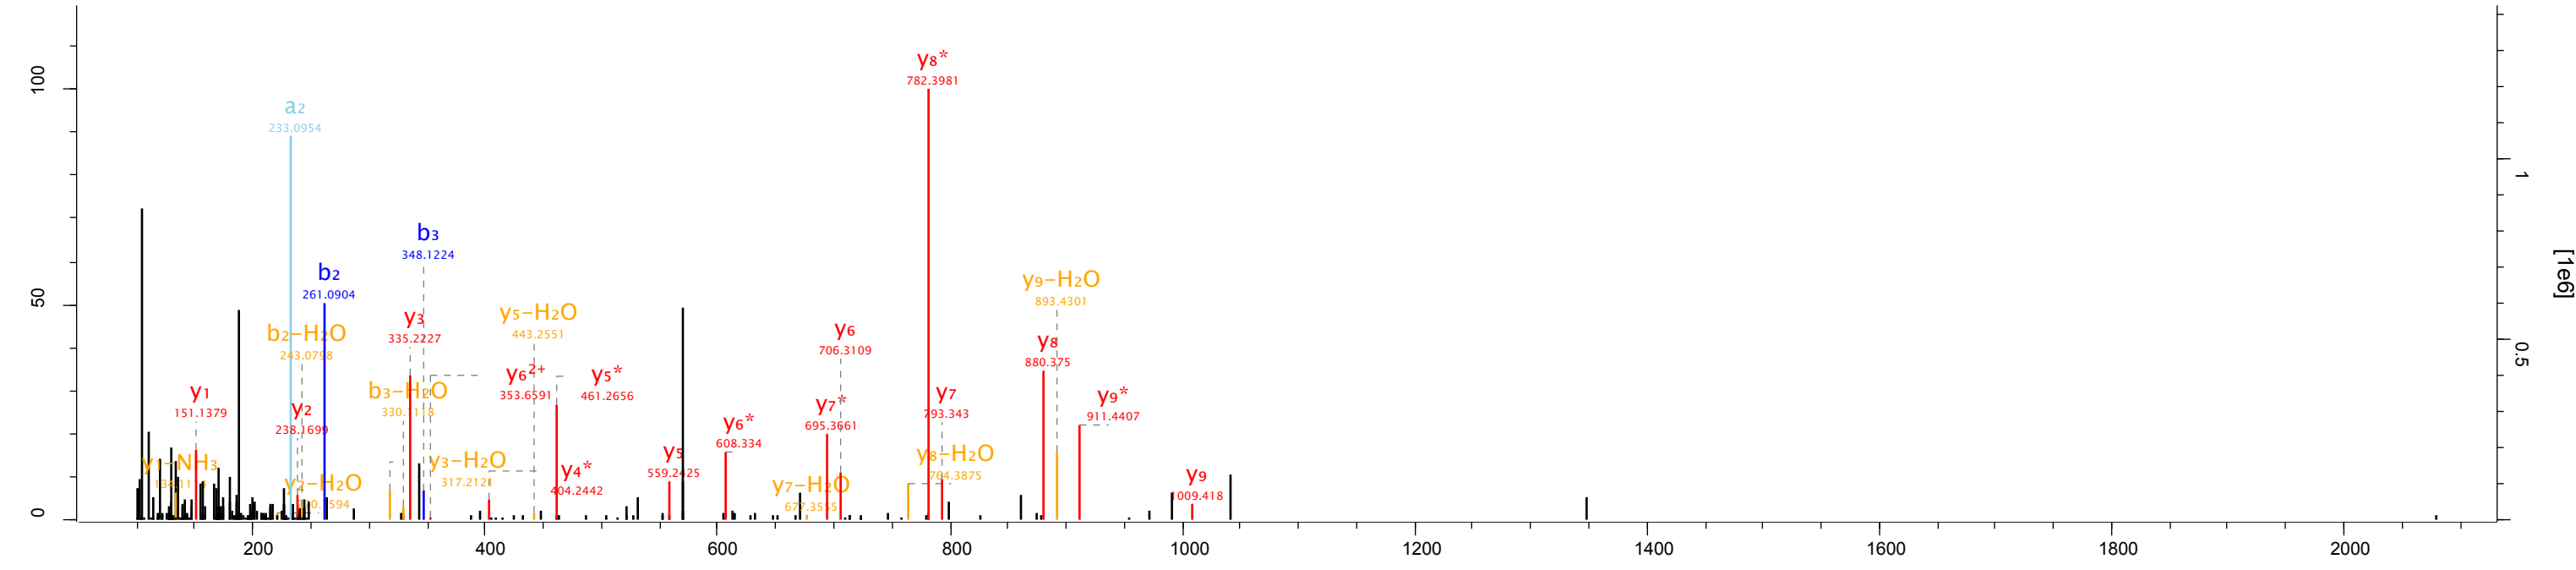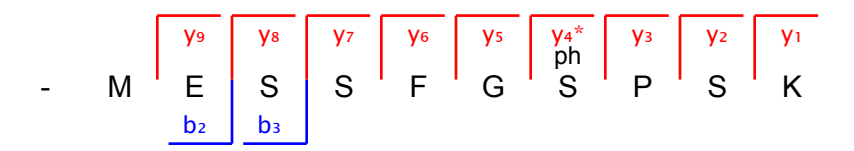

Raw file 20150814\_A375SR\_Phospho\_BR2\_09 Scan 7809 Method FTMS; HCD Score 64.12 m/z 393.54 Gene names OXSR1

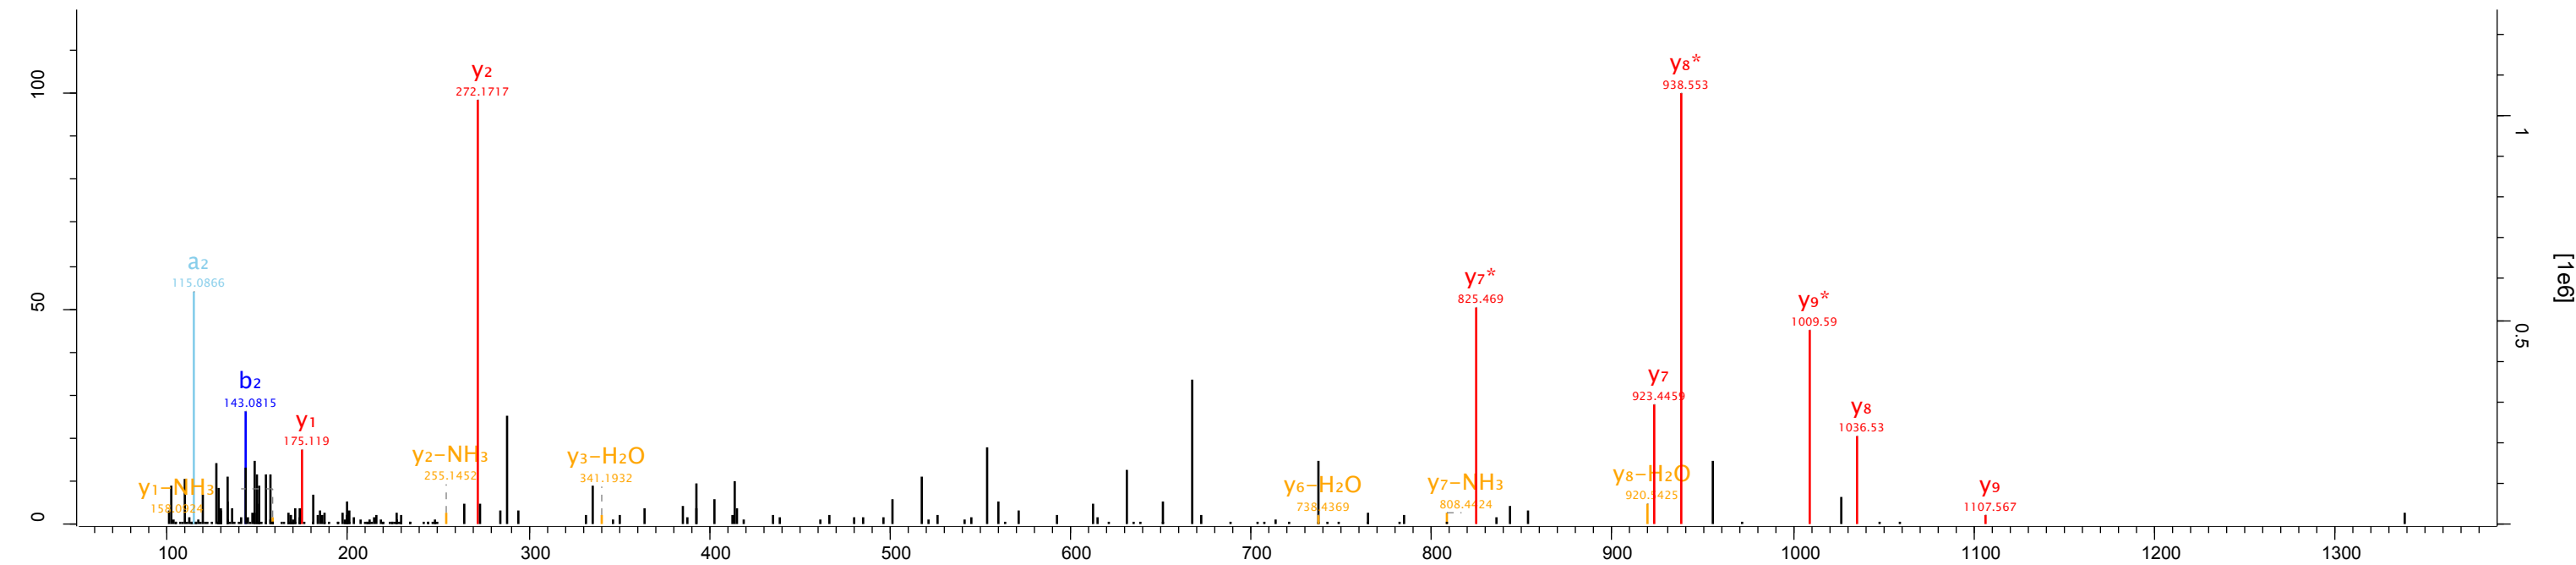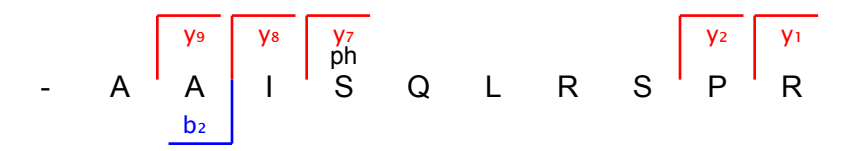

Raw file: 20150814\_A375SR\_Phospho\_BR2\_09  
 Scan: 7939 Method: FTMS; HCD Score: 184.38 m/z: 893.86 Gene names: DKC1

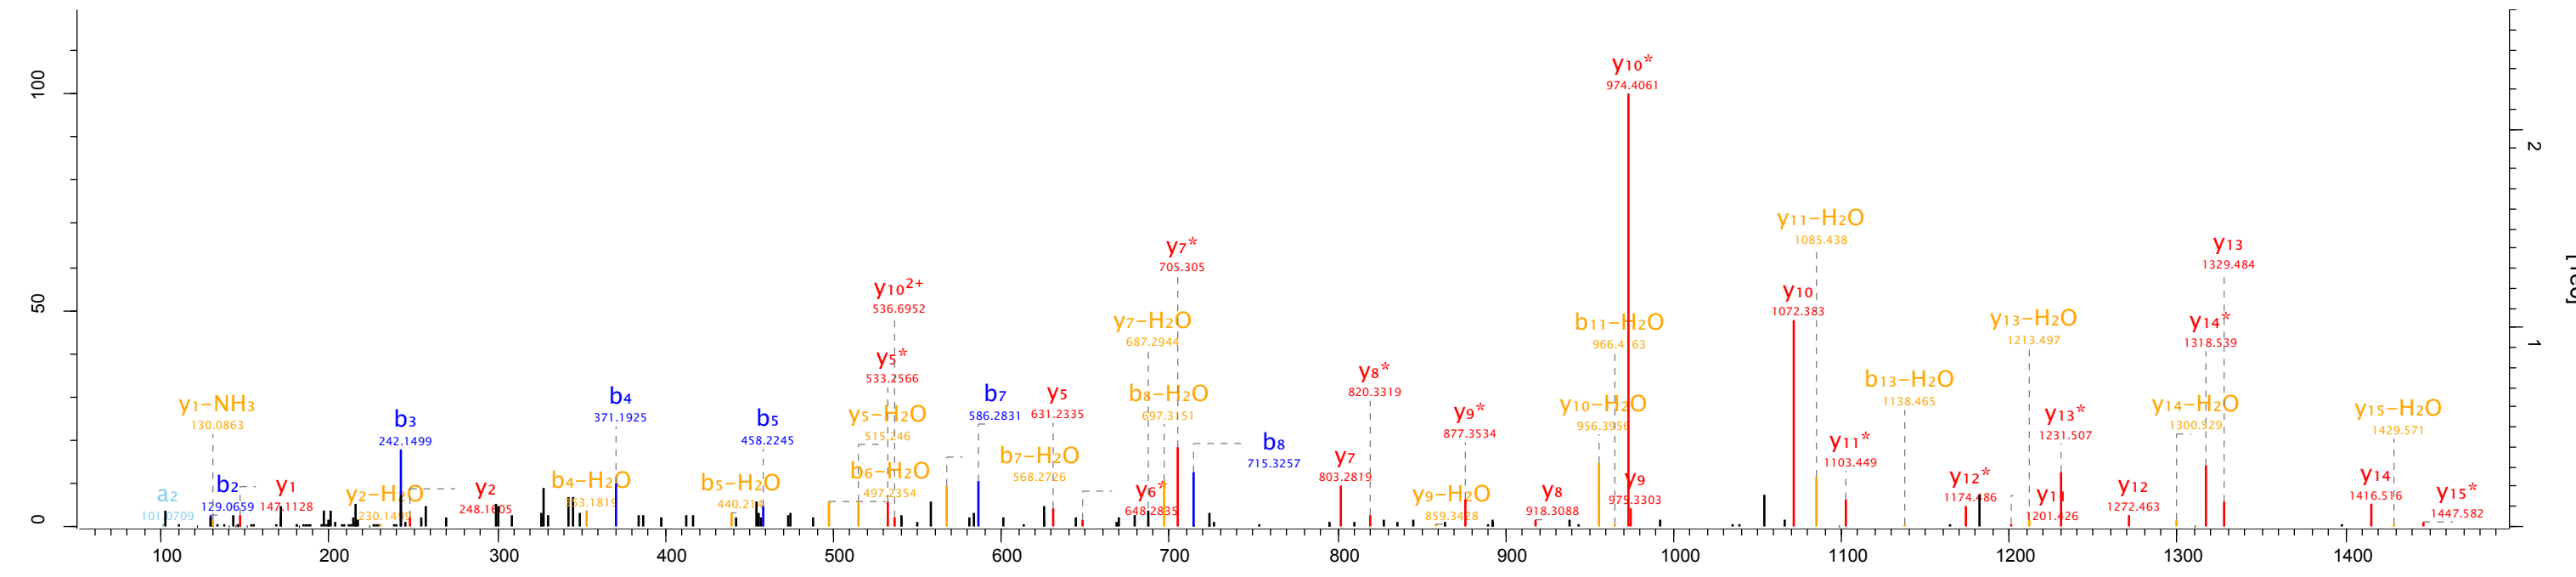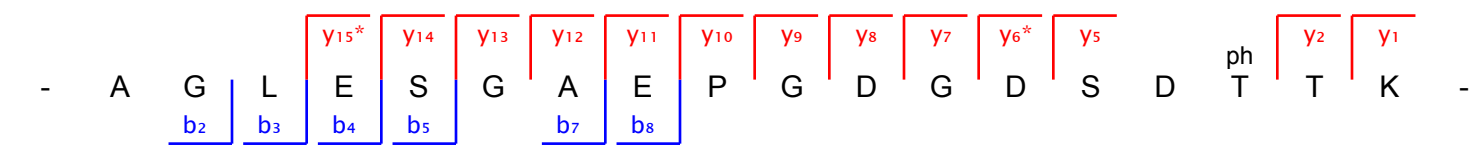

Raw file: 20150814\_A375SR\_Phospho\_BR2\_09  
 Scan: 8249 Method: FTMS; HCD Score: 73.89 m/z: 525.8 Gene names: NAV1

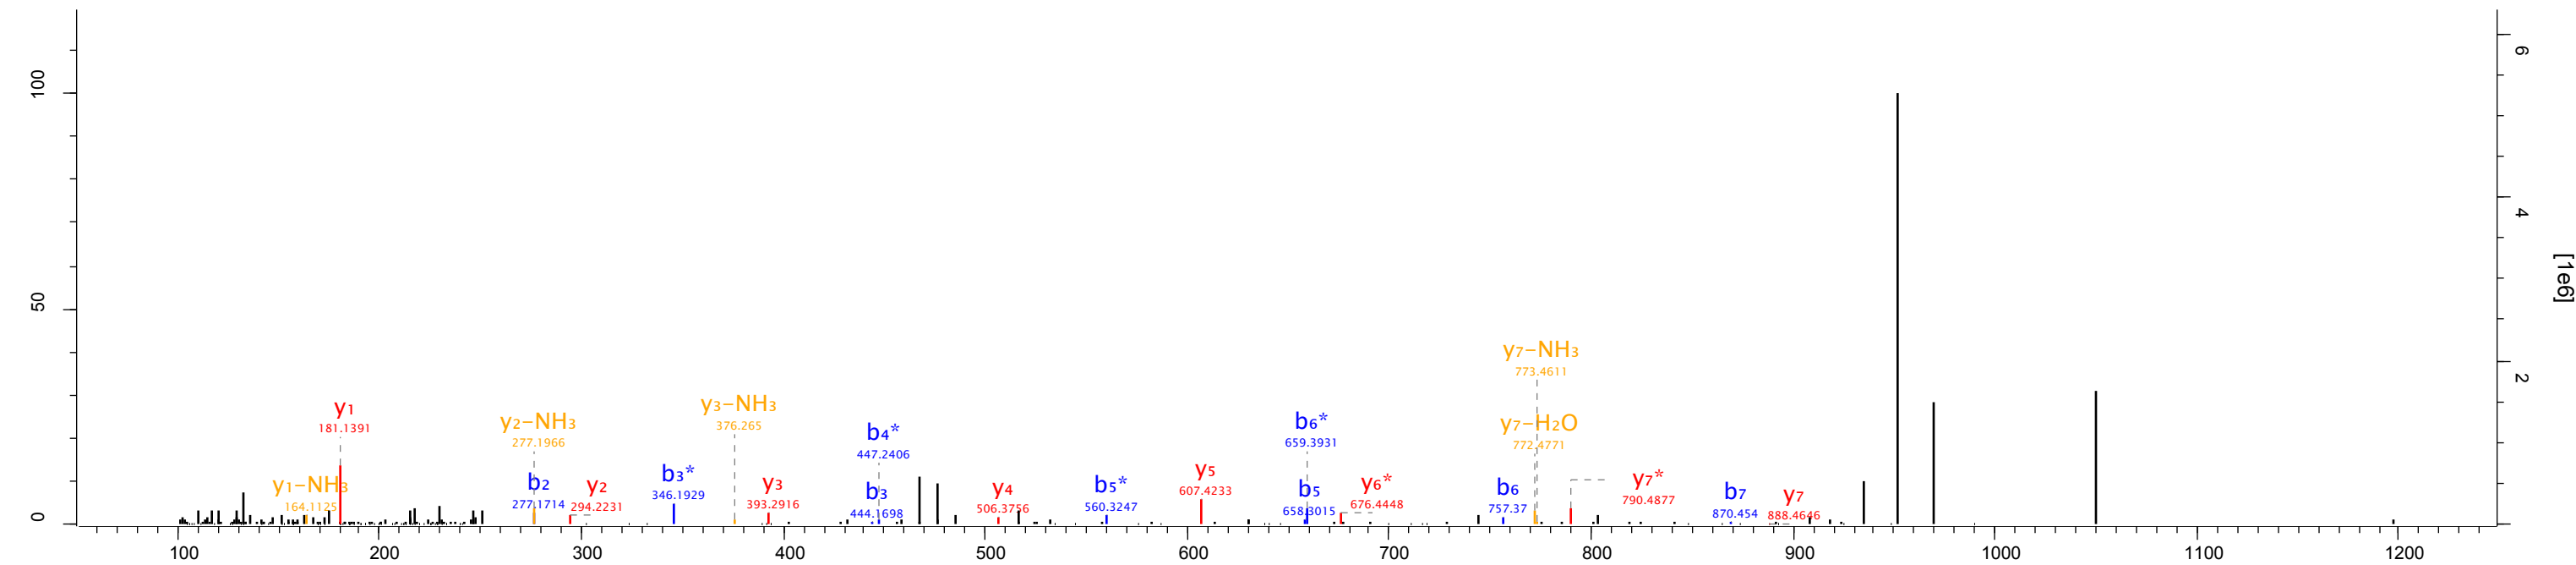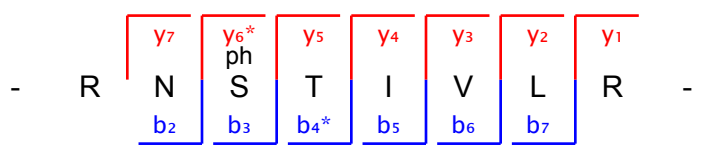

Raw file: 20150814\_A375SR\_Phospho\_BR2\_09  
 Scan: 9639 Method: FTMS; HCD Score: 98.06 m/z: 778.39 Gene names: SCRIB

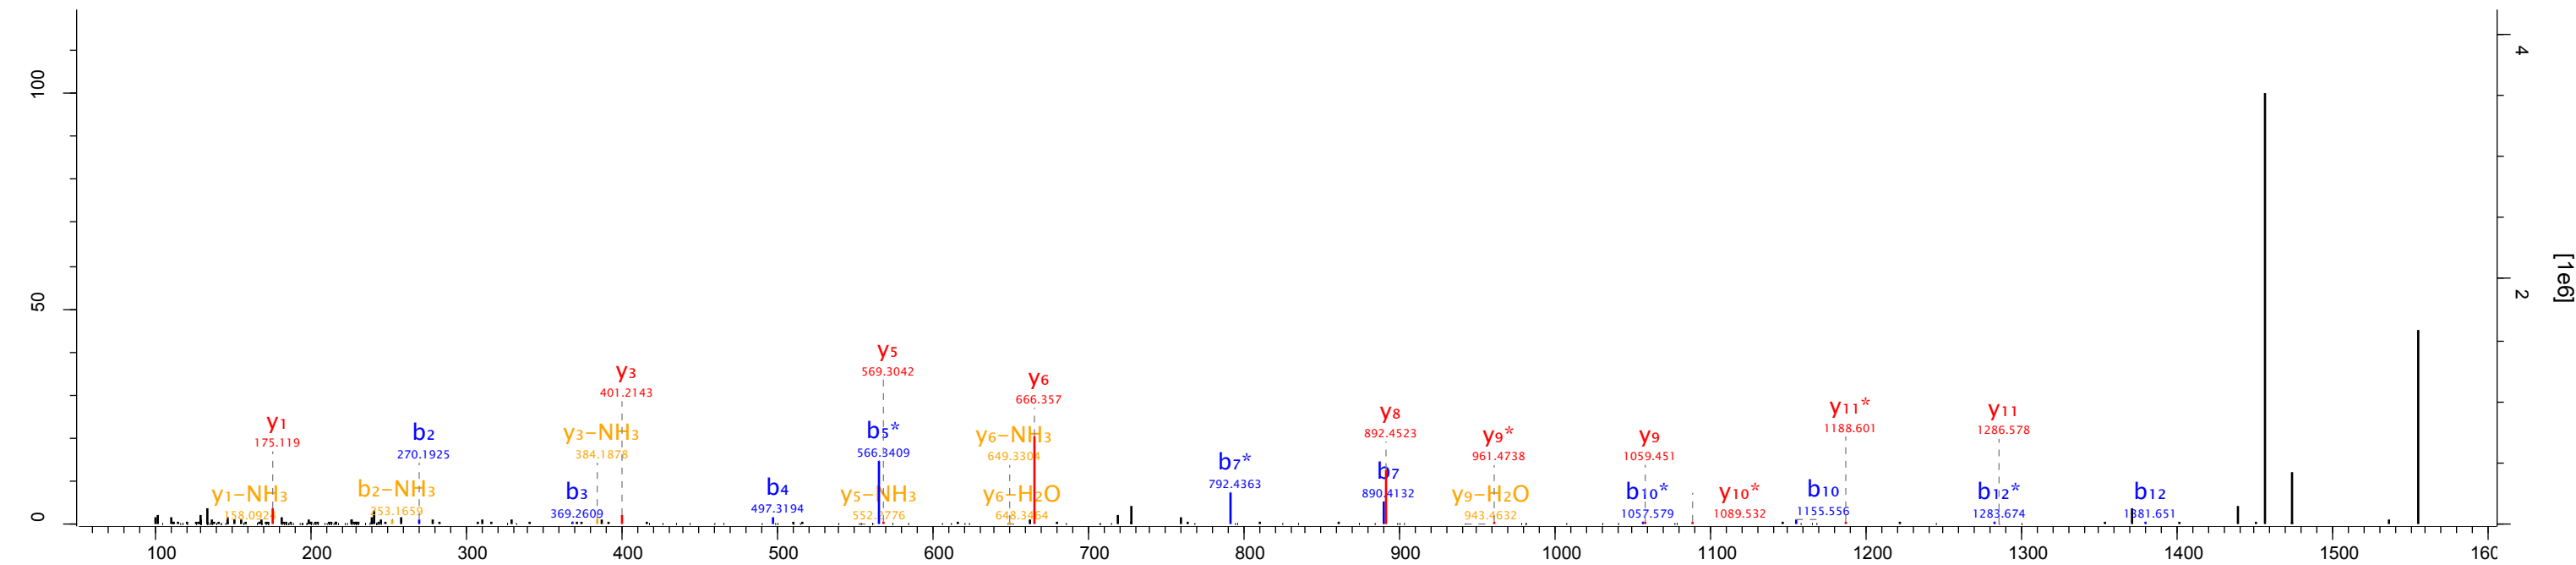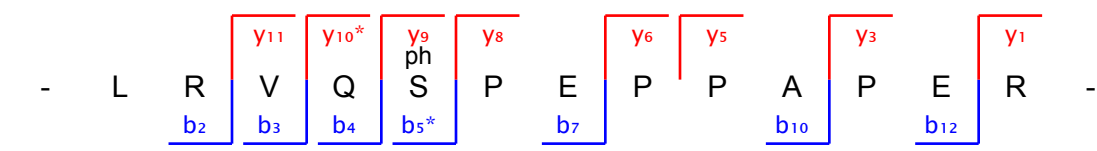



Raw file: 20150814\_A375SR\_Phospho\_BR2\_09  
 Scan: 9699 Method: FTMS; HCD Score: 164.92 m/z: 665.78 Gene names: GMPS

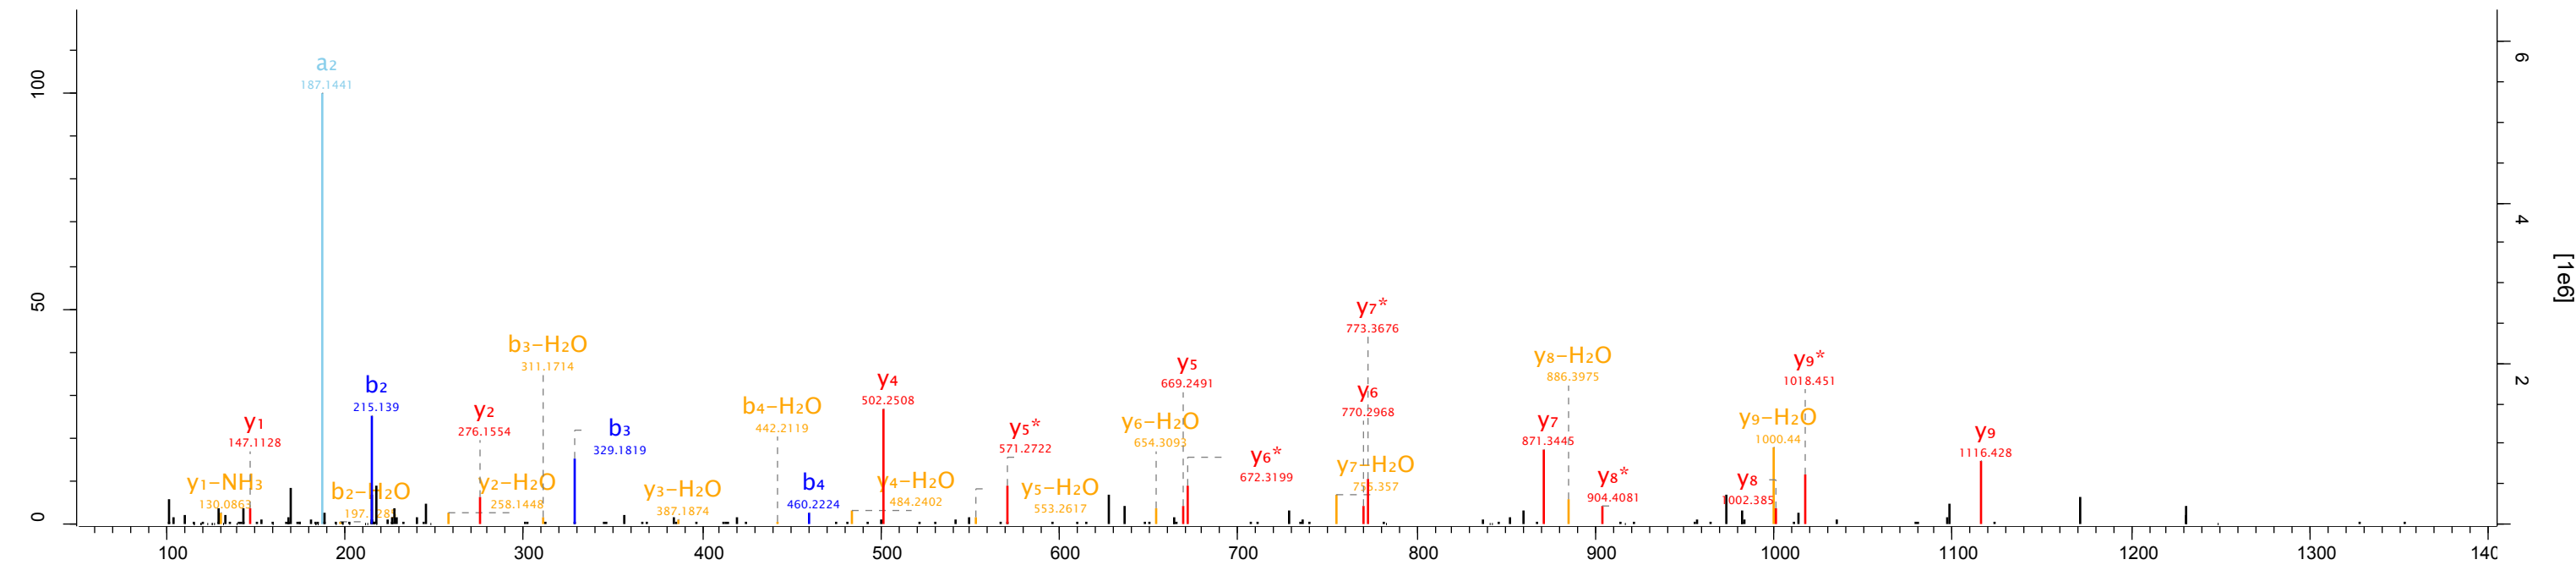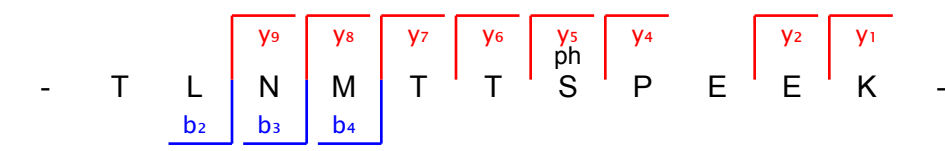

Raw file 20150822\_A375SR\_Phospho\_BR3\_09 Scan 10013 Method FTMS; HCD Score 115.91 m/z 659.32 Gene names PPA2

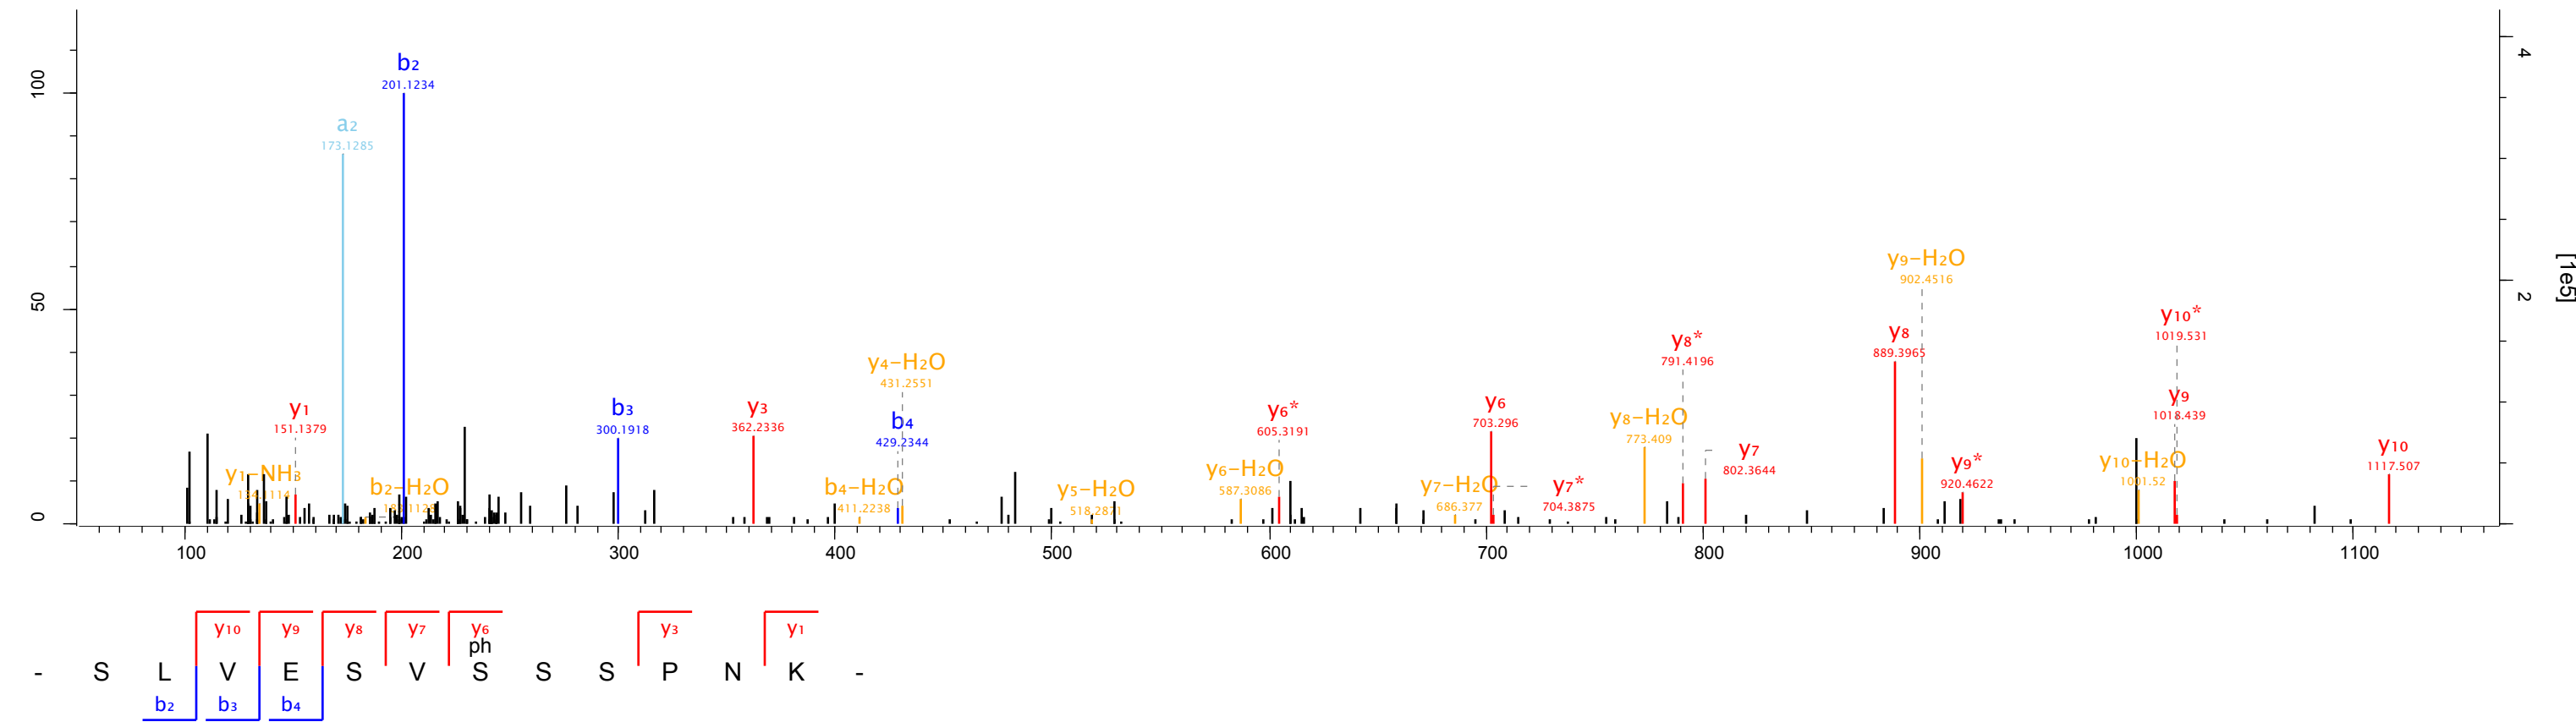

Raw file  
20150822\_A375SR\_Phospho\_BR3\_09

Scan 10230 Method FTMS; HCD Score 97.04 m/z 652.66 Gene names EIF2A

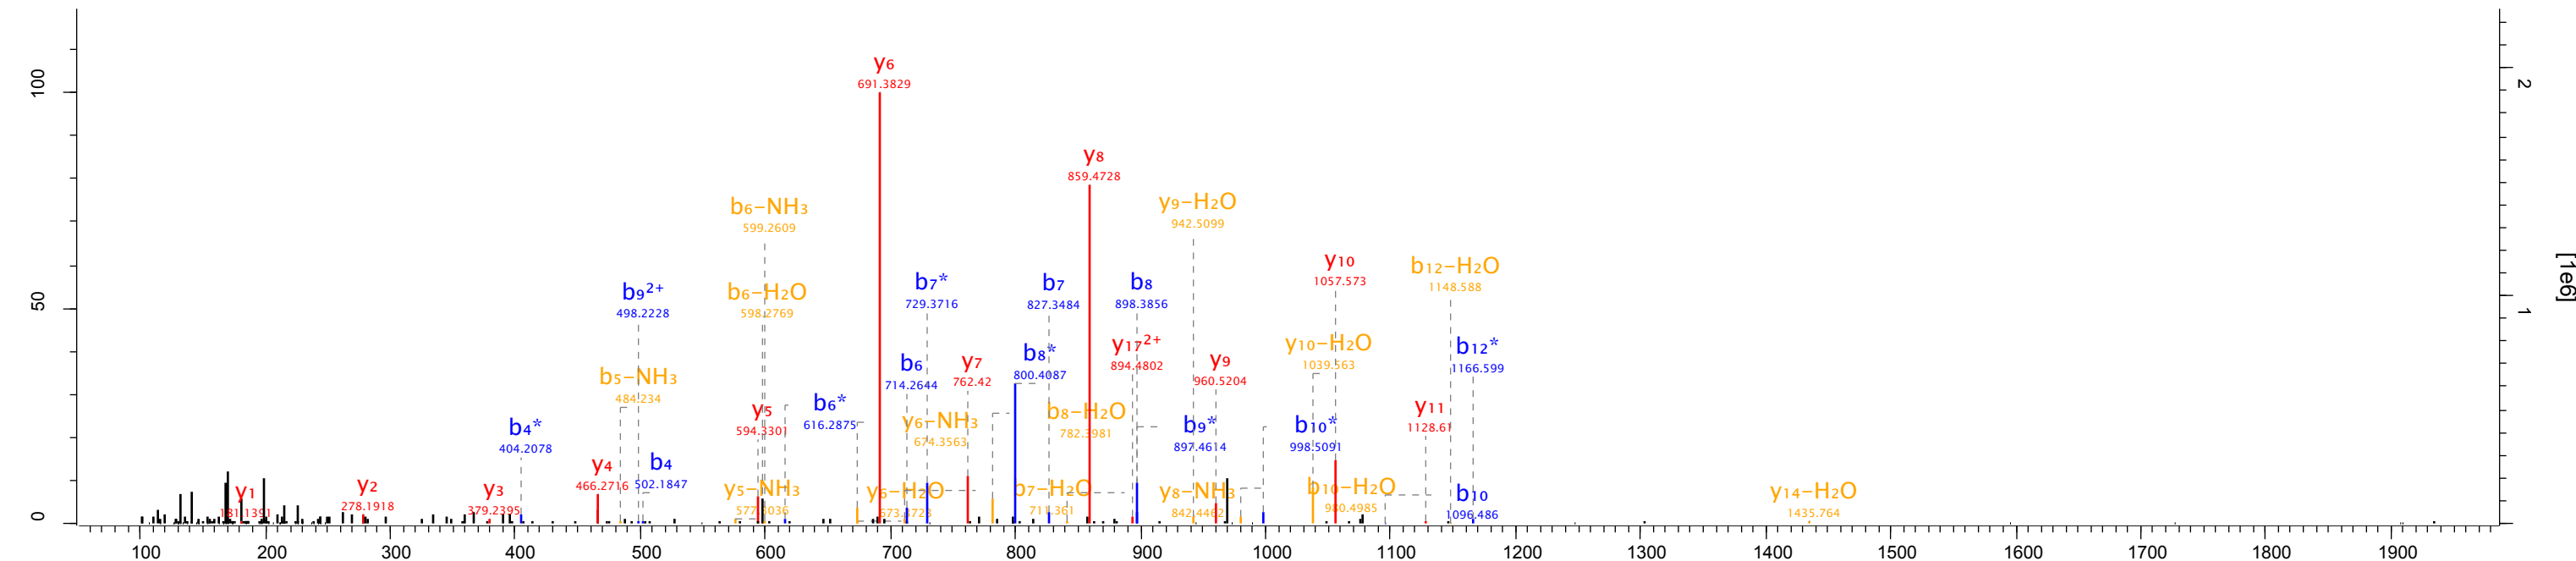

peptide sequence: - S D K S P D L A P T P A P Q S T P R -

Fragmentation sites (b ions): b4 (S), b6 (D), b7 (L), b8 (A), b9\* (P), b10 (T), b12\* (A)

Fragmentation sites (y ions): y1 (R), y2 (P), y3 (S), y4 (Q), y5 (P), y6 (A), y7 (T), y8 (P), y9 (L), y10 (D), y11 (S), y17<sup>2+</sup> (S)

Raw file Scan Method Score m/z Gene names  
 20150822\_A375SR\_Phospho\_BR3\_09 11569 FTMS; HCD 45.99 623.32 KLC1

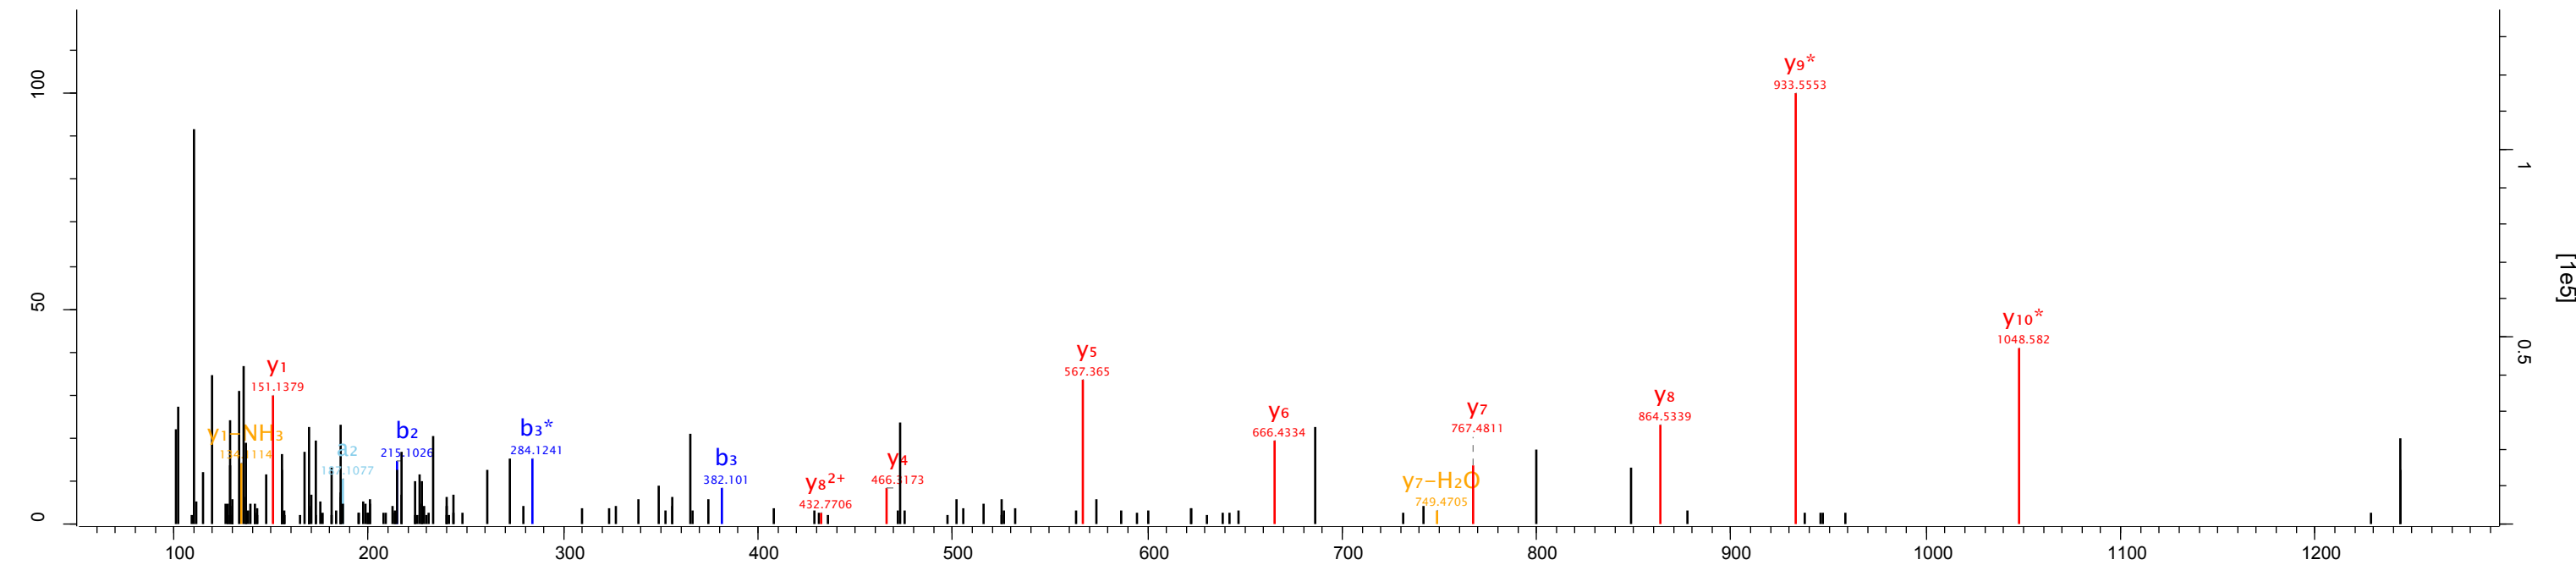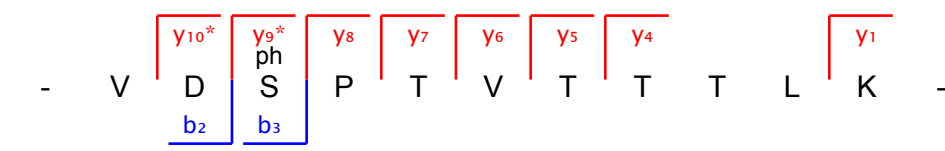

Raw file  
20150822\_A375SR\_Phospho\_BR3\_09

Scan 12318 Method FTMS; HCD Score 192.62 m/z 820.89 Gene names HEATR6

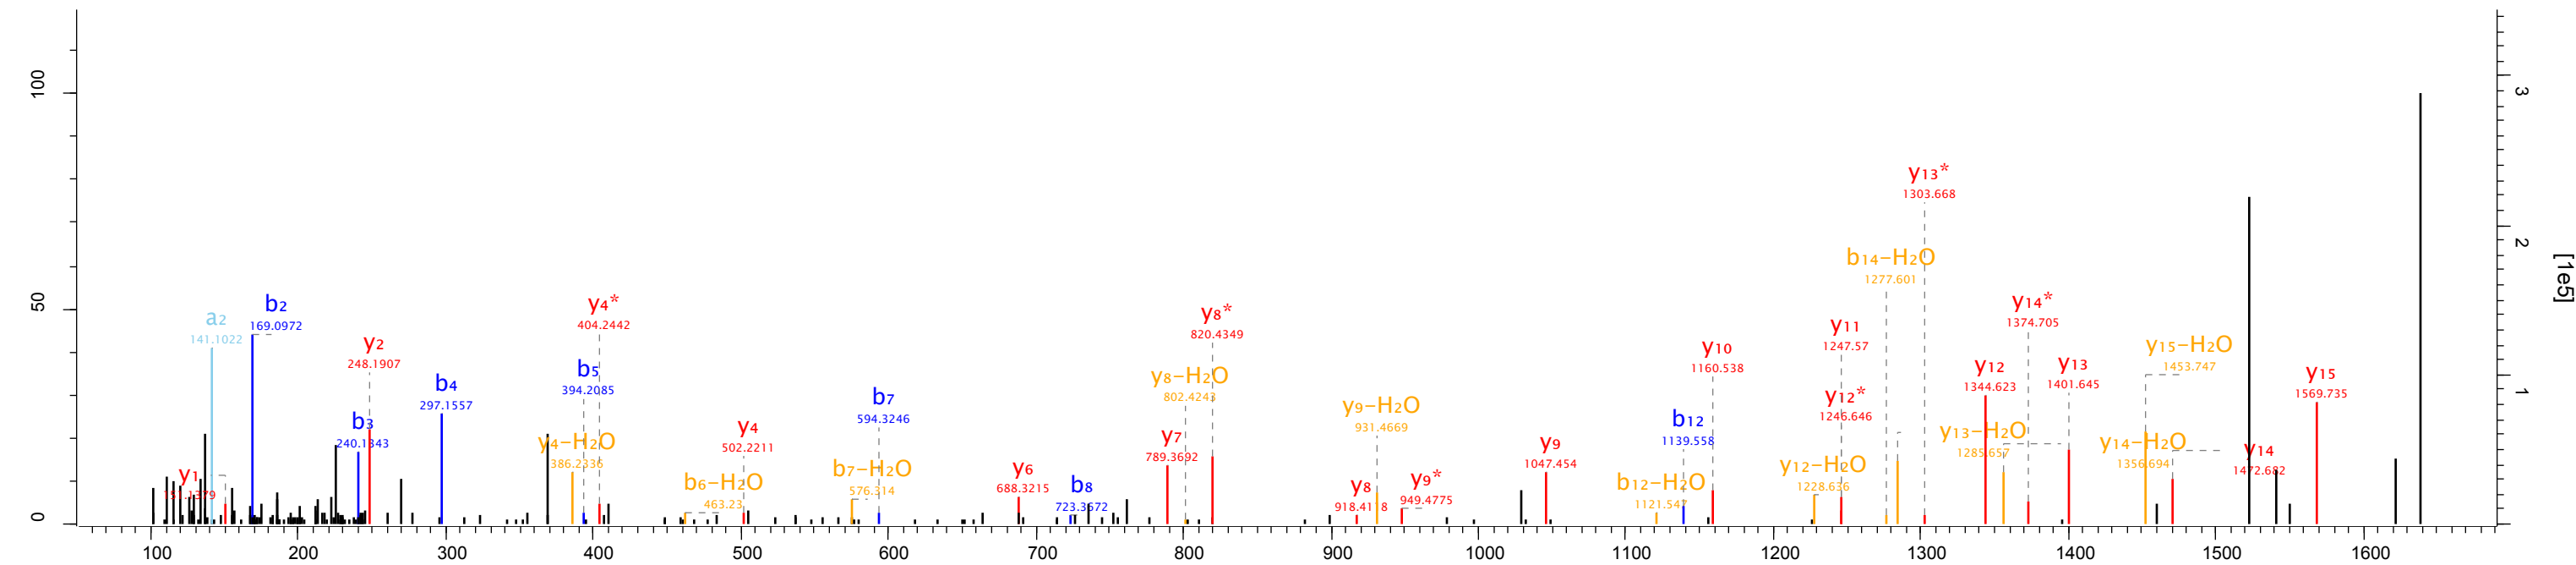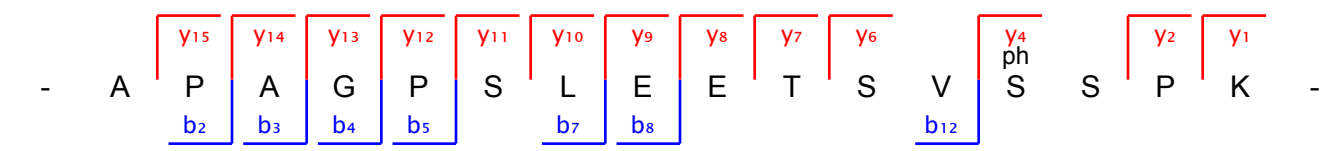

Raw file: 20150822\_A375SR\_Phospho\_BR3\_09  
 Scan: 12406 Method: FTMS; HCD Score: 133.16 m/z: 570.29 Gene names: RALBP1

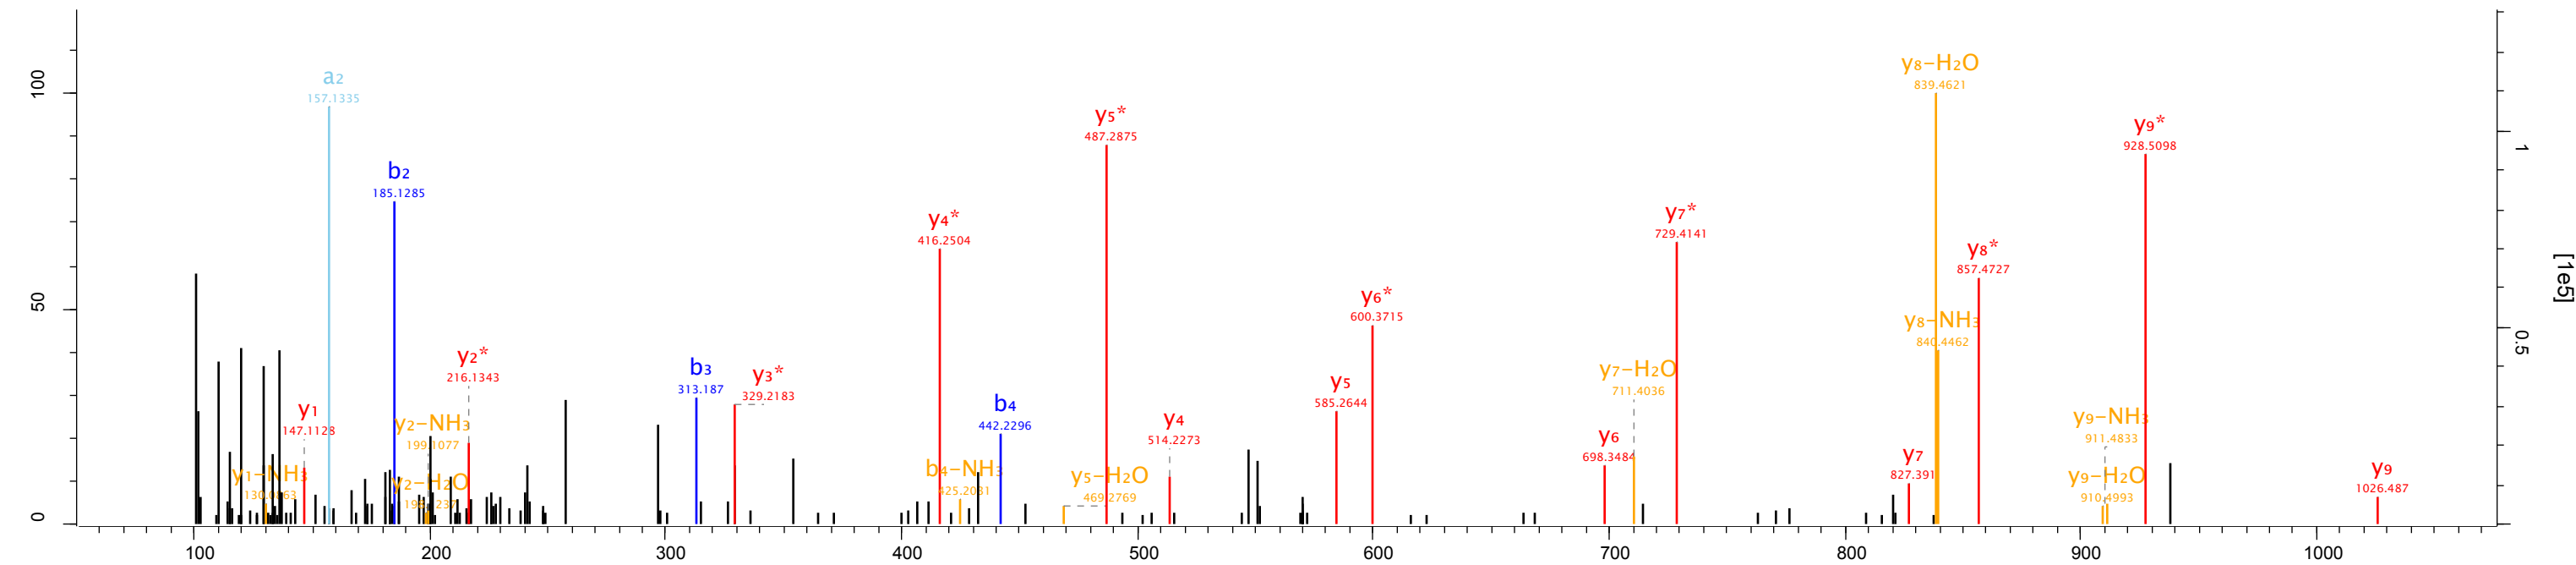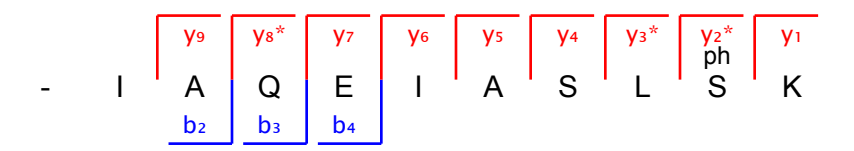

Raw file: 20150822\_A375SR\_Phospho\_BR3\_09  
 Scan: 13183  
 Method: FTMS; HCD  
 Score: 136.96  
 m/z: 494.25  
 Gene names: MARCKSL1

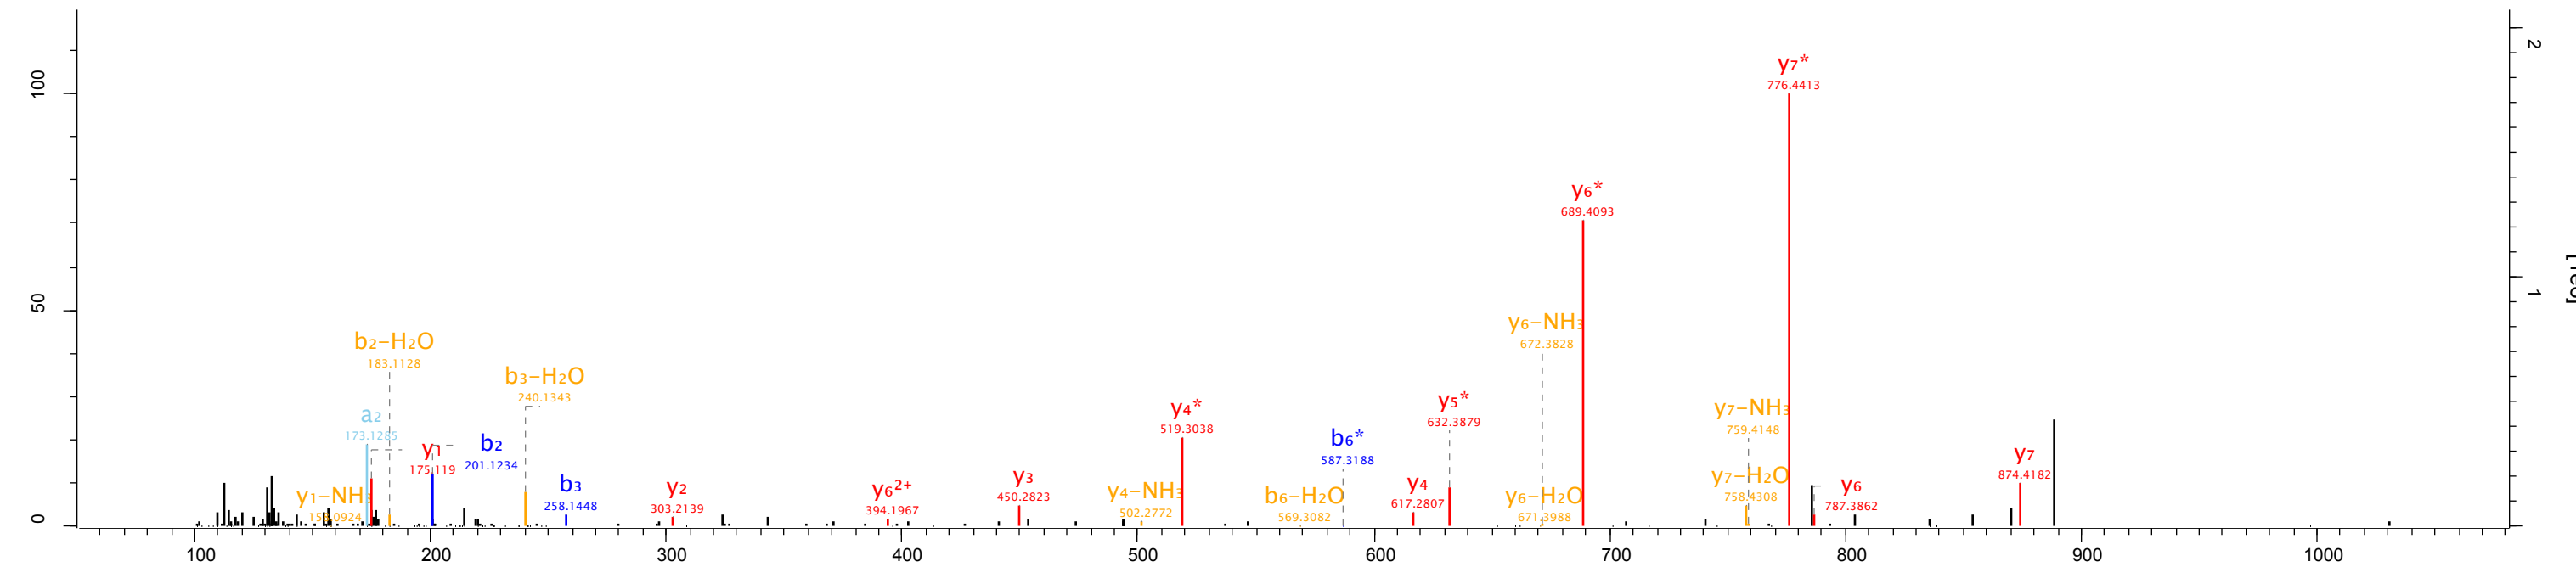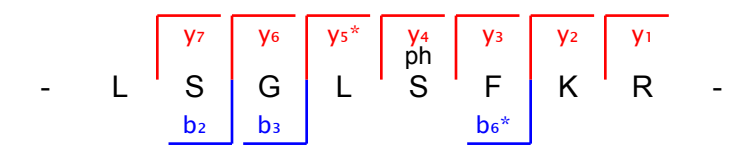

Raw file 20150822\_A375SR\_Phospho\_BR3\_09 Scan 13654 Method FTMS; HCD Score 49.19 m/z 751.33 Gene names AHNAK2

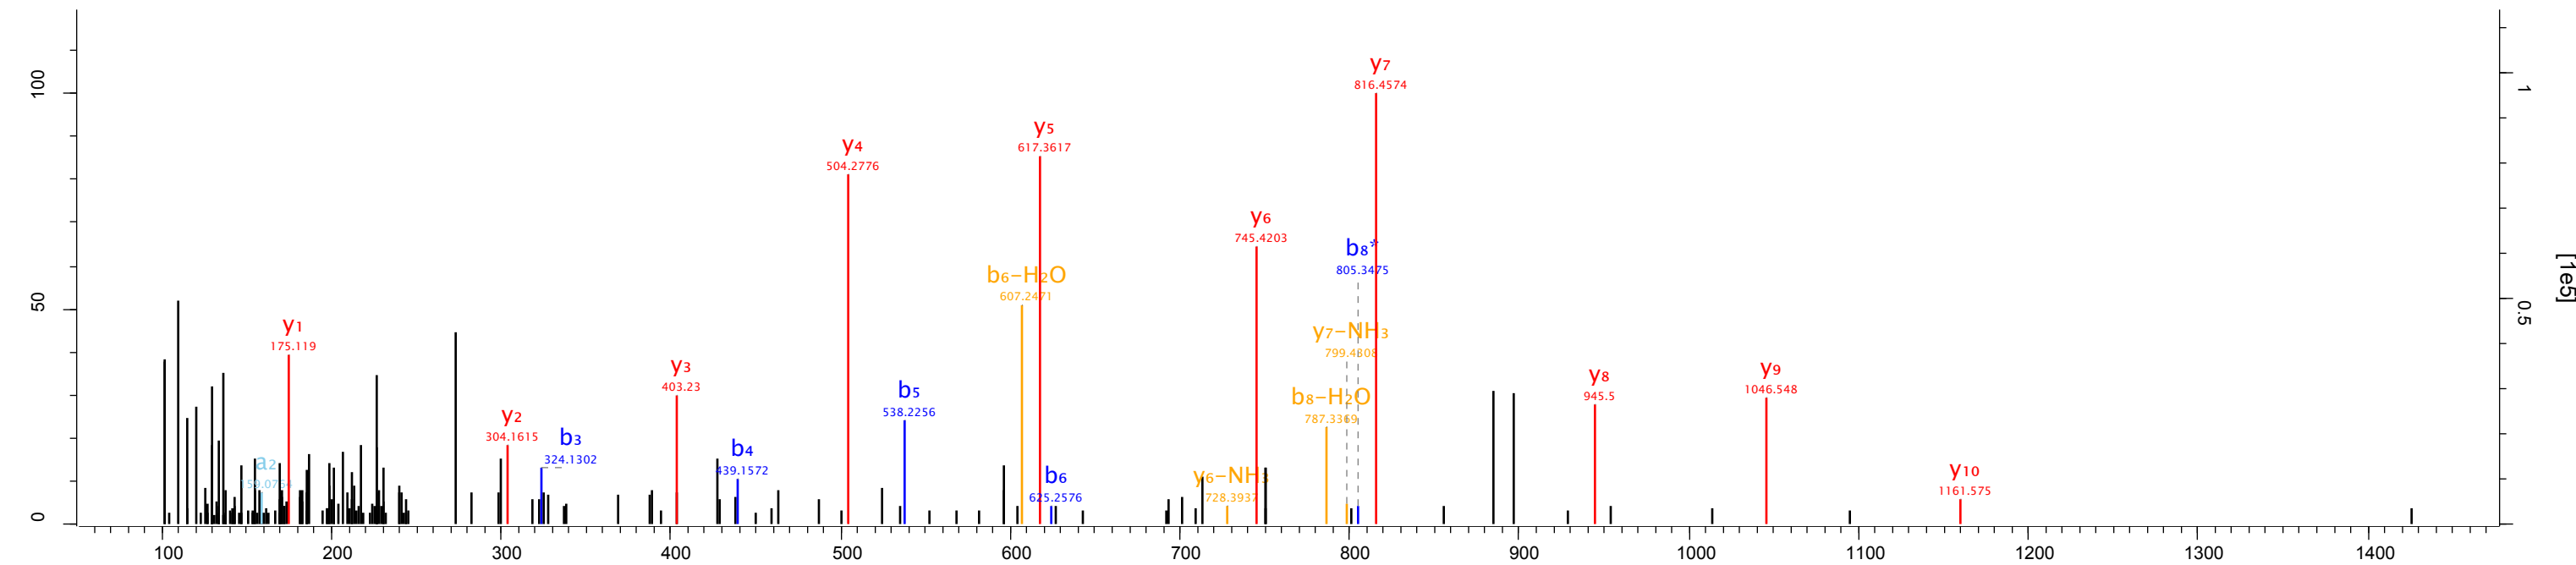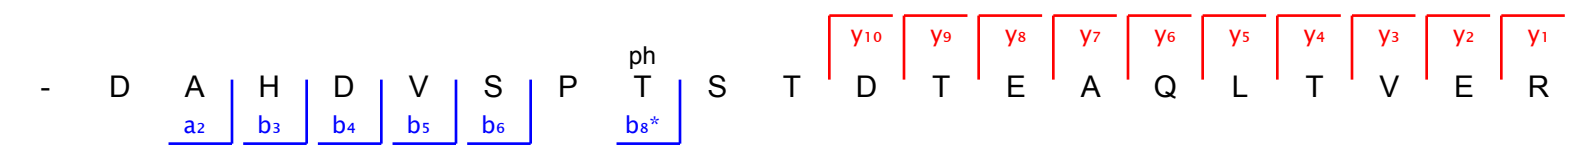



Raw file Scan Method Score m/z Gene names  
 20150822\_A375SR\_Phospho\_BR3\_09 13694 FTMS; HCD 82.59 685.84 MYOF

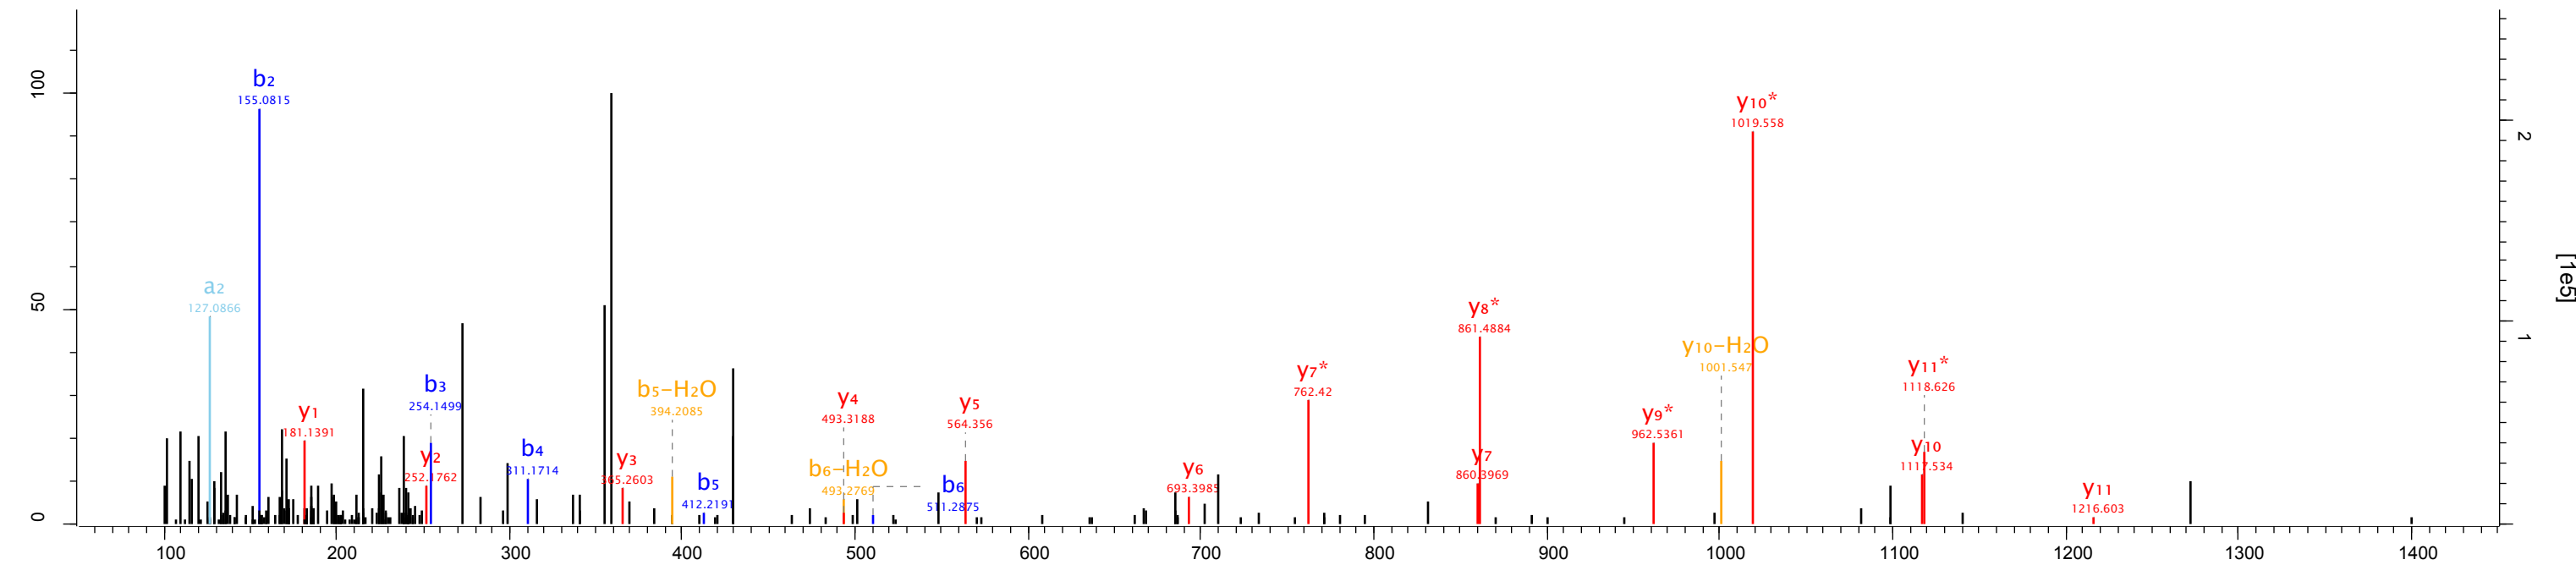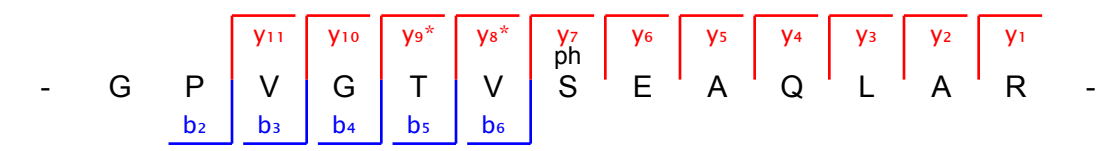

Raw file 20150822\_A375SR\_Phospho\_BR3\_09 Scan 13921 Method FTMS; HCD Score 90.41 m/z 587.27 Gene names LMNA

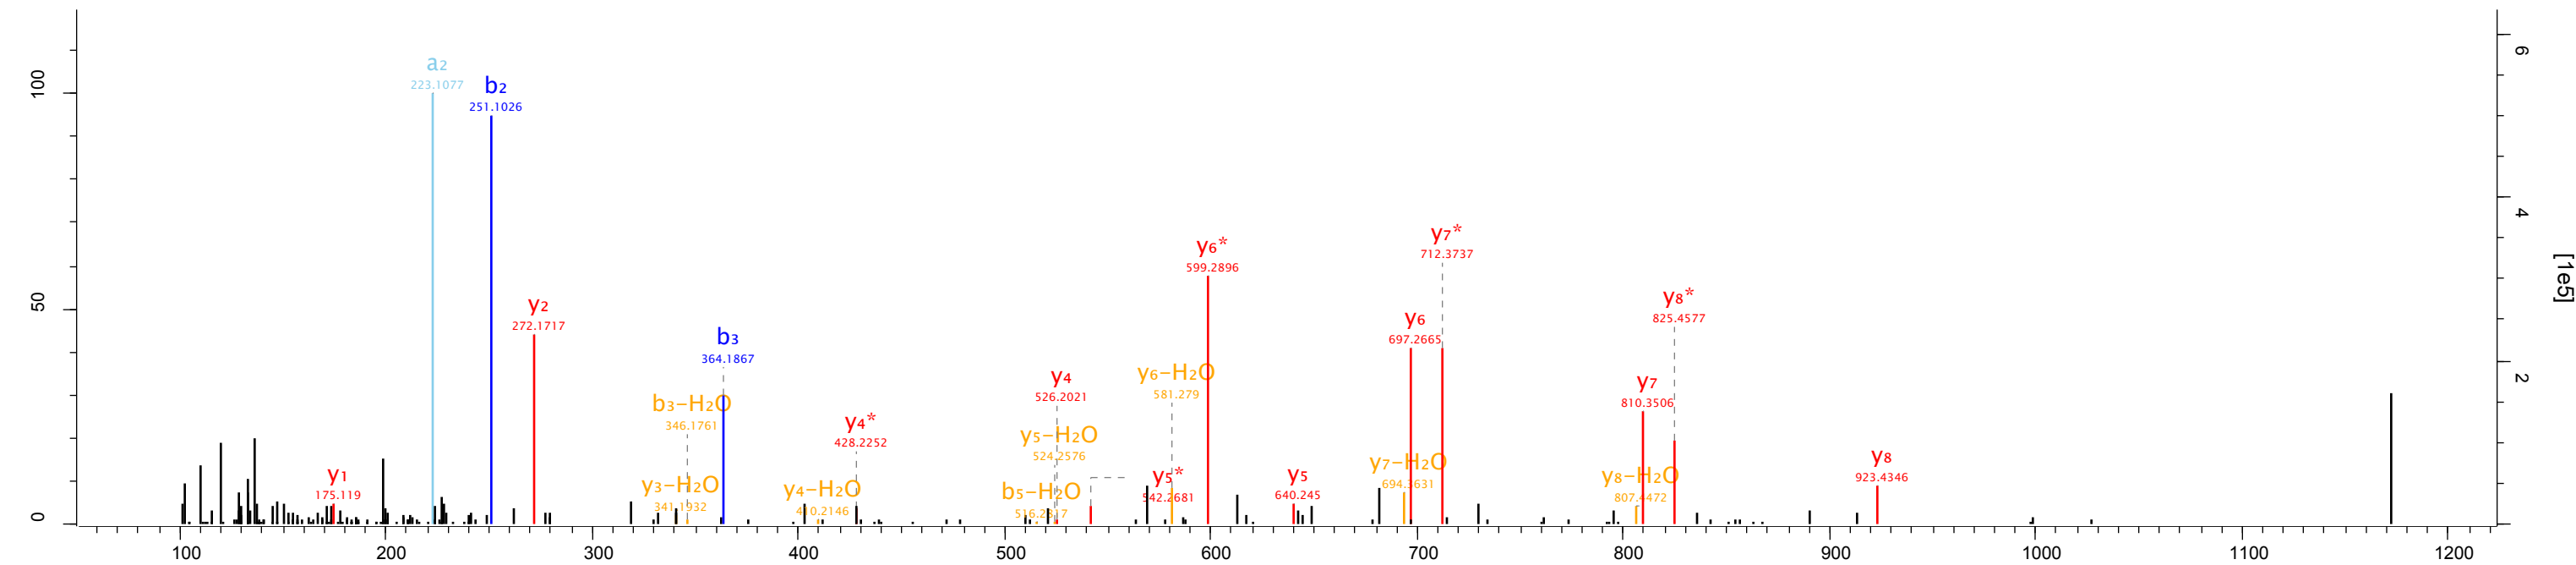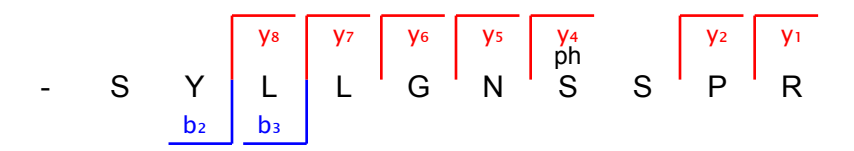

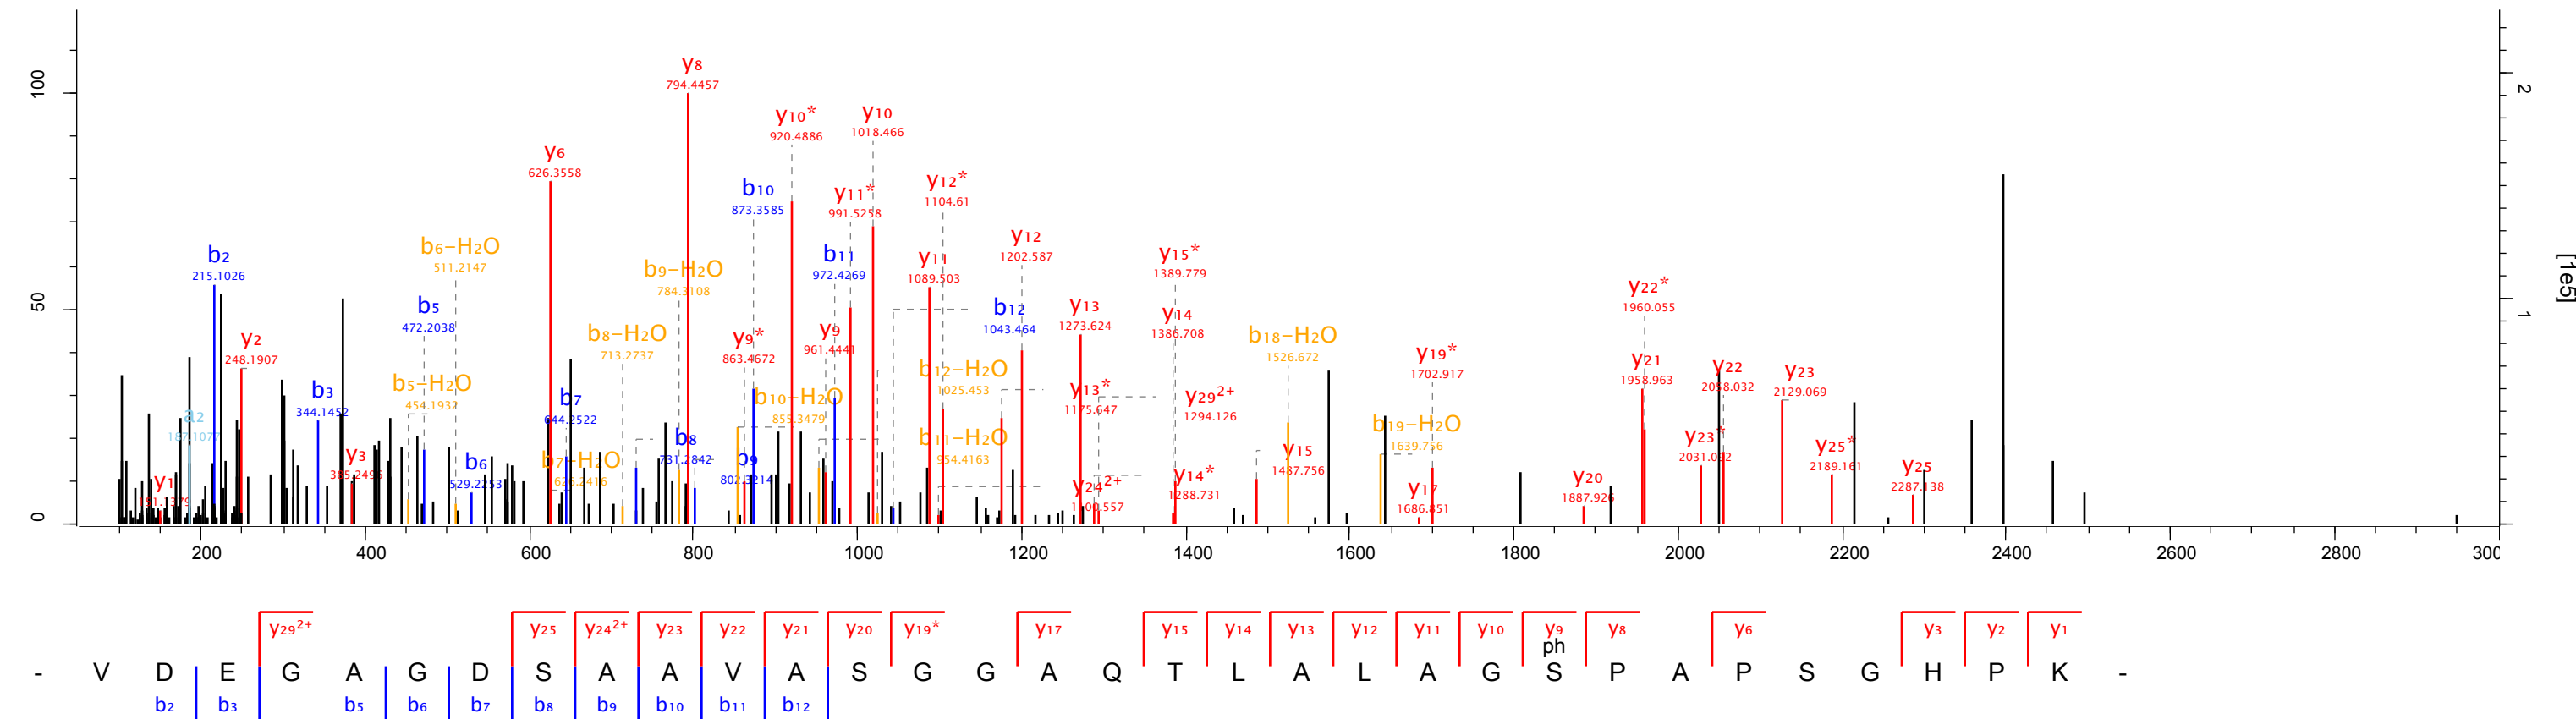

Raw file 20150822\_A375SR\_Phospho\_BR3\_09 Scan 17606 Method FTMS; HCD Score 55.62 m/z 896.39 Gene names ZNF148

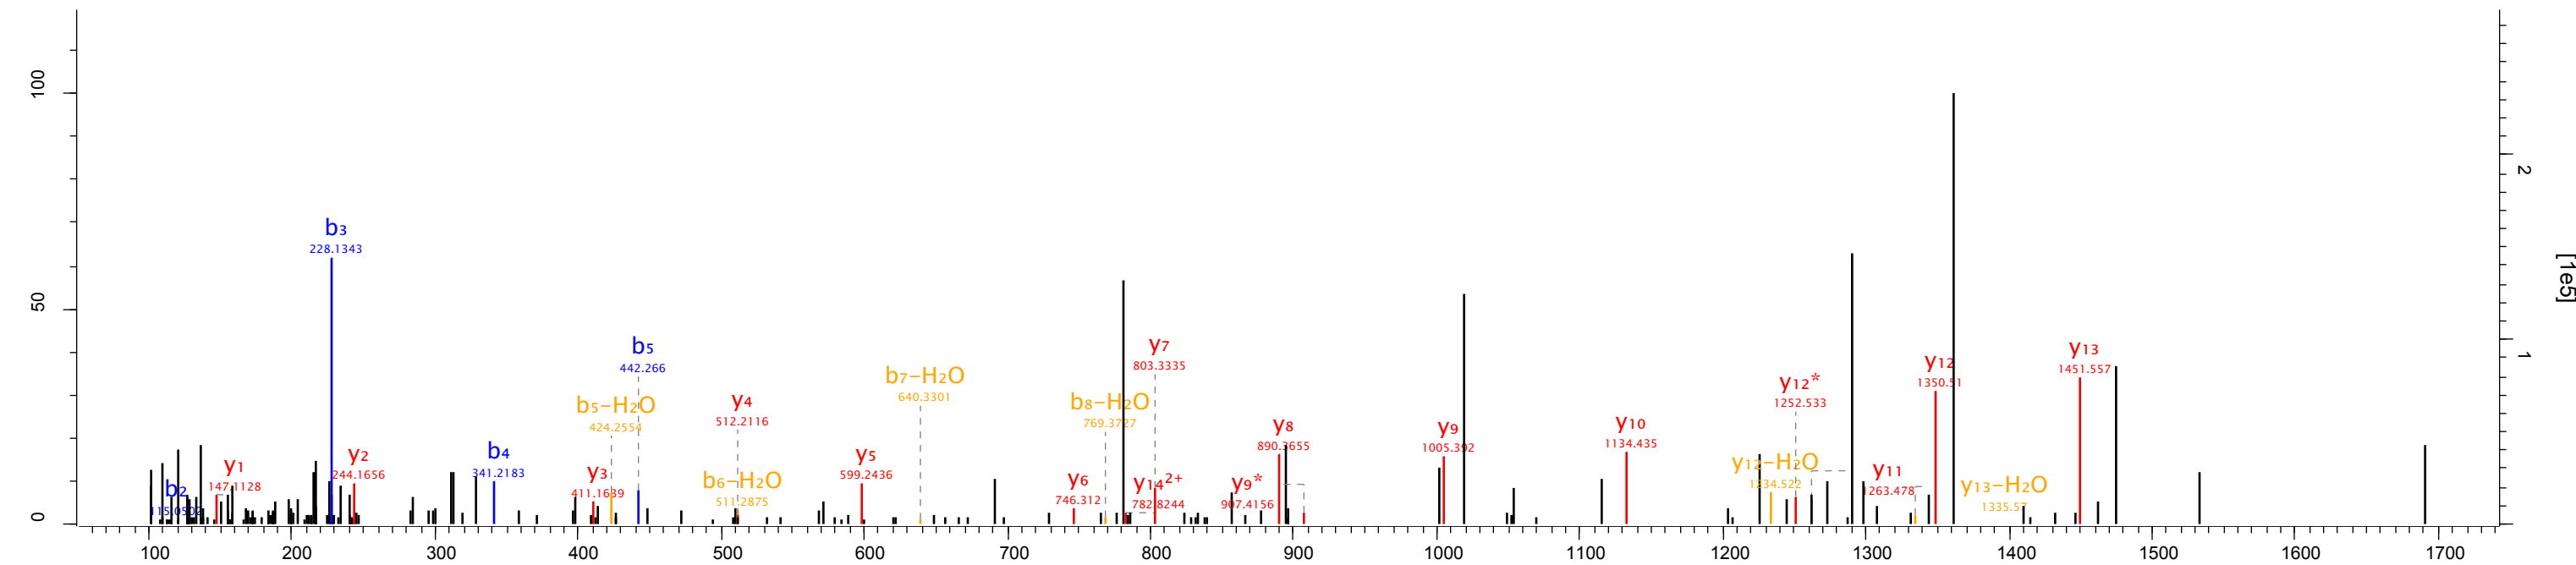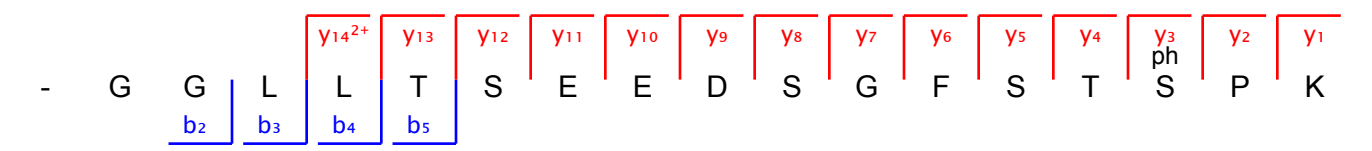

Raw file 20150822\_A375SR\_Phospho\_BR3\_09 Scan 1872 Method FTMS; HCD Score 66 m/z 567.24 Gene names NELFE

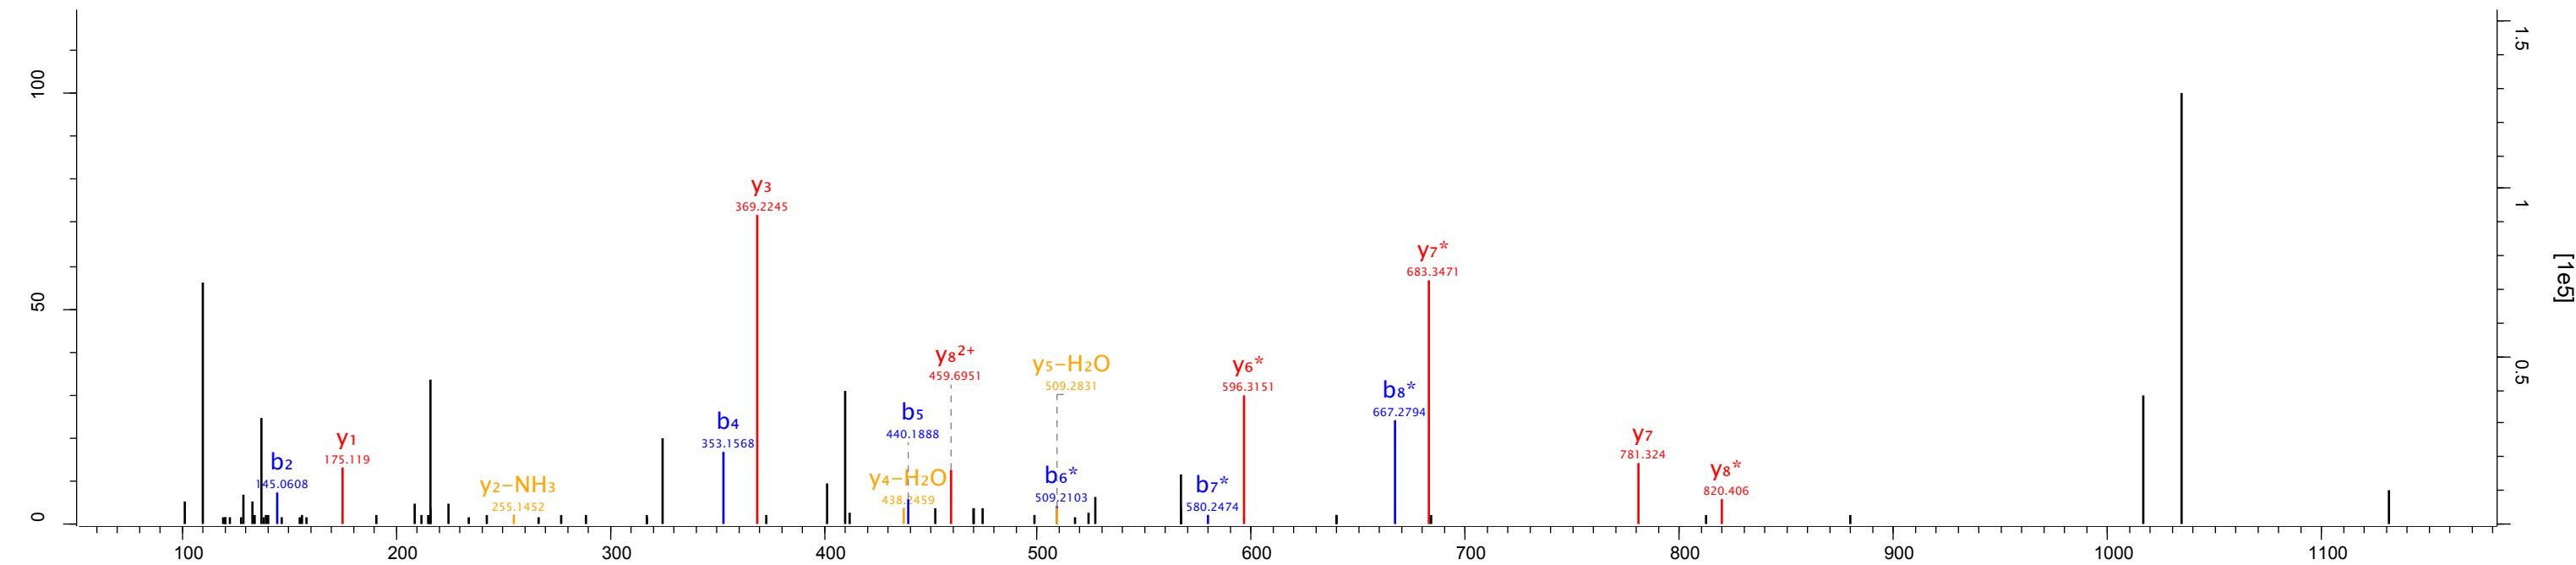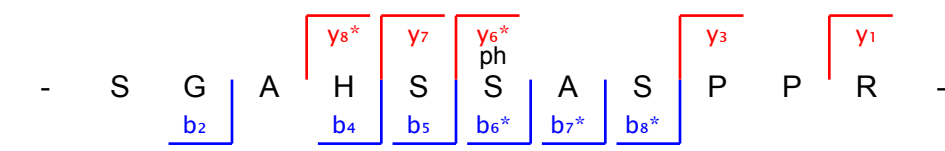

Raw file: 20150822\_A375SR\_Phospho\_BR3\_09  
 Scan: 18969 Method: FTMS; HCD Score: 58.48 m/z: 657.94 Gene names: SMC4

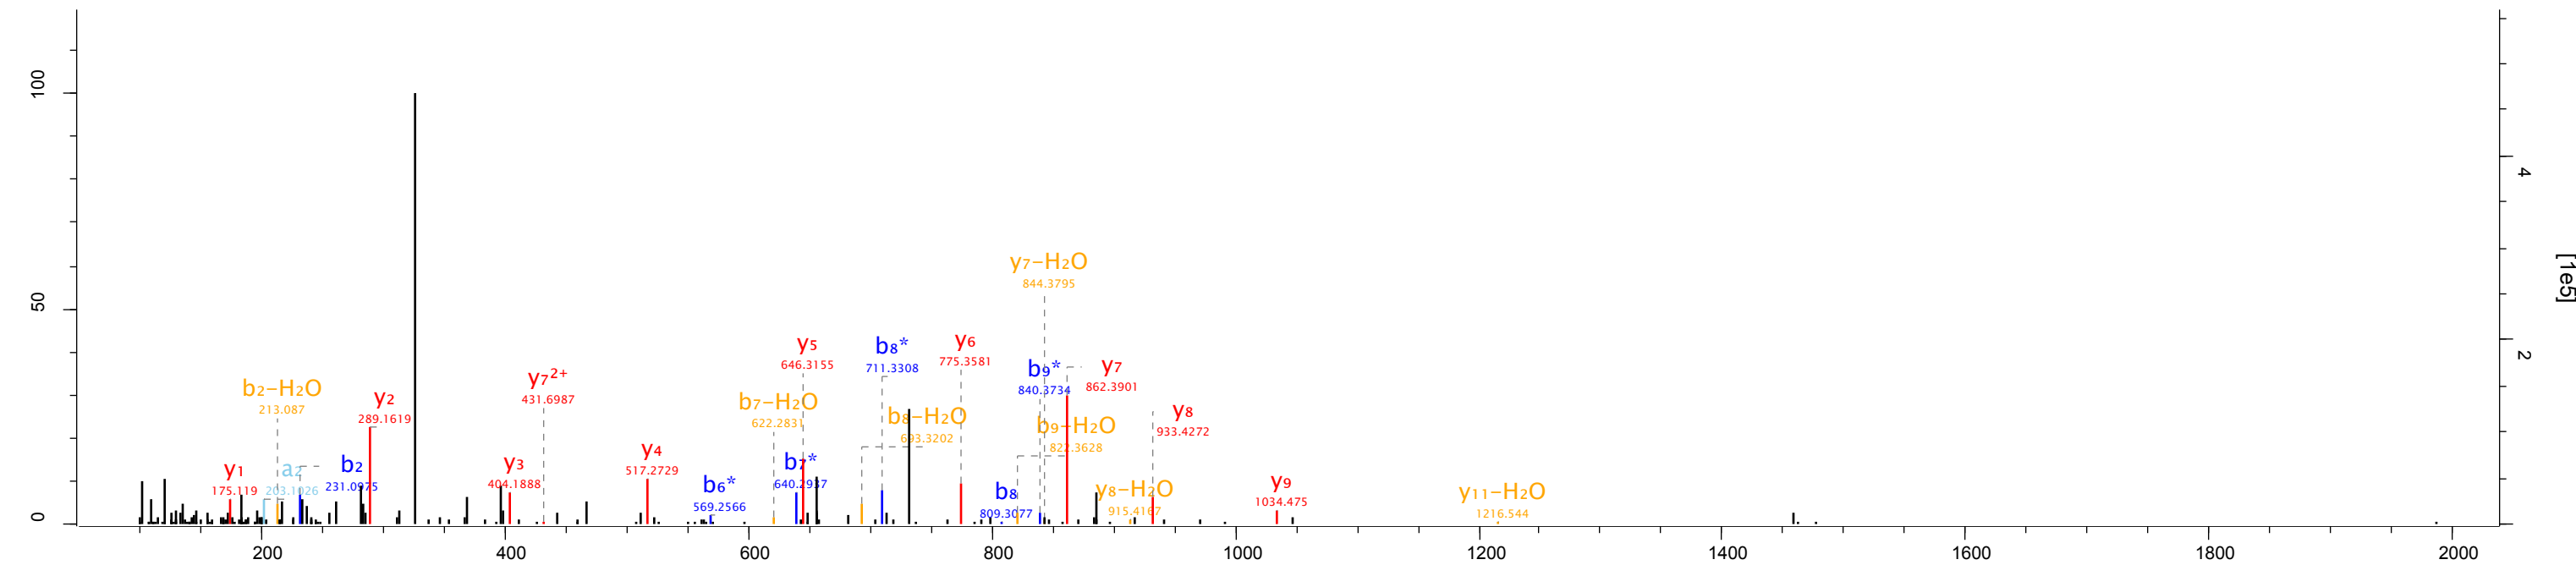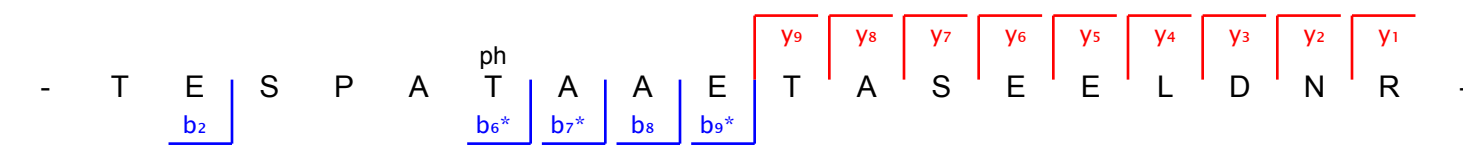

Raw file 20150822\_A375SR\_Phospho\_BR3\_09 Scan 20617 Method FTMS; HCD Score 54.83 m/z 974.95 Gene names ATXN2L

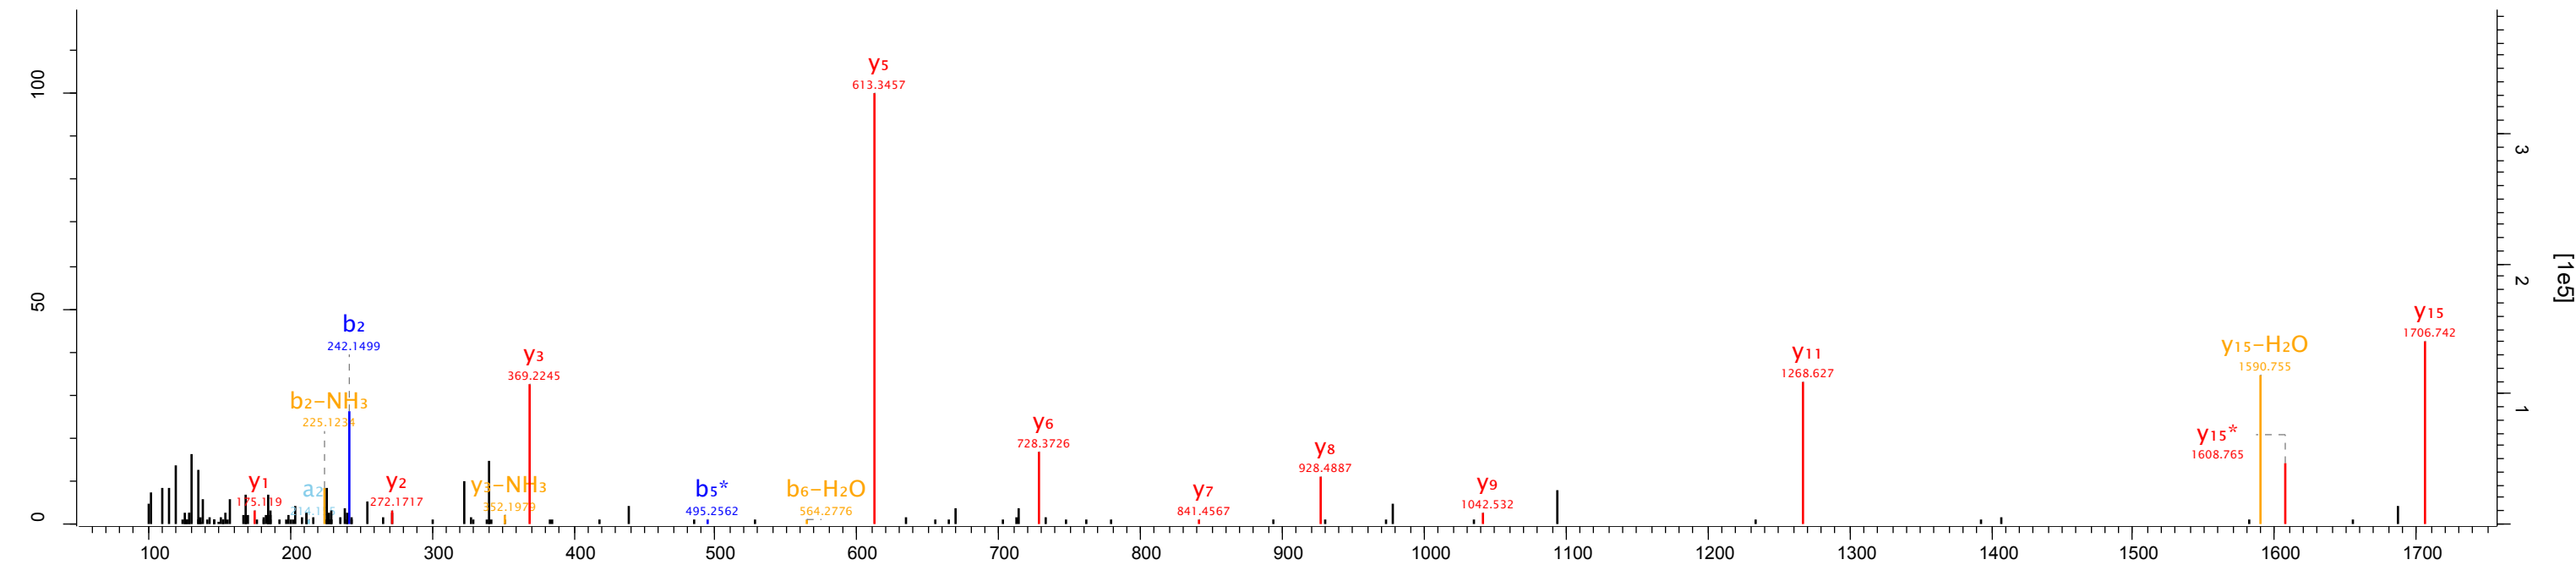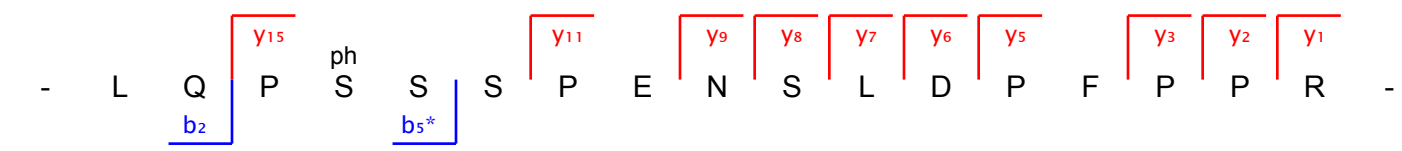

Raw file  
20150822\_A375SR\_Phospho\_BR3\_09

Scan 22332 Method FTMS; HCD Score 60.42 m/z 803.4 Gene names ZNF592

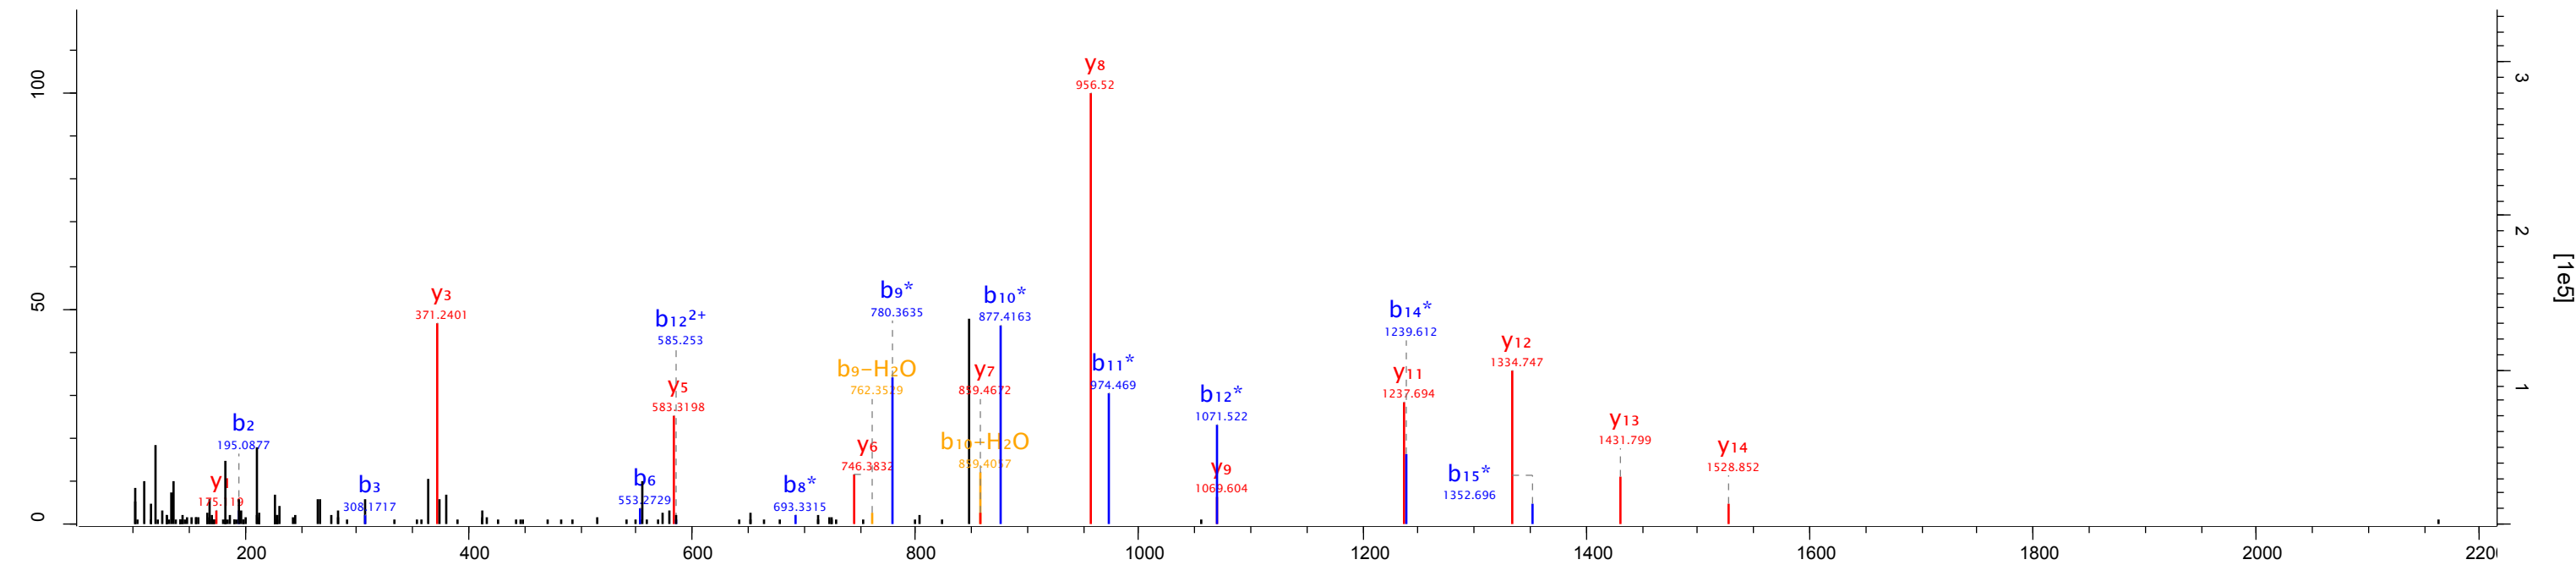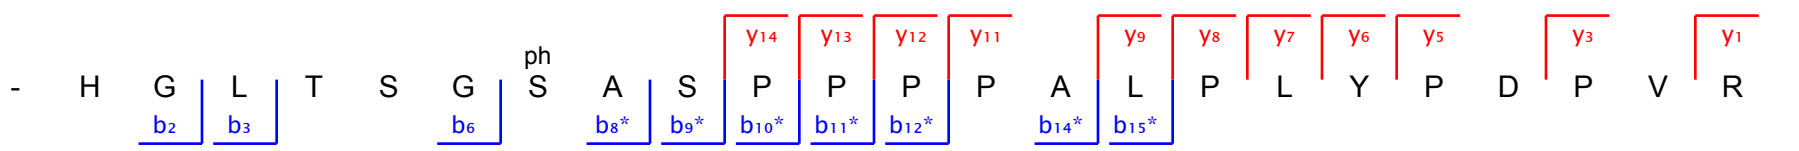



Raw file Scan Method Score m/z Gene names  
 20150822\_A375SR\_Phospho\_BR3\_09 23655 FTMS; HCD 65.23 1041.44 PRKAB2

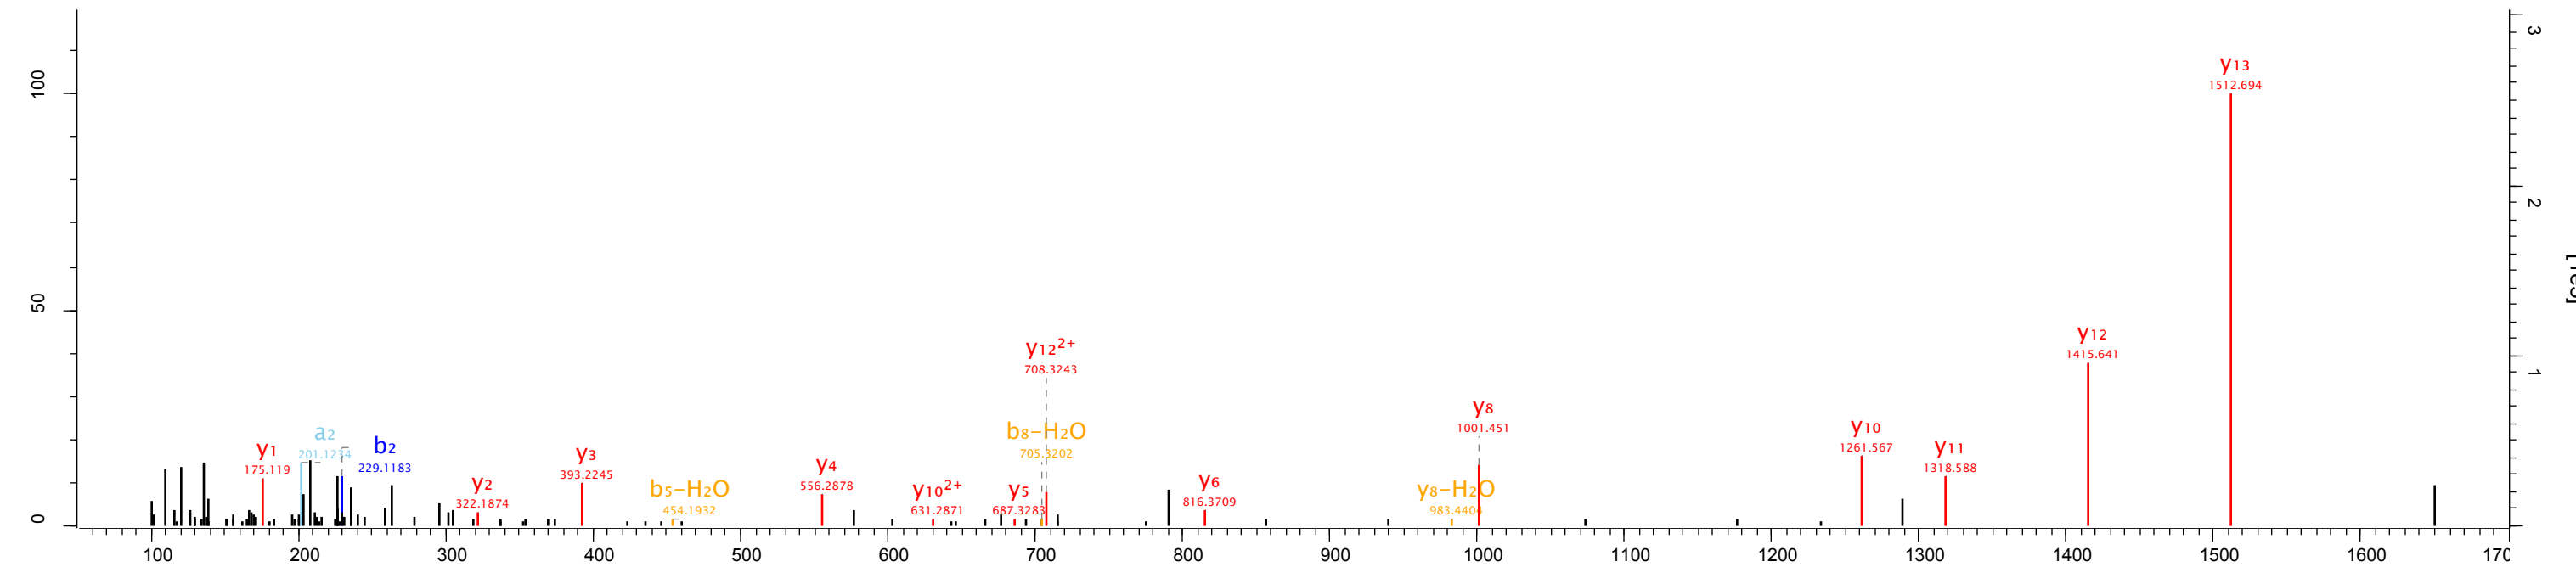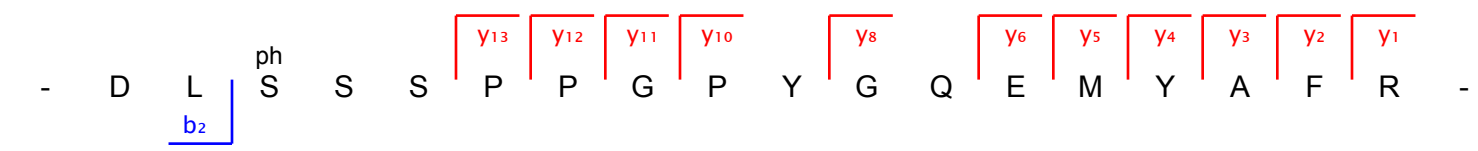

Raw file: 20150822\_A375SR\_Phospho\_BR3\_09  
 Scan: 24623  
 Method: FTMS; HCD  
 Score: 45.94  
 m/z: 1030.78  
 Gene names: ATXN2L

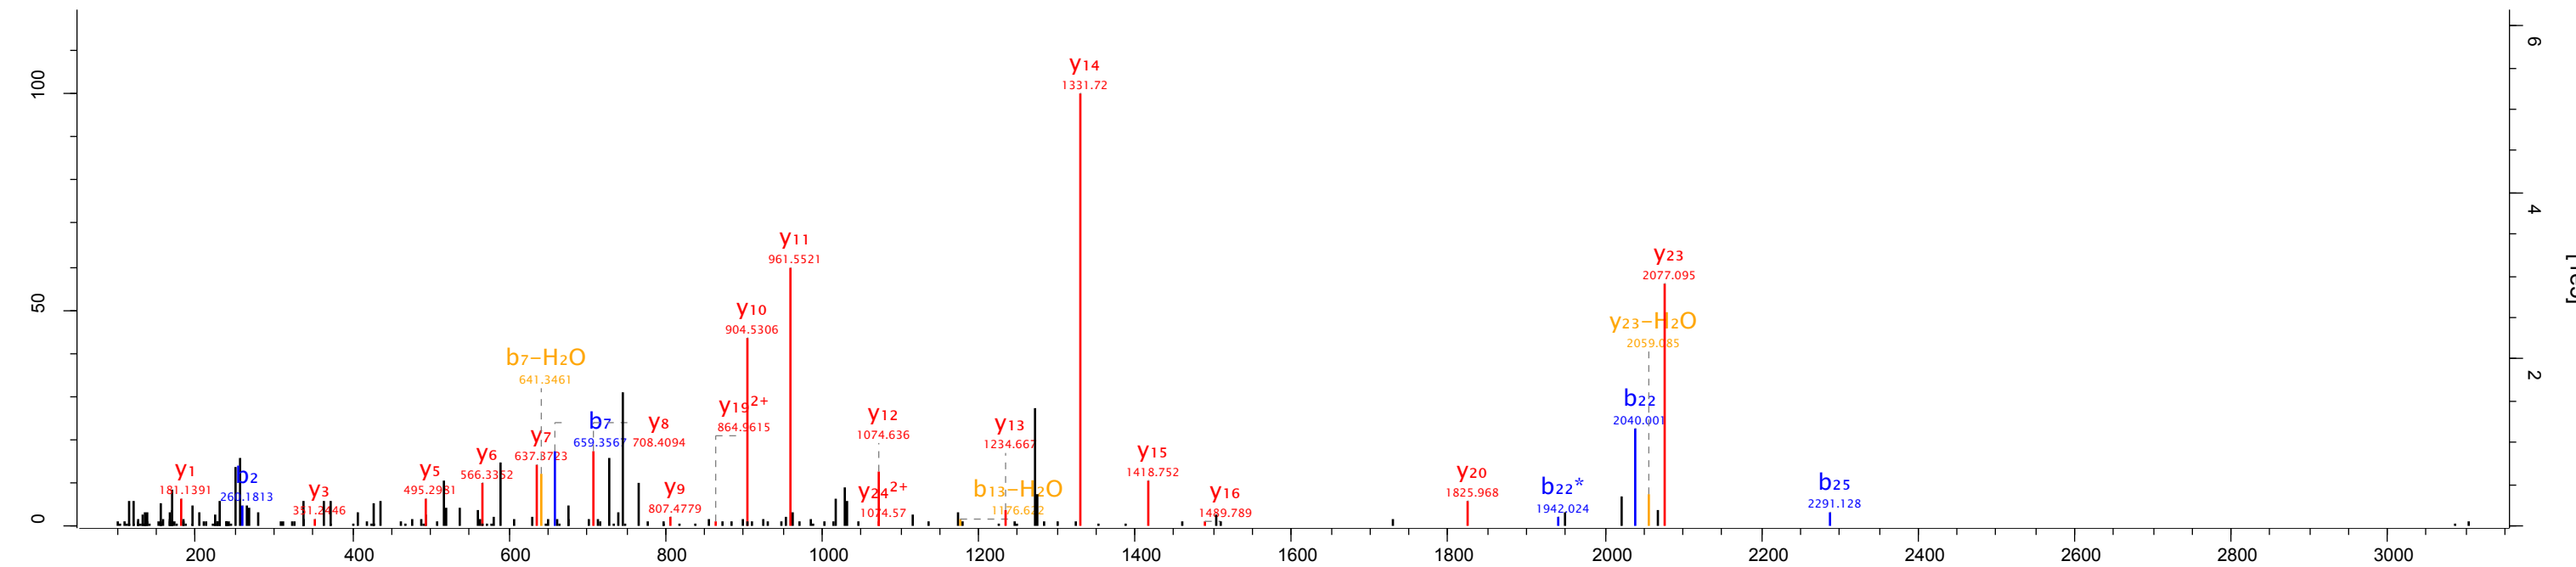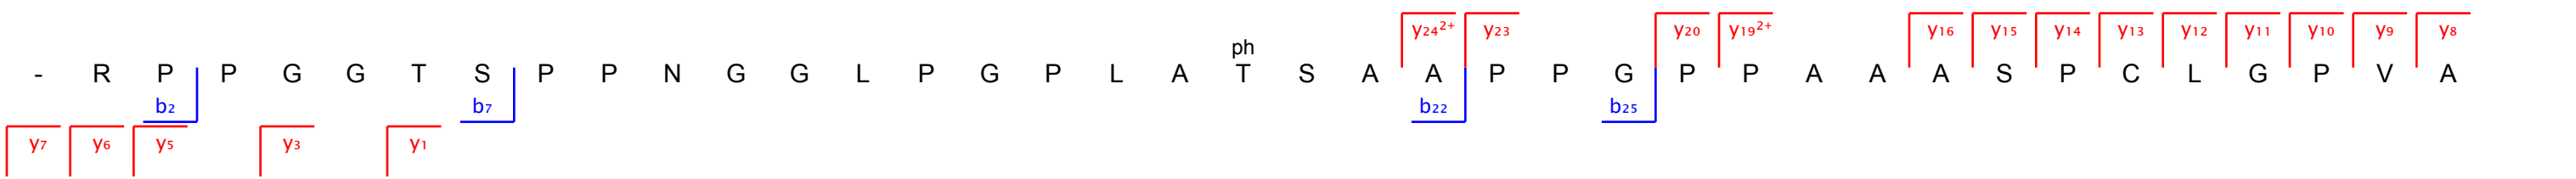

Raw file 20150822\_A375SR\_Phospho\_BR3\_09 Scan 2464 Method FTMS; HCD Score 92.38 m/z 628.81 Gene names CHAMP1

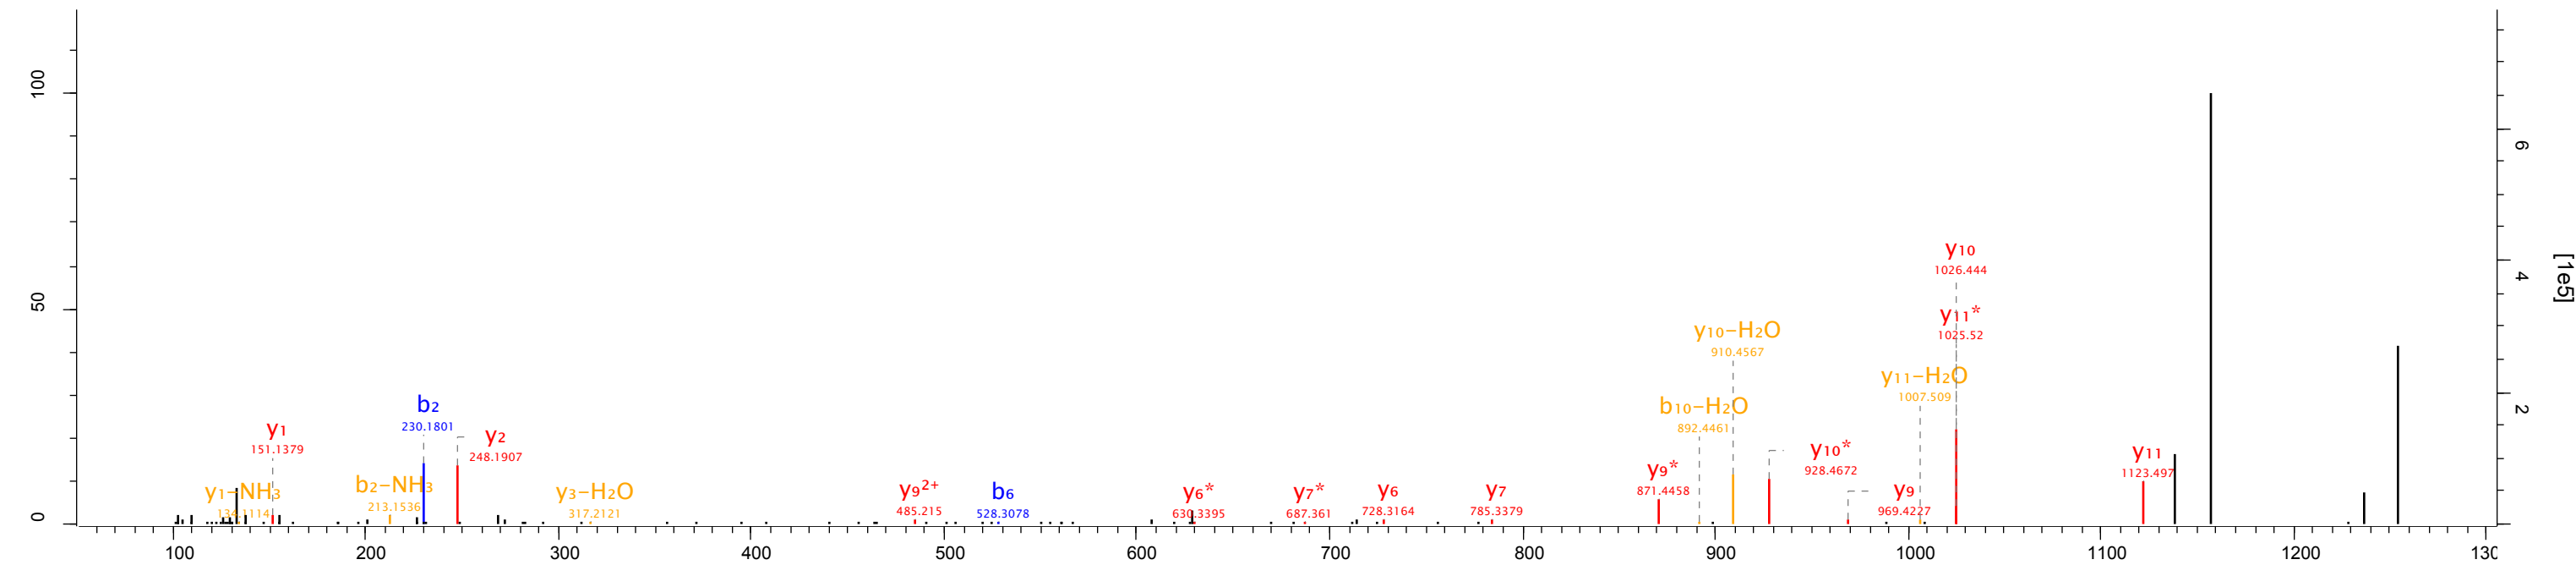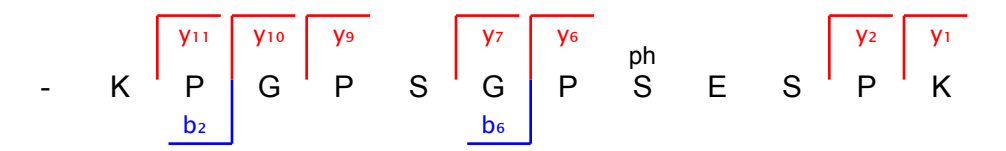

Raw file: 20150822\_A375SR\_Phospho\_BR3\_09  
 Scan: 24783 Method: FTMS; HCD Score: 53.36 m/z: 655.64 Gene names: SRRM2

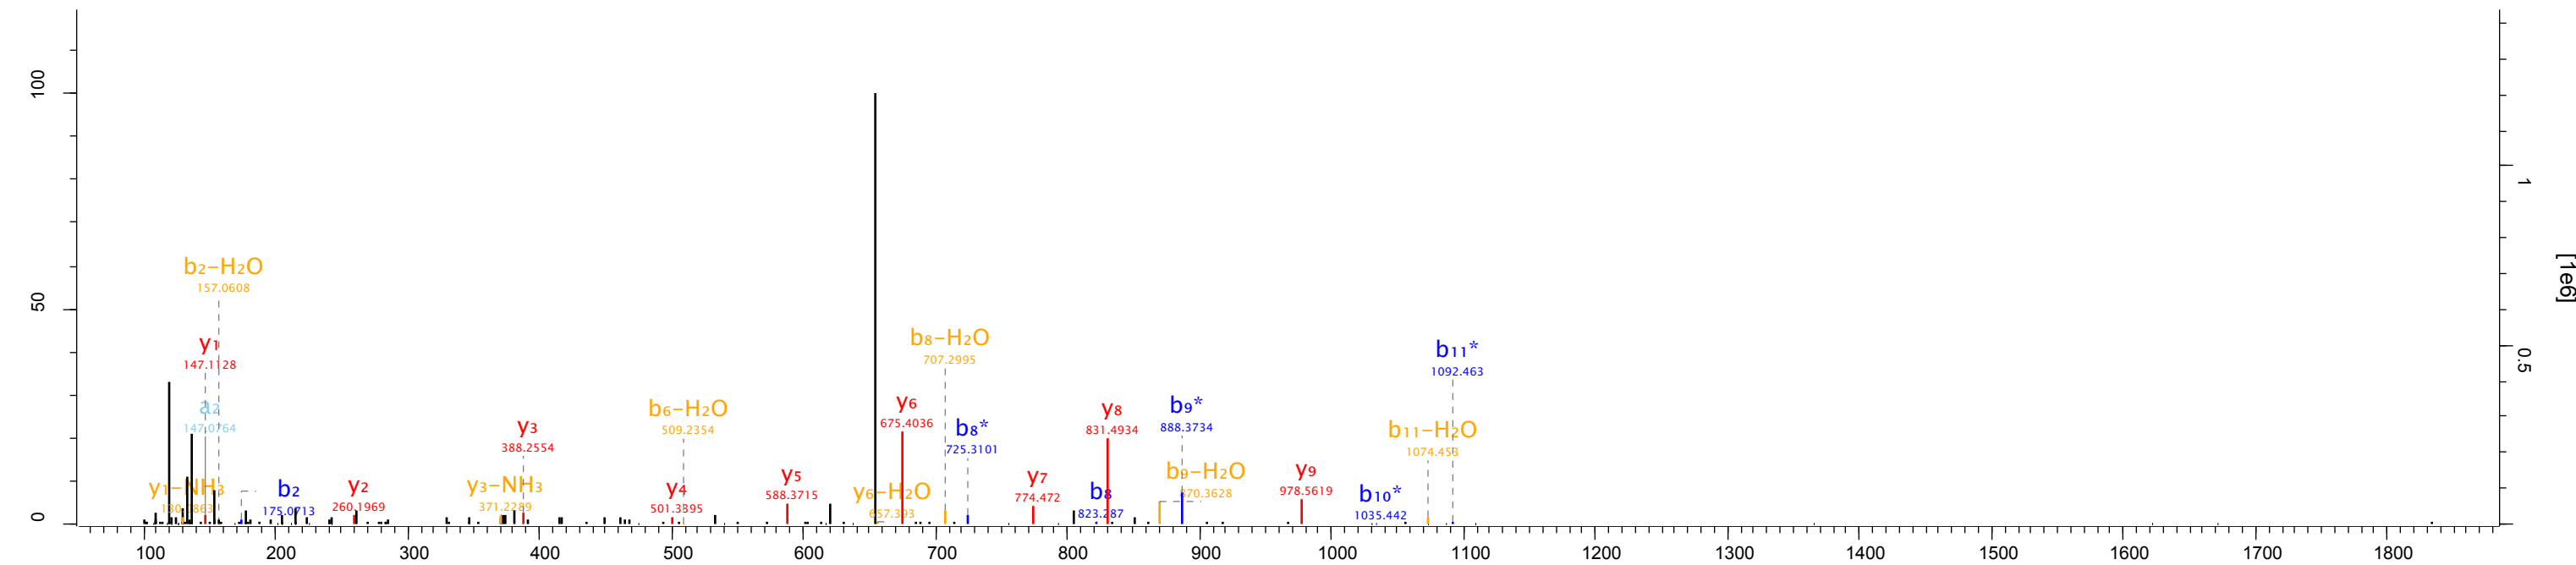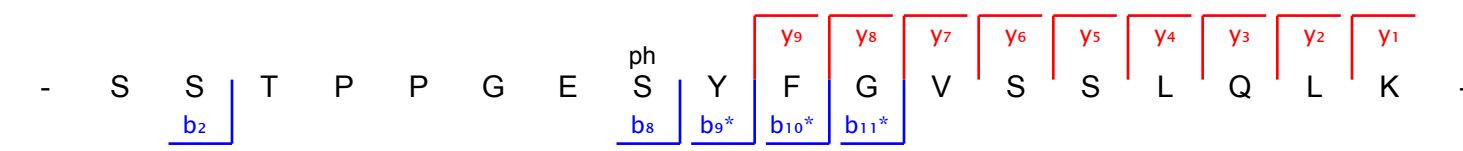

Raw file 20150822\_A375SR\_Phospho\_BR3\_09 Scan 27330 Method FTMS; HCD Score 70.34 m/z 1086.48 Gene names YWHAE

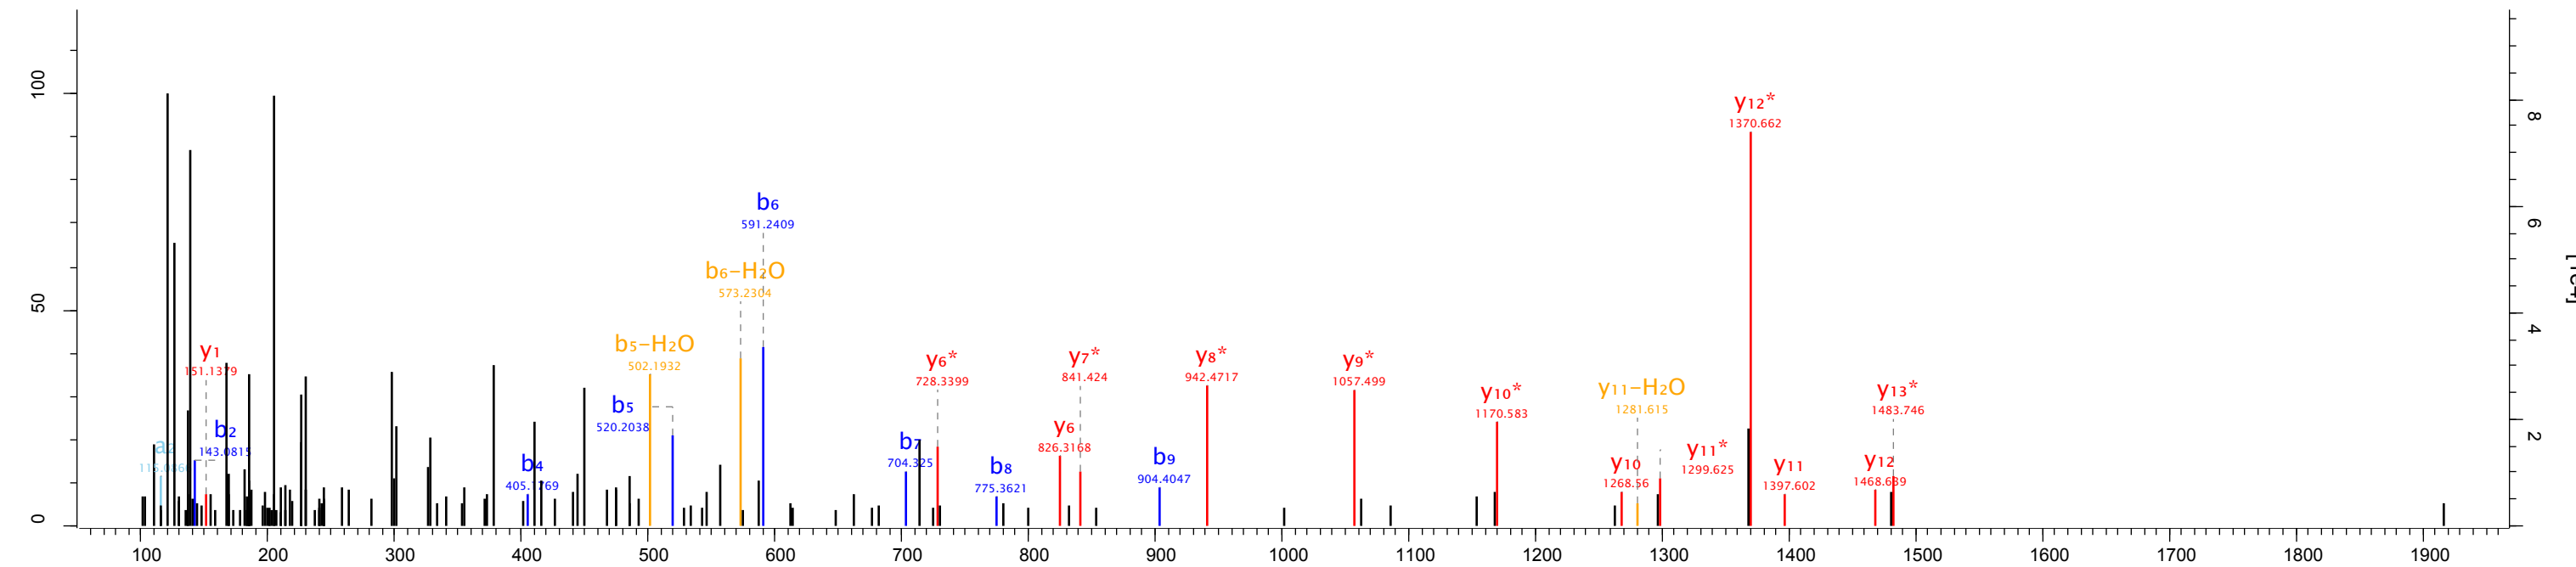

- A A F D D A I A E L D T L S E E S Y K -

Fragmentation sites are indicated by brackets below the amino acid sequence:

- Blue brackets: b2 (A), b4 (D), b5 (D), b6 (A), b7 (I), b8 (A), b9 (E)
- Red brackets: y13\* (I), y12 (A), y11 (E), y10 (L), y9\* (D), y8\* (T), y7\* (L), y6 (S), y1 (K)

Raw file: 20150822\_A375SR\_Phospho\_BR3\_09  
 Scan: 27858 Method: FTMS; HCD Score: 65.24 m/z: 845.38 Gene names: CEP131

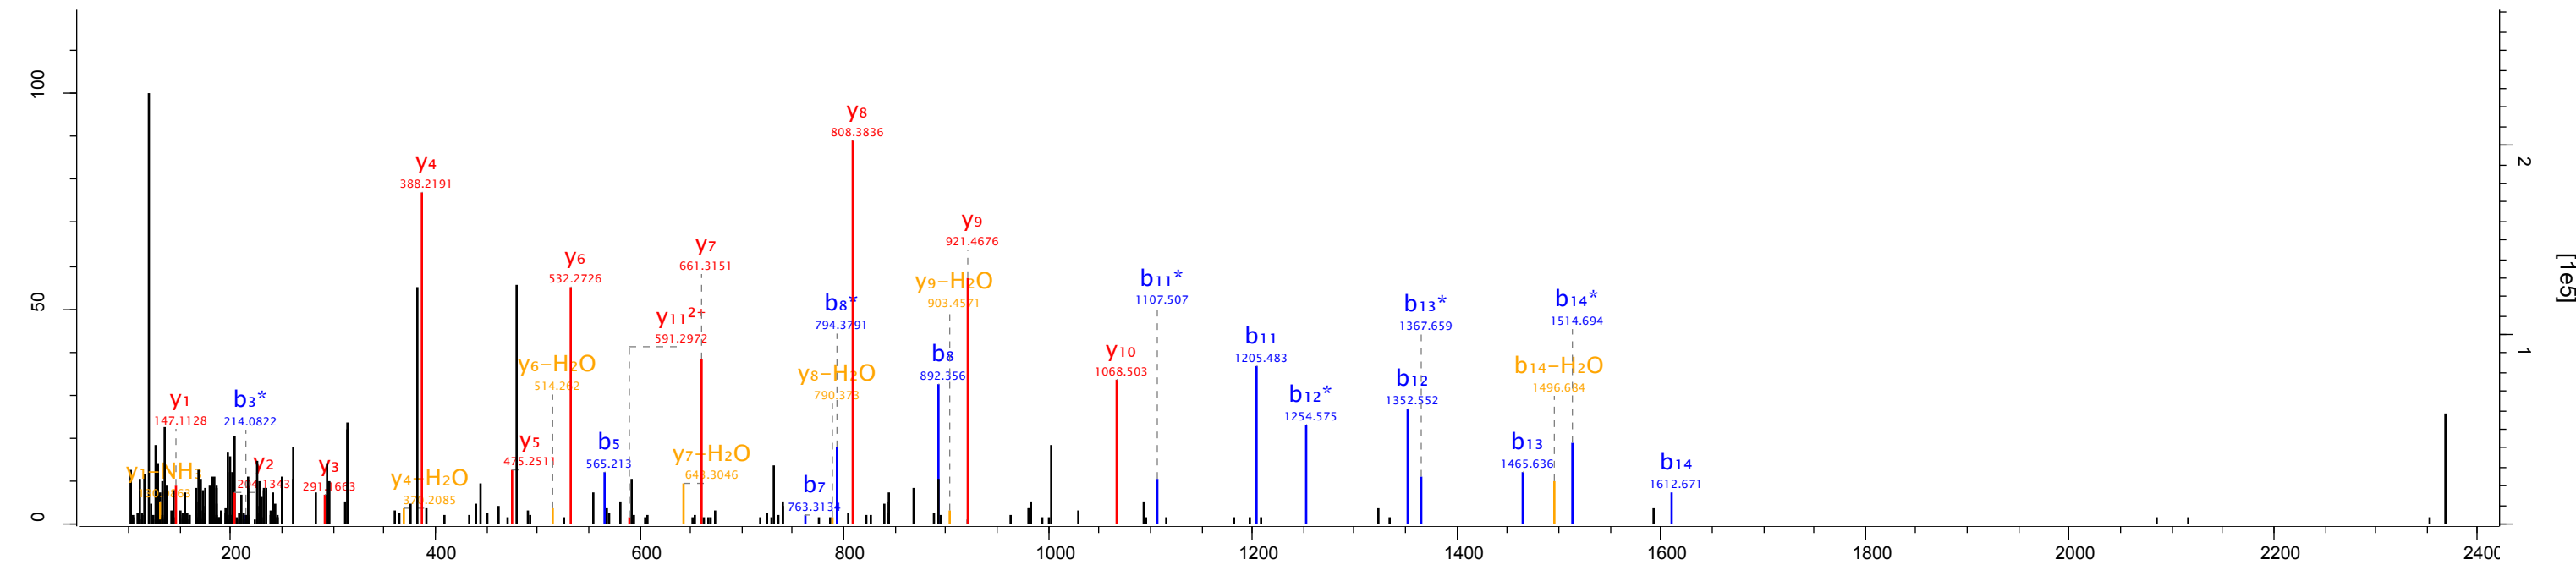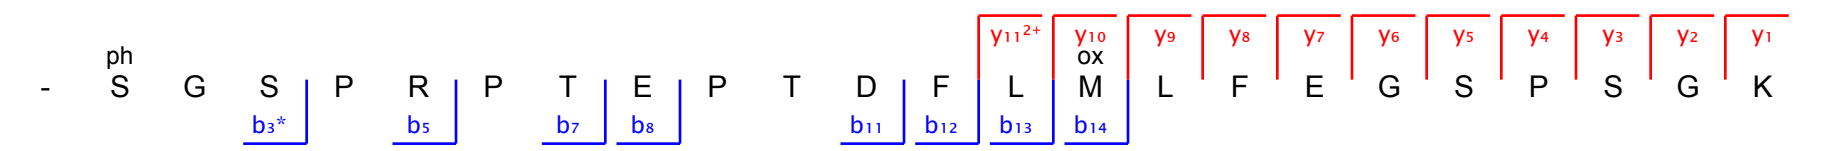

Raw file 20150822\_A375SR\_Phospho\_BR3\_09 Scan 27862 Method FTMS; HCD Score 57.71 m/z 1144.29 Gene names RAD23A

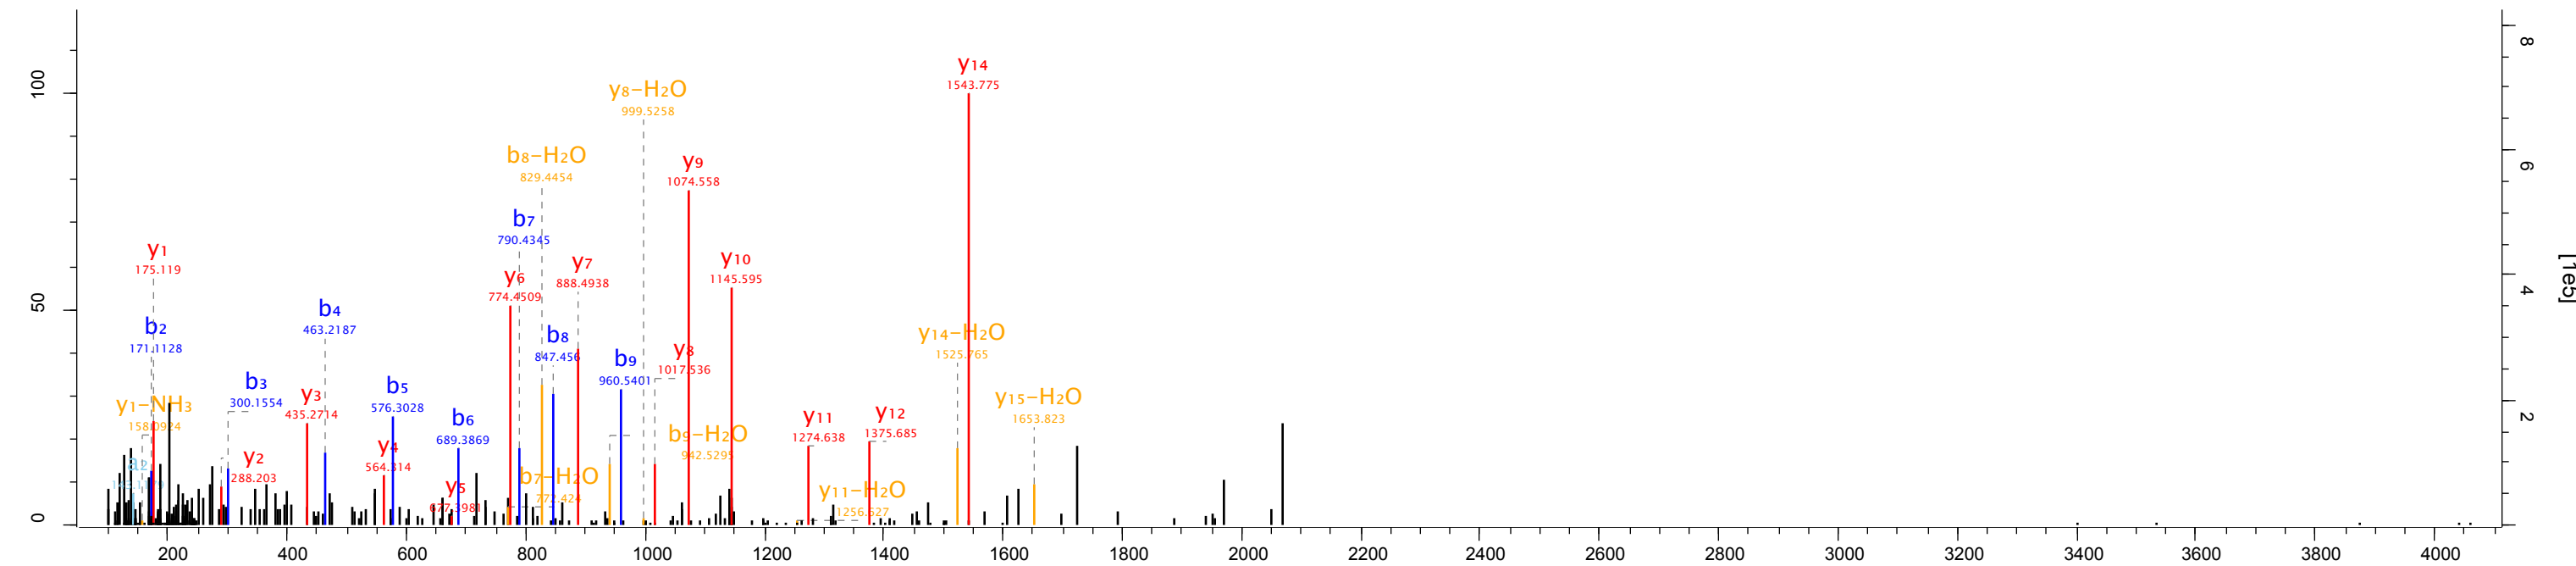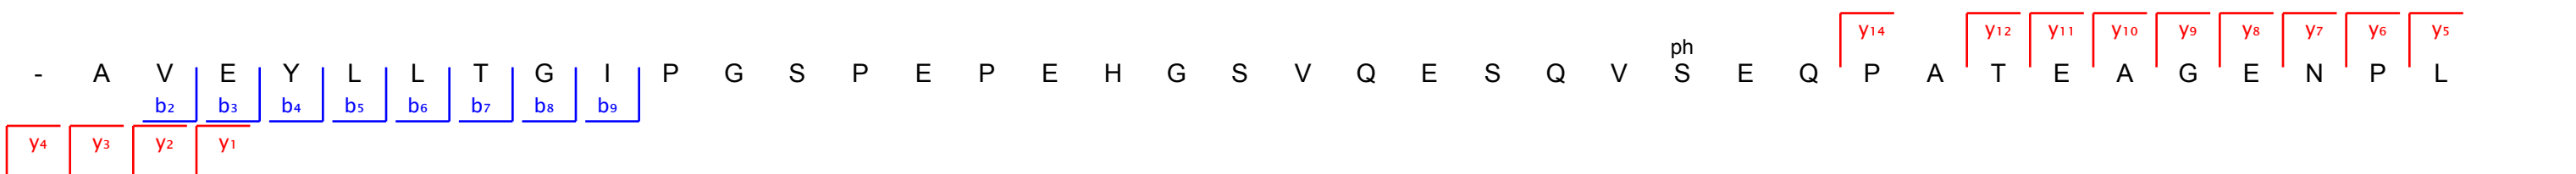

Raw file: 20150822\_A375SR\_Phospho\_BR3\_09  
 Scan: 5007 Method: FTMS; HCD Score: 152.9 m/z: 790.83 Gene names: MARCKS

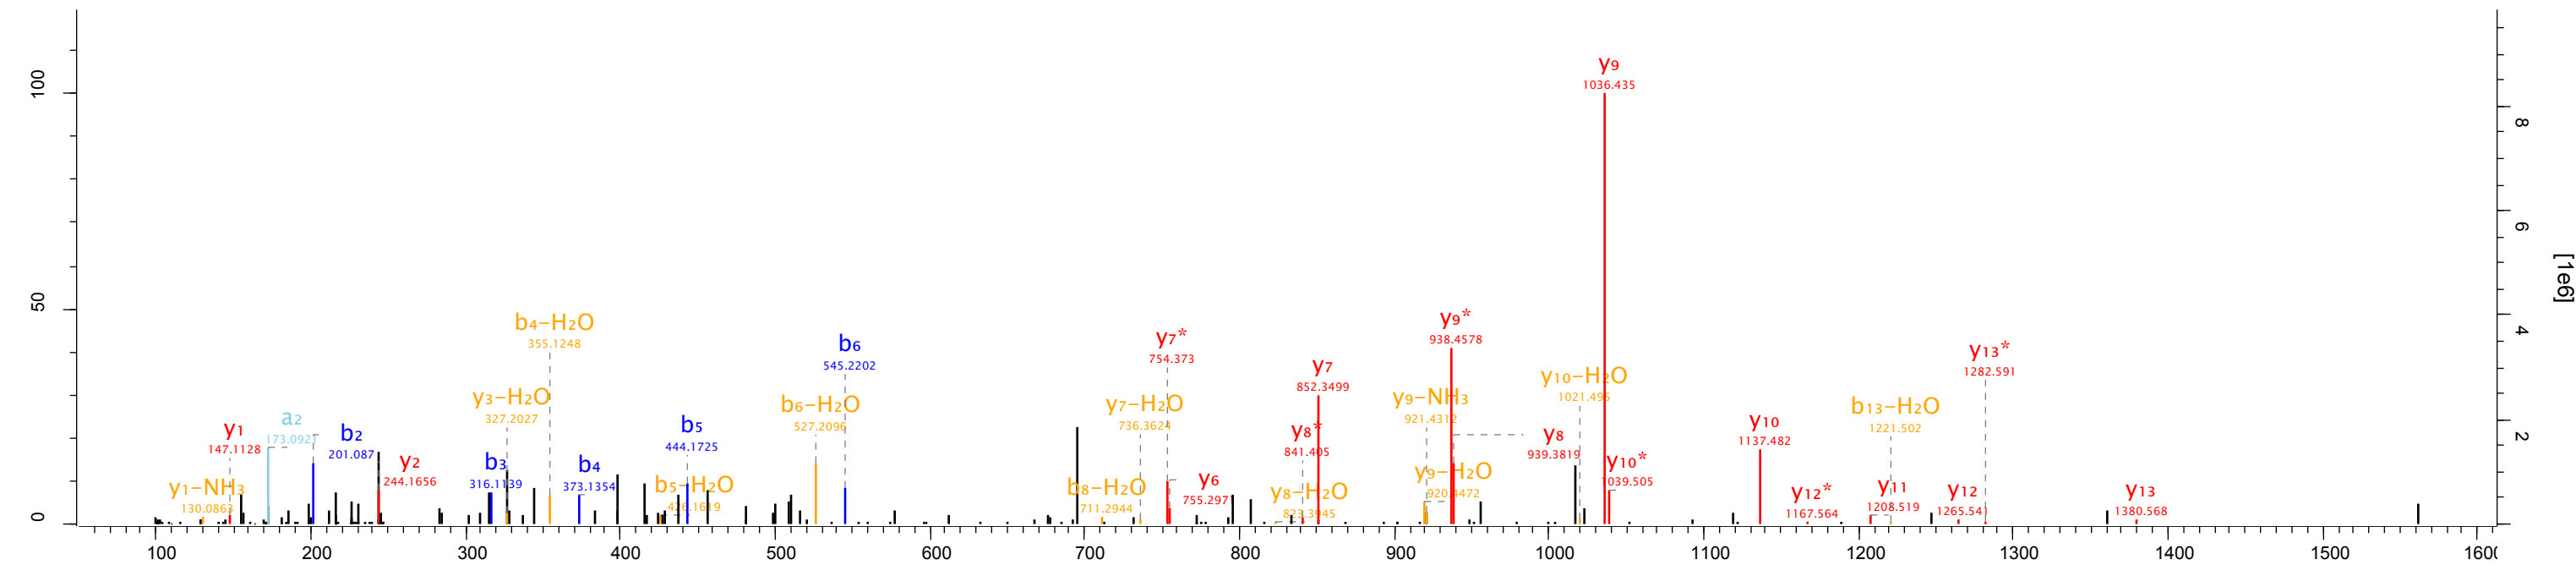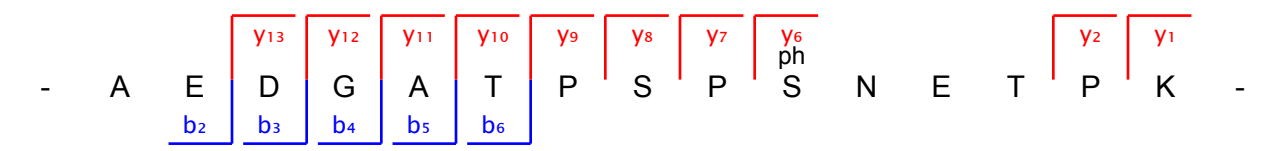



Raw file: 20150822\_A375SR\_Phospho\_BR3\_09  
 Scan: 5047 Method: FTMS; HCD Score: 121.61 m/z: 515.25 Gene names: PRKCD

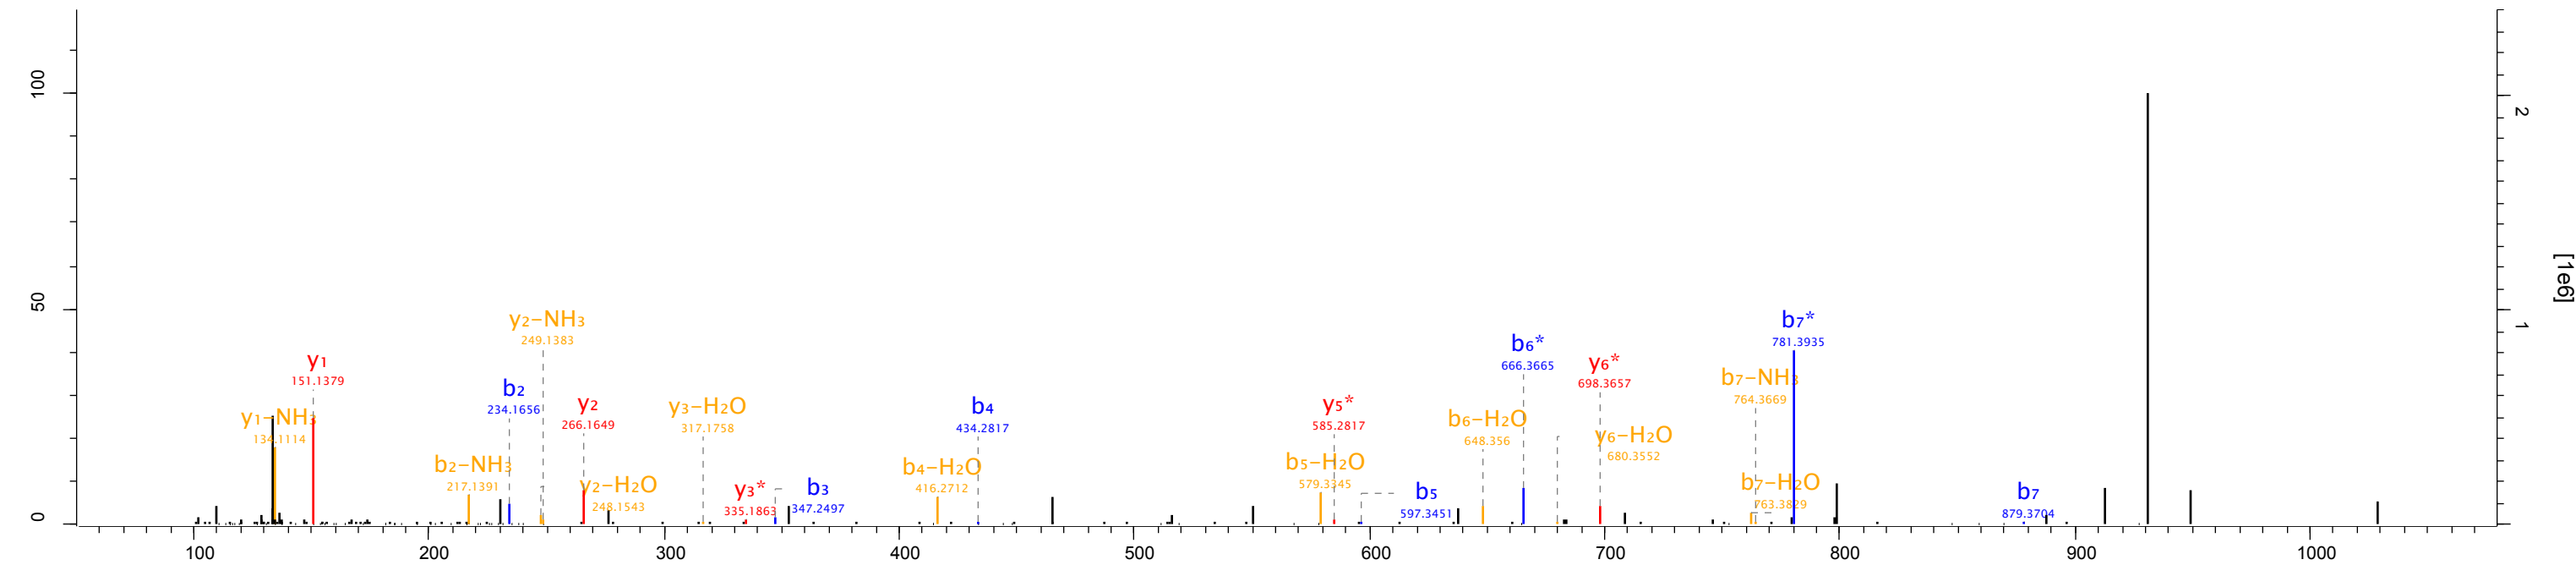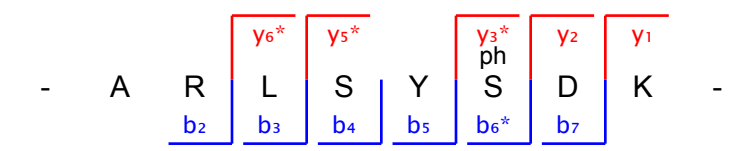

Raw file: 20150822\_A375SR\_Phospho\_BR3\_09  
 Scan: 6905 Method: FTMS; HCD Score: 77.66 m/z: 548.97 Gene names: CIAPIN1

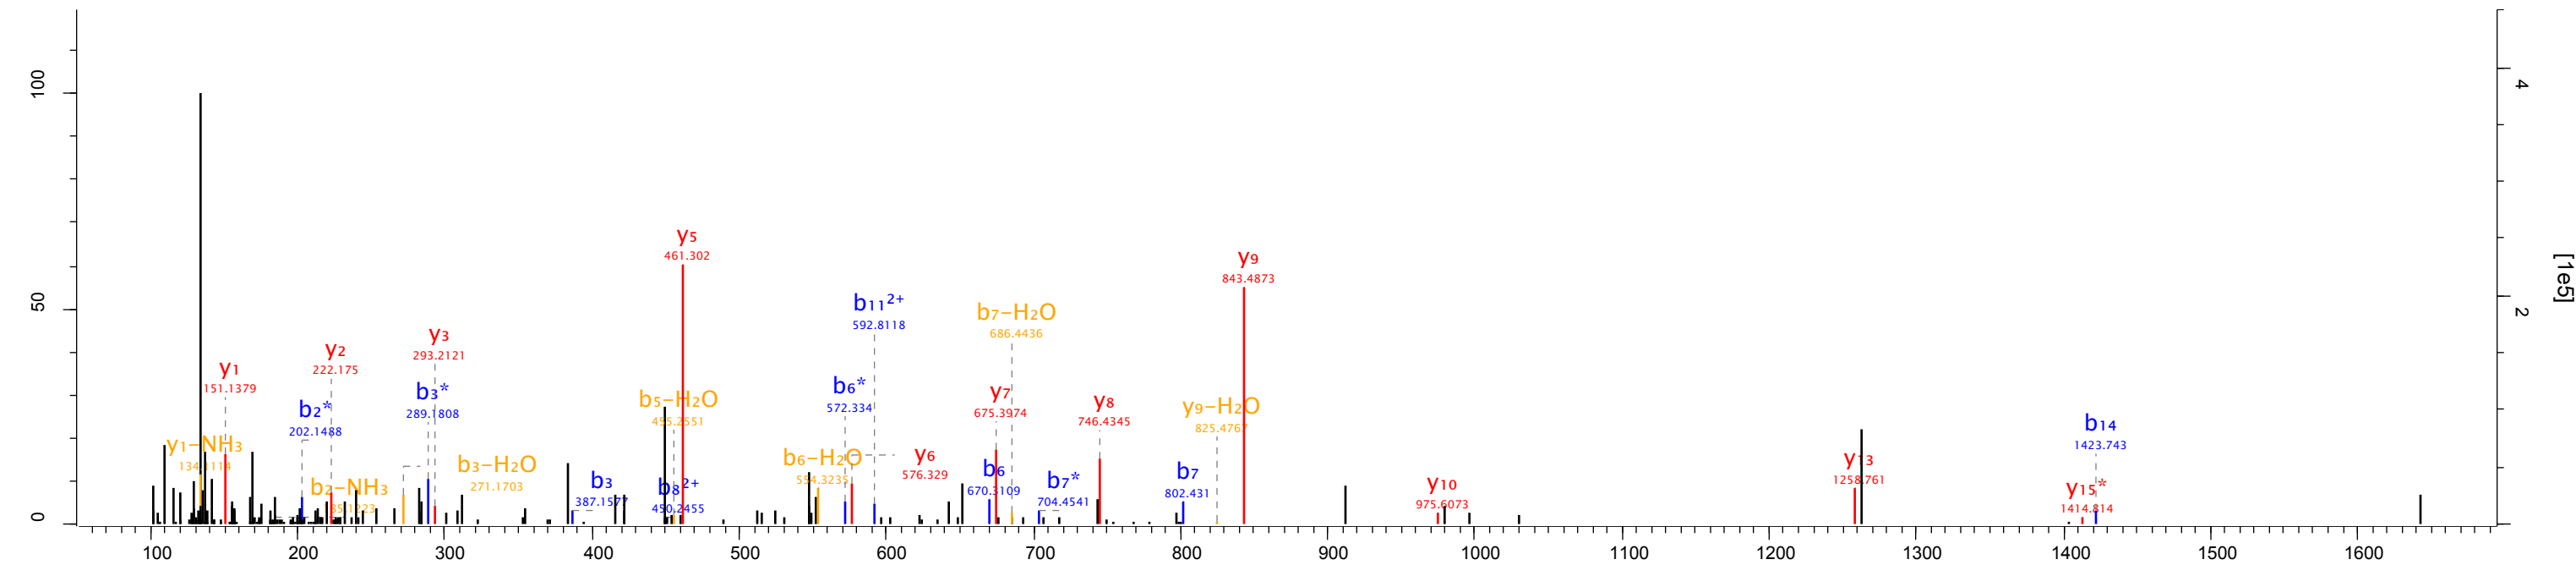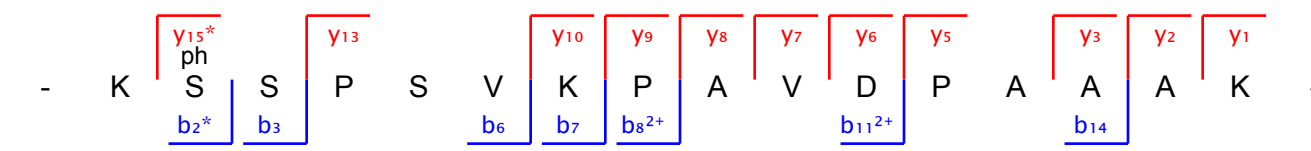

Raw file 20150822\_A375SR\_Phospho\_BR3\_09 Scan 7060 Method FTMS; HCD Score 52.53 m/z 548.61

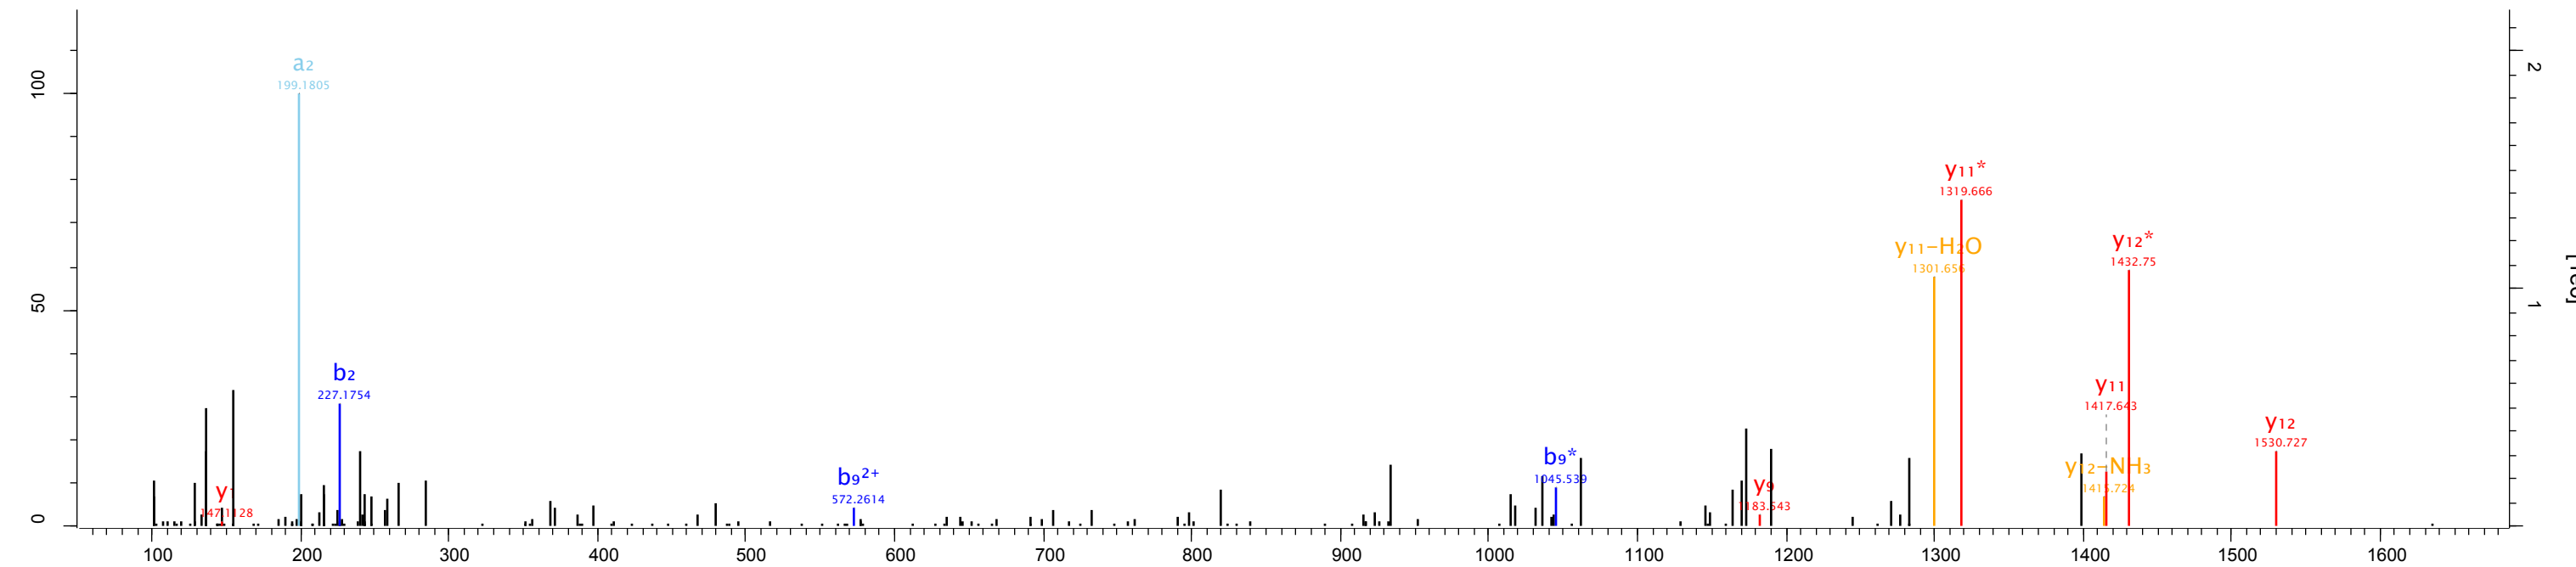

- I L S F E L C S L E K P K -

Fragmentation labels:  $b_2$  (under L),  $b_9^*$  (under L),  $y_{12}$  (over L),  $y_{11}$  (over S),  $y_9$  (over E),  $y_1$  (over K).

Raw file 20150822\_A375SR\_Phospho\_BR3\_09 Scan 7332 Method FTMS; HCD Score 47.08 m/z 910.94 Gene names CHAF1A

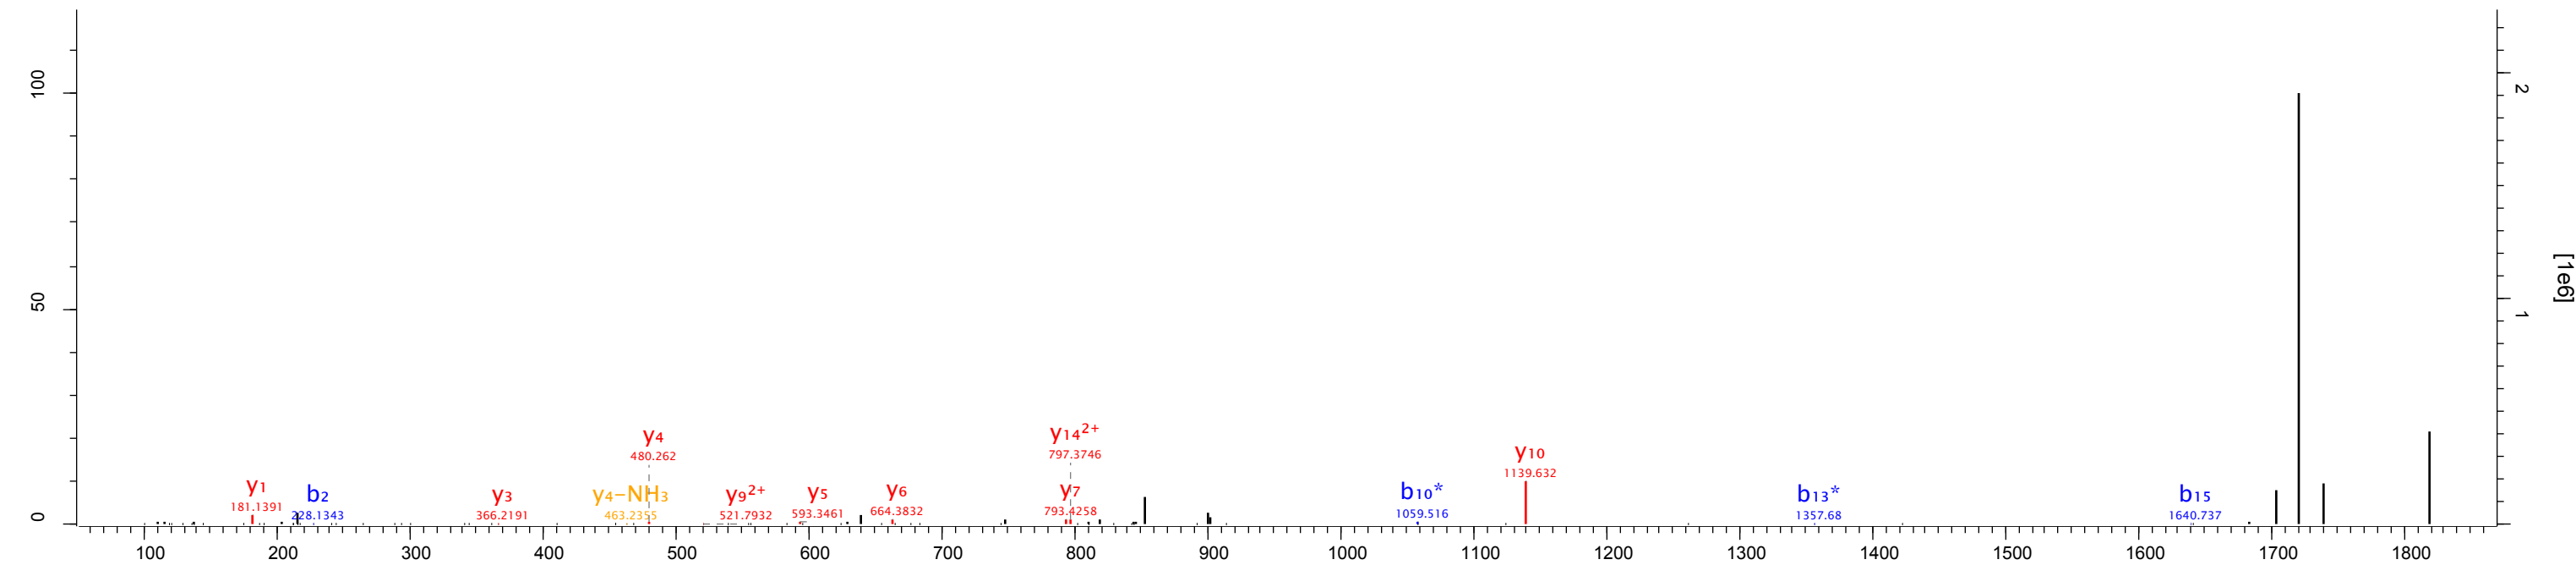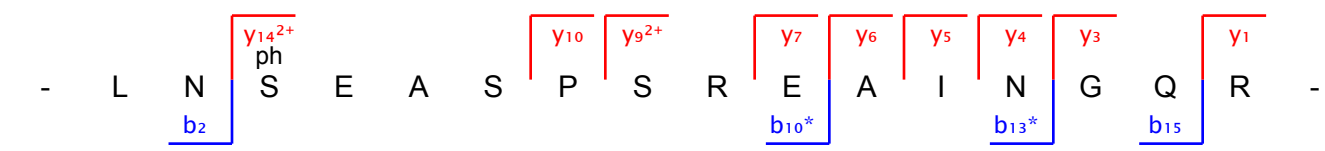

Raw file: 20150822\_A375SR\_Phospho\_BR3\_09  
 Scan: 8510 Method: FTMS; HCD Score: 132.24 m/z: 651.82 Gene names: DAP

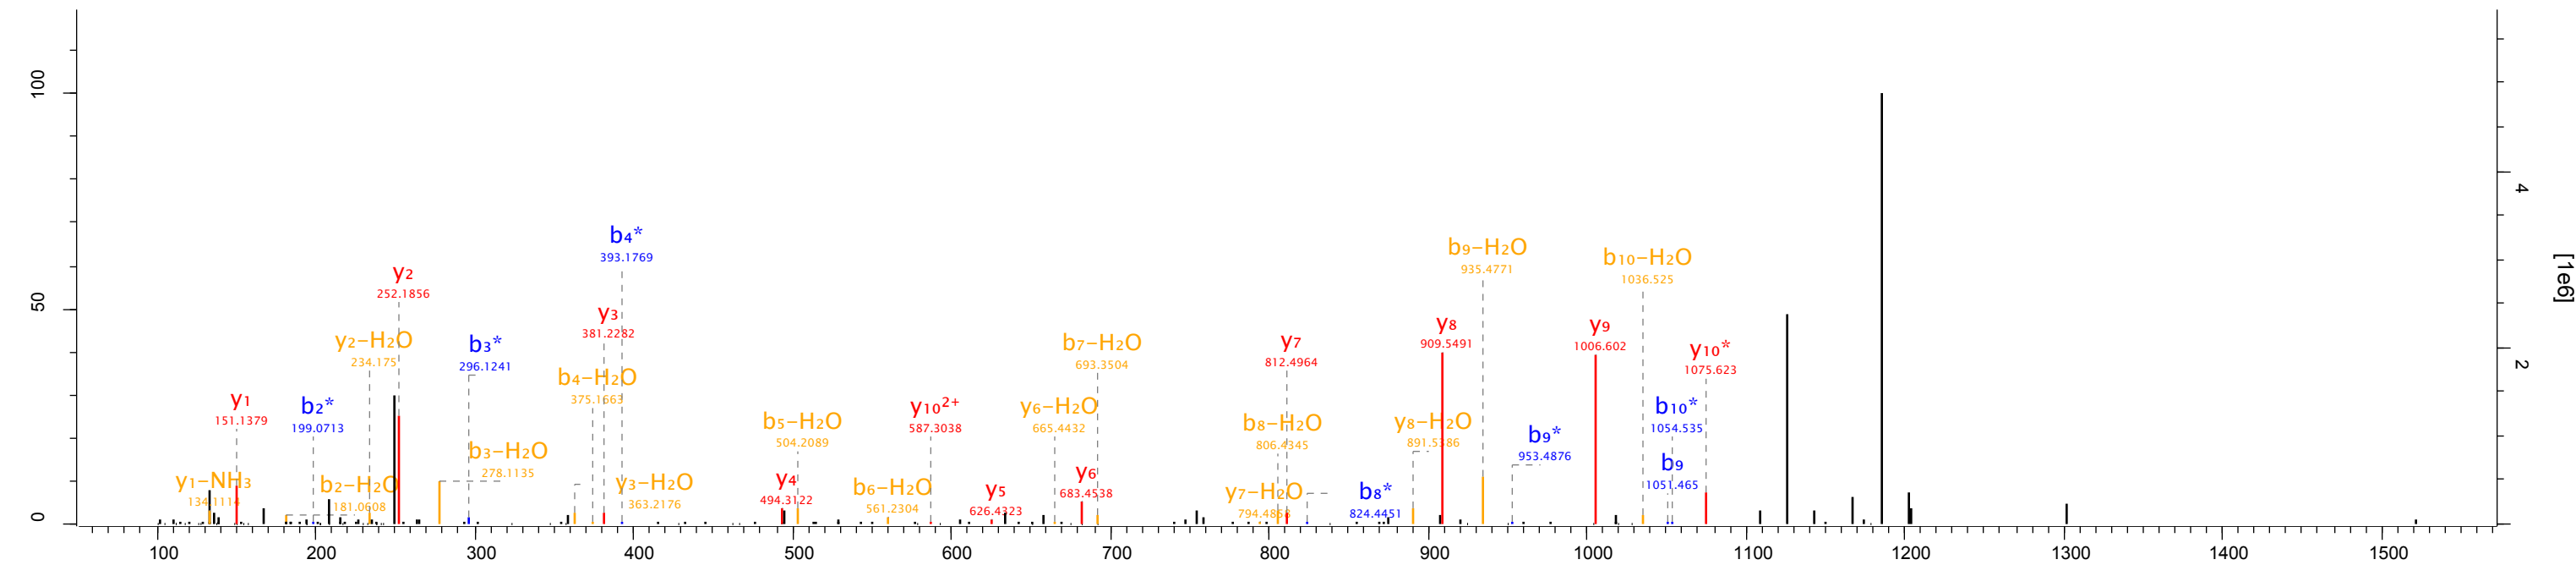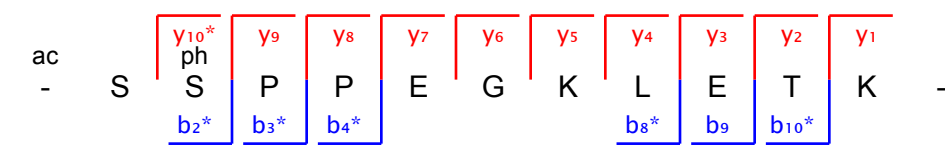
