# Supplementary material
Source: PubMed Central journal article supplement (PMC6553926)
Supplement: 142829_1_supp_284403_pmrjtt.pdf [file 142829_1_supp_284403_pmrjtt.pdf]

Raw file 20171215\_MaS\_33SR\_LMH\_phospho\_01 Scan 11290 Method FTMS; HCD Score 49.38 m/z 1032.11 Gene names SRRM2

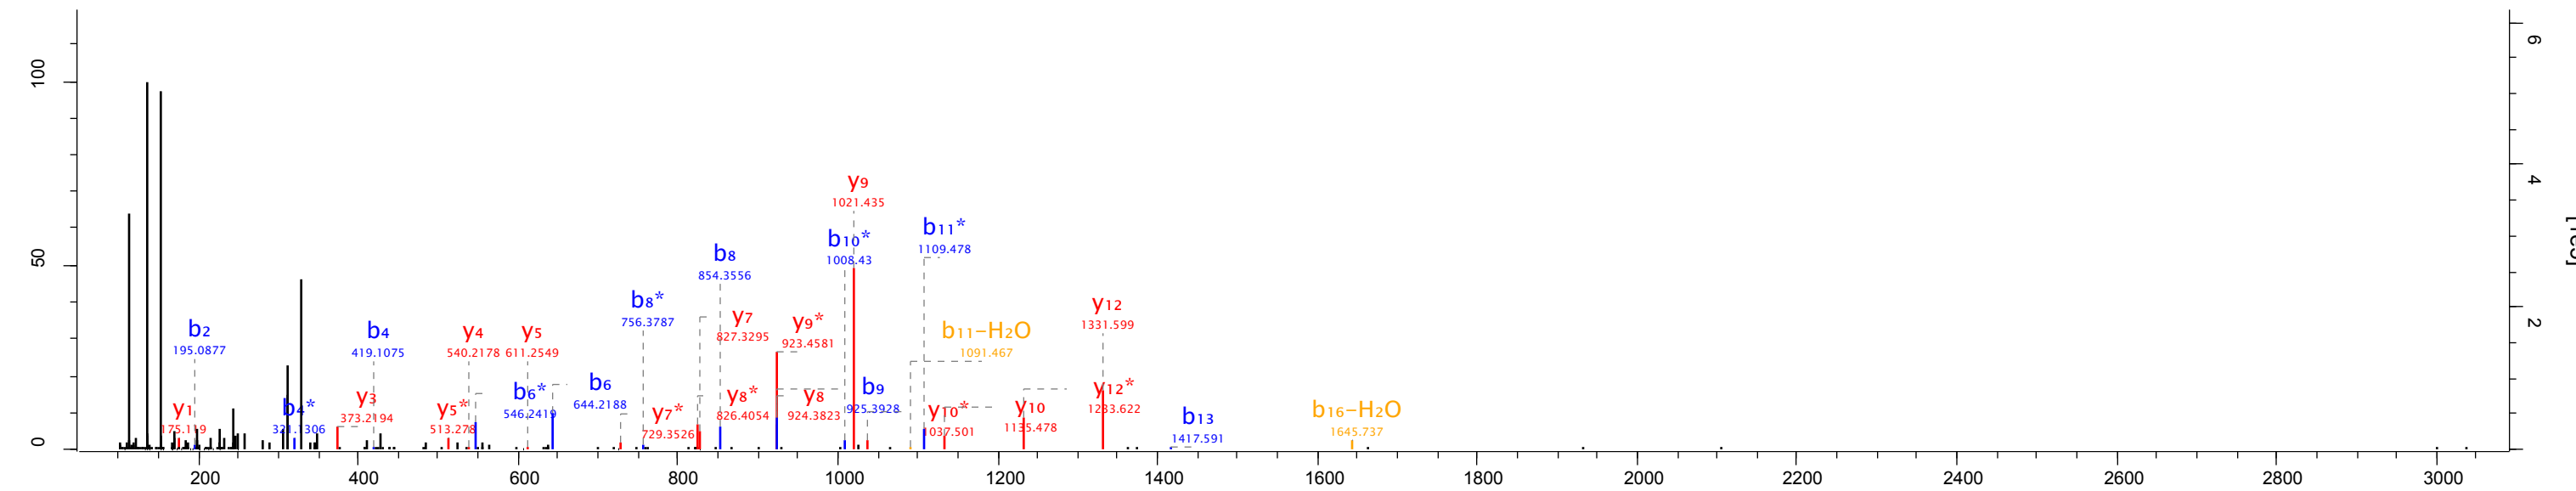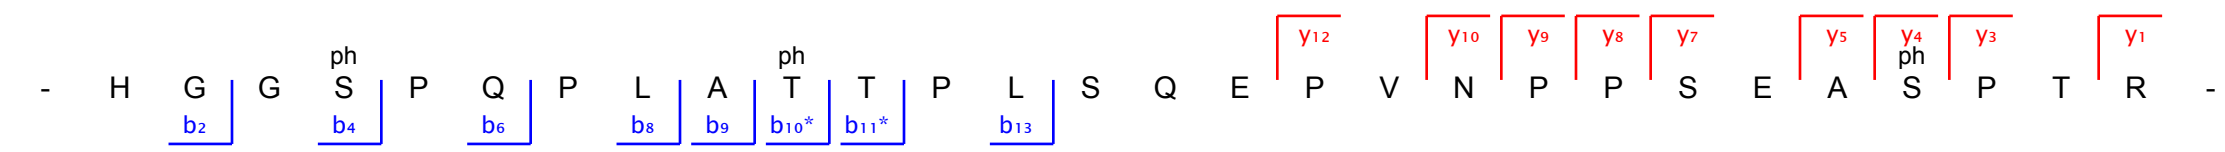

Raw file 20171215\_MaS\_33SR\_LMH\_phospho\_01 Scan 11310 Method FTMS; HCD Score 116.04 m/z 844.34 Gene names DSP

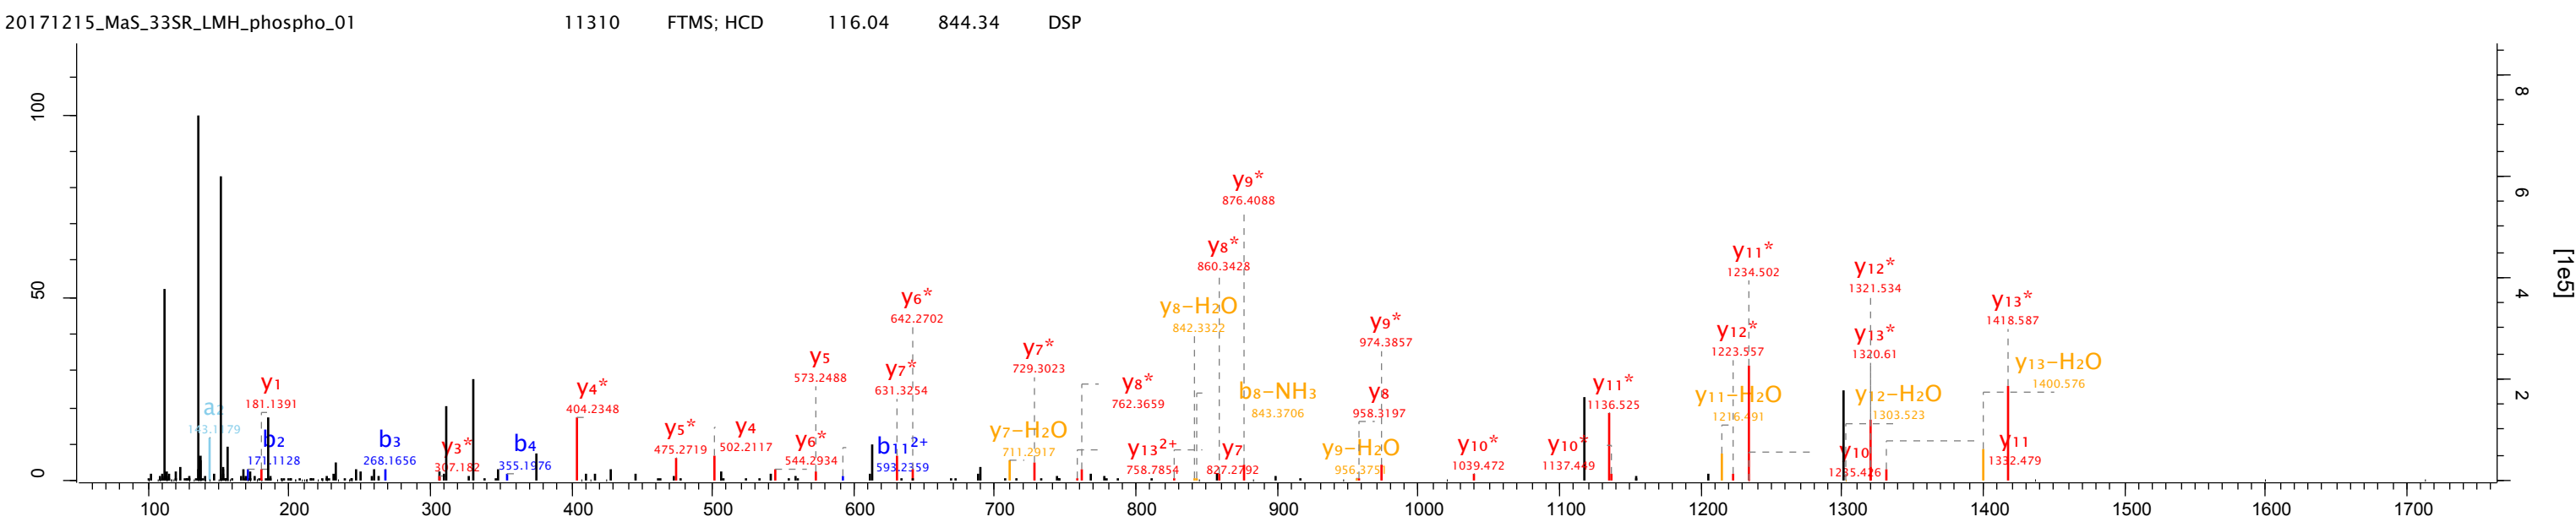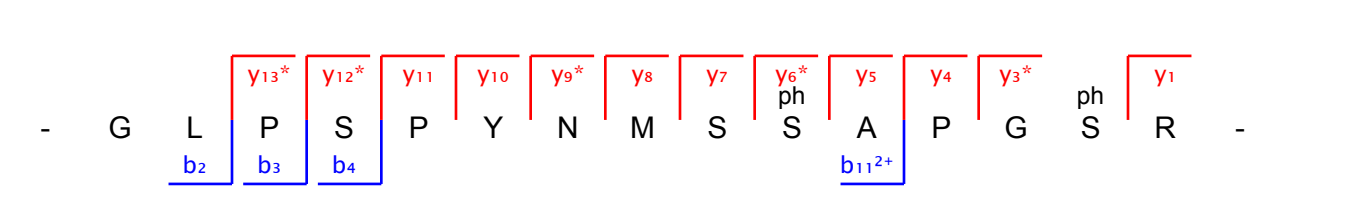



Raw file 20171215\_MaS\_33SR\_LMH\_phospho\_01 Scan 12680 Method FTMS; HCD Score 60.33 m/z 659.95 Gene names SMC4

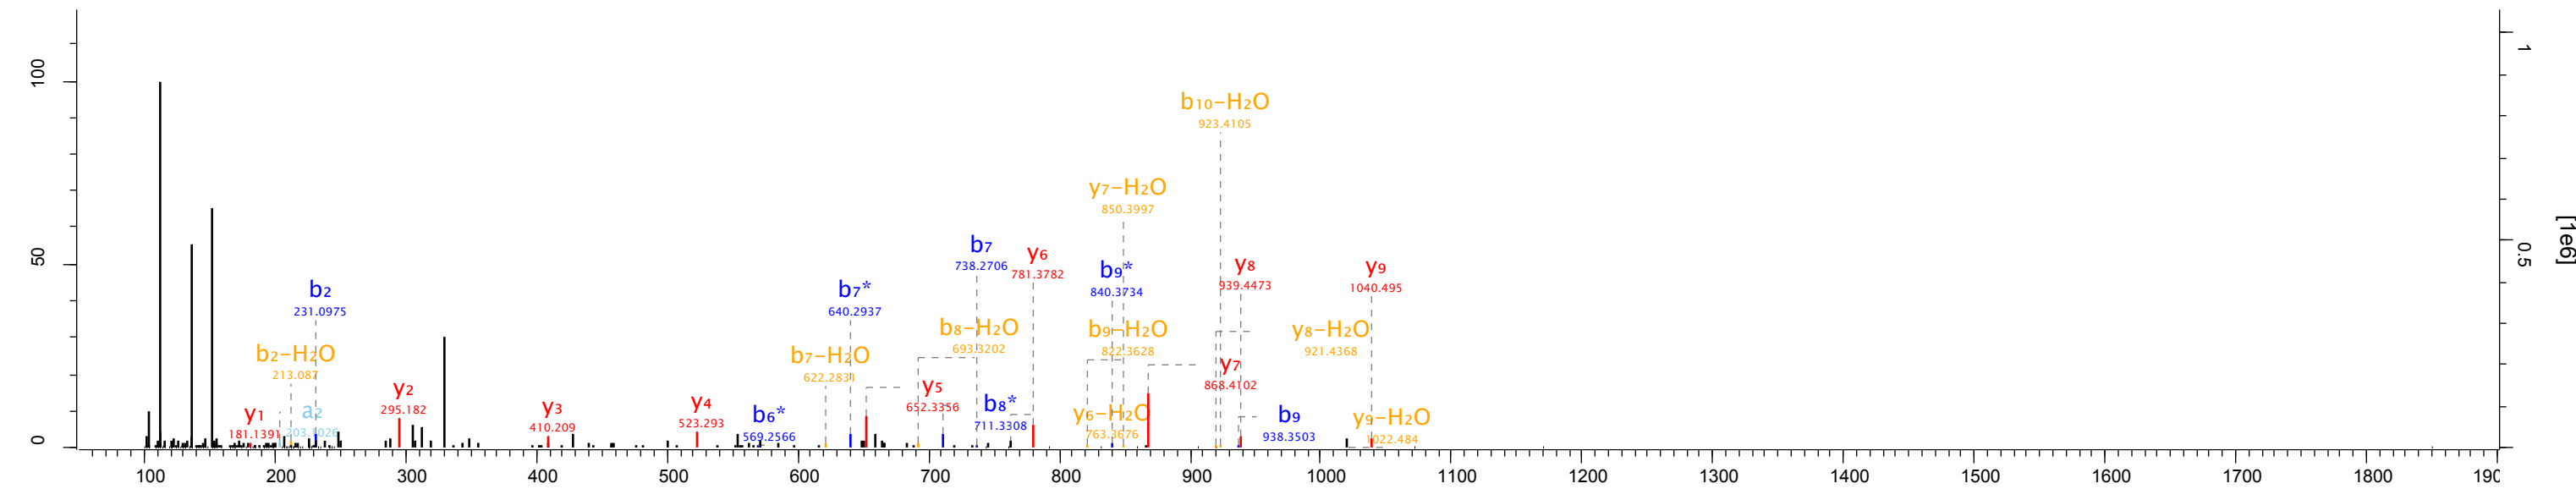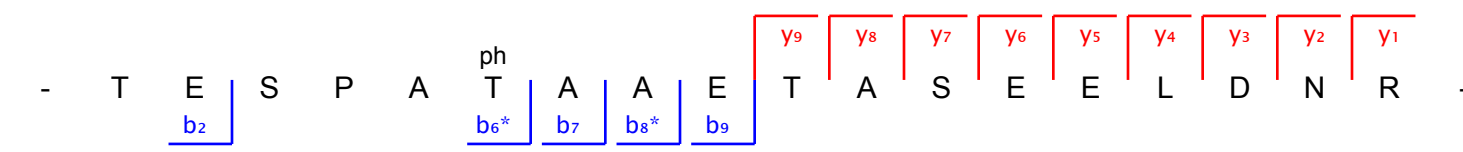

Raw file: 20171215\_MaS\_33SR\_LMH\_phospho\_01  
 Scan: 2820 Method: FTMS; HCD Score: 114.62 m/z: 674.59 Gene names: SRRM1

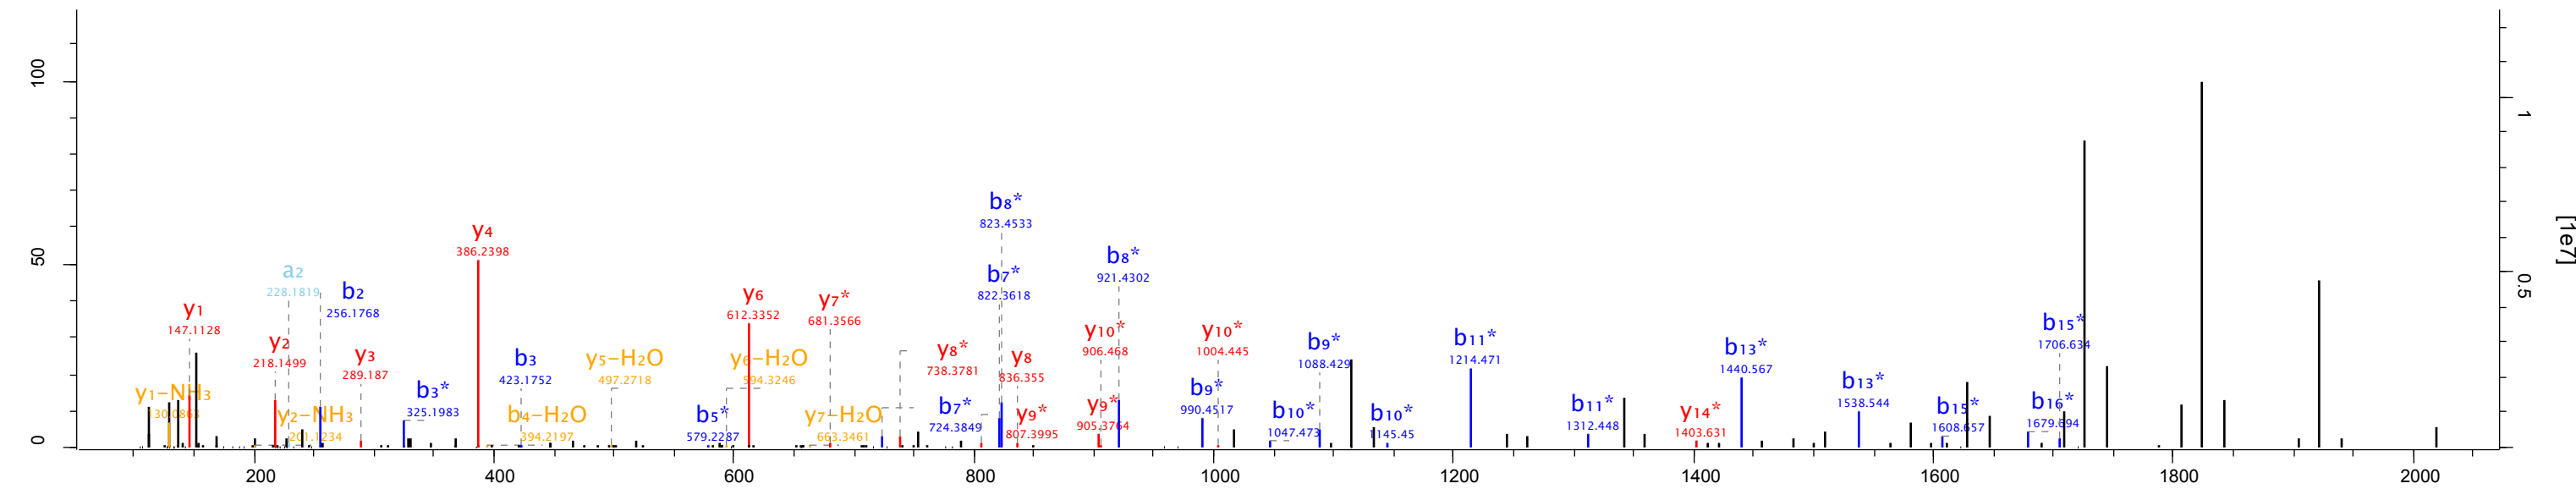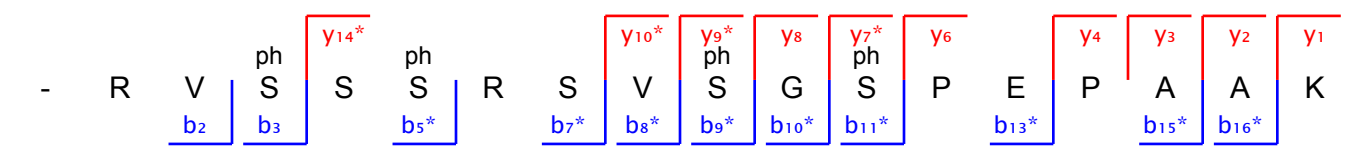

Raw file 20171215\_MaS\_33SR\_LMH\_phospho\_01 Scan 2900 Method FTMS; HCD Score 59.18 m/z 512.25 Gene names RBM39

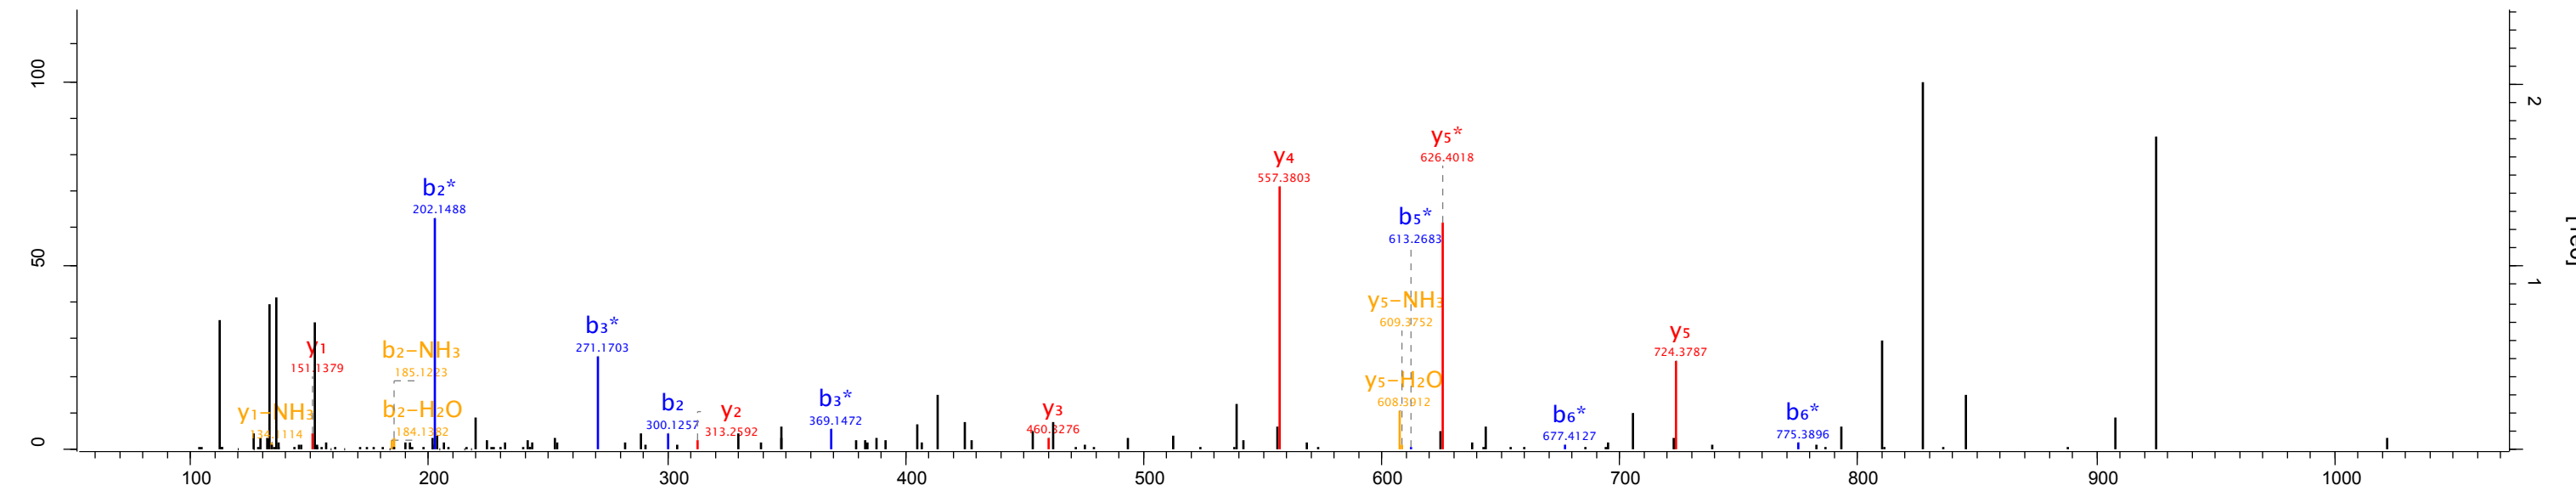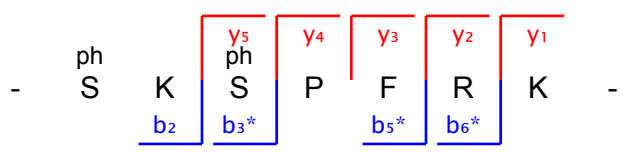

Raw file 20171215\_MaS\_33SR\_LMH\_phospho\_01 Scan 3070 Method FTMS; HCD Score 74.43 m/z 700.78 Gene names SRRM2

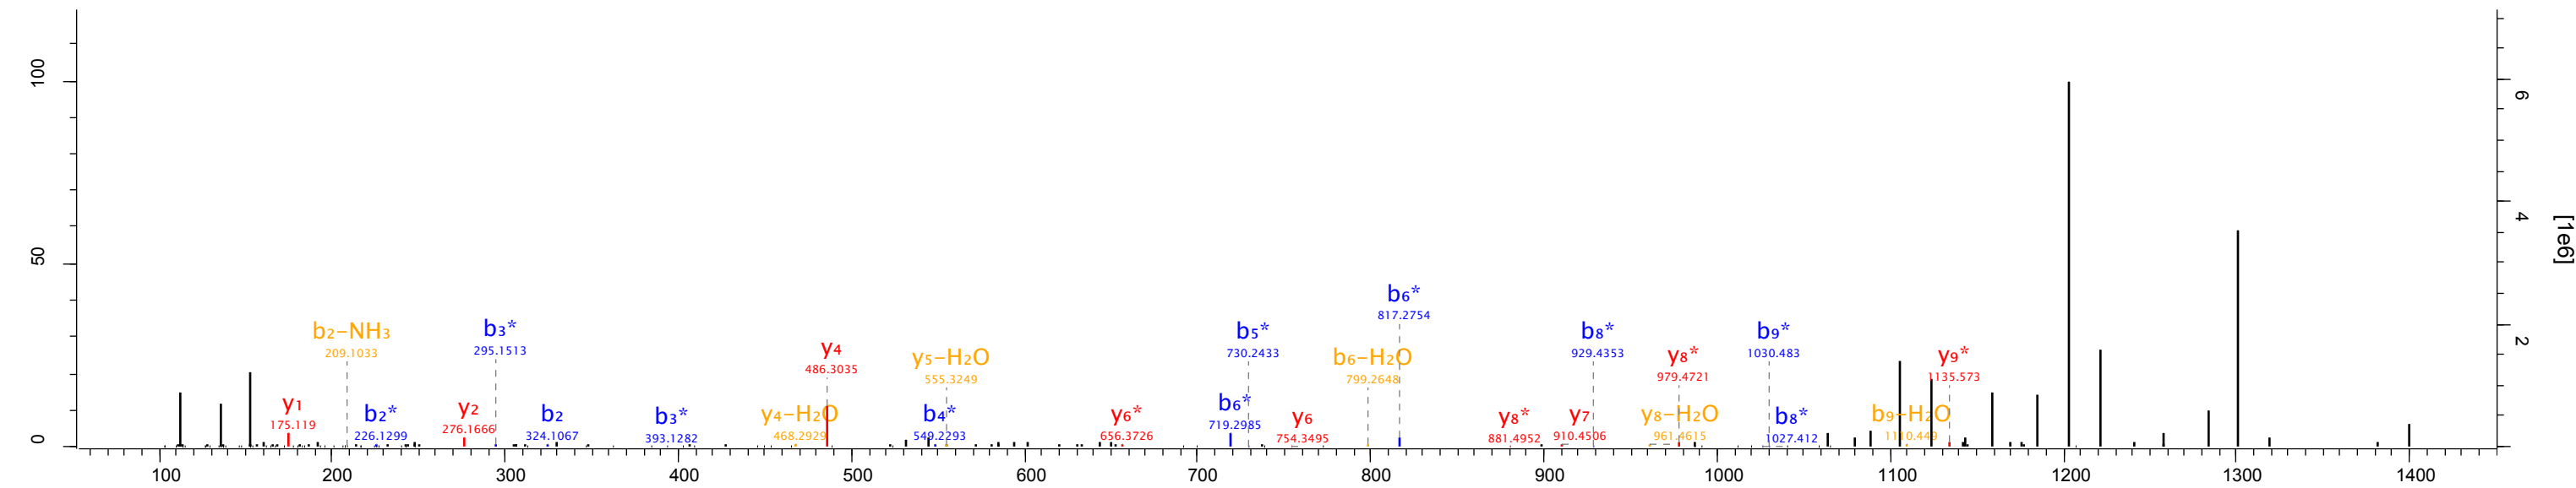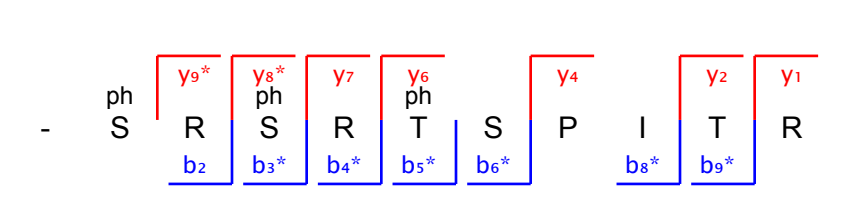

Raw file Scan Method Score m/z Gene names

20171215\_MaS\_33SR\_LMH\_phospho\_01 3250 FTMS; HCD 89.66 832.83 SRSF5

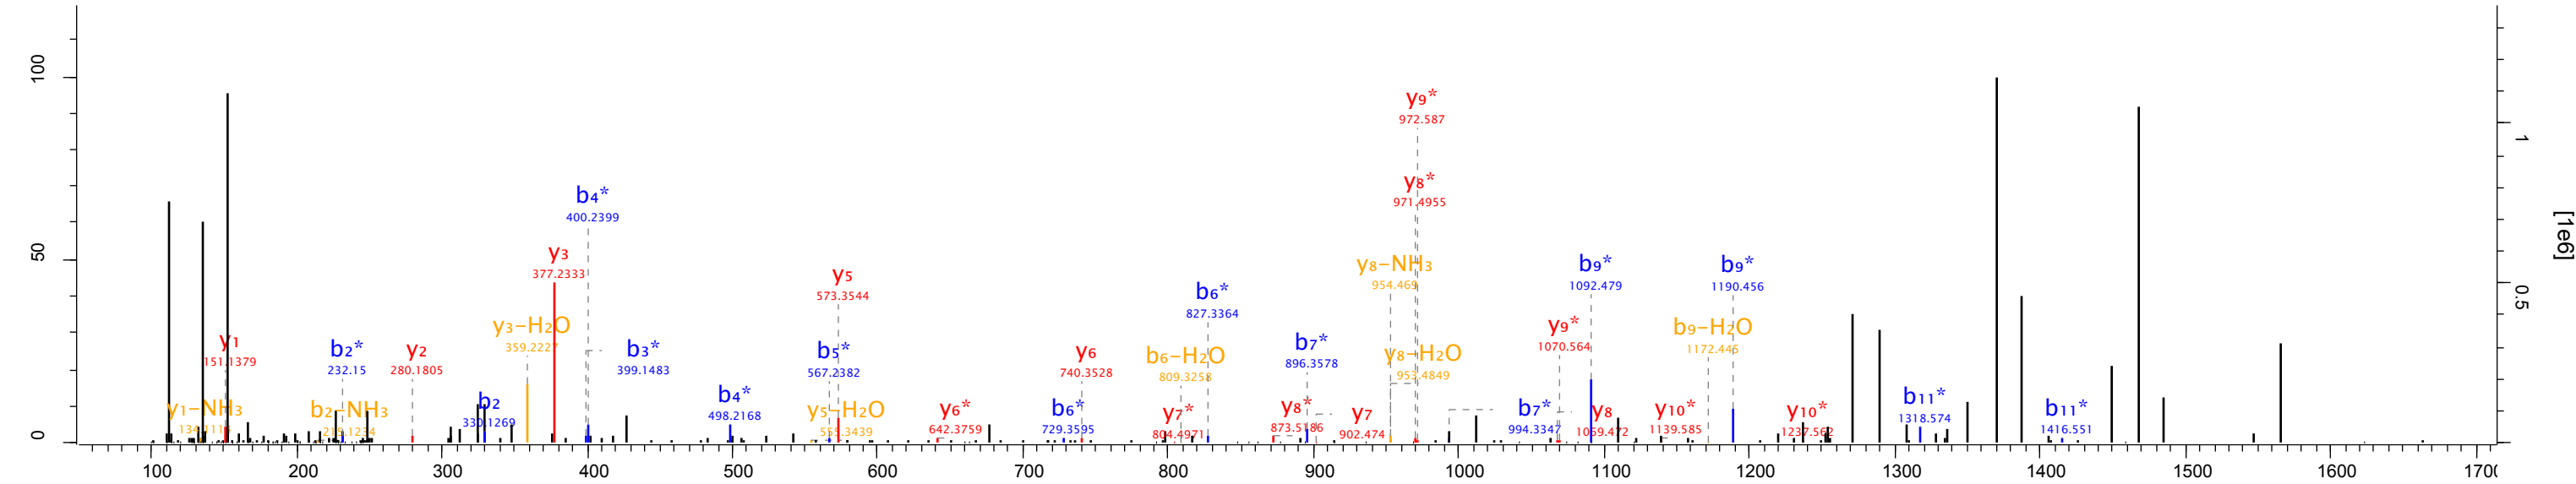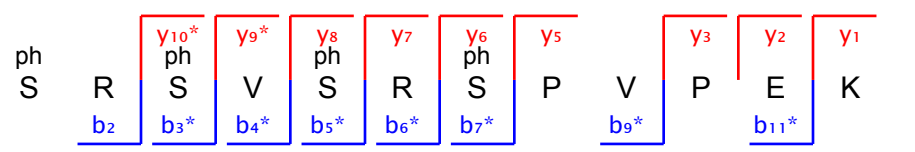

Raw file  
 20171215\_MaS\_33SR\_LMH\_phospho\_01  
 Scan 3360 Method FTMS; HCD Score 190.59 m/z 836.3 Gene names SAFB

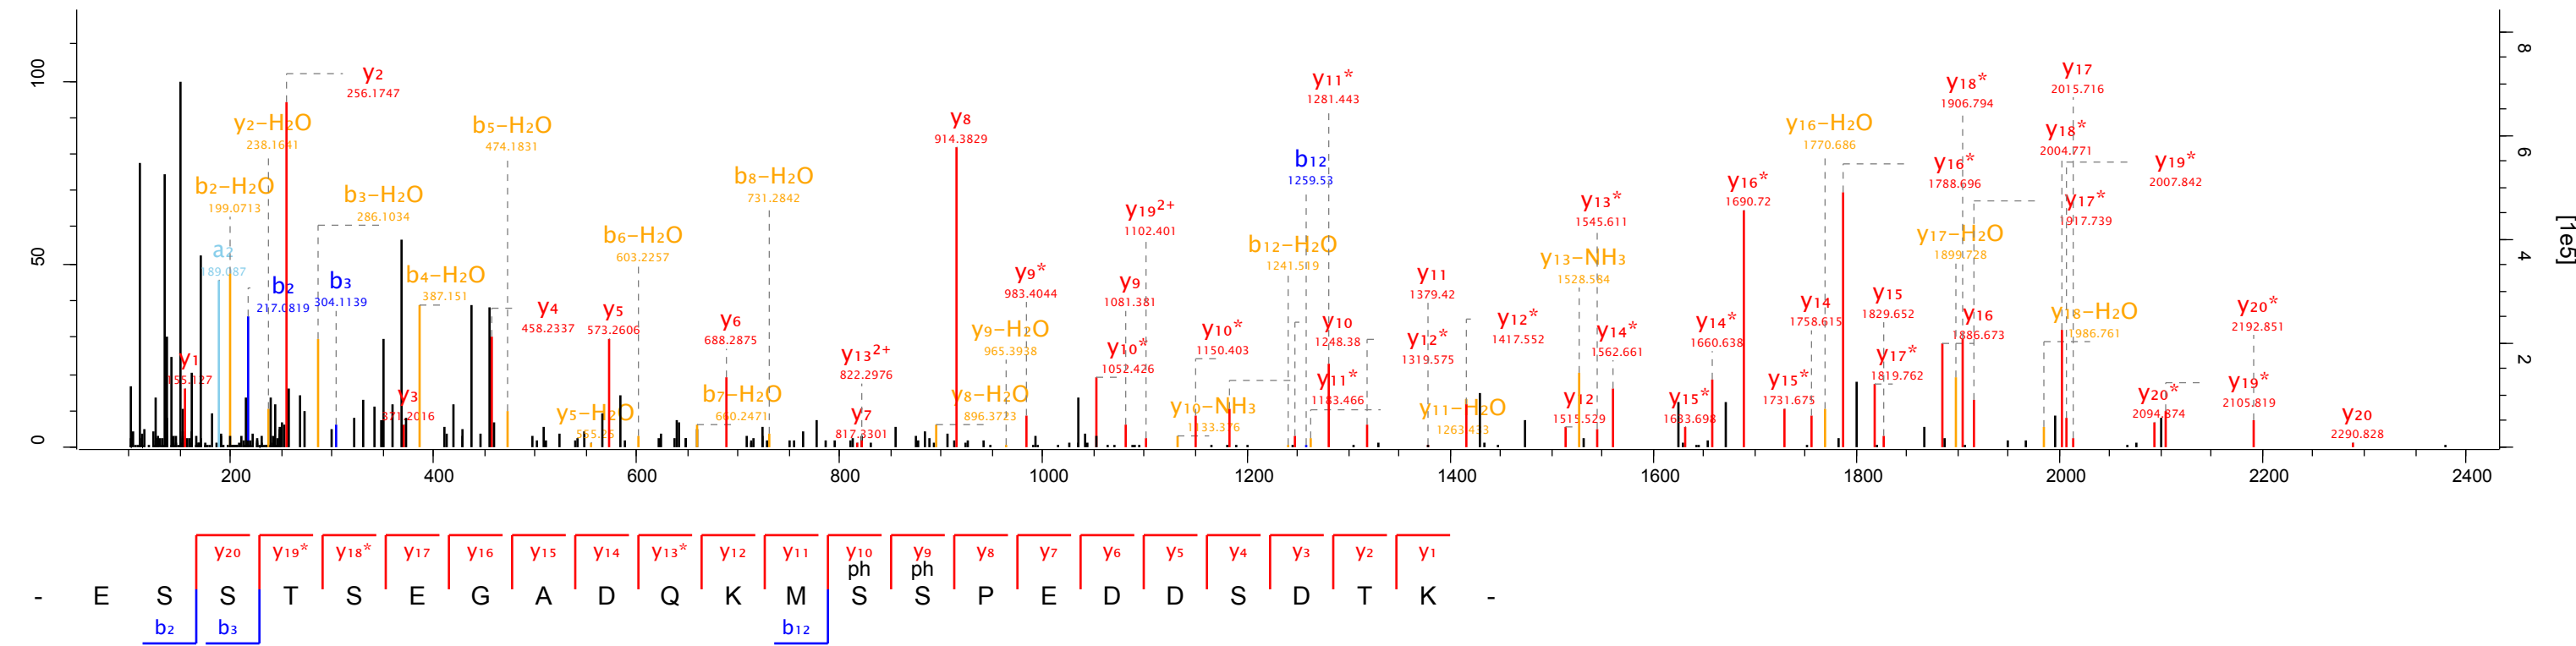

Raw file 20171215\_MaS\_33SR\_LMH\_phospho\_01 Scan 3720 Method FTMS; HCD Score 167.19 m/z 725.32 Gene names EPB41

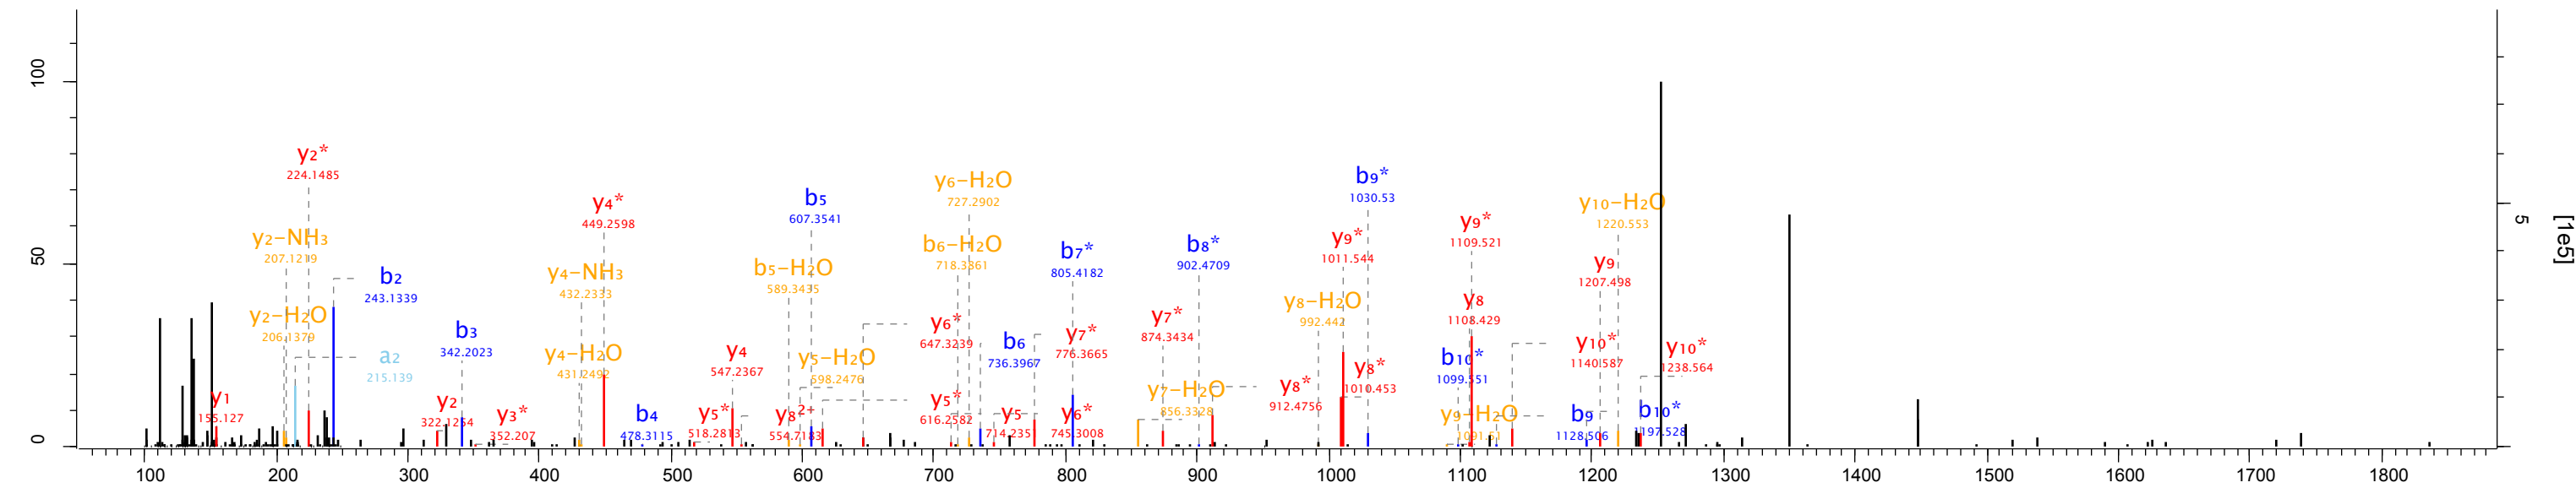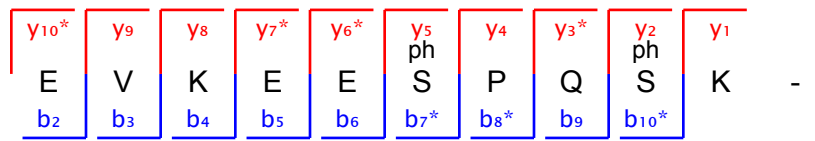

Raw file 20171215\_MaS\_33SR\_LMH\_phospho\_01 Scan 3900 Method FTMS; HCD Score 132.5 m/z 654.28 Gene names ADD2

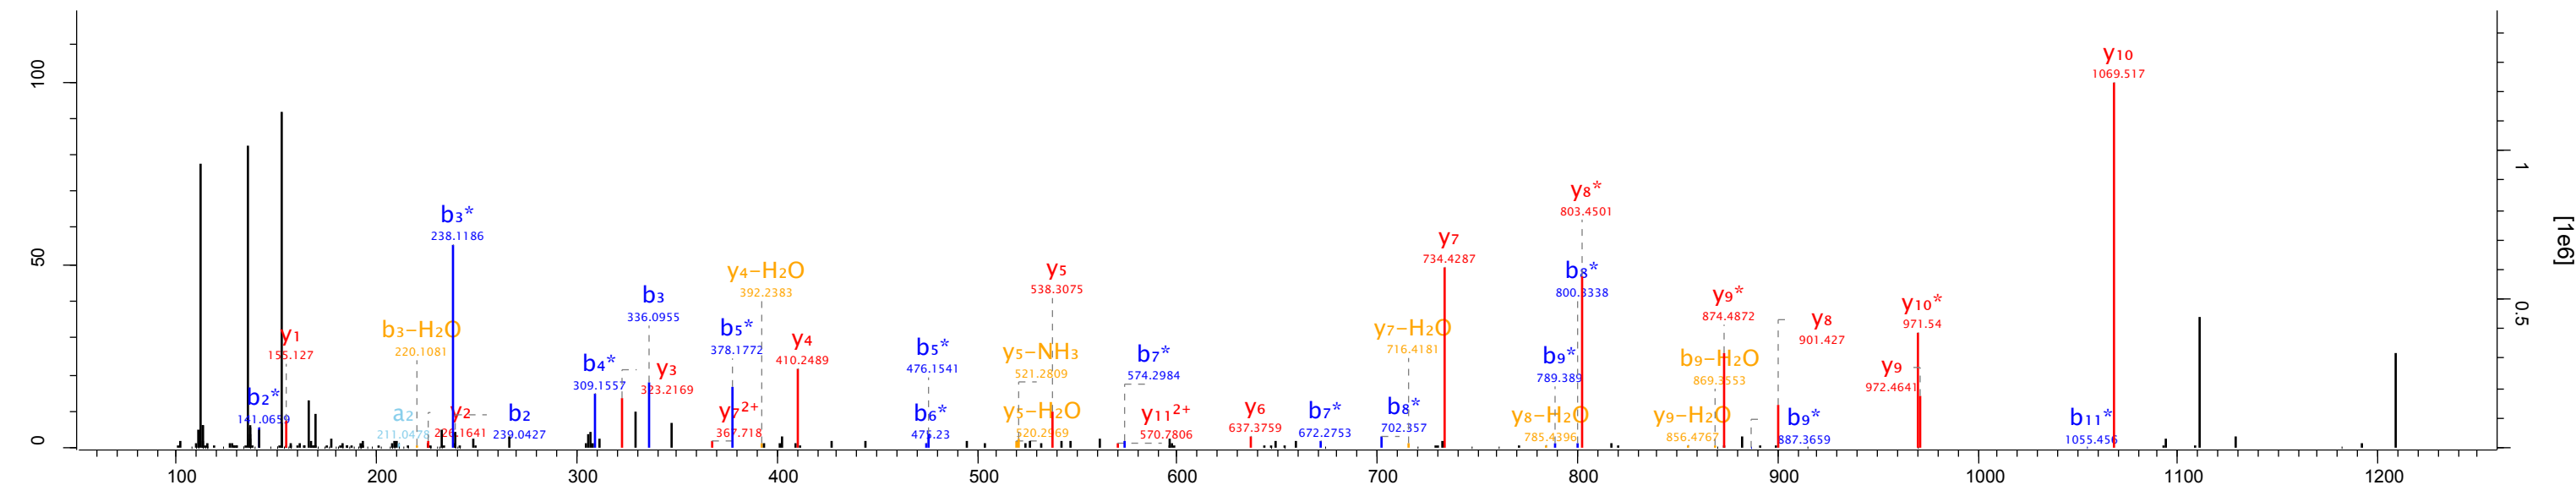

ph S -

|                               |                 |                  |                              |                  |                  |                  |                  |                |                   |                |
|-------------------------------|-----------------|------------------|------------------------------|------------------|------------------|------------------|------------------|----------------|-------------------|----------------|
| y <sub>11</sub> <sup>2+</sup> | y <sub>10</sub> | y <sub>9</sub>   | y <sub>8</sub> <sup>ph</sup> | y <sub>7</sub>   | y <sub>6</sub>   | y <sub>5</sub>   | y <sub>4</sub>   | y <sub>3</sub> | y <sub>2</sub>    | y <sub>1</sub> |
| A                             | P               | A                | S                            | P                | V                | Q                | S                | P              | A                 | K              |
| b <sub>2</sub>                | b <sub>3</sub>  | b <sub>4</sub> * | b <sub>5</sub> *             | b <sub>6</sub> * | b <sub>7</sub> * | b <sub>8</sub> * | b <sub>9</sub> * |                | b <sub>11</sub> * |                |

-



Raw file 20171215\_MaS\_33SR\_LMH\_phospho\_01 Scan 3990 Method FTMS; HCD Score 137.89 m/z 627.76 Gene names AGFG1

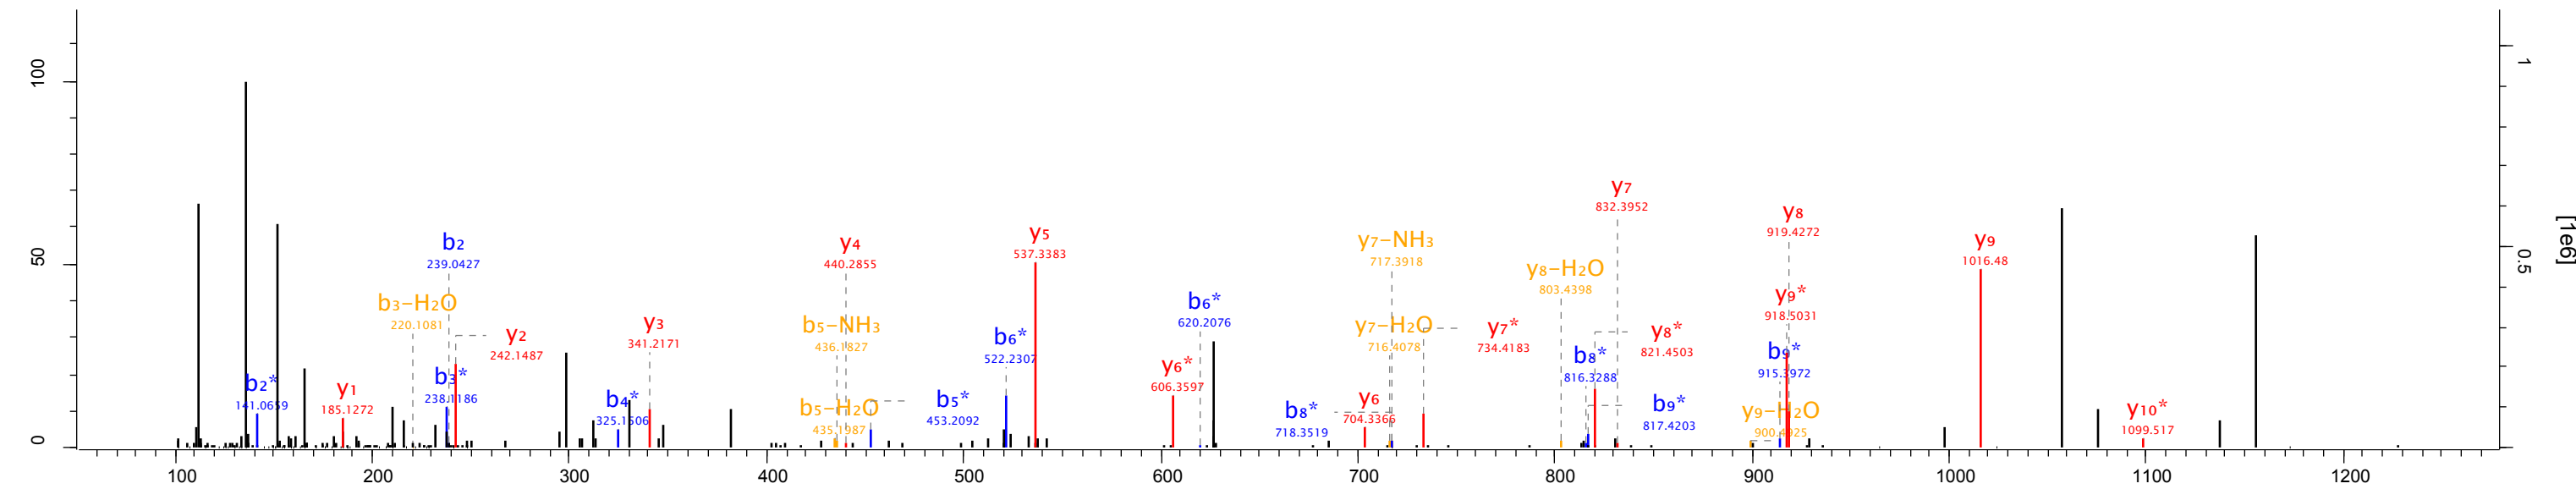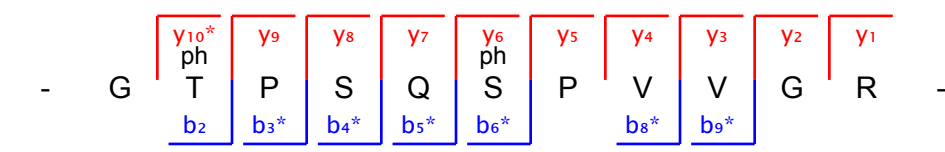

Raw file 20171215\_MaS\_33SR\_LMH\_phospho\_01 Scan 4000 Method FTMS; HCD Score 125.11 m/z 920.39 Gene names NUP214

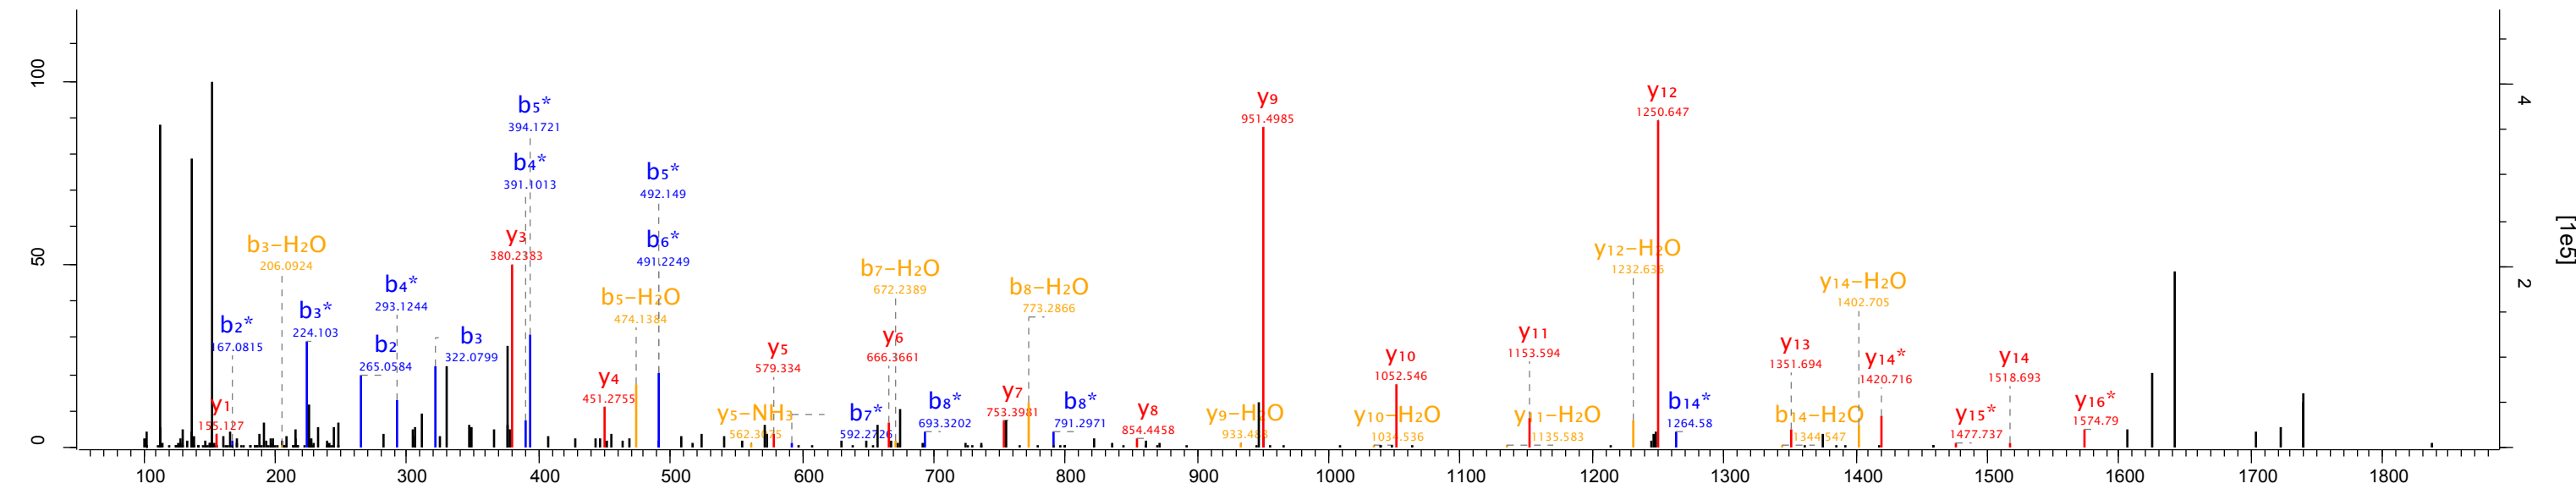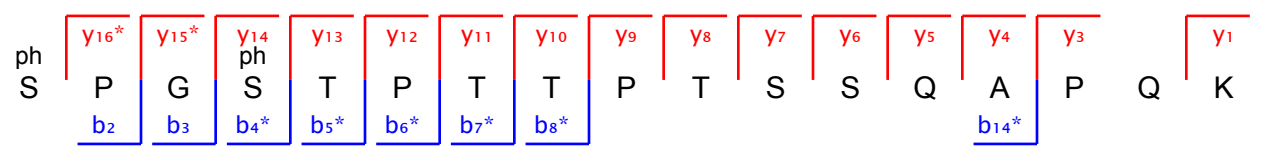

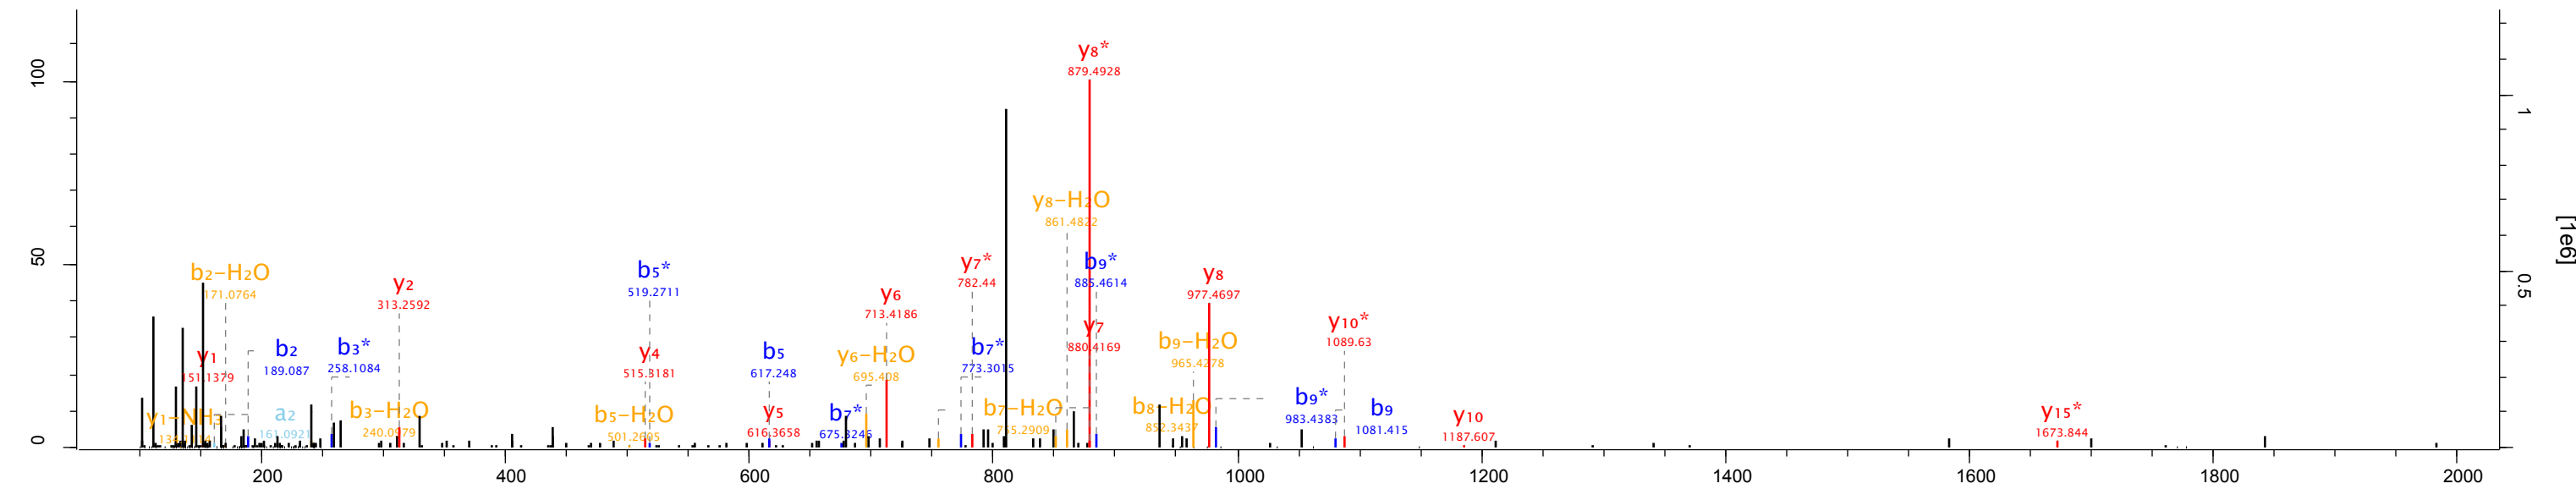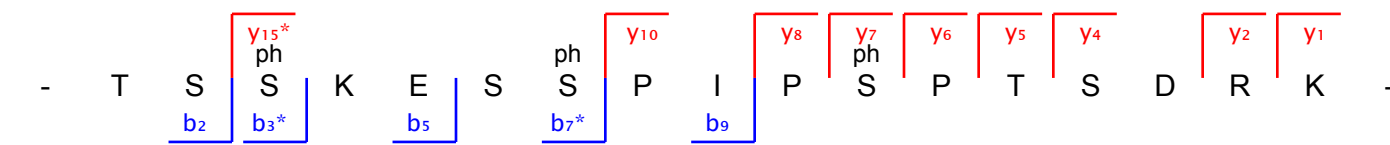

Raw file 20171215\_MaS\_33SR\_LMH\_phospho\_01 Scan 4920 Method FTMS; HCD Score 68.97 m/z 602.27 Gene names DFFA

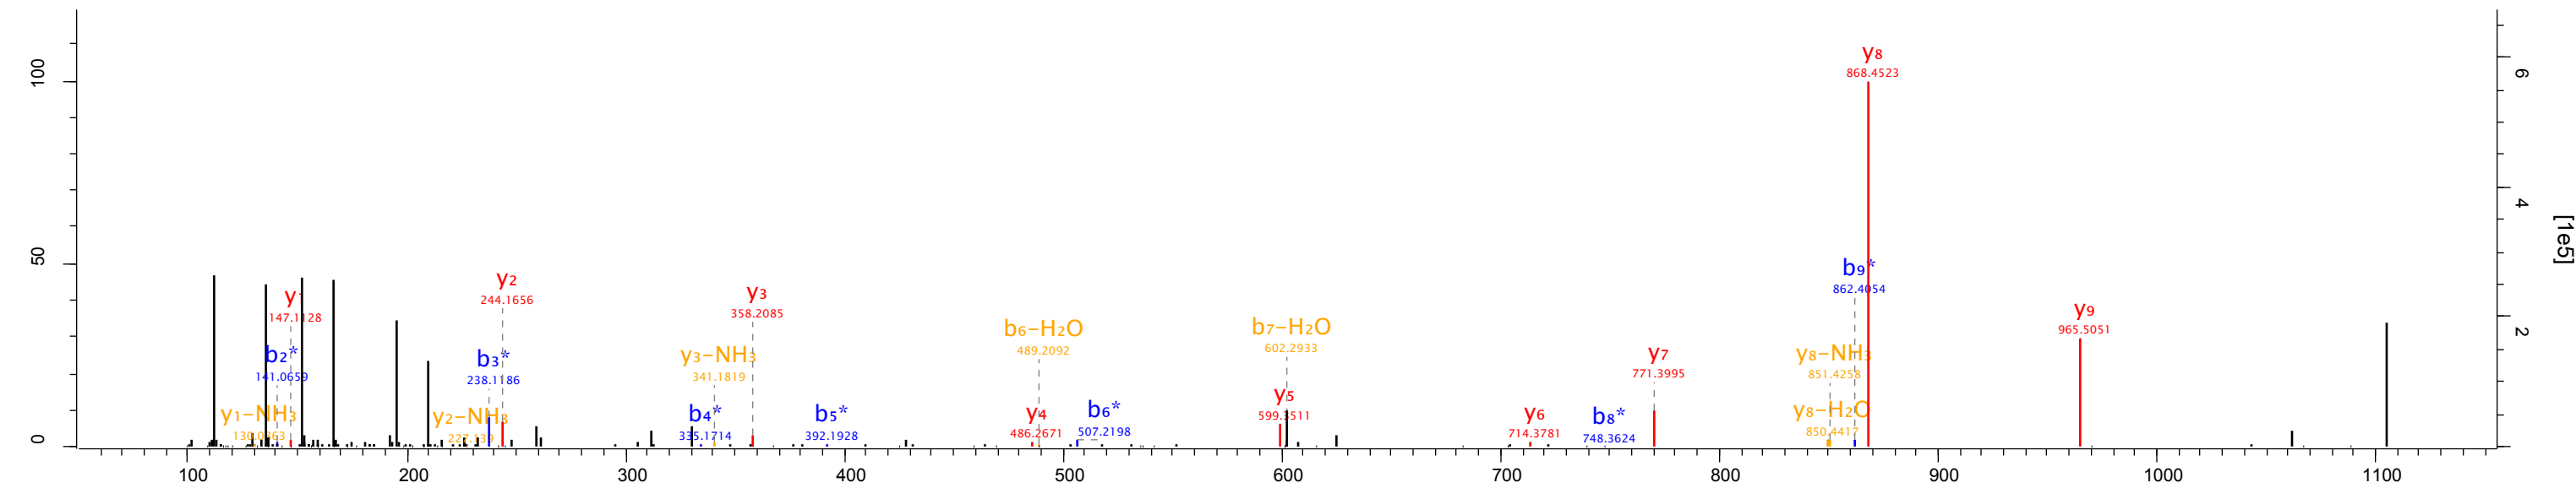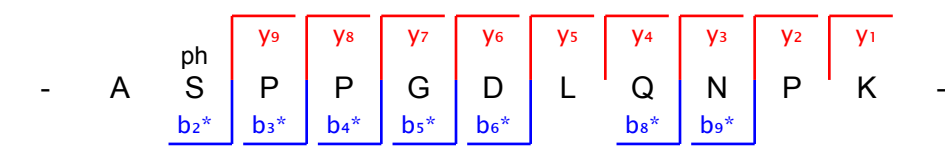

Raw file 20171215\_MaS\_33SR\_LMH\_phospho\_01 Scan 6350 Method FTMS; HCD Score 136.43 m/z 727.31 Gene names SORBS2

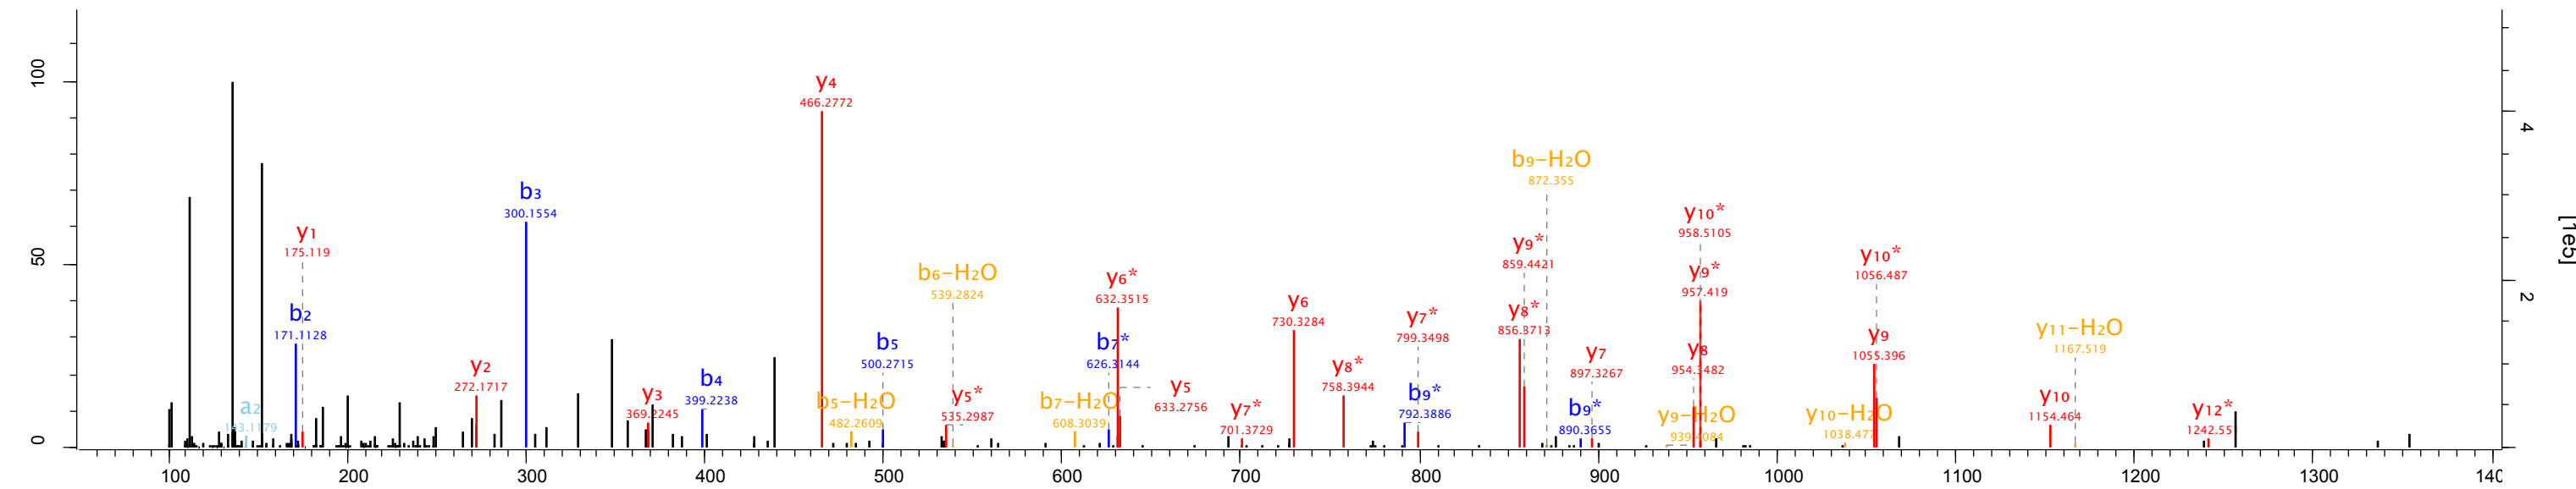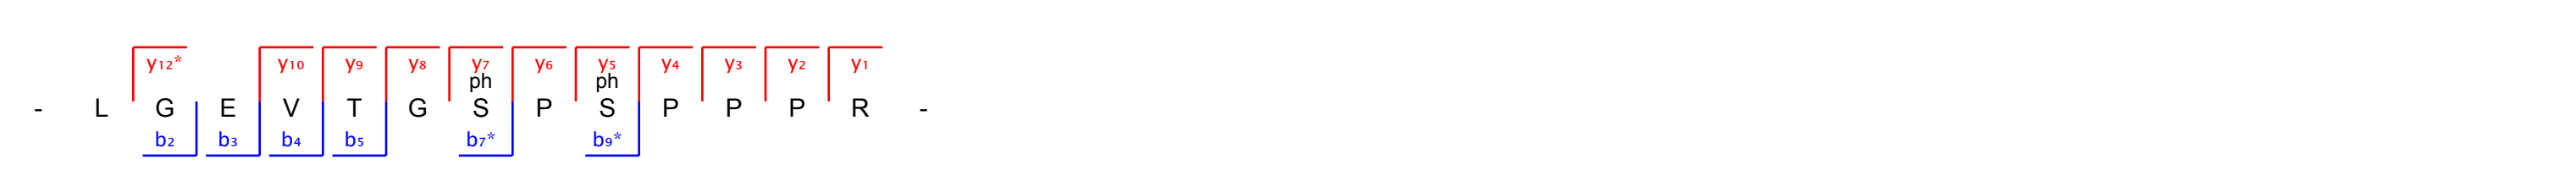



Raw file 20171215\_MaS\_33SR\_LMH\_phospho\_01 Scan 6940 Method FTMS; HCD Score 44.18 m/z 900.71 Gene names ZC3HC1

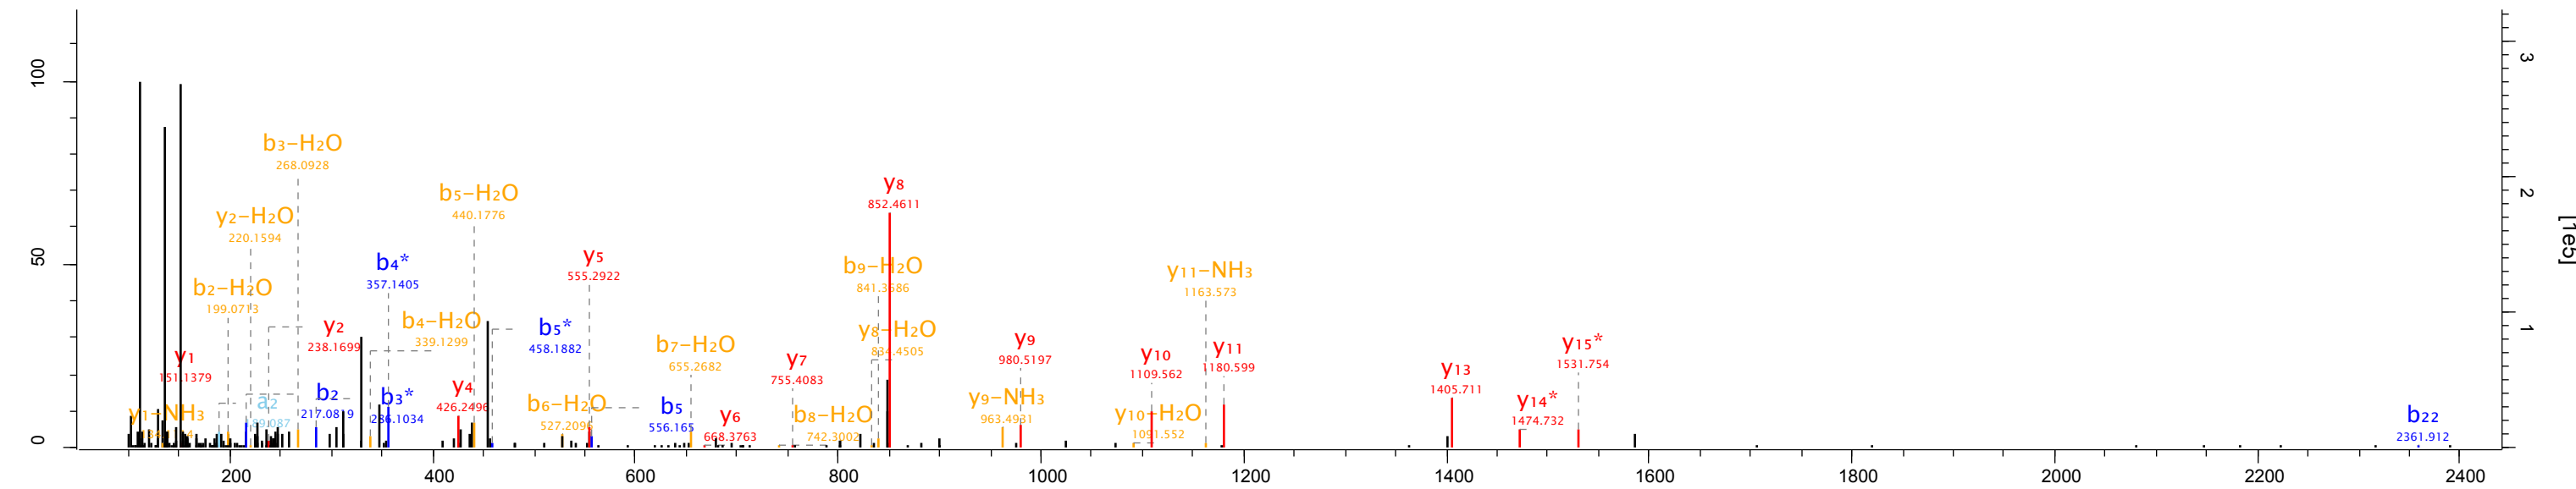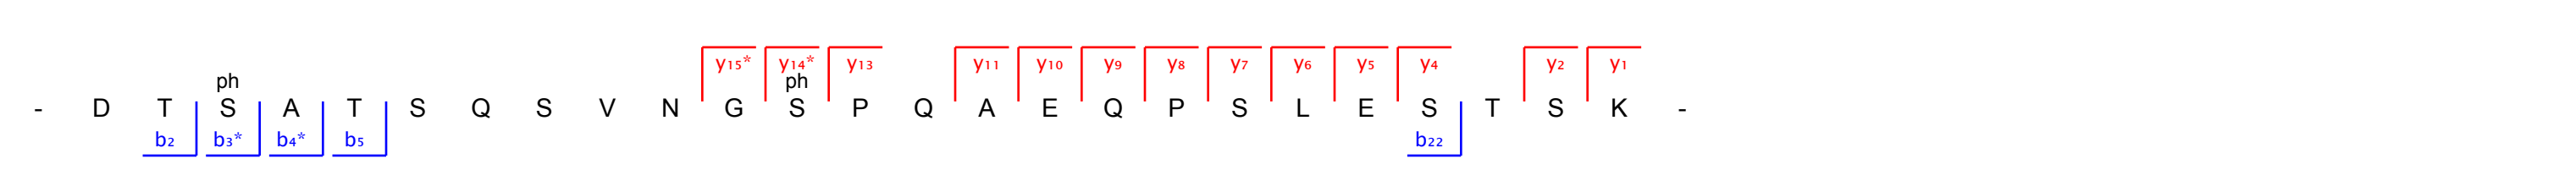

Raw file 20171215\_MaS\_33SR\_LMH\_phospho\_01 Scan 7020 Method FTMS; HCD Score 122.96 m/z 704.76 Gene names LARP7

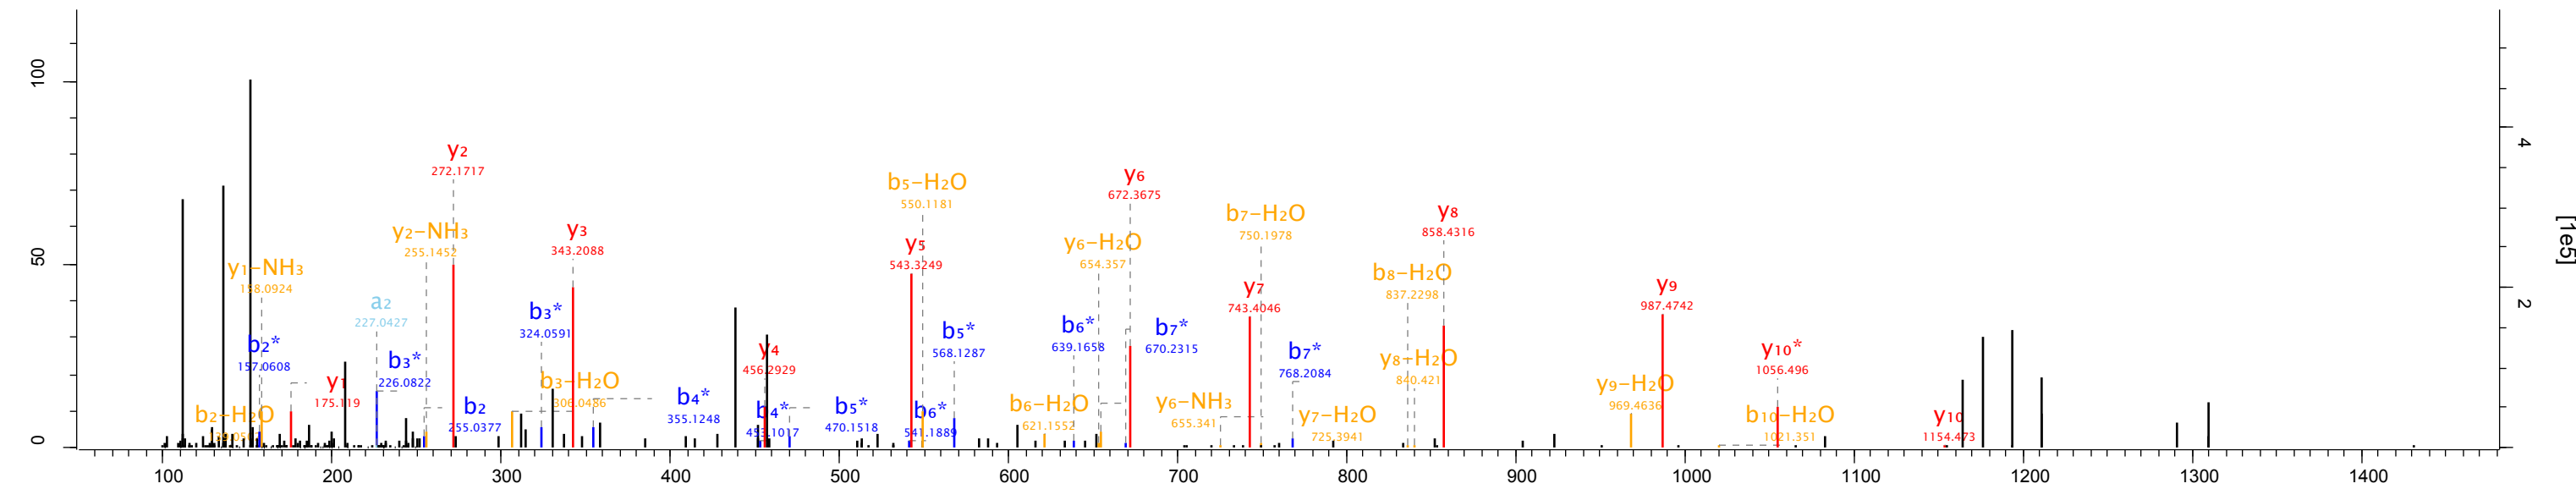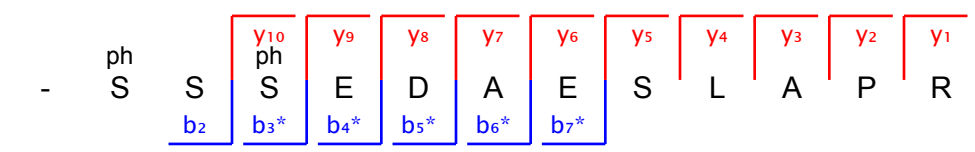



Raw file 20171215\_MaS\_33SR\_LMH\_phospho\_01 Scan 7480 Method FTMS; HCD Score 127.1 m/z 978.35 Gene names DHX16

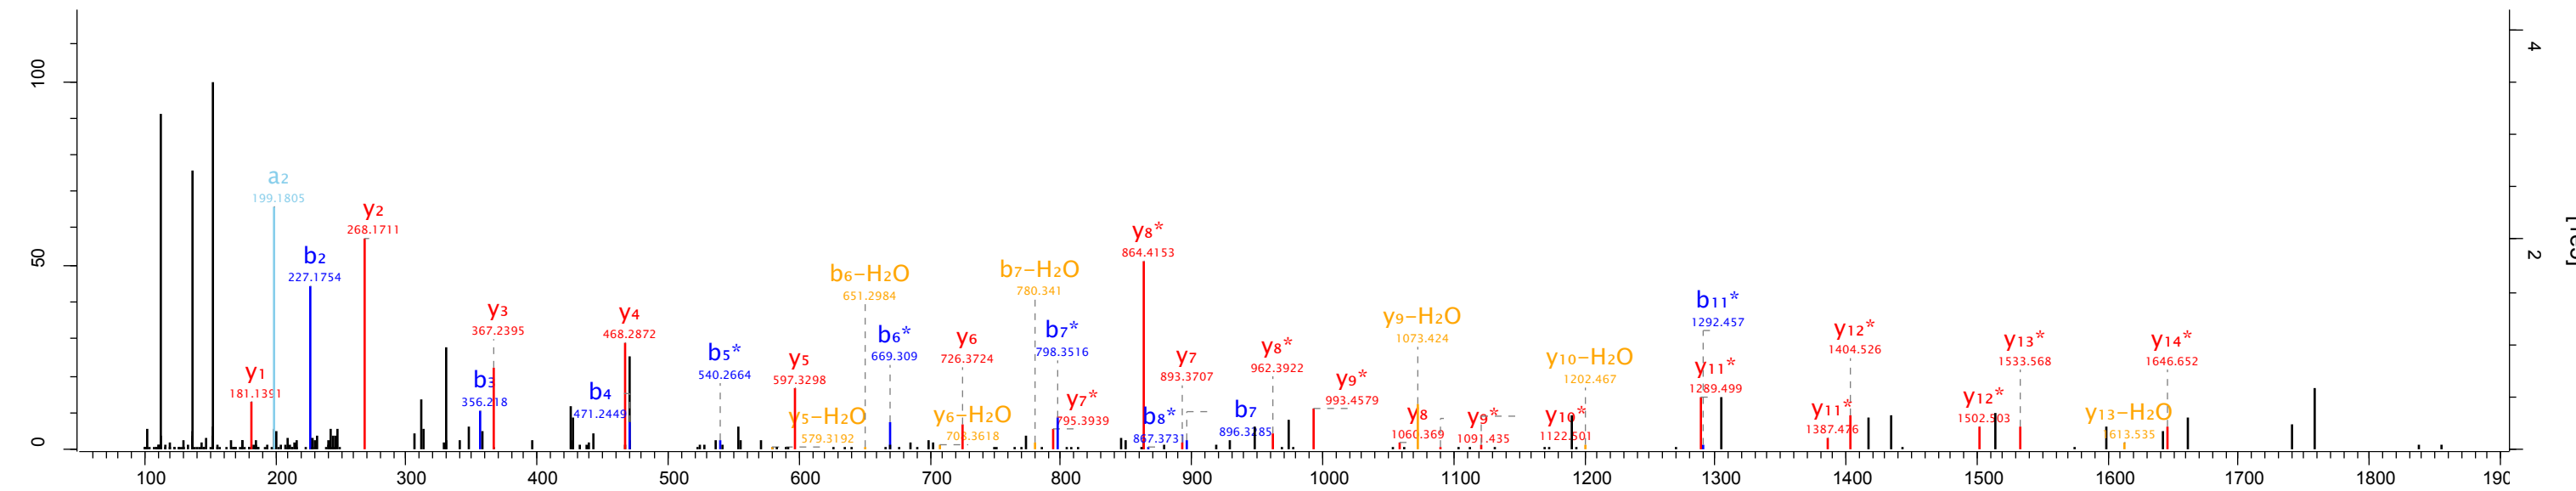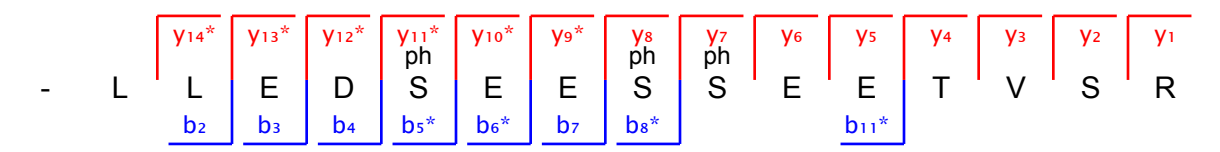

Raw file 20171215\_MaS\_33SR\_LMH\_phospho\_01 Scan 7770 Method FTMS; HCD Score 51.88 m/z 817.34 Gene names PI4KA

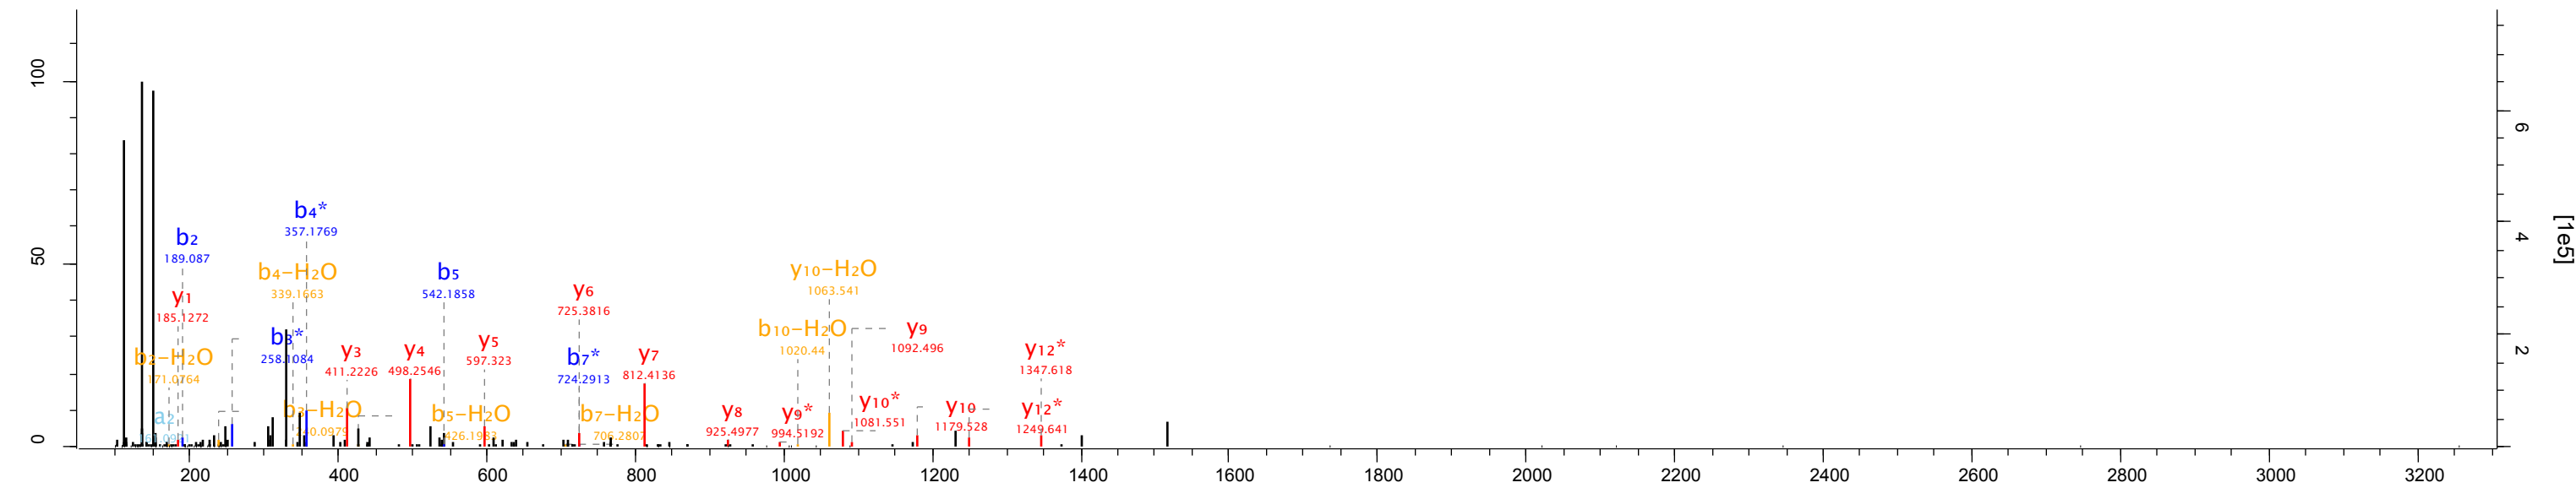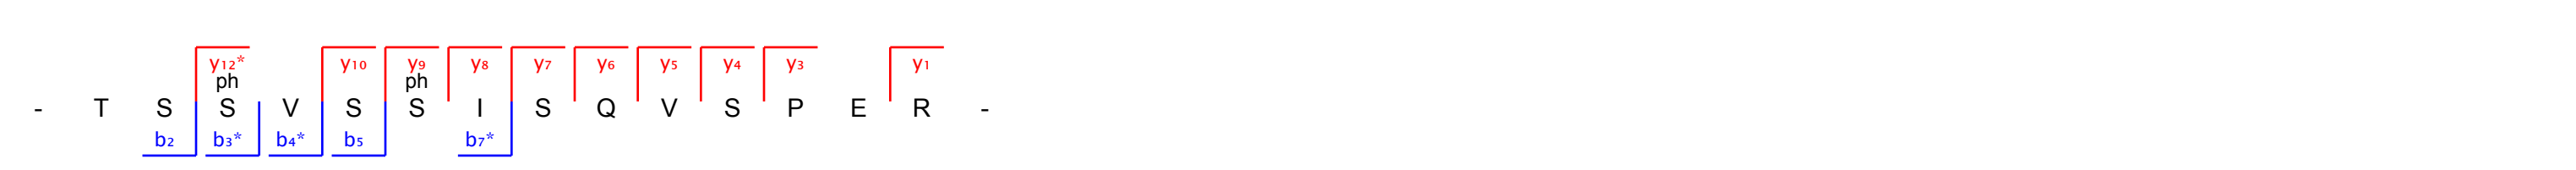

Raw file 20171215\_MaS\_33SR\_LMH\_phospho\_01 Scan 9060 Method FTMS; HCD Score 107.57 m/z 909.38 Gene names TMPO

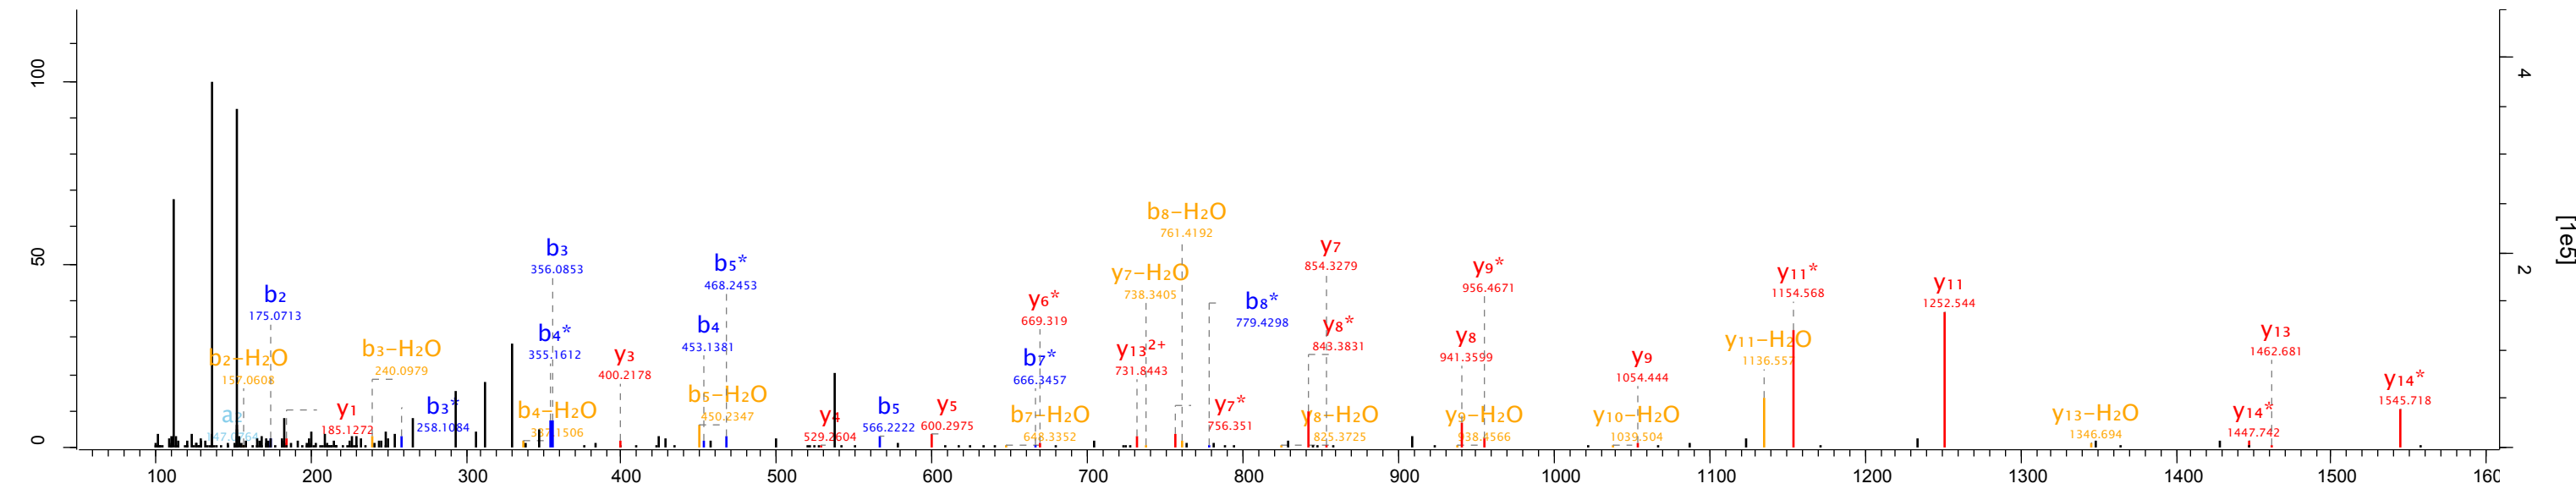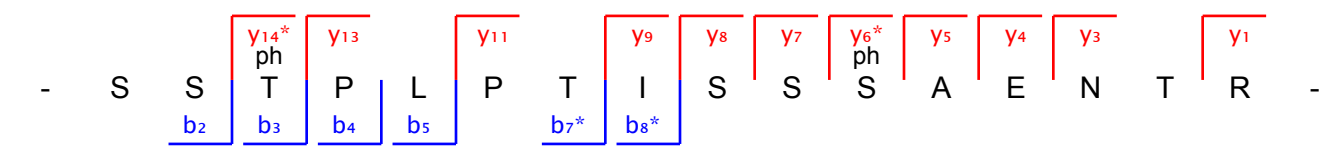

Raw file 20171215\_MaS\_33SR\_LMH\_phospho\_01 Scan 9210 Method FTMS; HCD Score 67.14 m/z 899.32 Gene names YBX3

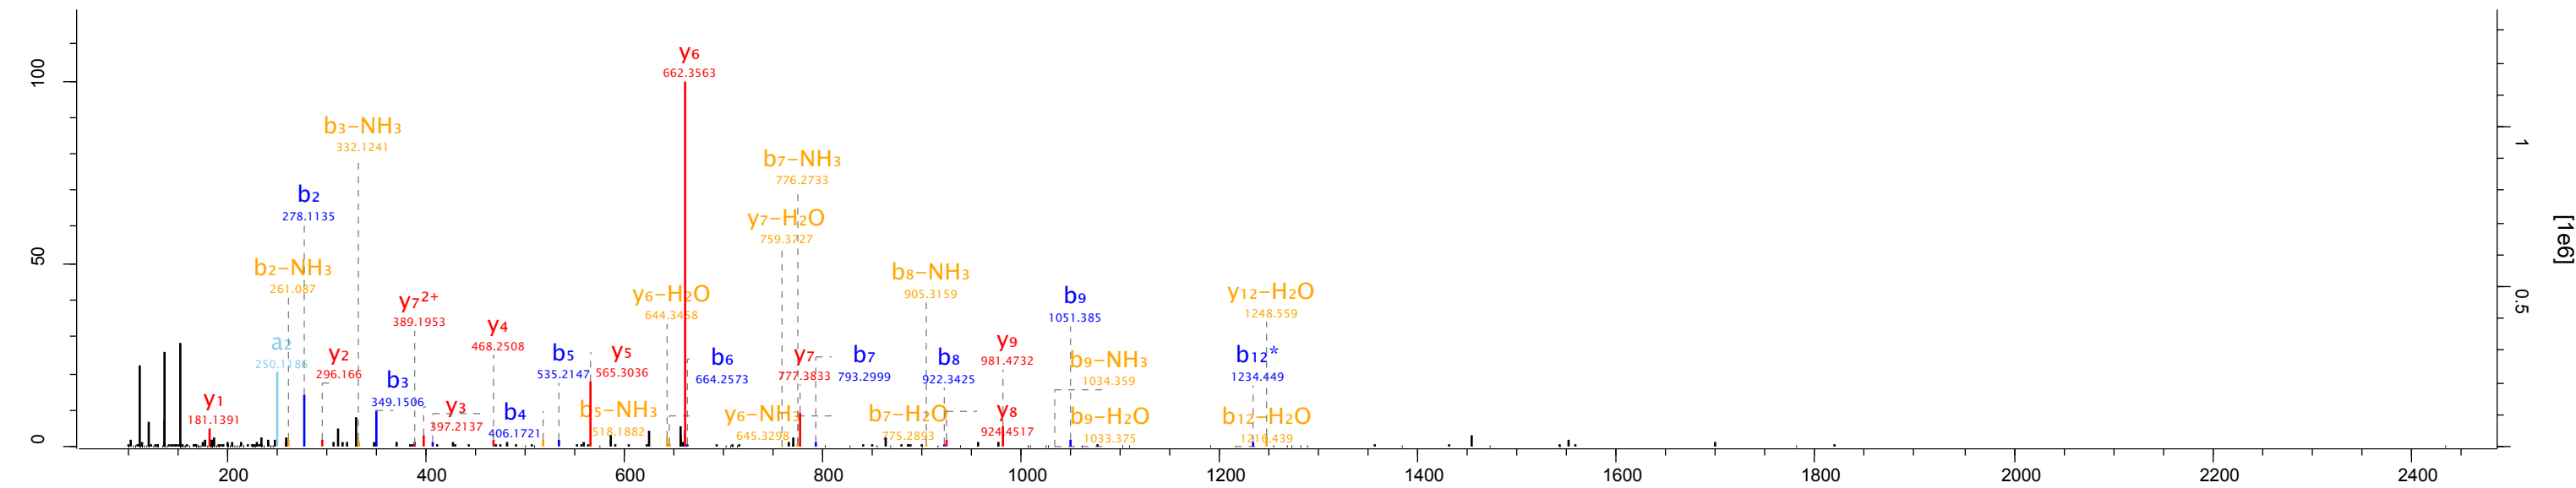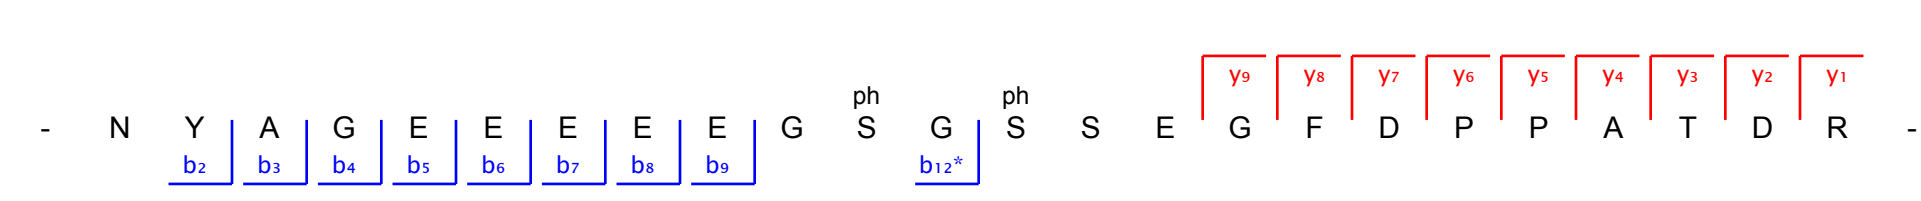

Raw file 20171215\_MaS\_33SR\_LMH\_phospho\_01 Scan 9270 Method FTMS; HCD Score 56.85 m/z 758.98 Gene names ARHGEF11

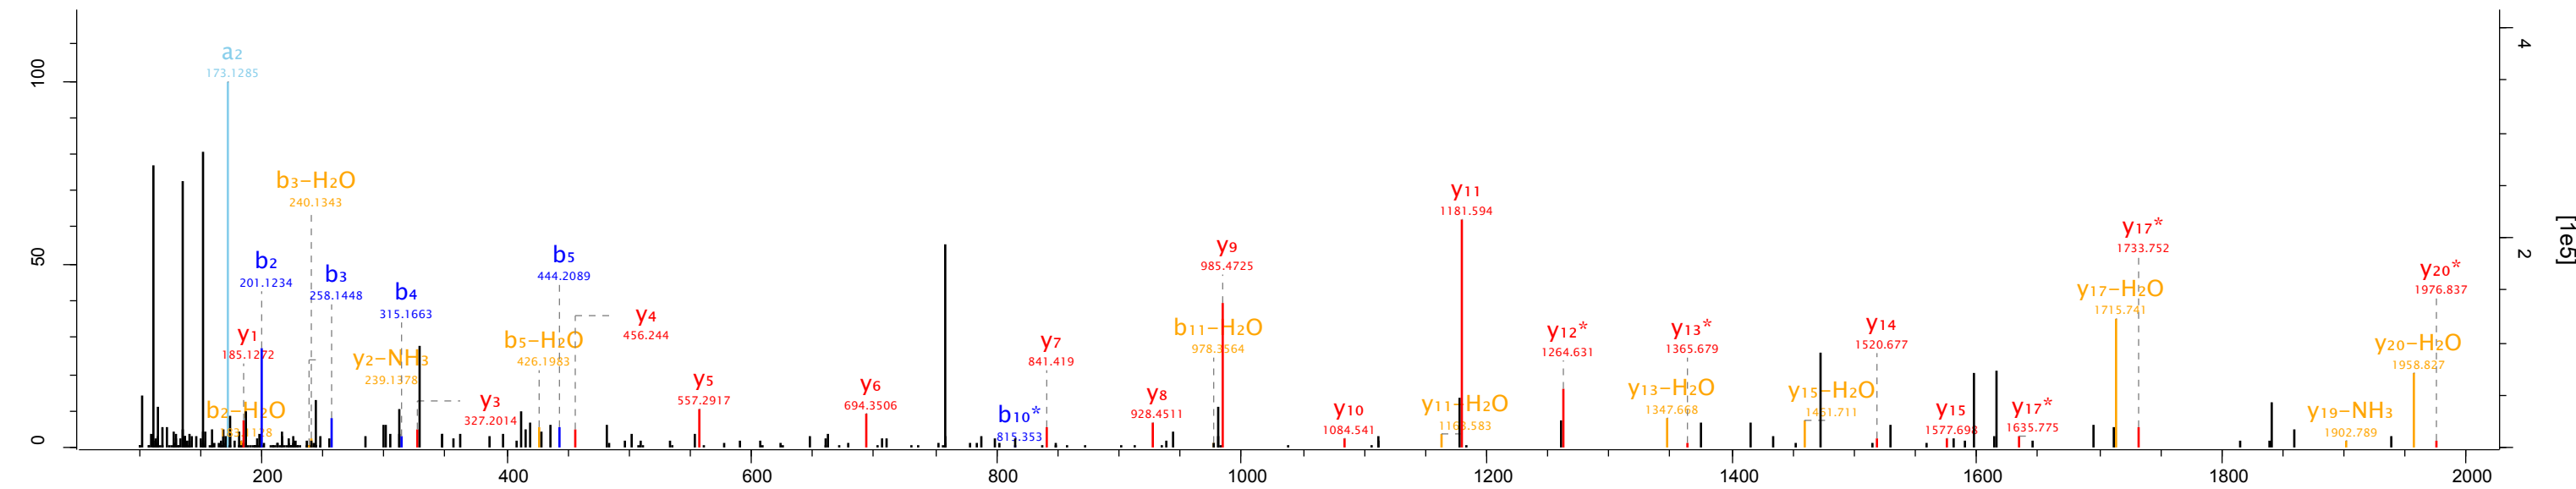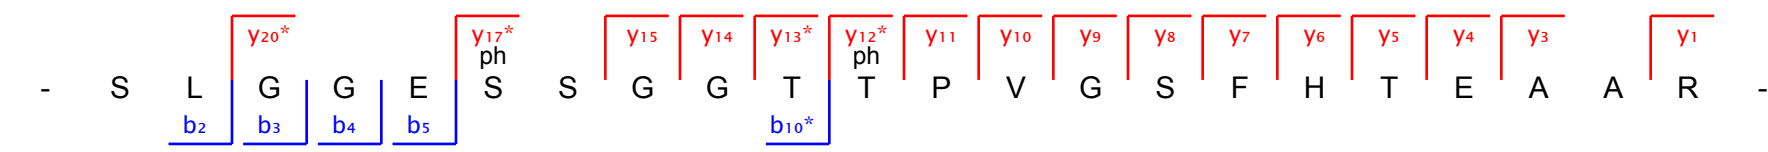

20171215\_MaS\_33SR\_LMH\_phospho\_02 10690 FTMS; HCD 107.41 720.33 C2orf49

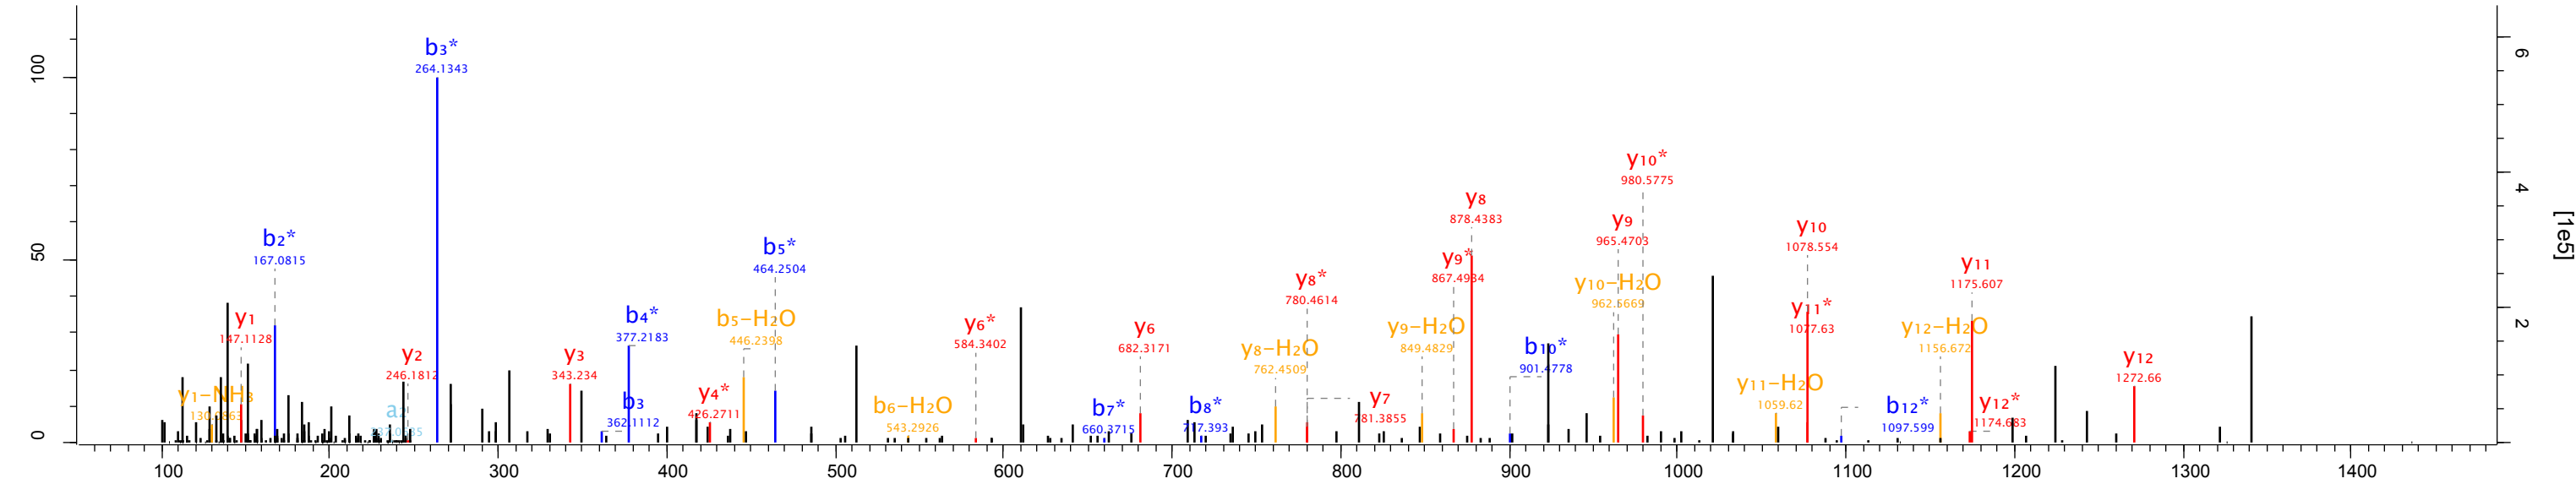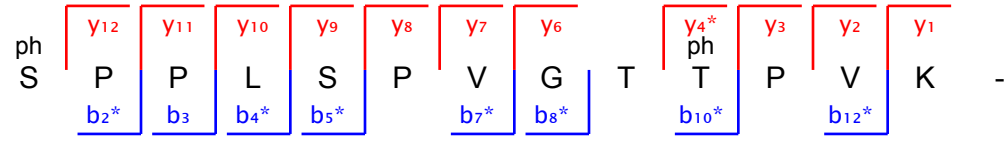

Raw file 20171215\_MaS\_33SR\_LMH\_phospho\_02 Scan 10770 Method FTMS; HCD Score 128.43 m/z 925.7 Gene names ASH2L

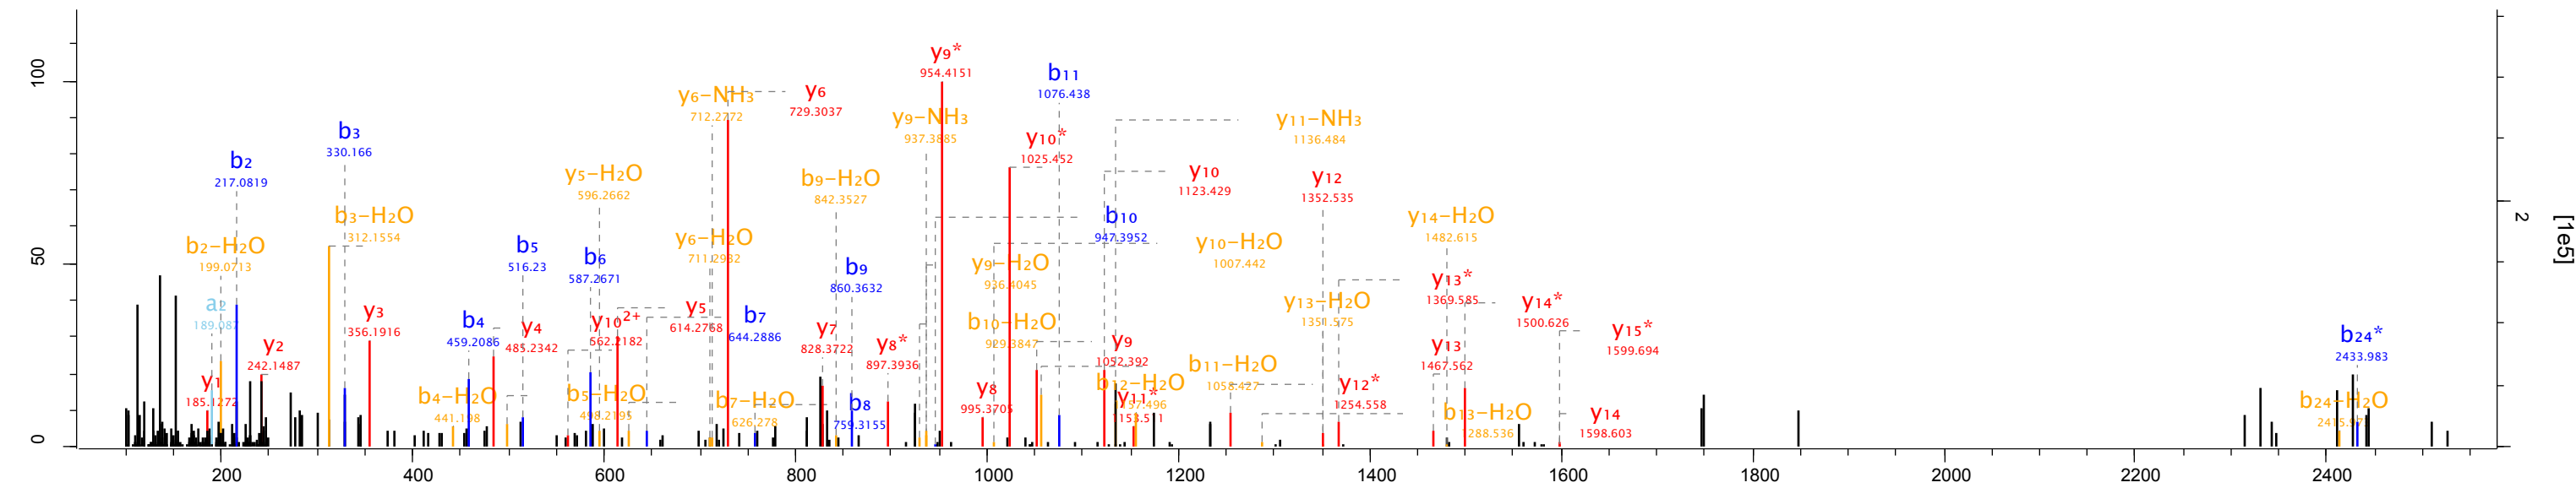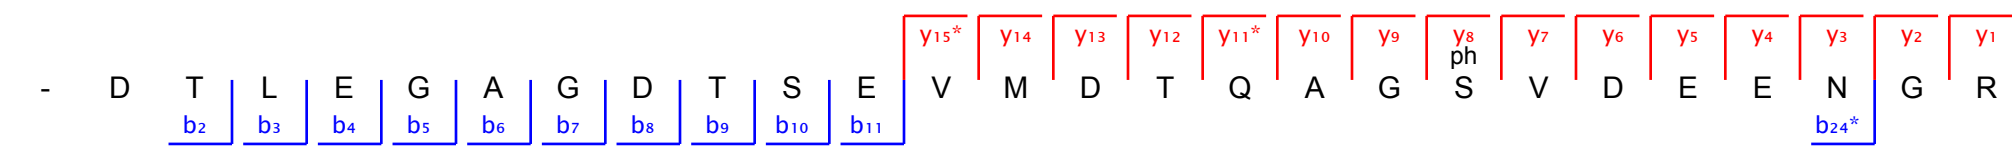

Raw file: 20171215\_MaS\_33SR\_LMH\_phospho\_02  
 Scan: 11420 Method: FTMS; HCD Score: 117.51 m/z: 1142.15 Gene names: PRRC2C

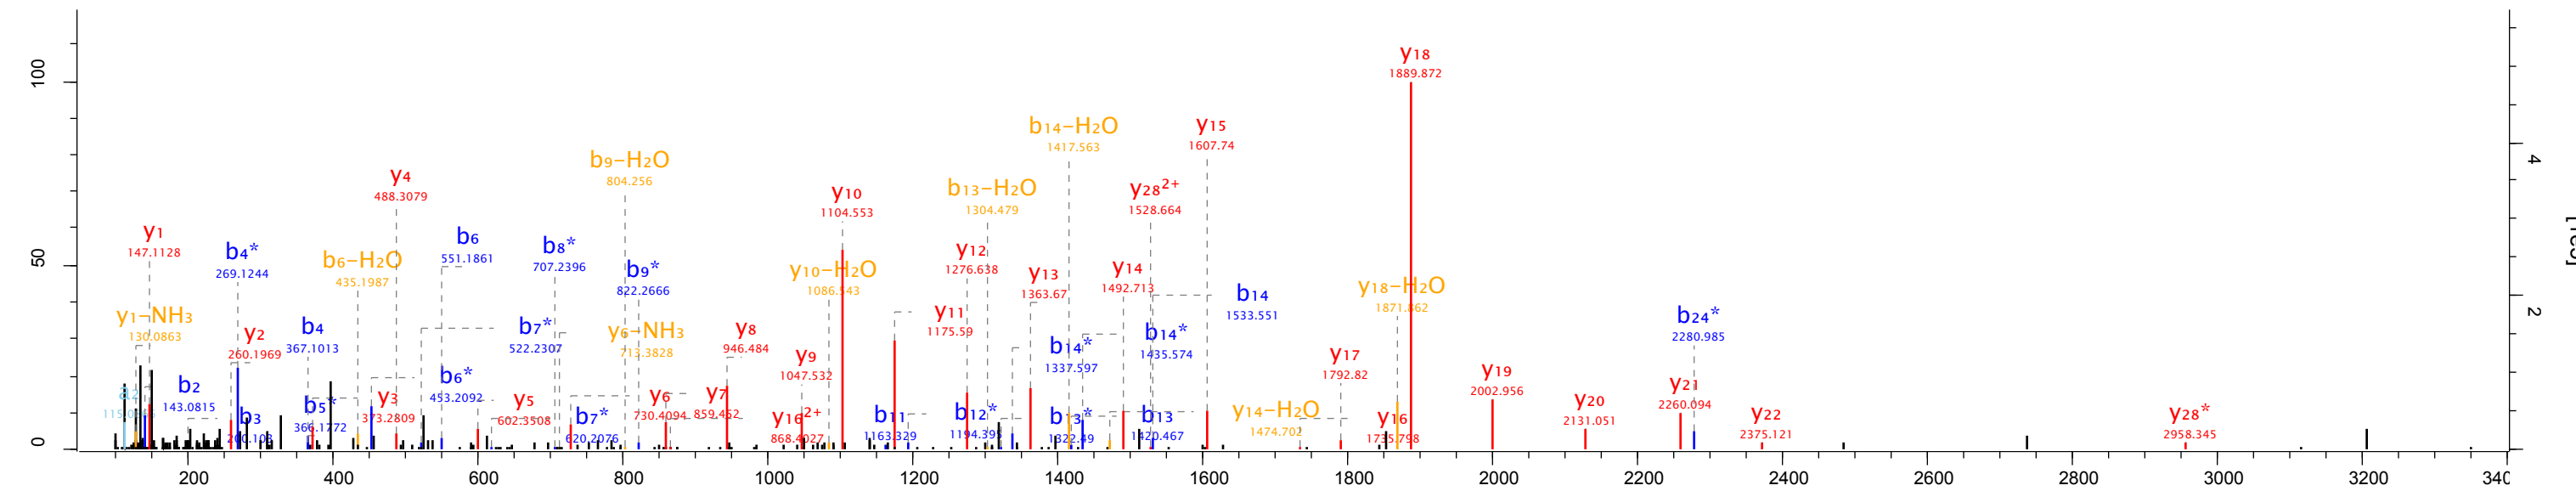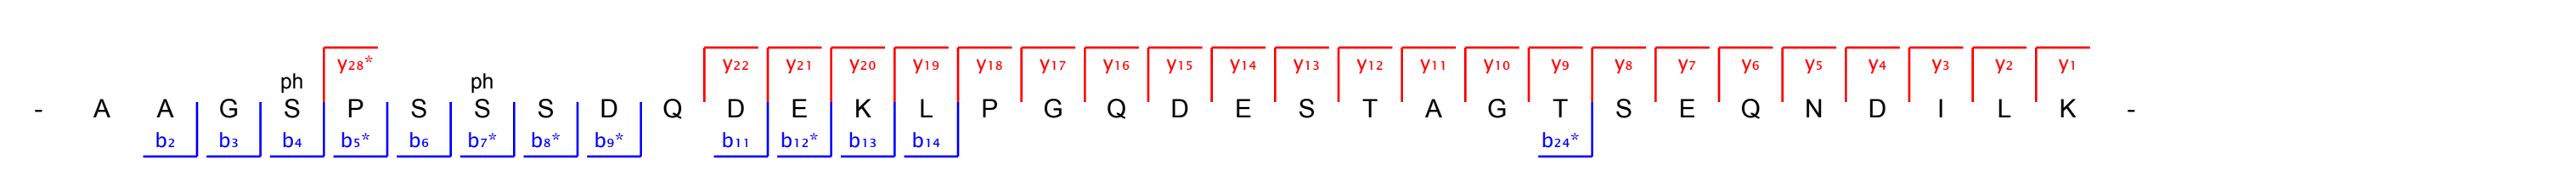



Raw file 20171215\_MaS\_33SR\_LMH\_phospho\_02 Scan 11710 Method FTMS; HCD Score 113.99 m/z 631.25 Gene names DPH2

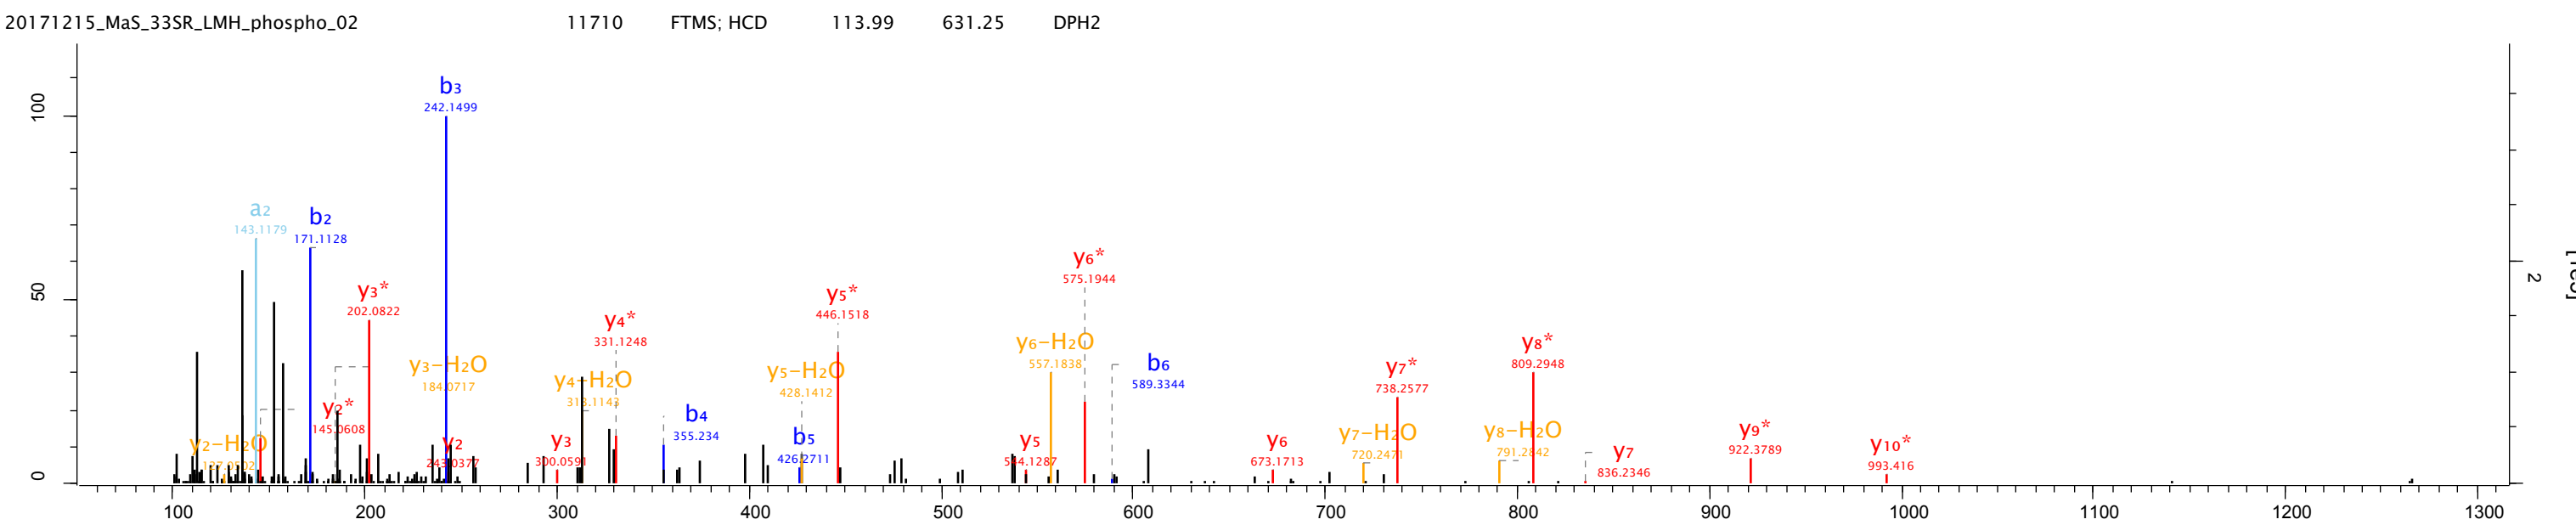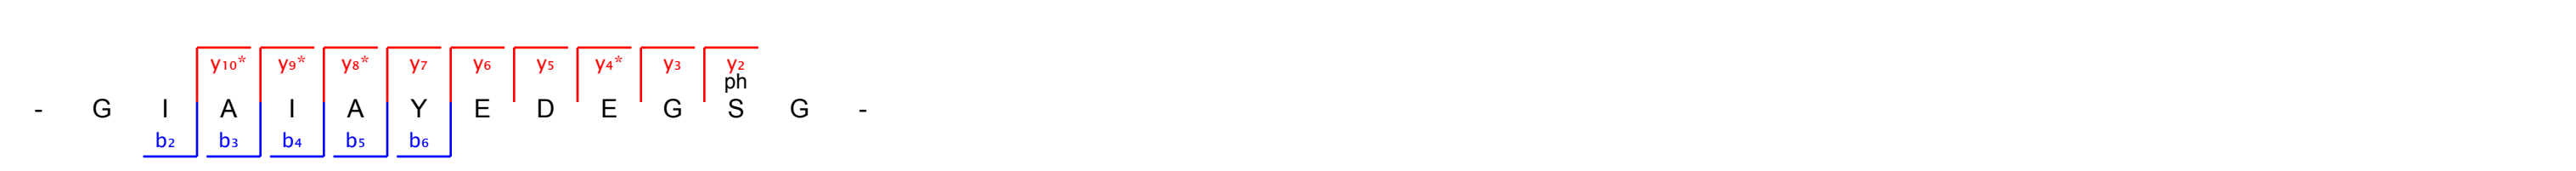

20171215\_MaS\_33SR\_LMH\_phospho\_02 12040 FTMS; HCD 118.81 846.69 C2CD5

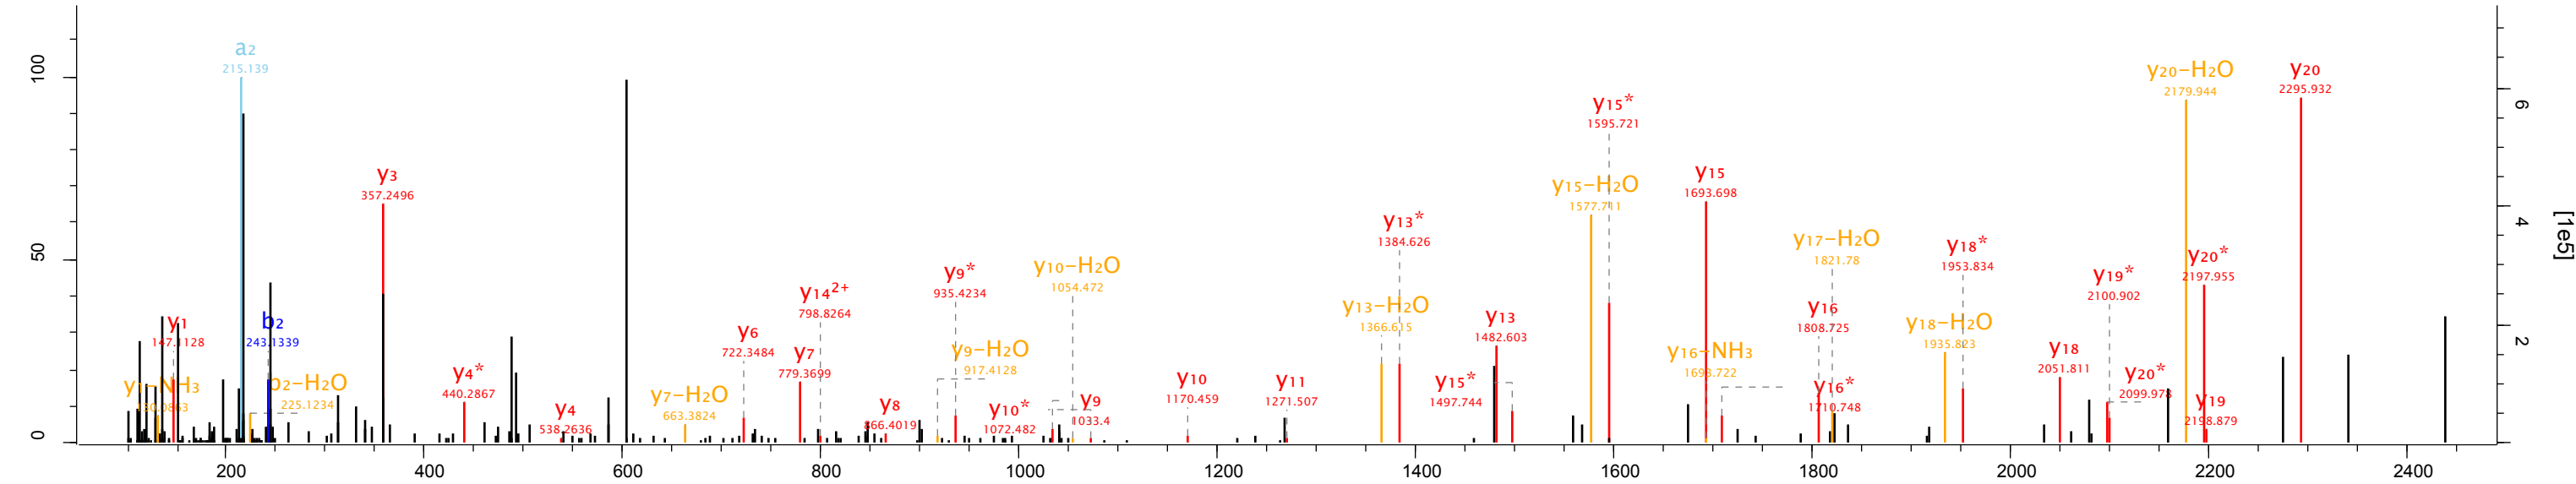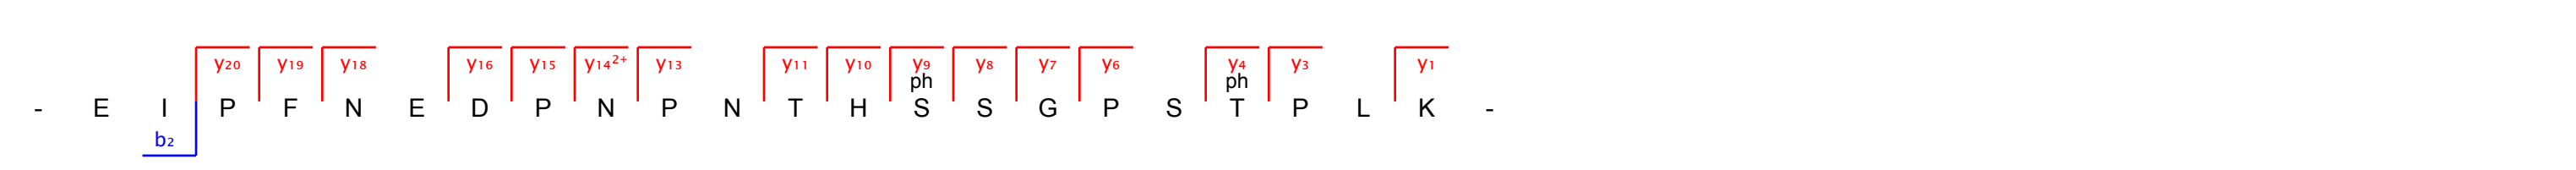

20171215\_MaS\_33SR\_LMH\_phospho\_02 12140 FTMS; HCD 143.76 661.76 KLC4

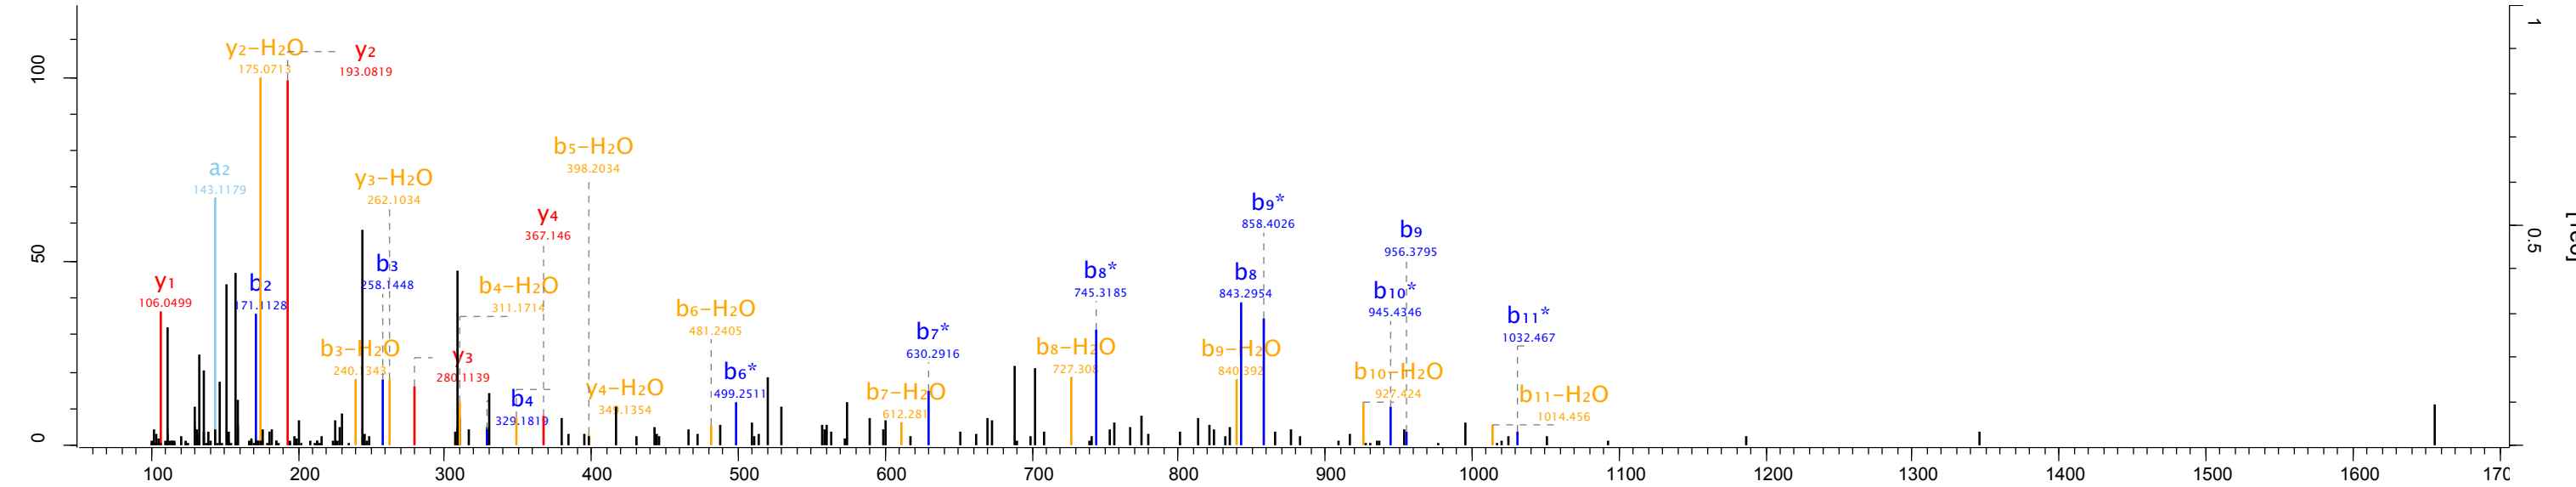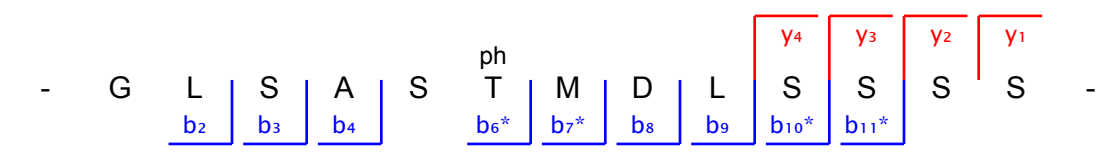

Raw file: 20171215\_MaS\_33SR\_LMH\_phospho\_02  
 Scan: 12170 Method: FTMS; HCD Score: 142.32 m/z: 744.31 Gene names: ARHGEF11

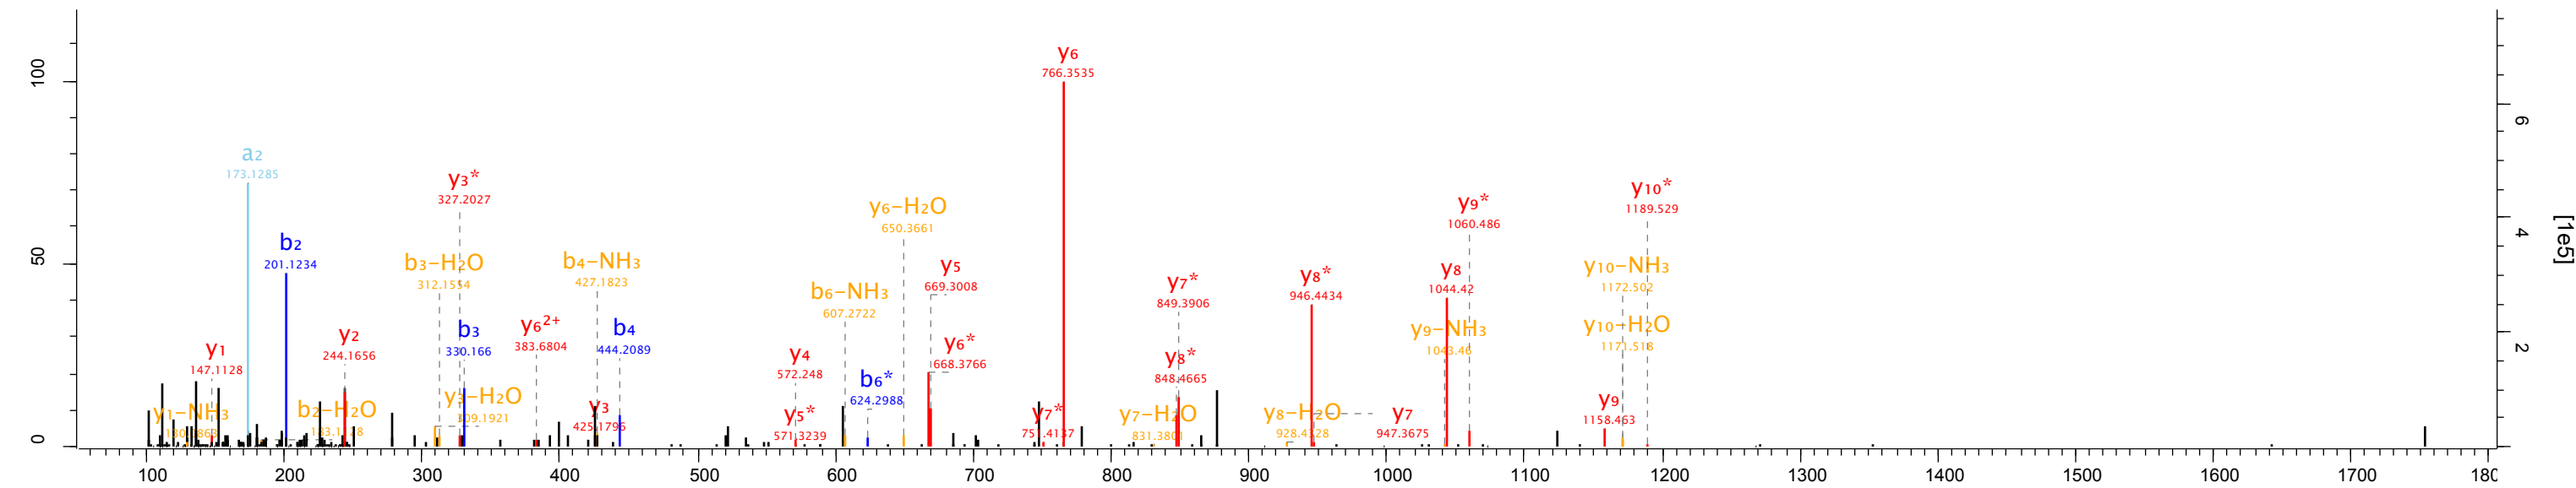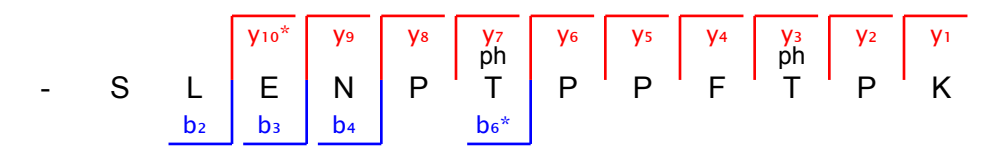

Raw file 20171215\_MaS\_33SR\_LMH\_phospho\_02 Scan 12500 Method FTMS; HCD Score 71.41 m/z 870.69

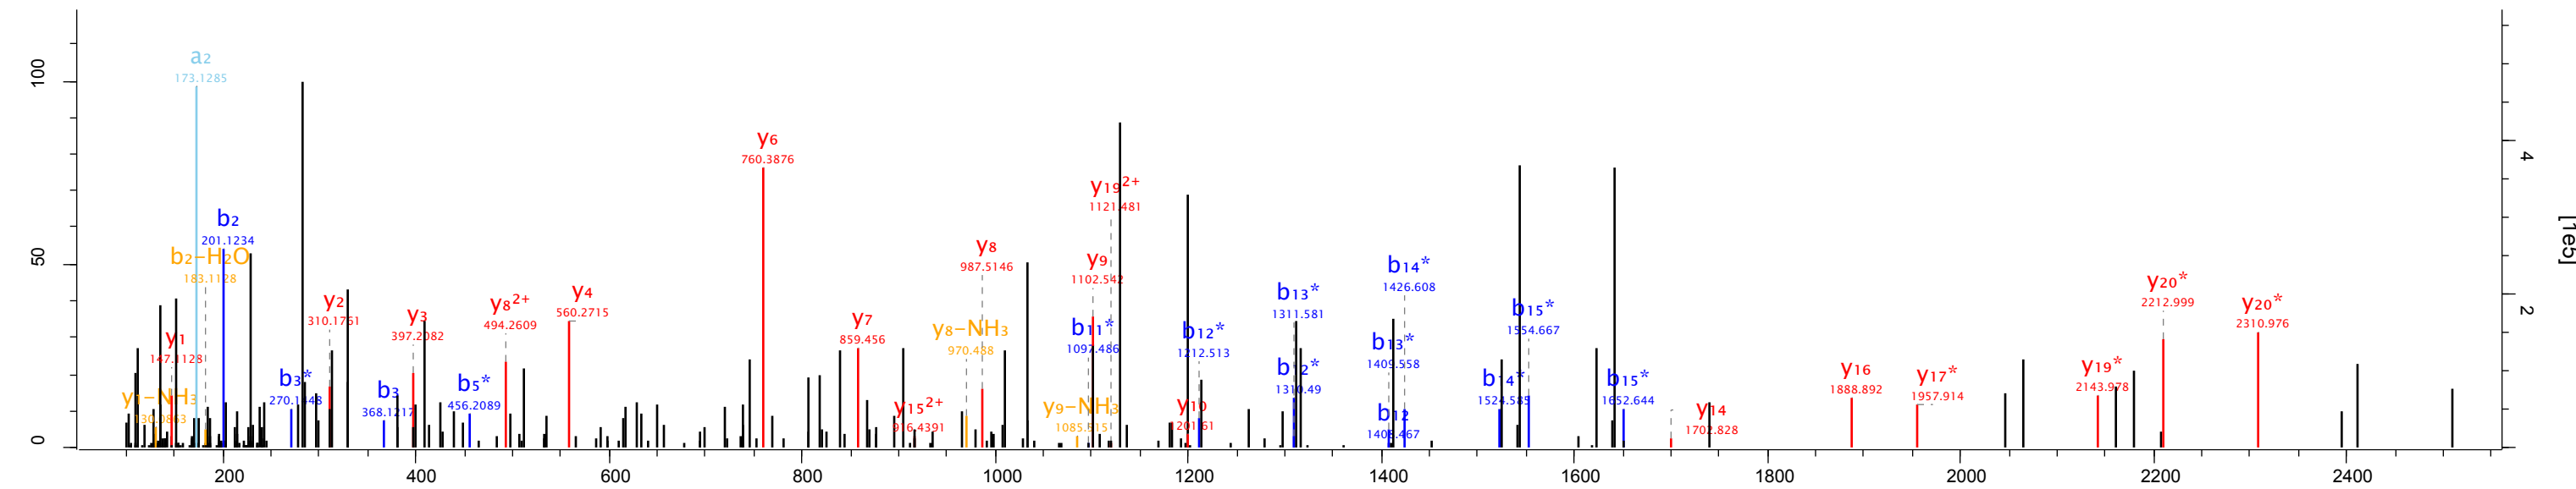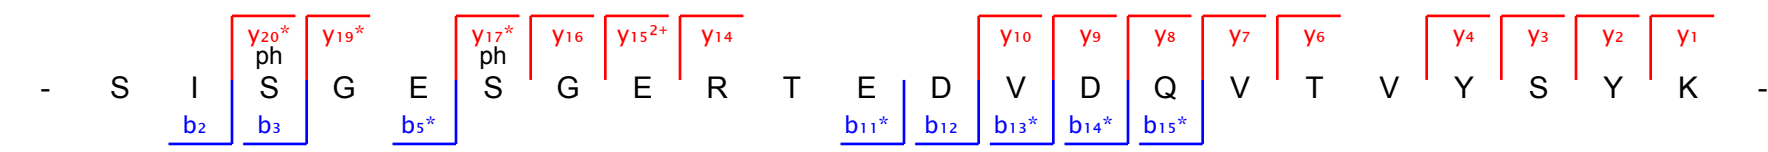

Raw file 20171215\_MaS\_33SR\_LMH\_phospho\_02 Scan 15430 Method FTMS; HCD Score 259.44 m/z 1020.93 Gene names CDC42EP3

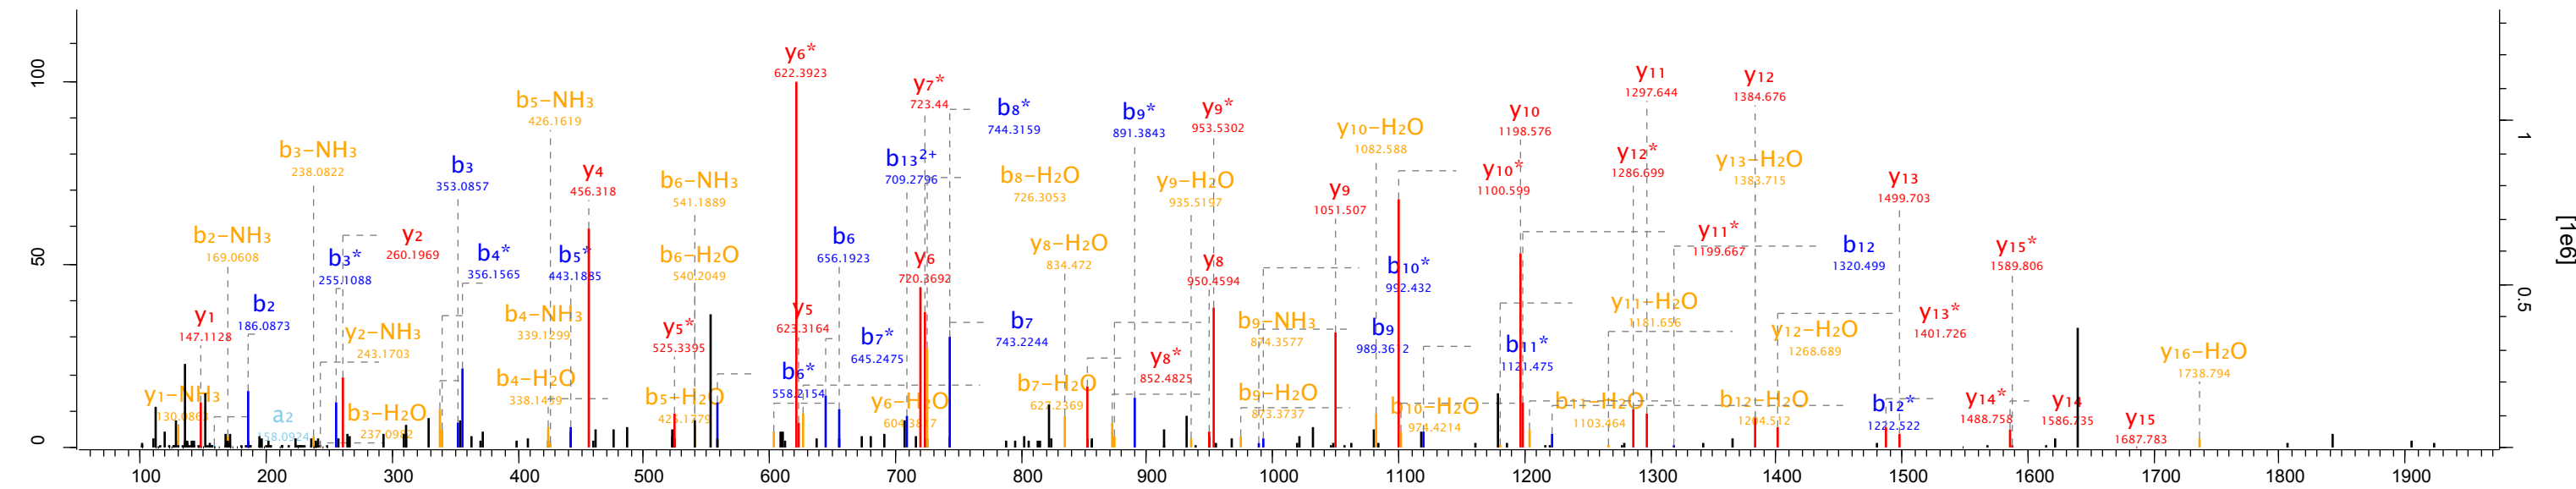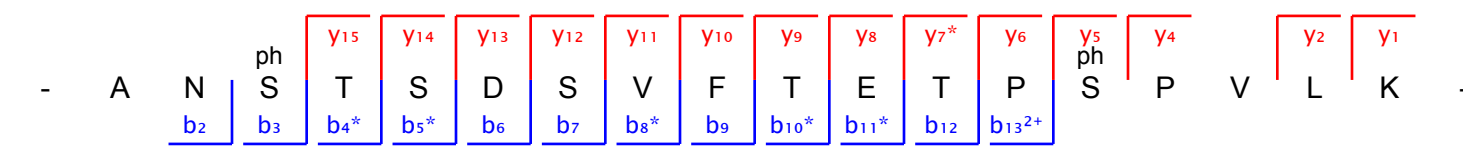

Raw file 20171215\_MaS\_33SR\_LMH\_phospho\_02 Scan 15660 Method FTMS; HCD Score 169.19 m/z 636.64 Gene names RB1

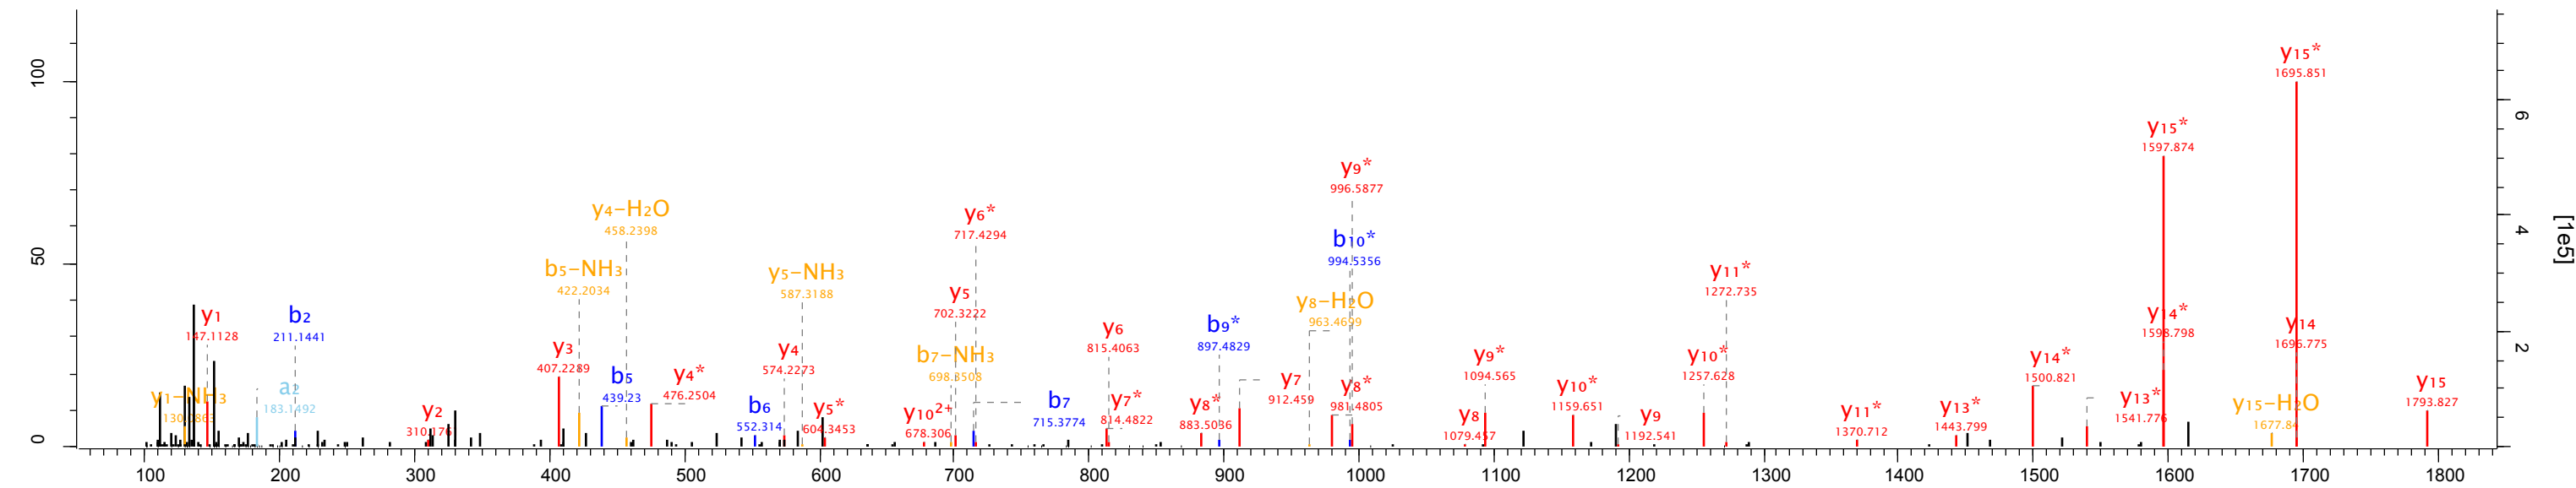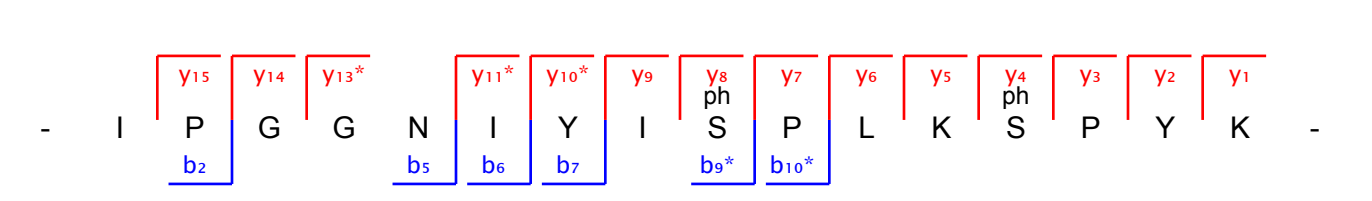

Raw file: 20171215\_MaS\_33SR\_LMH\_phospho\_02  
 Scan: 15830 Method: FTMS; HCD Score: 118.71 m/z: 847.32 Gene names: KIAA1143

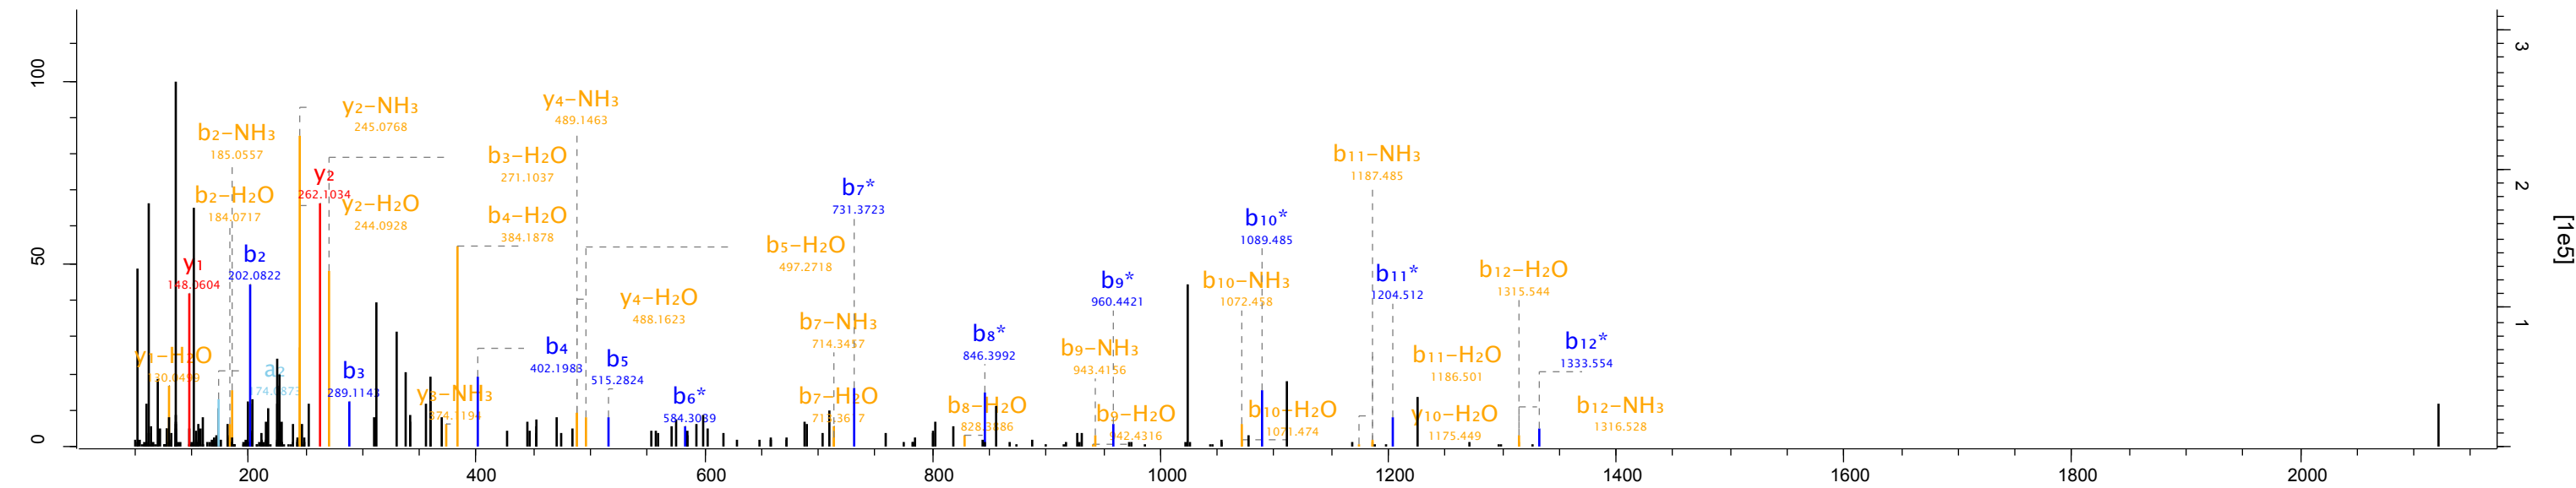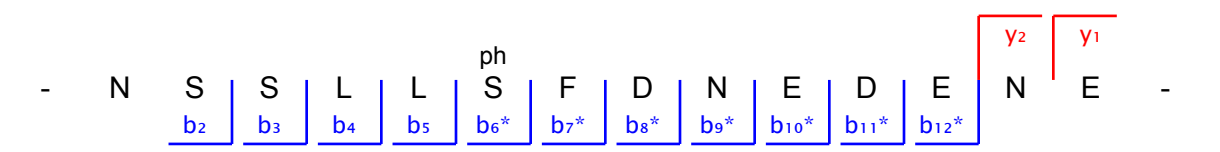





Raw file: 20171215\_MaS\_33SR\_LMH\_phospho\_02  
 Scan: 16280 Method: FTMS; HCD Score: 130.29 m/z: 1094.49 Gene names: SERBP1

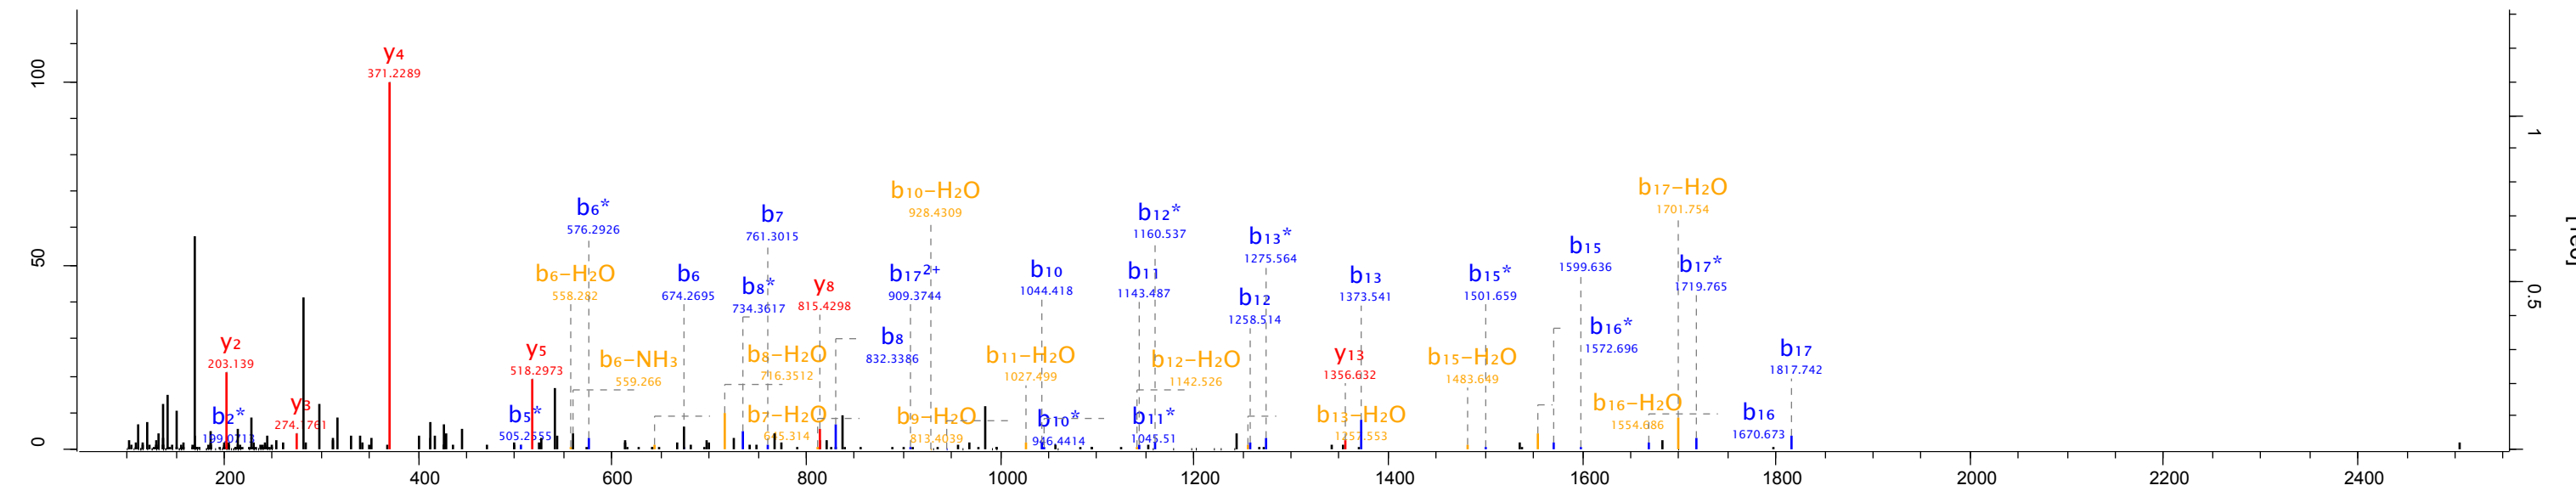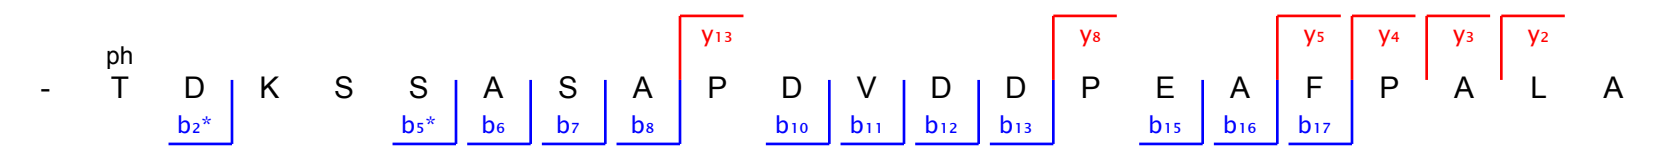

Raw file 20171215\_MaS\_33SR\_LMH\_phospho\_02 Scan 2200 Method FTMS; HCD Score 71.53 m/z 602.74 Gene names CLASP1

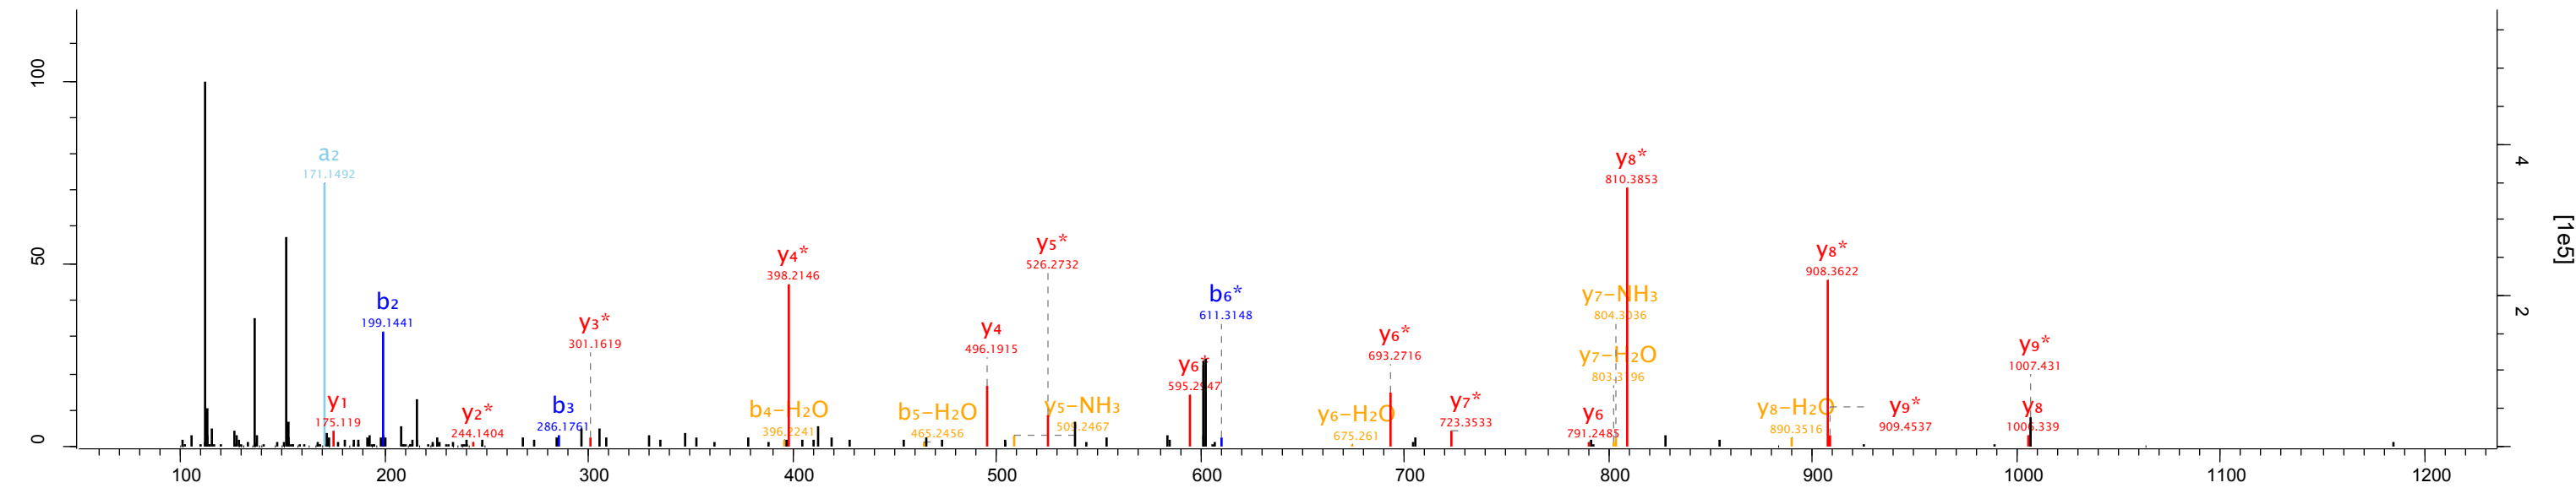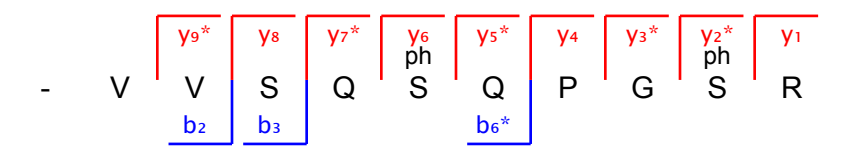

Raw file 20171215\_MaS\_33SR\_LMH\_phospho\_02 Scan 2390 Method FTMS; HCD Score 199.3 m/z 942.82 Gene names NUCKS1

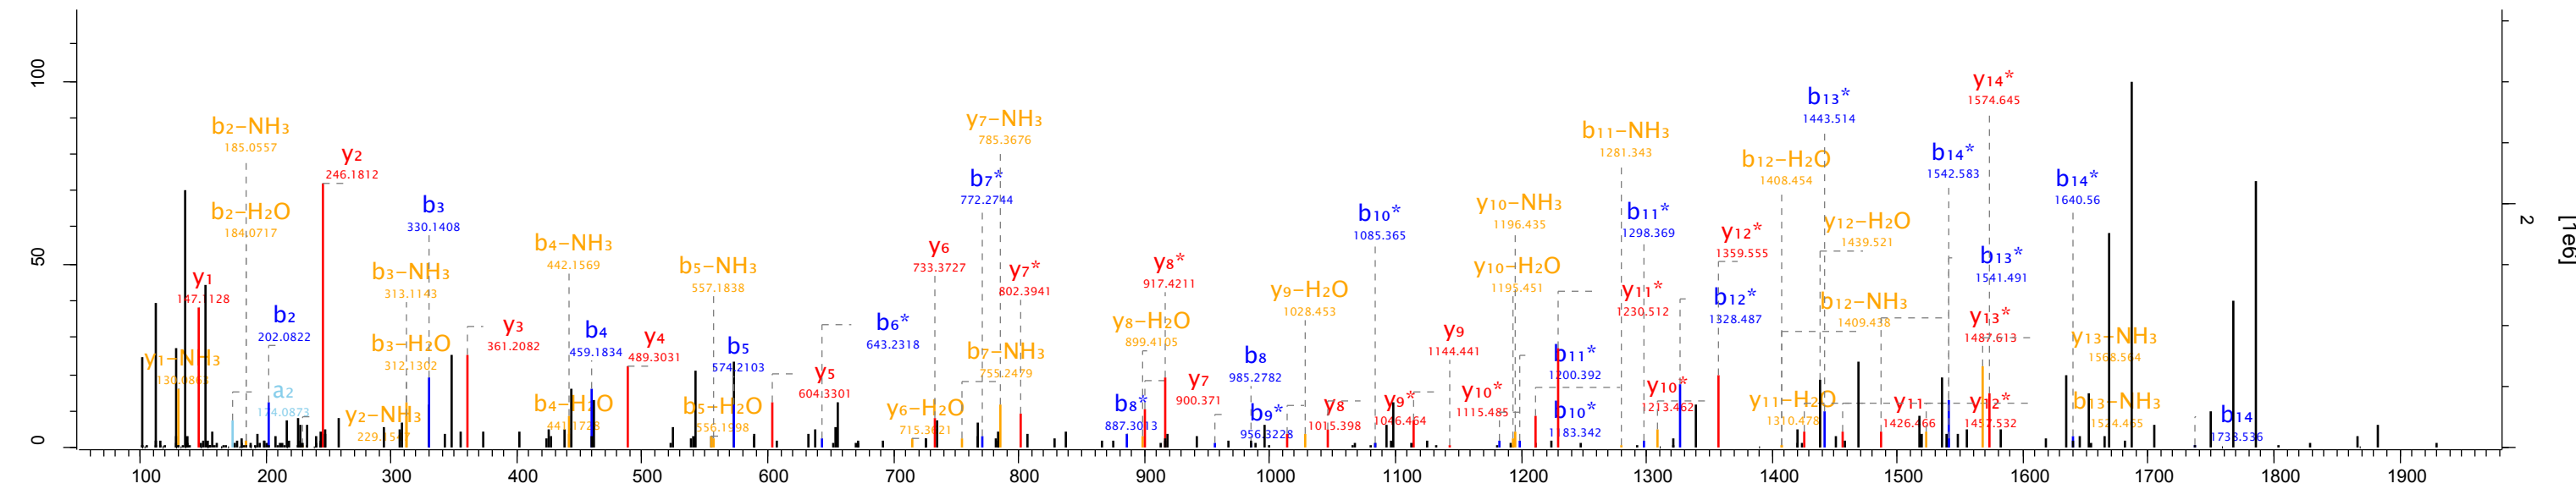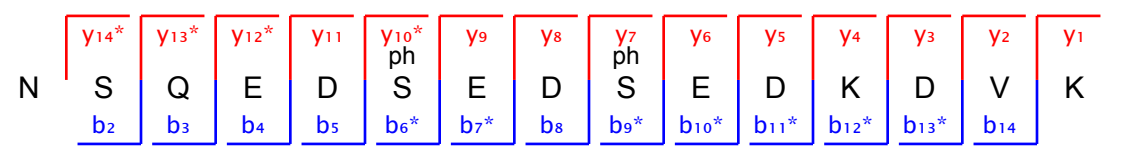

Raw file 20171215\_MaS\_33SR\_LMH\_phospho\_02 Scan 2450 Method FTMS; HCD Score 86.77 m/z 408.52 Gene names SRRM1

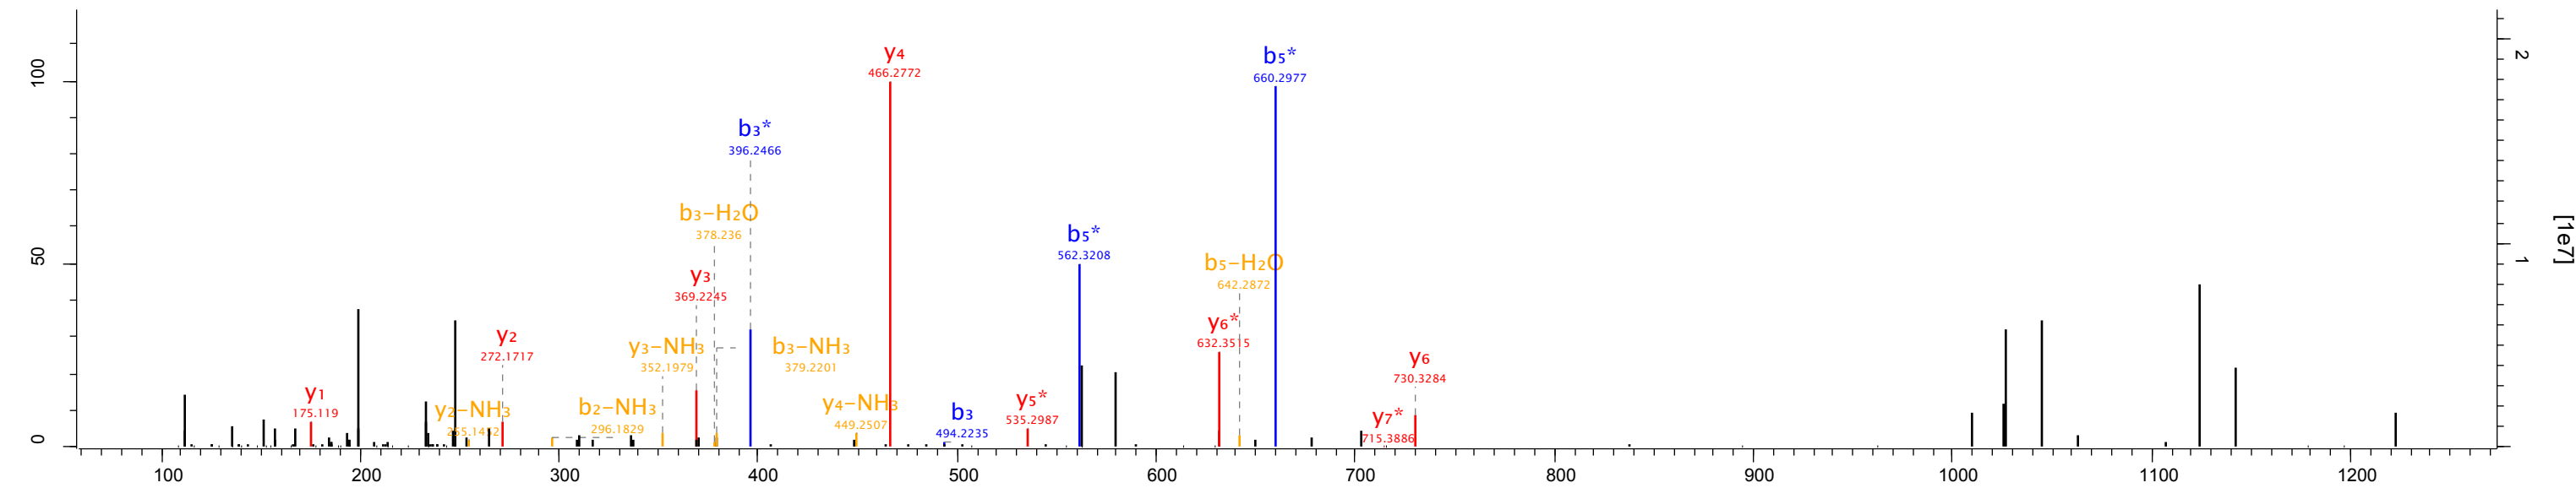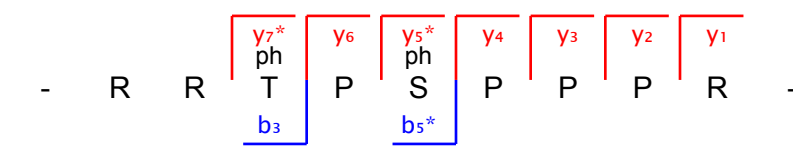

Raw file 20171215\_MaS\_33SR\_LMH\_phospho\_02 Scan 2460 Method FTMS; HCD Score 66.19 m/z 344.49 Gene names PRPF4B

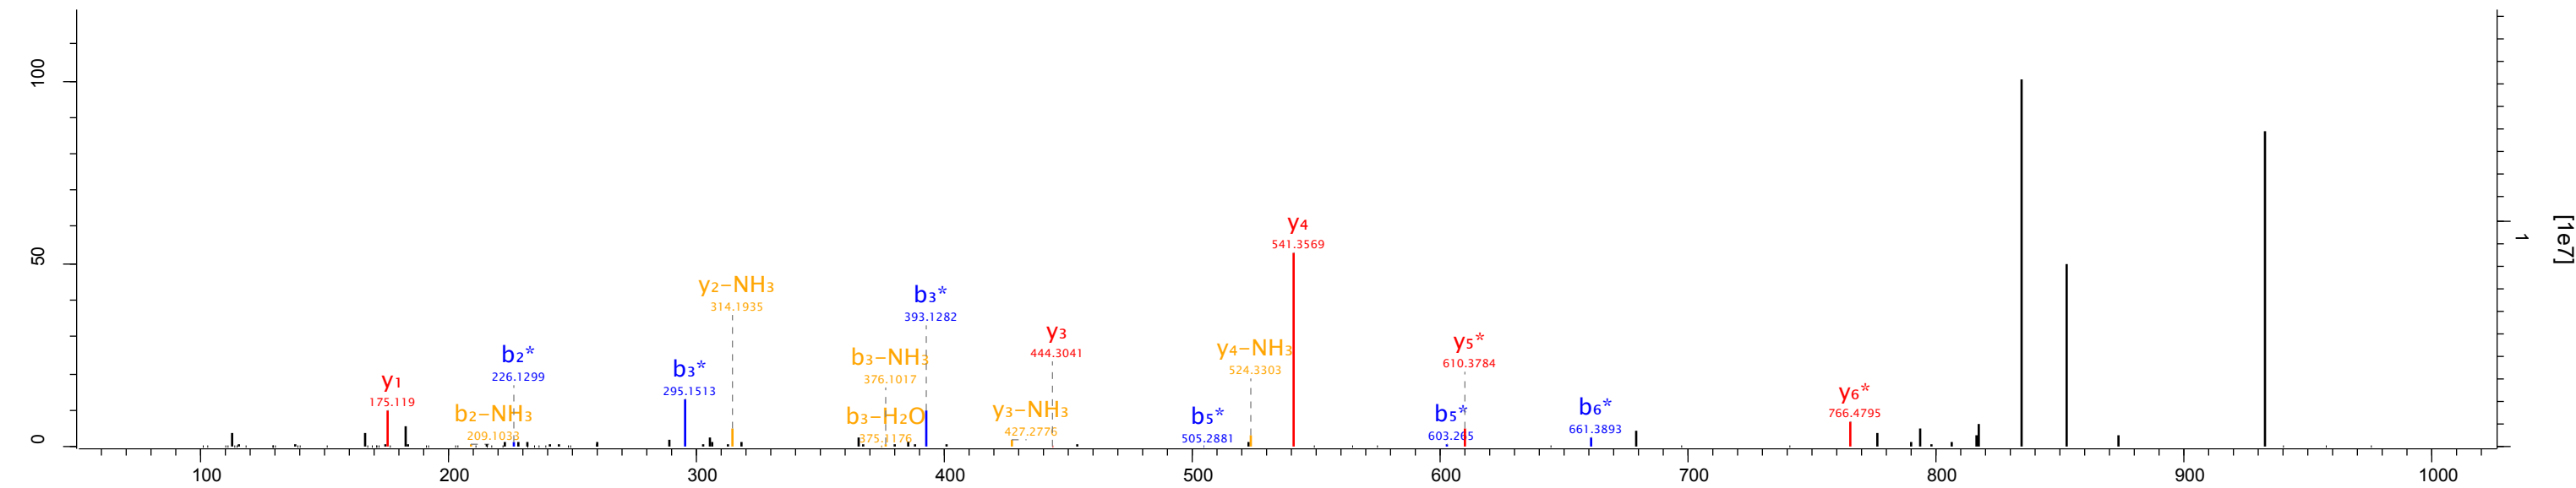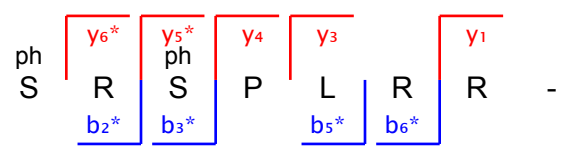

Raw file 20171215\_MaS\_33SR\_LMH\_phospho\_02 Scan 2960 Method FTMS; HCD Score 107.69 m/z 481.22 Gene names SRRM1

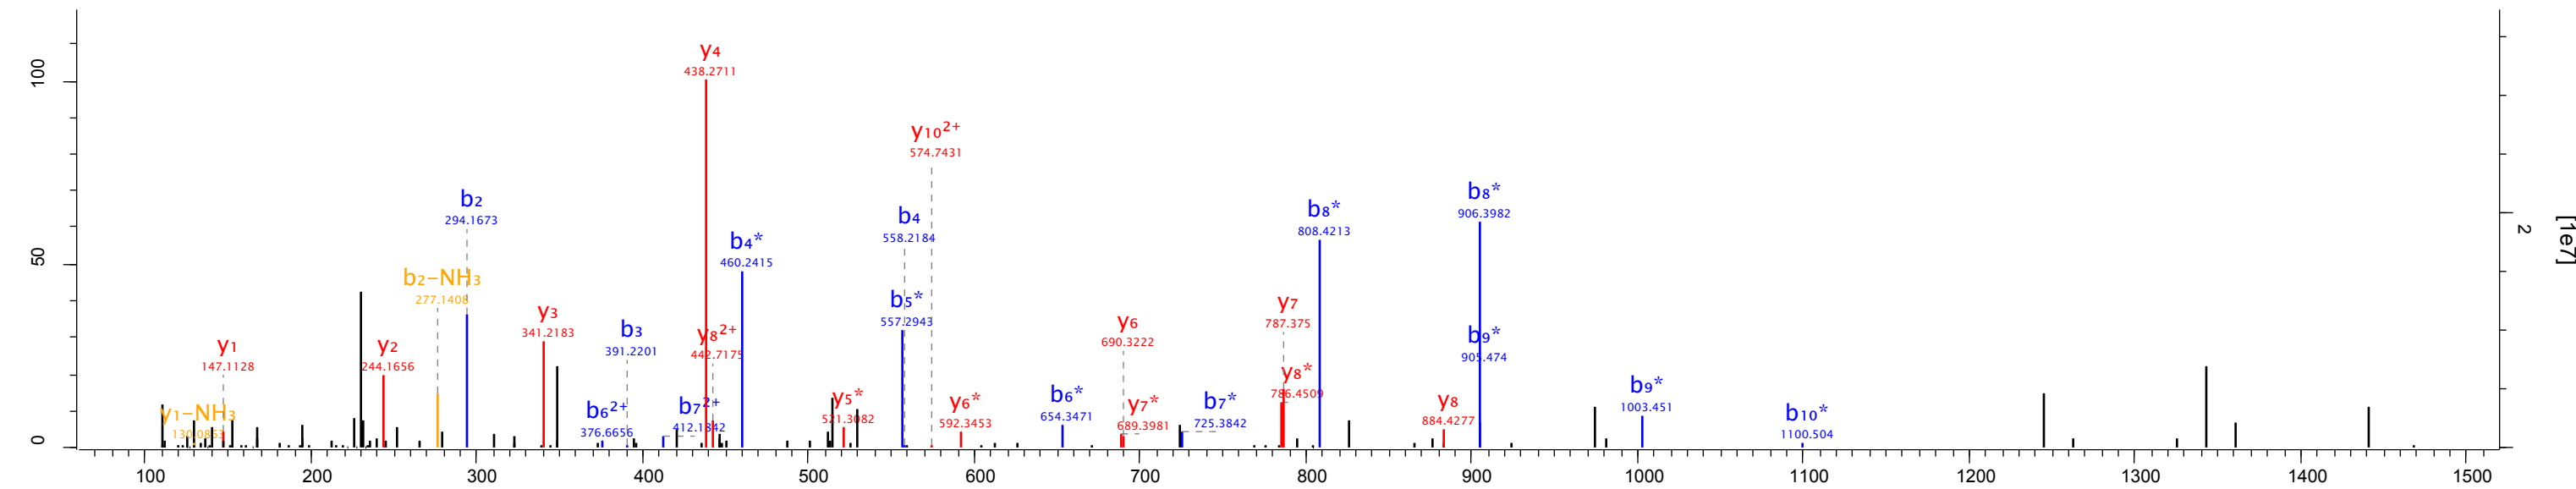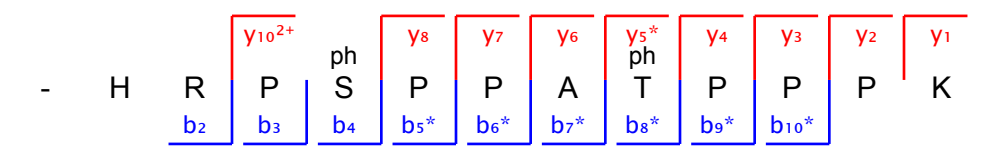

Raw file 20171215\_MaS\_33SR\_LMH\_phospho\_02 Scan 3030 Method FTMS; HCD Score 128.74 m/z 531.89 Gene names SRSF1

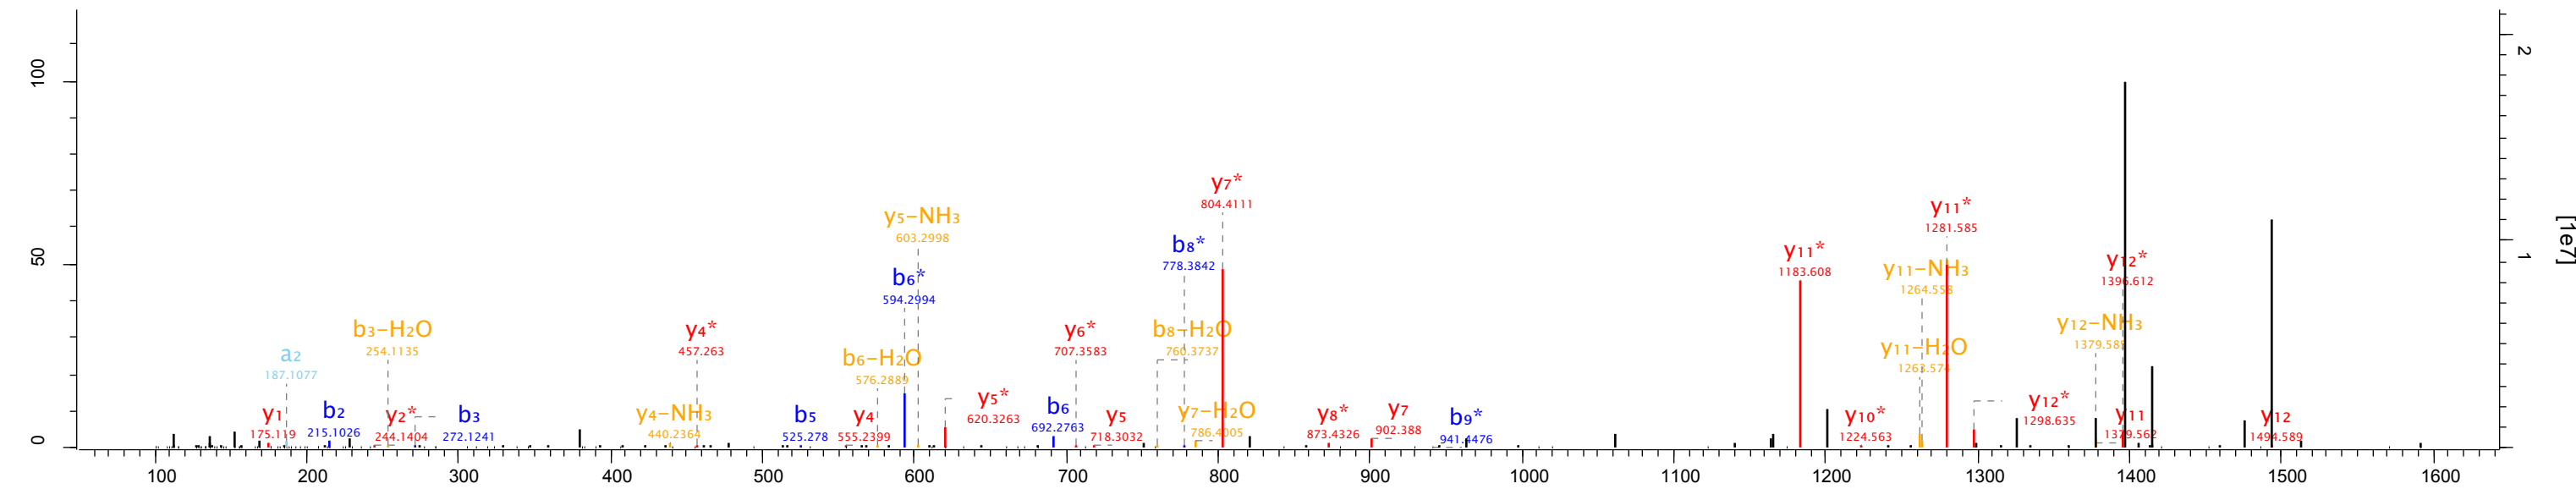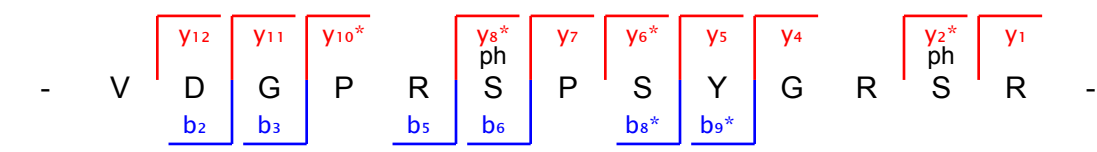



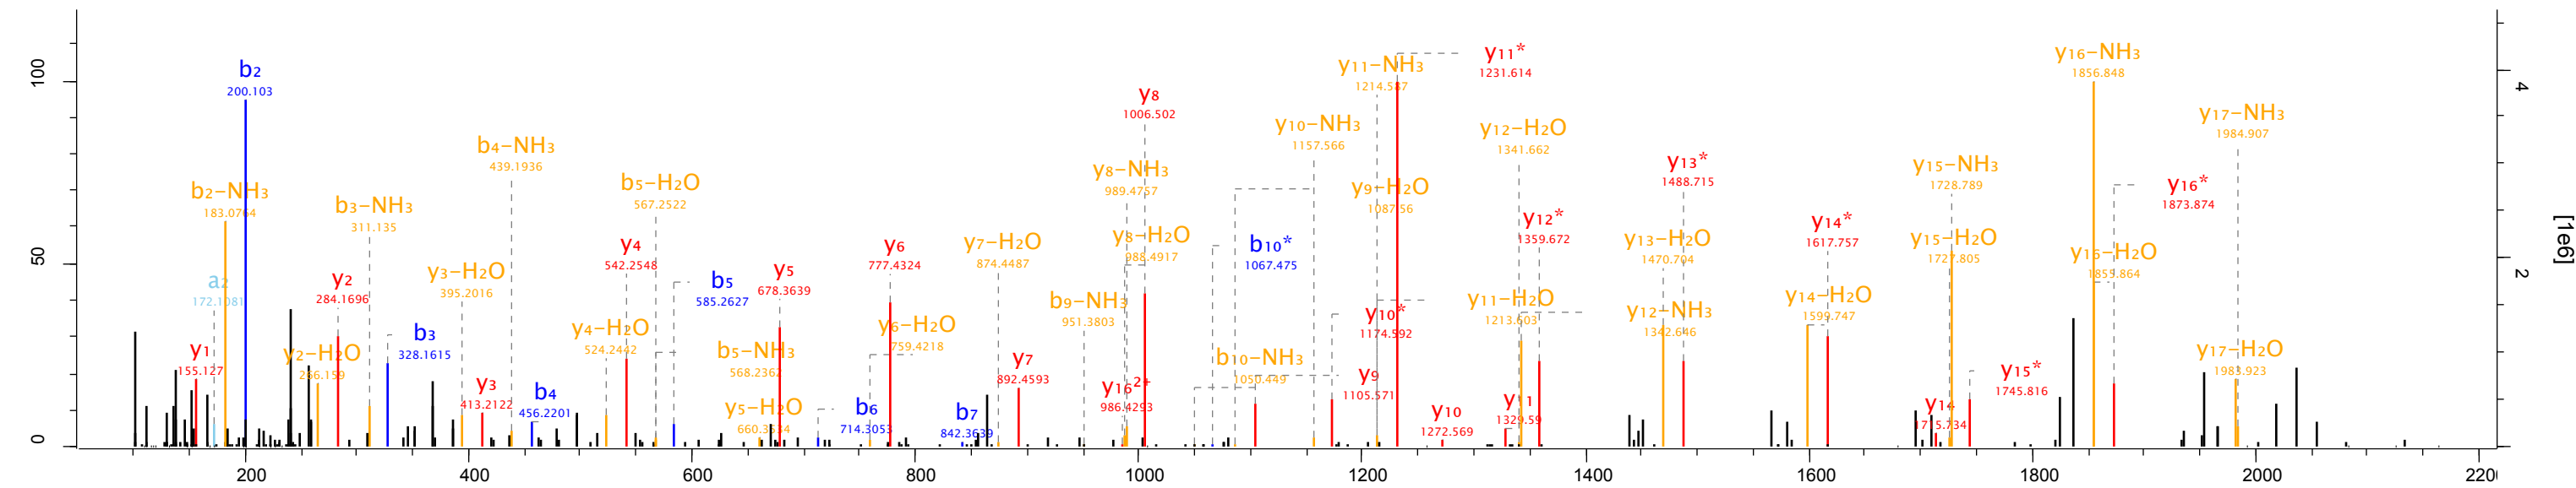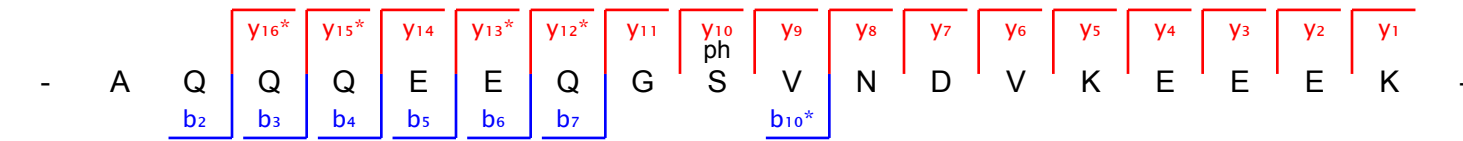

Raw file 20171215\_MaS\_33SR\_LMH\_phospho\_02 Scan 4020 Method FTMS; HCD Score 121.97 m/z 731.65 Gene names LARP7

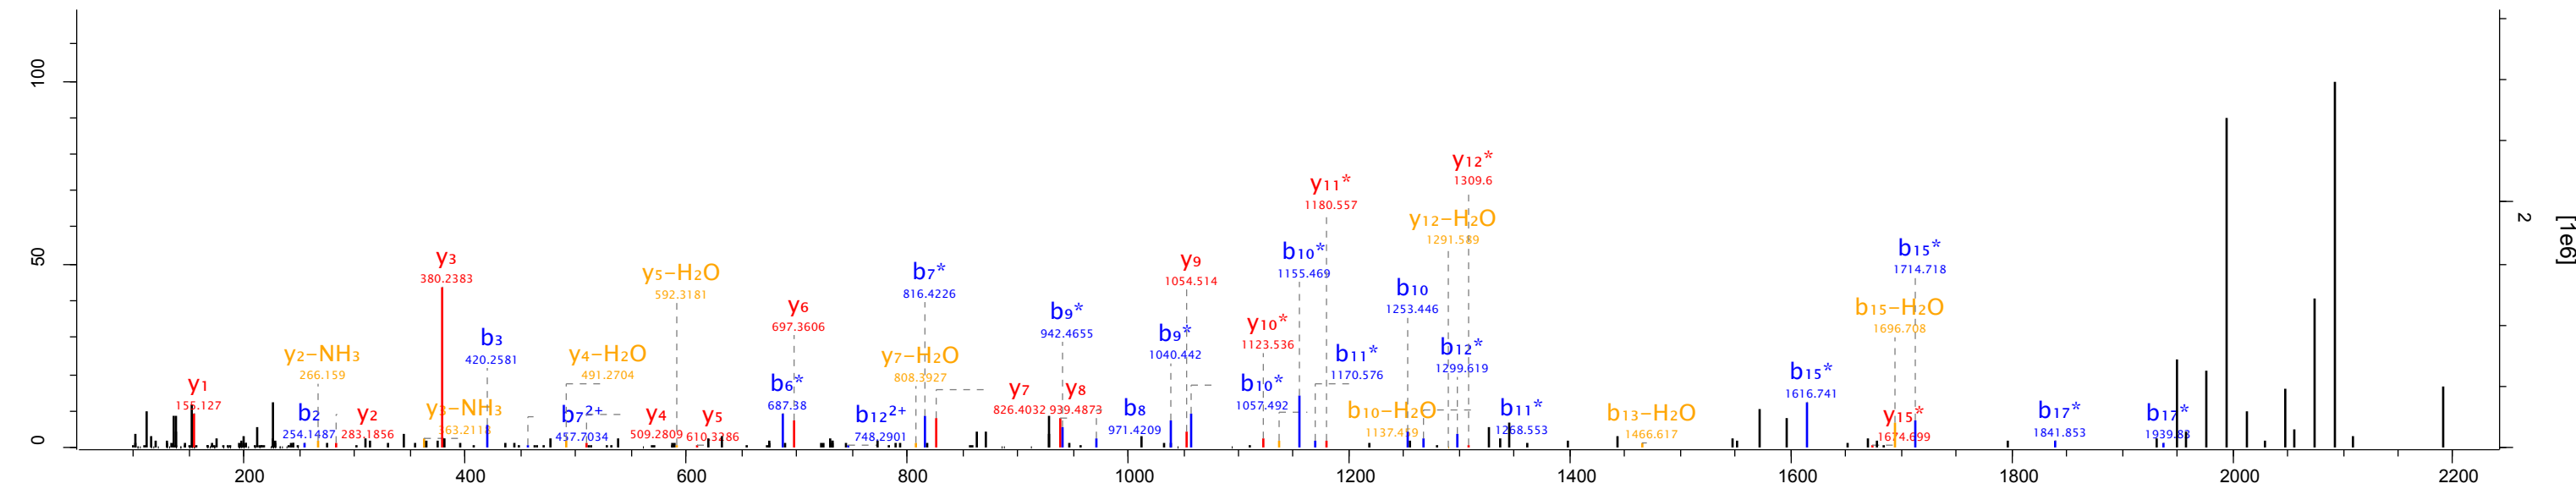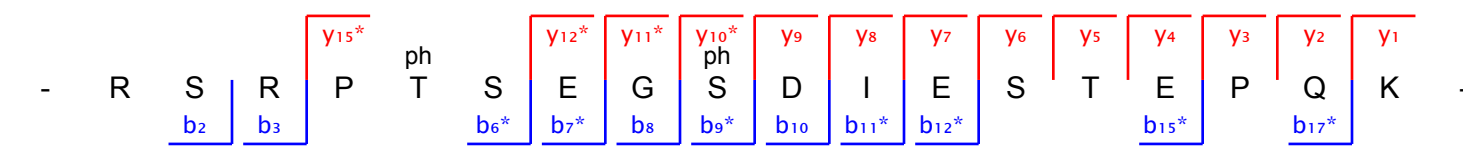

Raw file 20171215\_MaS\_33SR\_LMH\_phospho\_02 Scan 4040 Method FTMS; HCD Score 77.1 m/z 846.35 Gene names YAF2

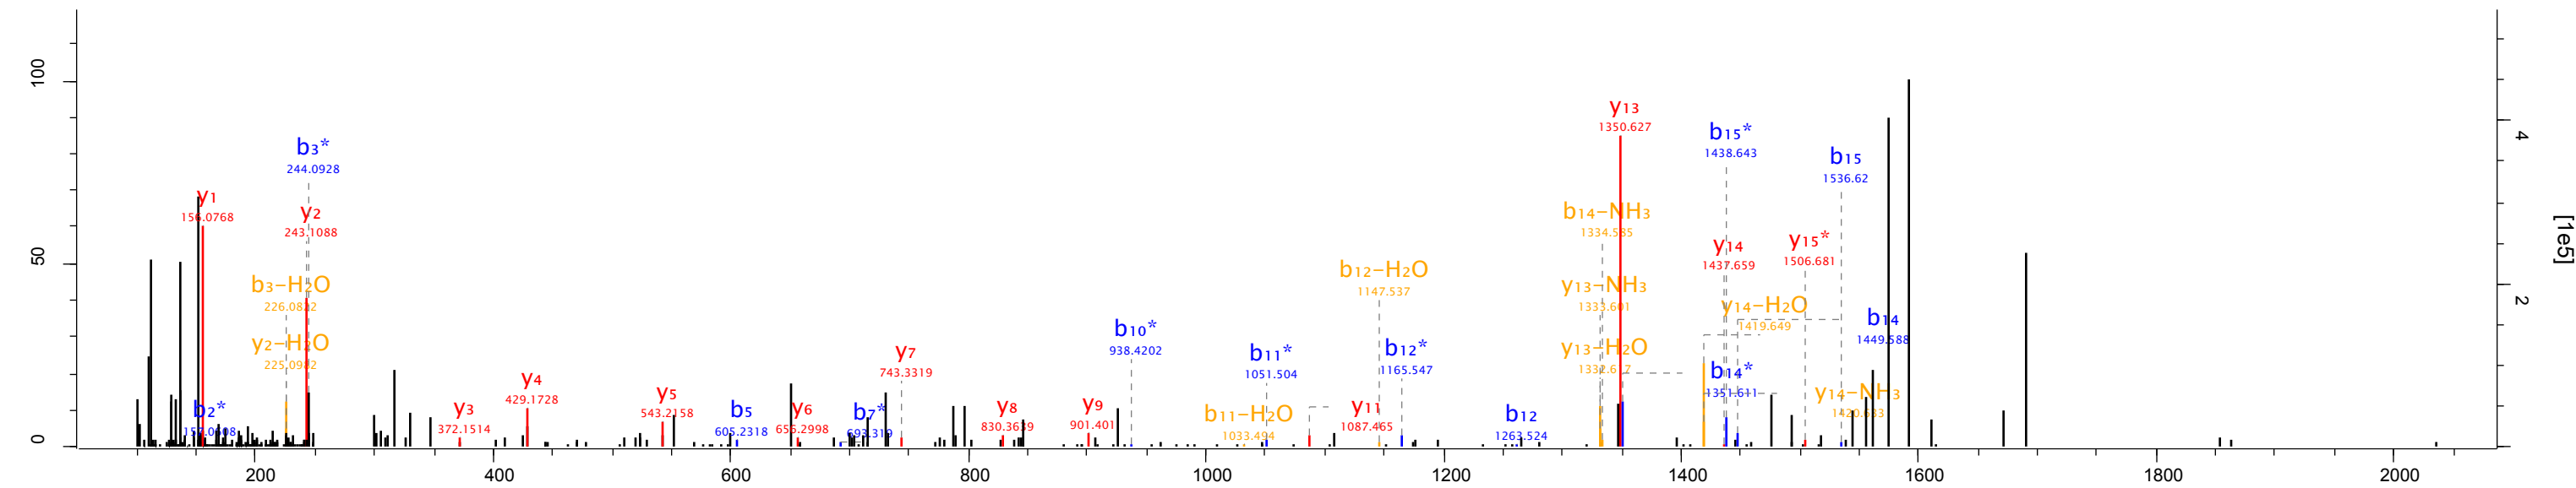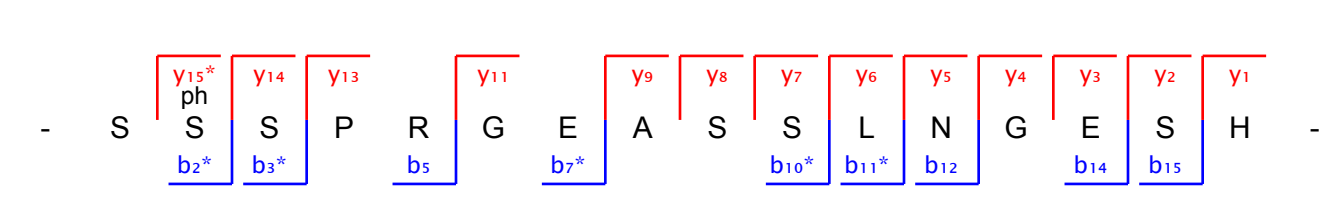

Raw file 20171215\_MaS\_33SR\_LMH\_phospho\_02 Scan 4260 Method FTMS; HCD Score 42.63 m/z 884.86 Gene names NRROS

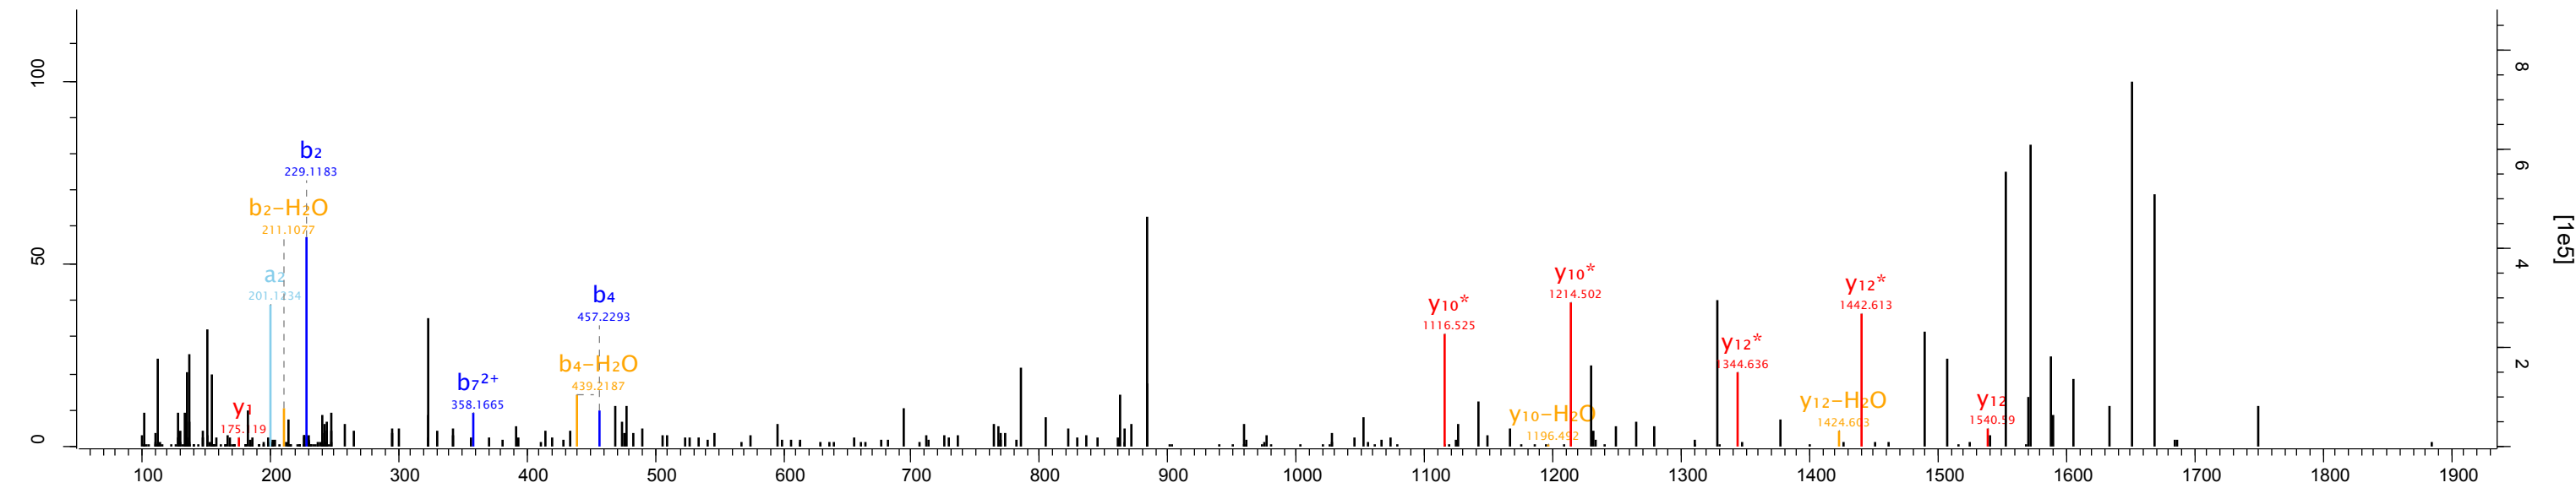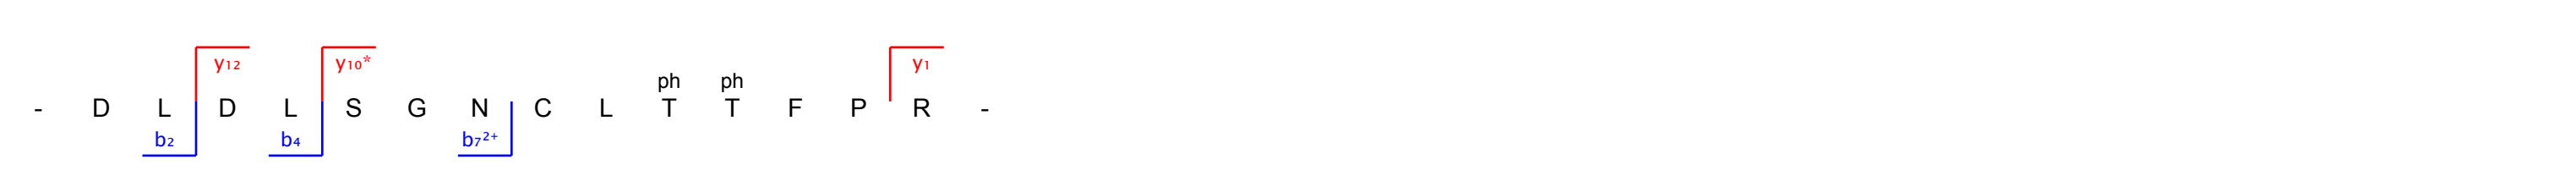

Raw file 20171215\_MaS\_33SR\_LMH\_phospho\_02 Scan 4280 Method FTMS; HCD Score 225.7 m/z 929.38 Gene names PI4K2A

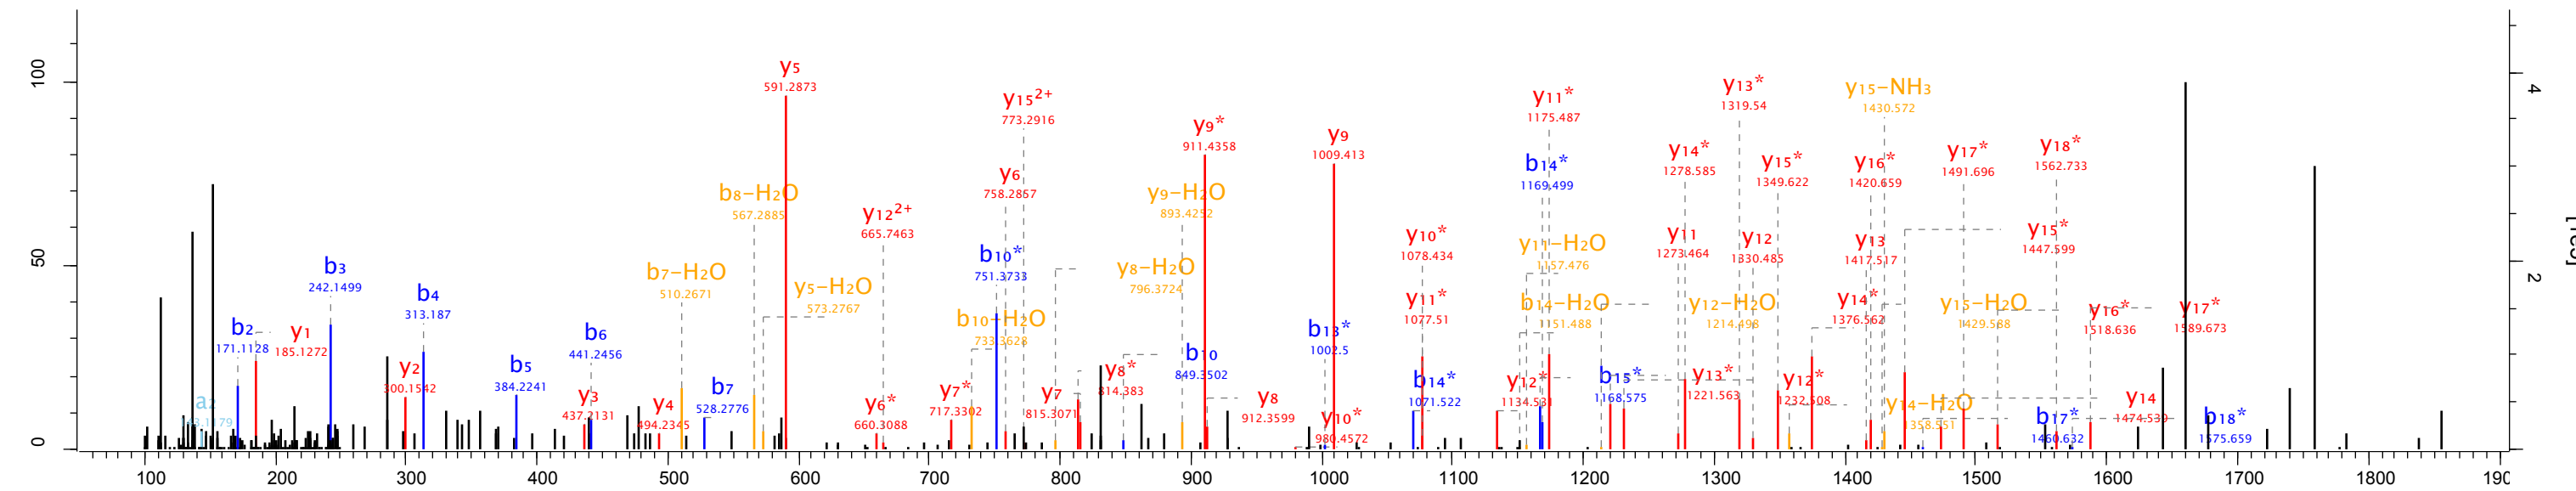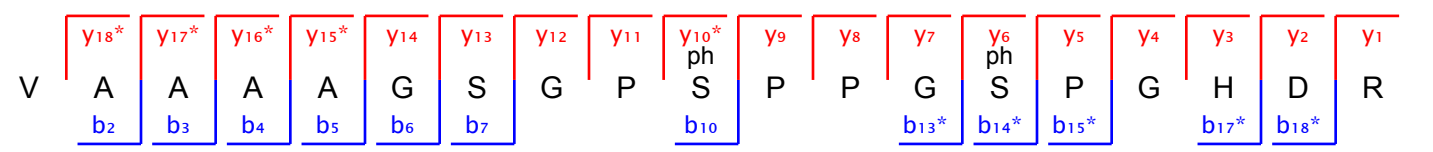

Raw file 20171215\_MaS\_33SR\_LMH\_phospho\_02 Scan 4420 Method FTMS; HCD Score 157.33 m/z 598.75 Gene names SLC38A1

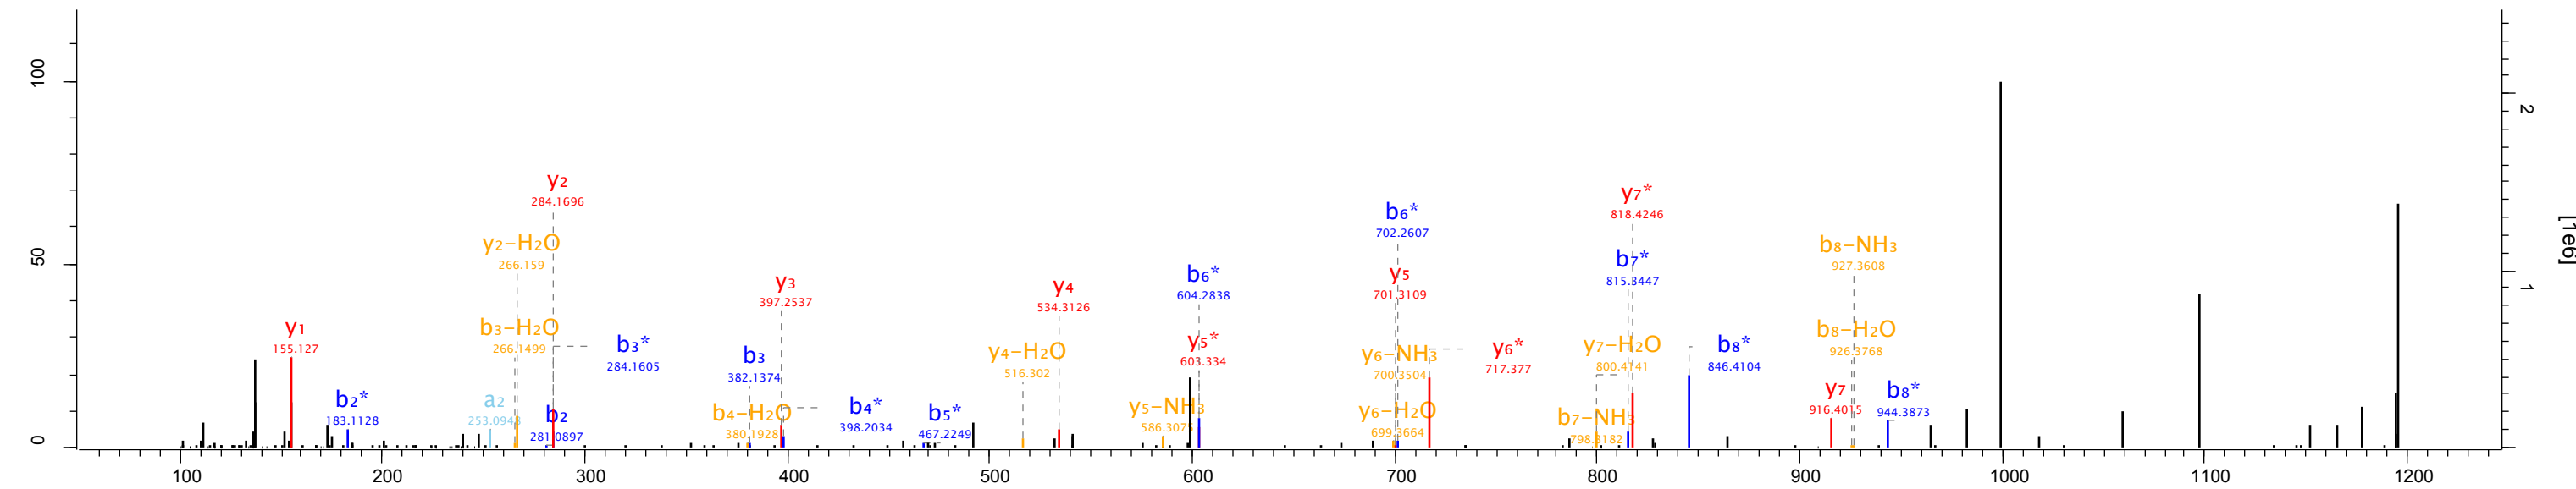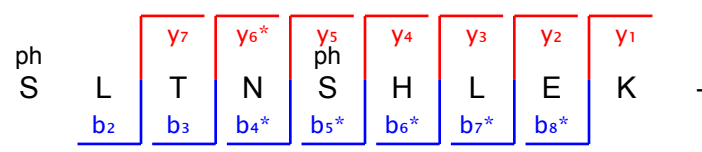

Raw file: 20171215\_MaS\_33SR\_LMH\_phospho\_02  
 Scan: 4480 Method: FTMS; HCD Score: 219.3 m/z: 853.87 Gene names: SLC6A15

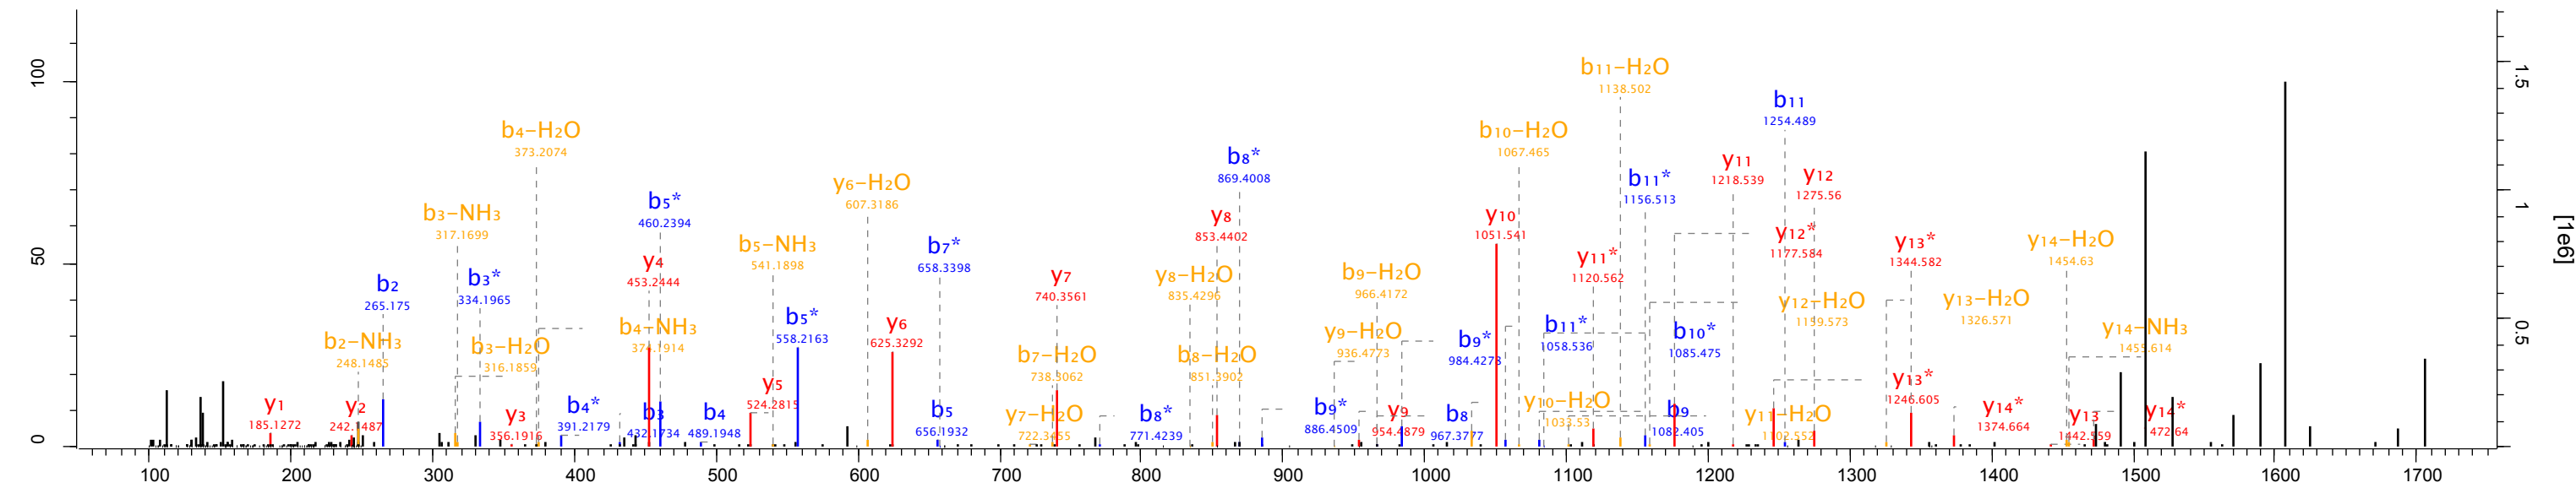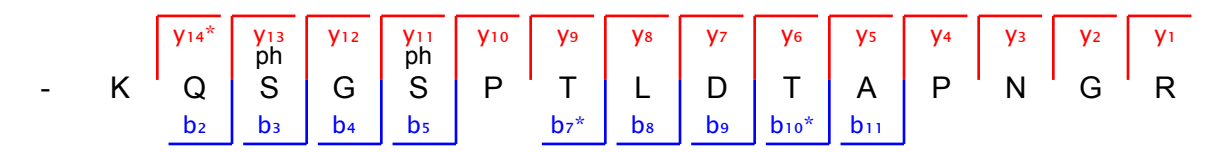

Raw file 20171215\_MaS\_33SR\_LMH\_phospho\_02 Scan 4570 Method FTMS; HCD Score 312.64 m/z 1179.47 Gene names NAA11

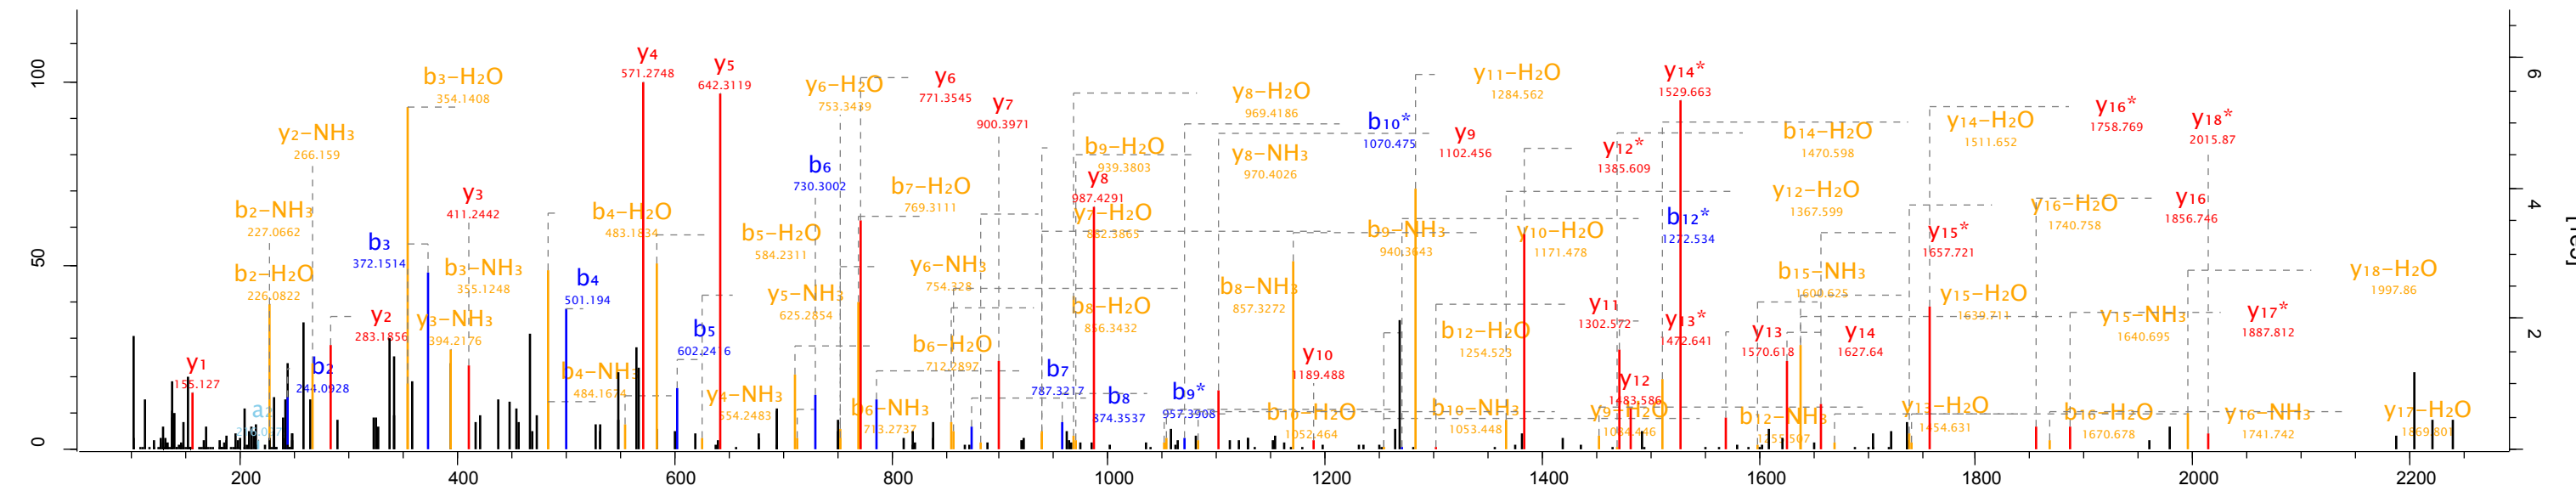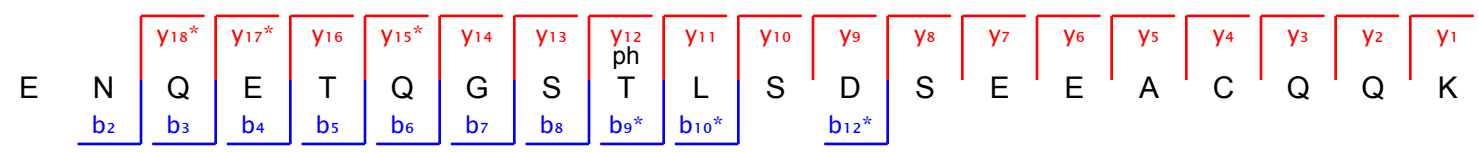



Raw file 20171215\_MaS\_33SR\_LMH\_phospho\_02 Scan 4690 Method FTMS; HCD Score 146.67 m/z 753.83 Gene names UBAP2L

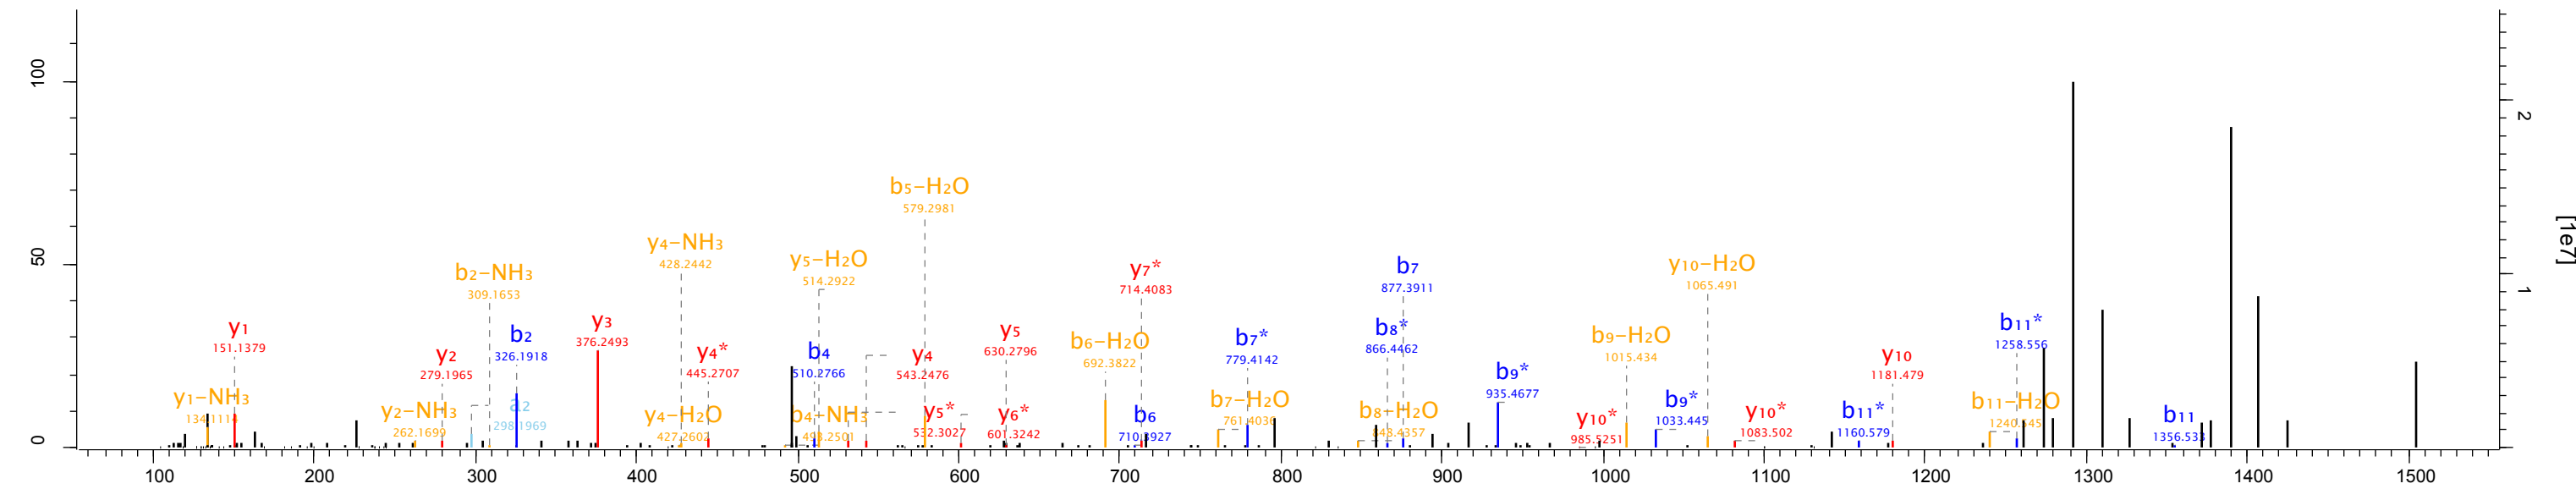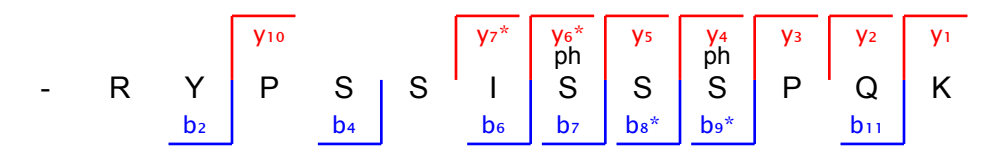

20171215\_MaS\_33SR\_LMH\_phospho\_02 4810 FTMS; HCD 134.05 1040.43 GTF2F1

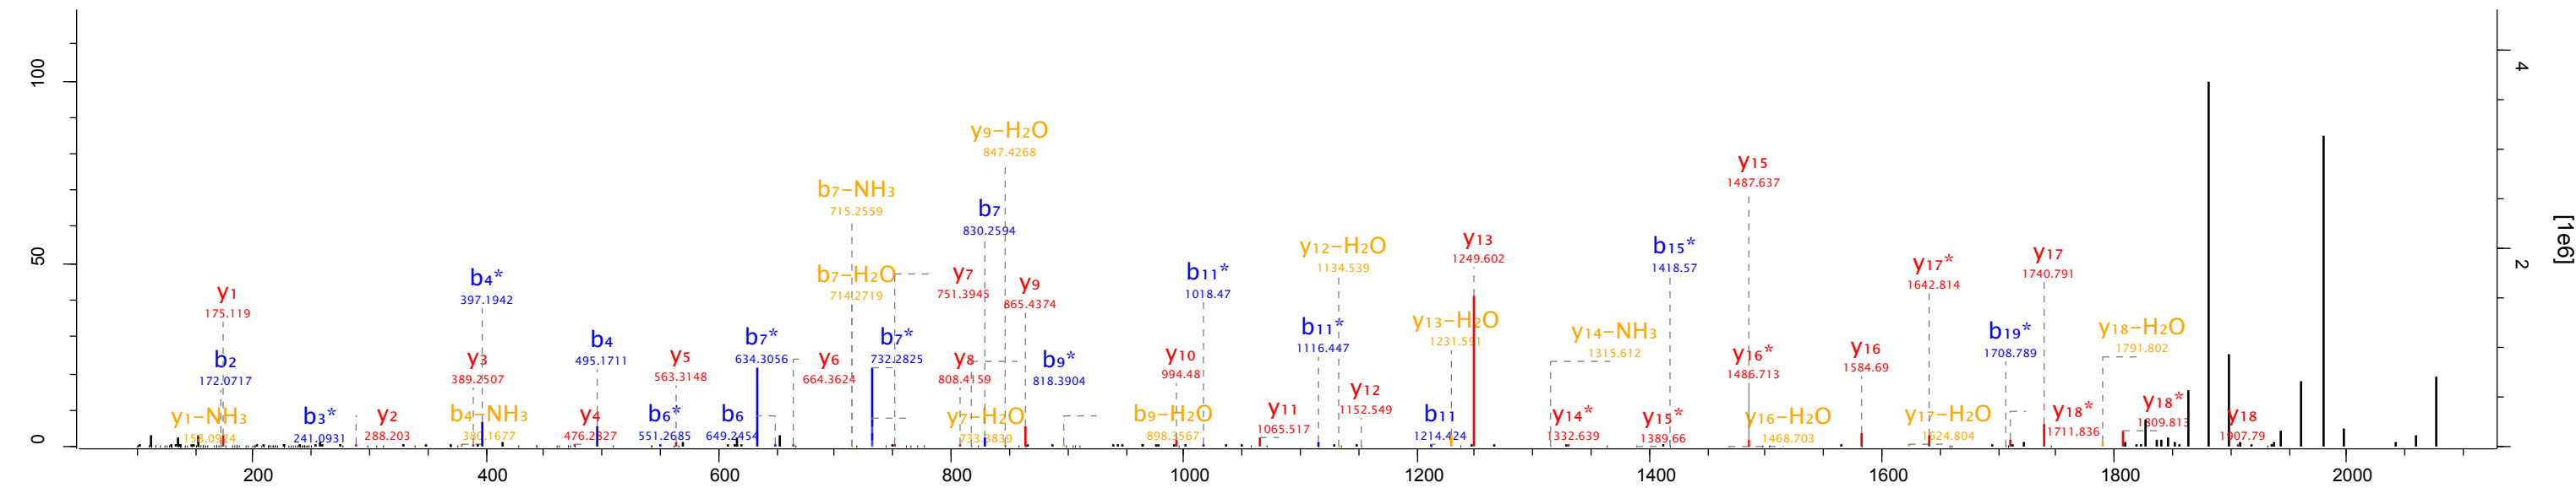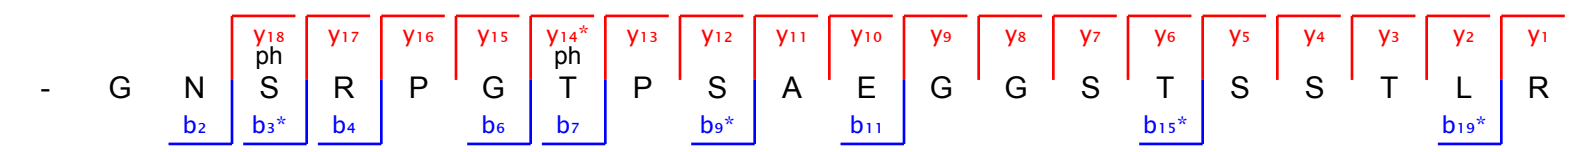

Raw file 20171215\_MaS\_33SR\_LMH\_phospho\_02 Scan 4910 Method FTMS; HCD Score 71.7 m/z 687.61 Gene names CDK12

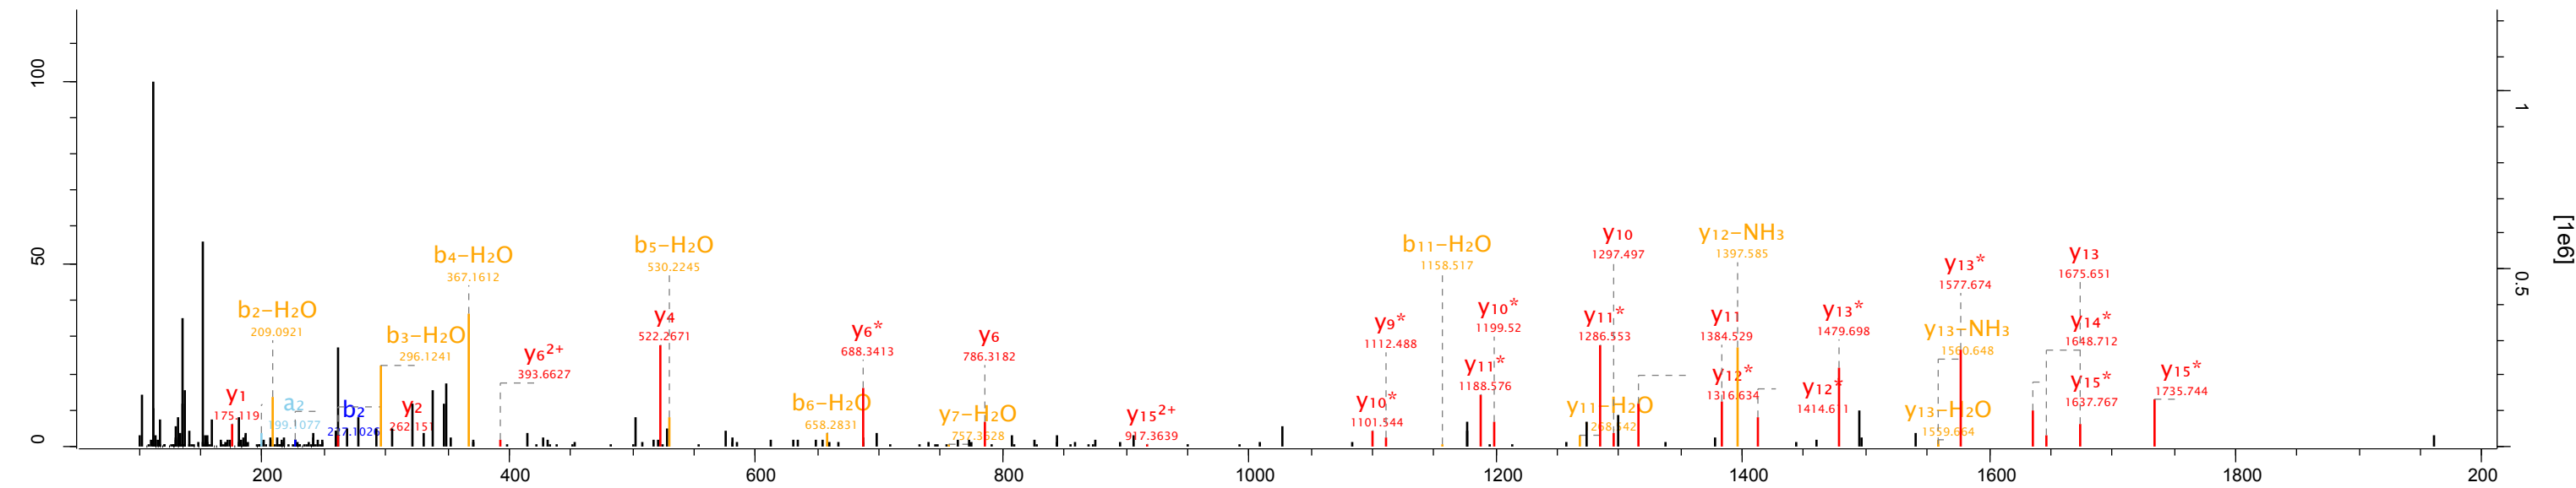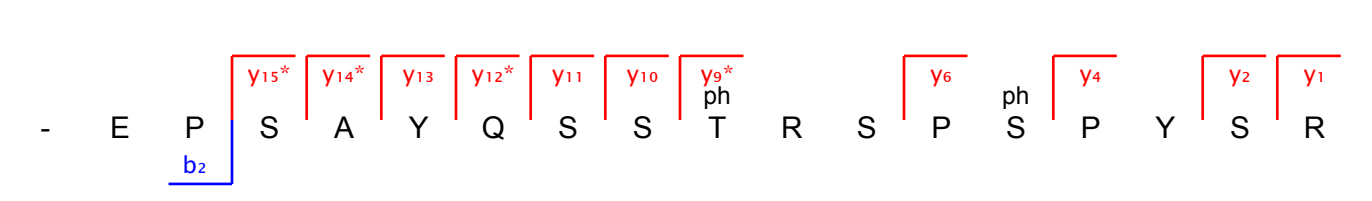

Raw file 20171215\_MaS\_33SR\_LMH\_phospho\_02 Scan 5720 Method FTMS; HCD Score 136.33 m/z 942.81 Gene names ARMCX3

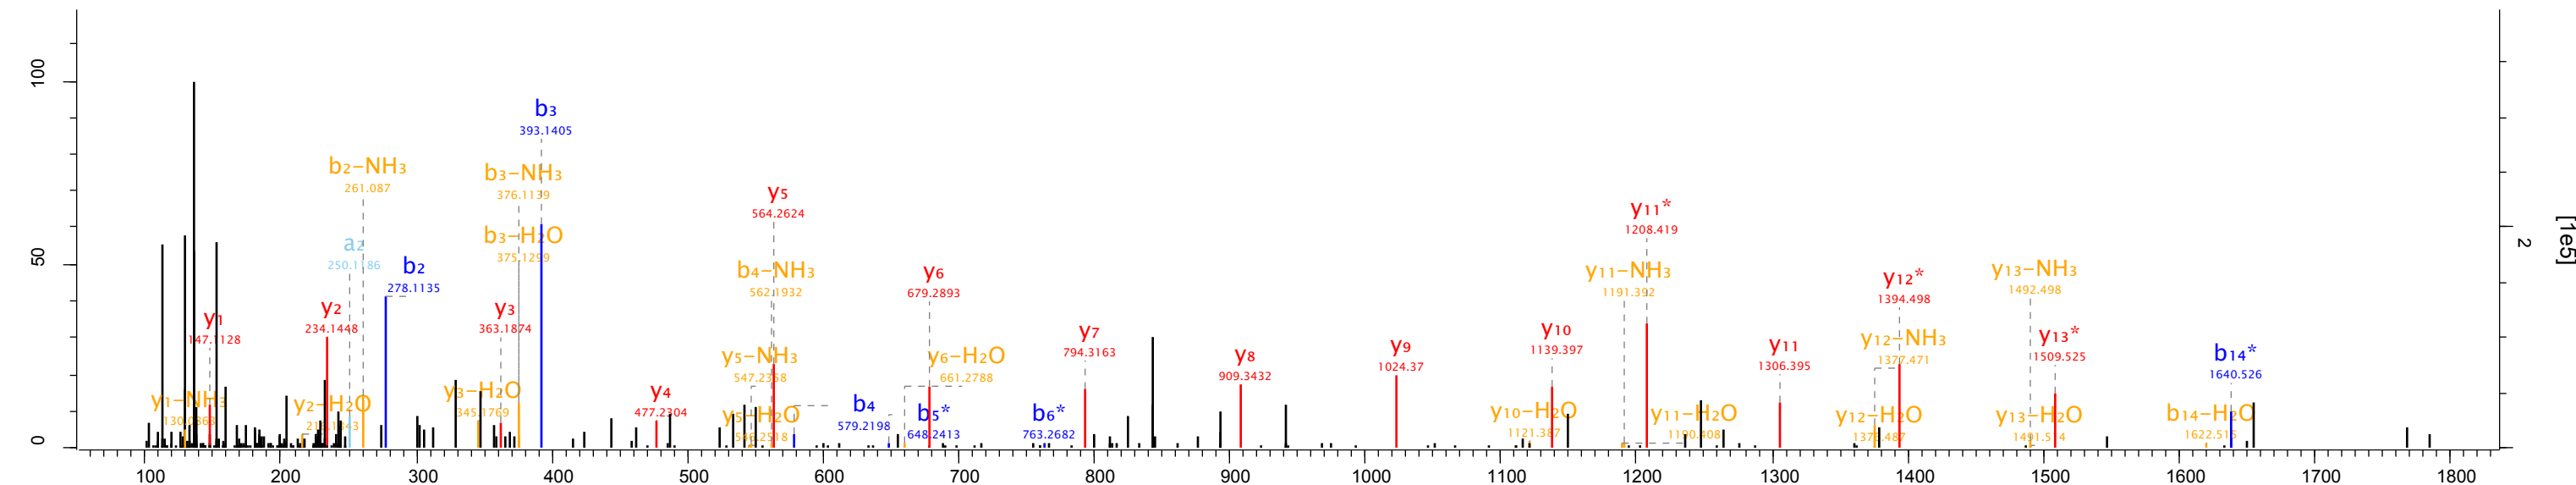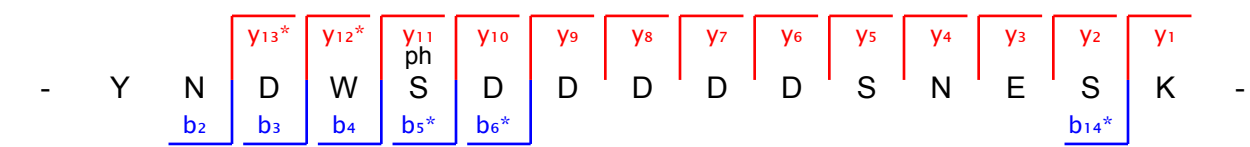

Raw file 20171215\_MaS\_33SR\_LMH\_phospho\_02 Scan 5730 Method FTMS; HCD Score 193.57 m/z 1035.45 Gene names MAP7D1

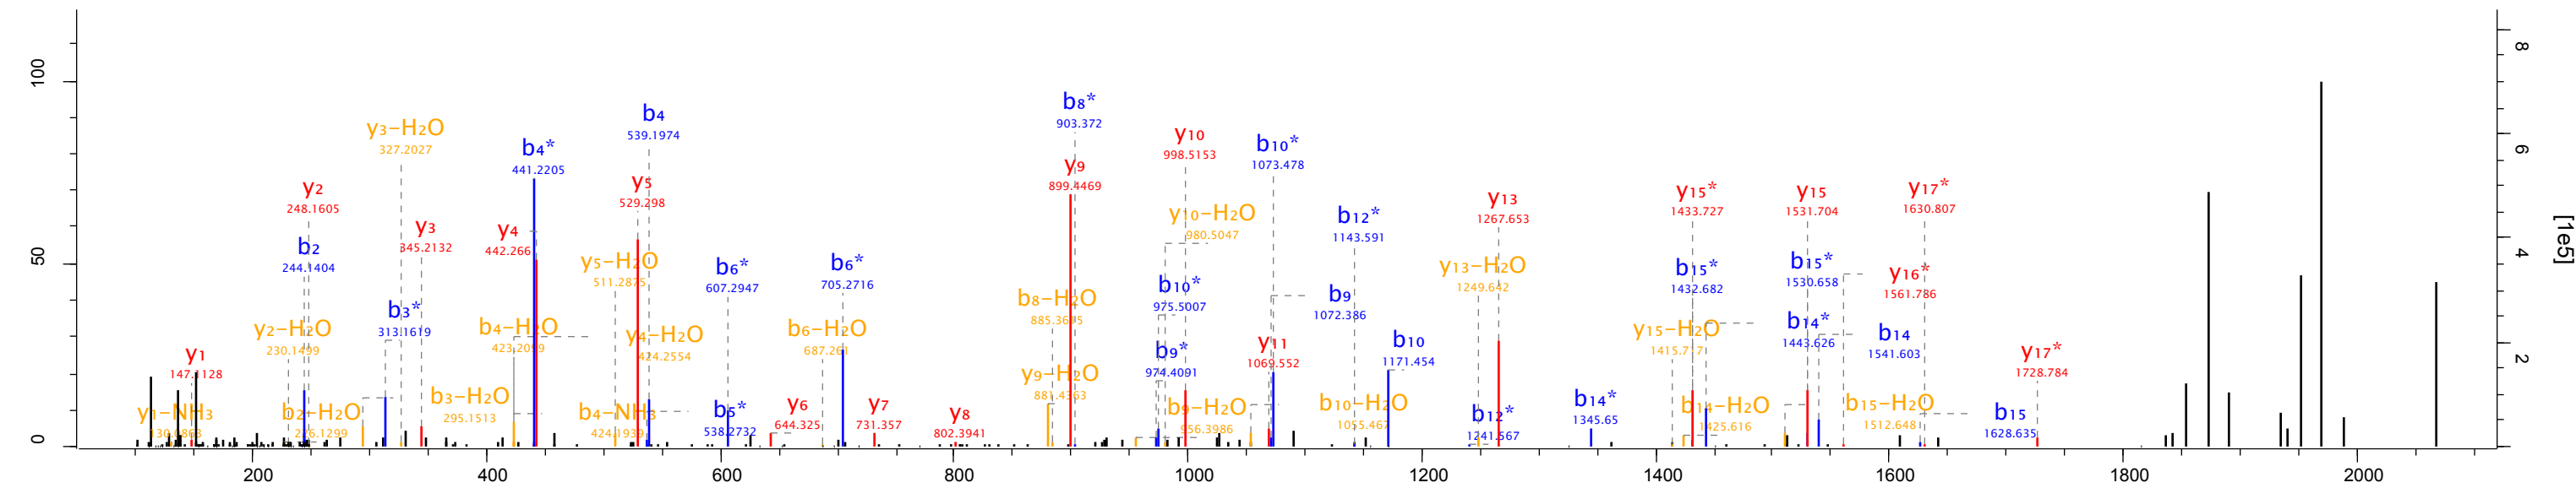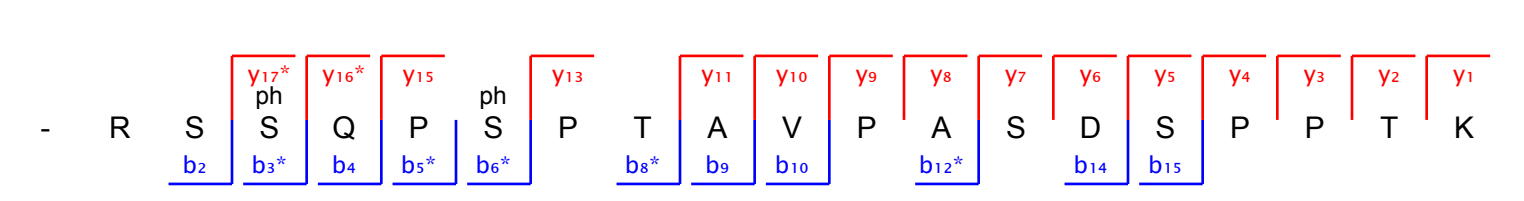

Raw file 20171215\_MaS\_33SR\_LMH\_phospho\_02 Scan 5820 Method FTMS; HCD Score 58.25 m/z 668.8 Gene names PHLDB2

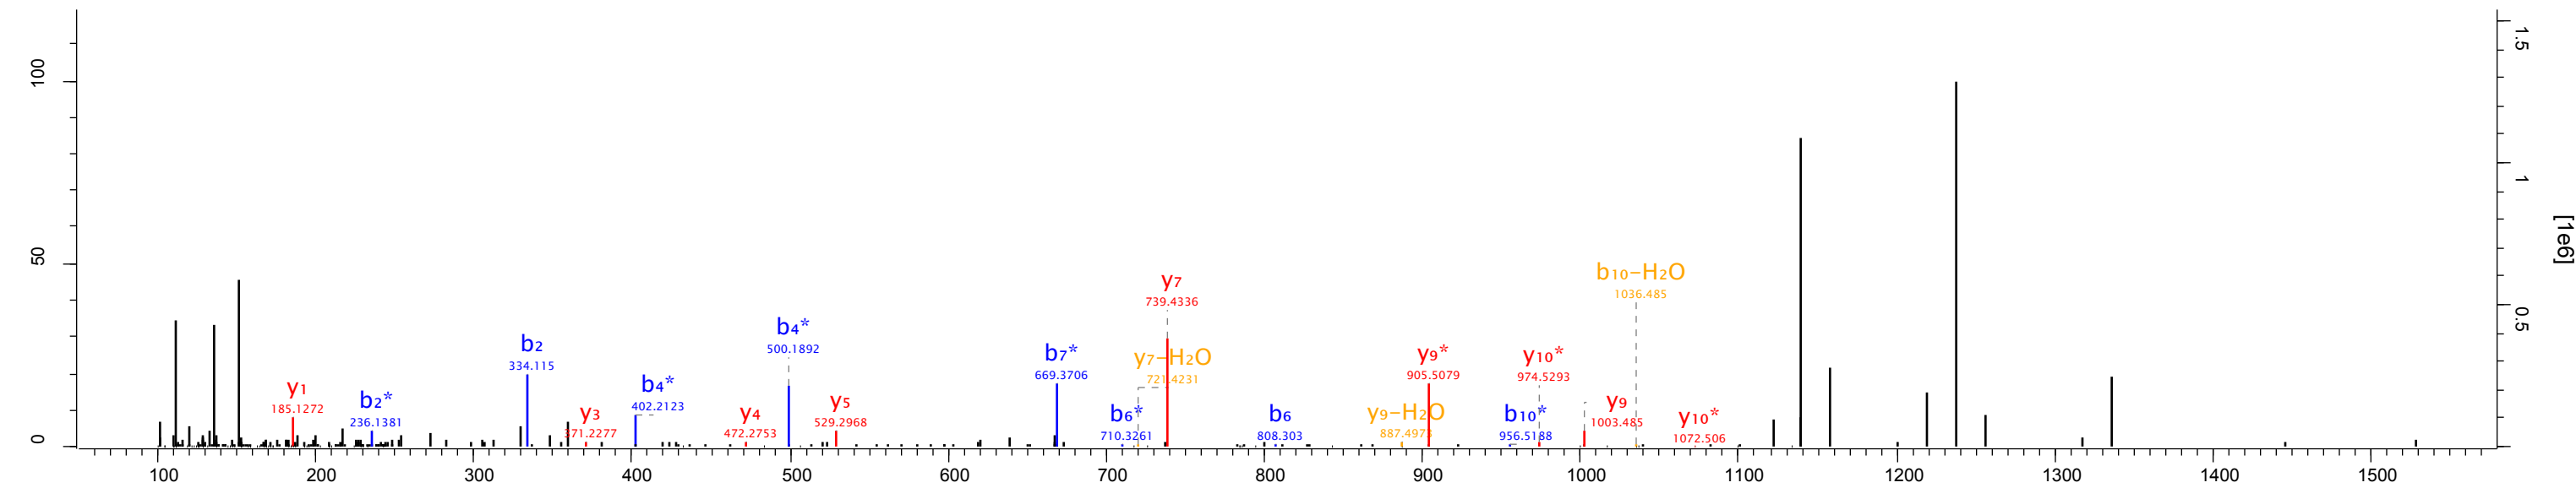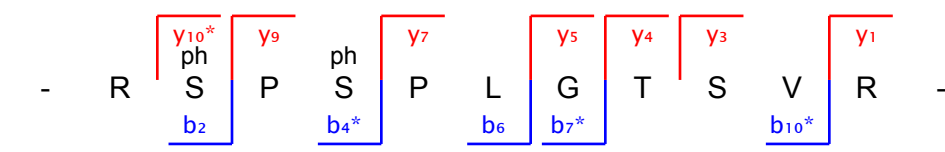

Raw file 20171215\_MaS\_33SR\_LMH\_phospho\_02 Scan 6100 Method FTMS; HCD Score 91.21 m/z 826.69 Gene names CEP170;CEP170P1

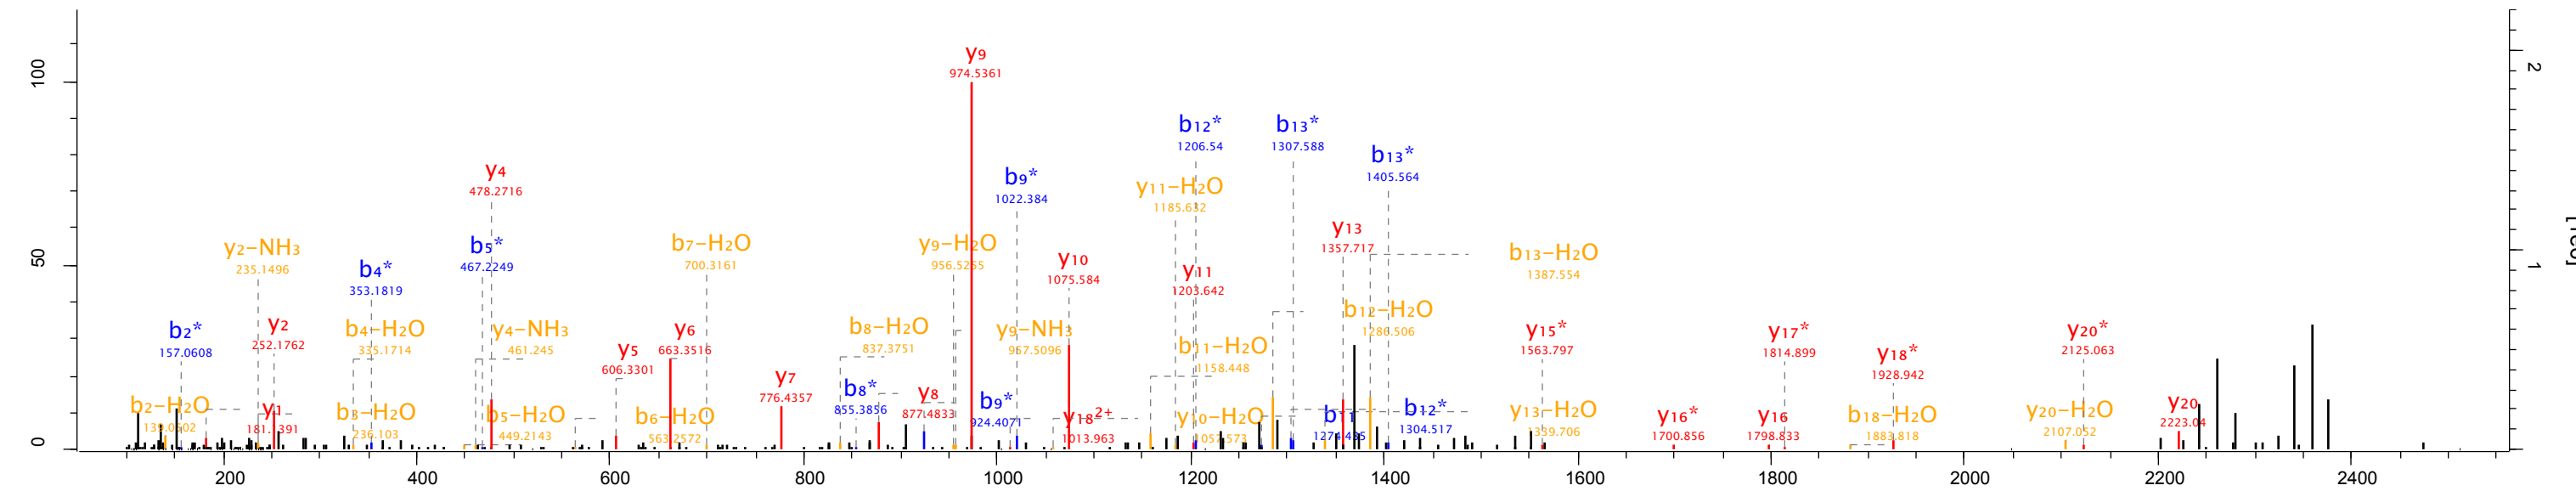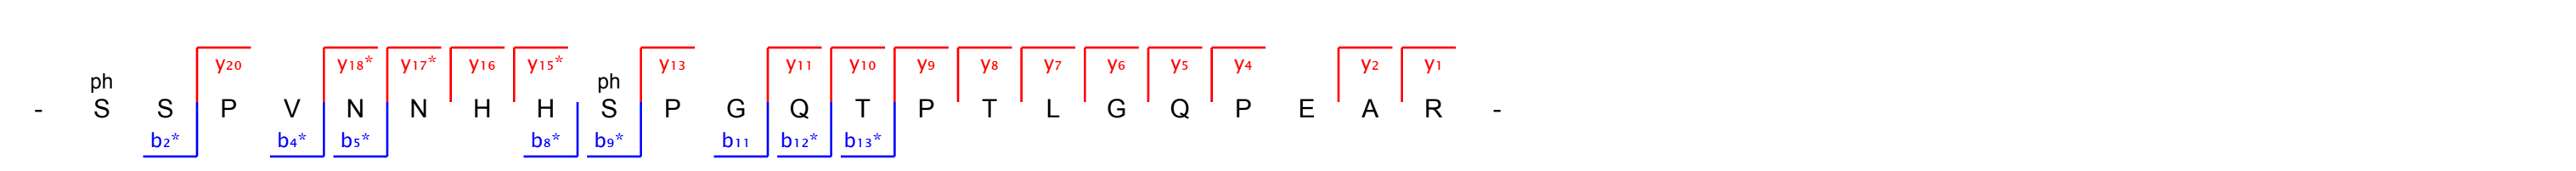

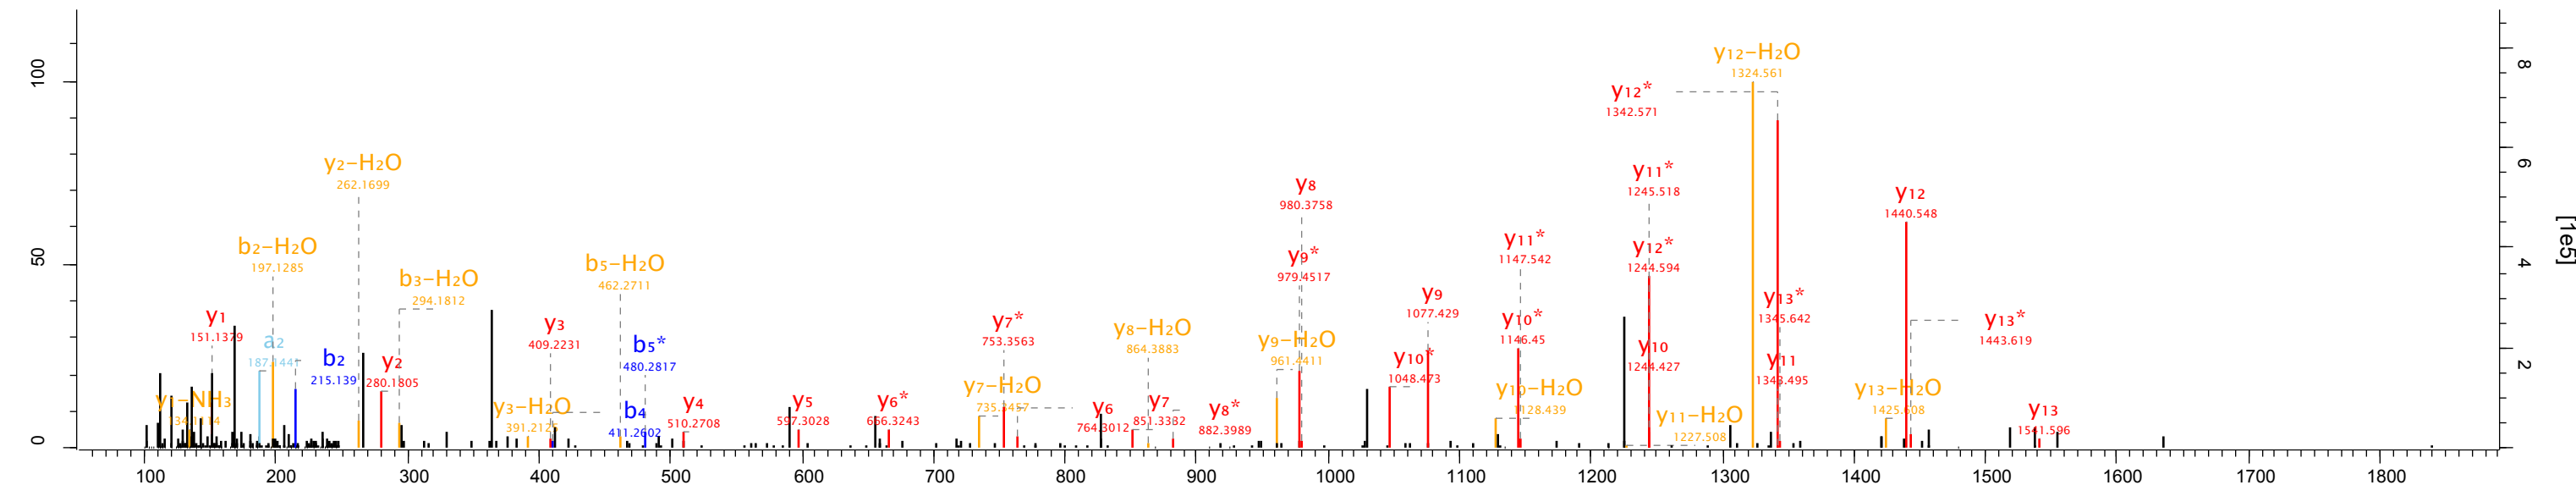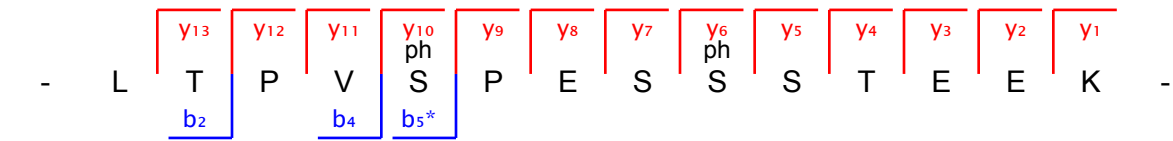



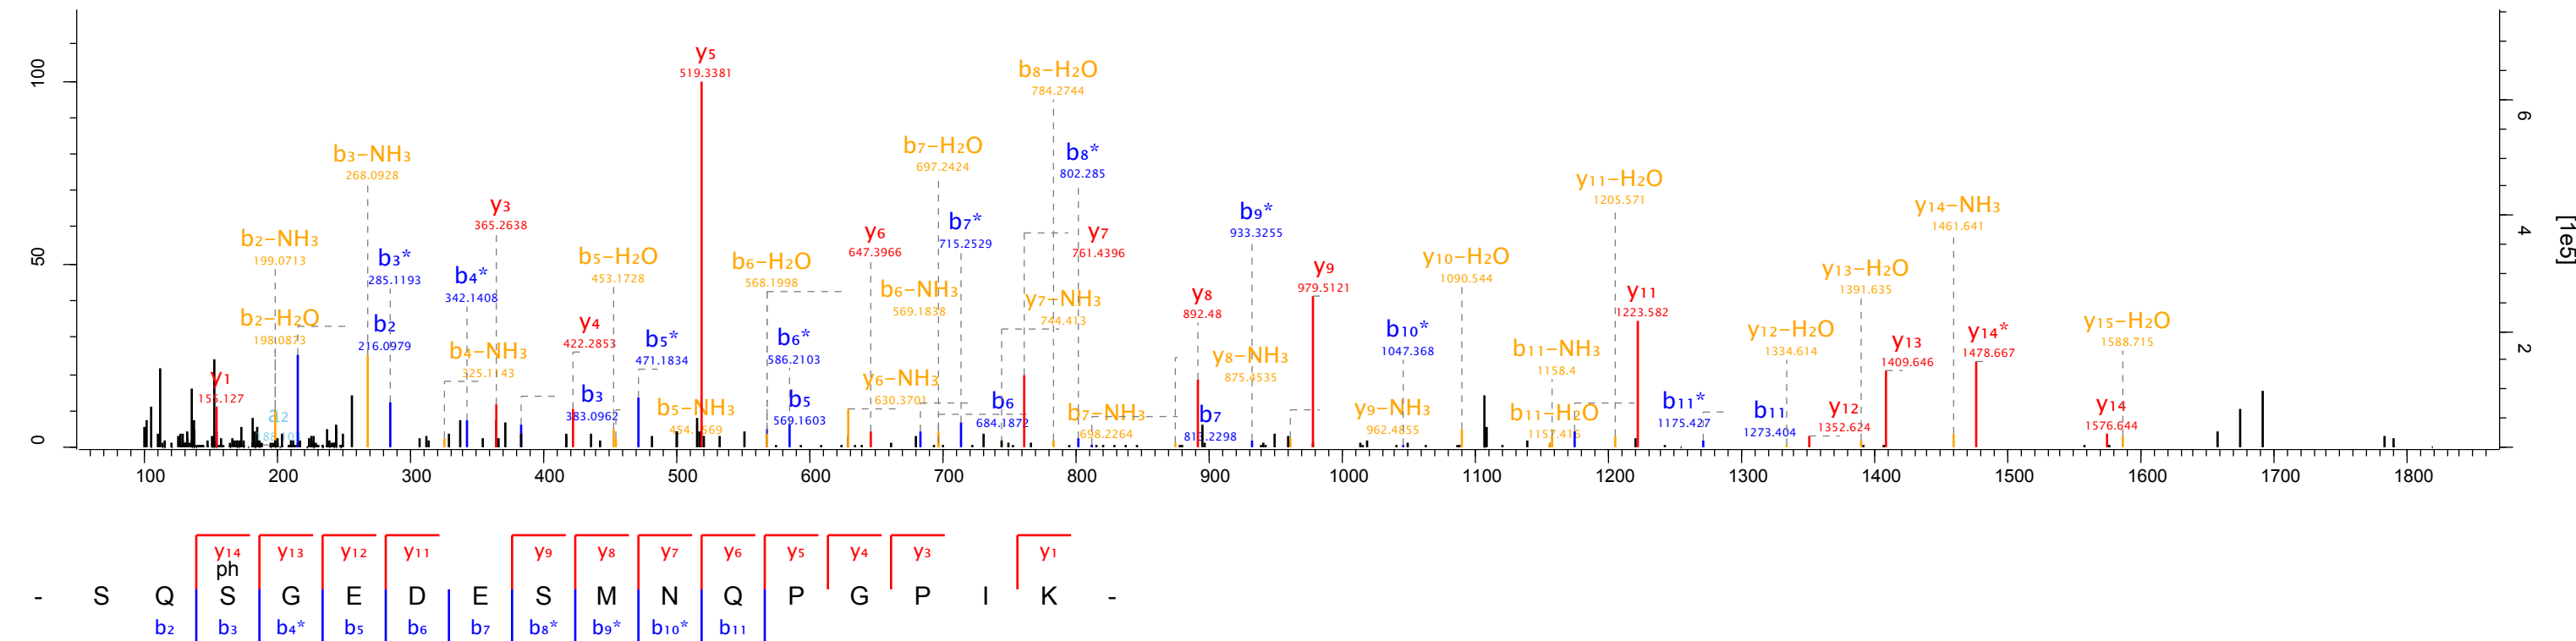

Raw file 20171215\_MaS\_33SR\_LMH\_phospho\_02 Scan 7520 Method FTMS; HCD Score 113.42 m/z 940.4 Gene names BCLAF1

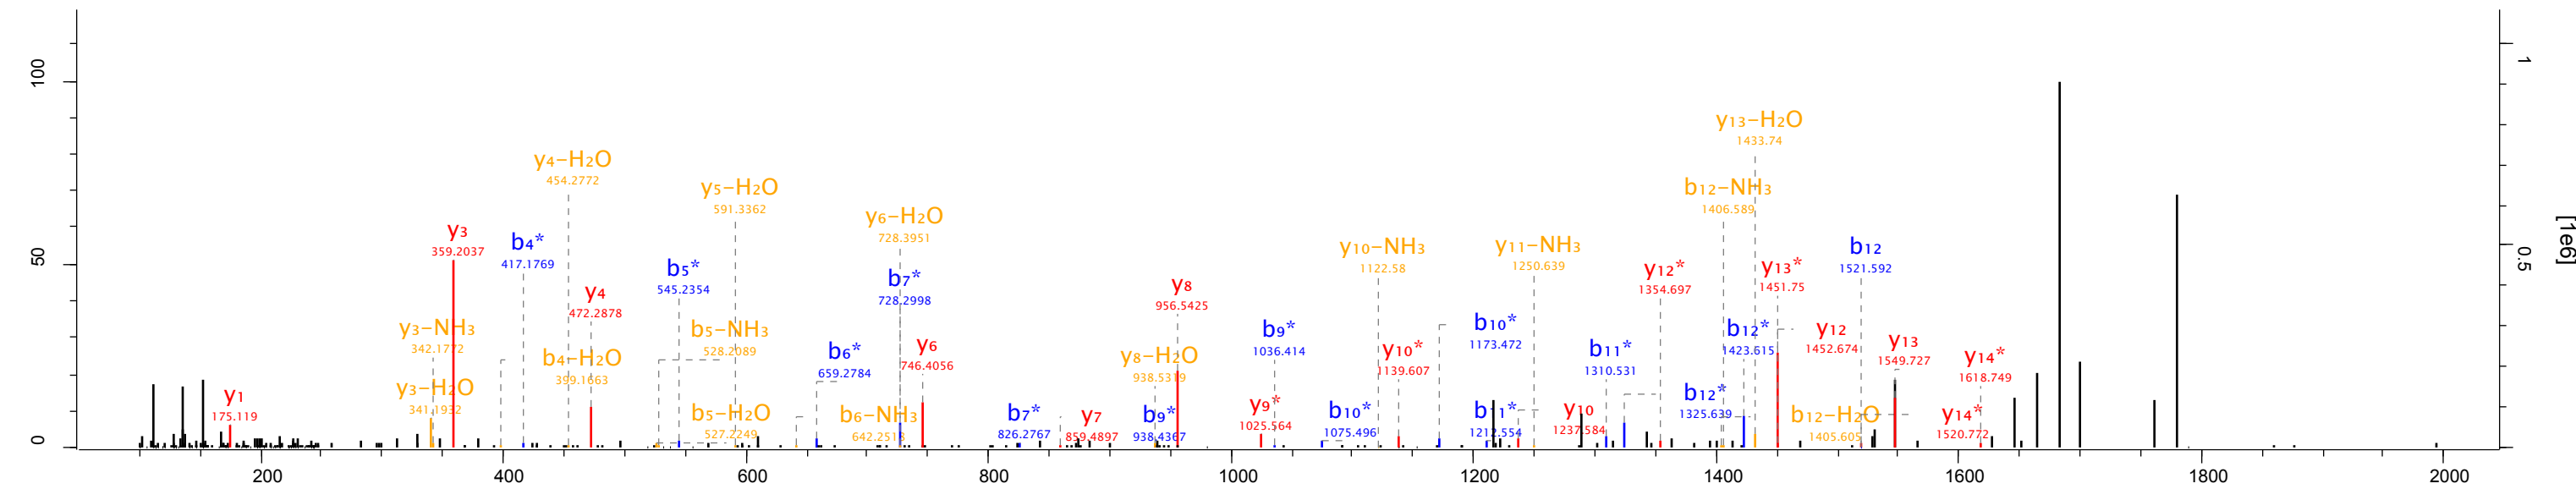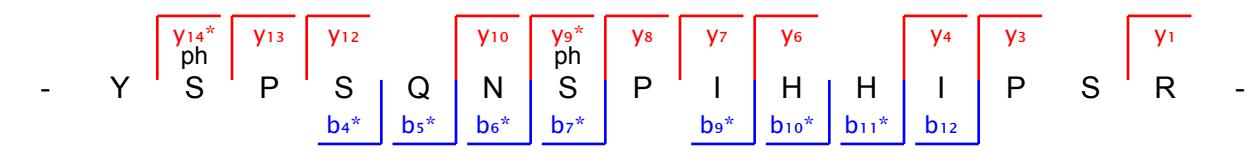

Raw file 20171215\_MaS\_33SR\_LMH\_phospho\_02 Scan 7740 Method FTMS; HCD Score 189.11 m/z 935.84 Gene names TRA2A

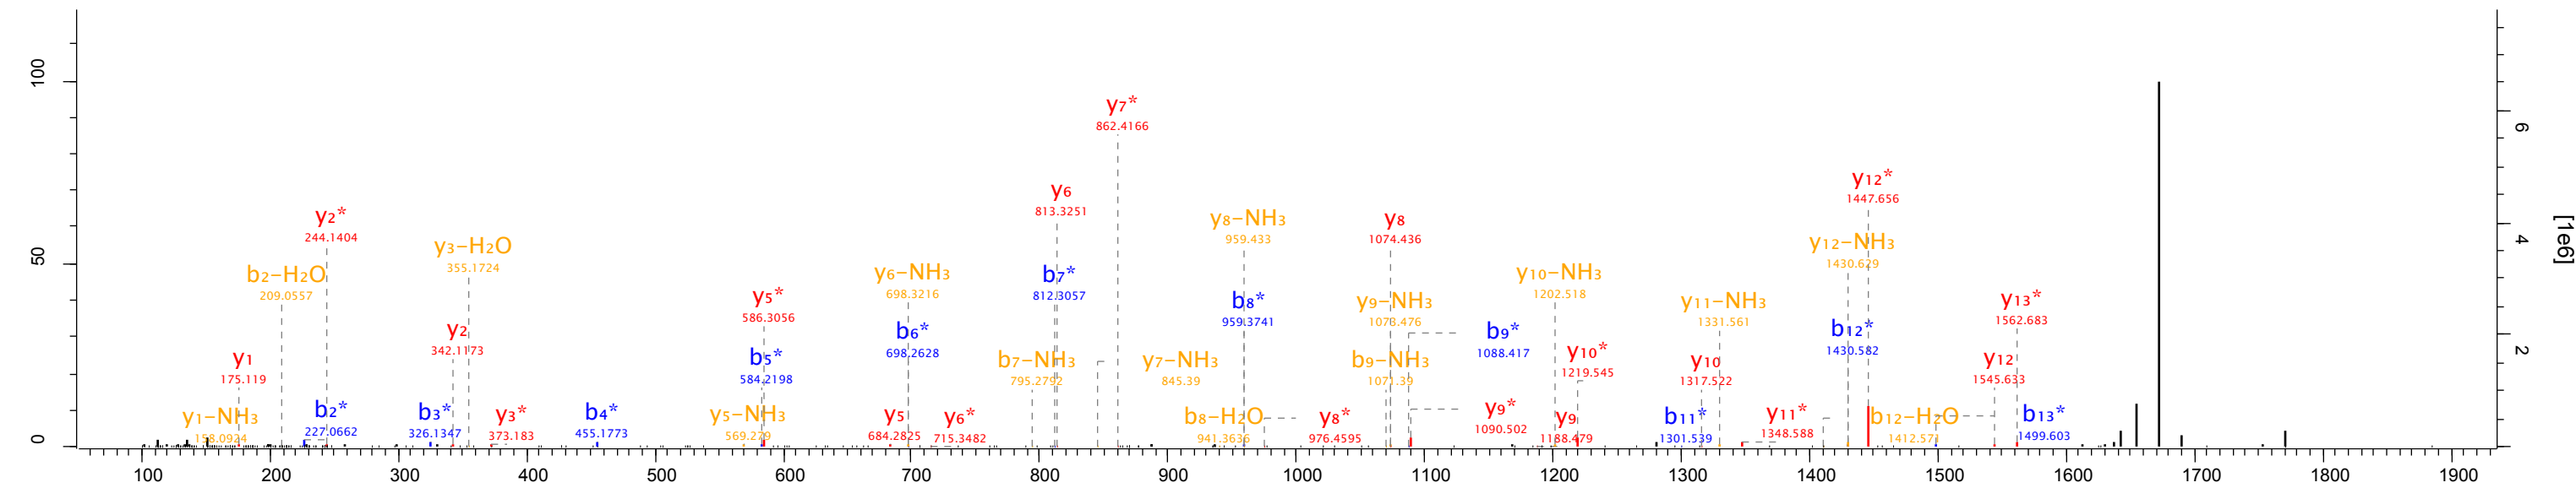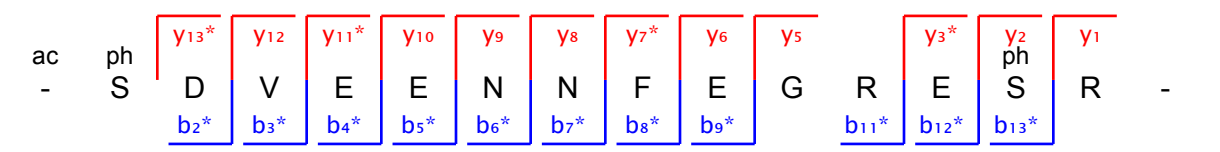

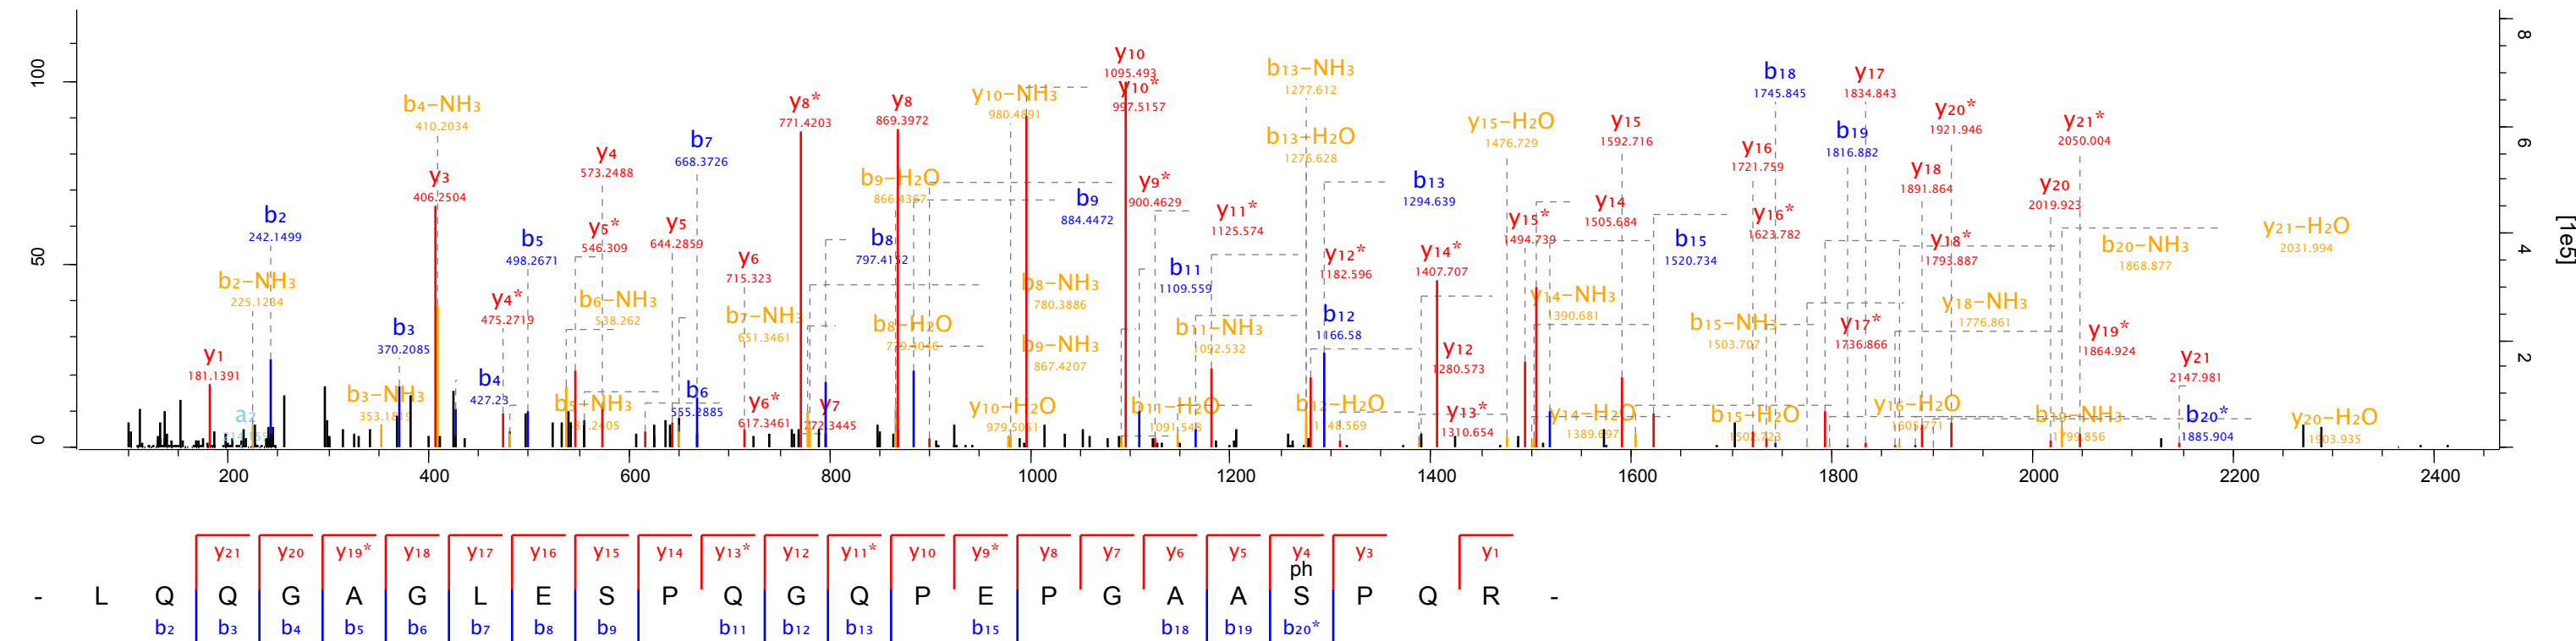

Raw file 20171215\_MaS\_33SR\_LMH\_phospho\_02 Scan 8060 Method FTMS; HCD Score 77.52 m/z 914.36 Gene names PBRM1

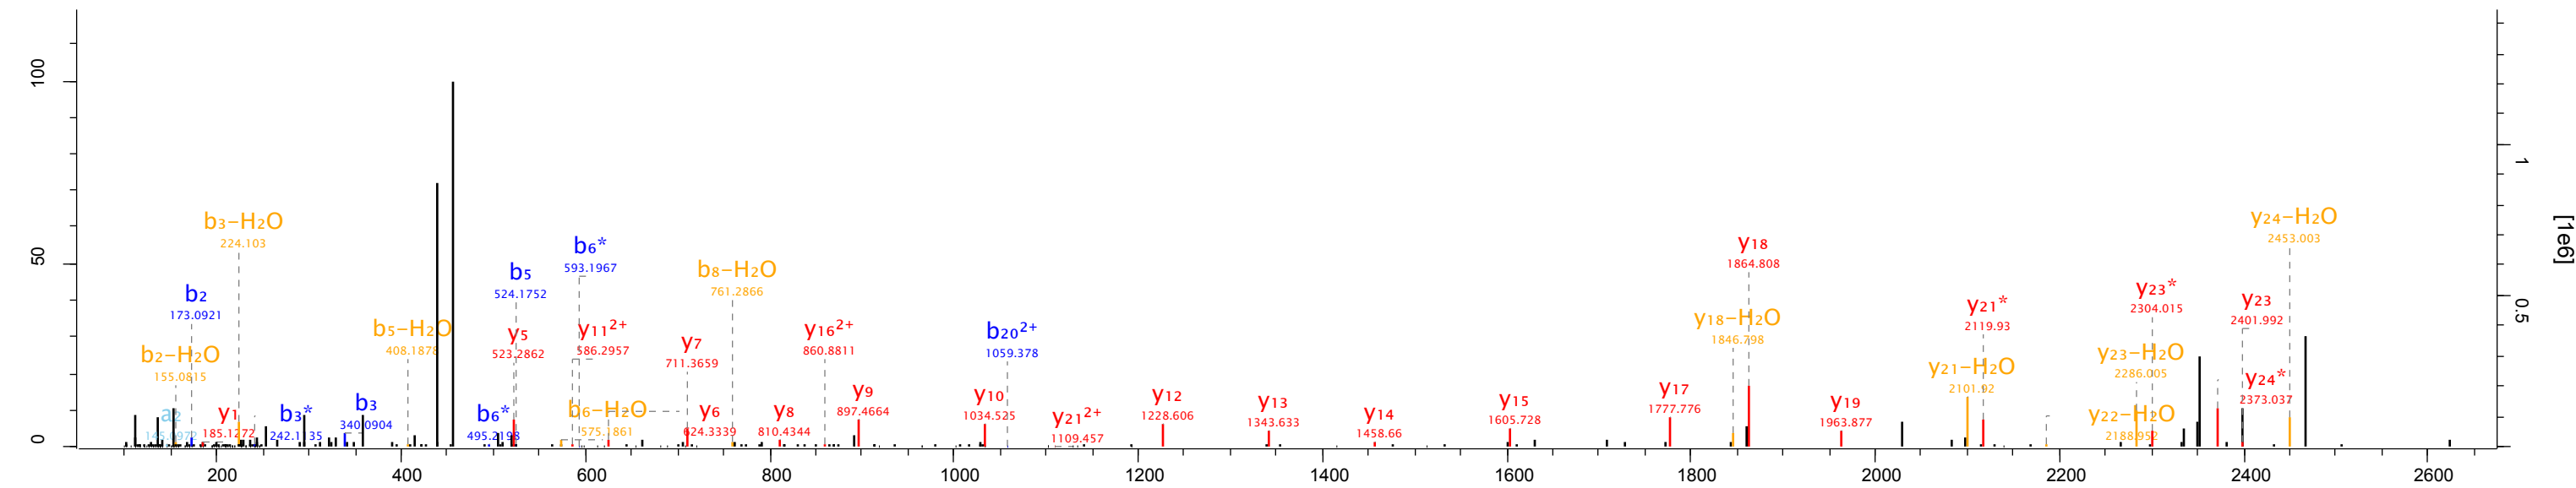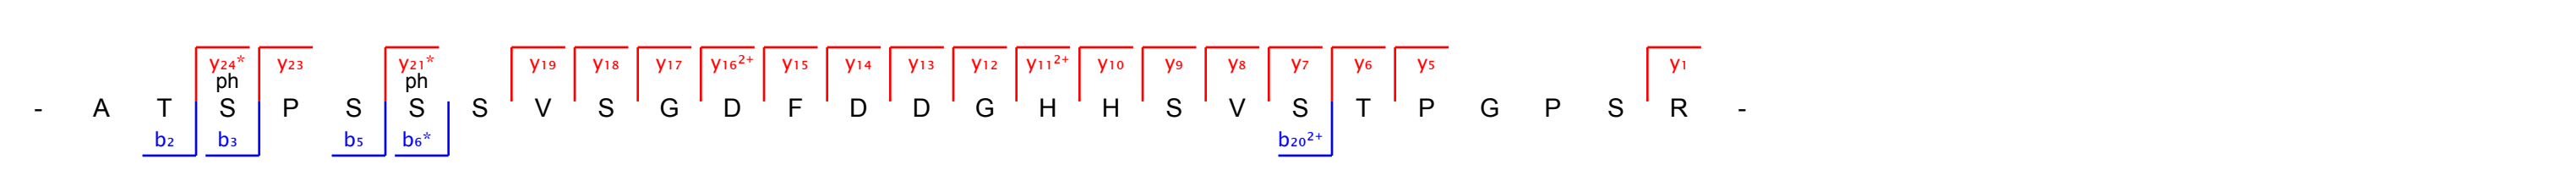



Raw file 20171215\_MaS\_33SR\_LMH\_phospho\_02 Scan 8350 Method FTMS; HCD Score 157.88 m/z 844.34 Gene names POLR2A

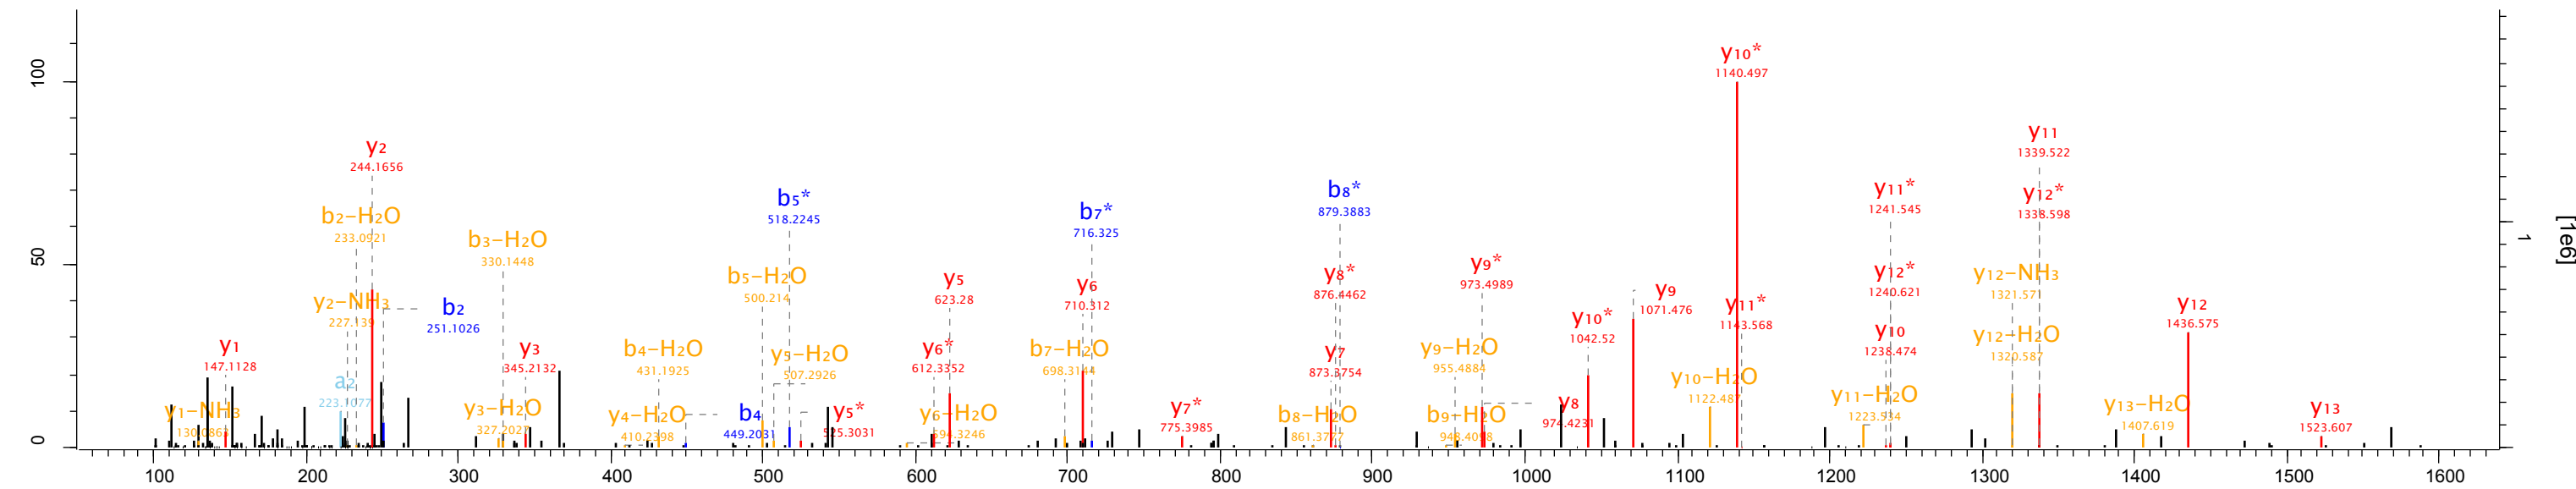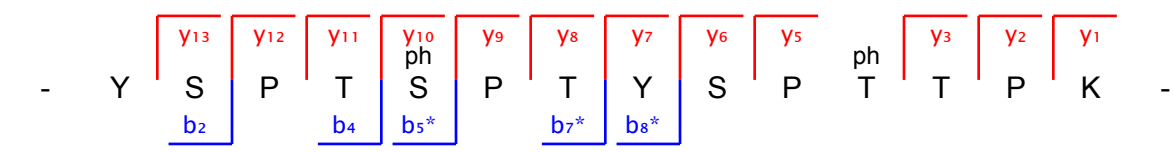

Raw file 20171215\_MaS\_33SR\_LMH\_phospho\_02 Scan 8780 Method FTMS; HCD Score 126.84 m/z 629.56 Gene names FIP1L1

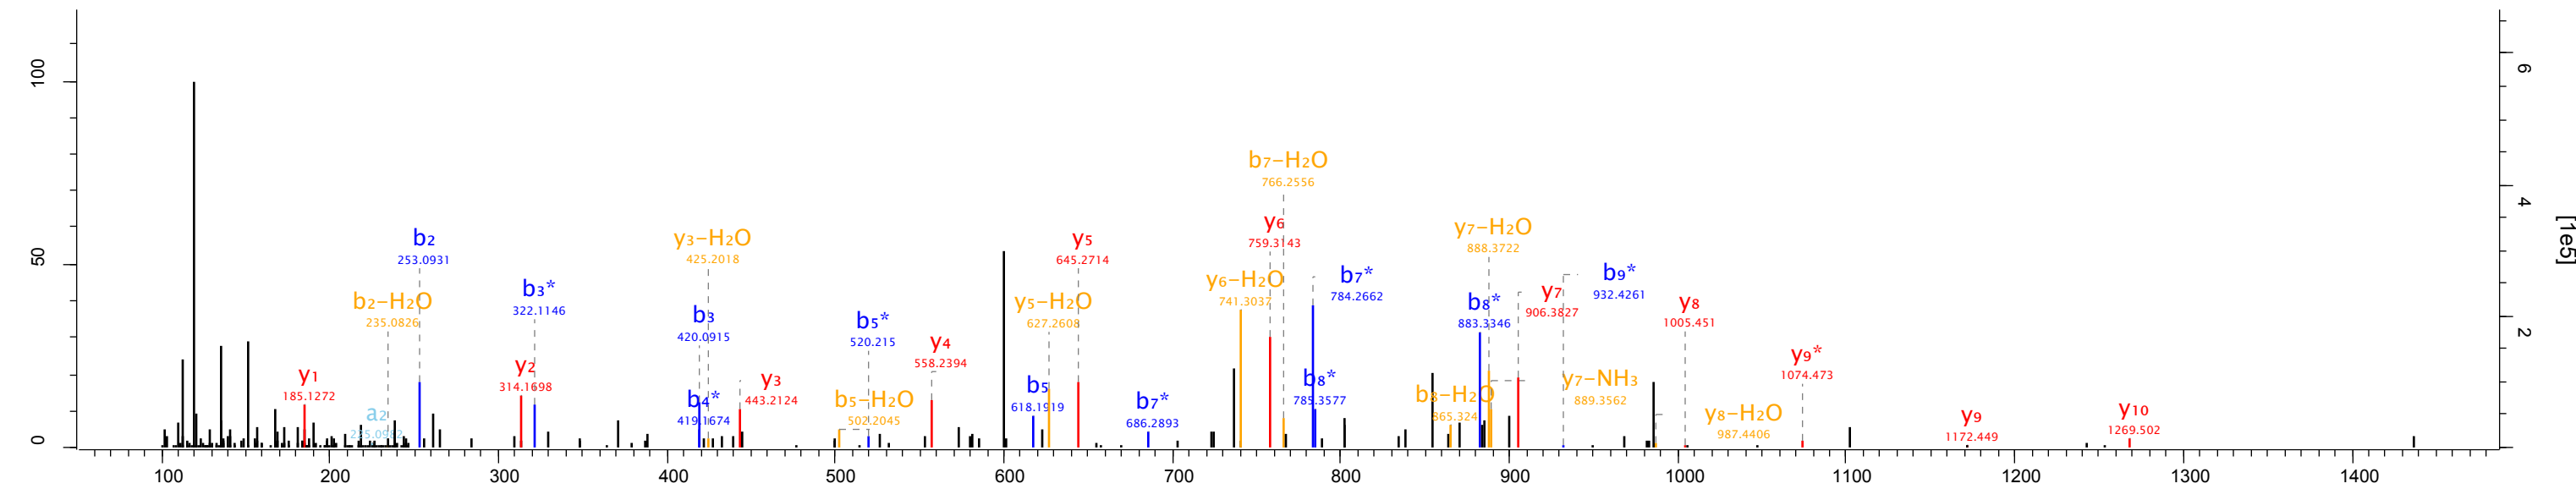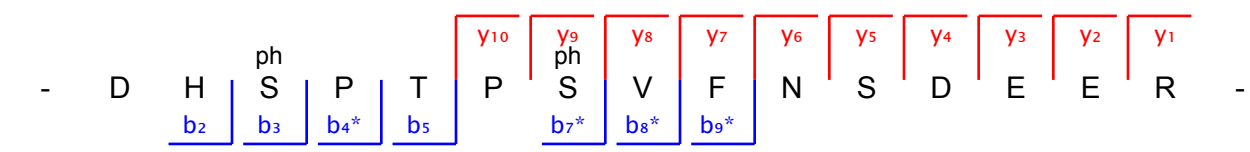



Raw file 20171215\_MaS\_33SR\_LMH\_phospho\_02 Scan 9530 Method FTMS; HCD Score 61.94 m/z 545.6 Gene names WIZ

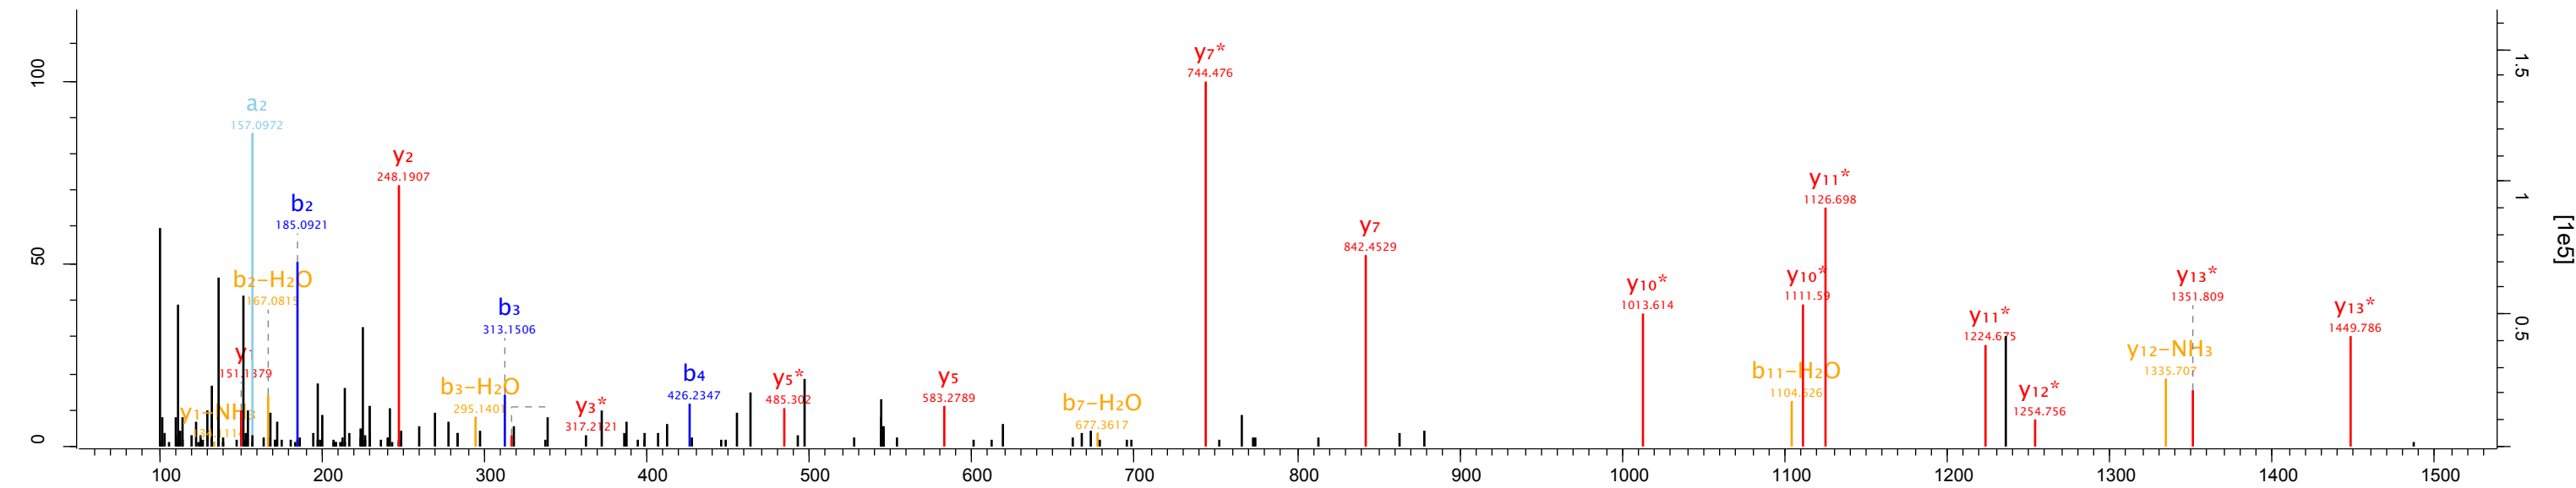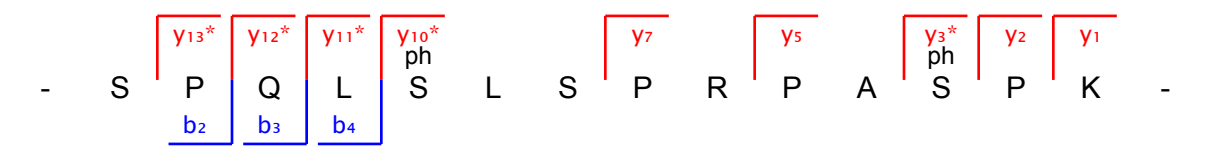

Raw file 20171215\_MaS\_33SR\_LMH\_phospho\_03 Scan 10200 Method FTMS; HCD Score 68.59 m/z 702.33 Gene names ARHGEF12

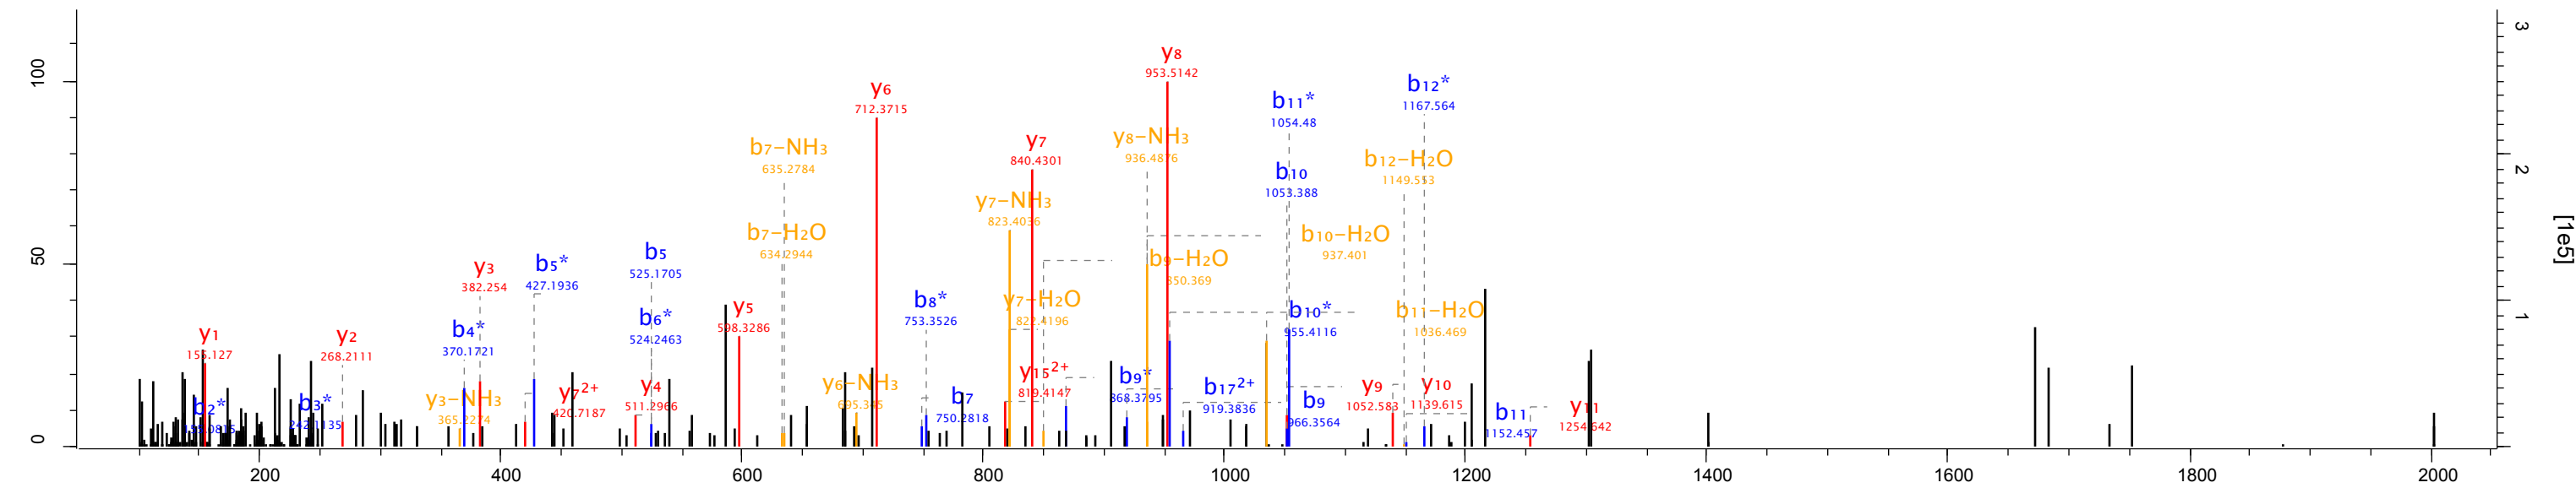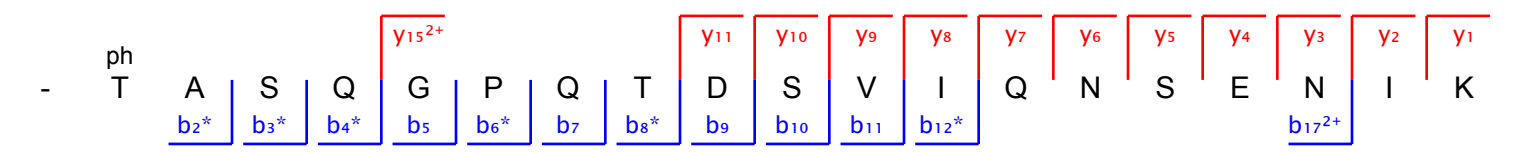

Raw file 20171215\_MaS\_33SR\_LMH\_phospho\_03 Scan 10470 Method FTMS; HCD Score 140.28 m/z 784.86 Gene names TJP2

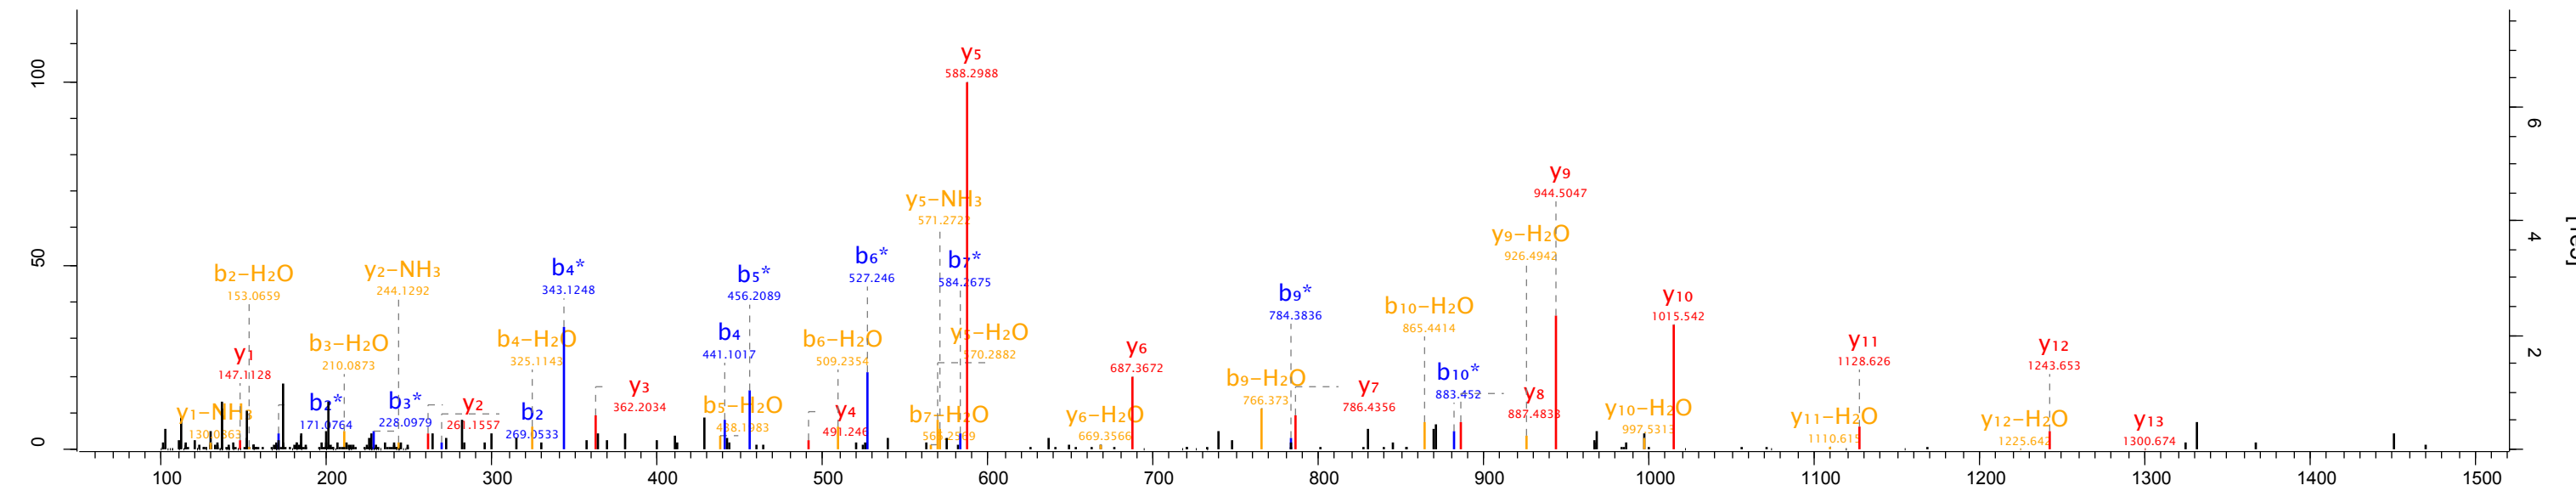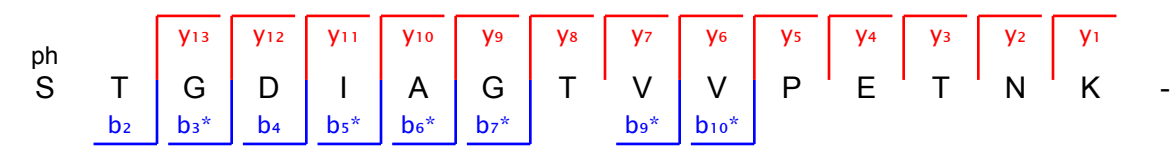

Raw file 20171215\_MaS\_33SR\_LMH\_phospho\_03 Scan 10490 Method FTMS; HCD Score 190.8 m/z 803.82 Gene names UBA1

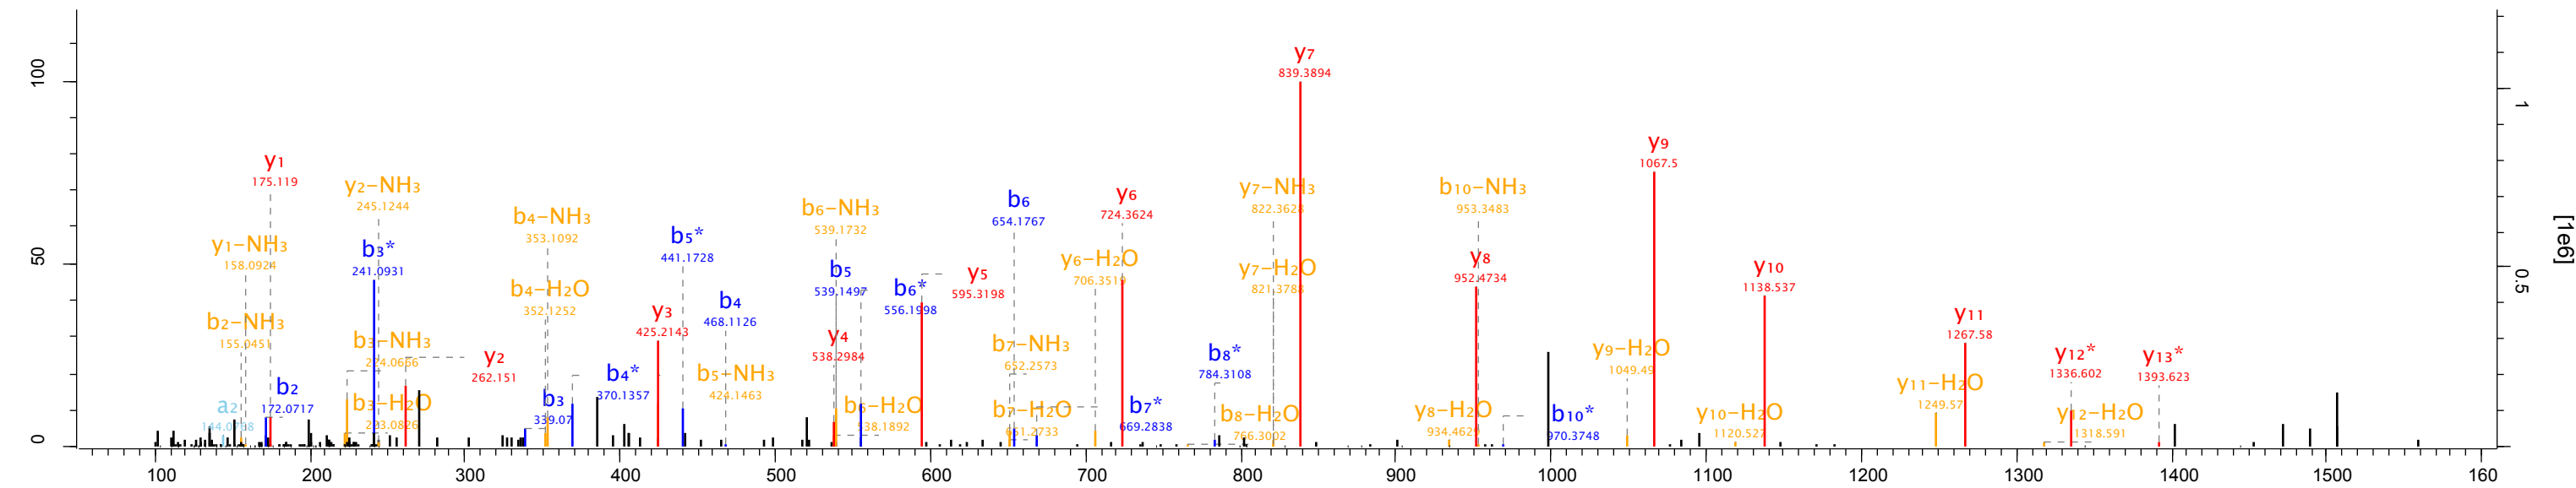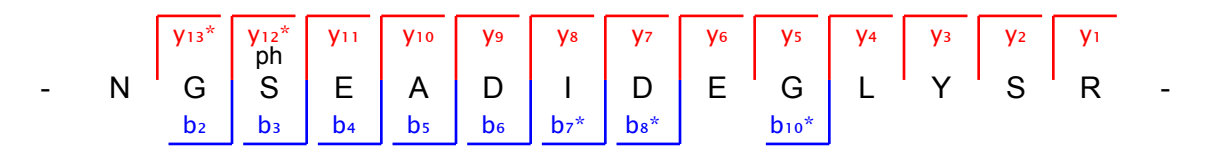

Raw file 20171215\_MaS\_33SR\_LMH\_phospho\_03 Scan 10760 Method FTMS; HCD Score 210.43 m/z 876.91 Gene names KDM5C

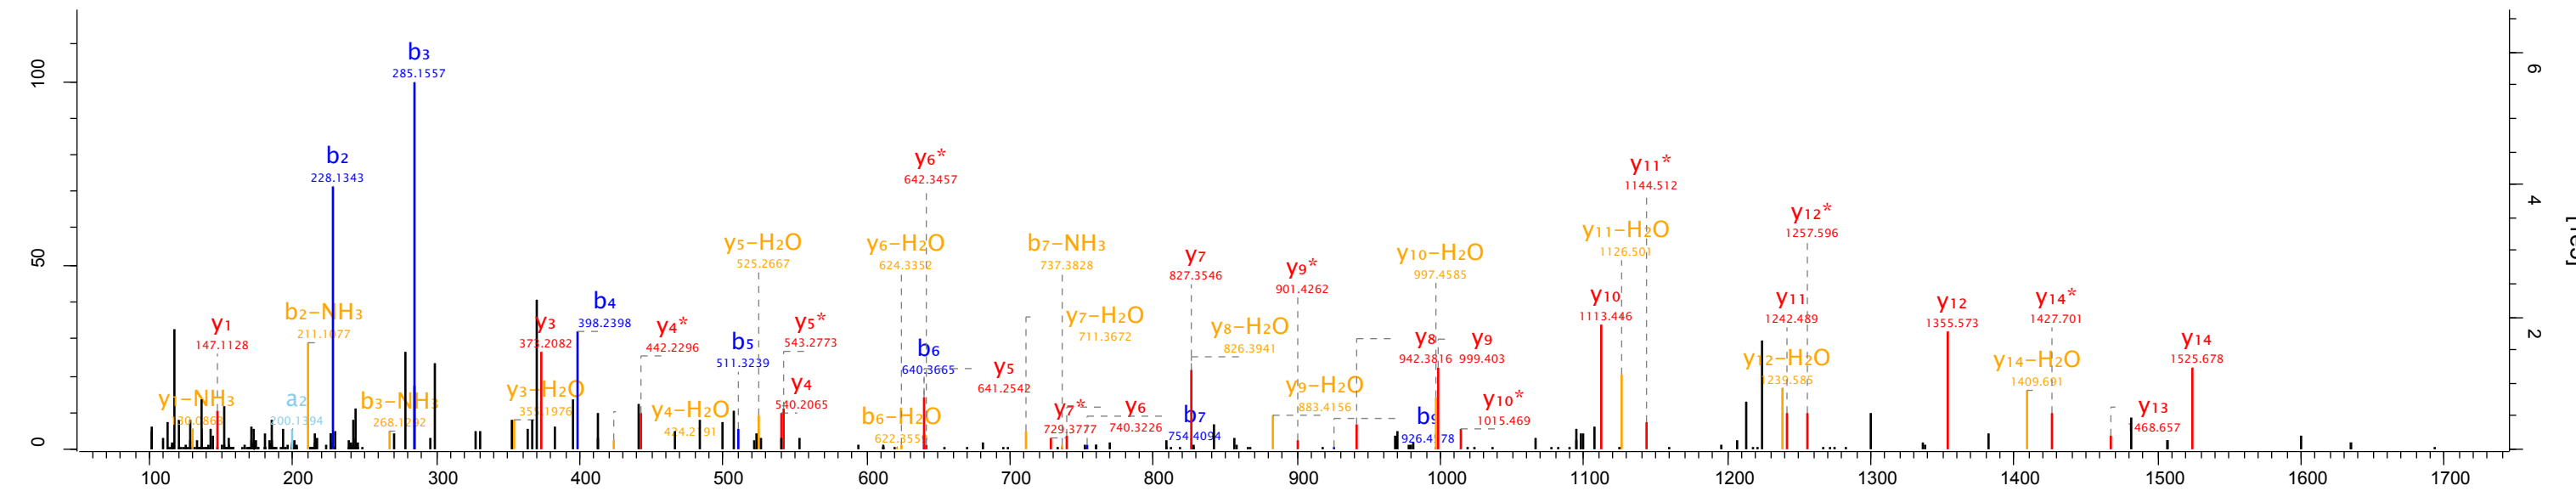

- V Q G L L E N G D S V T S P E K -

Fragmentation sites are indicated by brackets below the sequence:

- b<sub>2</sub> (under Q)
- b<sub>3</sub> (under G)
- b<sub>4</sub> (under L)
- b<sub>5</sub> (under L)
- b<sub>6</sub> (under E)
- b<sub>7</sub> (under N)
- b<sub>9</sub> (under D)
- y<sub>1</sub> (under K)
- y<sub>3</sub> (under P)
- y<sub>4</sub> (under S)
- y<sub>5</sub> (under T)
- y<sub>6</sub> (under V)
- y<sub>7</sub> (under S)
- y<sub>8</sub> (under D)
- y<sub>9</sub> (under G)
- y<sub>10</sub> (under N)
- y<sub>11</sub> (under E)
- y<sub>12</sub> (under L)
- y<sub>13</sub> (under L)
- y<sub>14</sub> (under G)

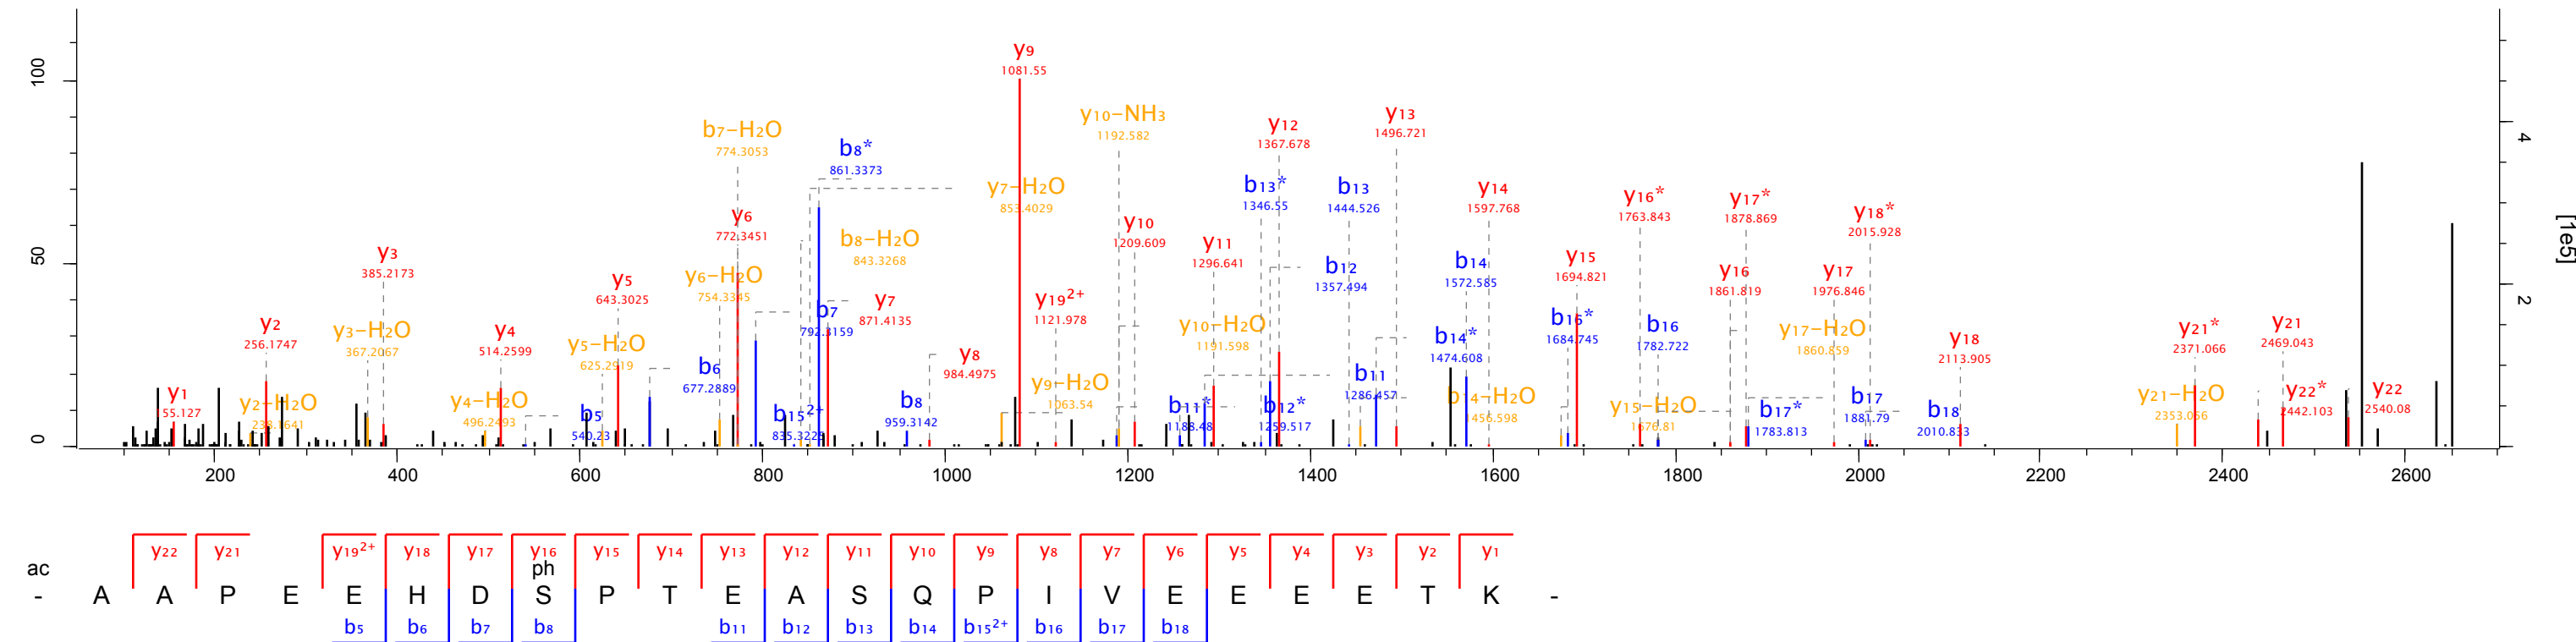

Raw file 20171215\_MaS\_33SR\_LMH\_phospho\_03 Scan 11470 Method FTMS; HCD Score 145.65 m/z 1126.97 Gene names PRRC2B

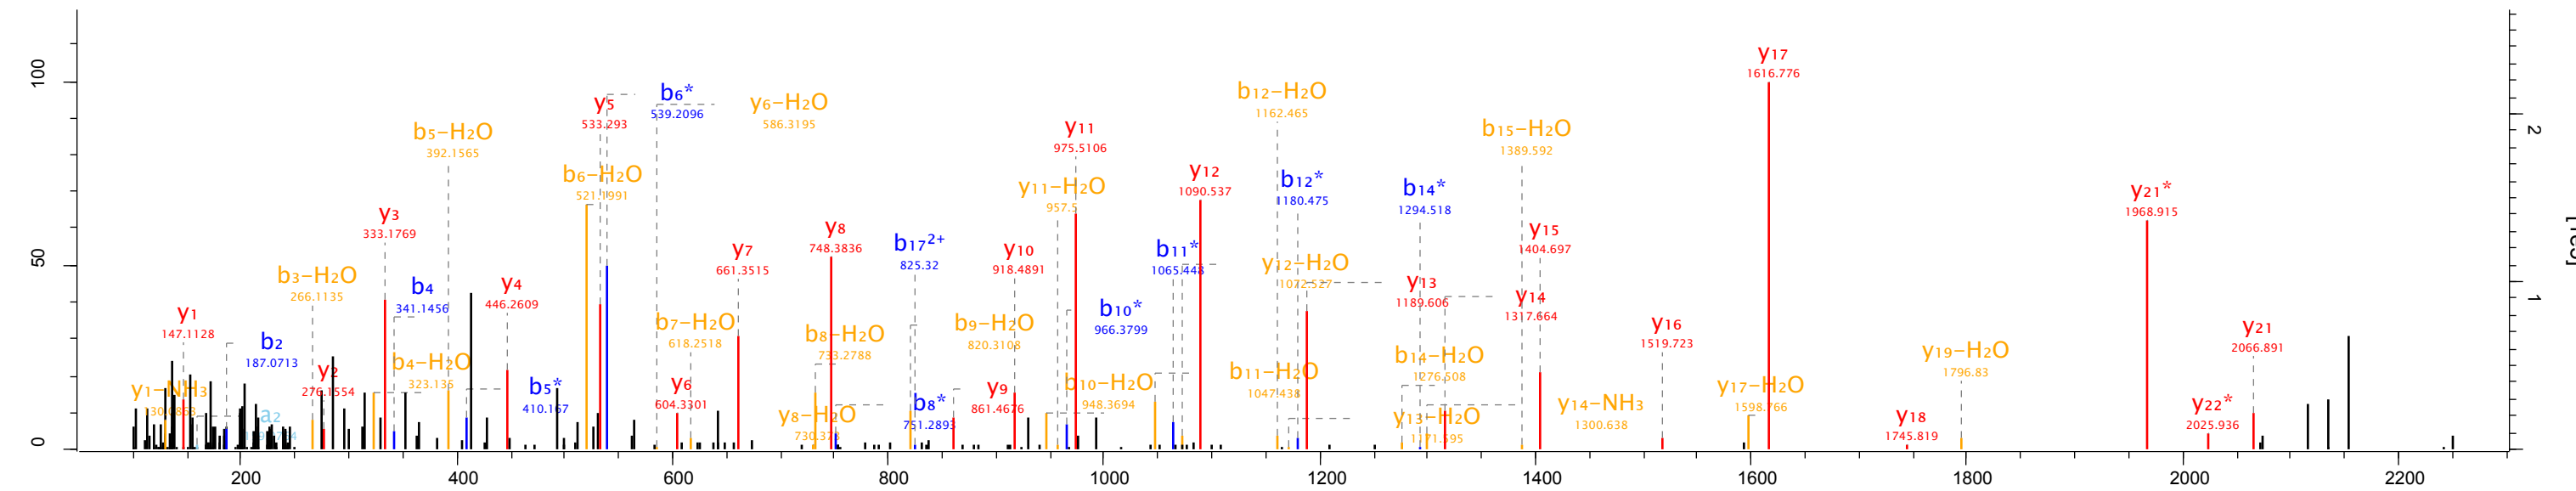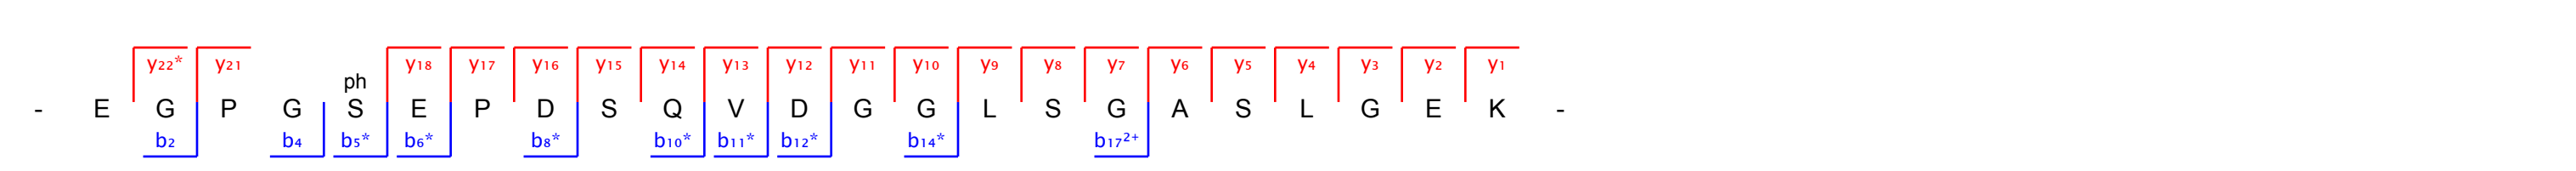

20171215\_MaS\_33SR\_LMH\_phospho\_03 11860 FTMS; HCD 213.83 786.32 SNAP23

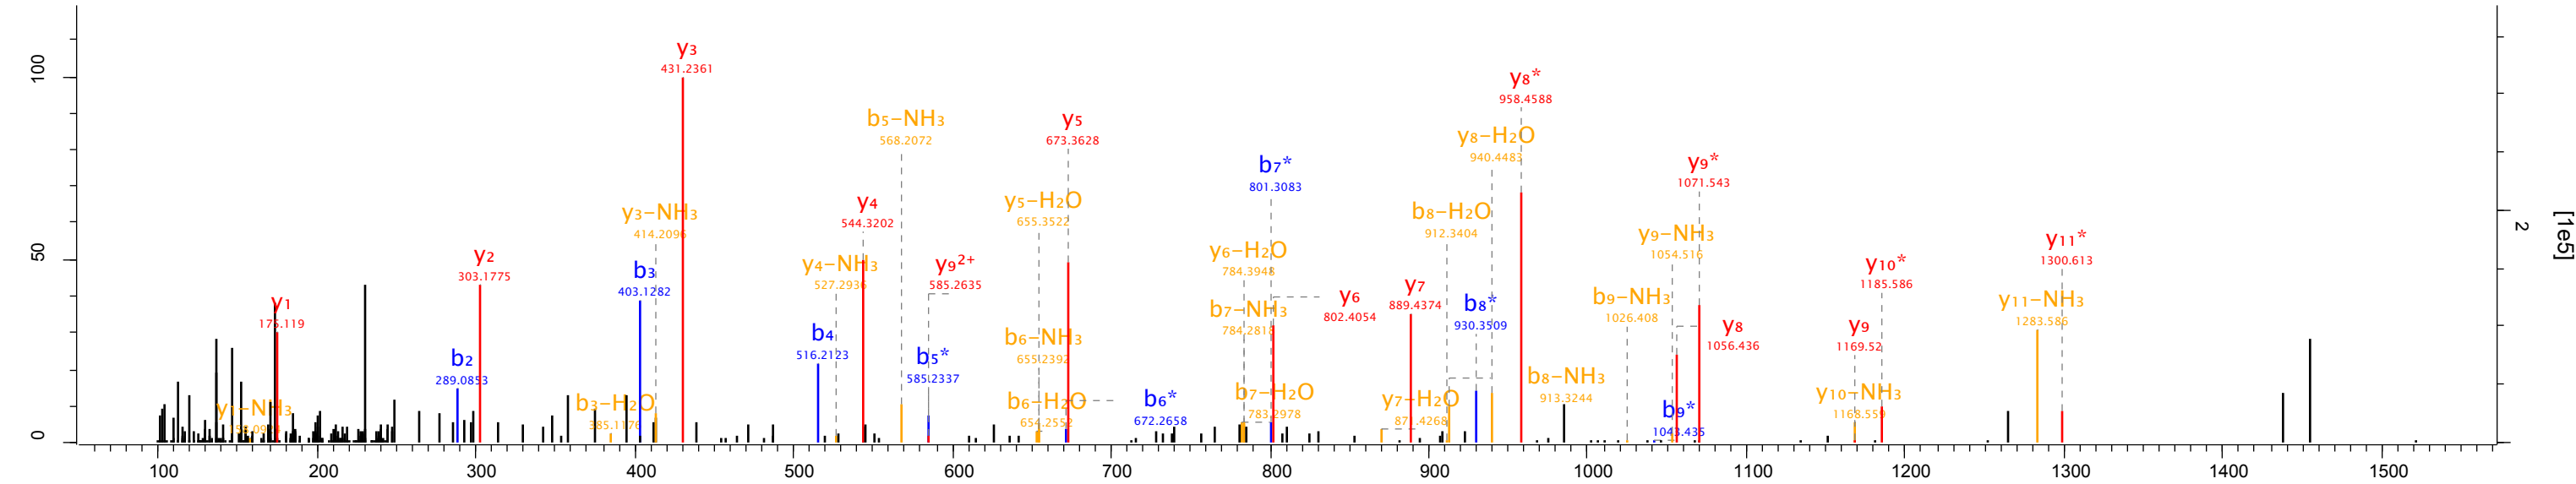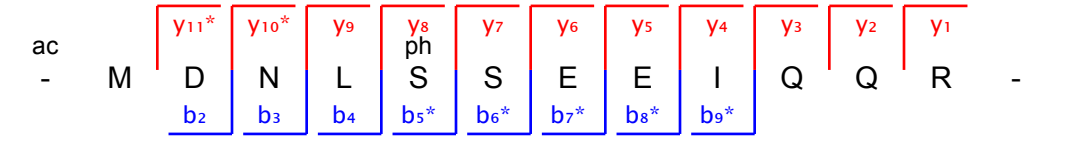



Raw file: 20171215\_MaS\_33SR\_LMH\_phospho\_03  
 Scan: 11870 Method: FTMS; HCD Score: 104.38 m/z: 928.45 Gene names: PTK2

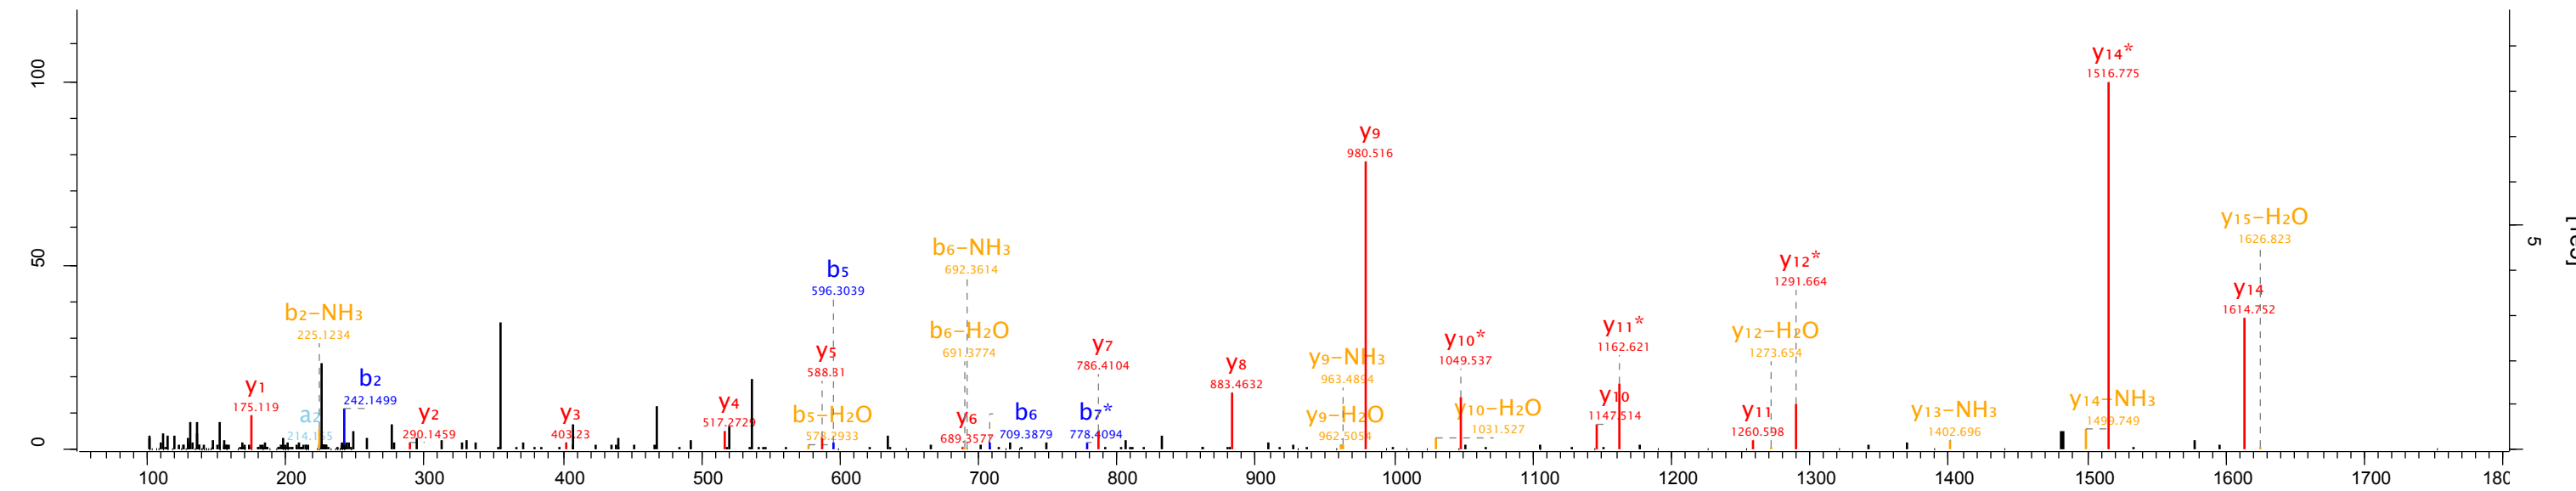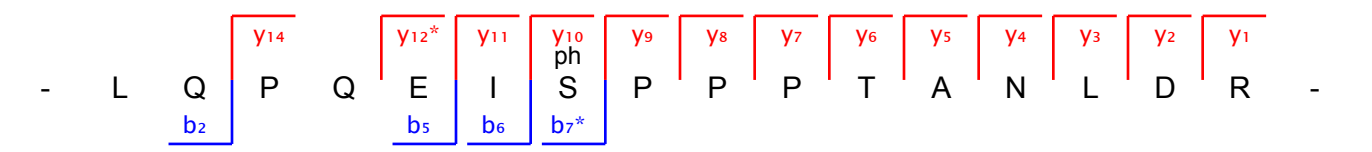

20171215\_MaS\_33SR\_LMH\_phospho\_03 11890 FTMS; HCD 186.94 771.37 TERF2IP

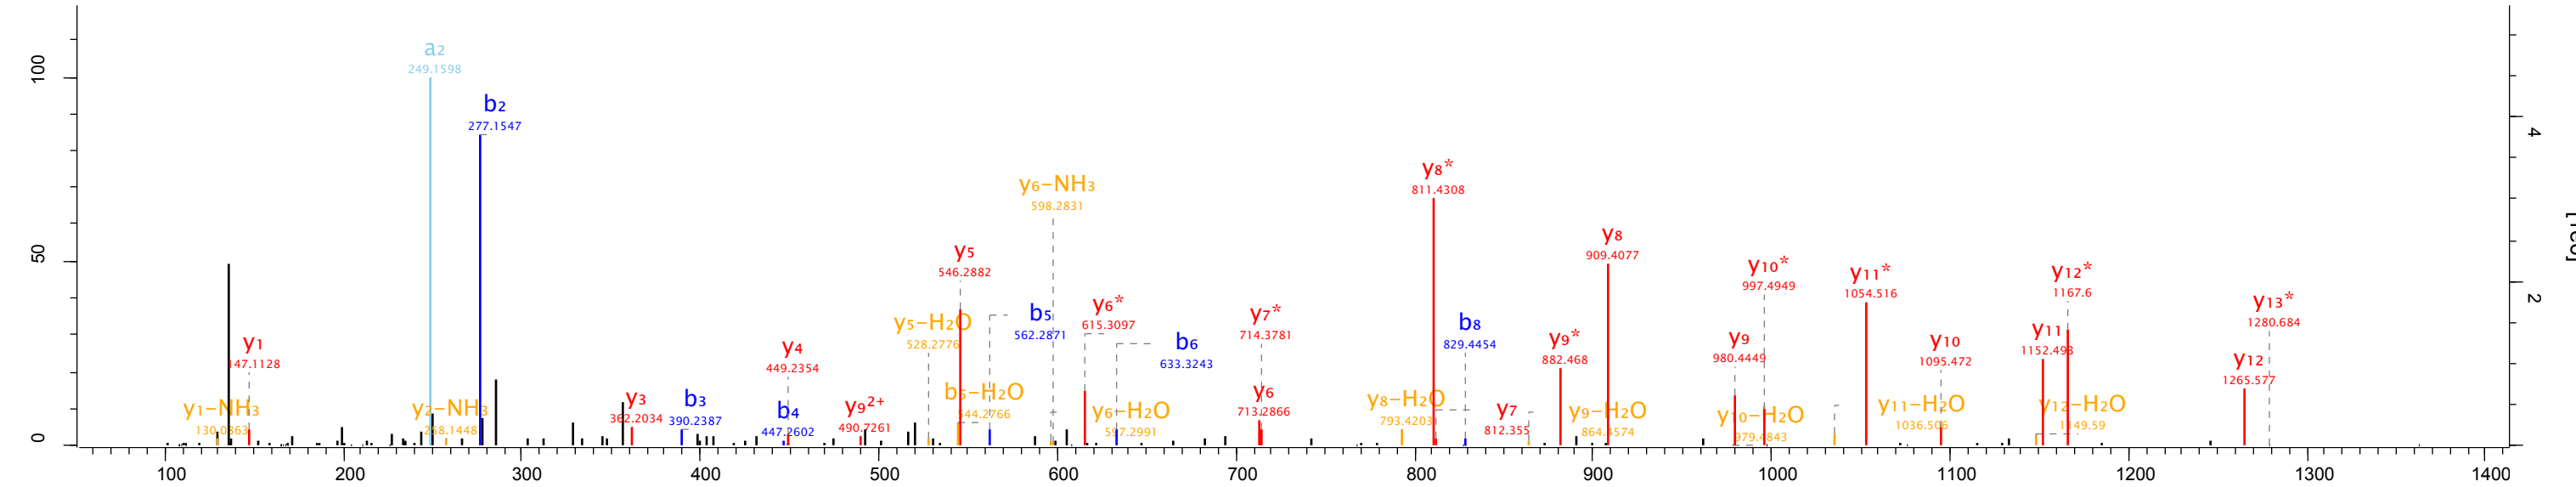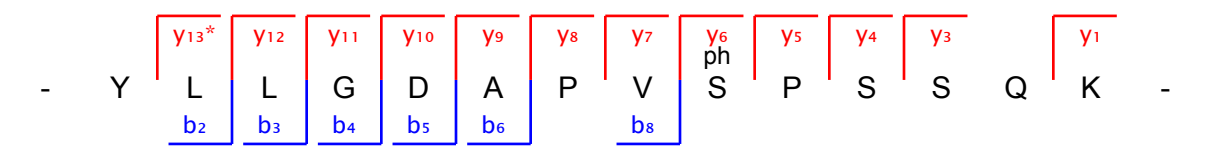

Raw file 20171215\_MaS\_33SR\_LMH\_phospho\_03 Scan 12190 Method FTMS; HCD Score 89.66 m/z 671.29 Gene names CTNND1

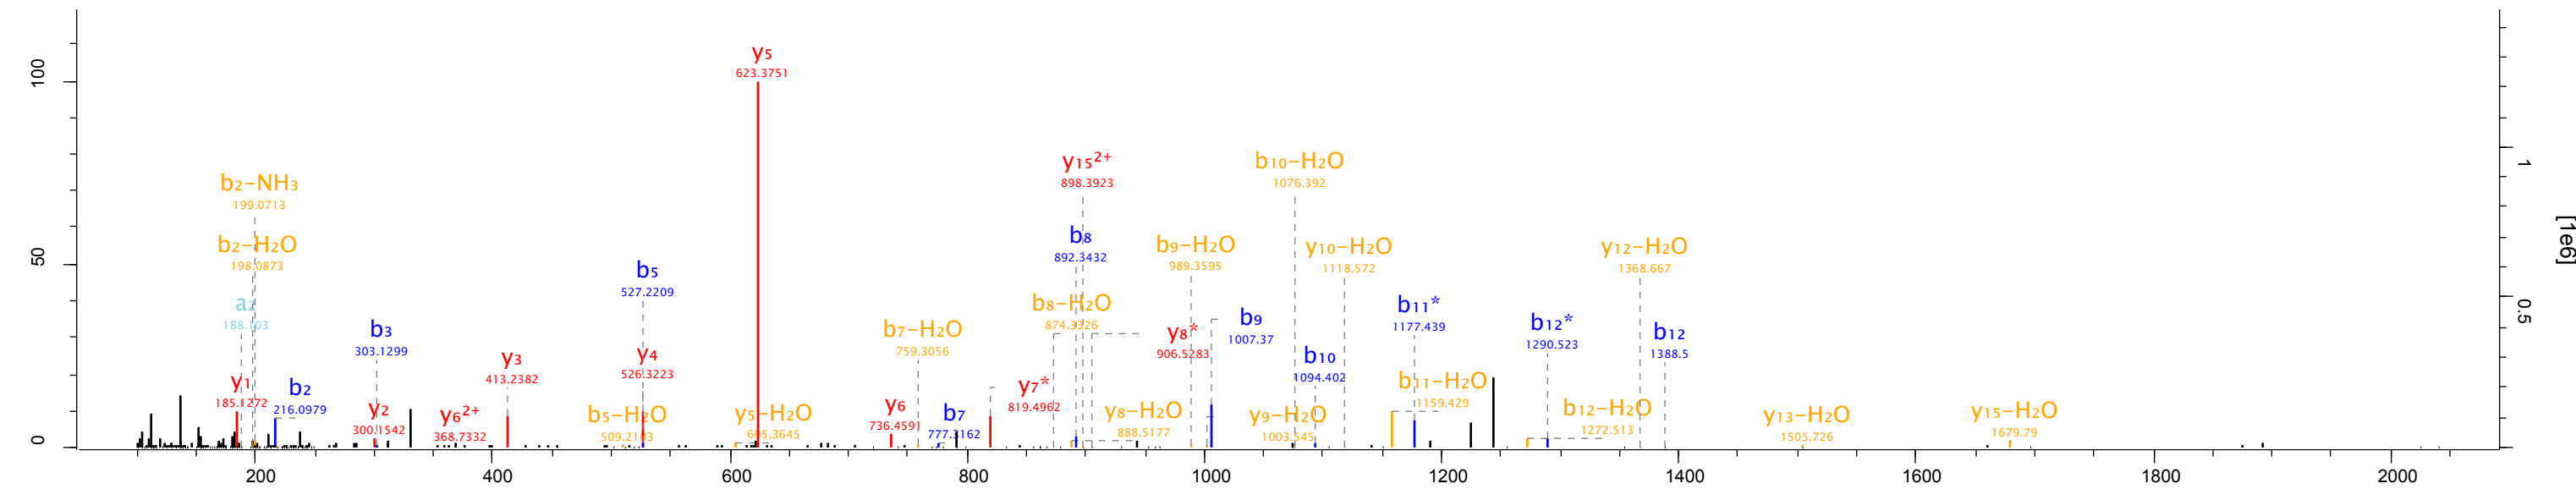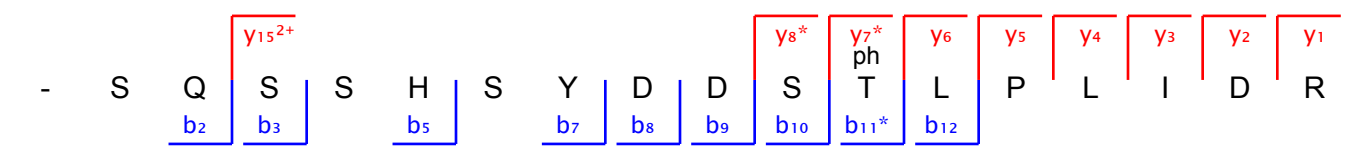

Raw file 20171215\_MaS\_33SR\_LMH\_phospho\_03 Scan 12380 Method FTMS; HCD Score 139.08 m/z 785.33 Gene names DR1

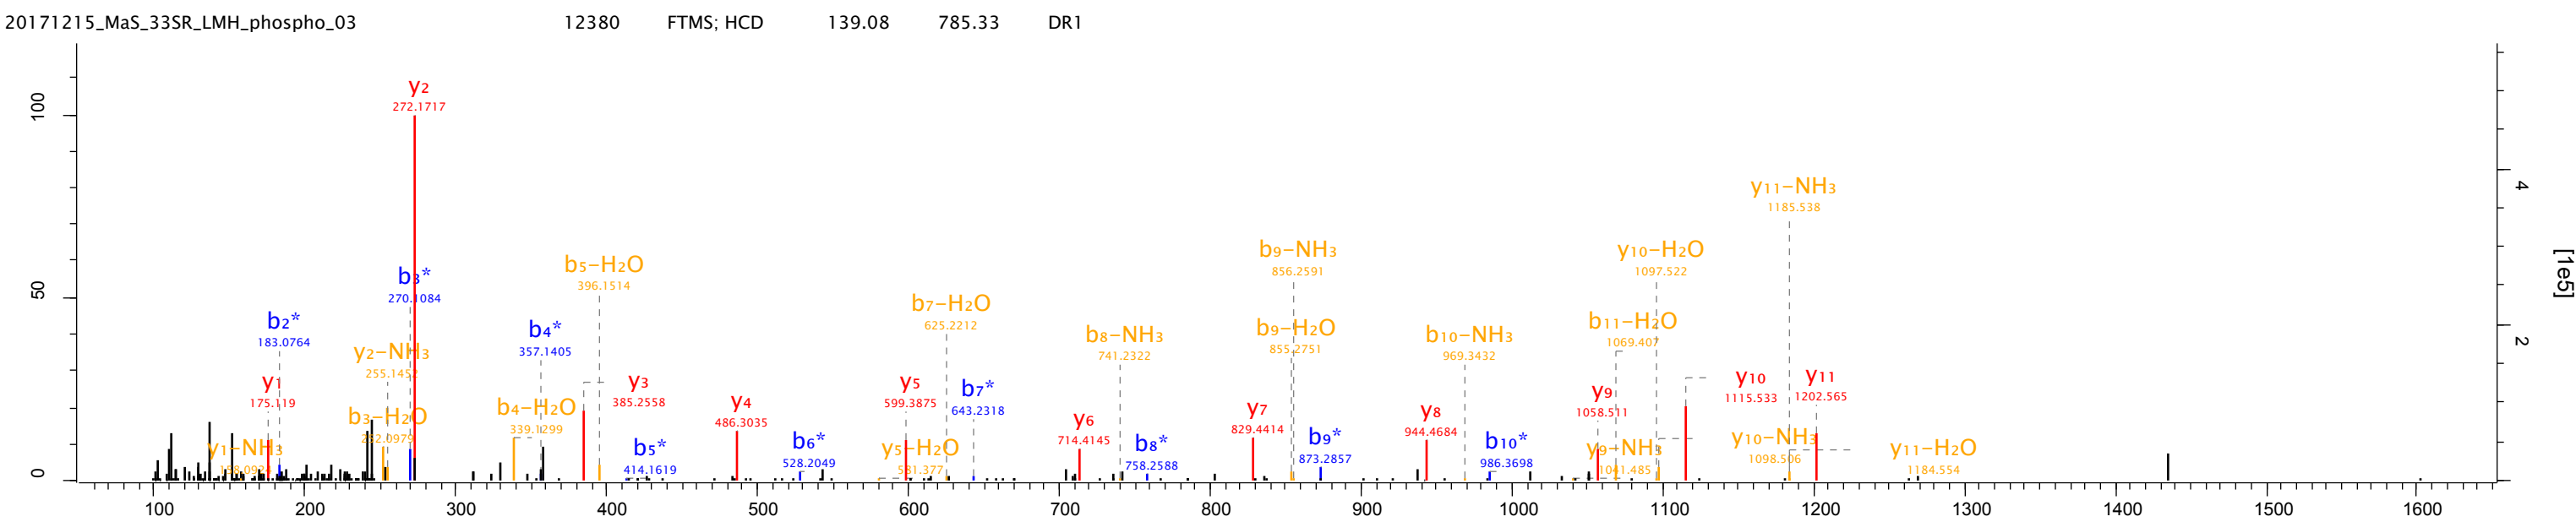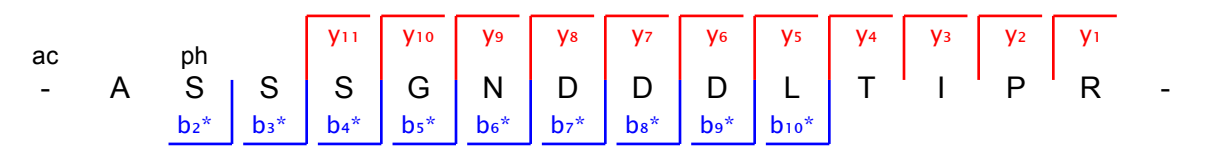

Raw file 20171215\_MaS\_33SR\_LMH\_phospho\_03 Scan 13130 Method FTMS; HCD Score 203.26 m/z 932.35 Gene names RPRD2

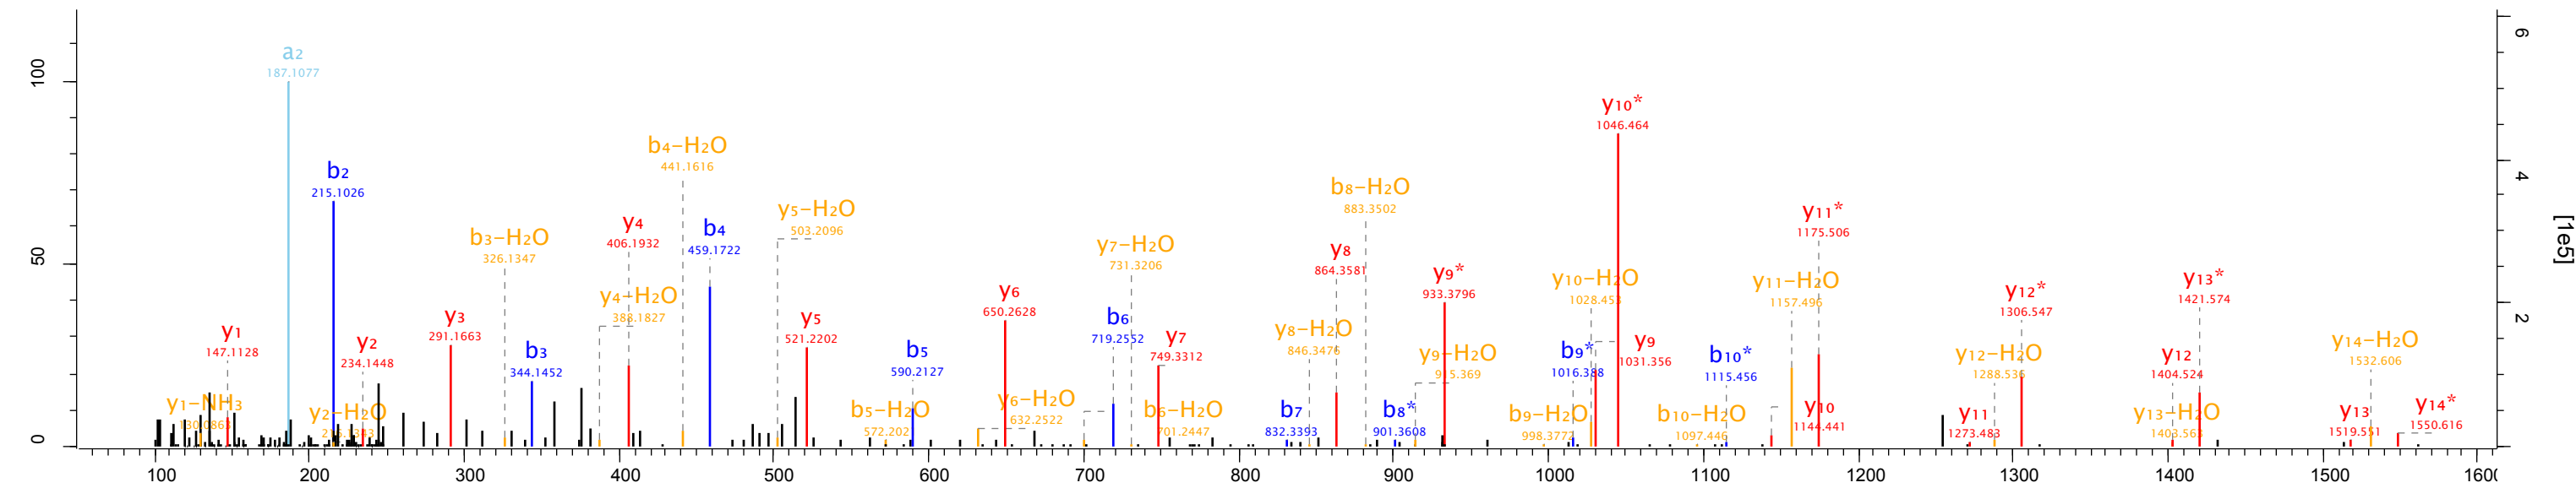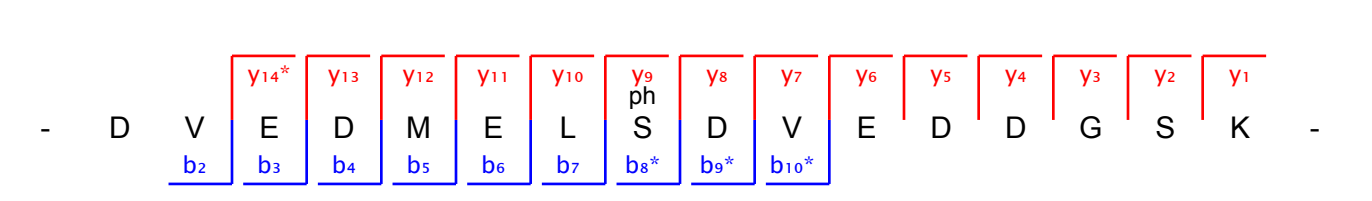

Raw file 20171215\_MaS\_33SR\_LMH\_phospho\_03 Scan 13430 Method FTMS; HCD Score 221.48 m/z 1258.57 Gene names ARHGEF2

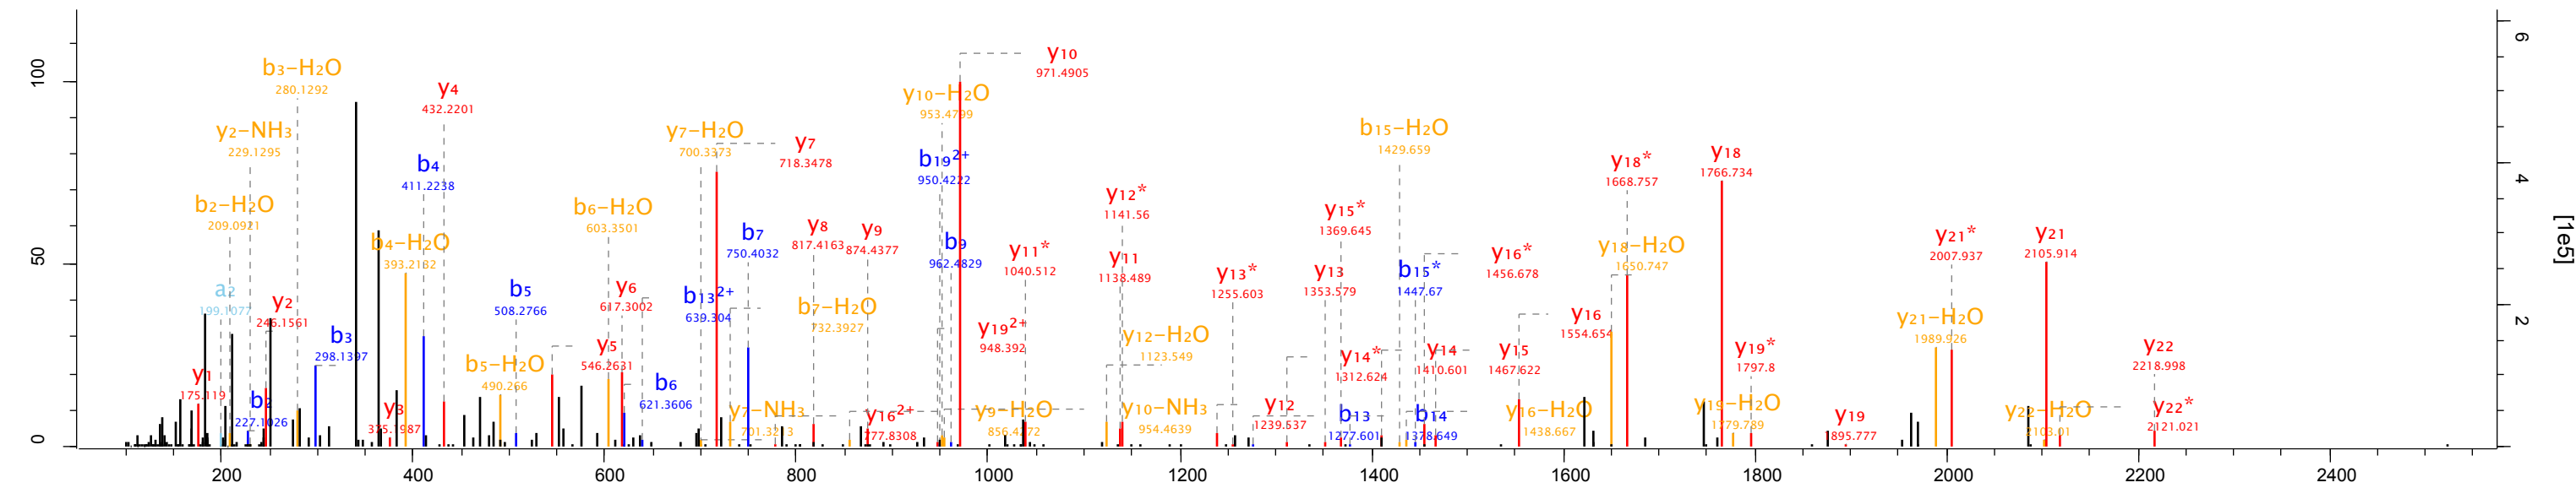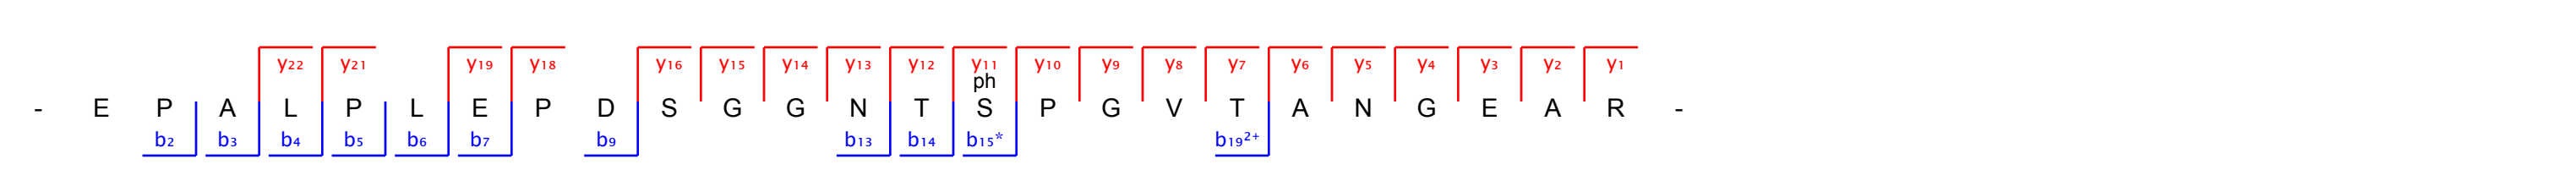

Raw file 20171215\_MaS\_33SR\_LMH\_phospho\_03 Scan 13610 Method FTMS; HCD Score 114.46 m/z 823.34 Gene names TMSB10

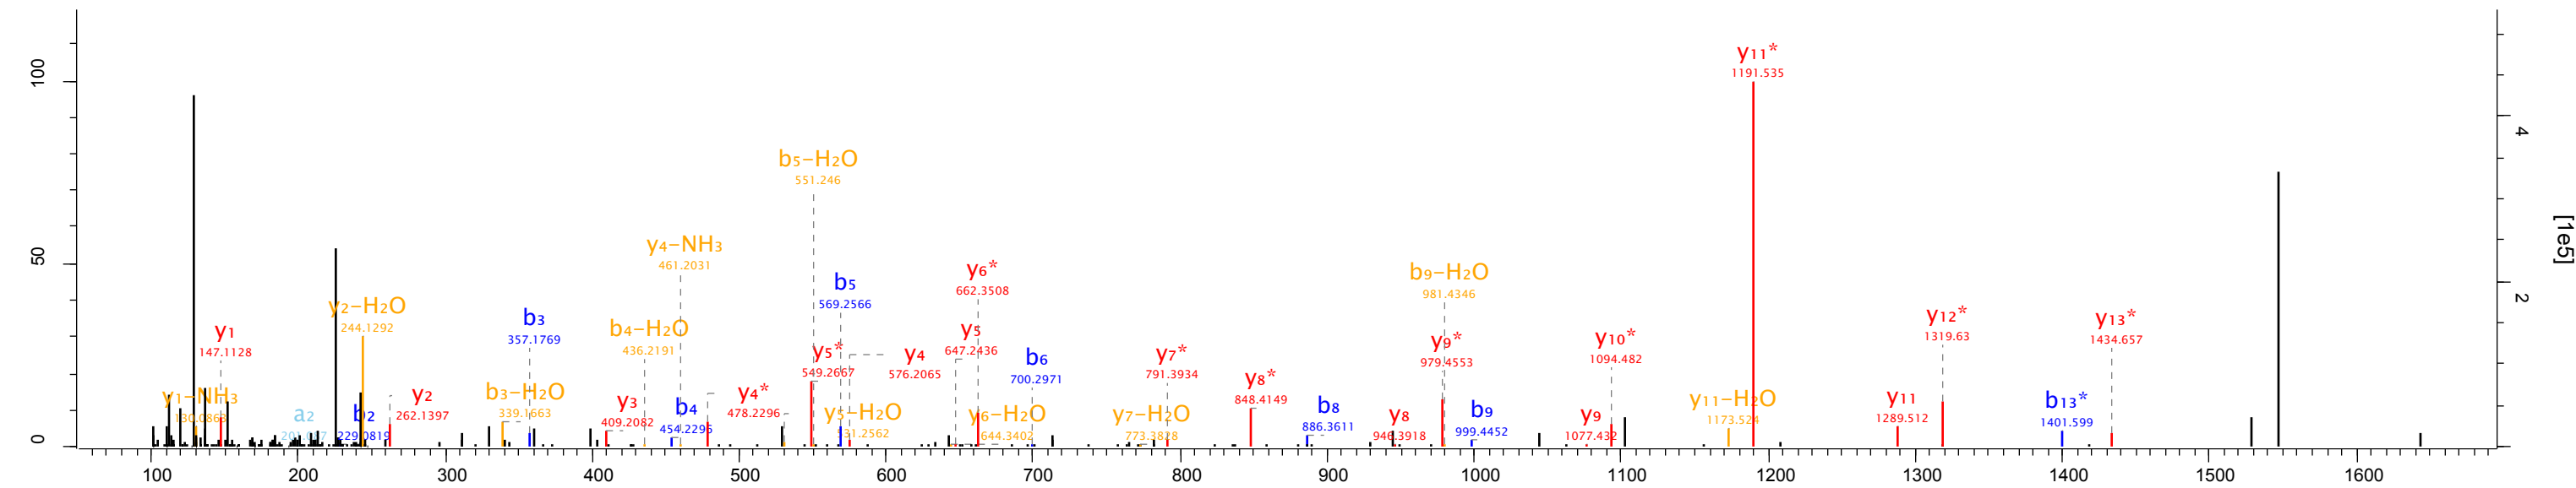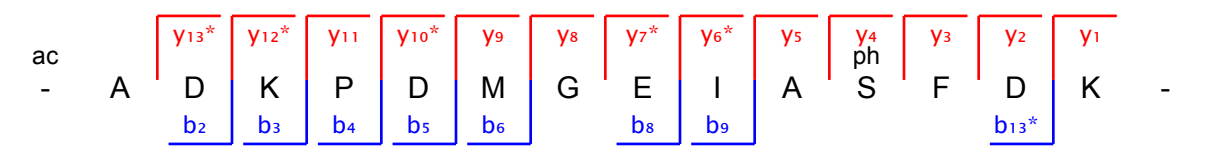

Raw file 20171215\_MaS\_33SR\_LMH\_phospho\_03 Scan 14060 Method FTMS; HCD Score 137.23 m/z 888.43 Gene names PI4KB

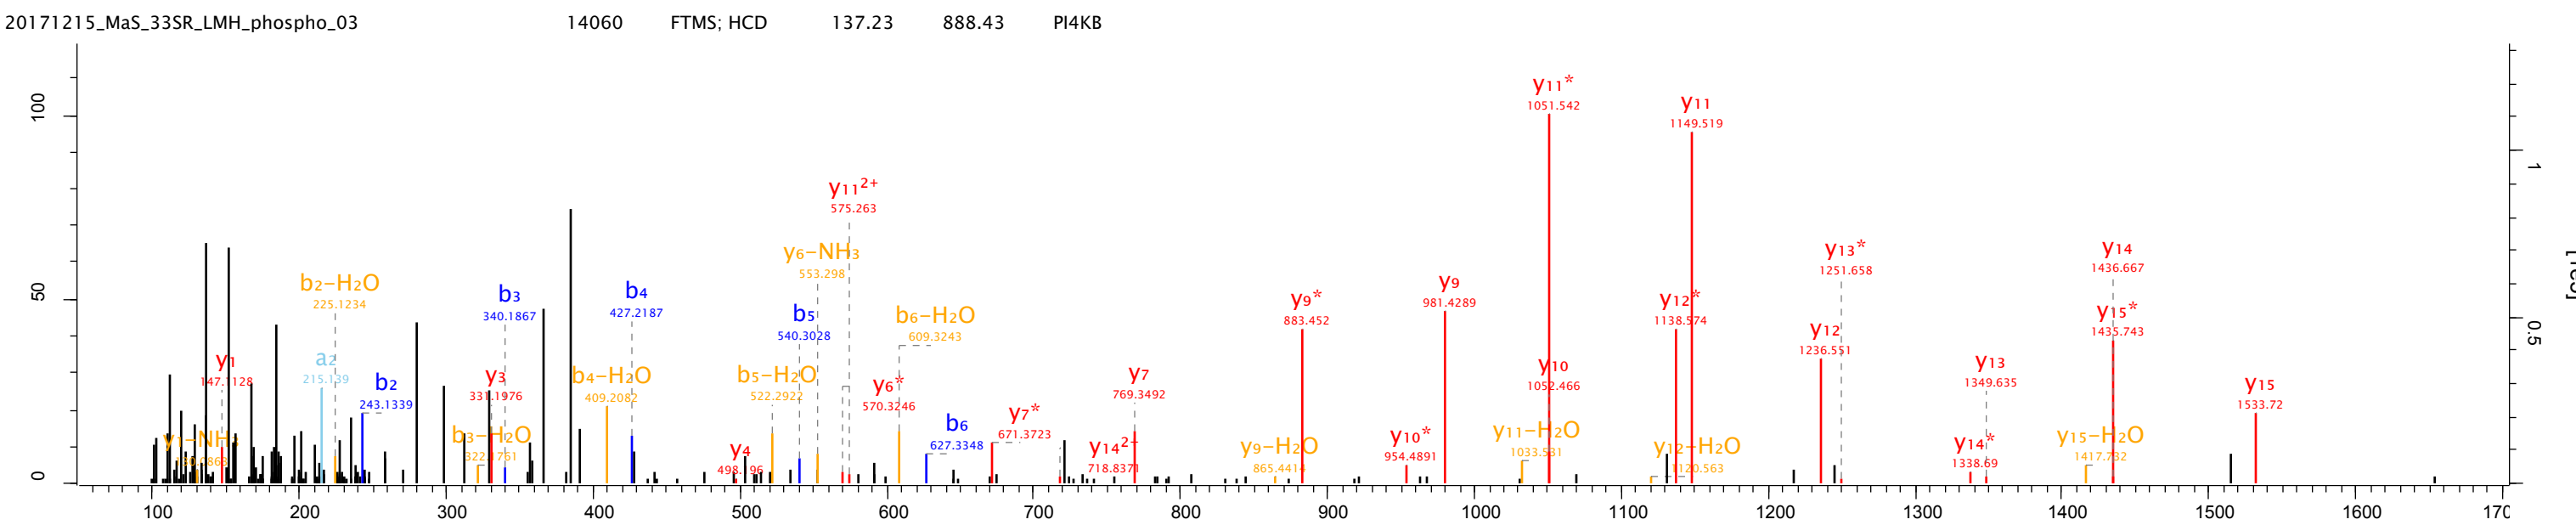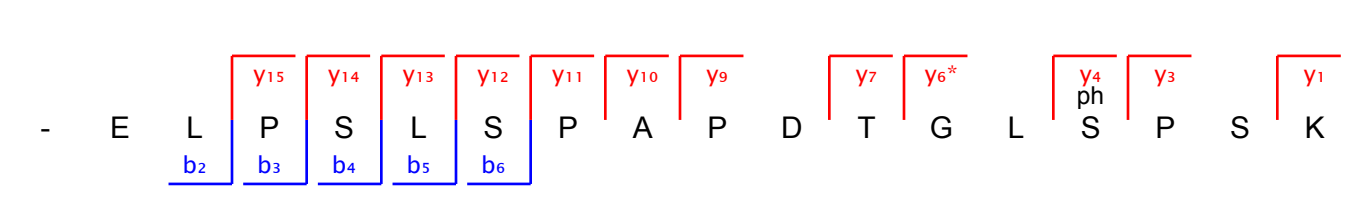



Raw file 20171215\_MaS\_33SR\_LMH\_phospho\_03 Scan 14170 Method FTMS; HCD Score 225.5 m/z 887.37 Gene names TP53BP1

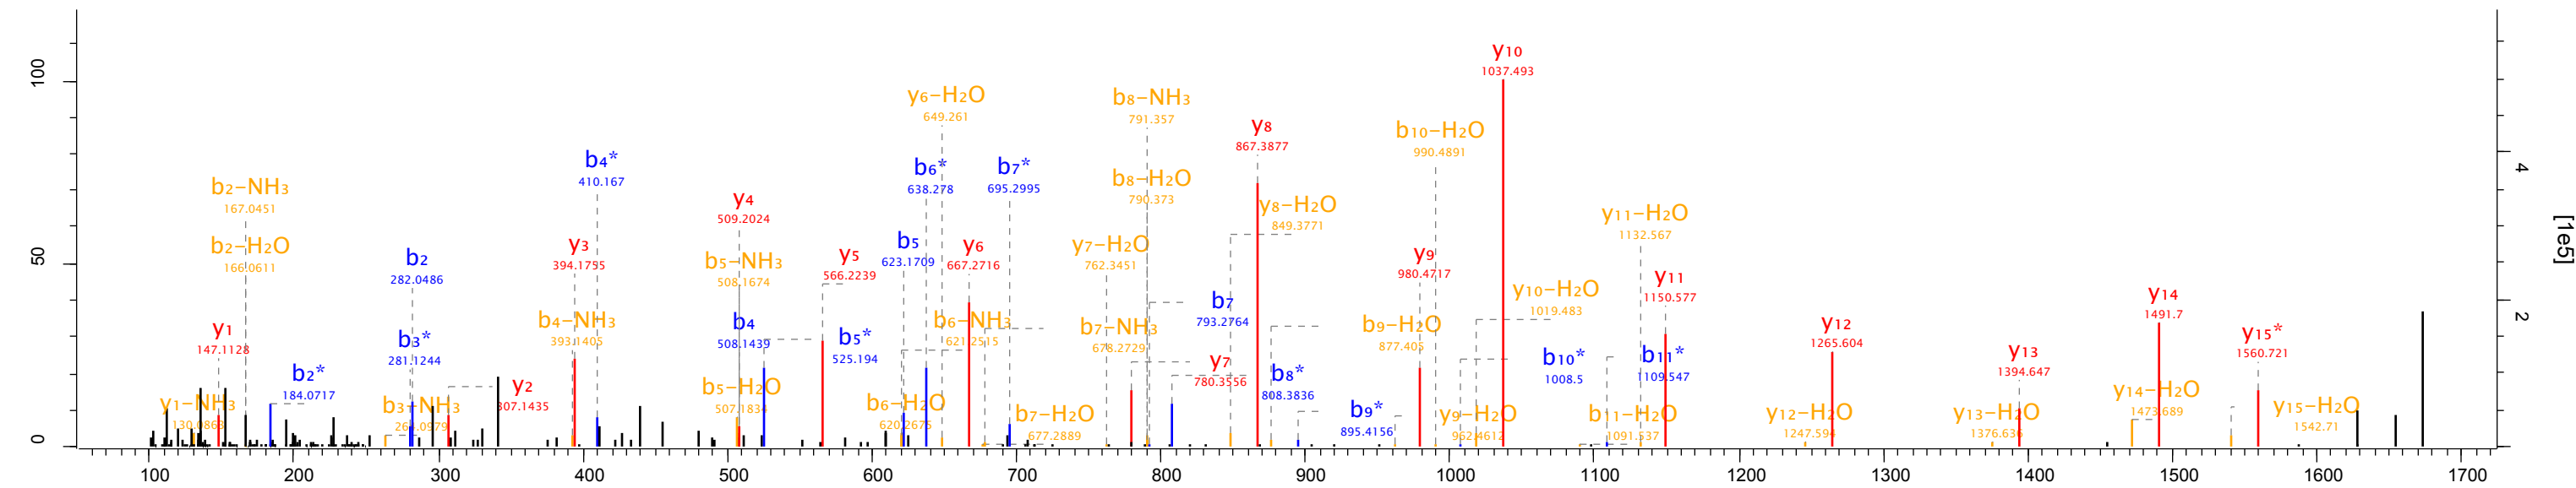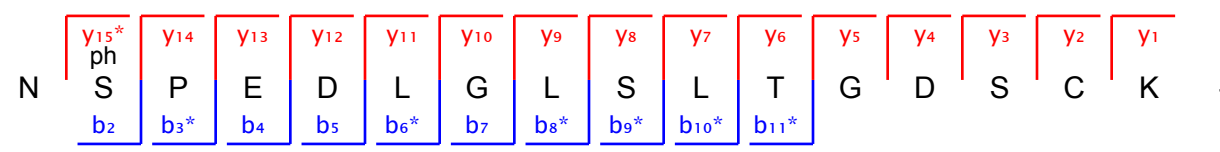

Raw file 20171215\_MaS\_33SR\_LMH\_phospho\_03 Scan 14490 Method FTMS; HCD Score 65.44 m/z 990.41 Gene names CRK

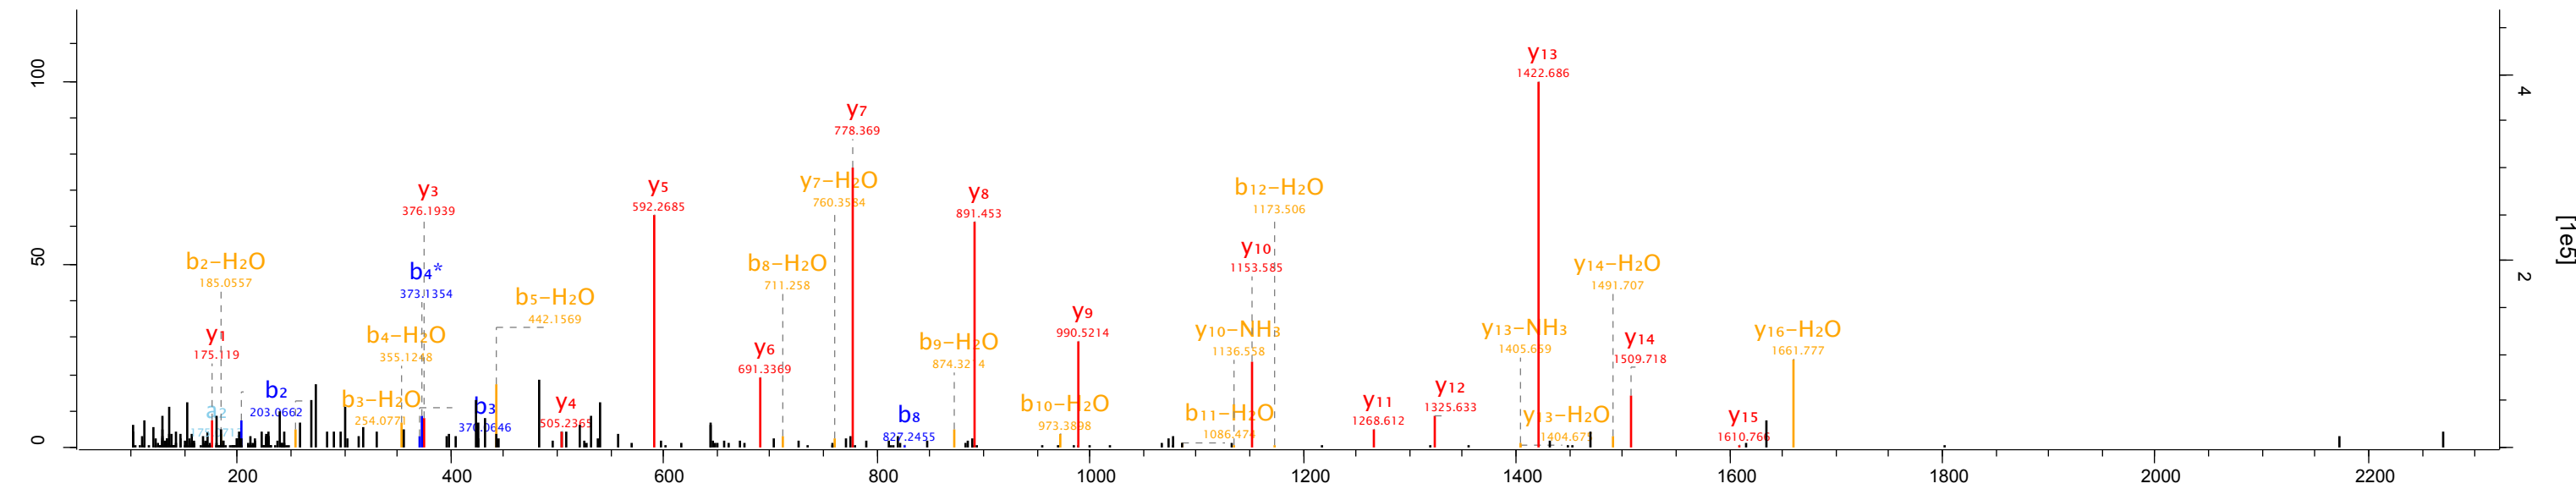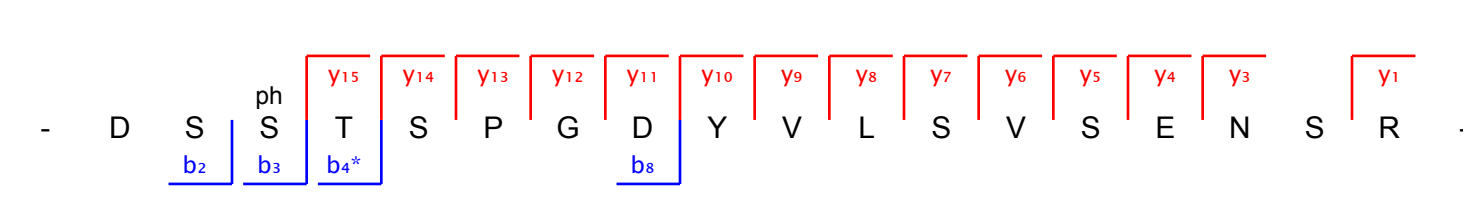

Raw file 20171215\_MaS\_33SR\_LMH\_phospho\_03 Scan 14760 Method FTMS; HCD Score 185.02 m/z 798.85 Gene names UGP2

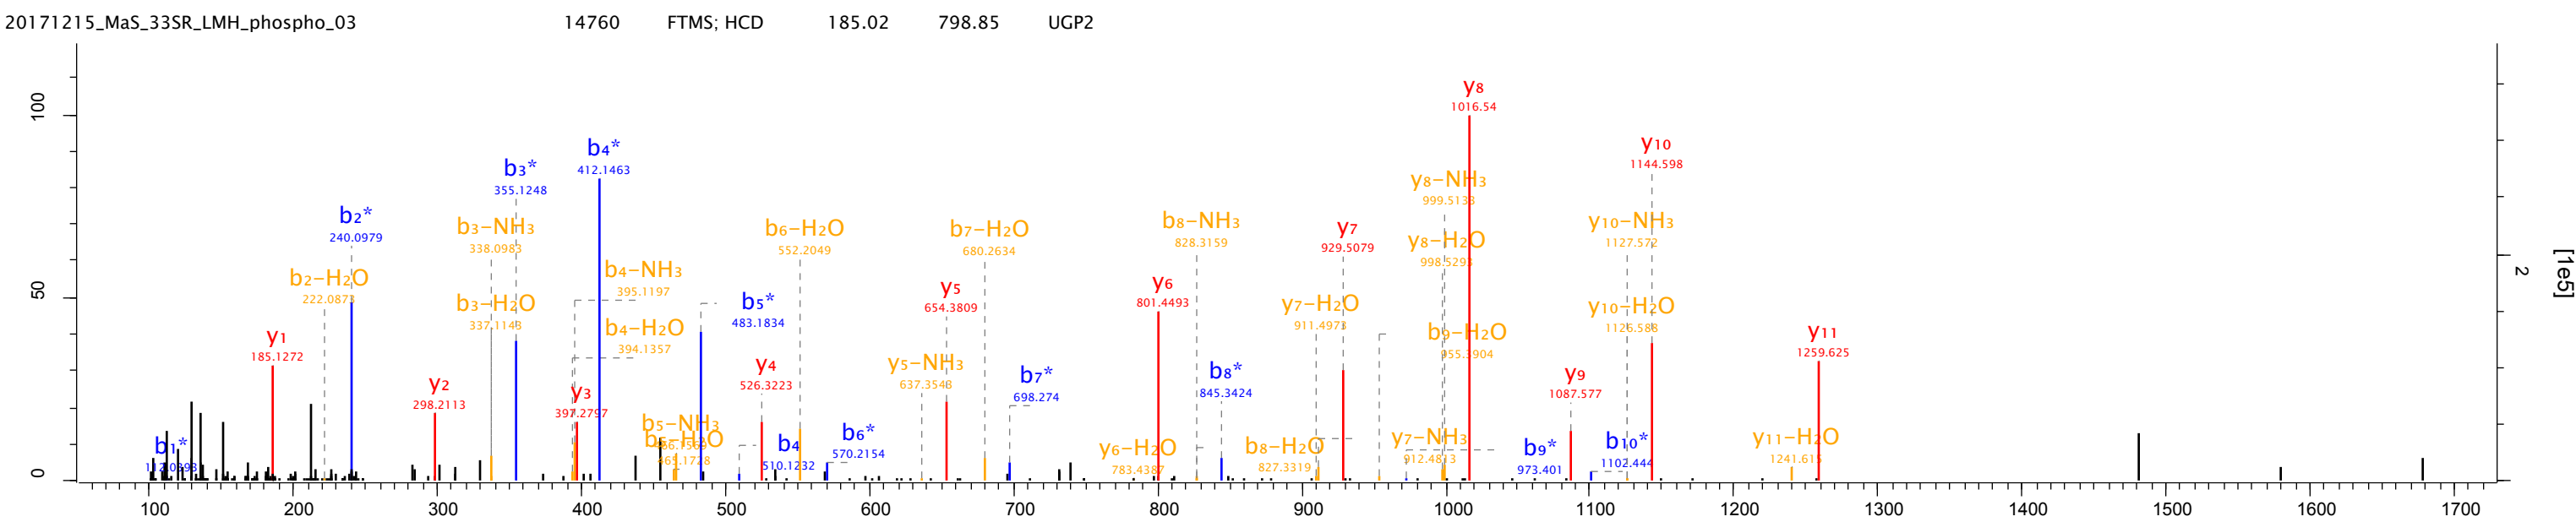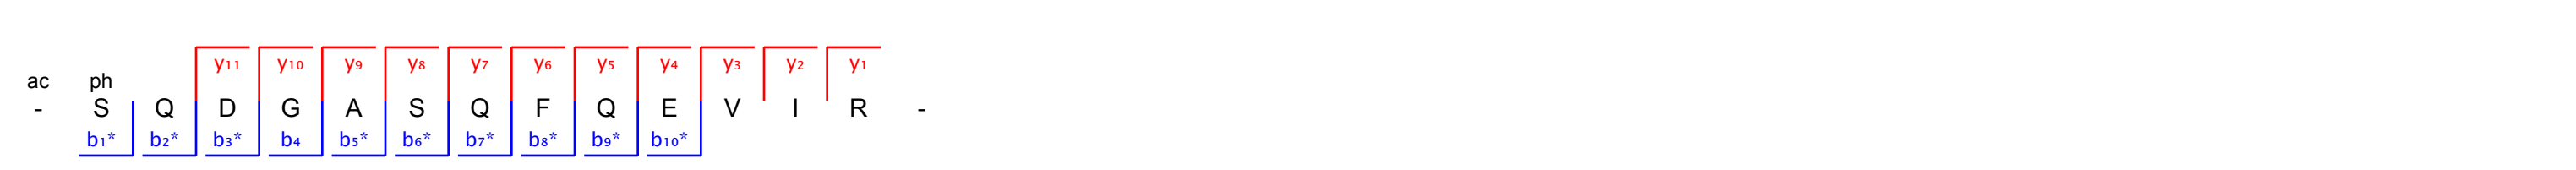

Raw file 20171215\_MaS\_33SR\_LMH\_phospho\_03 Scan 15320 Method FTMS; HCD Score 190.27 m/z 706.32 Gene names BCLAF1

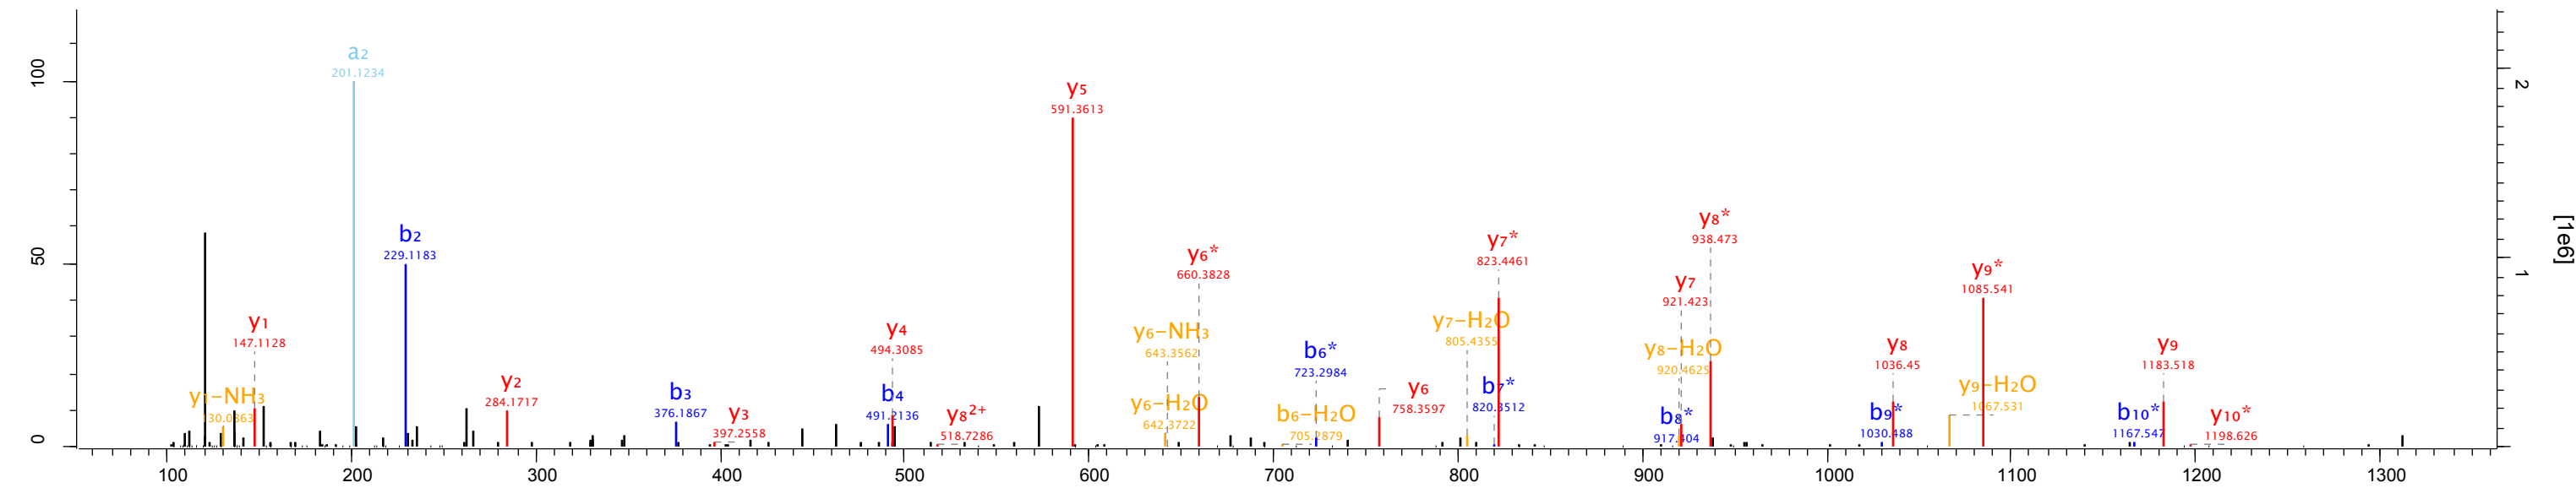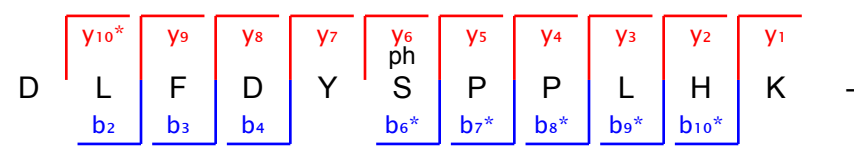

Raw file 20171215\_MaS\_33SR\_LMH\_phospho\_03 Scan 15630 Method FTMS; HCD Score 52.47 m/z 817.68 Gene names SAC3D1

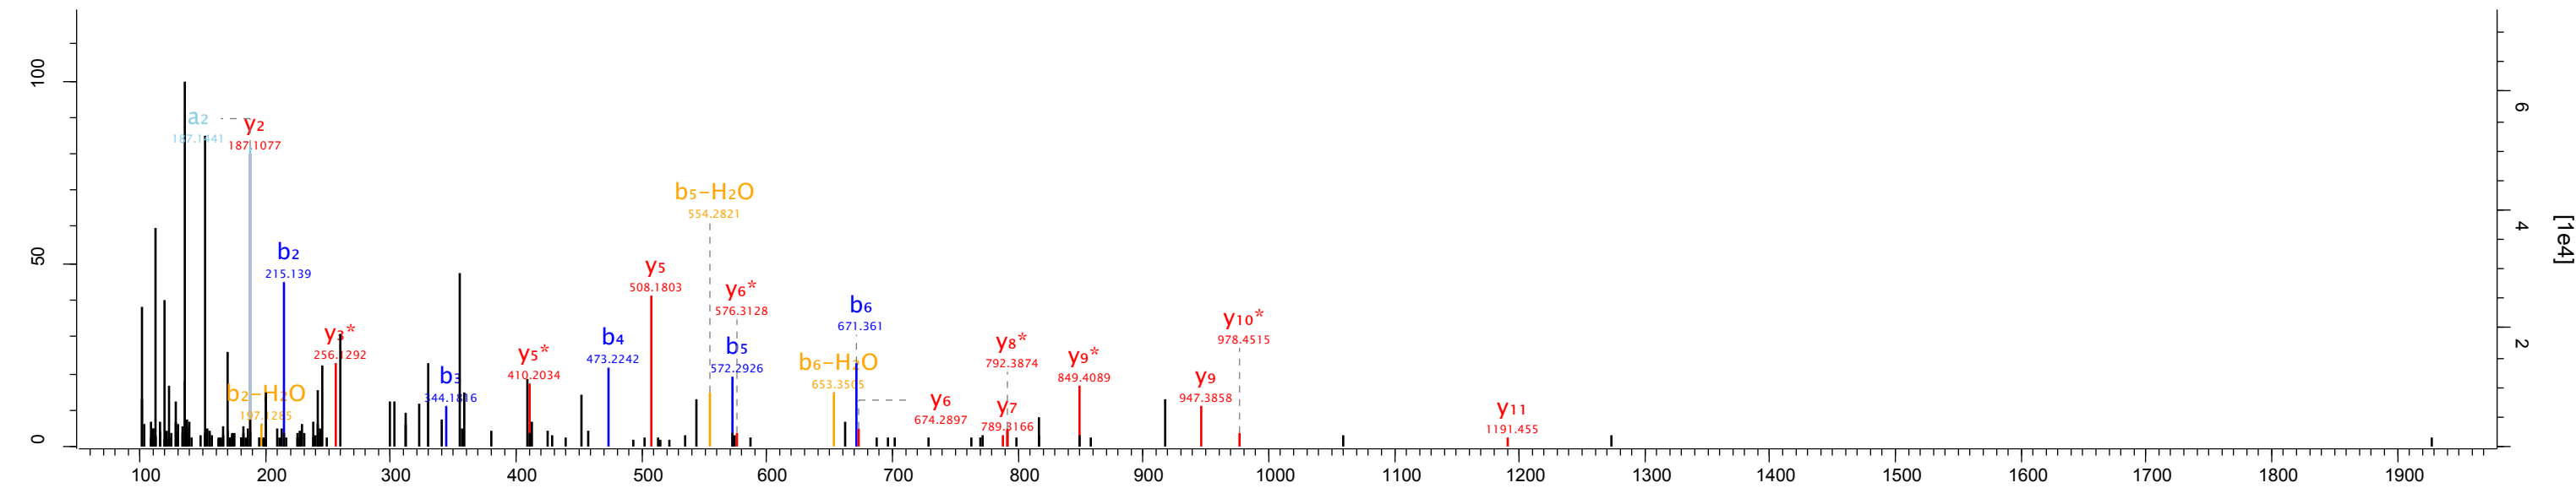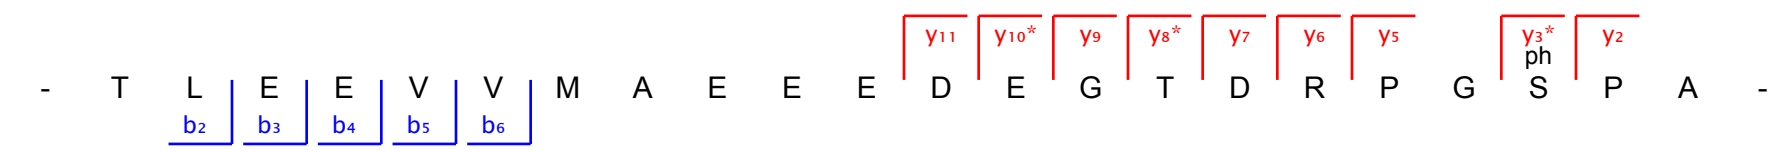

Raw file 20171215\_MaS\_33SR\_LMH\_phospho\_03 Scan 18260 Method FTMS; HCD Score 41.17 m/z 1010.93 Gene names SMN1

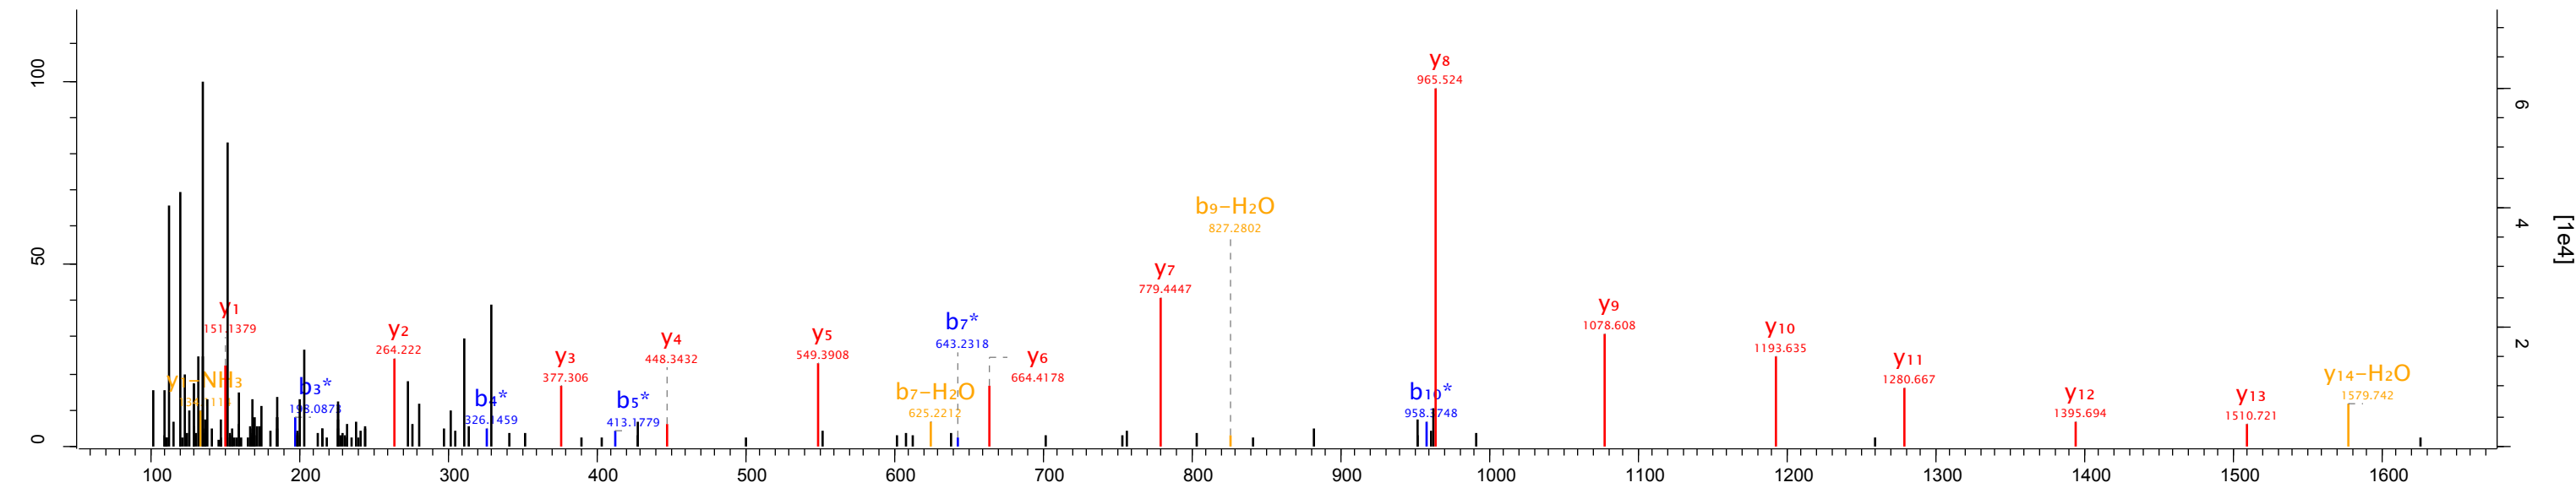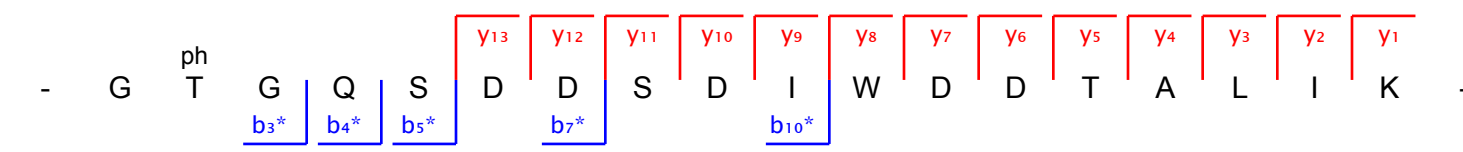

Raw file 20171215\_MaS\_33SR\_LMH\_phospho\_03 Scan 18570 Method FTMS; HCD Score 75.19 m/z 855.75 Gene names WDR44

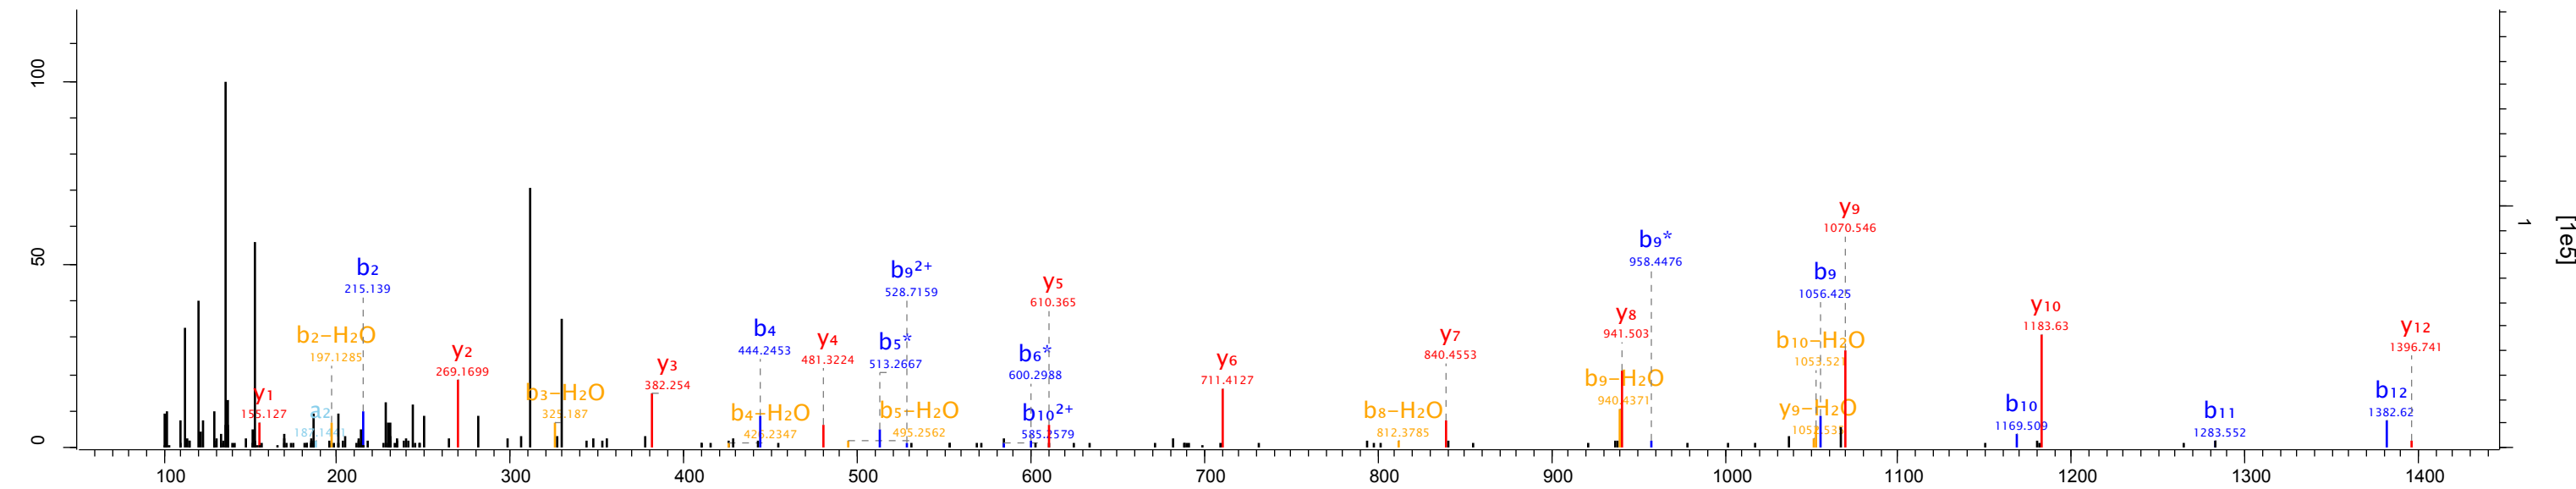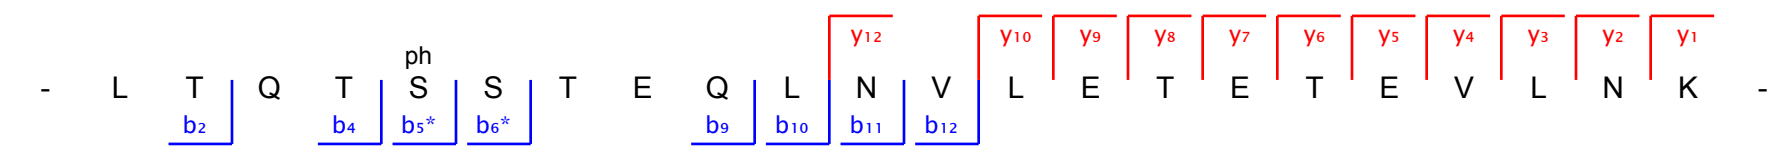

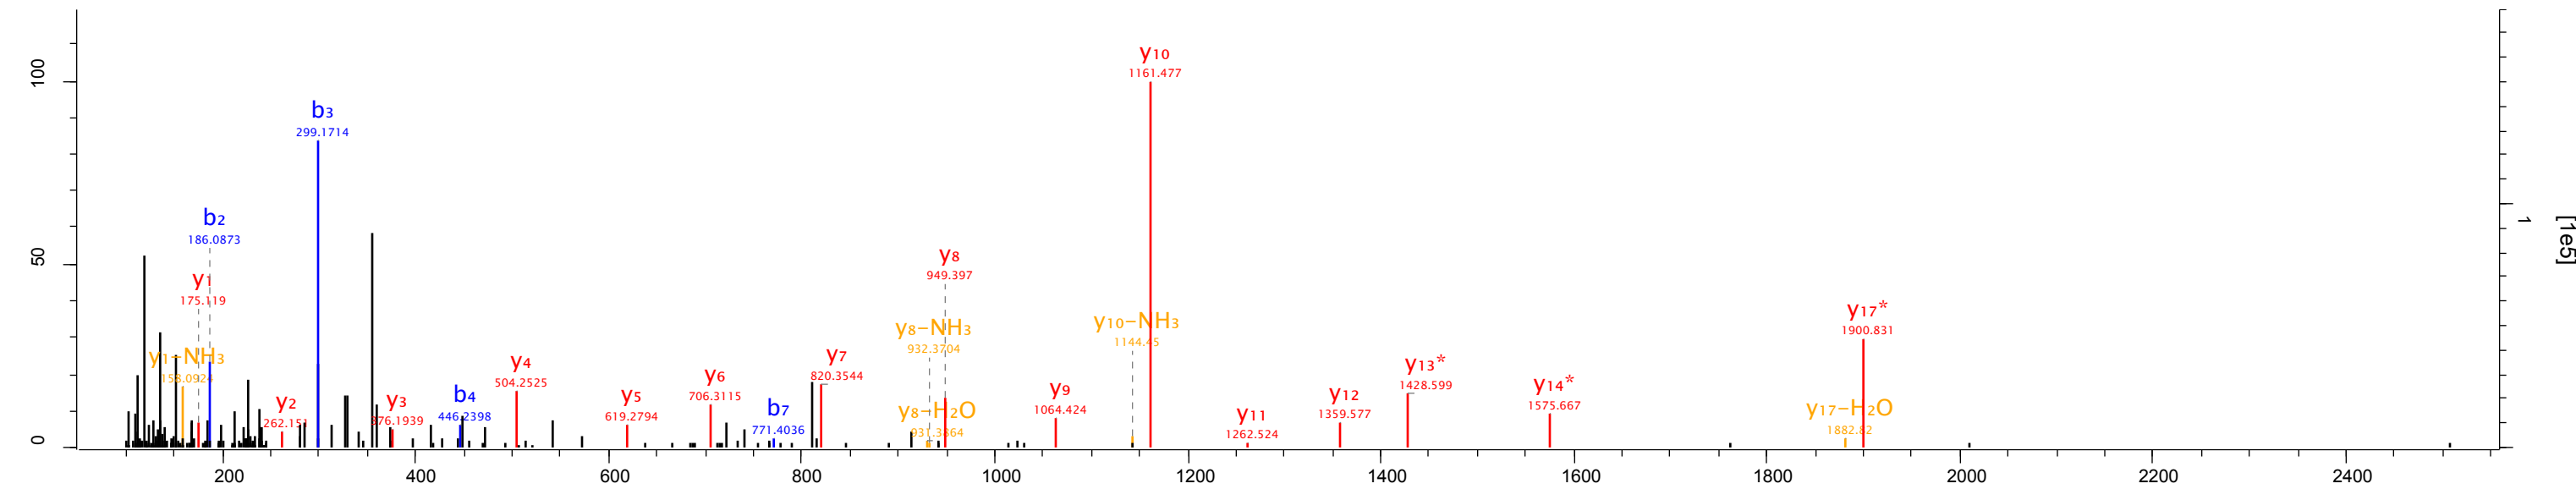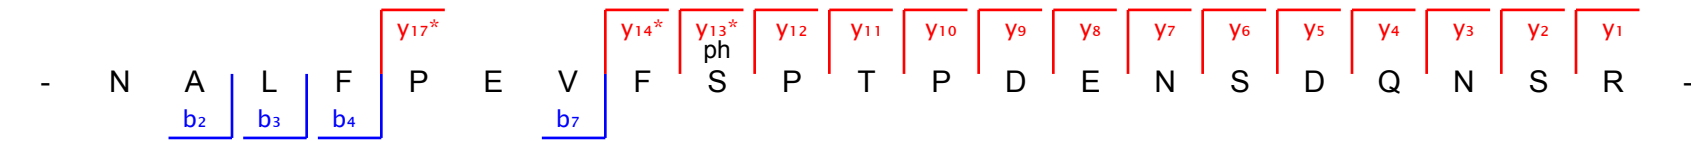



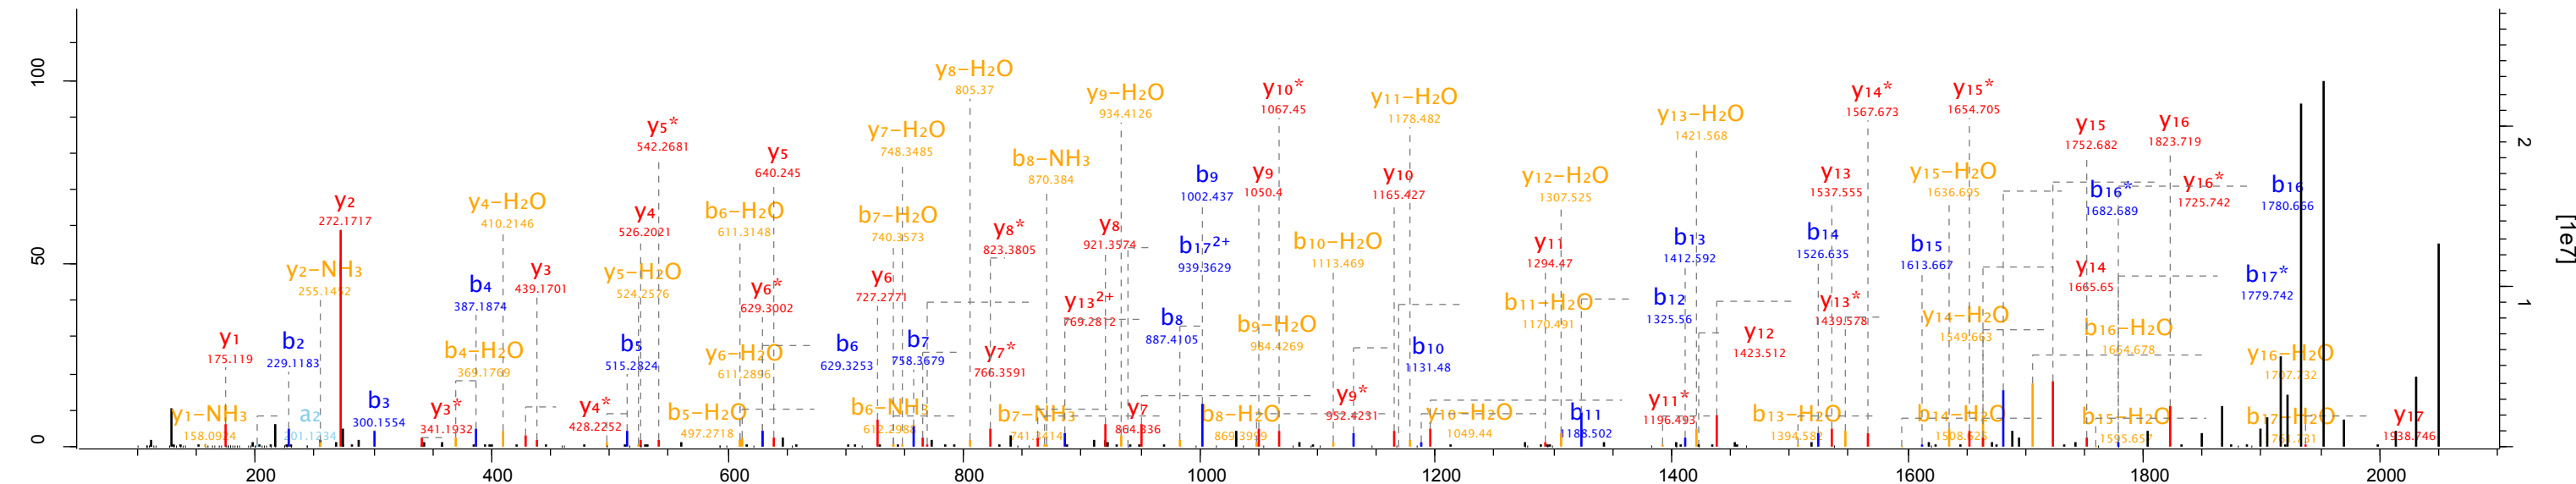

I D A S K N E E D E G H S N S P R  
 b<sub>2</sub> b<sub>3</sub> b<sub>4</sub> b<sub>5</sub> b<sub>6</sub> b<sub>7</sub> b<sub>8</sub> b<sub>9</sub> b<sub>10</sub> b<sub>11</sub> b<sub>12</sub> b<sub>13</sub> b<sub>14</sub> b<sub>15</sub> b<sub>16</sub> b<sub>17</sub><sup>\*</sup>

Raw file 20171215\_MaS\_33SR\_LMH\_phospho\_03 Scan 2100 Method FTMS; HCD Score 76.16 m/z 435.57 Gene names SLBP

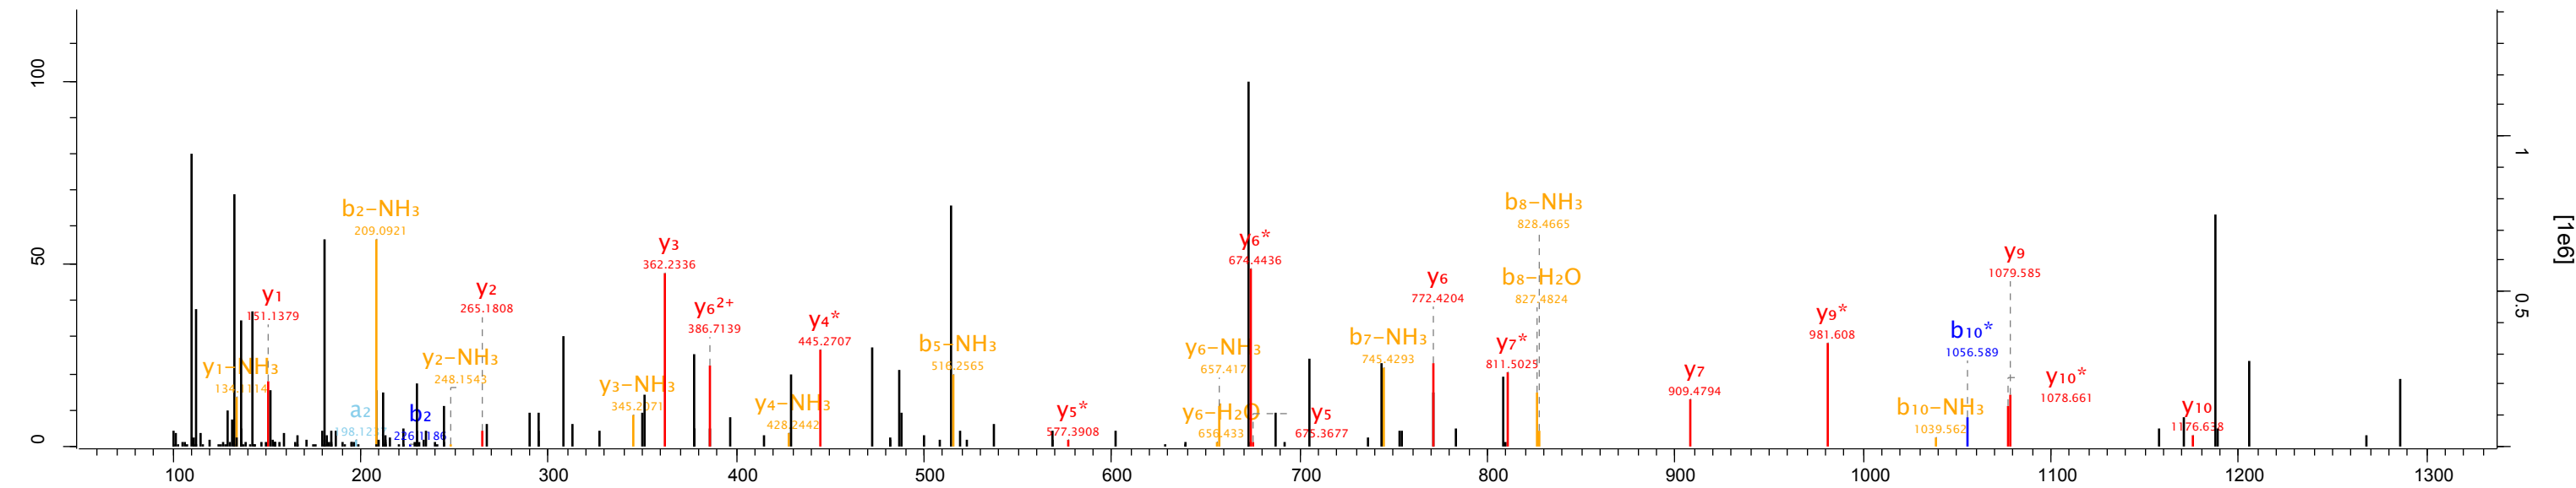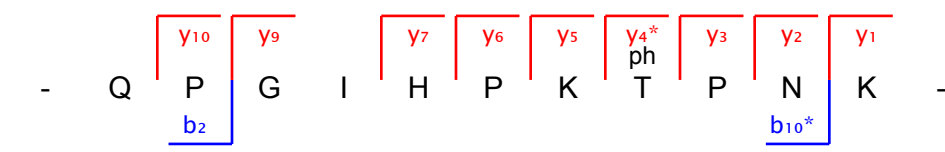

Raw file 20171215\_MaS\_33SR\_LMH\_phospho\_03 Scan 2180 Method FTMS; HCD Score 335.93 m/z 822.65 Gene names ZC3H18

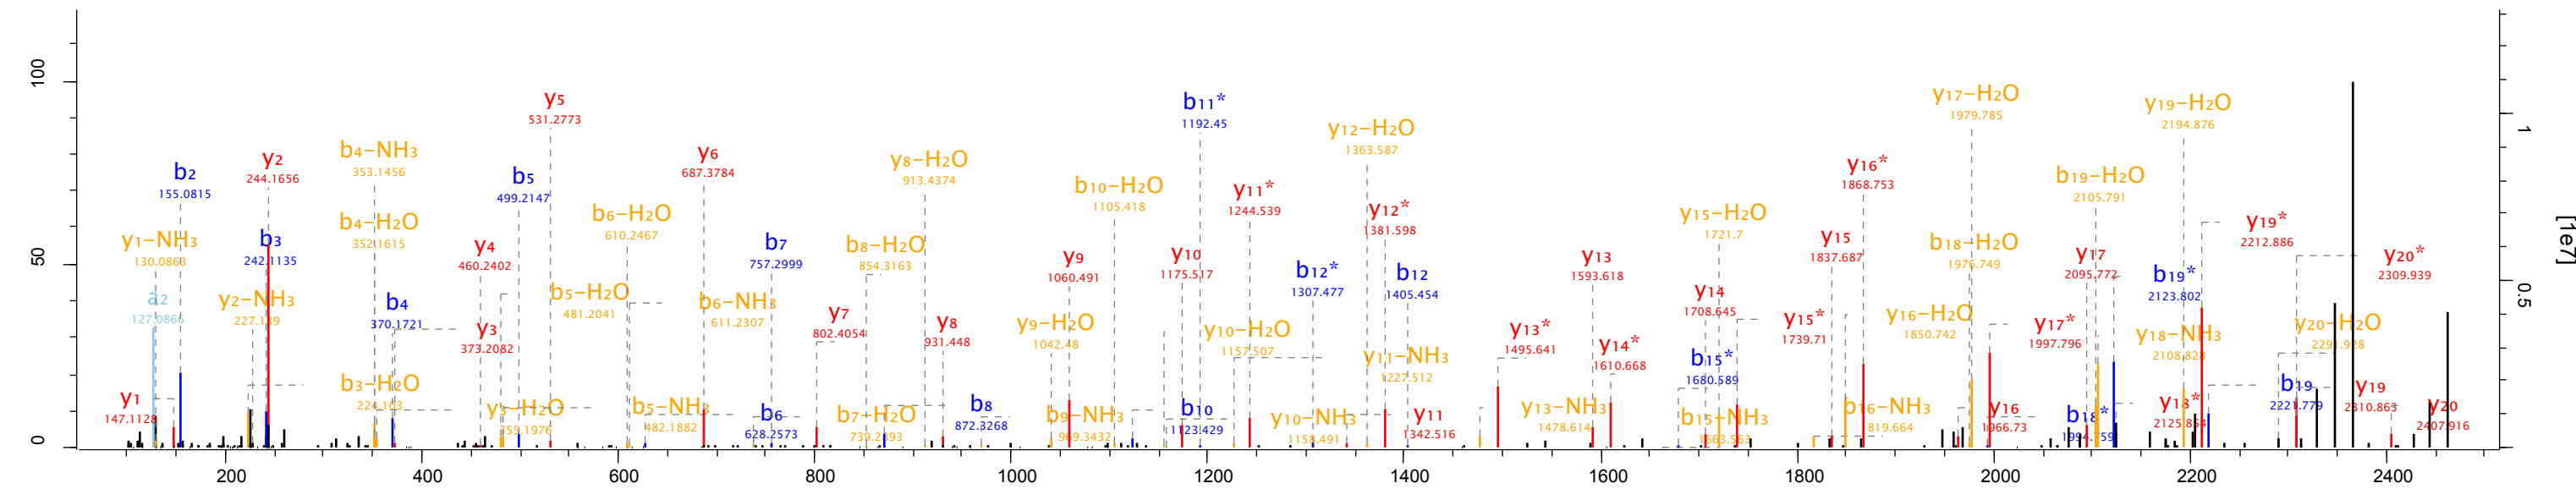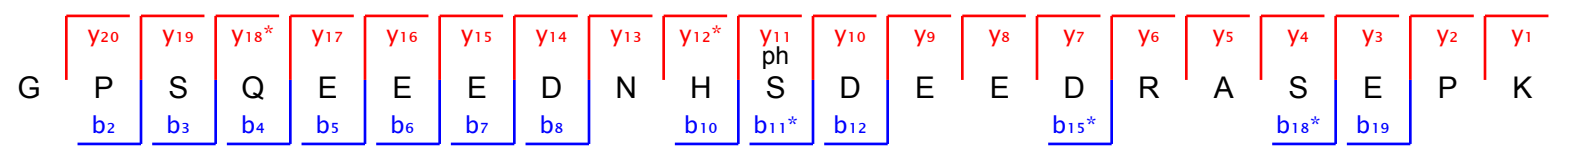

Raw file 20171215\_MaS\_33SR\_LMH\_phospho\_03 Scan 2260 Method FTMS; HCD Score 178.07 m/z 855.38 Gene names MARCKS

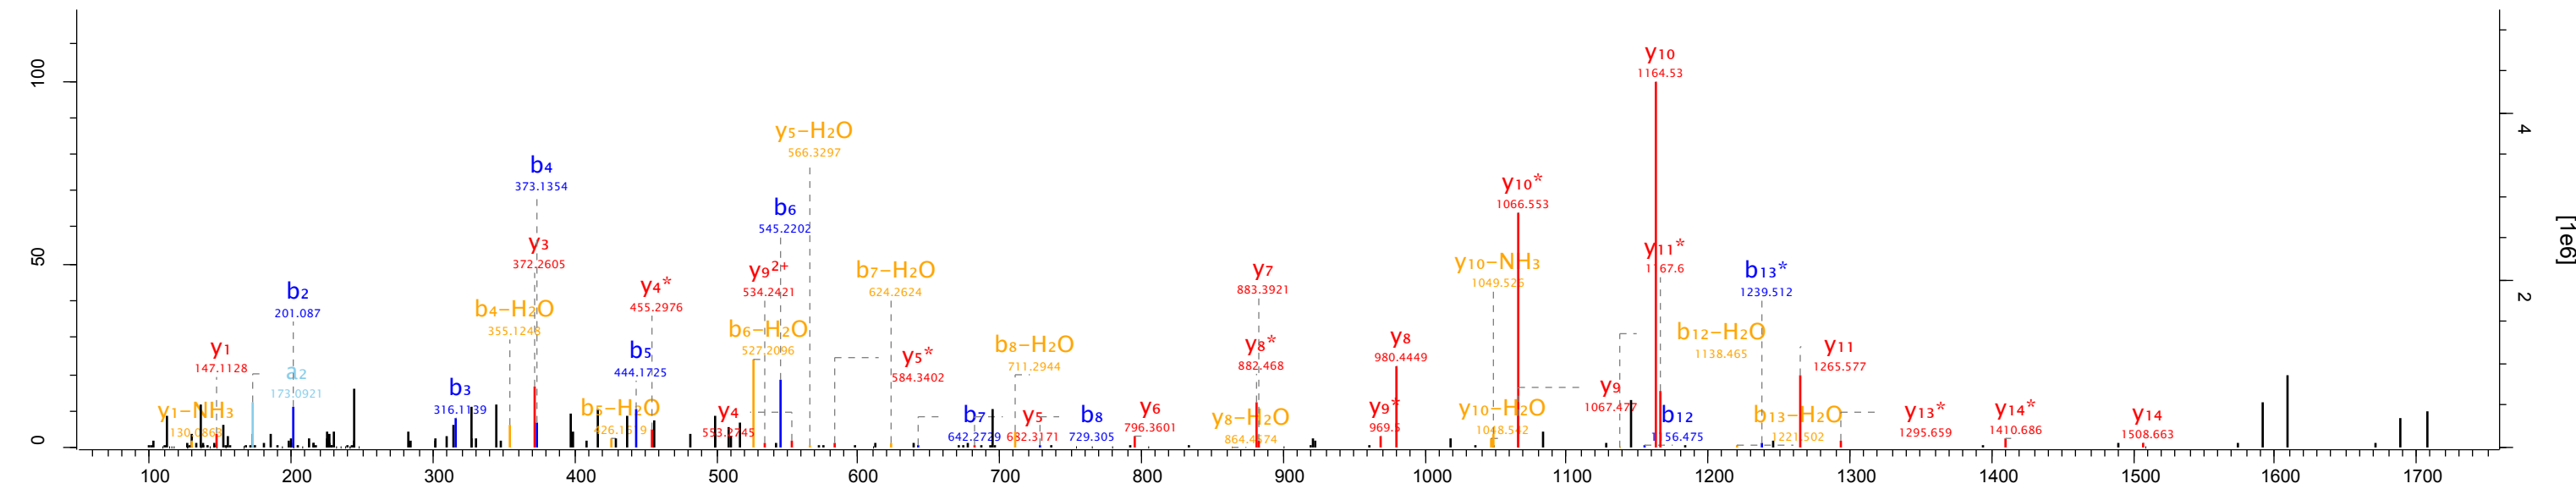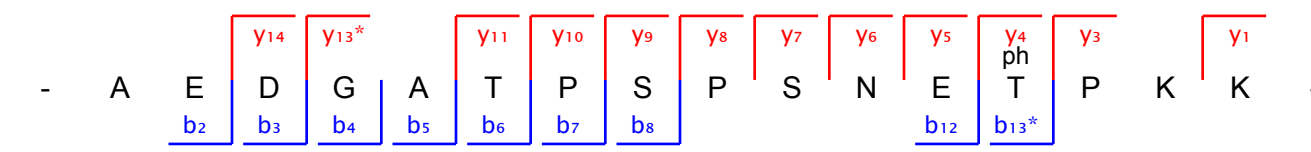

Raw file 20171215\_MaS\_33SR\_LMH\_phospho\_03 Scan 2310 Method FTMS; HCD Score 69.28 m/z 551.76

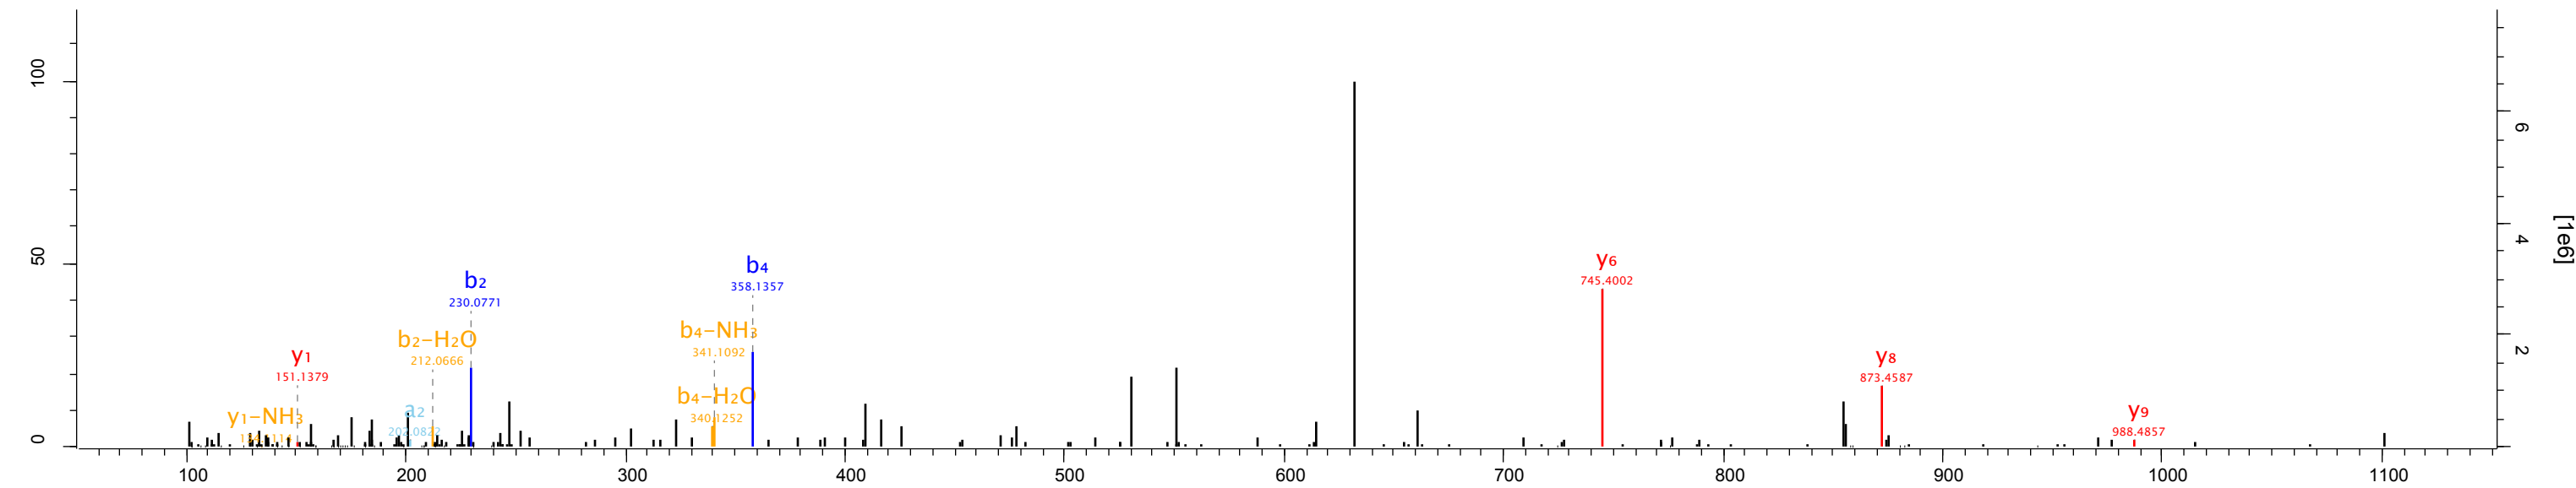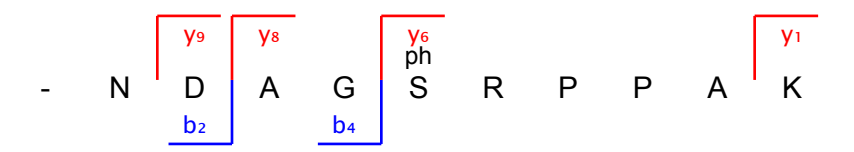

Raw file  
20171215\_MaS\_33SR\_LMH\_phospho\_03

Scan 2680 Method FTMS; HCD Score 226.14 m/z 728.81 Gene names LEO1

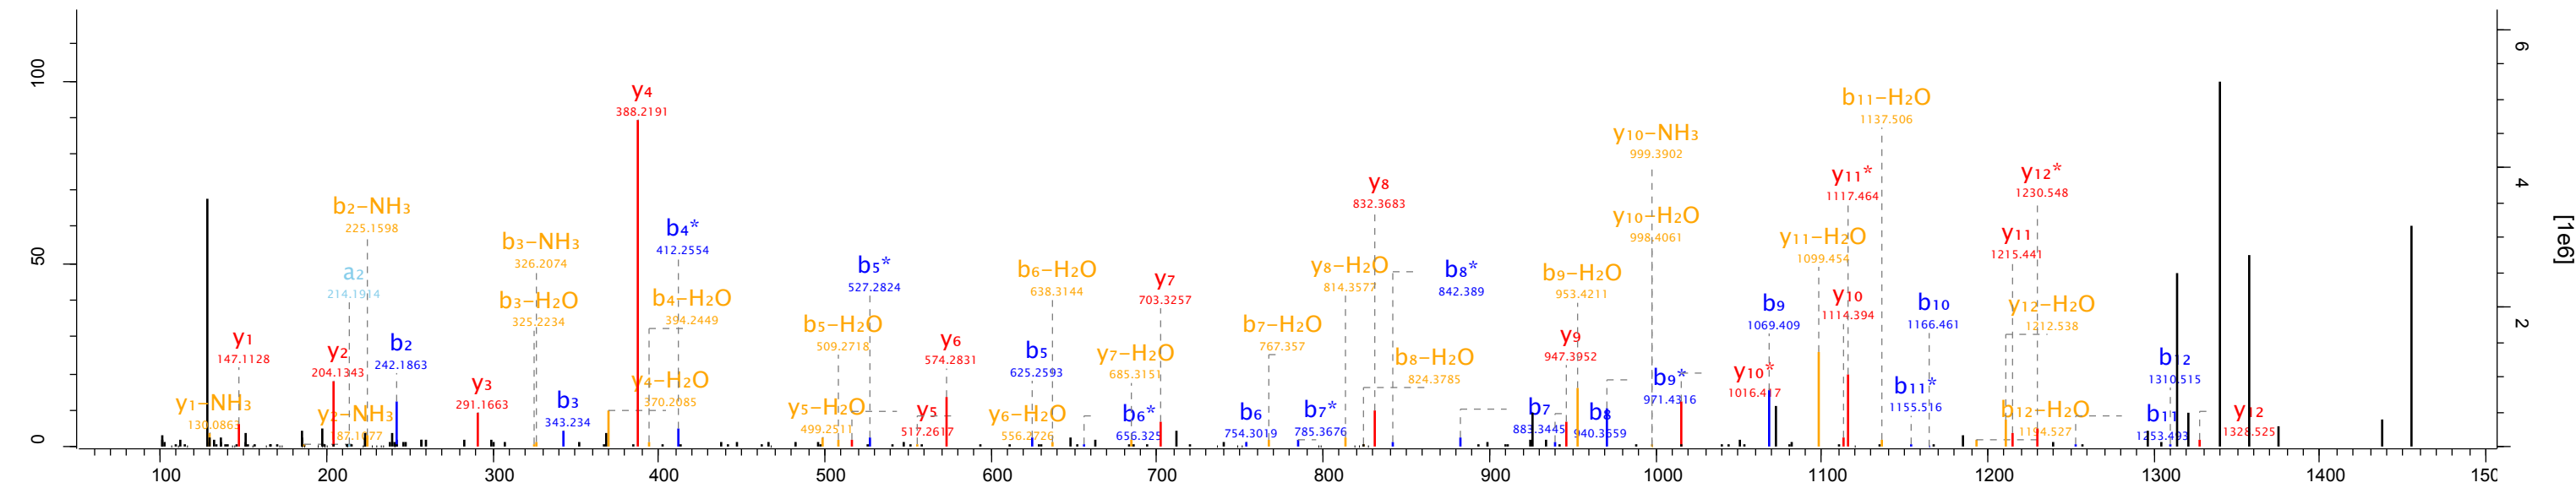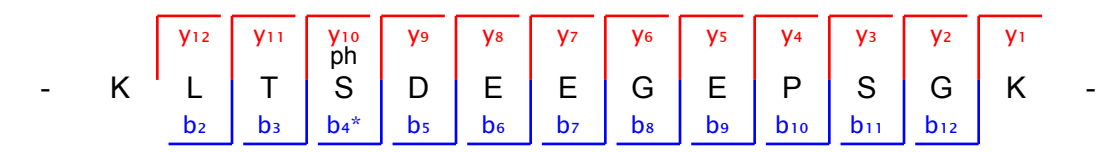

Raw file 20171215\_MaS\_33SR\_LMH\_phospho\_03 Scan 2720 Method FTMS; HCD Score 239.51 m/z 1084.41 Gene names TRIM16

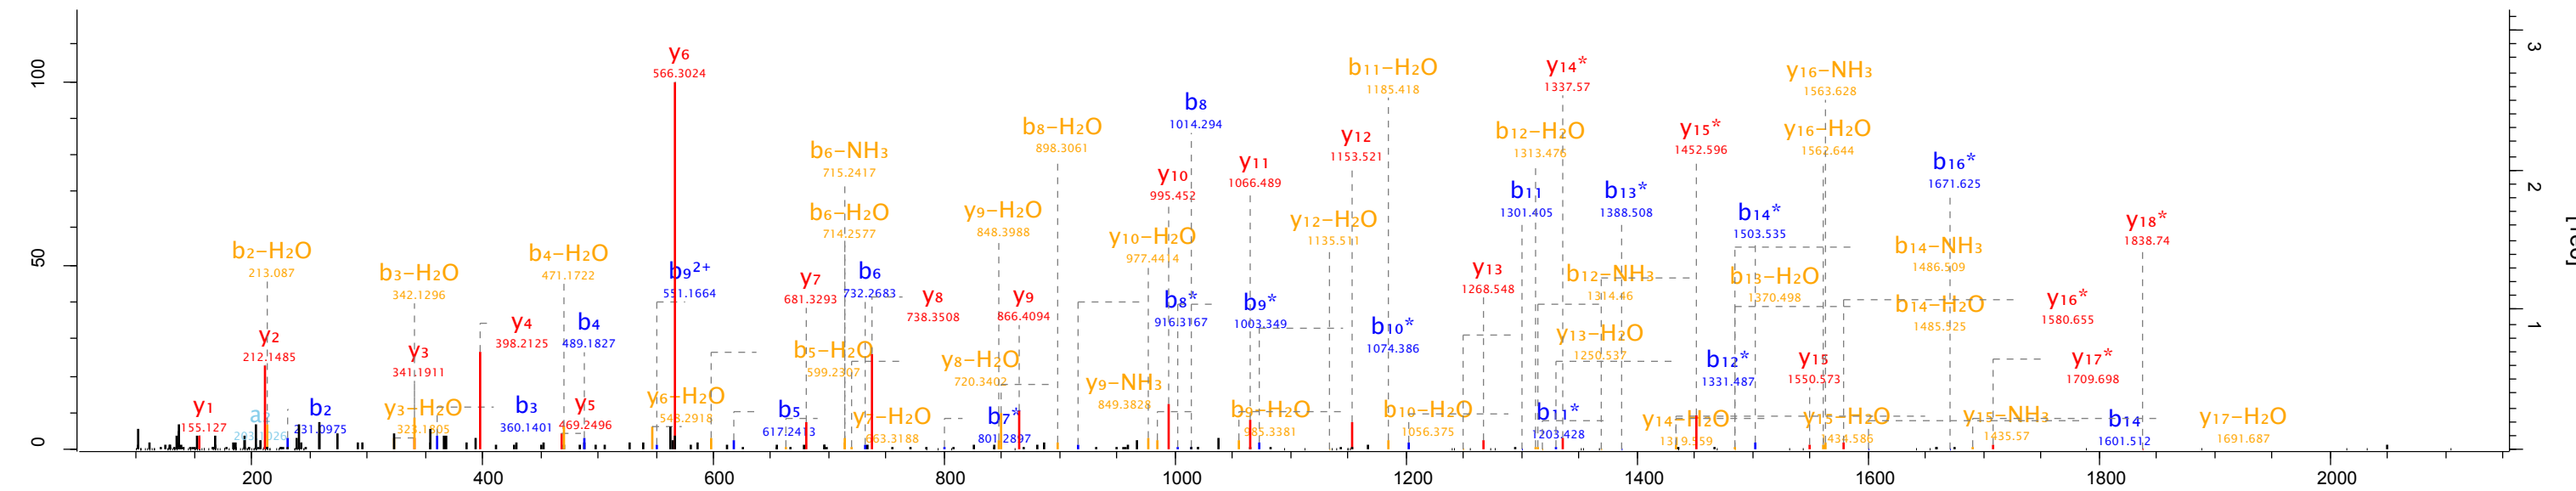

20171215\_MaS\_33SR\_LMH\_phospho\_03 2830 FTMS; HCD 47.22 472.55 FNBP1

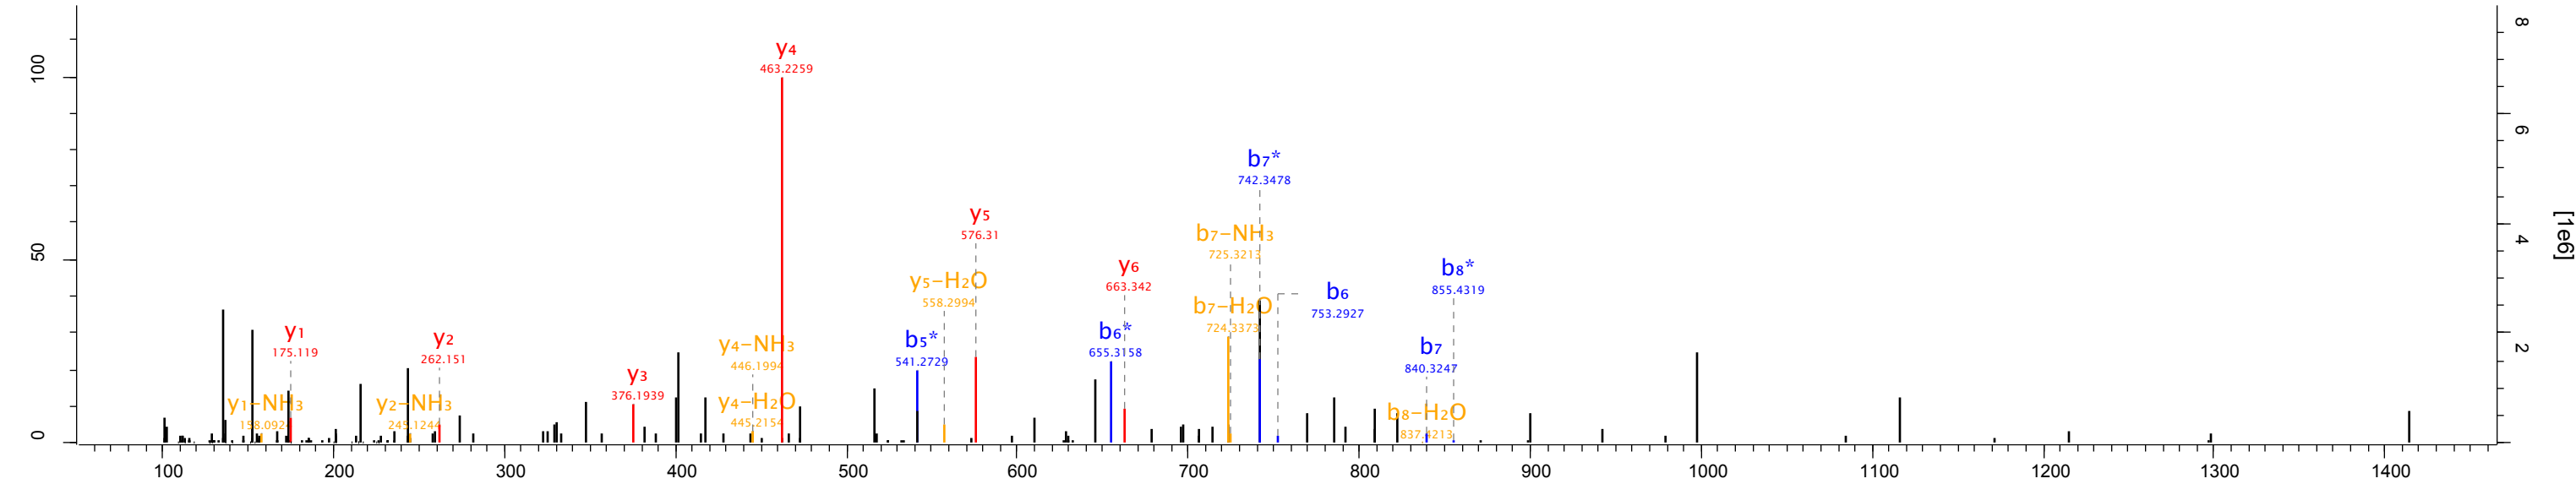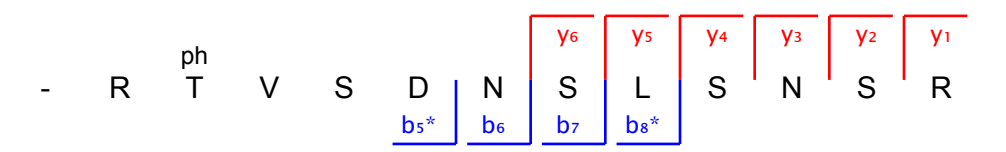



Raw file 20171215\_MaS\_33SR\_LMH\_phospho\_03 Scan 2950 Method FTMS; HCD Score 56.82 m/z 544.89 Gene names BCKDK

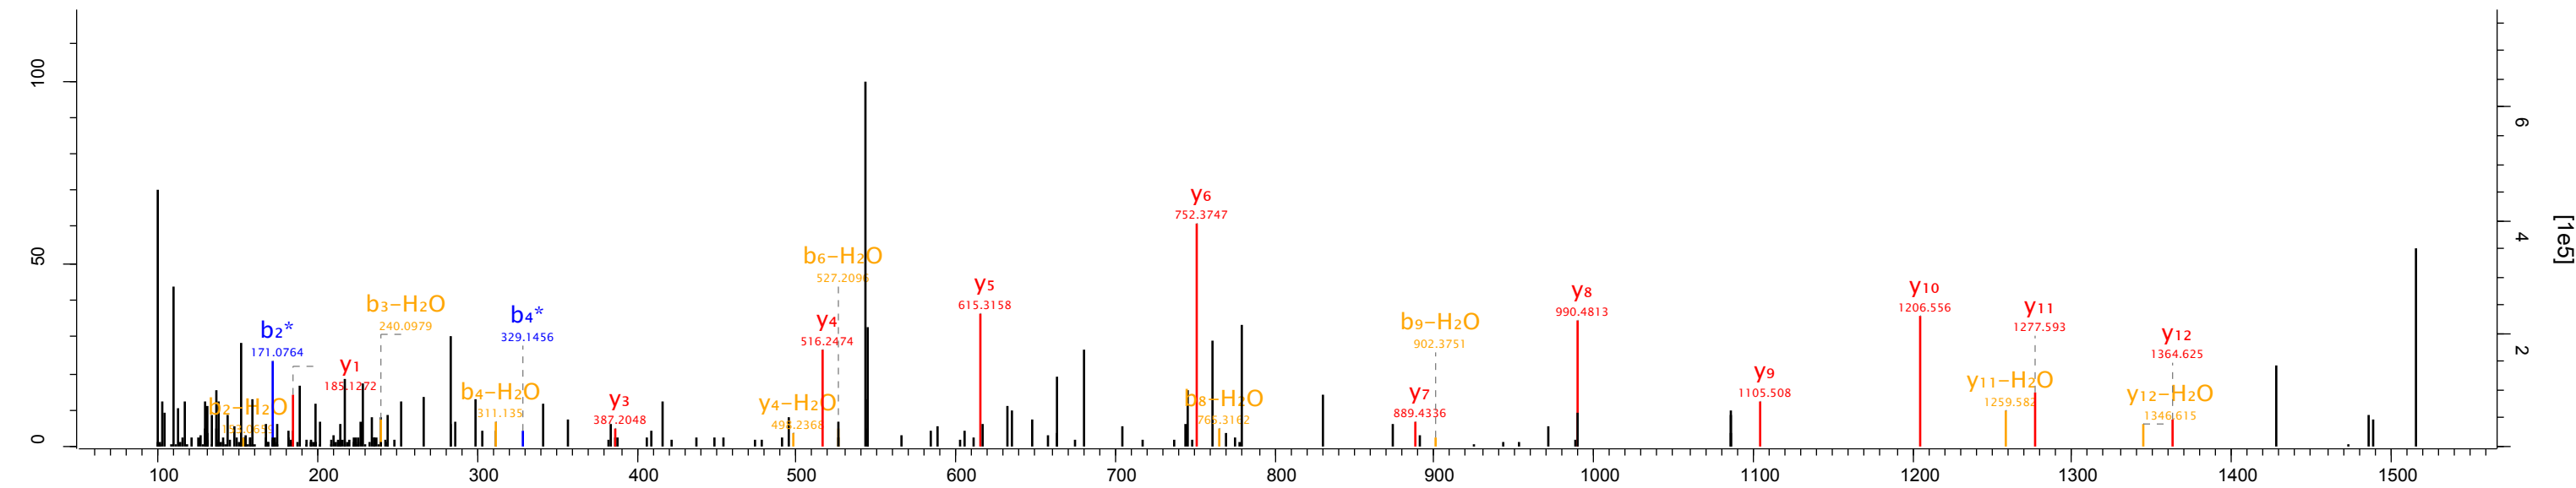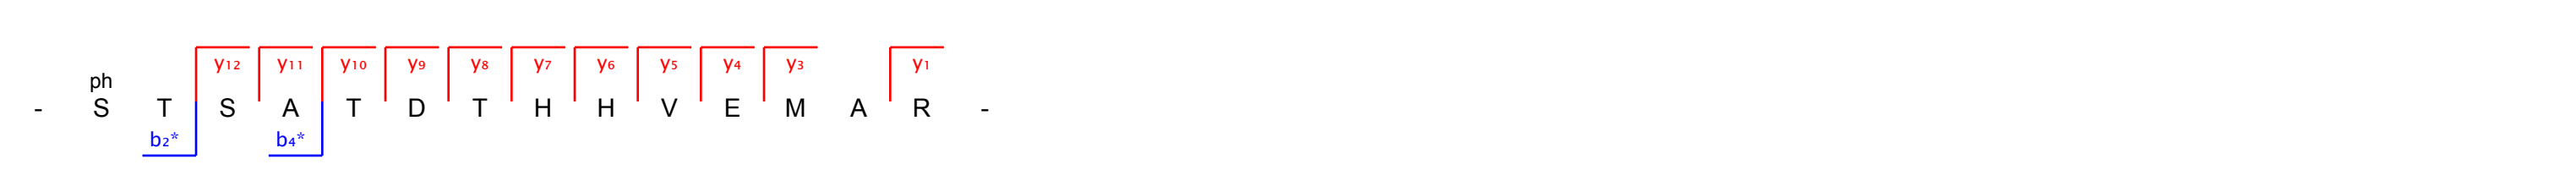

Raw file 20171215\_MaS\_33SR\_LMH\_phospho\_03 Scan 3000 Method FTMS; HCD Score 188.56 m/z 712.81 Gene names MARCKS

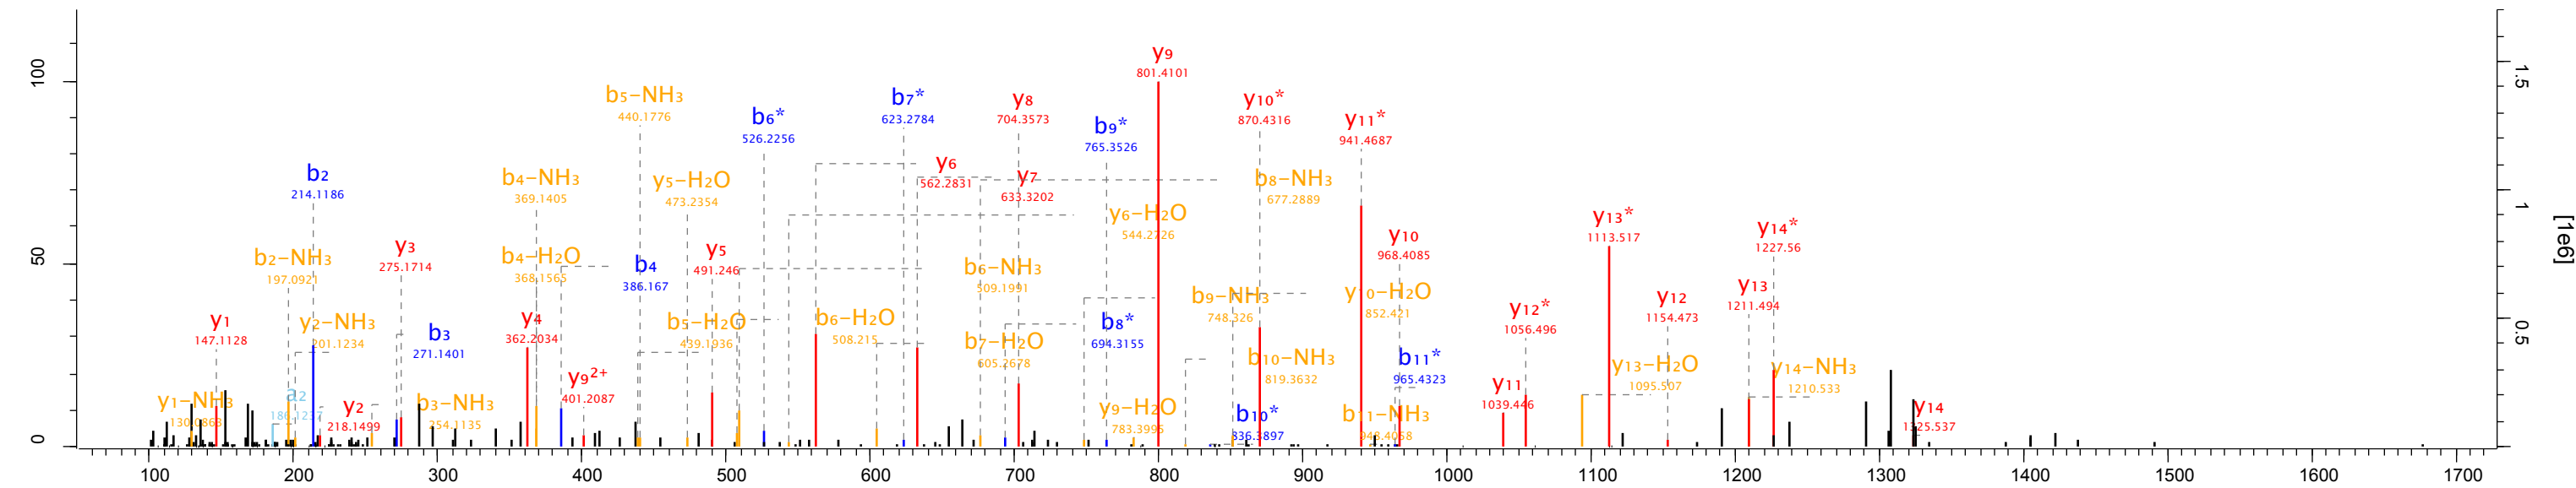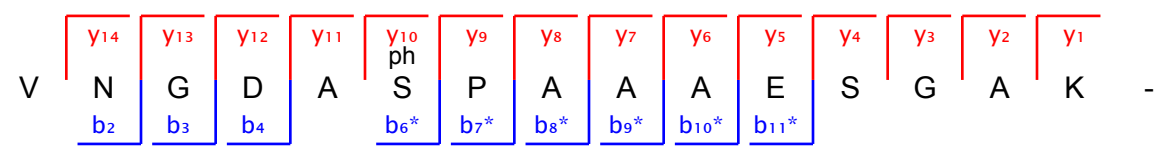

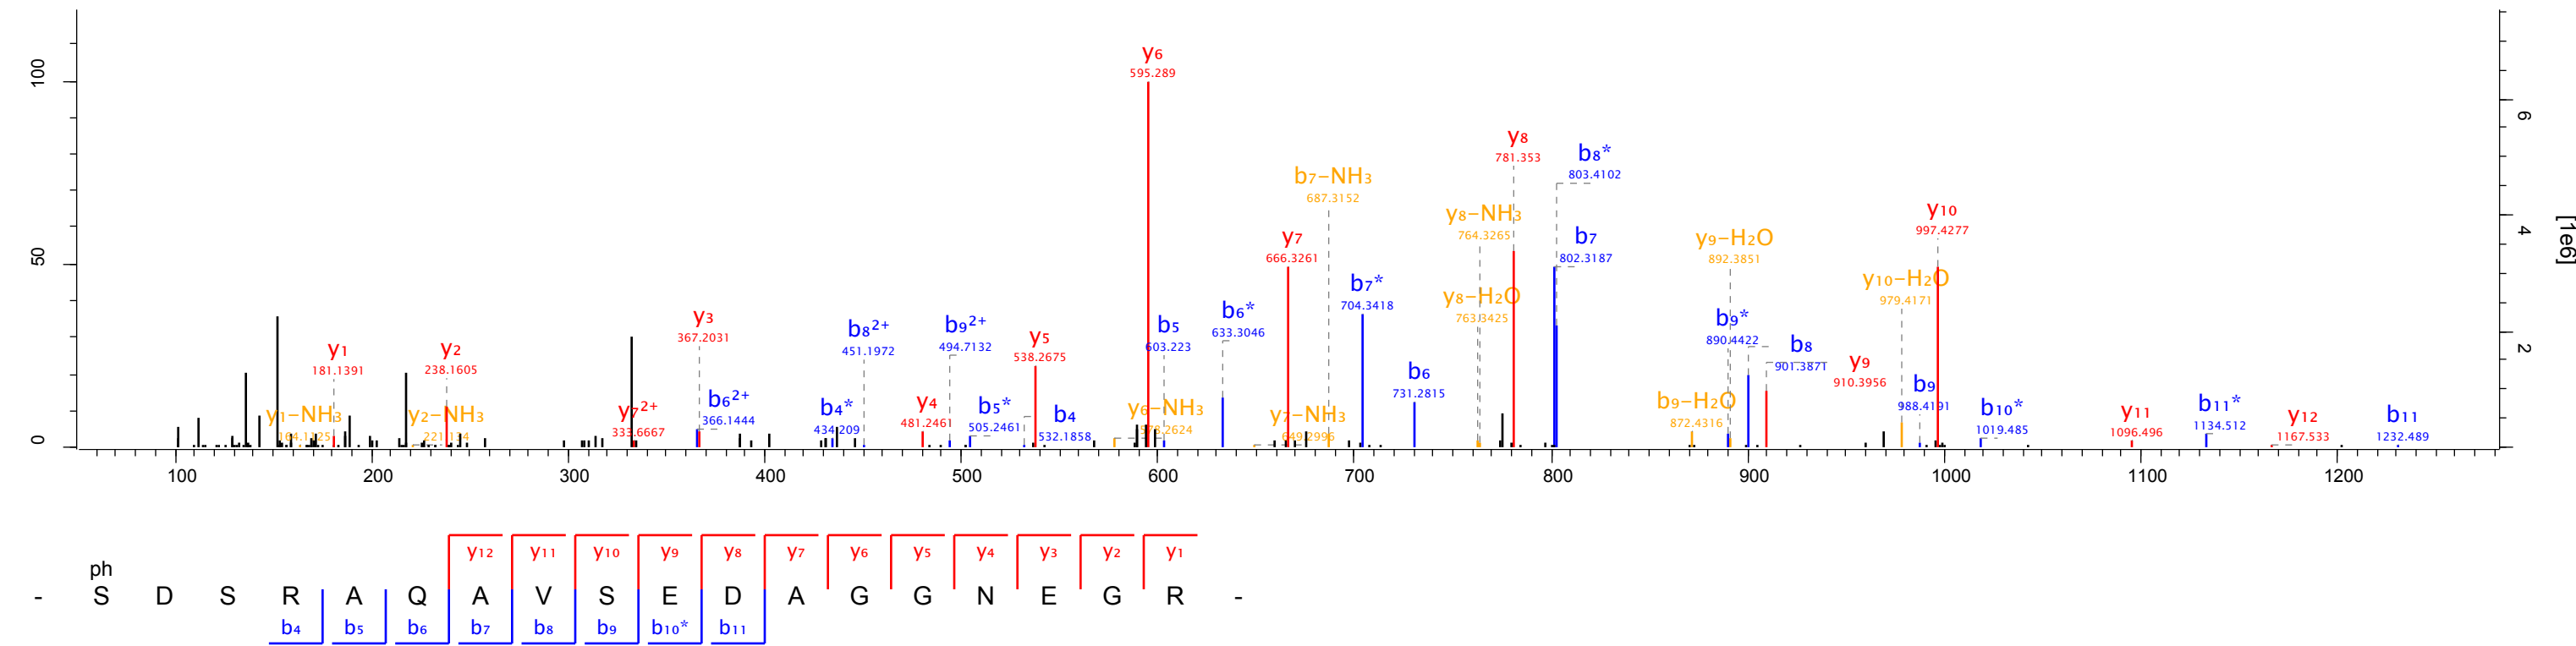

Raw file 20171215\_MaS\_33SR\_LMH\_phospho\_03 Scan 3620 Method FTMS; HCD Score 188.49 m/z 956.92 Gene names UTP14A

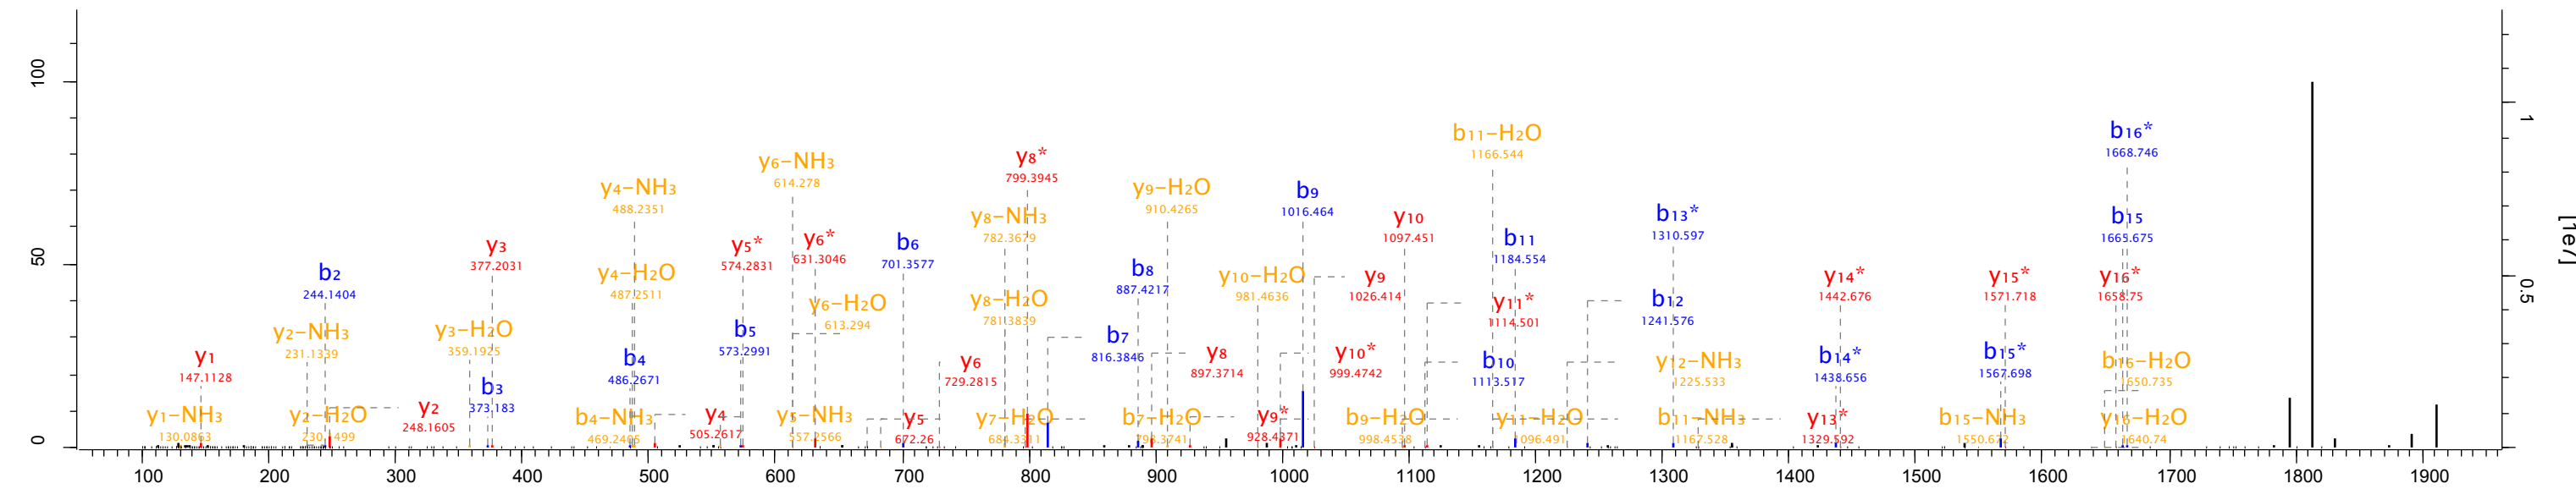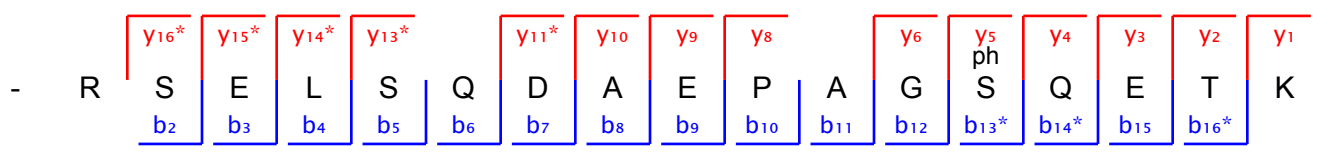

Raw file 20171215\_MaS\_33SR\_LMH\_phospho\_03 Scan 3790 Method FTMS; HCD Score 440.31 m/z 856.89 Gene names MKI67

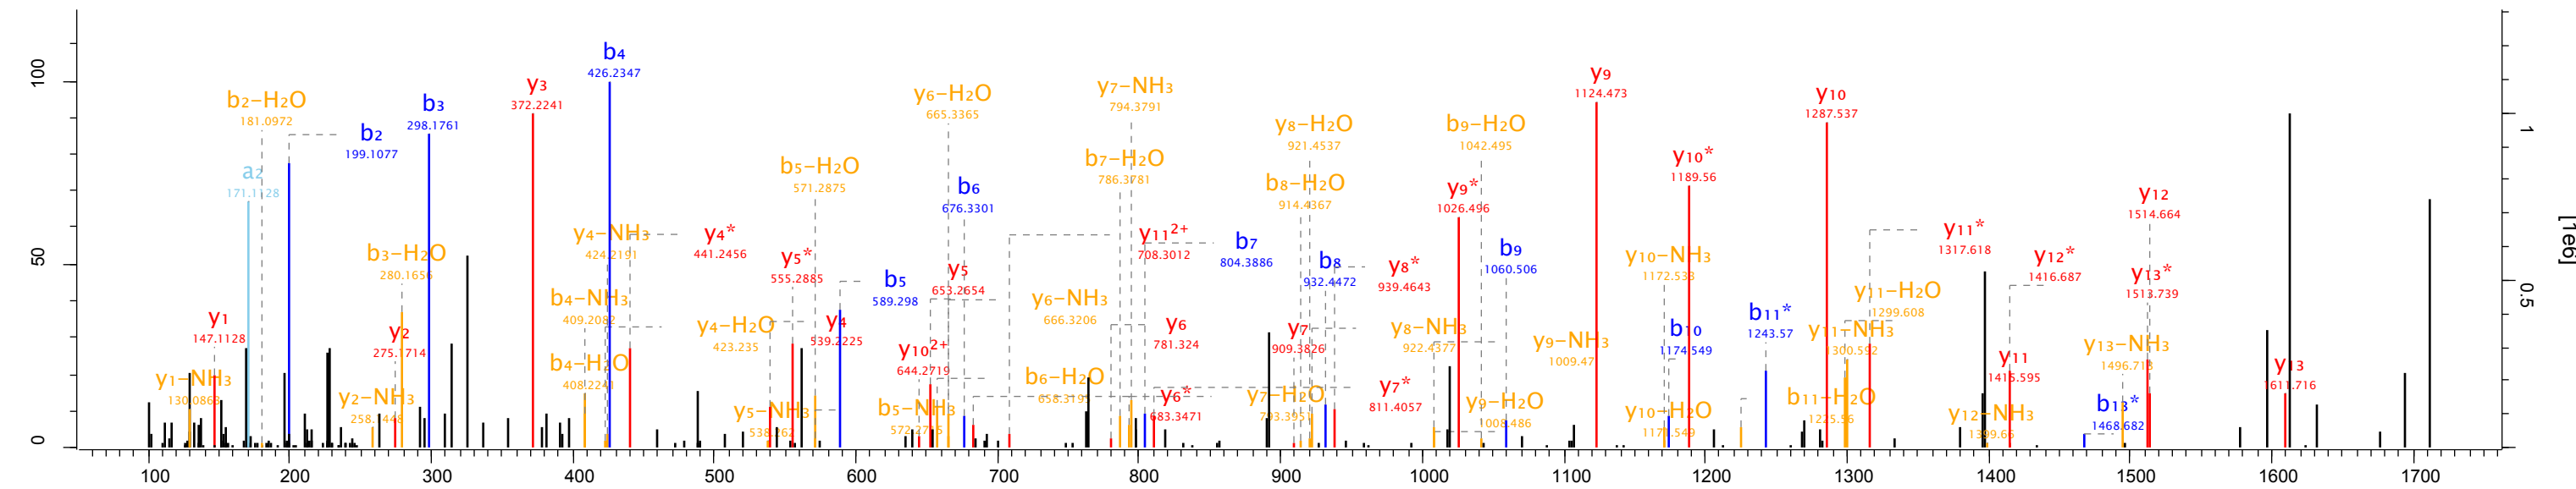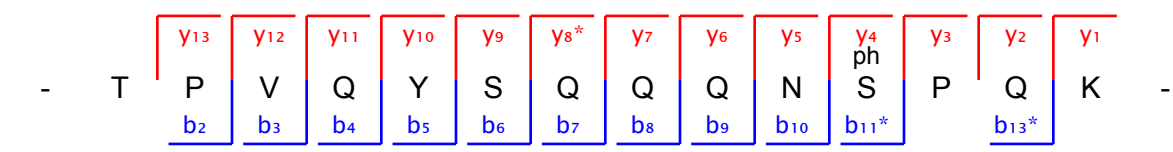

Raw file 20171215\_MaS\_33SR\_LMH\_phospho\_03 Scan 3800 Method FTMS; HCD Score 120.23 m/z 948.39 Gene names EPB41L3

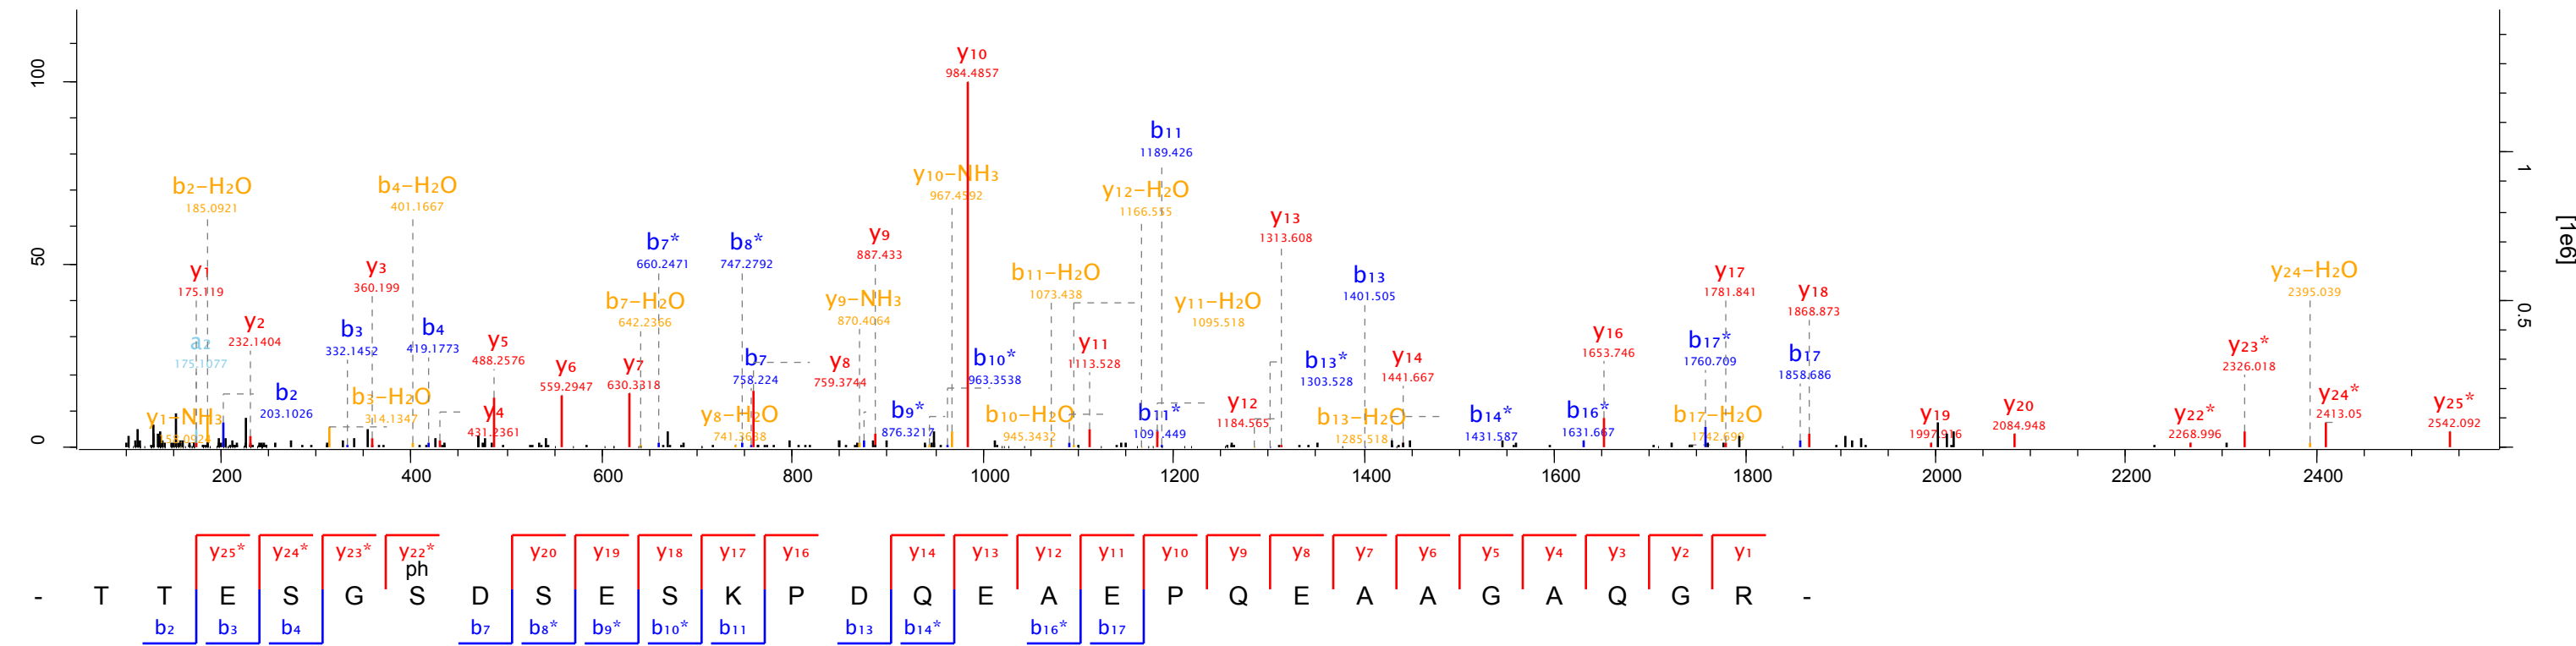

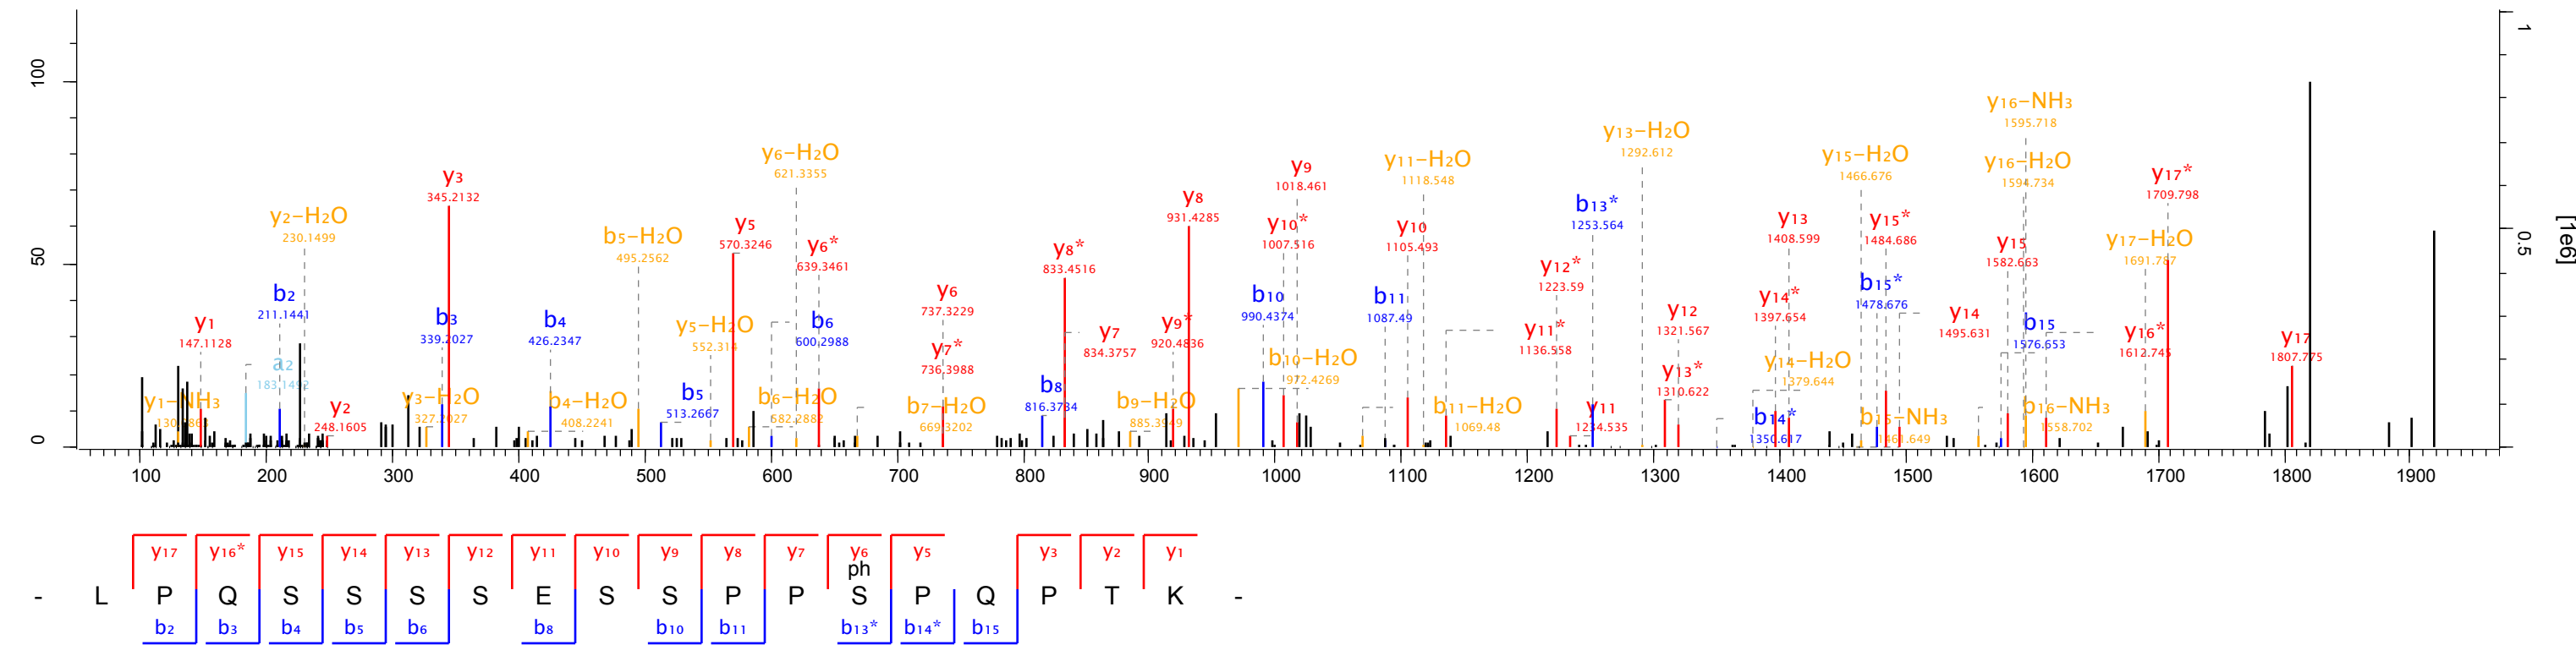

Raw file 20171215\_MaS\_33SR\_LMH\_phospho\_03 Scan 4590 Method FTMS; HCD Score 161.04 m/z 899.38 Gene names SLC4A7

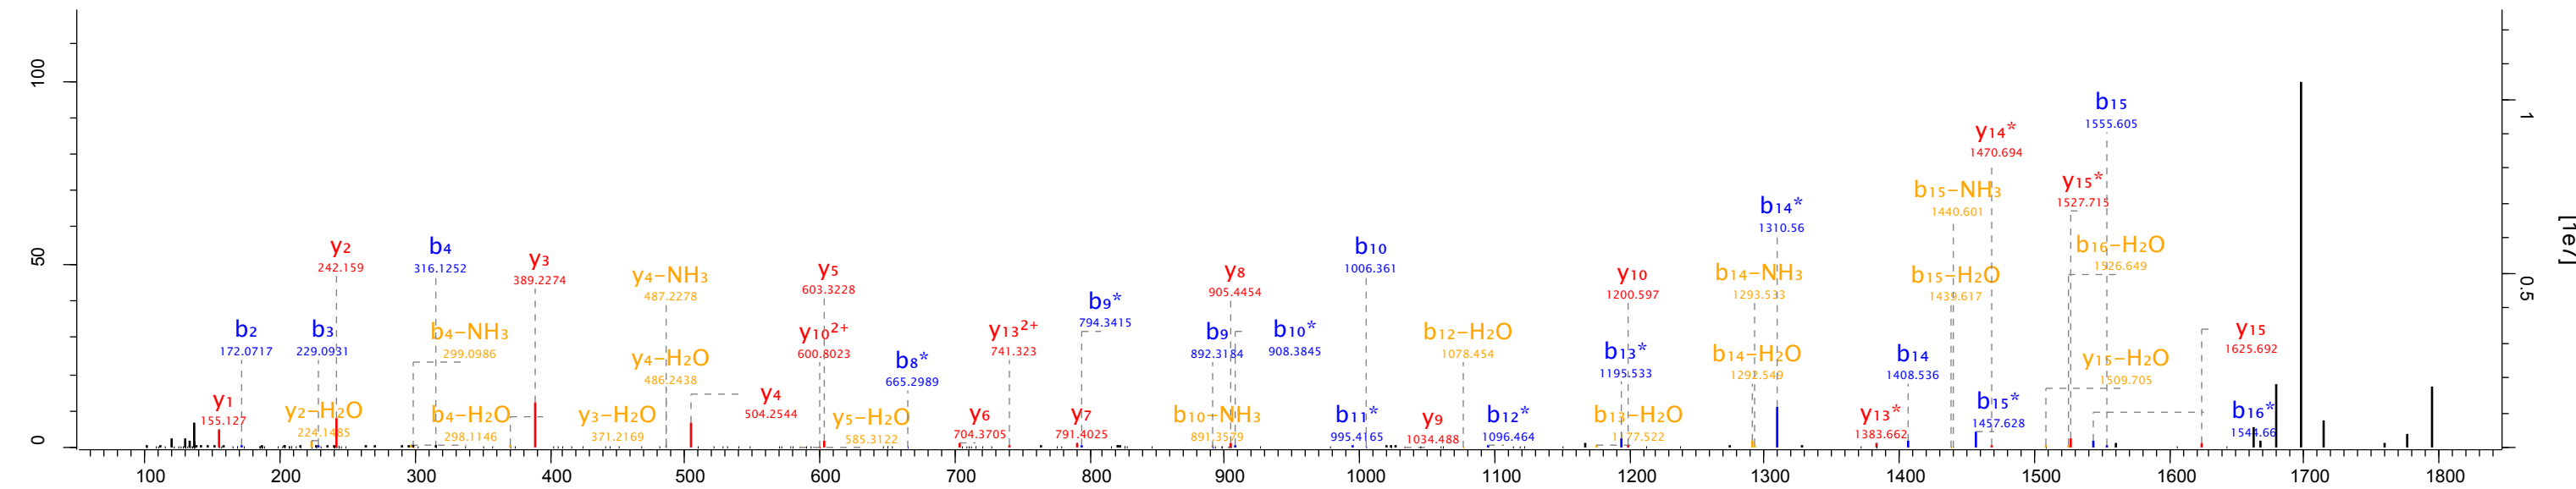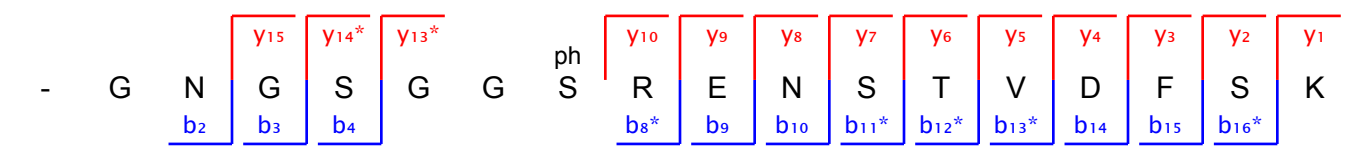



Raw file 20171215\_MaS\_33SR\_LMH\_phospho\_03 Scan 4630 Method FTMS; HCD Score 63.22 m/z 667.29 Gene names PCM1

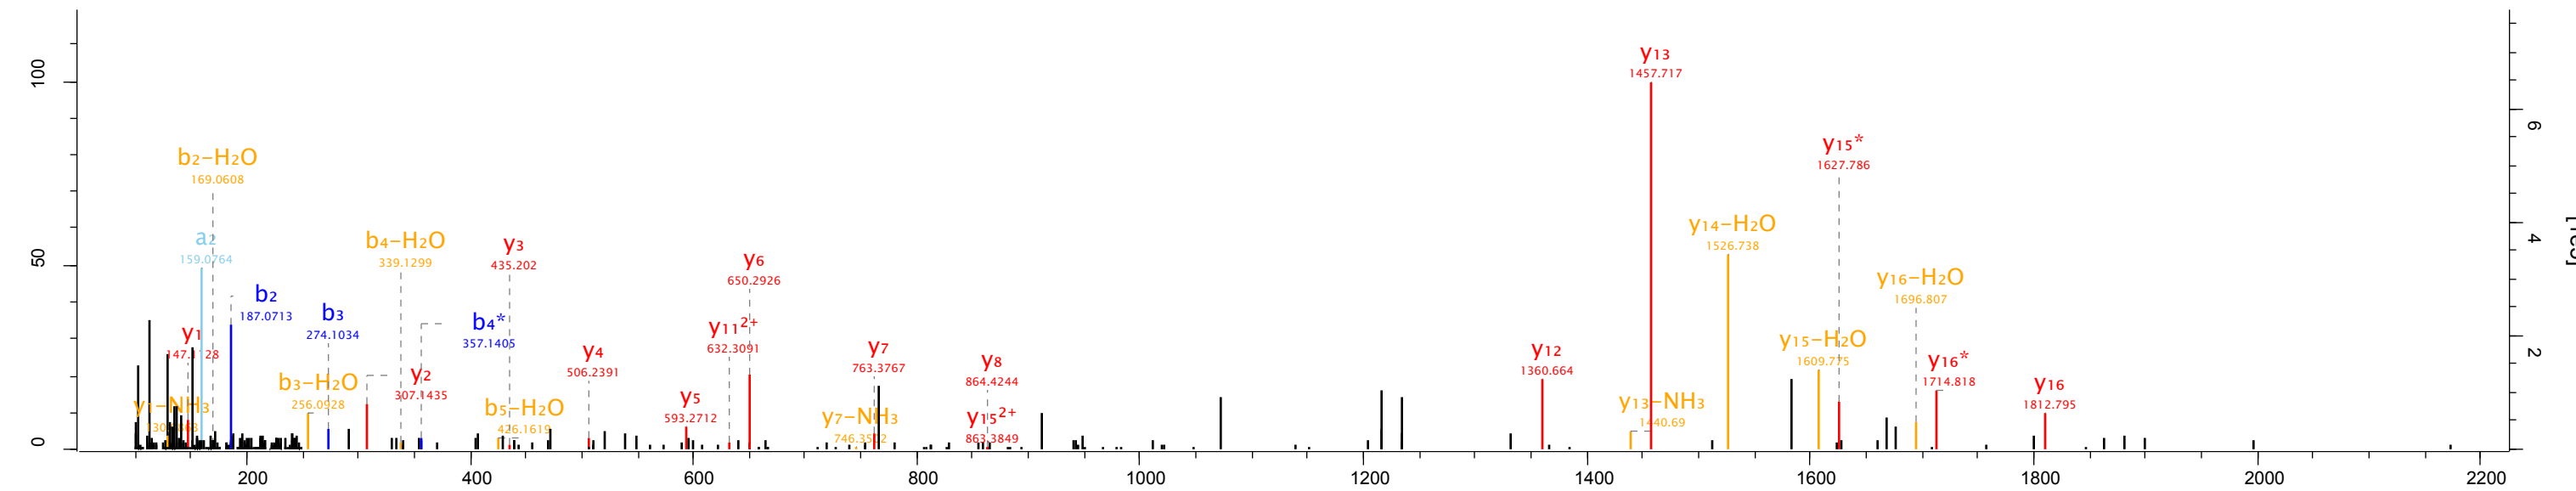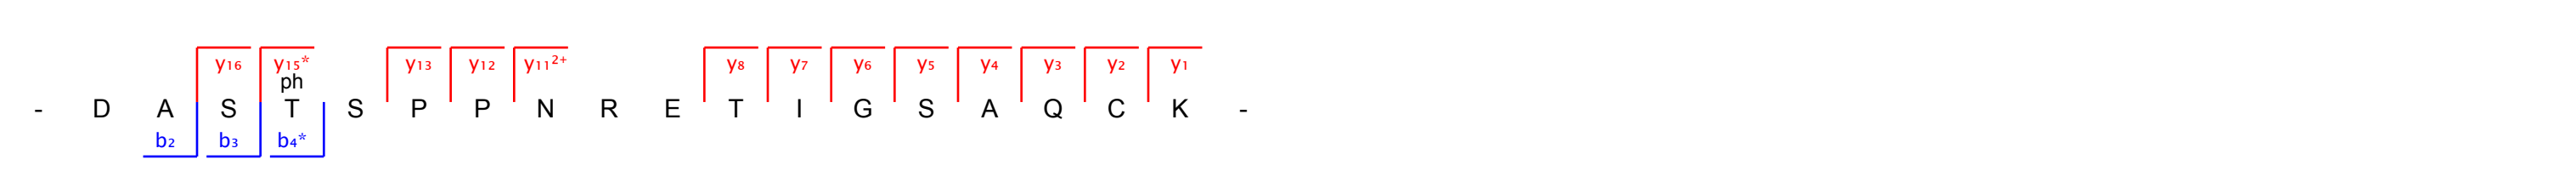

Raw file 20171215\_MaS\_33SR\_LMH\_phospho\_03 Scan 4710 Method FTMS; HCD Score 131.77 m/z 684.3 Gene names SQSTM1

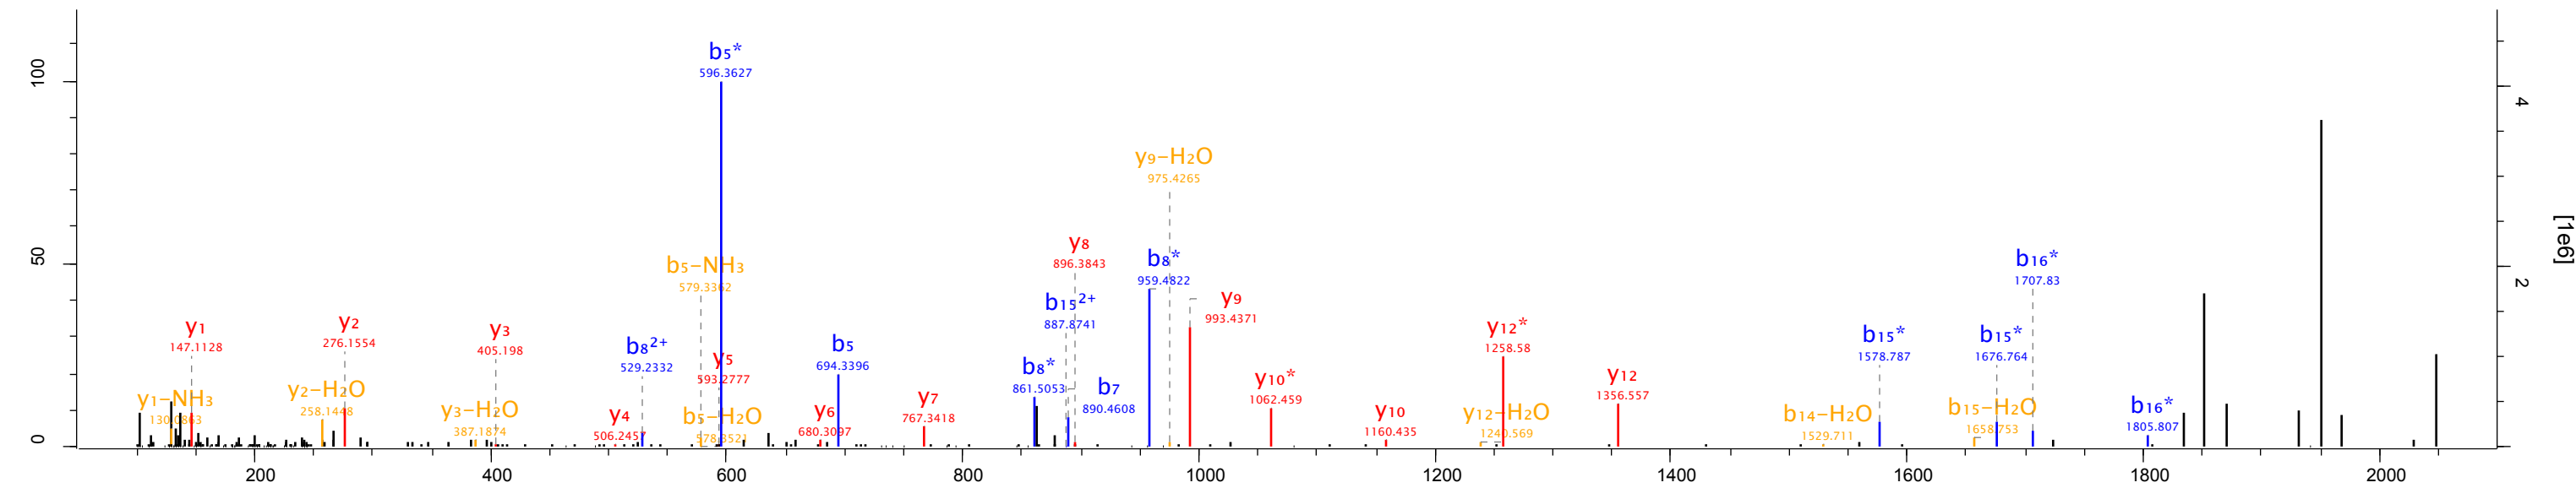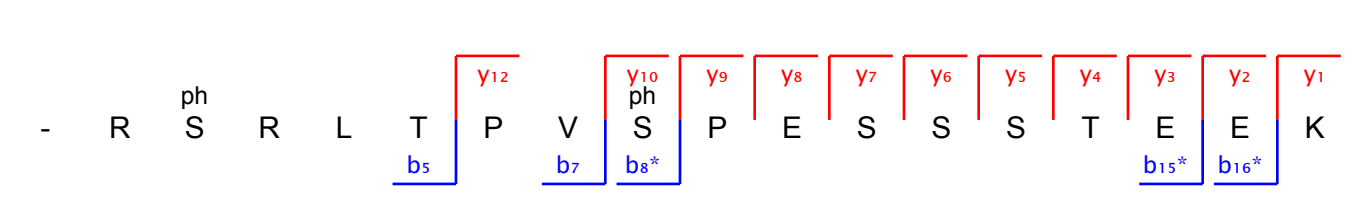

Raw file 20171215\_MaS\_33SR\_LMH\_phospho\_03 Scan 4910 Method FTMS; HCD Score 153.21 m/z 743.35 Gene names EIF4A3

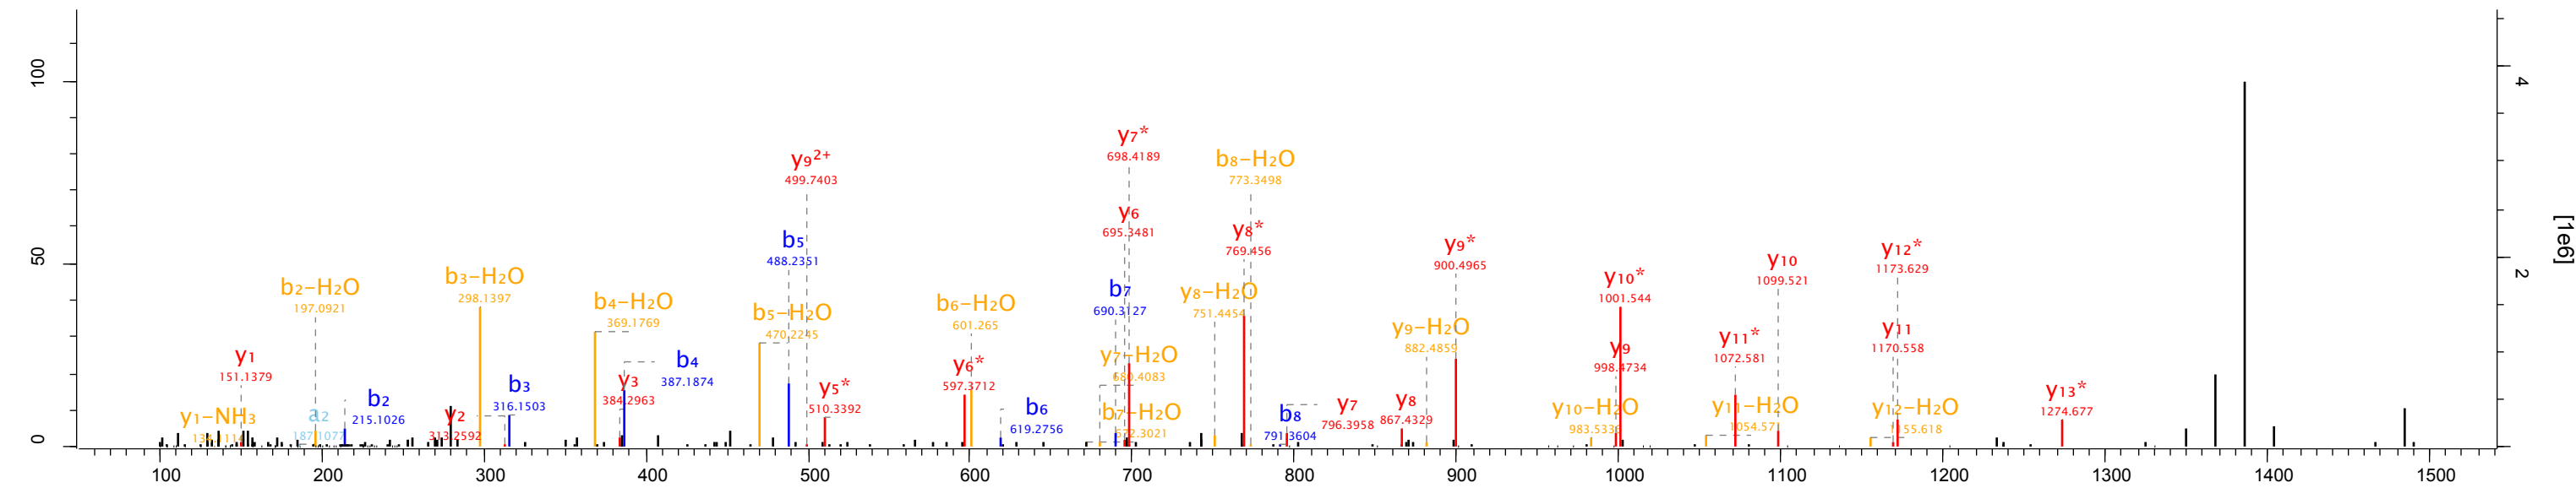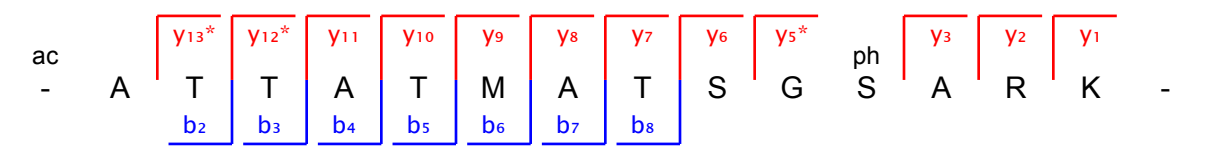

Raw file 20171215\_MaS\_33SR\_LMH\_phospho\_03 Scan 5240 Method FTMS; HCD Score 188.98 m/z 745.34 Gene names BAIAP2L2

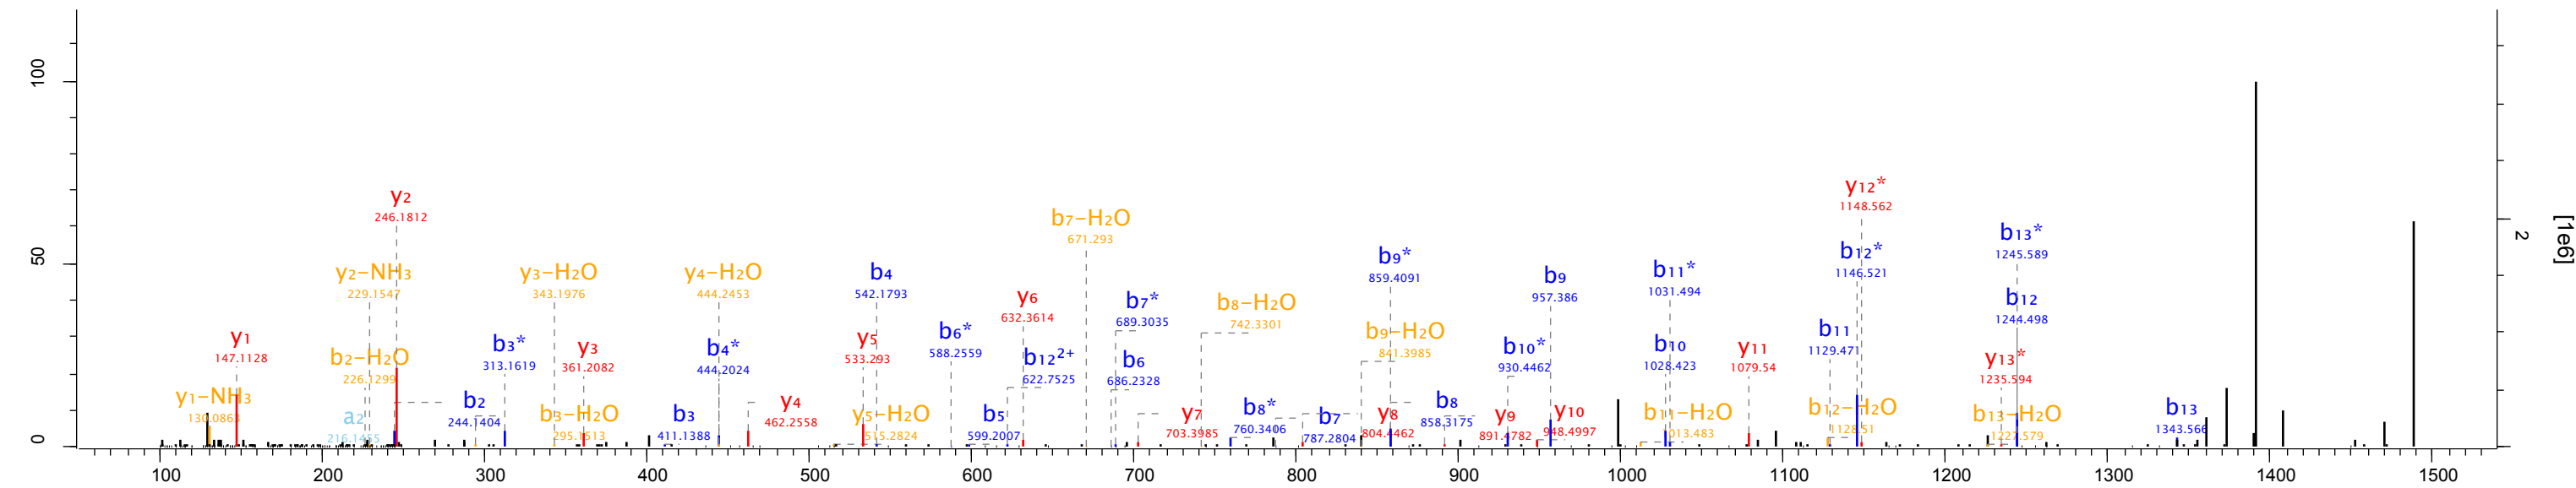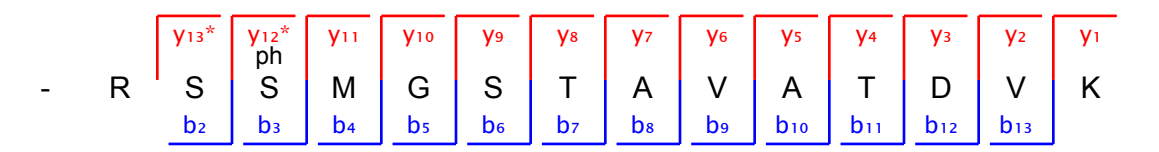

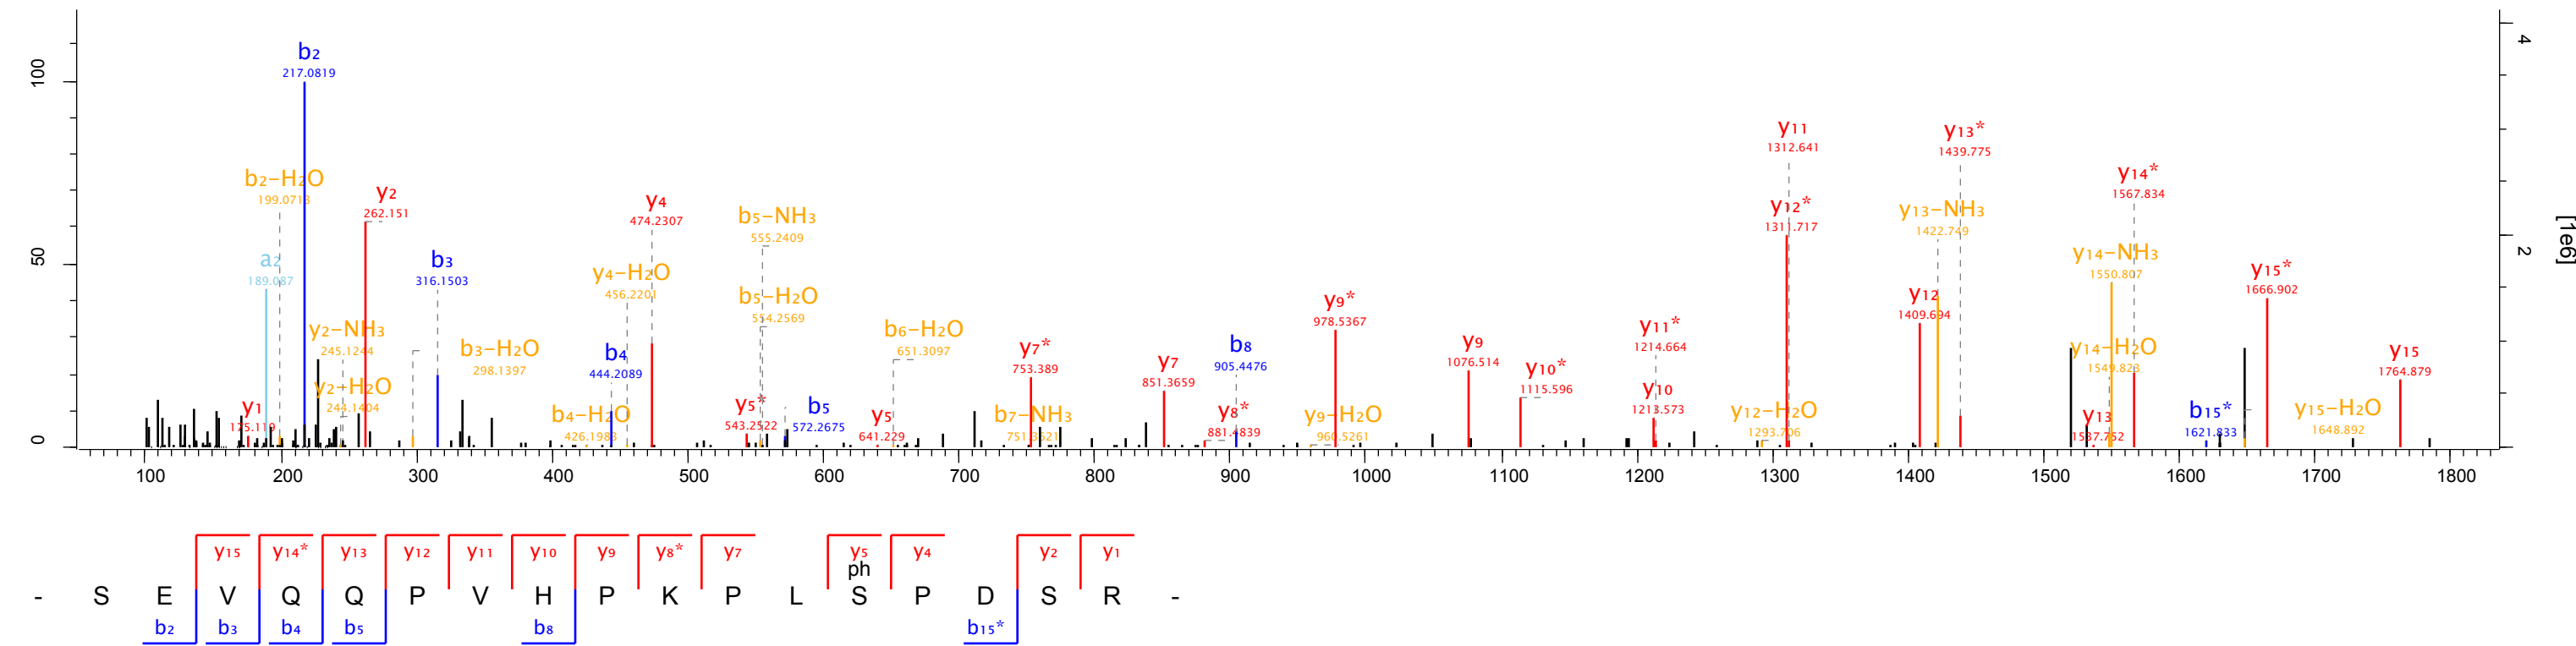

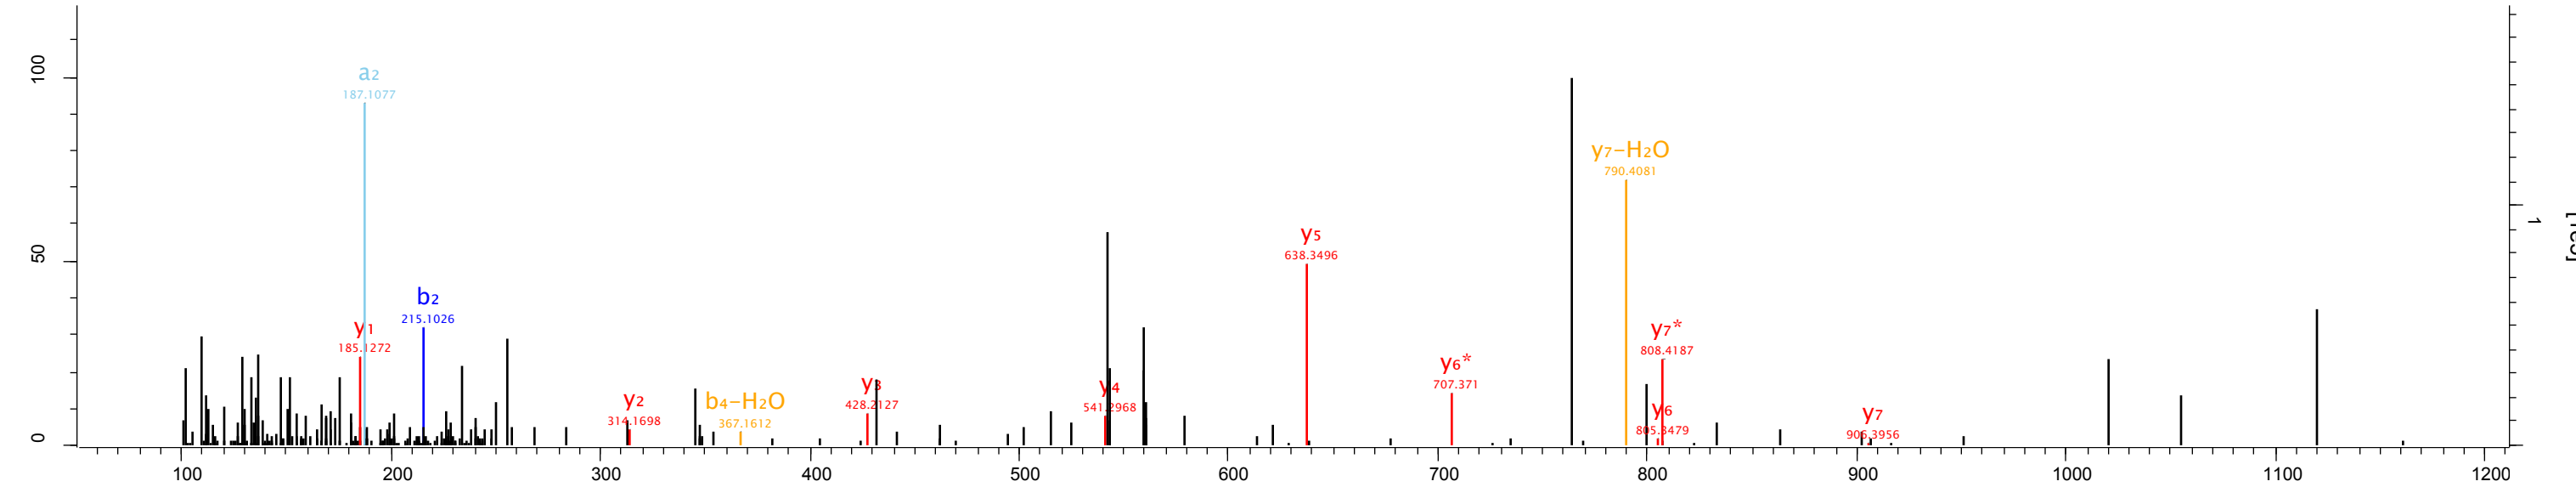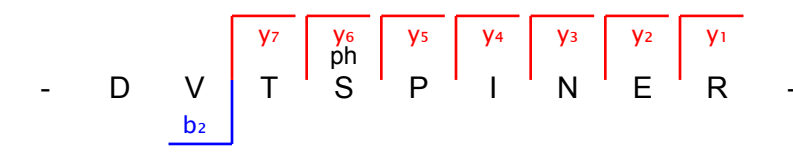

Raw file 20171215\_MaS\_33SR\_LMH\_phospho\_03 Scan 5980 Method FTMS; HCD Score 86.75 m/z 536.94 Gene names MAP1B

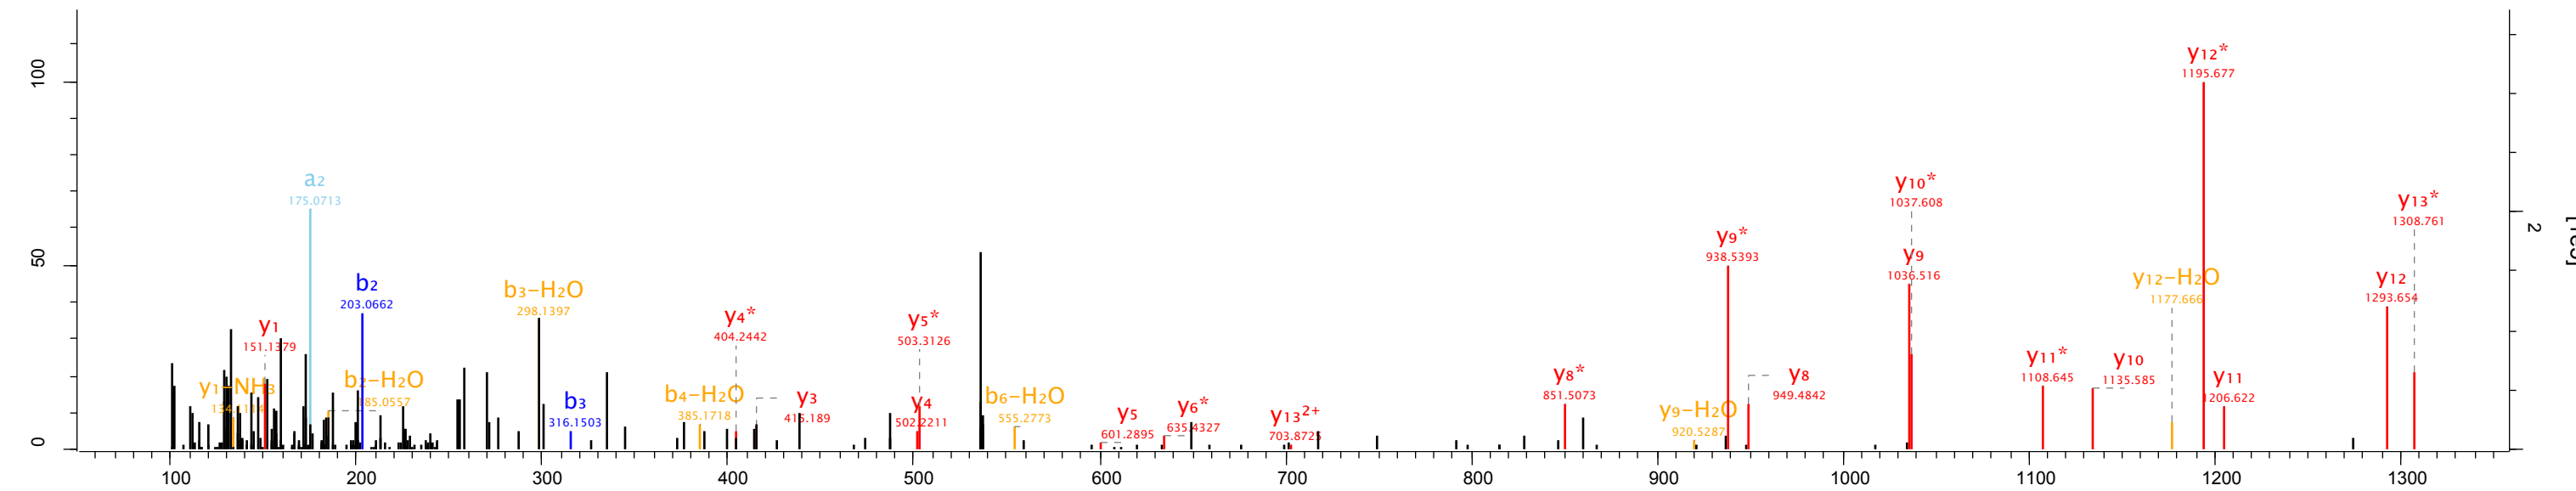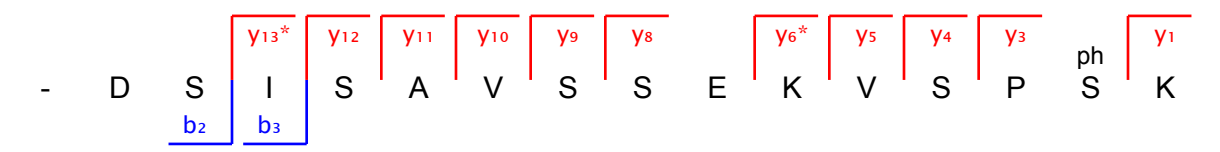

Raw file: 20171215\_MaS\_33SR\_LMH\_phospho\_03  
 Scan: 6040 Method: FTMS; HCD Score: 303.05 m/z: 753.84 Gene names: BNIP2

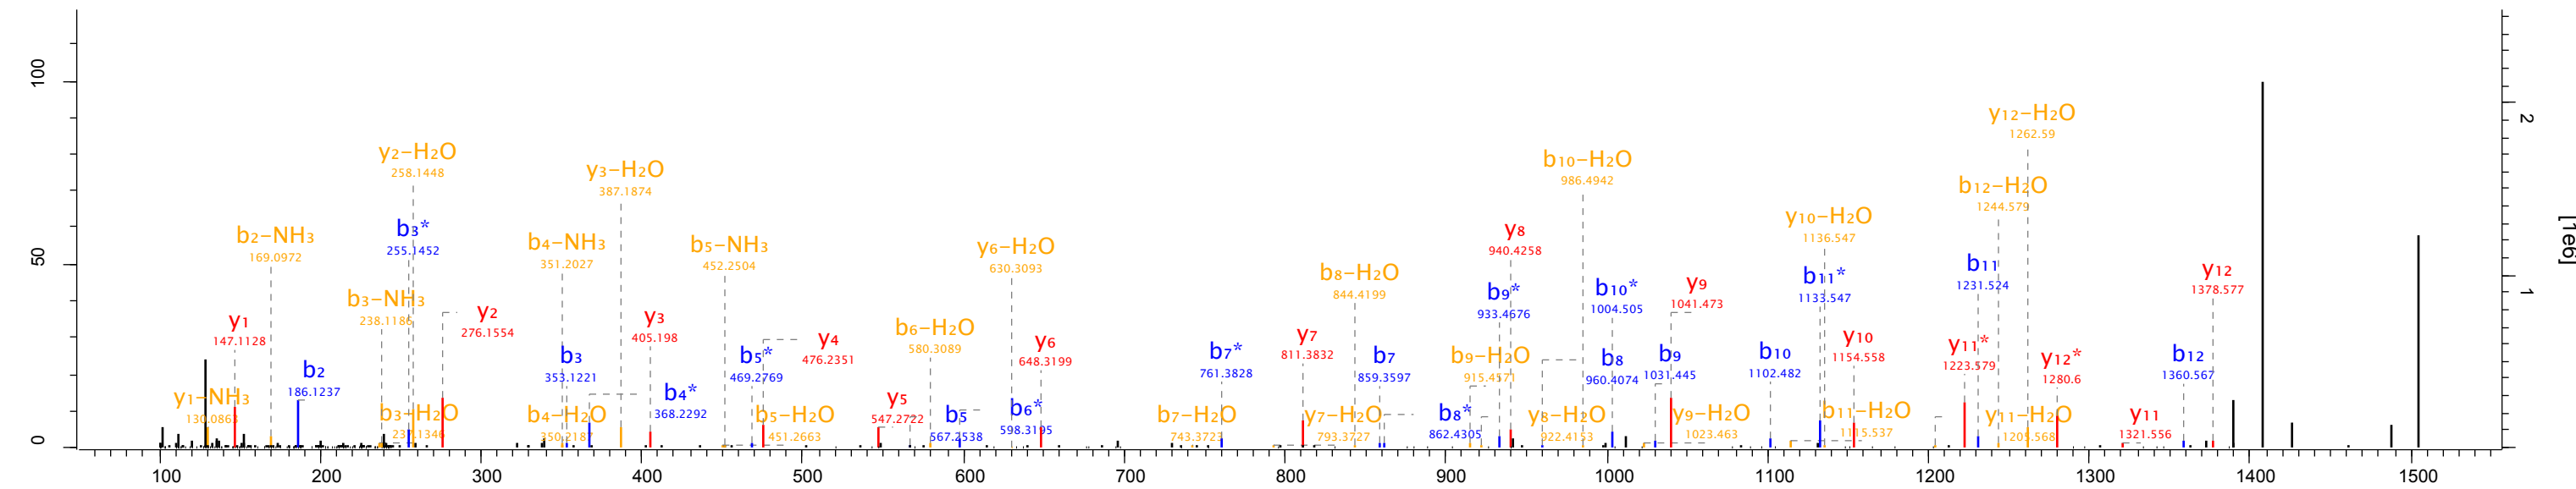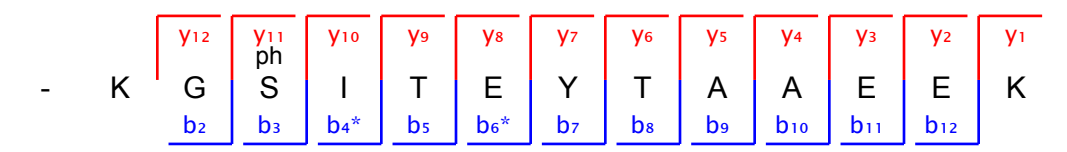



Raw file 20171215\_MaS\_33SR\_LMH\_phospho\_03 Scan 6360 Method FTMS; HCD Score 77.22 m/z 666.28 Gene names TXNL1

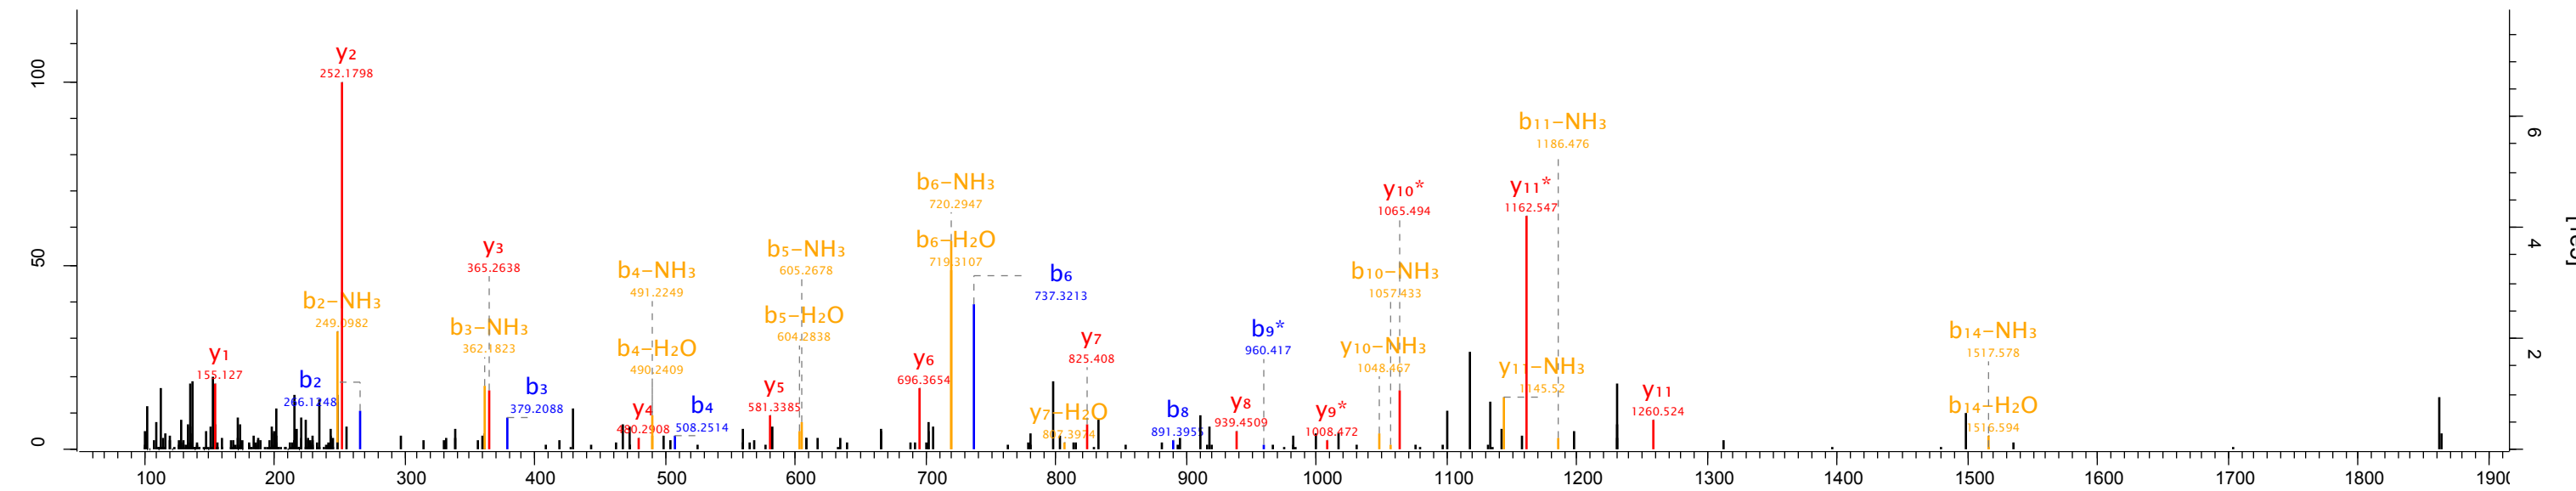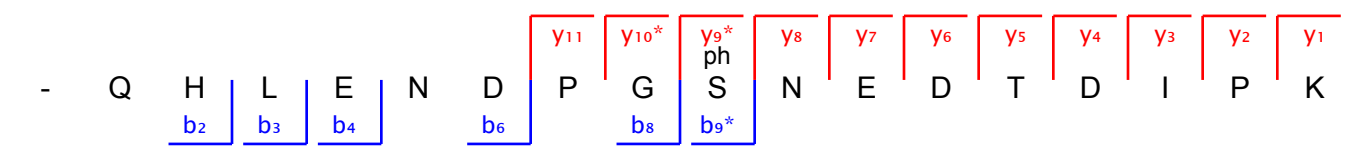

Raw file 20171215\_MaS\_33SR\_LMH\_phospho\_03 Scan 6400 Method FTMS; HCD Score 76.85 m/z 456.69 Gene names ADD3

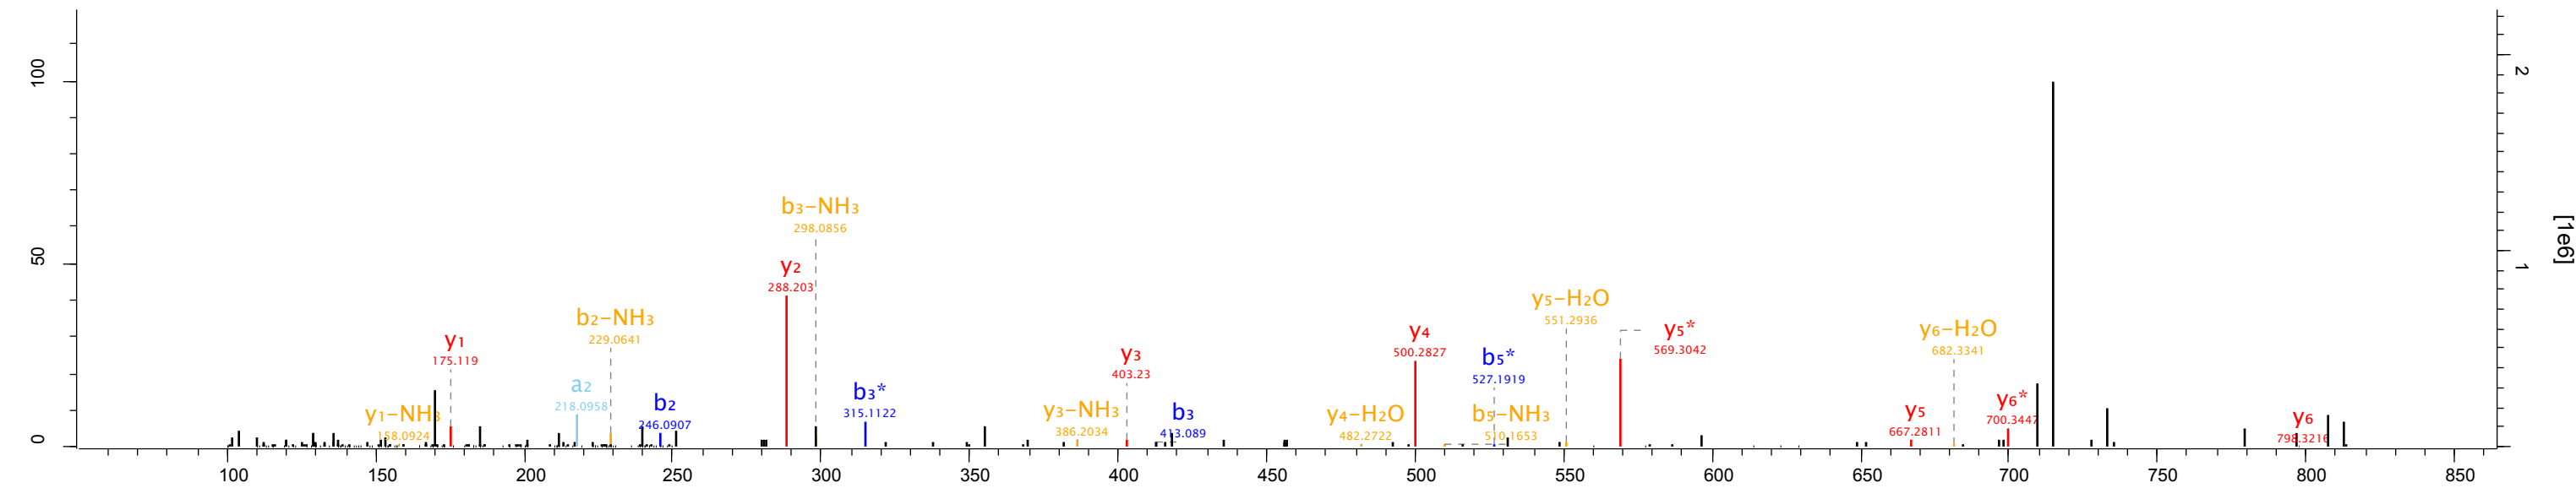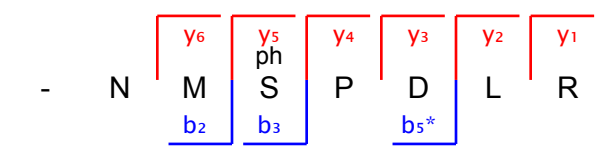

Raw file 20171215\_MaS\_33SR\_LMH\_phospho\_03 Scan 6480 Method FTMS; HCD Score 62.94 m/z 657.28 Gene names TRAPPC12

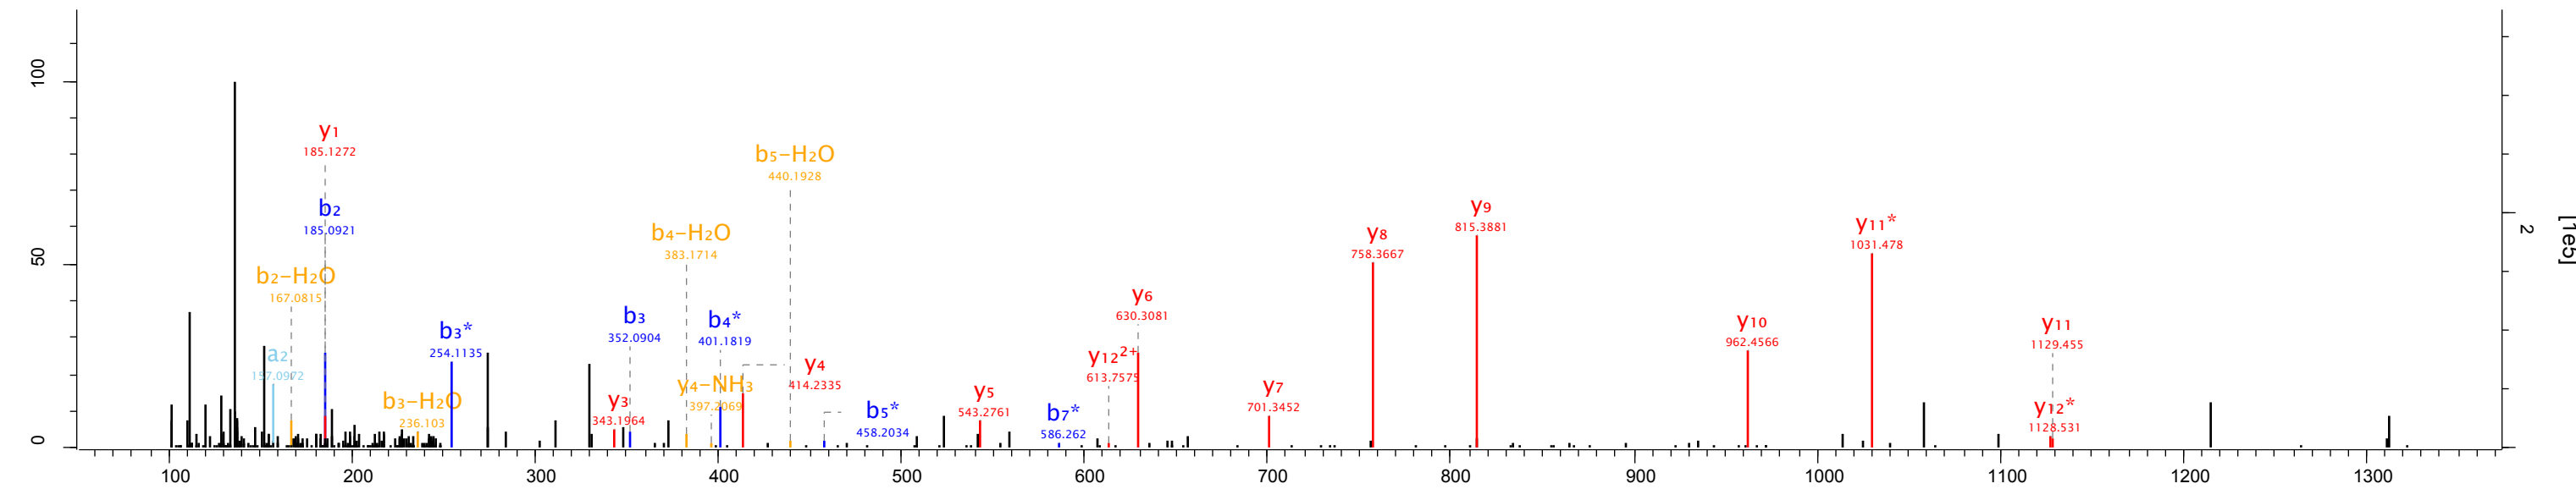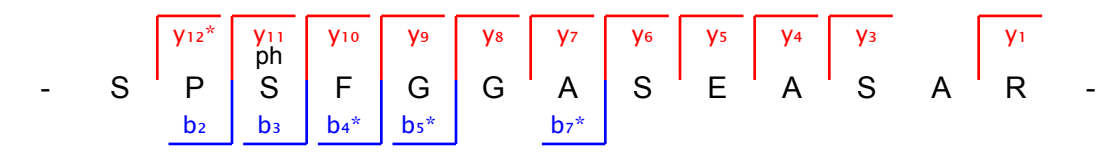

Raw file 20171215\_MaS\_33SR\_LMH\_phospho\_03 Scan 6550 Method FTMS; HCD Score 103.13 m/z 762.33 Gene names EYA4

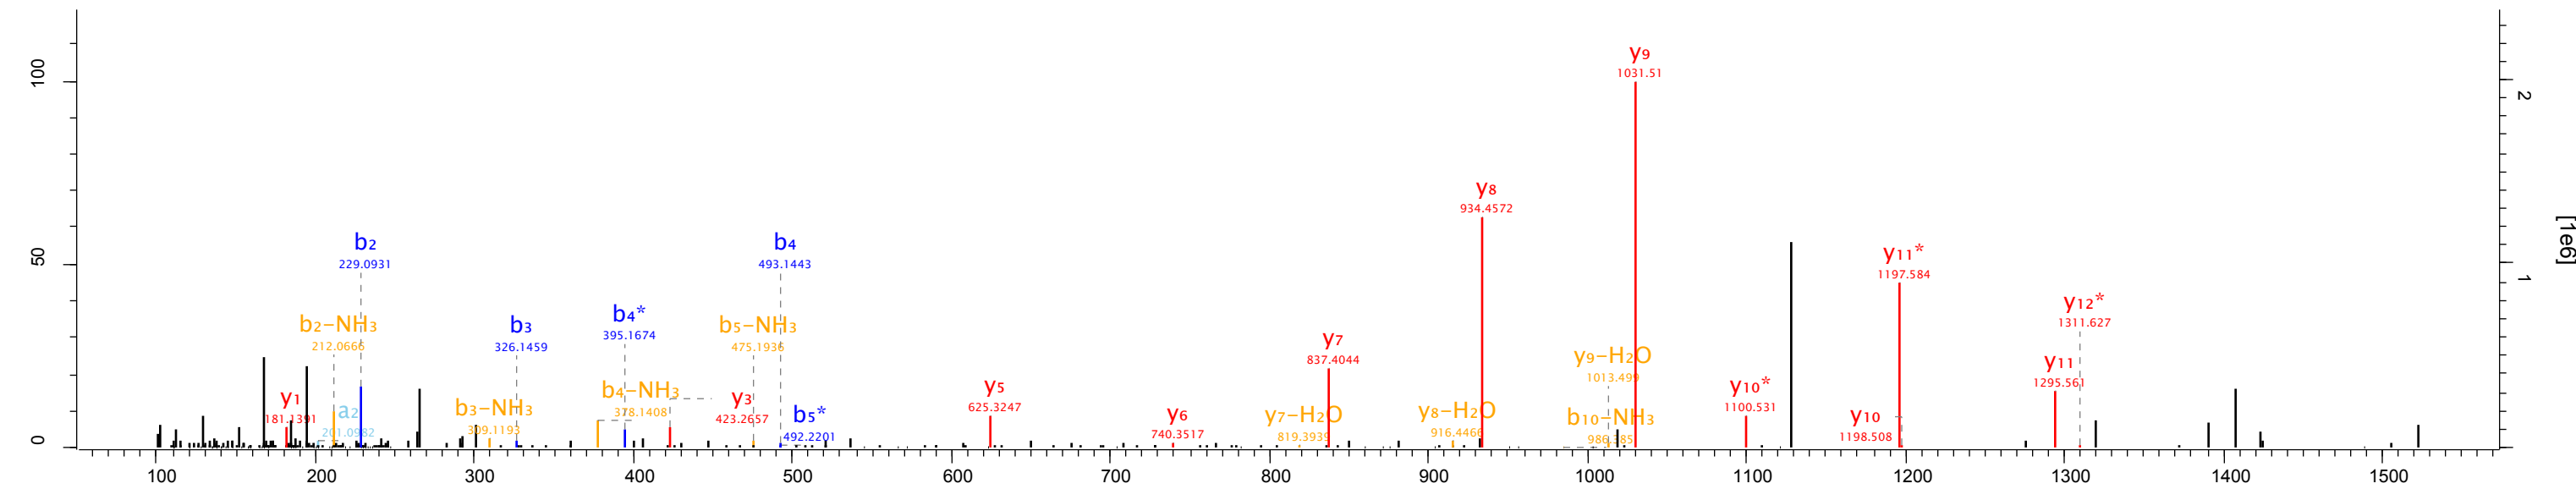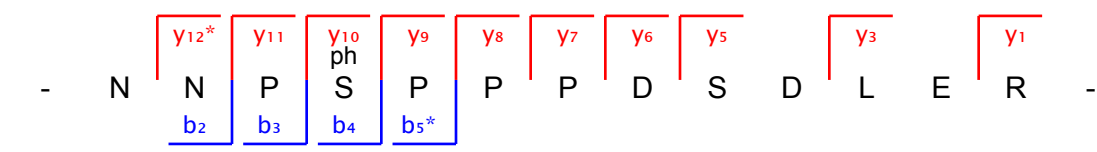

Raw file 20171215\_MaS\_33SR\_LMH\_phospho\_03 Scan 7660 Method FTMS; HCD Score 144.4 m/z 911.43 Gene names JMJD1C

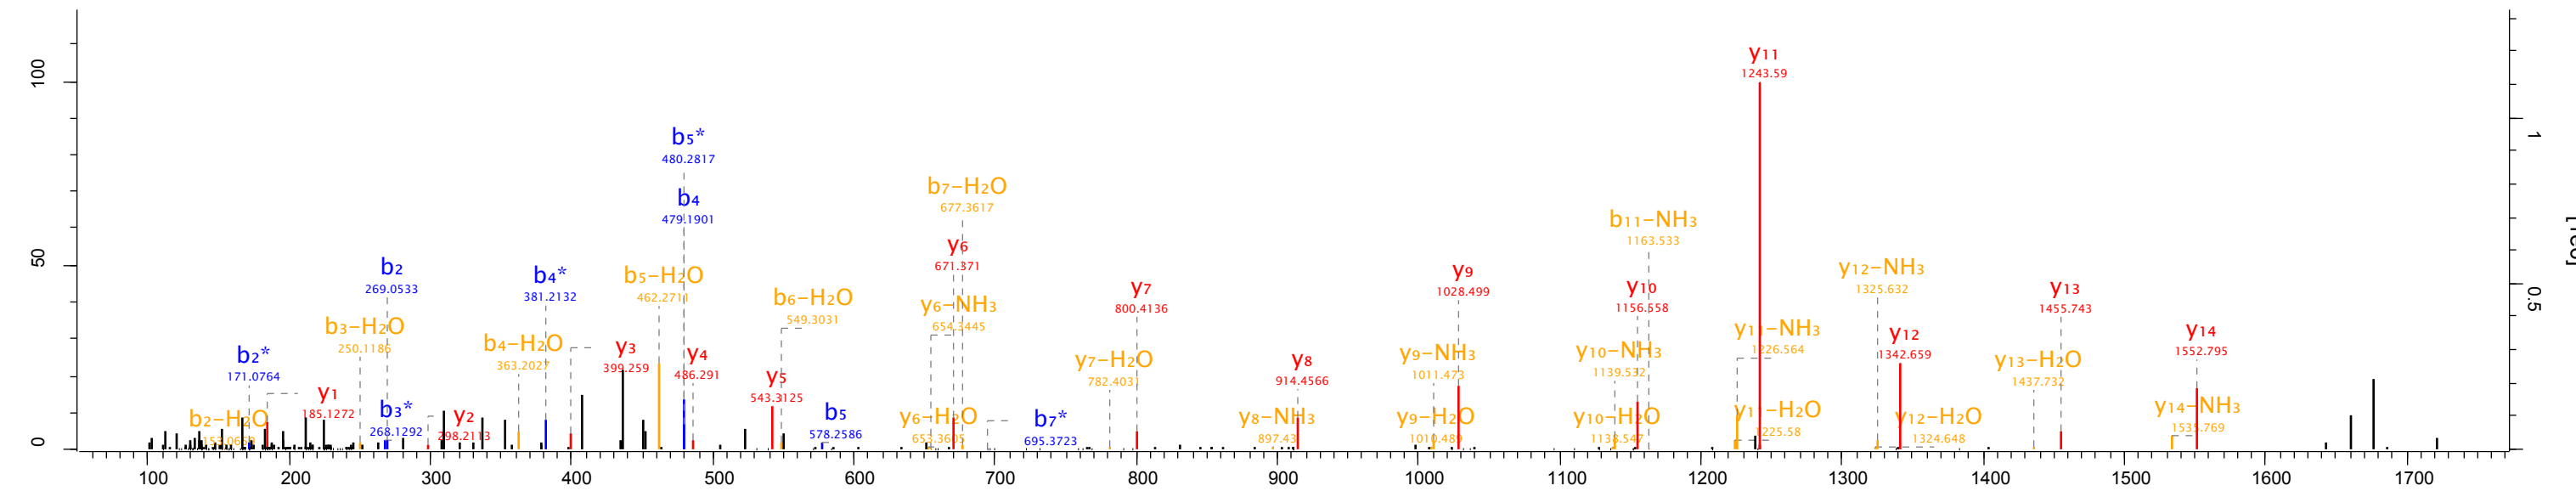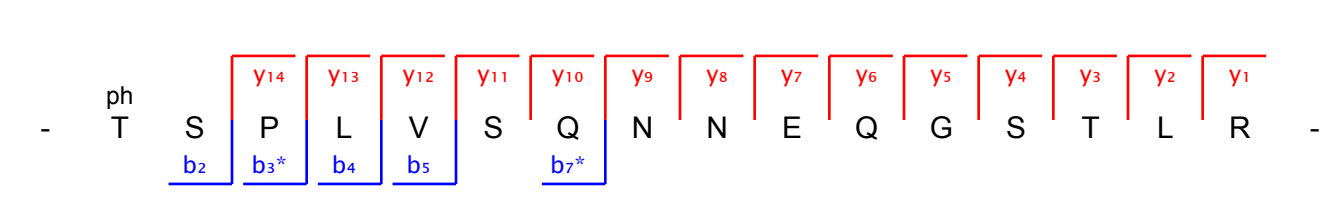

Raw file 20171215\_MaS\_33SR\_LMH\_phospho\_03 Scan 7740 Method FTMS; HCD Score 159.26 m/z 819.33 Gene names PXN

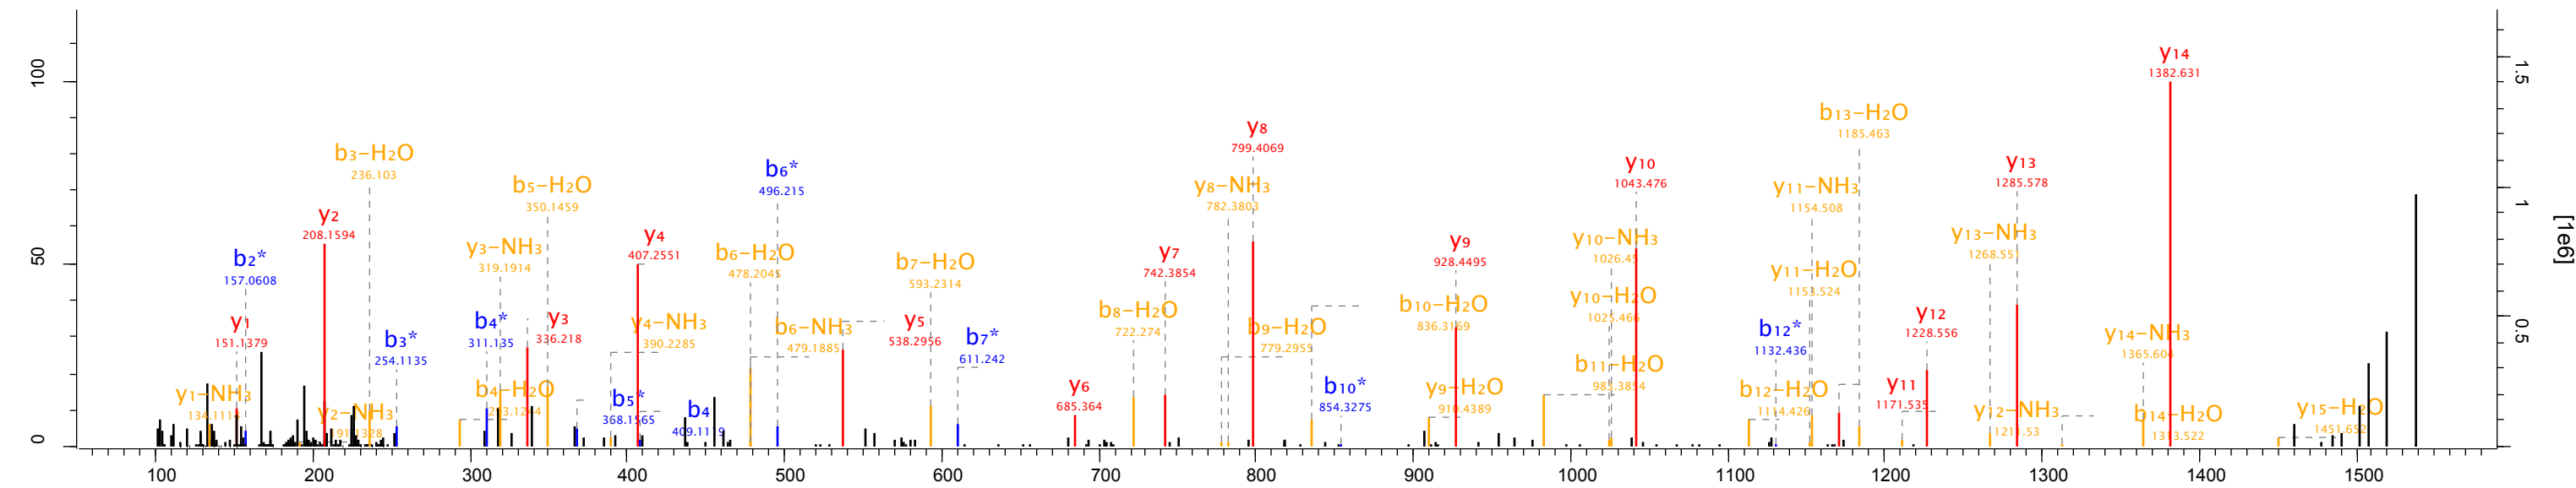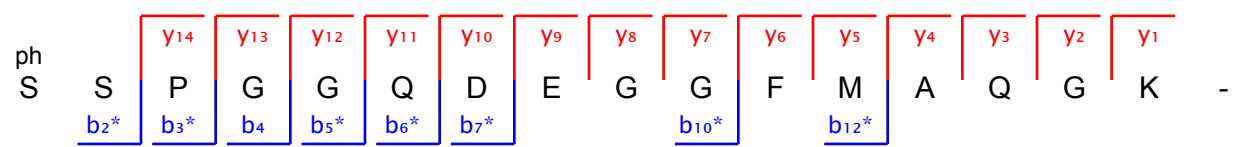

Raw file 20171215\_MaS\_33SR\_LMH\_phospho\_03 Scan 8350 Method FTMS; HCD Score 103.92 m/z 681.62 Gene names HBS1L

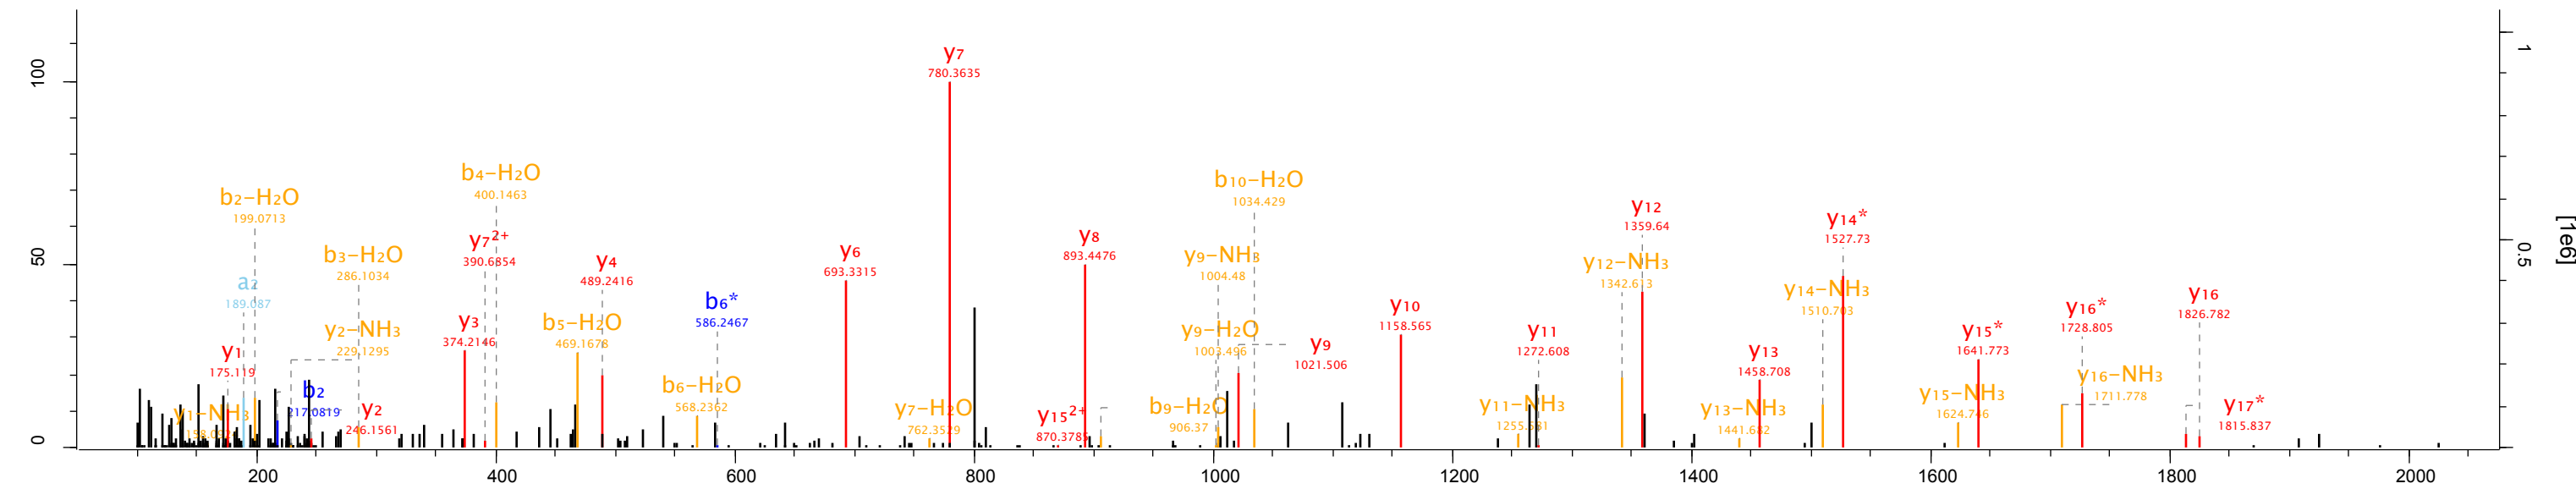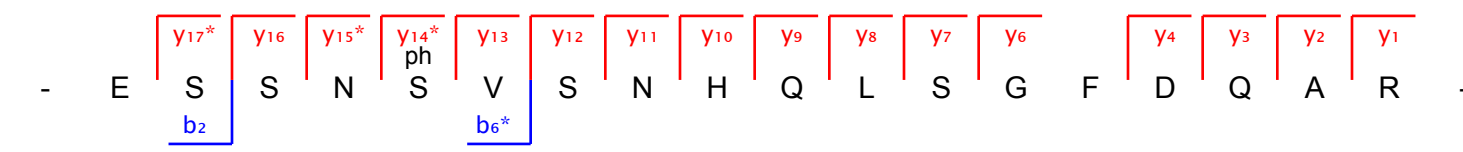

Raw file: 20171215\_MaS\_33SR\_LMH\_phospho\_03  
 Scan: 8460 Method: FTMS; HCD Score: 157.12 m/z: 1083.47 Gene names: CSNK1G3

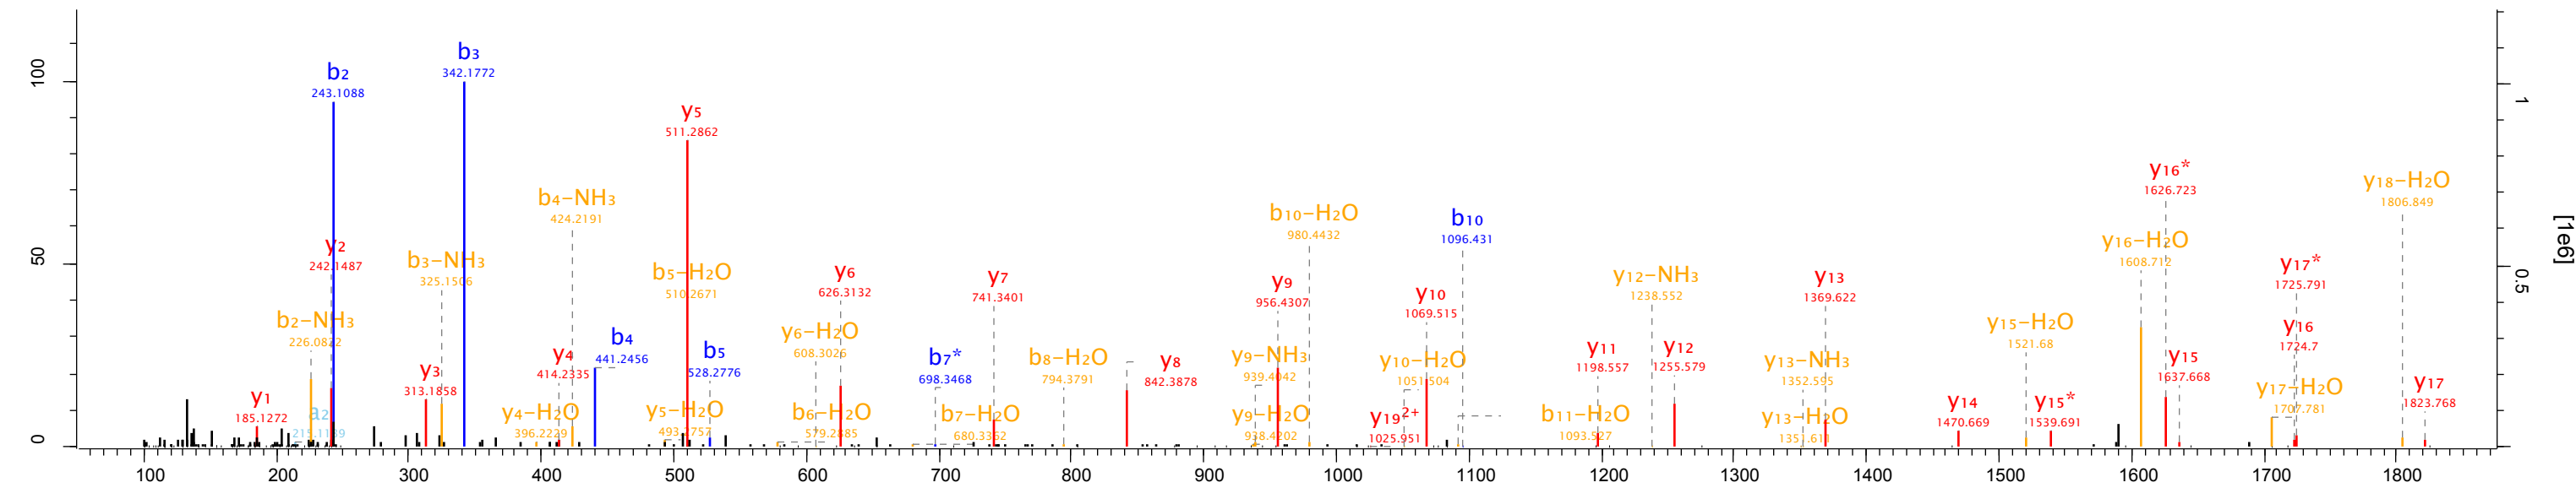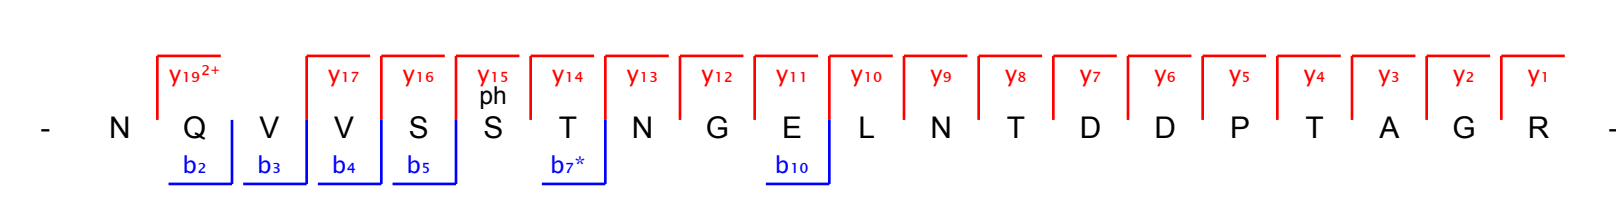



Raw file: 20171215\_MaS\_33SR\_LMH\_phospho\_03  
 Scan: 8860 Method: FTMS; HCD Score: 129.02 m/z: 924.9 Gene names: PI4KB

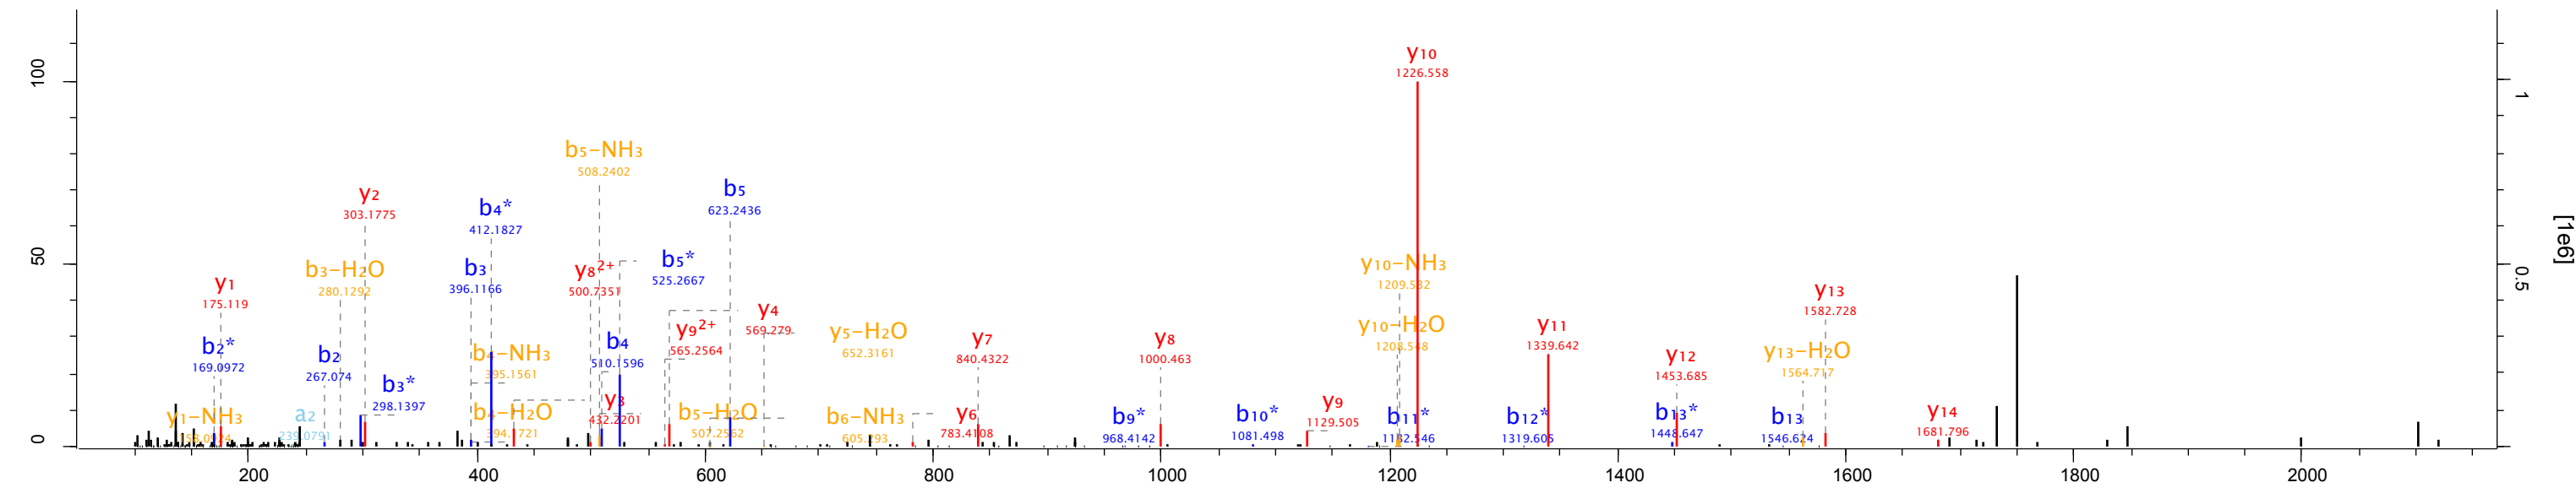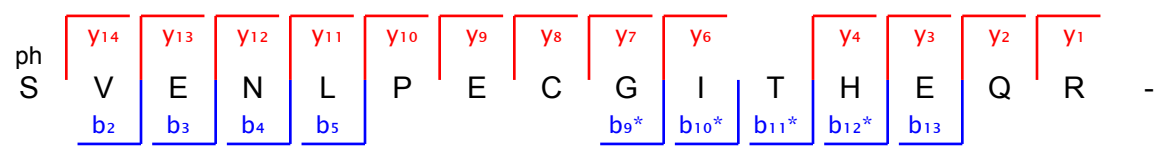

Raw file 20171215\_MaS\_33SR\_LMH\_phospho\_03 Scan 9020 Method FTMS; HCD Score 147.64 m/z 749.84 Gene names SCAF11

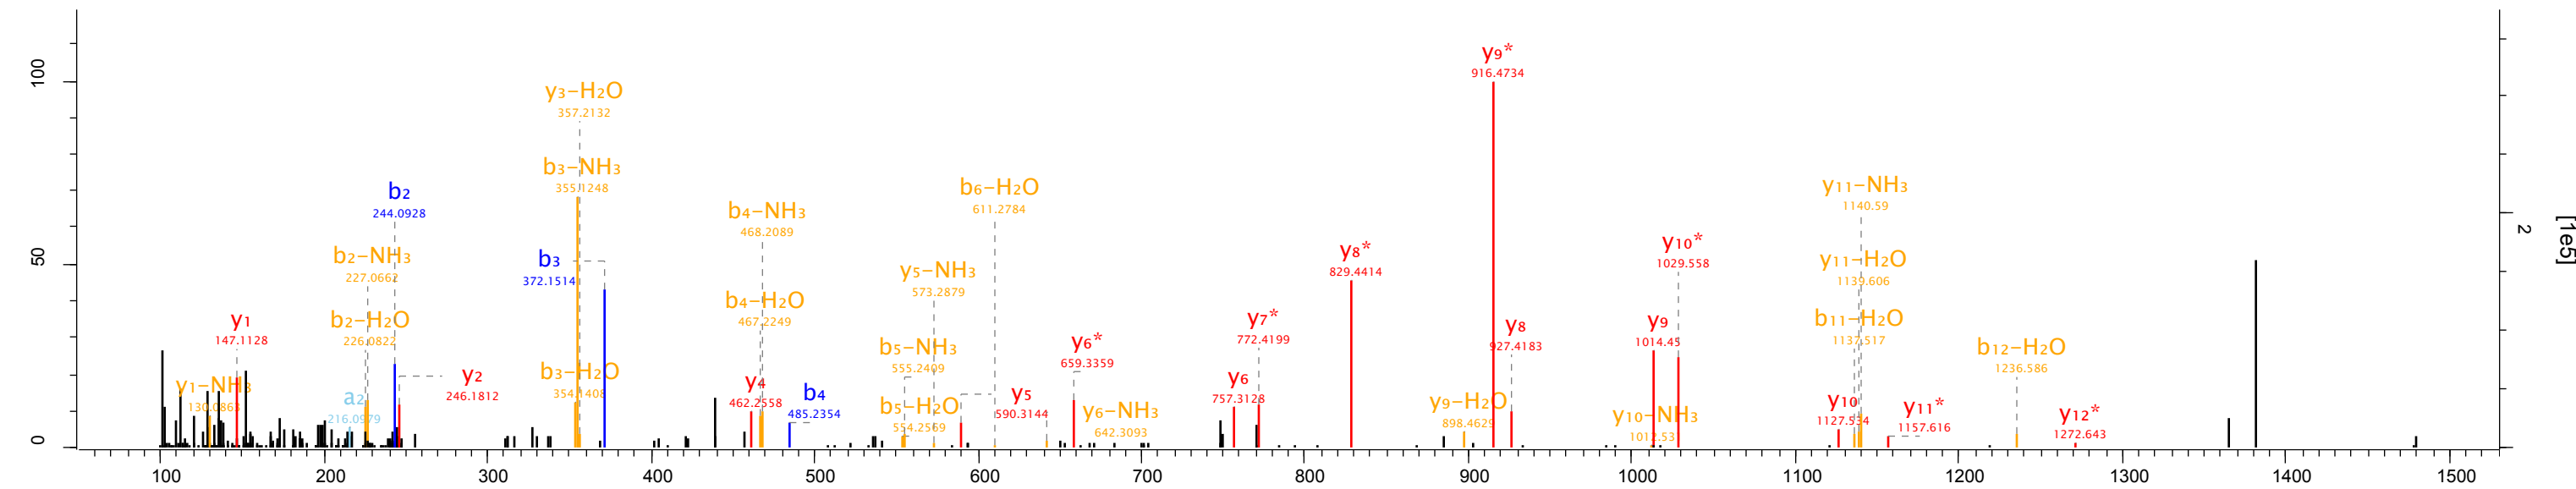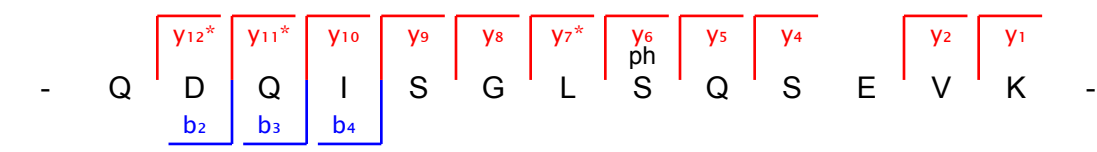

Raw file 20171215\_MaS\_33SR\_LMH\_phospho\_03 Scan 9050 Method FTMS; HCD Score 228.73 m/z 701.27 Gene names PPFIBP1

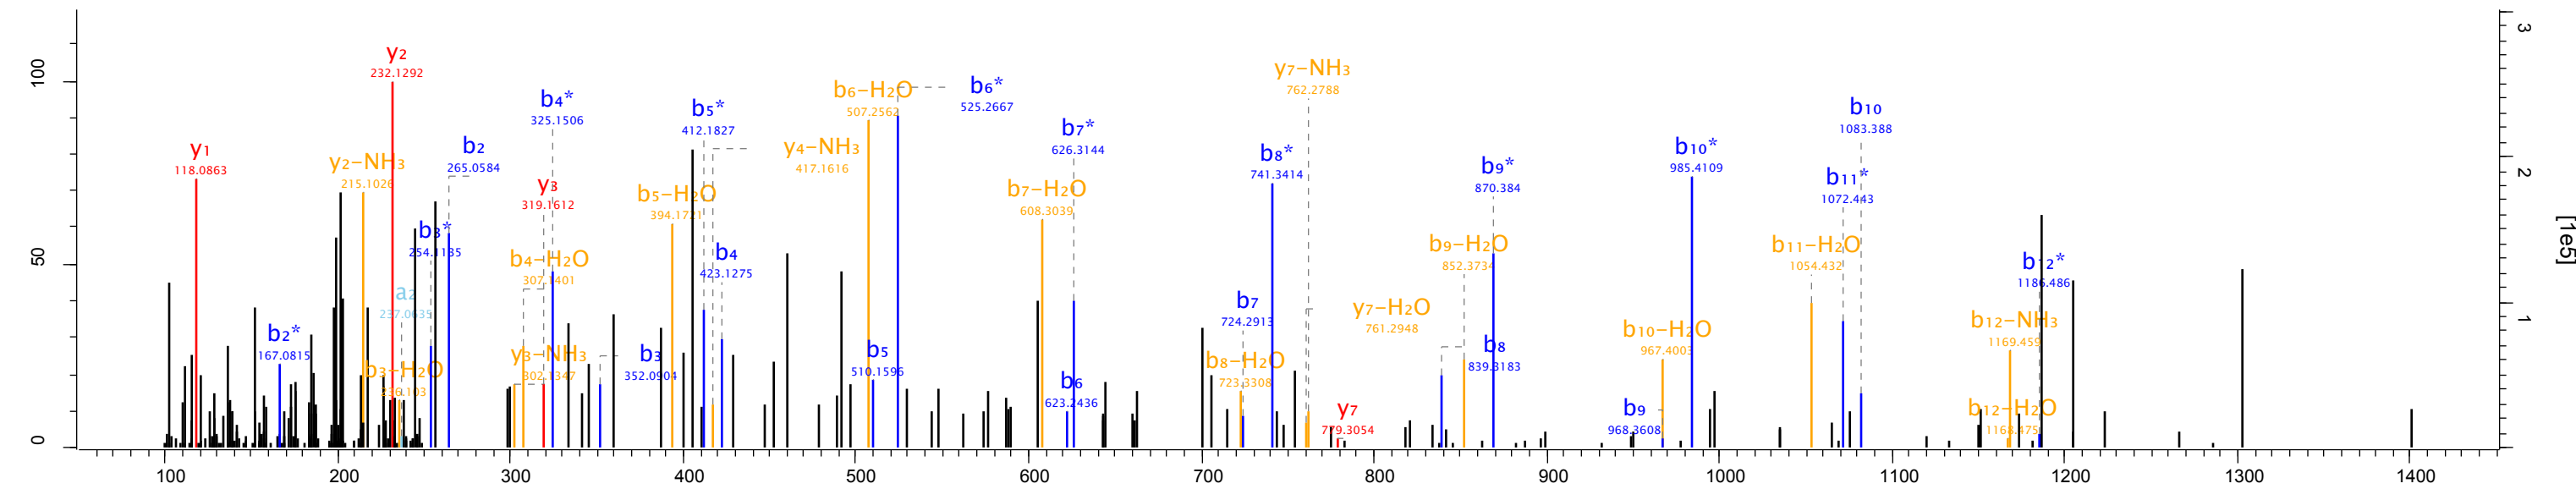

ph  
S

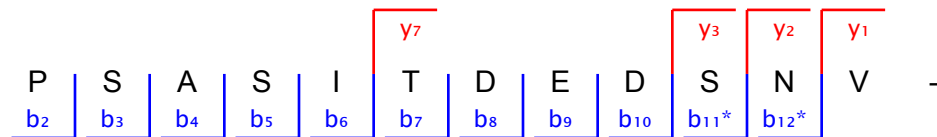

Raw file 20171215\_MaS\_33SR\_LMH\_phospho\_03 Scan 9070 Method FTMS; HCD Score 174.3 m/z 1069.98 Gene names QSER1

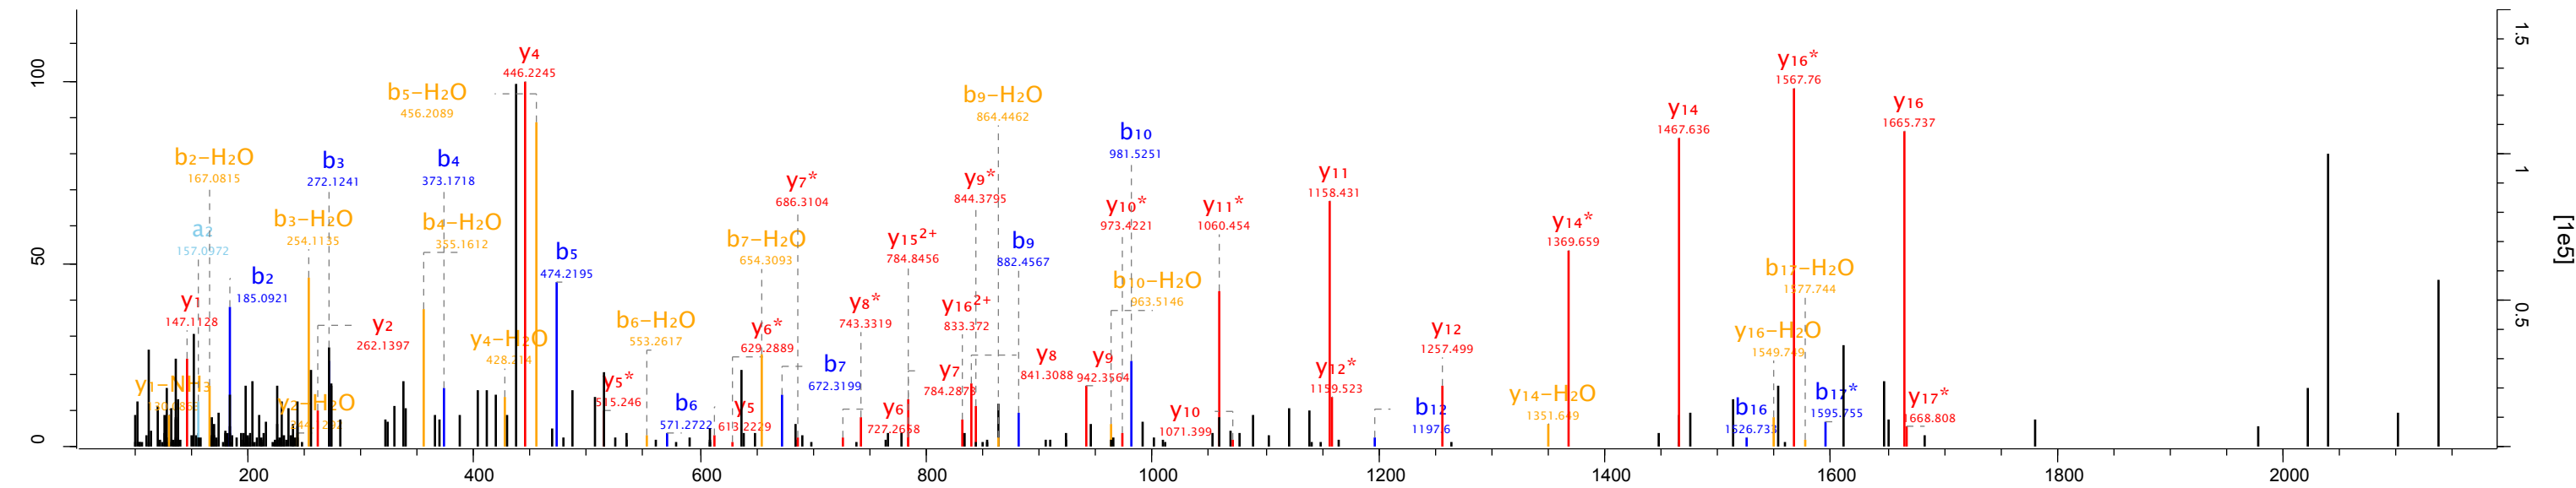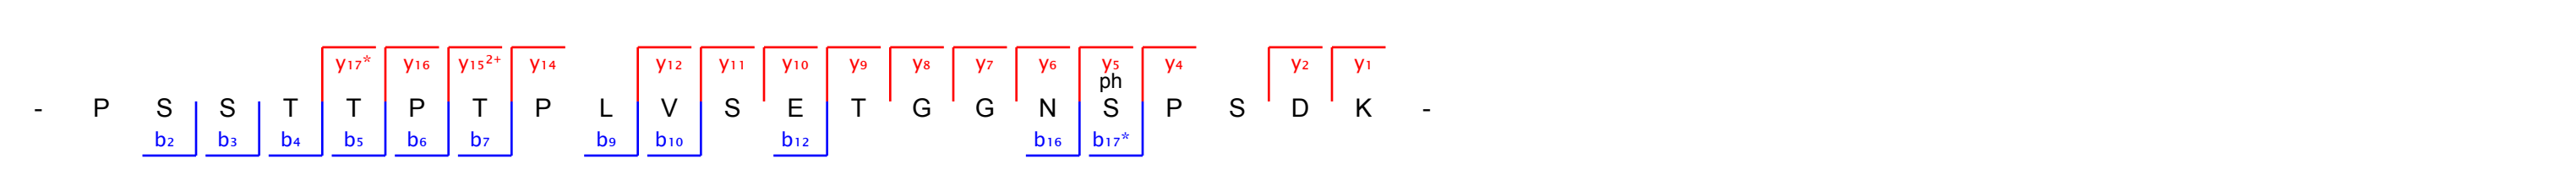

Raw file 20171215\_MaS\_33SR\_LMH\_phospho\_03 Scan 9090 Method FTMS; HCD Score 97.35 m/z 788.84 Gene names FOXK1

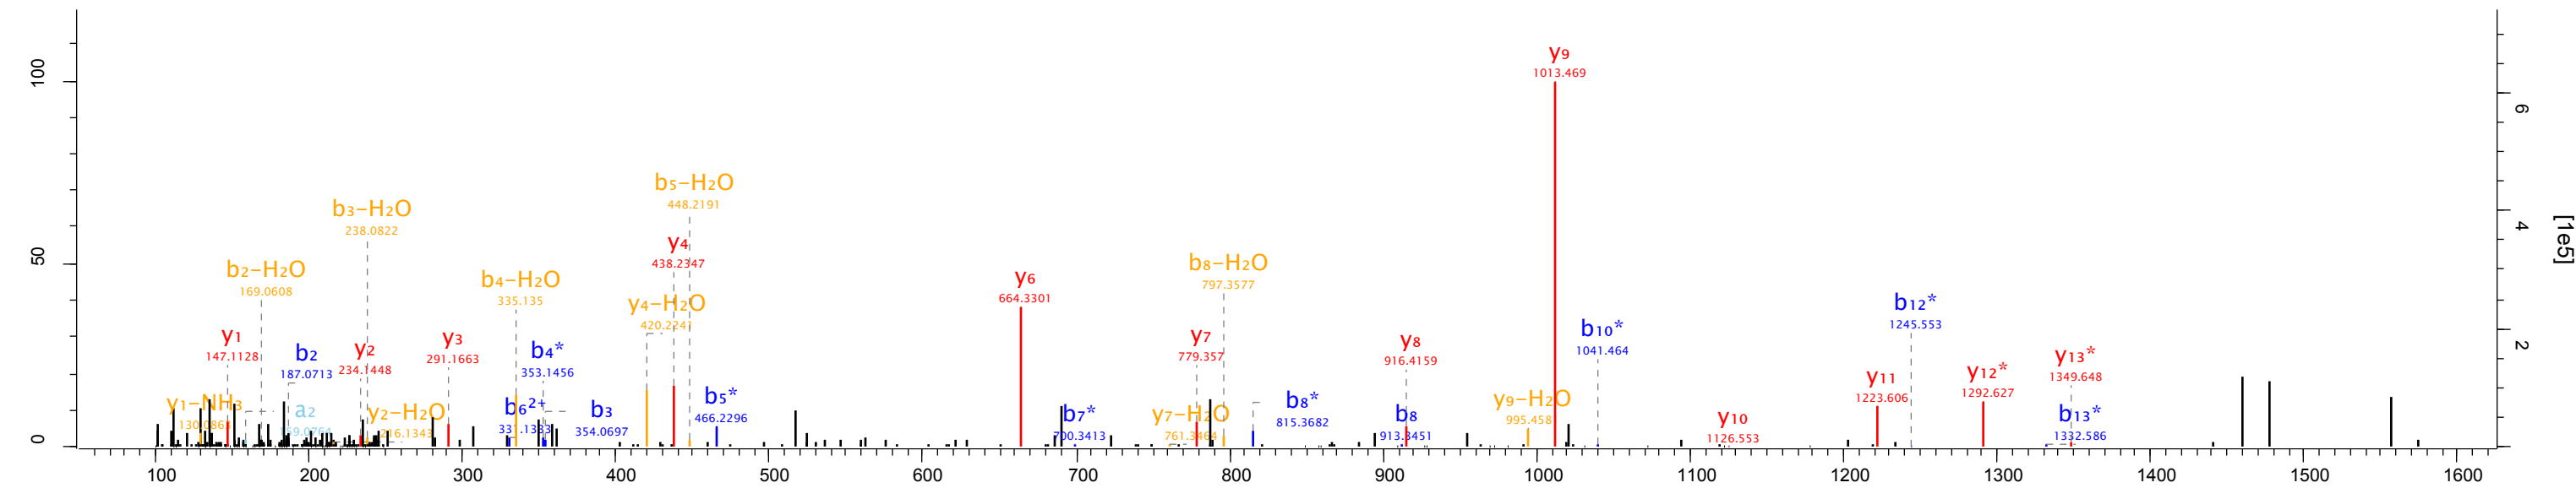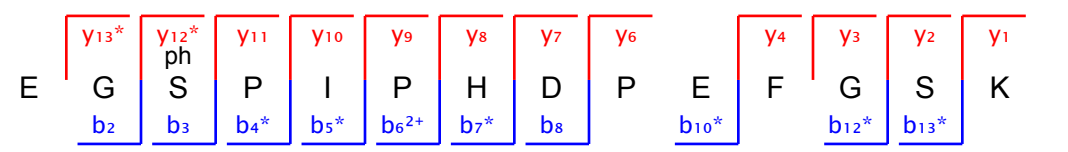

Raw file: 20171215\_MaS\_33SR\_LMH\_phospho\_03  
 Scan: 9440 Method: FTMS; HCD Score: 85.04 m/z: 1011.43 Gene names: UBQLN1

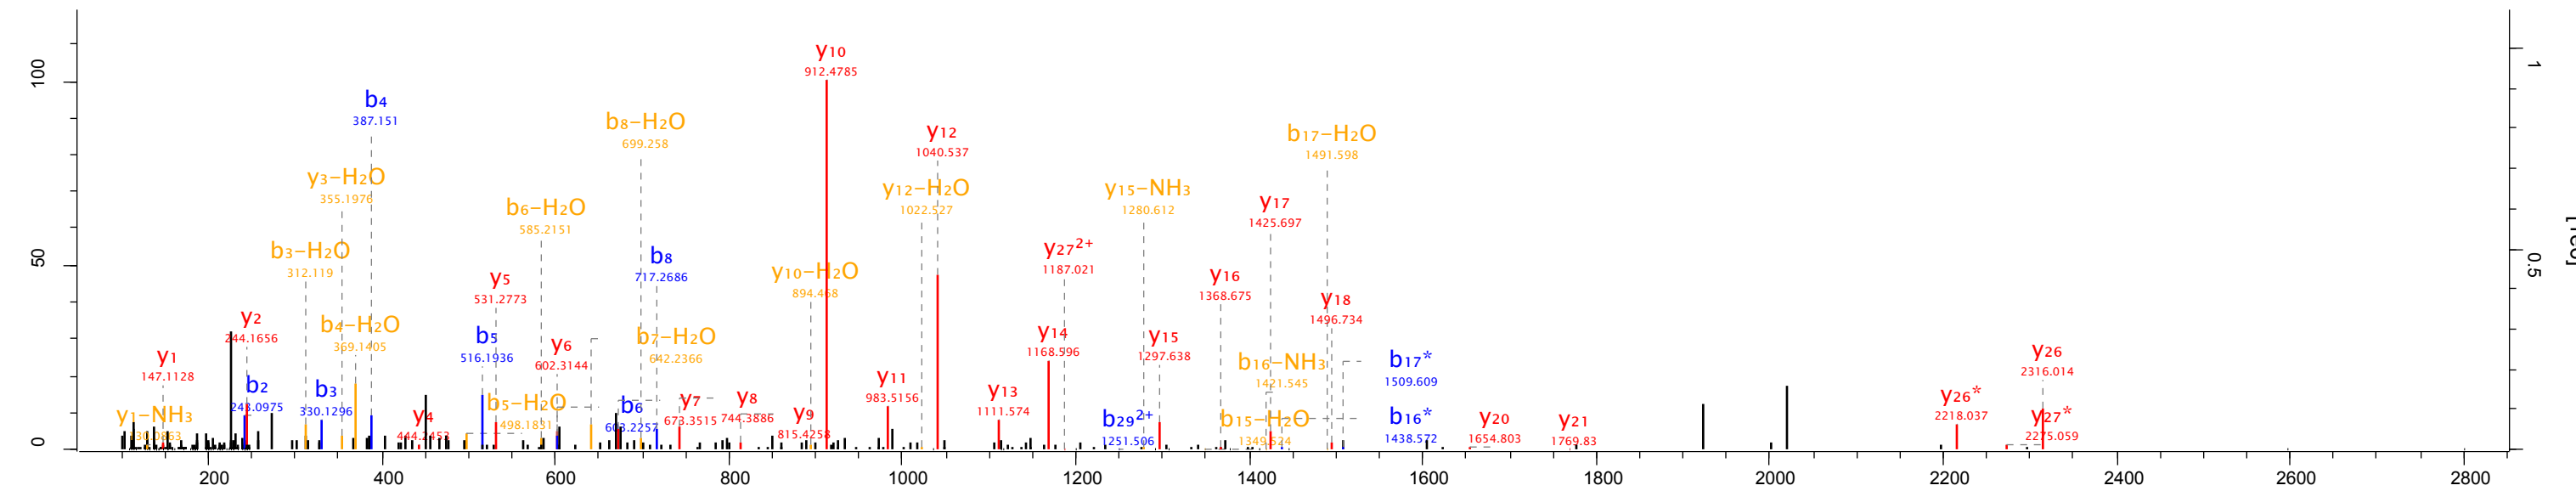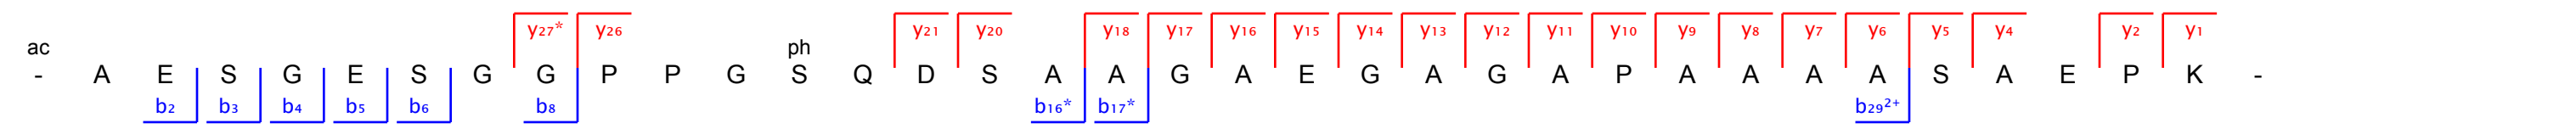

Raw file: 20171215\_MaS\_33SR\_LMH\_phospho\_03  
 Scan: 9600 Method: FTMS; HCD Score: 40.56 m/z: 1236.84 Gene names: MARCKSL1

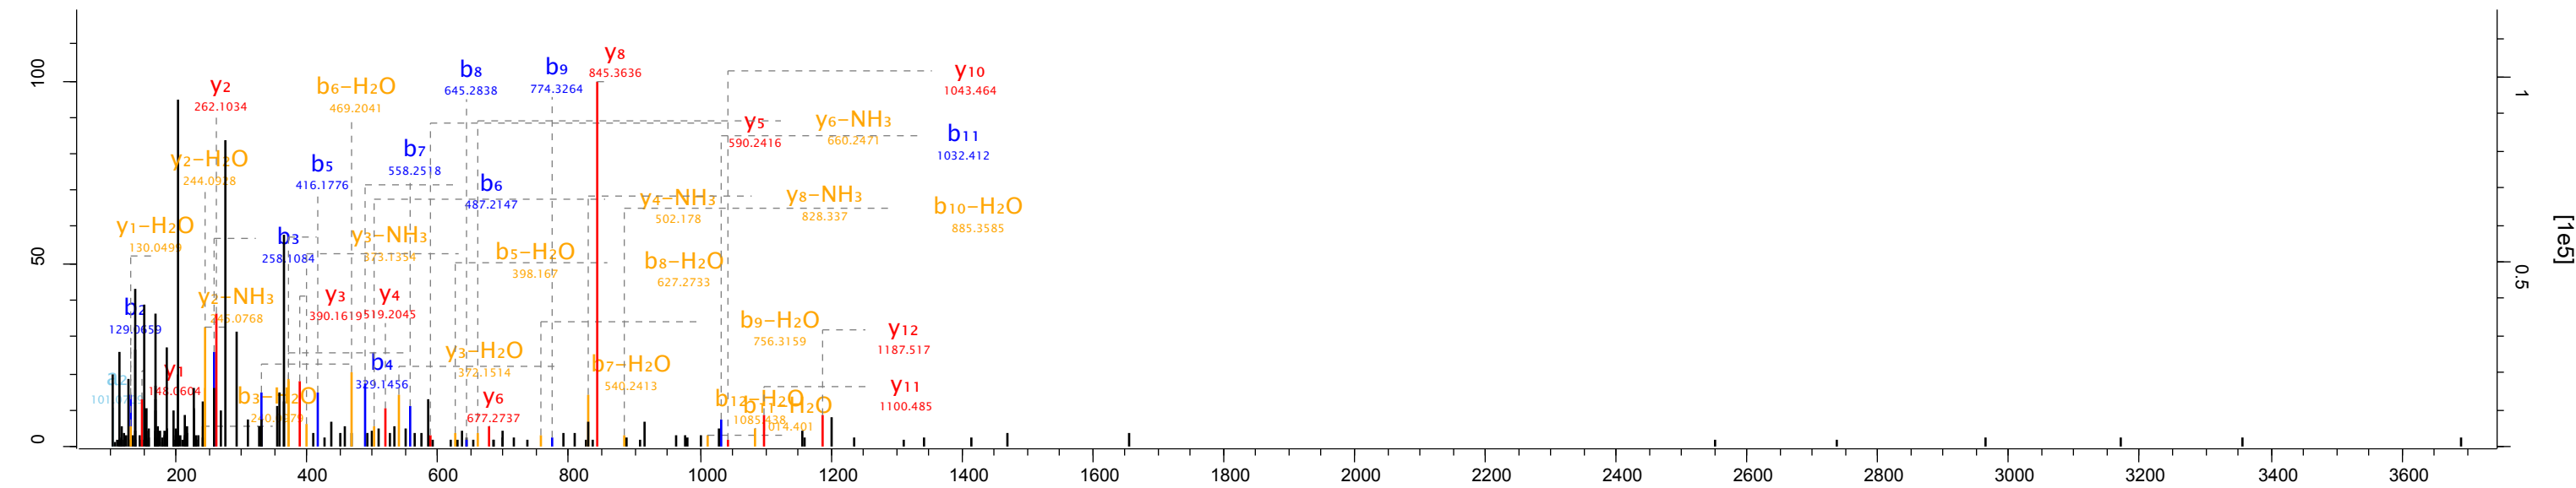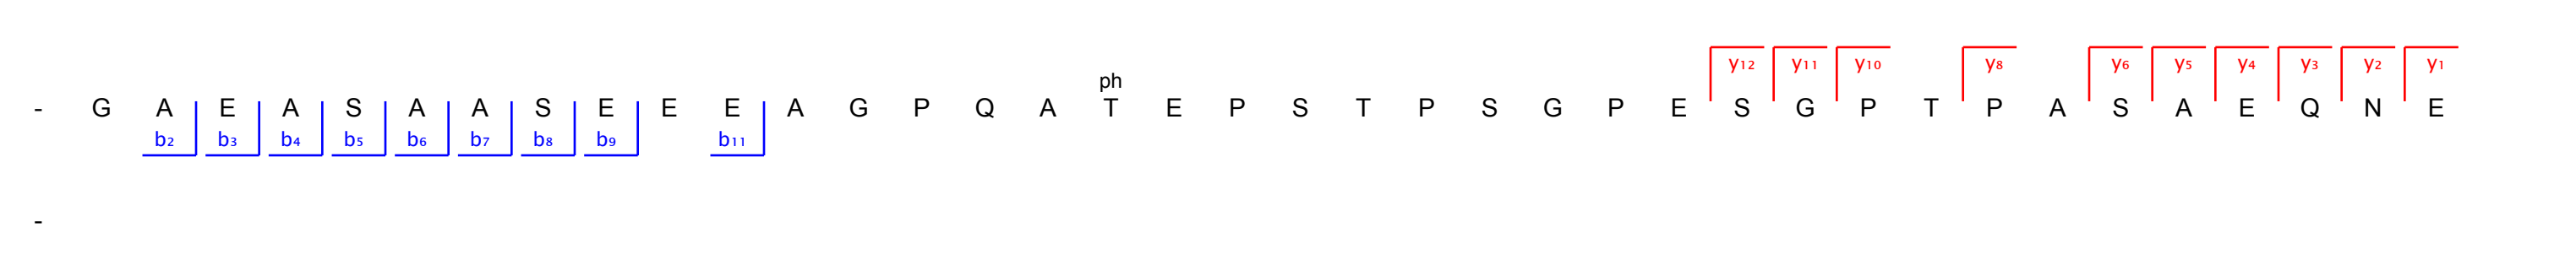

Raw file 20171215\_MaS\_33SR\_LMH\_phospho\_03 Scan 9770 Method FTMS; HCD Score 58.1 m/z 563.25 Gene names FAF1

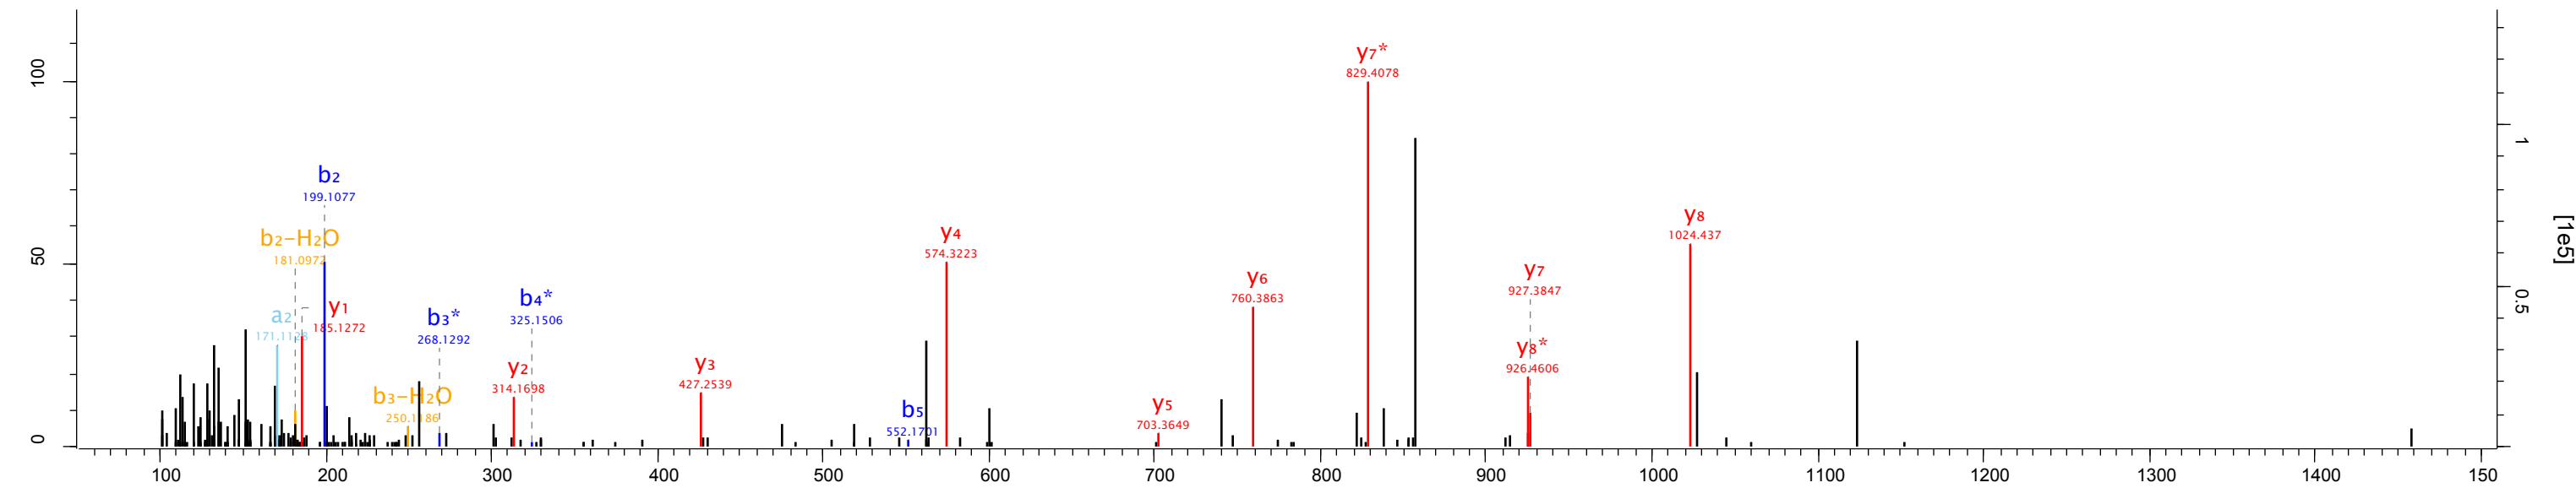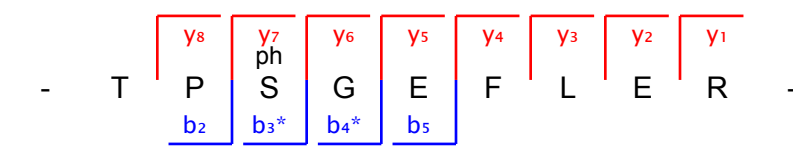



Raw file 20171215\_MaS\_33SR\_LMH\_phospho\_03 Scan 9820 Method FTMS; HCD Score 62.8 m/z 527.24 Gene names FAM53B

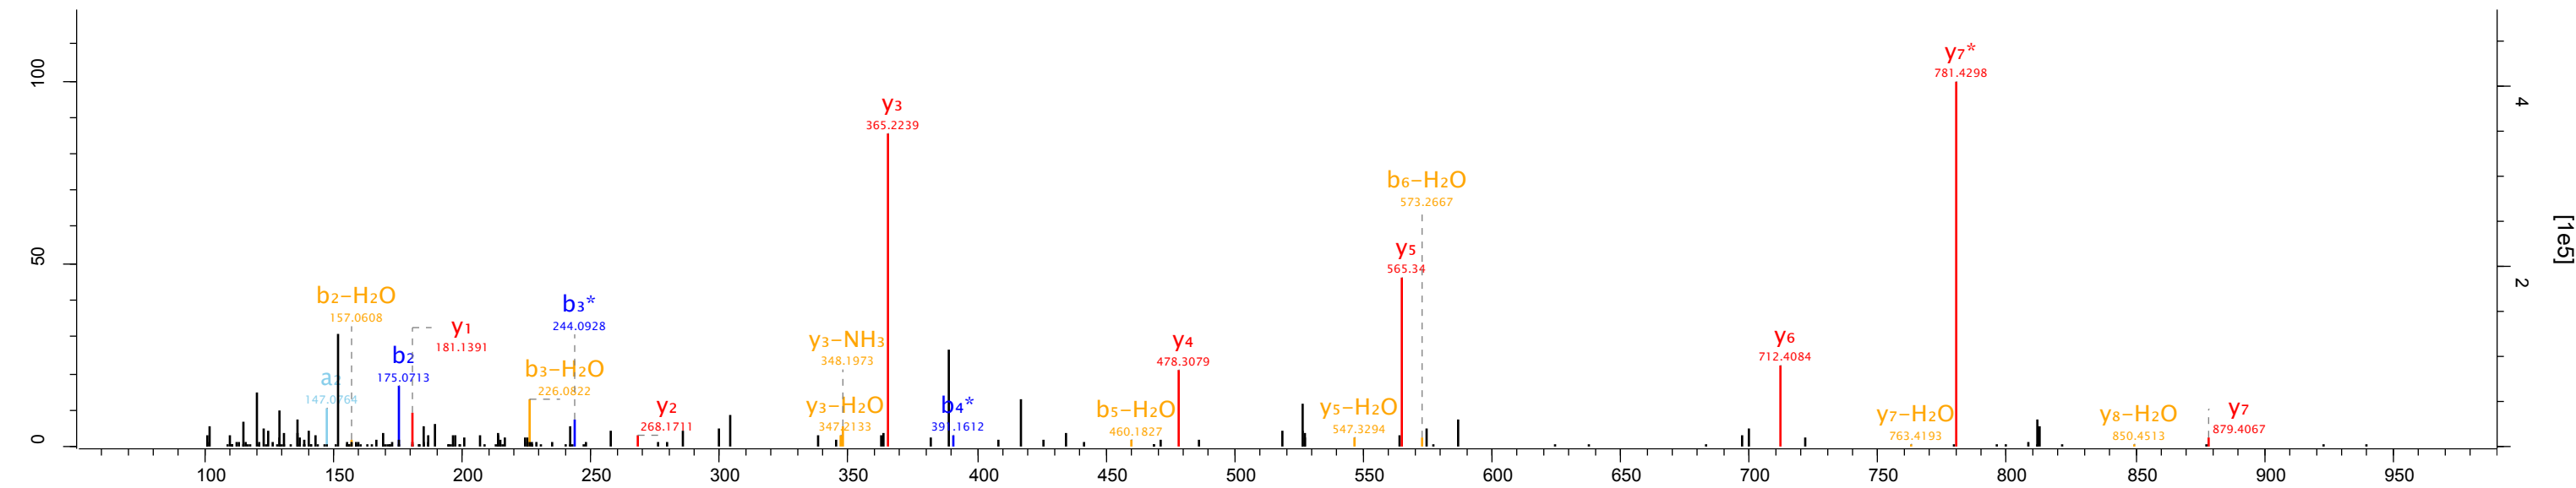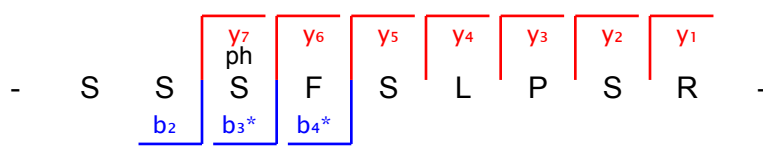

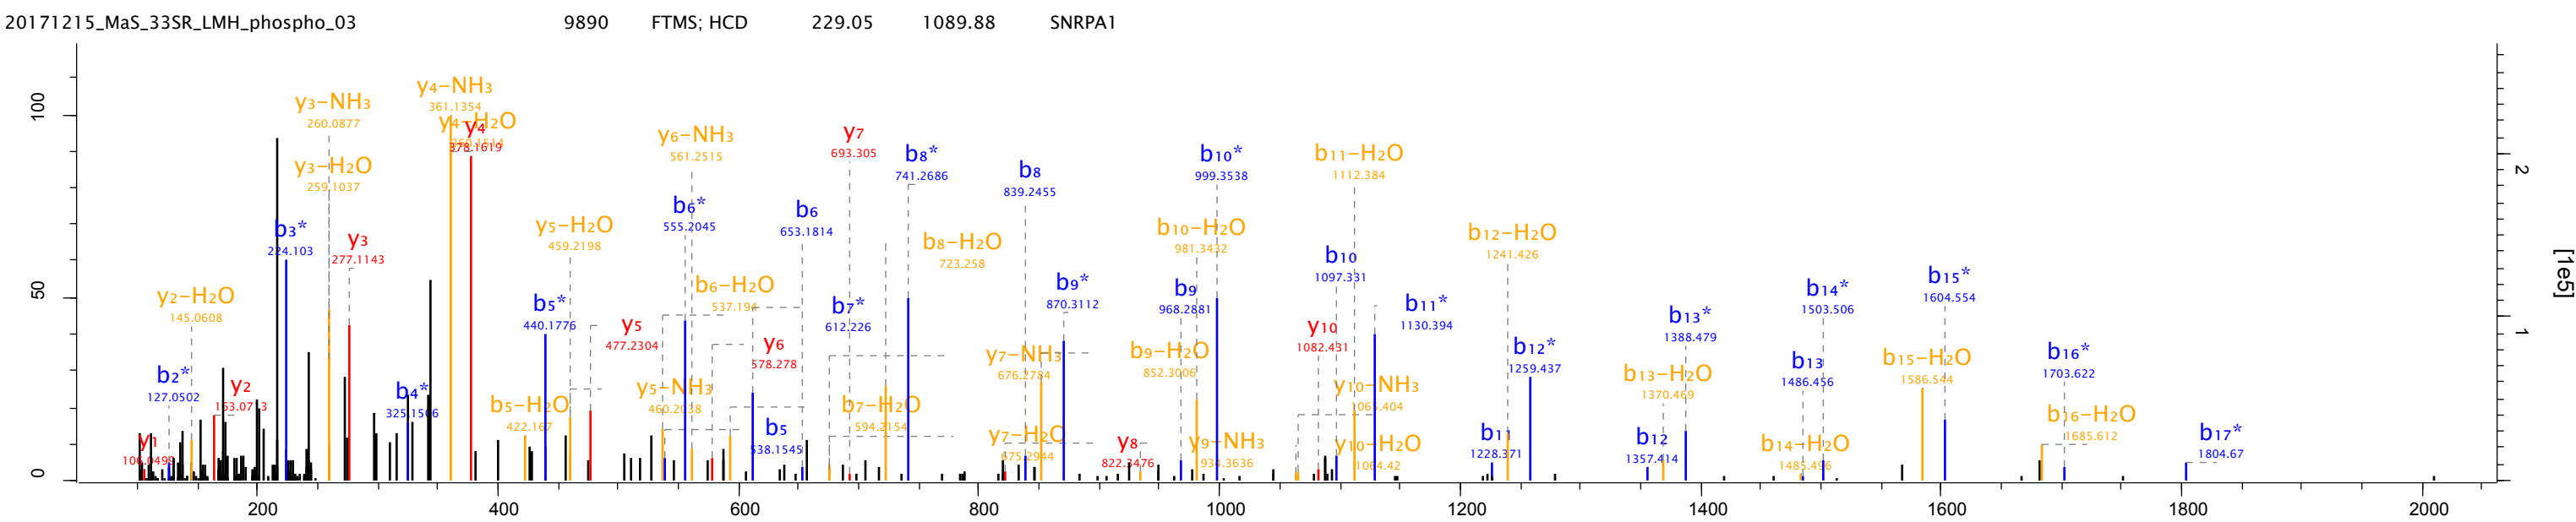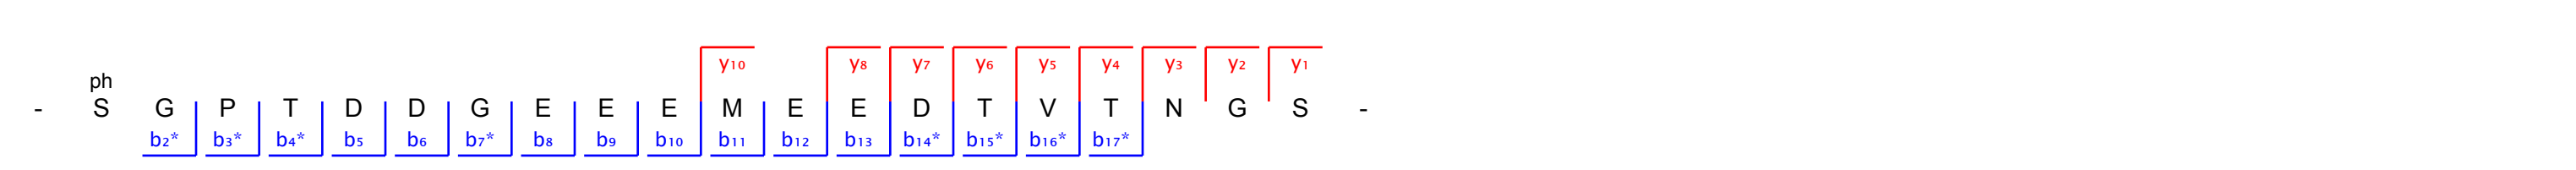

Raw file 20171215\_MaS\_33SR\_LMH\_phospho\_05 Scan 10430 Method FTMS; HCD Score 134.93 m/z 717.85 Gene names TPX2

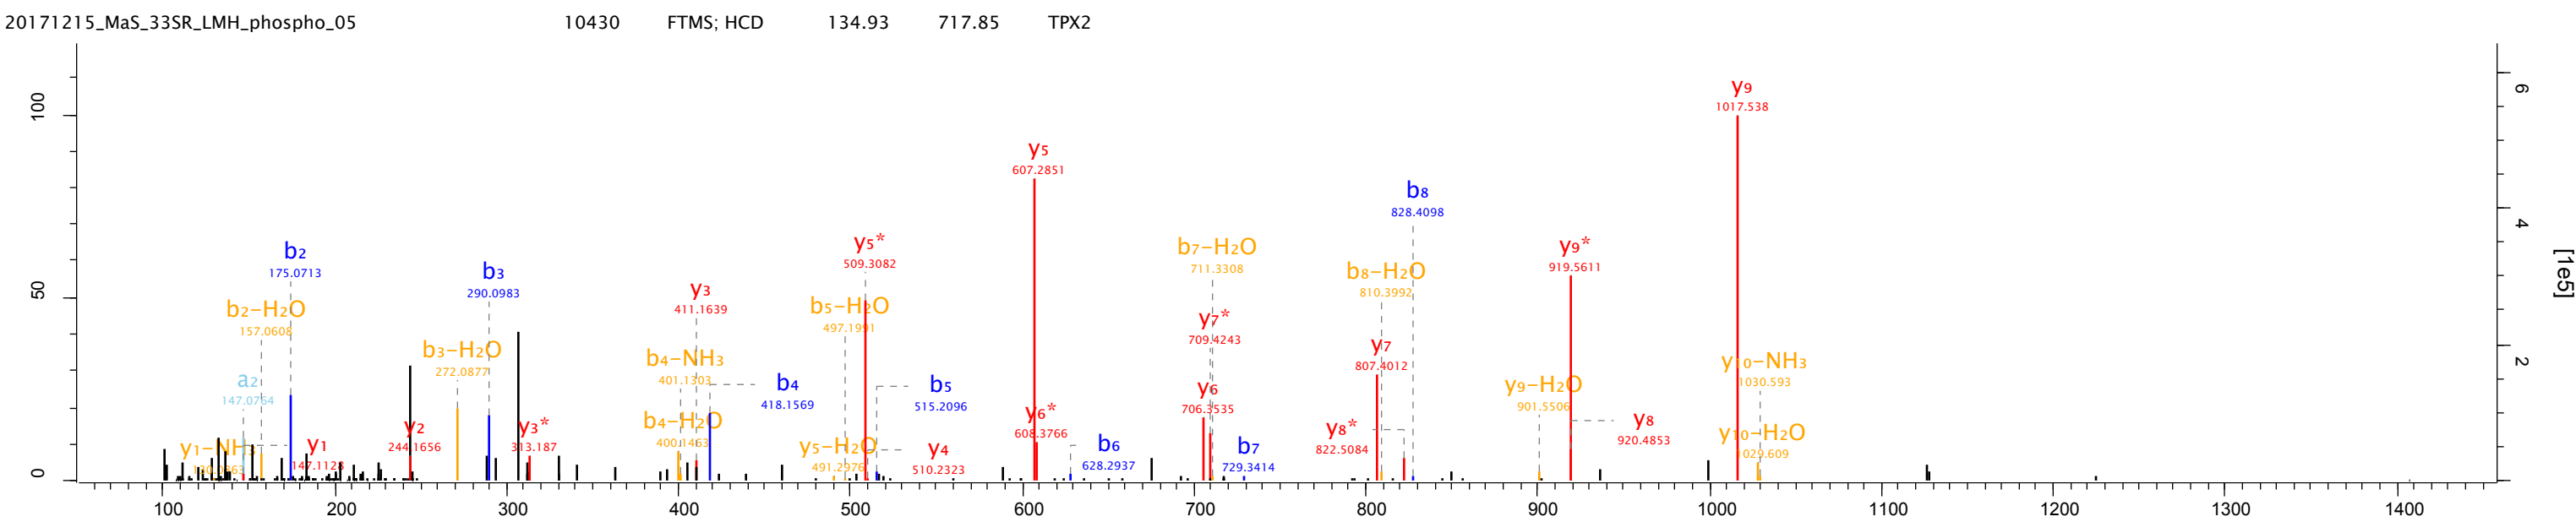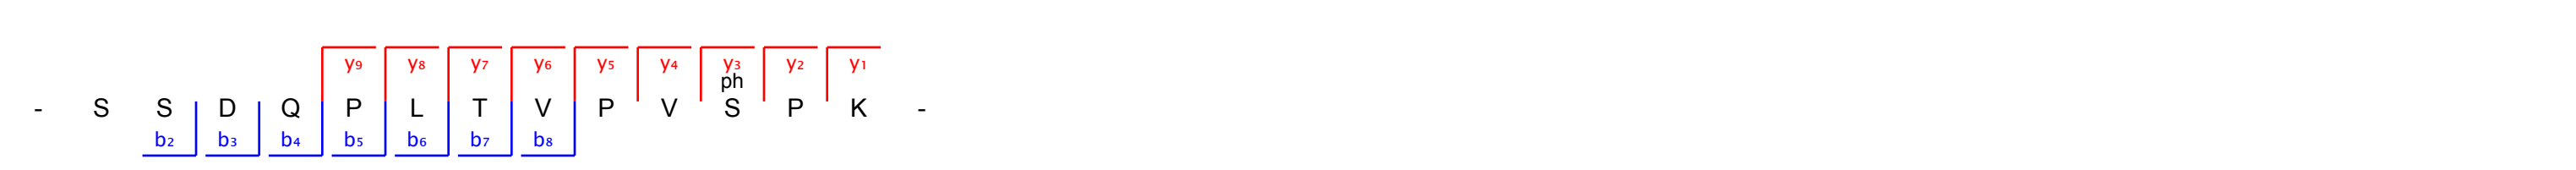

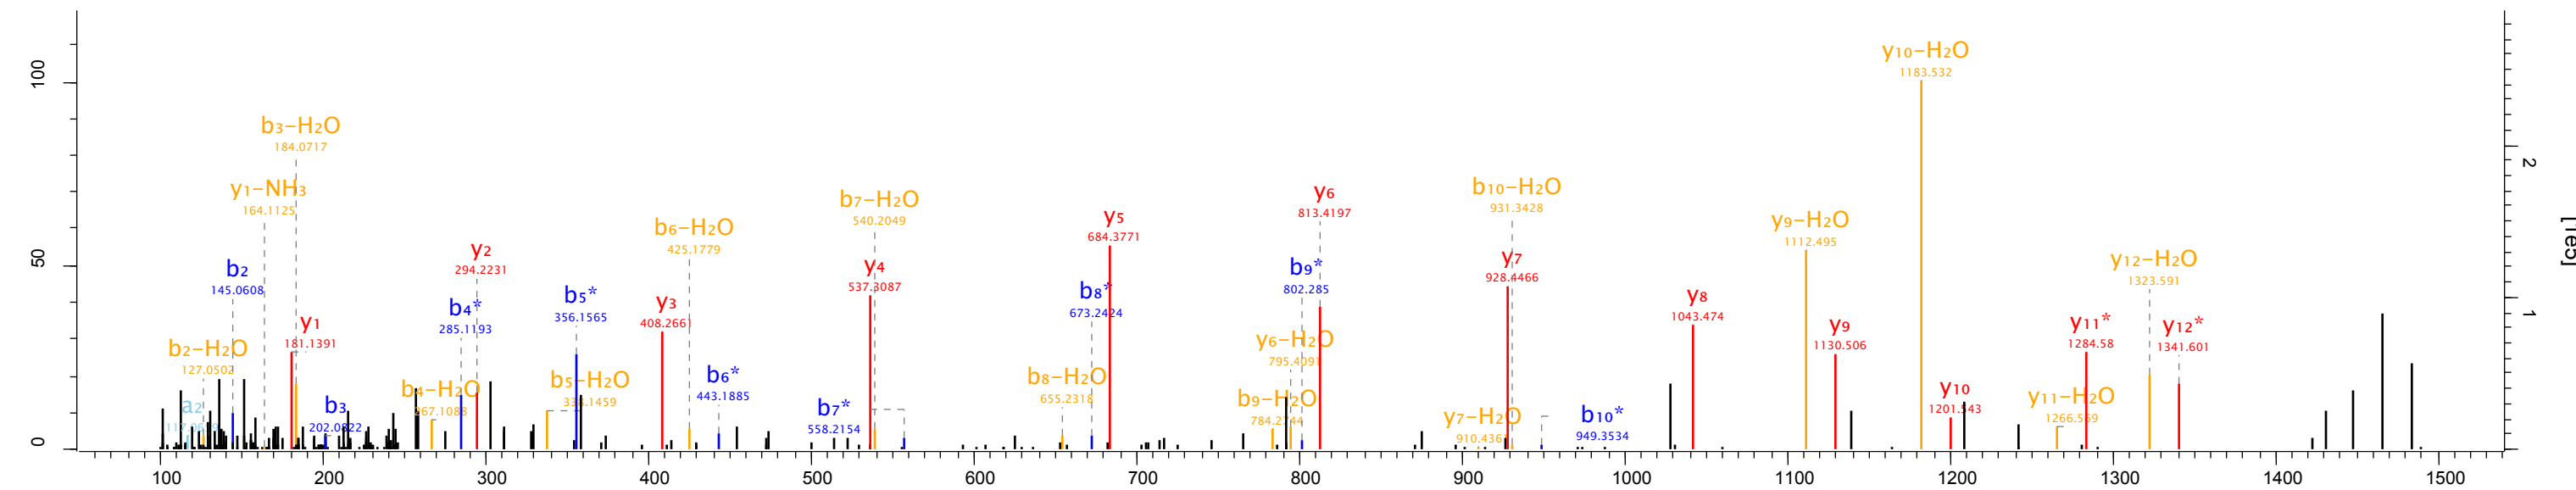

- G S G T A S D D E F E N L R -

b<sub>2</sub> b<sub>3</sub> b<sub>4</sub>\* b<sub>5</sub>\* b<sub>6</sub>\* b<sub>7</sub>\* b<sub>8</sub>\* b<sub>9</sub>\* b<sub>10</sub>\*

y<sub>12</sub>\* y<sub>11</sub>\* y<sub>10</sub> y<sub>9</sub> y<sub>8</sub> y<sub>7</sub> y<sub>6</sub> y<sub>5</sub> y<sub>4</sub> y<sub>3</sub> y<sub>2</sub> y<sub>1</sub>

ph

Raw file 20171215\_MaS\_33SR\_LMH\_phospho\_05 Scan 11120 Method FTMS; HCD Score 50.3 m/z 716.8 Gene names BUD13

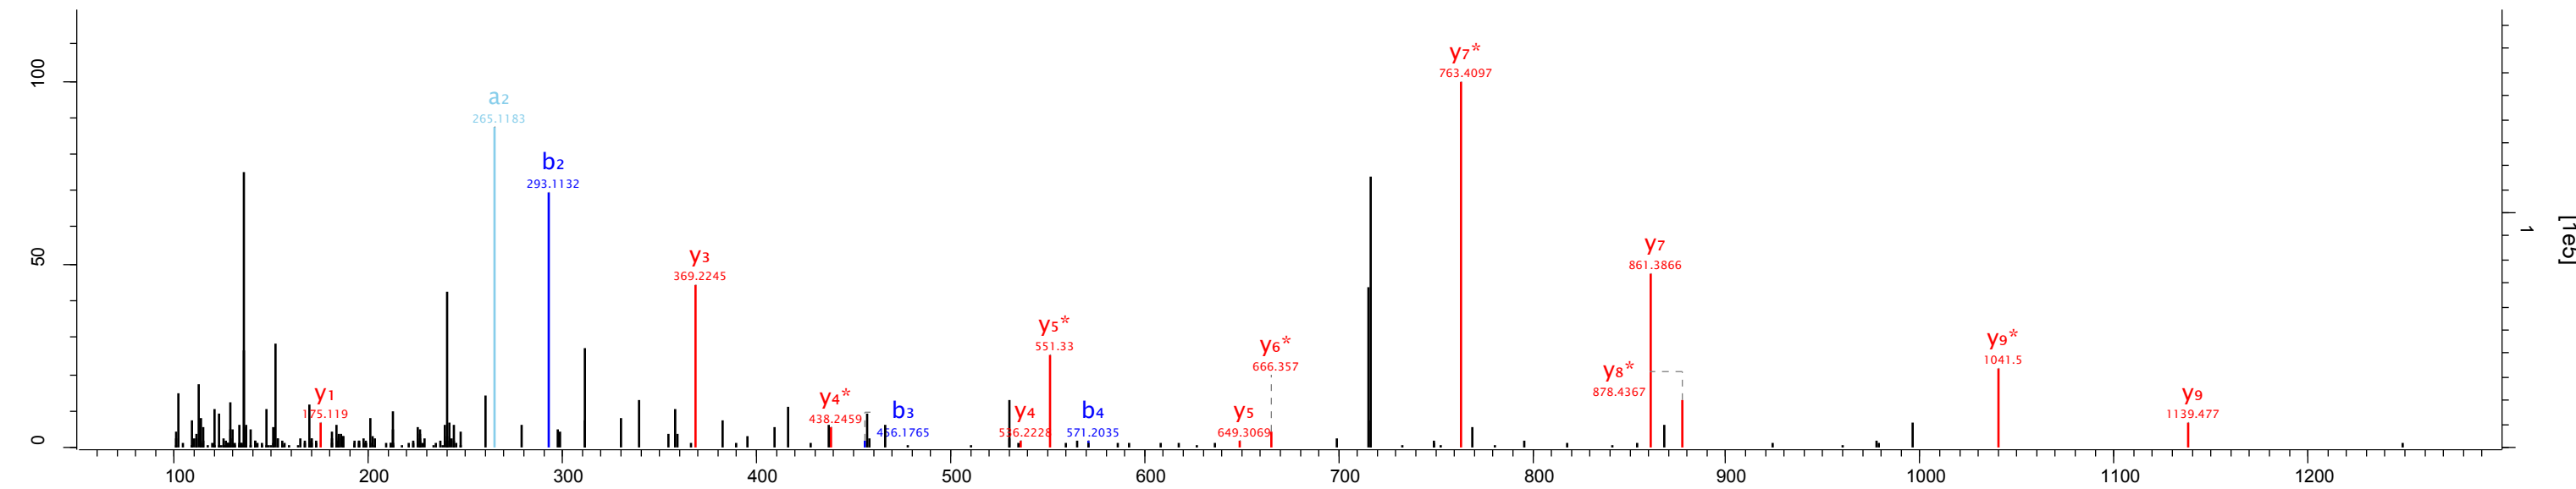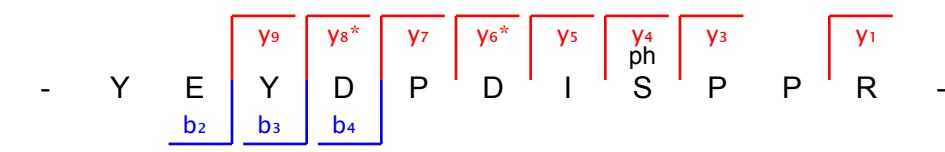

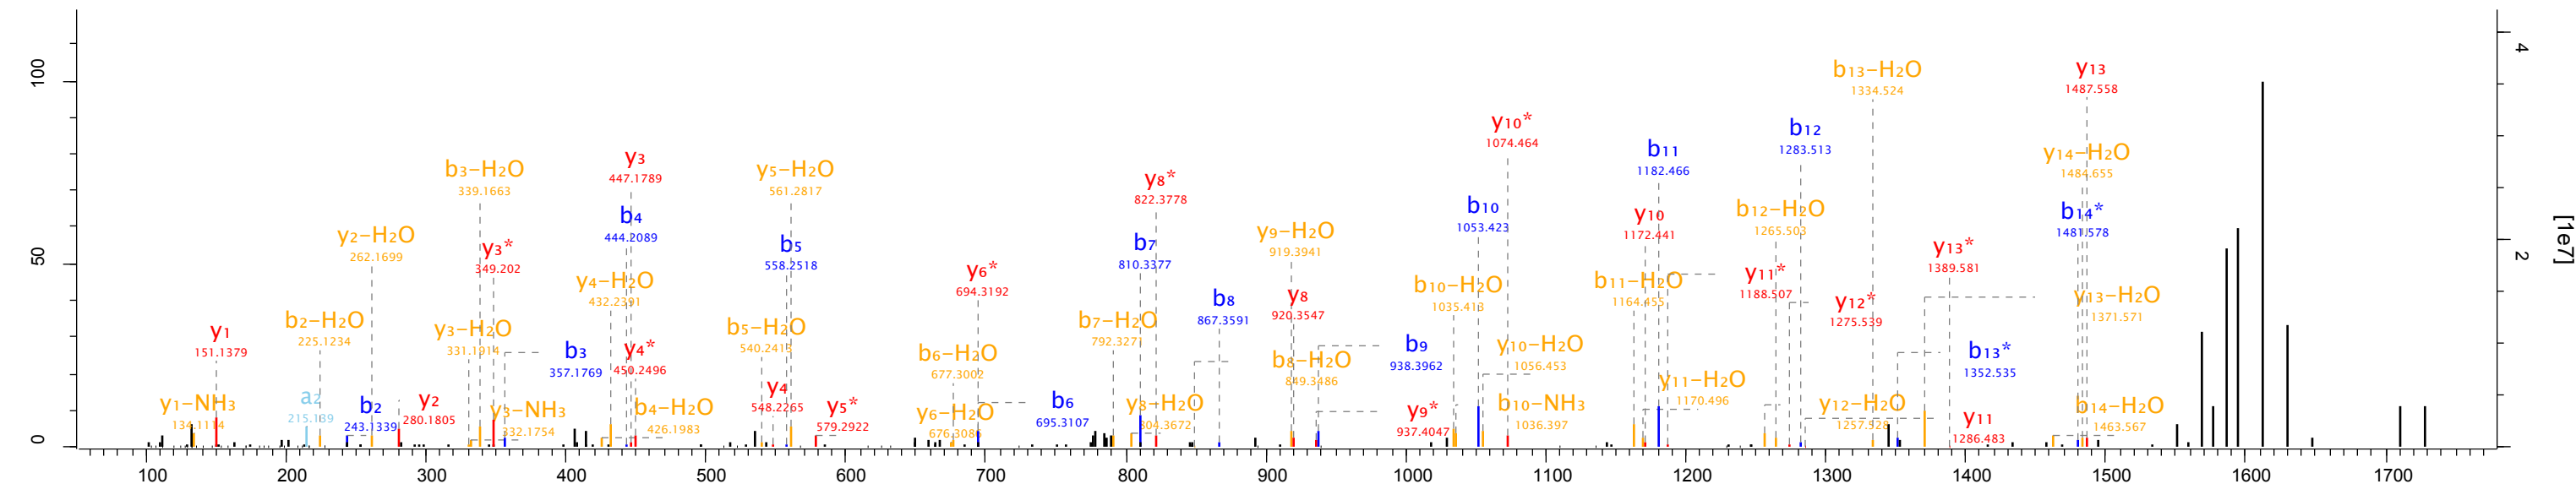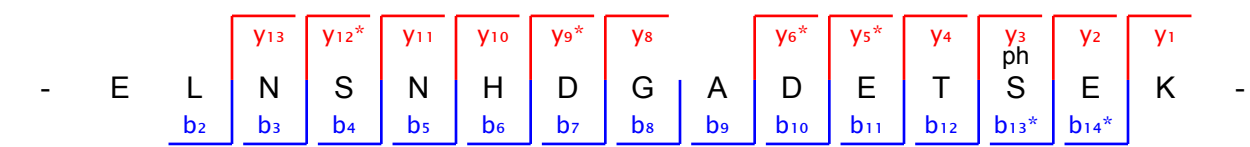

Raw file 20171215\_MaS\_33SR\_LMH\_phospho\_05 Scan 2680 Method FTMS; HCD Score 163.99 m/z 638.29 Gene names MBD3

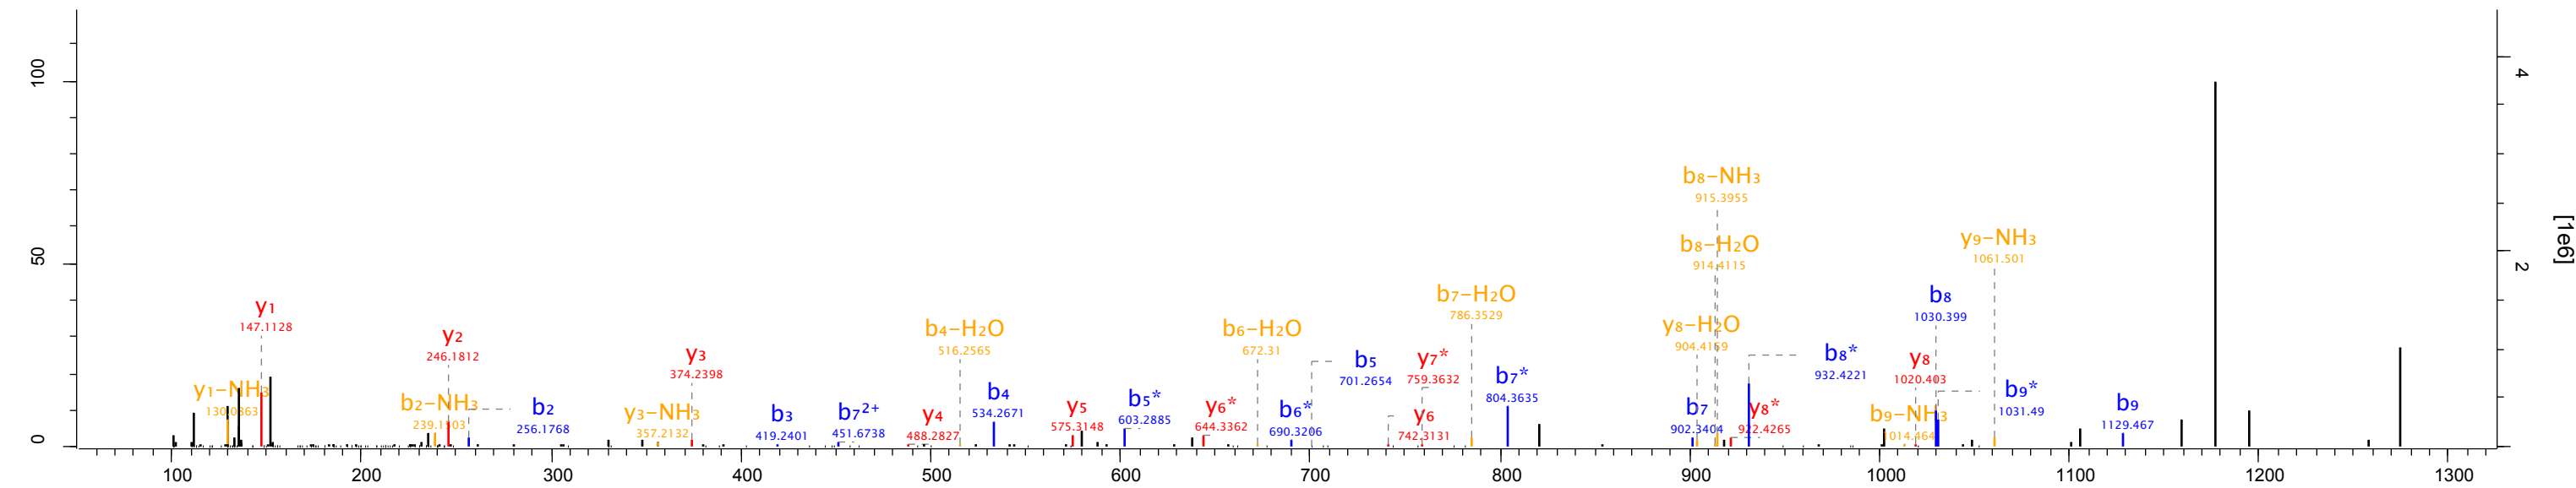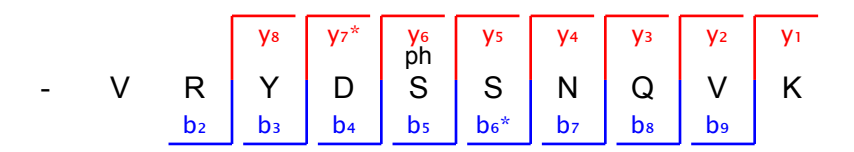

Raw file 20171215\_MaS\_33SR\_LMH\_phospho\_05 Scan 2740 Method FTMS; HCD Score 87.83 m/z 617.27 Gene names EIF4G1

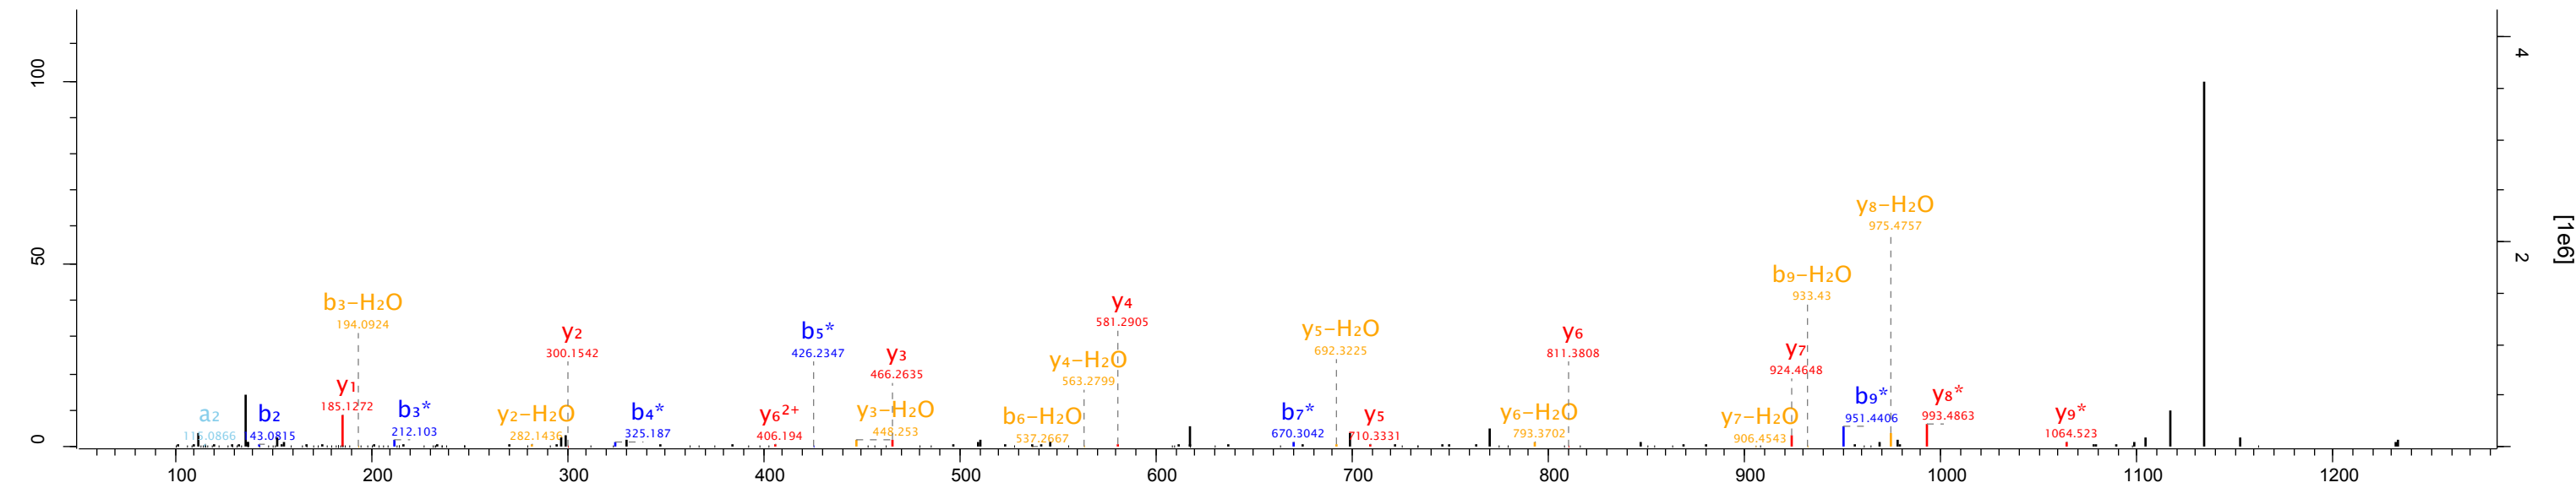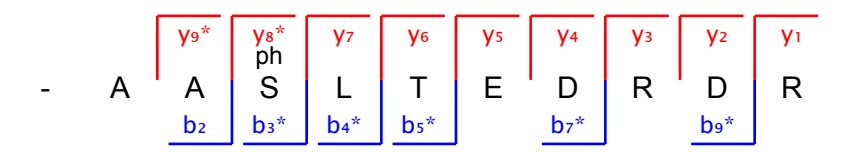



Raw file 20171215\_MaS\_33SR\_LMH\_phospho\_05 Scan 6240 Method FTMS; HCD Score 76.3 m/z 852.38 Gene names DNTTIP2

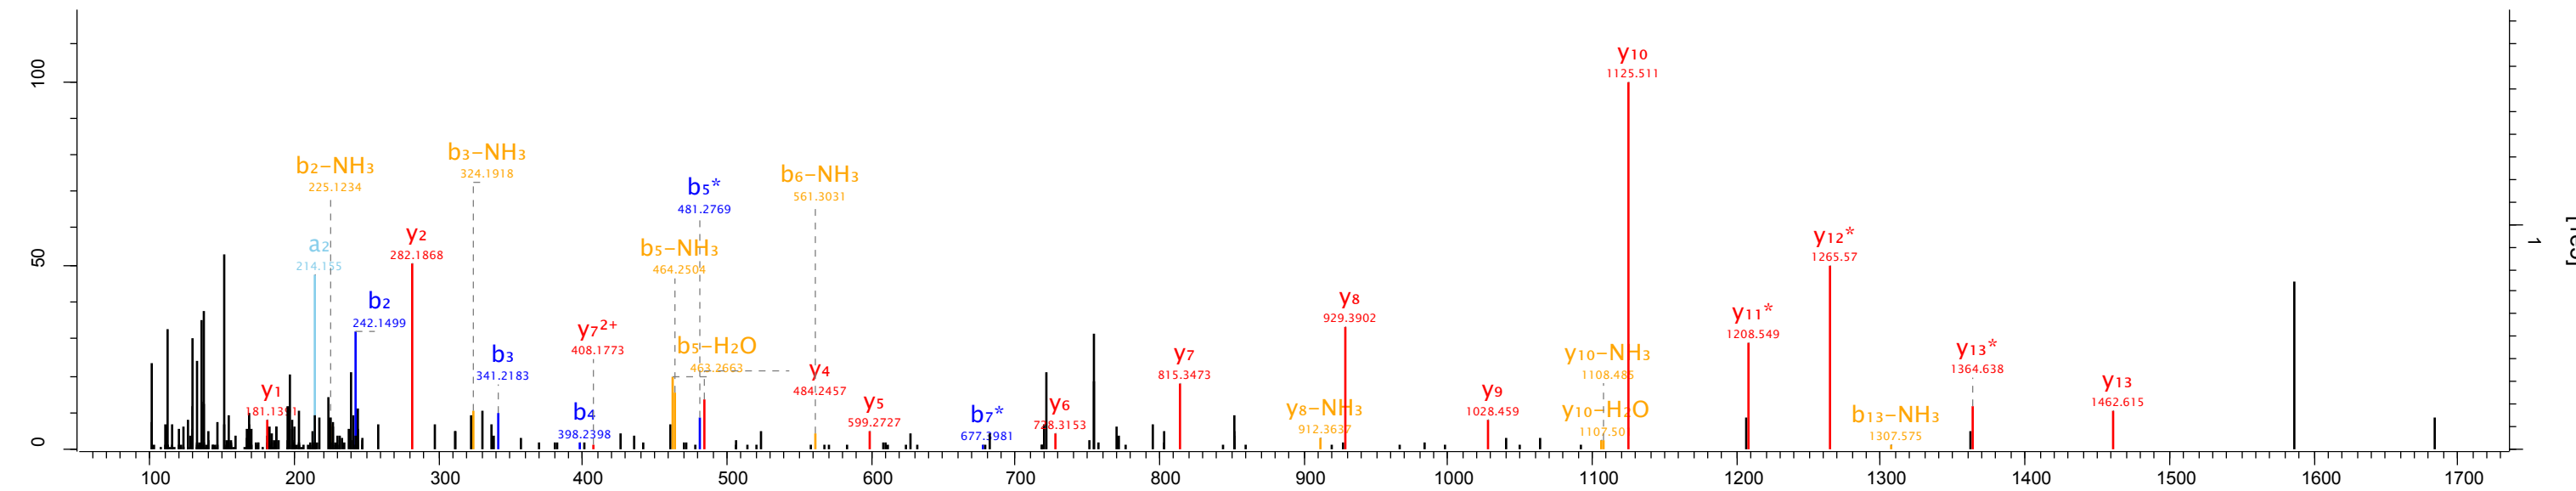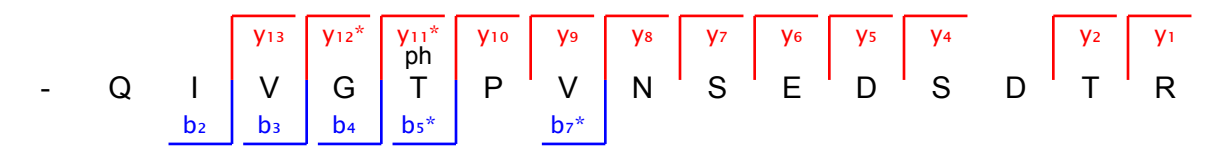

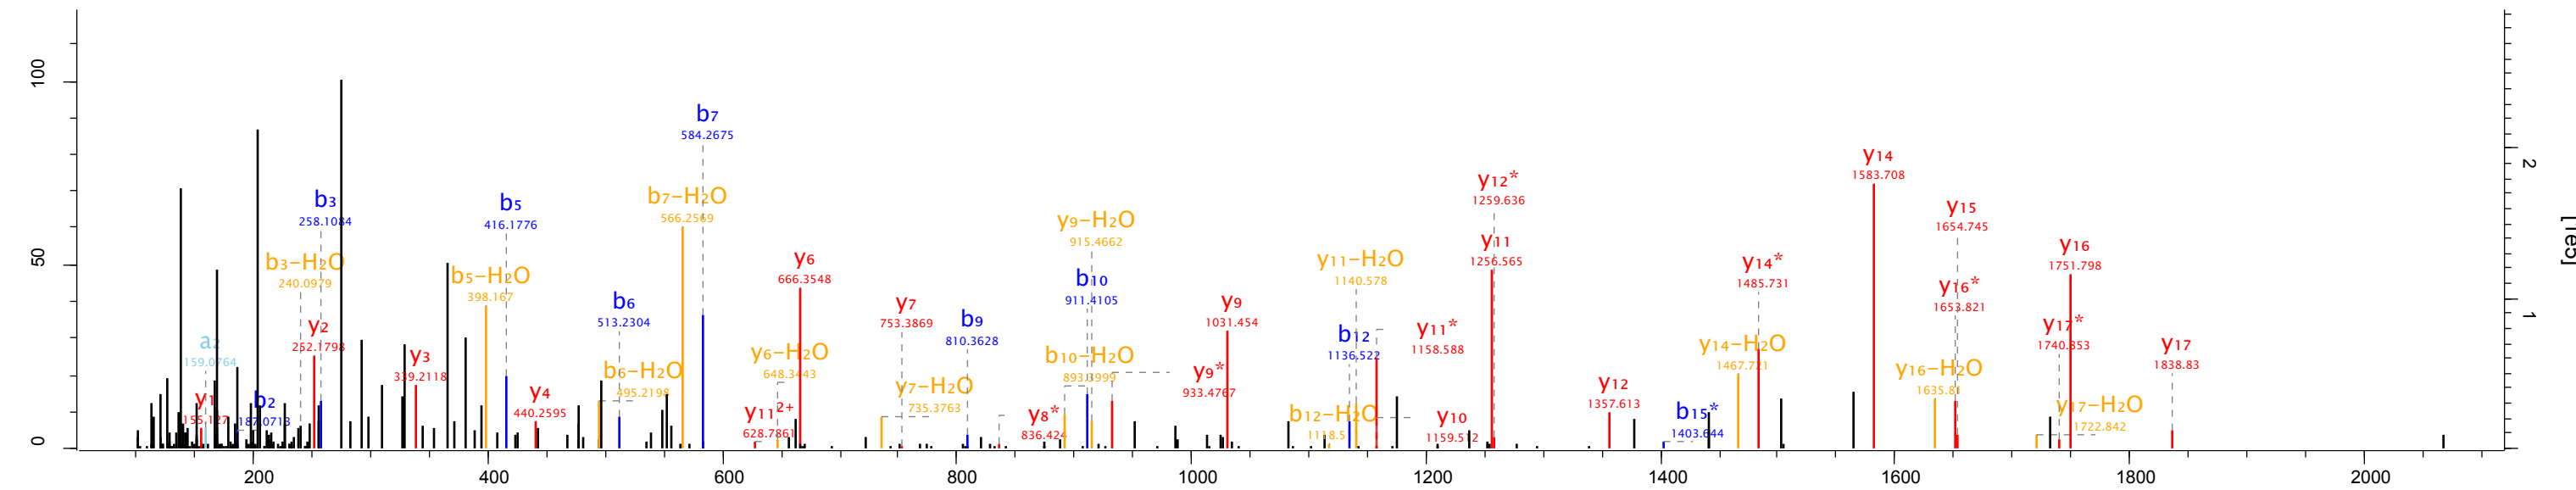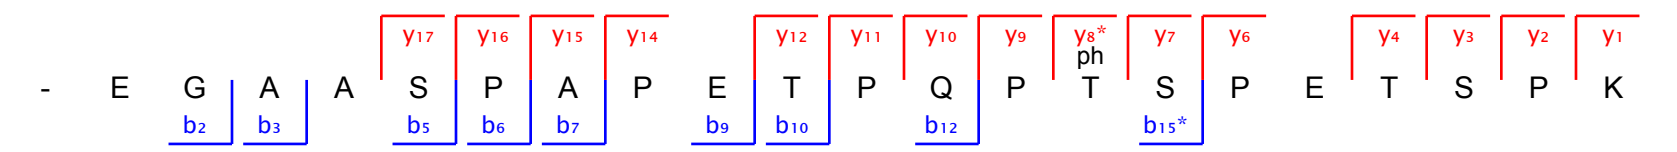

Raw file 20171215\_MaS\_33SR\_LMH\_phospho\_05 Scan 6450 Method FTMS; HCD Score 201.61 m/z 964.44 Gene names CHD3

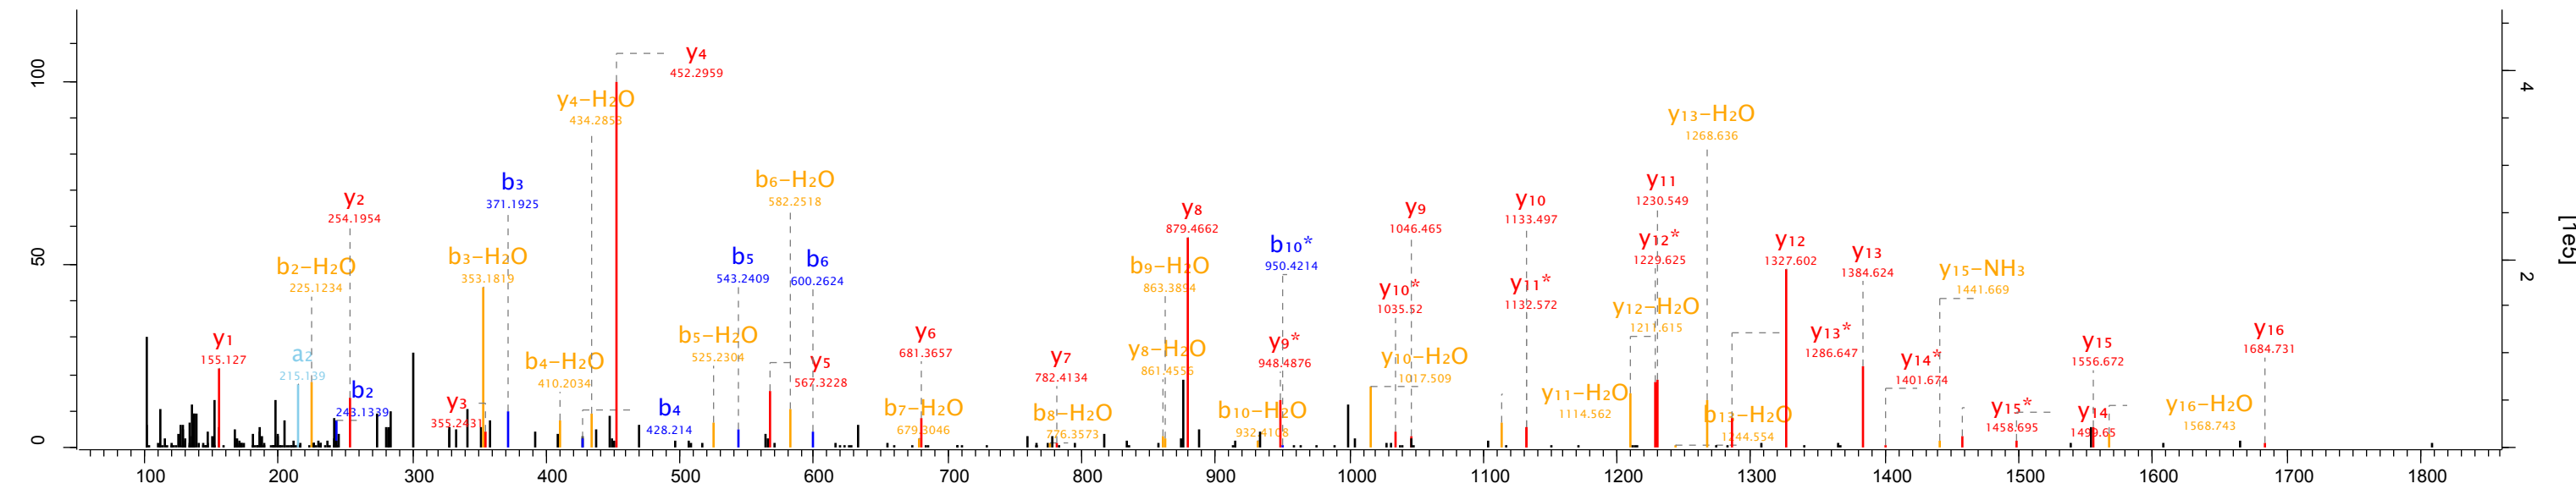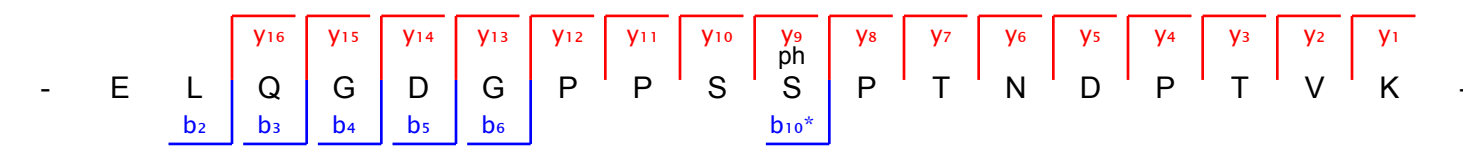

Raw file: 20171215\_MaS\_33SR\_LMH\_phospho\_05  
 Scan: 6530 Method: FTMS; HCD Score: 154.46 m/z: 705.35 Gene names: WDR26

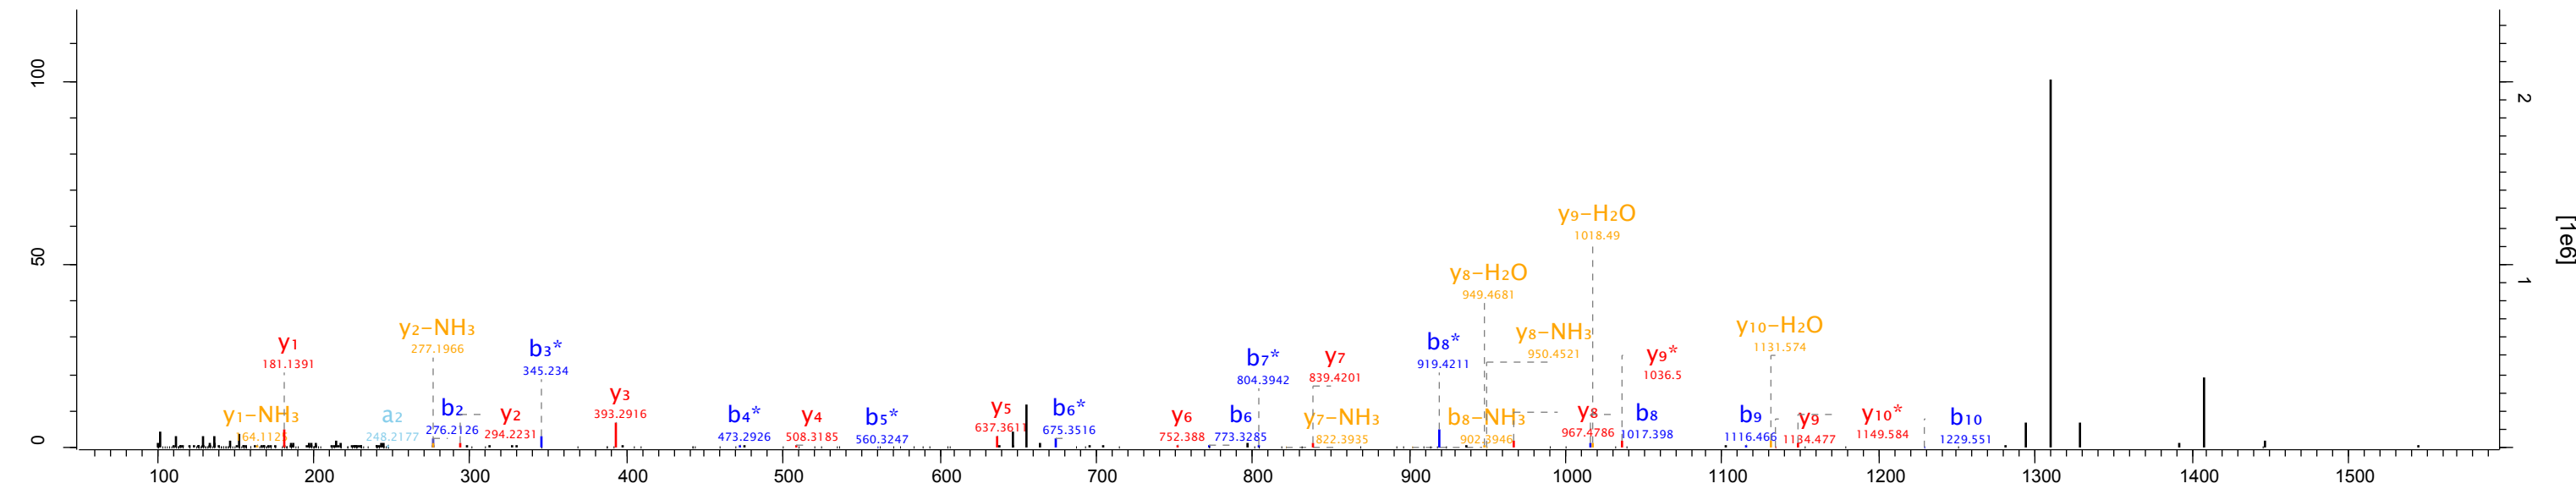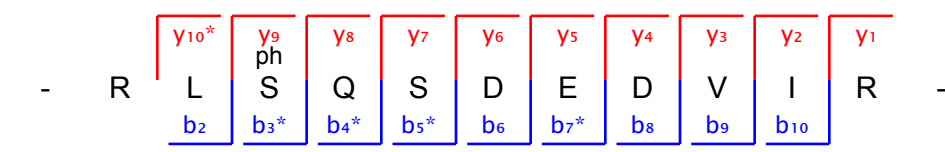

Raw file 20171215\_MaS\_33SR\_LMH\_phospho\_05 Scan 6650 Method FTMS; HCD Score 70.14 m/z 759.68 Gene names DENND4C

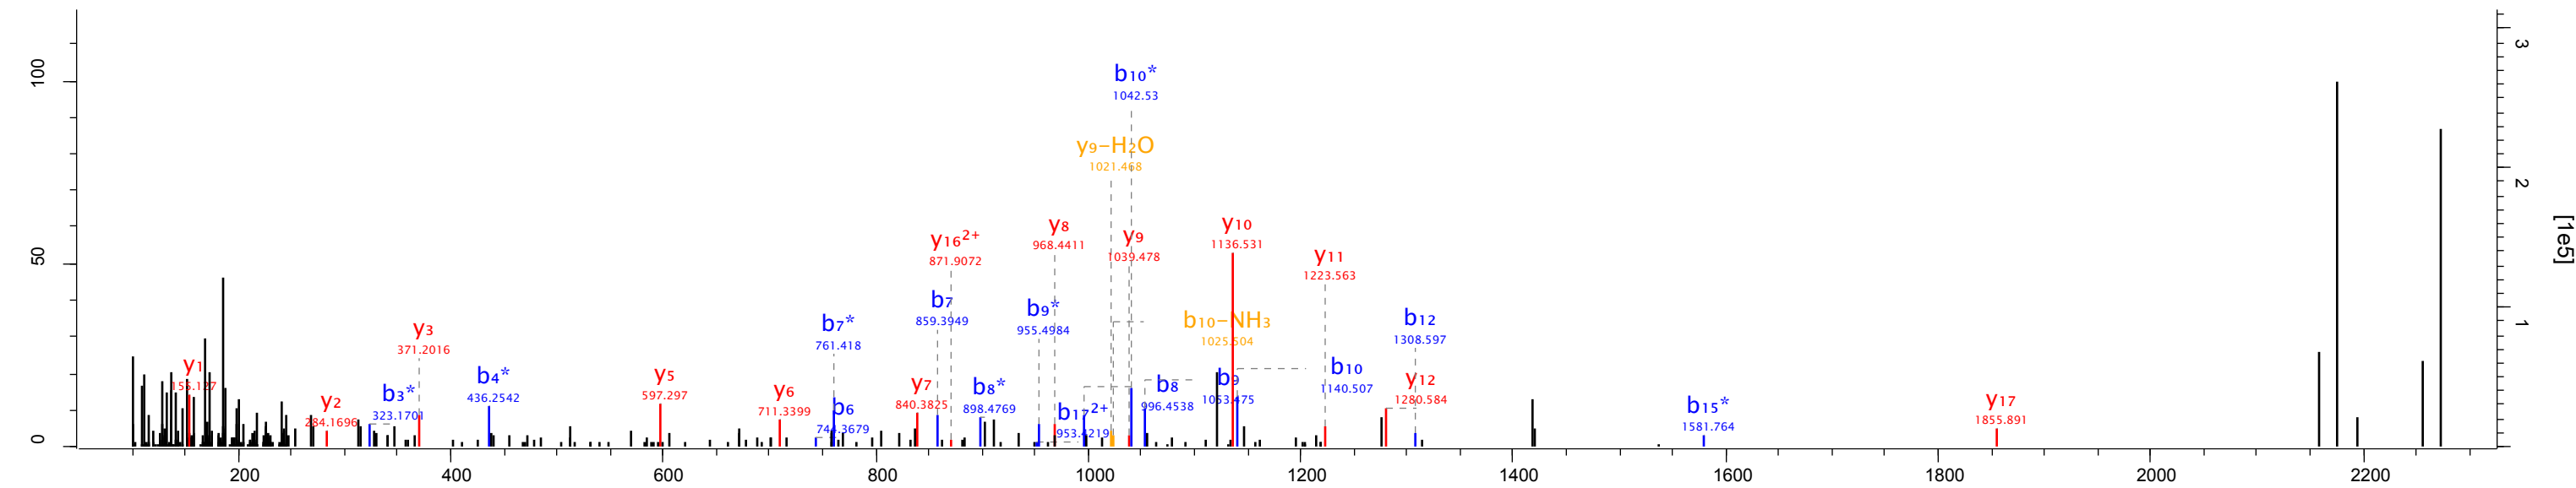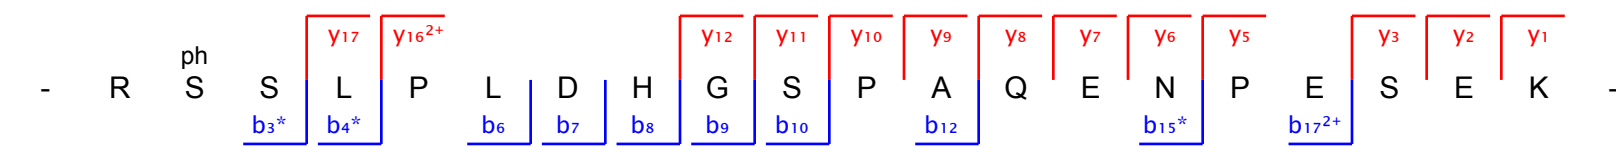

Raw file 20171215\_MaS\_33SR\_LMH\_phospho\_05 Scan 6960 Method FTMS; HCD Score 96.76 m/z 563.75 Gene names NAV1

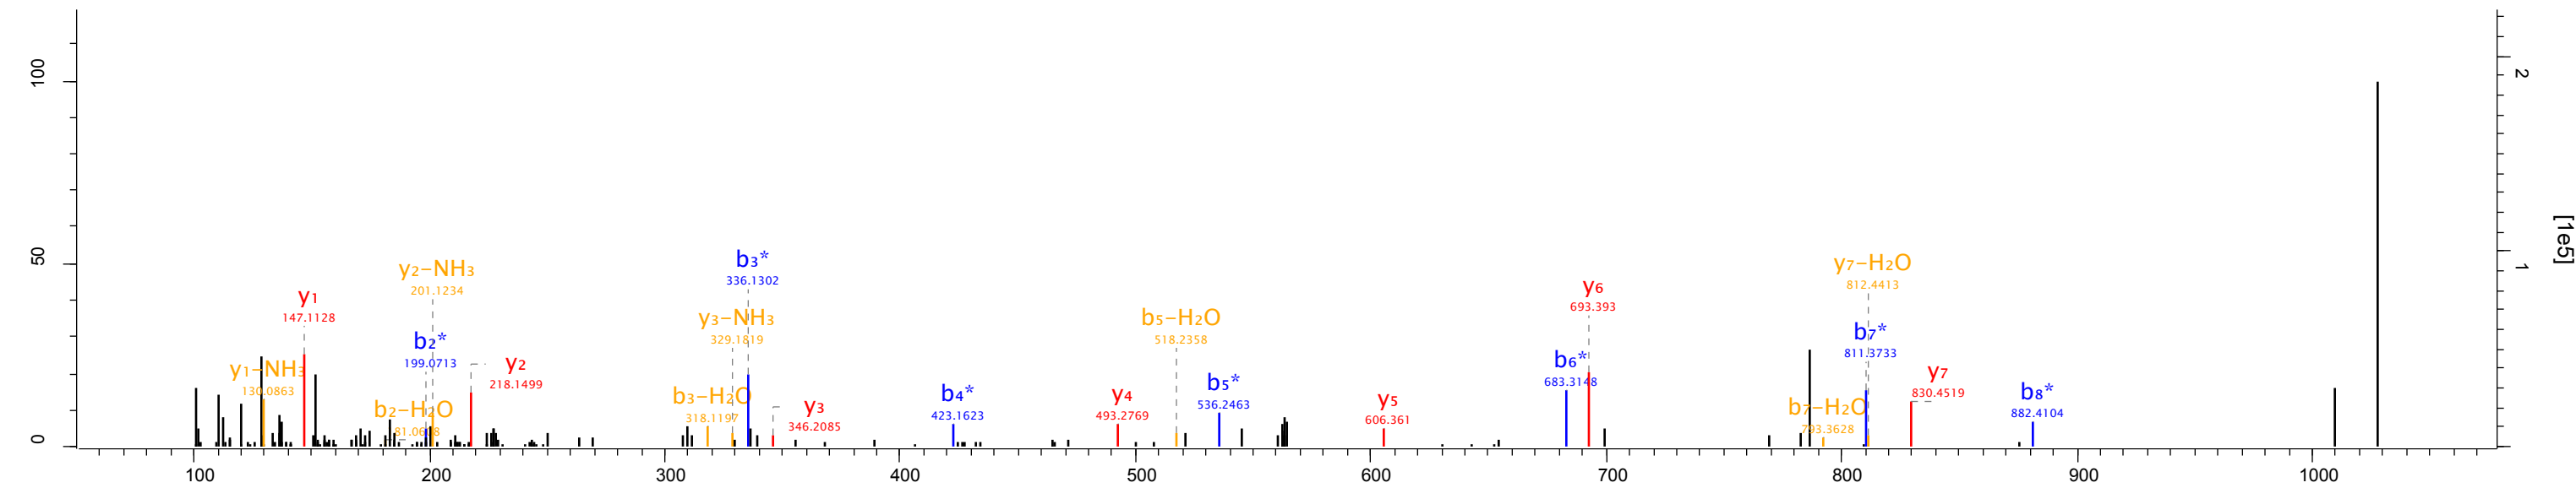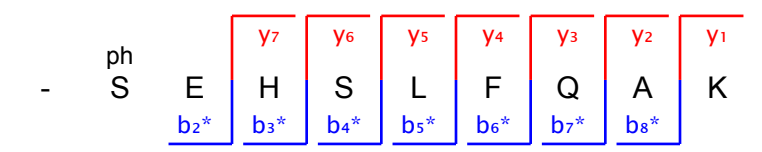

Raw file 20171215\_MaS\_33SR\_LMH\_phospho\_05 Scan 8750 Method FTMS; HCD Score 143.32 m/z 668.32 Gene names POGZ

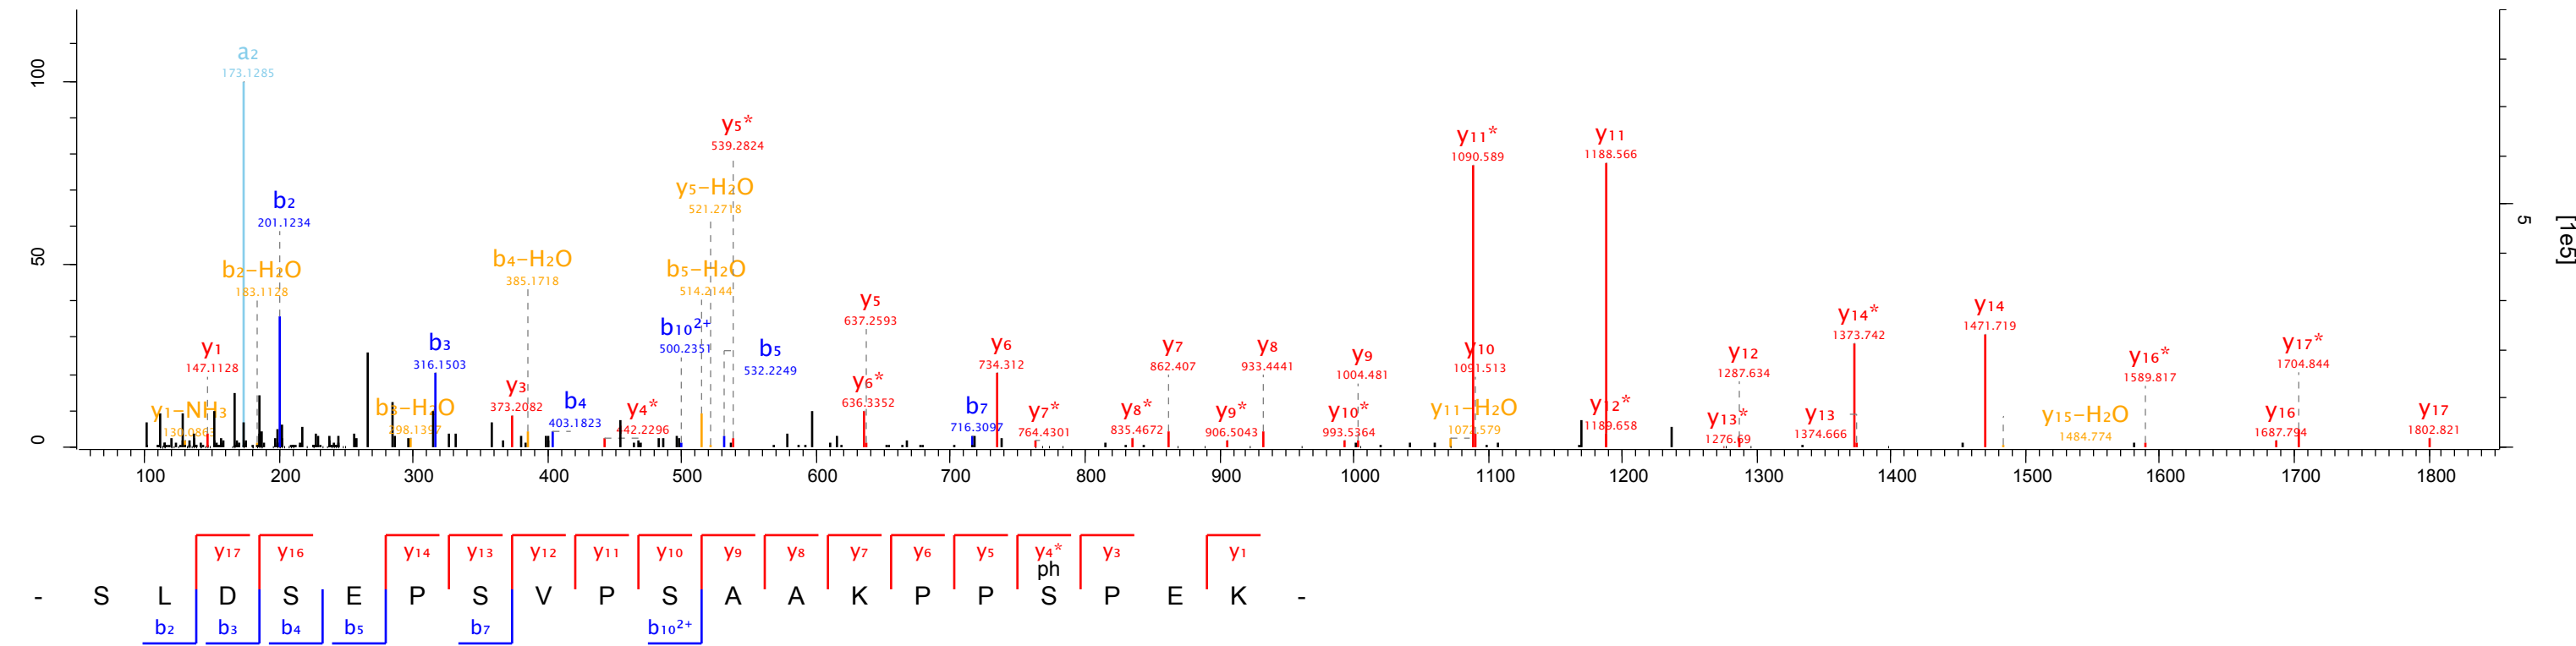

Raw file 20171215\_MaS\_33SR\_LMH\_phospho\_05 Scan 8830 Method FTMS; HCD Score 175.66 m/z 738.29 Gene names SRRM2

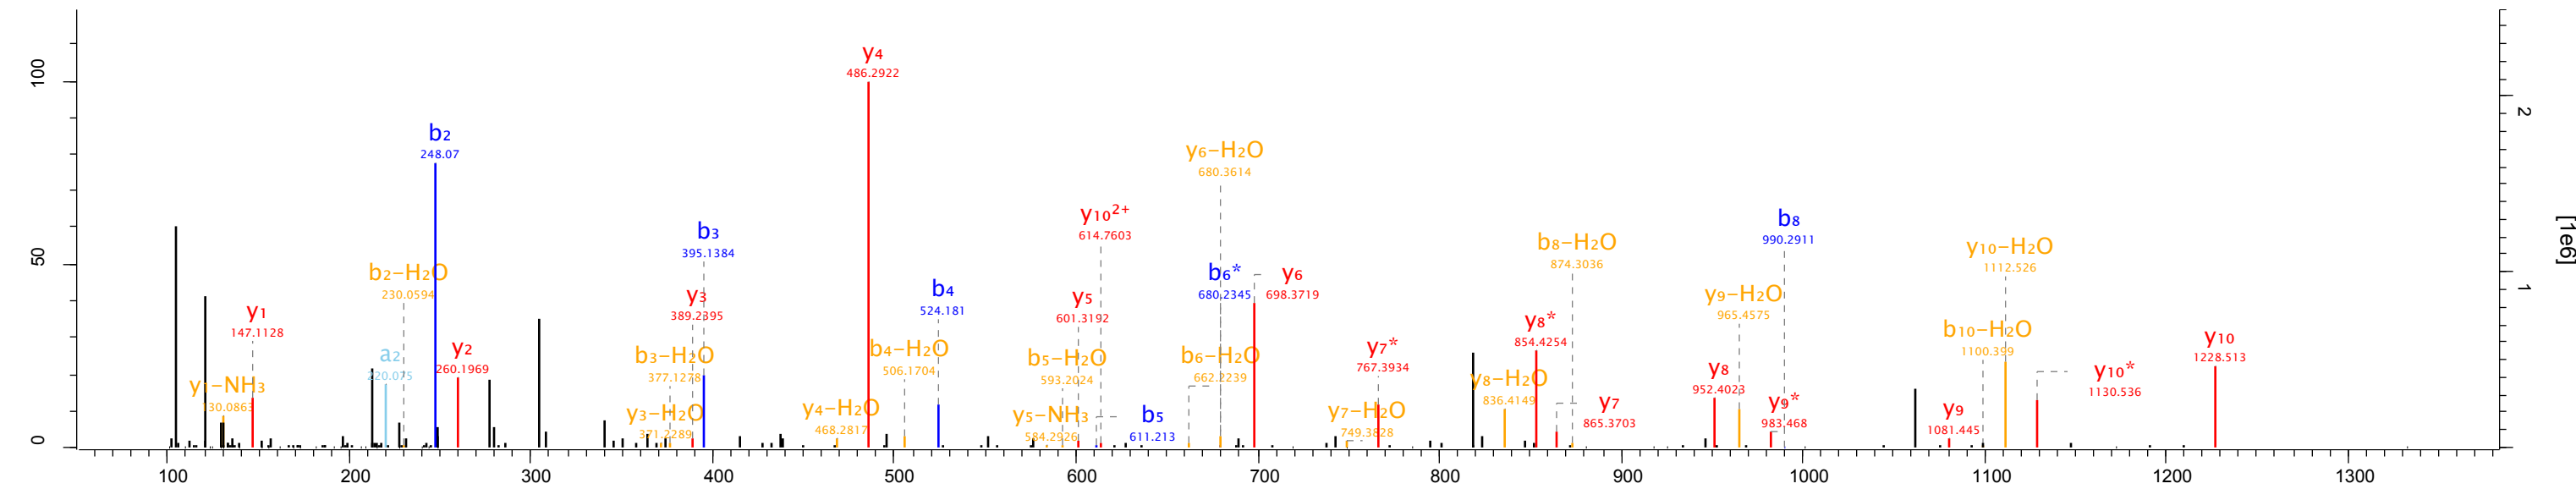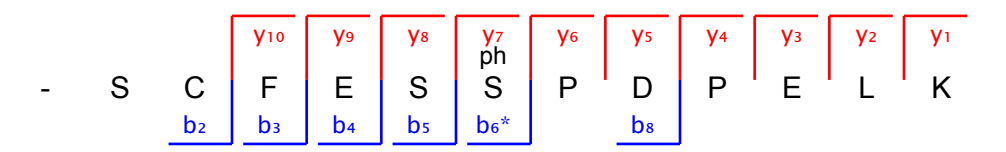





Raw file 20171215\_MaS\_33SR\_LMH\_phospho\_06 Scan 10380 Method FTMS; HCD Score 70.06 m/z 887.1 Gene names CASC3

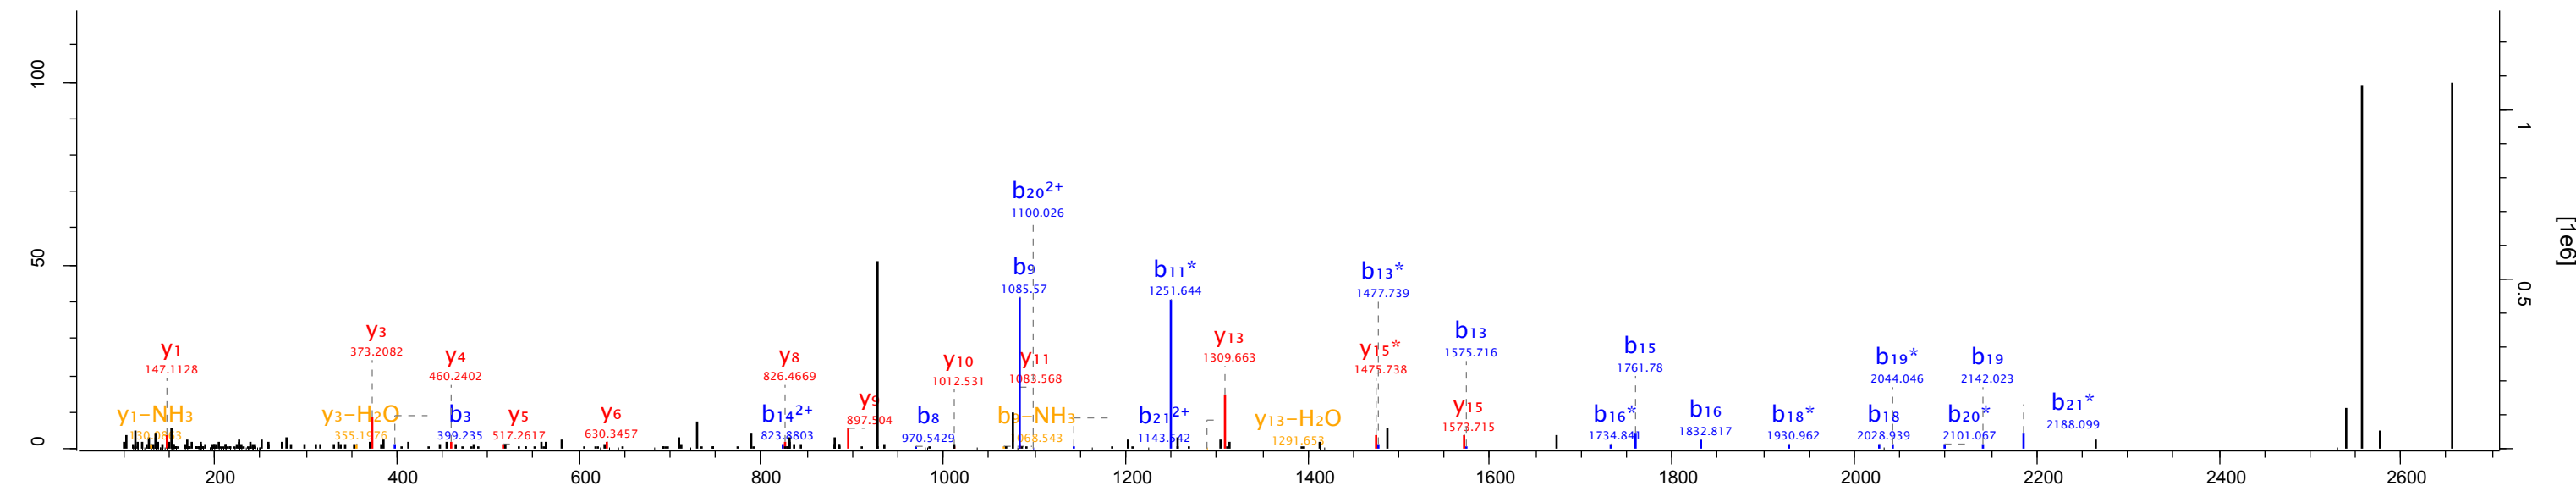

- R L E Q T S V R D P S P E A D A P V L G S P E K -

Fragmentation sites are indicated by brackets below the sequence:

- Red brackets (y-series): y15 (D-P), y13 (P-E), y11 (A-D), y10 (D-A), y9 (A-P), y8 (P-V), y6 (L-G), y5 (G-S), y4 (S-P), y3 (P-E), y1 (E-K)
- Blue brackets (b-series): b3 (E-Q), b8 (R-D), b9 (D-P), b11\* (S-P), b13 (E-A), b14<sup>2+</sup> (A-D), b15 (D-A), b16 (A-P), b18 (V-L), b19 (L-G), b20\* (G-S), b21\* (S-P)

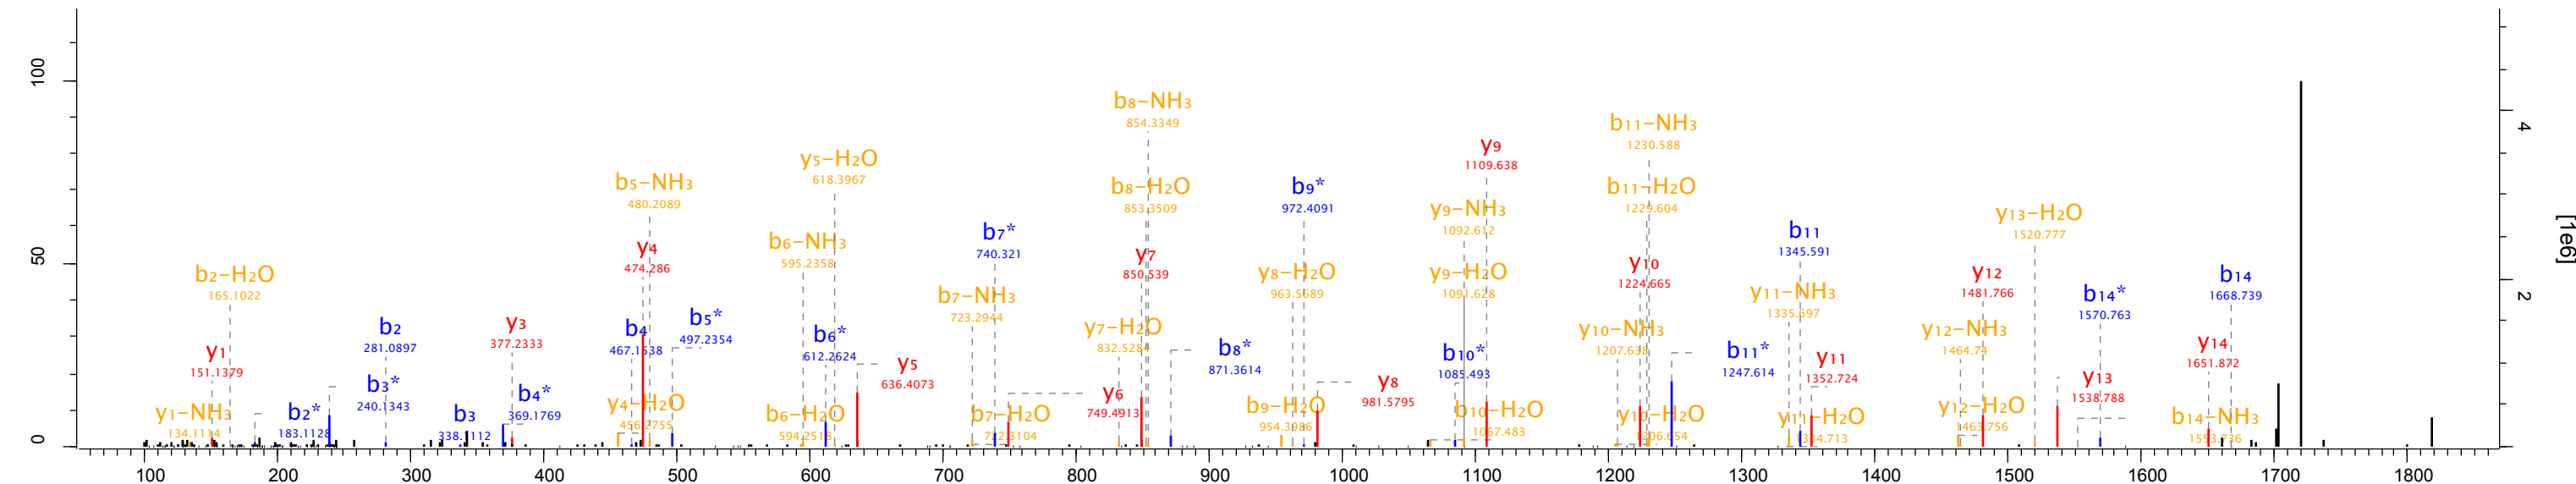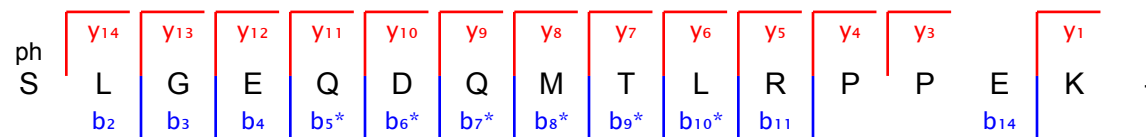

Raw file 20171215\_MaS\_33SR\_LMH\_phospho\_06 Scan 10780 Method FTMS; HCD Score 76.84 m/z 497.24 Gene names MARCKS

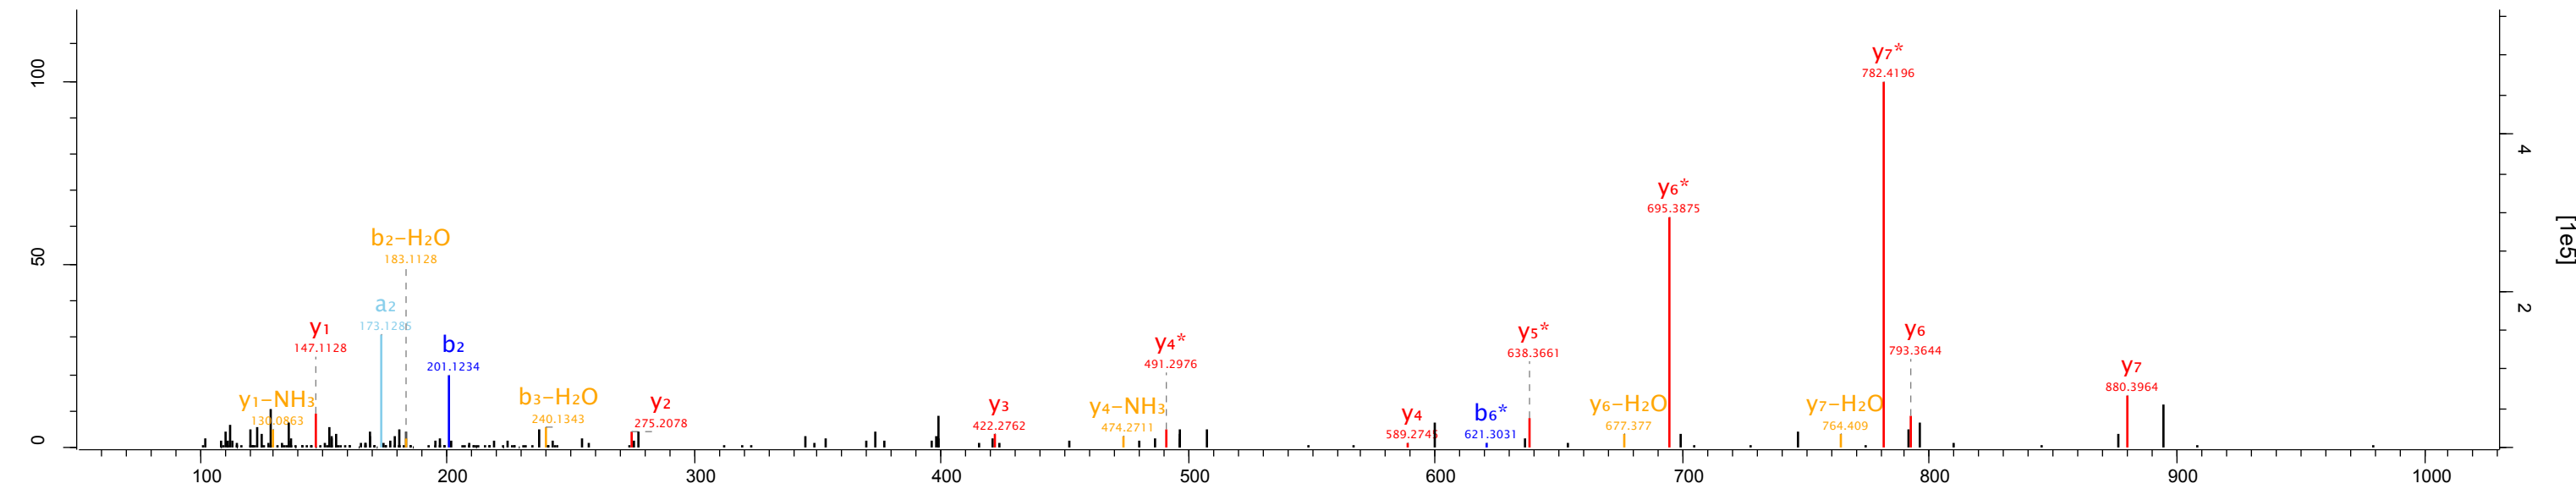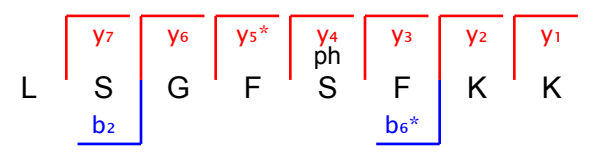

Raw file Scan Method Score m/z Gene names

20171215\_MaS\_33SR\_LMH\_phospho\_06 10990 FTMS; HCD 146.65 733.05 TAF12

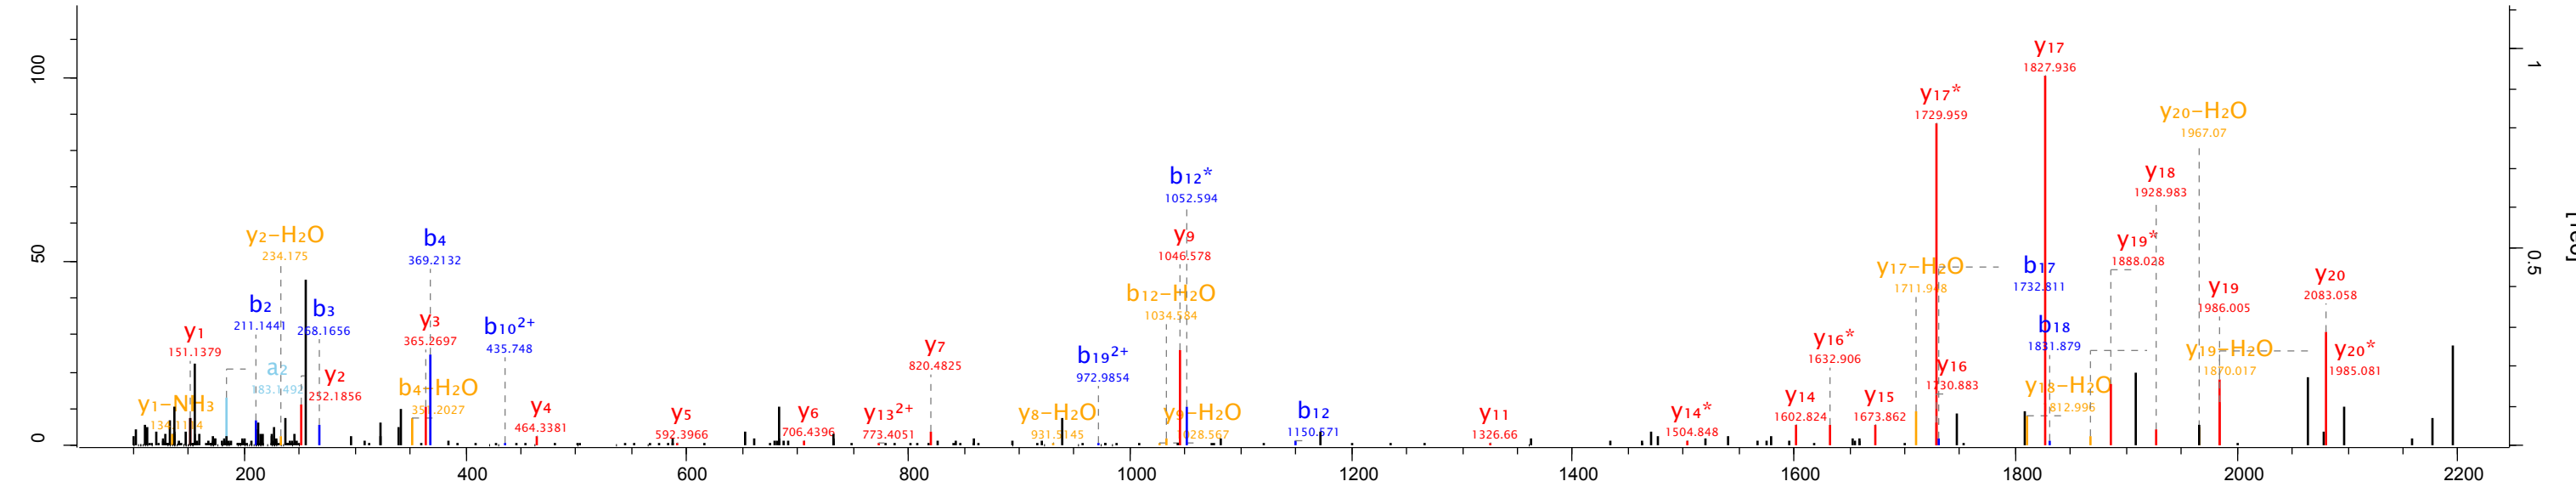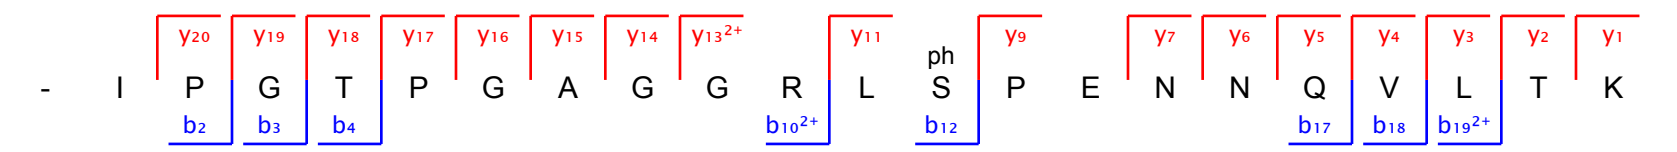

- I P G T P G A G G R L S P E N N Q V L T K -

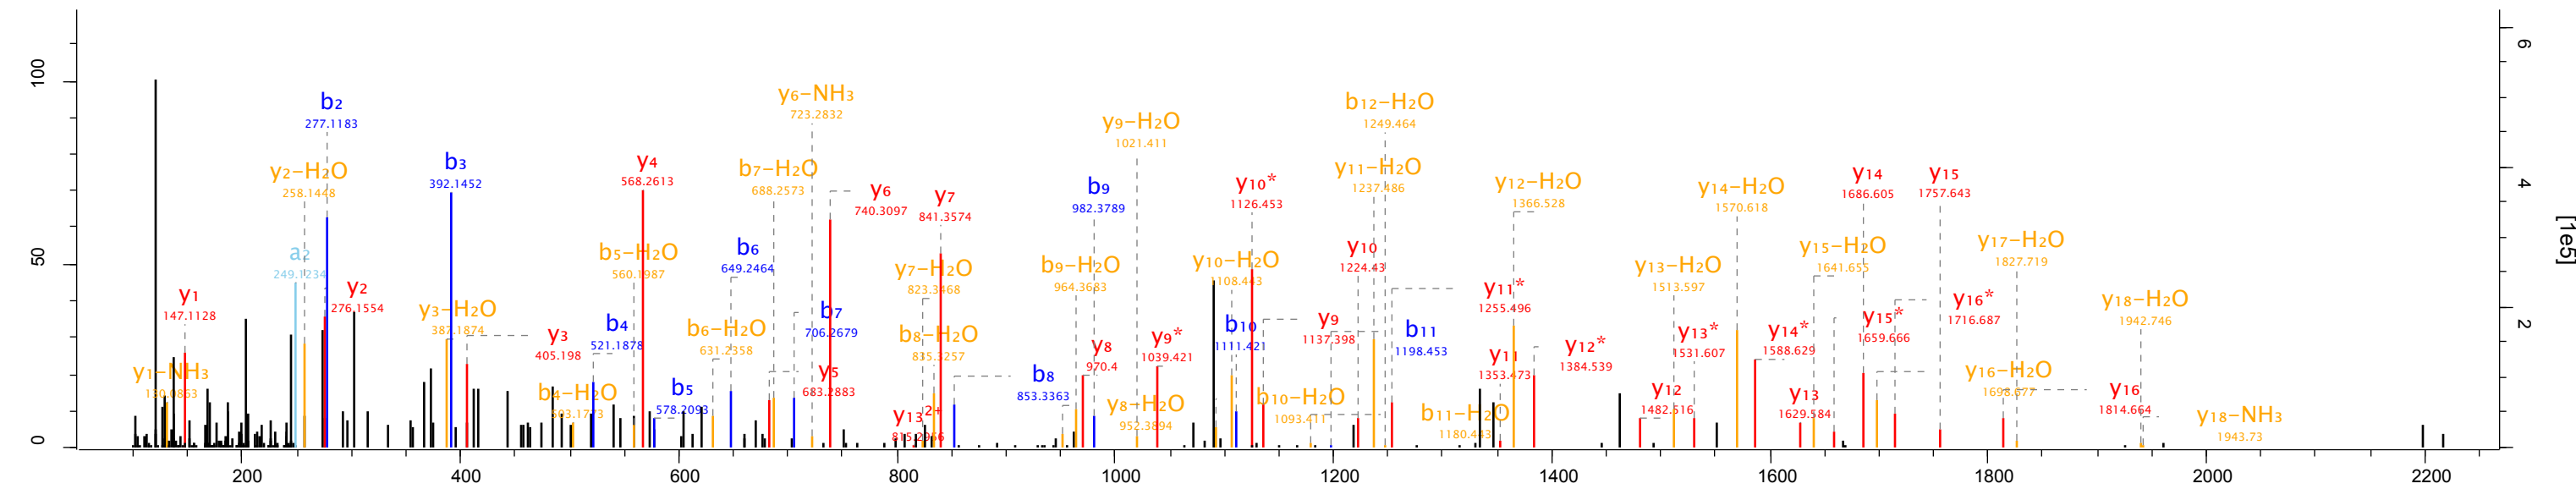

- F E D E G A G F E E S S E T G D Y E E K -

b<sub>2</sub> b<sub>3</sub> b<sub>4</sub> b<sub>5</sub> b<sub>6</sub> b<sub>7</sub> b<sub>8</sub> b<sub>9</sub> b<sub>10</sub> b<sub>11</sub> y<sub>ph</sub> y<sub>8</sub> y<sub>7</sub> y<sub>6</sub> y<sub>5</sub> y<sub>4</sub> y<sub>3</sub> y<sub>2</sub> y<sub>1</sub>

y<sub>16</sub> y<sub>15</sub> y<sub>14</sub> y<sub>13</sub> y<sub>12</sub> y<sub>11</sub> y<sub>10</sub> y<sub>9</sub> y<sub>8</sub> y<sub>7</sub> y<sub>6</sub> y<sub>5</sub> y<sub>4</sub> y<sub>3</sub> y<sub>2</sub> y<sub>1</sub>

Raw file 20171215\_MaS\_33SR\_LMH\_phospho\_06 Scan 11280 Method FTMS; HCD Score 148.19 m/z 930.4 Gene names PHC2

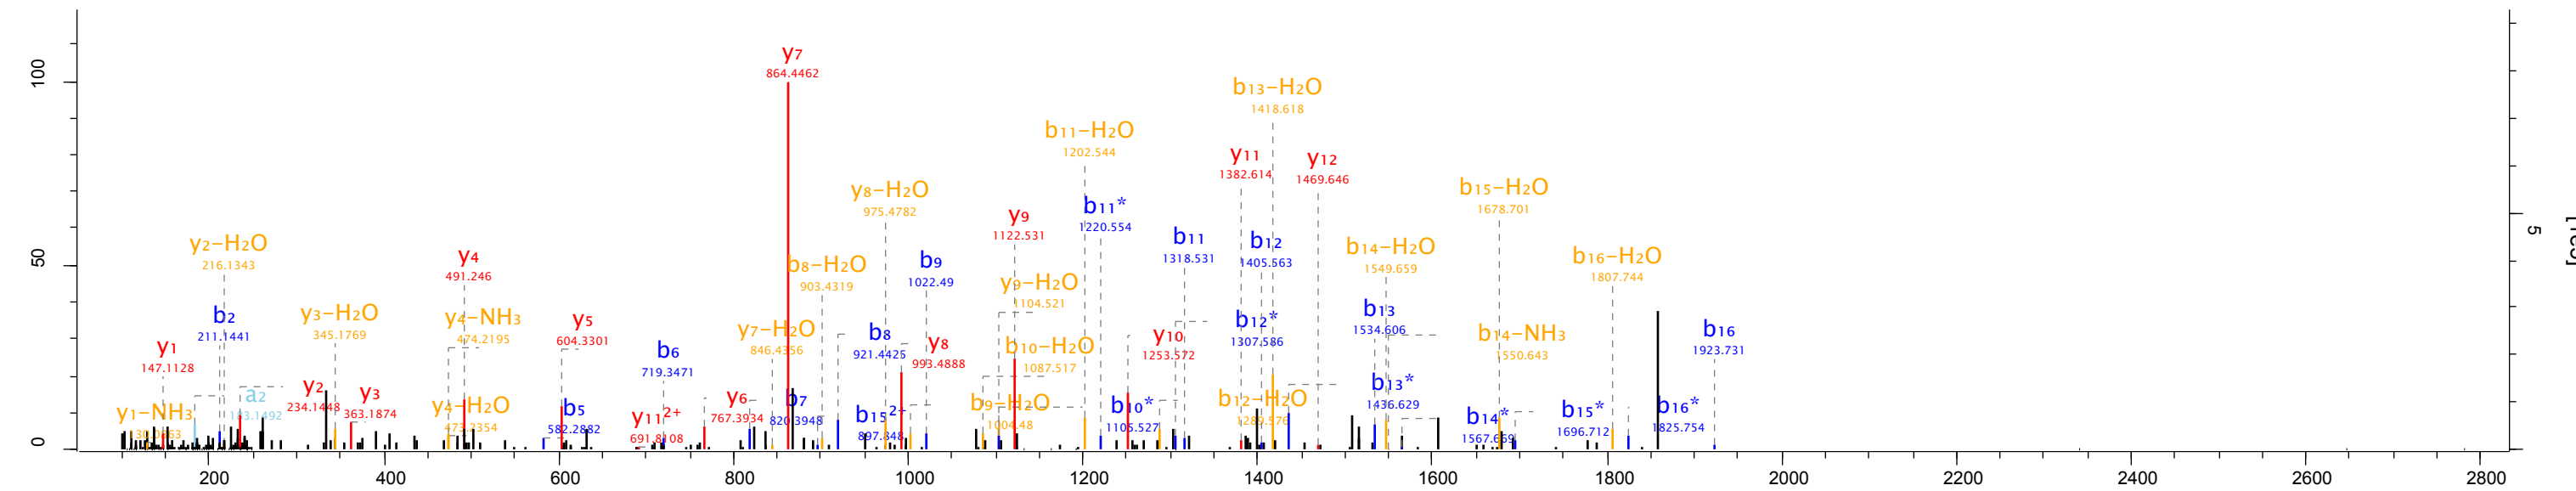

- L P Q Q D H T T T T D S E M E E P Y L Q E S K -

Peptide sequence: L P Q Q D H T T T T D S E M E E P Y L Q E S K

Fragmentation sites (b and y ions) are indicated by brackets below the sequence:

- b<sub>2</sub> (L-P)
- b<sub>5</sub> (D-H)
- b<sub>6</sub> (H-T)
- b<sub>7</sub> (T-T)
- b<sub>8</sub> (T-T)
- b<sub>9</sub> (T-T)
- b<sub>10</sub><sup>\*</sup> (T-T)
- b<sub>11</sub> (T-D)
- b<sub>12</sub> (D-S)
- b<sub>13</sub> (S-E)
- b<sub>14</sub><sup>\*</sup> (E-M)
- b<sub>15</sub><sup>\*</sup> (M-E)
- b<sub>16</sub> (E-E)

Corresponding y ions (y<sub>1</sub> to y<sub>12</sub>) are shown above the sequence, with y<sub>1</sub> to y<sub>12</sub> corresponding to the amino acids P, Q, Q, D, H, T, T, T, T, D, S, E, M, E, E, P, Y, L, Q, E, S, K respectively.

Raw file 20171215\_MaS\_33SR\_LMH\_phospho\_06 Scan 11680 Method FTMS; HCD Score 185.16 m/z 835.92 Gene names MAP4

20171215\_MaS\_33SR\_LMH\_phospho\_06

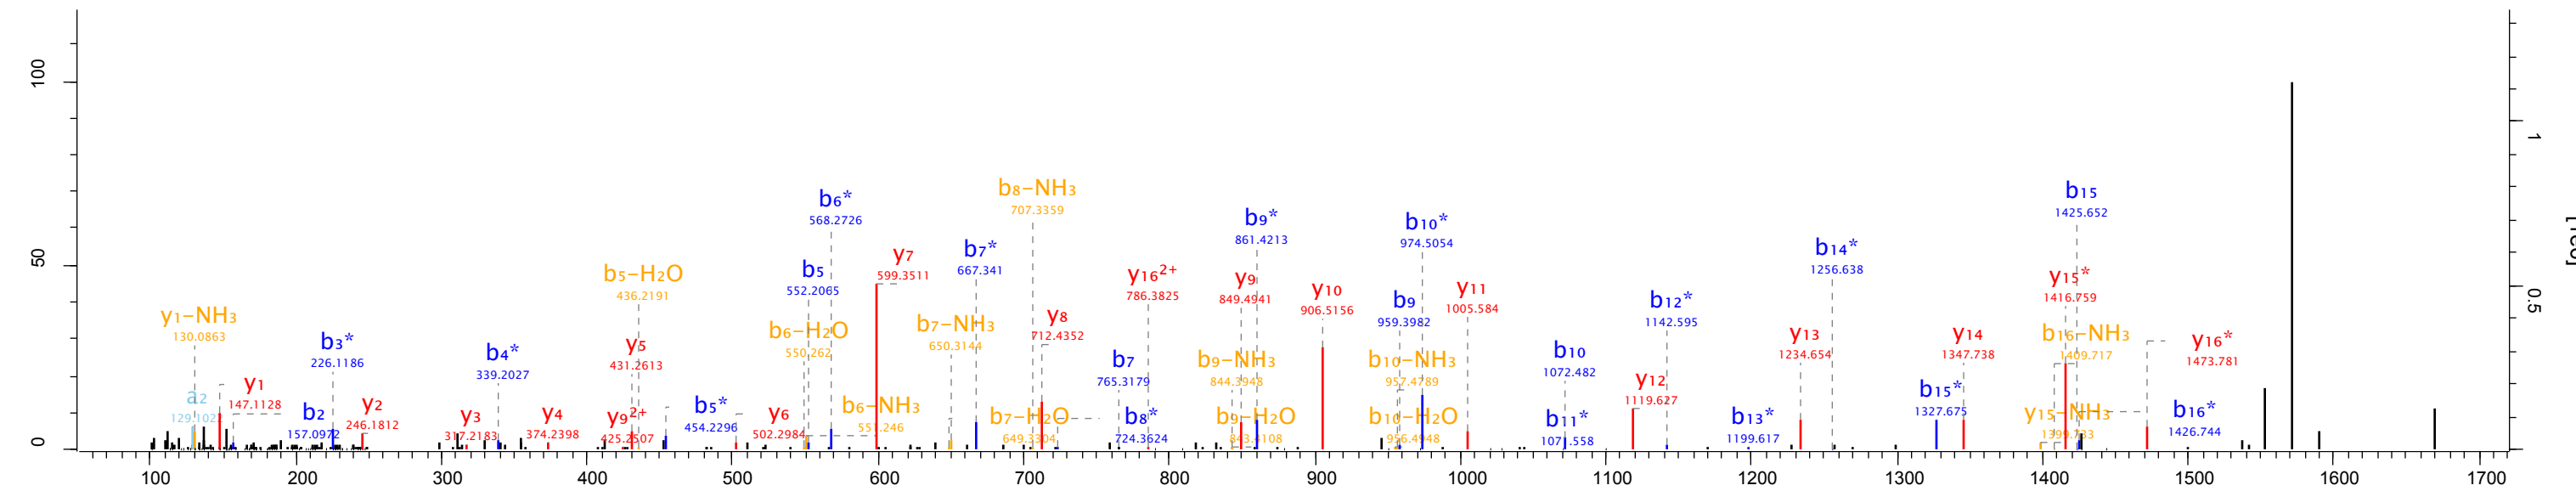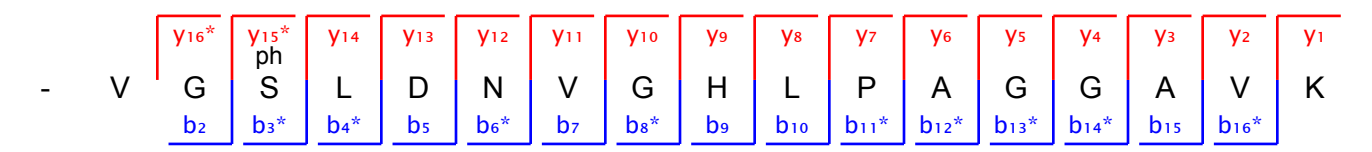



Raw file 20171215\_MaS\_33SR\_LMH\_phospho\_06 Scan 11690 Method FTMS; HCD Score 50.5 m/z 855.38 Gene names TXLNG

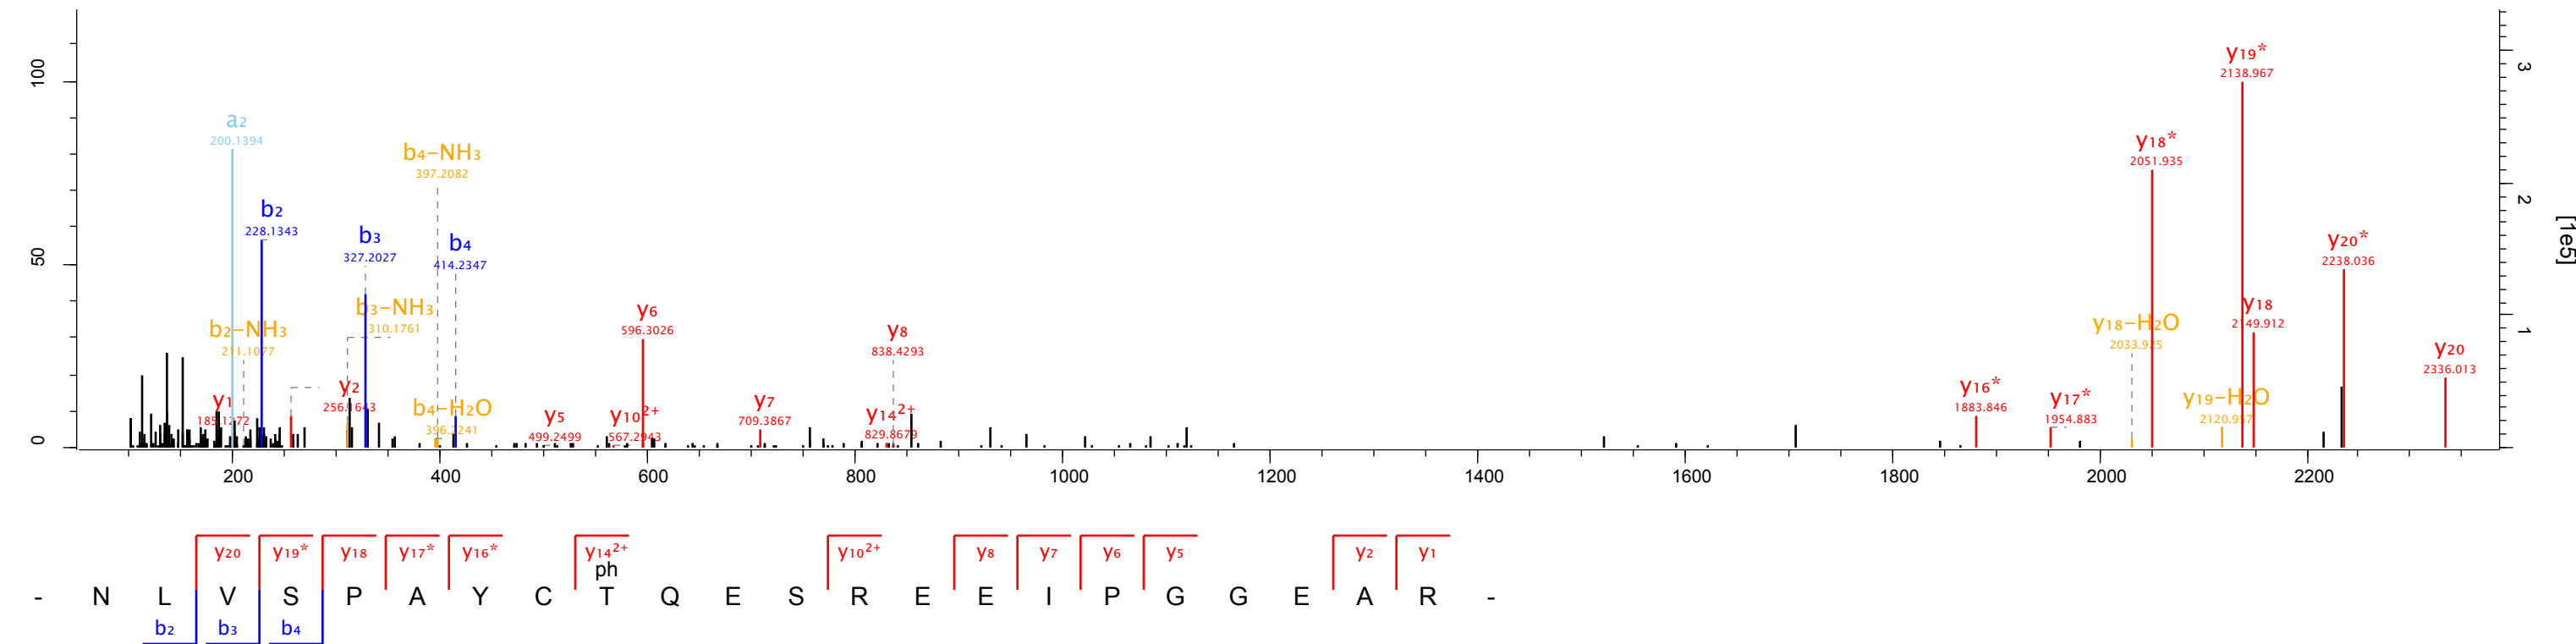

Raw file 20171215\_MaS\_33SR\_LMH\_phospho\_06 Scan 11810 Method FTMS; HCD Score 189.55 m/z 741.85 Gene names HJURP

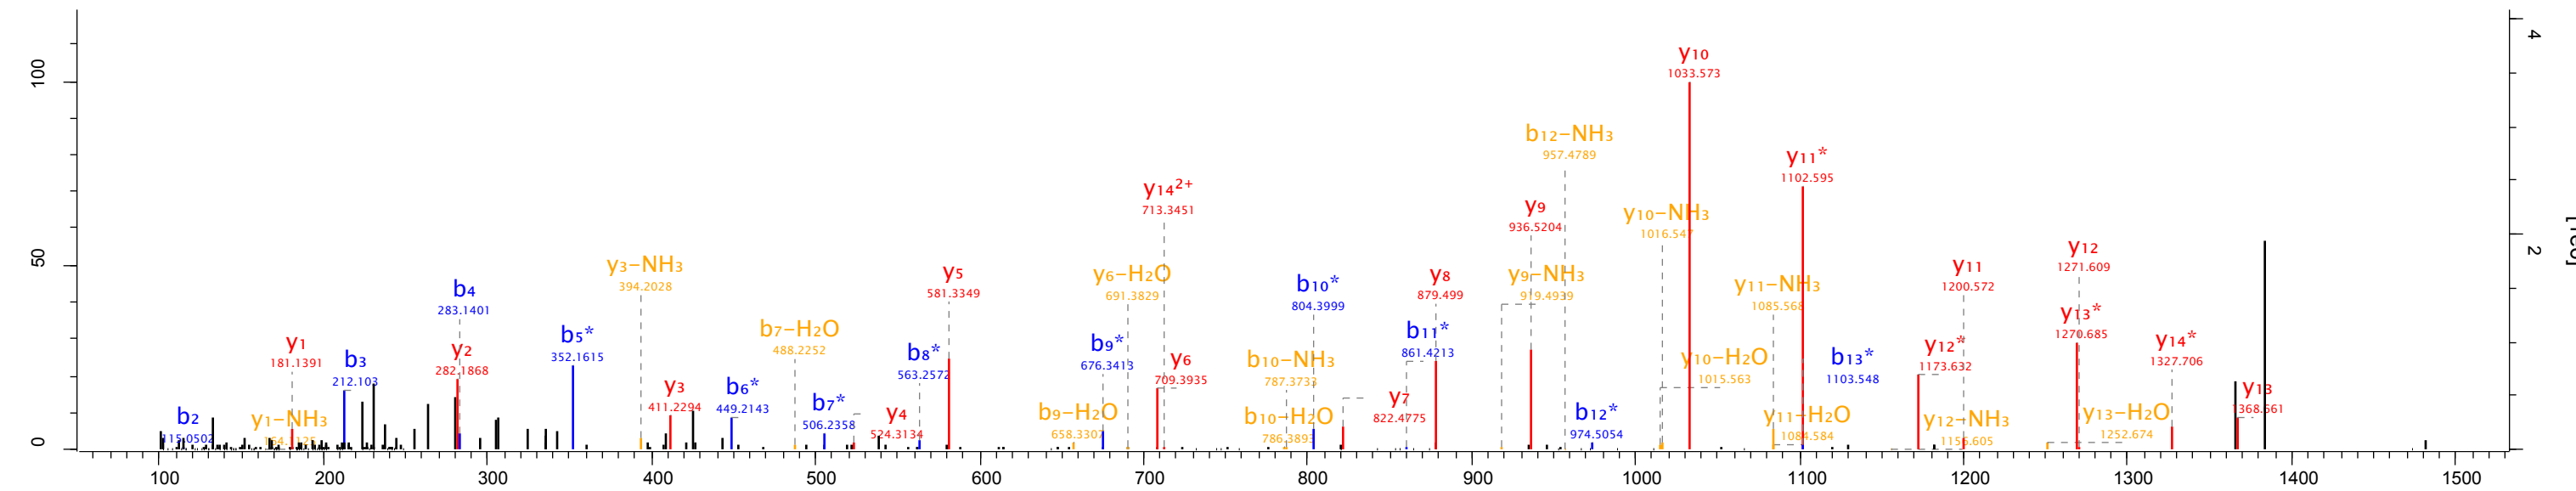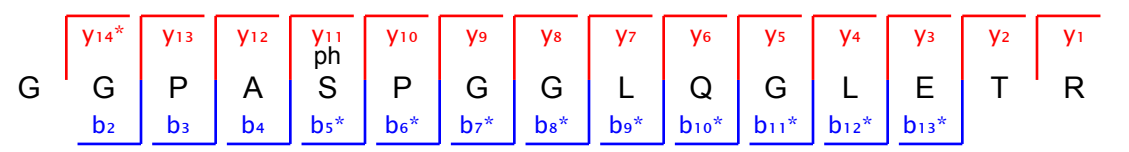

Raw file 20171215\_MaS\_33SR\_LMH\_phospho\_06 Scan 11950 Method FTMS; HCD Score 82.77 m/z 1201.83 Gene names HUWE1

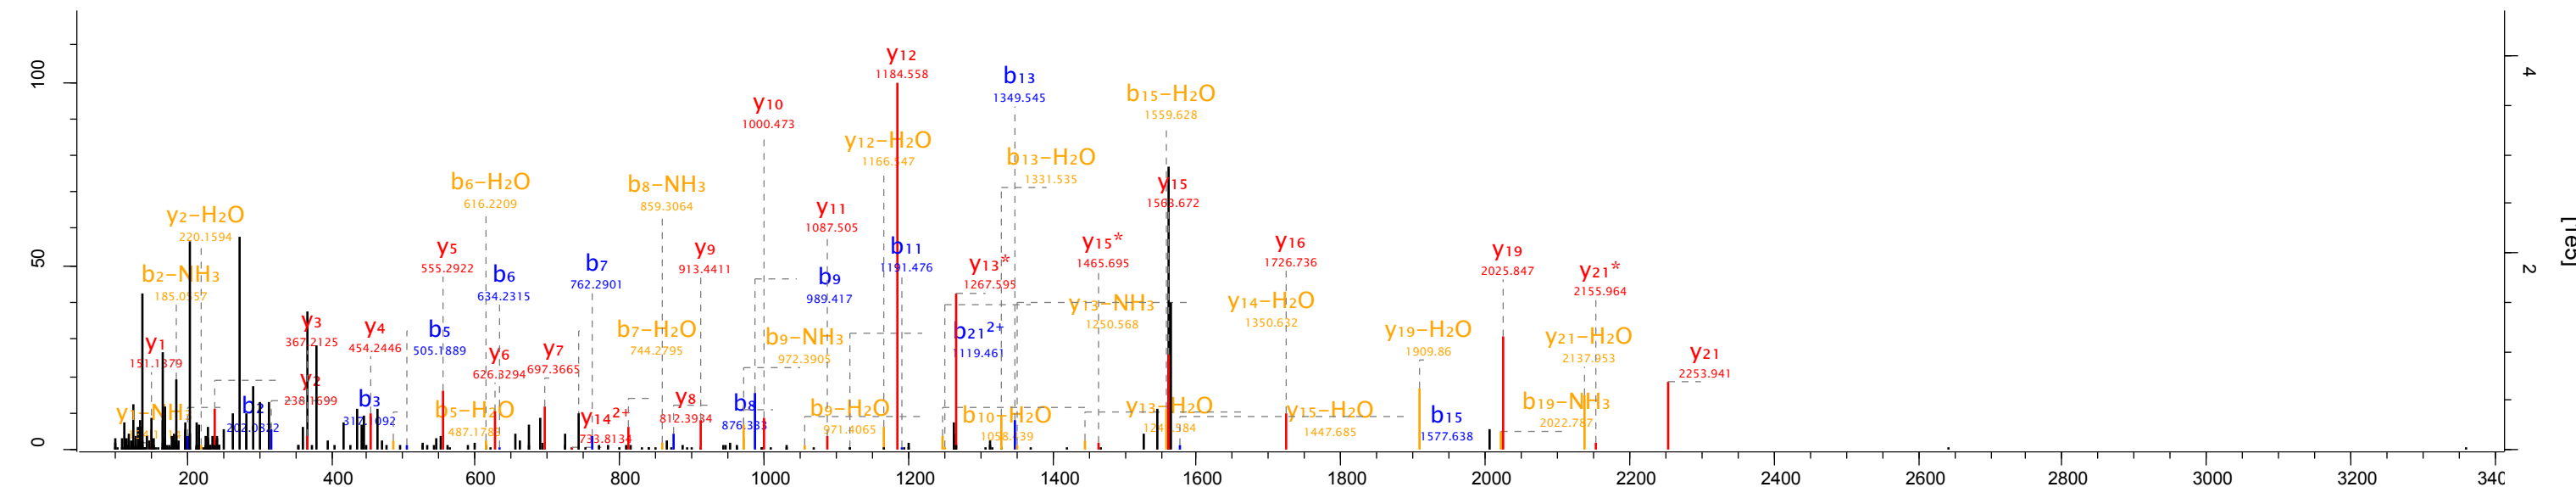

- S N D S T E Q N L S D G T P M P D S Y P T ph T P S S T D A A T S E S K -

b<sub>2</sub> b<sub>3</sub> b<sub>5</sub> b<sub>6</sub> b<sub>7</sub> b<sub>8</sub> b<sub>9</sub> b<sub>11</sub> b<sub>13</sub> b<sub>15</sub> b<sub>21</sub><sup>2+</sup>

y<sub>21</sub> y<sub>19</sub> y<sub>16</sub> y<sub>15</sub> y<sub>14</sub><sup>2+</sup> y<sub>13</sub><sup>\*</sup> y<sub>12</sub> y<sub>11</sub> y<sub>10</sub> y<sub>9</sub> y<sub>8</sub> y<sub>7</sub> y<sub>6</sub> y<sub>5</sub> y<sub>4</sub> y<sub>3</sub> y<sub>2</sub> y<sub>1</sub>

Raw file: 20171215\_MaS\_33SR\_LMH\_phospho\_06  
 Scan: 11970 Method: FTMS; HCD Score: 156.44 m/z: 906.42 Gene names: SLC6A15

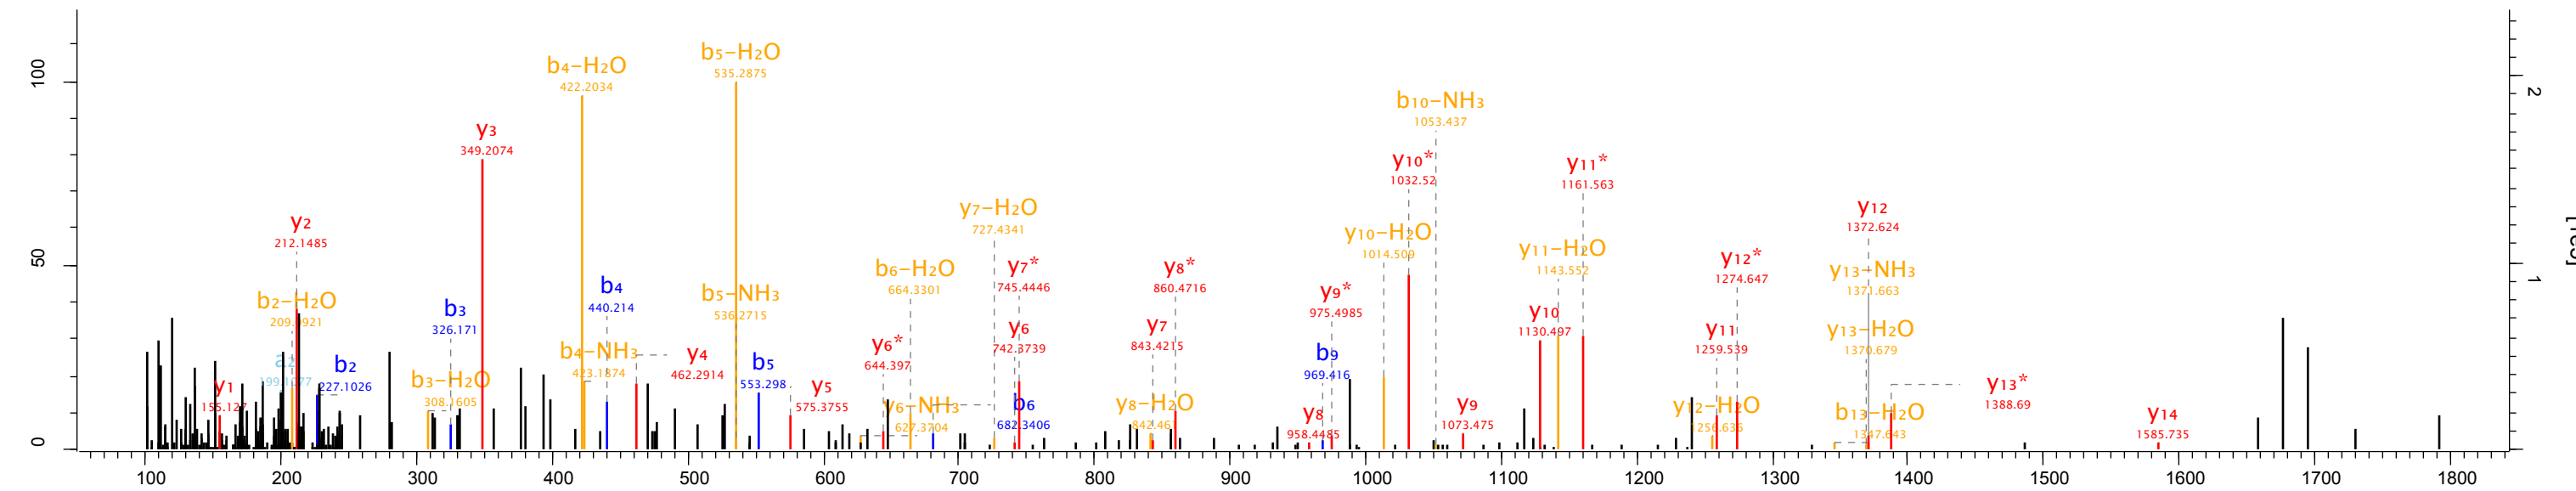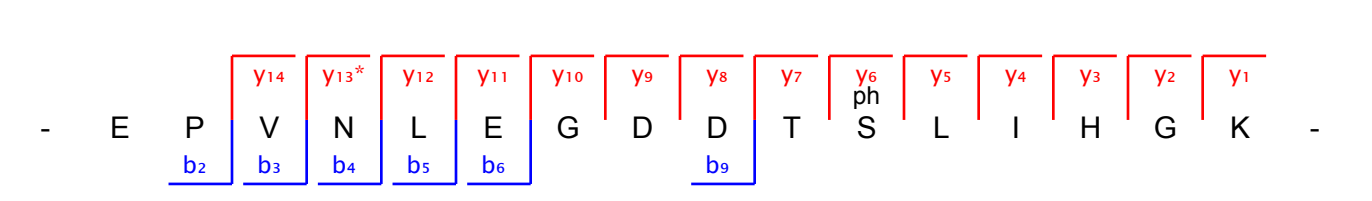

Raw file  
20171215\_MaS\_33SR\_LMH\_phospho\_06

Scan 12020 Method FTMS; HCD Score 105.79 m/z 779.7 Gene names SDE2

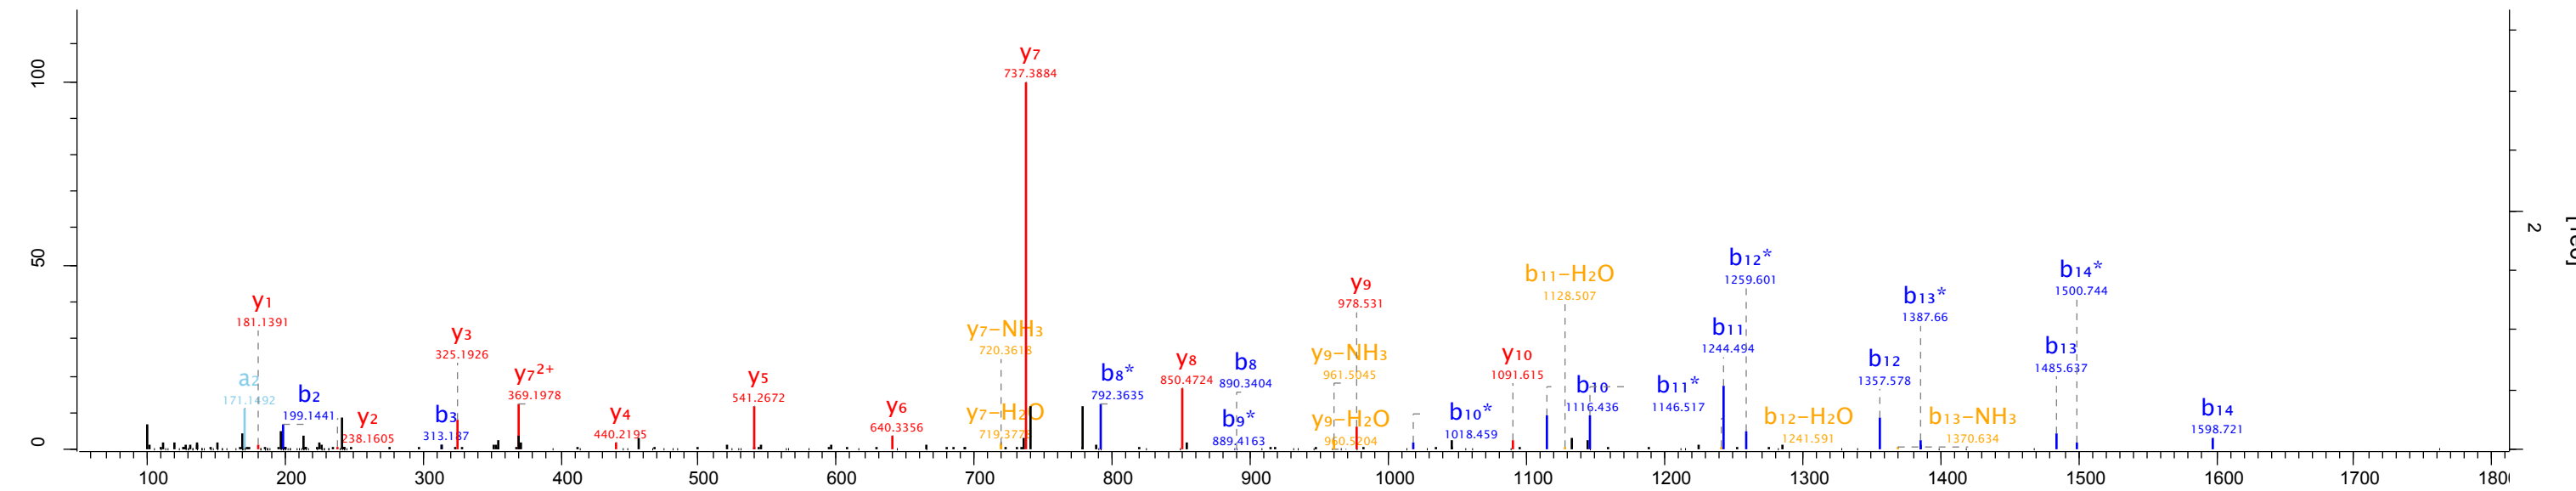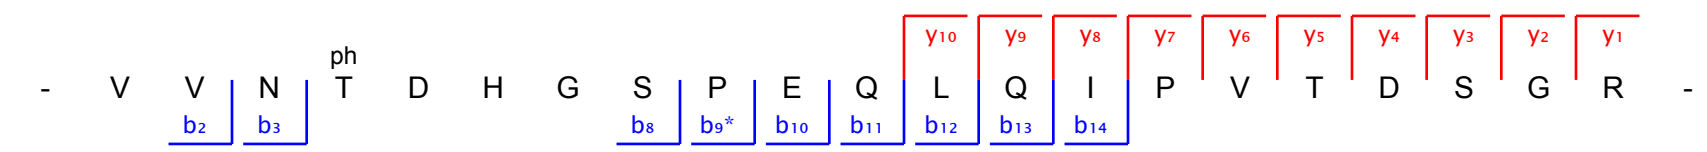

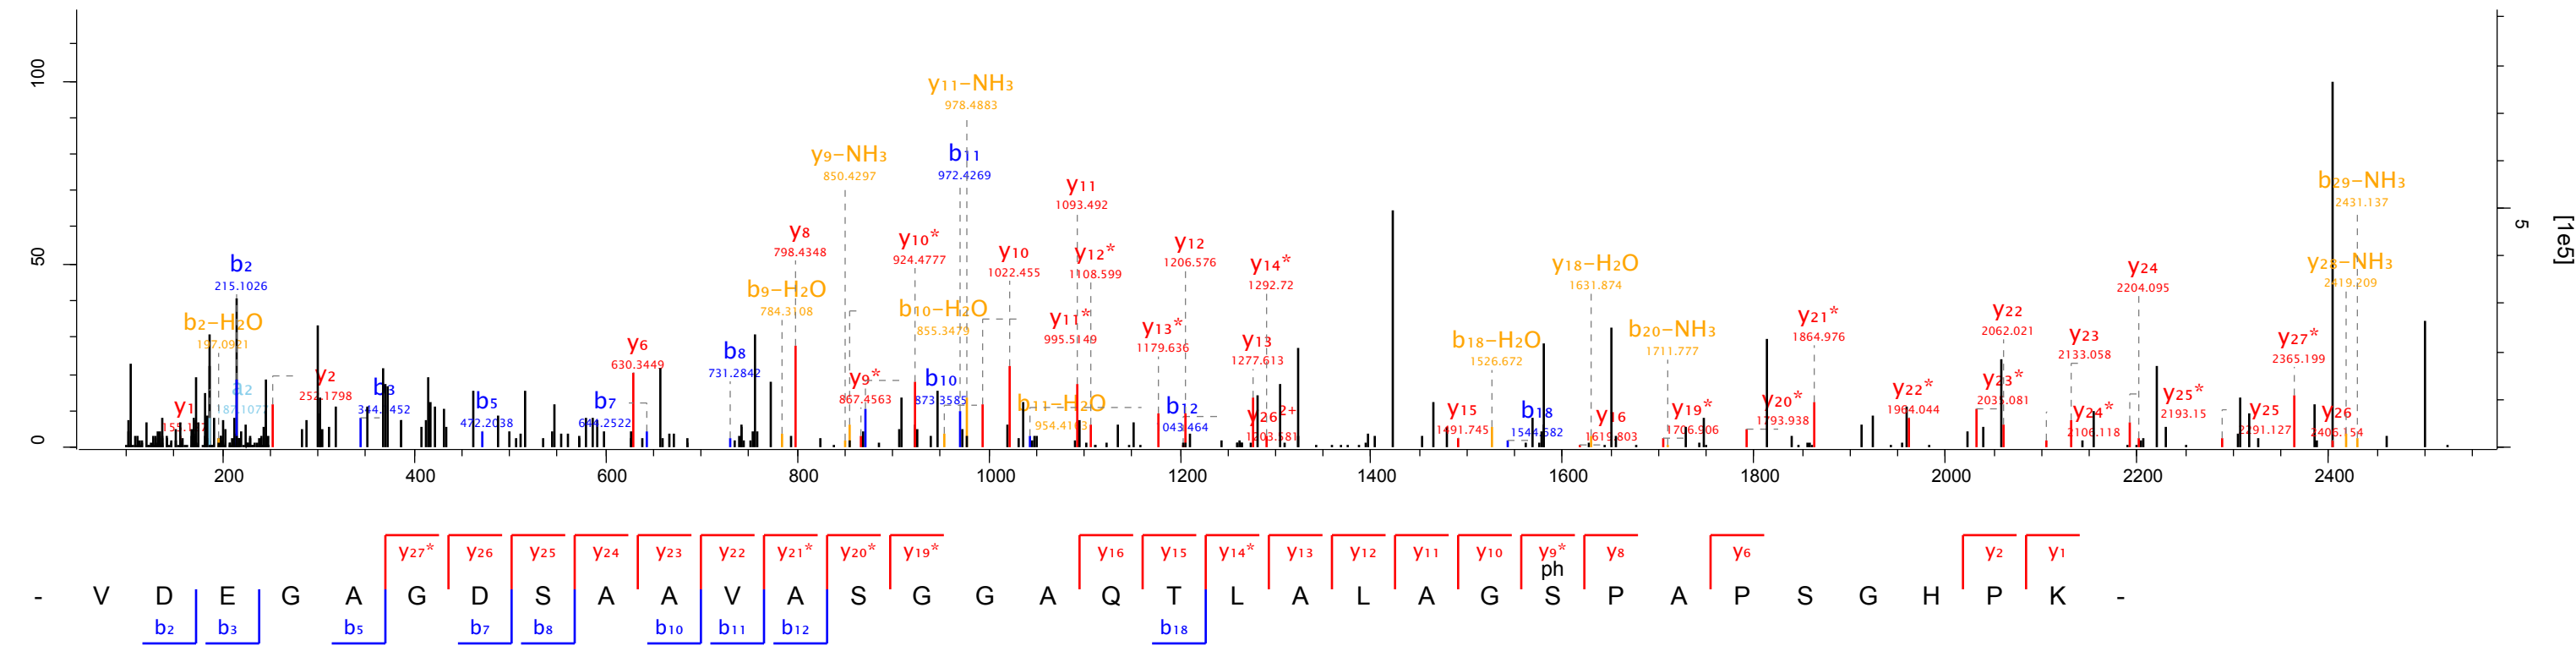

Raw file 20171215\_MaS\_33SR\_LMH\_phospho\_06 Scan 13560 Method FTMS; HCD Score 74.78 m/z 823.89 Gene names SIX4

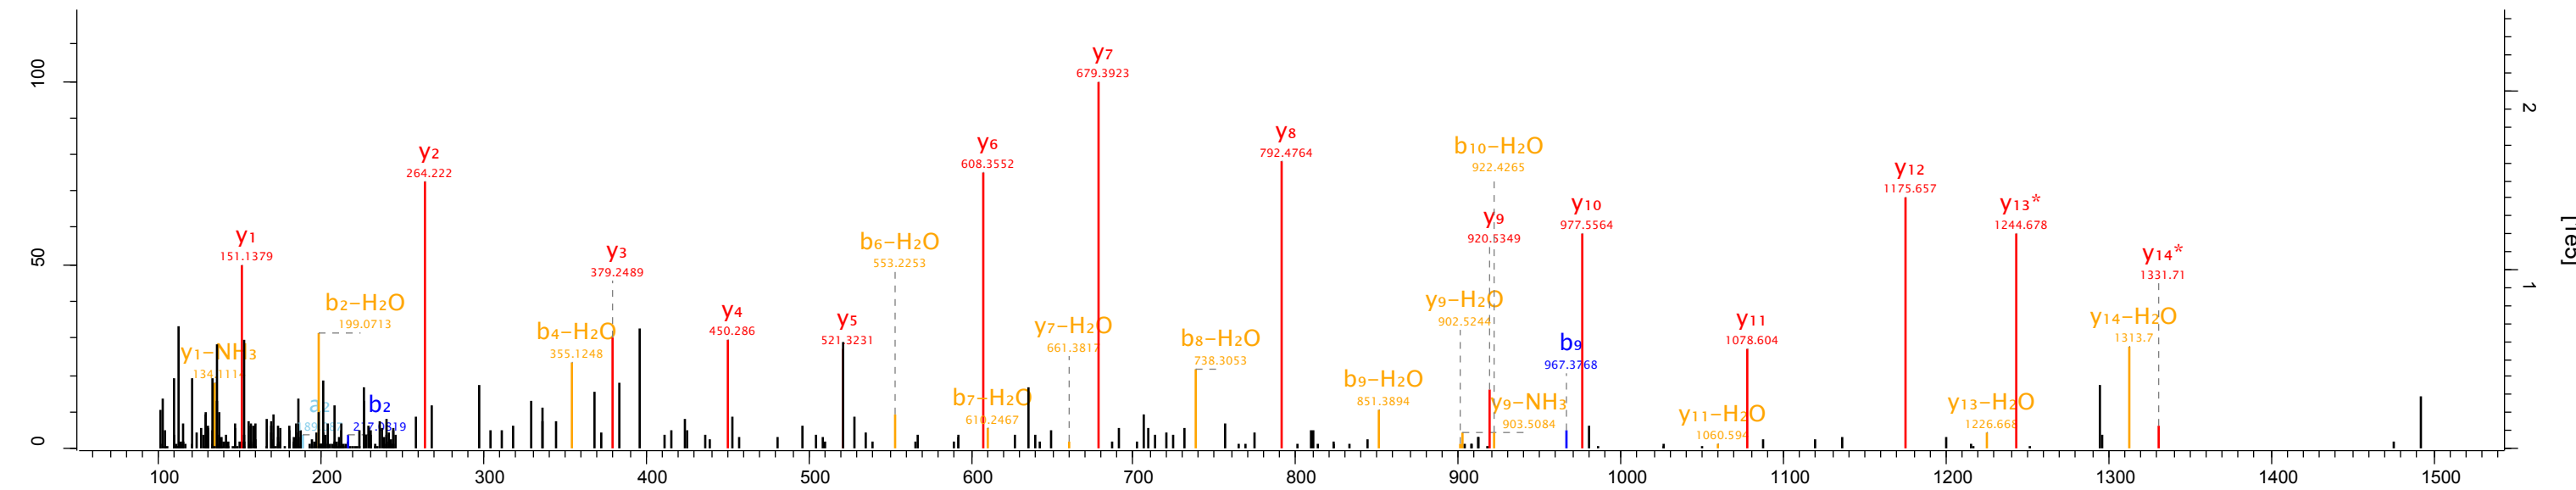

ac - S S S S P T G Q I A S A A D I K -

Fragmentation mapping: b2 (under the second S), b9 (under the I), and y14\* (under the first S), y13\* (under the second S), y12 (under P), y11 (under T), y10 (under G), y9 (under Q), y8 (under I), y7 (under A), y6 (under S), y5 (under A), y4 (under A), y3 (under D), y2 (under I), y1 (under K).

Raw file 20171215\_MaS\_33SR\_LMH\_phospho\_06 Scan 13630 Method FTMS; HCD Score 183.07 m/z 1023.47 Gene names NF1

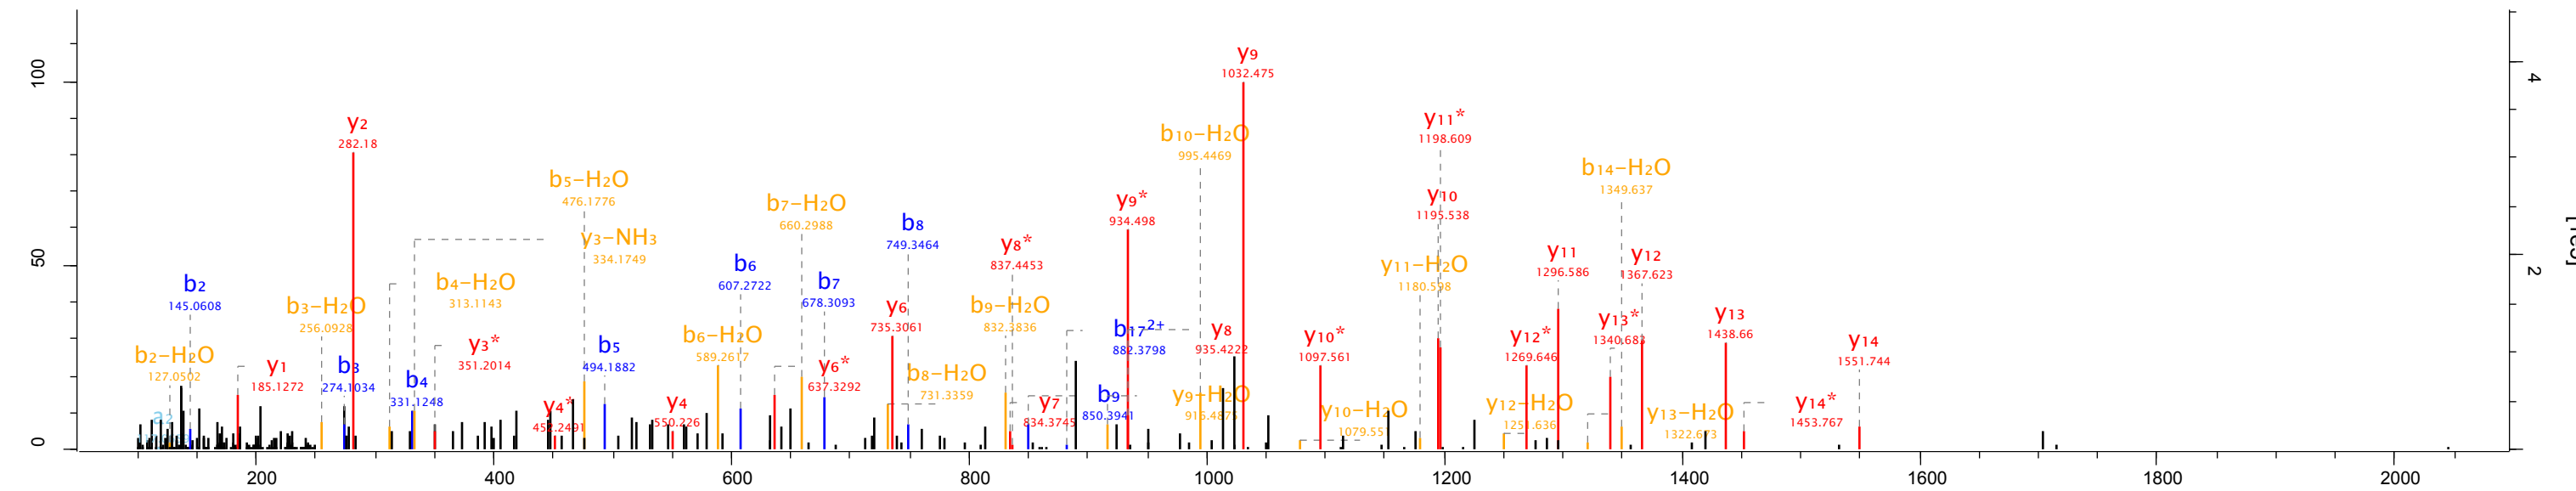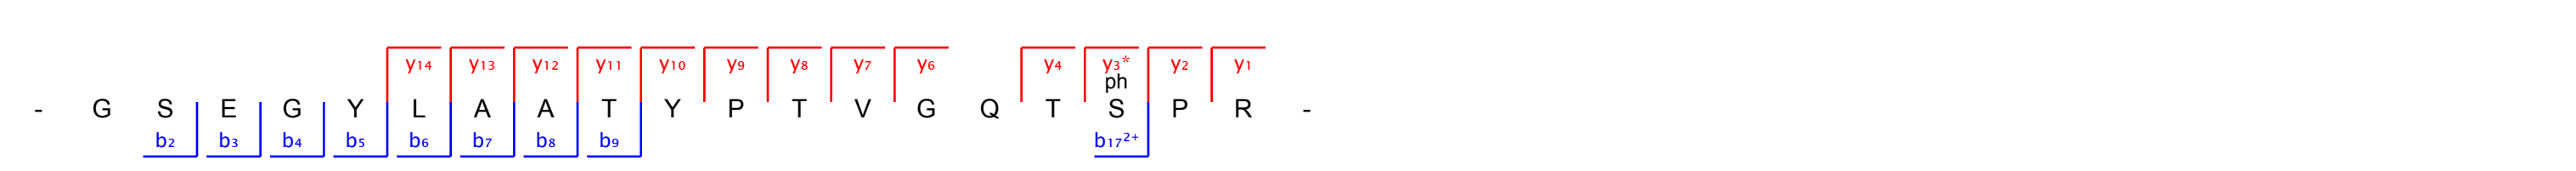



Raw file 20171215\_MaS\_33SR\_LMH\_phospho\_06 Scan 13850 Method FTMS; HCD Score 298.97 m/z 1323.58 Gene names TP53BP1

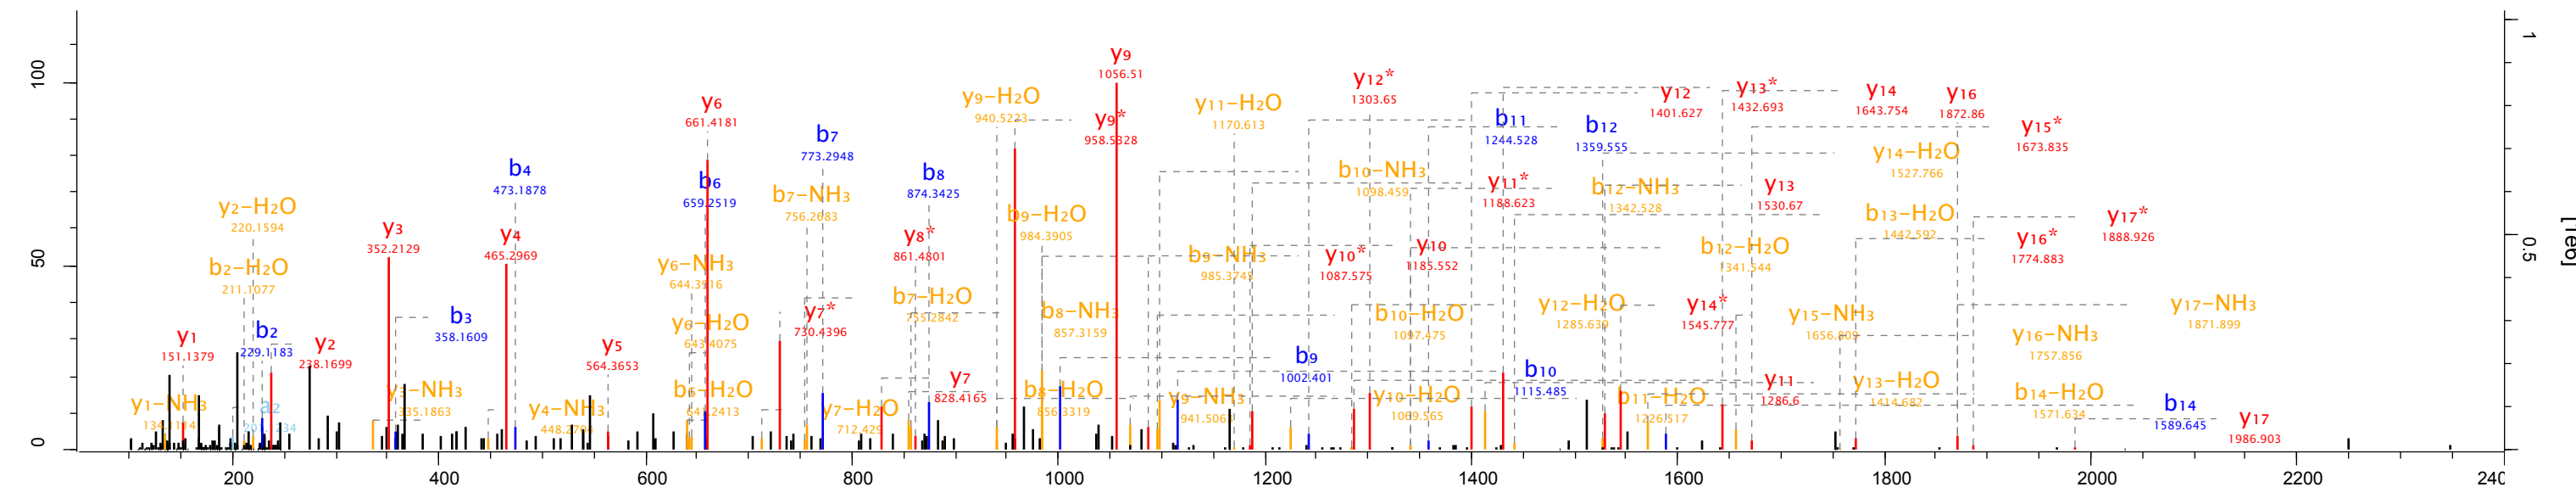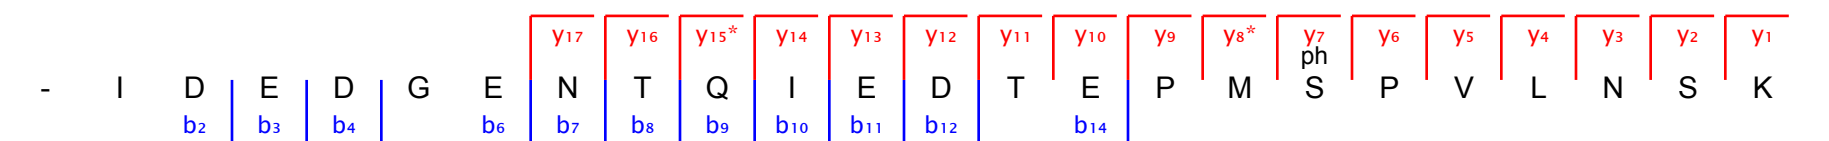

Raw file: 20171215\_MaS\_33SR\_LMH\_phospho\_06  
 Scan: 14080 Method: FTMS; HCD Score: 212.47 m/z: 882.37 Gene names: FAM21A;FAM21C

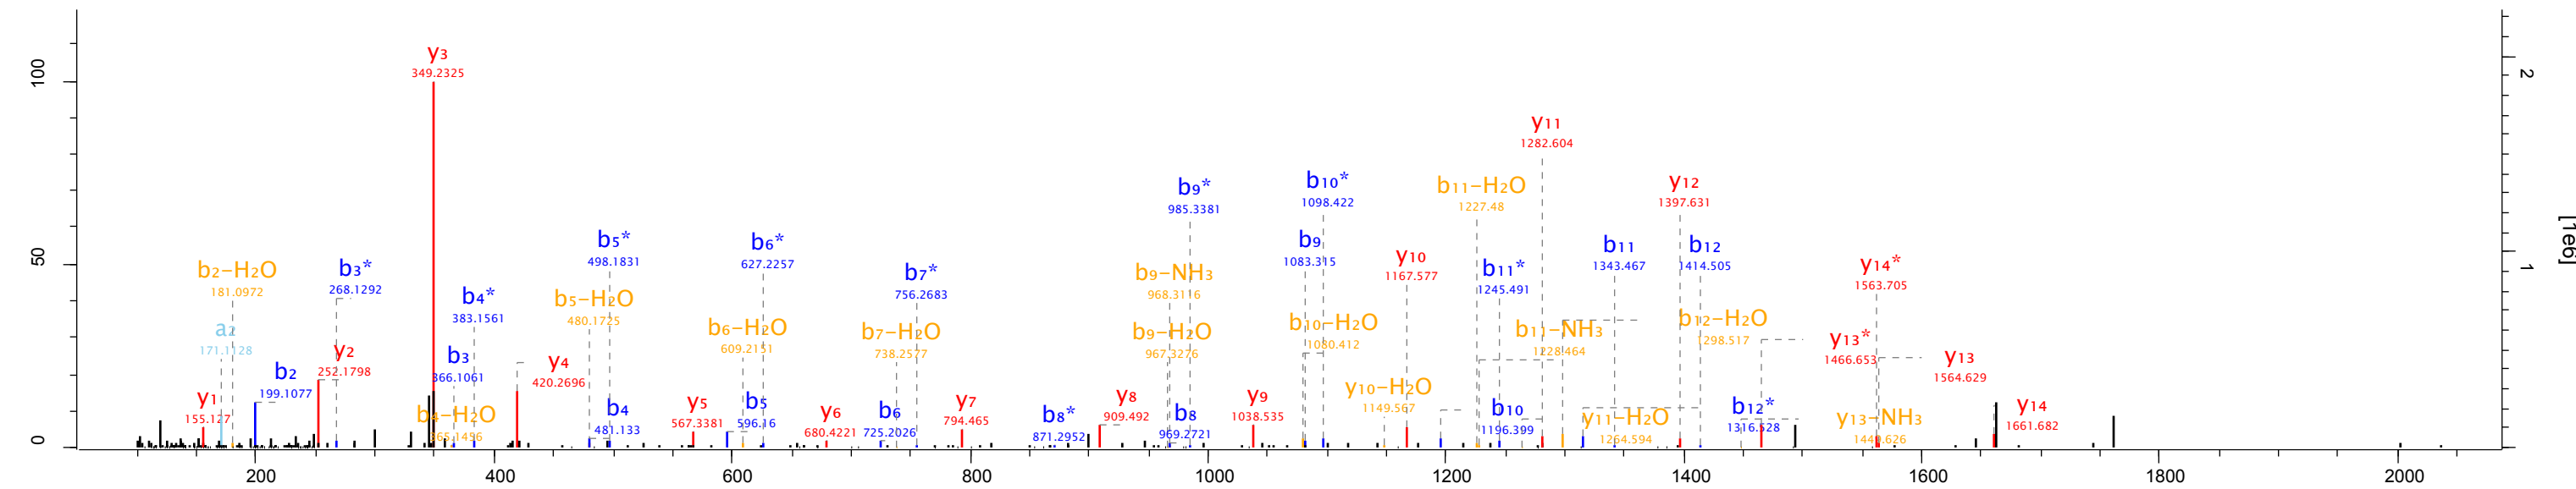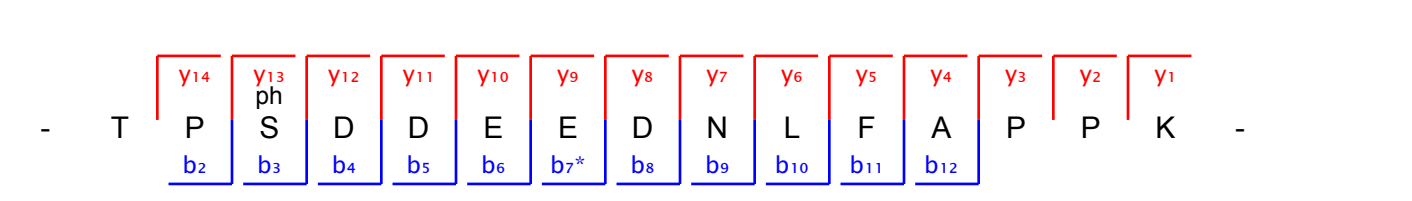

Raw file: 20171215\_MaS\_33SR\_LMH\_phospho\_06  
 Scan: 14180 Method: FTMS; HCD Score: 148.89 m/z: 1045.49 Gene names: AKAP2

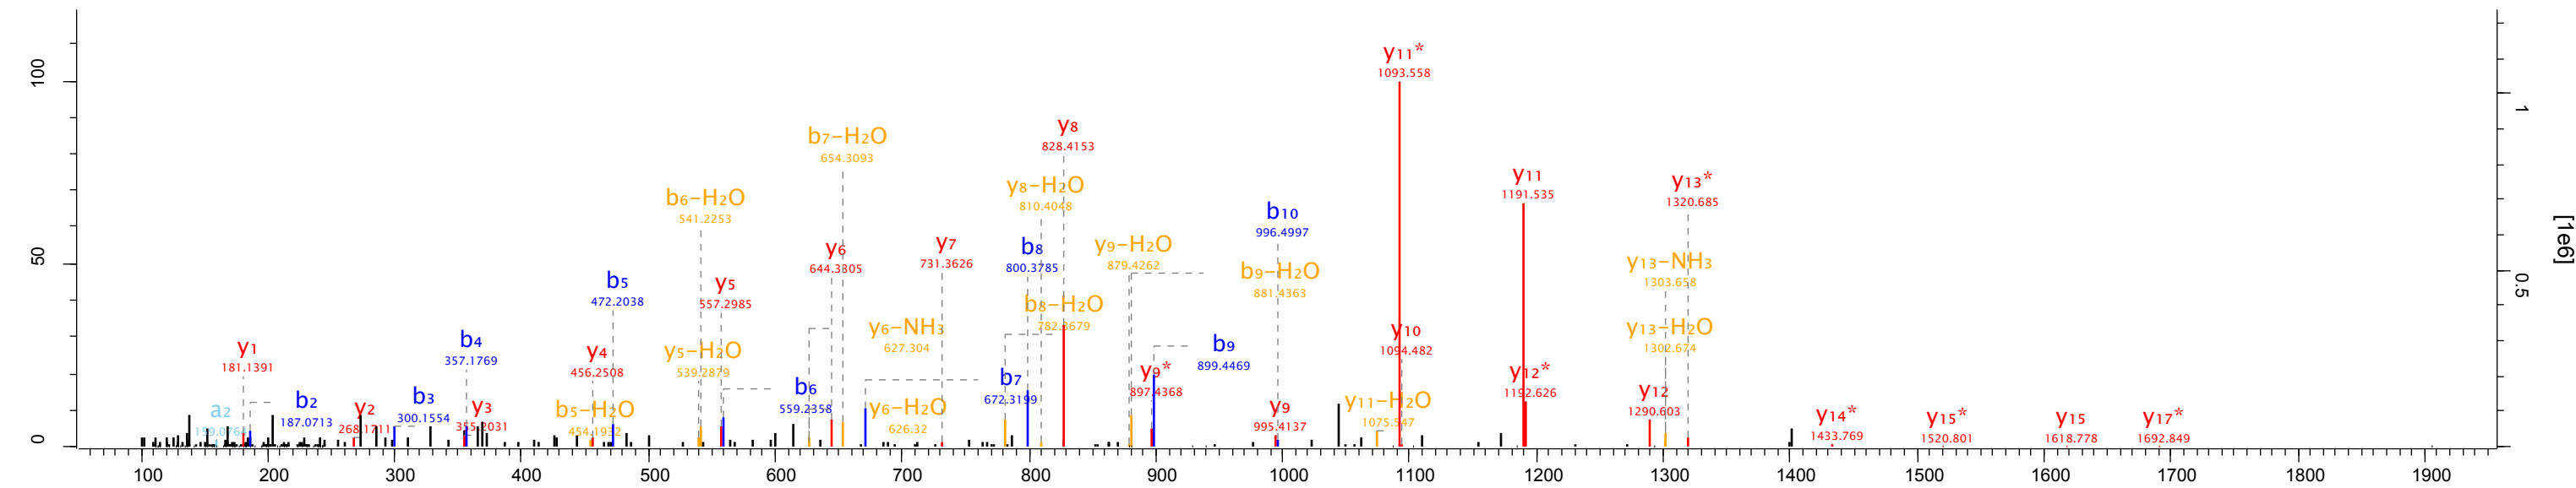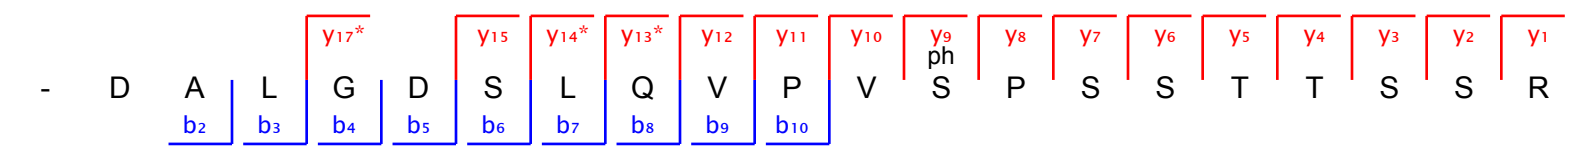

Raw file 20171215\_MaS\_33SR\_LMH\_phospho\_06 Scan 14420 Method FTMS; HCD Score 108.19 m/z 1045 Gene names USP6NL

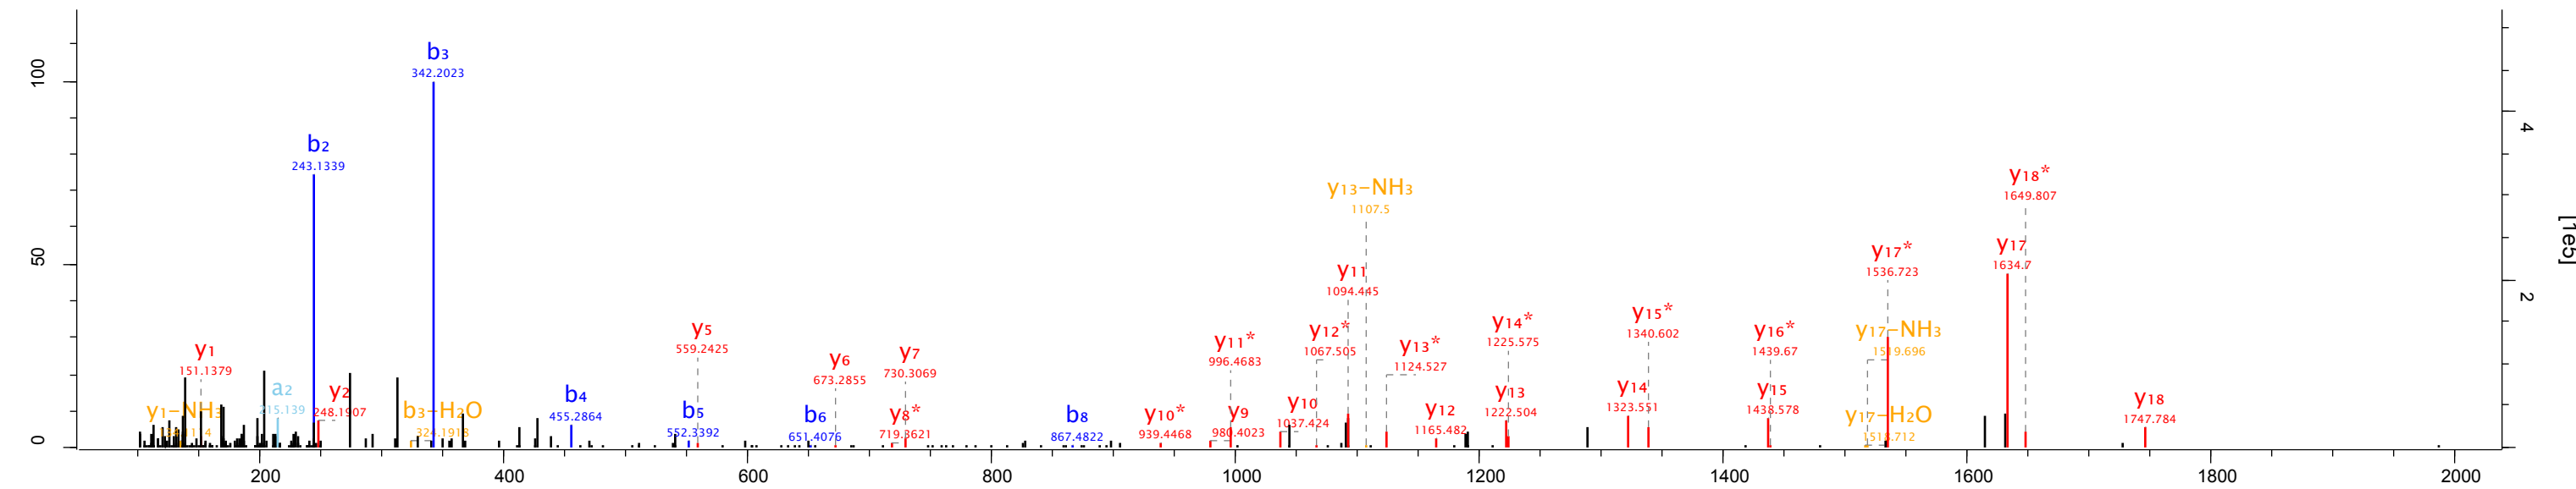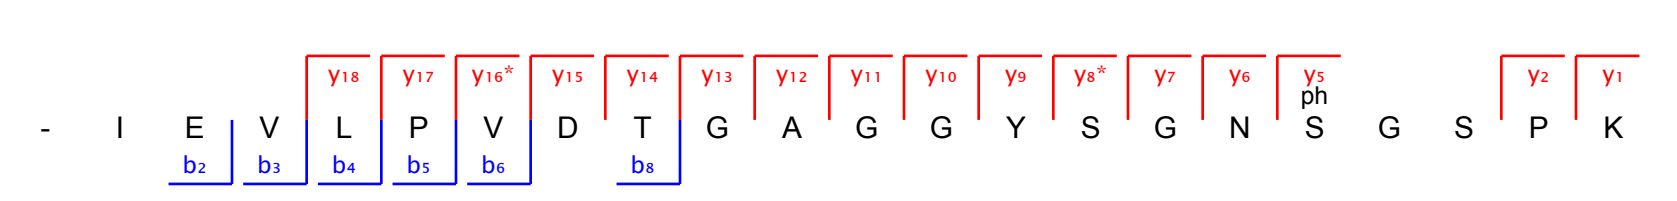

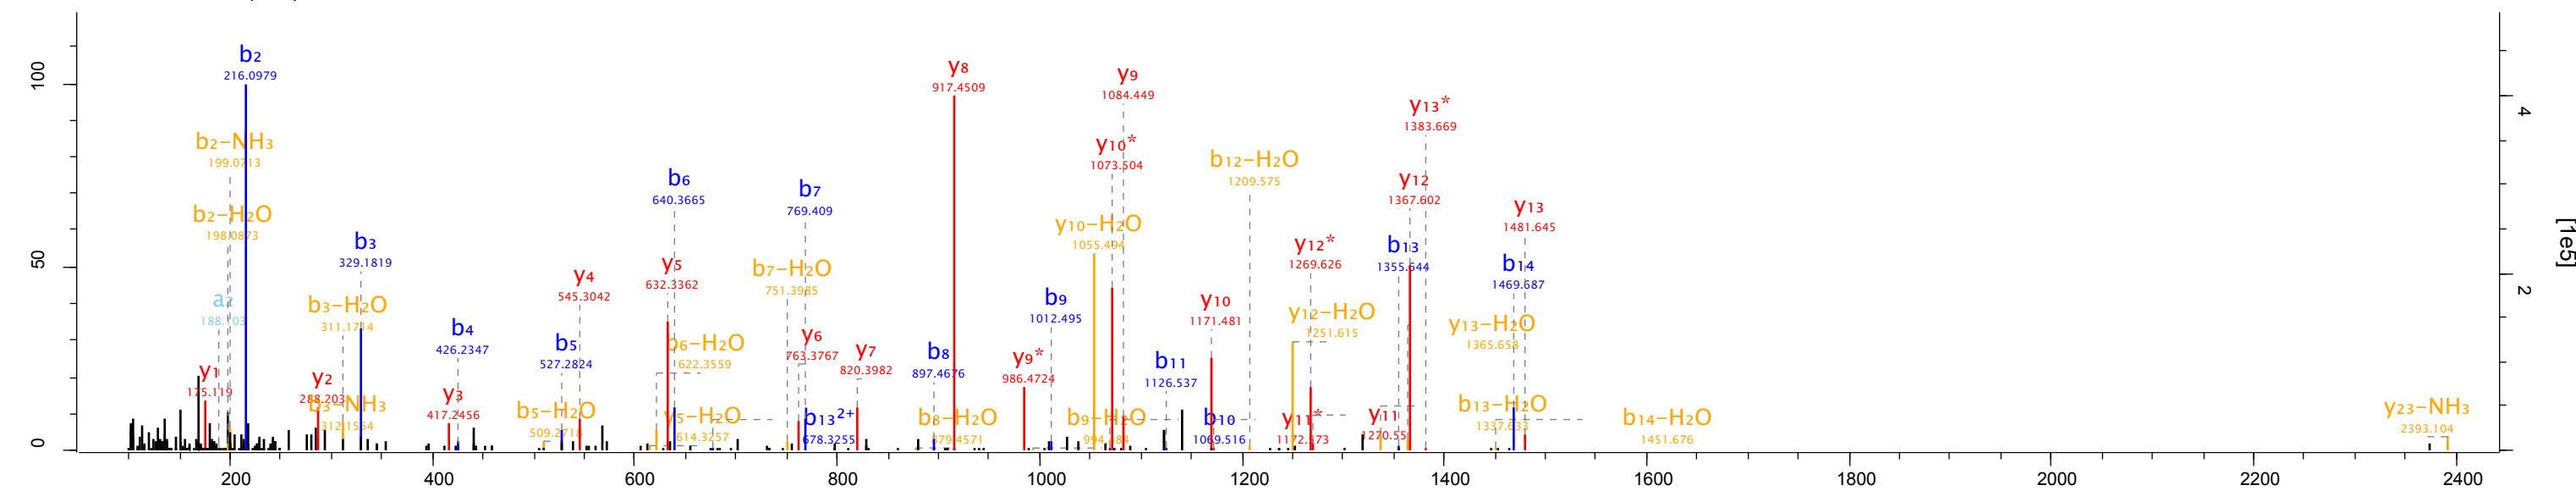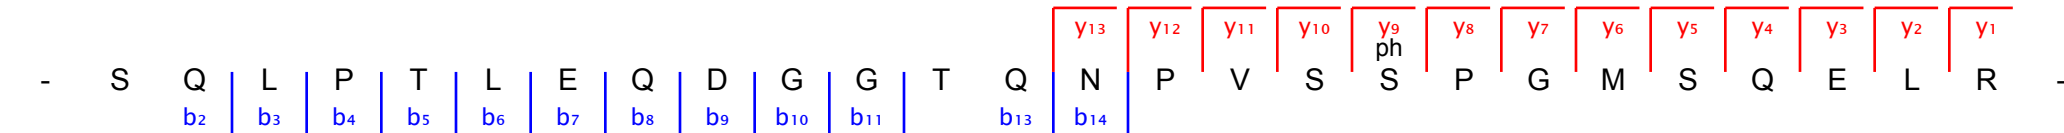

Raw file 20171215\_MaS\_33SR\_LMH\_phospho\_06 Scan 15280 Method FTMS; HCD Score 78.19 m/z 1105.18 Gene names SMARCA4

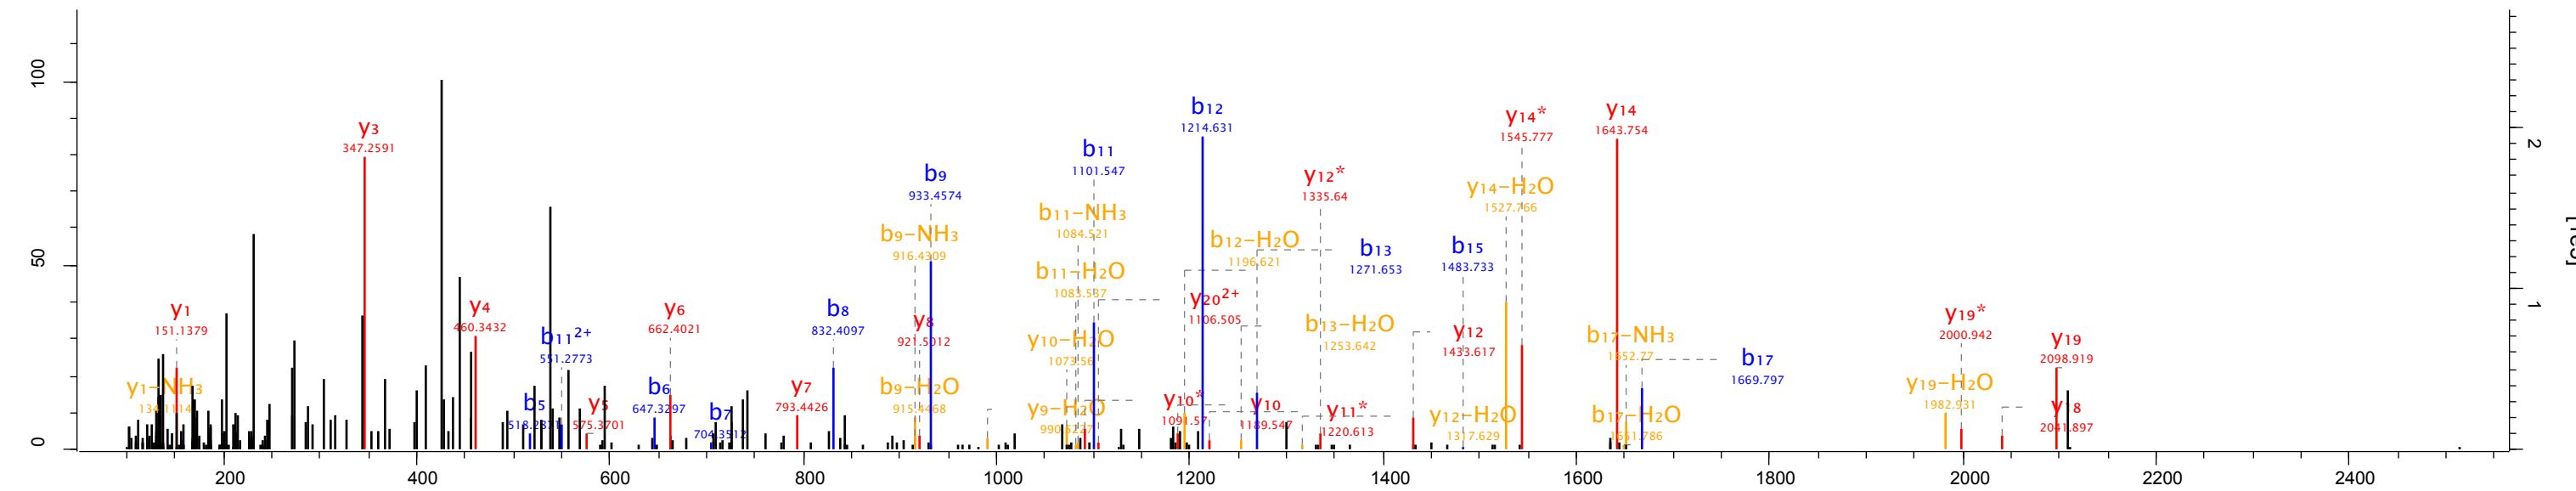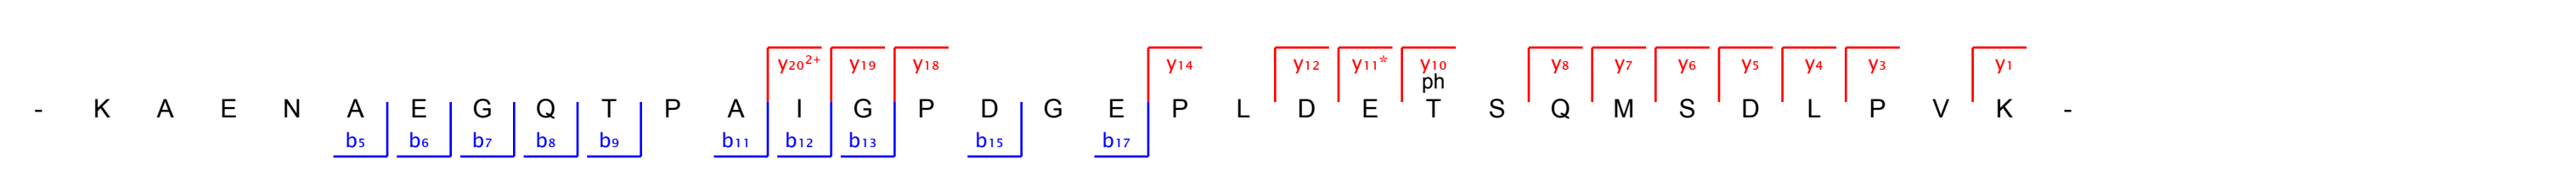

Raw file 20171215\_MaS\_33SR\_LMH\_phospho\_06 Scan 16410 Method FTMS; HCD Score 155.88 m/z 772.85 Gene names DNAJA1

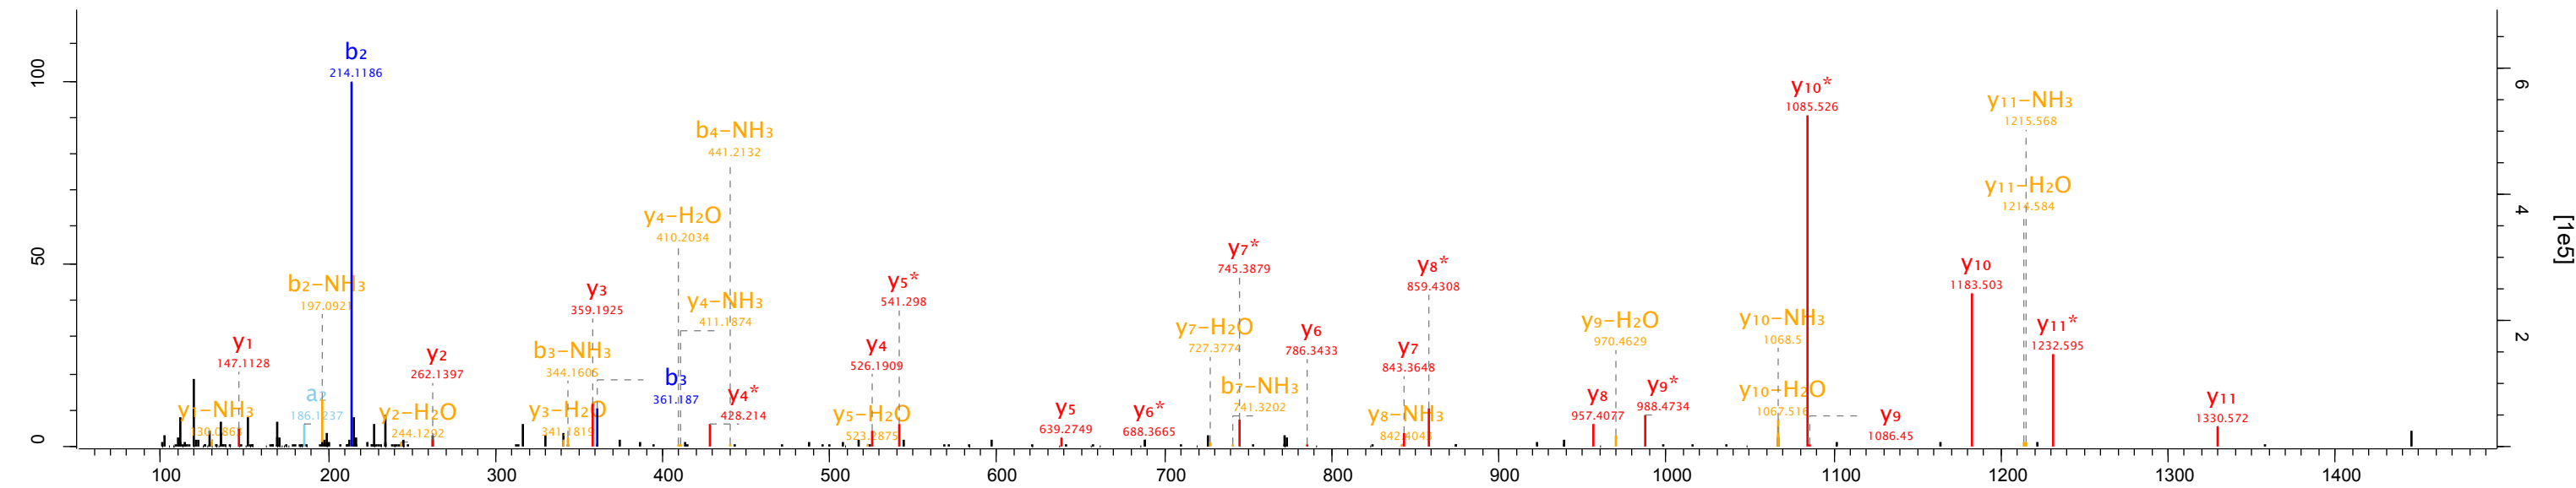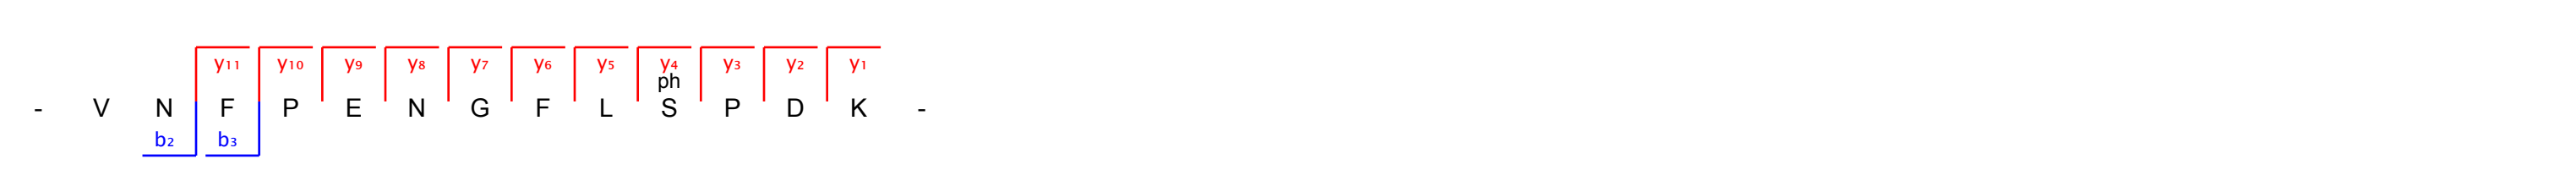

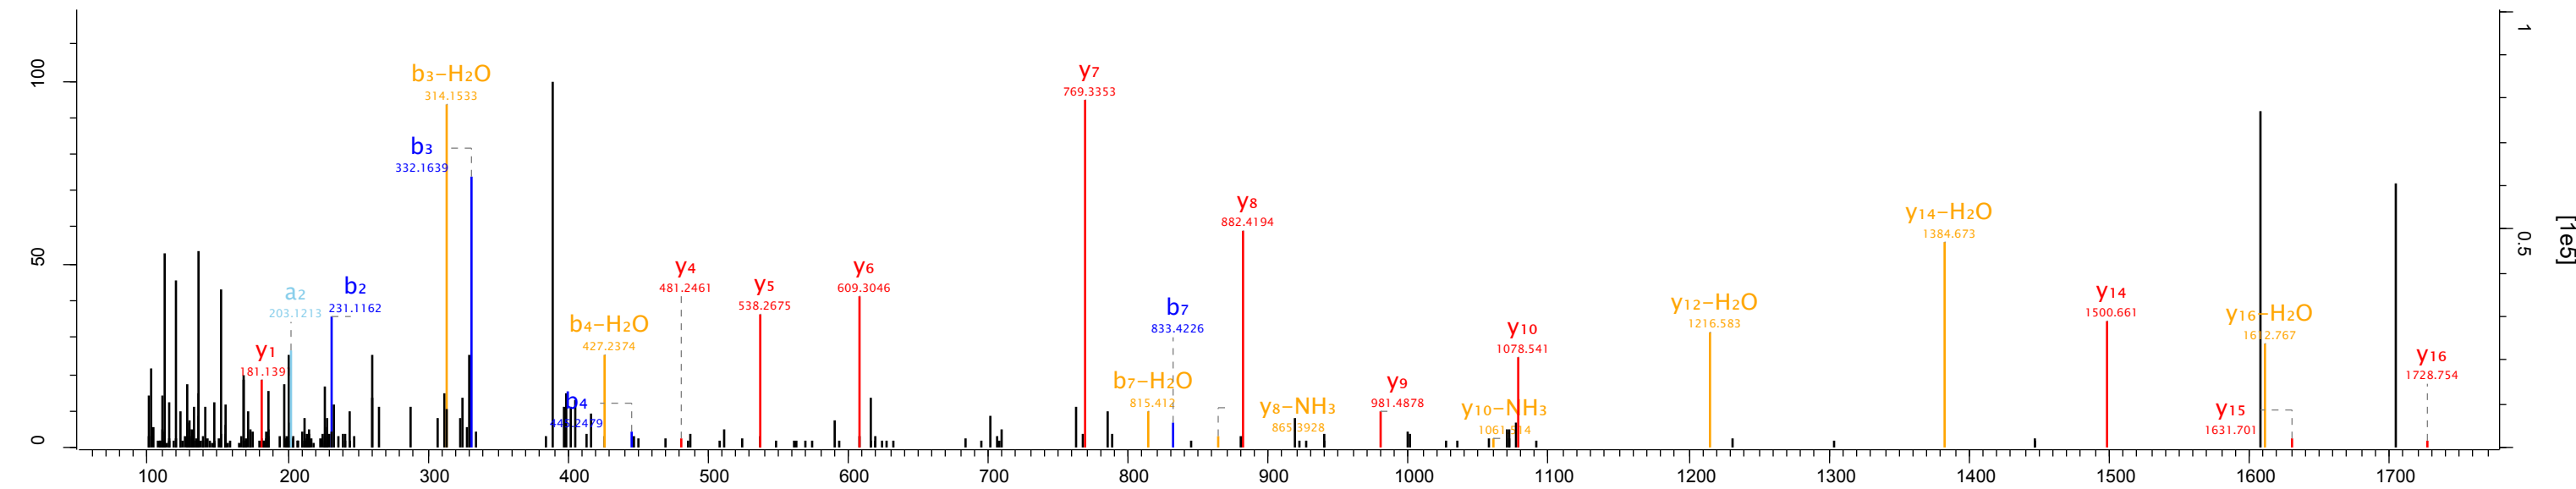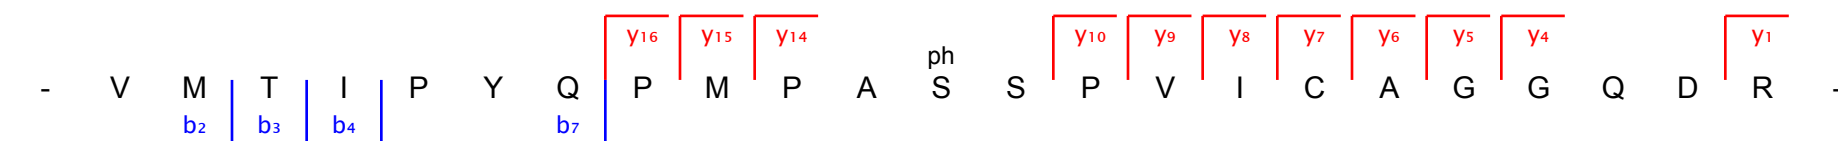



Raw file 20171215\_MaS\_33SR\_LMH\_phospho\_06 Scan 1930 Method FTMS; HCD Score 128.85 m/z 401.54 Gene names NOLC1

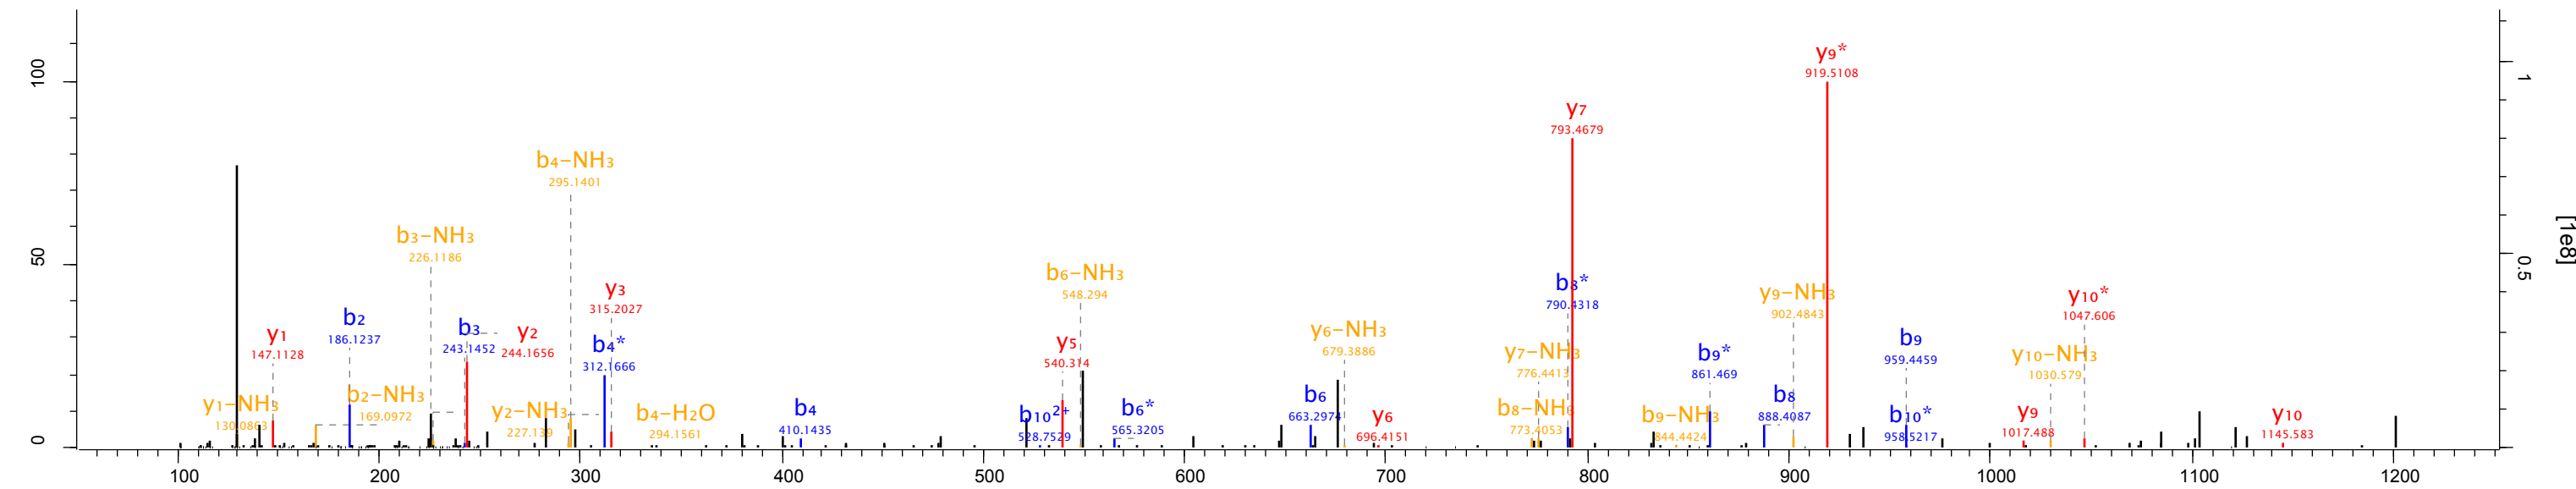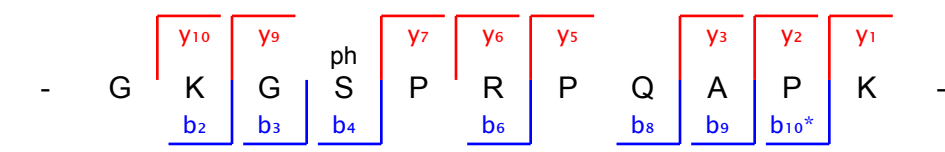

Raw file 20171215\_MaS\_33SR\_LMH\_phospho\_06 Scan 2170 Method FTMS; HCD Score 134.06 m/z 679.81 Gene names PBRM1

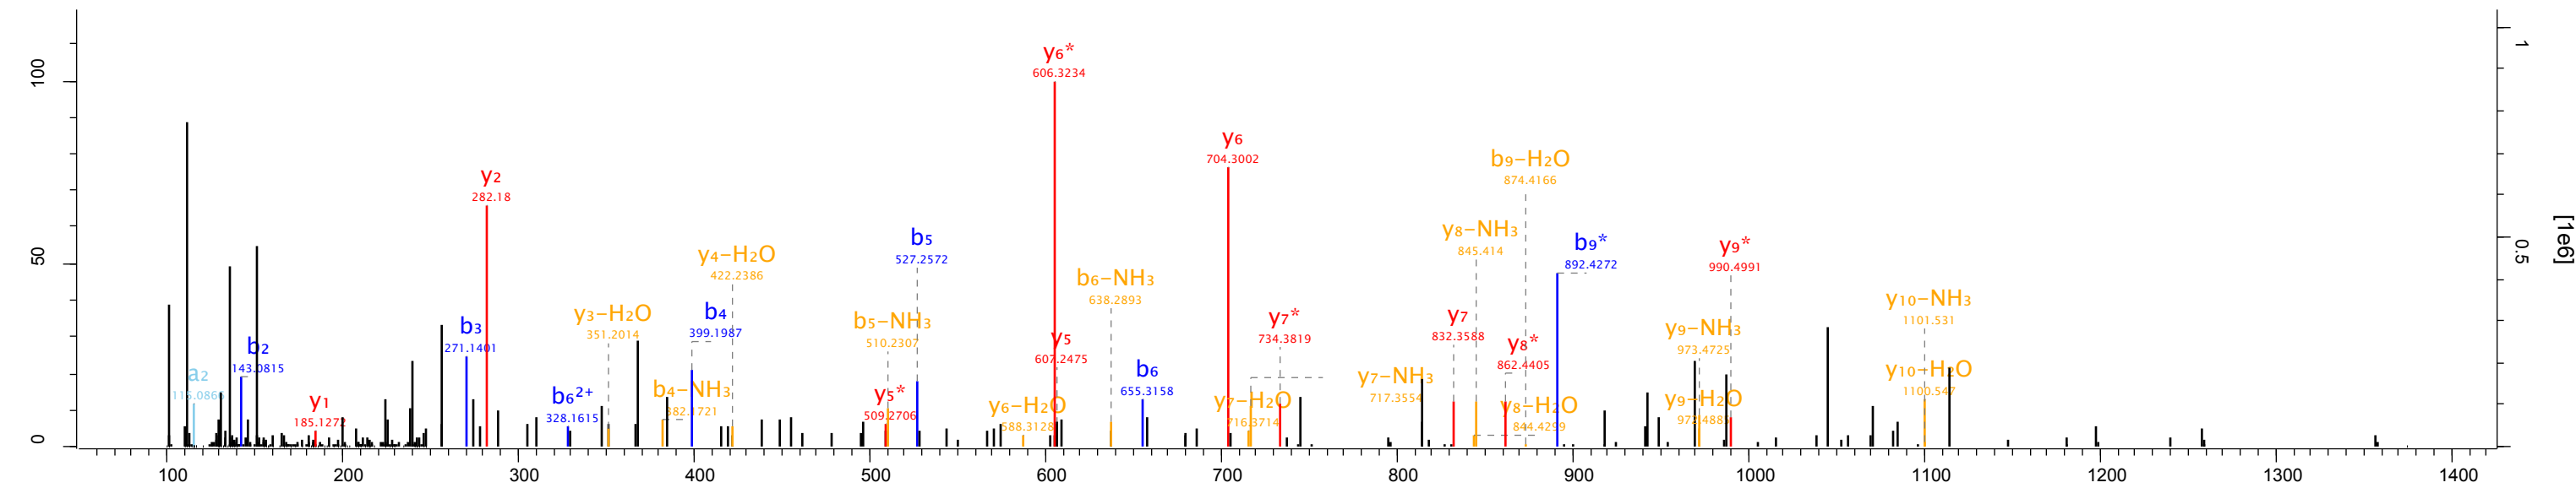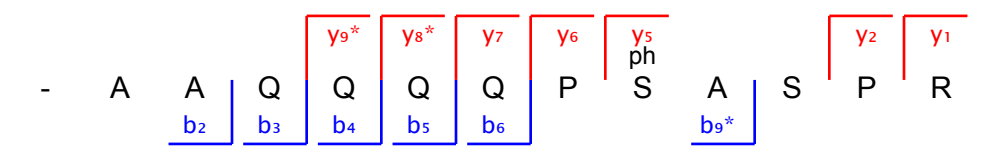

Raw file 20171215\_MaS\_33SR\_LMH\_phospho\_06 Scan 2450 Method FTMS; HCD Score 45.54 m/z 465.54 Gene names SRRM2

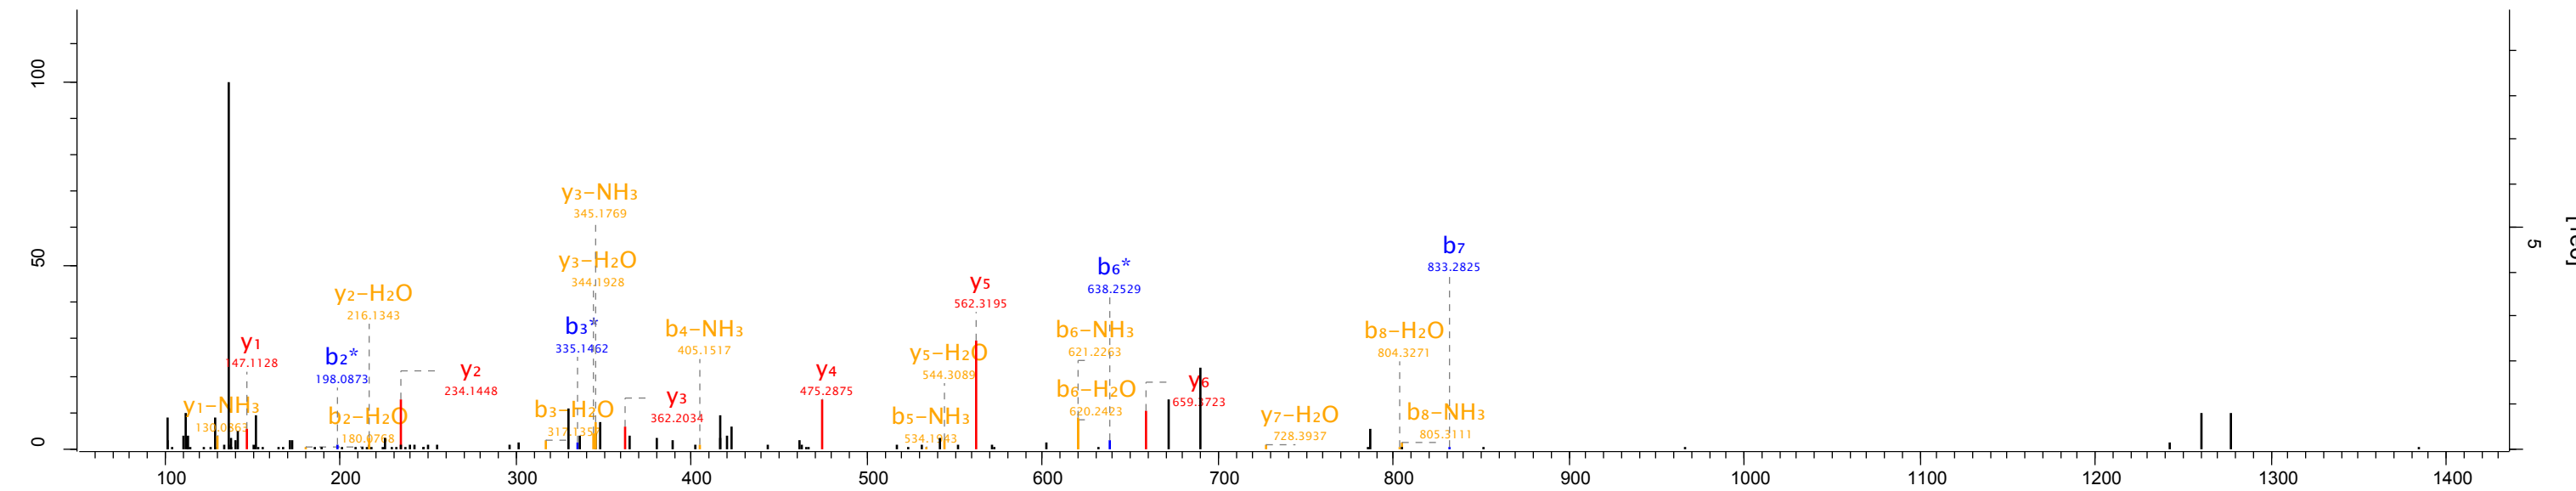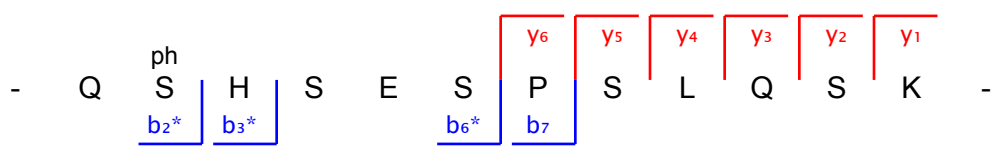

Raw file 20171215\_MaS\_33SR\_LMH\_phospho\_06 Scan 3080 Method FTMS; HCD Score 141.79 m/z 564.27 Gene names IMUP

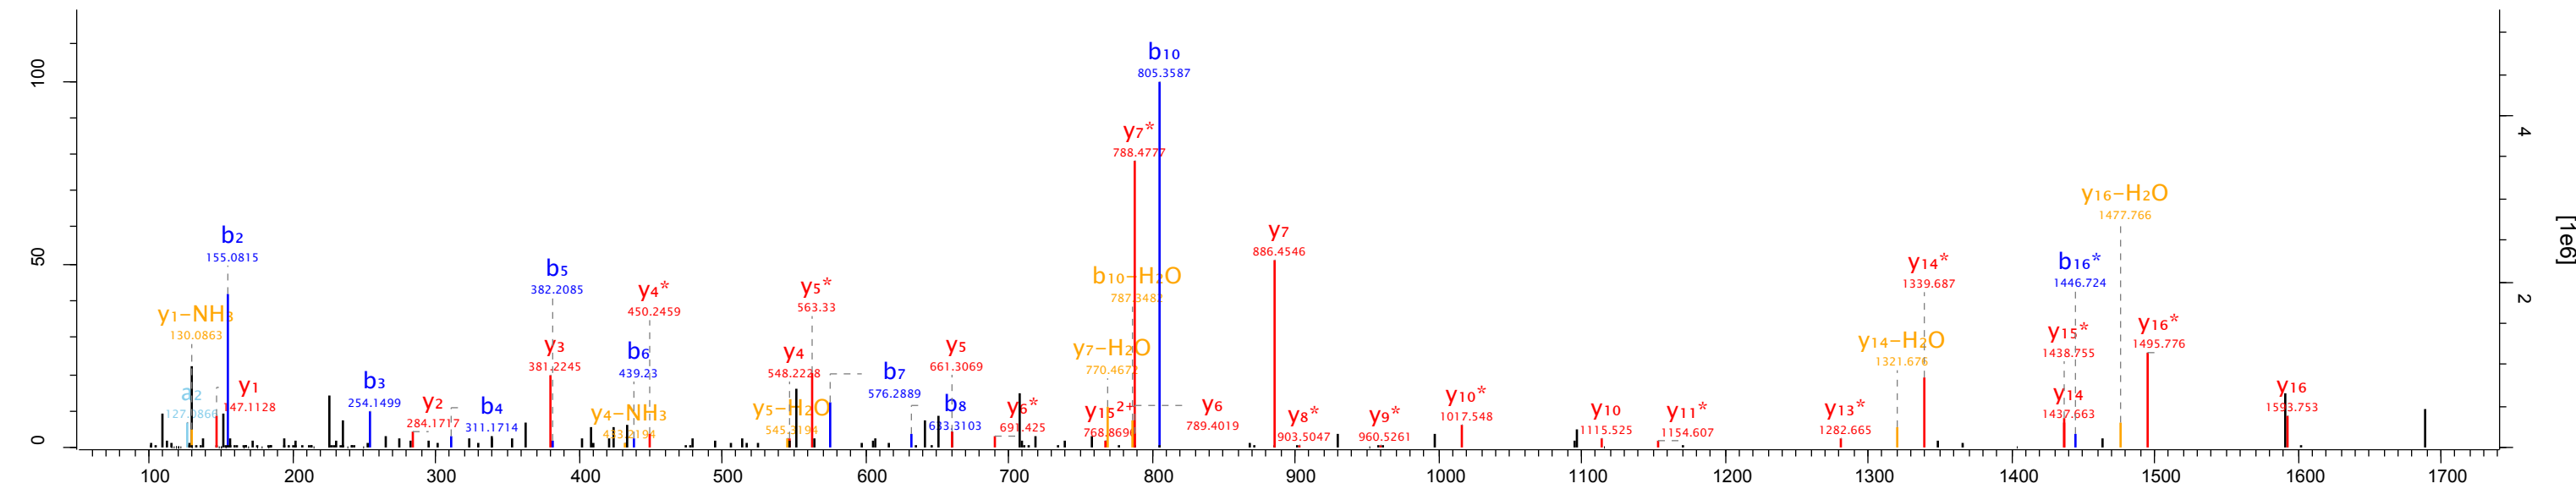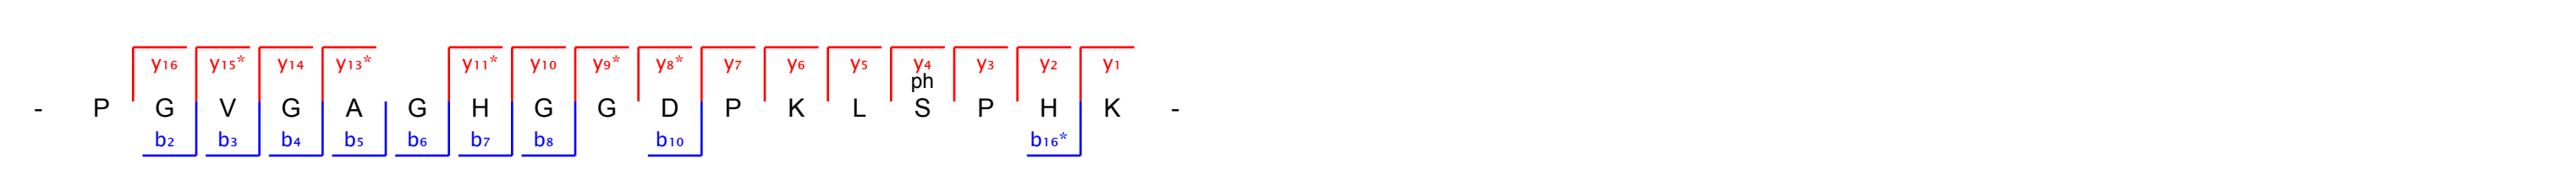

Raw file 20171215\_MaS\_33SR\_LMH\_phospho\_06 Scan 3160 Method FTMS; HCD Score 119.72 m/z 613.92 Gene names LIMCH1

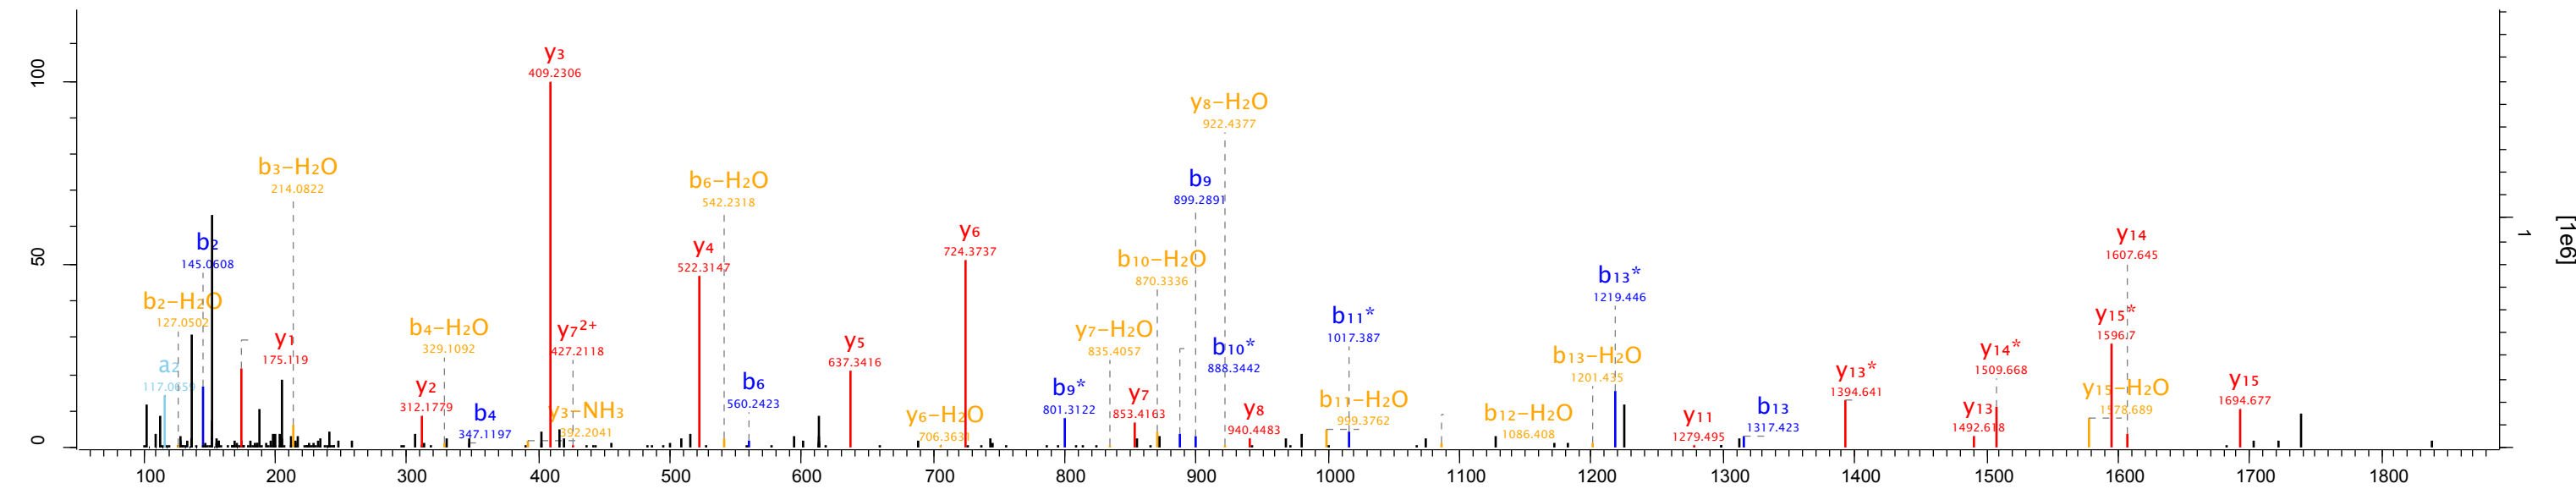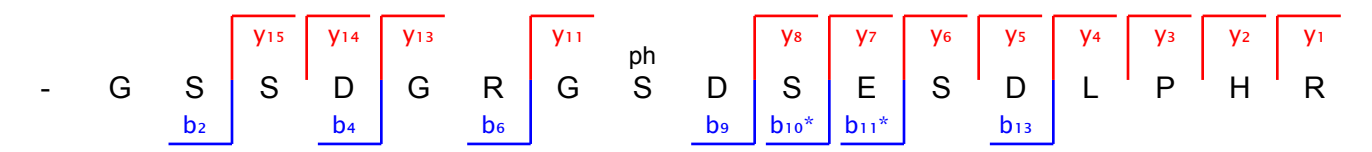

Raw file 20171215\_MaS\_33SR\_LMH\_phospho\_06 Scan 3380 Method FTMS; HCD Score 130.23 m/z 786.28 Gene names RBM25

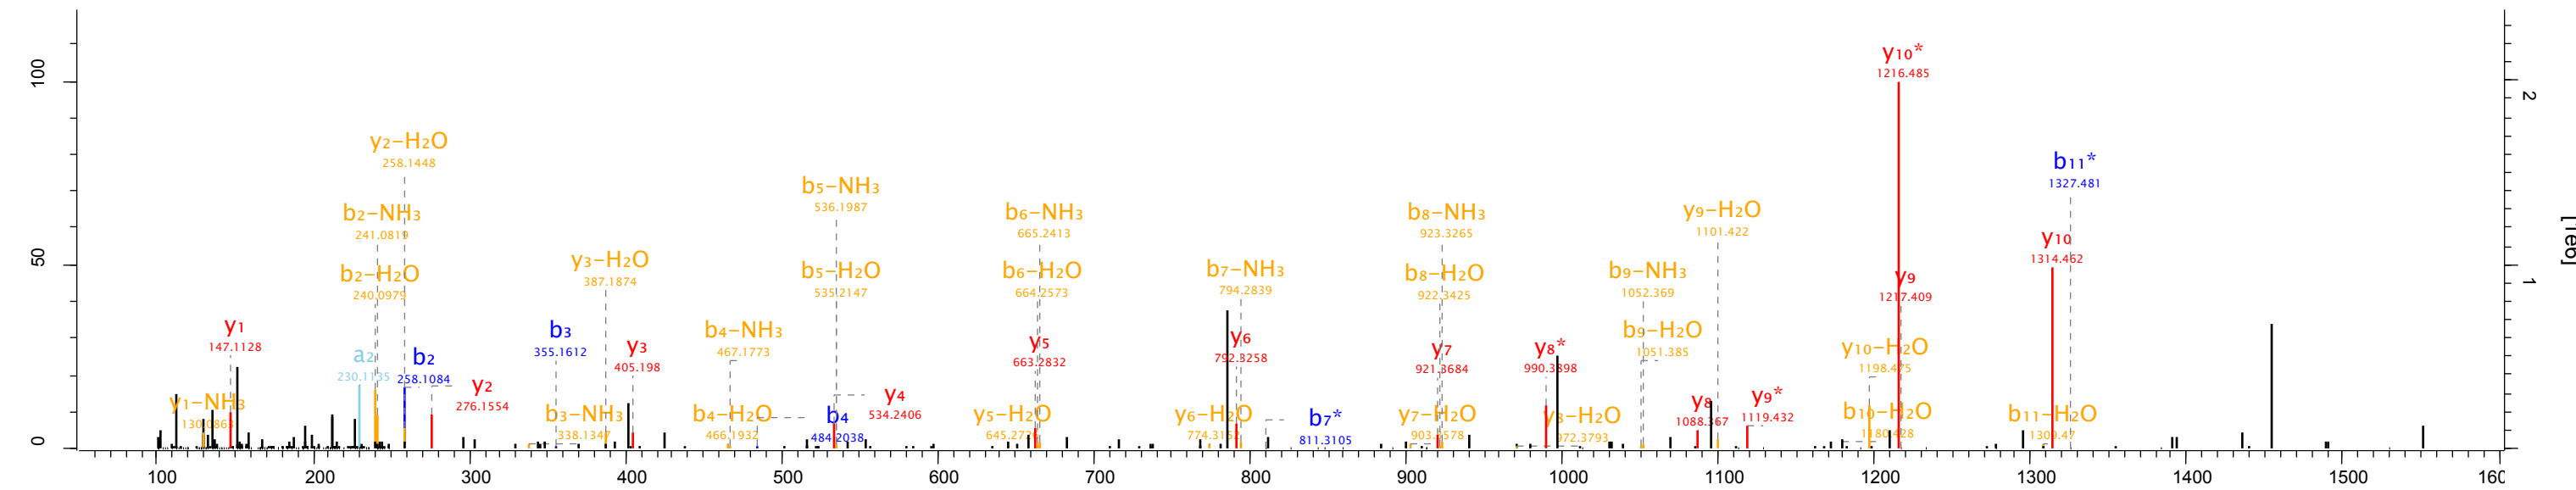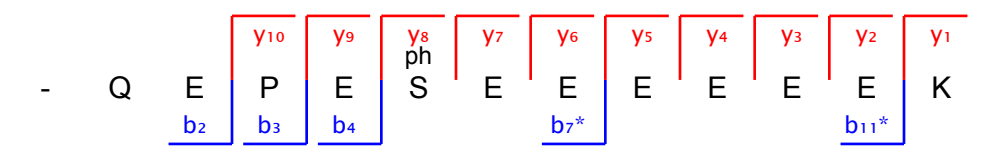

Raw file 20171215\_MaS\_33SR\_LMH\_phospho\_06 Scan 3580 Method FTMS; HCD Score 66.81 m/z 539.21 Gene names ATXN2

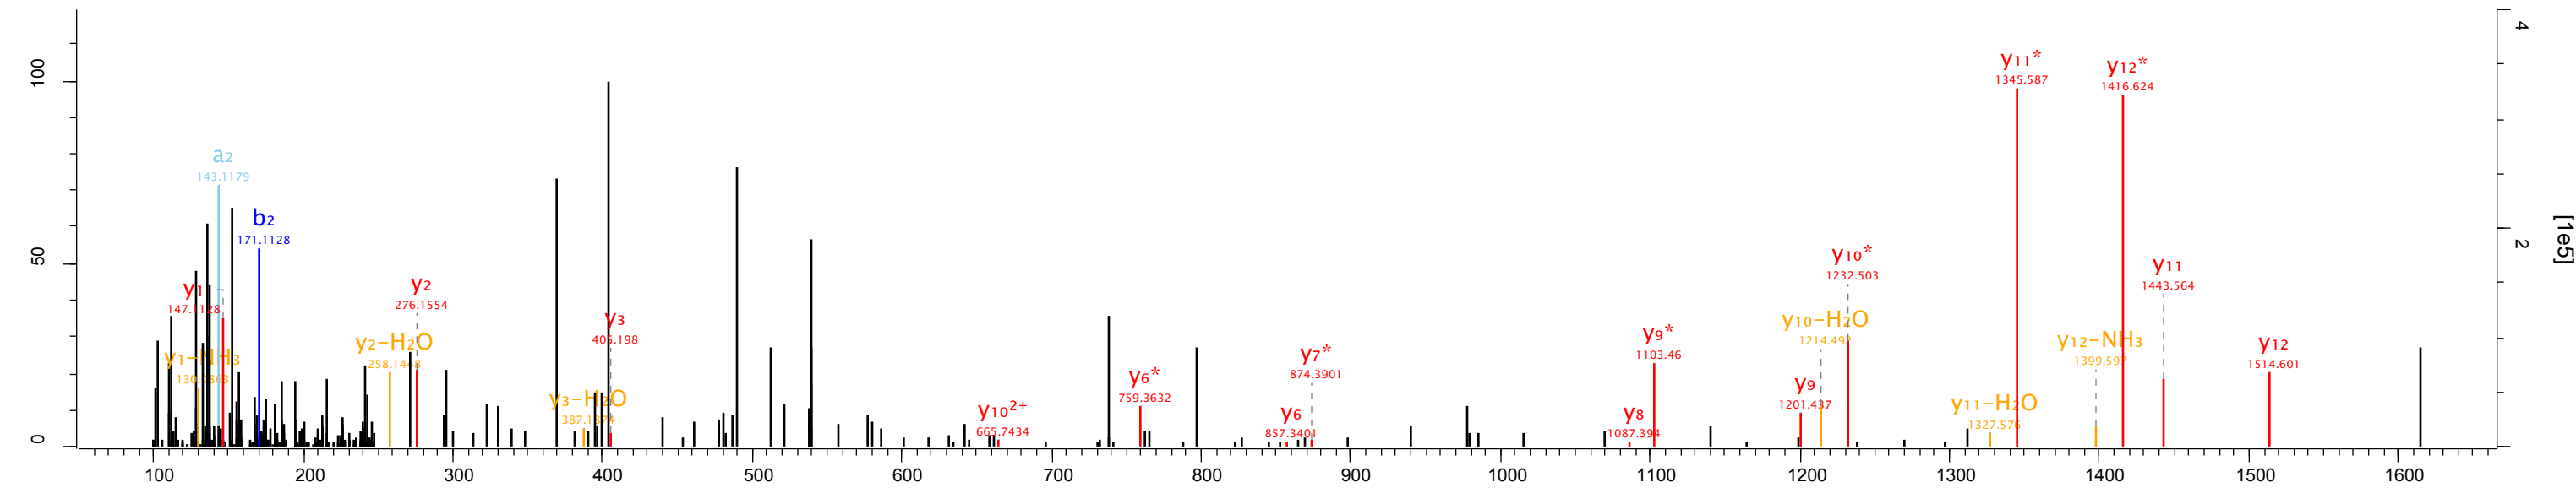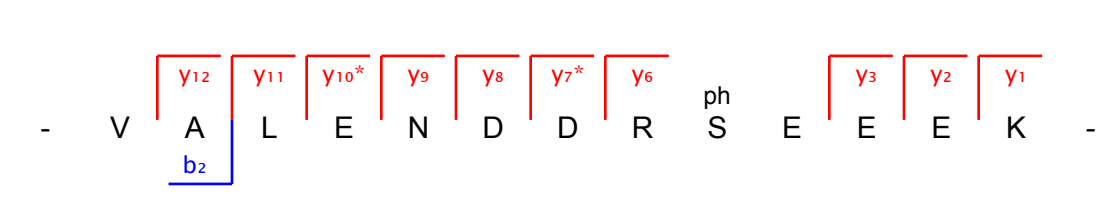

Raw file 20171215\_MaS\_33SR\_LMH\_phospho\_06 Scan 4190 Method FTMS; HCD Score 139.71 m/z 686.79 Gene names BRAP

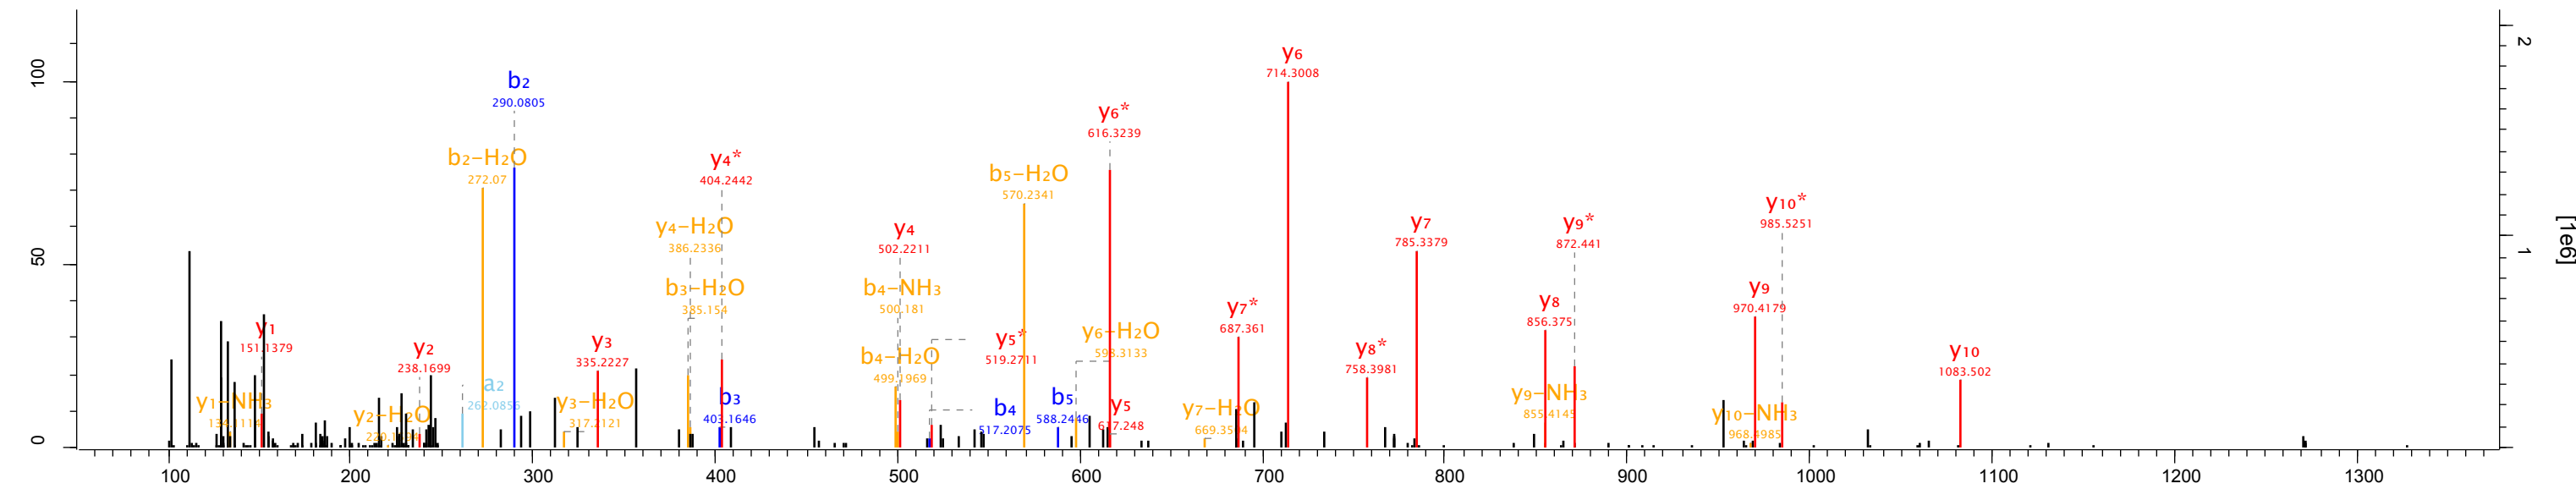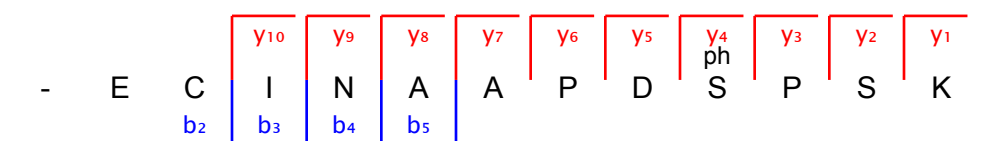



Raw file 20171215\_MaS\_33SR\_LMH\_phospho\_06 Scan 4210 Method FTMS; HCD Score 72.4 m/z 568.27 Gene names TJP2

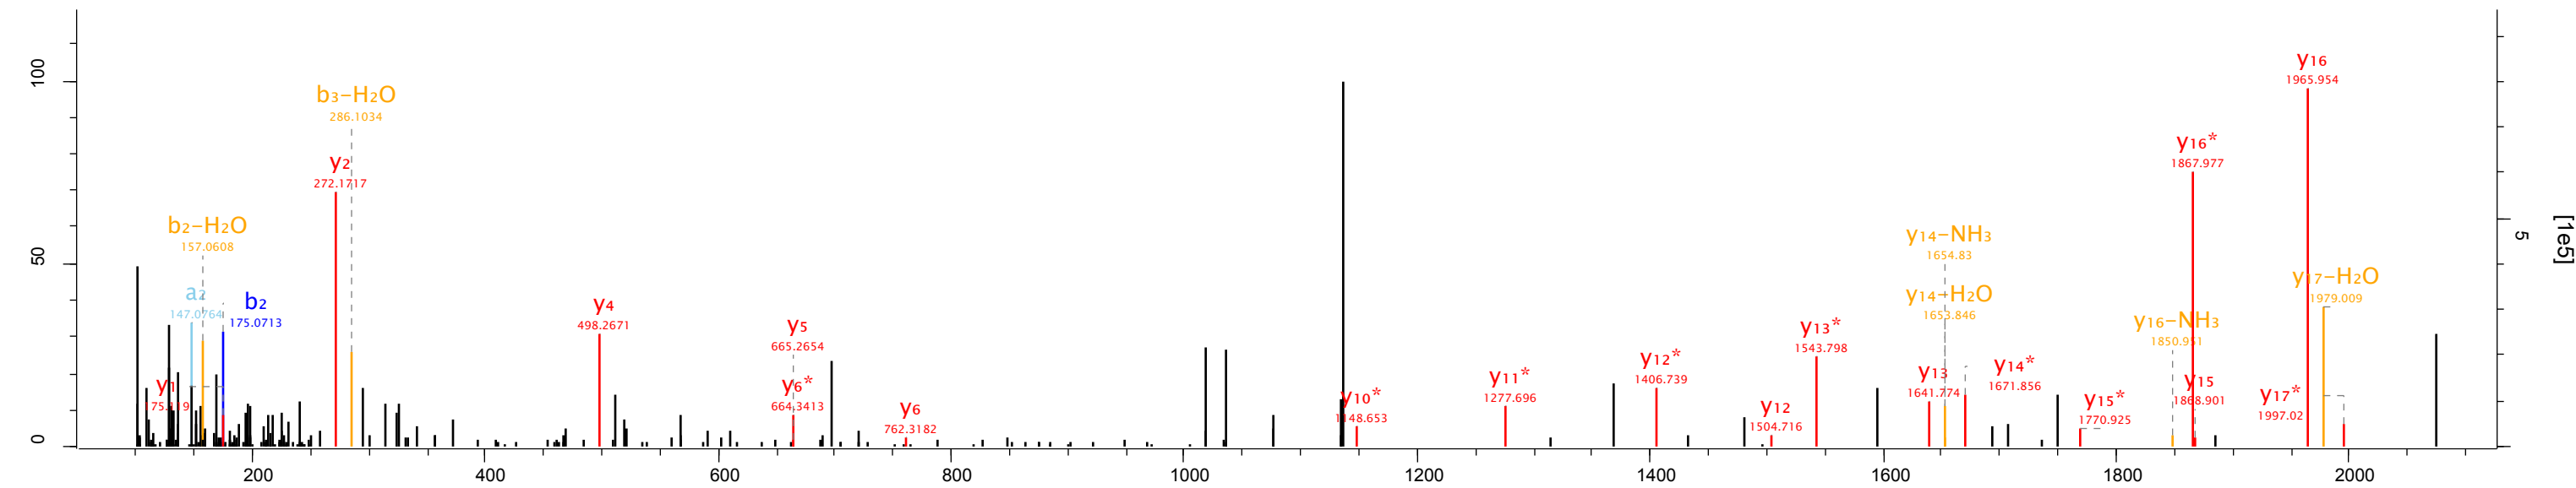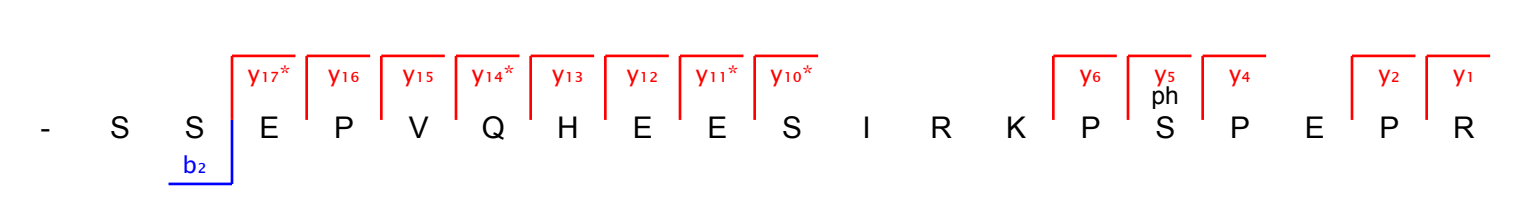

Raw file 20171215\_MaS\_33SR\_LMH\_phospho\_06 Scan 4270 Method FTMS; HCD Score 163.9 m/z 574.2 Gene names SGTB

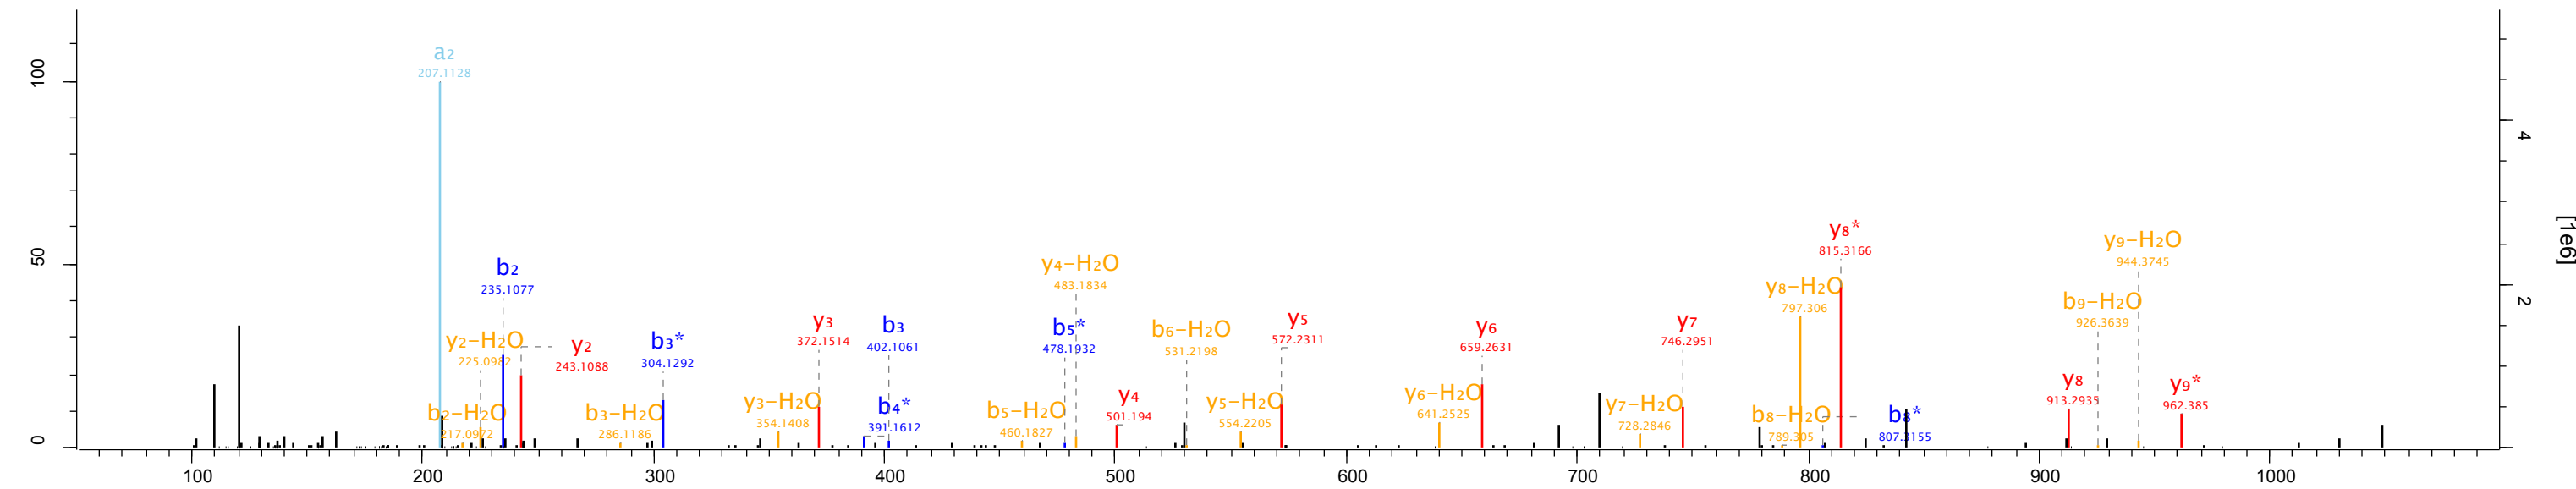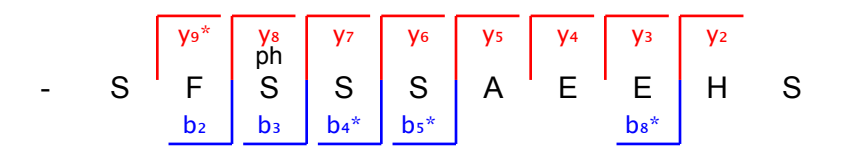

Raw file 20171215\_MaS\_33SR\_LMH\_phospho\_06 Scan 4420 Method FTMS; HCD Score 121.47 m/z 545.28 Gene names CIAPIN1

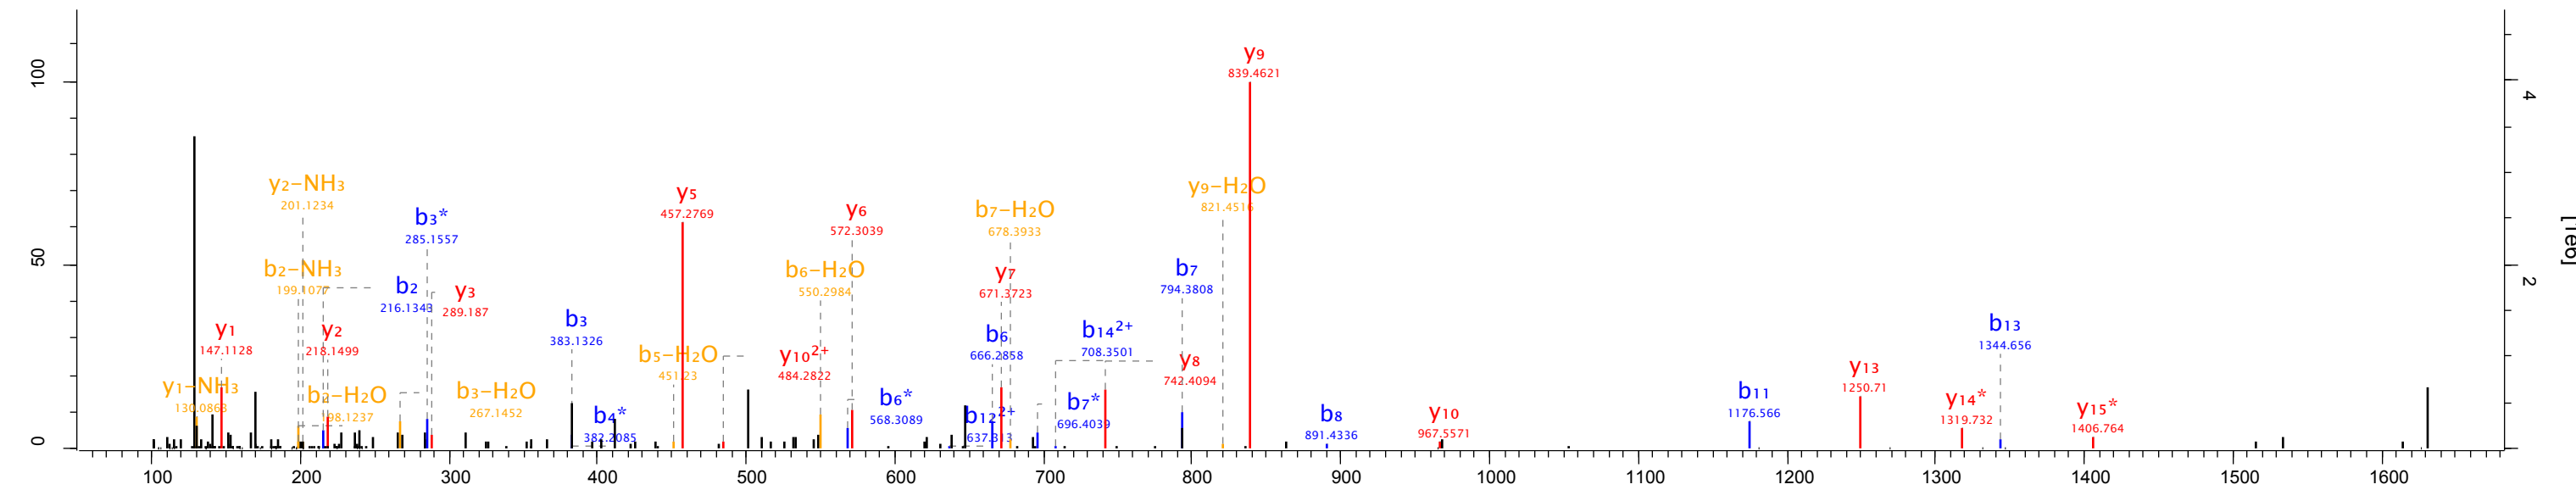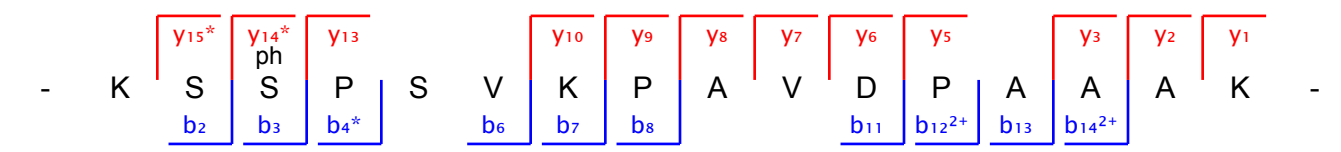

Raw file 20171215\_MaS\_33SR\_LMH\_phospho\_06 Scan 4610 Method FTMS; HCD Score 135 m/z 853.36 Gene names STAMBPL1

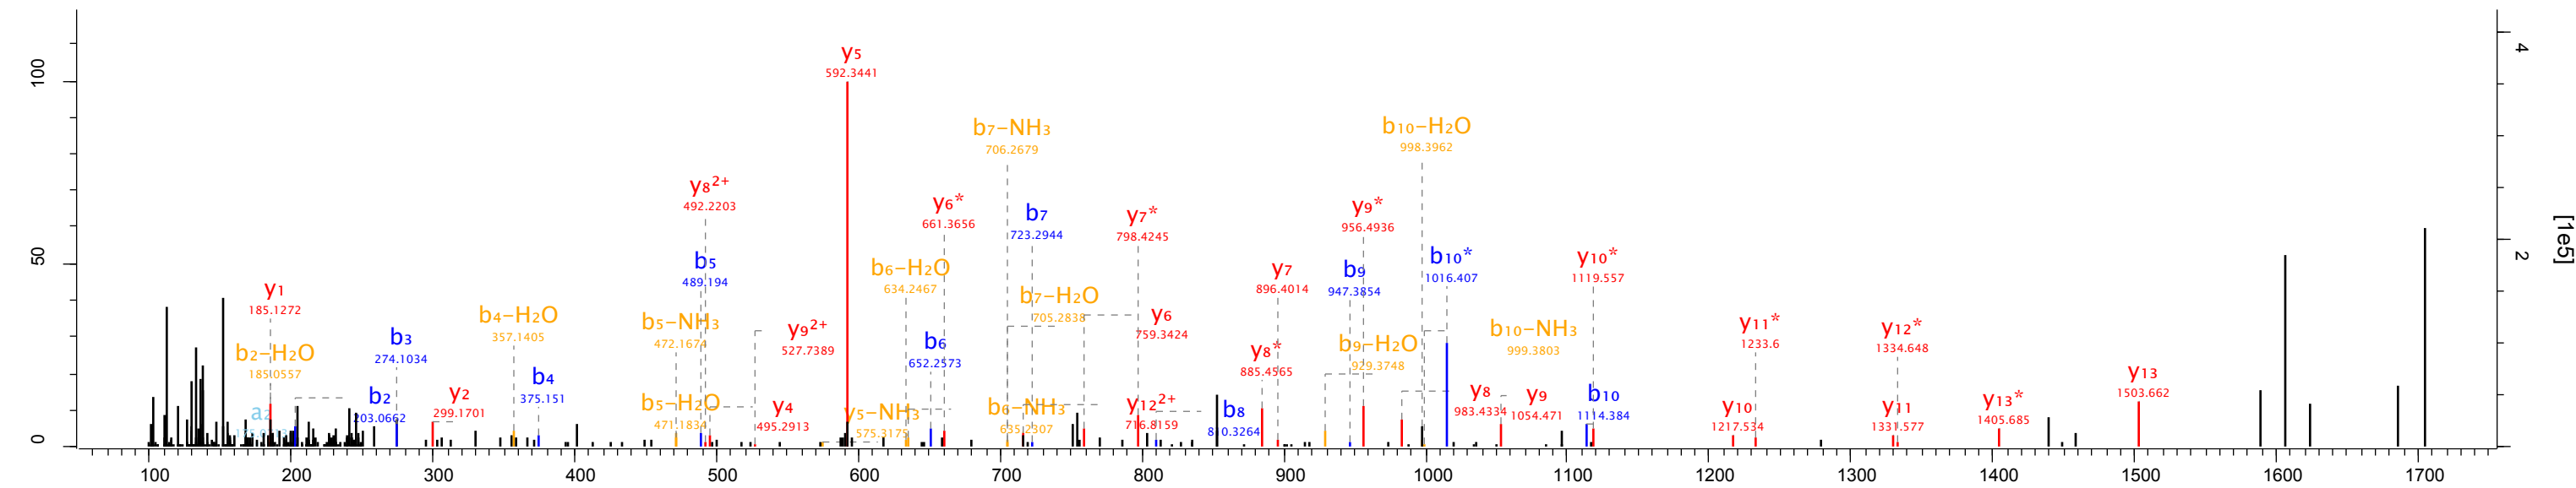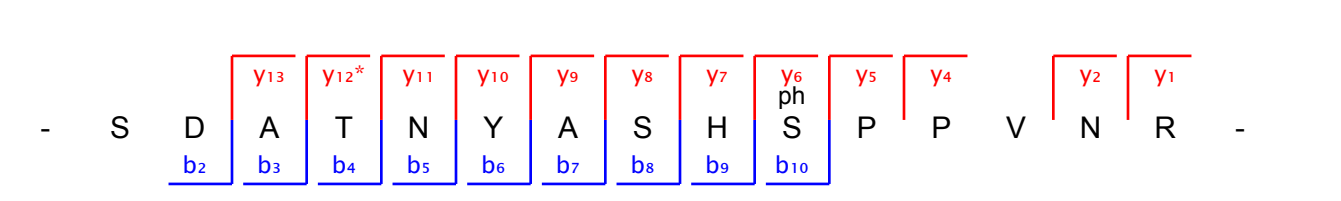

Raw file 20171215\_MaS\_33SR\_LMH\_phospho\_06 Scan 4790 Method FTMS; HCD Score 146.67 m/z 758.35 Gene names RBMX

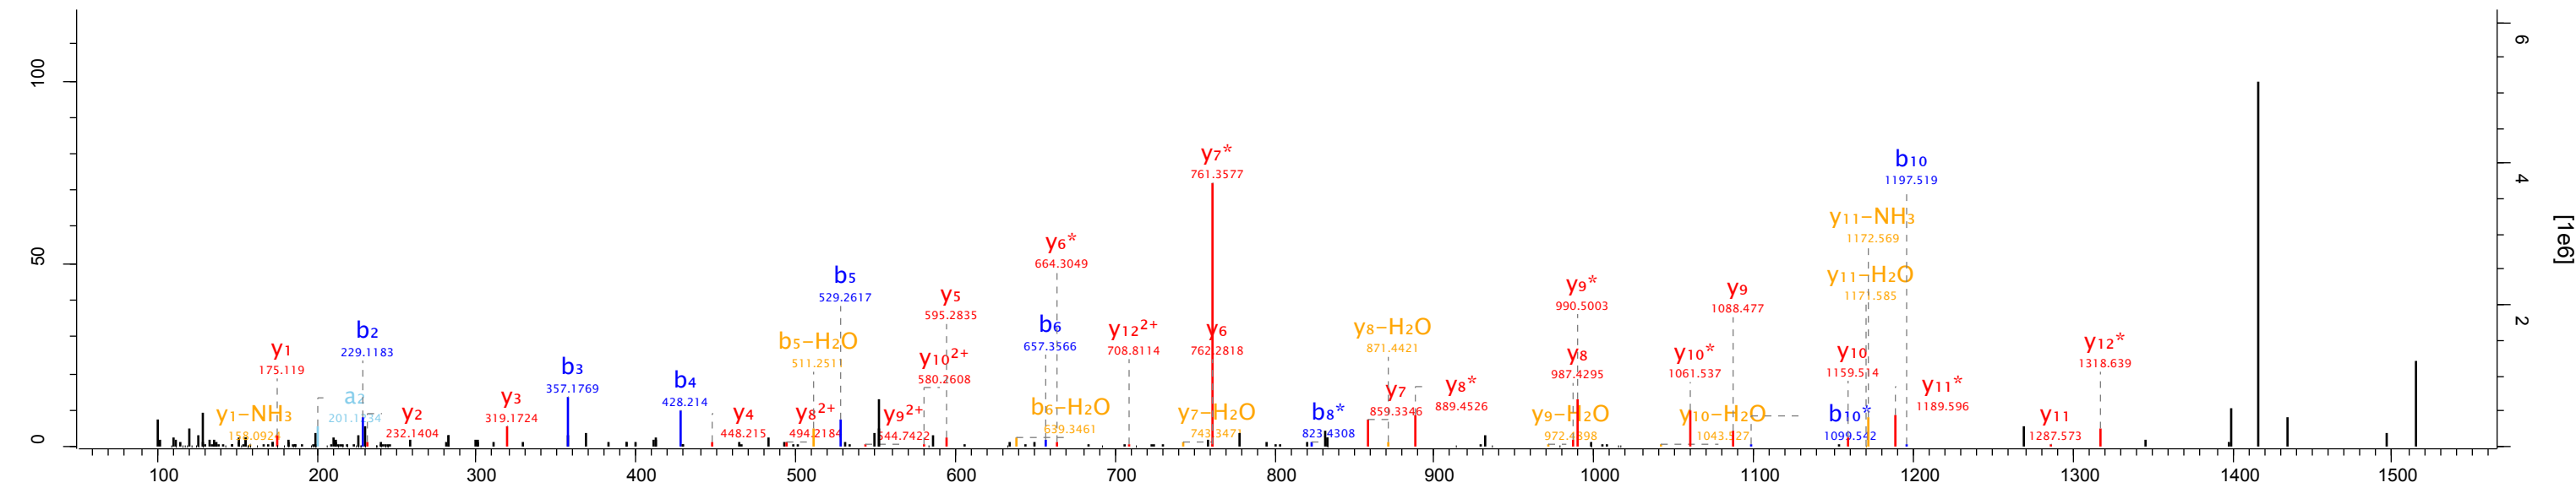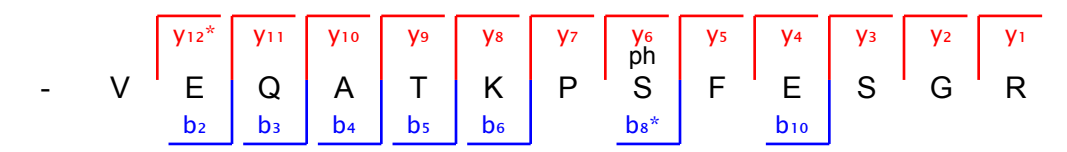

Raw file: 20171215\_MaS\_33SR\_LMH\_phospho\_06  
 Scan: 4900 Method: FTMS; HCD Score: 93.8 m/z: 838.43 Gene names: POU2F1

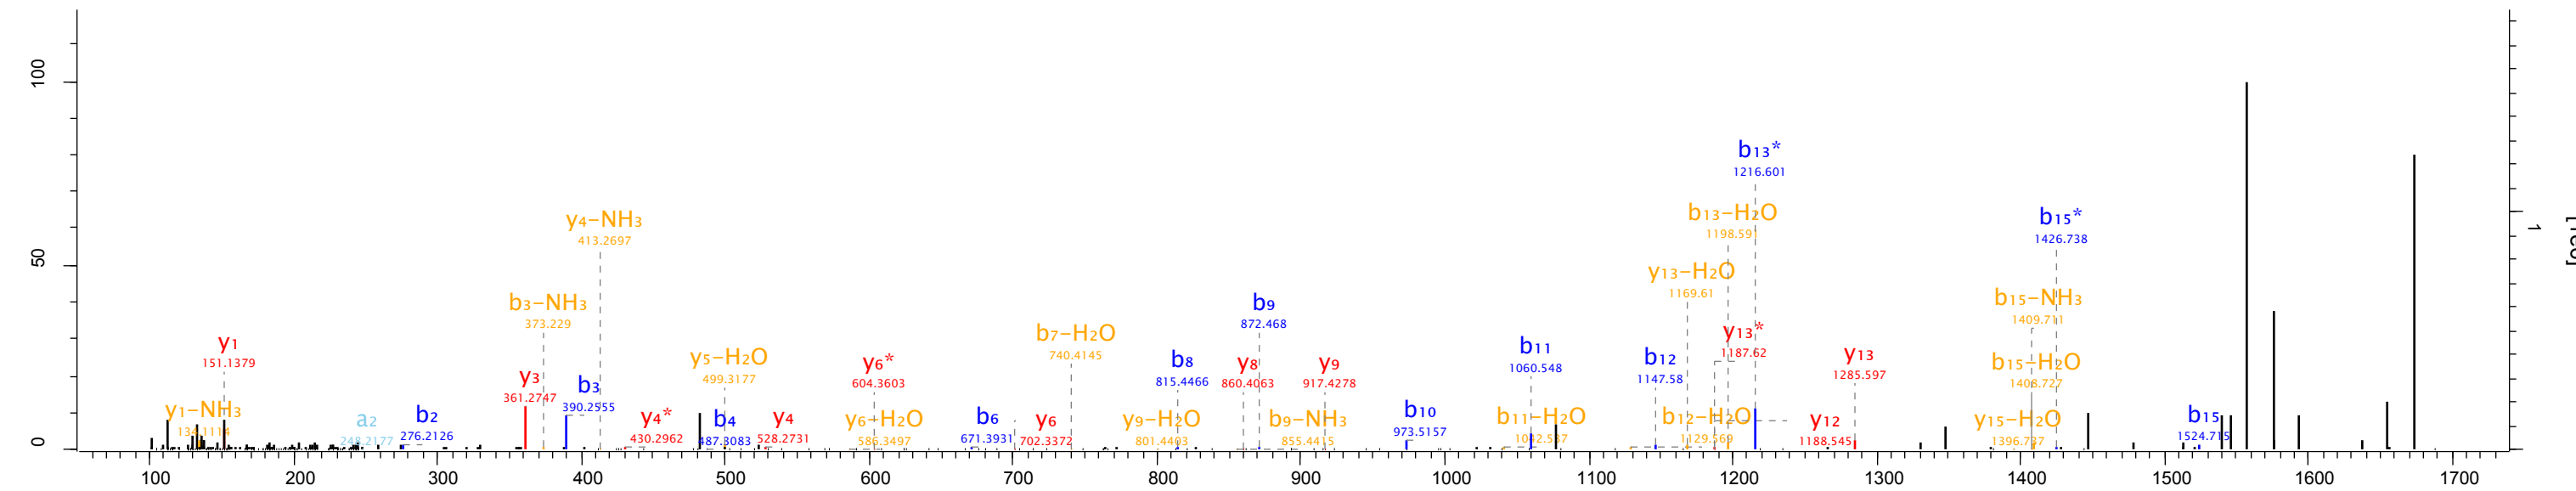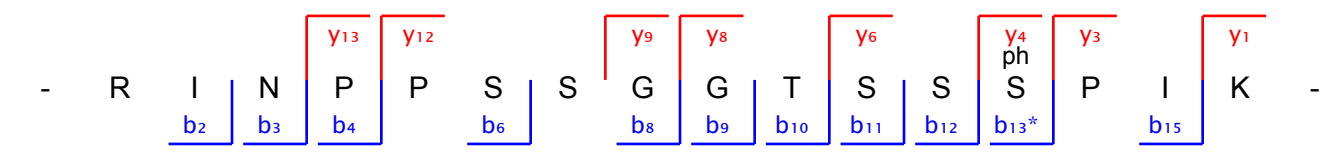

Raw file: 20171215\_MaS\_33SR\_LMH\_phospho\_06  
 Scan: 4930 Method: FTMS; HCD Score: 134.08 m/z: 705.31 Gene names: CBX8

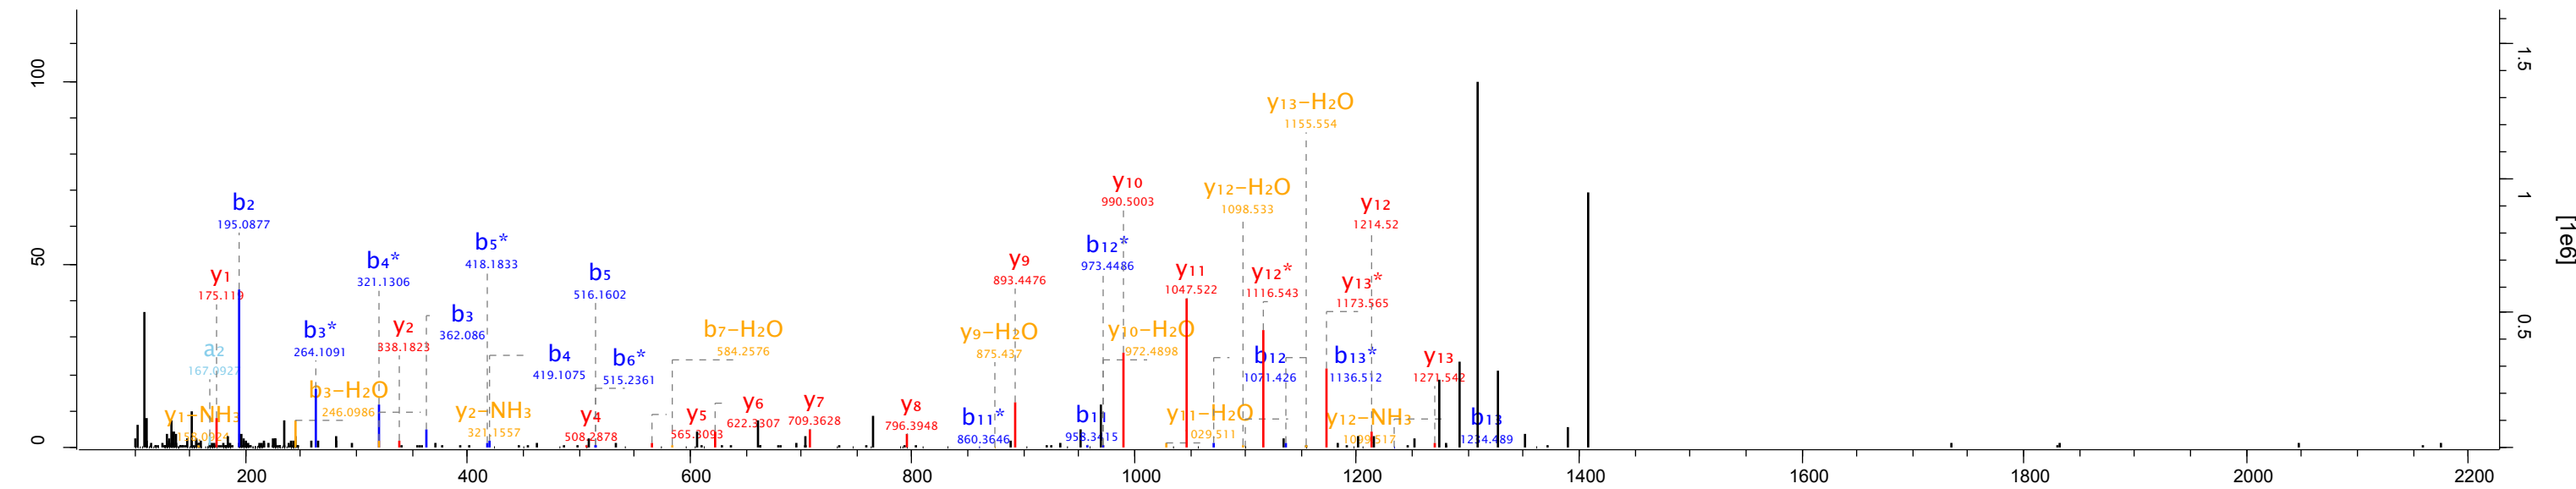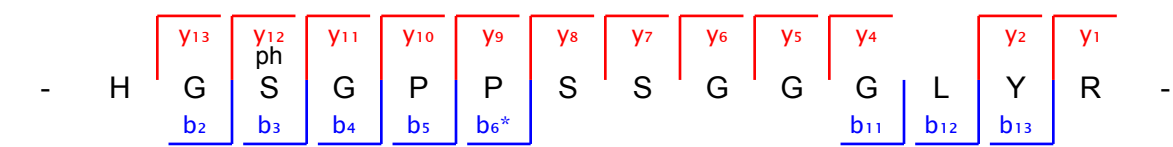

Raw file 20171215\_MaS\_33SR\_LMH\_phospho\_06 Scan 4970 Method FTMS; HCD Score 199.39 m/z 825.83 Gene names DTD1

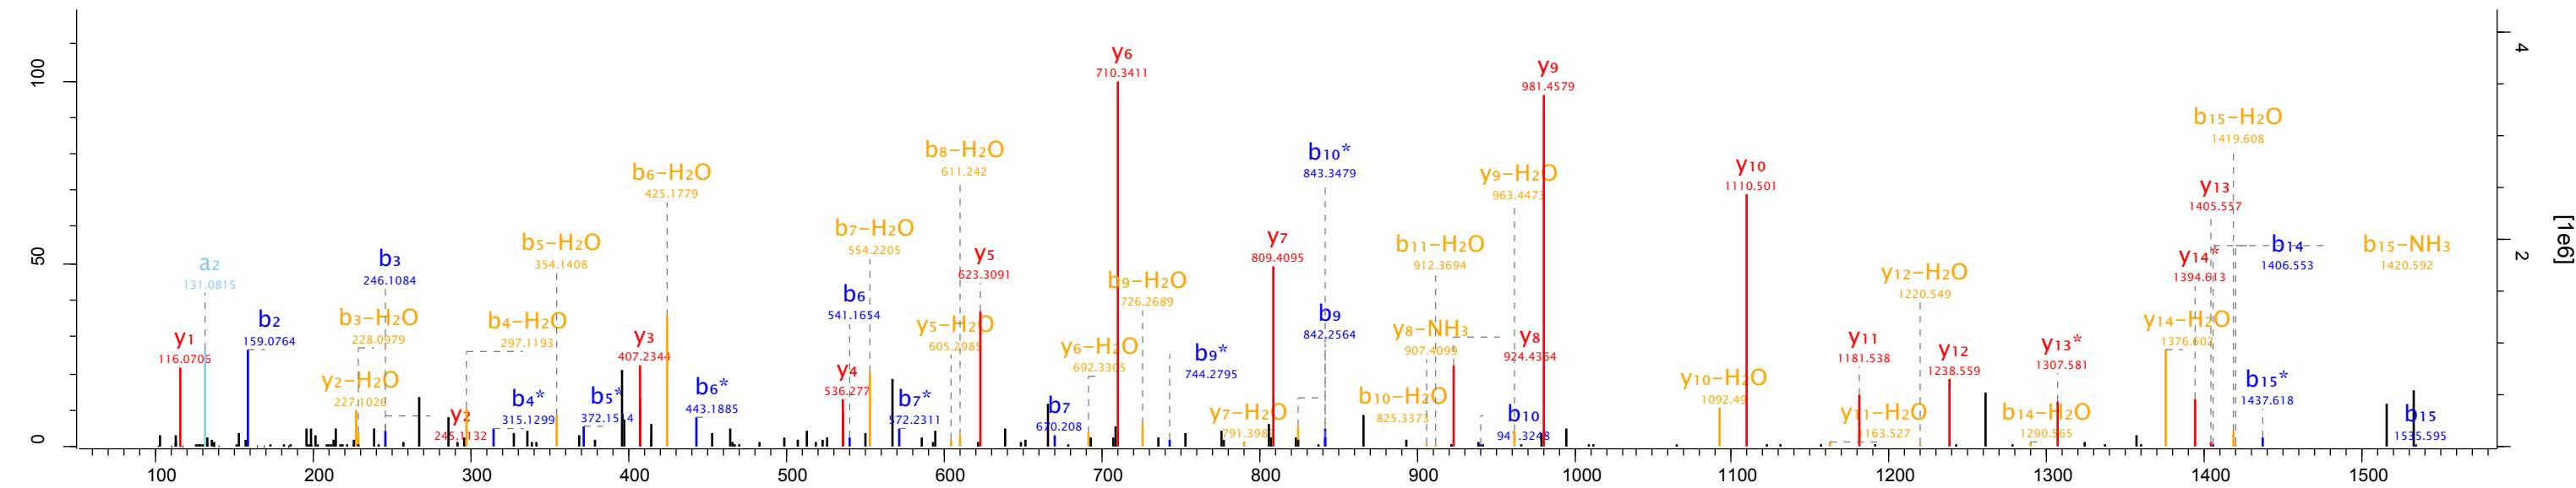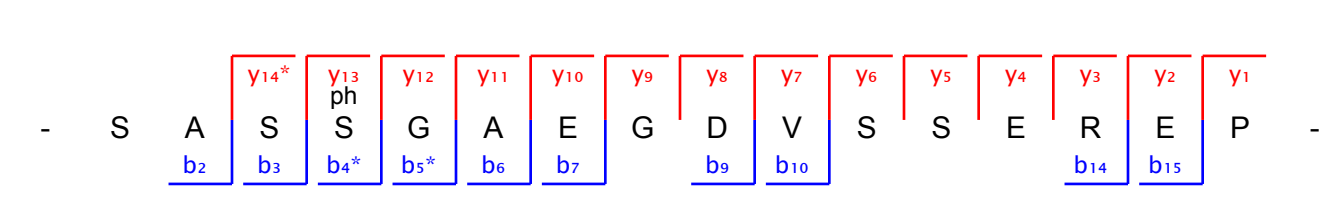



Raw file 20171215\_MaS\_33SR\_LMH\_phospho\_06 Scan 5040 Method FTMS; HCD Score 93.77 m/z 583.3 Gene names DBF4

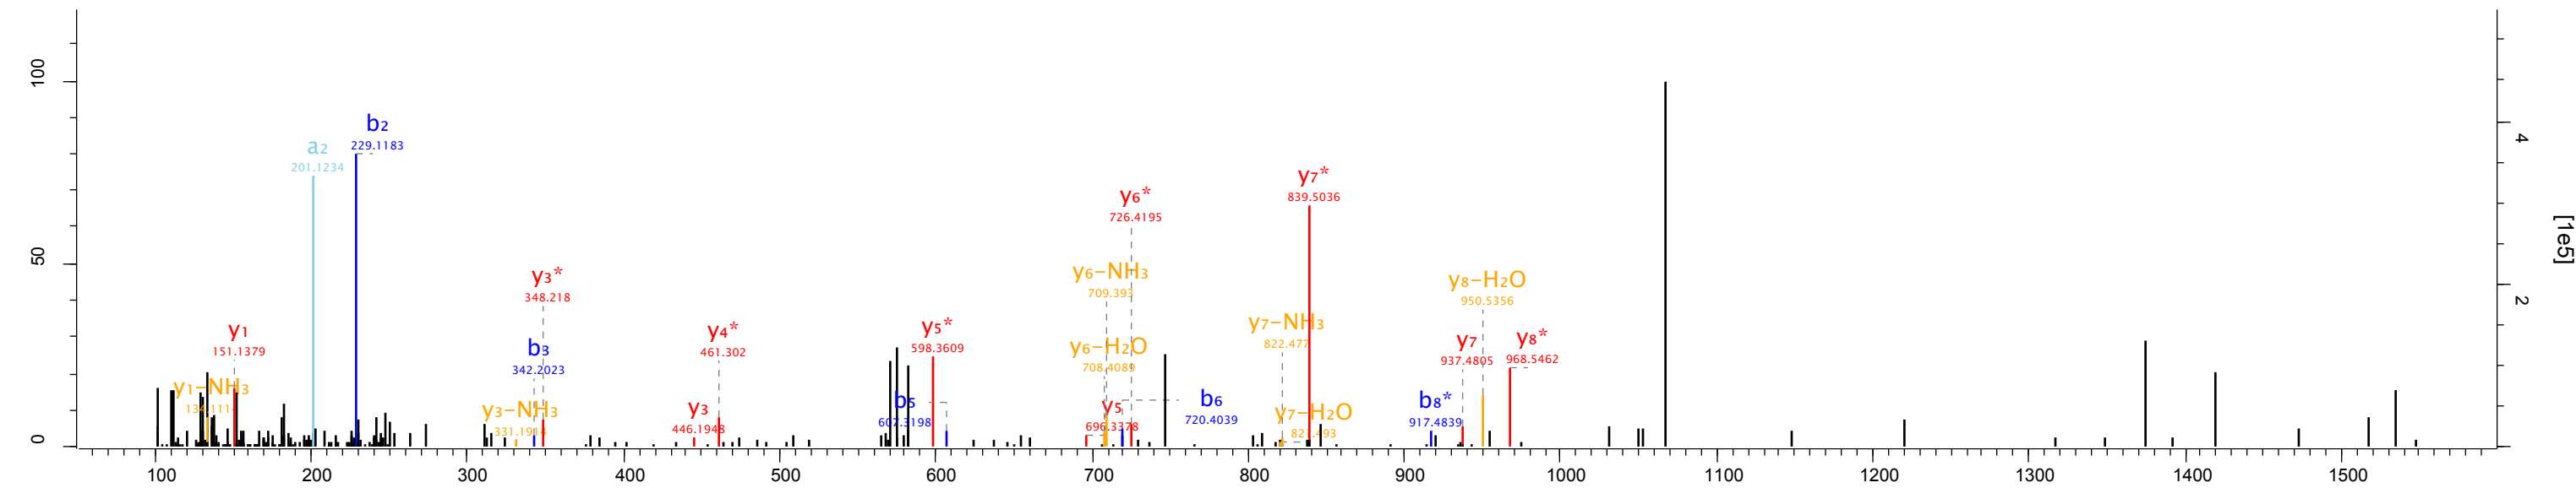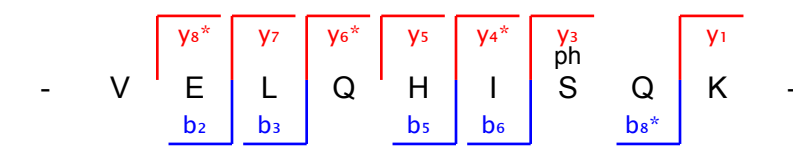

Raw file: 20171215\_MaS\_33SR\_LMH\_phospho\_06  
 Scan: 5100 Method: FTMS; HCD Score: 95.98 m/z: 520.26 Gene names: KIAA1522

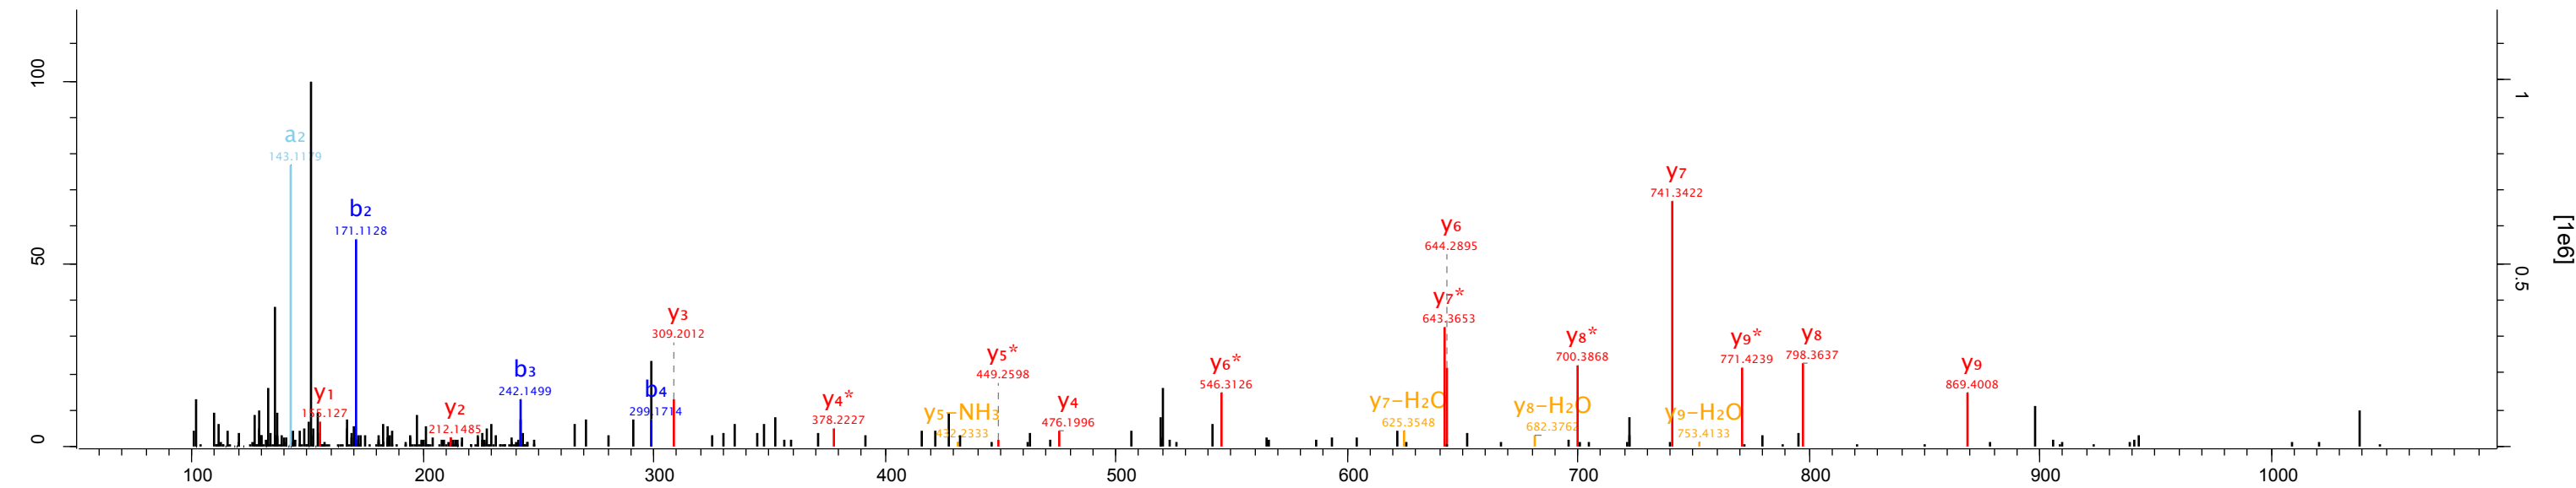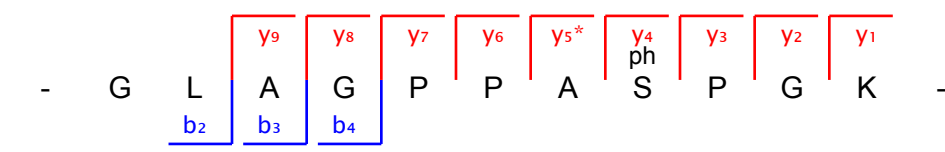

Raw file 20171215\_MaS\_33SR\_LMH\_phospho\_06 Scan 5250 Method FTMS; HCD Score 154.81 m/z 688.83 Gene names ZBTB21

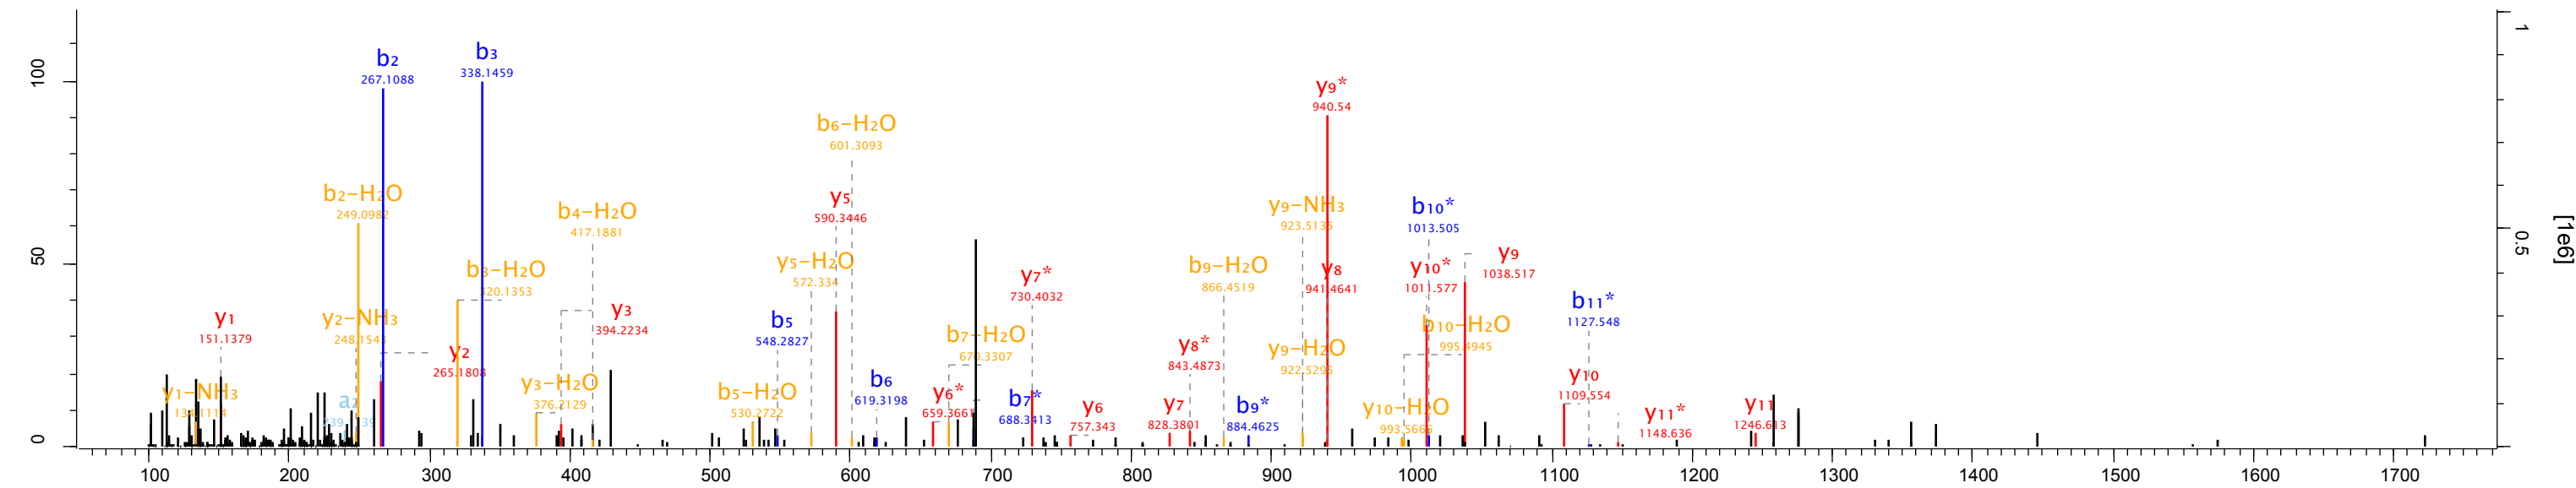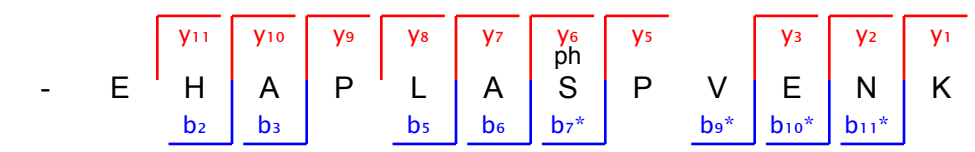

Raw file 20171215\_MaS\_33SR\_LMH\_phospho\_06 Scan 5370 Method FTMS; HCD Score 107.31 m/z 830.02 Gene names ATRX

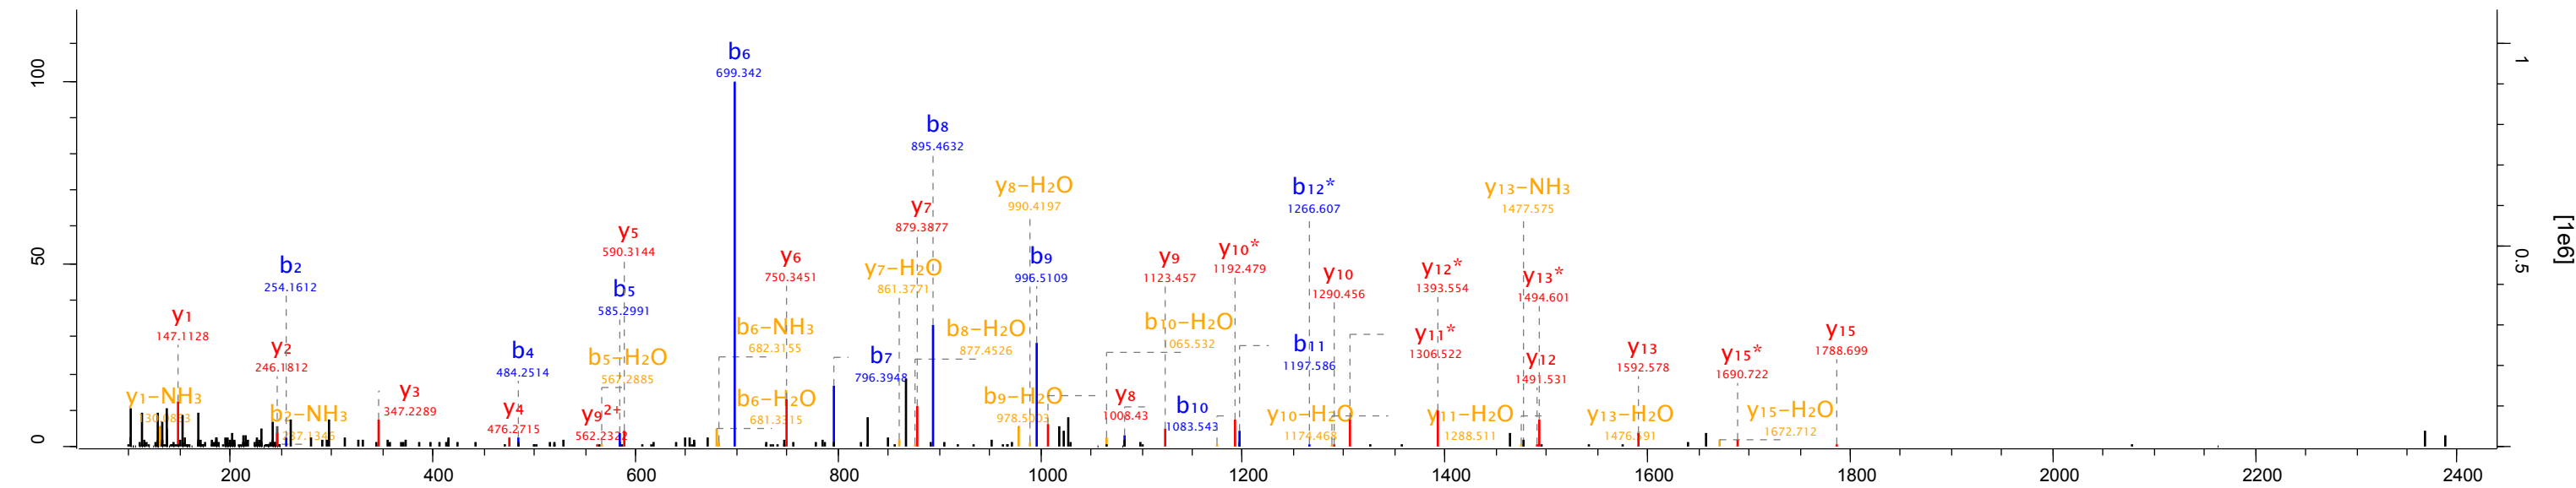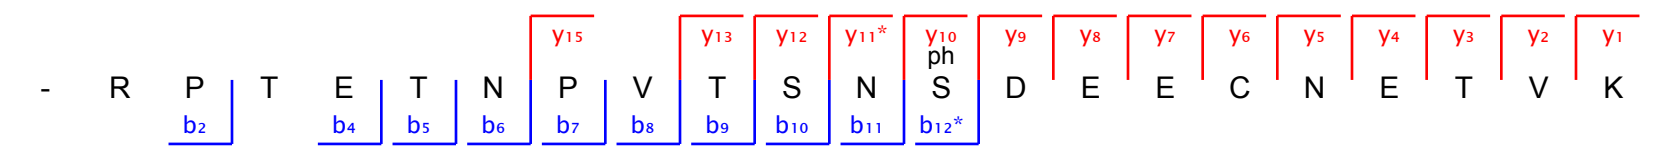

Raw file 20171215\_MaS\_33SR\_LMH\_phospho\_06 Scan 5670 Method FTMS; HCD Score 161.99 m/z 784.34 Gene names AHNAK

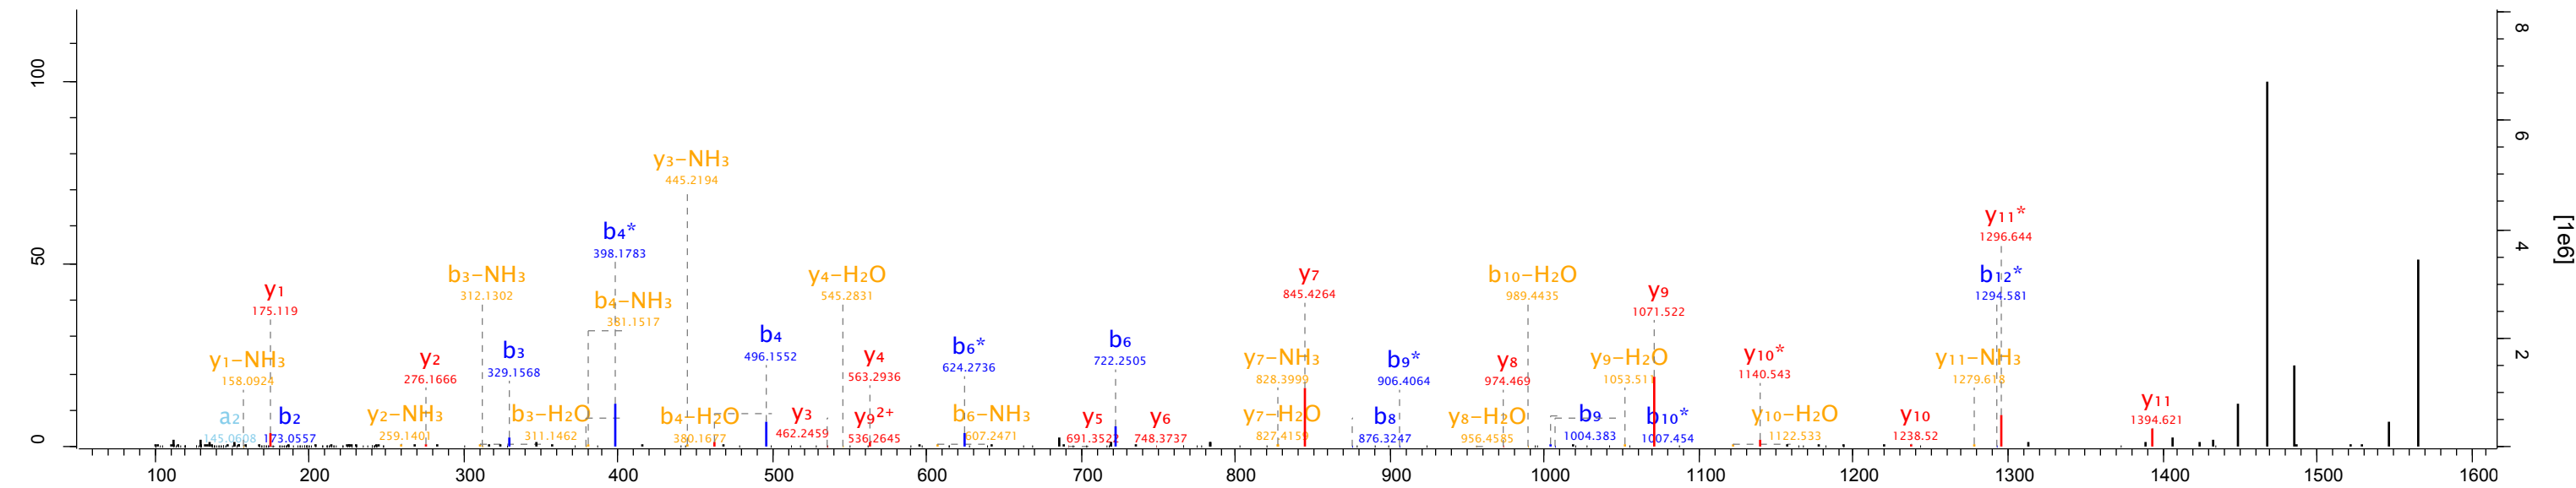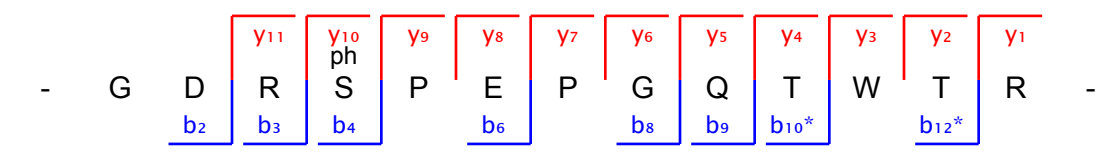

Raw file 20171215\_MaS\_33SR\_LMH\_phospho\_06 Scan 5740 Method FTMS; HCD Score 163.09 m/z 830.02 Gene names NFIL3

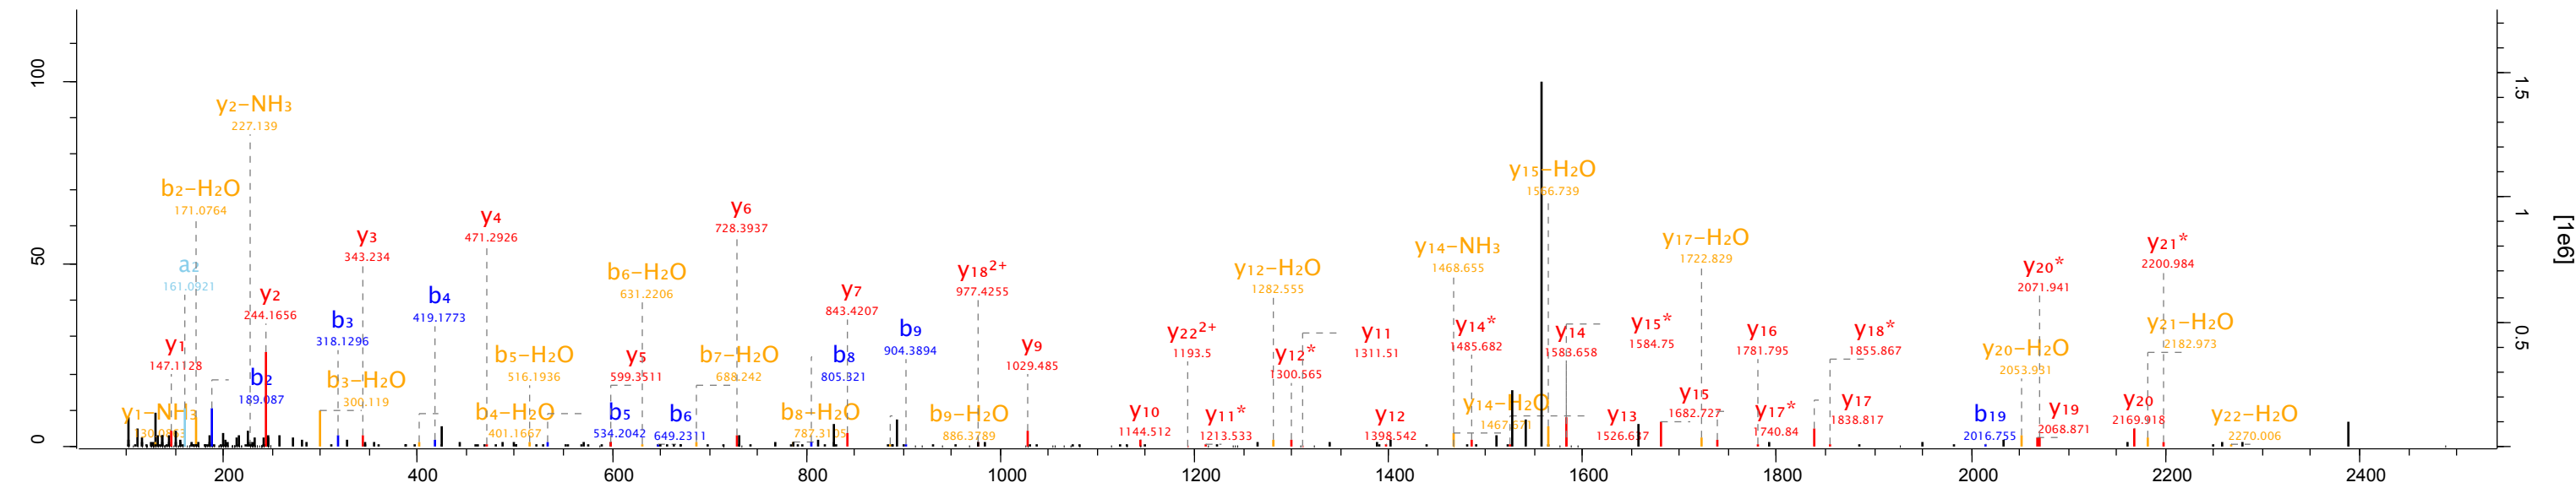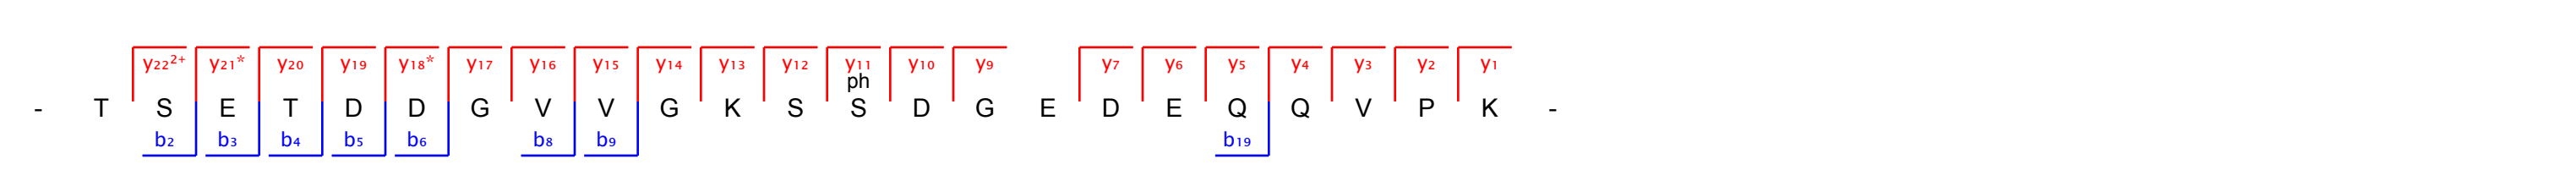

Raw file 20171215\_MaS\_33SR\_LMH\_phospho\_06 Scan 6170 Method FTMS; HCD Score 66.39 m/z 539.78 Gene names GTPBP4

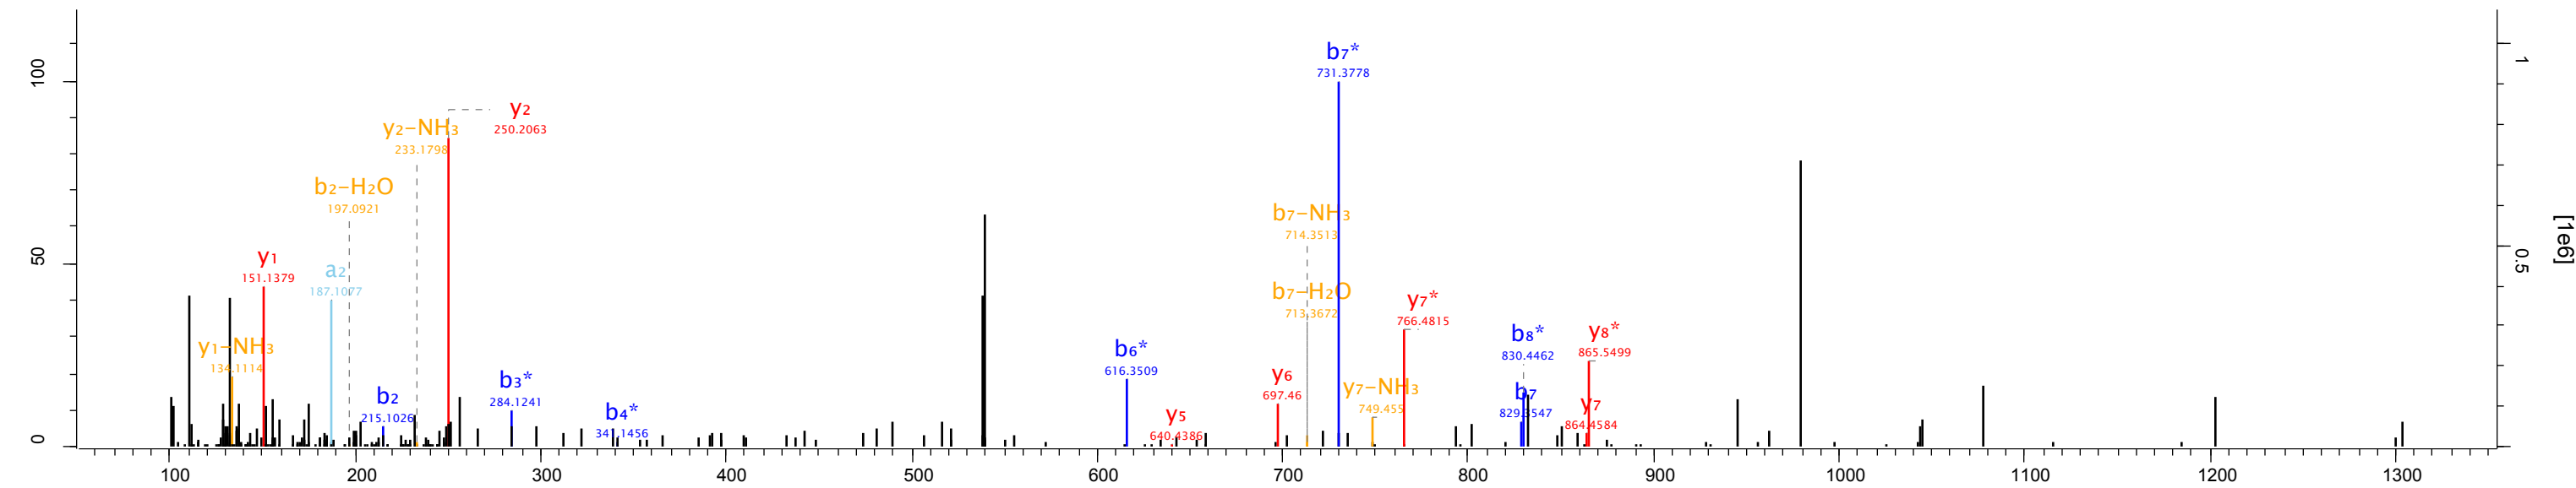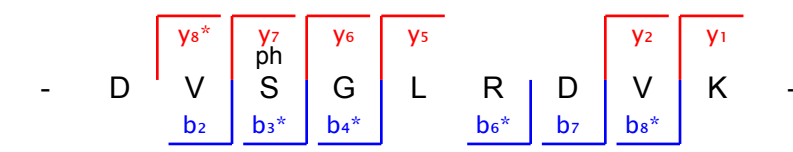

Raw file: 20171215\_MaS\_33SR\_LMH\_phospho\_06  
 Scan: 6430 Method: FTMS; HCD Score: 90.39 m/z: 699.83 Gene names: IRS2

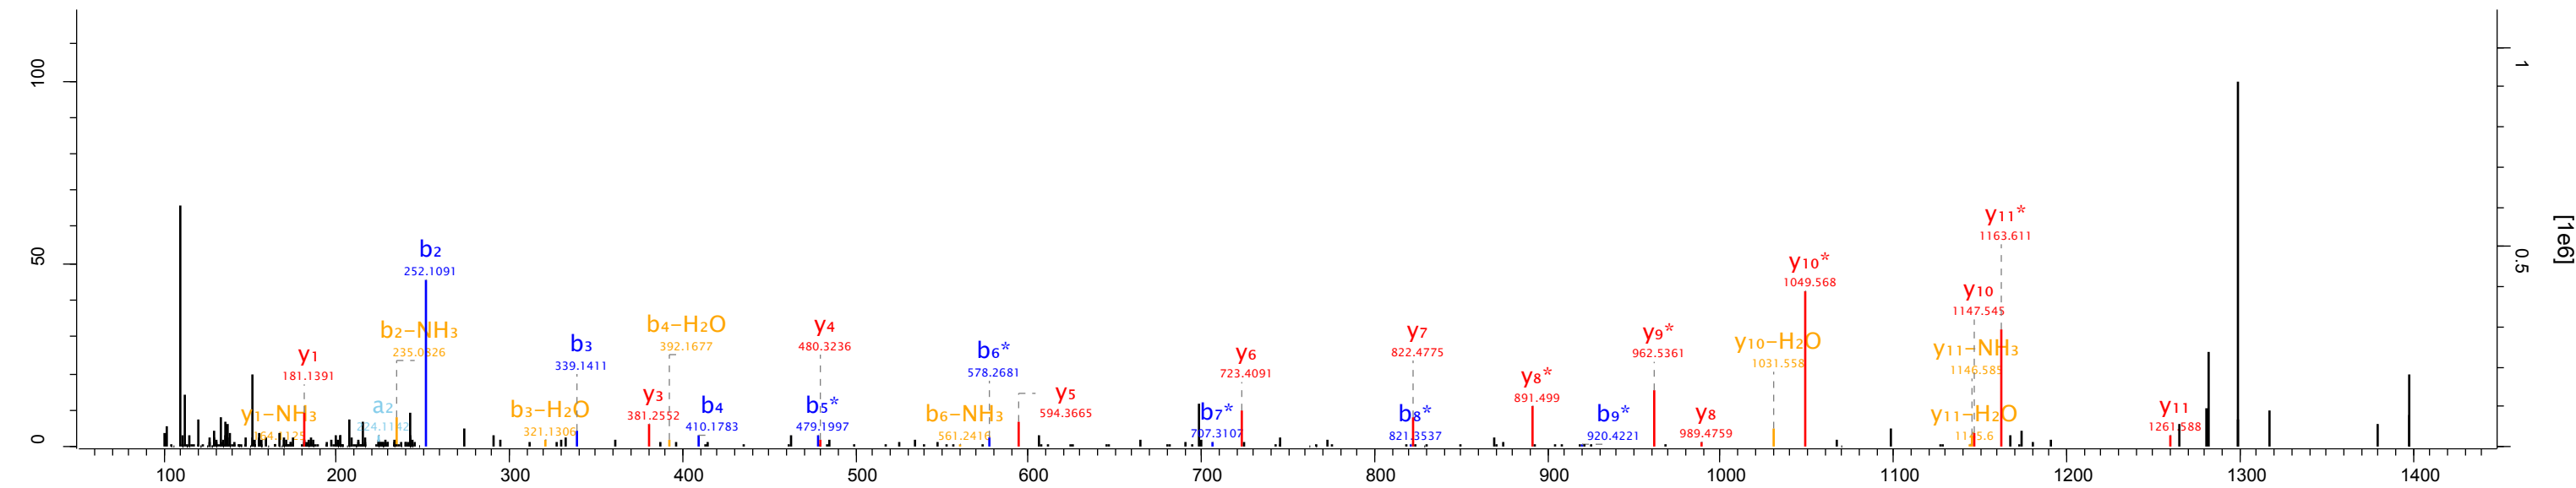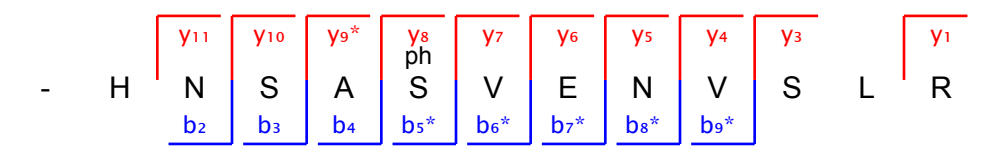



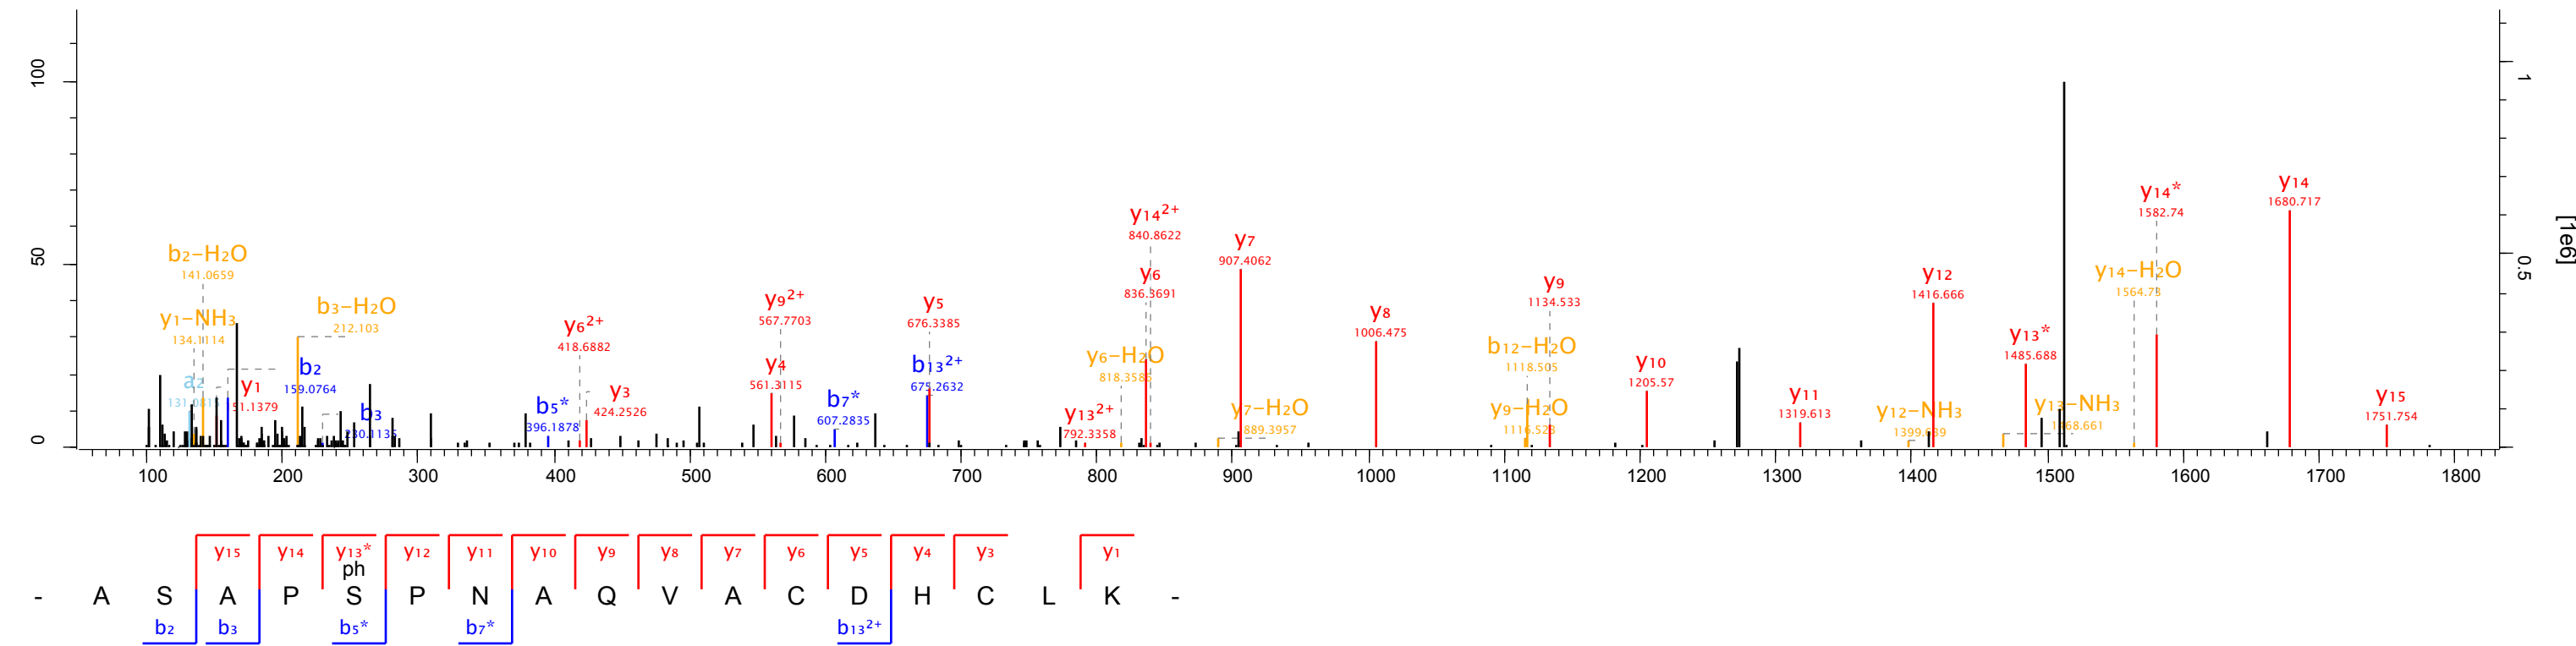

Raw file 20171215\_MaS\_33SR\_LMH\_phospho\_06 Scan 6520 Method FTMS; HCD Score 96.87 m/z 617.27 Gene names BRD3

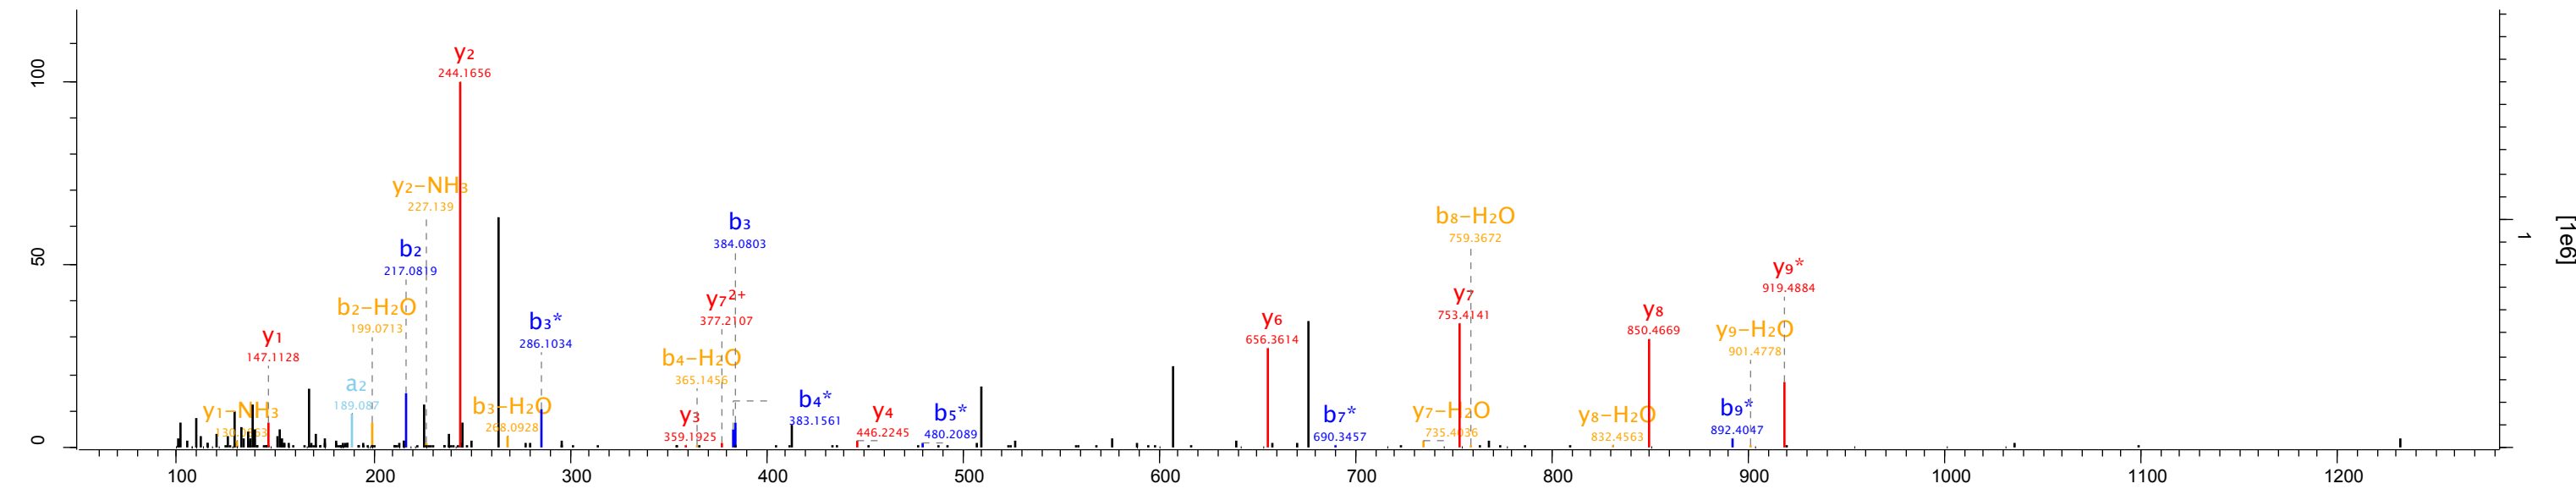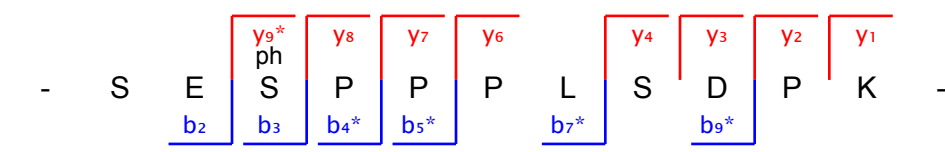

Raw file 20171215\_MaS\_33SR\_LMH\_phospho\_06 Scan 6910 Method FTMS; HCD Score 113.27 m/z 477.24 Gene names BOD1L1

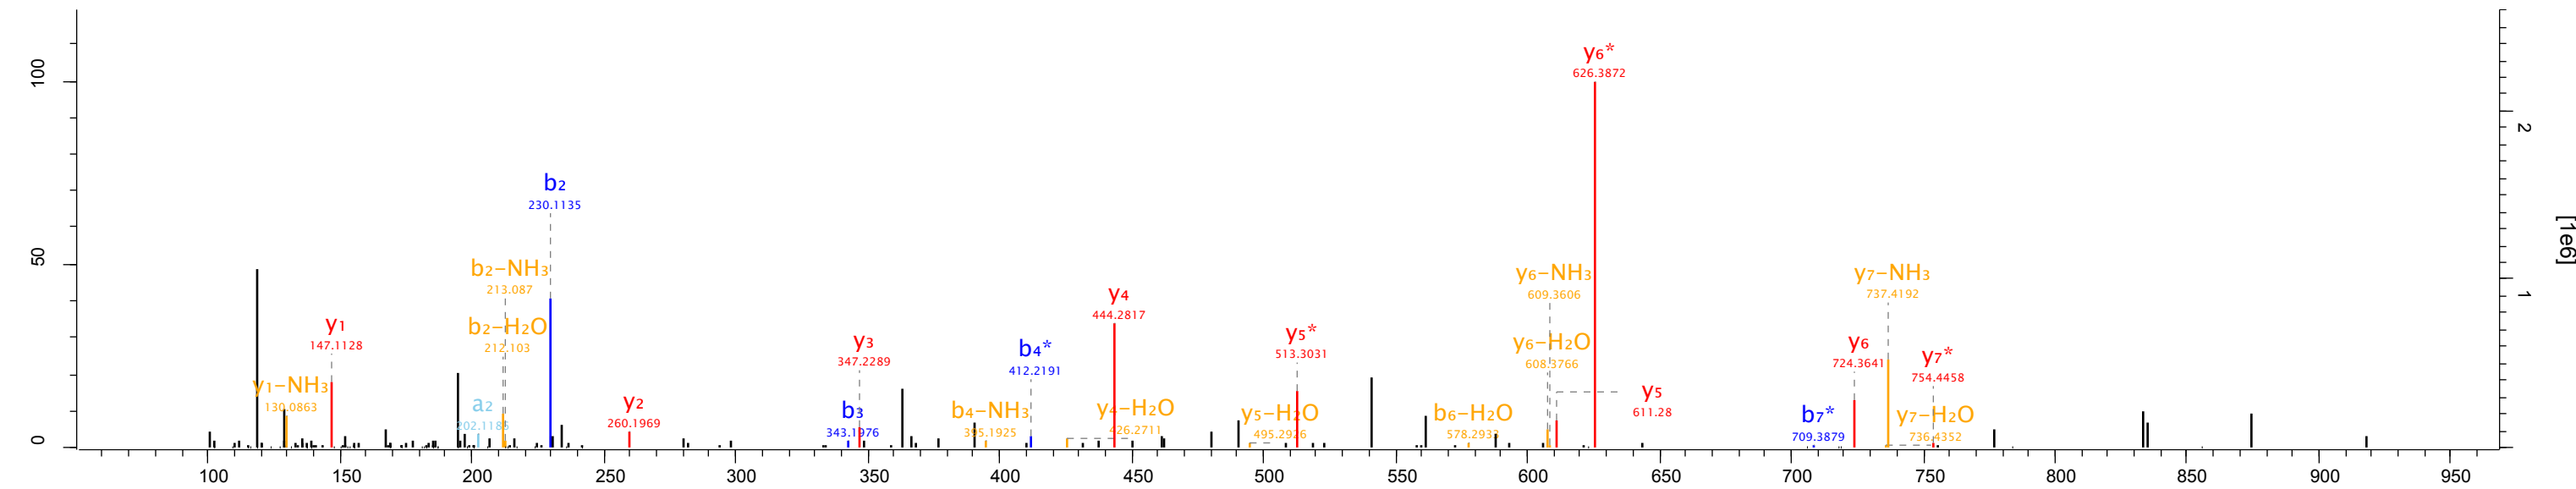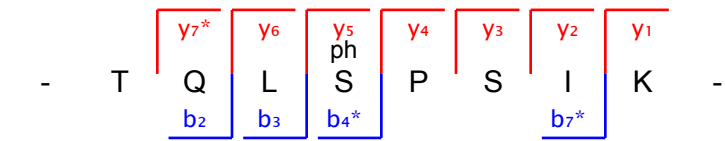

Raw file 20171215\_MaS\_33SR\_LMH\_phospho\_06 Scan 7030 Method FTMS; HCD Score 193.19 m/z 709.82 Gene names PYGO2

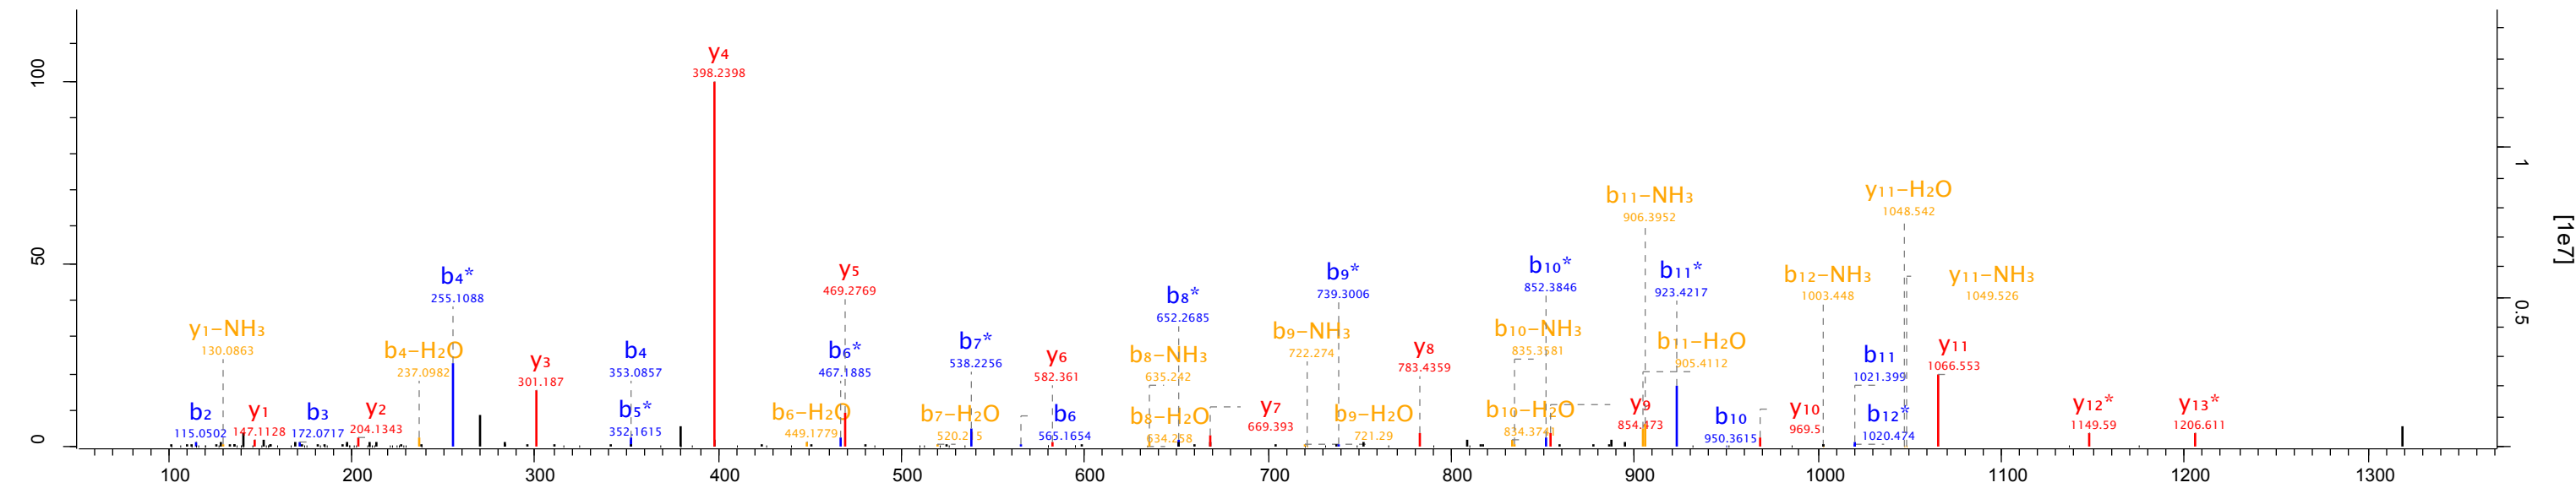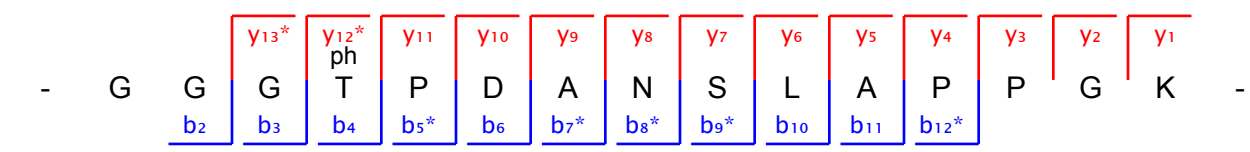

Raw file 20171215\_MaS\_33SR\_LMH\_phospho\_06 Scan 7100 Method FTMS; HCD Score 110.26 m/z 719.82 Gene names LMO7

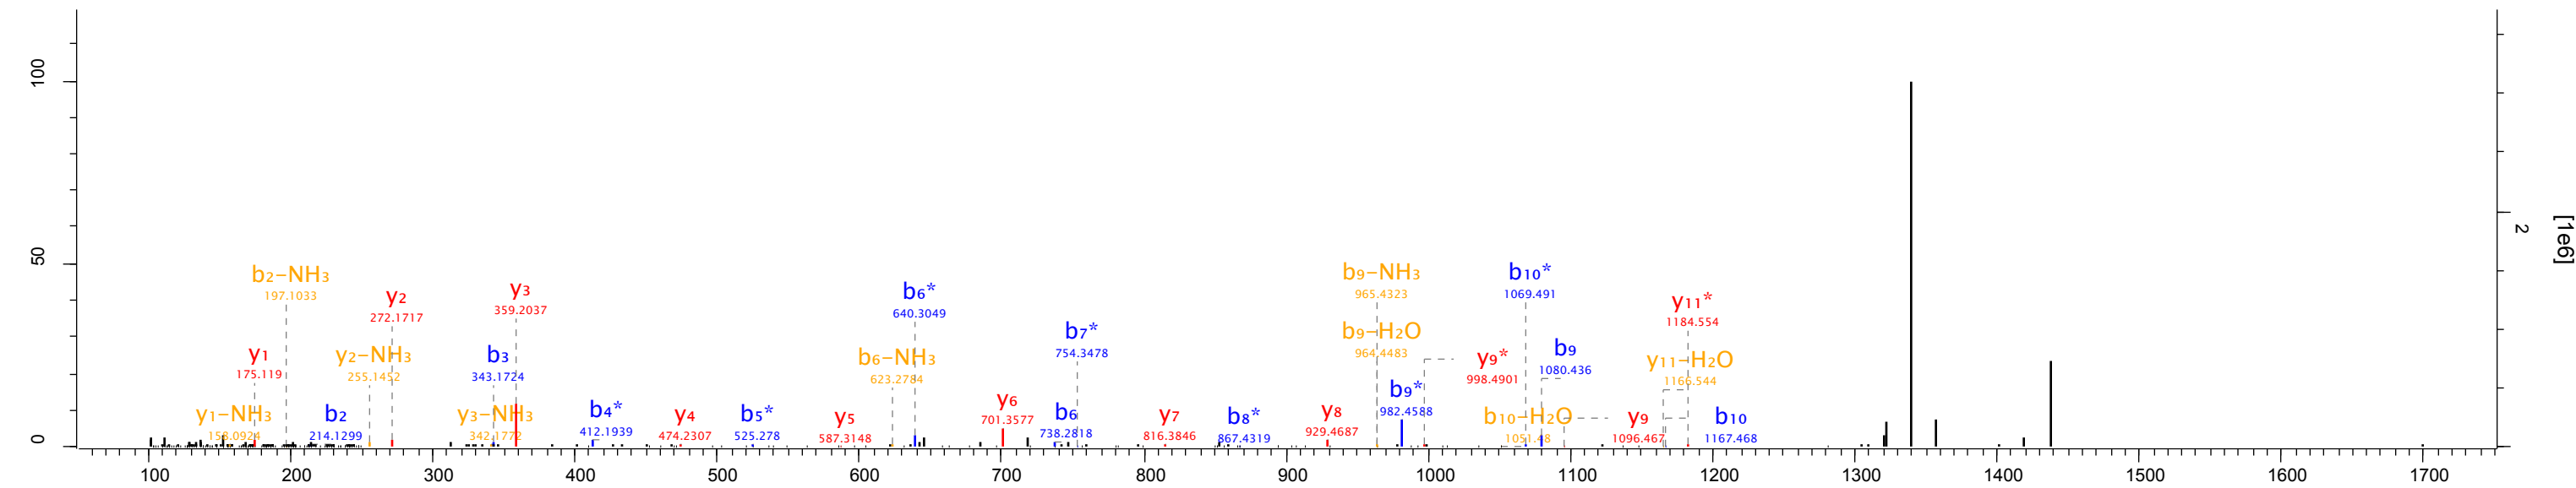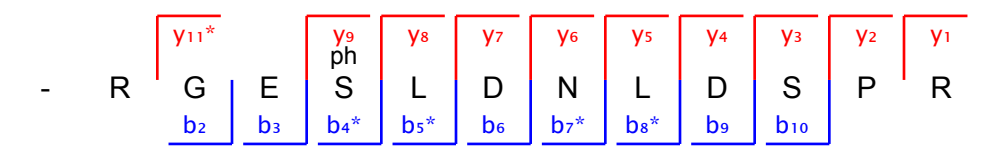

Raw file 20171215\_MaS\_33SR\_LMH\_phospho\_06 Scan 7310 Method FTMS; HCD Score 243.83 m/z 720.34 Gene names SVIL

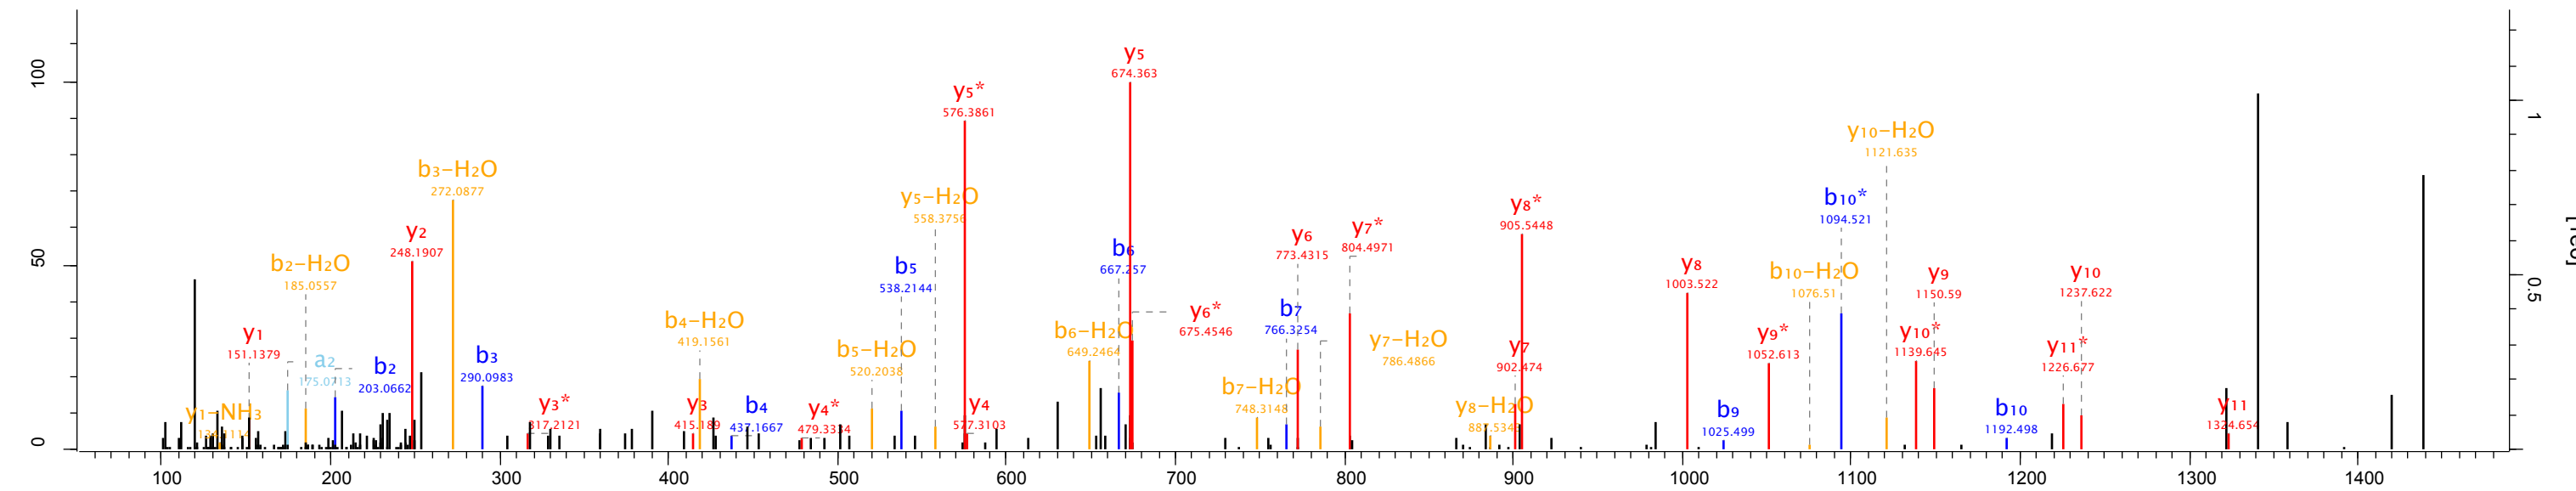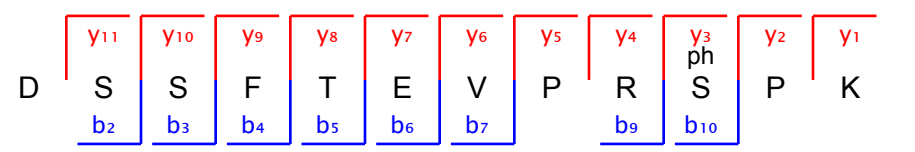

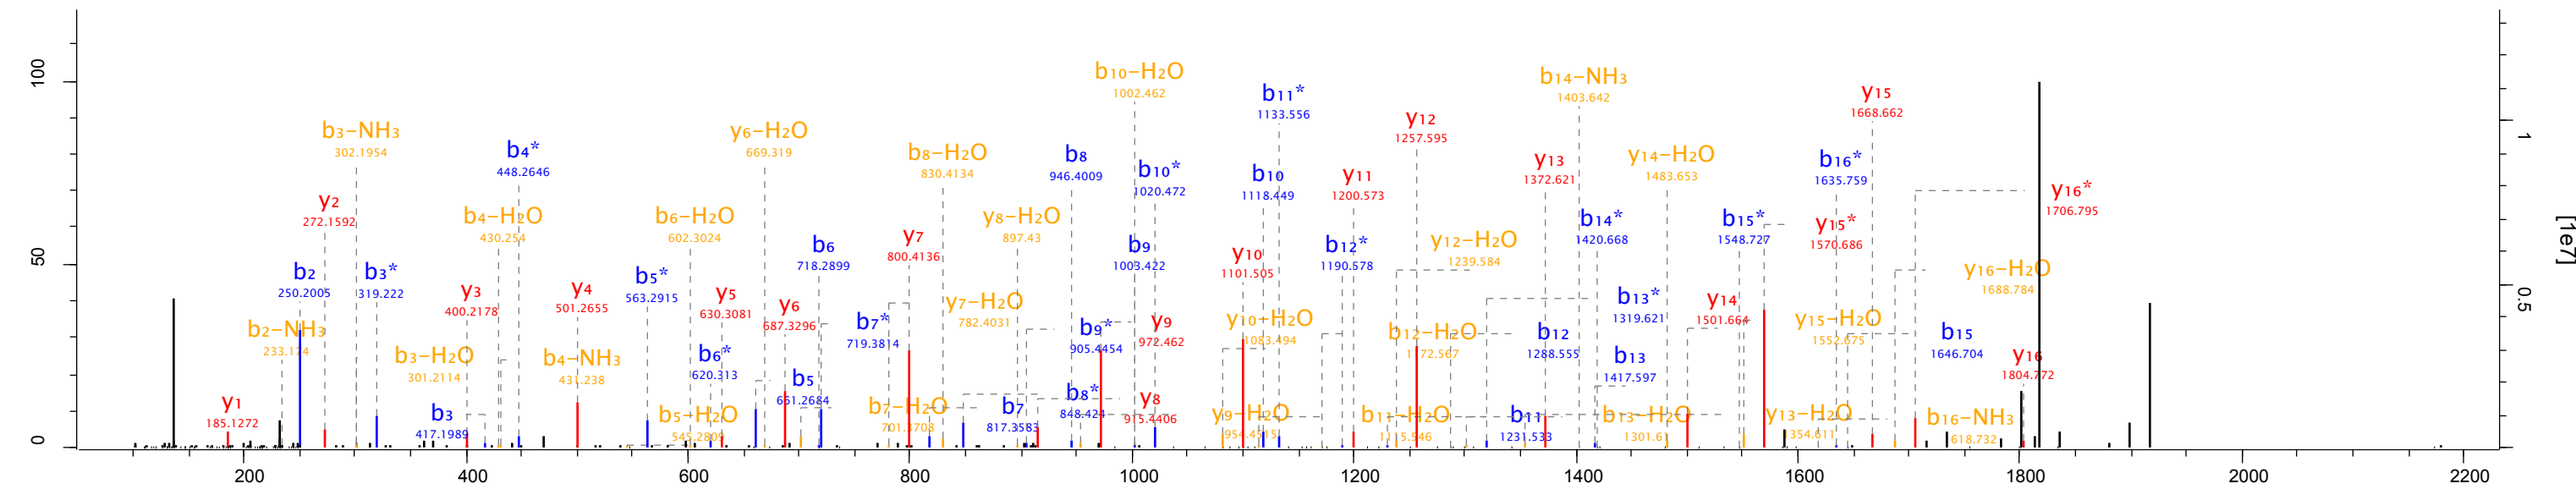

- L K S E D G V E G D L G E T Q S R -

b2 b3 b4\* b5 b6 b7 b8 b9 b10 b11 b12 b13 b14\* b15 b16\*

y16 y15 ph y14 y13 y12 y11 y10 y9 y8 y7 y6 y5 y4 y3 y2 y1

Raw file

20171215\_MaS\_33SR\_LMH\_phospho\_06

| Scan | Method    | Score | m/z    | Gene names |
|------|-----------|-------|--------|------------|
| 7610 | FTMS; HCD | 88.1  | 546.76 | DENND4A    |

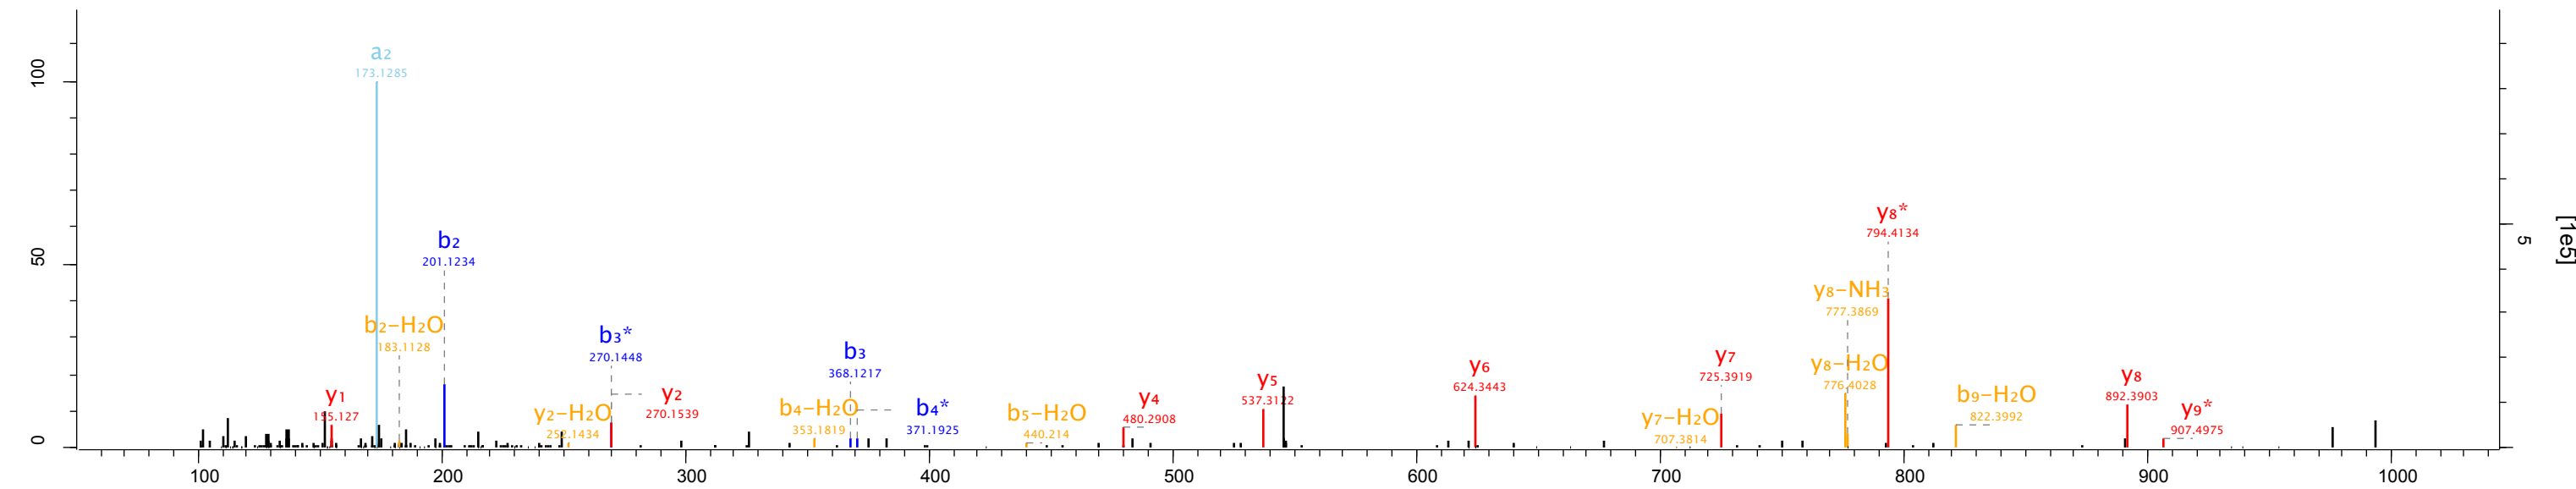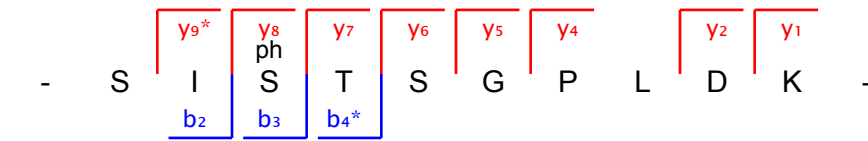



Raw file 20171215\_MaS\_33SR\_LMH\_phospho\_06 Scan 7760 Method FTMS; HCD Score 111.77 m/z 748.34 Gene names C15orf52

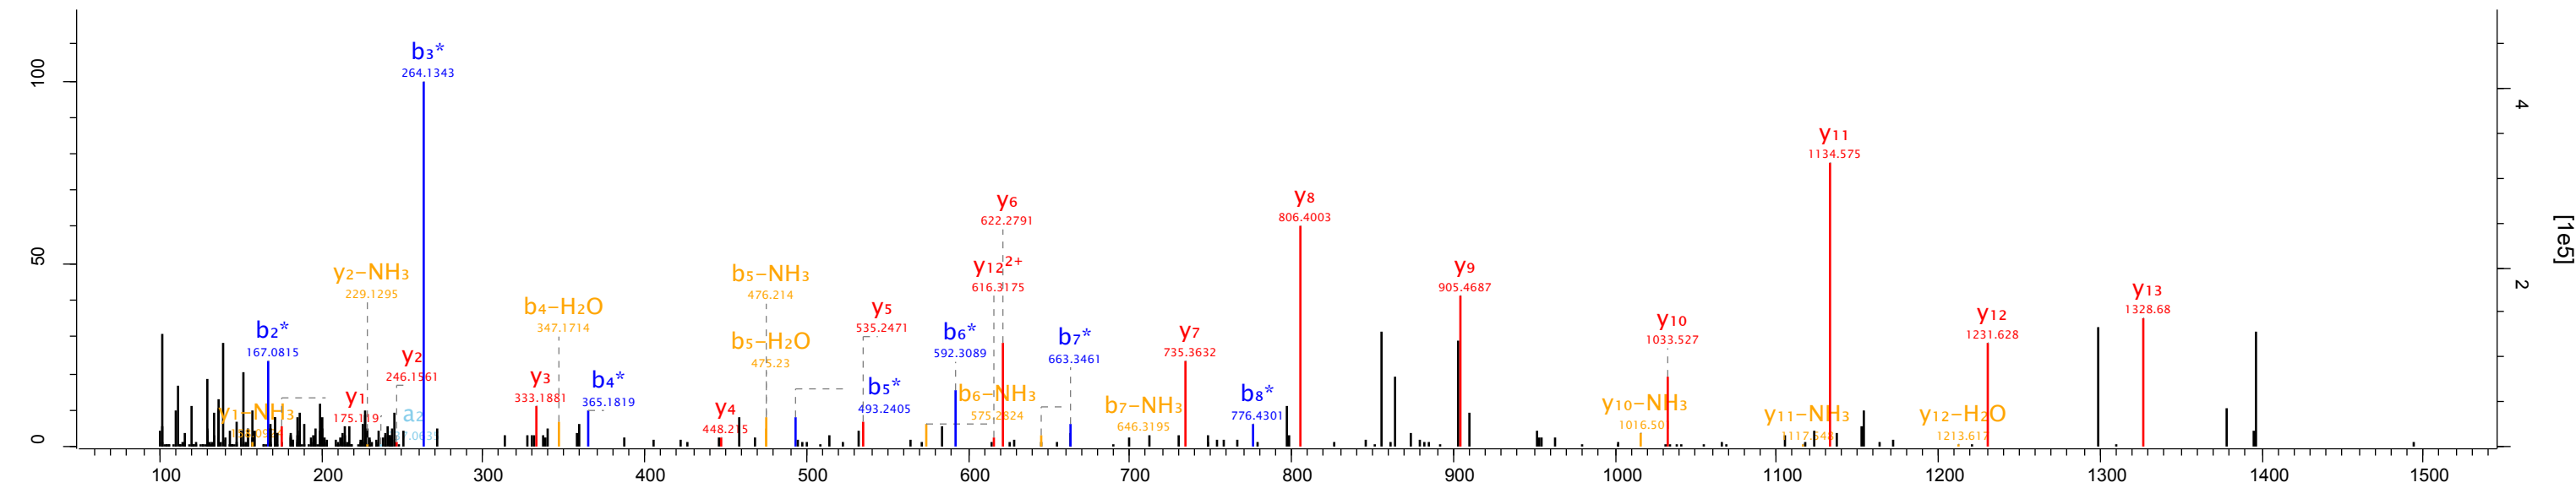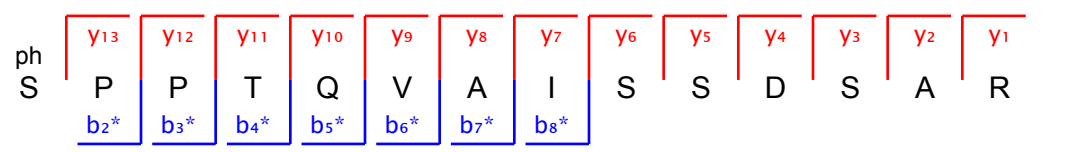

Raw file 20171215\_MaS\_33SR\_LMH\_phospho\_06 Scan 7860 Method FTMS; HCD Score 106.79 m/z 643.31 Gene names C11orf30;EMSY

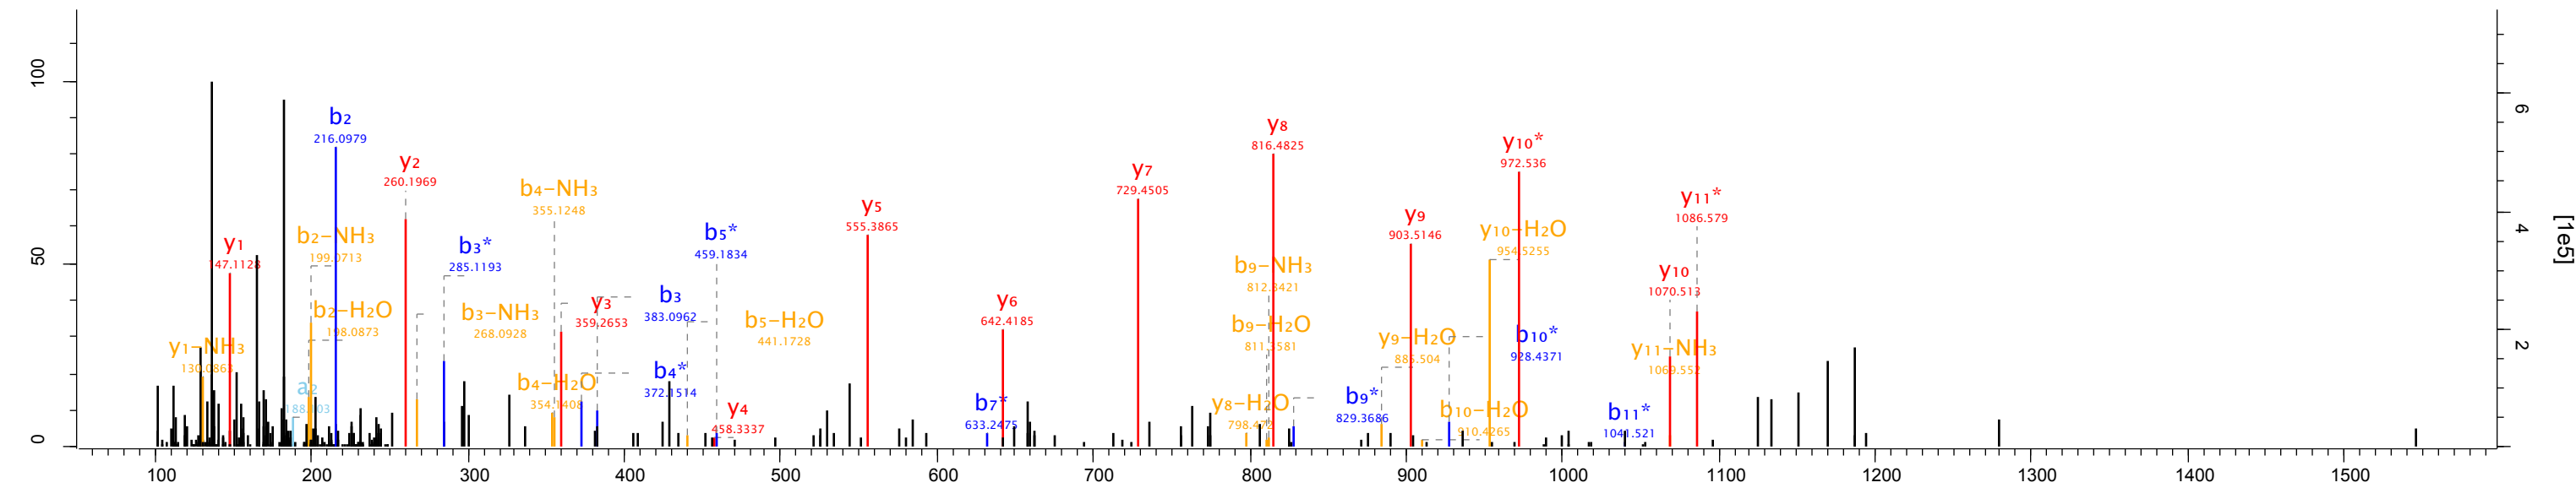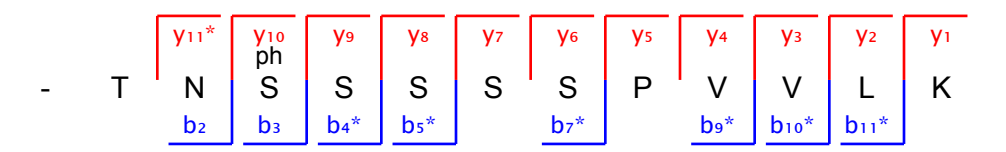

Raw file 20171215\_MaS\_33SR\_LMH\_phospho\_06 Scan 7990 Method FTMS; HCD Score 68.68 m/z 536.27 Gene names NFKB2

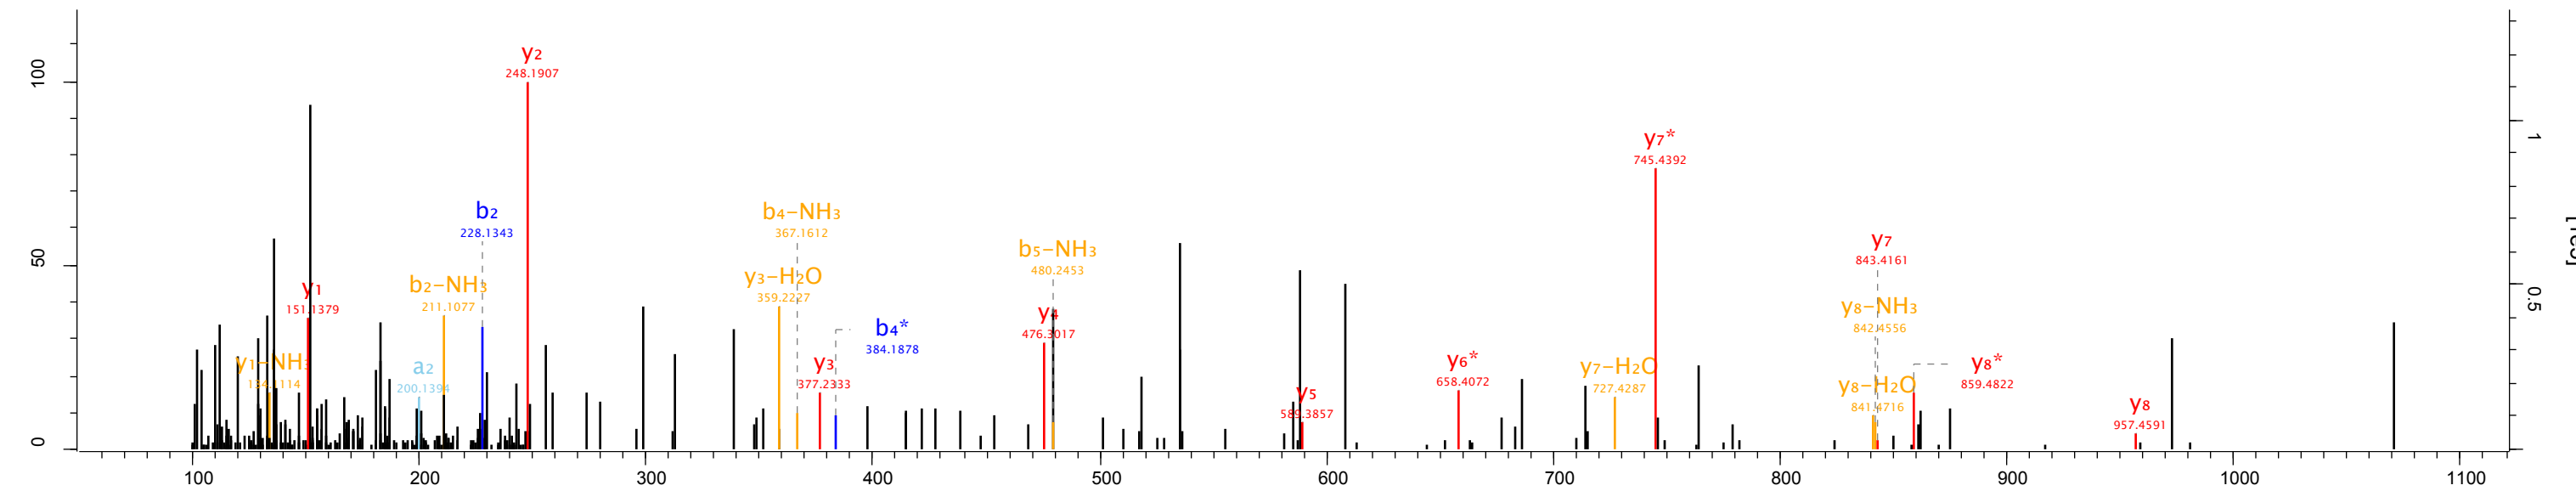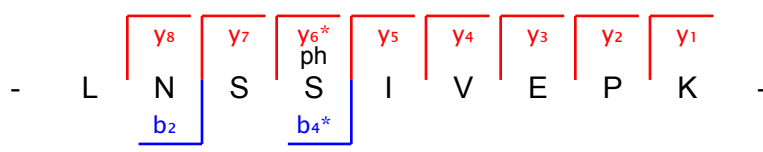

Raw file 20171215\_MaS\_33SR\_LMH\_phospho\_06 Scan 8490 Method FTMS; HCD Score 126.49 m/z 418.22 Gene names ANLN

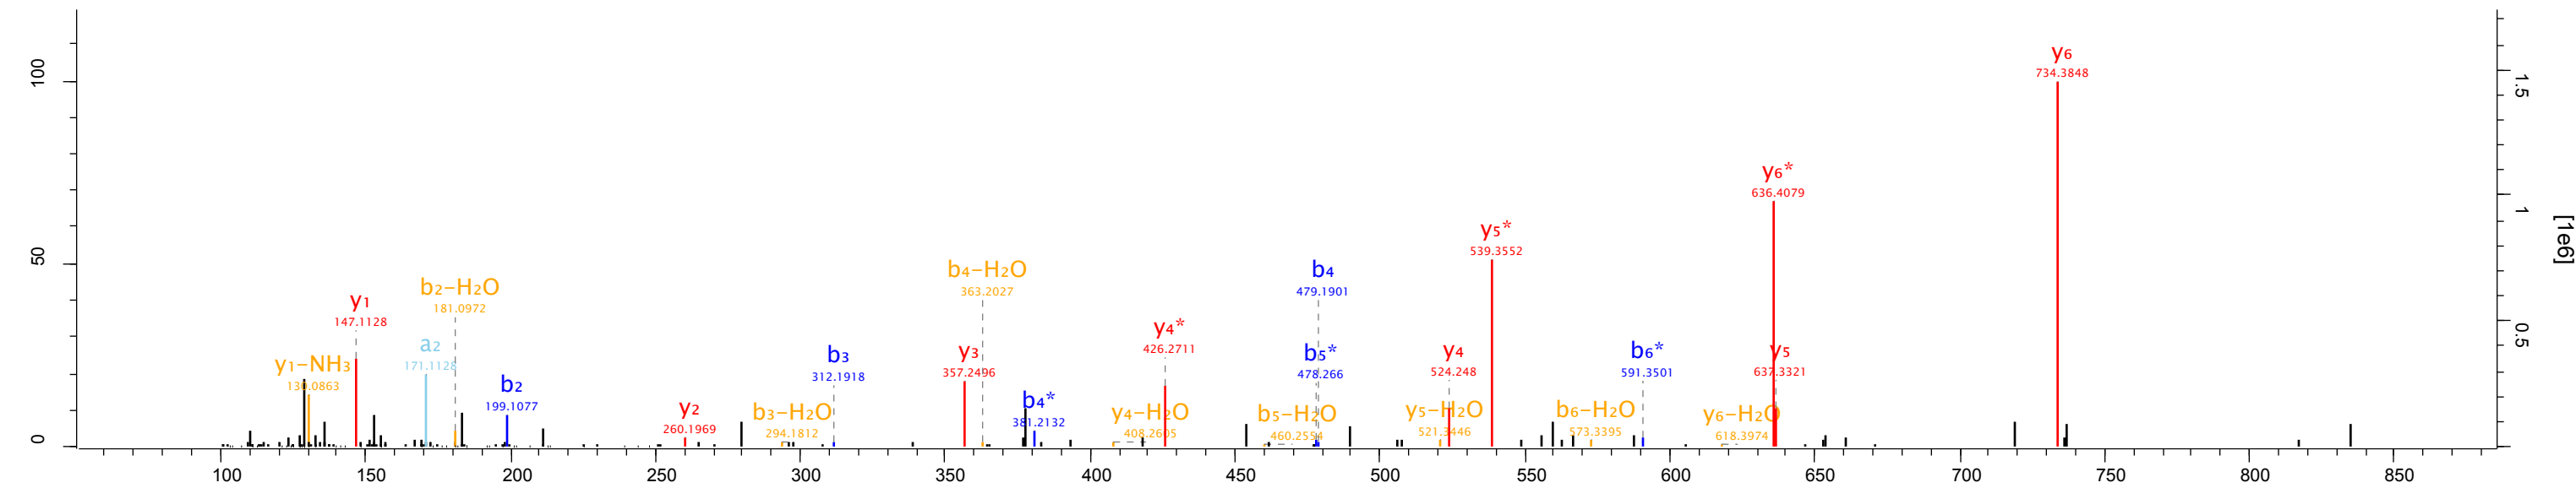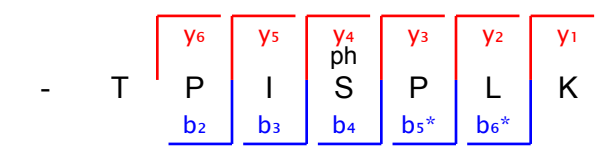

Raw file: 20171215\_MaS\_33SR\_LMH\_phospho\_06  
 Scan: 8540 Method: FTMS; HCD Score: 65.41 m/z: 546.26 Gene names: NELFA

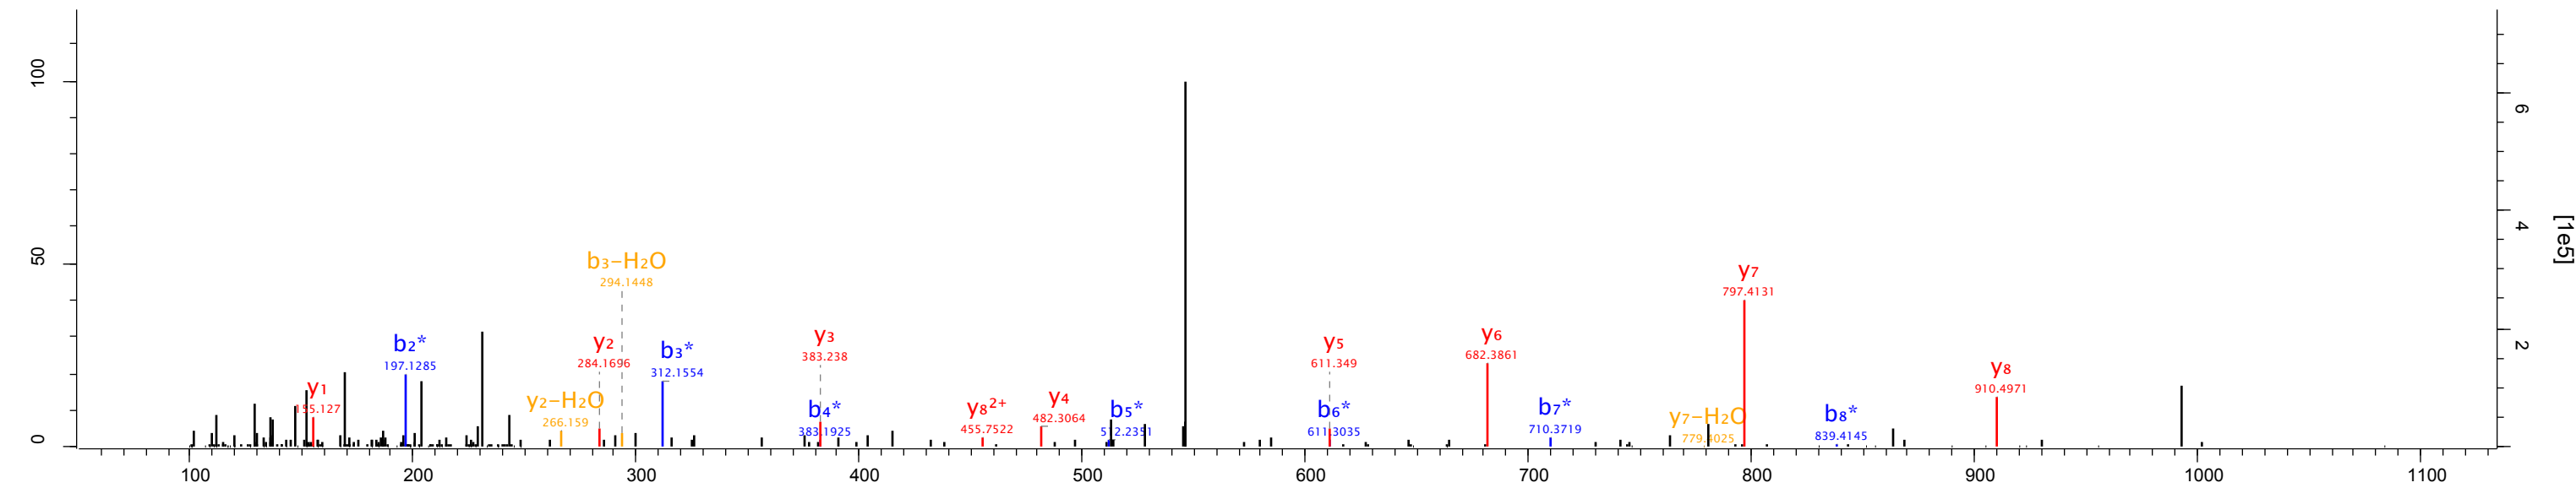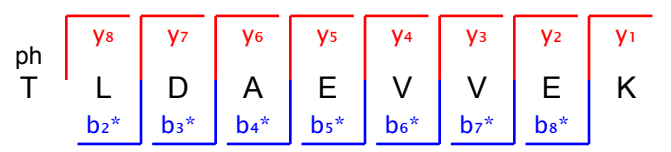

Raw file 20171215\_MaS\_33SR\_LMH\_phospho\_06 Scan 8860 Method FTMS; HCD Score 136.44 m/z 908.42 Gene names NRD1

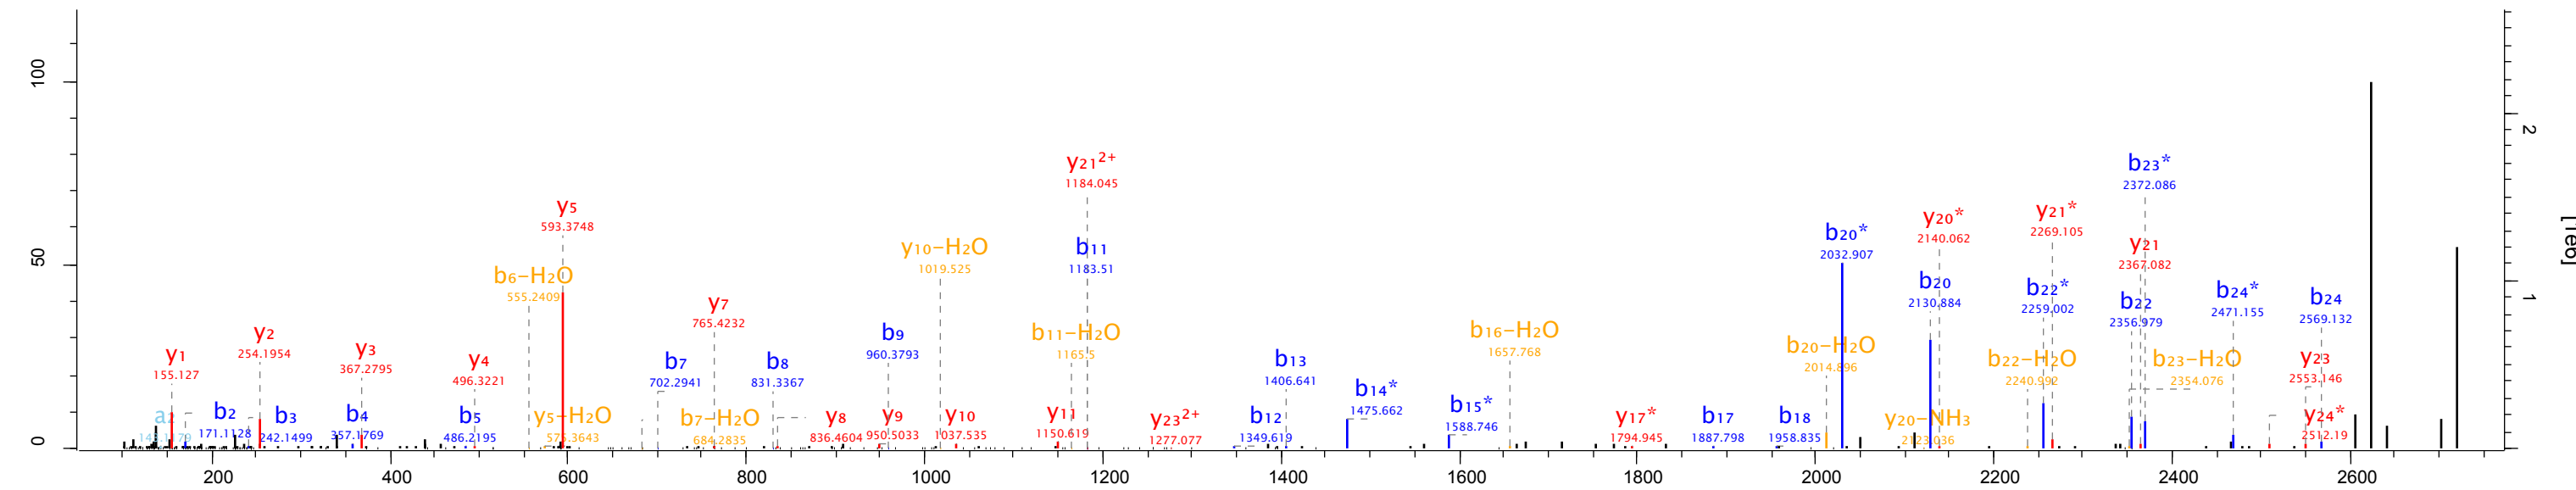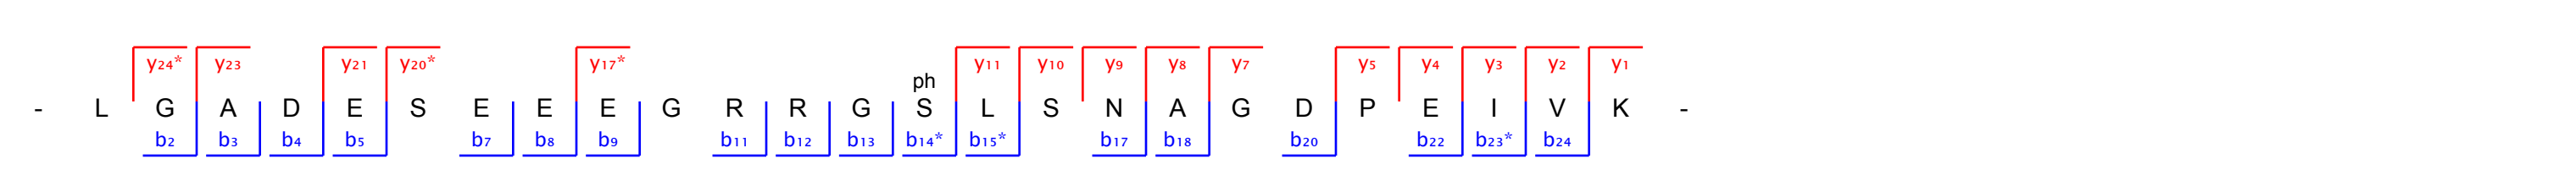

Raw file 20171215\_MaS\_33SR\_LMH\_phospho\_06 Scan 8880 Method FTMS; HCD Score 161.35 m/z 752.36 Gene names ANKRD17

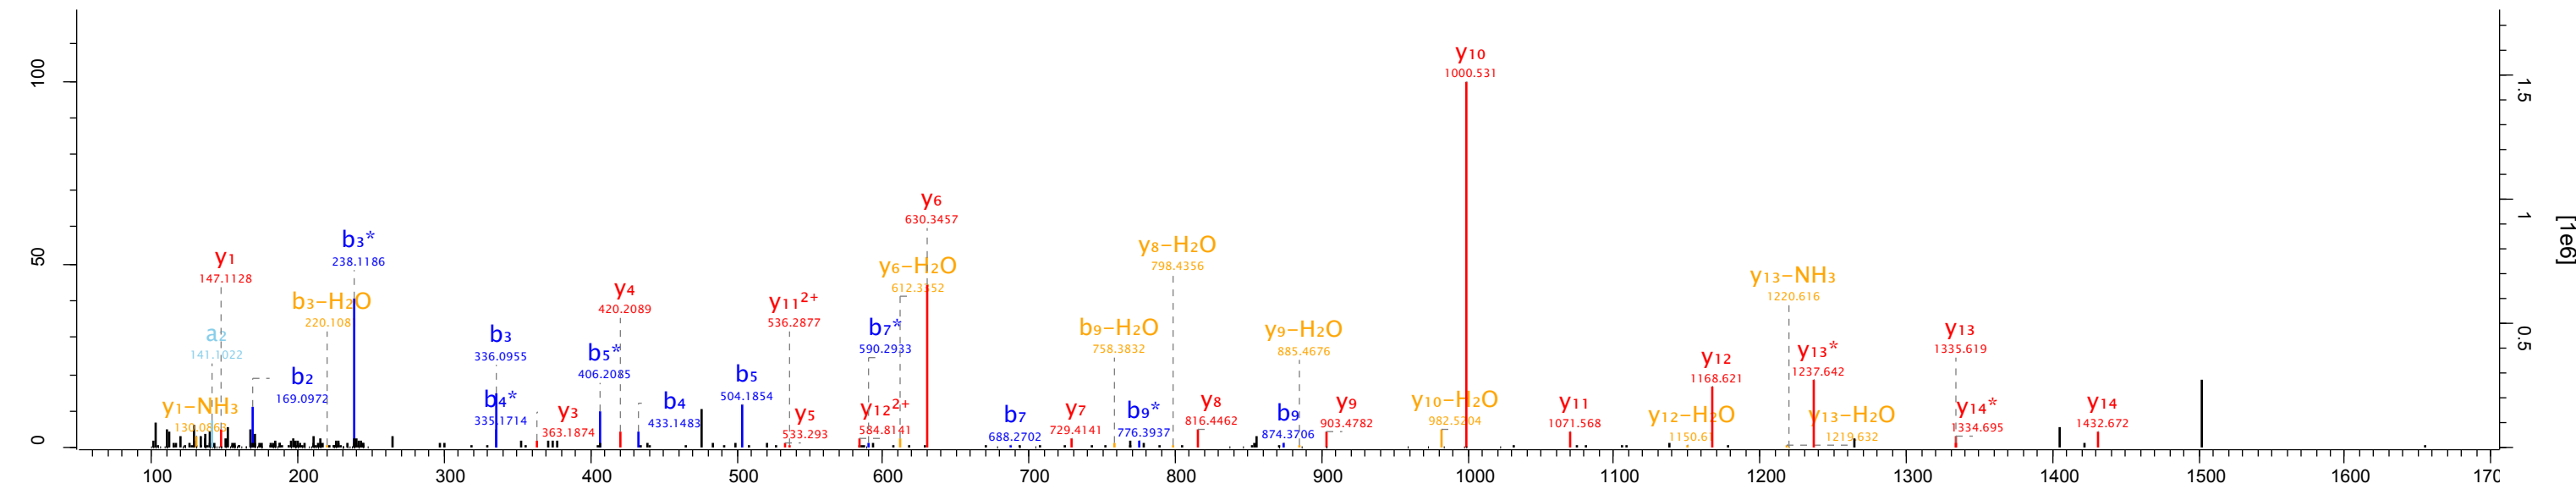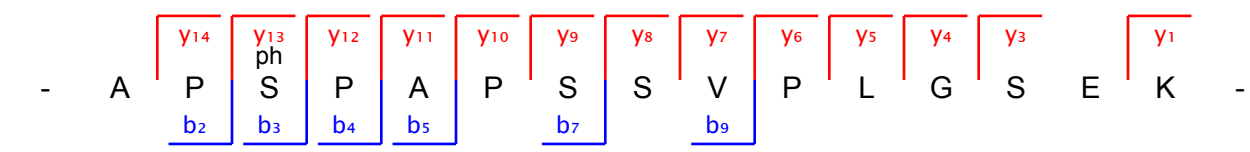

Raw file 20171215\_MaS\_33SR\_LMH\_phospho\_06 Scan 9090 Method FTMS; HCD Score 57.53 m/z 598.93 Gene names SH3BP4

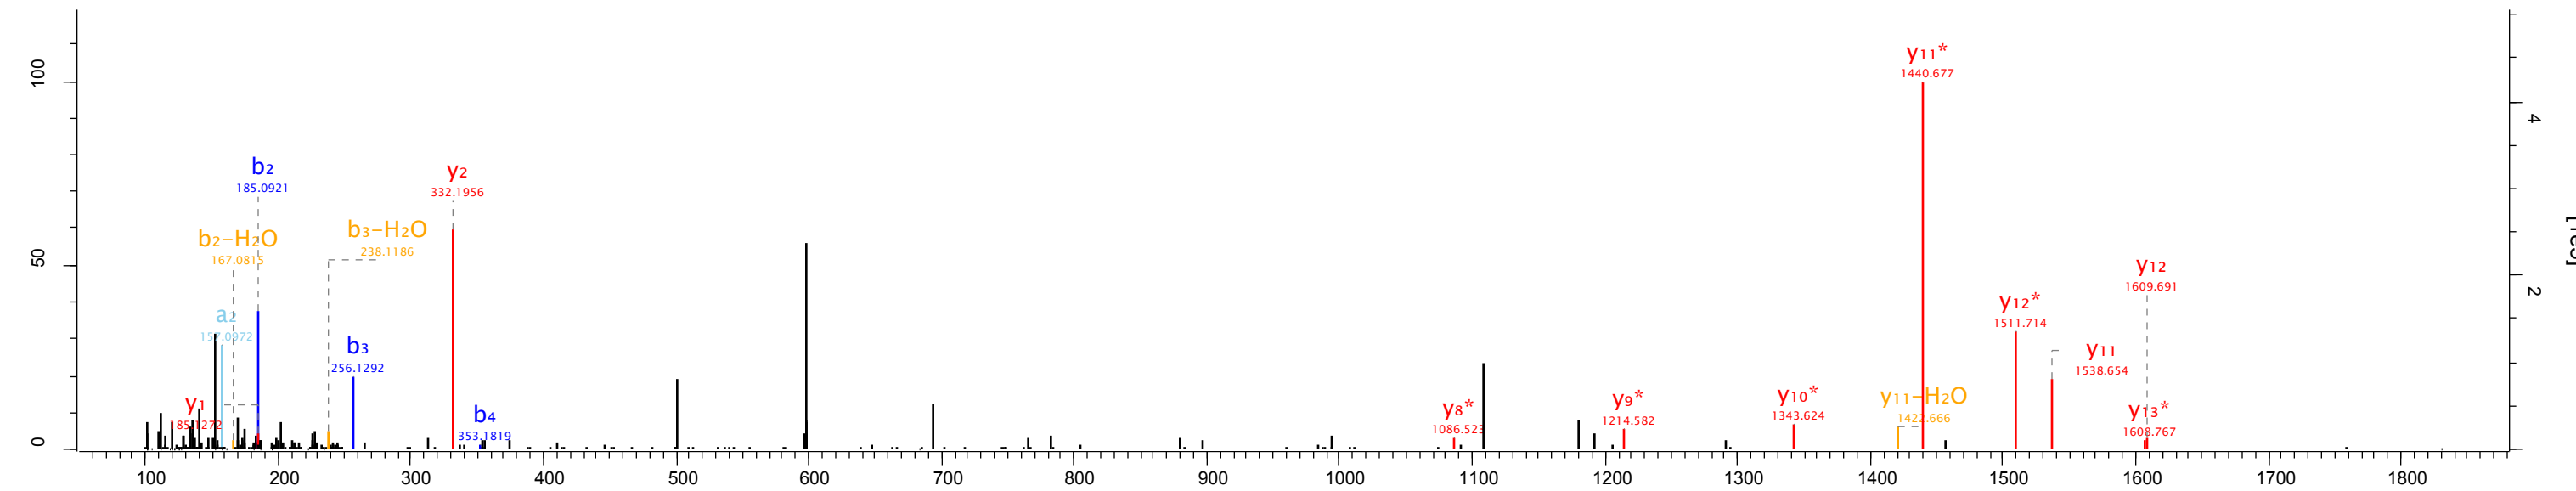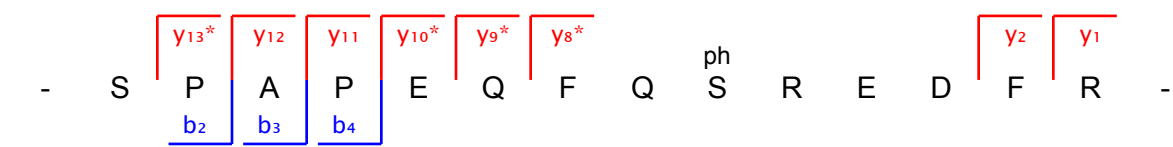



Raw file 20171215\_MaS\_33SR\_LMH\_phospho\_06 Scan 9100 Method FTMS; HCD Score 120.27 m/z 749.02 Gene names KMT2D

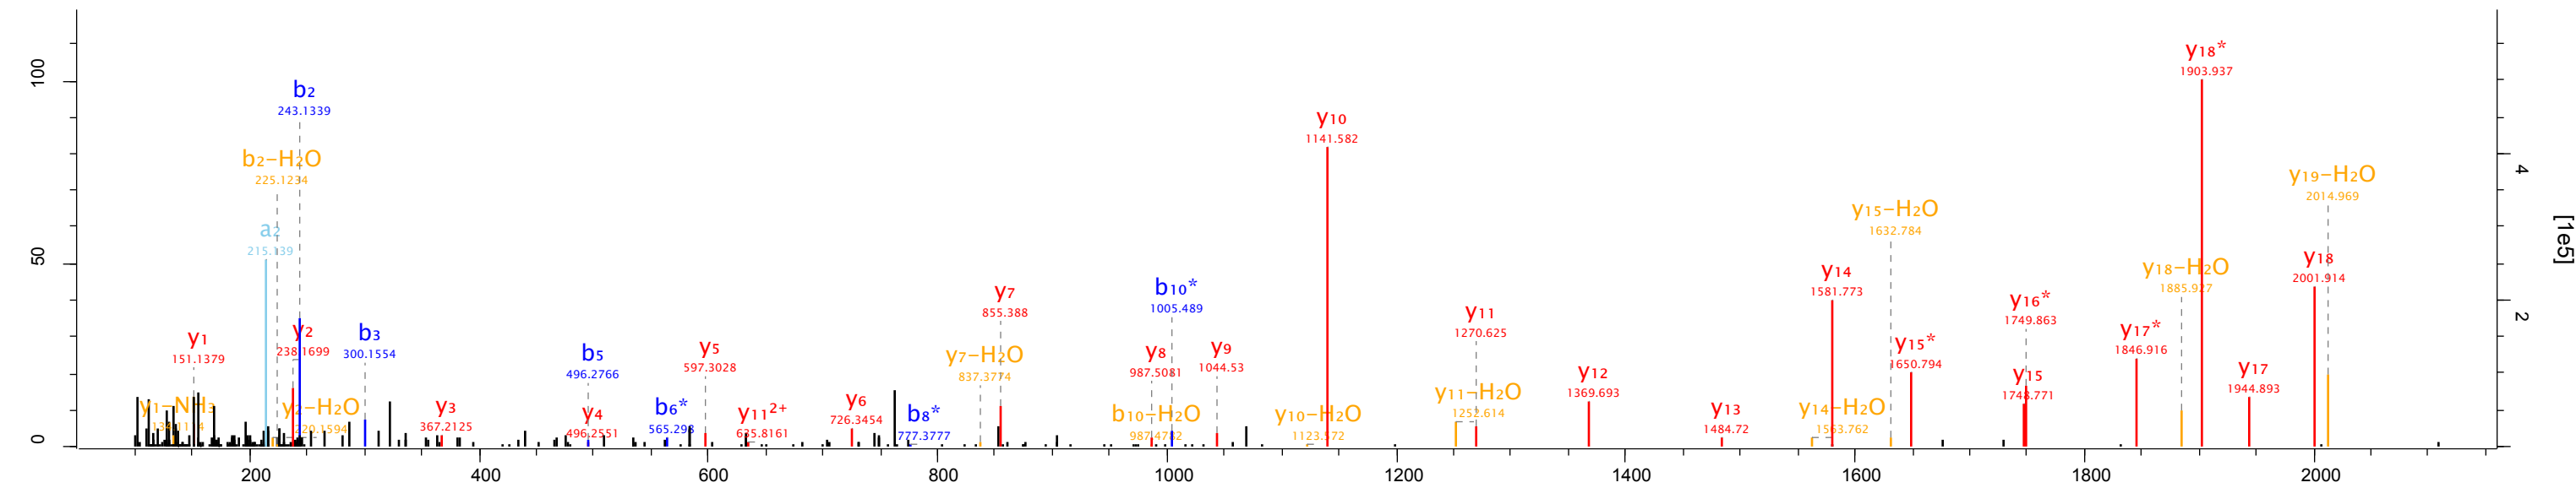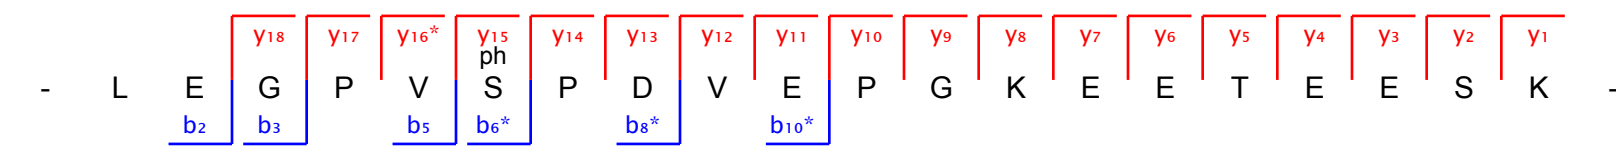

Raw file 20171215\_MaS\_33SR\_LMH\_phospho\_06 Scan 9500 Method FTMS; HCD Score 82.27 m/z 716.32 Gene names ARHGEF1

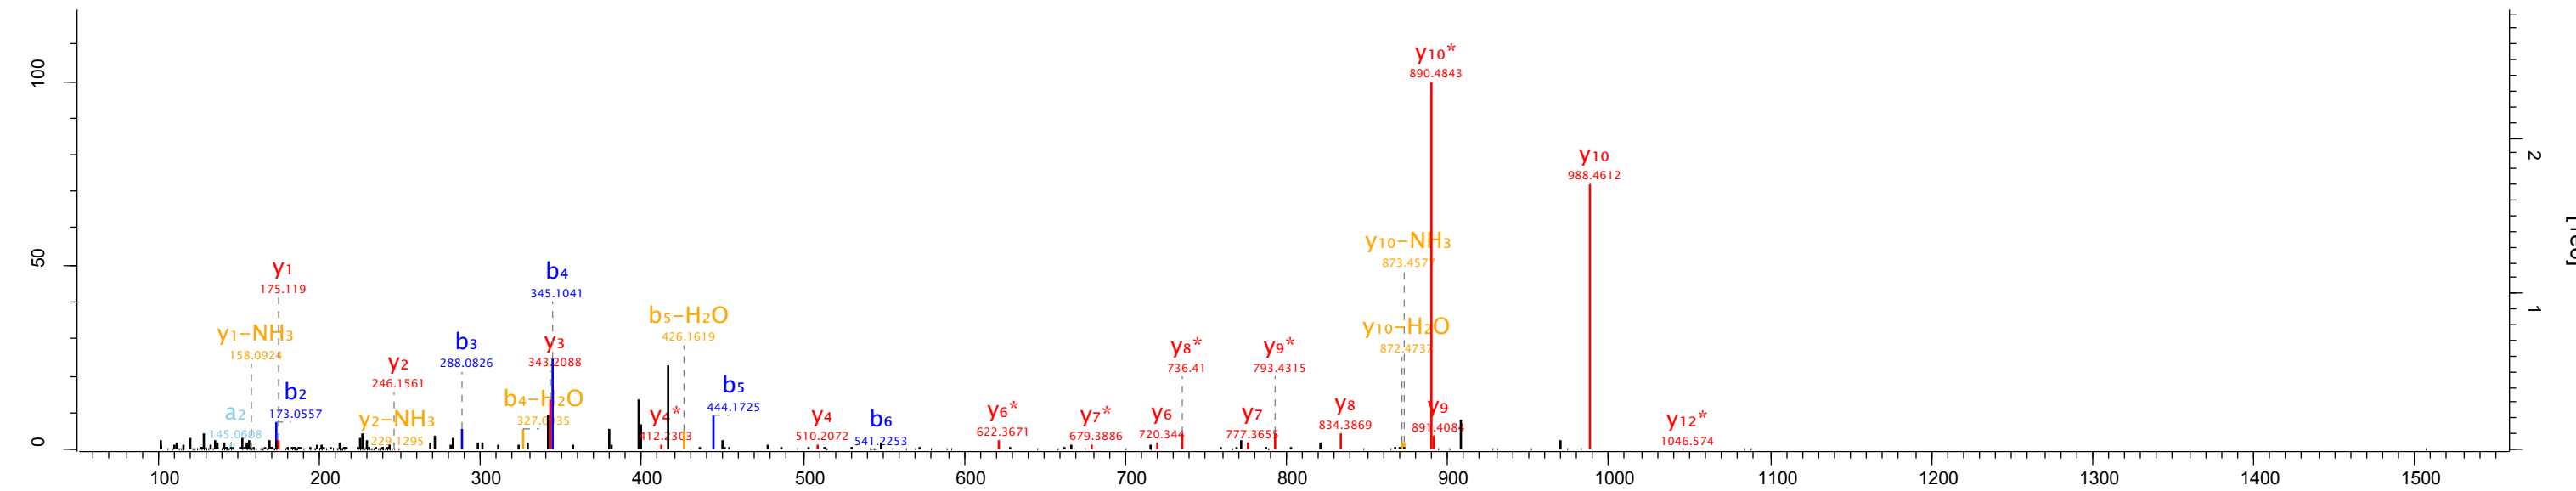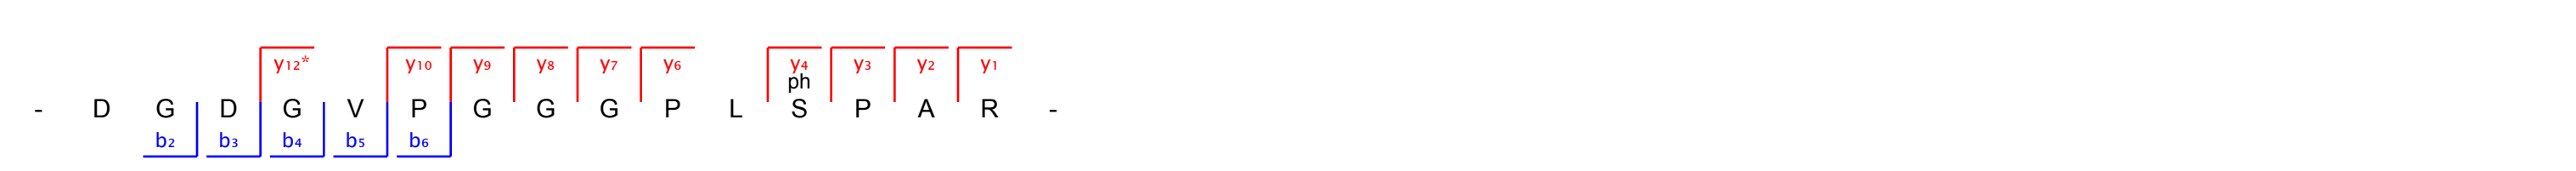

Raw file 20171215\_MaS\_33SR\_LMH\_phospho\_06 Scan 9650 Method FTMS; HCD Score 180.05 m/z 1021.01 Gene names UBAP2L

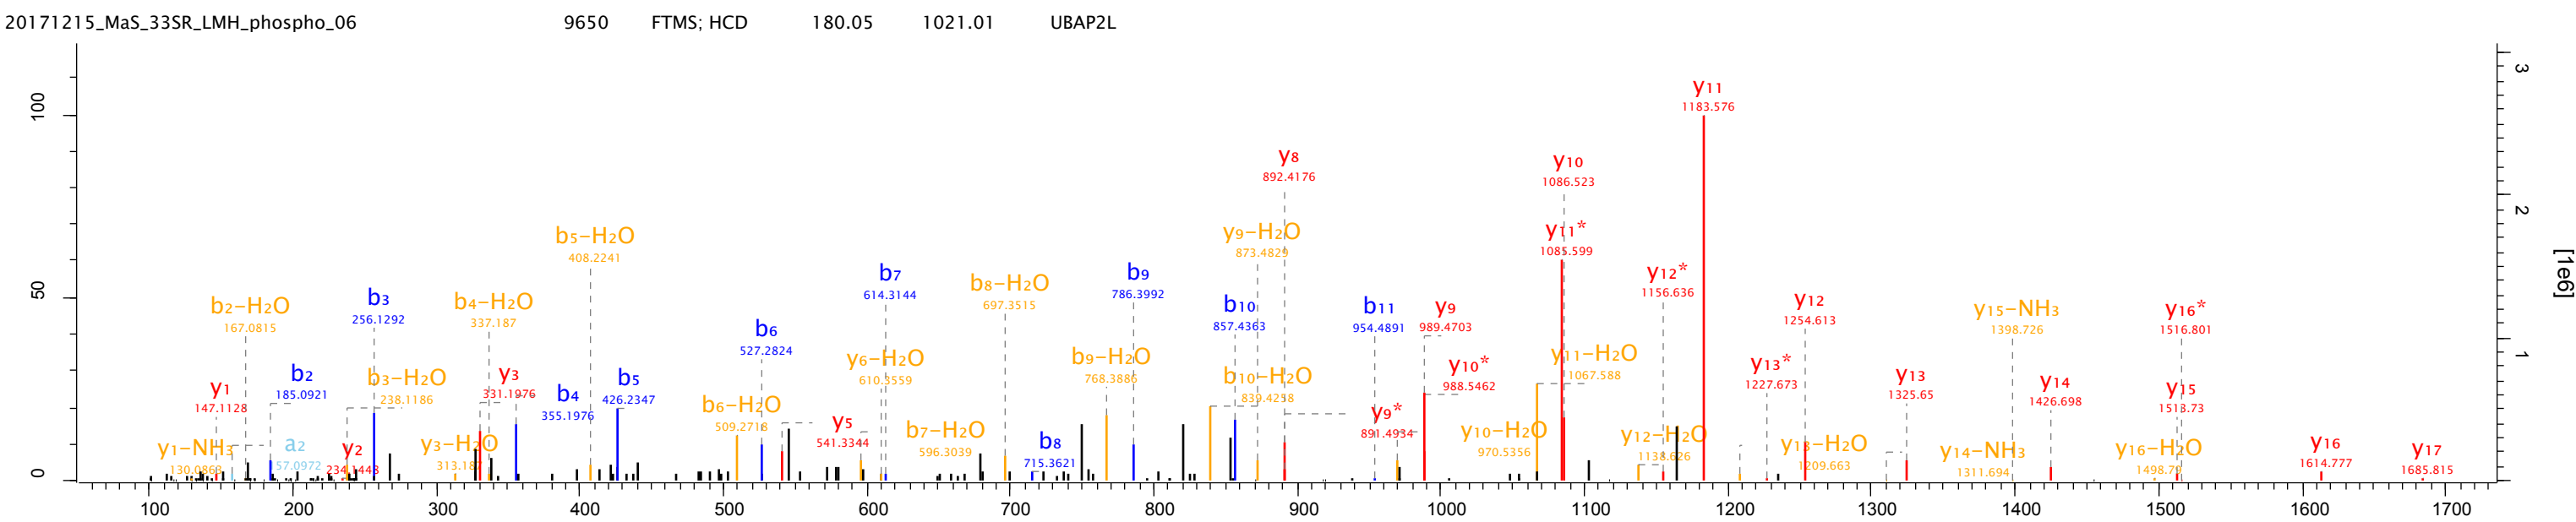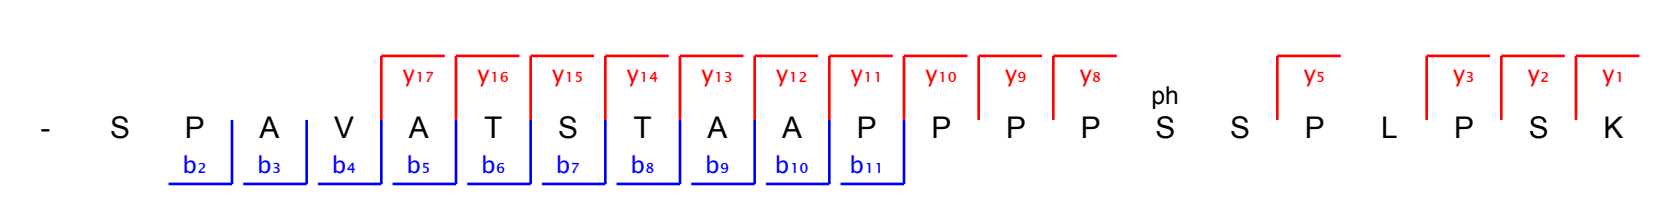

Raw file 20171215\_MaS\_33SR\_LMH\_phospho\_06 Scan 9890 Method FTMS; HCD Score 63.66 m/z 520.27 Gene names FHOD1

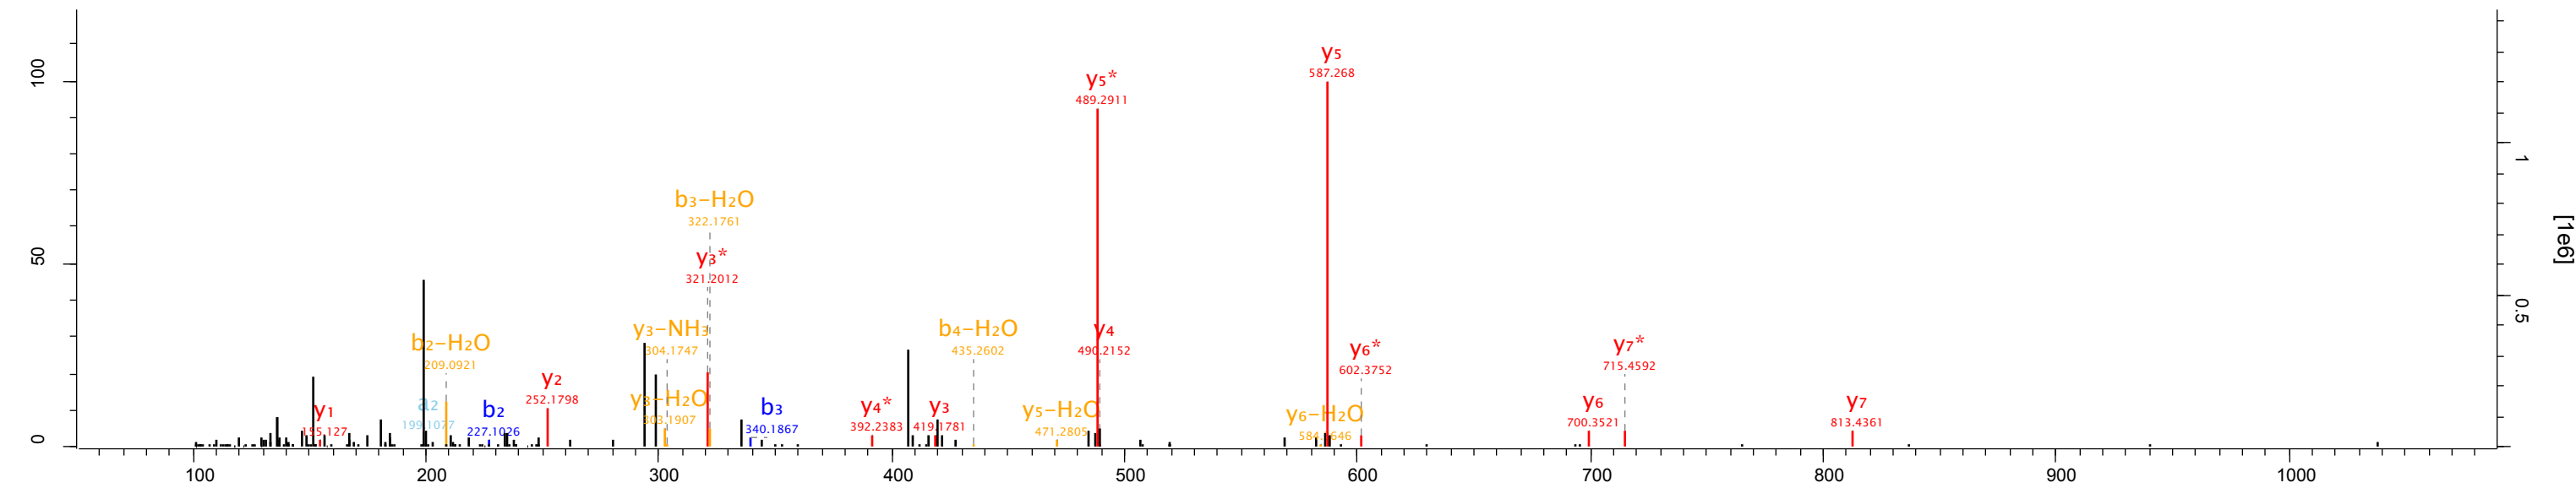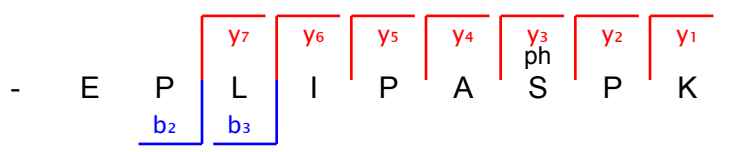

Raw file 20171215\_MaS\_33SR\_LMH\_phospho\_07 Scan 2010 Method FTMS; HCD Score 51.25 m/z 533.31 Gene names GCFC2

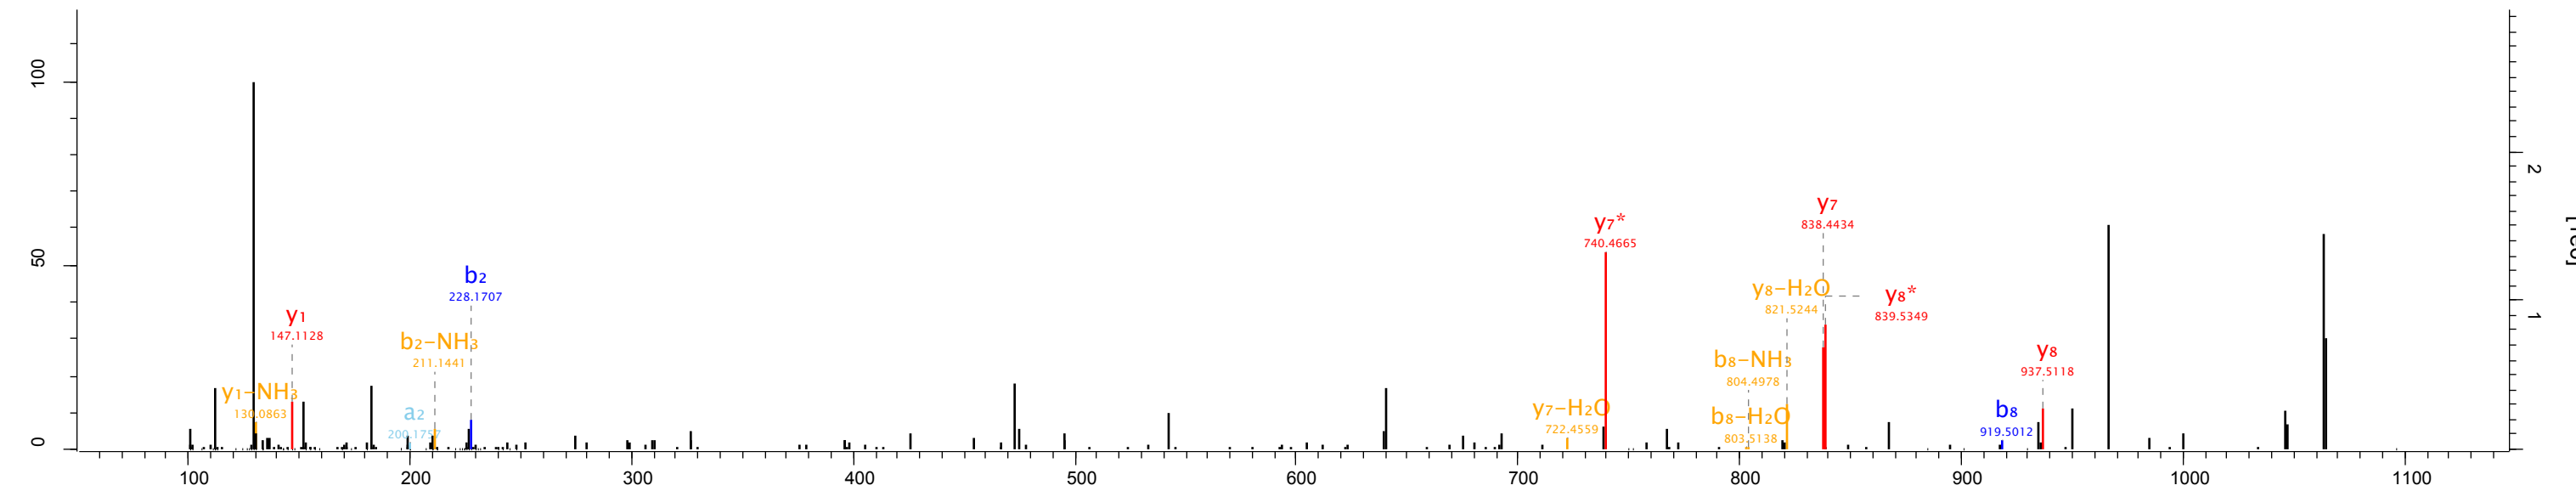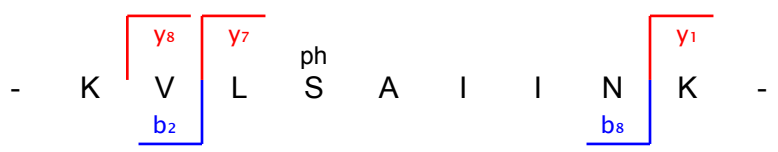

Raw file 20171215\_MaS\_33SR\_LMH\_phospho\_07 Scan 2170 Method FTMS; HCD Score 155.57 m/z 448.91 Gene names TCOF1

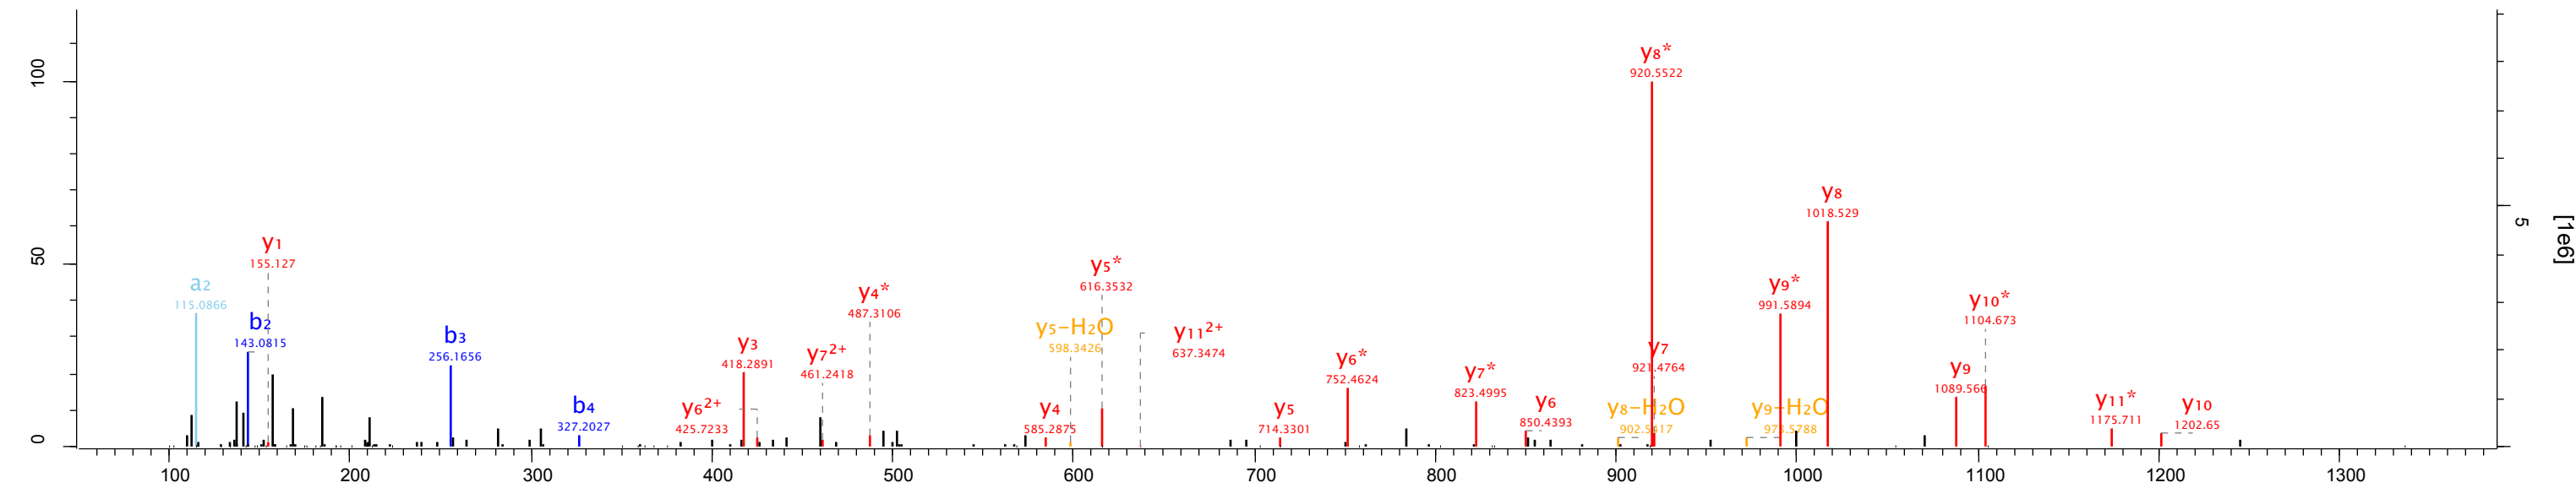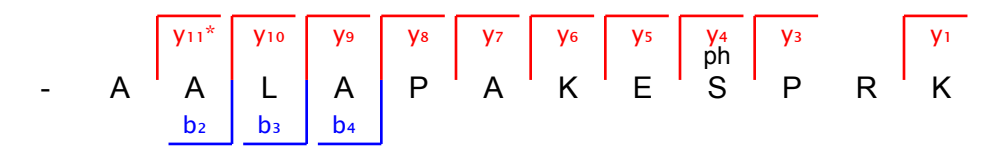

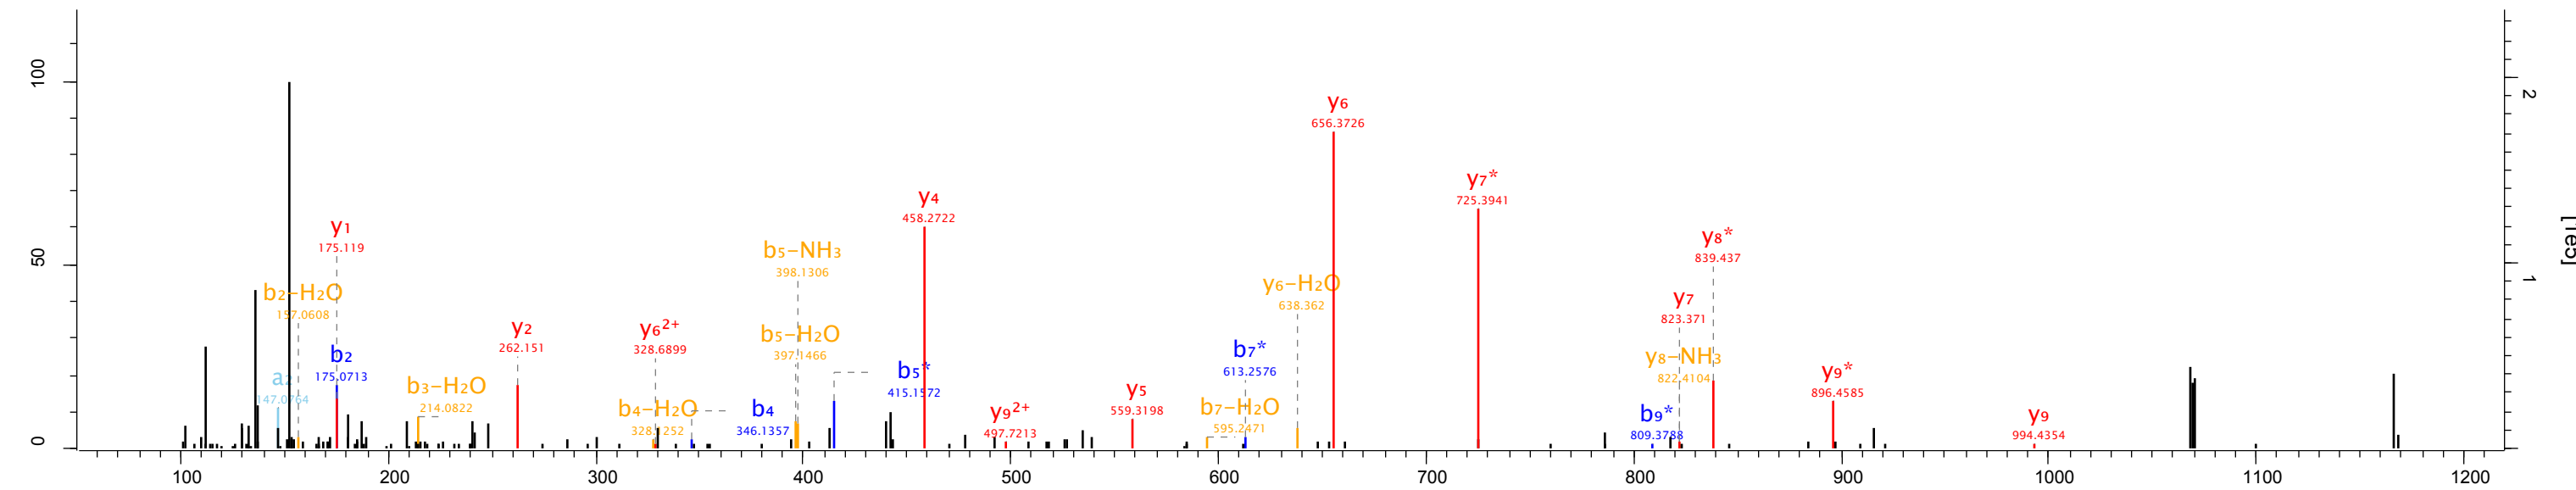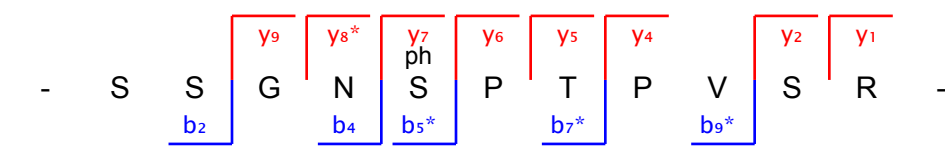

Raw file 20171215\_MaS\_33SR\_LMH\_phospho\_08 Scan 10720 Method FTMS; HCD Score 50.5 m/z 843.71

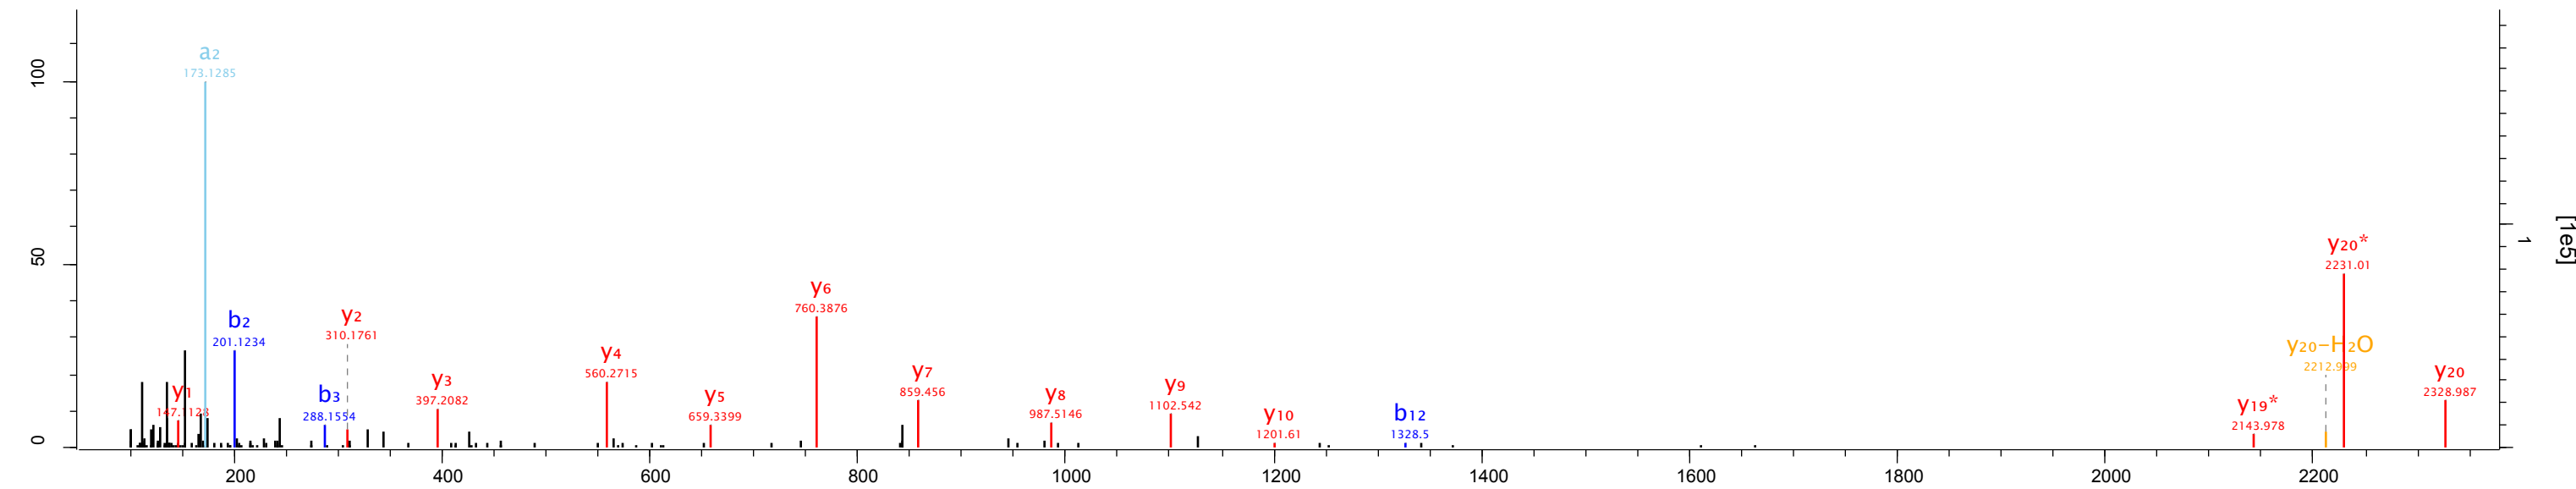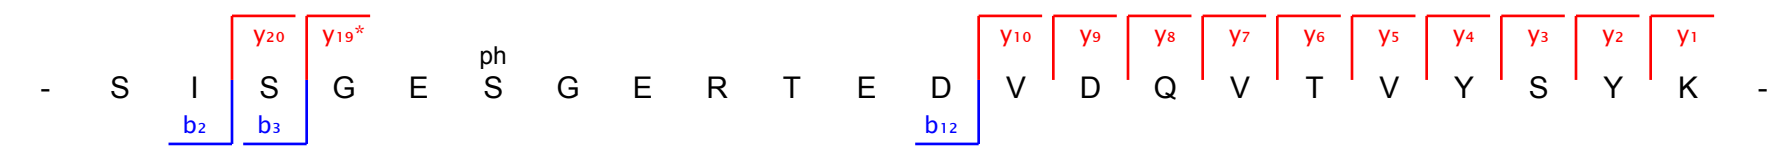



Raw file: 20171215\_MaS\_33SR\_LMH\_phospho\_08  
 Scan: 11380 Method: FTMS; HCD Score: 103.13 m/z: 682.35 Gene names: FOXC2

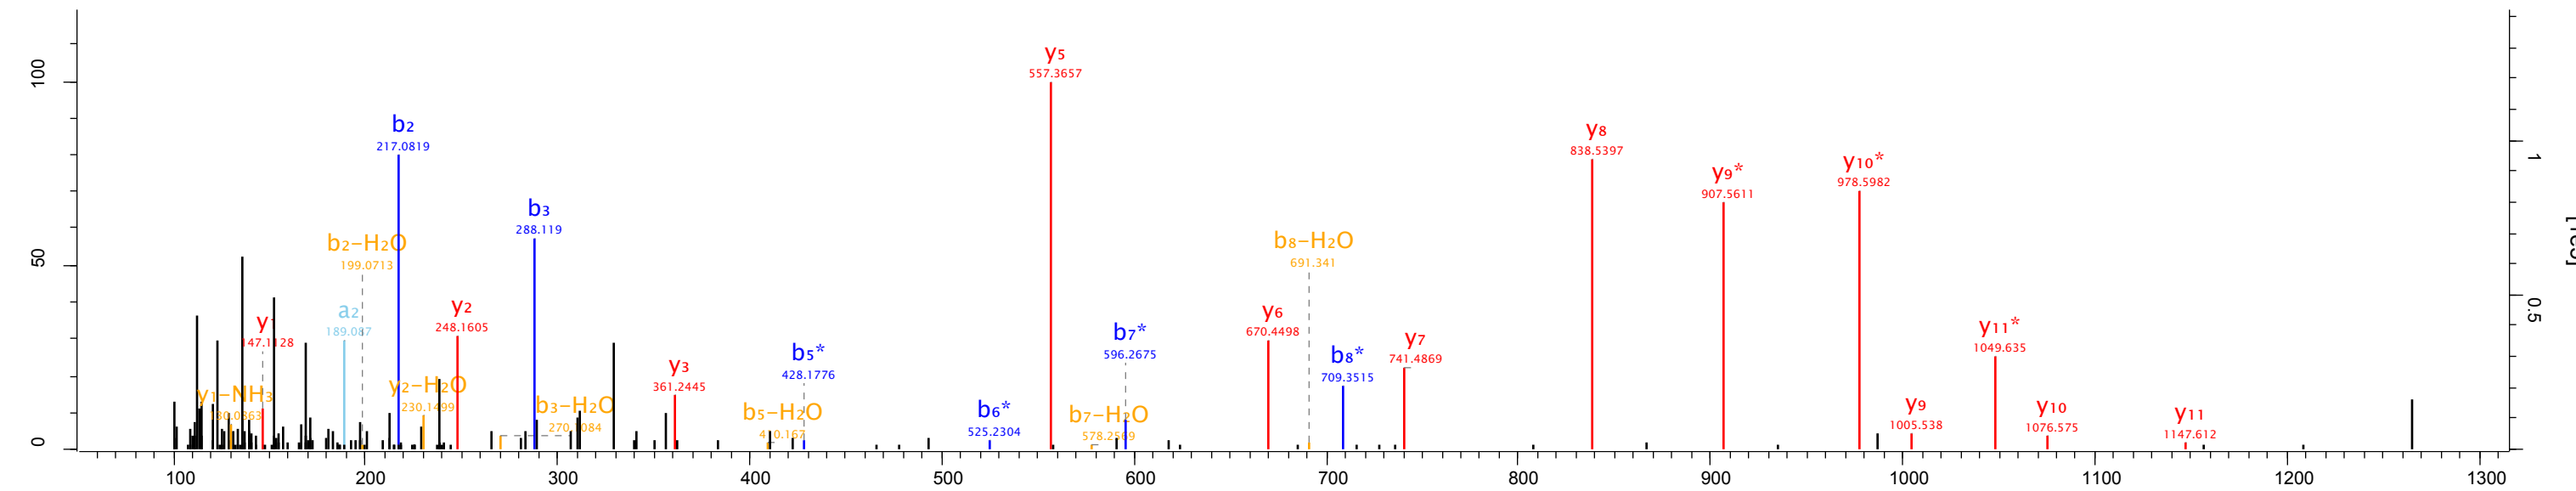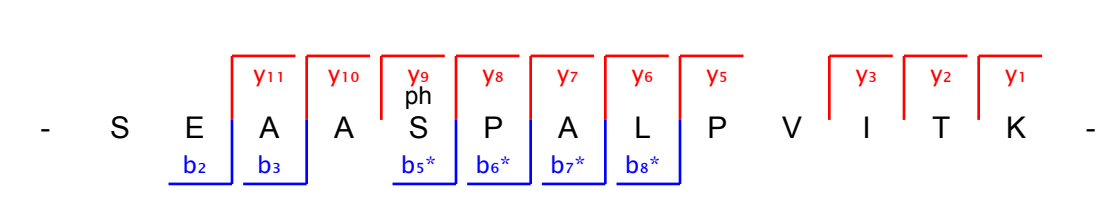

Raw file 20171215\_MaS\_33SR\_LMH\_phospho\_08 Scan 12440 Method FTMS; HCD Score 95.2 m/z 989.43 Gene names SMC4

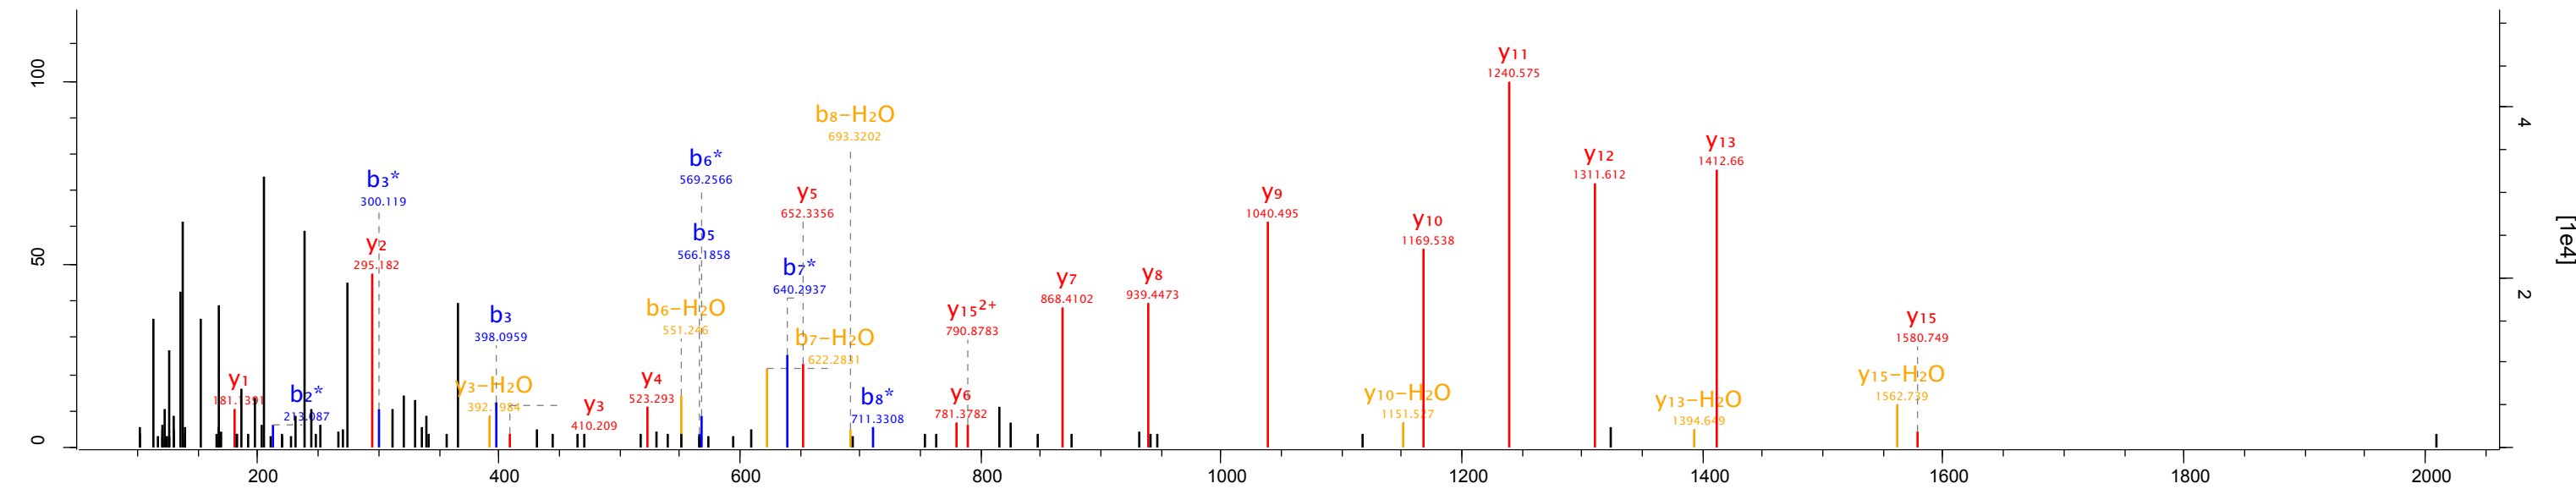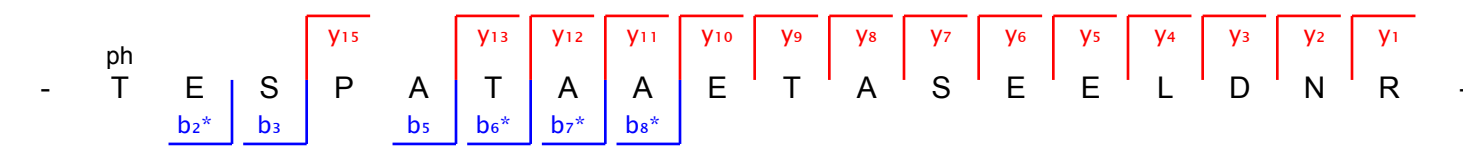

Raw file 20171215\_MaS\_33SR\_LMH\_phospho\_08 Scan 1910 Method FTMS; HCD Score 71.53 m/z 580.3 Gene names NUCKS1

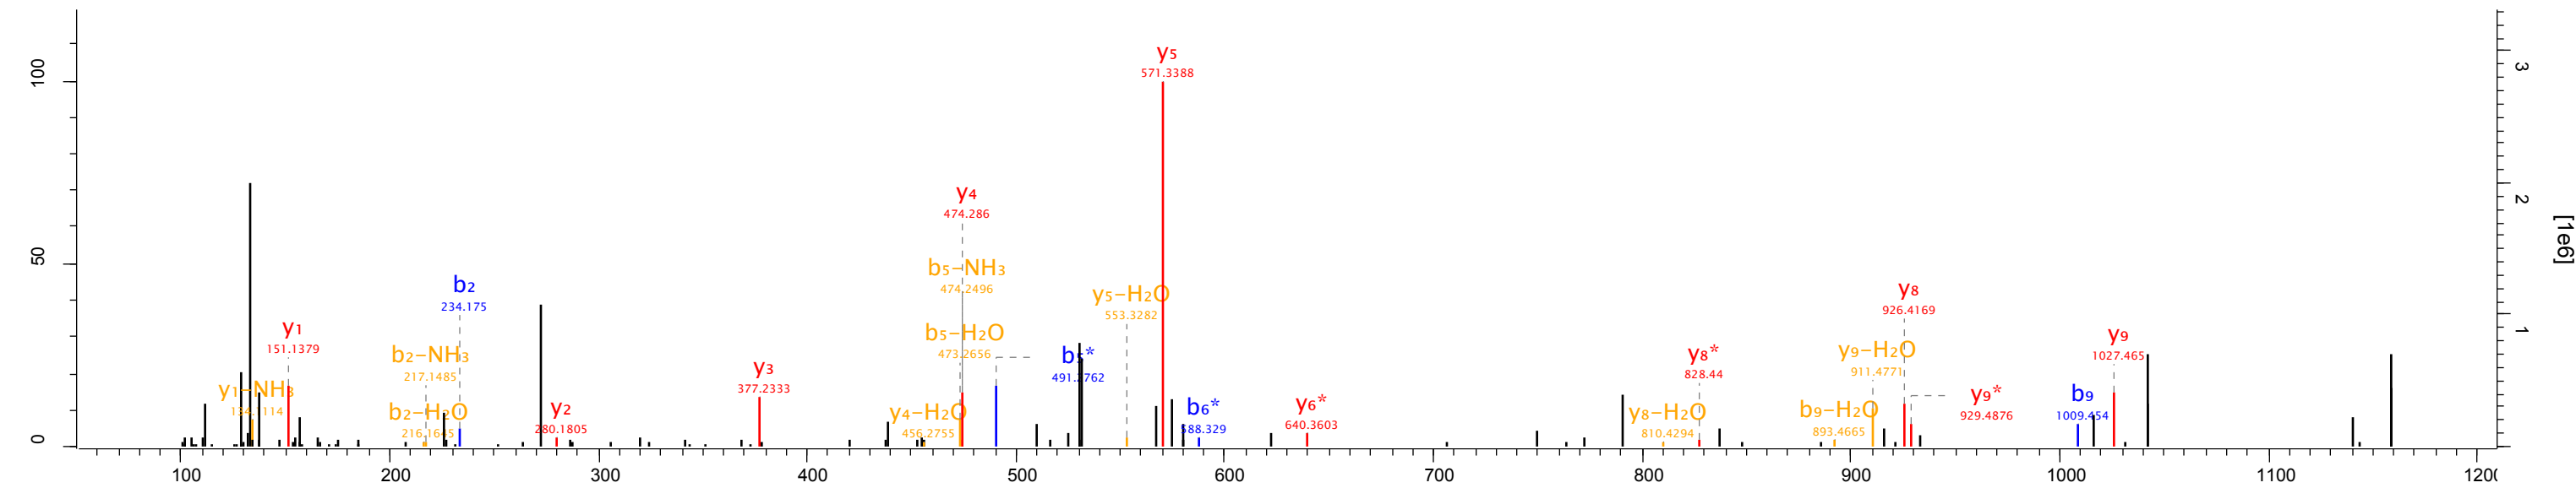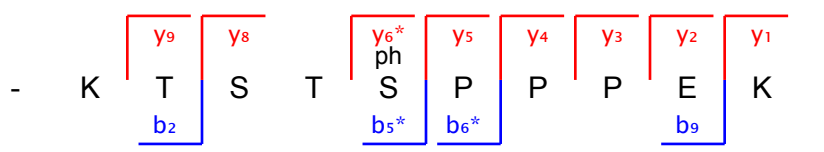

Raw file 20171215\_MaS\_33SR\_LMH\_phospho\_08 Scan 2110 Method FTMS; HCD Score 237.05 m/z 723.3 Gene names UTP20

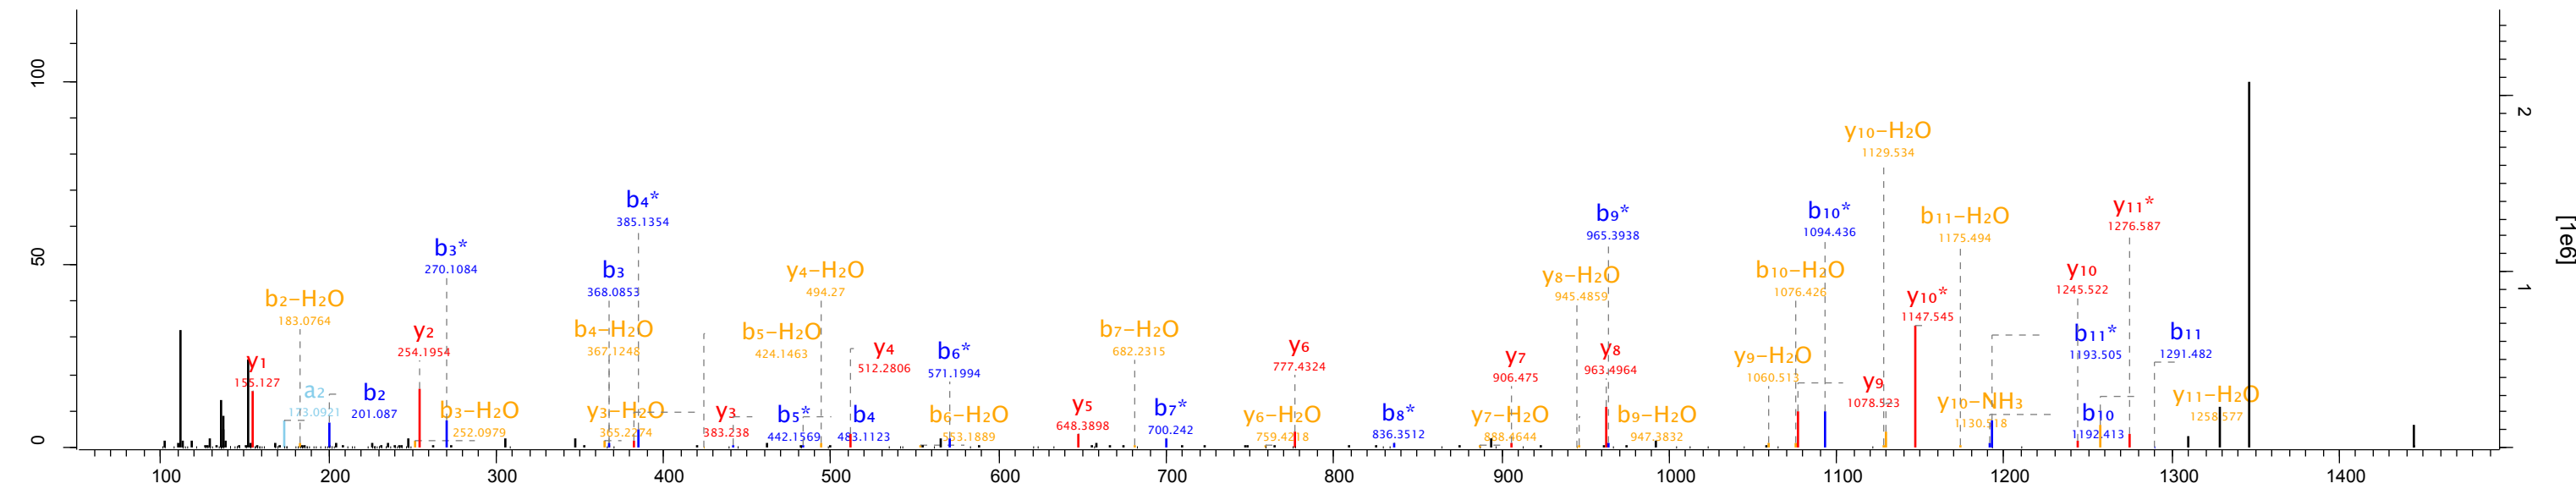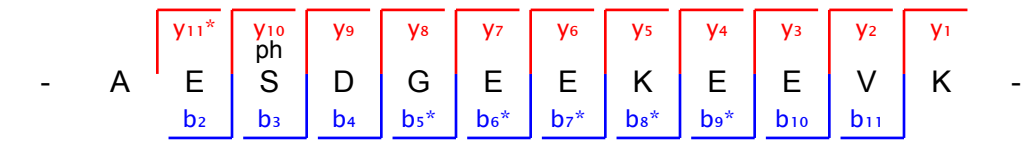

Raw file 20171215\_MaS\_33SR\_LMH\_phospho\_08 Scan 2270 Method FTMS; HCD Score 143.08 m/z 561.77 Gene names TCOF1

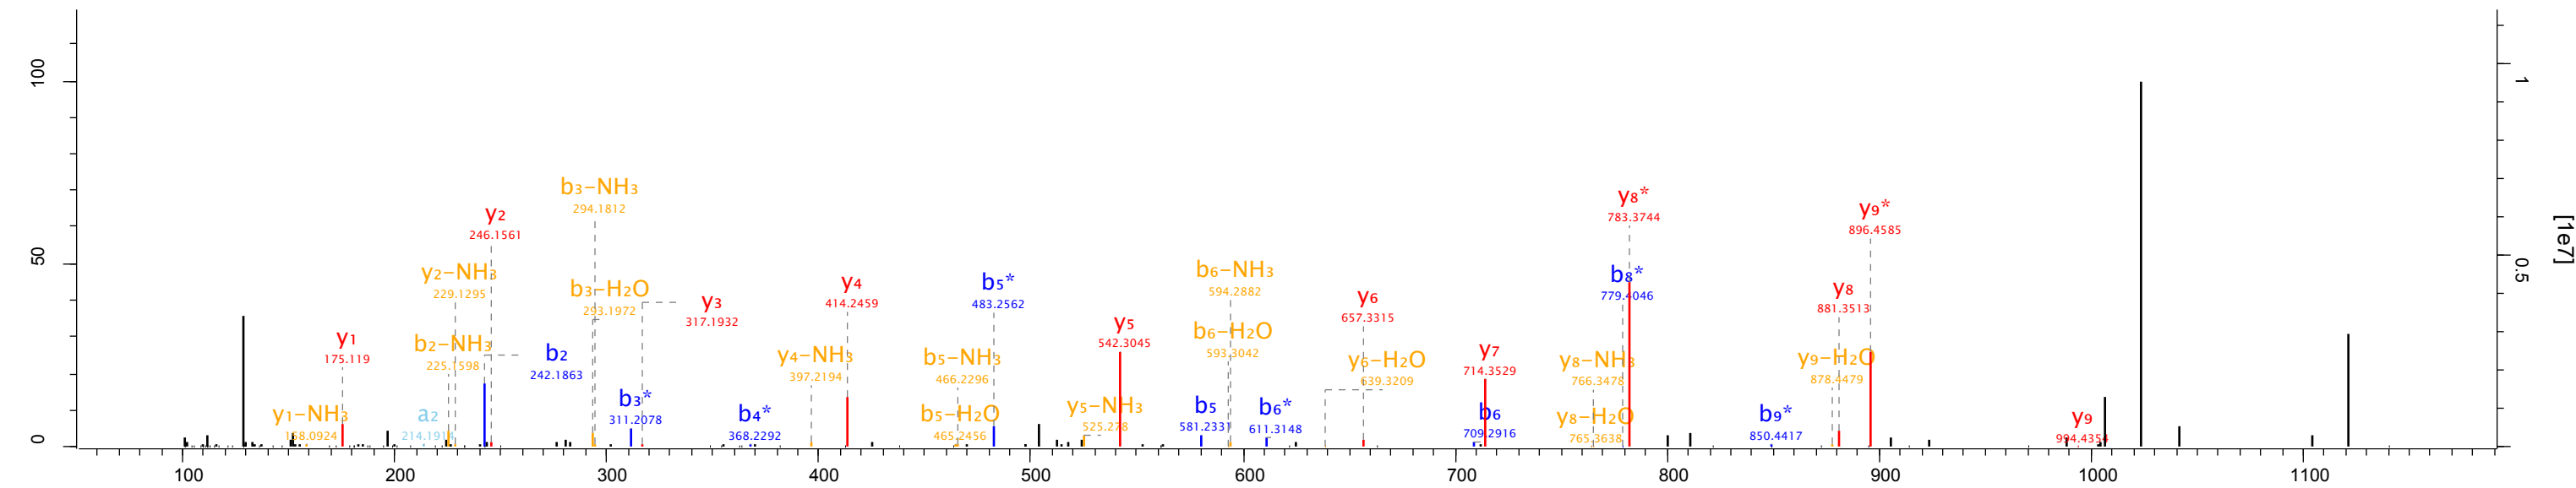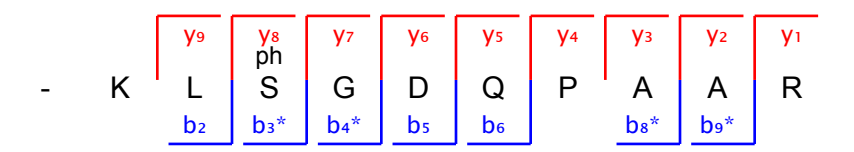

Raw file 20171215\_MaS\_33SR\_LMH\_phospho\_08 Scan 2970 Method FTMS; HCD Score 111.33 m/z 463.22 Gene names IRS2

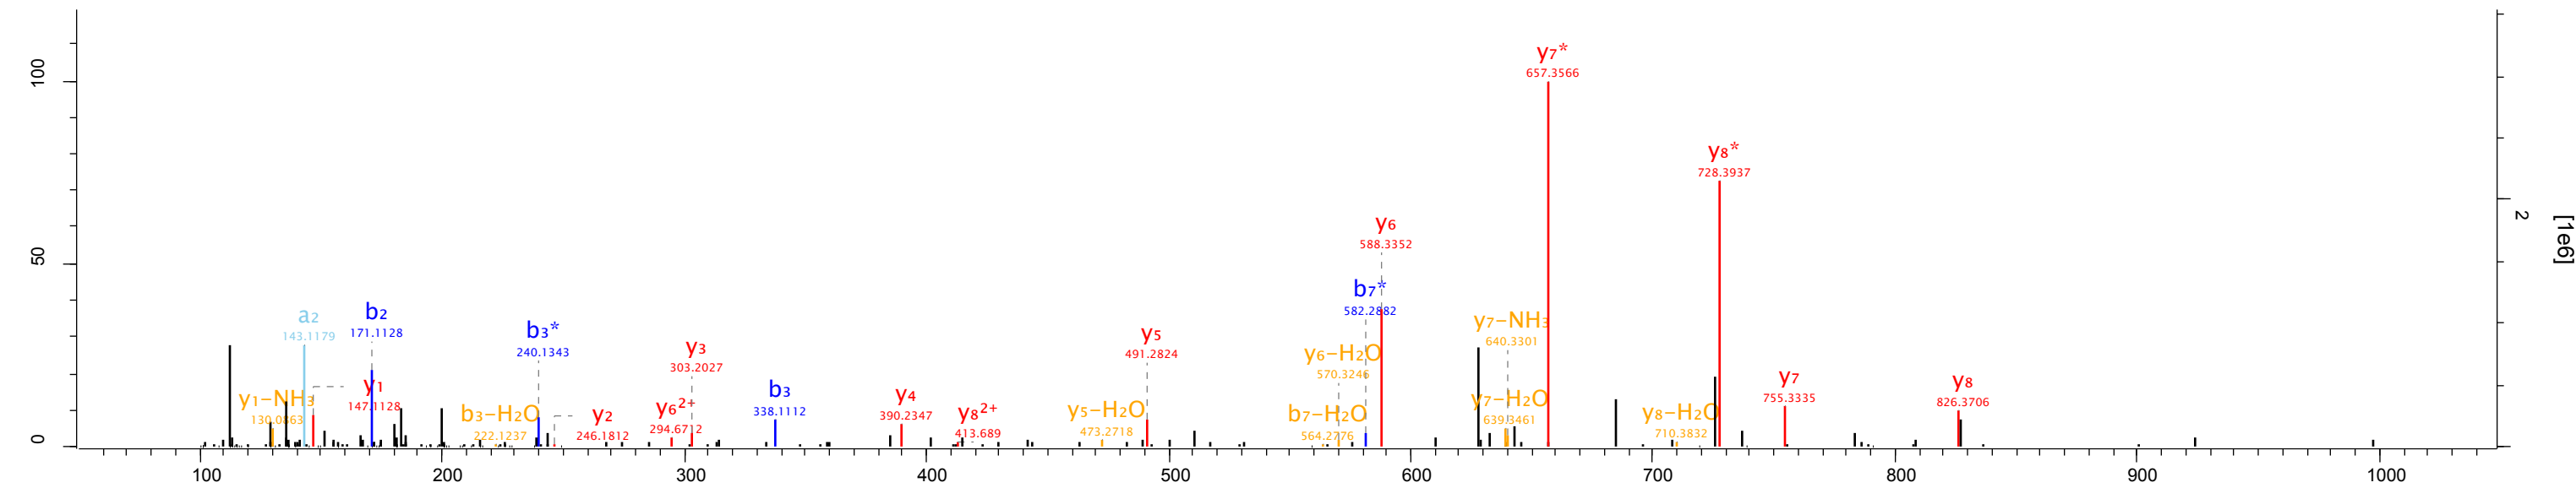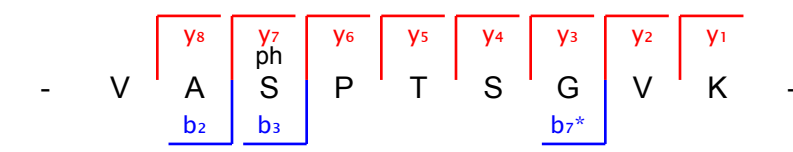

Raw file 20171215\_MaS\_33SR\_LMH\_phospho\_08 Scan 3180 Method FTMS; HCD Score 52.79 m/z 467.19 Gene names IRS2

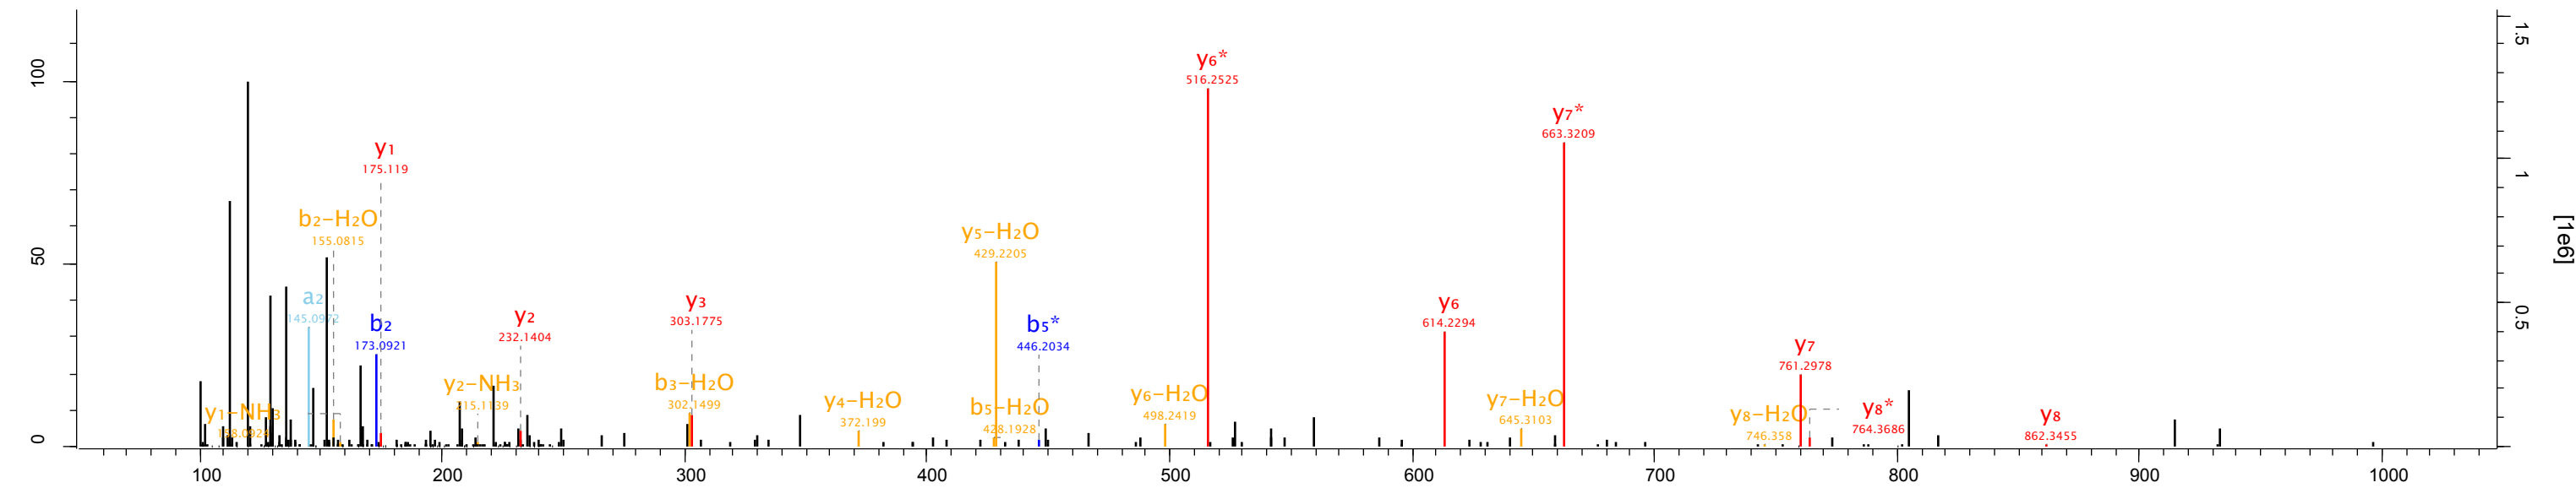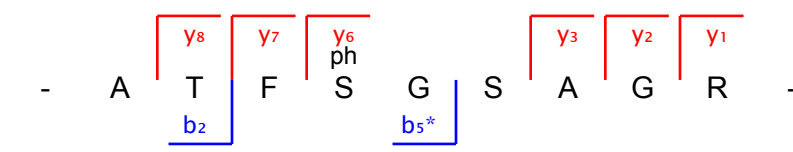

Raw file 20171215\_MaS\_33SR\_LMH\_phospho\_08 Scan 3420 Method FTMS; HCD Score 148.66 m/z 856.38 Gene names BCL9

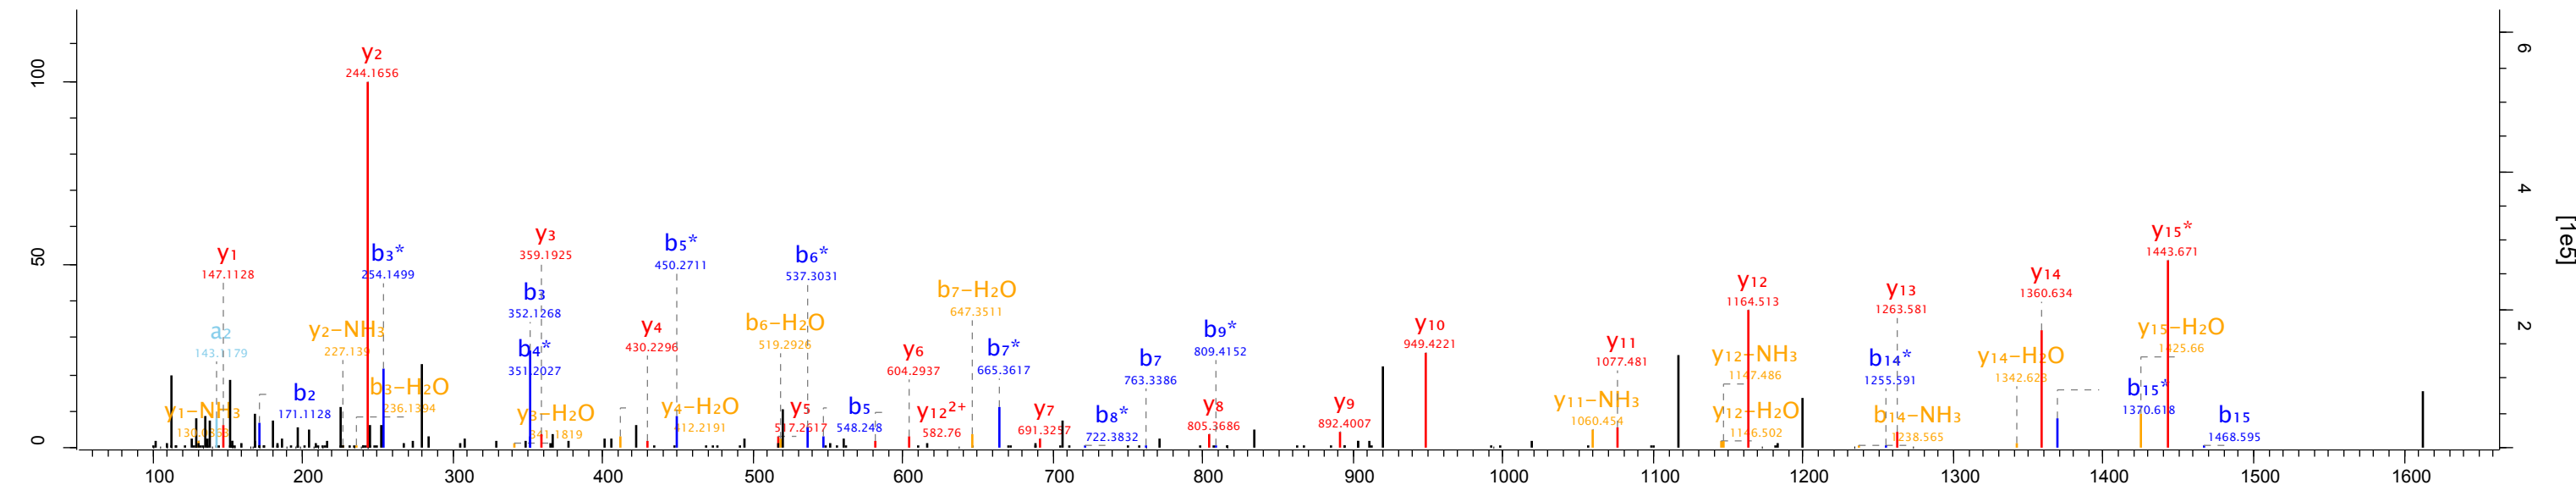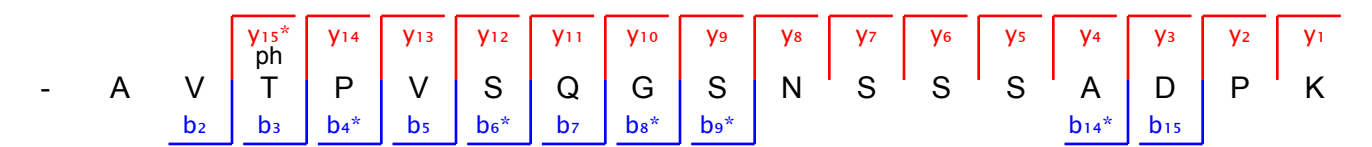



Raw file 20171215\_MaS\_33SR\_LMH\_phospho\_08 Scan 3730 Method FTMS; HCD Score 121.9 m/z 442.21 Gene names PTPN14

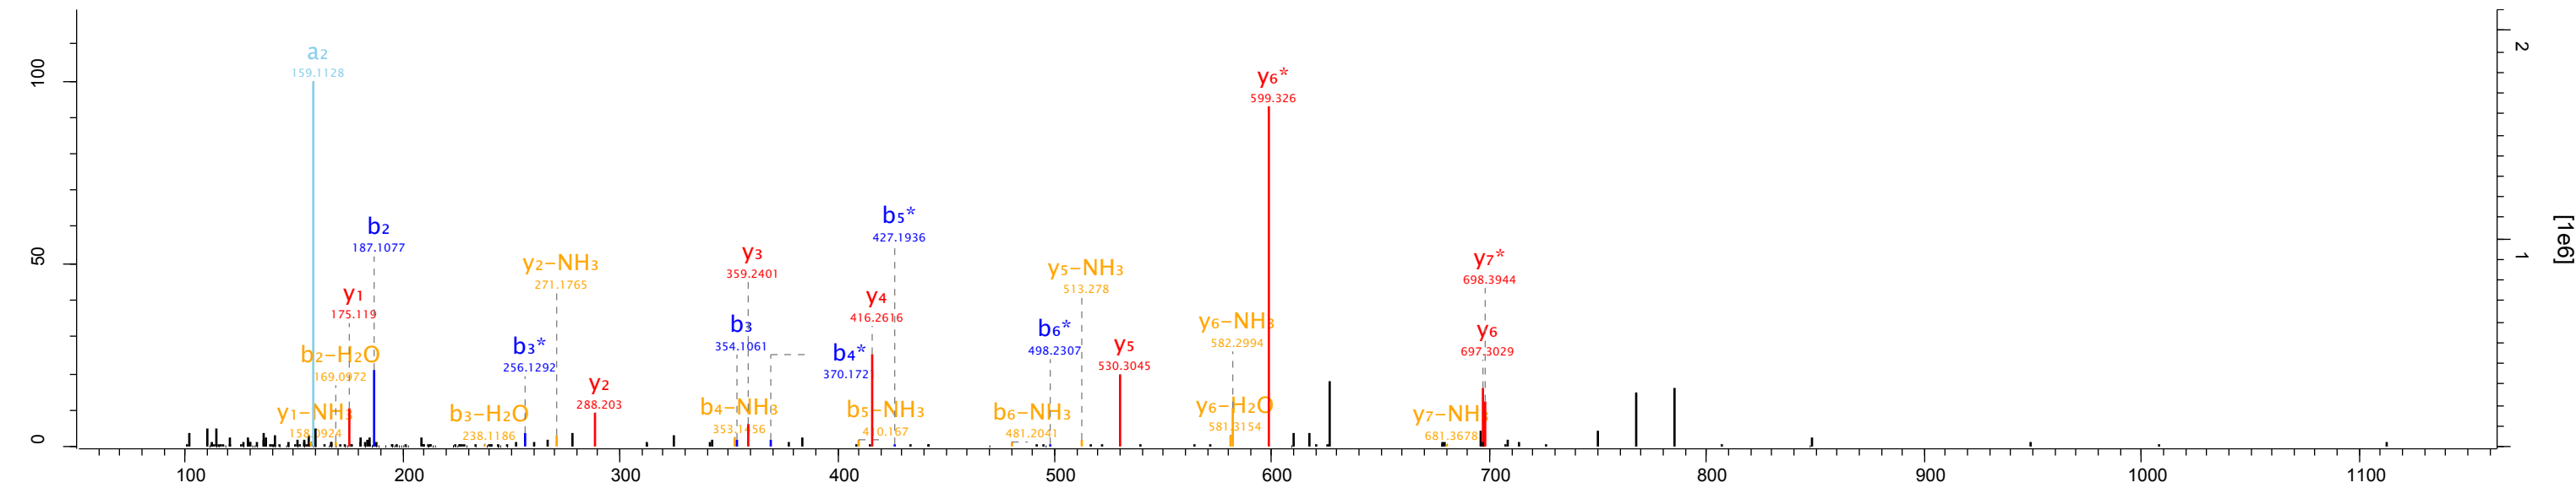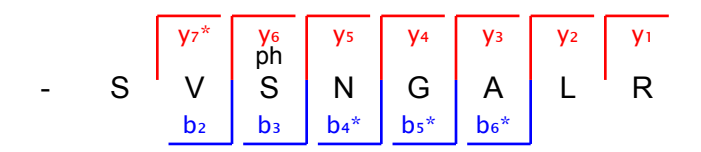

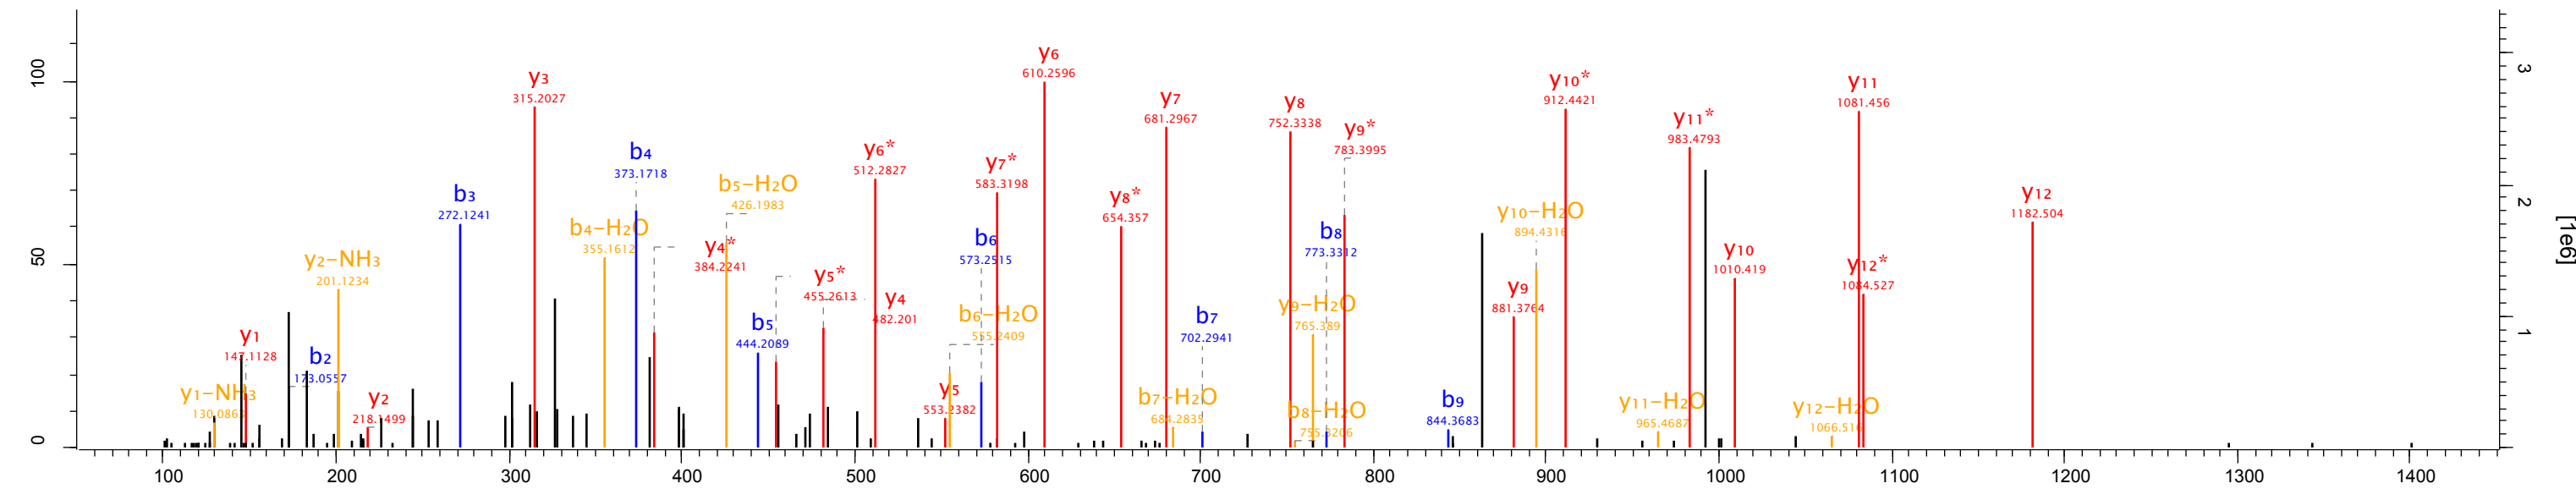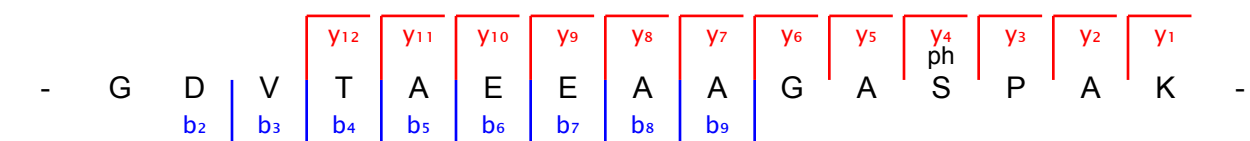

Raw file 20171215\_MaS\_33SR\_LMH\_phospho\_08 Scan 4860 Method FTMS; HCD Score 92.38 m/z 648.79 Gene names TBC1D5

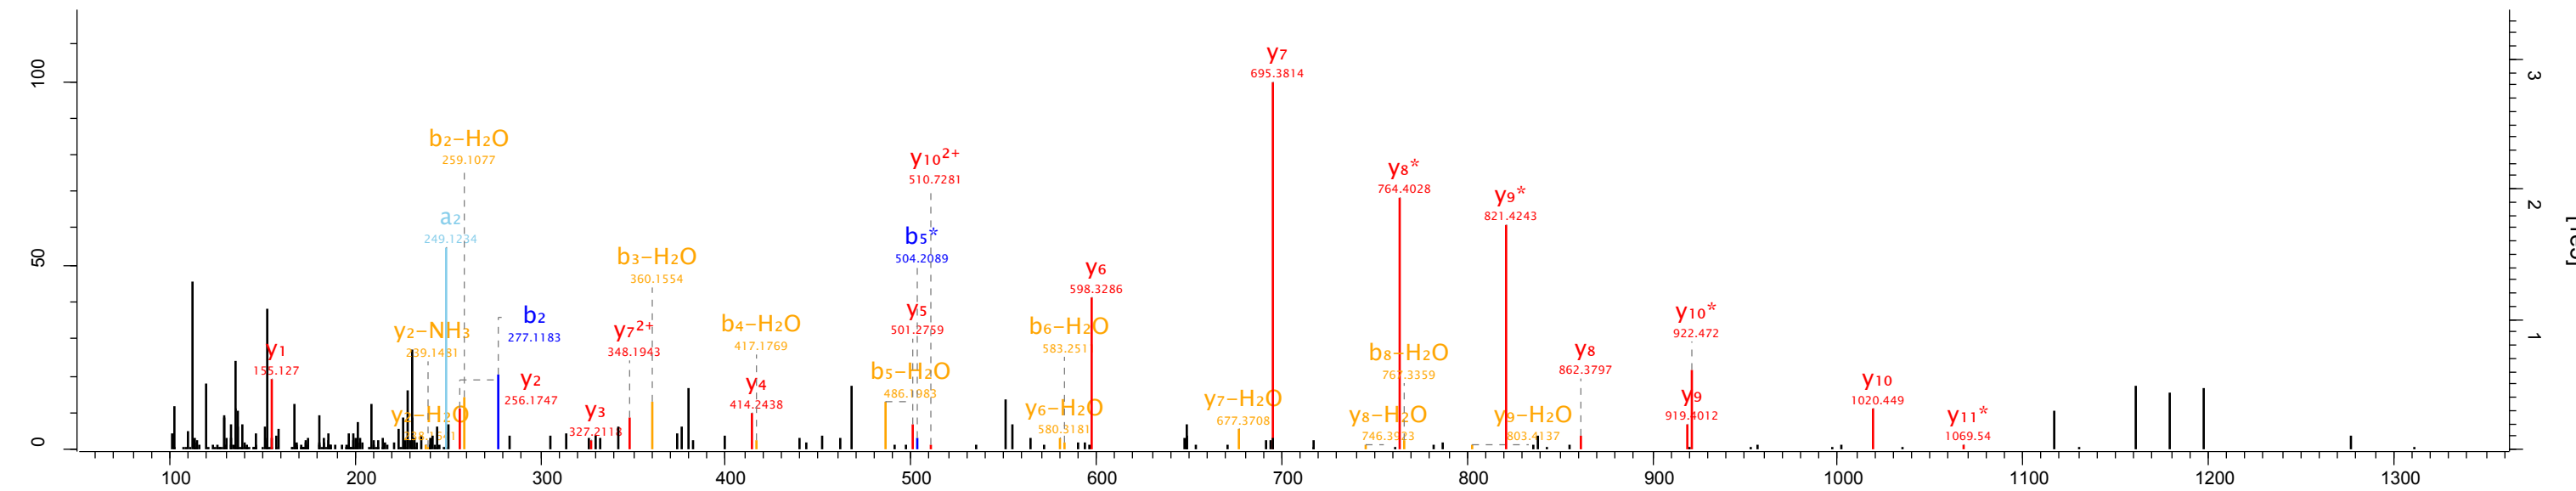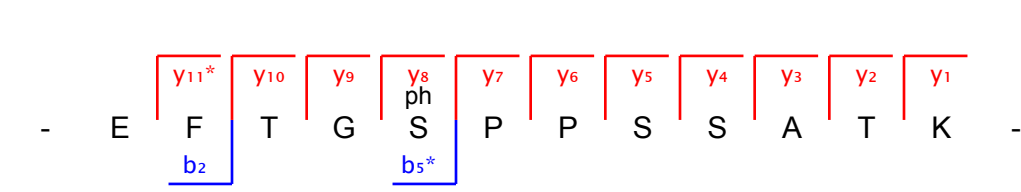

Raw file 20171215\_MaS\_33SR\_LMH\_phospho\_08 Scan 6160 Method FTMS; HCD Score 235.57 m/z 814.37 Gene names LIMA1;TRMT1

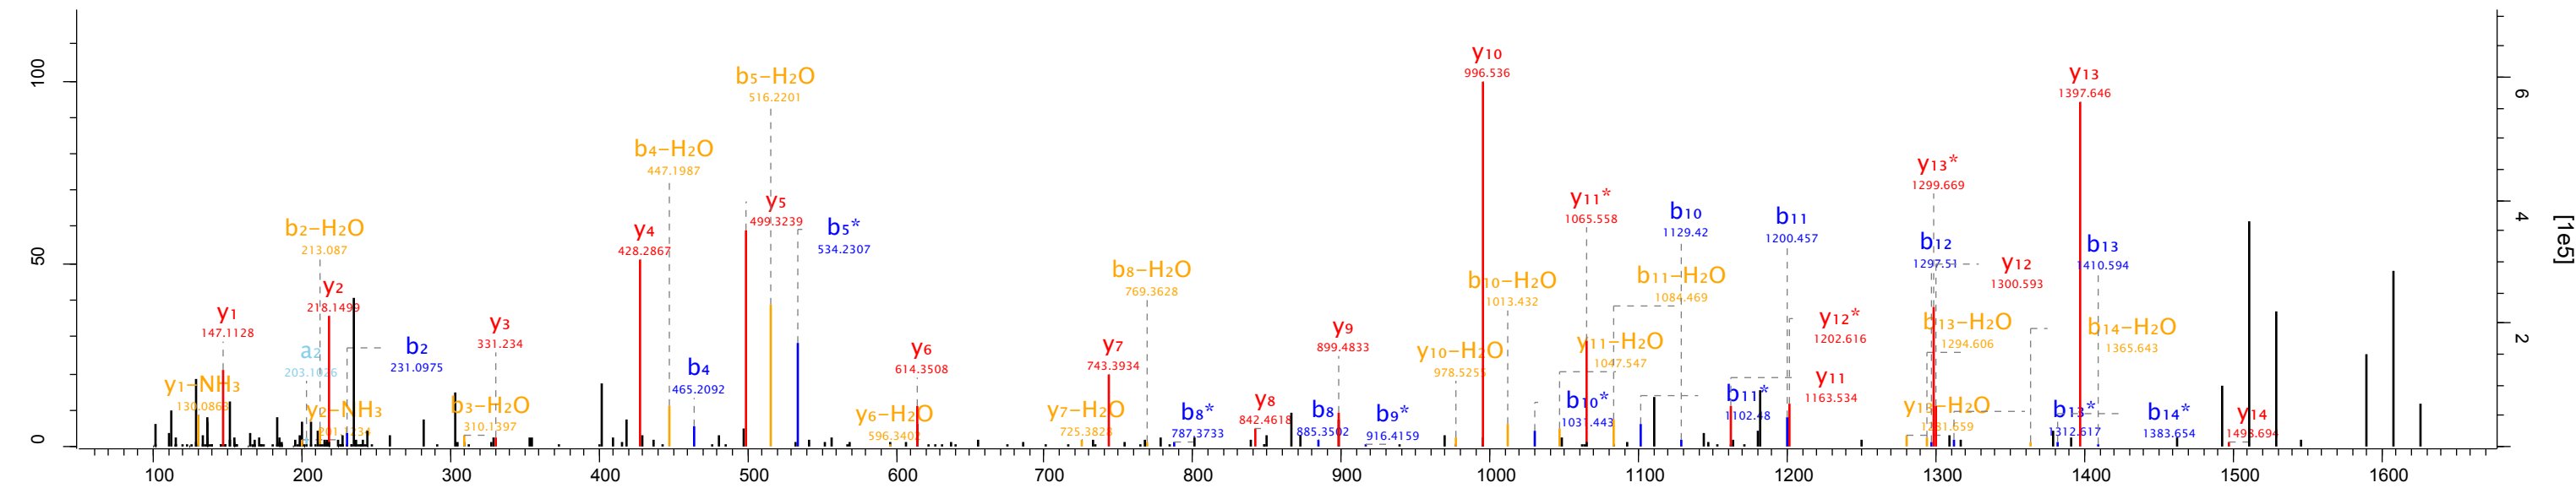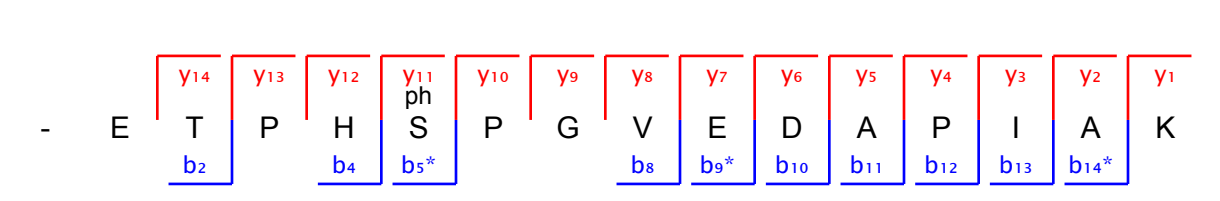

Raw file 20171215\_MaS\_33SR\_LMH\_phospho\_08 Scan 8220 Method FTMS; HCD Score 97.27 m/z 614.81 Gene names NOP2

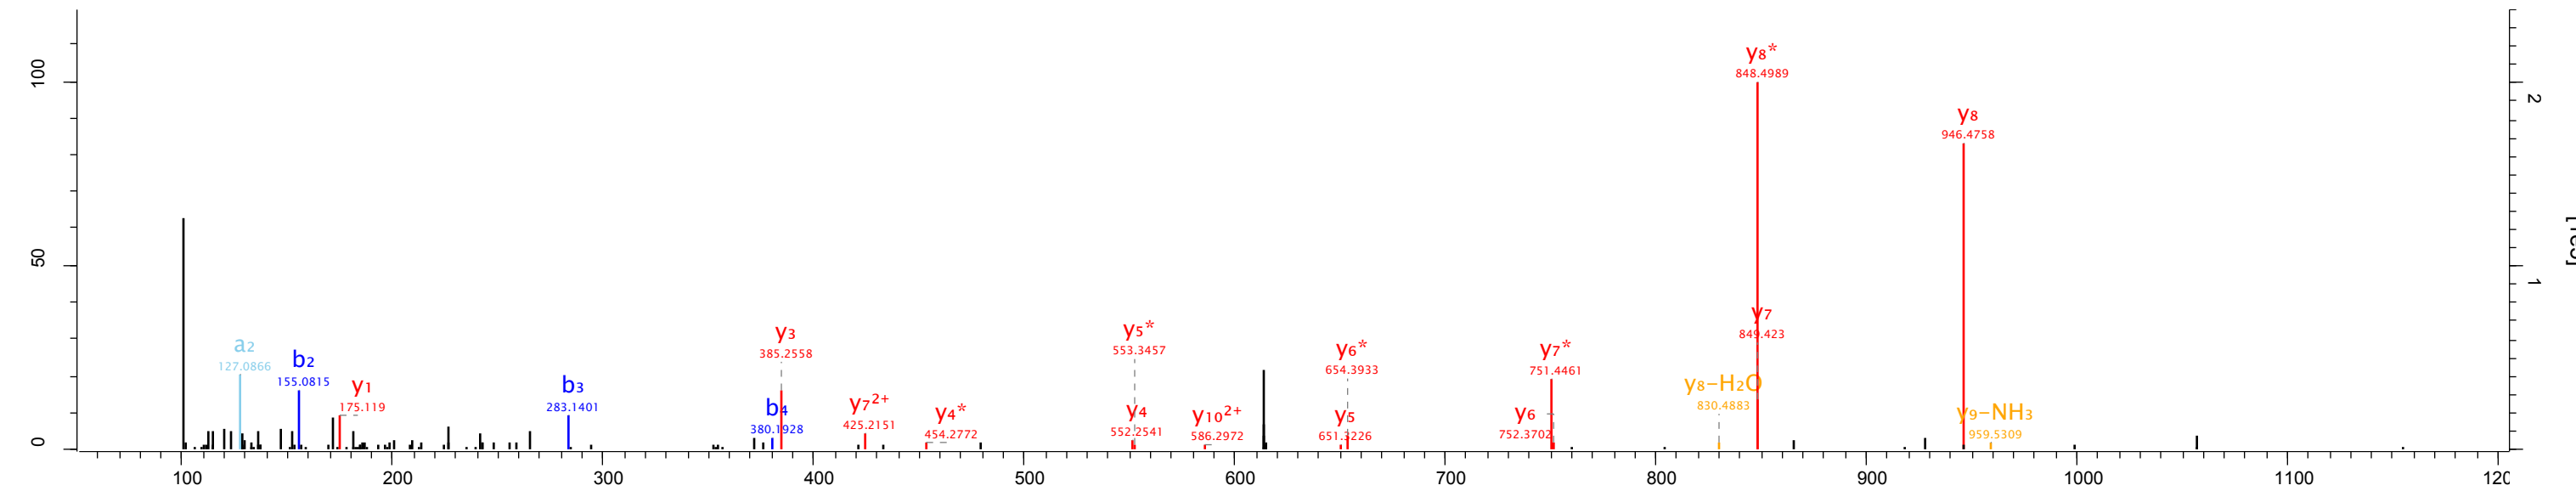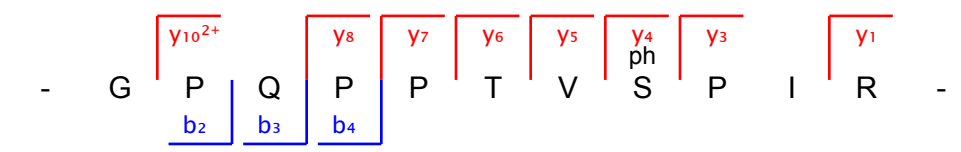

Raw file 20171215\_MaS\_33SR\_LMH\_phospho\_08 Scan 8950 Method FTMS; HCD Score 118.72 m/z 783.88 Gene names MICALL1

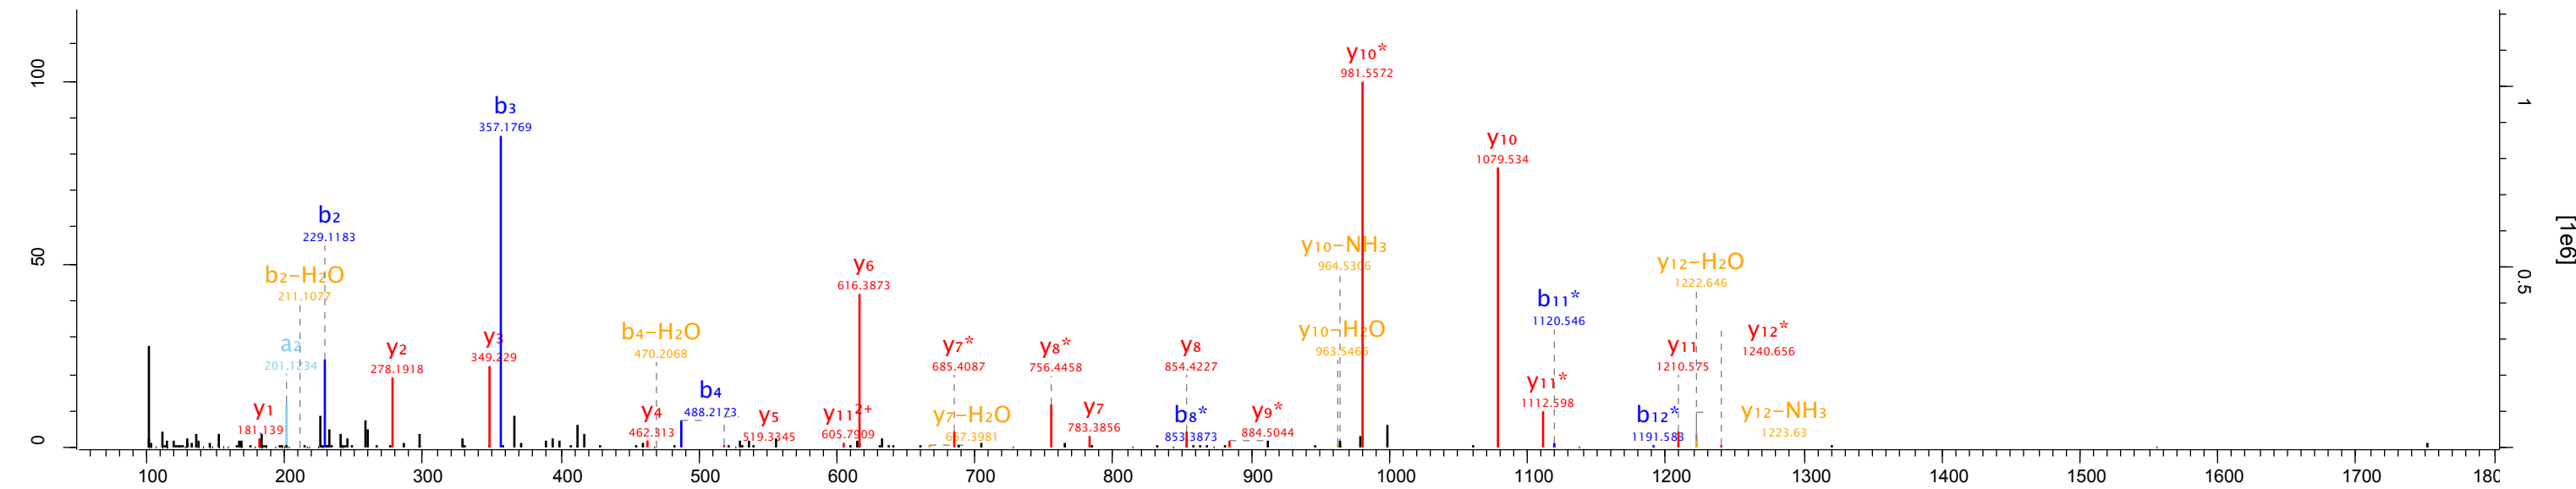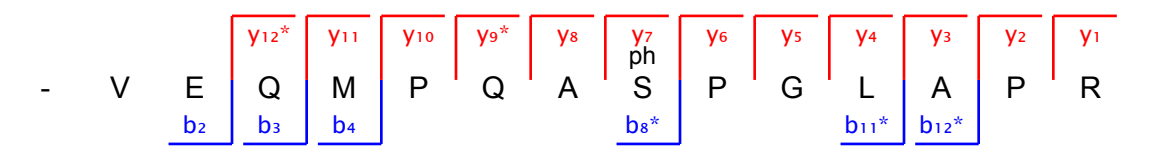

Raw file 20171215\_MaS\_33SR\_LMH\_phospho\_08 Scan 9930 Method FTMS; HCD Score 47.5 m/z 851.39 Gene names ACSS2

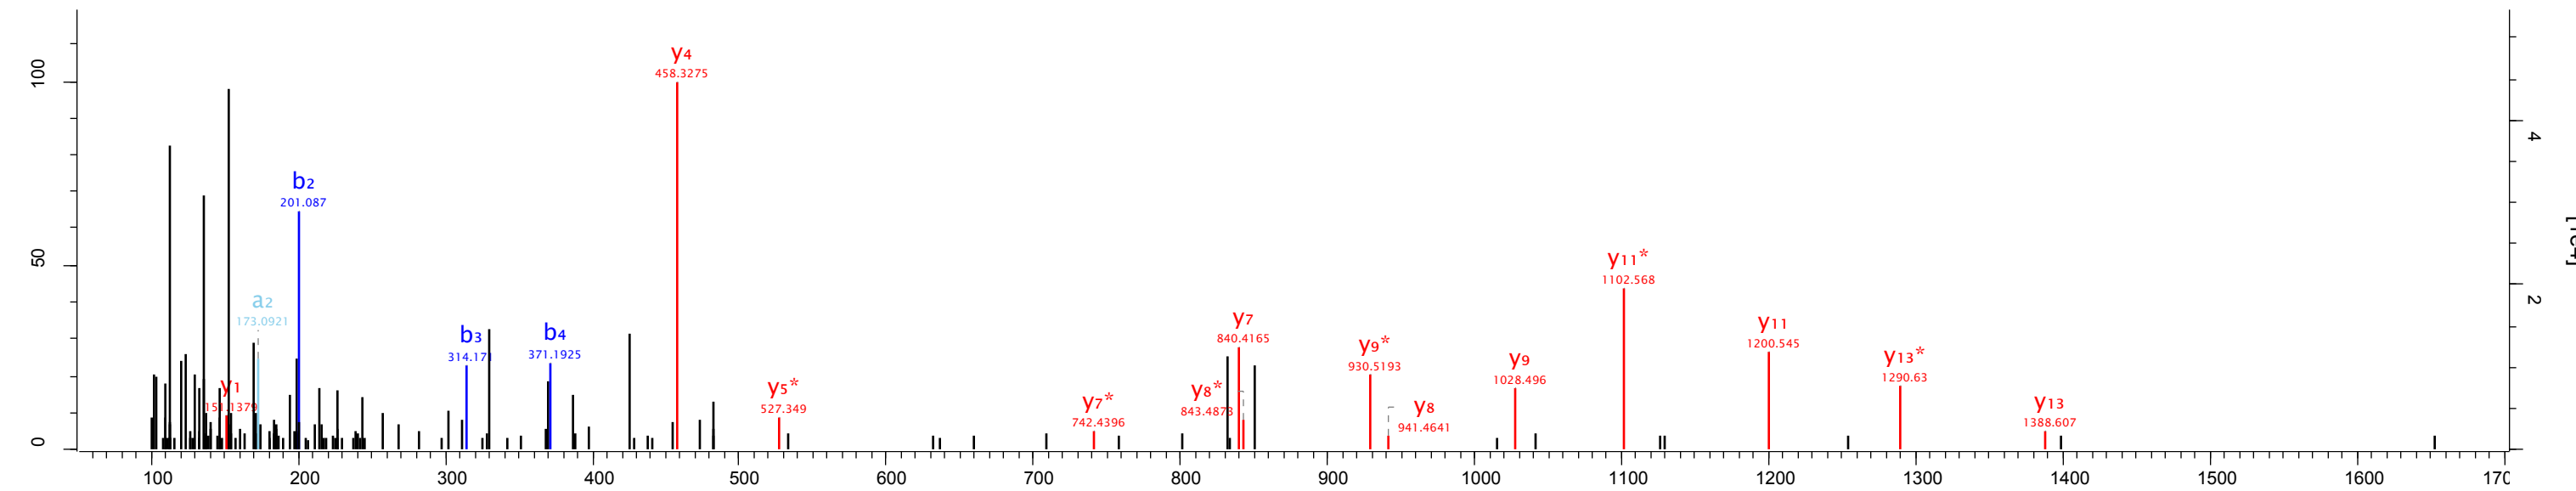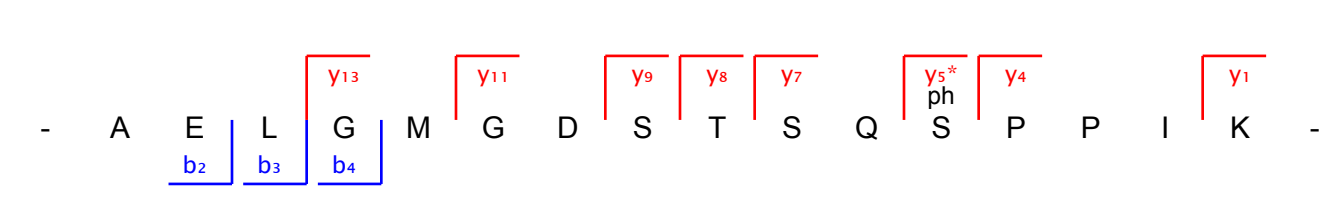

Raw file 20171215\_MaS\_33SR\_LMH\_phospho\_09 Scan 1920 Method FTMS; HCD Score 156.02 m/z 524.74 Gene names SRRM1

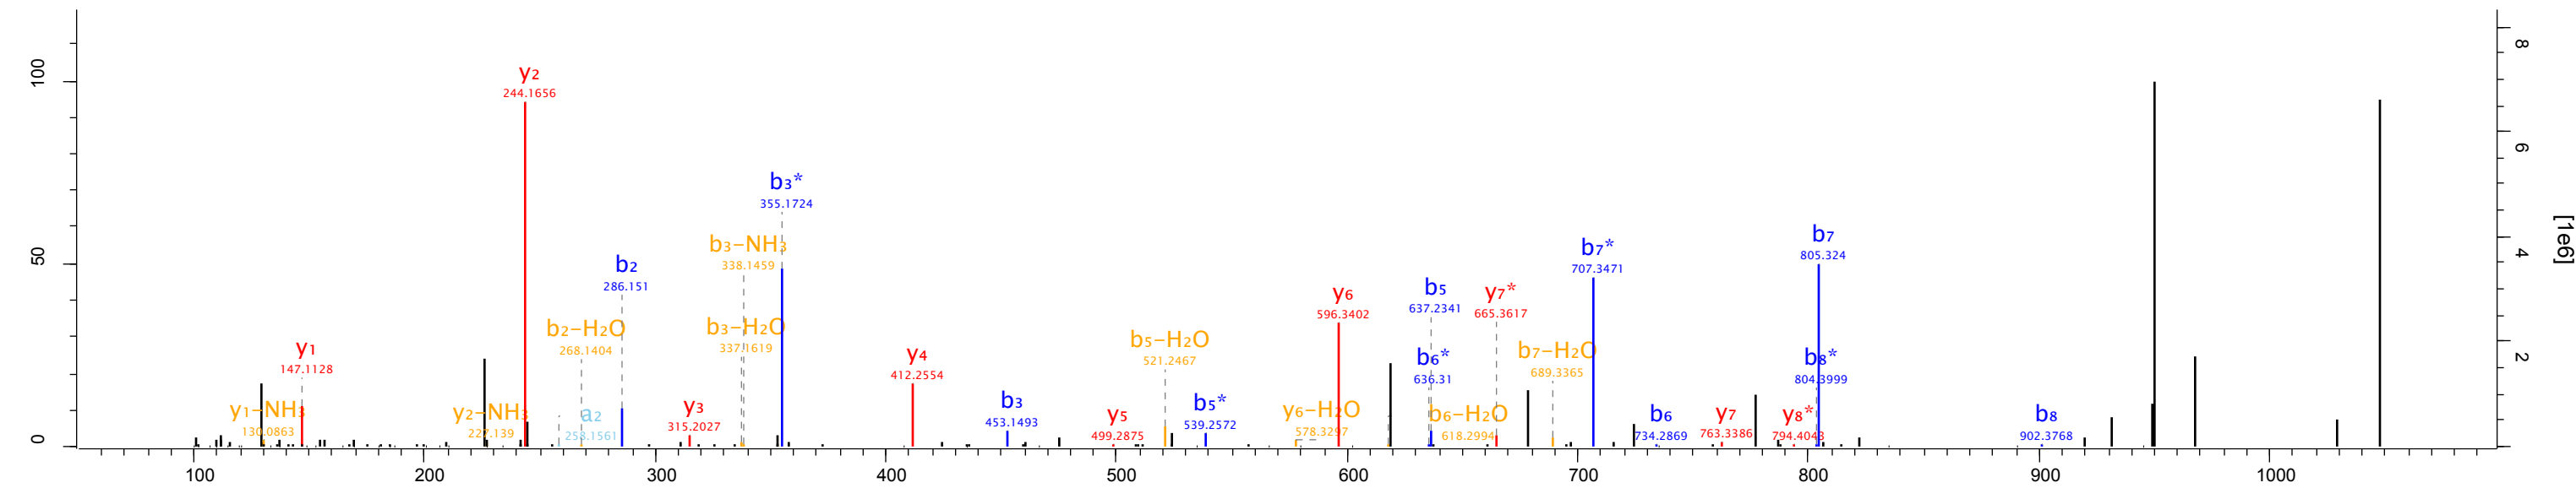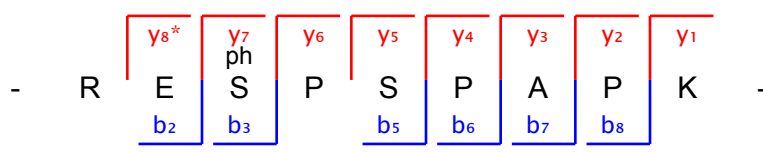



Raw file 20171215\_MaS\_33SR\_LMH\_phospho\_09 Scan 2000 Method FTMS; HCD Score 146.9 m/z 505.71 Gene names STIP1

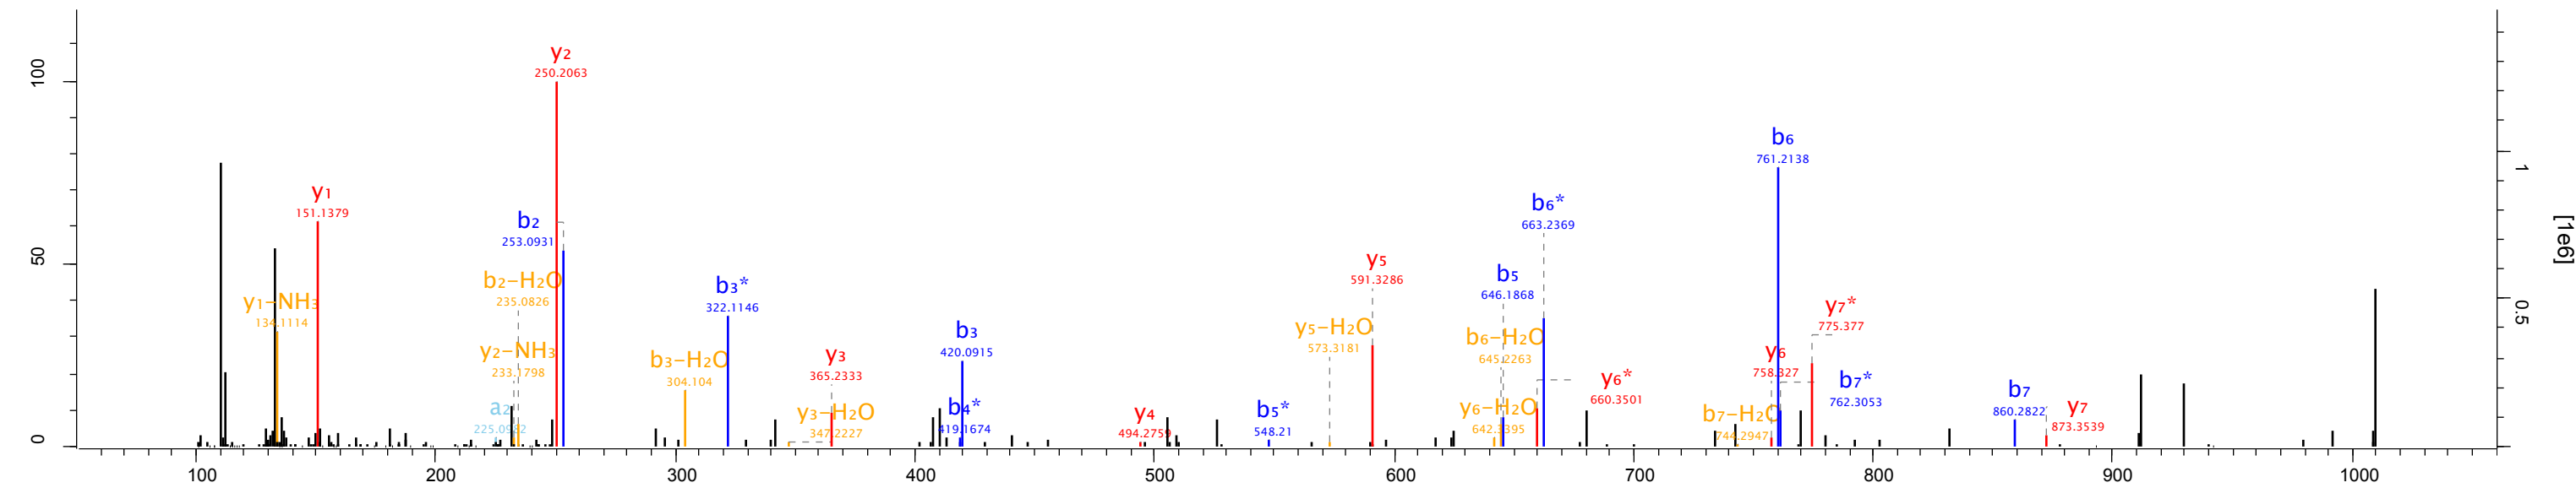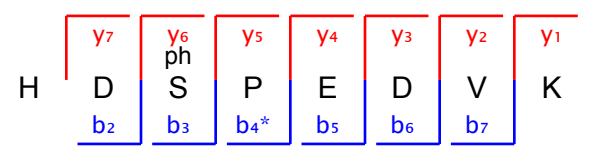

Raw file 20171215\_MaS\_33SR\_LMH\_phospho\_09 Scan 2240 Method FTMS; HCD Score 72.32 m/z 568.24 Gene names MAP3K19

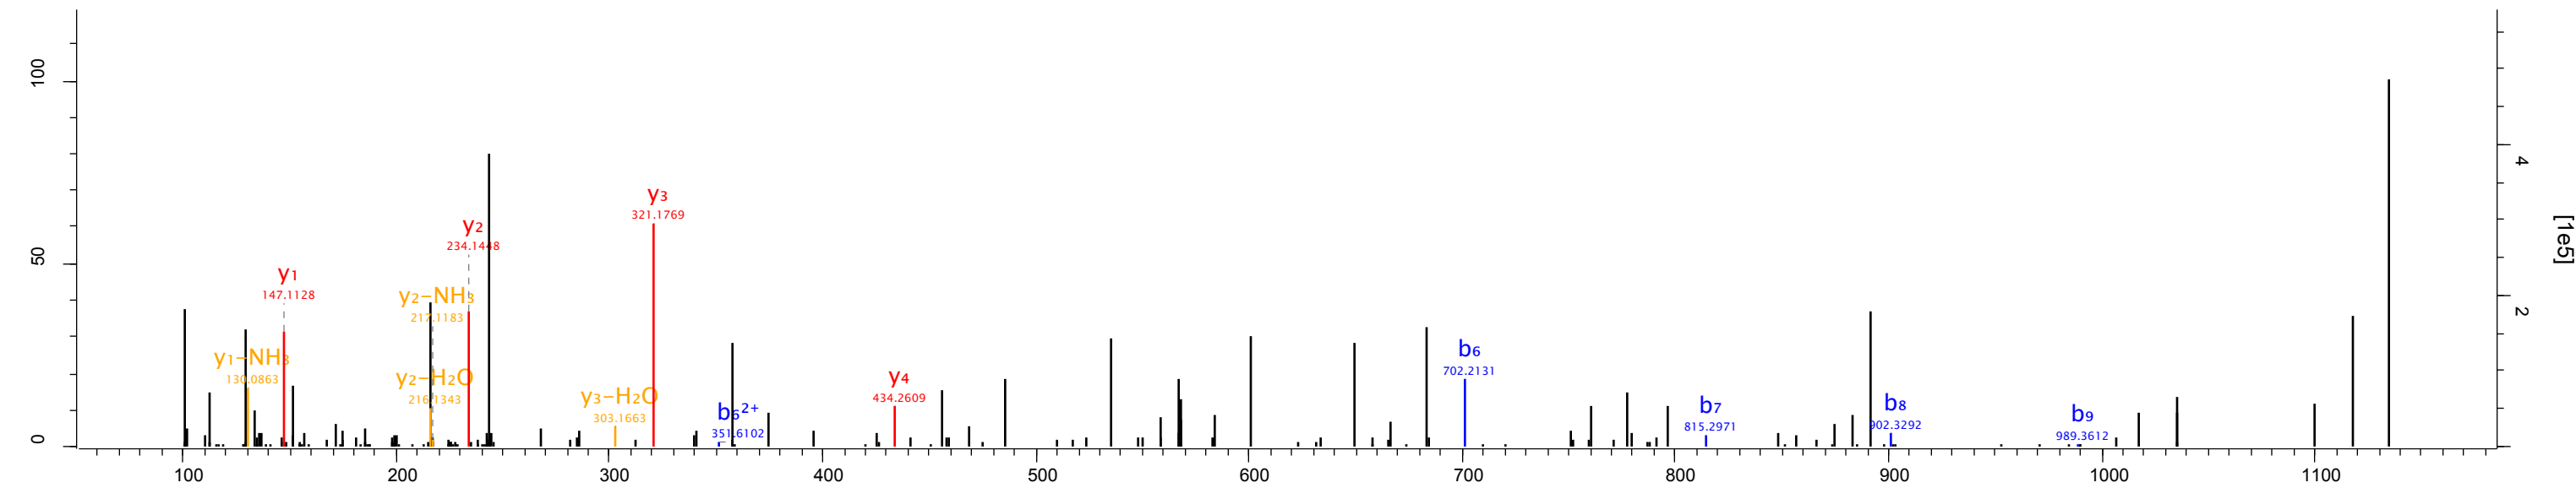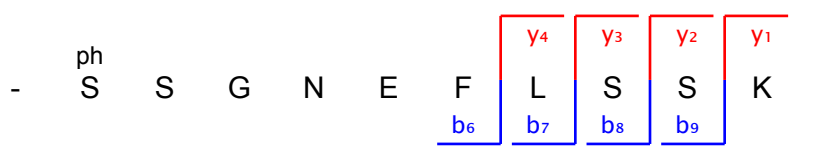

Raw file 20171215\_MaS\_33SR\_LMH\_phospho\_09 Scan 3300 Method FTMS; HCD Score 103.87 m/z 635.25 Gene names RBM15B

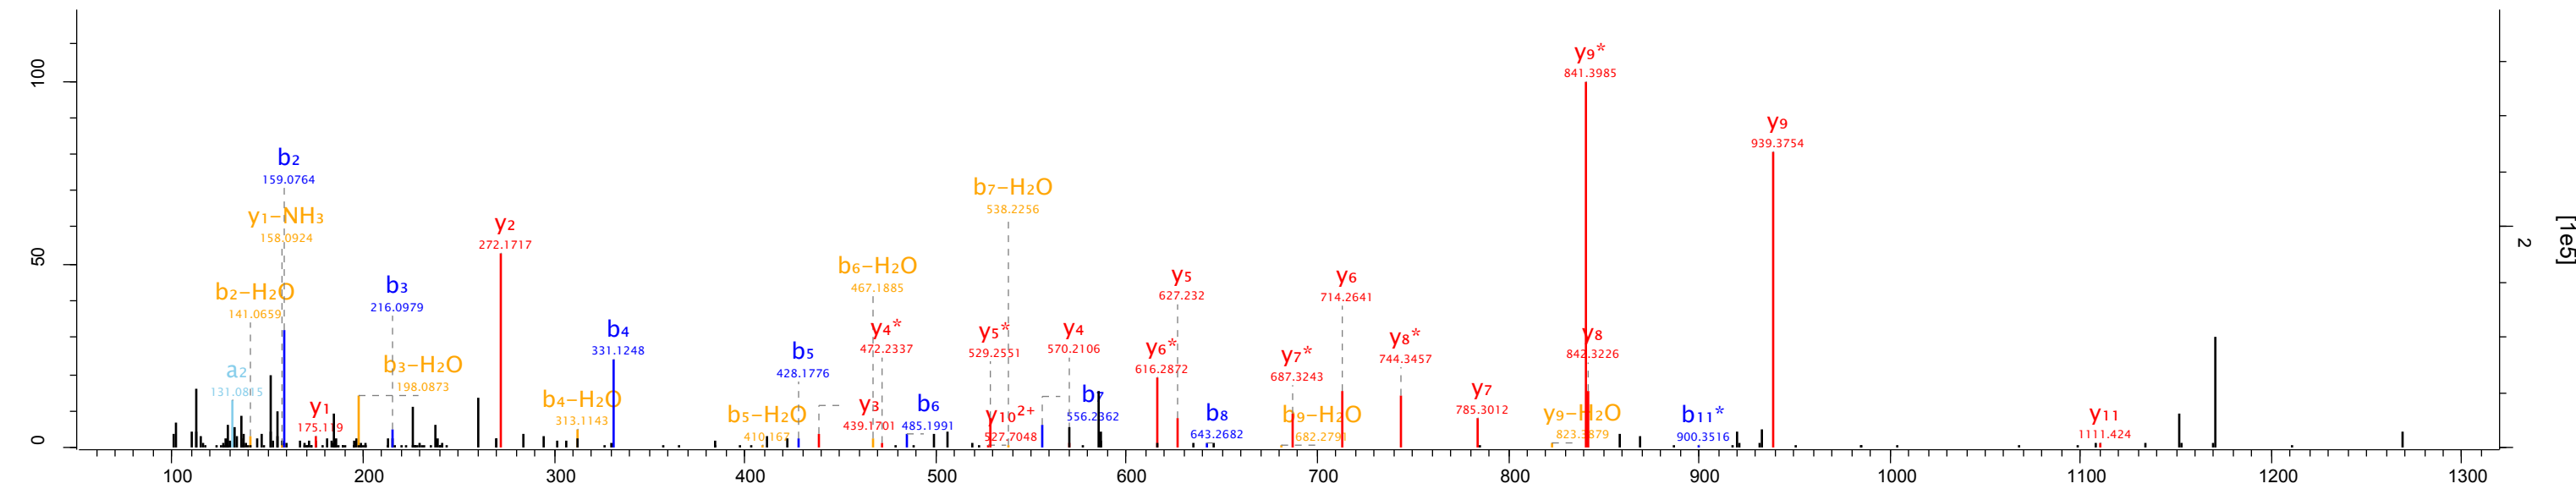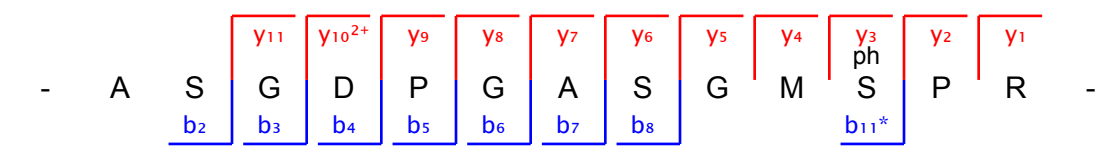

Raw file 20171215\_MaS\_33SR\_LMH\_phospho\_09 Scan 3460 Method FTMS; HCD Score 87.39 m/z 467.89 Gene names SNTB2

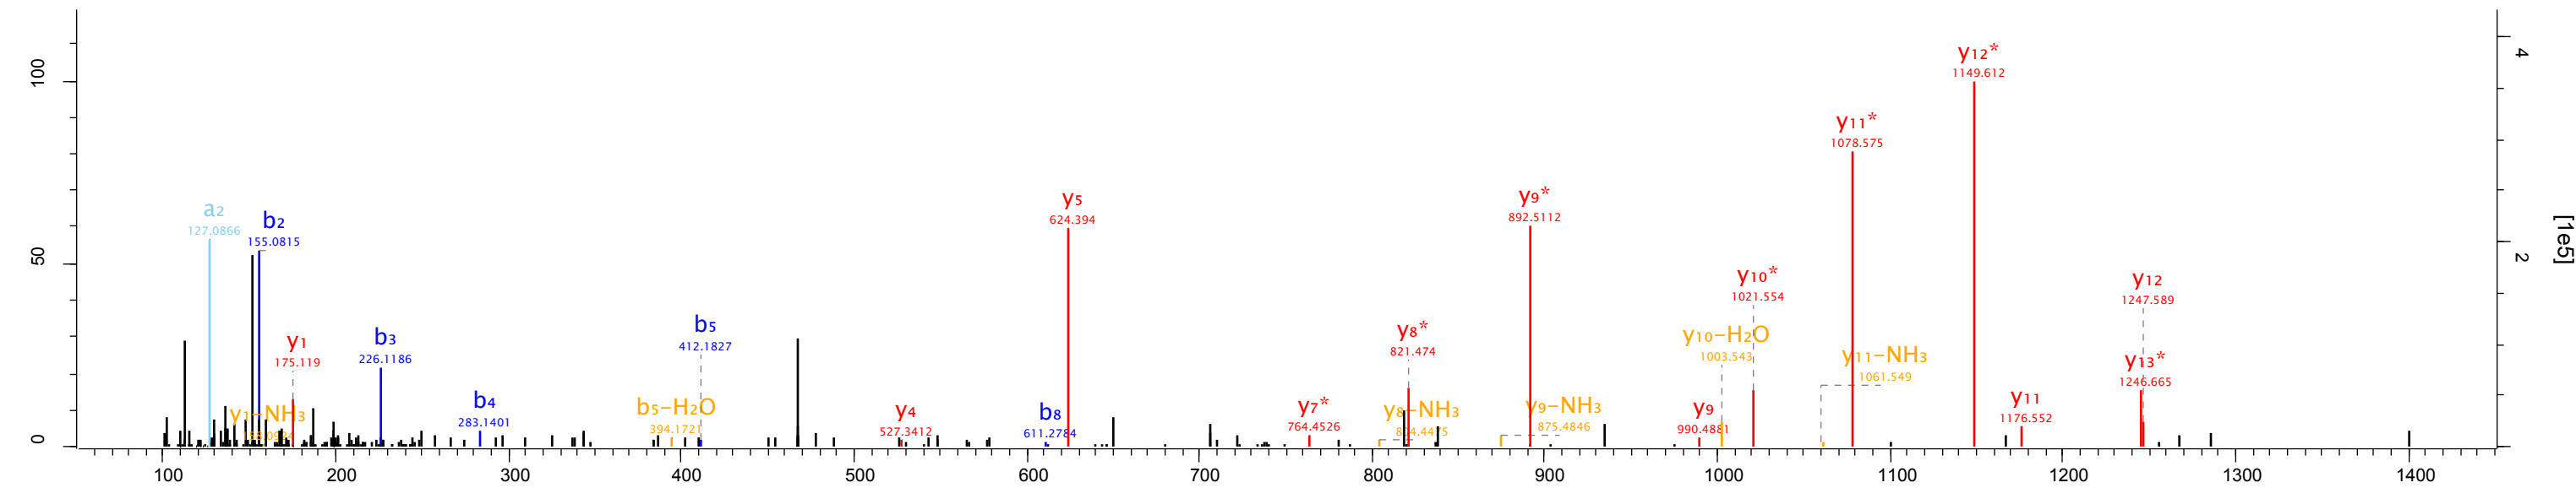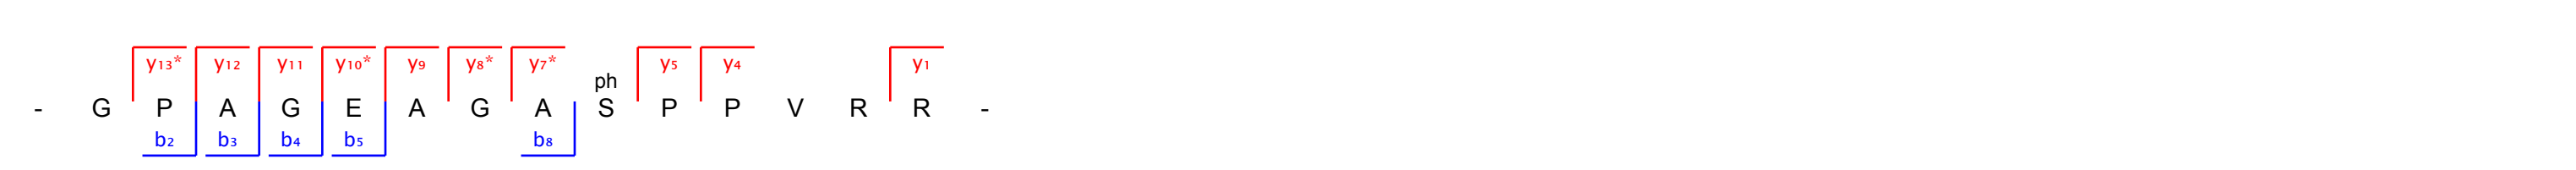

Raw file

20171215\_MaS\_33SR\_LMH\_phospho\_09

Scan 3710 Method FTMS; HCD Score 83.09 m/z 430.87 Gene names RBM10

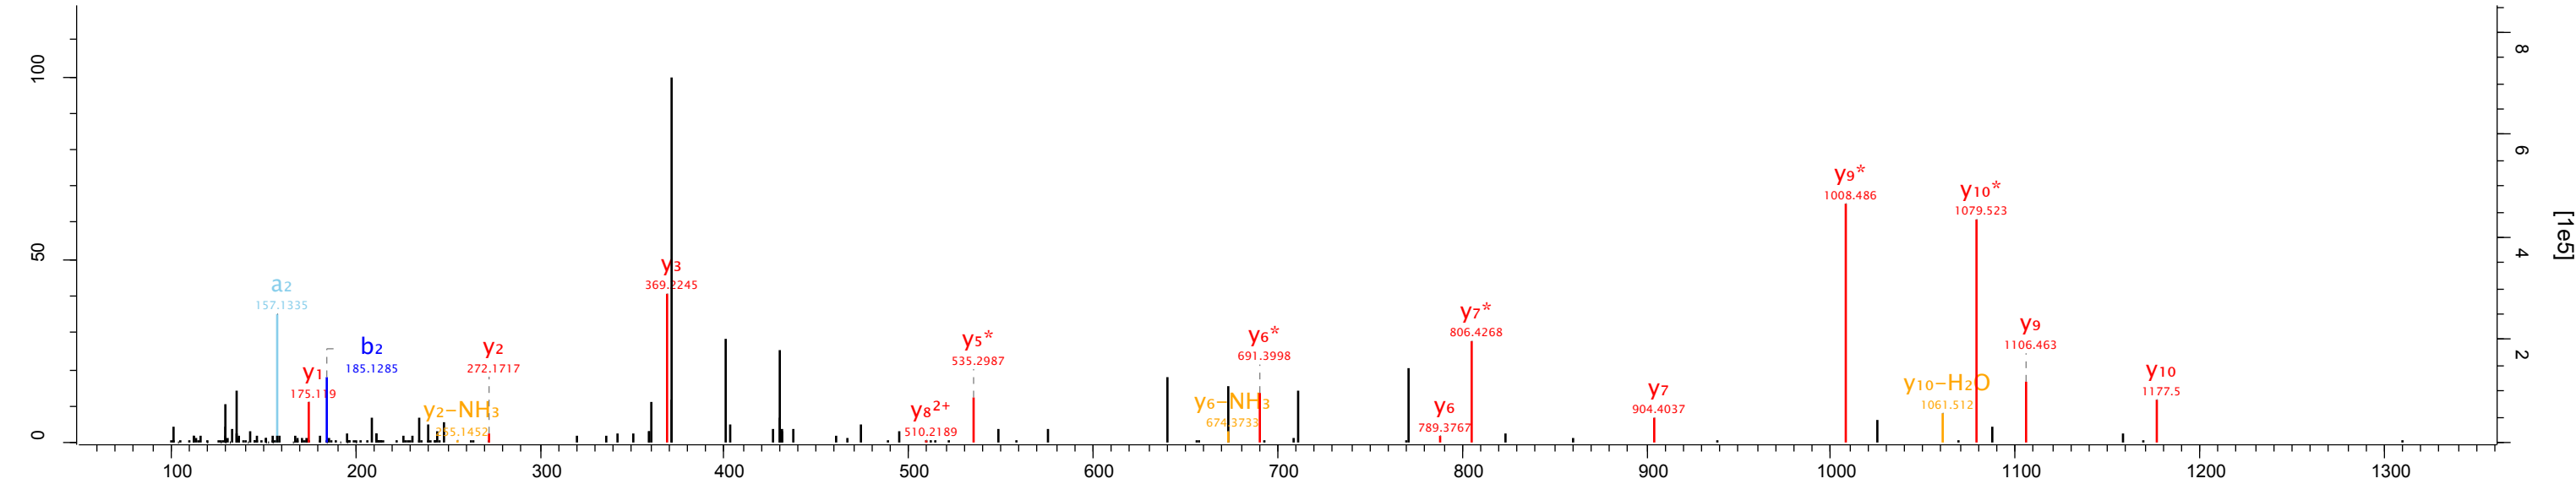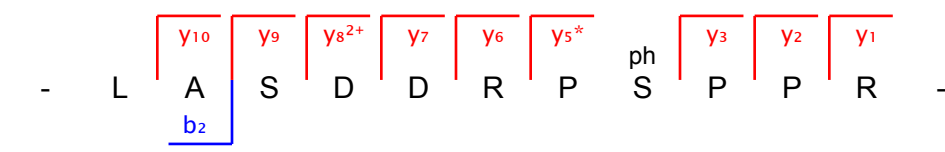

Raw file 20171215\_MaS\_33SR\_LMH\_phospho\_09 Scan 3820 Method FTMS; HCD Score 63.62 m/z 453.73 Gene names RBM14

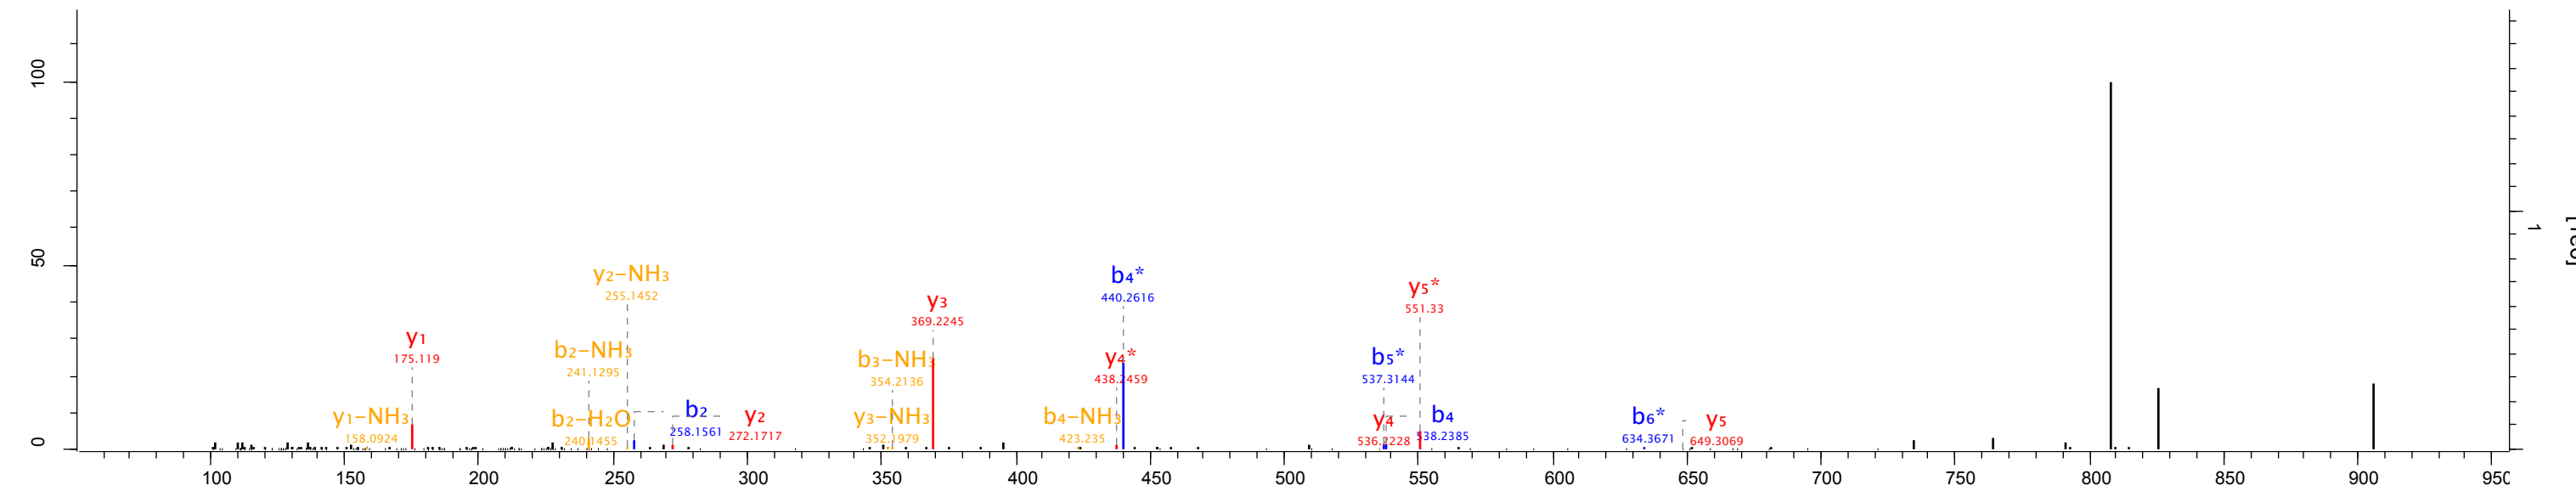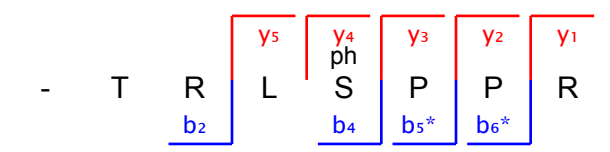

Raw file 20171215\_MaS\_33SR\_LMH\_phospho\_09 Scan 5280 Method FTMS; HCD Score 153.79 m/z 660.34 Gene names LIG3

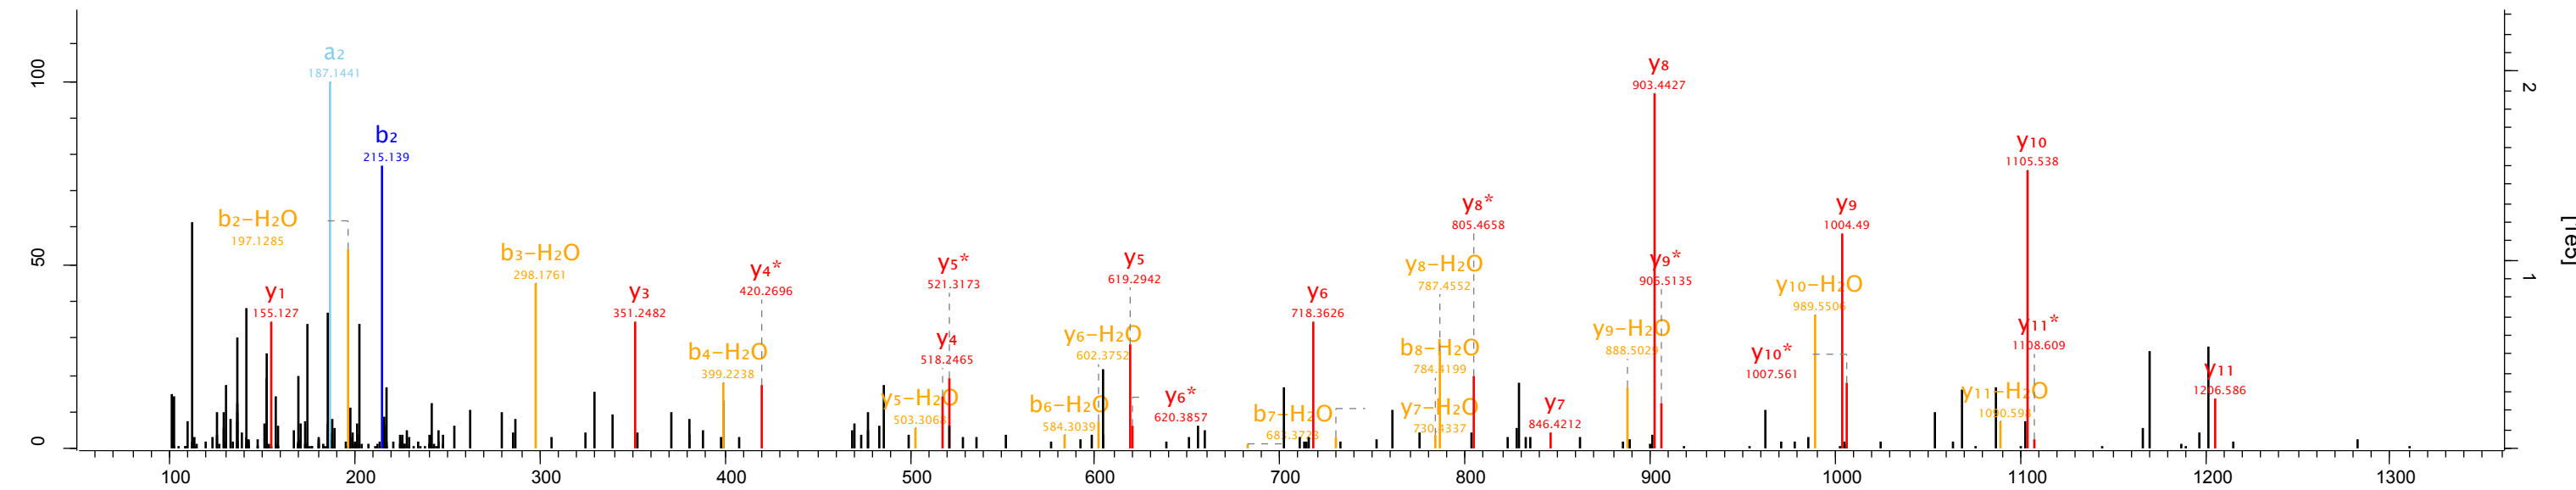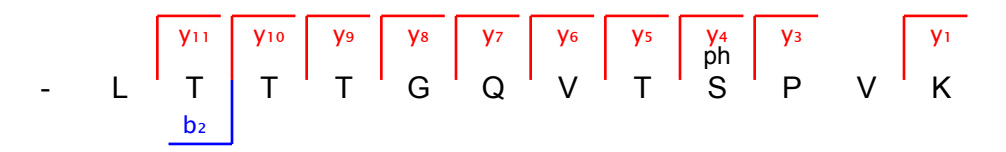

Raw file 20171215\_MaS\_33SR\_LMH\_phospho\_09 Scan 8290 Method FTMS; HCD Score 105.9 m/z 787.84 Gene names MAP1B

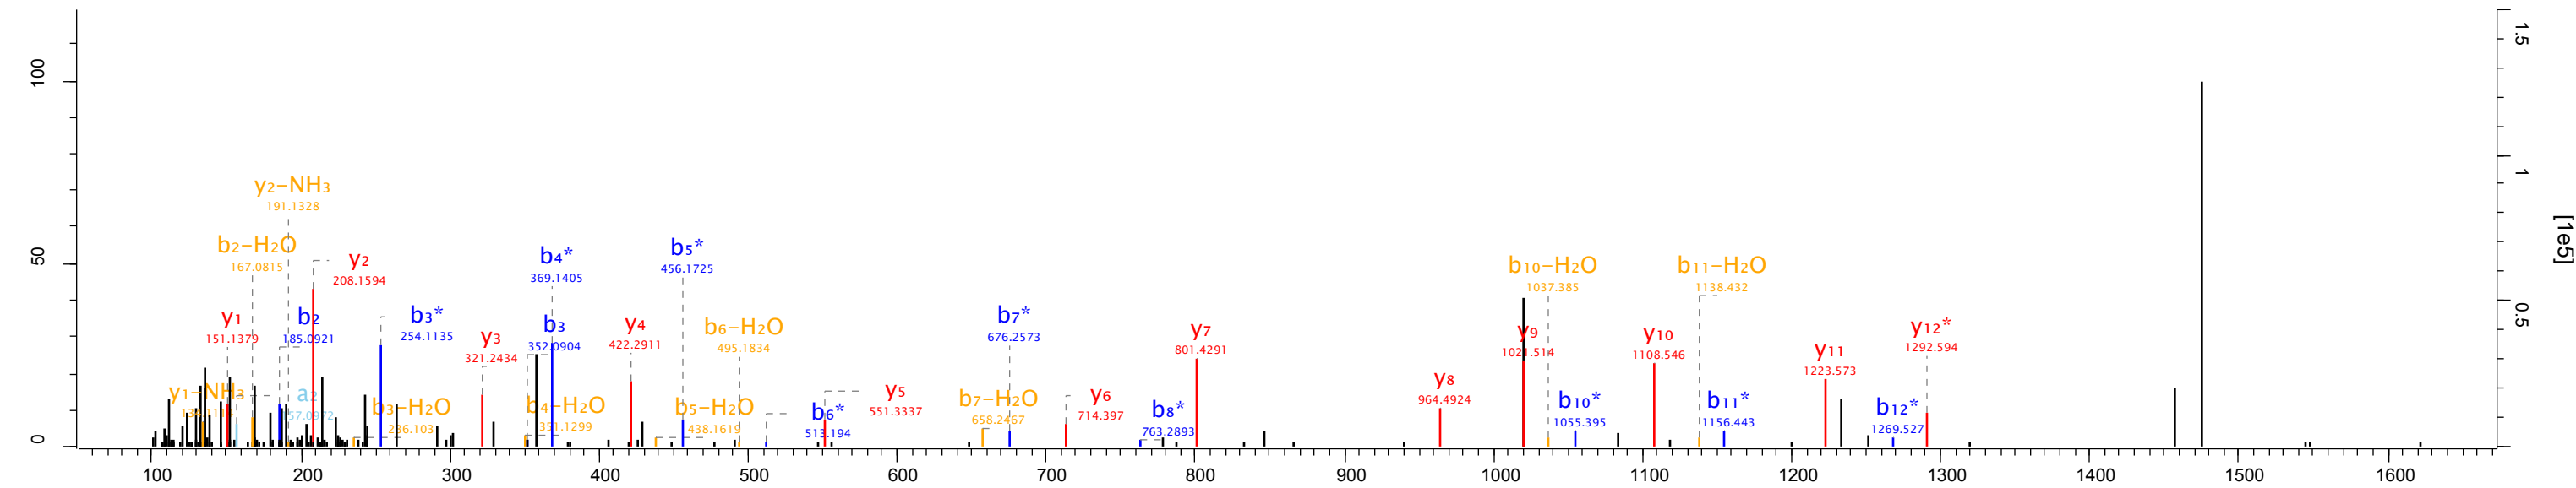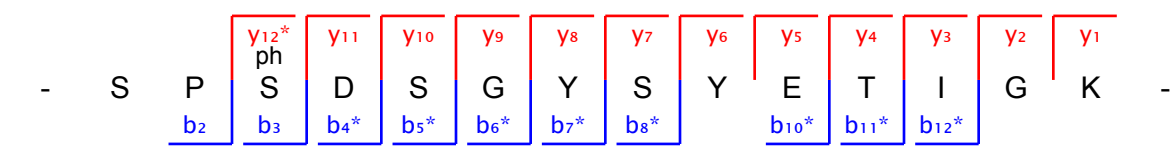



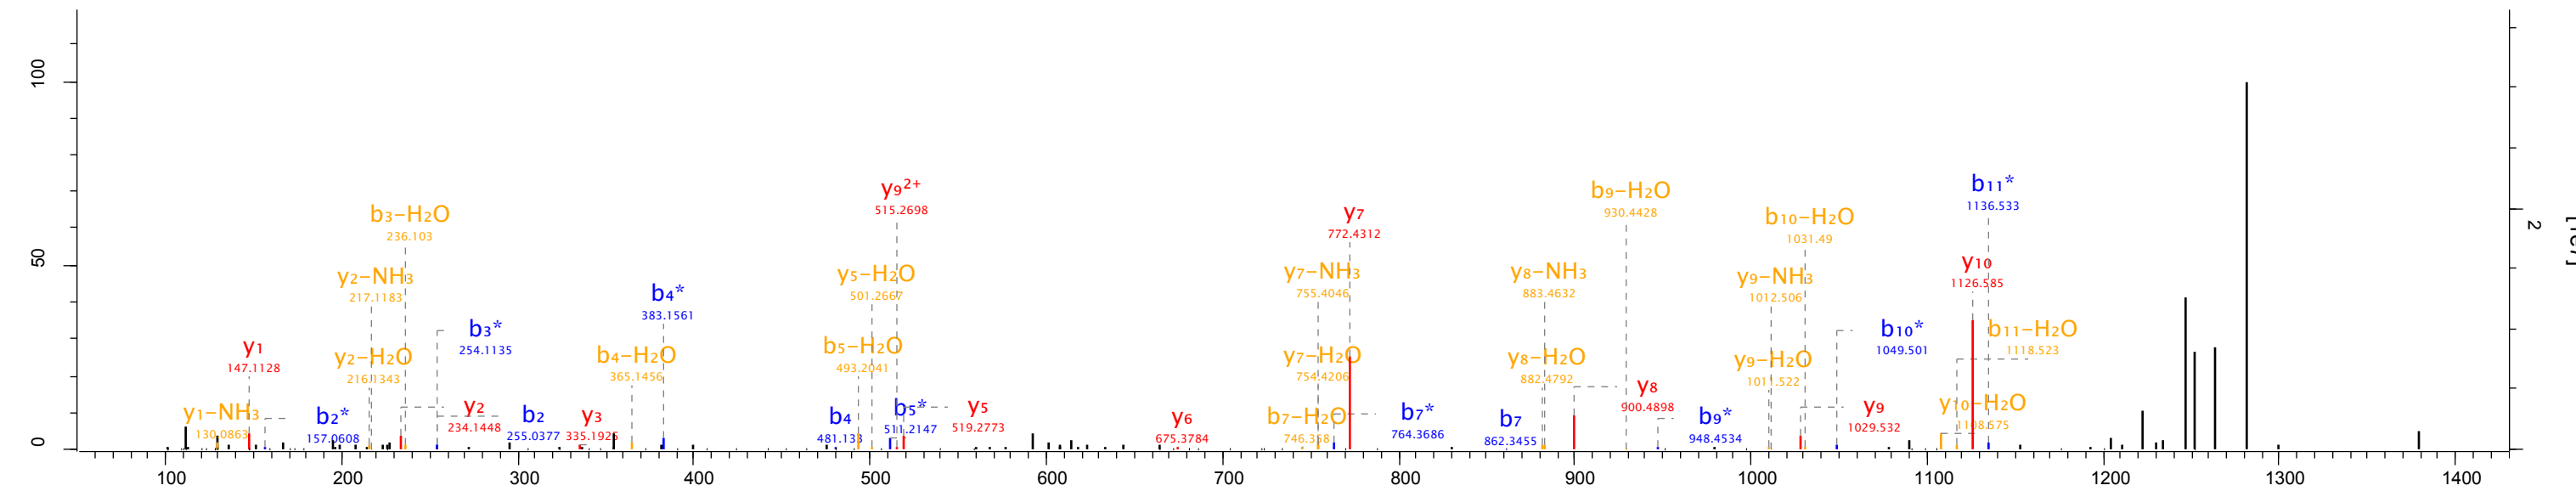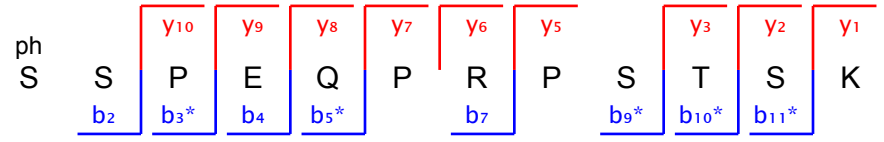

Raw file  
20171215\_MaS\_33SR\_LMH\_phospho2\_01

Scan 2060 Method FTMS; HCD Score 148.38 m/z 585.58 Gene names ZBTB7A

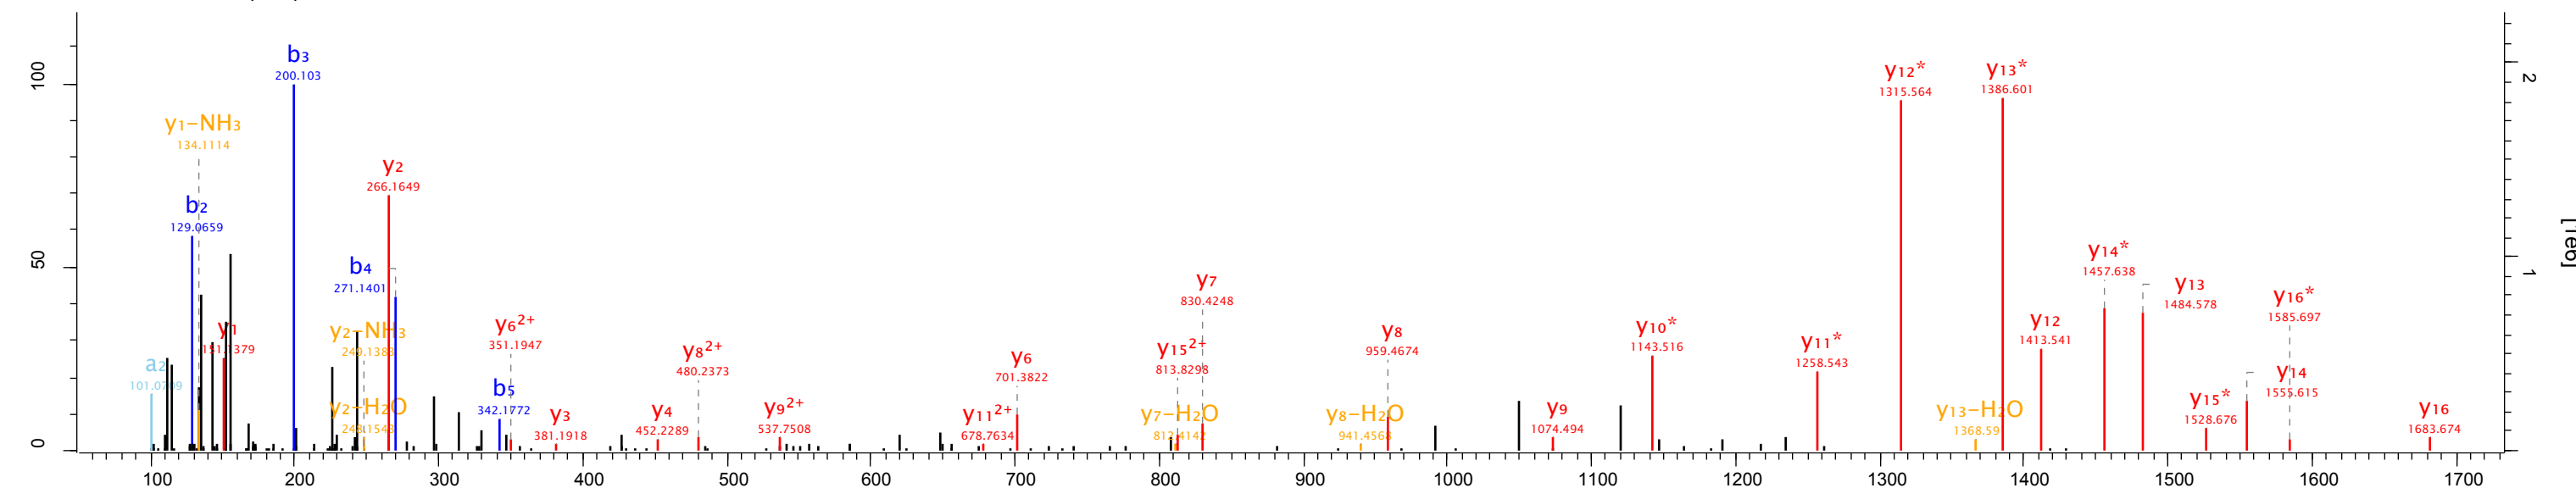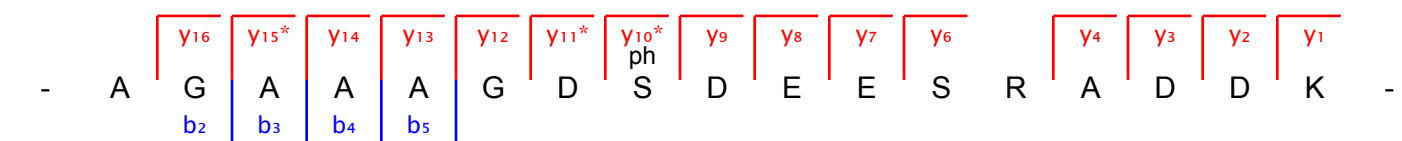

Raw file 20171215\_MaS\_33SR\_LMH\_phospho2\_01 Scan 2290 Method FTMS; HCD Score 60.32 m/z 587.74 Gene names CLASP1

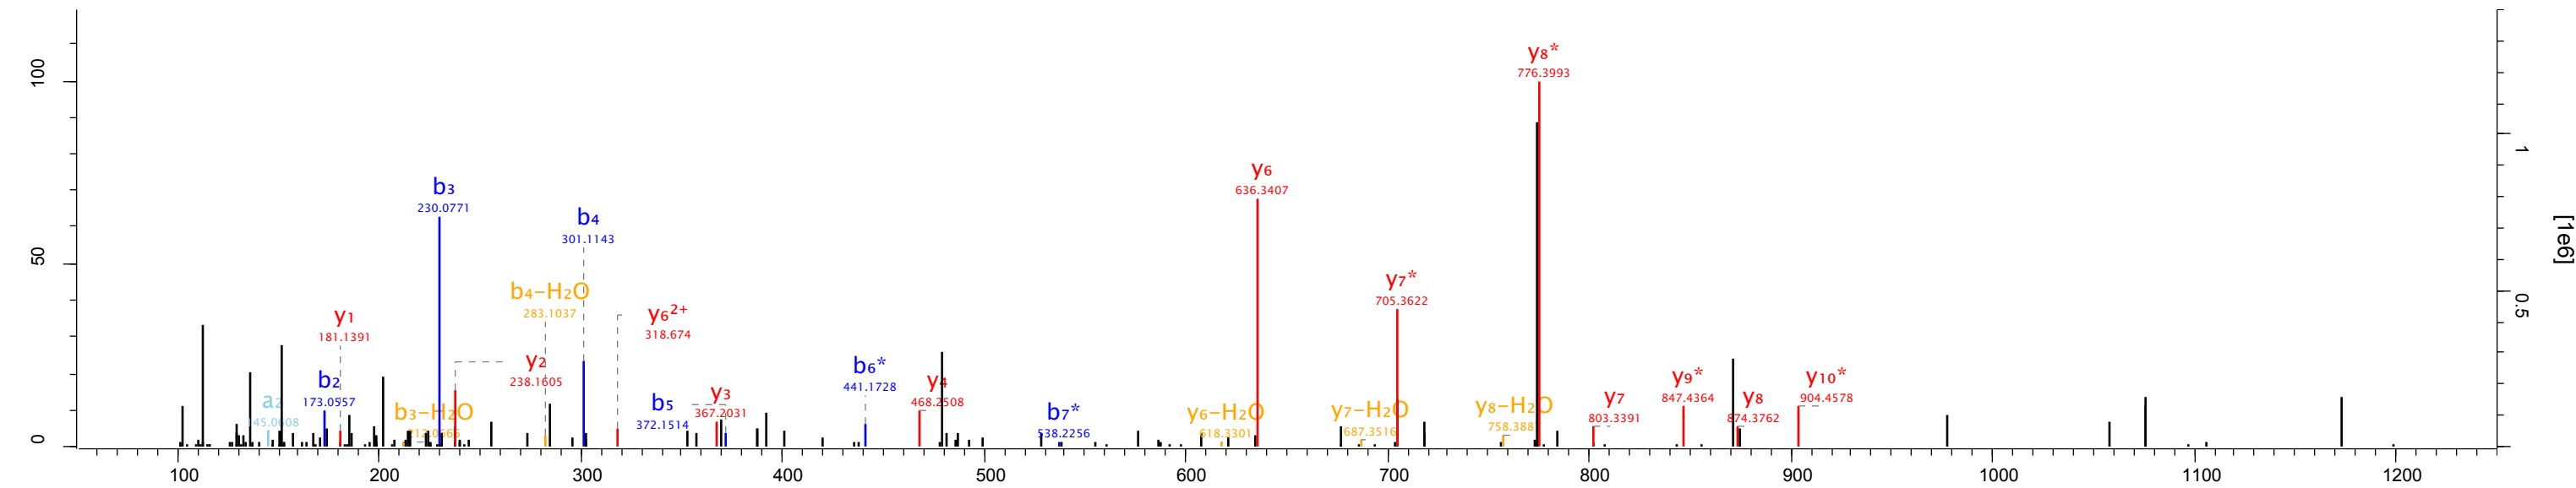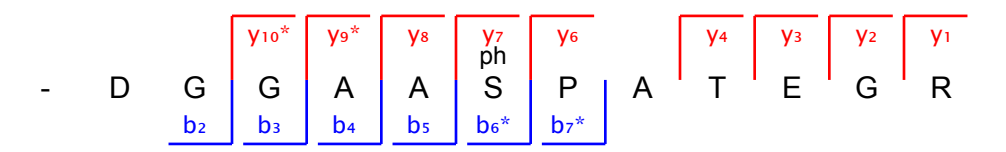

Raw file: 20171215\_MaS\_33SR\_LMH\_phospho2\_01  
 Scan: 2380 Method: FTMS; HCD Score: 321.88 m/z: 946.39 Gene names: CTR9

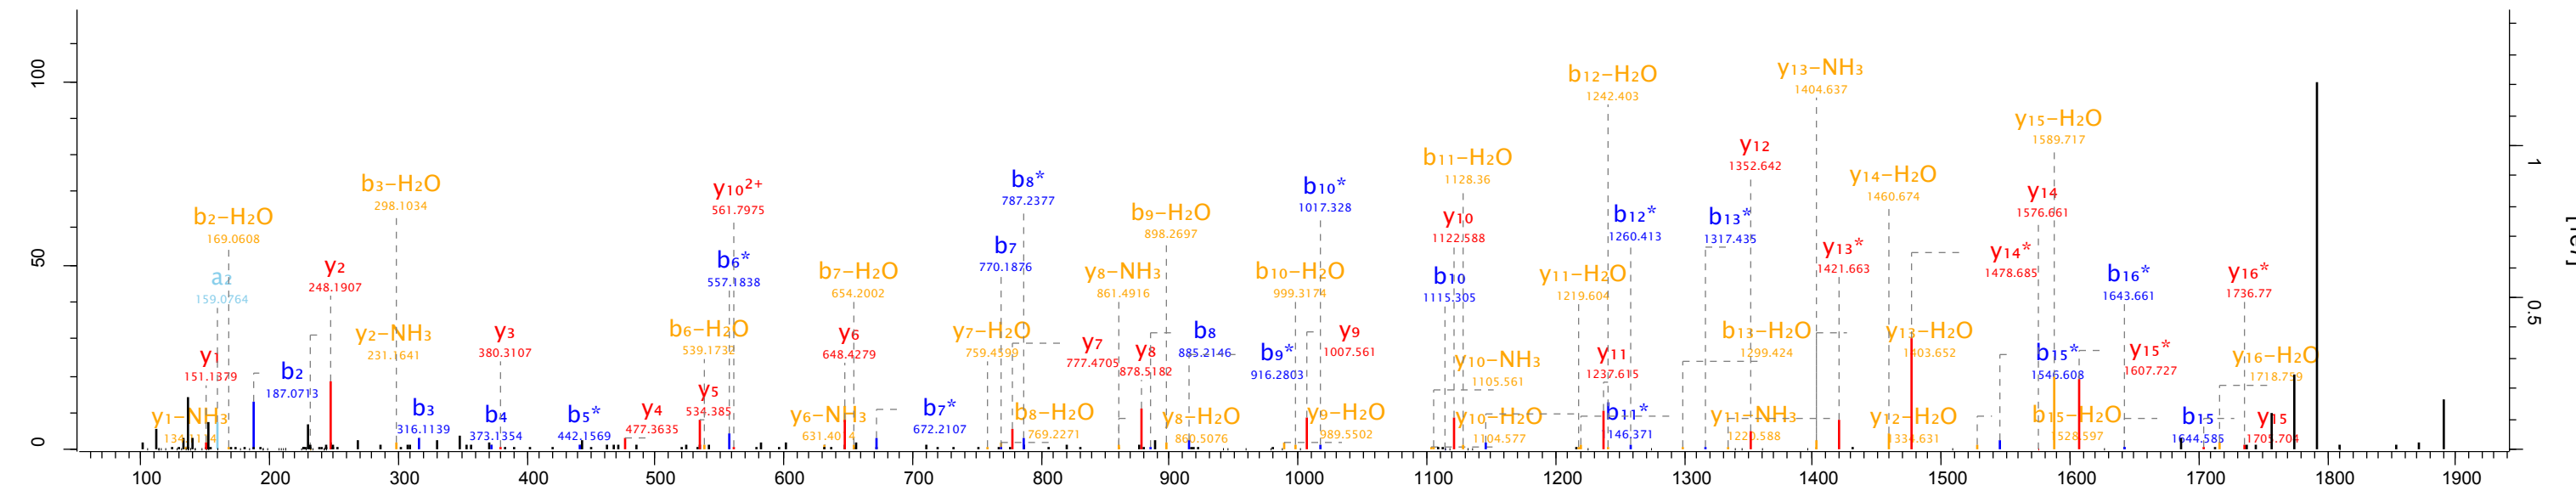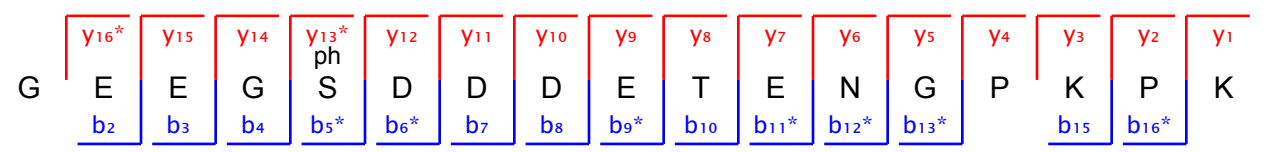

Raw file 20171215\_MaS\_33SR\_LMH\_phospho2\_01 Scan 2530 Method FTMS; HCD Score 167.35 m/z 757.36 Gene names DPYSL2

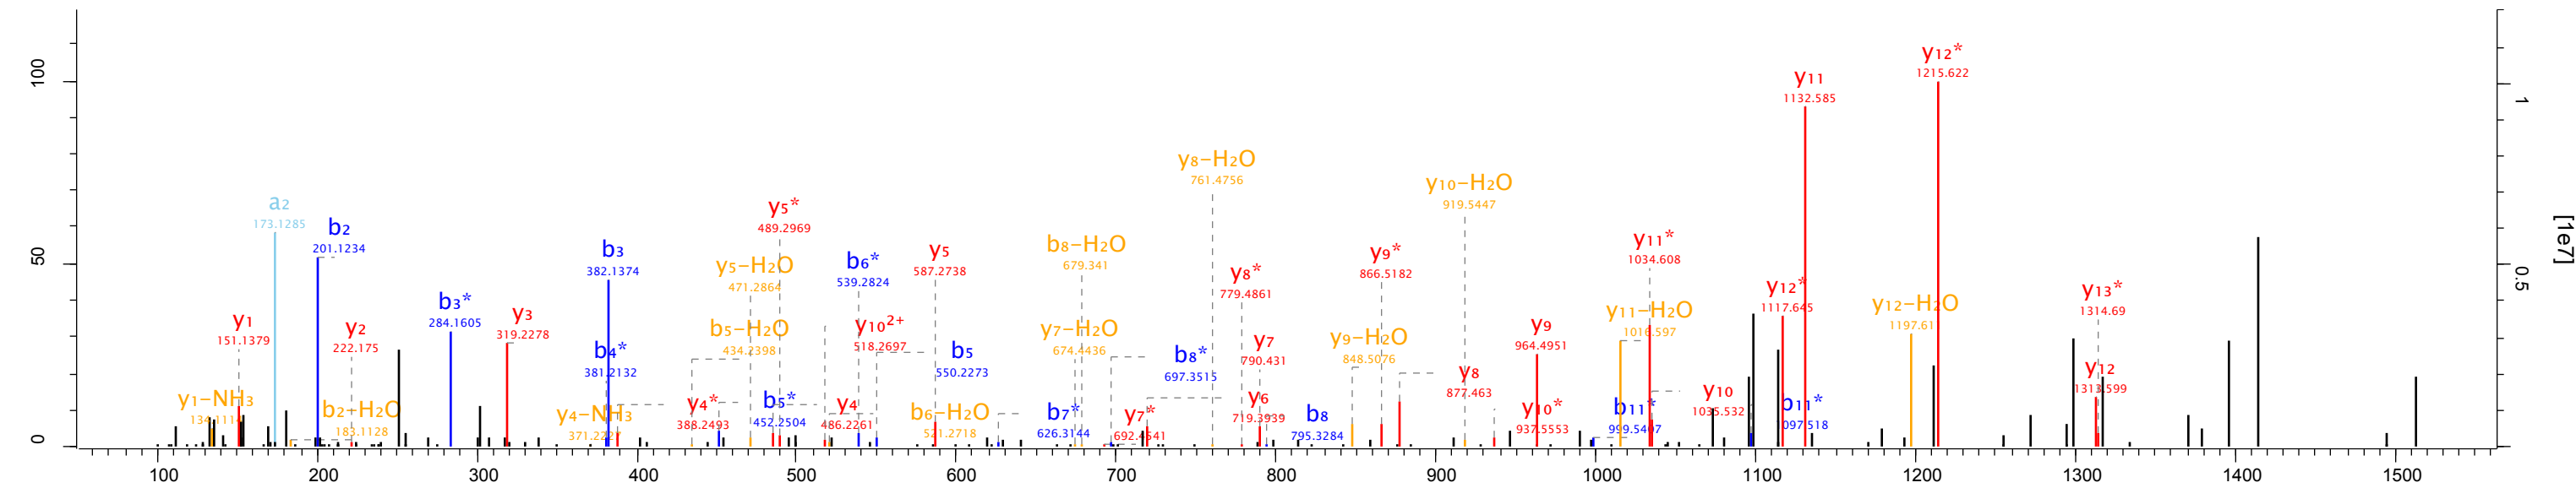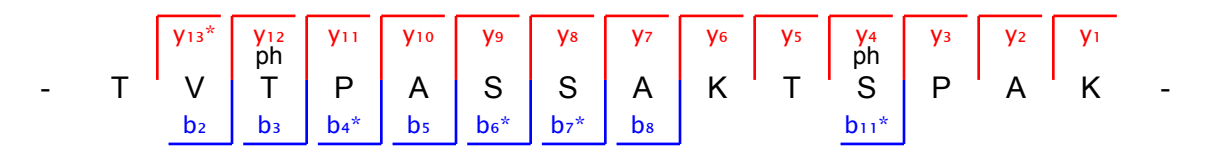

Raw file 20171215\_MaS\_33SR\_LMH\_phospho2\_01 Scan 2980 Method FTMS; HCD Score 92.97 m/z 596.77 Gene names RASAL2

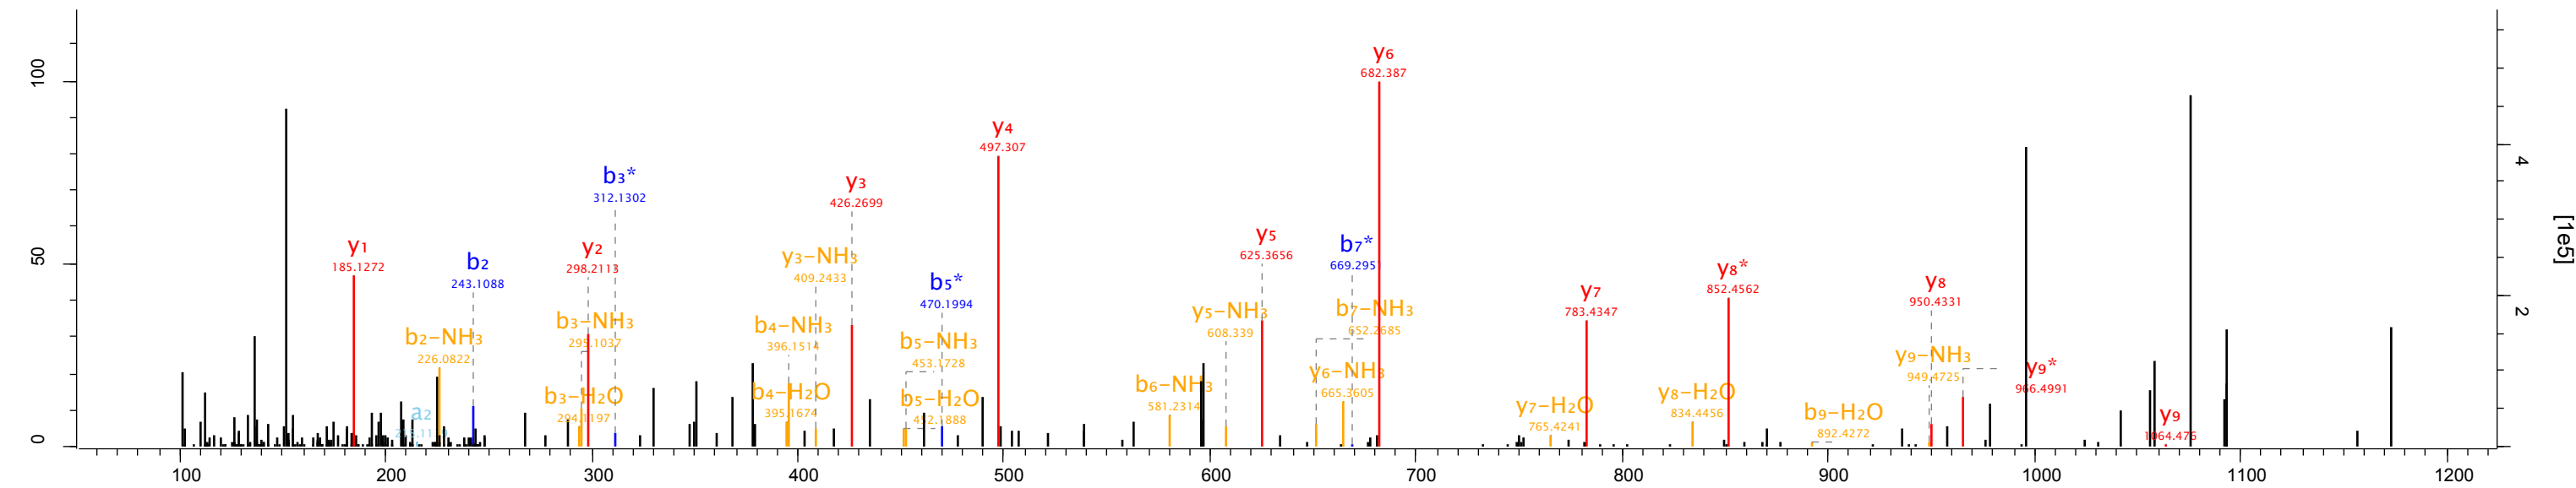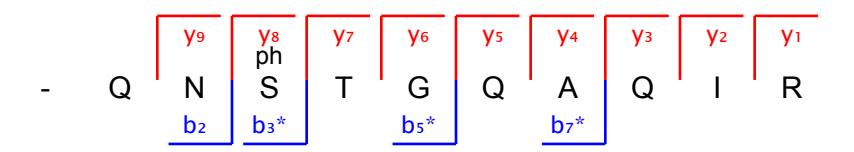

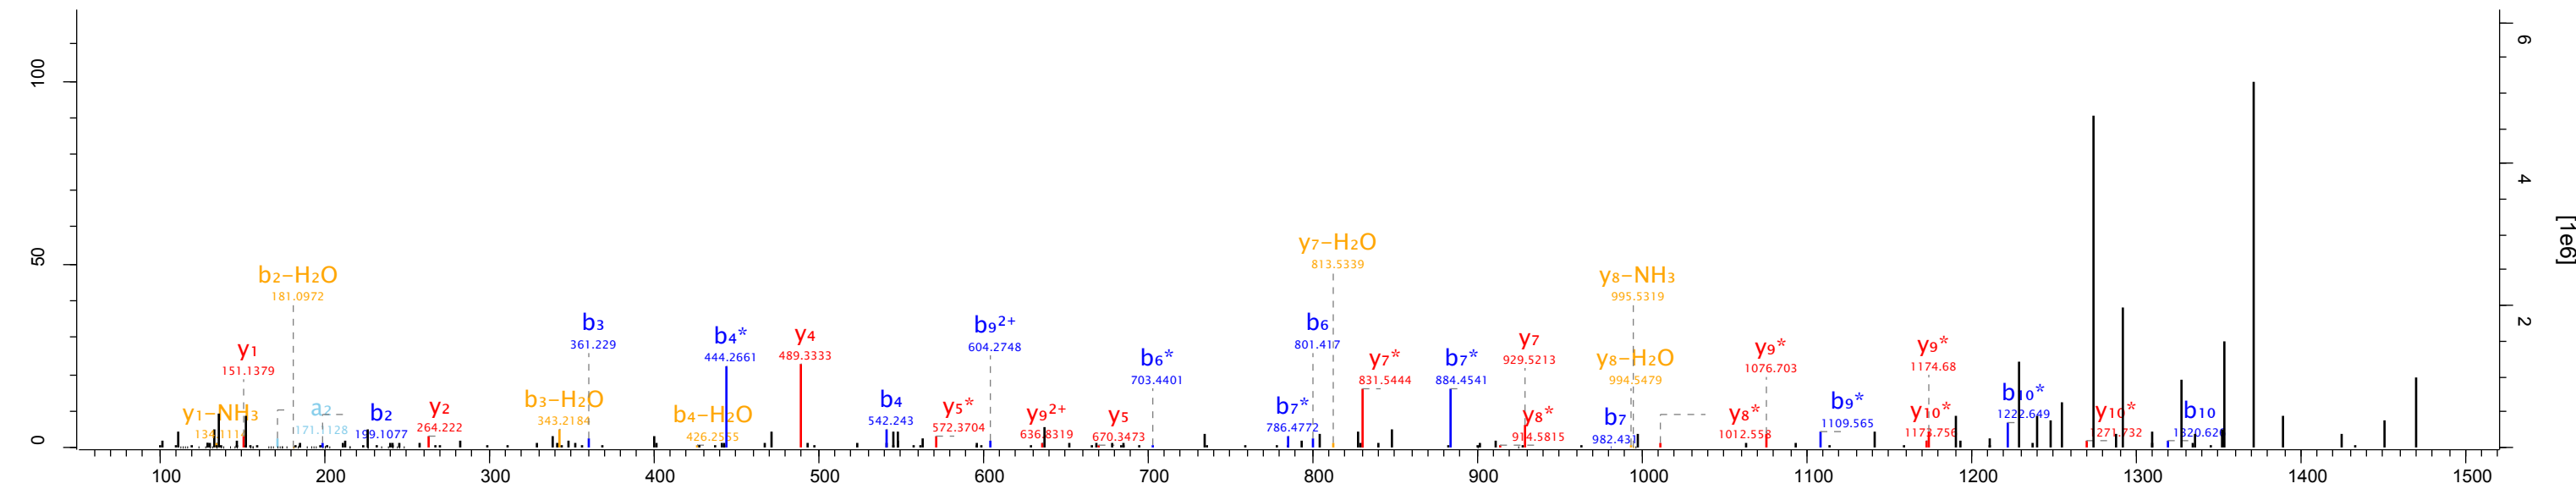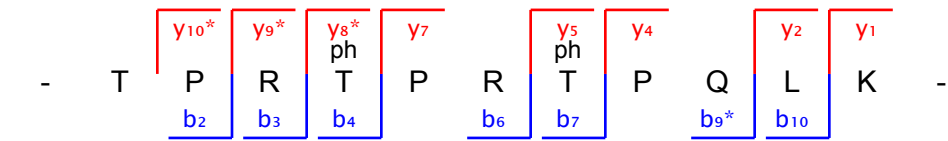

Raw file

20171215\_MaS\_33SR\_LMH\_phospho2\_01

| Scan | Method    | Score | m/z    | Gene names |
|------|-----------|-------|--------|------------|
| 4030 | FTMS; HCD | 118.5 | 684.78 | BRAP       |

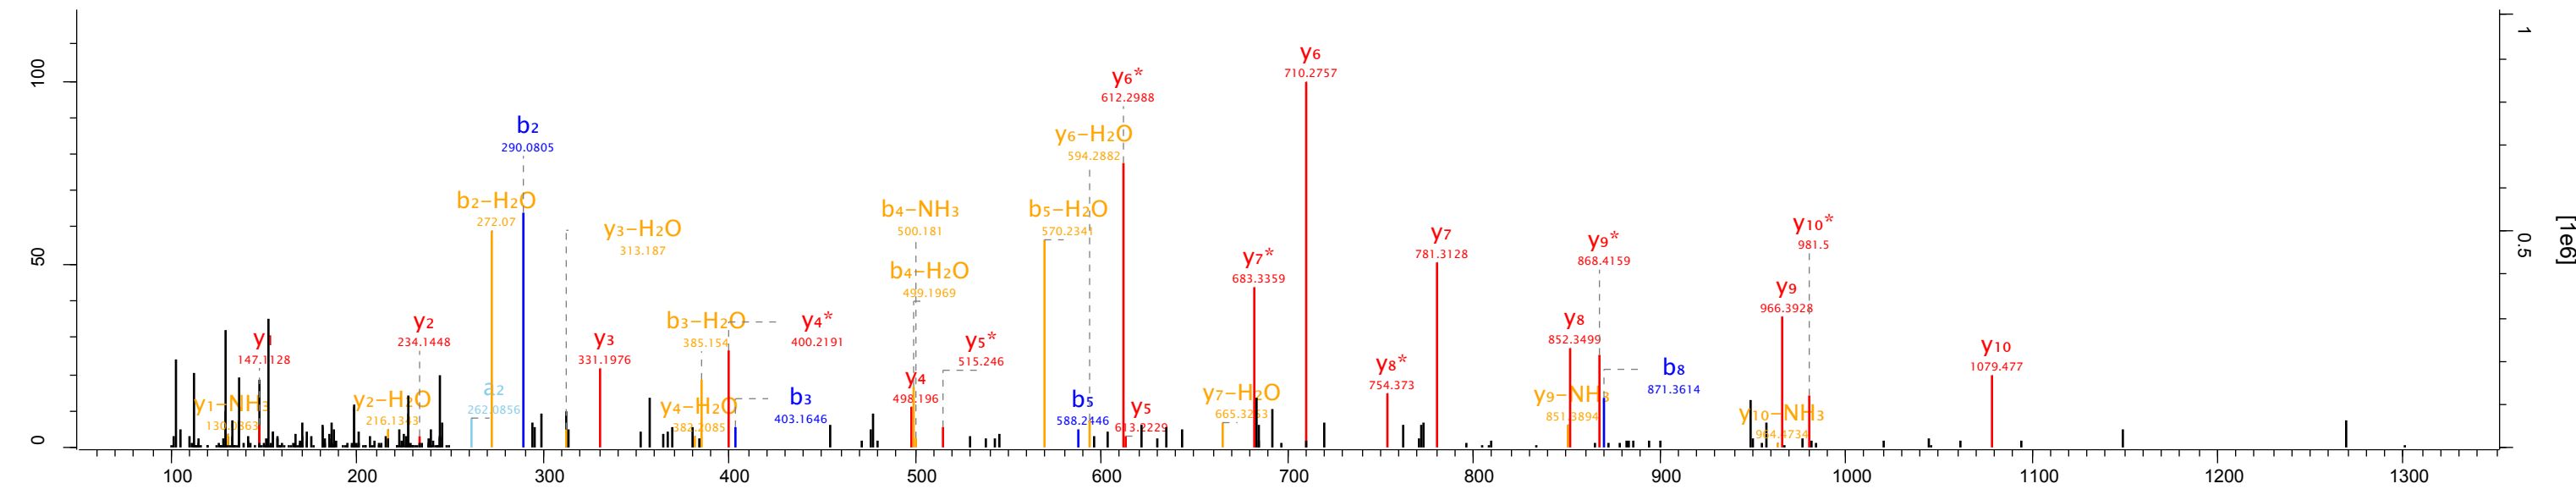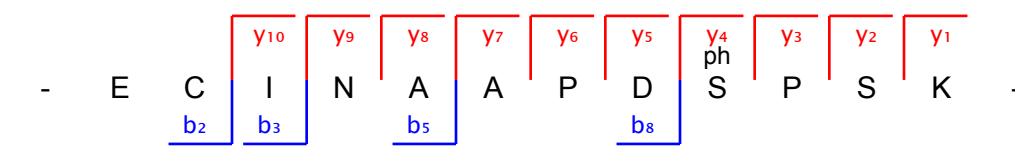



Raw file  
20171215\_MaS\_33SR\_LMH\_phospho2\_01

Scan 4050 Method FTMS; HCD Score 179.54 m/z 993.77 Gene names NUFIP2

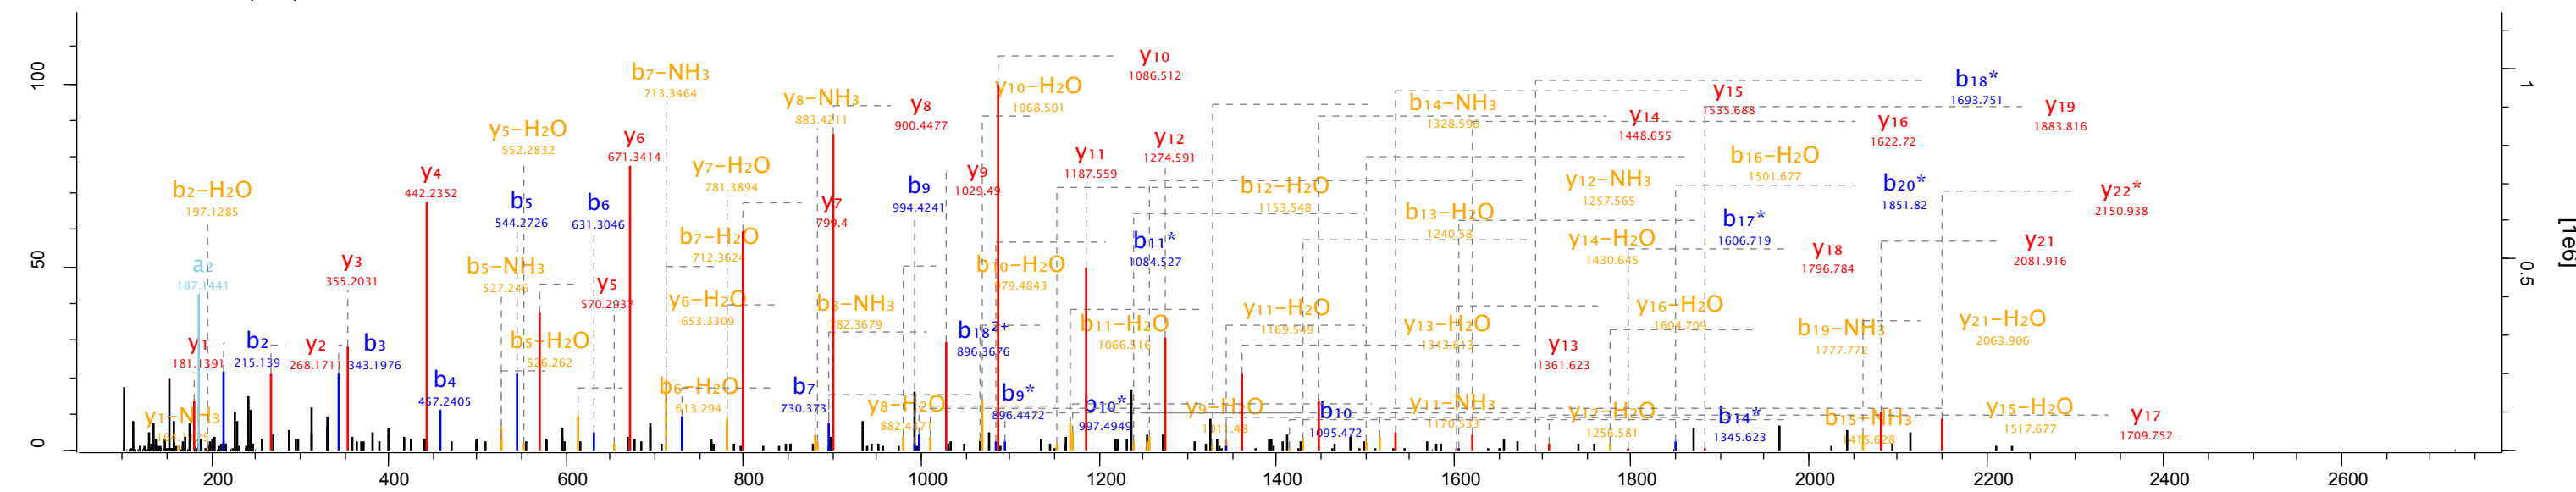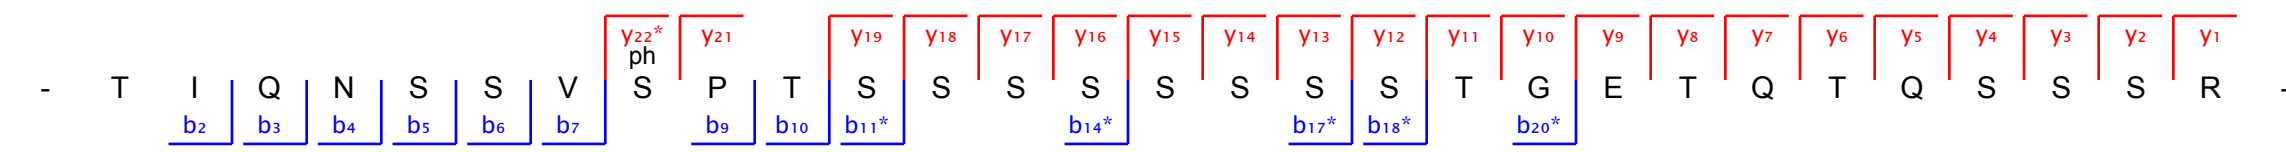



Raw file: 20171215\_MaS\_33SR\_LMH\_phospho2\_01  
 Scan: 5180 Method: FTMS; HCD Score: 267.32 m/z: 829.36 Gene names: CLASP1

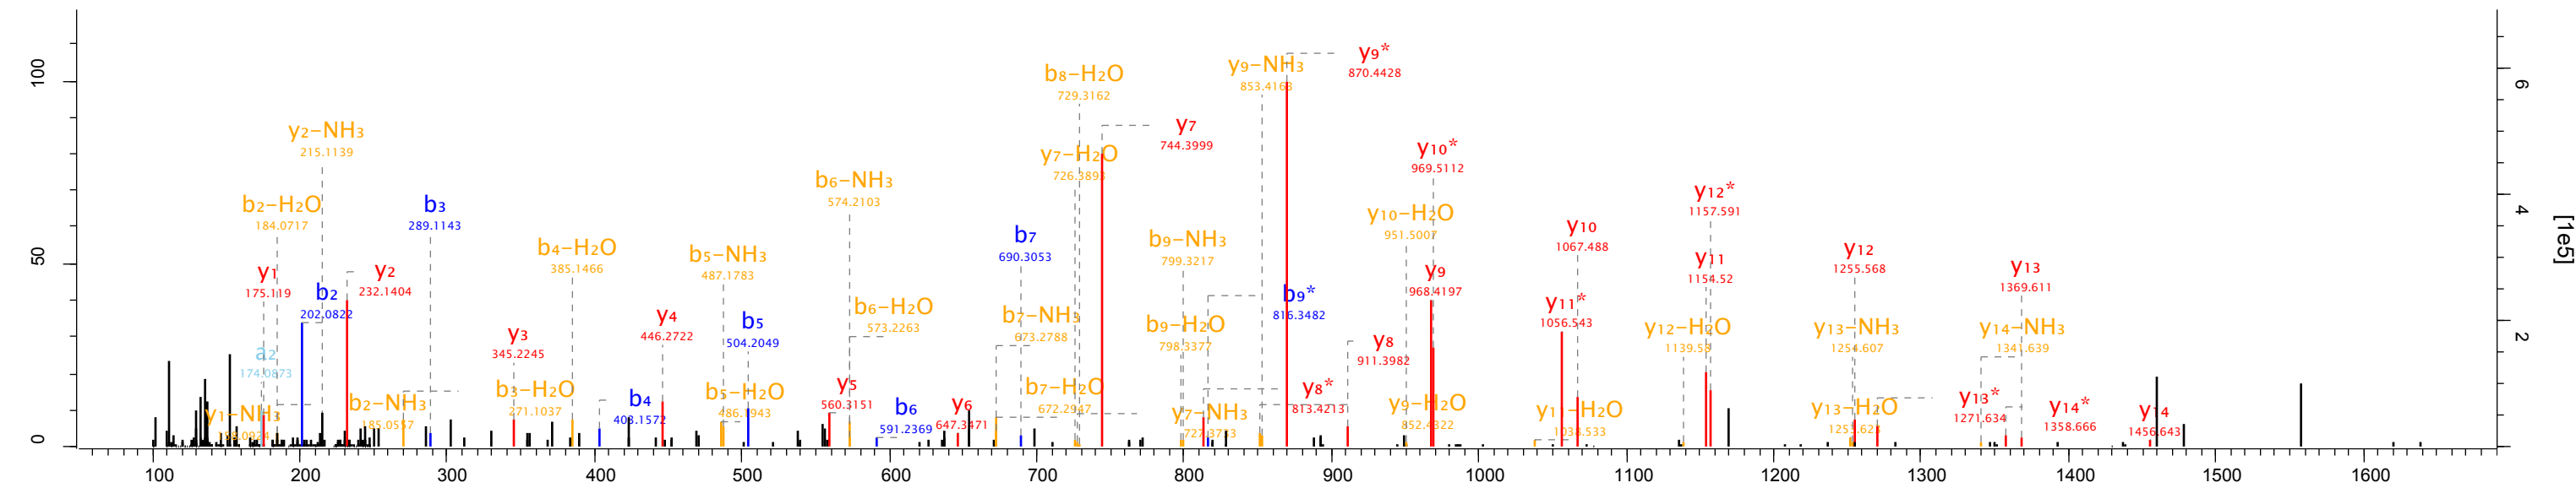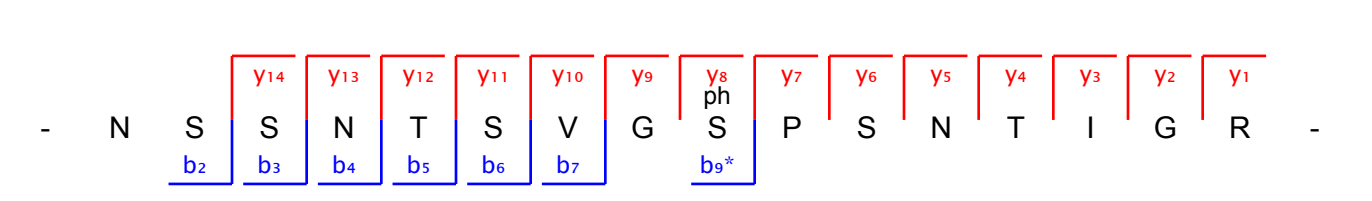

Raw file 20171215\_MaS\_33SR\_LMH\_phospho2\_01 Scan 5530 Method FTMS; HCD Score 71.14 m/z 670 Gene names ZFP91

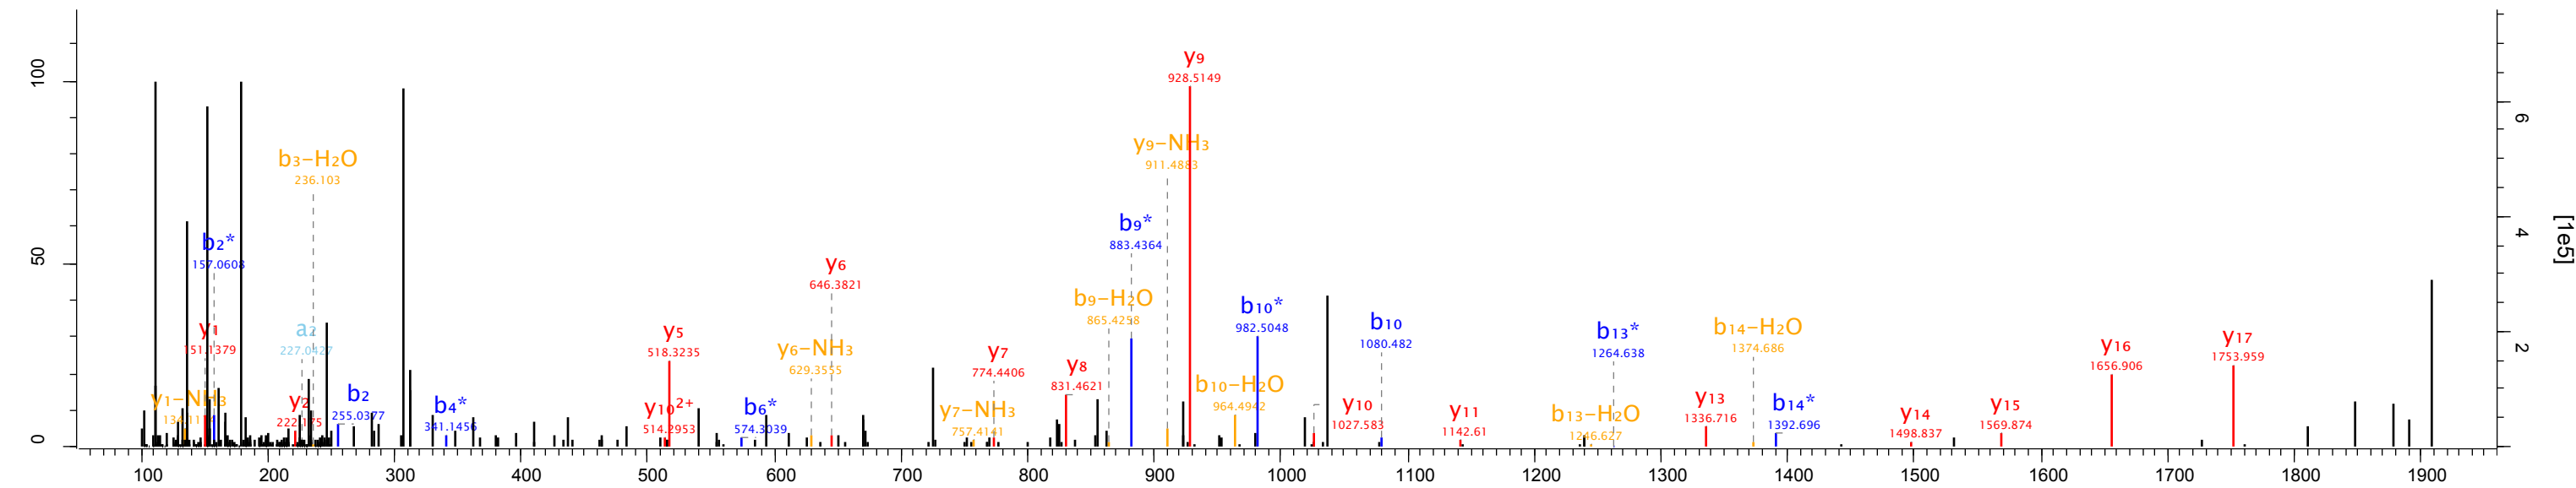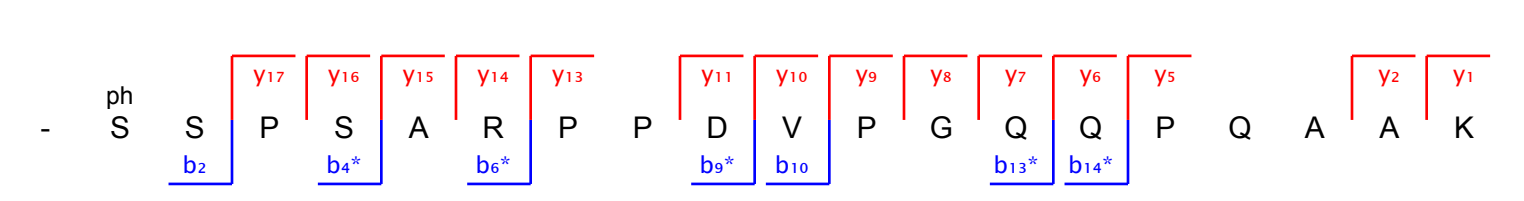

Raw file 20171215\_MaS\_33SR\_LMH\_phospho2\_01 Scan 6580 Method FTMS; HCD Score 140.38 m/z 944.1 Gene names MAP4K4

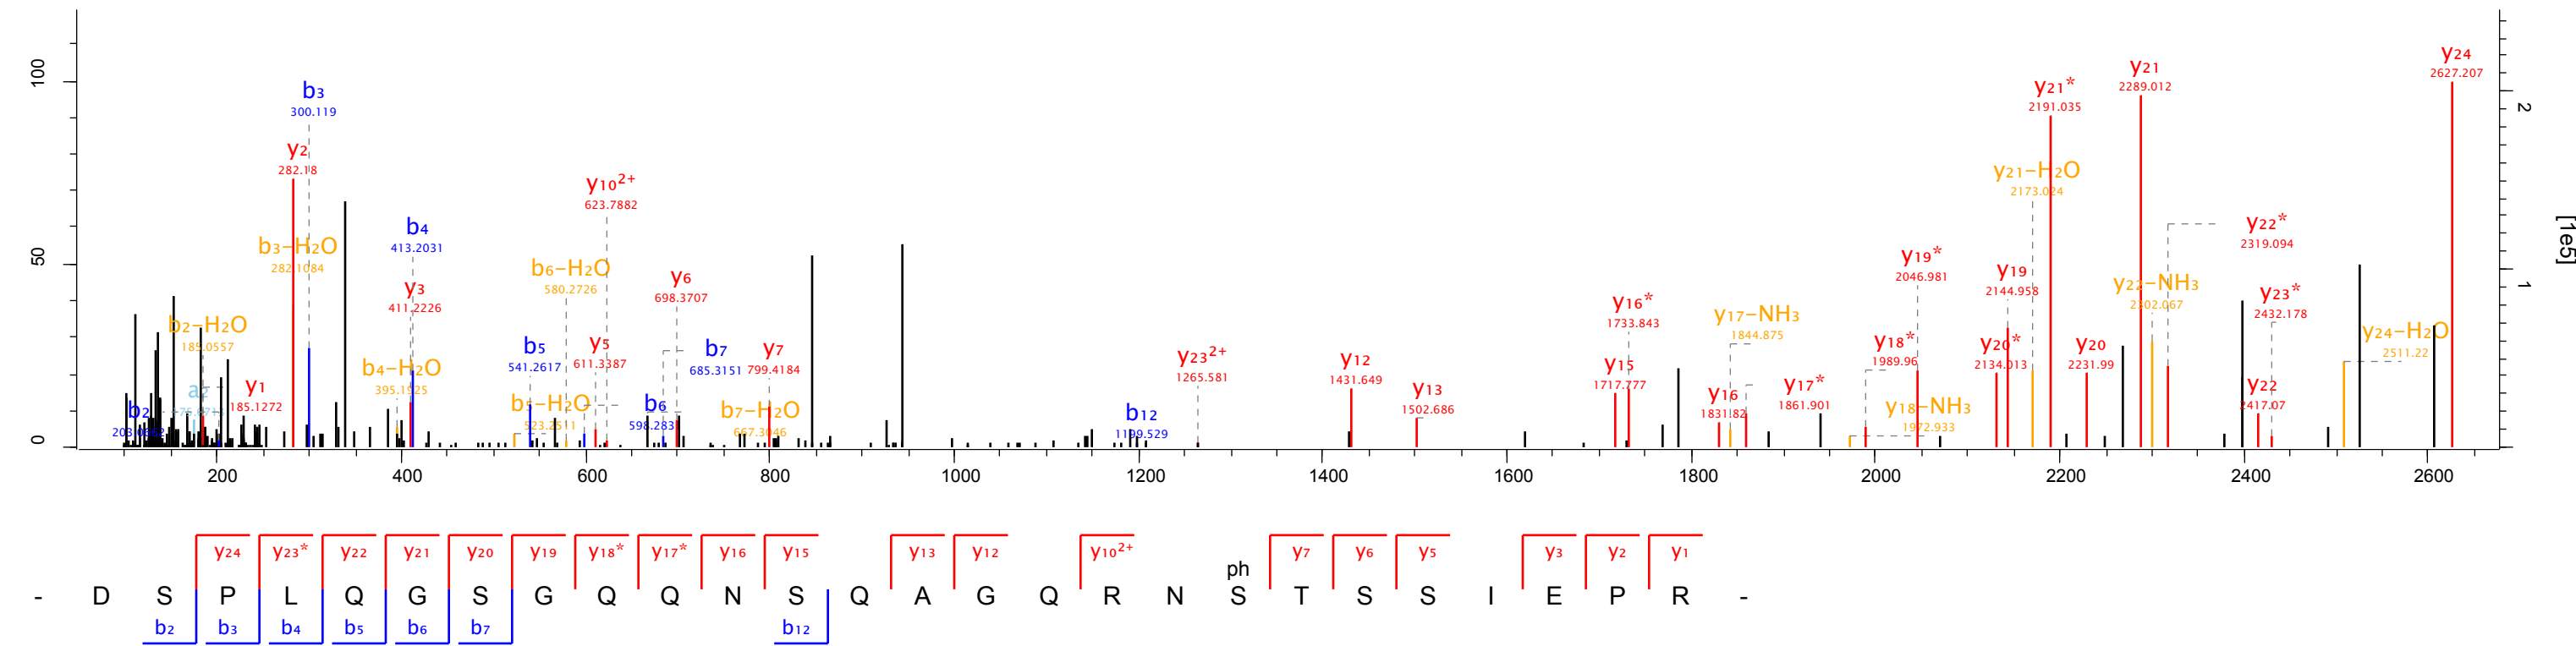

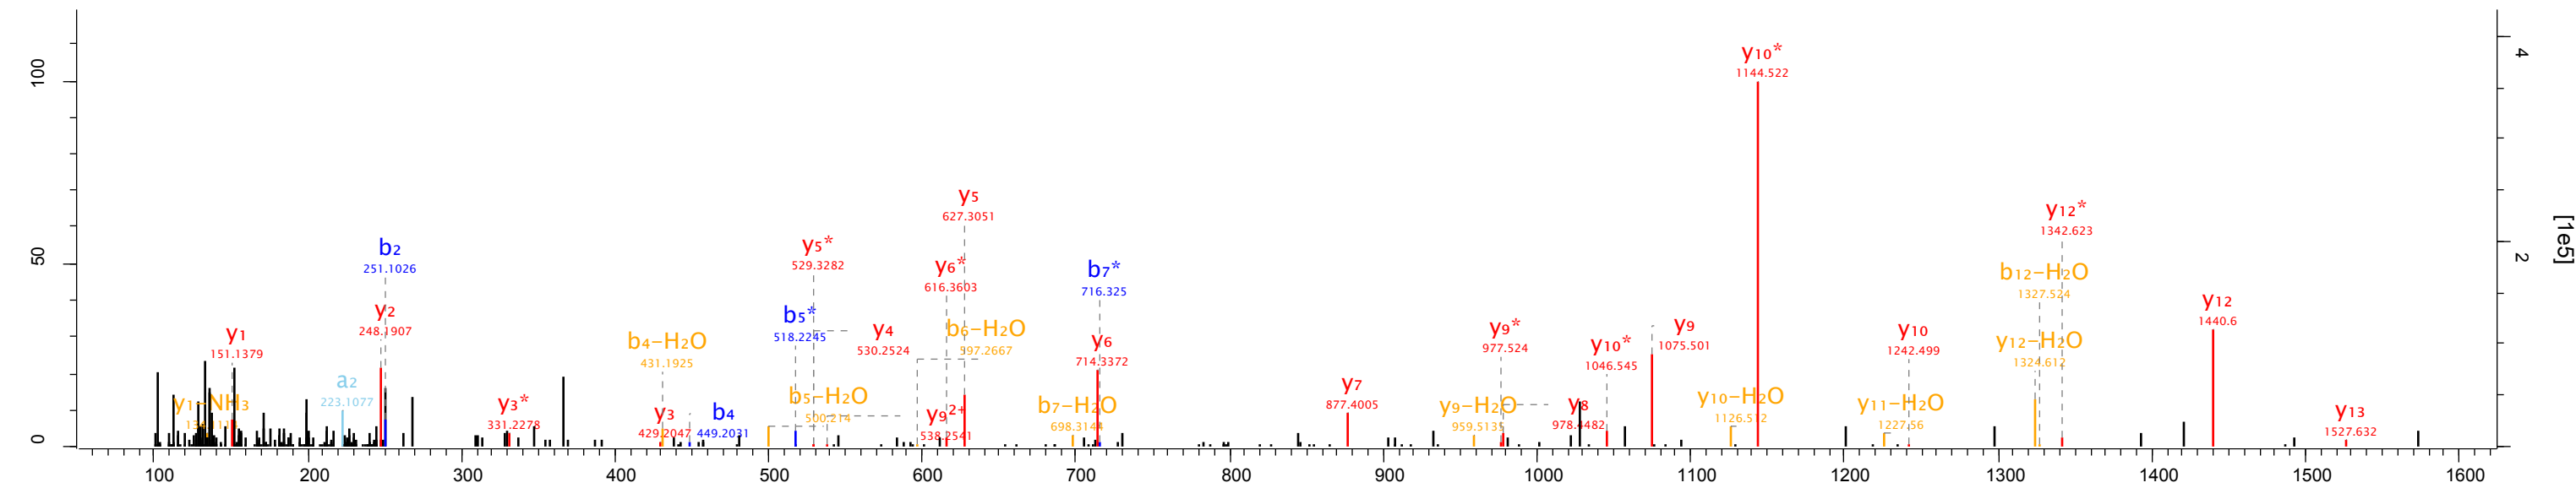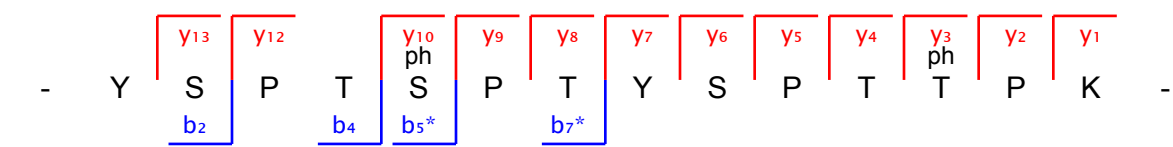

Raw file: 20171215\_MaS\_33SR\_LMH\_phospho2\_02  
 Scan: 10800 Method: FTMS; HCD Score: 190.96 m/z: 649.3 Gene names: EPB41L3

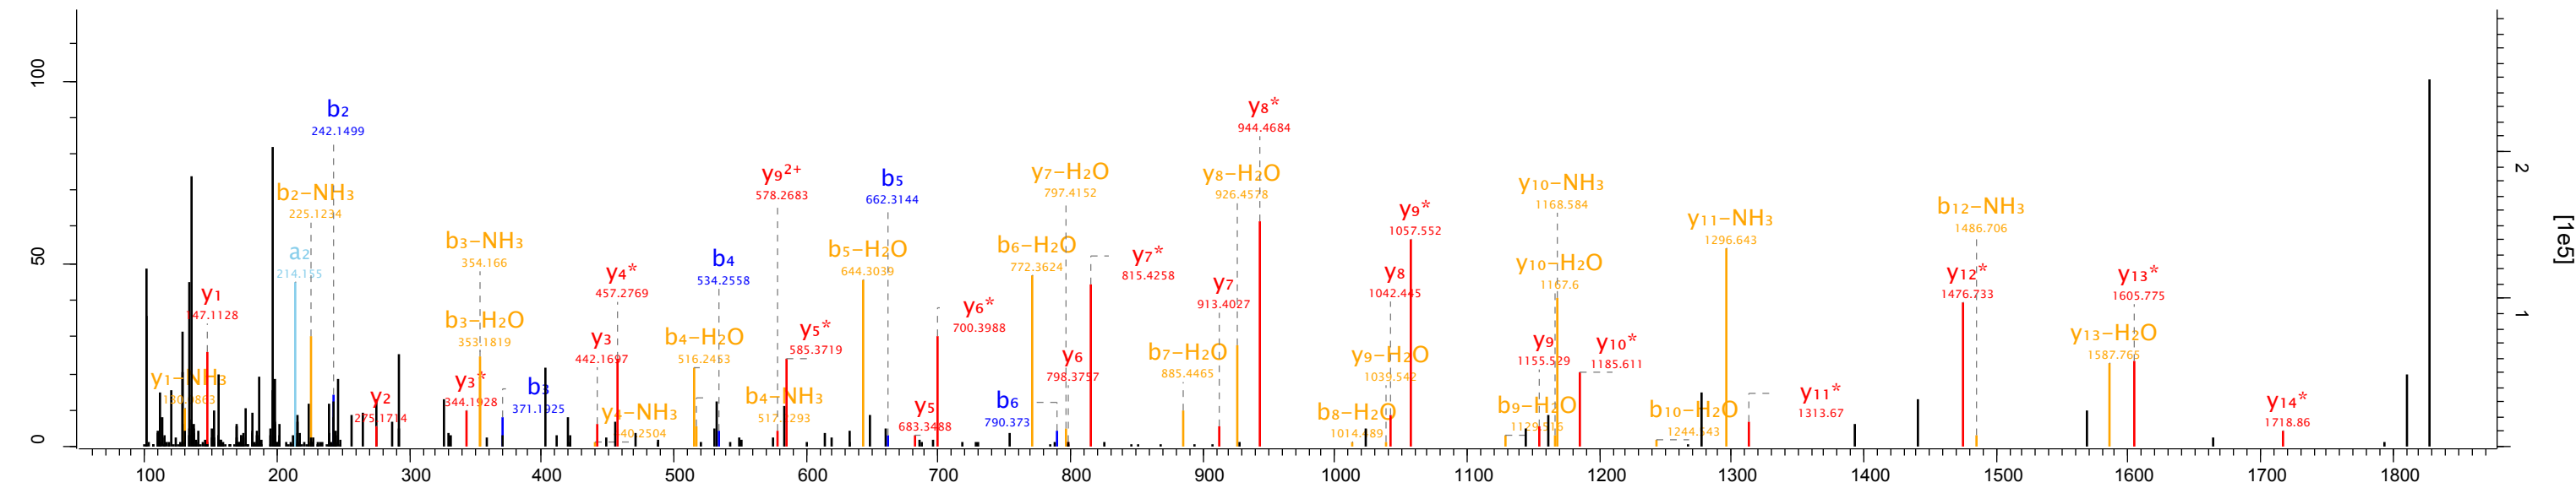

Peptide sequence: - Q L E Y Q Q L E D D K L S Q K -

Fragmentation mapping (b and y ions):

- Red boxes (y ions): y14\* (L), y13\* (E), y12\* (Y), y11\* (Q), y10\* (Q), y9 (L), y8 (E), y7 (D), y6 (D), y5 (K), y4\* (L), y3<sub>ph</sub> (S), y2 (Q), y1 (K)
- Blue boxes (b ions): b2 (L), b3 (E), b4 (Y), b5 (Q), b6 (Q)

Raw file 20171215\_MaS\_33SR\_LMH\_phospho2\_02 Scan 10890 Method FTMS; HCD Score 49.43 m/z 1024.49 Gene names SAFB;SAFB2

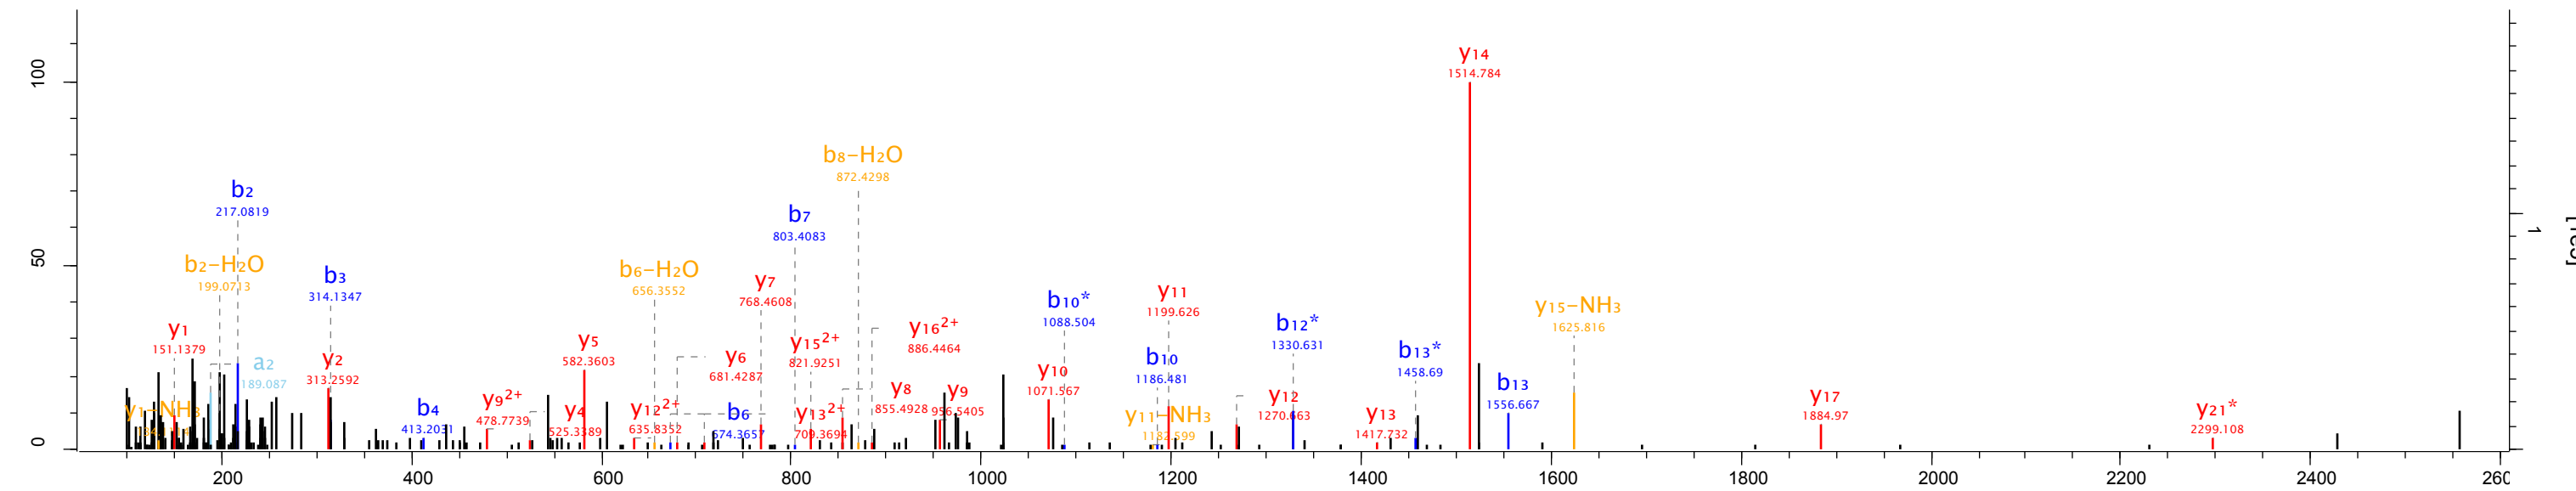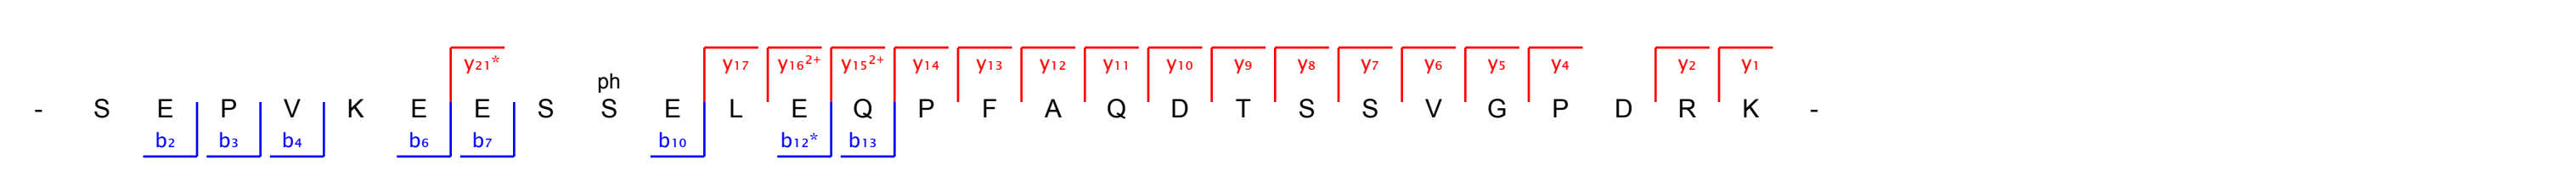



Raw file 20171215\_MaS\_33SR\_LMH\_phospho2\_02 Scan 10920 Method FTMS; HCD Score 233.45 m/z 843.05 Gene names SAFB;SAFB2

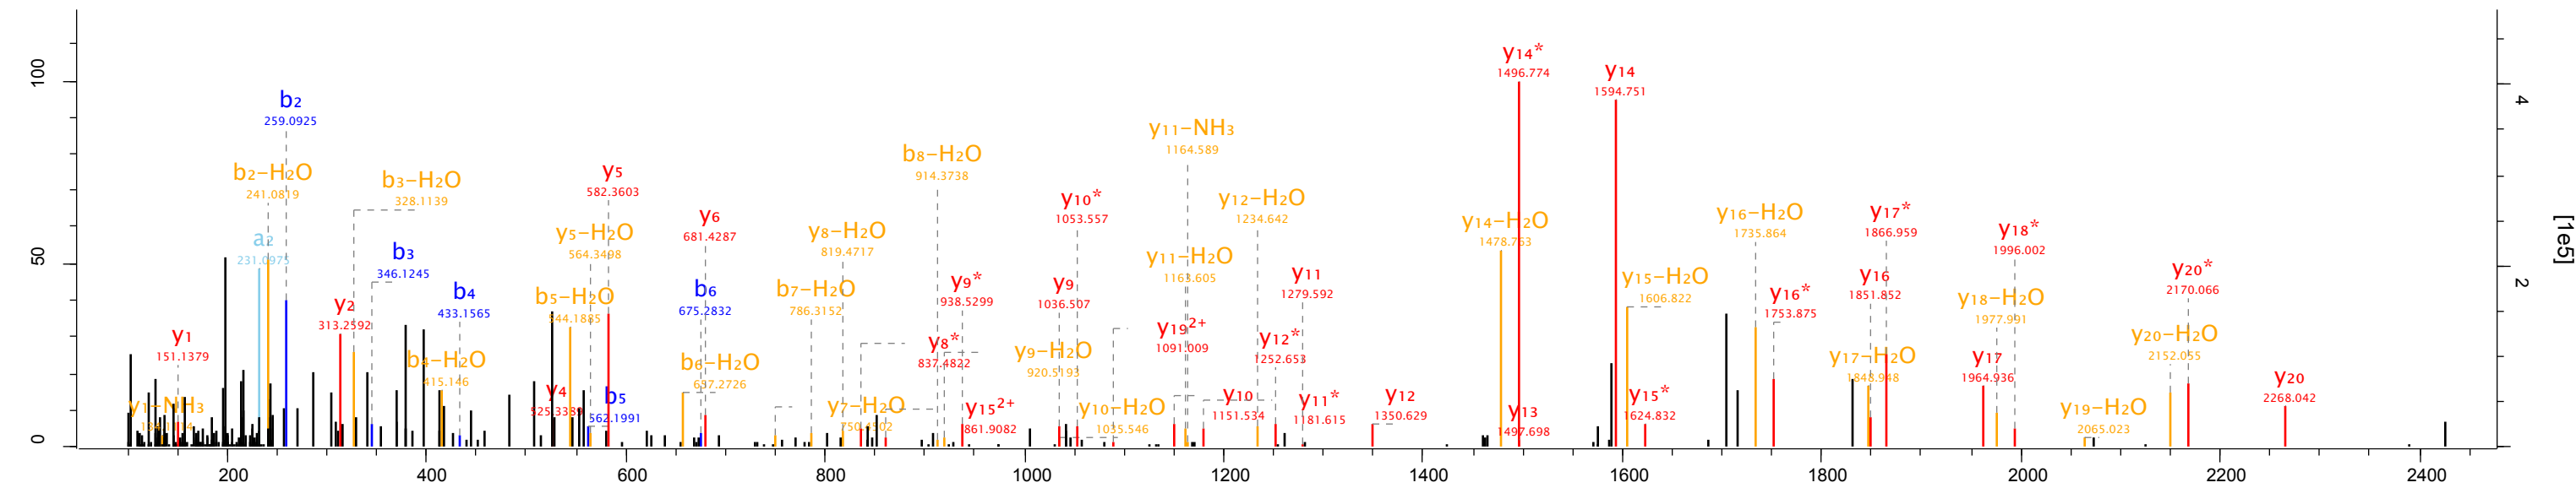

- E E S S E L E Q P F A Q D T S S V G P D R K -

b<sub>2</sub>
b<sub>3</sub>
b<sub>4</sub>
b<sub>5</sub>
b<sub>6</sub>
y<sub>20</sub>
y<sub>19</sub><sup>2+</sup>
y<sub>18</sub><sup>\*</sup>
y<sub>17</sub>
y<sub>16</sub>
y<sub>15</sub><sup>\*</sup>
y<sub>14</sub>
y<sub>13</sub>
y<sub>12</sub>
y<sub>11</sub>
y<sub>10</sub>
y<sub>9</sub>
y<sub>8</sub><sup>\*</sup>
y<sub>6</sub>
y<sub>5</sub>
y<sub>4</sub>
y<sub>2</sub>
y<sub>1</sub>

Raw file: 20171215\_MaS\_33SR\_LMH\_phospho2\_02  
 Scan: 11320 Method: FTMS; HCD Score: 123.76 m/z: 636.3 Gene names: TSC22D4

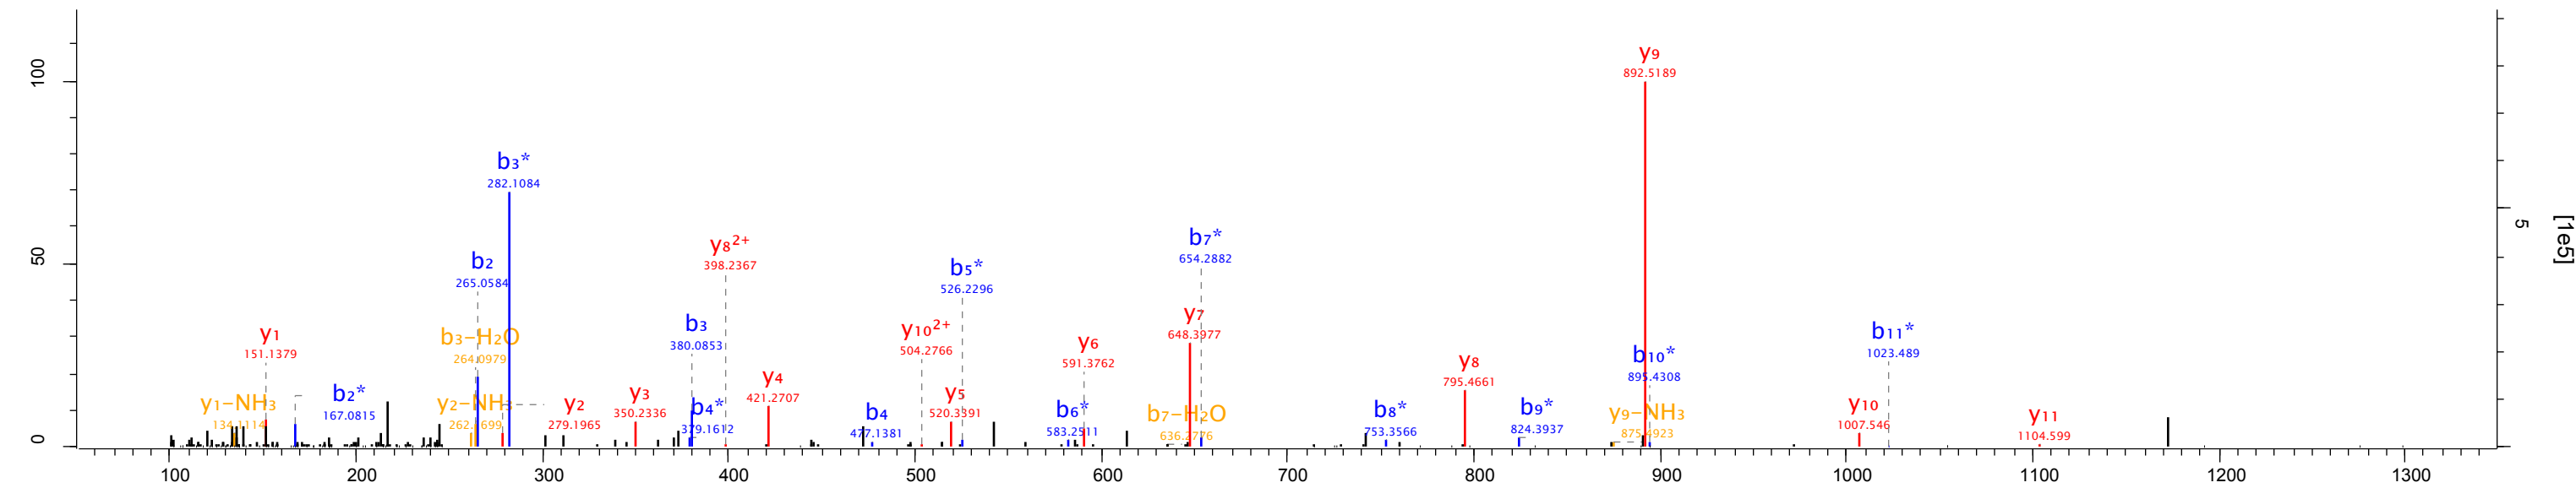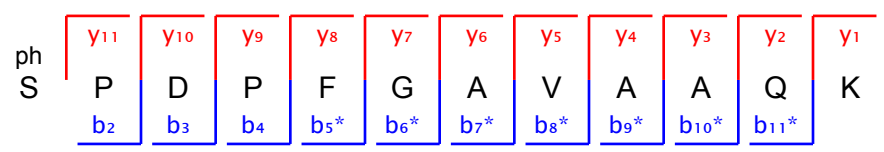

Raw file 20171215\_MaS\_33SR\_LMH\_phospho2\_02 Scan 11410 Method FTMS; HCD Score 106.44 m/z 965.67 Gene names SERBP1

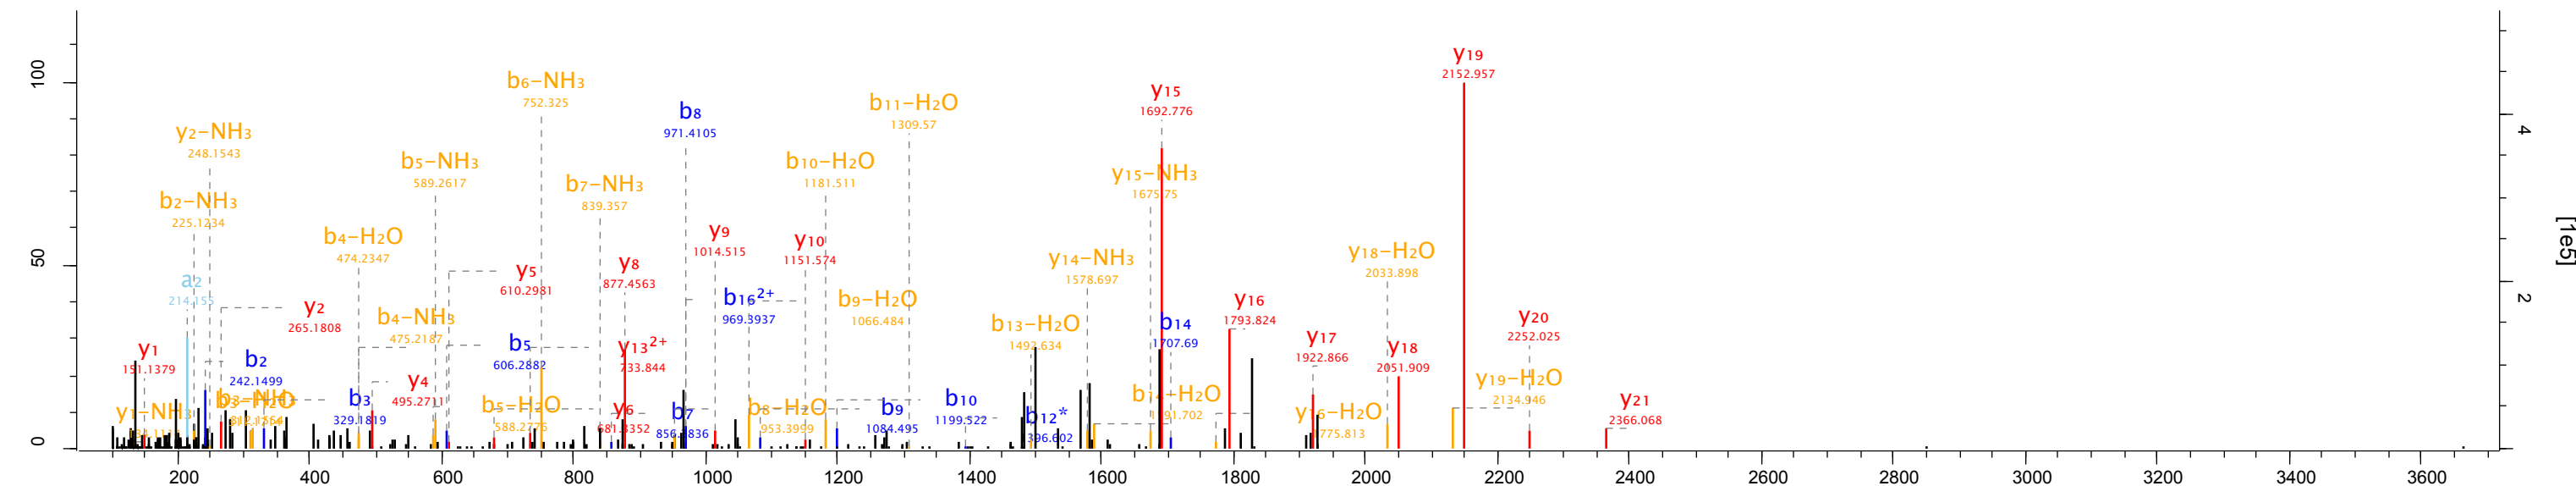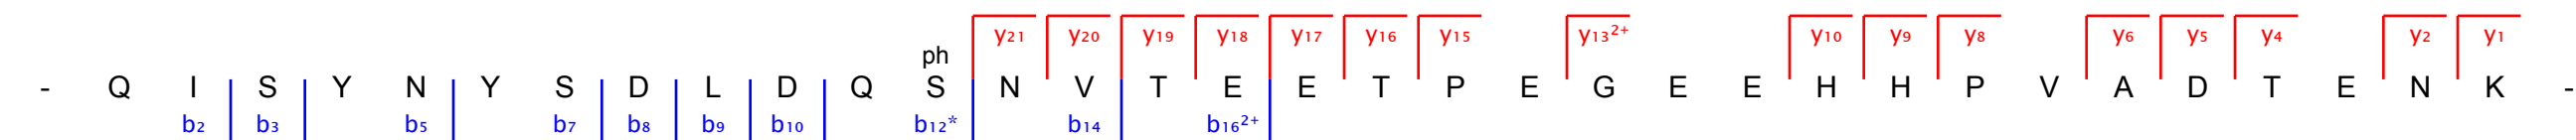

Raw file 20171215\_MaS\_33SR\_LMH\_phospho2\_02 Scan 12580 Method FTMS; HCD Score 291.02 m/z 914.41 Gene names ATXN2L

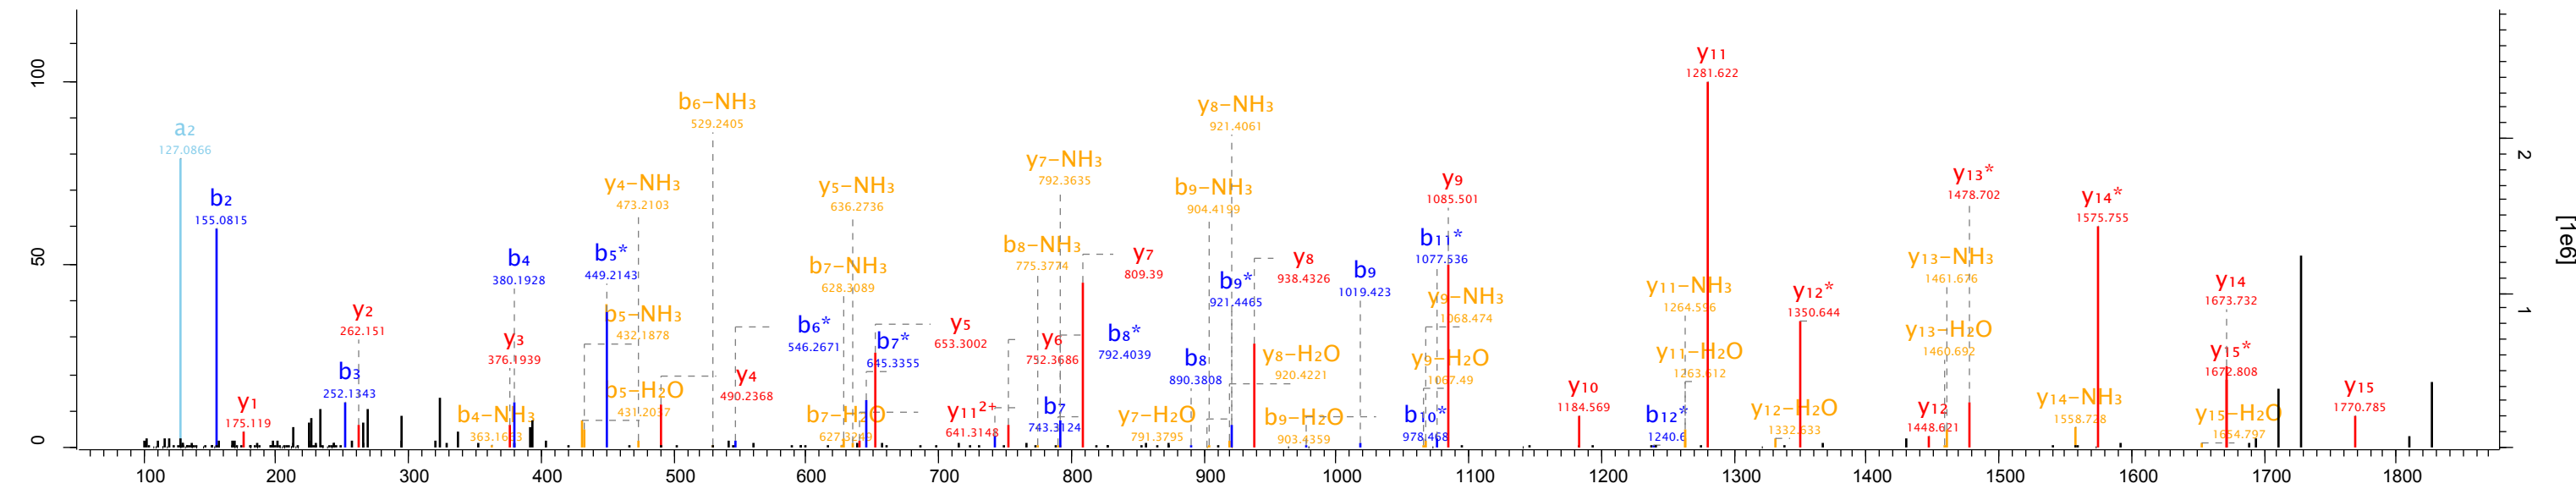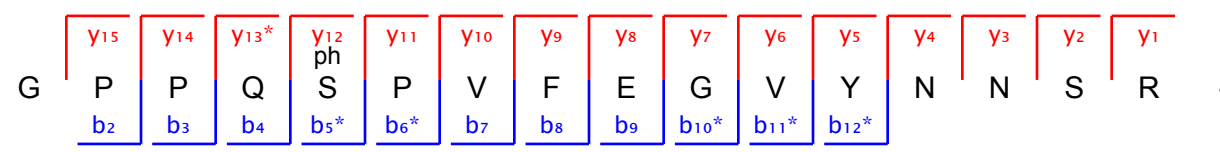

Raw file  
20171215\_MaS\_33SR\_LMH\_phospho2\_02

Scan 13830 Method FTMS; HCD Score 54.1 m/z 584.95 Gene names VIM

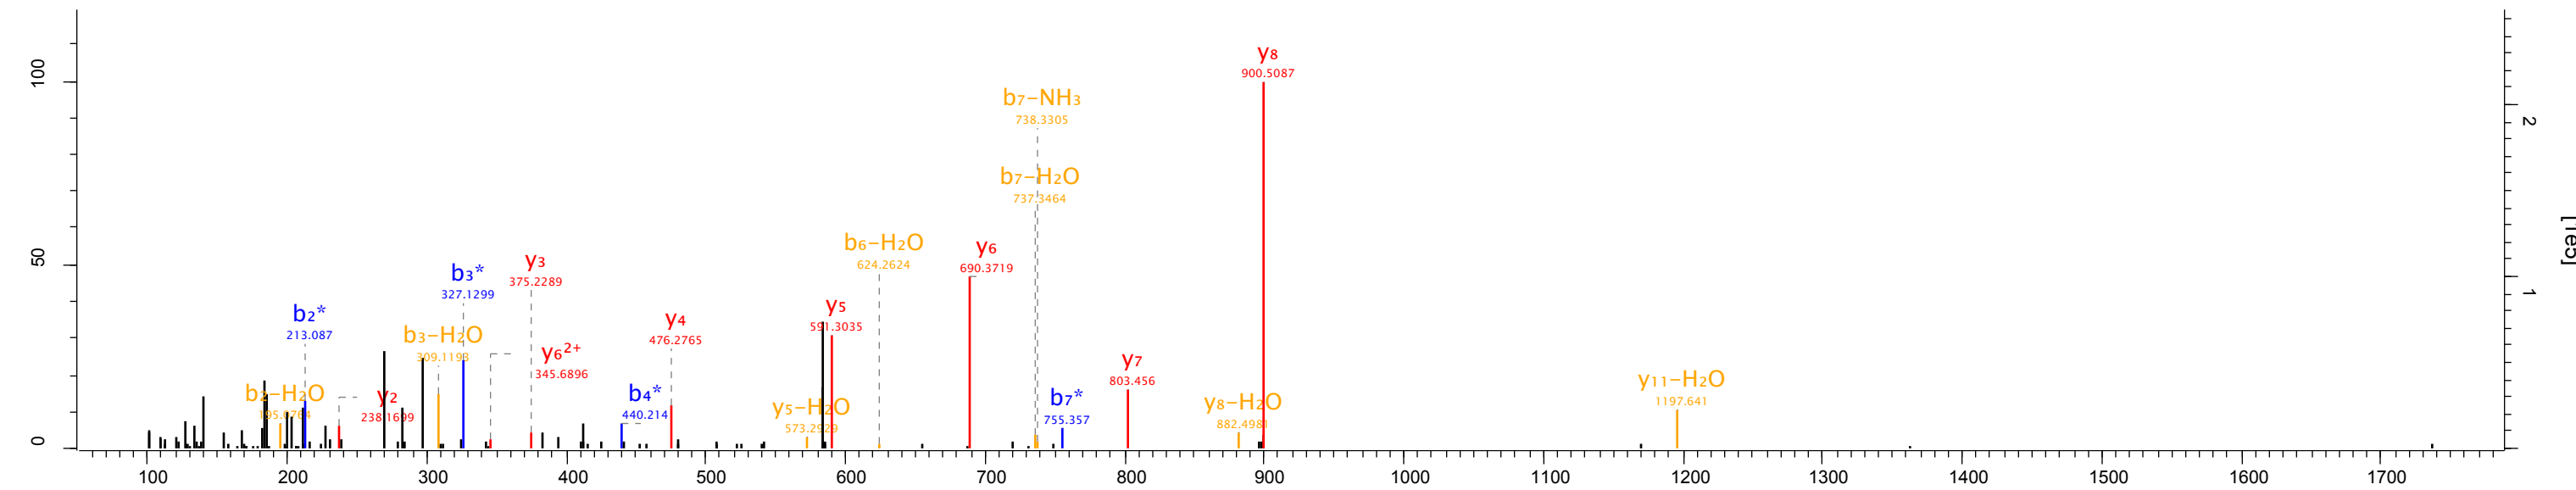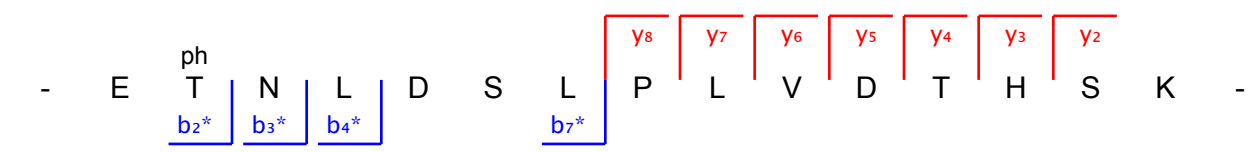

Raw file: 20171215\_MaS\_33SR\_LMH\_phospho2\_02  
 Scan: 14260 Method: FTMS; HCD Score: 180.78 m/z: 838.9 Gene names: SEC22B

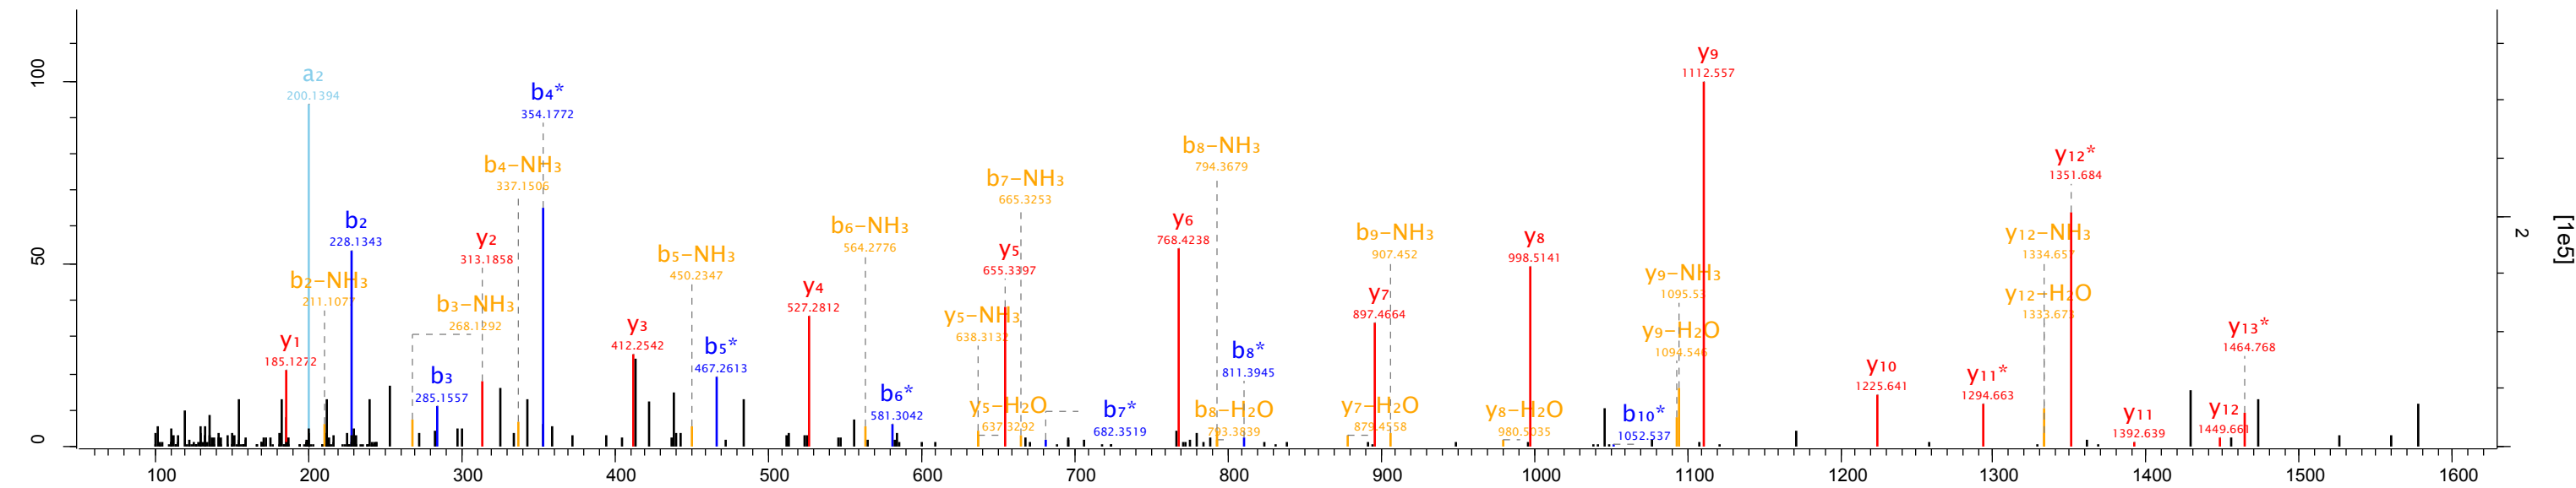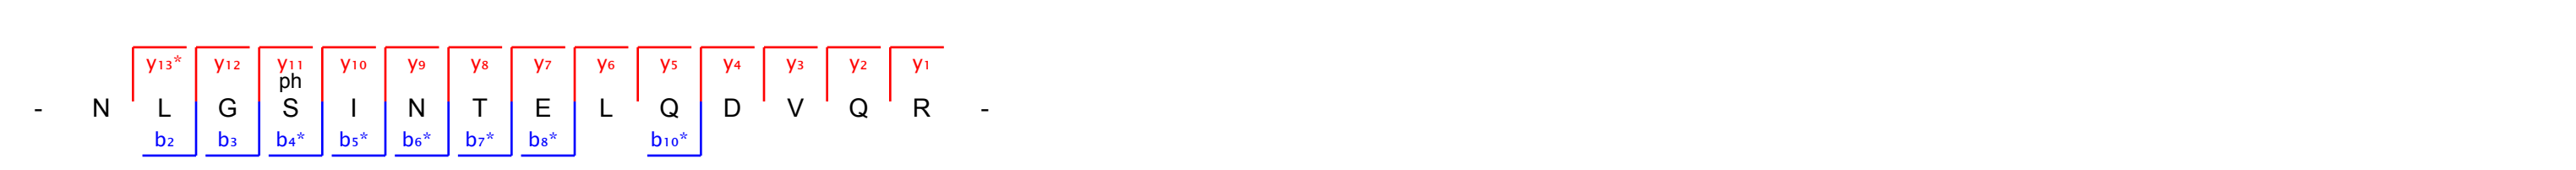

Raw file 20171215\_MaS\_33SR\_LMH\_phospho2\_02 Scan 14620 Method FTMS; HCD Score 204.35 m/z 658.82 Gene names NES

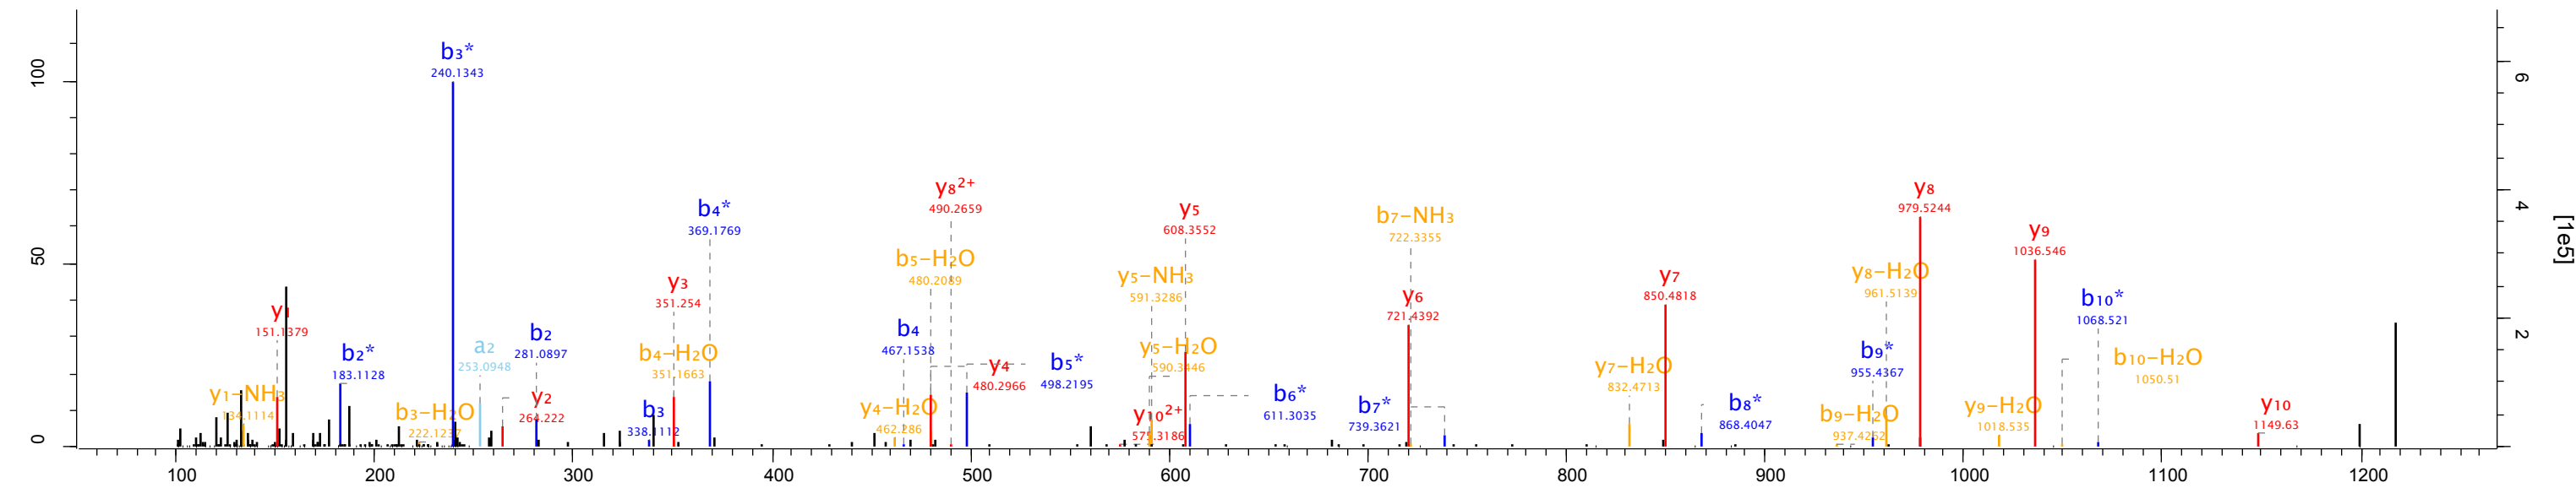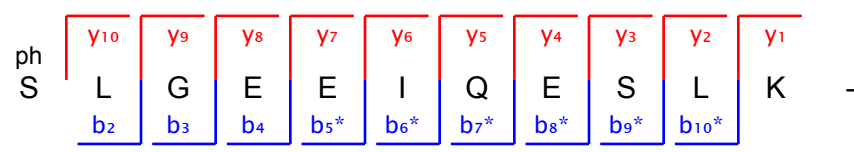

Raw file  
20171215\_MaS\_33SR\_LMH\_phospho2\_02

Scan 1930 Method FTMS; HCD Score 334.65 m/z 825.35 Gene names HNRNPC

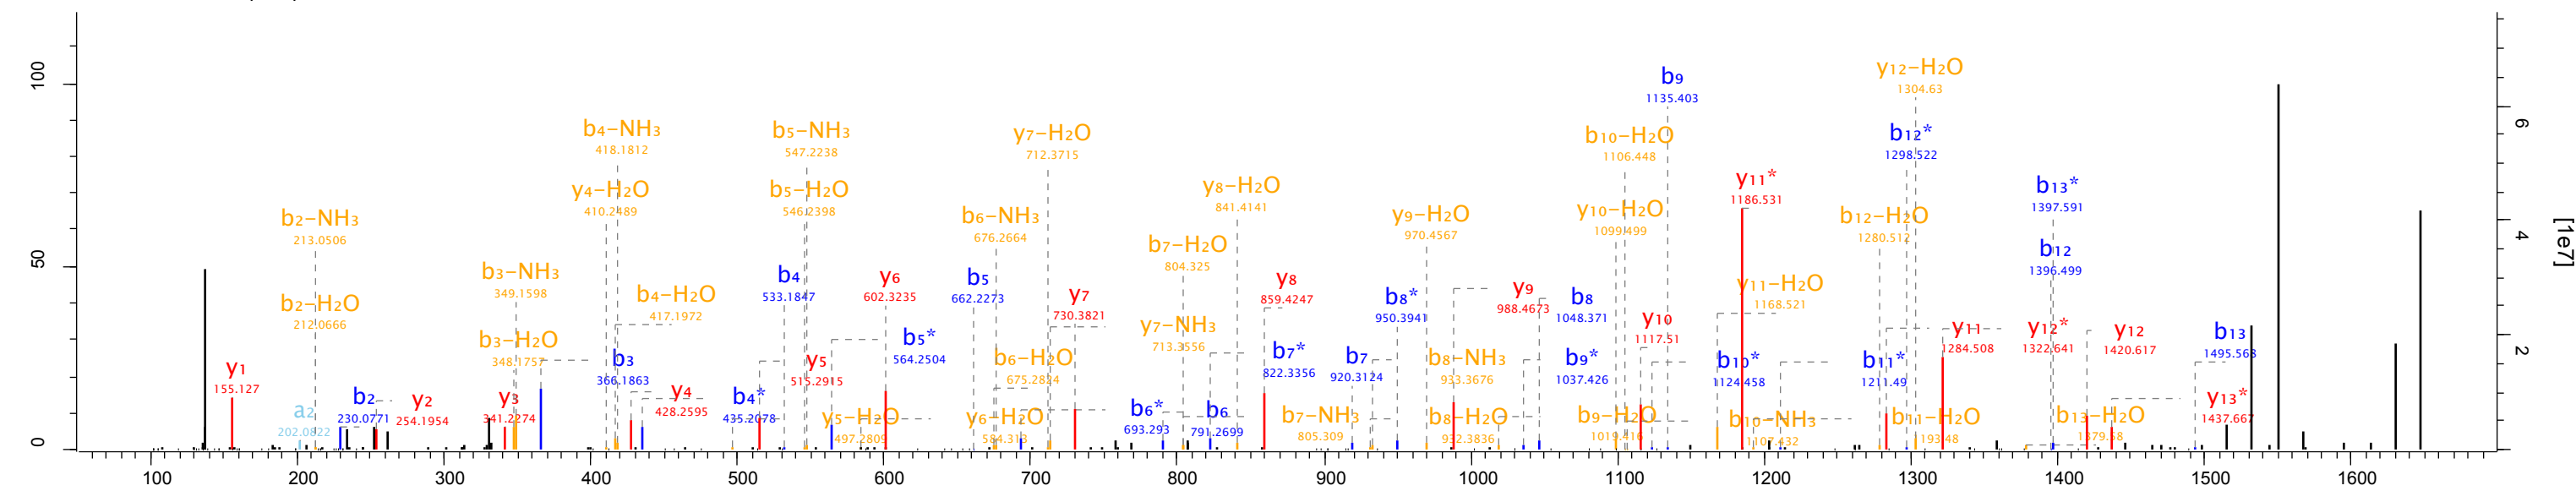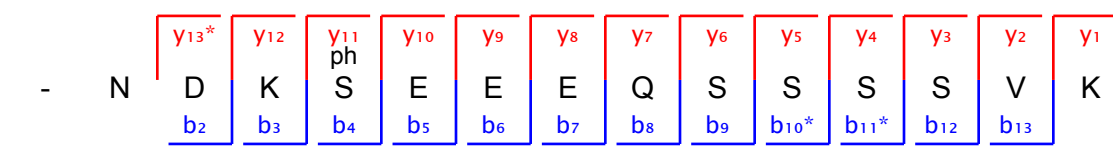



Raw file 20171215\_MaS\_33SR\_LMH\_phospho2\_02 Scan 2360 Method FTMS; HCD Score 223.7 m/z 660.29 Gene names CNOT3

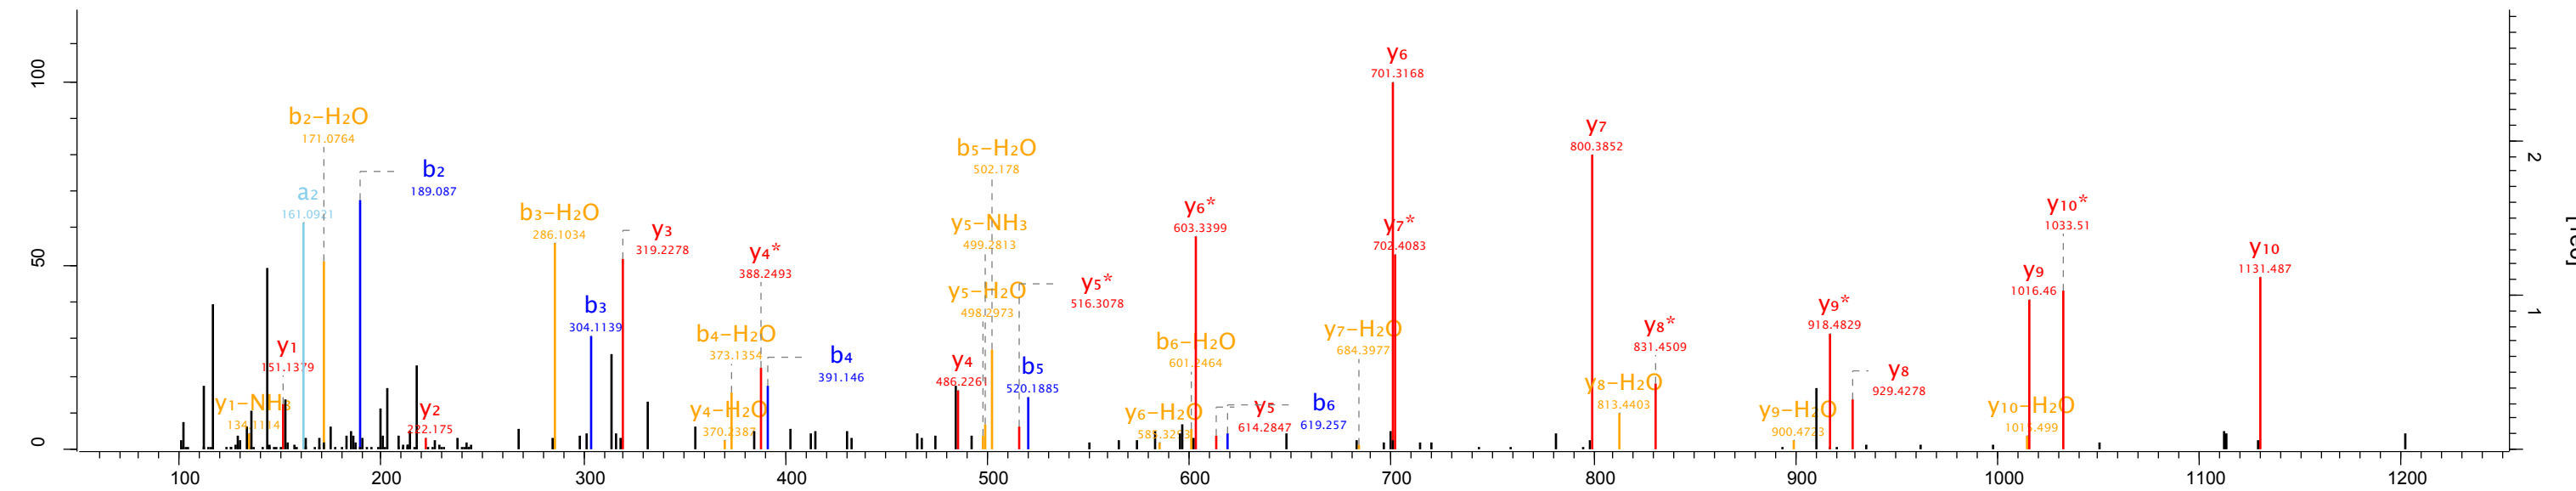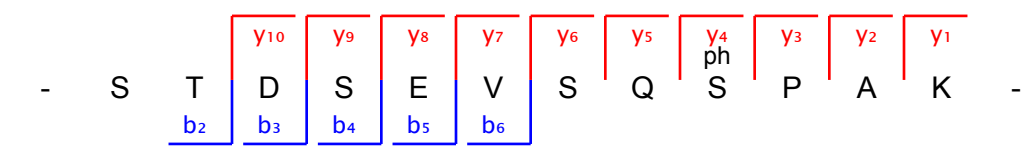

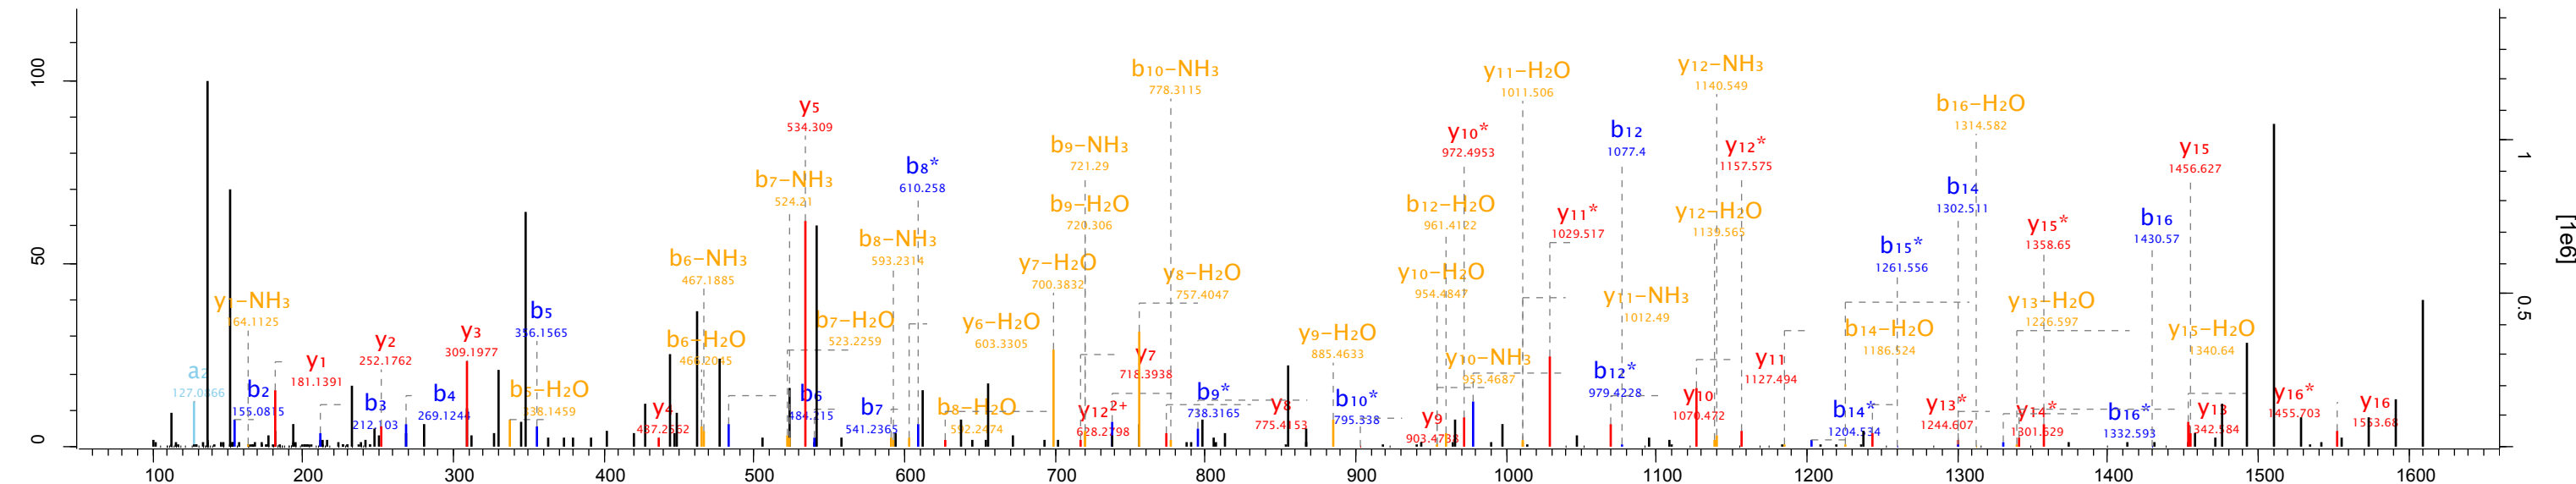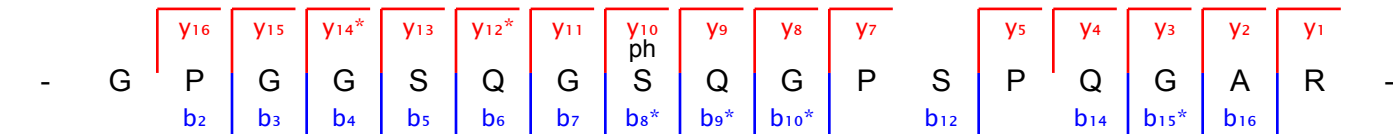

Raw file 20171215\_MaS\_33SR\_LMH\_phospho2\_02 Scan 3340 Method FTMS; HCD Score 220.36 m/z 872.34 Gene names UBN1

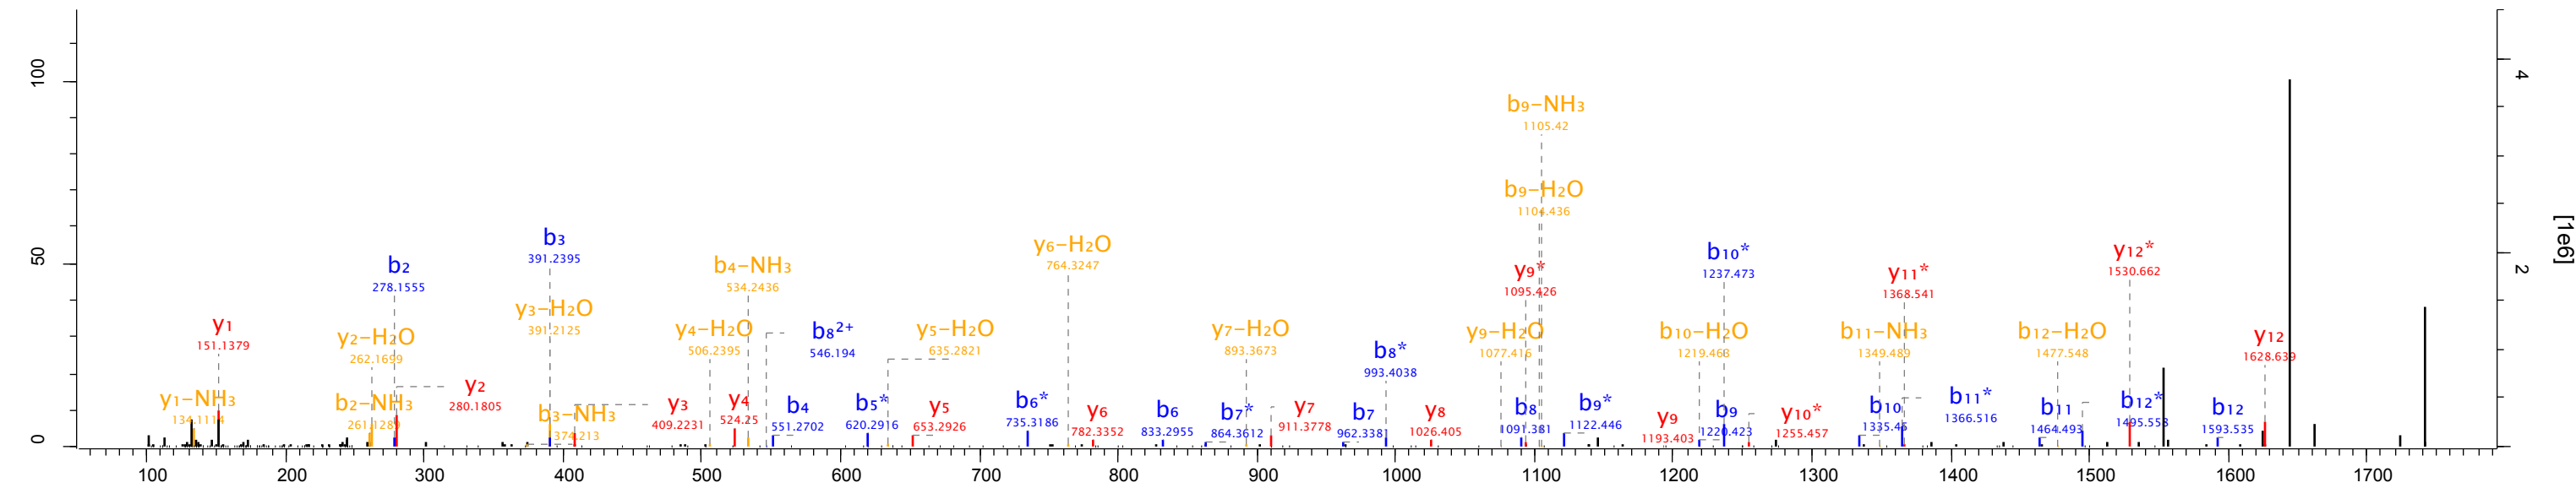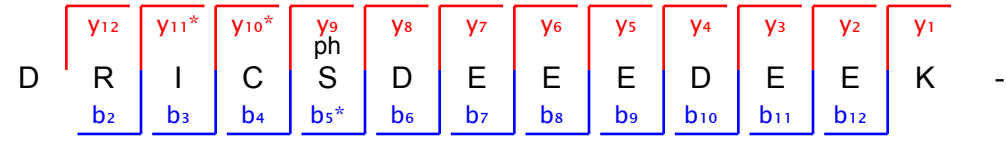

Raw file 20171215\_MaS\_33SR\_LMH\_phospho2\_02 Scan 3360 Method FTMS; HCD Score 142.27 m/z 809.9 Gene names PCIF1

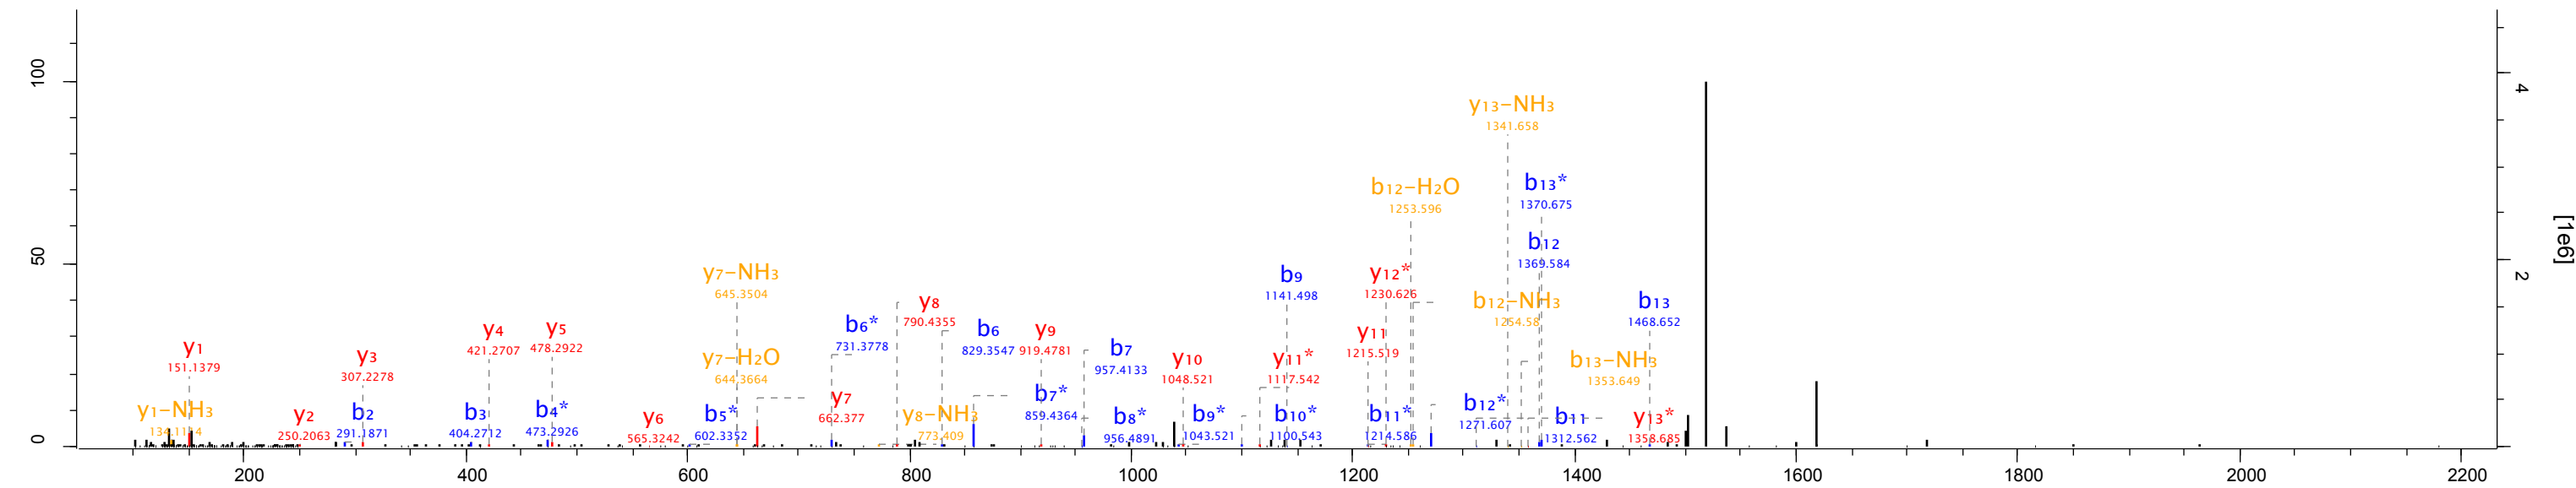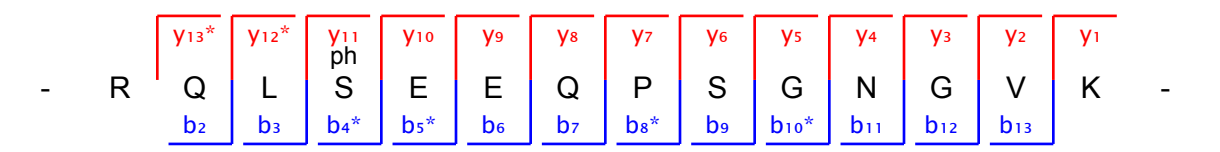

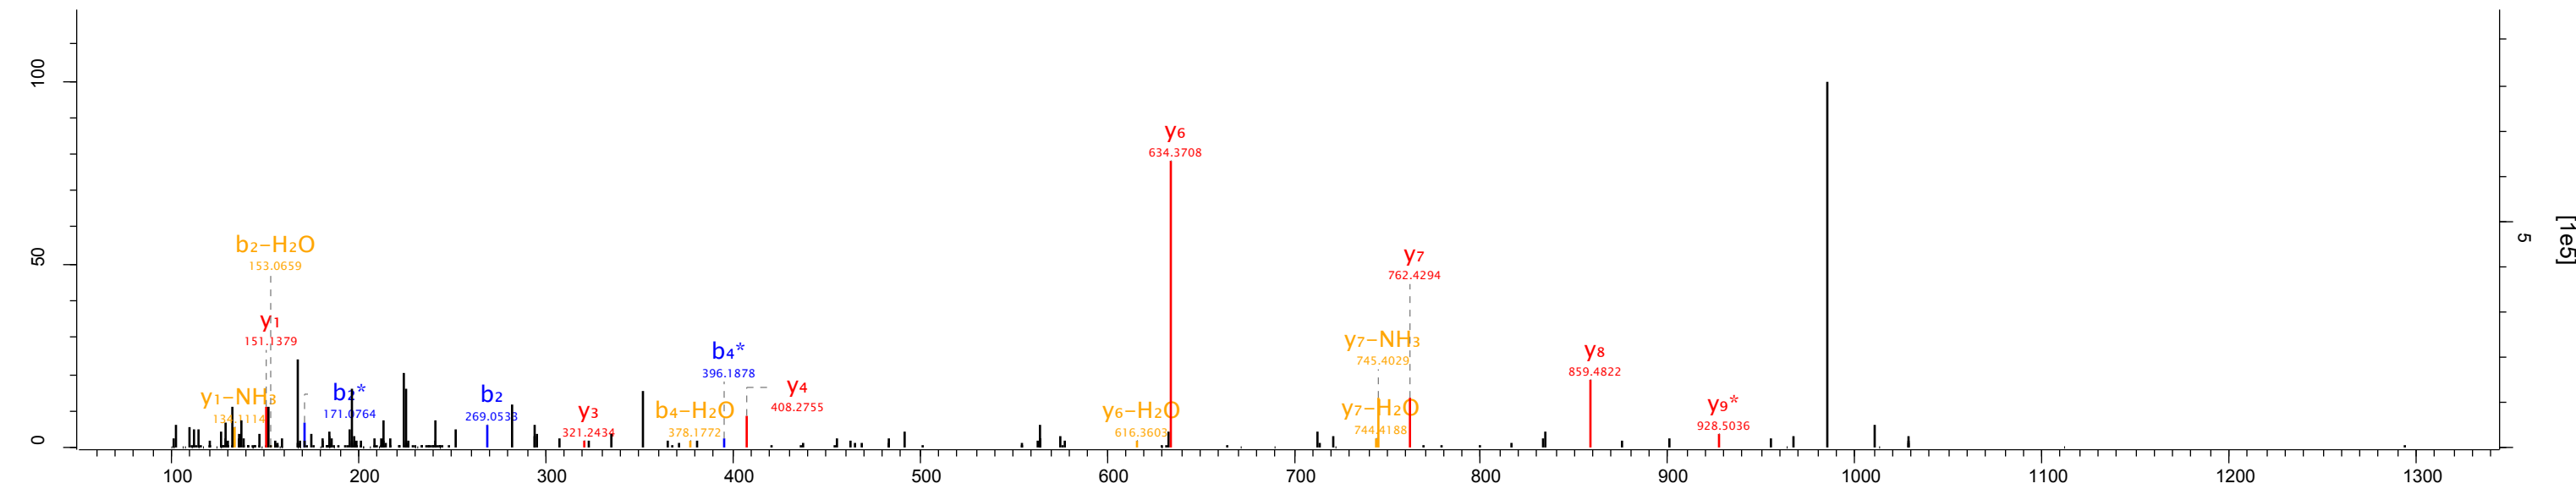

- T y<sub>9</sub>\*  
b<sub>2</sub> y<sub>8</sub> P y<sub>7</sub> y<sub>6</sub> P E y<sub>4</sub> y<sub>3</sub> I y<sub>1</sub> K -

b<sub>4</sub>\*

Raw file

20171215\_MaS\_33SR\_LMH\_phospho2\_02

Scan 3890 Method FTMS; HCD Score 61.34 m/z 495.22 Gene names KIF15

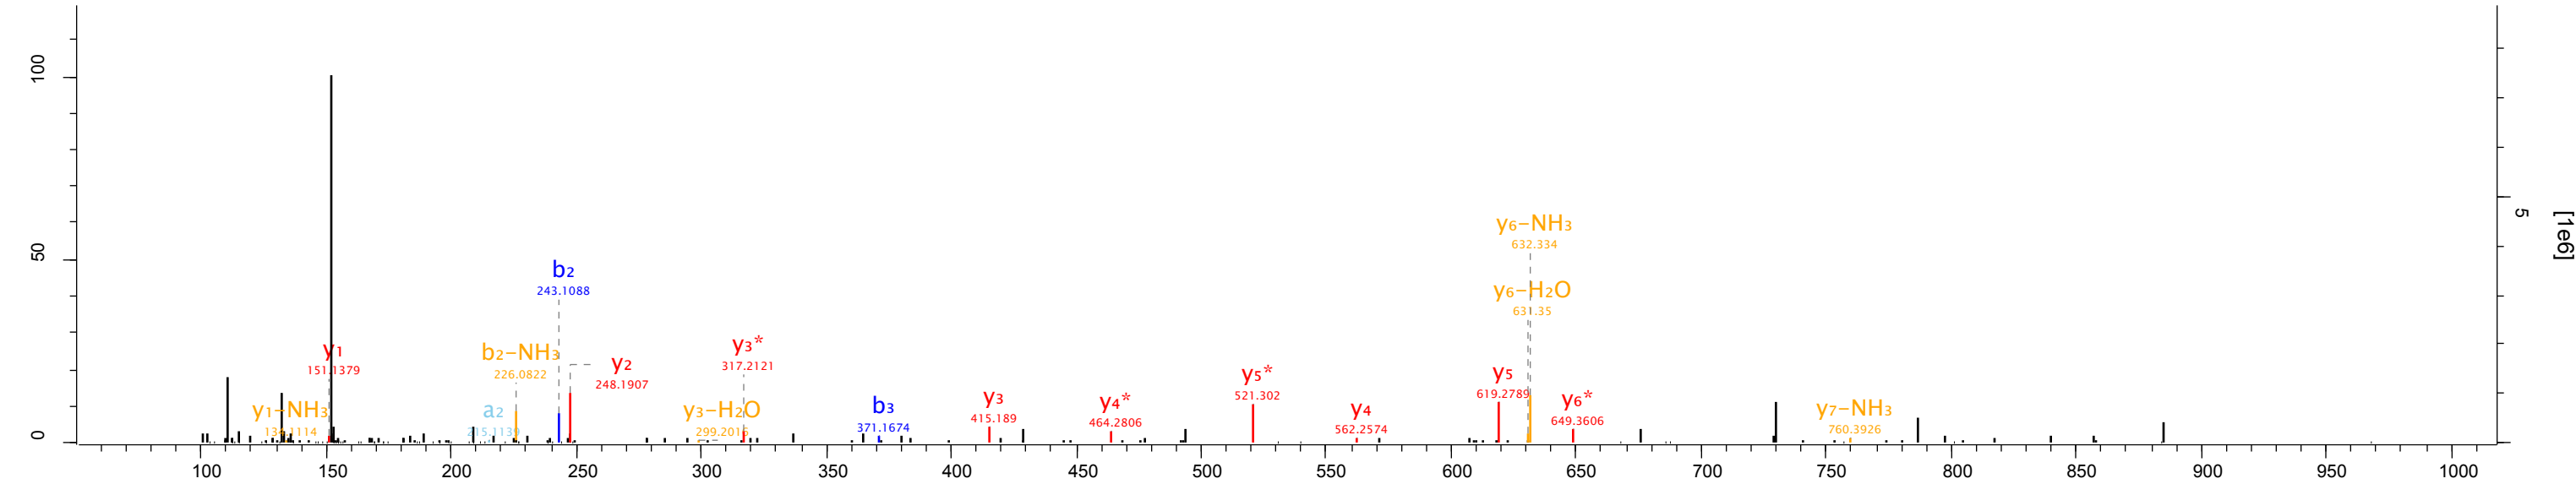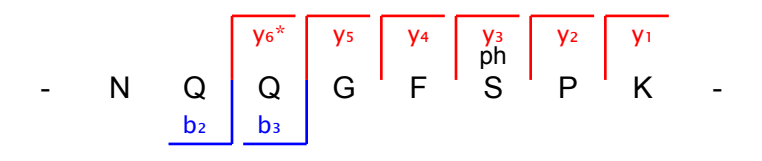

5 [1e6]

Raw file 20171215\_MaS\_33SR\_LMH\_phospho2\_02 Scan 3930 Method FTMS; HCD Score 96.14 m/z 446.69 Gene names PPIG

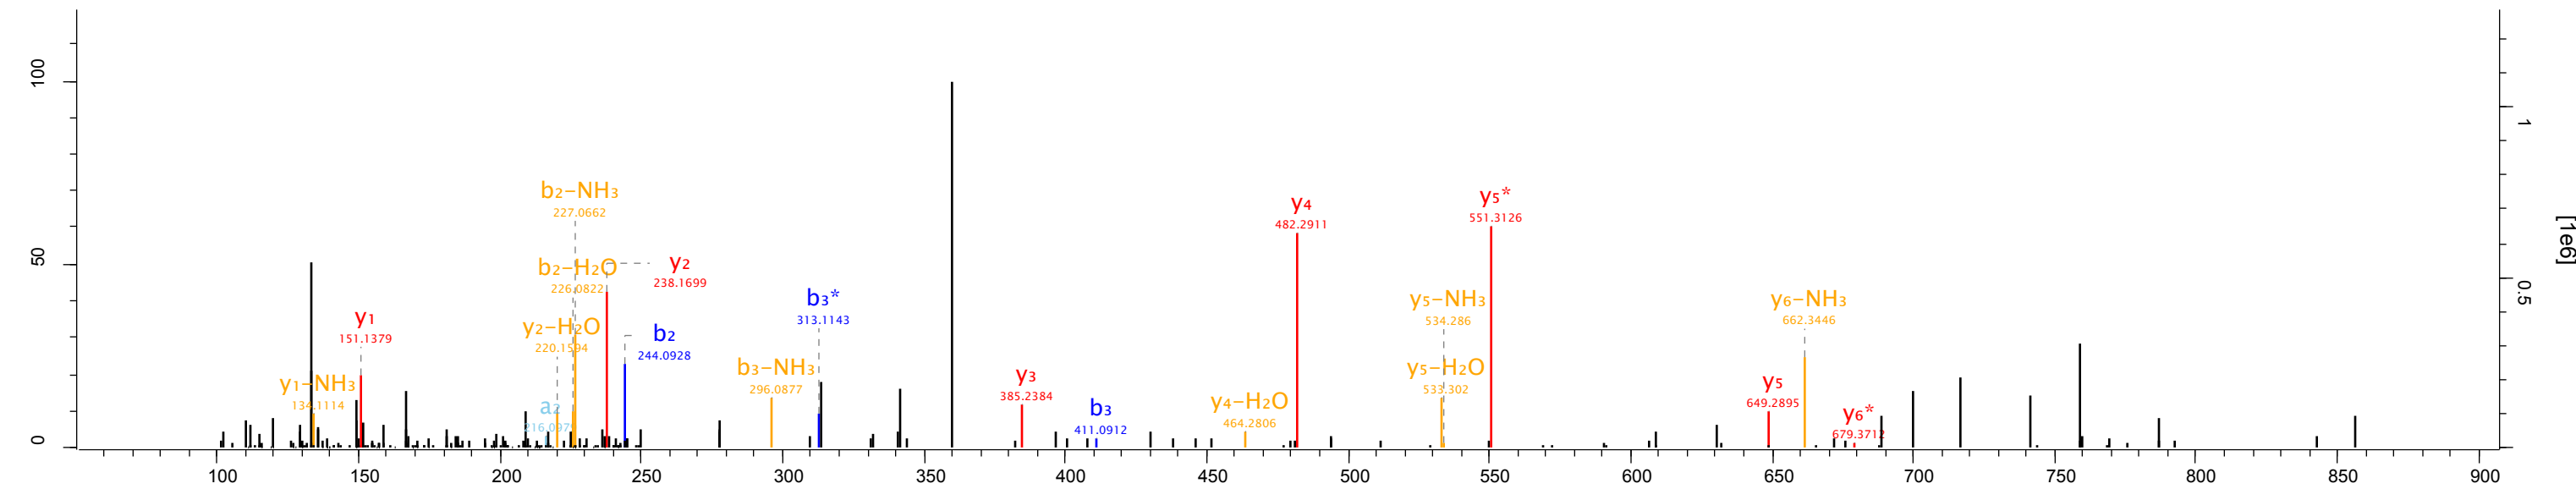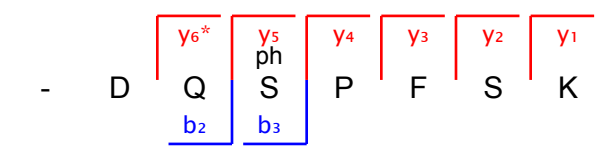

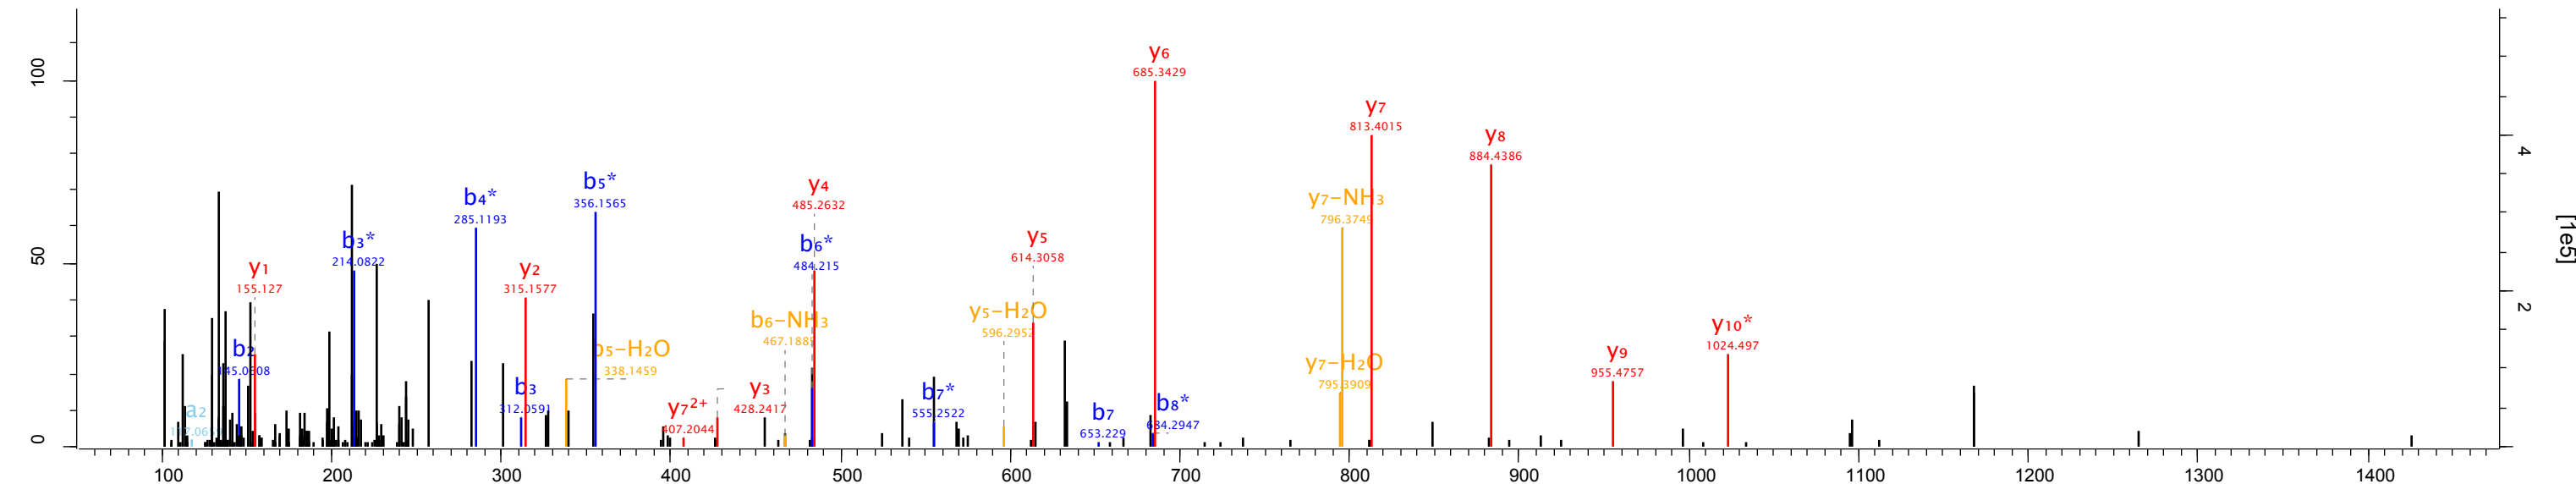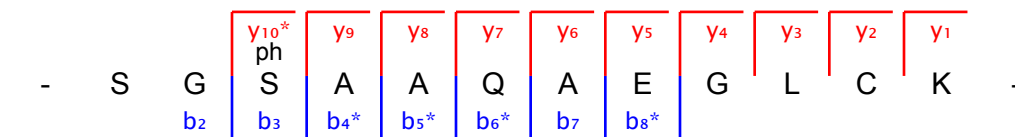



Raw file 20171215\_MaS\_33SR\_LMH\_phospho2\_02 Scan 4300 Method FTMS; HCD Score 83.95 m/z 400.19 Gene names RTKN

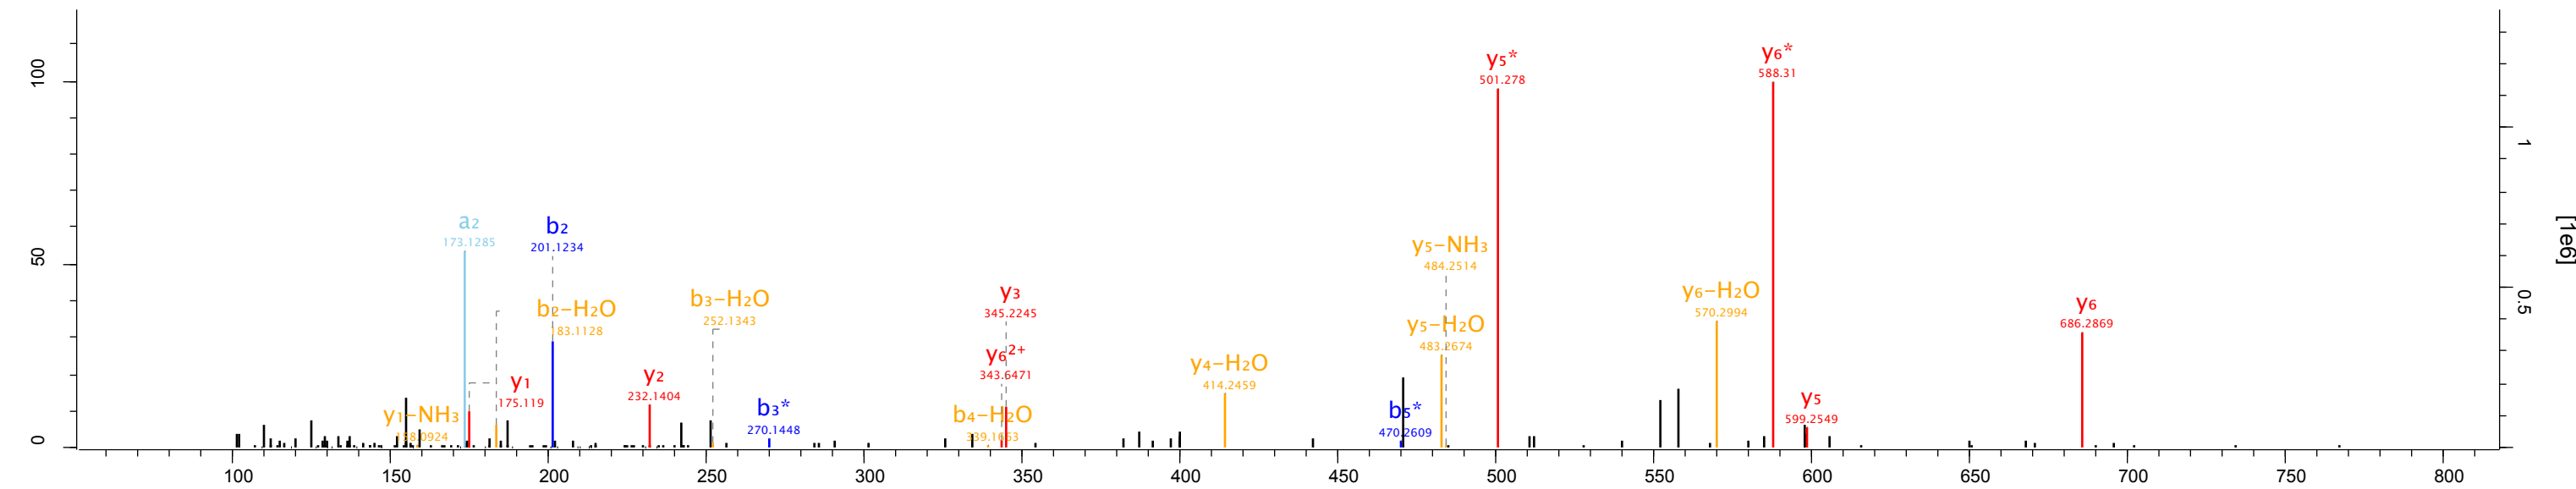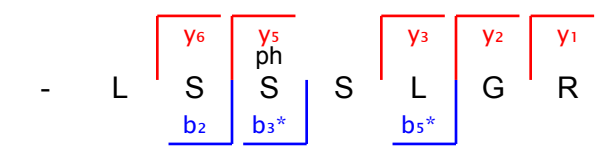

Raw file 20171215\_MaS\_33SR\_LMH\_phospho2\_02 Scan 6310 Method FTMS; HCD Score 71.99 m/z 736.33 Gene names PRRC2C

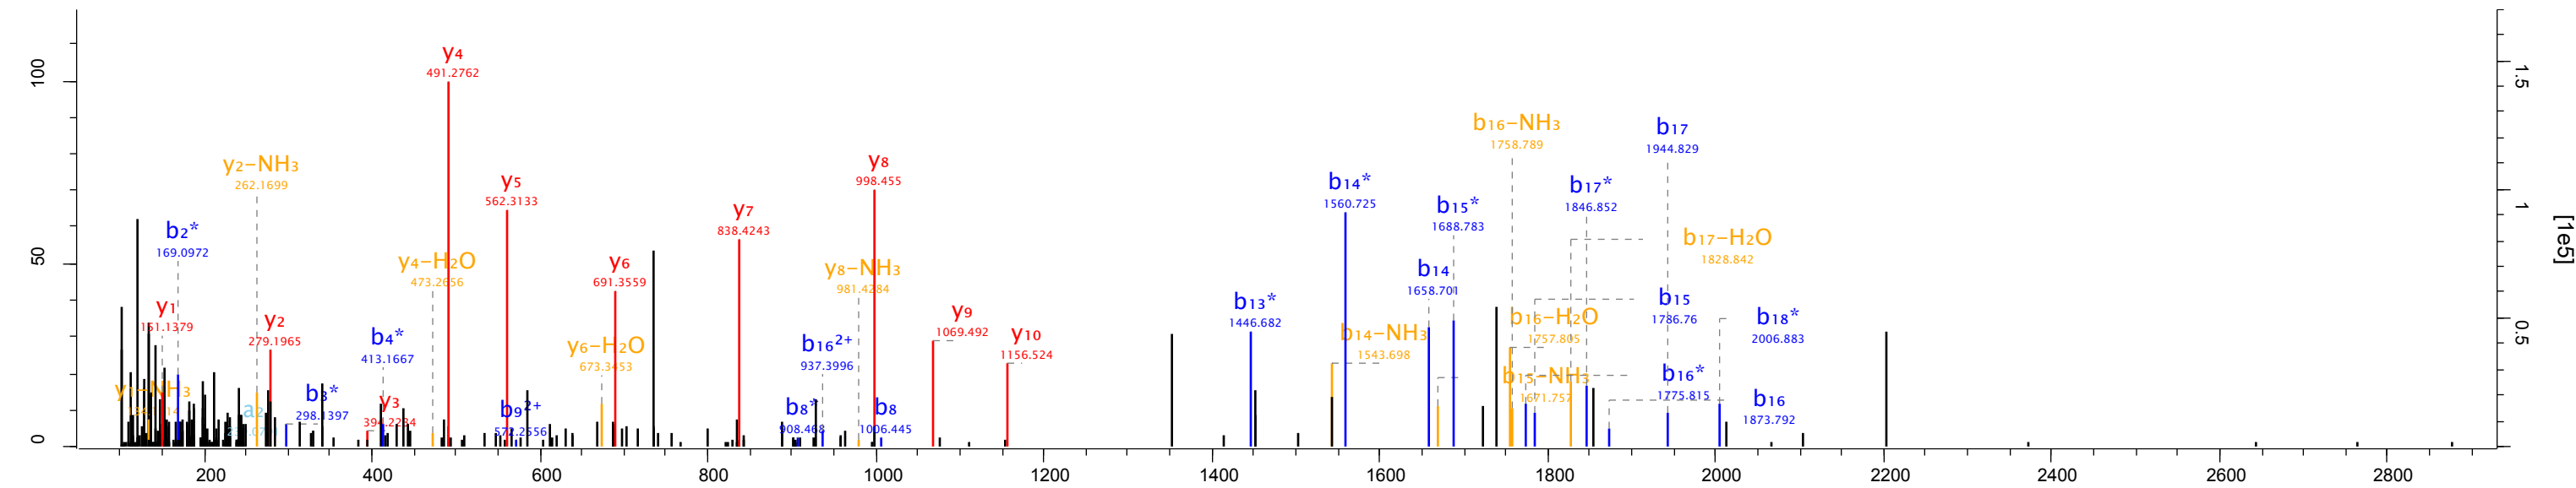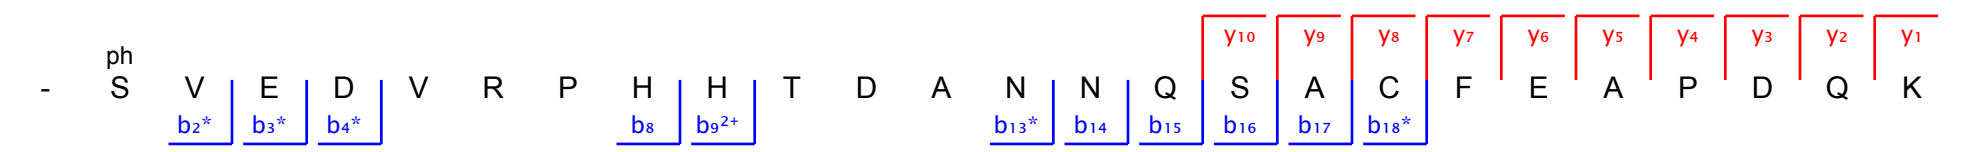

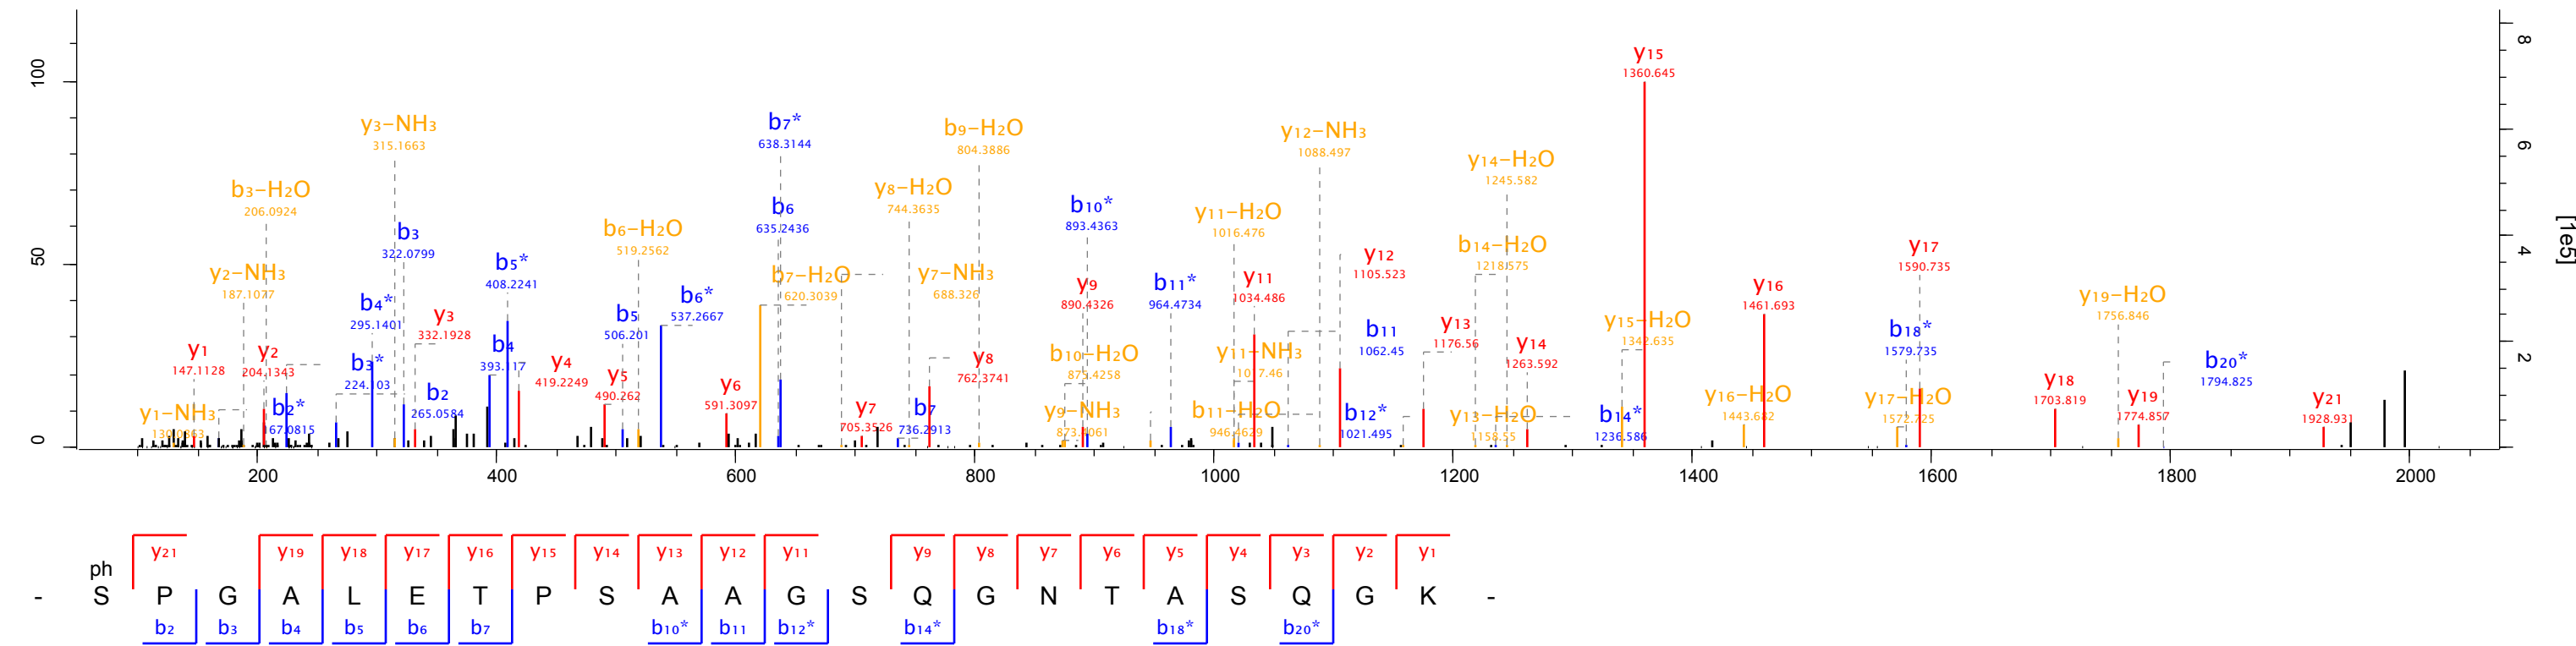

Raw file  
20171215\_MaS\_33SR\_LMH\_phospho2\_02

Scan 8130 Method FTMS; HCD Score 199.05 m/z 724.33 Gene names NCKAP5L

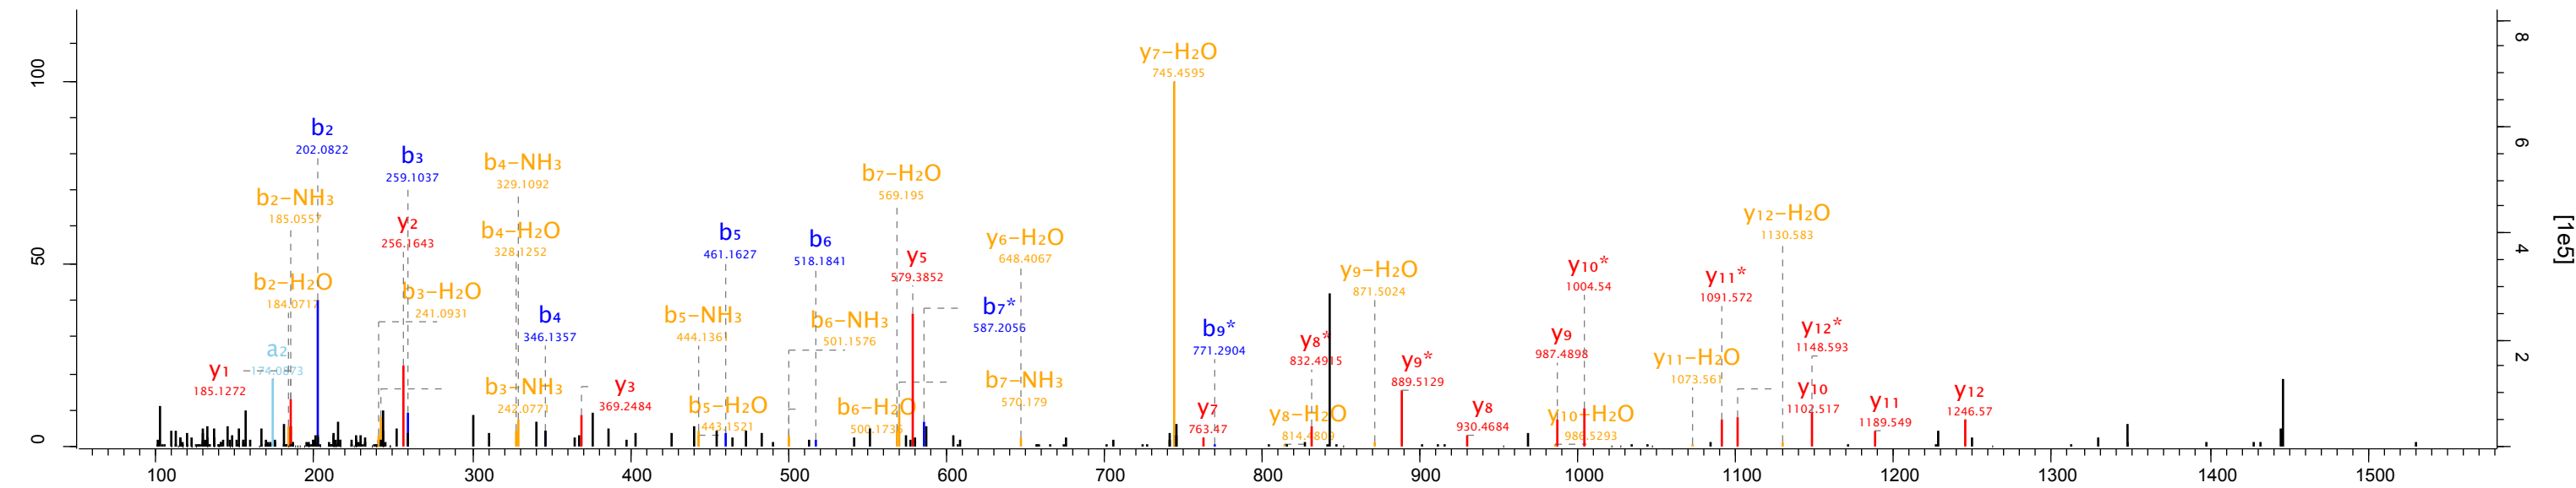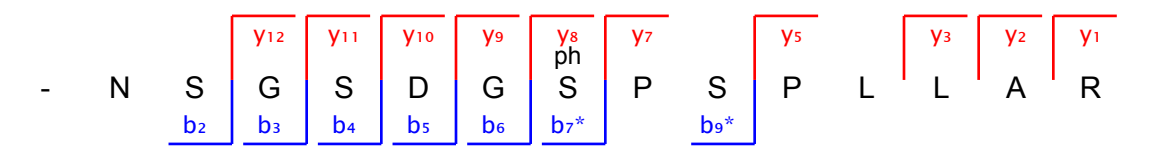

Raw file

20171215\_MaS\_33SR\_LMH\_phospho2\_02

| Scan | Method    | Score | m/z    | Gene names |
|------|-----------|-------|--------|------------|
| 8510 | FTMS; HCD | 64.91 | 491.72 | RAB11FIP2  |

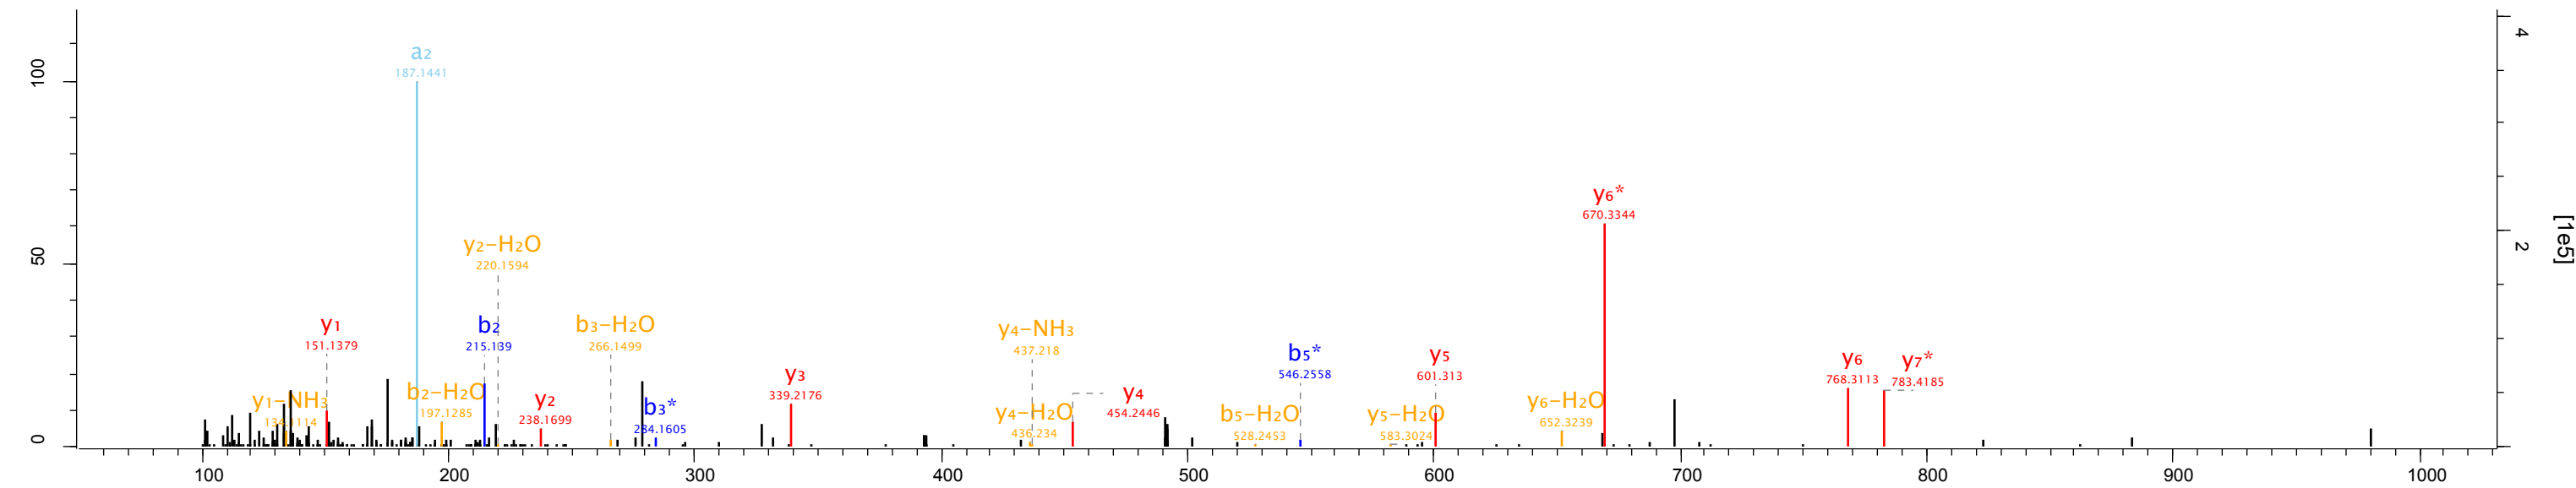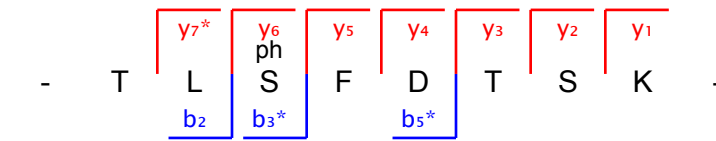

Raw file: 20171215\_MaS\_33SR\_LMH\_phospho2\_02  
 Scan: 8900 Method: FTMS; HCD Score: 153.41 m/z: 651.79 Gene names: MLLT4

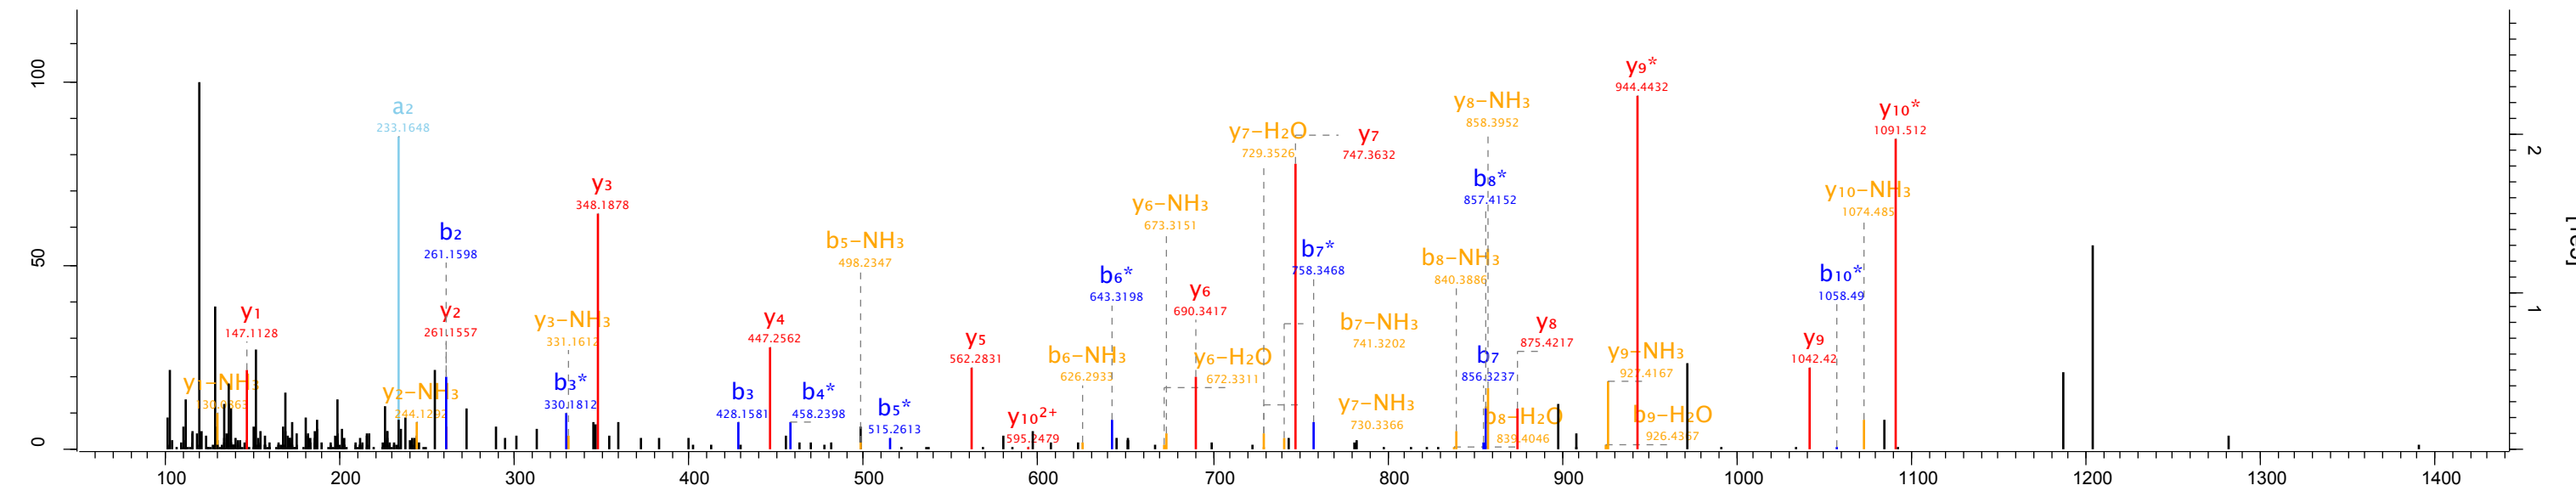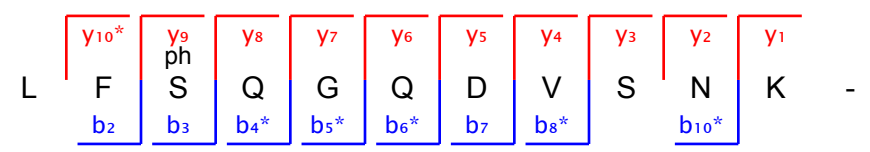



Raw file  
20171215\_MaS\_33SR\_LMH\_phospho2\_02

Scan 9710 Method FTMS; HCD Score 180.6 m/z 845.72 Gene names MDC1

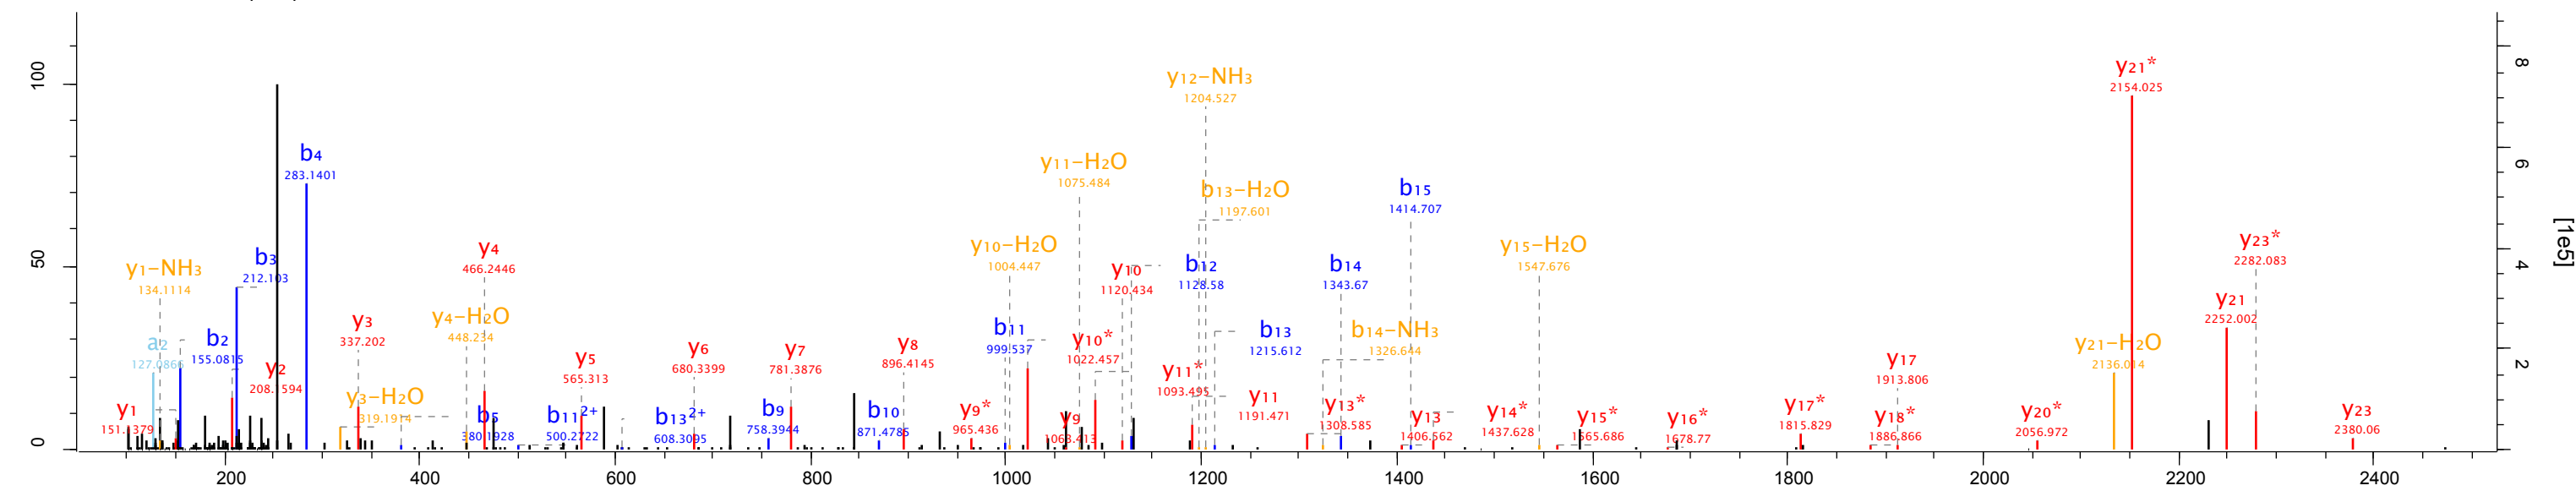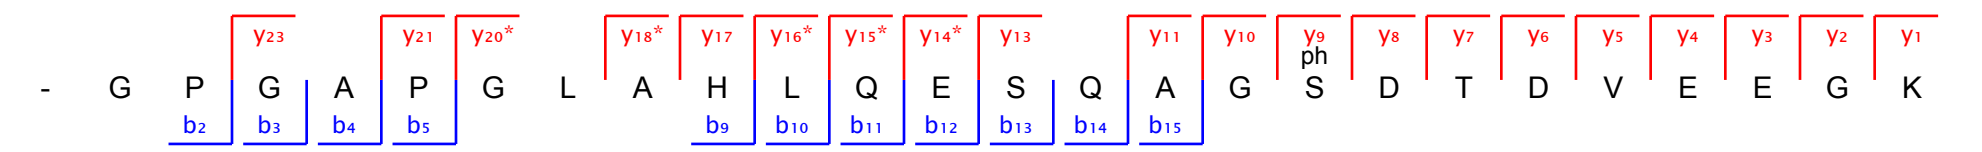



Raw file 20171215\_MaS\_33SR\_LMH\_phospho2\_03 Scan 10000 Method FTMS; HCD Score 140.4 m/z 998.42 Gene names FNBP4

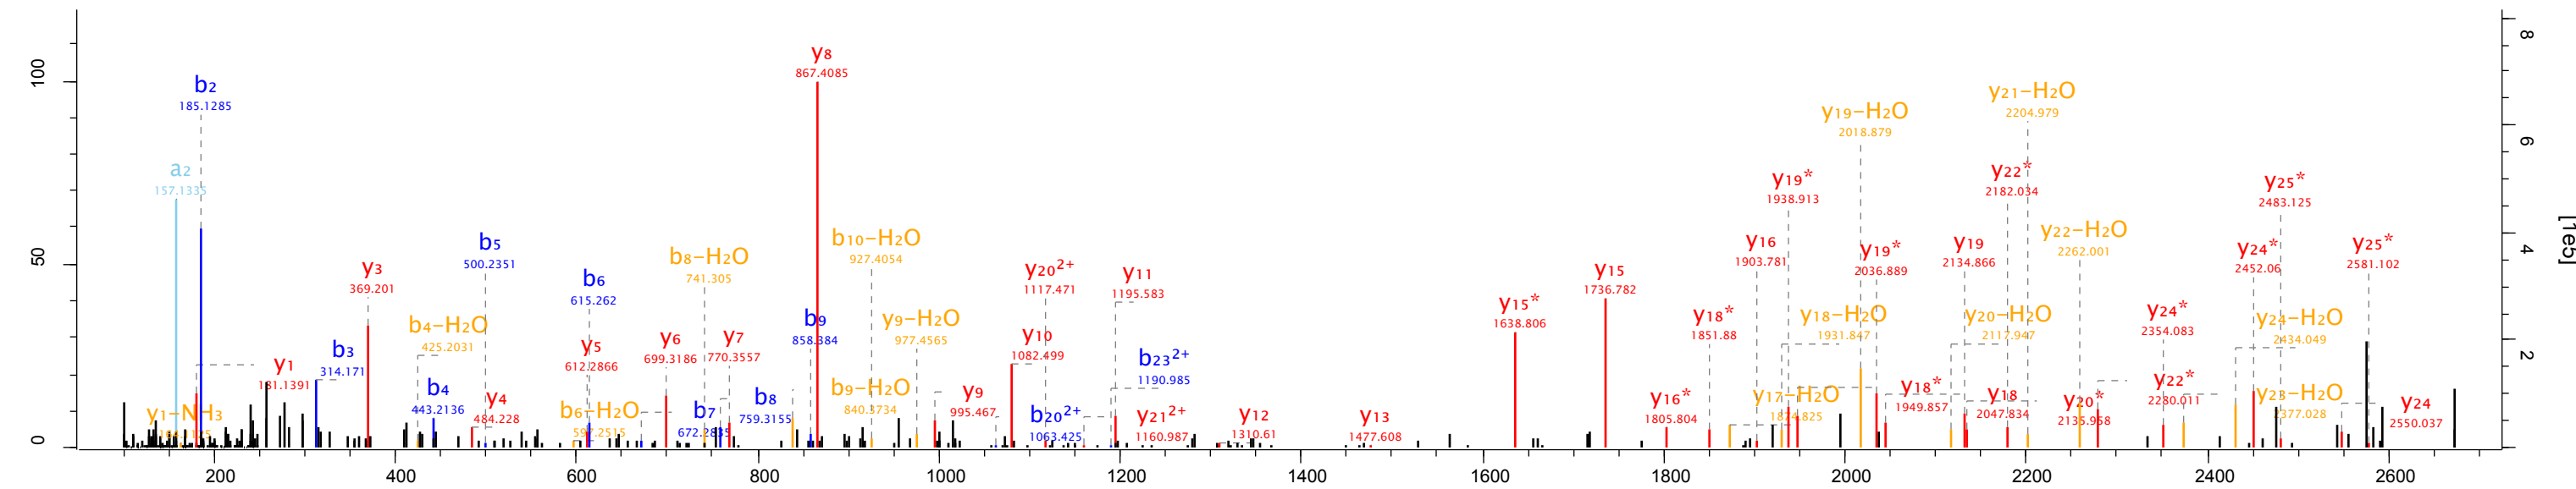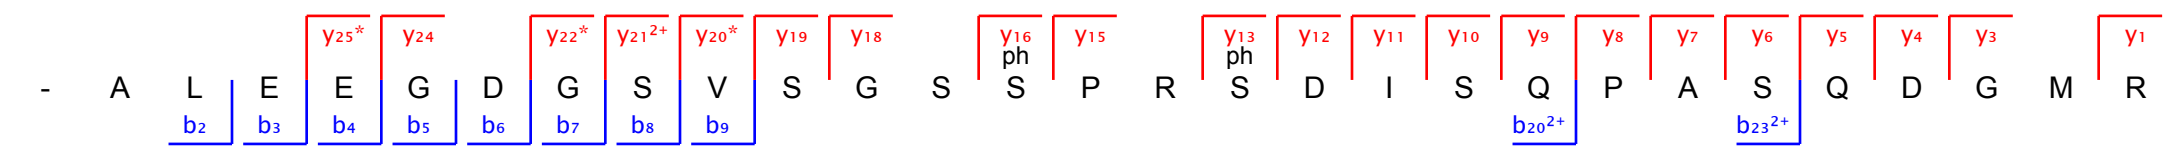

Raw file 20171215\_MaS\_33SR\_LMH\_phospho2\_03 Scan 10110 Method FTMS; HCD Score 127.35 m/z 986.41 Gene names ATN1

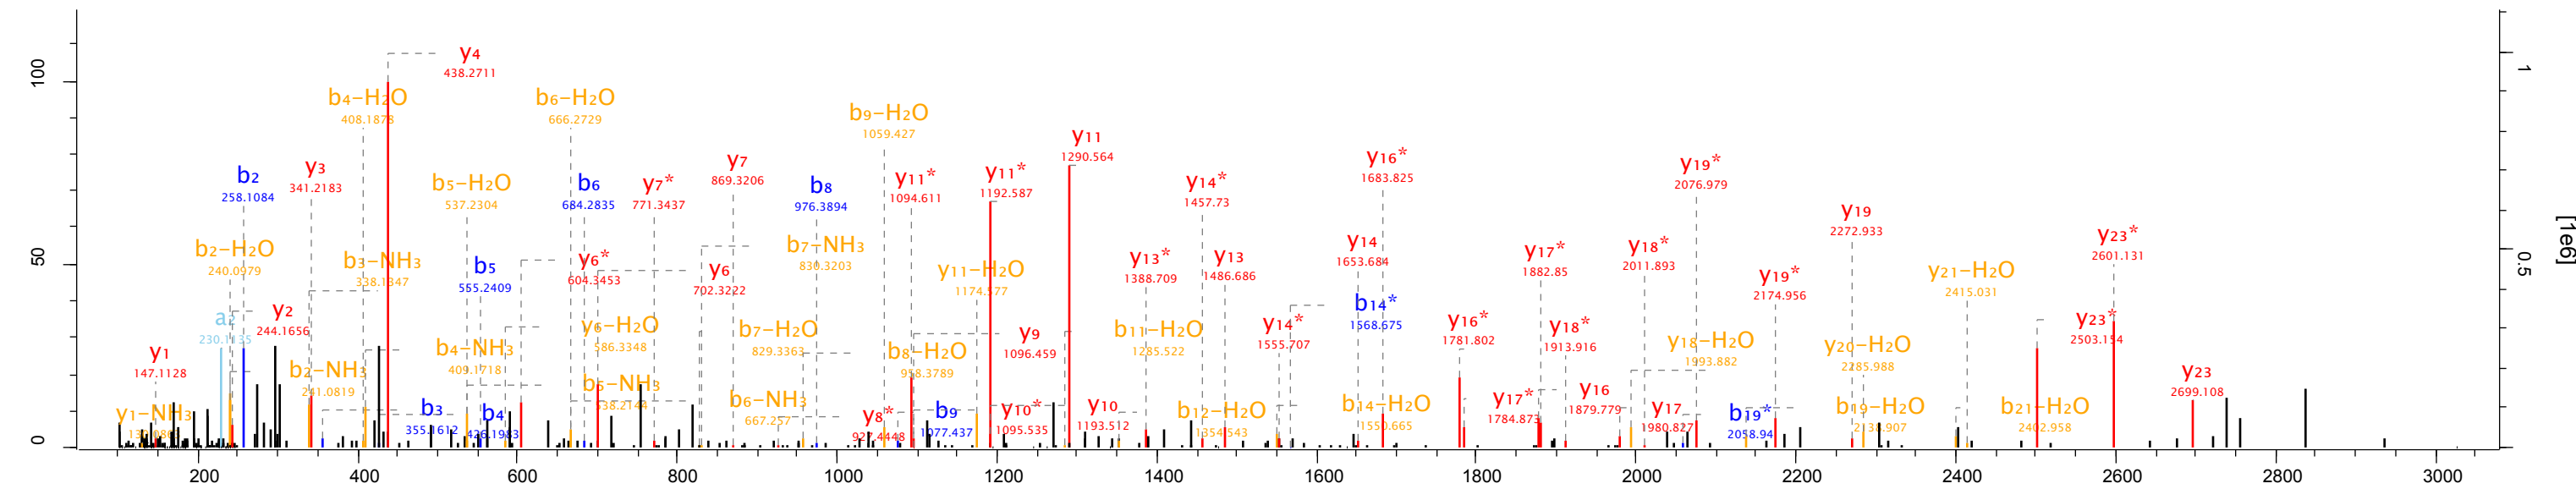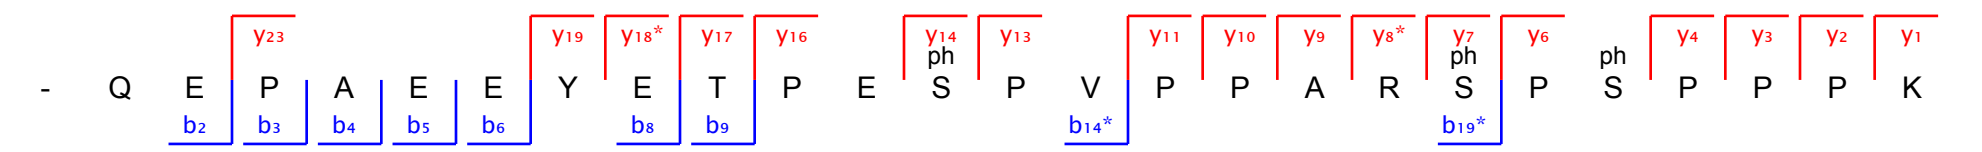

Raw file 20171215\_MaS\_33SR\_LMH\_phospho2\_03 Scan 10200 Method FTMS; HCD Score 149.16 m/z 739.65 Gene names NAV1

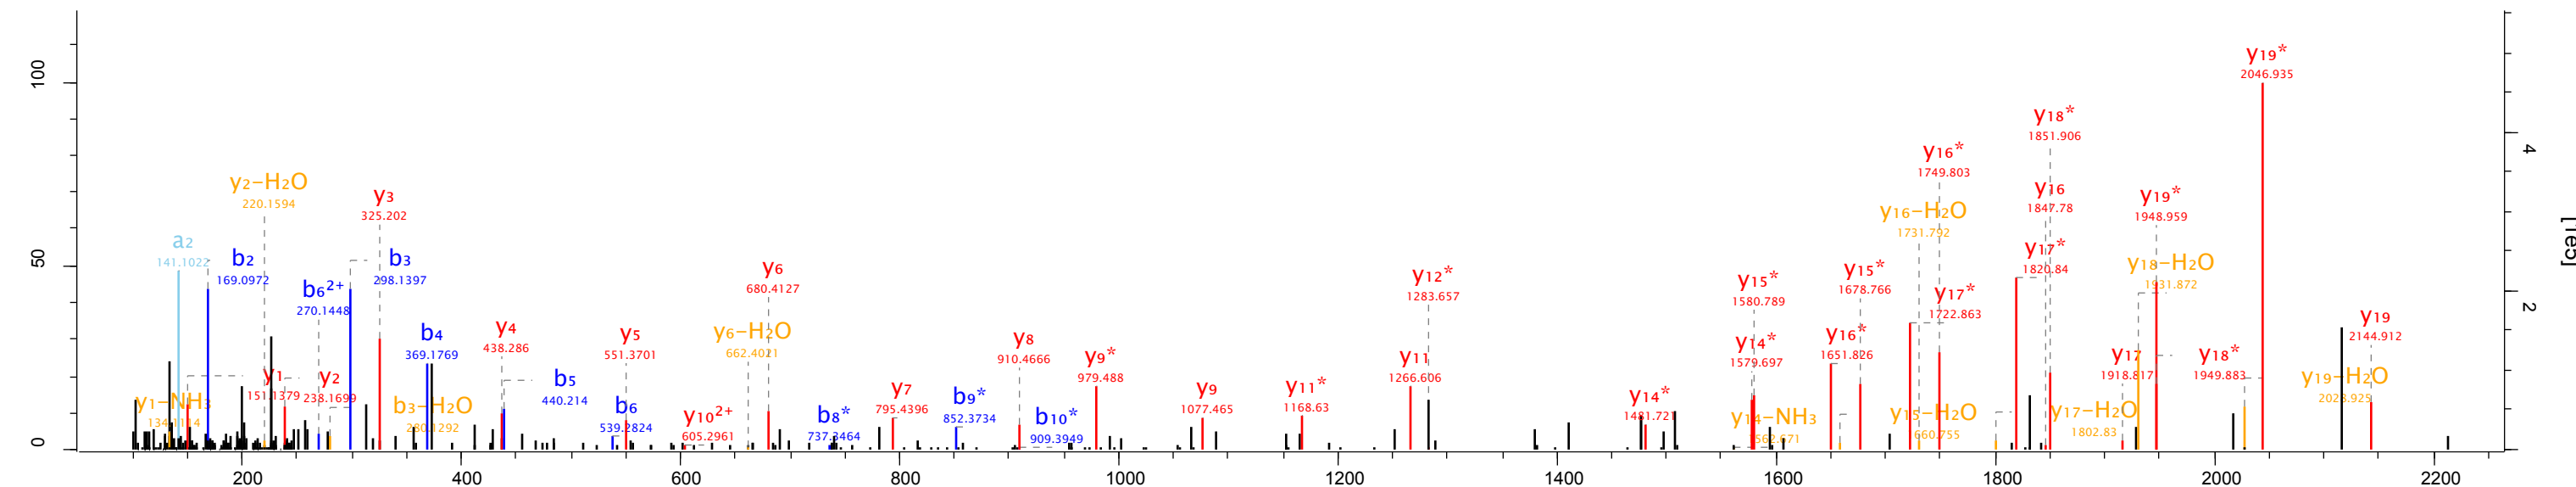

- A P E A A V S E D G K S D D E L L S S K -

Fragmentation mapping (b and y ions) is shown below the sequence:

- Red boxes above the sequence indicate y ions: y19, y18\*, y17, y16, y15\*, y14\*ph, y12\*, y11, y10<sup>2+</sup>, y<sub>ph</sub>, y8, y7, y6, y5, y4, y3, y2, y1.
- Blue boxes below the sequence indicate b ions: b2, b3, b4, b5, b6, b8\*, b9\*, b10\*.

Raw file  
20171215\_MaS\_33SR\_LMH\_phospho2\_03

Scan 10250 Method FTMS; HCD Score 73.43 m/z 639.96 Gene names DCP1A

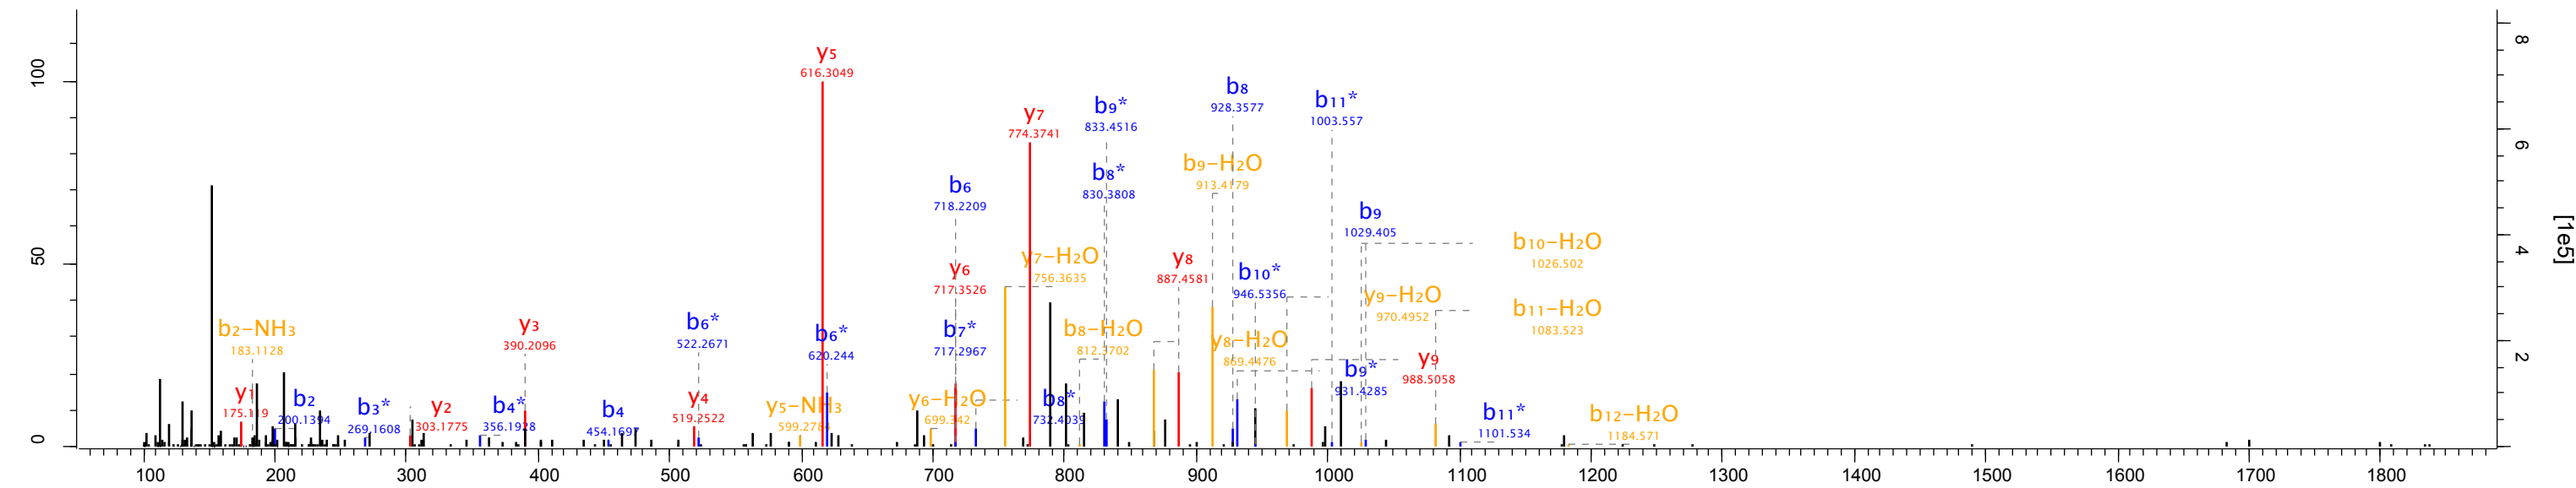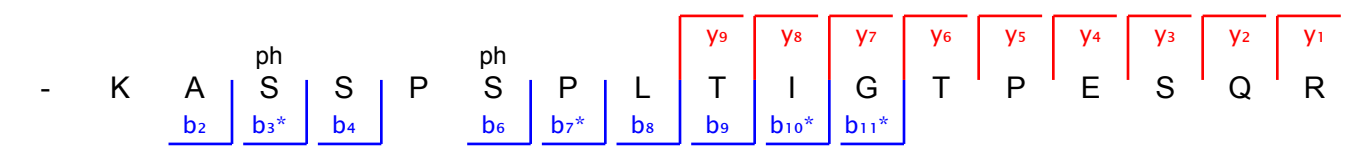

Raw file  
20171215\_MaS\_33SR\_LMH\_phospho2\_03

Scan 10340 Method FTMS; HCD Score 269.46 m/z 902.39 Gene names AHNAK

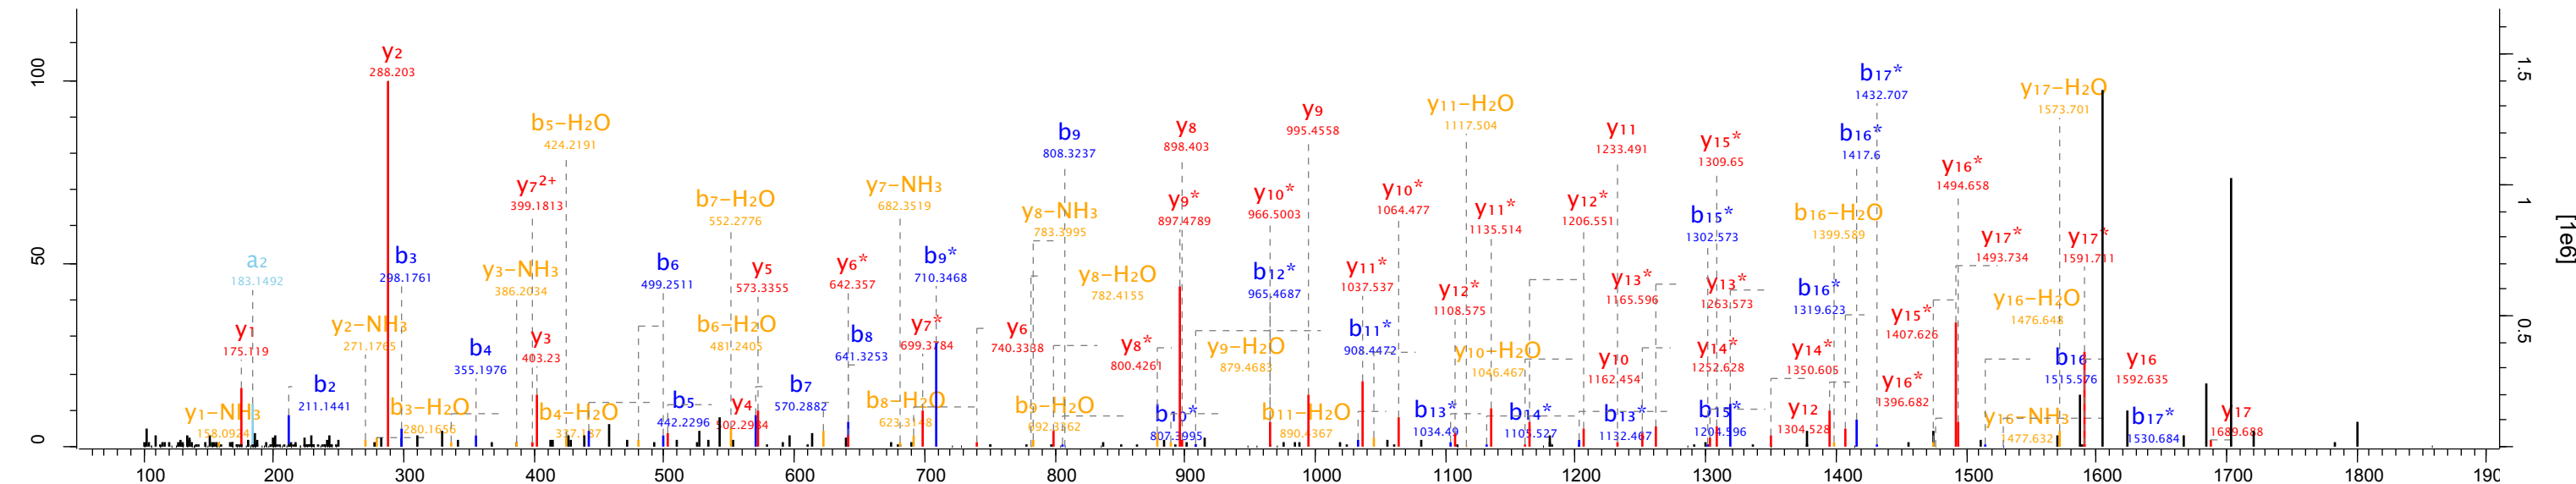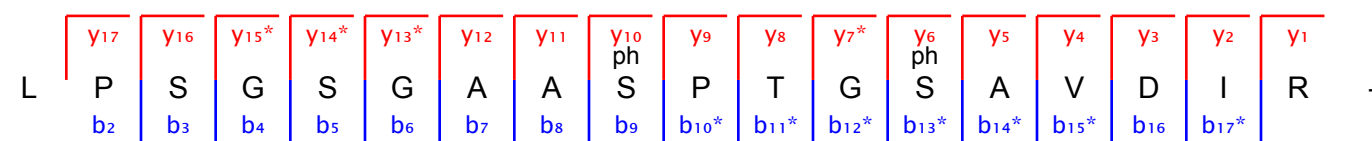

Raw file 20171215\_MaS\_33SR\_LMH\_phospho2\_03 Scan 10480 Method FTMS; HCD Score 193.45 m/z 1062.43 Gene names NSUN2

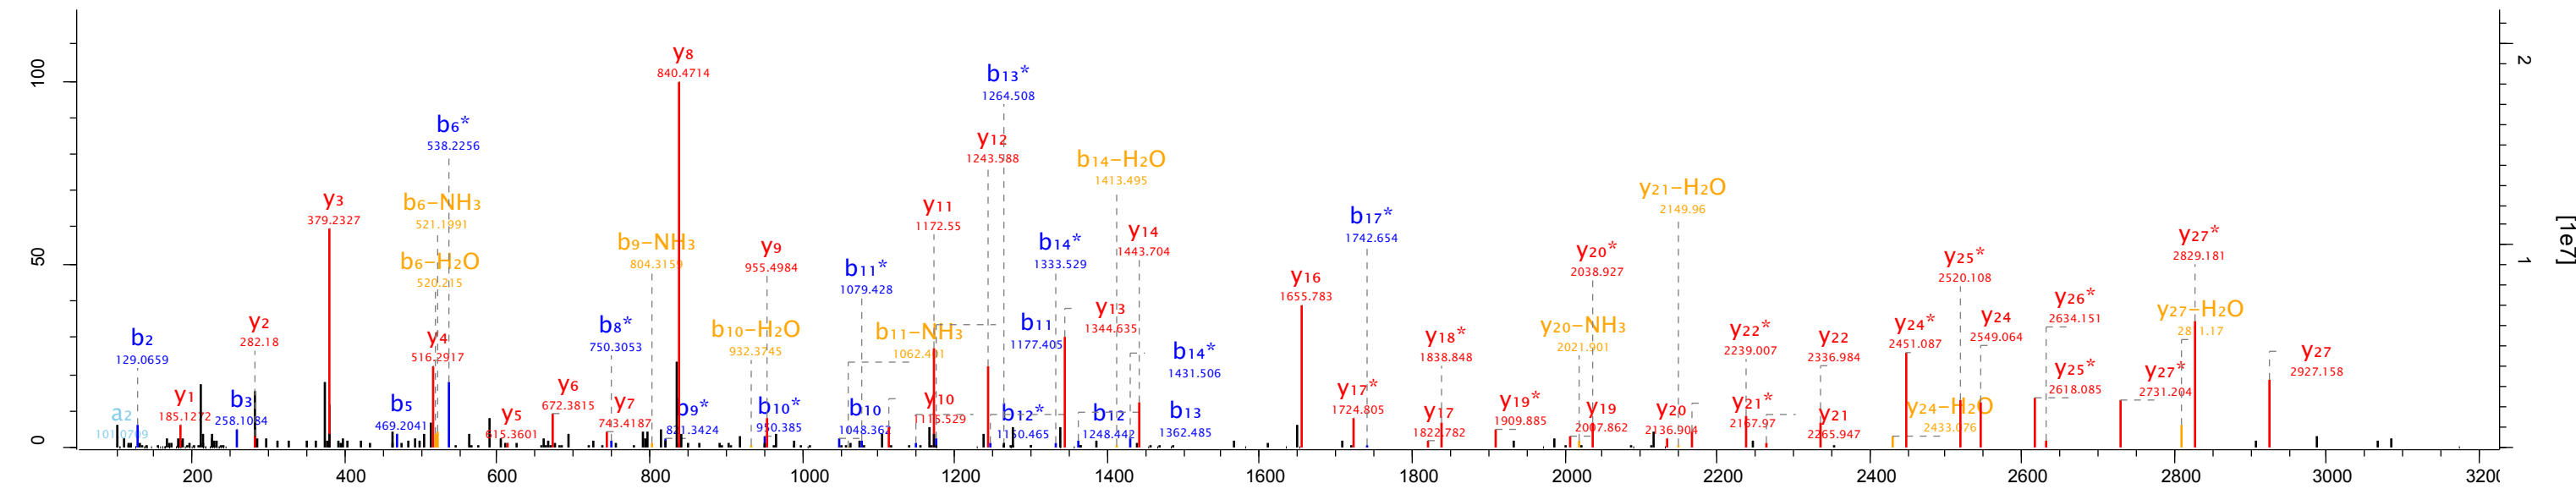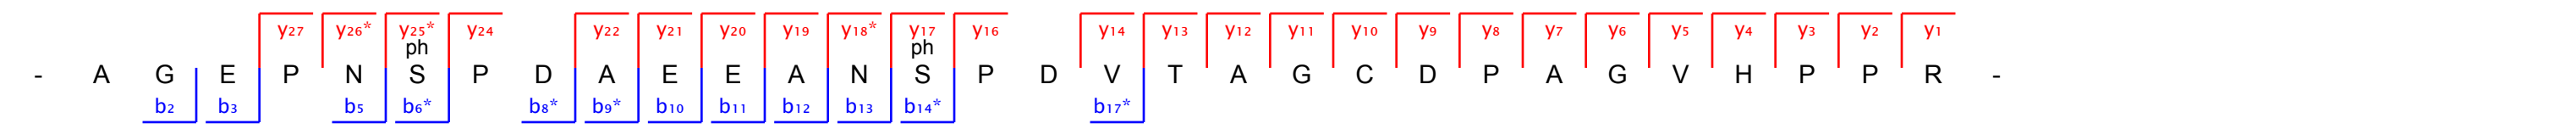

Raw file 20171215\_MaS\_33SR\_LMH\_phospho2\_03 Scan 10600 Method FTMS; HCD Score 56.78 m/z 720.31 Gene names PLEC

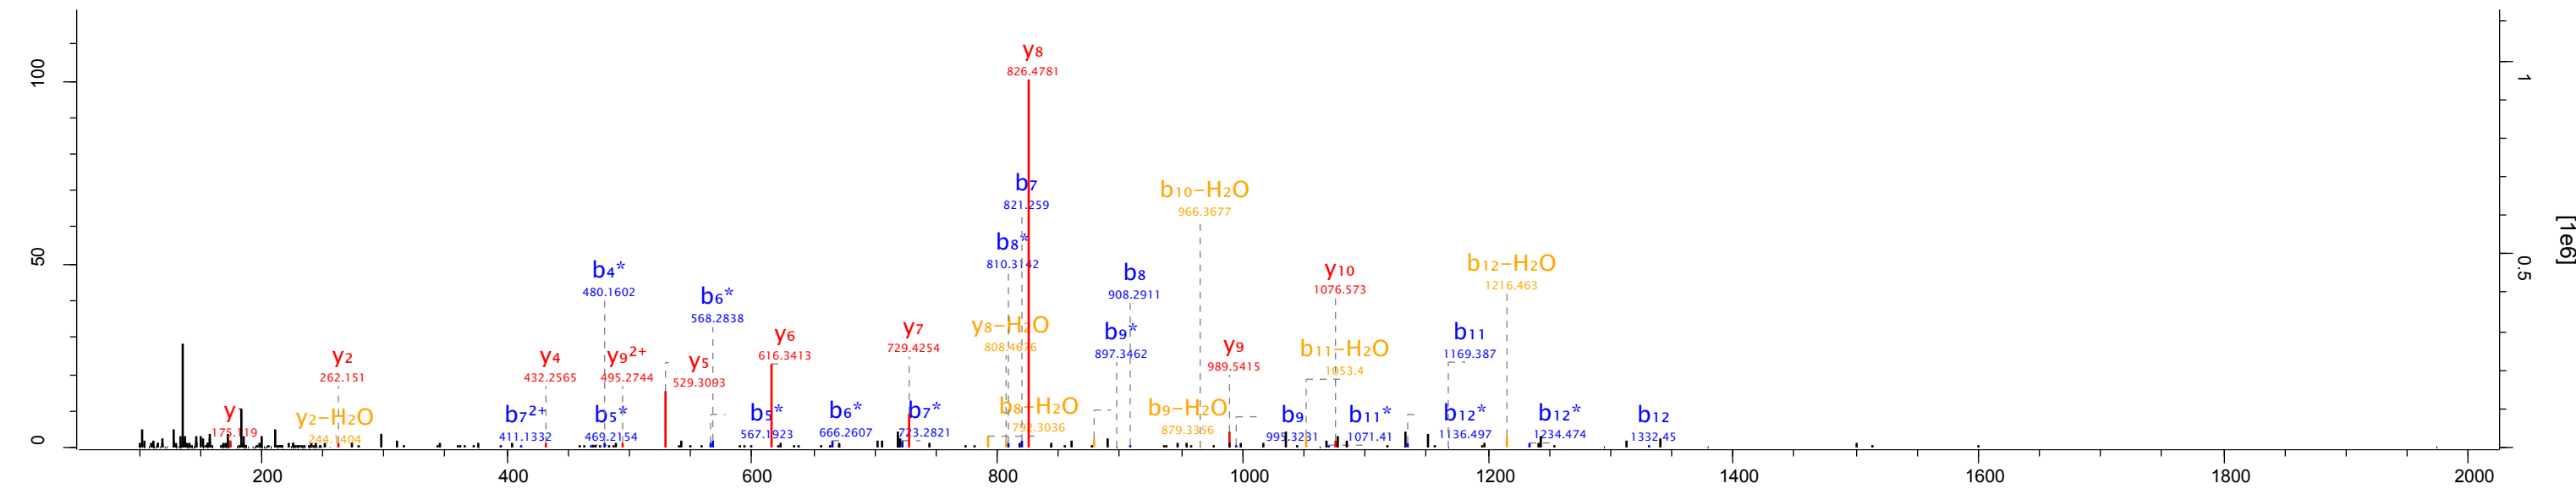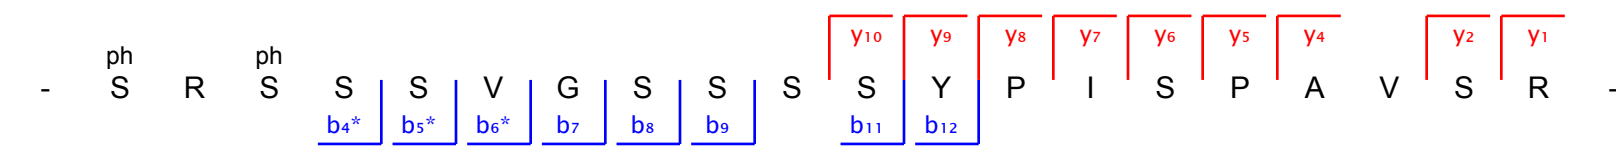

Raw file: 20171215\_MaS\_33SR\_LMH\_phospho2\_03  
 Scan: 10660 Method: FTMS; HCD Score: 225.07 m/z: 849.71 Gene names: ZC3HC1

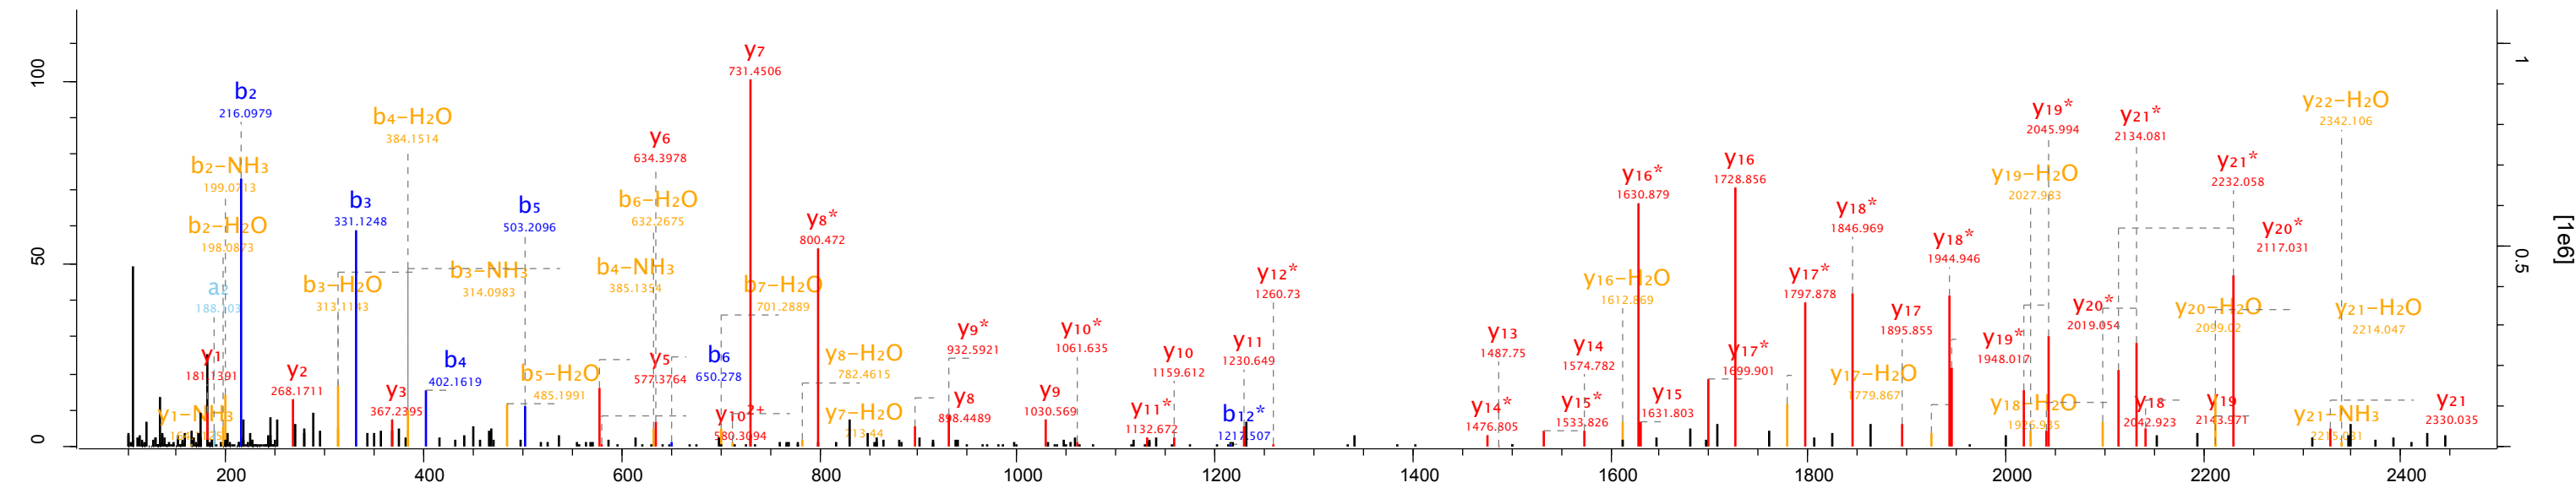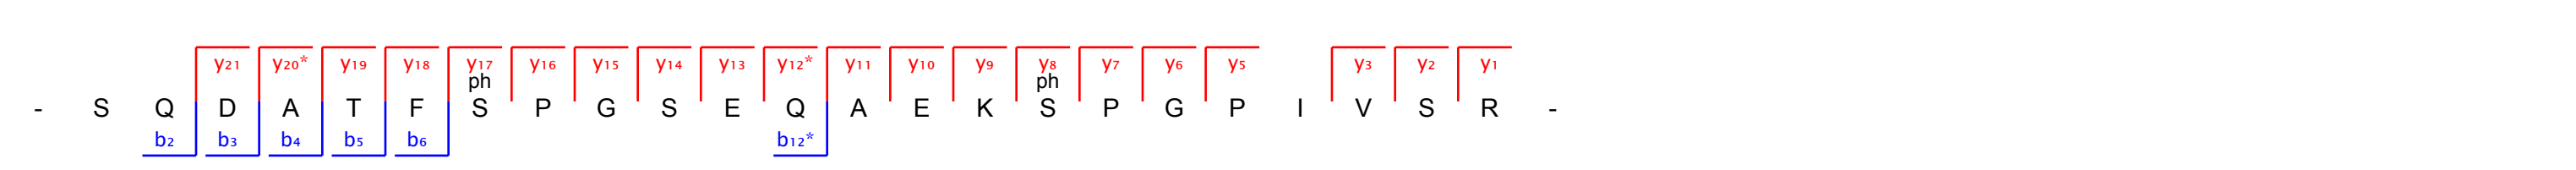



Raw file 20171215\_MaS\_33SR\_LMH\_phospho2\_03 Scan 10680 Method FTMS; HCD Score 167.27 m/z 1135.98 Gene names ARHGEF11

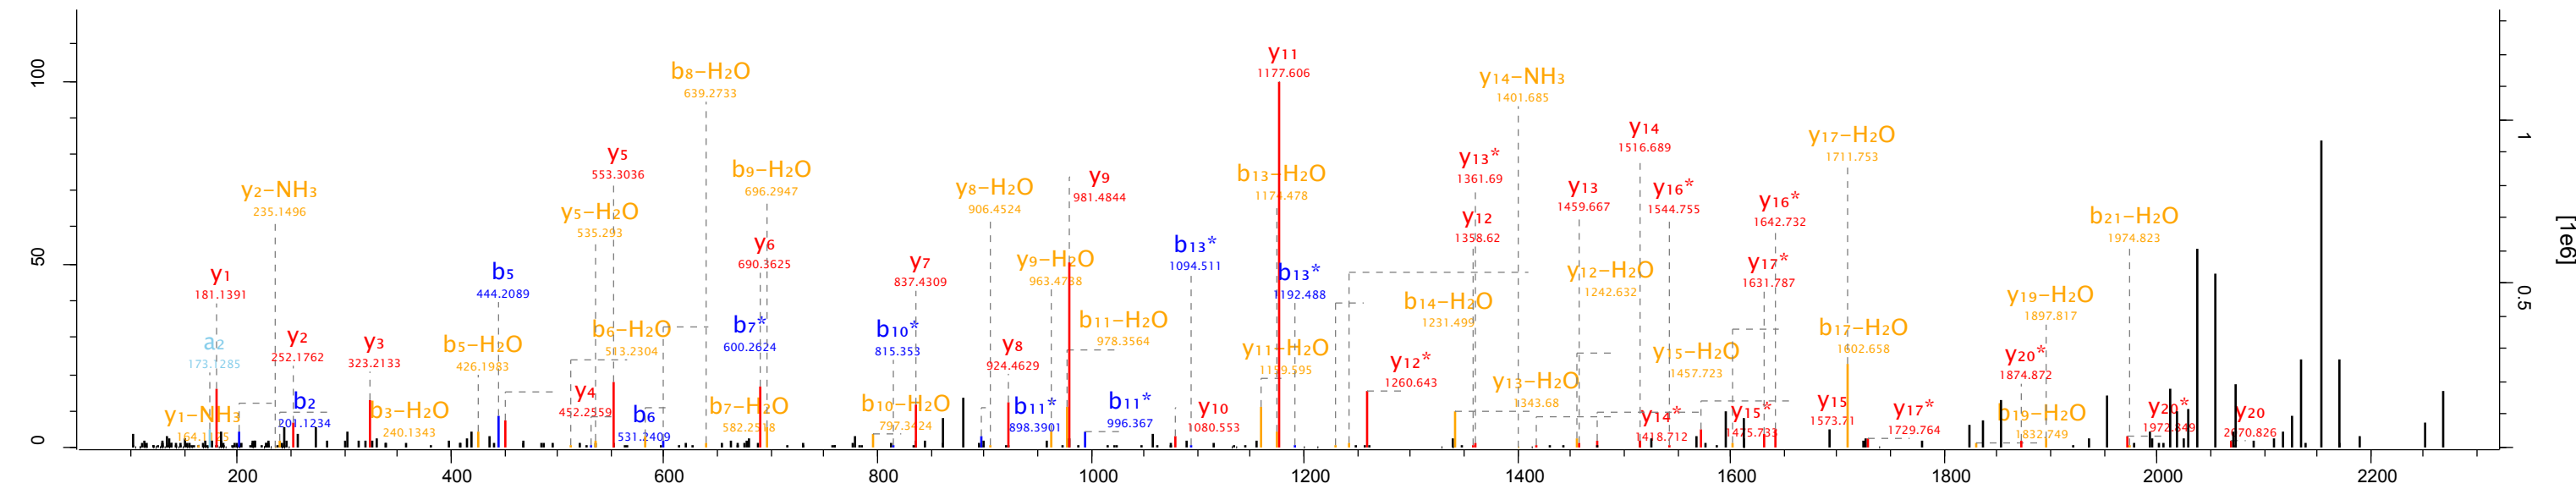

- S L G G E S S G G T T P V G S F H T E A A R -

b<sub>2</sub>
b<sub>5</sub>
b<sub>6</sub>
b<sub>7</sub>\*
b<sub>10</sub>\*
b<sub>11</sub>\*
b<sub>13</sub>\*
y<sub>20</sub>
y<sub>17</sub>\*
y<sub>16</sub>\*
ph
y<sub>15</sub>
y<sub>14</sub>
y<sub>13</sub>
y<sub>12</sub>
ph
y<sub>11</sub>
y<sub>10</sub>
y<sub>9</sub>
y<sub>8</sub>
y<sub>7</sub>
y<sub>6</sub>
y<sub>5</sub>
y<sub>4</sub>
y<sub>3</sub>
y<sub>2</sub>
y<sub>1</sub>

Raw file 20171215\_MaS\_33SR\_LMH\_phospho2\_03 Scan 10700 Method FTMS; HCD Score 86 m/z 902.4 Gene names FGD1

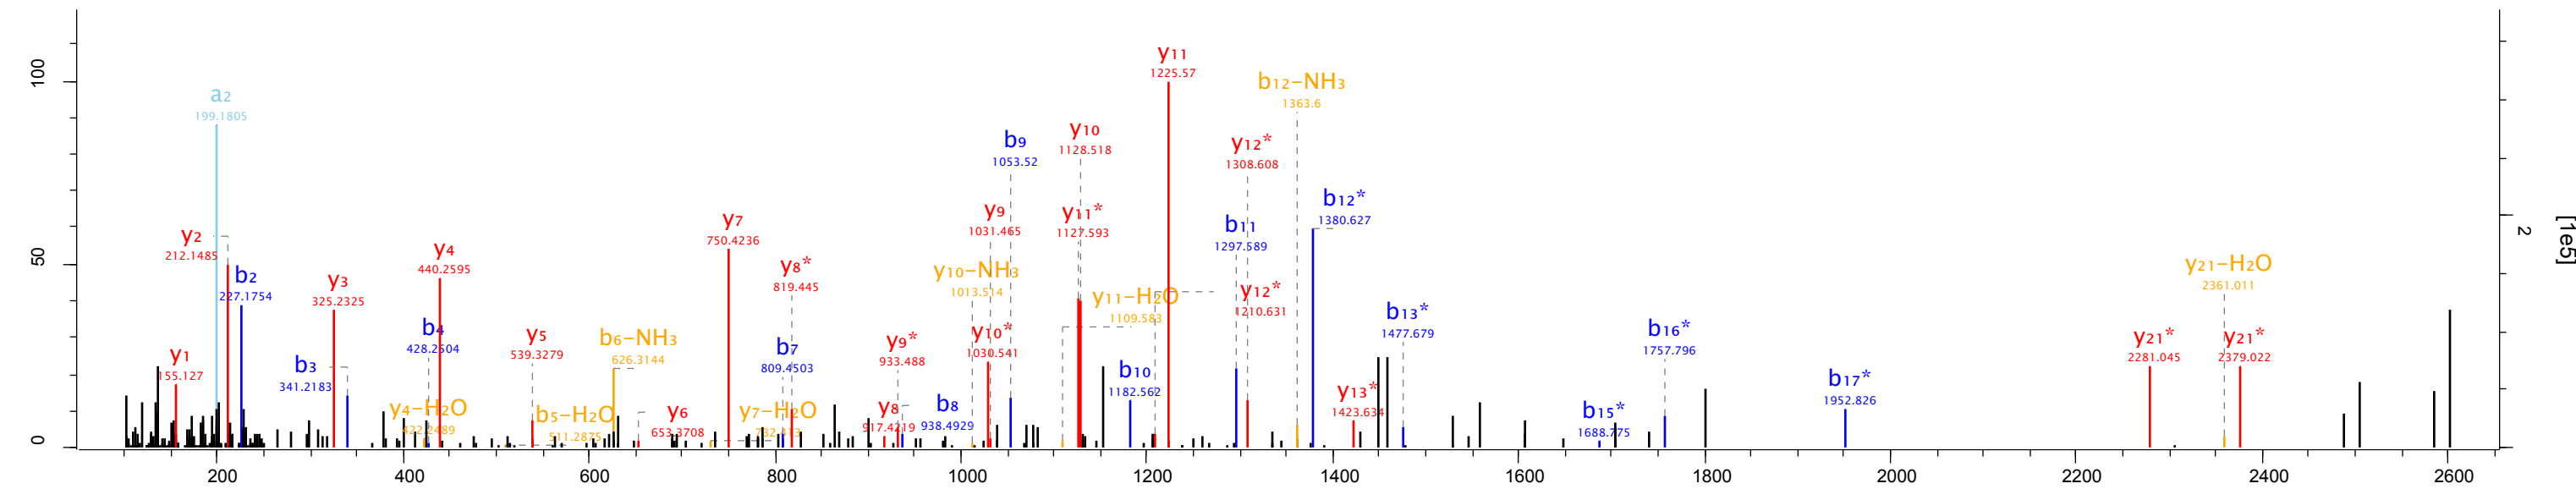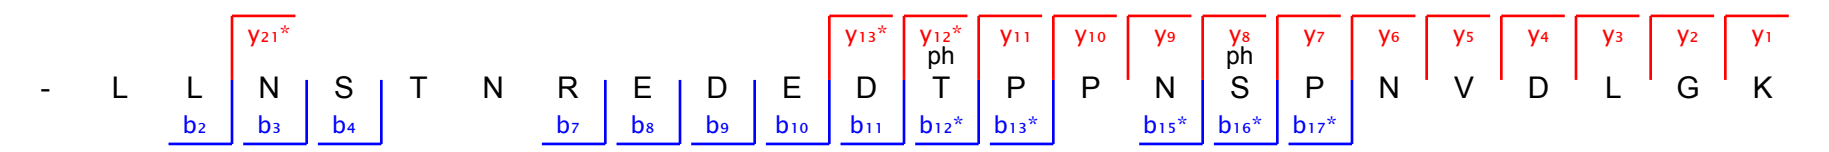

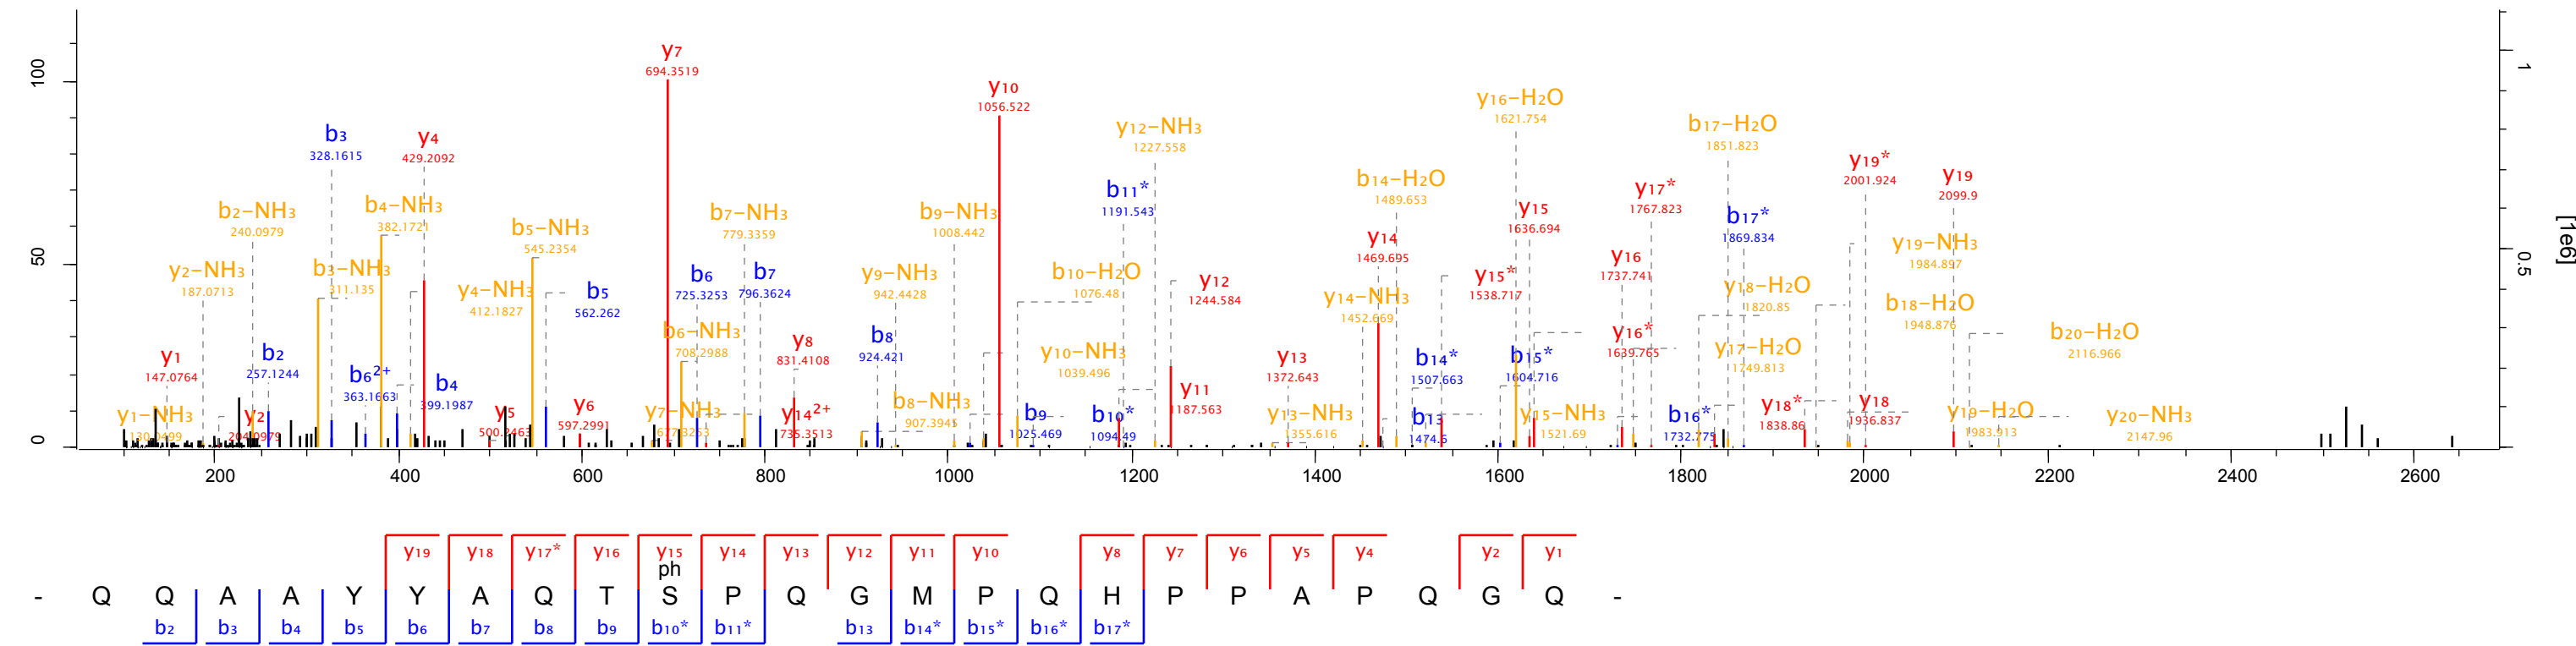

Raw file: 20171215\_MaS\_33SR\_LMH\_phospho2\_03  
 Scan: 11120 Method: FTMS; HCD Score: 143.35 m/z: 770.01 Gene names: BANF1

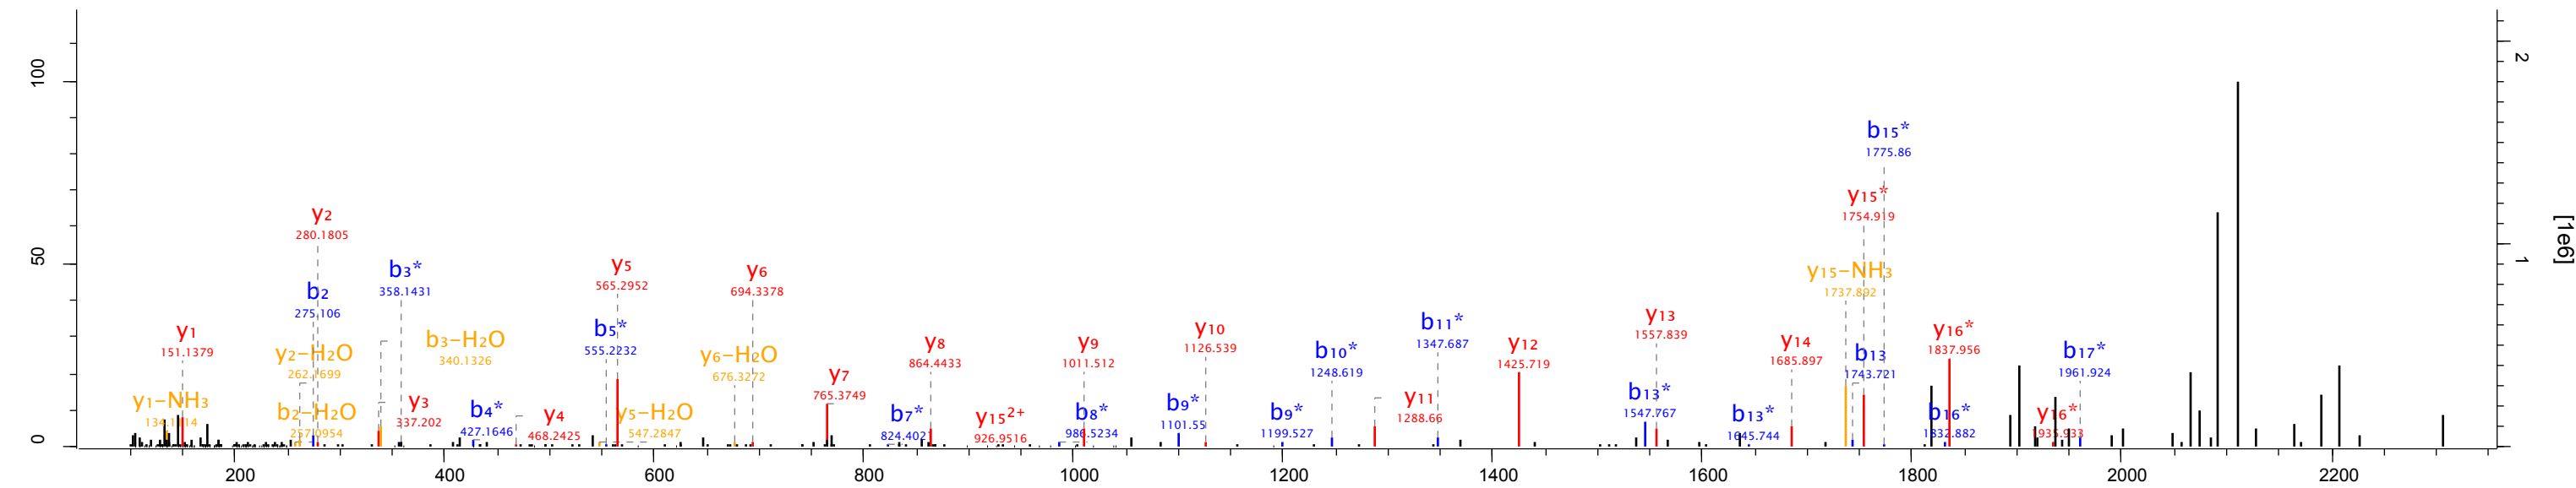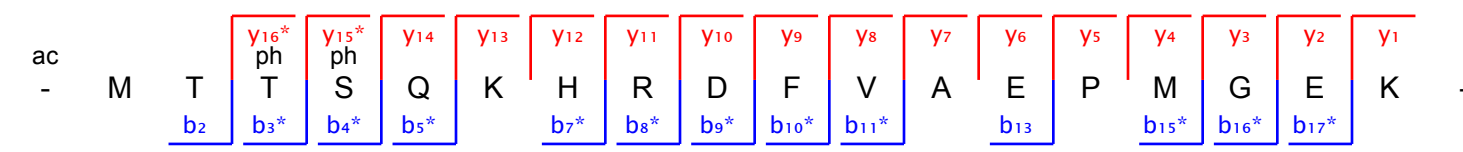

Raw file 20171215\_MaS\_33SR\_LMH\_phospho2\_03 Scan 11420 Method FTMS; HCD Score 76.05 m/z 855.89 Gene names BCL7C

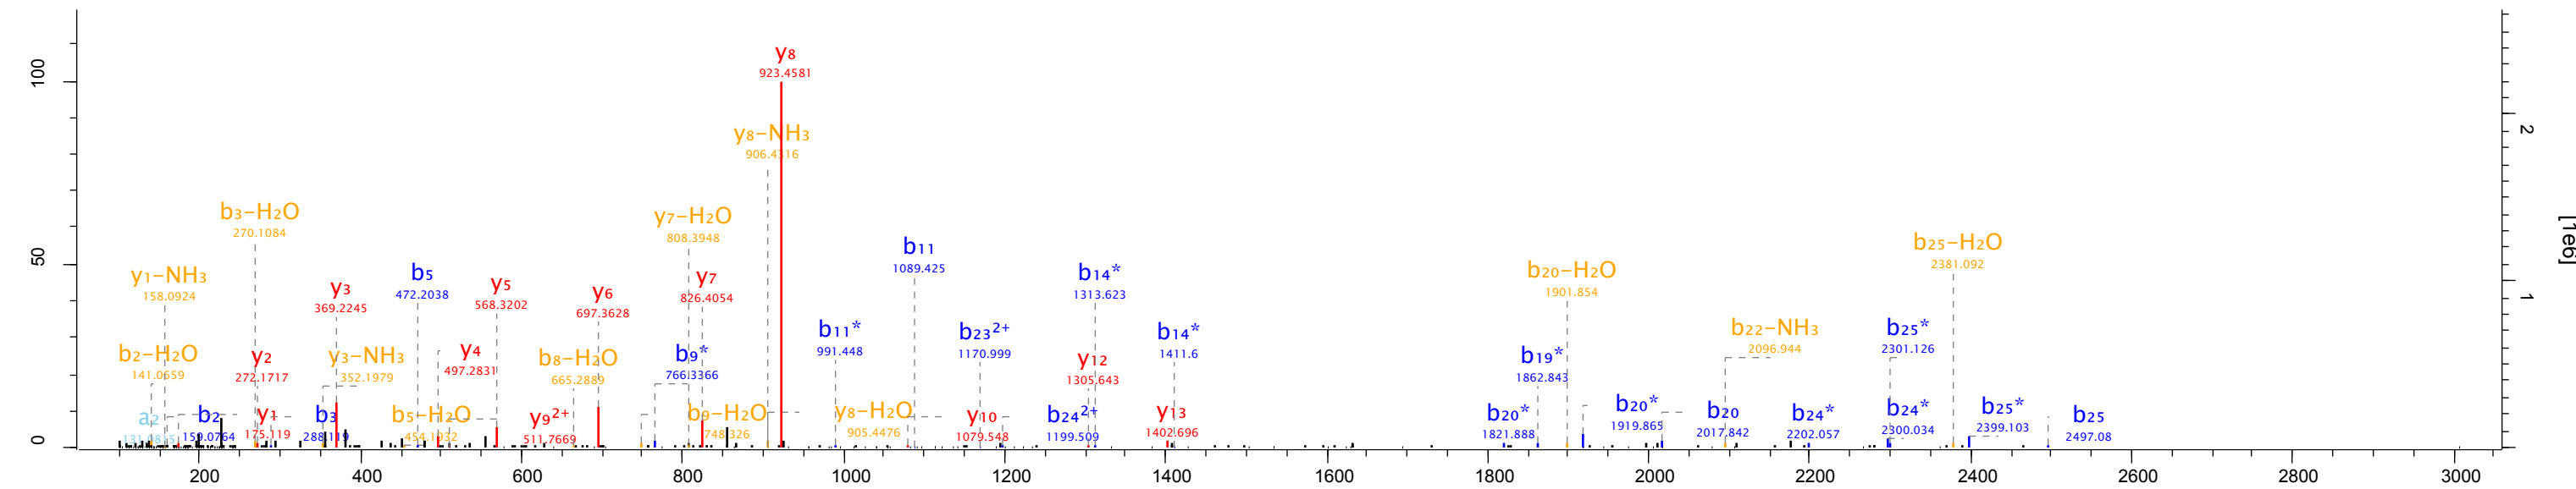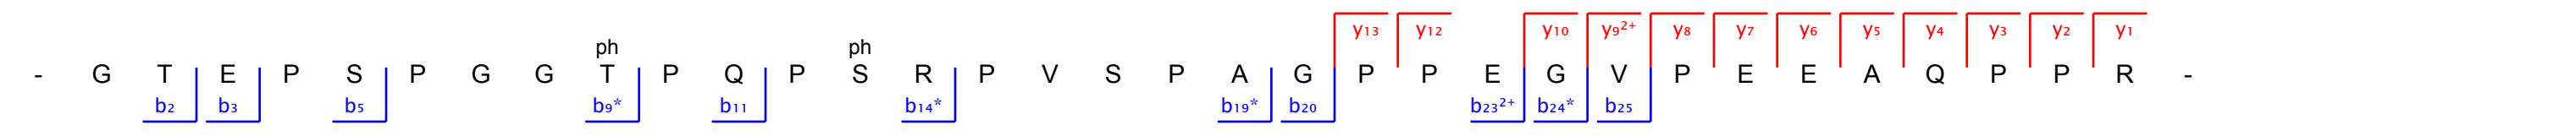

Raw file  
20171215\_MaS\_33SR\_LMH\_phospho2\_03

Scan 11450 Method FTMS; HCD Score 102.66 m/z 816.38 Gene names PAGE5

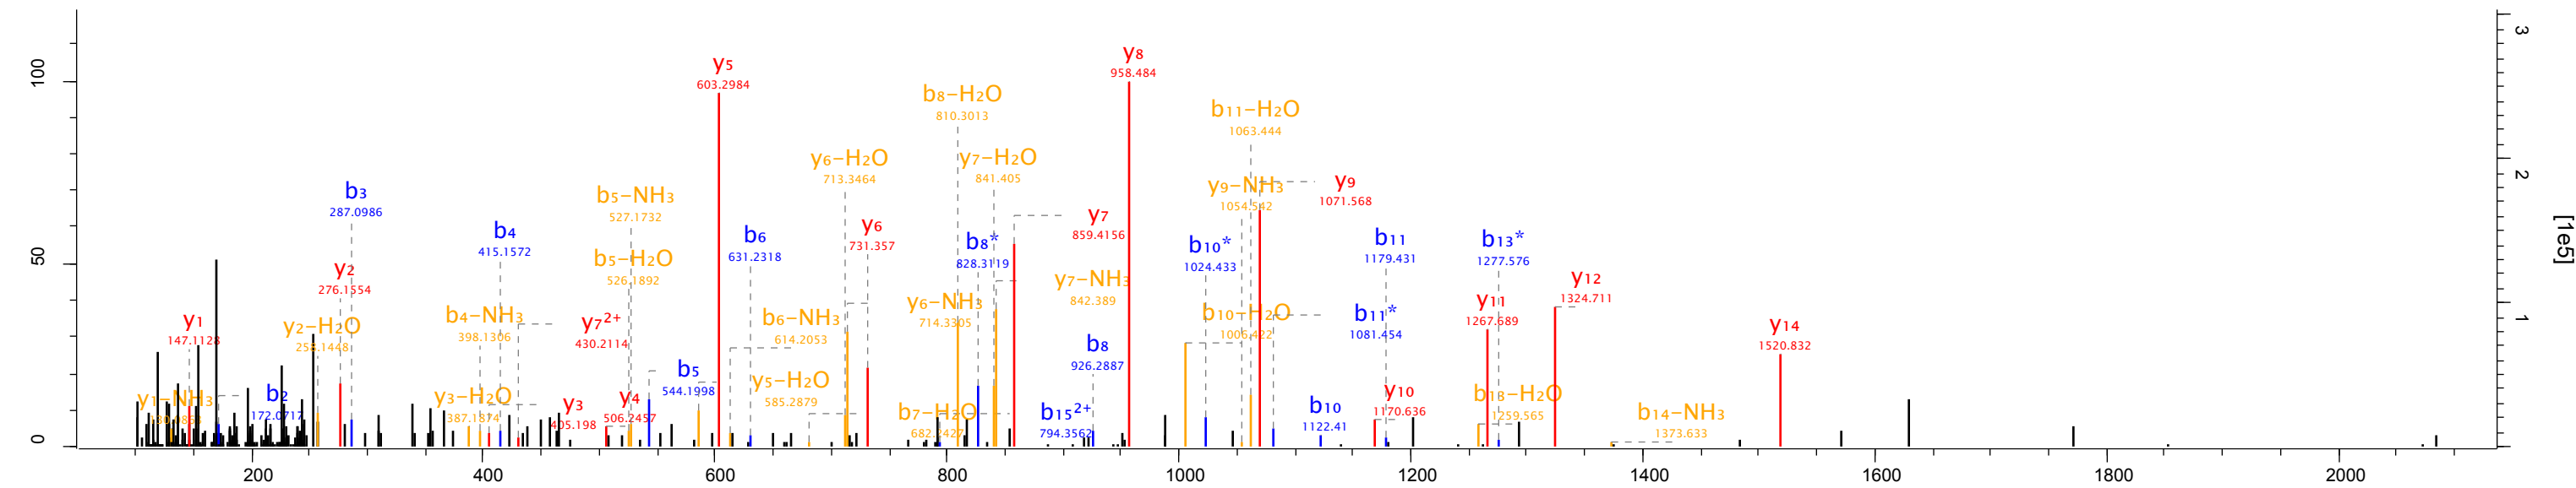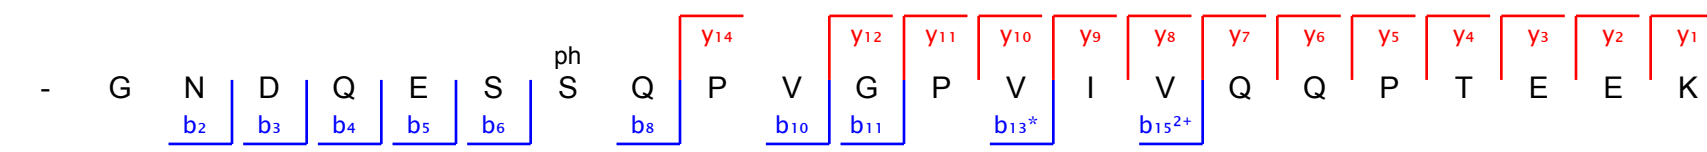

Raw file 20171215\_MaS\_33SR\_LMH\_phospho2\_03 Scan 11480 Method FTMS; HCD Score 79.62 m/z 689.29 Gene names DAB2

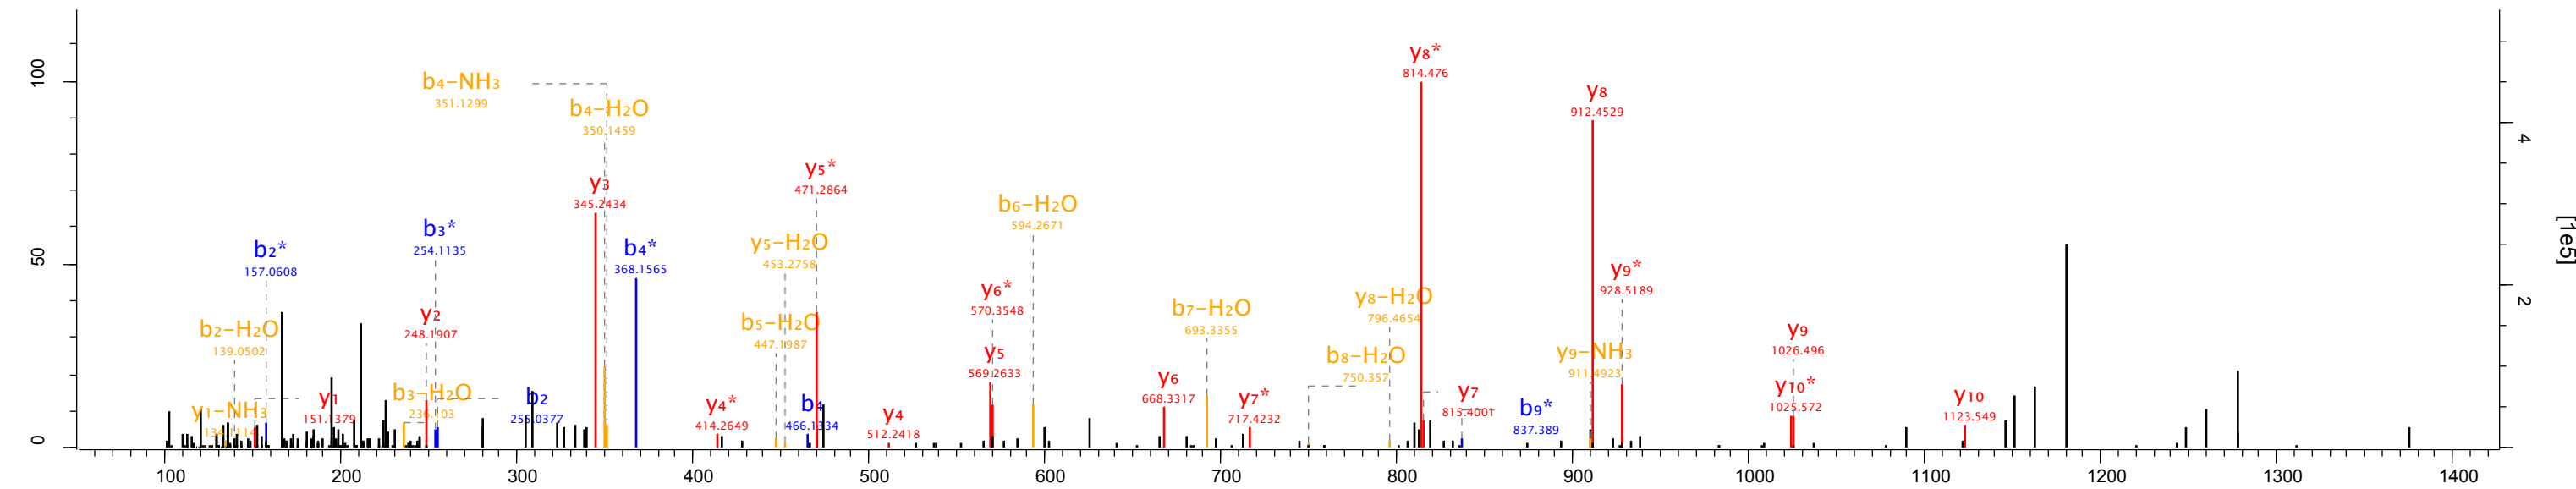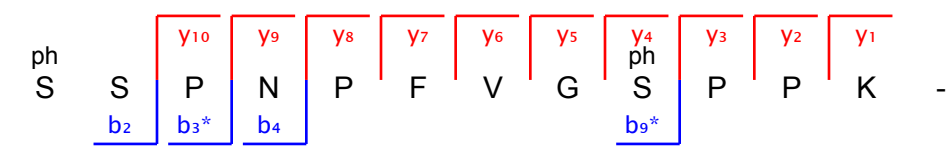

Raw file 20171215\_MaS\_33SR\_LMH\_phospho2\_03 Scan 11640 Method FTMS; HCD Score 102.16 m/z 759.71 Gene names TAF12

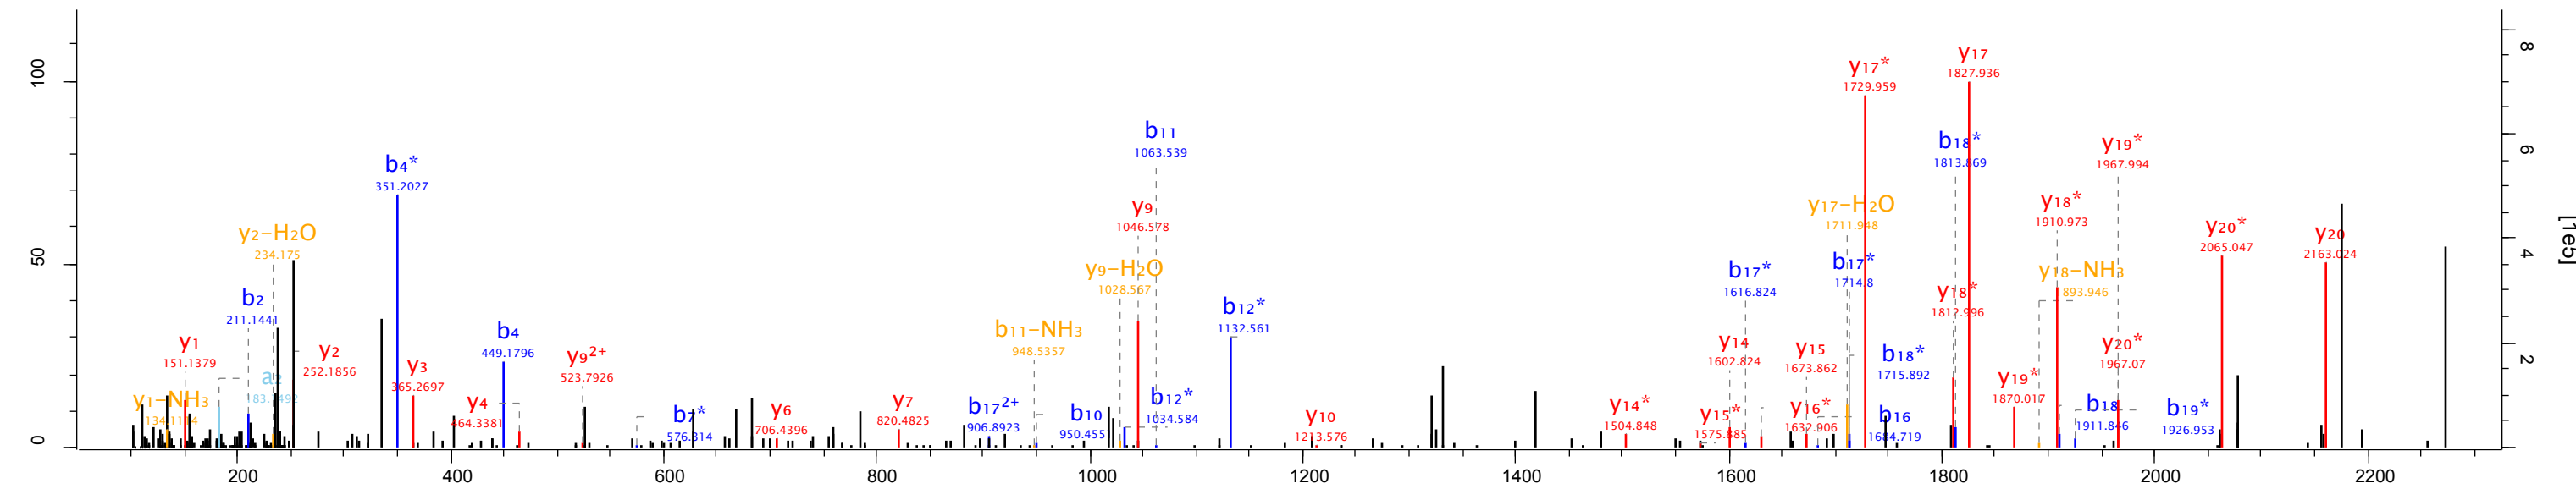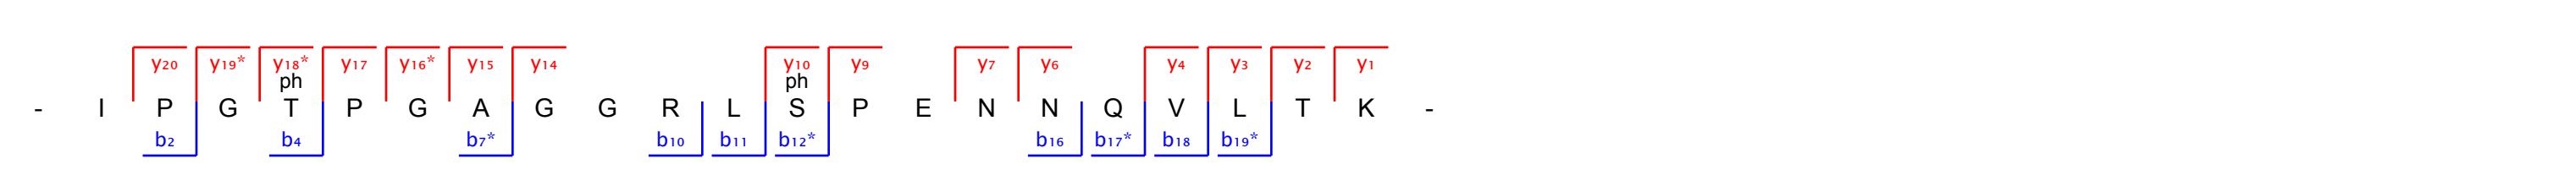



Raw file 20171215\_MaS\_33SR\_LMH\_phospho2\_03 Scan 11650 Method FTMS; HCD Score 215.45 m/z 938.4 Gene names ACD

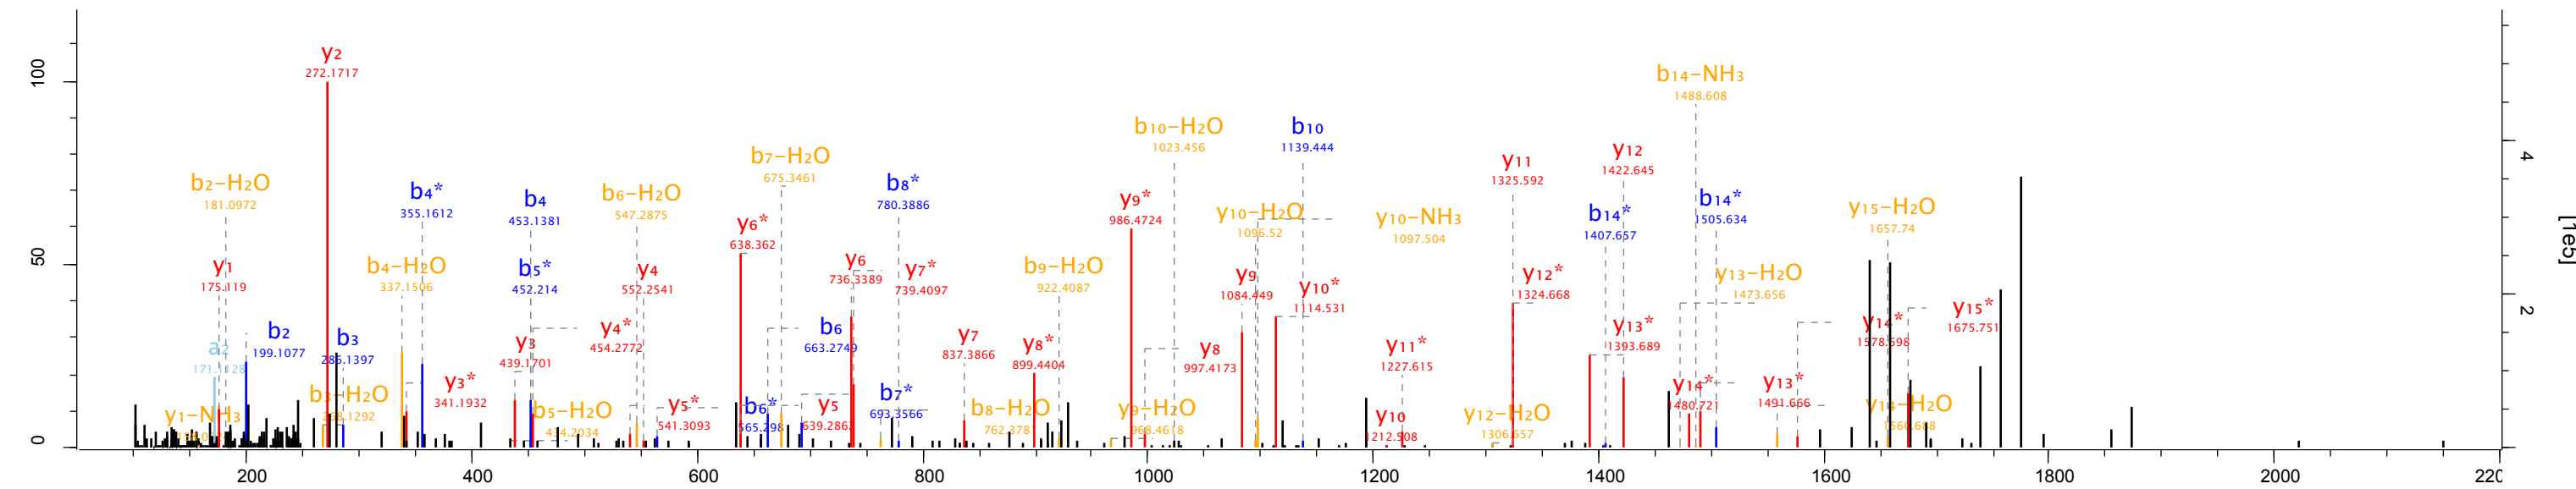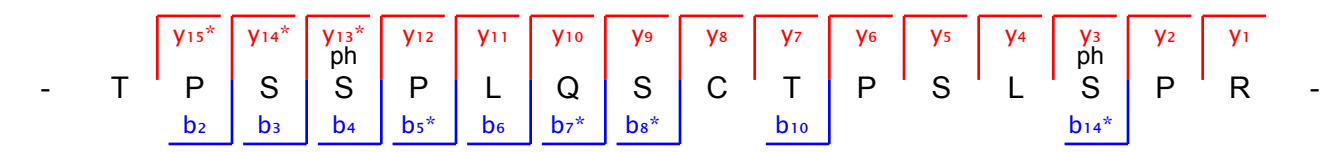

Raw file 20171215\_MaS\_33SR\_LMH\_phospho2\_03 Scan 11780 Method FTMS; HCD Score 277.07 m/z 879.38 Gene names CLIP1

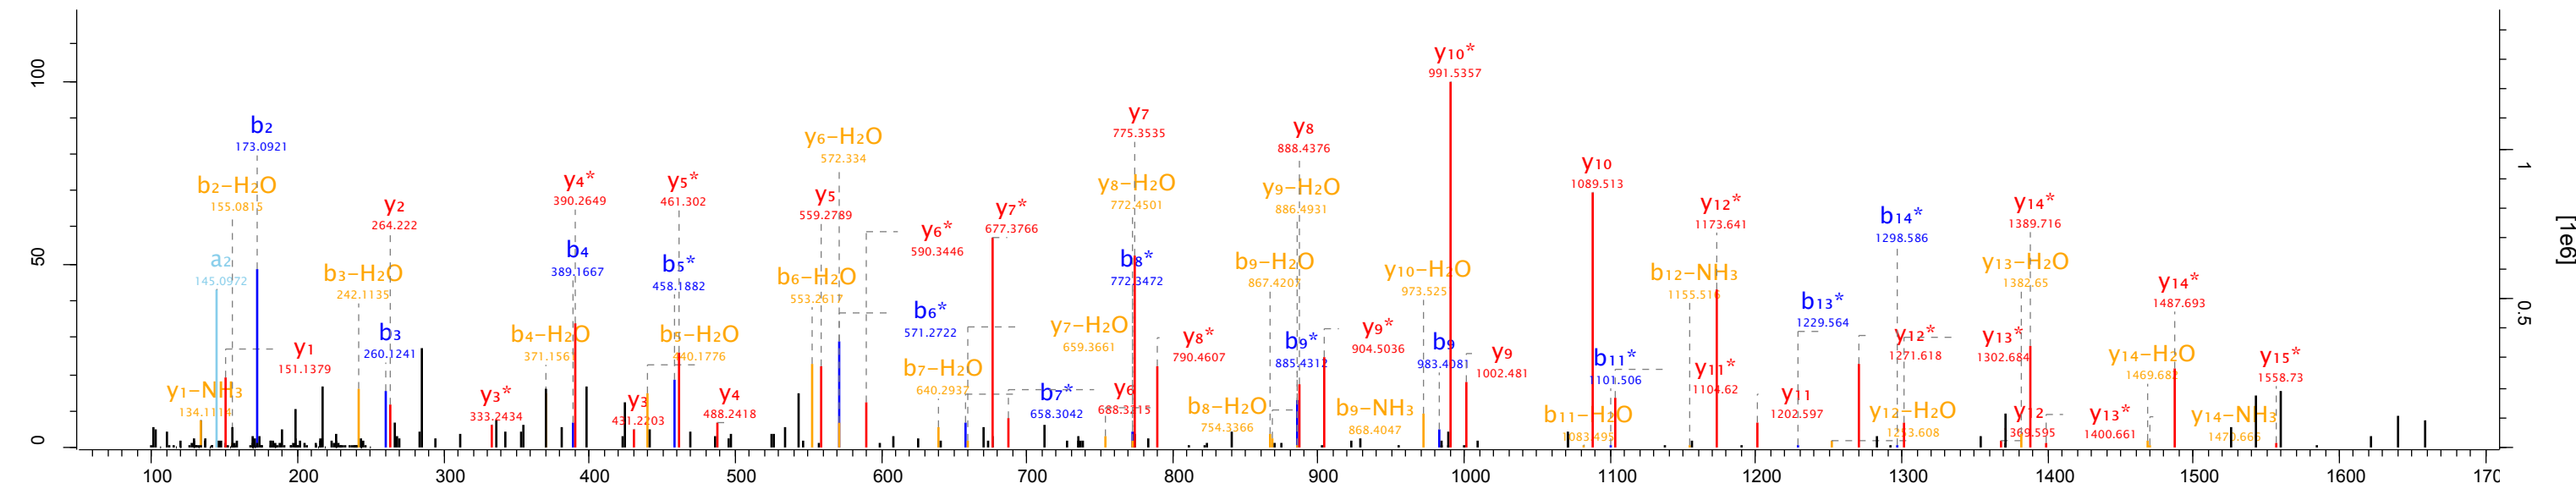

- T A S E I S N L S E A G S I K -

Fragmentation mapping (b and y ions) is shown below the sequence:

- b2 (A), b3 (S), b4 (E), b5\* (S), b6\* (I), b7\* (S), b8\* (N), b9 (L), b11\* (S), b13\* (A), b14\* (G)
- y1 (K), y2 (I), y3 (S), y4 (N), y5 (L), y6 (E), y7 (S), y8 (L), y9 (N), y10 (S), y11 (I), y12 (S), y13\* (E), y14\* (A), y15\* (G)

Raw file: 20171215\_MaS\_33SR\_LMH\_phospho2\_03  
 Scan: 11810 Method: FTMS; HCD Score: 288.69 m/z: 792.34 Gene names: MAP1B

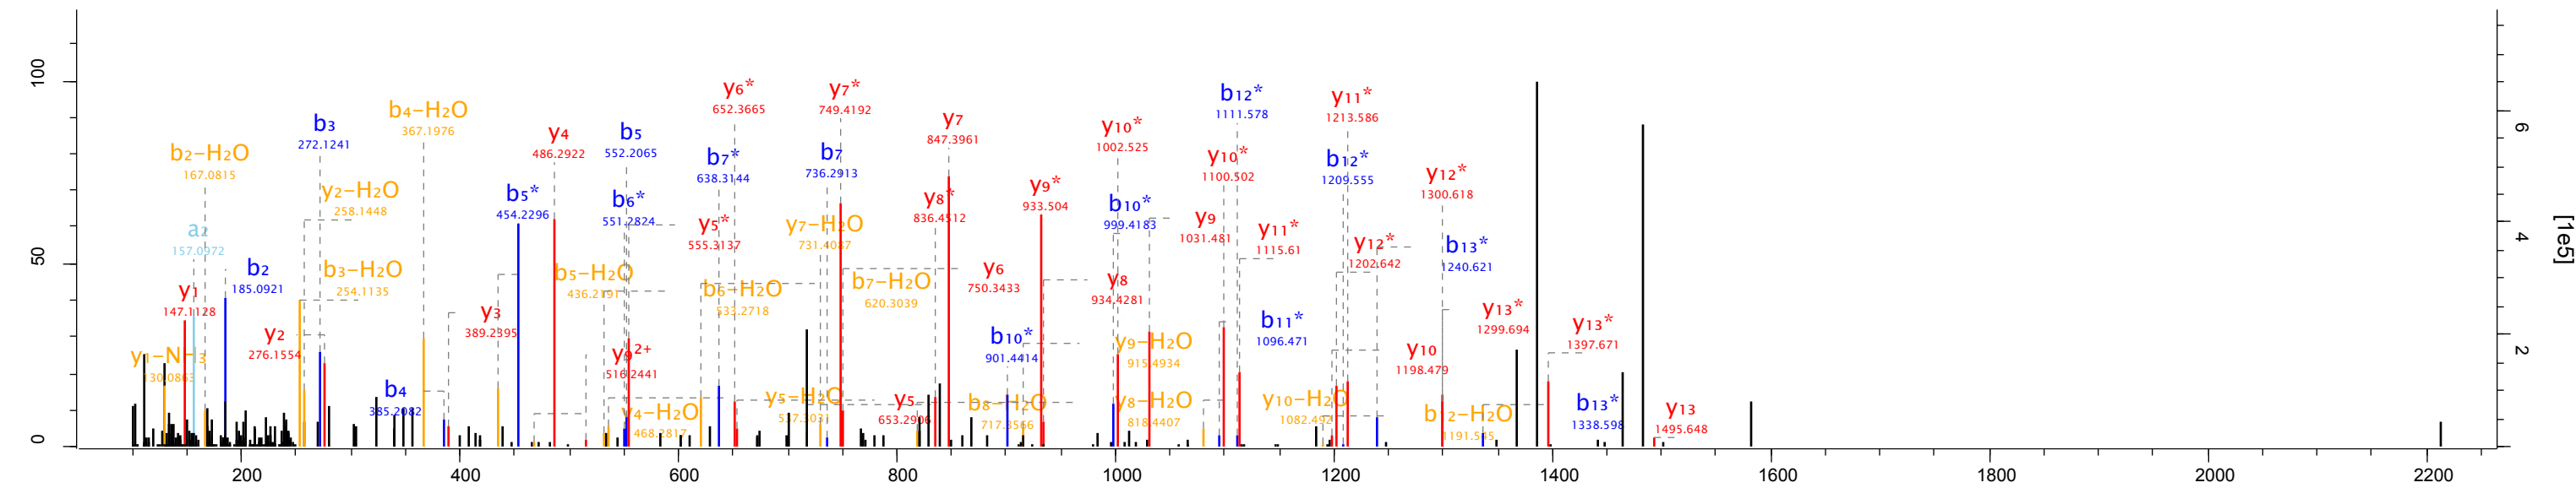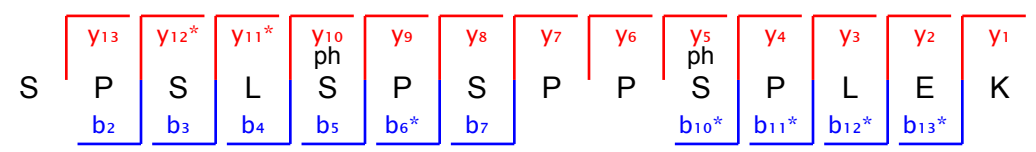

Raw file  
 20171215\_MaS\_33SR\_LMH\_phospho2\_03  
 Scan 11820 Method FTMS; HCD Score 155.11 m/z 904.11 Gene names ARFGEF2

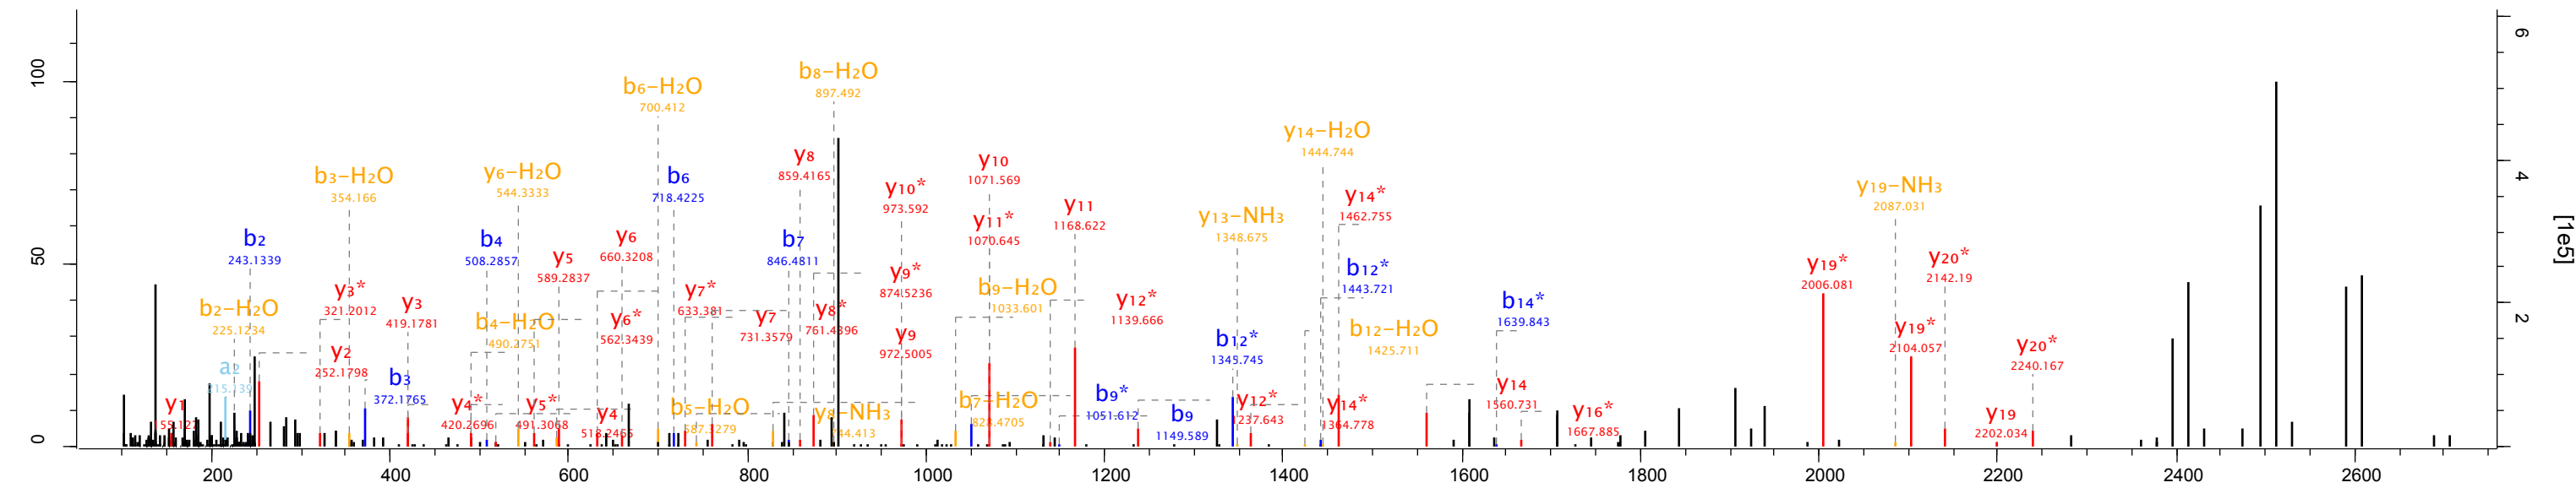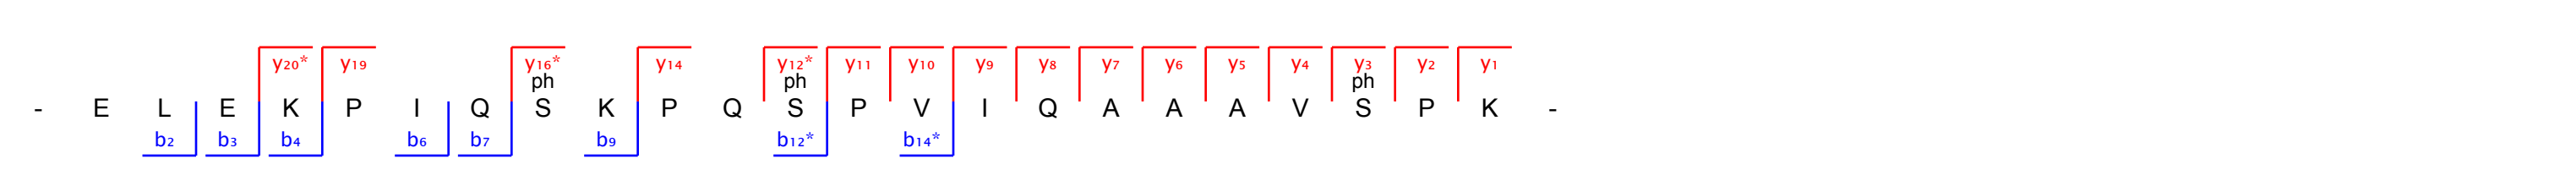

Raw file 20171215\_MaS\_33SR\_LMH\_phospho2\_03 Scan 11850 Method FTMS; HCD Score 208.67 m/z 886.61 Gene names SERBP1

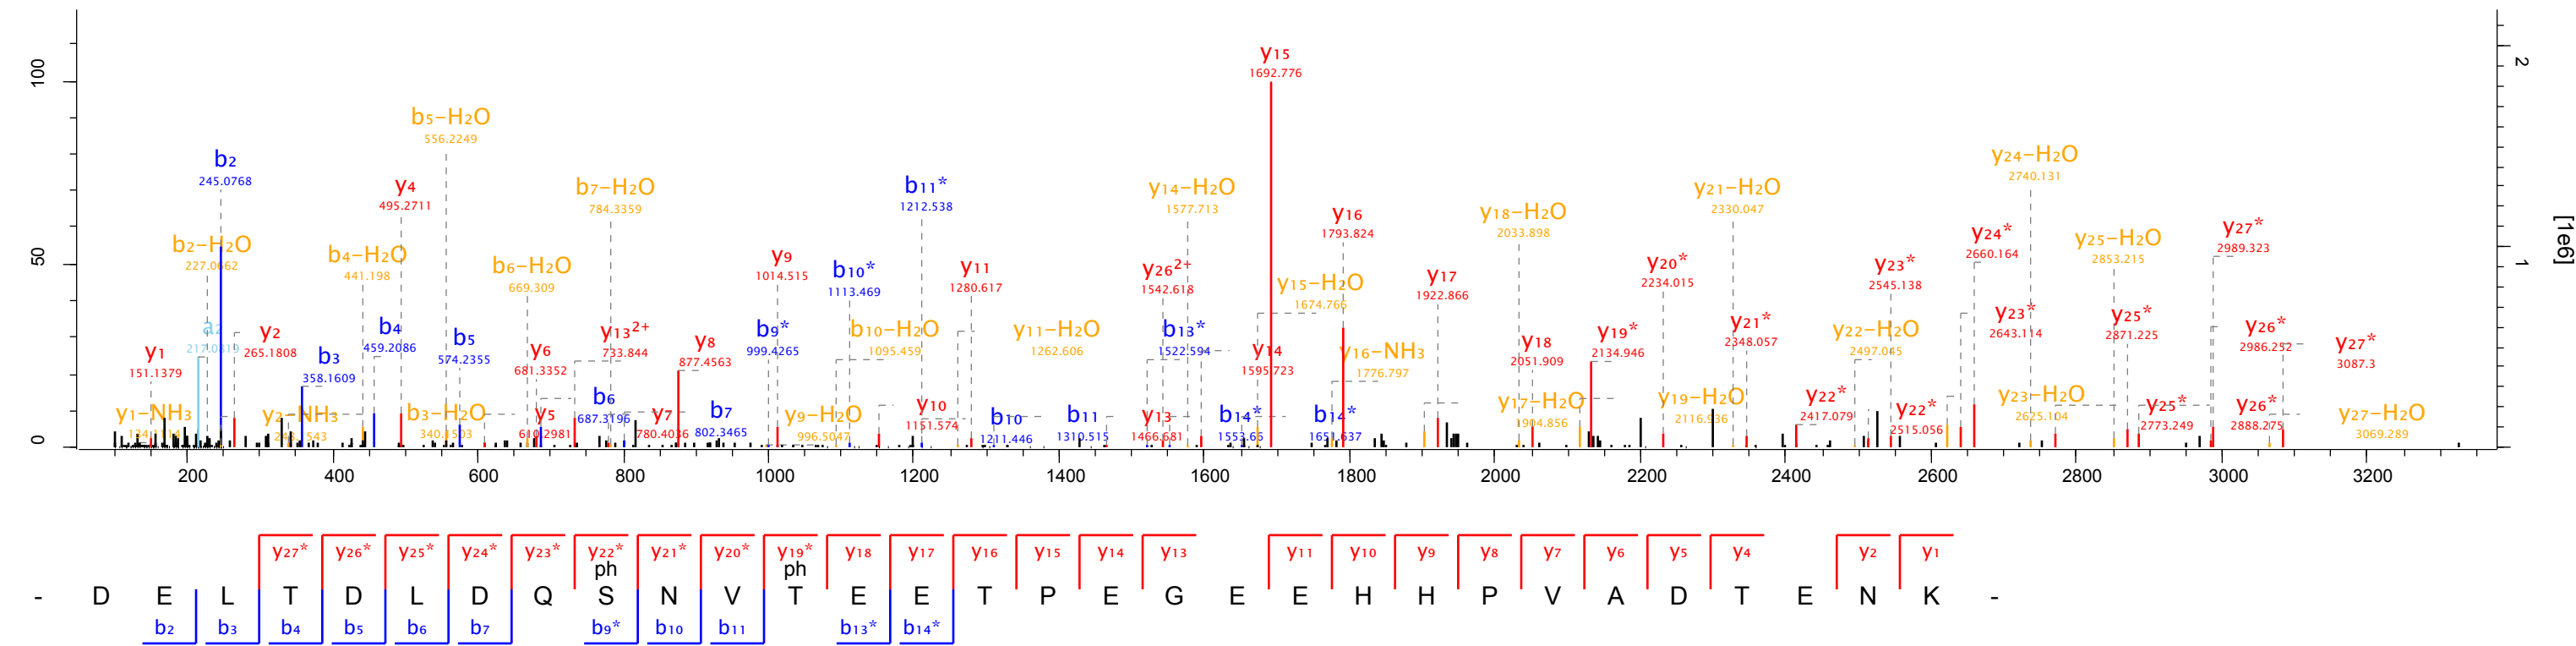

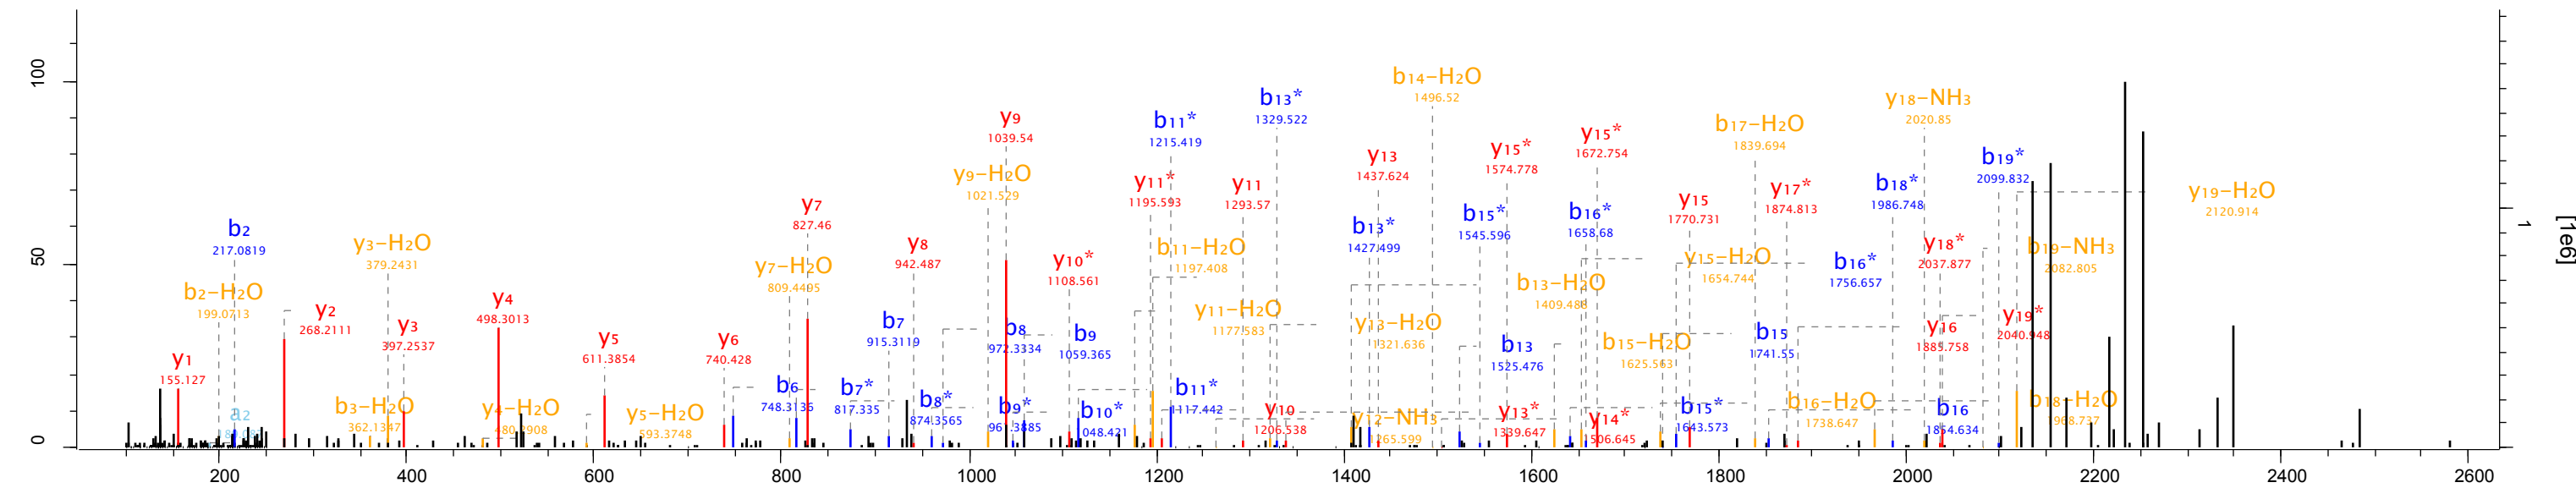

- D T Y S D R S G S S S P D S E I T E L K -  
 b<sub>2</sub> b<sub>6</sub> b<sub>7</sub> b<sub>8</sub> b<sub>9</sub> b<sub>10</sub>\* b<sub>11</sub>\* b<sub>13</sub> b<sub>15</sub> b<sub>16</sub> b<sub>18</sub>\* b<sub>19</sub>\*

Raw file: 20171215\_MaS\_33SR\_LMH\_phospho2\_03  
 Scan: 12310 Method: FTMS; HCD Score: 233.93 m/z: 954.72 Gene names: PHF6

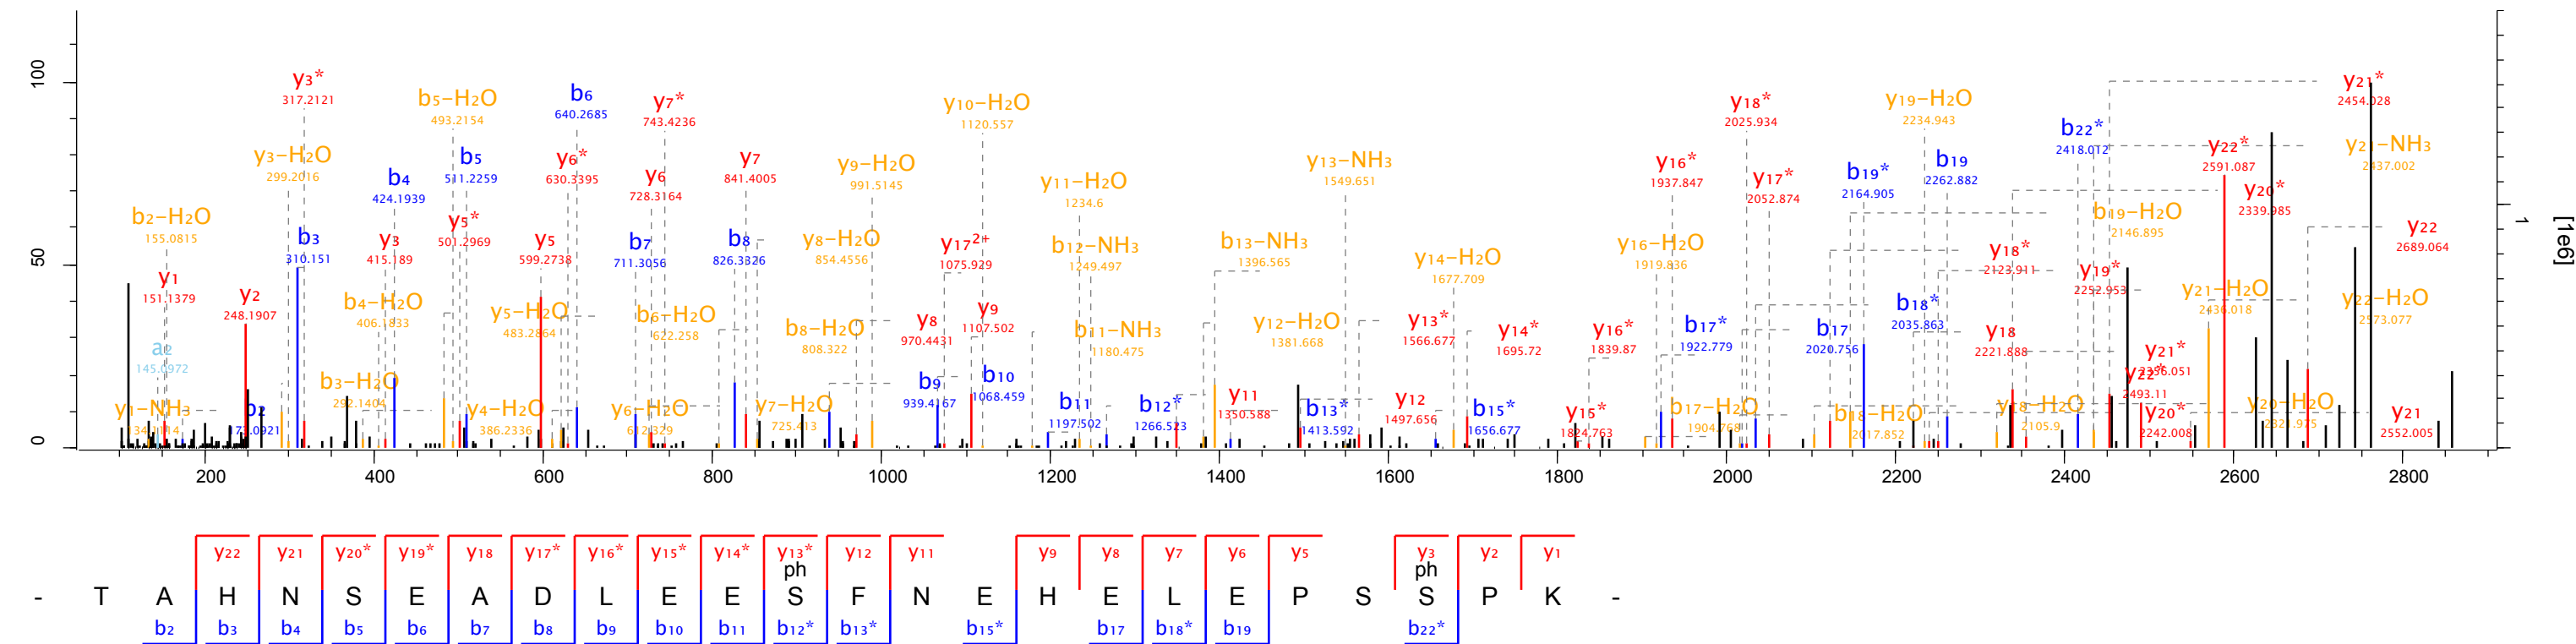

Raw file 20171215\_MaS\_33SR\_LMH\_phospho2\_03 Scan 12470 Method FTMS; HCD Score 147.37 m/z 1093.82 Gene names GYS1

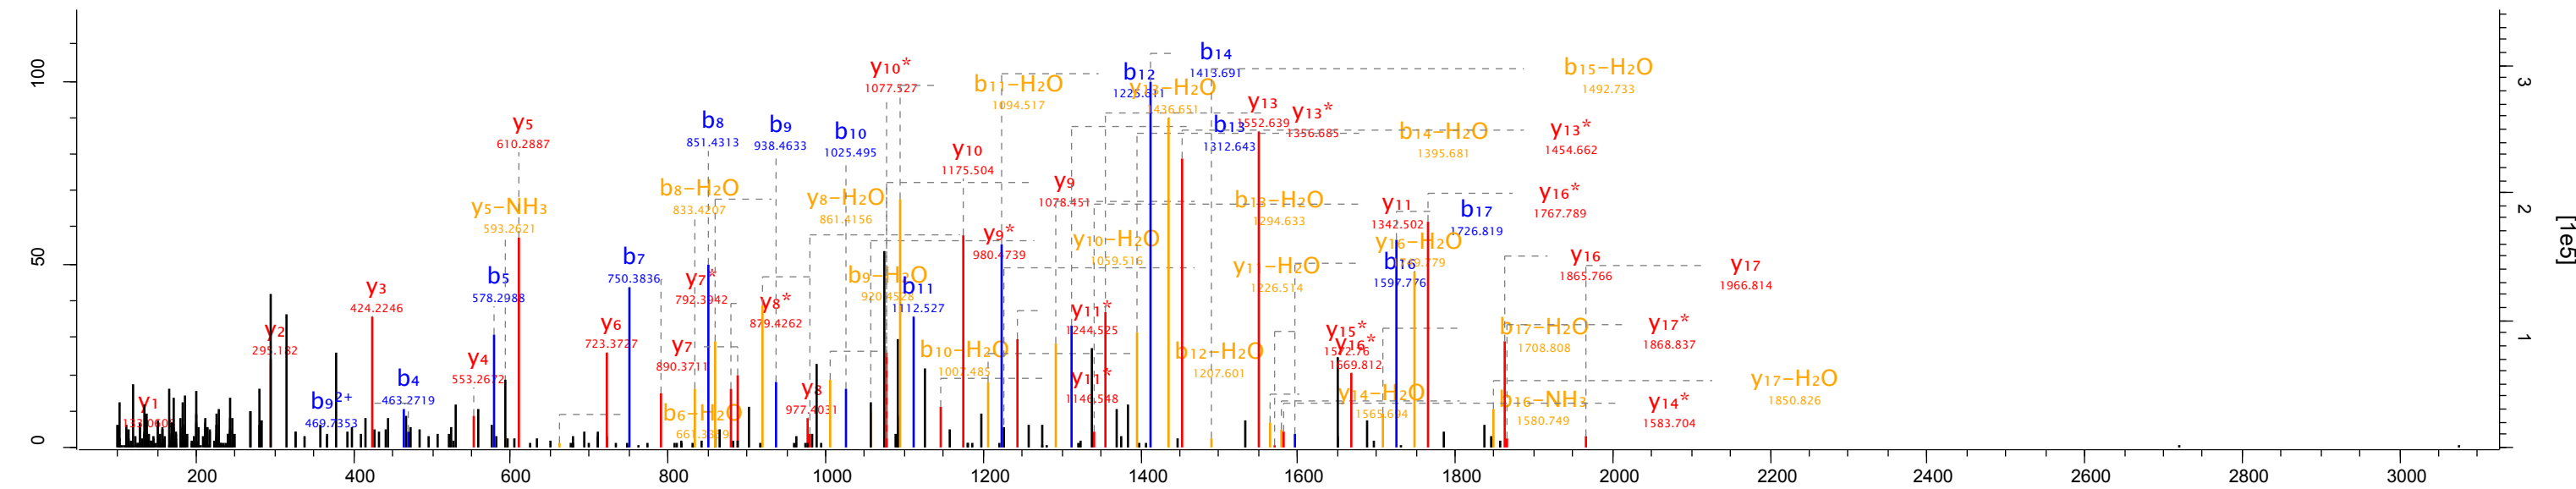

- R N S V D T A T S S S L S T P S E P L S P T S S L G E E R N -

Fragmentation mapping below the sequence:

- Red boxes: y17, y16, y15\*, y14\*, y13, y11 ph, y10, y9, y8, y7 ph, y6, y5, y4, y3, y2, y1
- Blue boxes: b4, b5, b7, b8, b9, b10, b11, b12, b13, b14, b16, b17



Raw file 20171215\_MaS\_33SR\_LMH\_phospho2\_03 Scan 12670 Method FTMS; HCD Score 185.88 m/z 1341.6 Gene names RNF20

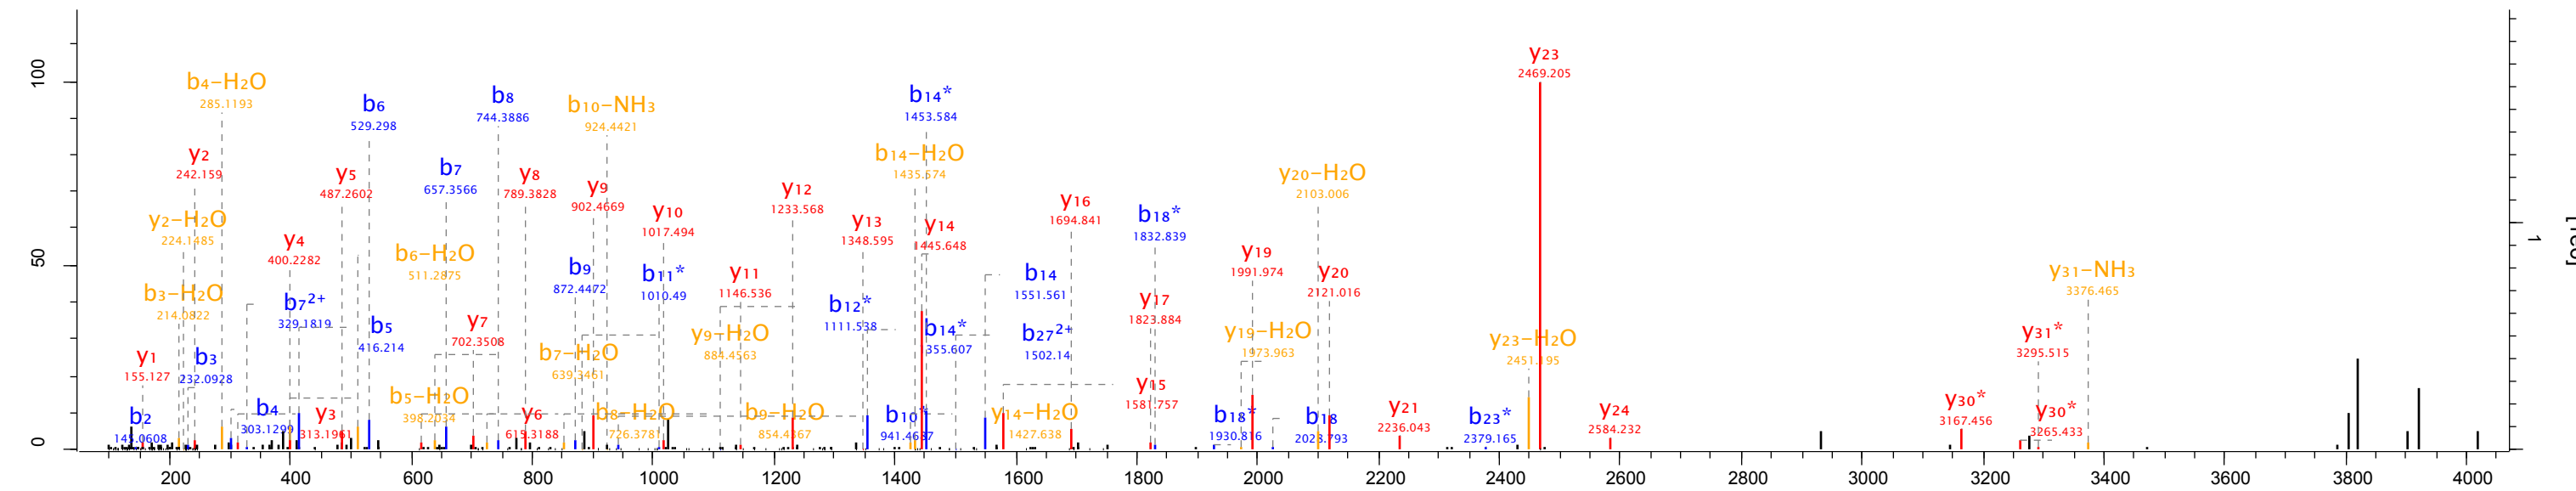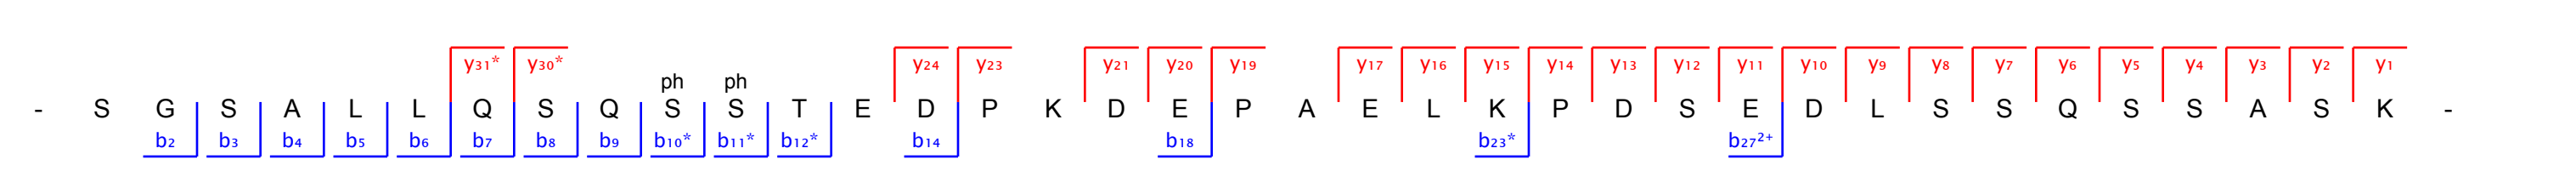

Raw file 20171215\_MaS\_33SR\_LMH\_phospho2\_03 Scan 13260 Method FTMS; HCD Score 94.51 m/z 723.76 Gene names CNN3

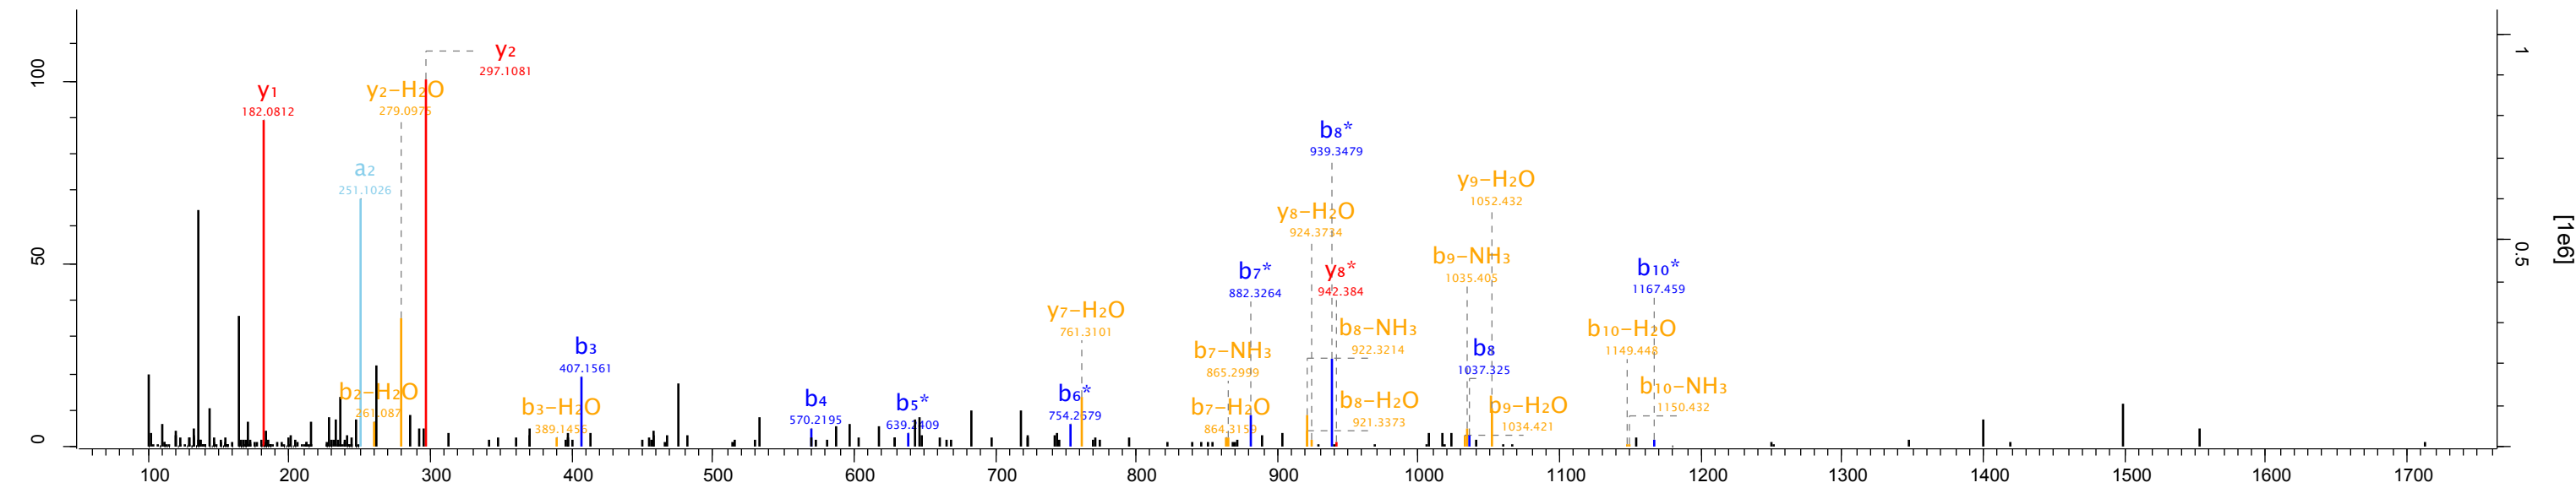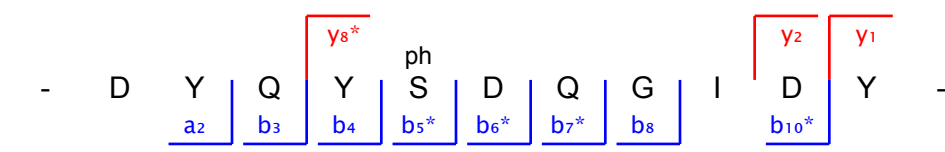

Raw file: 20171215\_MaS\_33SR\_LMH\_phospho2\_03  
 Scan: 13270 Method: FTMS; HCD Score: 208.52 m/z: 947.04 Gene names: ZC3H18

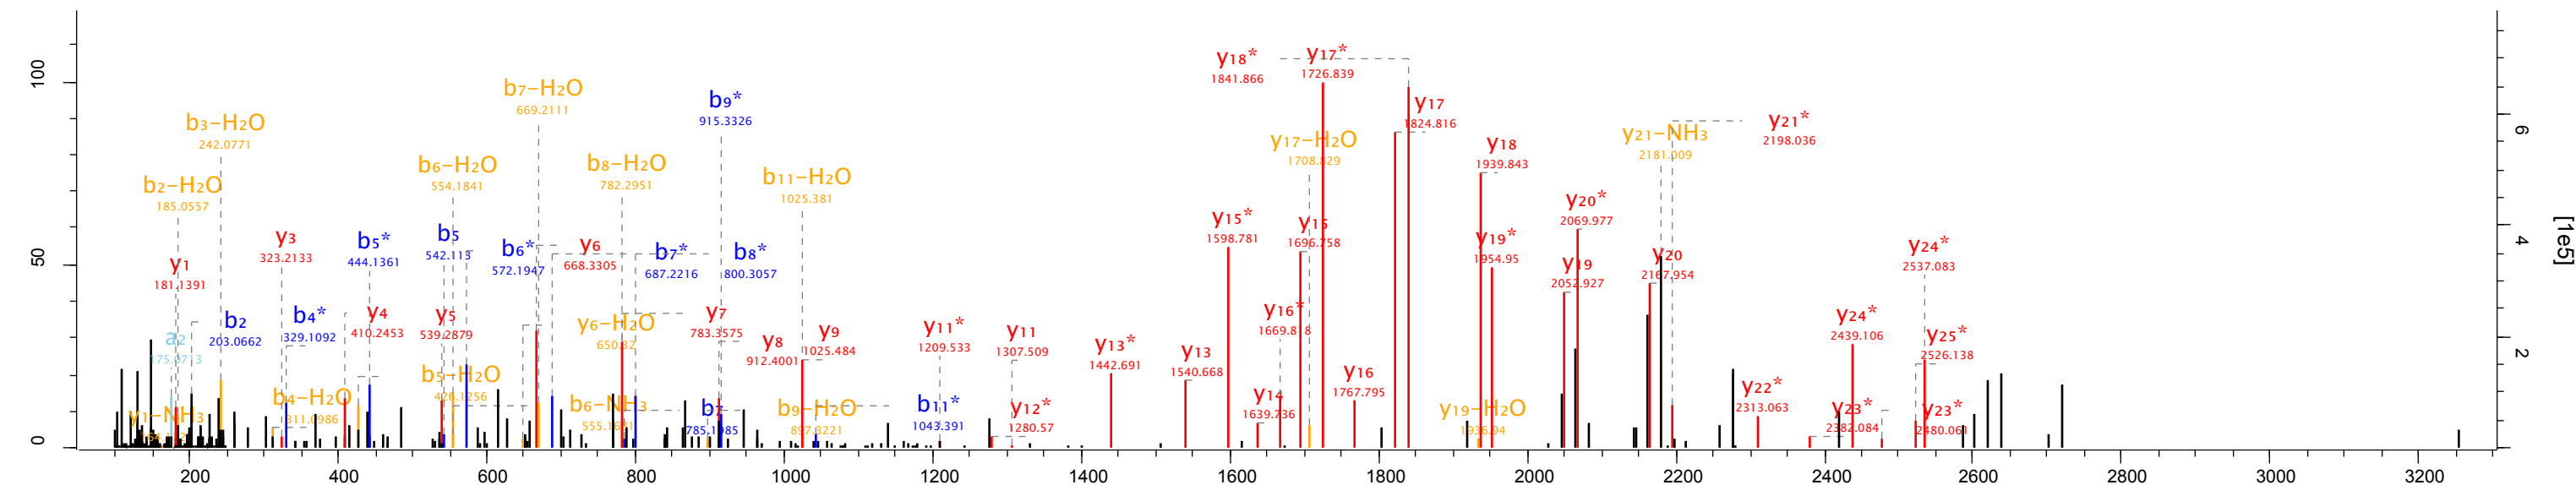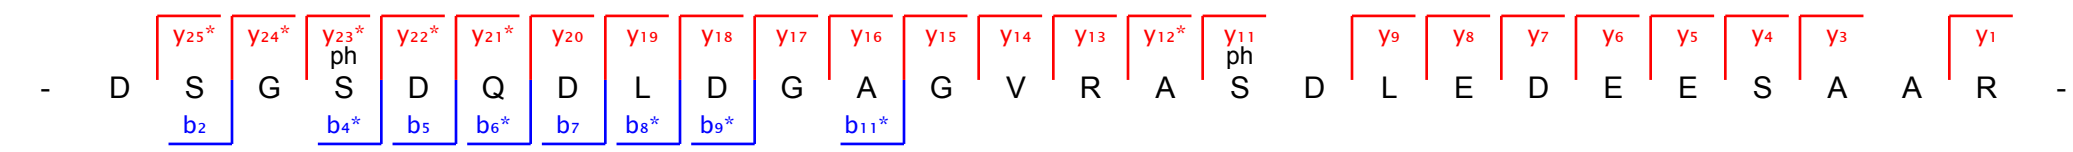

Raw file 20171215\_MaS\_33SR\_LMH\_phospho2\_03 Scan 13340 Method FTMS; HCD Score 55.26 m/z 526.71 Gene names SON

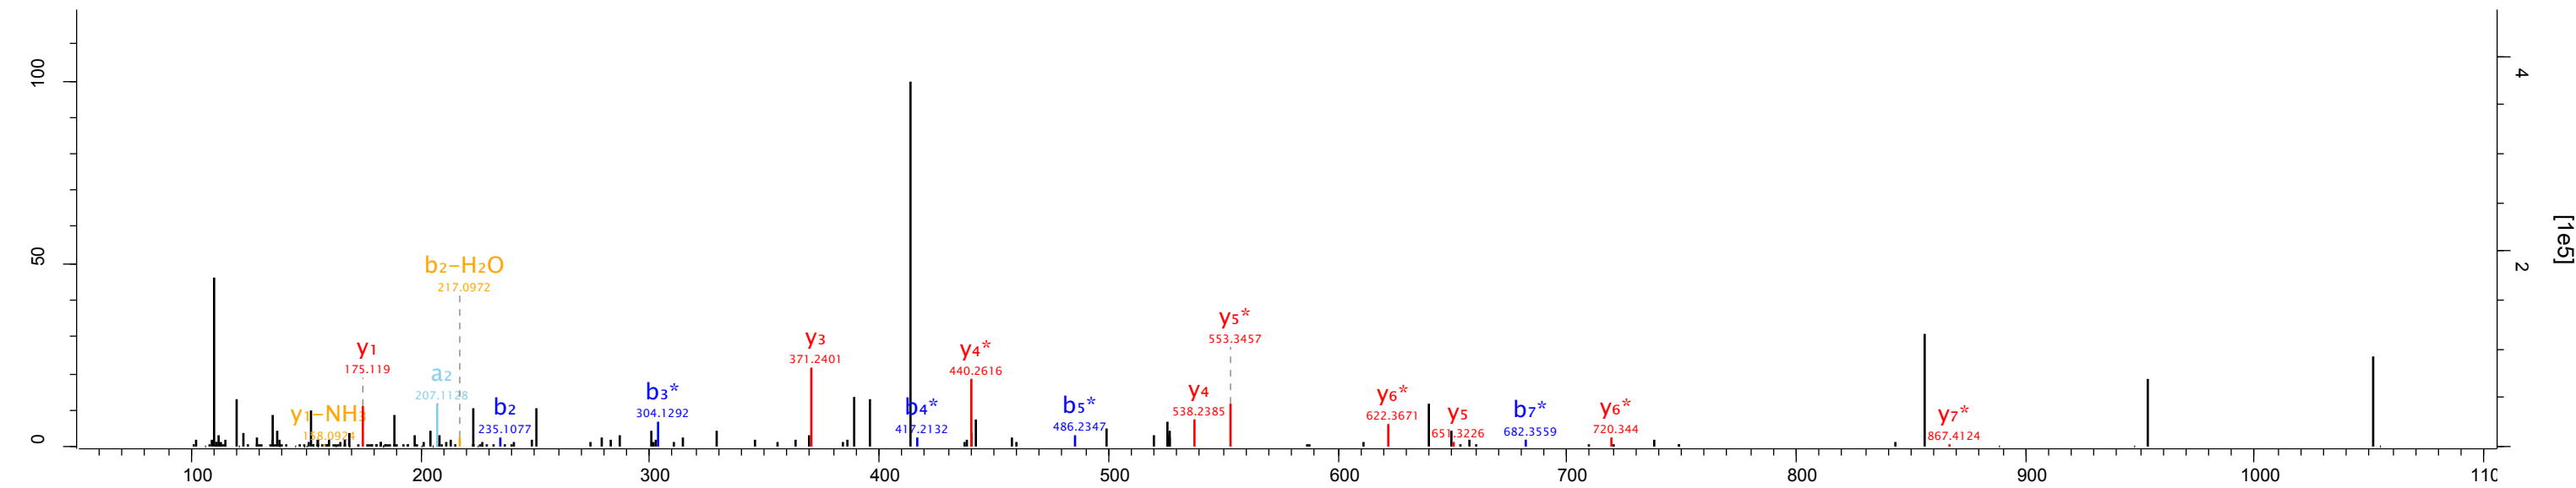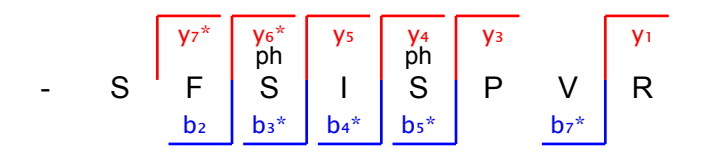

Raw file 20171215\_MaS\_33SR\_LMH\_phospho2\_03 Scan 13420 Method FTMS; HCD Score 209.46 m/z 780.04 Gene names ZC3H11A

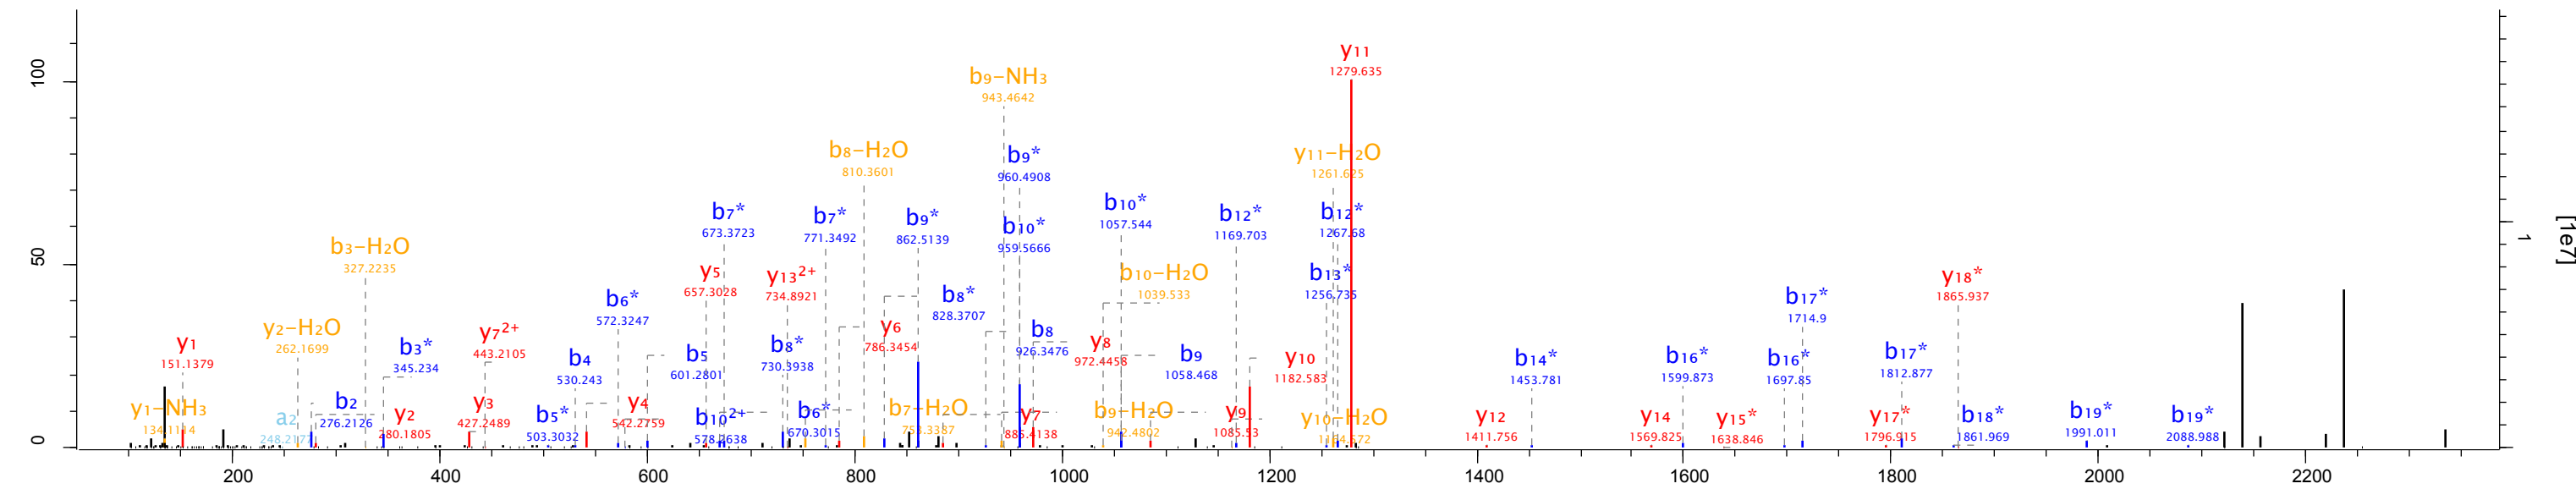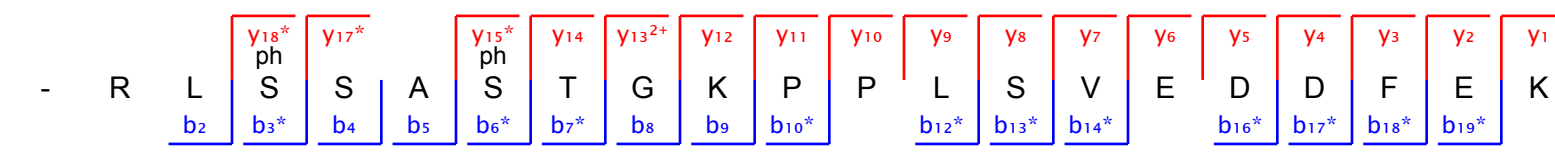

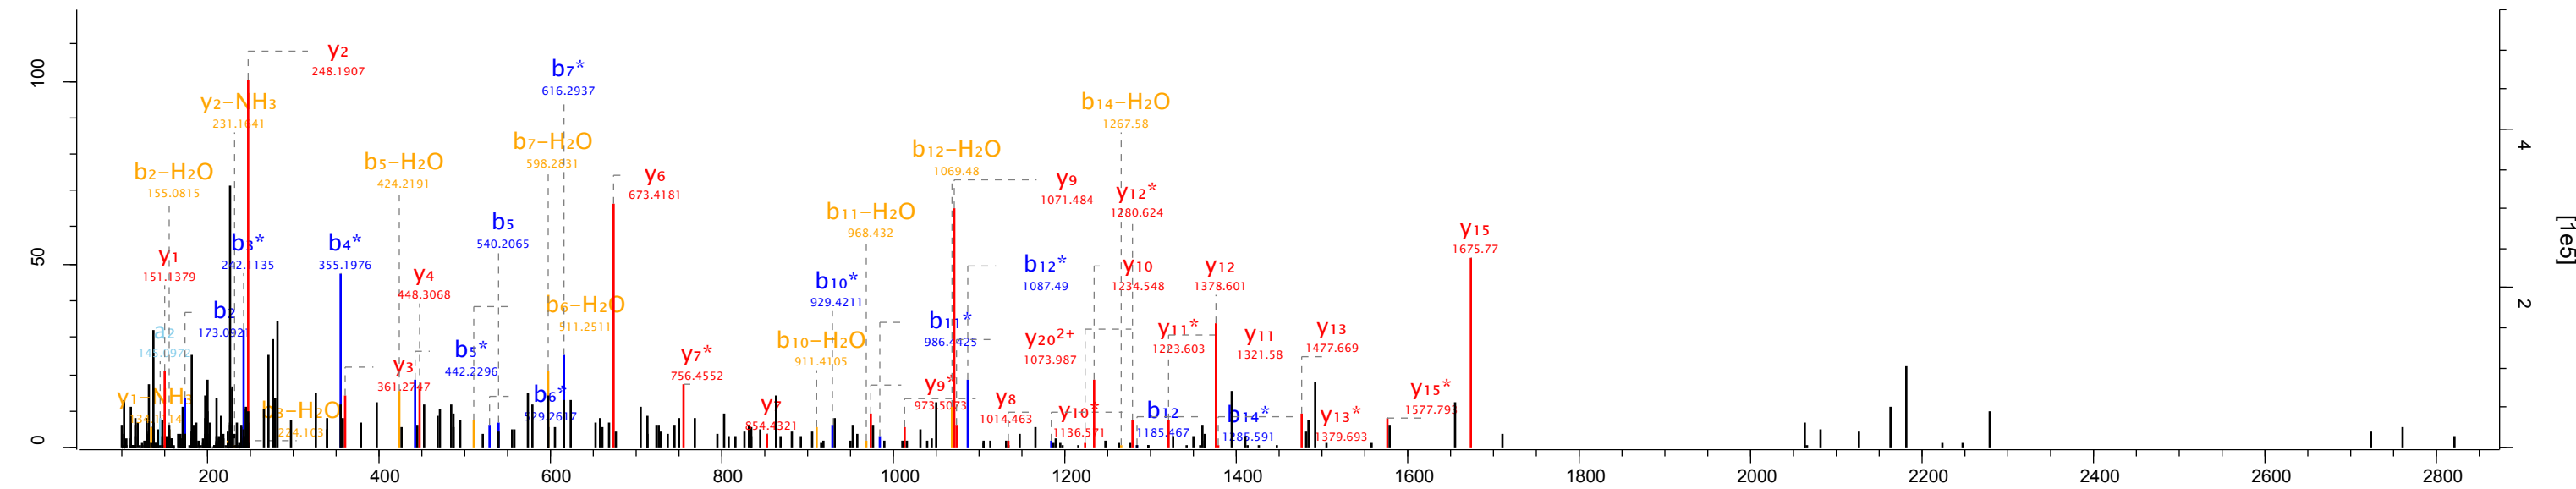

- T A S I S S S P S E G T P T V G S Y G C T P Q S L P K -

ph

b<sub>2</sub> b<sub>3</sub><sup>\*</sup> b<sub>4</sub><sup>\*</sup> b<sub>5</sub> b<sub>6</sub><sup>\*</sup> b<sub>7</sub><sup>\*</sup> y<sub>20</sub><sup>2+</sup> y<sub>15</sub> y<sub>13</sub> y<sub>12</sub> y<sub>11</sub> y<sub>10</sub> y<sub>9</sub> y<sub>8</sub> y<sub>7</sub> y<sub>6</sub> y<sub>4</sub> y<sub>3</sub> y<sub>2</sub> y<sub>1</sub>

ph

Raw file 20171215\_MaS\_33SR\_LMH\_phospho2\_03 Scan 13630 Method FTMS; HCD Score 144.4 m/z 868.88 Gene names DPF2

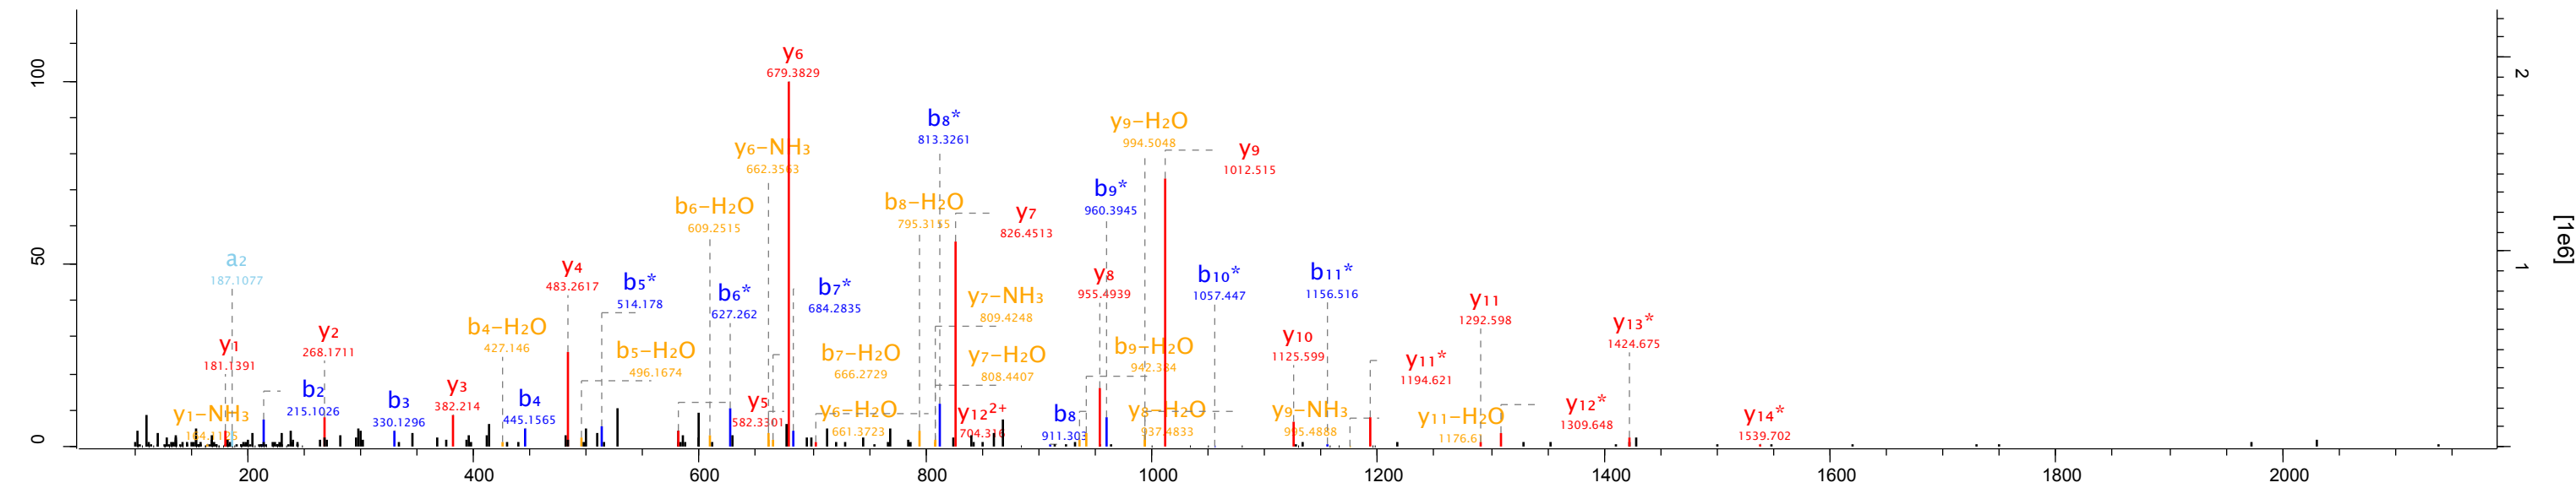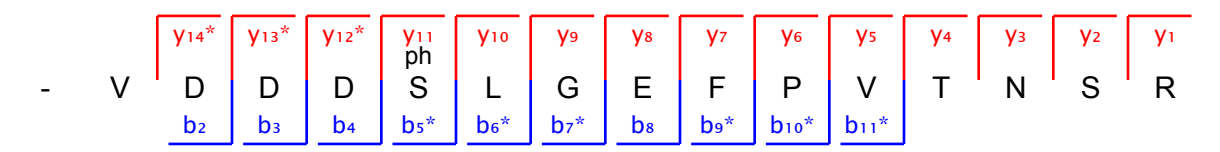

Raw file: 20171215\_MaS\_33SR\_LMH\_phospho2\_03  
 Scan: 13830 Method: FTMS; HCD Score: 204.47 m/z: 824.68 Gene names: SDCCAG3

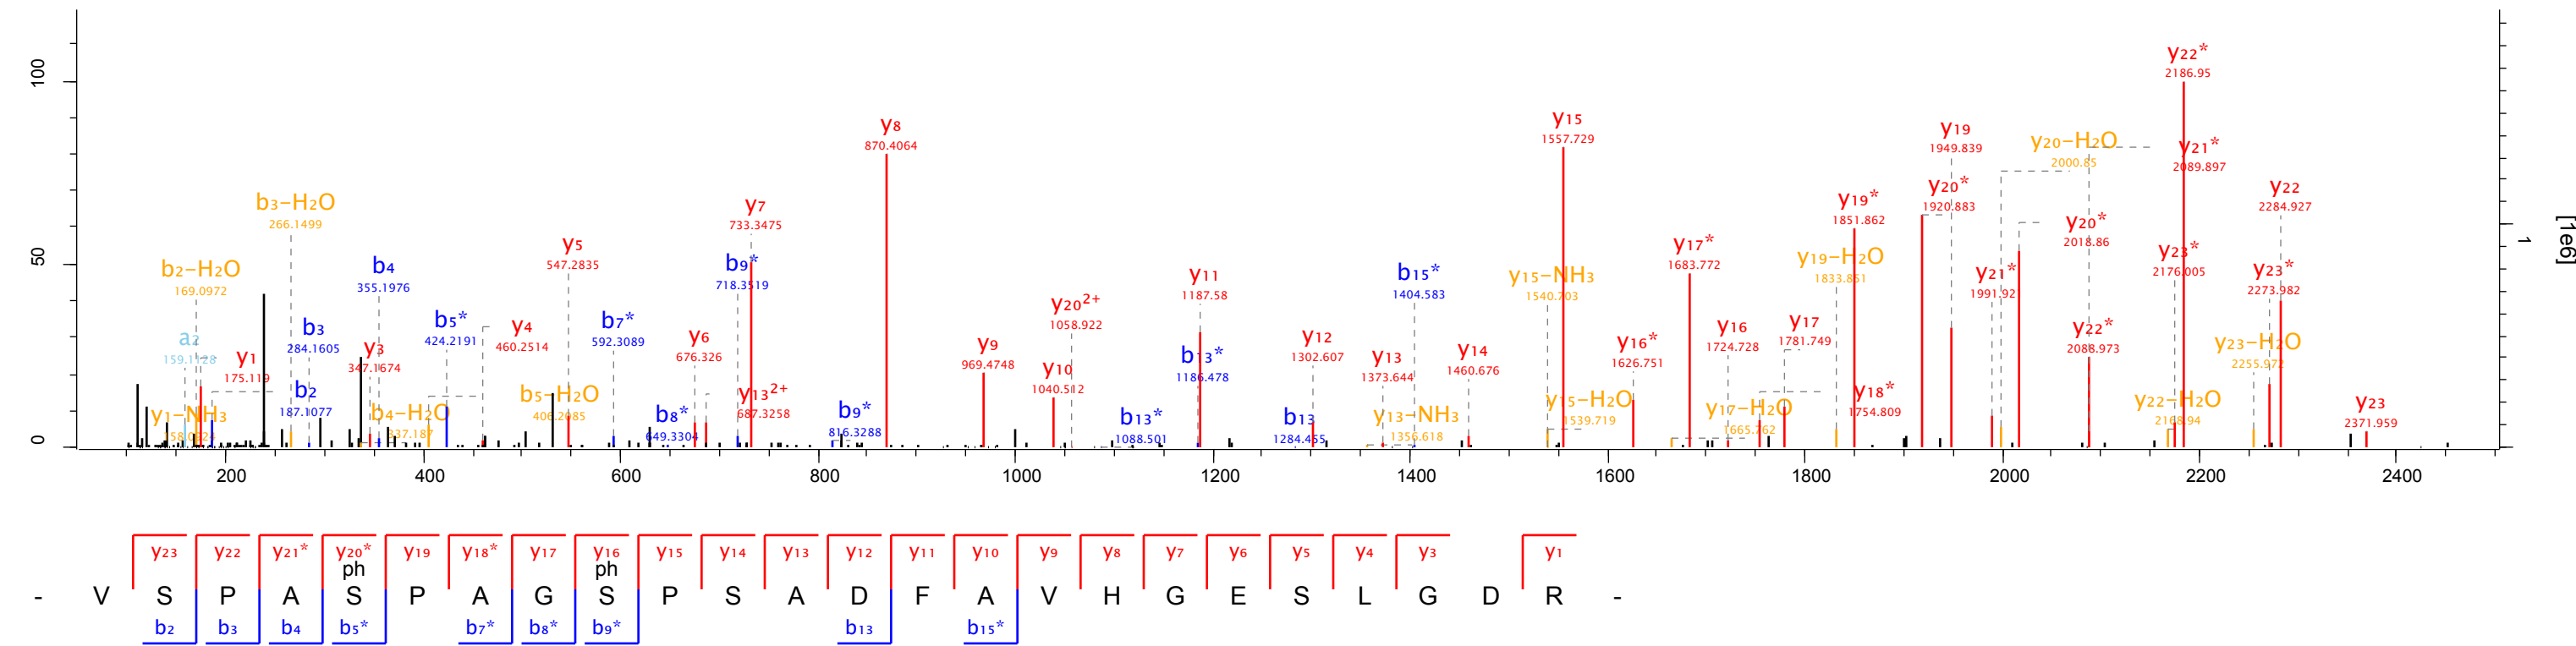



Raw file 20171215\_MaS\_33SR\_LMH\_phospho2\_03 Scan 13920 Method FTMS; HCD Score 175.34 m/z 781.66 Gene names MAPK3

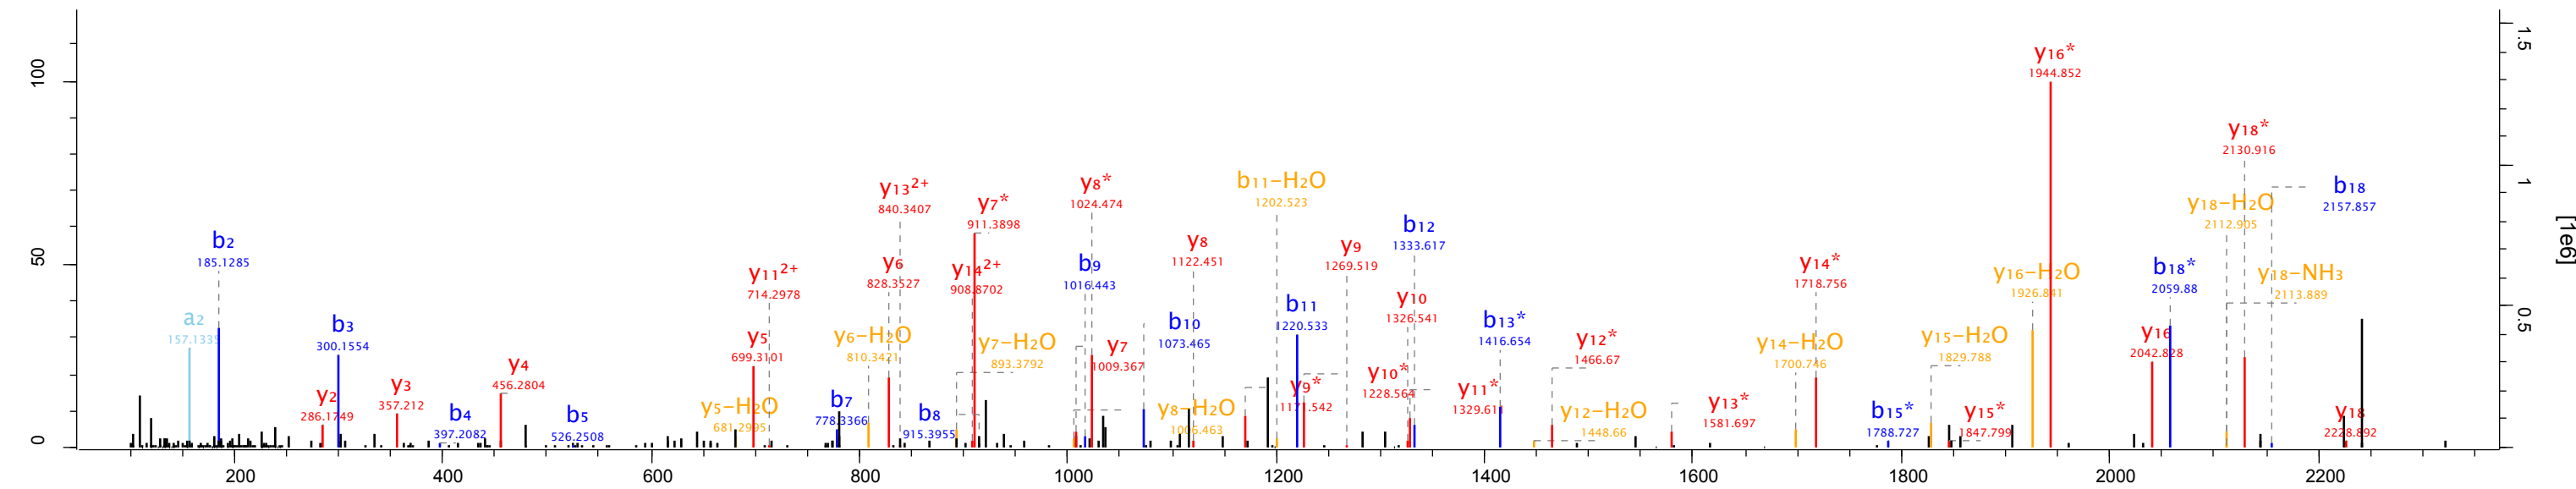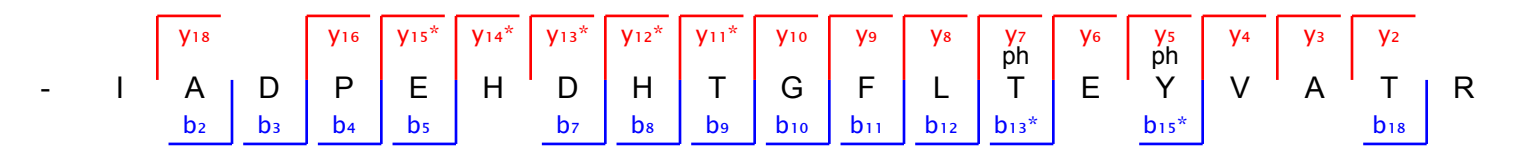

Raw file 20171215\_MaS\_33SR\_LMH\_phospho2\_03 Scan 14120 Method FTMS; HCD Score 207.17 m/z 835.36 Gene names MISP

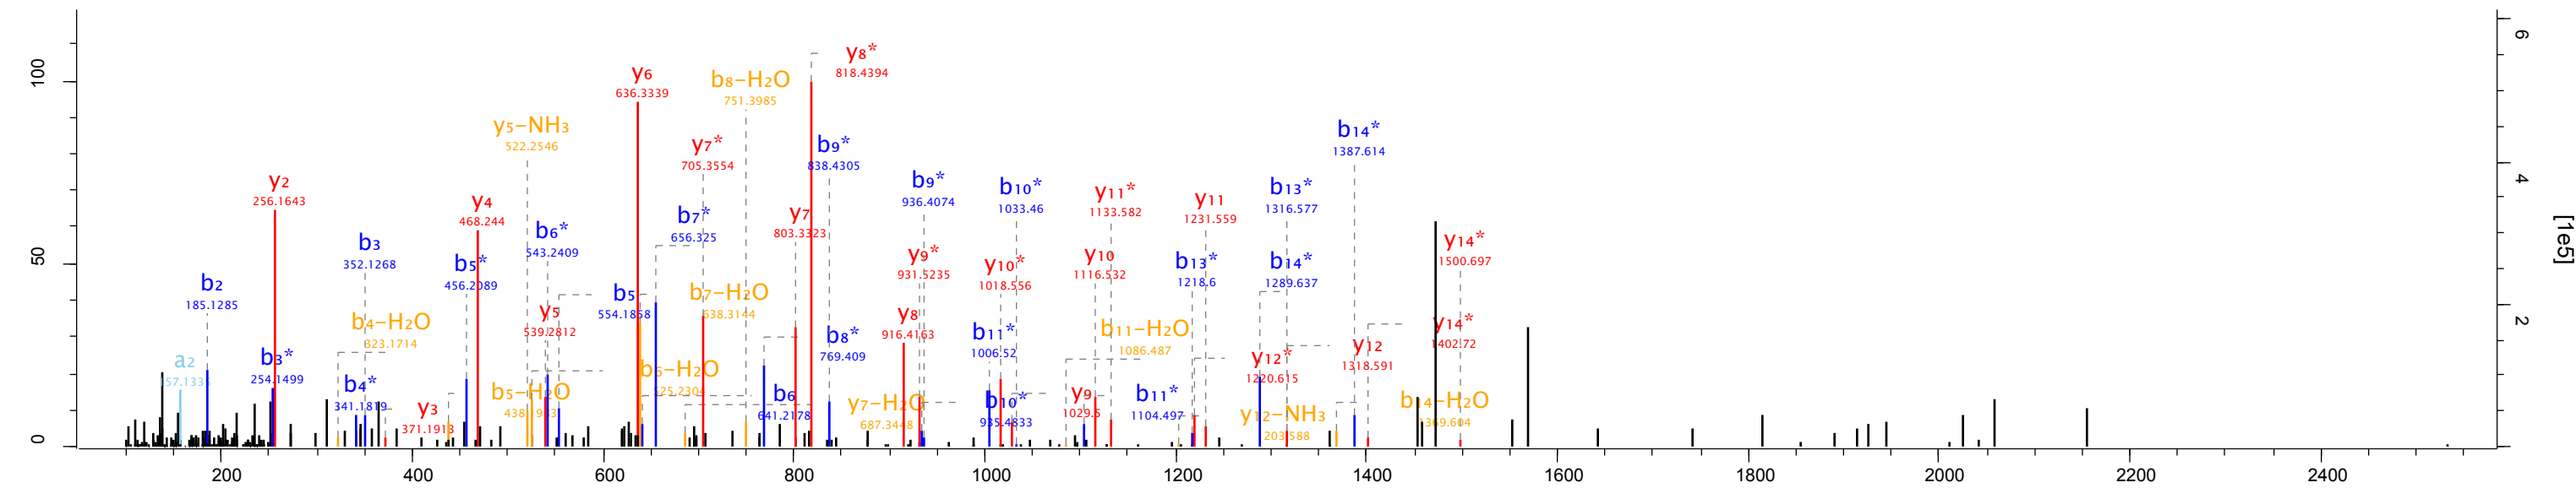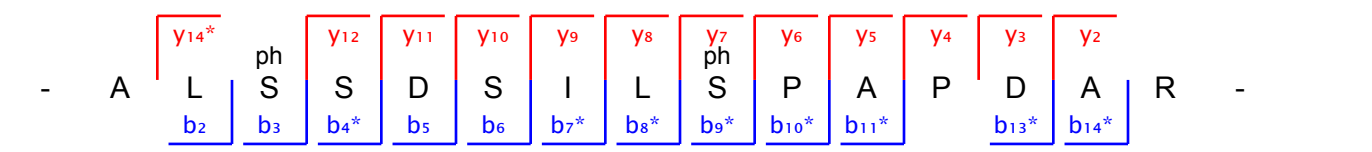

Raw file 20171215\_MaS\_33SR\_LMH\_phospho2\_03 Scan 14130 Method FTMS; HCD Score 226.28 m/z 1412.07 Gene names DIDO1

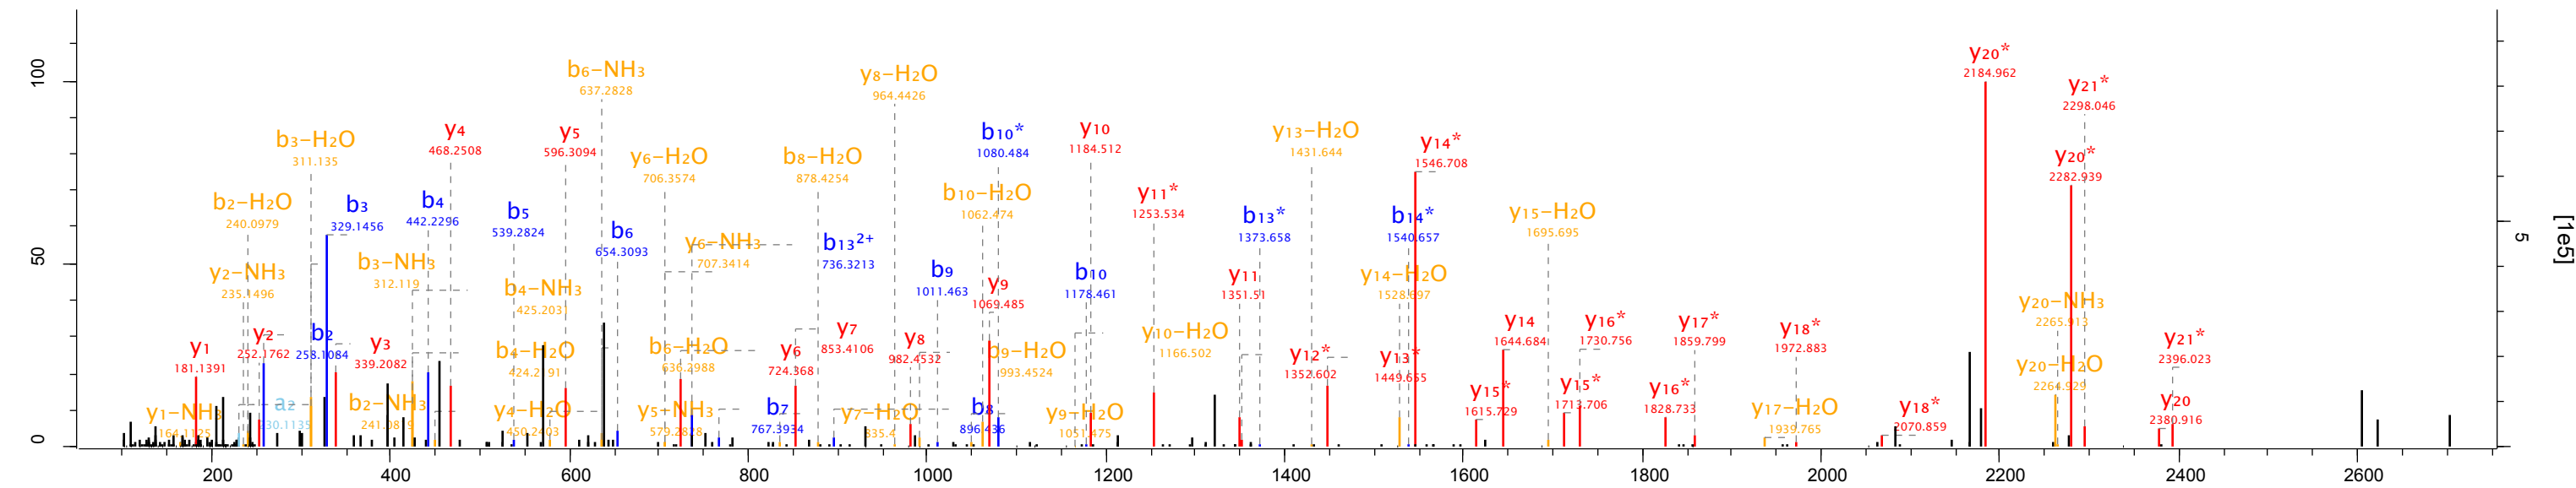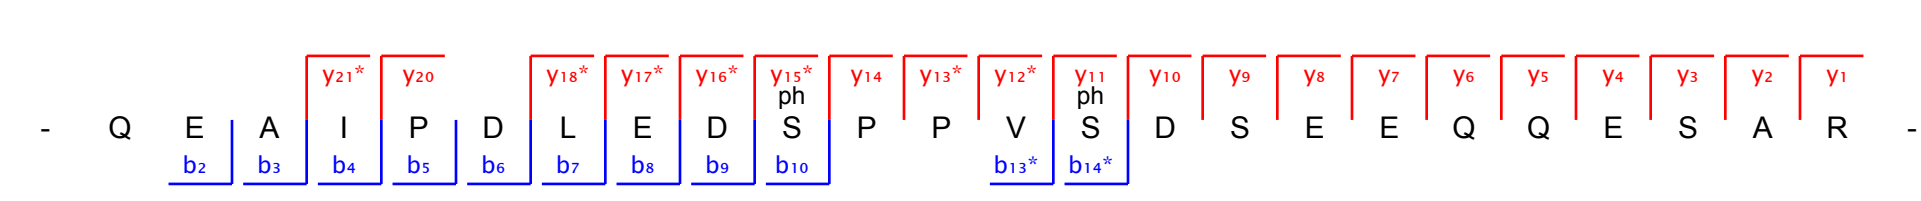

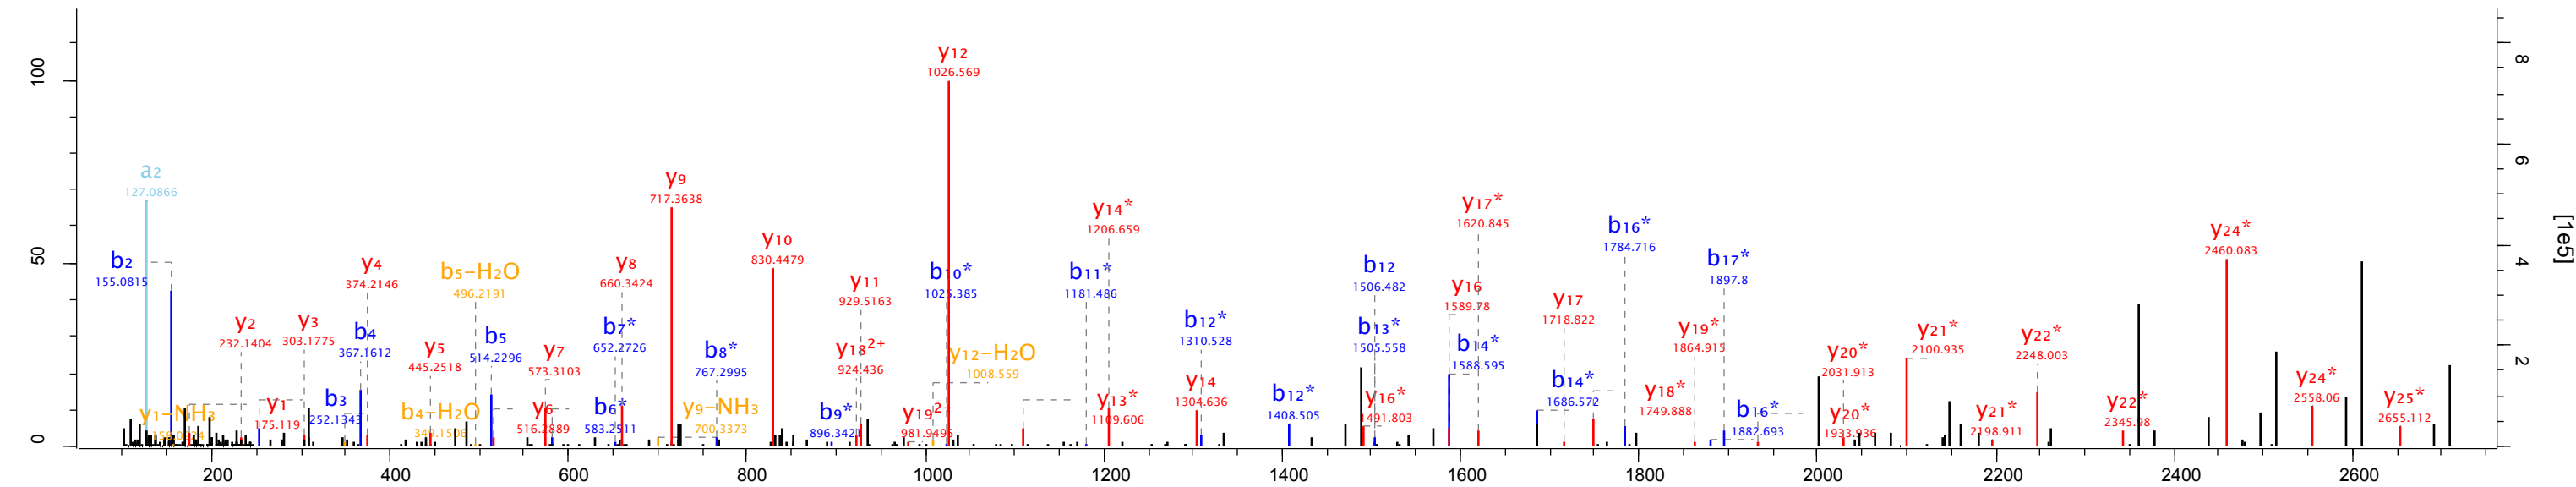

- G P P D F S S D E E R E P T P V L G S G A A A A G R -  
 b<sub>2</sub> b<sub>3</sub> b<sub>4</sub> b<sub>5</sub> b<sub>6</sub><sup>\*</sup> b<sub>7</sub><sup>\*</sup> b<sub>8</sub><sup>\*</sup> b<sub>9</sub><sup>\*</sup> b<sub>10</sub><sup>\*</sup> b<sub>11</sub><sup>\*</sup> b<sub>12</sub> b<sub>13</sub><sup>\*</sup> b<sub>14</sub><sup>\*</sup> b<sub>16</sub><sup>\*</sup> b<sub>17</sub><sup>\*</sup>  
 y<sub>25</sub><sup>\*</sup> y<sub>24</sub><sup>\*</sup> y<sub>22</sub><sup>\*</sup> y<sub>21</sub><sup>\*</sup> y<sub>20</sub><sup>\*</sup> y<sub>19</sub><sup>\*</sup> y<sub>18</sub><sup>\*</sup> y<sub>17</sub> y<sub>16</sub> y<sub>14</sub> y<sub>13</sub><sup>\*</sup> y<sub>12</sub> y<sub>11</sub> y<sub>10</sub> y<sub>9</sub> y<sub>8</sub> y<sub>7</sub> y<sub>6</sub> y<sub>5</sub> y<sub>4</sub> y<sub>3</sub> y<sub>2</sub> y<sub>1</sub>

Raw file 20171215\_MaS\_33SR\_LMH\_phospho2\_03 Scan 14810 Method FTMS; HCD Score 146.02 m/z 1040.75 Gene names RPRD2

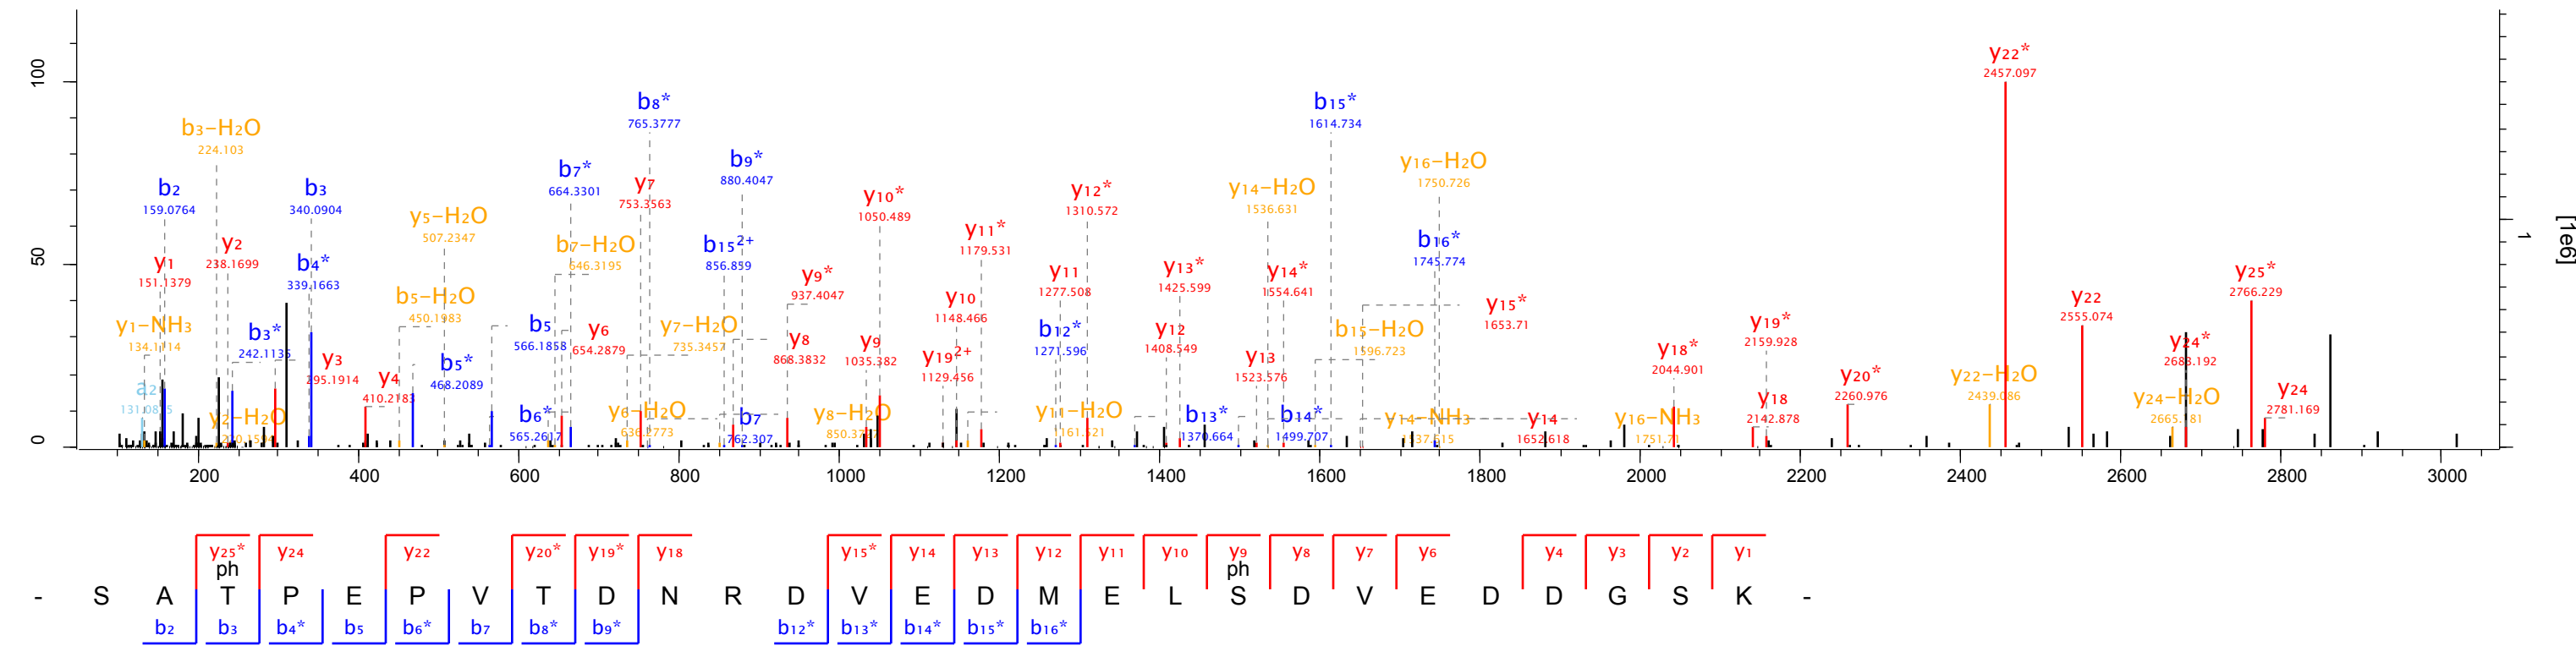

Raw file: 20171215\_MaS\_33SR\_LMH\_phospho2\_03  
 Scan: 14830 Method: FTMS; HCD Score: 125.23 m/z: 891.33 Gene names: RIOK2

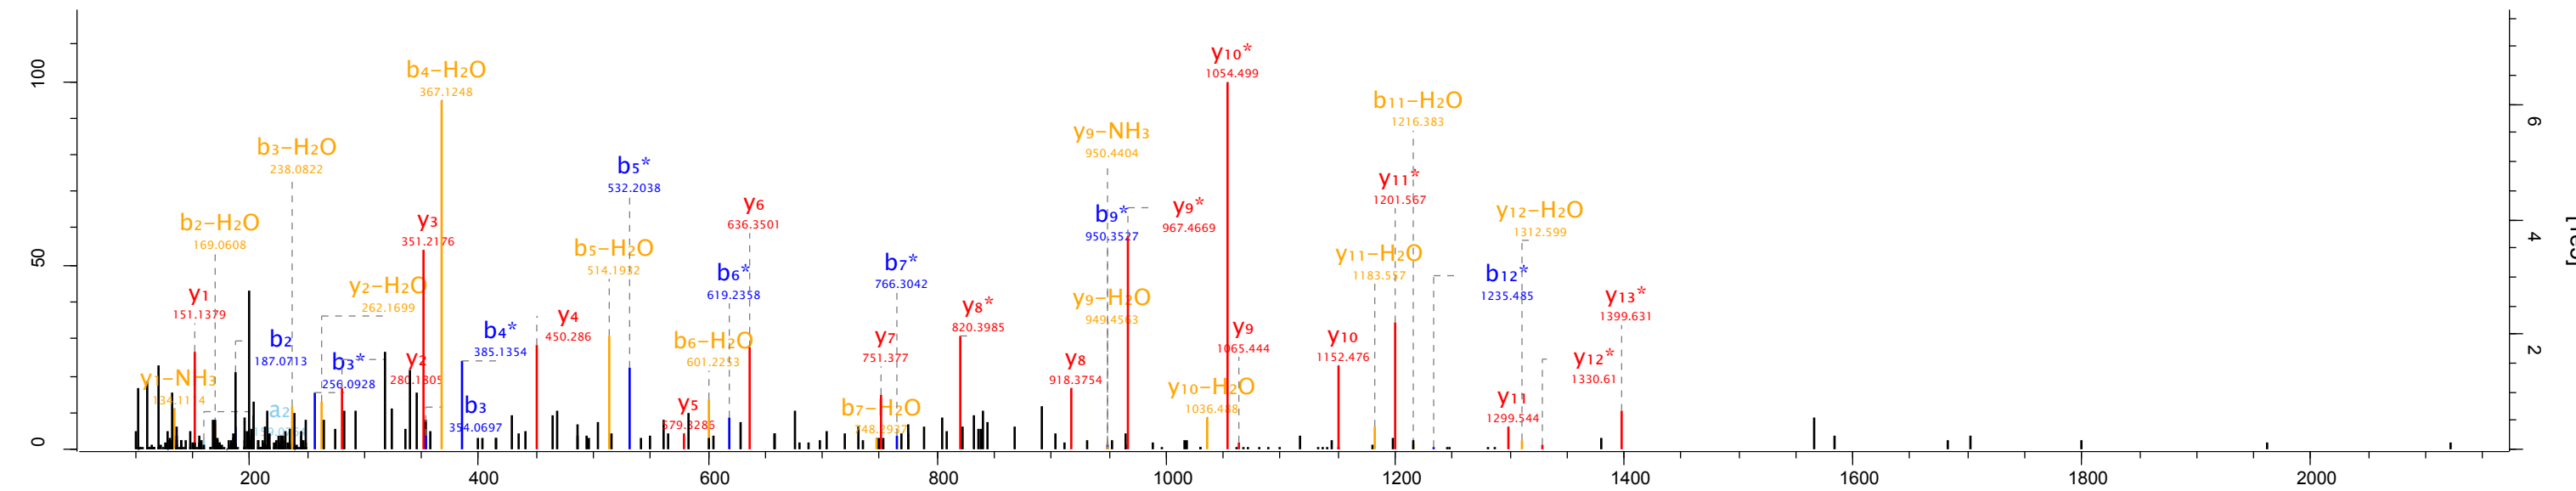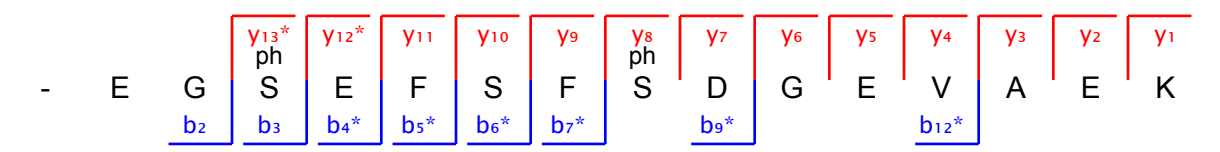

Raw file 20171215\_MaS\_33SR\_LMH\_phospho2\_03 Scan 15050 Method FTMS; HCD Score 86.54 m/z 743.03 Gene names BCL9L

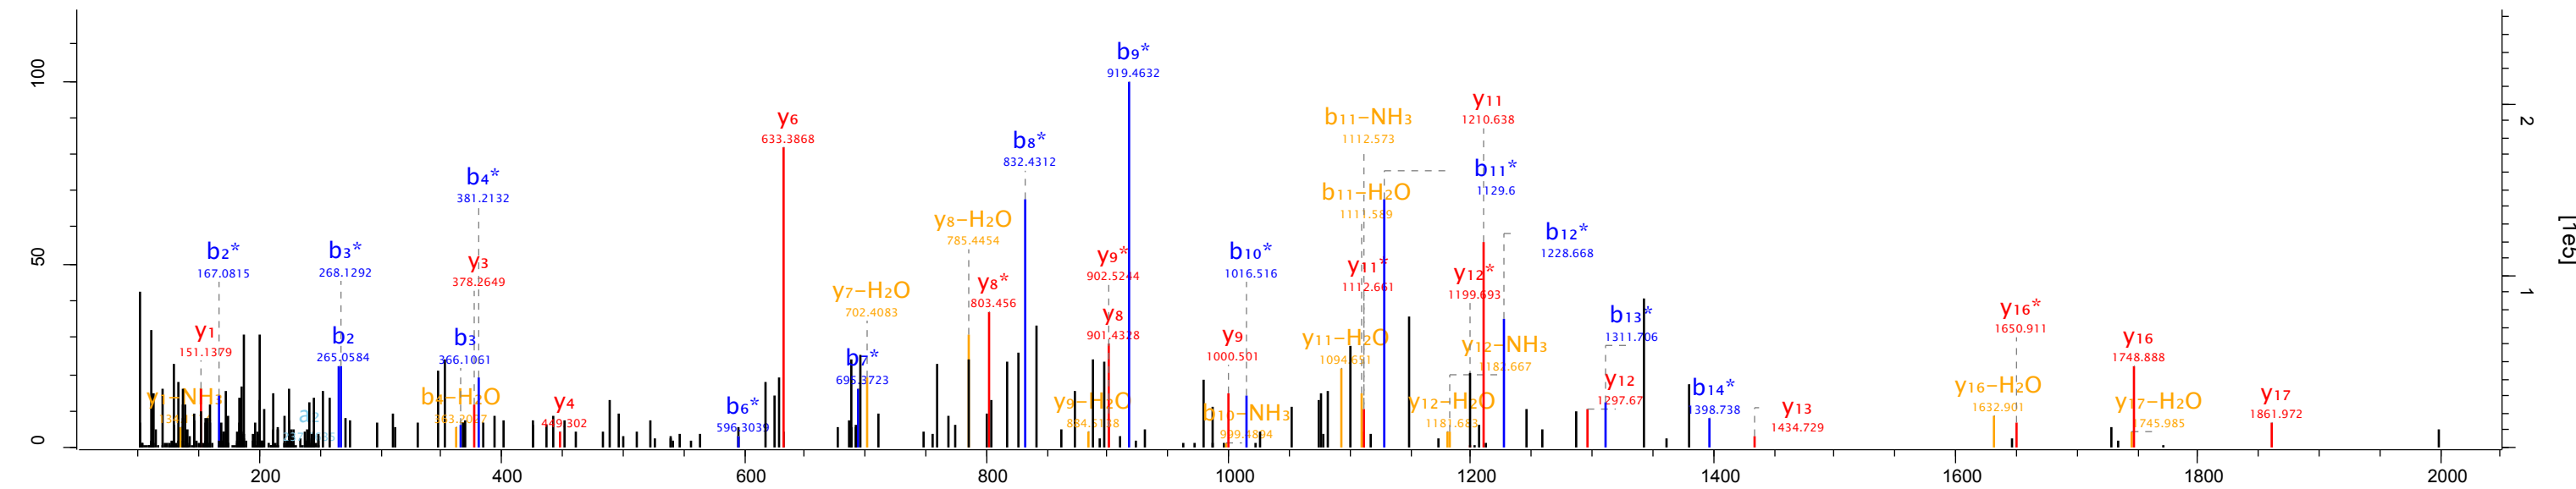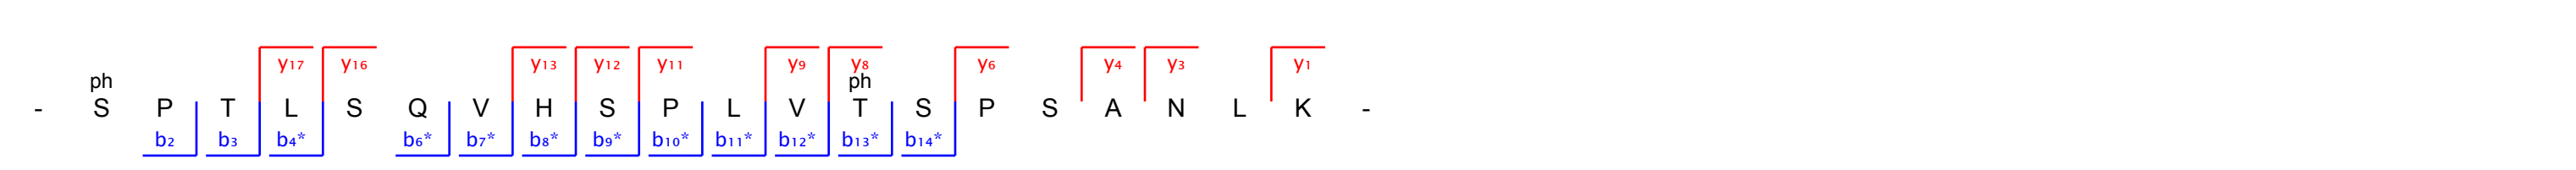

Raw file: 20171215\_MaS\_33SR\_LMH\_phospho2\_03  
 Scan: 15270 Method: FTMS; HCD Score: 156.18 m/z: 1096.8 Gene names: MAP1B

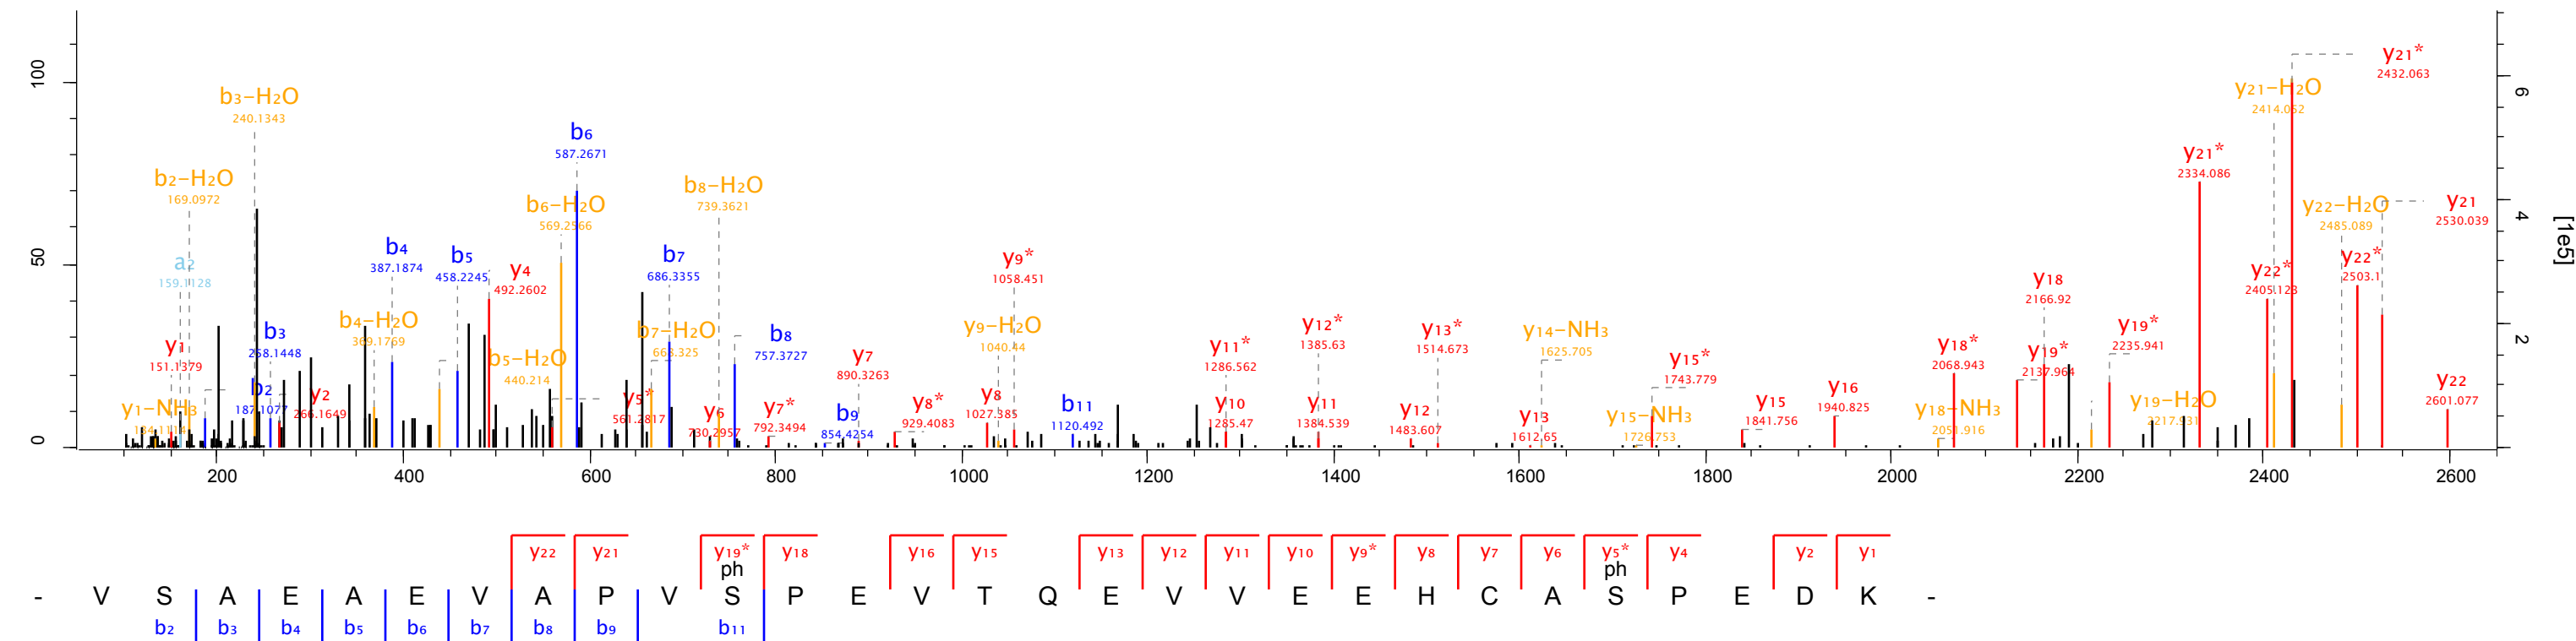



Raw file 20171215\_MaS\_33SR\_LMH\_phospho2\_03 Scan 15290 Method FTMS; HCD Score 41.91 m/z 1143.45 Gene names PPFIBP1

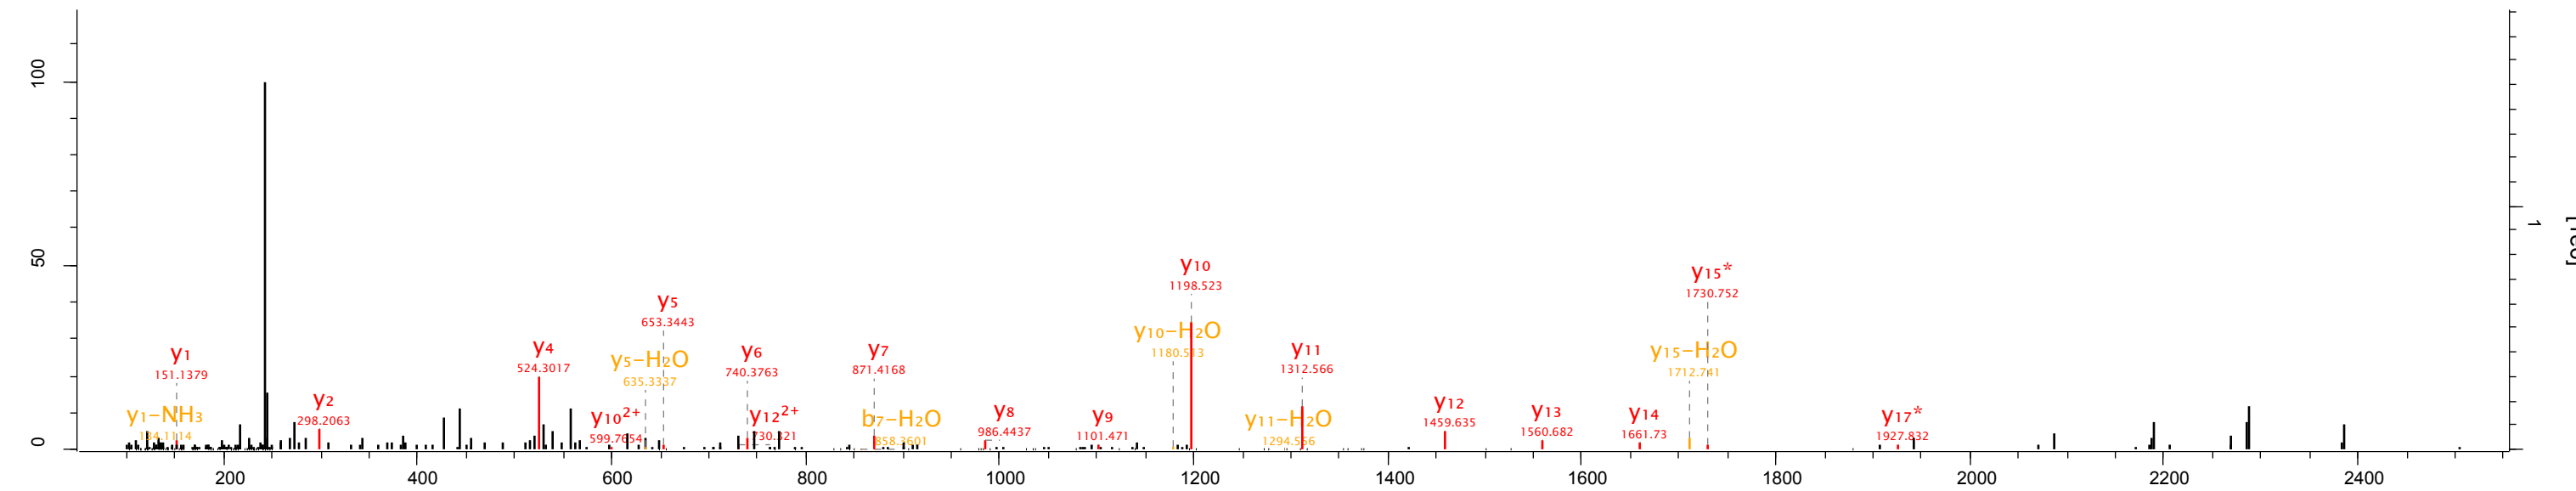

- R y17\*  
ph S Q y15\*  
ph T y14 y13 y12 y11 y10 y9 y8 y7 y6 y5 y4 E y2 y1 -

Raw file 20171215\_MaS\_33SR\_LMH\_phospho2\_03 Scan 15610 Method FTMS; HCD Score 56.88 m/z 890.38 Gene names ZBTB21

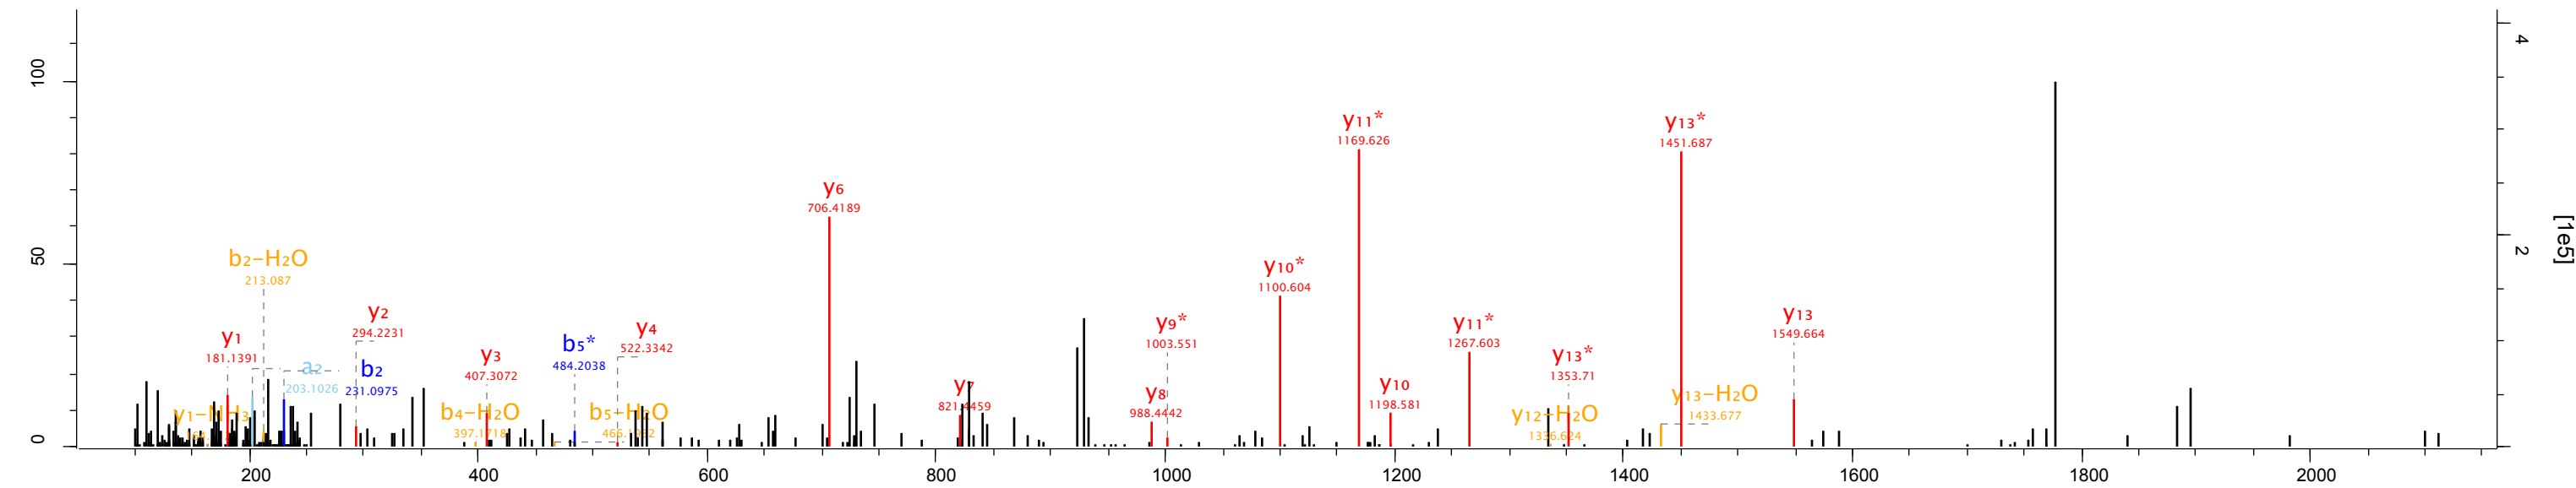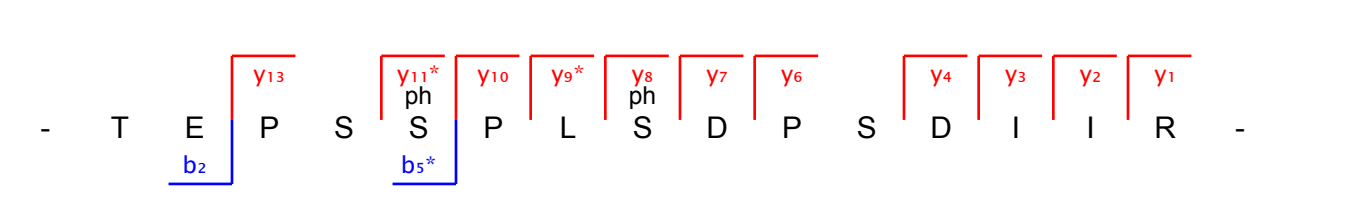

Raw file 20171215\_MaS\_33SR\_LMH\_phospho2\_03 Scan 15640 Method FTMS; HCD Score 56.66 m/z 1022.11 Gene names TPD52L2

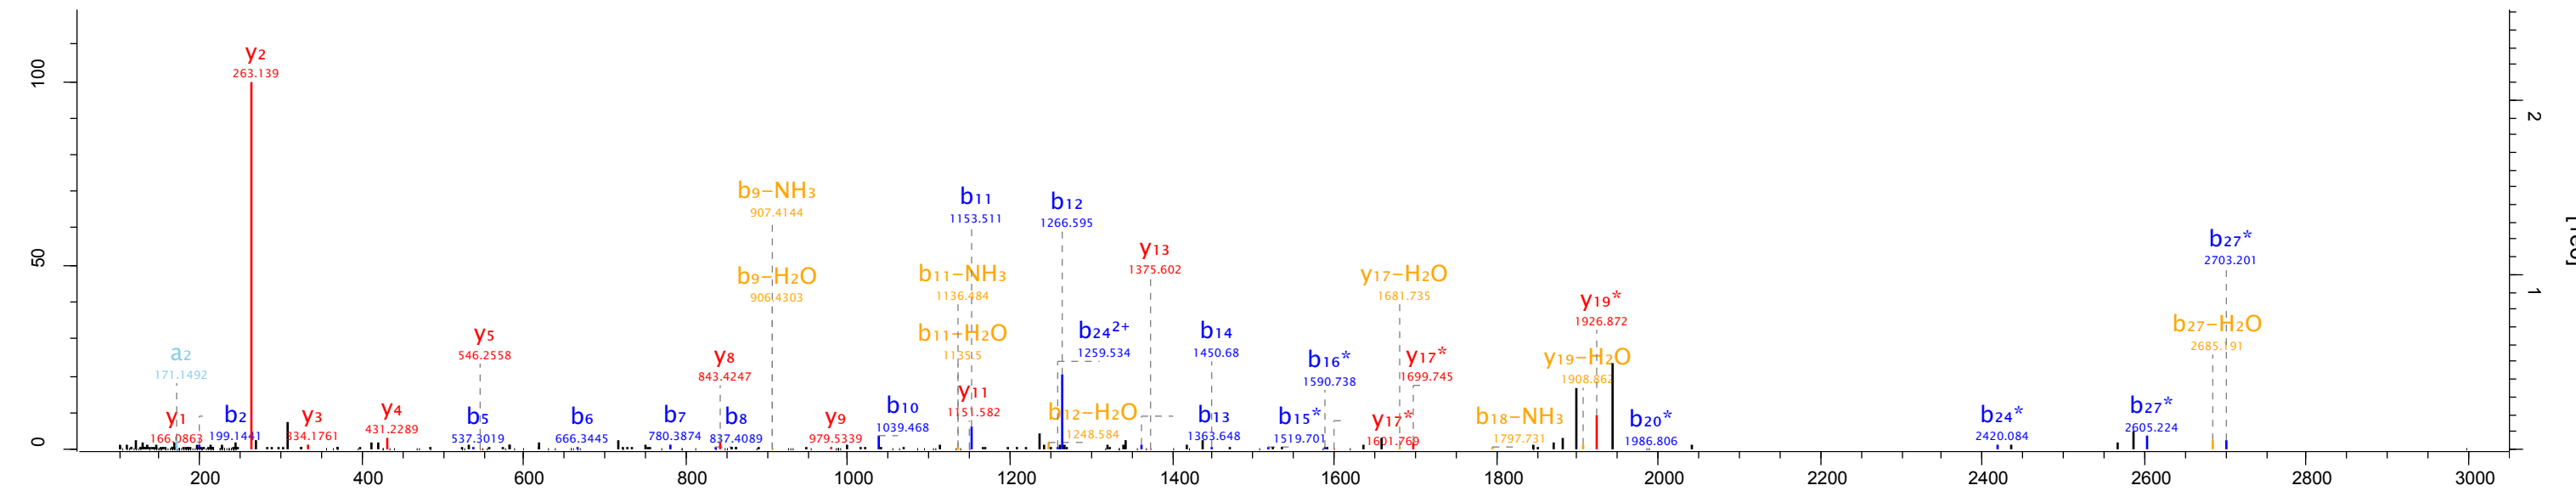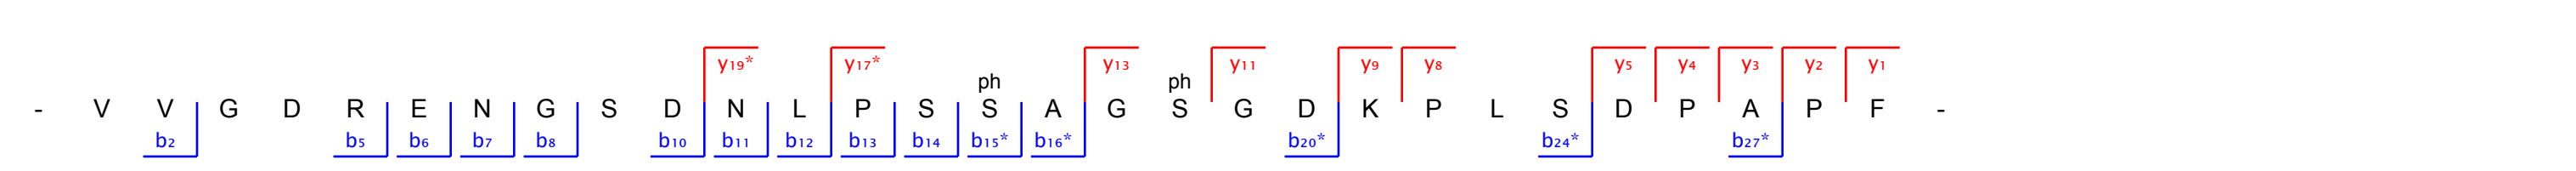

Raw file: 20171215\_MaS\_33SR\_LMH\_phospho2\_03  
 Scan: 15990 Method: FTMS; HCD Score: 163.56 m/z: 708.86 Gene names: CEP170

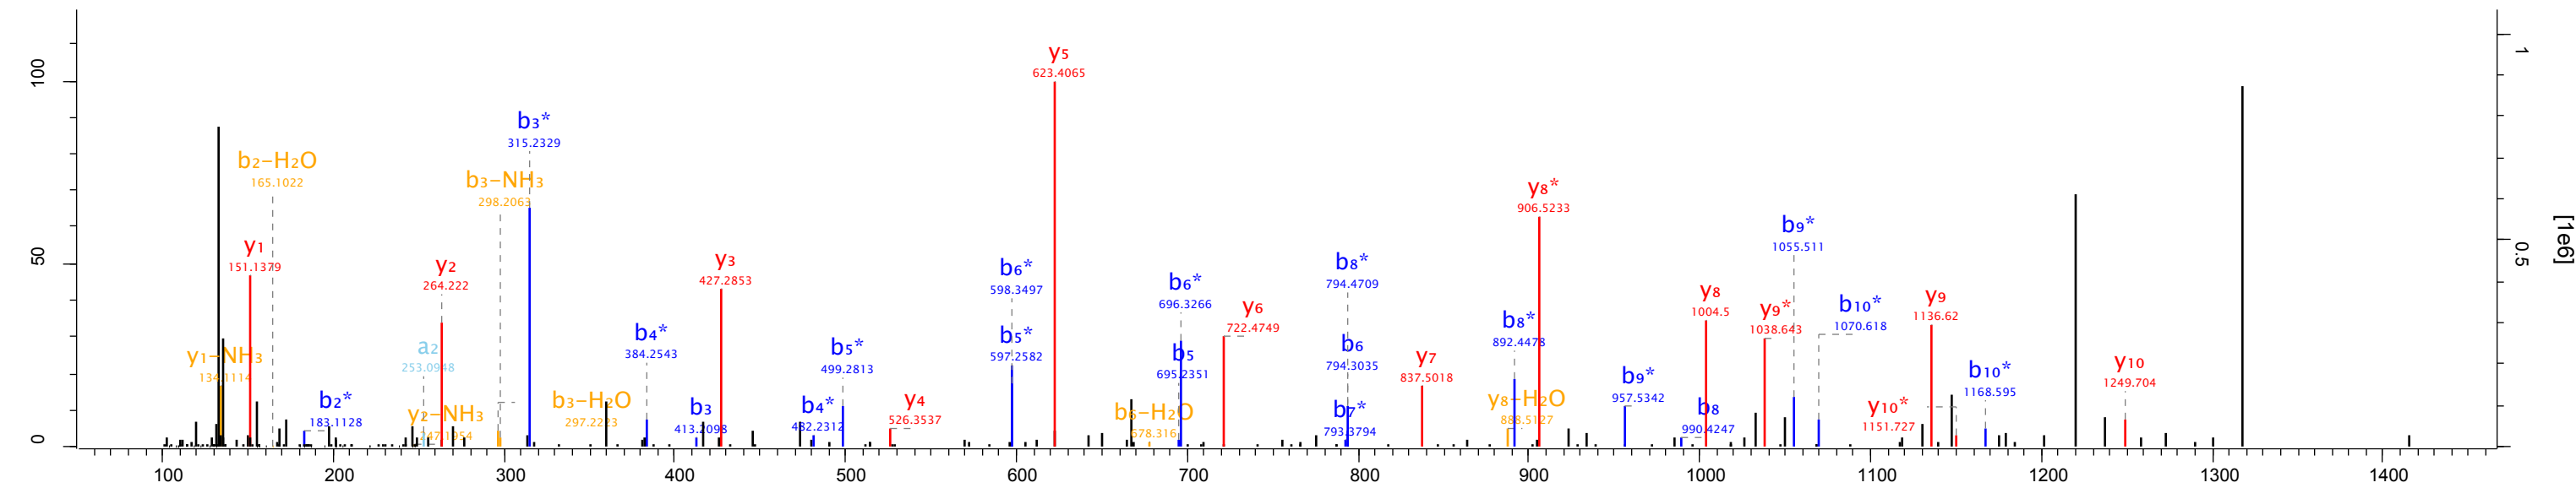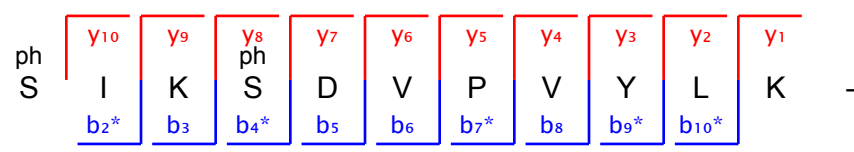

Raw file 20171215\_MaS\_33SR\_LMH\_phospho2\_03 Scan 16110 Method FTMS; HCD Score 182.13 m/z 916.4 Gene names MICALL1

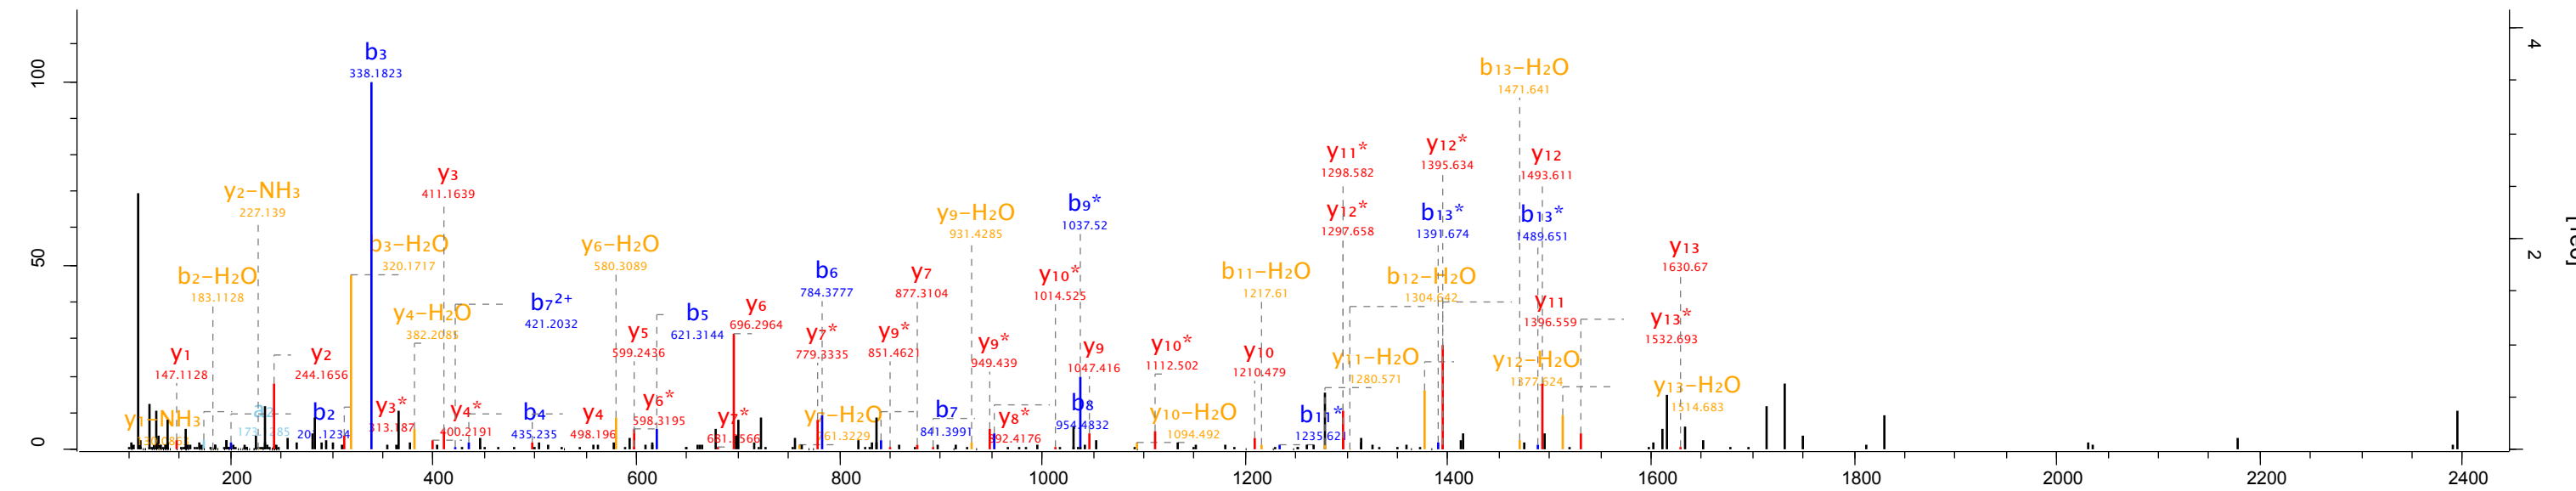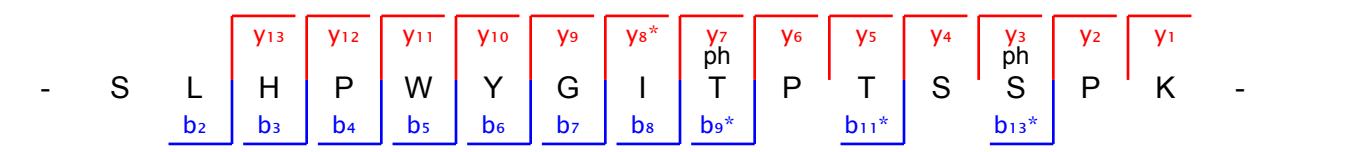

Raw file 20171215\_MaS\_33SR\_LMH\_phospho2\_03 Scan 16580 Method FTMS; HCD Score 78.5 m/z 804.75 Gene names RANBP1

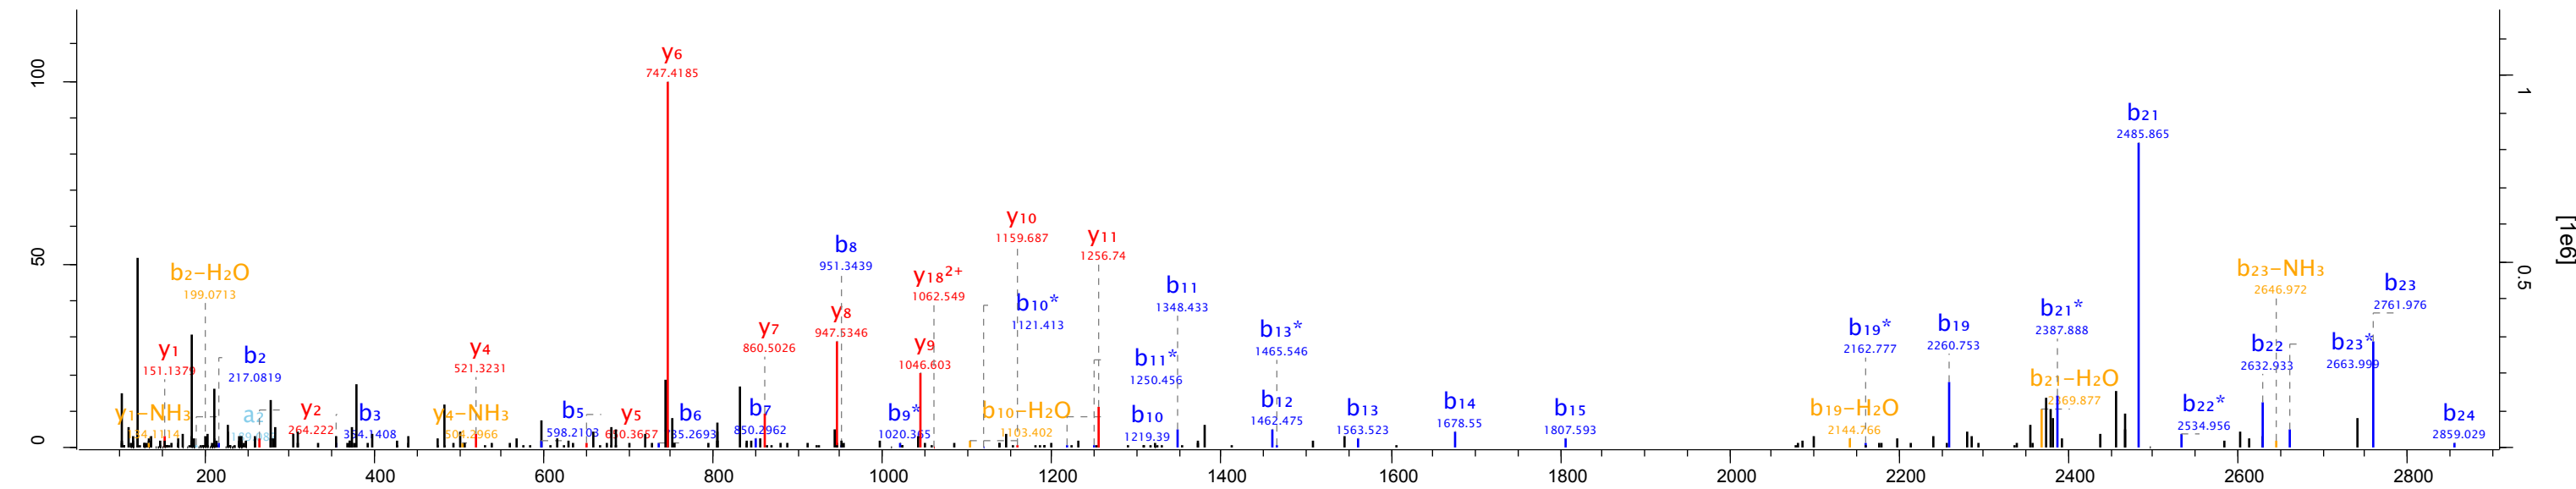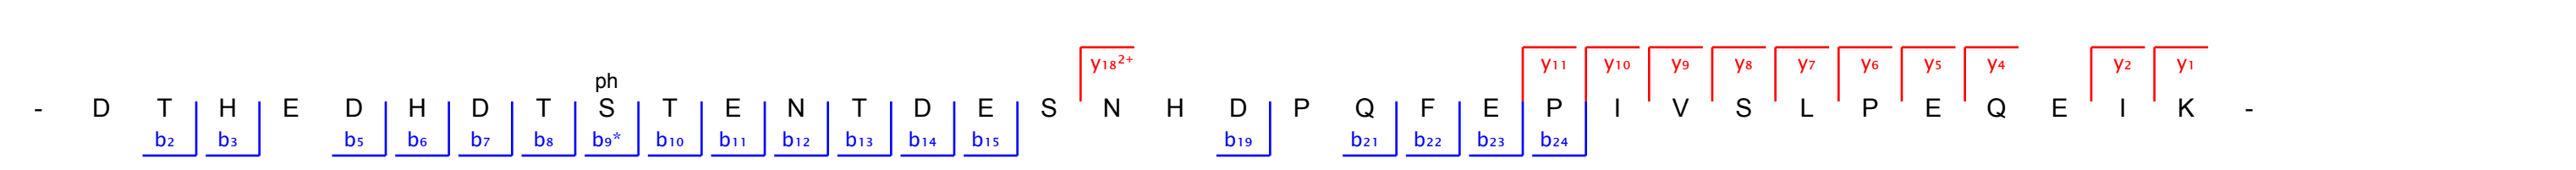

Raw file 20171215\_MaS\_33SR\_LMH\_phospho2\_03 Scan 16730 Method FTMS; HCD Score 172.32 m/z 818.35 Gene names CTR9

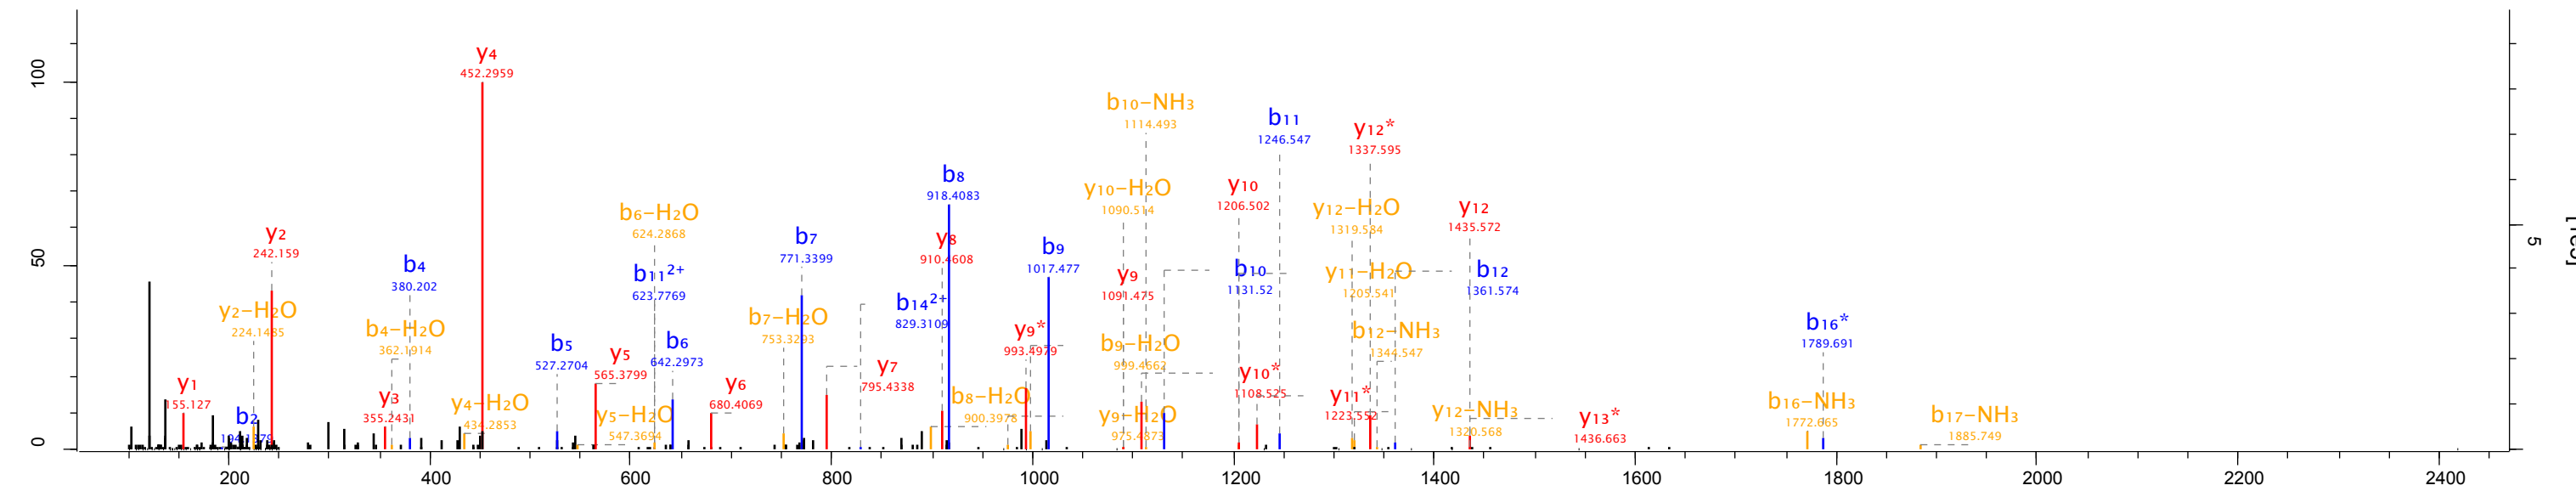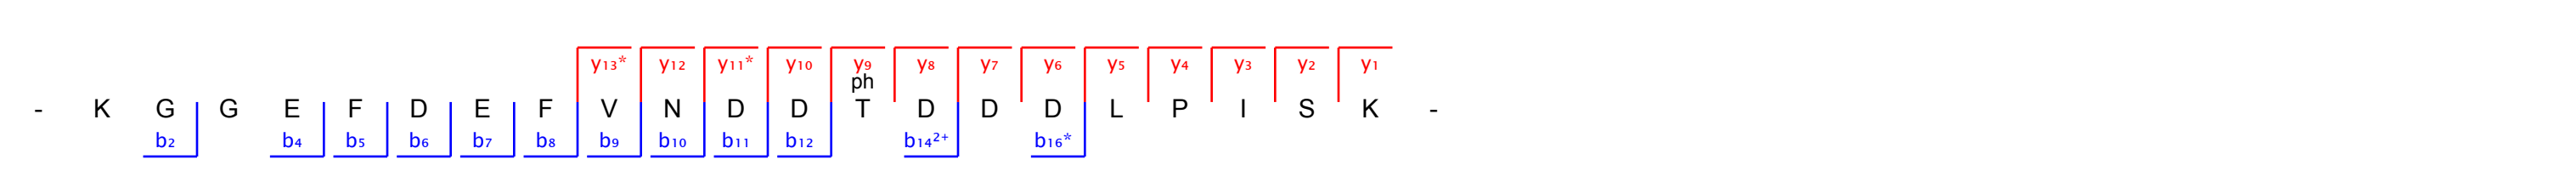

Raw file  
20171215\_MaS\_33SR\_LMH\_phospho2\_03

Scan 16760 Method FTMS; HCD Score 114.68 m/z 862.73 Gene names IGF2R

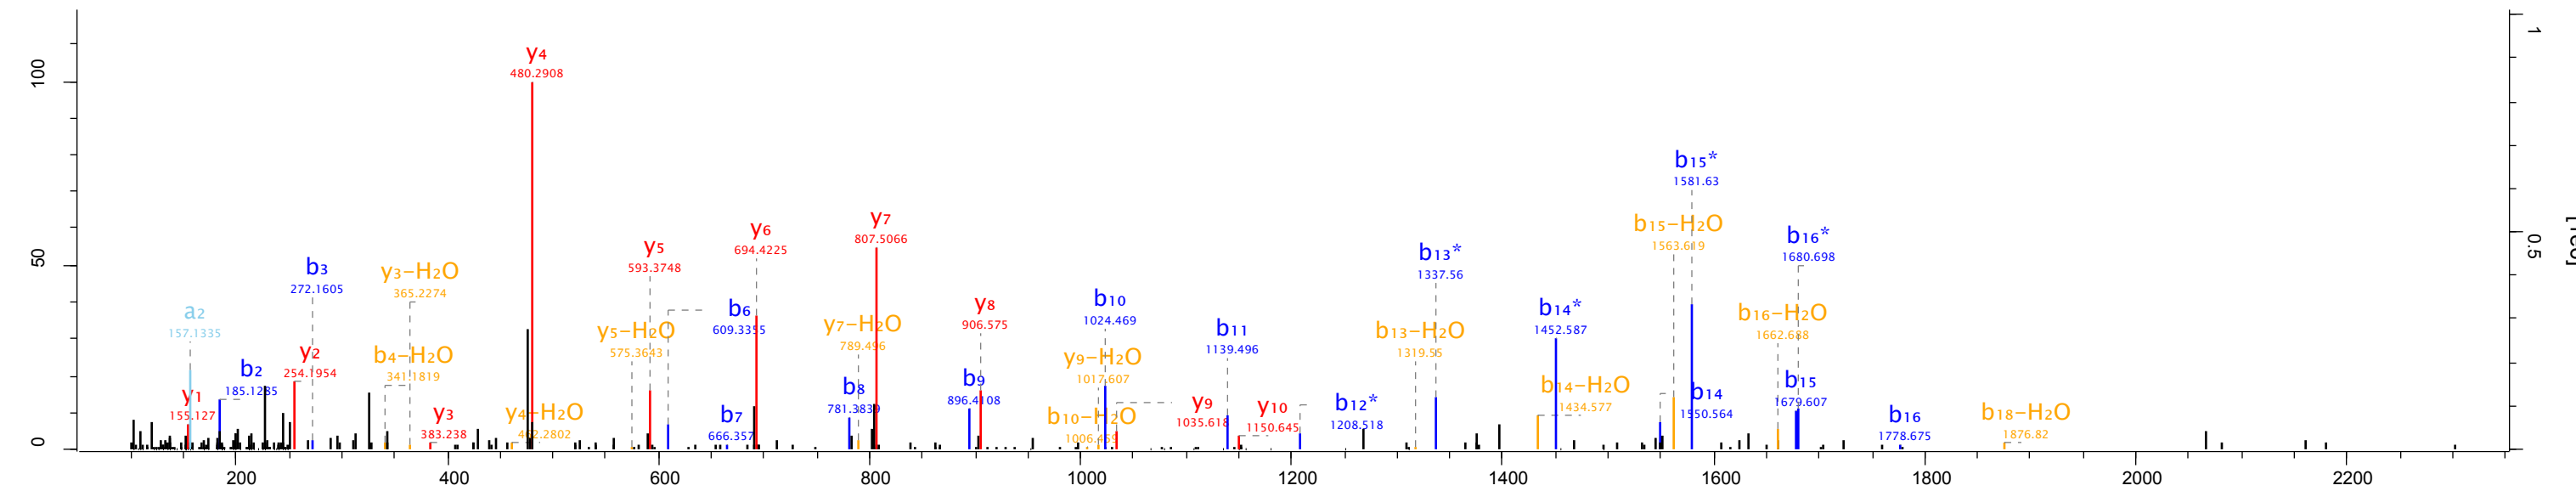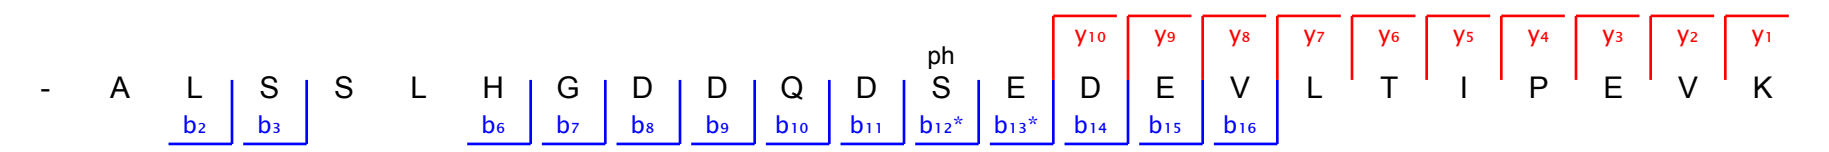



Raw file  
20171215\_MaS\_33SR\_LMH\_phospho2\_03

Scan 16970 Method FTMS; HCD Score 155.8 m/z 1066.46 Gene names NUP35

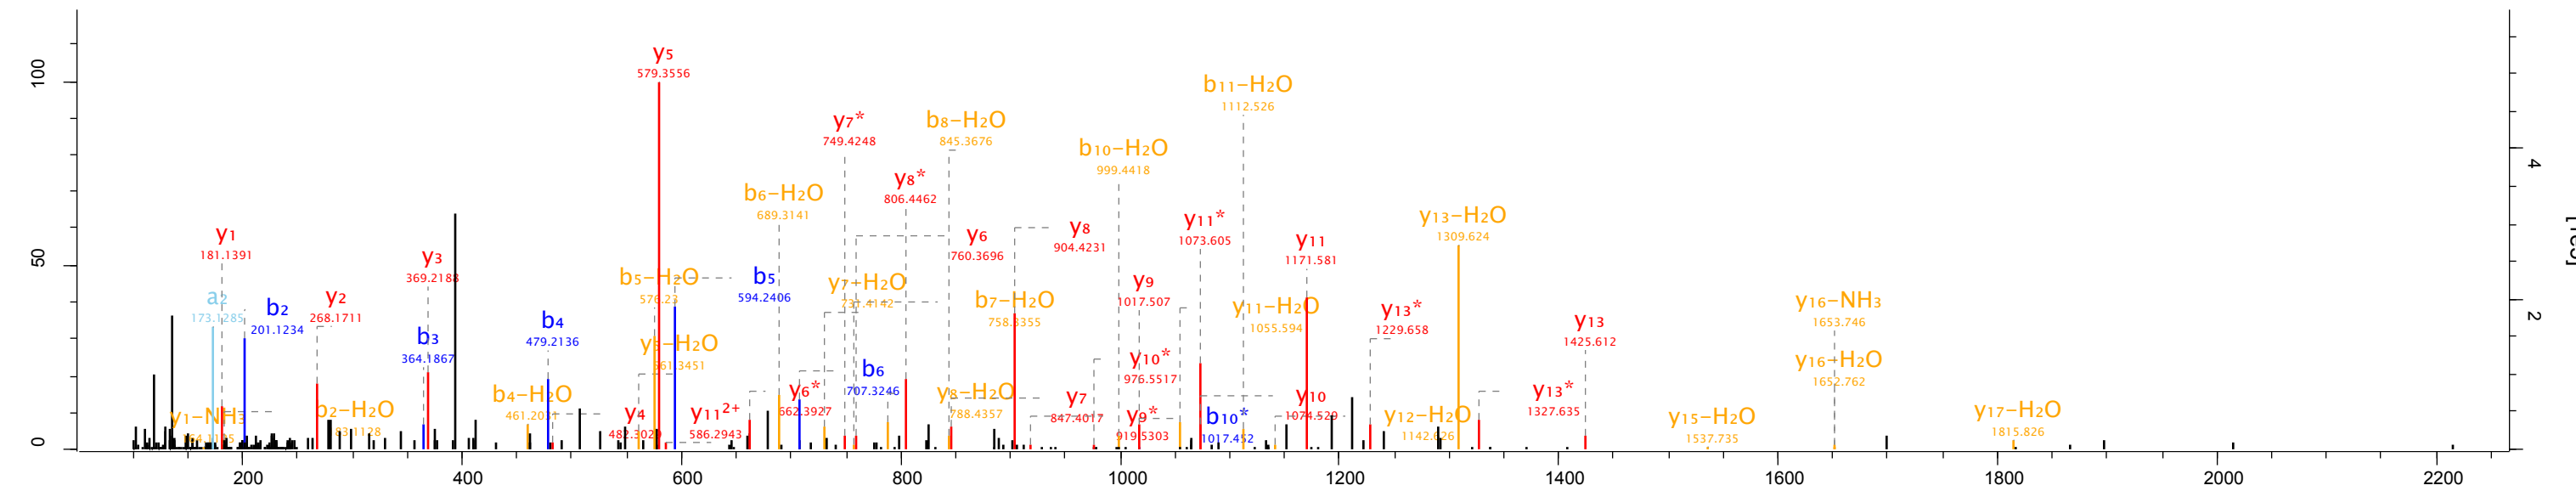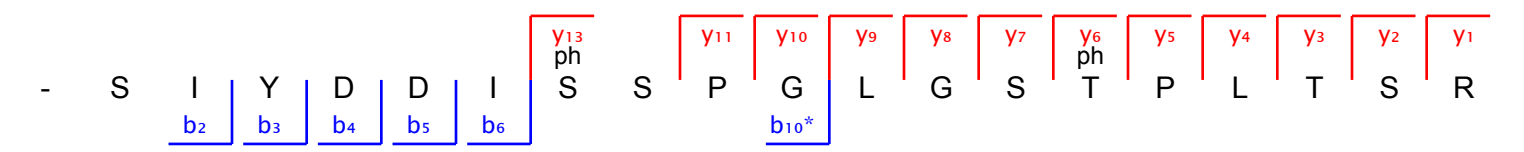

Raw file 20171215\_MaS\_33SR\_LMH\_phospho2\_03 Scan 17160 Method FTMS; HCD Score 158.53 m/z 1190.18 Gene names MAVS

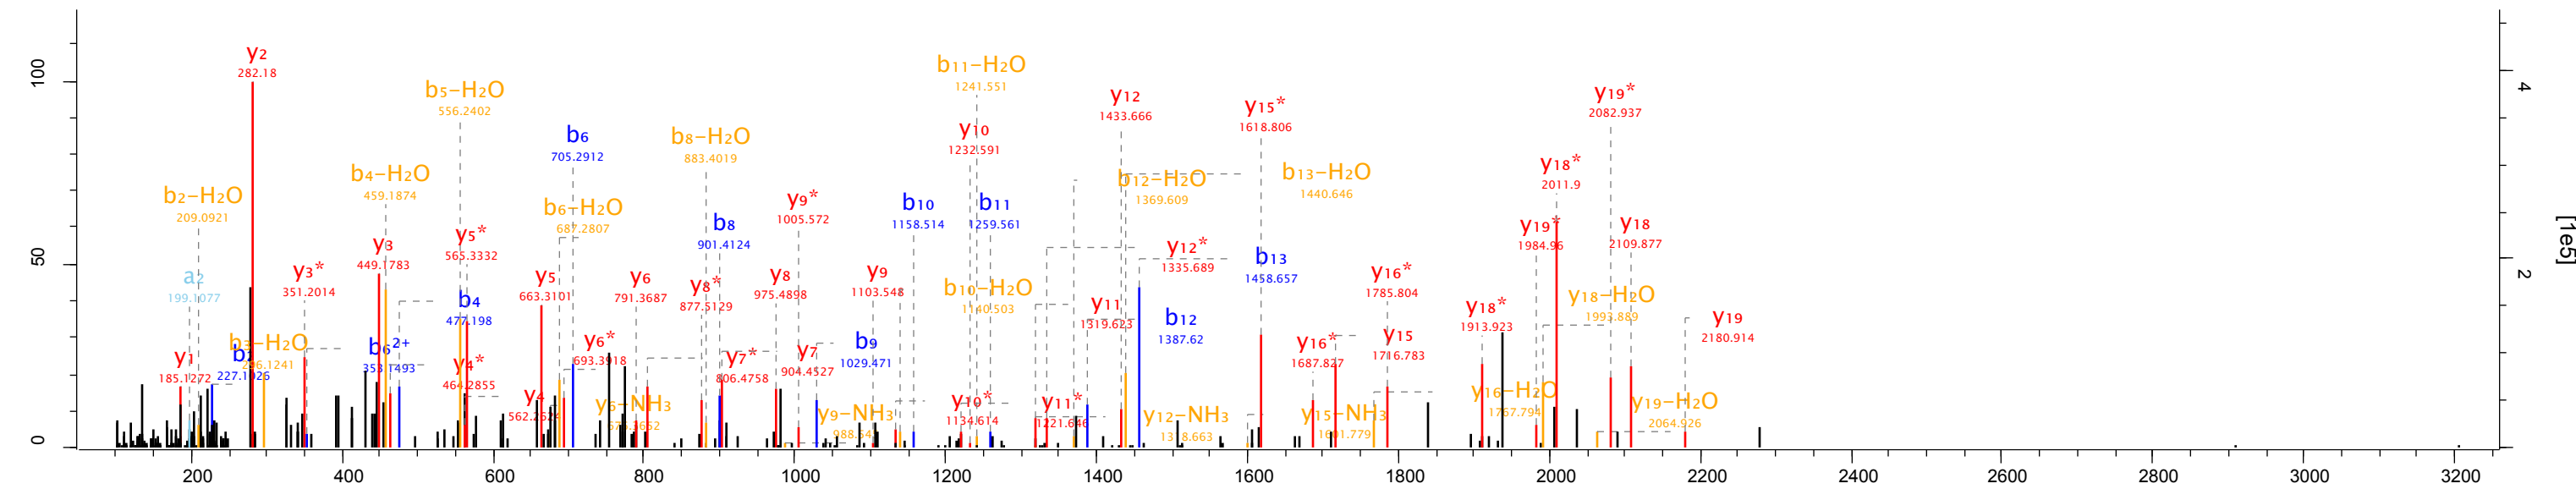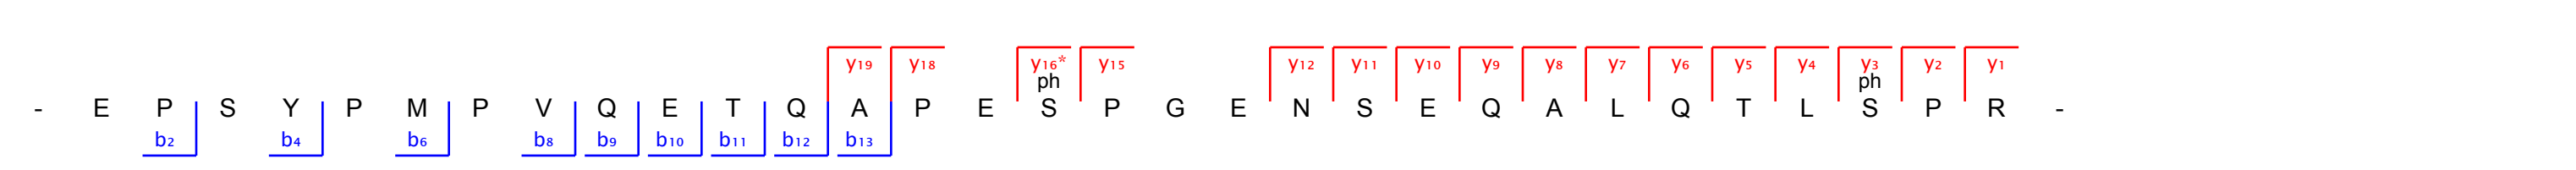

Raw file 20171215\_MaS\_33SR\_LMH\_phospho2\_03 Scan 17180 Method FTMS; HCD Score 50.68 m/z 1066.5 Gene names ARHGAP12

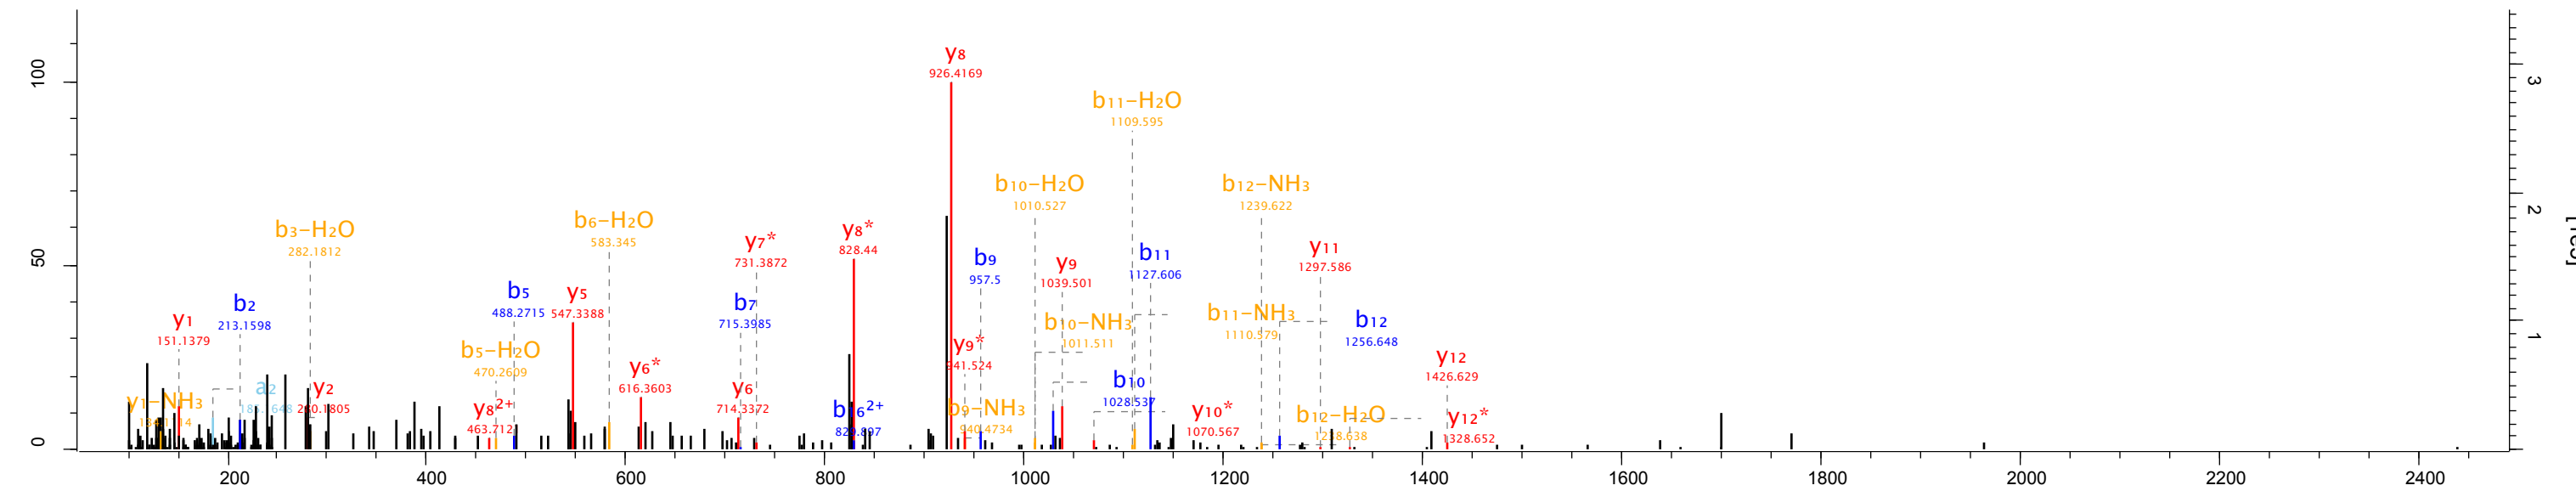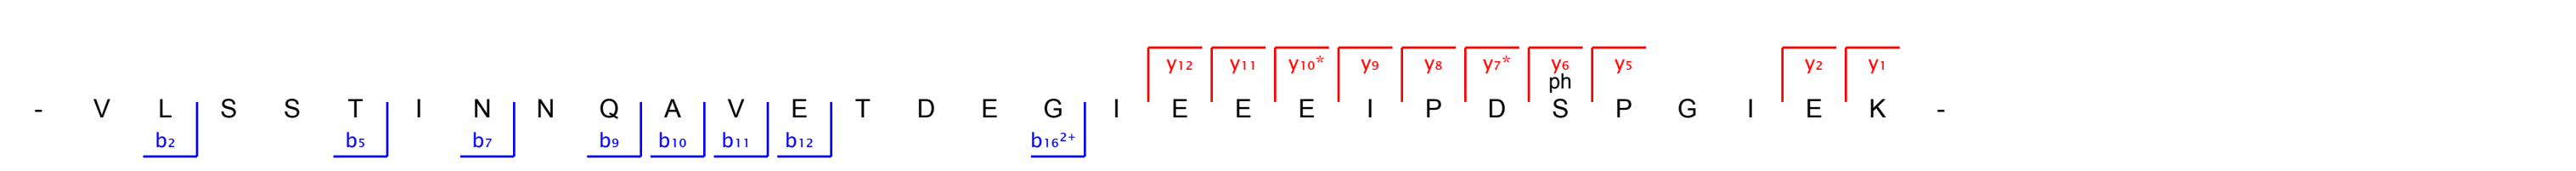

Raw file: 20171215\_MaS\_33SR\_LMH\_phospho2\_03  
 Scan: 17370 Method: FTMS; HCD Score: 128.04 m/z: 973.91 Gene names: HELZ

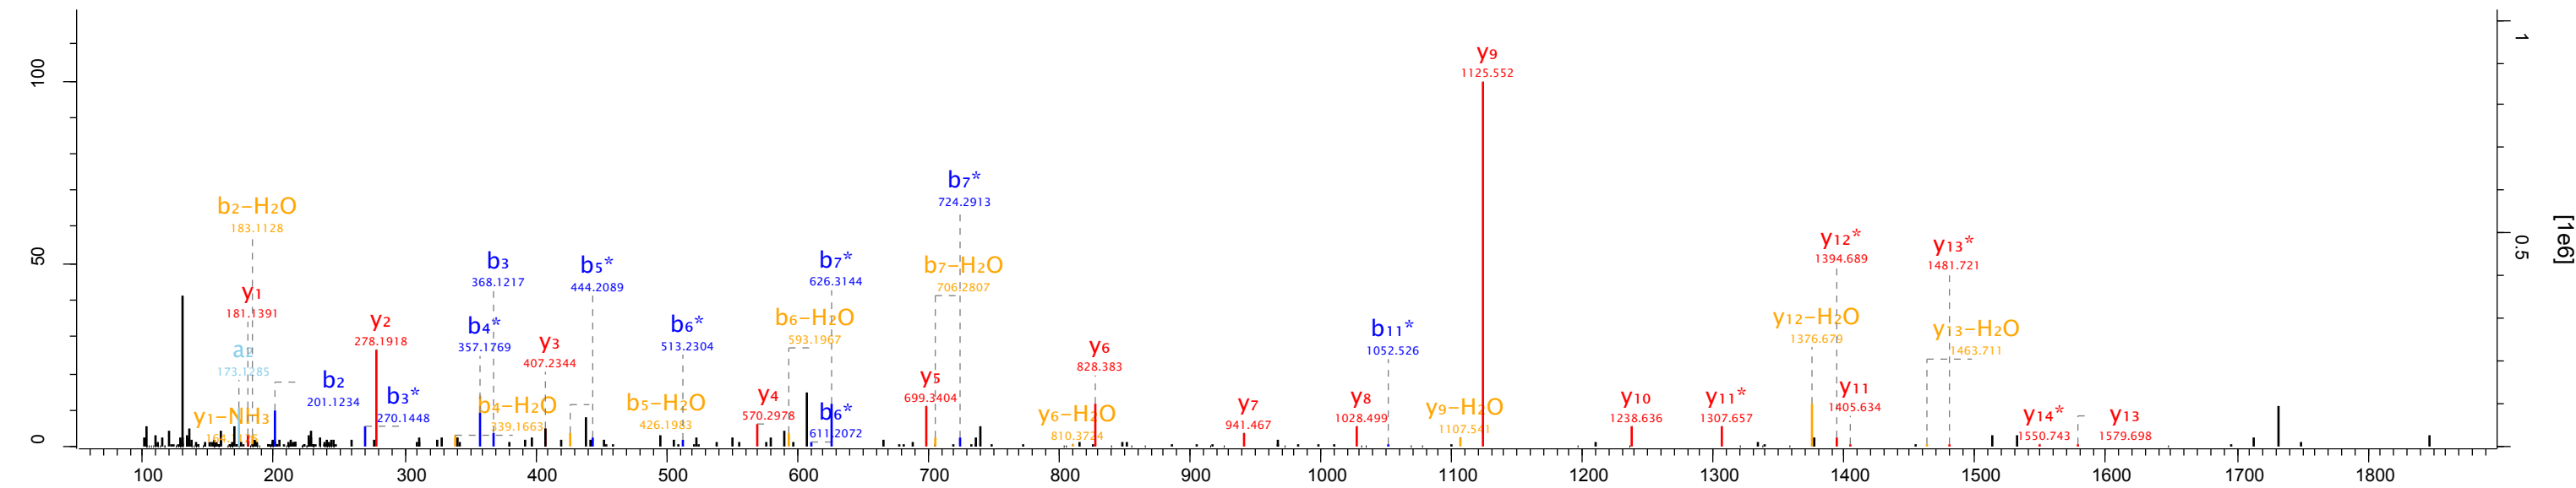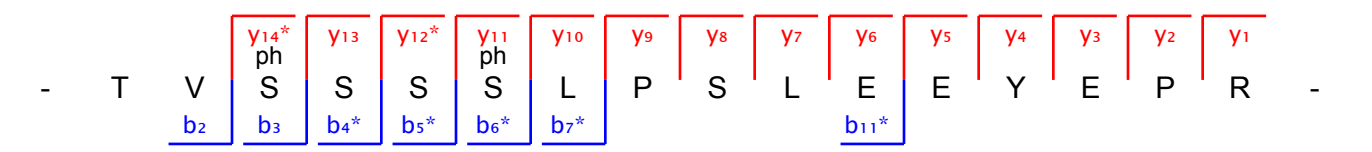

Raw file 20171215\_MaS\_33SR\_LMH\_phospho2\_03 Scan 17460 Method FTMS; HCD Score 114.61 m/z 1457.95 Gene names PARN

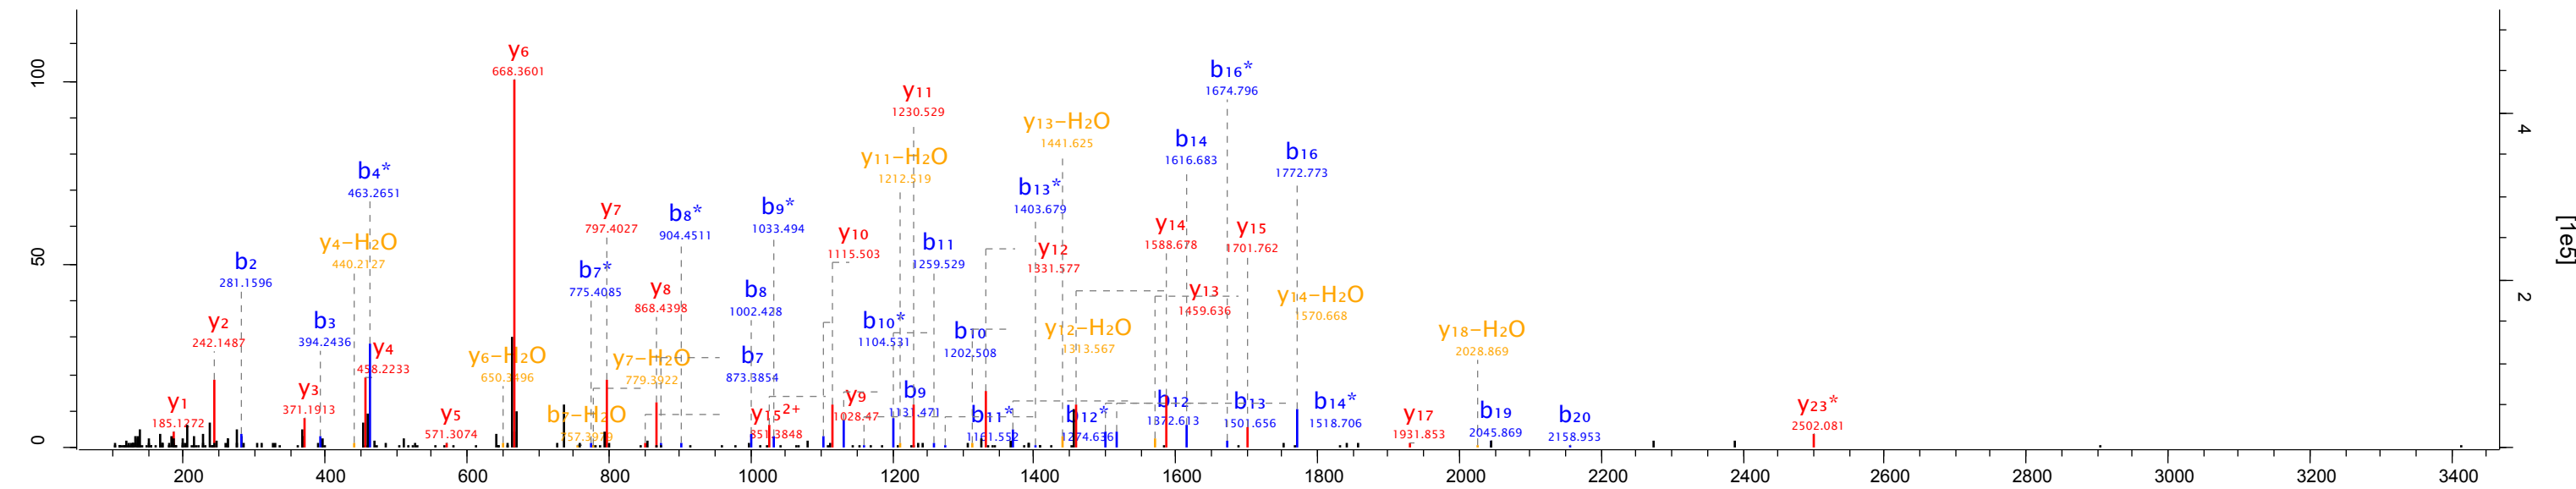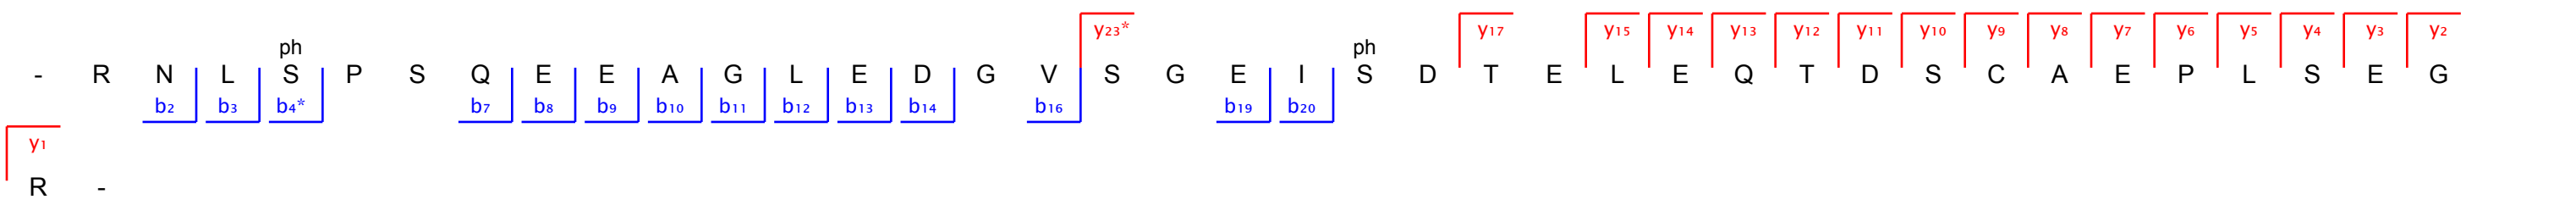

Raw file: 20171215\_MaS\_33SR\_LMH\_phospho2\_03  
 Scan: 17720 Method: FTMS; HCD Score: 180.8 m/z: 782.88 Gene names: SSFA2

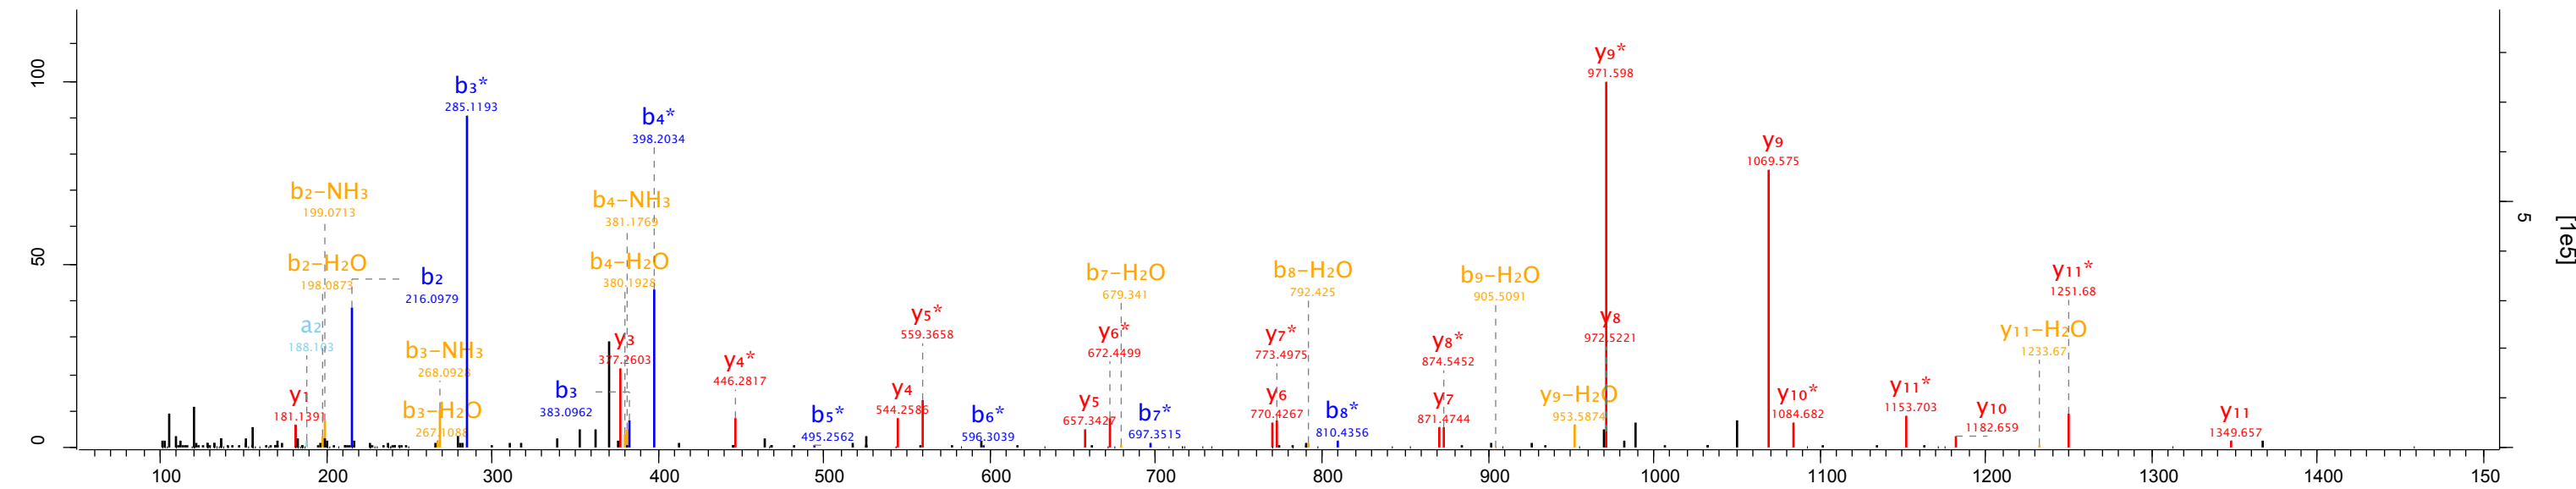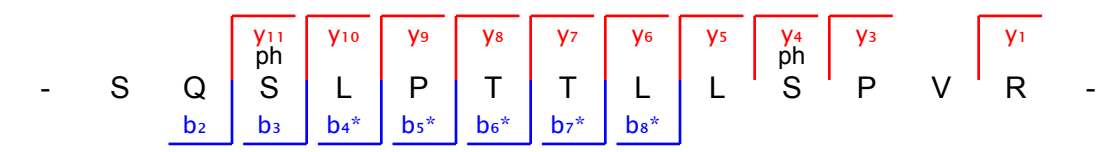

Raw file 20171215\_MaS\_33SR\_LMH\_phospho2\_03 Scan 17770 Method FTMS; HCD Score 119.97 m/z 1213.5 Gene names GTPBP1

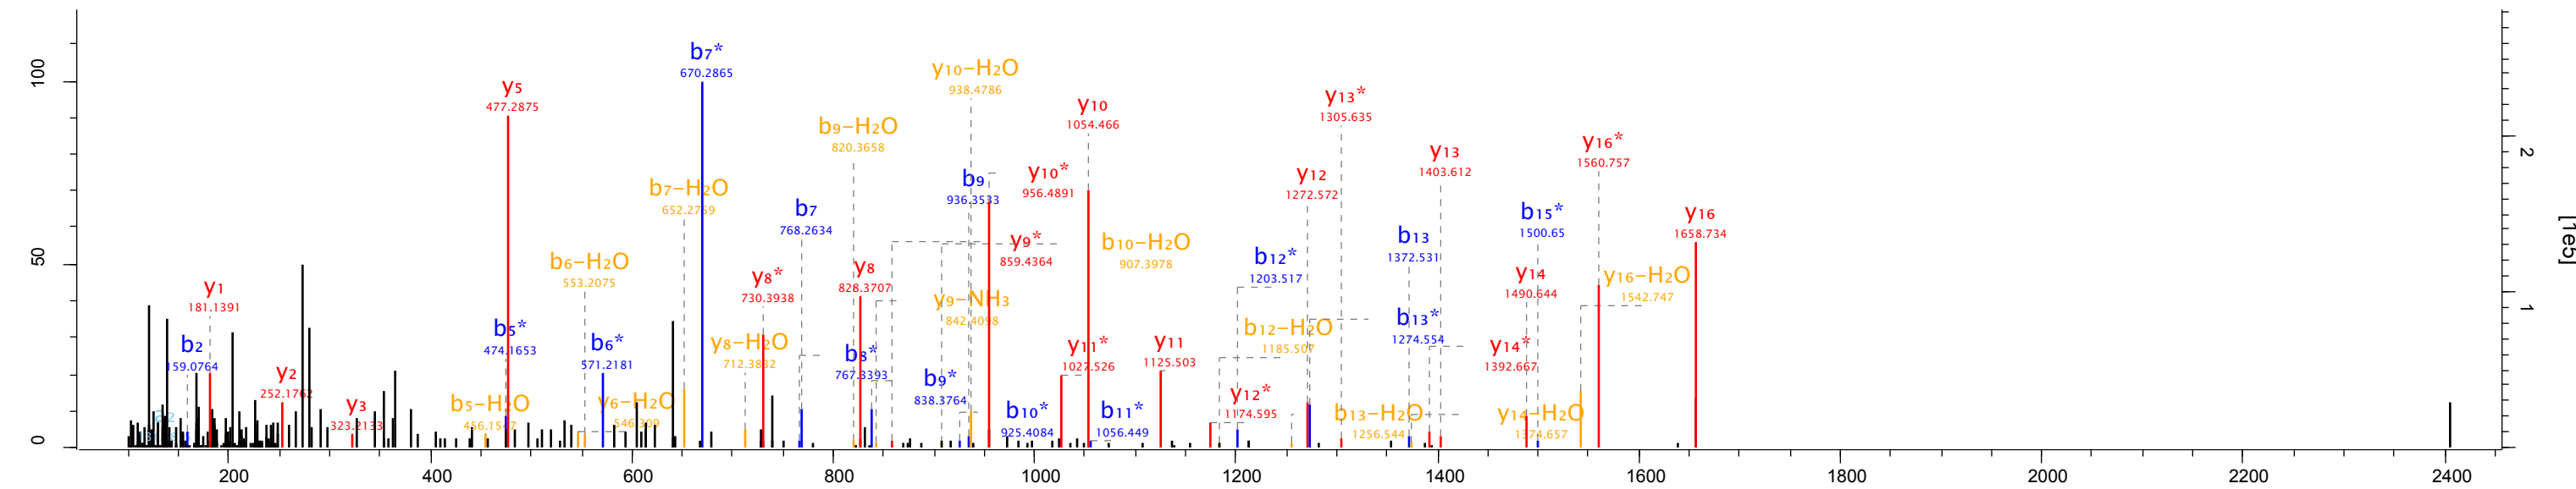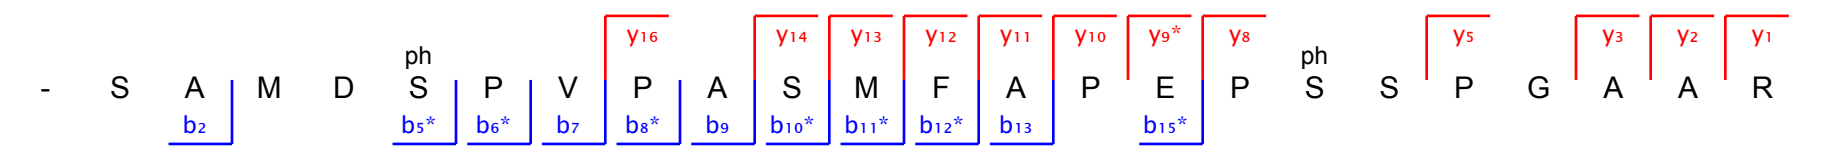

Raw file 20171215\_MaS\_33SR\_LMH\_phospho2\_03 Scan 17890 Method FTMS; HCD Score 92.23 m/z 891.05 Gene names SMARCAD1

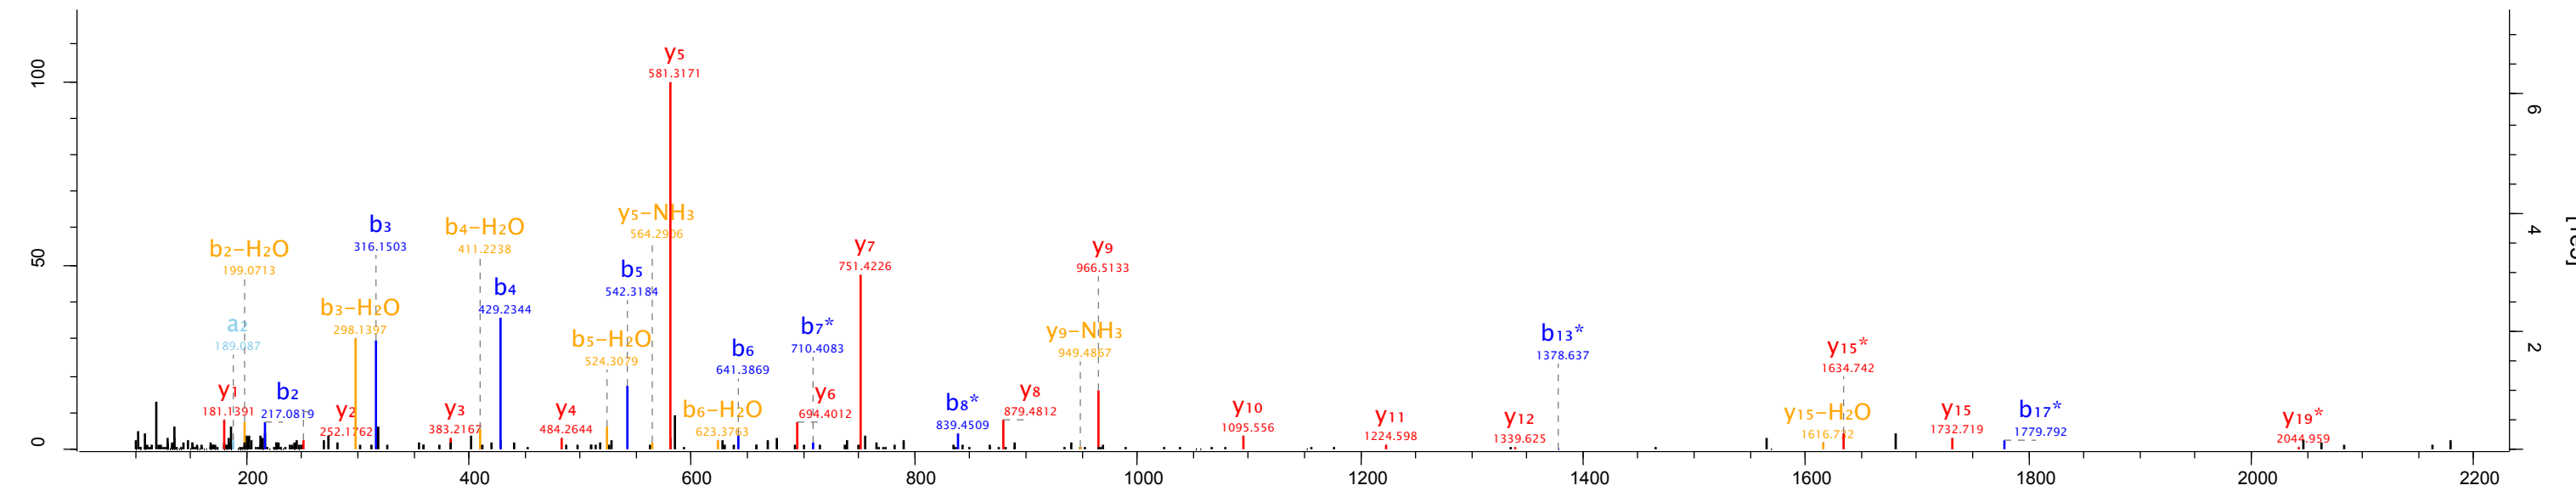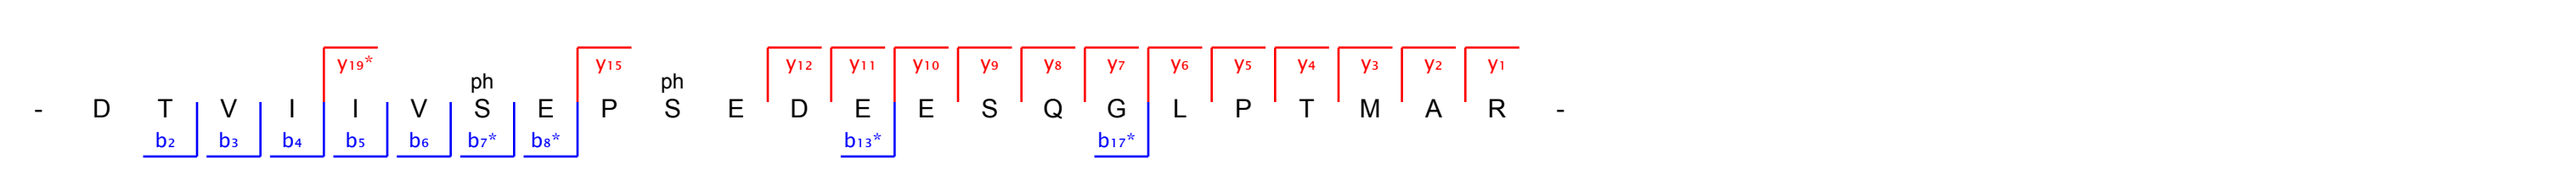



Raw file 20171215\_MaS\_33SR\_LMH\_phospho2\_03 Scan 18300 Method FTMS; HCD Score 97.94 m/z 933.41 Gene names NUP107

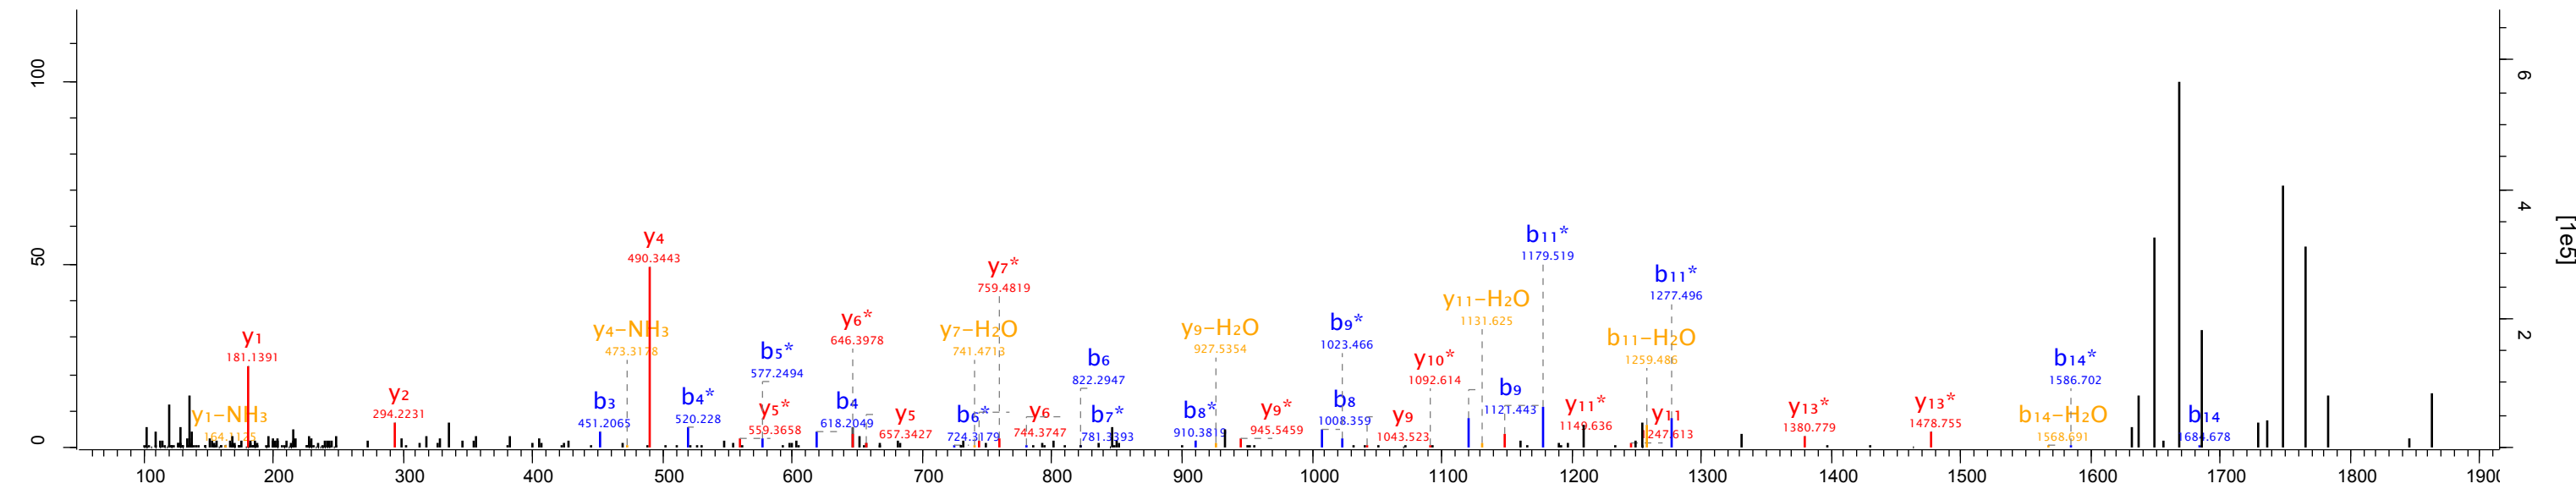

ac - M D R S G F G E I S S P V I R -

Fragmentation mapping (b and y ions):

- b3: R
- b4: S
- b5\*: G
- b6: F
- b7\*: G
- b8: E
- b9: I
- b11\*: S
- b14: V
- y1: R
- y2: I
- y4: P
- y5: S
- y6: S
- y7\*: I
- y9: G
- y10\*: F
- y11: G
- y13\*: G

Raw file: 20171215\_MaS\_33SR\_LMH\_phospho2\_03  
 Scan: 18320 Method: FTMS; HCD Score: 208.66 m/z: 777.85 Gene names: RELB

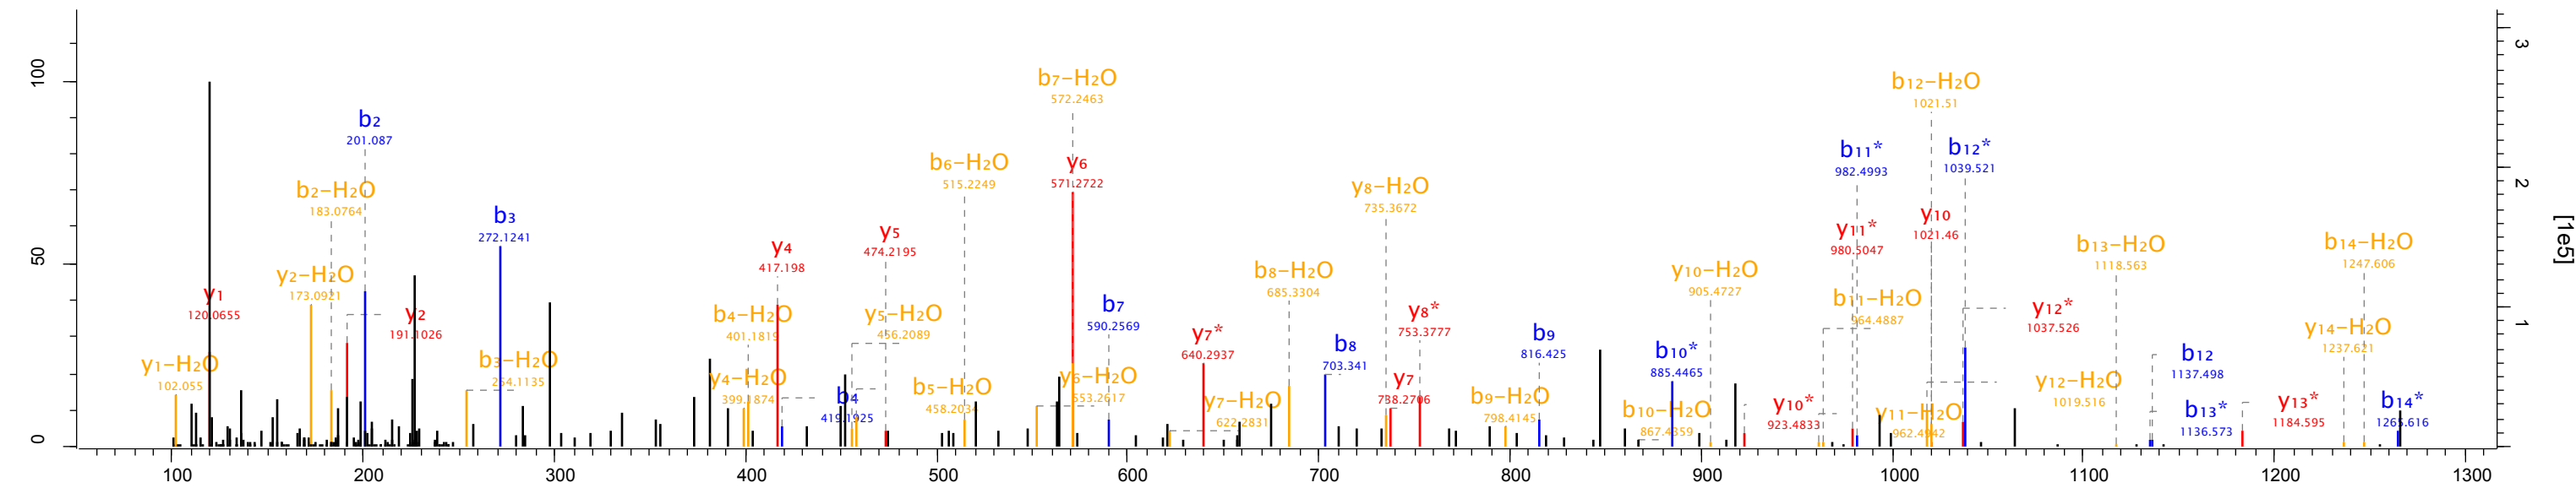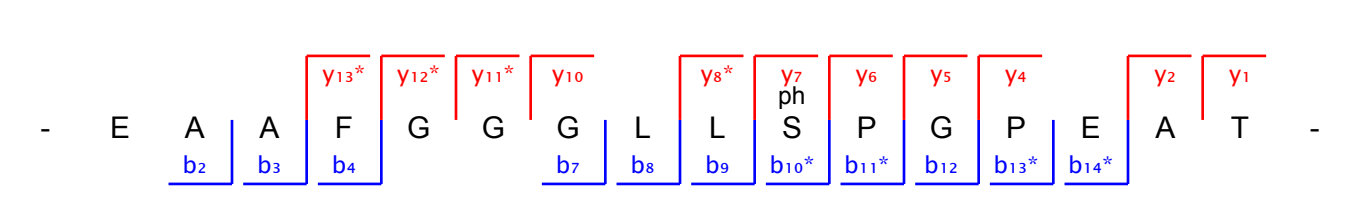

Raw file: 20171215\_MaS\_33SR\_LMH\_phospho2\_03  
 Scan: 18730 Method: FTMS; HCD Score: 174.4 m/z: 784.36 Gene names: SRRM2

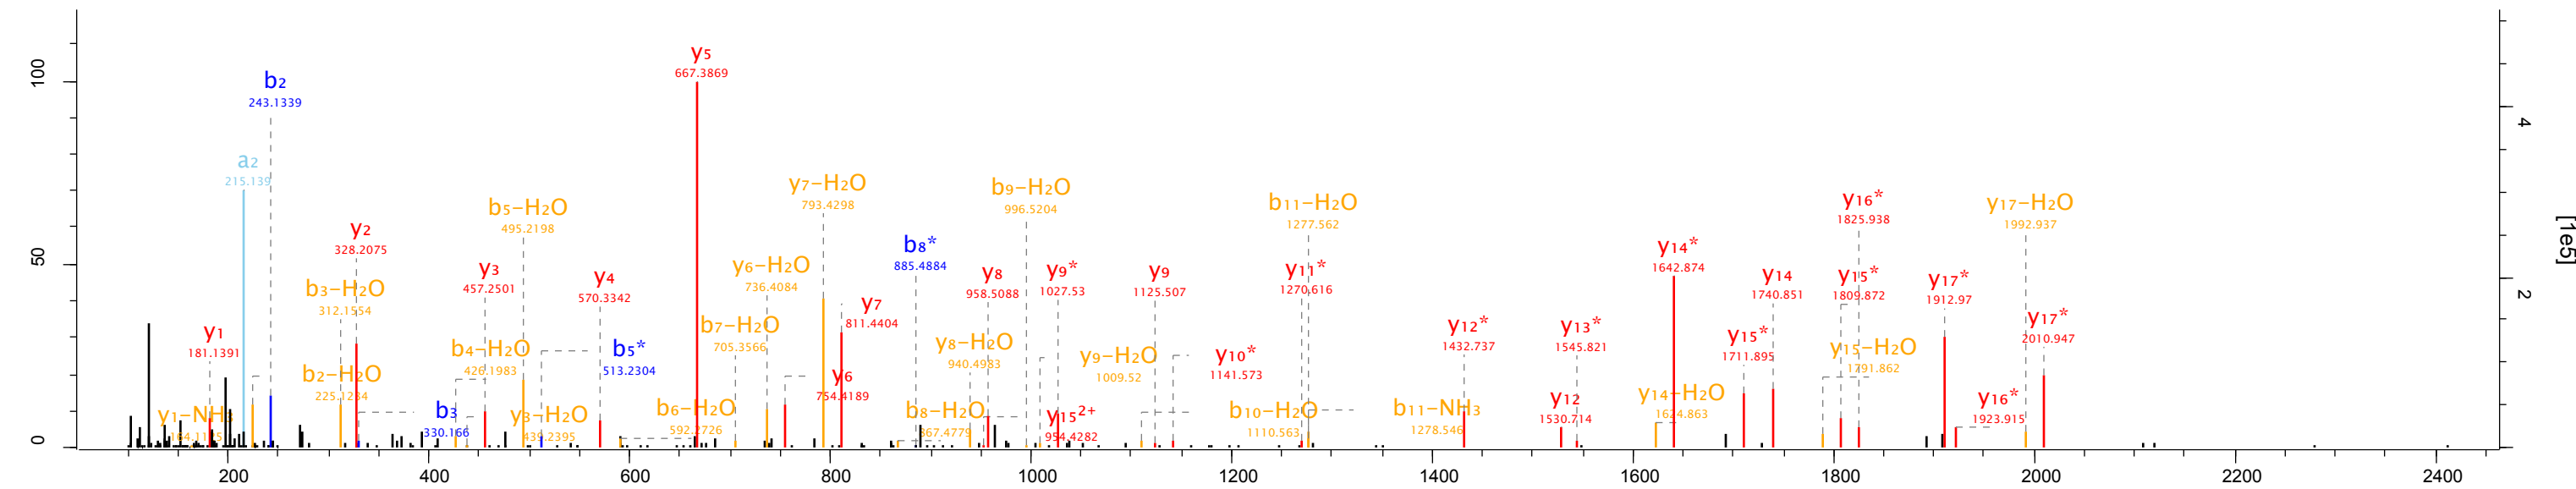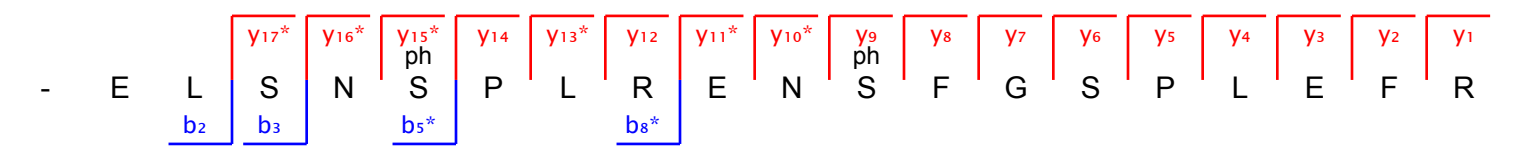

Raw file: 20171215\_MaS\_33SR\_LMH\_phospho2\_03  
 Scan: 19090 Method: FTMS; HCD Score: 109.59 m/z: 969.92 Gene names: C1orf226

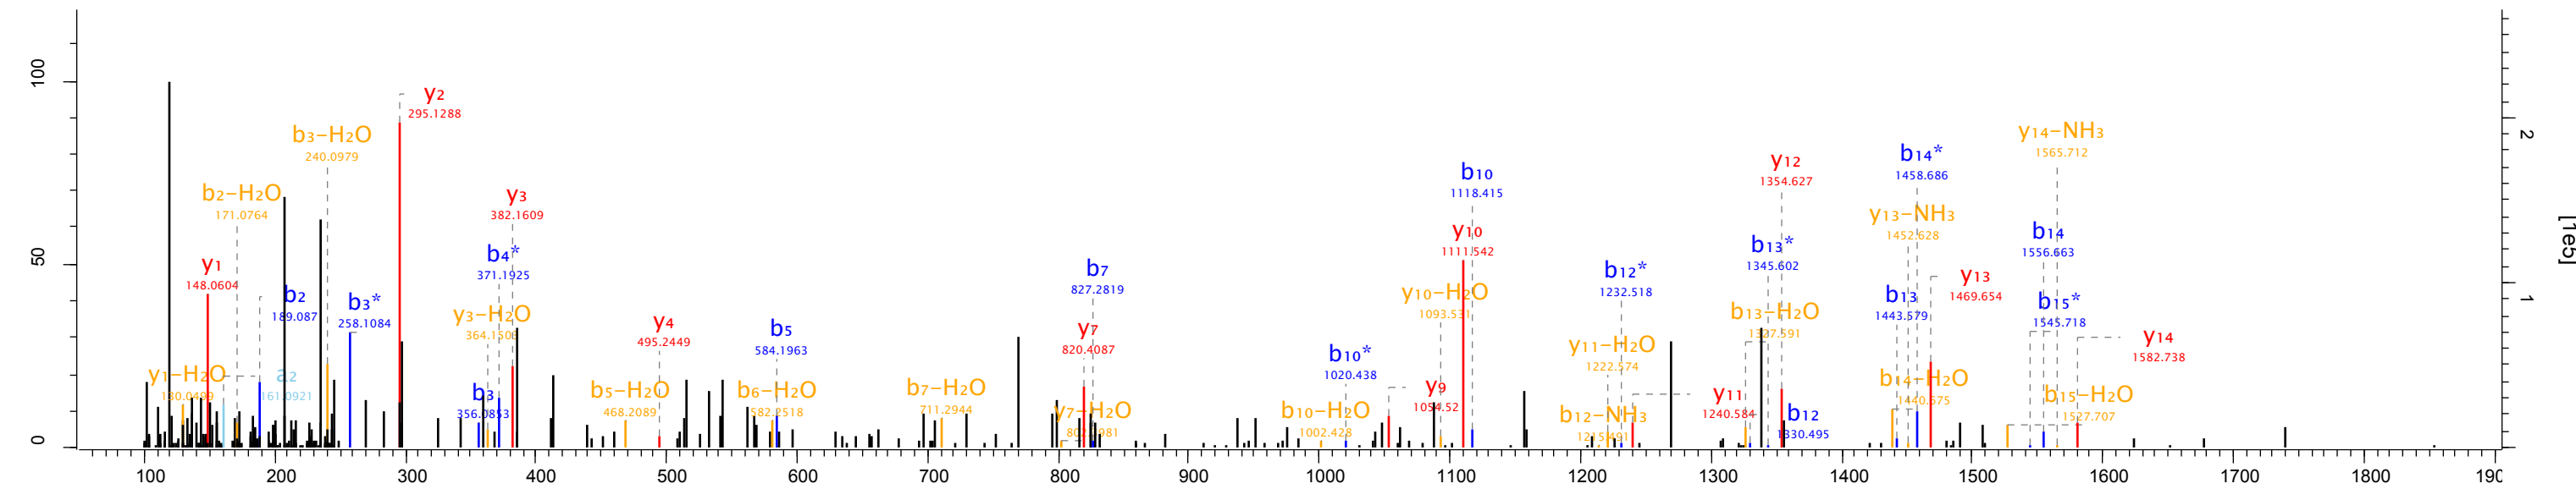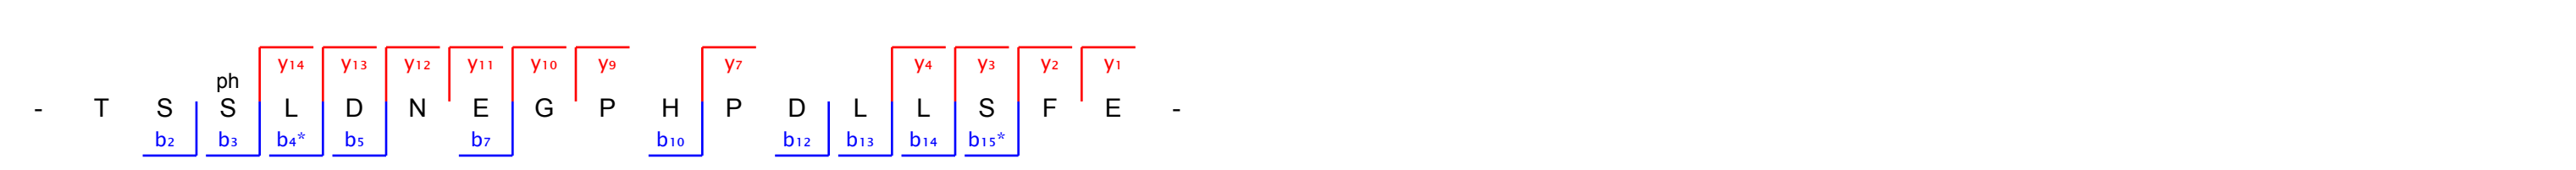

Raw file 20171215\_MaS\_33SR\_LMH\_phospho2\_03 Scan 19200 Method FTMS; HCD Score 101.01 m/z 782.35 Gene names CCDC88A

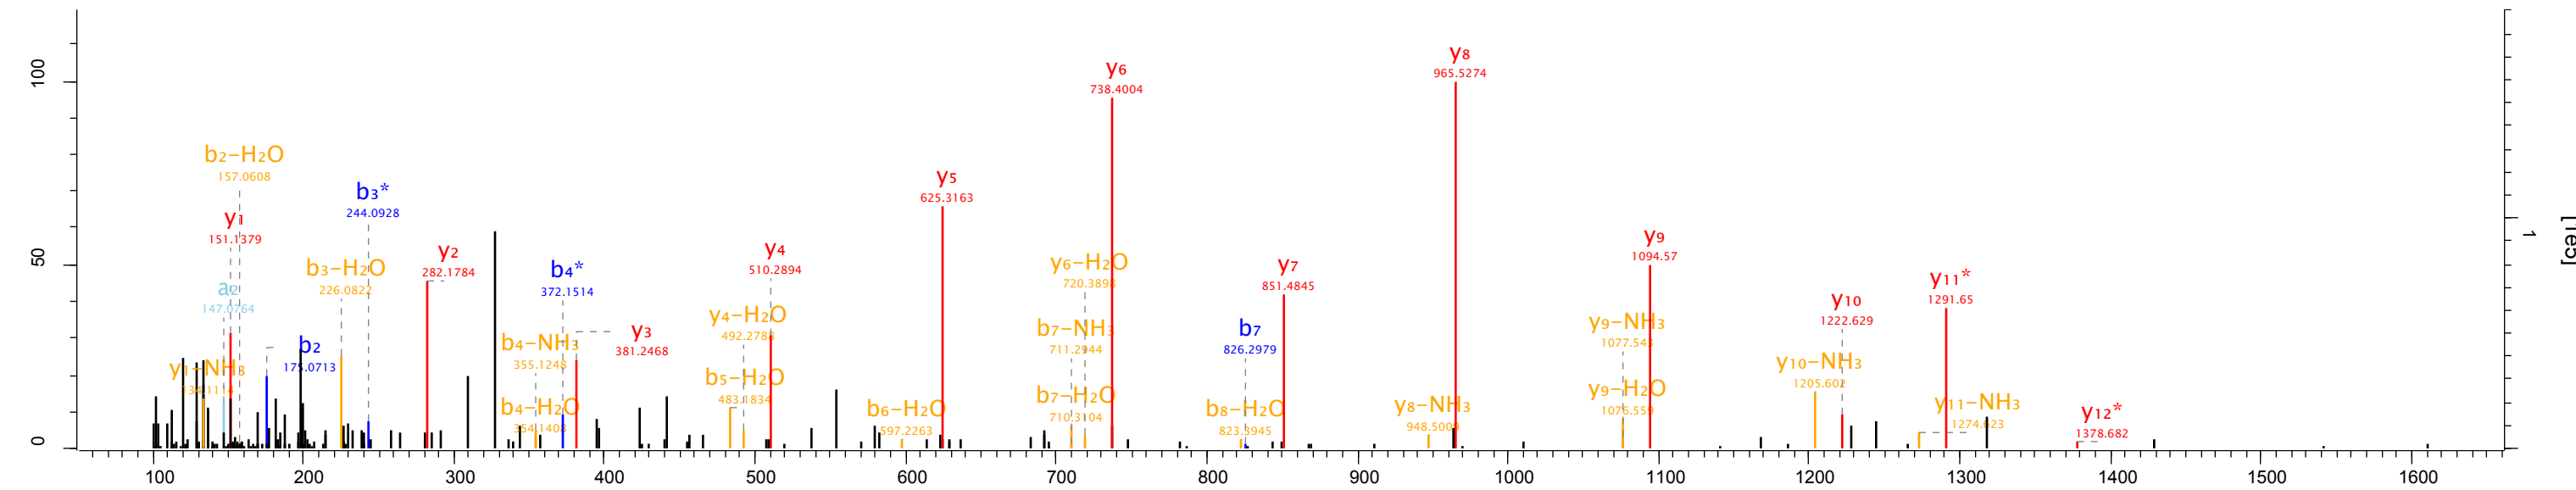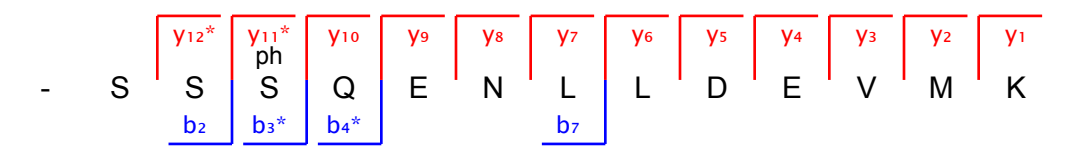

Raw file 20171215\_MaS\_33SR\_LMH\_phospho2\_03 Scan 19510 Method FTMS; HCD Score 118.74 m/z 1247.19 Gene names PRKCDBP

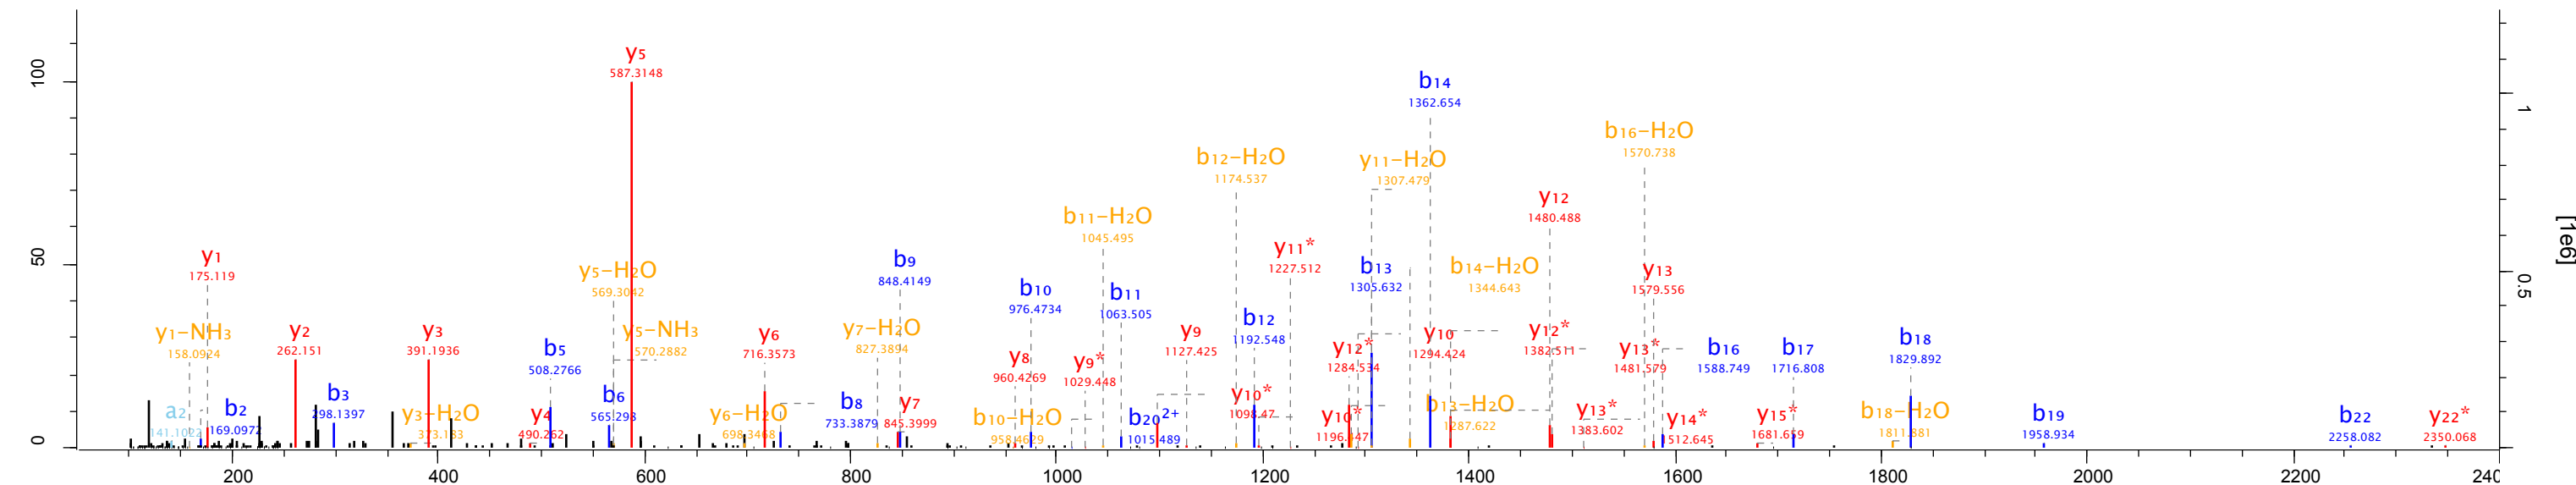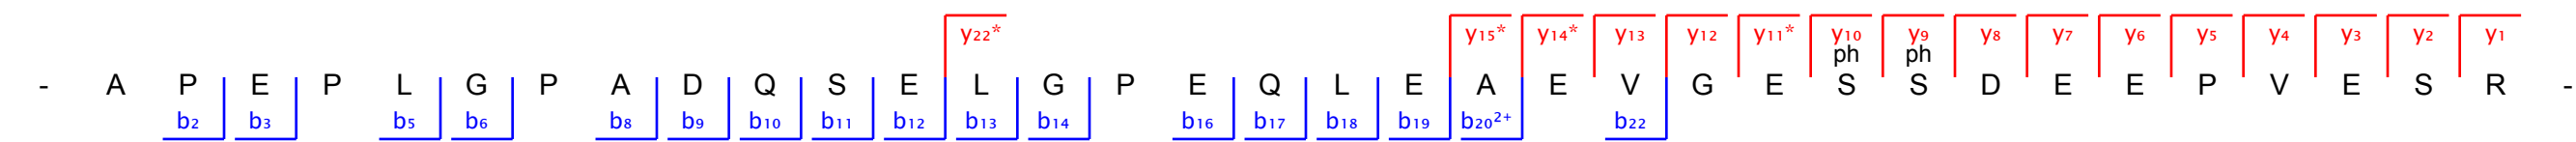

Raw file 20171215\_MaS\_33SR\_LMH\_phospho2\_03 Scan 19690 Method FTMS; HCD Score 108.86 m/z 919.41 Gene names ASF1A

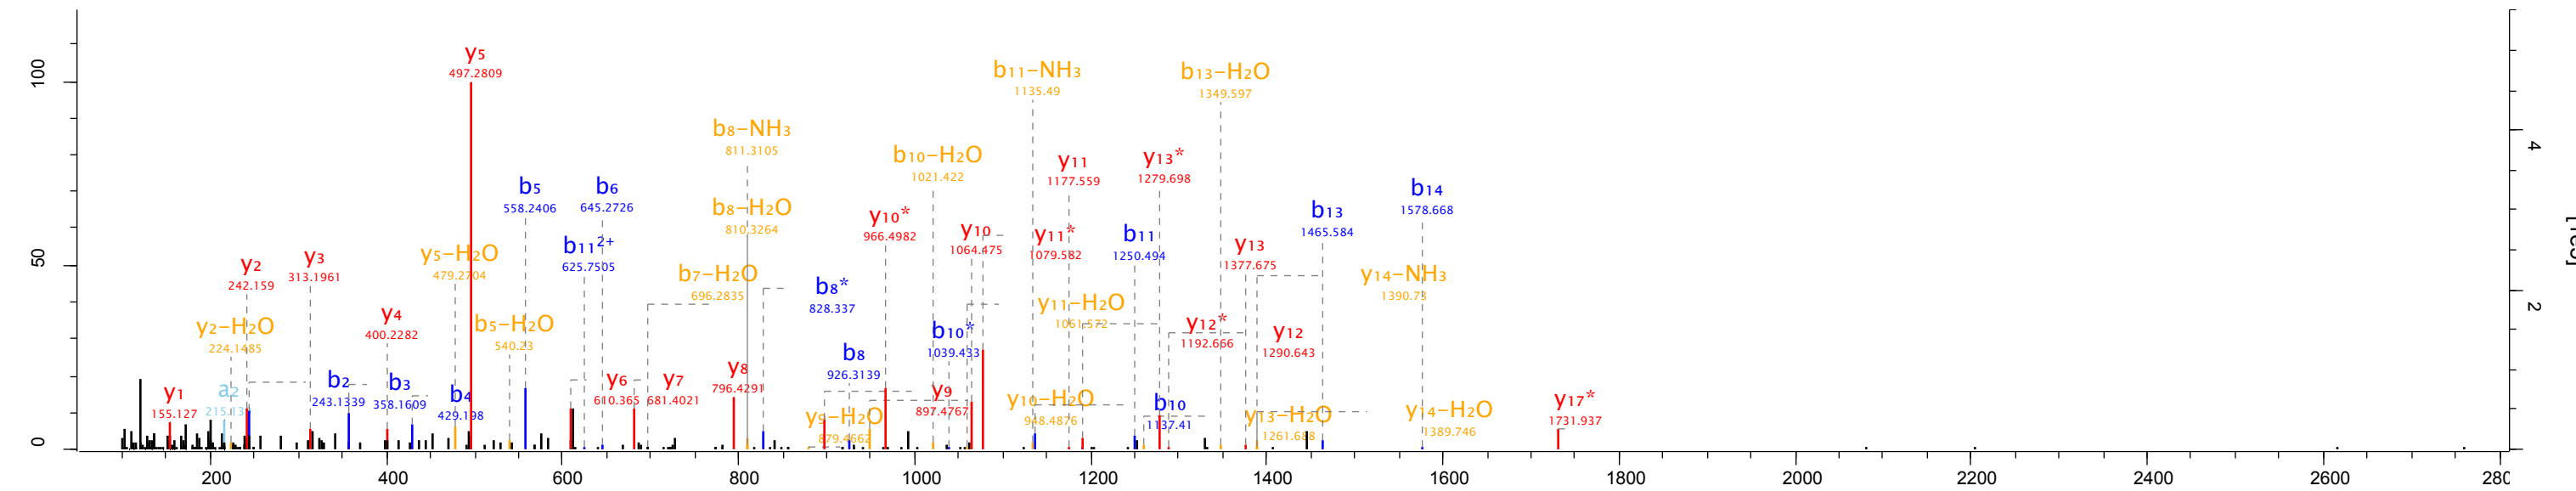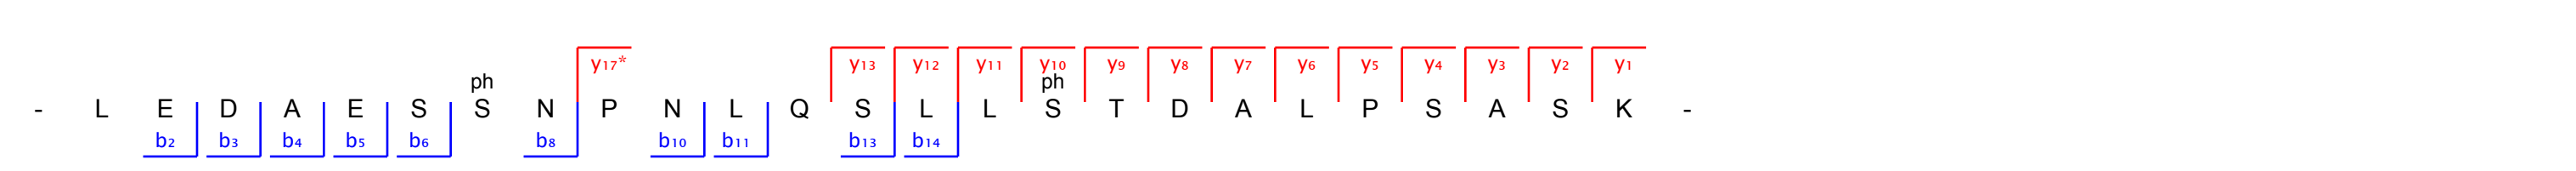





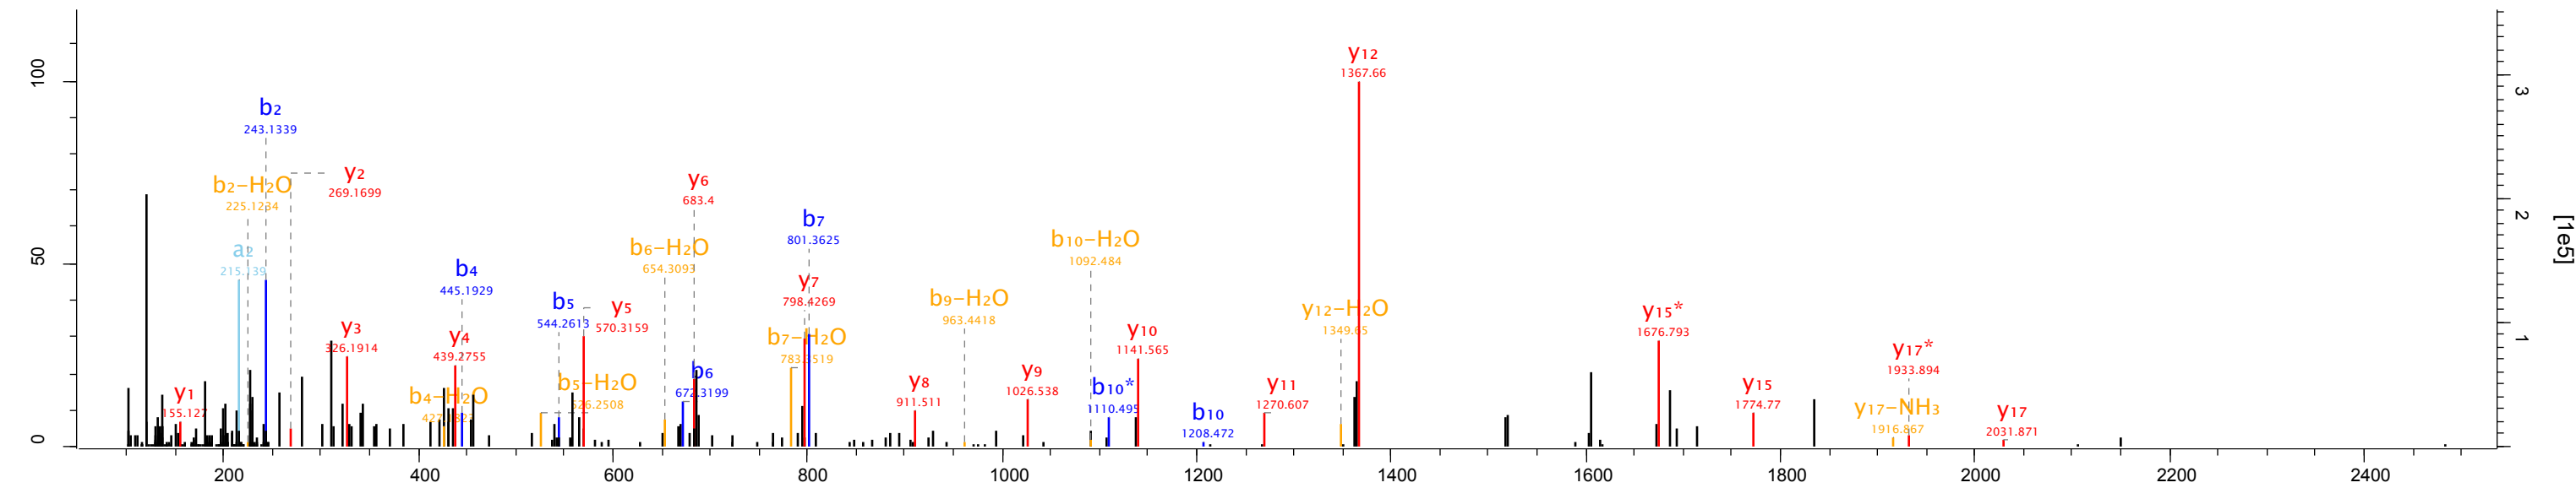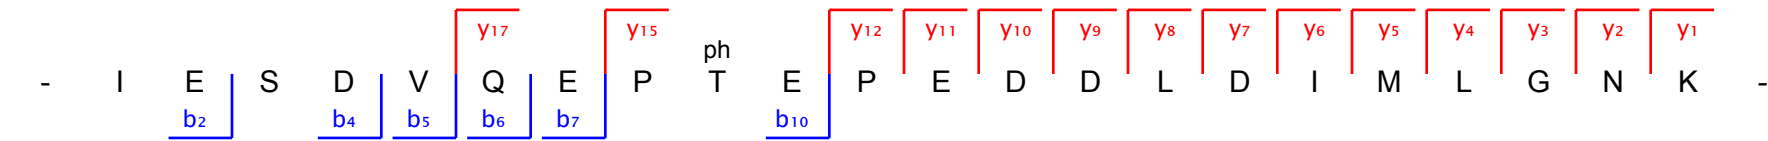

20171215\_MaS\_33SR\_LMH\_phospho2\_03 2150 FTMS; HCD 79.34 564.73 SRRM1

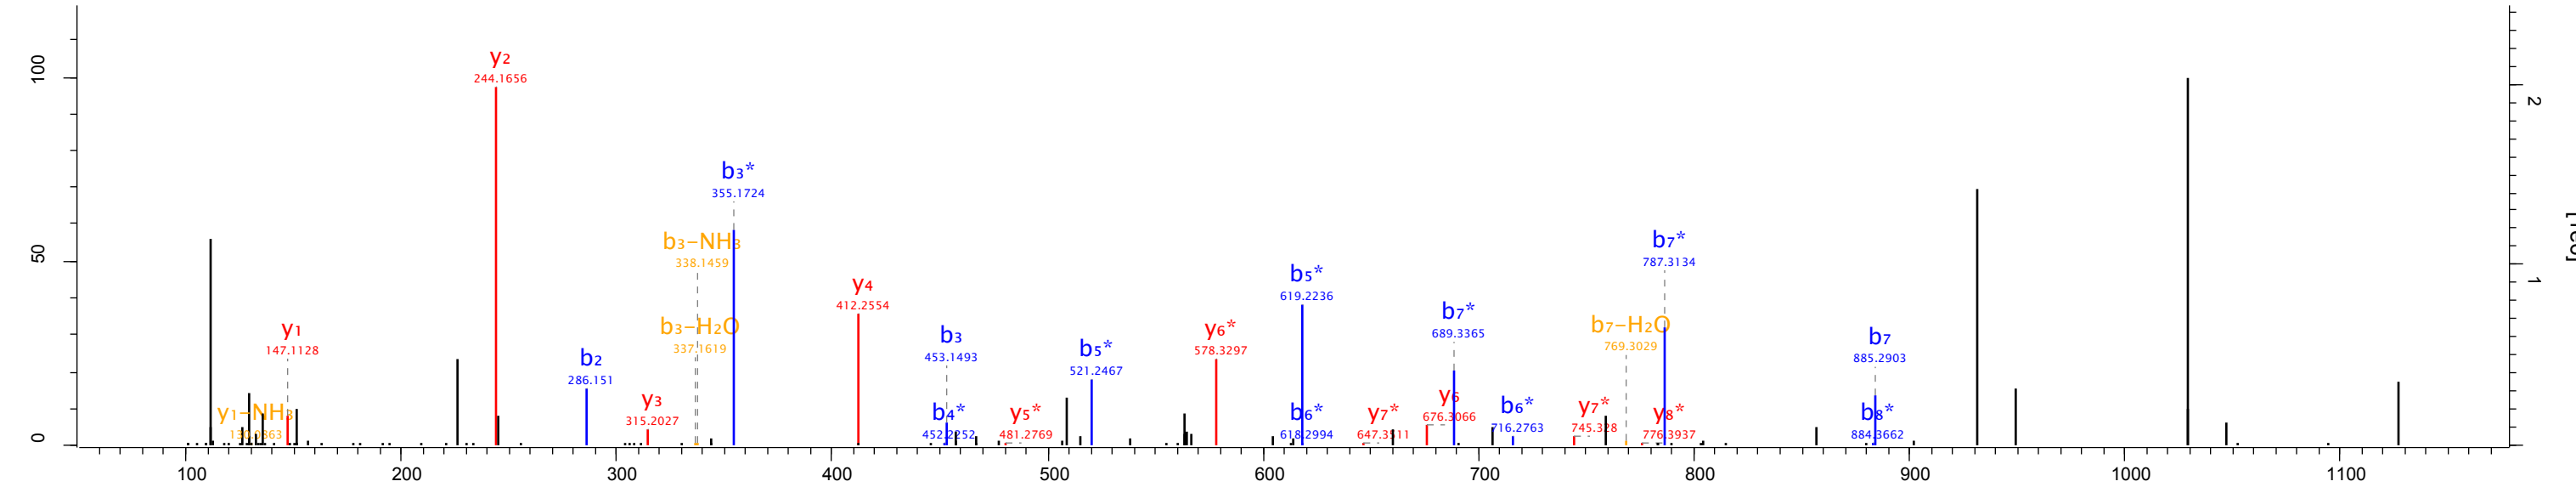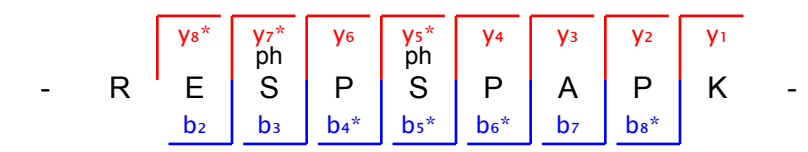

Raw file 20171215\_MaS\_33SR\_LMH\_phospho2\_03 Scan 21740 Method FTMS; HCD Score 171.76 m/z 680.82 Gene names NSFL1C

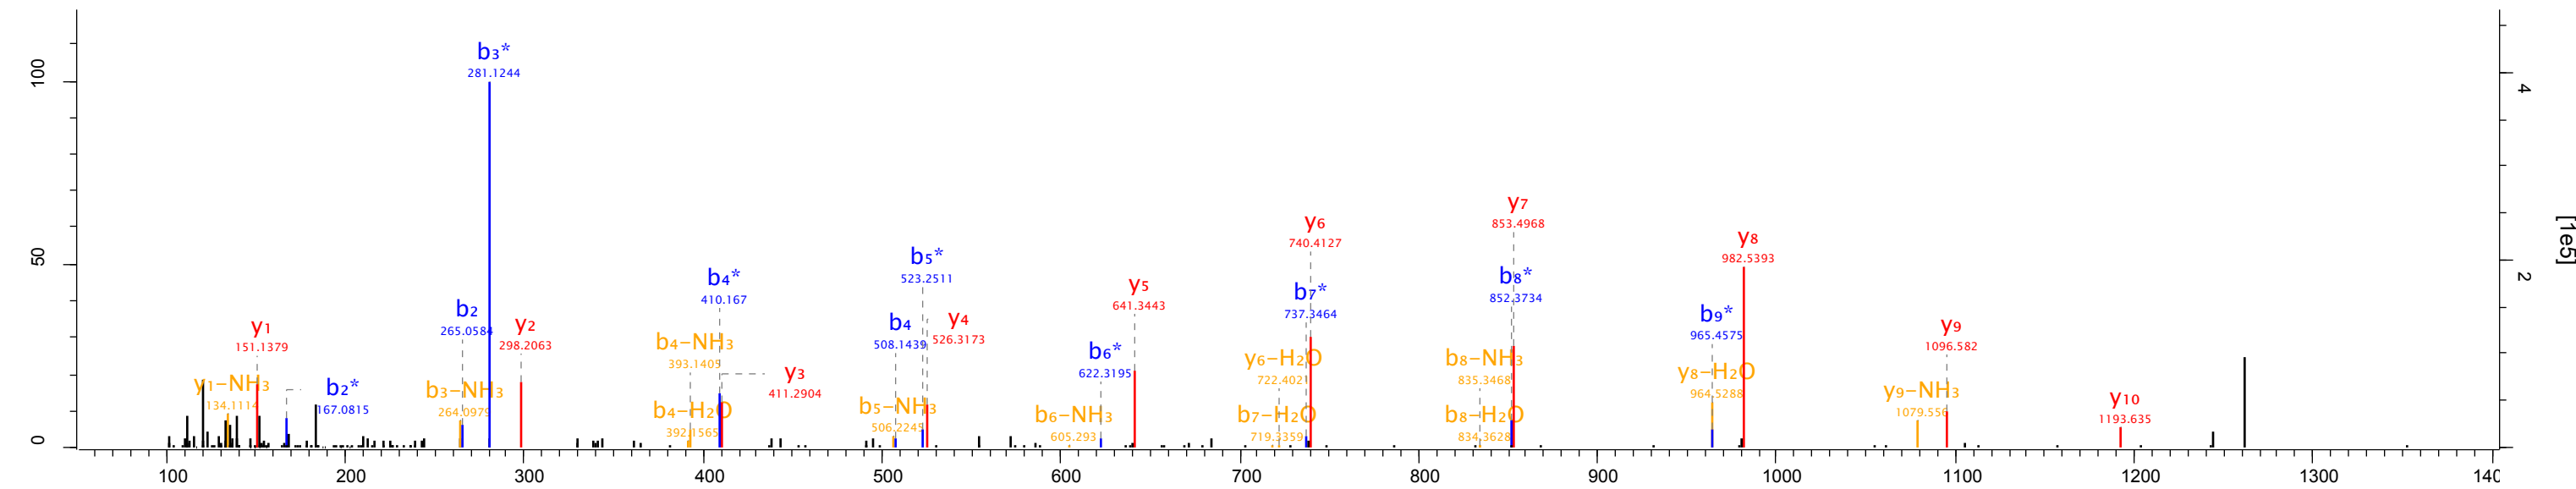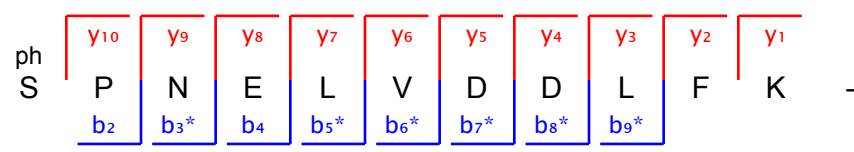

Raw file 20171215\_MaS\_33SR\_LMH\_phospho2\_03 Scan 23130 Method FTMS; HCD Score 69.36 m/z 886.41 Gene names LIMCH1

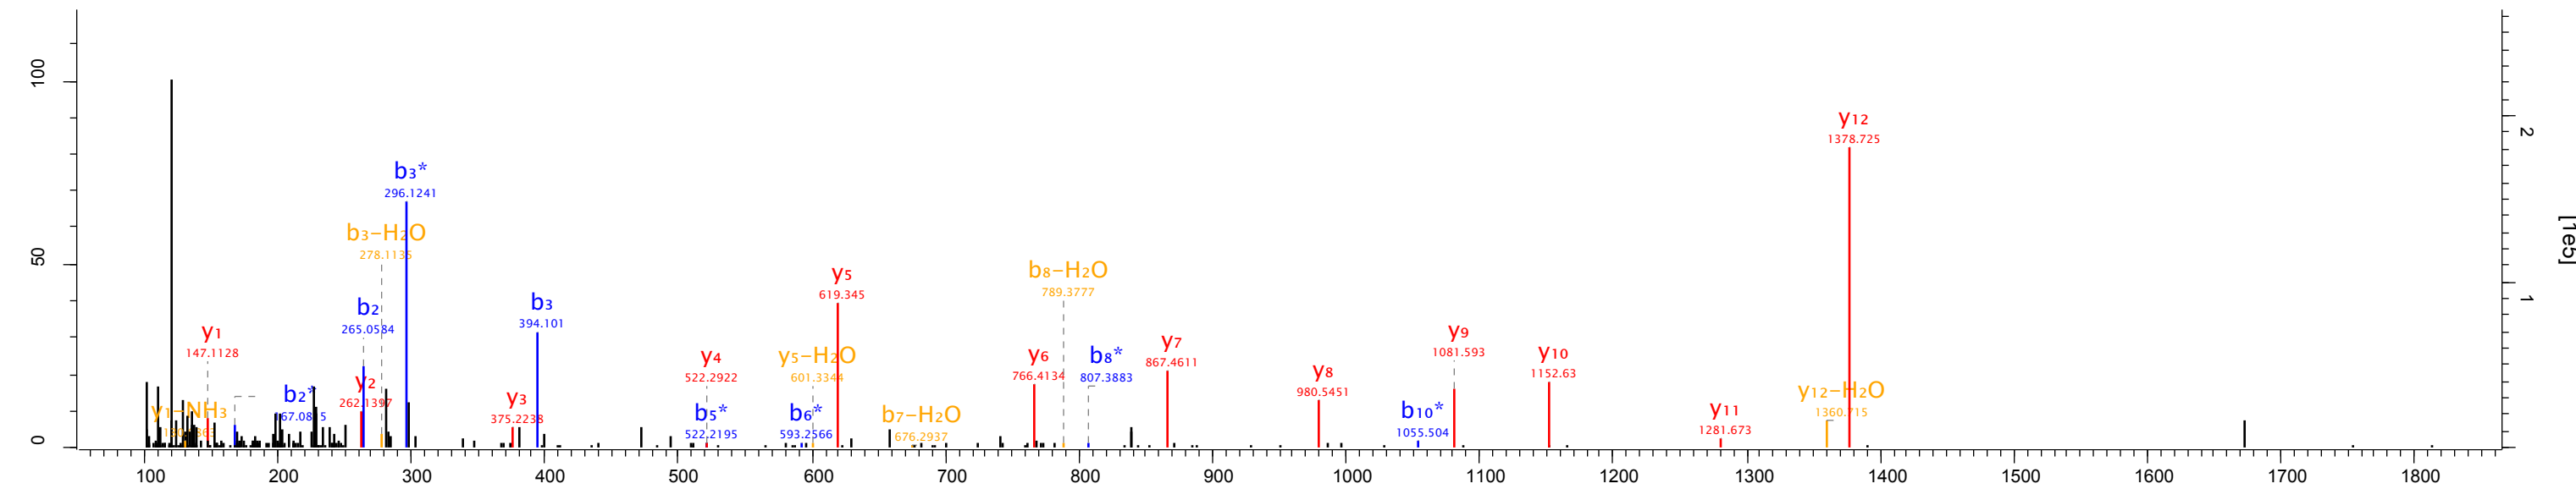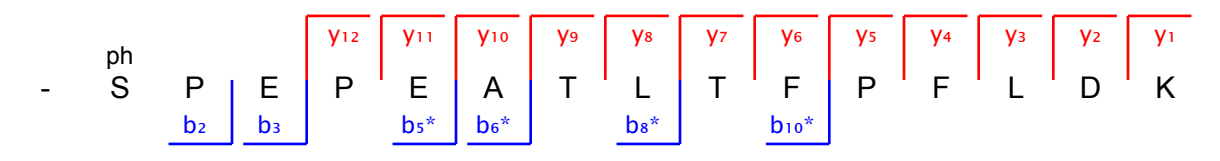

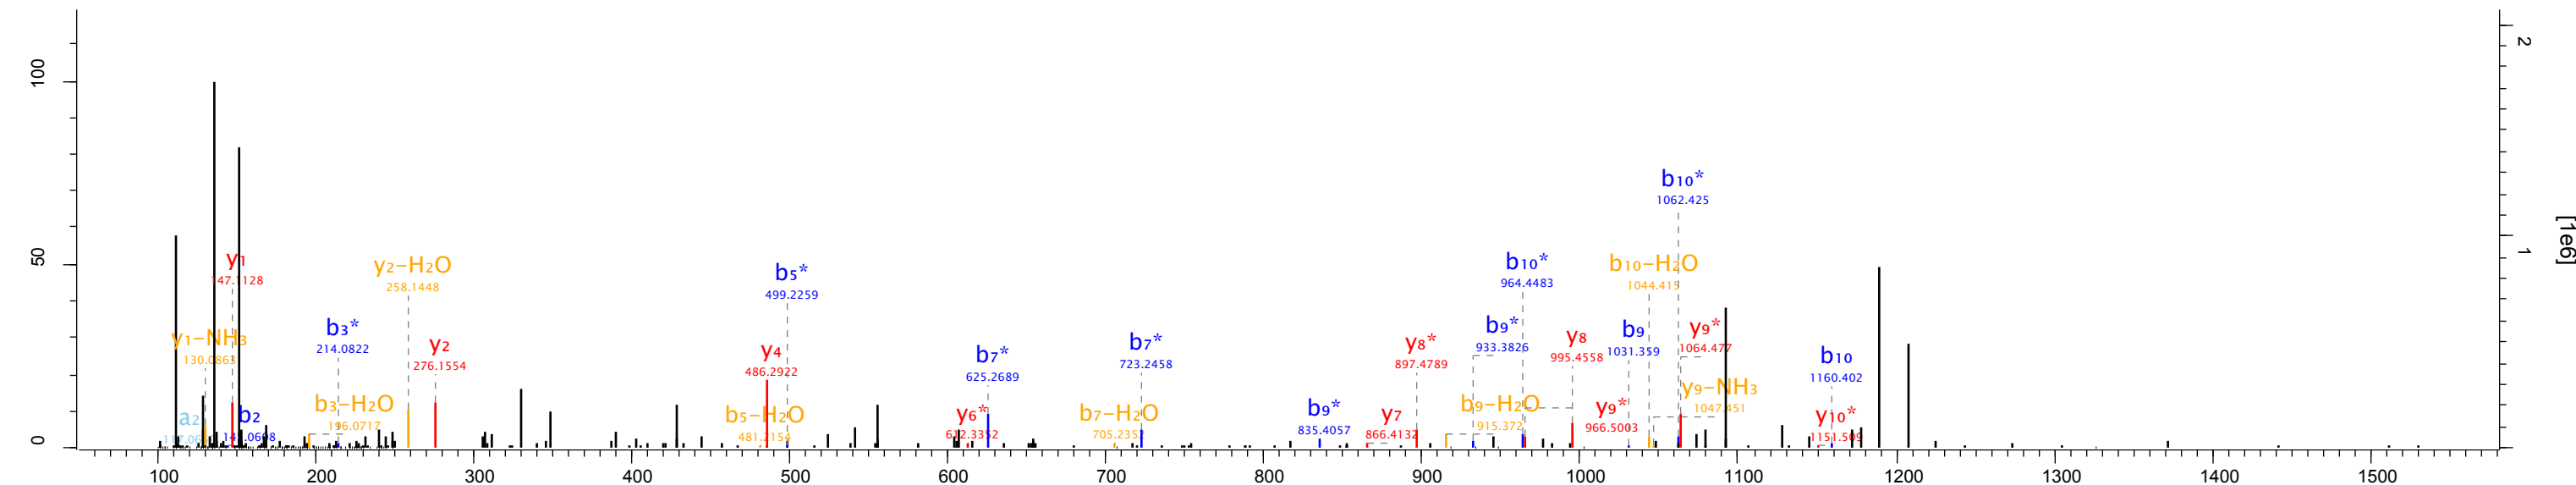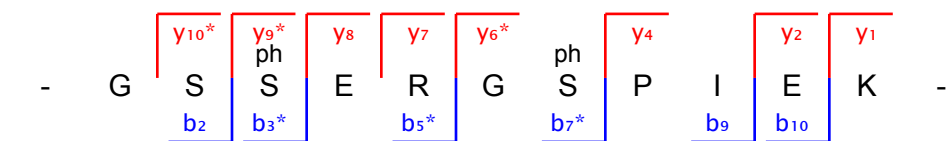

Raw file 20171215\_MaS\_33SR\_LMH\_phospho2\_03 Scan 3010 Method FTMS; HCD Score 121.46 m/z 664.92 Gene names PNN

20171215\_MaS\_33SR\_LMH\_phospho2\_03

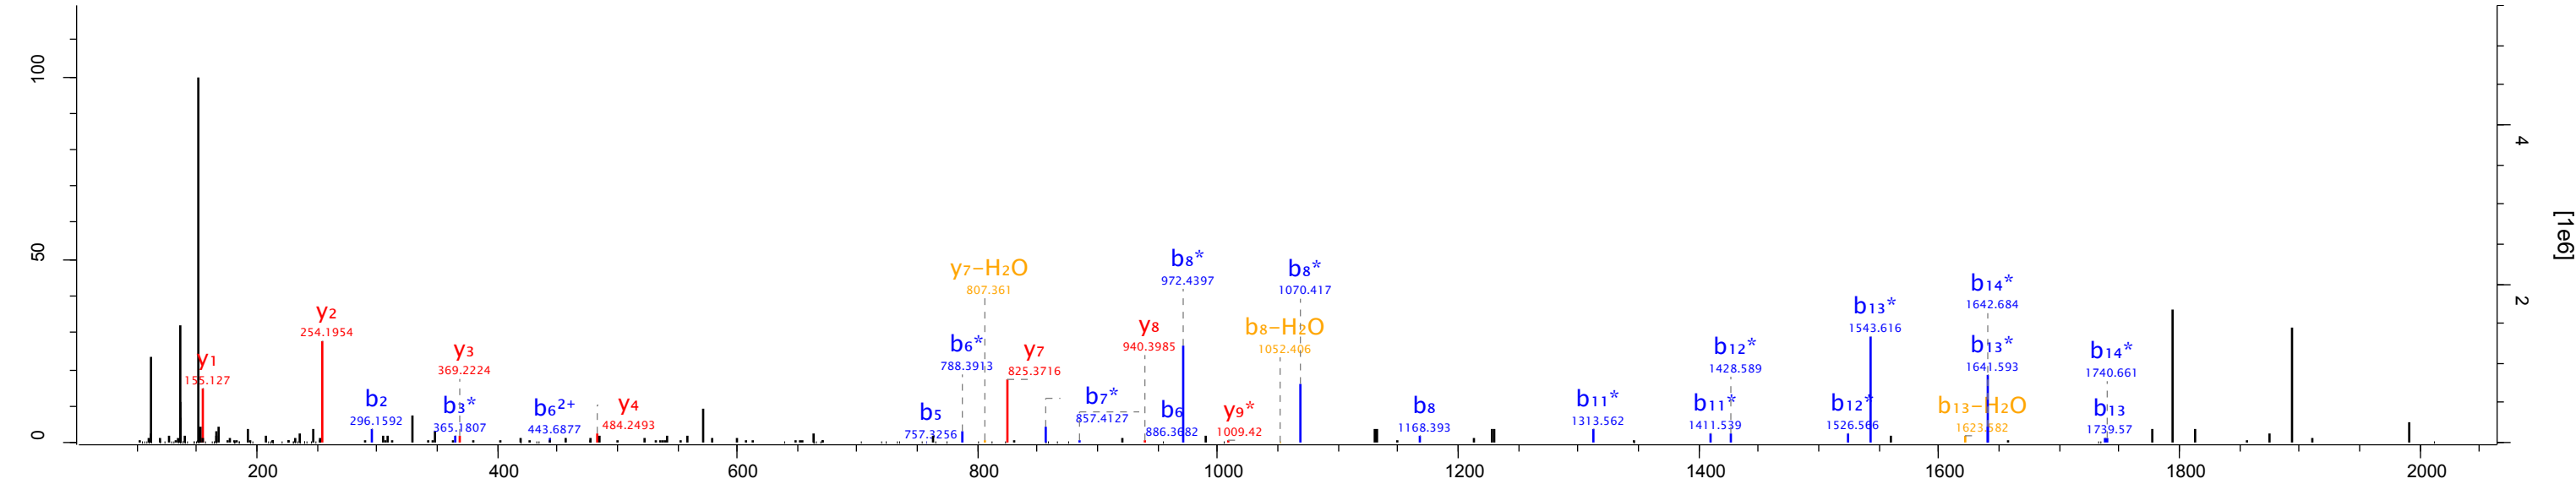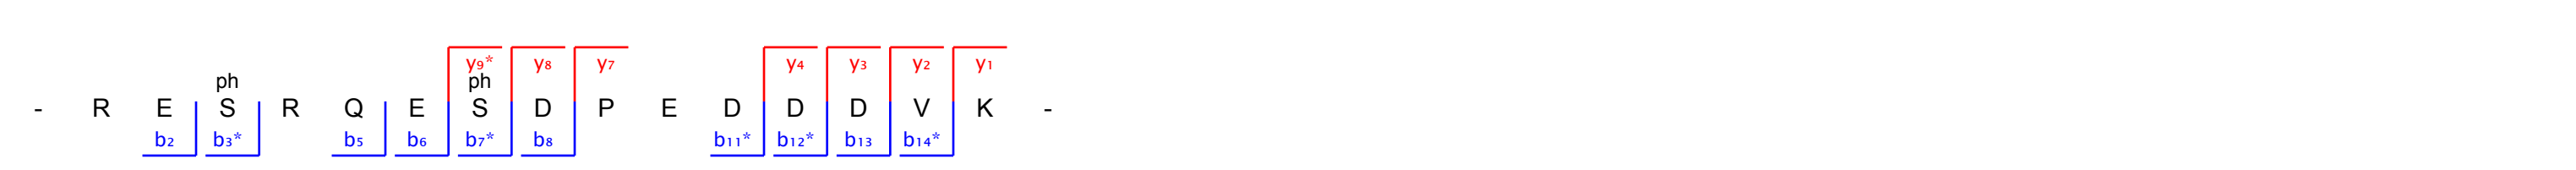

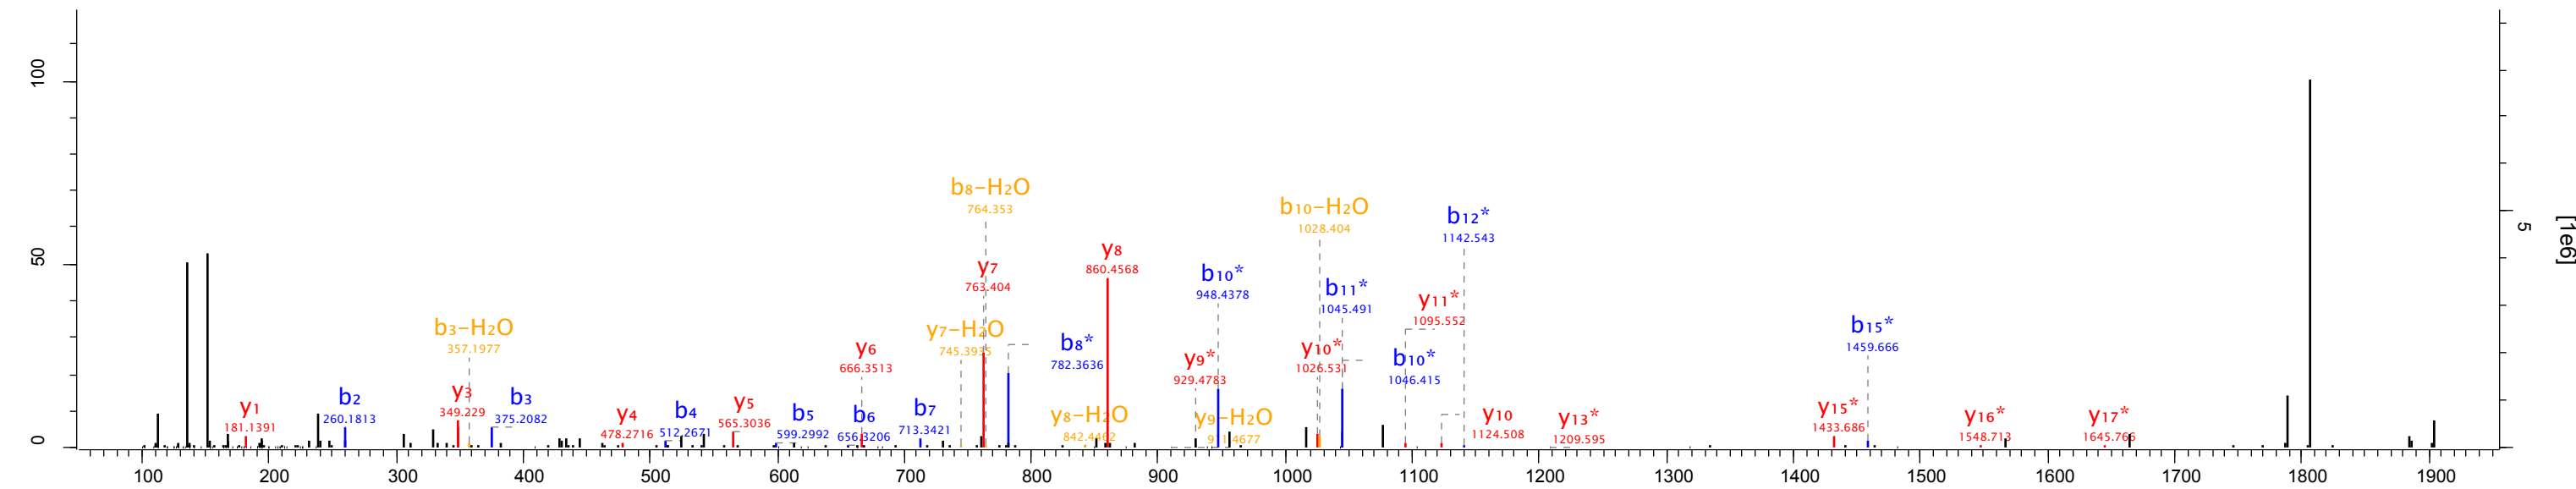

- R P D H S G G S P S P P T S E P A R -

b<sub>2</sub>
b<sub>3</sub>
b<sub>4</sub>
b<sub>5</sub>
b<sub>6</sub>
b<sub>7</sub>
b<sub>8</sub>\*
b<sub>10</sub>\*
b<sub>11</sub>\*
b<sub>12</sub>\*
b<sub>15</sub>\*

Raw file 20171215\_MaS\_33SR\_LMH\_phospho2\_03 Scan 3670 Method FTMS; HCD Score 193.61 m/z 722 Gene names THRAP3

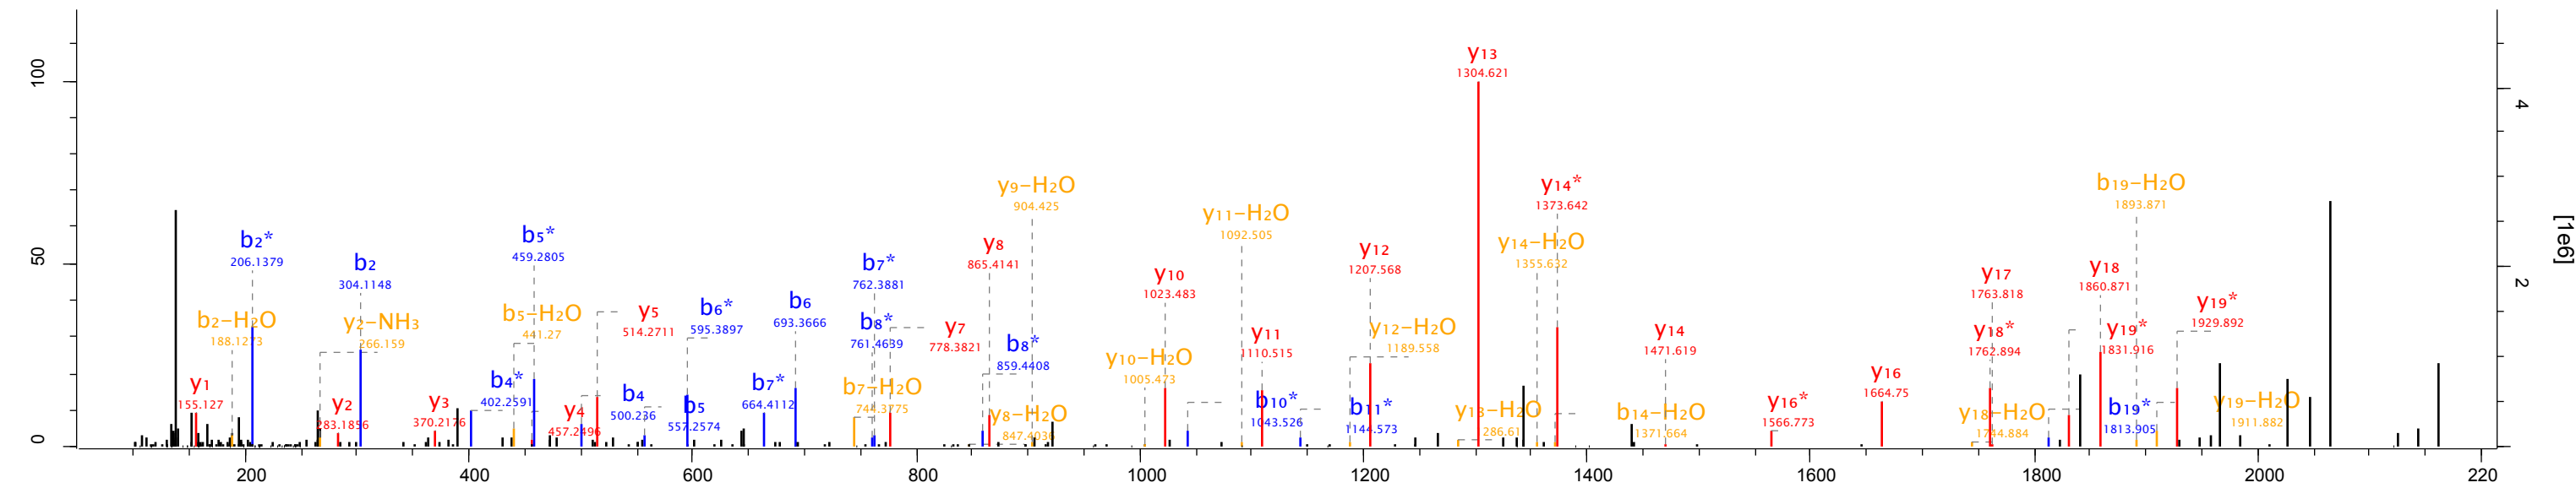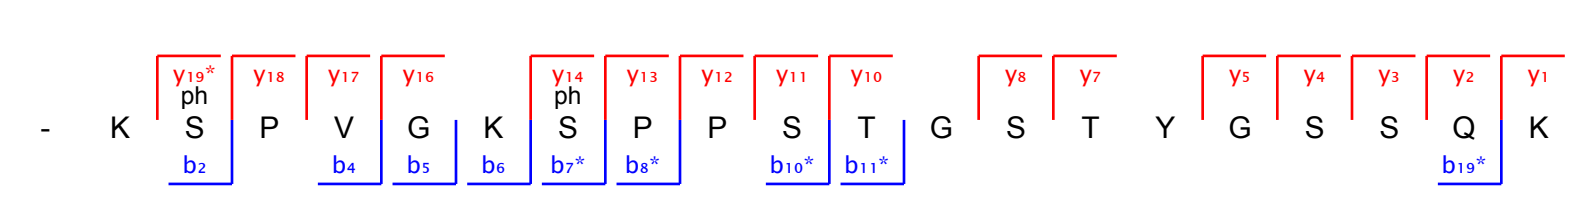



Raw file: 20171215\_MaS\_33SR\_LMH\_phospho2\_03  
 Scan: 3690 Method: FTMS; HCD Score: 102.92 m/z: 851.37 Gene names: PRR12

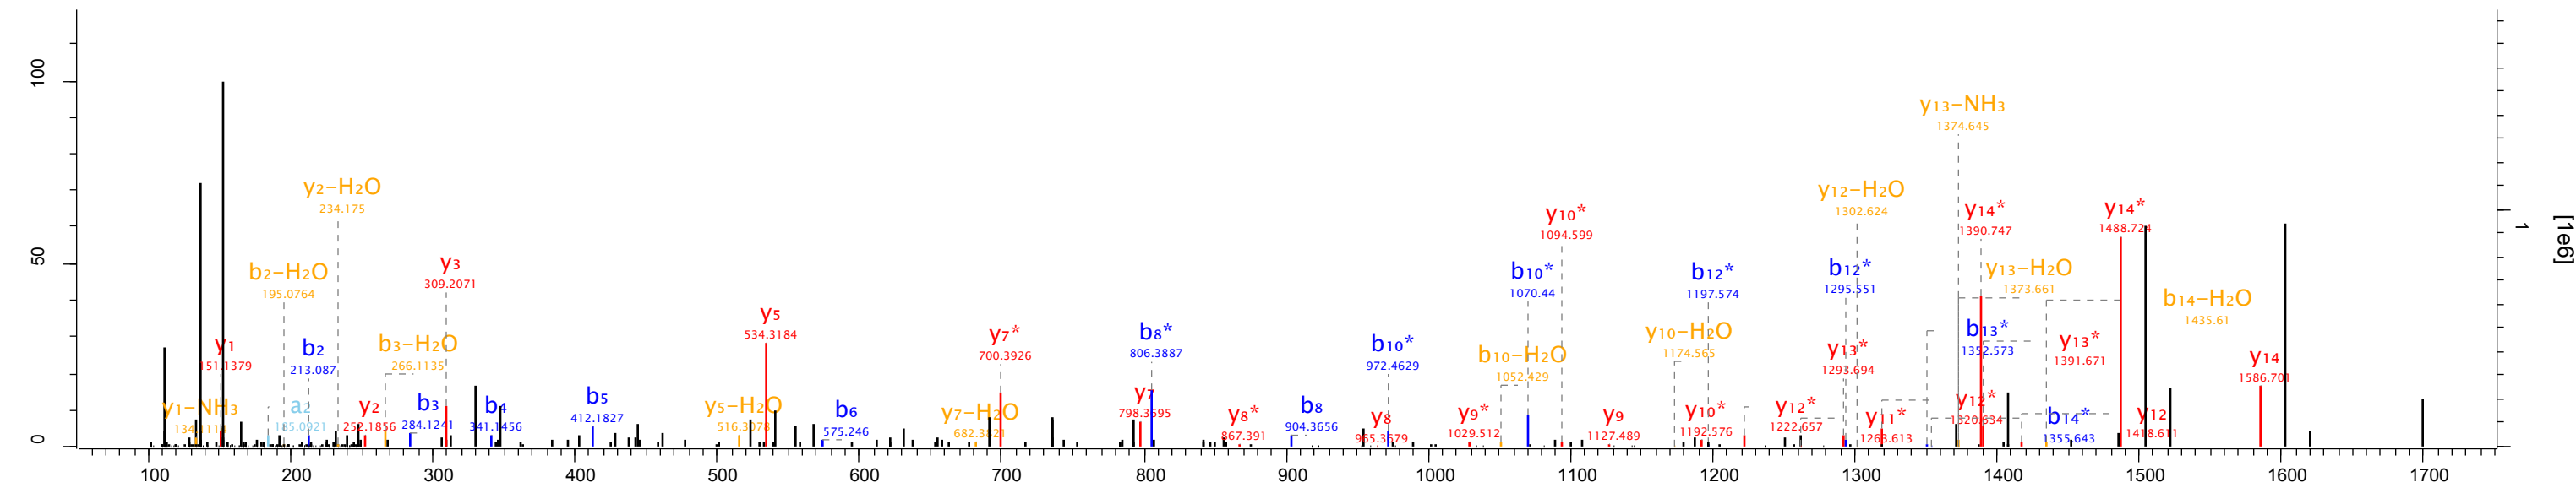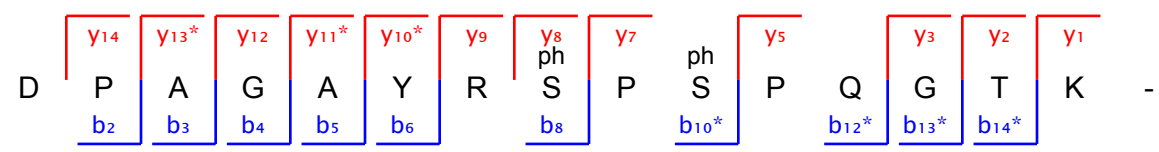

Raw file 20171215\_MaS\_33SR\_LMH\_phospho2\_03 Scan 4130 Method FTMS; HCD Score 69.64 m/z 559.74 Gene names SRSF10

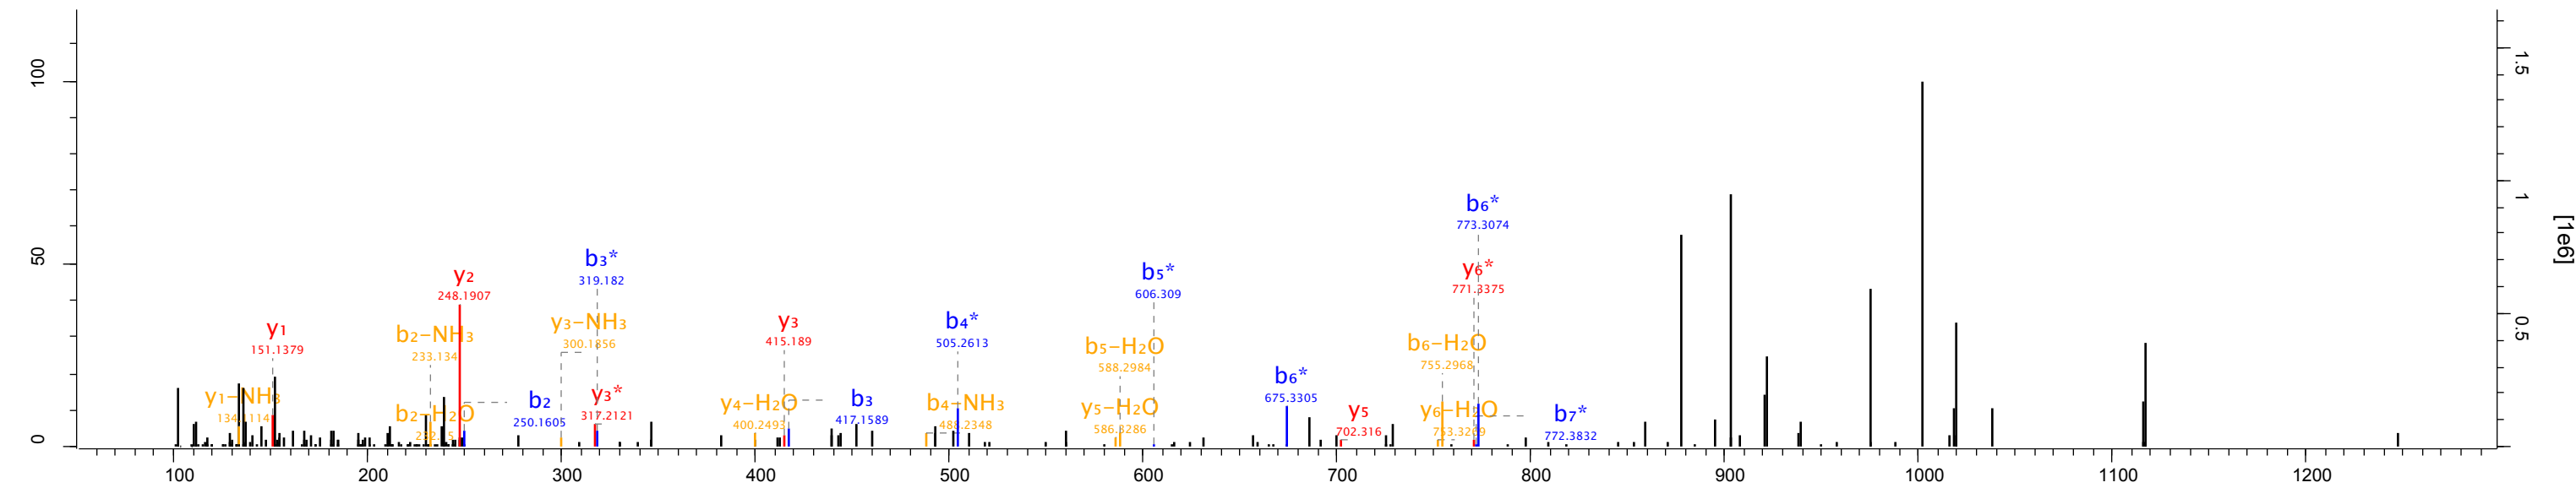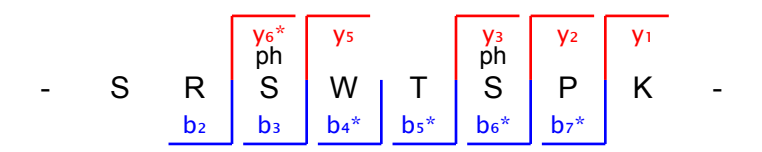

Raw file 20171215\_MaS\_33SR\_LMH\_phospho2\_03 Scan 4730 Method FTMS; HCD Score 56.77 m/z 450.2 Gene names PRPF38B

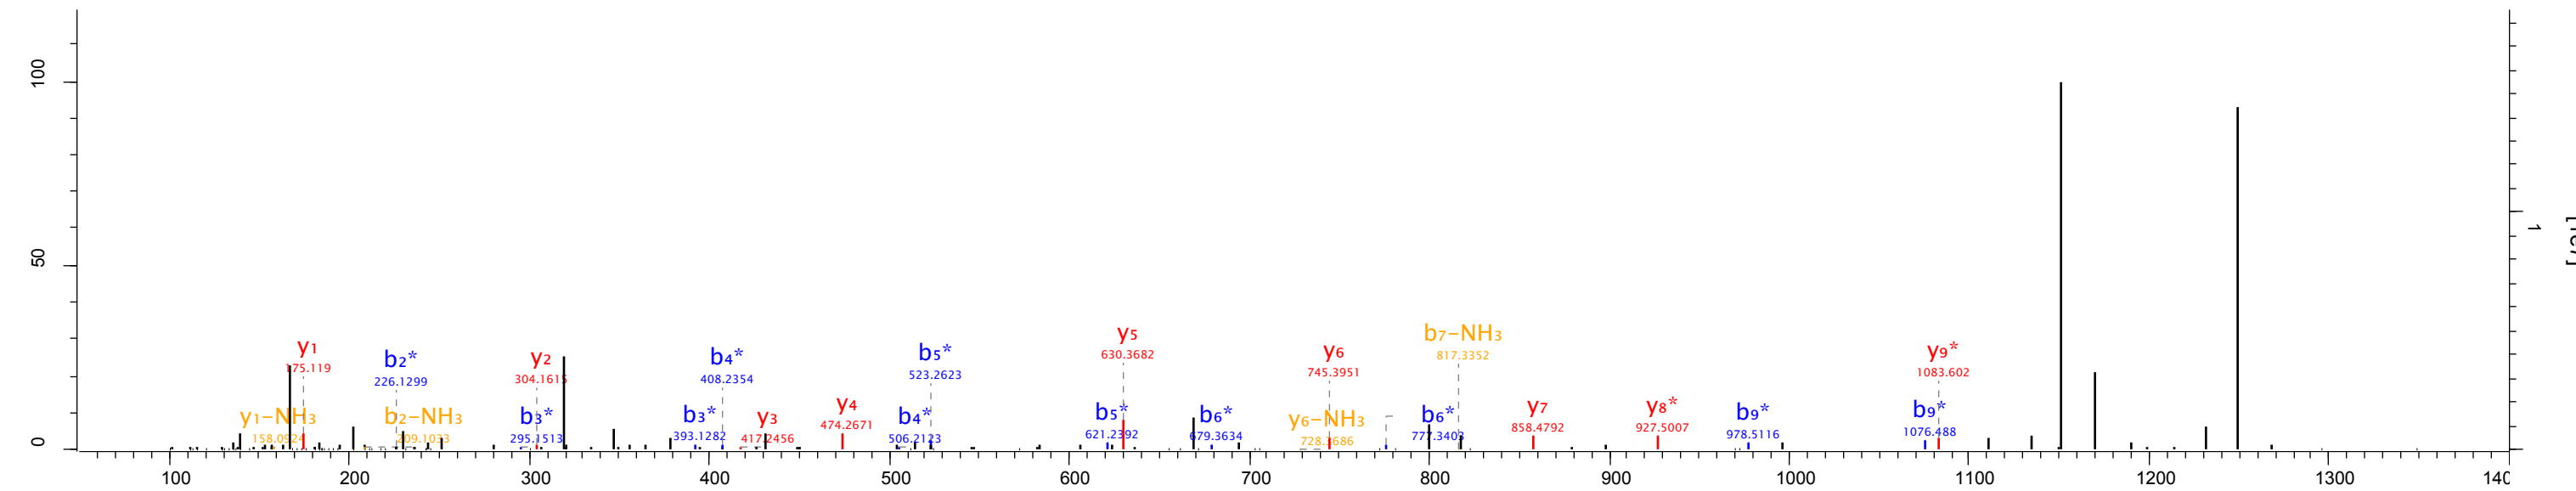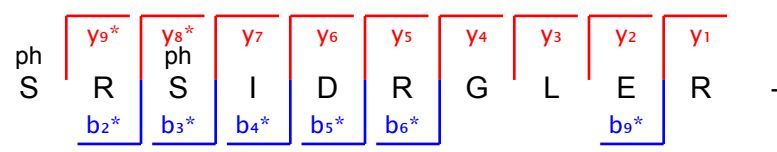

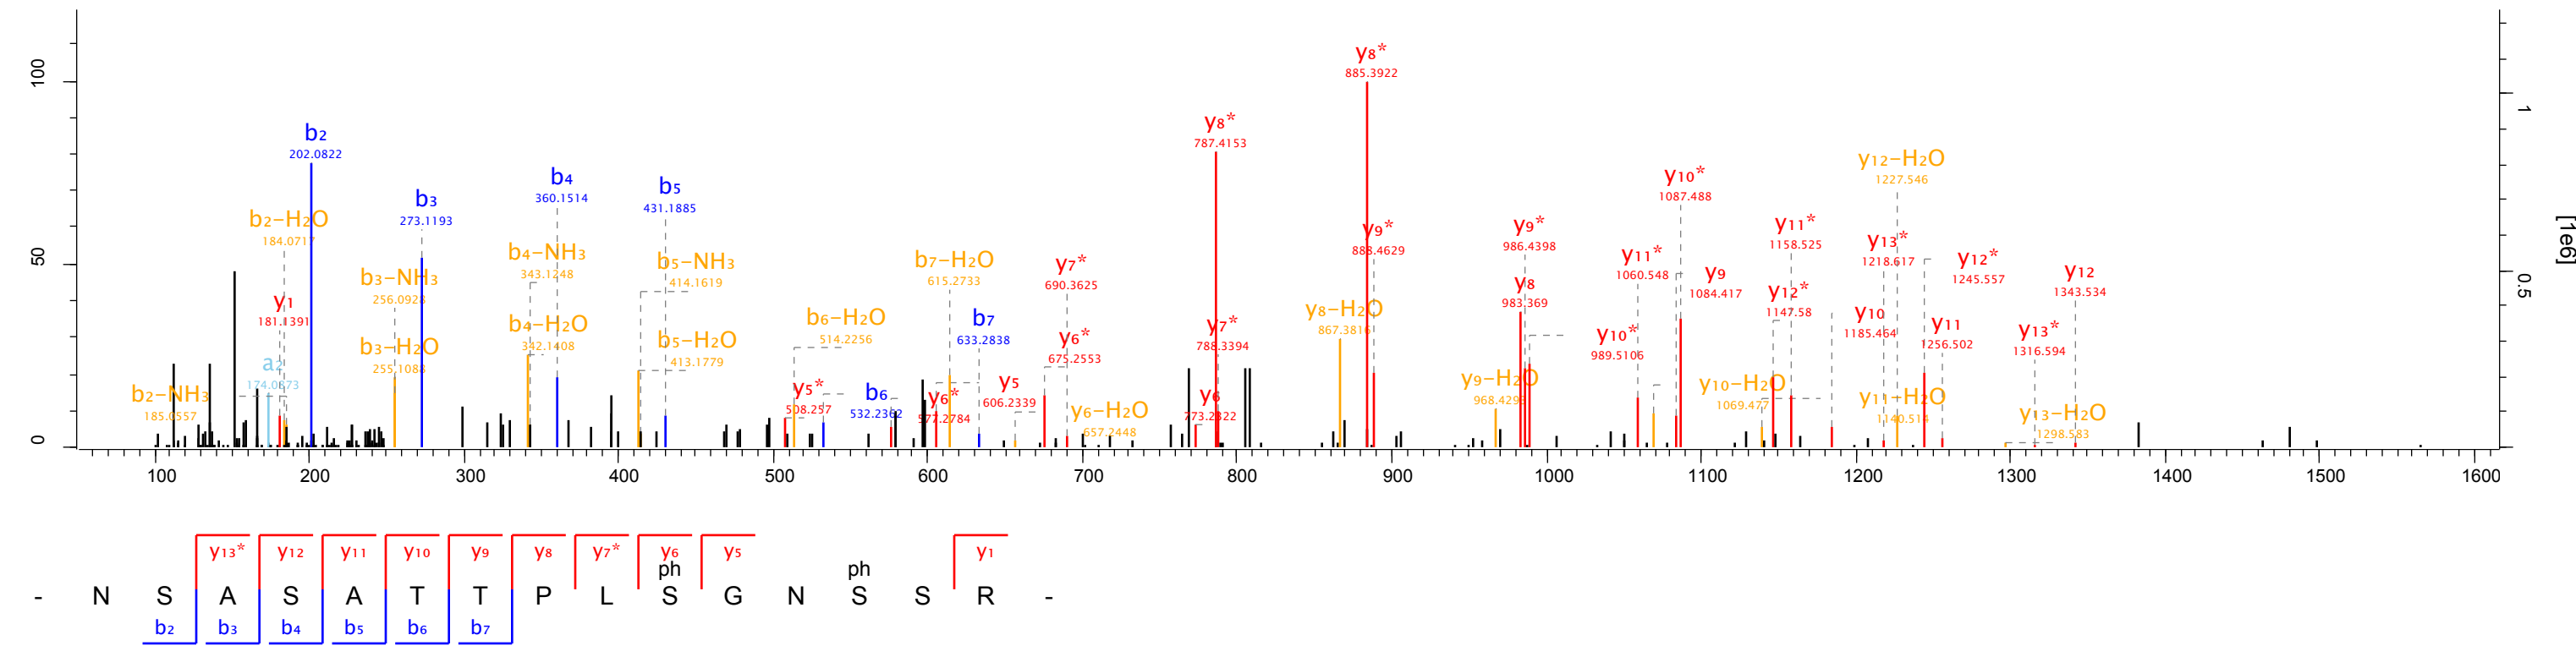

Raw file 20171215\_MaS\_33SR\_LMH\_phospho2\_03 Scan 5230 Method FTMS; HCD Score 89.08 m/z 706.97 Gene names CIC

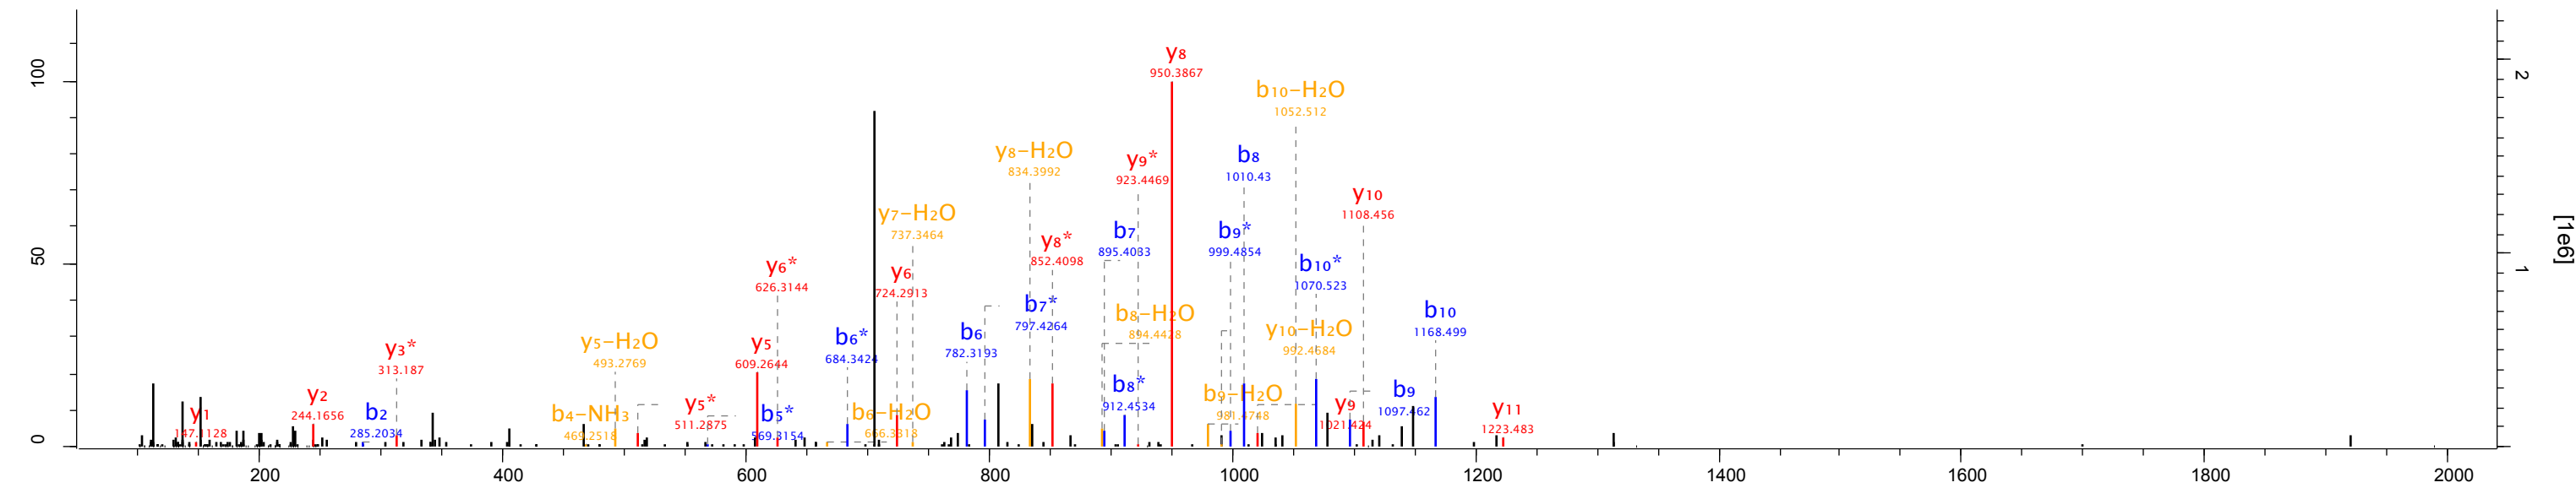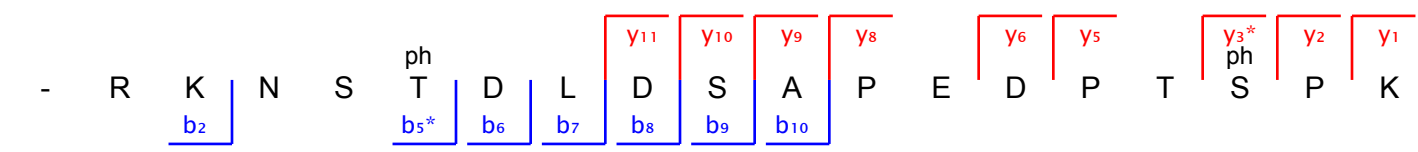

Raw file 20171215\_MaS\_33SR\_LMH\_phospho2\_03 Scan 5270 Method FTMS; HCD Score 97.49 m/z 804.82 Gene names PDCL3

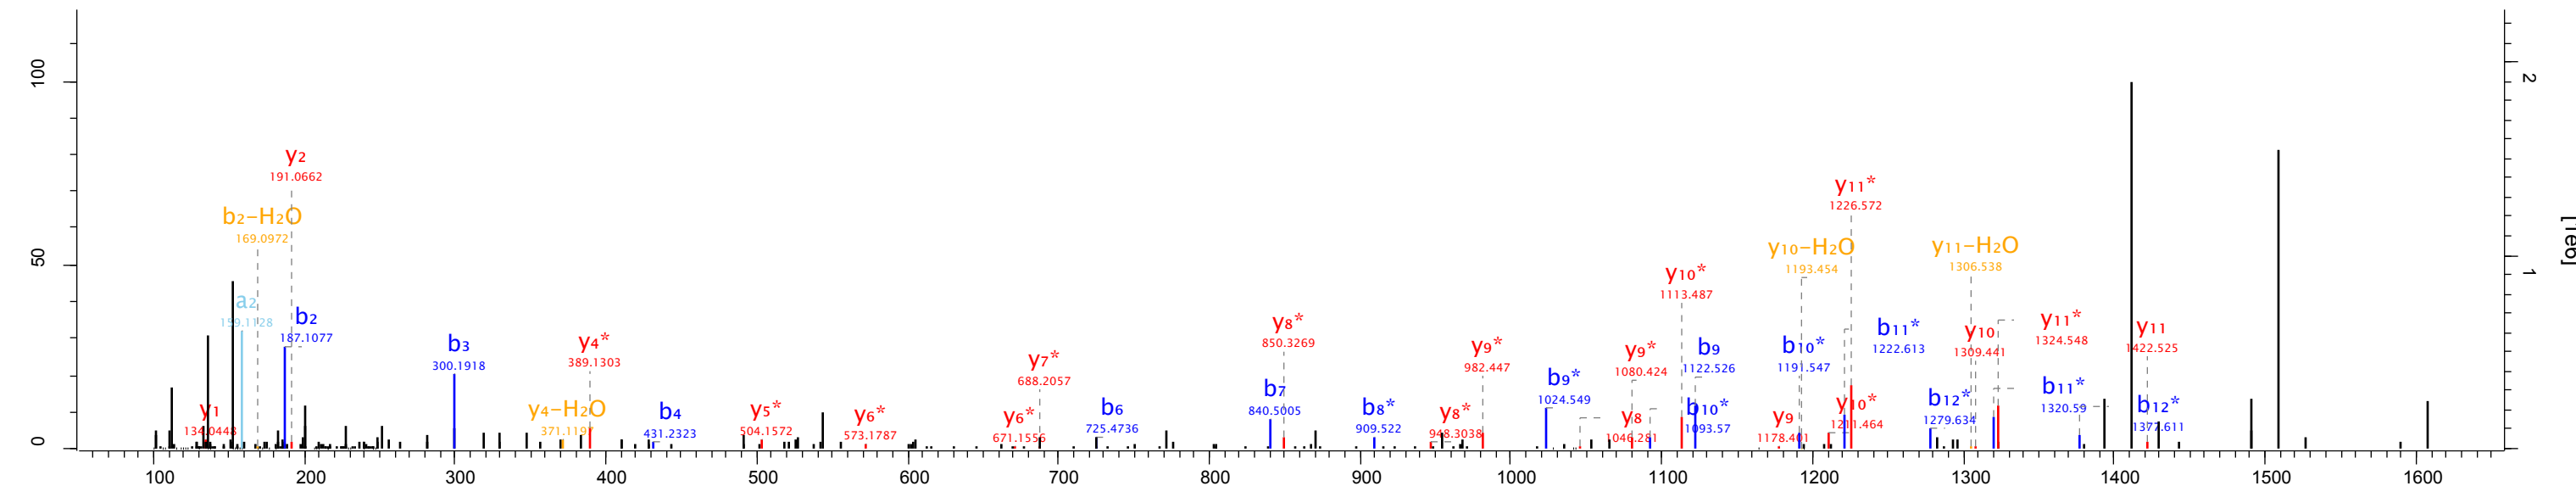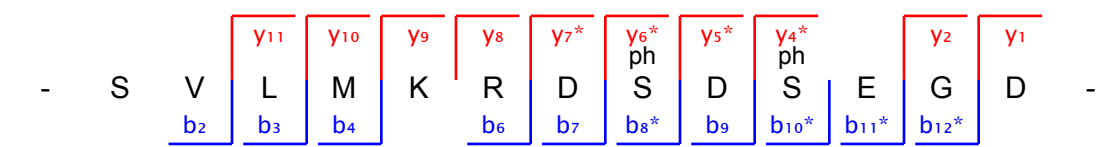

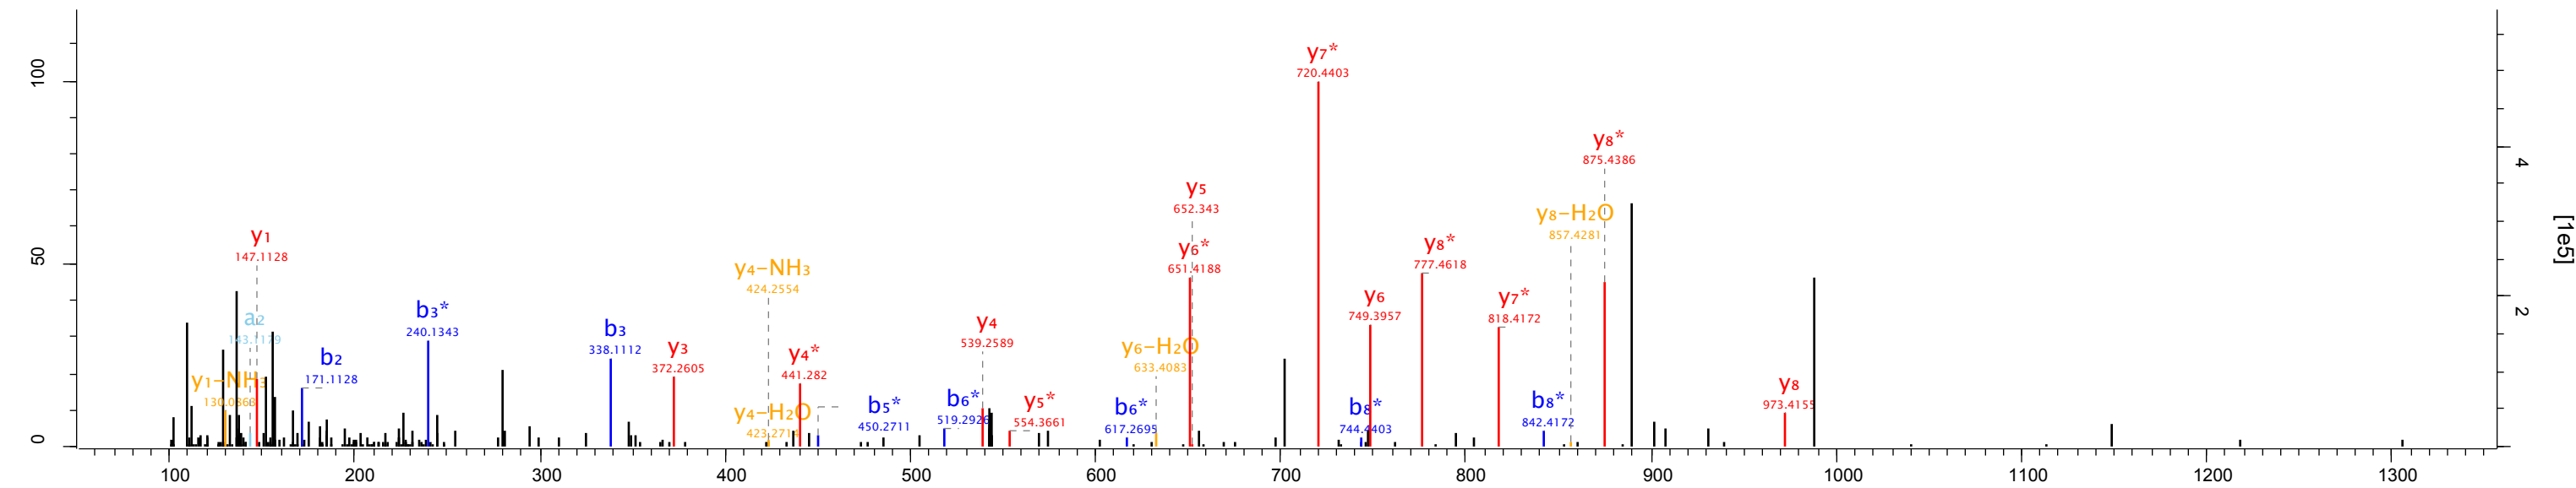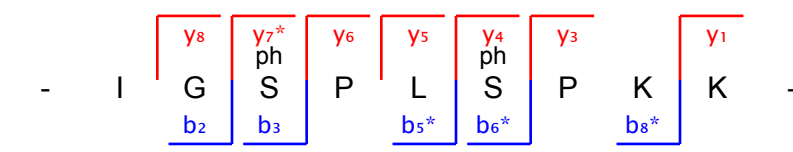

Raw file: 20171215\_MaS\_33SR\_LMH\_phospho2\_03  
 Scan: 5550 Method: FTMS; HCD Score: 94.23 m/z: 949.86 Gene names: RAP1GAP2

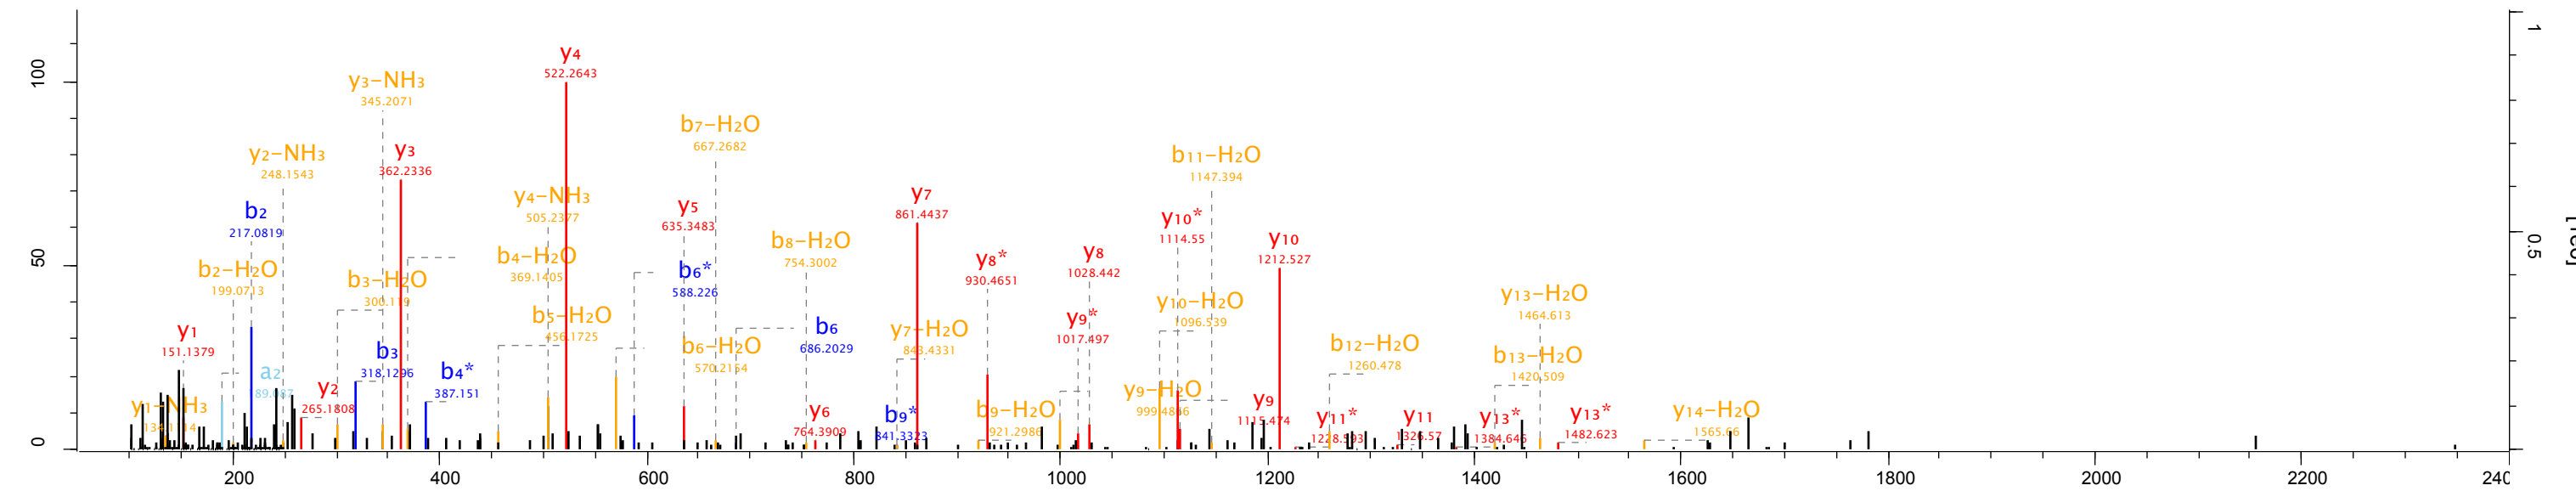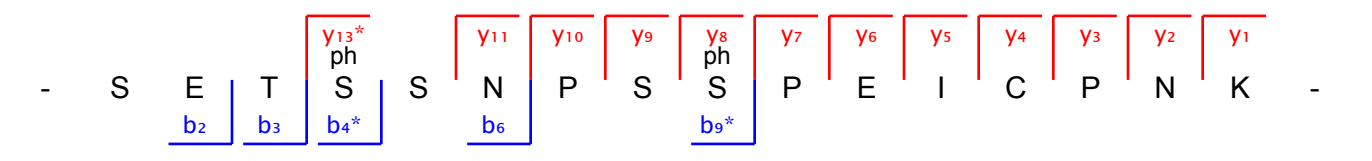



Raw file 20171215\_MaS\_33SR\_LMH\_phospho2\_03 Scan 5830 Method FTMS; HCD Score 190.96 m/z 865.9 Gene names HNRNPA1

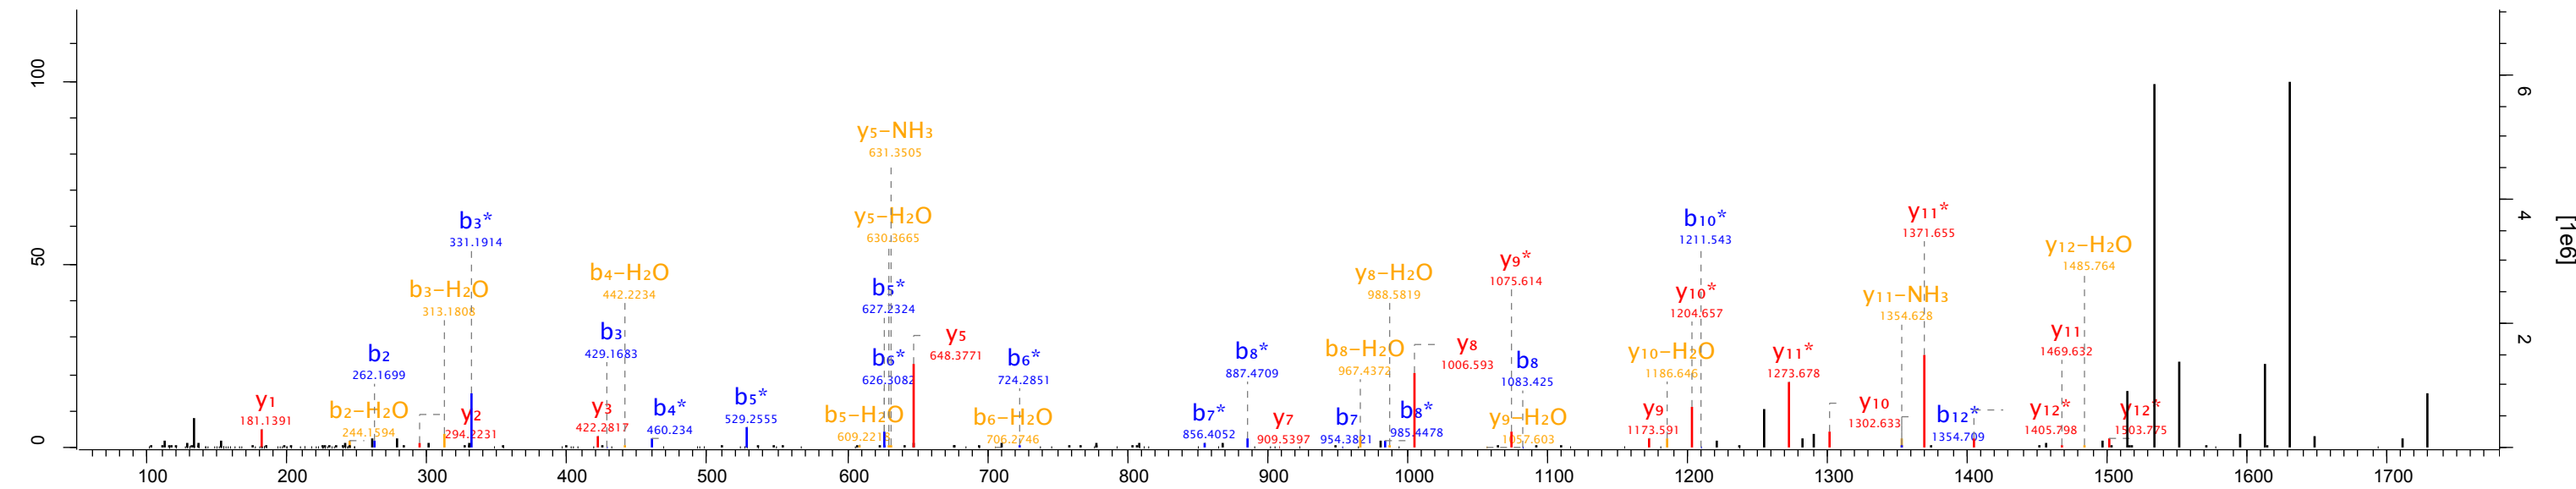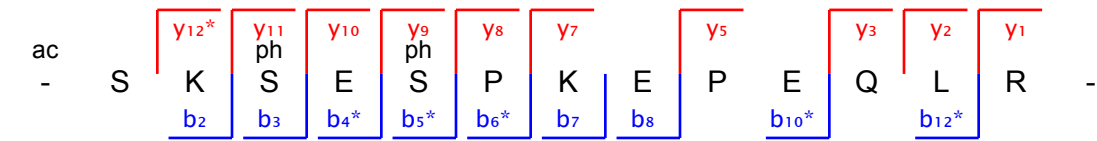

Raw file  
20171215\_MaS\_33SR\_LMH\_phospho2\_03

Scan 6190 Method FTMS; HCD Score 130.02 m/z 679.27 Gene names POC5

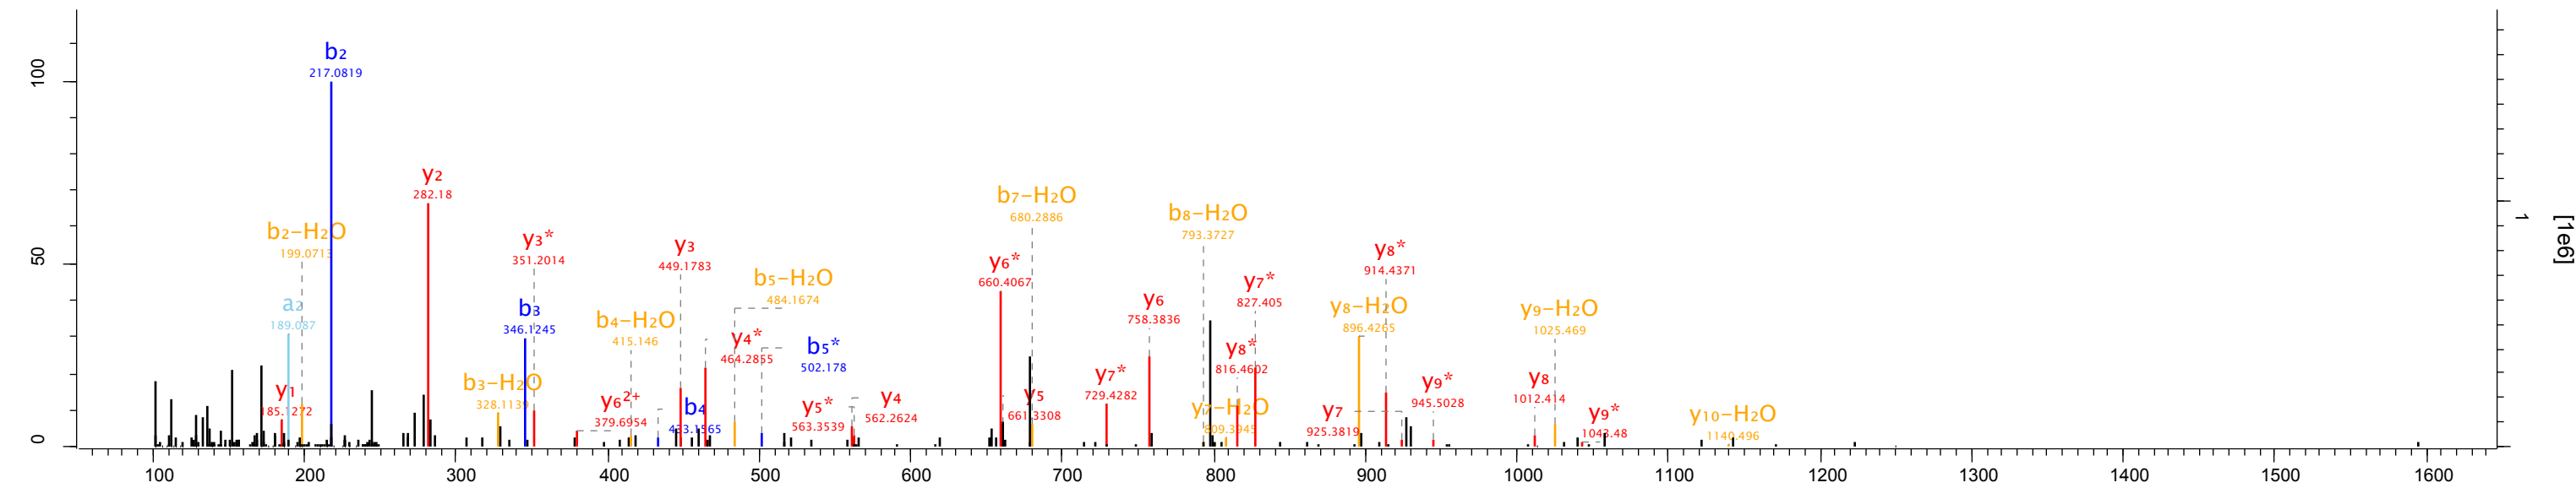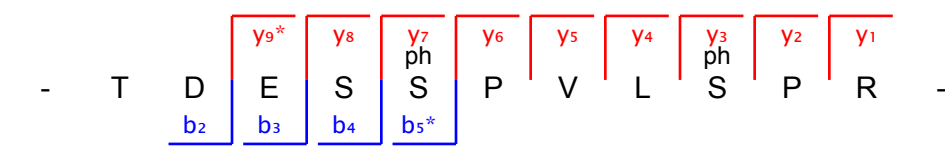

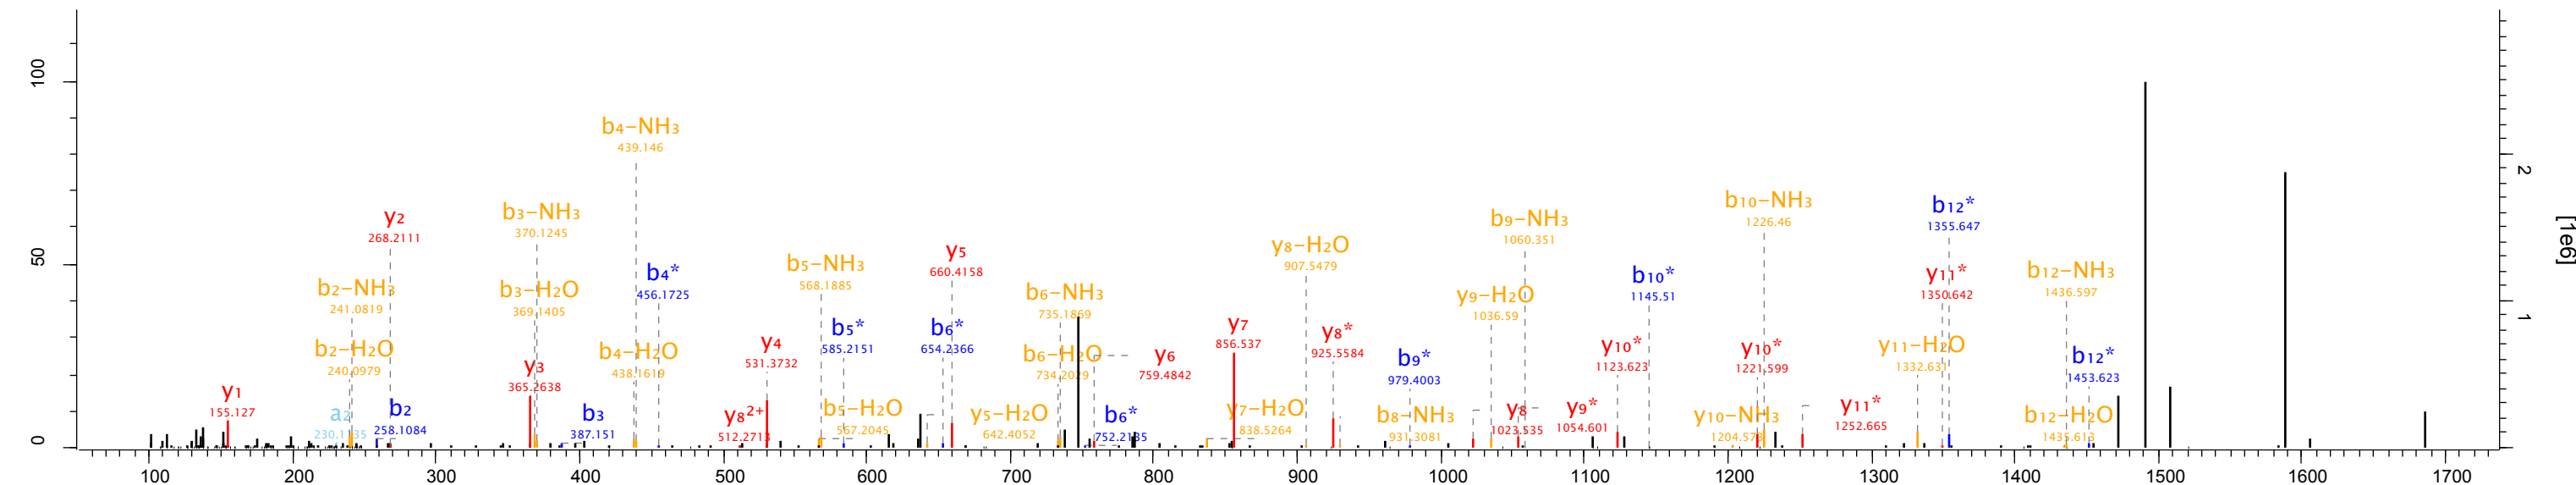

- Q E E E S E S P V E R P L K -

b<sub>2</sub>
b<sub>3</sub>
b<sub>4</sub><sup>\*</sup>
b<sub>5</sub><sup>\*</sup>
b<sub>6</sub><sup>\*</sup>
b<sub>9</sub><sup>\*</sup>
b<sub>10</sub><sup>\*</sup>
b<sub>12</sub><sup>\*</sup>

y<sub>11</sub><sup>\*</sup>
y<sub>10</sub><sup>\*</sup>
y<sub>9</sub><sup>\*</sup>
y<sub>8</sub><sup>\*</sup>
y<sub>7</sub>
y<sub>6</sub>
y<sub>5</sub>
y<sub>4</sub>
y<sub>3</sub>
y<sub>2</sub>
y<sub>1</sub>

ph
ph



Raw file 20171215\_MaS\_33SR\_LMH\_phospho2\_03 Scan 6300 Method FTMS; HCD Score 90.44 m/z 781.37 Gene names KIF21A

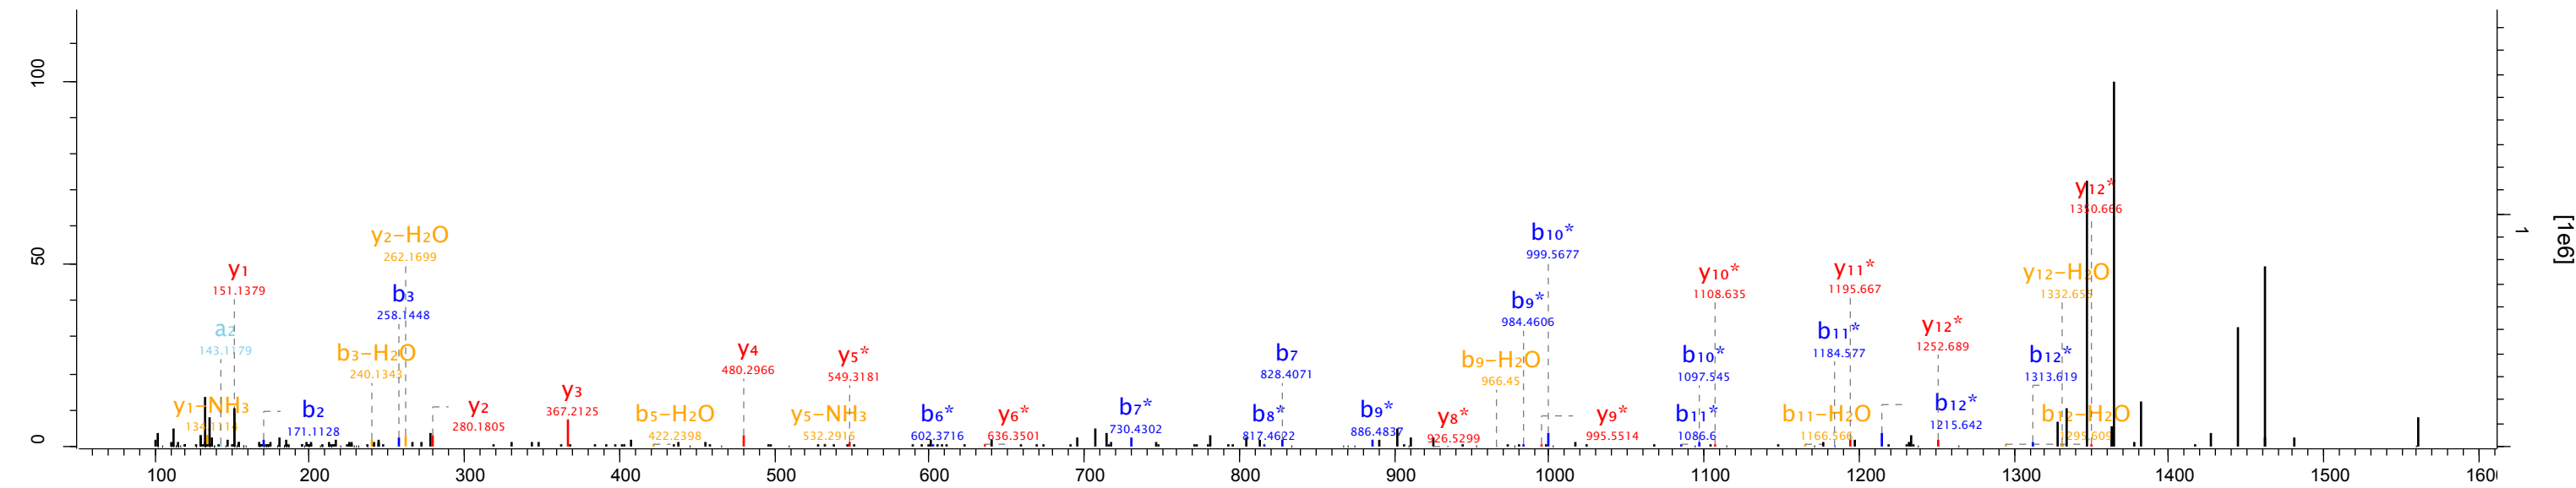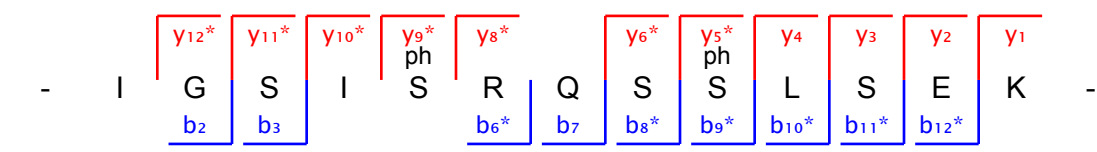

Raw file 20171215\_MaS\_33SR\_LMH\_phospho2\_03 Scan 6540 Method FTMS; HCD Score 286.58 m/z 1296.52 Gene names PPP1R2;PPP1R2P3

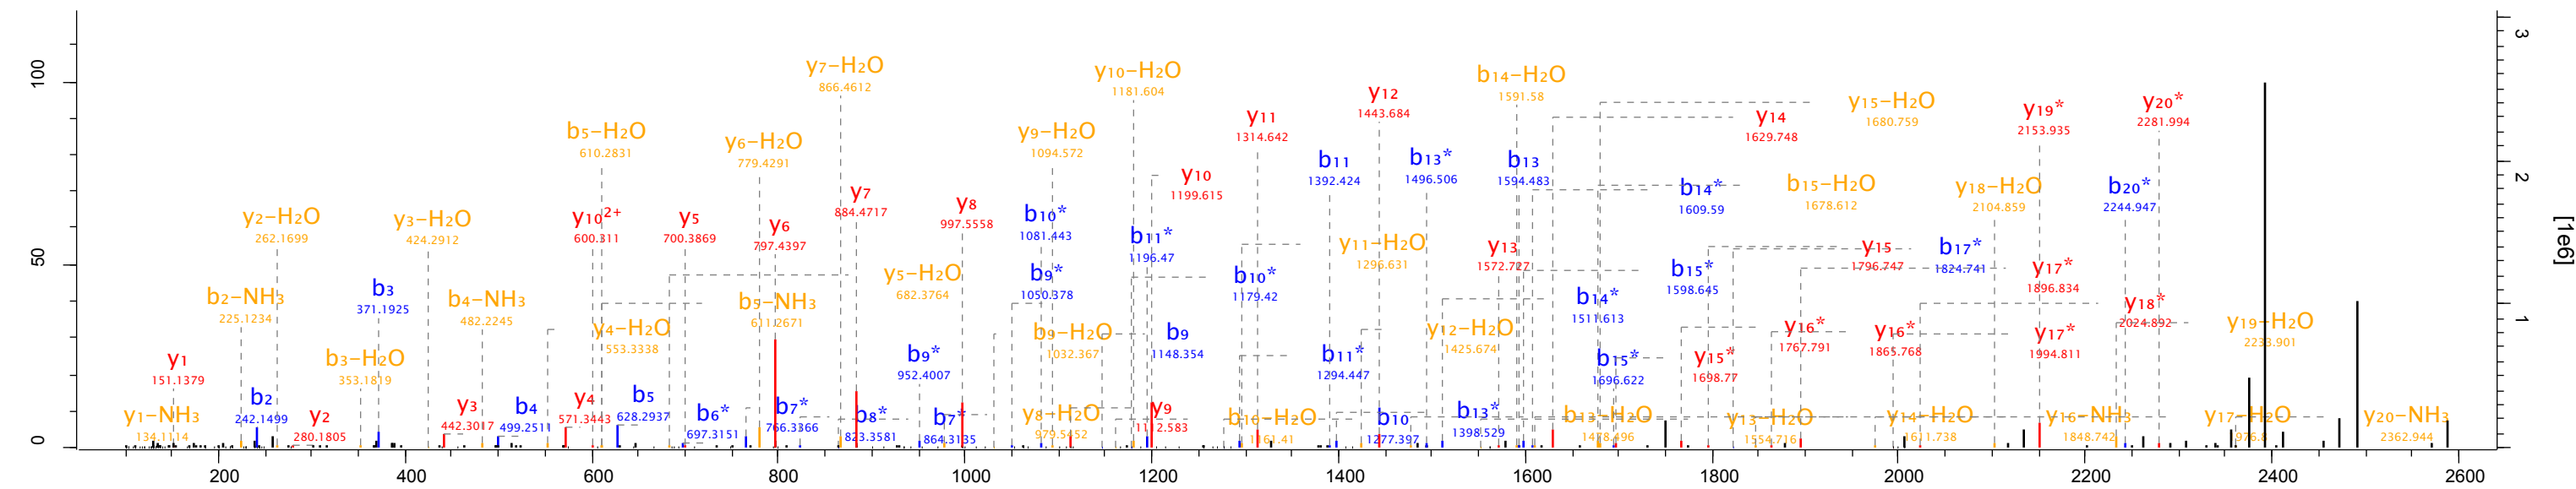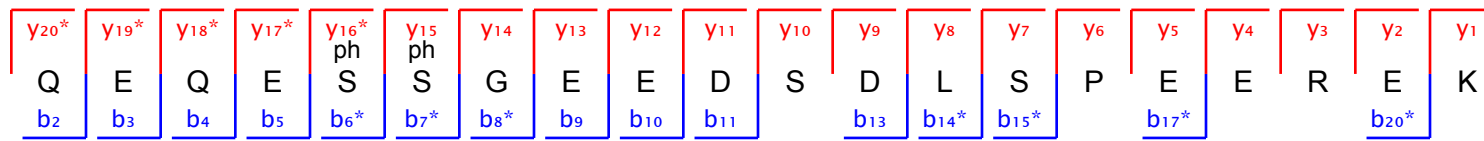

Raw file 20171215\_MaS\_33SR\_LMH\_phospho2\_03 Scan 6670 Method FTMS; HCD Score 44.05 m/z 608.27 Gene names RANBP2

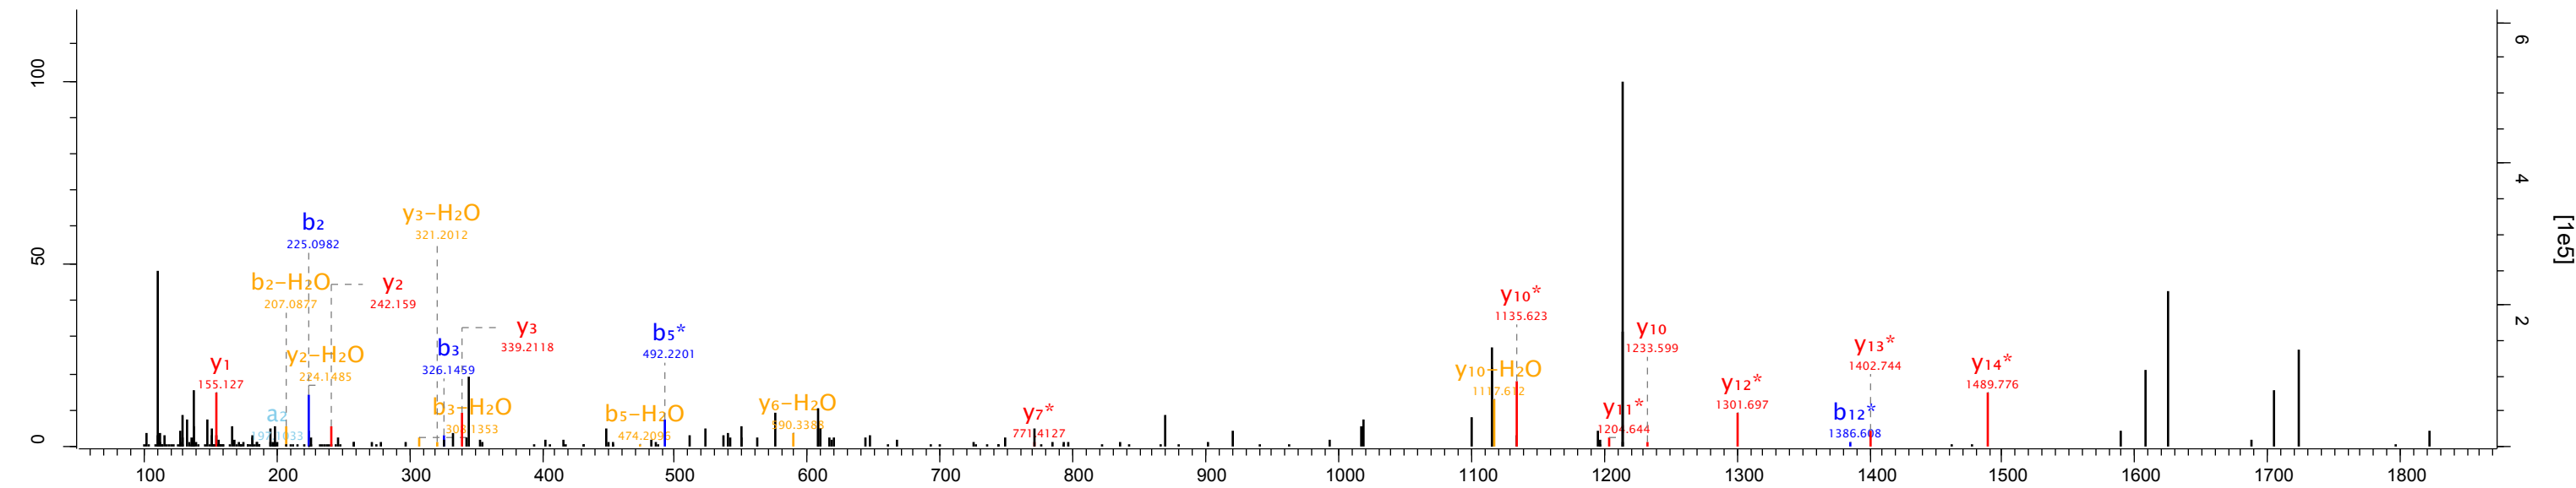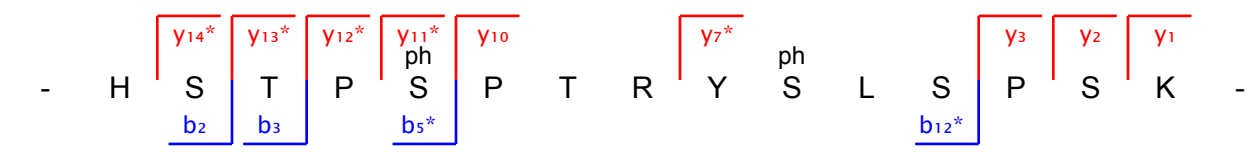

Raw file 20171215\_MaS\_33SR\_LMH\_phospho2\_03 Scan 6820 Method FTMS; HCD Score 214.95 m/z 857.4 Gene names MEPCE

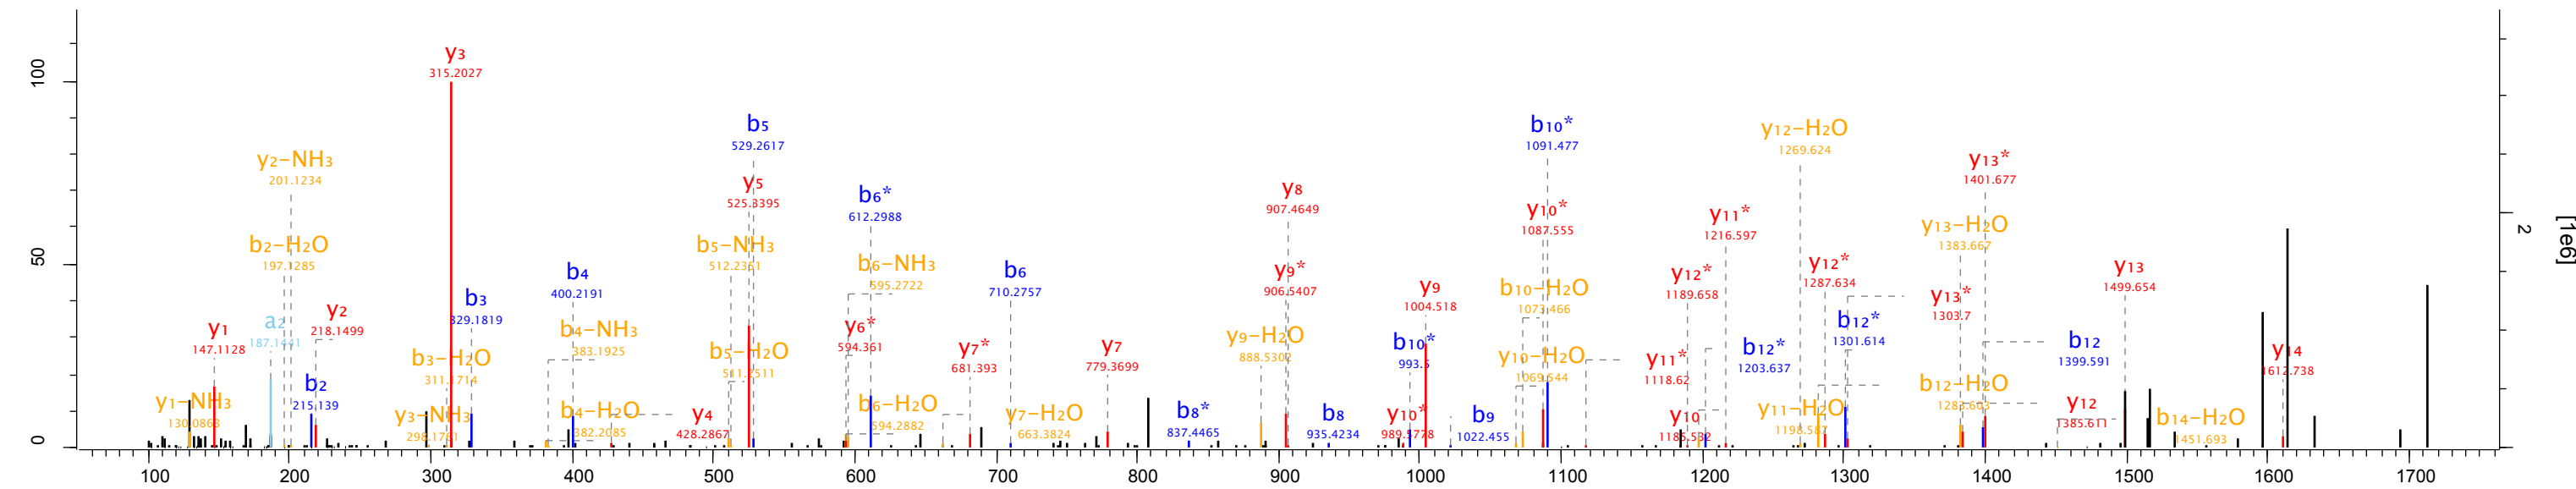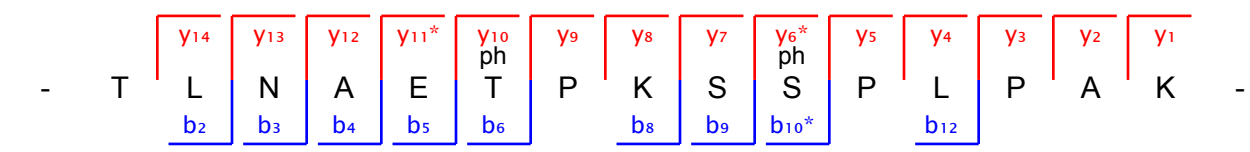



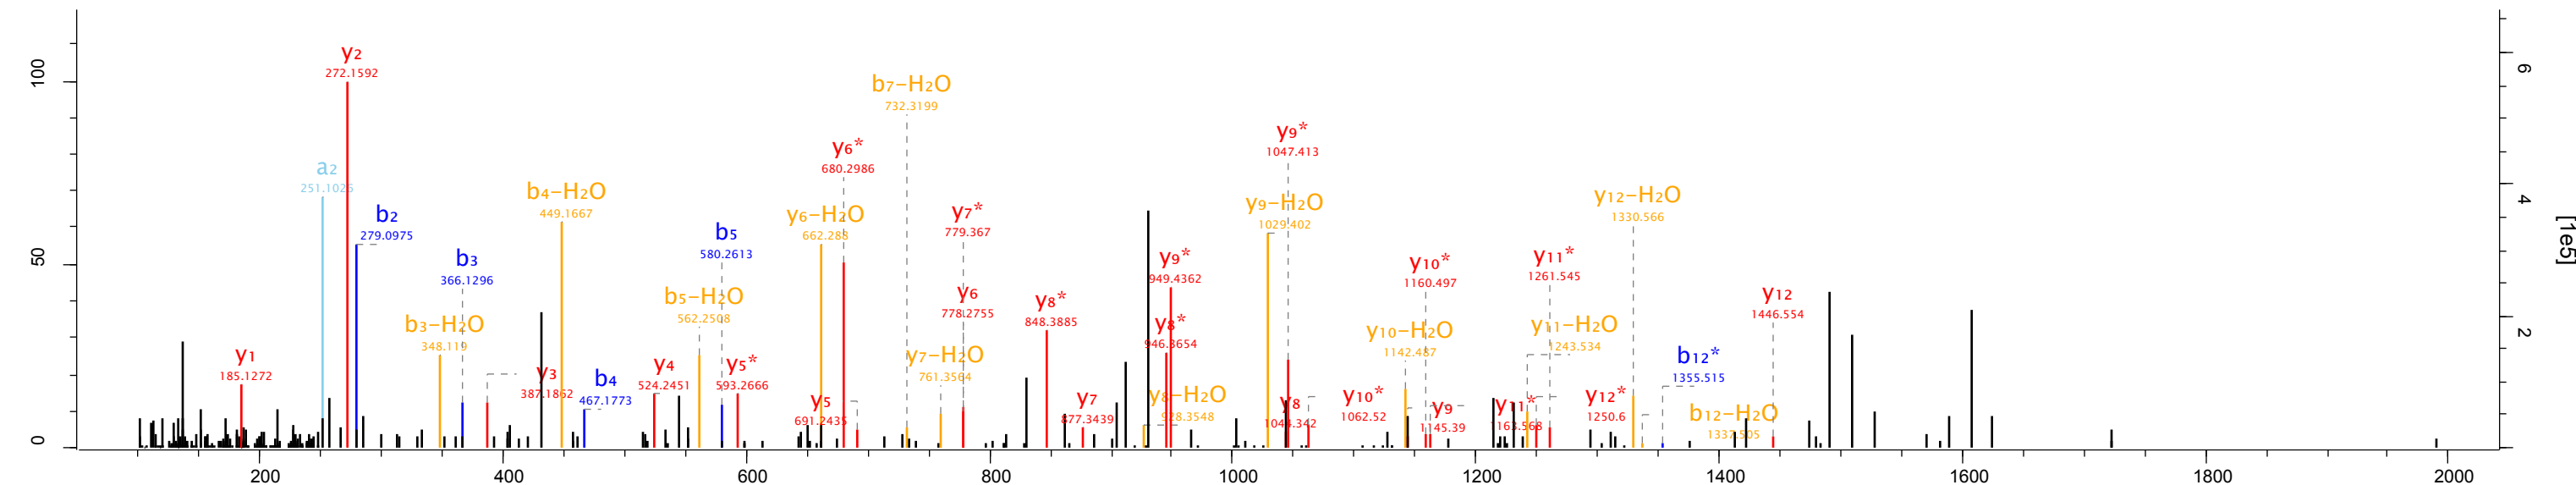

- D Y S T L T S V S S H D S R -

Fragmentation mapping (b and y ions):

- b<sub>2</sub> (under Y)
- b<sub>3</sub> (under S)
- b<sub>4</sub> (under T)
- b<sub>5</sub> (under L)
- b<sub>12</sub>\* (under D)
- y<sub>1</sub> (under R)
- y<sub>2</sub> (under S)
- y<sub>3</sub> (under D)
- y<sub>4</sub> (under H)
- y<sub>5</sub> (under S)
- y<sub>6</sub> (under S)
- y<sub>7</sub> (under V)
- y<sub>8</sub> (under S)
- y<sub>9</sub> (under T)
- y<sub>10</sub>\* (under L)
- y<sub>11</sub>\* (under T)
- y<sub>12</sub> (under S)

Raw file 20171215\_MaS\_33SR\_LMH\_phospho2\_03 Scan 7950 Method FTMS; HCD Score 118.2 m/z 641.24 Gene names TLE4

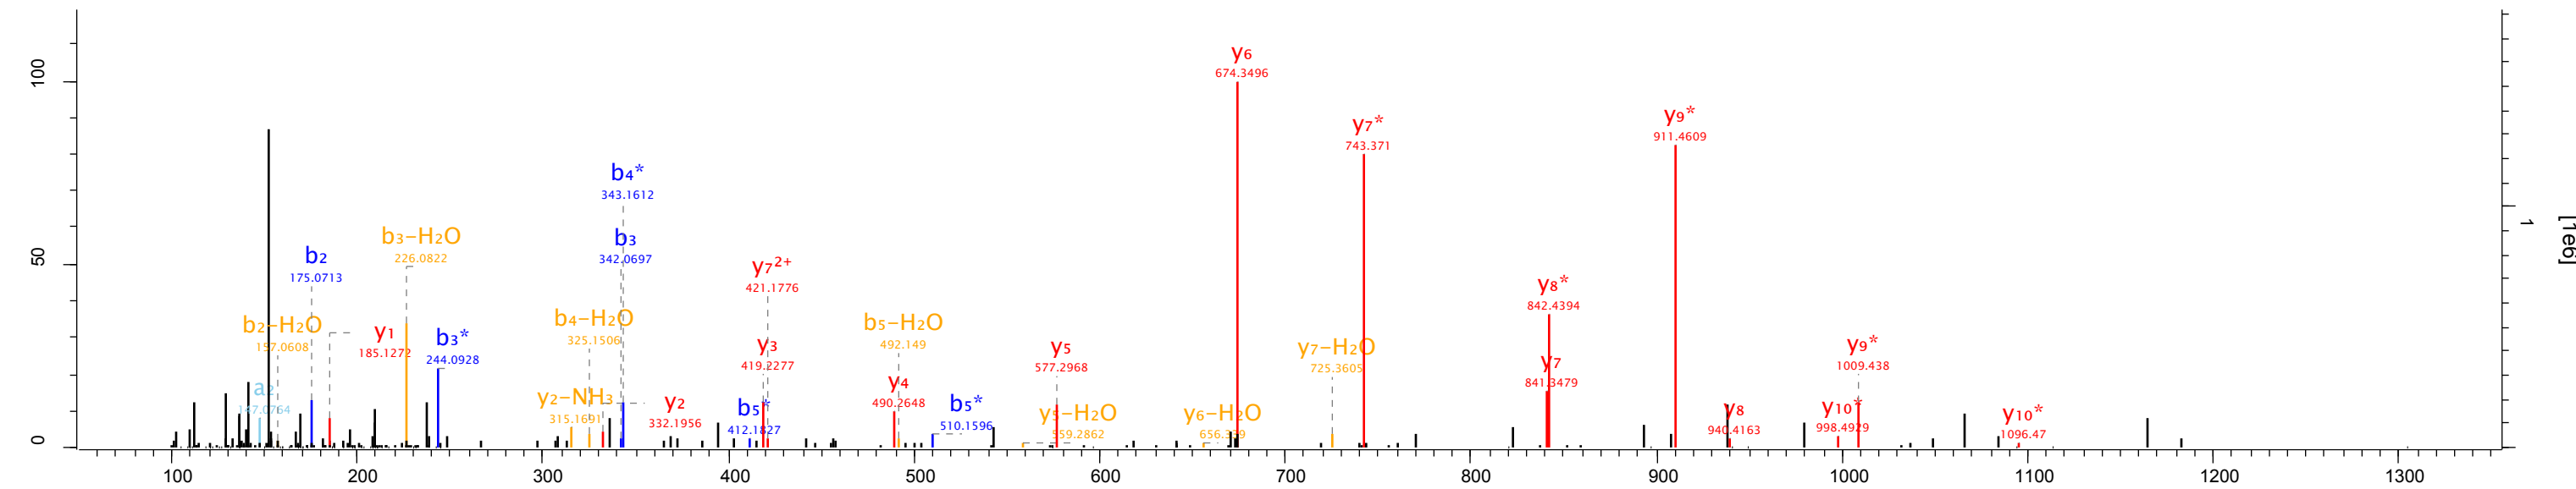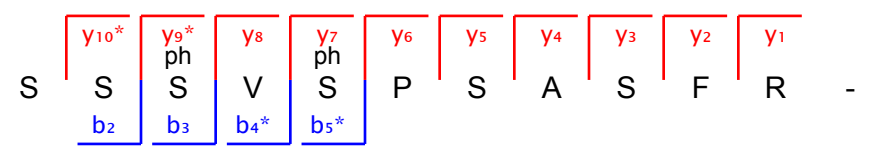

Raw file: 20171215\_MaS\_33SR\_LMH\_phospho2\_03  
 Scan: 8160 Method: FTMS; HCD Score: 143.47 m/z: 655.97 Gene names: SRRT

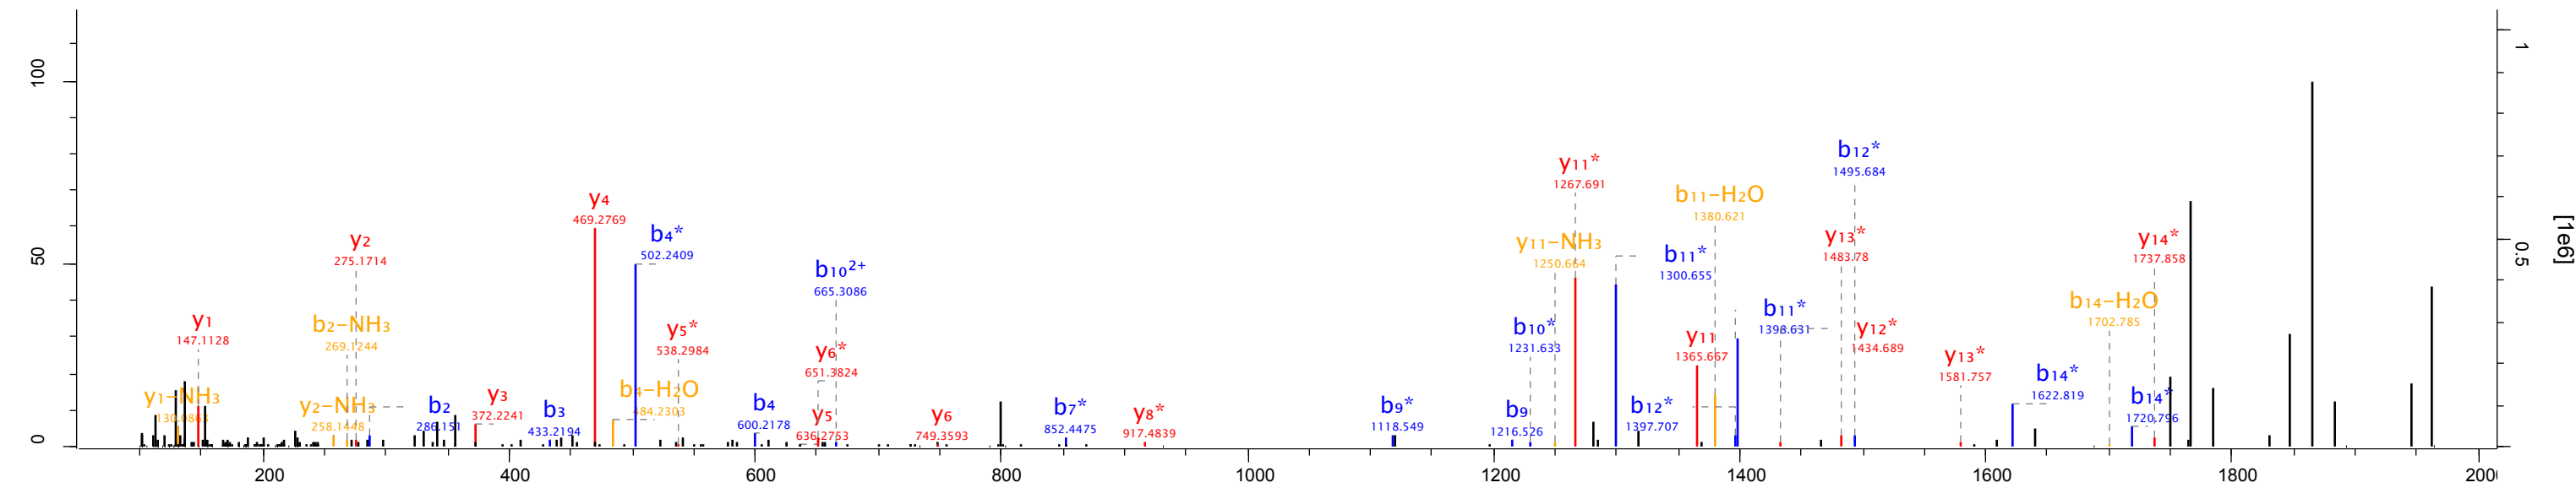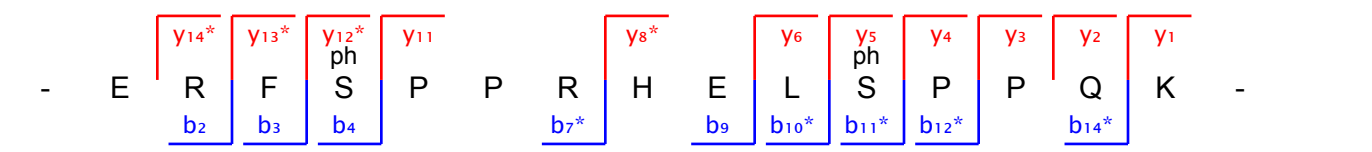

Raw file: 20171215\_MaS\_33SR\_LMH\_phospho2\_03  
 Scan: 8330 Method: FTMS; HCD Score: 204.78 m/z: 937.35 Gene names: ARFGAP1

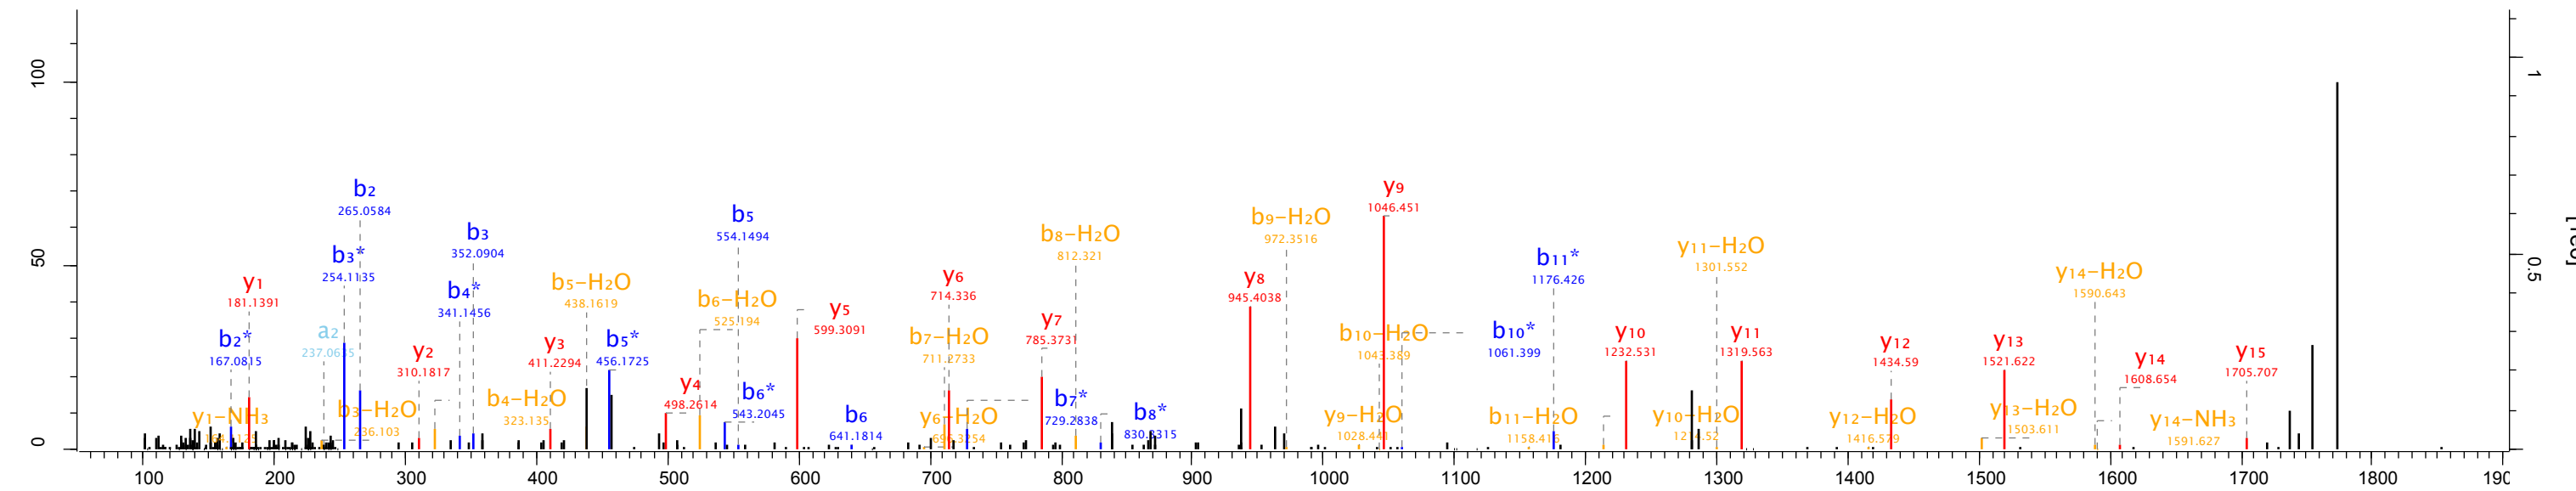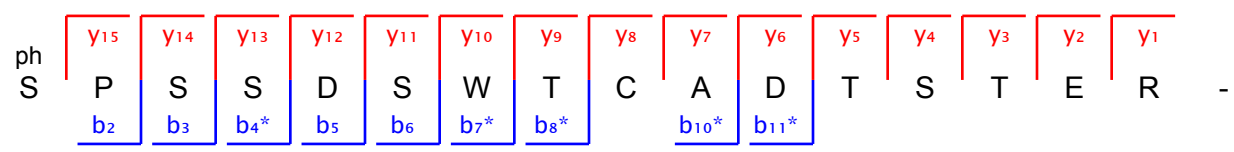

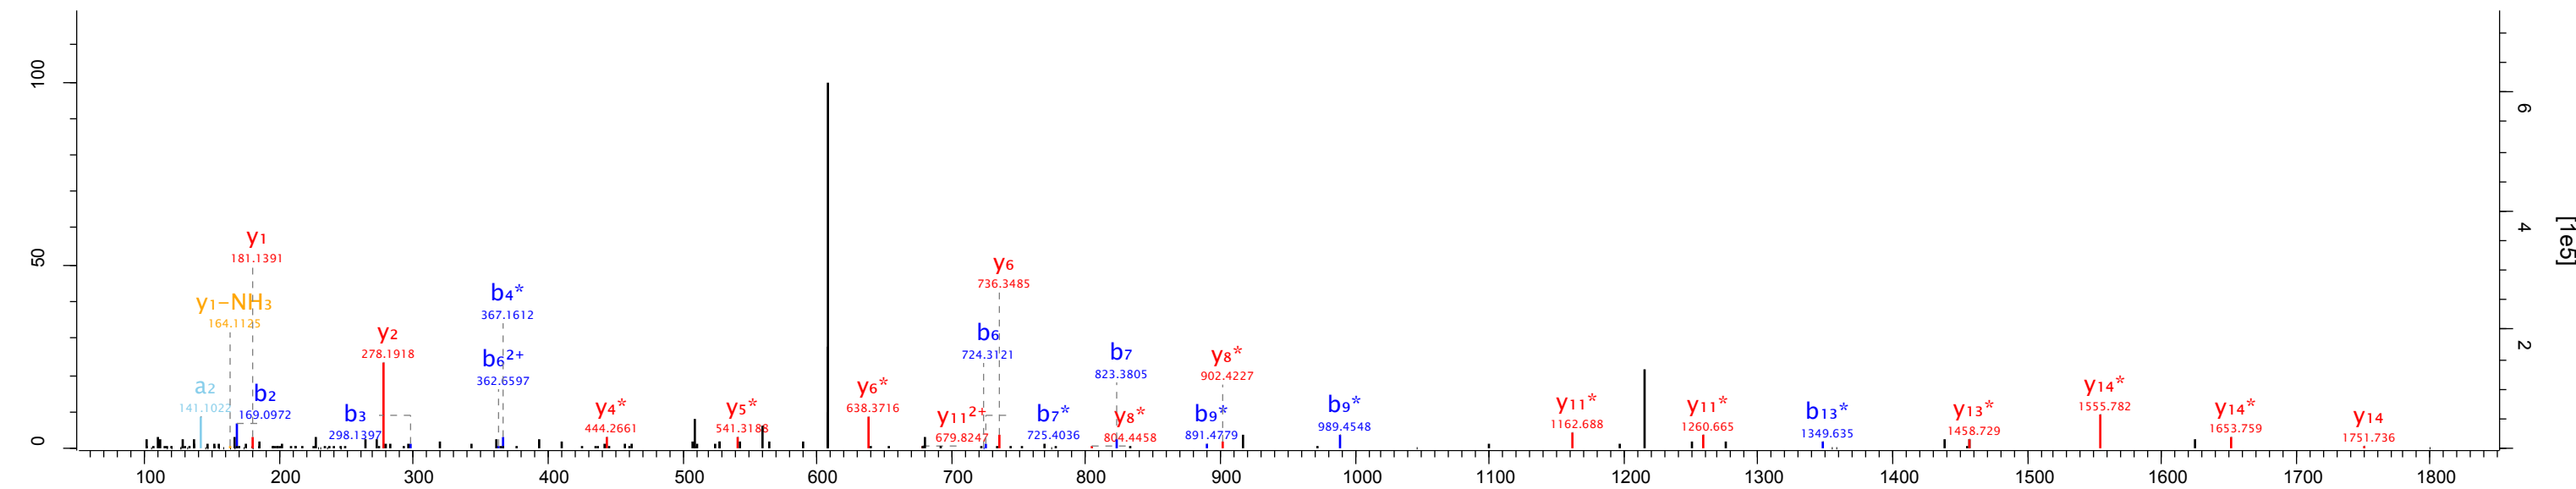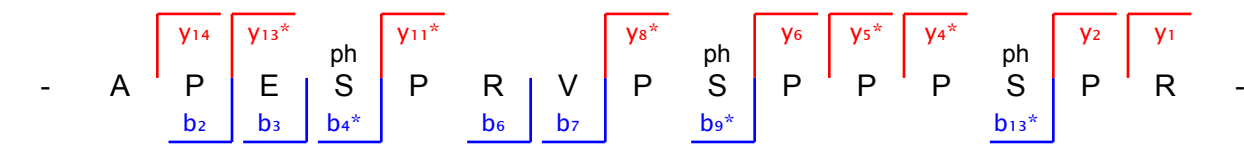

Raw file 20171215\_MaS\_33SR\_LMH\_phospho2\_03 Scan 8480 Method FTMS; HCD Score 257.77 m/z 1255.51 Gene names BLOC1S3

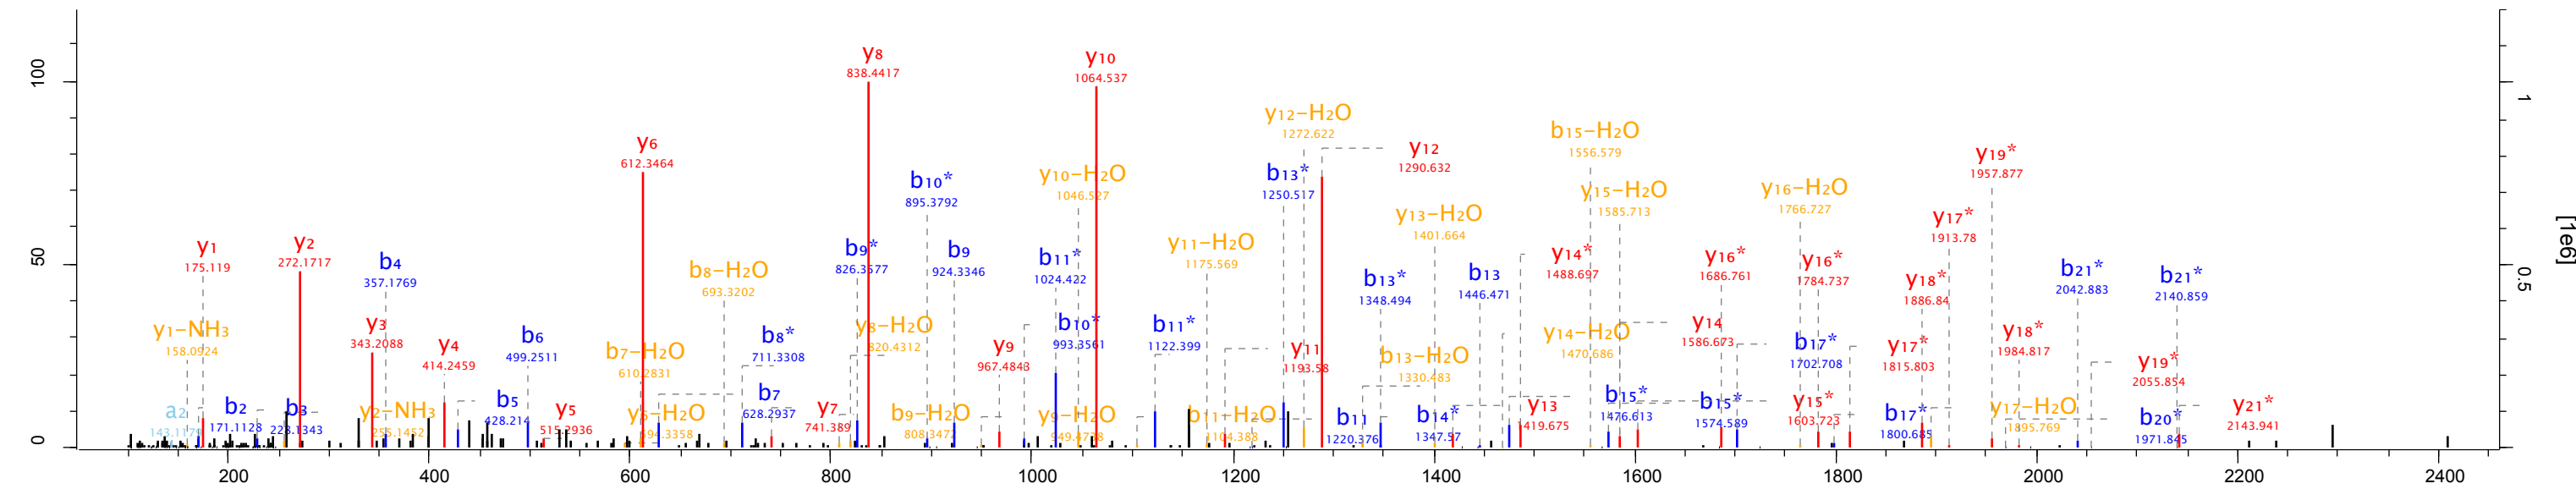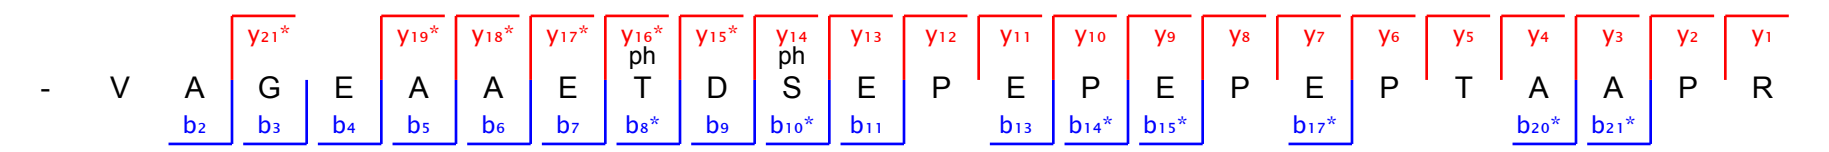

Raw file: 20171215\_MaS\_33SR\_LMH\_phospho2\_03  
 Scan: 8630 Method: FTMS; HCD Score: 149.93 m/z: 932.89 Gene names: MKL1; mkl1

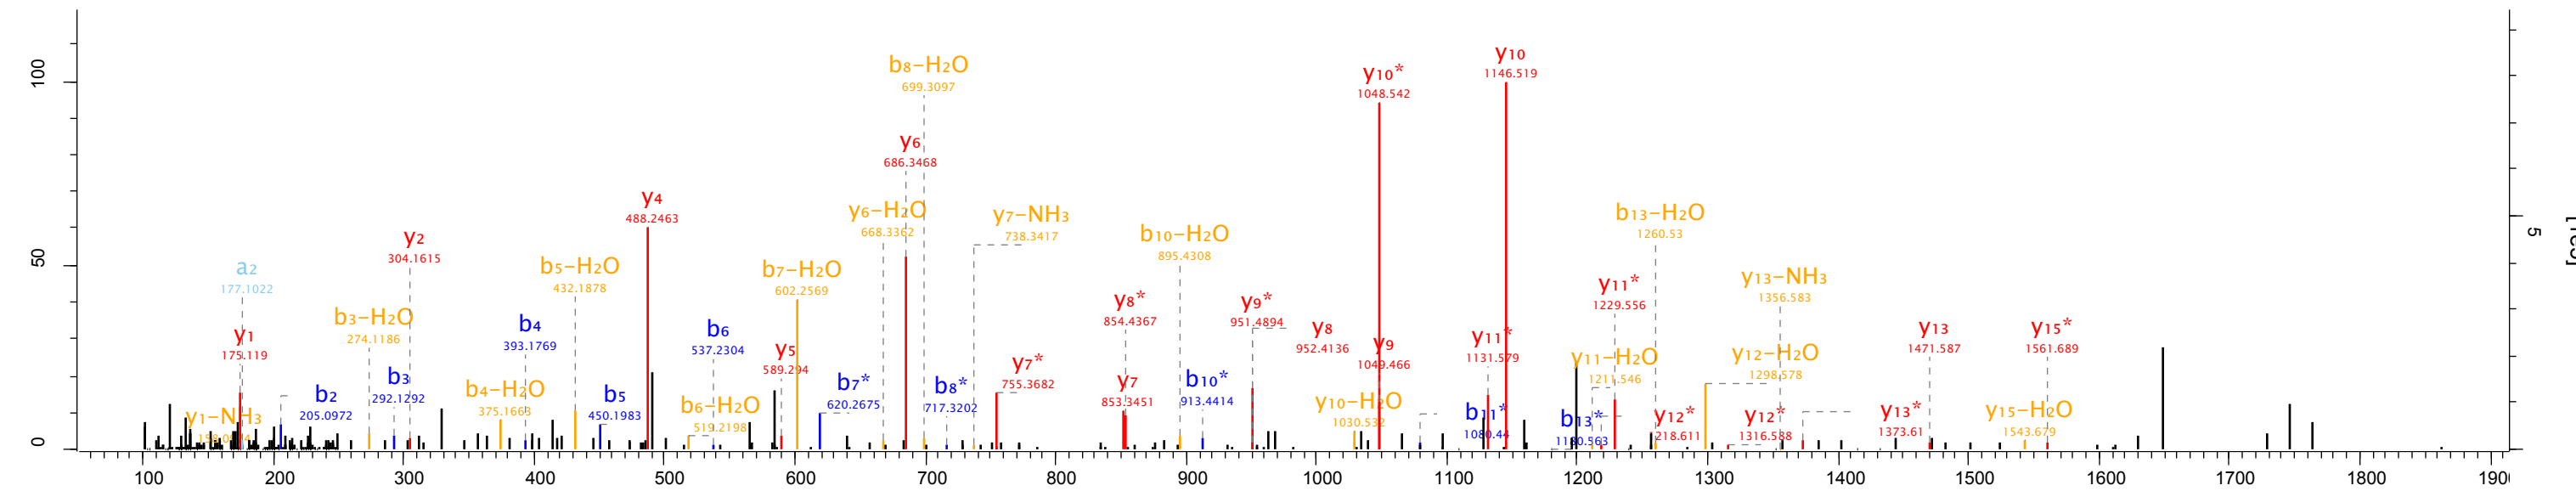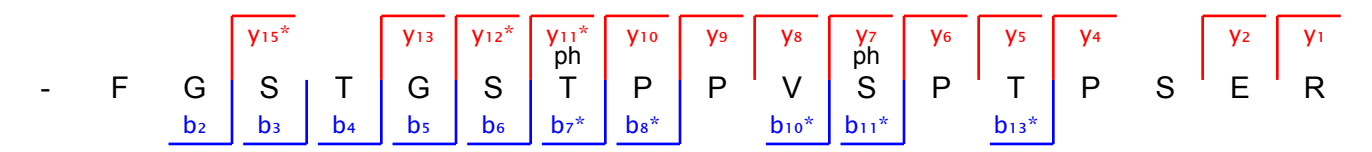

Raw file  
20171215\_MaS\_33SR\_LMH\_phospho2\_03

Scan 8640 Method FTMS; HCD Score 151.42 m/z 649.29 Gene names NOP56

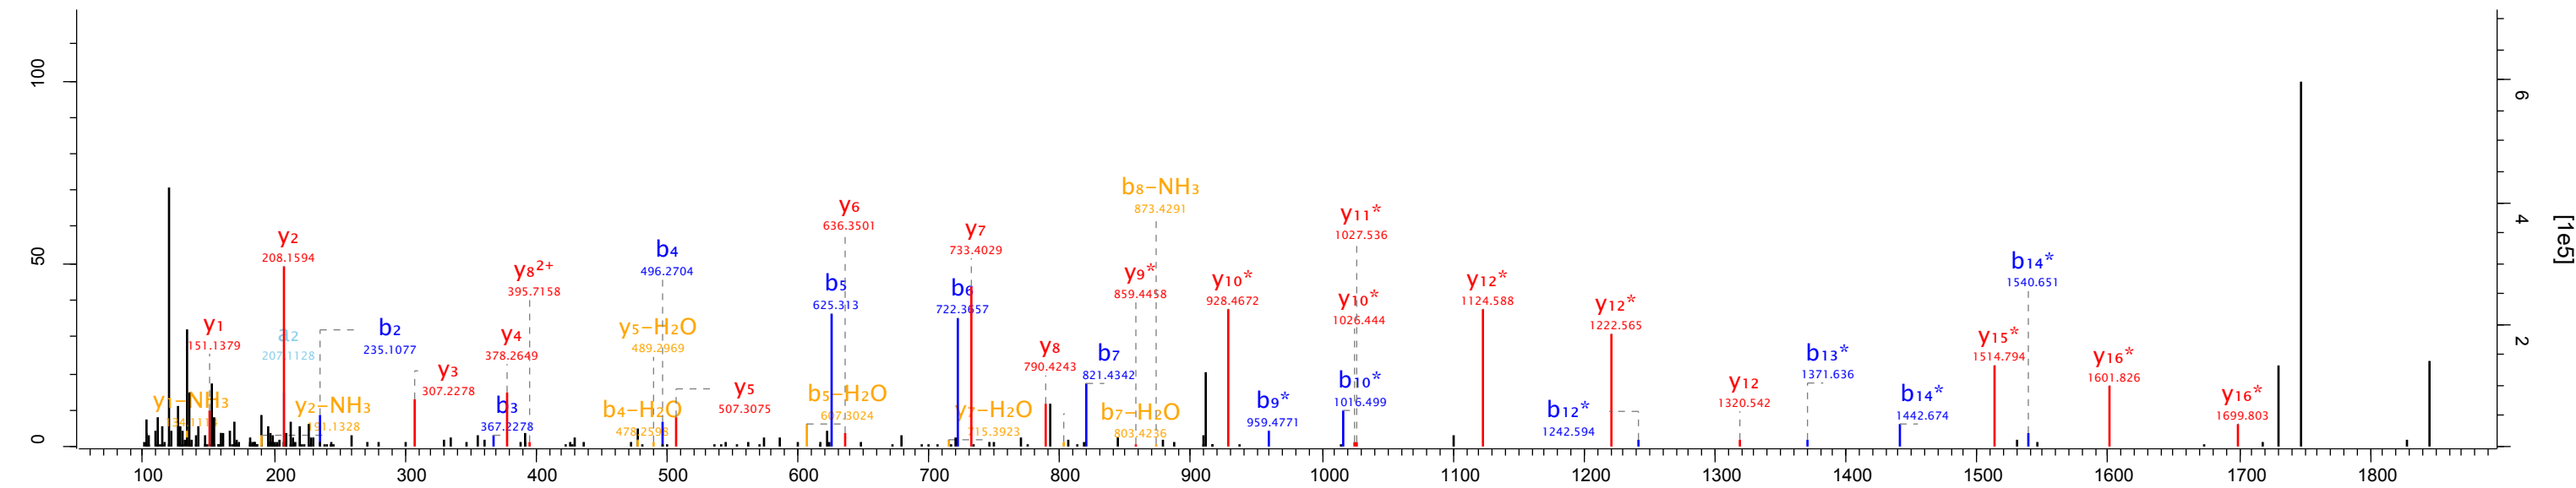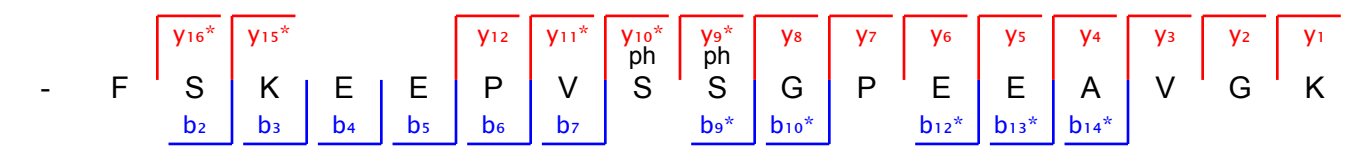



Raw file  
20171215\_MaS\_33SR\_LMH\_phospho2\_03

Scan 8740 Method FTMS; HCD Score 80.69 m/z 959.75 Gene names SGTA

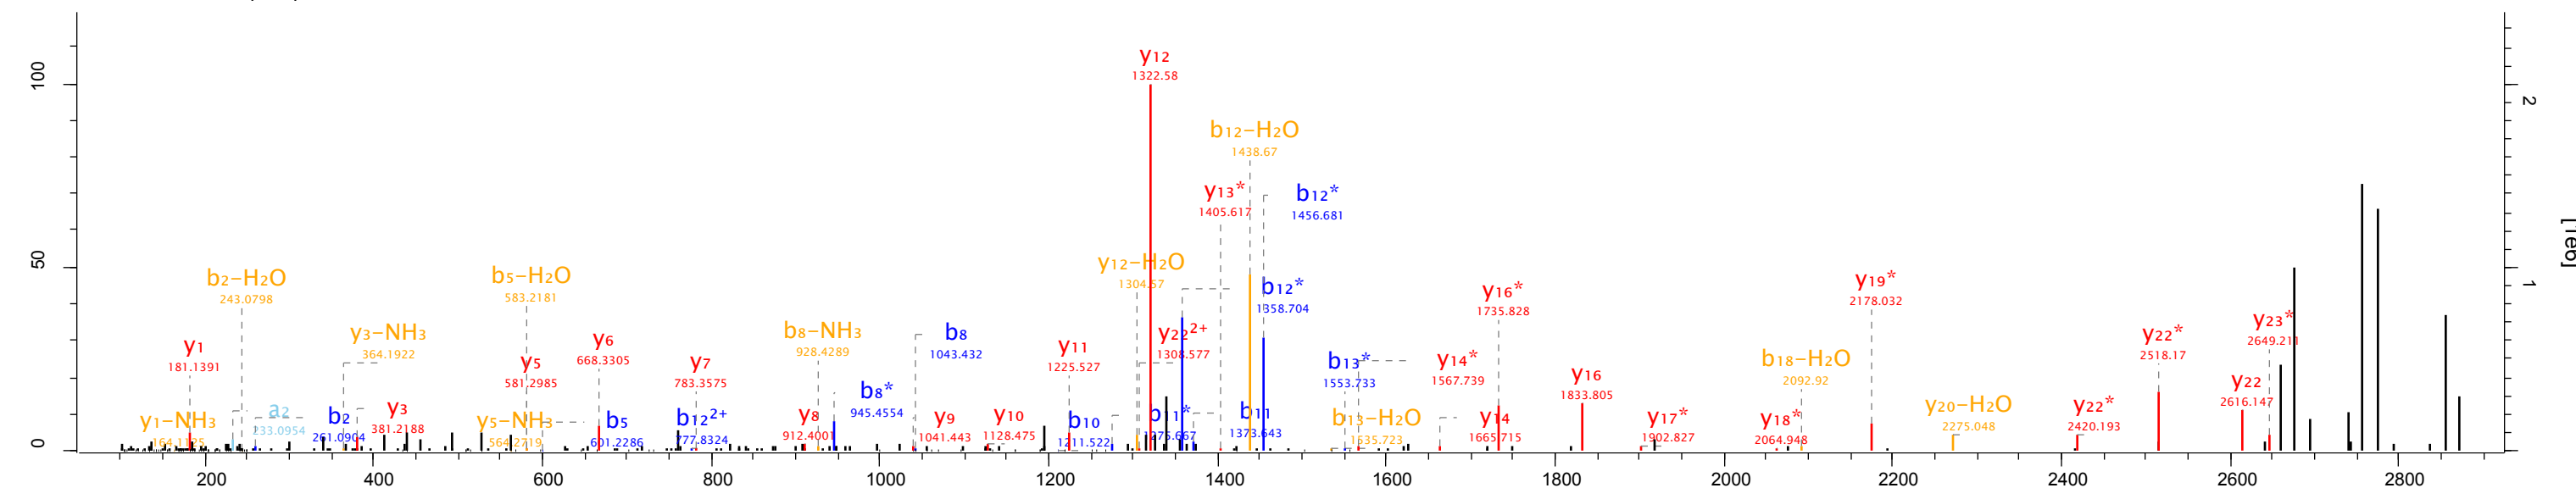

- E M P Q D L R S P A R T P P S E E D S A E A E R -

Fragmentation mapping (b and y ions) is shown below the sequence:

- Red boxes: y23\* (M), y22 (P), y19\* (L), y18\* (R), y17\* (S), y16 (P), y14 (R), y13\* (T), y12 (P), y11 (P), y10 (S), y9 (E), y8 (E), y7 (D), y6 (S), y5 (A), y3 (A), y1 (R)
- Blue boxes: b2 (M), b5 (D), b8 (S), b10 (A), b11 (R), b12\* (T), b13\* (P)

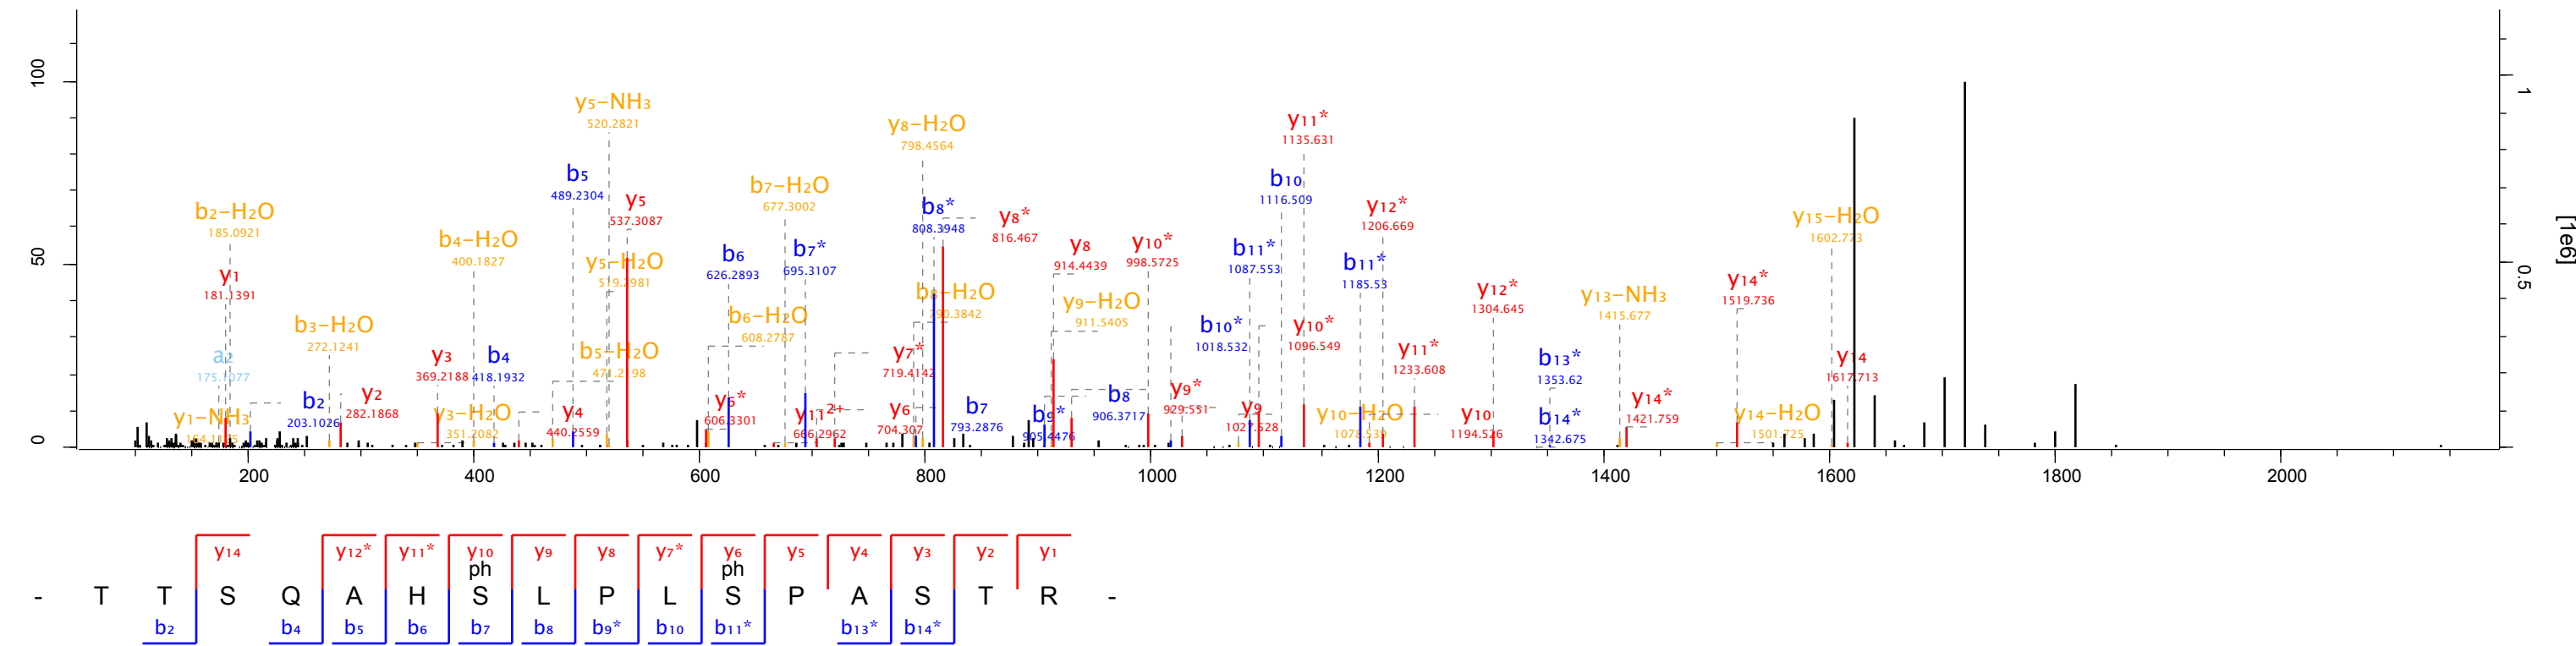

Raw file 20171215\_MaS\_33SR\_LMH\_phospho2\_03 Scan 8840 Method FTMS; HCD Score 164.39 m/z 1197.45 Gene names PURB

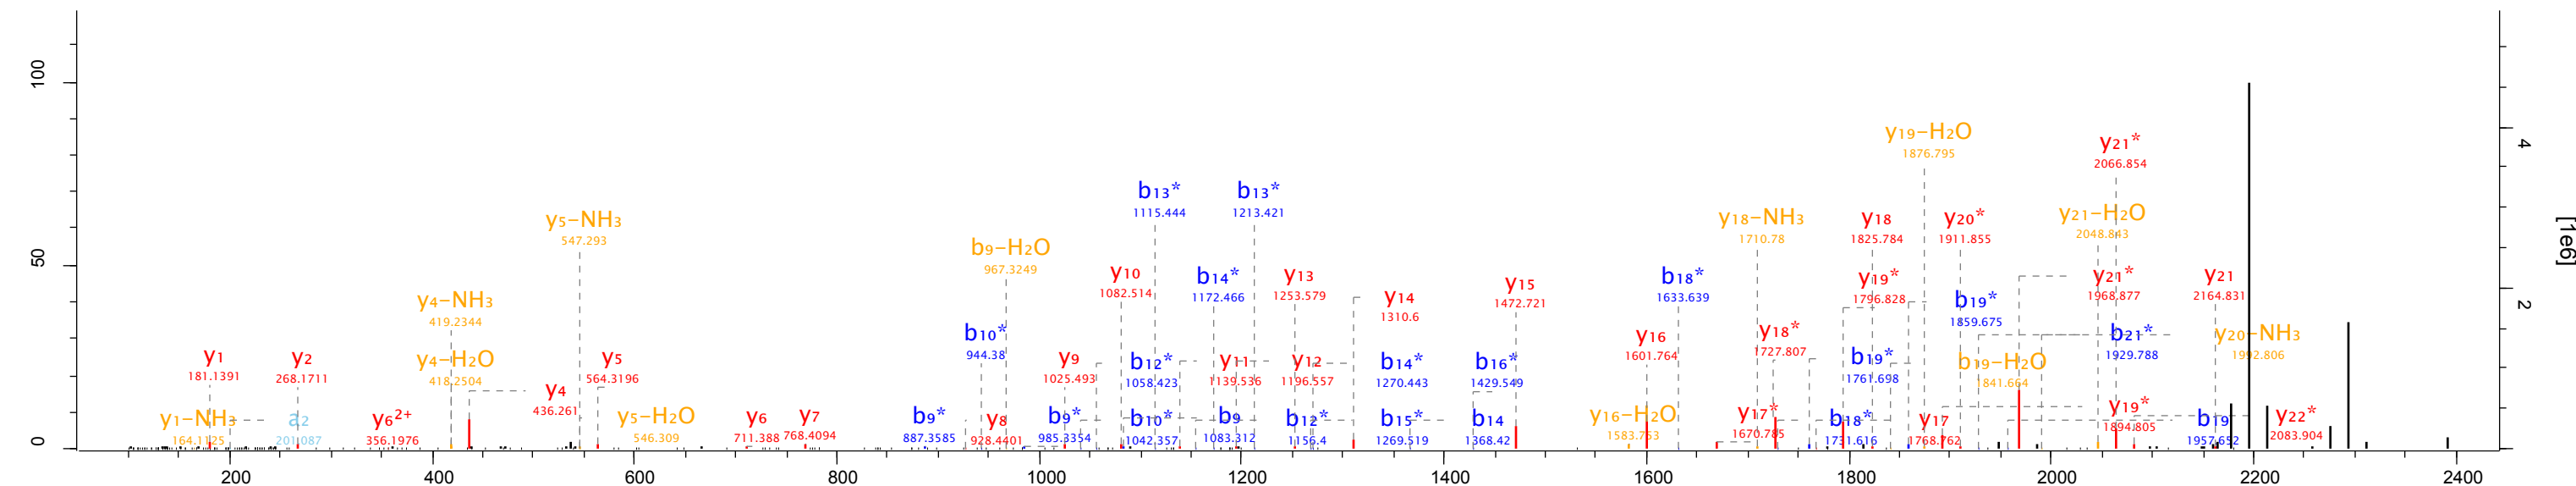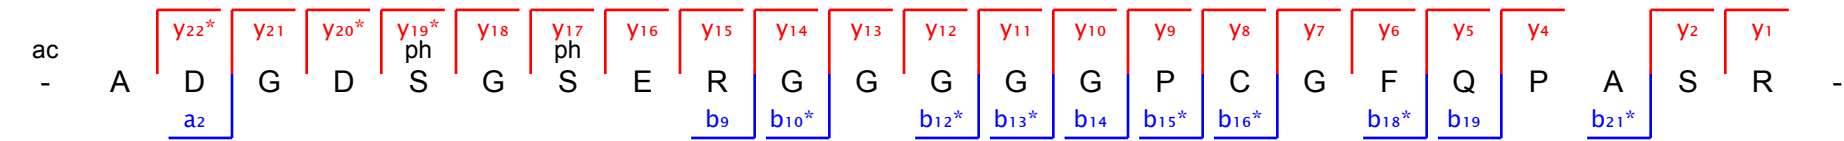

Raw file 20171215\_MaS\_33SR\_LMH\_phospho2\_03 Scan 8860 Method FTMS; HCD Score 47.22 m/z 728.3 Gene names CEP350

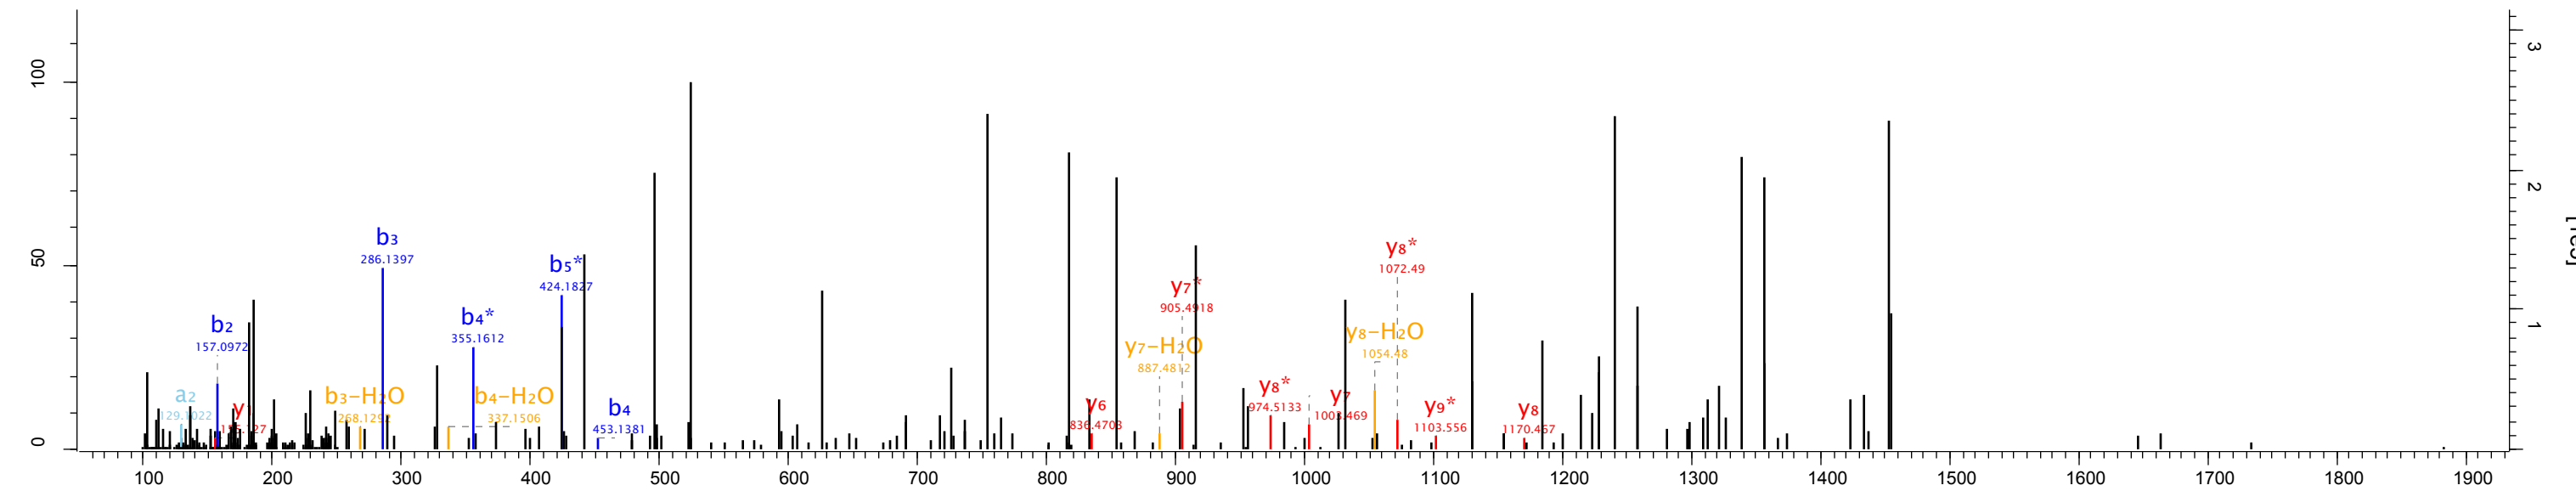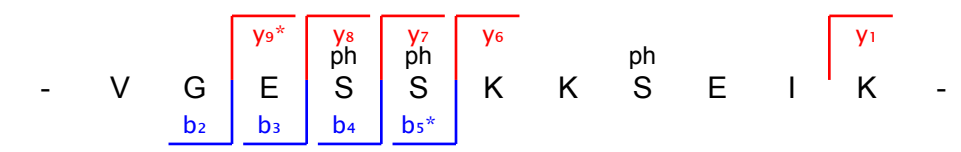

Raw file 20171215\_MaS\_33SR\_LMH\_phospho2\_03 Scan 8960 Method FTMS; HCD Score 118.15 m/z 794 Gene names ANKRD17

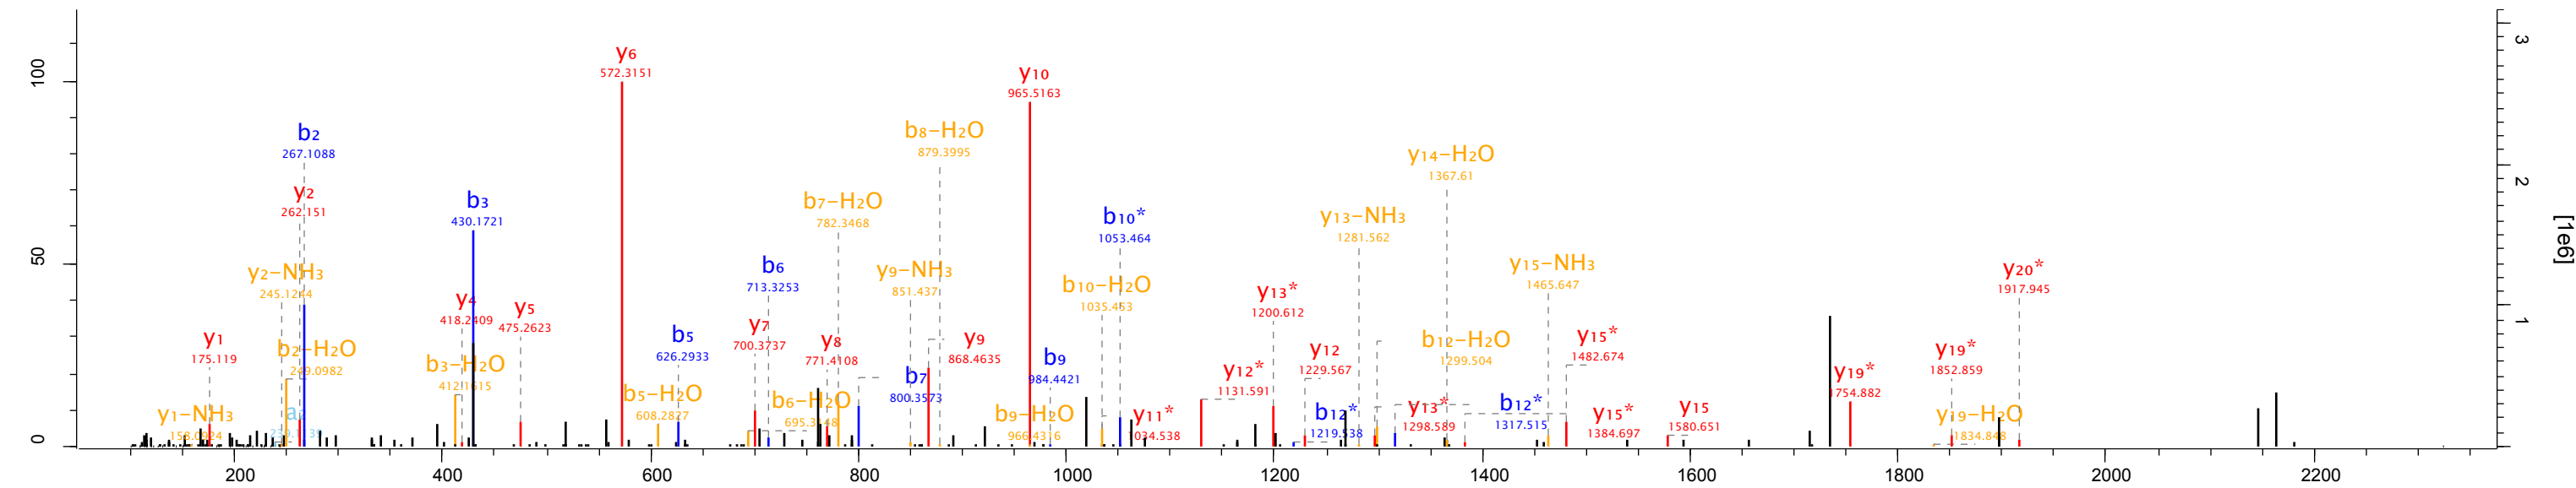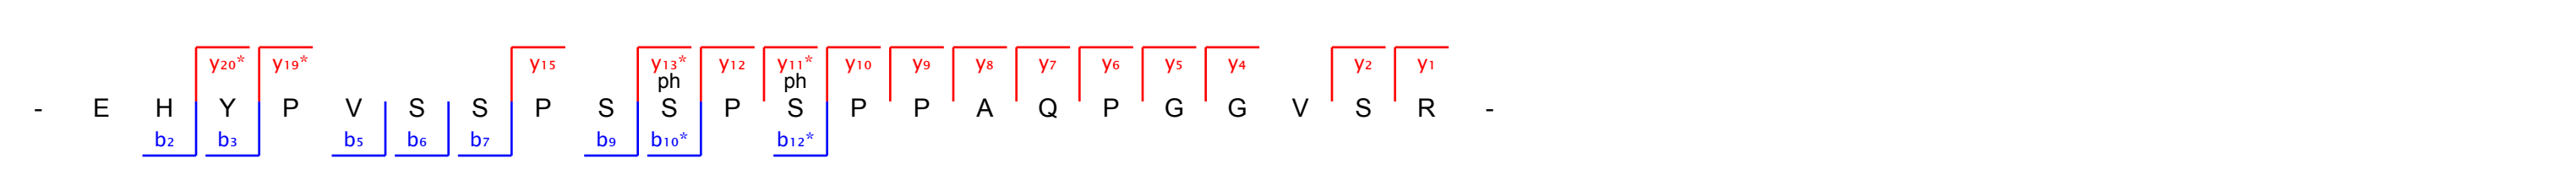

Raw file: 20171215\_MaS\_33SR\_LMH\_phospho2\_03  
 Scan: 9020 Method: FTMS; HCD Score: 119.88 m/z: 605.27 Gene names: NOLC1

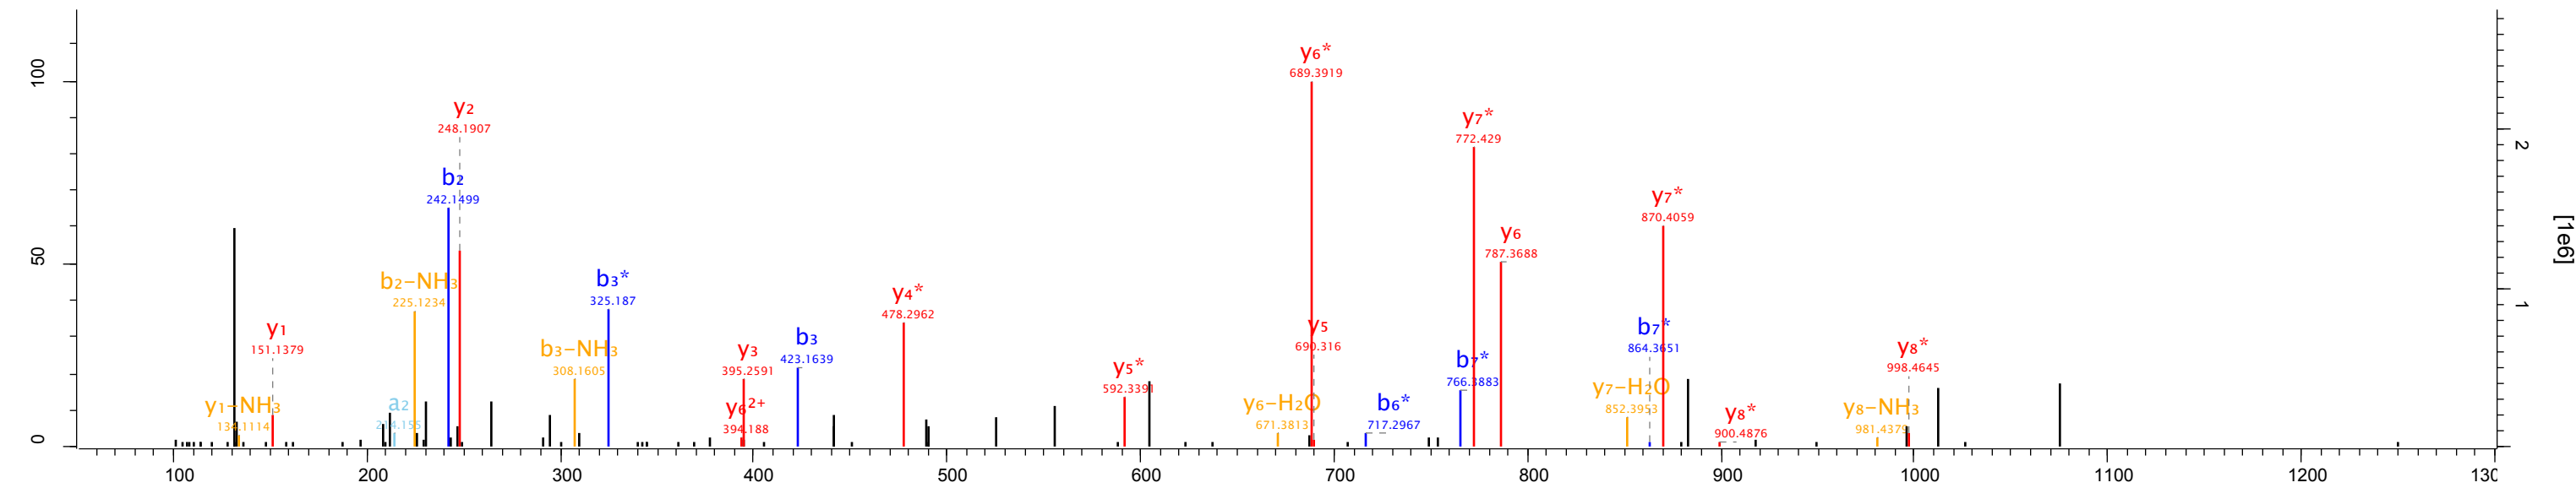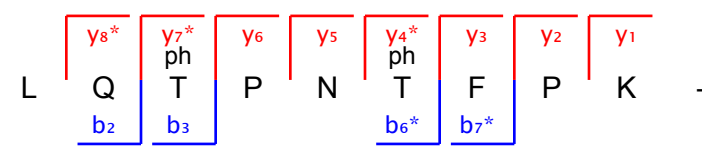

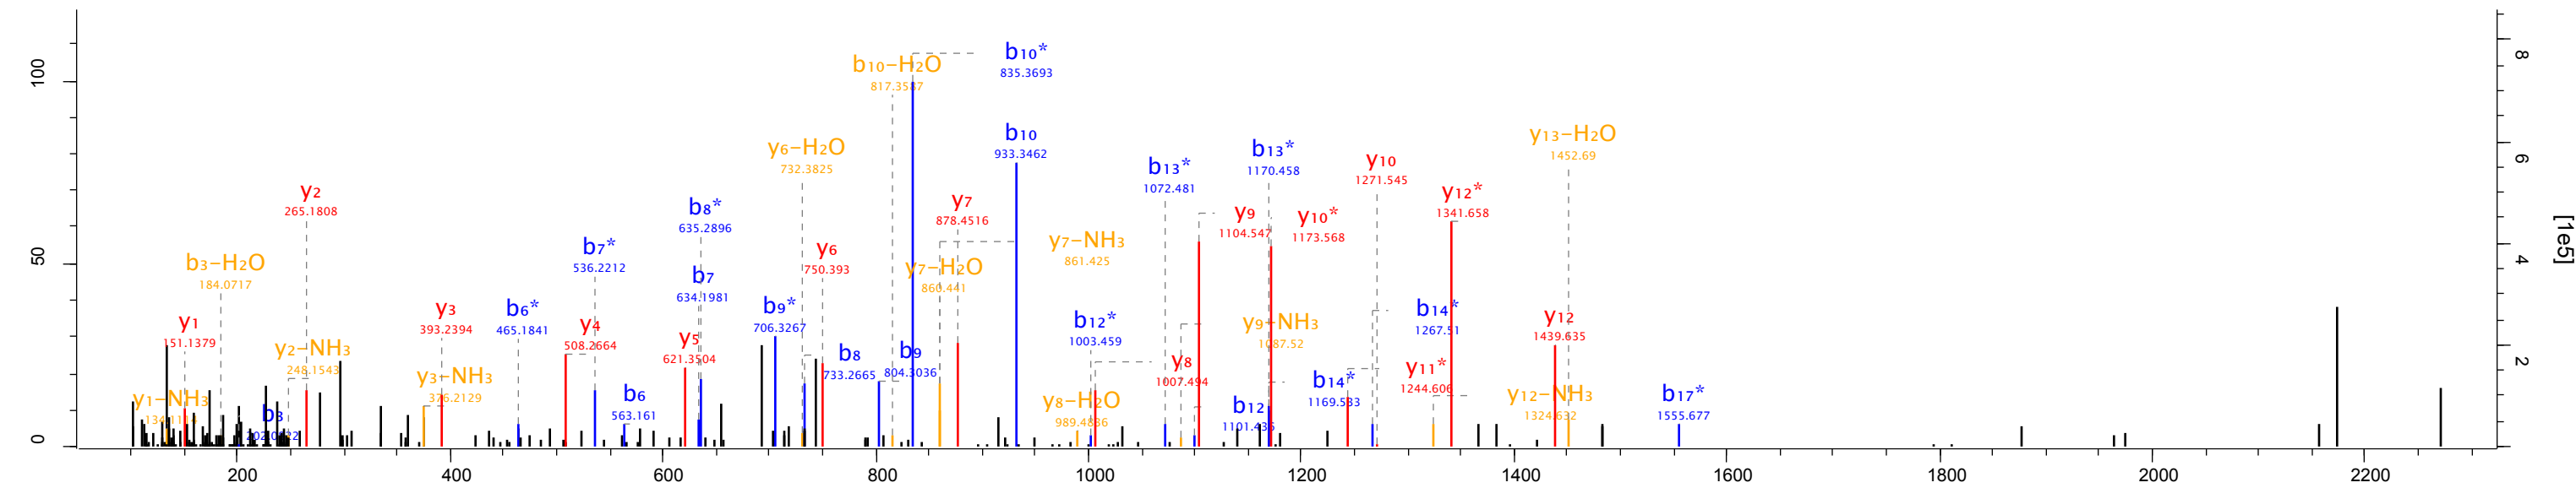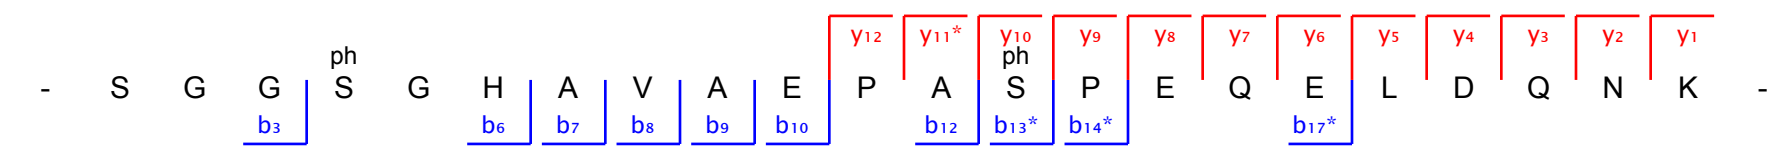

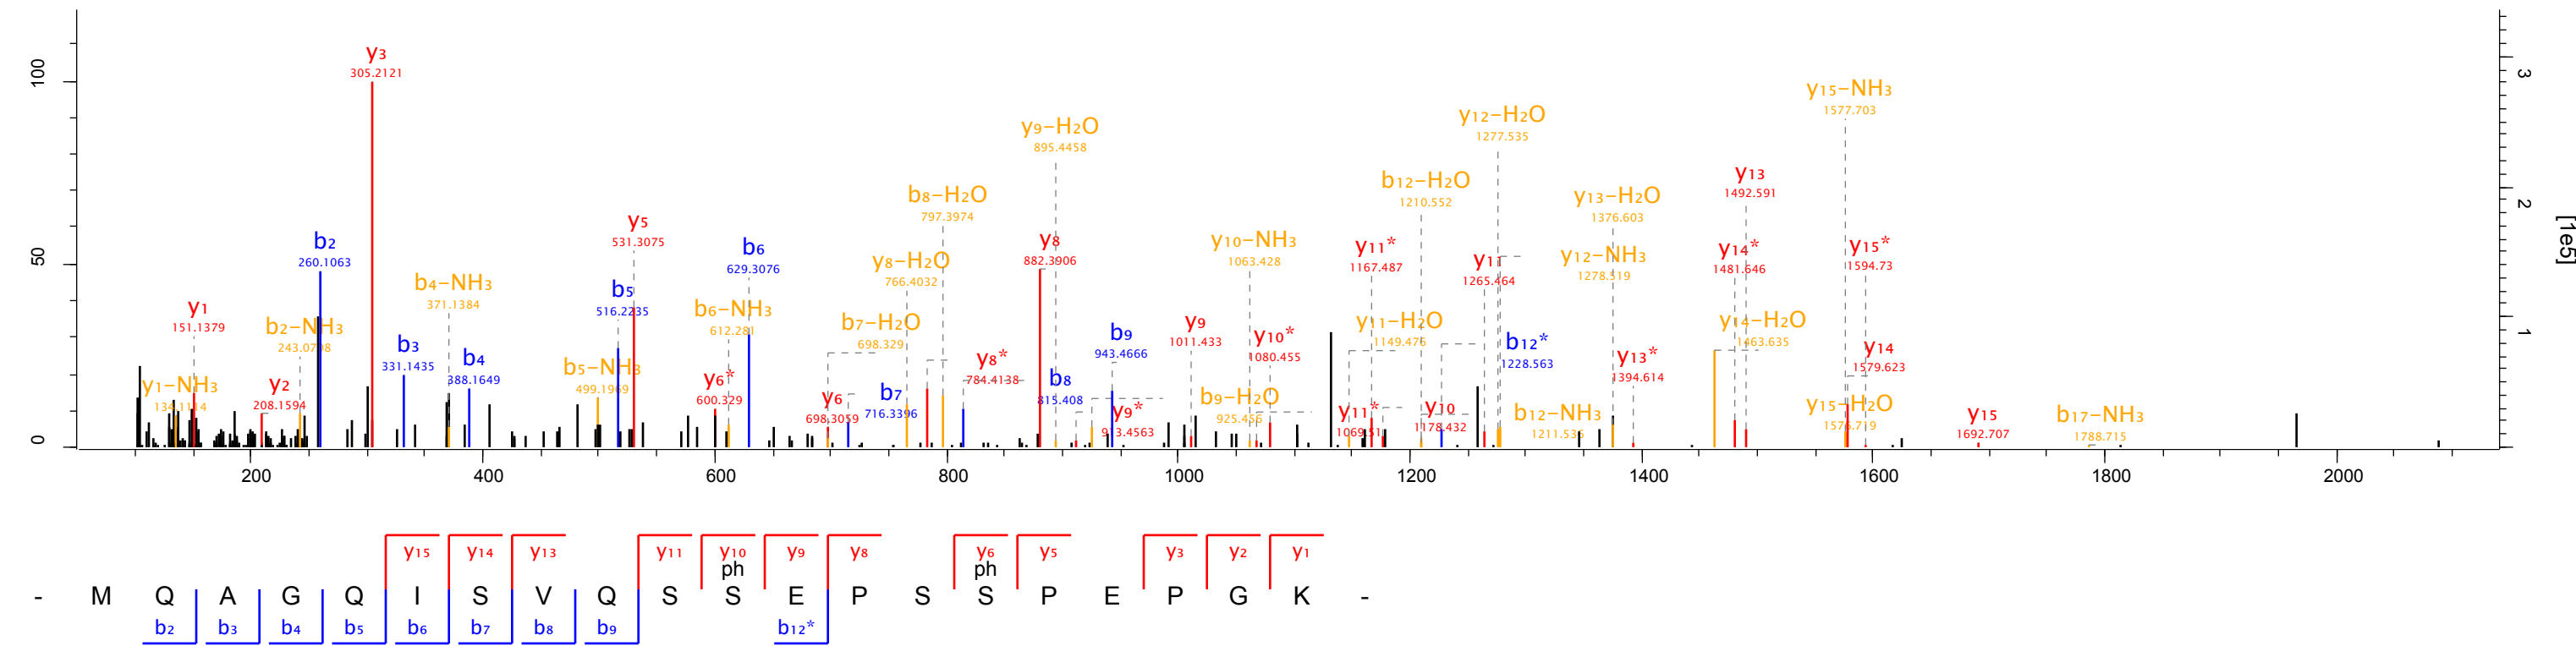



Raw file  
20171215\_MaS\_33SR\_LMH\_phospho2\_03

Scan 9400 Method FTMS; HCD Score 285.62 m/z 1052.93 Gene names SF3B2

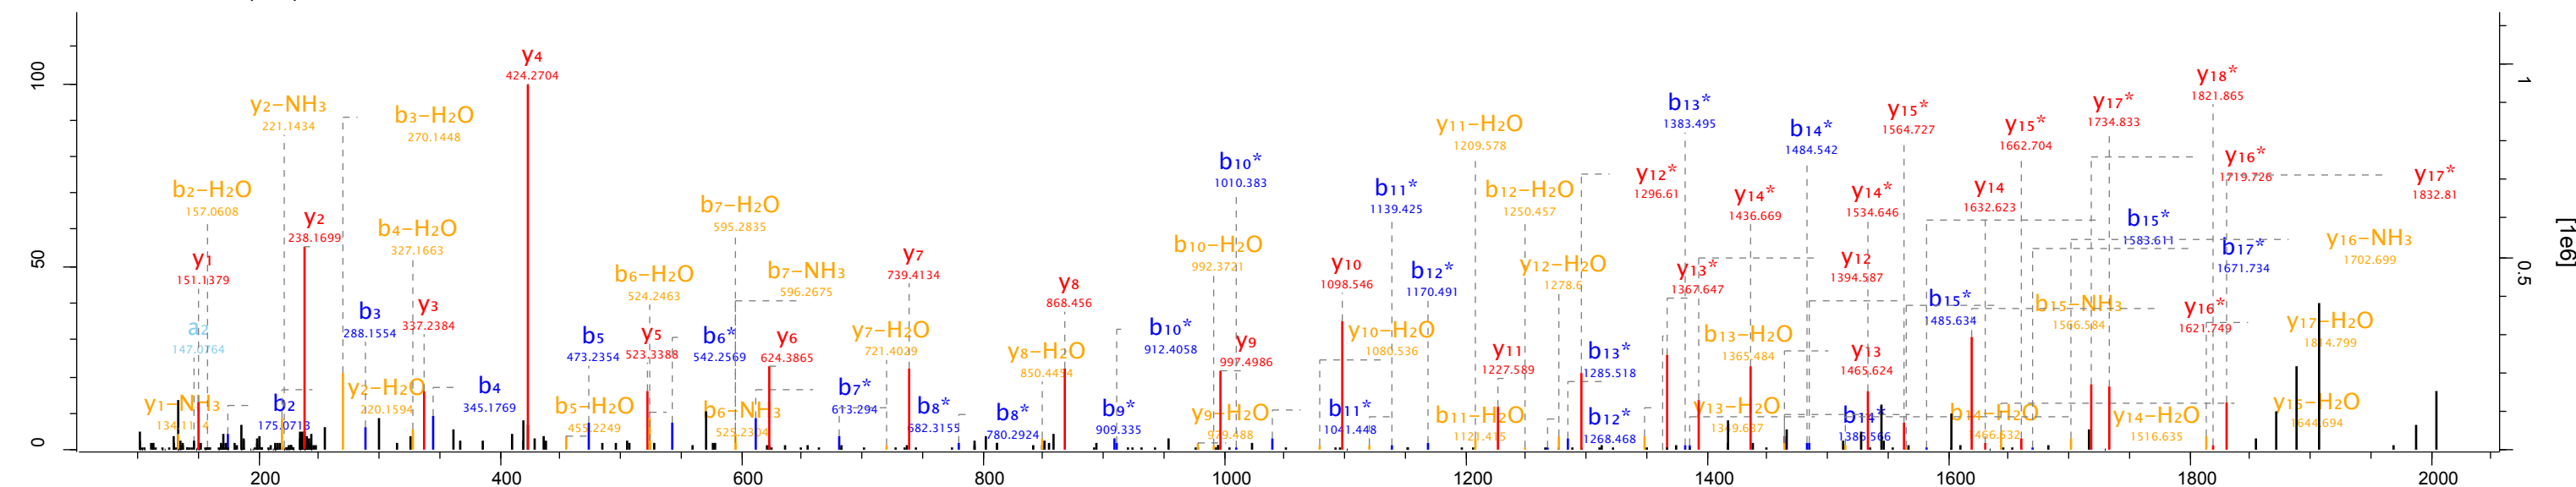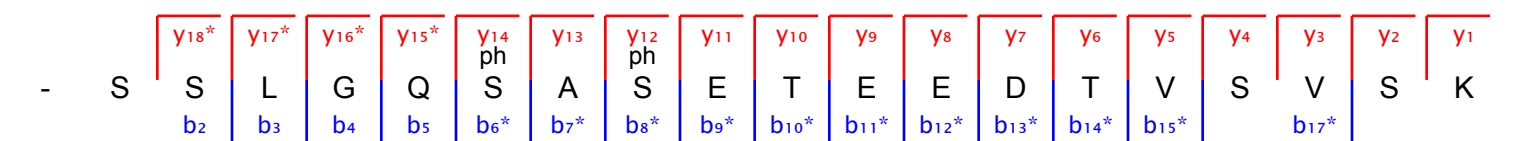

Raw file 20171215\_MaS\_33SR\_LMH\_phospho2\_03 Scan 9480 Method FTMS; HCD Score 73.07 m/z 806.02 Gene names PRRC2C

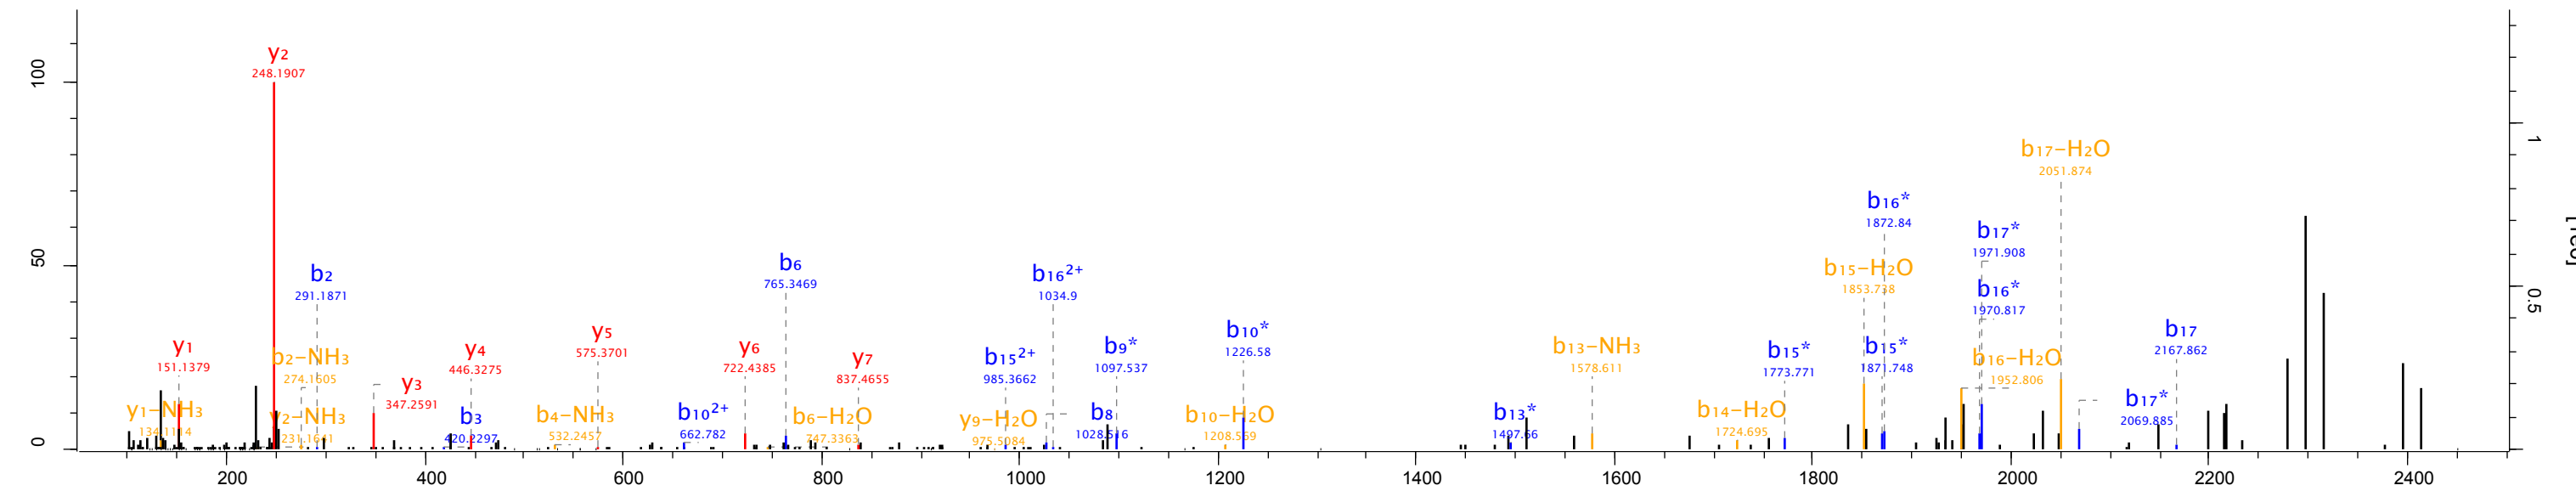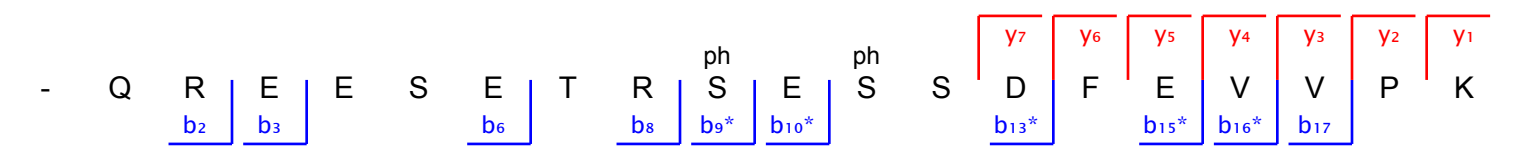

Raw file 20171215\_MaS\_33SR\_LMH\_phospho2\_03 Scan 9650 Method FTMS; HCD Score 116.45 m/z 663.31 Gene names ASAP1

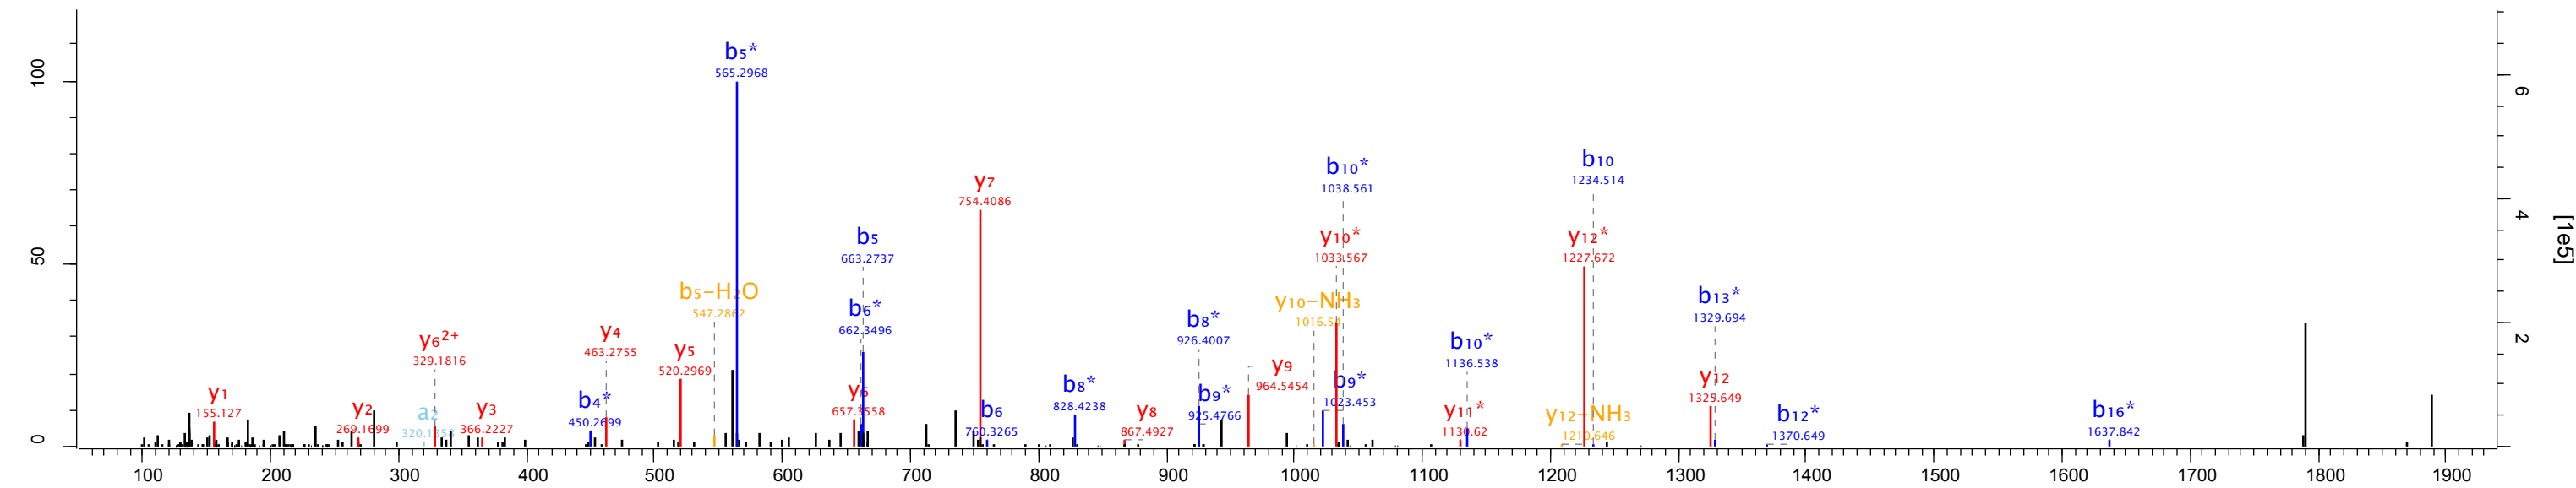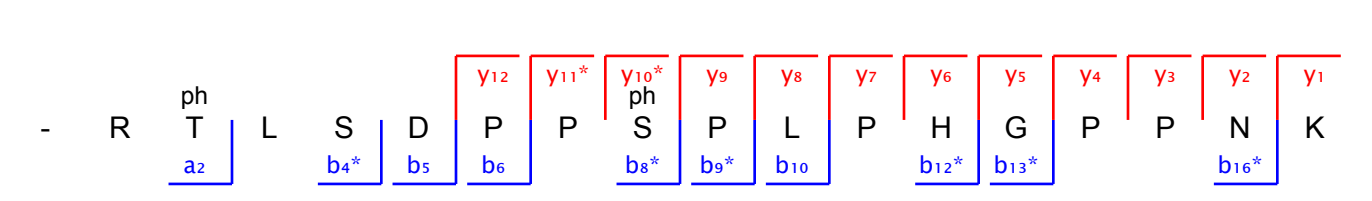

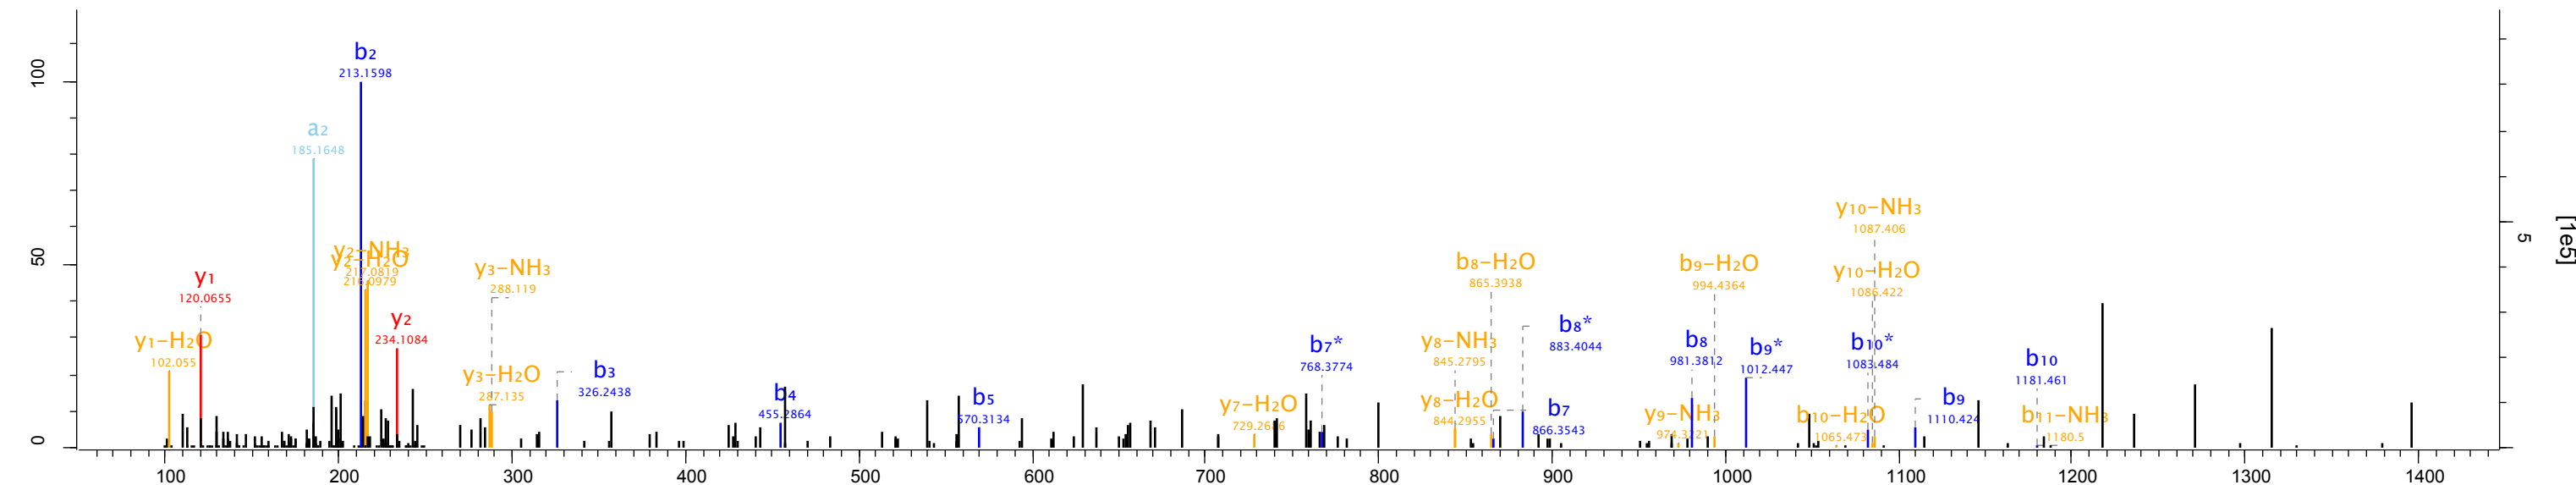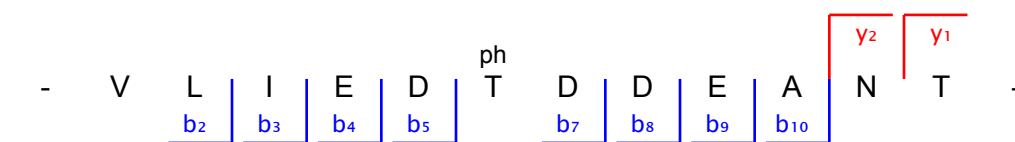



Raw file 20171215\_MaS\_33SR\_LMH\_phospho2\_03 Scan 9840 Method FTMS; HCD Score 98.9 m/z 471.17 Gene names SAFB

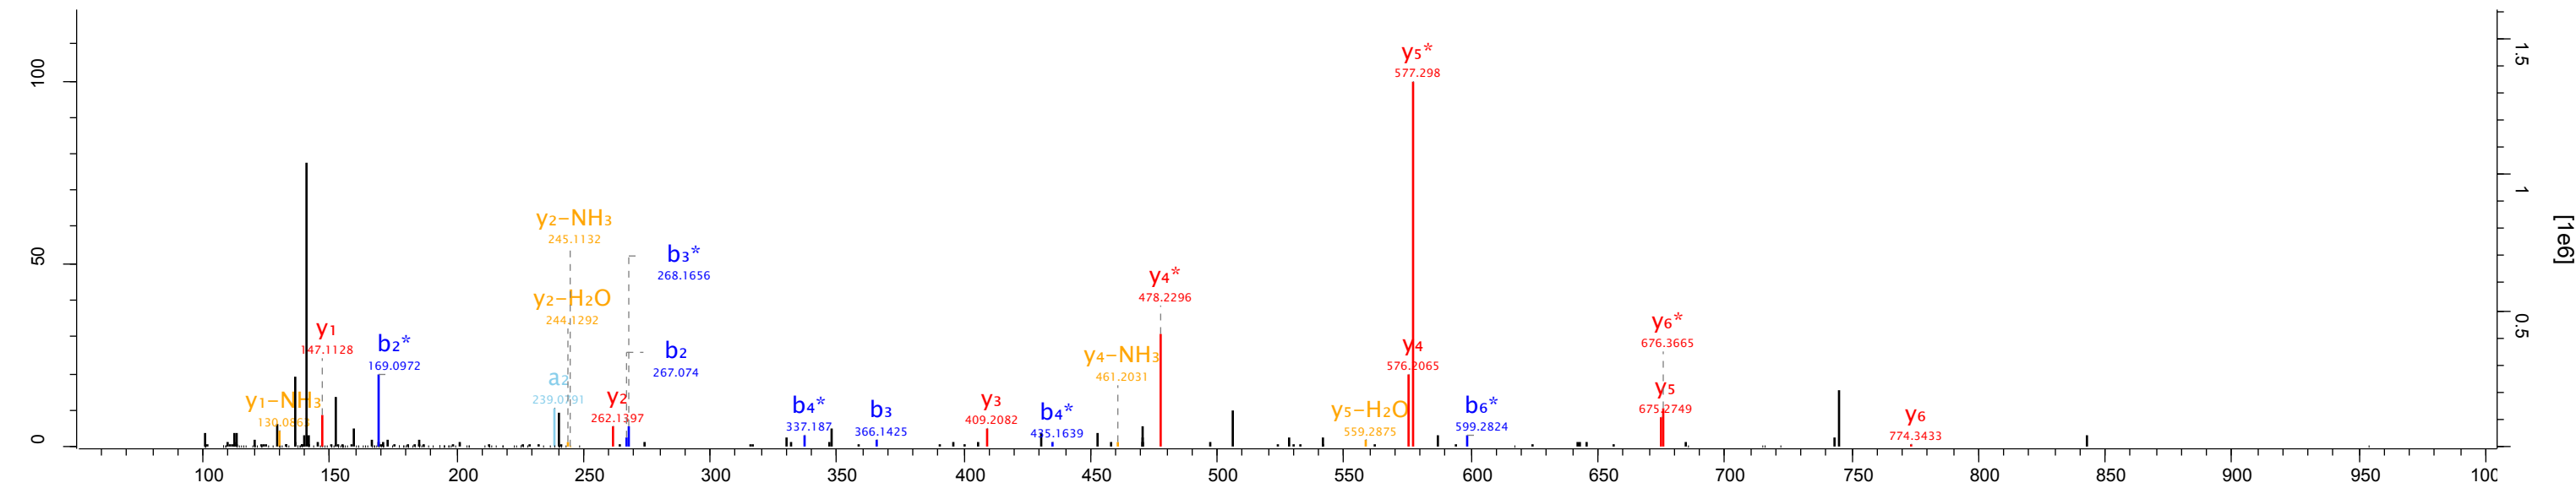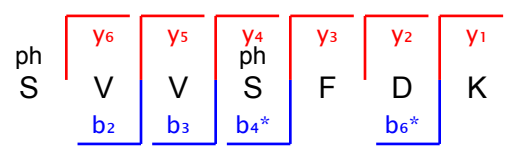

Raw file 20171215\_MaS\_33SR\_LMH\_phospho2\_04 Scan 12700 Method FTMS; HCD Score 54.53 m/z 789.33 Gene names CHAMP1

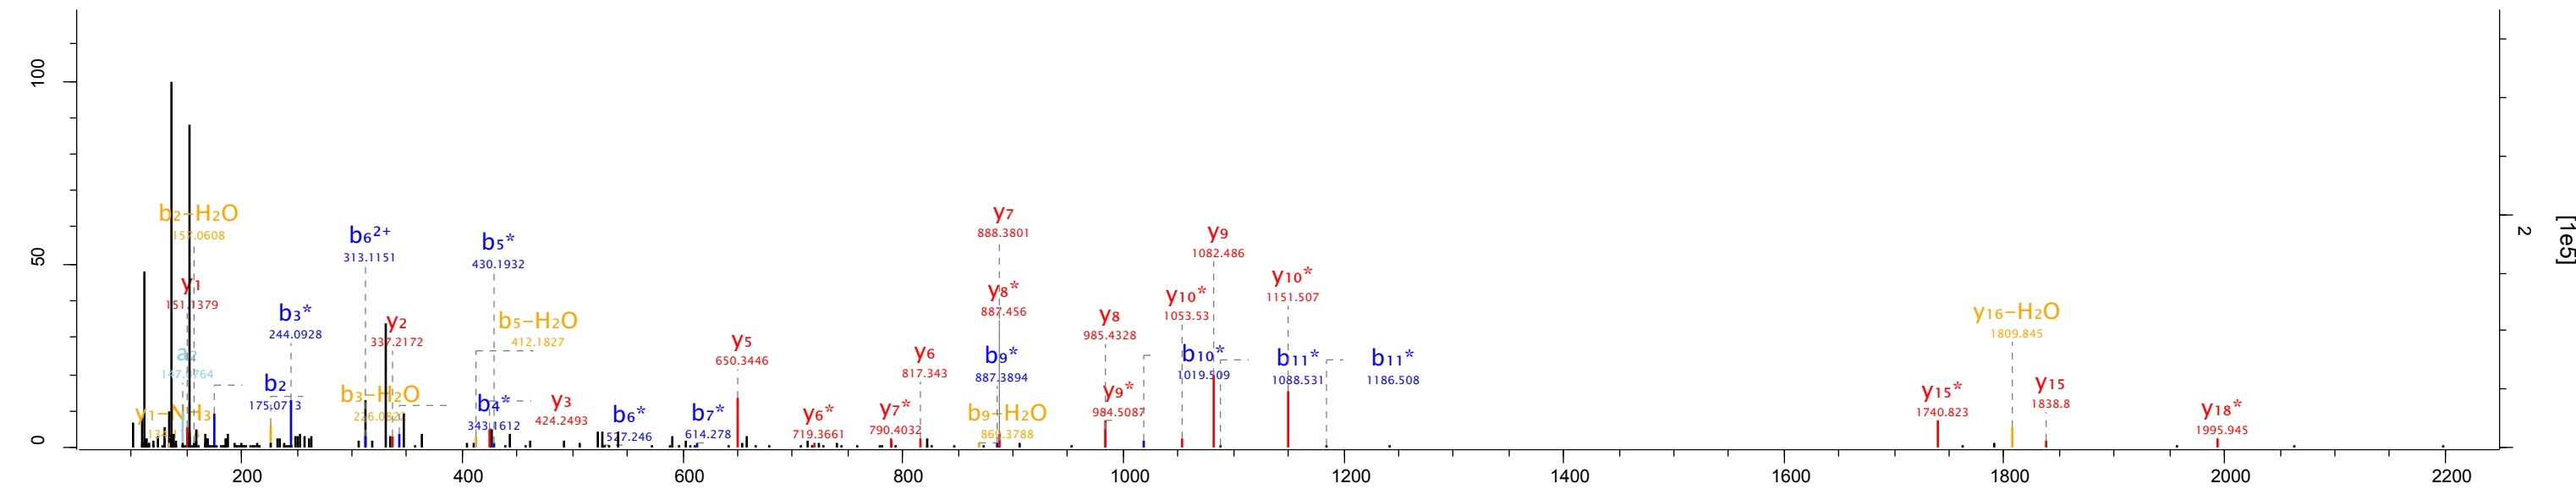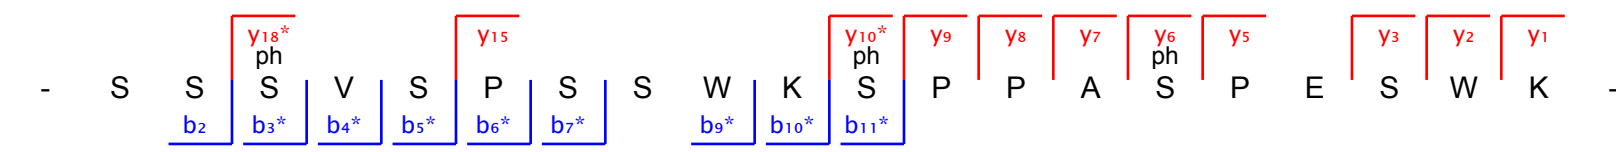

20171215\_MaS\_33SR\_LMH\_phospho2\_04 2170 FTMS; HCD 73.27 595.73 PPIG

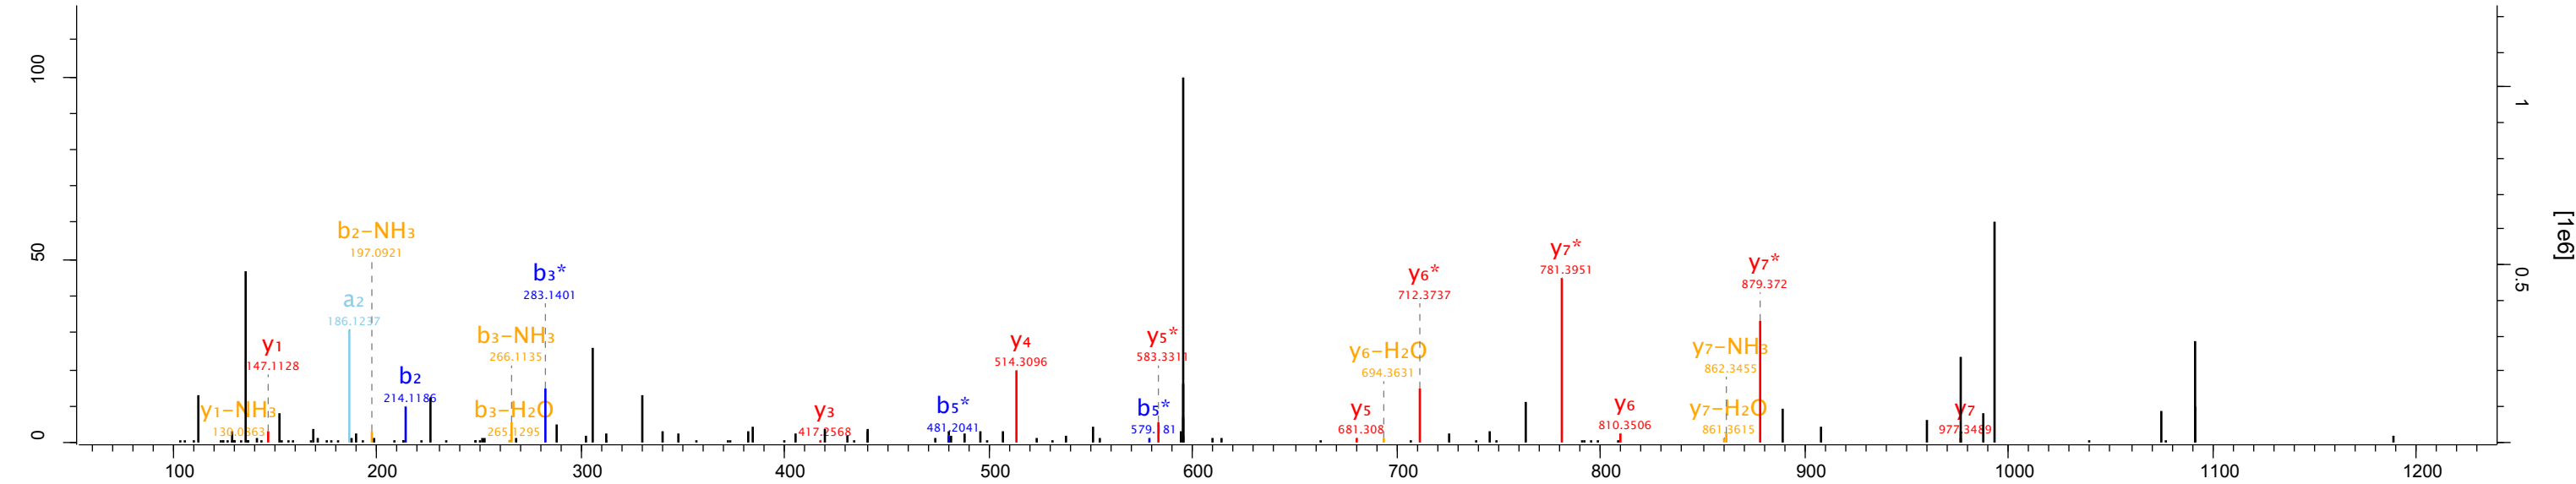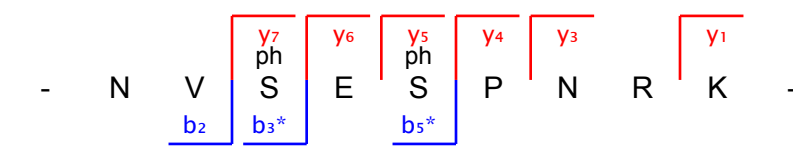



Raw file 20171215\_MaS\_33SR\_LMH\_phospho2\_04 Scan 3130 Method FTMS; HCD Score 145.65 m/z 688.27 Gene names LEO1

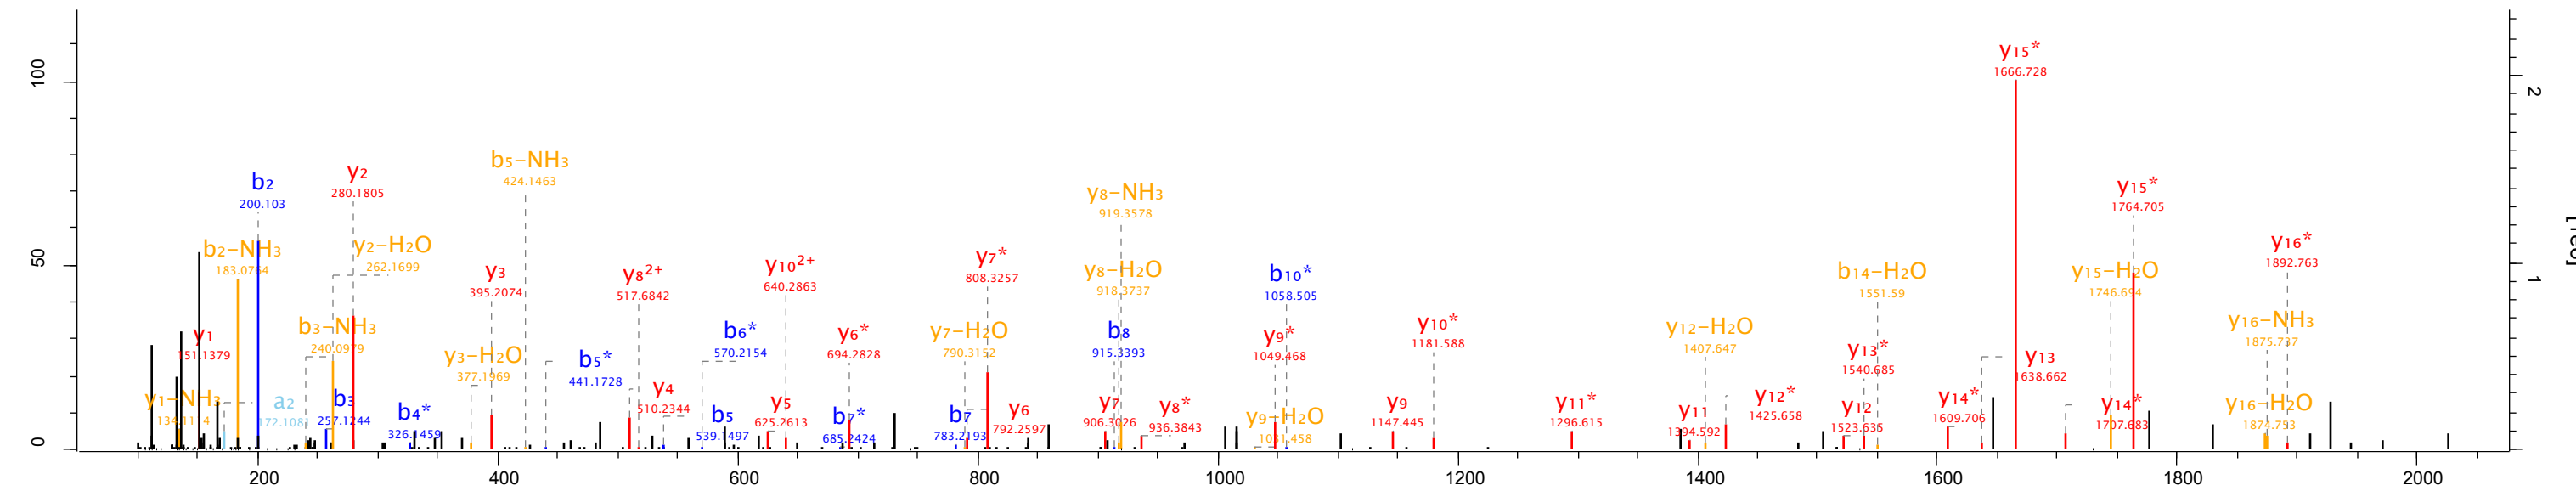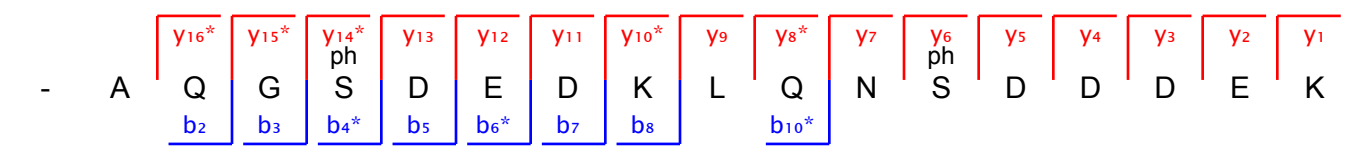

Raw file 20171215\_MaS\_33SR\_LMH\_phospho2\_04 Scan 3460 Method FTMS; HCD Score 194.19 m/z 1170.37 Gene names PSIP1

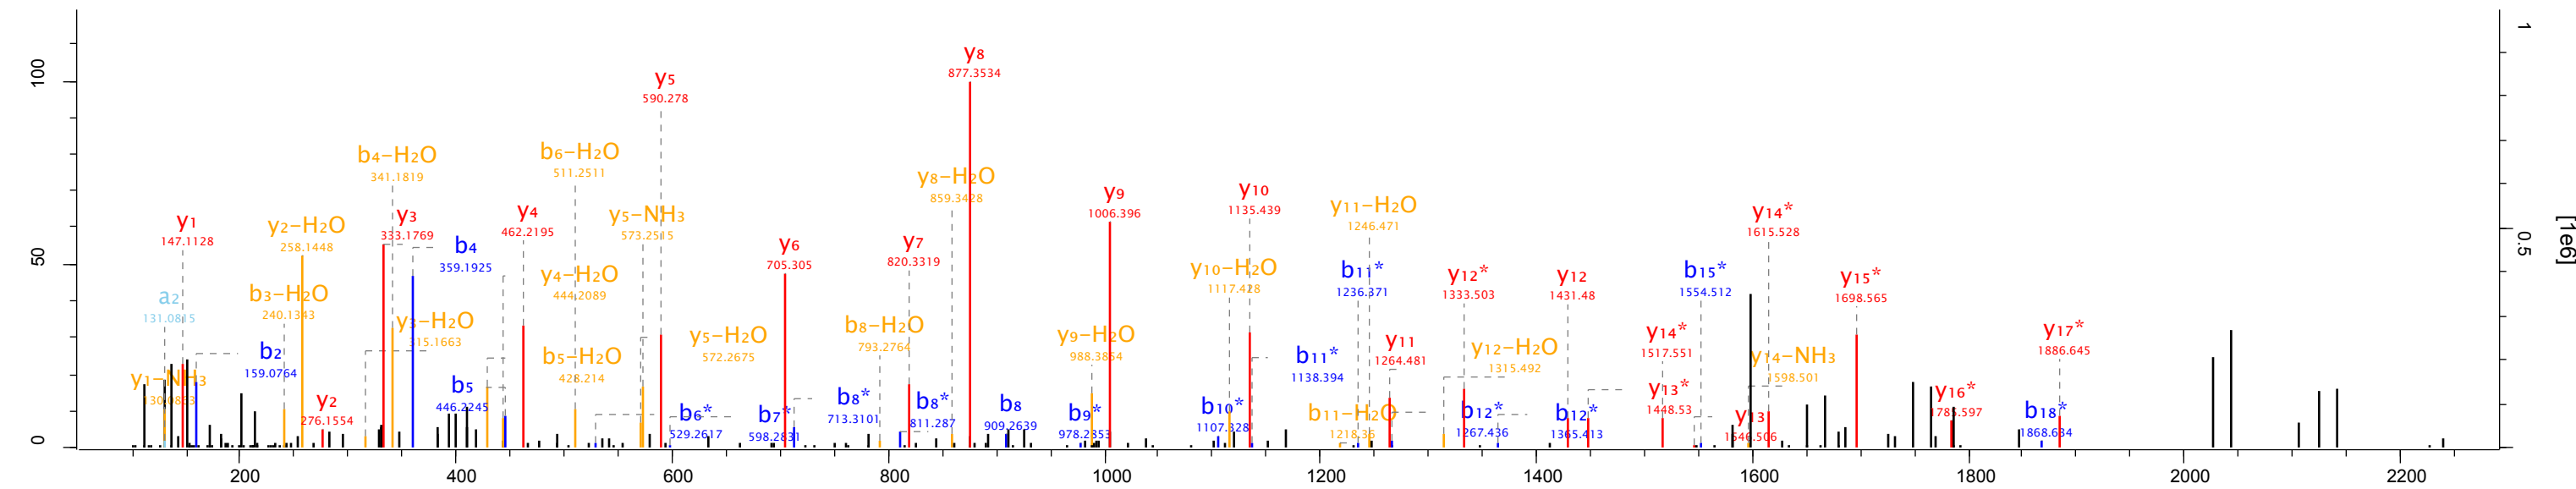

- T G V T S T ph S D S E E E G D D Q E G E K -

Fragmentation mapping (b and y ions) is shown below the sequence:

- b<sub>2</sub> (under G)
- b<sub>4</sub> (under T), b<sub>5</sub> (under S), b<sub>6</sub><sup>\*</sup> (under T), b<sub>7</sub><sup>\*</sup> (under ph), b<sub>8</sub> (under S), b<sub>9</sub><sup>\*</sup> (under S), b<sub>10</sub><sup>\*</sup> (under E), b<sub>11</sub><sup>\*</sup> (under E), b<sub>12</sub><sup>\*</sup> (under E), b<sub>15</sub><sup>\*</sup> (under D), b<sub>18</sub><sup>\*</sup> (under G)
- y<sub>1</sub> (under E), y<sub>2</sub> (under E), y<sub>3</sub> (under G), y<sub>4</sub> (under E), y<sub>5</sub> (under Q), y<sub>6</sub> (under E), y<sub>7</sub> (under D), y<sub>8</sub> (under G), y<sub>9</sub> (under E), y<sub>10</sub> (under E), y<sub>11</sub> (under S), y<sub>12</sub> (under S), y<sub>13</sub> (under D), y<sub>14</sub><sup>\*</sup> (under ph), y<sub>15</sub><sup>\*</sup> (under T), y<sub>16</sub><sup>\*</sup> (under S), y<sub>17</sub><sup>\*</sup> (under T)

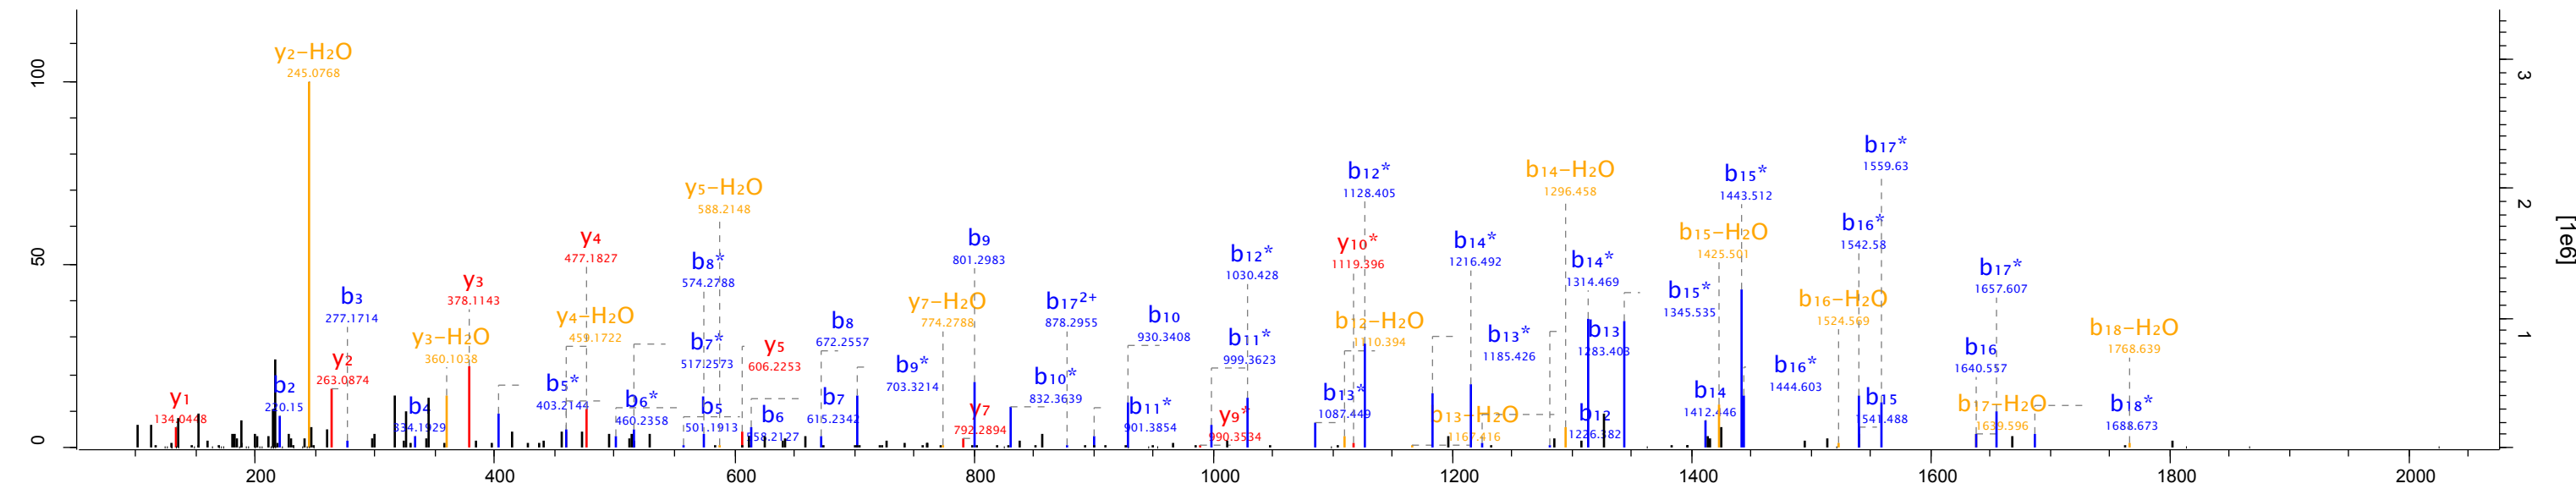

- R G G G ph S G G G E E S E G E E V D E D -

b<sub>2</sub>
b<sub>3</sub>
b<sub>4</sub>
b<sub>5</sub>
b<sub>6</sub>
b<sub>7</sub>
b<sub>8</sub>
b<sub>9</sub>
y<sub>10</sub>\*
y<sub>9</sub><sup>ph</sup>
y<sub>7</sub>
y<sub>5</sub>
y<sub>4</sub>
y<sub>3</sub>
y<sub>2</sub>
y<sub>1</sub>



Raw file 20171215\_MaS\_33SR\_LMH\_phospho2\_04 Scan 4170 Method FTMS; HCD Score 184.22 m/z 696.76 Gene names SORBS2

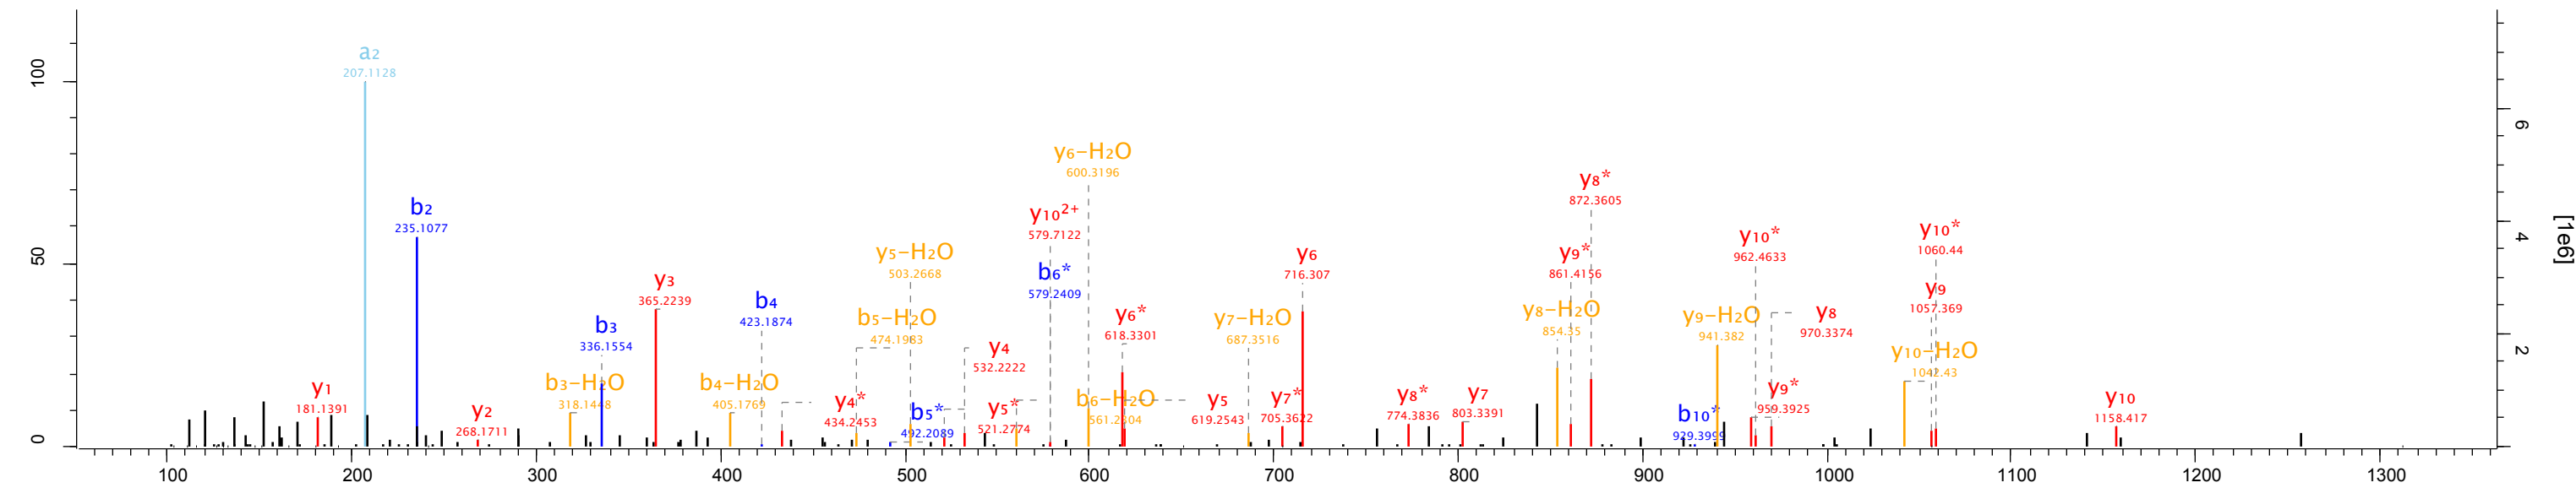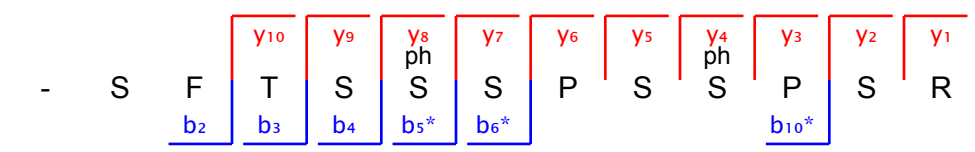

Raw file 20171215\_MaS\_33SR\_LMH\_phospho2\_04 Scan 4390 Method FTMS; HCD Score 142.55 m/z 694.26 Gene names SRRM2

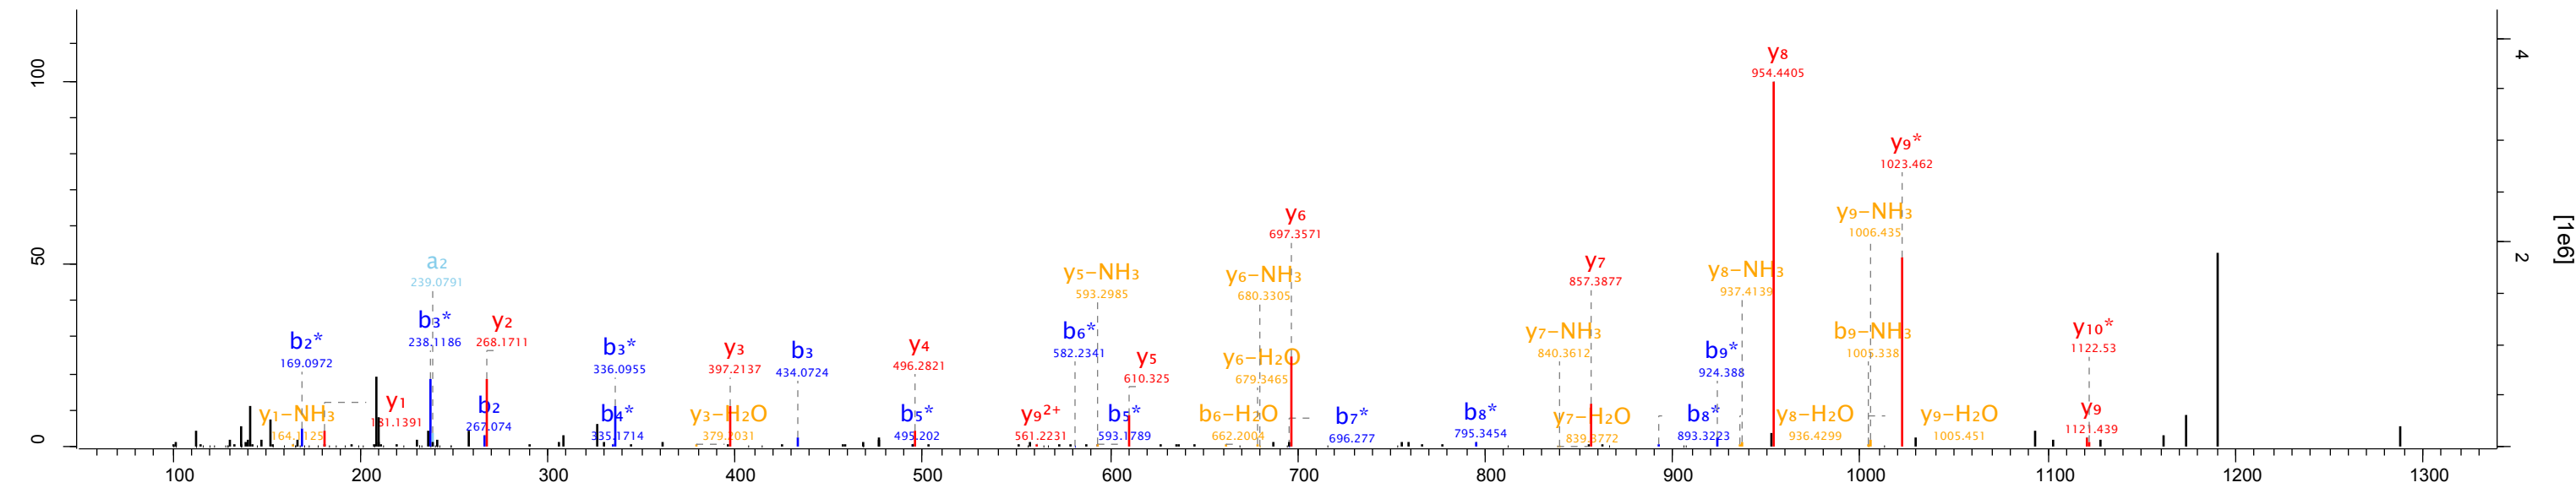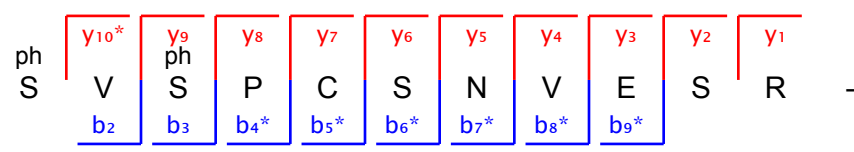

Raw file 20171215\_MaS\_33SR\_LMH\_phospho2\_04 Scan 5310 Method FTMS; HCD Score 82.22 m/z 801.82 Gene names FZR1

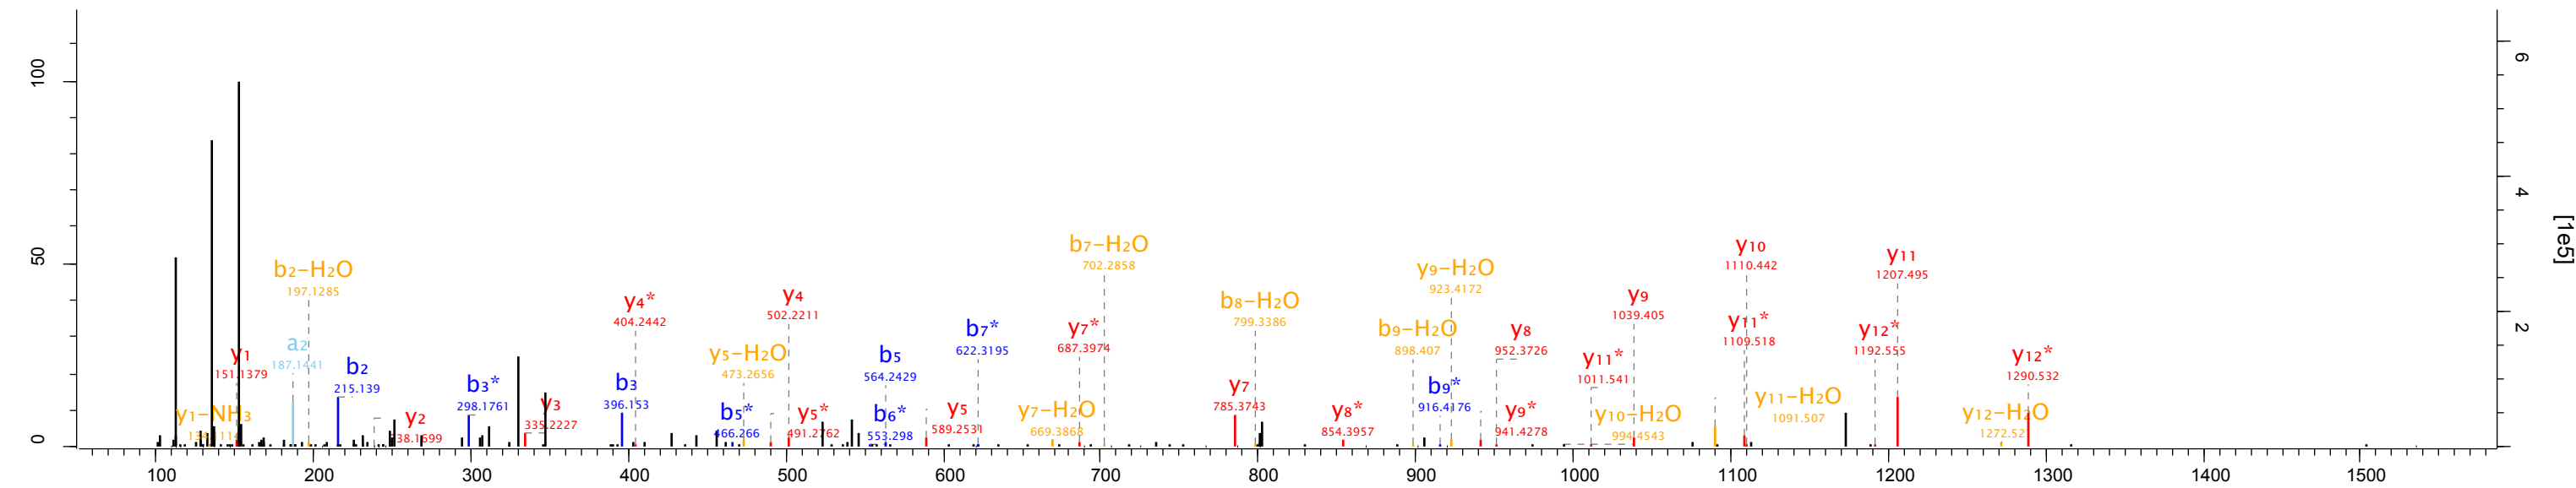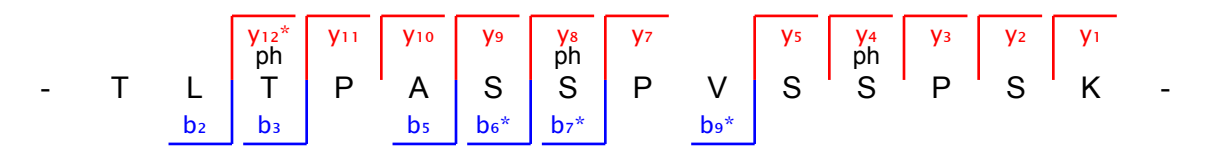

Raw file 20171215\_MaS\_33SR\_LMH\_phospho2\_04 Scan 5530 Method FTMS; HCD Score 62.19 m/z 971.88 Gene names ABCA2

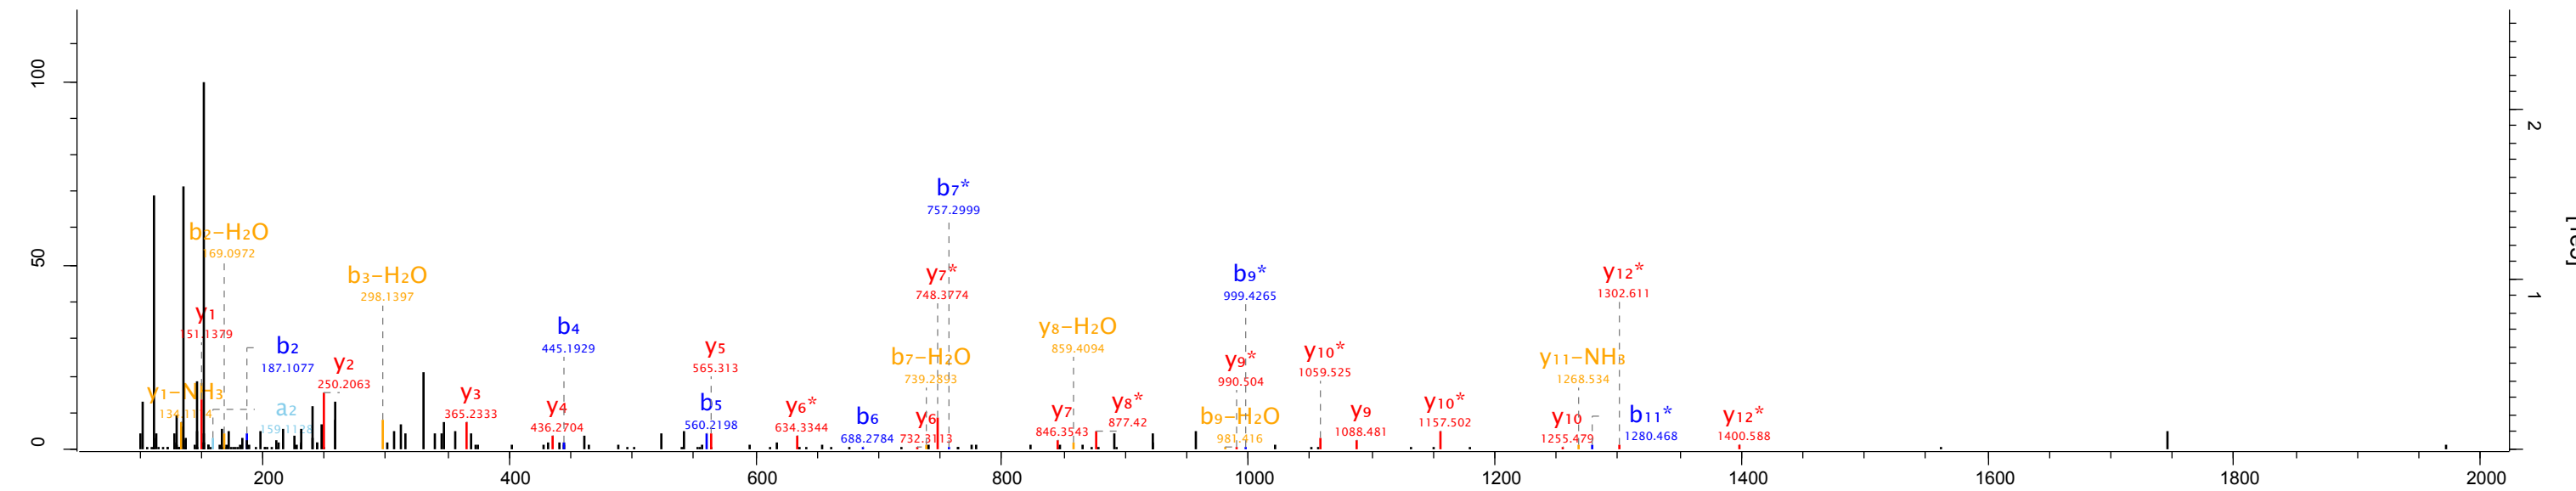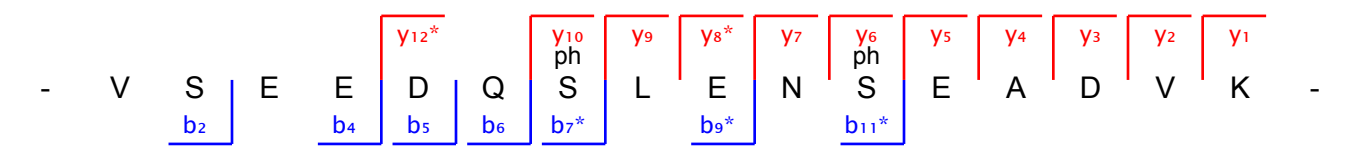



Raw file 20171215\_MaS\_33SR\_LMH\_phospho2\_04 Scan 5910 Method FTMS; HCD Score 64.31 m/z 601.2 Gene names TAF2

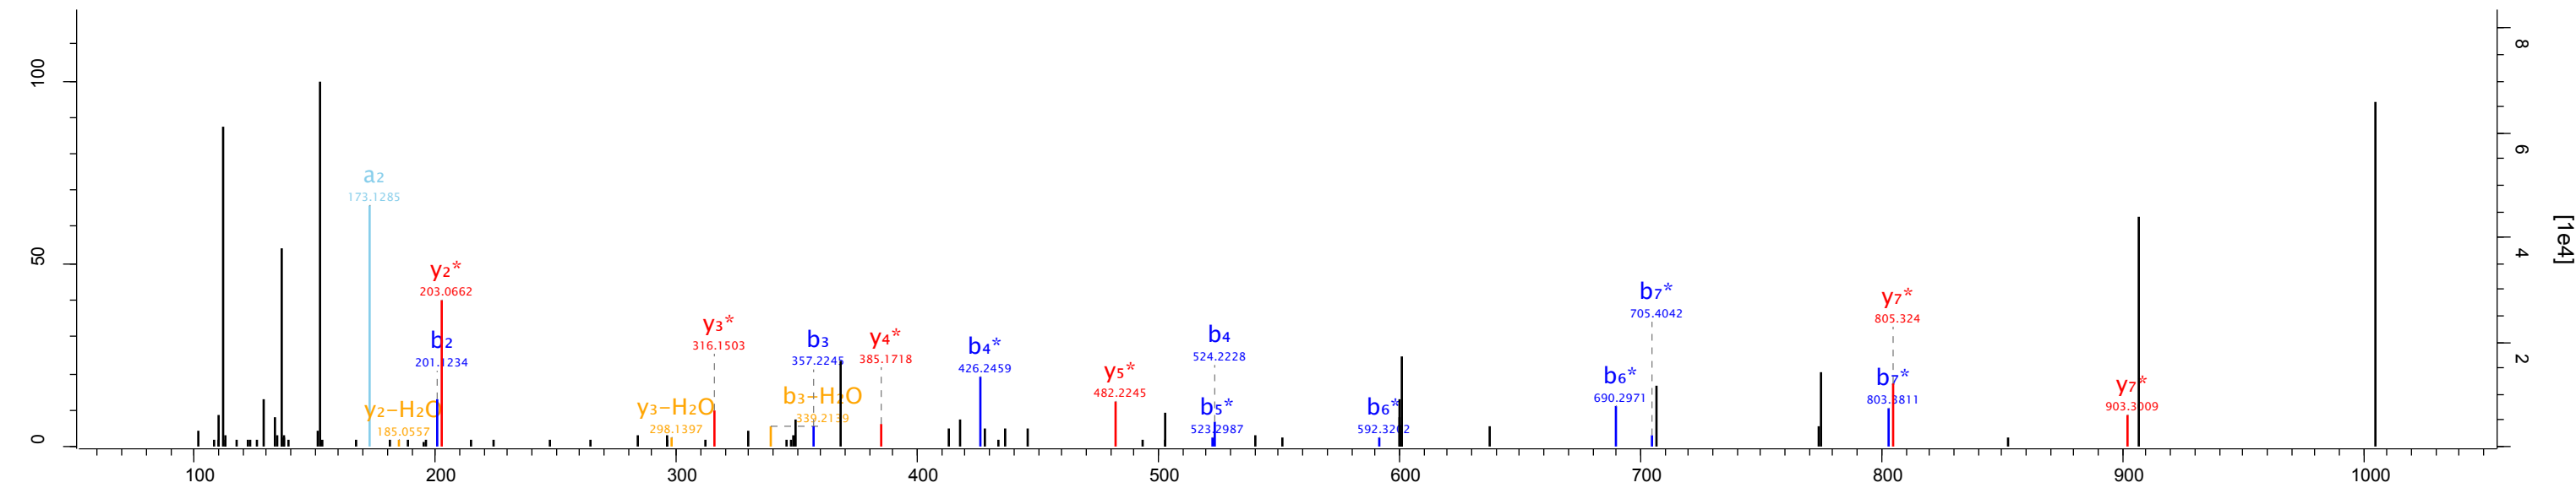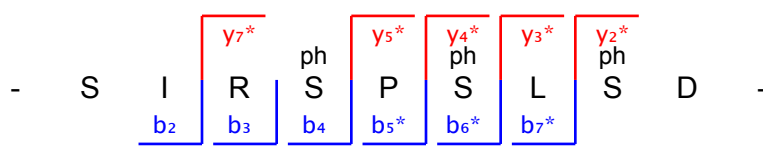

Raw file 20171215\_MaS\_33SR\_LMH\_phospho2\_04 Scan 6070 Method FTMS; HCD Score 80.91 m/z 569.69 Gene names HIRIP3

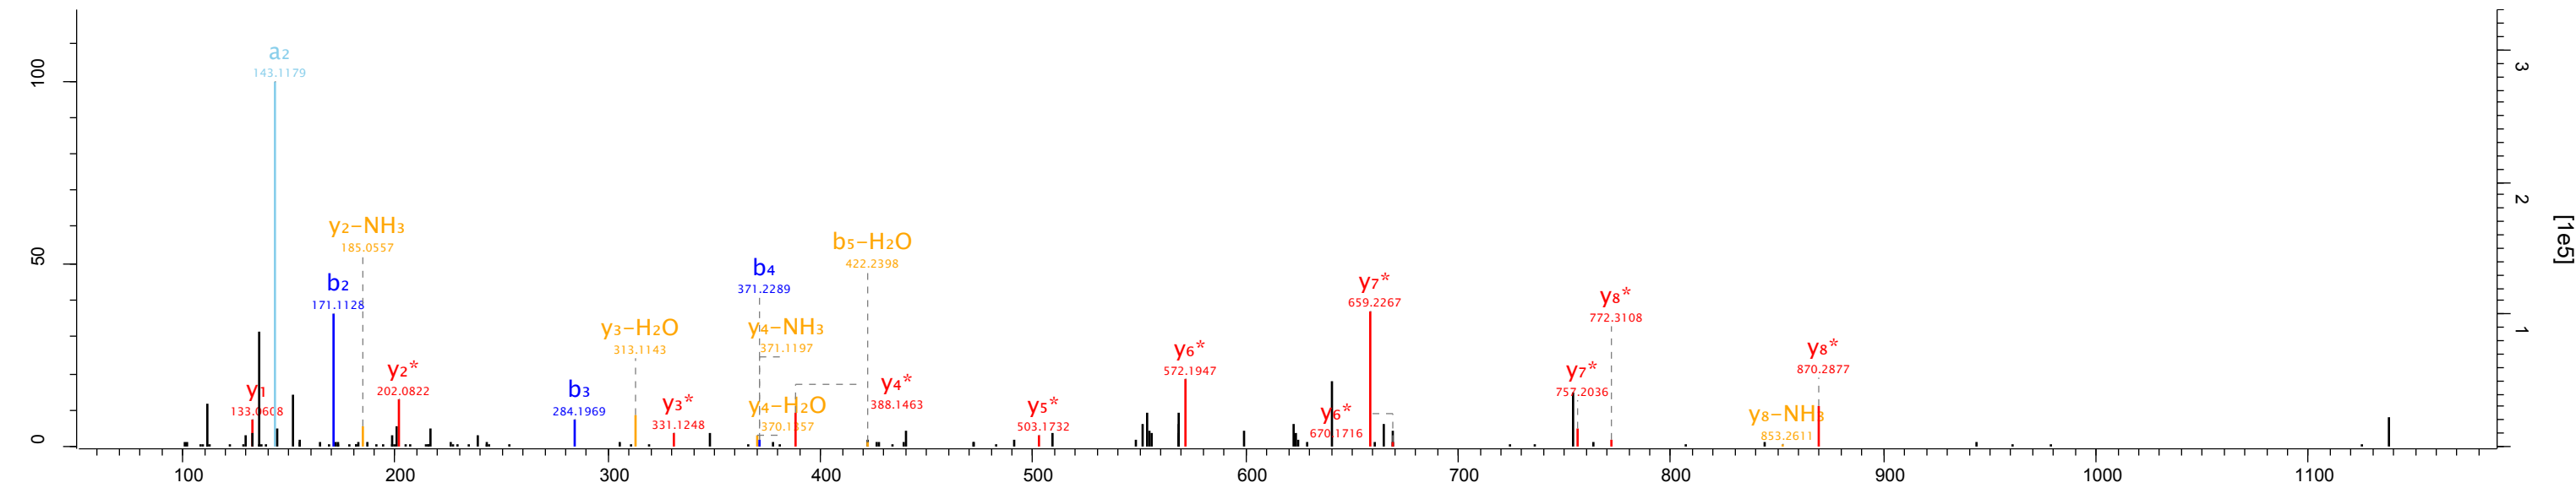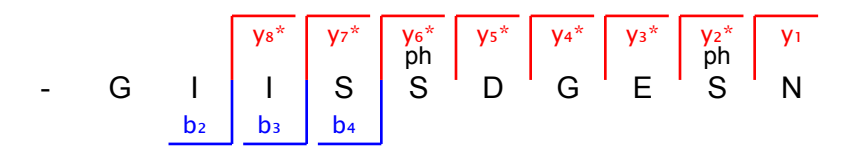

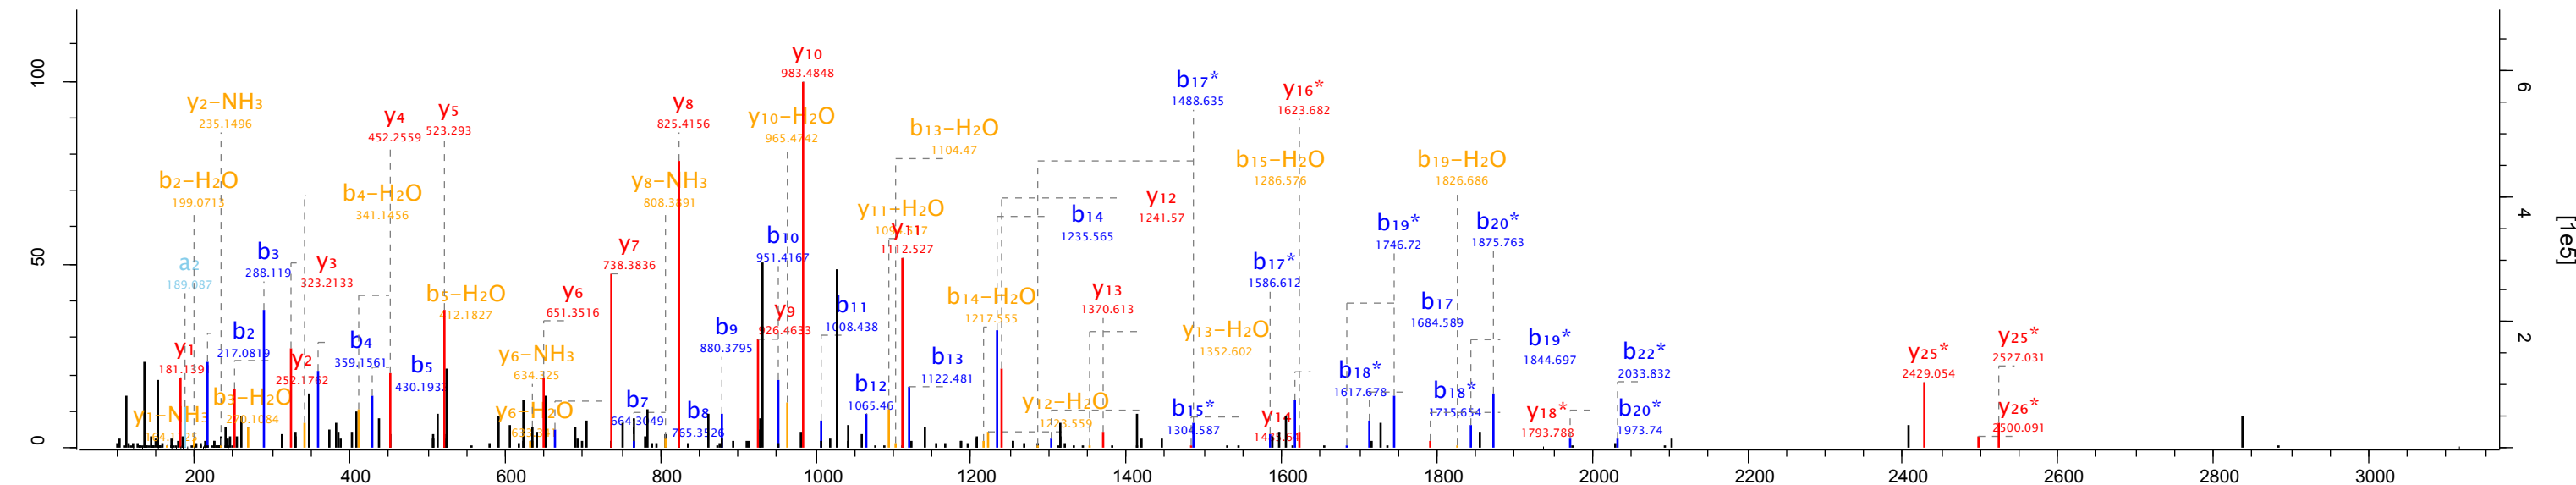

- S E A A A P H T D A G G G L ph S D E E E G T S S Q A E A A R -

b<sub>2</sub>
b<sub>3</sub>
b<sub>4</sub>
b<sub>5</sub>
y<sub>26</sub>\*
y<sub>25</sub>\*
b<sub>7</sub>
b<sub>8</sub>
b<sub>9</sub>
b<sub>10</sub>
b<sub>11</sub>
b<sub>12</sub>
b<sub>13</sub>
b<sub>14</sub>
b<sub>15</sub>\*
y<sub>18</sub>\*
y<sub>16</sub>\*
y<sub>14</sub>
y<sub>13</sub>
y<sub>12</sub>
y<sub>11</sub>
y<sub>10</sub>
y<sub>9</sub>
y<sub>8</sub>
y<sub>7</sub>
y<sub>6</sub>
y<sub>5</sub>
y<sub>4</sub>
y<sub>3</sub>
y<sub>2</sub>
y<sub>1</sub>

20171215\_MaS\_33SR\_LMH\_phospho2\_04 8750 FTMS; HCD 56.53 617.77 ITGB4

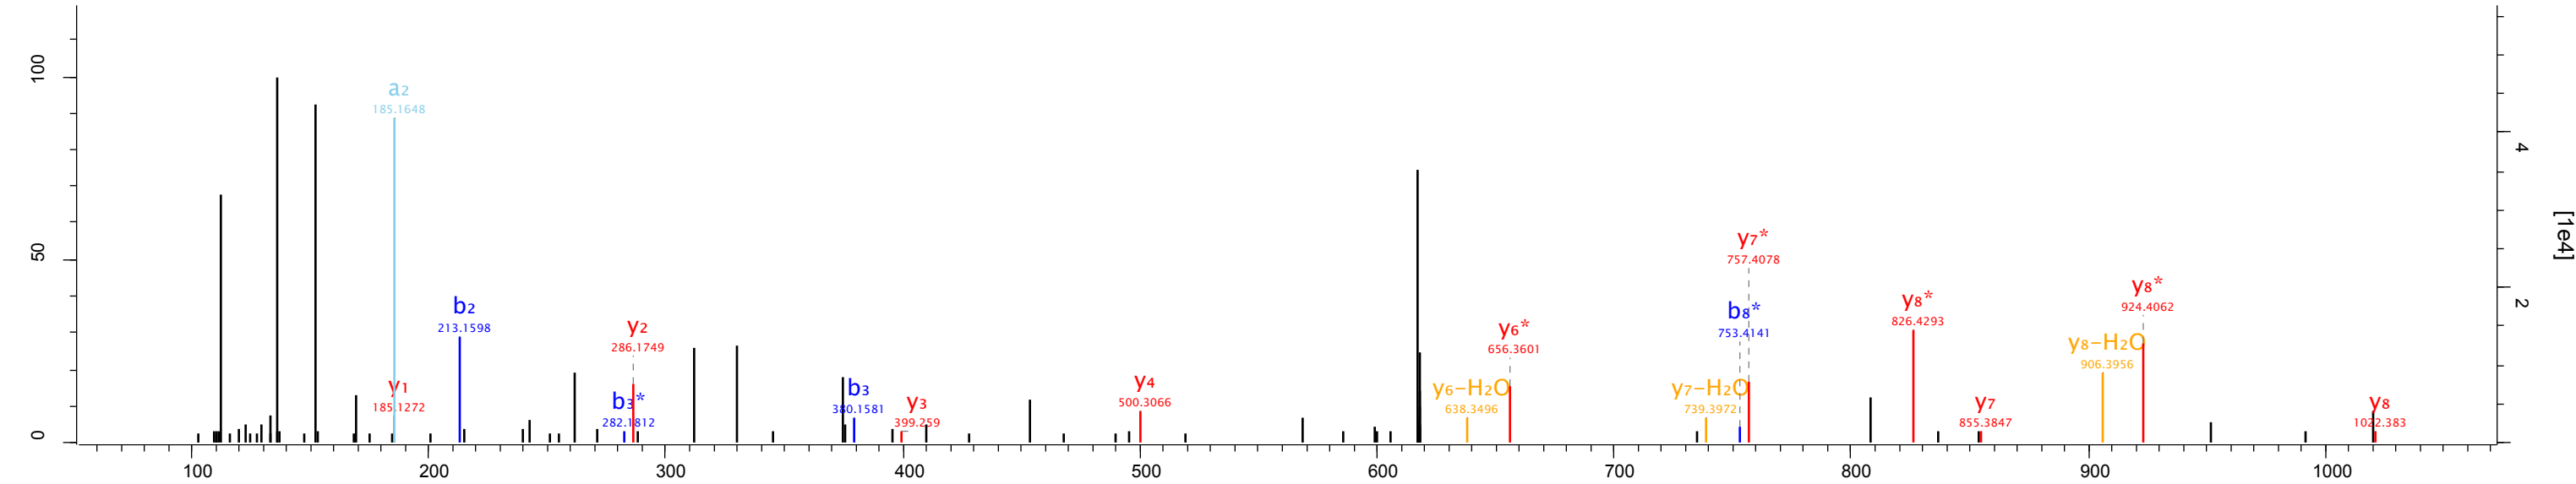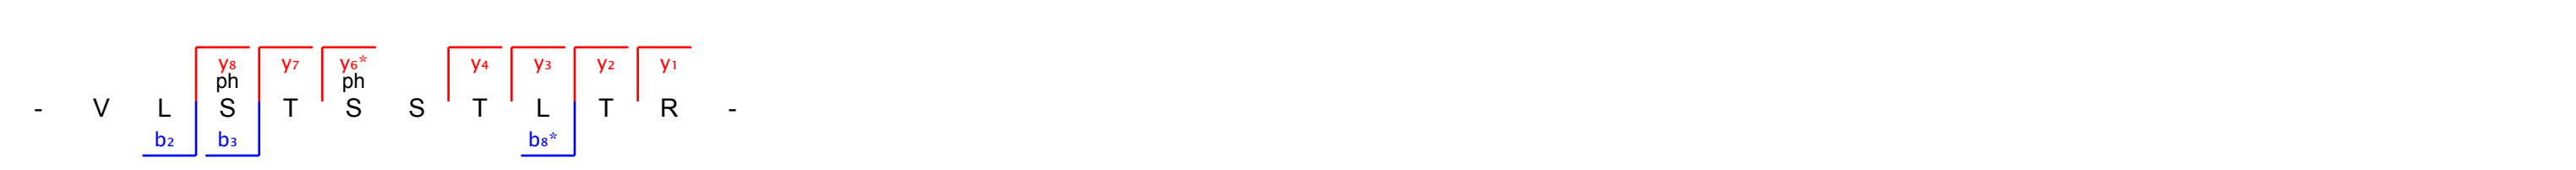

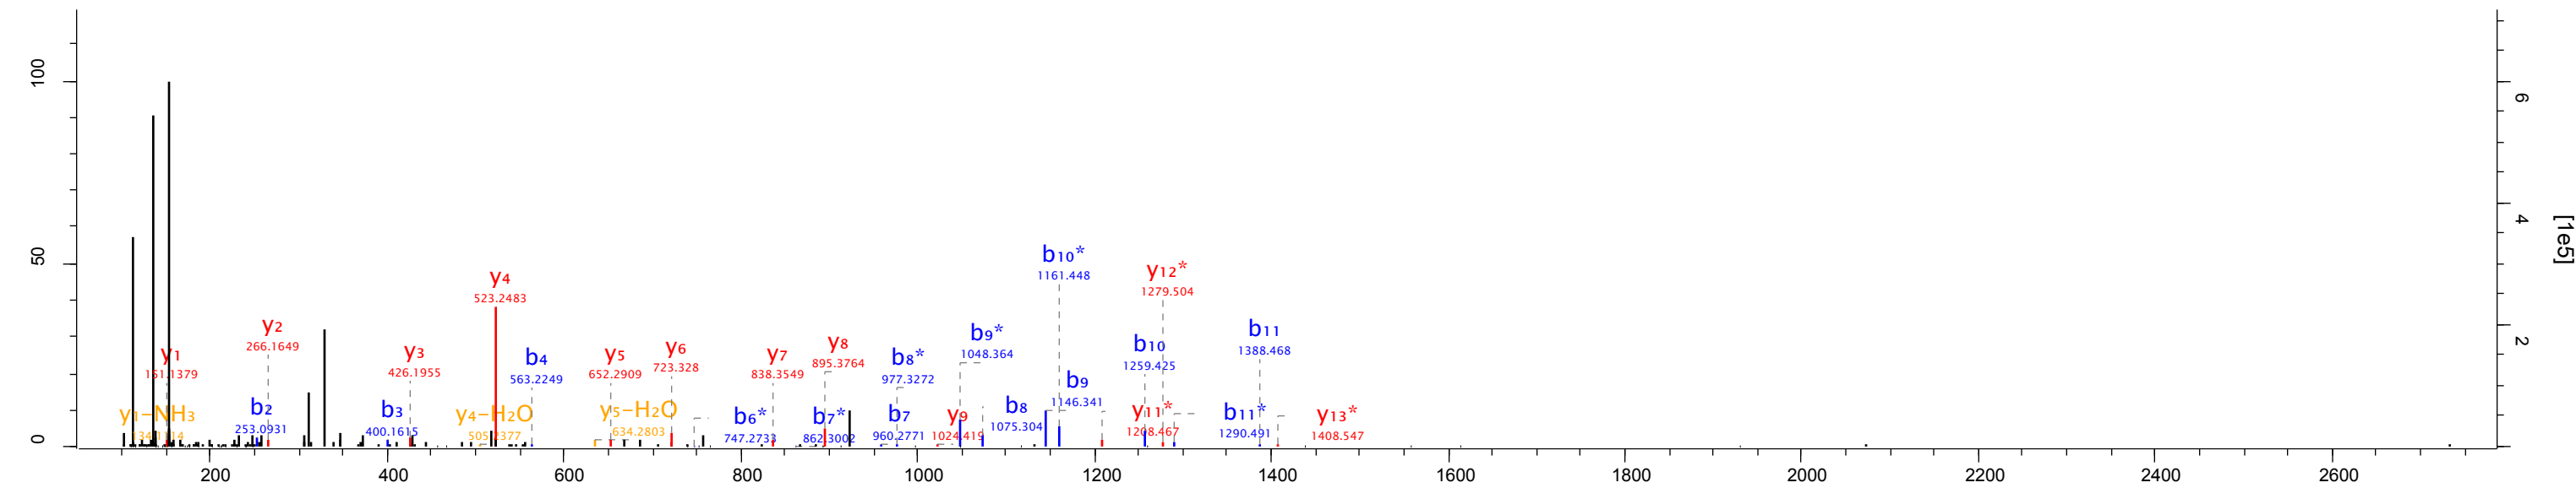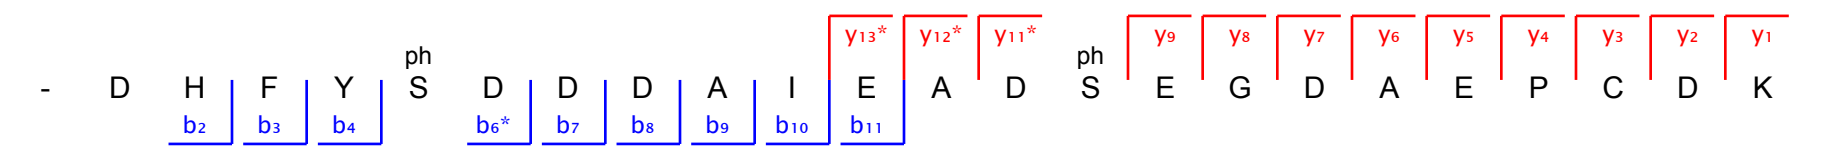

Raw file 20171215\_MaS\_33SR\_LMH\_phospho2\_05 Scan 11350 Method FTMS; HCD Score 130.57 m/z 1139.4 Gene names UTP3

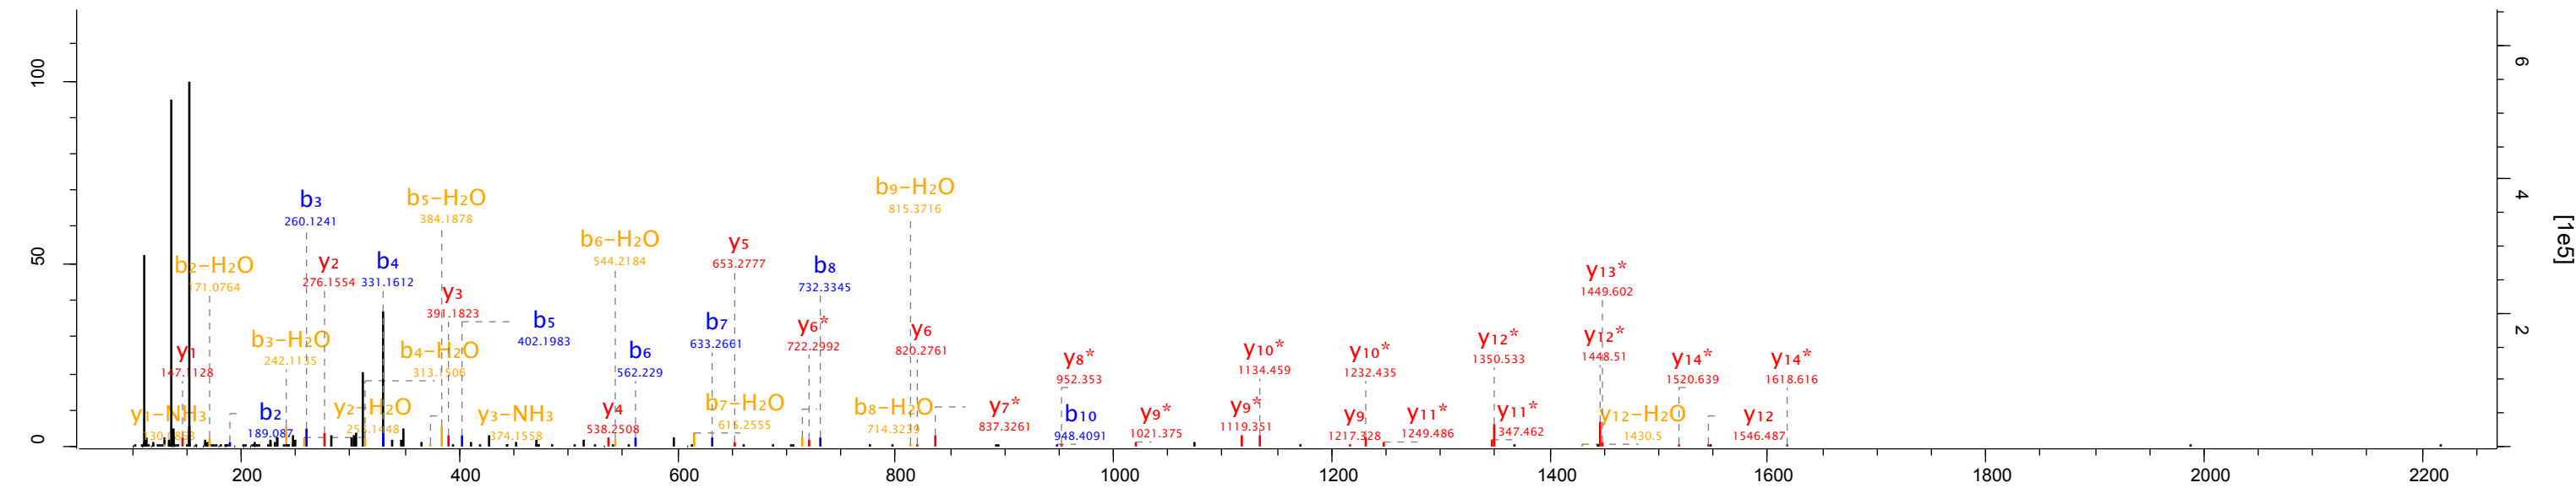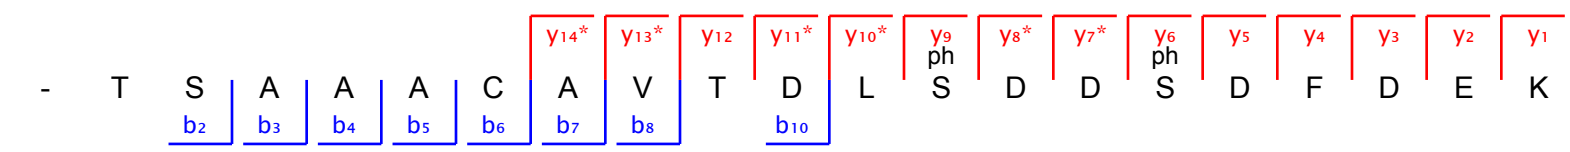

Raw file 20171215\_MaS\_33SR\_LMH\_phospho2\_05 Scan 11650 Method FTMS; HCD Score 101.39 m/z 619.77 Gene names AHNAK

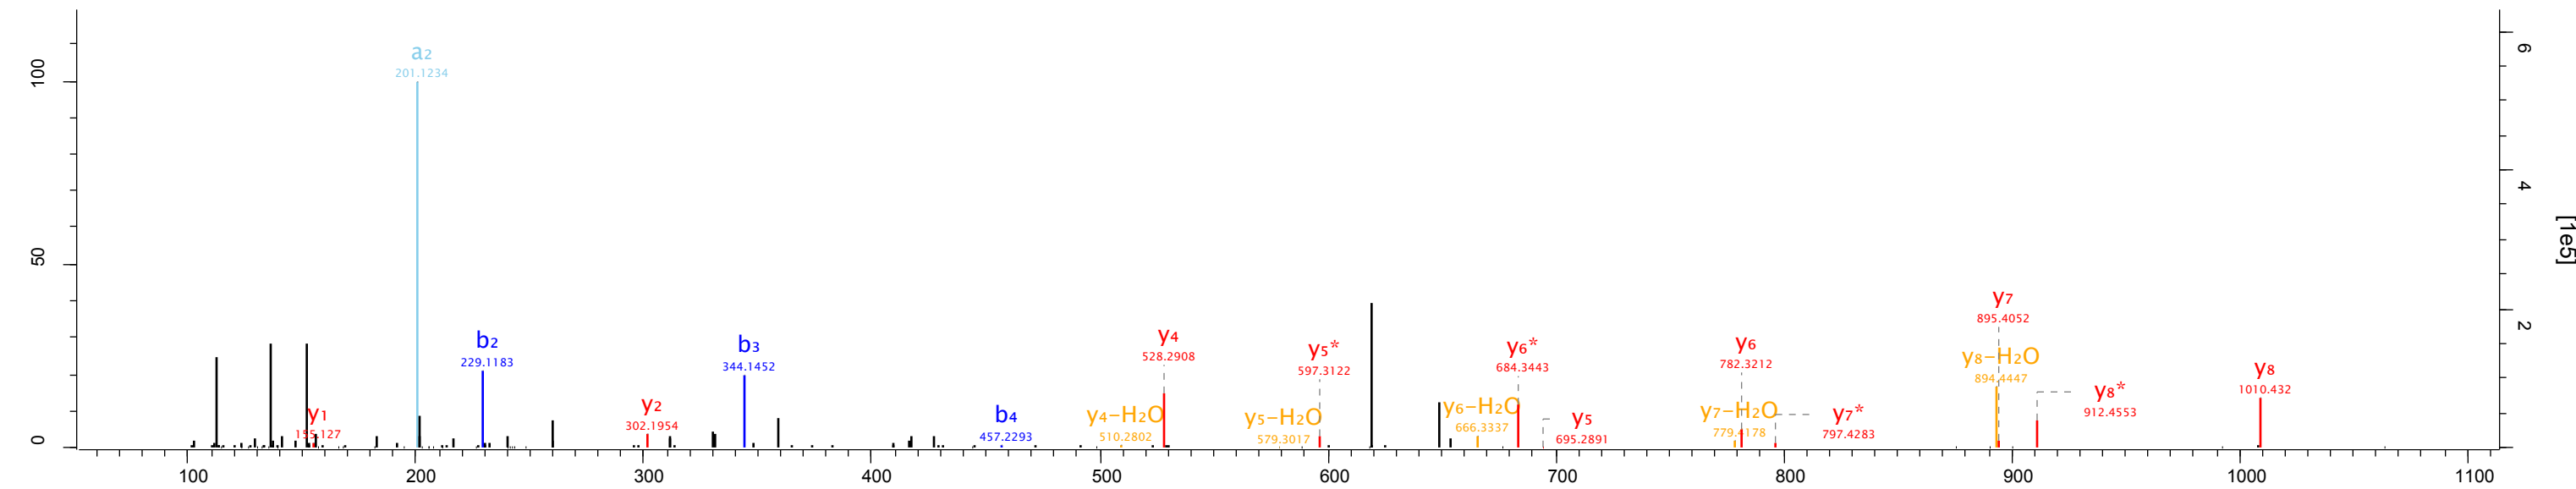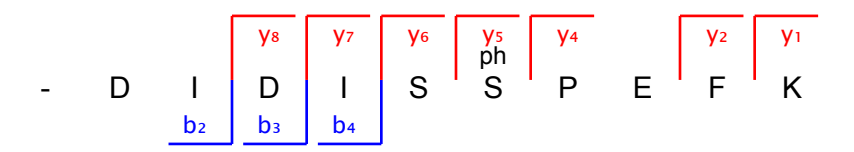

Raw file

20171215\_MaS\_33SR\_LMH\_phospho2\_05

| Scan | Method    | Score | m/z    | Gene names |
|------|-----------|-------|--------|------------|
| 2490 | FTMS; HCD | 54.66 | 817.92 | HMGA2      |

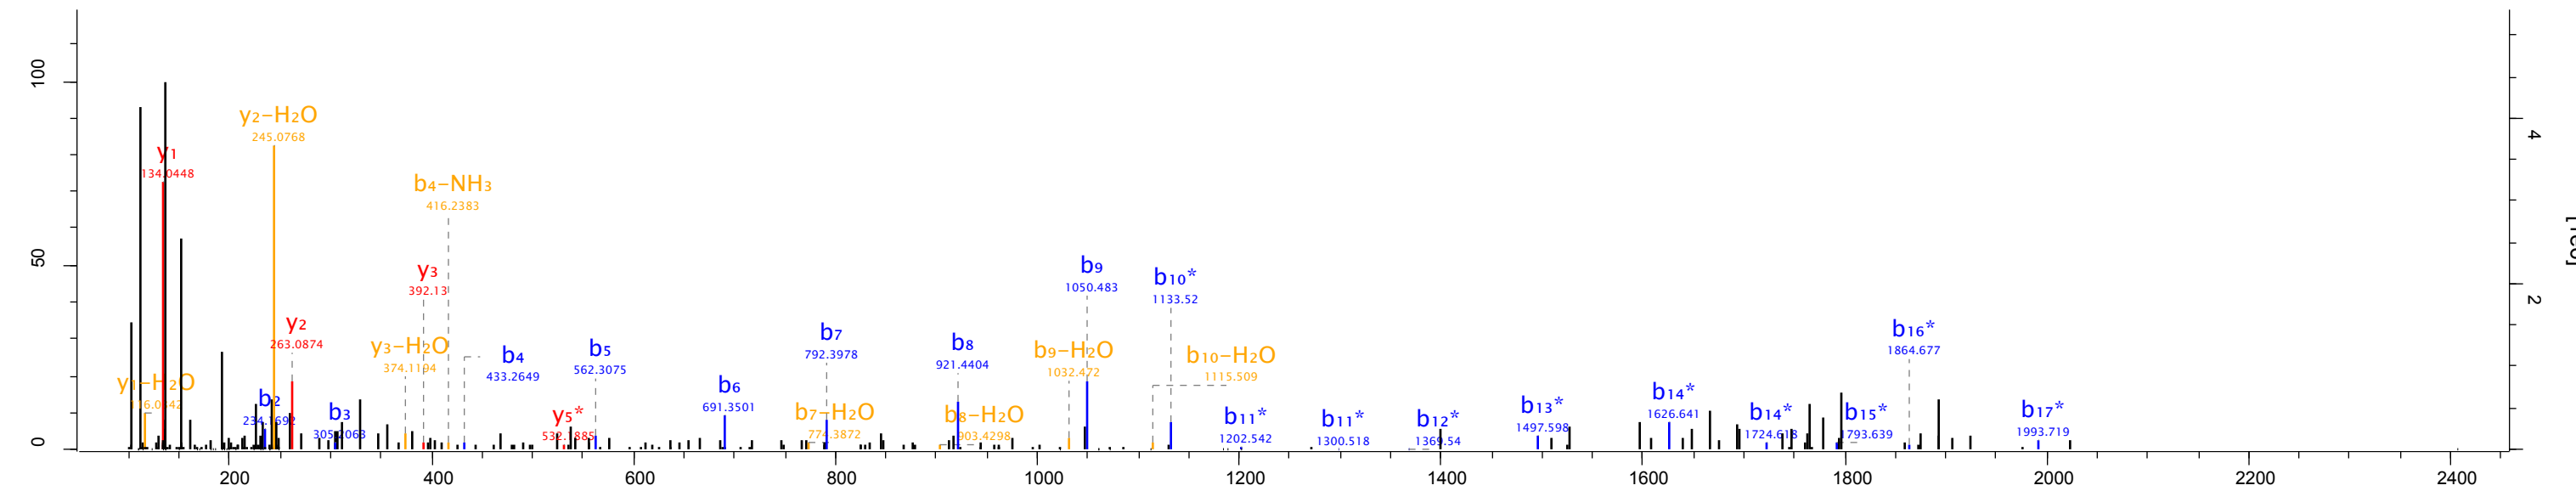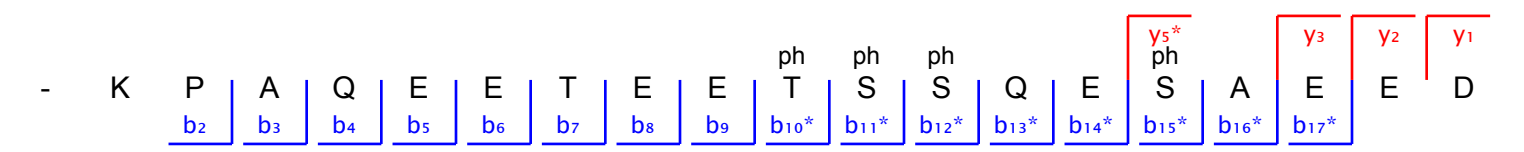



Raw file  
20171215\_MaS\_33SR\_LMH\_phospho2\_05

Scan 3870 Method FTMS; HCD Score 191.59 m/z 1021.4 Gene names RPS6

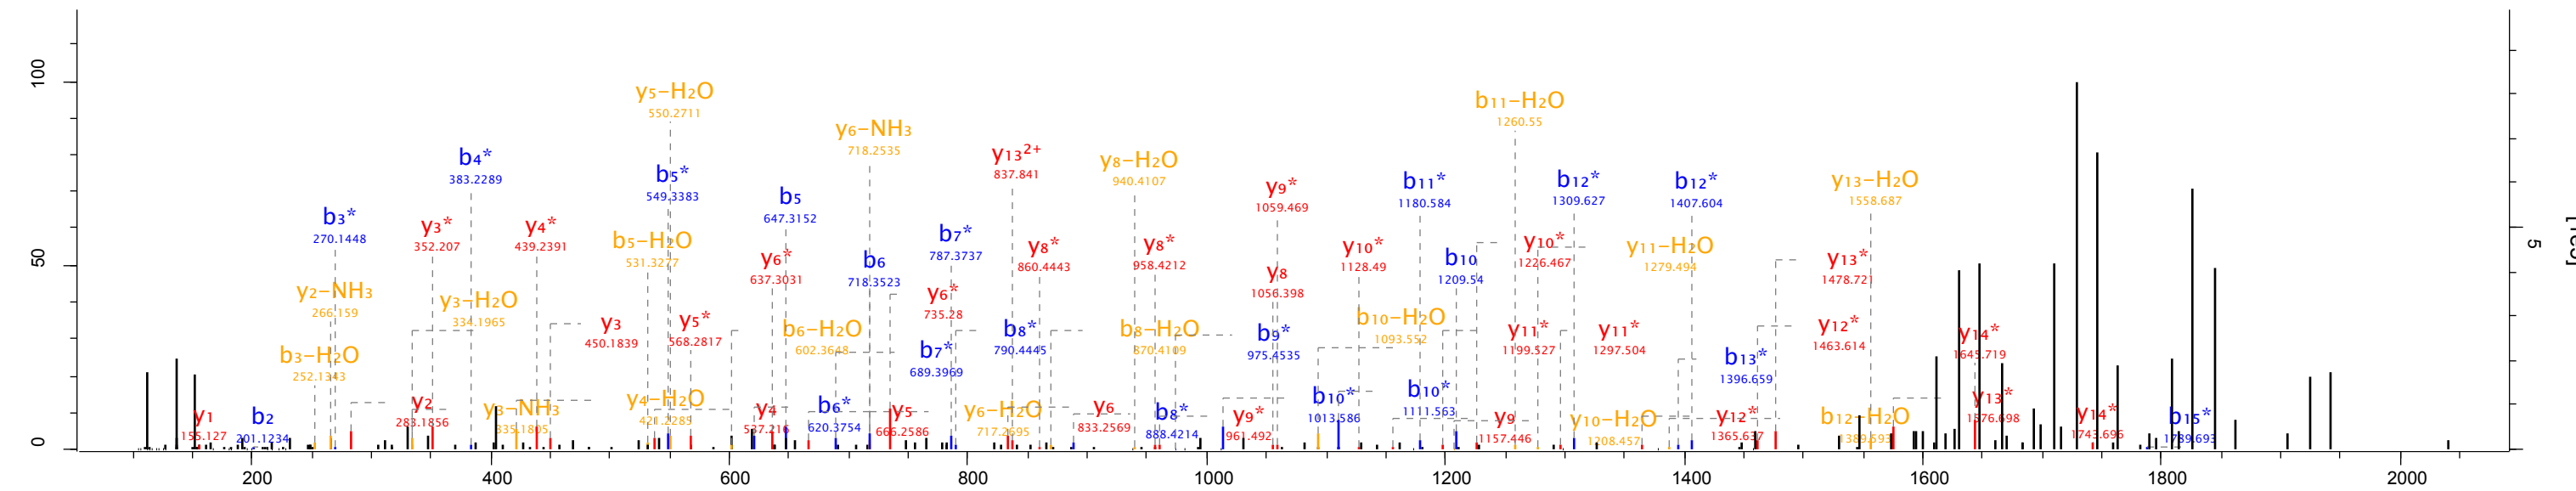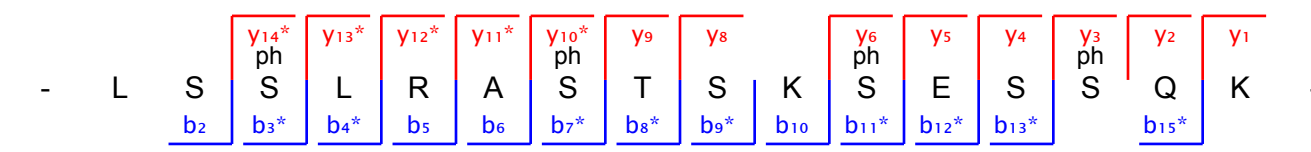

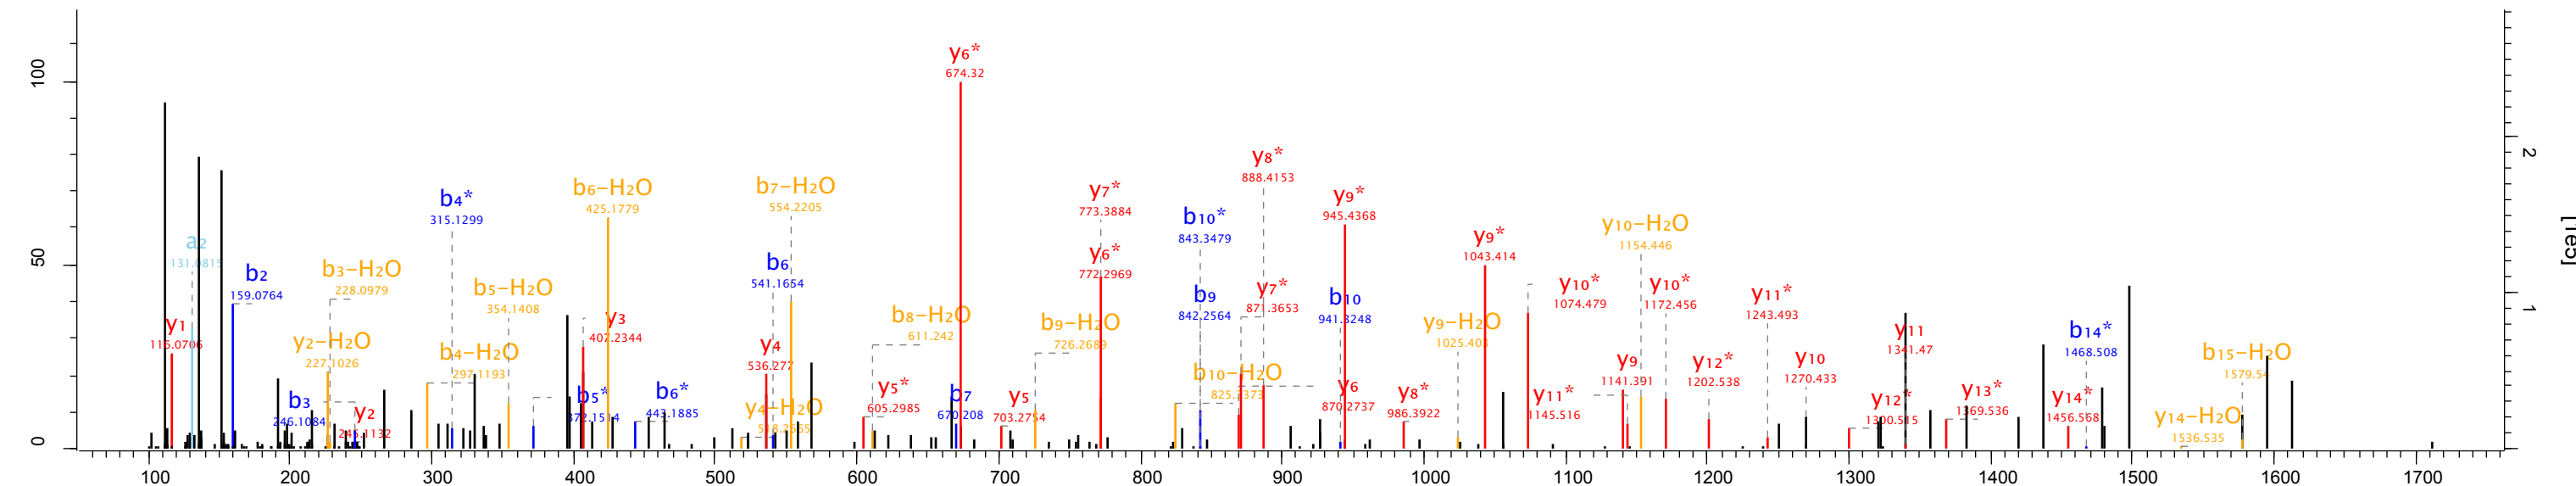

- S A S S G A E G D V S S E R E P -

b<sub>2</sub> b<sub>3</sub> b<sub>4</sub>\* b<sub>5</sub>\* b<sub>6</sub> b<sub>7</sub> b<sub>9</sub> b<sub>10</sub> b<sub>14</sub>\*

y<sub>14</sub>\* y<sub>13</sub>\* y<sub>12</sub>\* y<sub>11</sub> y<sub>10</sub> y<sub>9</sub> y<sub>8</sub>\* y<sub>7</sub>\* y<sub>6</sub> y<sub>5</sub> y<sub>4</sub> y<sub>3</sub> y<sub>2</sub> y<sub>1</sub>

ph ph

Raw file 20171215\_MaS\_33SR\_LMH\_phospho2\_05 Scan 7110 Method FTMS; HCD Score 172.6 m/z 716.79 Gene names HUWE1

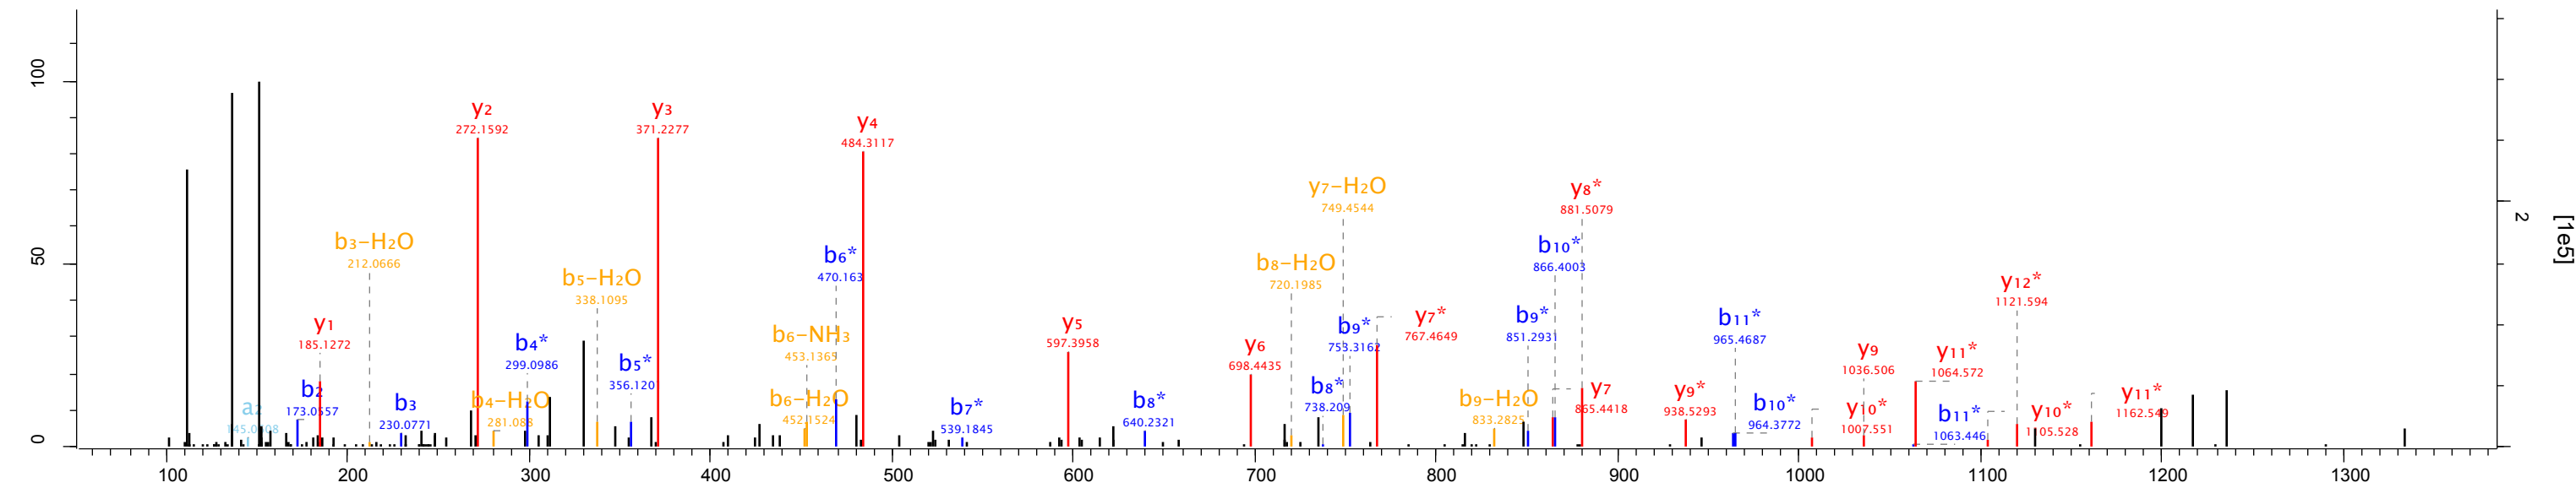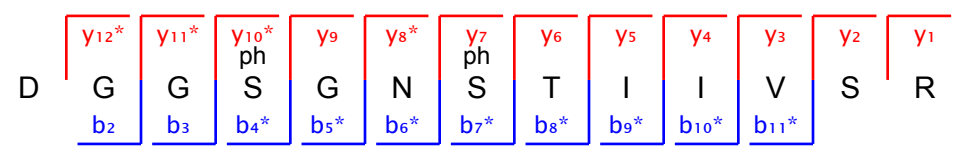

Raw file 20171215\_MaS\_33SR\_LMH\_phospho2\_06 Scan 11170 Method FTMS; HCD Score 109.85 m/z 1034.45 Gene names TGOLN2

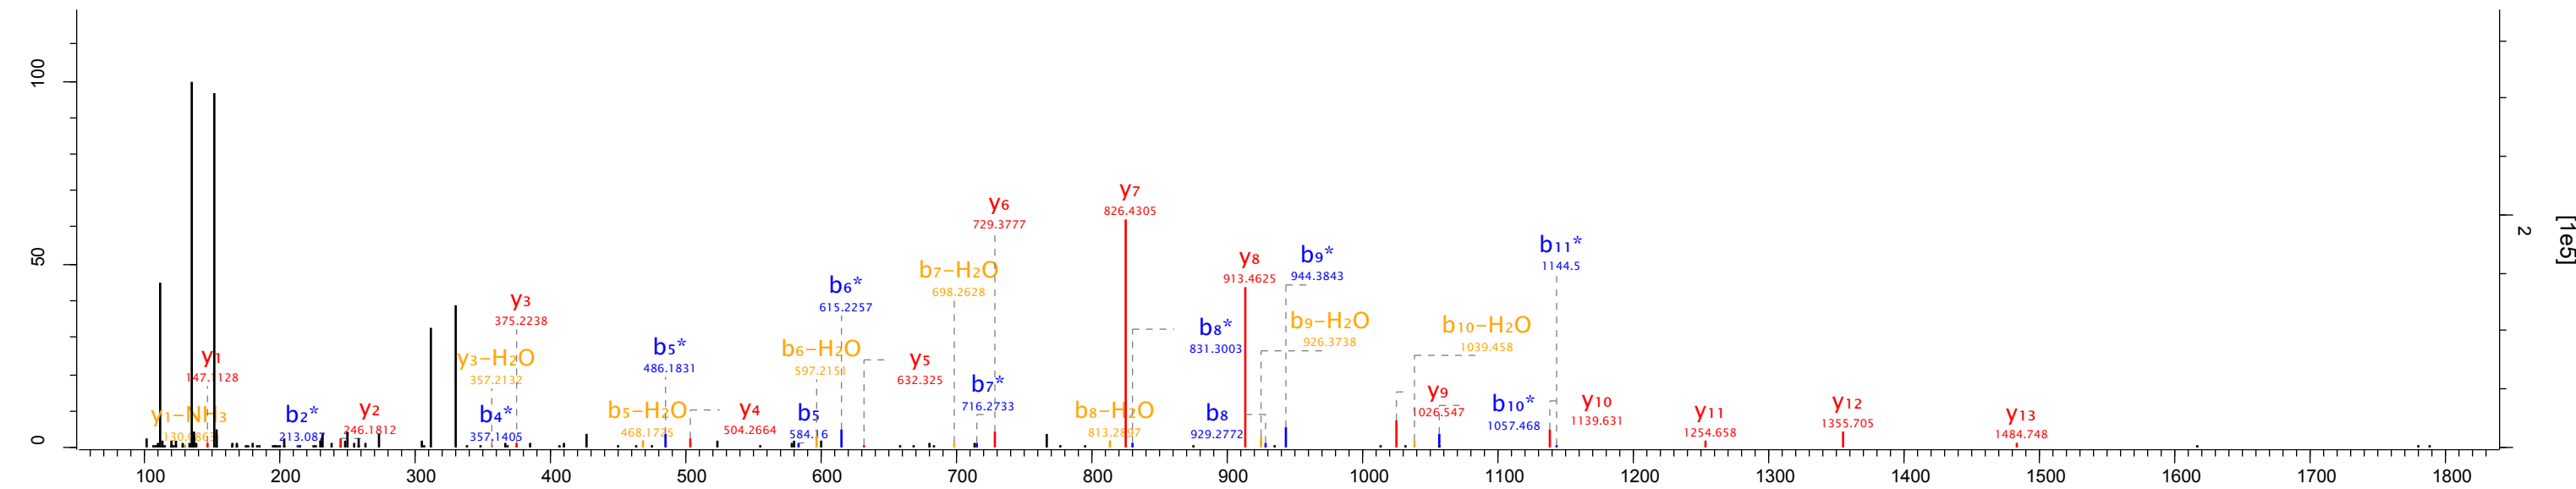

ph  
- T E S G E E T D L I S P P Q E E V K -

Fragmentation labels below the sequence:  
 - b2\* (under E)  
 - b4\* (under G), b5 (under E), b6\* (under E), b7\* (under T), b8 (under D), b9\* (under L), b10\* (under I), b11\* (under S)  
 - y13 (under E), y12 (under T), y11 (under D), y10 (under L), y9 (under I), y8 (under S), y7 (under P), y6 (under P), y5 (under Q), y4 (under E), y3 (under E), y2 (under V), y1 (under K)

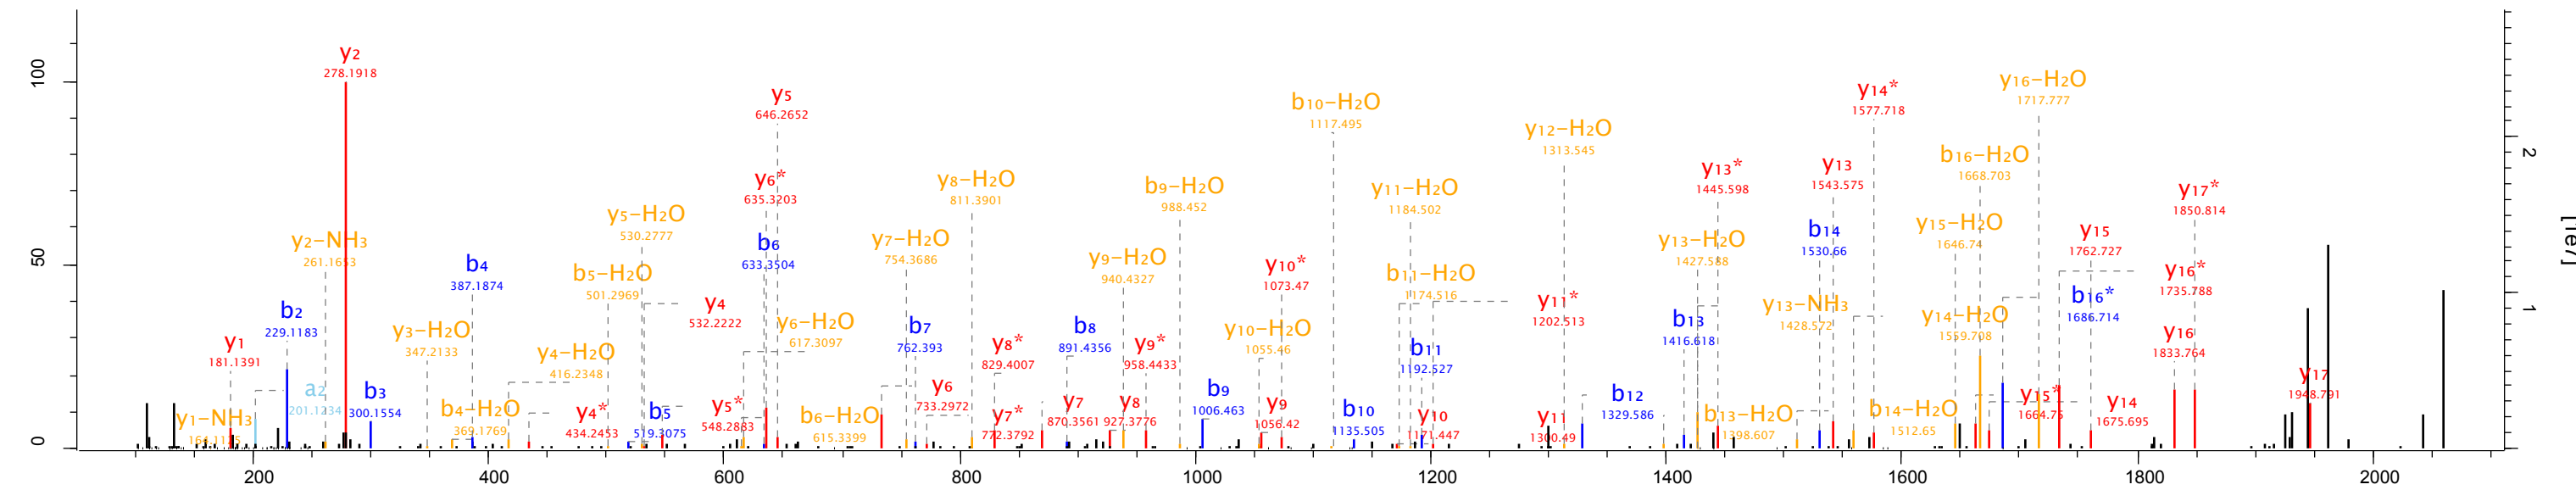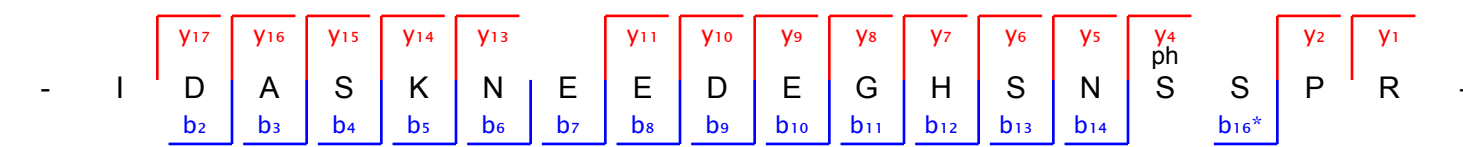

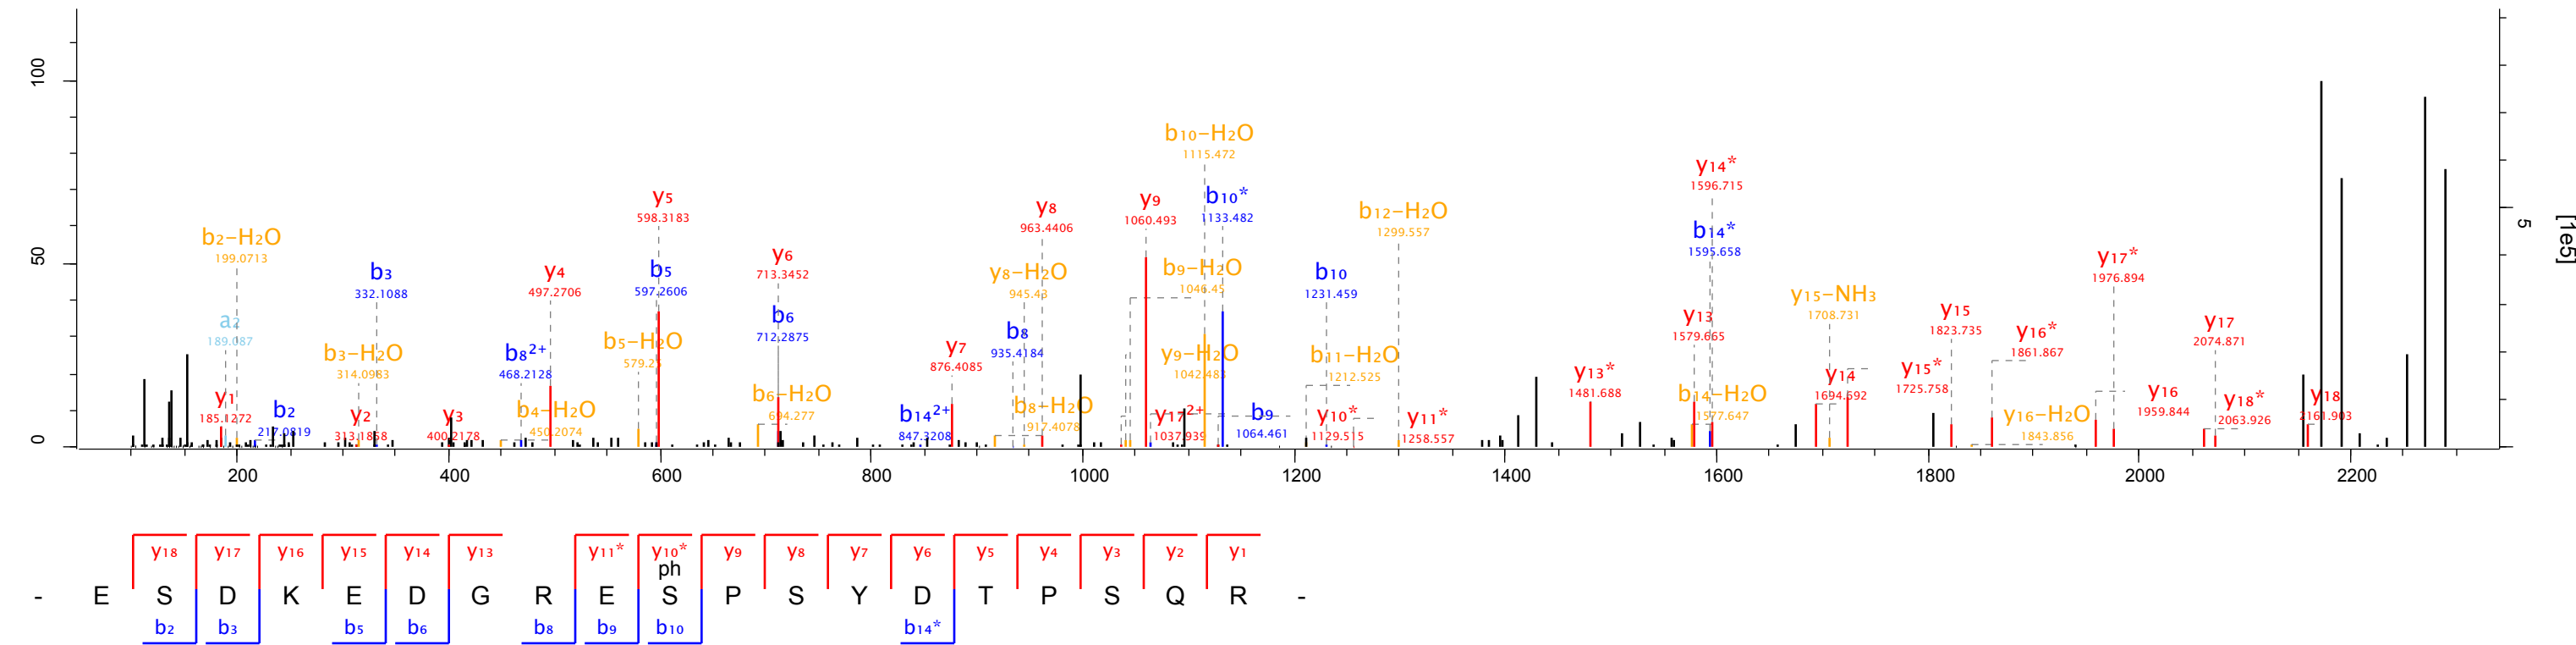

Raw file  
20171215\_MaS\_33SR\_LMH\_phospho2\_06

Scan 3020 Method FTMS; HCD Score 214.28 m/z 878.81 Gene names PSMA3

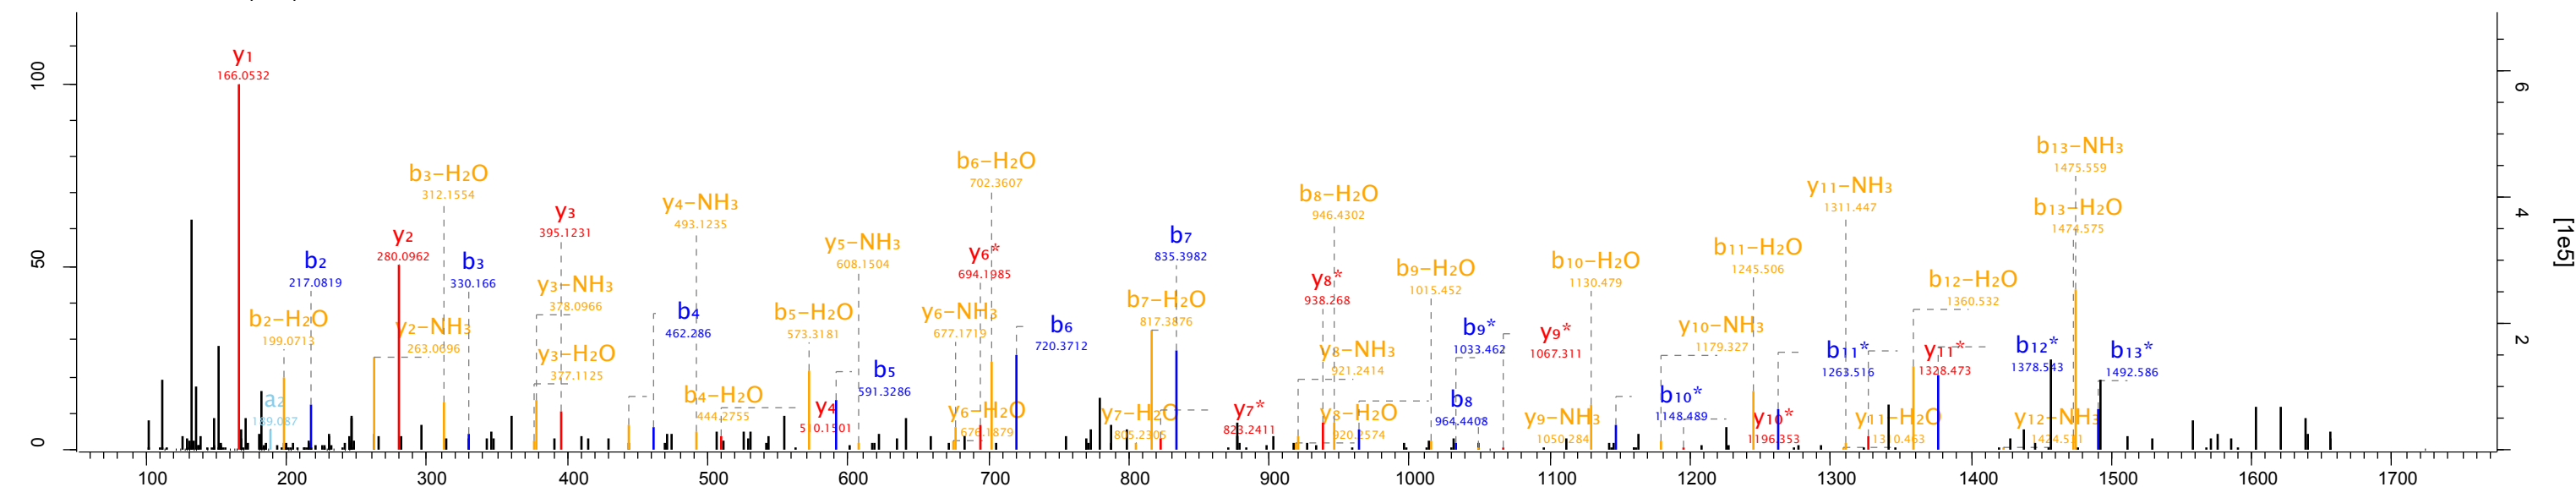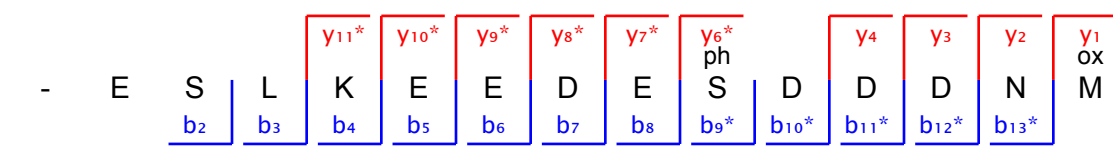

Raw file 20171215\_MaS\_33SR\_LMH\_phospho2\_06 Scan 5230 Method FTMS; HCD Score 42.12 m/z 927.39 Gene names CASK

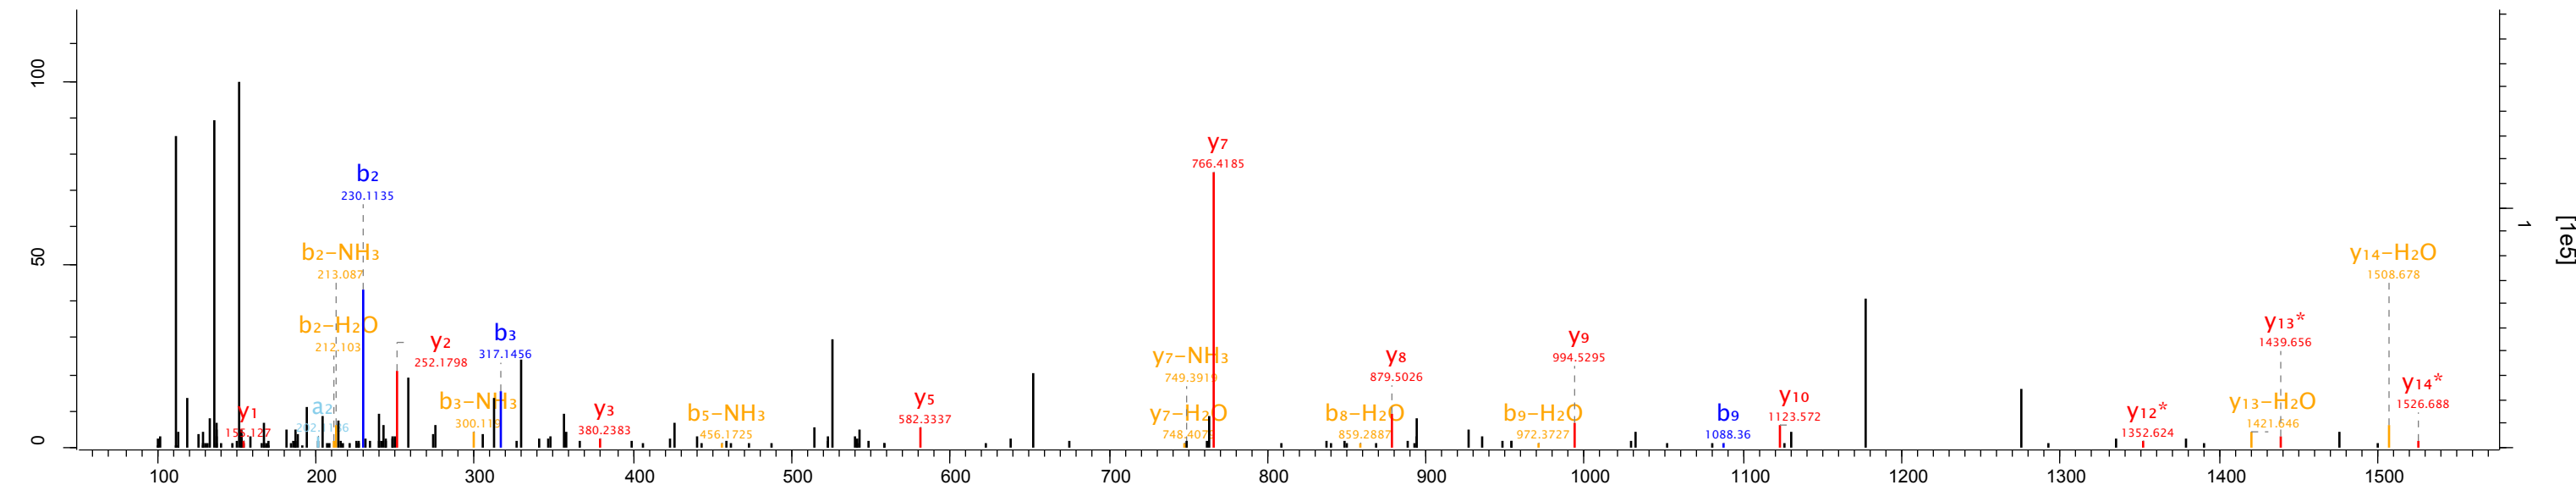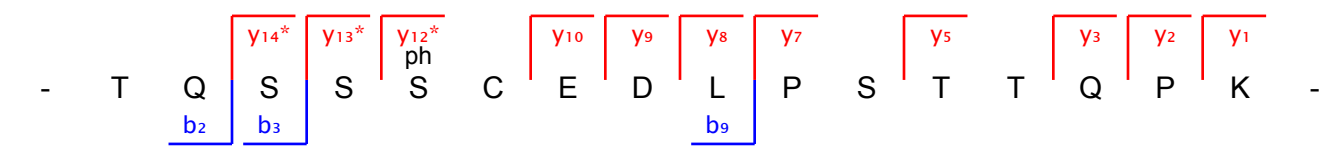



Raw file

20171215\_MaS\_33SR\_LMH\_phospho2\_08

Scan 2910 Method FTMS; HCD Score 75.97 m/z 662.79 Gene names RFX5

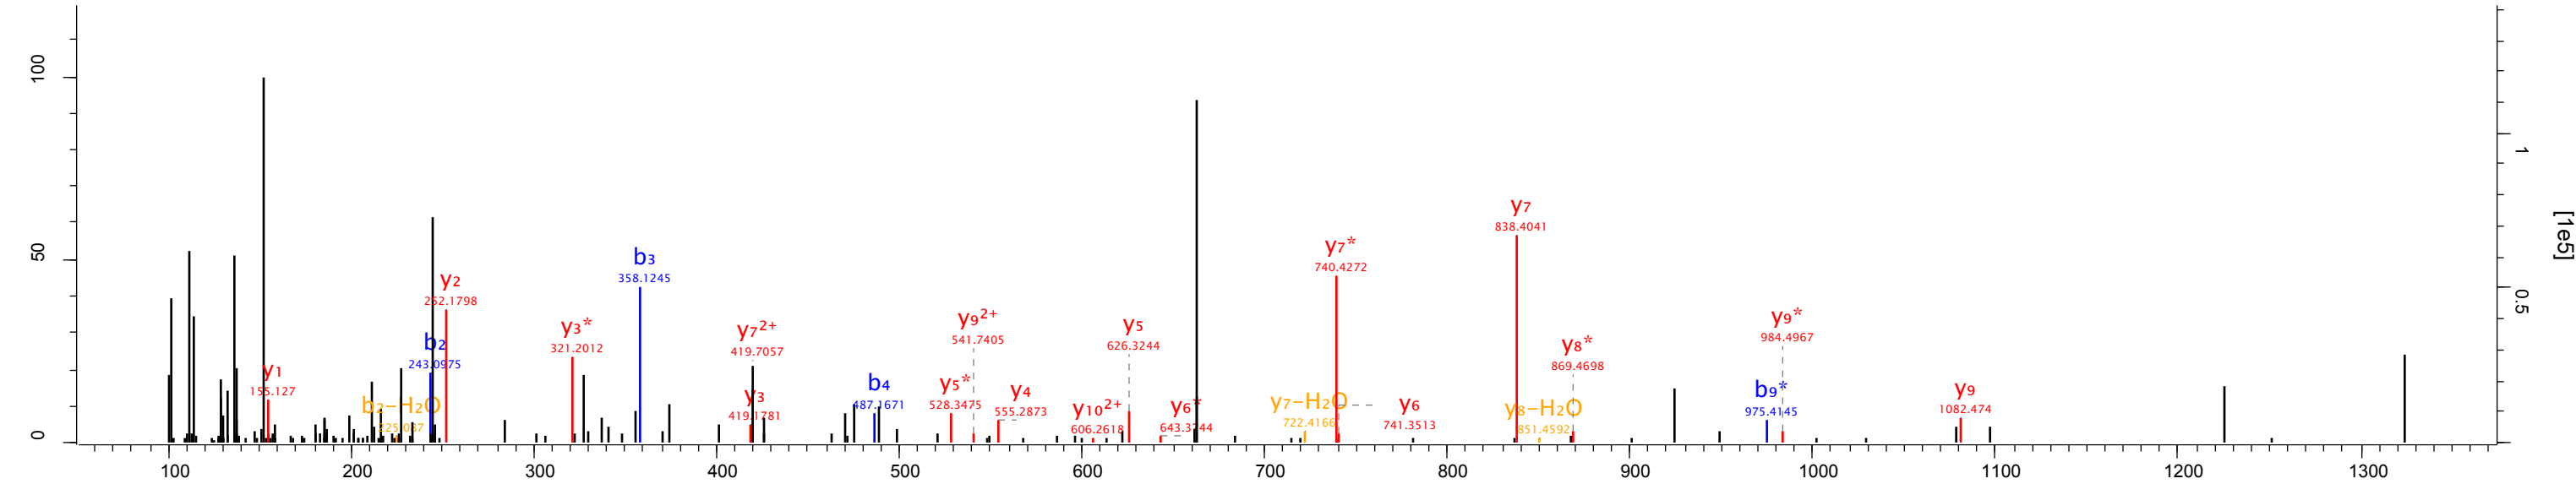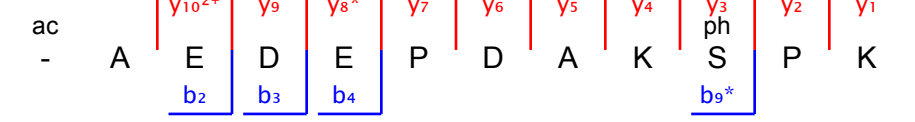

Raw file 20171215\_MaS\_33SR\_LMH\_phospho2\_08 Scan 5590 Method FTMS; HCD Score 120.27 m/z 1007.45 Gene names MECP2

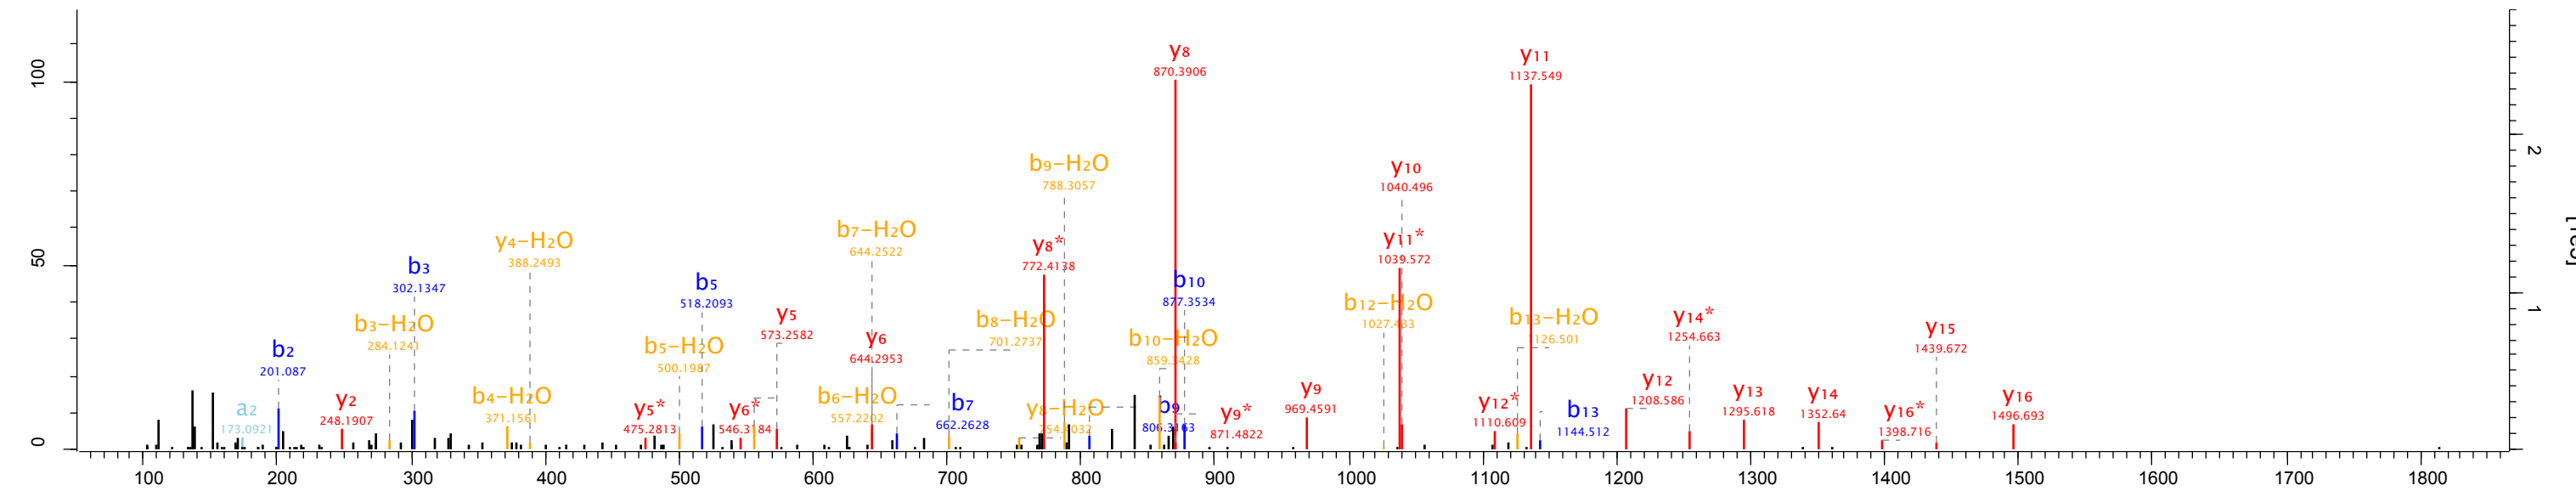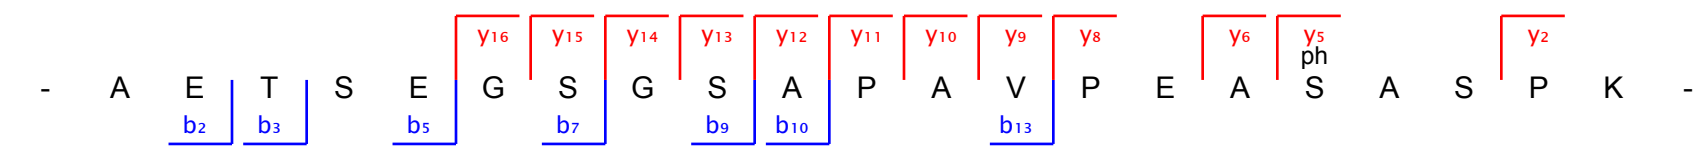

Raw file

20171215\_MaS\_33SR\_LMH\_phospho2\_08

| Scan | Method    | Score | m/z    | Gene names |
|------|-----------|-------|--------|------------|
| 5750 | FTMS; HCD | 90.1  | 980.95 | EYA3       |

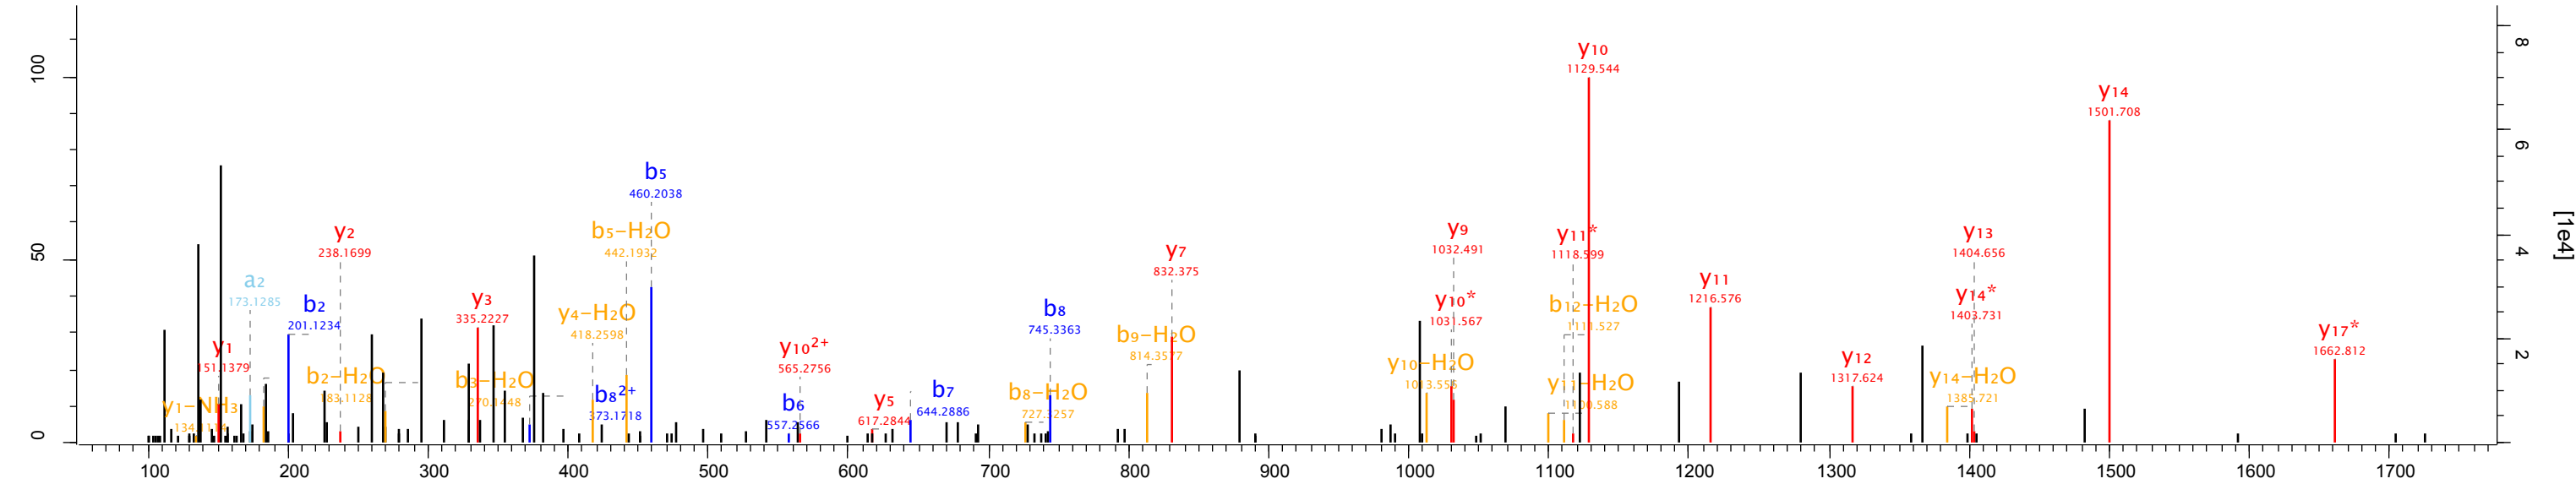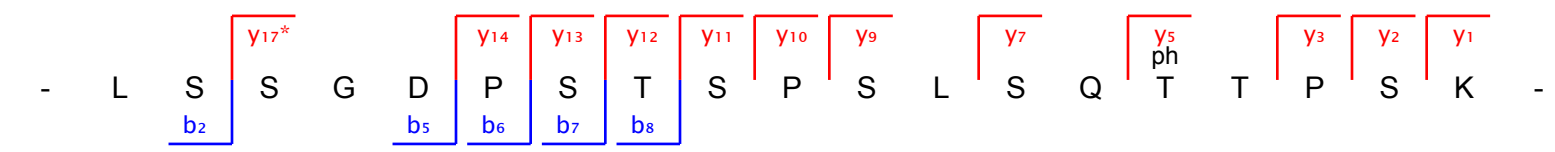

Raw file 20171215\_MaS\_33SR\_LMH\_phospho2\_08 Scan 7480 Method FTMS; HCD Score 42.21 m/z 563.77 Gene names BCOR

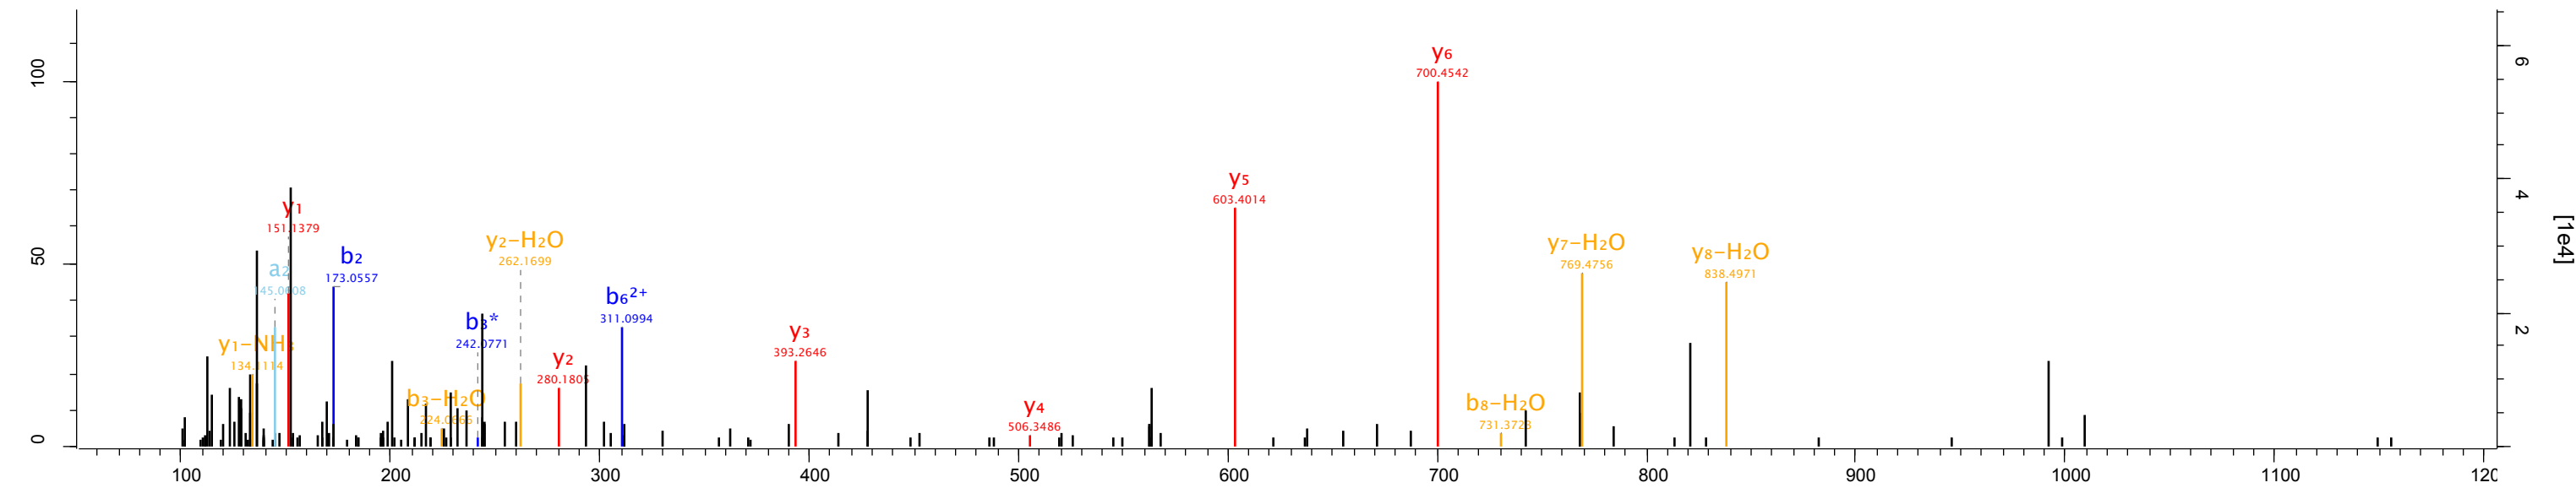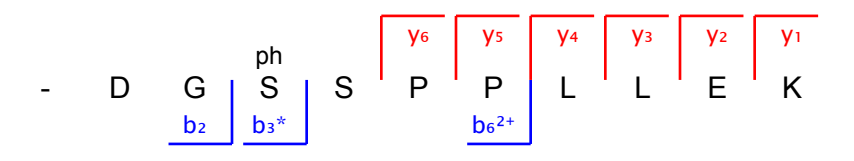

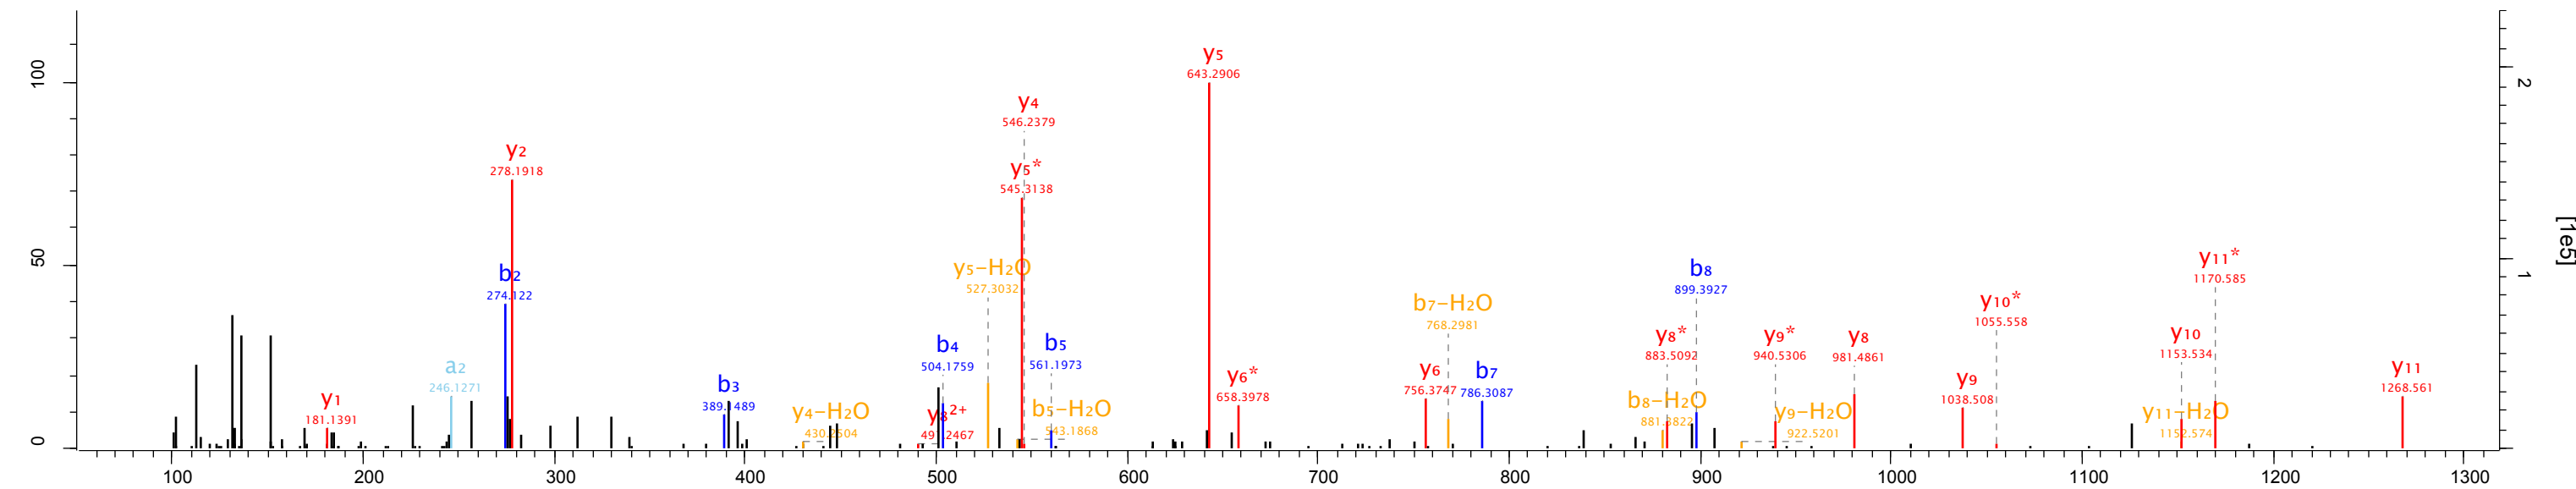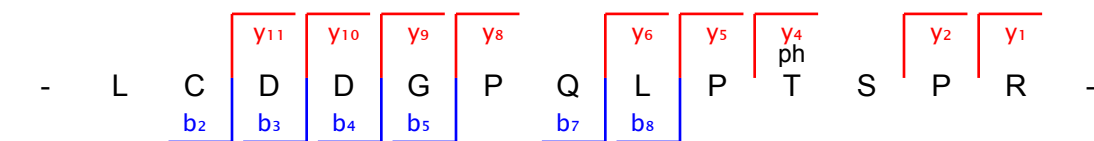

Raw file  
20171215\_MaS\_33SR\_LMH\_phospho2\_09

Scan 1960 Method FTMS; HCD Score 236.96 m/z 827.33 Gene names EIF4B

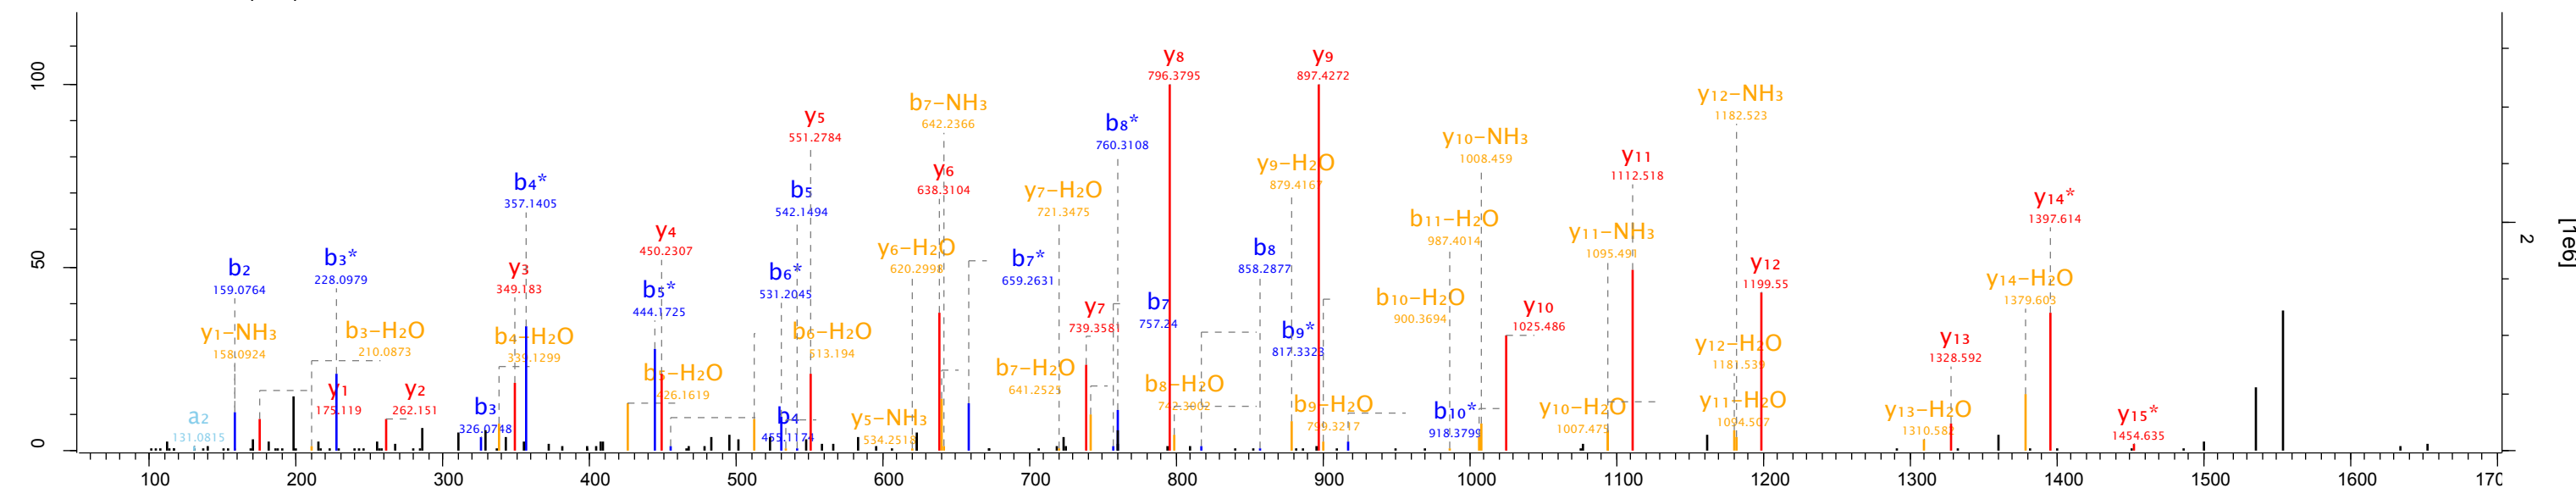

- T G S E S S Q T G T S T T S S R -

y15\*
y14\*
y13
y12
y11
y10
y9
y8
y7
y6
y5
y4
y3
y2
y1

b2
b3
b4
b5
b6\*
b7
b8
b9\*
b10\*

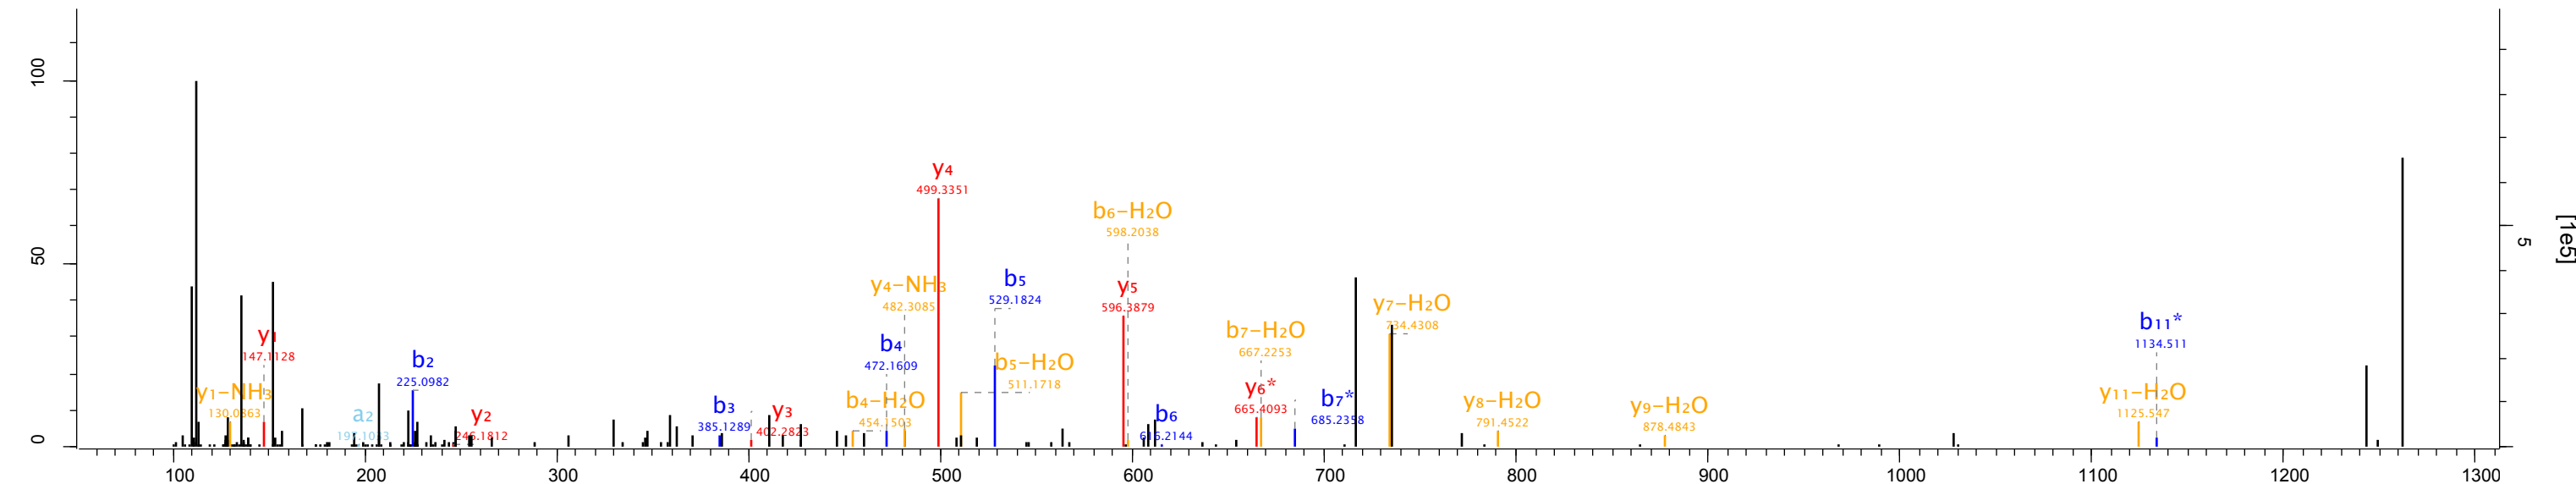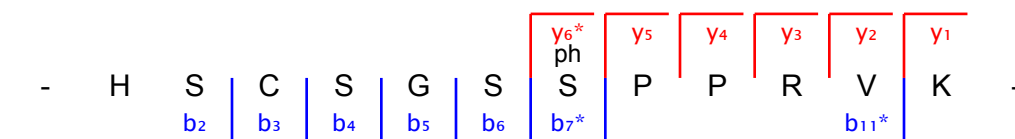

Raw file 20171215\_MaS\_33SR\_LMH\_phospho2\_09 Scan 2650 Method FTMS; HCD Score 64.1 m/z 498.21 Gene names VIM;GFAP

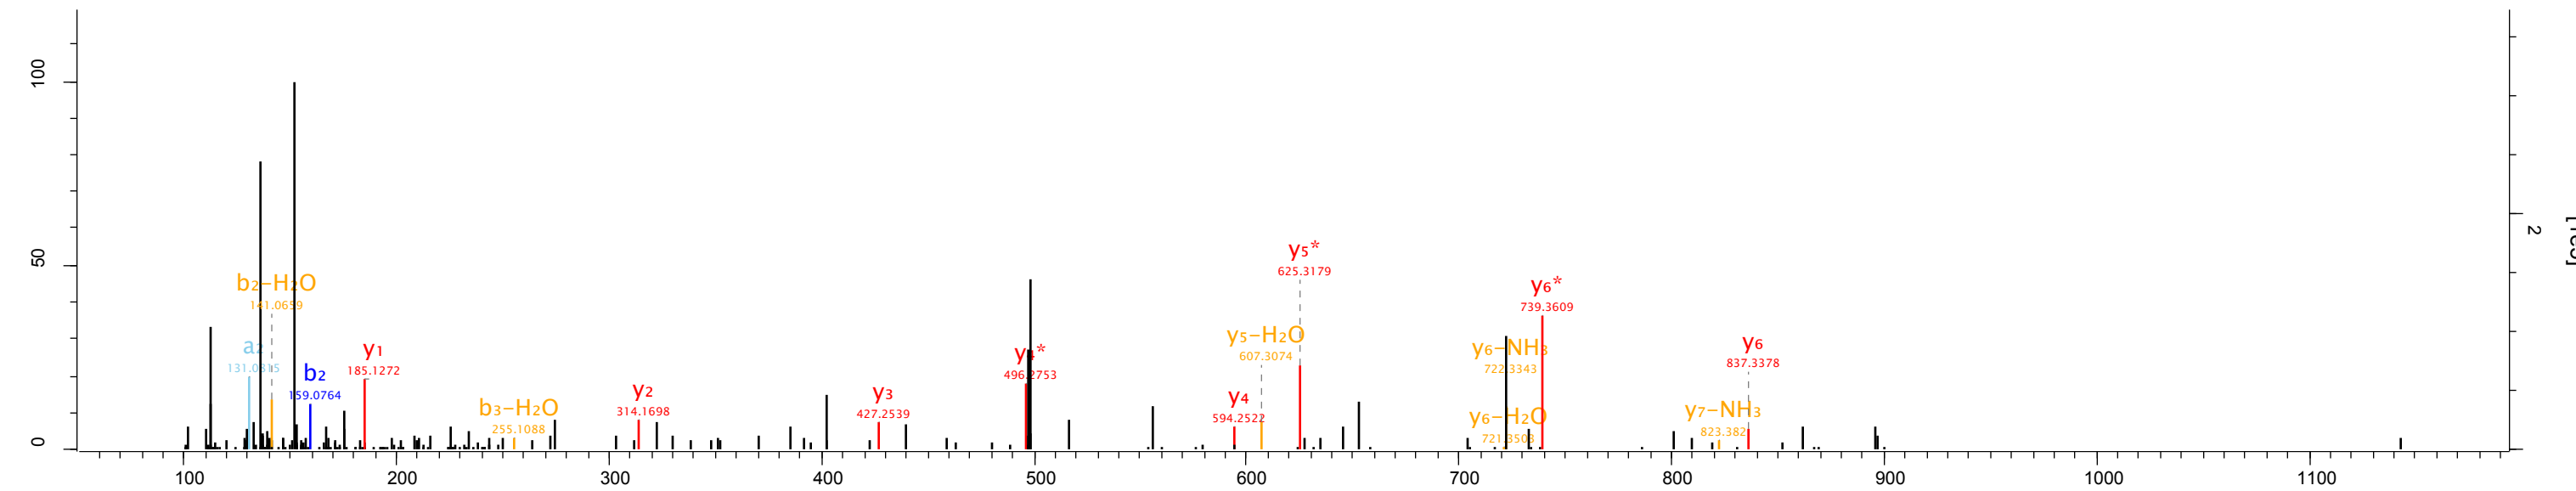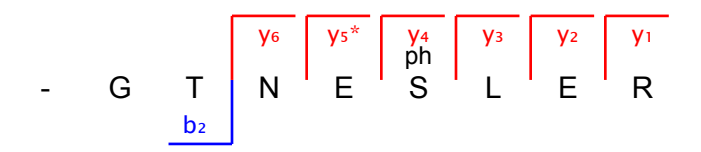



Raw file 20171215\_MaS\_33SR\_LMH\_phospho2\_09 Scan 2910 Method FTMS; HCD Score 209.33 m/z 647.8 Gene names MICAL3

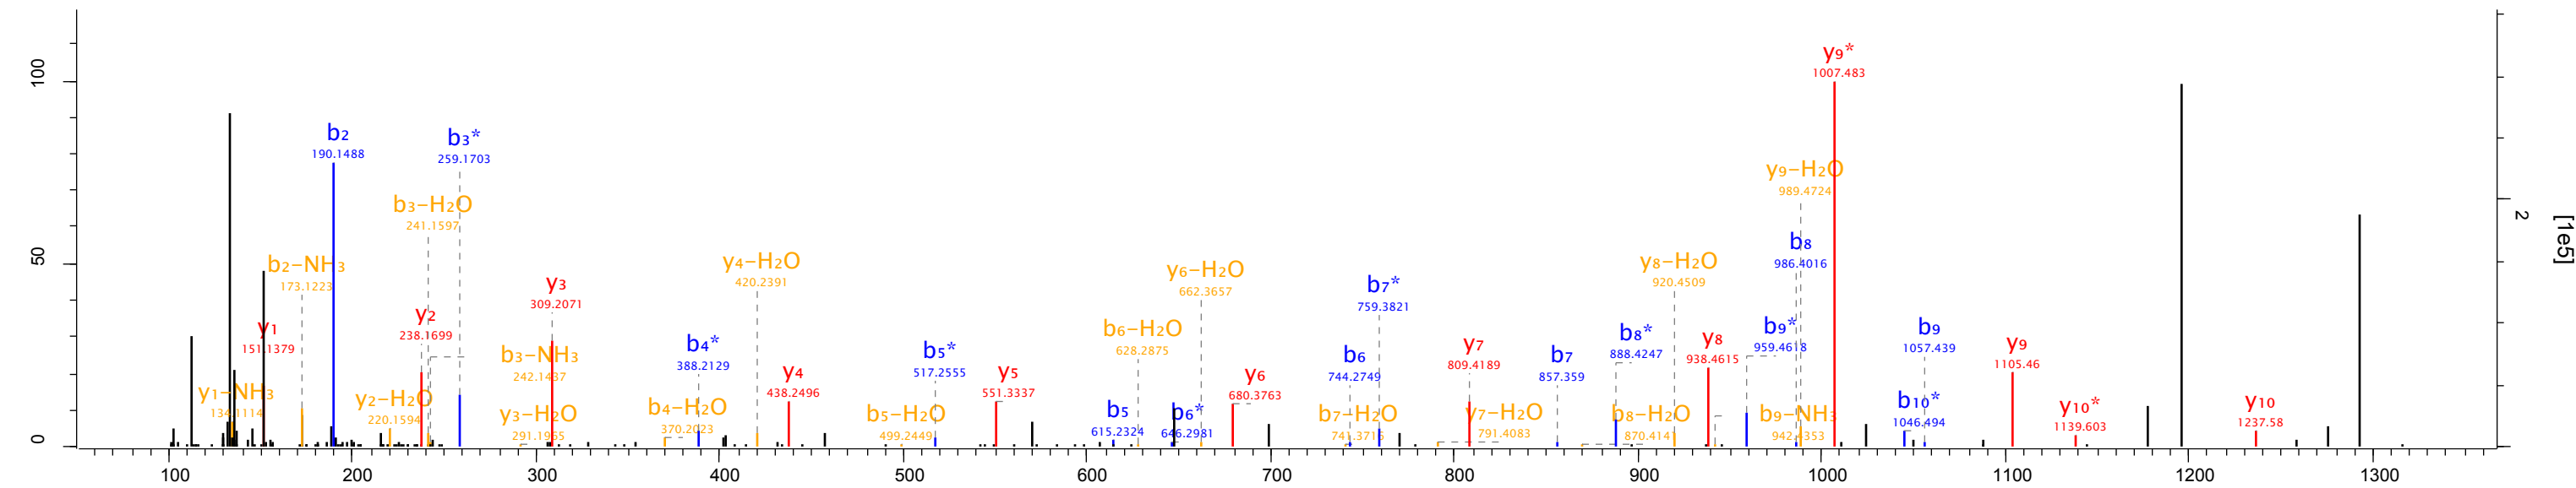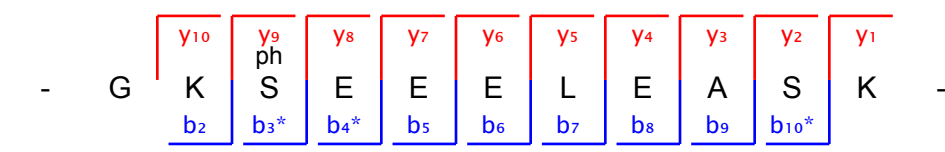

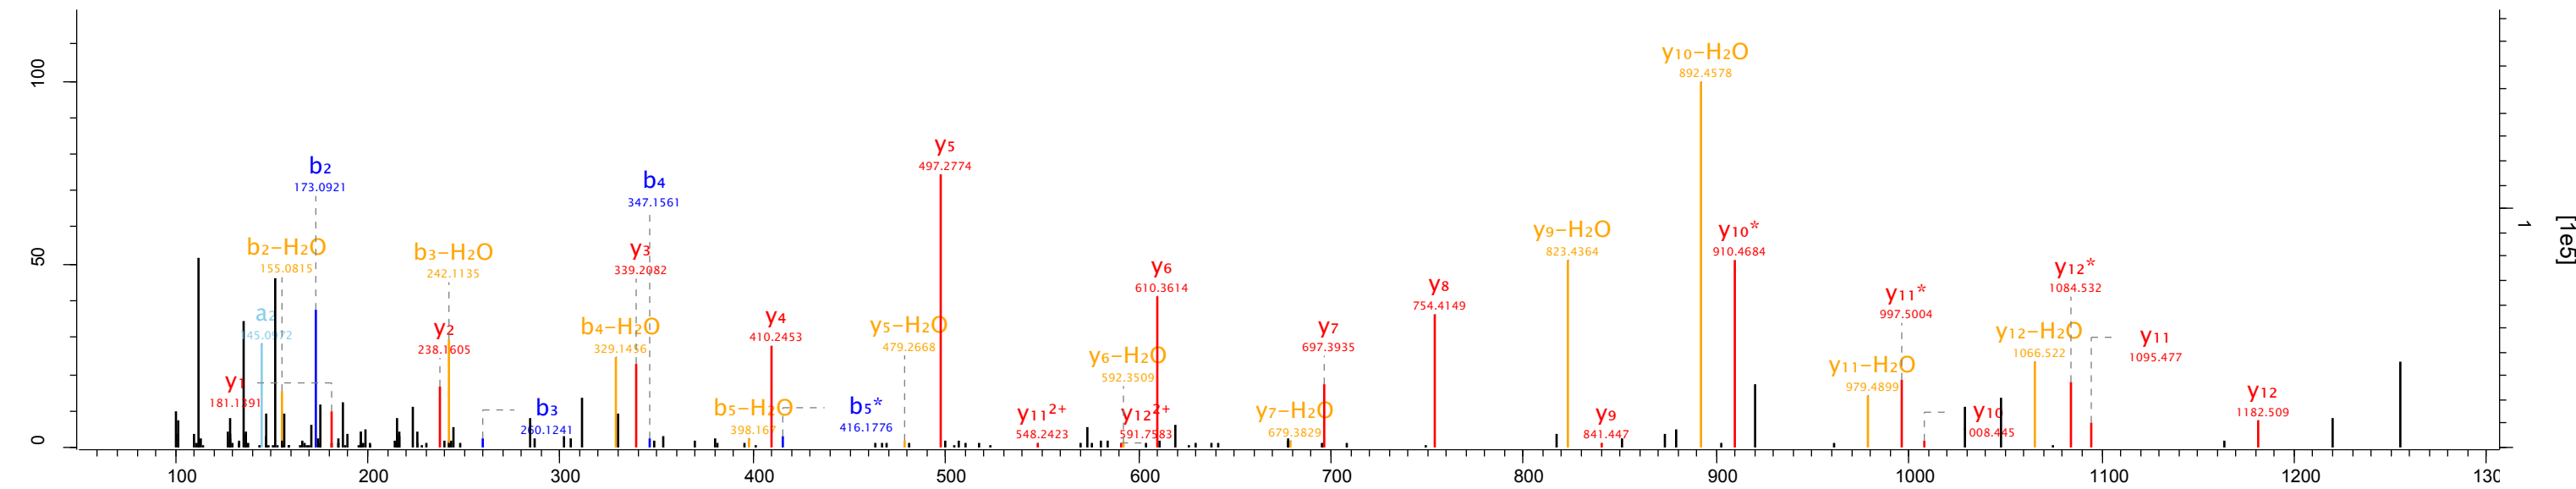

- A T S S S G S L S A T G R -

b<sub>2</sub>
b<sub>3</sub>
b<sub>4</sub>
b<sub>5</sub>\*
y<sub>12</sub>
y<sub>11</sub>
y<sub>10</sub> ph
y<sub>9</sub>
y<sub>8</sub>
y<sub>7</sub>
y<sub>6</sub>
y<sub>5</sub>
y<sub>4</sub>
y<sub>3</sub>
y<sub>2</sub>
y<sub>1</sub>

Raw file 20171215\_MaS\_33SR\_LMH\_phospho2\_09 Scan 3650 Method FTMS; HCD Score 58.13 m/z 528.26 Gene names BBX

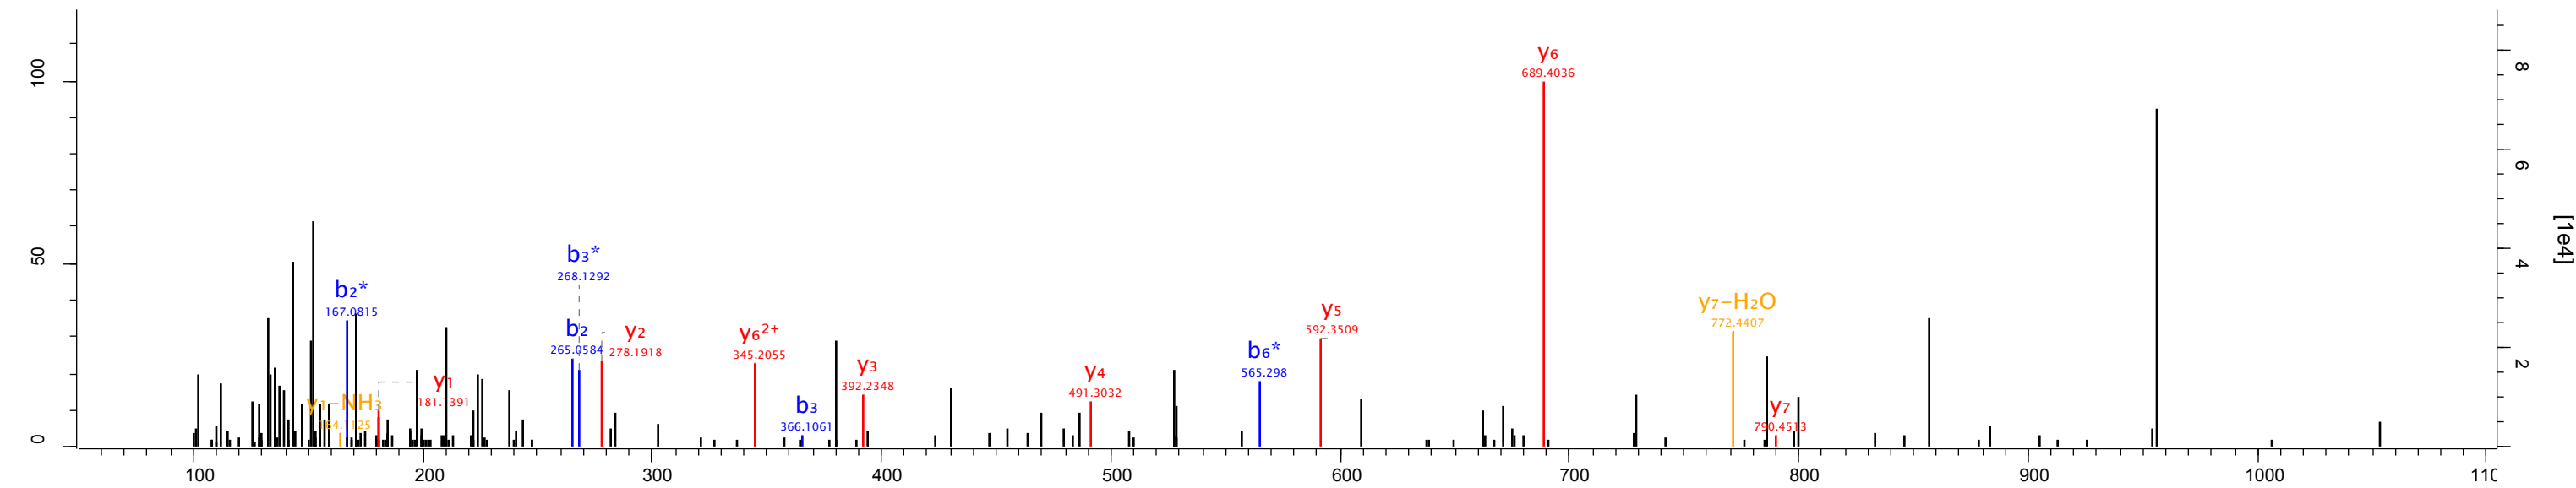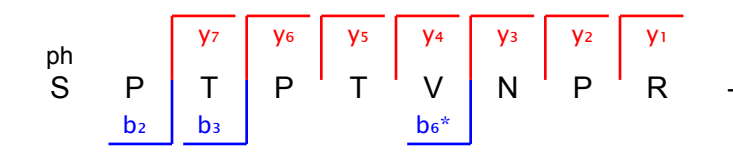

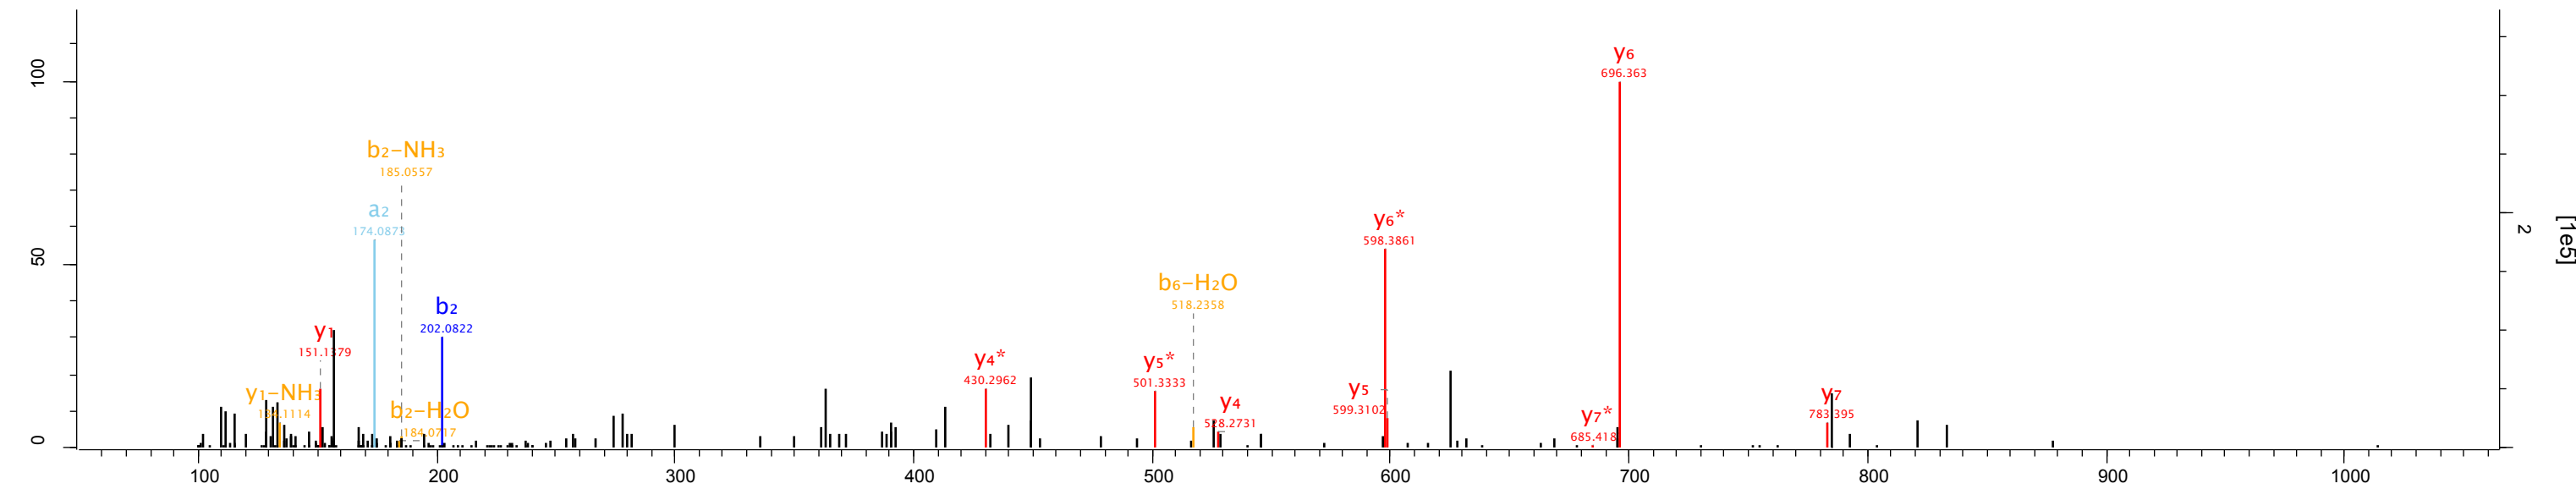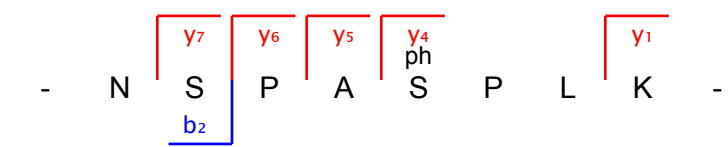

Raw file: 20171215\_MaS\_33SR\_LMH\_phospho2\_09  
 Scan: 4070 Method: FTMS; HCD Score: 54.02 m/z: 512.75 Gene names: NUMA1

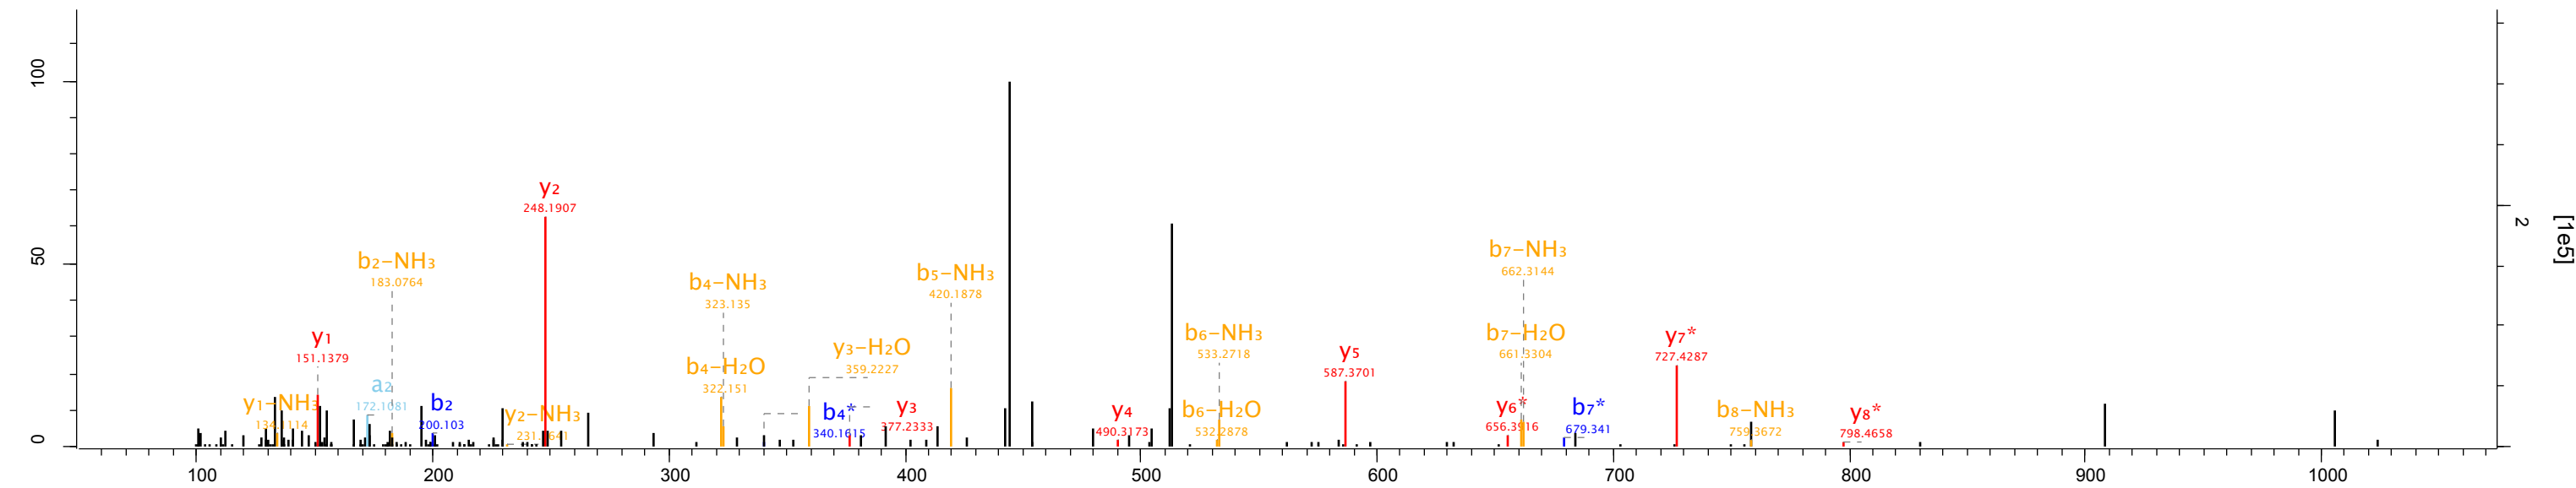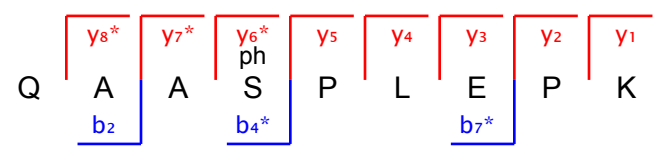

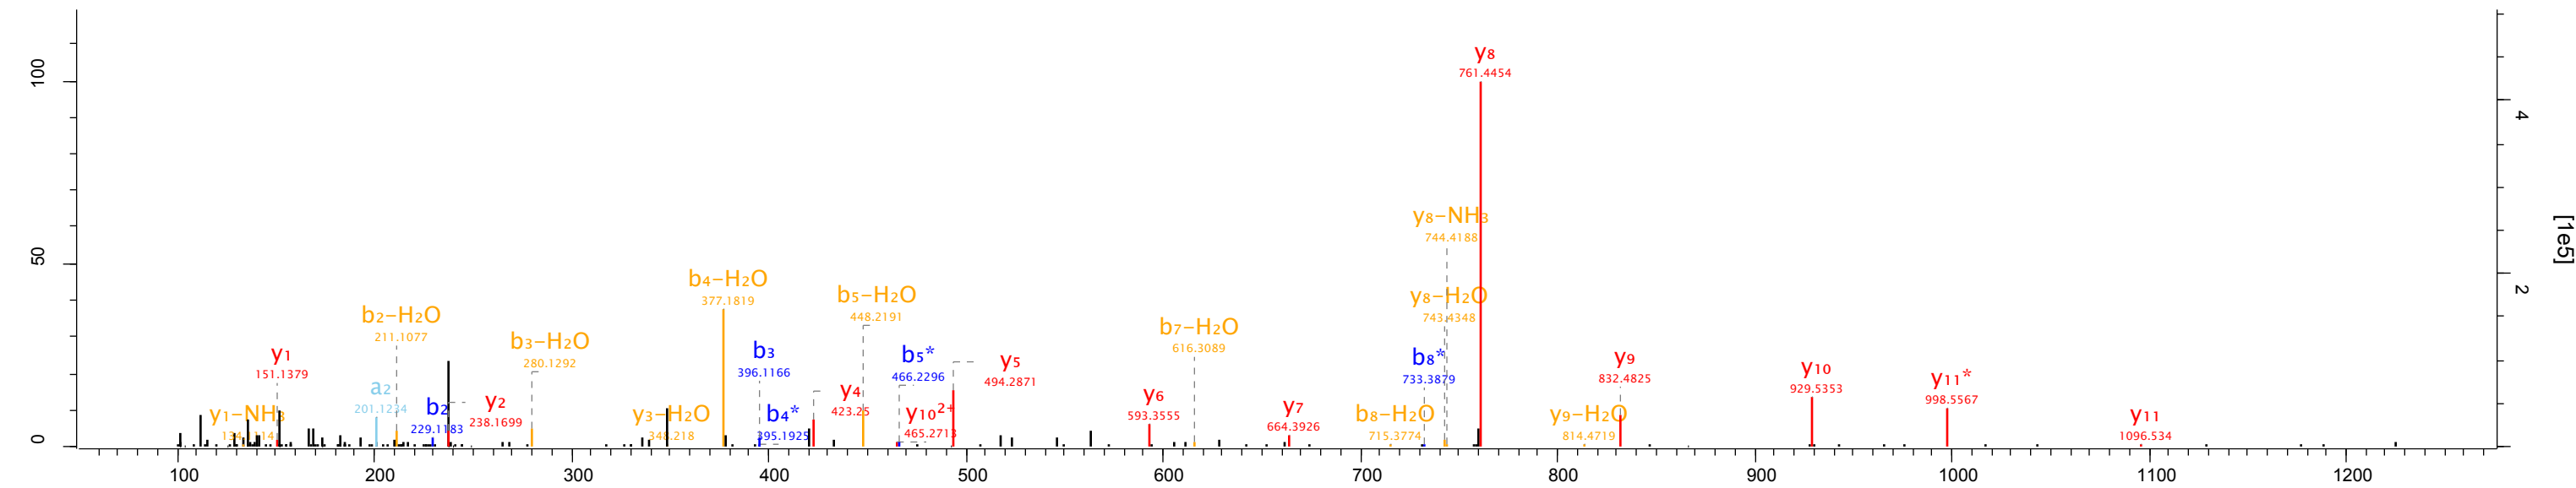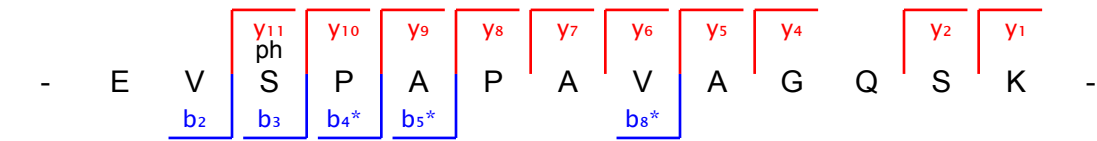

Raw file 20171215\_MaS\_33SR\_LMH\_phospho2\_09 Scan 4810 Method FTMS; HCD Score 67.66 m/z 501.25 Gene names KMT2D

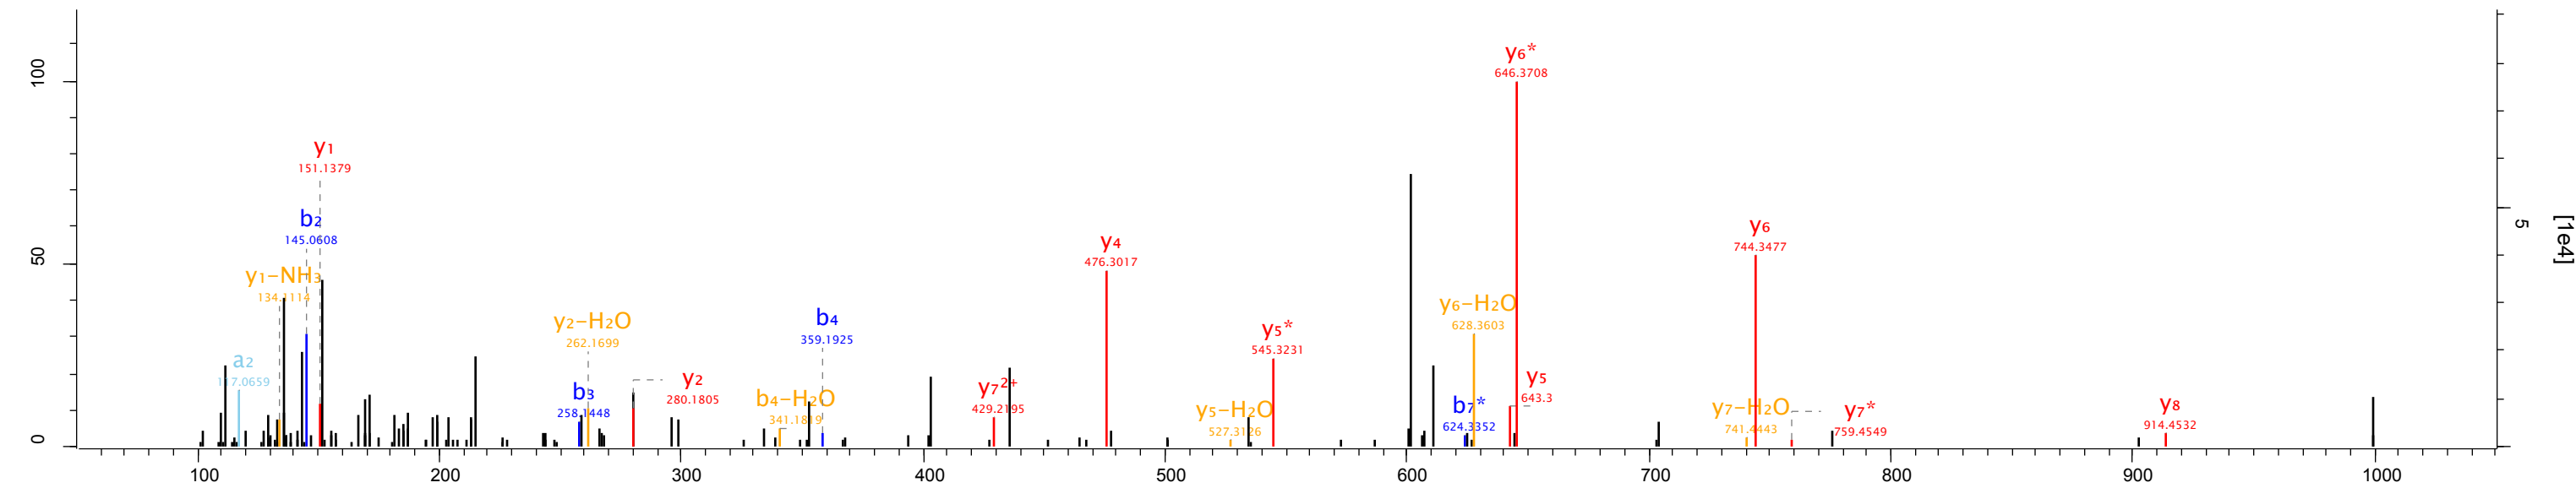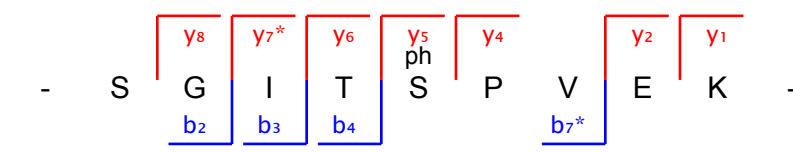

[1e4]

Raw file

20171215\_MaS\_33SR\_LMH\_phospho2\_09

| Scan | Method    | Score | m/z    | Gene names |
|------|-----------|-------|--------|------------|
| 5800 | FTMS; HCD | 42.32 | 641.32 | STIM2      |

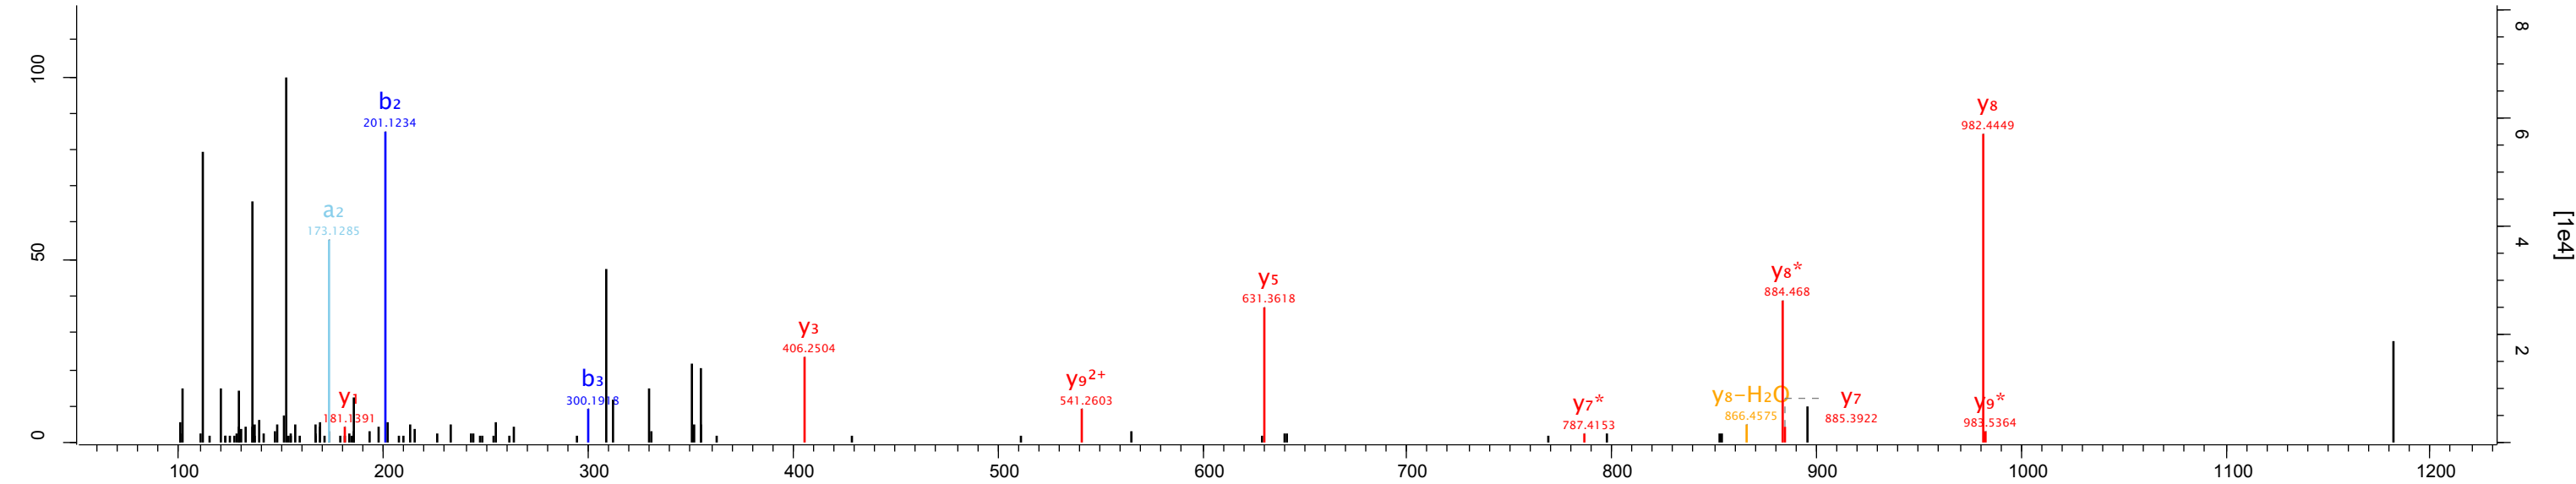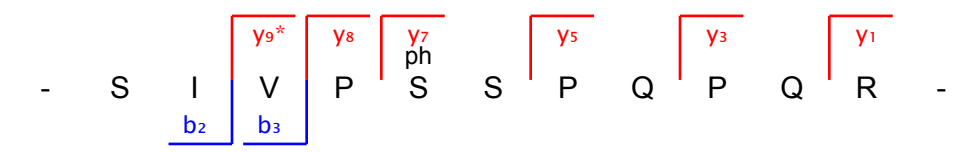



Raw file 20171215\_MaS\_33SR\_LMH\_phospho2\_09 Scan 6120 Method FTMS; HCD Score 70.94 m/z 494.25 Gene names FARSB

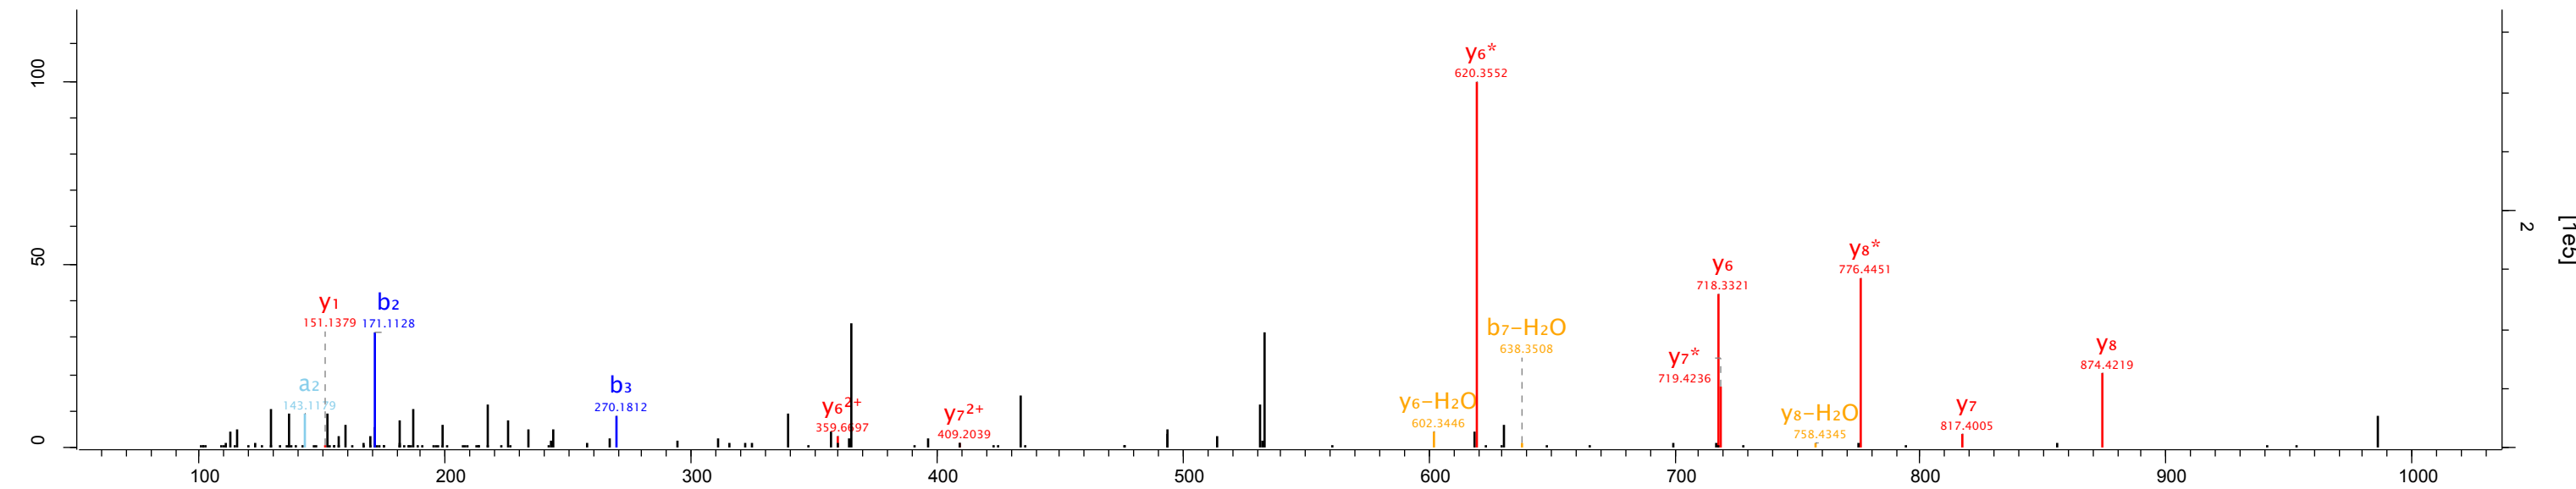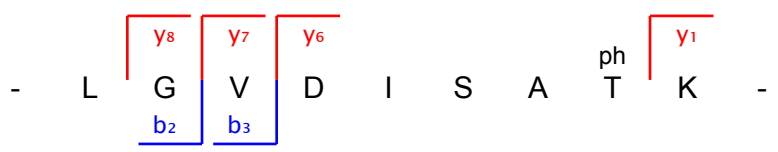

Raw file 20171215\_MaS\_33SR\_LMH\_phospho2\_09 Scan 6360 Method FTMS; HCD Score 60.55 m/z 642.27 Gene names EXOSC9

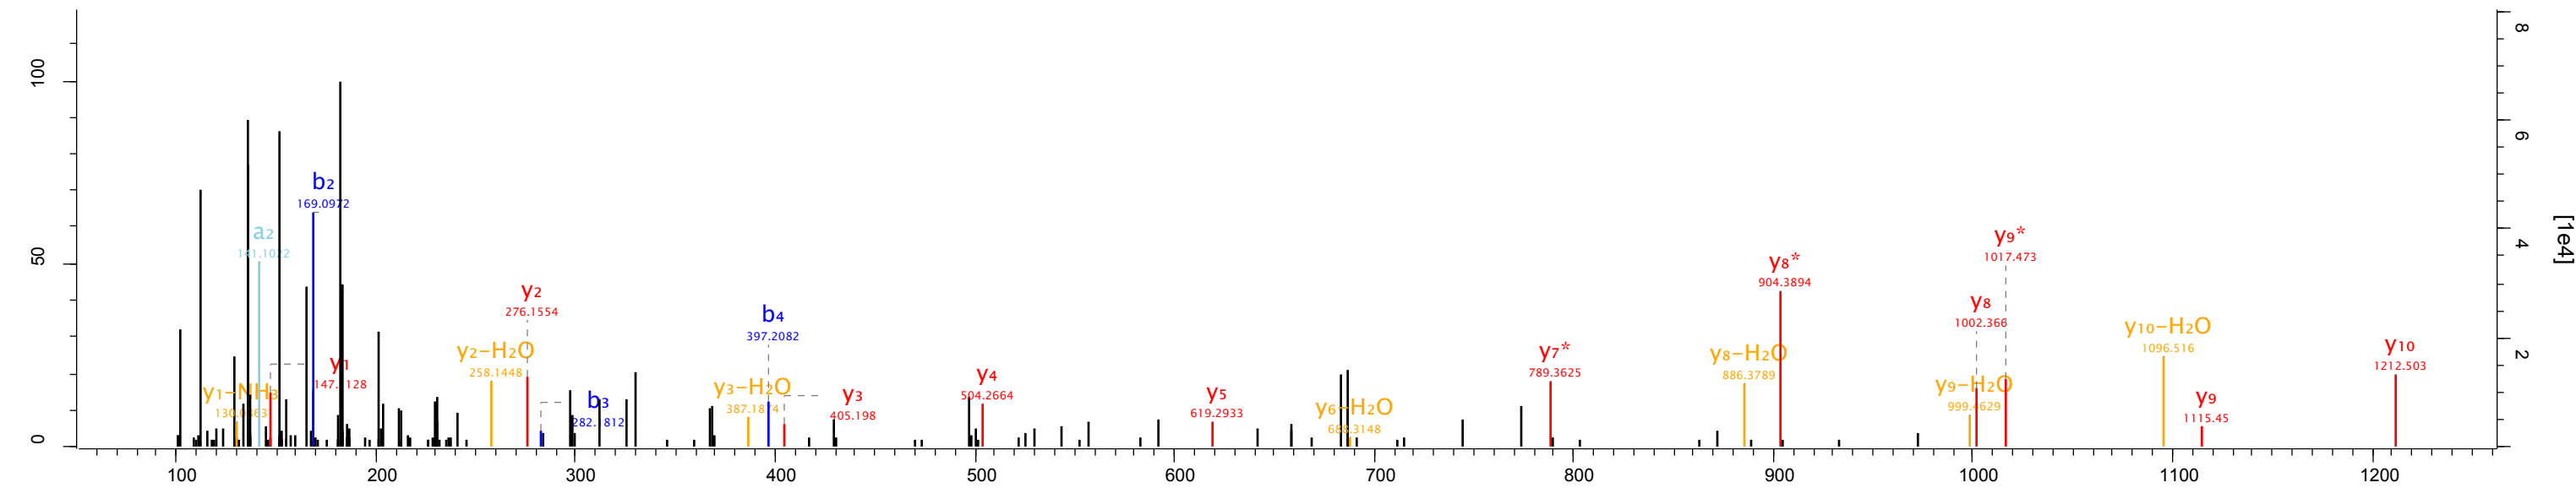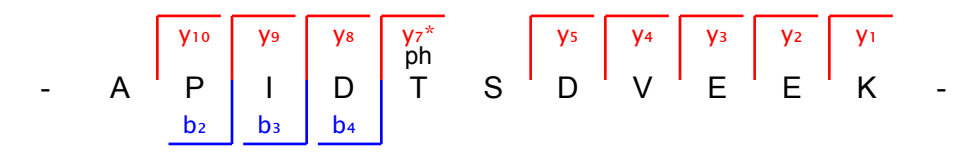

Raw file 20171215\_MaS\_33SR\_LMH\_proteome\_01 Scan 17020 Method FTMS; HCD Score 68.22 m/z 604.26 Gene names PLCG2

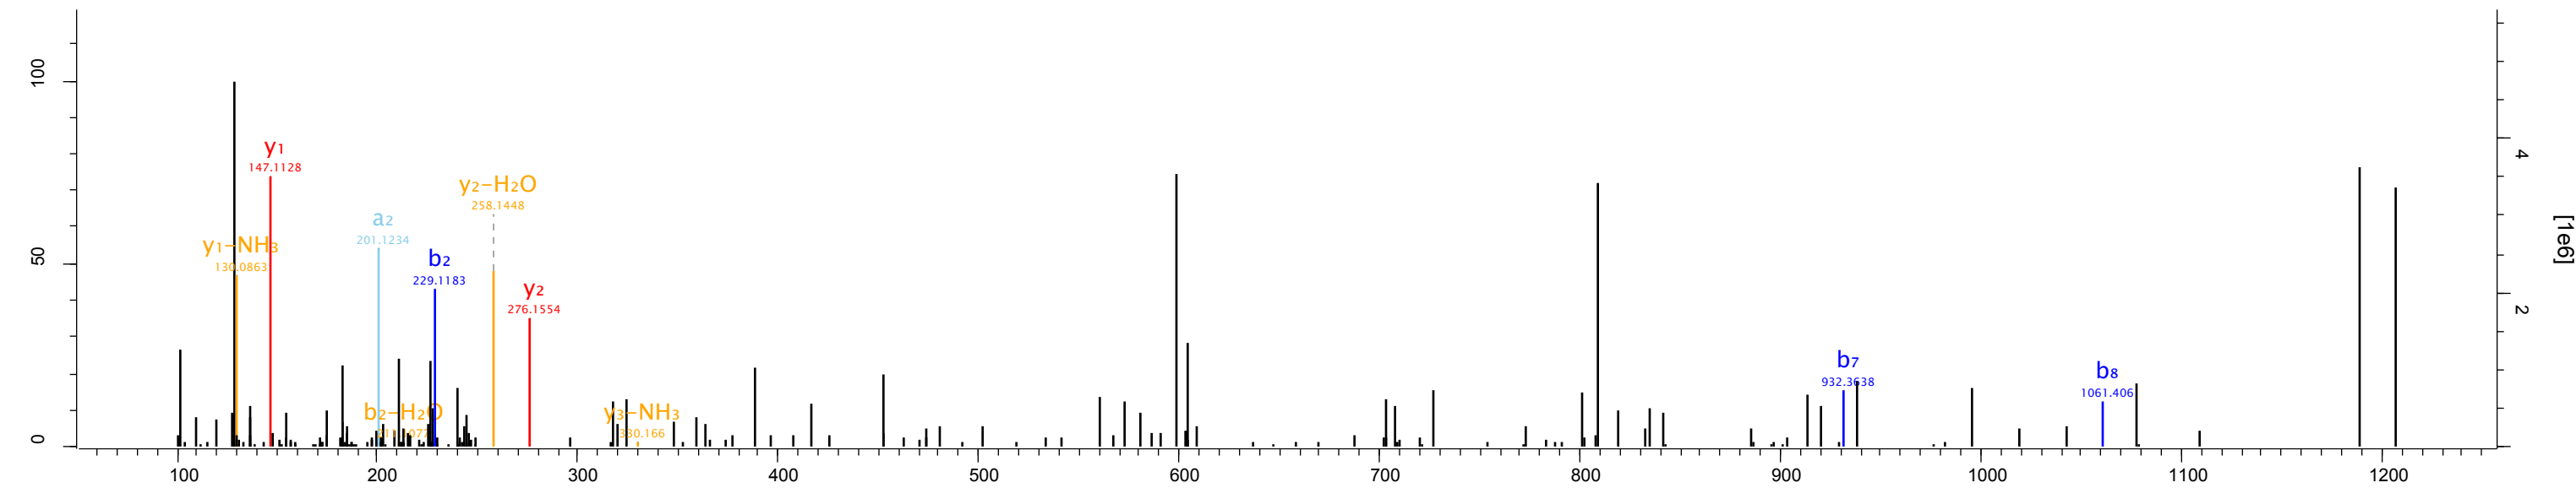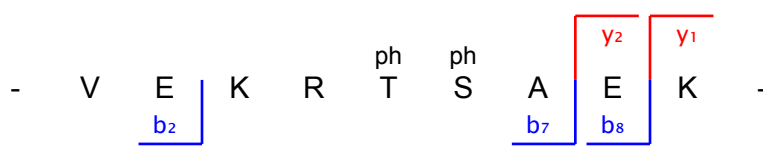

Raw file 20171215\_MaS\_33SR\_LMH\_proteome\_01 Scan 18620 Method FTMS; HCD Score 54.72 m/z 580.81 Gene names POLR3E

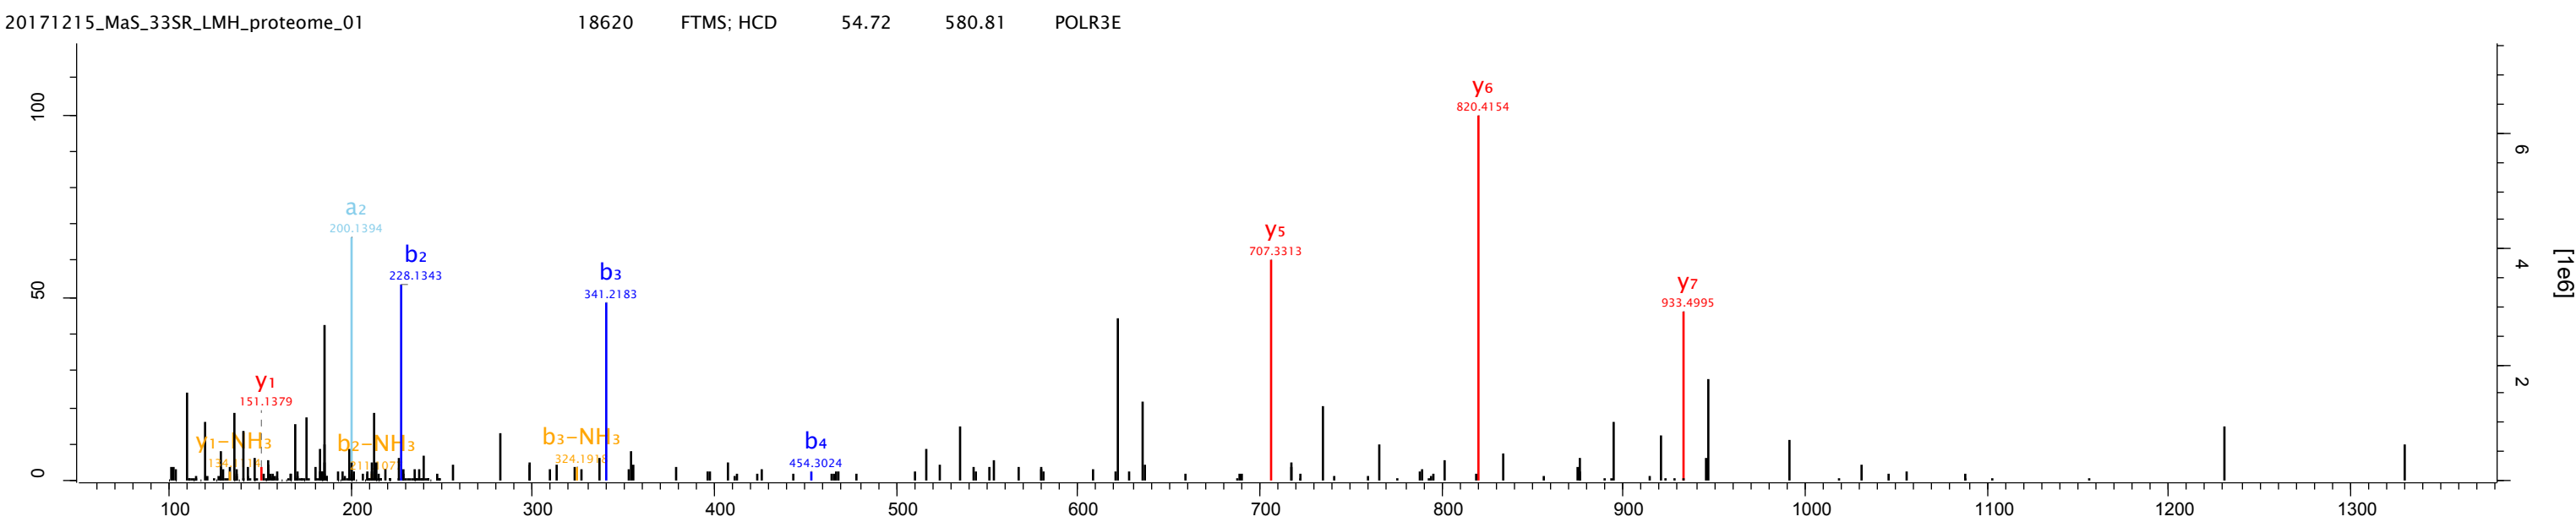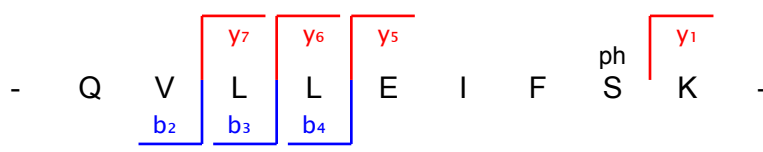



Raw file  
20171215\_MaS\_33SR\_LMH\_proteome\_01

Scan 5250 Method FTMS; HCD Score 51.28 m/z 630.82

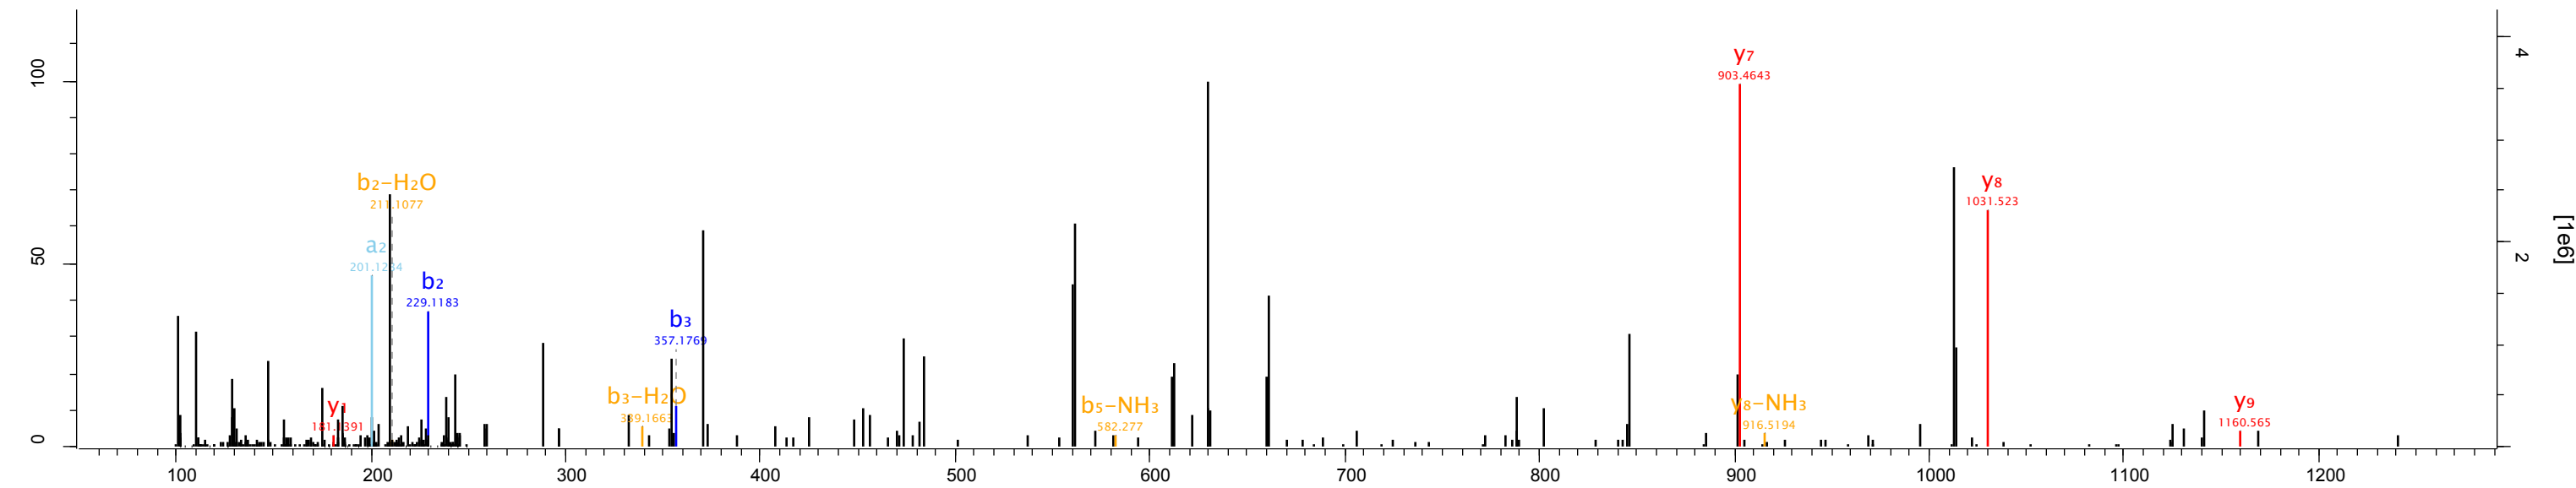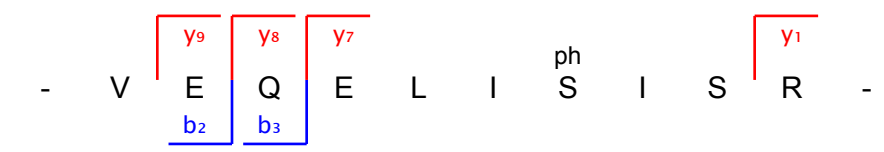

Raw file 20171215\_MaS\_33SR\_LMH\_proteome\_01 Scan 5670 Method FTMS; HCD Score 48.98 m/z 613.31 Gene names ATP5A1

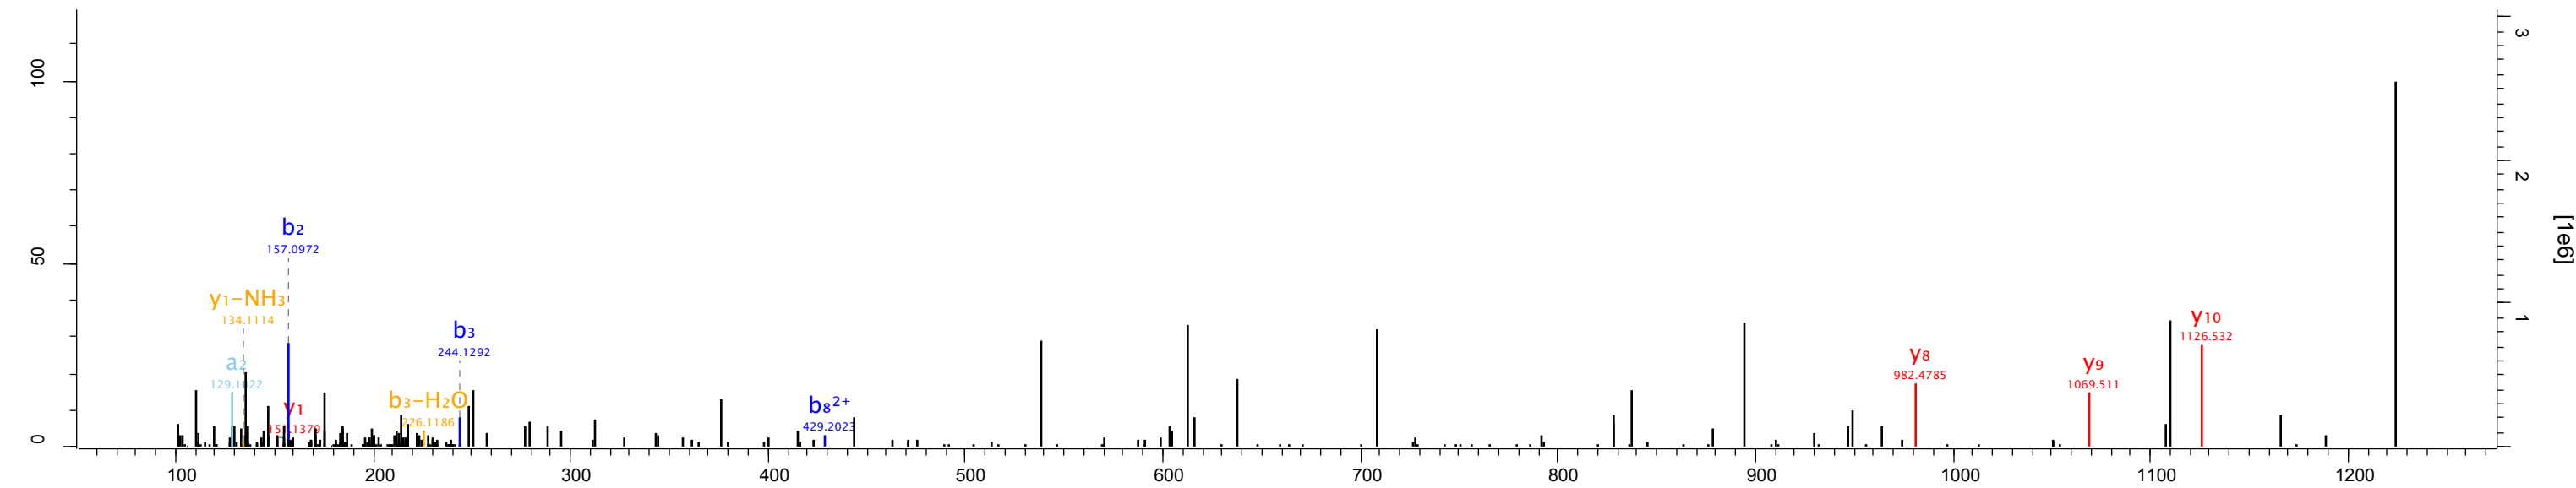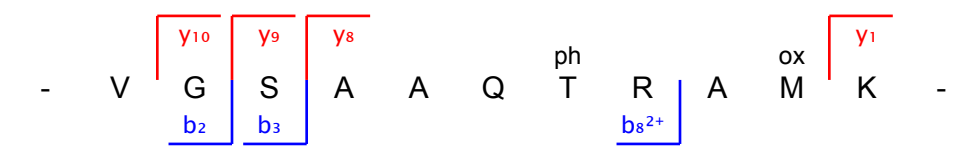

Raw file  
20171215\_MaS\_33SR\_LMH\_proteome\_01  
Scan 83080 Method FTMS; HCD Score 60.76 m/z 1184.6

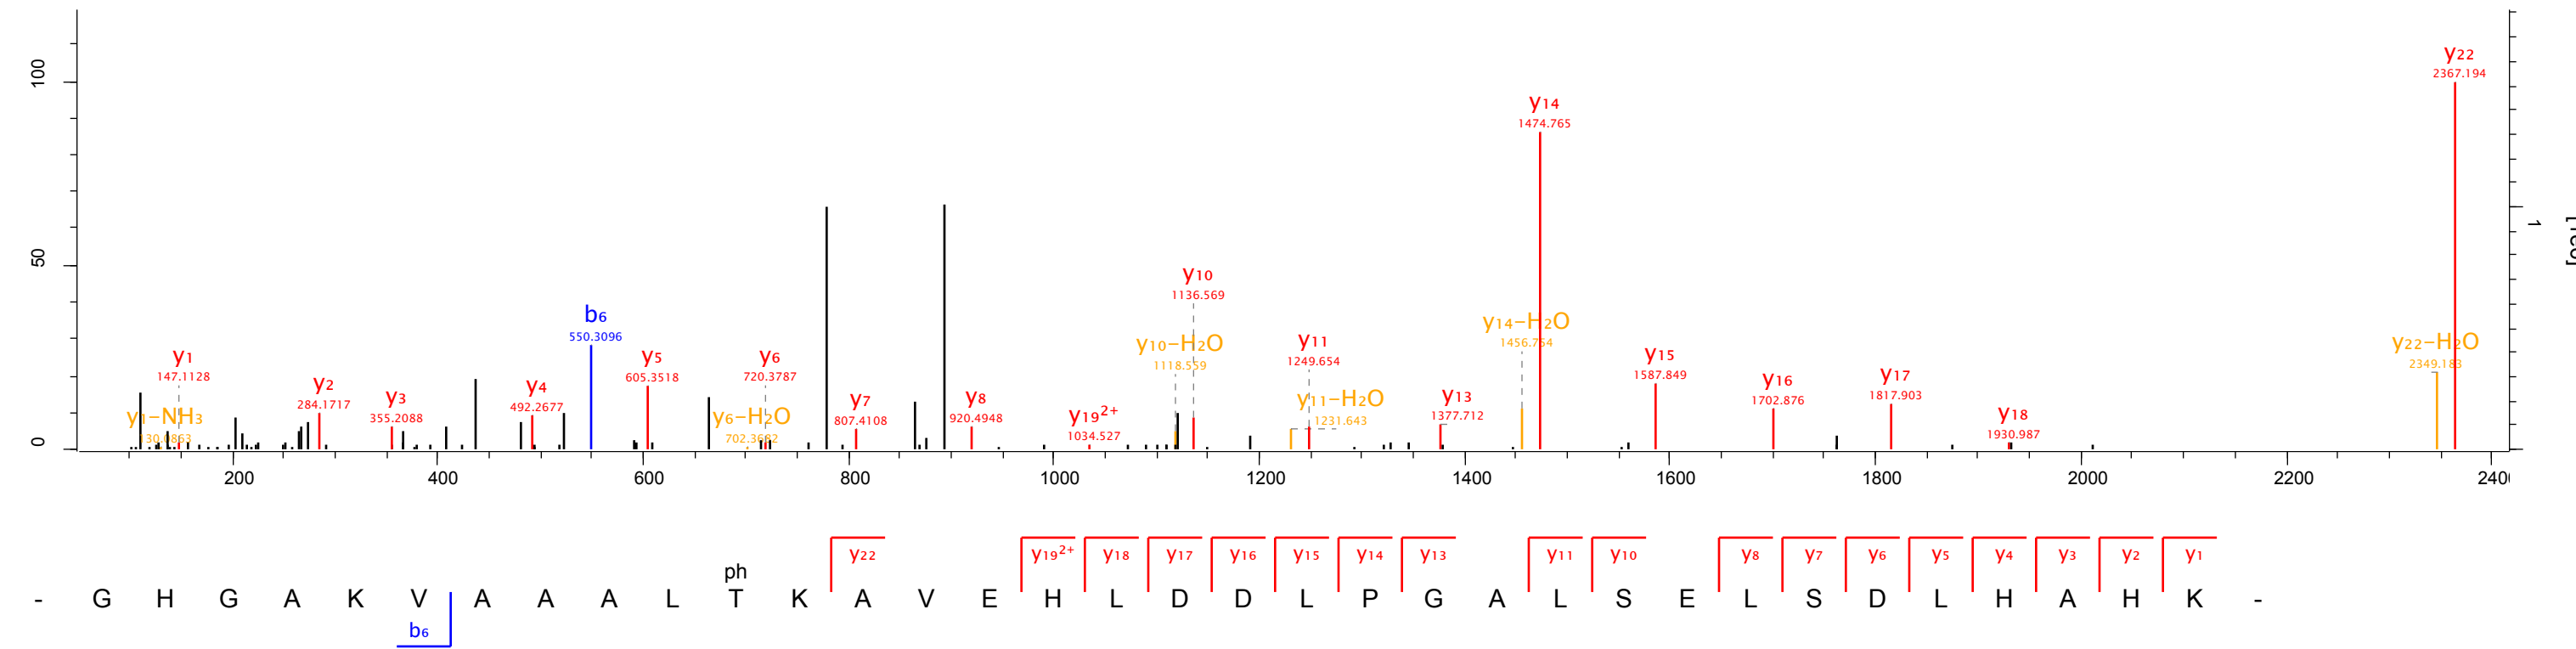



Raw file 20171215\_MaS\_33SR\_LMH\_proteome\_01 Scan 83450 Method FTMS; HCD Score 159.77 m/z 819.95 Gene names TPI1

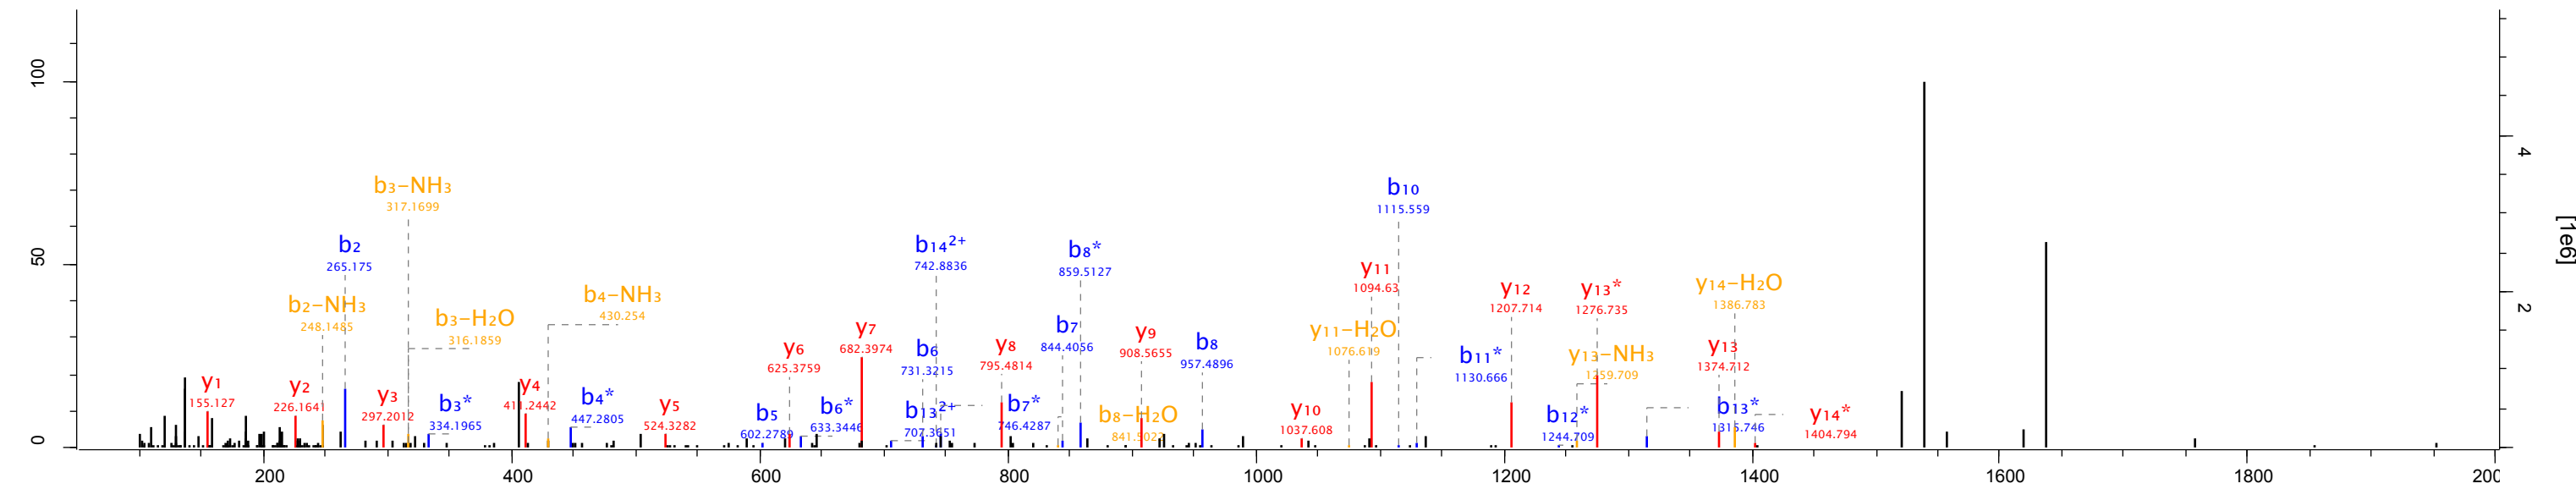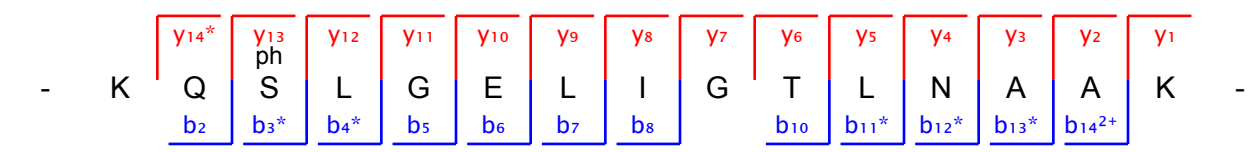

Raw file: 20171215\_MaS\_33SR\_LMH\_proteome\_02  
 Scan: 10340 Method: FTMS; HCD Score: 47.89 m/z: 611.78 Gene names: MYH11

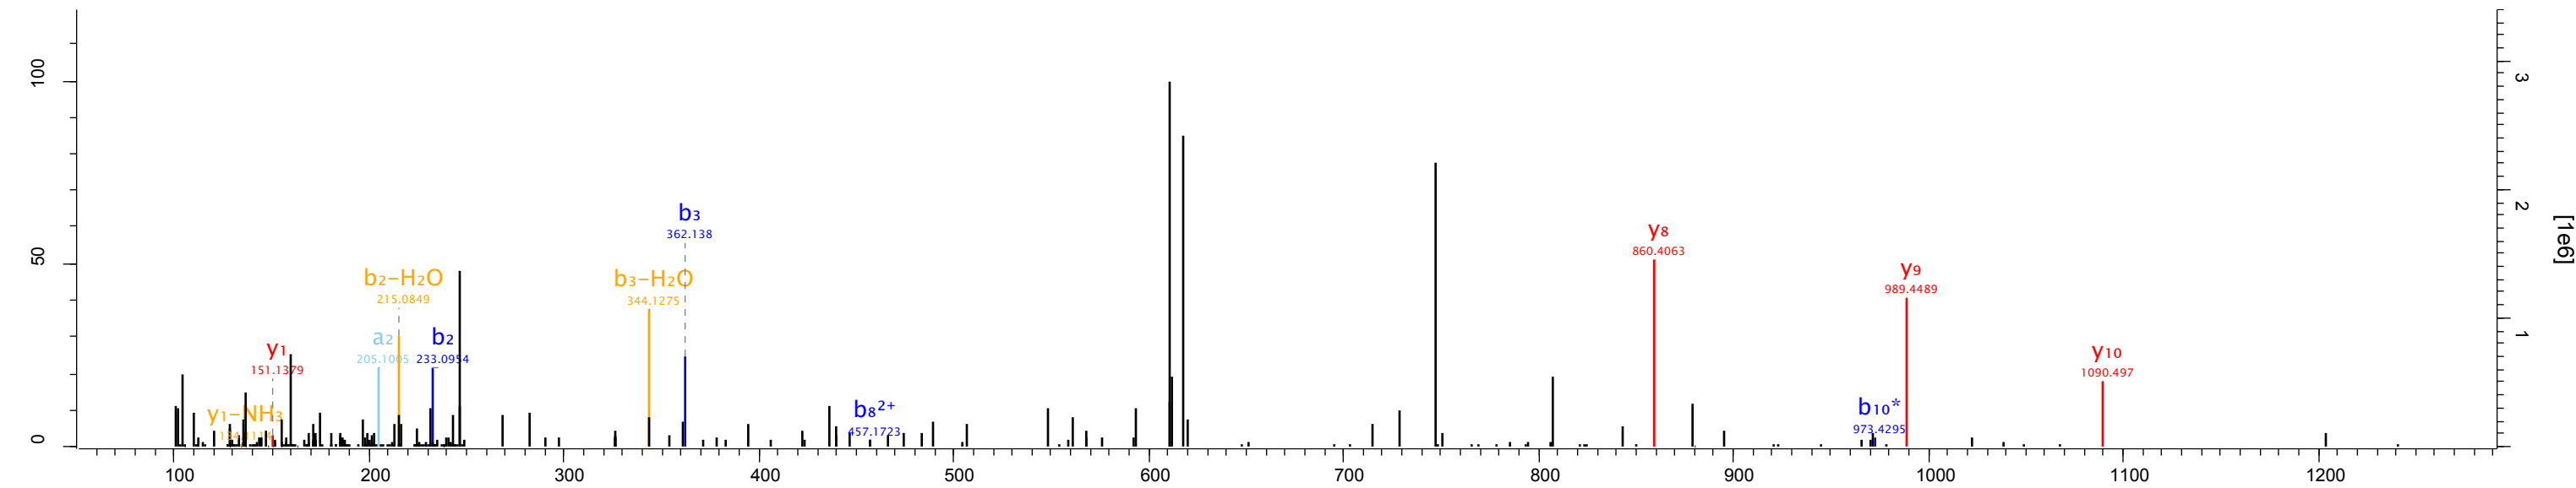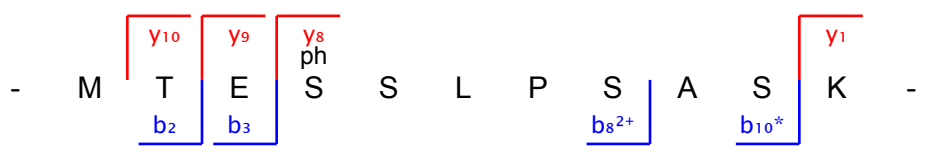

Raw file 20171215\_MaS\_33SR\_LMH\_proteome\_02 Scan 106670 Method FTMS; HCD Score 48.79 m/z 662.85 Gene names INTS4

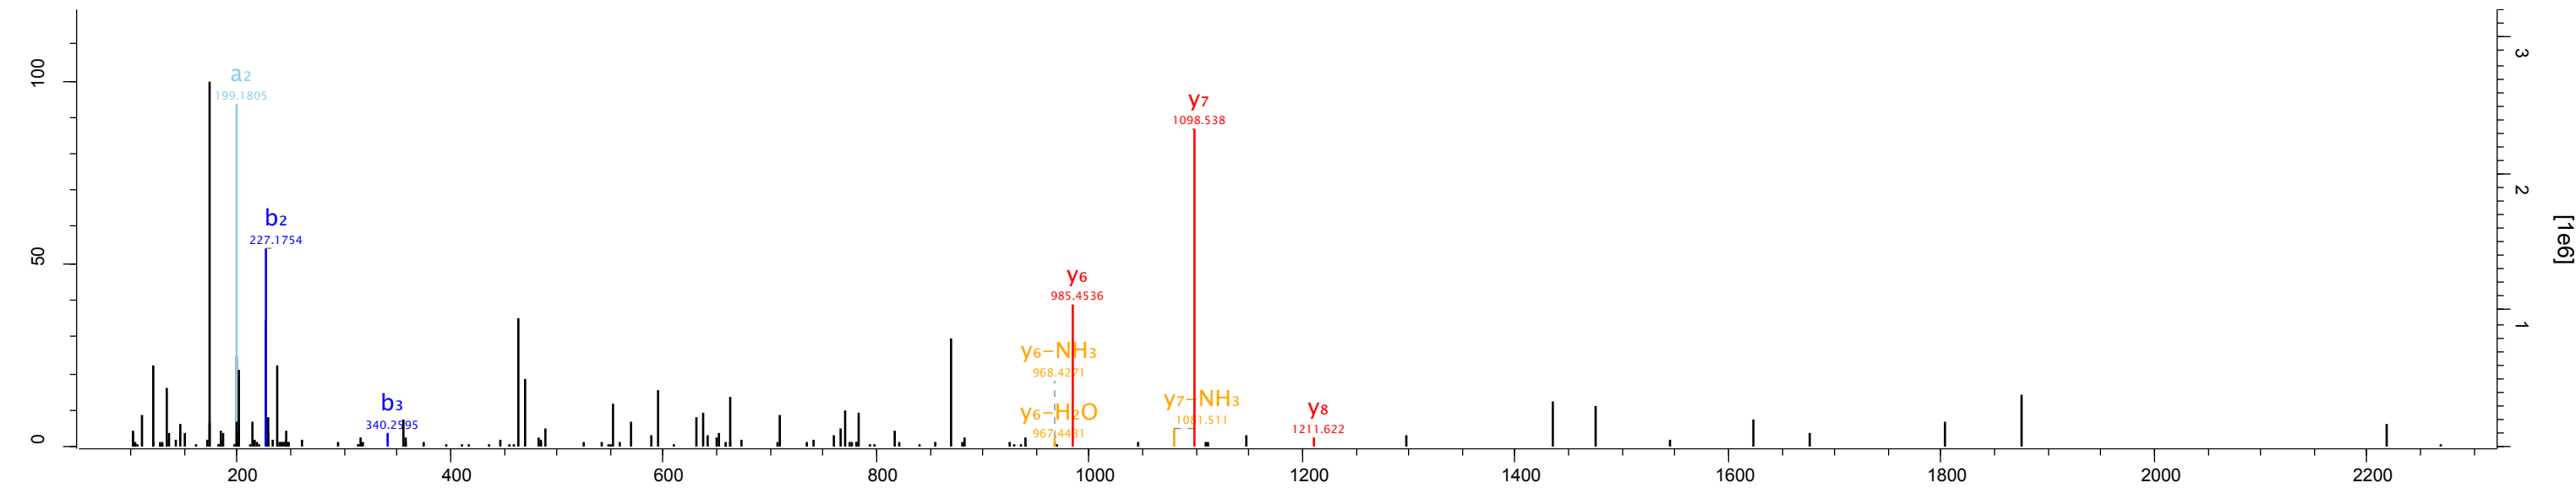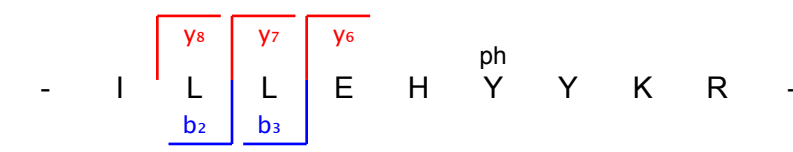

Raw file

20171215\_MaS\_33SR\_LMH\_proteome\_02

| Scan  | Method    | Score | m/z    | Gene names |
|-------|-----------|-------|--------|------------|
| 12560 | FTMS; HCD | 50.11 | 629.78 | C5         |

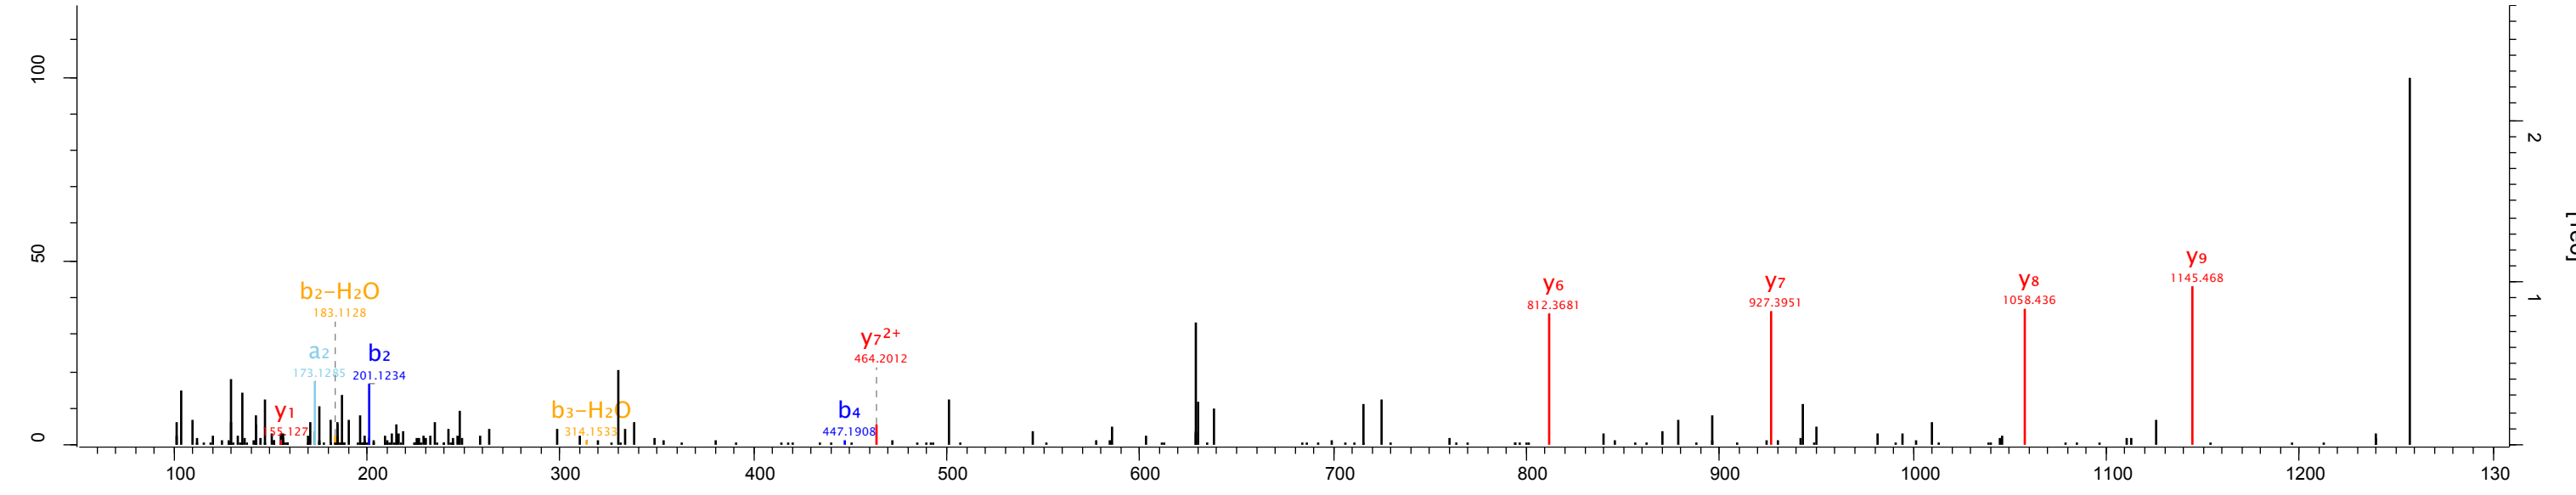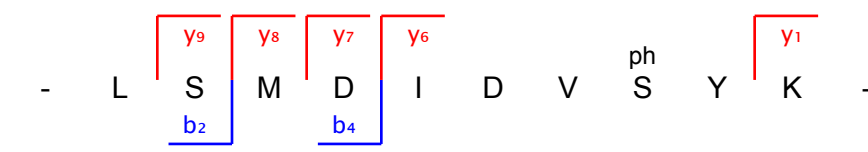

Raw file 20171215\_MaS\_33SR\_LMH\_proteome\_02 Scan 16090 Method FTMS; HCD Score 50.11 m/z 574.28

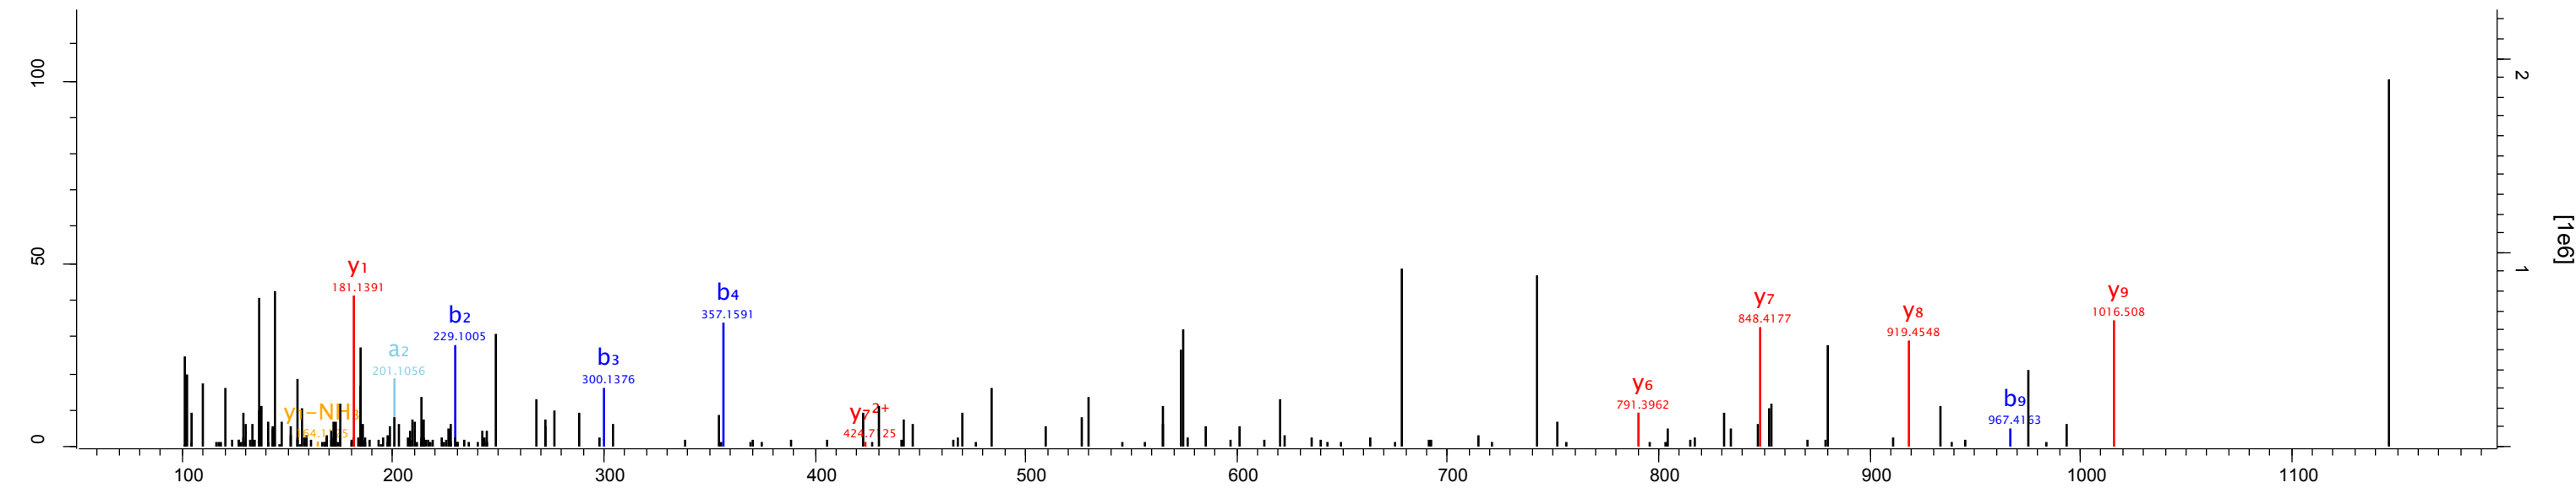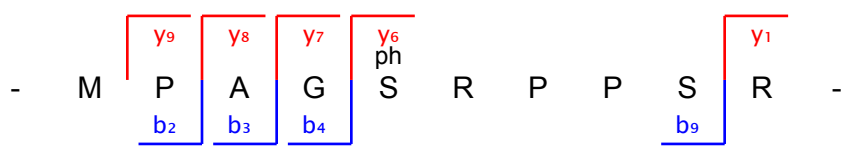

Raw file 20171215\_MaS\_33SR\_LMH\_proteome\_02 Scan 32510 Method FTMS; HCD Score 59.2 m/z 729.39

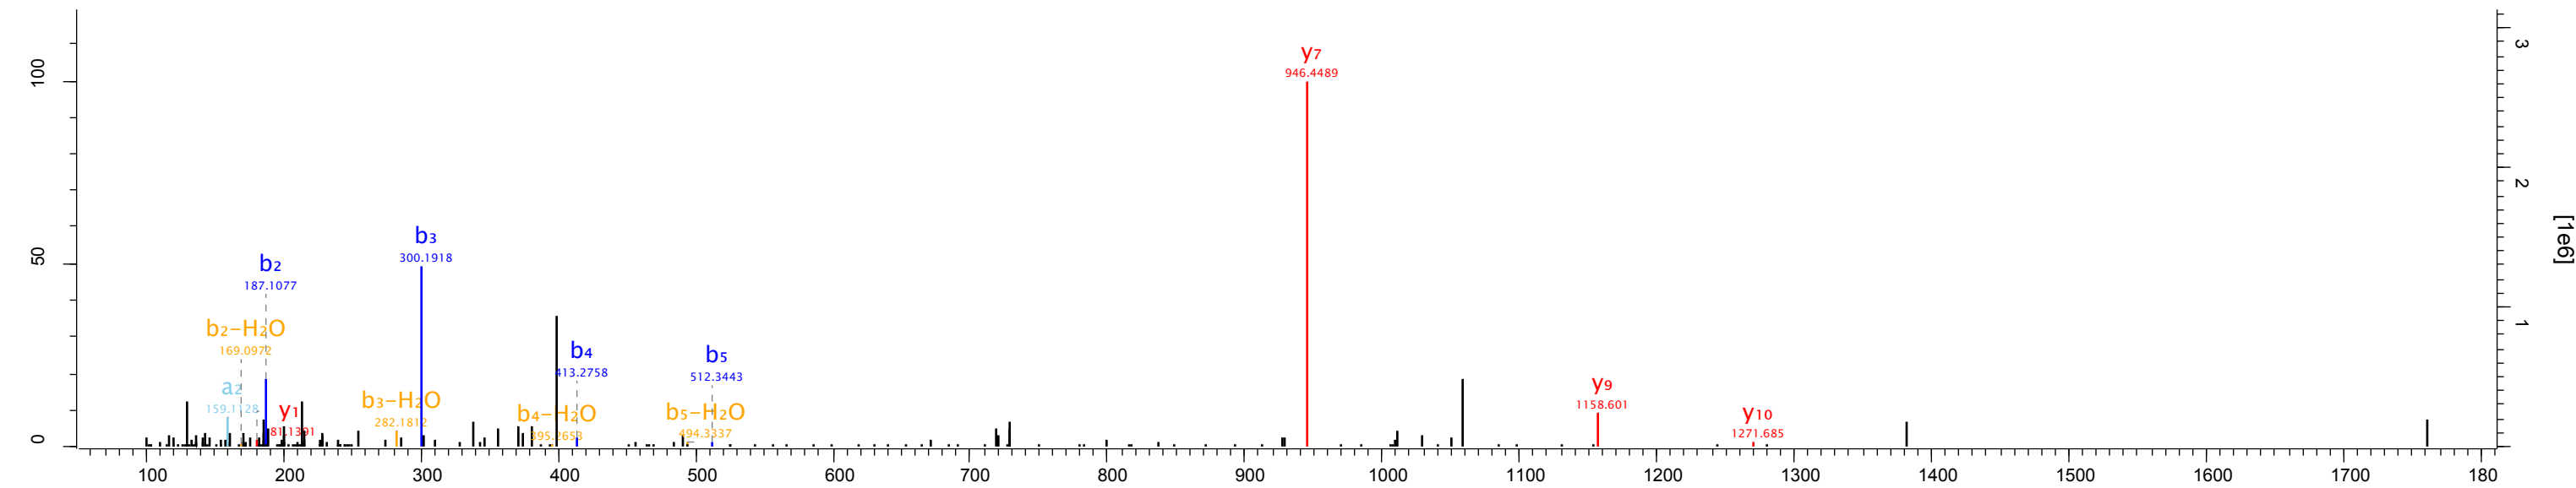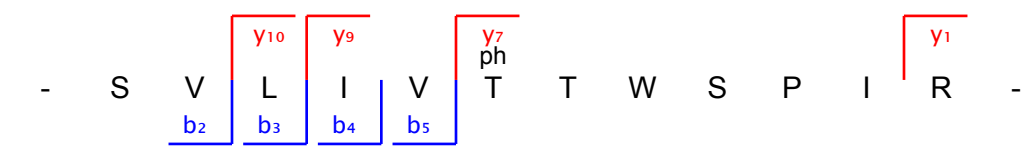

Raw file: 20171215\_MaS\_33SR\_LMH\_proteome\_02  
 Scan: 36540 Method: FTMS; HCD Score: 81.32 m/z: 850.47 Gene names: TCOF1

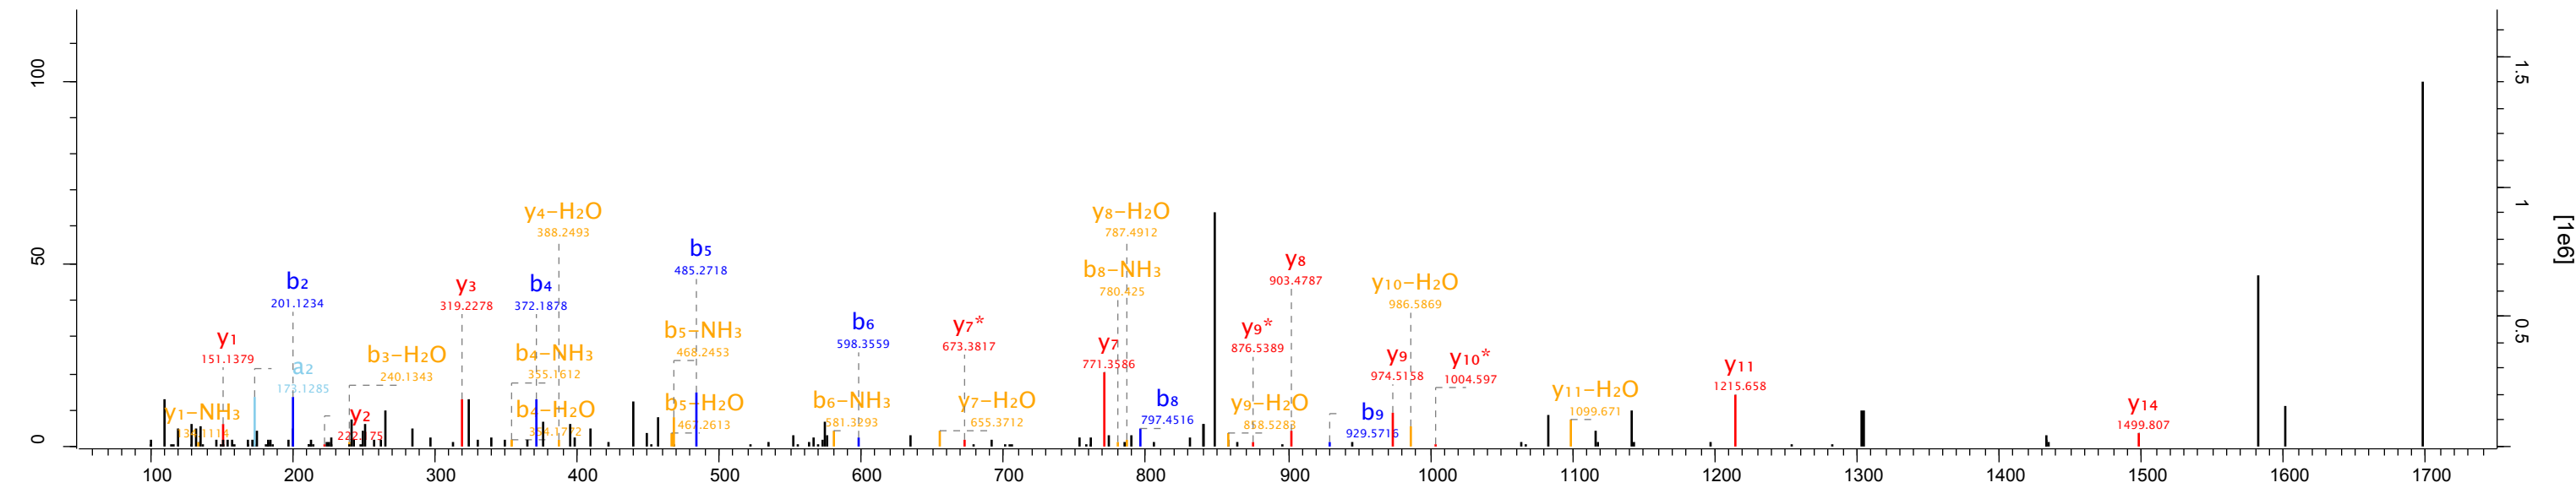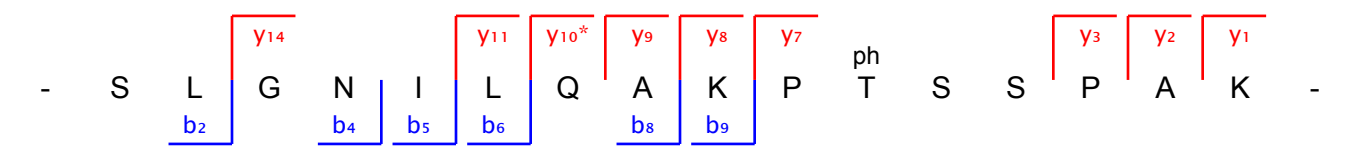

Raw file 20171215\_MaS\_33SR\_LMH\_proteome\_02 Scan 50660 Method FTMS; HCD Score 63.62 m/z 672.84

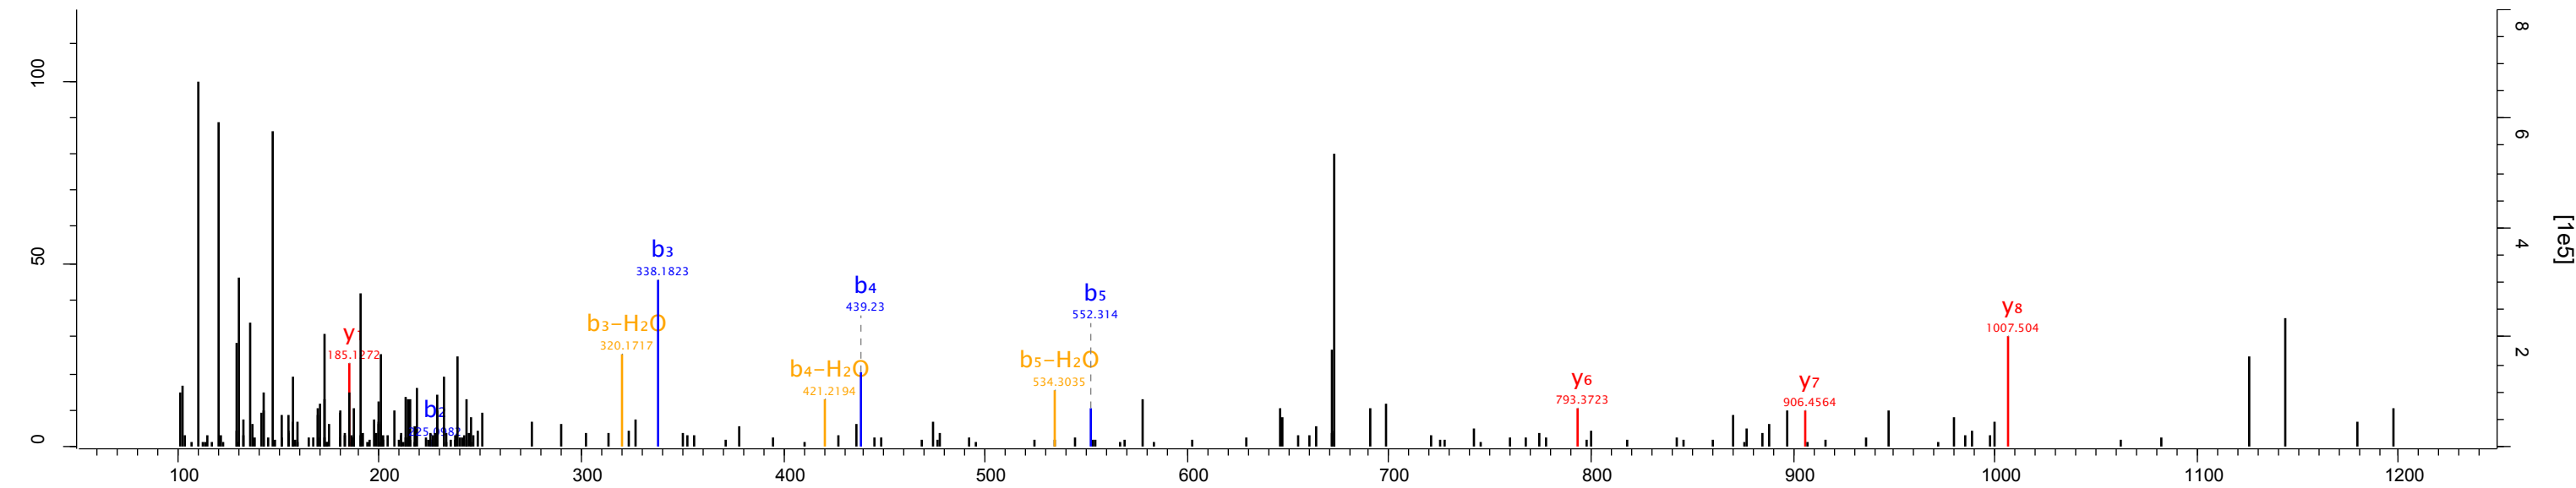

- S H L T I A ph S K A Y R -

Fragmentation mapping: b<sub>2</sub> (H), b<sub>3</sub> (HL), b<sub>4</sub> (LTI), b<sub>5</sub> (LTI), y<sub>8</sub> (TL), y<sub>7</sub> (TI), y<sub>6</sub> (TIA), y<sub>1</sub> (YR).



Raw file: 20171215\_MaS\_33SR\_LMH\_proteome\_02  
 Scan: 5170 Method: FTMS; HCD Score: 67.9 m/z: 560.76 Gene names: RGPD5;RGPD8

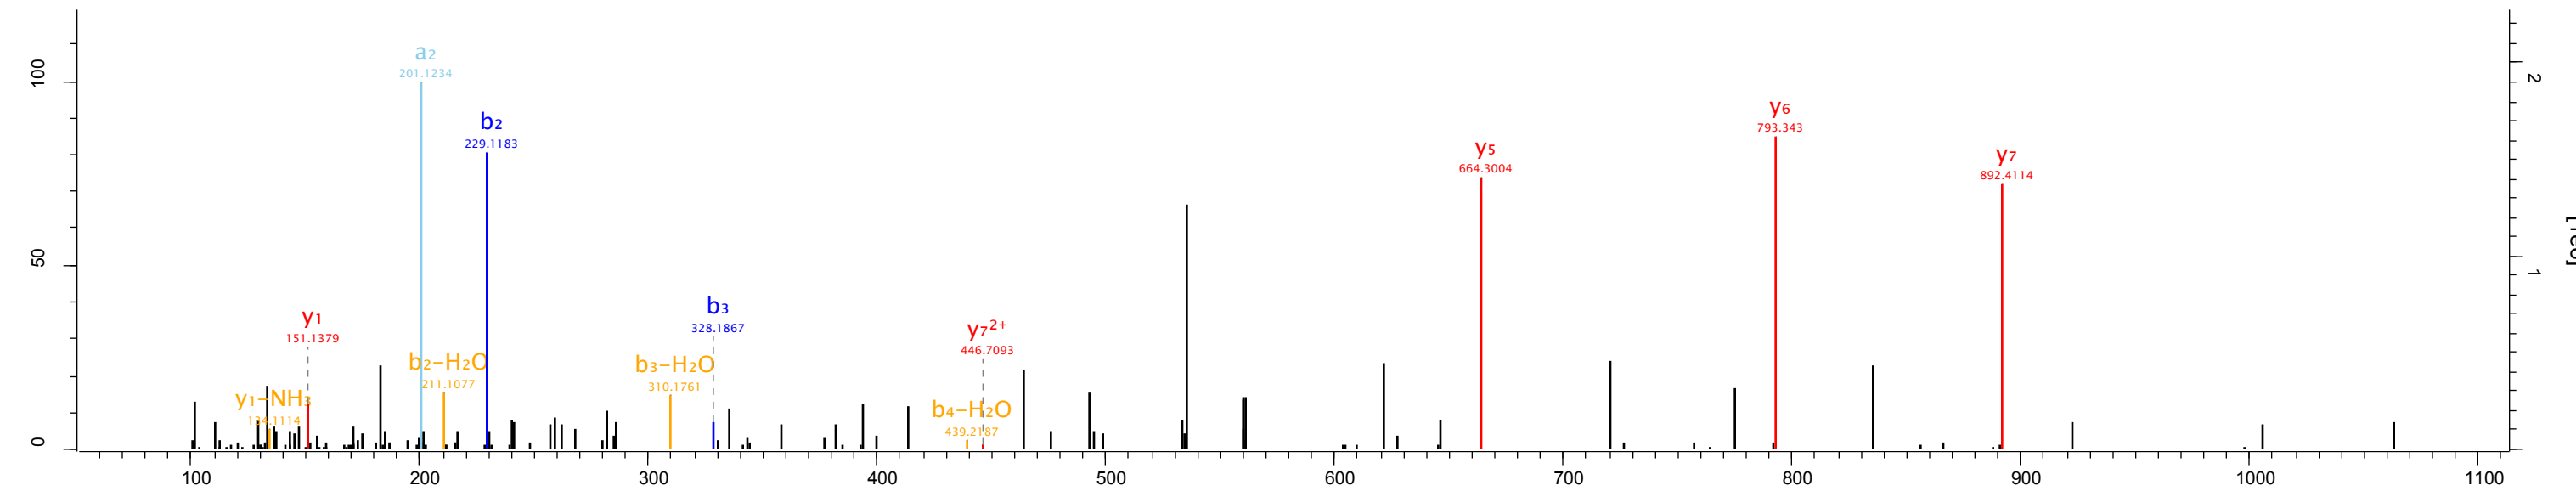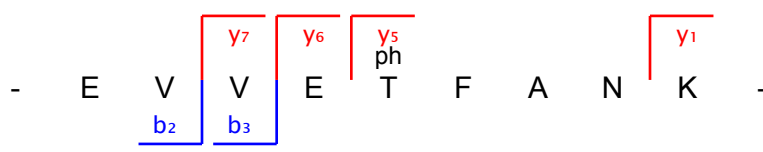

Raw file

20171215\_MaS\_33SR\_LMH\_proteome\_02

| Scan  | Method    | Score | m/z    | Gene names |
|-------|-----------|-------|--------|------------|
| 59240 | FTMS; HCD | 72.93 | 643.35 | MYH7       |

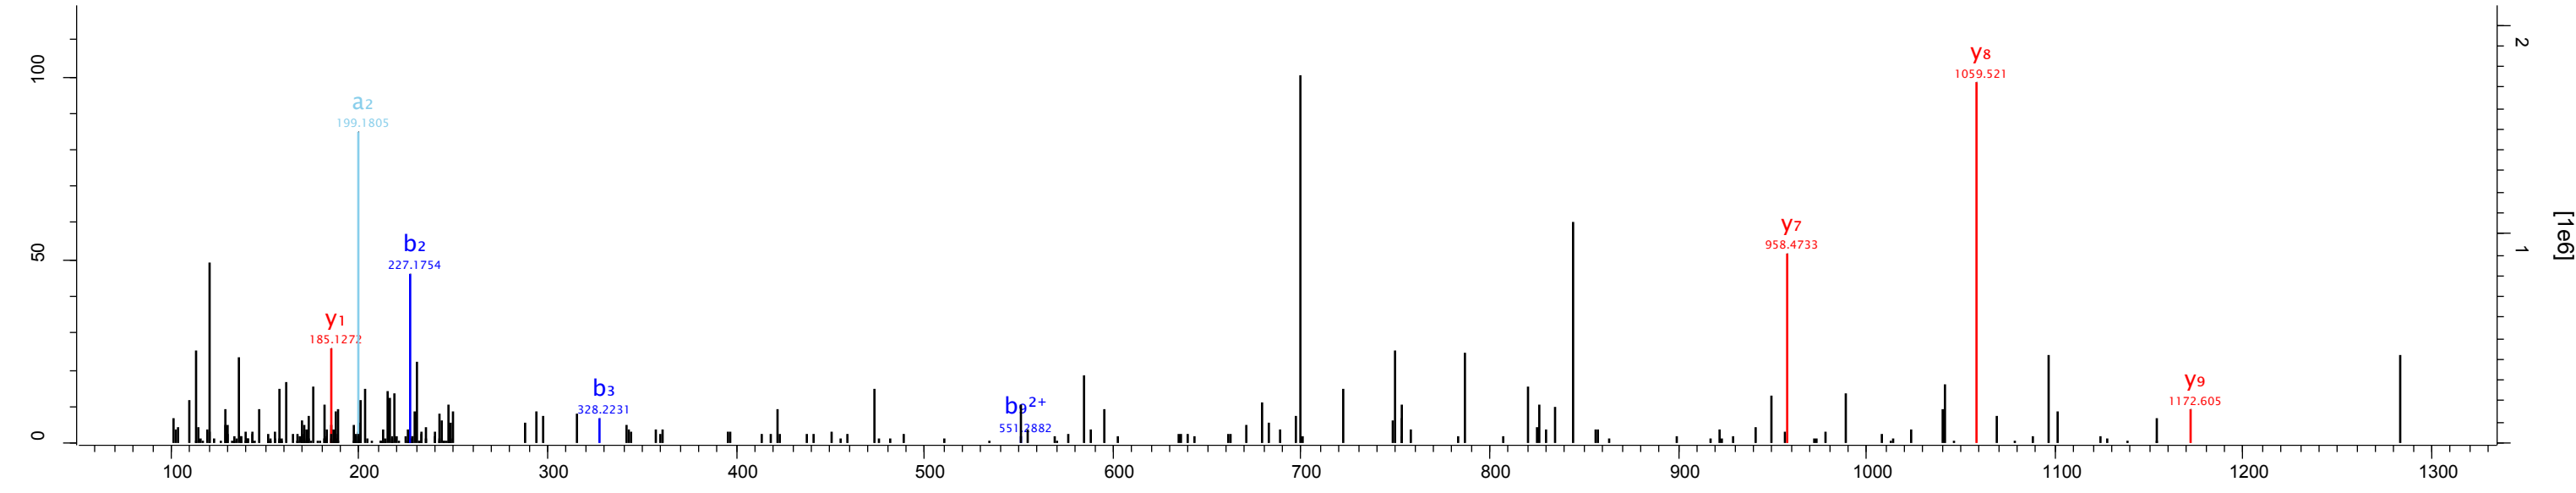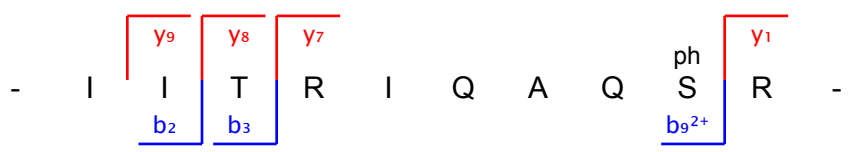

Raw file 20171215\_MaS\_33SR\_LMH\_proteome\_02 Scan 6860 Method FTMS; HCD Score 45.08 m/z 485.74 Gene names ZNF451

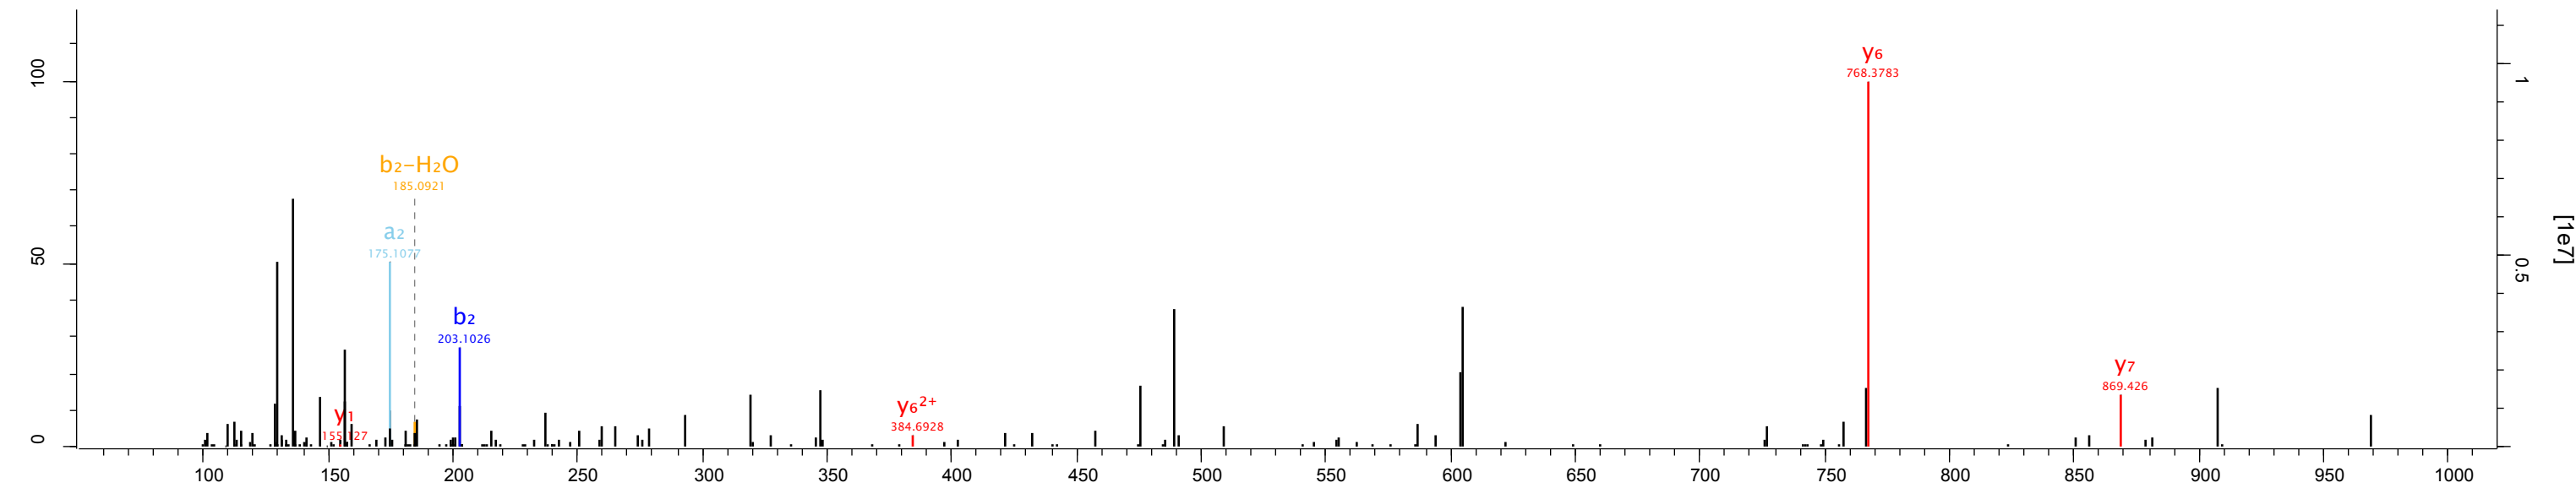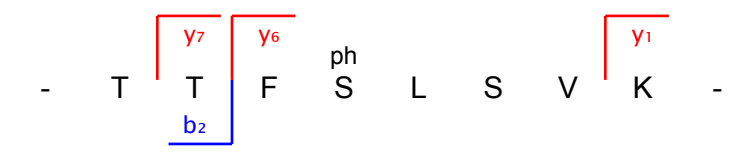

Raw file 20171215\_MaS\_33SR\_LMH\_phospho\_01 Scan 11781 Method FTMS; HCD Score 101.2 m/z 953.07 Gene names LARP1

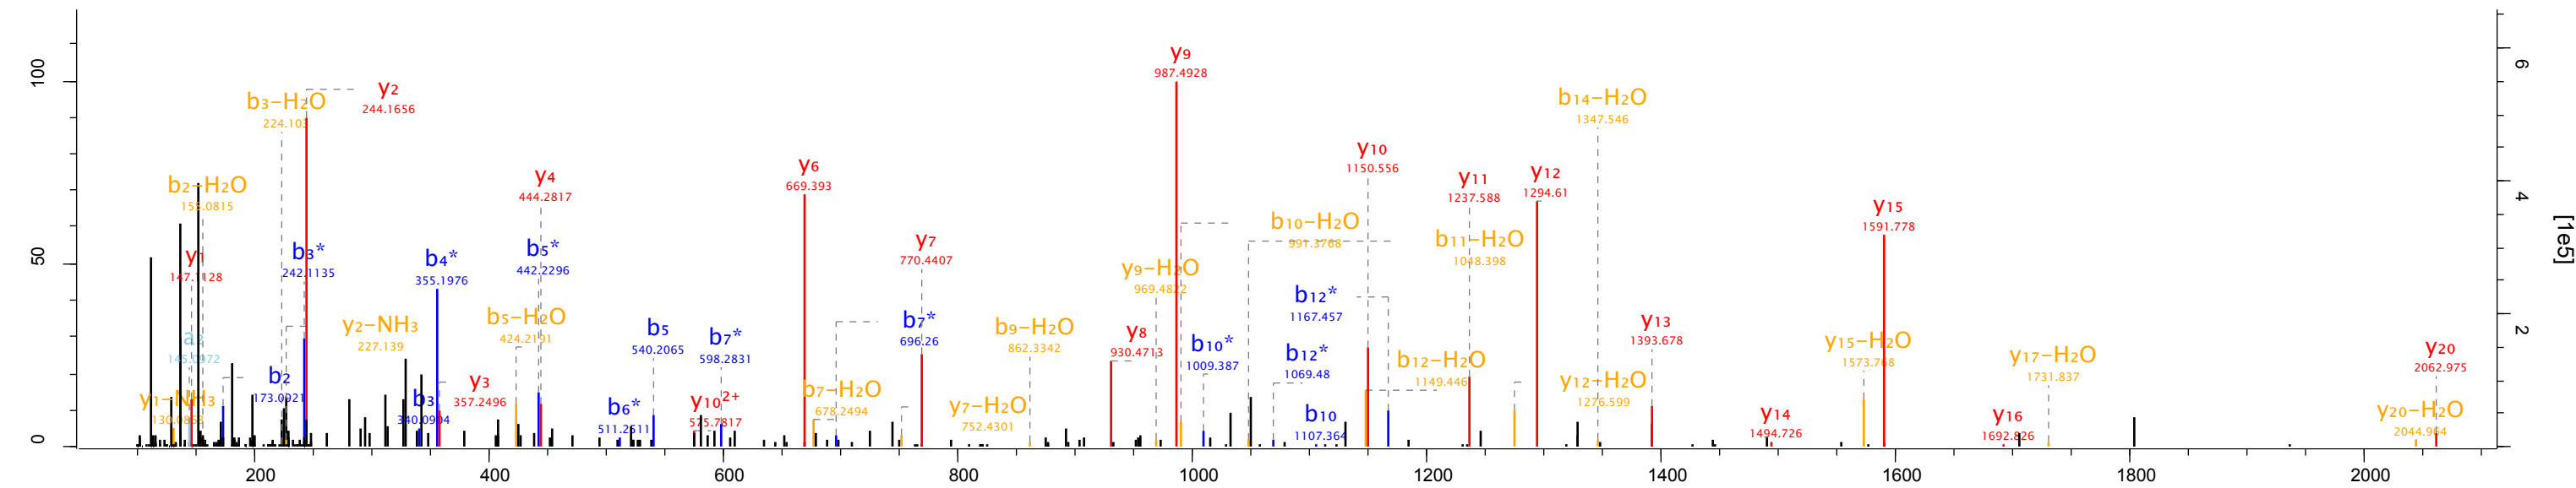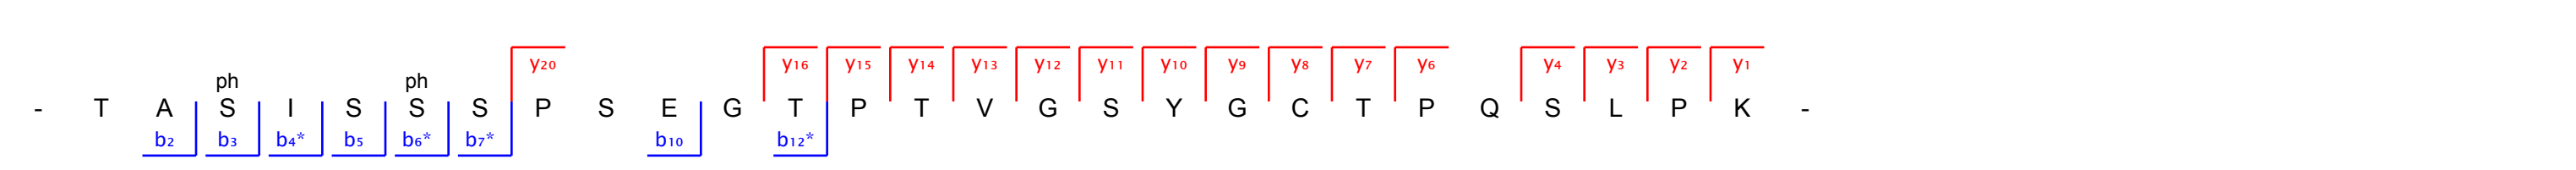

Raw file 20171215\_MaS\_33SR\_LMH\_phospho\_01 Scan 12341 Method FTMS; HCD Score 124.16 m/z 791.25 Gene names ZCRB1

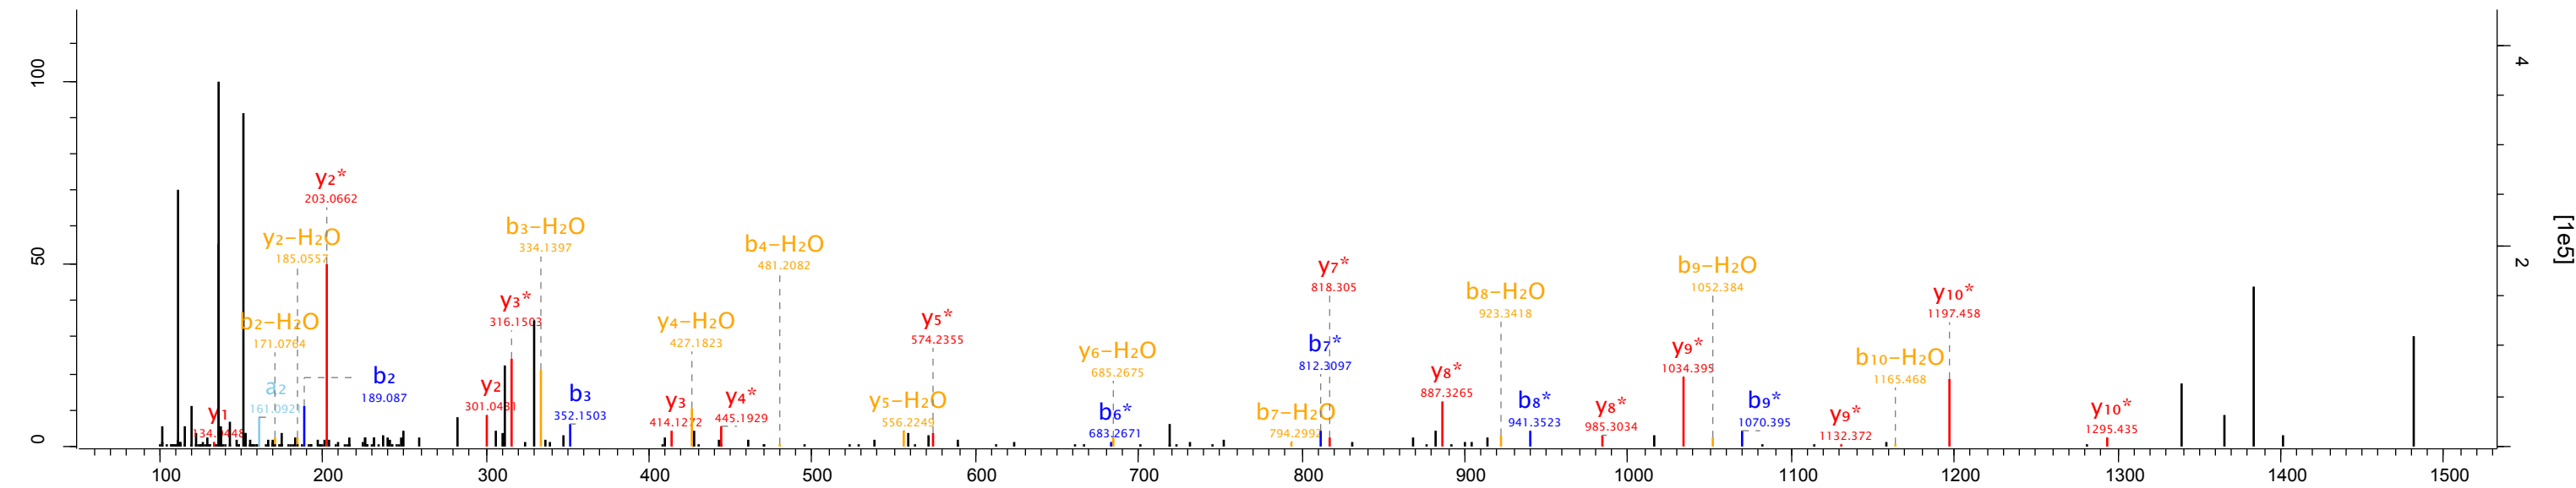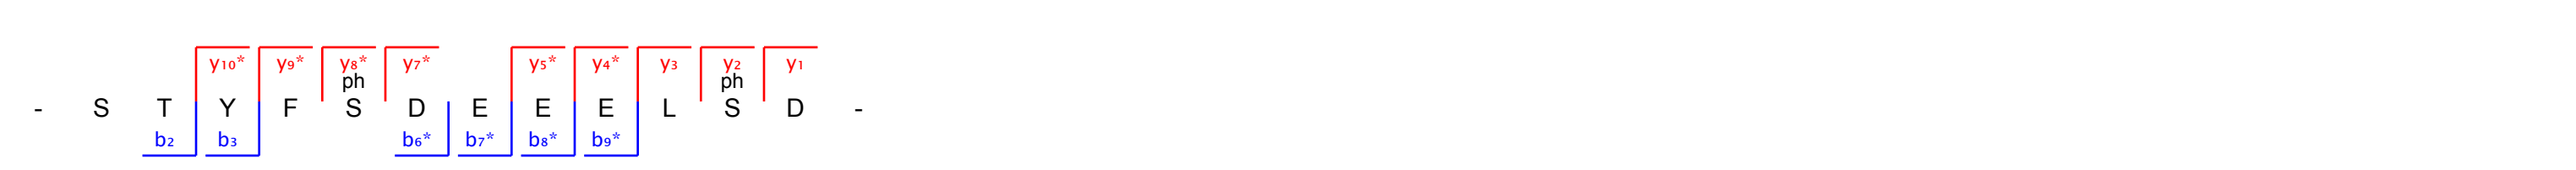

Raw file 20171215\_MaS\_33SR\_LMH\_phospho\_01 Scan 2781 Method FTMS; HCD Score 123.68 m/z 601.71 Gene names BUD13

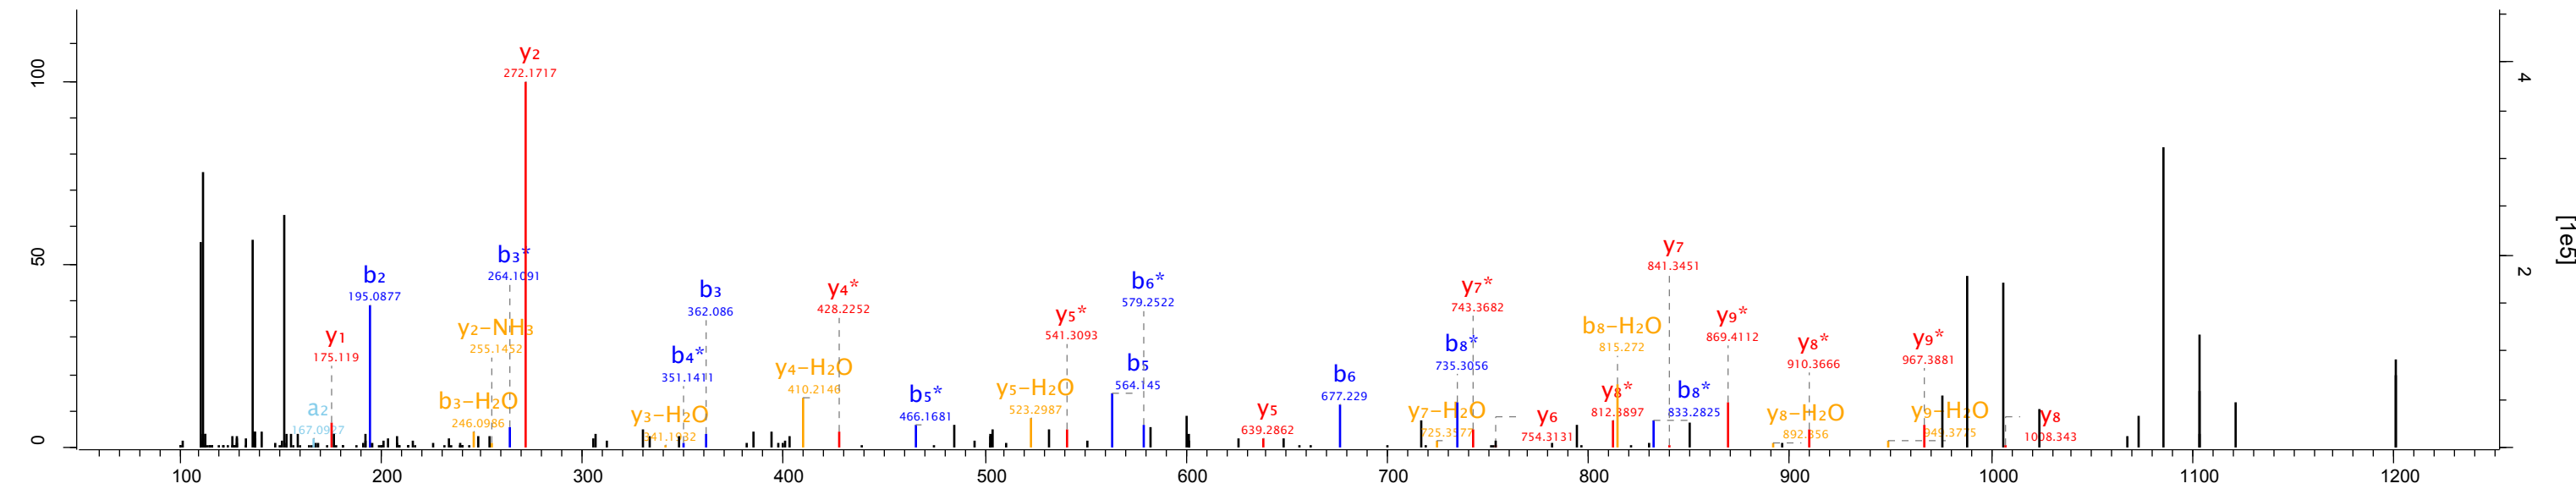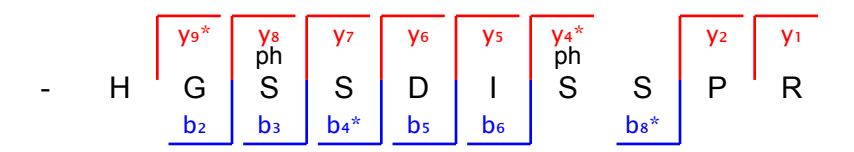

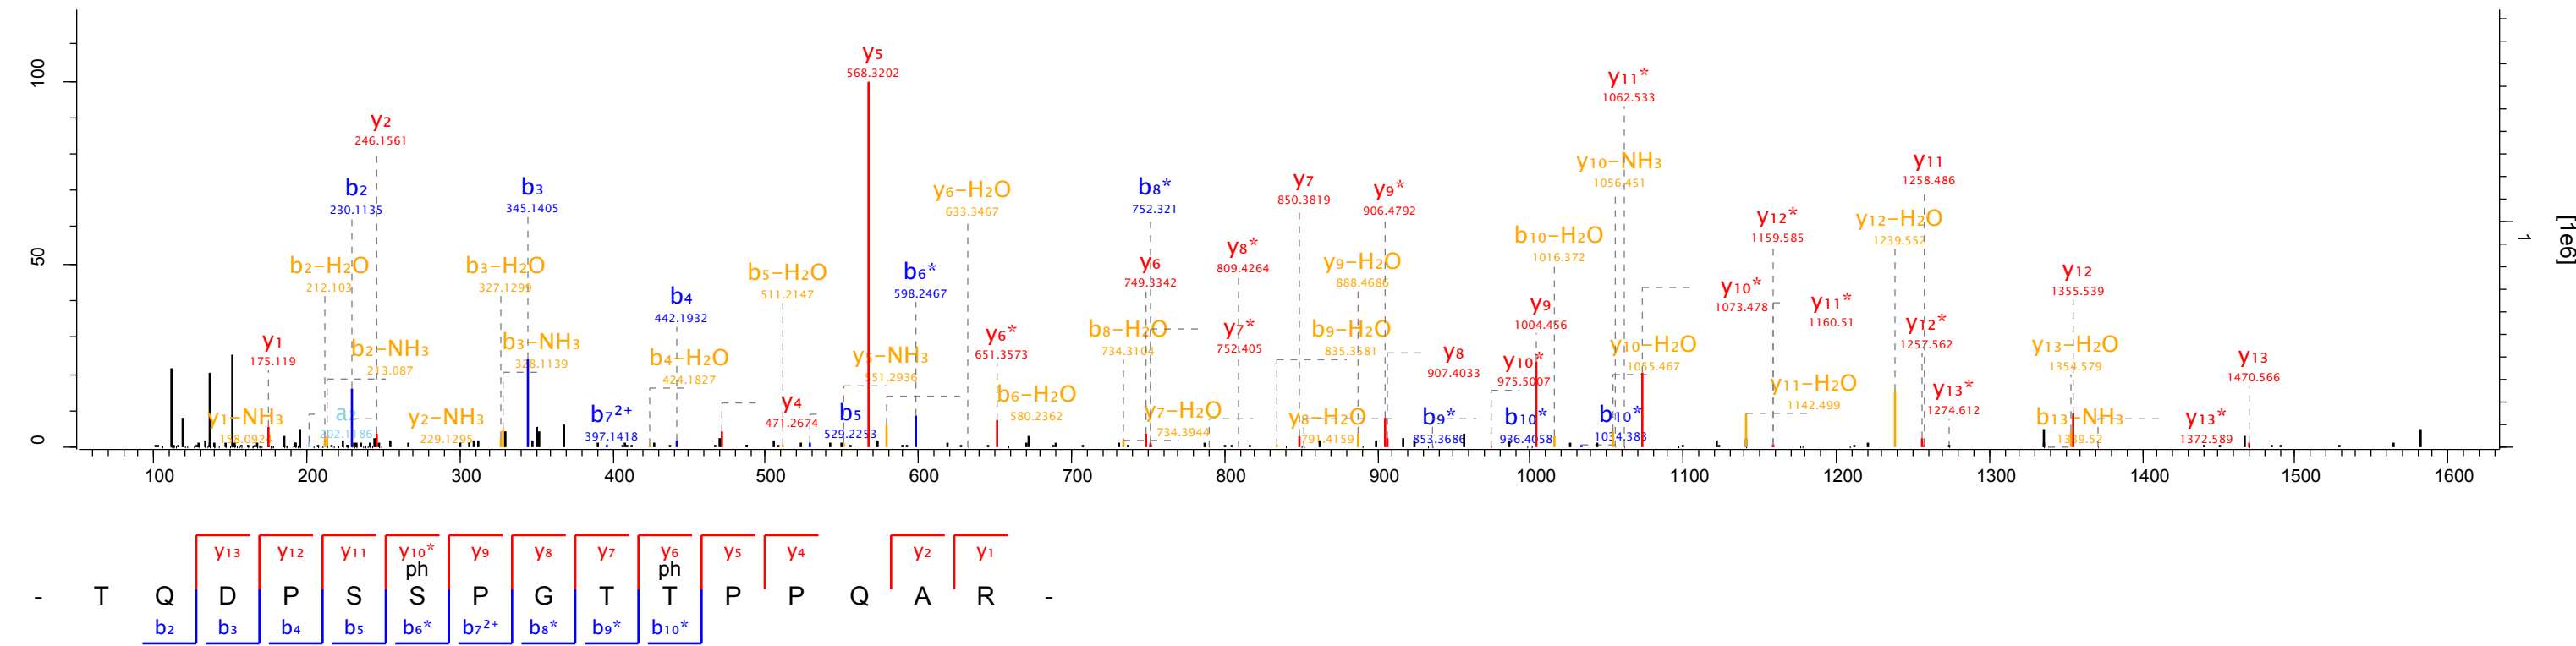

Raw file 20171215\_MaS\_33SR\_LMH\_phospho\_01 Scan 3981 Method FTMS; HCD Score 94.63 m/z 839.79 Gene names C17orf75

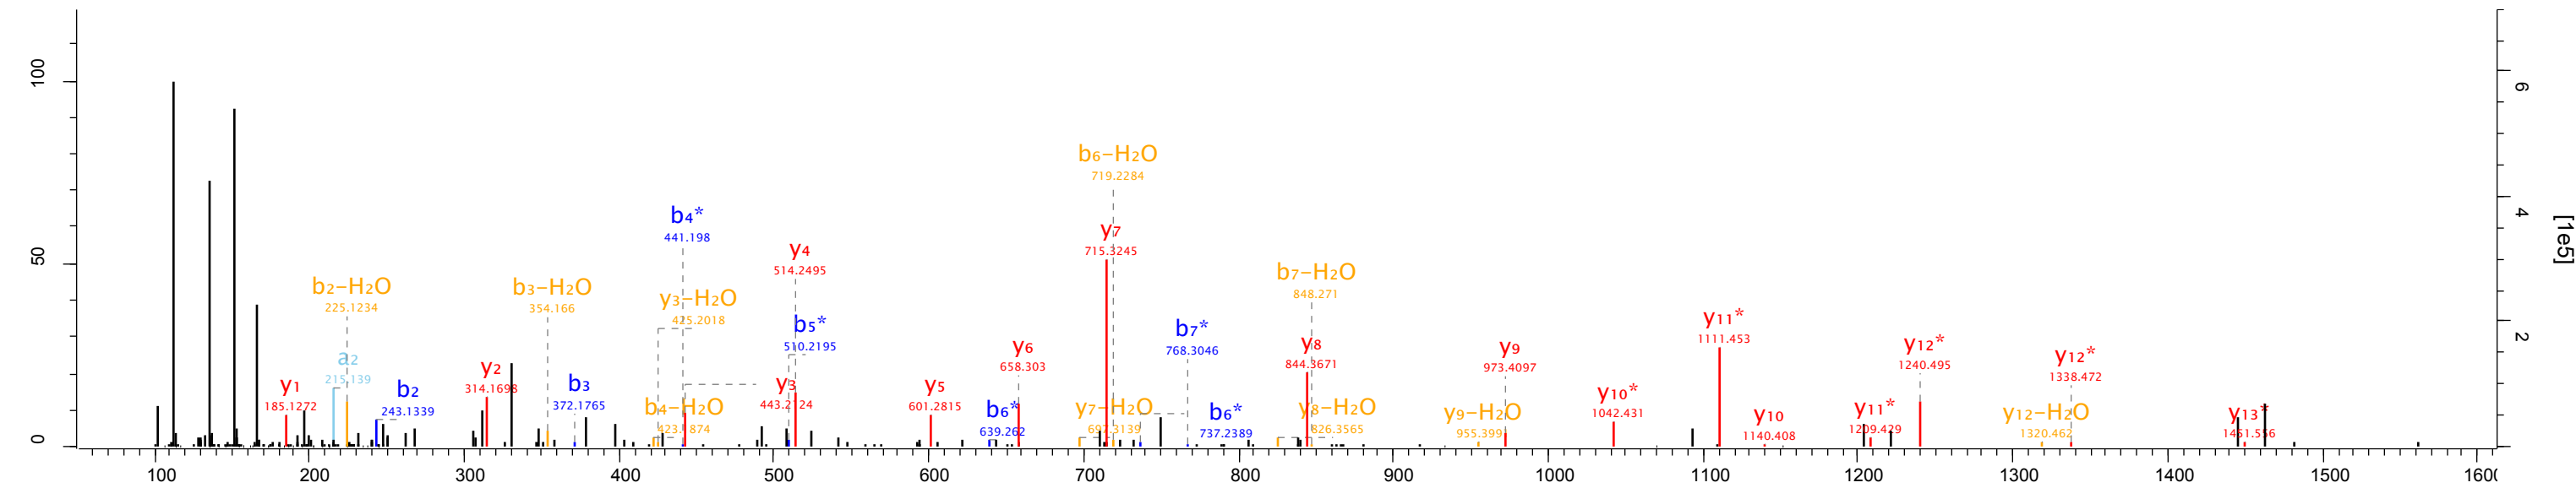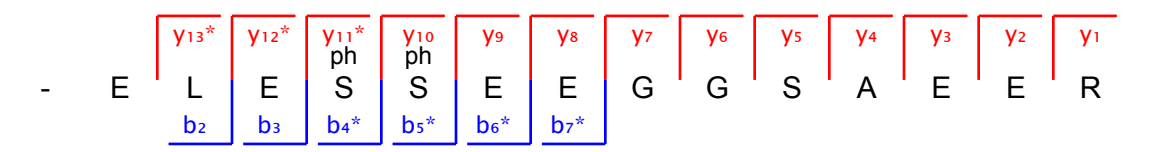



Raw file 20171215\_MaS\_33SR\_LMH\_phospho\_01 Scan 5231 Method FTMS; HCD Score 92.89 m/z 934.84 Gene names TBC1D23

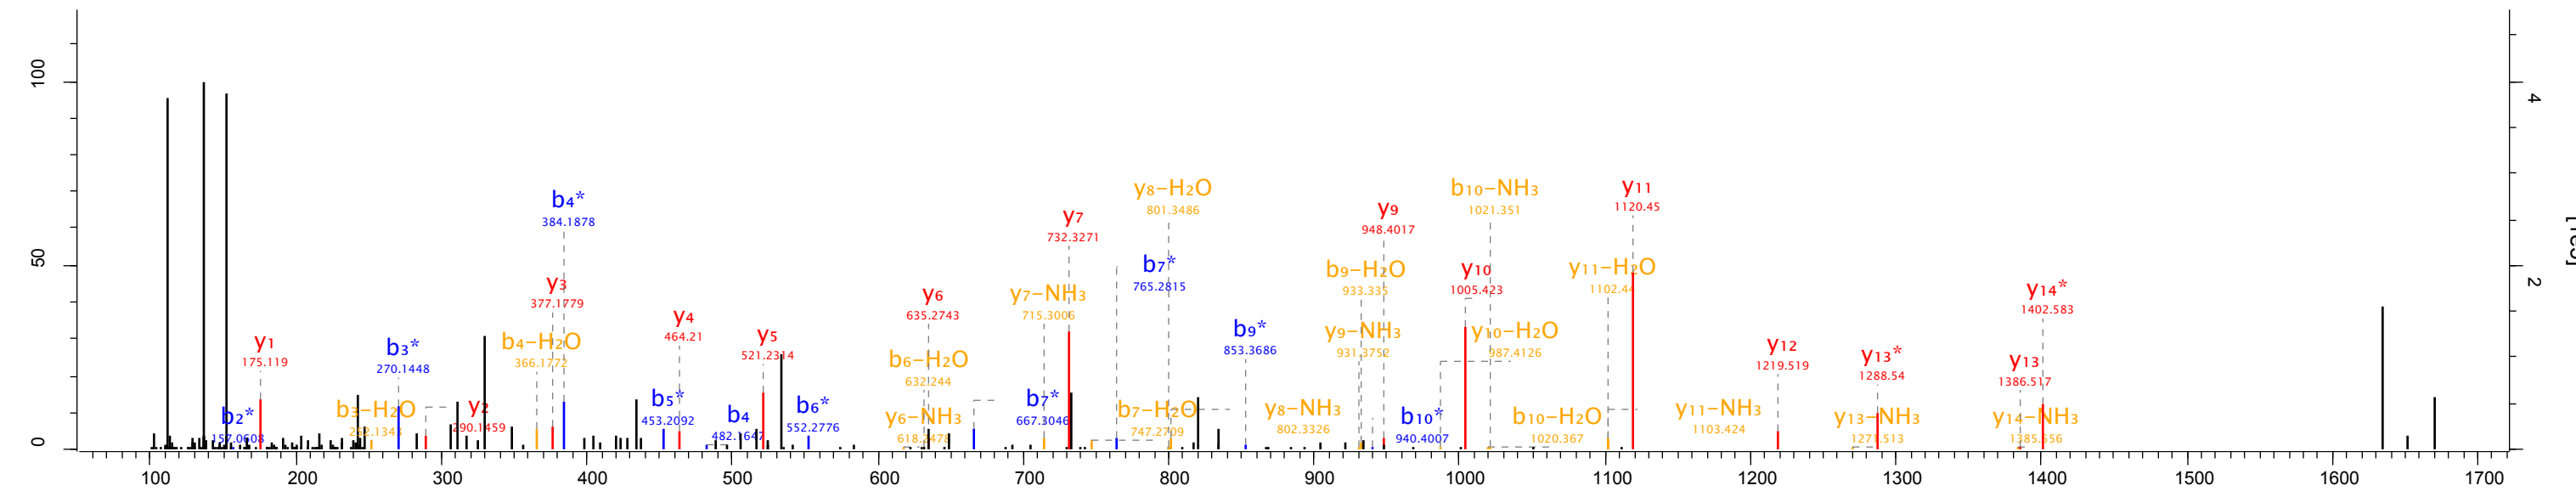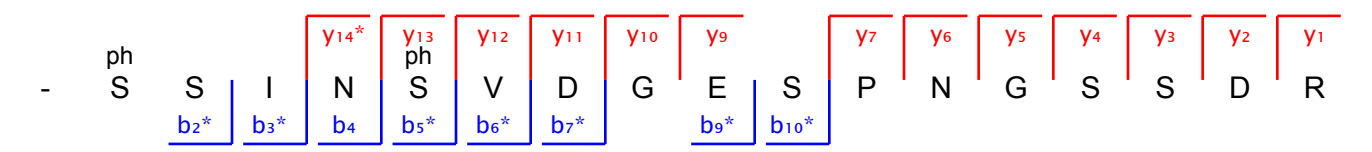

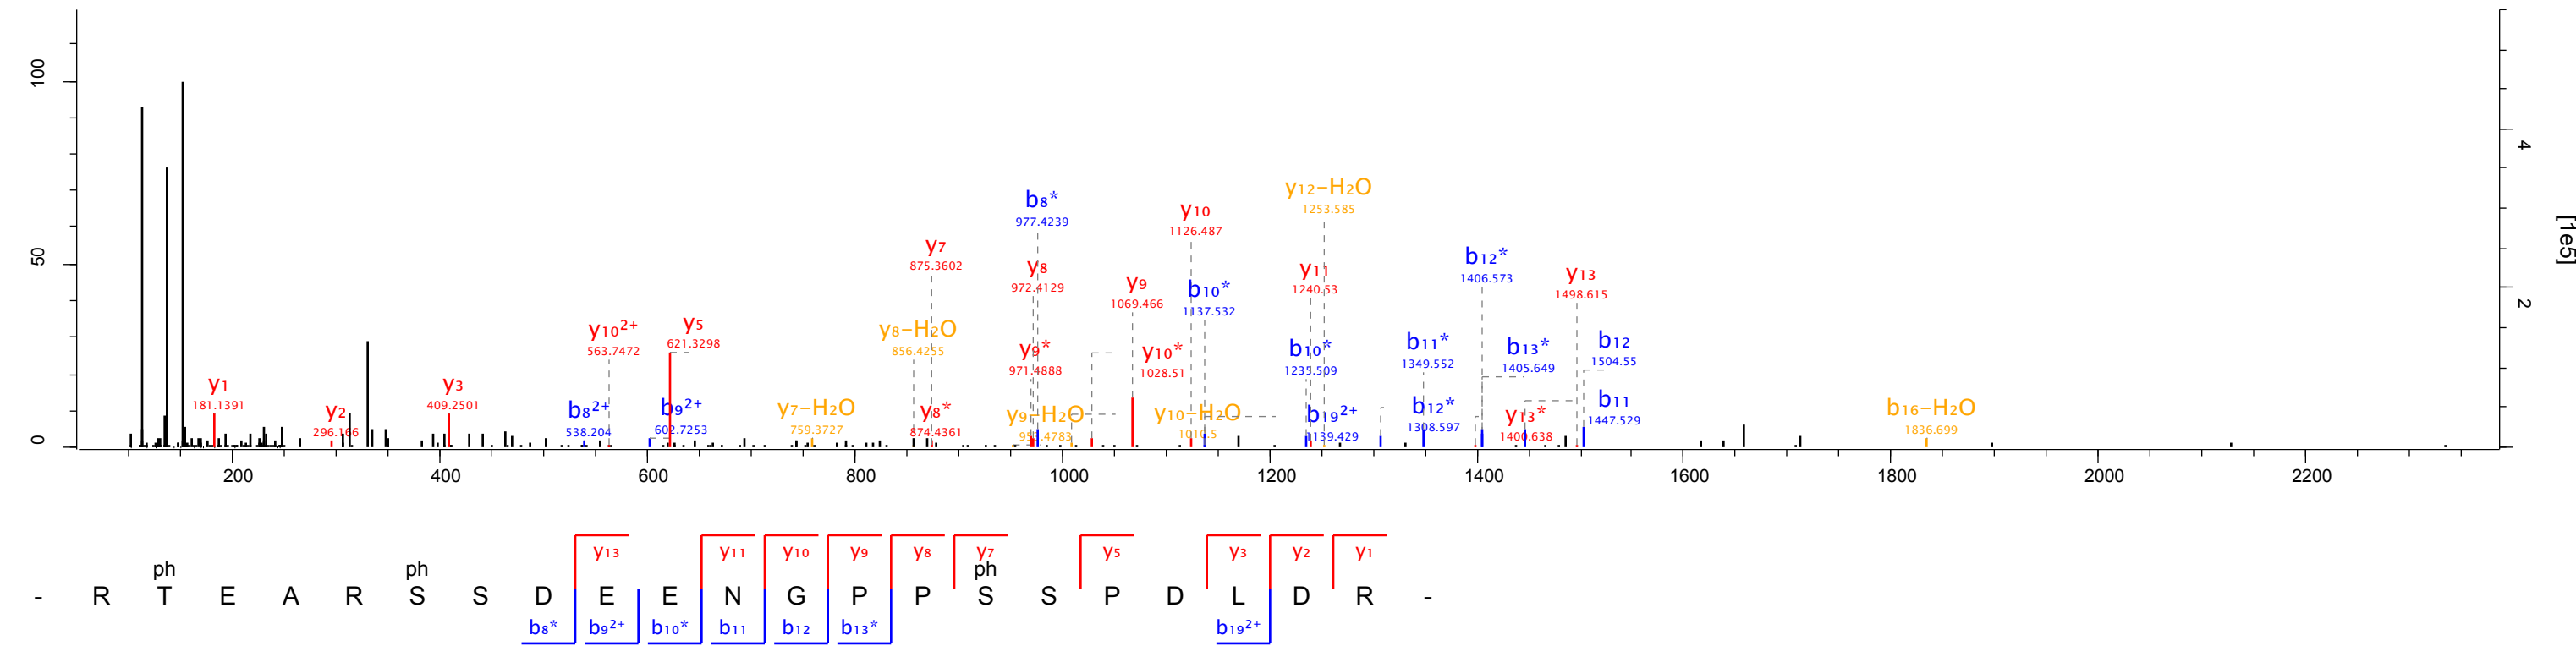

Raw file Scan Method Score m/z Gene names  
 20171215\_MaS\_33SR\_LMH\_phospho\_01 5631 FTMS; HCD 168.46 749.79 NDRG1

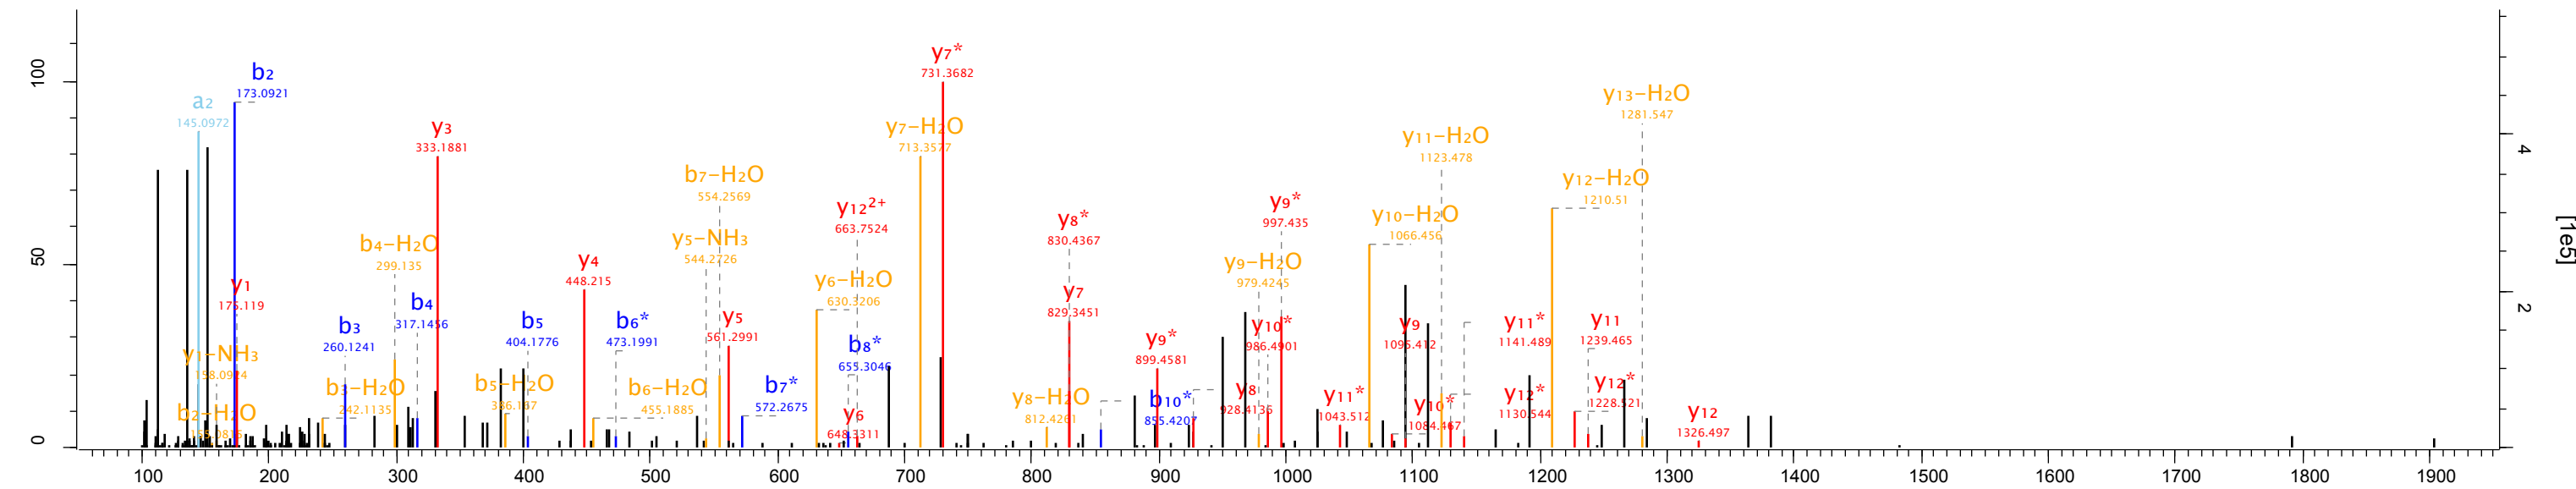

- T A S G S S V T S L D G T R -

b<sub>2</sub>
b<sub>3</sub>
b<sub>4</sub>
b<sub>5</sub>
b<sub>6</sub><sup>\*</sup>
b<sub>7</sub><sup>\*</sup>
b<sub>8</sub><sup>\*</sup>
b<sub>10</sub><sup>\*</sup>

y<sub>12</sub>
y<sub>11</sub>
y<sub>10</sub><sup>\*</sup>
y<sub>9</sub>  
ph
y<sub>8</sub>
y<sub>7</sub>  
ph
y<sub>6</sub>
y<sub>5</sub>
y<sub>4</sub>
y<sub>3</sub>
y<sub>1</sub>

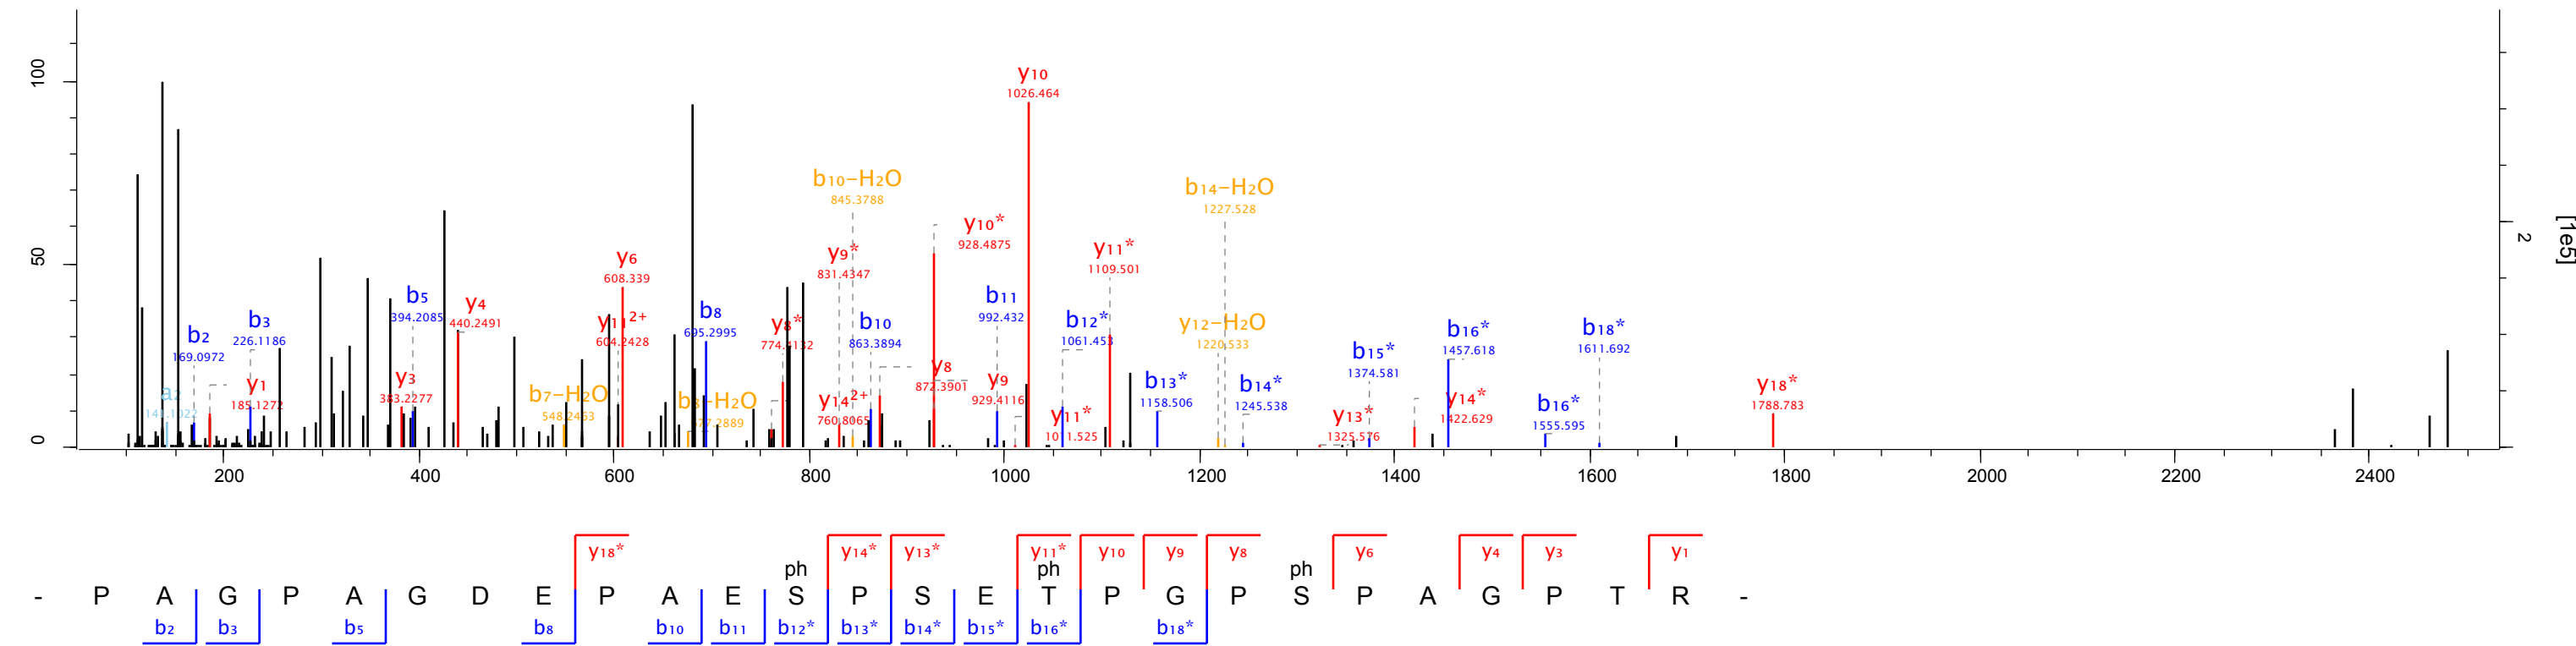

Raw file 20171215\_MaS\_33SR\_LMH\_phospho\_01 Scan 6661 Method FTMS; HCD Score 64.42 m/z 1030.95 Gene names PPP4R2

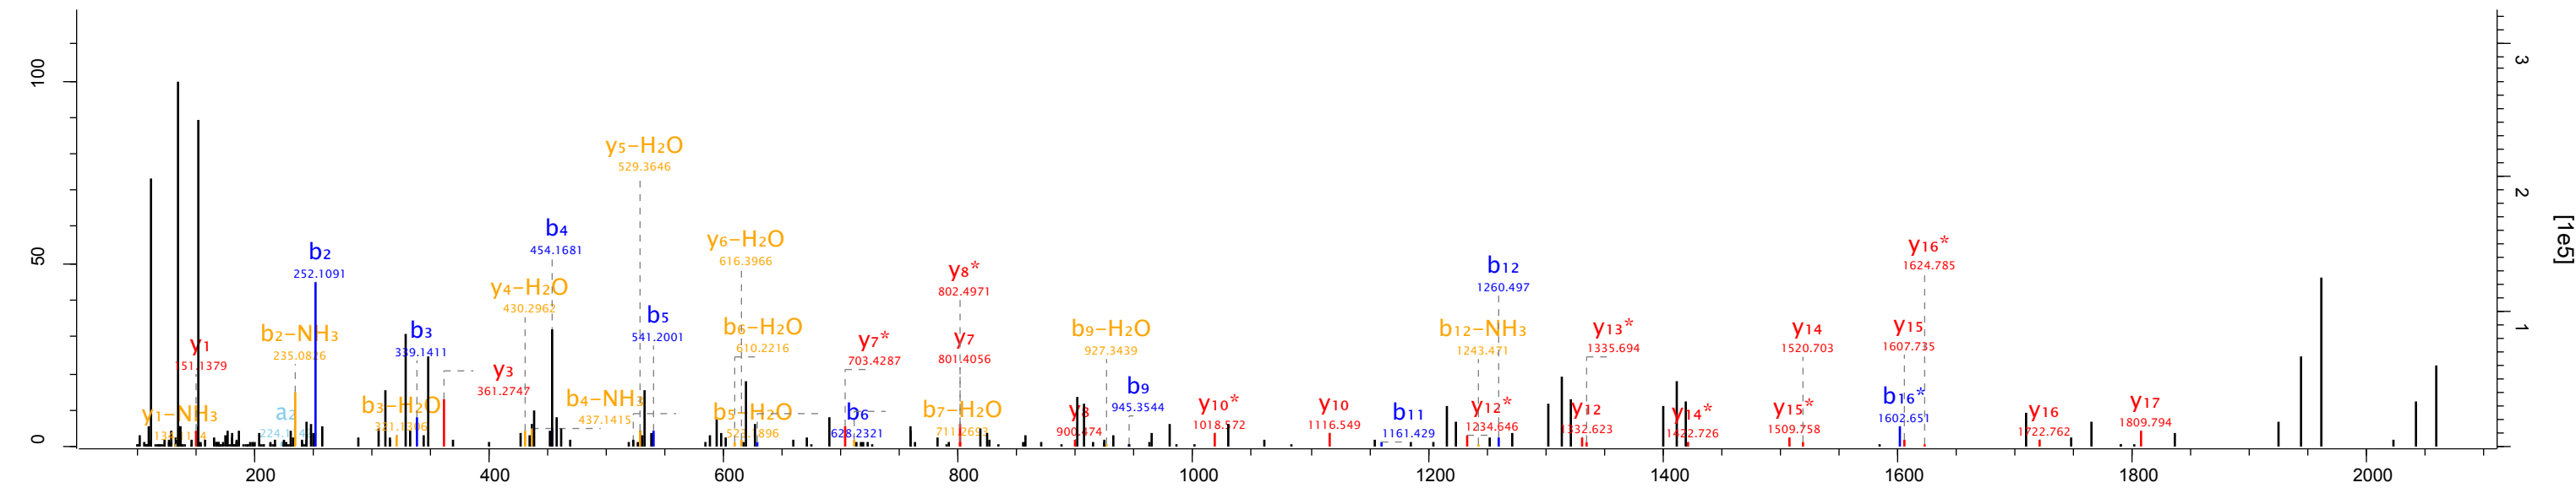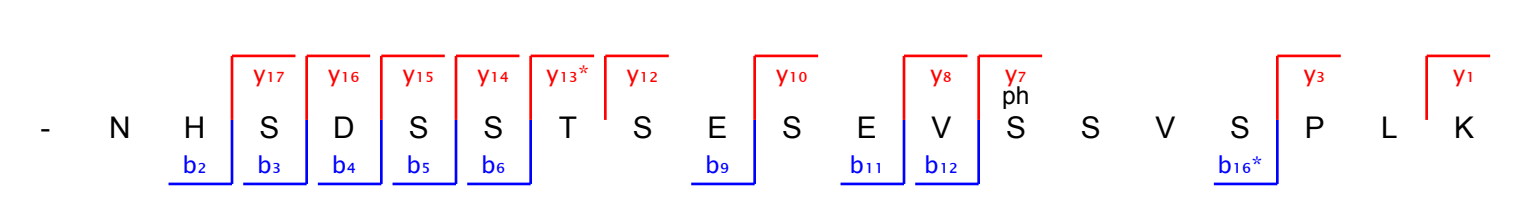

Raw file 20171215\_MaS\_33SR\_LMH\_phospho\_01 Scan 8871 Method FTMS; HCD Score 257.77 m/z 817.78 Gene names PUS1

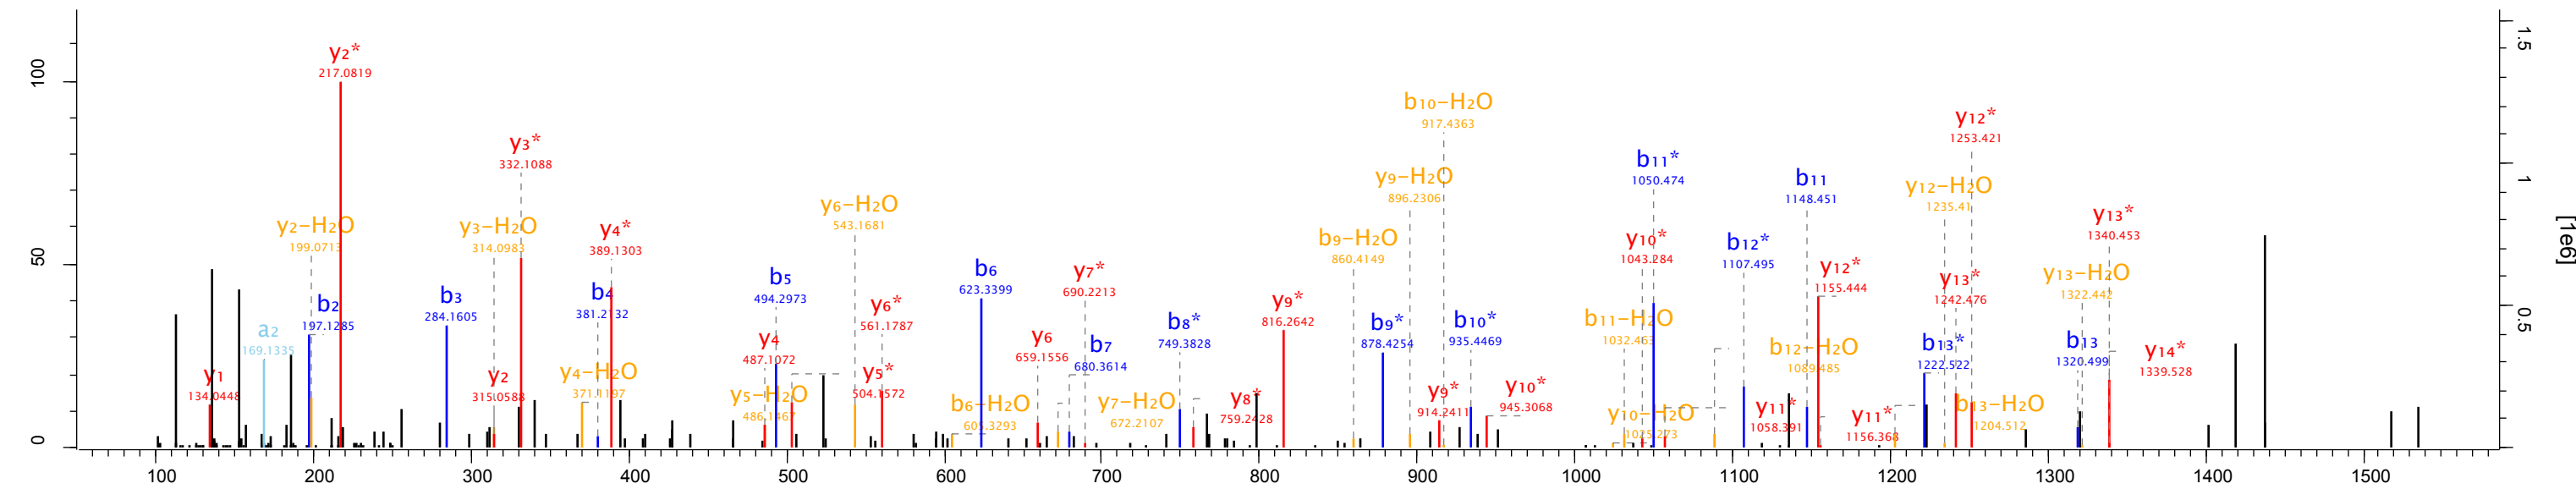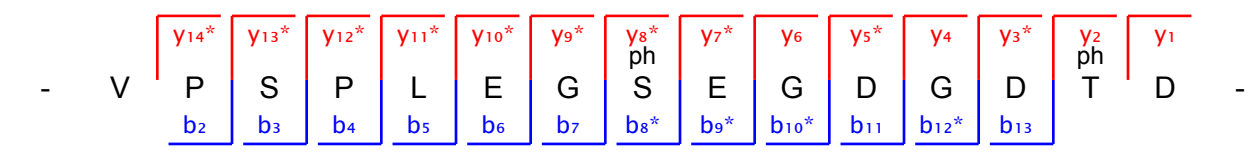

Raw file 20171215\_MaS\_33SR\_LMH\_phospho\_01 Scan 9261 Method FTMS; HCD Score 154.75 m/z 866.33 Gene names ARFGEF2

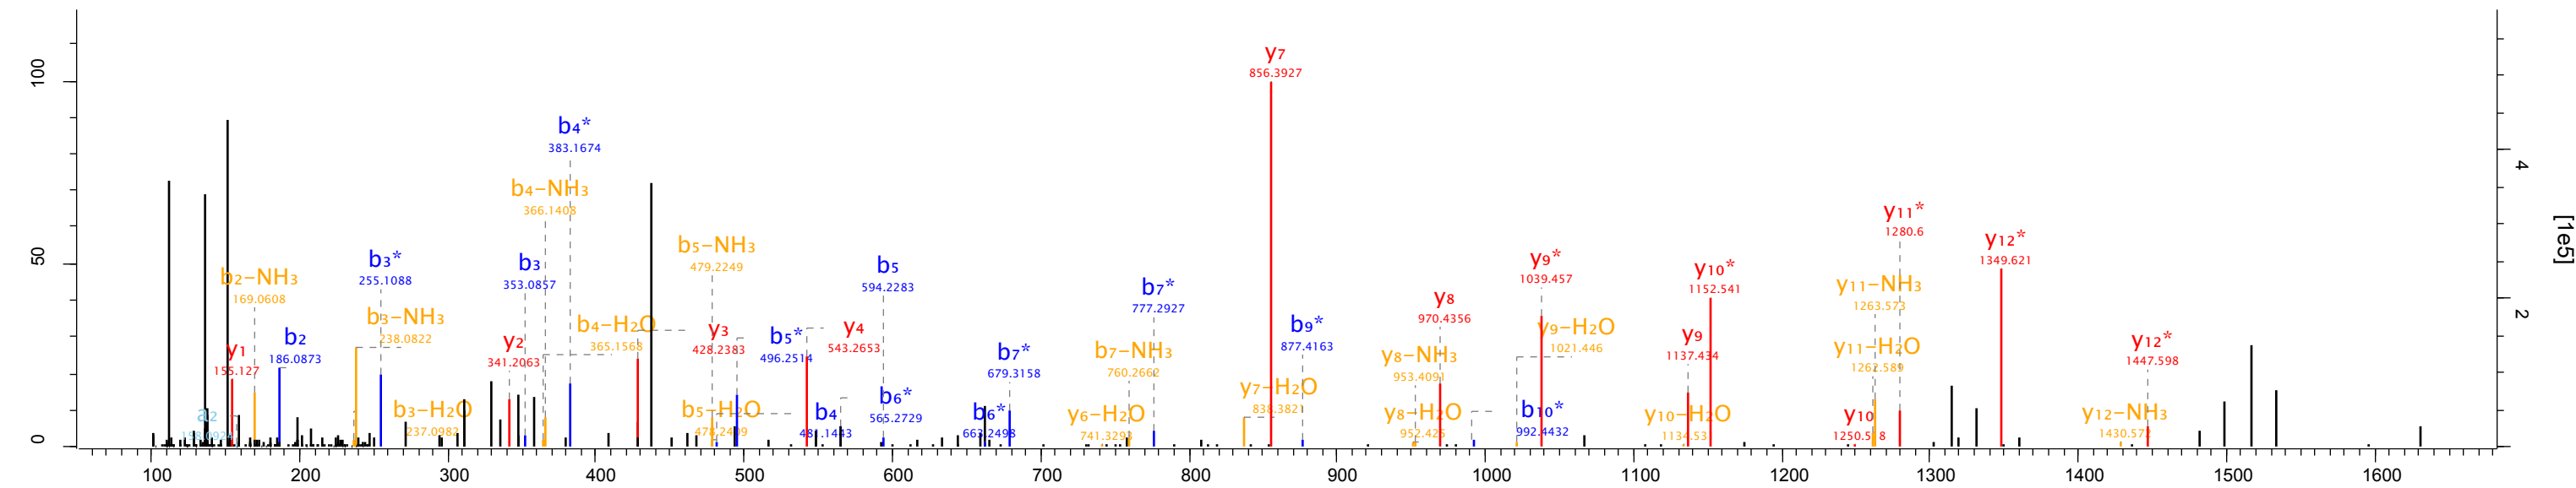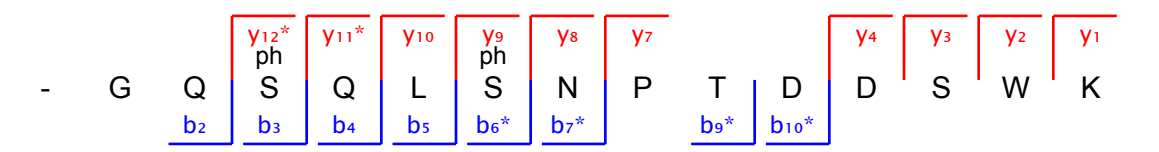

Raw file 20171215\_MaS\_33SR\_LMH\_phospho\_01 Scan 9991 Method FTMS; HCD Score 159.03 m/z 726.31 Gene names GPR56

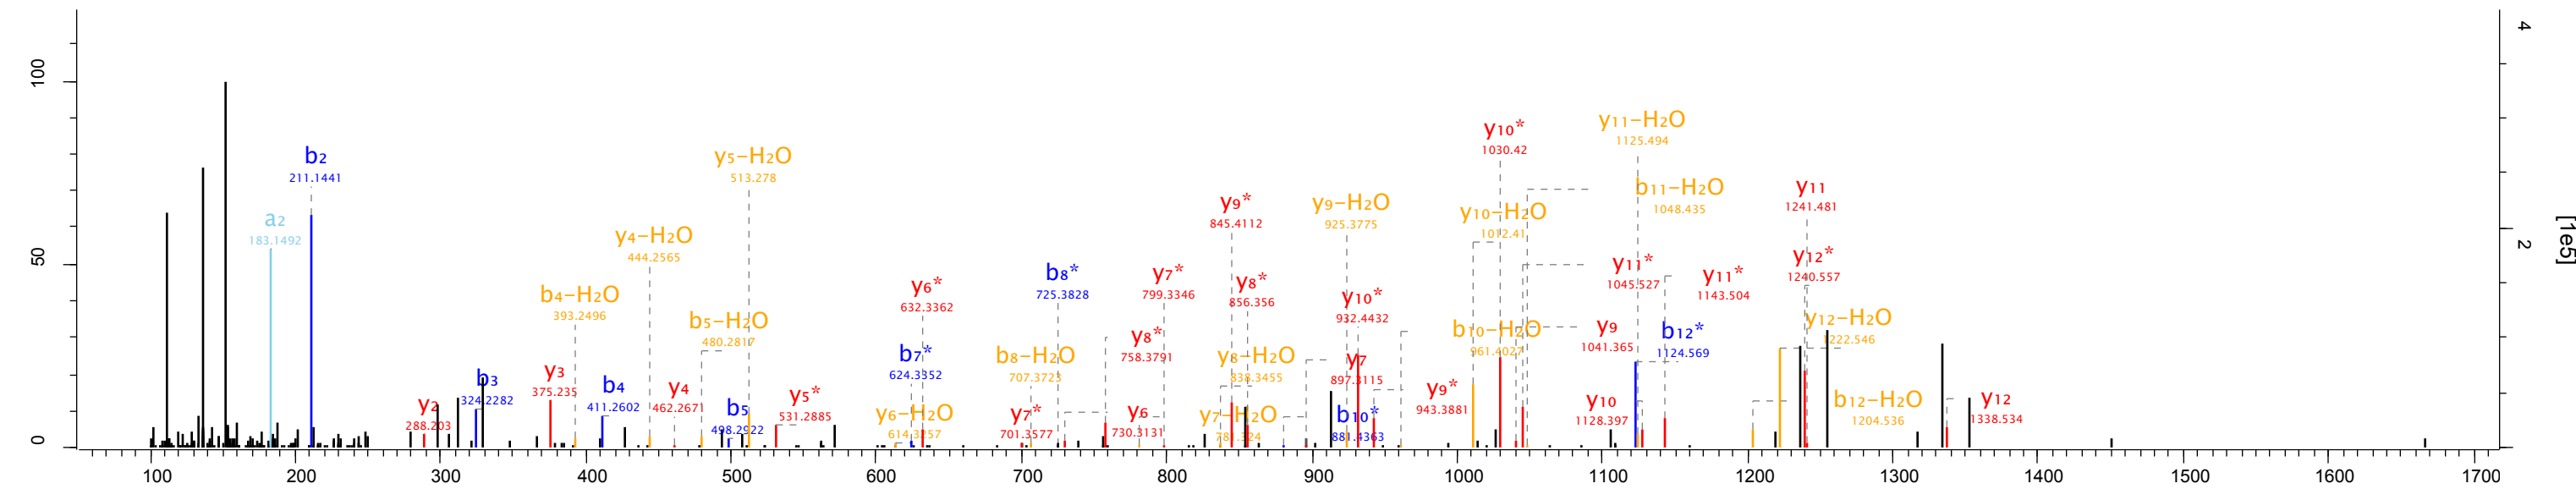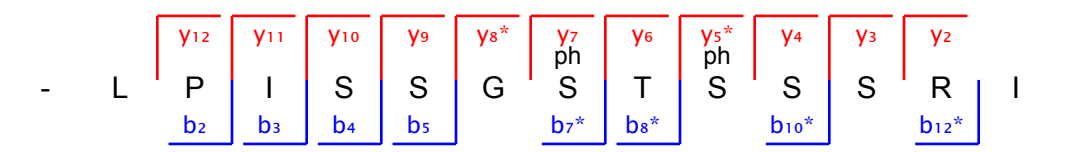



Raw file 20171215\_MaS\_33SR\_LMH\_phospho\_02 Scan 10051 Method FTMS; HCD Score 61.21 m/z 805.31 Gene names ZNF148

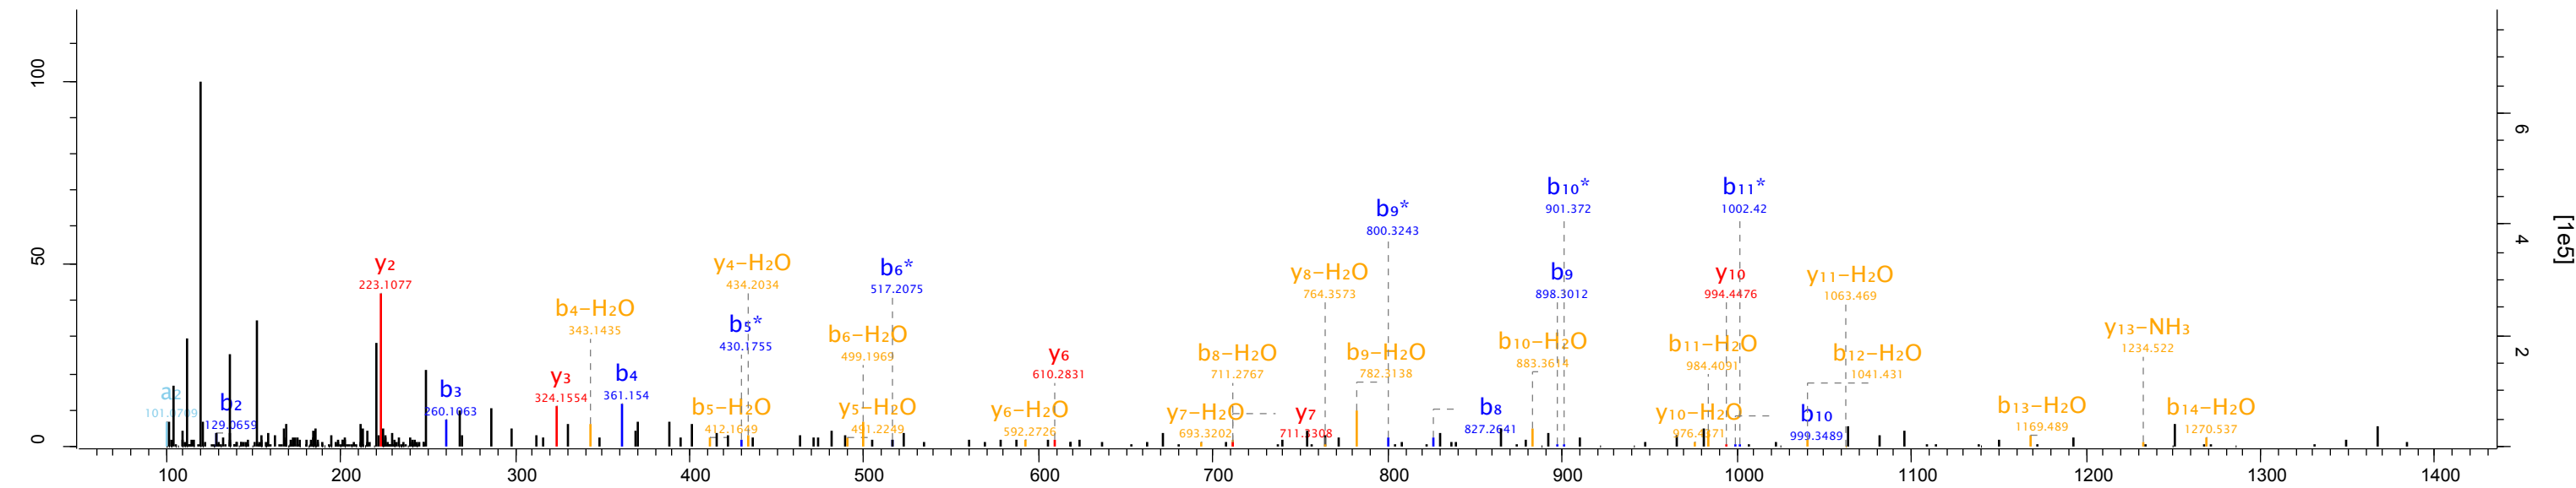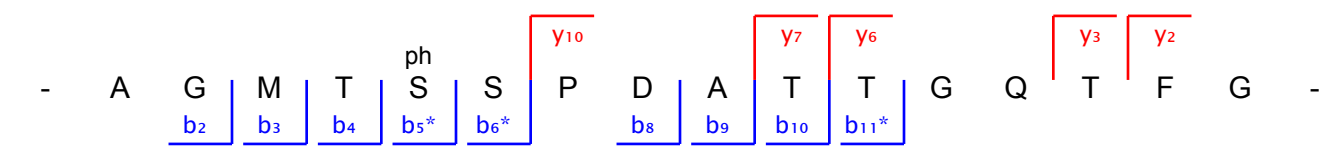

Raw file 20171215\_MaS\_33SR\_LMH\_phospho\_02 Scan 10111 Method FTMS; HCD Score 96.14 m/z 626.26 Gene names LYN

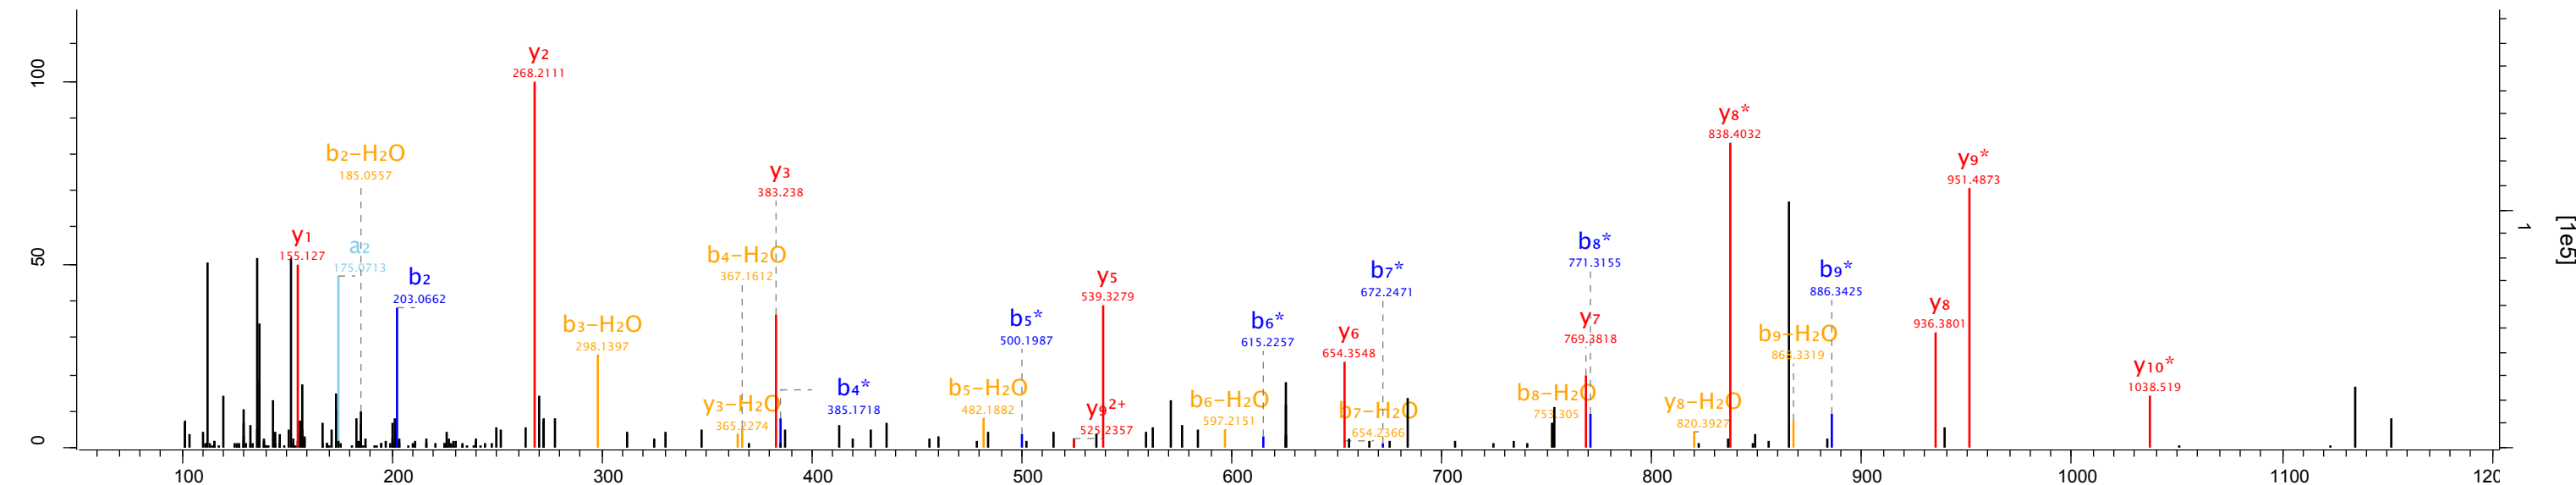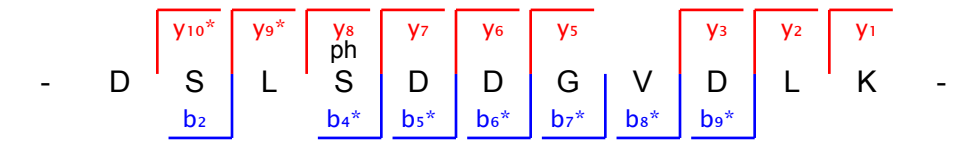

Raw file 20171215\_MaS\_33SR\_LMH\_phospho\_02 Scan 10161 Method FTMS; HCD Score 245.1 m/z 874.41 Gene names TJAP1

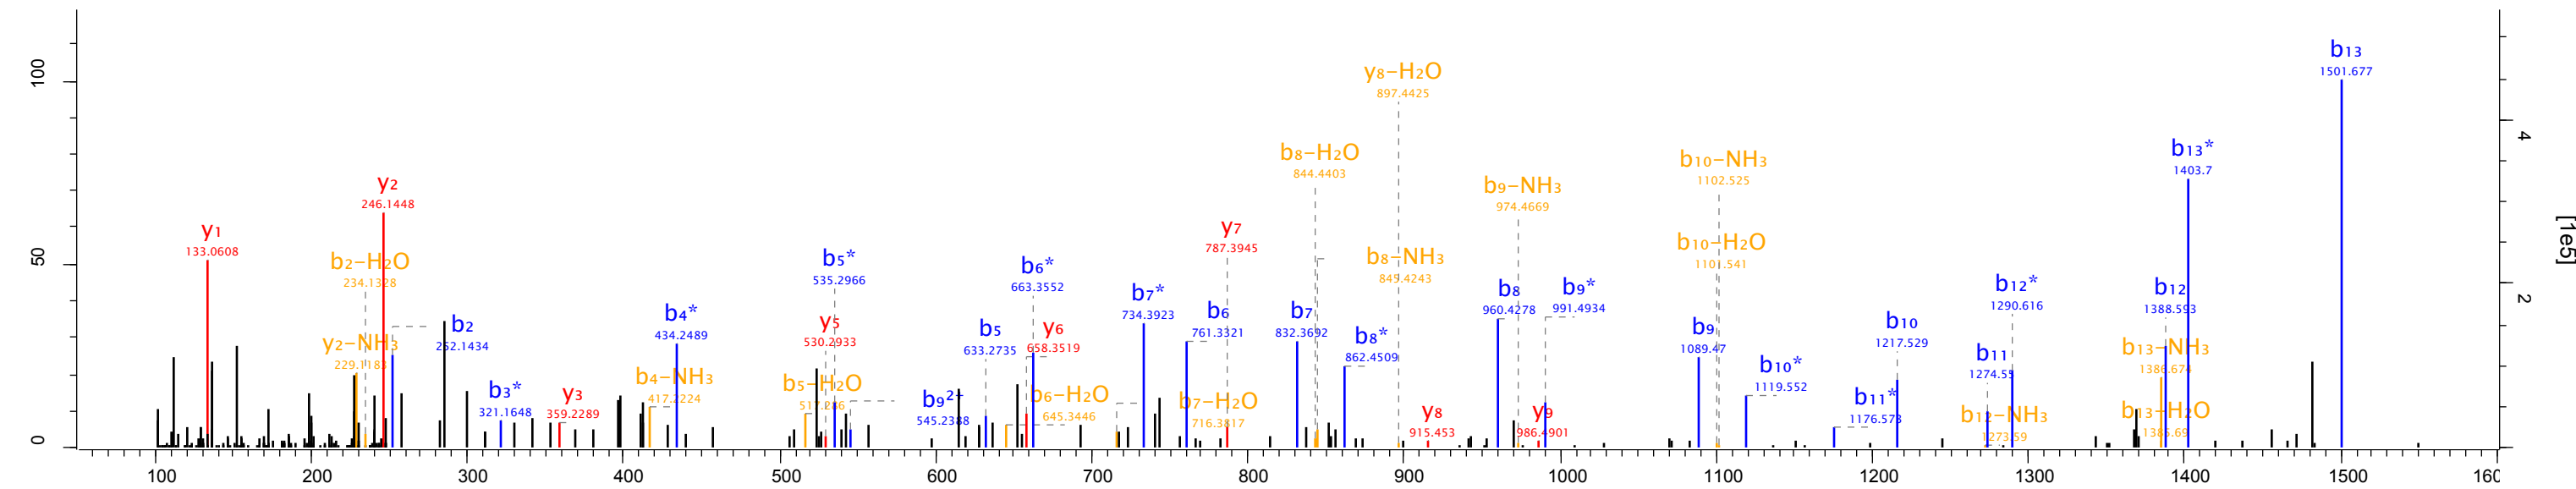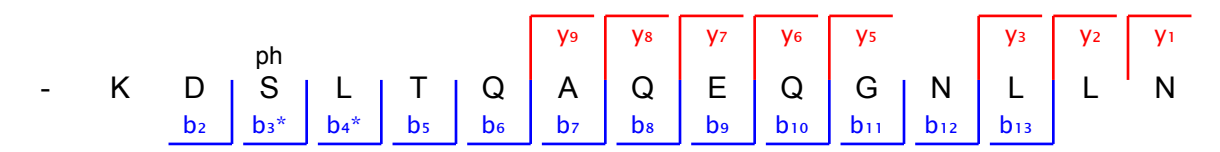

20171215\_MaS\_33SR\_LMH\_phospho\_02 10371 FTMS; HCD 223.29 842.34 WDR70

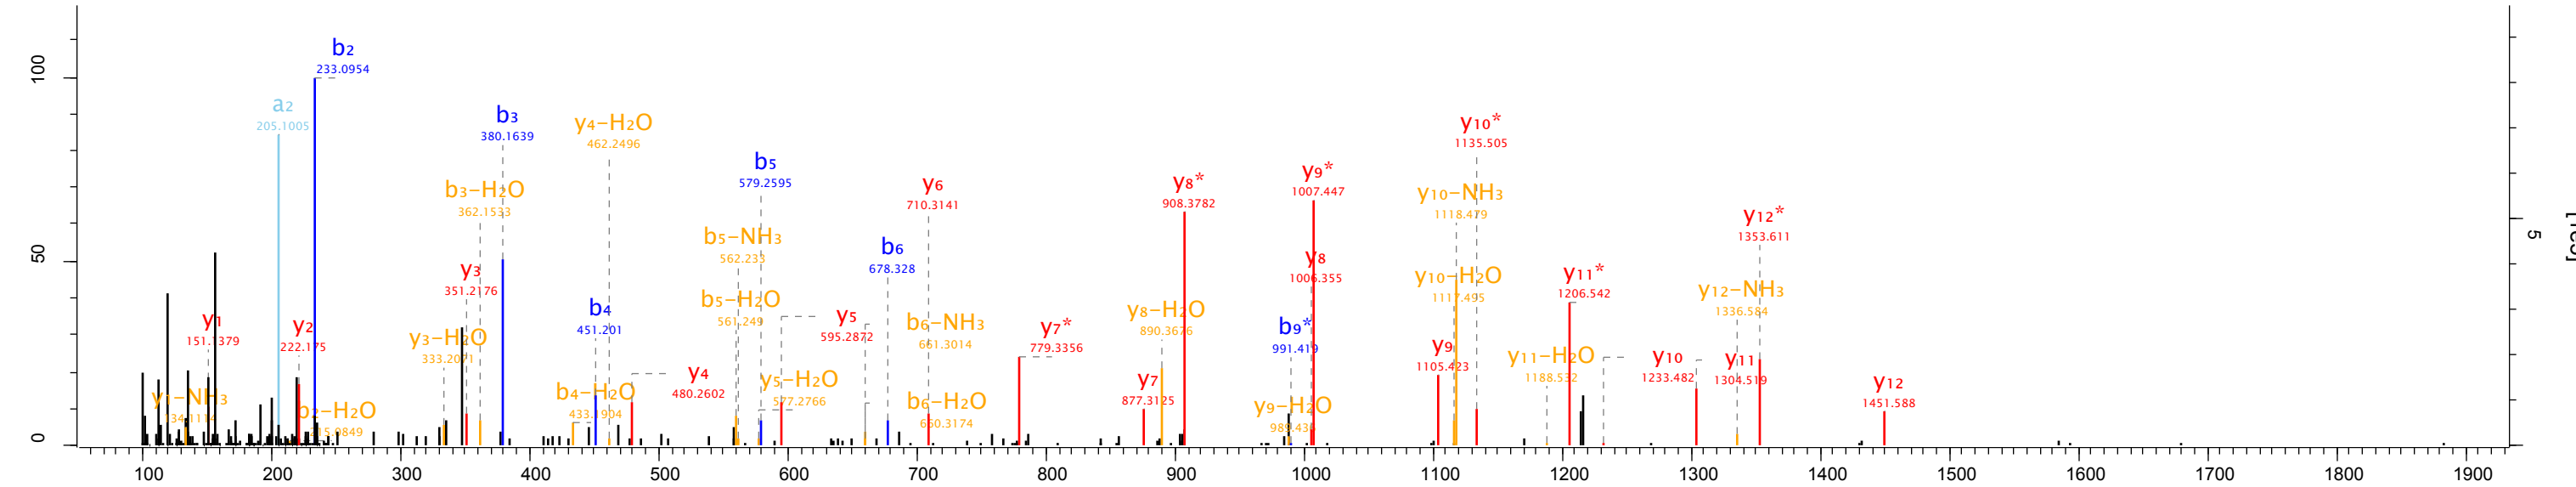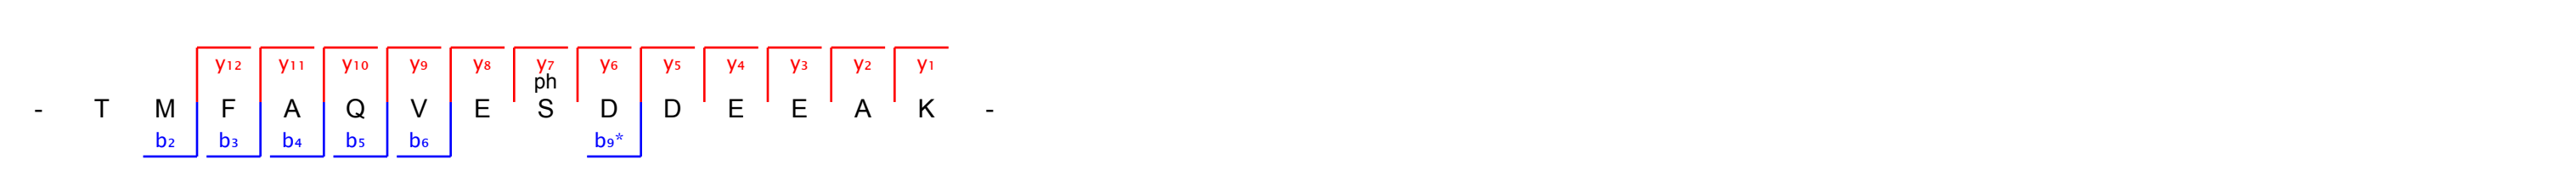

Raw file 20171215\_MaS\_33SR\_LMH\_phospho\_02 Scan 10481 Method FTMS; HCD Score 235.42 m/z 901.89 Gene names AHNAK

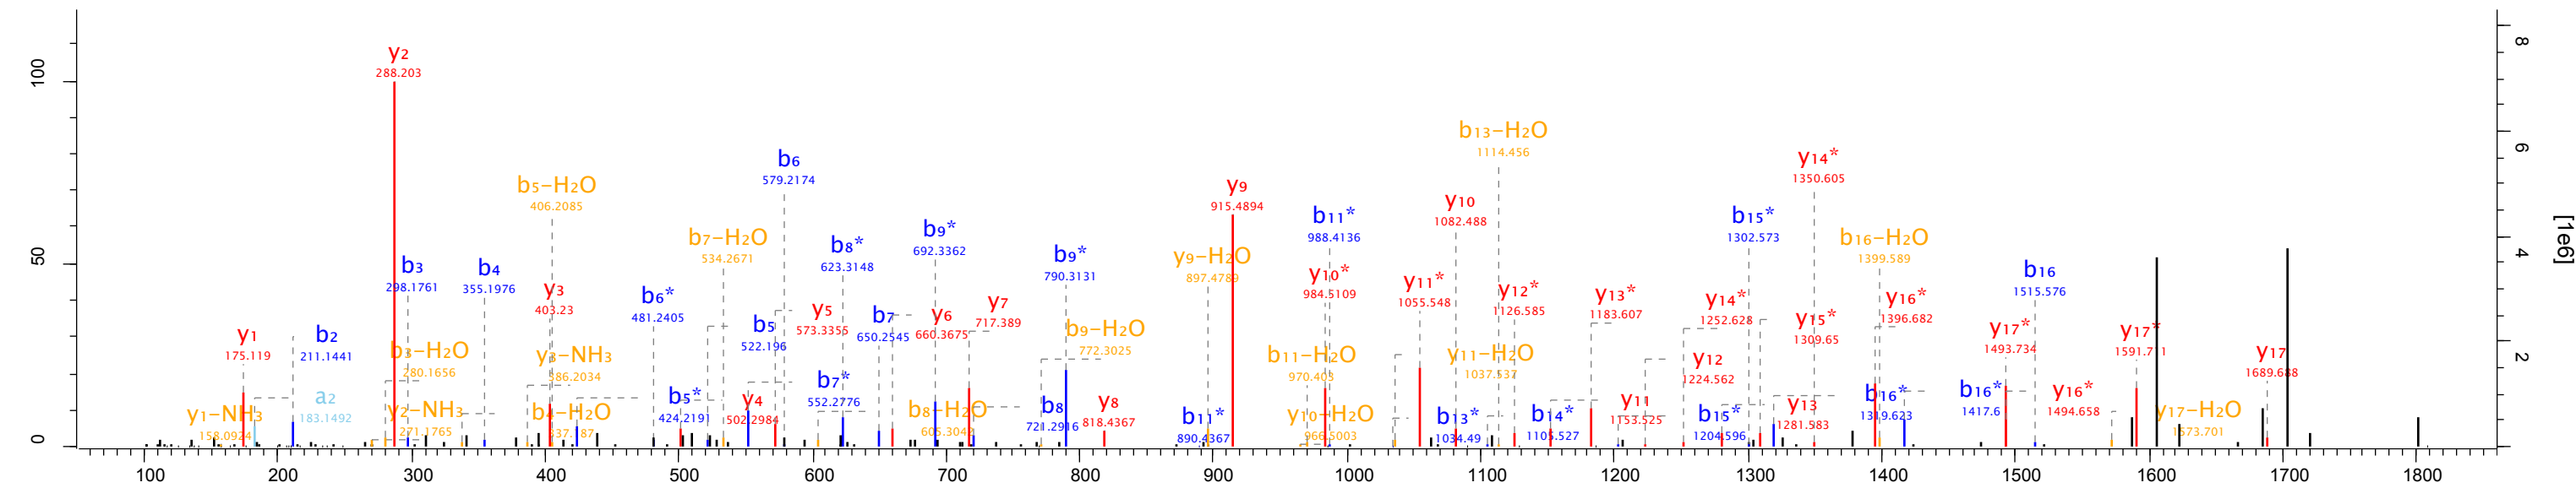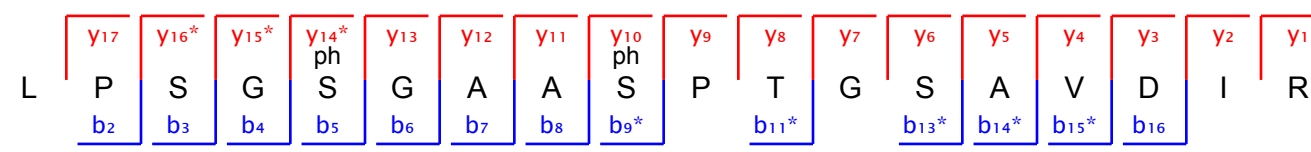

Raw file 20171215\_MaS\_33SR\_LMH\_phospho\_02 Scan 10581 Method FTMS; HCD Score 42.35 m/z 1219.5 Gene names POLR2A

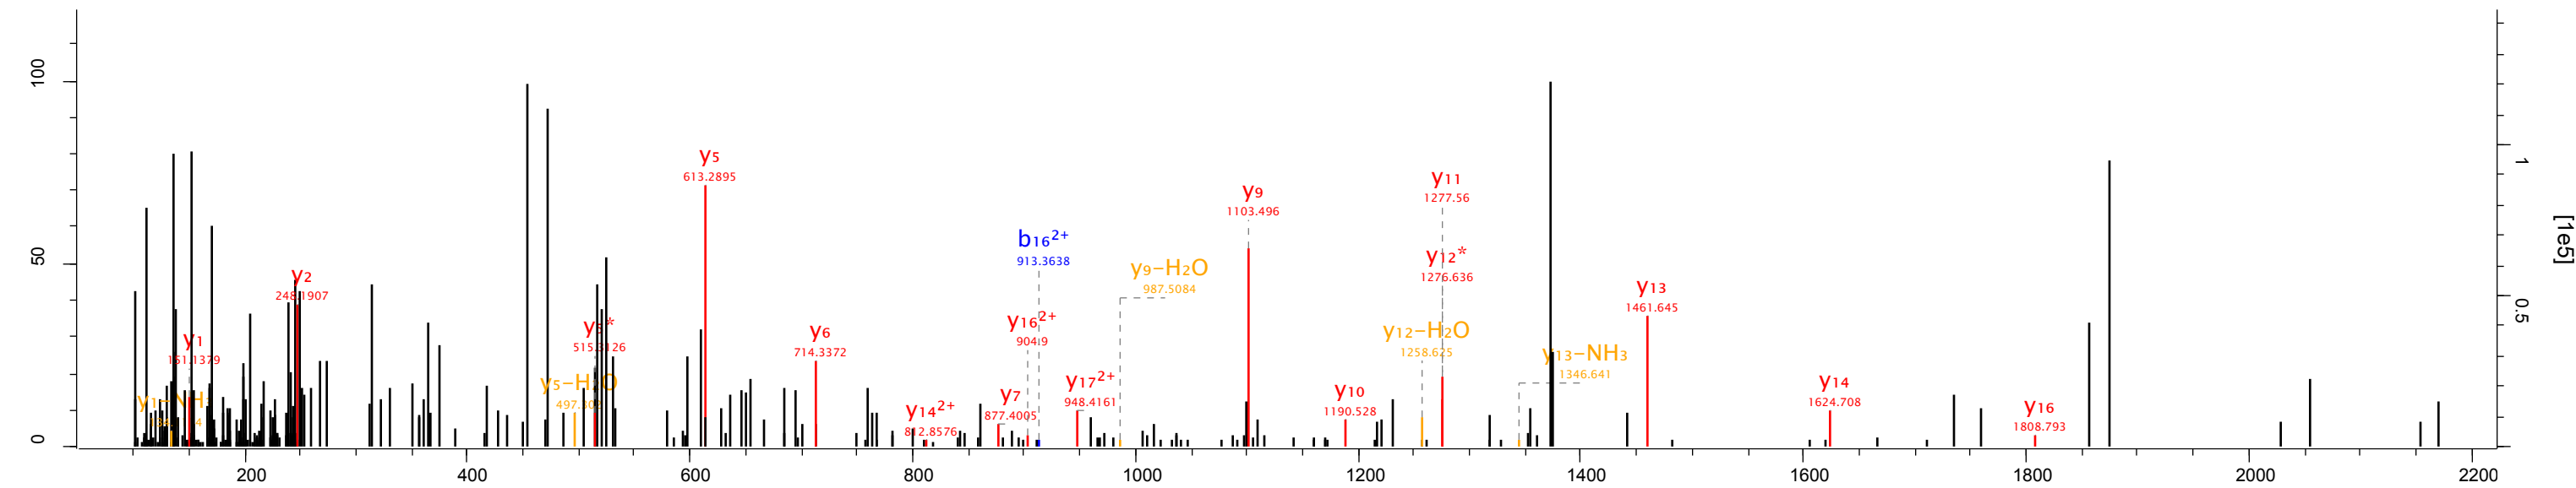

- ph Y T P T S P S Y S P S S P E Y T P ph T S P K -

┌ y17<sup>2+</sup> └ ┌ y16 └ ┌ y14 └ ┌ y13 └ ┌ y12\* └ ┌ y11 └ ┌ y10 └ ┌ y9 └  
┌ b16<sup>2+</sup> └

Raw file: 20171215\_MaS\_33SR\_LMH\_phospho\_02  
 Scan: 10661 Method: FTMS; HCD Score: 141.84 m/z: 823.35 Gene names: SOX5

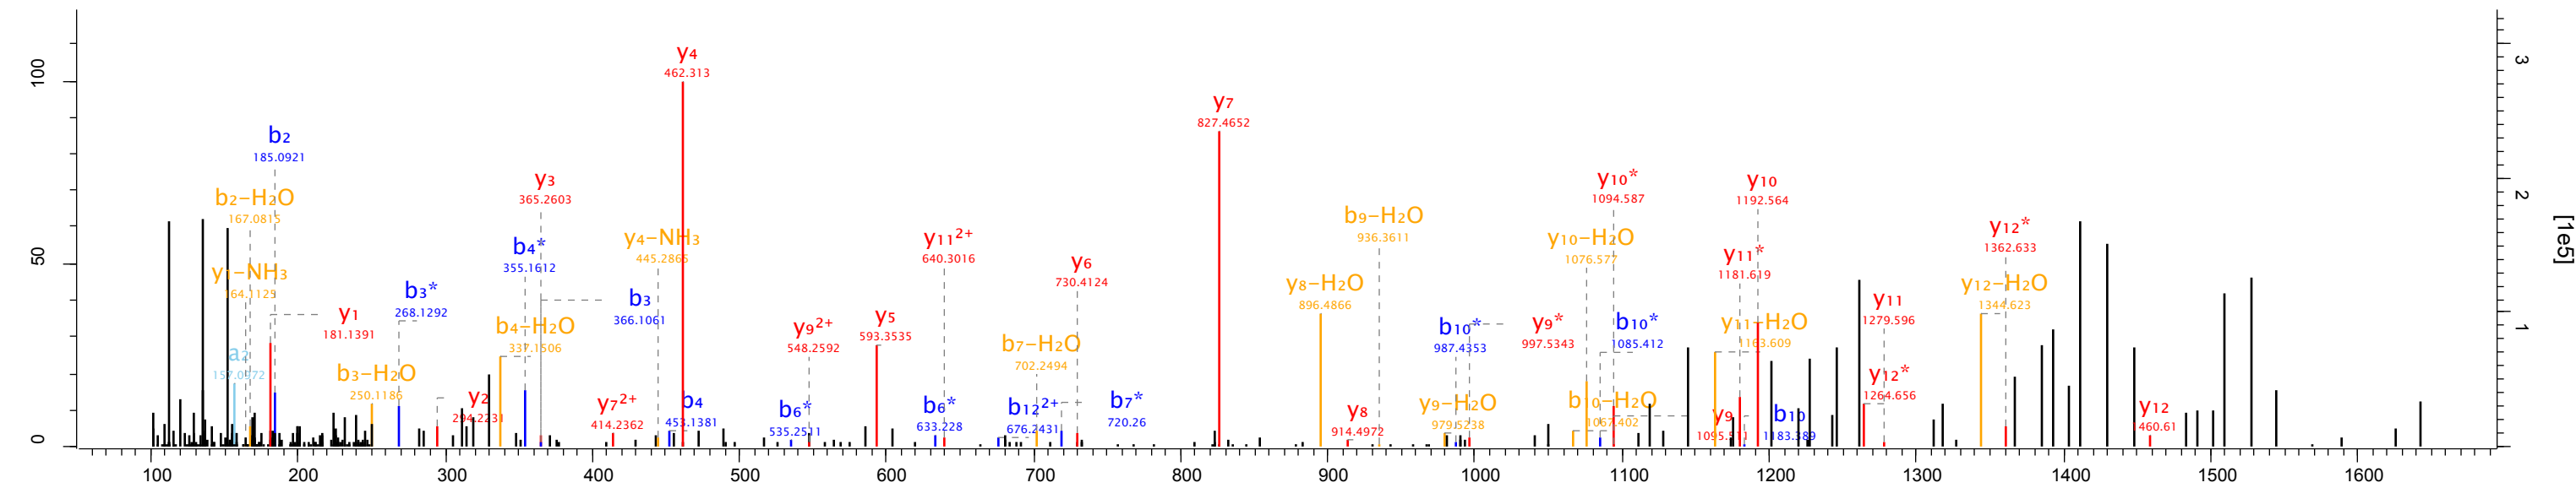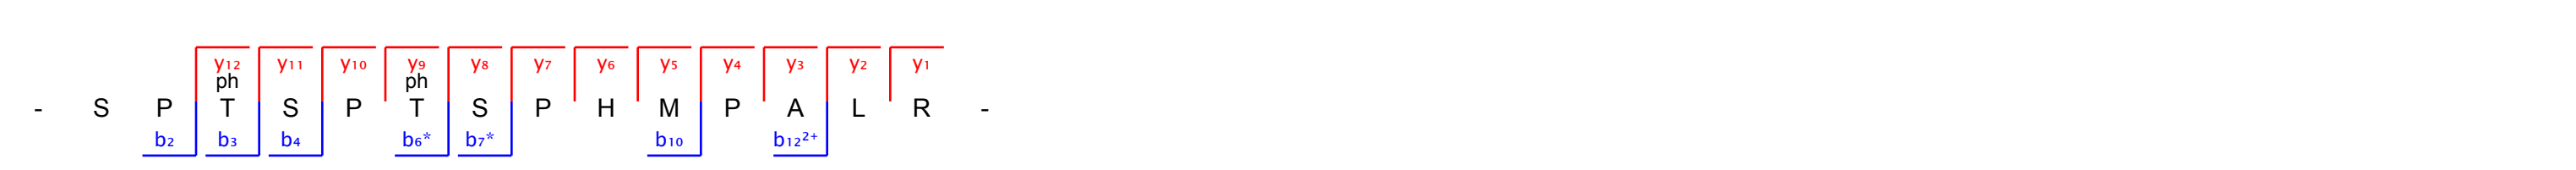

Raw file: 20171215\_MaS\_33SR\_LMH\_phospho\_02  
 Scan: 10811 Method: FTMS; HCD Score: 87.36 m/z: 617.8 Gene names: RBM15

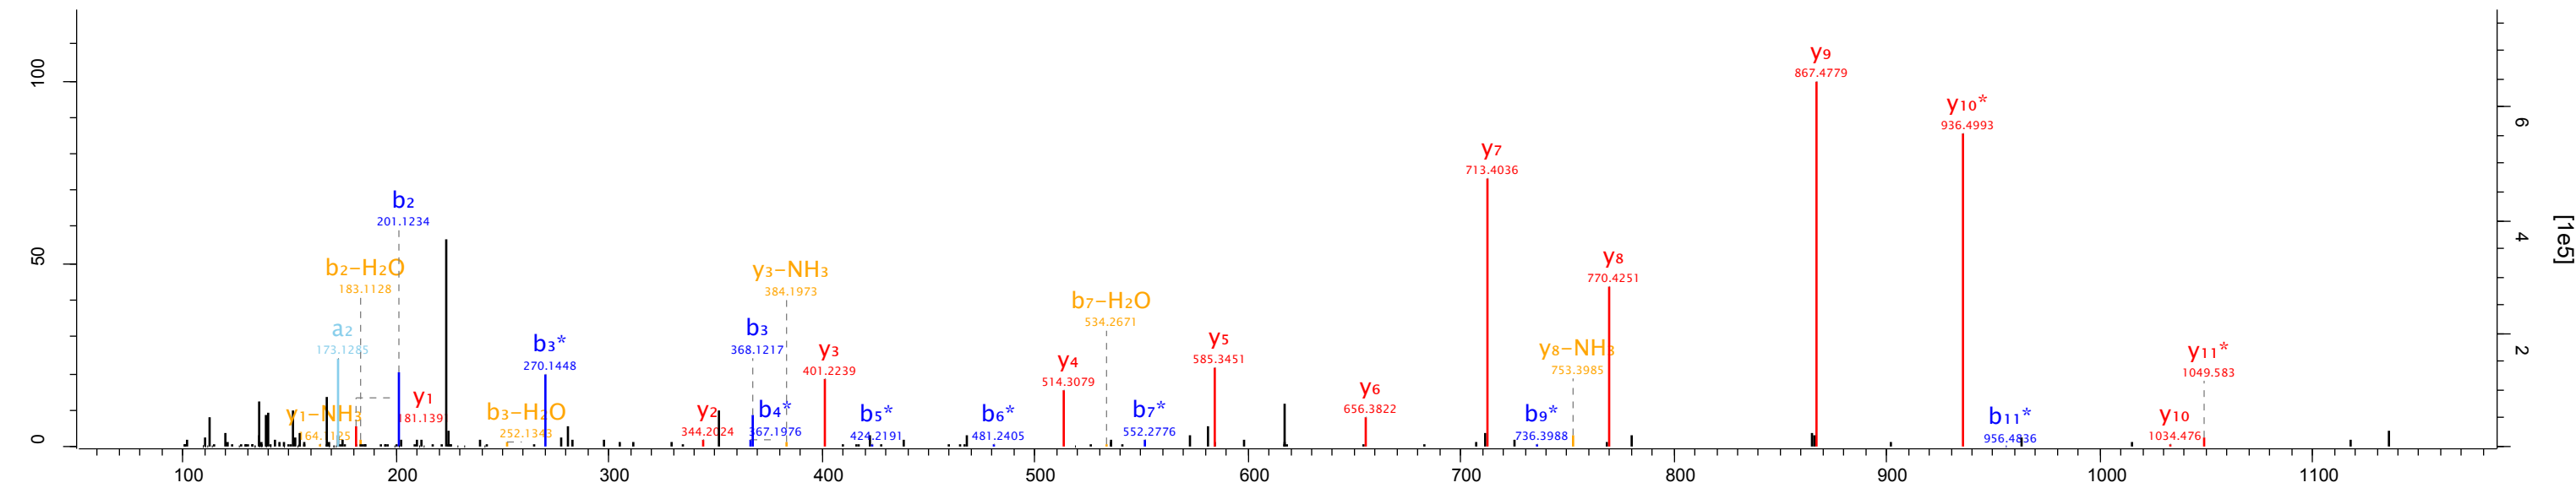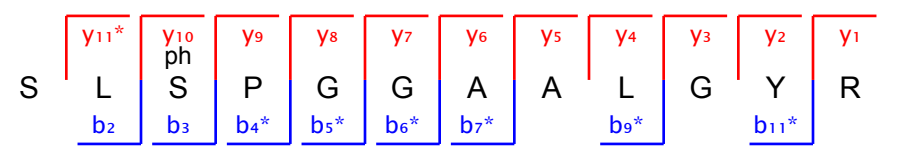



Raw file 20171215\_MaS\_33SR\_LMH\_phospho\_02 Scan 11011 Method FTMS; HCD Score 131.49 m/z 626.21 Gene names RYBP

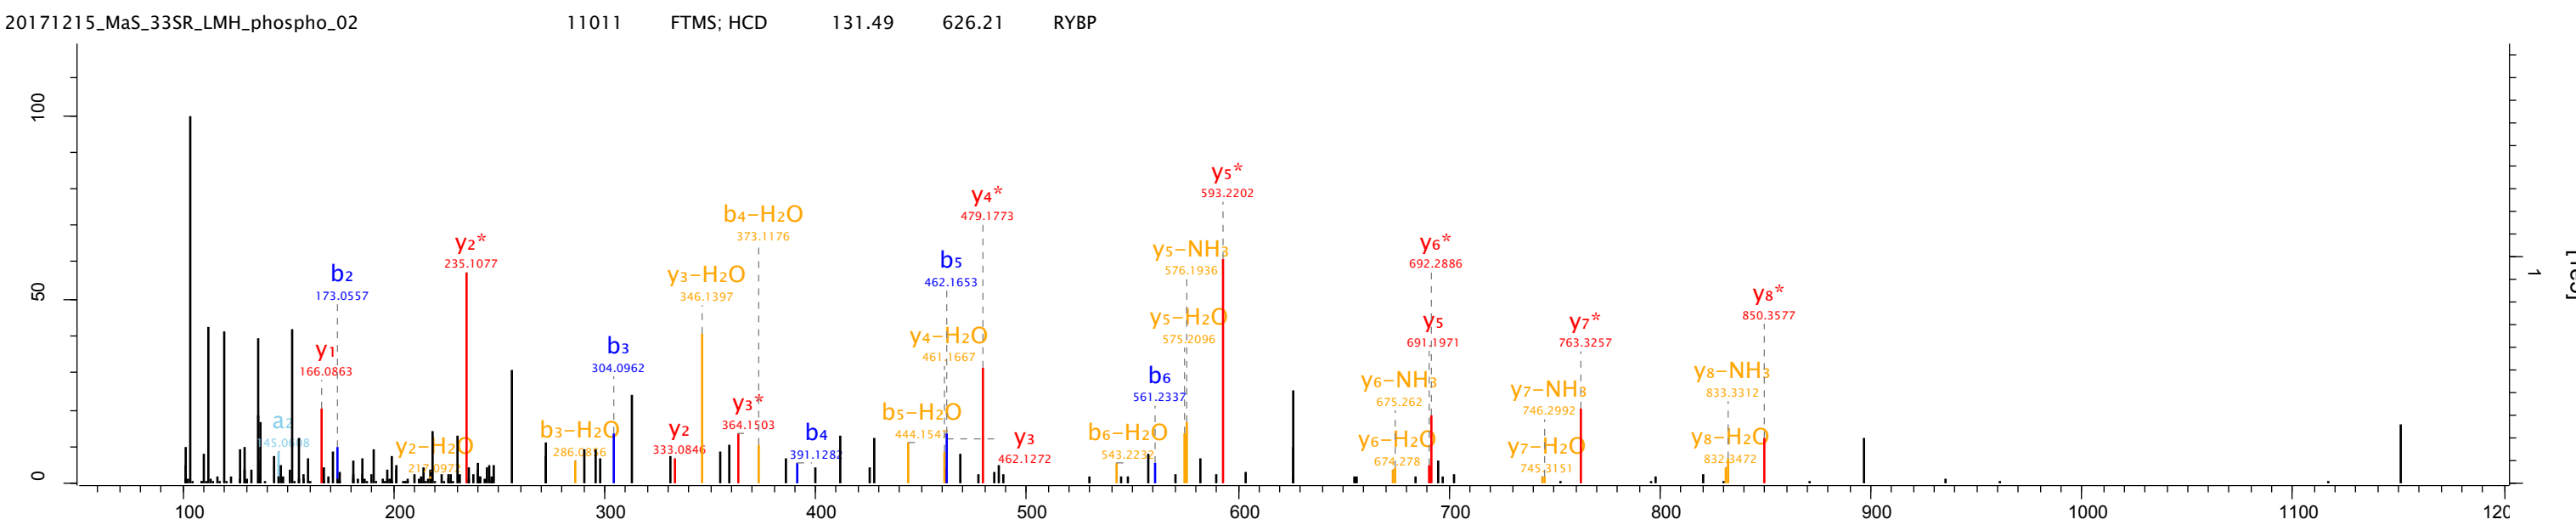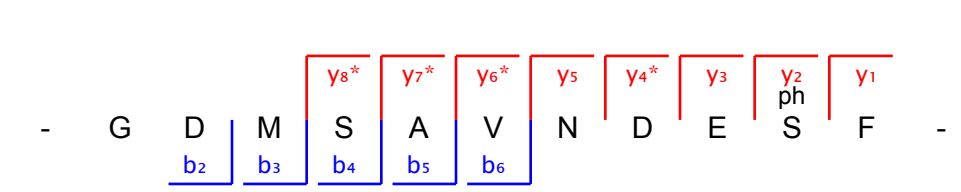

Raw file: 20171215\_MaS\_33SR\_LMH\_phospho\_02  
 Scan: 11061 Method: FTMS; HCD Score: 137.42 m/z: 1051.46 Gene names: NES

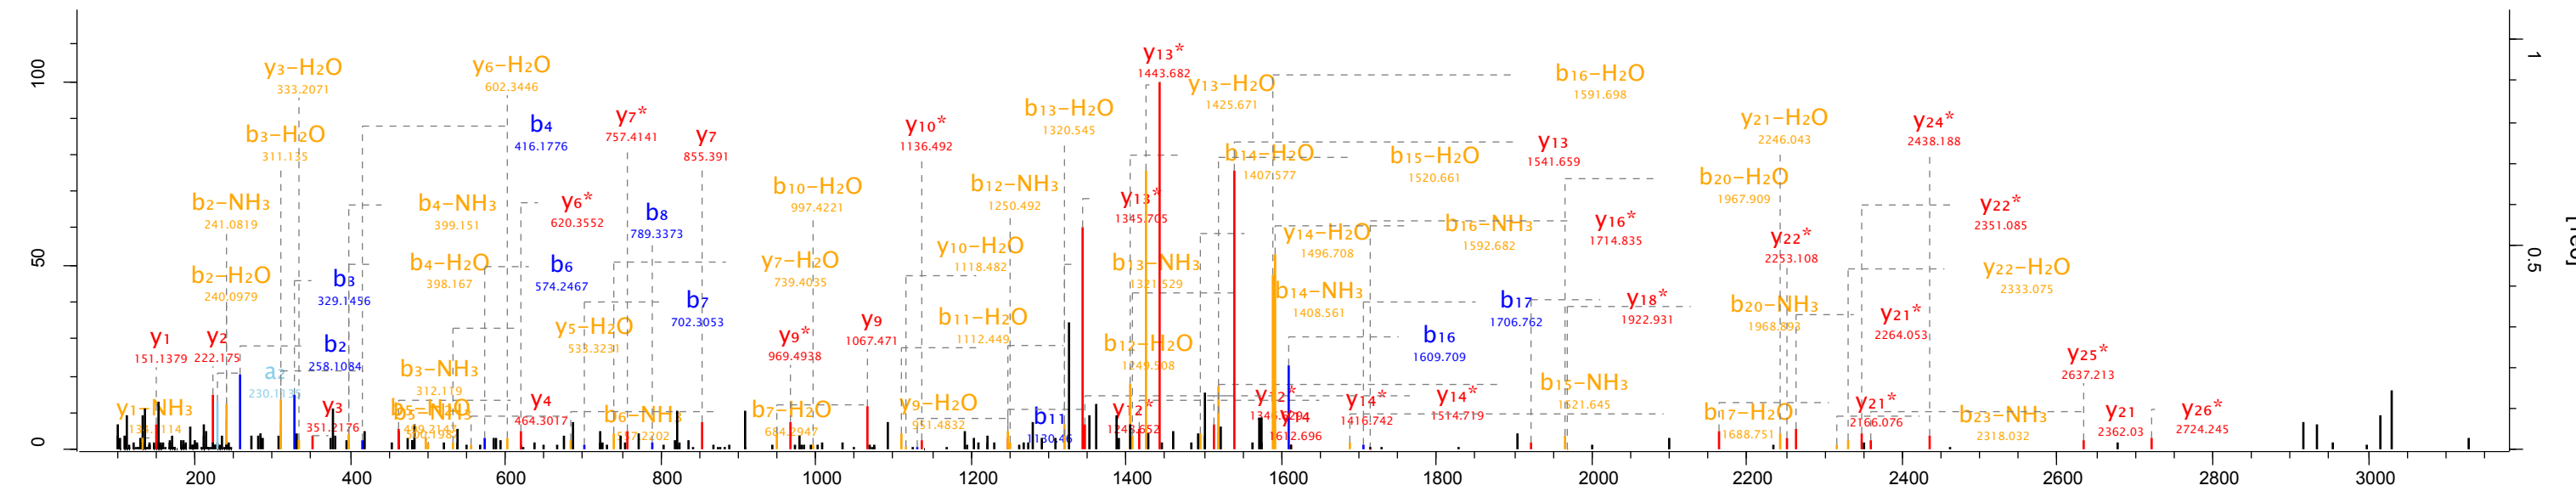

Protein sequence: - Q E A S T G Q S P E D H A S L A P P L S P D H S S L E A K -

Fragmentation sites are indicated by brackets below the sequence:

- Blue brackets (b ions): b<sub>2</sub> (E), b<sub>3</sub> (EA), b<sub>4</sub> (EAS), b<sub>6</sub> (GQ), b<sub>7</sub> (GQ), b<sub>8</sub> (GQS), b<sub>11</sub> (D), b<sub>16</sub> (A), b<sub>17</sub> (AP)
- Red brackets (y ions): y<sub>26</sub><sup>\*</sup> (S), y<sub>25</sub><sup>\*</sup> (ST), y<sub>24</sub><sup>\*</sup> (STG), y<sub>22</sub><sup>\*</sup> (STG), y<sub>21</sub> (STGQ), y<sub>18</sub><sup>\*</sup> (D), y<sub>16</sub><sup>\*</sup> (D), y<sub>14</sub> (A), y<sub>13</sub> (AP), y<sub>12</sub><sup>\*</sup> (APP), y<sub>10</sub><sup>\*</sup> (S), y<sub>9</sub> (SP), y<sub>7</sub> (D), y<sub>6</sub><sup>\*</sup> (D), y<sub>4</sub> (S), y<sub>3</sub> (SL), y<sub>2</sub> (SL), y<sub>1</sub> (SL)

Raw file 20171215\_MaS\_33SR\_LMH\_phospho\_02 Scan 11211 Method FTMS; HCD Score 173.87 m/z 810.84 Gene names LARP1

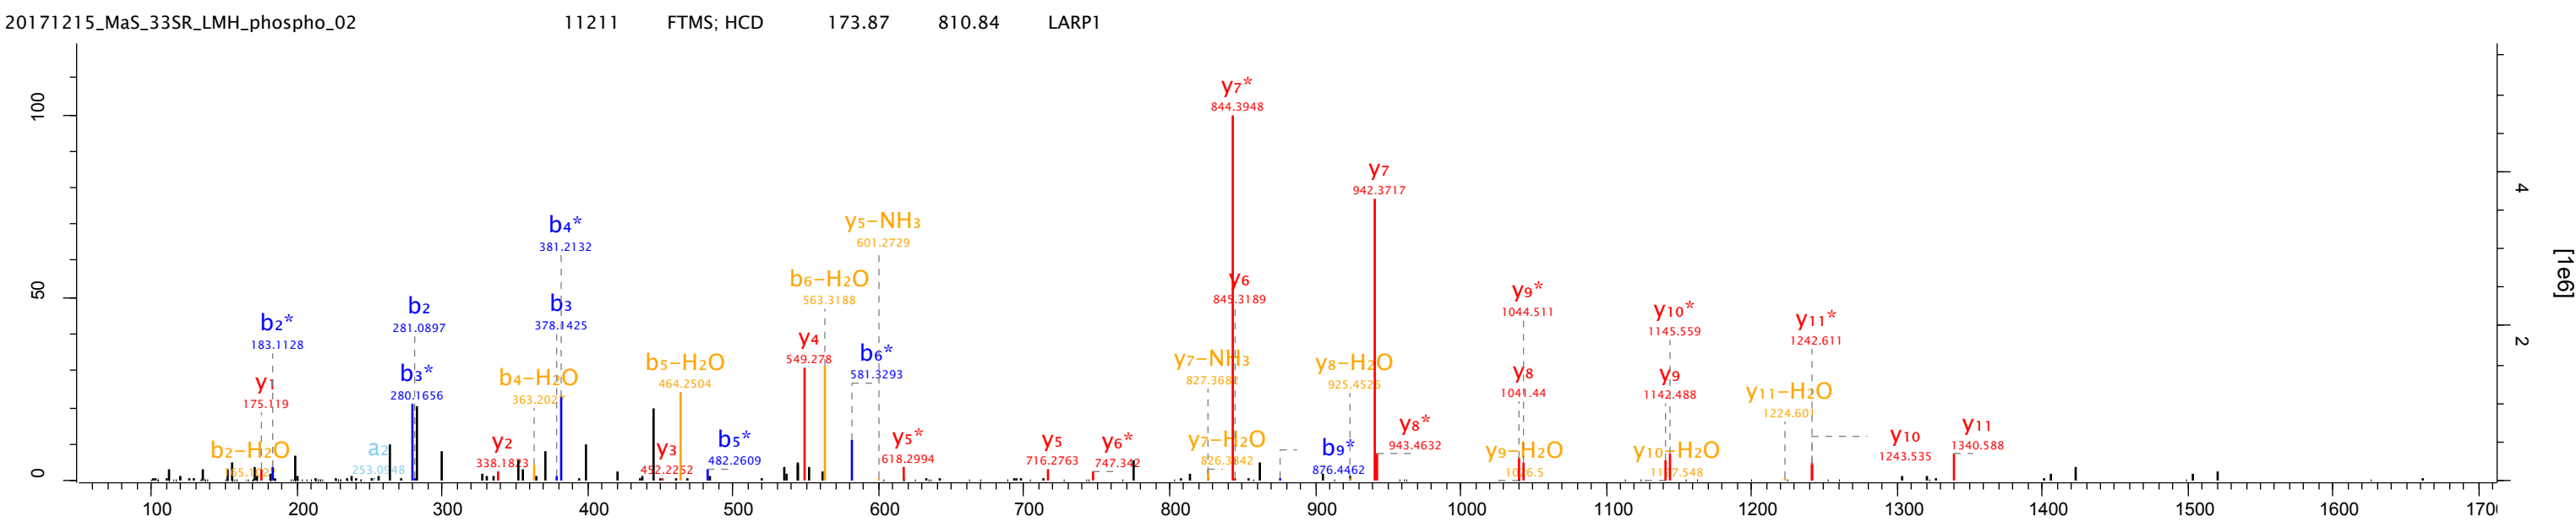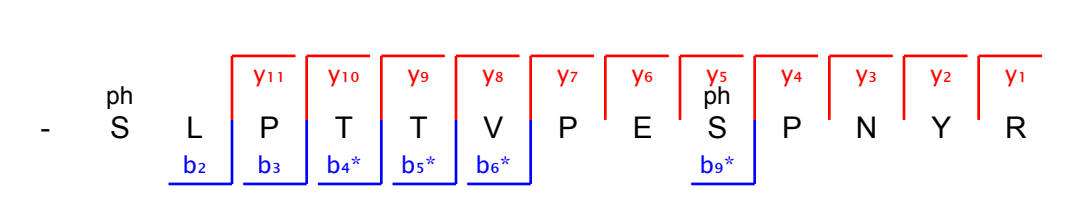

Raw file 20171215\_MaS\_33SR\_LMH\_phospho\_02 Scan 11301 Method FTMS; HCD Score 219.73 m/z 1182.47 Gene names NOP58

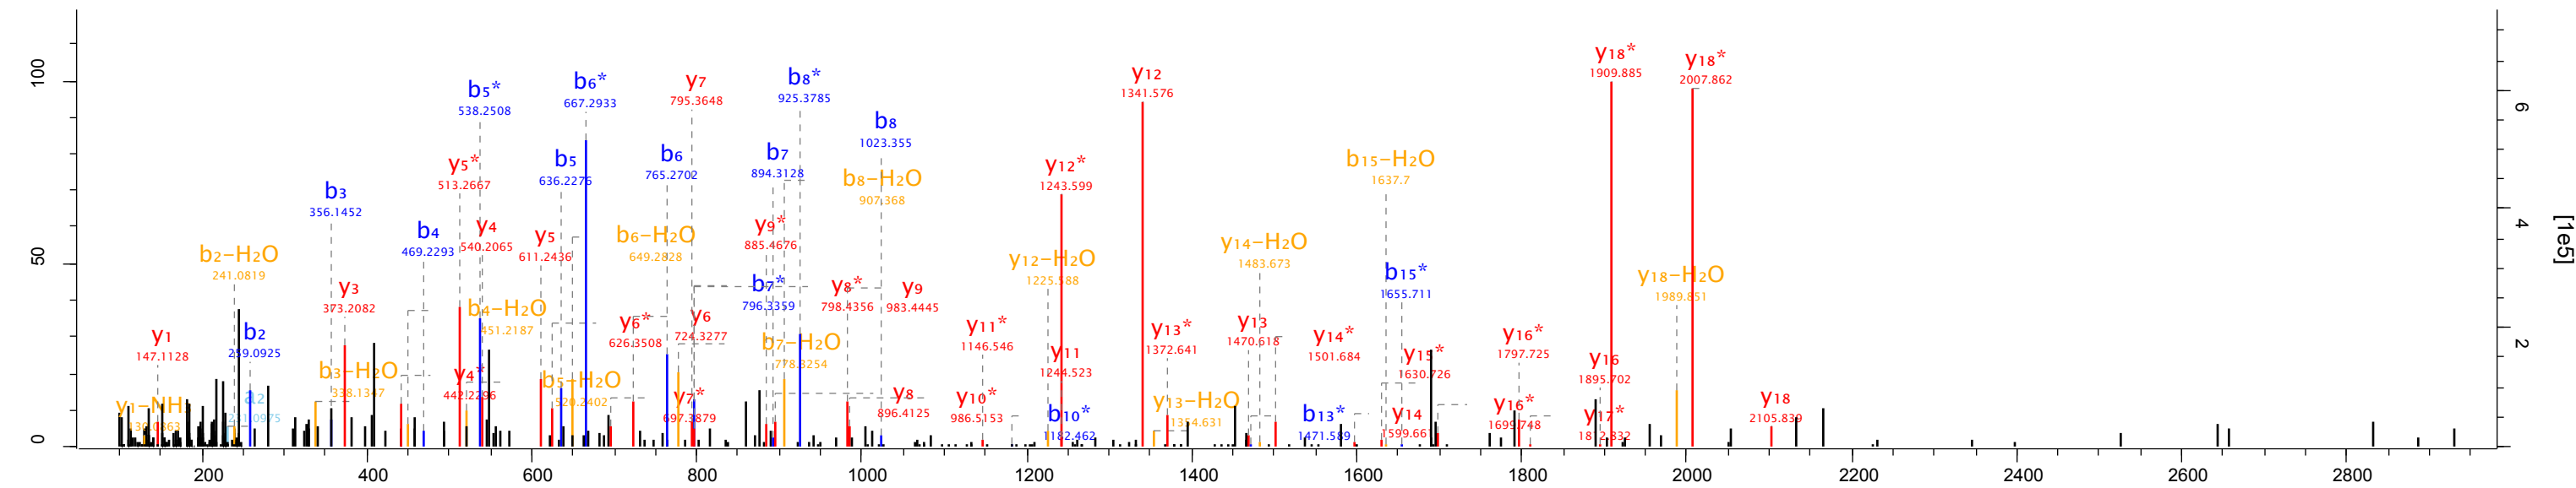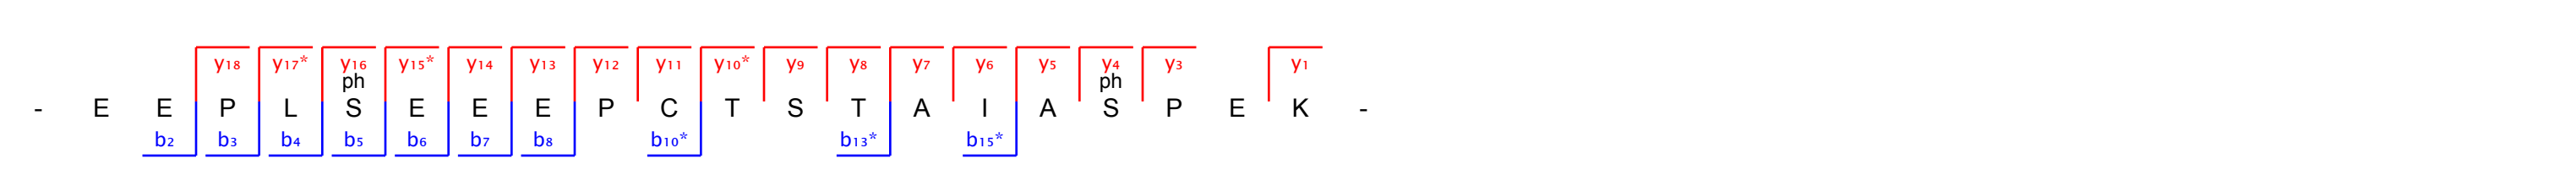

Raw file 20171215\_MaS\_33SR\_LMH\_phospho\_02 Scan 11651 Method FTMS; HCD Score 180.7 m/z 712.33 Gene names EPHA2

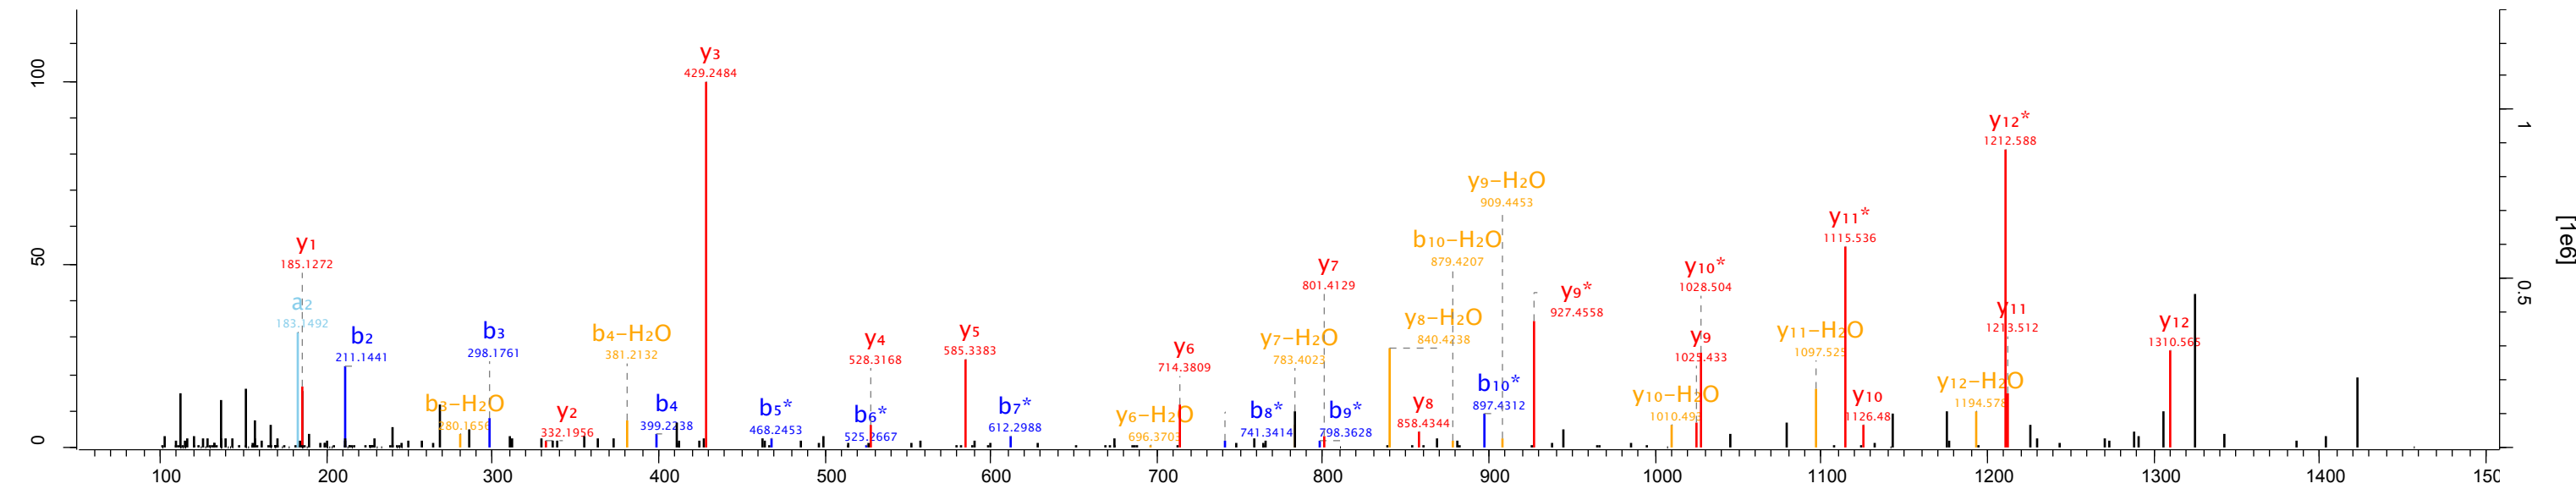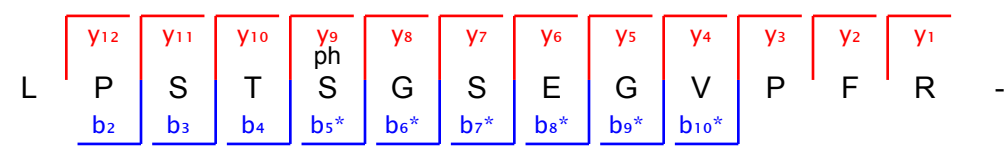

Raw file 20171215\_MaS\_33SR\_LMH\_phospho\_02 Scan 14331 Method FTMS; HCD Score 145.95 m/z 920.74 Gene names RAB11FIP1

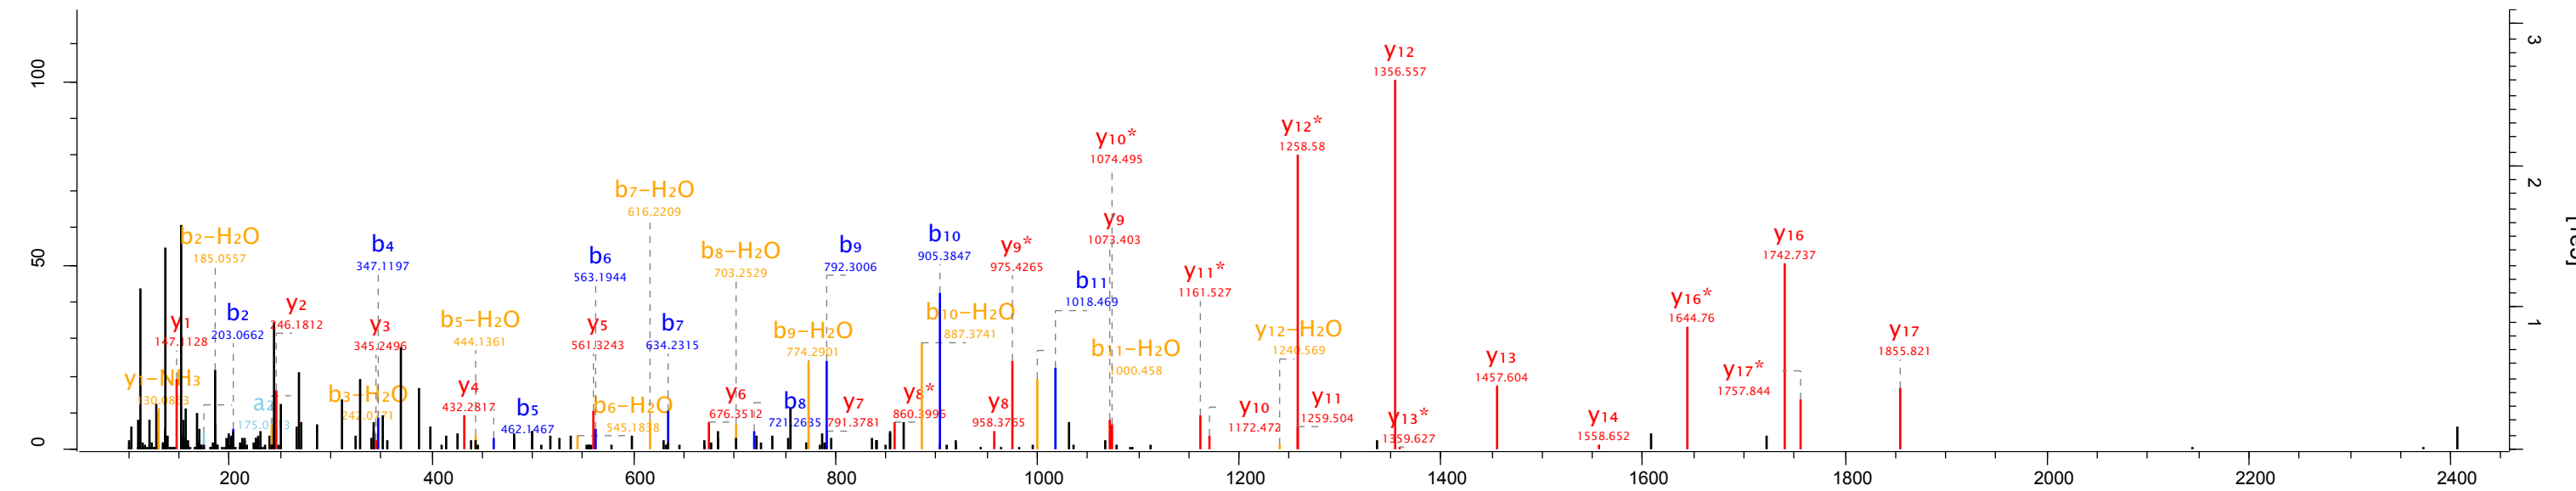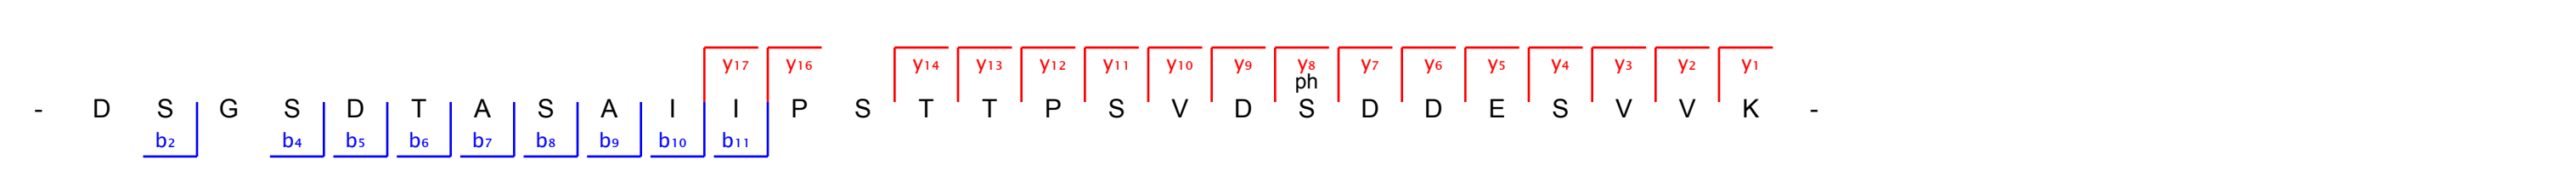

20171215\_MaS\_33SR\_LMH\_phospho\_02 15151 FTMS; HCD 104.96 669.65 TBX2

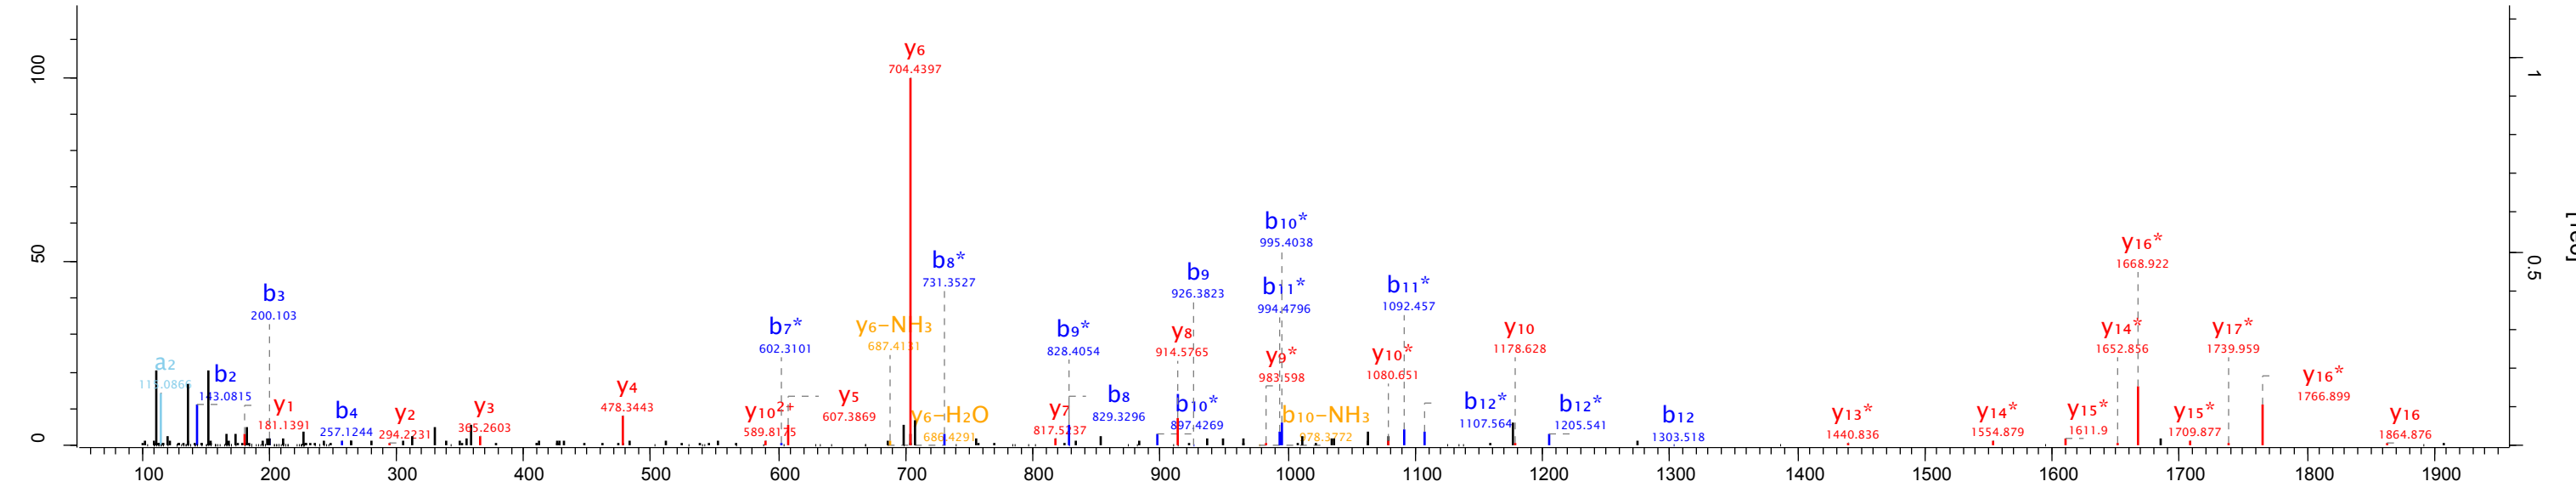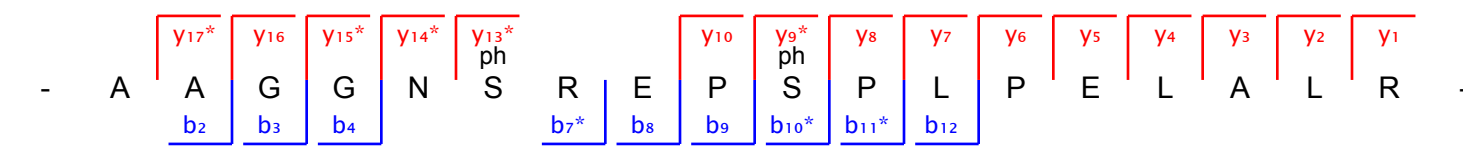

Raw file 20171215\_MaS\_33SR\_LMH\_phospho\_02 Scan 15581 Method FTMS; HCD Score 49.19 m/z 875.34 Gene names ITGB4

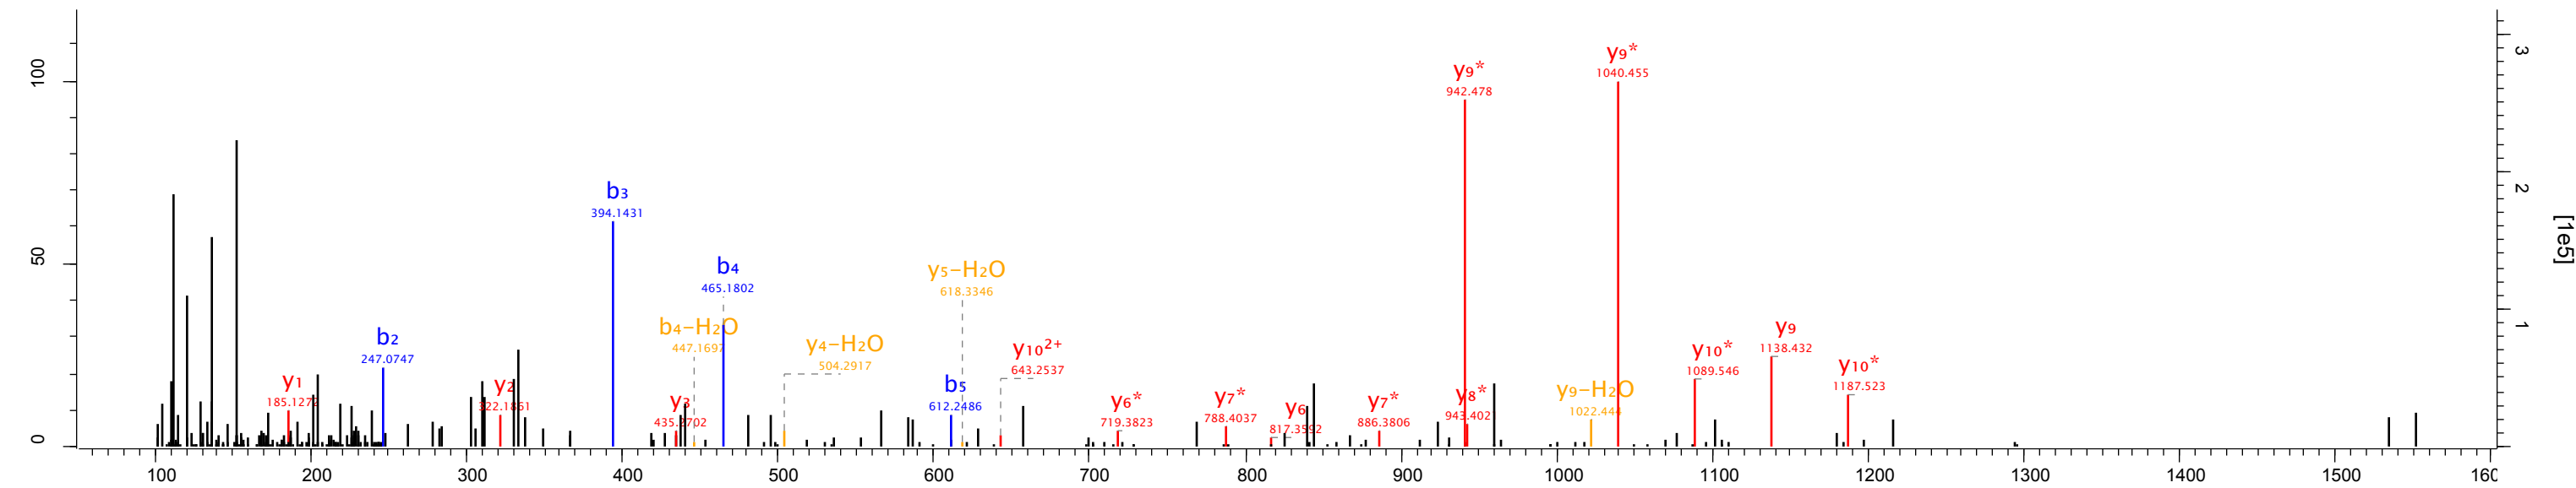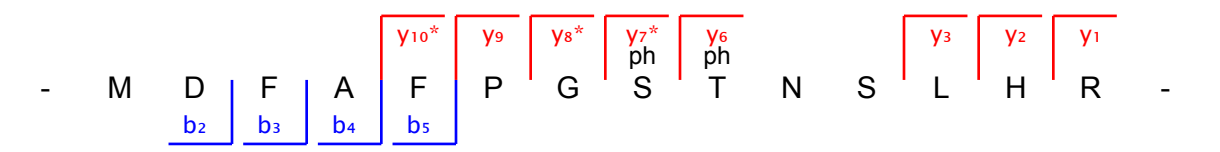



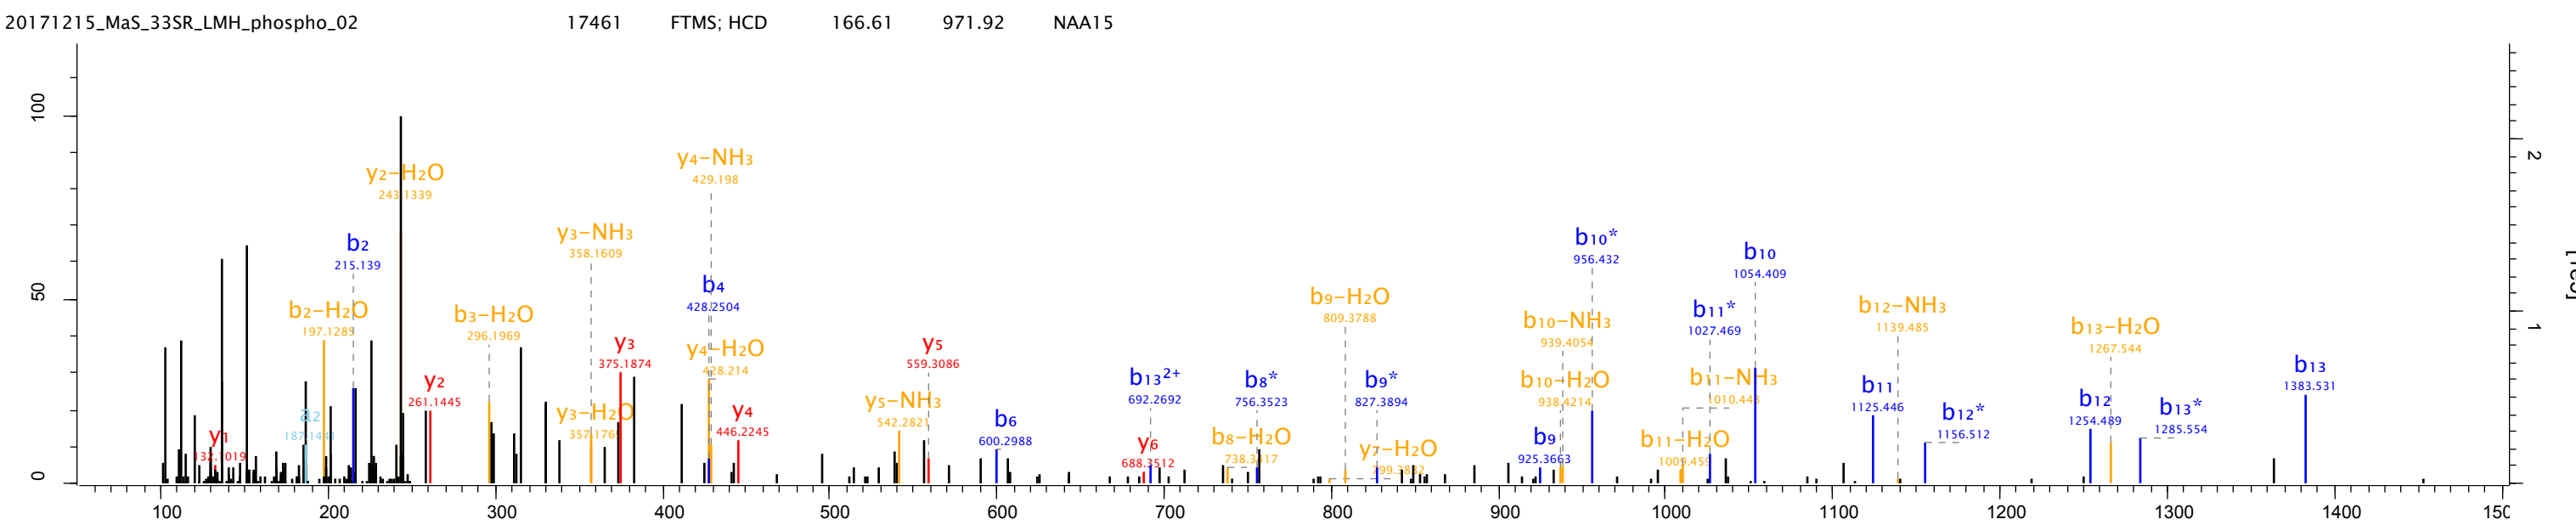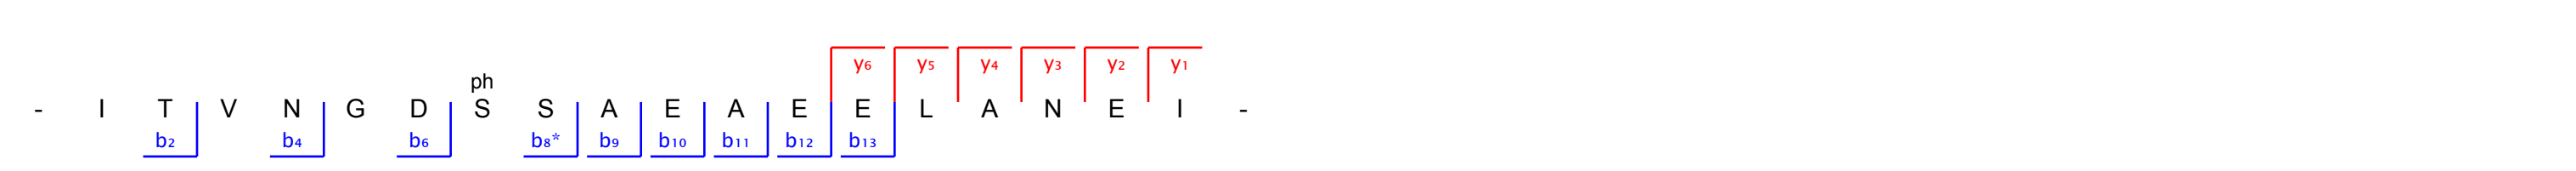

Raw file 20171215\_MaS\_33SR\_LMH\_phospho\_02 Scan 18921 Method FTMS; HCD Score 106.93 m/z 815.03 Gene names SRRM2

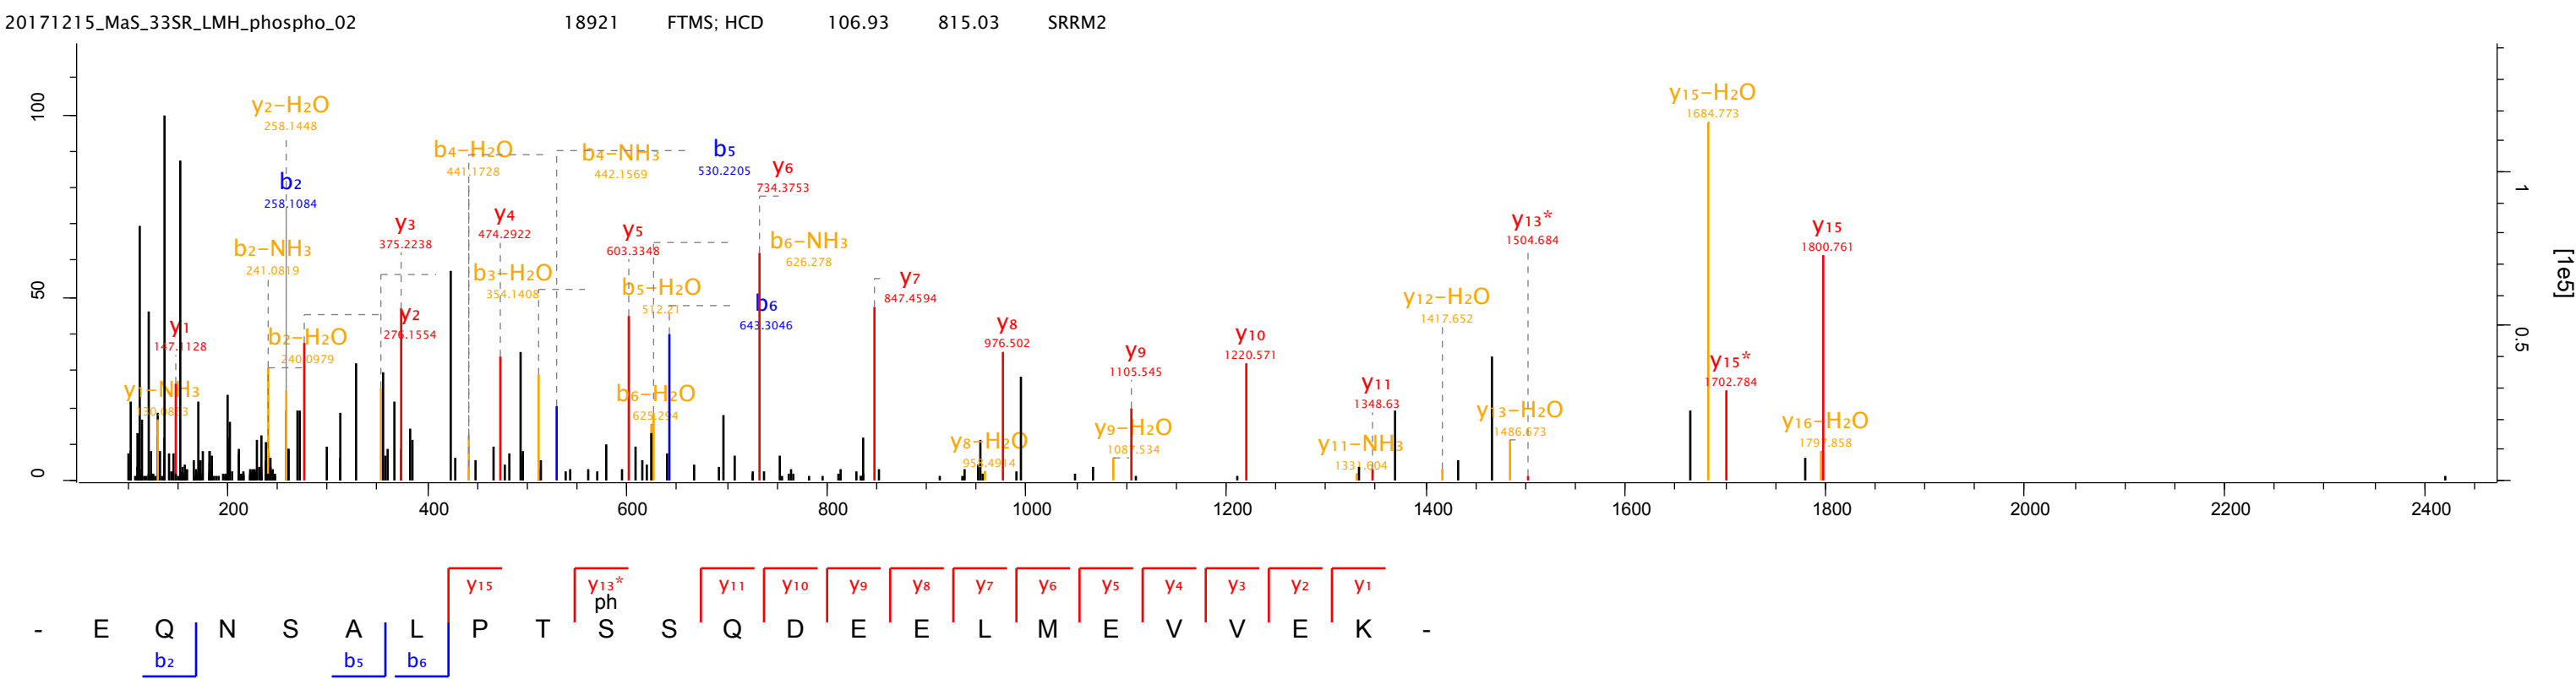

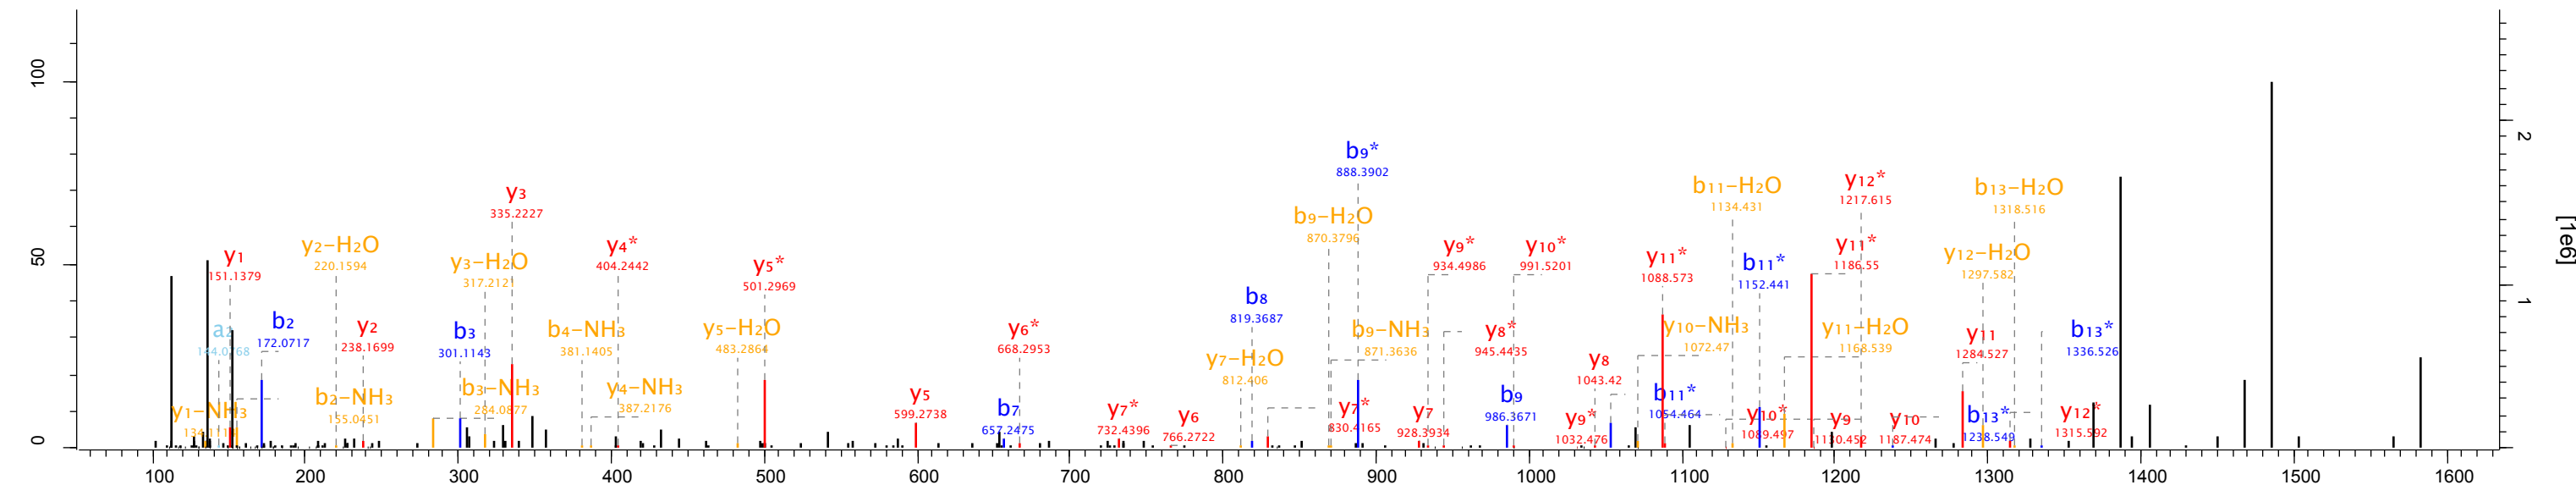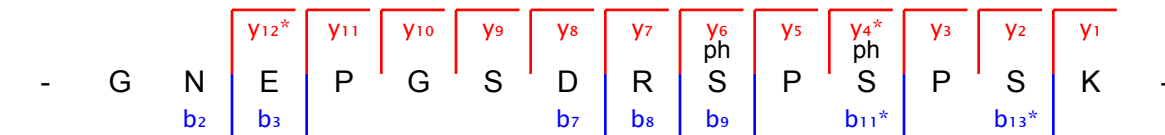

Raw file  
20171215\_MaS\_33SR\_LMH\_phospho\_02

Scan Method Score m/z Gene names  
2401 FTMS; HCD 107.46 589.26 SRRM1

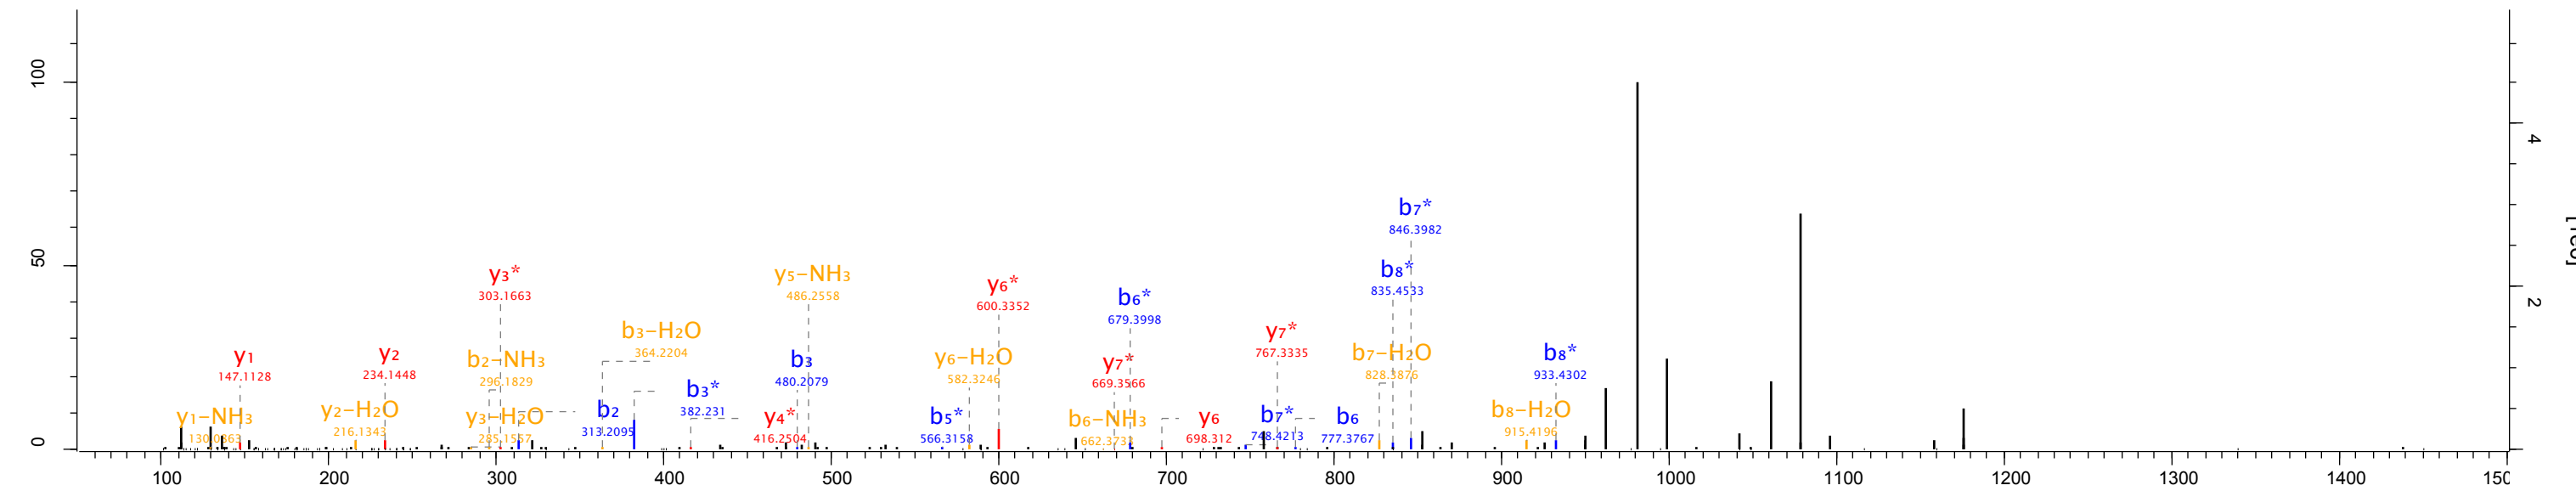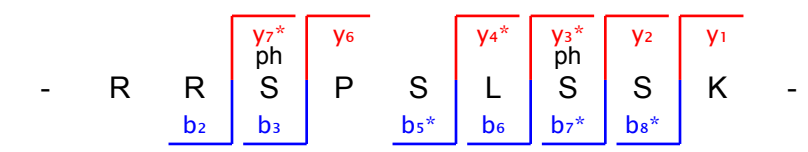

Raw file 20171215\_MaS\_33SR\_LMH\_phospho\_02 Scan 2421 Method FTMS; HCD Score 110.12 m/z 690.79 Gene names PPHLN1

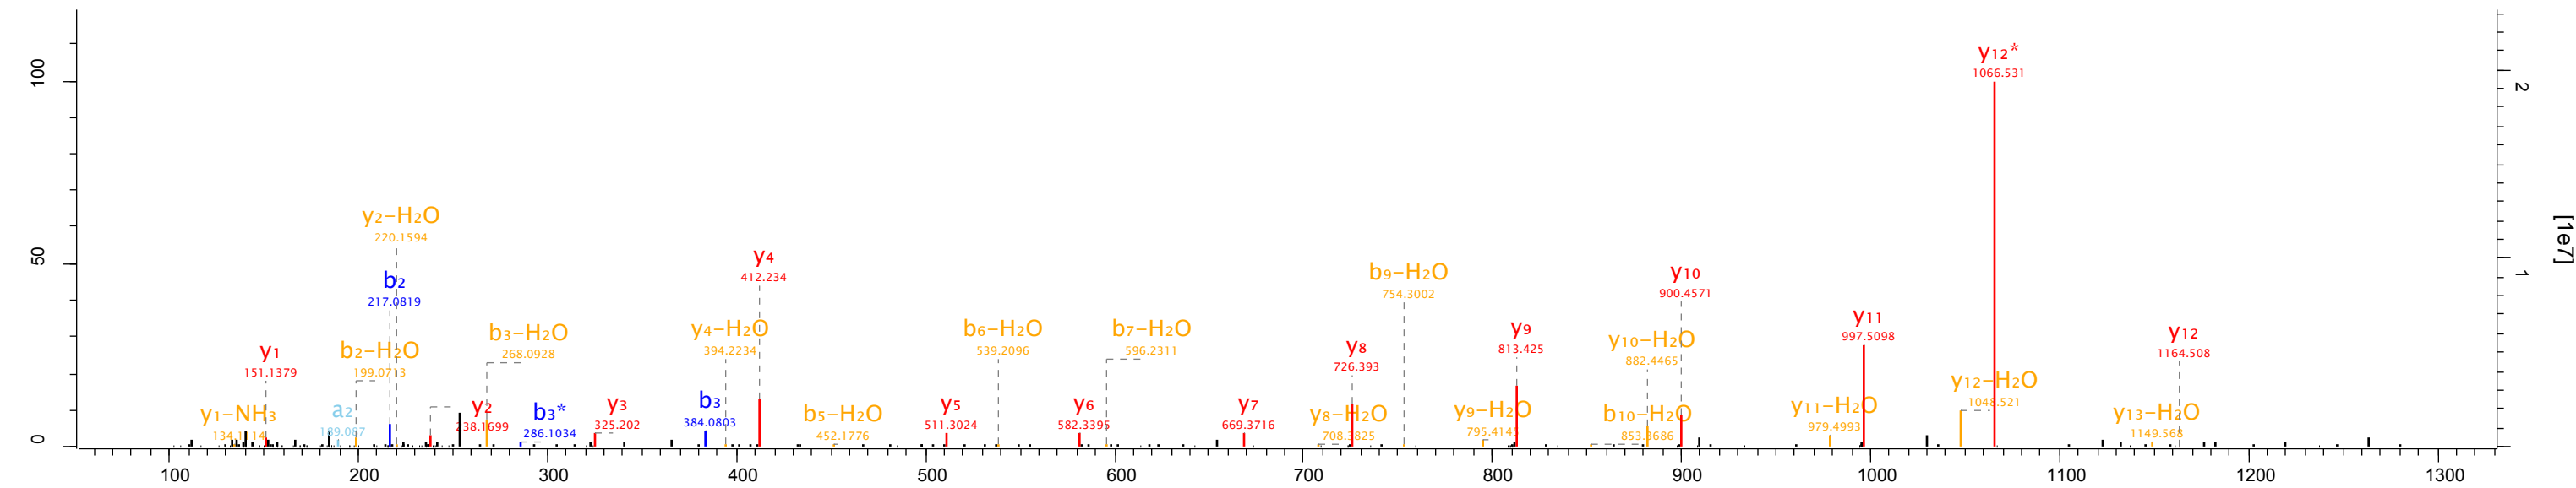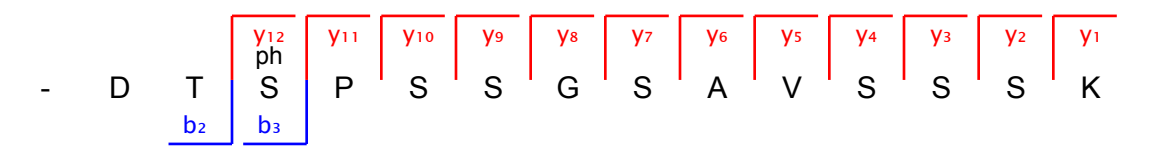

Raw file 20171215\_MaS\_33SR\_LMH\_phospho\_02 Scan 2821 Method FTMS; HCD Score 101.33 m/z 537.23 Gene names SRRM2

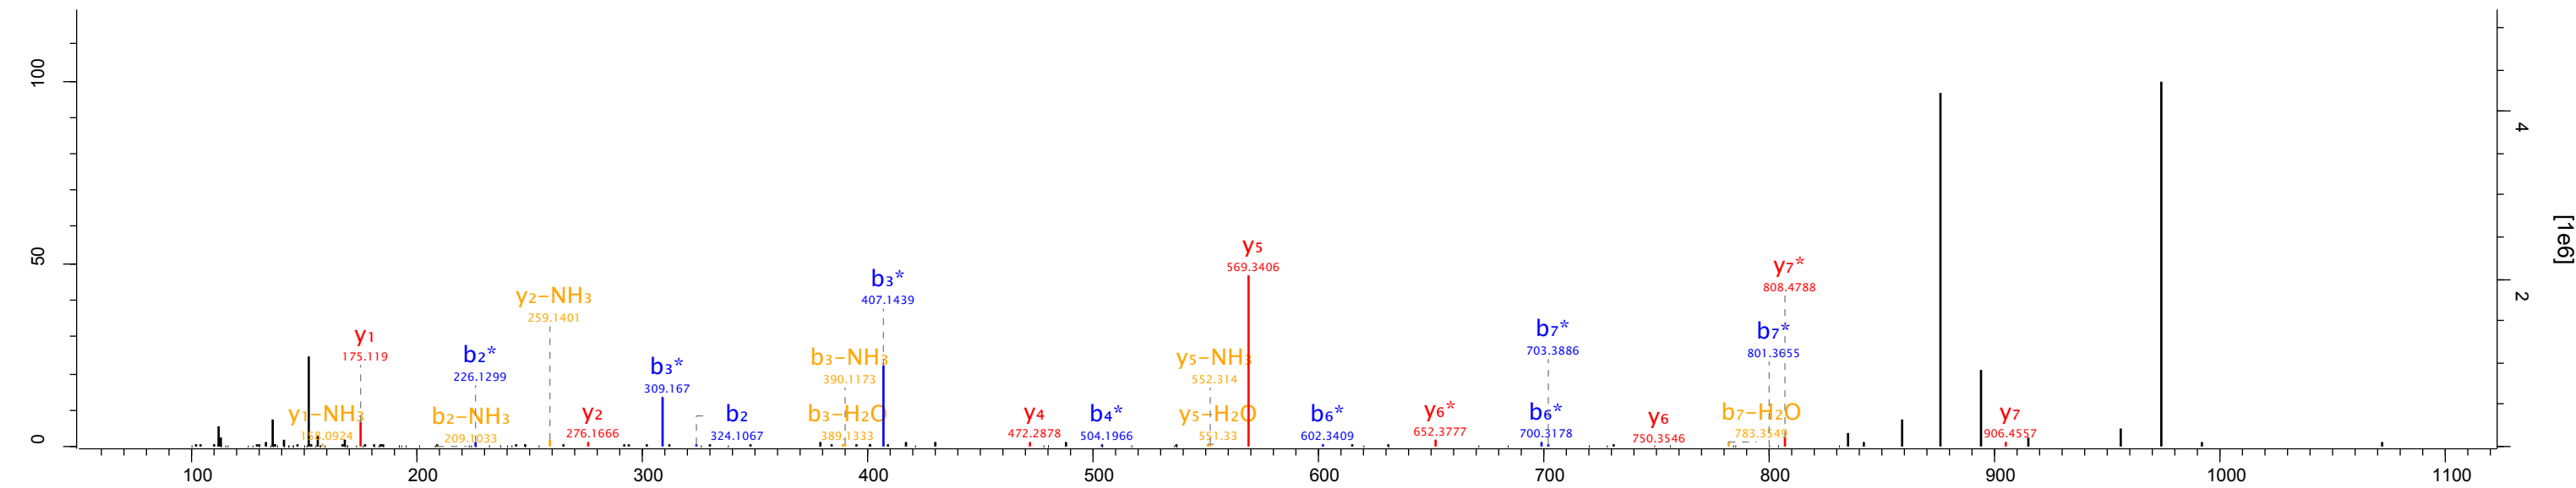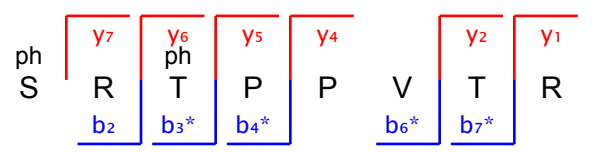

Raw file 20171215\_MaS\_33SR\_LMH\_phospho\_02 Scan 3621 Method FTMS; HCD Score 141.55 m/z 732.31 Gene names UBE3A

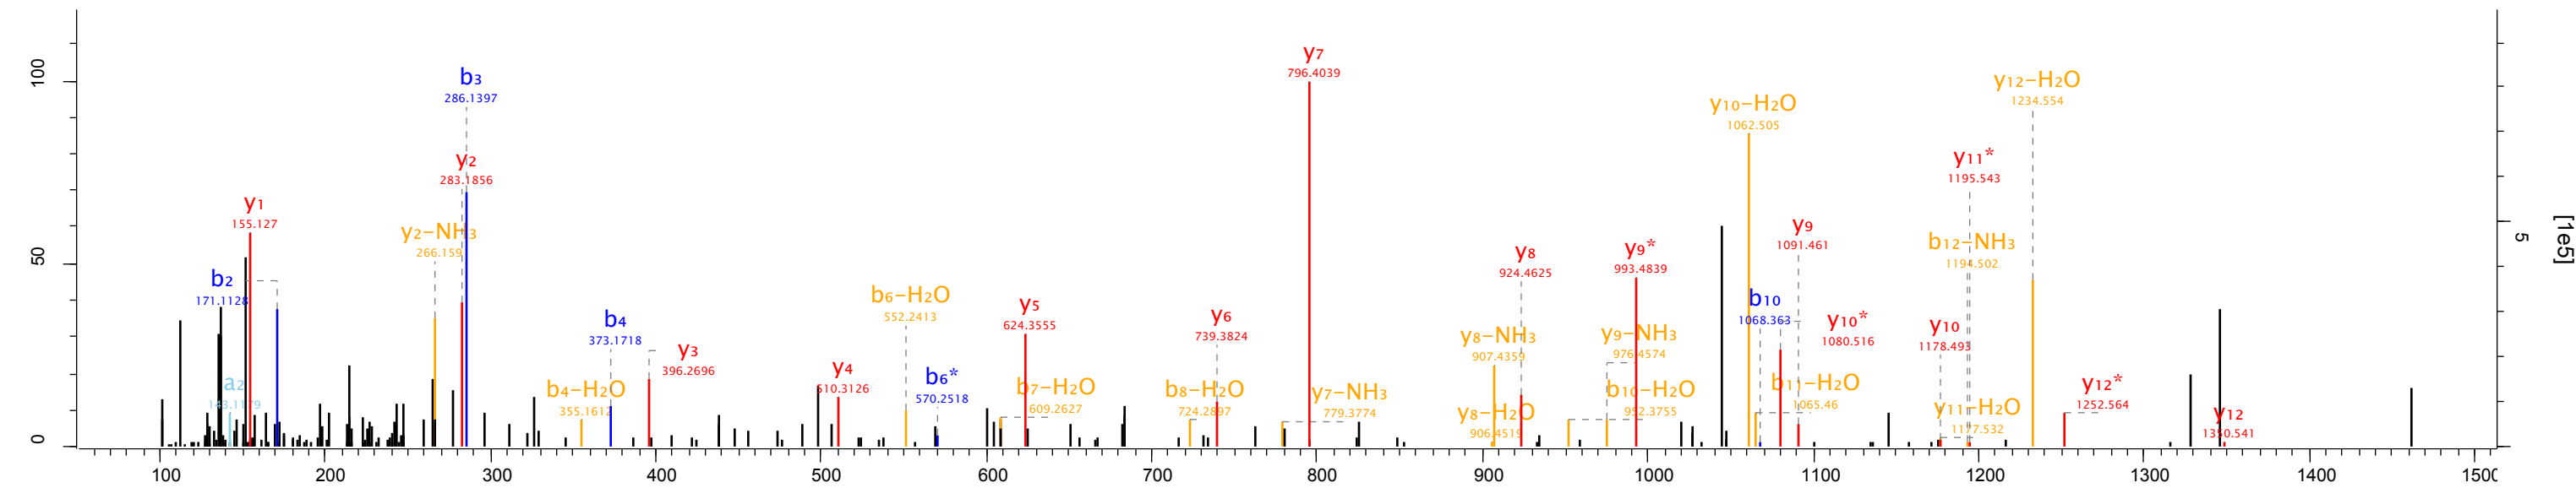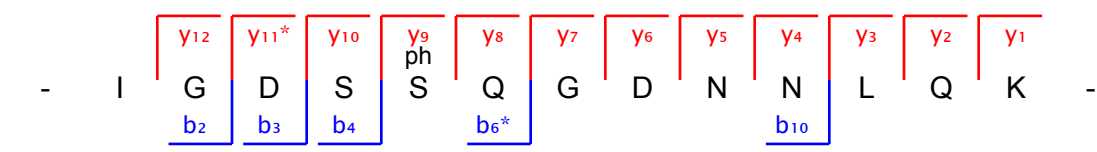

Raw file  
20171215\_MaS\_33SR\_LMH\_phospho\_02

Scan 4691 Method FTMS; HCD Score 228.46 m/z 909.82 Gene names HMGA1

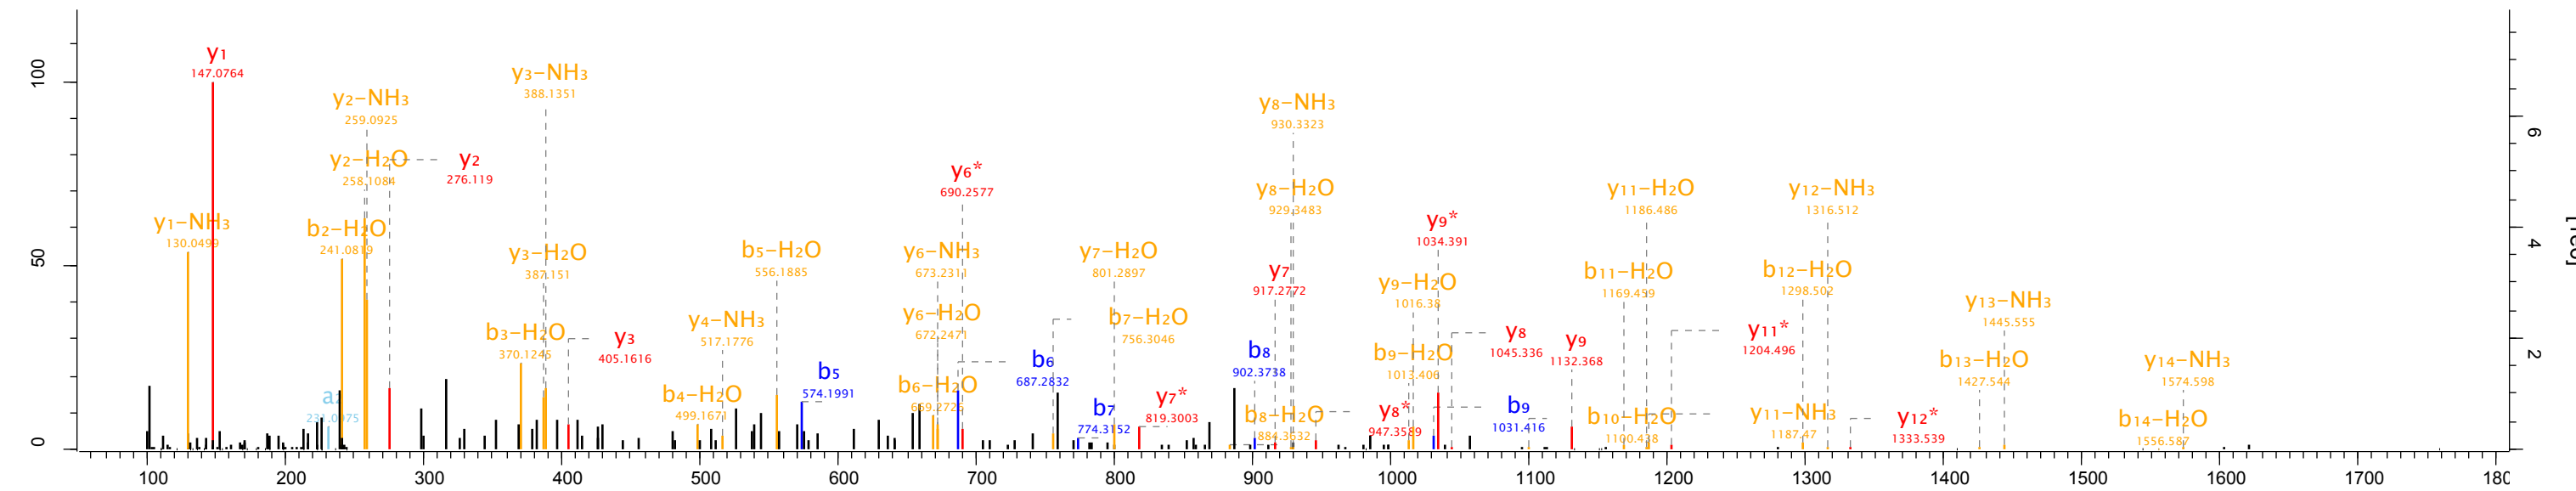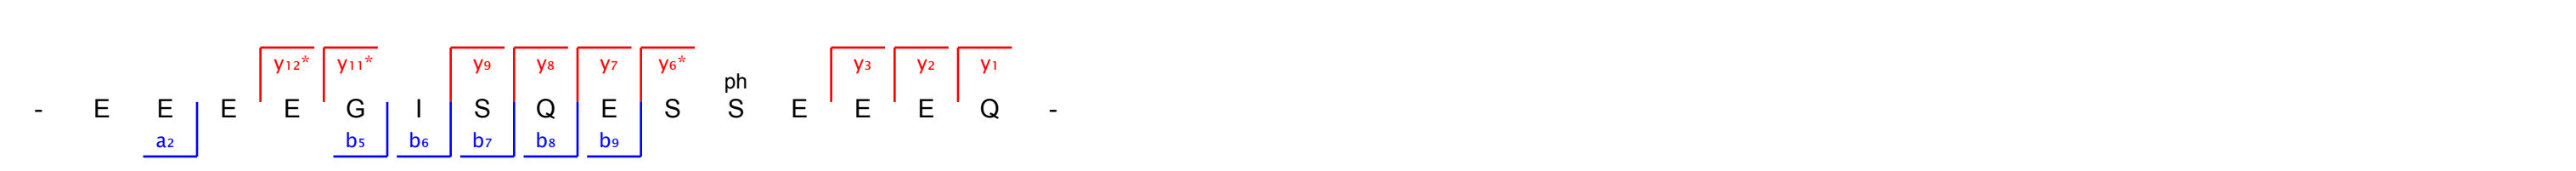



Raw file 20171215\_MaS\_33SR\_LMH\_phospho\_02 Scan 4781 Method FTMS; HCD Score 148.31 m/z 767.77 Gene names HNRNPUL2-BSC12;HNRNPUL2

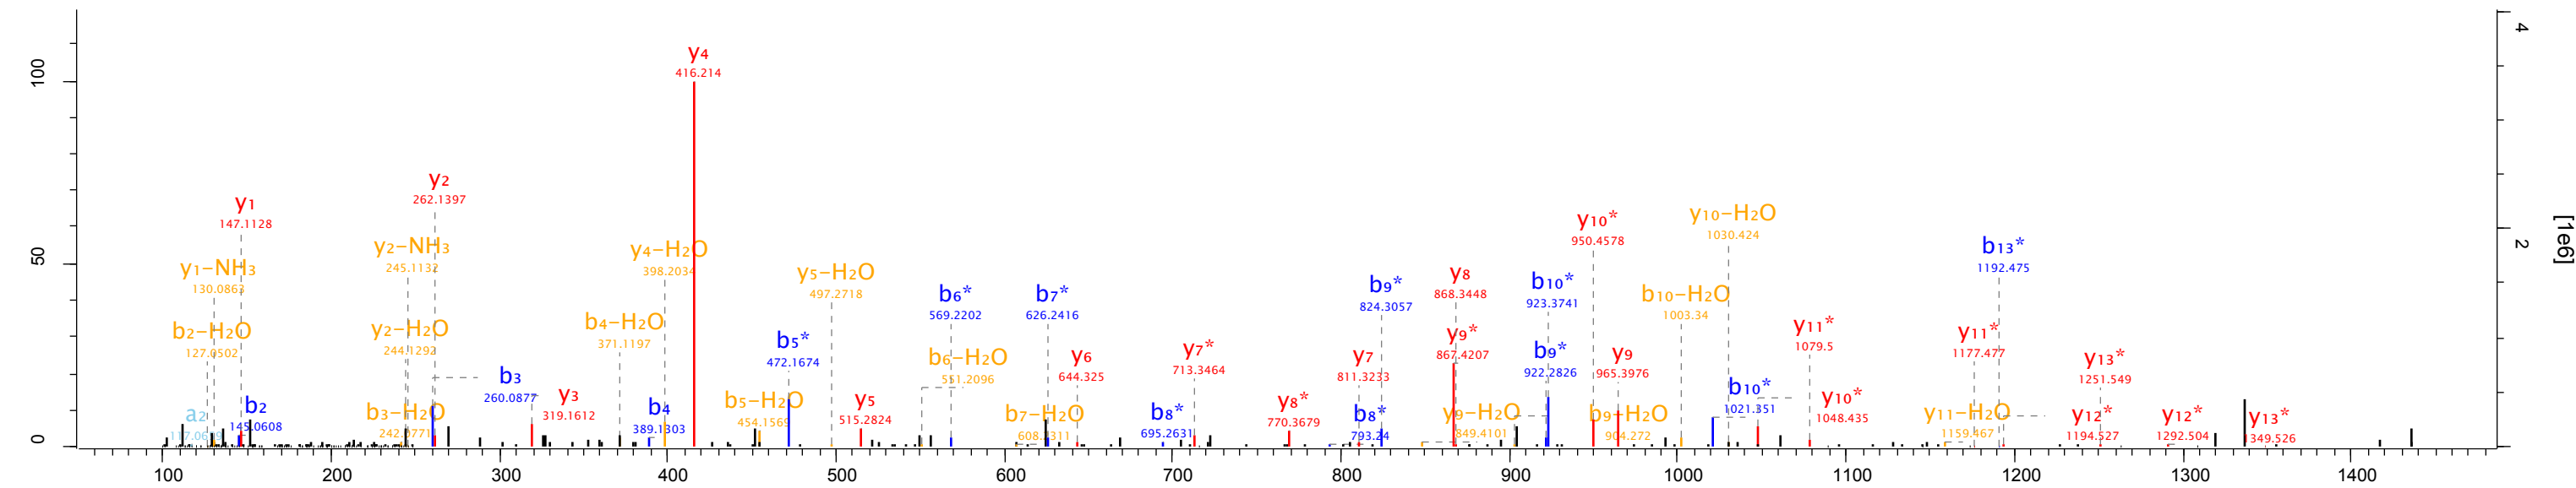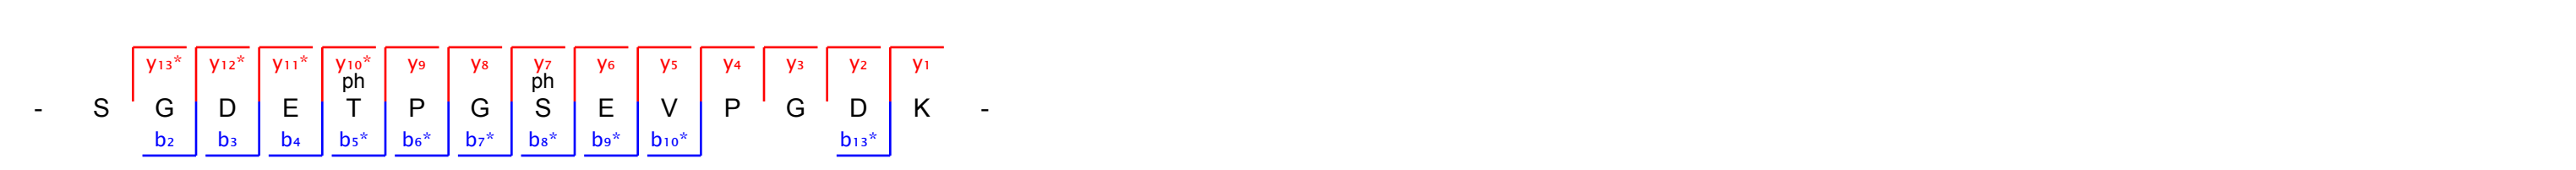

Raw file 20171215\_MaS\_33SR\_LMH\_phospho\_02 Scan 4901 Method FTMS; HCD Score 118.64 m/z 674.77 Gene names DNAJC6

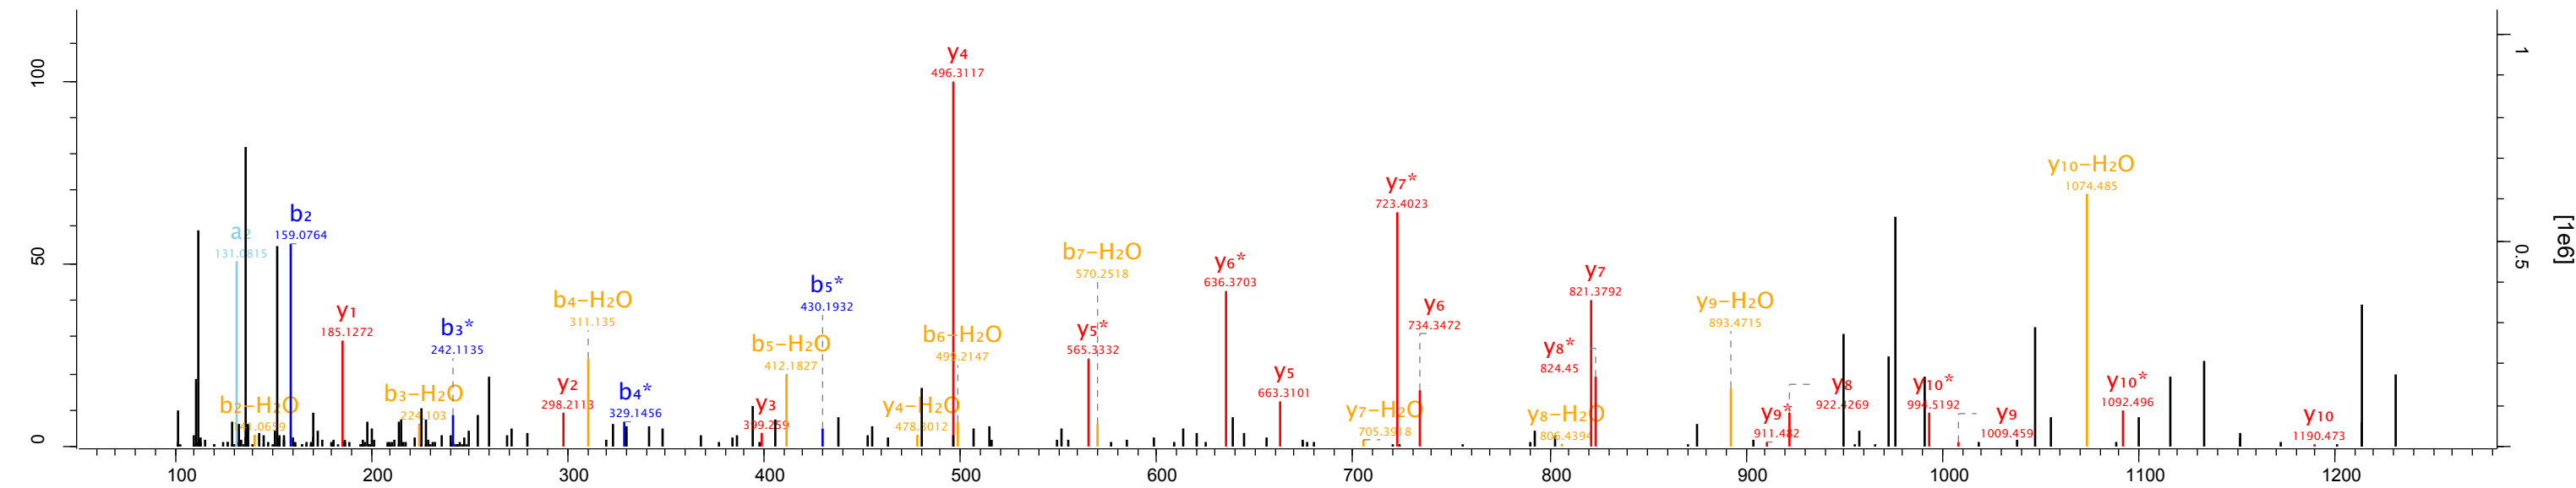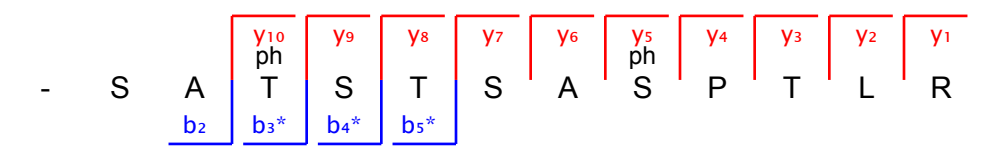

Raw file 20171215\_MaS\_33SR\_LMH\_phospho\_02 Scan 5221 Method FTMS; HCD Score 126.16 m/z 630.29 Gene names NUMA1

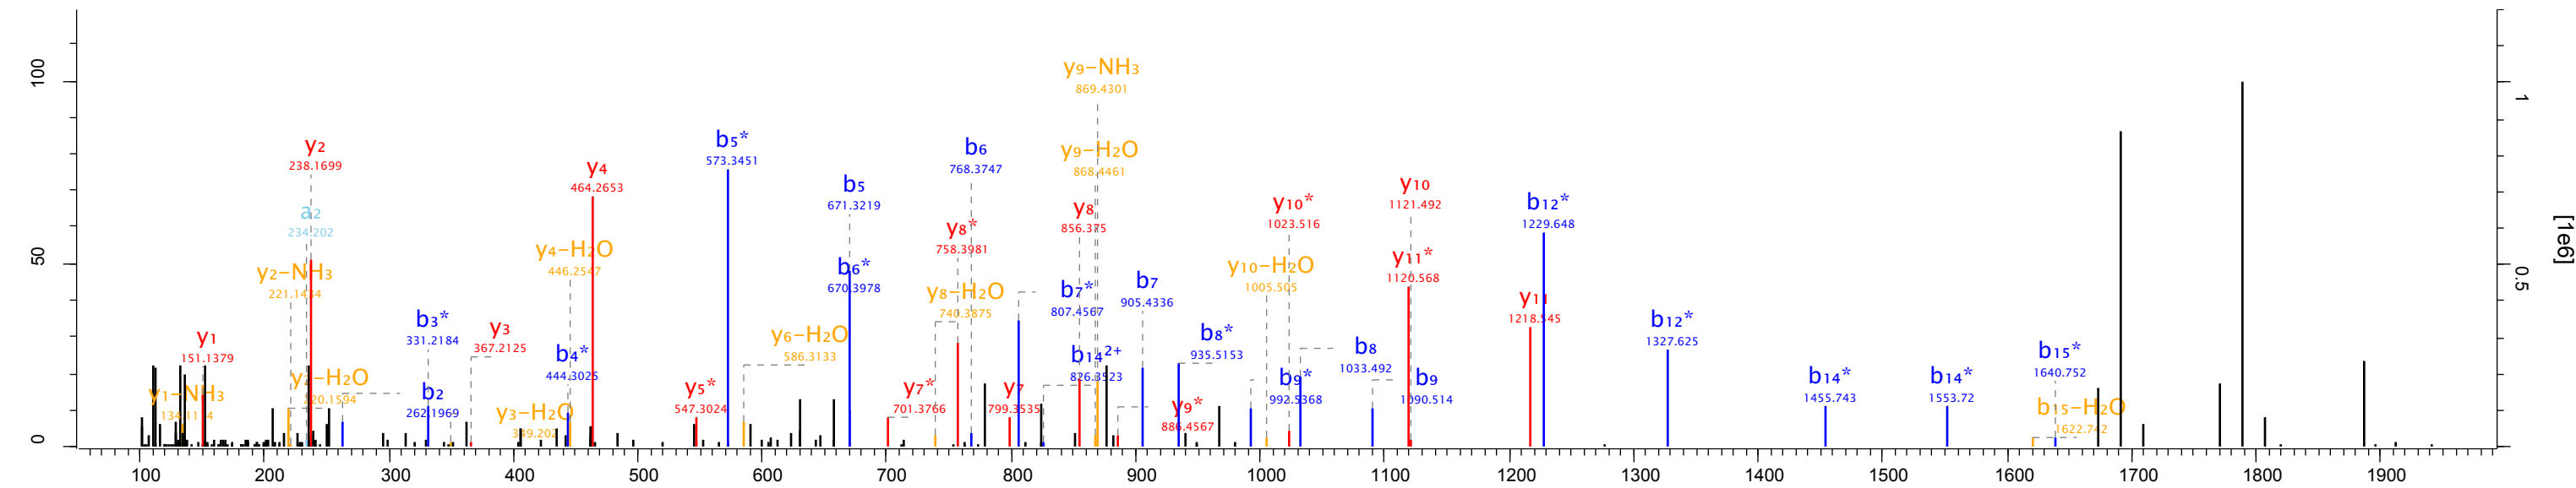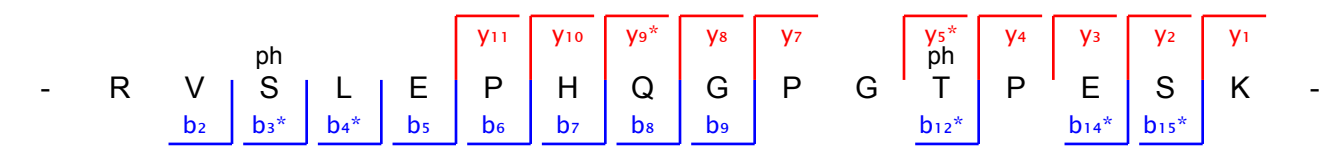

Raw file 20171215\_MaS\_33SR\_LMH\_phospho\_02 Scan 5321 Method FTMS; HCD Score 136.83 m/z 650.76 Gene names BUD13

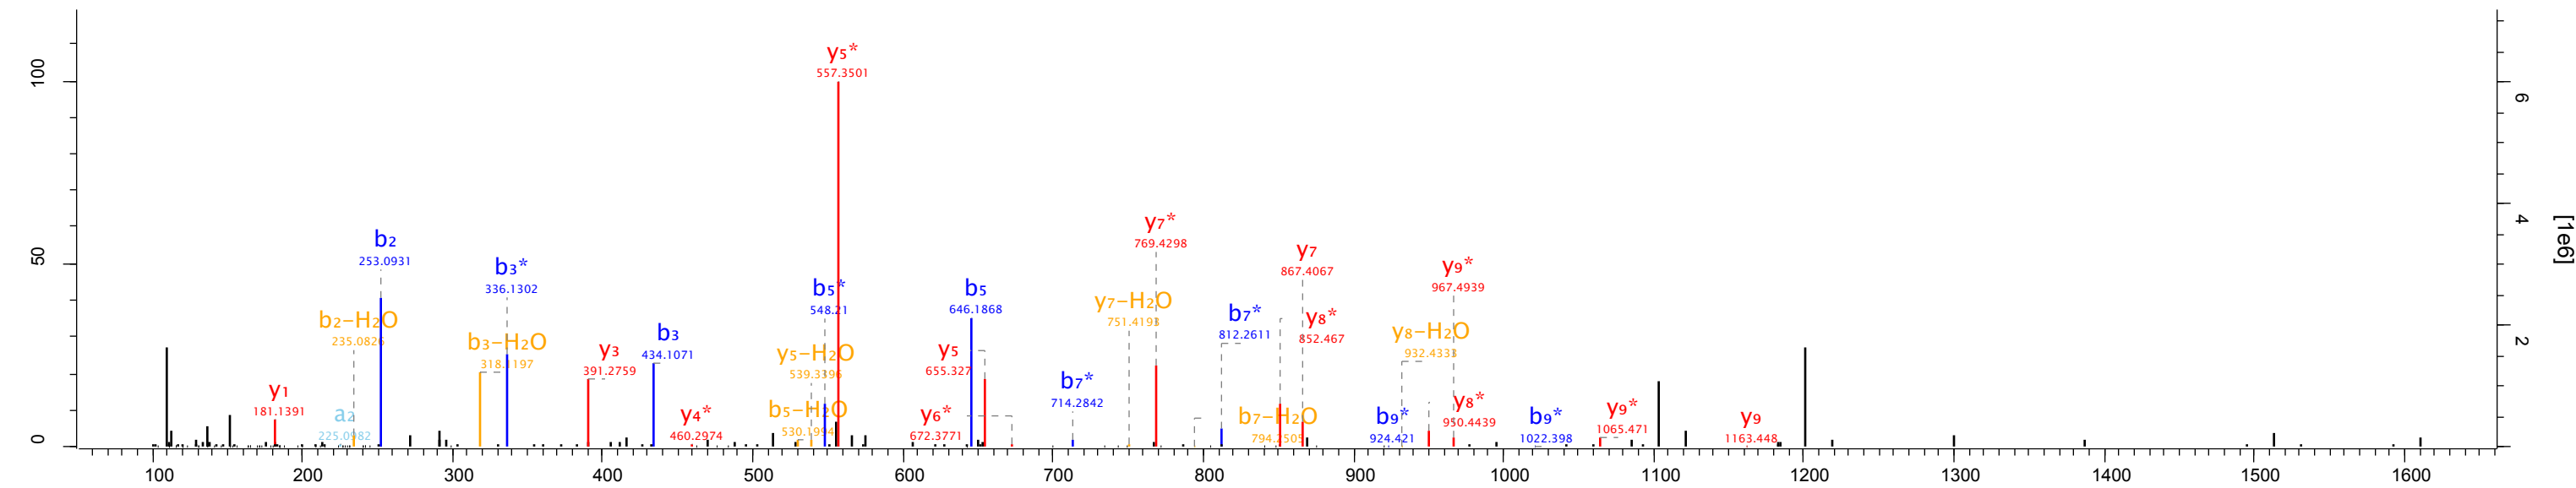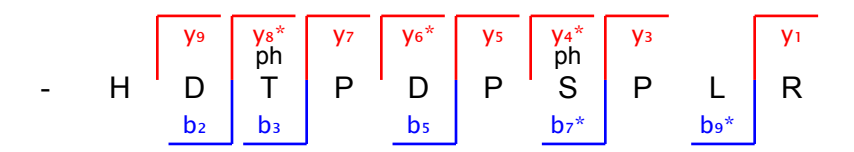

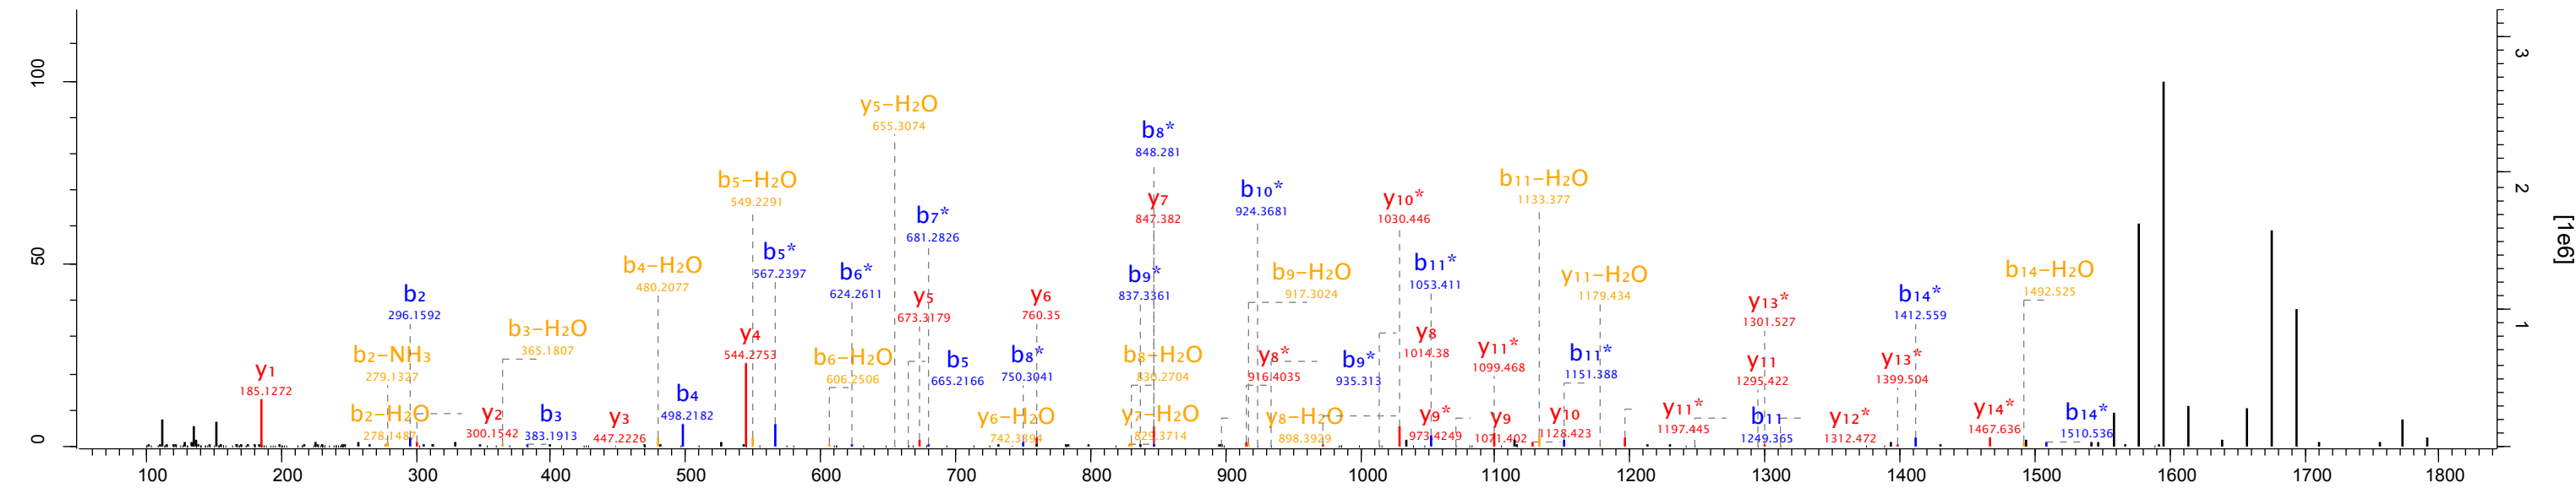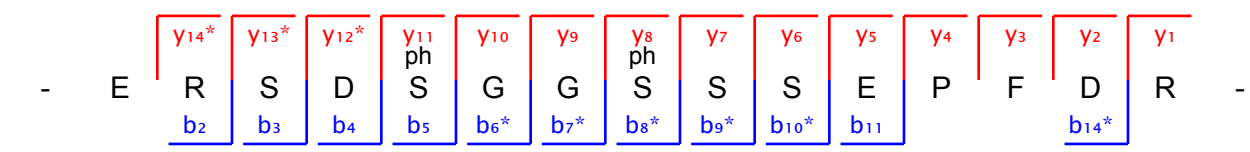

Raw file 20171215\_MaS\_33SR\_LMH\_phospho\_02 Scan 5781 Method FTMS; HCD Score 69.09 m/z 844.87 Gene names ZNF532

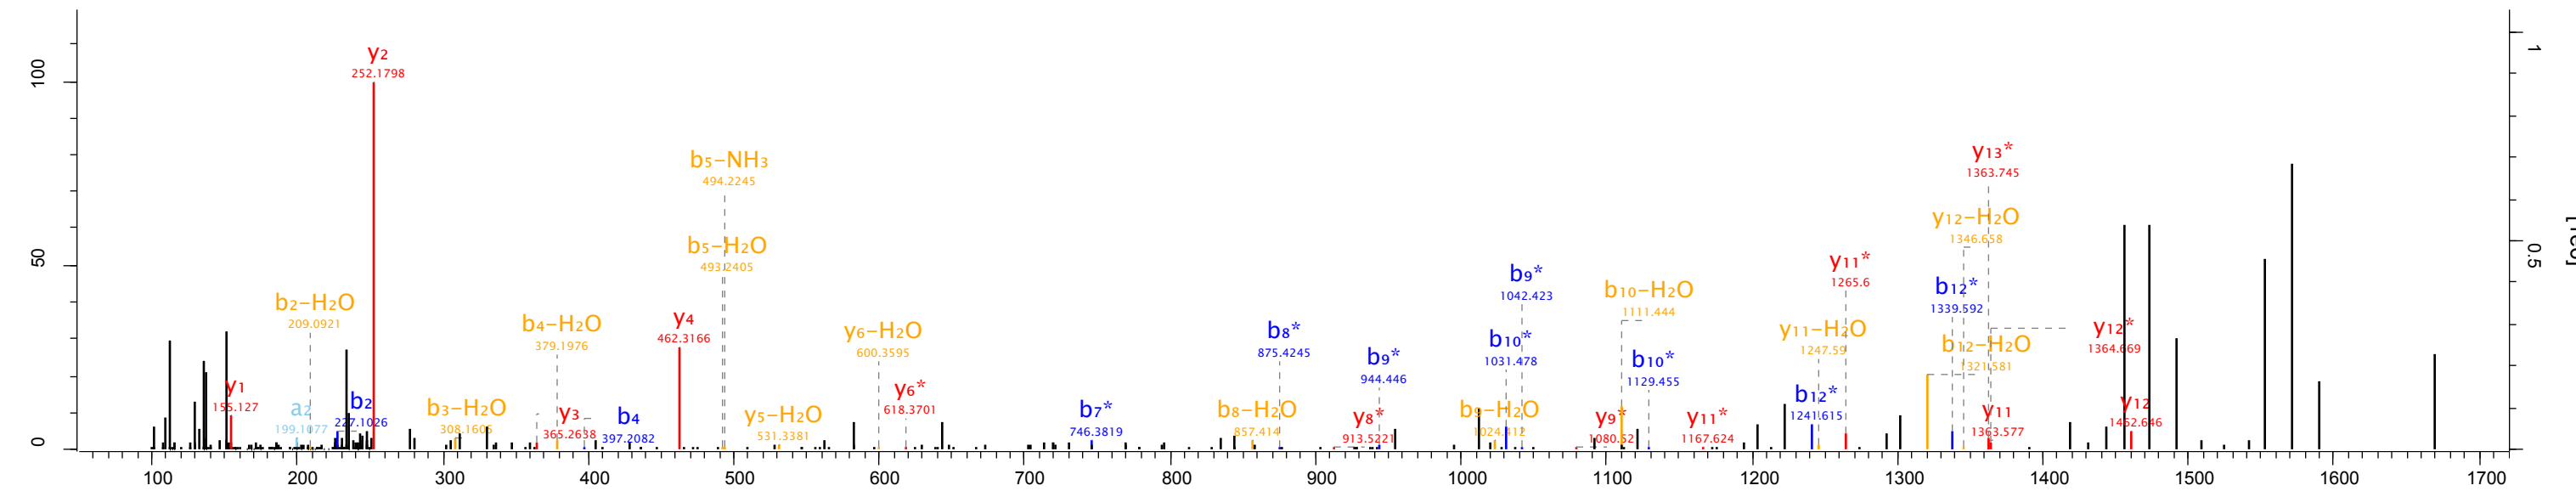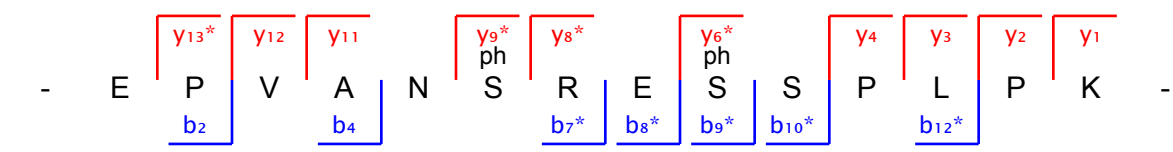

Raw file 20171215\_MaS\_33SR\_LMH\_phospho\_02 Scan 5861 Method FTMS; HCD Score 87.23 m/z 782.31 Gene names ZNF148

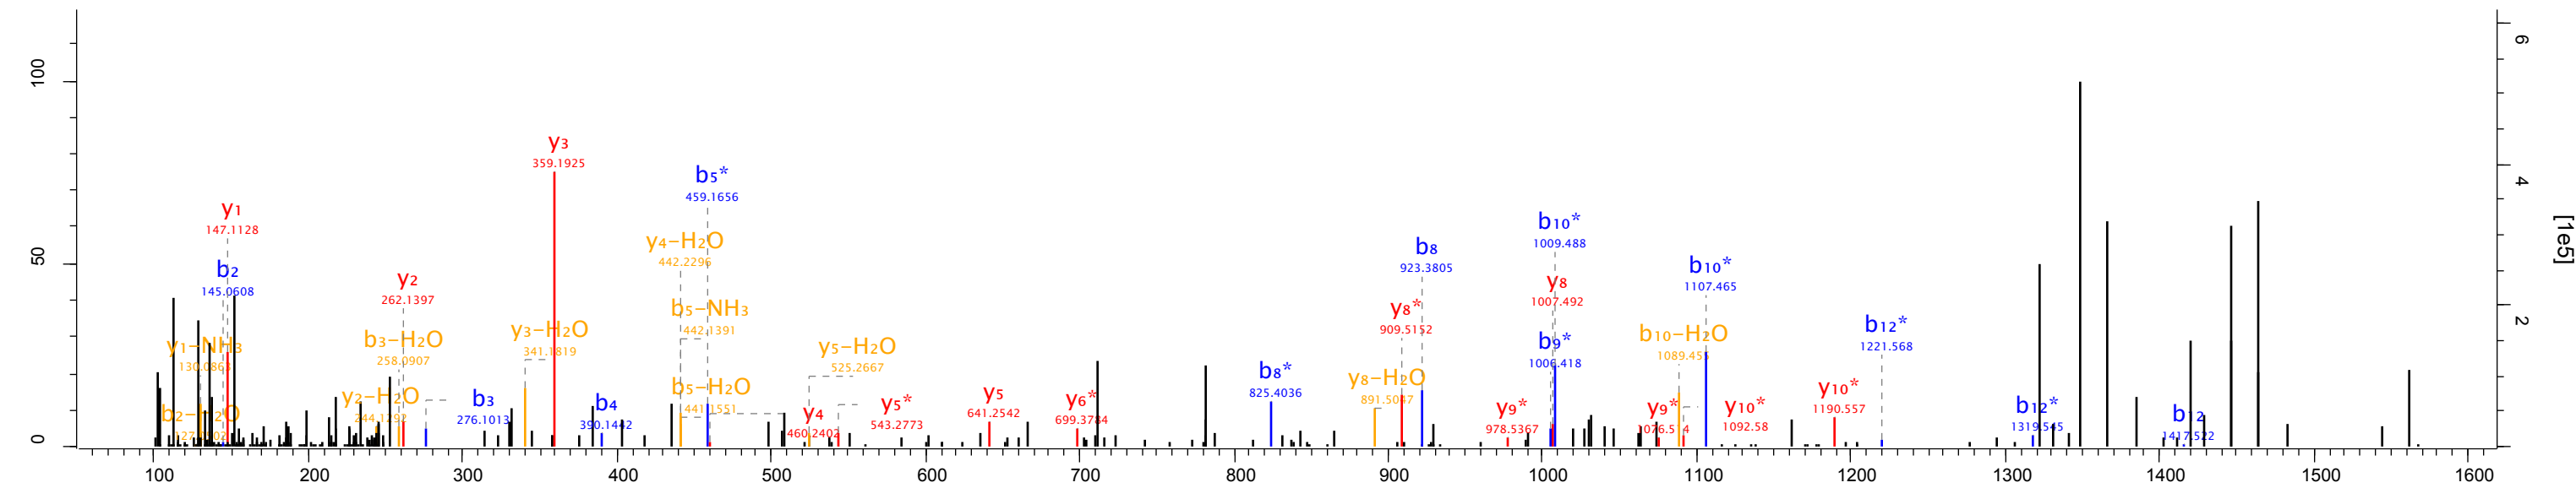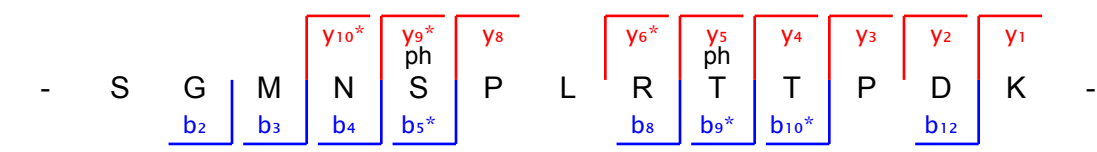

Raw file  
20171215\_MaS\_33SR\_LMH\_phospho\_02

Scan 6141 Method FTMS; HCD Score 122.24 m/z 1257.52 Gene names GSK3A

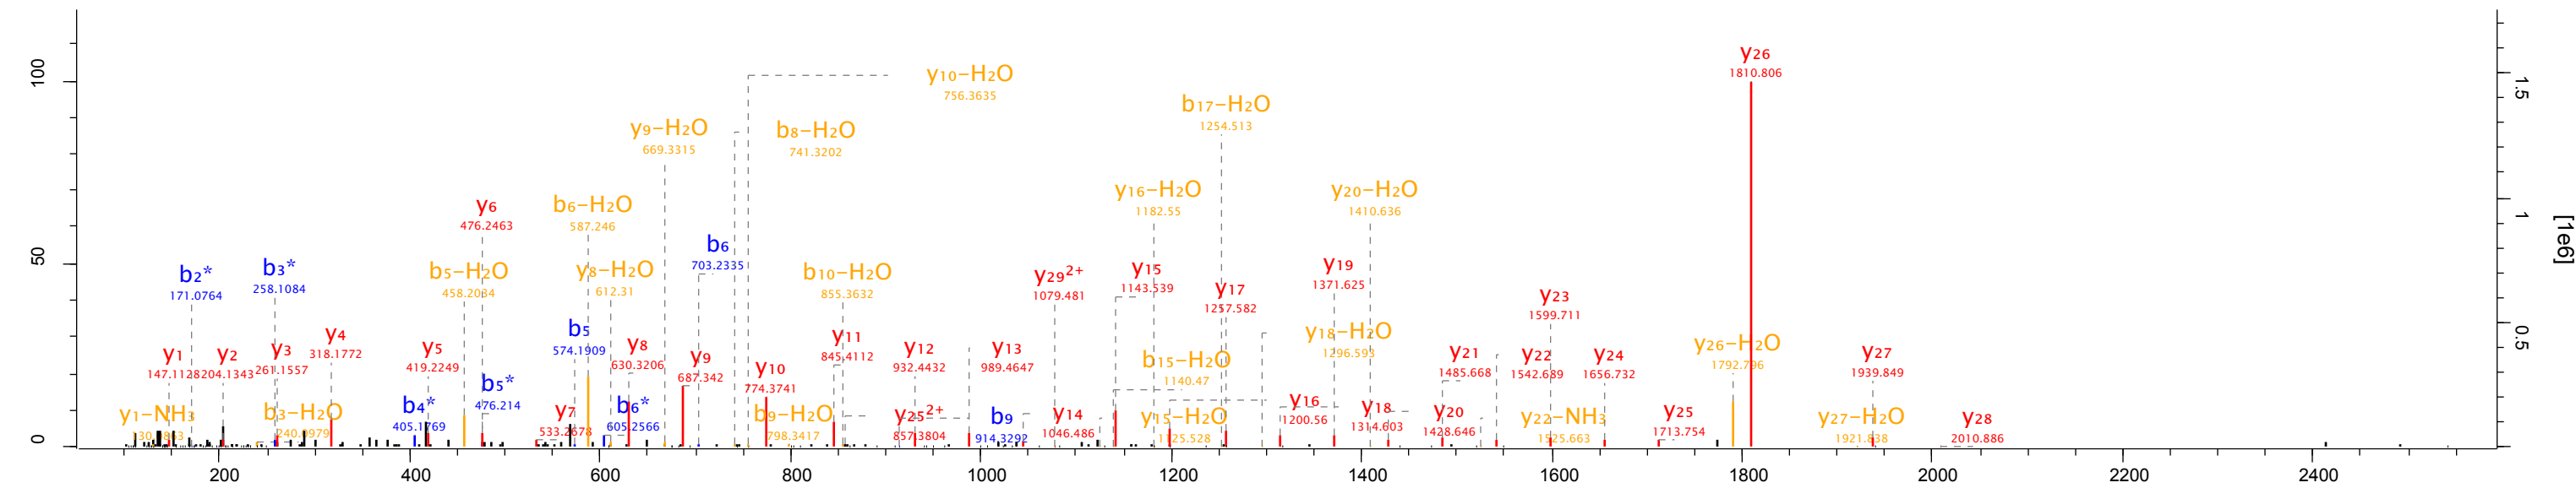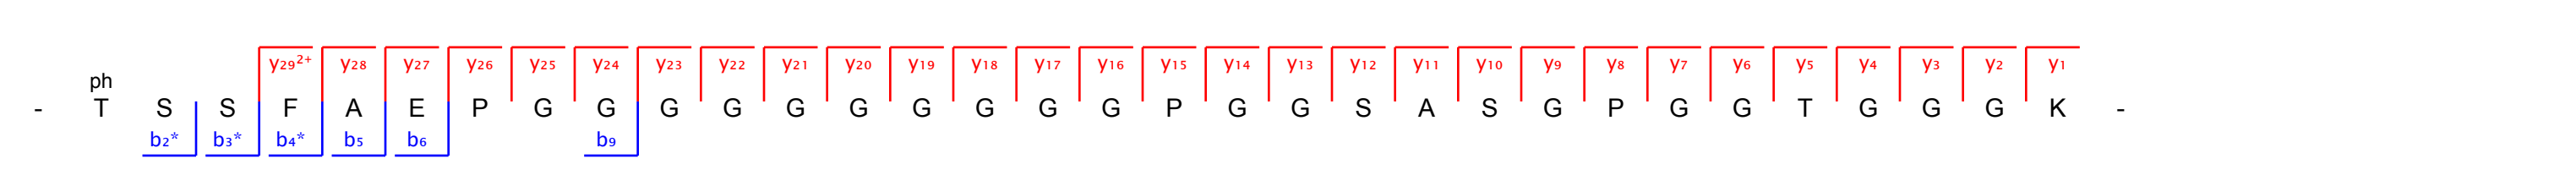



Raw file 20171215\_MaS\_33SR\_LMH\_phospho\_02 Scan 6331 Method FTMS; HCD Score 160.88 m/z 871.36 Gene names NDRG1

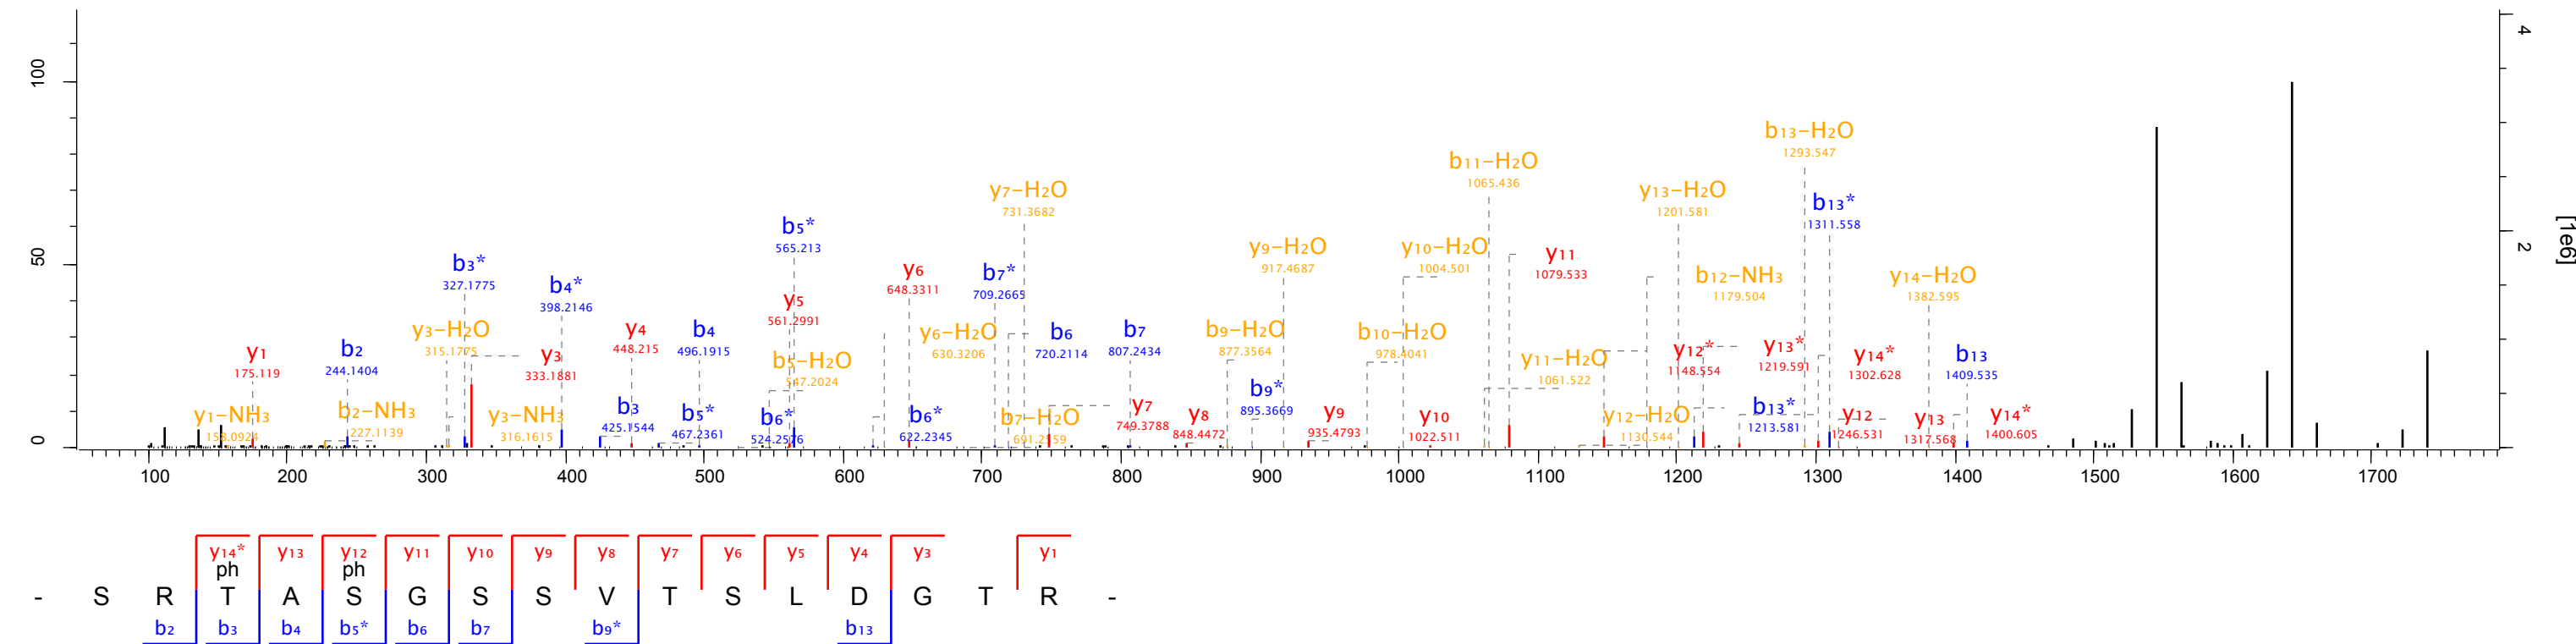

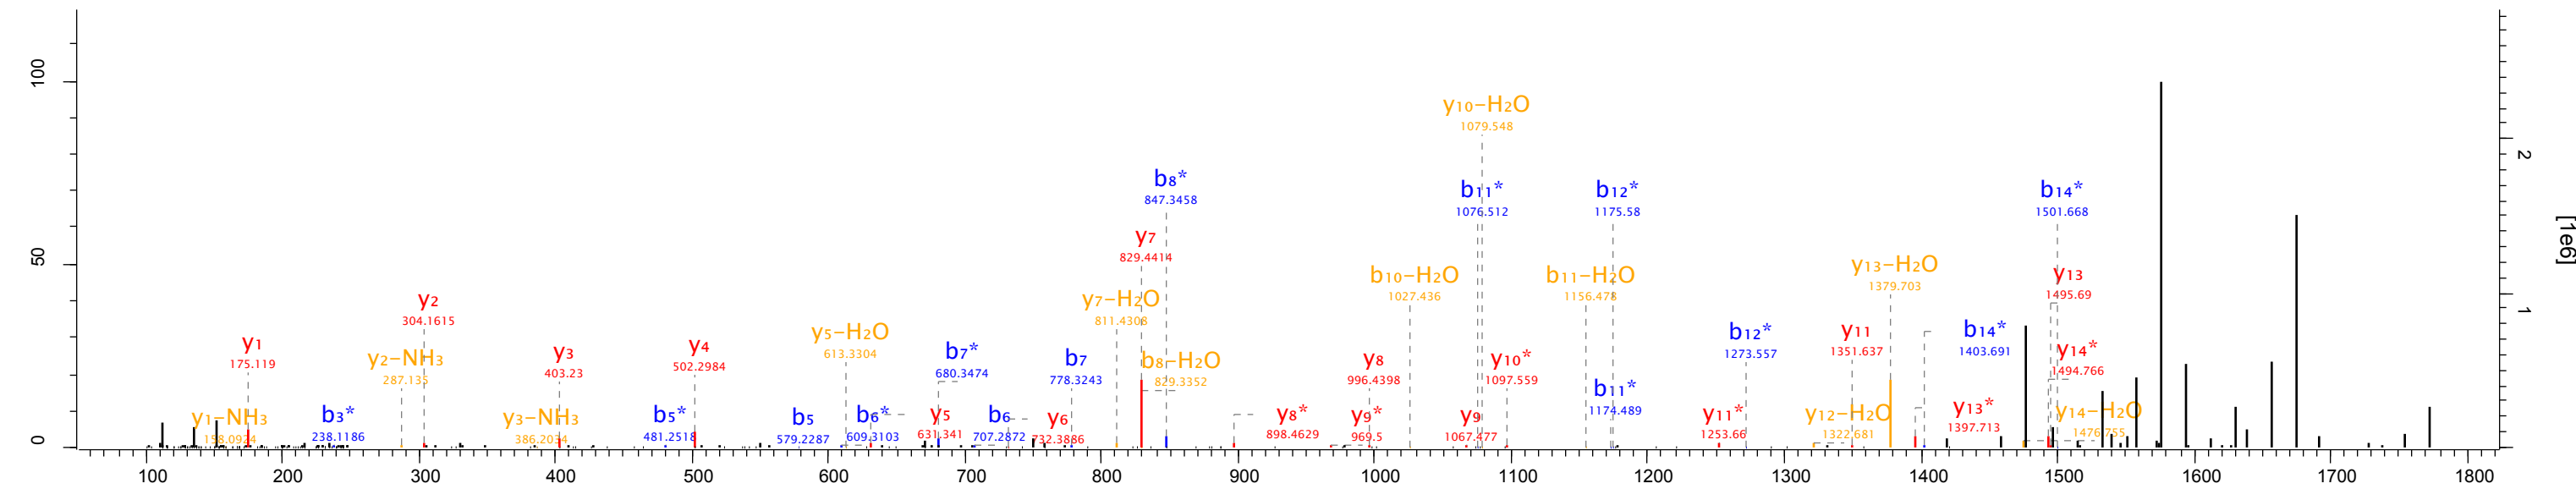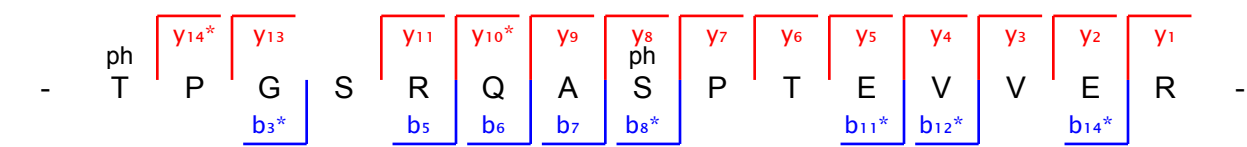

Raw file 20171215\_MaS\_33SR\_LMH\_phospho\_02 Scan 6681 Method FTMS; HCD Score 234.89 m/z 1009.41 Gene names PXN

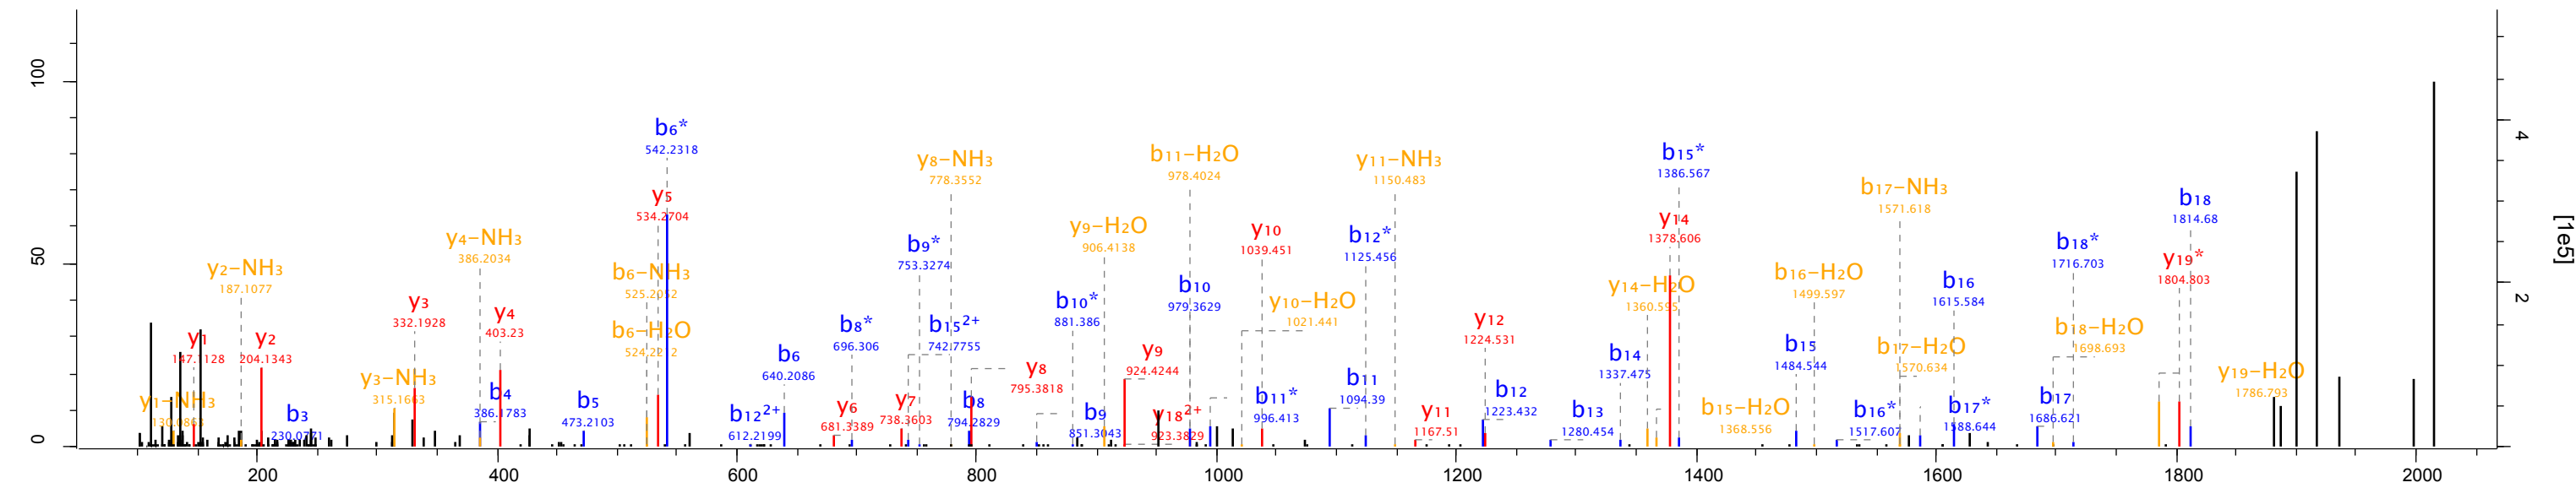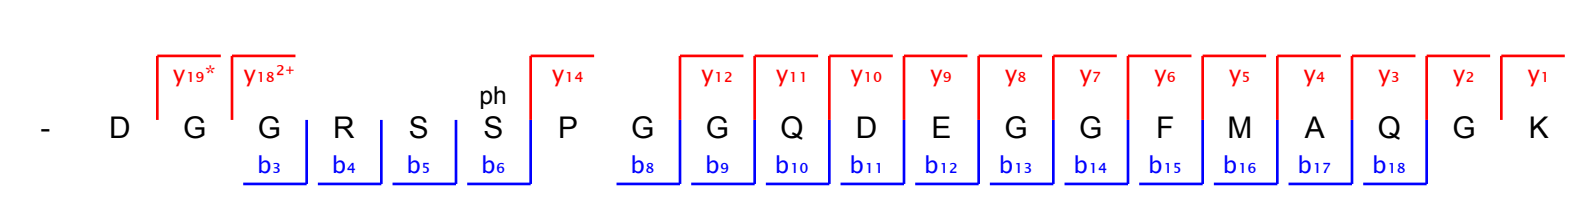

Raw file 20171215\_MaS\_33SR\_LMH\_phospho\_02 Scan 6781 Method FTMS; HCD Score 86.56 m/z 952.39 Gene names FTSJ3

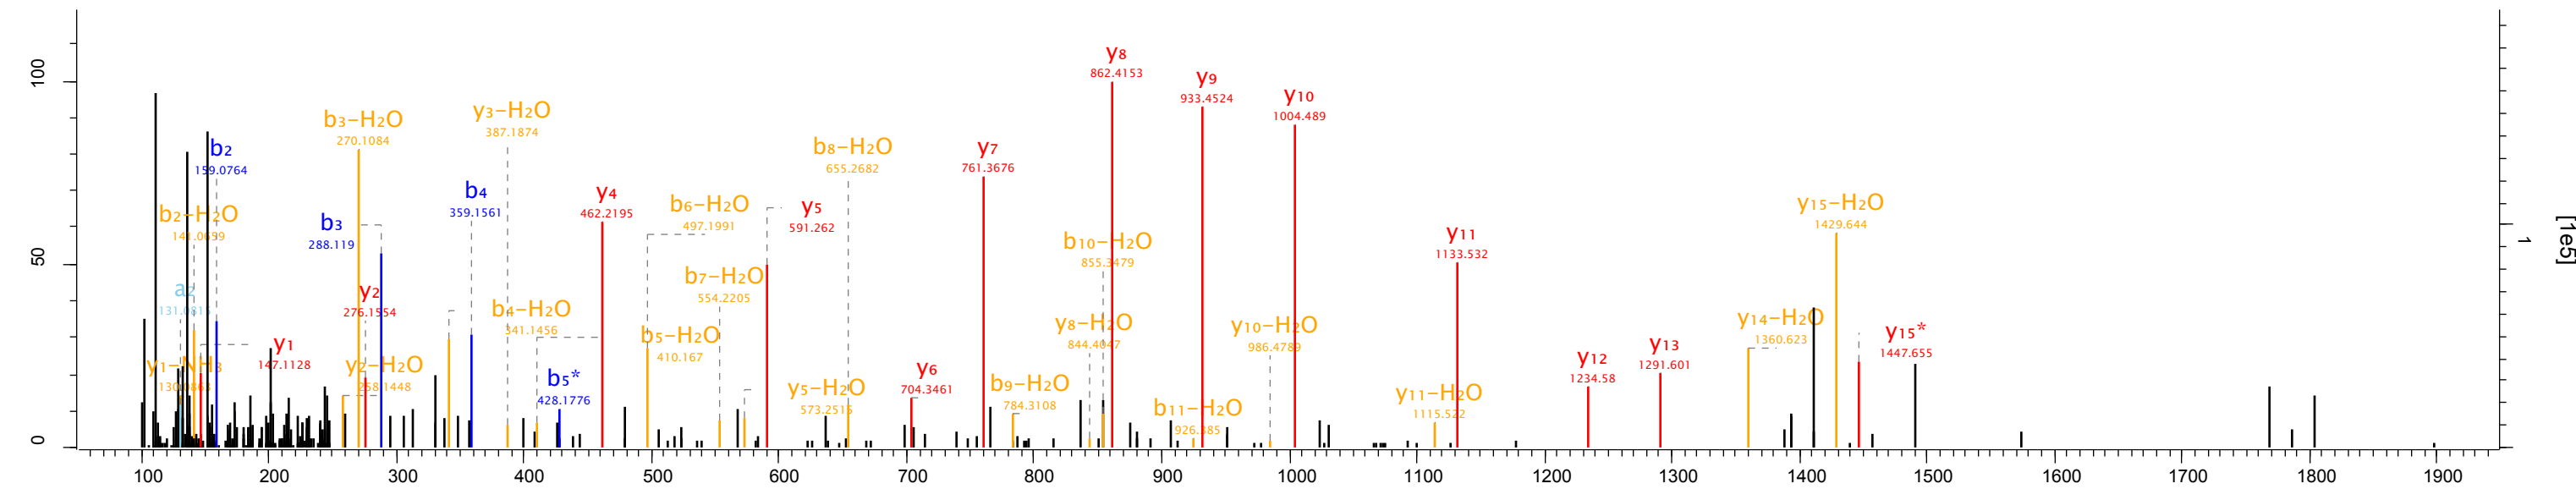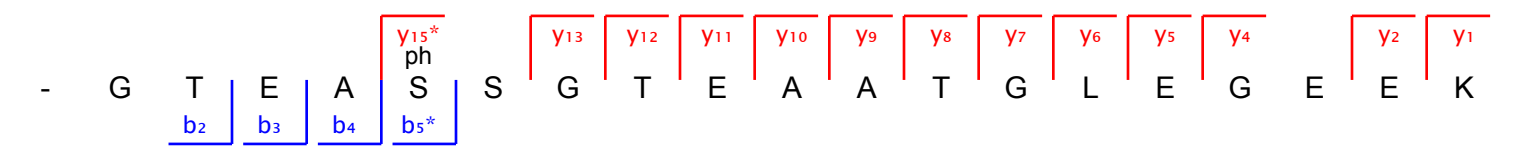

Raw file

20171215\_MaS\_33SR\_LMH\_phospho\_02

Scan 6861 Method FTMS; HCD Score 42.06 m/z 1031.43 Gene names SRRM2

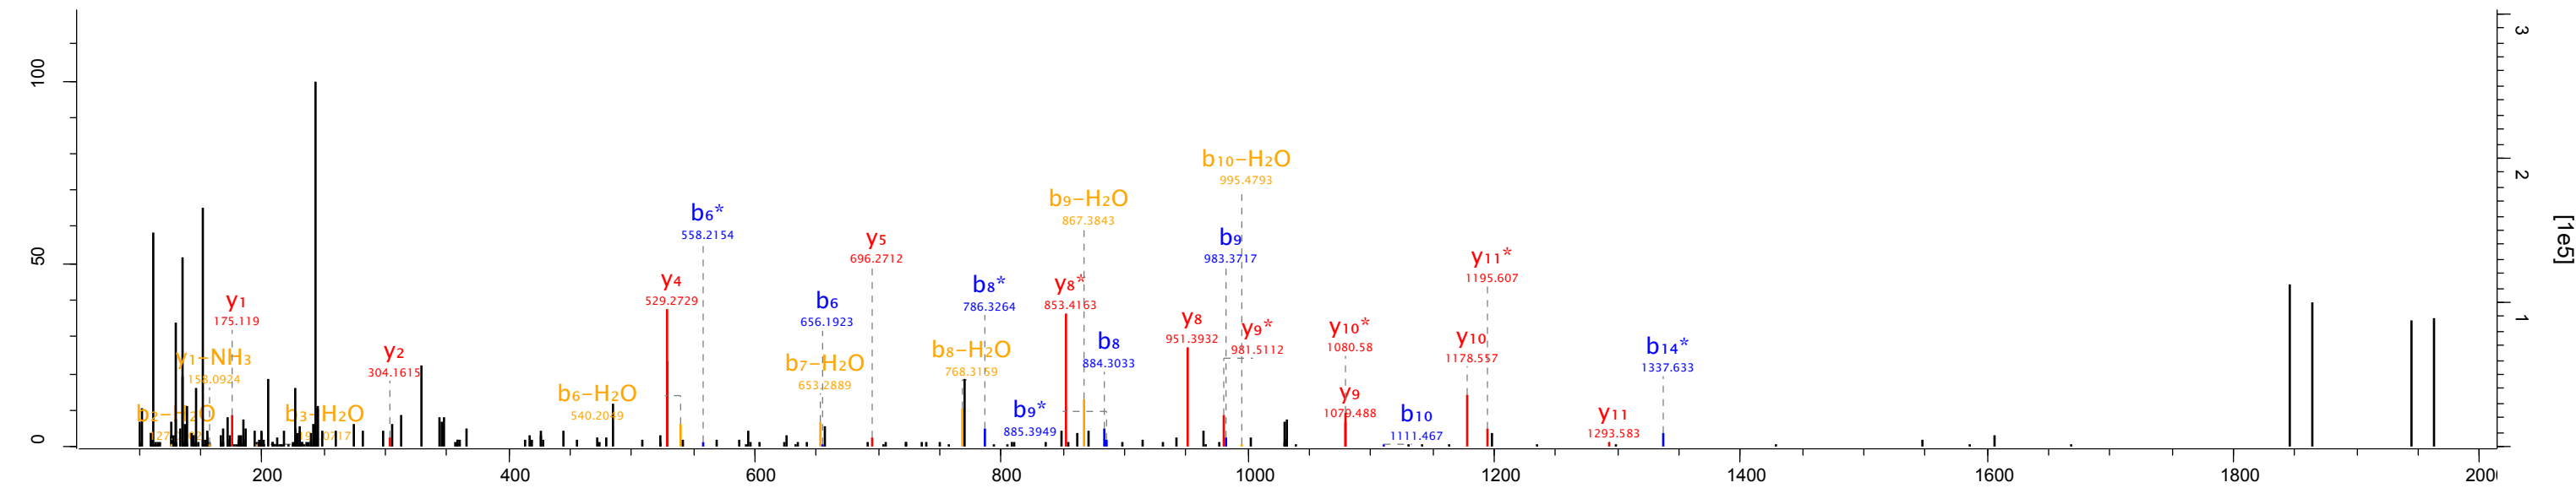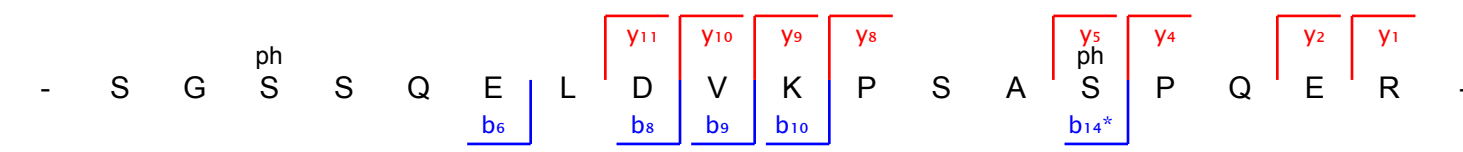

Raw file 20171215\_MaS\_33SR\_LMH\_phospho\_02 Scan 7001 Method FTMS; HCD Score 171.44 m/z 701.32 Gene names LMNA

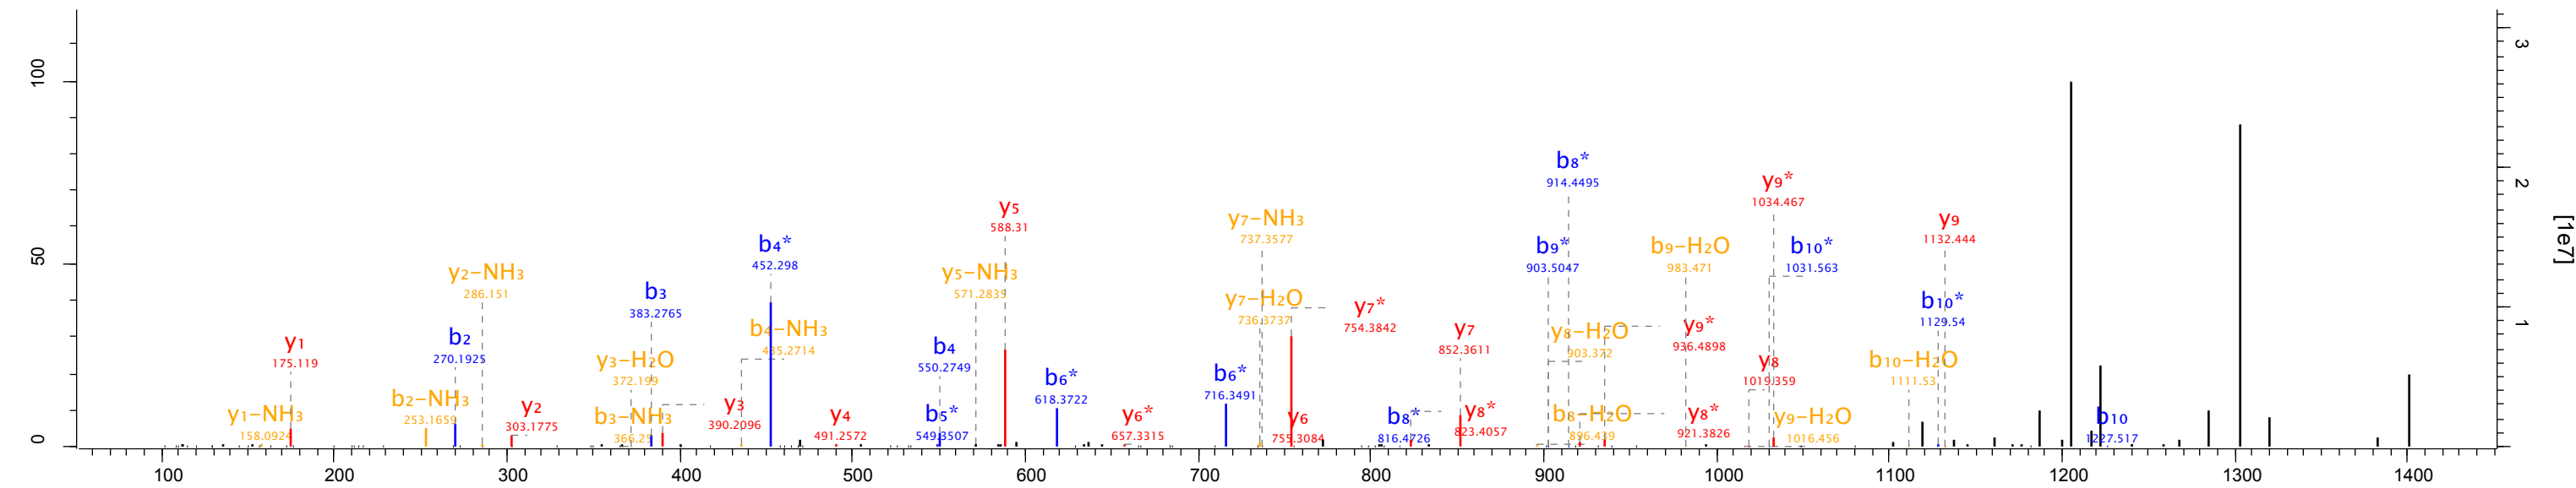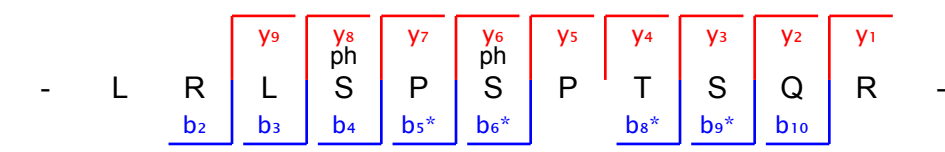

Raw file  
20171215\_MaS\_33SR\_LMH\_phospho\_02

Scan 7371 Method FTMS; HCD Score 103.02 m/z 895.74 Gene names SRRM2

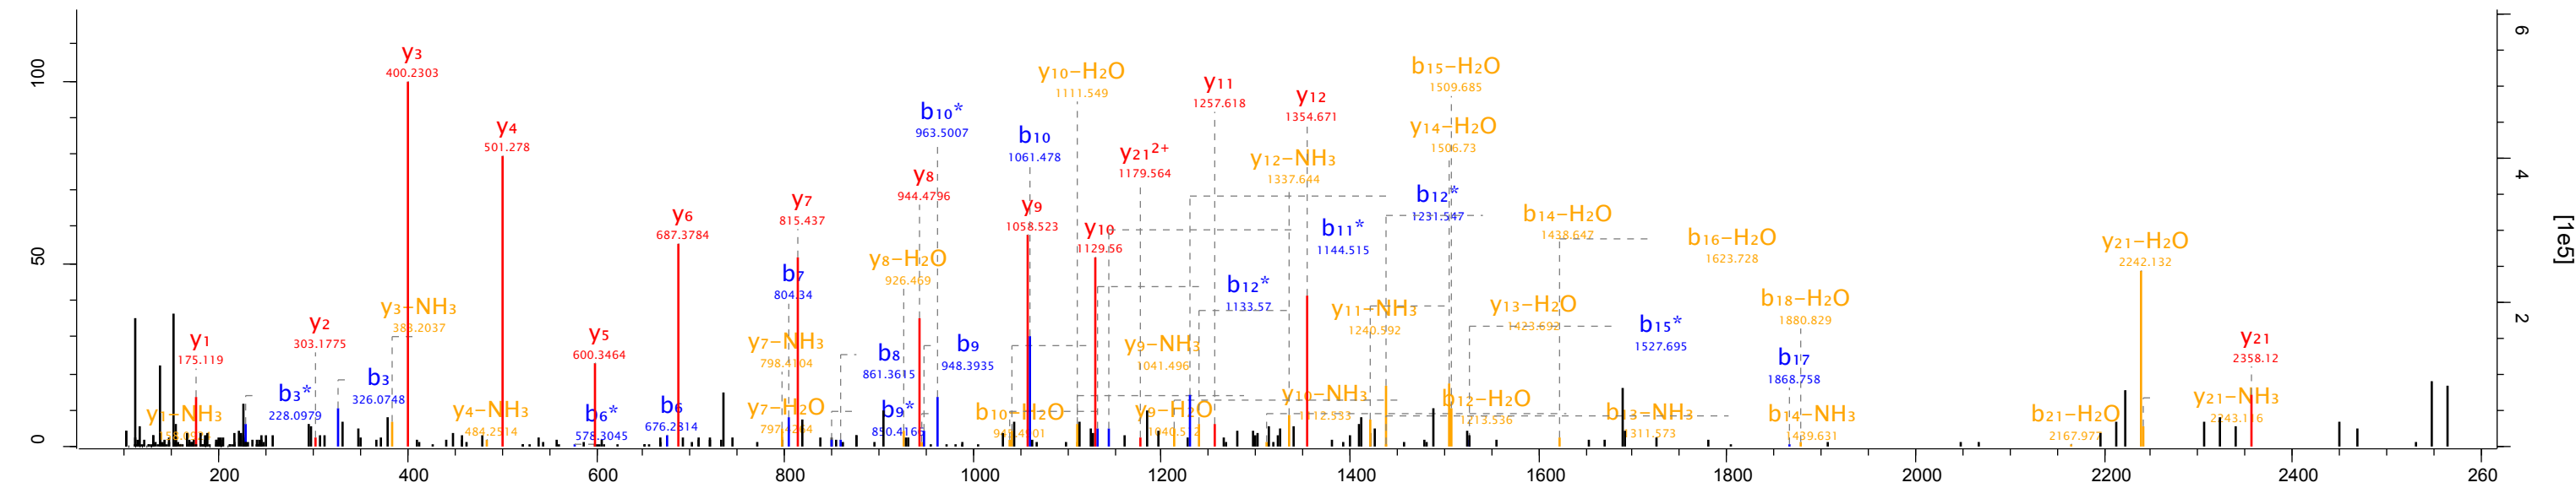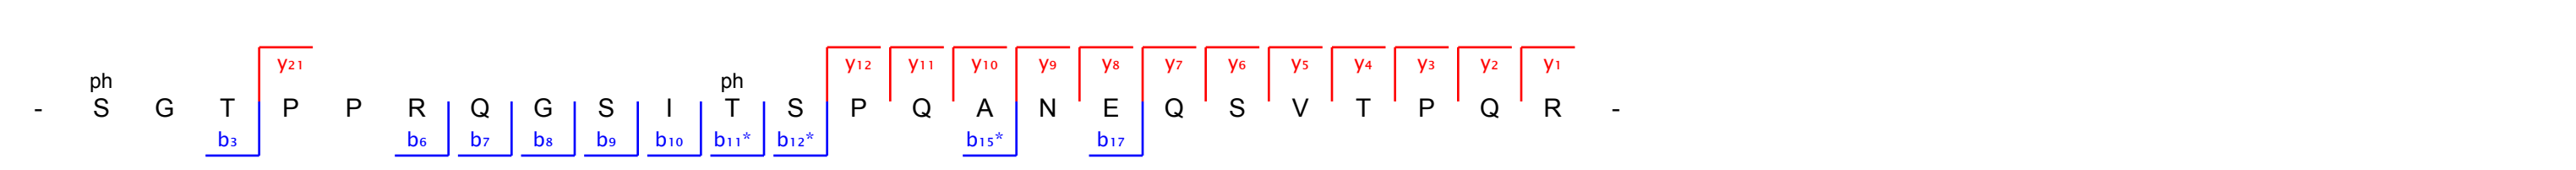

Raw file 20171215\_MaS\_33SR\_LMH\_phospho\_02 Scan 7551 Method FTMS; HCD Score 115.12 m/z 623.76 Gene names C2CD5

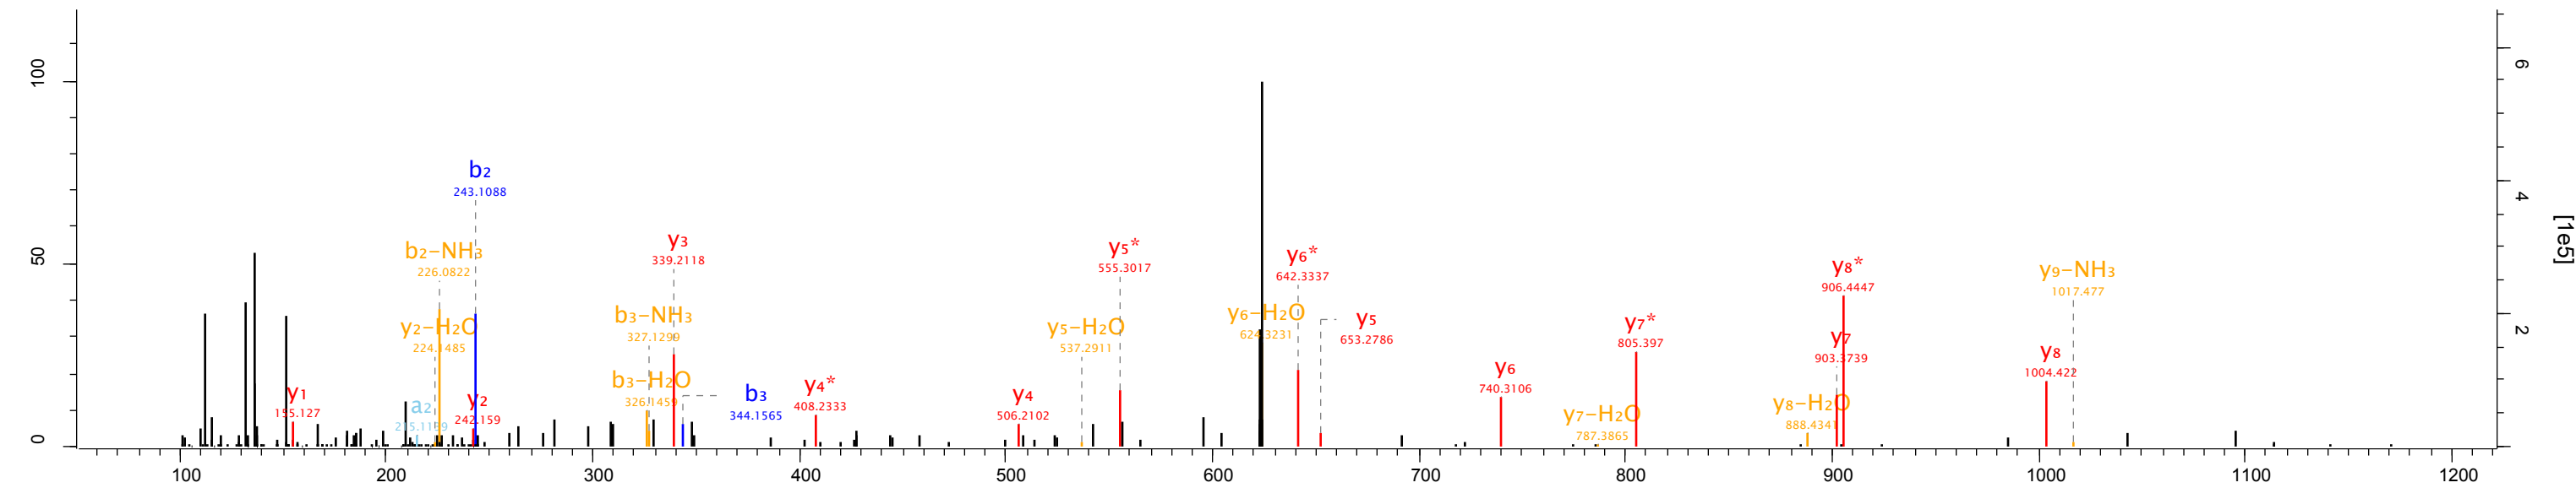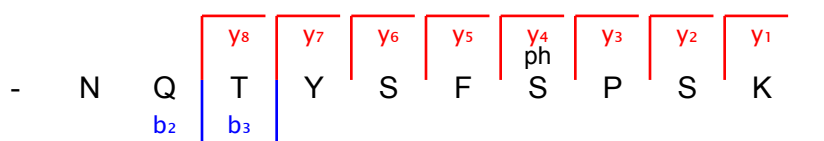



Raw file 20171215\_MaS\_33SR\_LMH\_phospho\_02 Scan 8761 Method FTMS; HCD Score 143.04 m/z 871.03 Gene names DOCK7

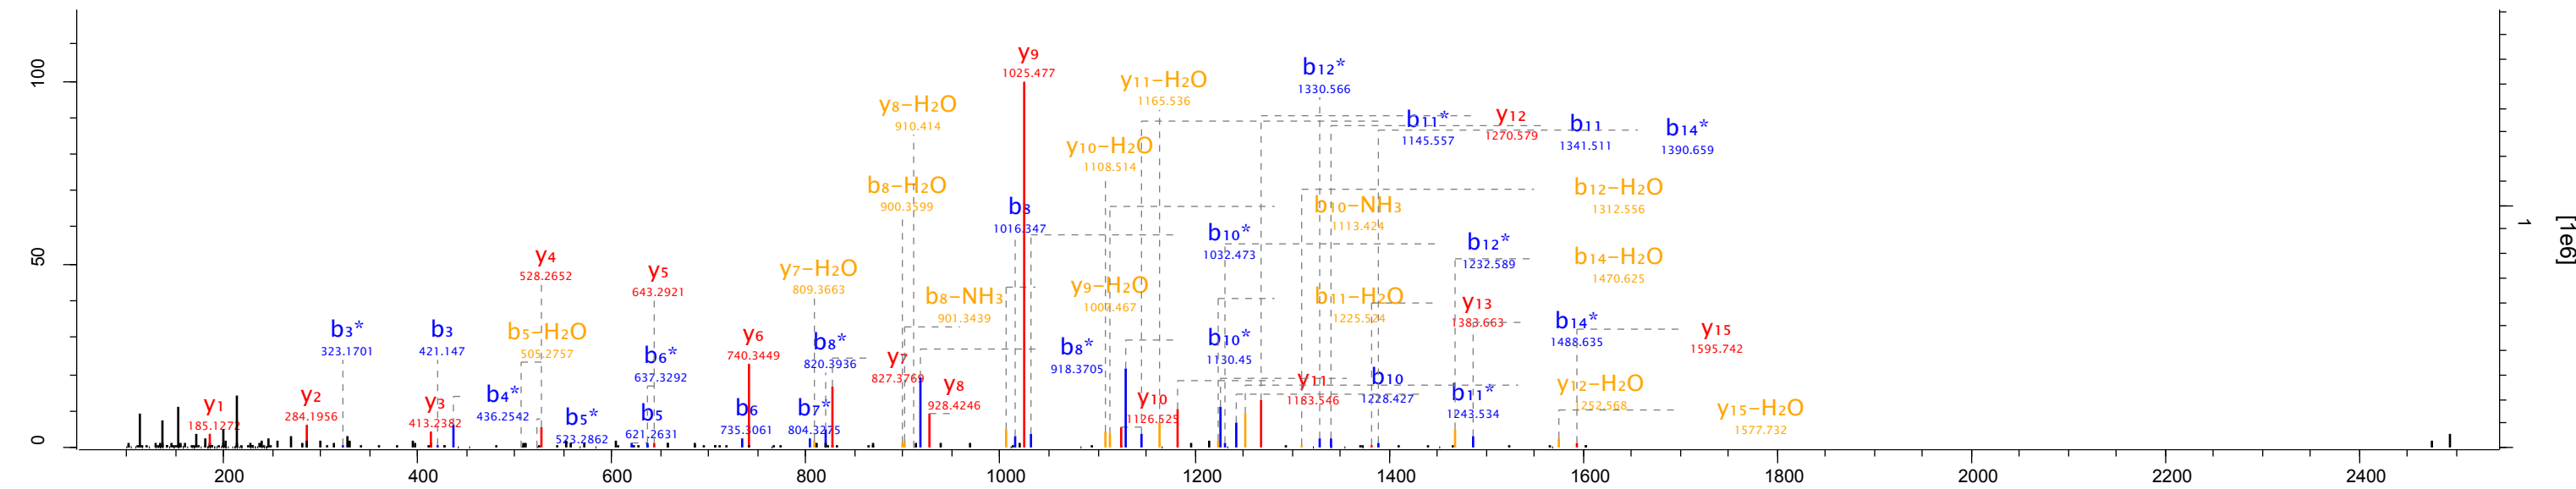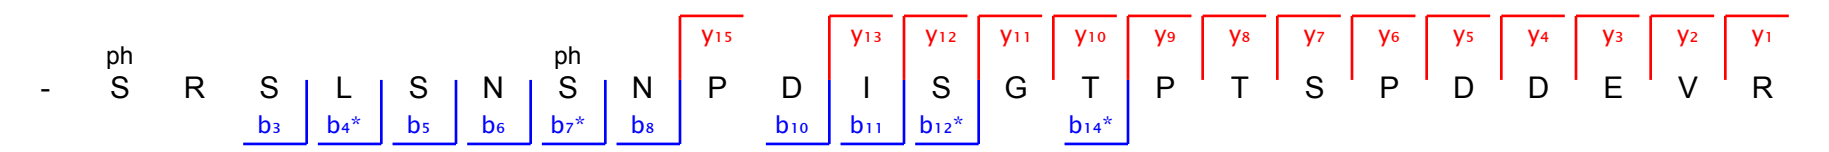

Raw file 20171215\_MaS\_33SR\_LMH\_phospho\_02 Scan 9411 Method FTMS; HCD Score 111.22 m/z 775.83 Gene names DCAF6

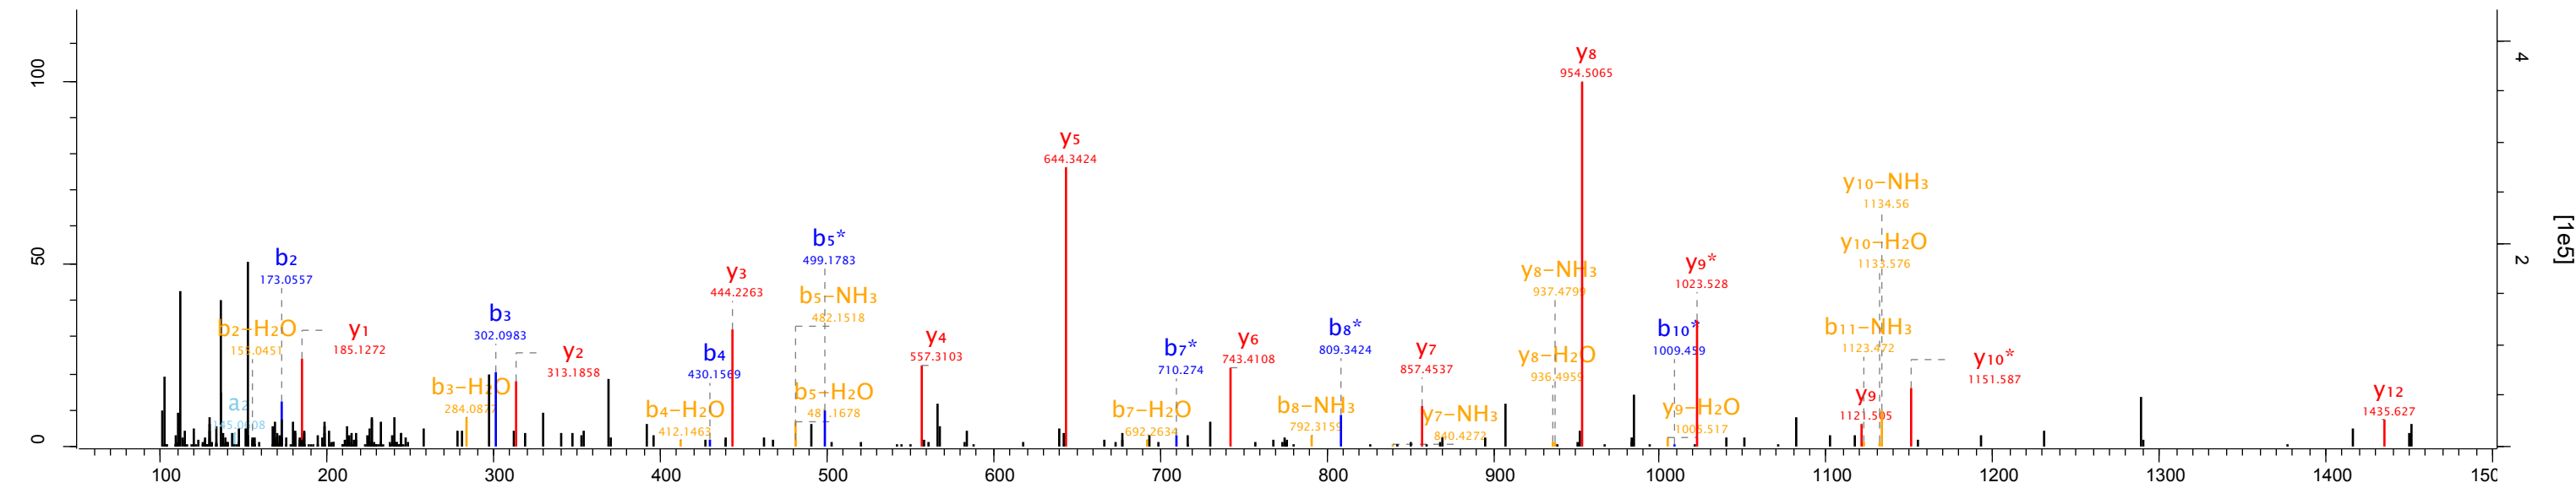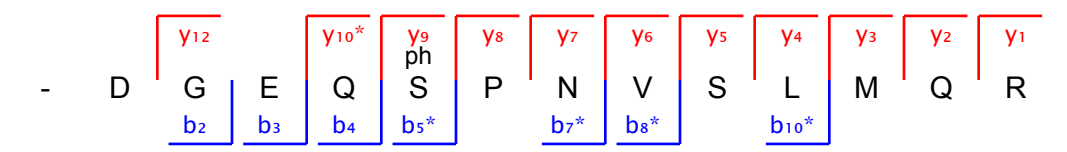

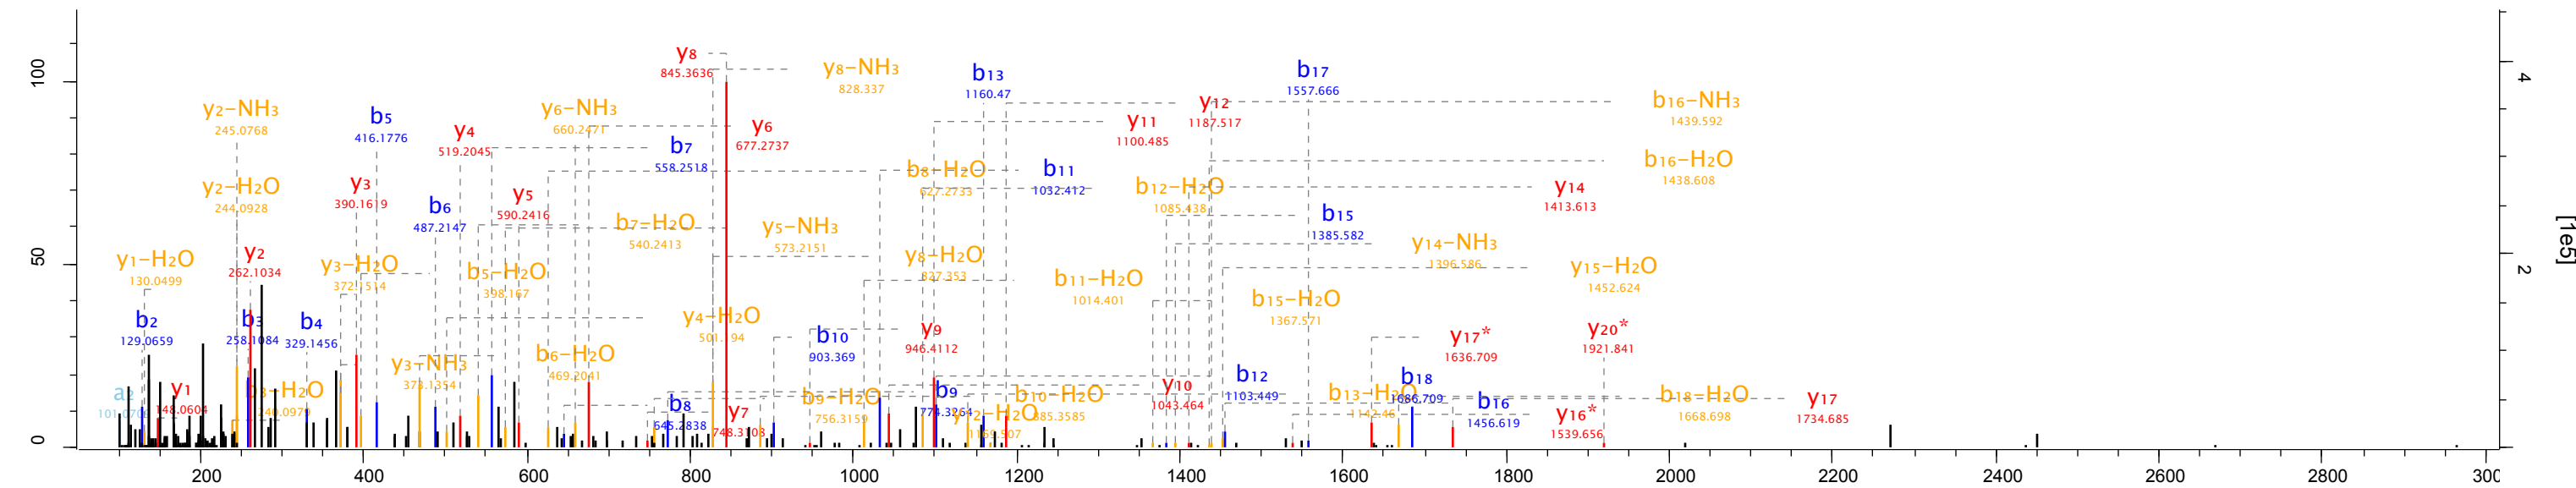

- G A E A S A A S E E E A G P Q A T E P S T P S G P E S G P T P A S A E Q N E  
 b<sub>2</sub> b<sub>3</sub> b<sub>4</sub> b<sub>5</sub> b<sub>6</sub> b<sub>7</sub> b<sub>8</sub> b<sub>9</sub> b<sub>10</sub> b<sub>11</sub> b<sub>12</sub> b<sub>13</sub> b<sub>15</sub> b<sub>16</sub> b<sub>17</sub> b<sub>18</sub> y<sub>20</sub>\* y<sub>17</sub> y<sub>16</sub>\*<sub>ph</sub> y<sub>14</sub> y<sub>12</sub> y<sub>11</sub> y<sub>10</sub> y<sub>9</sub> y<sub>8</sub> y<sub>7</sub> y<sub>6</sub> y<sub>5</sub> y<sub>4</sub> y<sub>3</sub> y<sub>2</sub> y<sub>1</sub>

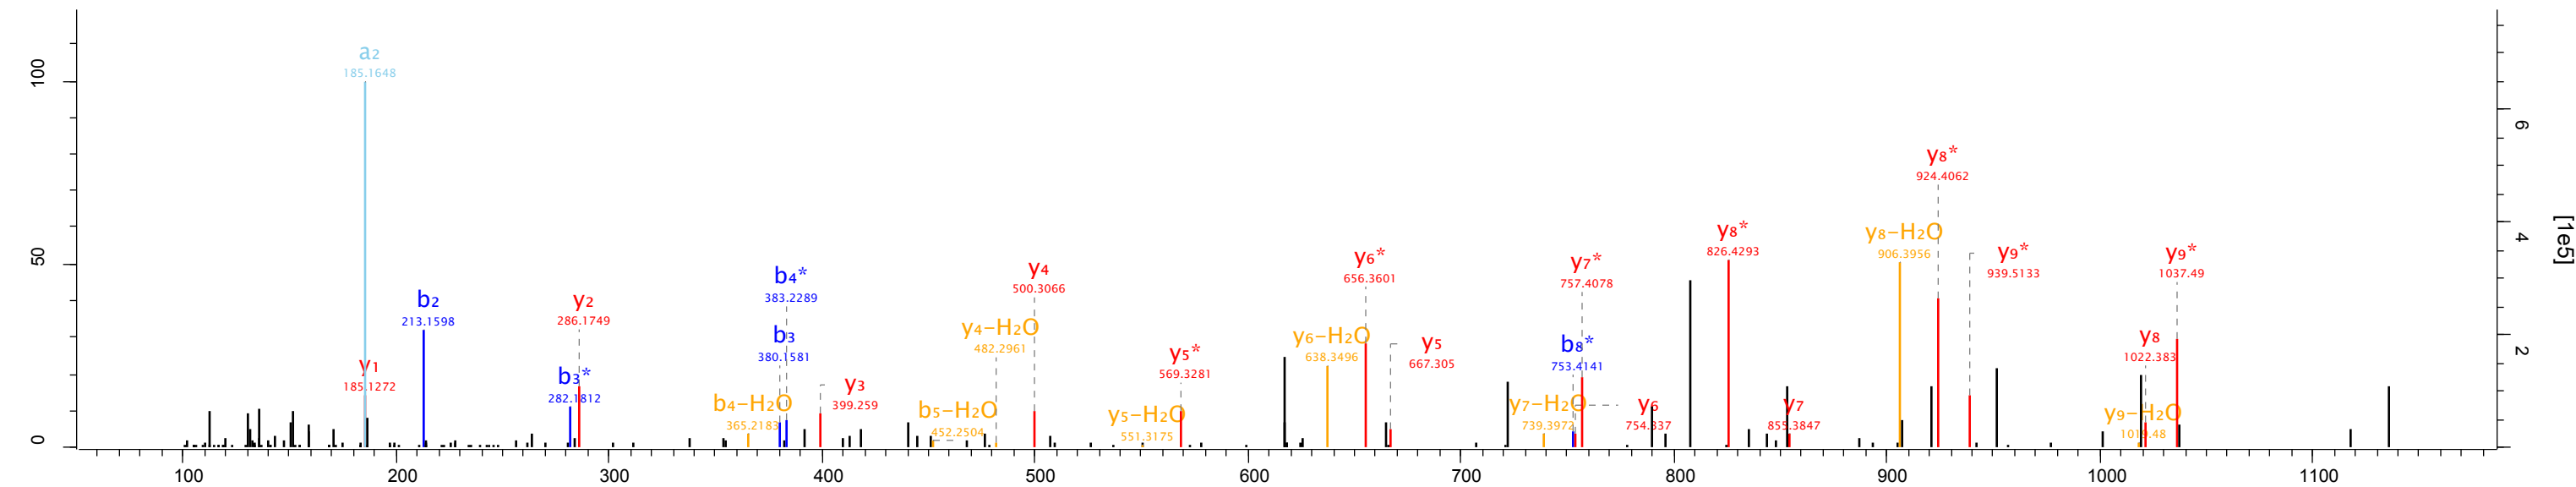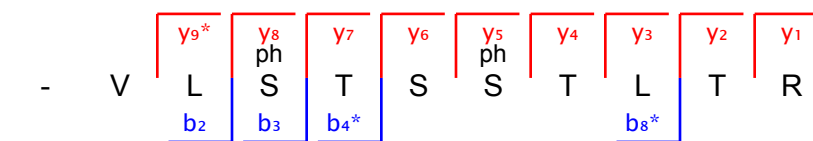

Raw file

20171215\_MaS\_33SR\_LMH\_phospho\_02

| Scan | Method    | Score | m/z    | Gene names |
|------|-----------|-------|--------|------------|
| 9621 | FTMS; HCD | 50.23 | 509.57 | PATL1      |

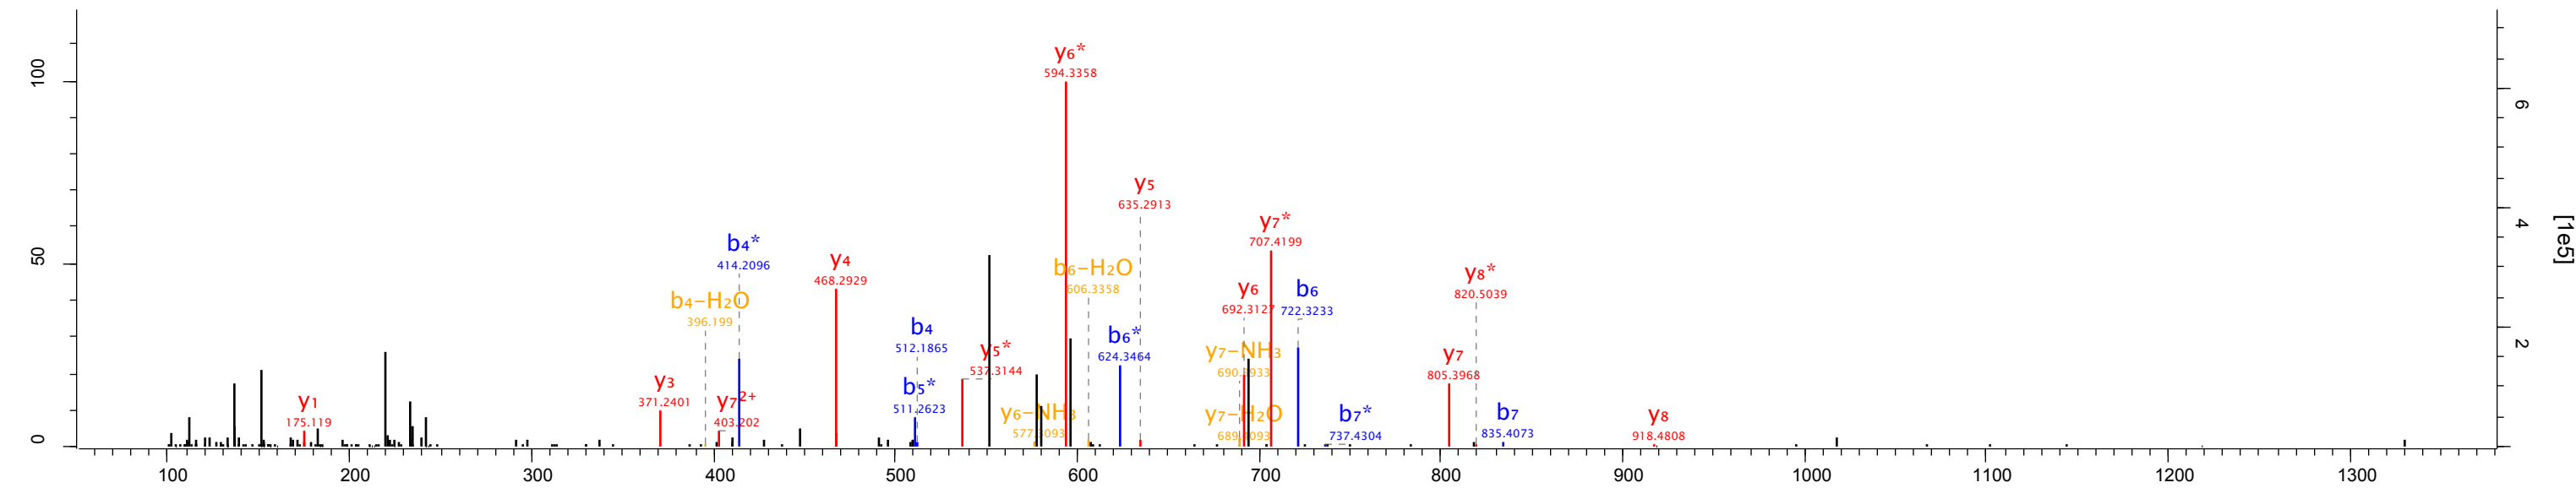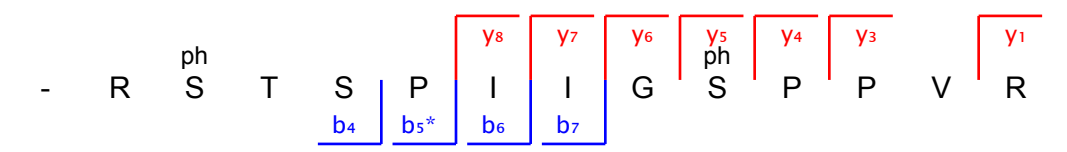

Raw file 20171215\_MaS\_33SR\_LMH\_phospho\_02 Scan 9681 Method FTMS; HCD Score 170.22 m/z 842.42 Gene names MICALL1

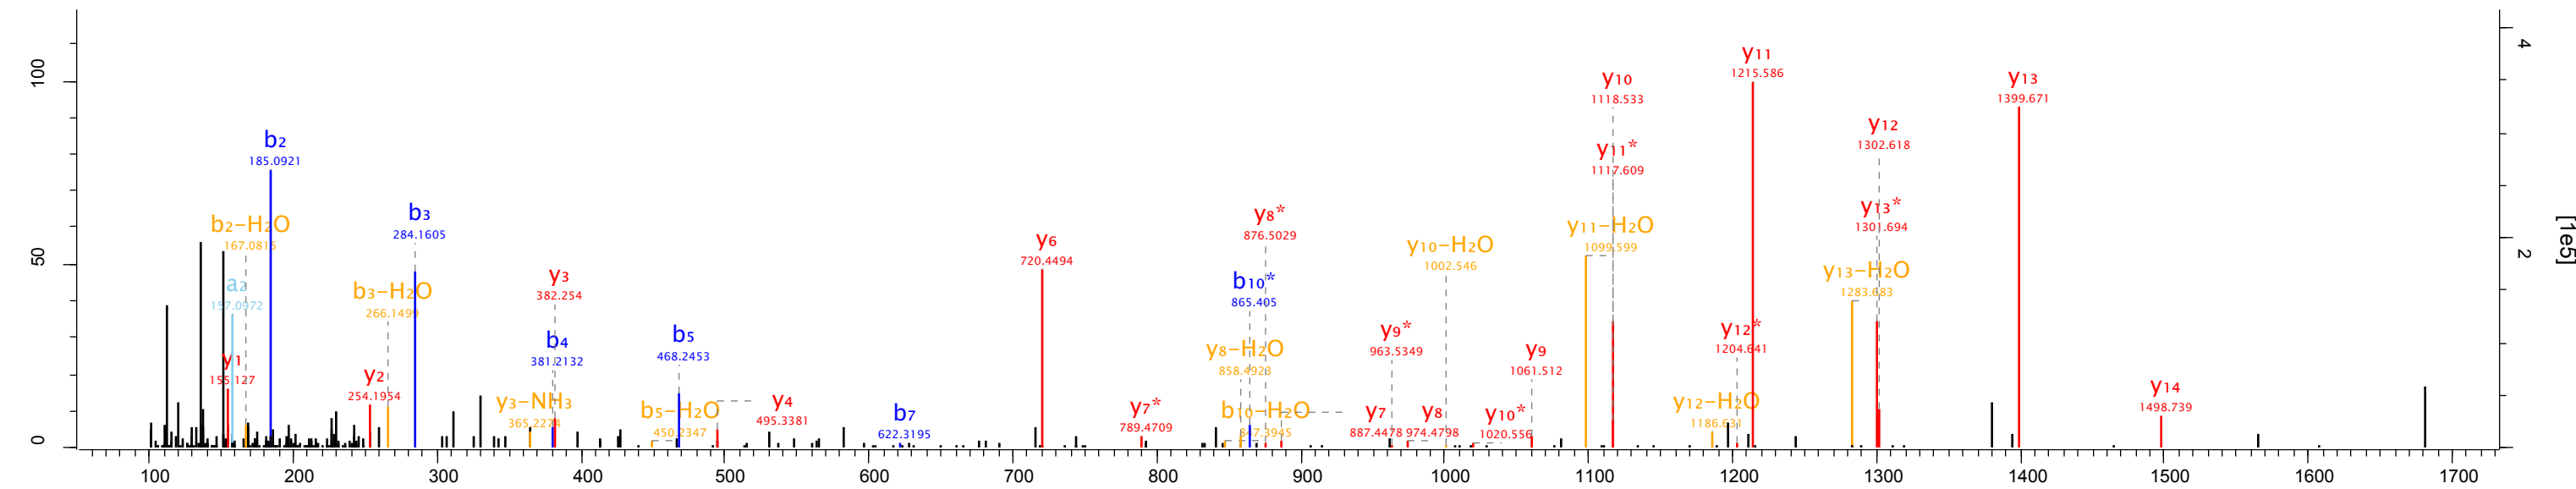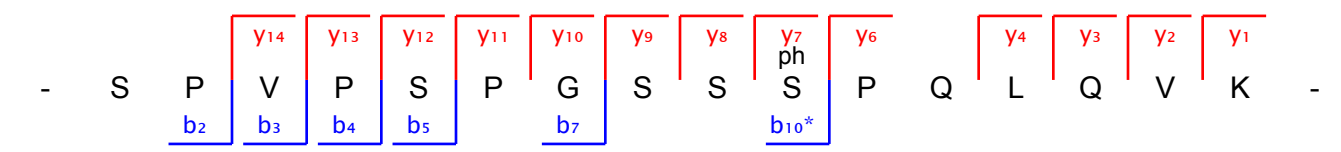

Raw file  
20171215\_MaS\_33SR\_LMH\_phospho\_02

Scan Method Score m/z Gene names  
9911 FTMS; HCD 202.58 1101.95 JUNB

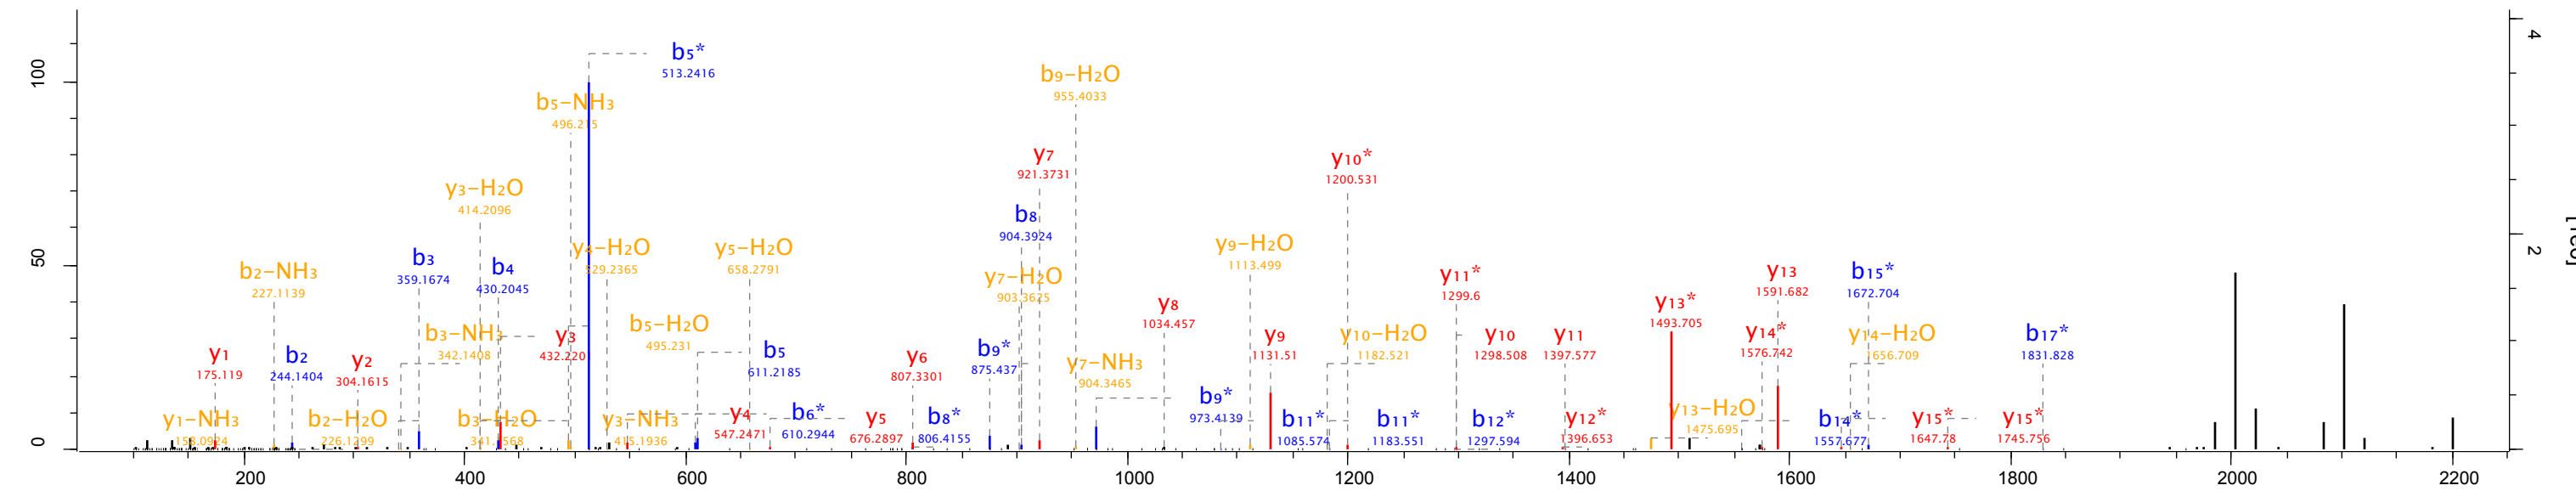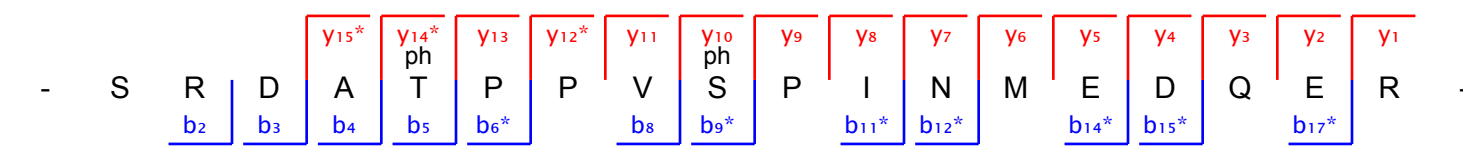

Raw file: 20171215\_MaS\_33SR\_LMH\_phospho\_03  
 Scan: 10061 Method: FTMS; HCD Score: 165.44 m/z: 782.84 Gene names: PWWP2A

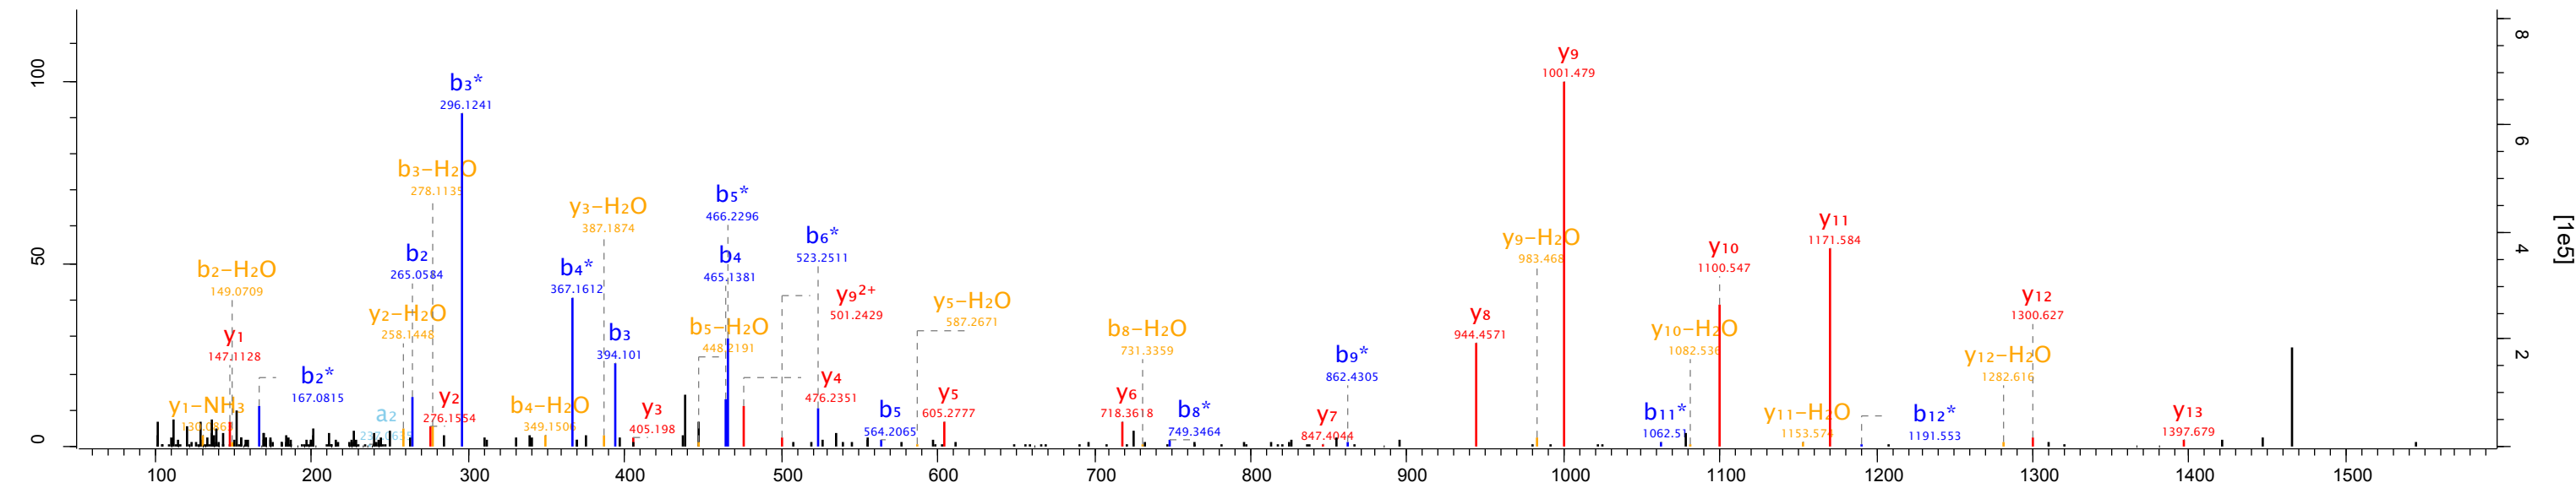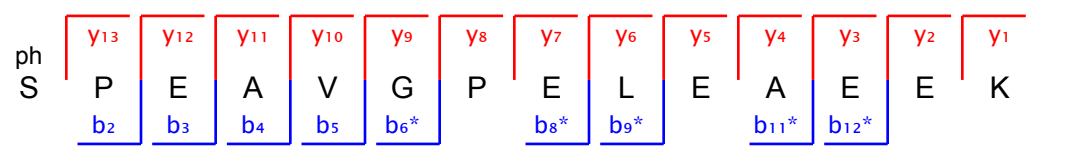





Raw file 20171215\_MaS\_33SR\_LMH\_phospho\_03 Scan 11131 Method FTMS; HCD Score 165.1 m/z 981.93 Gene names RNF20

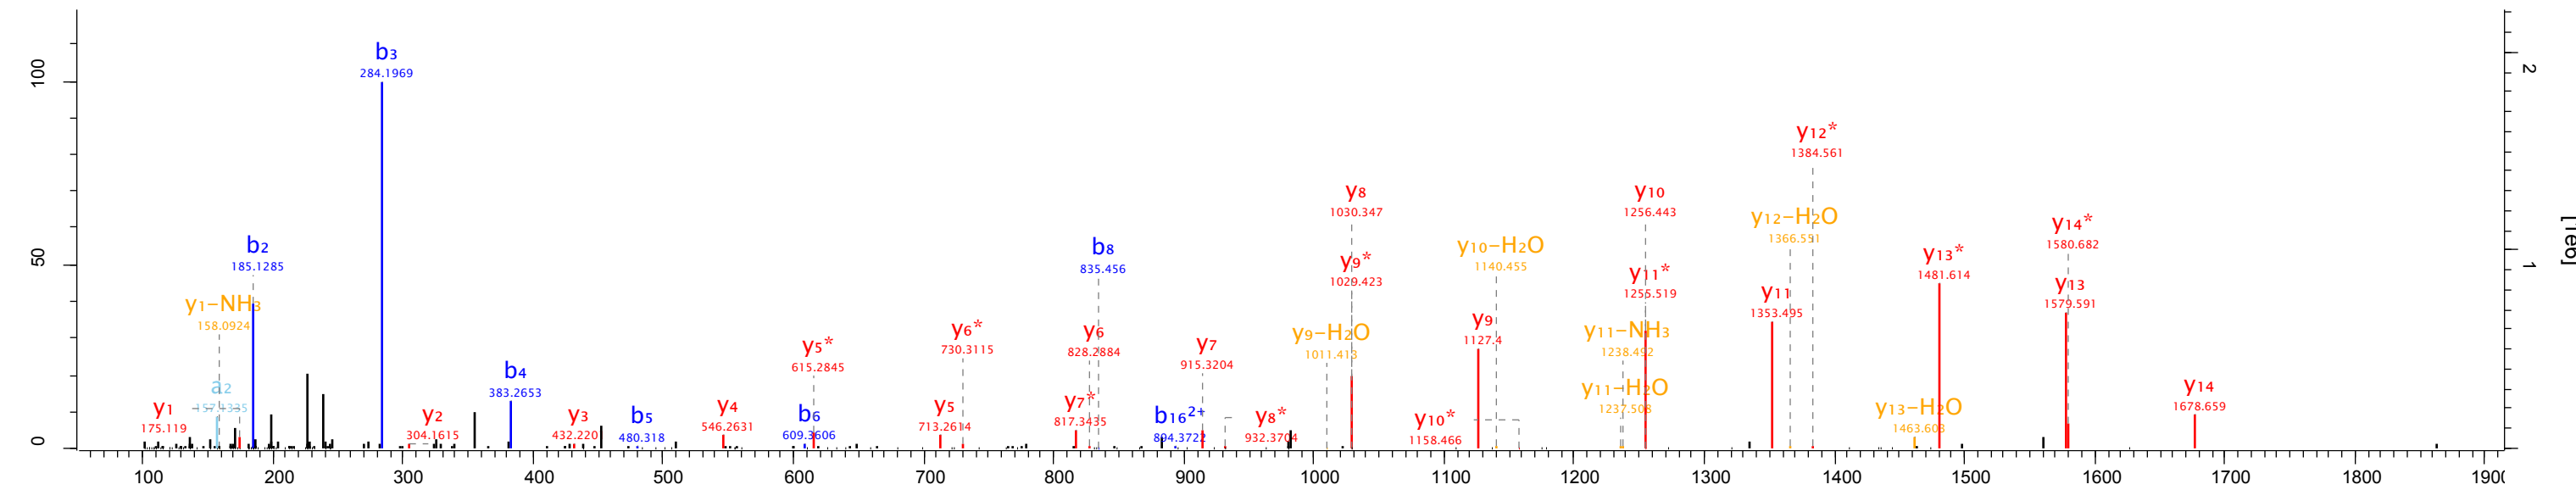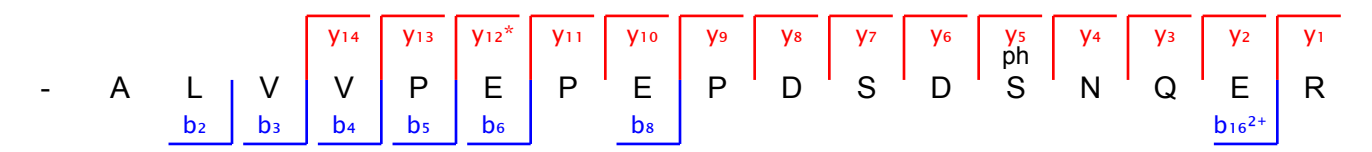

20171215\_MaS\_33SR\_LMH\_phospho\_03 11141 FTMS; HCD 111.63 590.26 FTSJ3

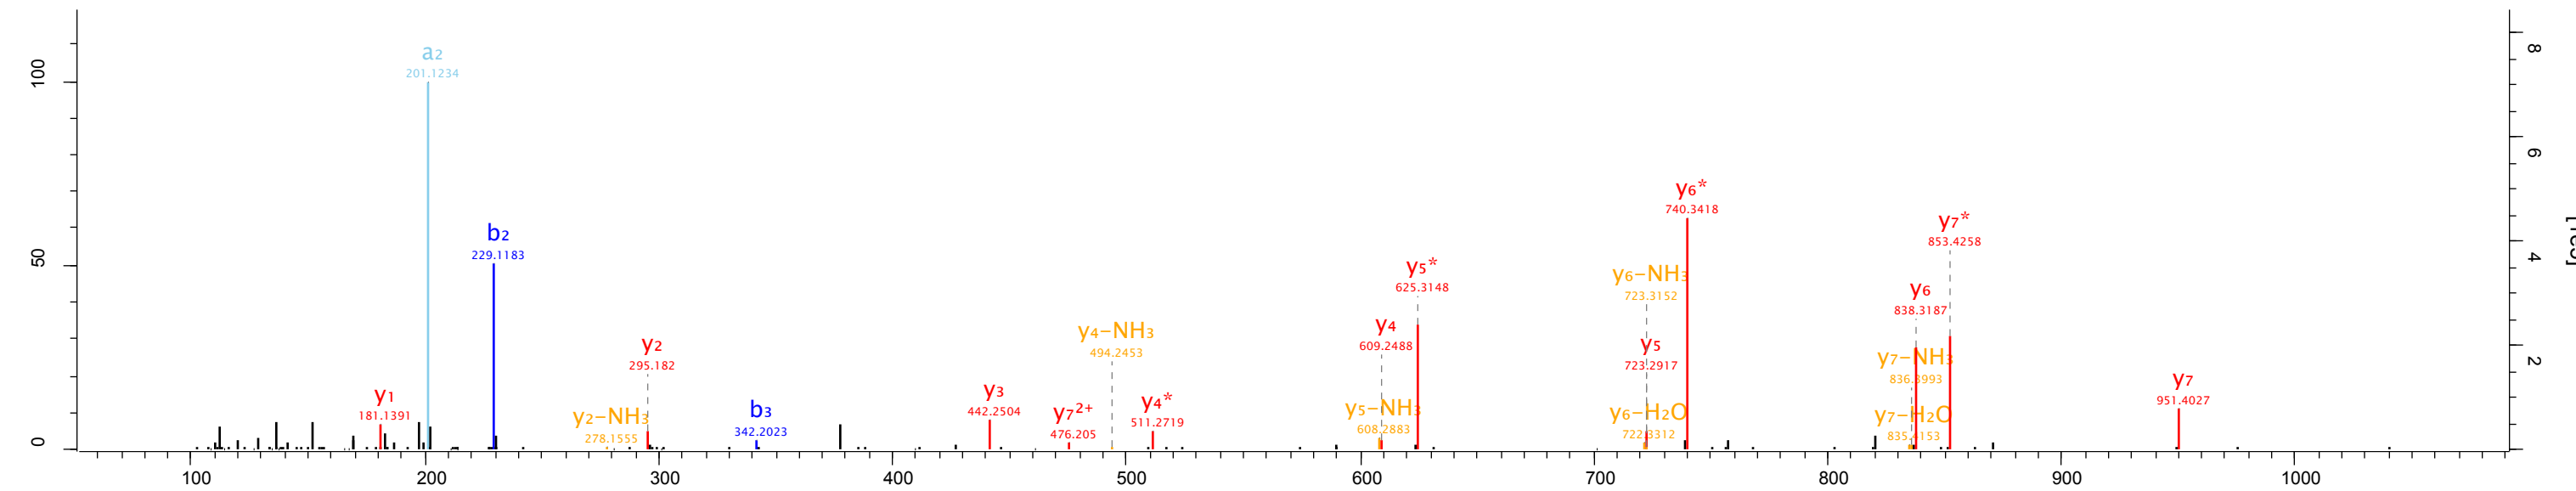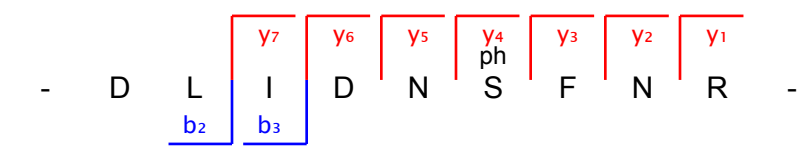

Raw file: 20171215\_MaS\_33SR\_LMH\_phospho\_03  
 Scan: 11331 Method: FTMS; HCD Score: 301.77 m/z: 904.36 Gene names: MCM2

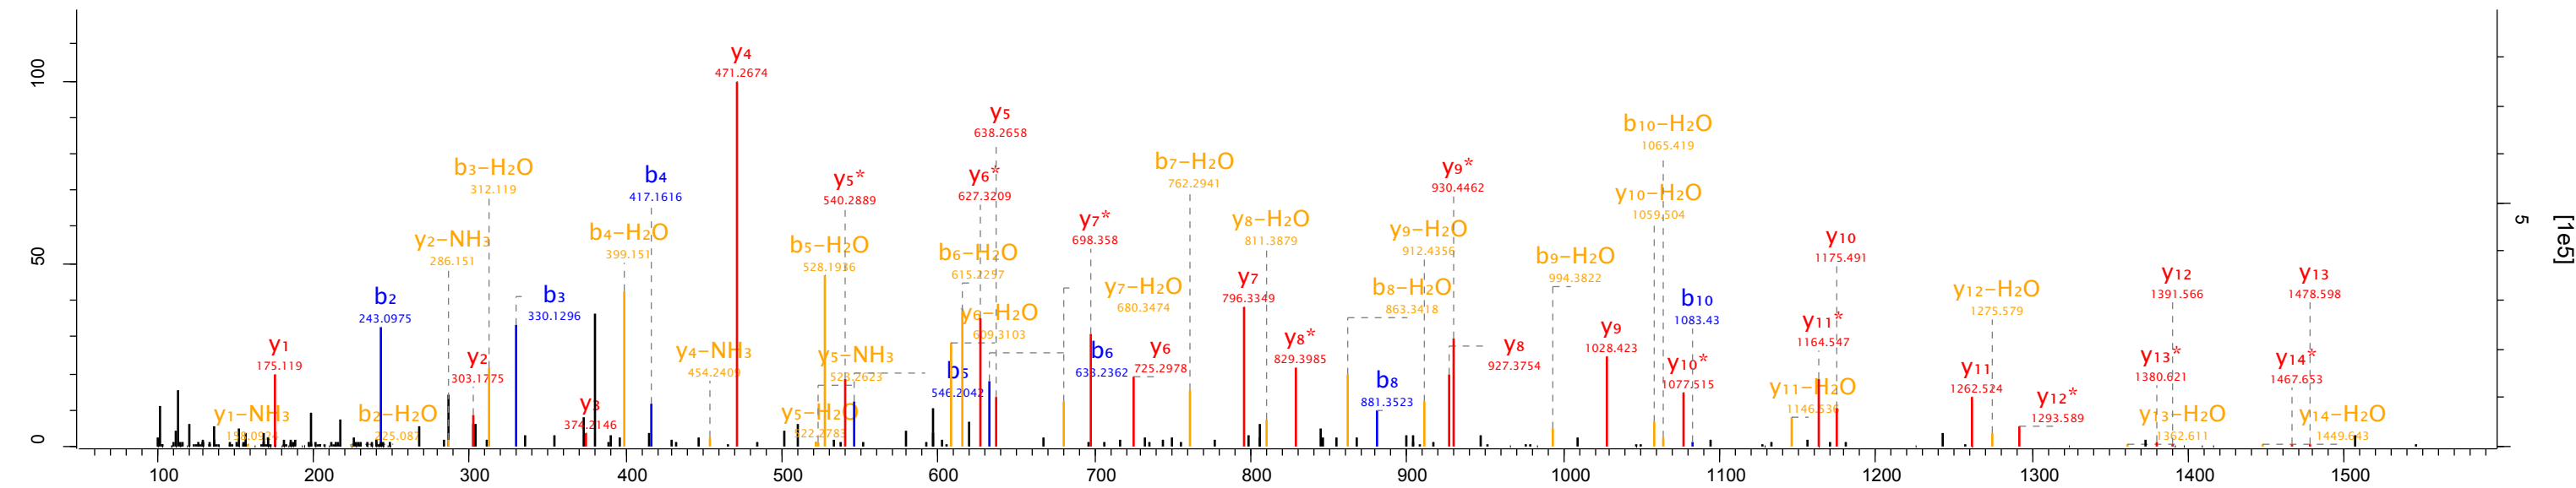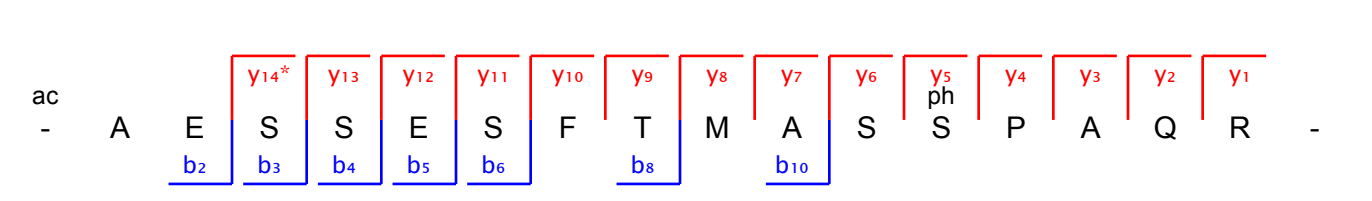

Raw file 20171215\_MaS\_33SR\_LMH\_phospho\_03 Scan 11761 Method FTMS; HCD Score 82.3 m/z 1065.9 Gene names CHD3

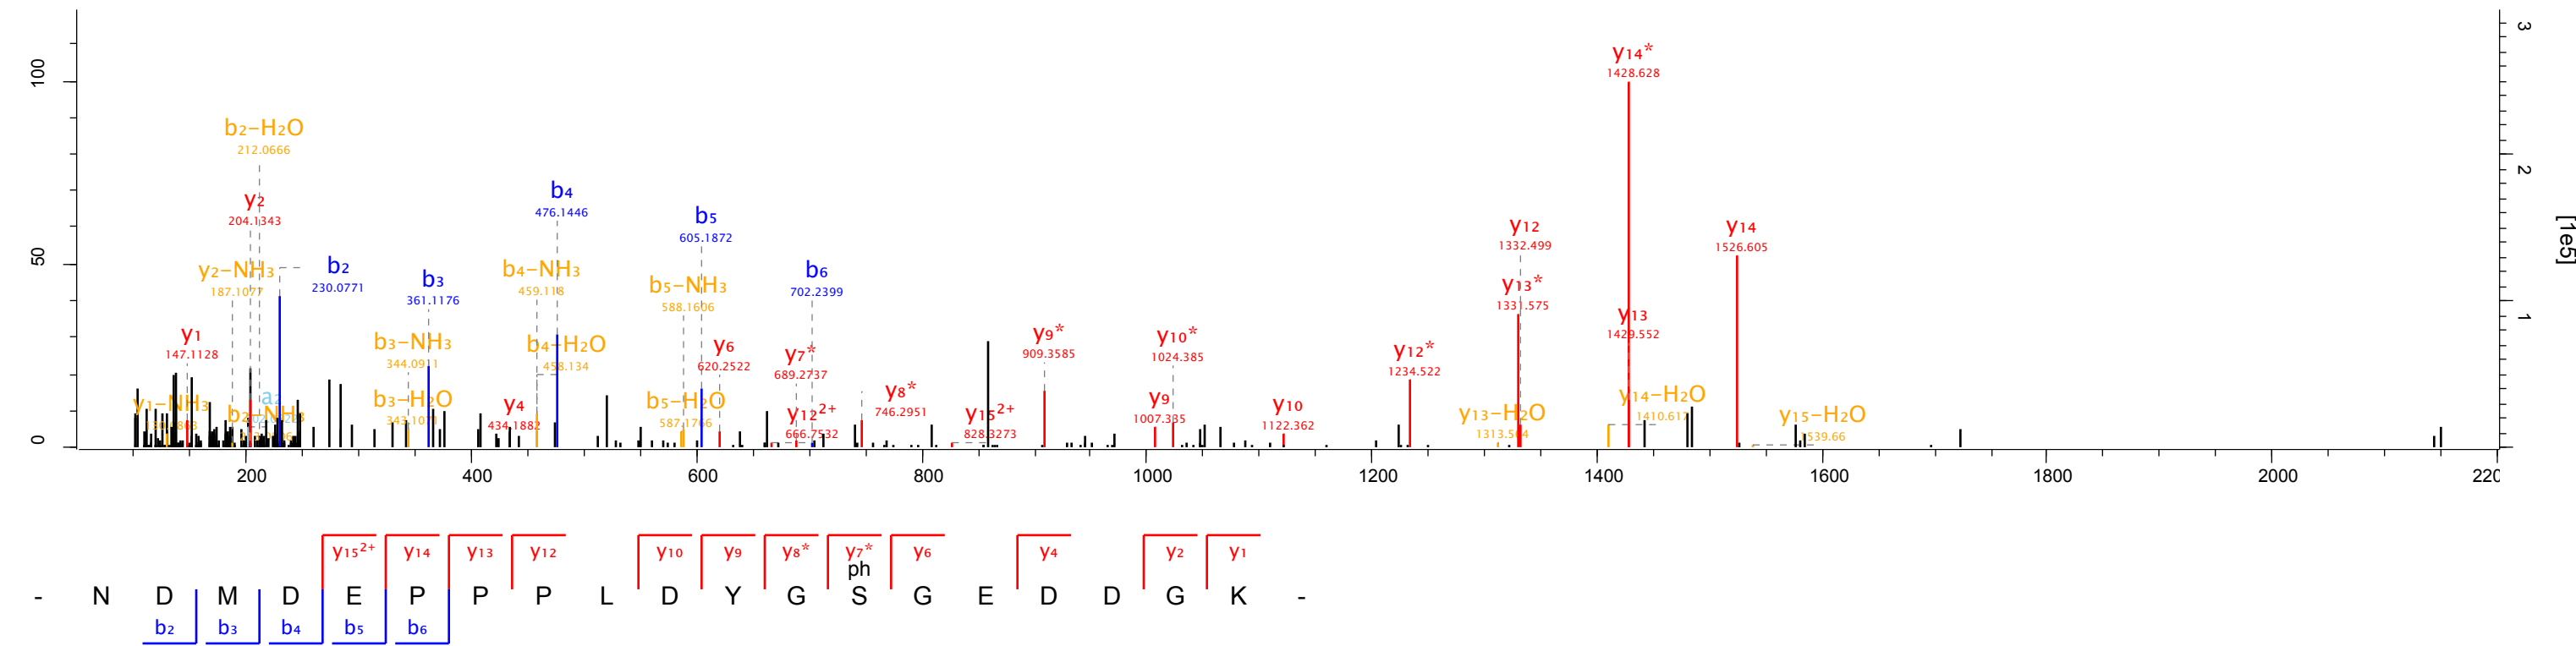

Raw file 20171215\_MaS\_33SR\_LMH\_phospho\_03 Scan 11801 Method FTMS; HCD Score 73.13 m/z 1050.79 Gene names NES

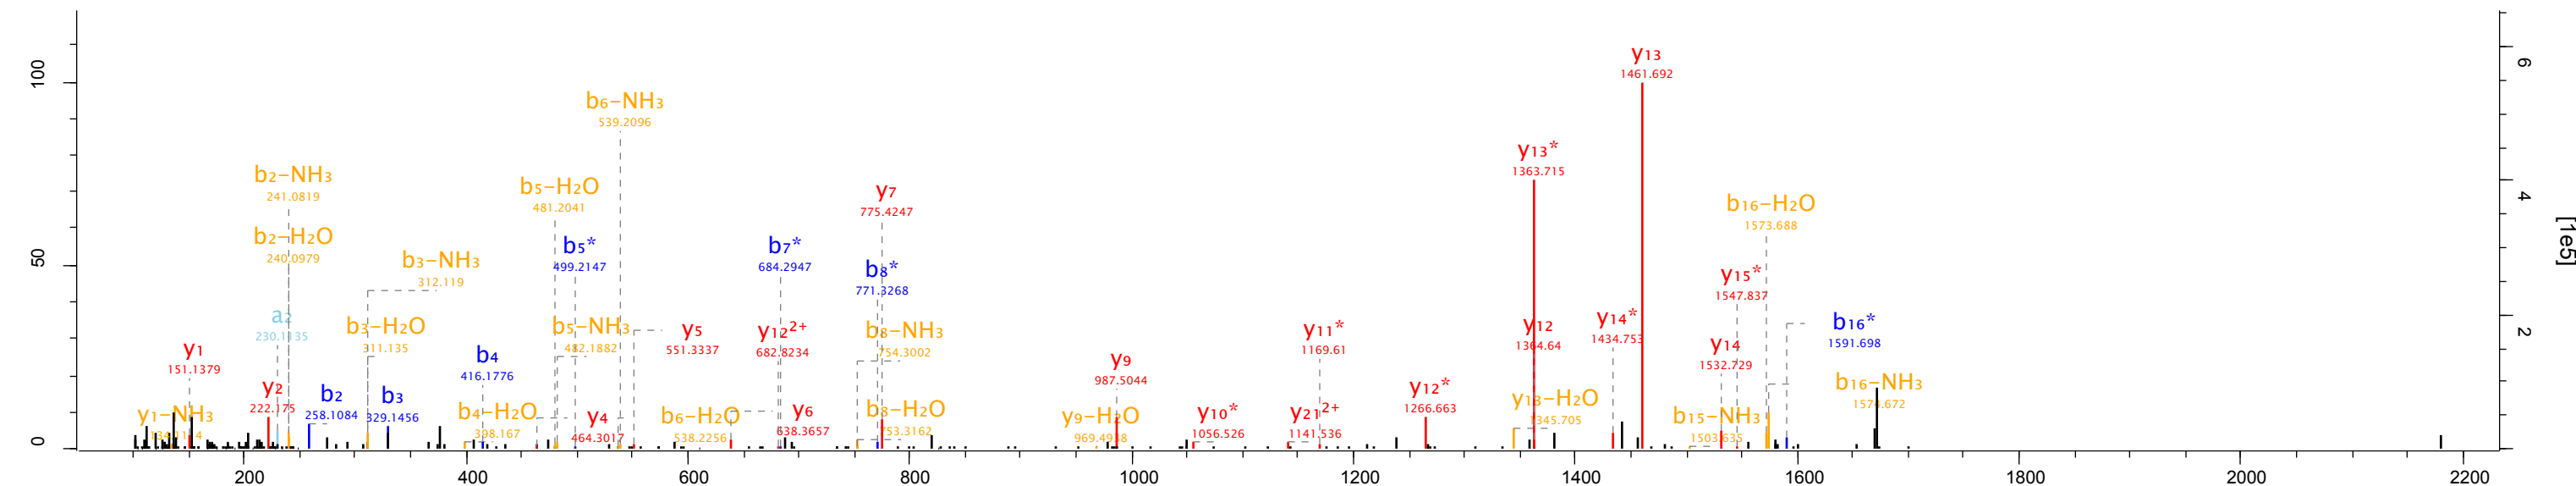

- Q E A S T G Q S P E D H A S L A P P L S P D H S S L E A K -

Fragmentation mapping (b-ions in blue, y-ions in red):

- b<sub>2</sub> (E), b<sub>3</sub> (A), b<sub>4</sub> (S), b<sub>5</sub>\* (T), b<sub>7</sub>\* (Q), b<sub>8</sub>\* (S), b<sub>16</sub>\* (A)
- y<sub>1</sub> (K), y<sub>2</sub> (E), y<sub>4</sub> (L), y<sub>5</sub> (S), y<sub>6</sub> (S), y<sub>7</sub> (D), y<sub>9</sub> (P), y<sub>10</sub>\* (S), y<sub>11</sub>\* (L), y<sub>12</sub> (P), y<sub>13</sub> (A), y<sub>14</sub> (L), y<sub>15</sub>\* (S), y<sub>21</sub><sup>2+</sup> (P)

Raw file 20171215\_MaS\_33SR\_LMH\_phospho\_03 Scan 11891 Method FTMS; HCD Score 129.82 m/z 581.78 Gene names STMN1;STMN2

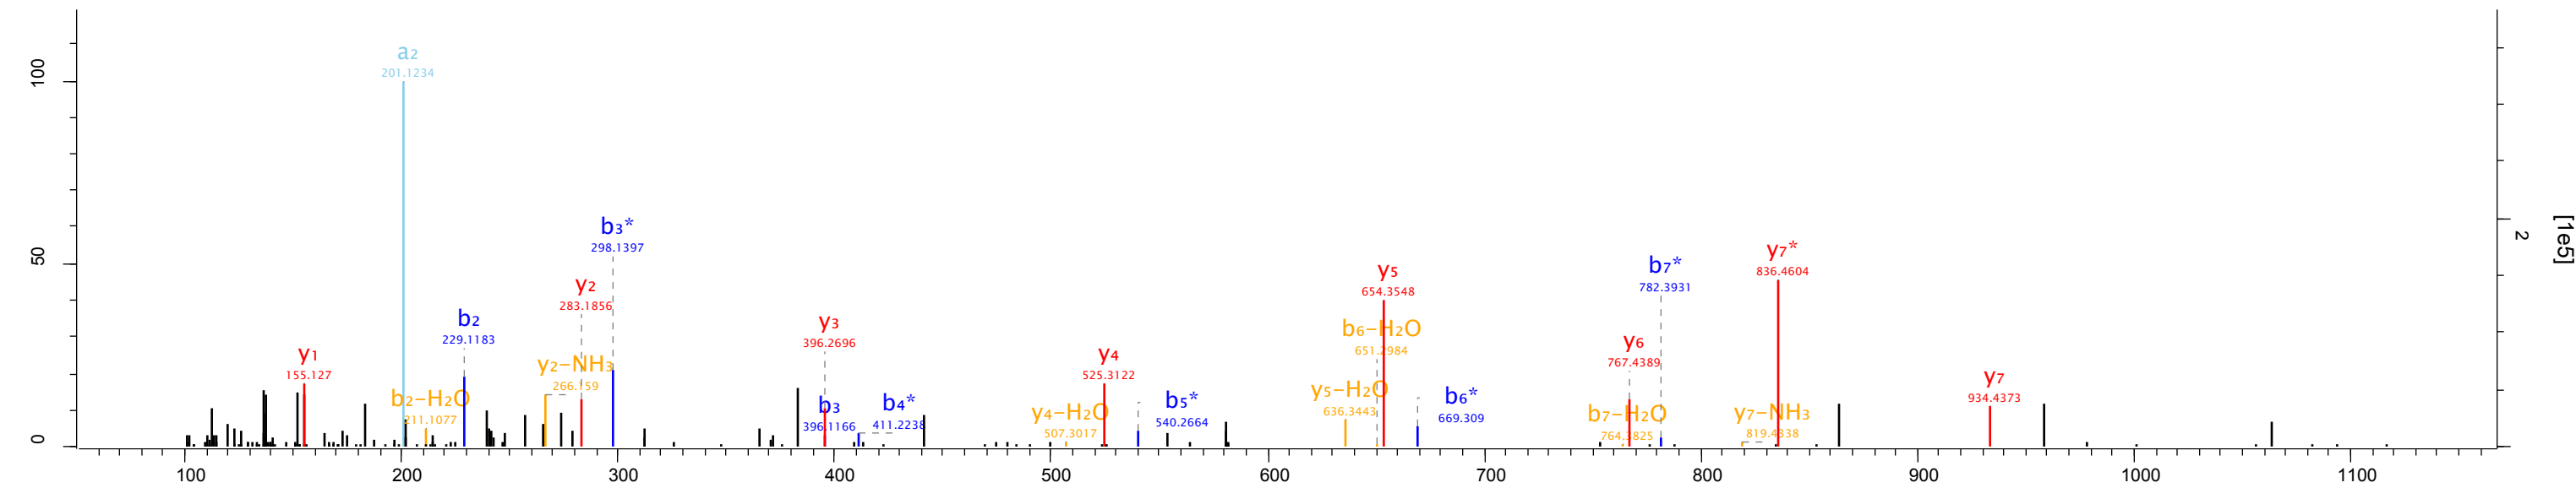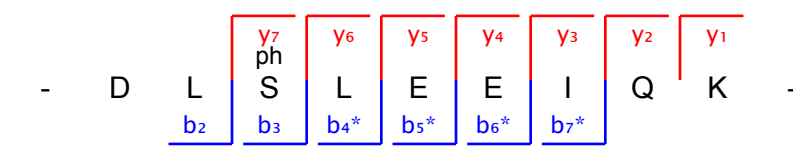

Raw file 20171215\_MaS\_33SR\_LMH\_phospho\_03 Scan 11901 Method FTMS; HCD Score 232.82 m/z 912.36 Gene names SP1

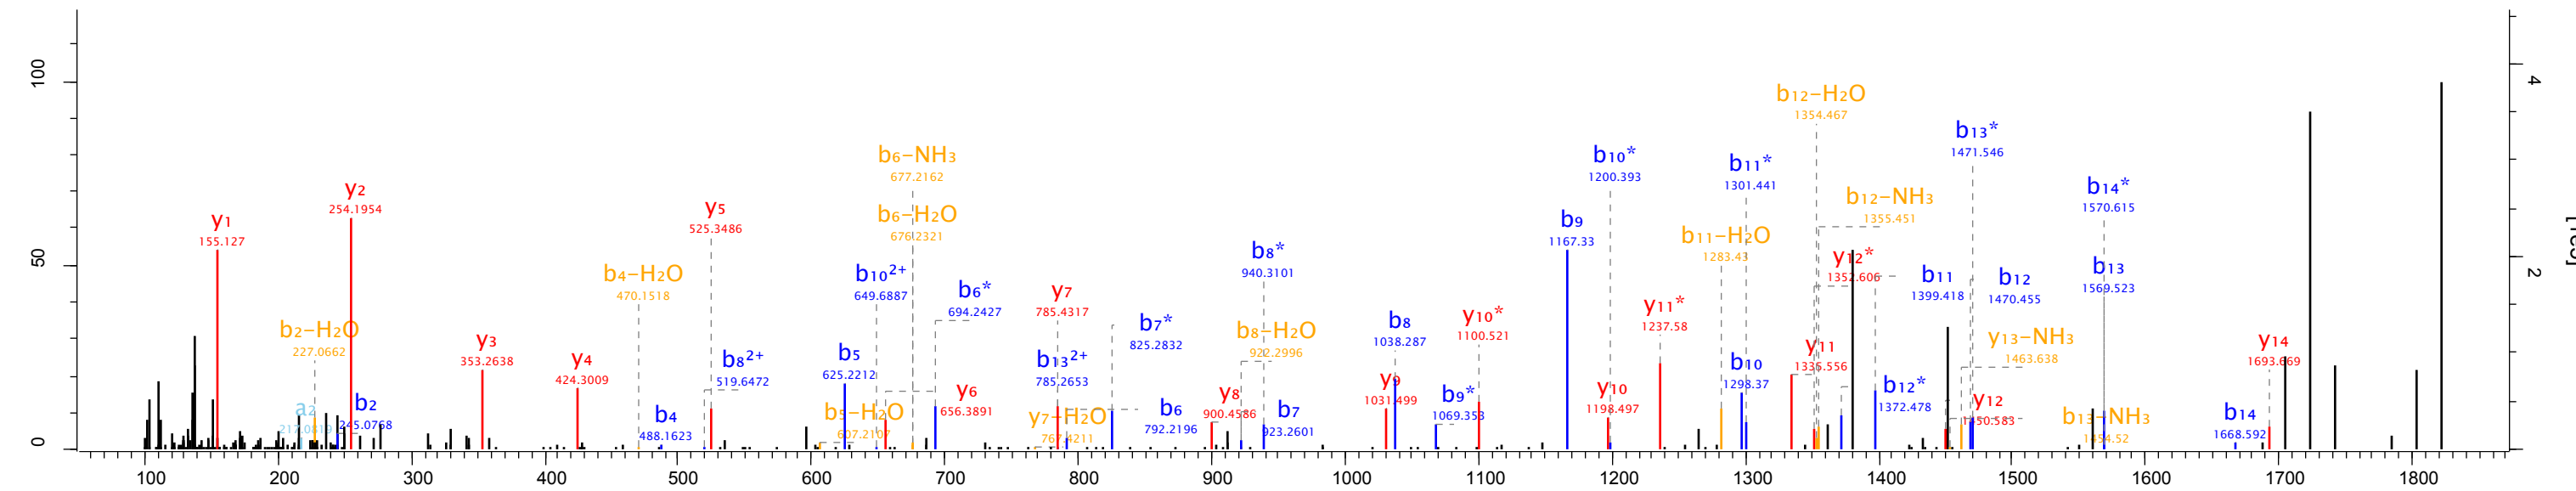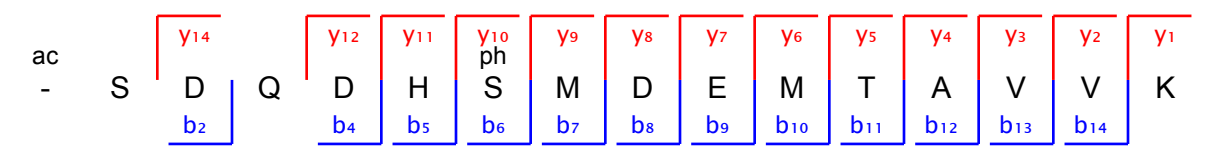



Raw file 20171215\_MaS\_33SR\_LMH\_phospho\_03 Scan 11961 Method FTMS; HCD Score 201.96 m/z 961.93 Gene names MTX3

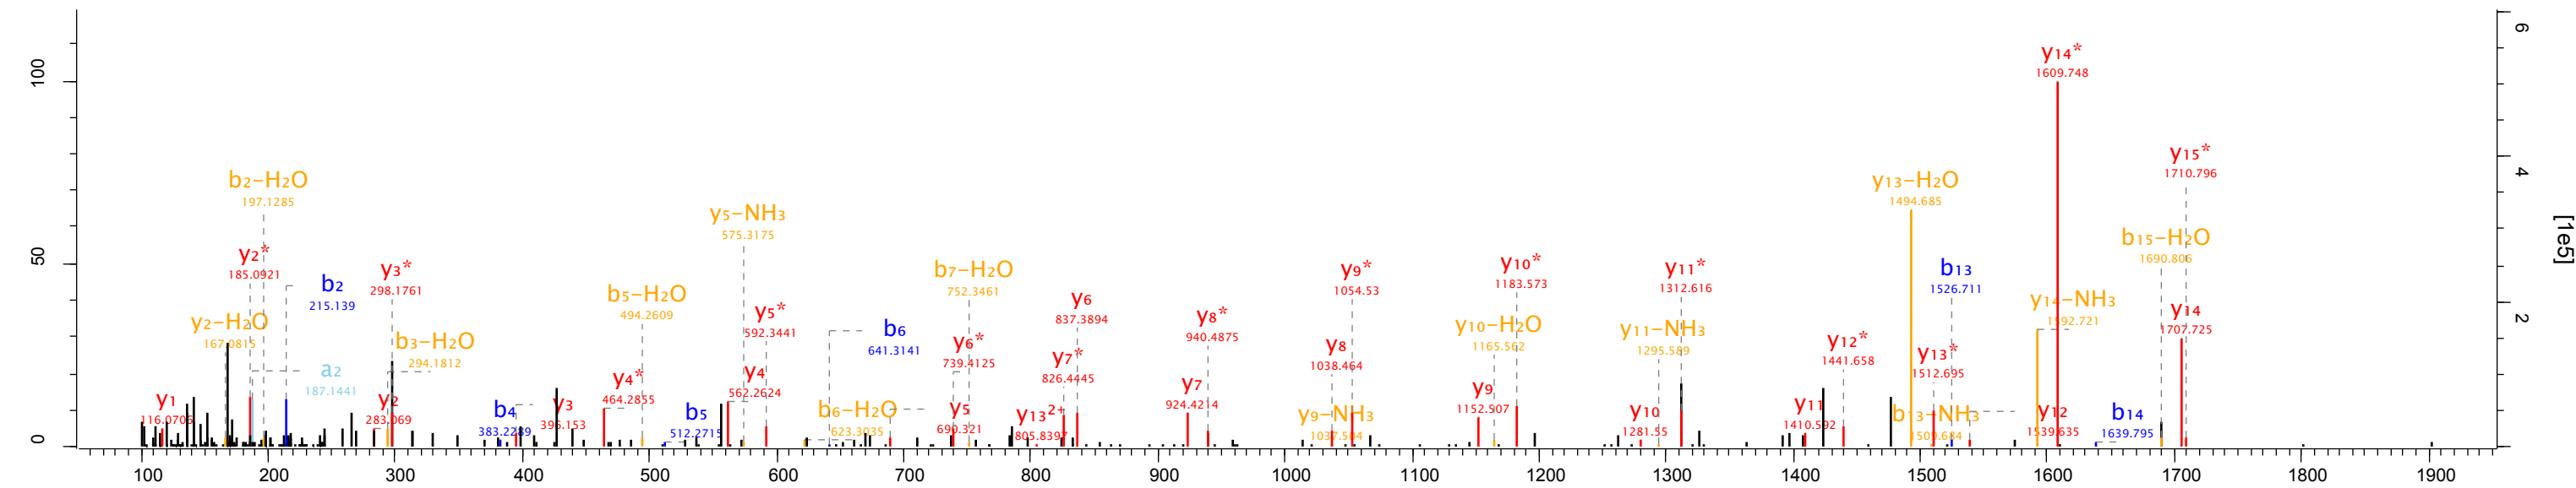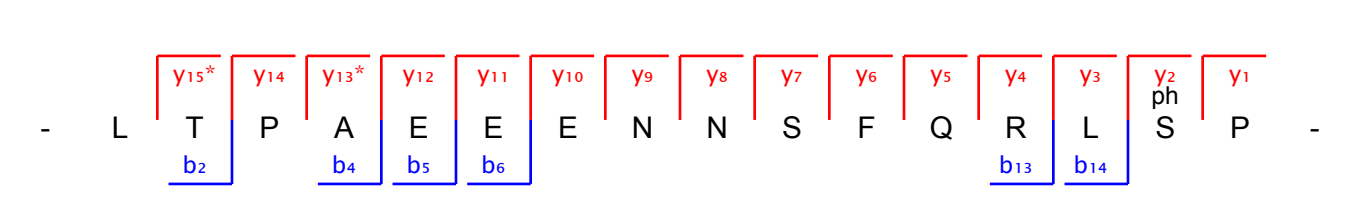

Raw file 20171215\_MaS\_33SR\_LMH\_phospho\_03 Scan 12021 Method FTMS; HCD Score 416.2 m/z 1255.54 Gene names TRIM28

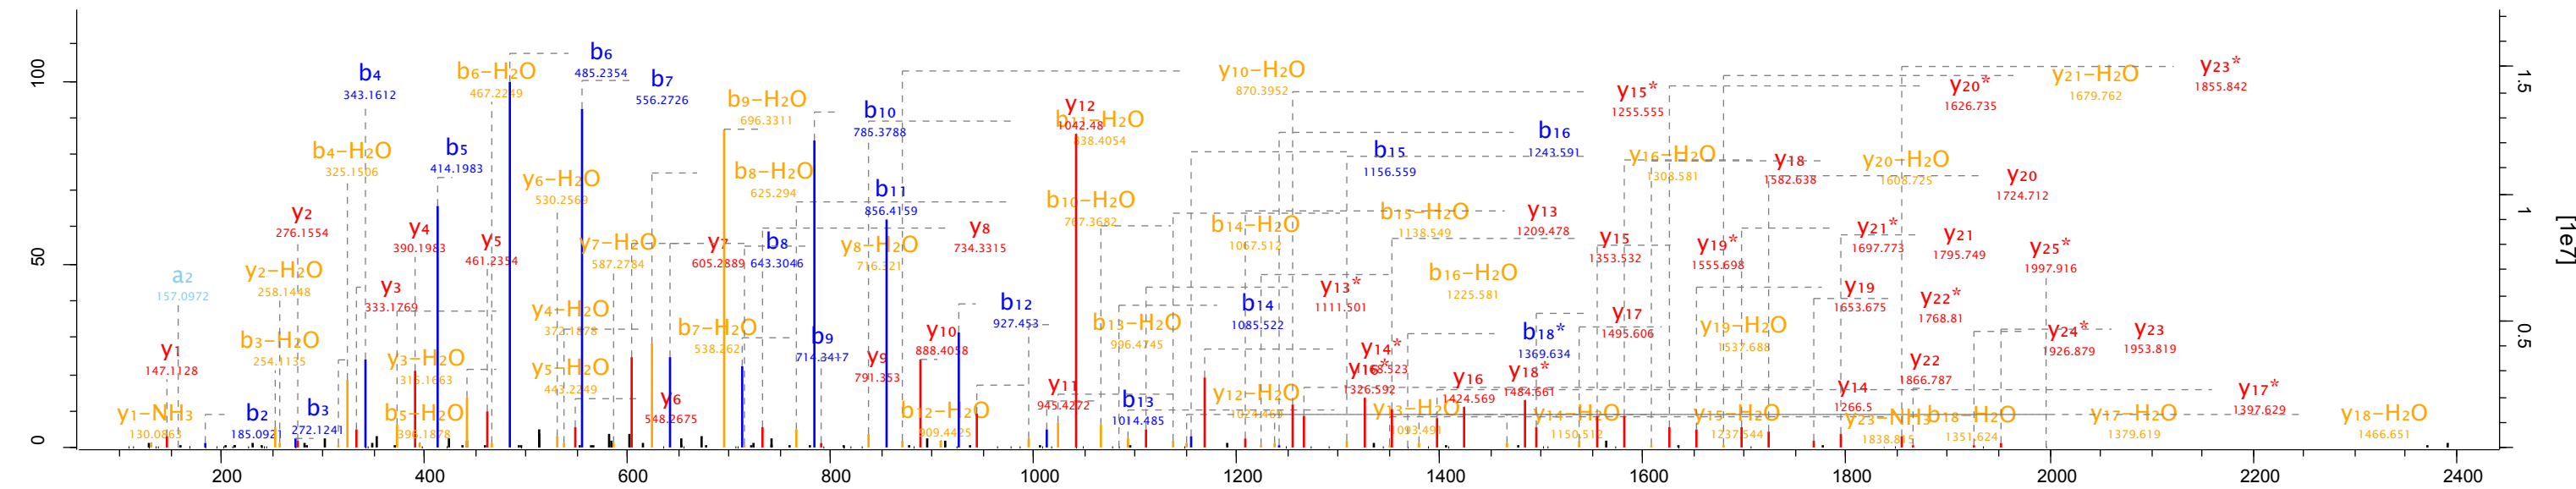

ac - A A S A A A A A A A A S A A S G P G P G E G S A G G E K -

b<sub>2</sub>
b<sub>3</sub>
b<sub>4</sub>
b<sub>5</sub>
b<sub>6</sub>
b<sub>7</sub>
b<sub>8</sub>
b<sub>9</sub>
b<sub>10</sub>
b<sub>11</sub>
b<sub>12</sub>
b<sub>13</sub>
b<sub>14</sub>
b<sub>15</sub>
b<sub>16</sub>
b<sub>18</sub>\*
y<sub>25</sub>\*
y<sub>24</sub>\*
y<sub>23</sub>
y<sub>22</sub>
y<sub>21</sub>
y<sub>20</sub>
y<sub>19</sub>
y<sub>18</sub>
y<sub>17</sub>
y<sub>16</sub>
y<sub>15</sub>
y<sub>14</sub>
y<sub>13</sub> ph
y<sub>12</sub>
y<sub>11</sub>
y<sub>10</sub>
y<sub>9</sub>
y<sub>8</sub>
y<sub>7</sub>
y<sub>6</sub>
y<sub>5</sub>
y<sub>4</sub>
y<sub>3</sub>
y<sub>2</sub>
y<sub>1</sub>

Raw file 20171215\_MaS\_33SR\_LMH\_phospho\_03 Scan 12101 Method FTMS; HCD Score 131.33 m/z 1004.44 Gene names HTT

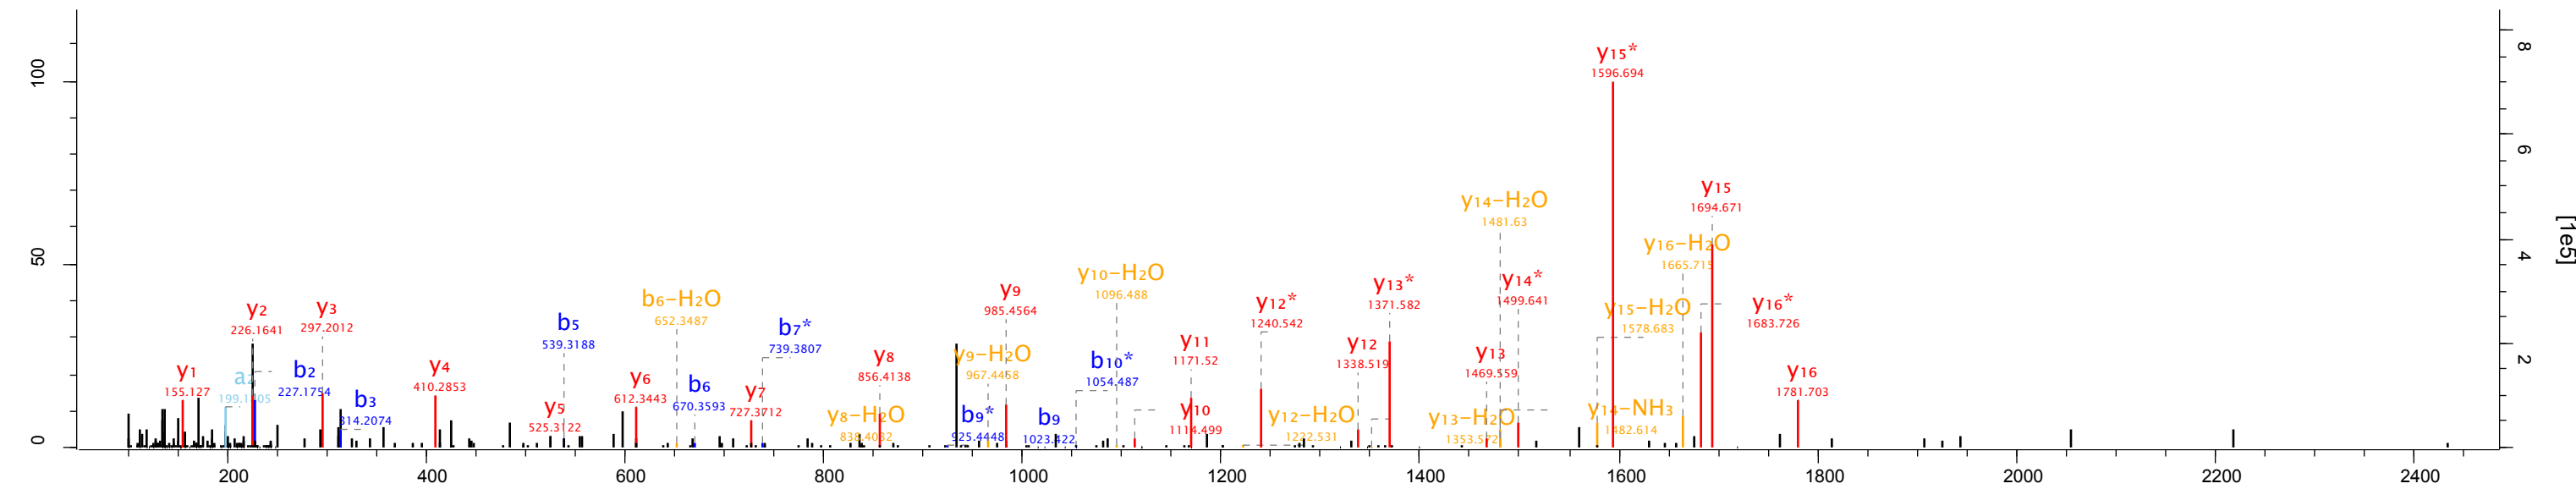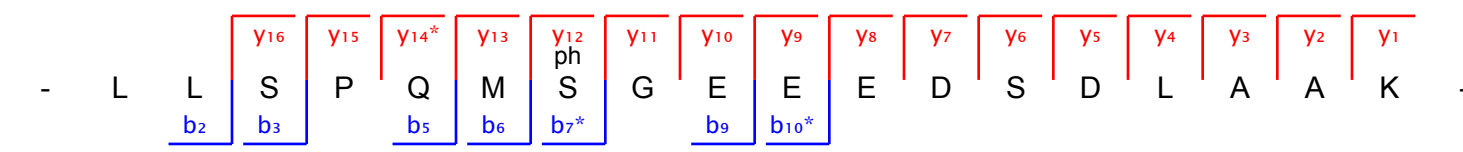

Raw file 20171215\_MaS\_33SR\_LMH\_phospho\_03 Scan 12281 Method FTMS; HCD Score 166.48 m/z 849.38 Gene names ZNF395

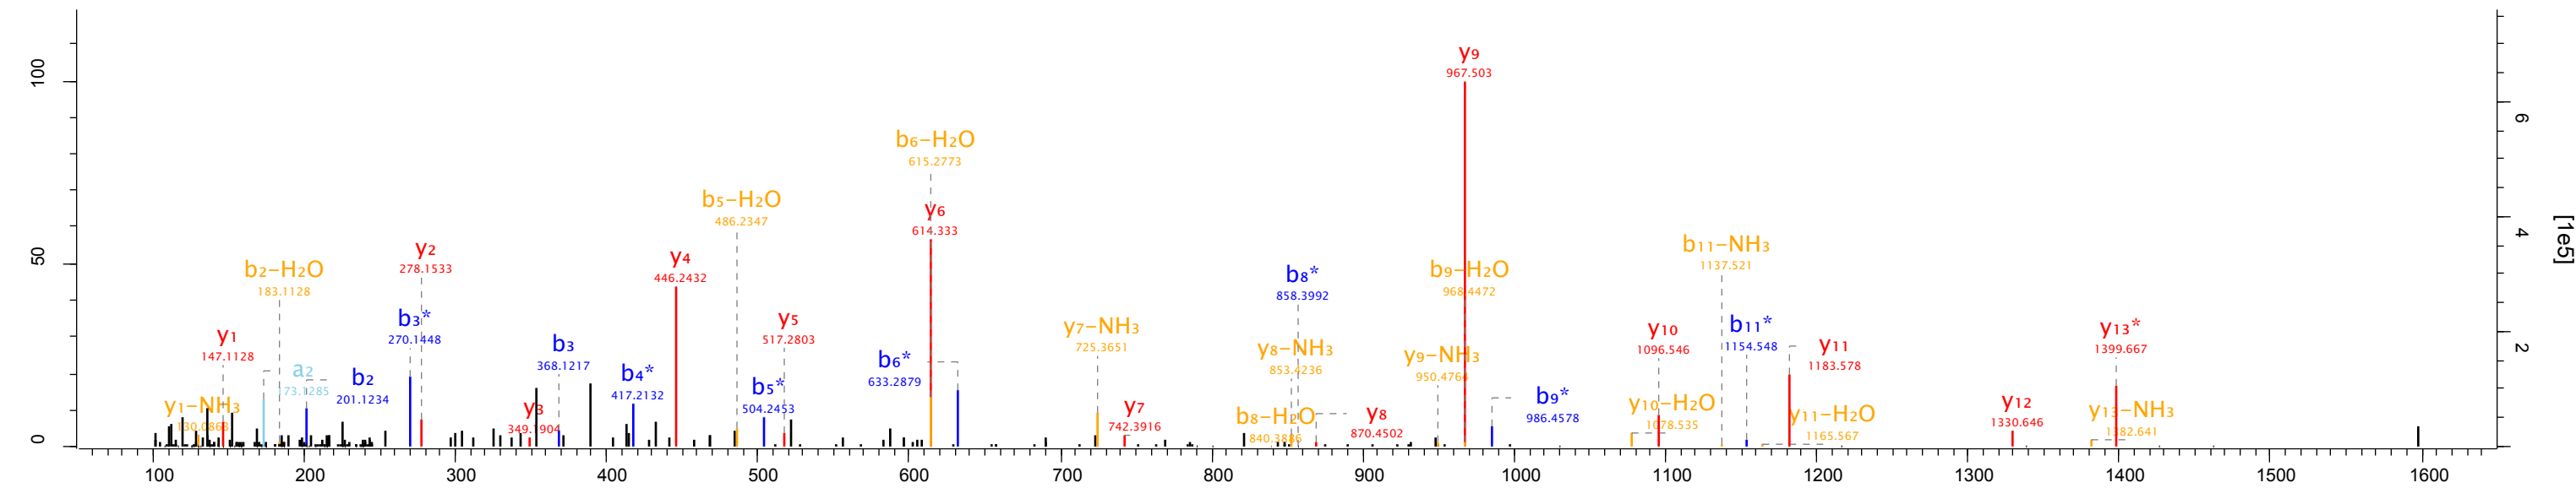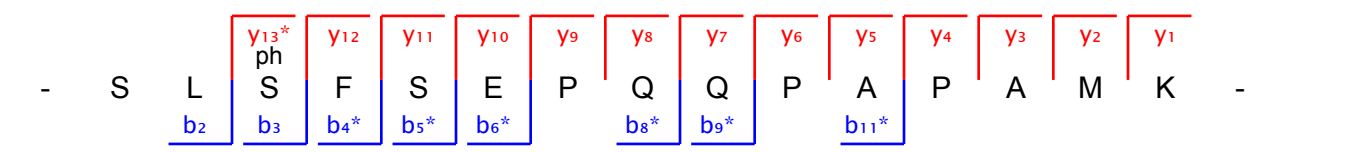

Raw file: 20171215\_MaS\_33SR\_LMH\_phospho\_03  
 Scan: 12891 Method: FTMS; HCD Score: 187.97 m/z: 665.3 Gene names: PAICS

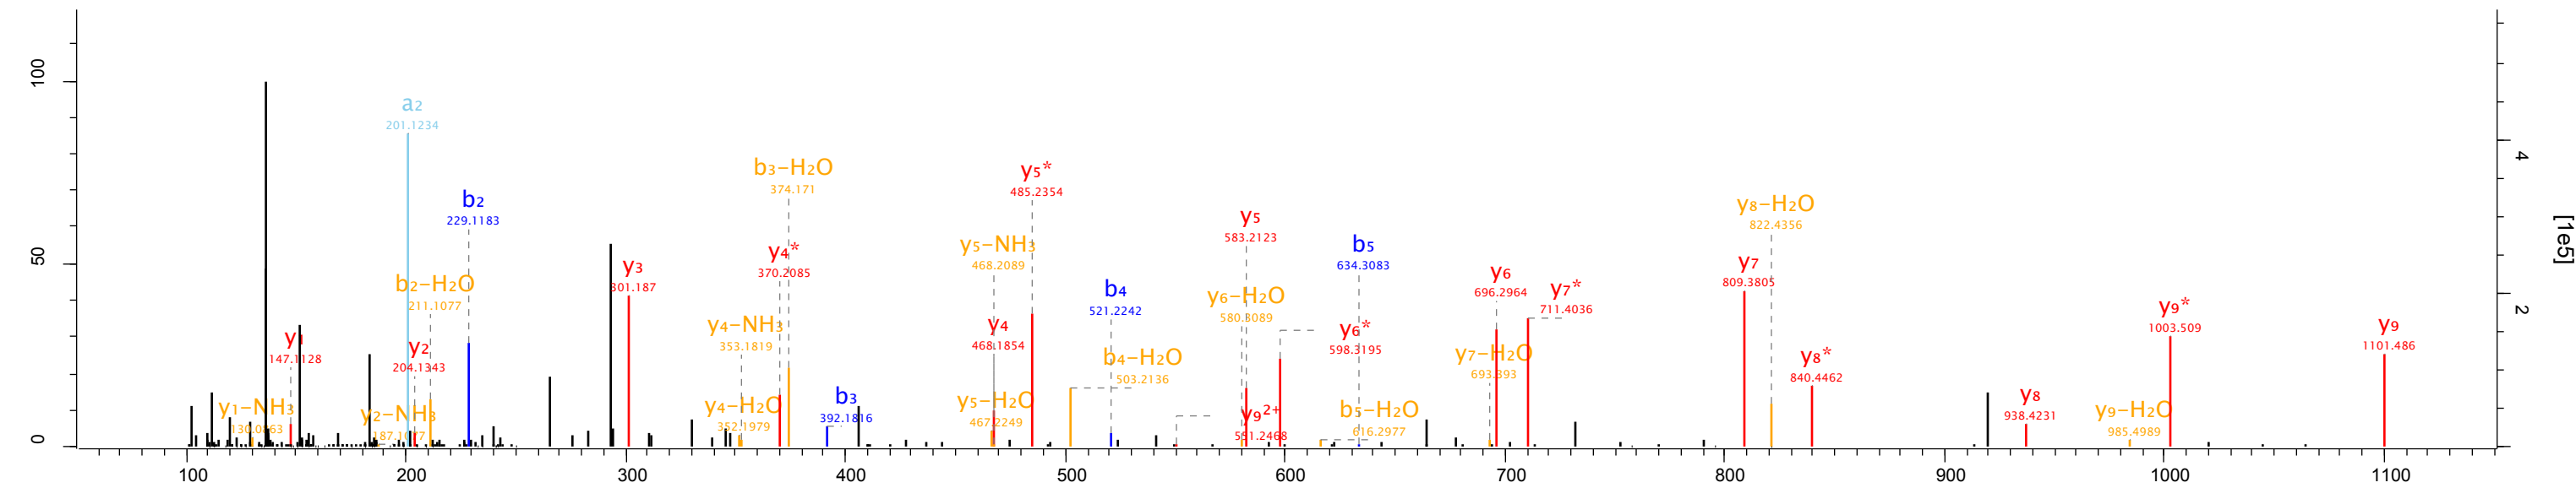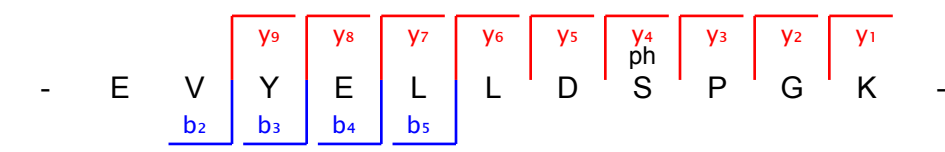

Raw file 20171215\_MaS\_33SR\_LMH\_phospho\_03 Scan 13171 Method FTMS; HCD Score 96.25 m/z 740.34 Gene names DPCD

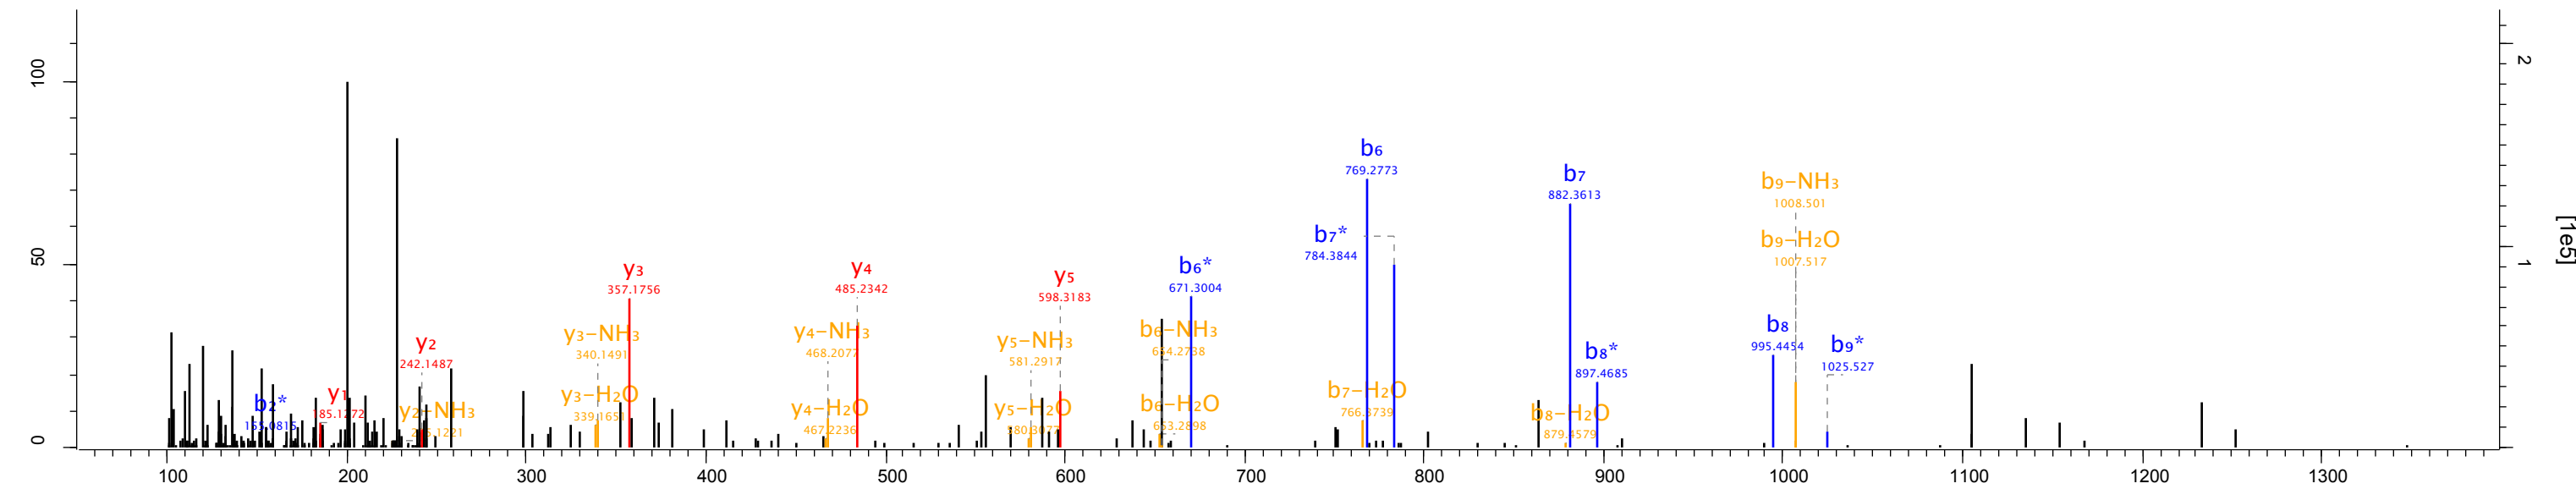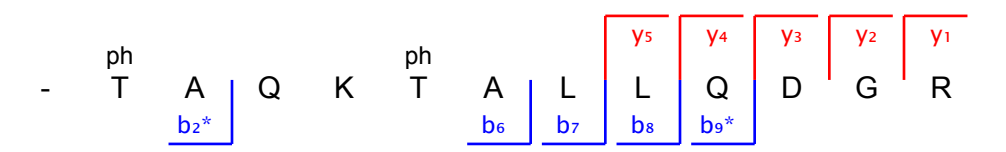

Raw file 20171215\_MaS\_33SR\_LMH\_phospho\_03 Scan 13581 Method FTMS; HCD Score 80.94 m/z 1149.79 Gene names YBX1

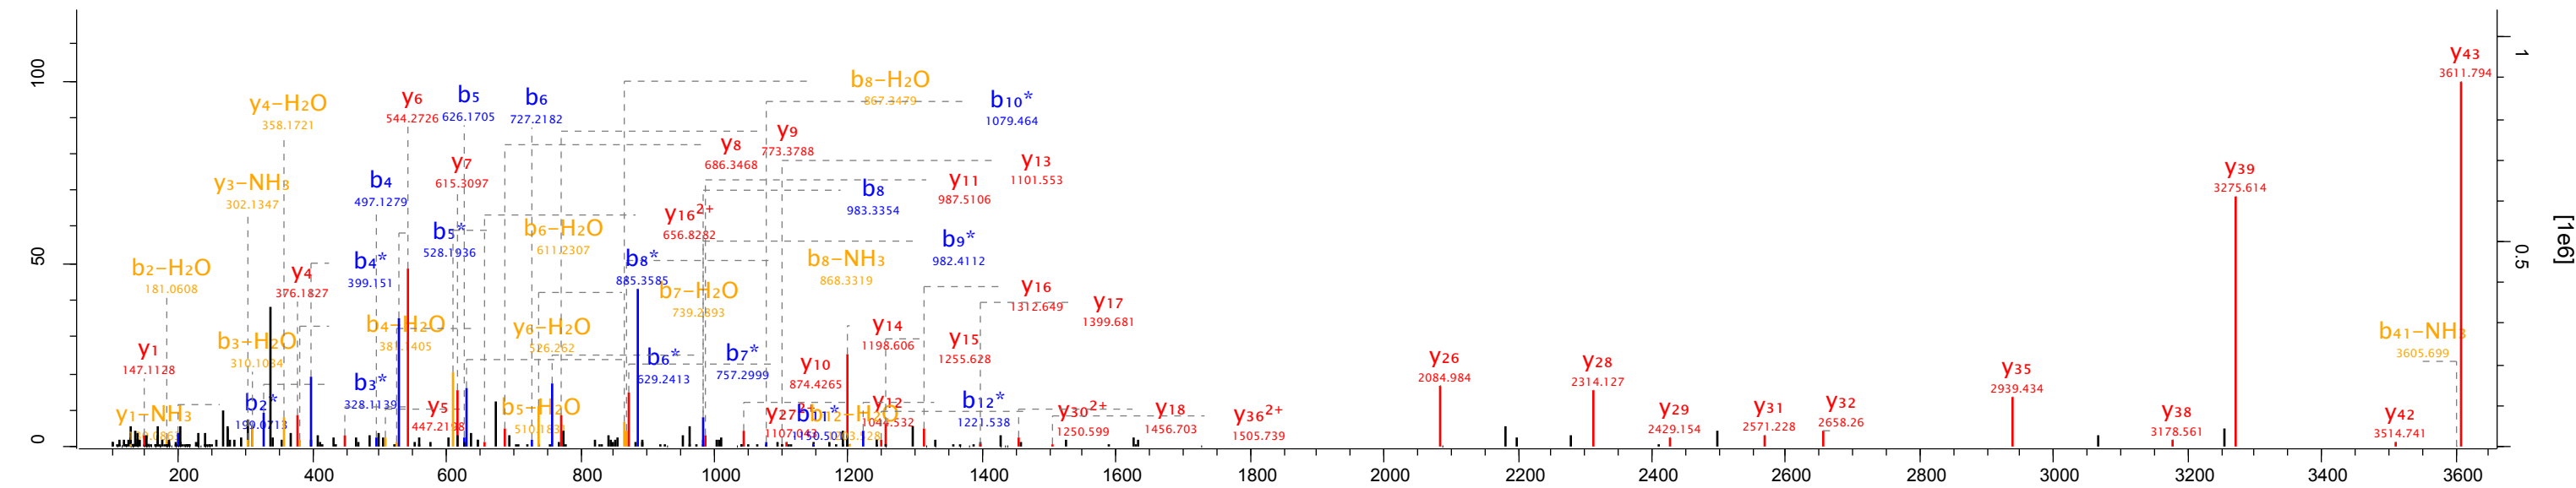

ac - S S E A E T Q Q P P A A P P A A P A L S A A D T K P G T T G S G A G S G G P

ph S S E A E T Q Q P P A A P P A A P A L S A A D T K P G T T G S G A G S G G P

b2\* b3\* b4 b5 b6 b7\* b8 b9\* b10\* b11\* b12\*

y1 y2 y3 y4 y5 y6 y7 y8 y9 y10 y11 y12 y13 y14 y15 y16 y17 y18 y19 y20 y21 y22 y23 y24 y25 y26 y27 y28 y29 y30 y31 y32 y33 y34 y35 y36 y37 y38 y39 y40 y41 y42 y43

Raw file 20171215\_MaS\_33SR\_LMH\_phospho\_03 Scan 13871 Method FTMS; HCD Score 123.44 m/z 1094.99 Gene names NCAPD2

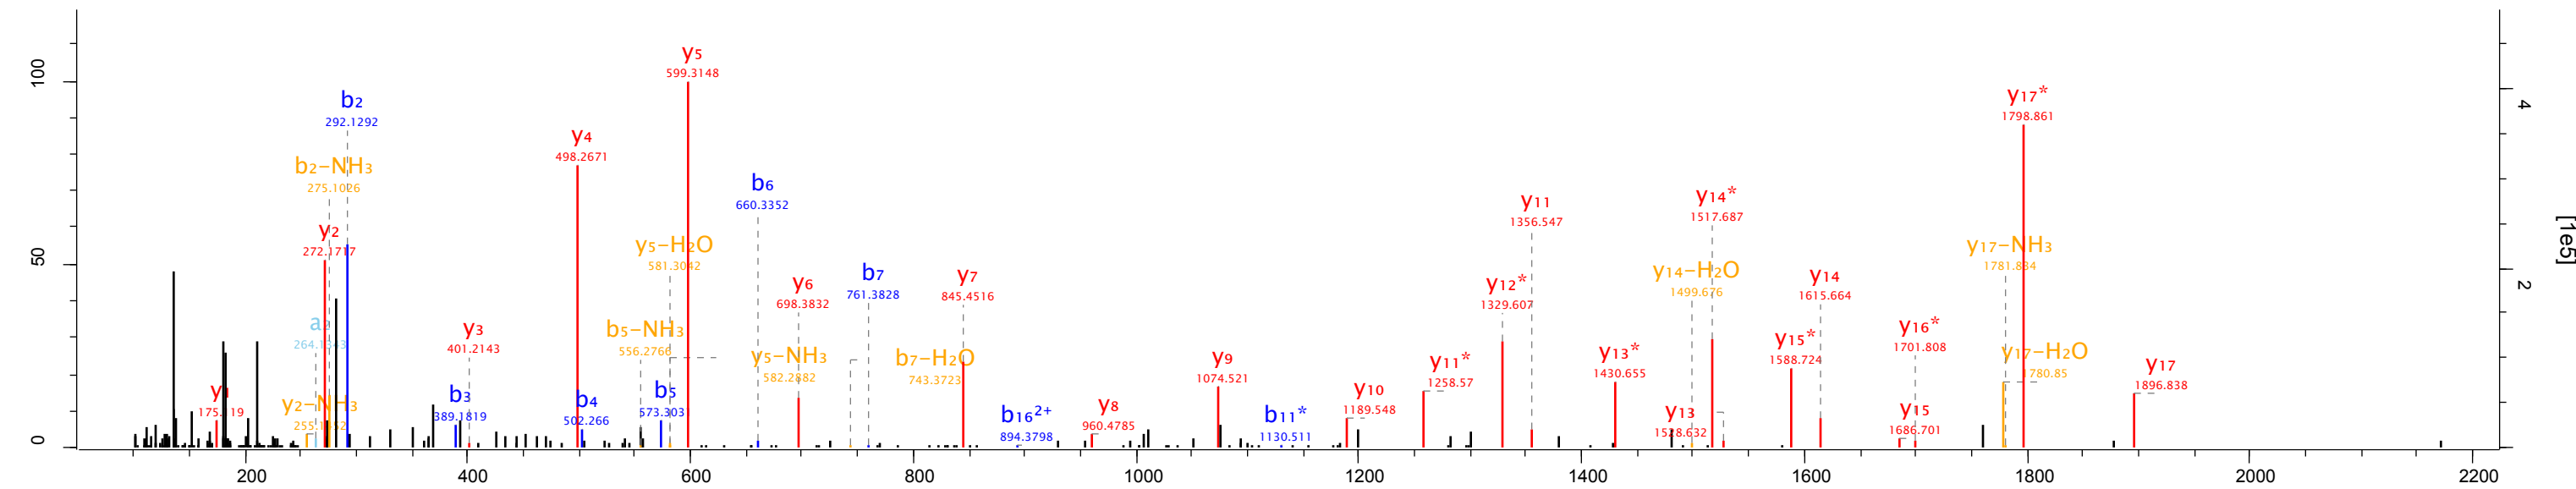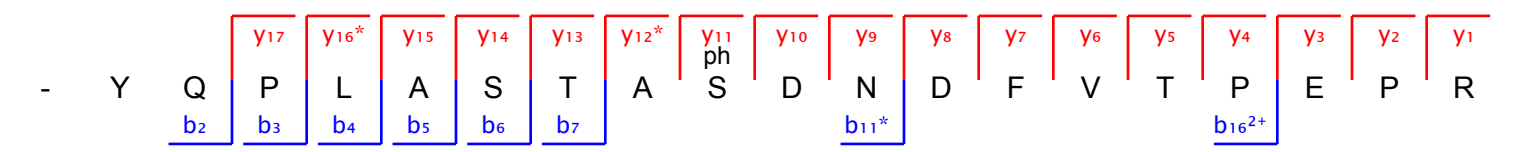



Raw file 20171215\_MaS\_33SR\_LMH\_phospho\_03 Scan 14221 Method FTMS; HCD Score 103.53 m/z 1197.01 Gene names FAM13A

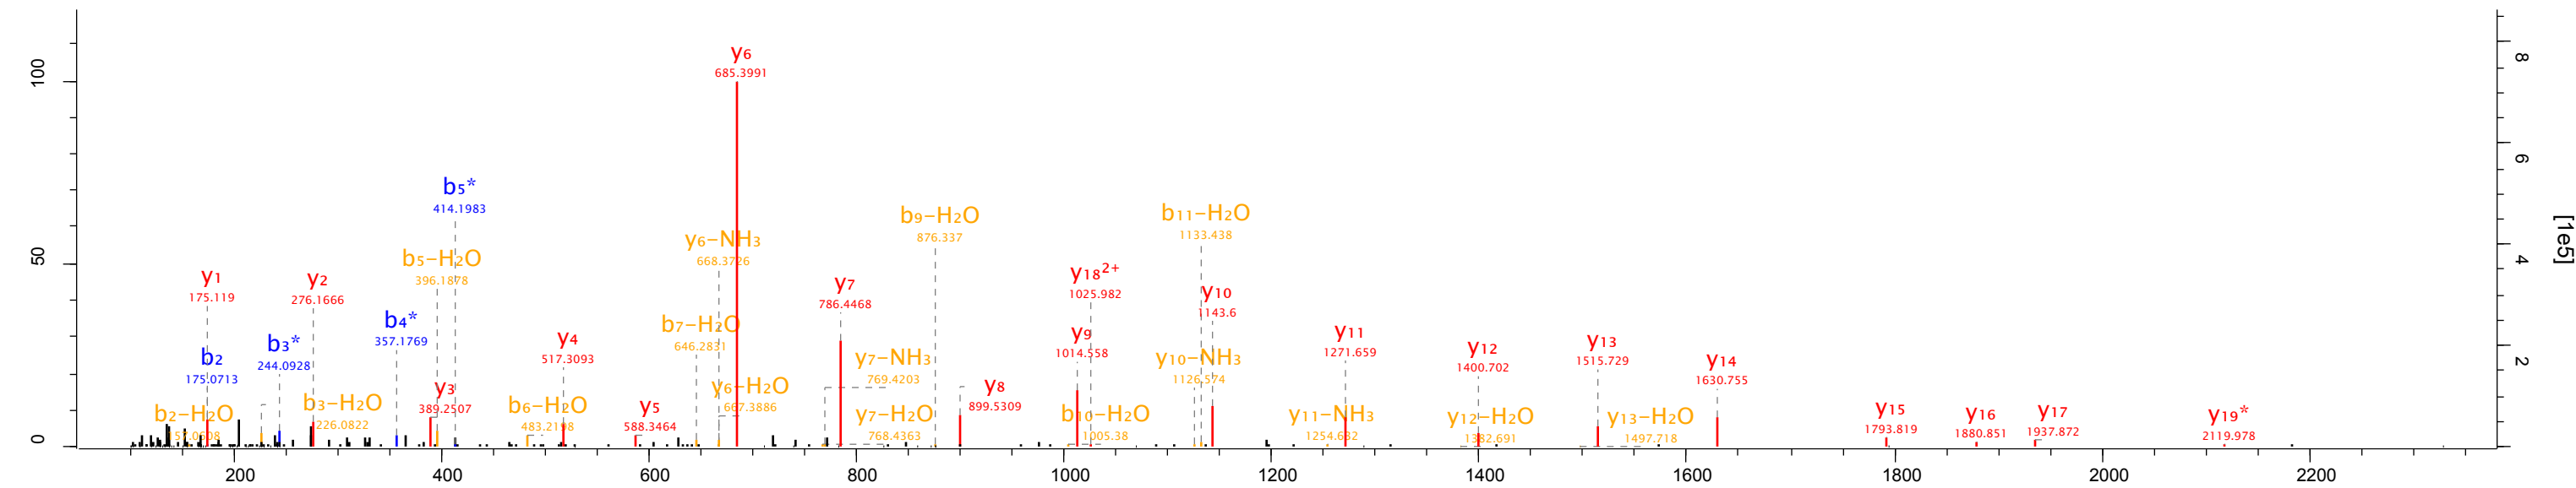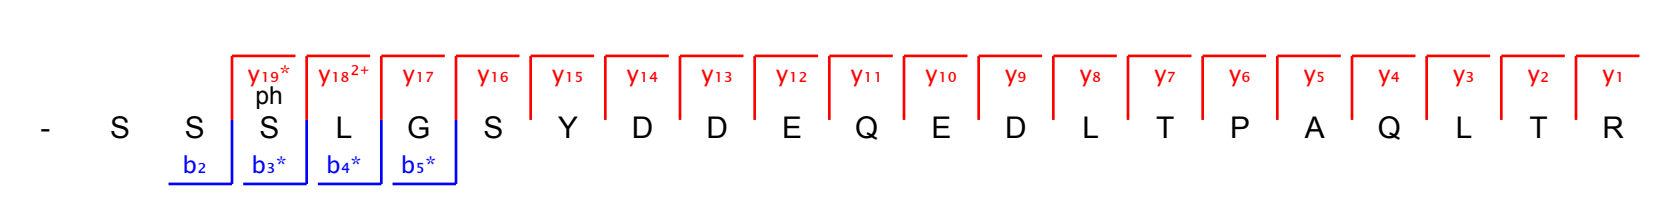

Raw file 20171215\_MaS\_33SR\_LMH\_phospho\_03 Scan 14231 Method FTMS; HCD Score 53.87 m/z 744.35

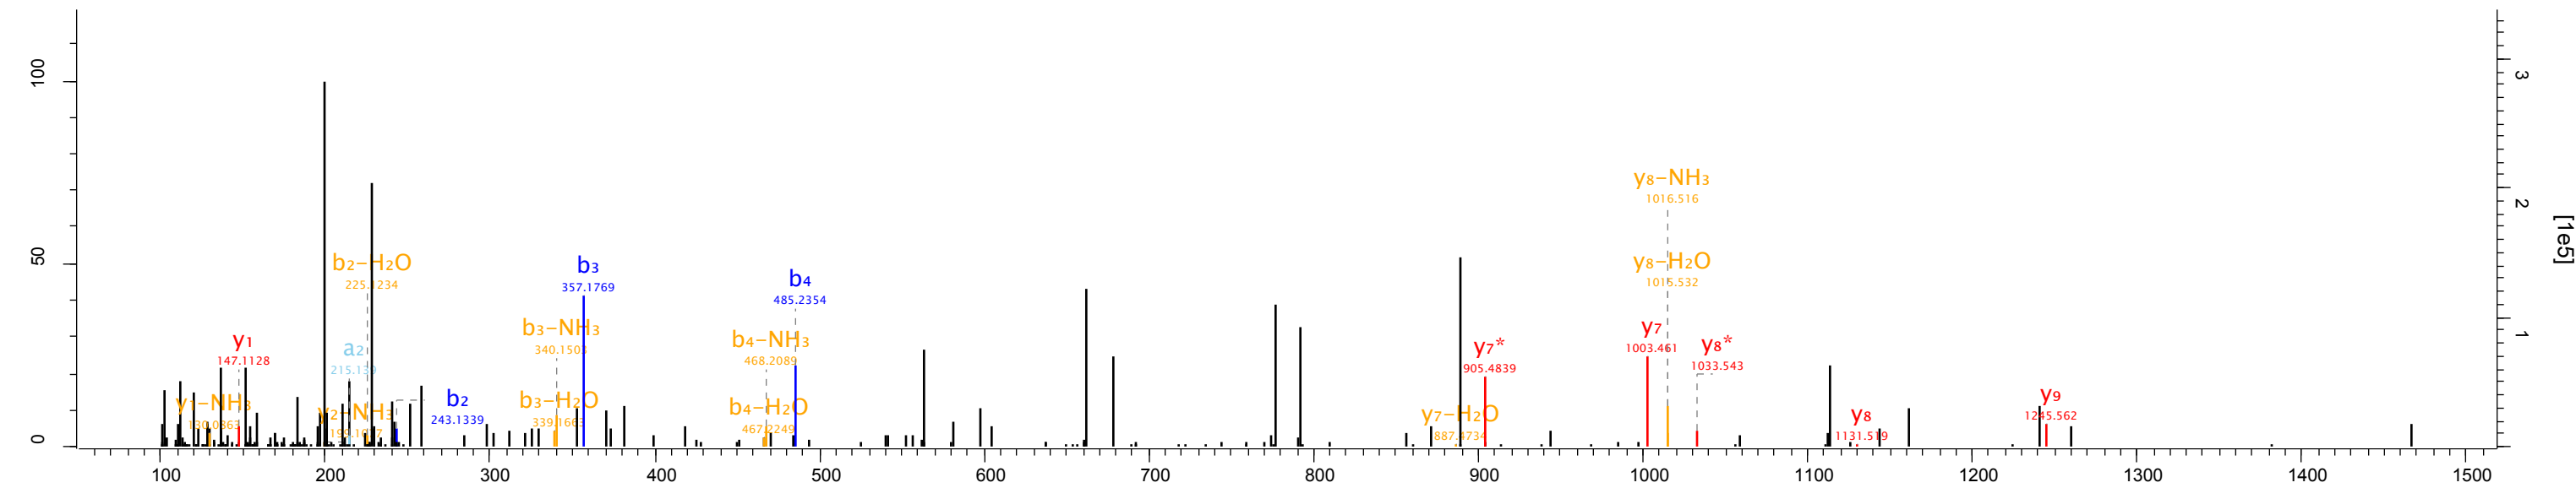

- I E N Q E Q I R Y S K -  
 b2 b3 b4 y9 y8 y7 y1

Raw file 20171215\_MaS\_33SR\_LMH\_phospho\_03 Scan 14651 Method FTMS; HCD Score 243.9 m/z 743.86 Gene names STRN3

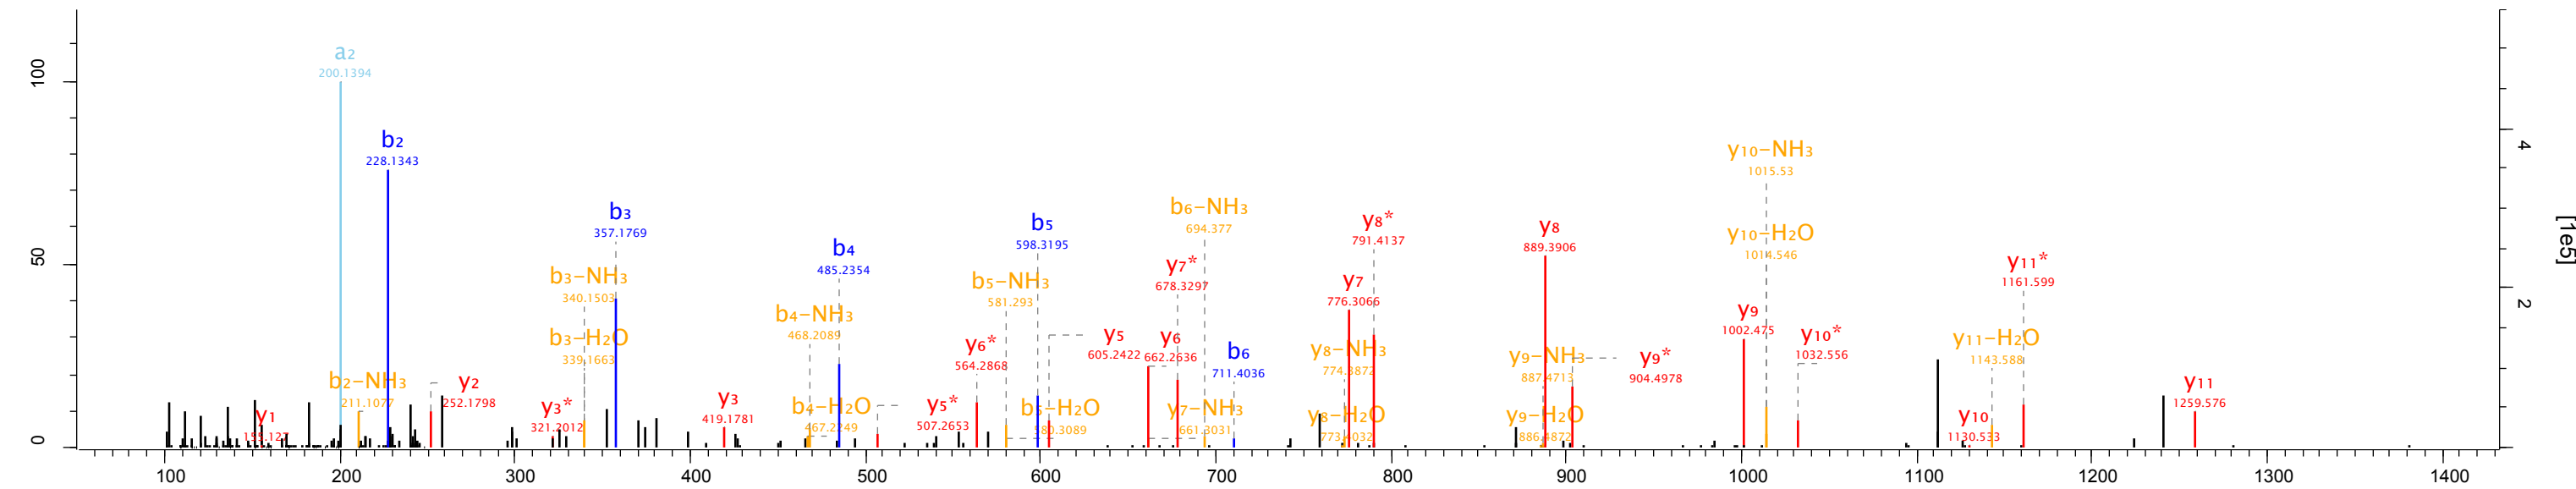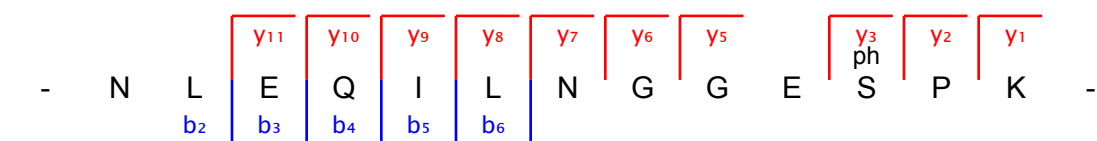

Raw file: 20171215\_MaS\_33SR\_LMH\_phospho\_03  
 Scan: 15111 Method: FTMS; HCD Score: 100.97 m/z: 830.36 Gene names: ARHGAP35

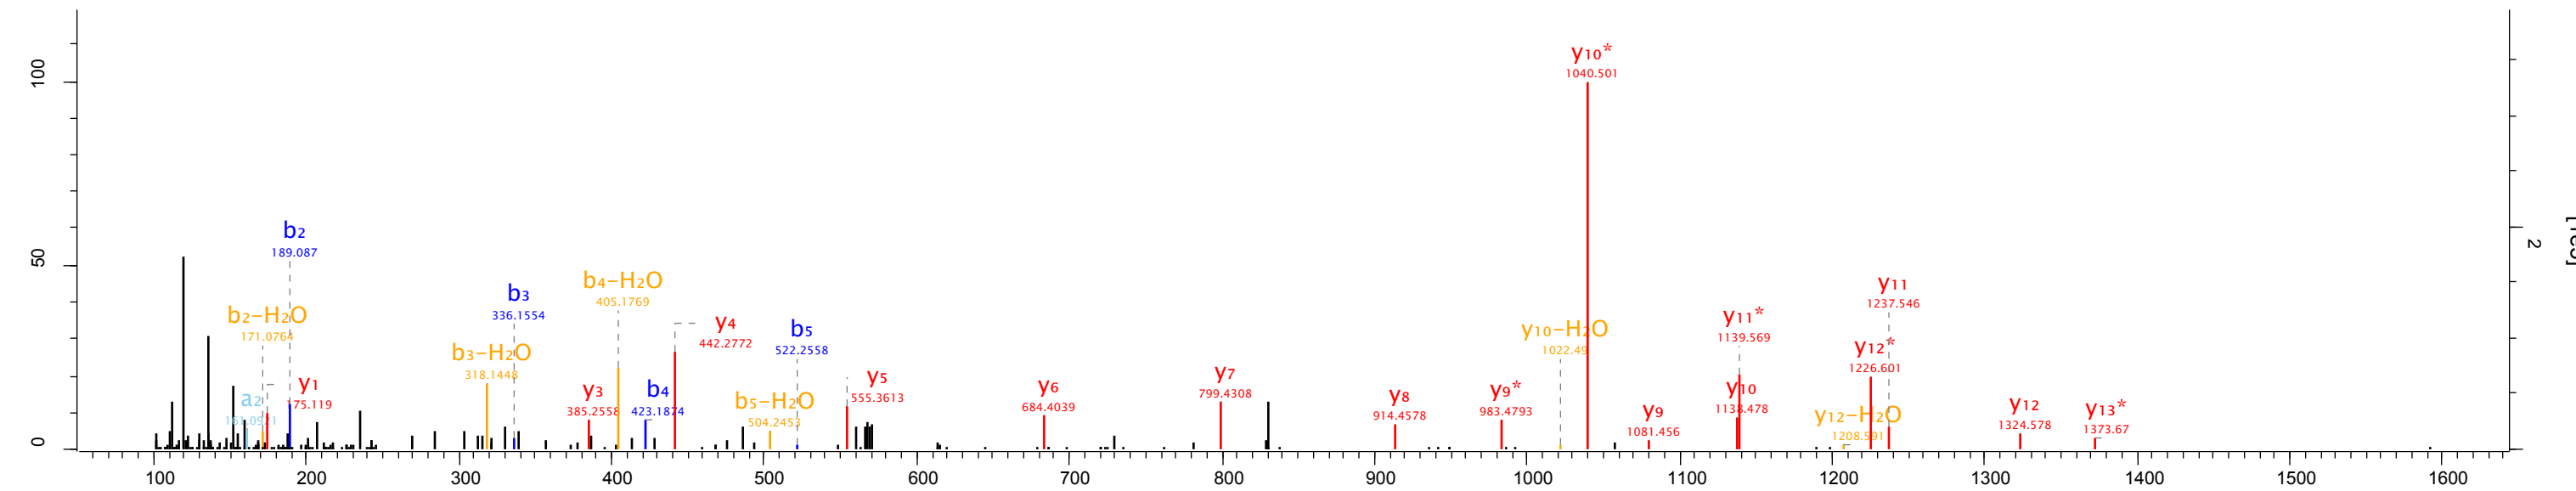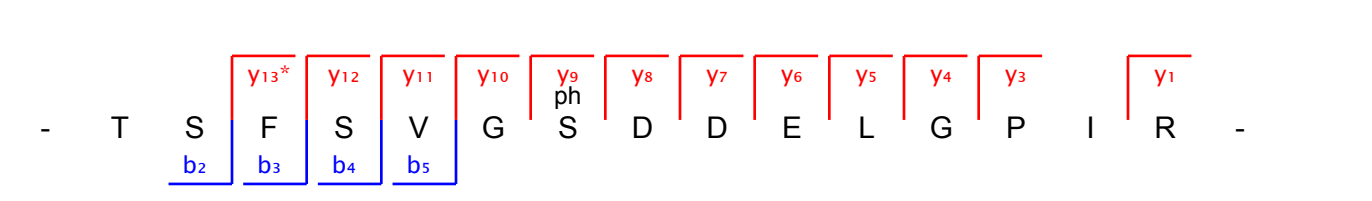

Raw file 20171215\_MaS\_33SR\_LMH\_phospho\_03 Scan 15421 Method FTMS; HCD Score 106.37 m/z 865.4 Gene names TOM1L1

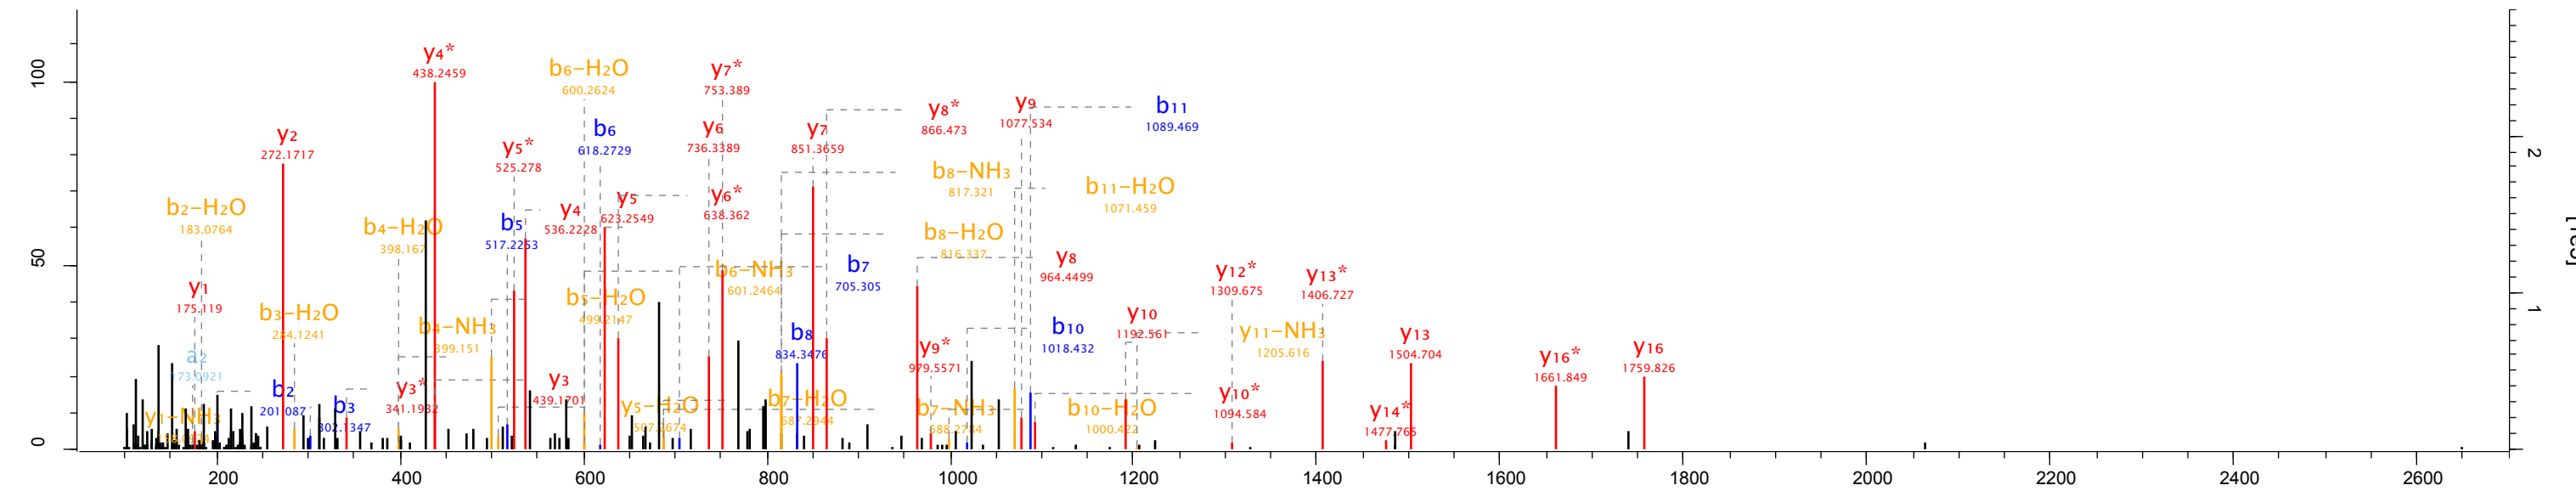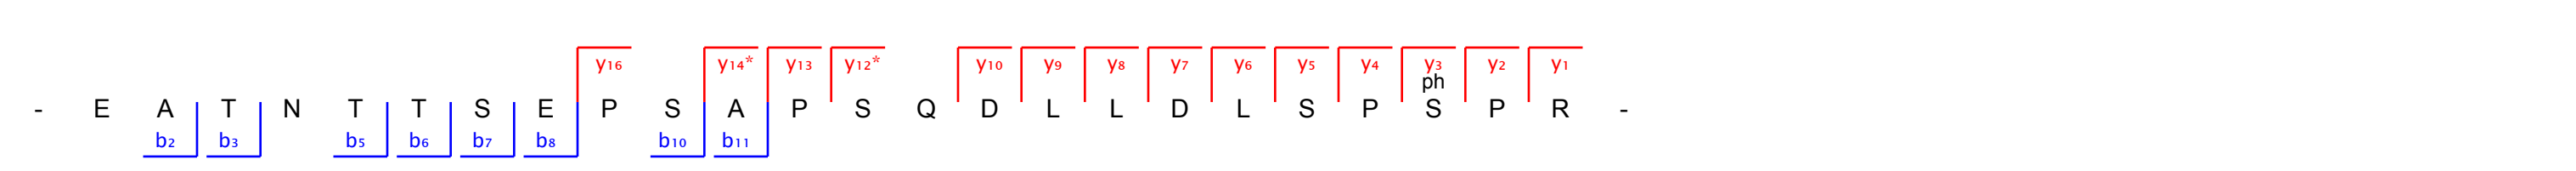

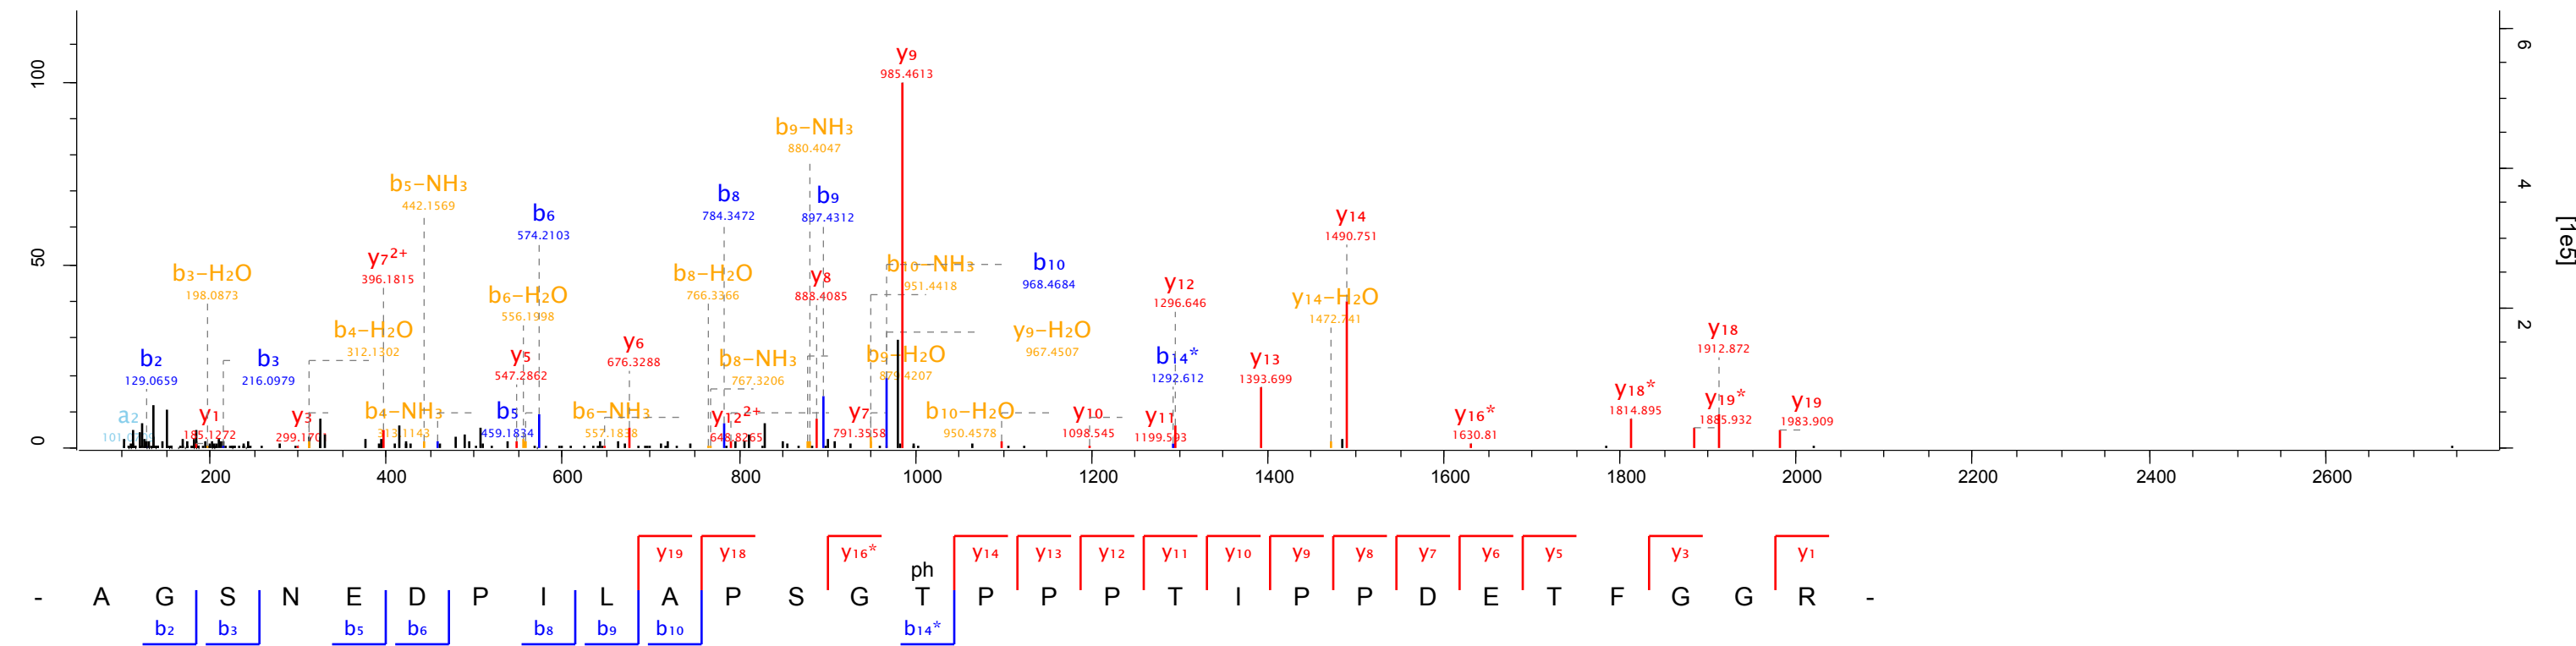

Raw file 20171215\_MaS\_33SR\_LMH\_phospho\_03 Scan 16851 Method FTMS; HCD Score 54.43 m/z 1148.5 Gene names FXR2

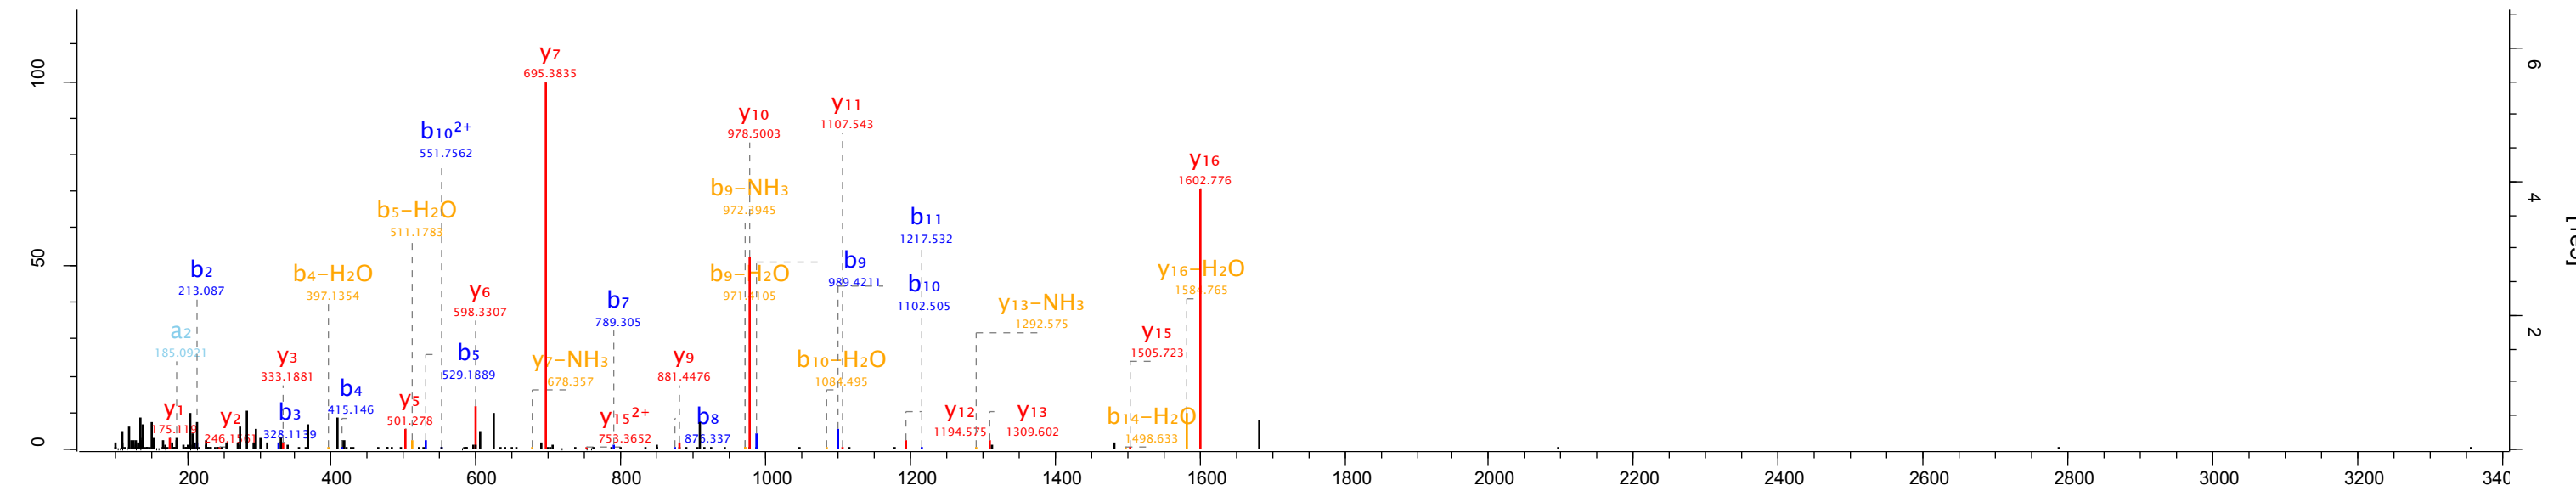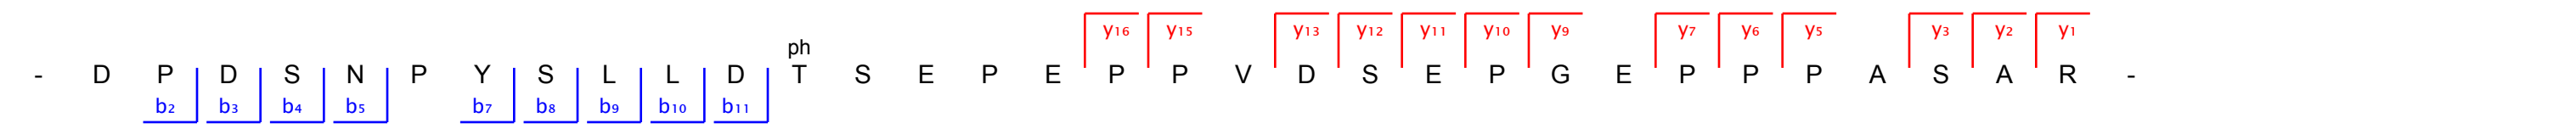

Raw file

20171215\_MaS\_33SR\_LMH\_phospho\_03

| Scan  | Method    | Score | m/z    | Gene names |
|-------|-----------|-------|--------|------------|
| 18831 | FTMS; HCD | 121.5 | 815.02 | SRRM2      |

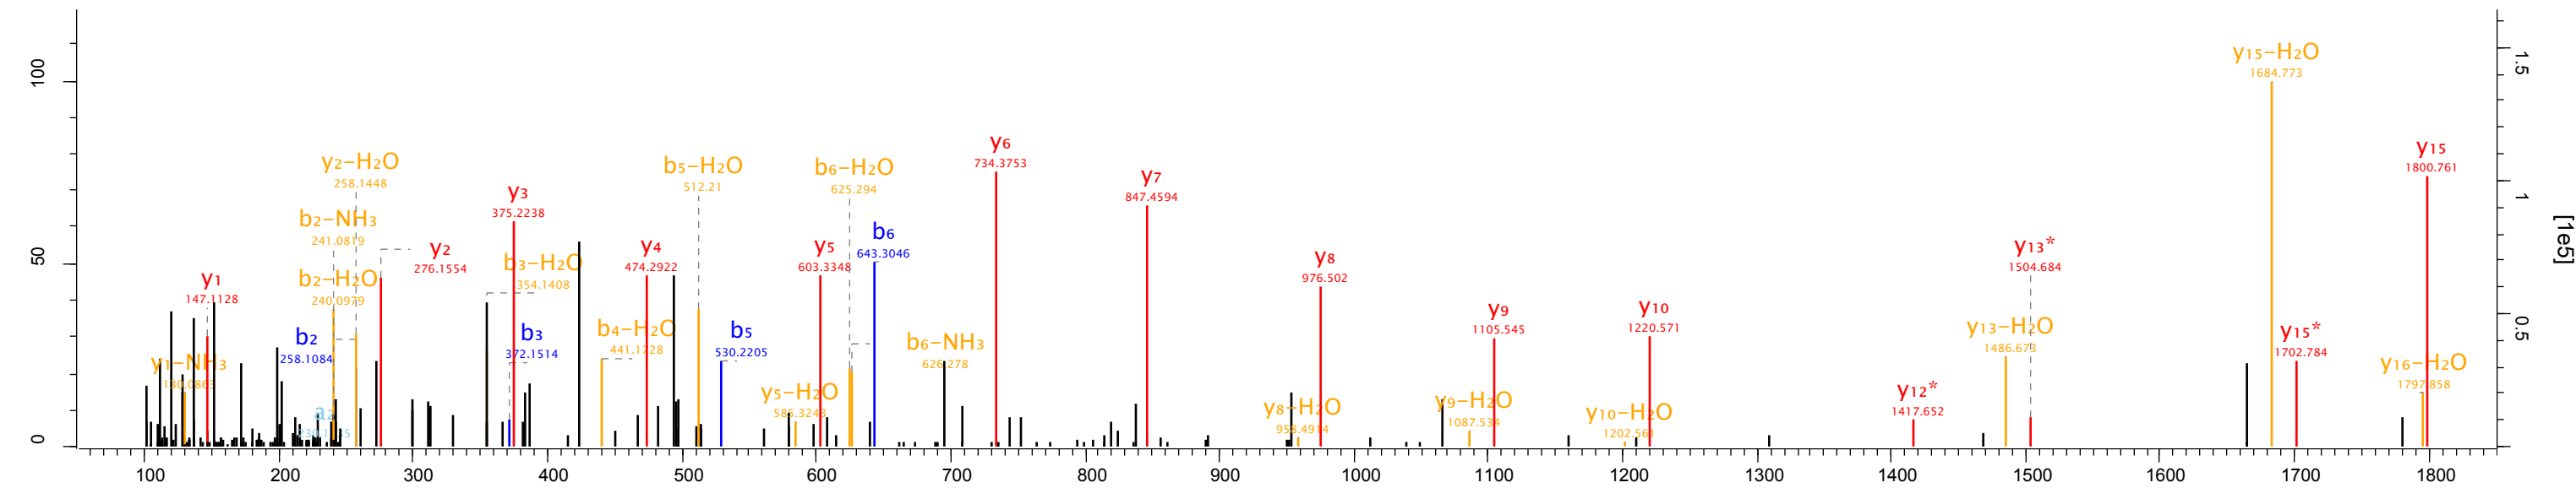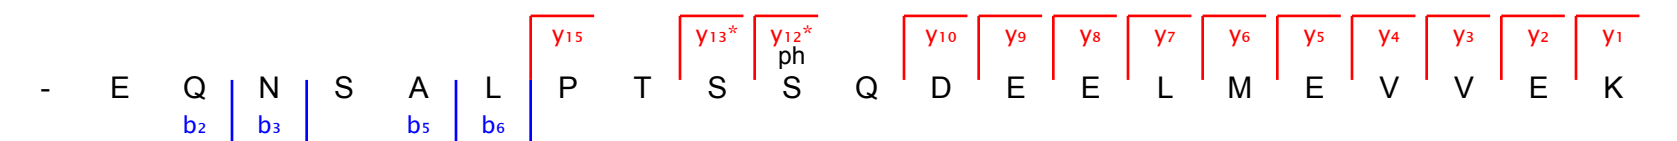



Raw file: 20171215\_MaS\_33SR\_LMH\_phospho\_03  
 Scan: 1901 Method: FTMS; HCD Score: 206.63 m/z: 849.85 Gene names: ILF3

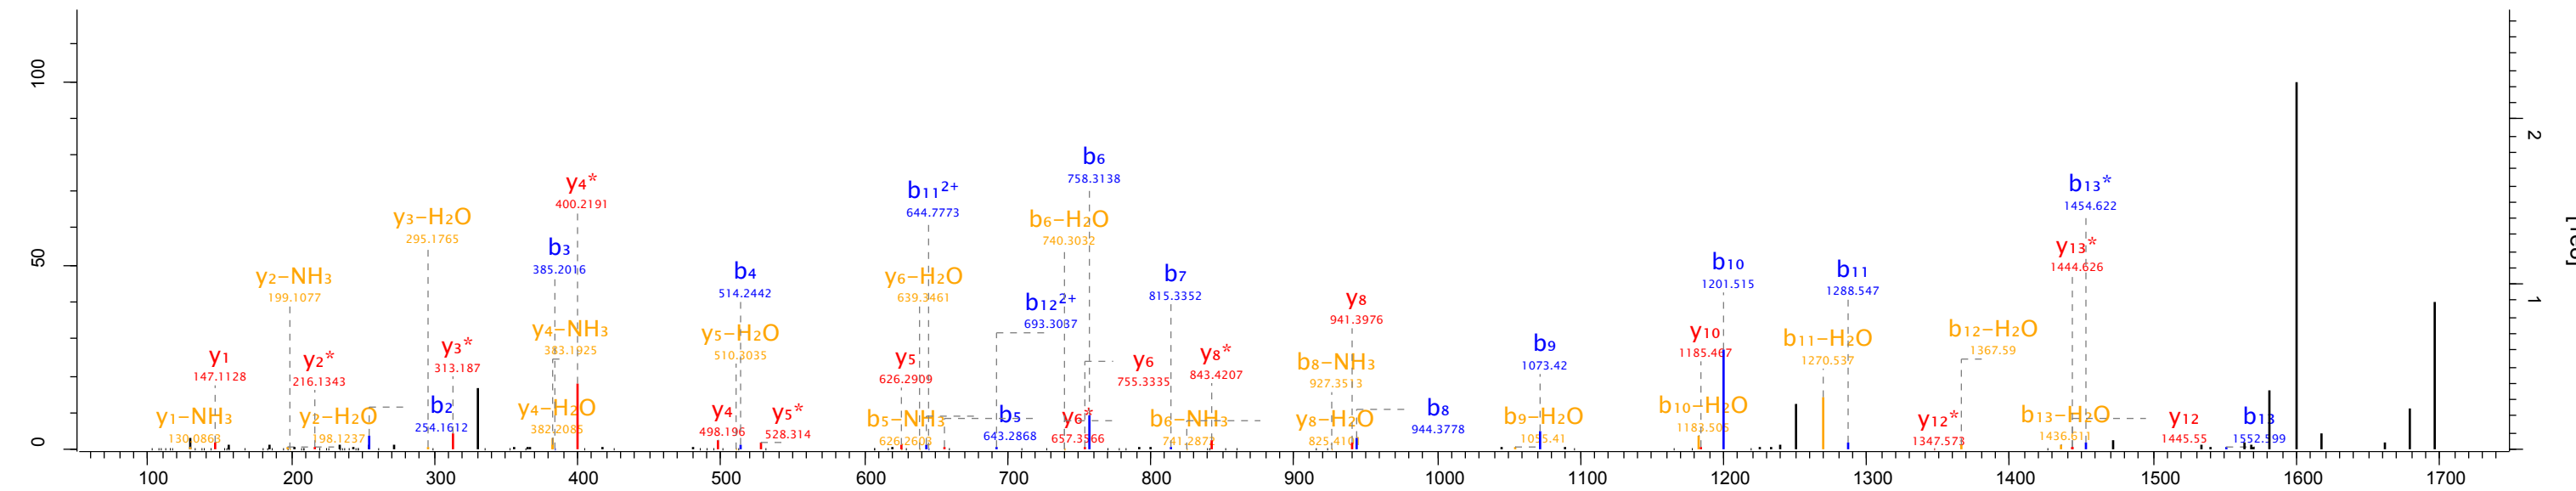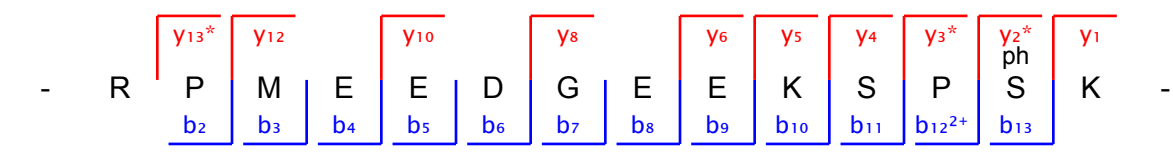

Raw file 20171215\_MaS\_33SR\_LMH\_phospho\_03 Scan 2071 Method FTMS; HCD Score 140.63 m/z 768.3 Gene names ARNT

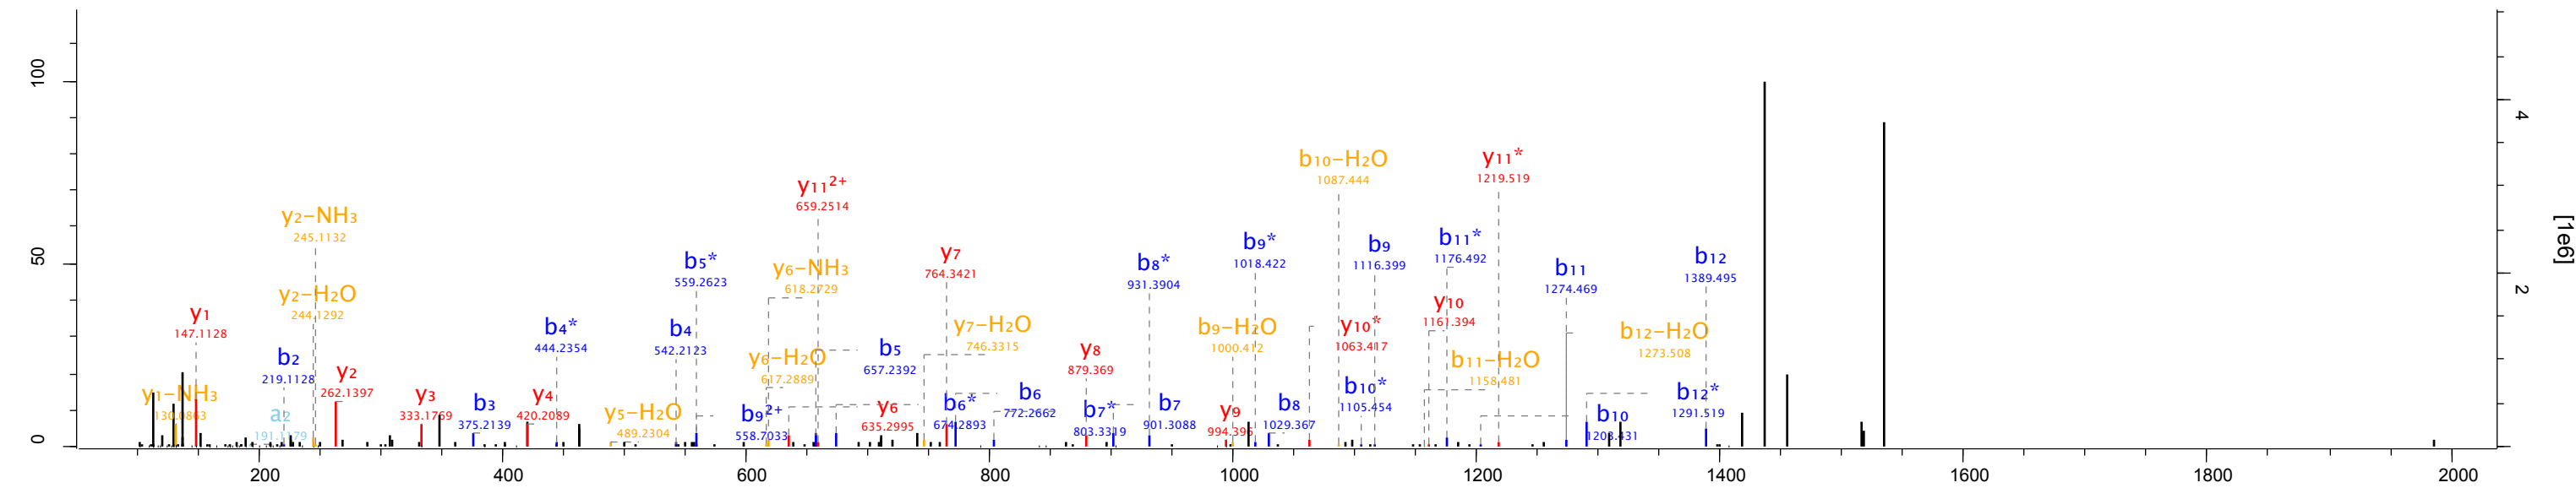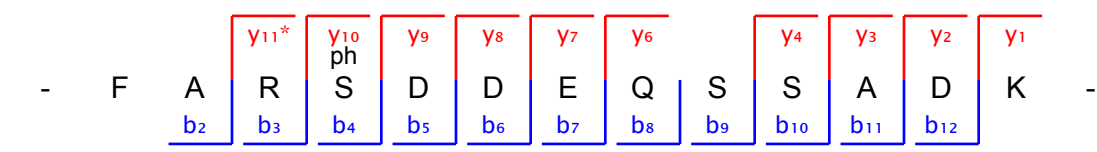

Raw file 20171215\_MaS\_33SR\_LMH\_phospho\_03 Scan 2181 Method FTMS; HCD Score 267.29 m/z 806.37 Gene names MED1

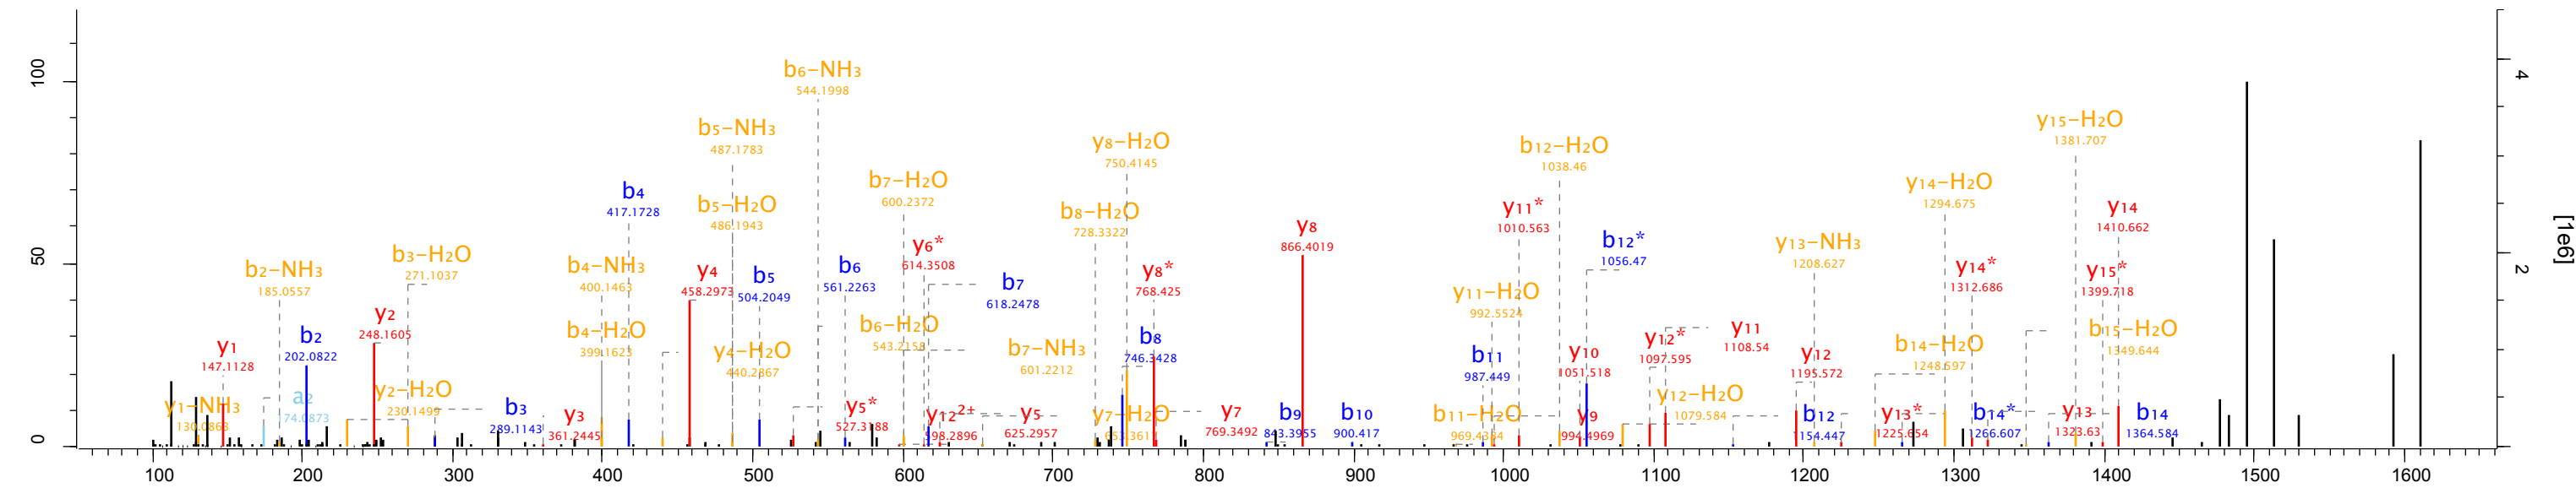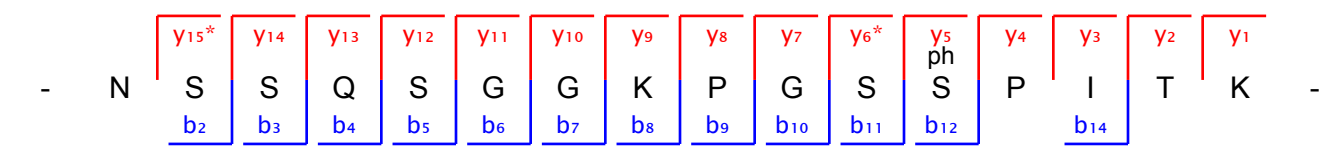

Raw file 20171215\_MaS\_33SR\_LMH\_phospho\_03 Scan 22341 Method FTMS; HCD Score 87.65 m/z 778.83 Gene names PARN

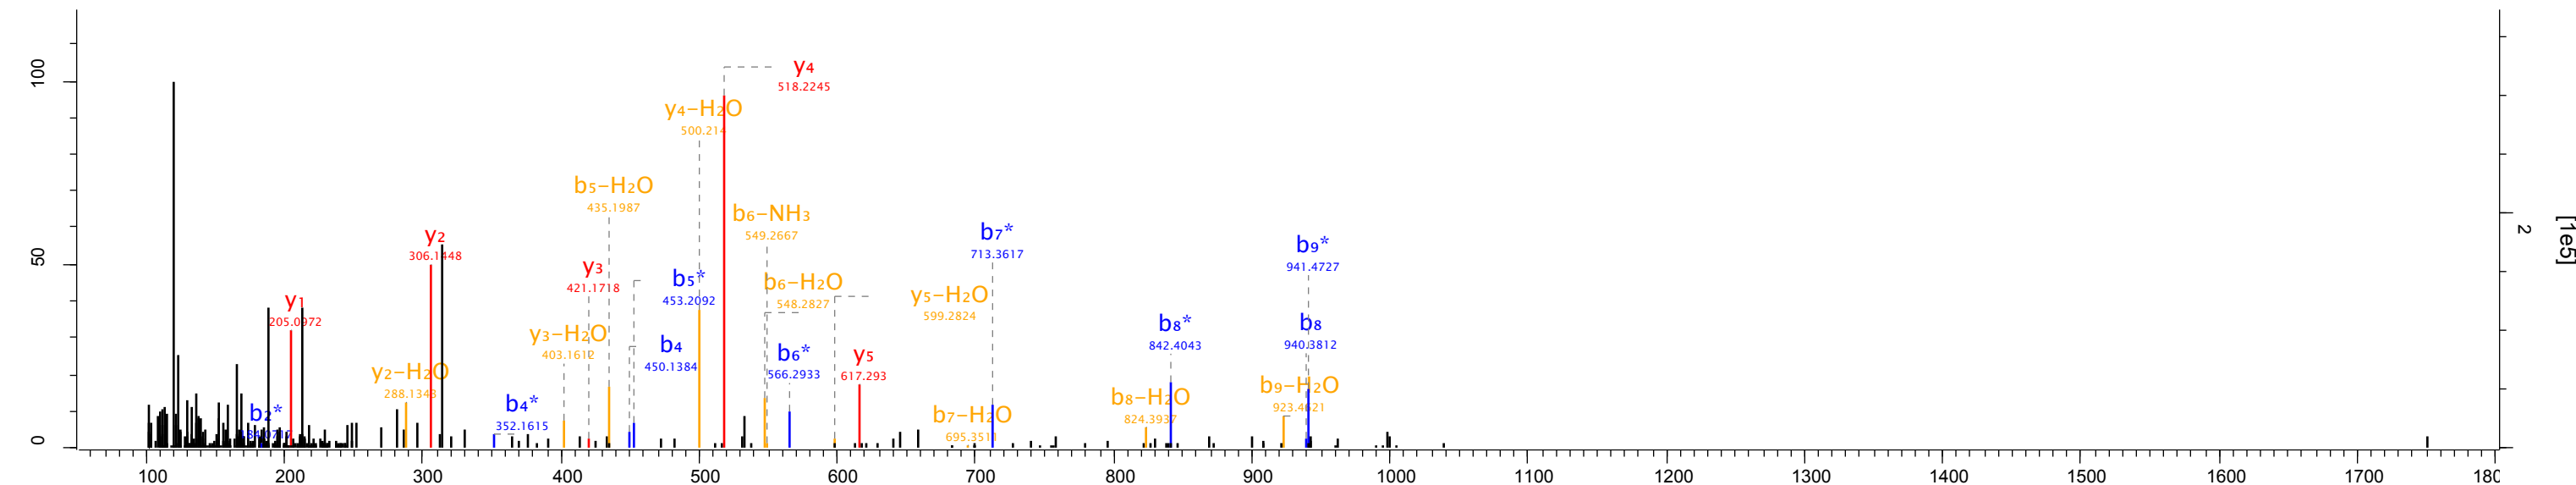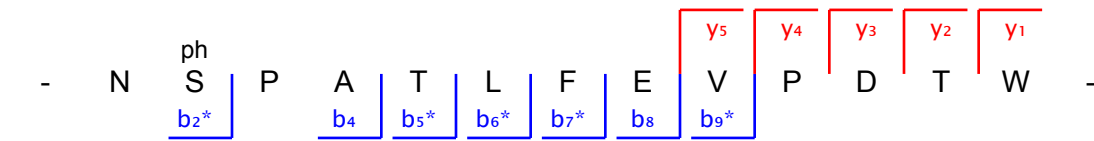

Raw file 20171215\_MaS\_33SR\_LMH\_phospho\_03 Scan 2331 Method FTMS; HCD Score 140.12 m/z 657.28 Gene names PBDC1

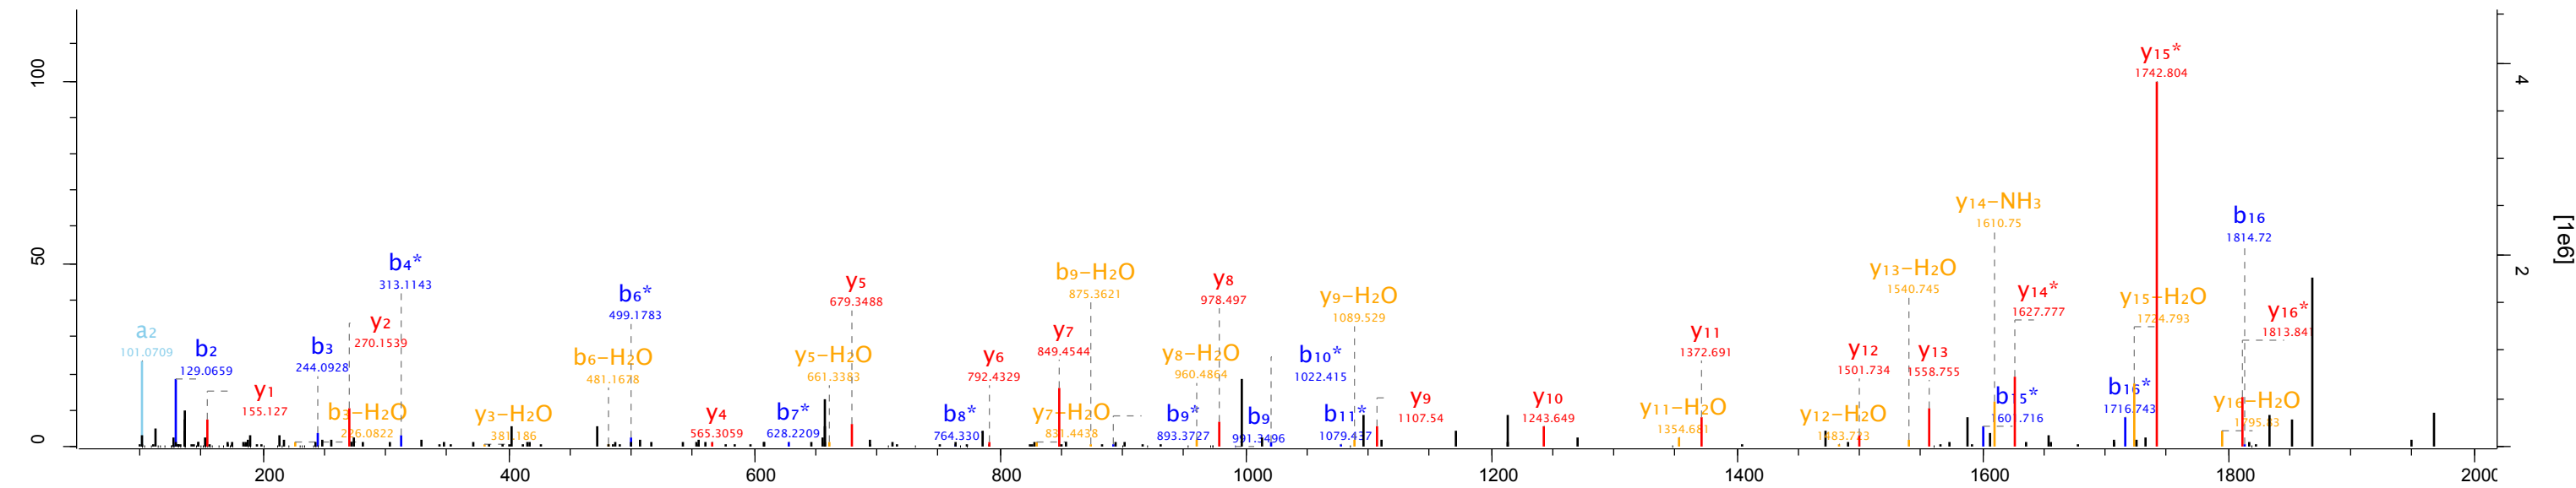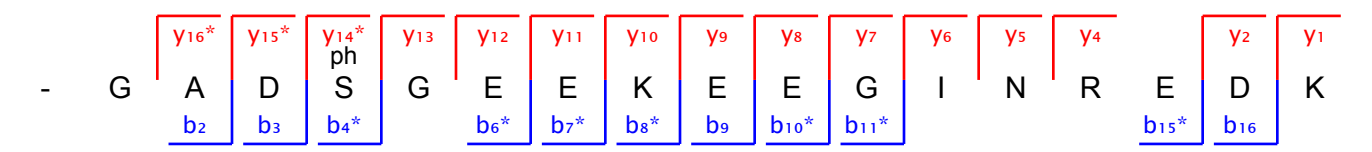

Raw file 20171215\_MaS\_33SR\_LMH\_phospho\_03 Scan 2601 Method FTMS; HCD Score 177.36 m/z 584.25 Gene names SRRM2

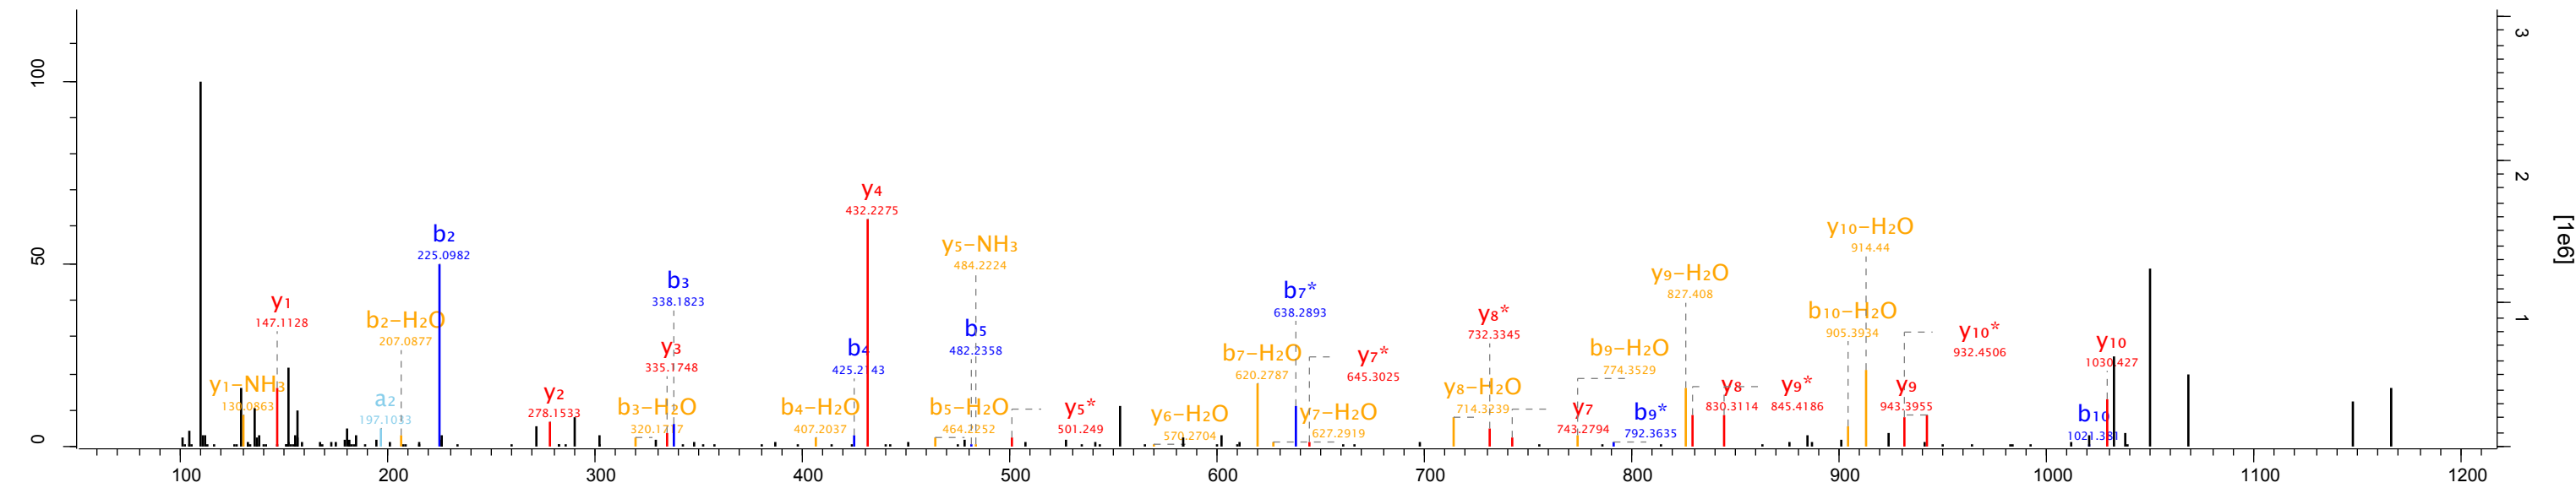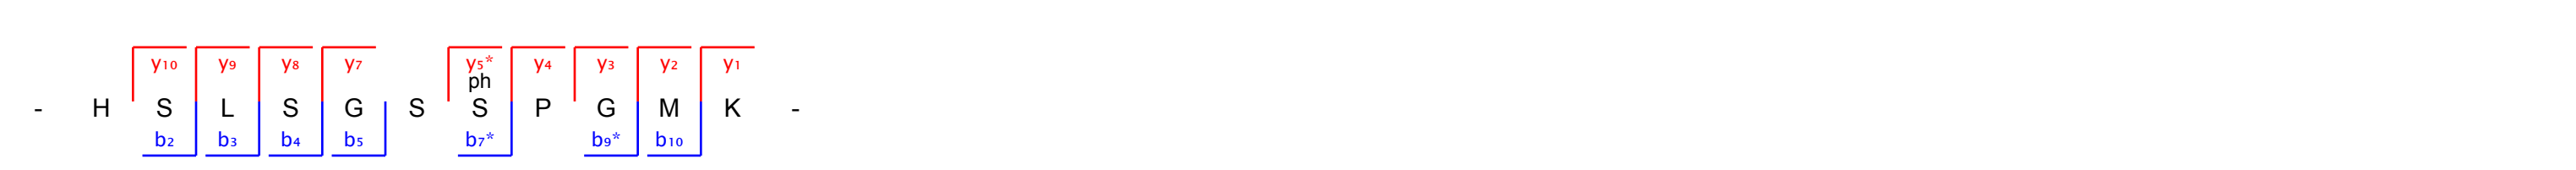

Raw file 20171215\_MaS\_33SR\_LMH\_phospho\_03 Scan 2841 Method FTMS; HCD Score 75.74 m/z 556.3 Gene names NOP2

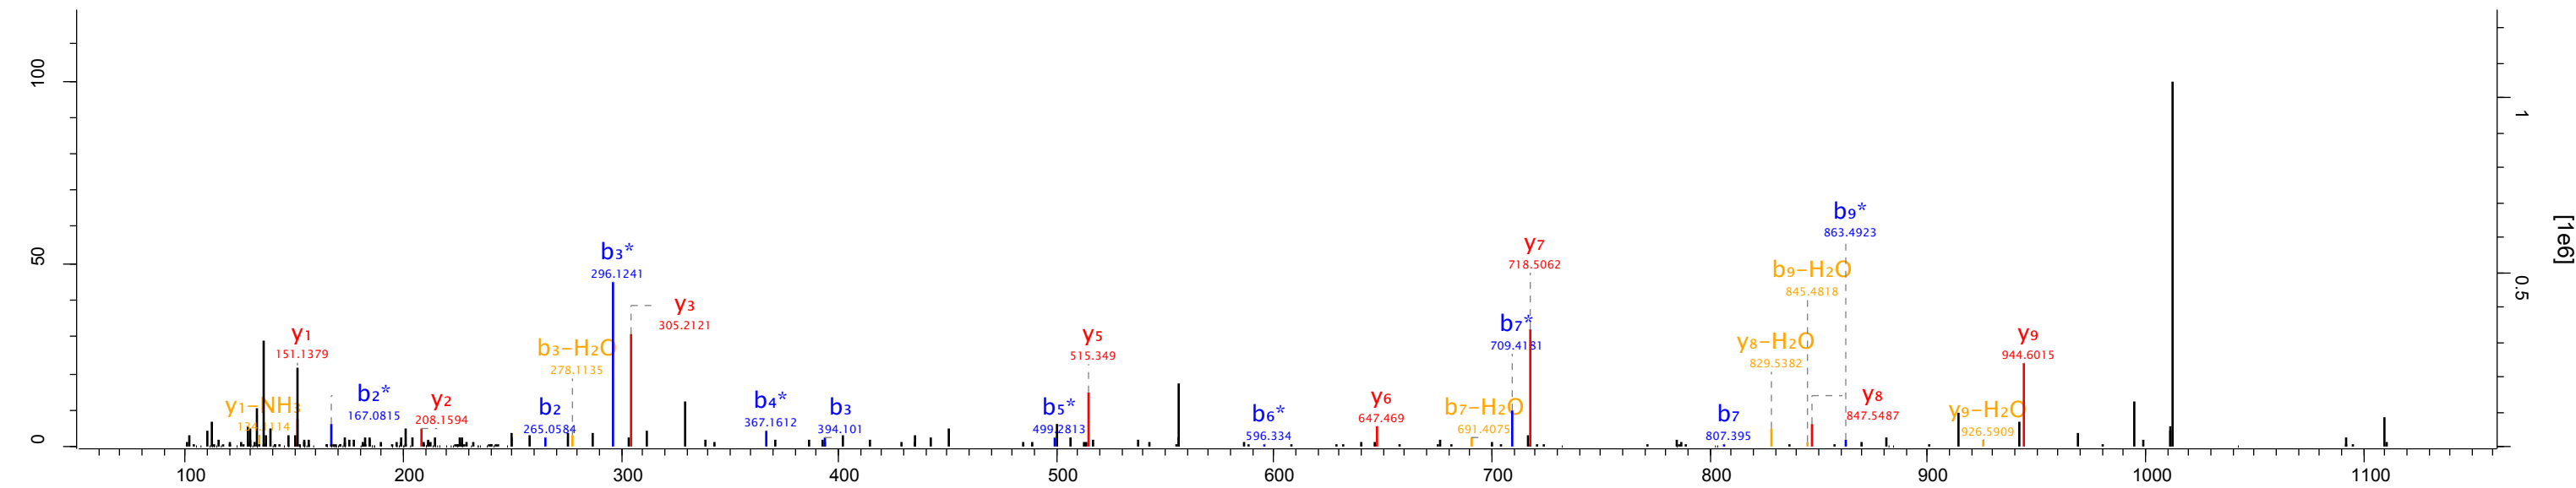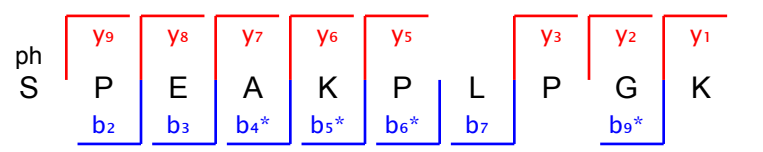

Raw file 20171215\_MaS\_33SR\_LMH\_phospho\_03 Scan 3381 Method FTMS; HCD Score 124.6 m/z 599.24 Gene names RASA3

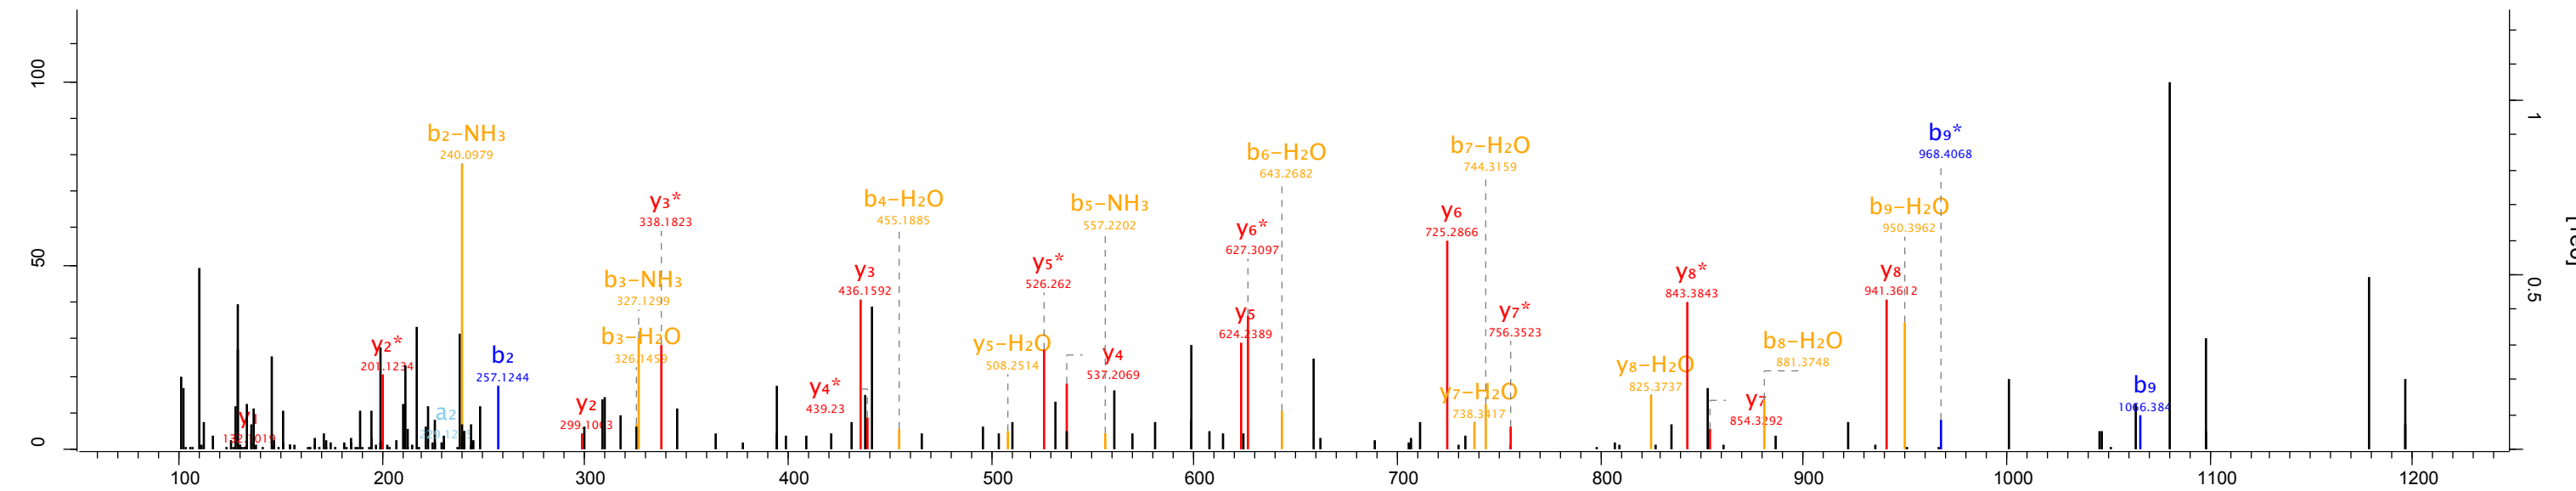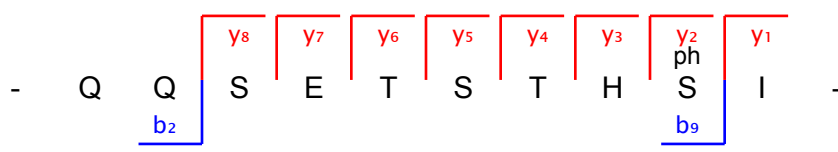



Raw file 20171215\_MaS\_33SR\_LMH\_phospho\_03 Scan 3591 Method FTMS; HCD Score 191.41 m/z 757.29 Gene names DHX57

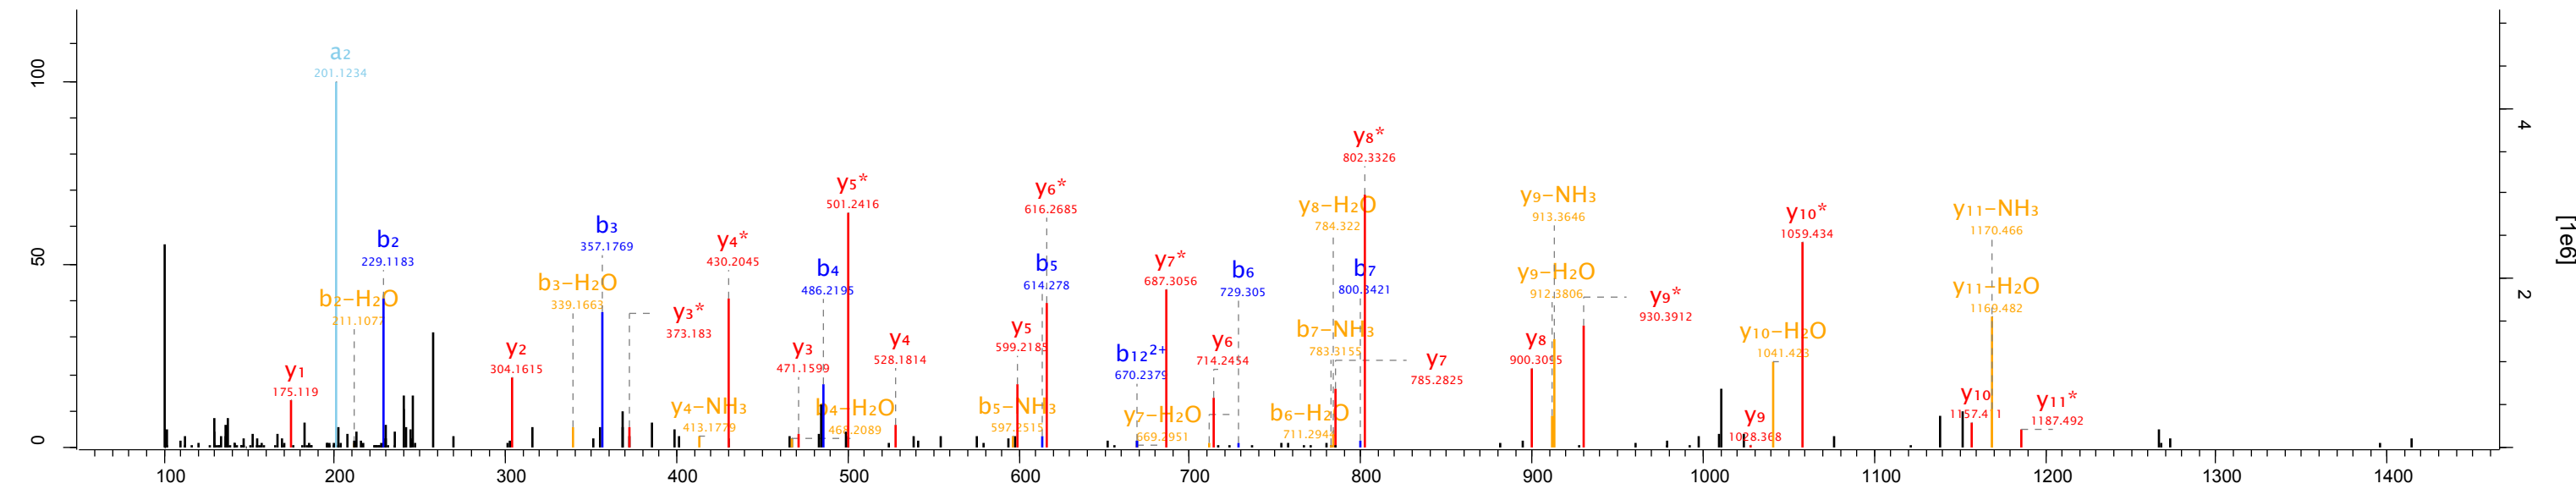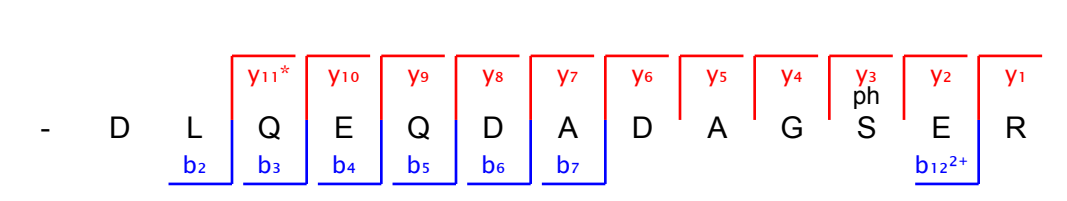

Raw file 20171215\_MaS\_33SR\_LMH\_phospho\_03 Scan 3691 Method FTMS; HCD Score 101.32 m/z 421.86 Gene names HMOX1

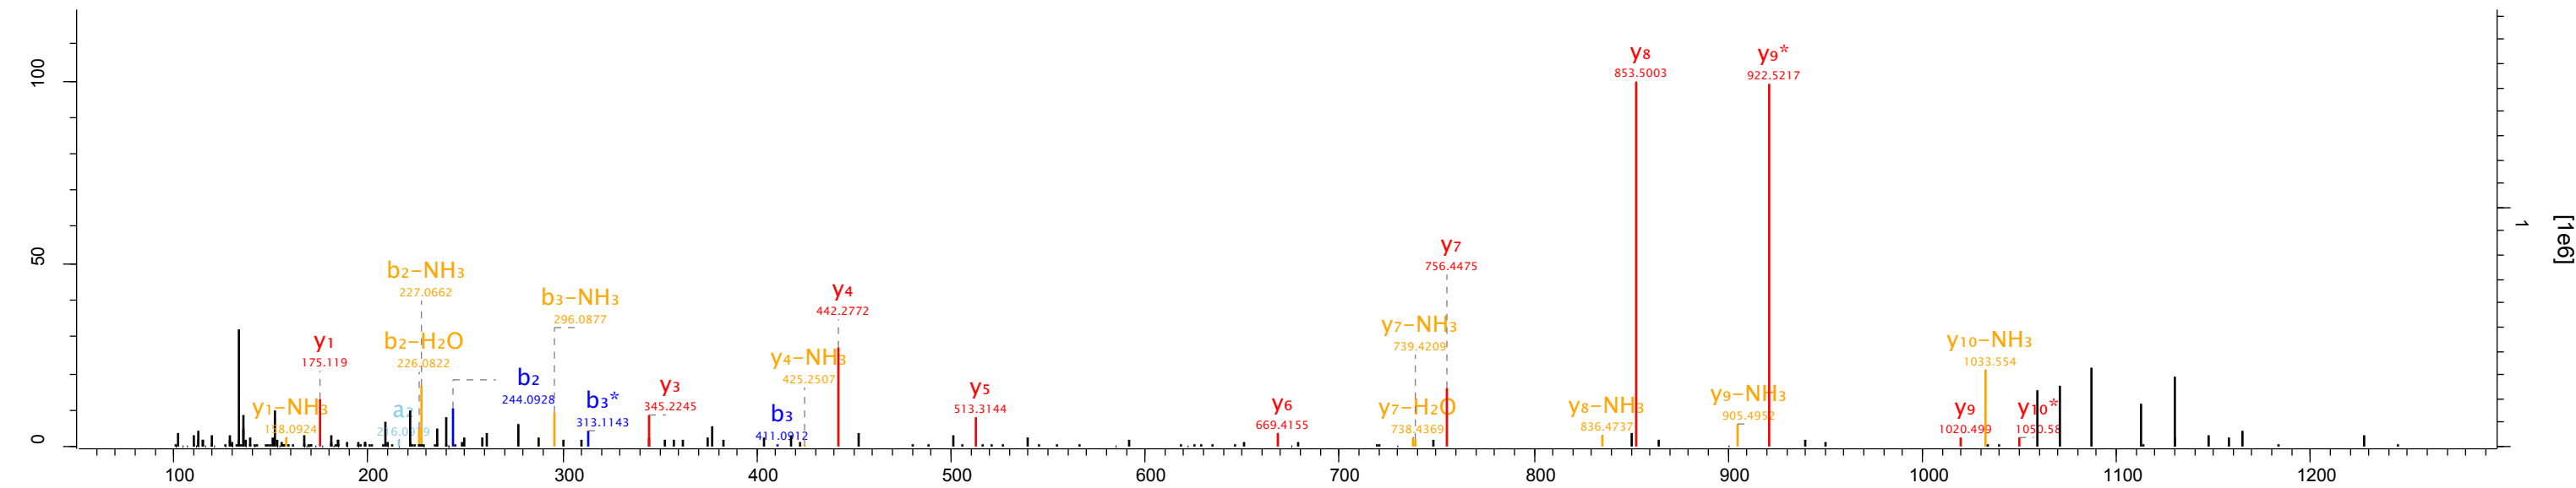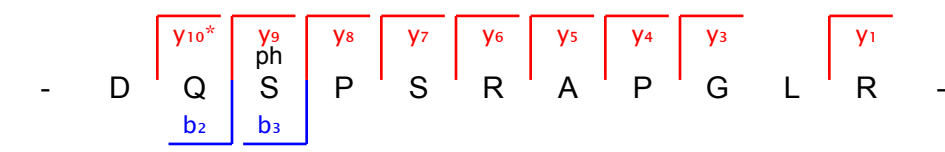

Raw file 20171215\_MaS\_33SR\_LMH\_phospho\_03 Scan 3801 Method FTMS; HCD Score 70.89 m/z 437.54 Gene names RBM10

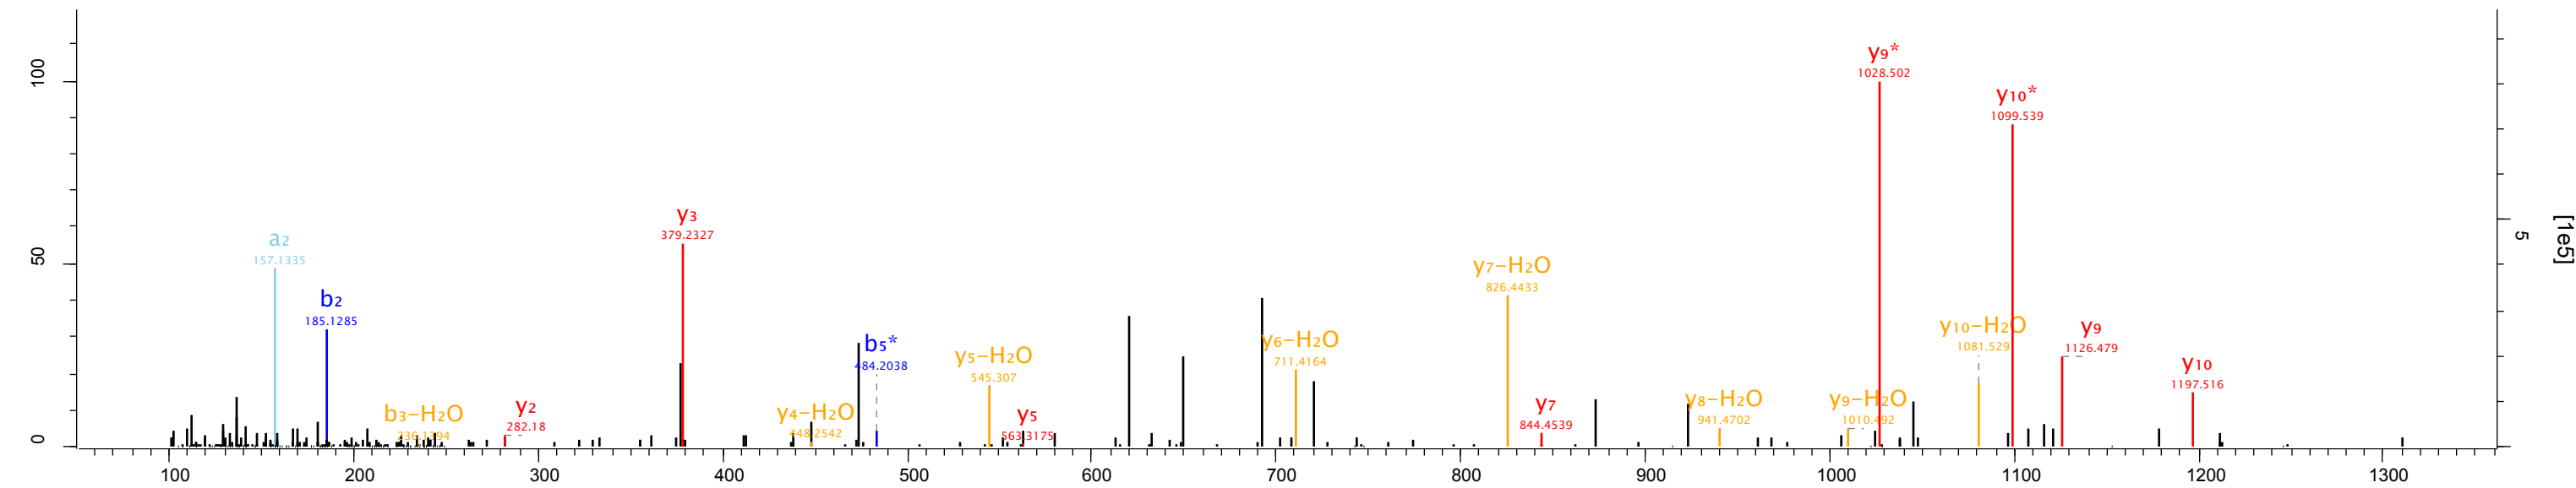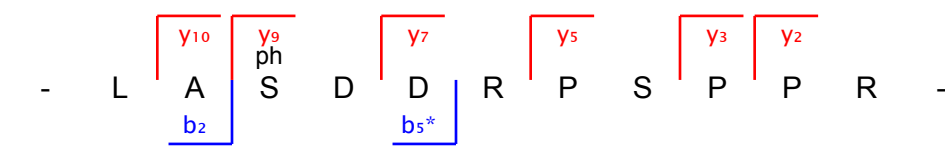

Raw file 20171215\_MaS\_33SR\_LMH\_phospho\_03 Scan 4421 Method FTMS; HCD Score 97.62 m/z 697.83 Gene names IRS2

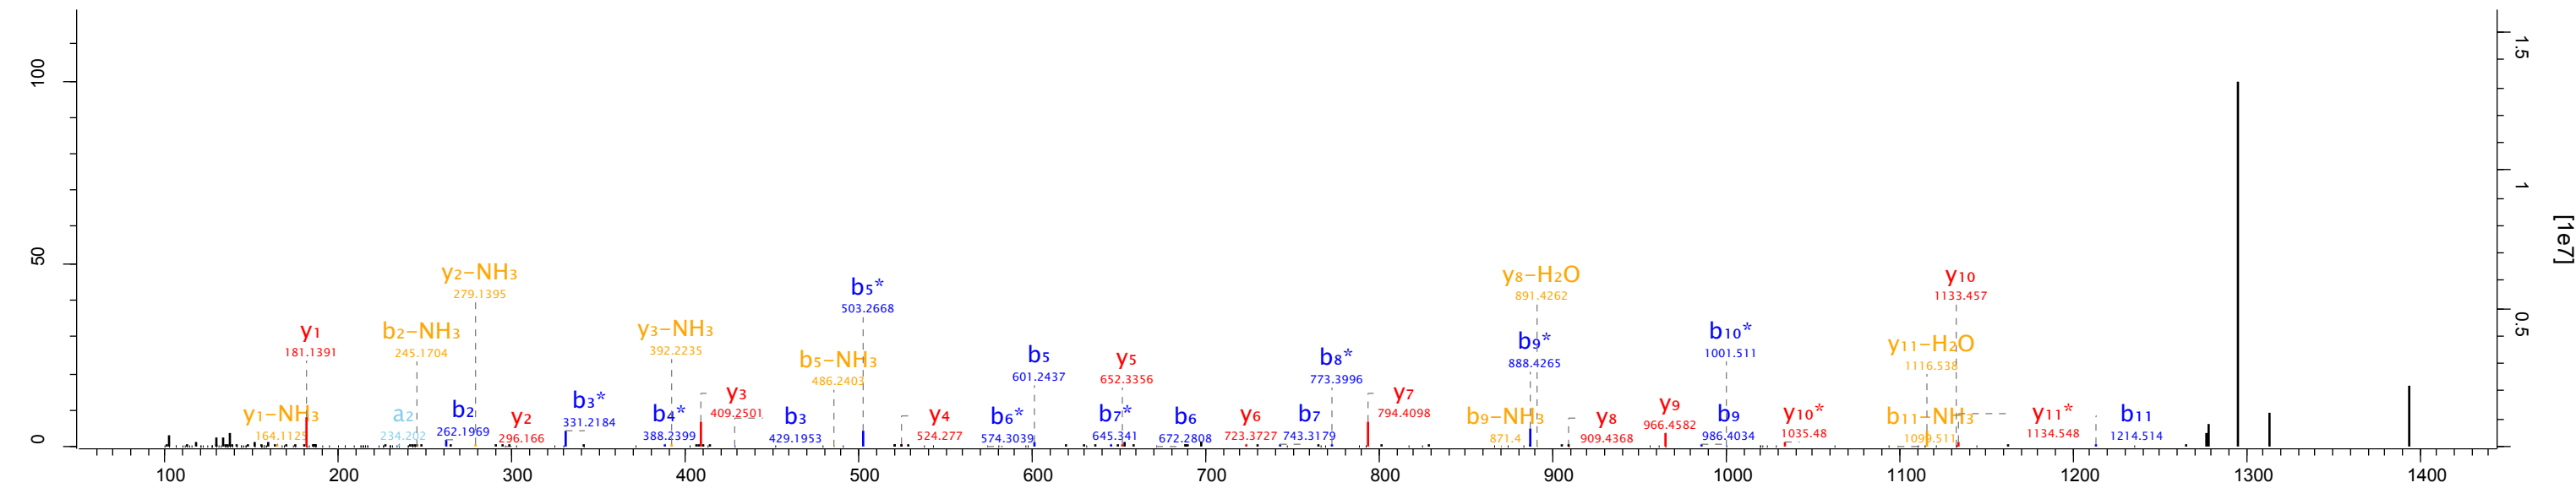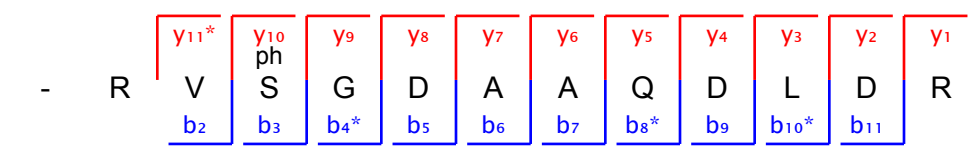

Raw file 20171215\_MaS\_33SR\_LMH\_phospho\_03 Scan 4431 Method FTMS; HCD Score 117.53 m/z 880.86 Gene names PDCD4

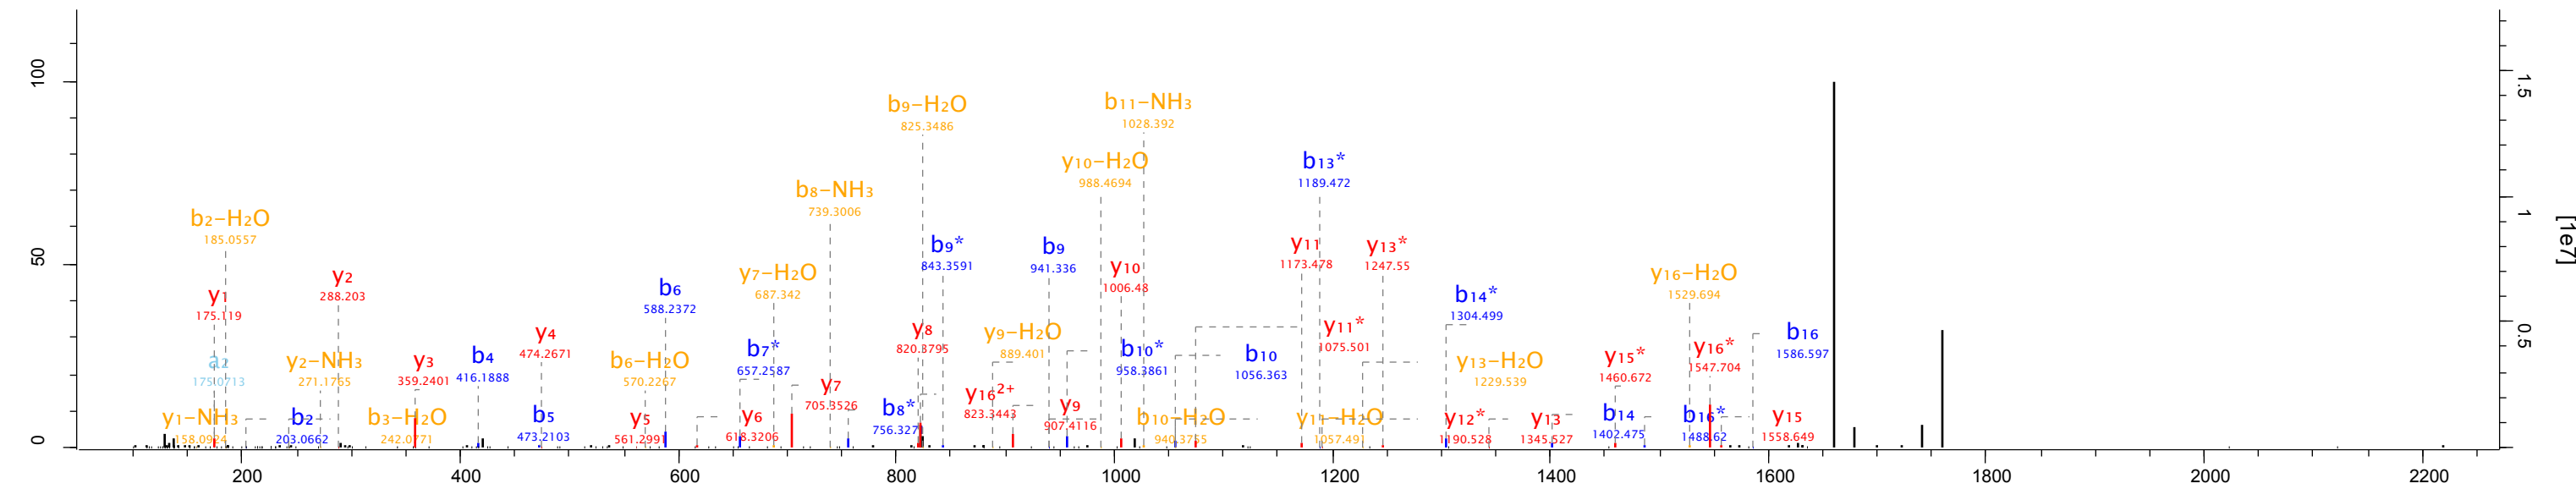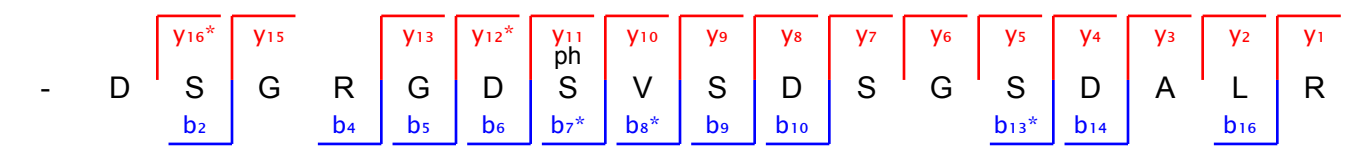

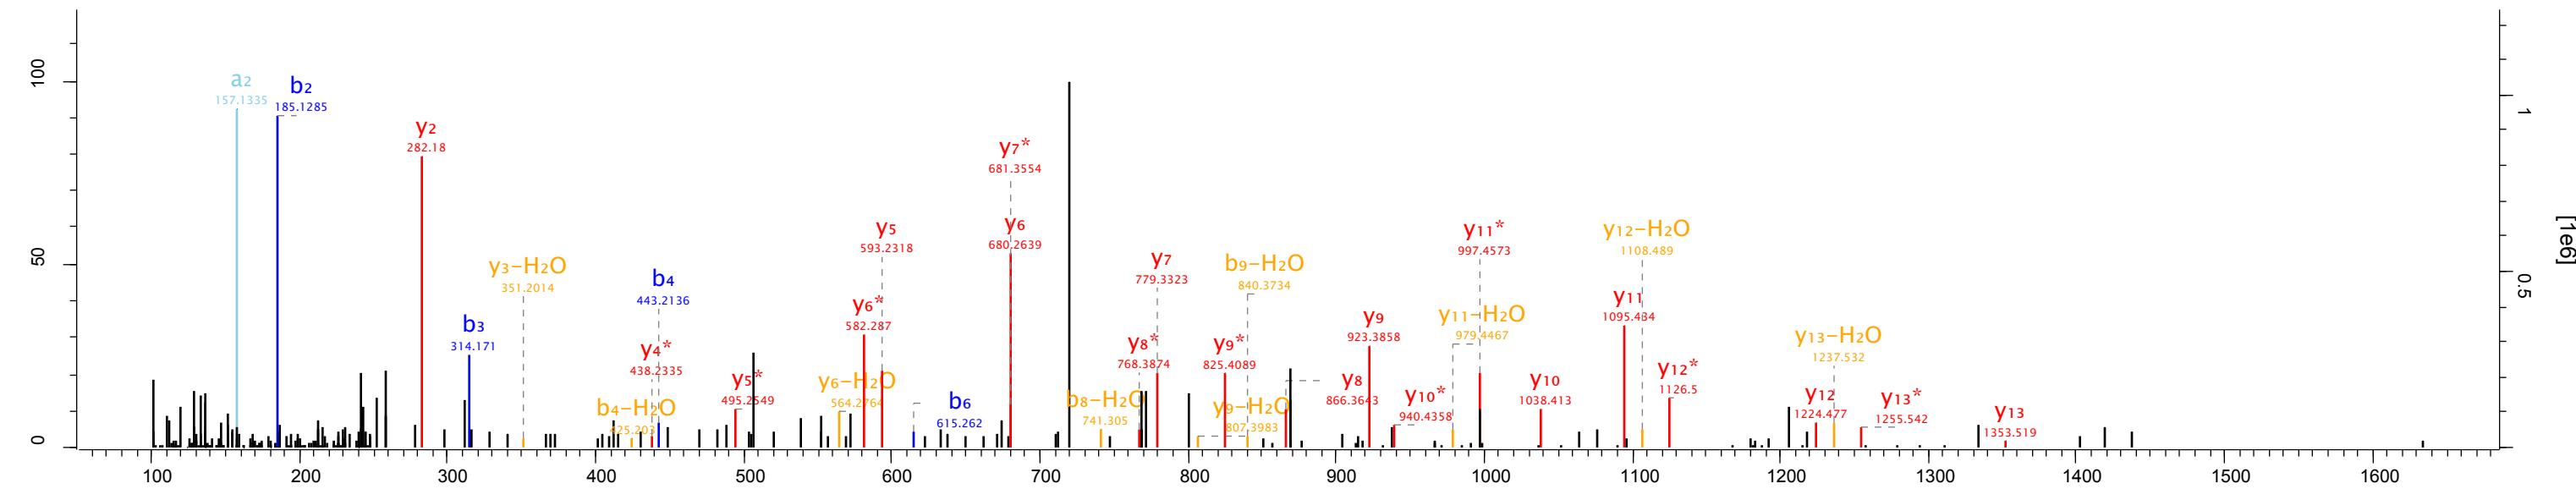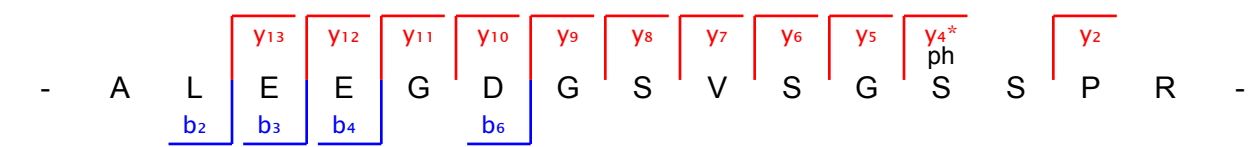

Raw file 20171215\_MaS\_33SR\_LMH\_phospho\_03 Scan 4501 Method FTMS; HCD Score 174.05 m/z 553.75 Gene names CTNND1

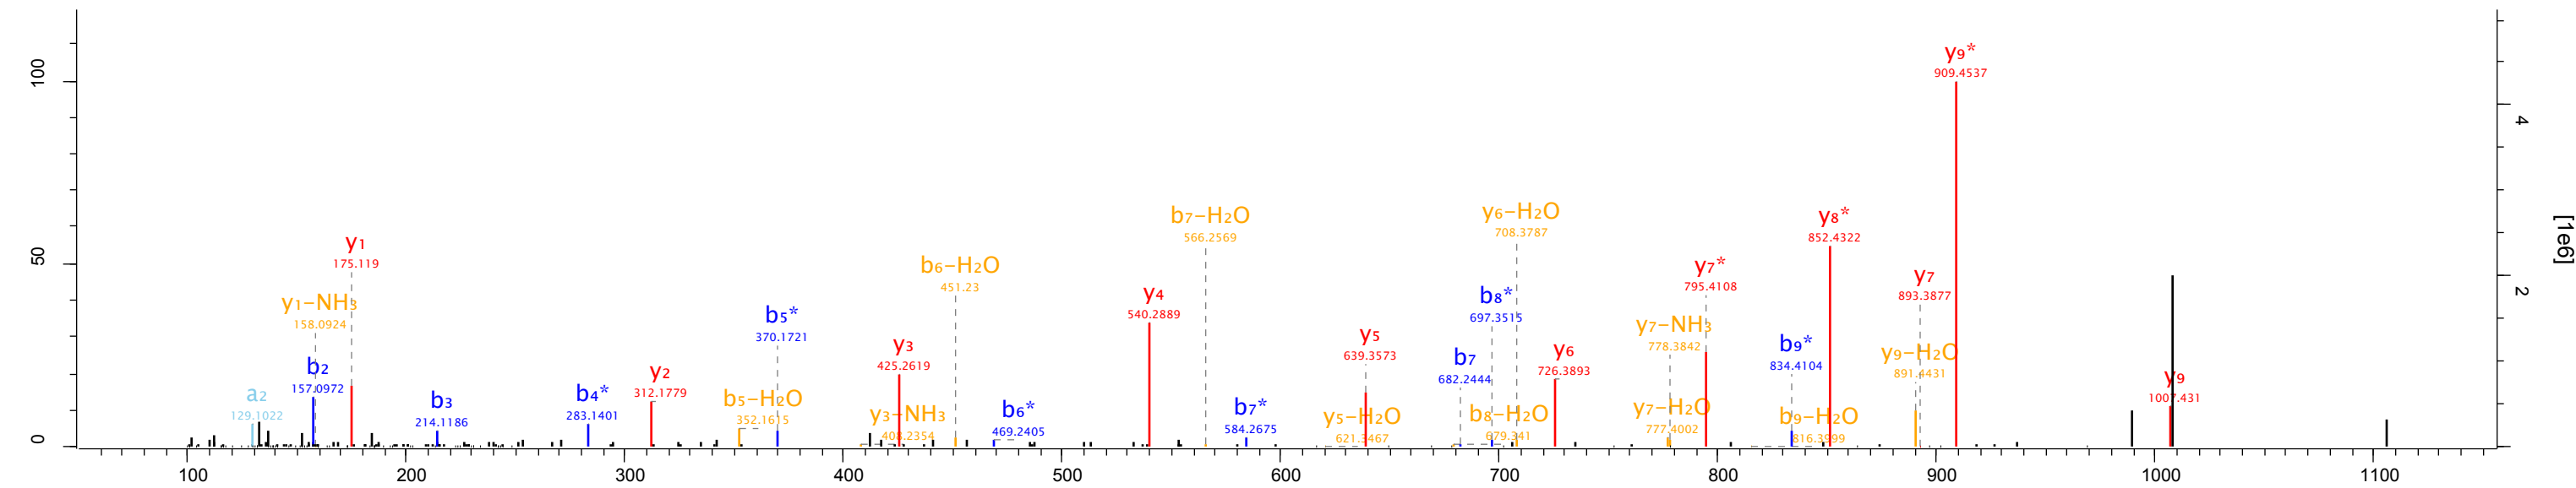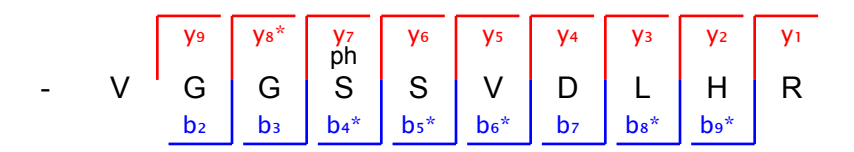

Raw file 20171215\_MaS\_33SR\_LMH\_phospho\_03 Scan 4701 Method FTMS; HCD Score 99.41 m/z 649.62 Gene names MED26

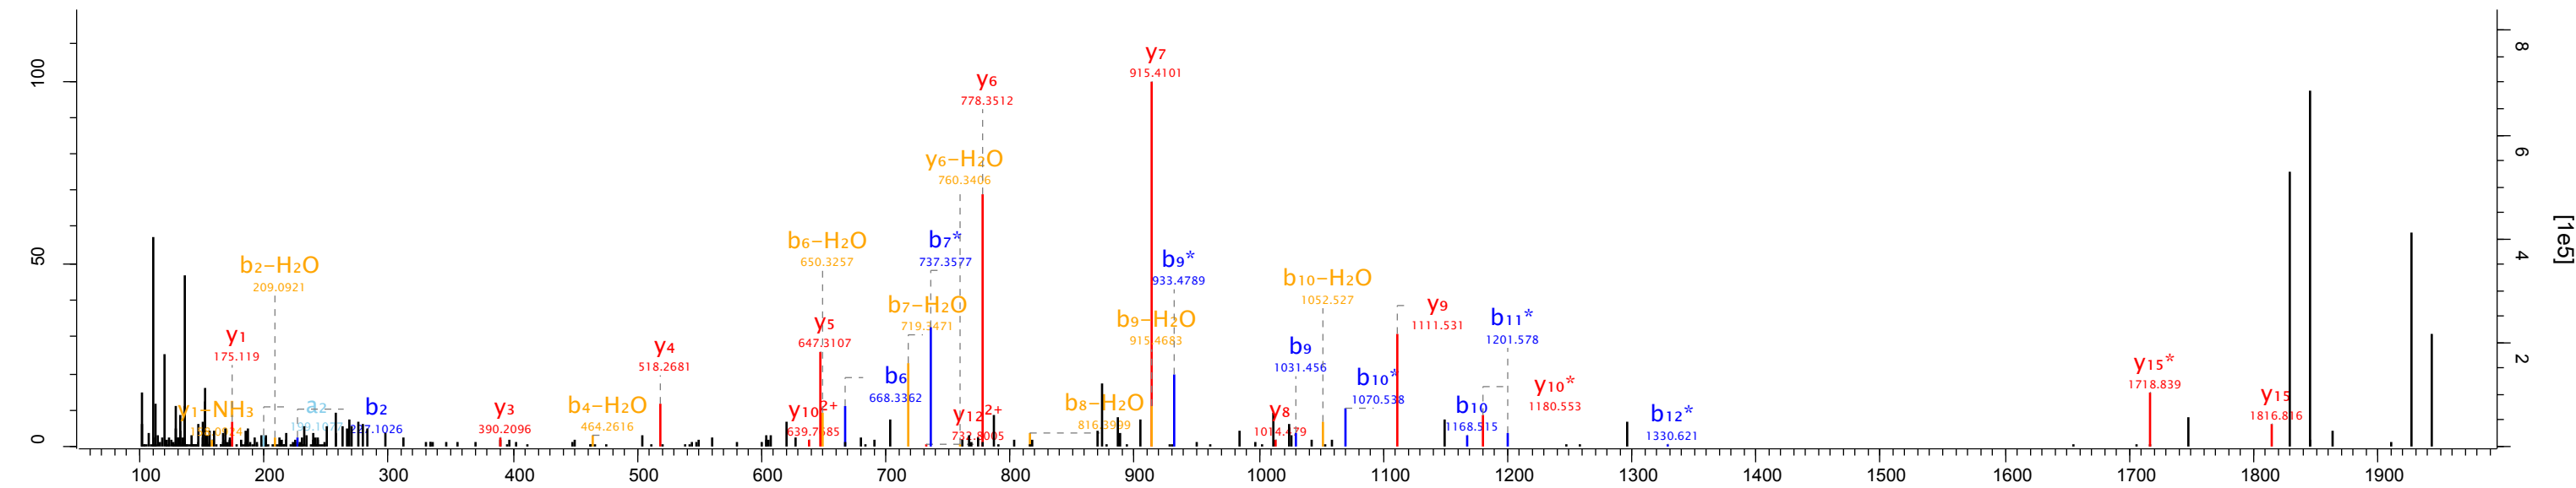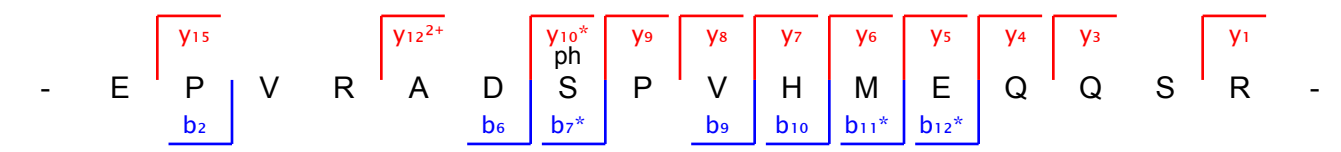



Raw file 20171215\_MaS\_33SR\_LMH\_phospho\_03 Scan 4801 Method FTMS; HCD Score 109.83 m/z 897.37 Gene names TBC1D23

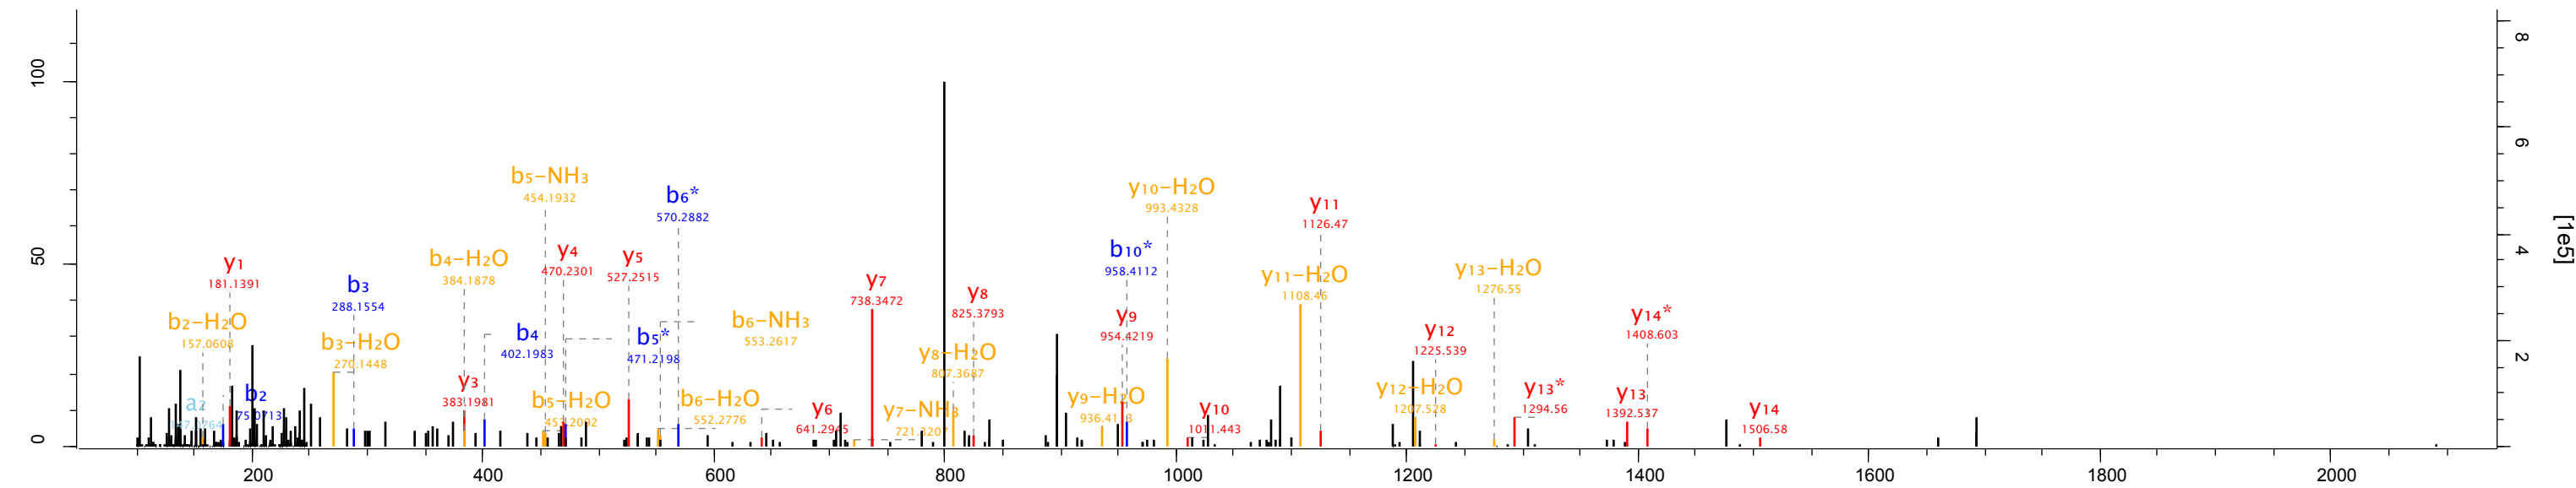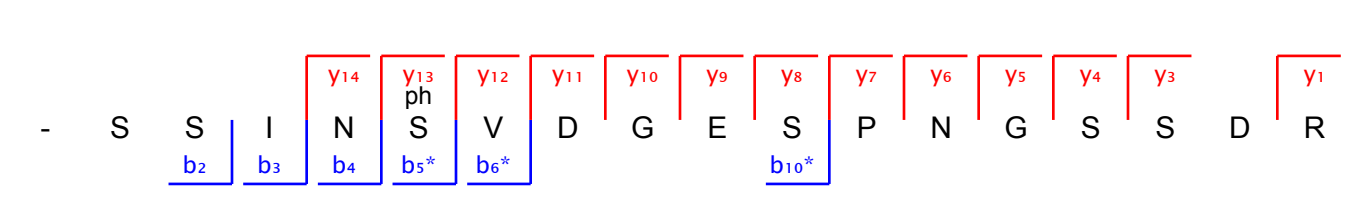

Raw file 20171215\_MaS\_33SR\_LMH\_phospho\_03 Scan 4841 Method FTMS; HCD Score 47.02 m/z 791.8 Gene names ING5

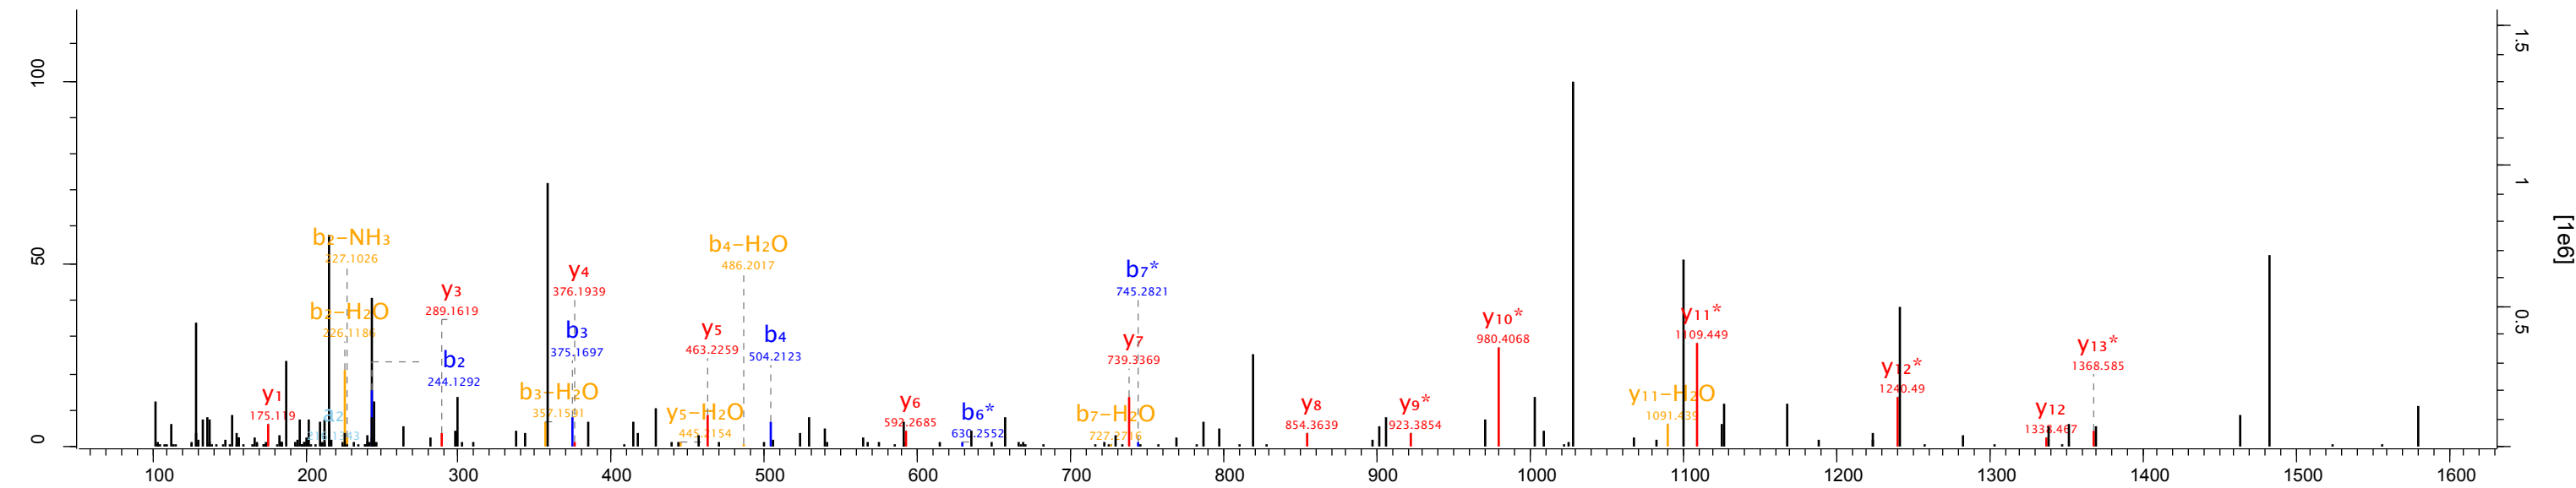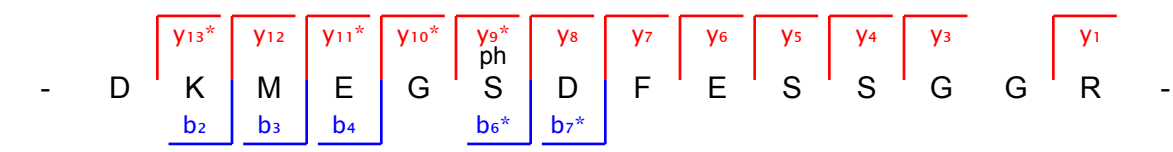

Raw file 20171215\_MaS\_33SR\_LMH\_phospho\_03 Scan 4871 Method FTMS; HCD Score 166.03 m/z 701.27 Gene names RABGAP1

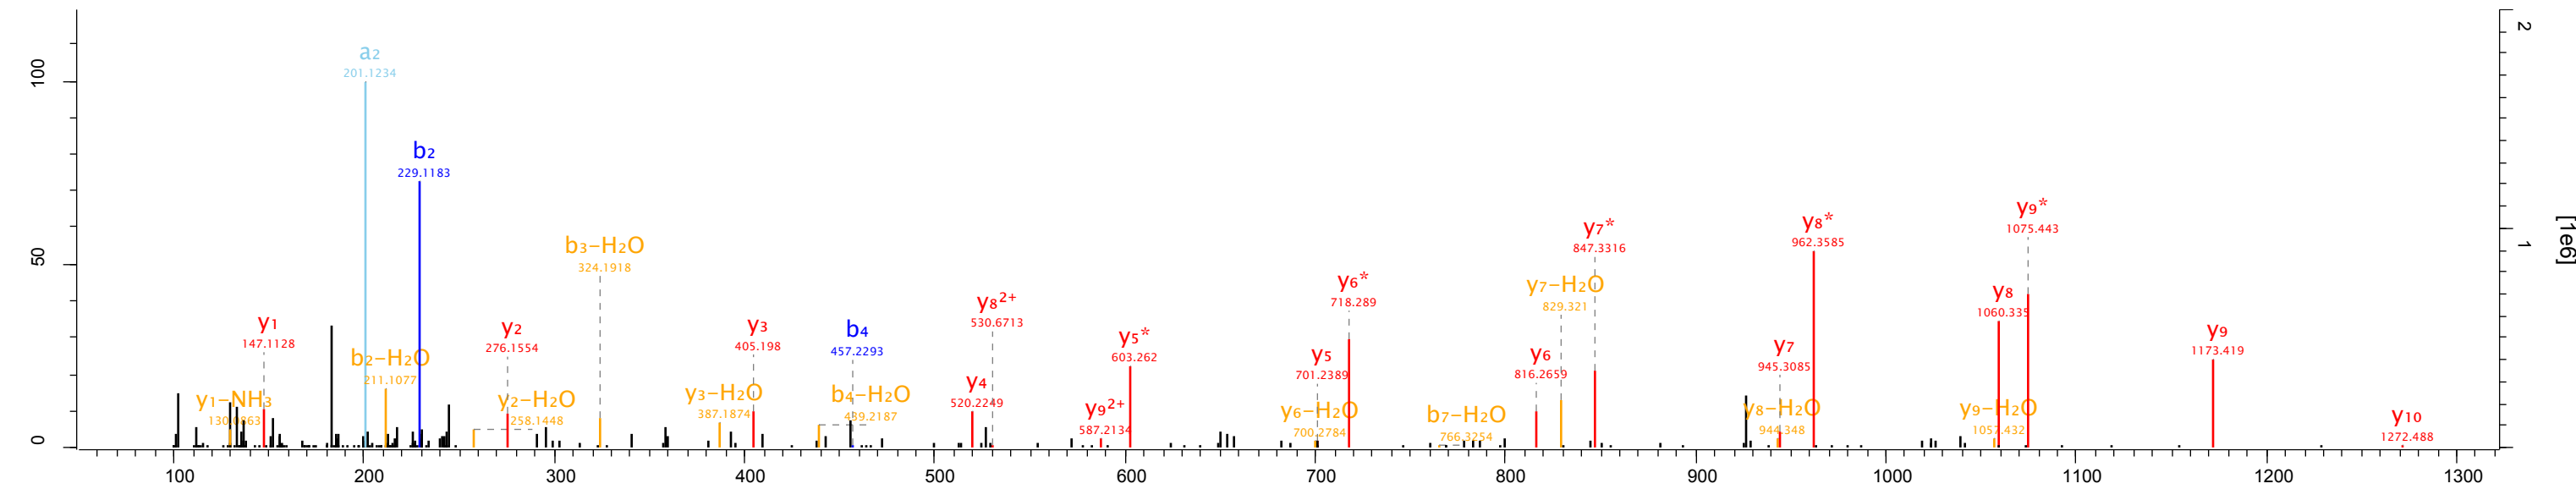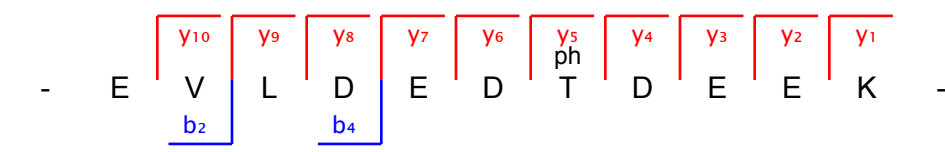

Raw file 20171215\_MaS\_33SR\_LMH\_phospho\_03 Scan 5111 Method FTMS; HCD Score 90.05 m/z 551.23 Gene names GPATCH8

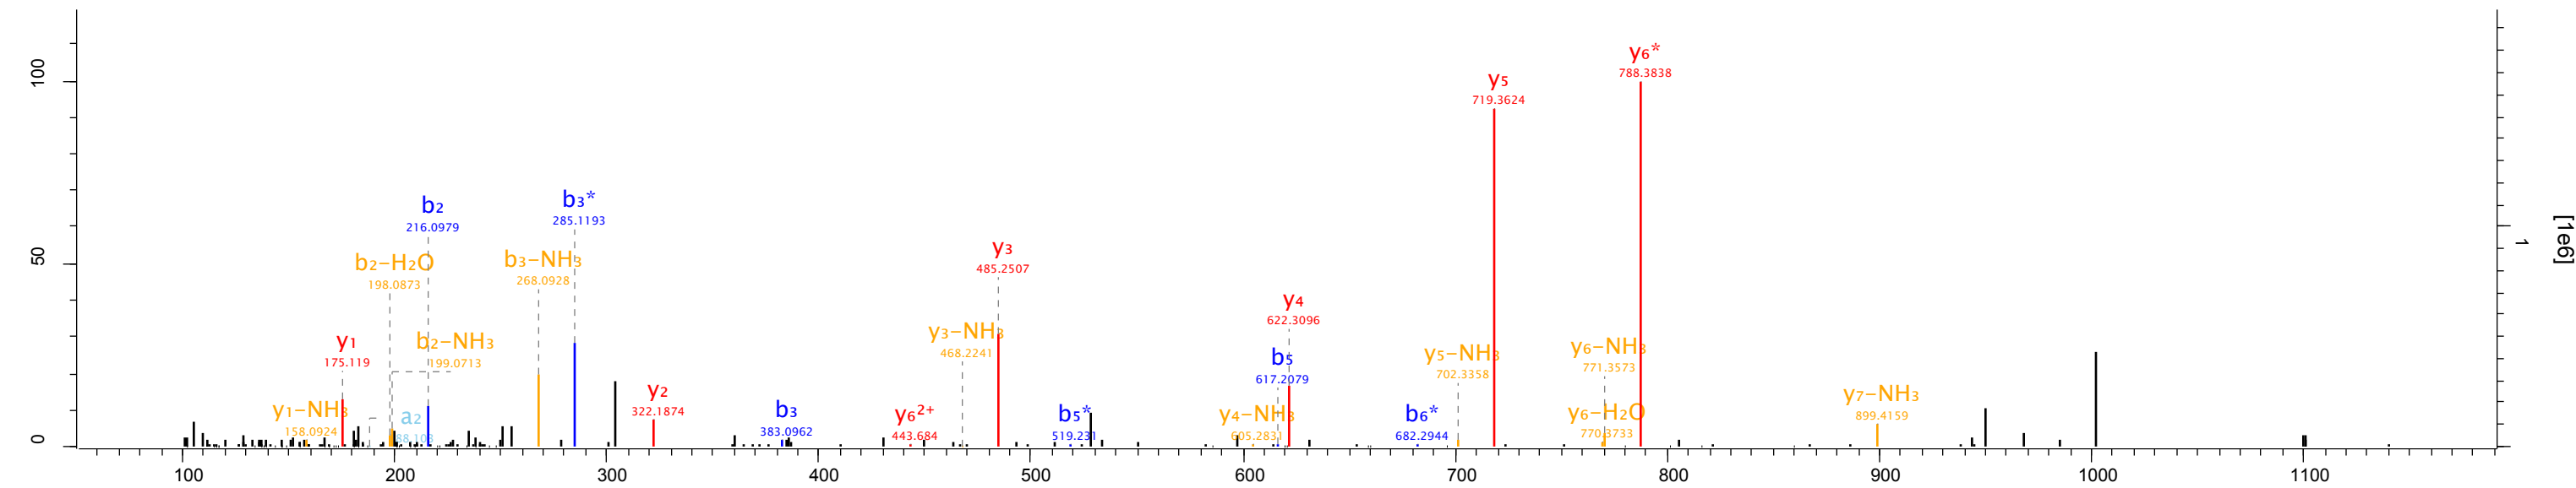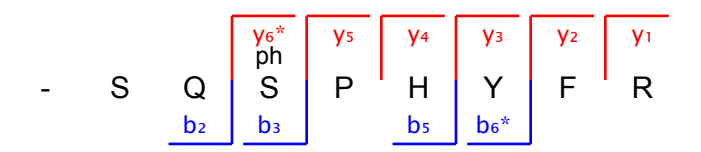

Raw file: 20171215\_MaS\_33SR\_LMH\_phospho\_03  
 Scan: 5191 Method: FTMS; HCD Score: 53.45 m/z: 542.72 Gene names: PKP3

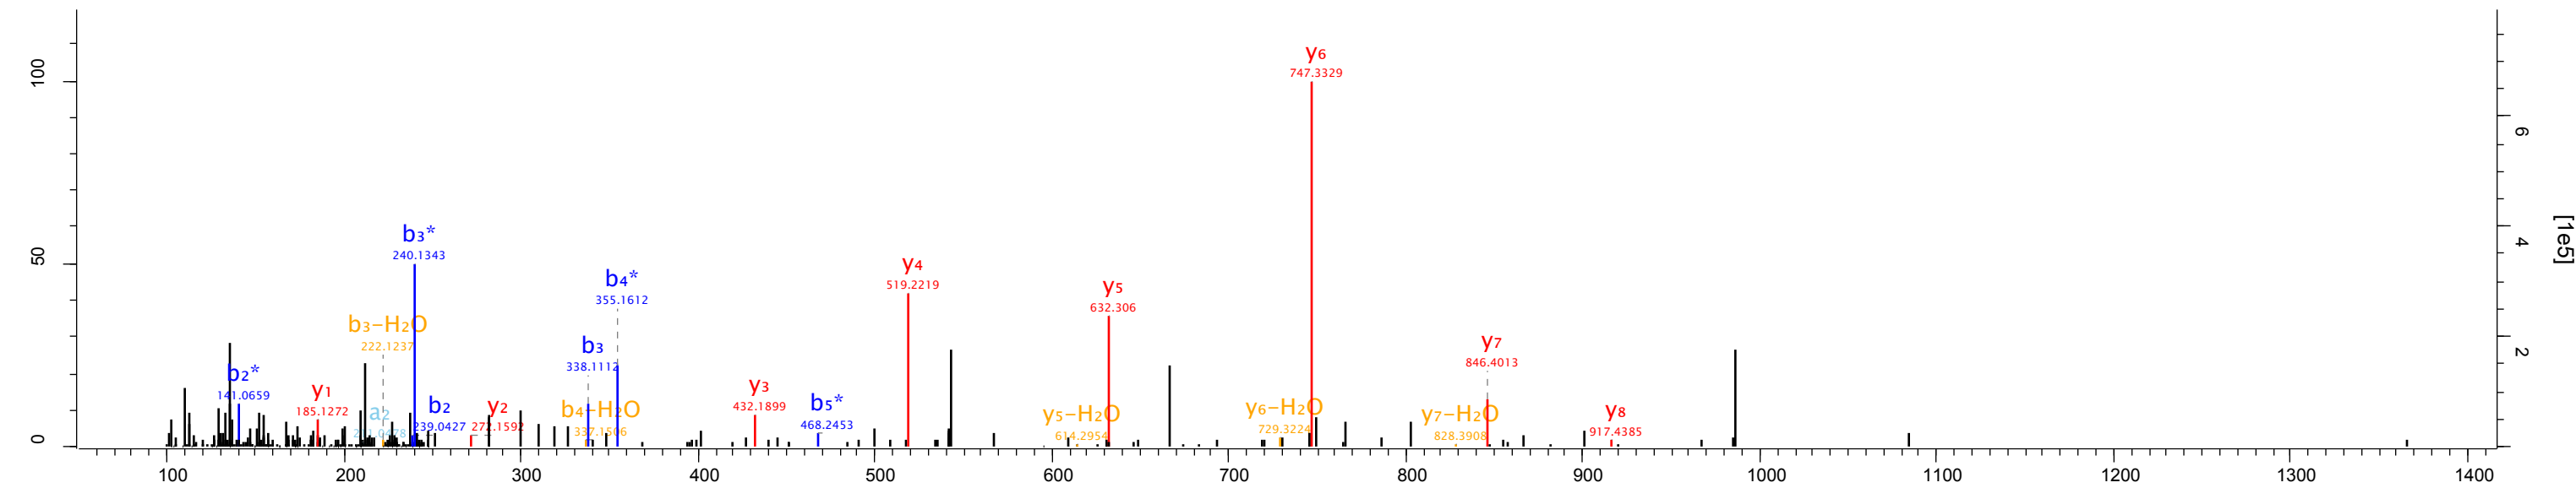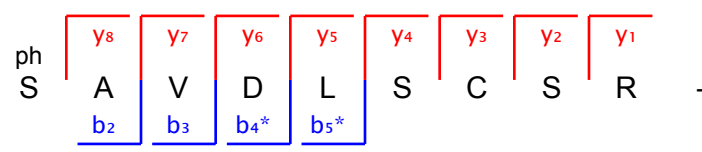

Raw file 20171215\_MaS\_33SR\_LMH\_phospho\_03 Scan 5461 Method FTMS; HCD Score 132.56 m/z 506.22 Gene names NPM1

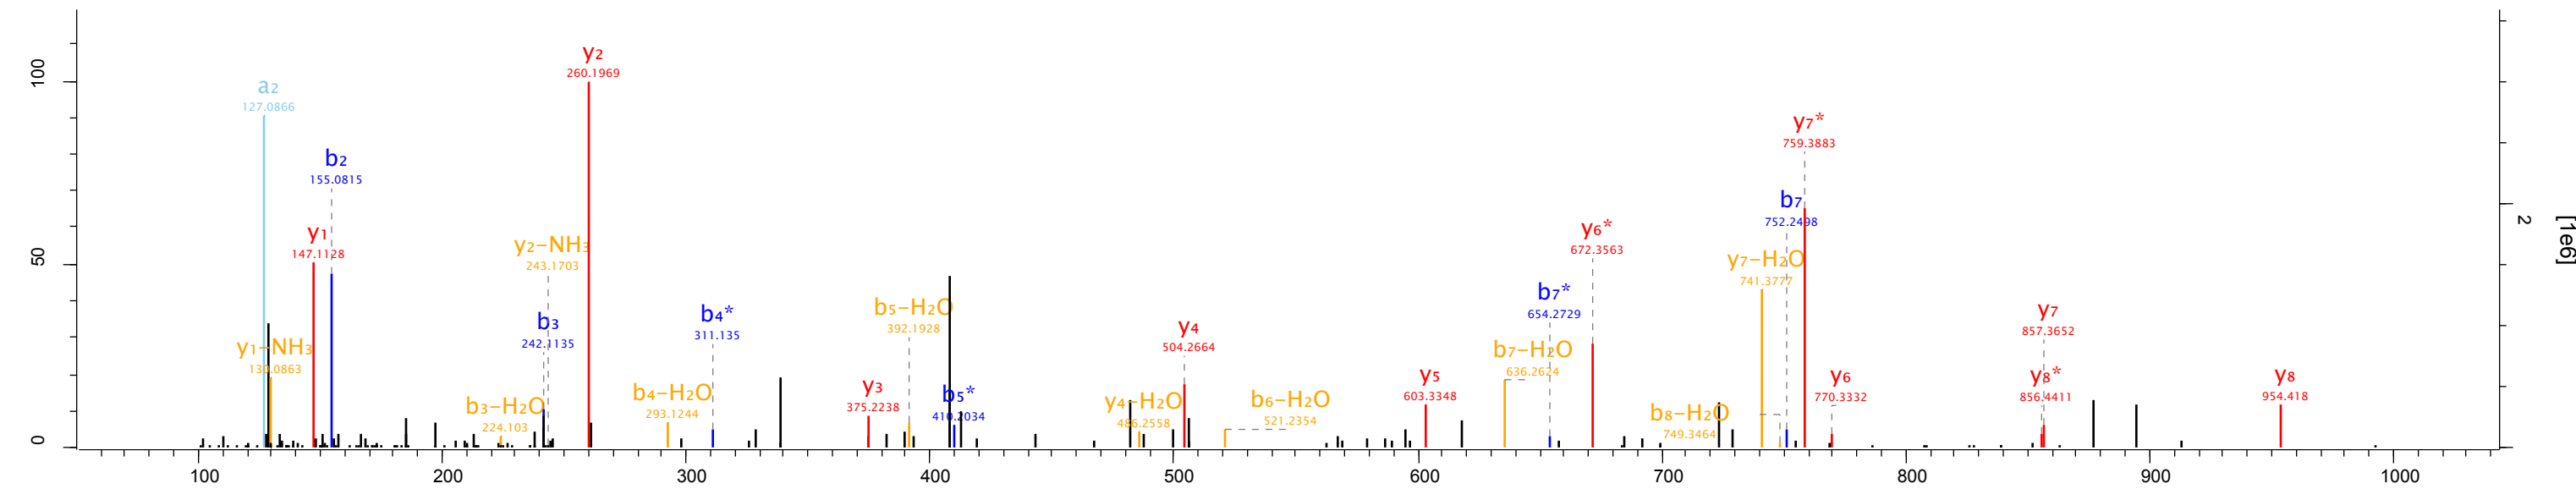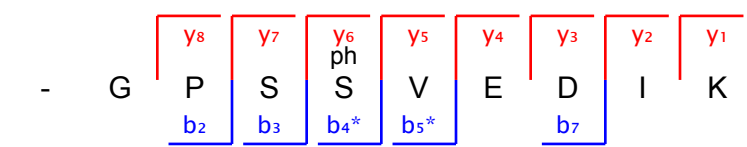

Raw file 20171215\_MaS\_33SR\_LMH\_phospho\_03 Scan 5601 Method FTMS; HCD Score 155.86 m/z 530.27 Gene names PIK3C2A

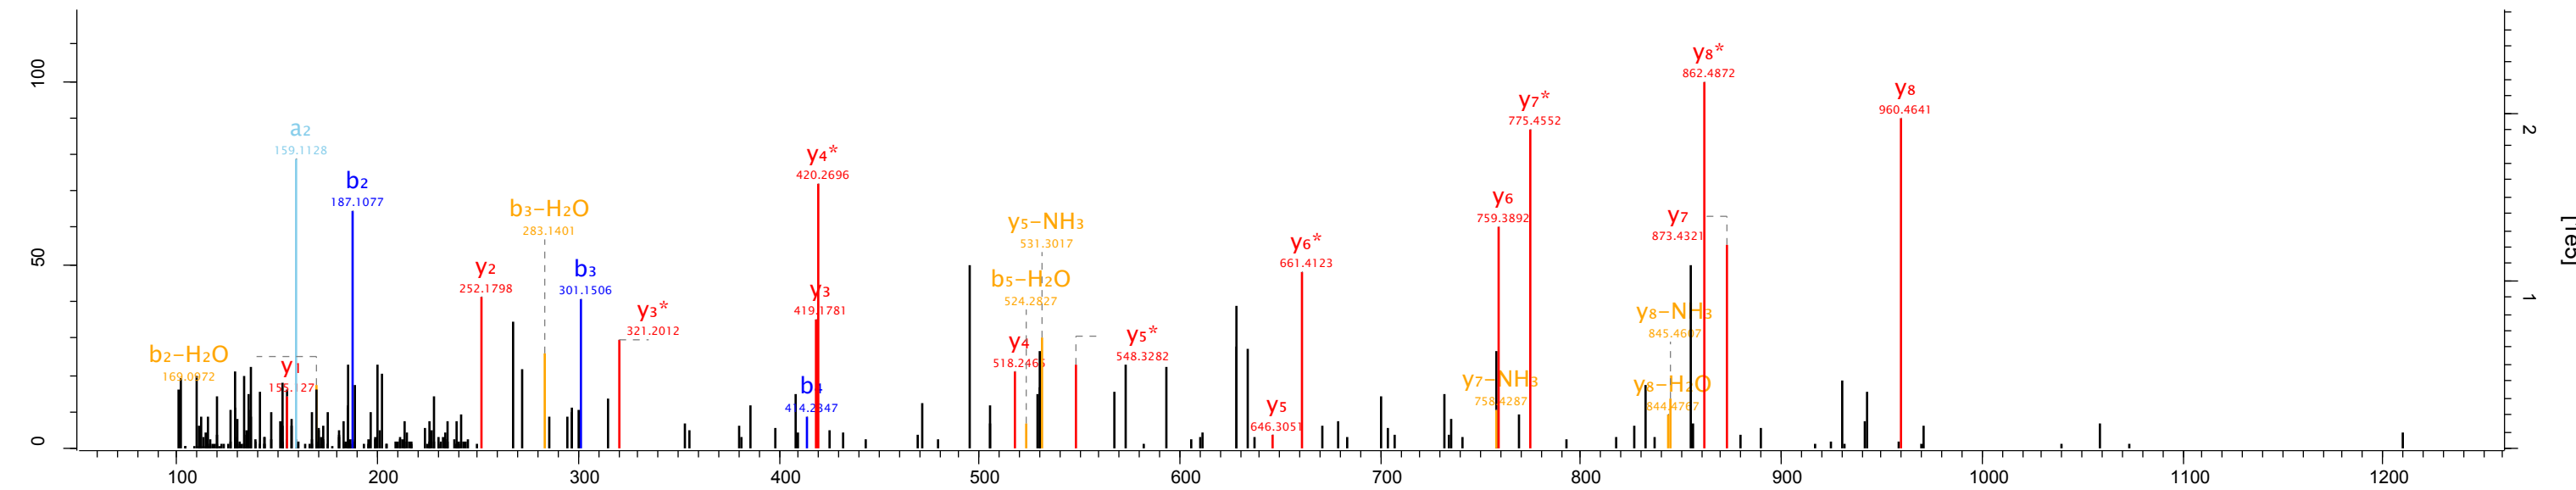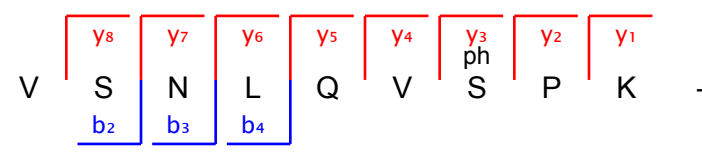

Raw file 20171215\_MaS\_33SR\_LMH\_phospho\_03 Scan 6111 Method FTMS; HCD Score 137.39 m/z 619.31 Gene names BUB1

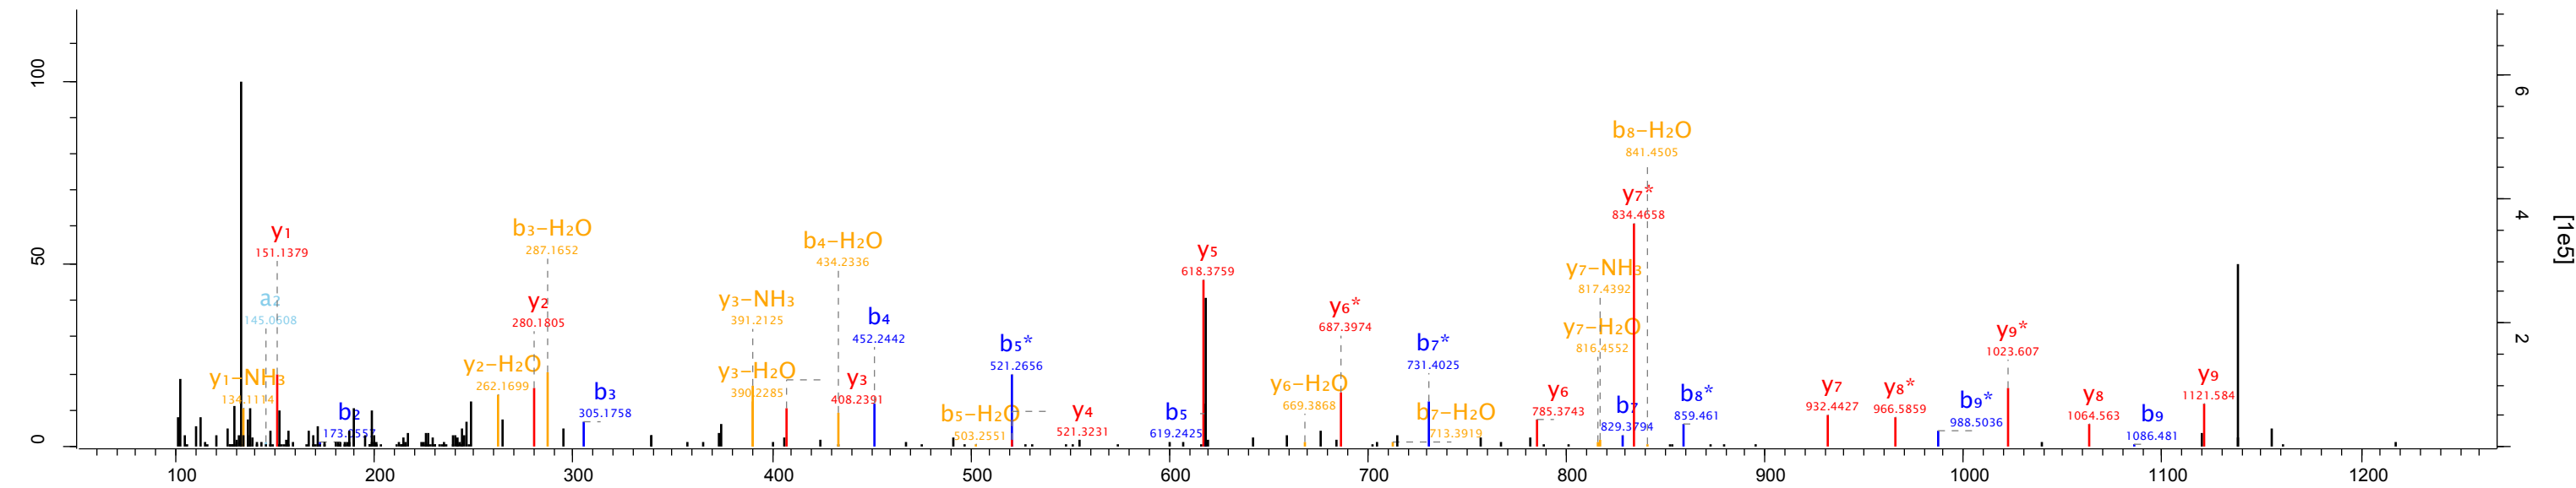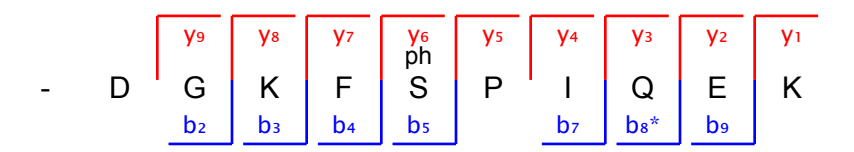



Raw file 20171215\_MaS\_33SR\_LMH\_phospho\_03 Scan 6201 Method FTMS; HCD Score 252.37 m/z 977.38 Gene names WTAP

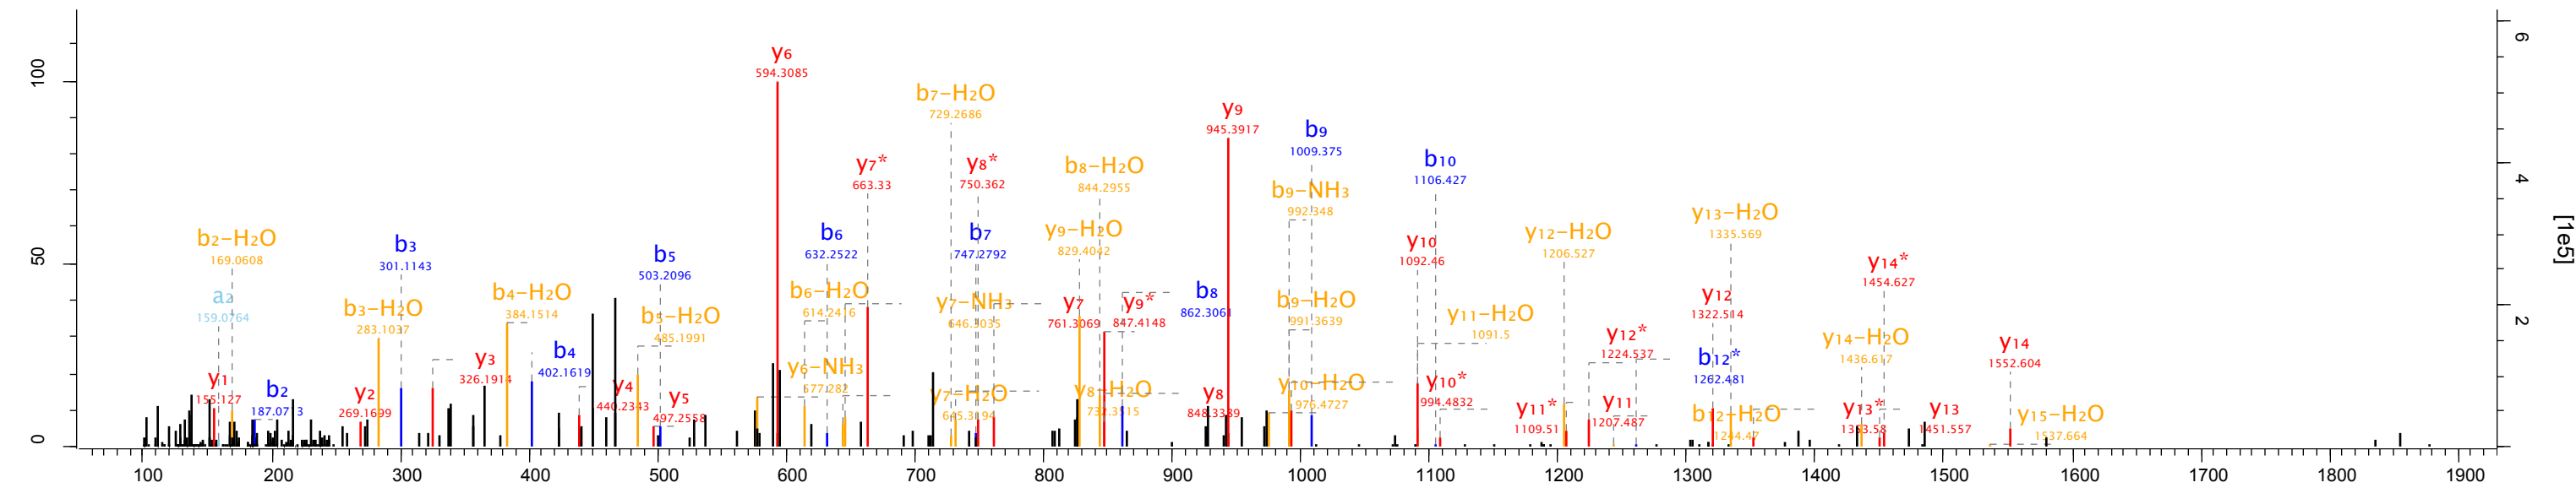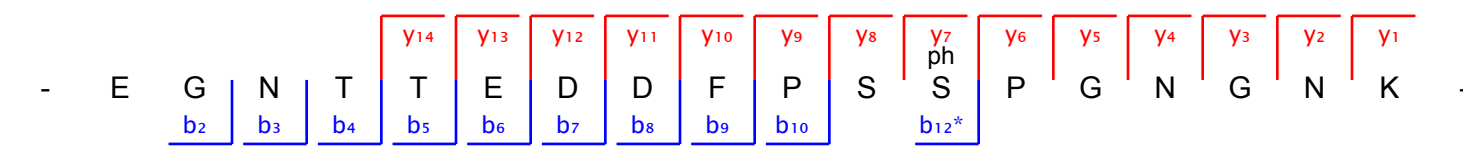

Raw file 20171215\_MaS\_33SR\_LMH\_phospho\_03 Scan 6291 Method FTMS; HCD Score 78.51 m/z 509.24 Gene names PEBP1

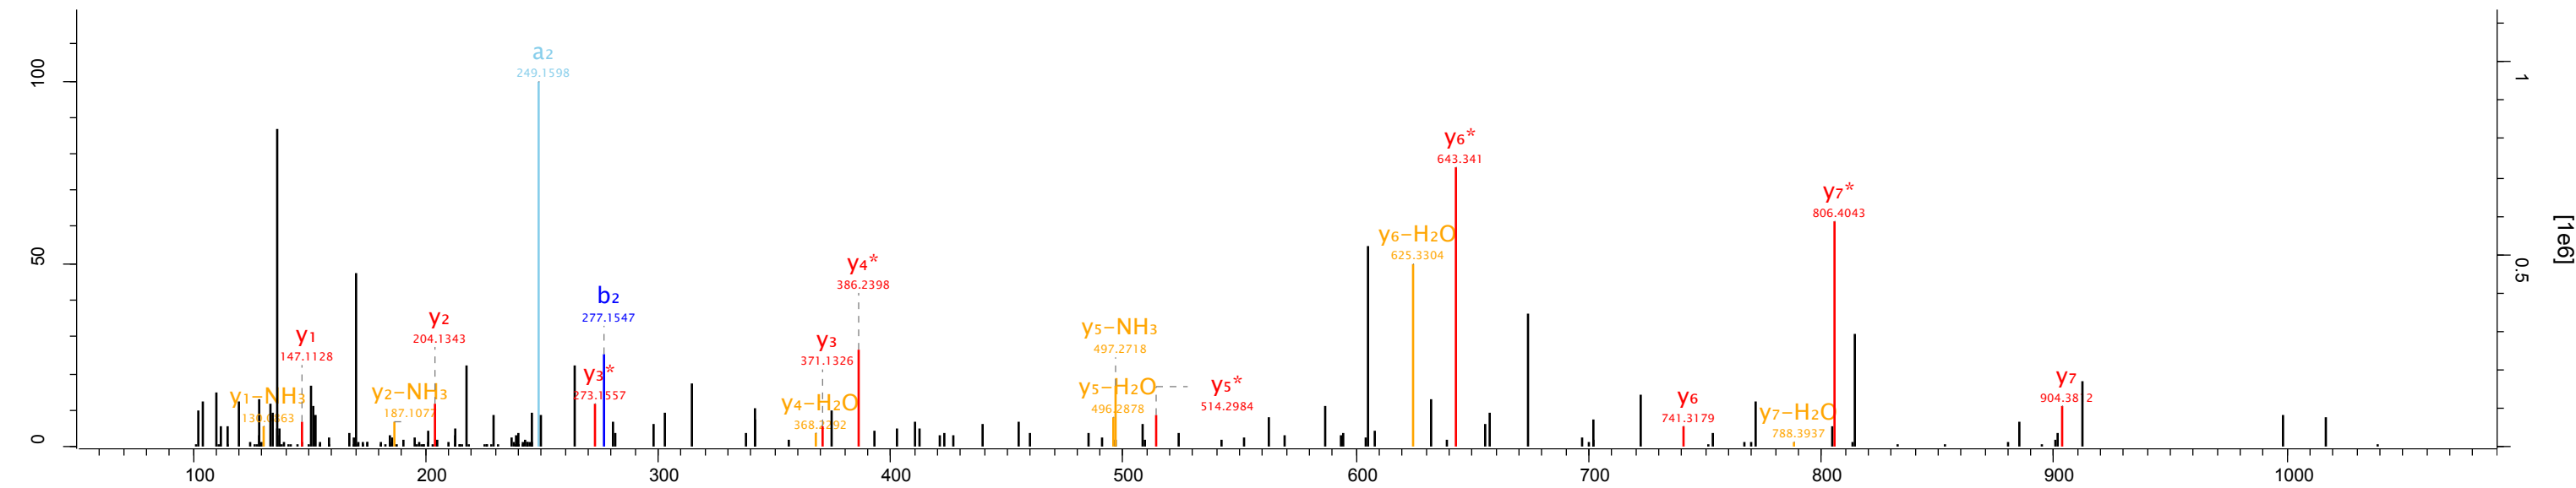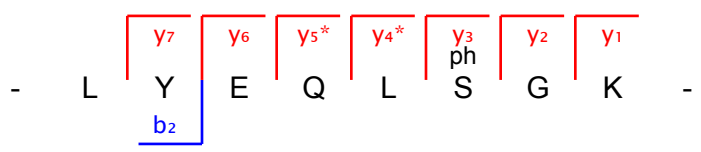

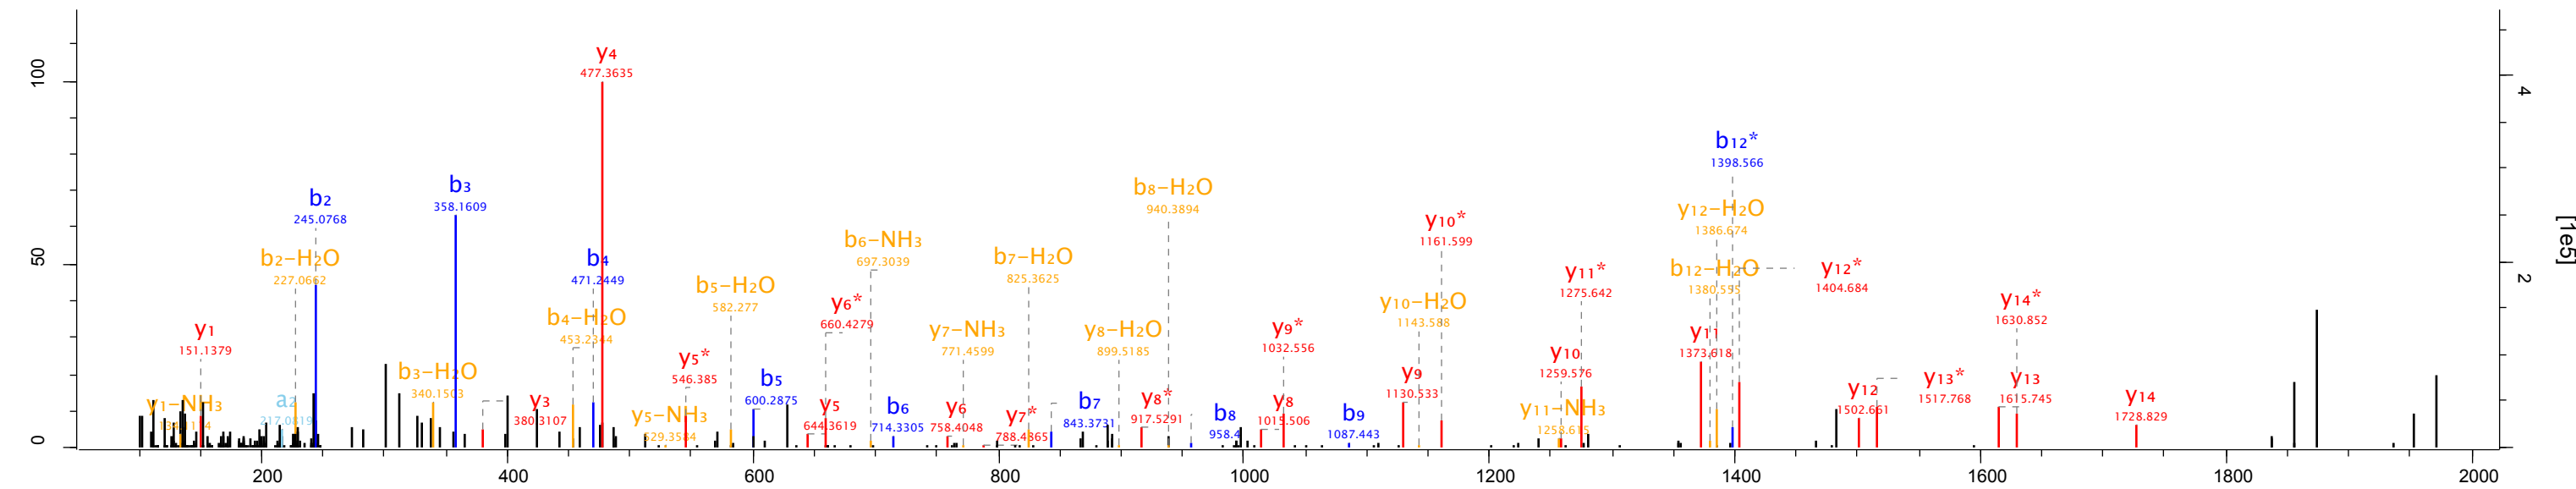

- E D I L E N E D E Q N S P P K -

Fragmentation sites are indicated by boxes below the sequence:

- Red boxes: y14, y13, y12, y11, y10, y9, y8, y7\*, y6, y5<sup>ph</sup>, y4, y3, y1
- Blue boxes: b2, b3, b4, b5, b6, b7, b8, b9, b12\*

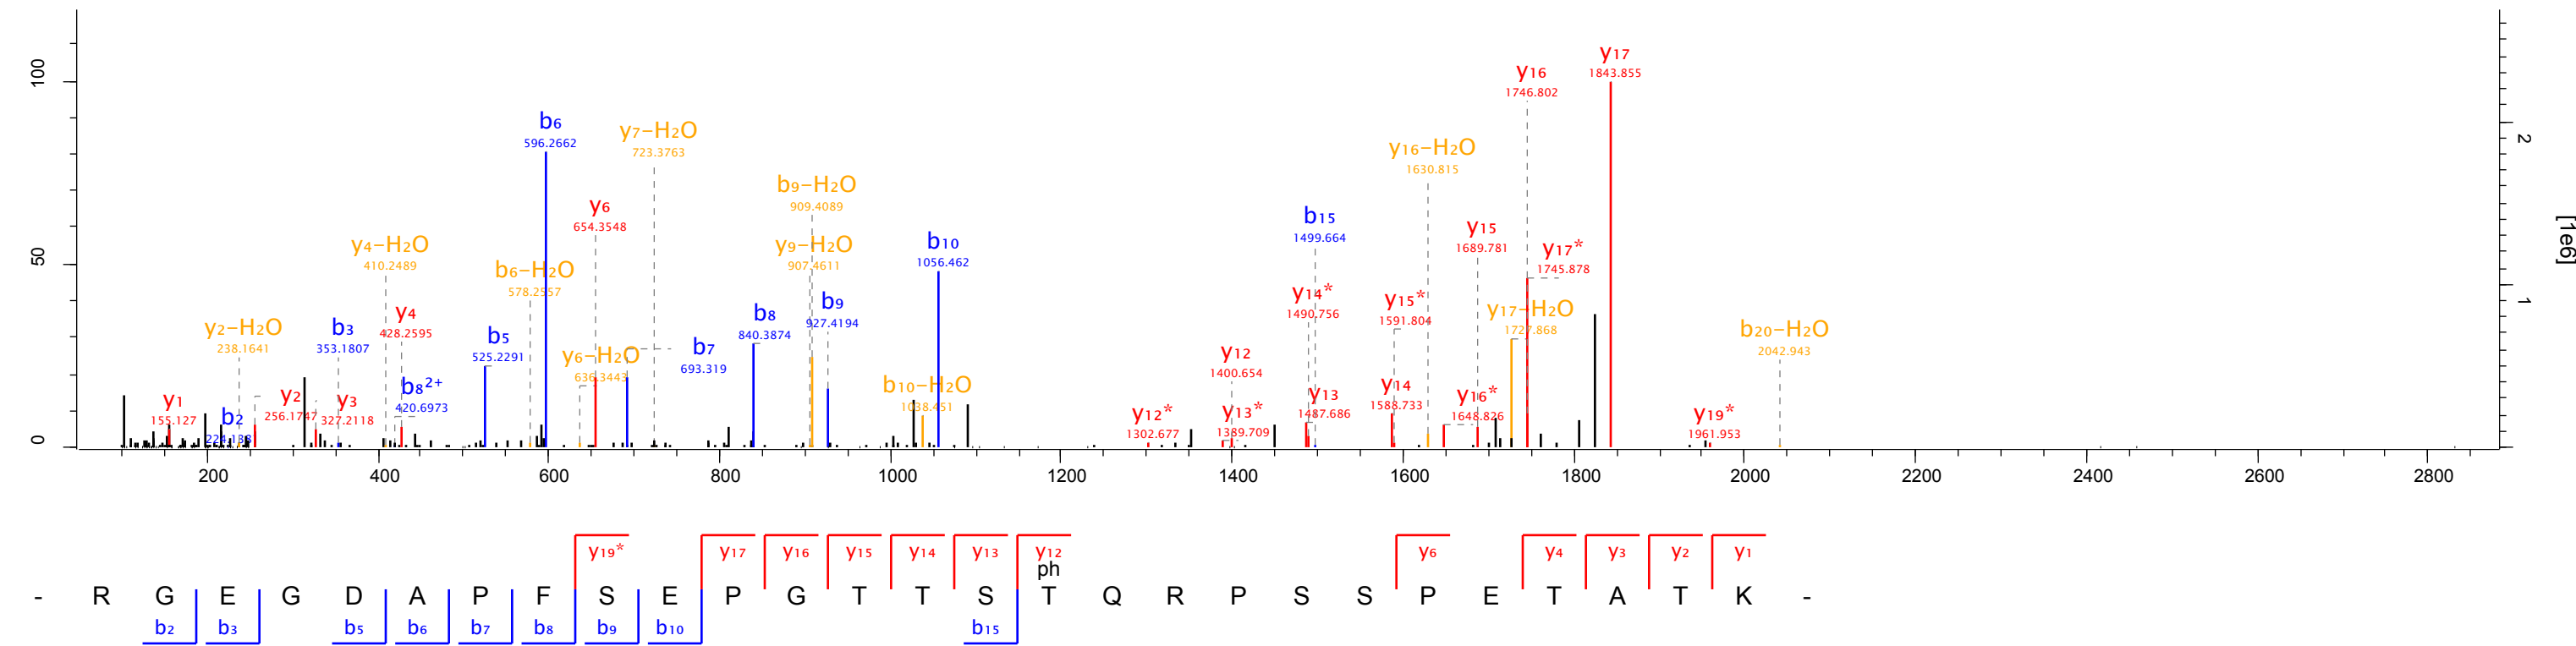

Raw file 20171215\_MaS\_33SR\_LMH\_phospho\_03 Scan 7021 Method FTMS; HCD Score 115.04 m/z 550.26 Gene names C11orf96

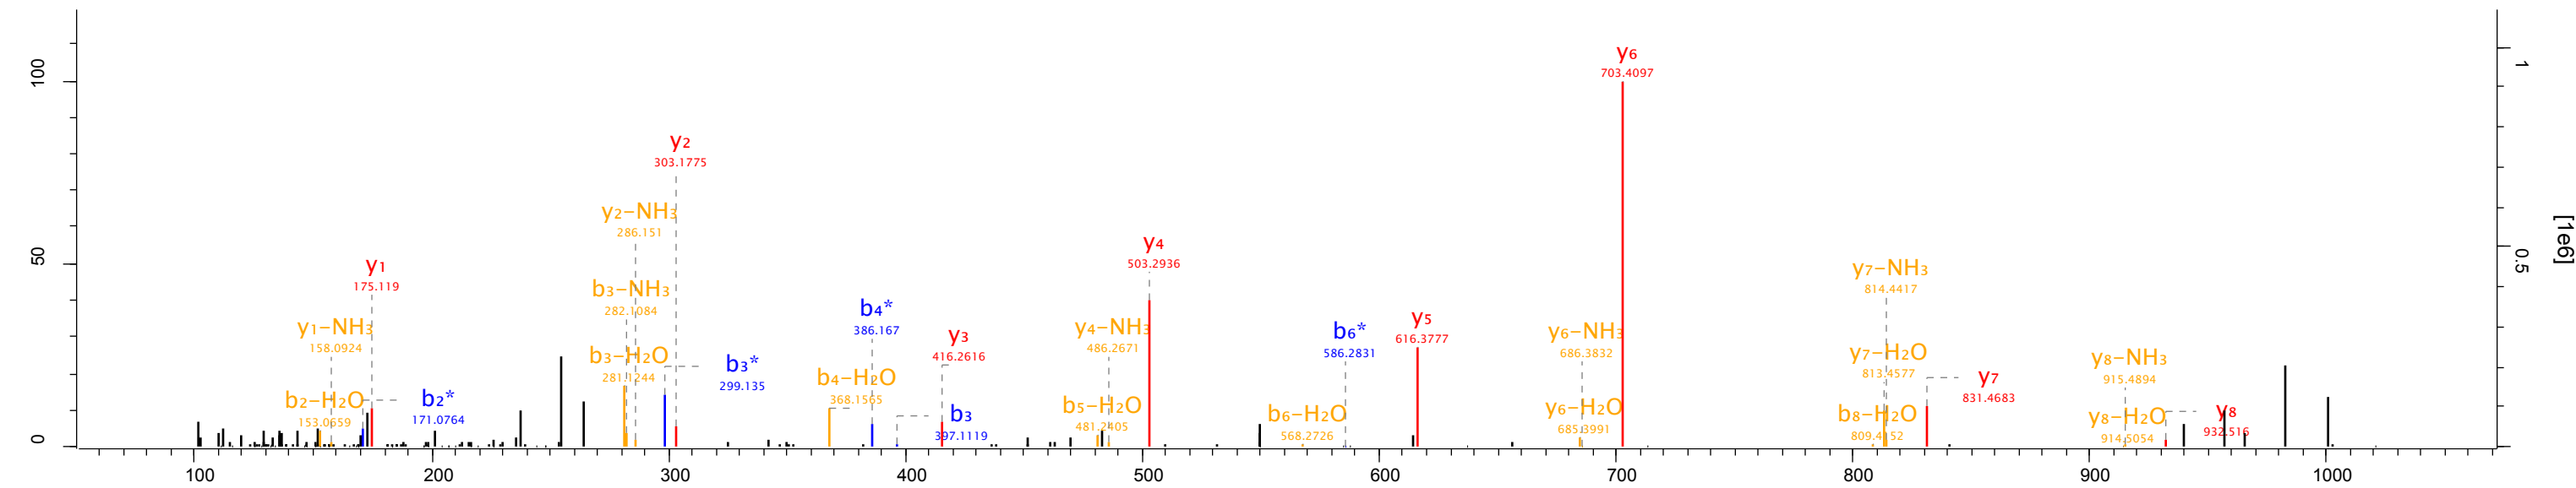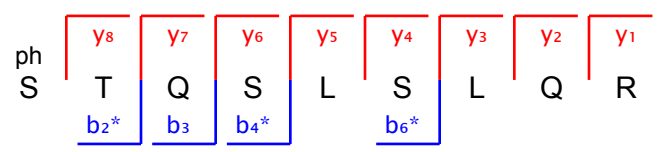

Raw file: 20171215\_MaS\_33SR\_LMH\_phospho\_03  
 Scan: 7121 Method: FTMS; HCD Score: 55.9 m/z: 567.26 Gene names: FUNDC2

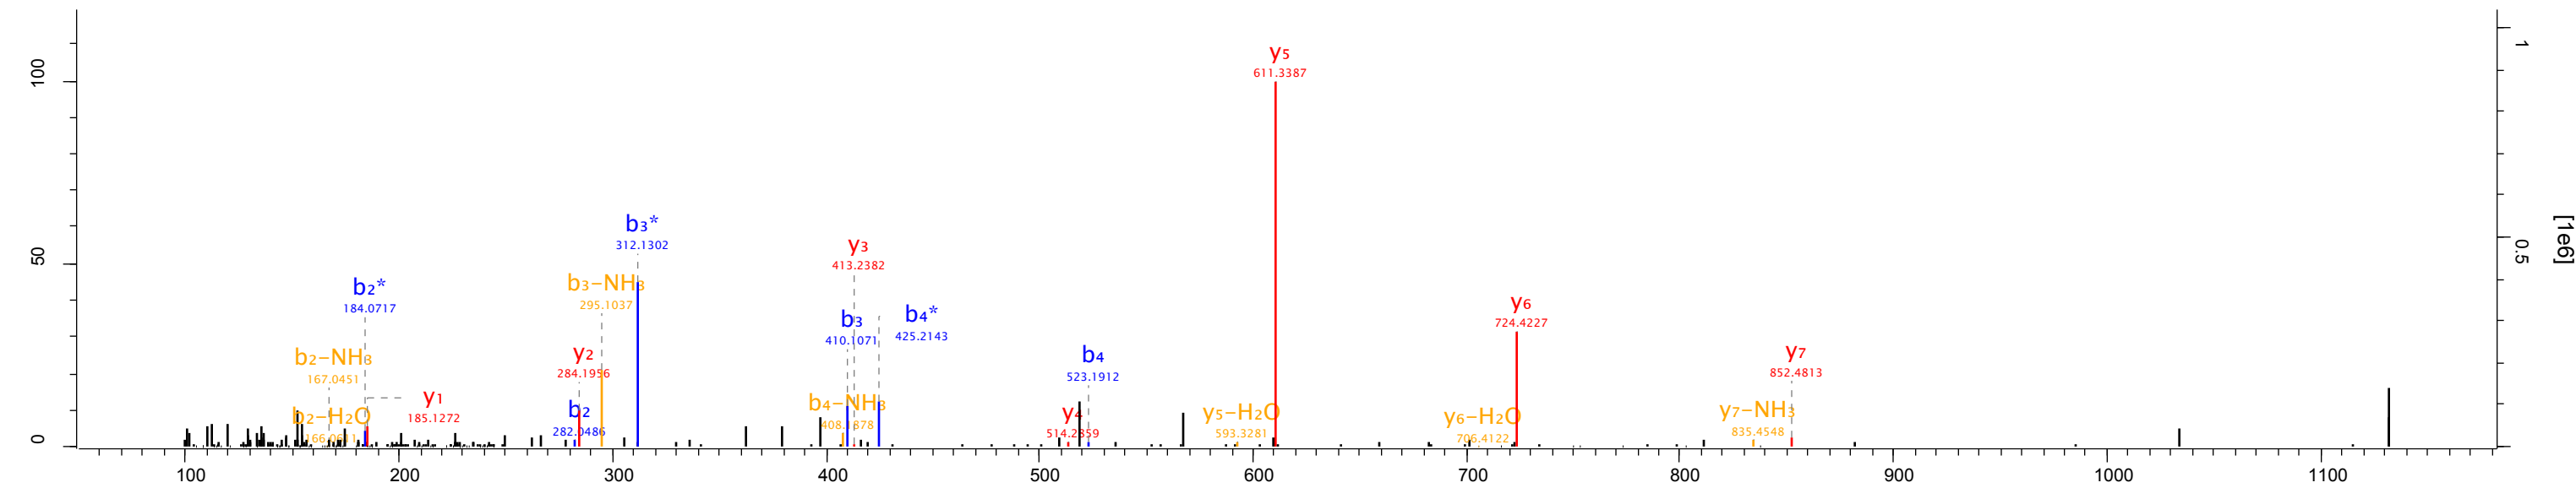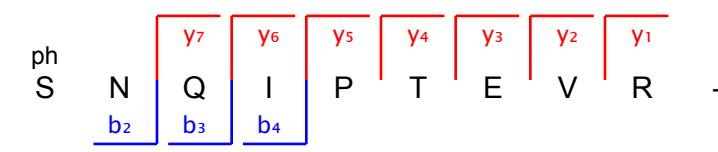

20171215\_MaS\_33SR\_LMH\_phospho\_03 7351 FTMS; HCD 69.03 562.74 MISP

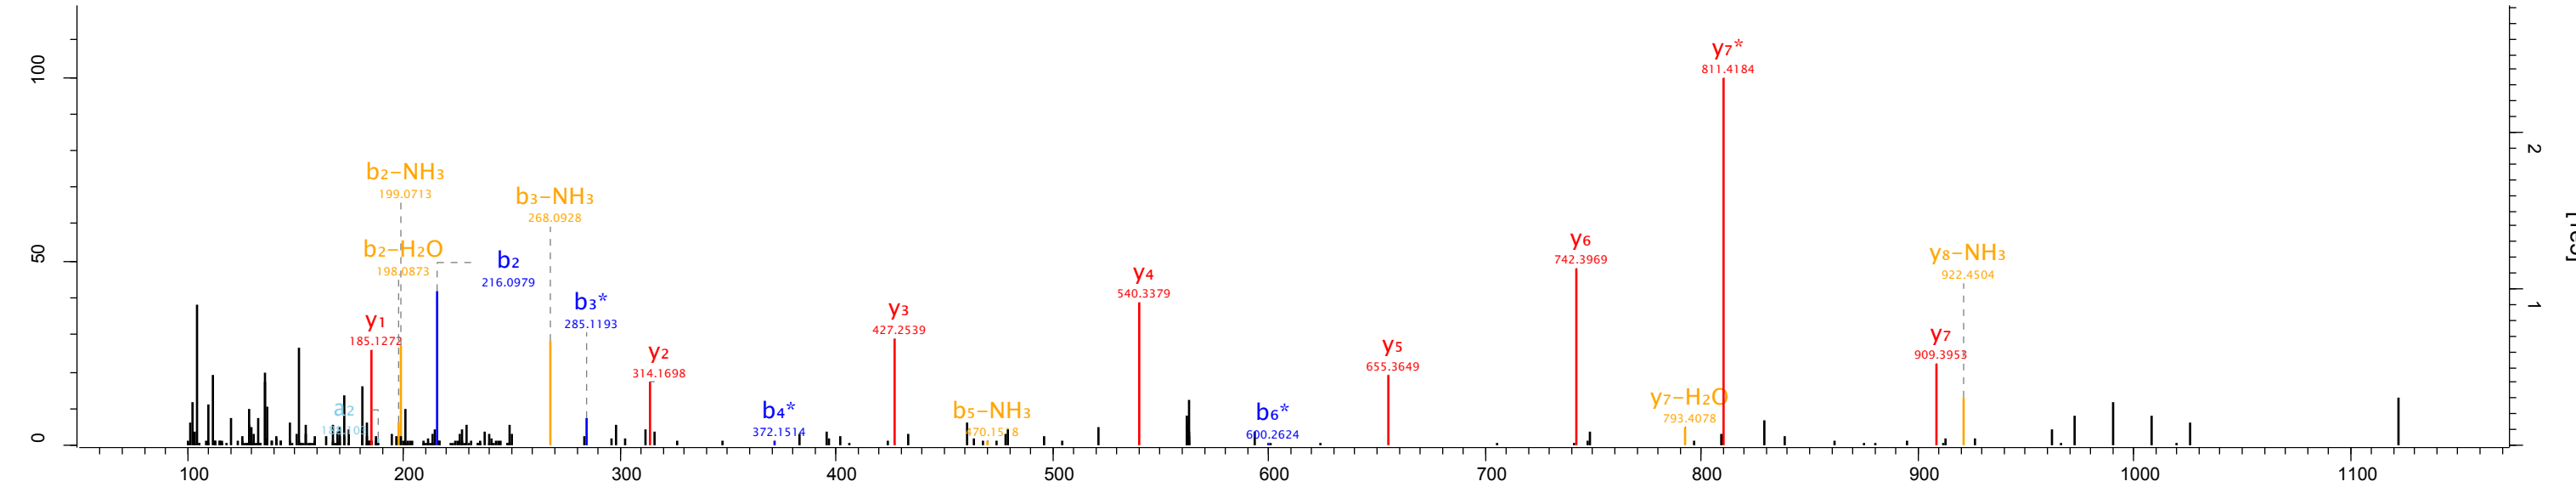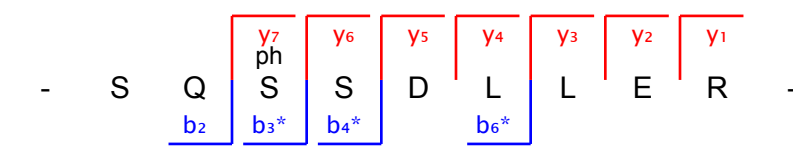

Raw file 20171215\_MaS\_33SR\_LMH\_phospho\_03 Scan 7381 Method FTMS; HCD Score 142.83 m/z 621.77 Gene names CHMP2B

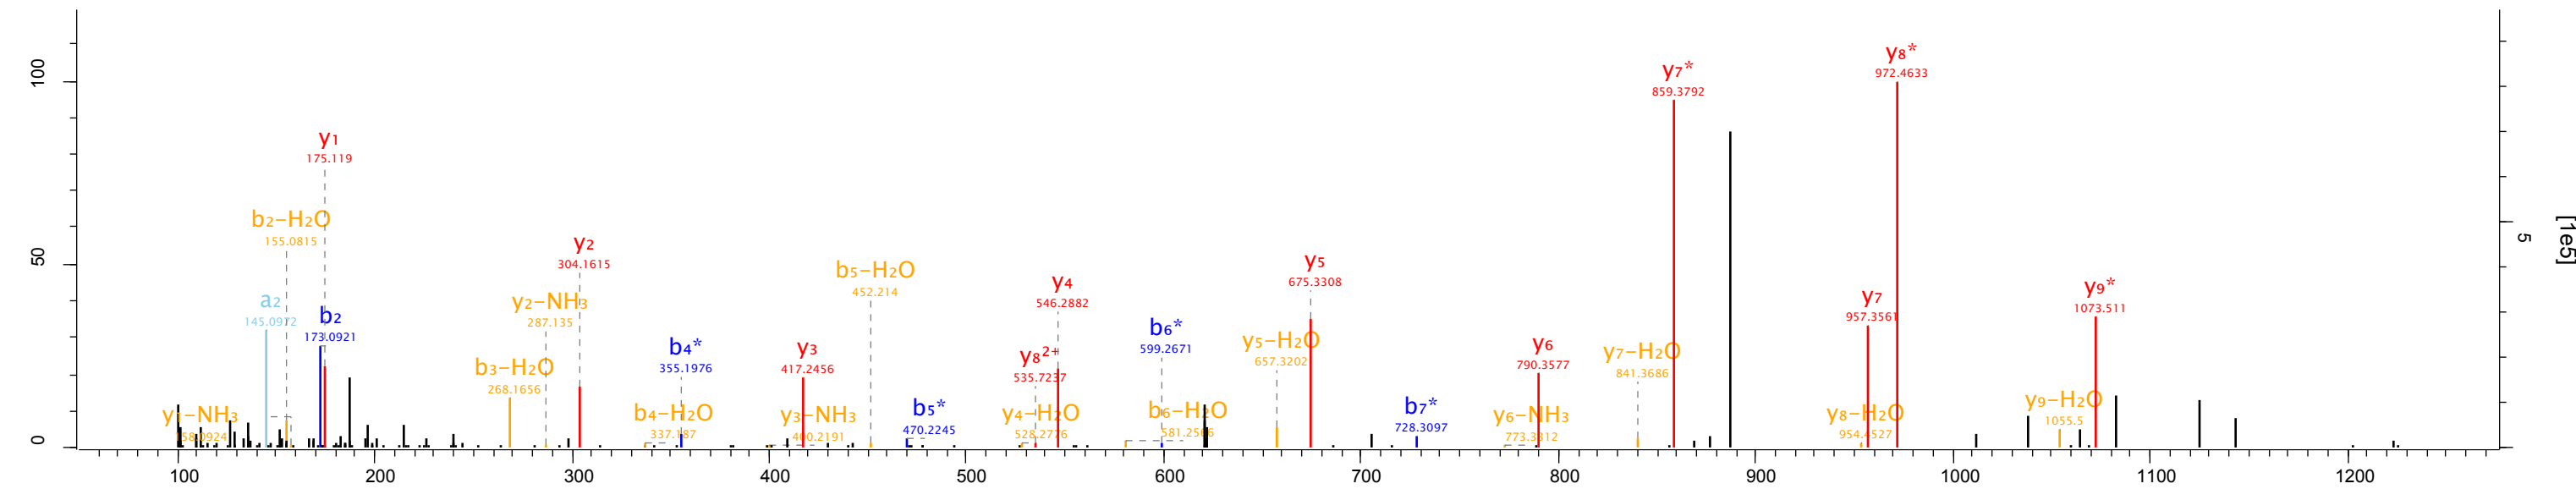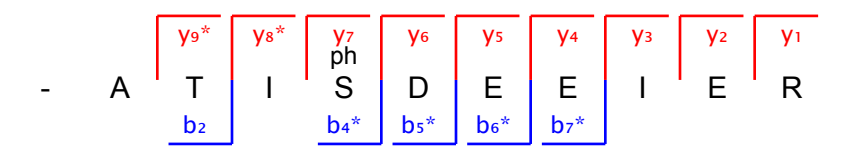



Raw file 20171215\_MaS\_33SR\_LMH\_phospho\_03 Scan 7511 Method FTMS; HCD Score 212.79 m/z 923.87 Gene names MDM2;mdm2

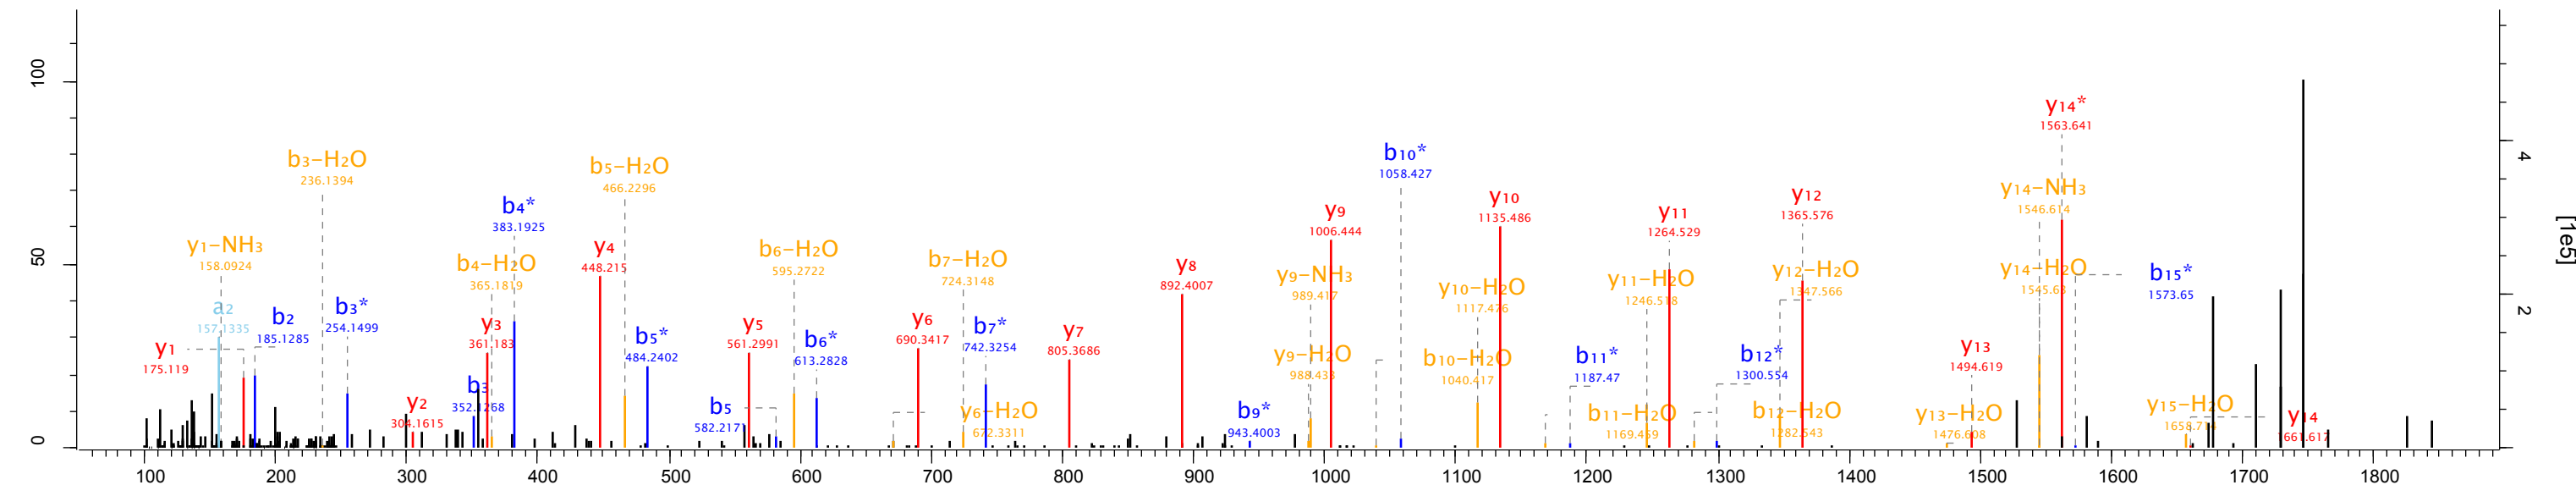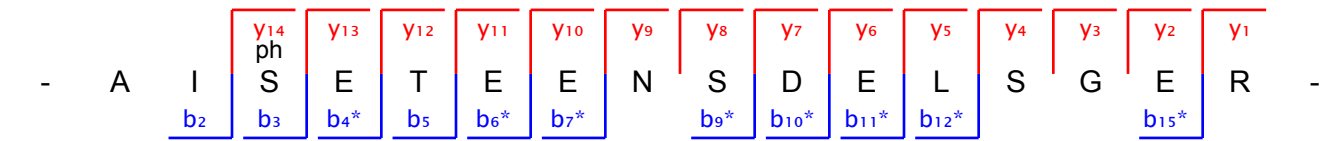

Raw file 20171215\_MaS\_33SR\_LMH\_phospho\_03 Scan 7541 Method FTMS; HCD Score 93.5 m/z 882.38 Gene names CLSPN

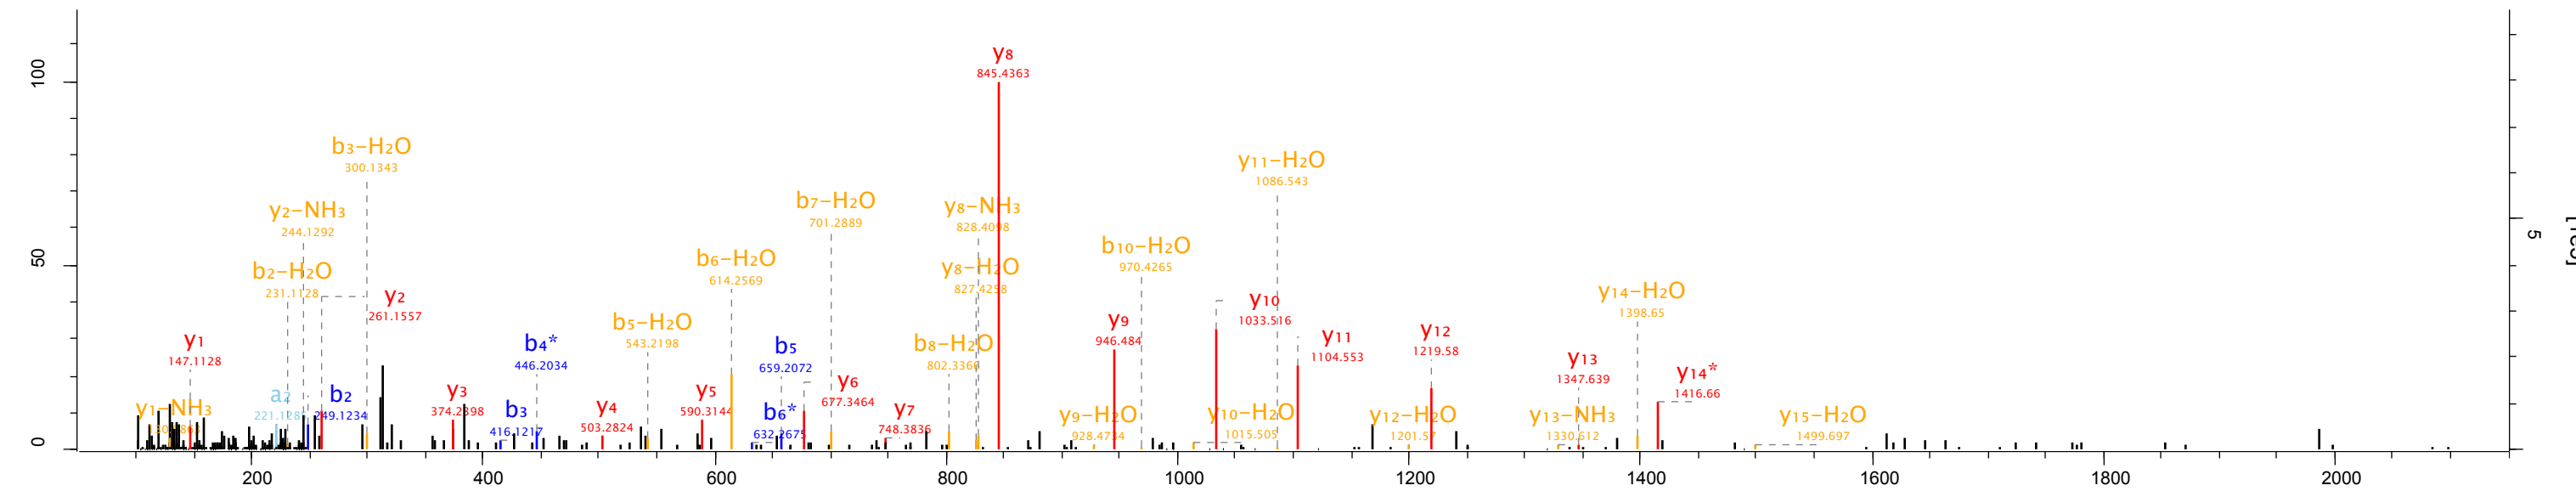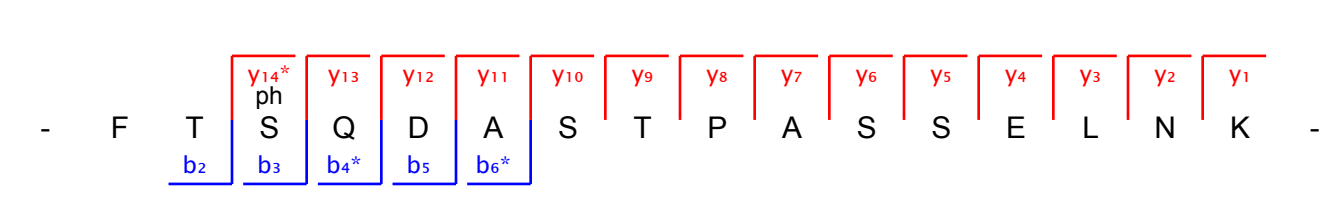

Raw file 20171215\_MaS\_33SR\_LMH\_phospho\_03 Scan 7741 Method FTMS; HCD Score 295.78 m/z 1118.46 Gene names ZFAND5

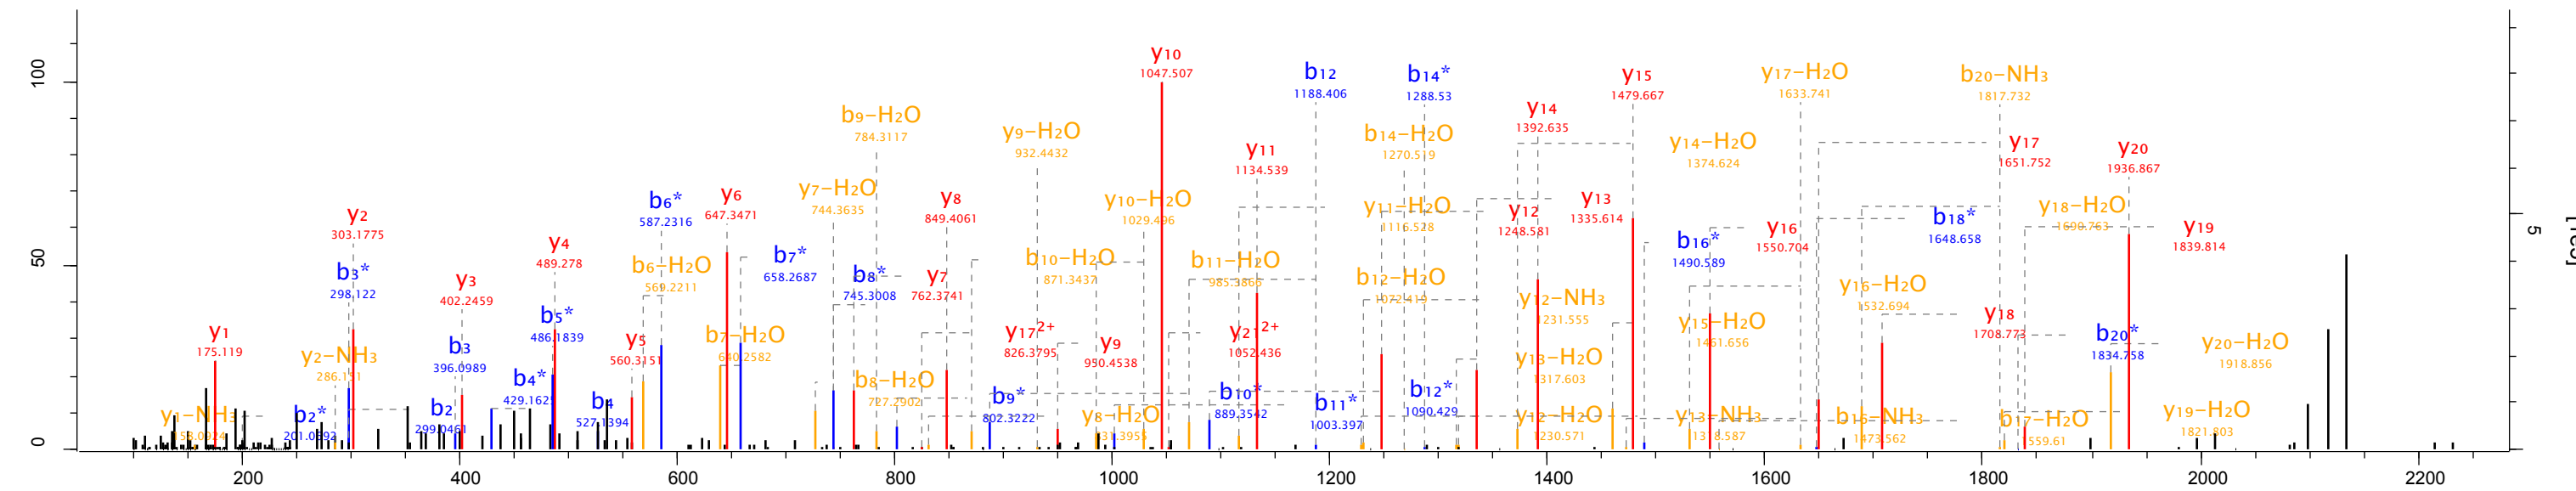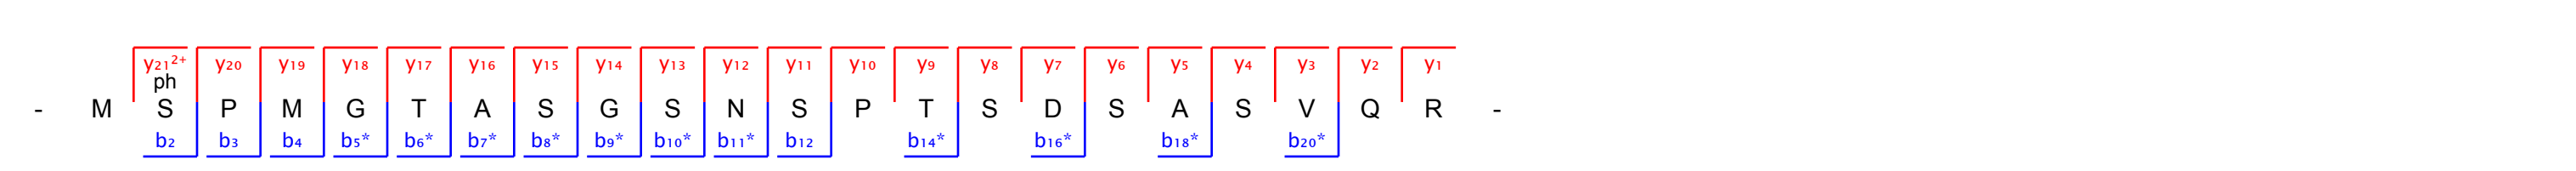

Raw file 20171215\_MaS\_33SR\_LMH\_phospho\_03 Scan 7771 Method FTMS; HCD Score 153.48 m/z 681.33 Gene names LOH12CR1

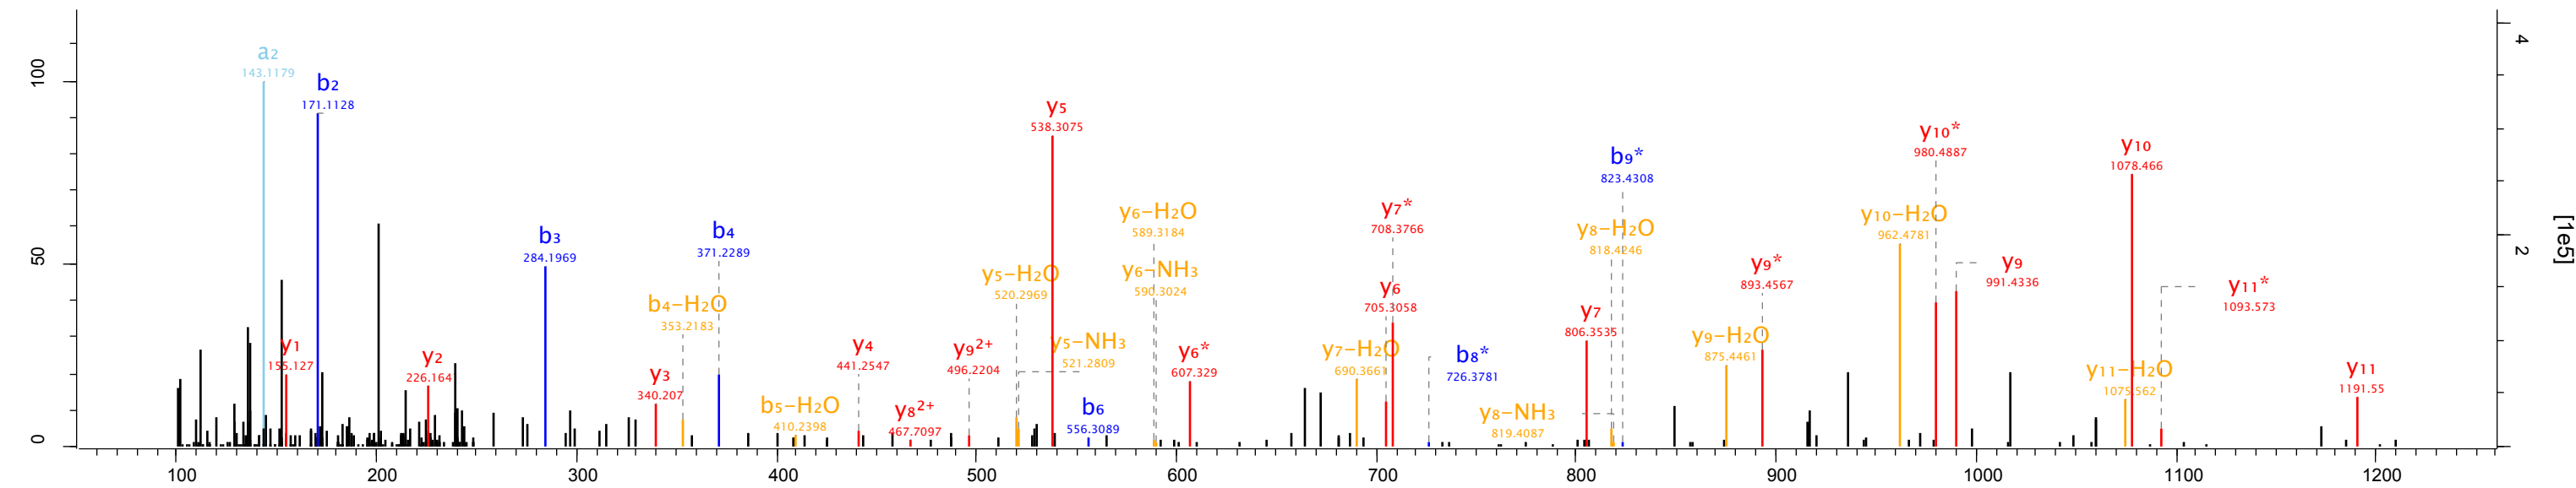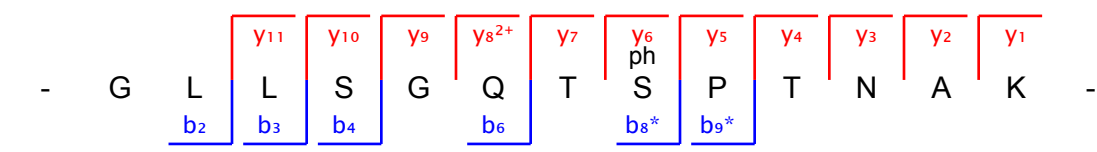

Raw file 20171215\_MaS\_33SR\_LMH\_phospho\_03 Scan 7961 Method FTMS; HCD Score 133.16 m/z 865.36 Gene names NRBP1

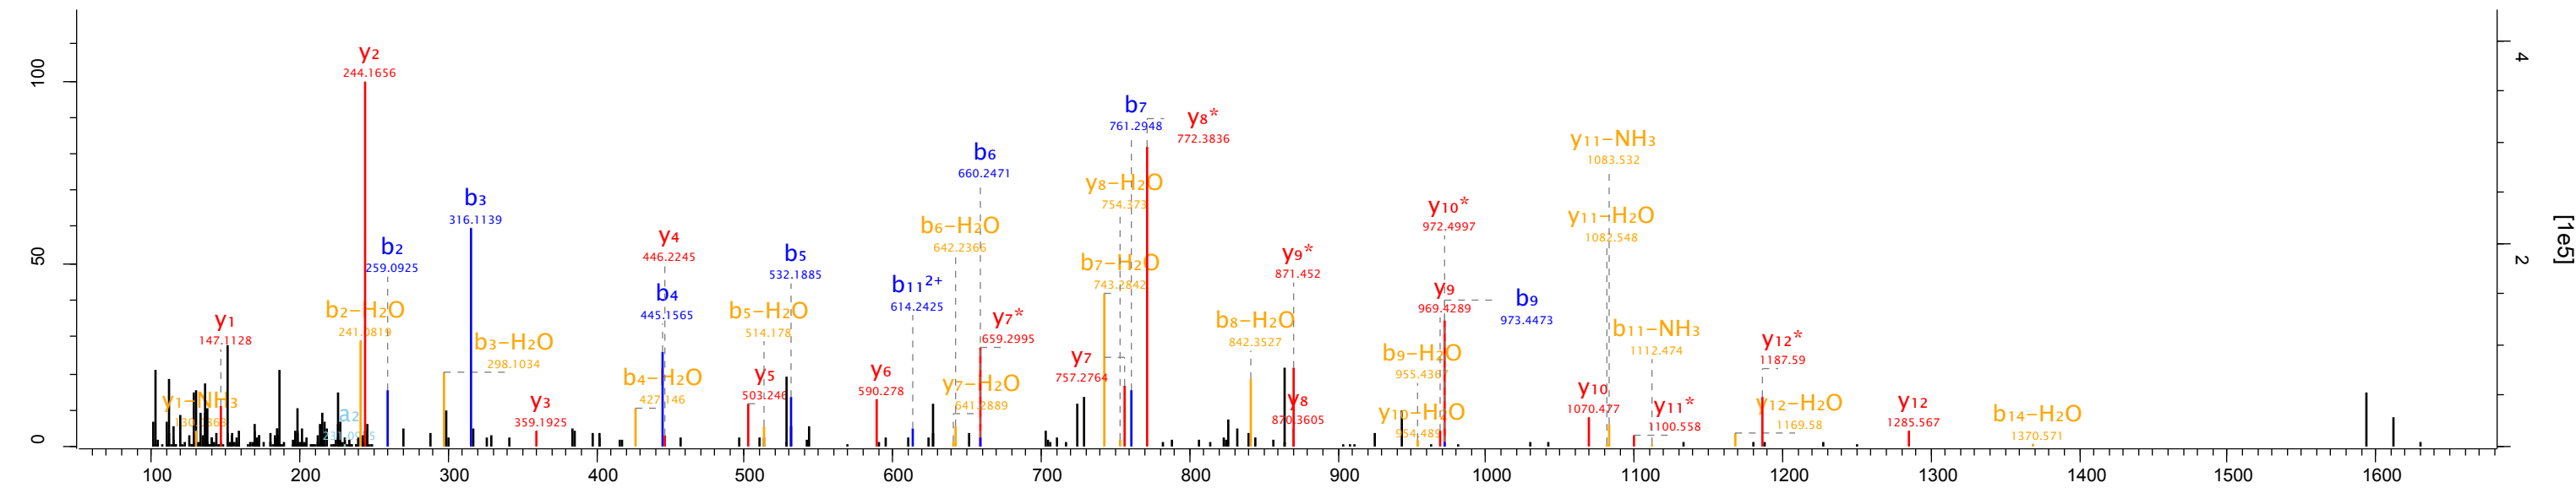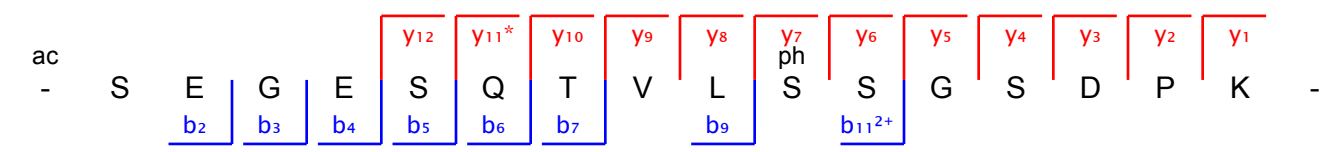

Raw file 20171215\_MaS\_33SR\_LMH\_phospho\_03 Scan 8301 Method FTMS; HCD Score 124.66 m/z 888.36 Gene names COMMD3-BMI1;BMI1

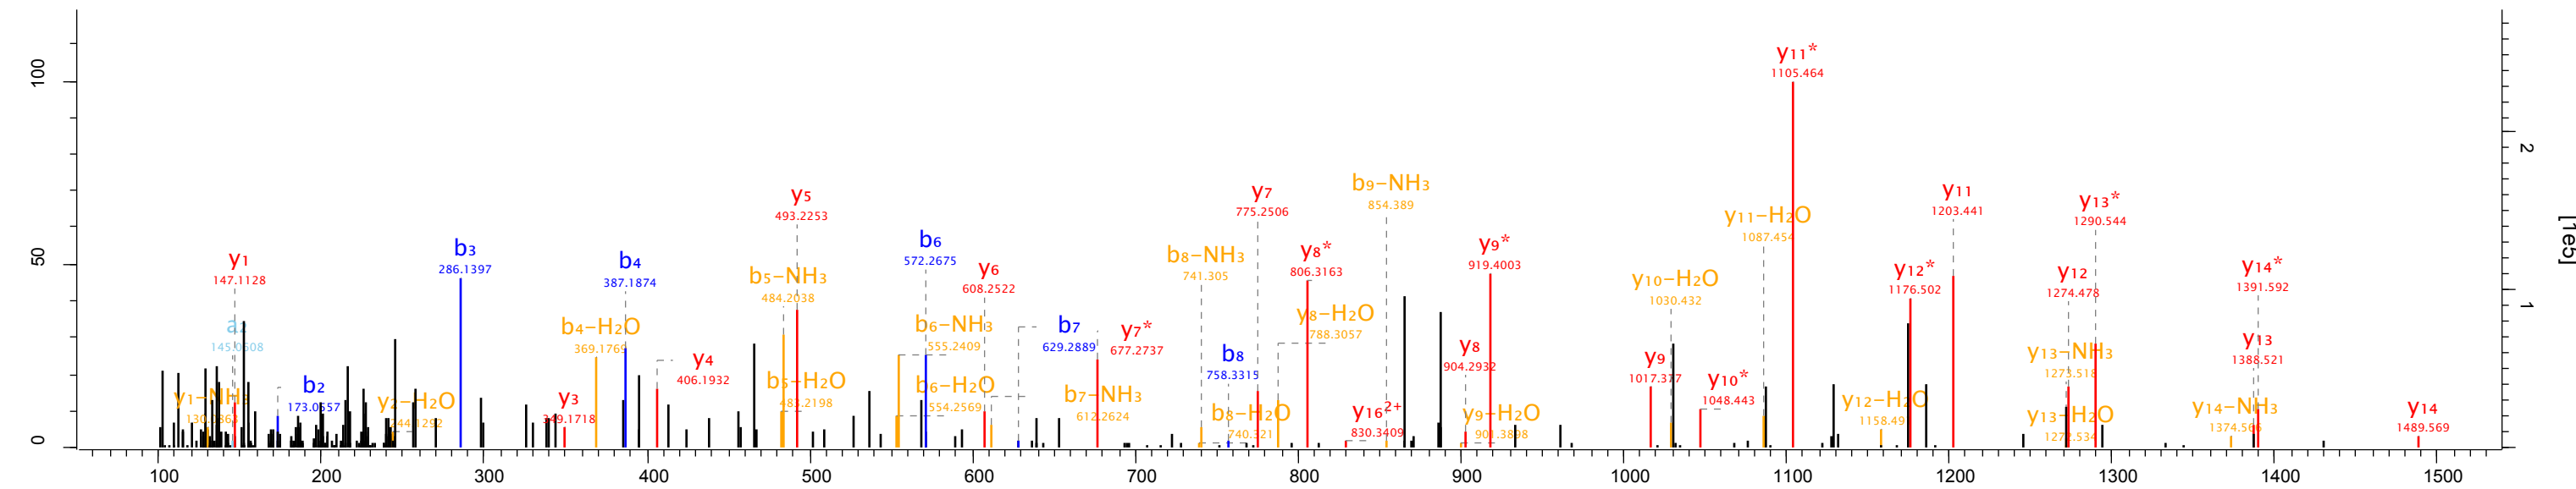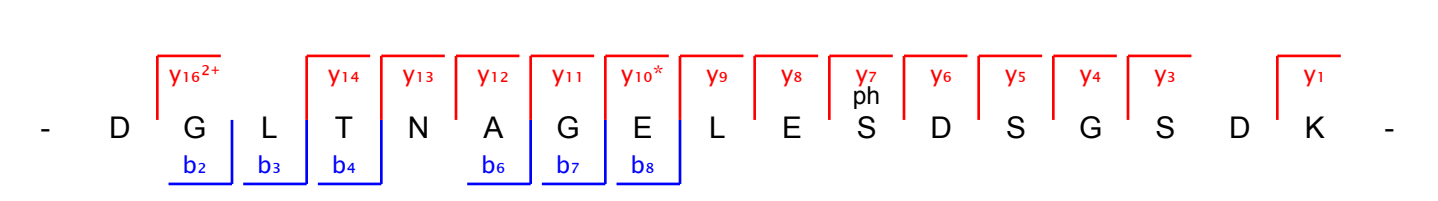

Raw file 20171215\_MaS\_33SR\_LMH\_phospho\_03 Scan 8461 Method FTMS; HCD Score 97.27 m/z 650.81 Gene names STK10

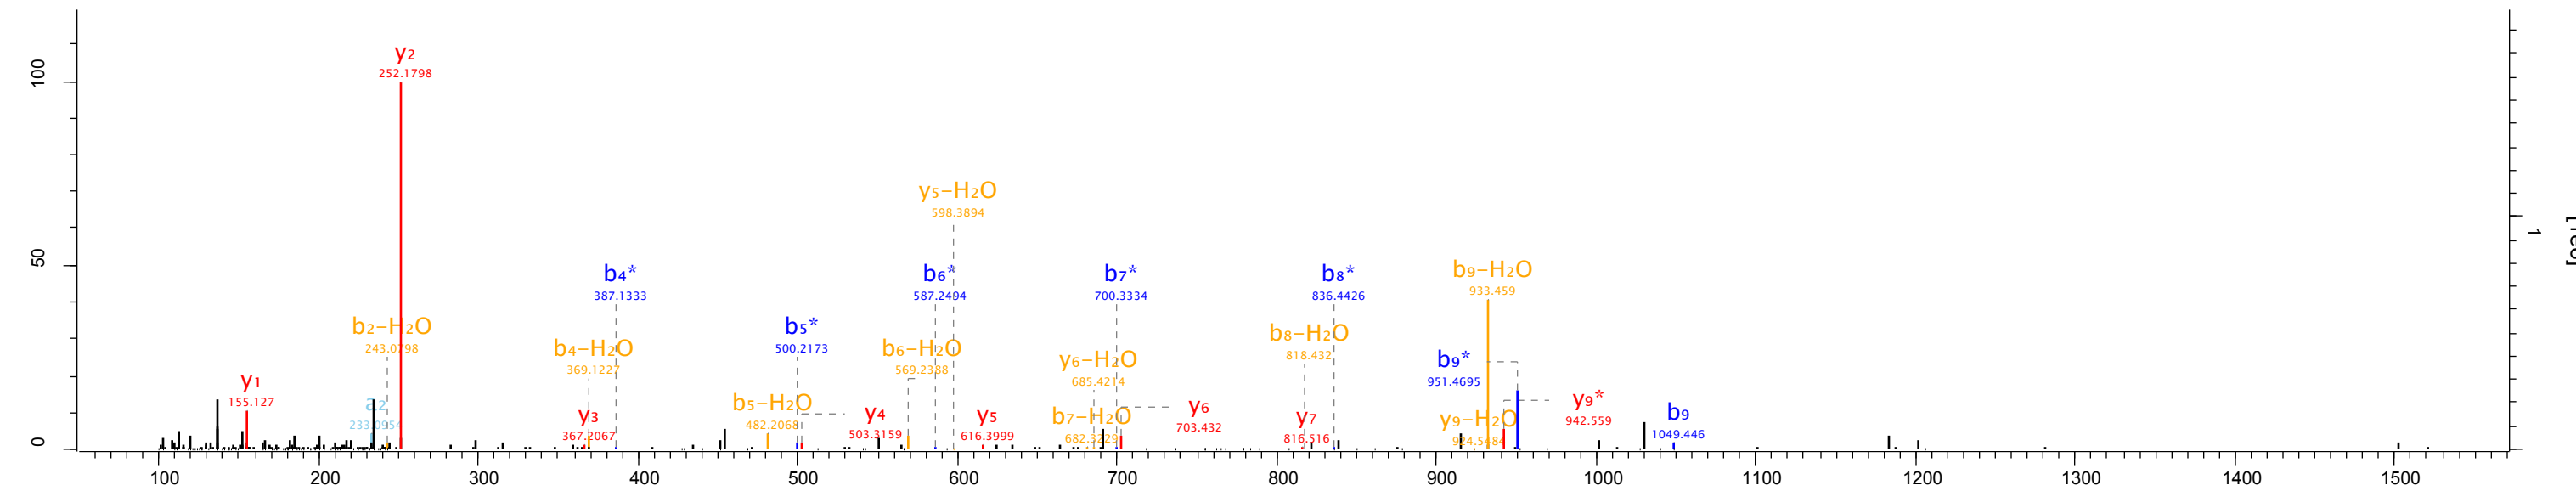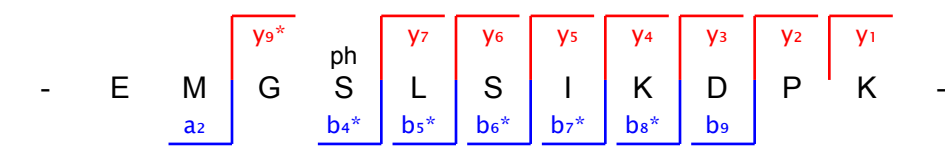

Raw file 20171215\_MaS\_33SR\_LMH\_phospho\_03 Scan 8651 Method FTMS; HCD Score 128.21 m/z 567.25 Gene names MECP2

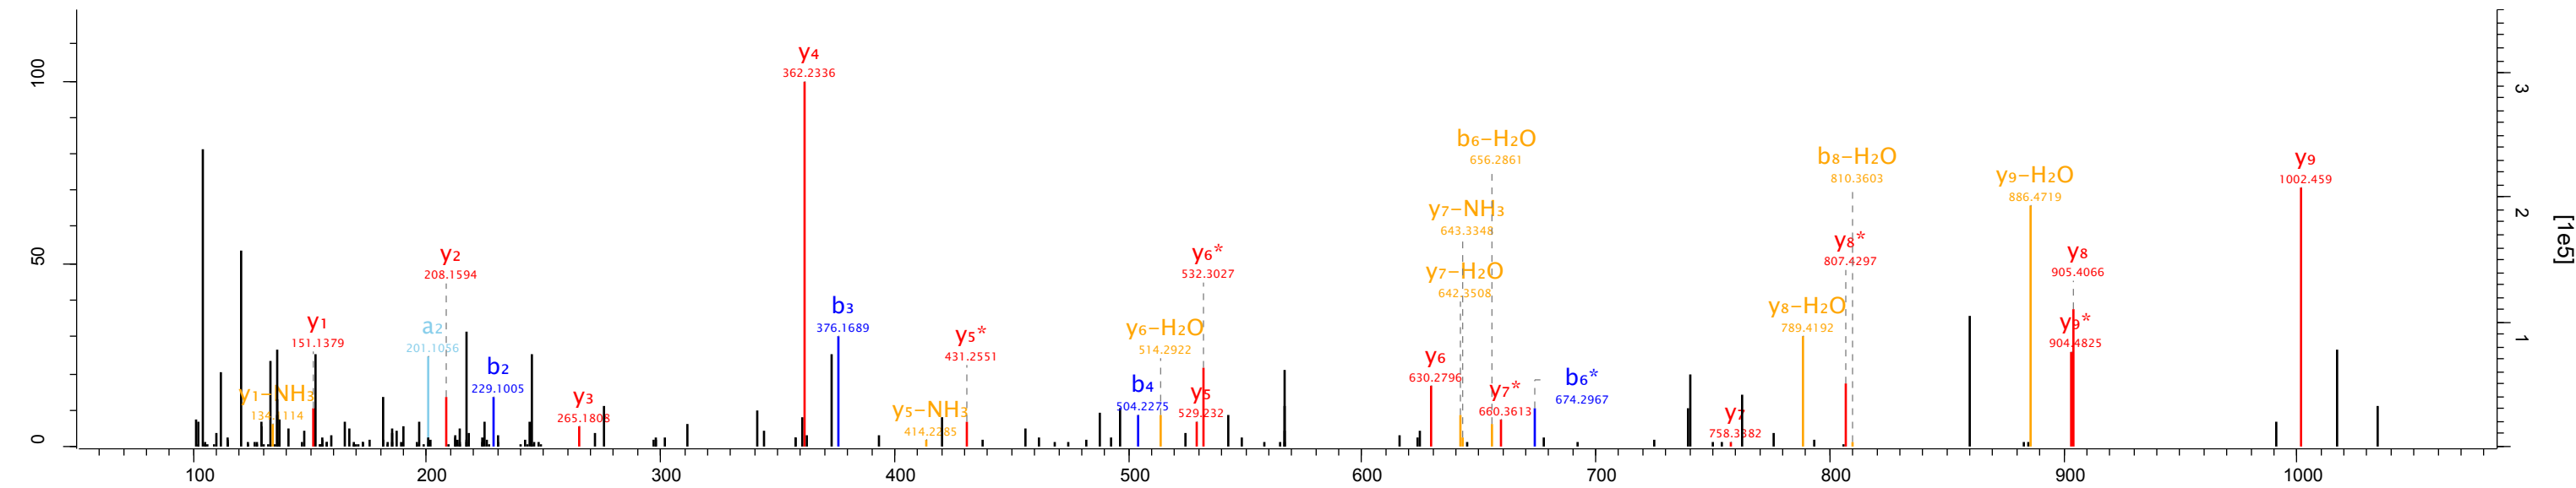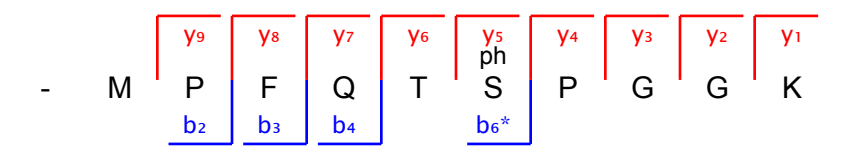



Raw file 20171215\_MaS\_33SR\_LMH\_phospho\_03 Scan 8671 Method FTMS; HCD Score 64.37 m/z 623.81 Gene names MAP3K11

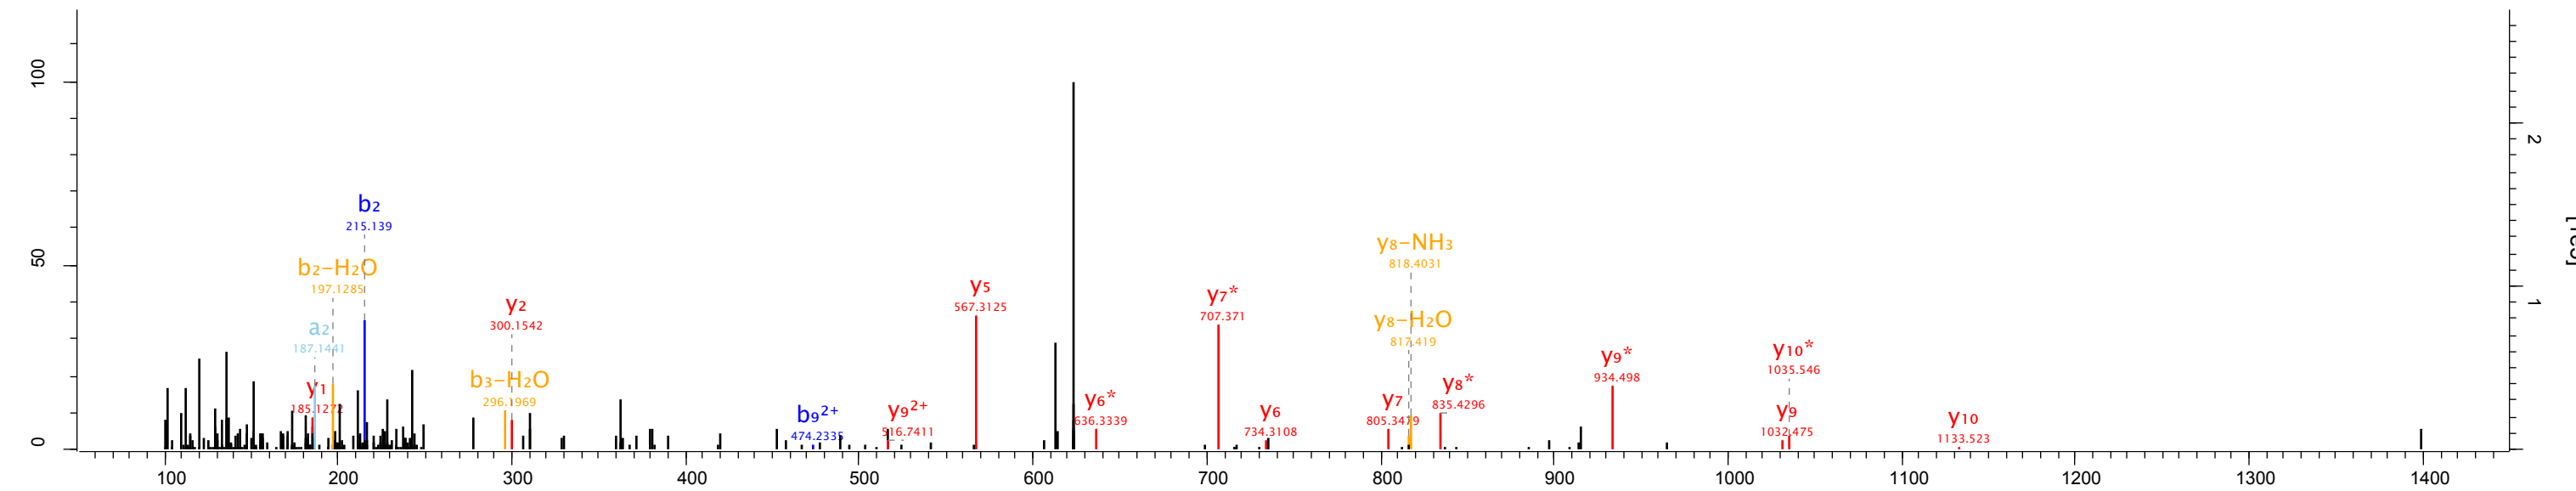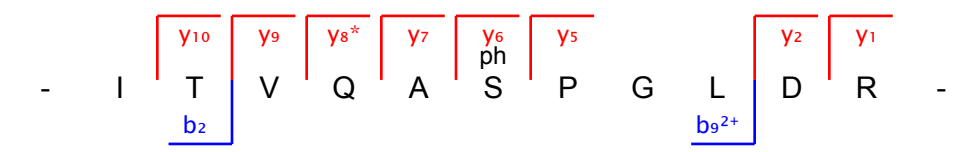

Raw file 20171215\_MaS\_33SR\_LMH\_phospho\_03 Scan 8861 Method FTMS; HCD Score 71.53 m/z 597.29 Gene names MSL3

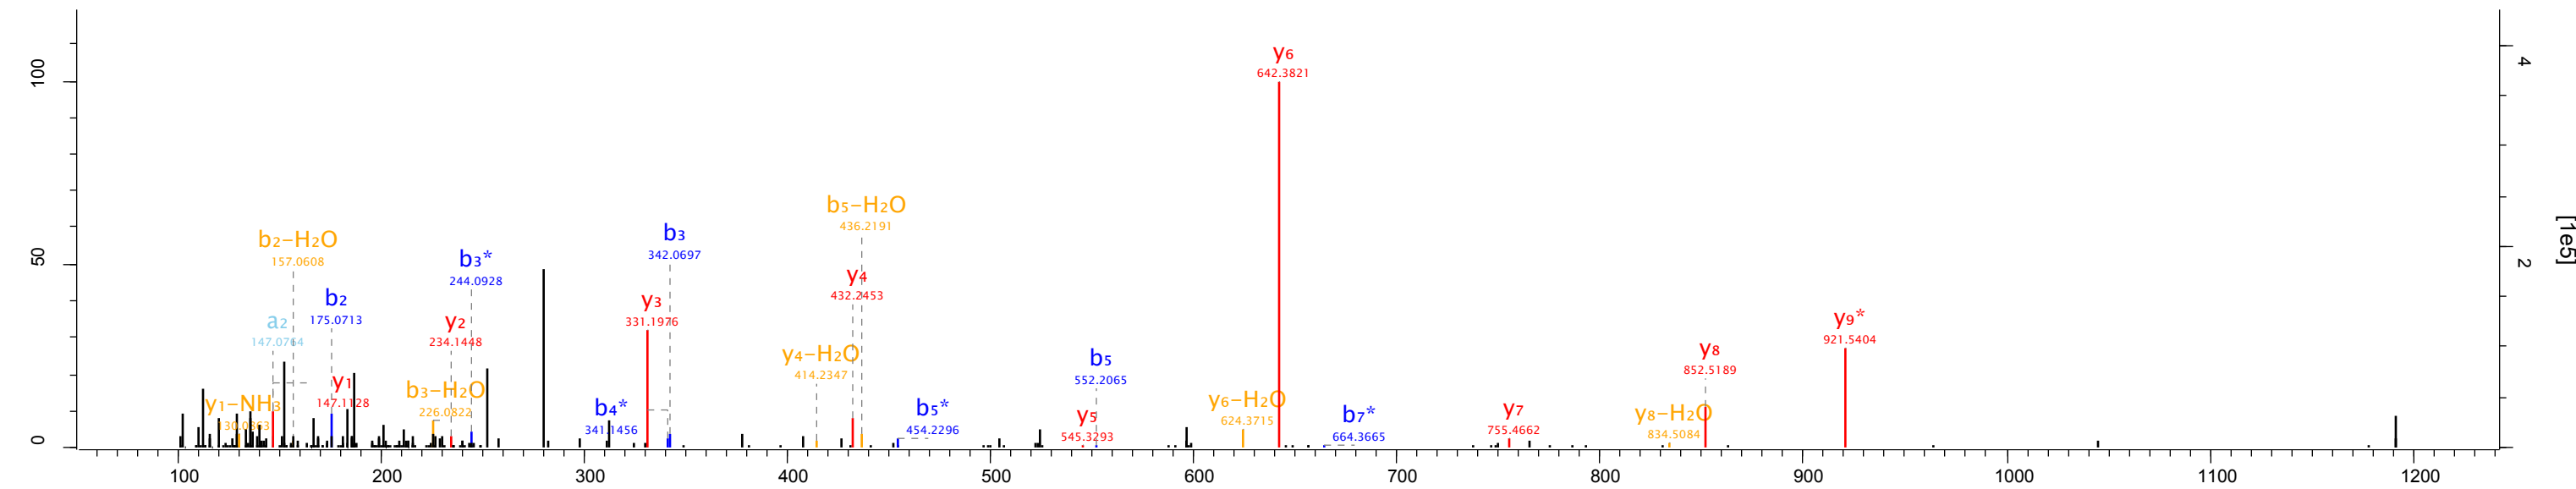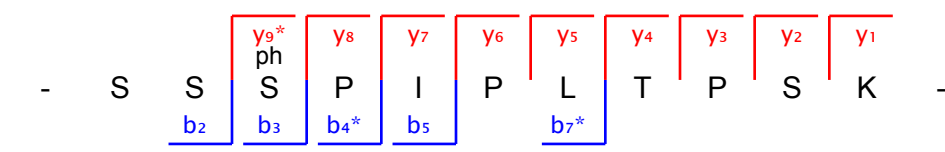

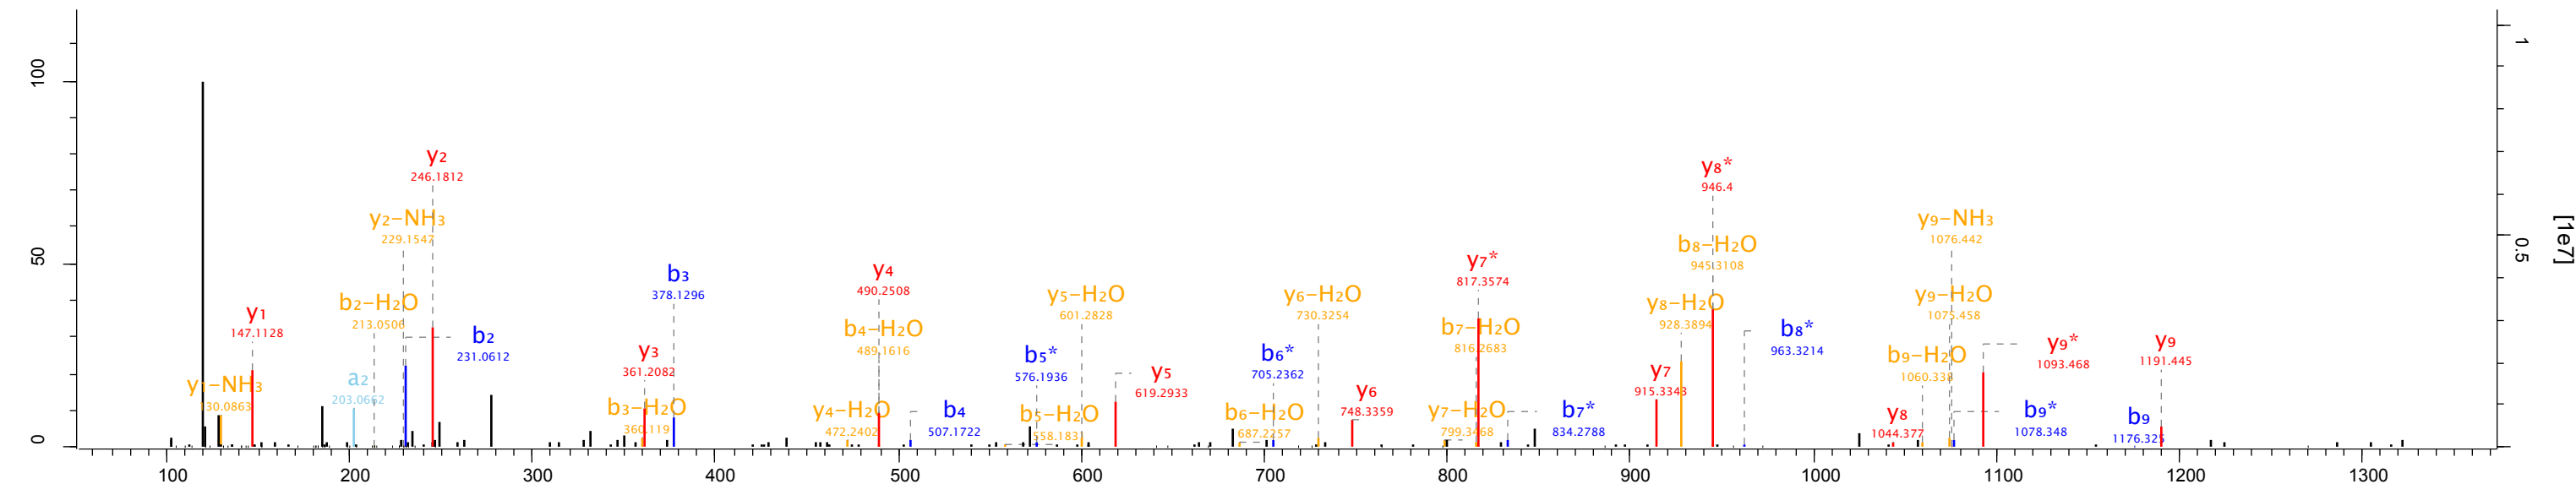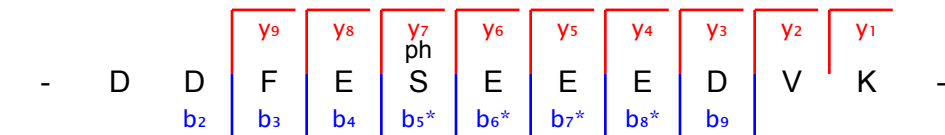

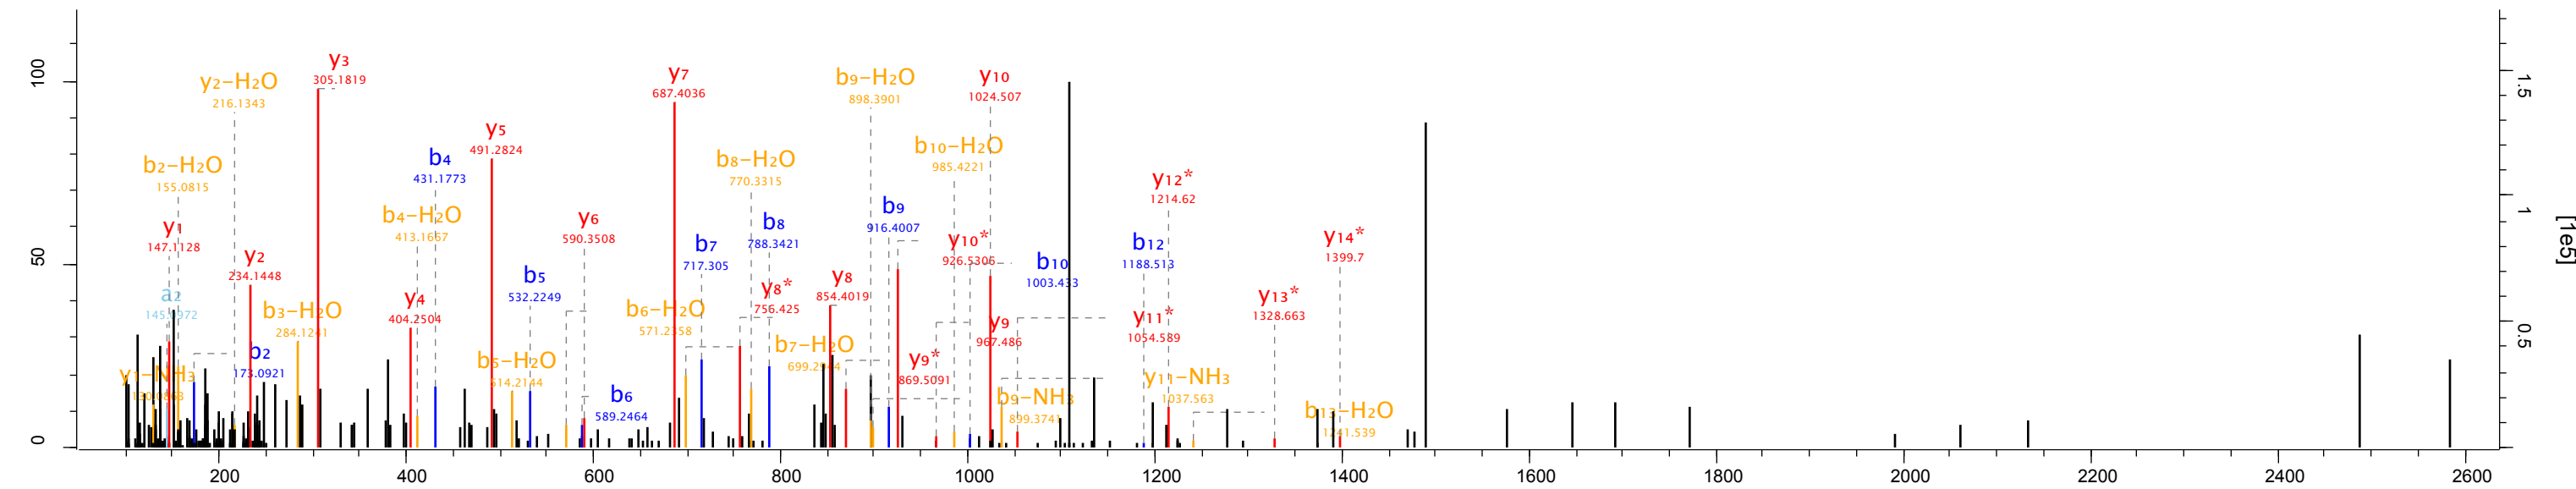

- A T E E T G Q A Q S G Q A N C Q G L S P V S V A S K -

b<sub>2</sub>
b<sub>4</sub>
b<sub>5</sub>
b<sub>6</sub>
b<sub>7</sub>
b<sub>8</sub>
b<sub>9</sub>
b<sub>10</sub>
b<sub>12</sub>
y<sub>14</sub>\*
y<sub>13</sub>\*
y<sub>12</sub>\*
y<sub>11</sub>\*
y<sub>10</sub>
y<sub>9</sub>
y<sub>8</sub><sub>ph</sub>
y<sub>7</sub>
y<sub>6</sub>
y<sub>5</sub>
y<sub>4</sub>
y<sub>3</sub>
y<sub>2</sub>
y<sub>1</sub>

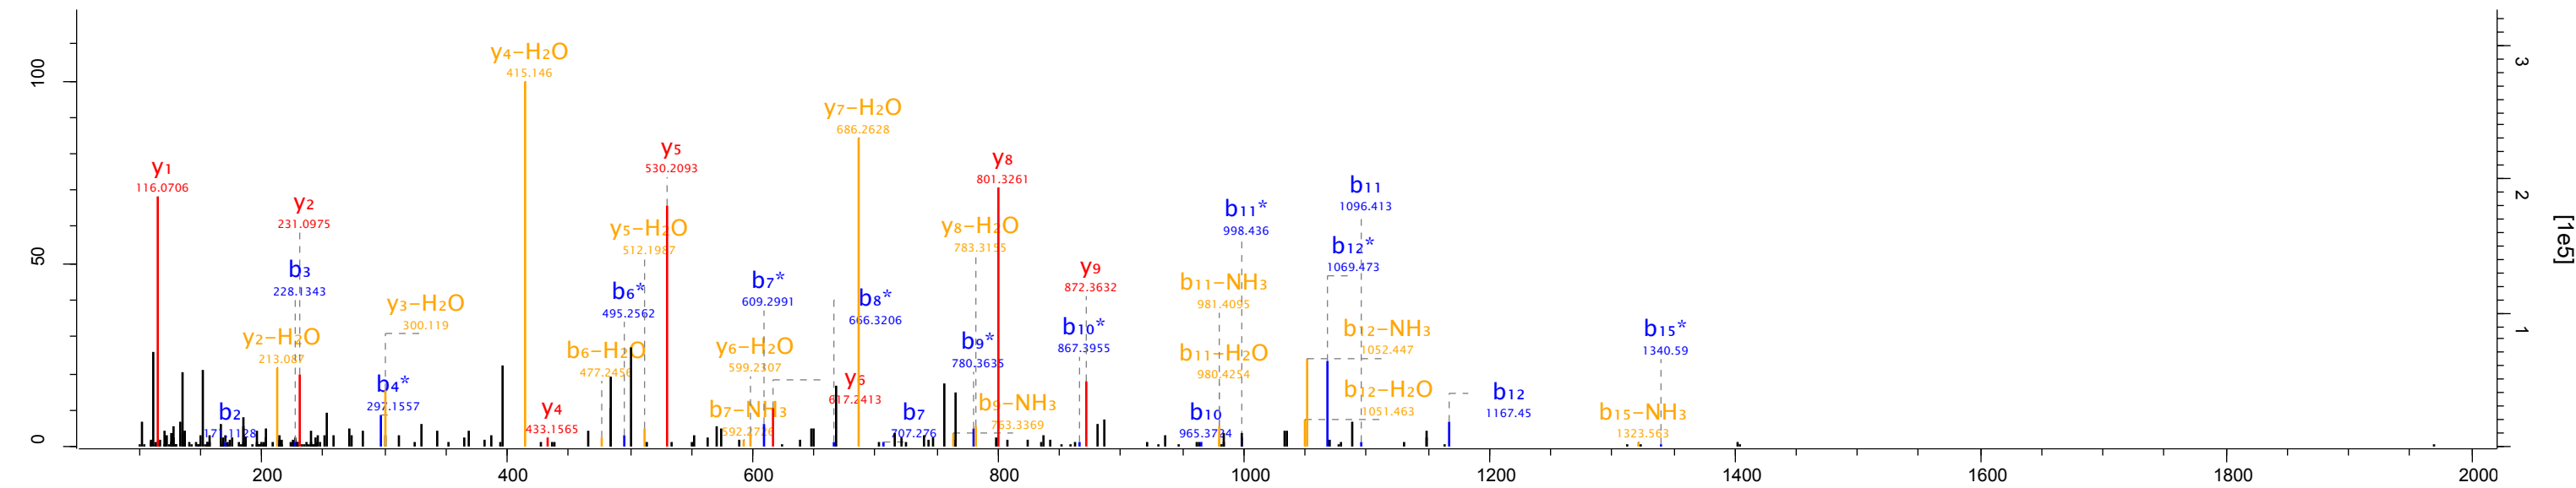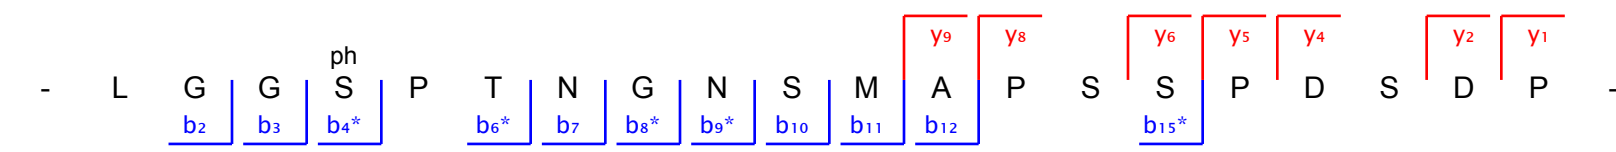

Raw file 20171215\_MaS\_33SR\_LMH\_phospho\_03 Scan 8991 Method FTMS; HCD Score 77.08 m/z 713.99 Gene names BAT3;BAG6

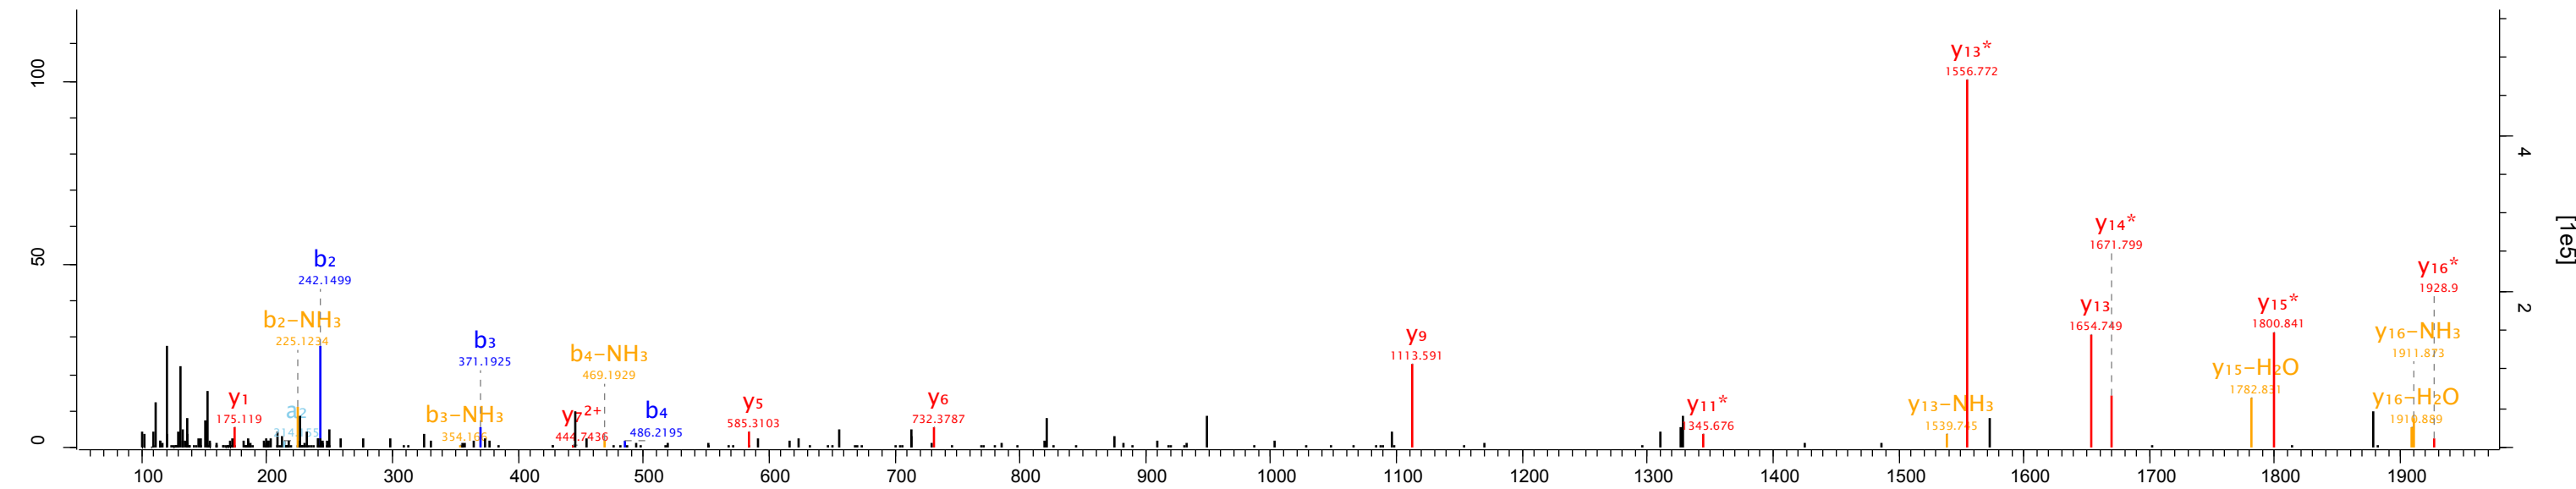

- L Q E D P N Y S P Q R F P N A Q R -

b<sub>2</sub>
b<sub>3</sub>
b<sub>4</sub>
y<sub>16</sub>\*
y<sub>15</sub>\*
y<sub>14</sub>\*
y<sub>13</sub>
y<sub>11</sub>\*
y<sub>9</sub>
y<sub>7</sub><sup>2+</sup>
y<sub>6</sub>
y<sub>5</sub>
y<sub>1</sub>

Raw file 20171215\_MaS\_33SR\_LMH\_phospho\_03 Scan 9061 Method FTMS; HCD Score 138.03 m/z 887.85 Gene names CHD7

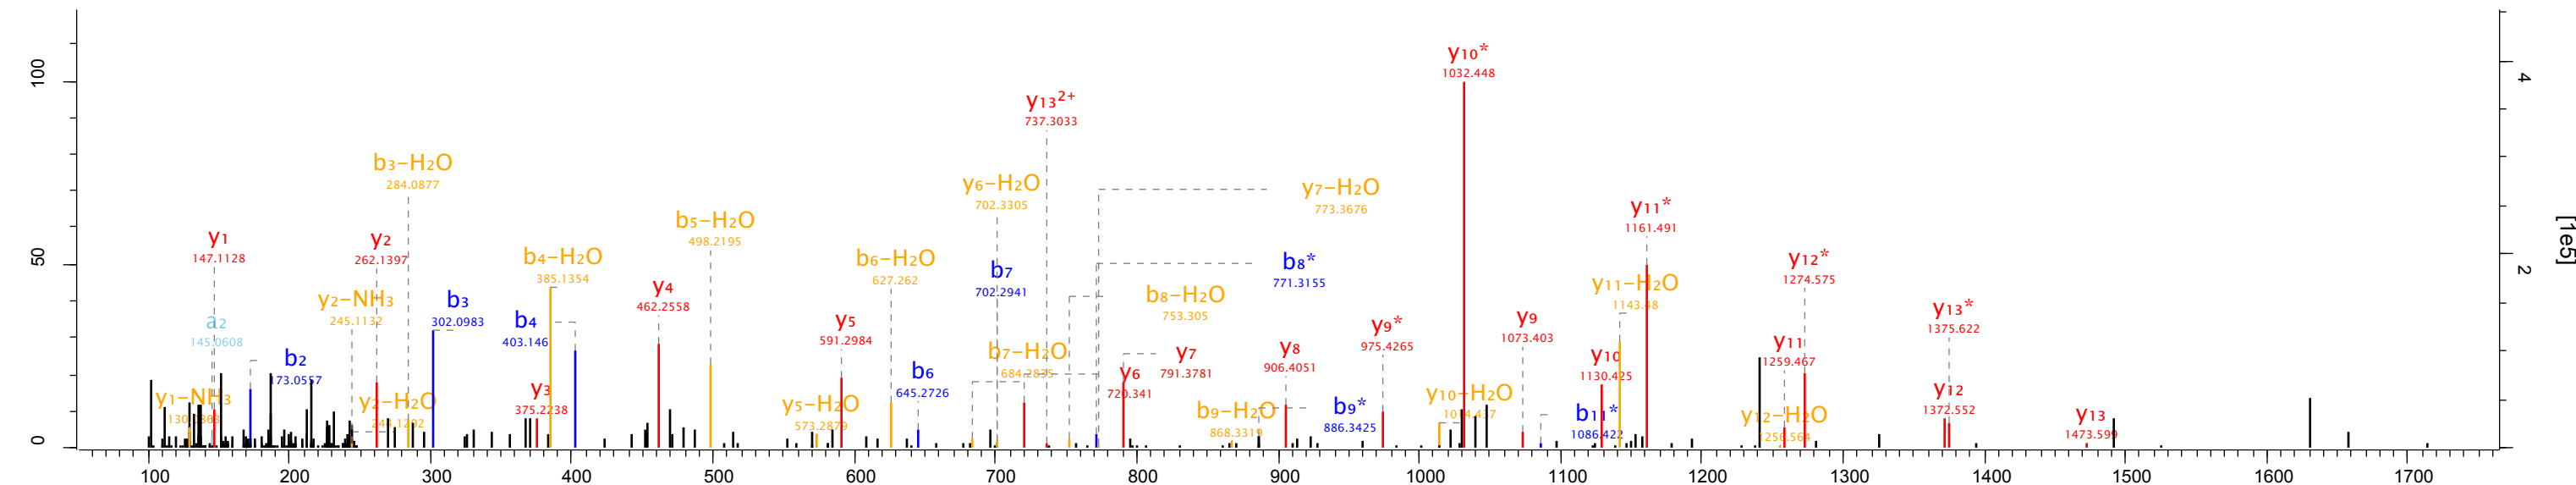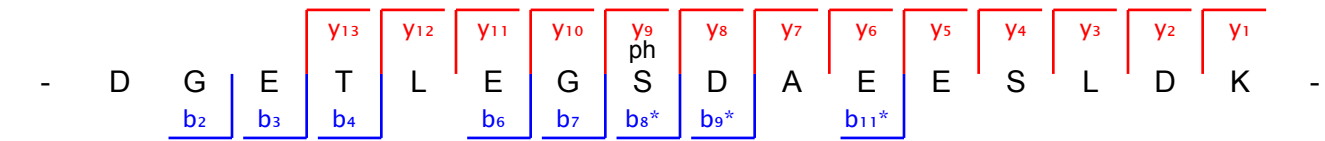

20171215\_MaS\_33SR\_LMH\_phospho\_03 9261 FTMS; HCD 85.81 1036.41 POU2F1

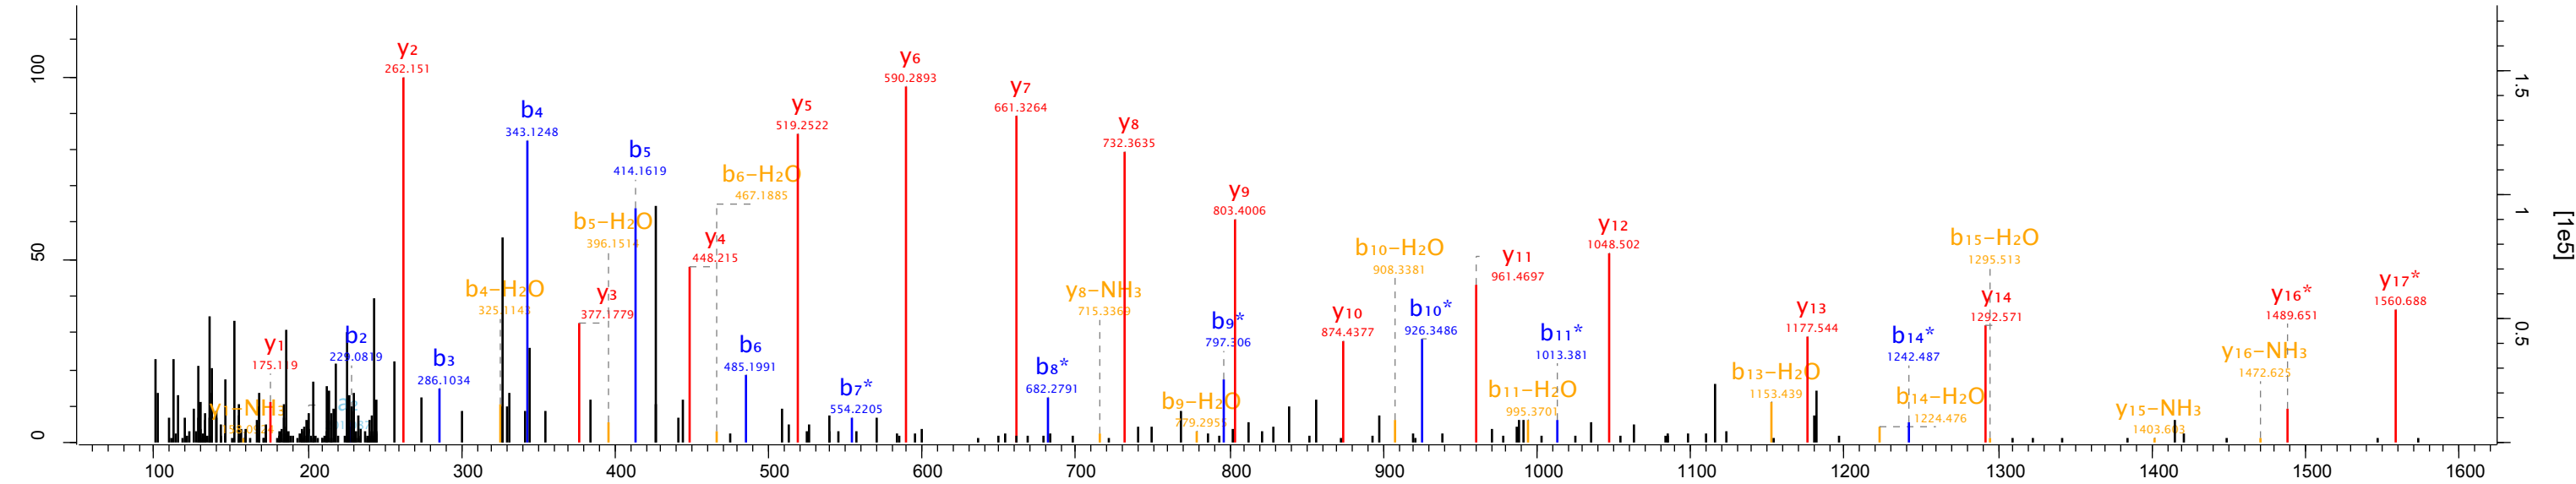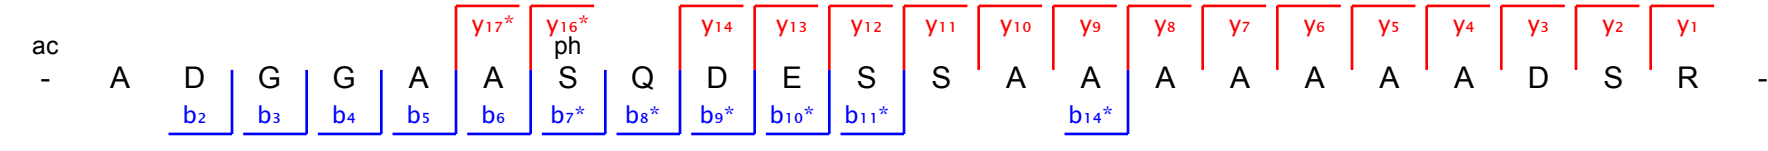



Raw file 20171215\_MaS\_33SR\_LMH\_phospho\_03 Scan 9301 Method FTMS; HCD Score 284.48 m/z 1030.75 Gene names CASP7

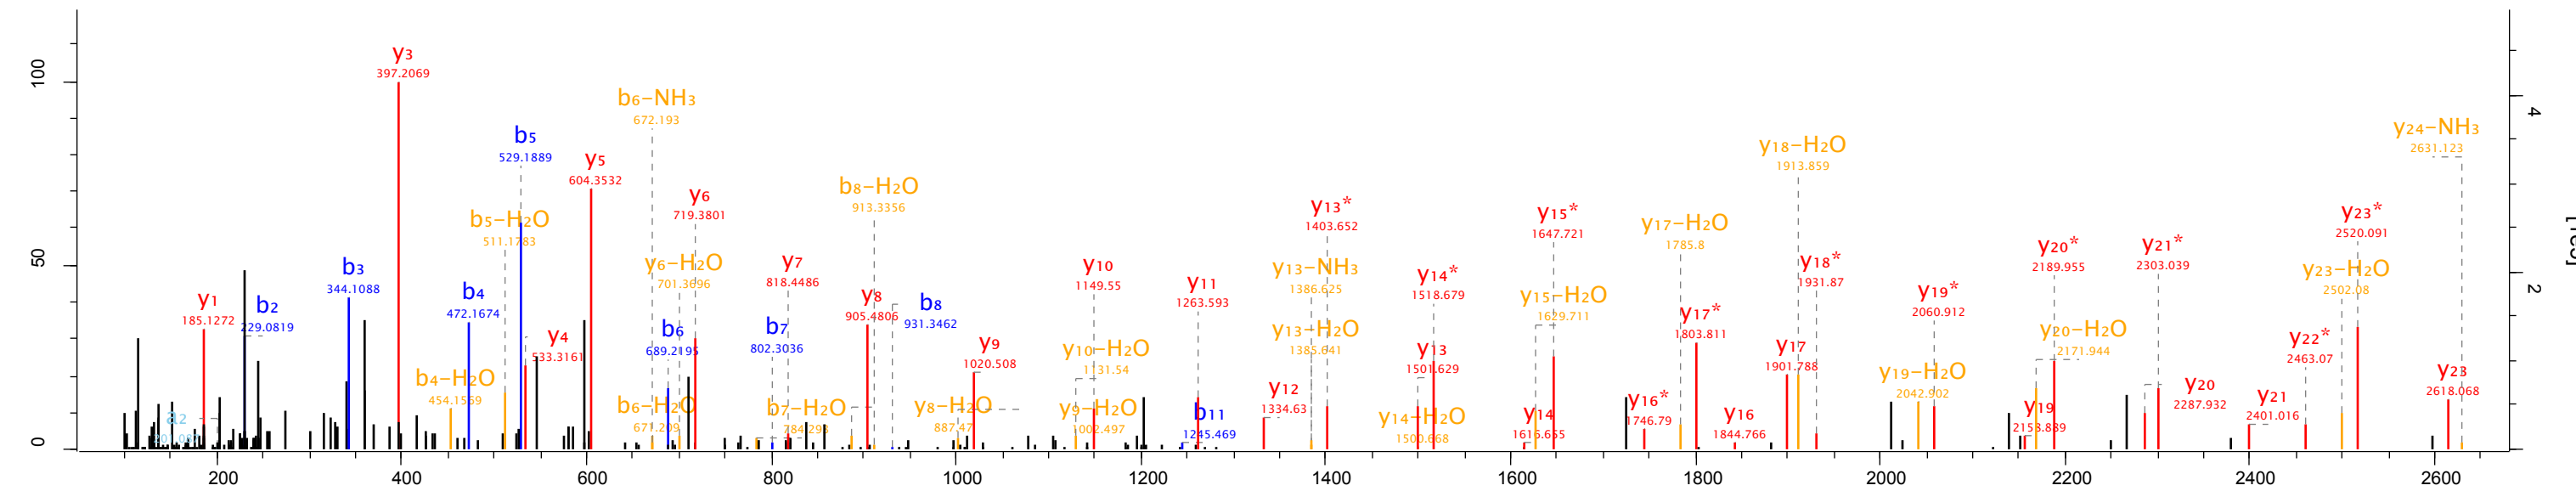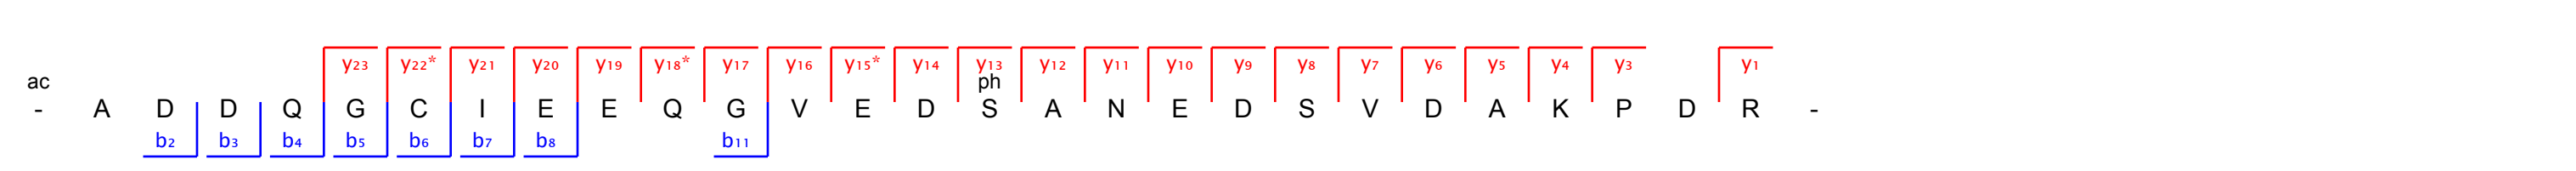

Raw file 20171215\_MaS\_33SR\_LMH\_phospho\_03 Scan 9341 Method FTMS; HCD Score 69.88 m/z 640.99 Gene names CIZ1

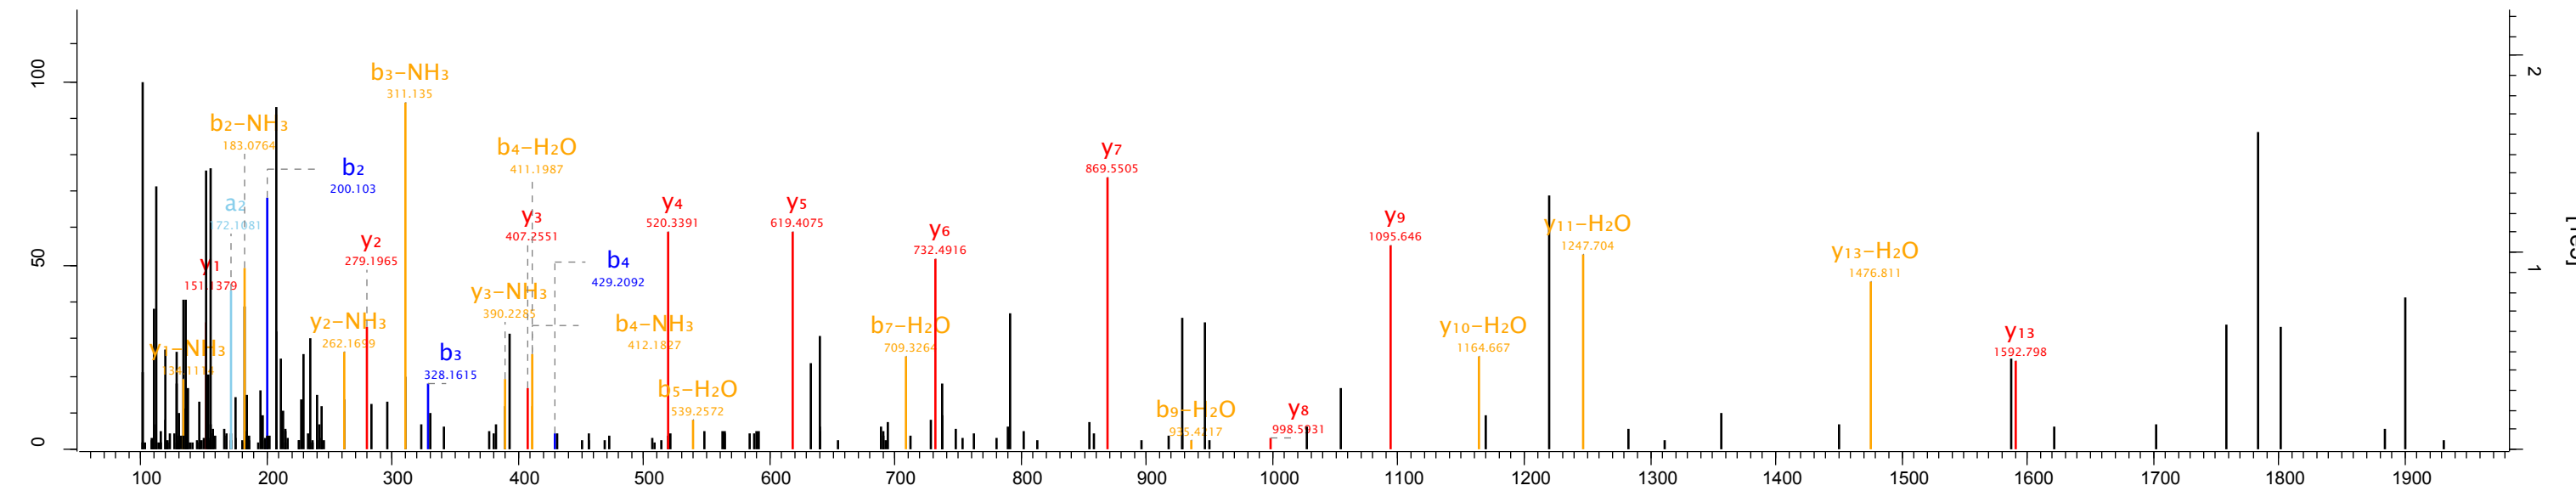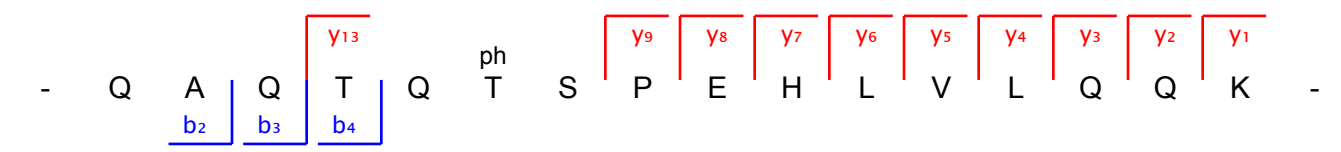

Raw file 20171215\_MaS\_33SR\_LMH\_phospho\_03 Scan 9501 Method FTMS; HCD Score 85.54 m/z 615.79 Gene names FOSL2

20171215\_MaS\_33SR\_LMH\_phospho\_03

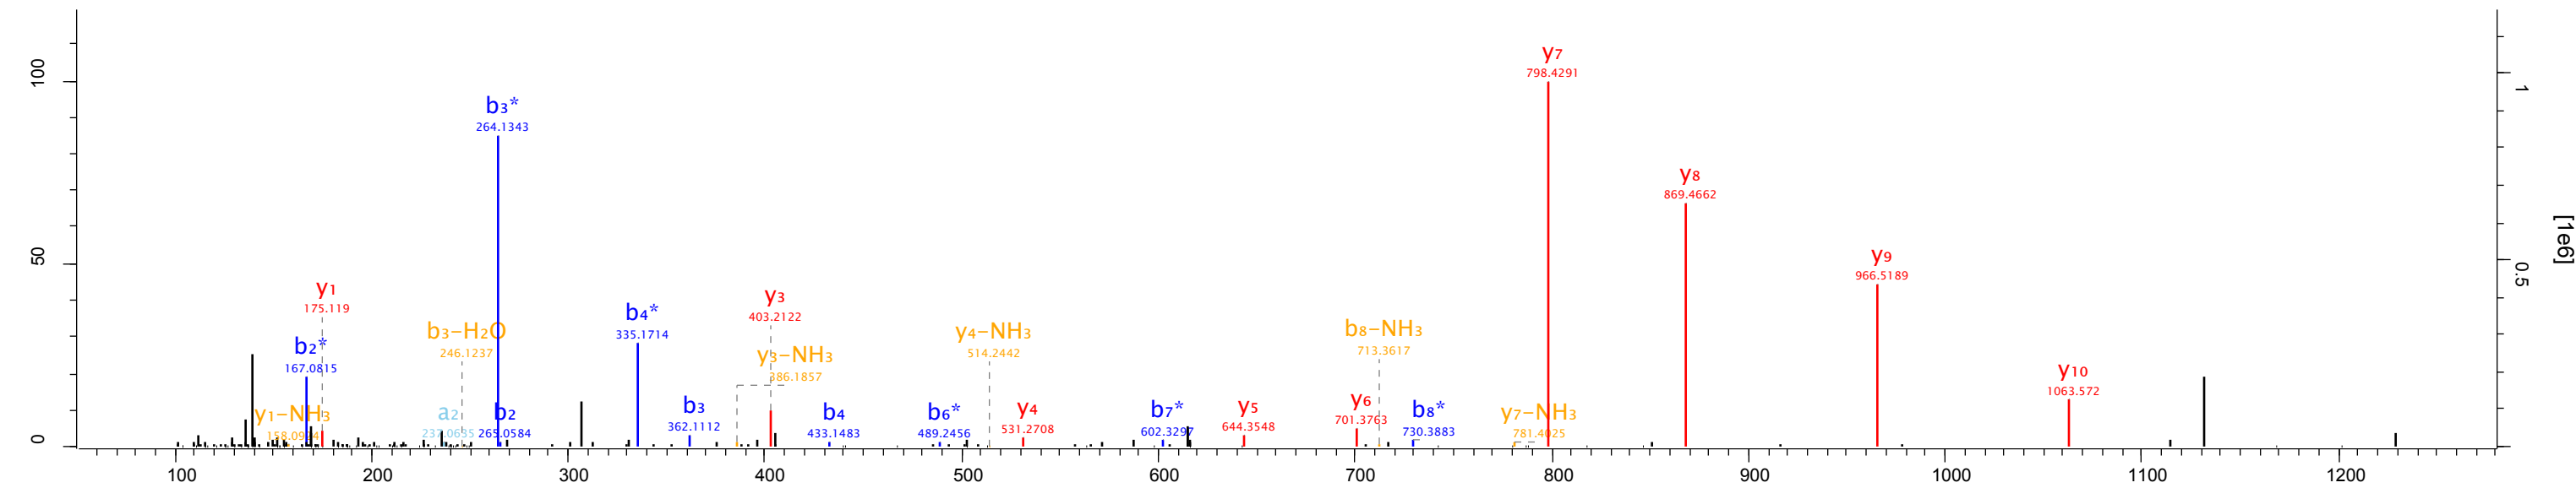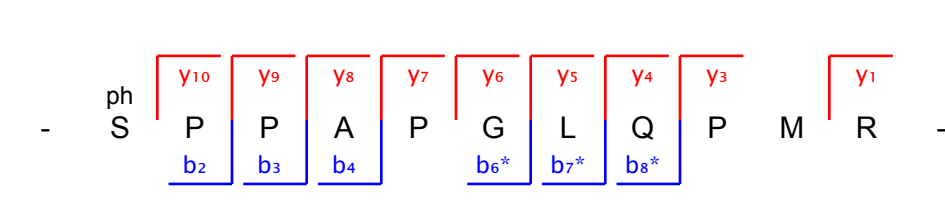

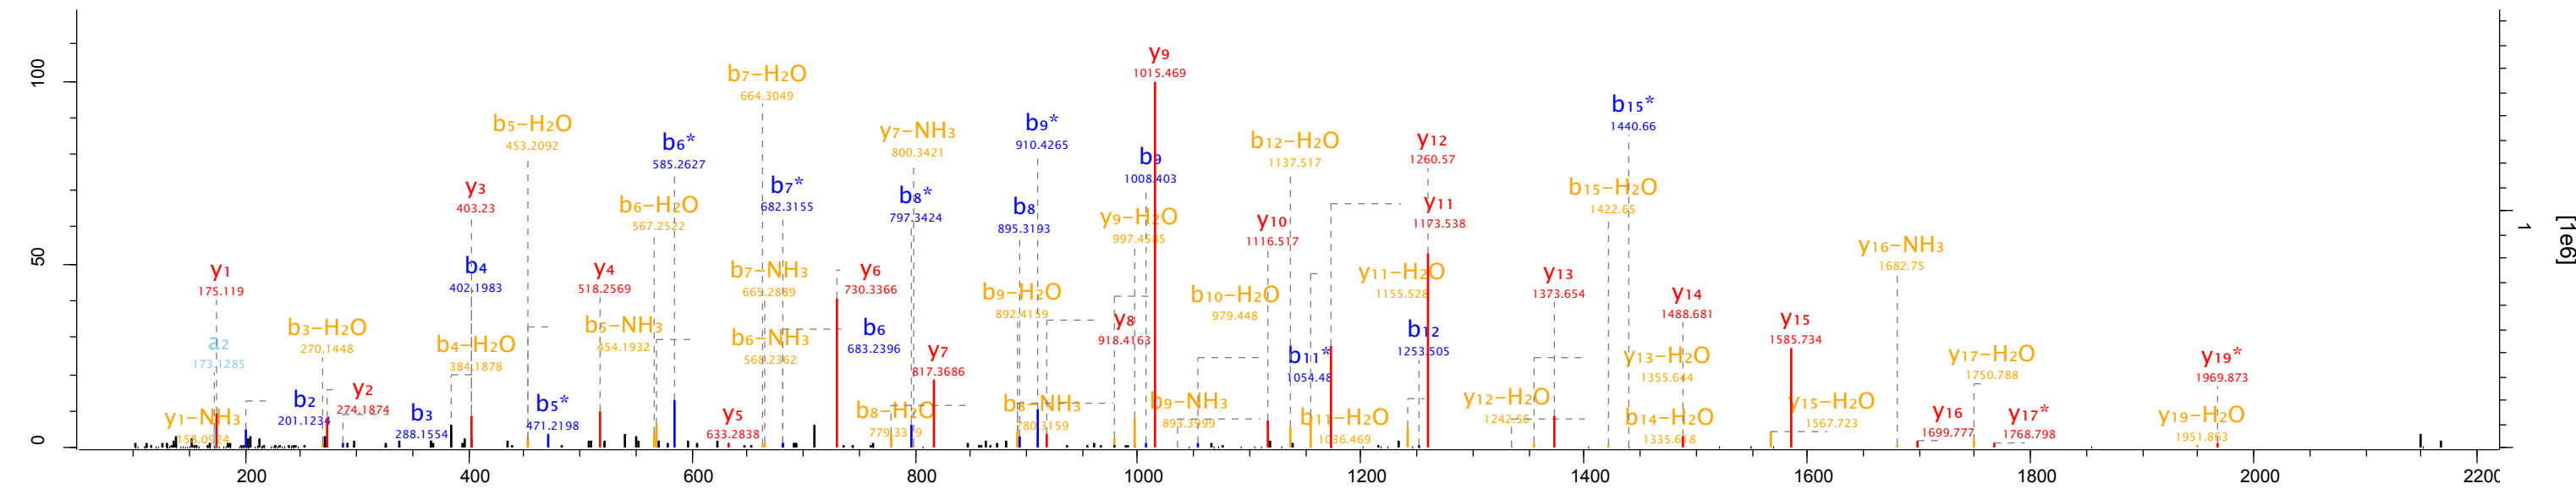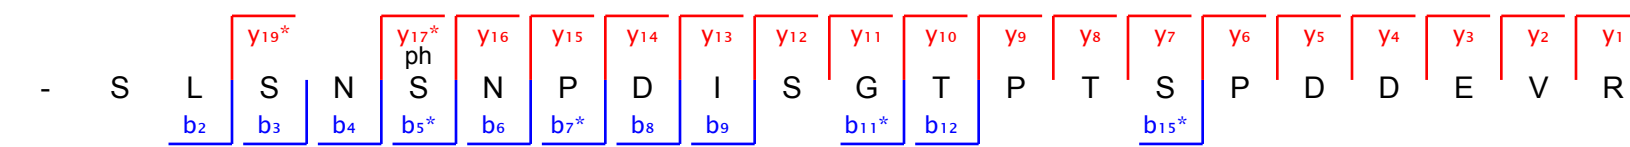

Raw file 20171215\_MaS\_33SR\_LMH\_phospho\_03 Scan 9641 Method FTMS; HCD Score 162.72 m/z 633.31 Gene names NHSL1

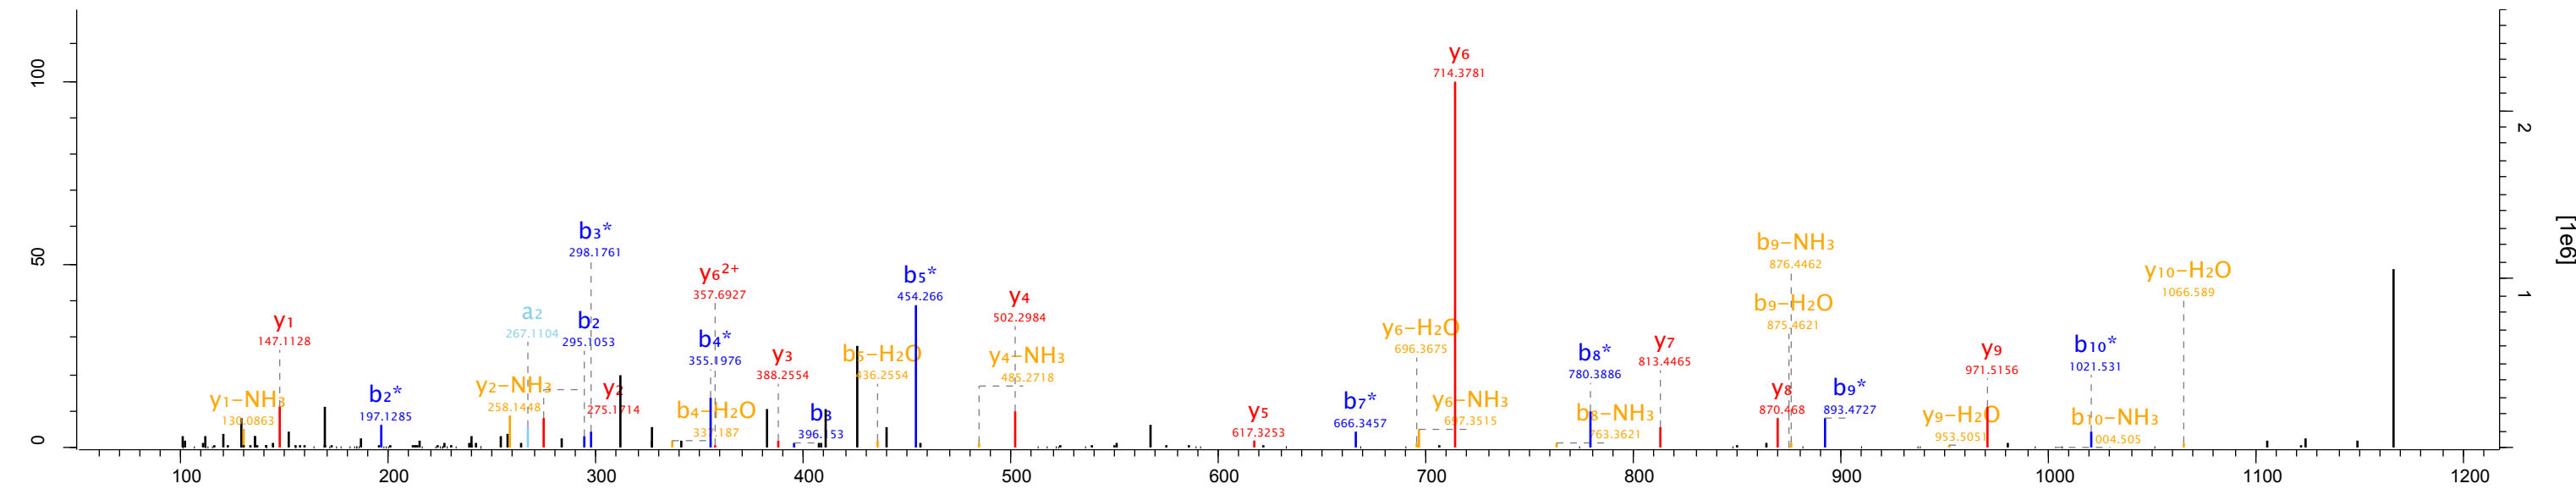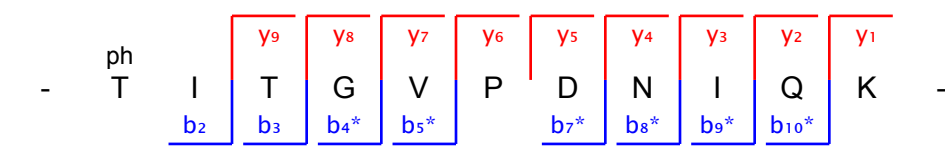

Raw file 20171215\_MaS\_33SR\_LMH\_phospho\_03 Scan 9701 Method FTMS; HCD Score 91.36 m/z 730.31 Gene names HNRNPA1;HNRNPA1L2

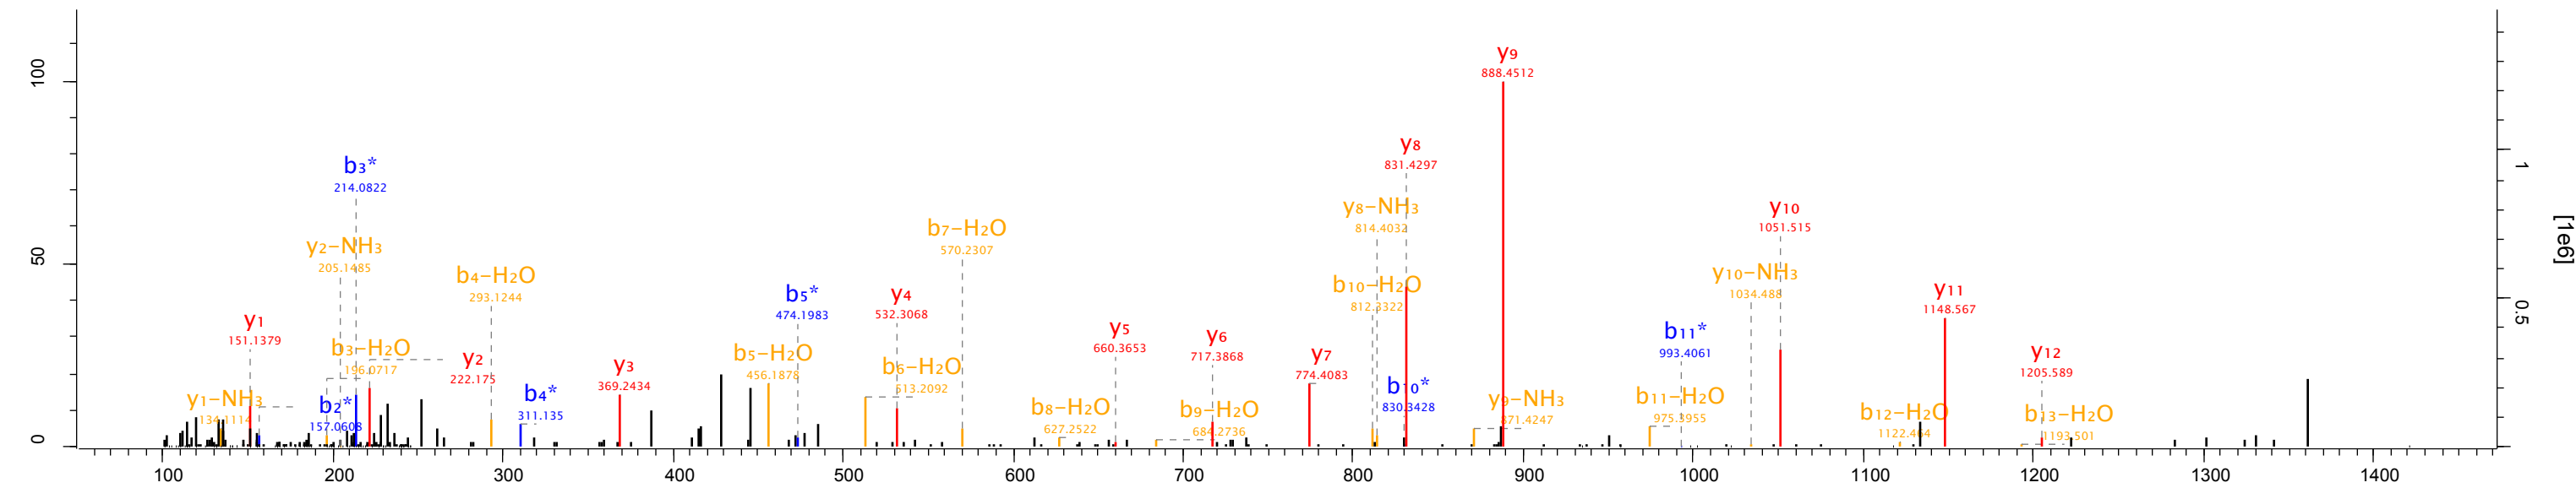

ph  
S

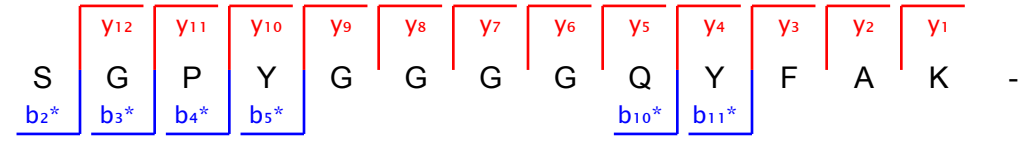

Raw file 20171215\_MaS\_33SR\_LMH\_phospho\_03 Scan 9751 Method FTMS; HCD Score 167.3 m/z 741.39 Gene names ARFGEF2

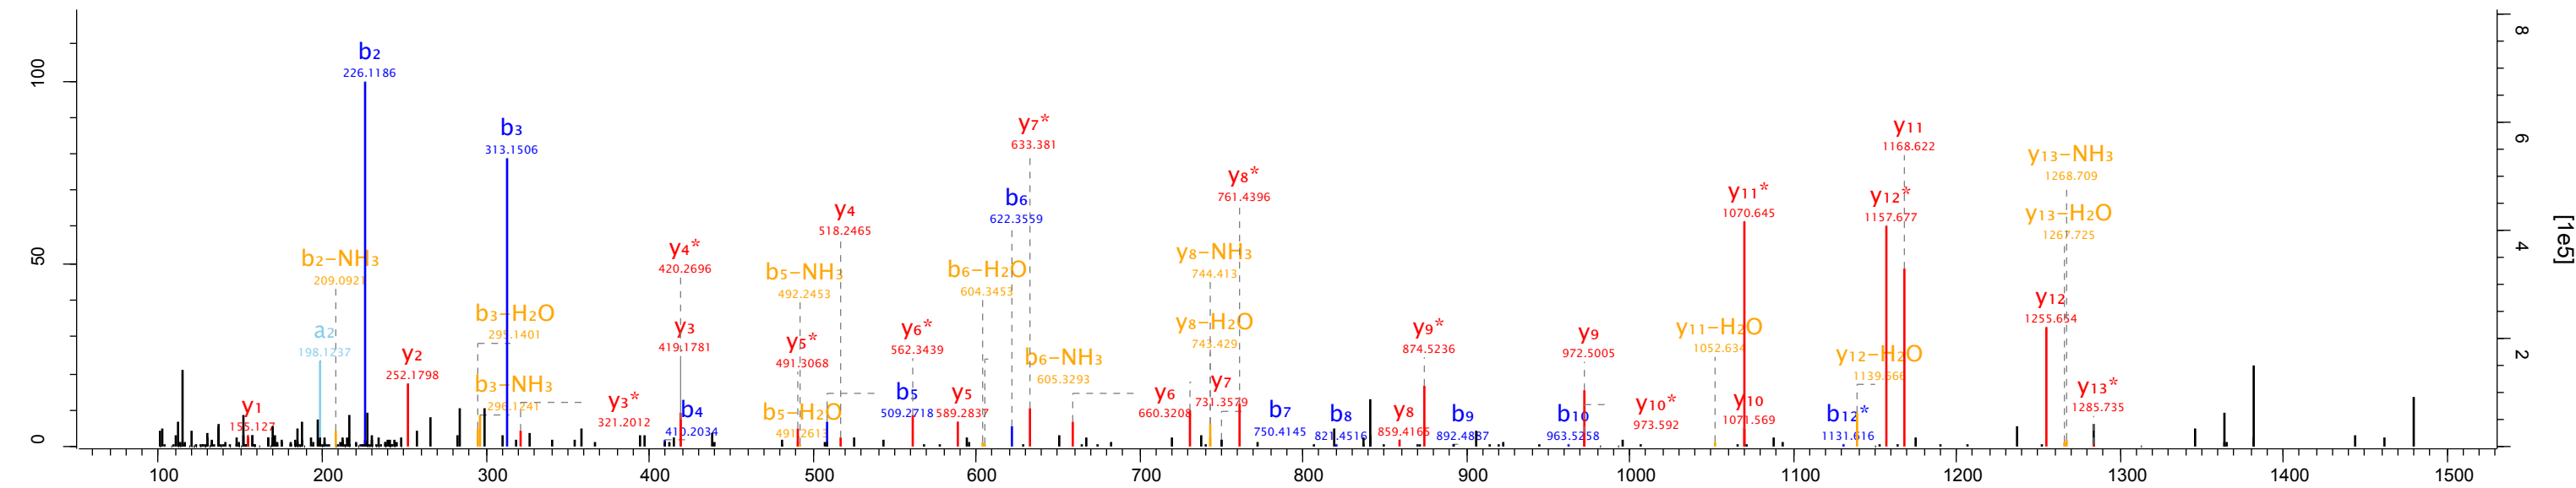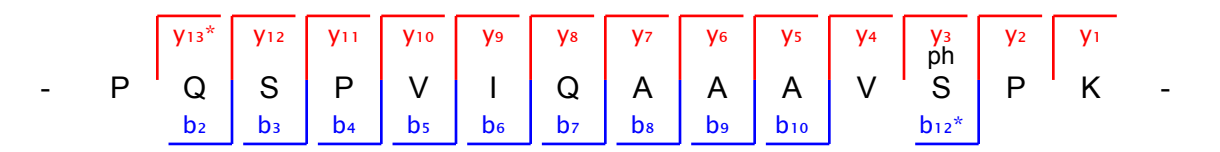

Raw file 20171215\_MaS\_33SR\_LMH\_phospho\_03 Scan 9871 Method FTMS; HCD Score 114.35 m/z 967.38 Gene names EPS8

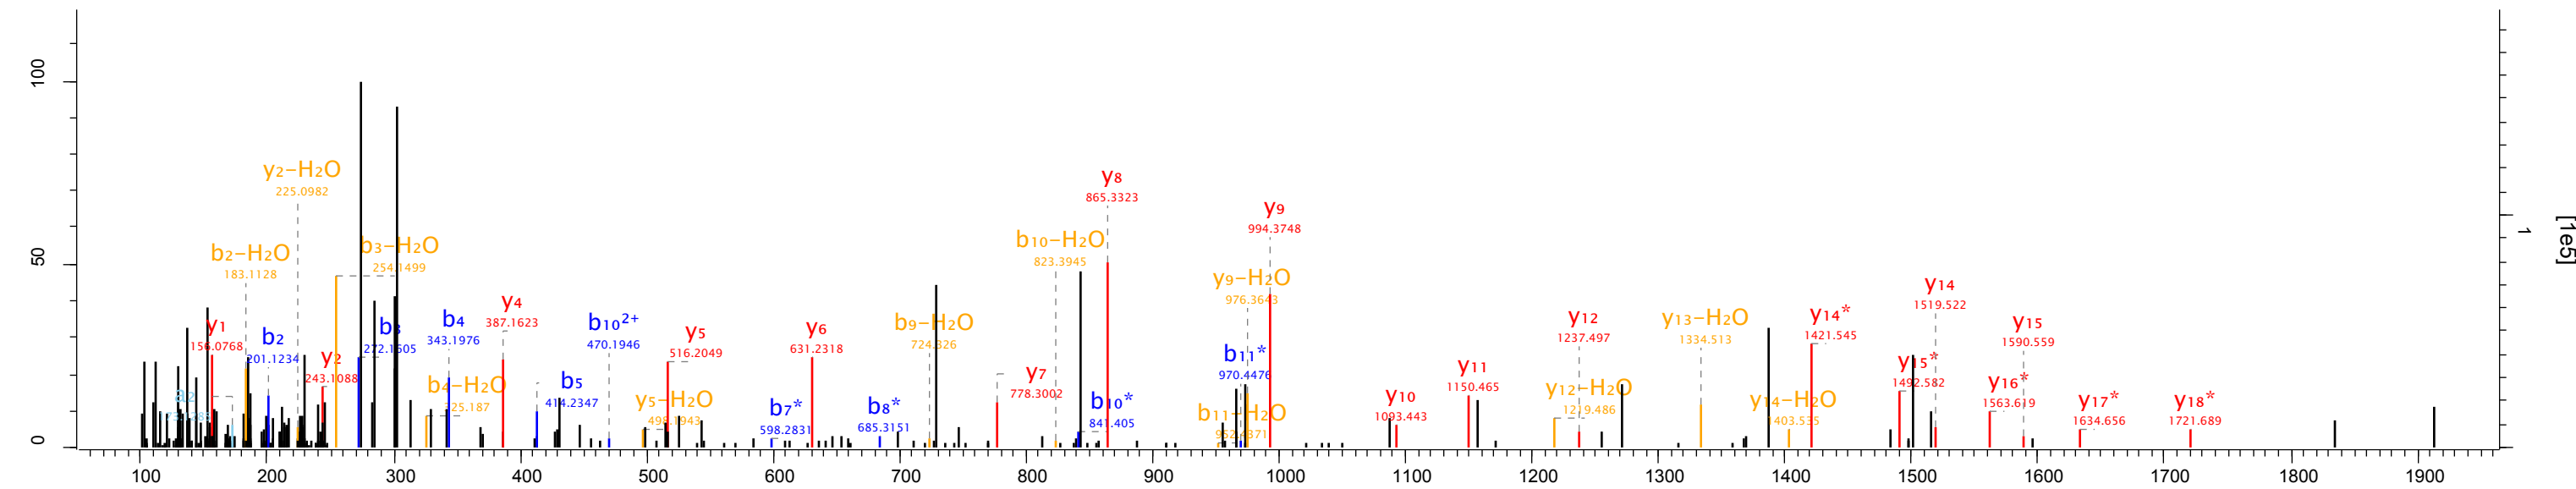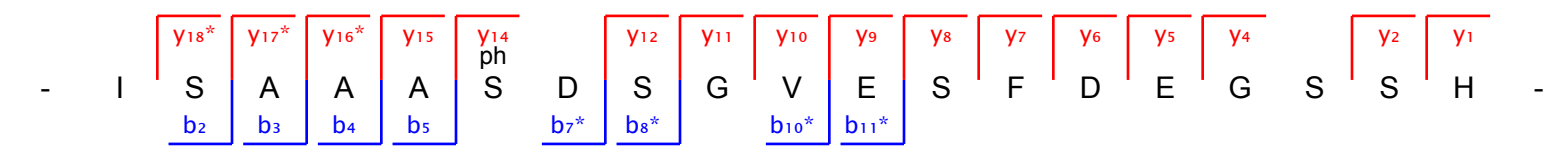



Raw file 20171215\_MaS\_33SR\_LMH\_phospho\_05 Scan 10461 Method FTMS; HCD Score 71.14 m/z 722.84 Gene names CTDSPL2

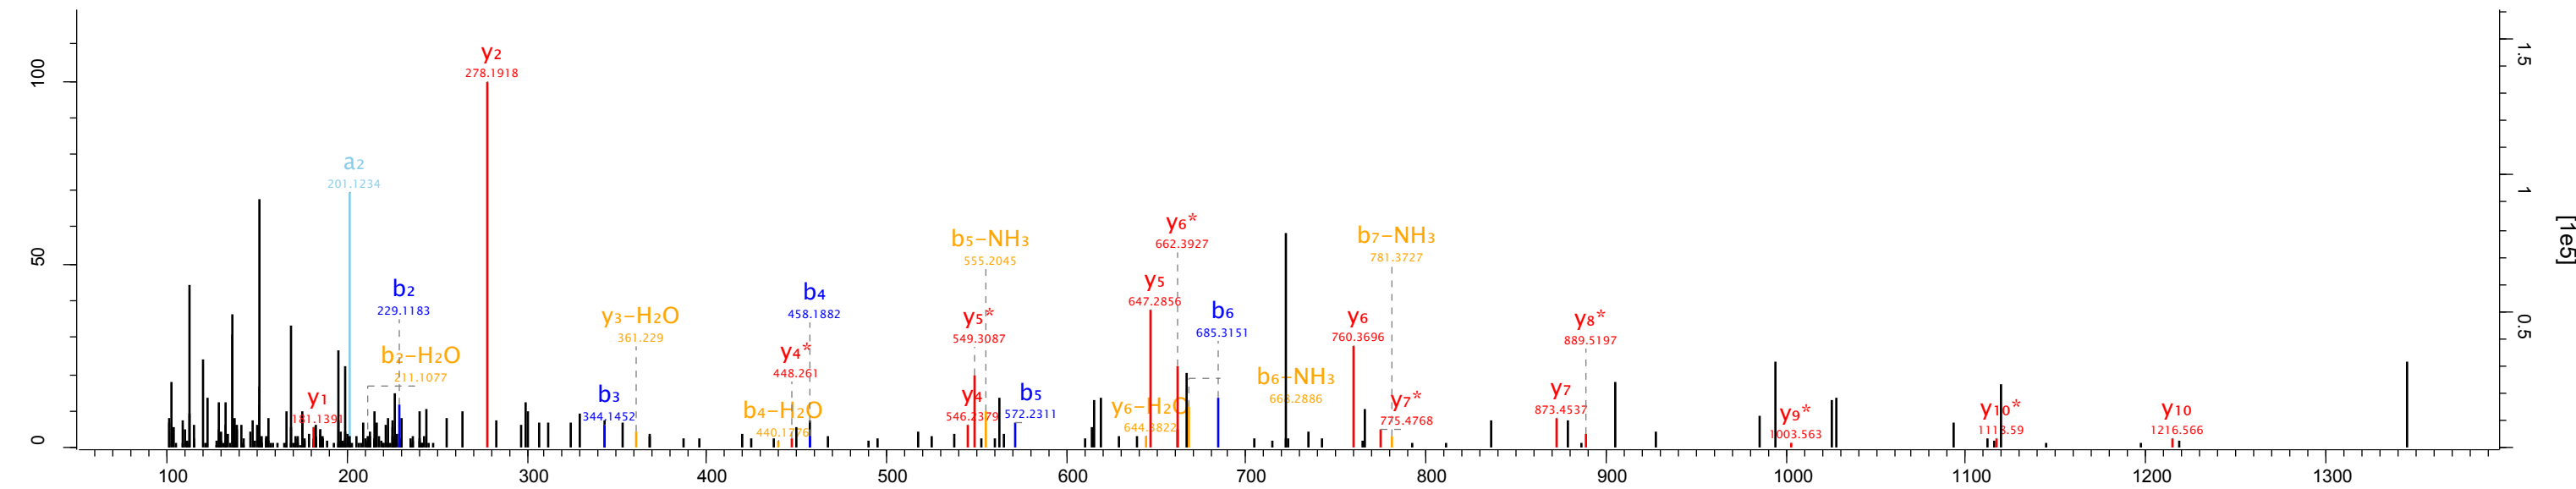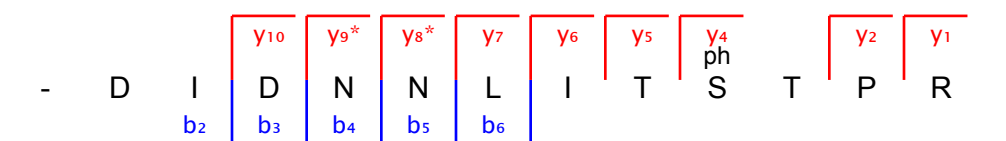

Raw file 20171215\_MaS\_33SR\_LMH\_phospho\_05 Scan 11781 Method FTMS; HCD Score 108.28 m/z 1037.49 Gene names PRRC2A

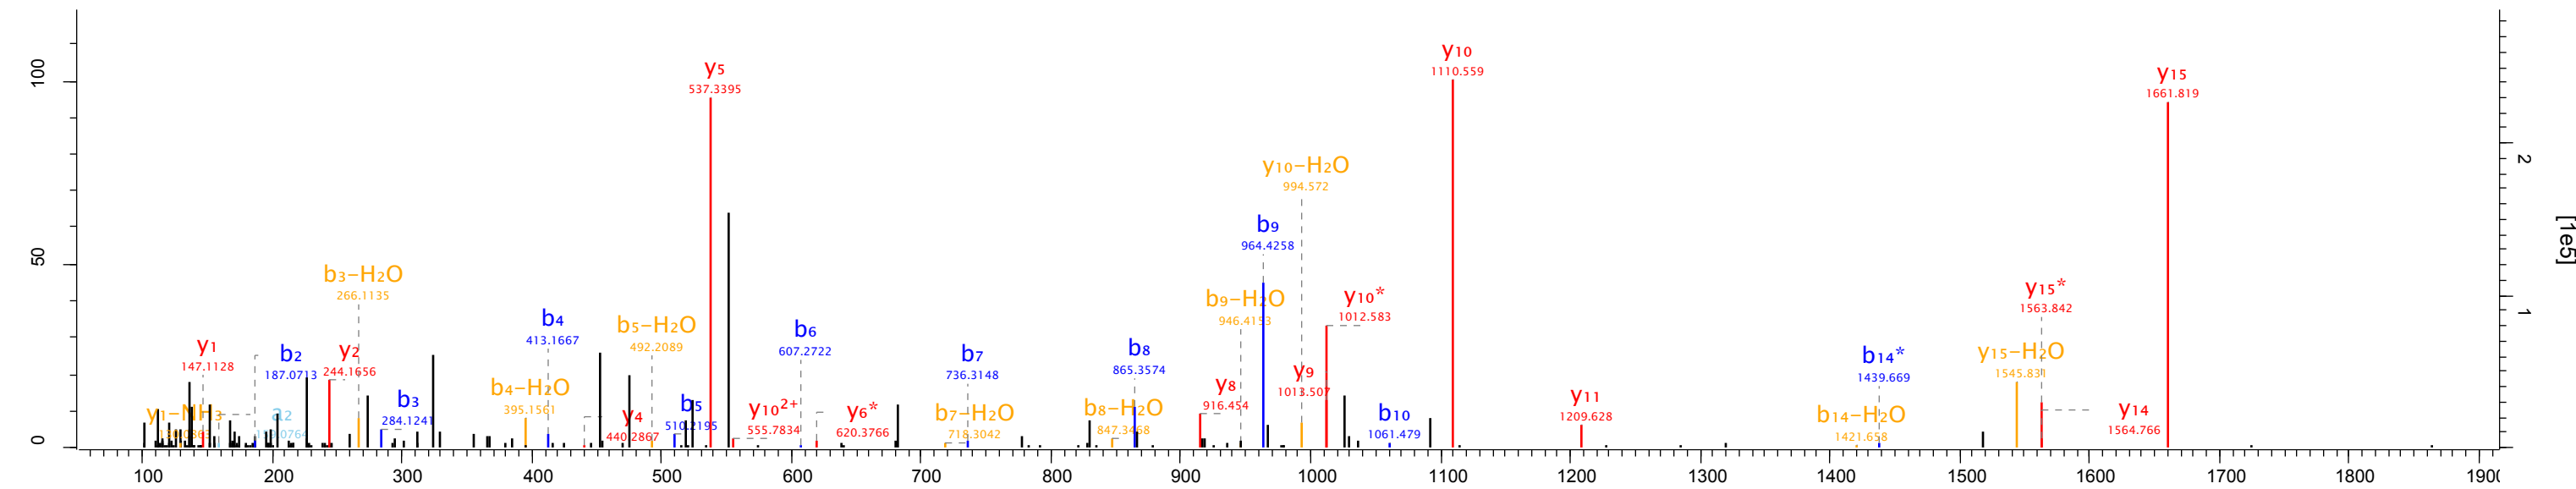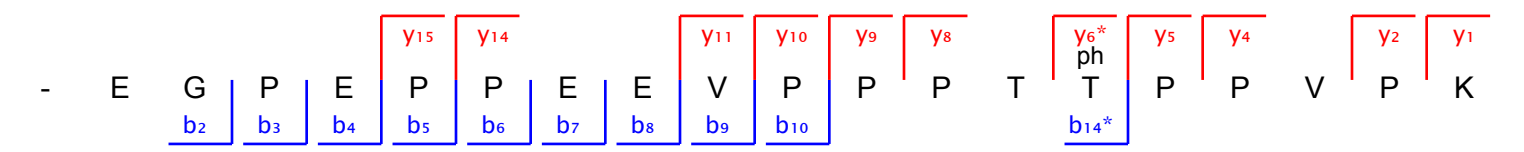

Raw file 20171215\_MaS\_33SR\_LMH\_phospho\_05 Scan 12411 Method FTMS; HCD Score 140.56 m/z 898.4 Gene names ZNF148

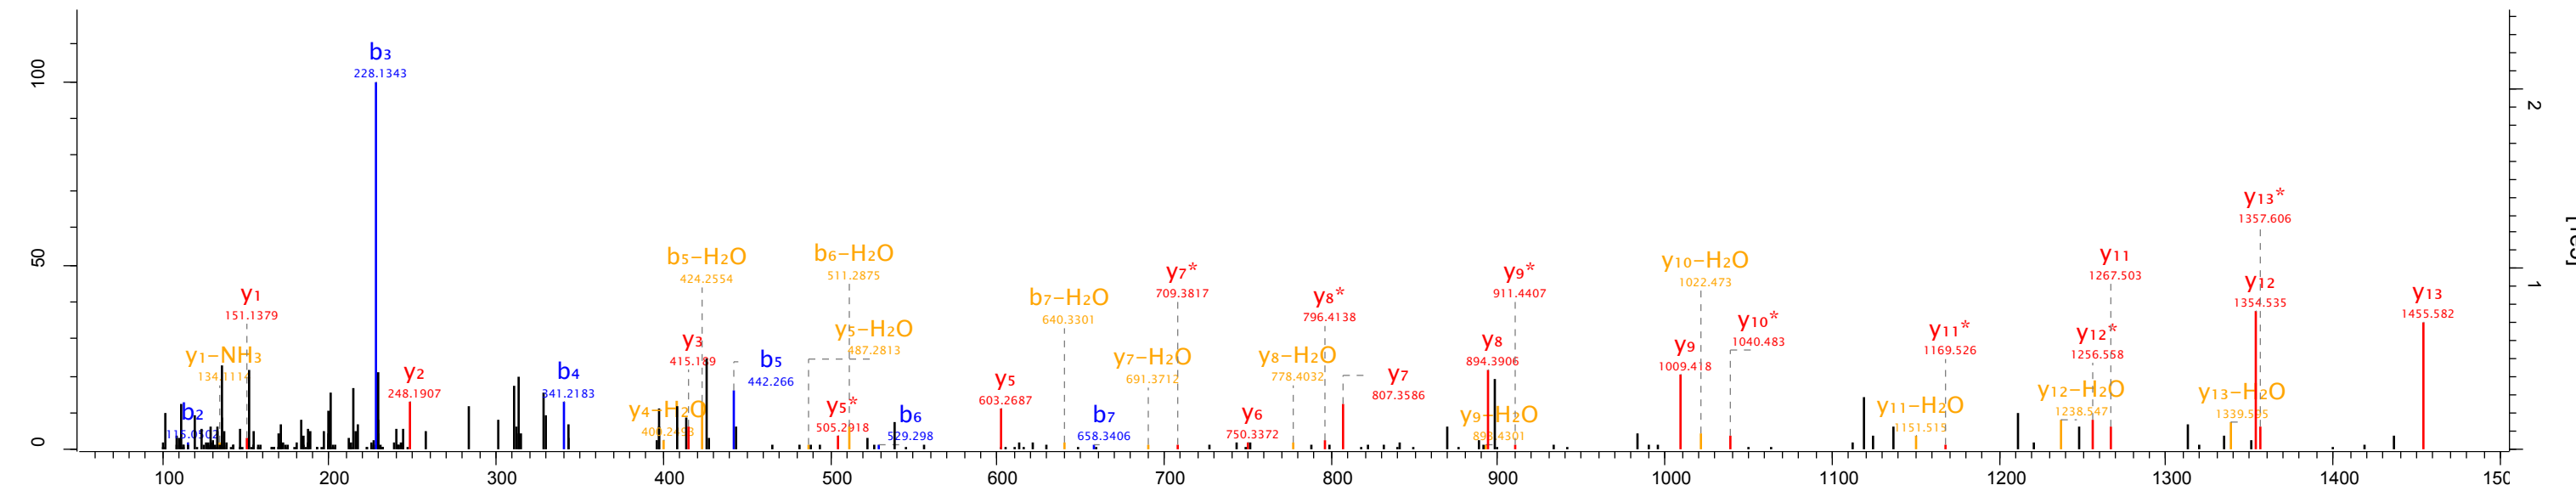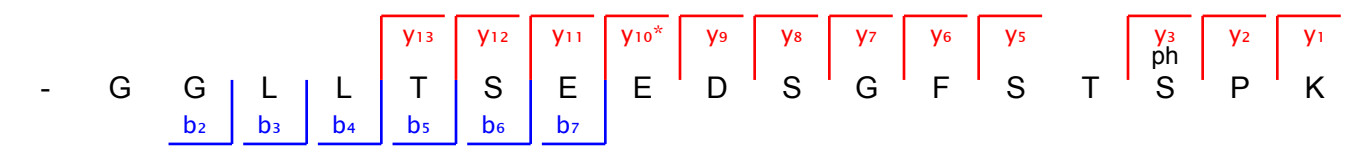

Raw file: 20171215\_MaS\_33SR\_LMH\_phospho\_05  
 Scan: 1931 Method: FTMS; HCD Score: 117.63 m/z: 573.24 Gene names: SRSF9

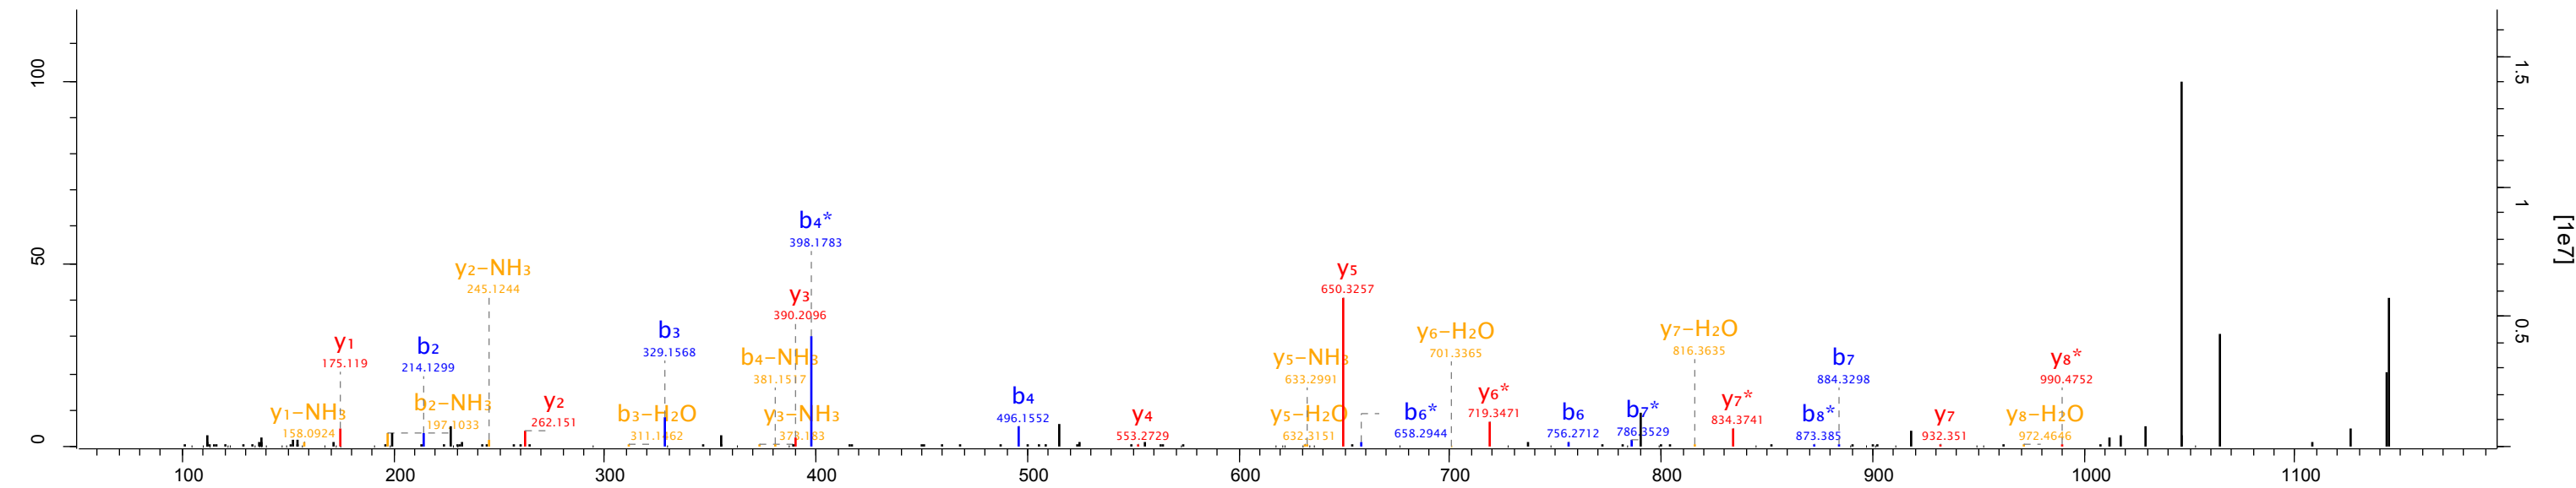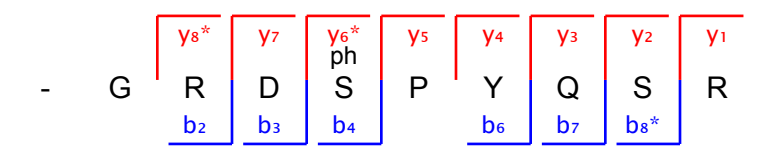

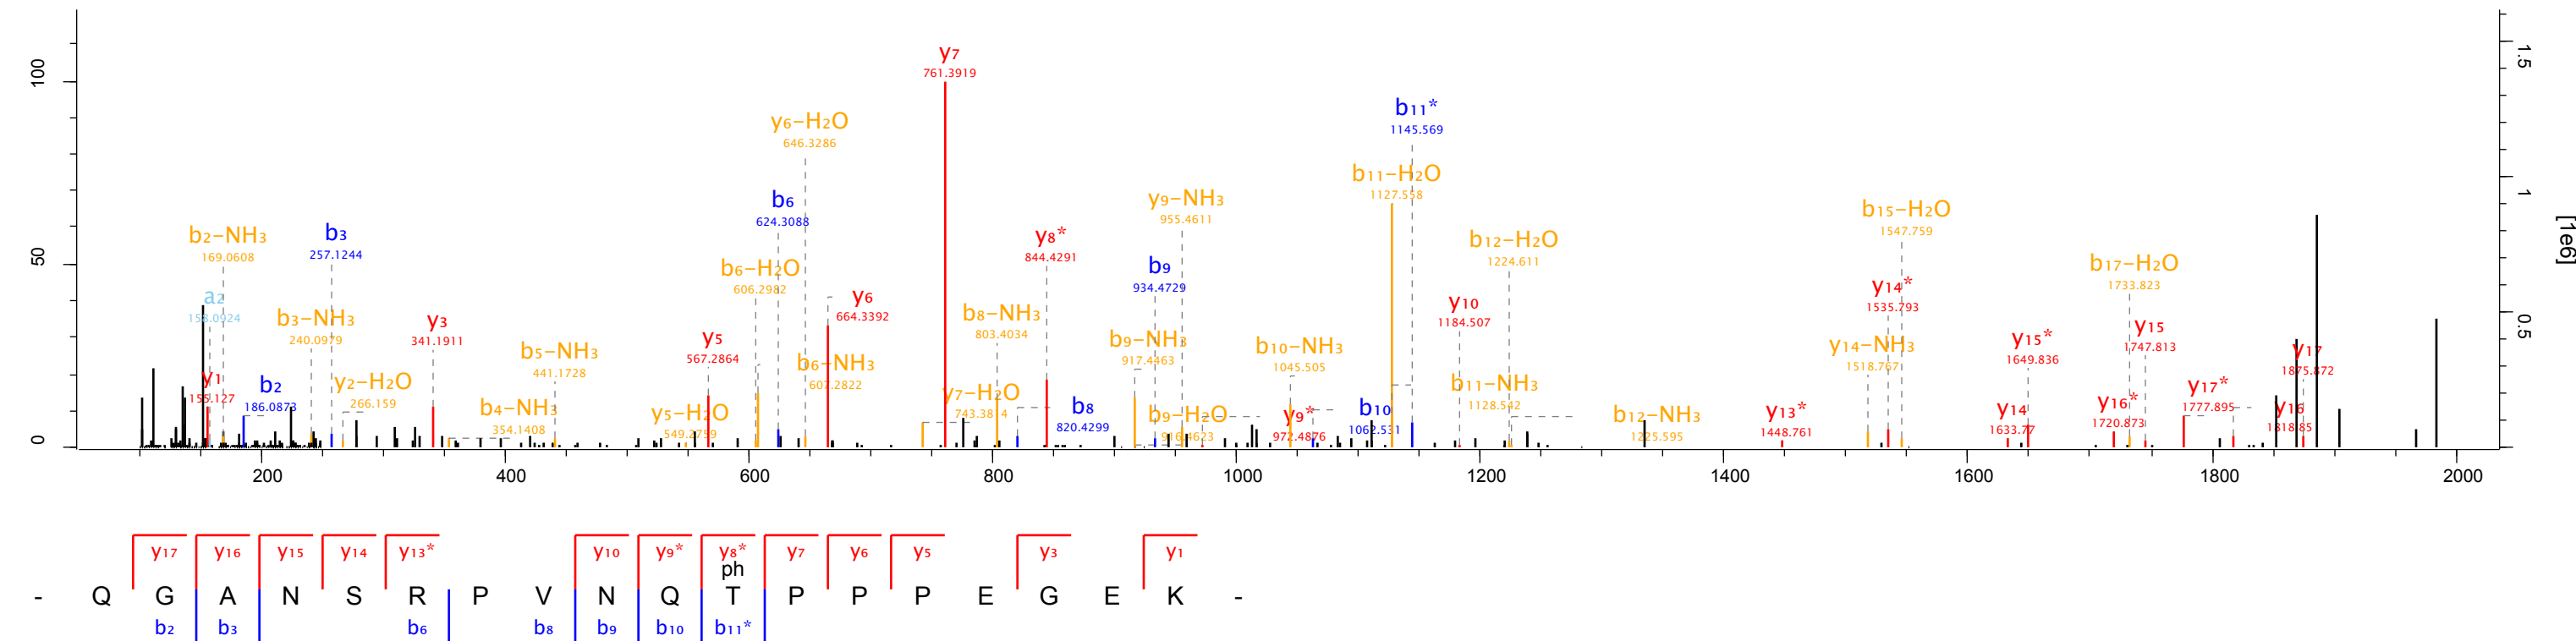

Raw file 20171215\_MaS\_33SR\_LMH\_phospho\_05 Scan 3261 Method FTMS; HCD Score 139.47 m/z 816.98 Gene names RSF1

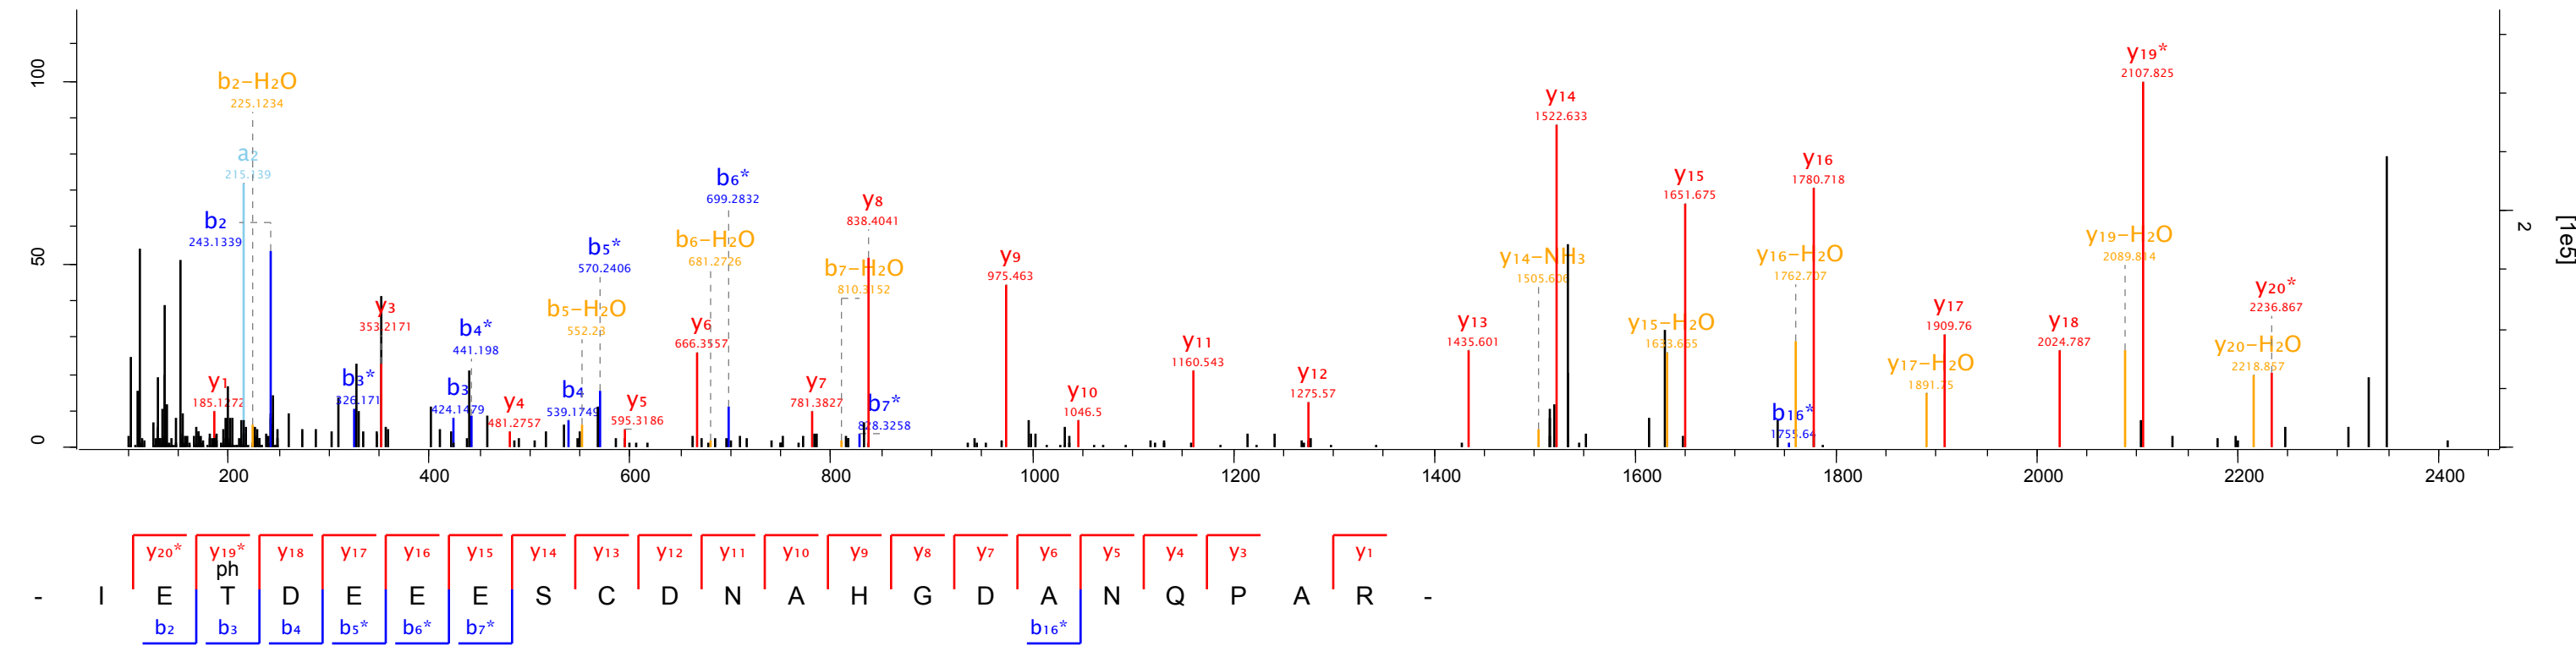

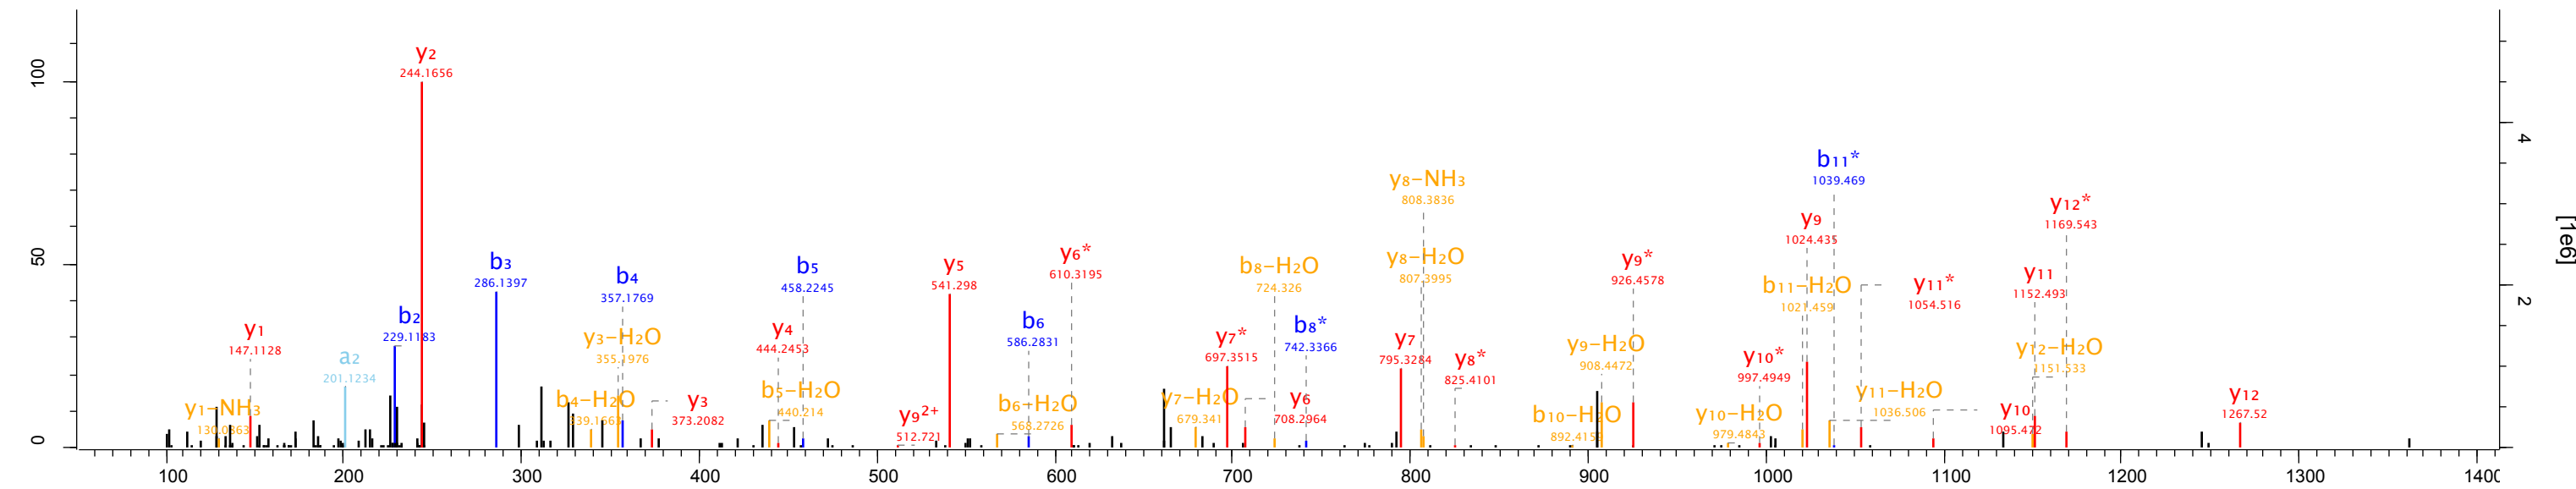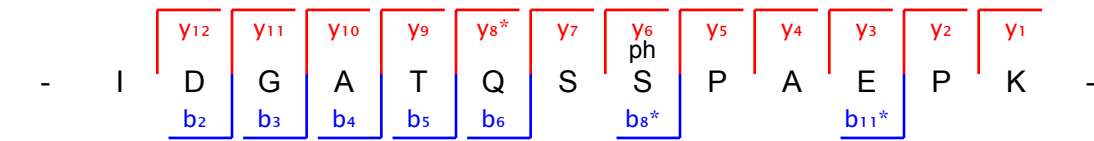

Raw file 20171215\_MaS\_33SR\_LMH\_phospho\_05 Scan 3371 Method FTMS; HCD Score 184.58 m/z 614.2 Gene names DDA1

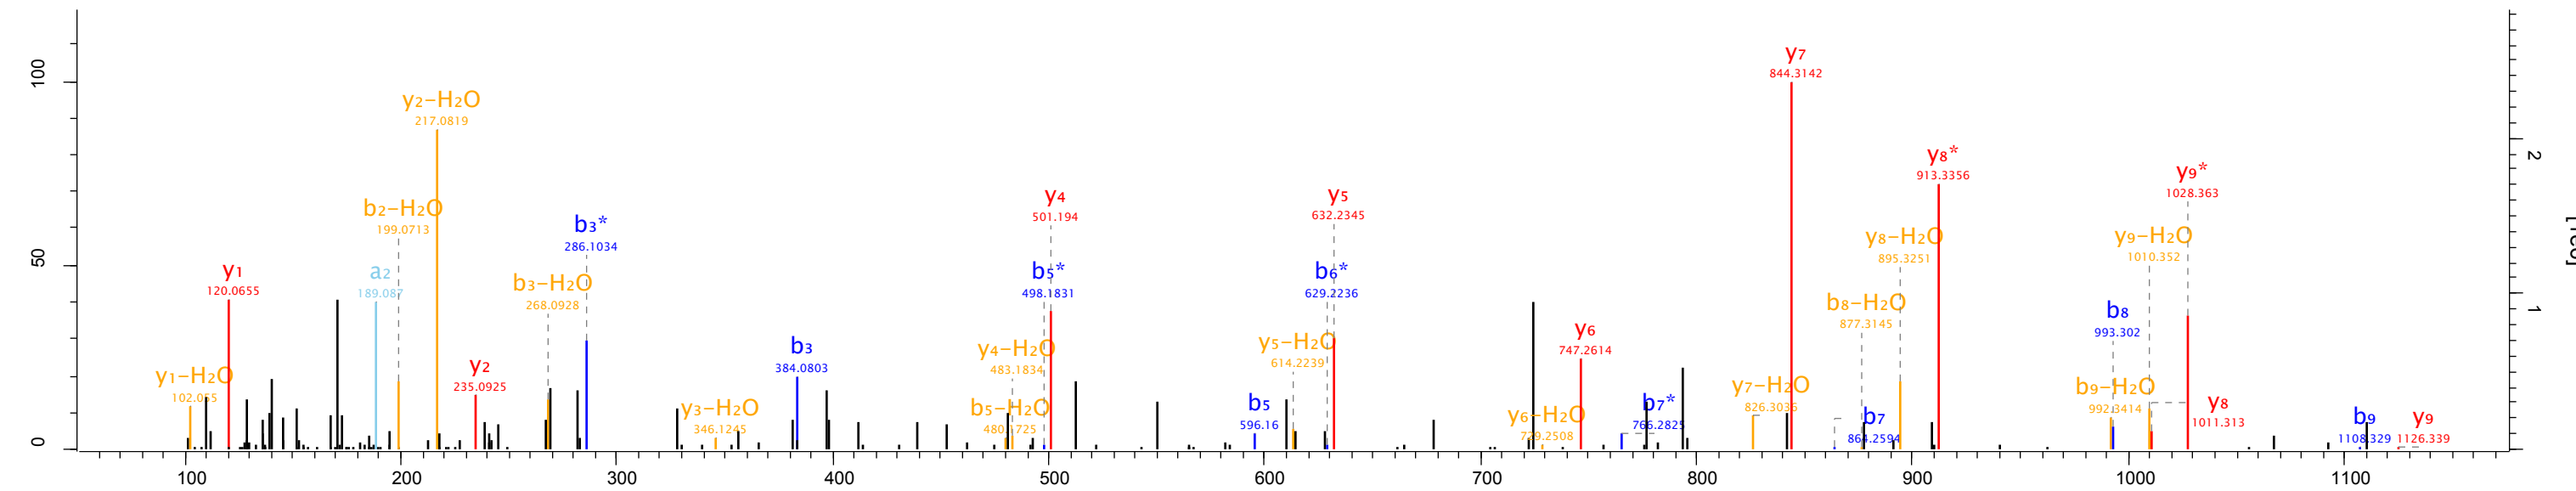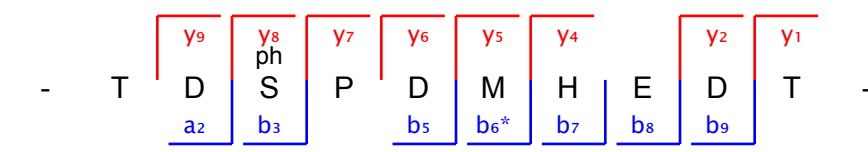



Raw file 20171215\_MaS\_33SR\_LMH\_phospho\_05 Scan 3541 Method FTMS; HCD Score 118.71 m/z 741.28 Gene names SERINC1

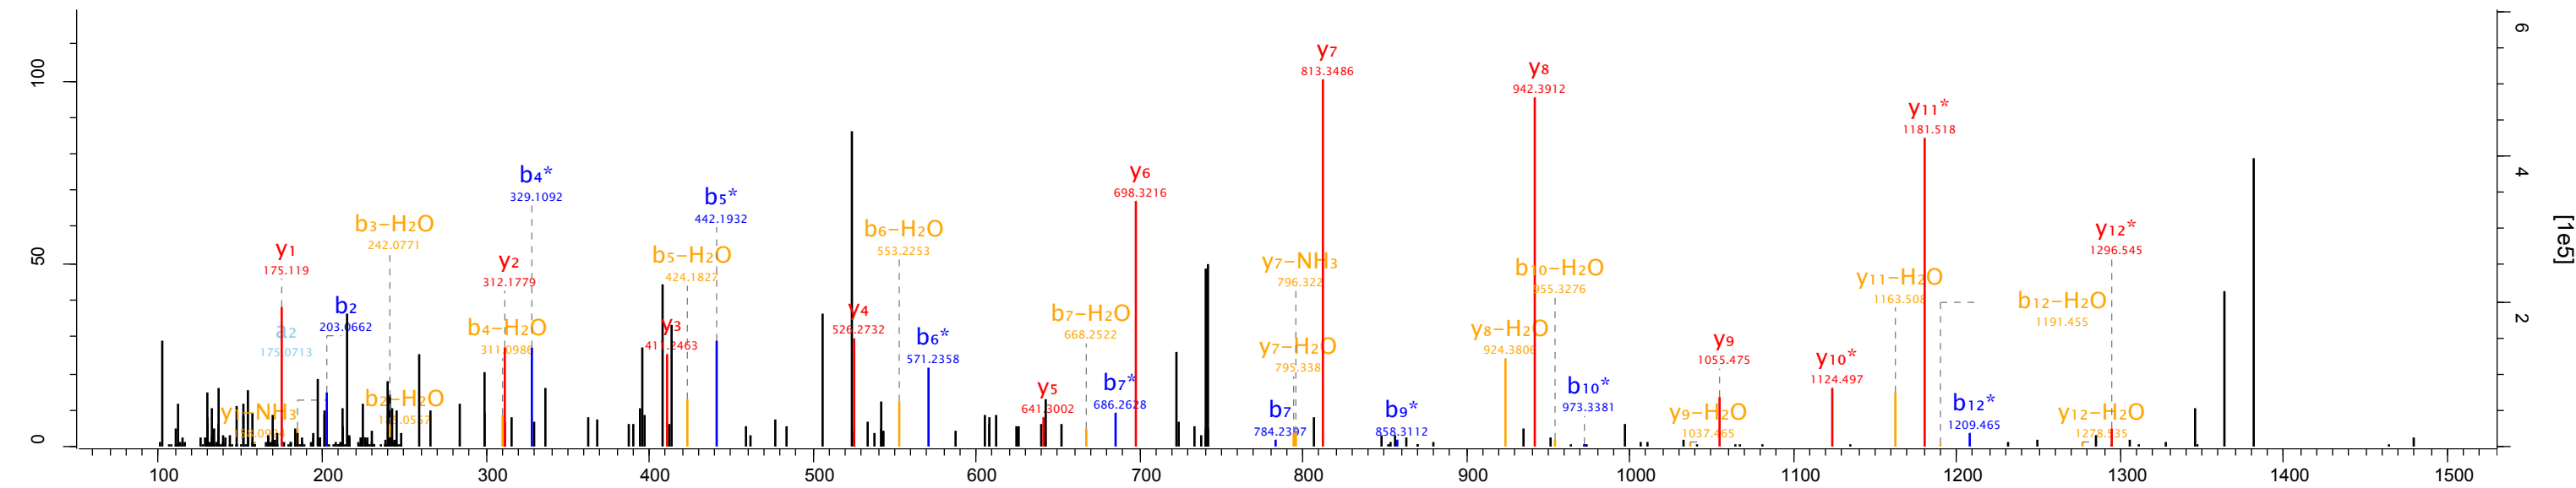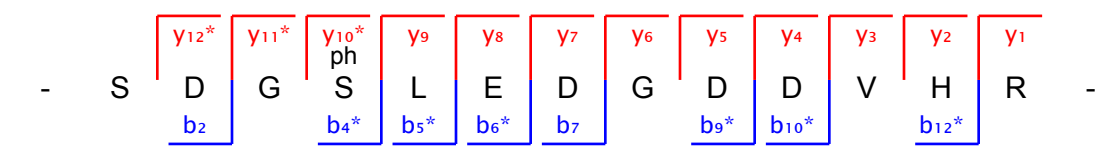

Raw file 20171215\_MaS\_33SR\_LMH\_phospho\_05 Scan 3801 Method FTMS; HCD Score 99.73 m/z 571.77 Gene names AMOTL1

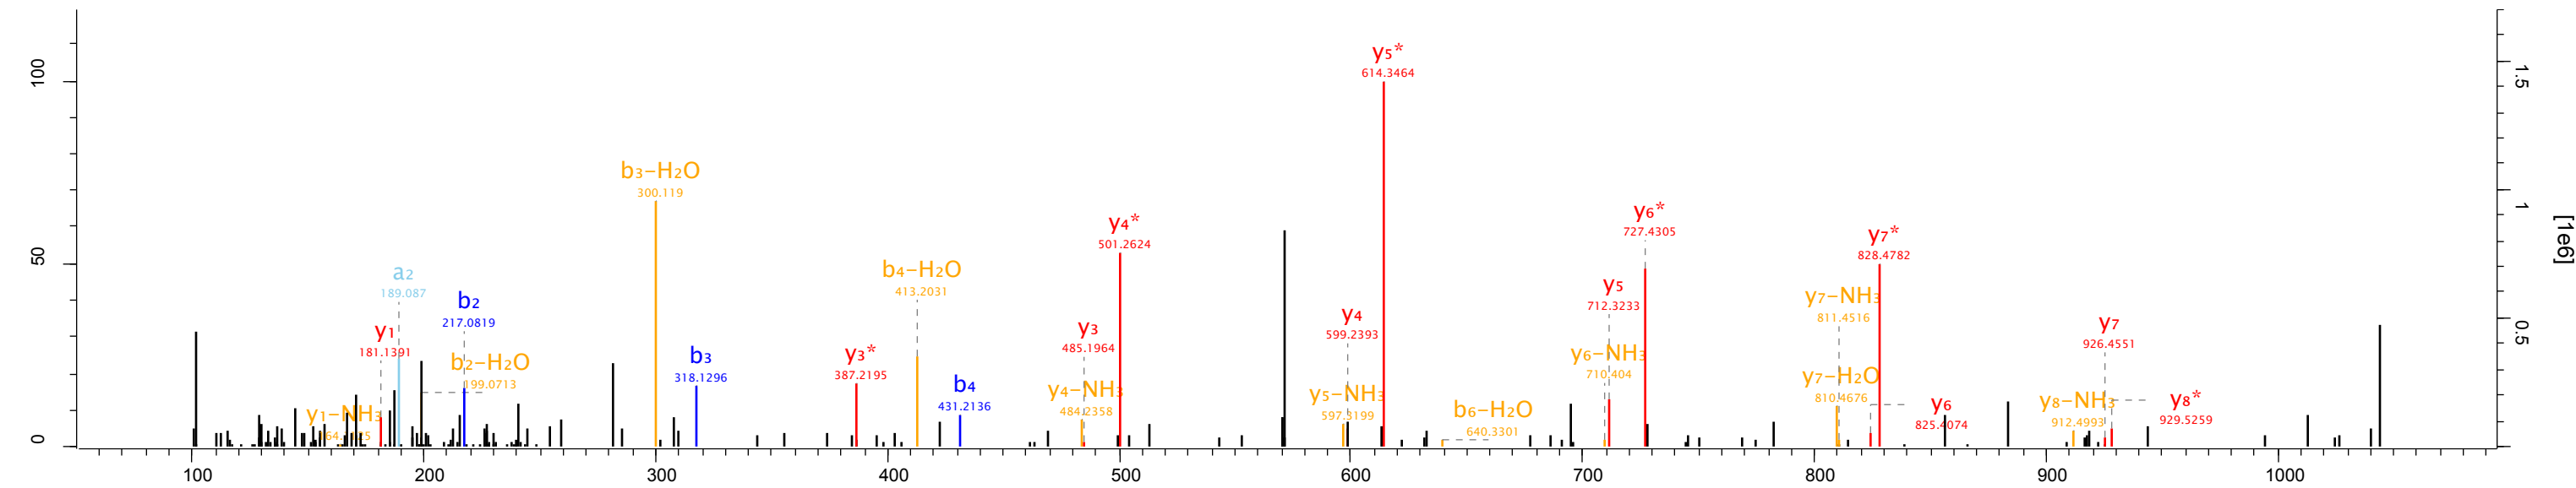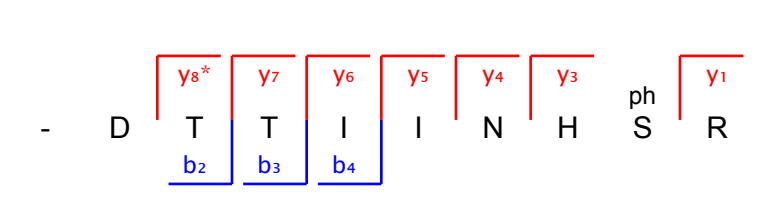

Raw file 20171215\_MaS\_33SR\_LMH\_phospho\_05 Scan 3881 Method FTMS; HCD Score 106.58 m/z 565.77 Gene names NIFK

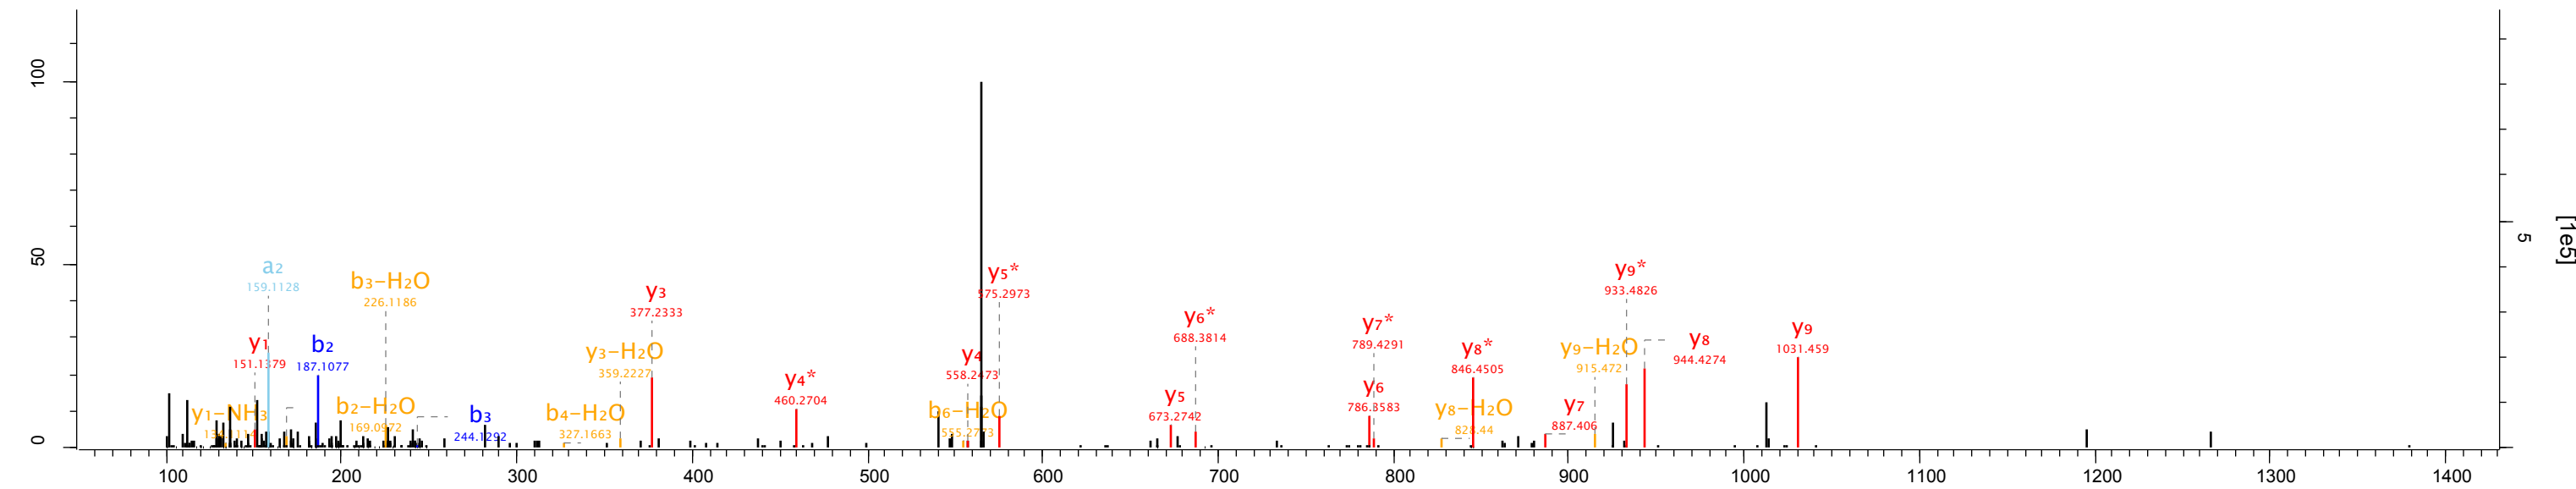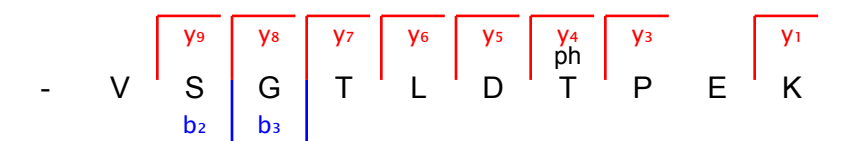

Raw file: 20171215\_MaS\_33SR\_LMH\_phospho\_05  
 Scan: 4011 Method: FTMS; HCD Score: 78.81 m/z: 613.79 Gene names: RAI14

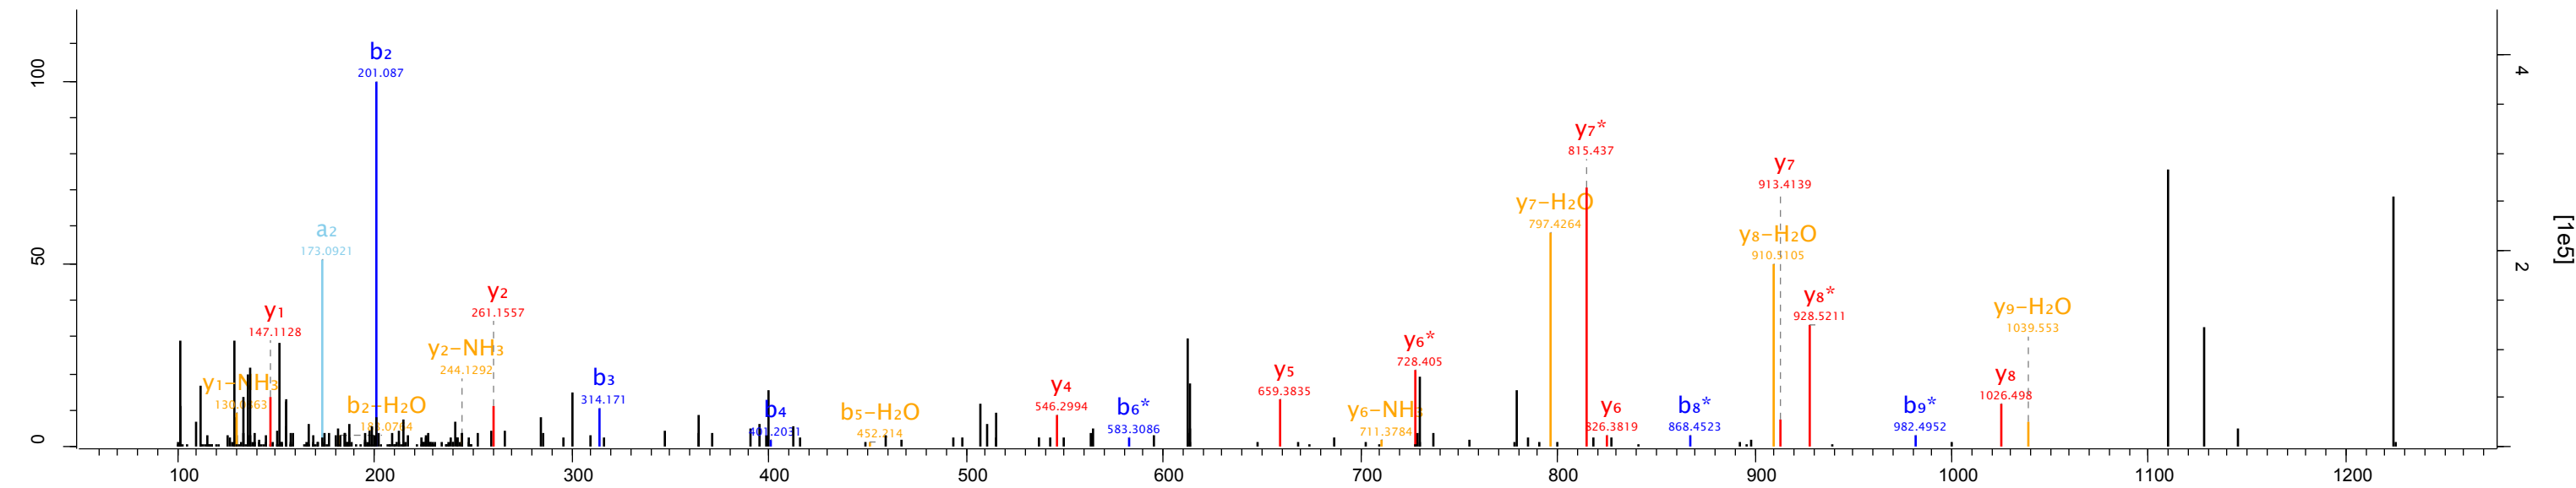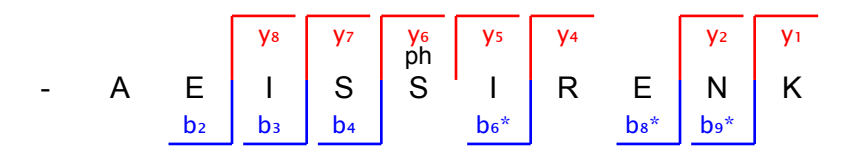

Raw file 20171215\_MaS\_33SR\_LMH\_phospho\_05 Scan 4341 Method FTMS; HCD Score 105.03 m/z 535.77 Gene names WRNIP1

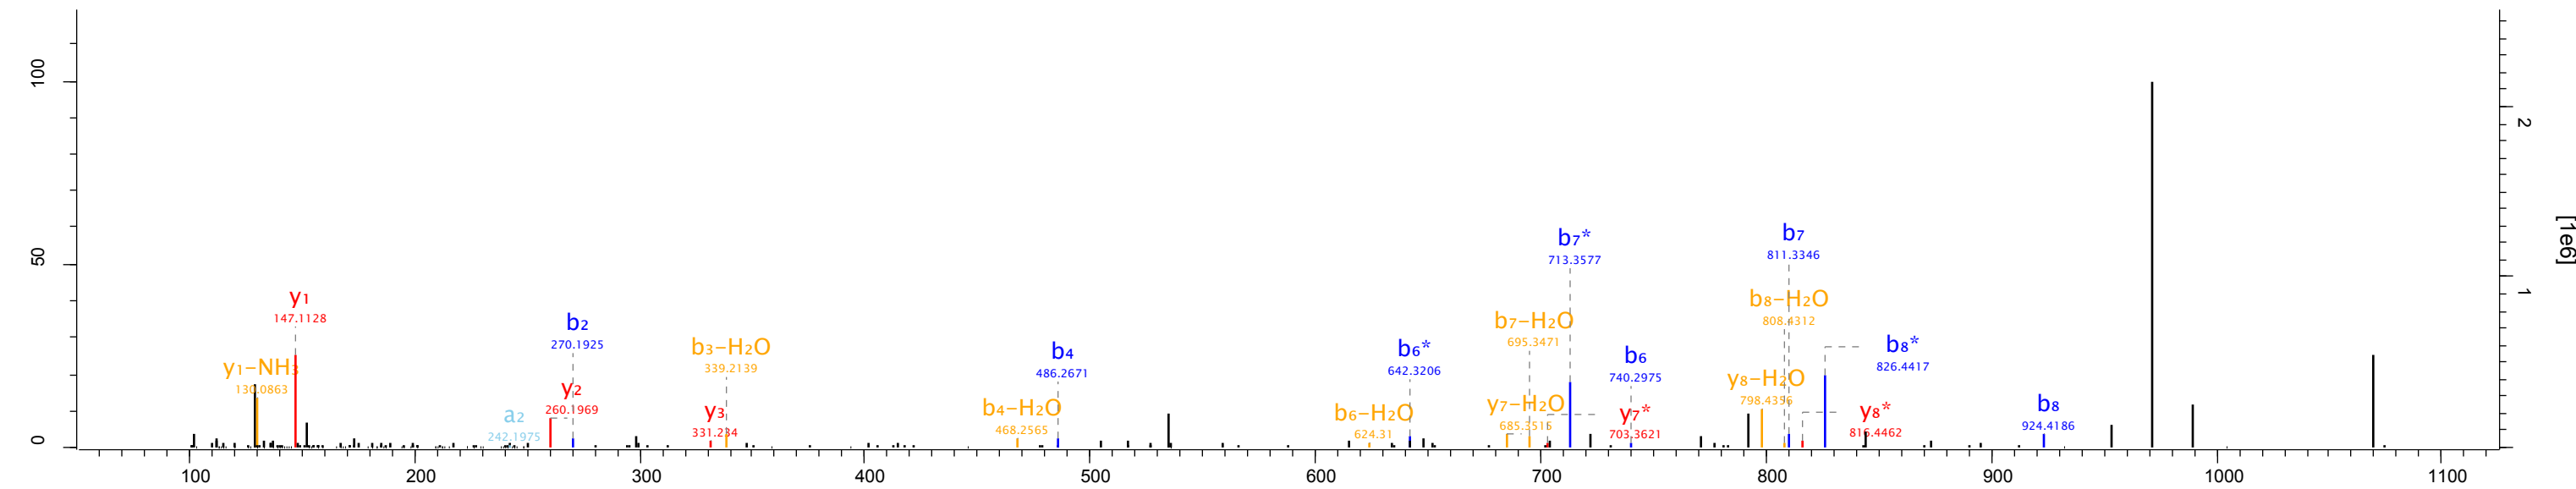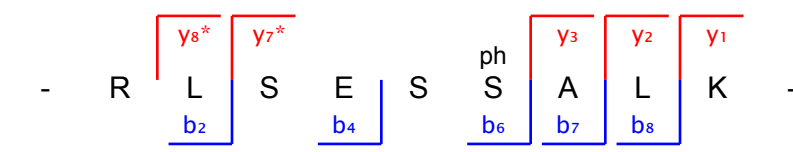

Raw file 20171215\_MaS\_33SR\_LMH\_phospho\_05 Scan 4651 Method FTMS; HCD Score 44.3 m/z 673.81 Gene names TAB3

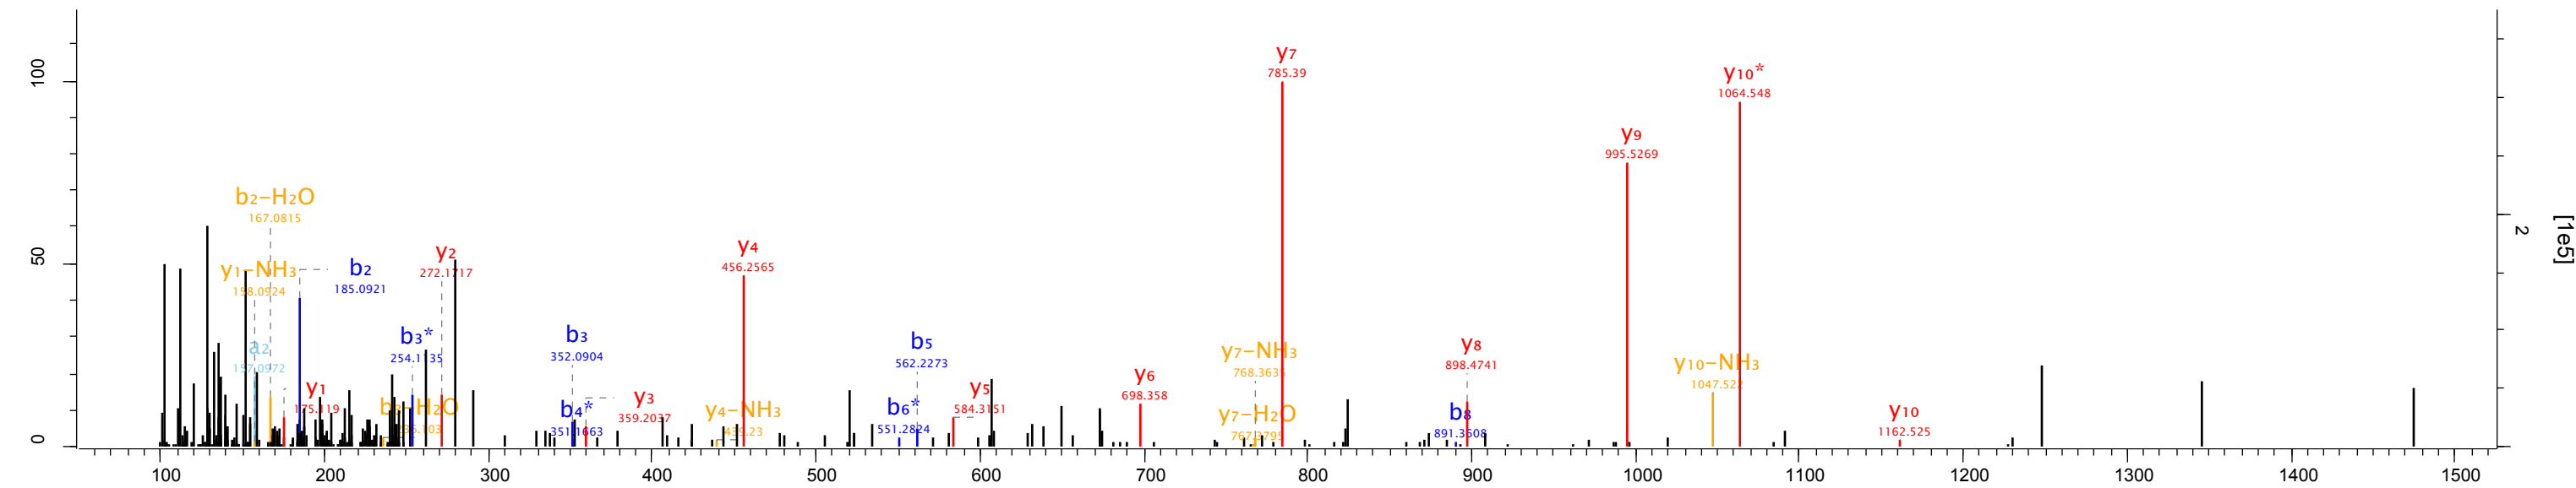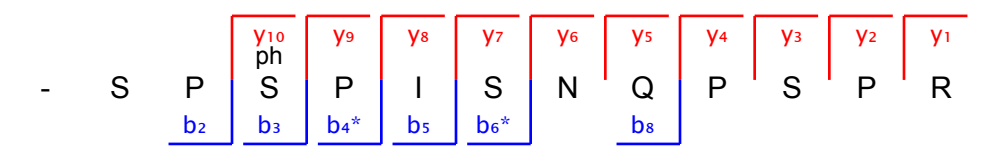

Raw file 20171215\_MaS\_33SR\_LMH\_phospho\_05 Scan 4771 Method FTMS; HCD Score 86.29 m/z 580.25 Gene names PPP1R18

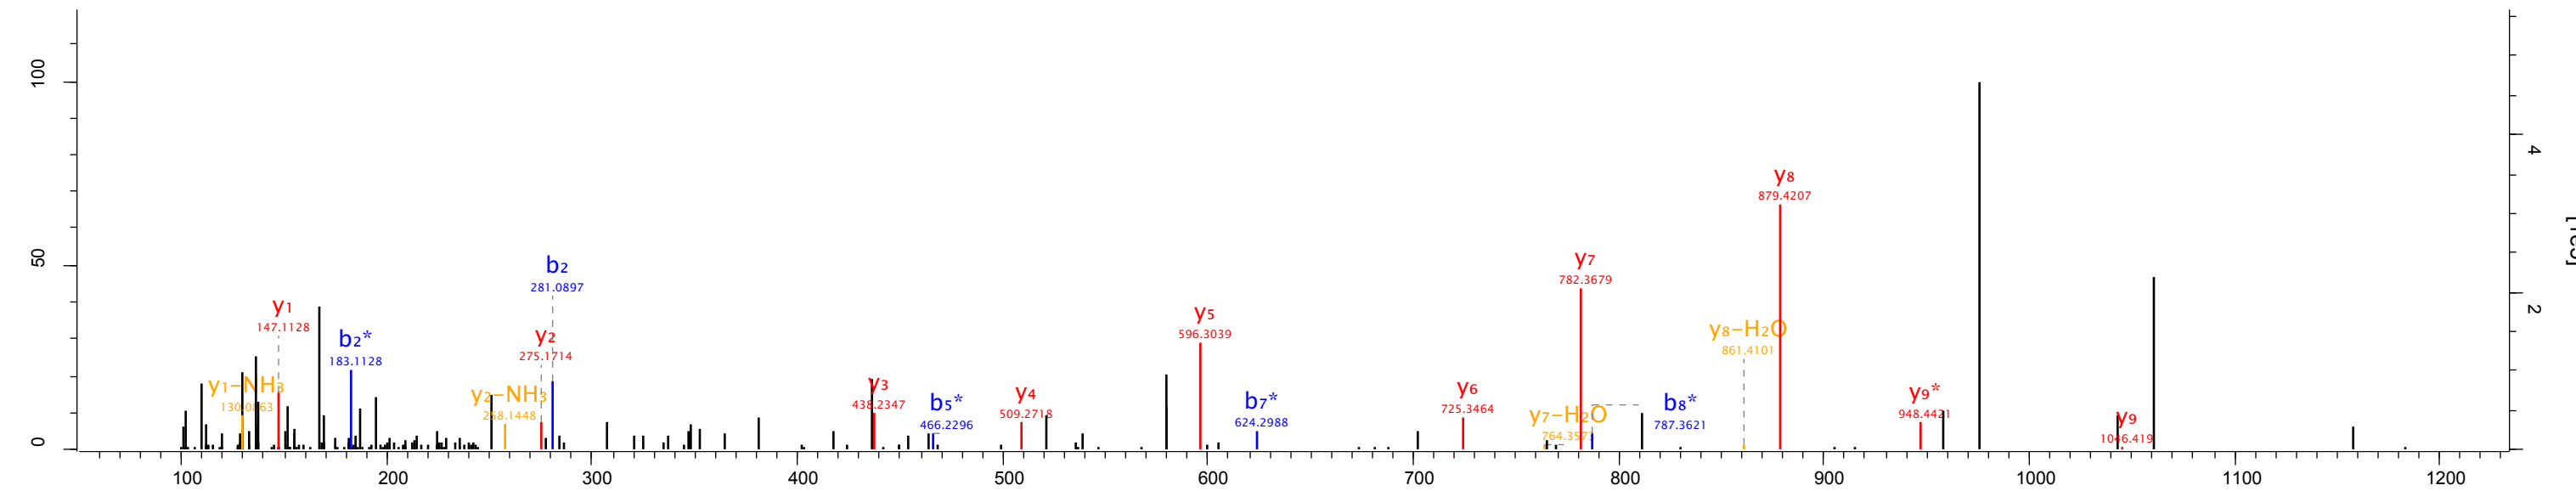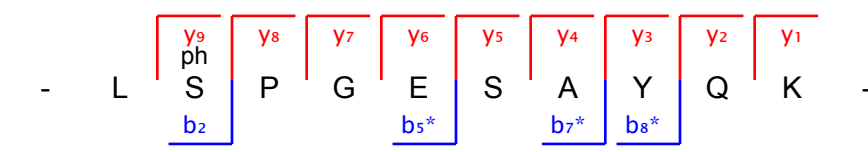

Raw file 20171215\_MaS\_33SR\_LMH\_phospho\_05 Scan 4911 Method FTMS; HCD Score 238.03 m/z 716.65 Gene names PLEKHF1

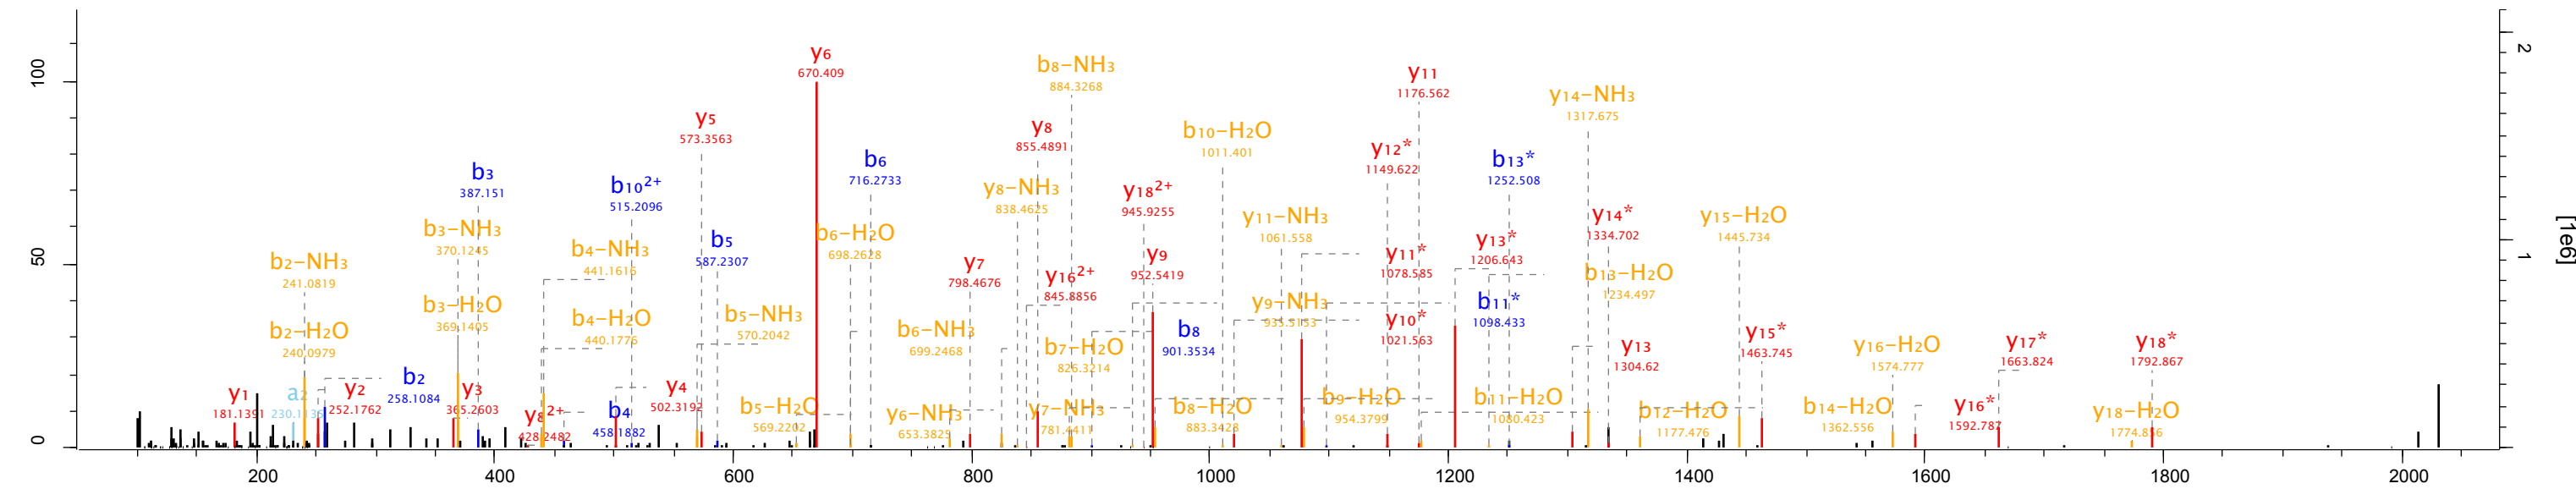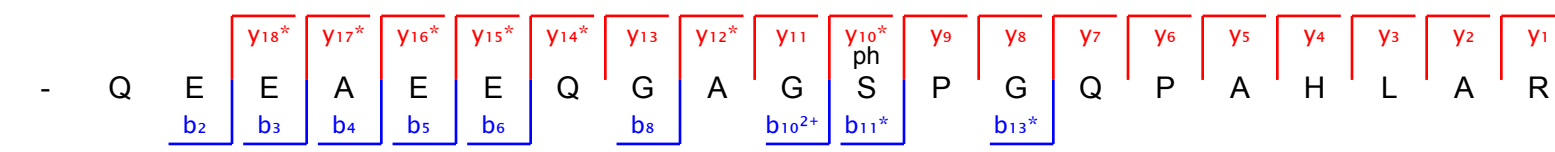



Raw file 20171215\_MaS\_33SR\_LMH\_phospho\_05 Scan 5231 Method FTMS; HCD Score 185.21 m/z 936.88 Gene names CAMK2D

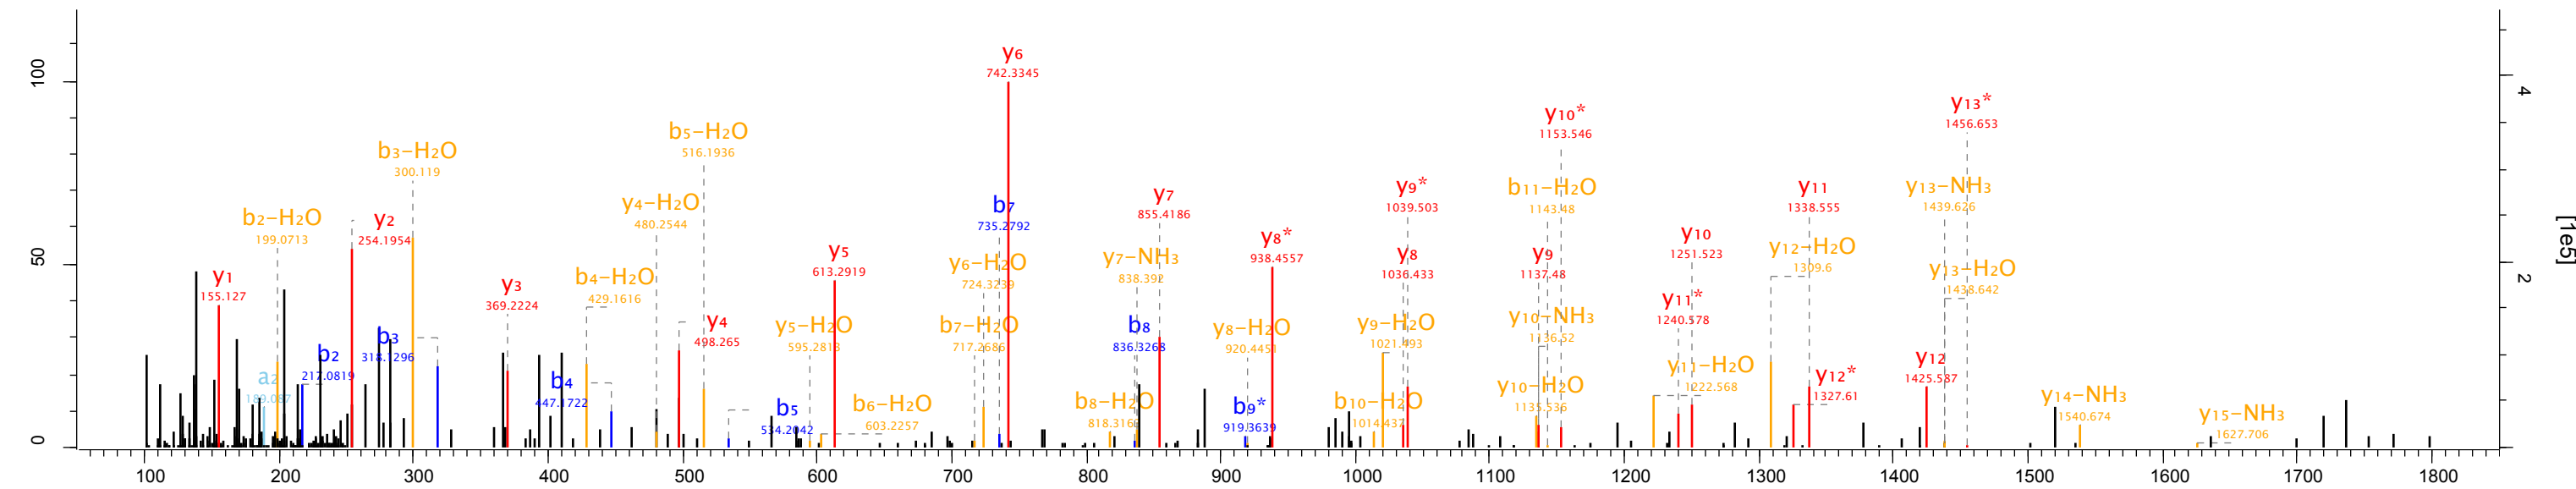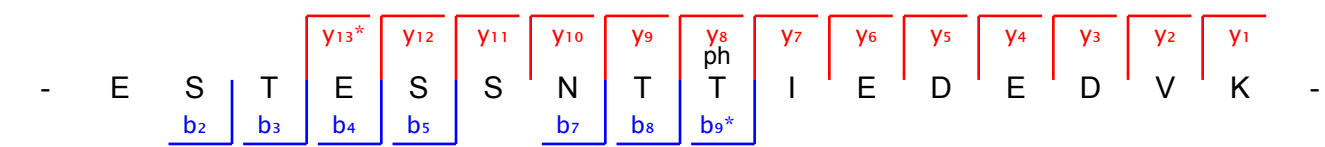

Raw file 20171215\_MaS\_33SR\_LMH\_phospho\_05 Scan 5521 Method FTMS; HCD Score 326.38 m/z 733.82 Gene names UBAP2L

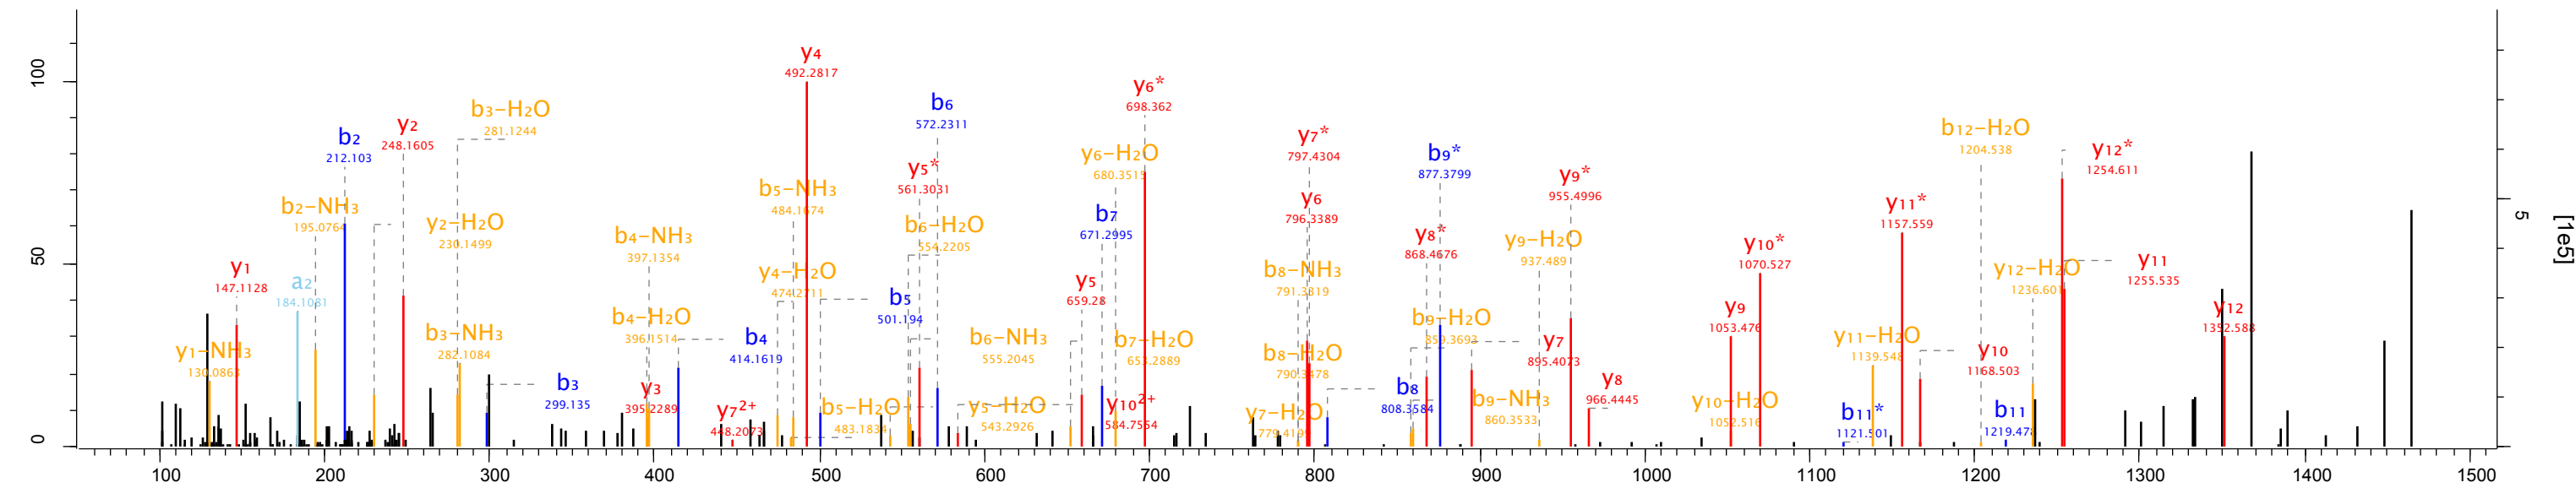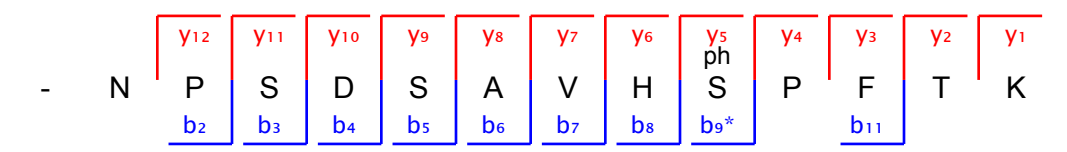

Raw file 20171215\_MaS\_33SR\_LMH\_phospho\_05 Scan 5911 Method FTMS; HCD Score 455.67 m/z 1201.5 Gene names HSP90AA1

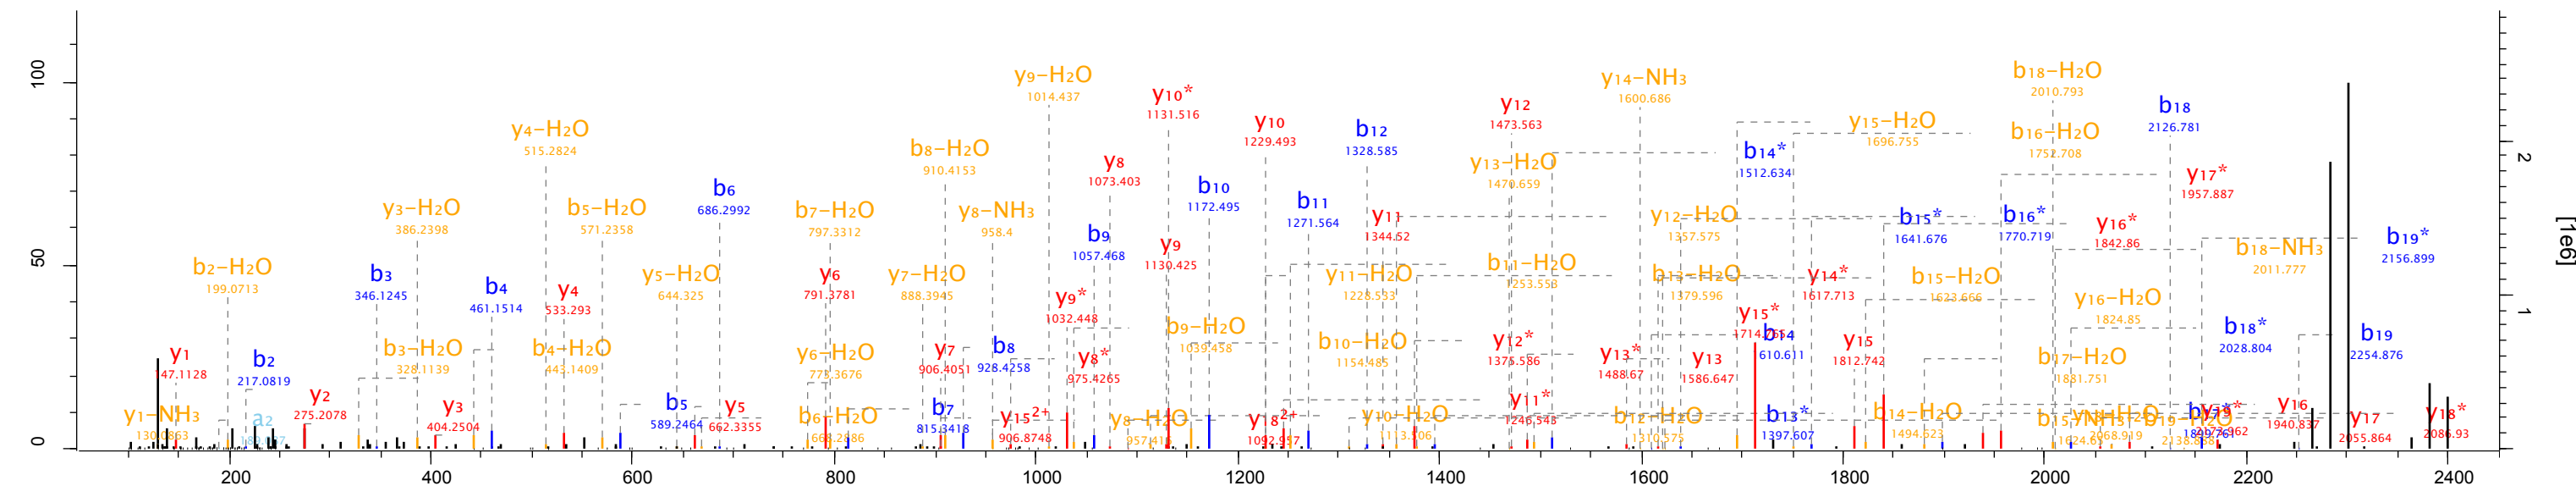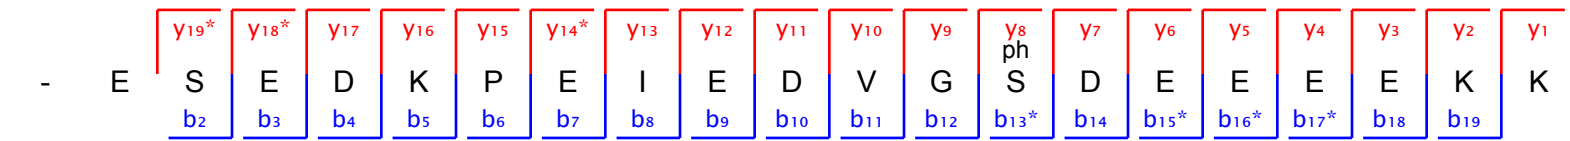

Raw file  
20171215\_MaS\_33SR\_LMH\_phospho\_05

Scan Method Score m/z Gene names  
6001 FTMS; HCD 186.51 646.24 HTATSFI

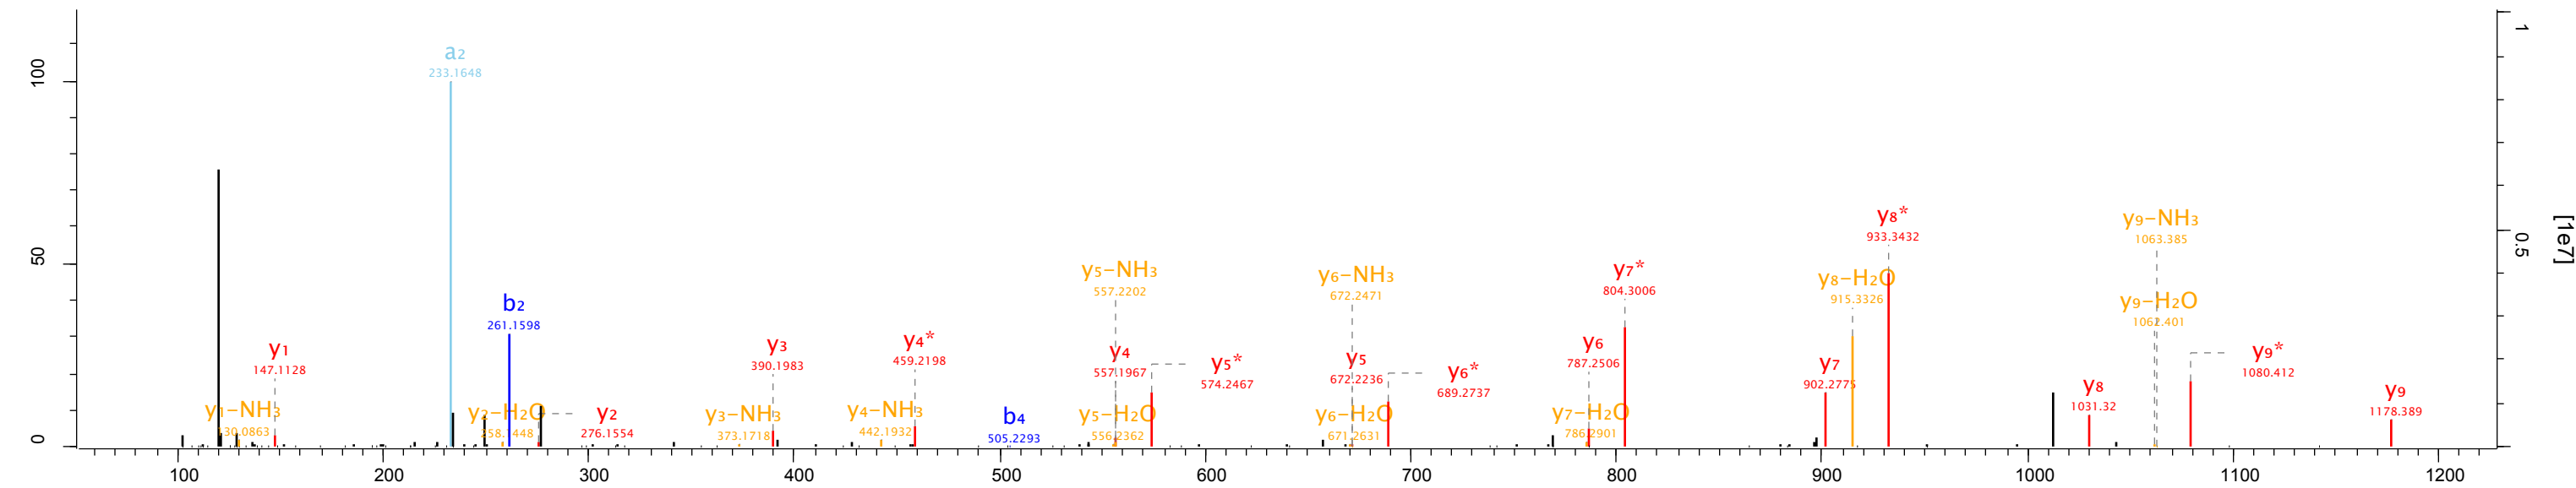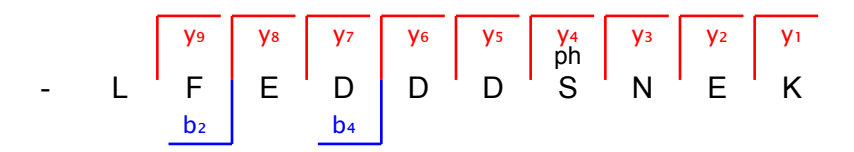

Raw file 20171215\_MaS\_33SR\_LMH\_phospho\_05 Scan 6511 Method FTMS; HCD Score 72.29 m/z 549.24 Gene names RALGPS2

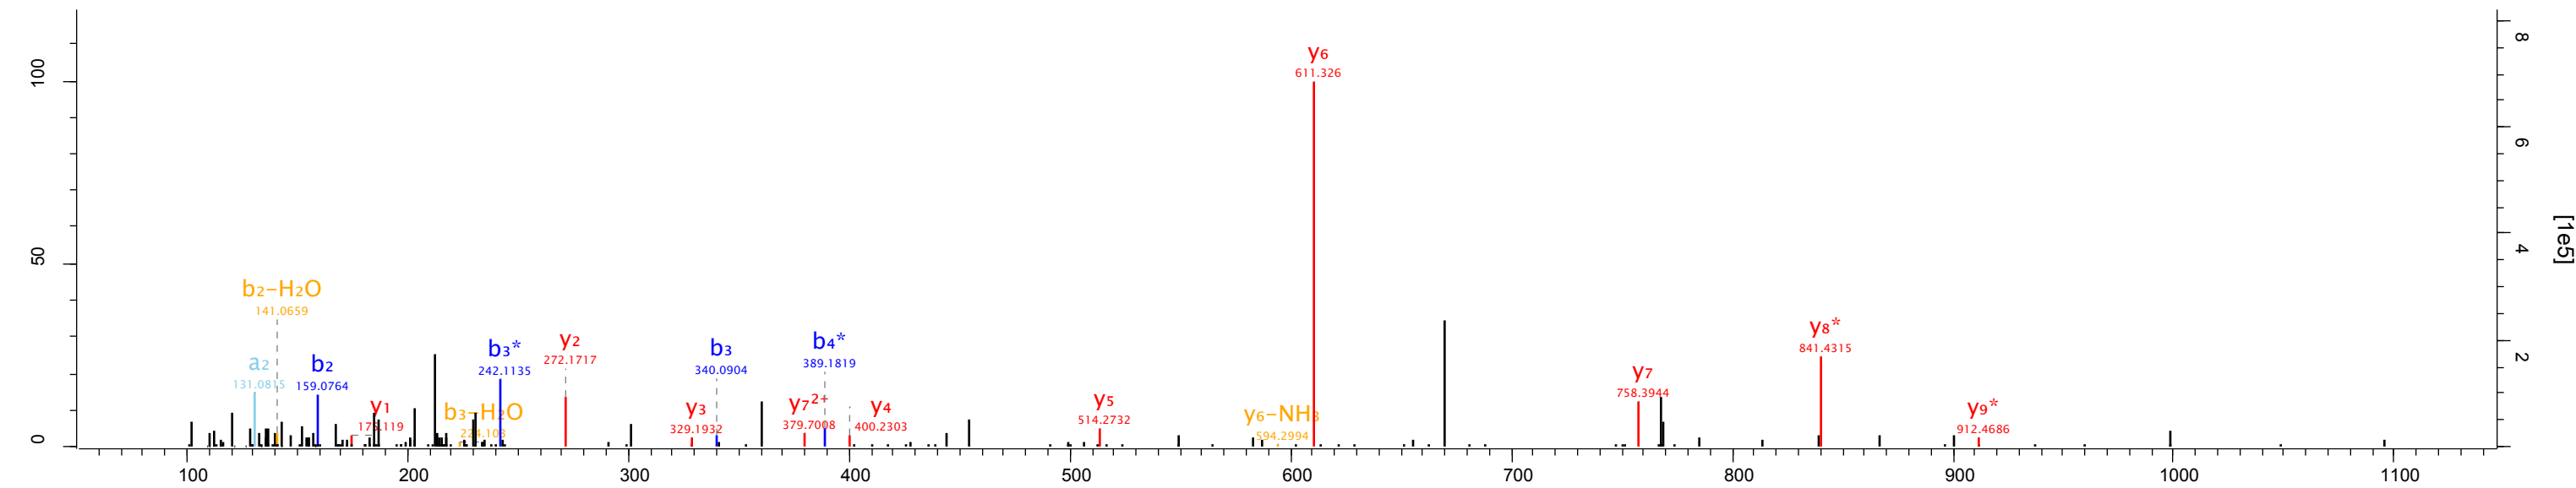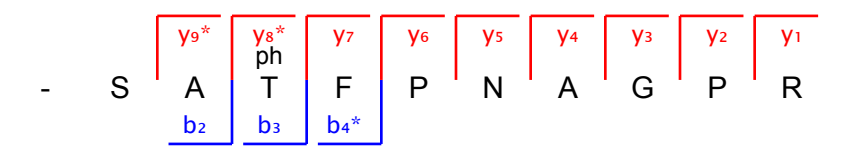

Raw file 20171215\_MaS\_33SR\_LMH\_phospho\_05 Scan 8361 Method FTMS; HCD Score 61.34 m/z 814.34 Gene names SON

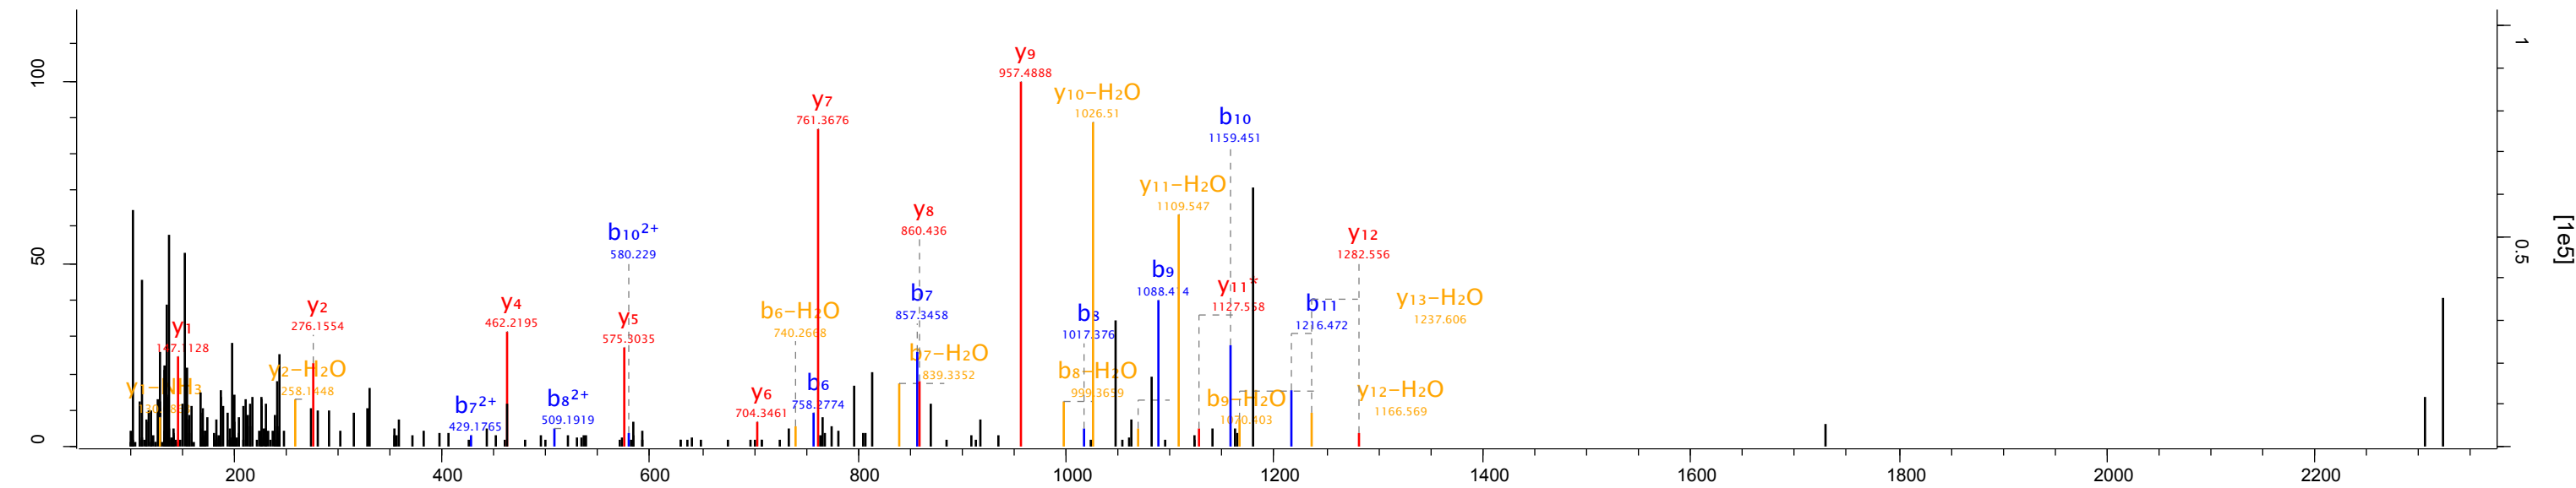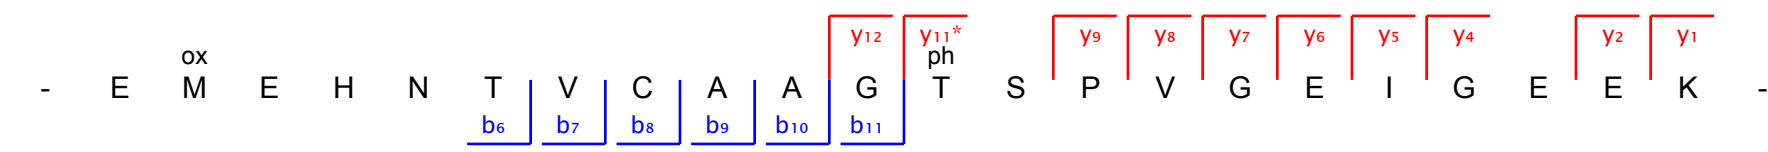

Raw file 20171215\_MaS\_33SR\_LMH\_phospho\_05 Scan 8951 Method FTMS; HCD Score 102.66 m/z 923.92 Gene names HUWE1

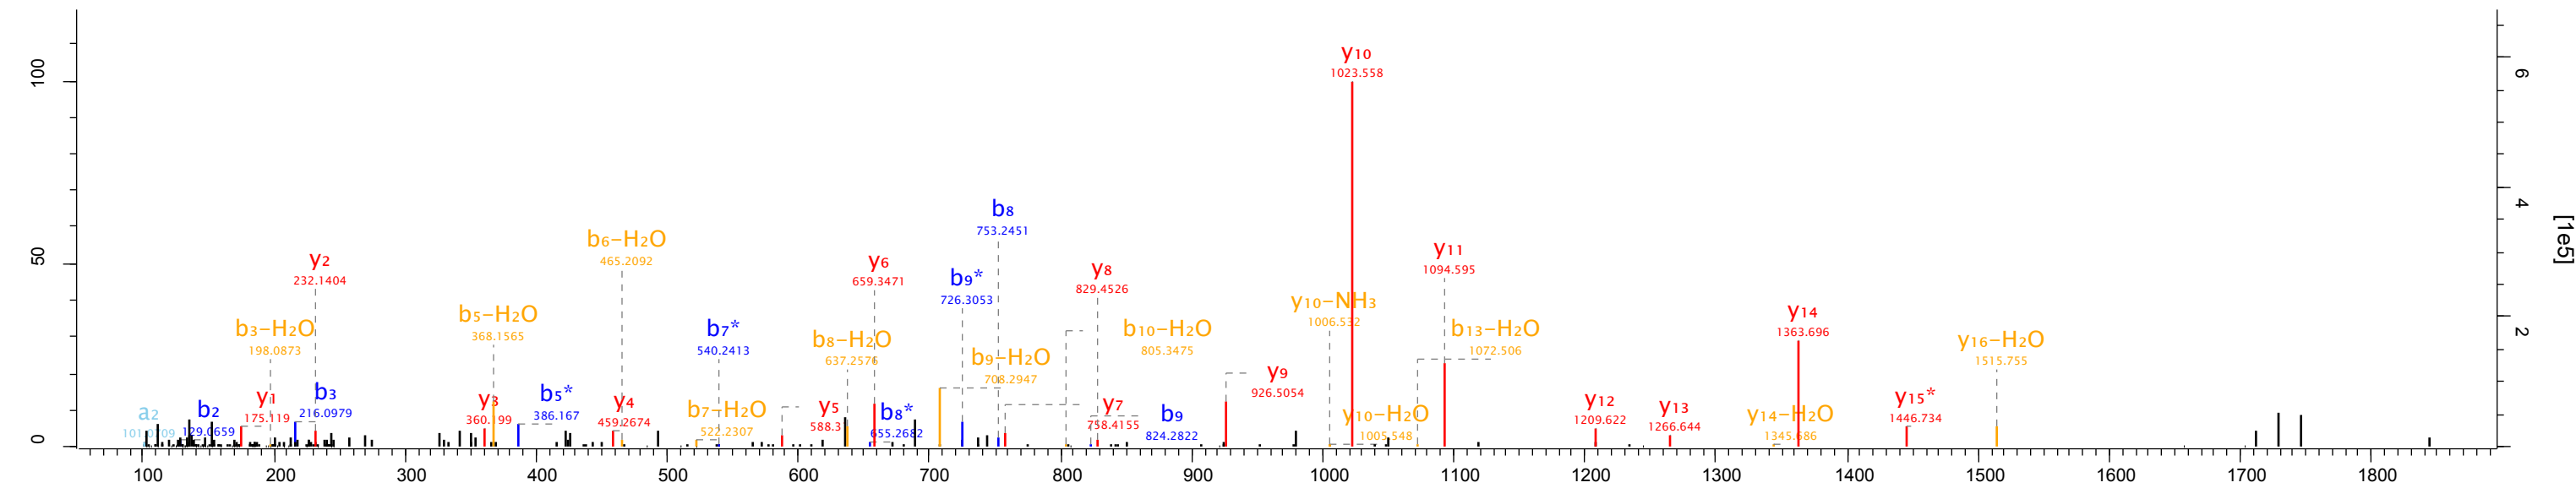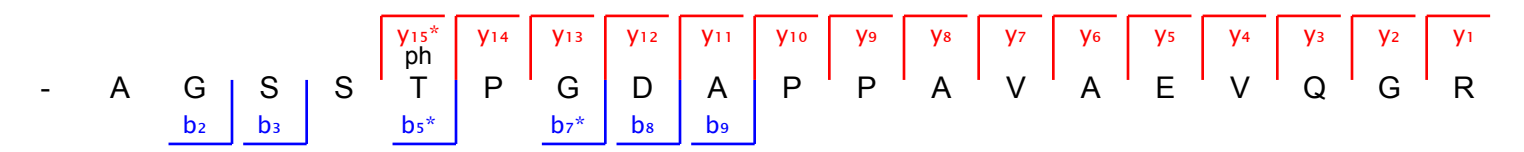

Raw file 20171215\_MaS\_33SR\_LMH\_phospho\_05 Scan 9921 Method FTMS; HCD Score 195.45 m/z 881.37 Gene names GOLGA4

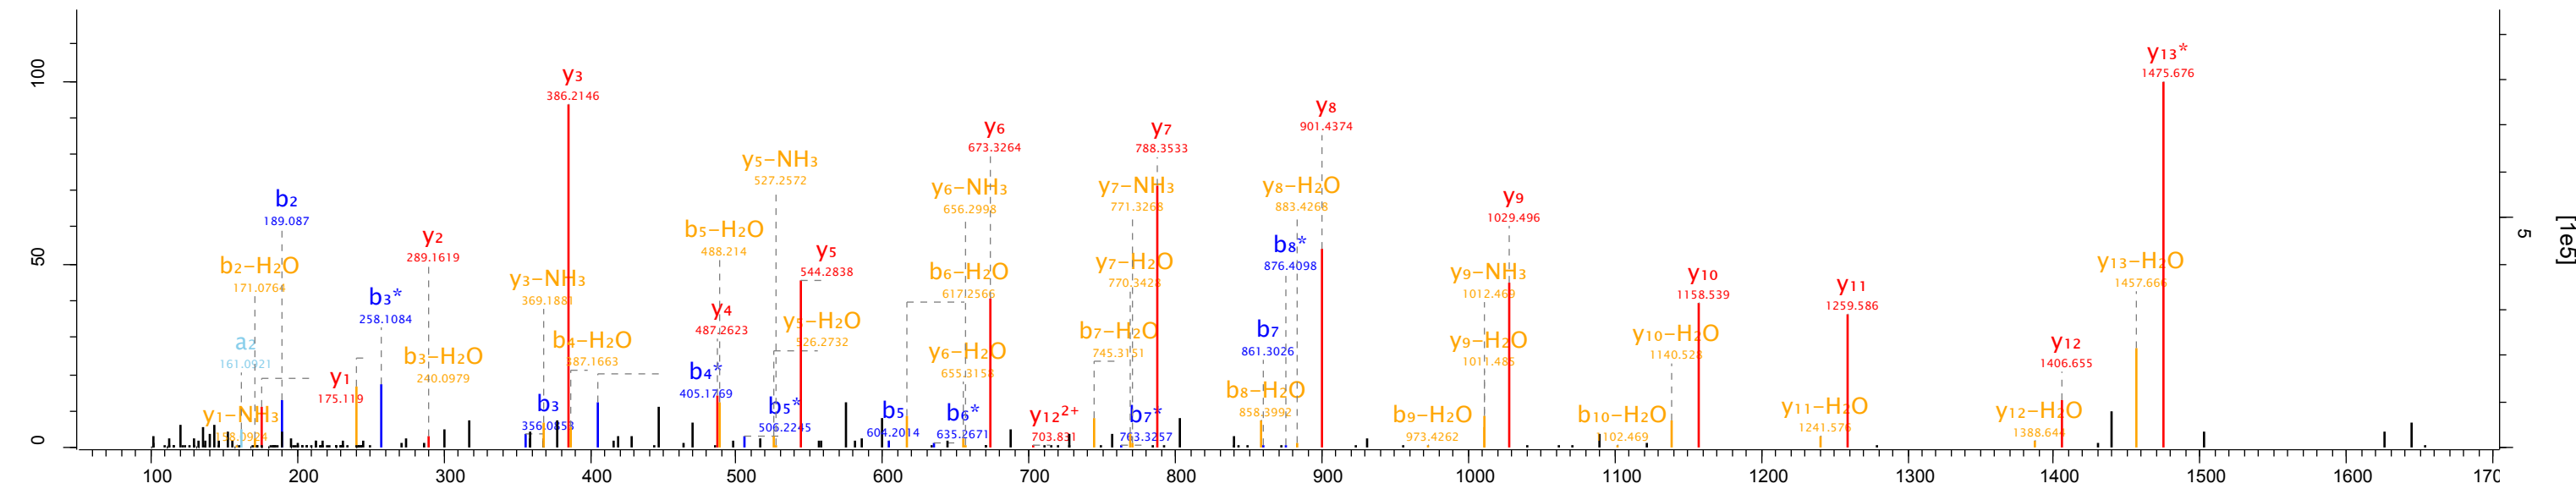

- T S S F T E Q L D E G T P N R -

Fragmentation mapping:

- b<sub>2</sub> (blue box) under S
- b<sub>3</sub> (blue box) under S
- b<sub>4</sub>\* (blue box) under F
- b<sub>5</sub> (blue box) under T
- b<sub>6</sub>\* (blue box) under E
- b<sub>7</sub> (blue box) under Q
- b<sub>8</sub>\* (blue box) under L
- y<sub>1</sub> (red box) under R
- y<sub>2</sub> (red box) under N
- y<sub>3</sub> (red box) under P
- y<sub>4</sub> (red box) under T
- y<sub>5</sub> (red box) under G
- y<sub>6</sub> (red box) under E
- y<sub>7</sub> (red box) under D
- y<sub>8</sub> (red box) under L
- y<sub>9</sub> (red box) under Q
- y<sub>10</sub> (red box) under E
- y<sub>11</sub> (red box) under T
- y<sub>12</sub> (red box) under F
- y<sub>13</sub>\* (red box) under S



Raw file 20171215\_MaS\_33SR\_LMH\_phospho\_06 Scan 10001 Method FTMS; HCD Score 79.35 m/z 741.36 Gene names FTSJ3

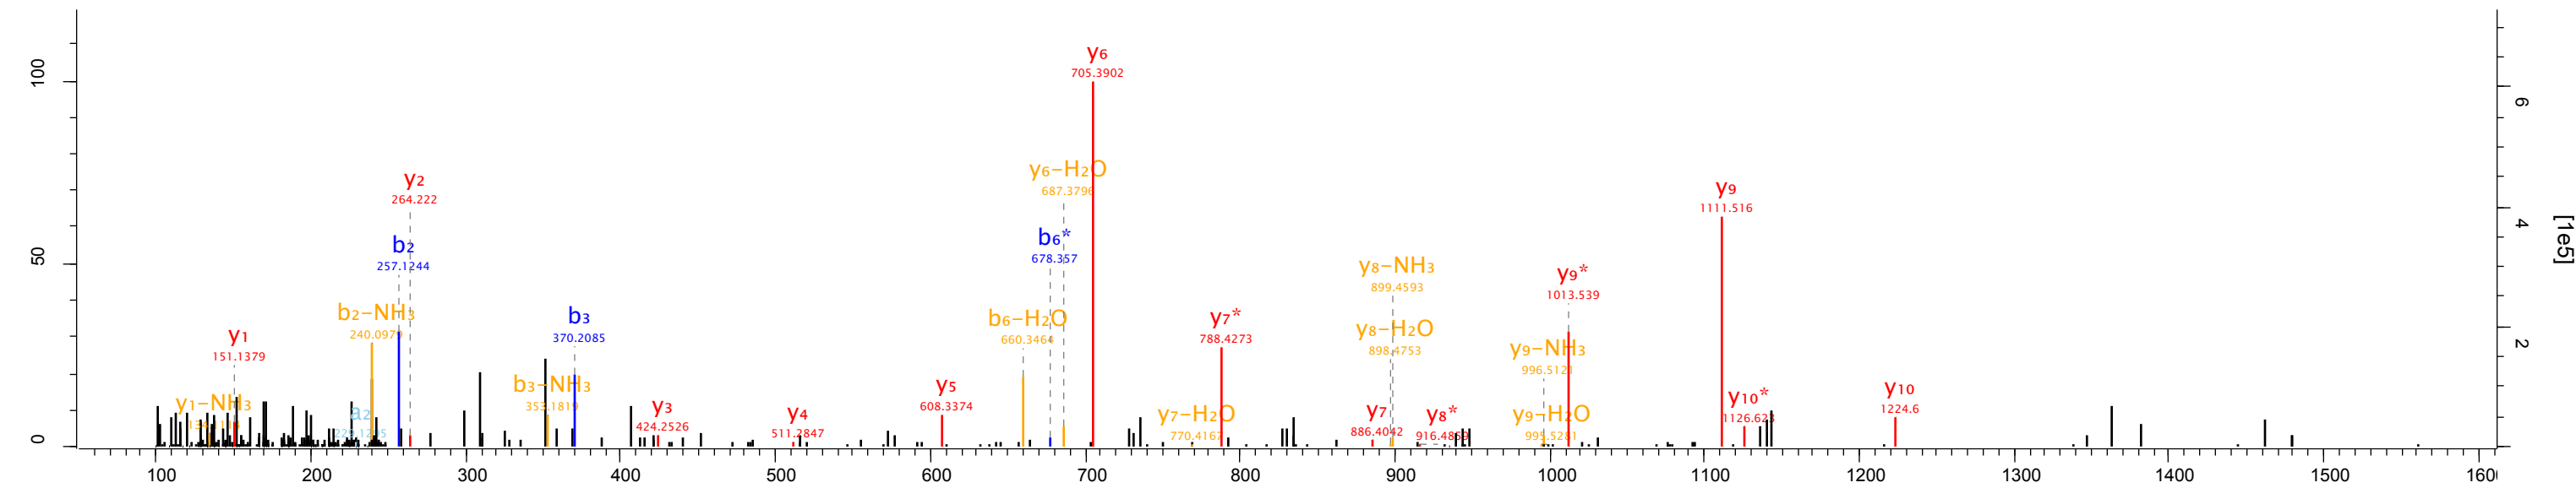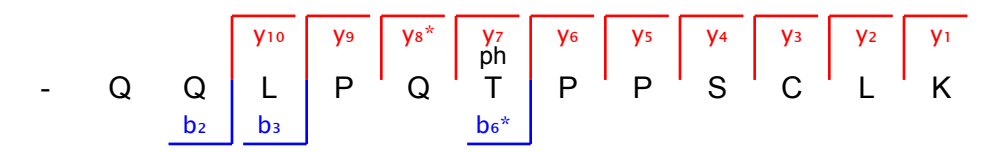

Raw file 20171215\_MaS\_33SR\_LMH\_phospho\_06 Scan 10171 Method FTMS; HCD Score 88.76 m/z 646.96 Gene names SYMPK

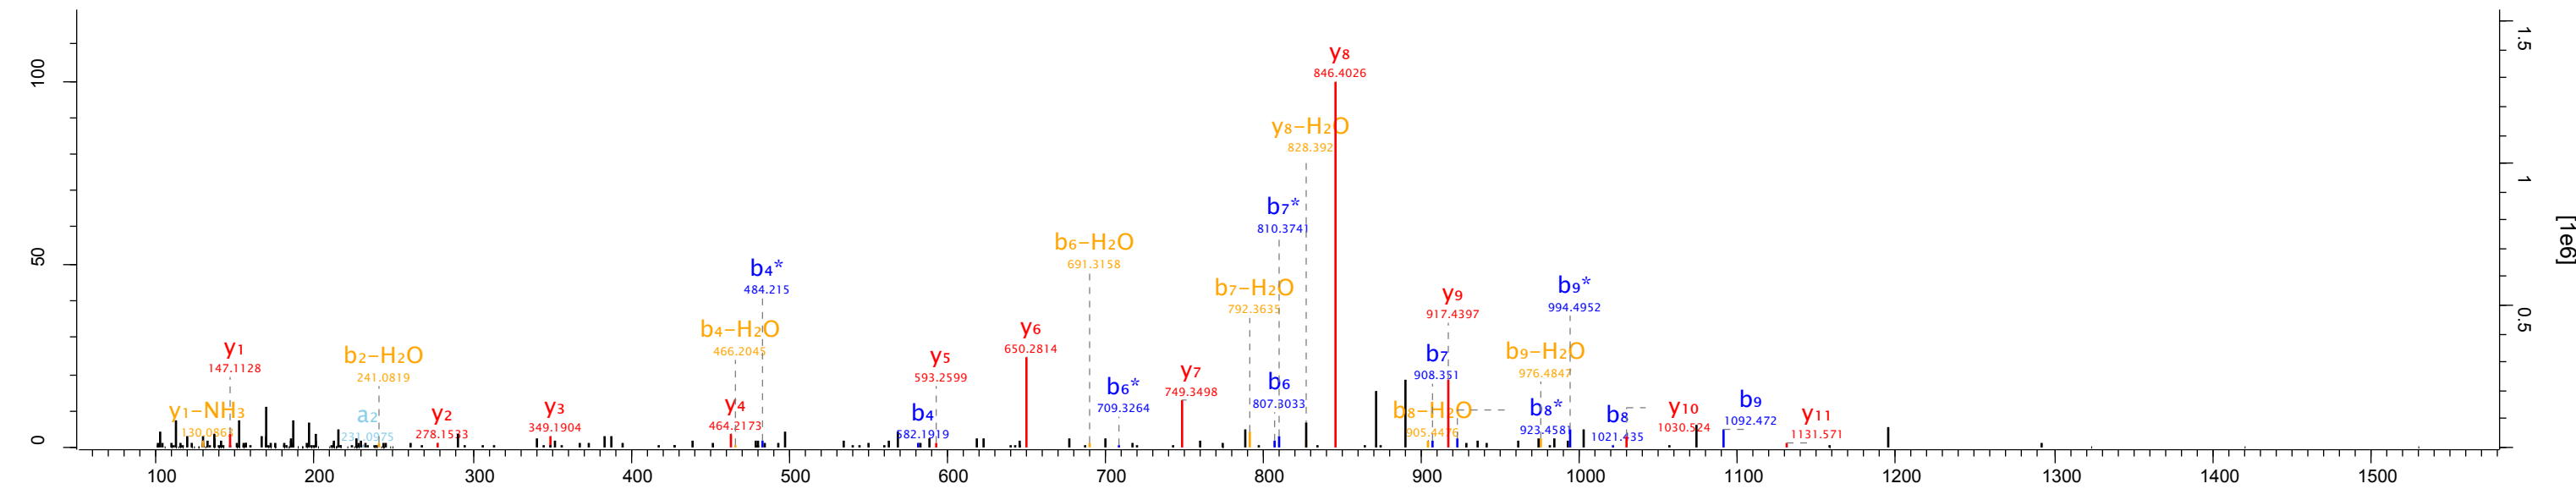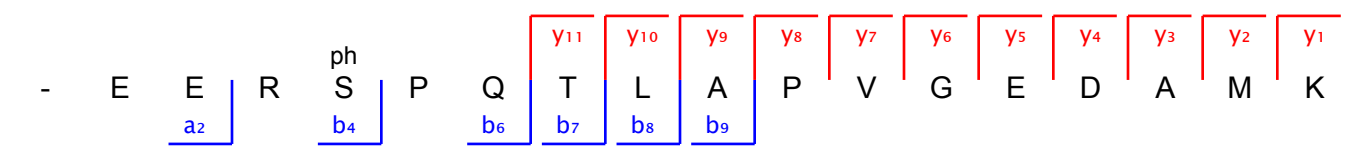

Raw file 20171215\_MaS\_33SR\_LMH\_phospho\_06 Scan 10291 Method FTMS; HCD Score 128.99 m/z 1131.47 Gene names MYH14

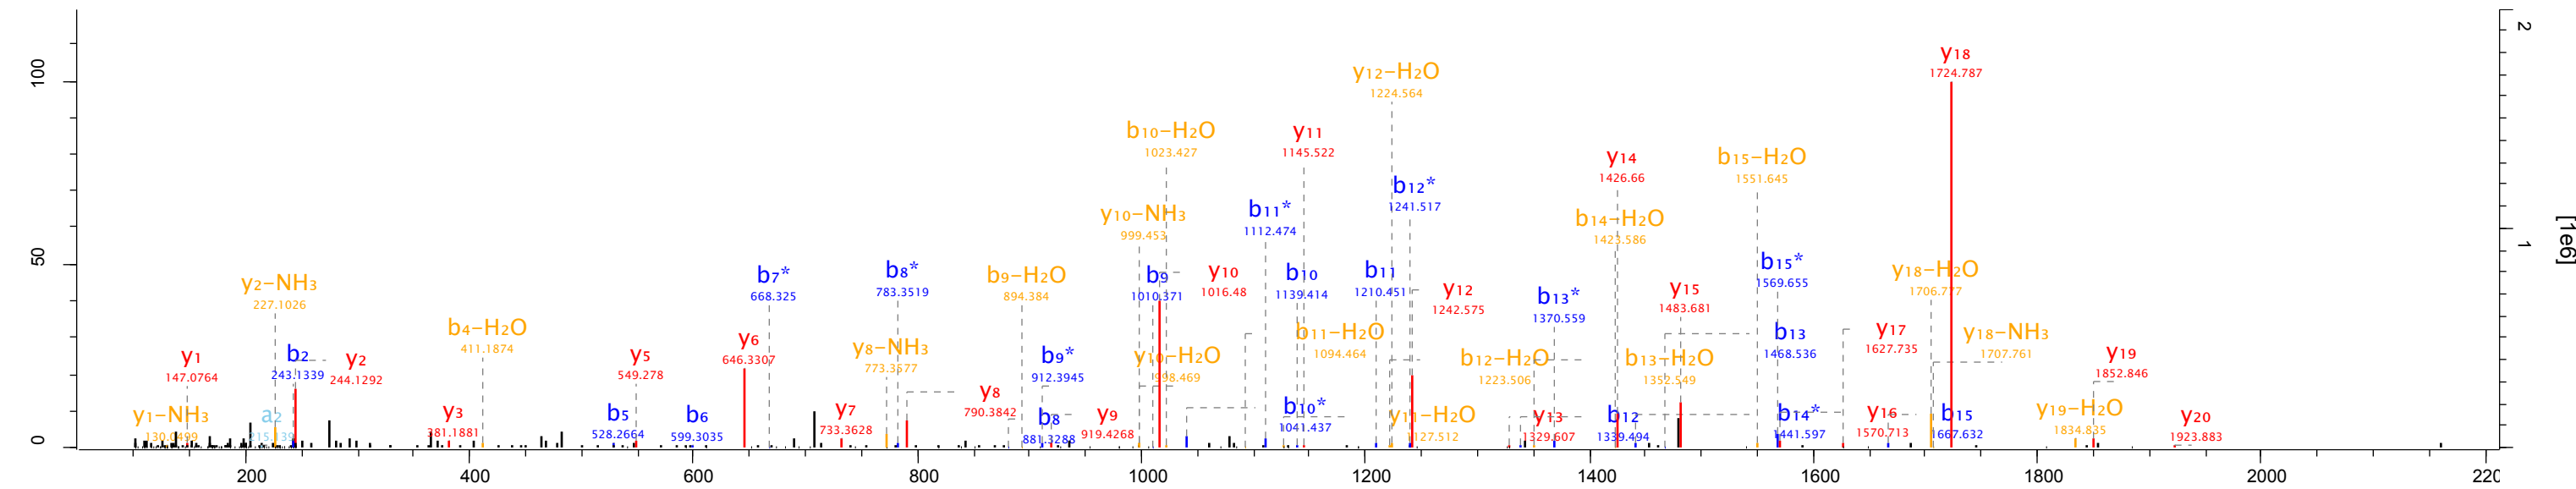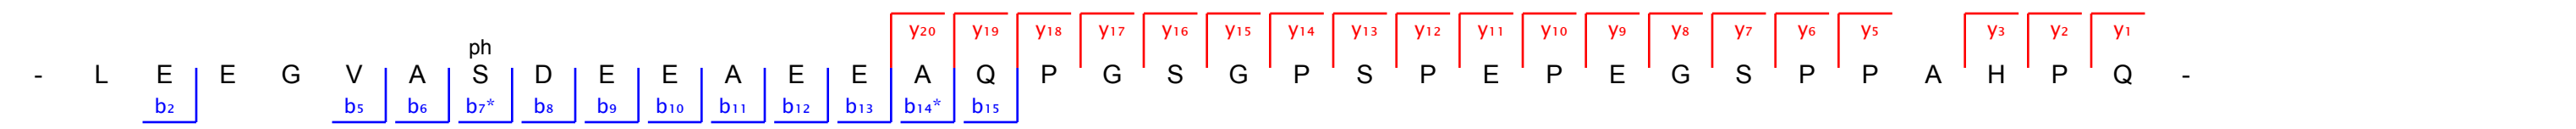

Raw file: 20171215\_MaS\_33SR\_LMH\_phospho\_06  
 Scan: 10351 Method: FTMS; HCD Score: 233.49 m/z: 911.86 Gene names: CDCA7L

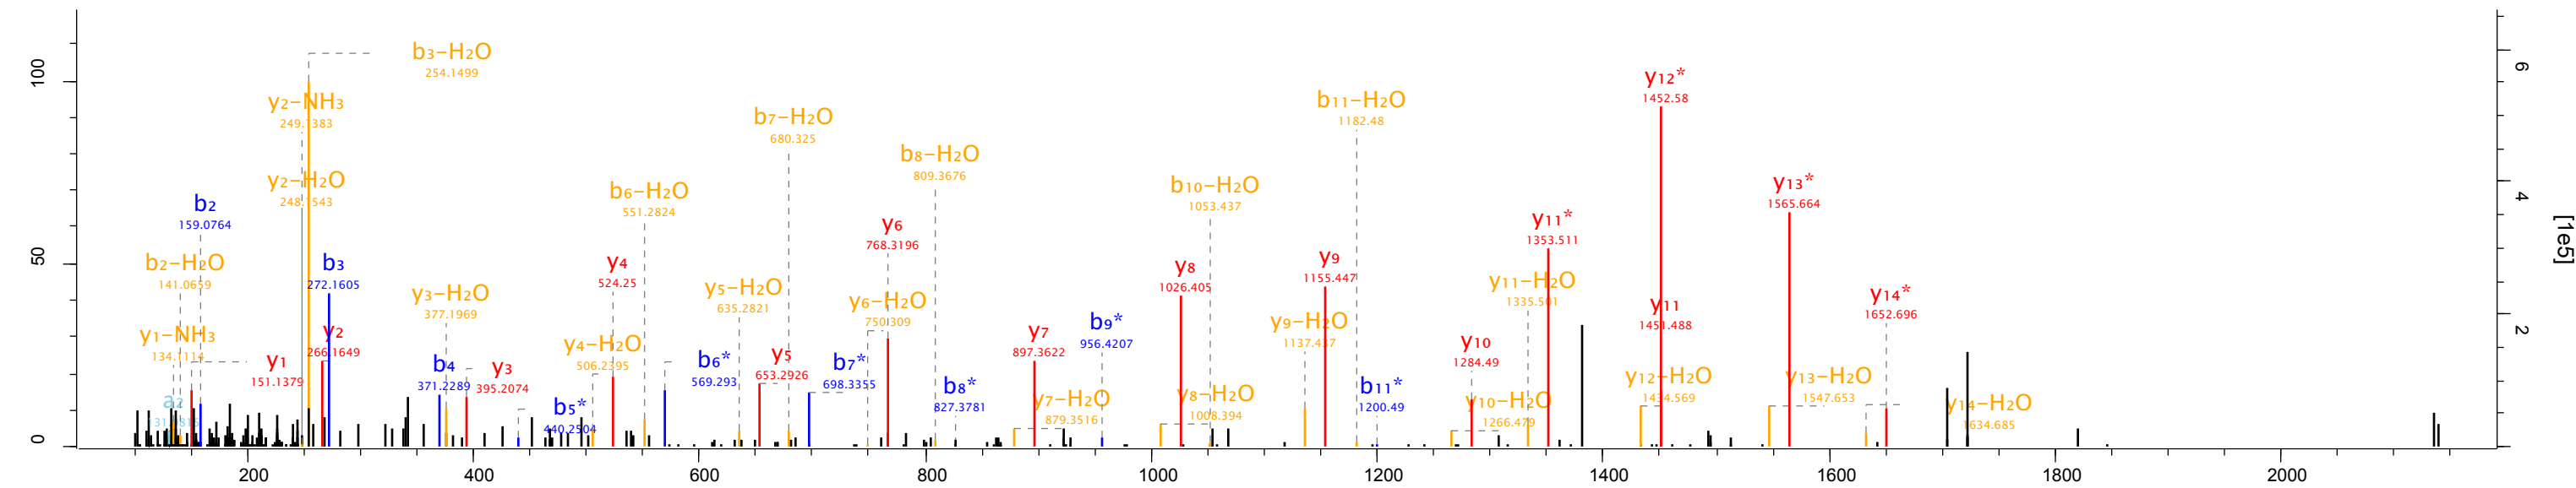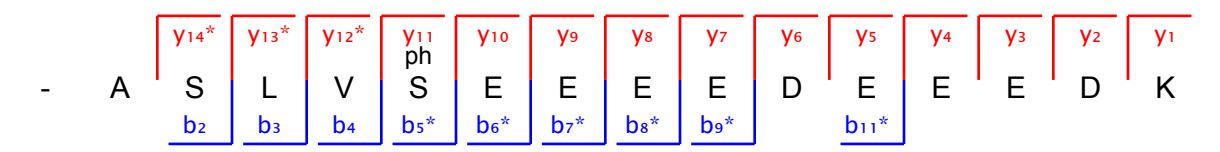

Raw file 20171215\_MaS\_33SR\_LMH\_phospho\_06 Scan 10491 Method FTMS; HCD Score 67.56 m/z 641.95 Gene names SUPT6H

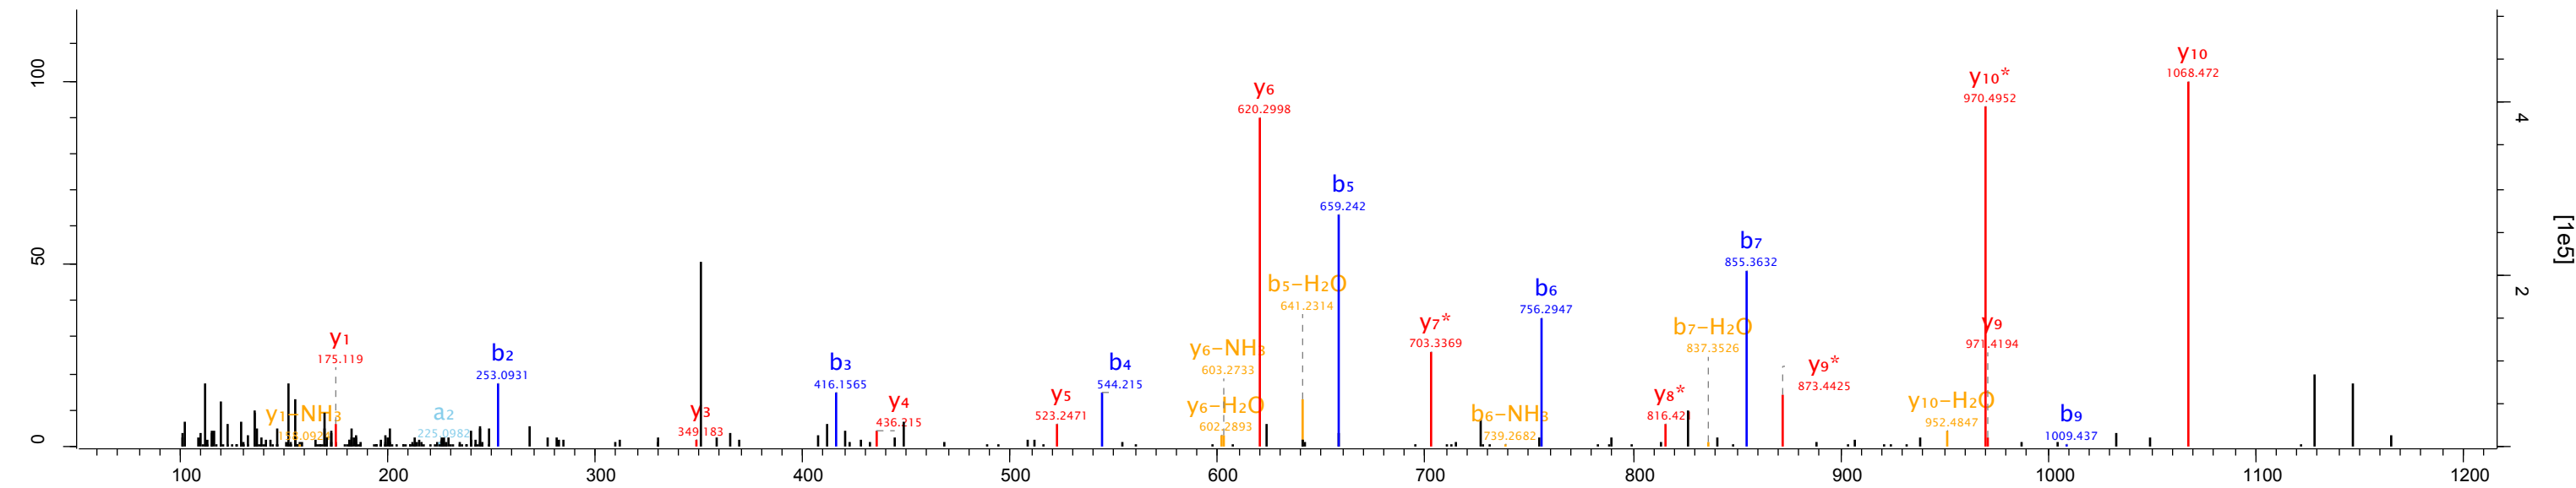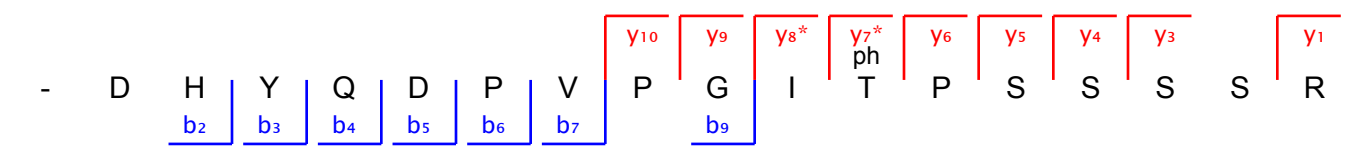

Raw file 20171215\_MaS\_33SR\_LMH\_phospho\_06 Scan 10771 Method FTMS; HCD Score 226.9 m/z 1099.02 Gene names NSUN2

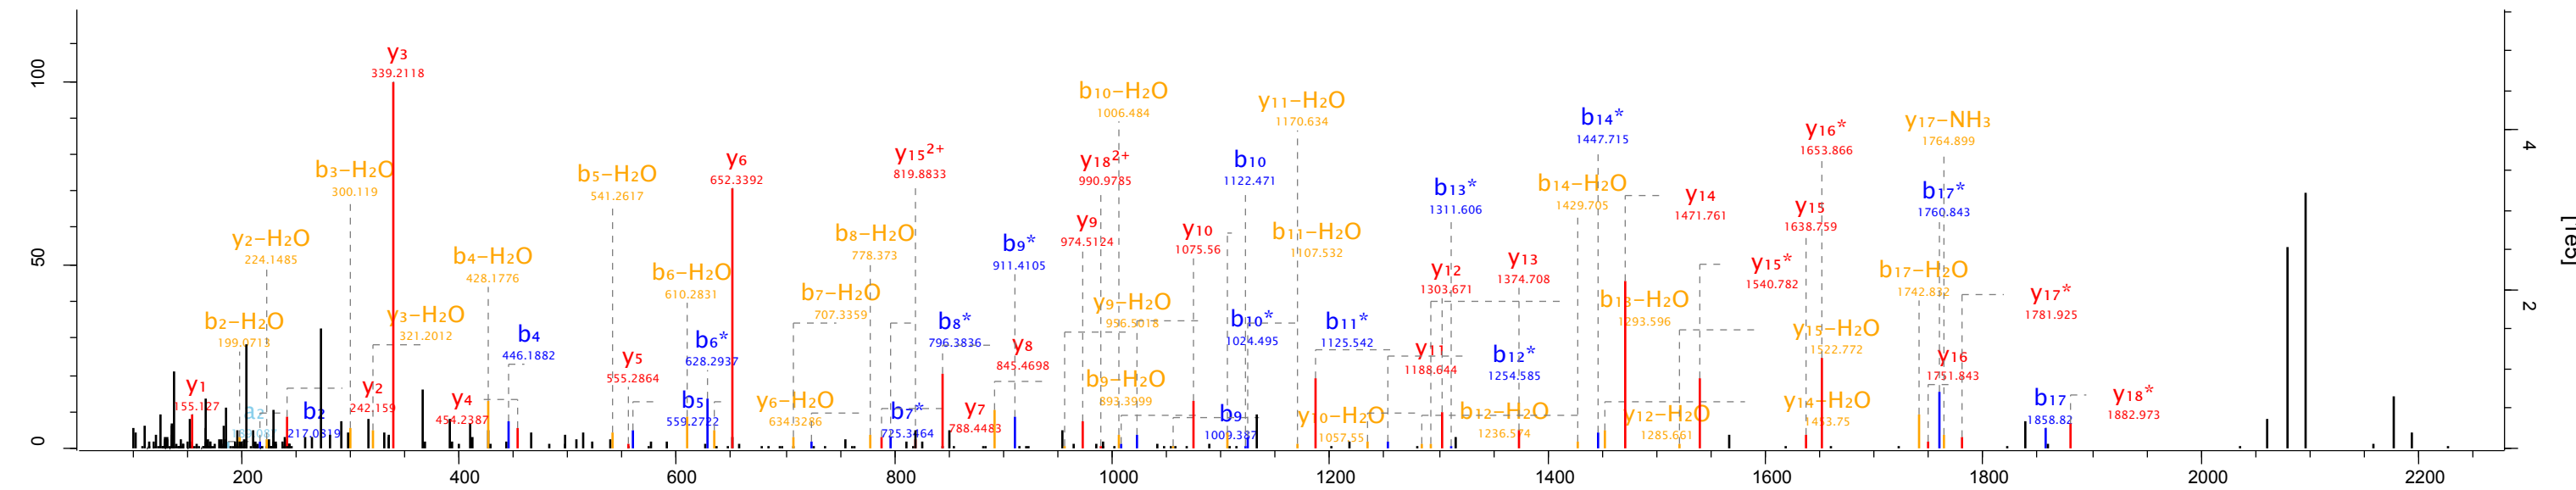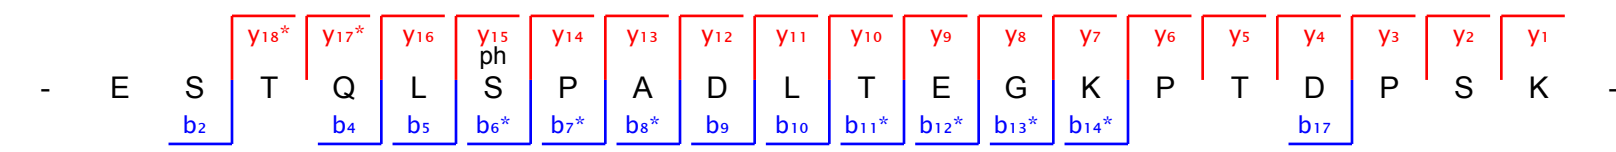

Raw file 20171215\_MaS\_33SR\_LMH\_phospho\_06 Scan 10851 Method FTMS; HCD Score 66.39 m/z 410.87 Gene names RBM15

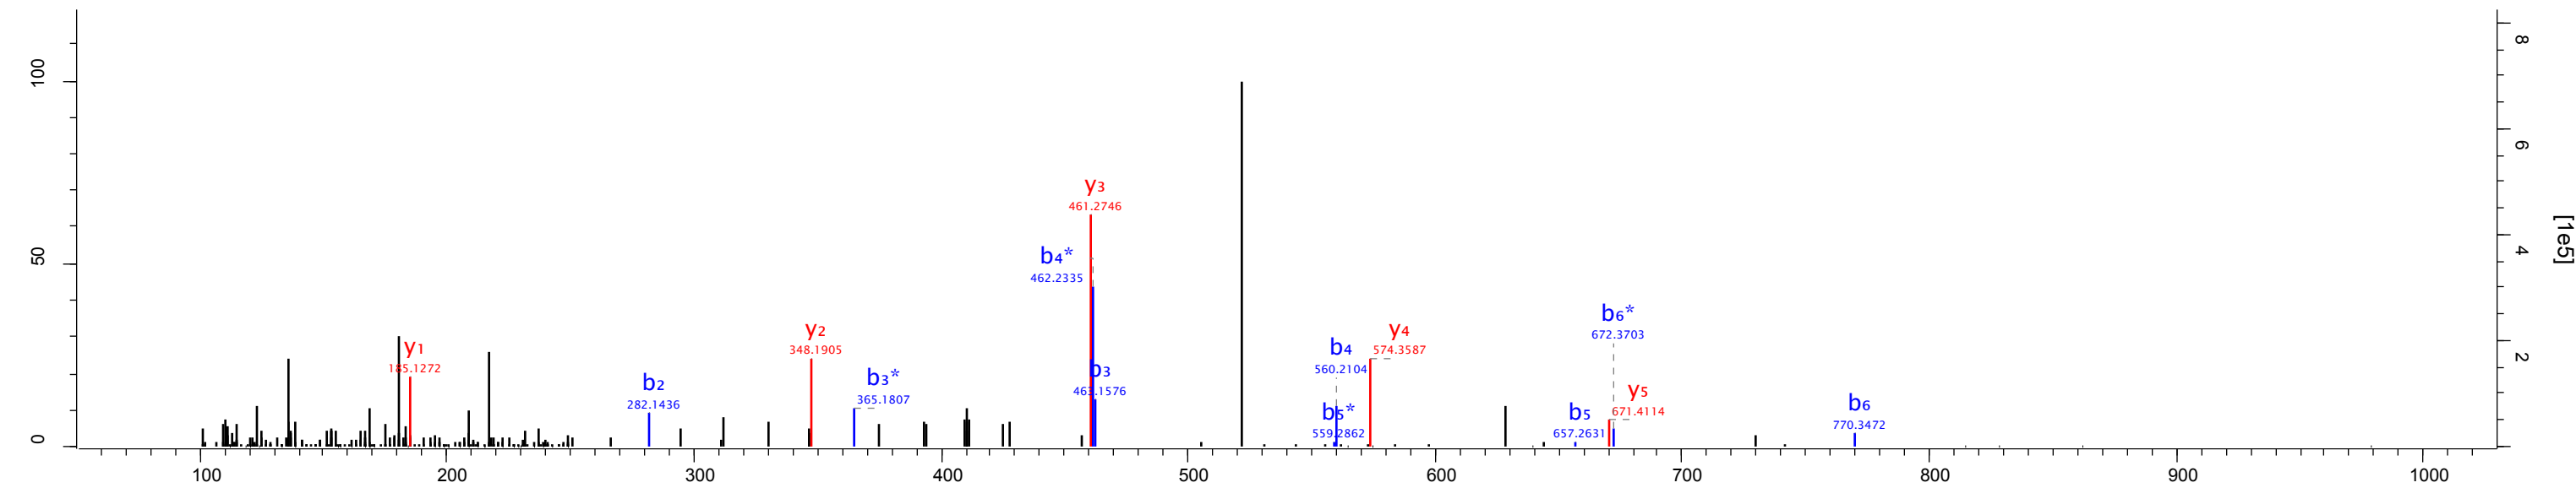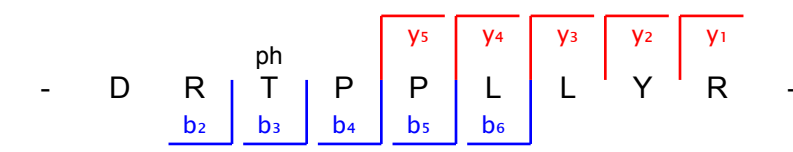

Raw file 20171215\_MaS\_33SR\_LMH\_phospho\_06 Scan 11131 Method FTMS; HCD Score 83.07 m/z 750.89 Gene names LRWD1

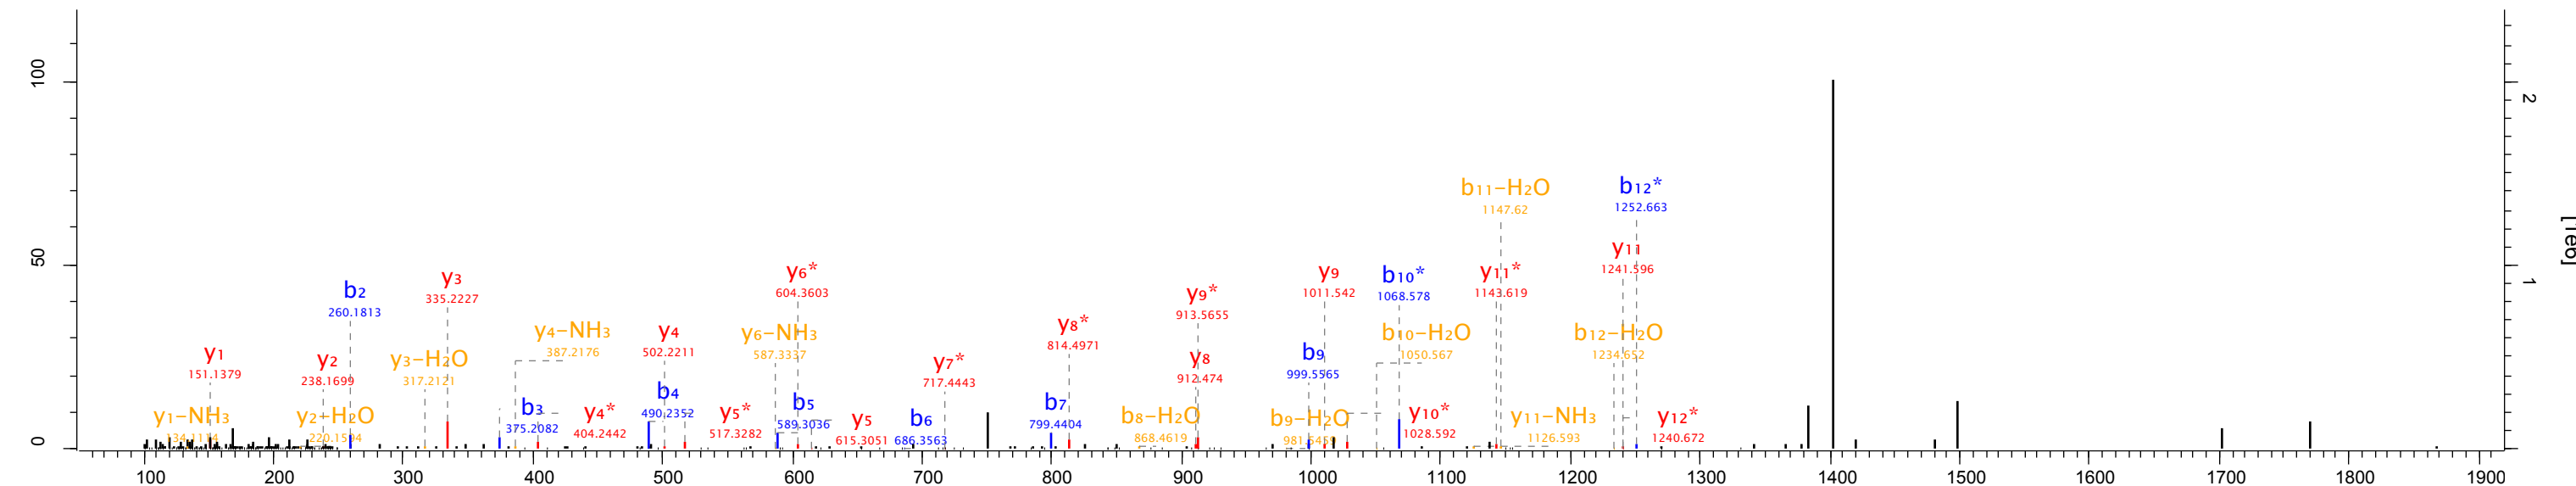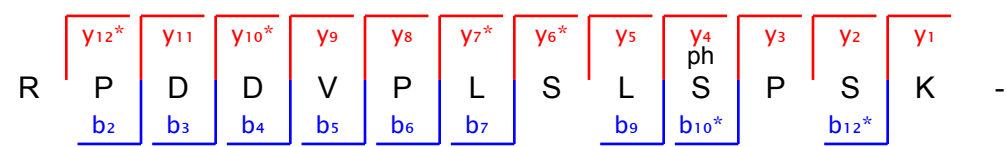



Raw file 20171215\_MaS\_33SR\_LMH\_phospho\_06 Scan 11521 Method FTMS; HCD Score 167.05 m/z 1110.15 Gene names SAMD4B

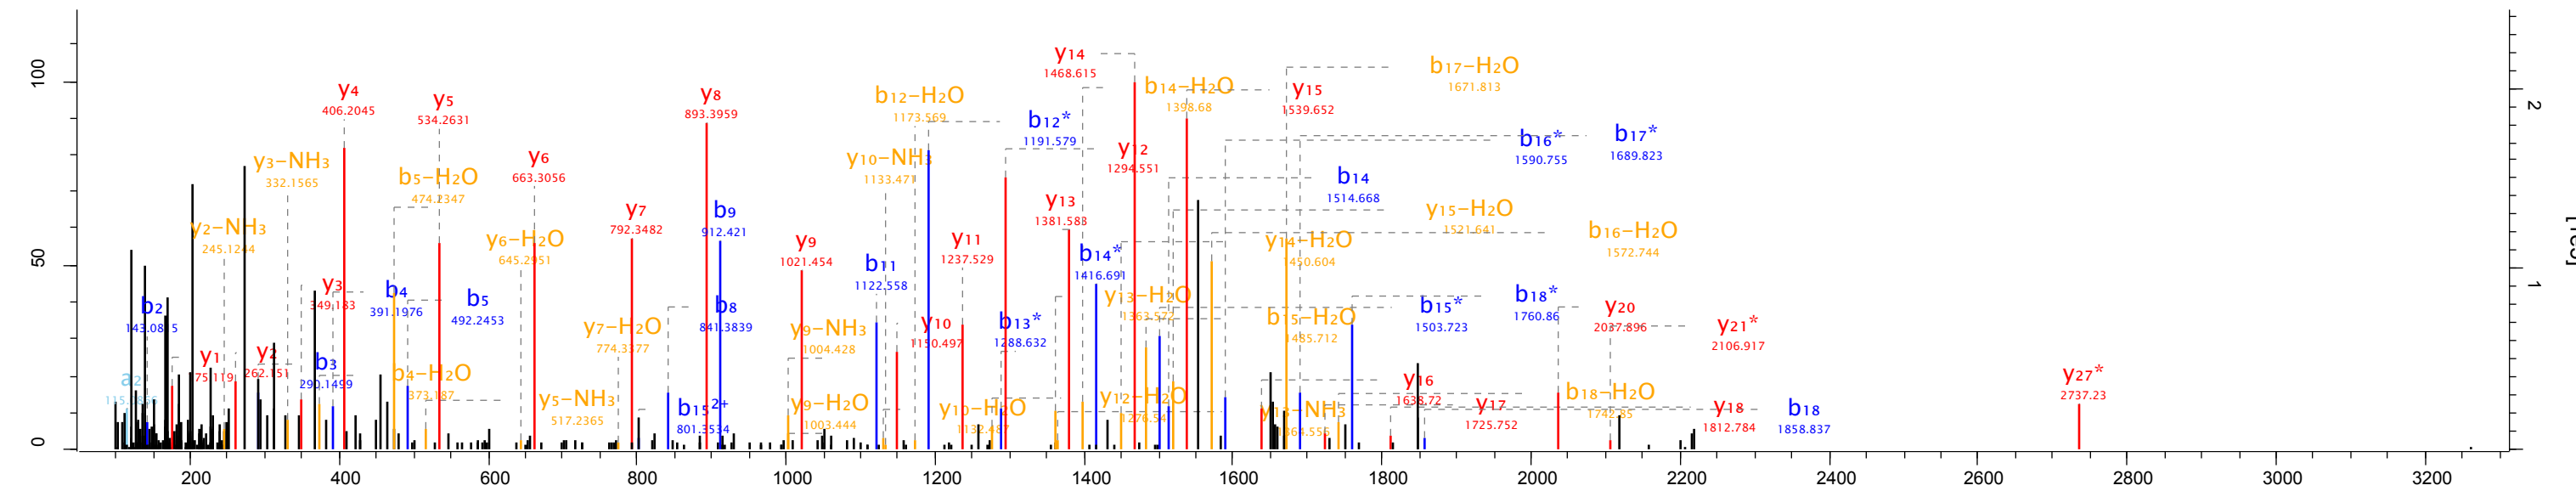

- A A F T T P D H A P L S P Q S S V A S S G S E Q T E E Q G S S R -

b<sub>2</sub>
b<sub>3</sub>
b<sub>4</sub>
b<sub>5</sub>
b<sub>8</sub>
b<sub>9</sub>
b<sub>11</sub>
b<sub>12</sub><sup>\*</sup>
b<sub>13</sub><sup>\*</sup>
b<sub>14</sub>
b<sub>15</sub><sup>\*</sup>
b<sub>16</sub><sup>\*</sup>
b<sub>17</sub><sup>\*</sup>
b<sub>18</sub>
y<sub>21</sub><sup>\*</sup>
y<sub>20</sub>
y<sub>18</sub>
y<sub>17</sub>
y<sub>16</sub>
y<sub>15</sub>
y<sub>14</sub>
y<sub>13</sub>
y<sub>12</sub>
y<sub>11</sub>
y<sub>10</sub>
y<sub>9</sub>
y<sub>8</sub>
y<sub>7</sub>
y<sub>6</sub>
y<sub>5</sub>
y<sub>4</sub>
y<sub>3</sub>
y<sub>2</sub>
y<sub>1</sub>
y<sub>27</sub><sup>\*</sup>

Raw file 20171215\_MaS\_33SR\_LMH\_phospho\_06 Scan 11681 Method FTMS; HCD Score 159.26 m/z 665.61 Gene names BCLAF1

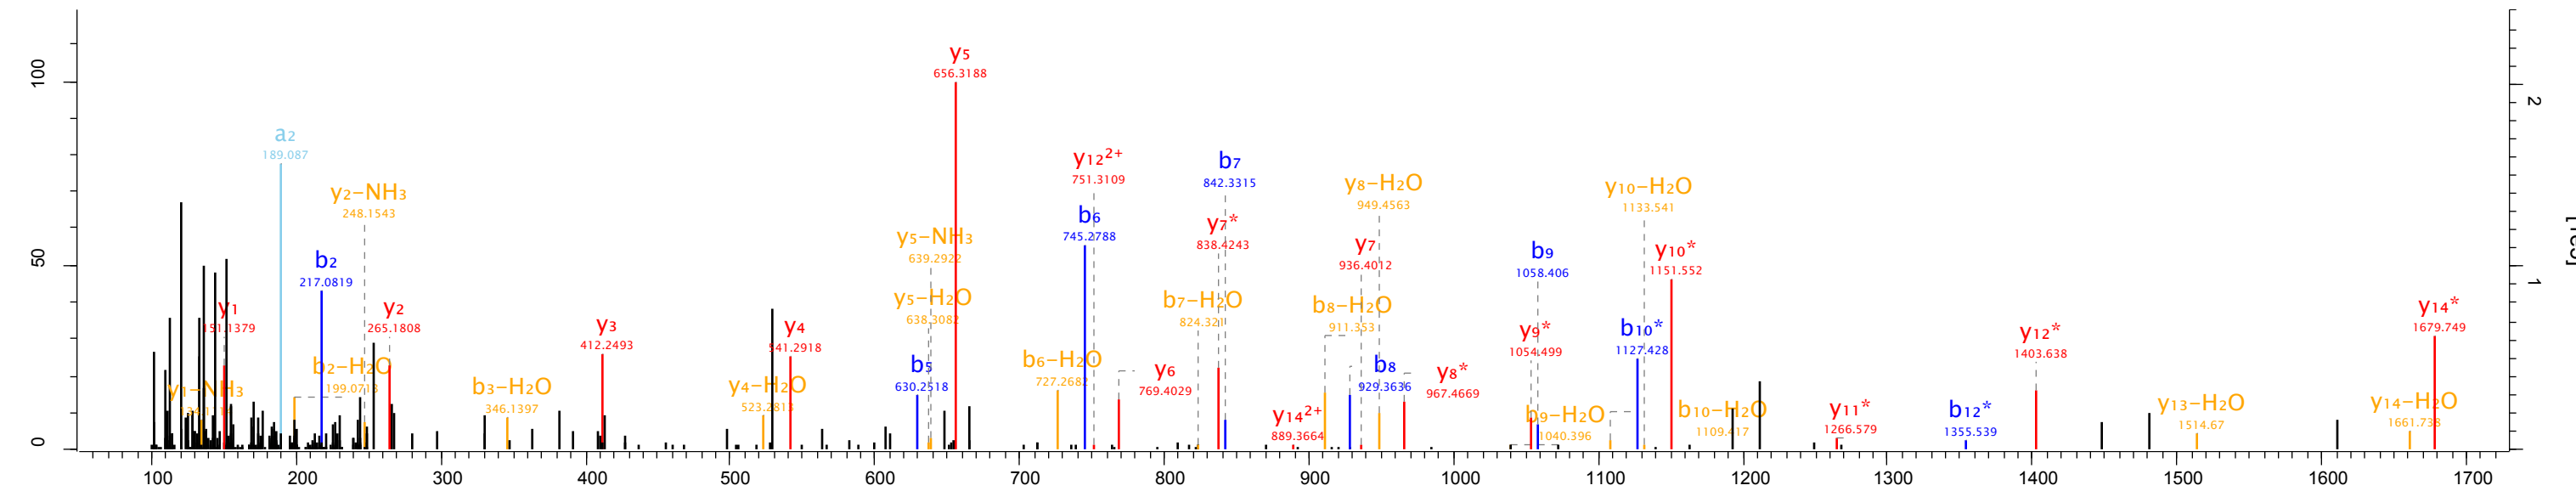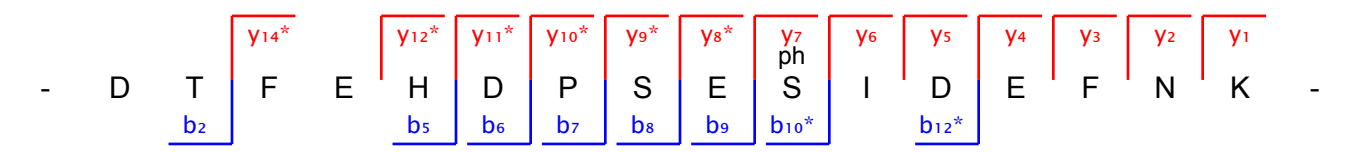

Raw file 20171215\_MaS\_33SR\_LMH\_phospho\_06 Scan 11711 Method FTMS; HCD Score 138.49 m/z 734.35 Gene names TP53BP1

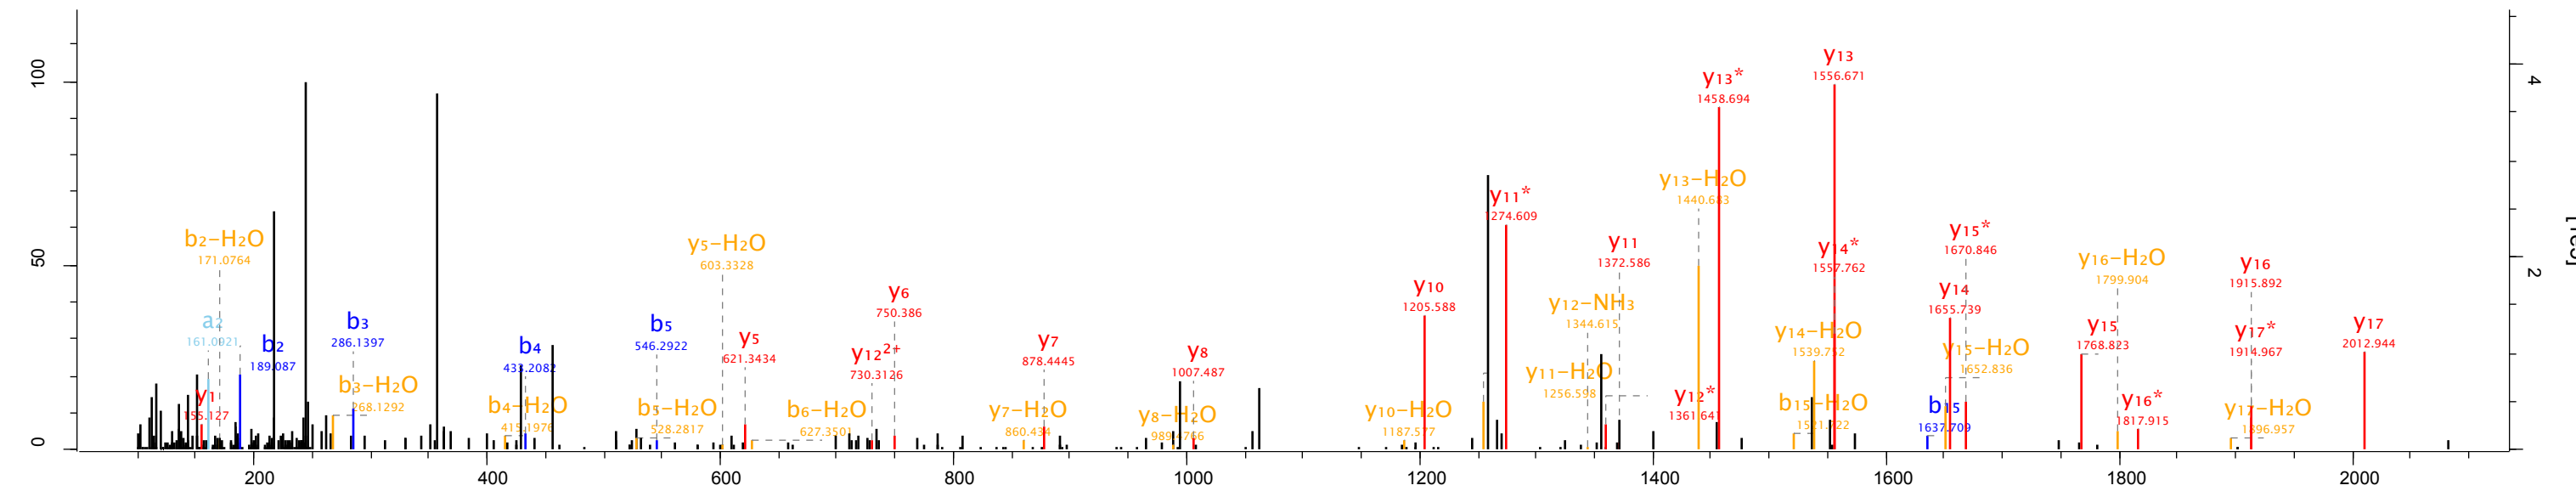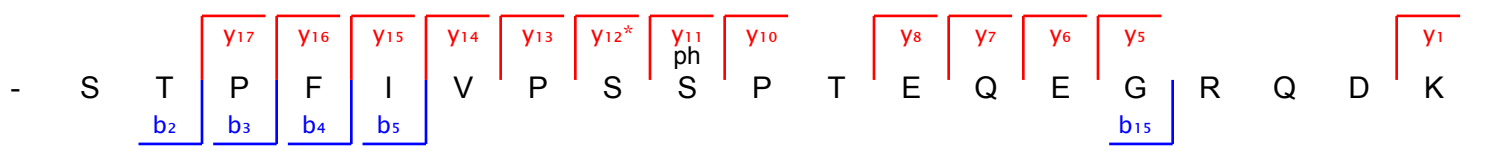

Raw file 20171215\_MaS\_33SR\_LMH\_phospho\_06 Scan 11811 Method FTMS; HCD Score 97.8 m/z 858.38 Gene names CTNNB1

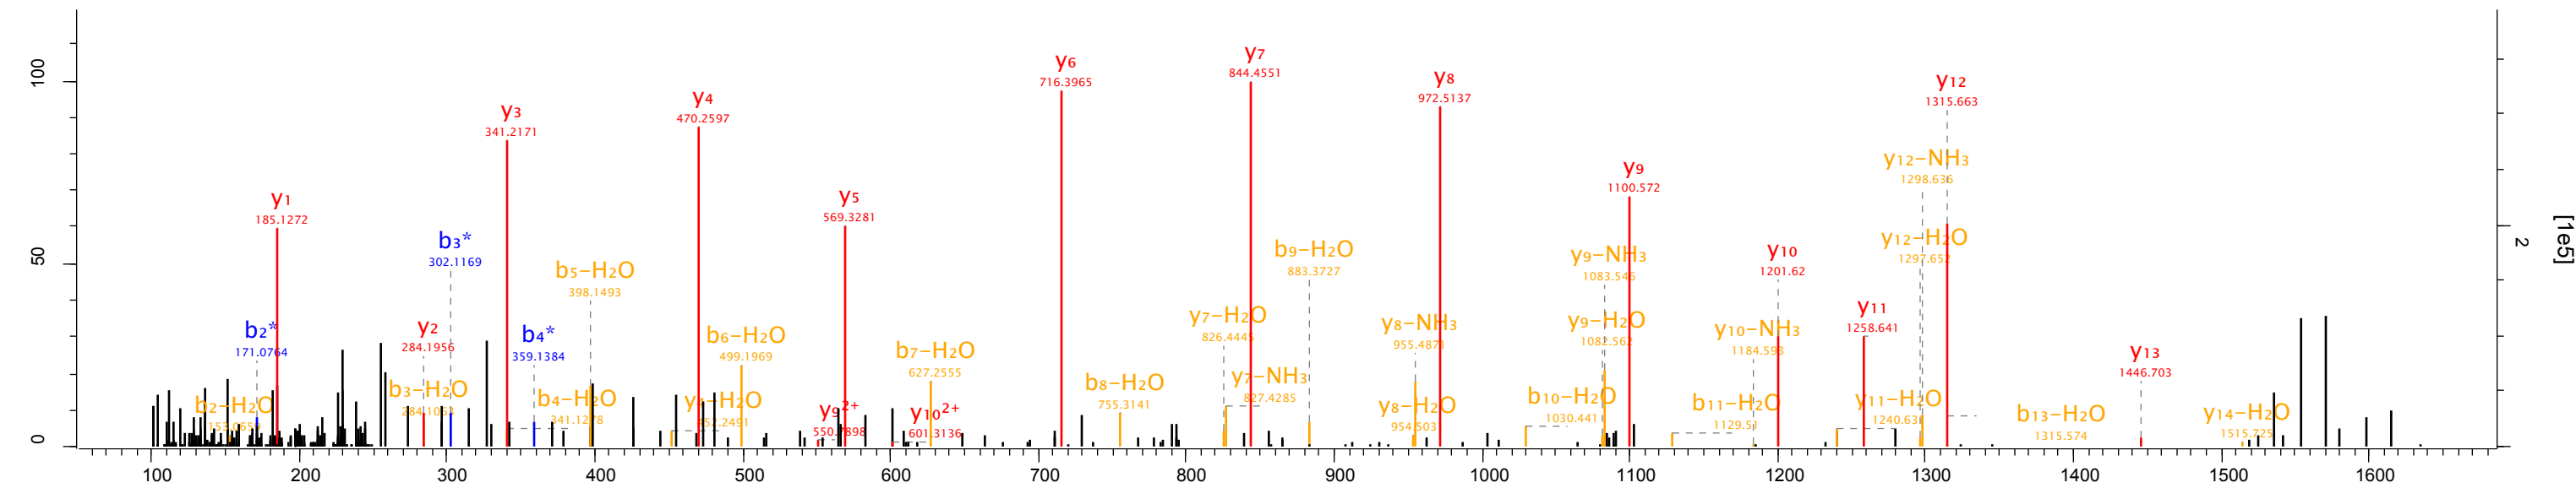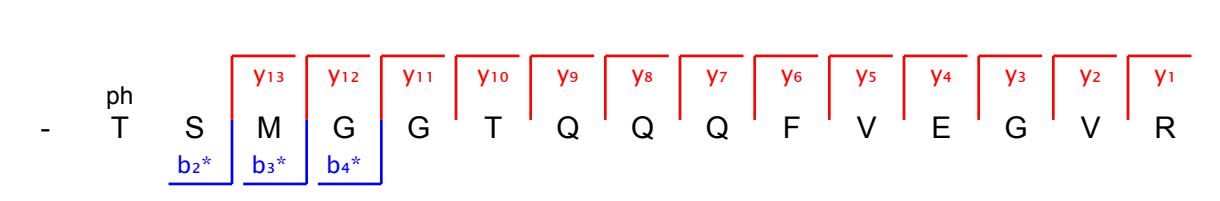

Raw file 20171215\_MaS\_33SR\_LMH\_phospho\_06 Scan 11941 Method FTMS; HCD Score 116.9 m/z 631.8 Gene names SOWAHC

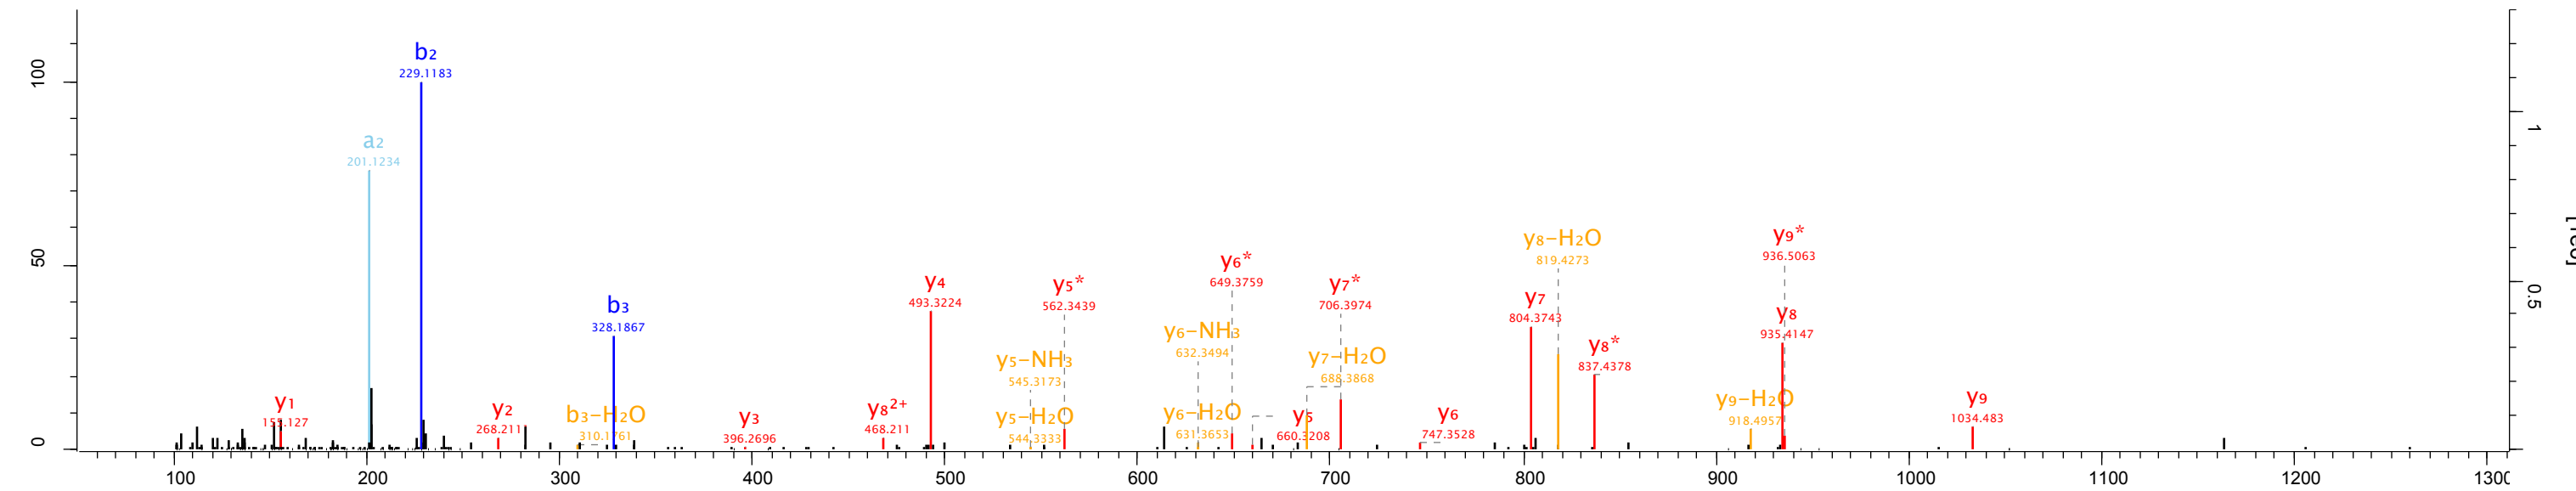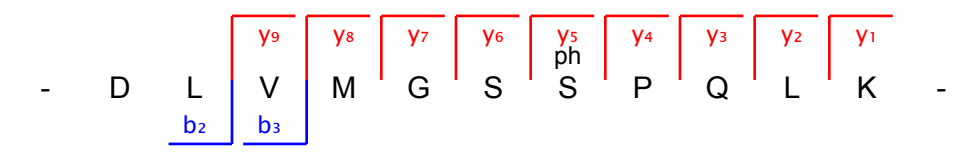

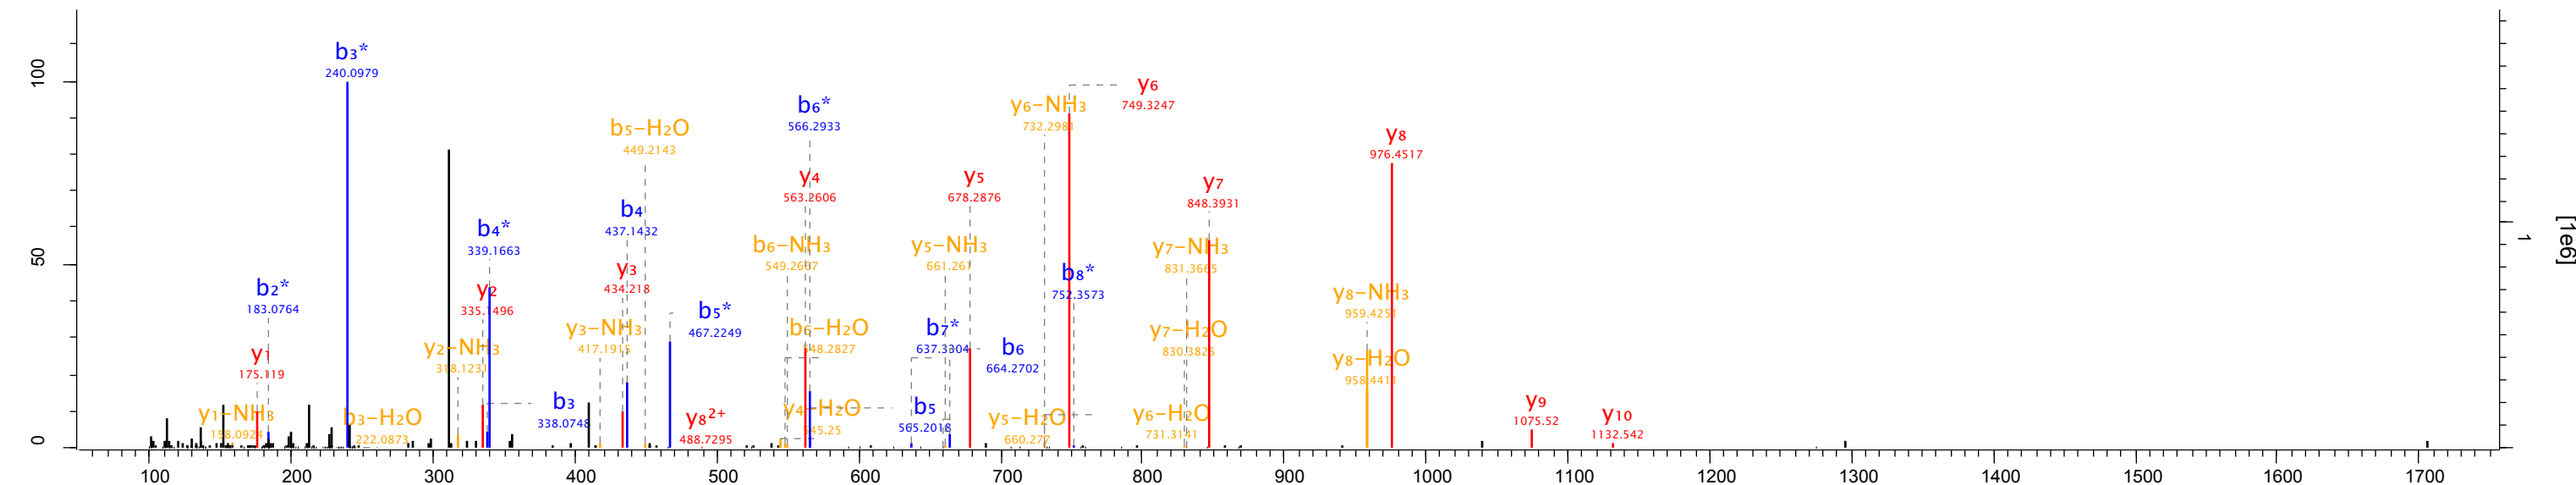

ac

-

A

ph

S

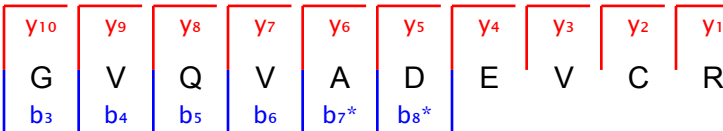

Raw file: 20171215\_MaS\_33SR\_LMH\_phospho\_06  
 Scan: 12191 Method: FTMS; HCD Score: 87.42 m/z: 761.02 Gene names: CHAF1A

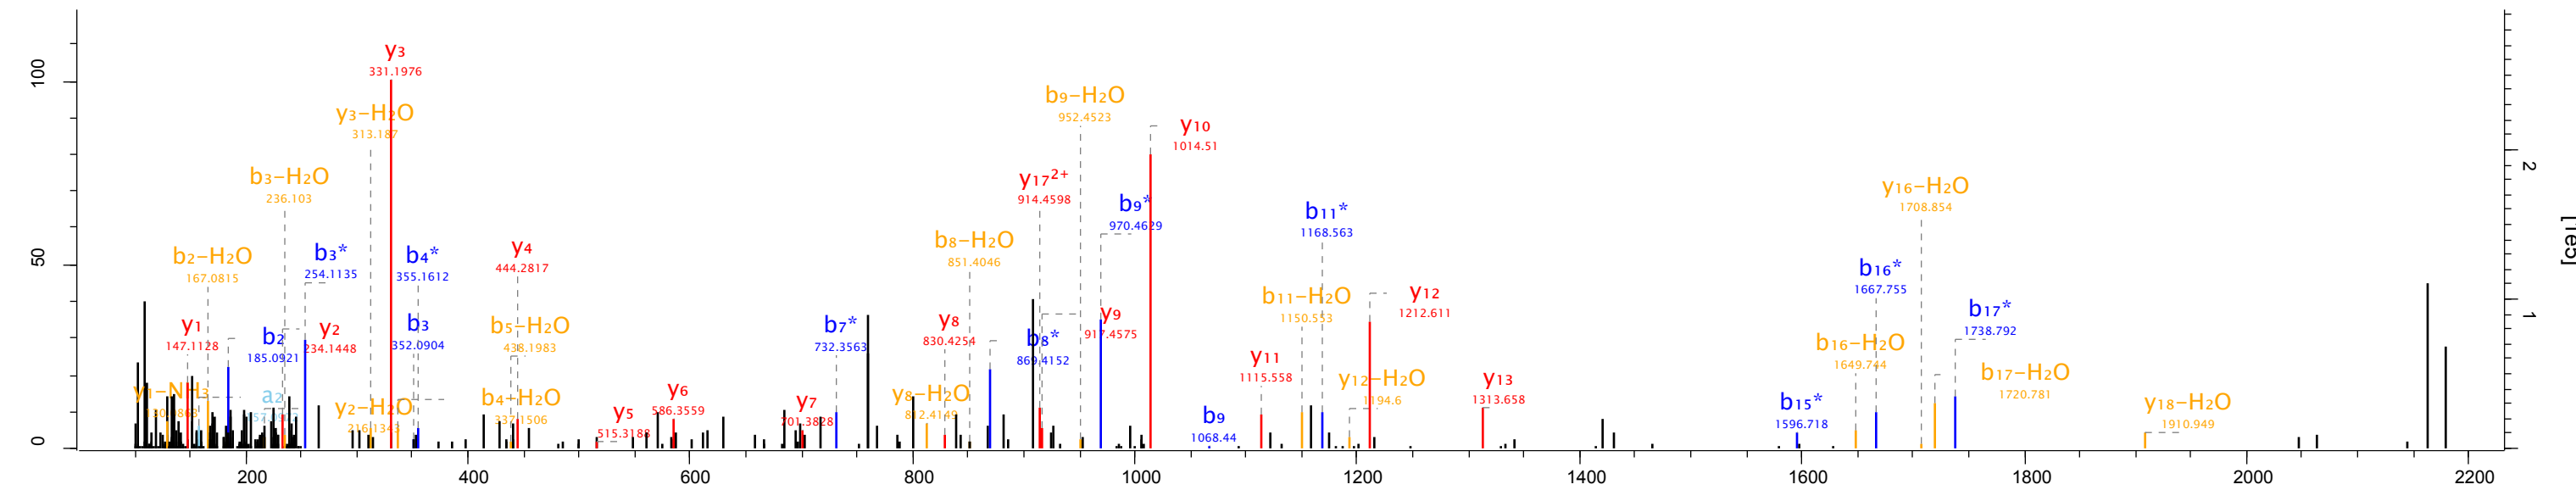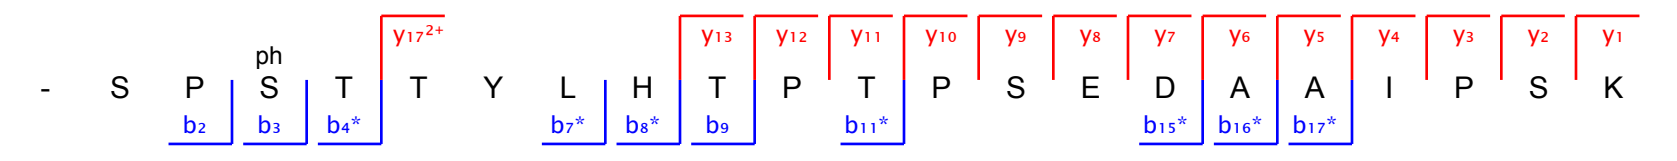

Raw file 20171215\_MaS\_33SR\_LMH\_phospho\_06 Scan 12301 Method FTMS; HCD Score 158 m/z 917.94 Gene names USP42

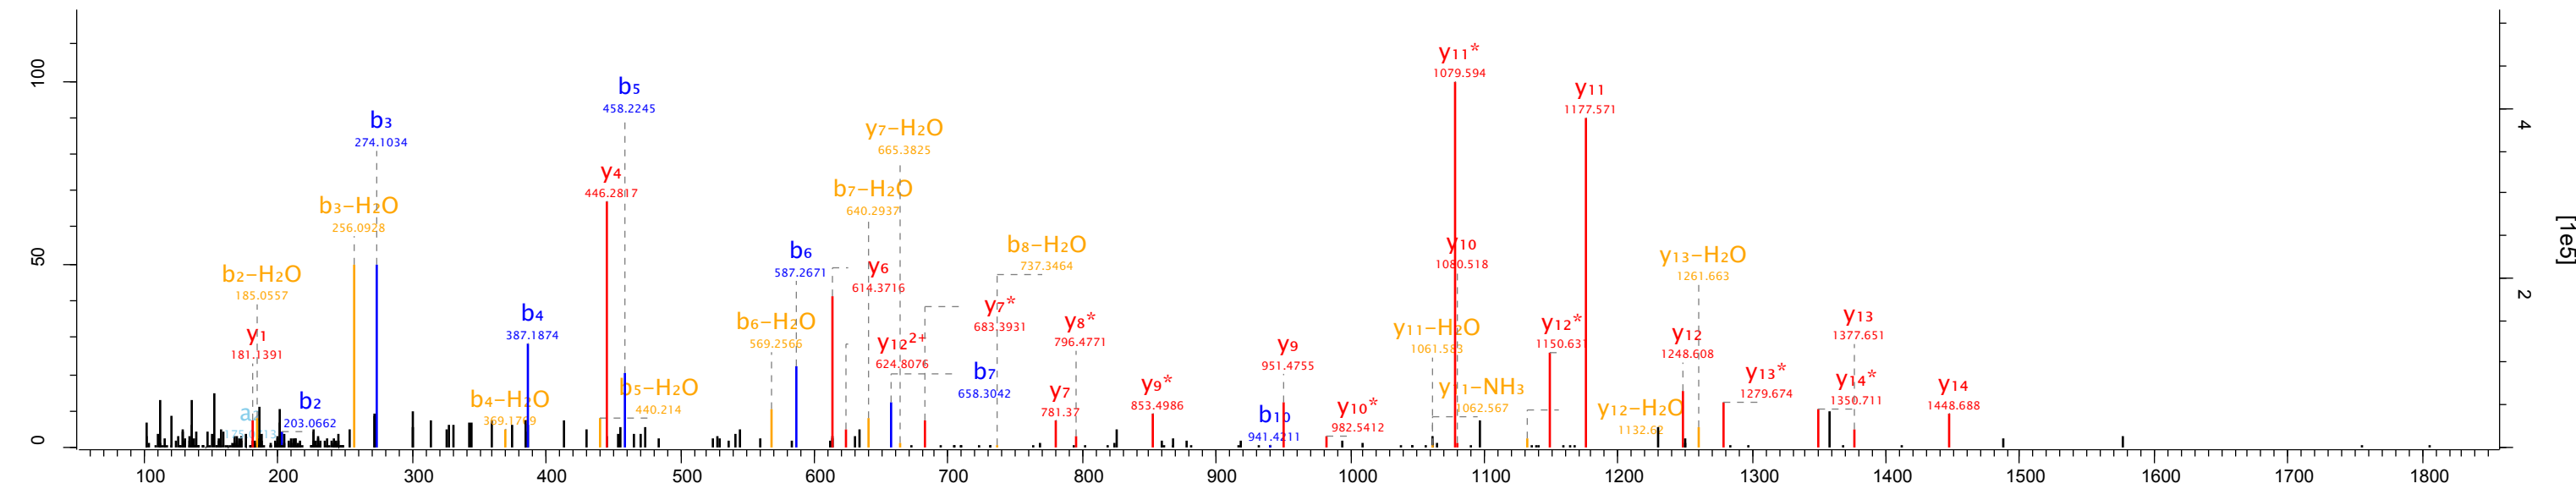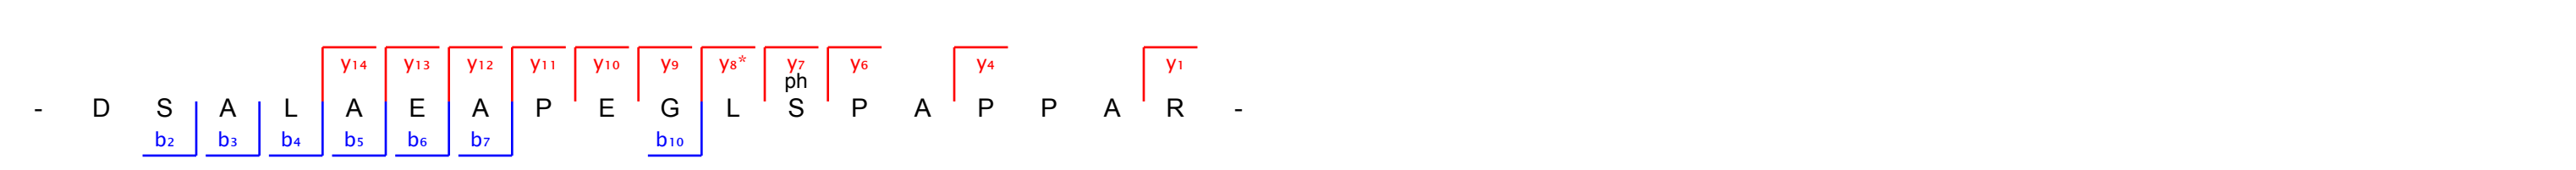



Raw file 20171215\_MaS\_33SR\_LMH\_phospho\_06 Scan 12461 Method FTMS; HCD Score 115.93 m/z 1043.84 Gene names PHLDA2

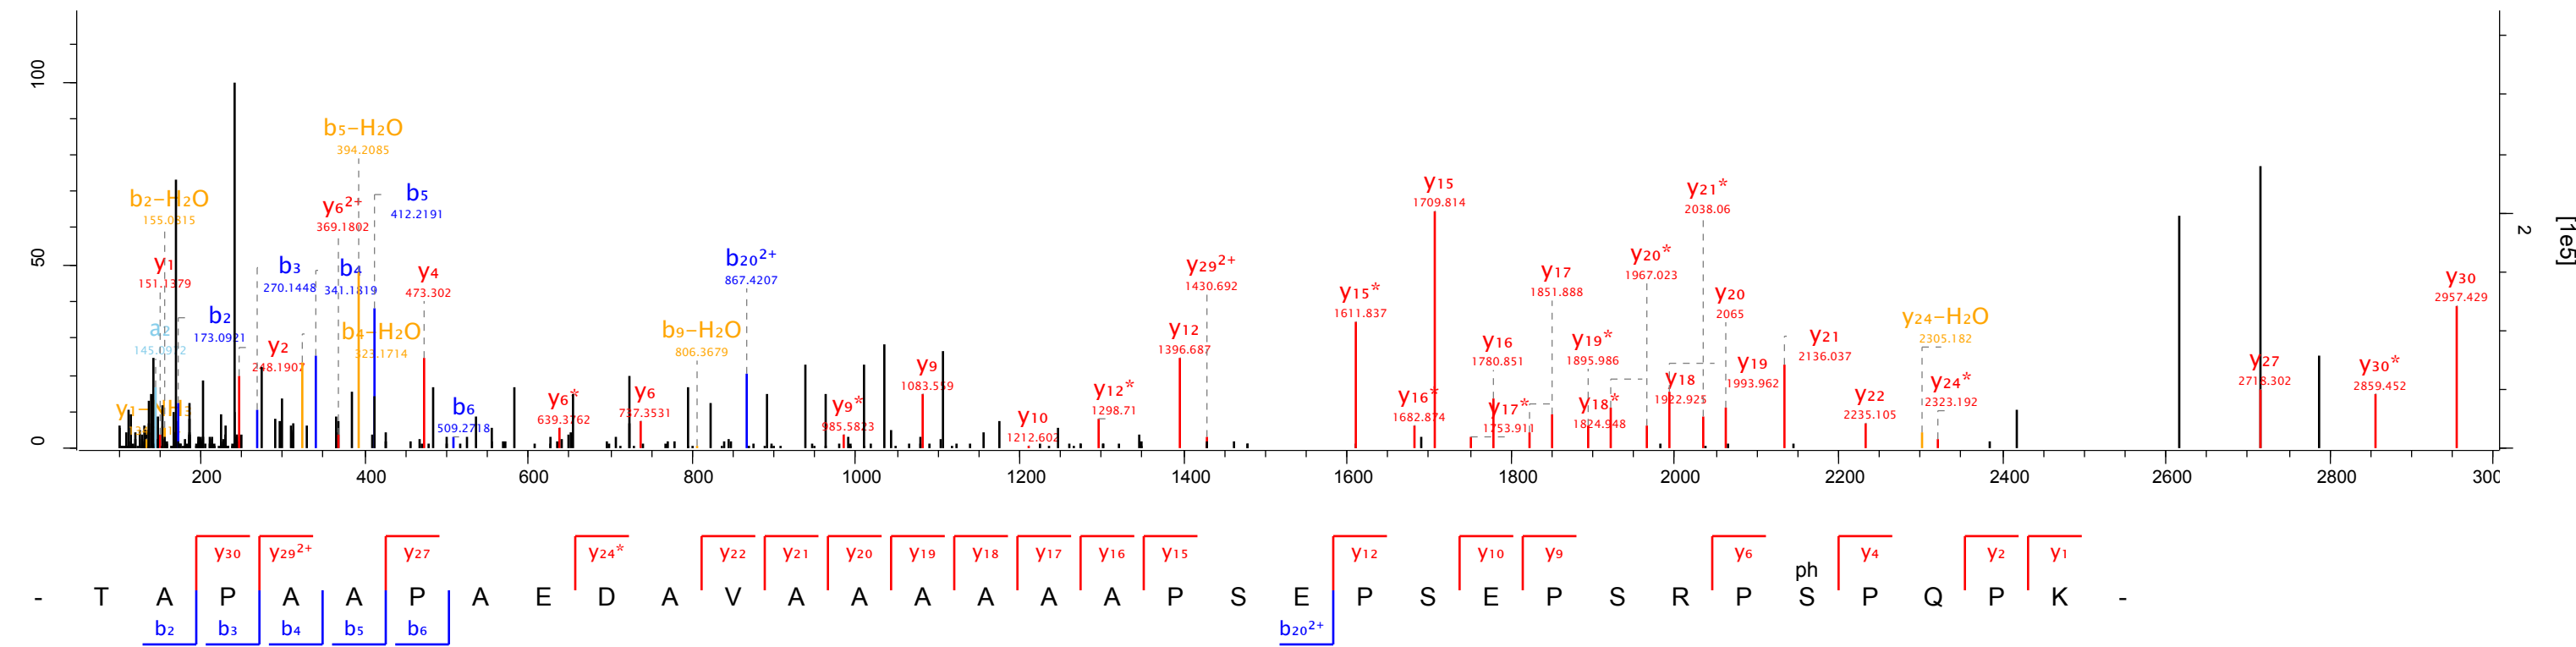

Raw file 20171215\_MaS\_33SR\_LMH\_phospho\_06 Scan 12501 Method FTMS; HCD Score 63.73 m/z 606.25 Gene names FRYL

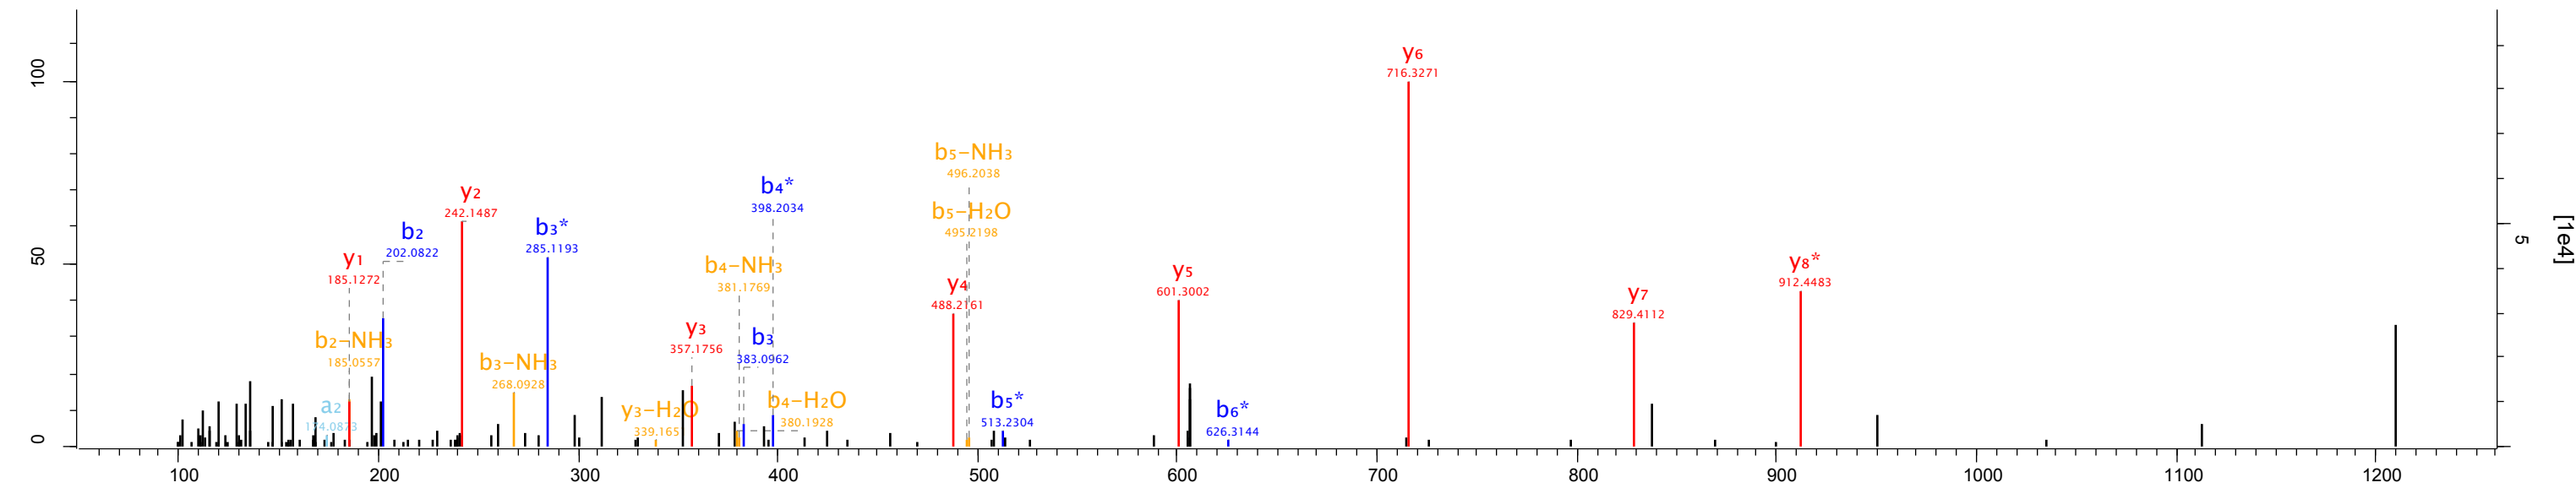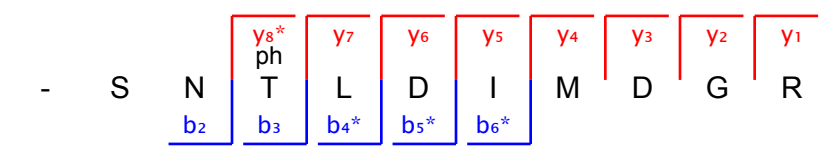

[1e4]



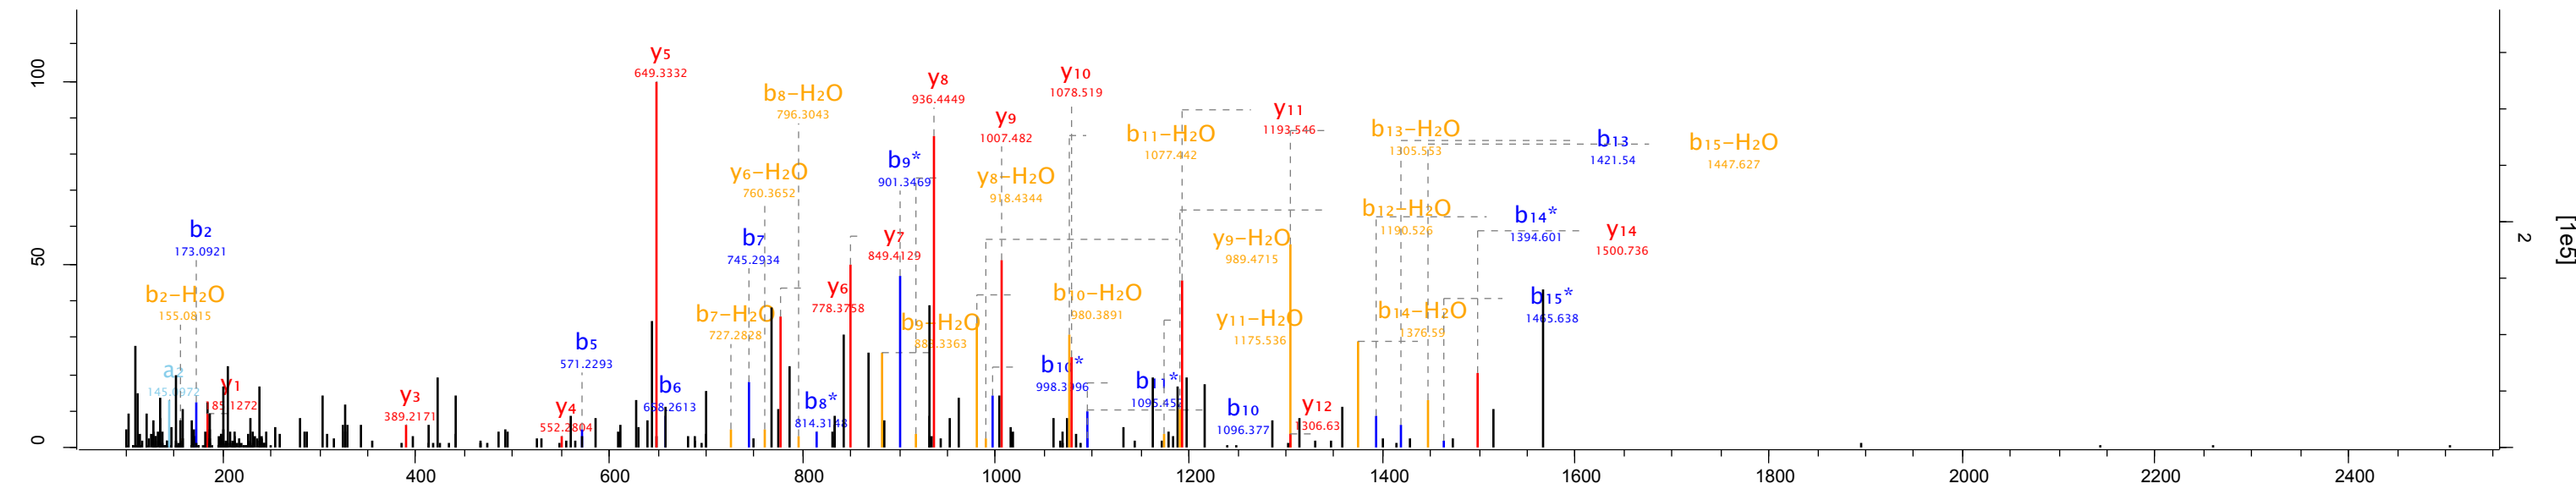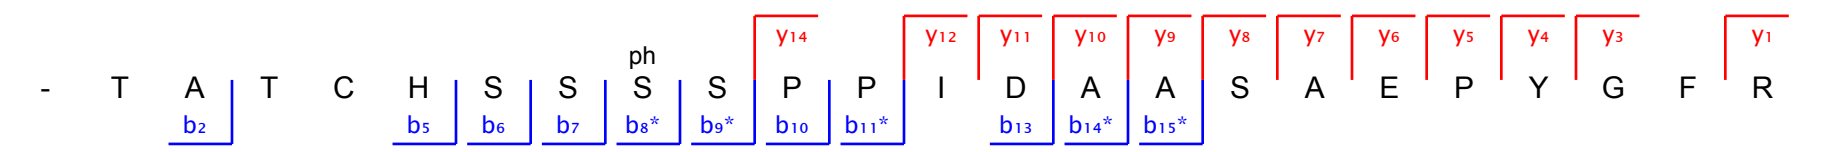

Raw file: 20171215\_MaS\_33SR\_LMH\_phospho\_06  
 Scan: 12931 Method: FTMS; HCD Score: 155.91 m/z: 820.37 Gene names: AKAP12

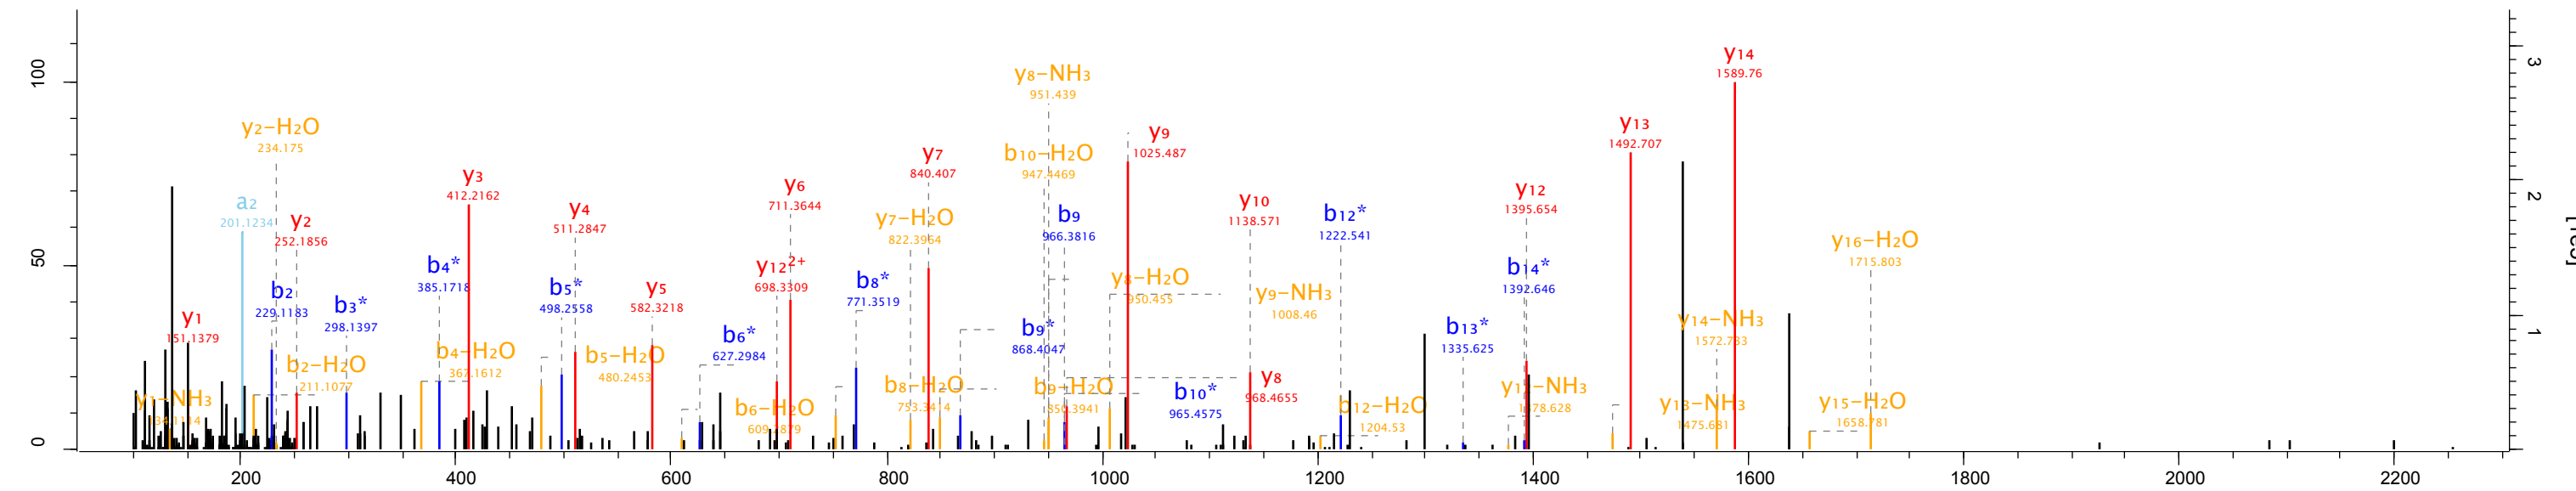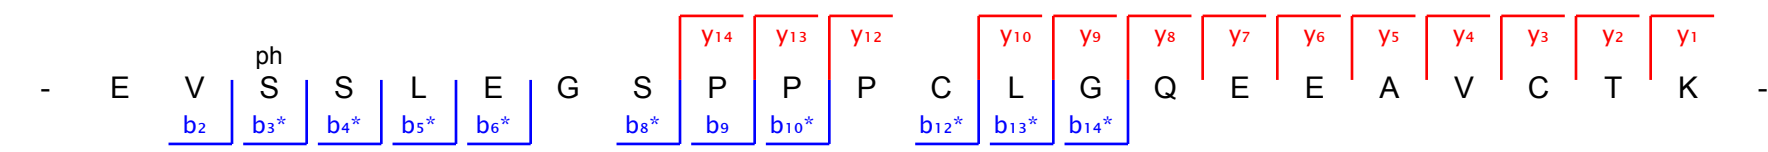

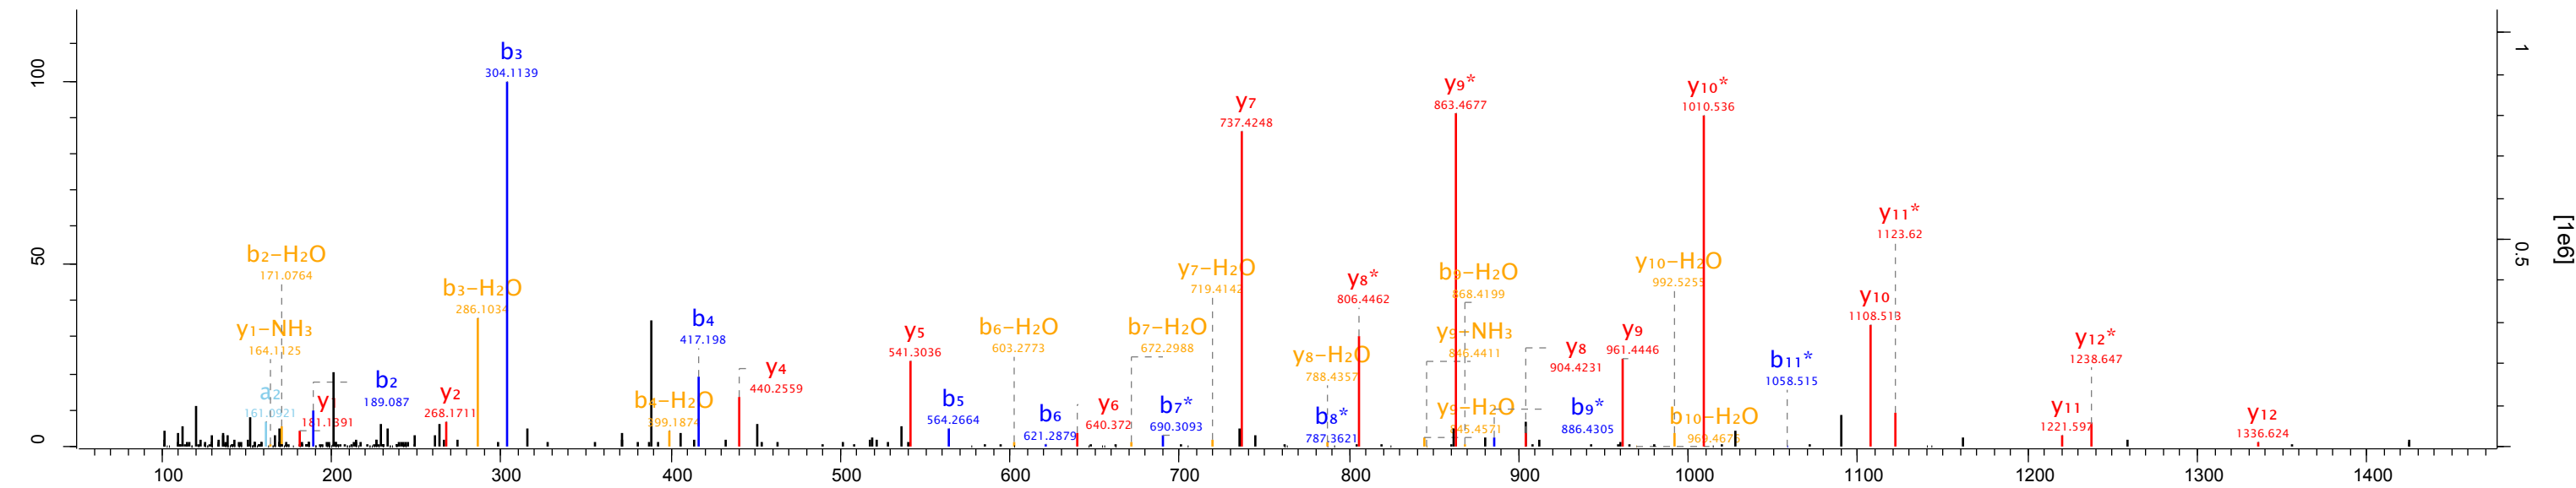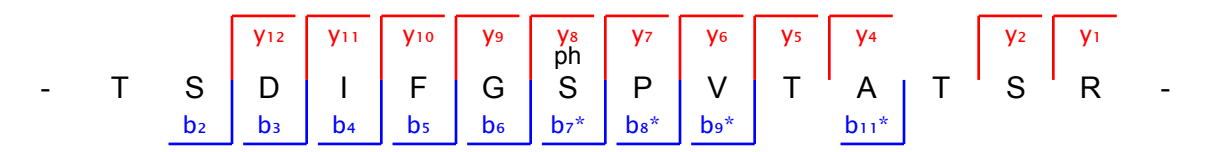

Raw file: 20171215\_MaS\_33SR\_LMH\_phospho\_06  
 Scan: 13141 Method: FTMS; HCD Score: 154.55 m/z: 826.36 Gene names: NAGK

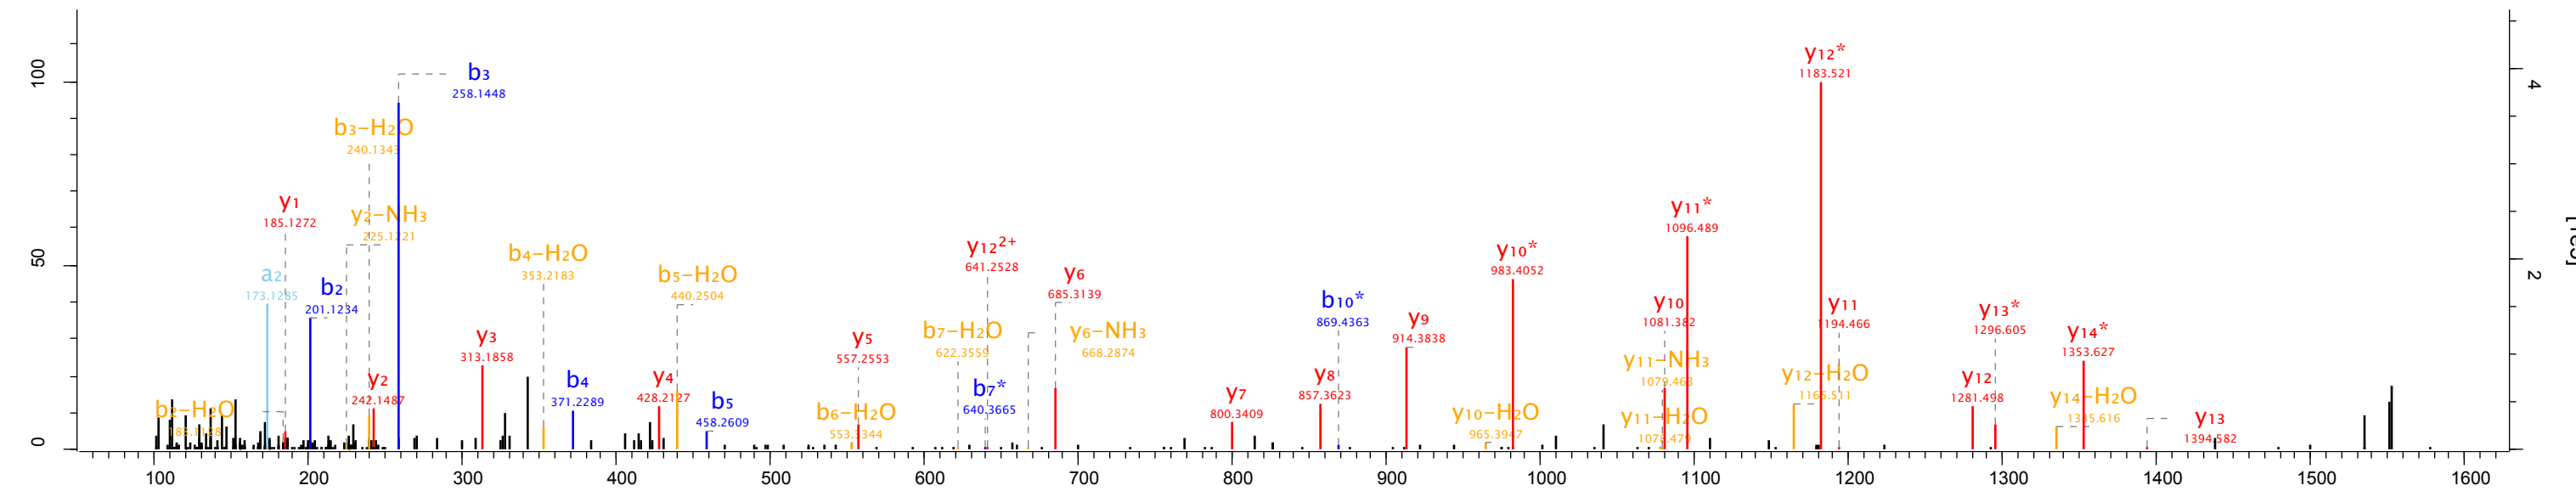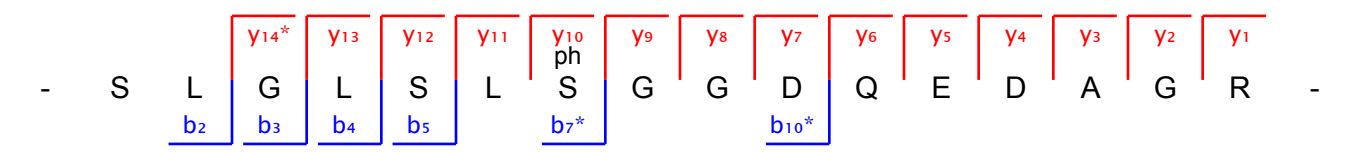

20171215\_MaS\_33SR\_LMH\_phospho\_06 13251 FTMS; HCD 235.07 903.76 NUFIP1

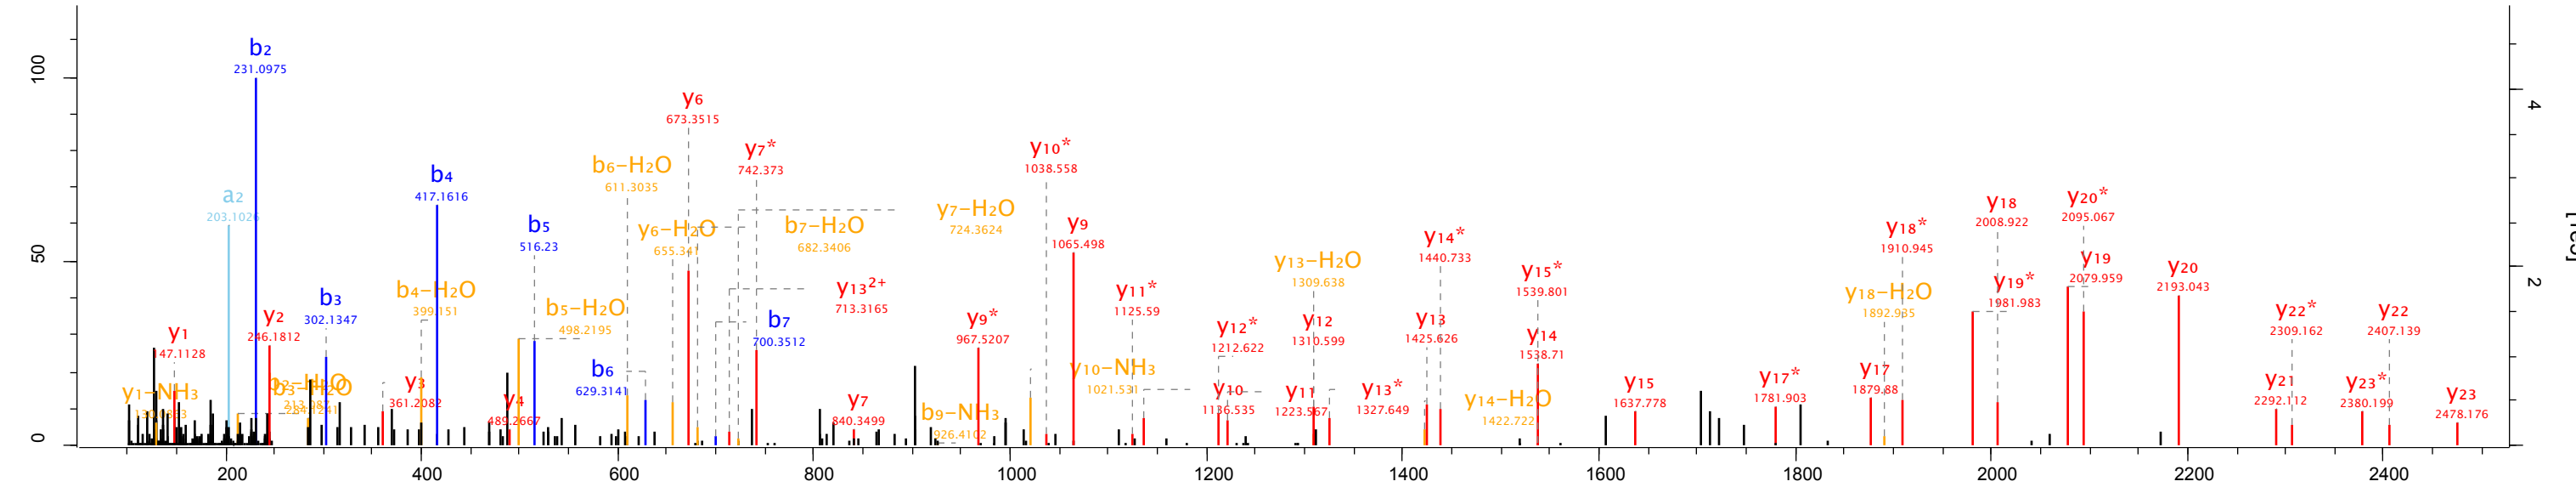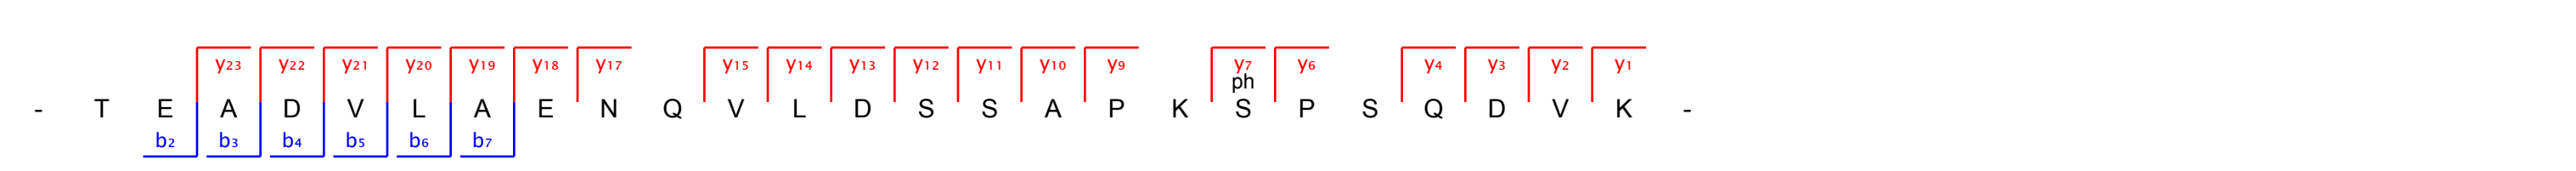



Raw file Scan Method Score m/z Gene names

20171215\_MaS\_33SR\_LMH\_phospho\_06 14991 FTMS; HCD 217.37 807.38 C12orf43

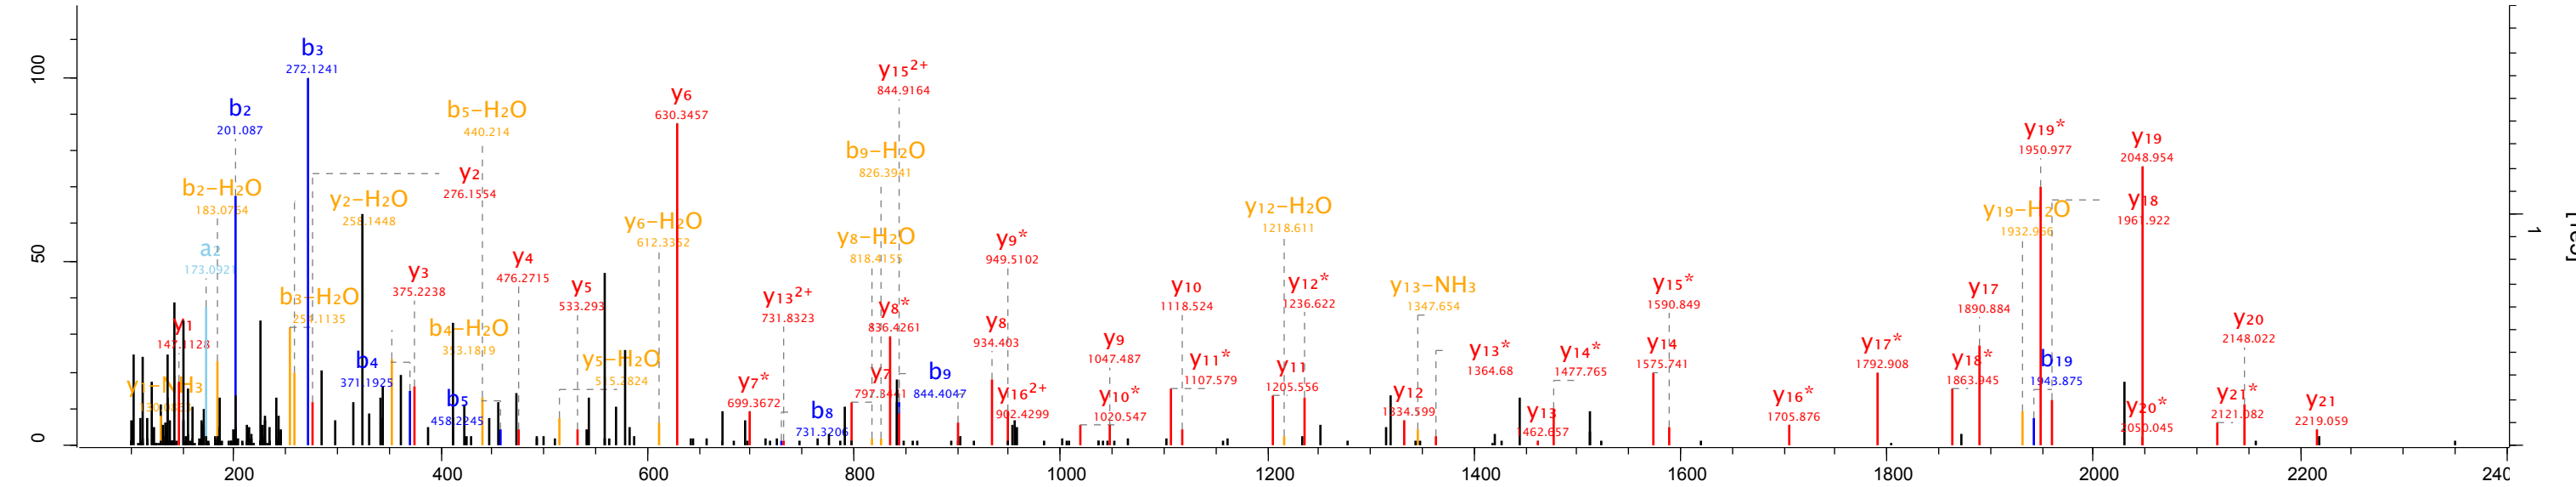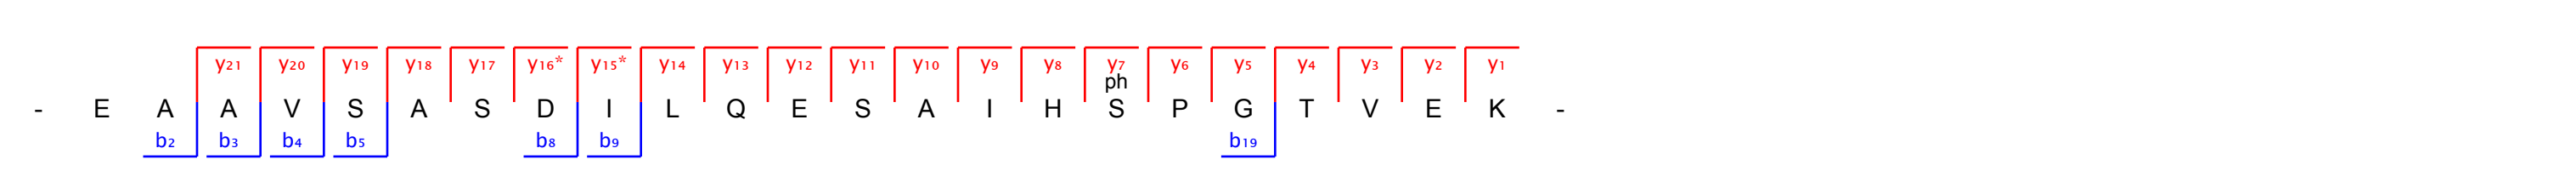

Raw file 20171215\_MaS\_33SR\_LMH\_phospho\_06 Scan 15191 Method FTMS; HCD Score 91.08 m/z 875.69 Gene names MAP3K2

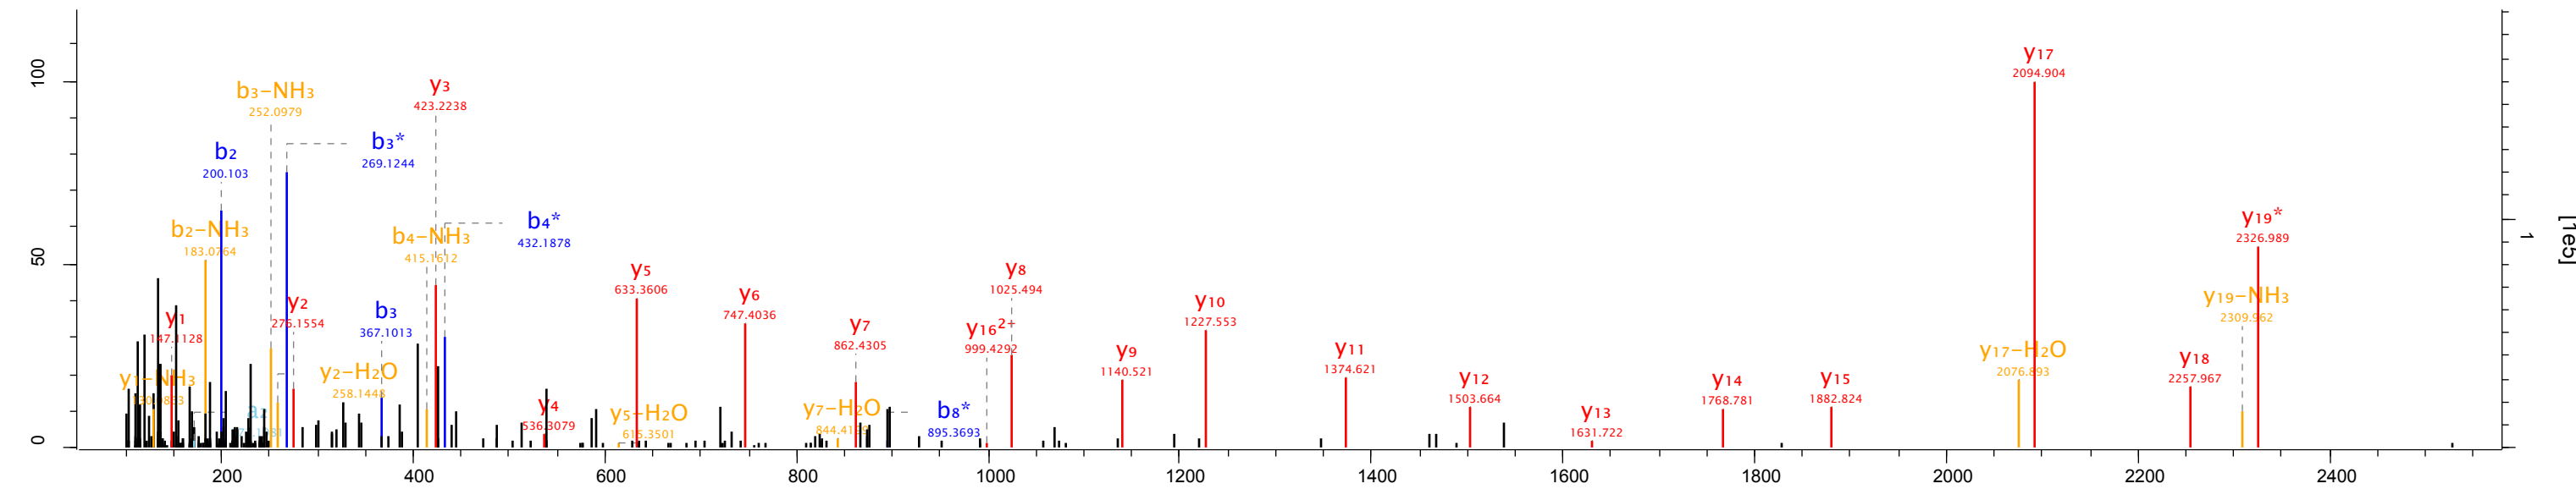

- A Q S Y P D N H Q E F S D Y D N P I F E K -

Fragmentation mapping (b and y ions) is shown below the sequence:

- b2: A-Q
- b3: Q-S
- b4\*: S-Y
- b8\*: N-H
- y1: E-K
- y2: F-E
- y3: D-F
- y4: N-D
- y5: P-N
- y6: S-P
- y7: D-S
- y8: Y-D
- y9: D-Y
- y10: S-D
- y11: F-S
- y12: E-F
- y13: Q-E
- y14: H-Q
- y15: N-H
- y16<sup>2+</sup>: D-N
- y17: P-D
- y18: Y-P
- y19\*: S-Y

Raw file 20171215\_MaS\_33SR\_LMH\_phospho\_06 Scan 15411 Method FTMS; HCD Score 71.08 m/z 547.27 Gene names OSBP

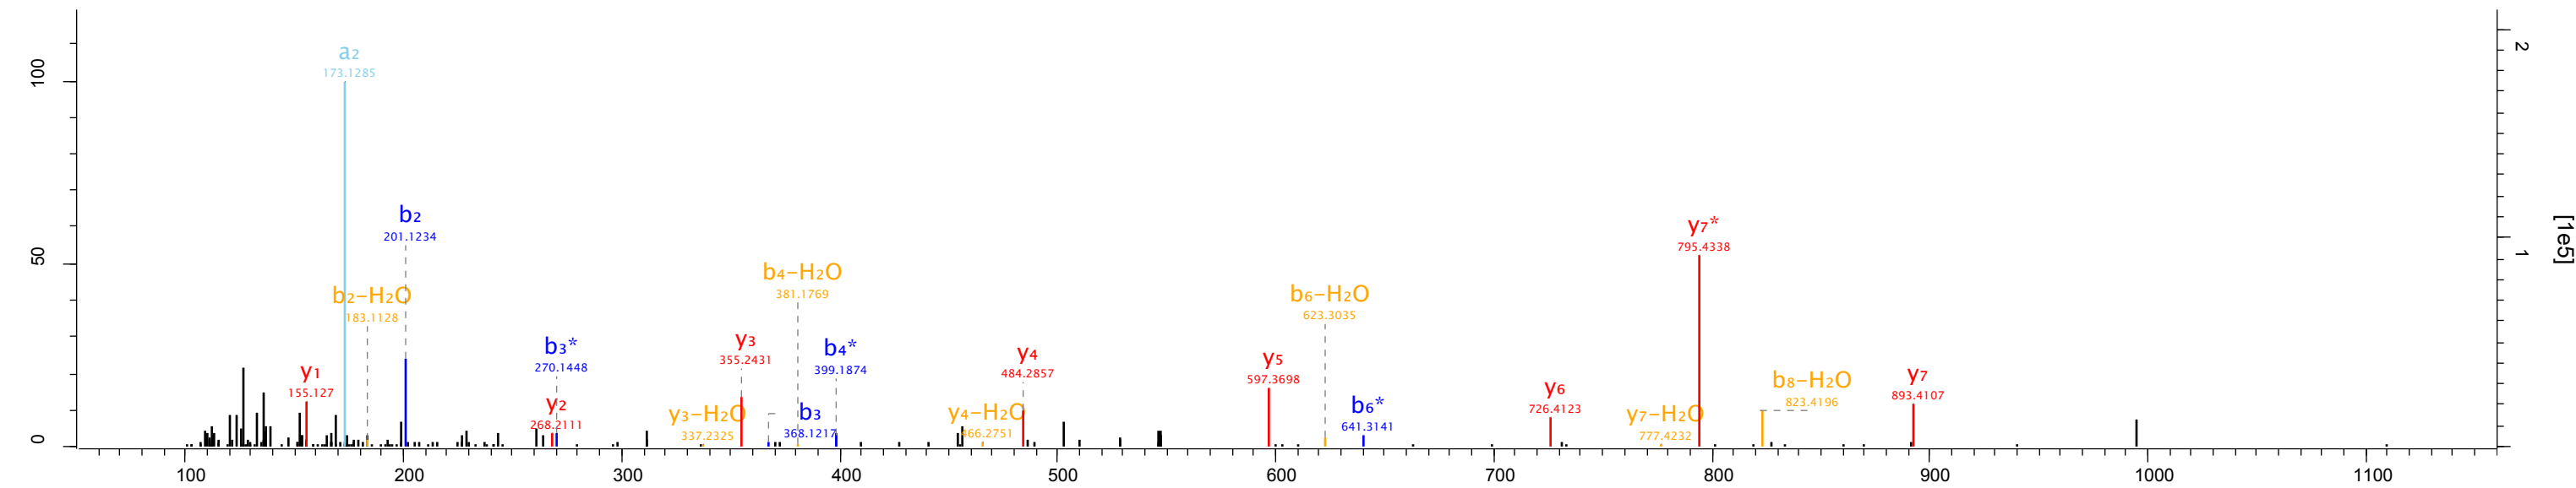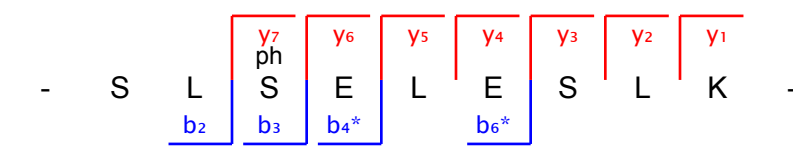

Raw file 20171215\_MaS\_33SR\_LMH\_phospho\_06 Scan 15451 Method FTMS; HCD Score 133.51 m/z 716.37 Gene names ACIN1

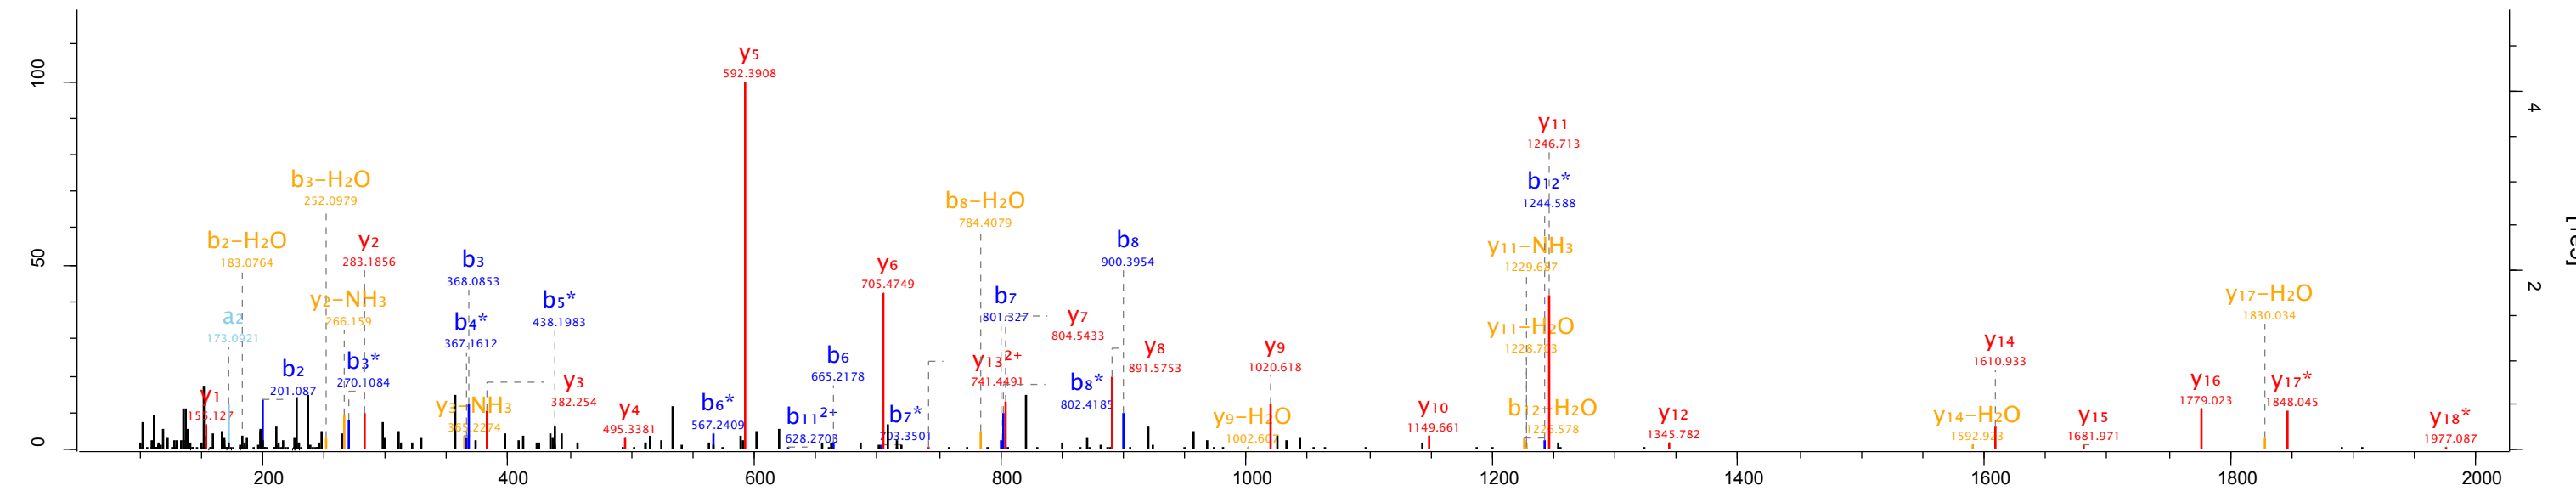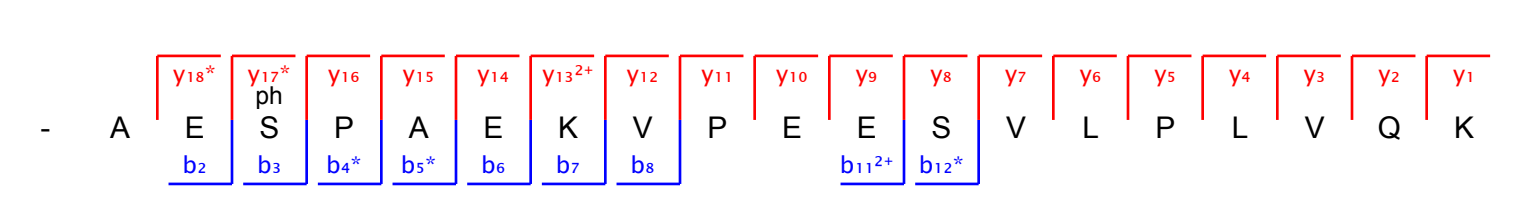

Raw file 20171215\_MaS\_33SR\_LMH\_phospho\_06 Scan 18751 Method FTMS; HCD Score 227.08 m/z 982.95 Gene names G3BP1

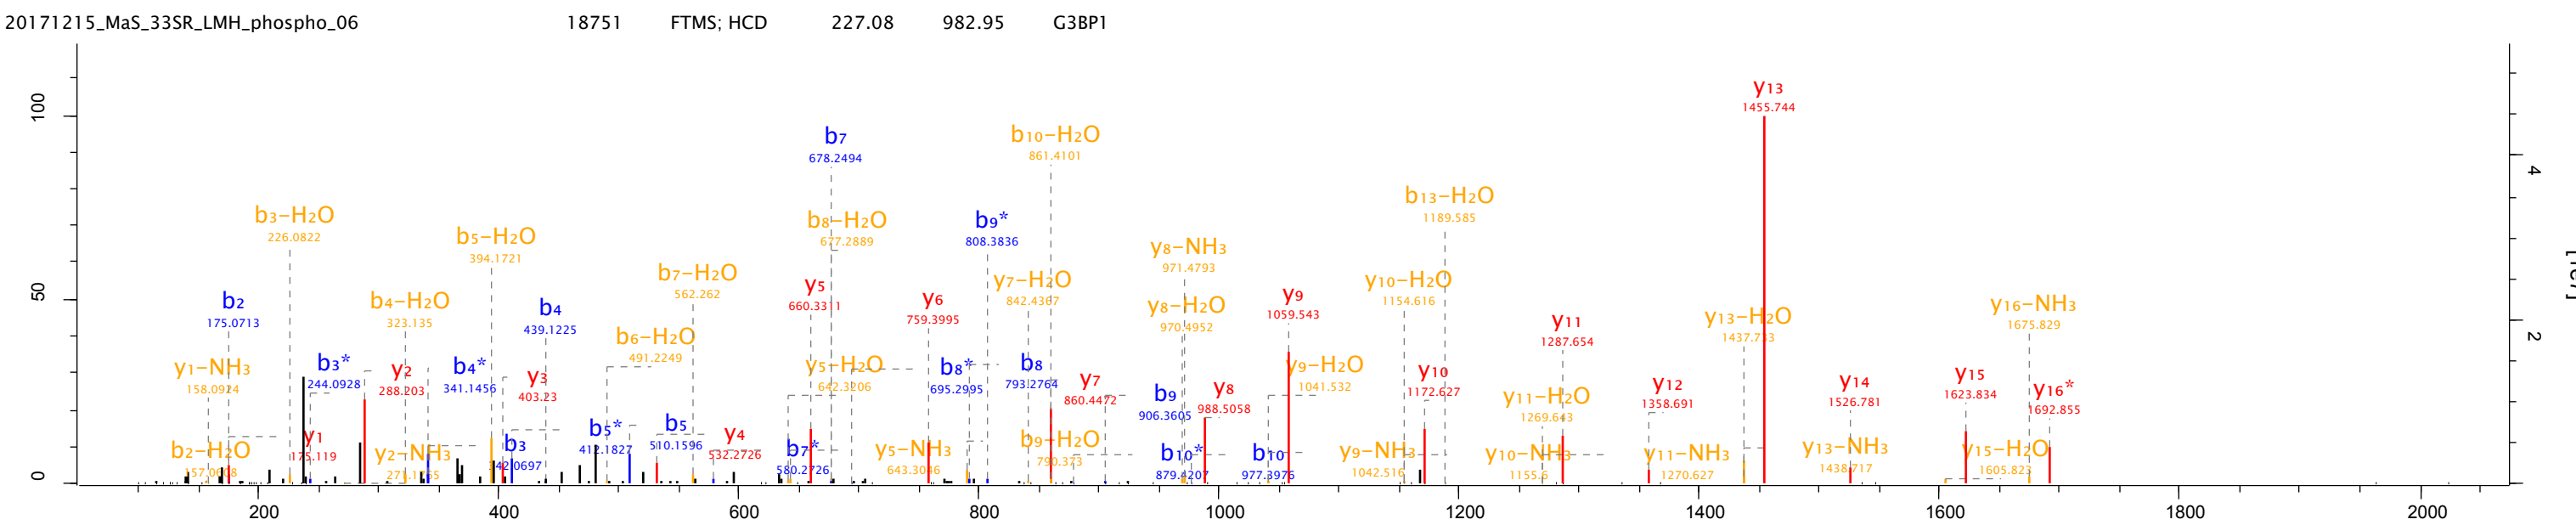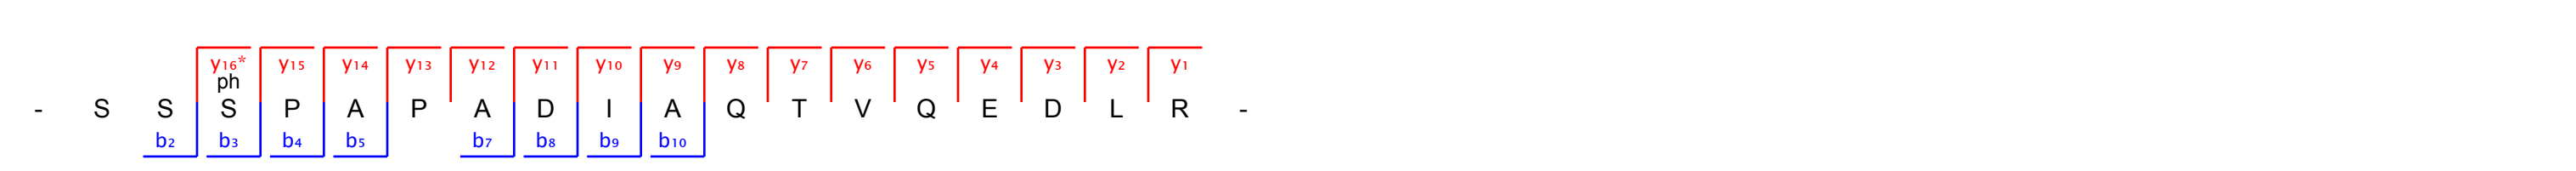

Raw file 20171215\_MaS\_33SR\_LMH\_phospho\_06 Scan 1961 Method FTMS; HCD Score 74.35 m/z 486.57 Gene names RBM26

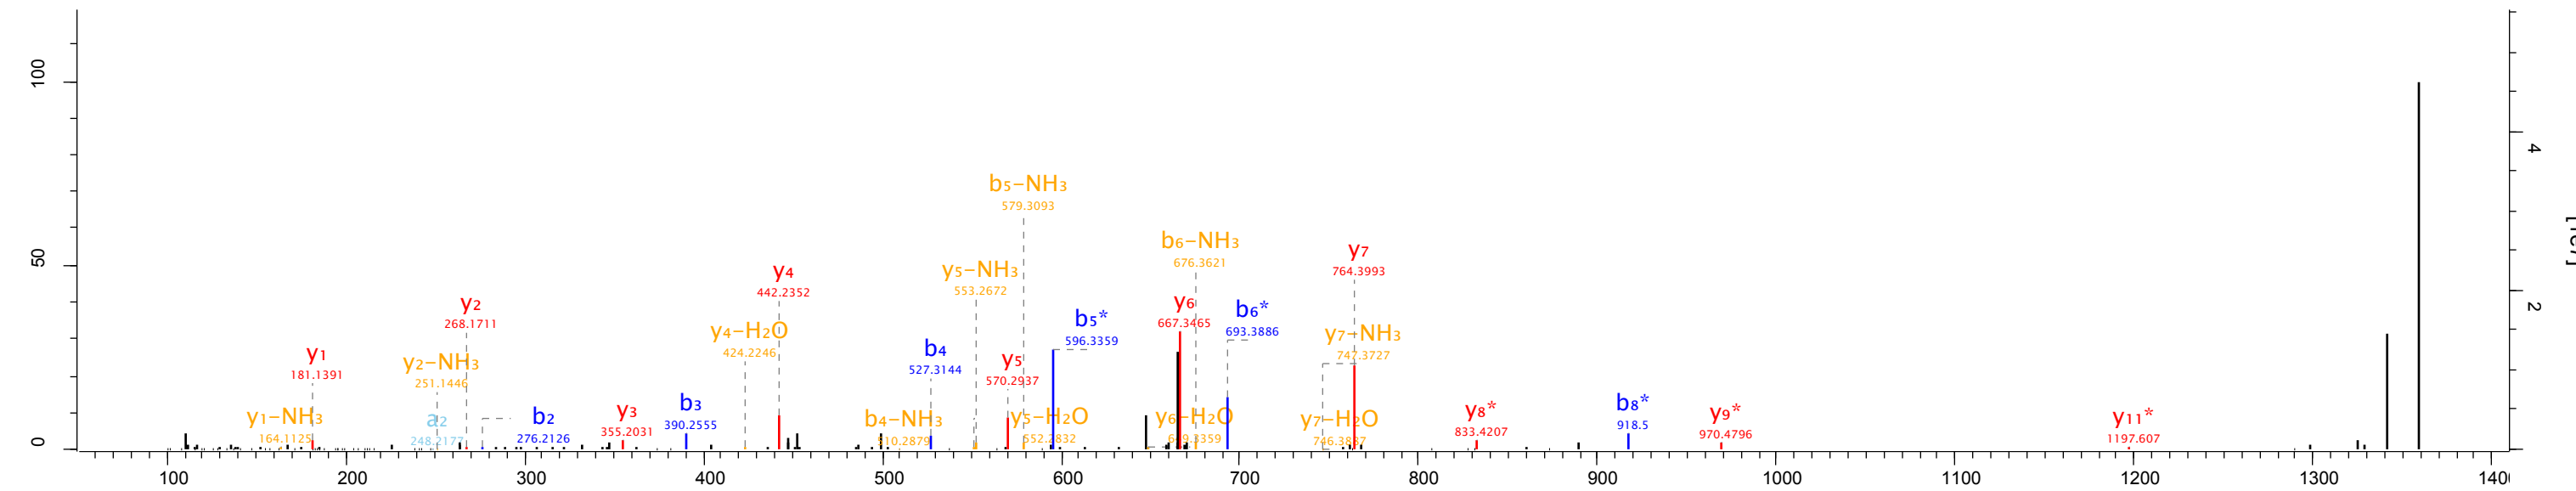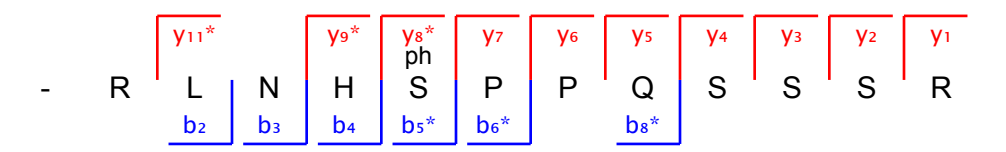

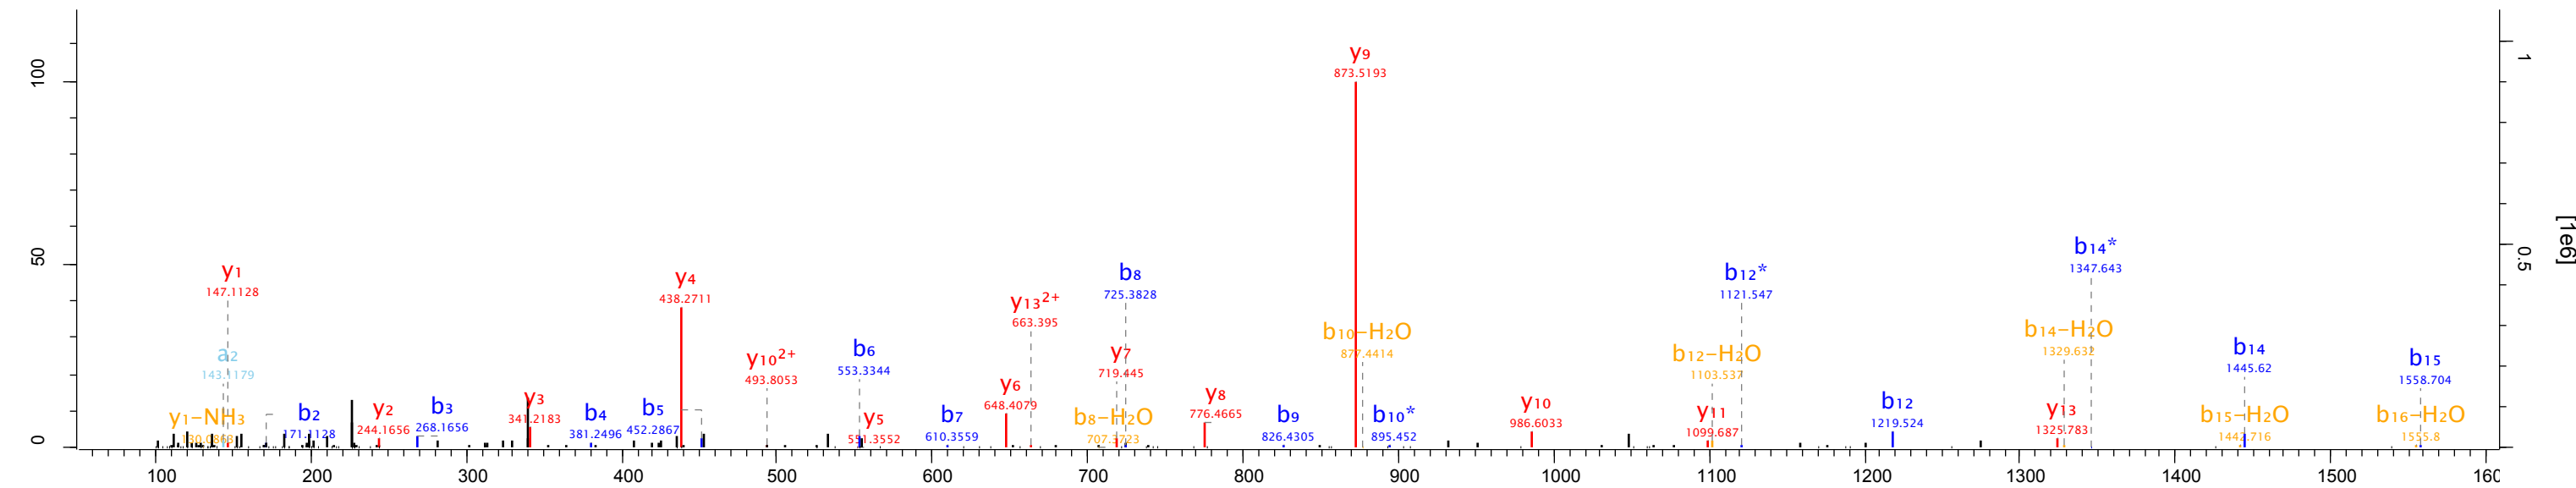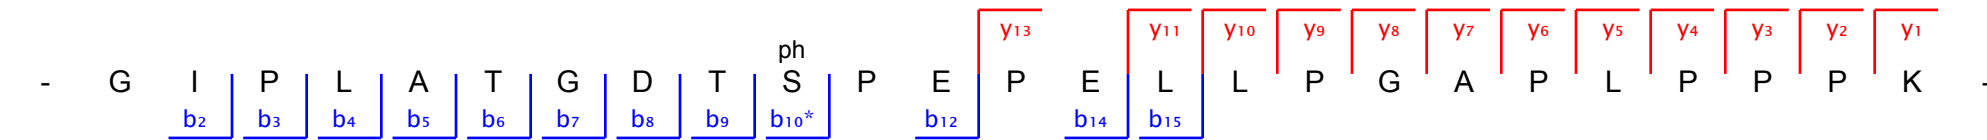

Raw file 20171215\_MaS\_33SR\_LMH\_phospho\_06 Scan 2321 Method FTMS; HCD Score 158.89 m/z 586.76 Gene names SF3B1

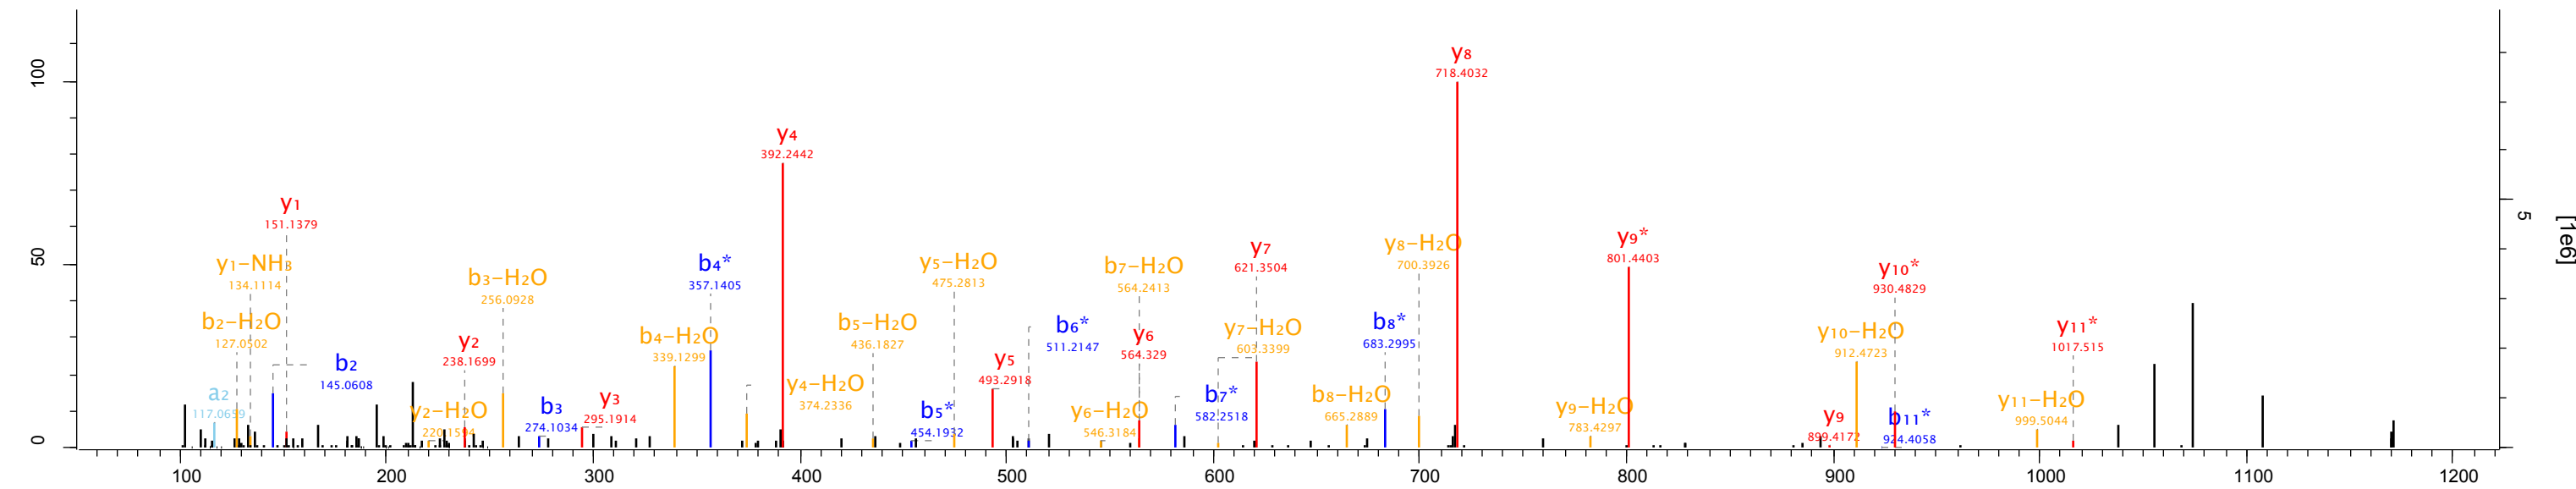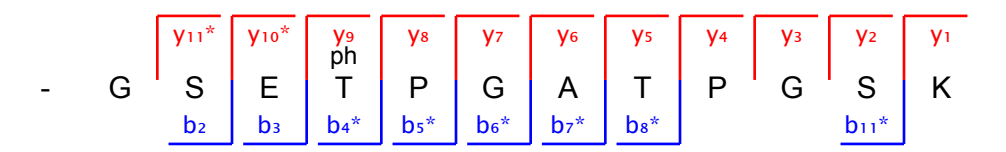



Raw file: 20171215\_MaS\_33SR\_LMH\_phospho\_06  
 Scan: 2961 Method: FTMS; HCD Score: 96.27 m/z: 562.82 Gene names: NOLC1

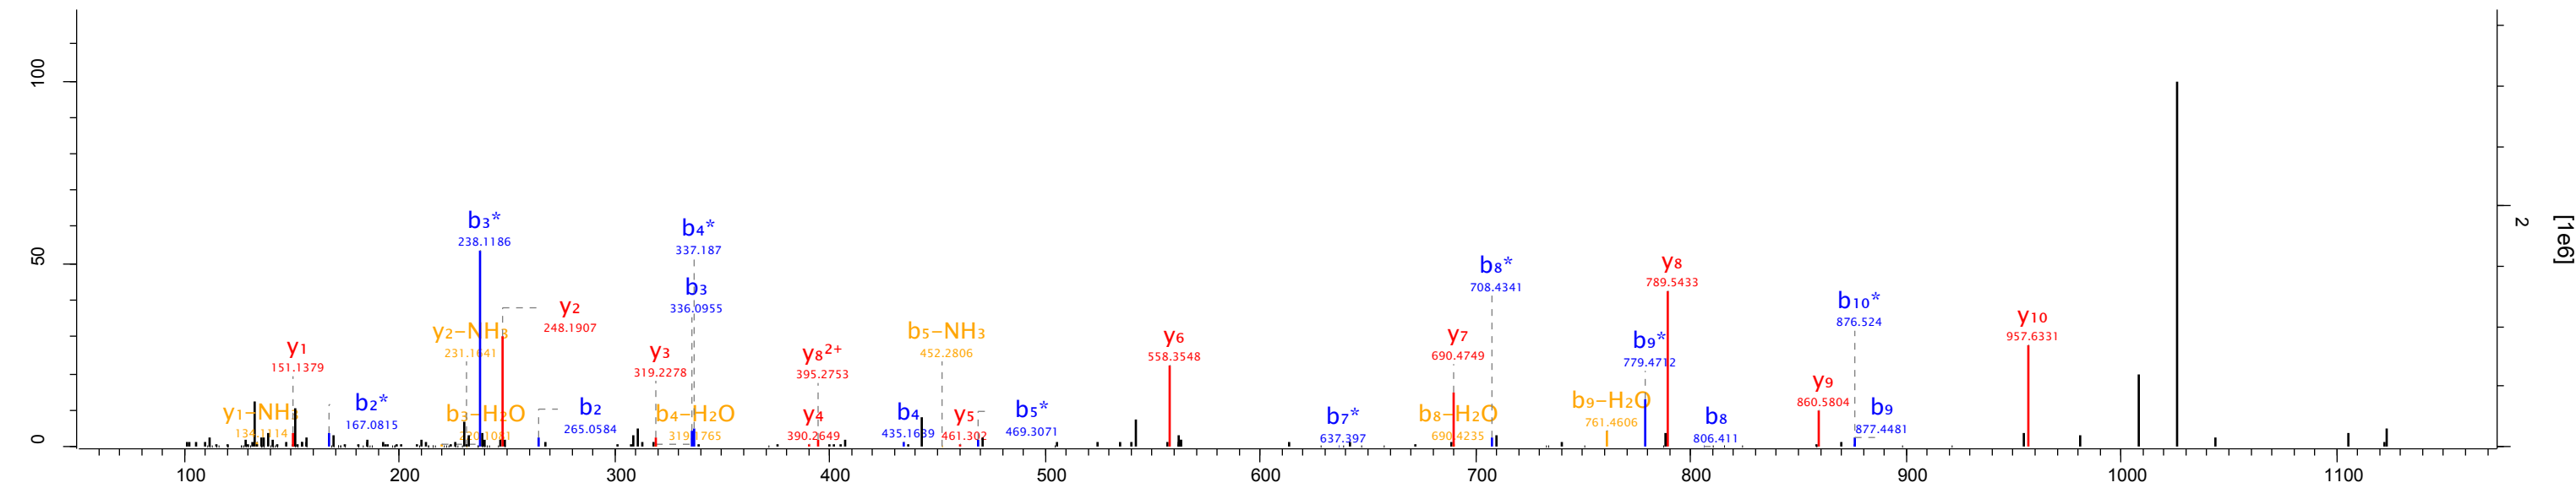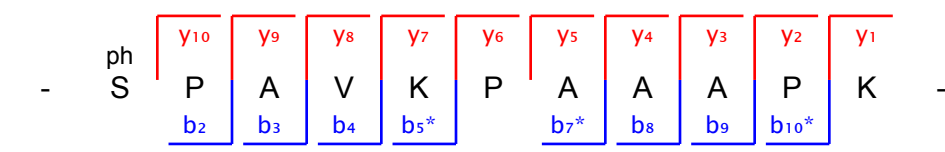

Raw file 20171215\_MaS\_33SR\_LMH\_phospho\_06 Scan 4241 Method FTMS; HCD Score 495.72 m/z 1220.49 Gene names NUDC

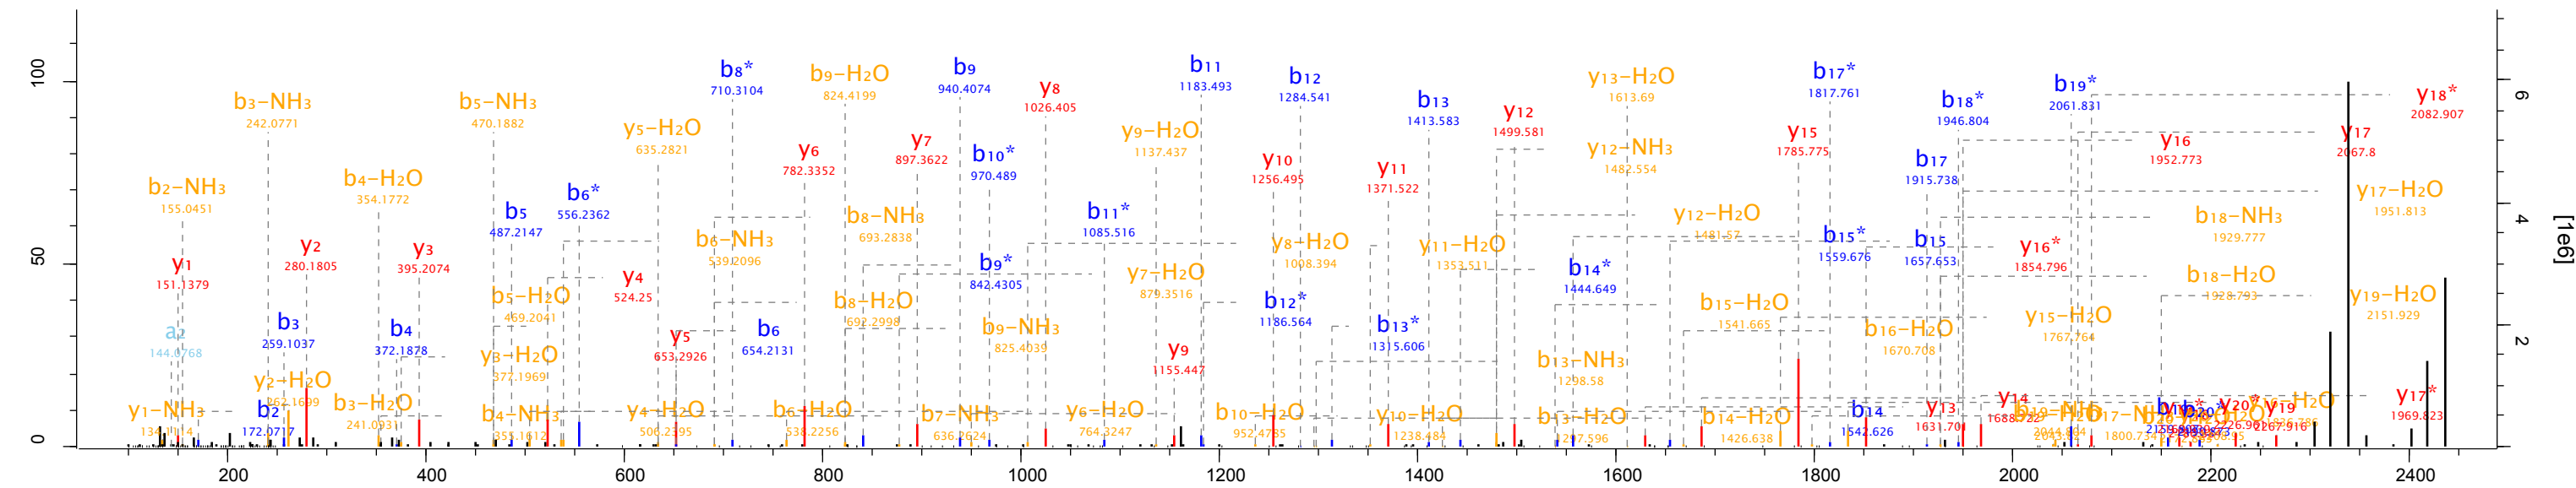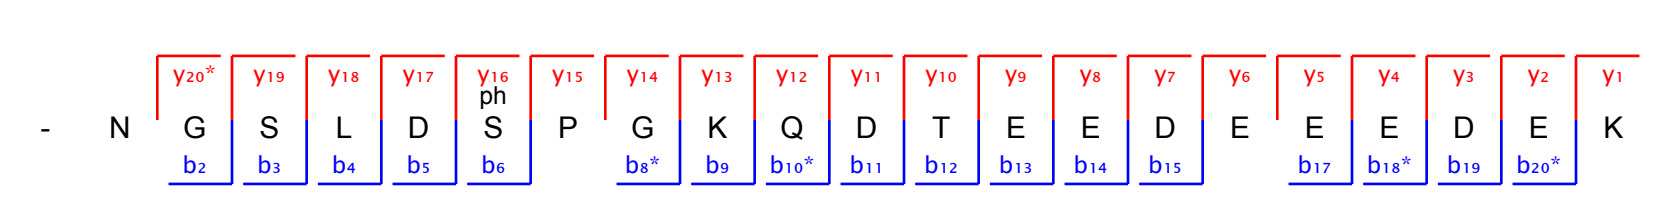

Raw file 20171215\_MaS\_33SR\_LMH\_phospho\_06 Scan 4981 Method FTMS; HCD Score 152.51 m/z 925.89 Gene names PXN

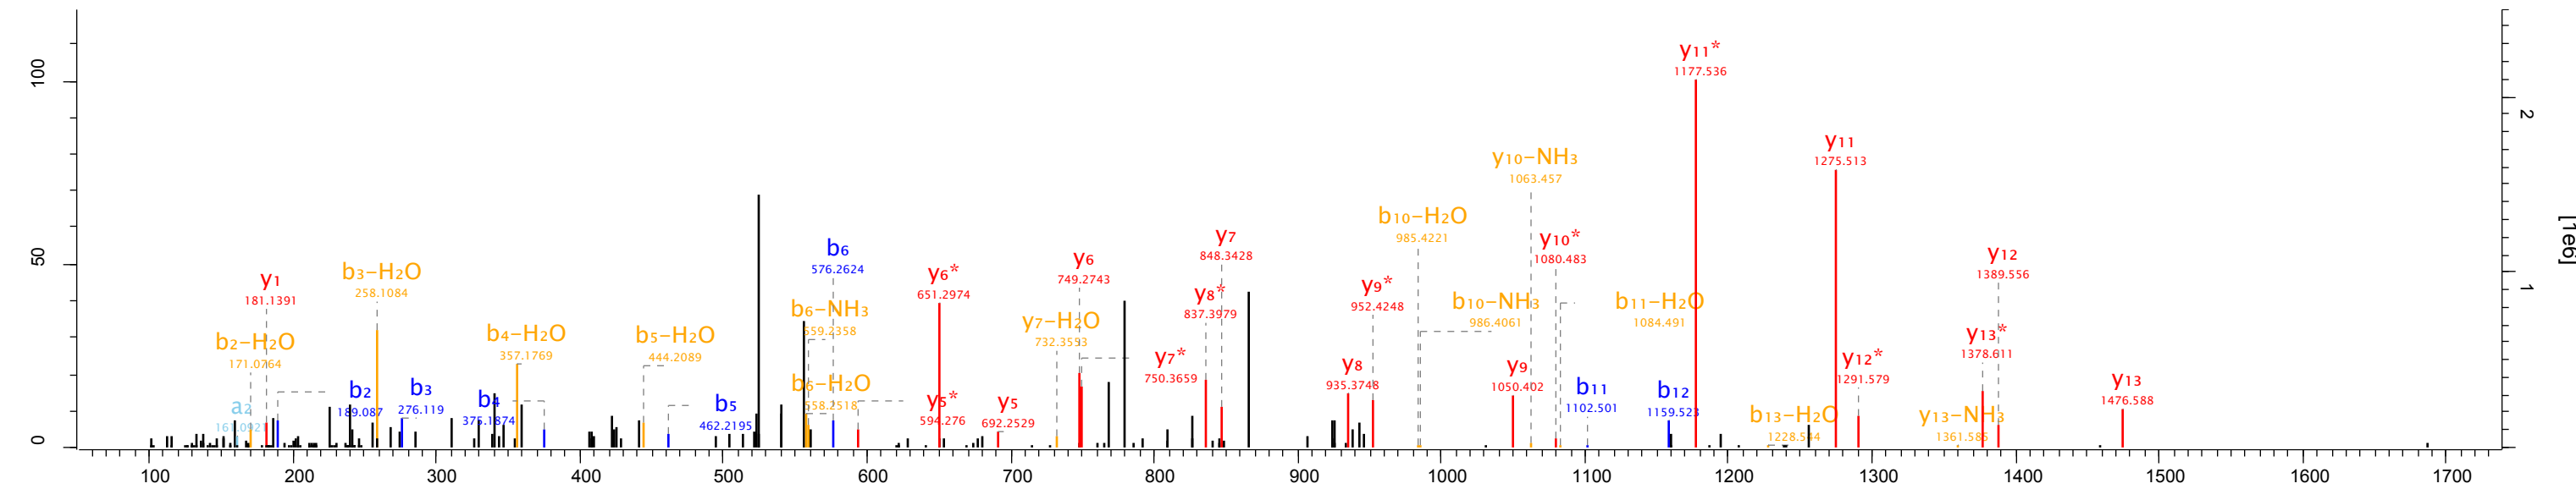

- T S S V S N P Q D S V G S P C S R -

Fragmentation mapping: b2 (S), b3 (S), b4 (V), b5 (S), b6 (N), b11 (V), b12 (G), y1 (R), y5 (S), y6 (G), y7 (V), y8 (S), y9 (D), y10\* (Q), y11 (P), y12 (N), y13 (S).

Raw file 20171215\_MaS\_33SR\_LMH\_phospho\_06 Scan 5631 Method FTMS; HCD Score 85.5 m/z 811.81 Gene names ERICH1

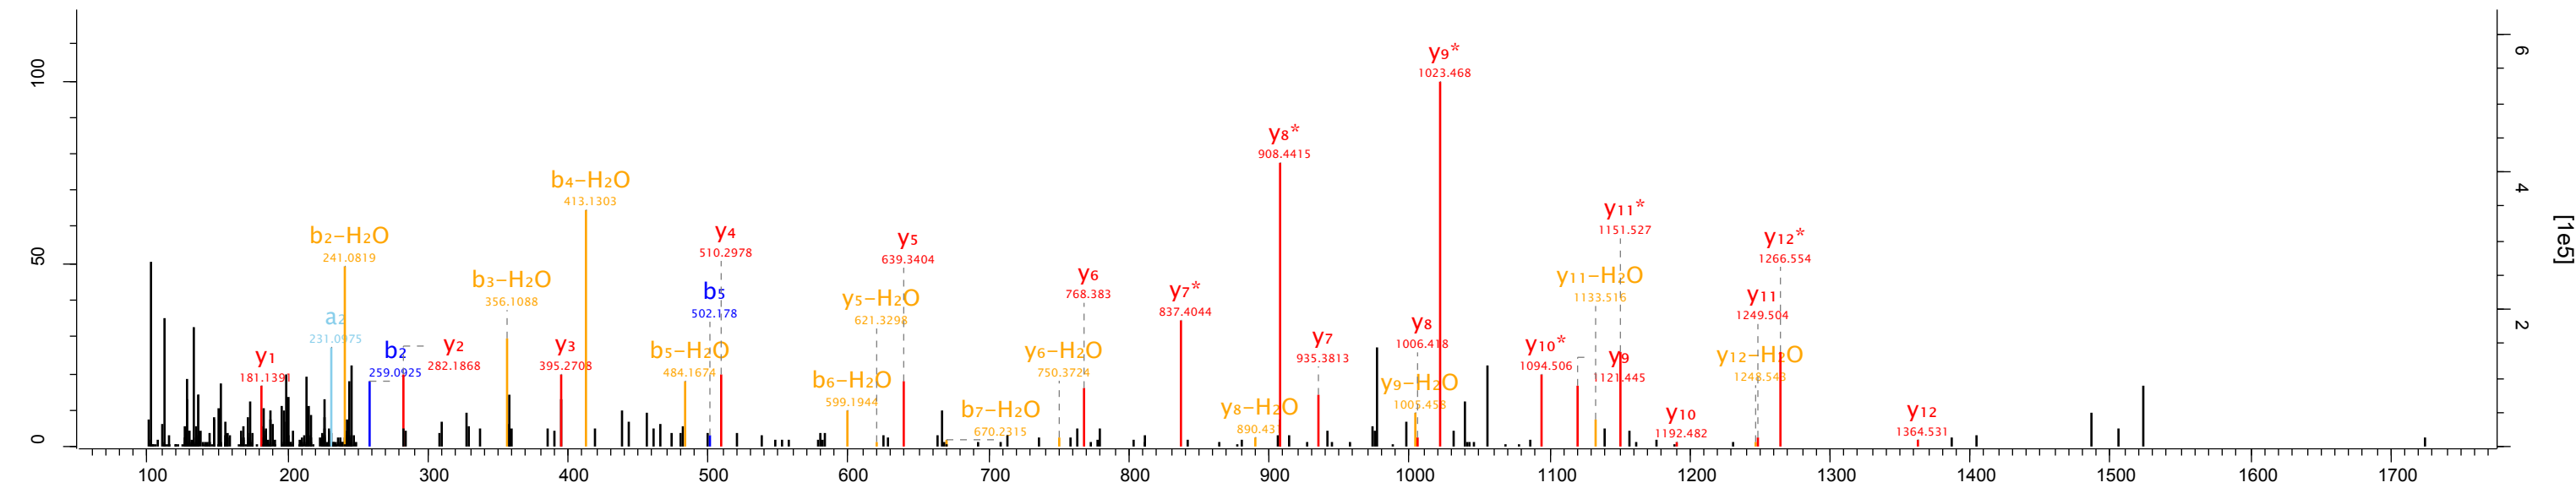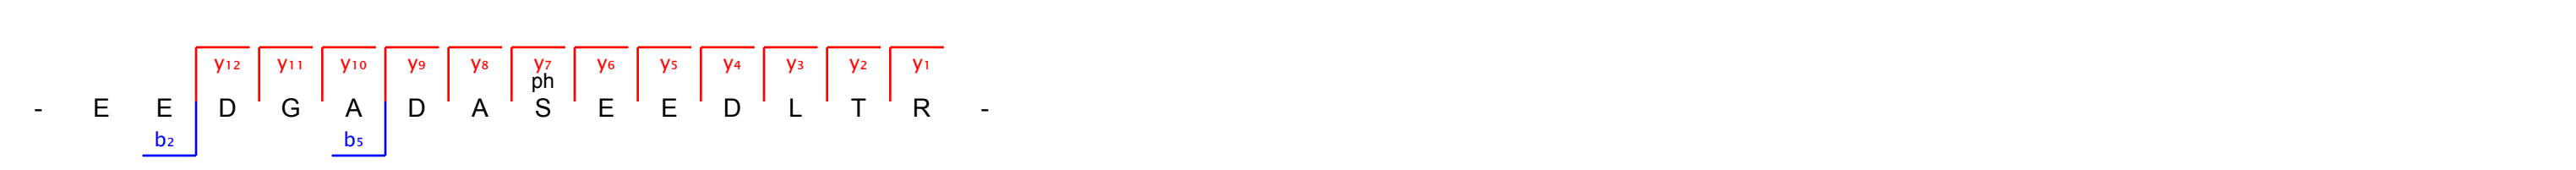

Raw file 20171215\_MaS\_33SR\_LMH\_phospho\_06 Scan 5831 Method FTMS; HCD Score 147.22 m/z 769.34 Gene names STX4

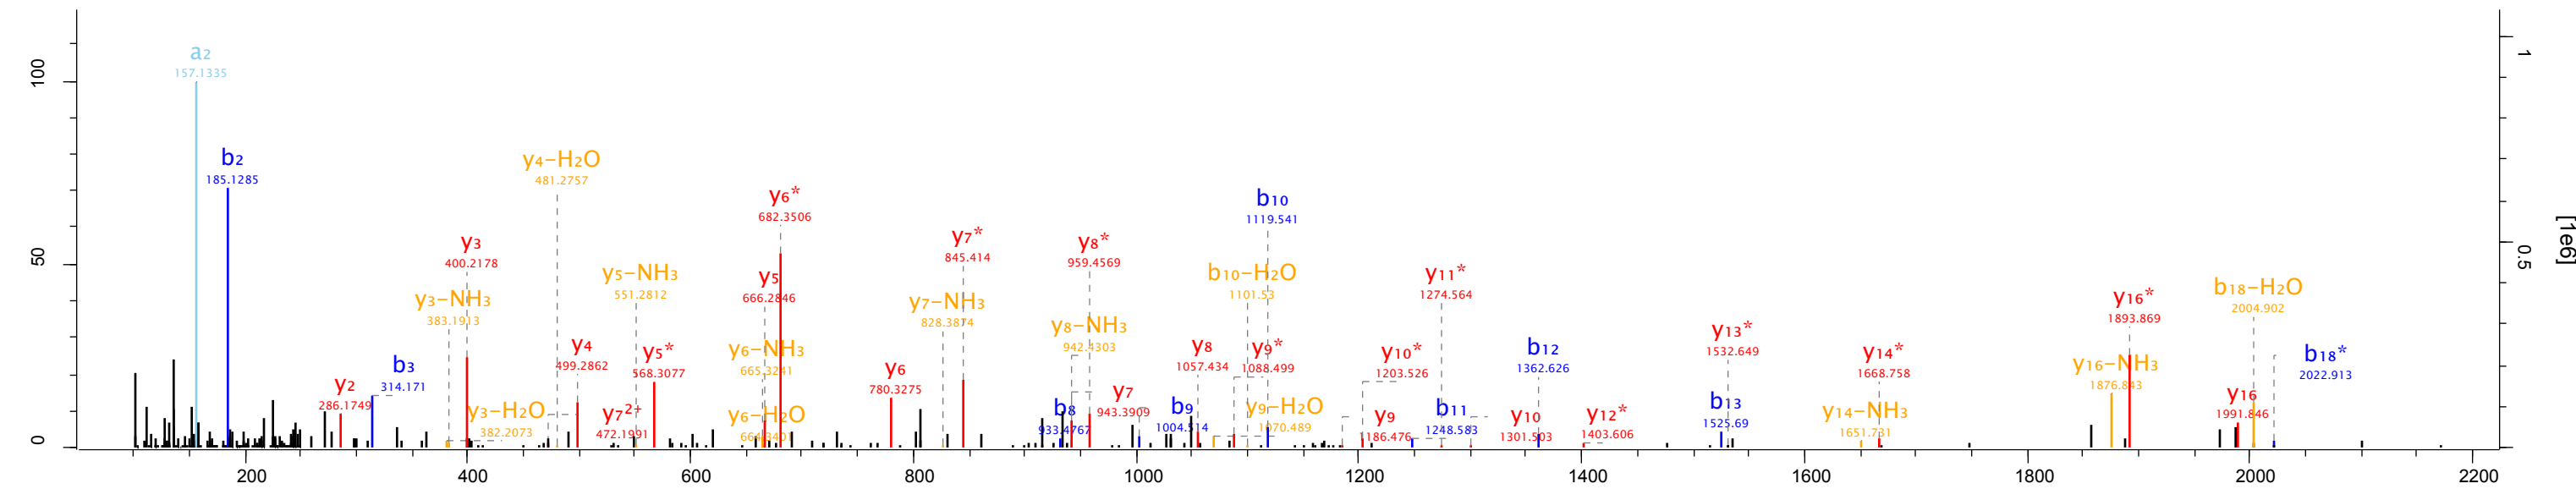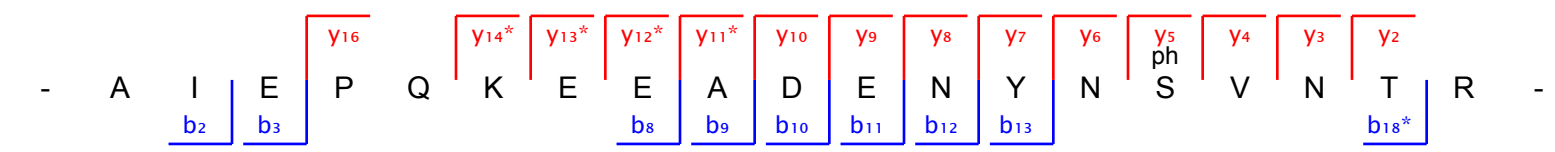

Raw file: 20171215\_MaS\_33SR\_LMH\_phospho\_06  
 Scan: 6111 Method: FTMS; HCD Score: 85.88 m/z: 677.99 Gene names: PXN

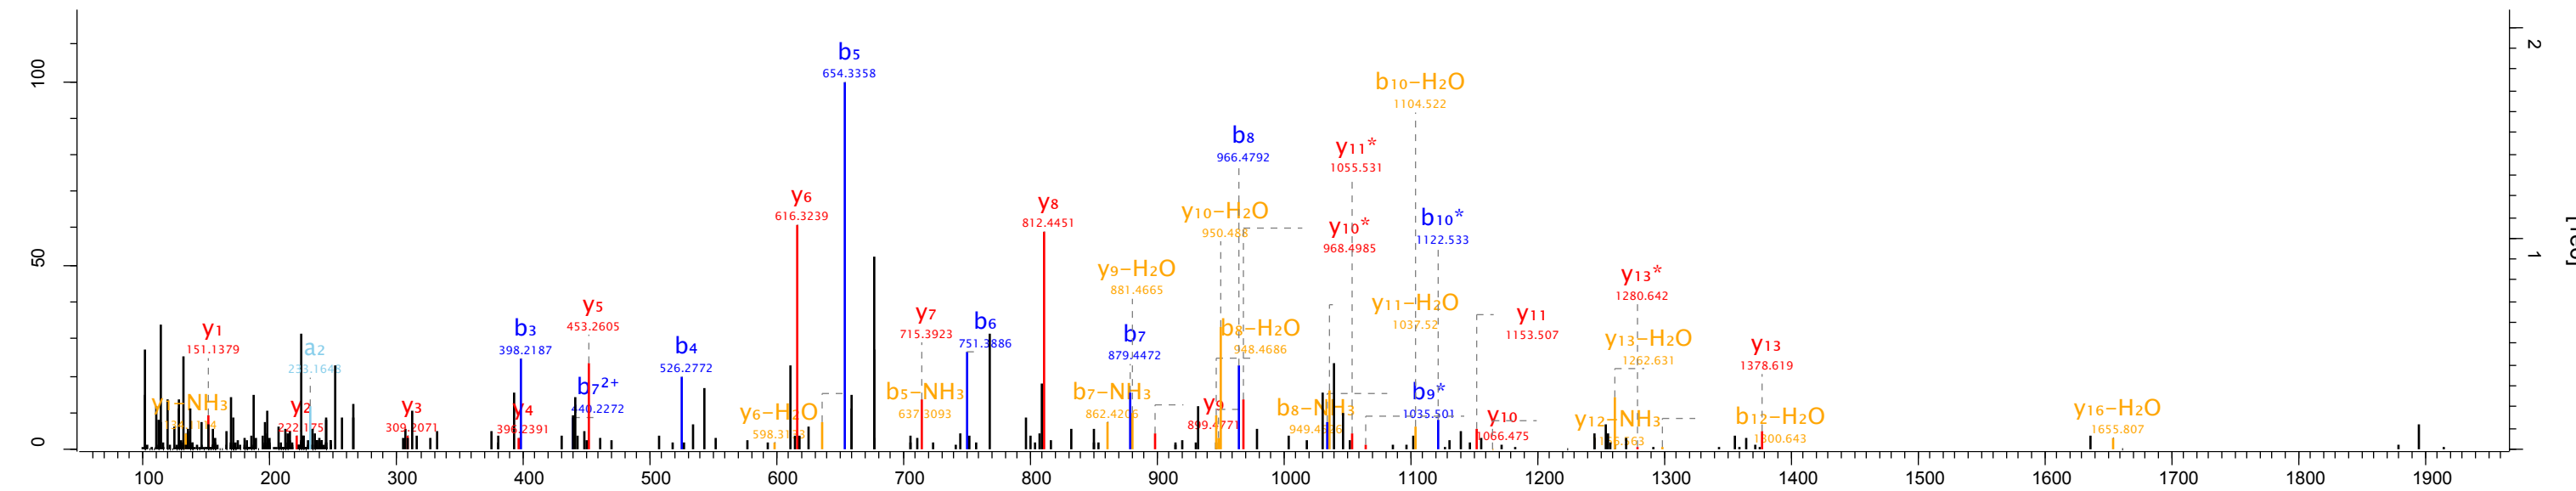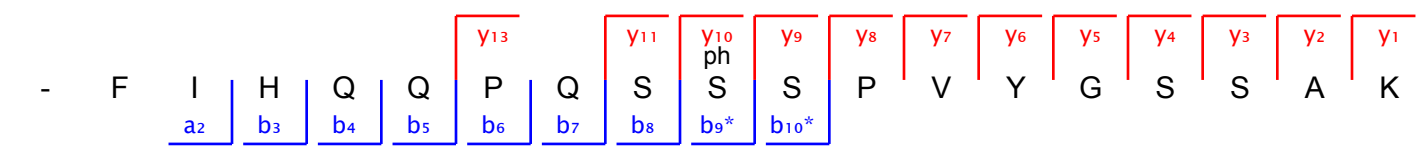

Raw file 20171215\_MaS\_33SR\_LMH\_phospho\_06 Scan 6161 Method FTMS; HCD Score 49.77 m/z 607.26 Gene names HSP90AA1

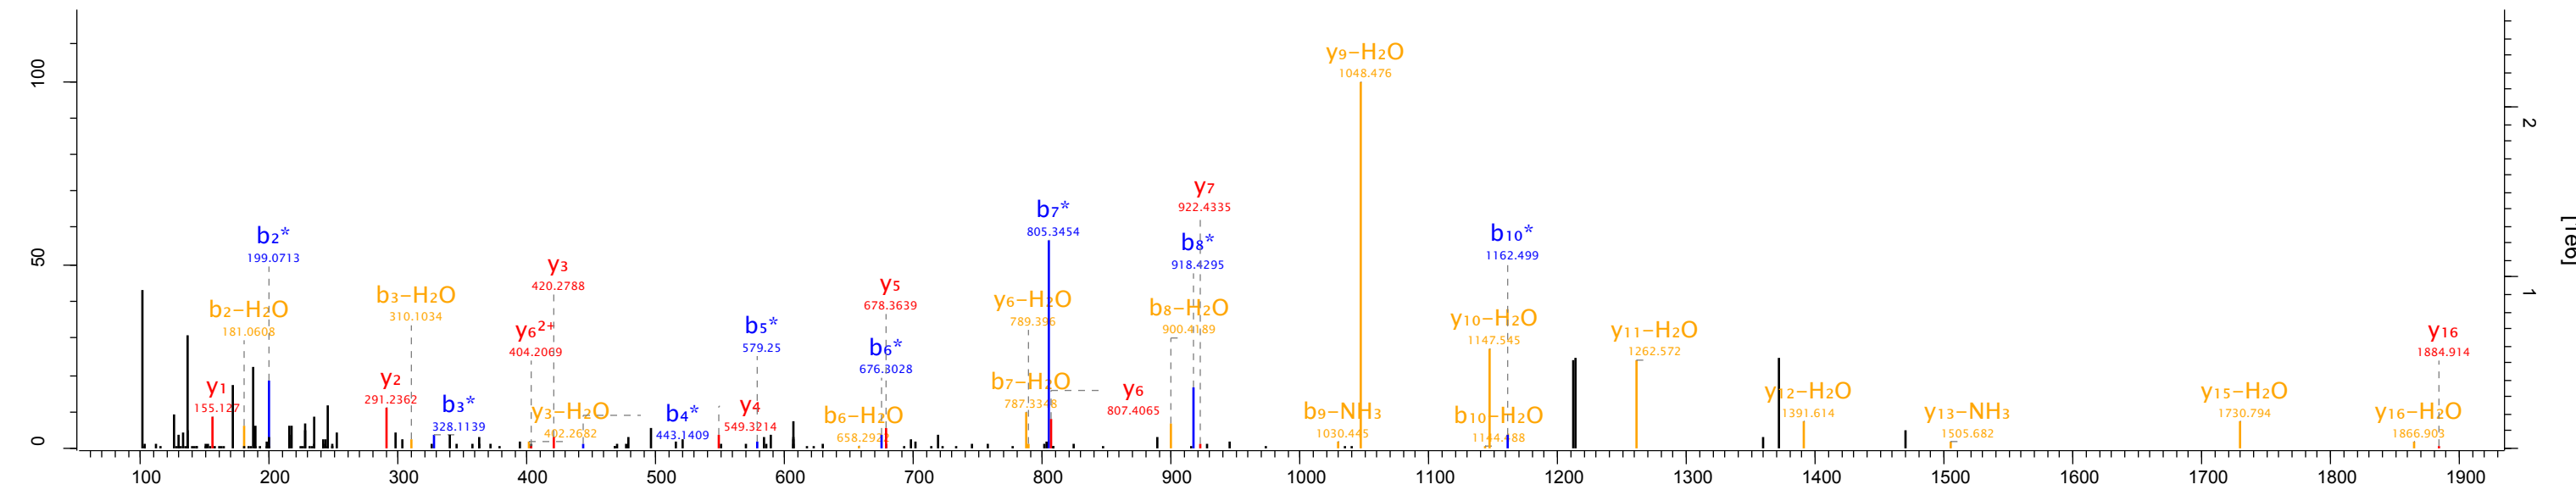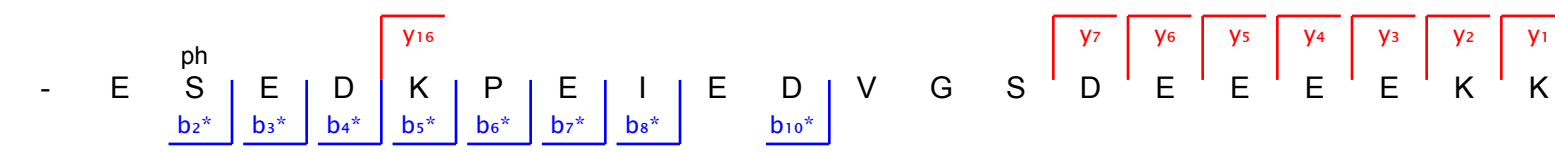

Raw file 20171215\_MaS\_33SR\_LMH\_phospho\_06 Scan 6231 Method FTMS; HCD Score 61.34 m/z 447.71 Gene names ZNF740

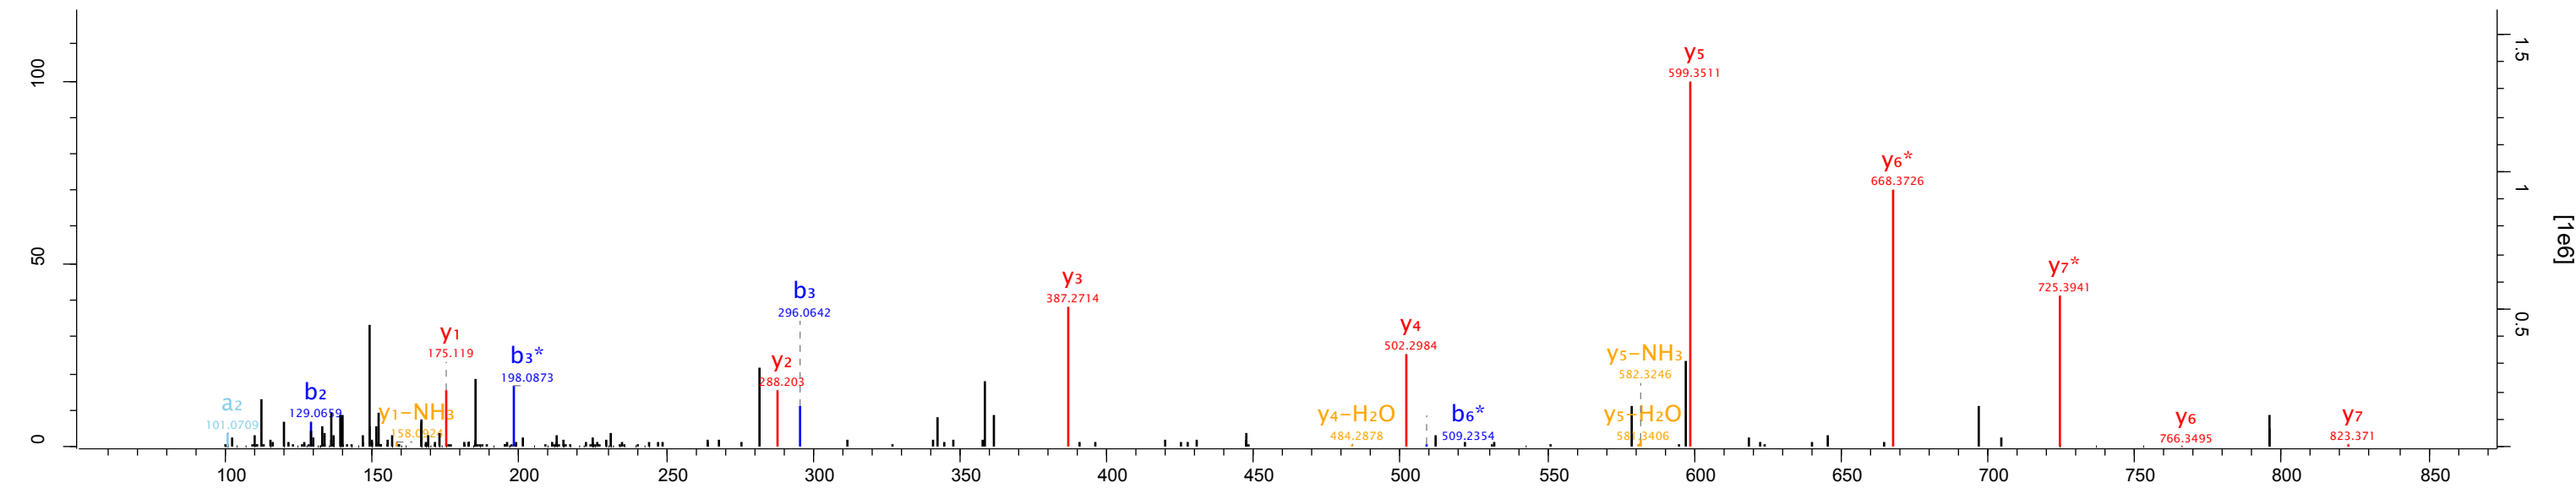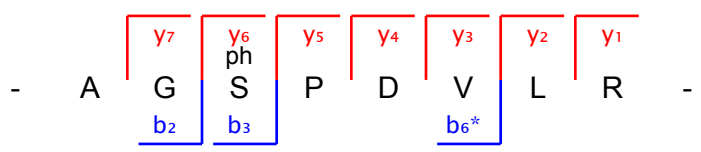



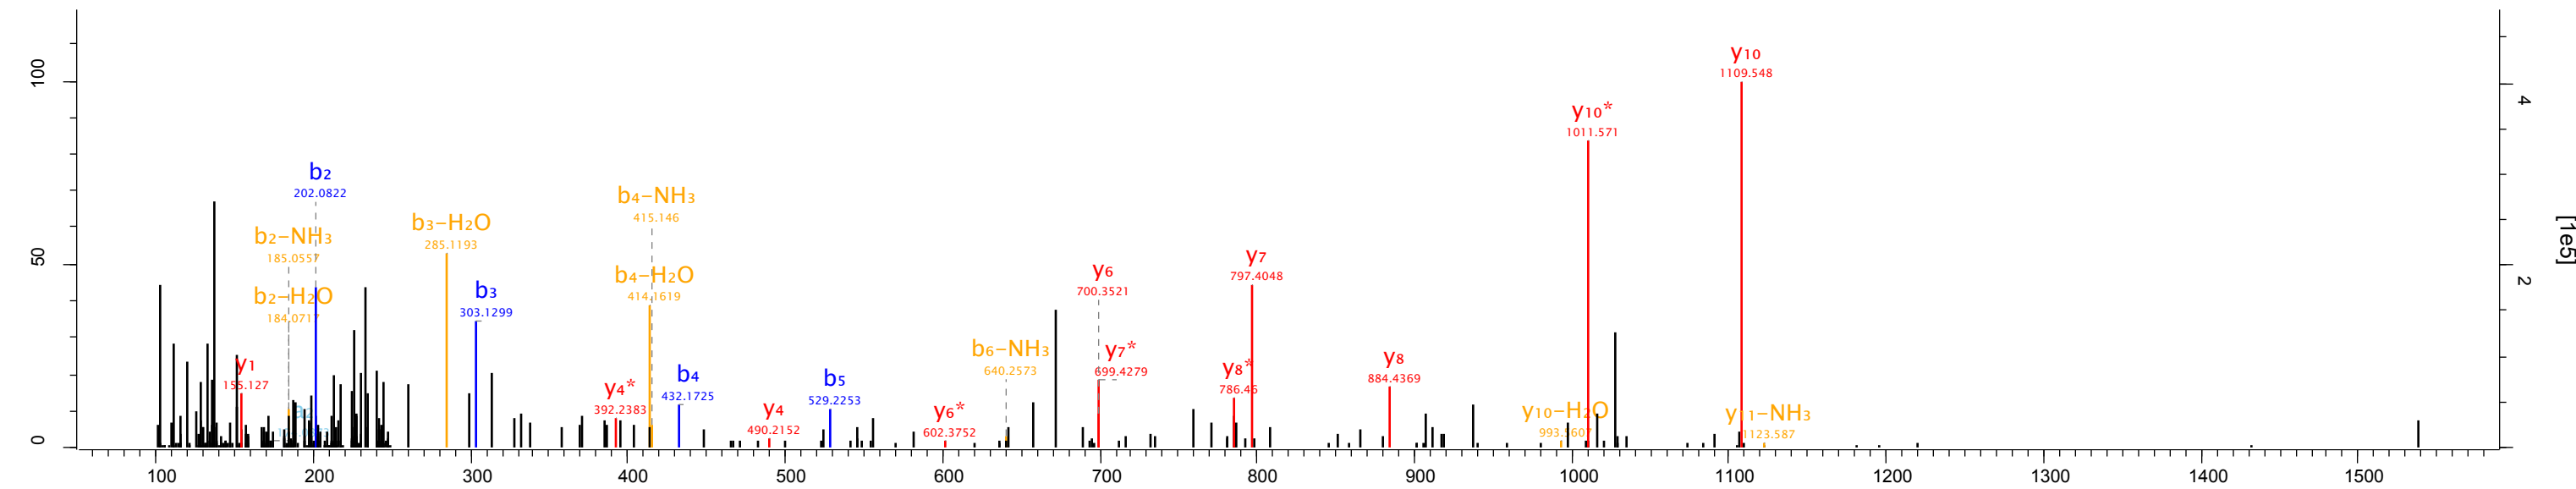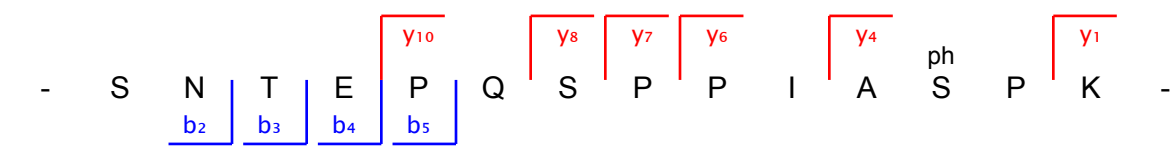

Raw file 20171215\_MaS\_33SR\_LMH\_phospho\_06 Scan 6801 Method FTMS; HCD Score 81.13 m/z 893.09 Gene names ZBTB7A

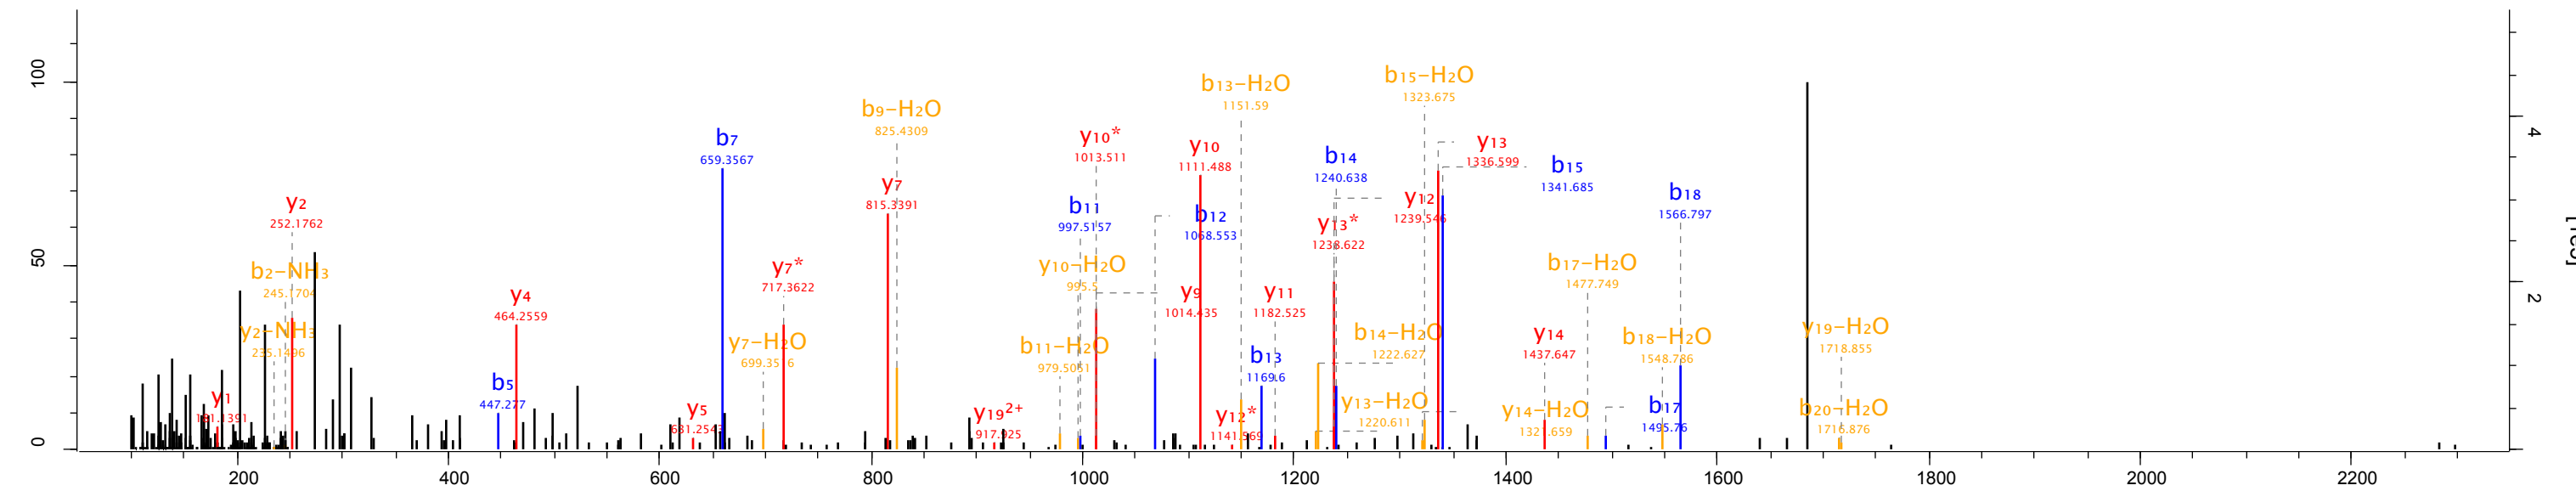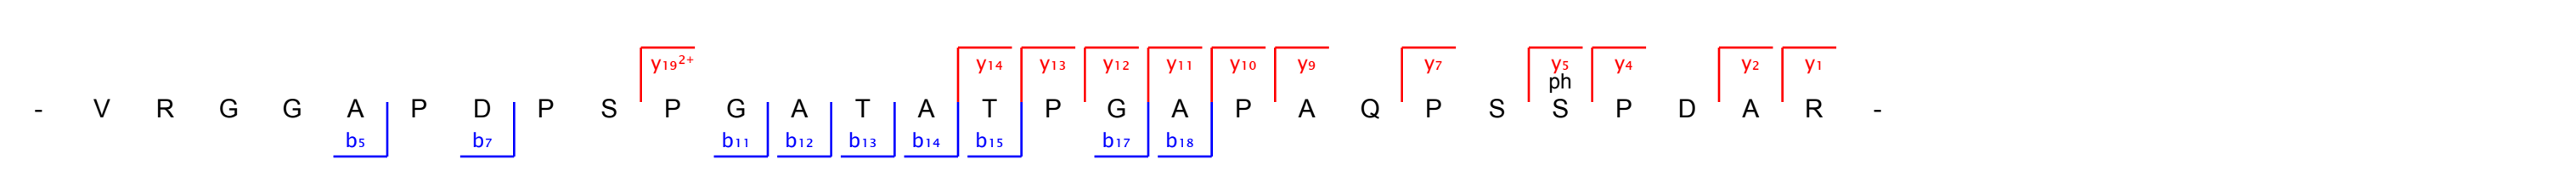

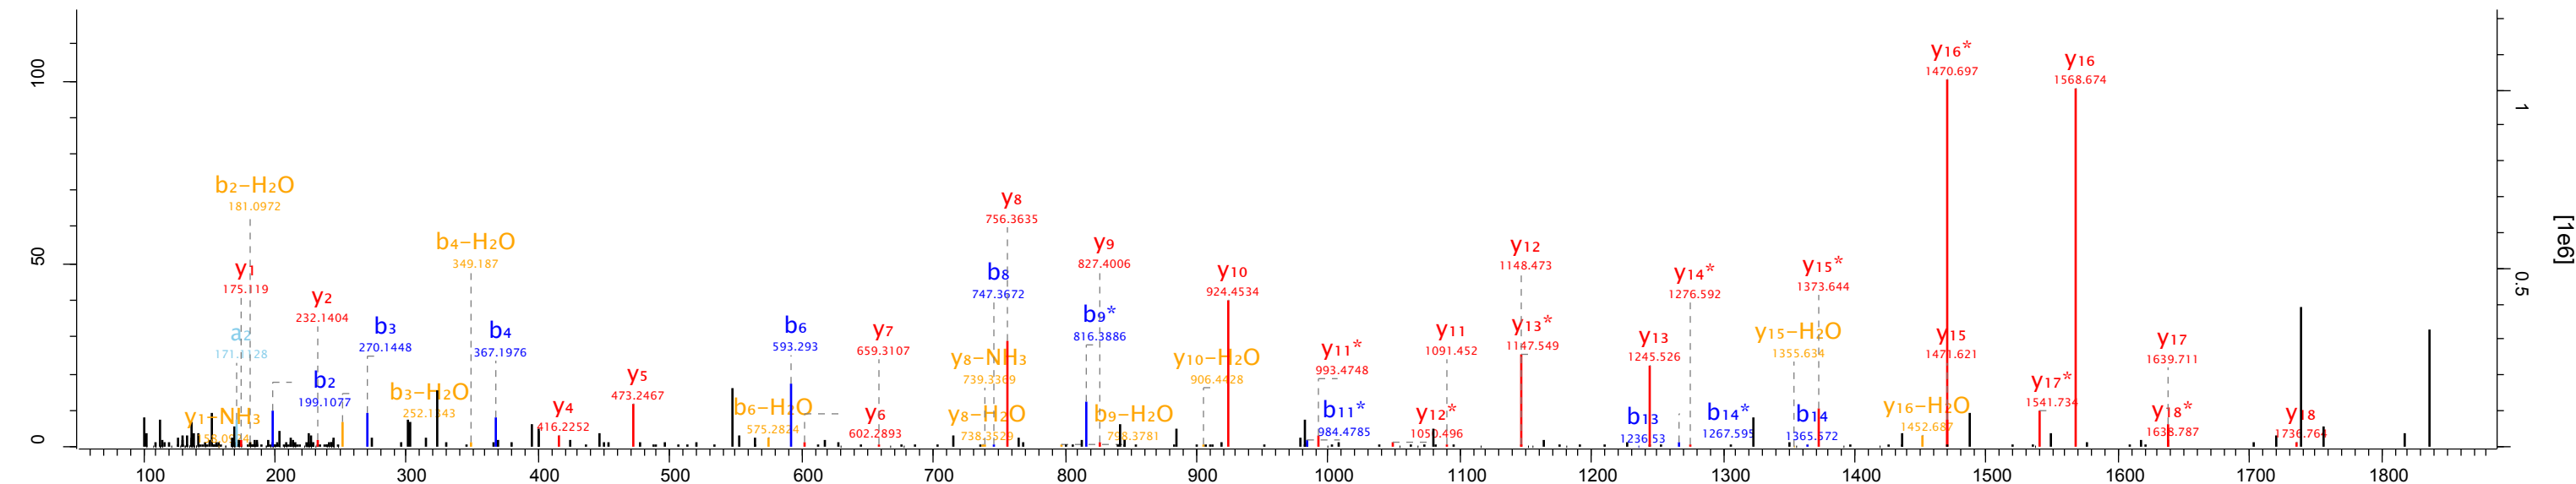

- T P A P E P G S P A P G E G P S G R -

y<sub>18</sub>
y<sub>17</sub>
y<sub>16</sub>
y<sub>15</sub>
y<sub>14</sub>\*
y<sub>13</sub>
y<sub>12</sub>
y<sub>11</sub>ph
y<sub>10</sub>
y<sub>9</sub>
y<sub>8</sub>
y<sub>7</sub>
y<sub>6</sub>
y<sub>5</sub>
y<sub>4</sub>
y<sub>2</sub>
y<sub>1</sub>

b<sub>2</sub>
b<sub>3</sub>
b<sub>4</sub>
b<sub>6</sub>
b<sub>8</sub>
b<sub>9</sub>\*
b<sub>11</sub>\*
b<sub>13</sub>
b<sub>14</sub>

20171215\_MaS\_33SR\_LMH\_phospho\_06 6921 FTMS; HCD 159.65 1022.13 MARCKS

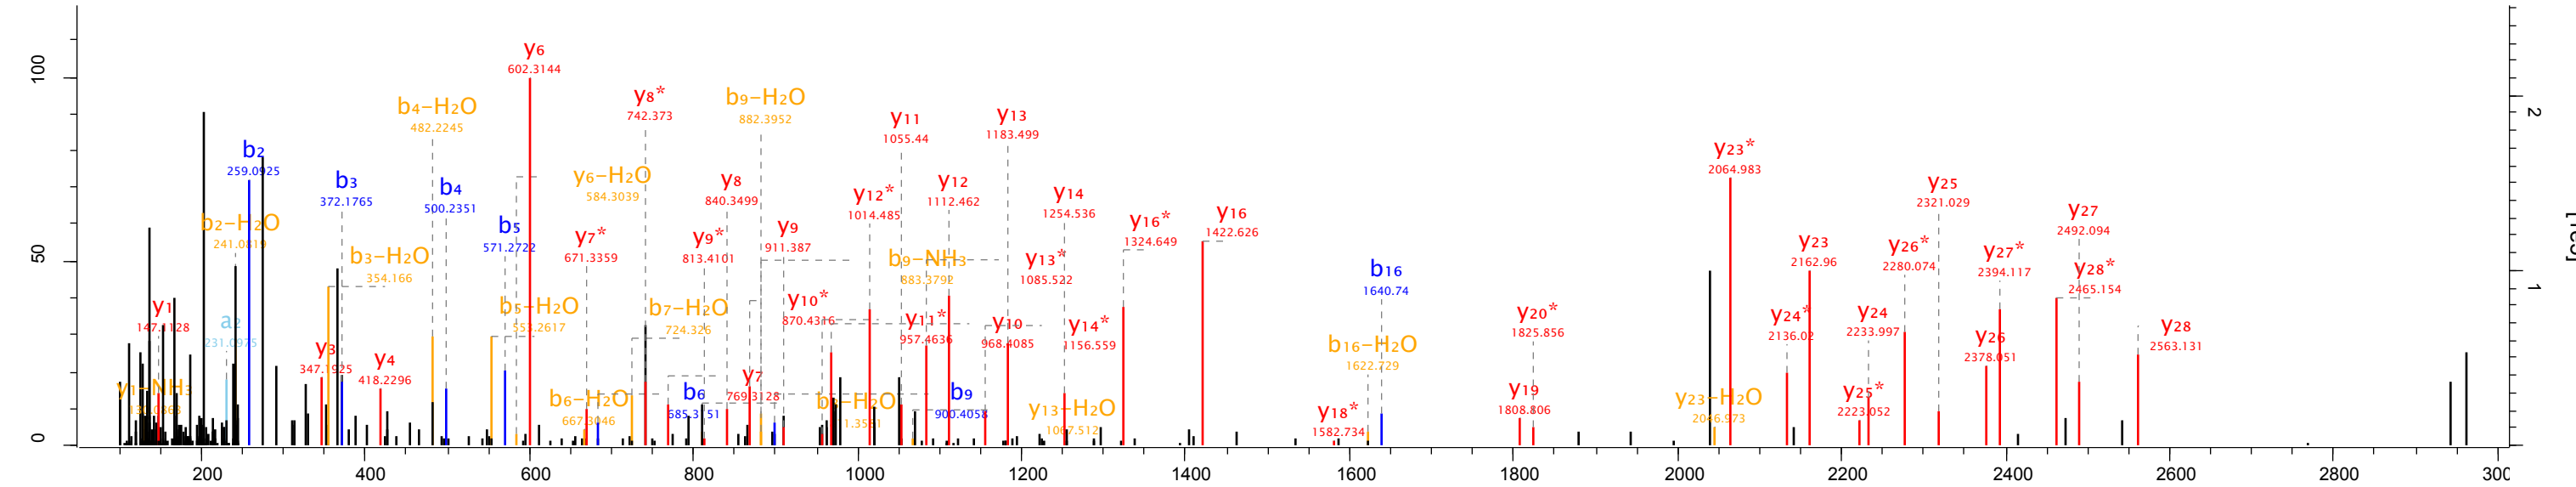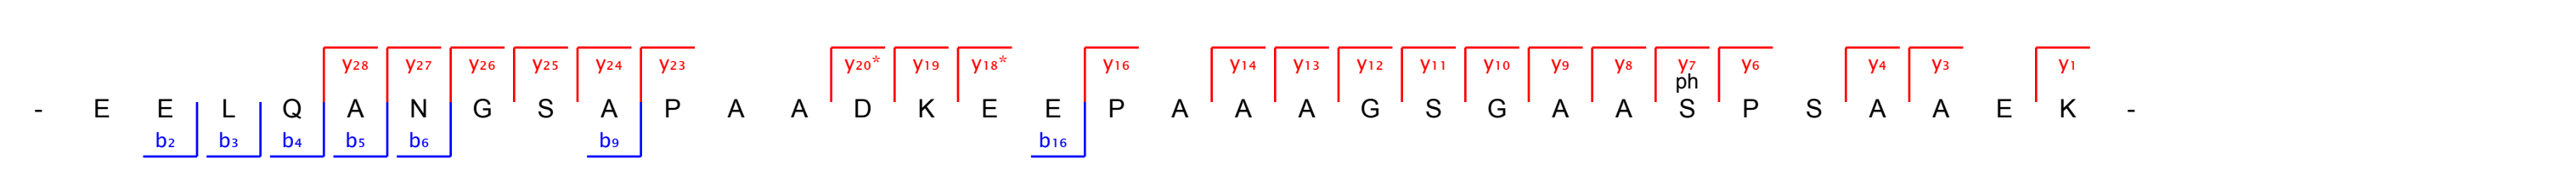

Raw file 20171215\_MaS\_33SR\_LMH\_phospho\_06 Scan 7031 Method FTMS; HCD Score 80.71 m/z 449.73 Gene names BICD2

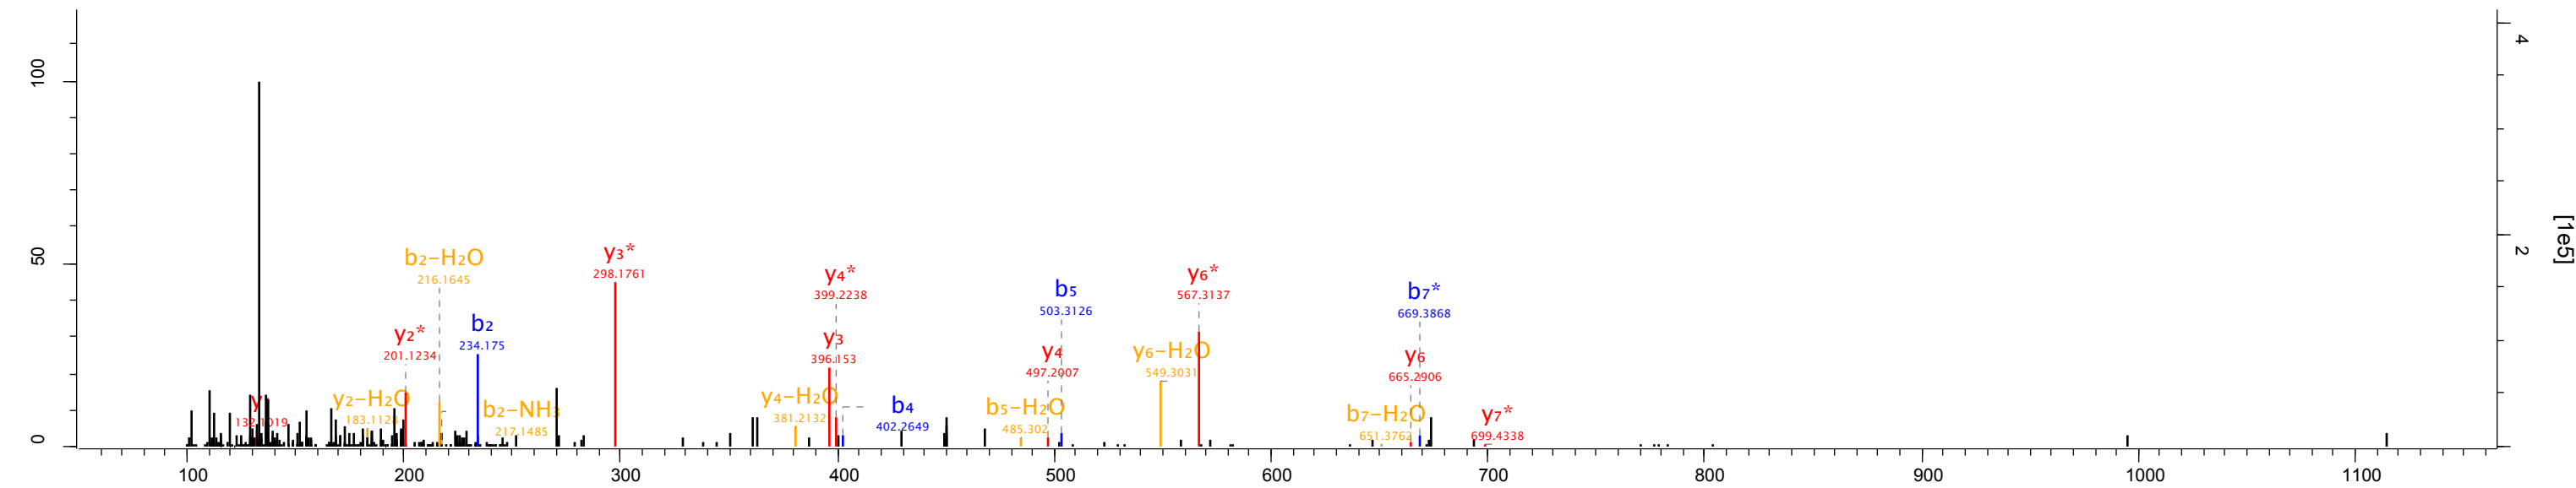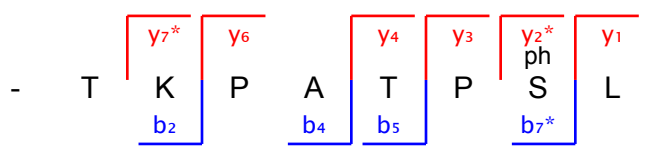

Raw file 20171215\_MaS\_33SR\_LMH\_phospho\_06 Scan 7241 Method FTMS; HCD Score 63.27 m/z 920.91

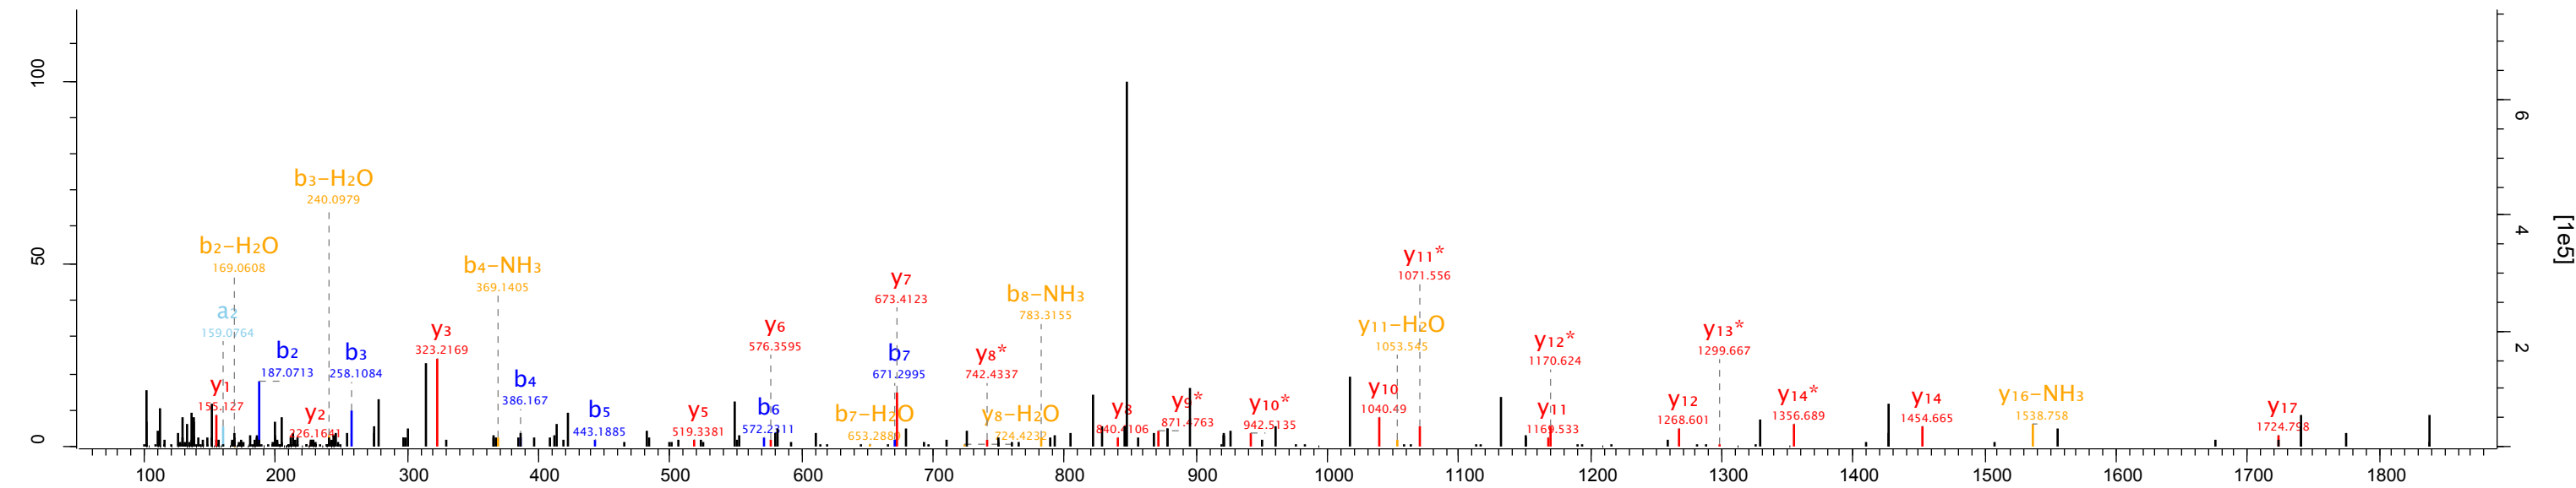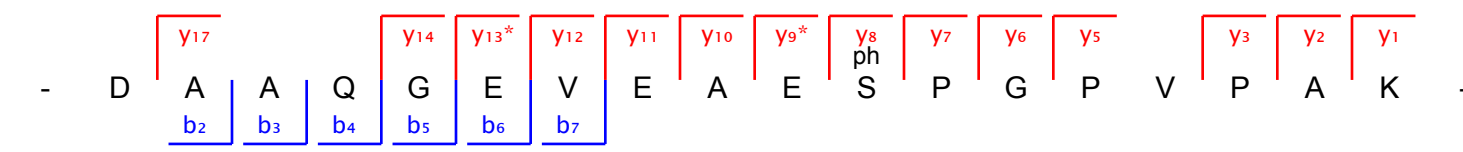

Raw file 20171215\_MaS\_33SR\_LMH\_phospho\_06 Scan 8081 Method FTMS; HCD Score 45.44 m/z 719.35 Gene names ZNF532

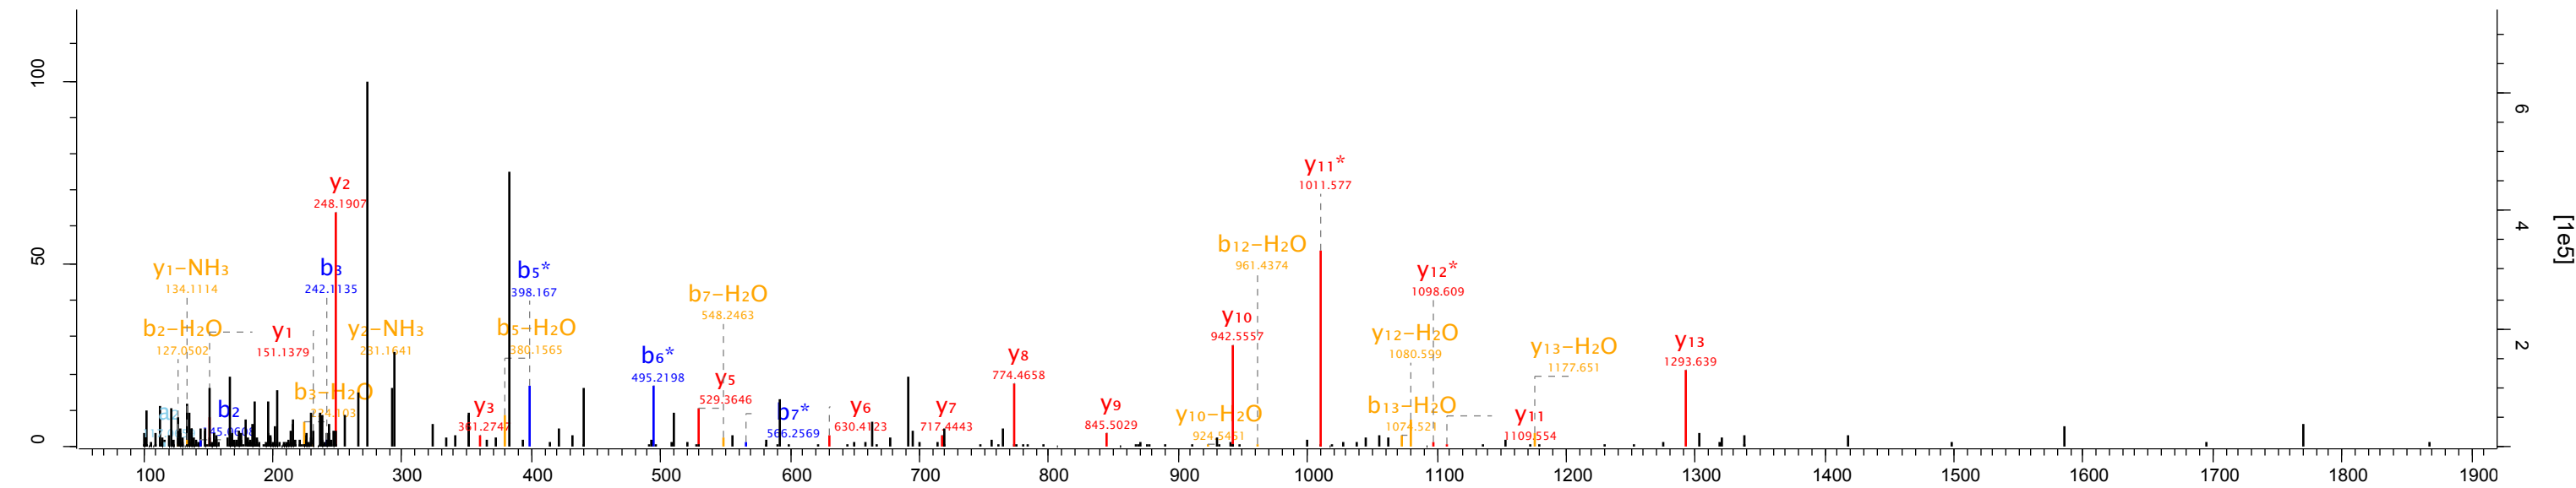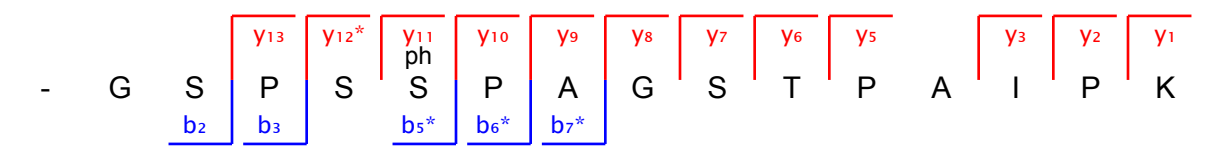

Raw file 20171215\_MaS\_33SR\_LMH\_phospho\_06 Scan 8141 Method FTMS; HCD Score 98.56 m/z 690.96 Gene names ZCCHC8

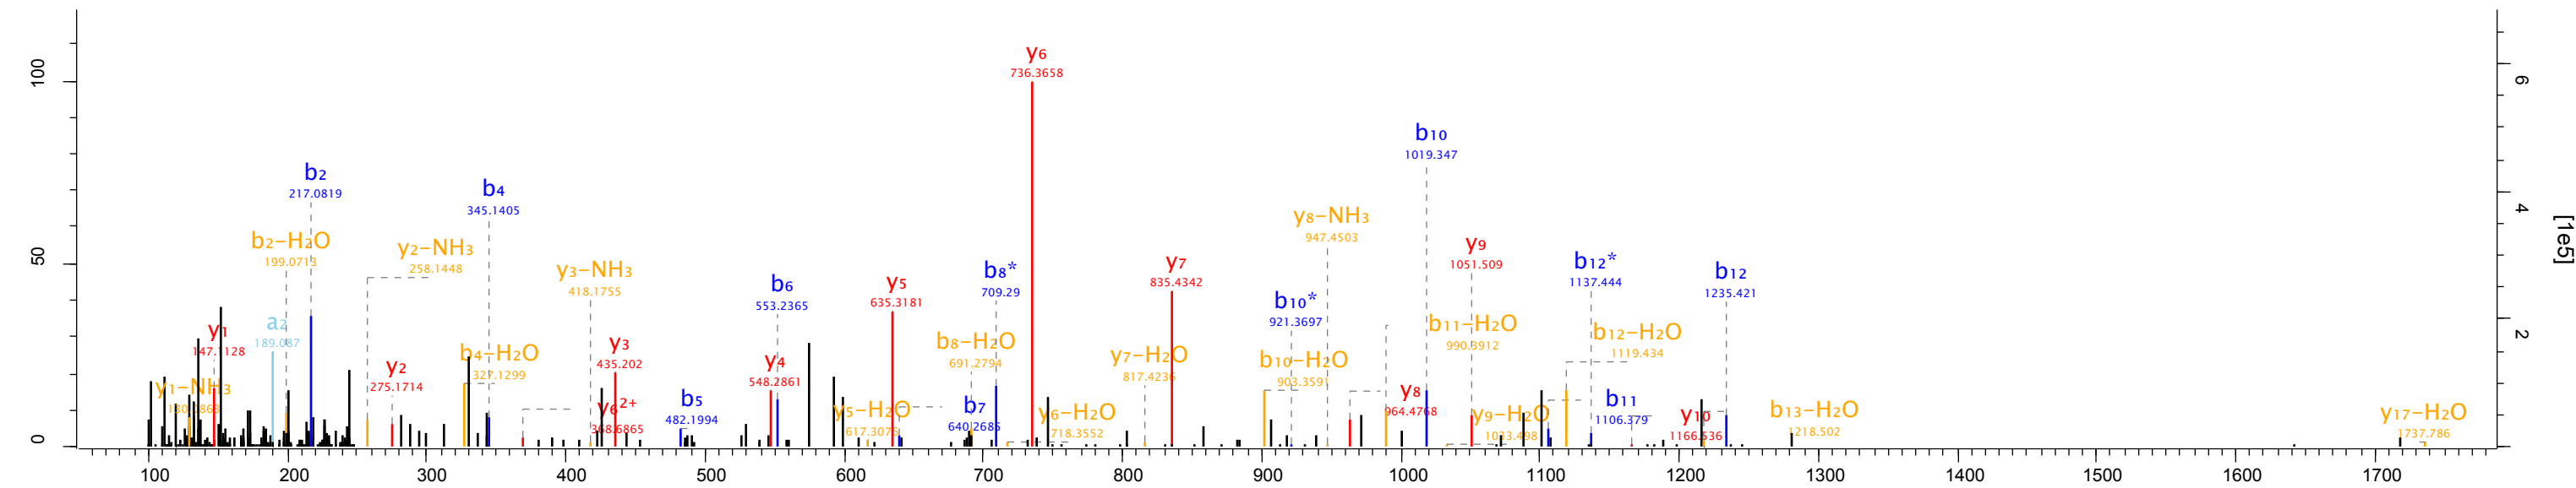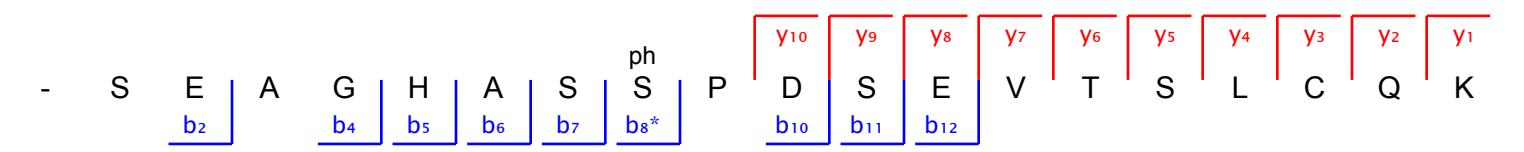



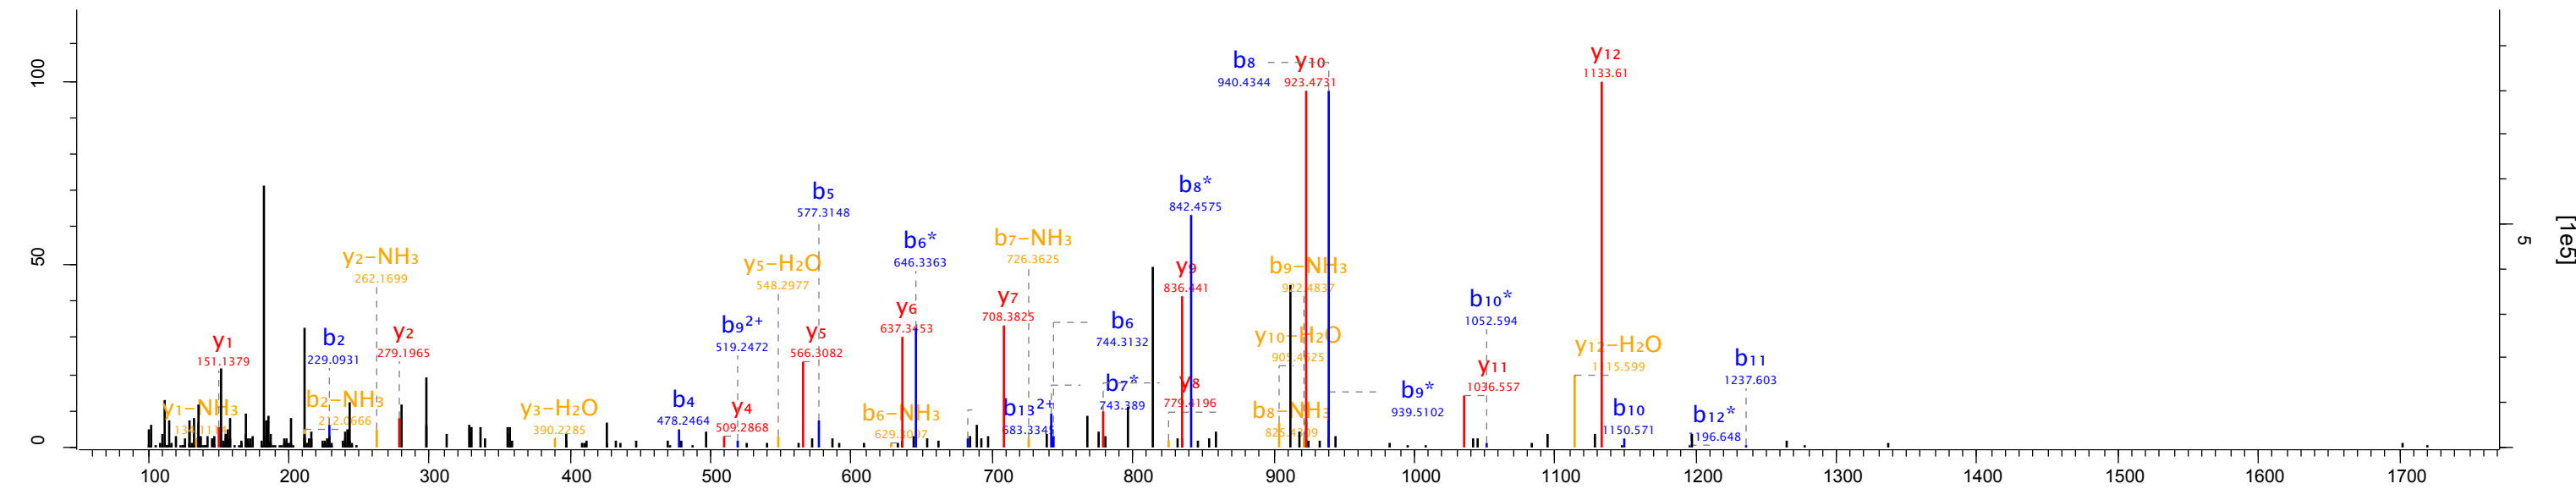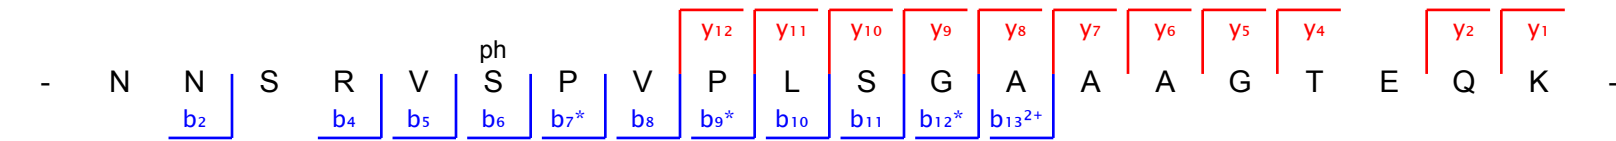

Raw file 20171215\_MaS\_33SR\_LMH\_phospho\_06 Scan 8421 Method FTMS; HCD Score 131.38 m/z 1013.5 Gene names HIST1H1E

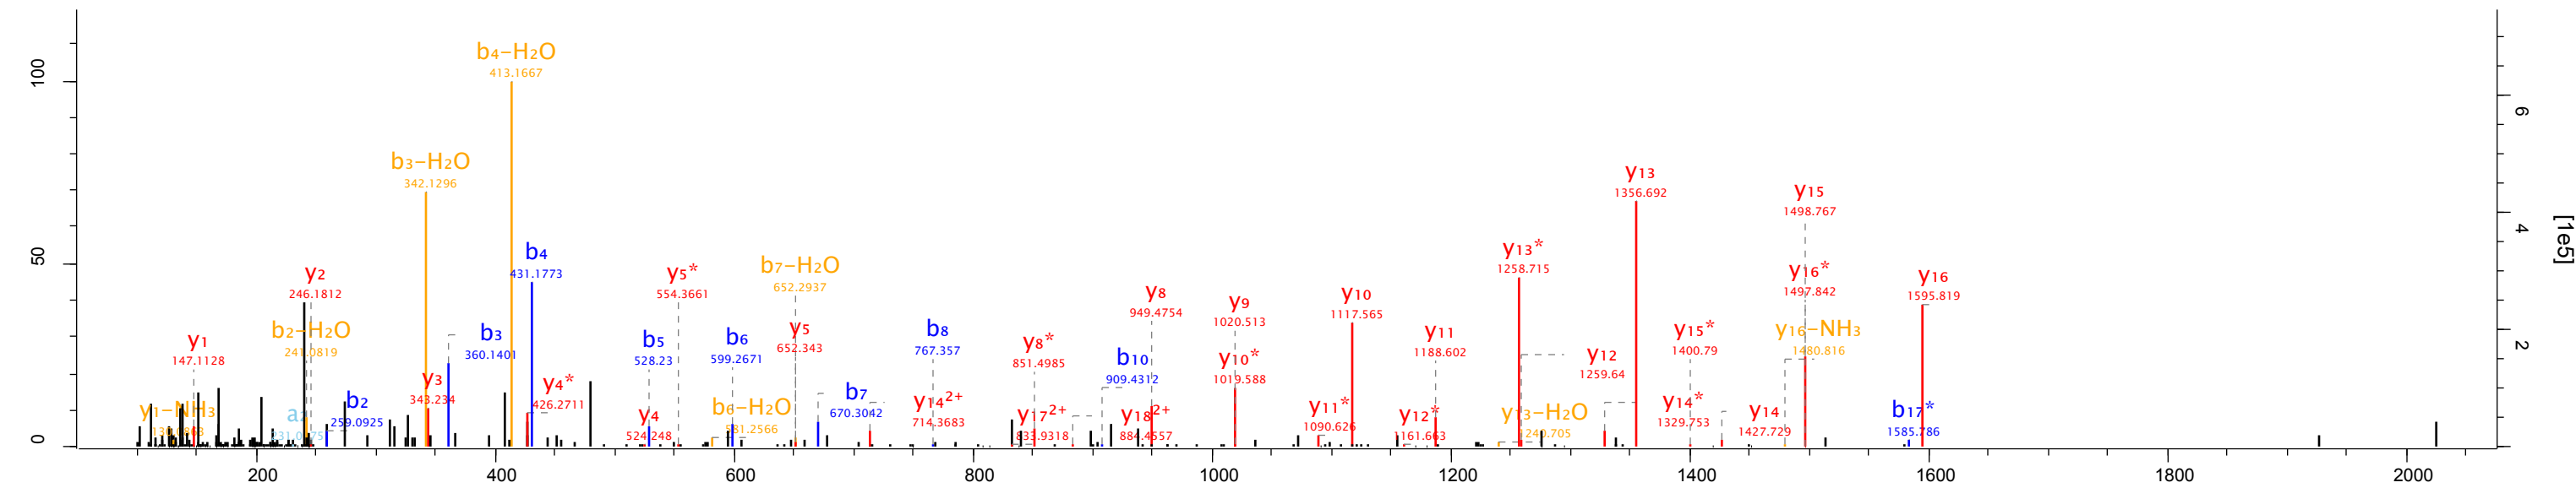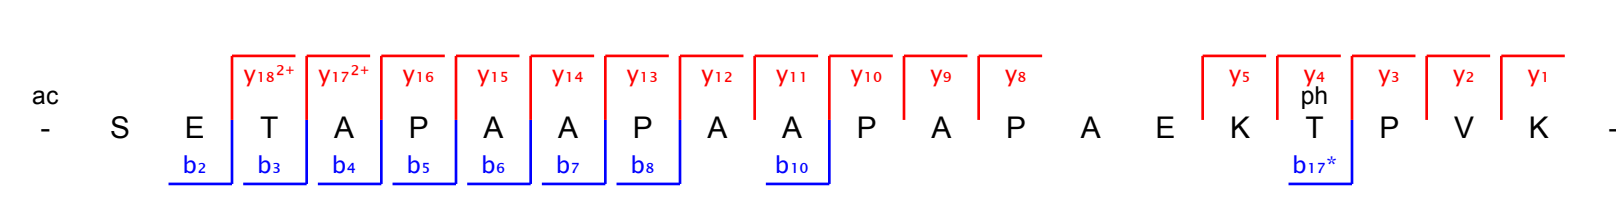

Raw file 20171215\_MaS\_33SR\_LMH\_phospho\_06 Scan 8581 Method FTMS; HCD Score 40.97 m/z 746.86 Gene names PAK1IP1

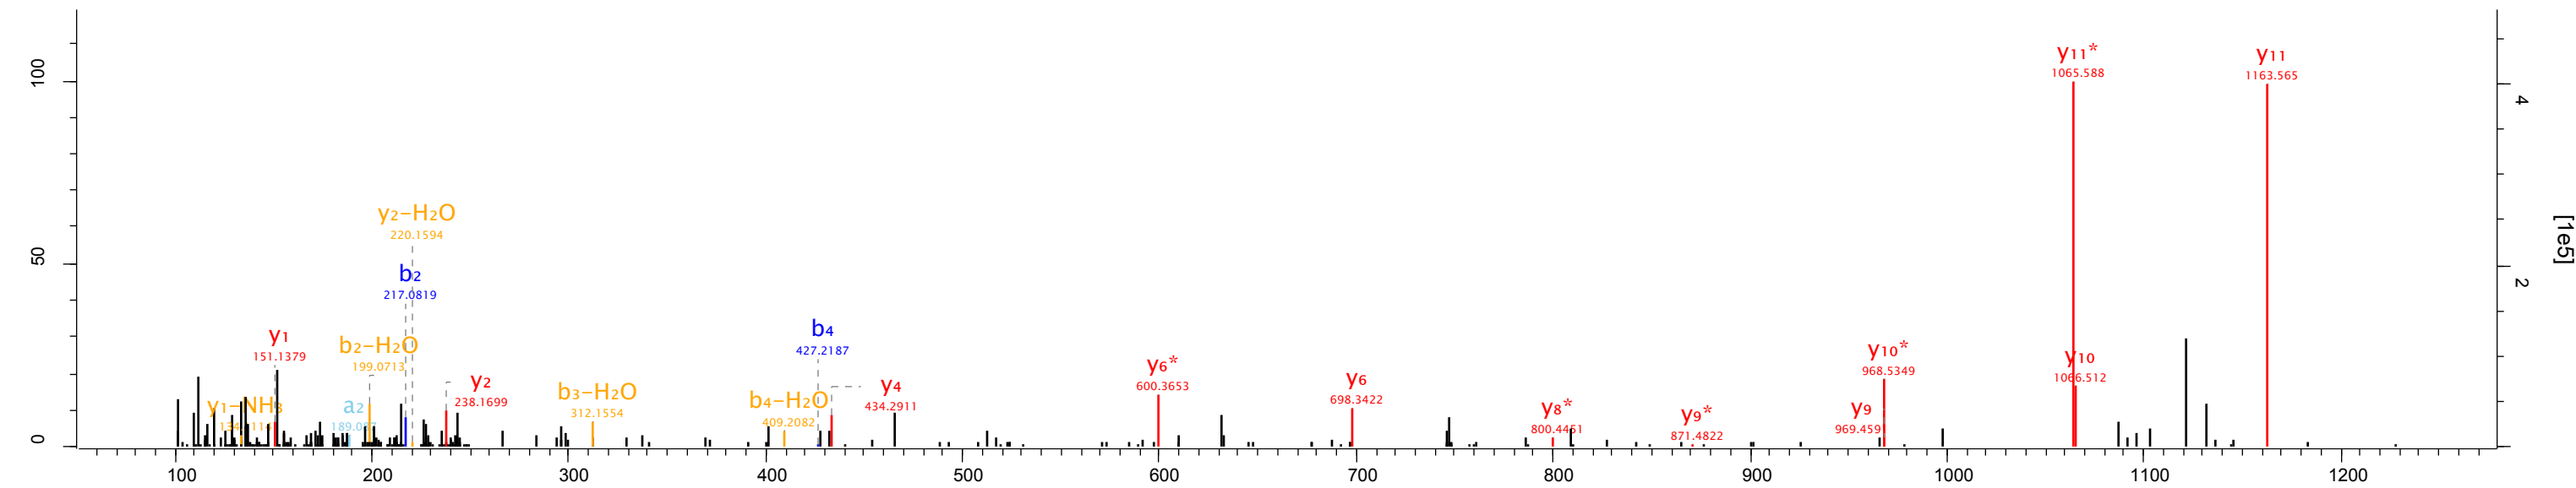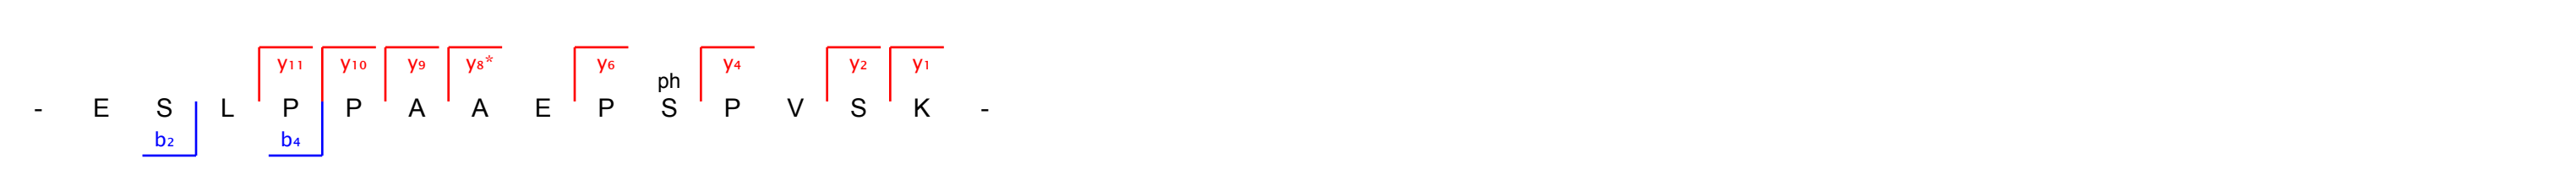

Raw file: 20171215\_MaS\_33SR\_LMH\_phospho\_06  
 Scan: 8641 Method: FTMS; HCD Score: 103.14 m/z: 577.76 Gene names: PPFIA1

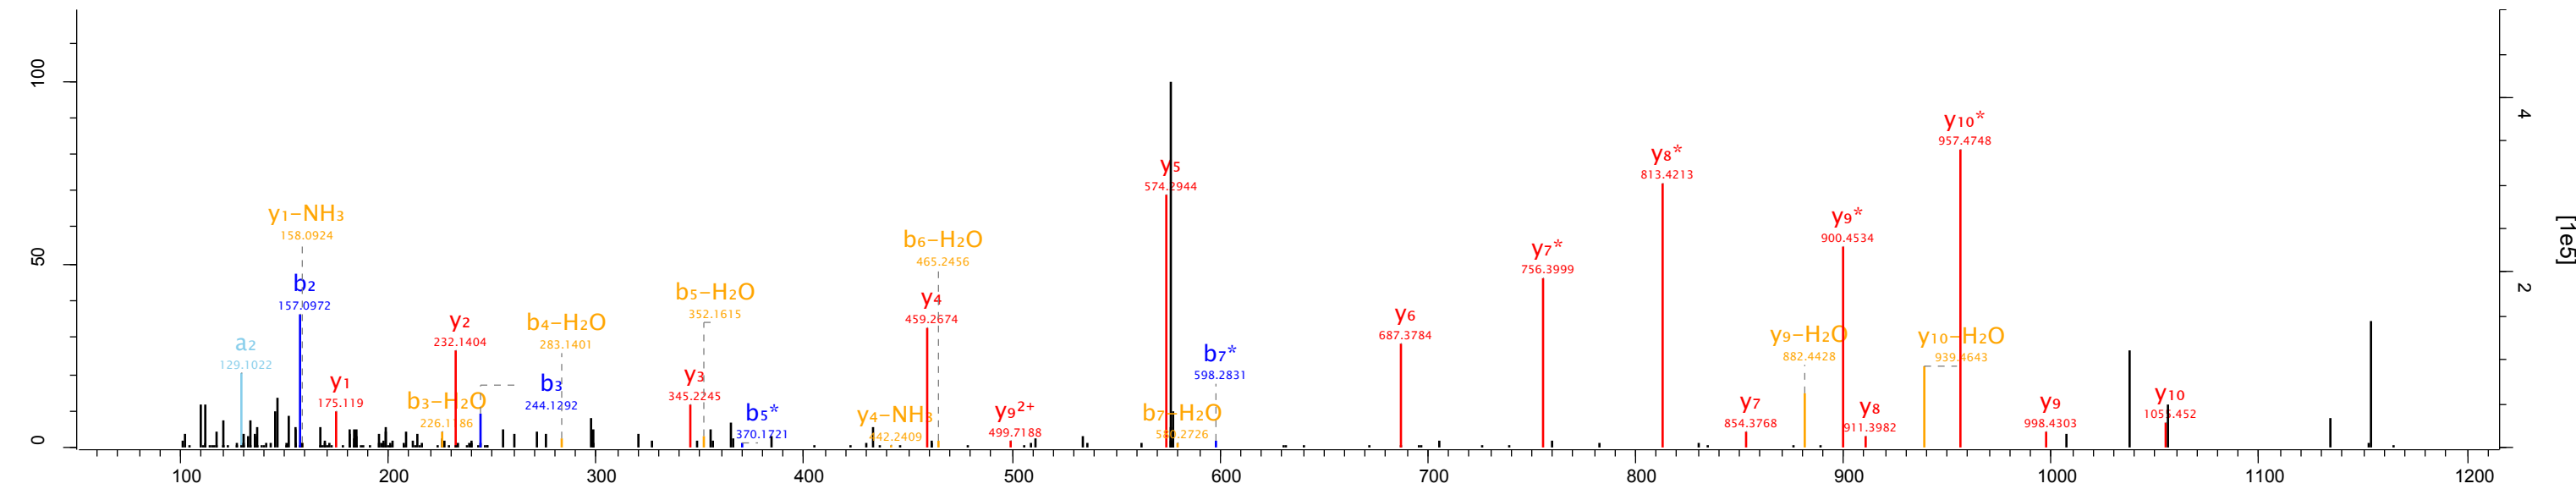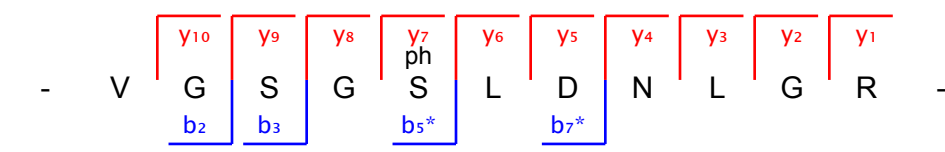

Raw file 20171215\_MaS\_33SR\_LMH\_phospho\_06 Scan 8801 Method FTMS; HCD Score 109.44 m/z 556.79 Gene names RRP1B

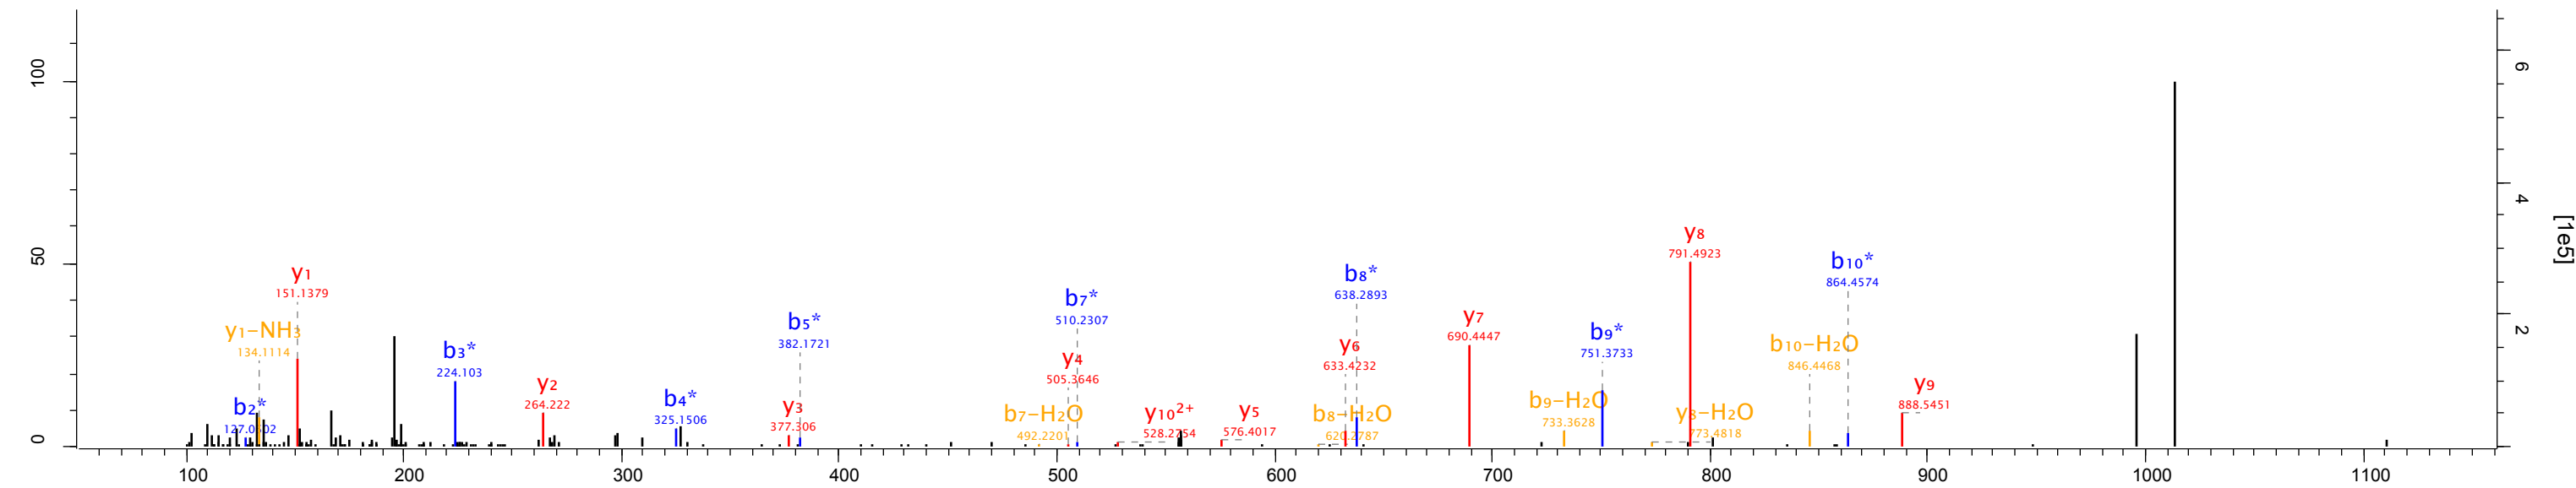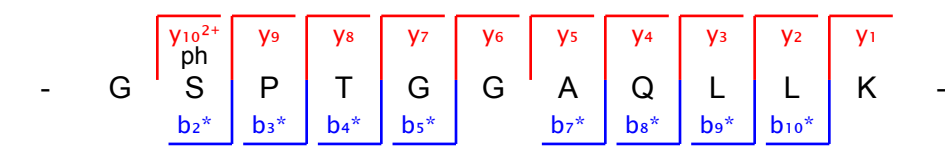

Raw file 20171215\_MaS\_33SR\_LMH\_phospho\_06 Scan 8921 Method FTMS; HCD Score 152.51 m/z 843.86 Gene names FLNB

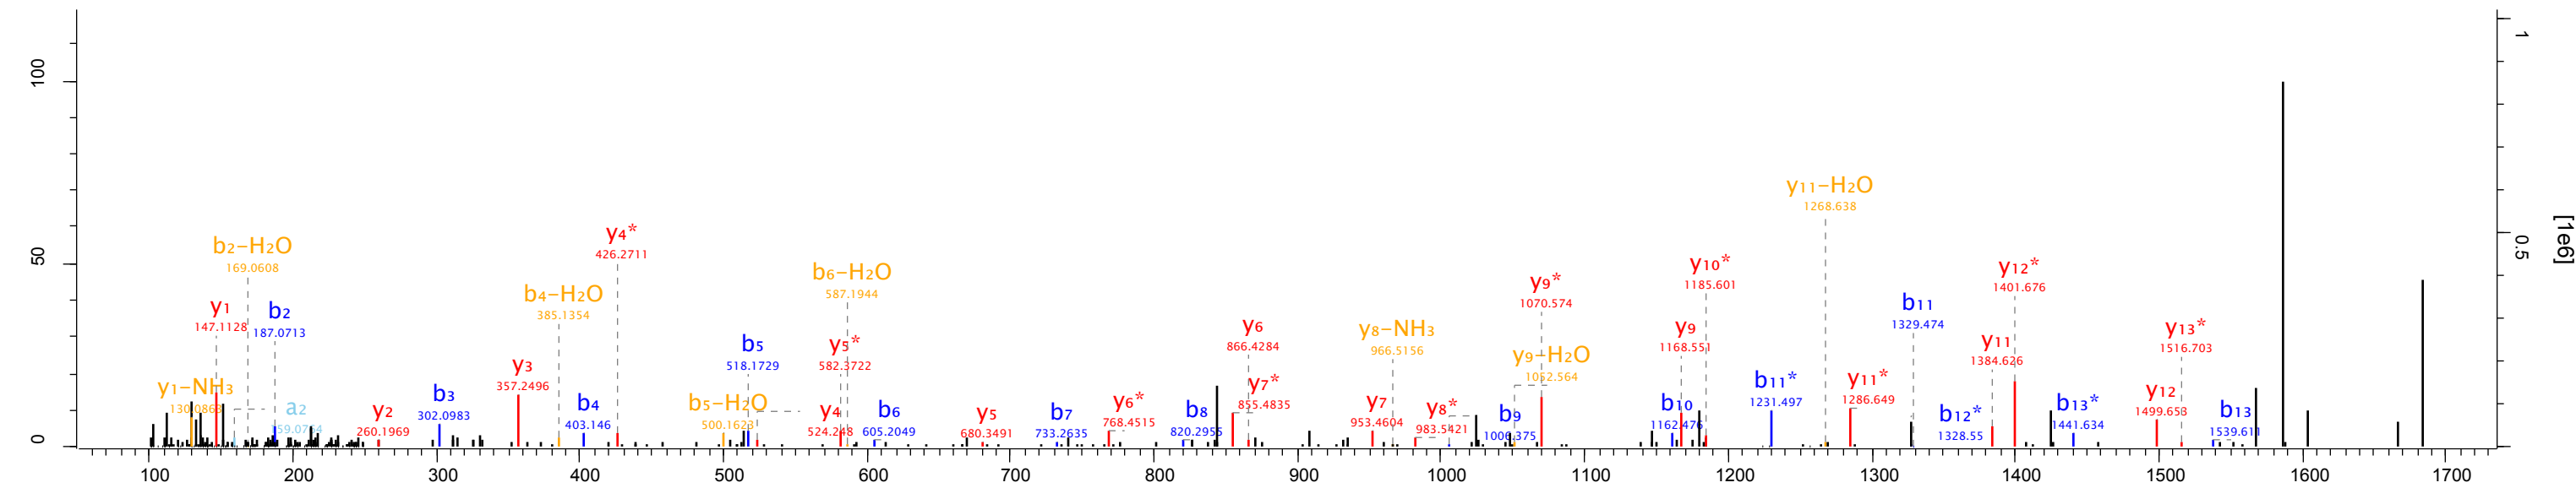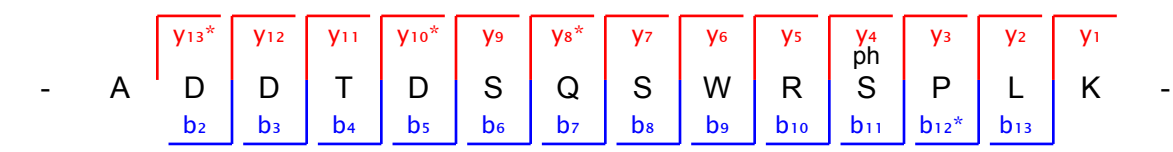

Raw file 20171215\_MaS\_33SR\_LMH\_phospho\_06 Scan 9001 Method FTMS; HCD Score 50.83 m/z 930.4 Gene names ZNF831

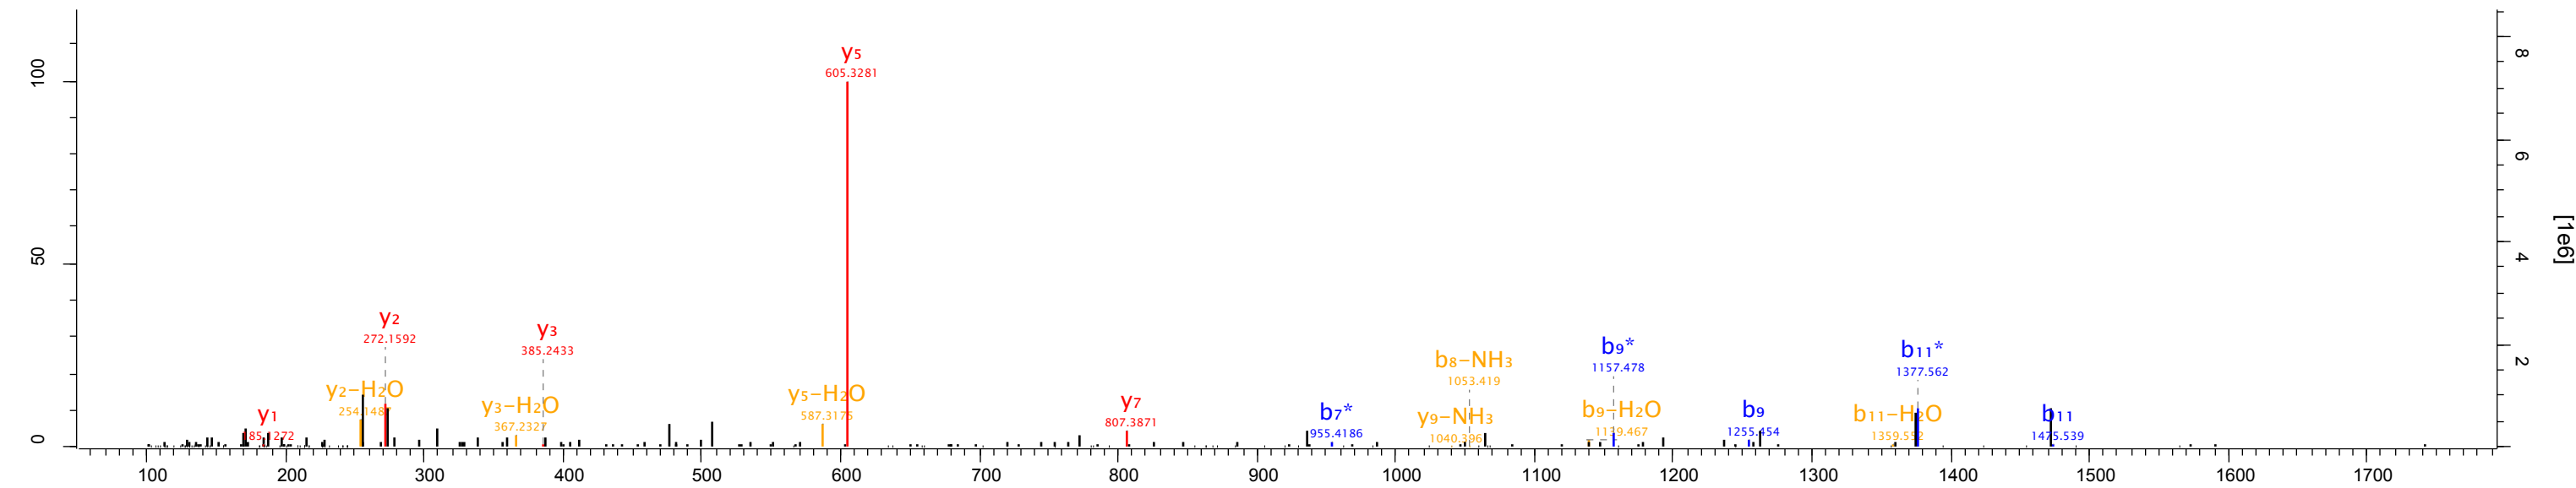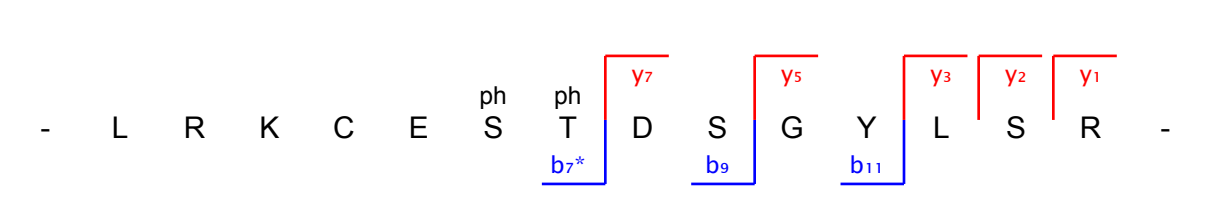

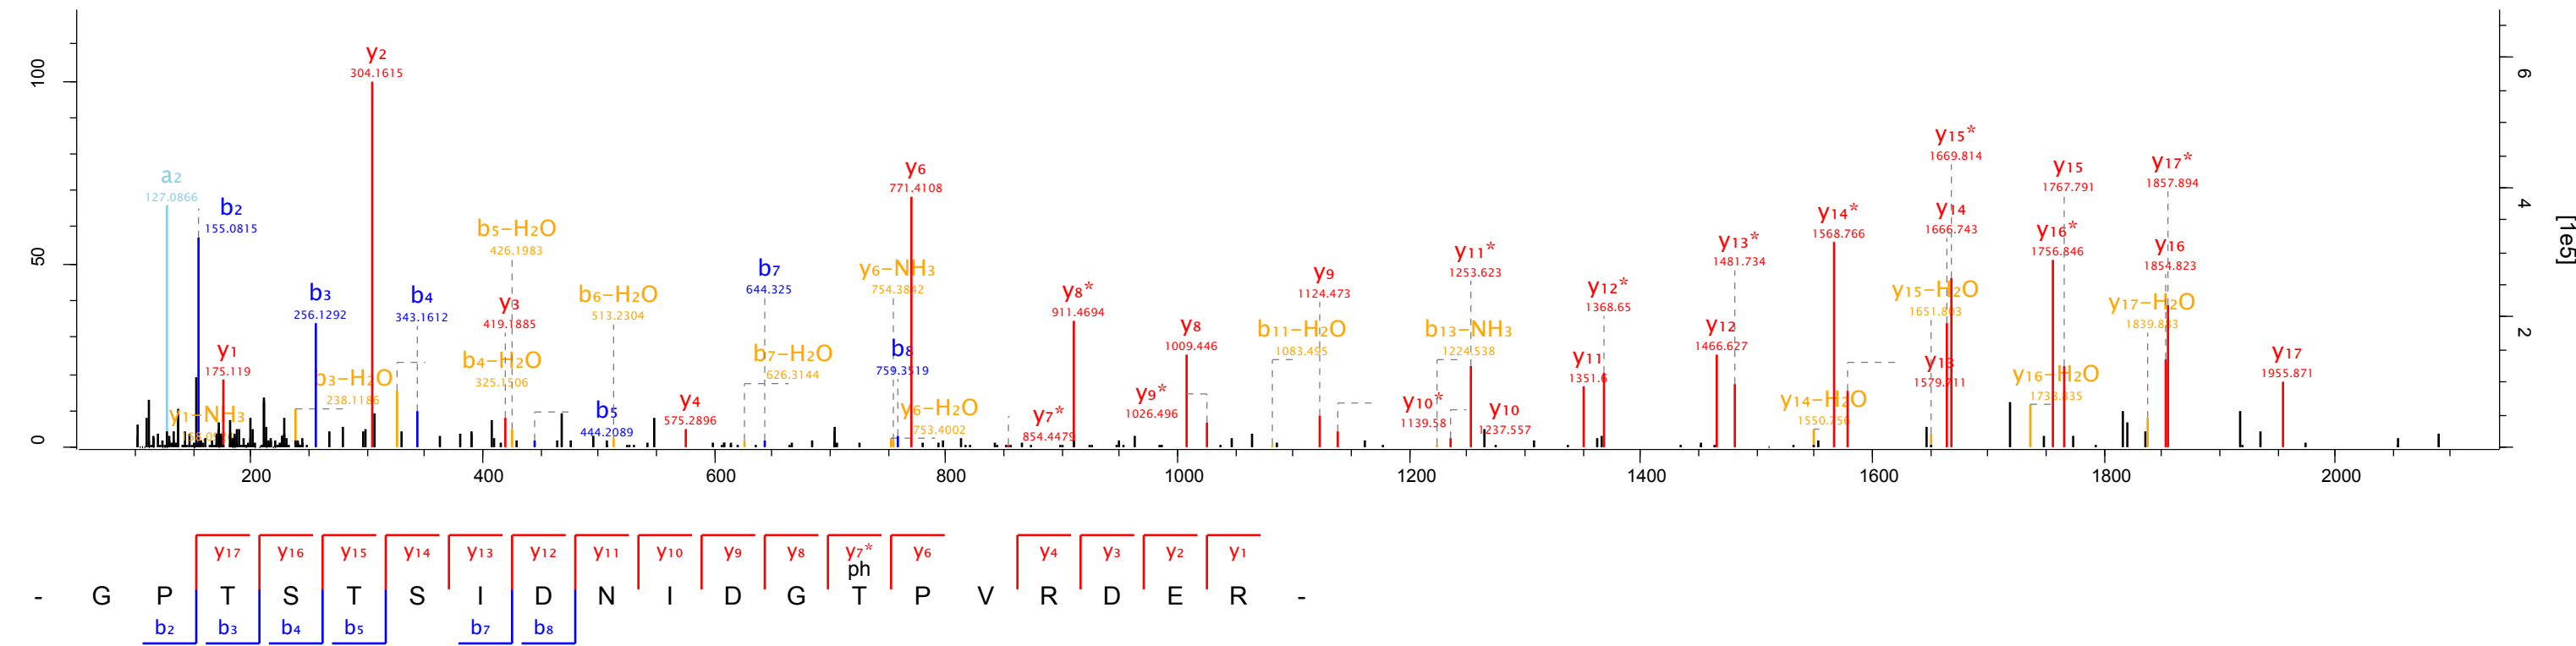



Raw file 20171215\_MaS\_33SR\_LMH\_phospho\_06 Scan 9241 Method FTMS; HCD Score 132.86 m/z 512.76 Gene names CIC

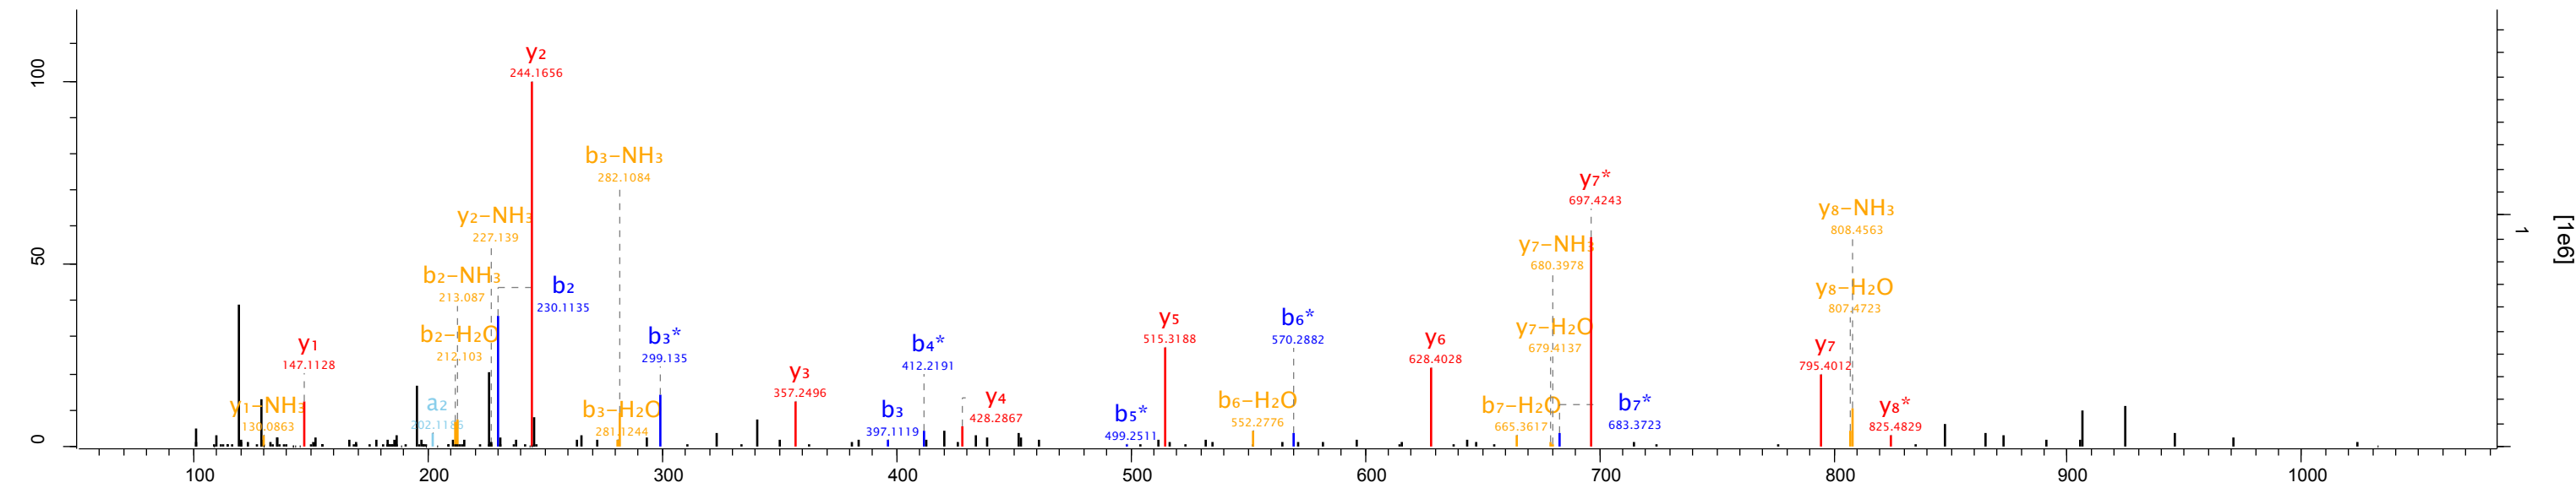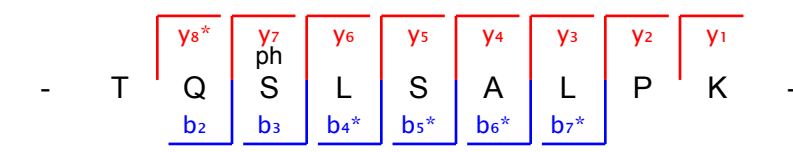

Raw file 20171215\_MaS\_33SR\_LMH\_phospho\_06 Scan 9491 Method FTMS; HCD Score 53.75 m/z 1344.46 Gene names LOC388210

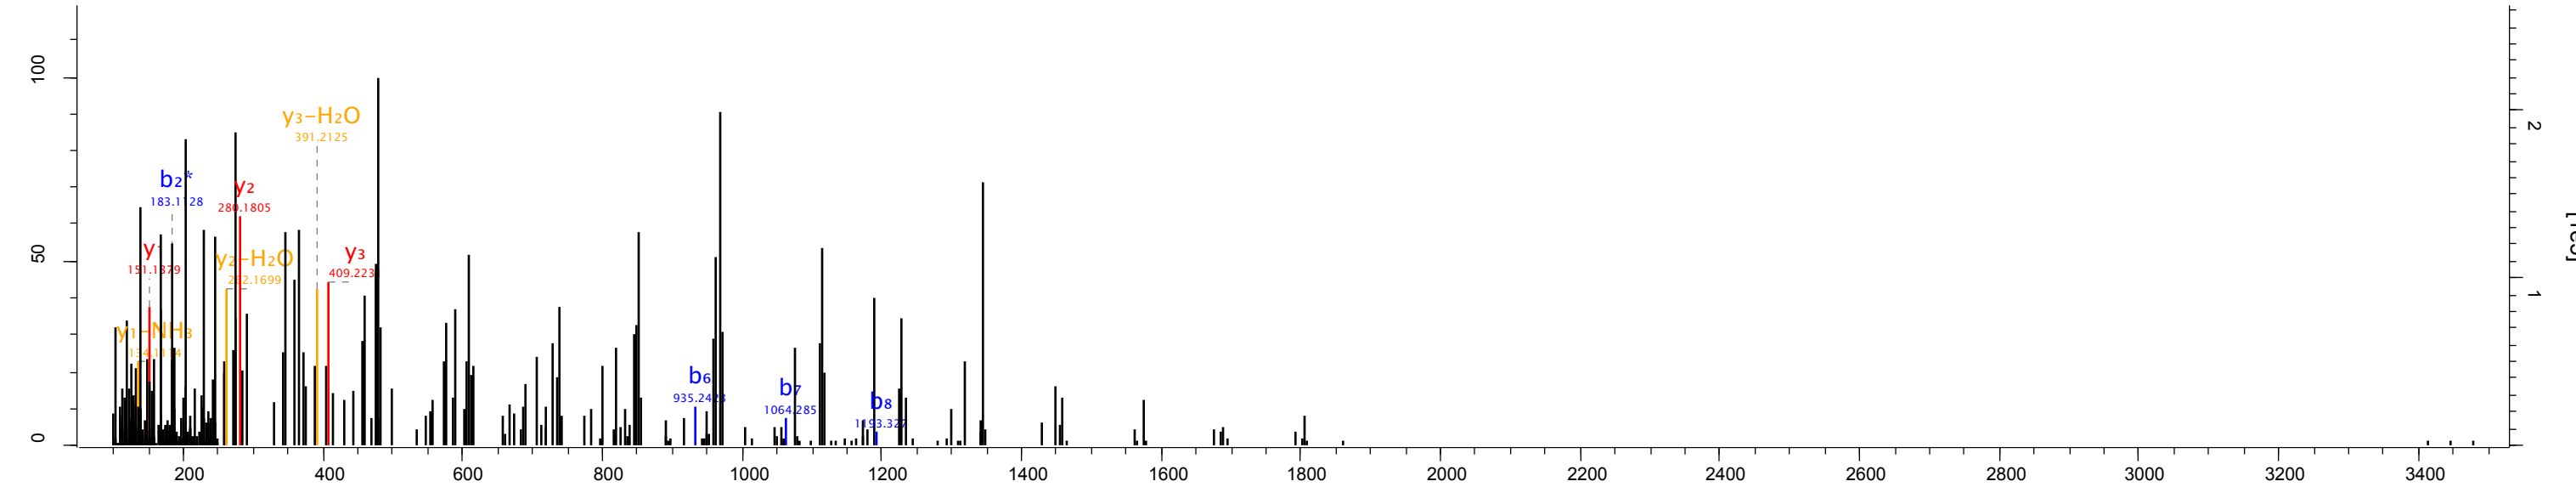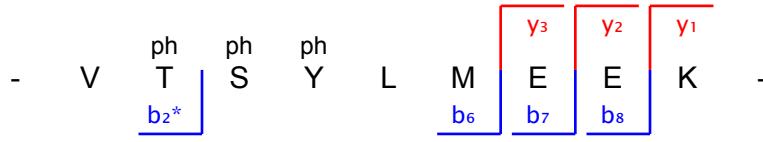

Raw file 20171215\_MaS\_33SR\_LMH\_phospho\_06 Scan 9621 Method FTMS; HCD Score 174.19 m/z 630.97 Gene names FLNA

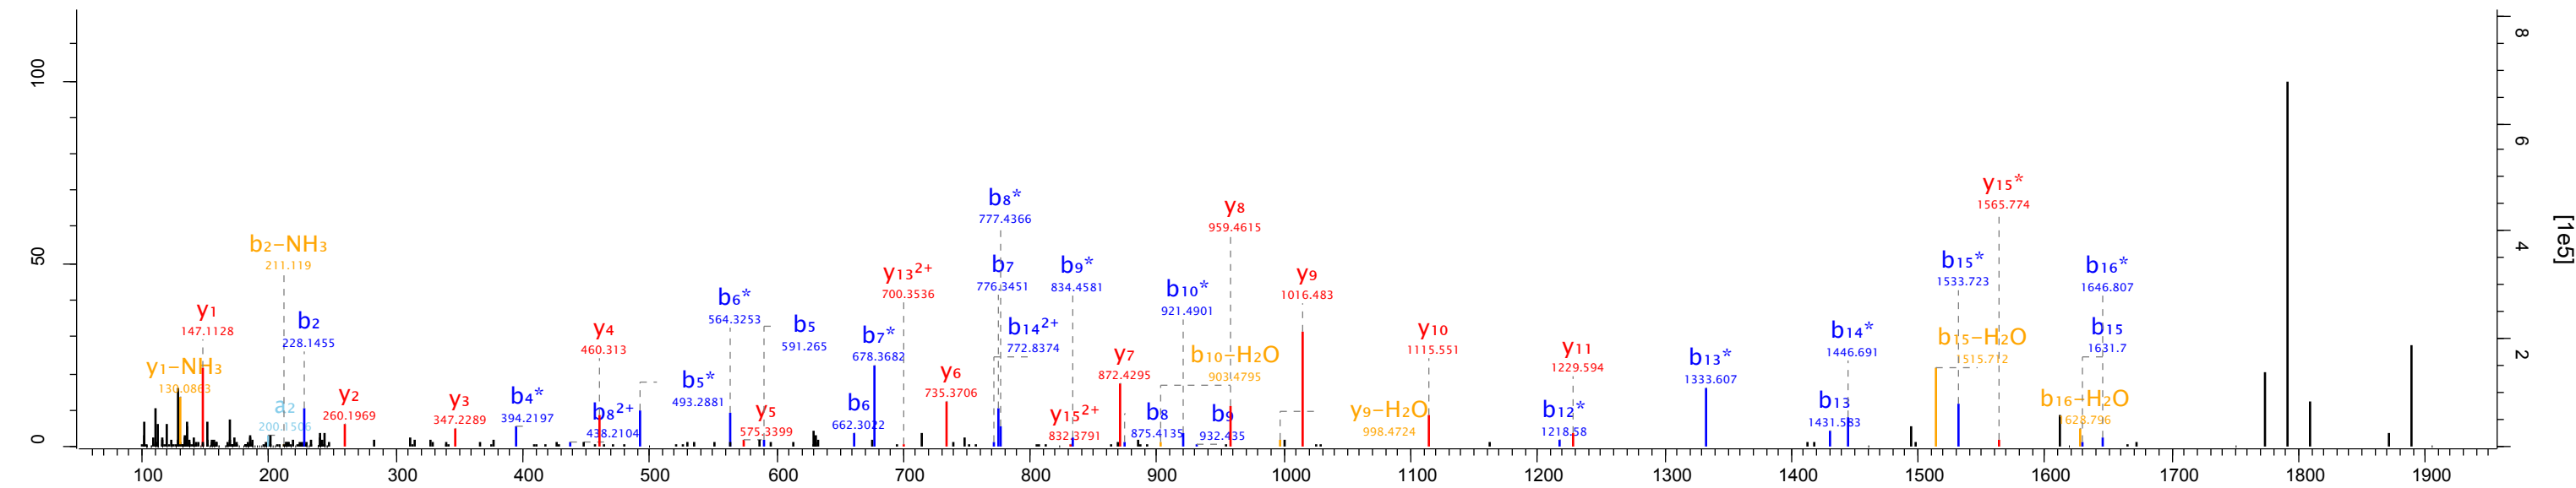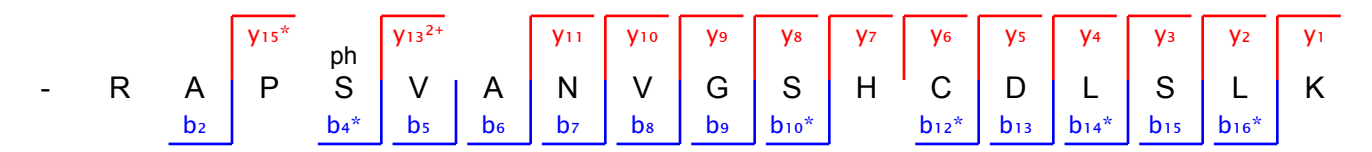

Raw file 20171215\_MaS\_33SR\_LMH\_phospho\_06 Scan 9701 Method FTMS; HCD Score 160.77 m/z 997.83 Gene names NCOR1

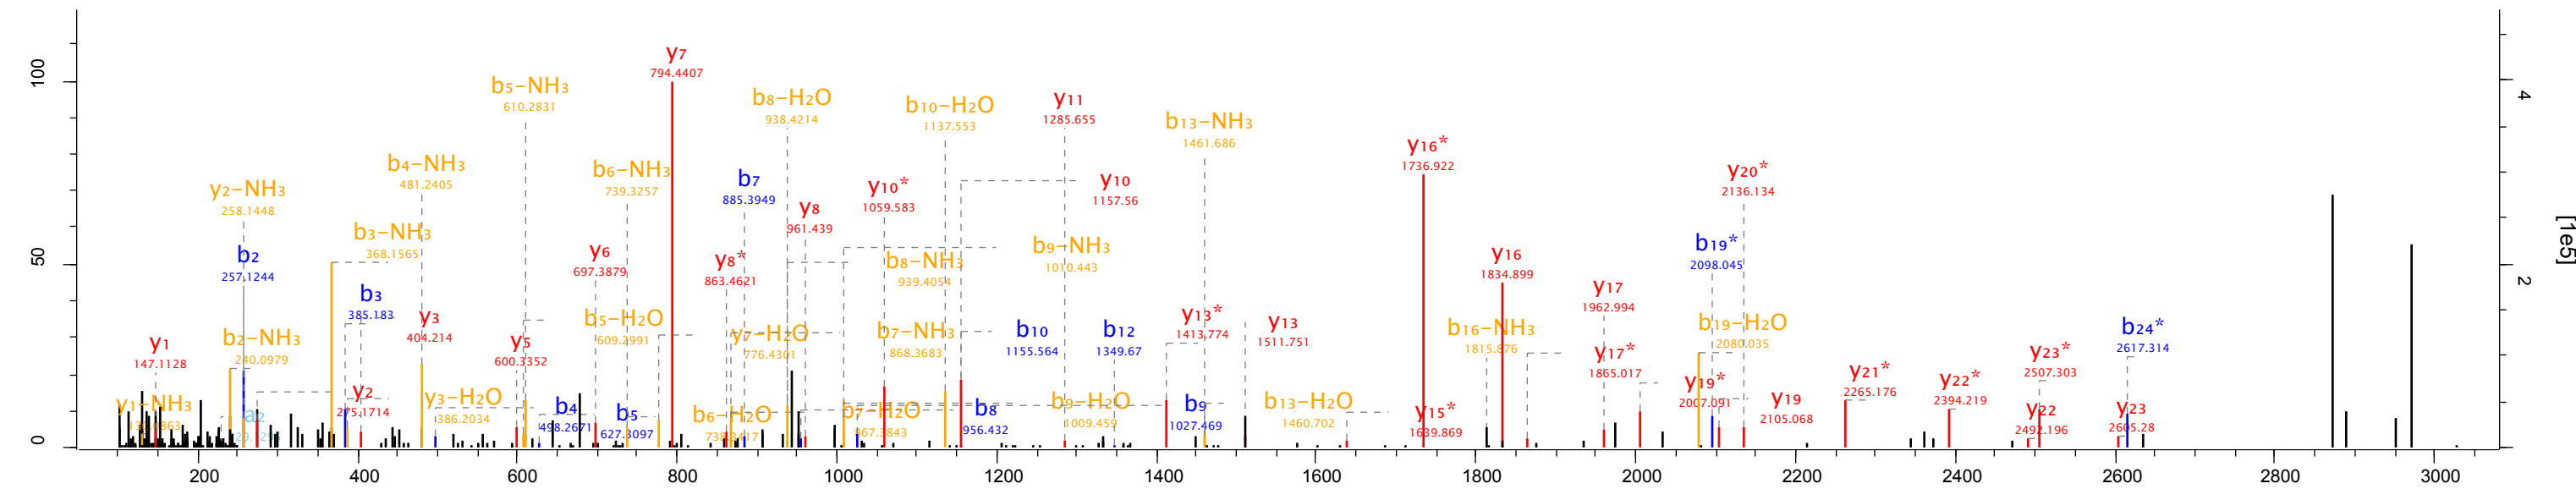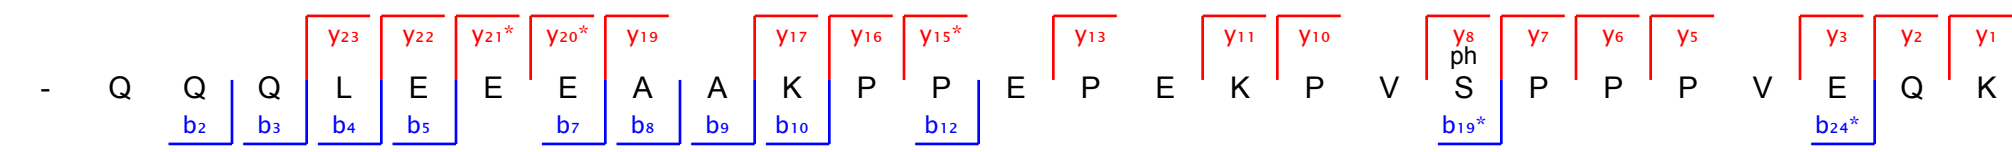

Raw file 20171215\_MaS\_33SR\_LMH\_phospho\_07 Scan 2231 Method FTMS; HCD Score 58.82 m/z 437.21 Gene names HP1BP3

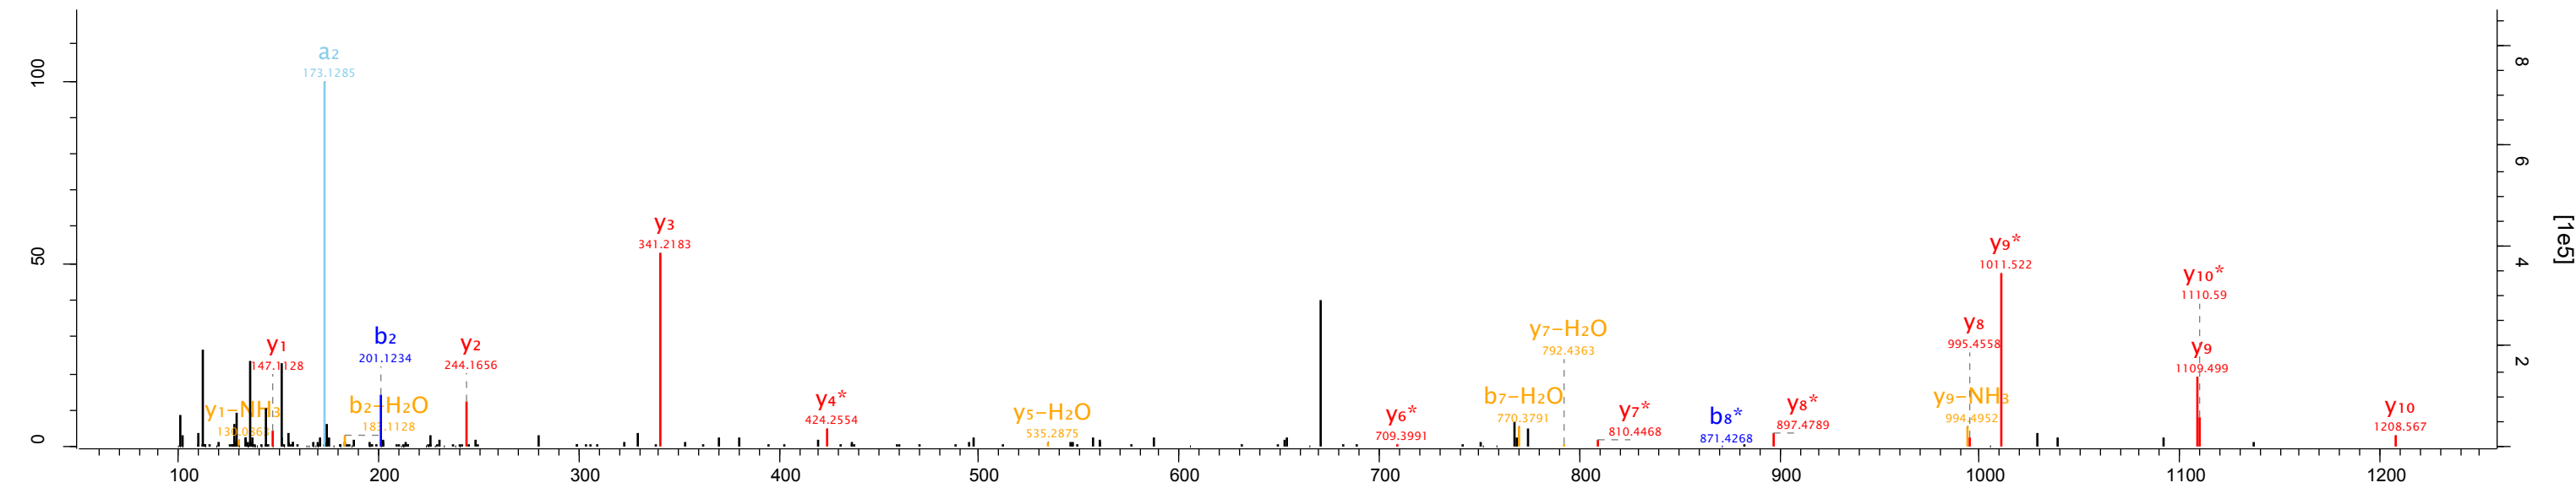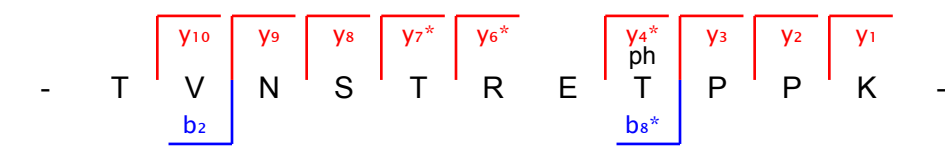

Raw file 20171215\_MaS\_33SR\_LMH\_phospho\_07 Scan 2251 Method FTMS; HCD Score 101.97 m/z 583.77 Gene names USP36

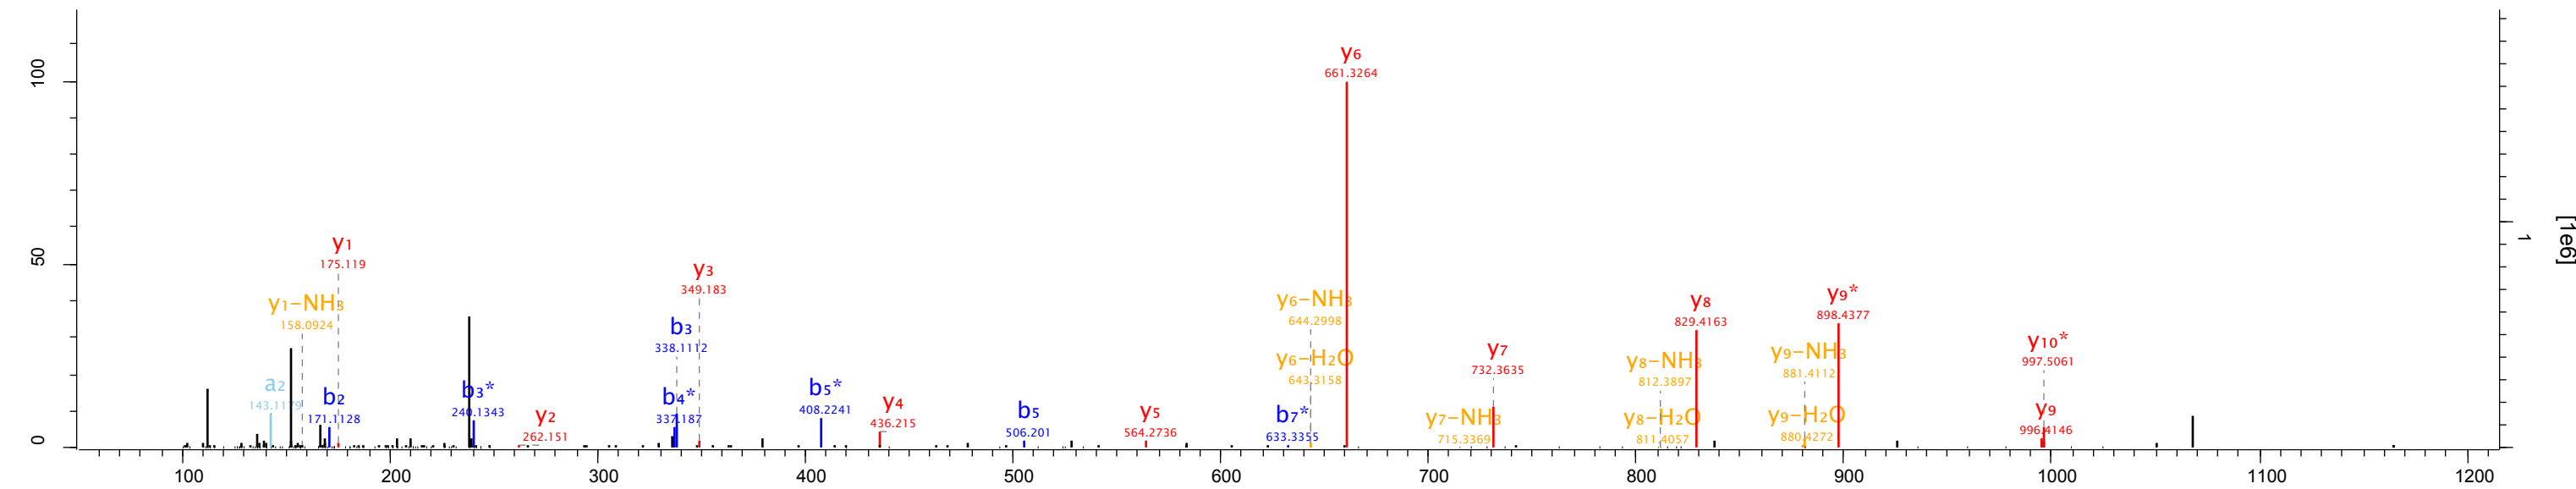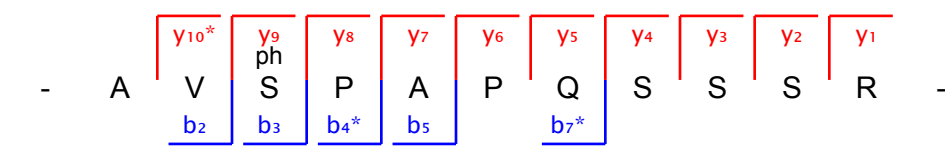

Raw file 20171215\_MaS\_33SR\_LMH\_phospho\_07 Scan 2761 Method FTMS; HCD Score 119.22 m/z 481.7 Gene names VIM

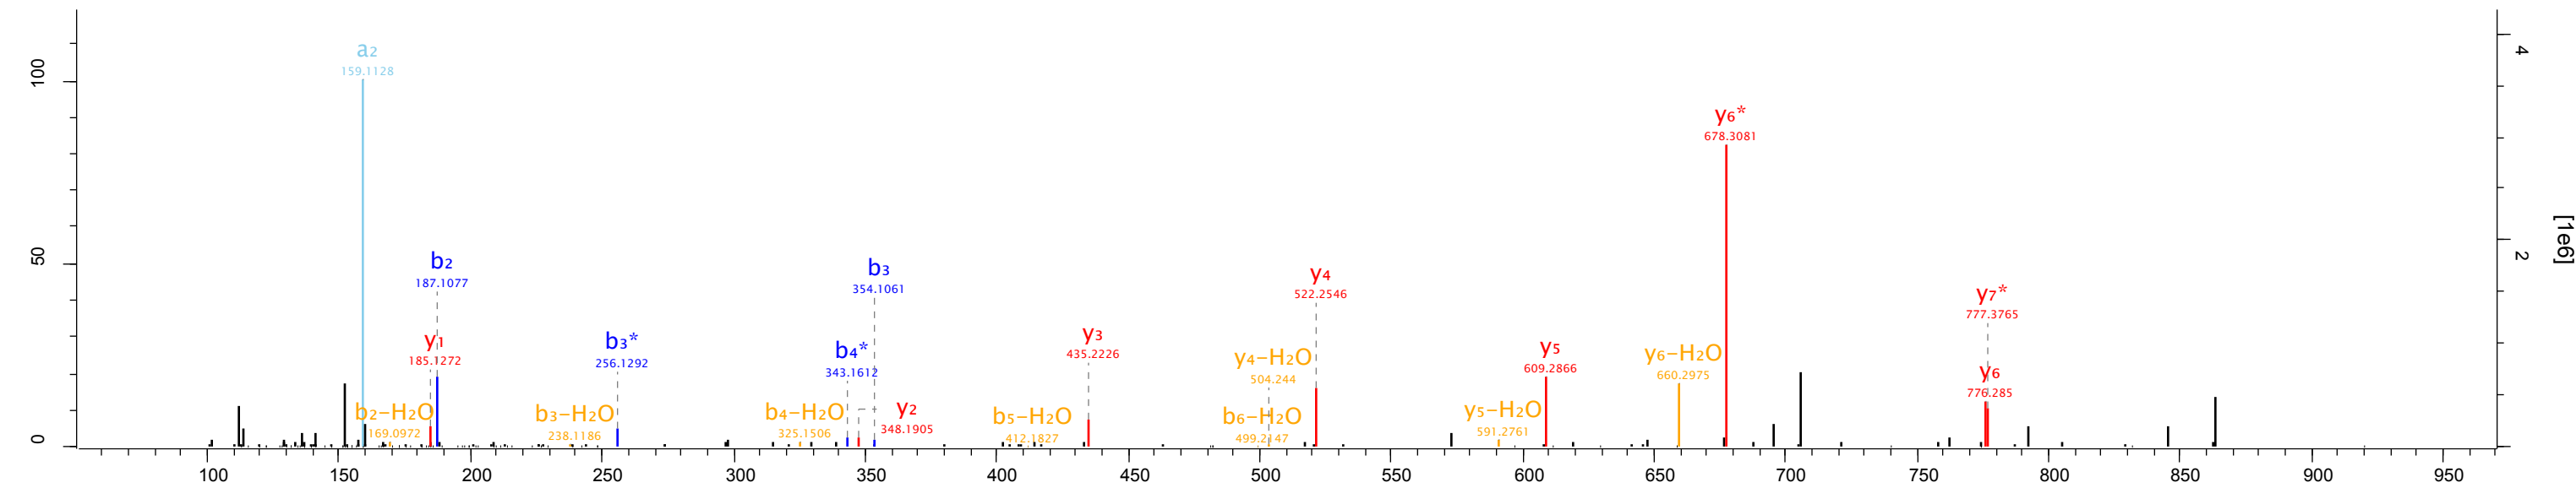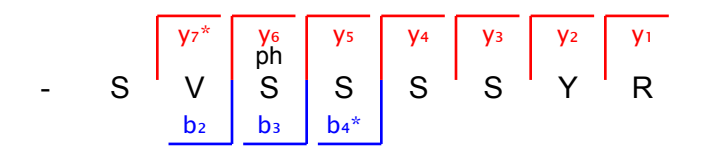

Raw file 20171215\_MaS\_33SR\_LMH\_phospho\_07 Scan 2901 Method FTMS; HCD Score 148.41 m/z 630.29 Gene names FAM76B

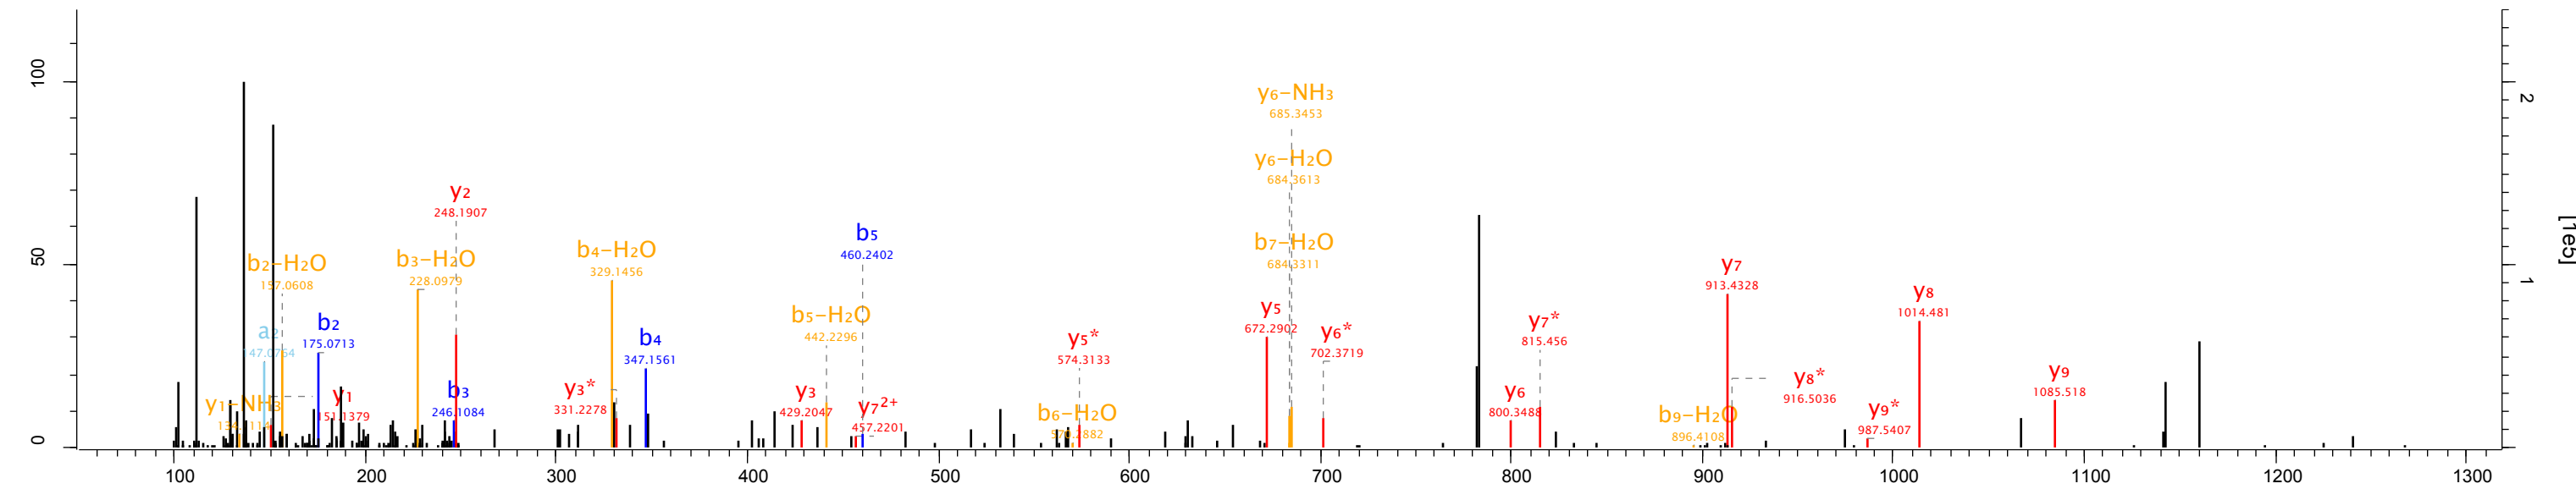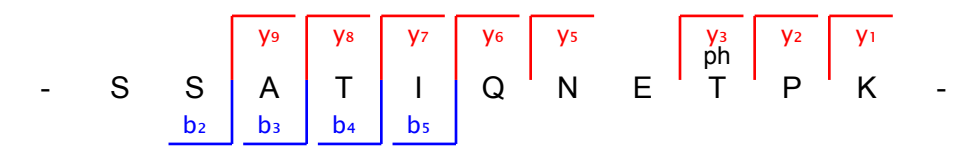



Raw file 20171215\_MaS\_33SR\_LMH\_phospho\_07 Scan 3861 Method FTMS; HCD Score 55.75 m/z 468.56 Gene names RPRD1B

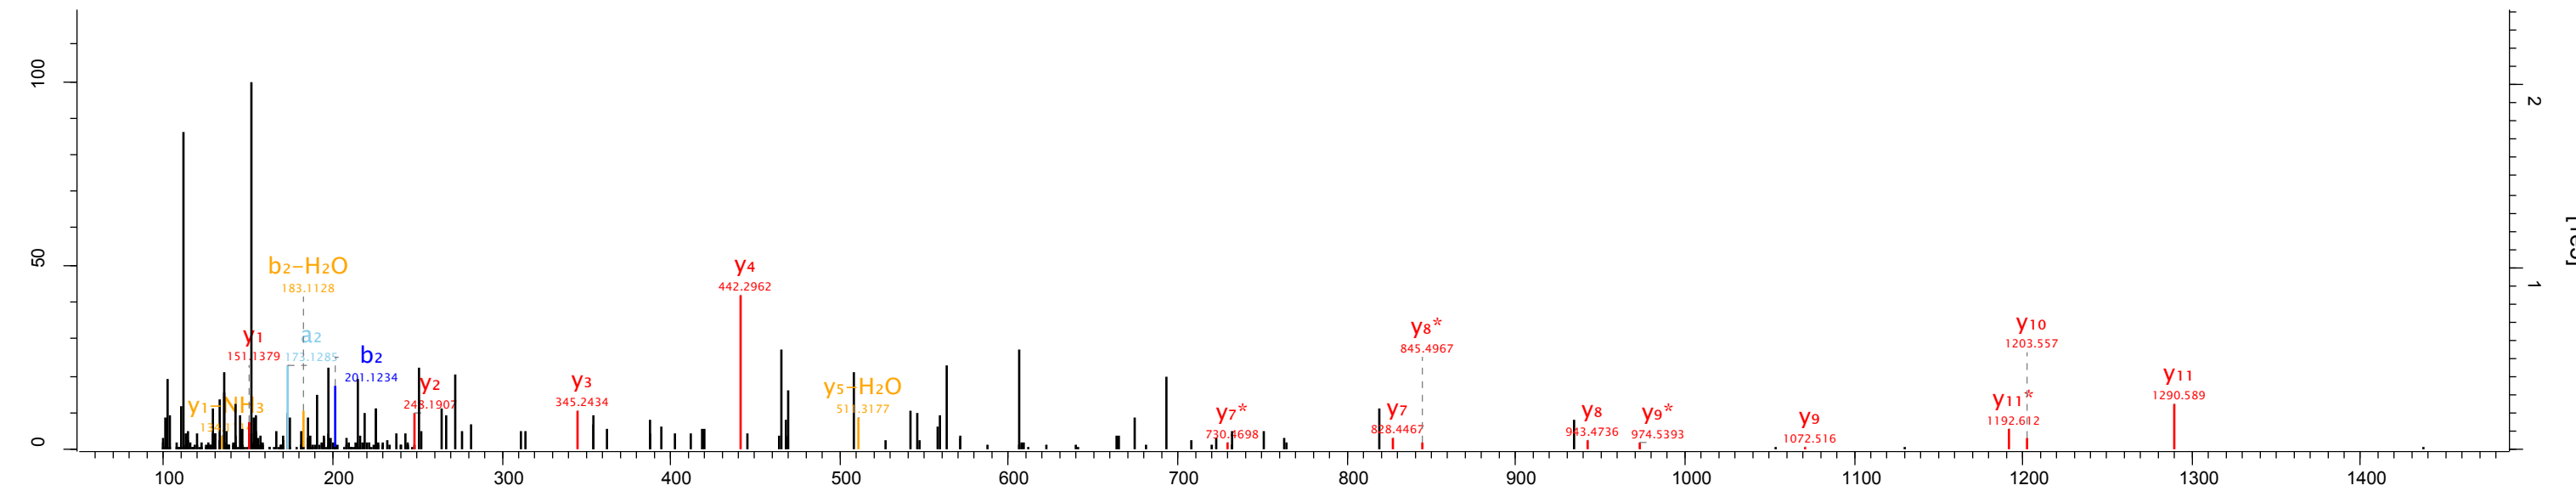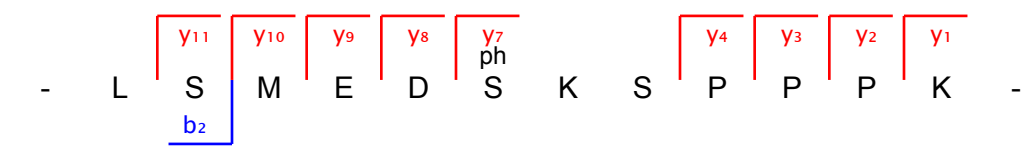

Raw file 20171215\_MaS\_33SR\_LMH\_phospho\_07 Scan 3981 Method FTMS; HCD Score 110.92 m/z 603.29 Gene names PHLDB2

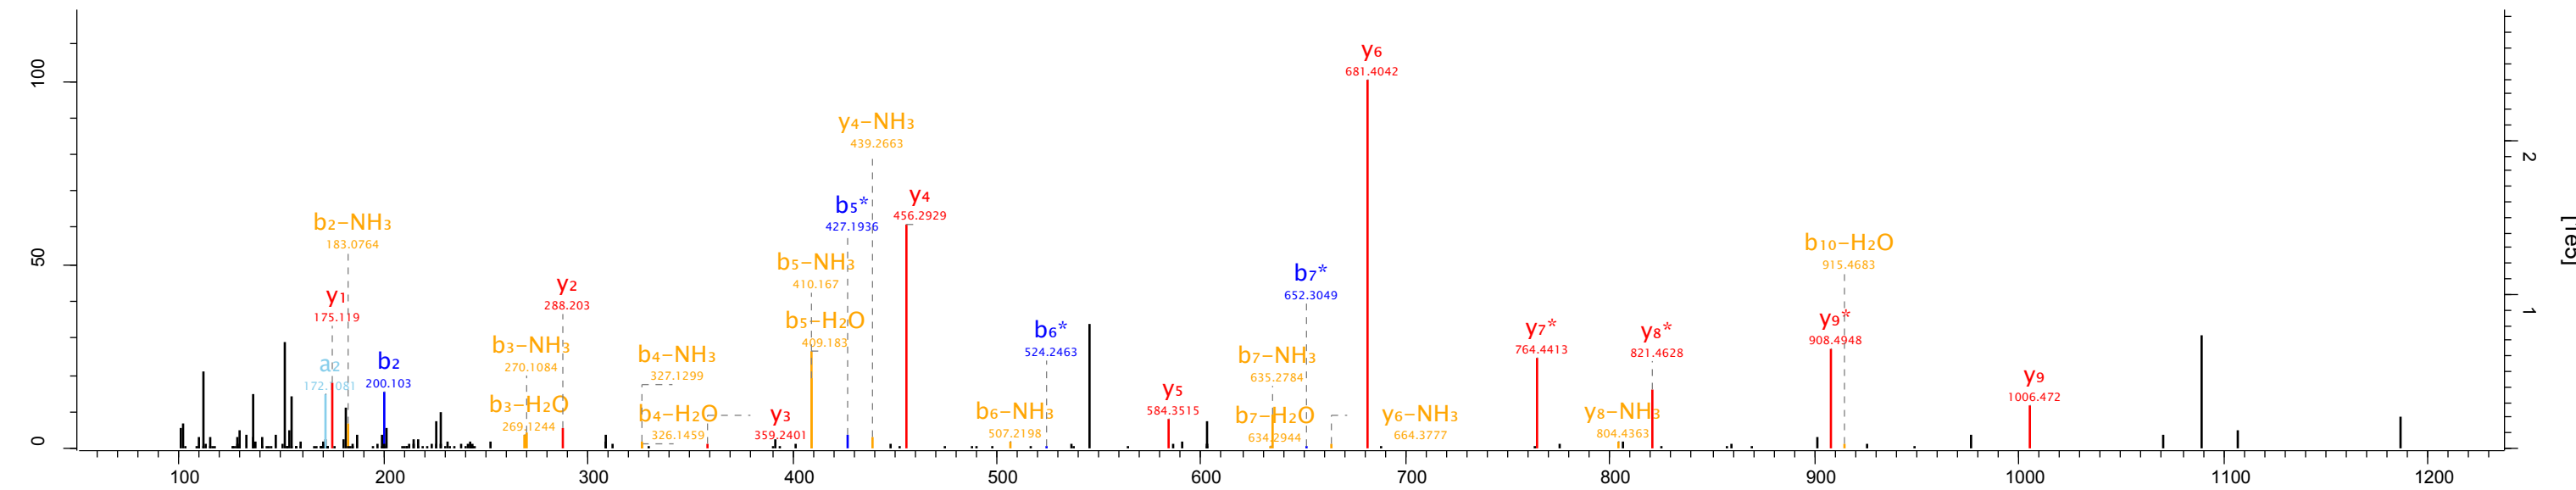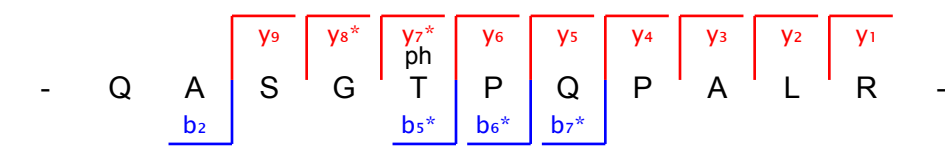

Raw file 20171215\_MaS\_33SR\_LMH\_phospho\_07 Scan 4551 Method FTMS; HCD Score 198.98 m/z 720.33 Gene names LMNA

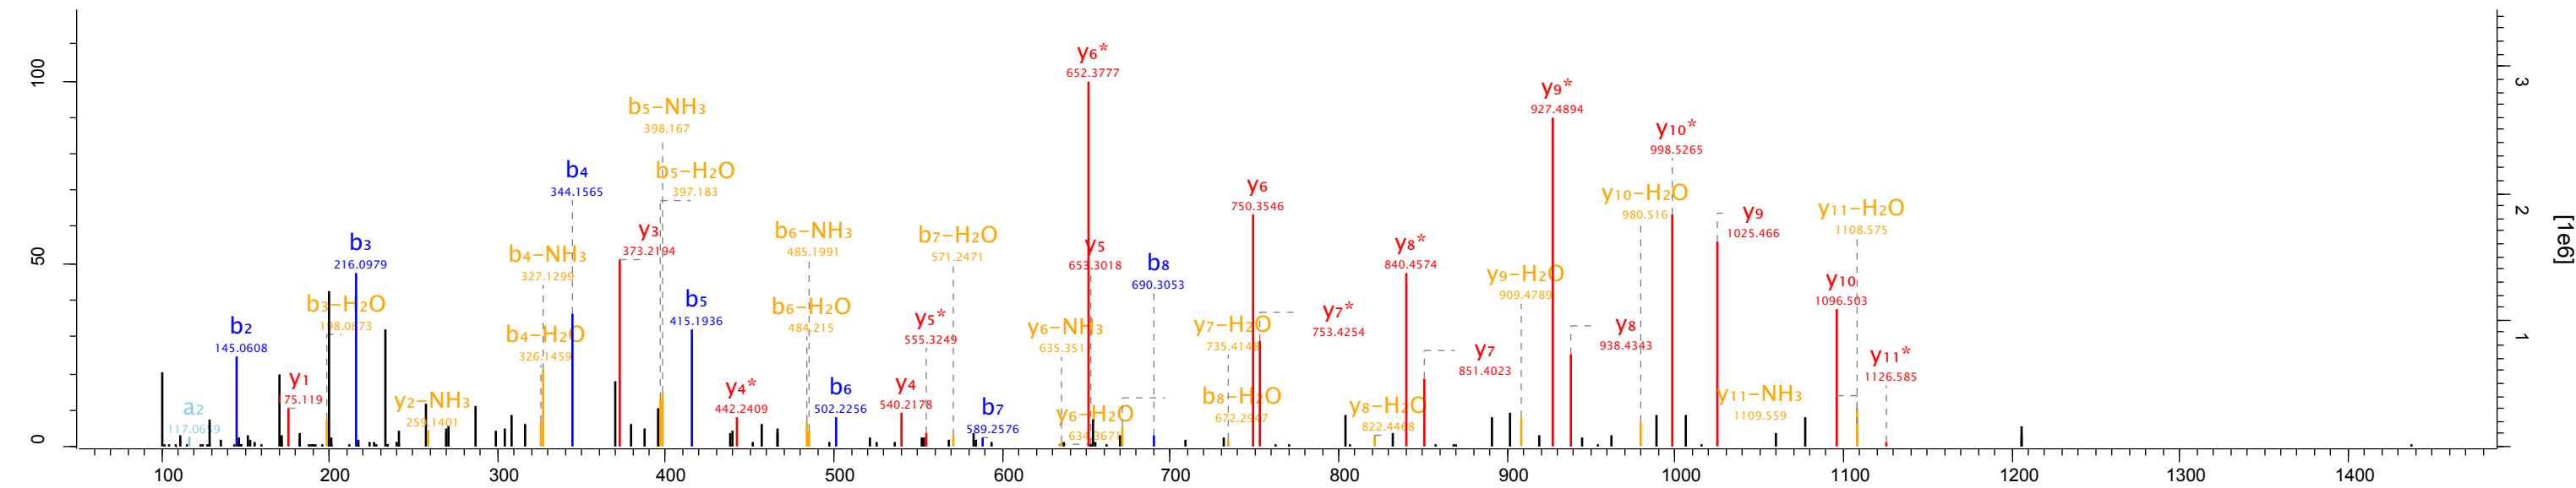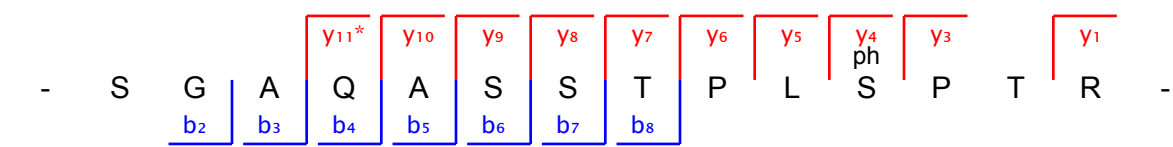

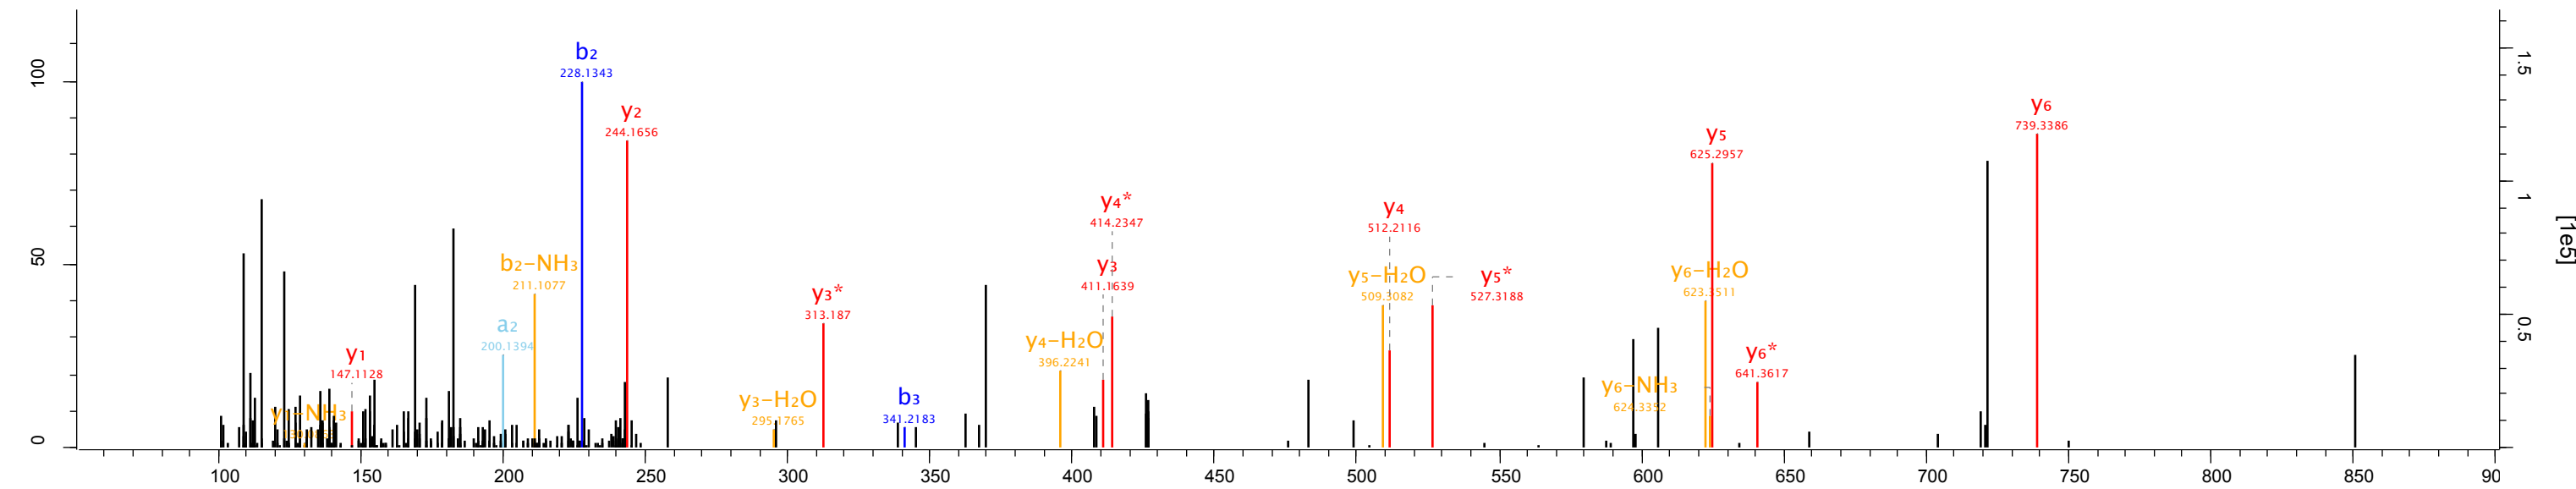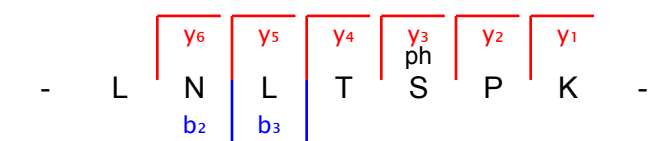

Raw file 20171215\_MaS\_33SR\_LMH\_phospho\_08 Scan 10021 Method FTMS; HCD Score 52.17 m/z 554.27 Gene names MAP4

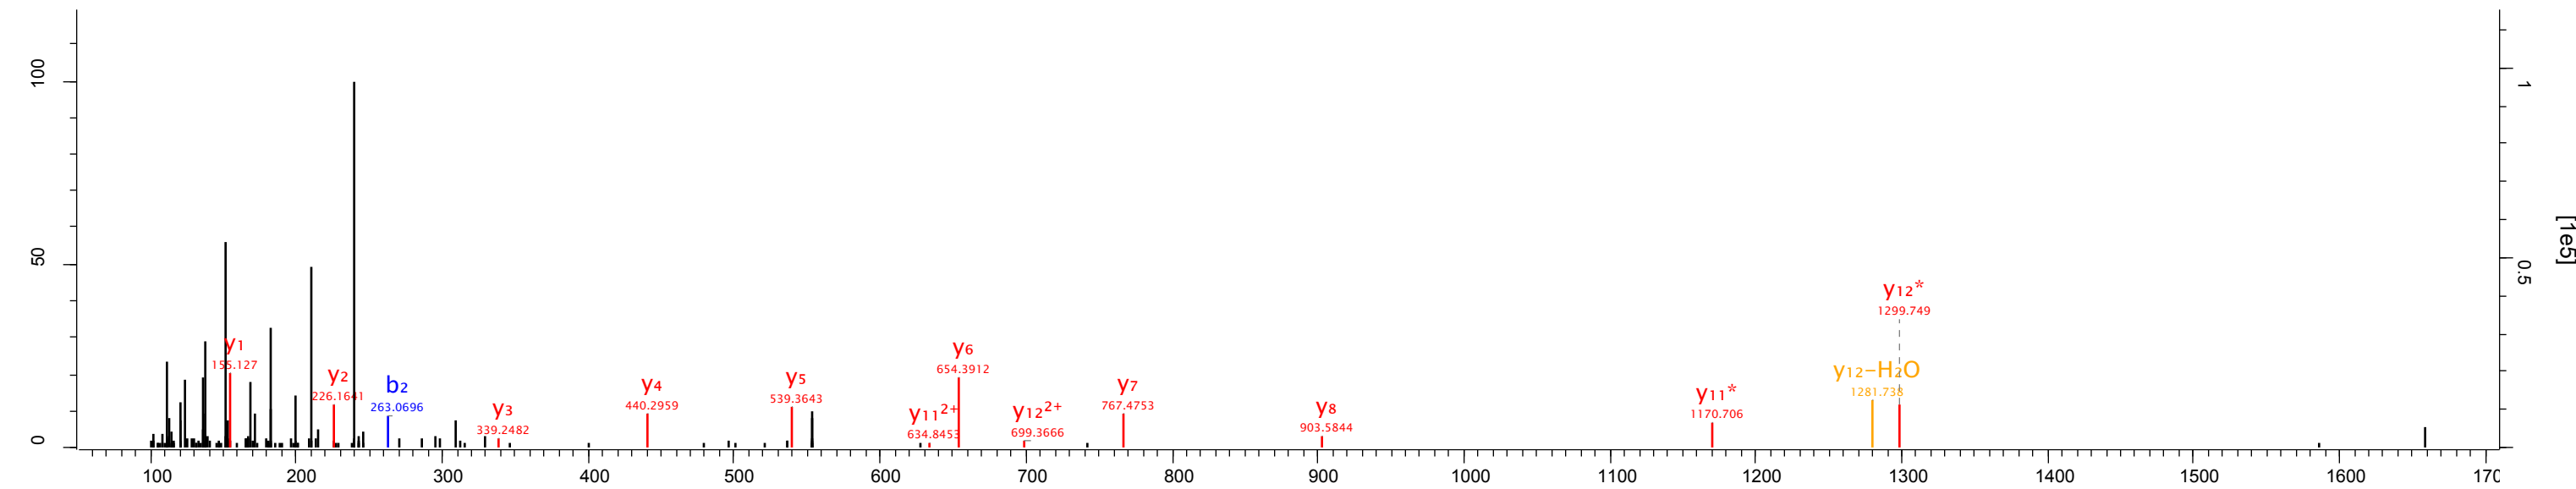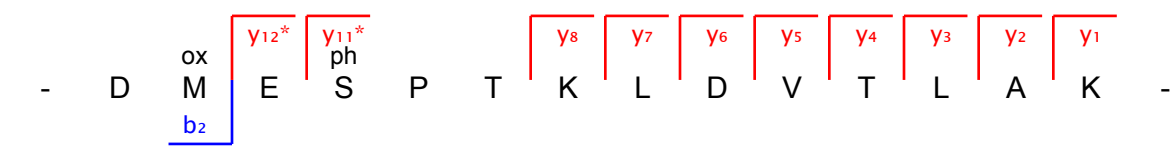

Raw file 20171215\_MaS\_33SR\_LMH\_phospho\_08 Scan 10571 Method FTMS; HCD Score 88.24 m/z 1068.98 Gene names EPRS

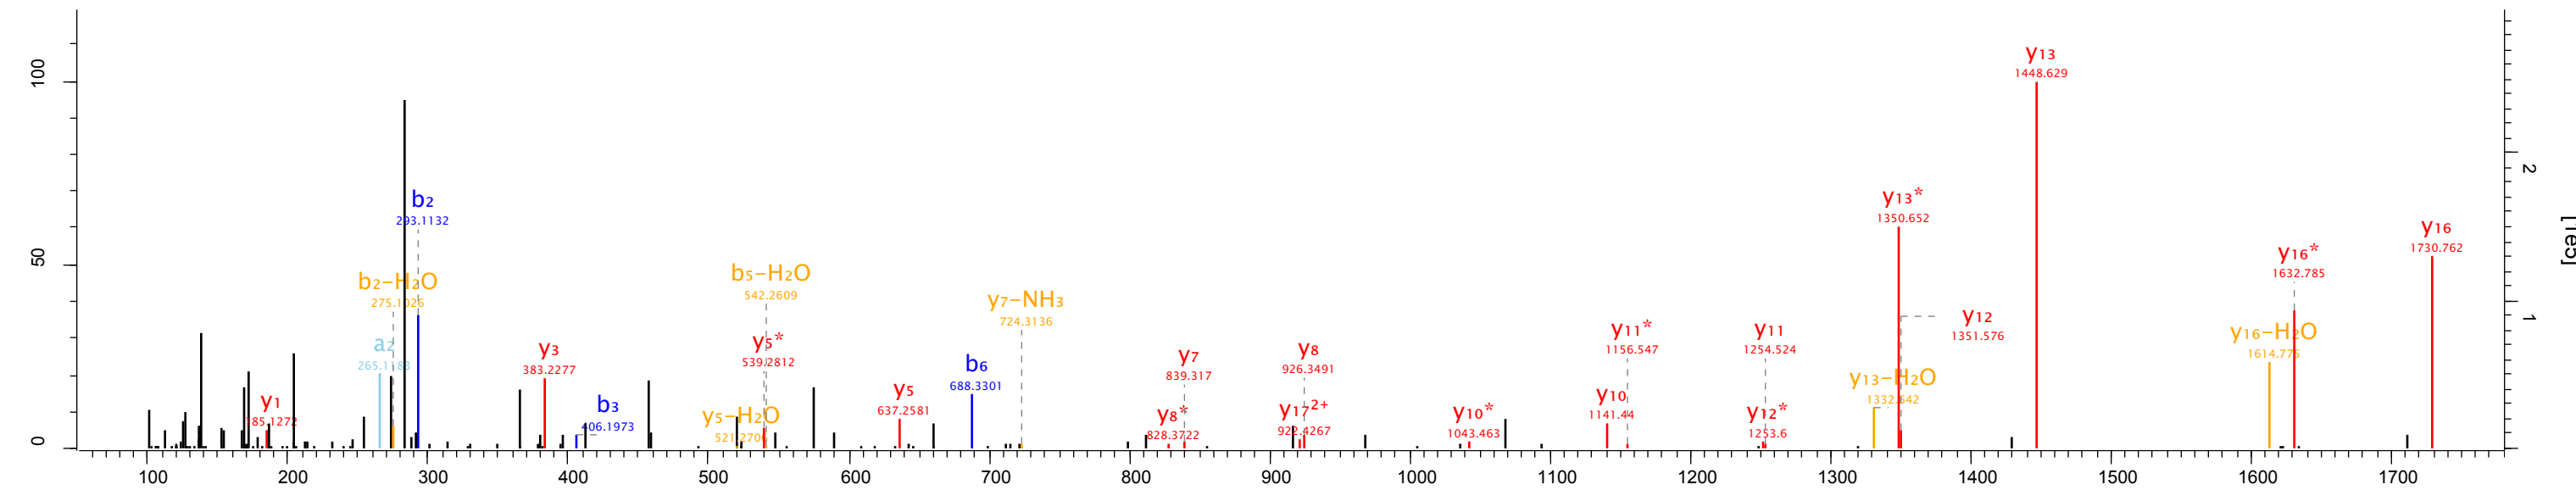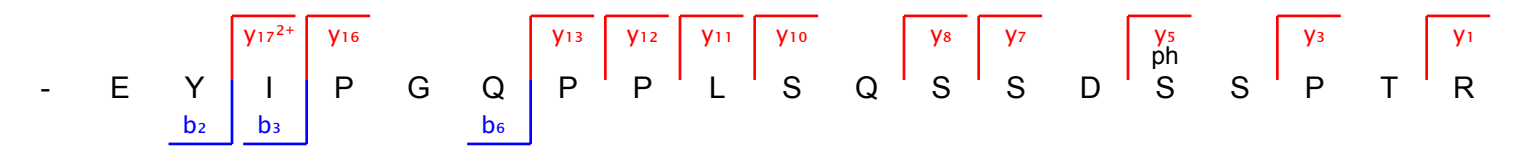

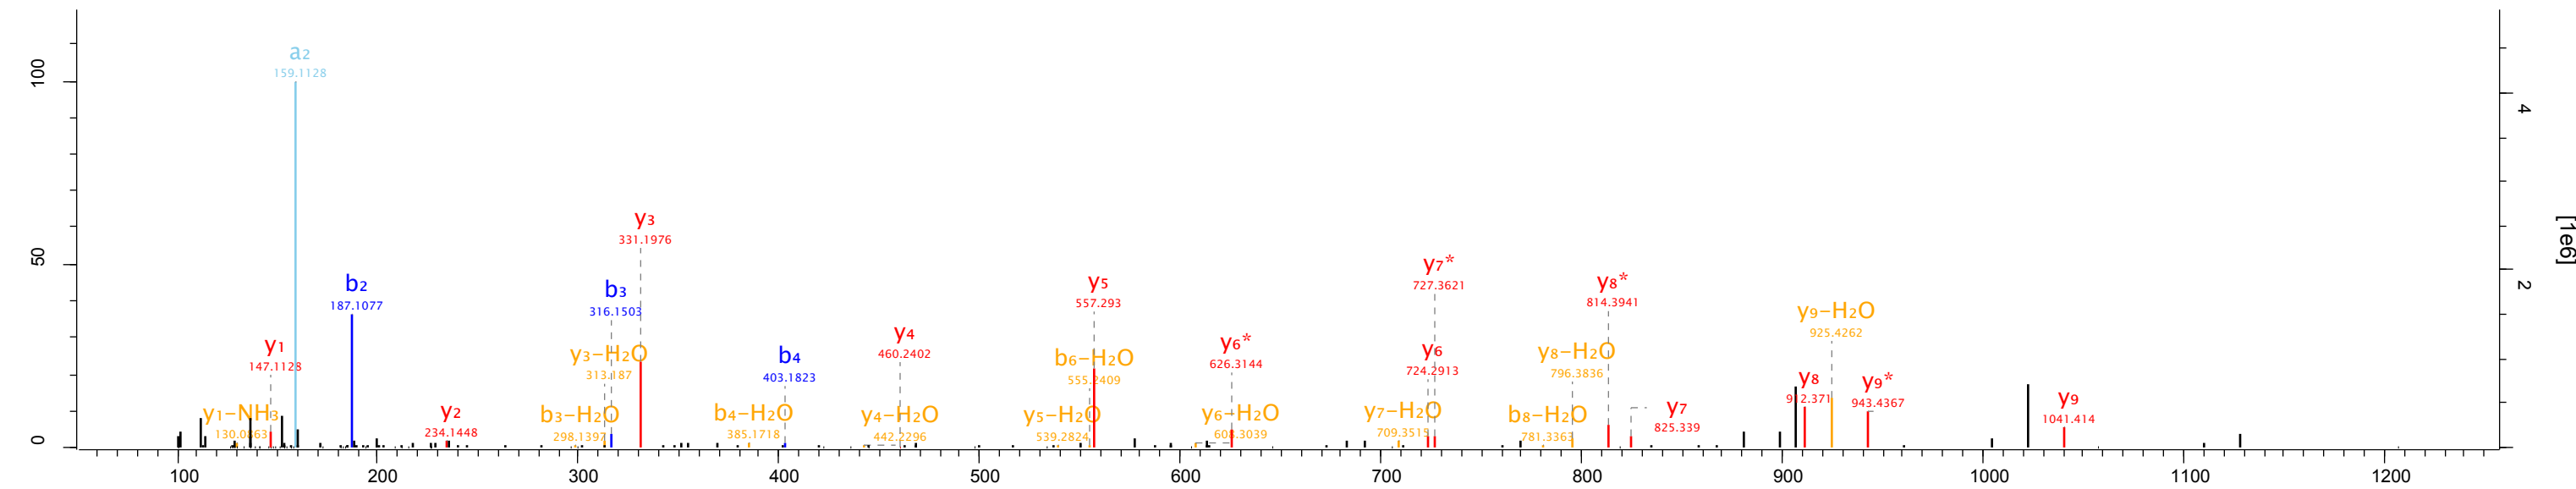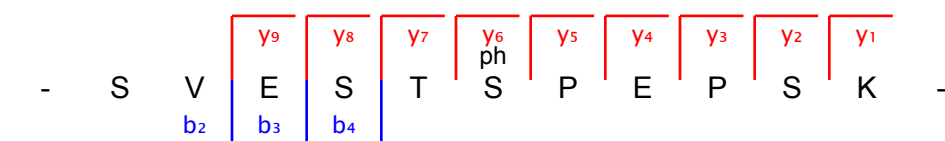

Raw file 20171215\_MaS\_33SR\_LMH\_phospho\_08 Scan 2731 Method FTMS; HCD Score 68.54 m/z 472.26 Gene names UBTF

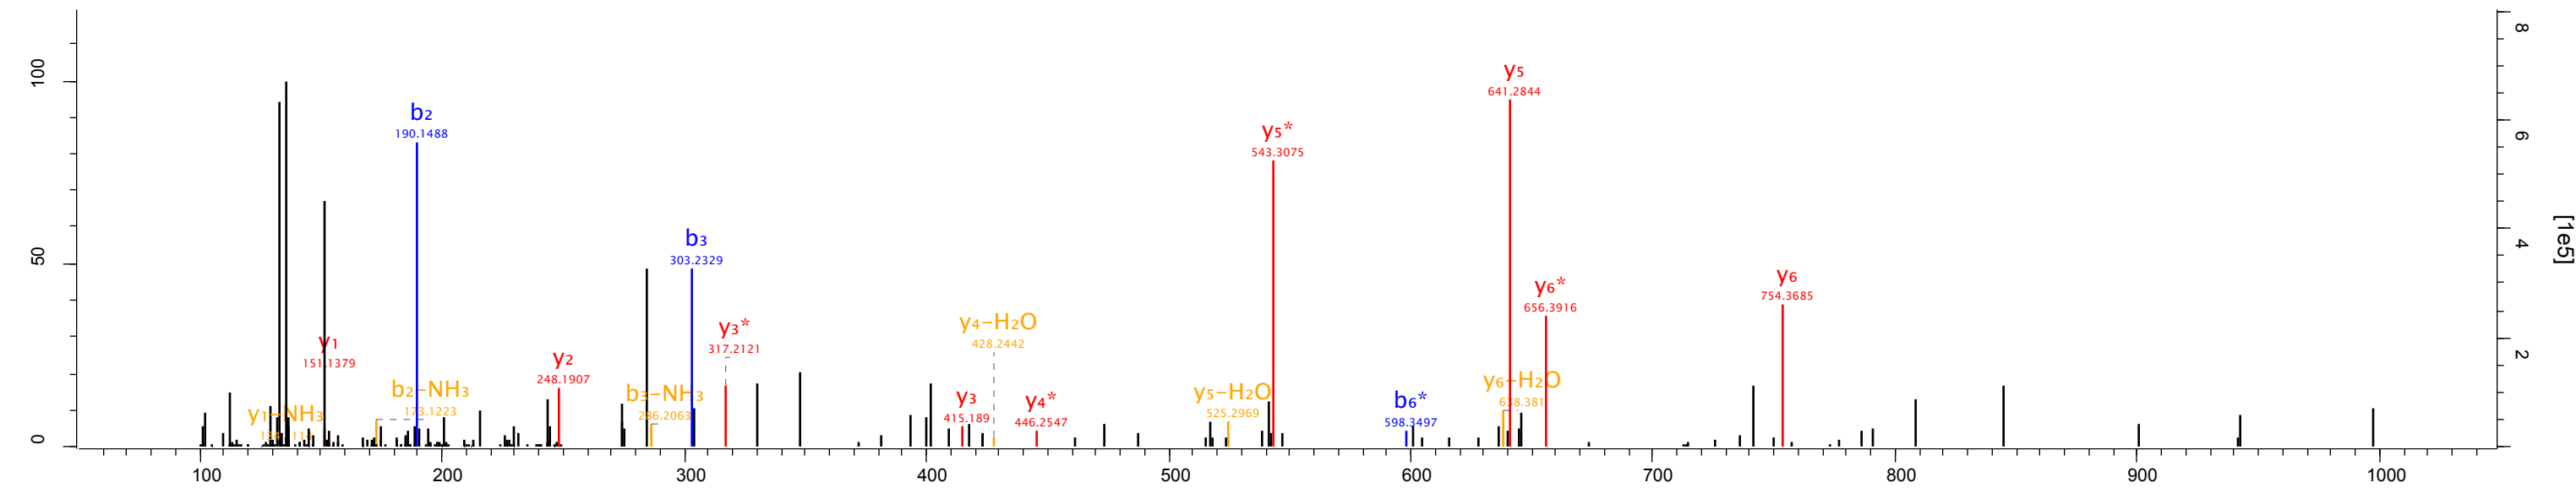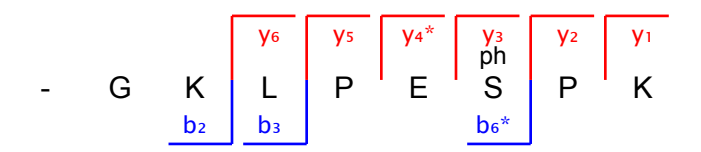



Raw file 20171215\_MaS\_33SR\_LMH\_phospho\_08 Scan 3341 Method FTMS; HCD Score 55.08 m/z 451.7 Gene names BOD1L1

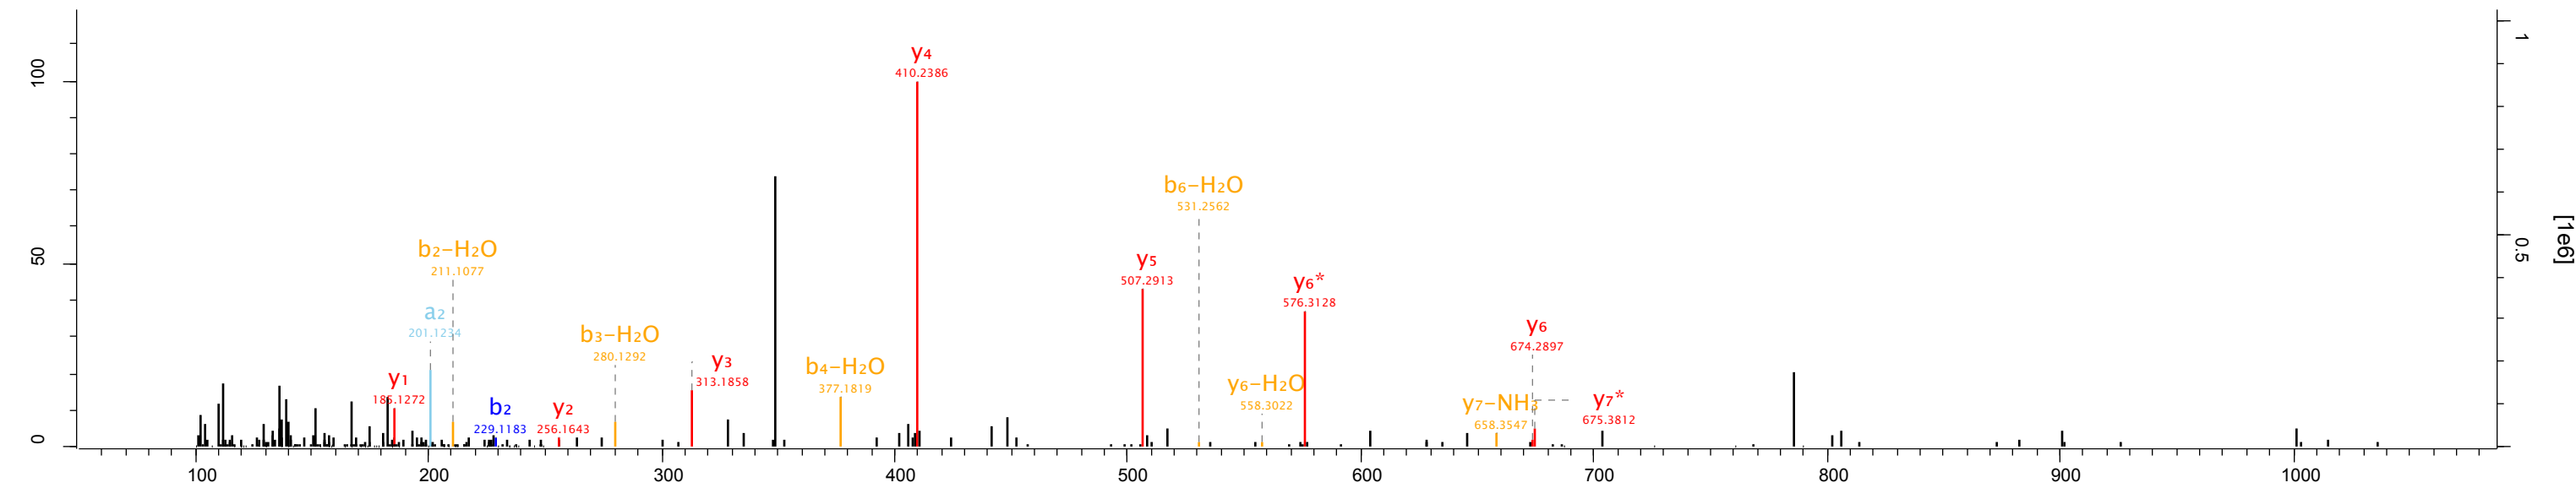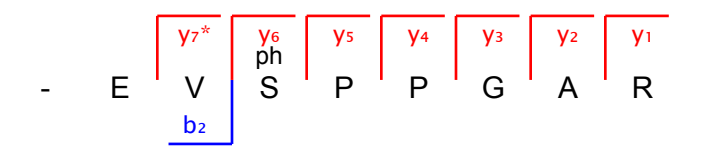

Raw file 20171215\_MaS\_33SR\_LMH\_phospho\_08 Scan 3441 Method FTMS; HCD Score 67.52 m/z 486.79 Gene names NCL

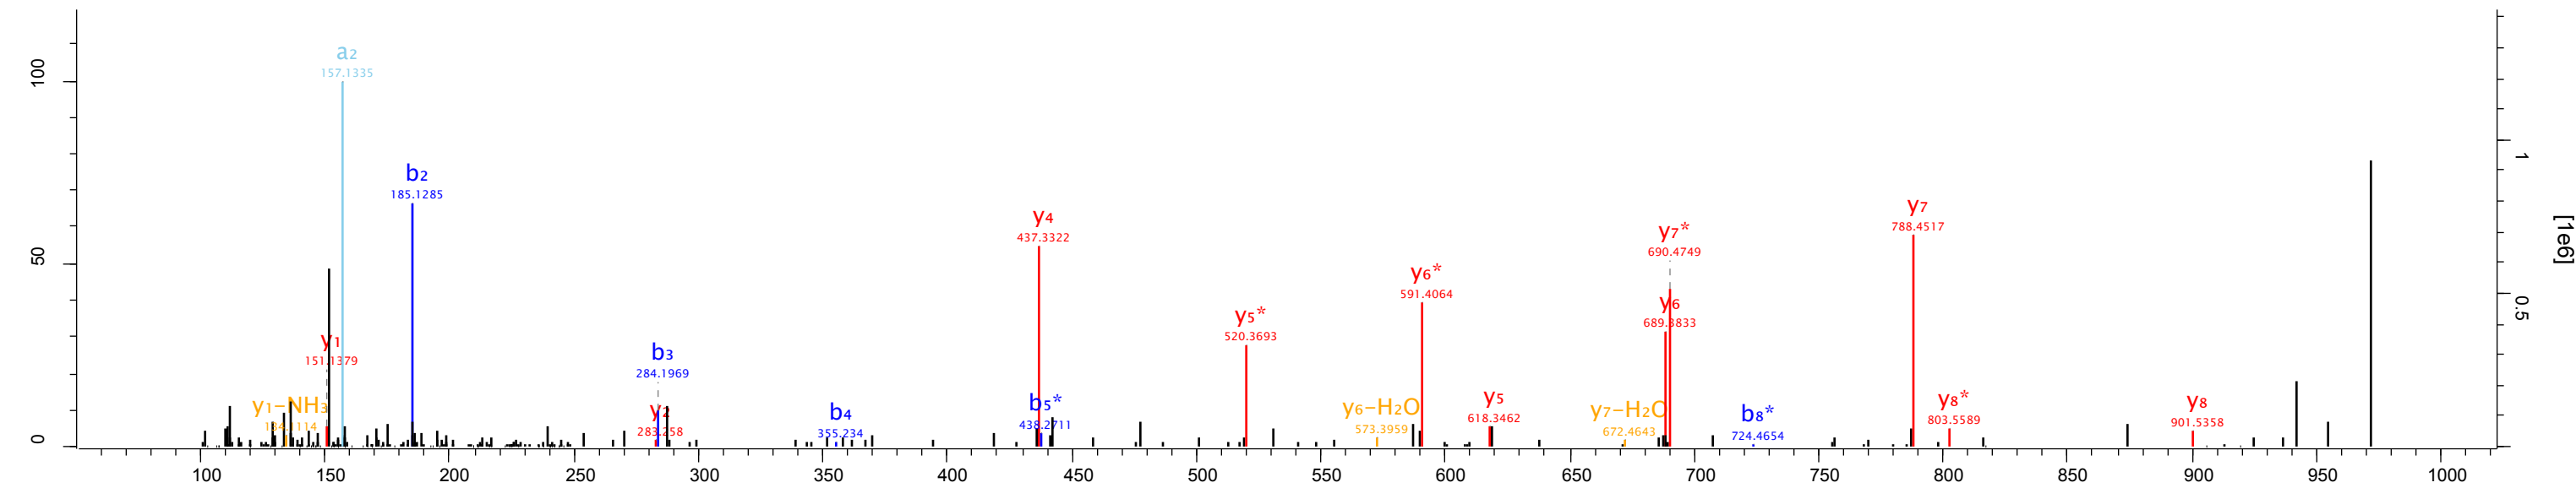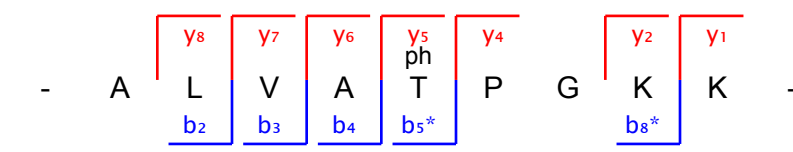



Raw file 20171215\_MaS\_33SR\_LMH\_phospho\_08 Scan 4291 Method FTMS; HCD Score 65.04 m/z 571.72 Gene names MACF1

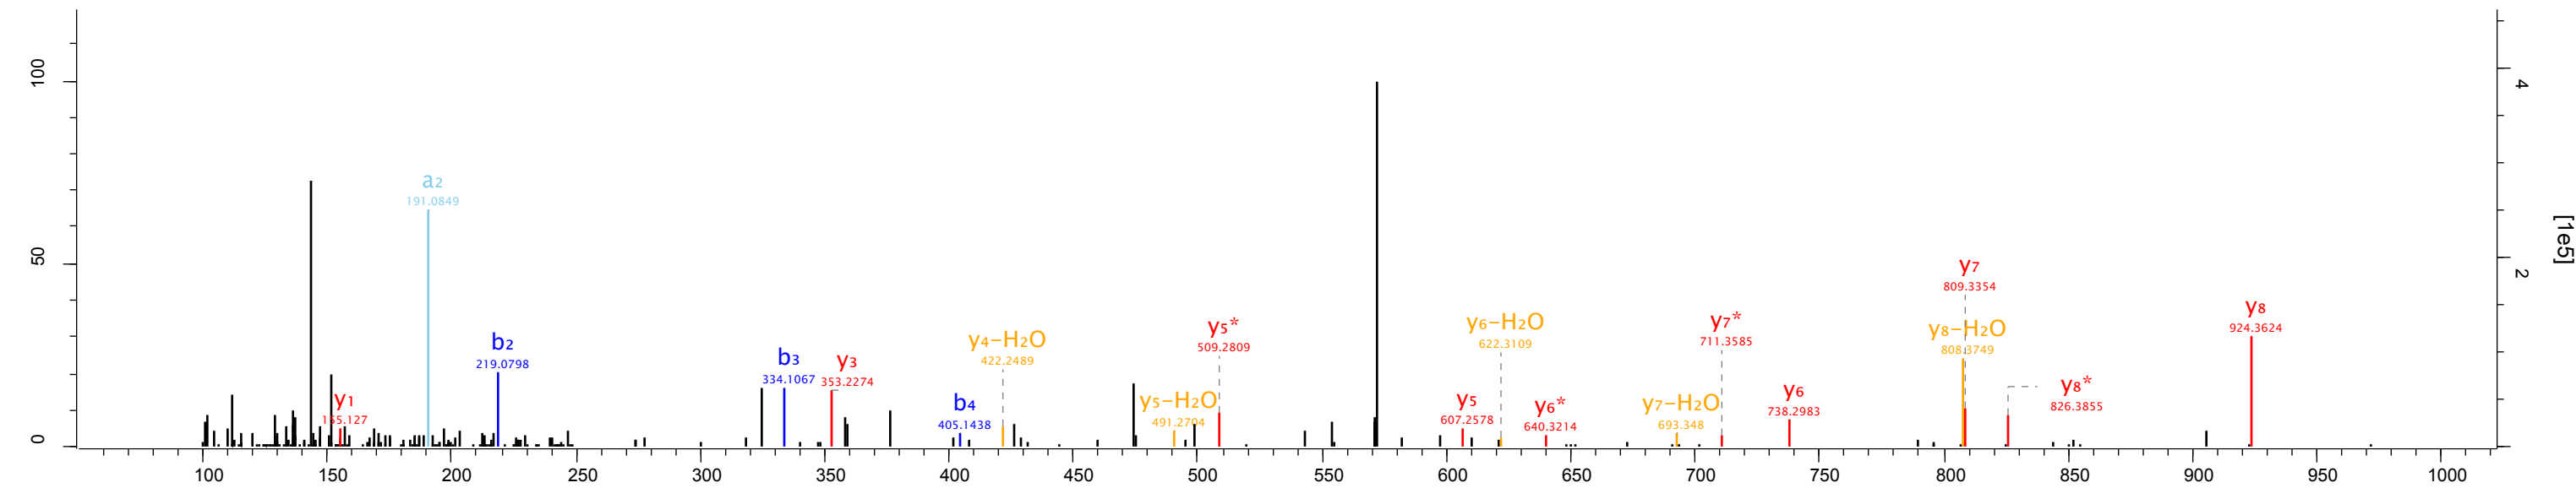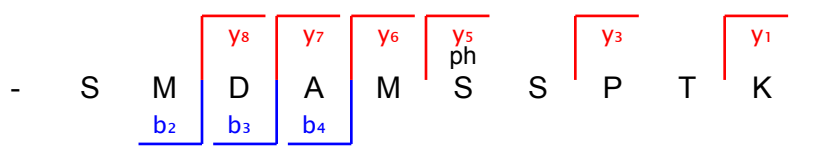

Raw file 20171215\_MaS\_33SR\_LMH\_phospho\_08 Scan 4531 Method FTMS; HCD Score 45.37 m/z 314.16 Gene names RAG1

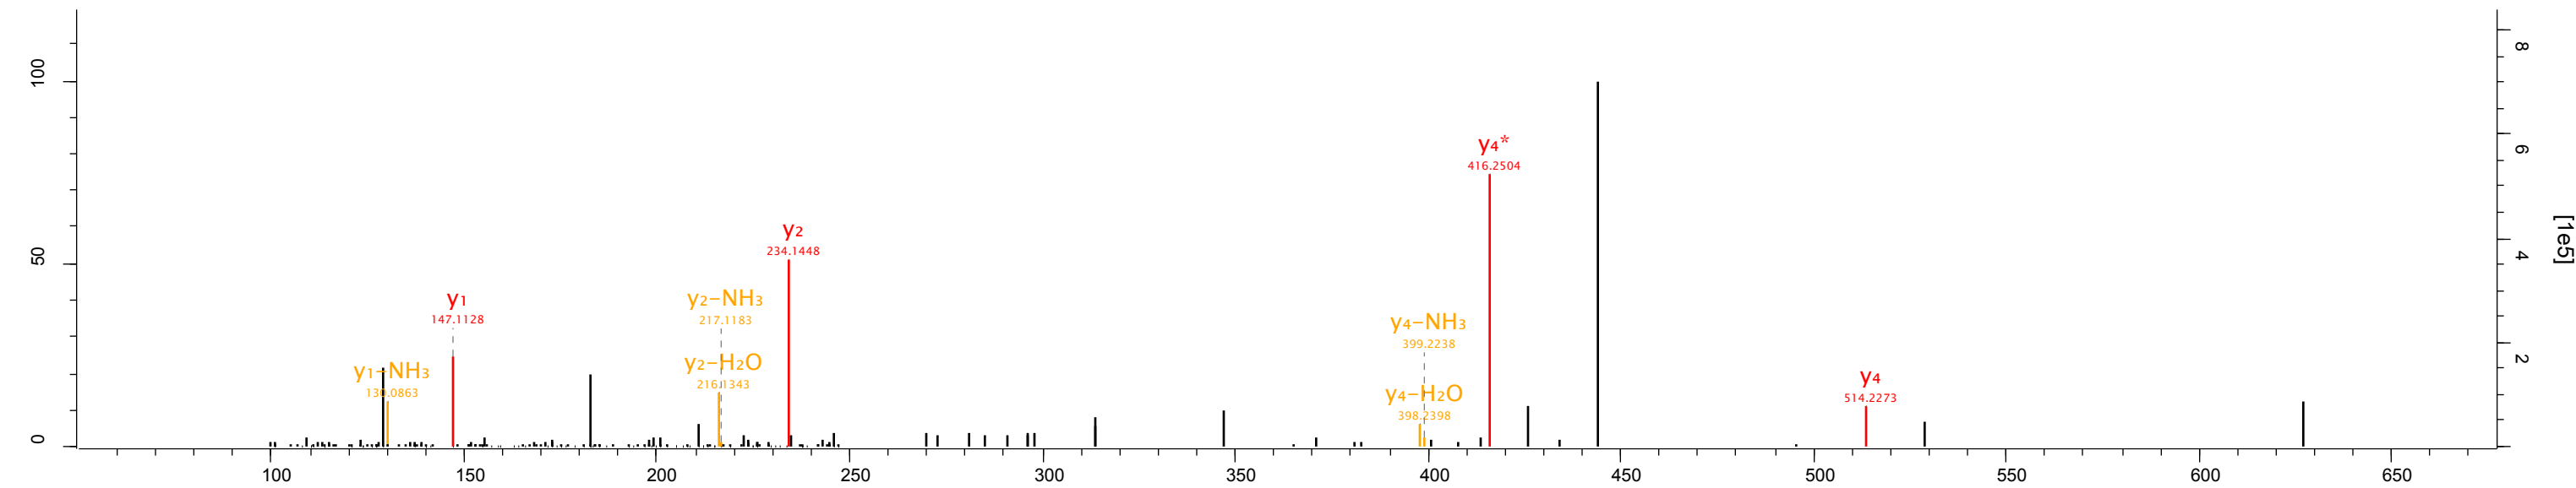

- A Q A R I S S K -

Fragmentation mapping: y4 covers I and S; y2 covers S; y1 covers K.

Raw file 20171215\_MaS\_33SR\_LMH\_phospho\_08 Scan 4601 Method FTMS; HCD Score 87.43 m/z 566.26 Gene names SMARCC2

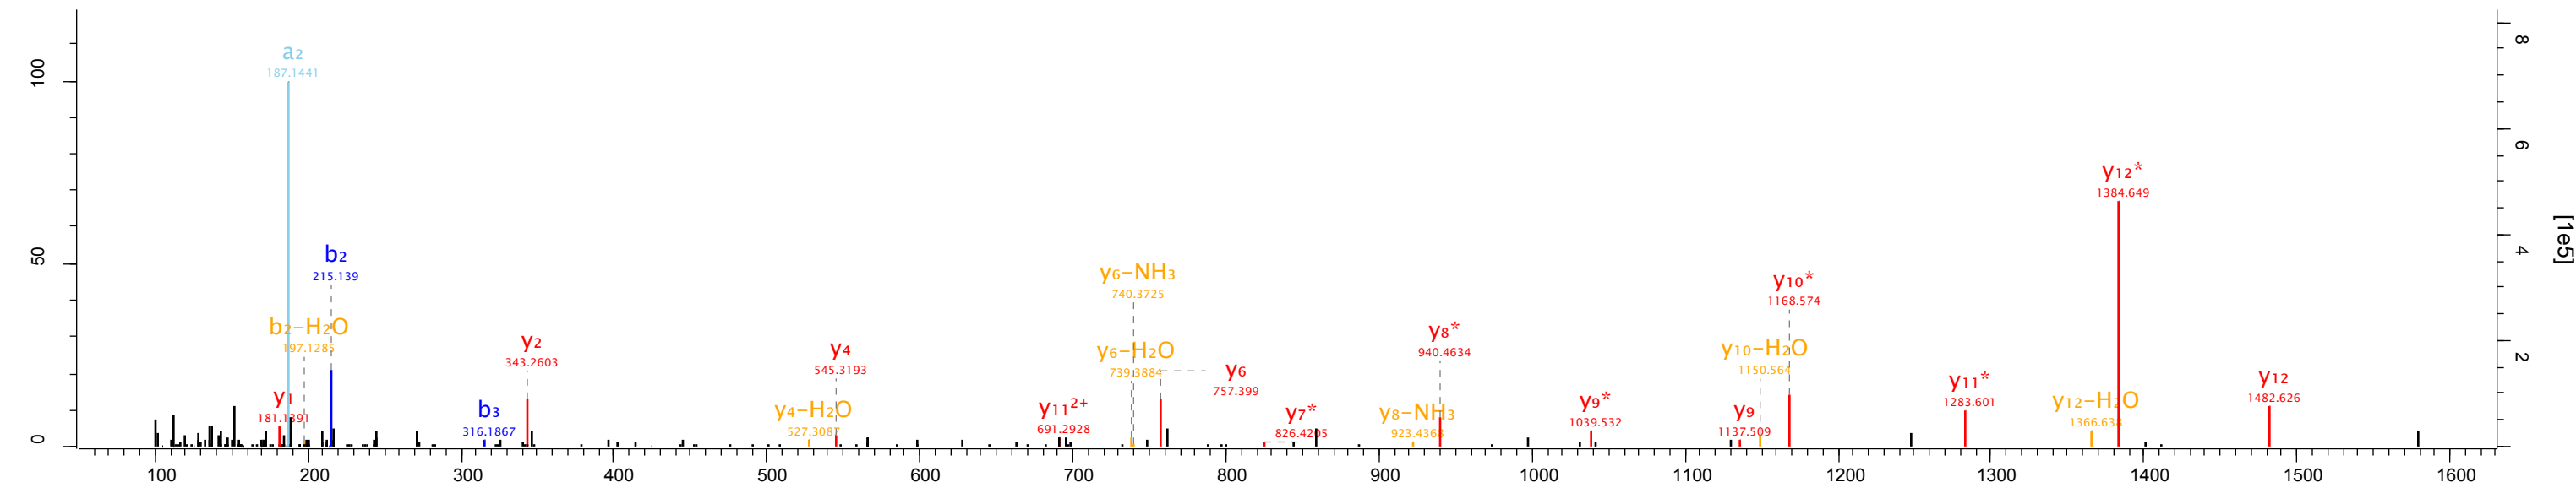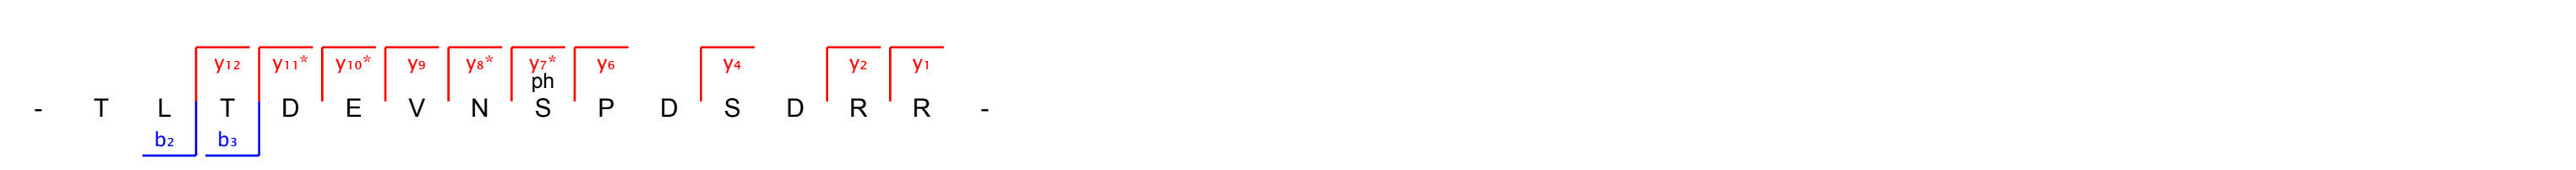

Raw file: 20171215\_MaS\_33SR\_LMH\_phospho\_08  
 Scan: 5011 Method: FTMS; HCD Score: 72.33 m/z: 466.18 Gene names: RBM12B

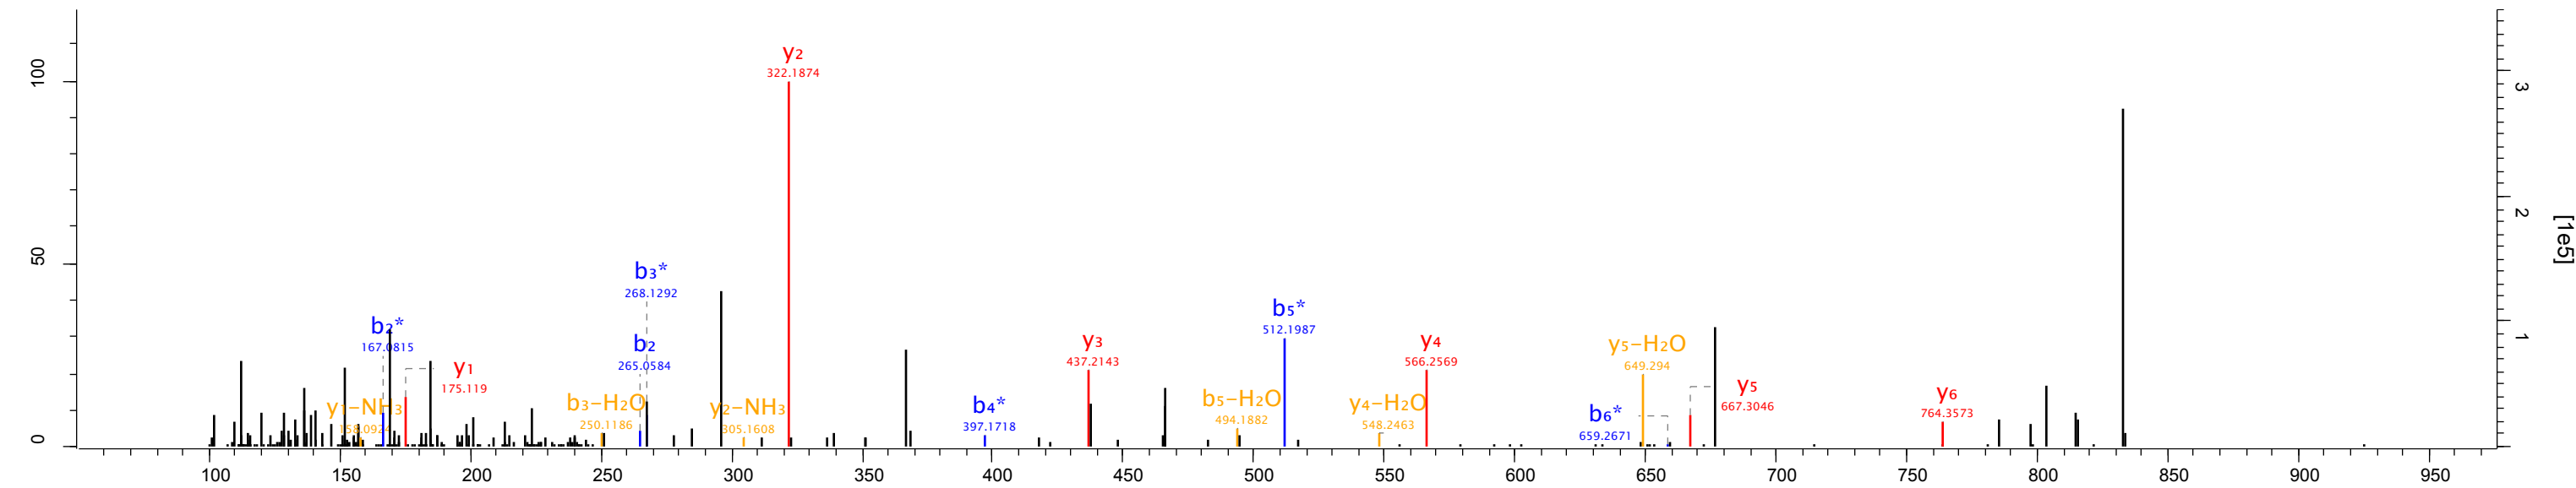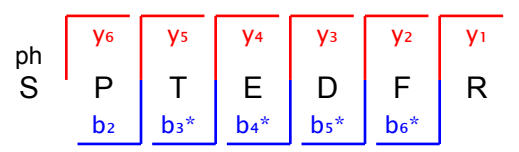

Raw file

20171215\_MaS\_33SR\_LMH\_phospho\_08

| Scan | Method    | Score | m/z    | Gene names |
|------|-----------|-------|--------|------------|
| 5411 | FTMS; HCD | 64.73 | 464.74 | PSIP1      |

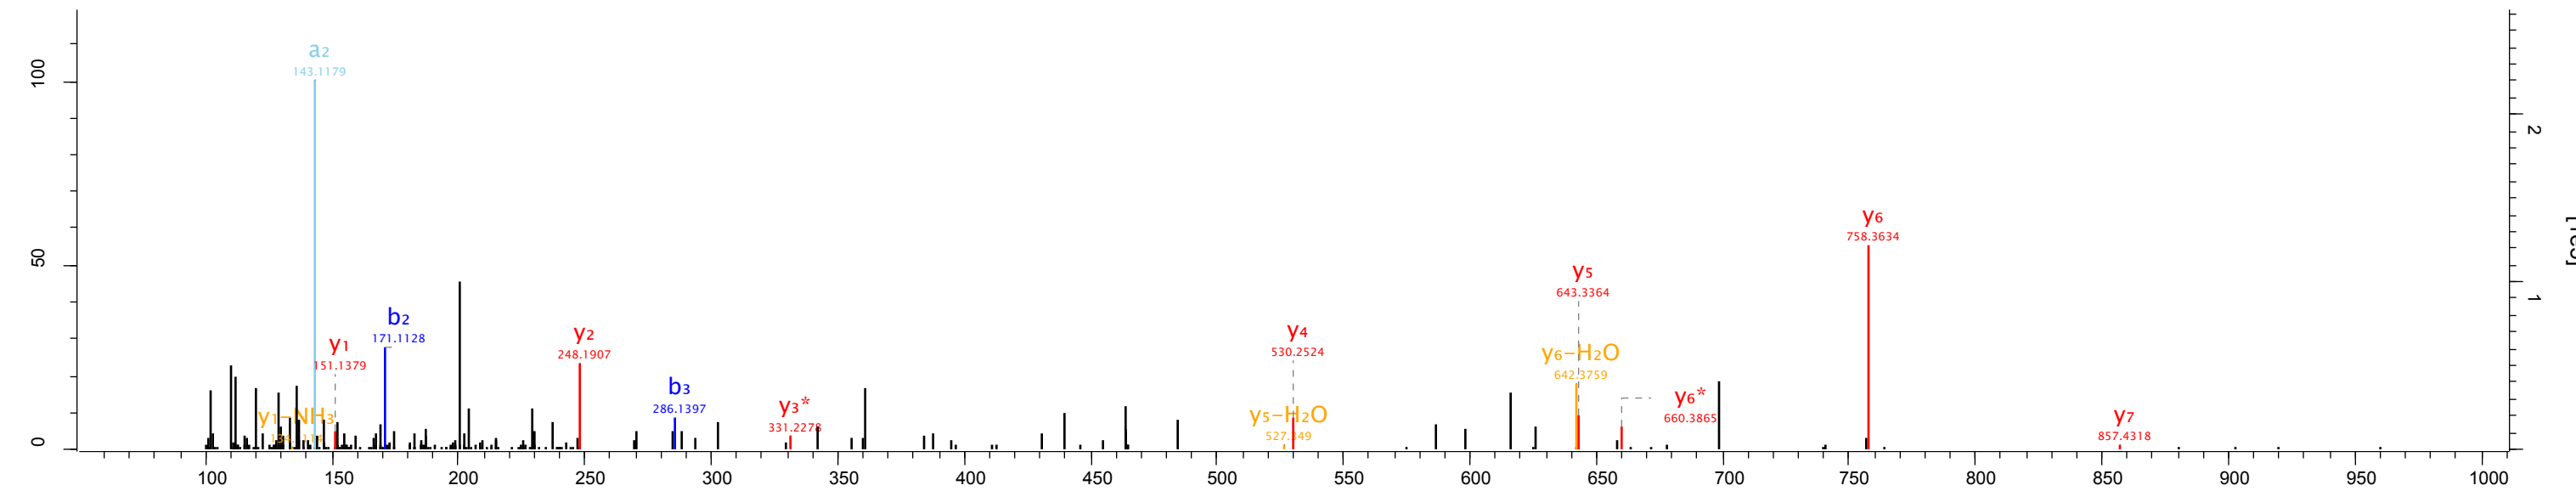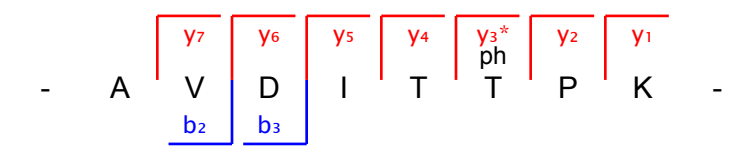



Raw file: 20171215\_MaS\_33SR\_LMH\_phospho\_08  
 Scan: 5461 Method: FTMS; HCD Score: 56.92 m/z: 569.23 Gene names: KIAA1468

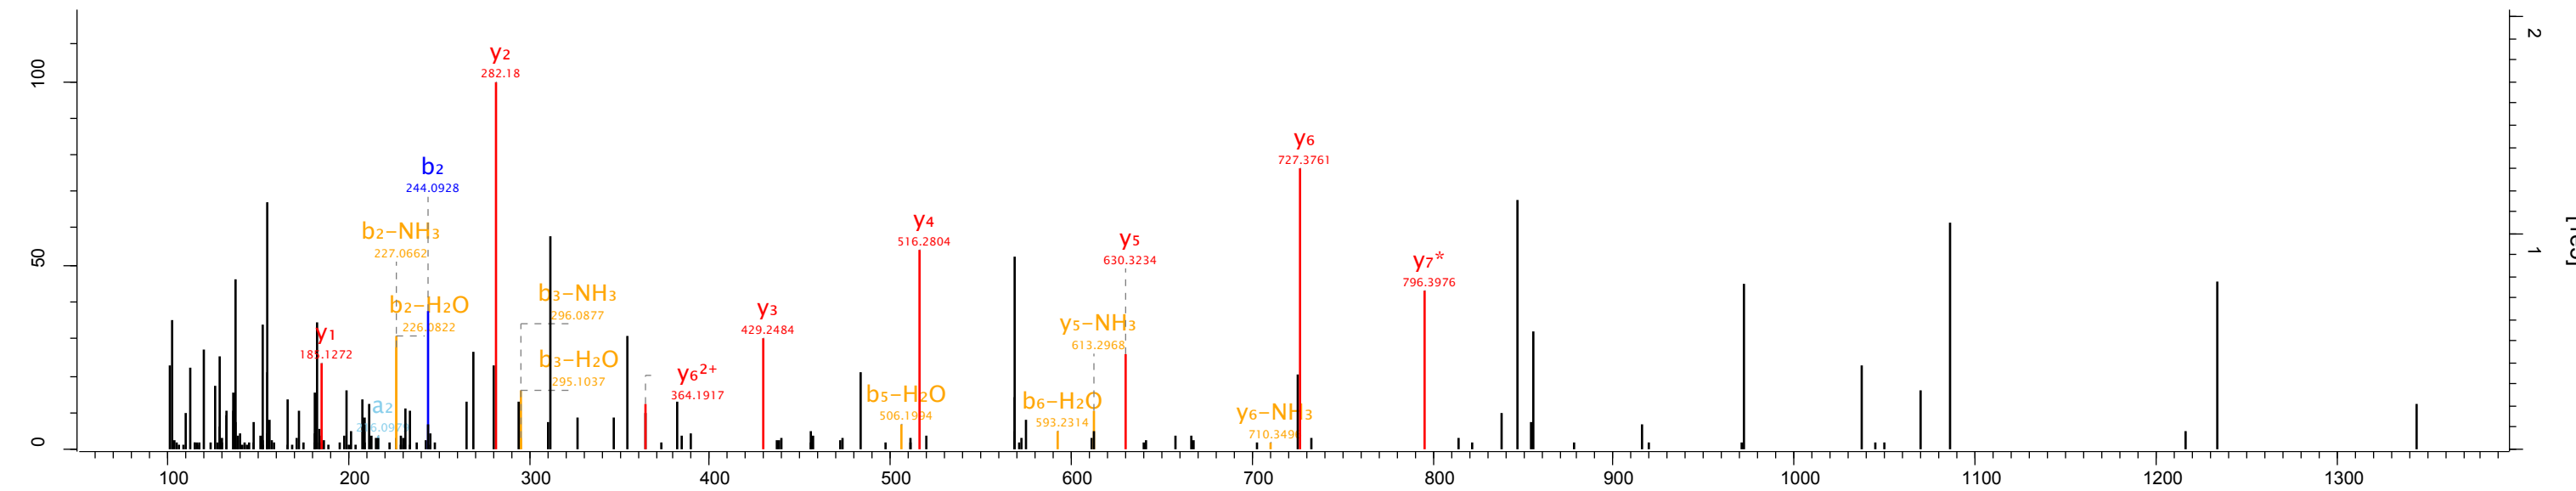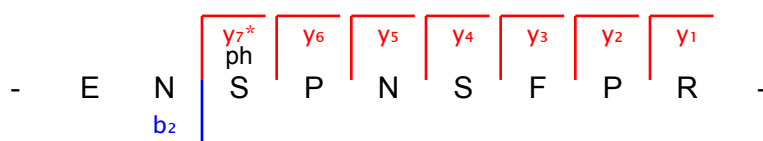

Raw file 20171215\_MaS\_33SR\_LMH\_phospho\_08 Scan 6001 Method FTMS; HCD Score 64.24 m/z 614.79 Gene names RRM2

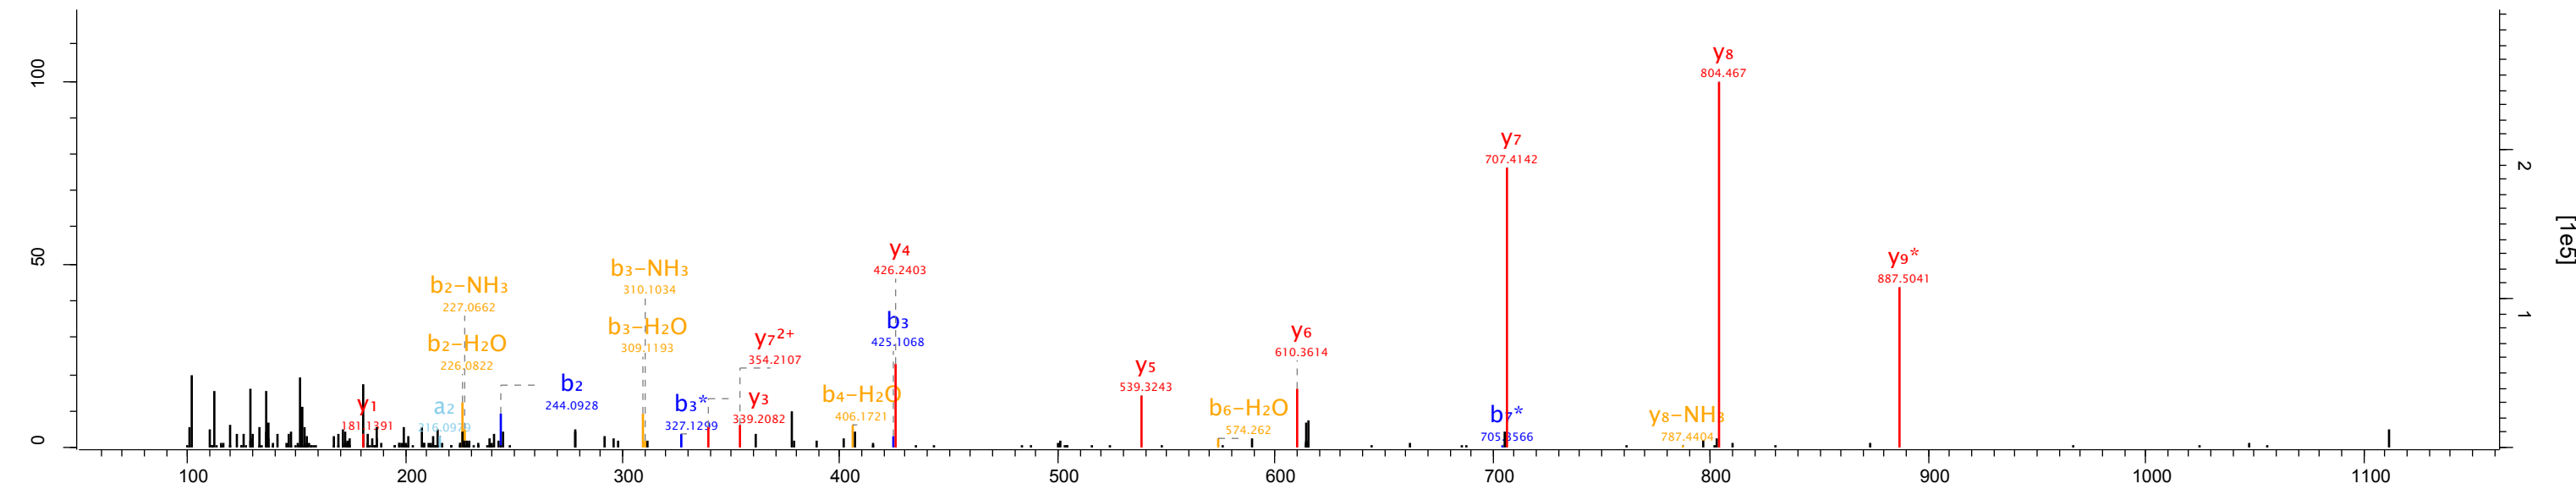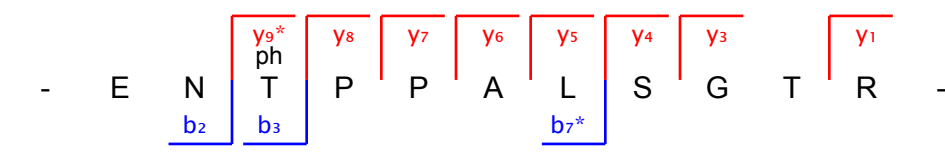

Raw file 20171215\_MaS\_33SR\_LMH\_phospho\_08 Scan 7121 Method FTMS; HCD Score 82.07 m/z 612.29 Gene names DPM1

20171215\_MaS\_33SR\_LMH\_phospho\_08

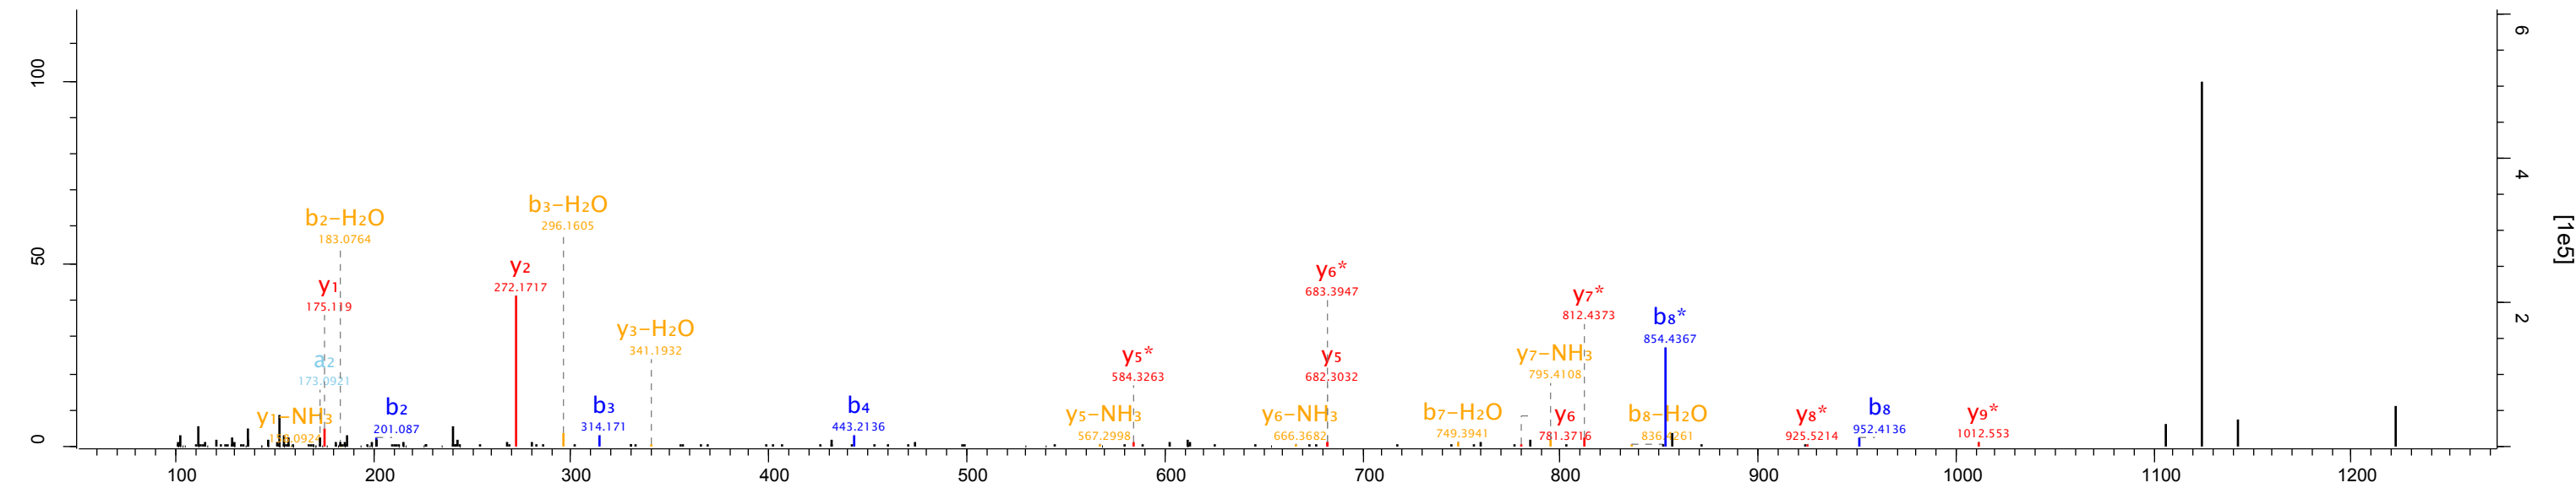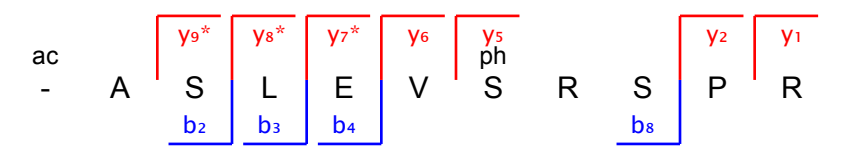

Raw file 20171215\_MaS\_33SR\_LMH\_phospho\_08 Scan 8031 Method FTMS; HCD Score 145.69 m/z 701.81 Gene names MIOS

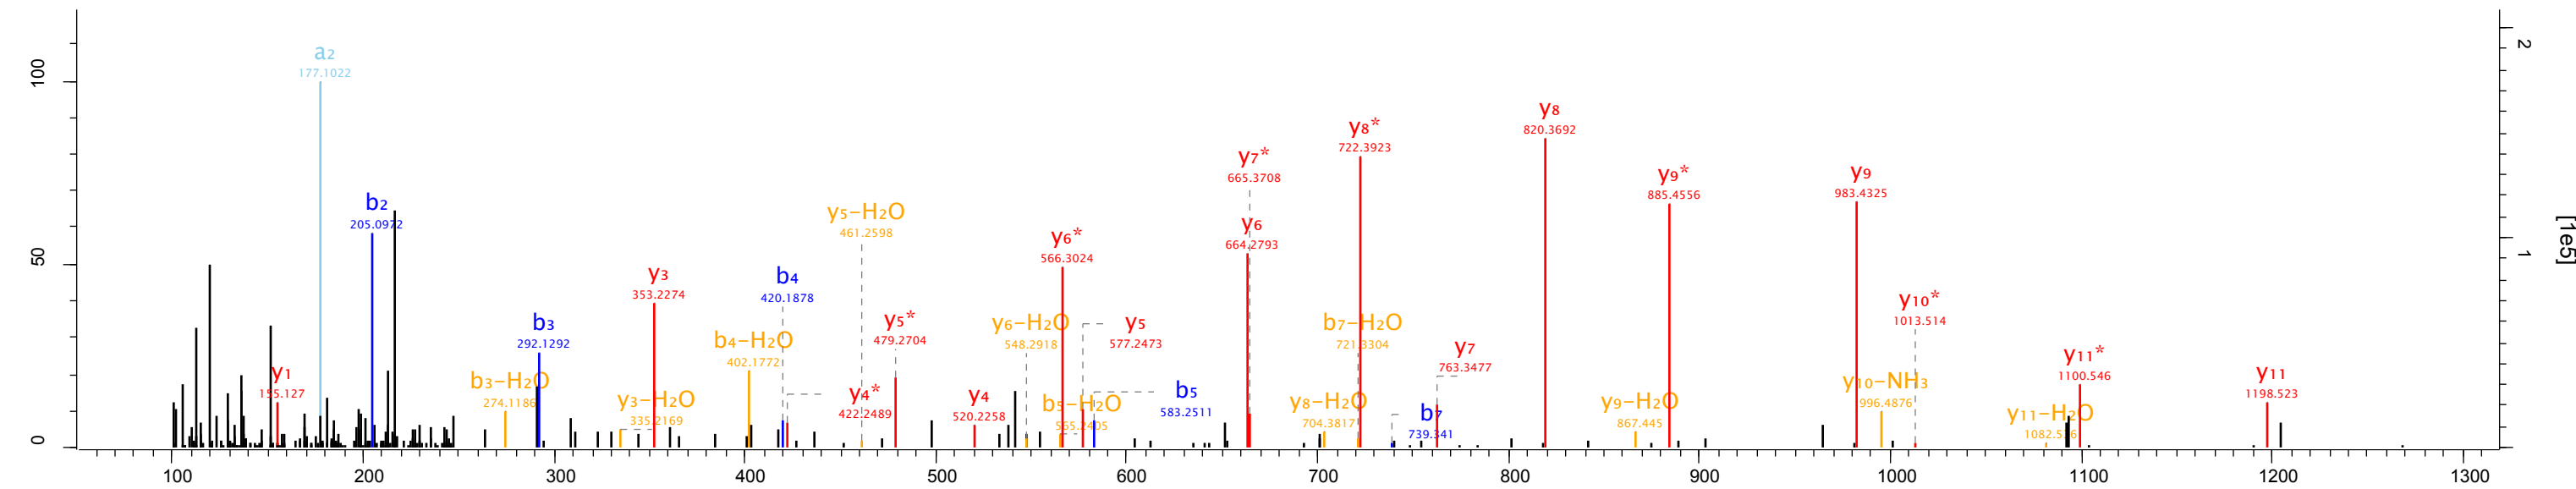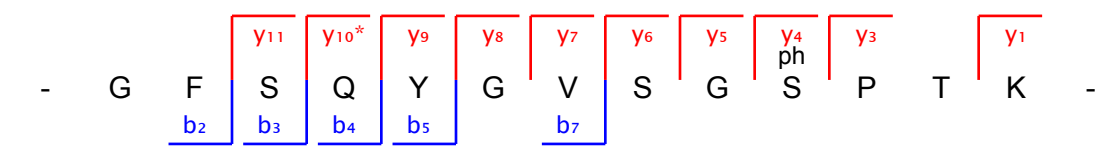

Raw file 20171215\_MaS\_33SR\_LMH\_phospho\_08 Scan 8631 Method FTMS; HCD Score 116.63 m/z 635.28 Gene names KLC2

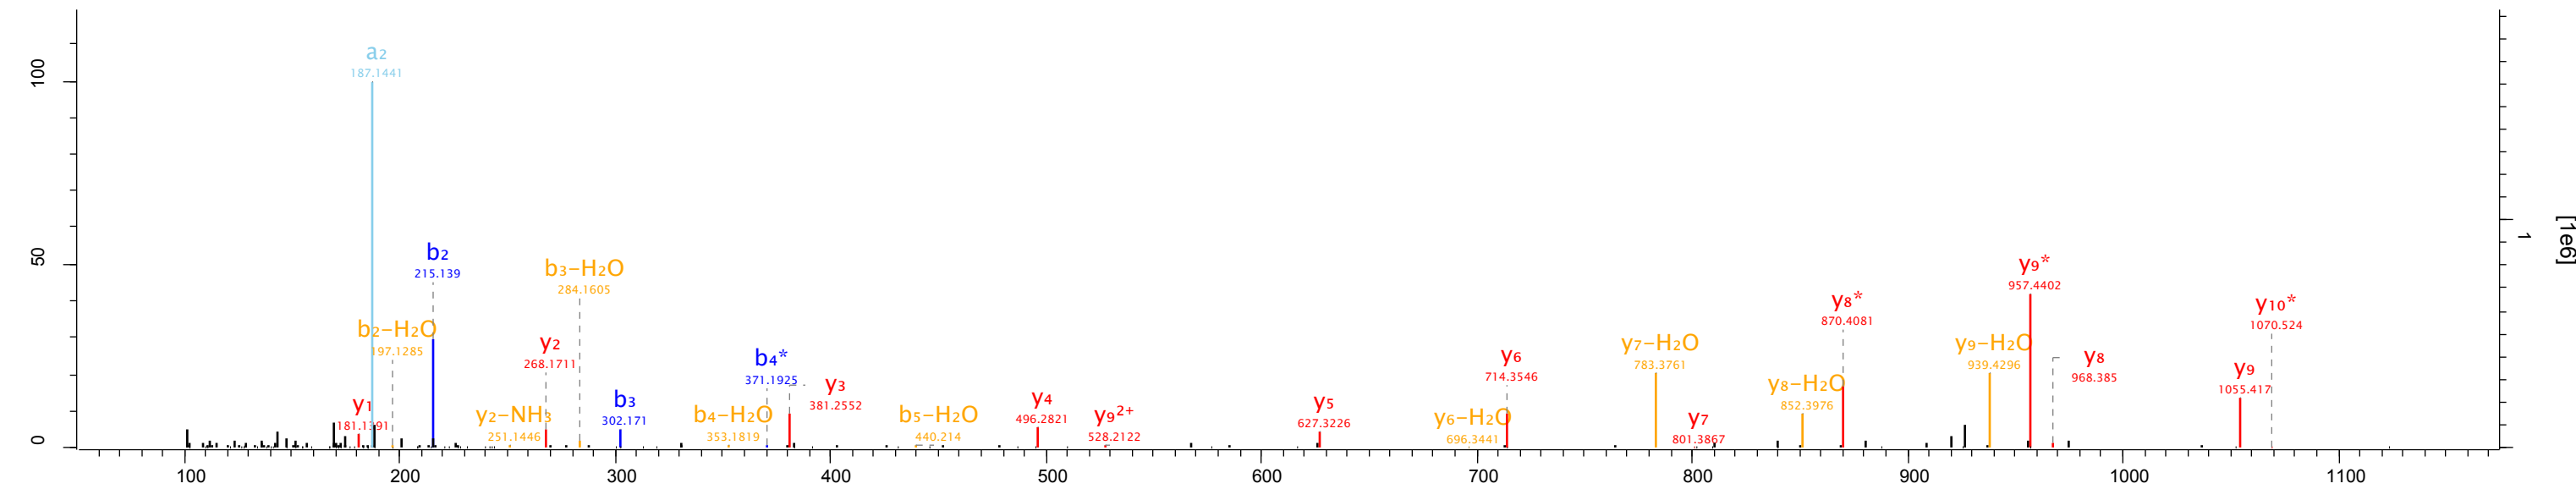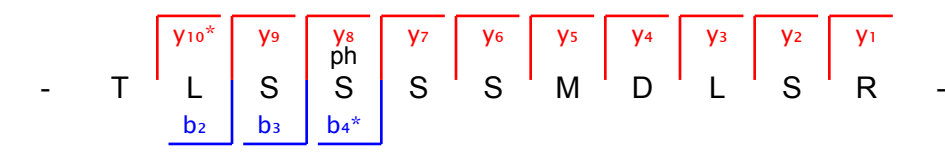

Raw file 20171215\_MaS\_33SR\_LMH\_phospho\_08 Scan 9981 Method FTMS; HCD Score 51.52 m/z 806.38 Gene names NUP50

20171215\_MaS\_33SR\_LMH\_phospho\_08

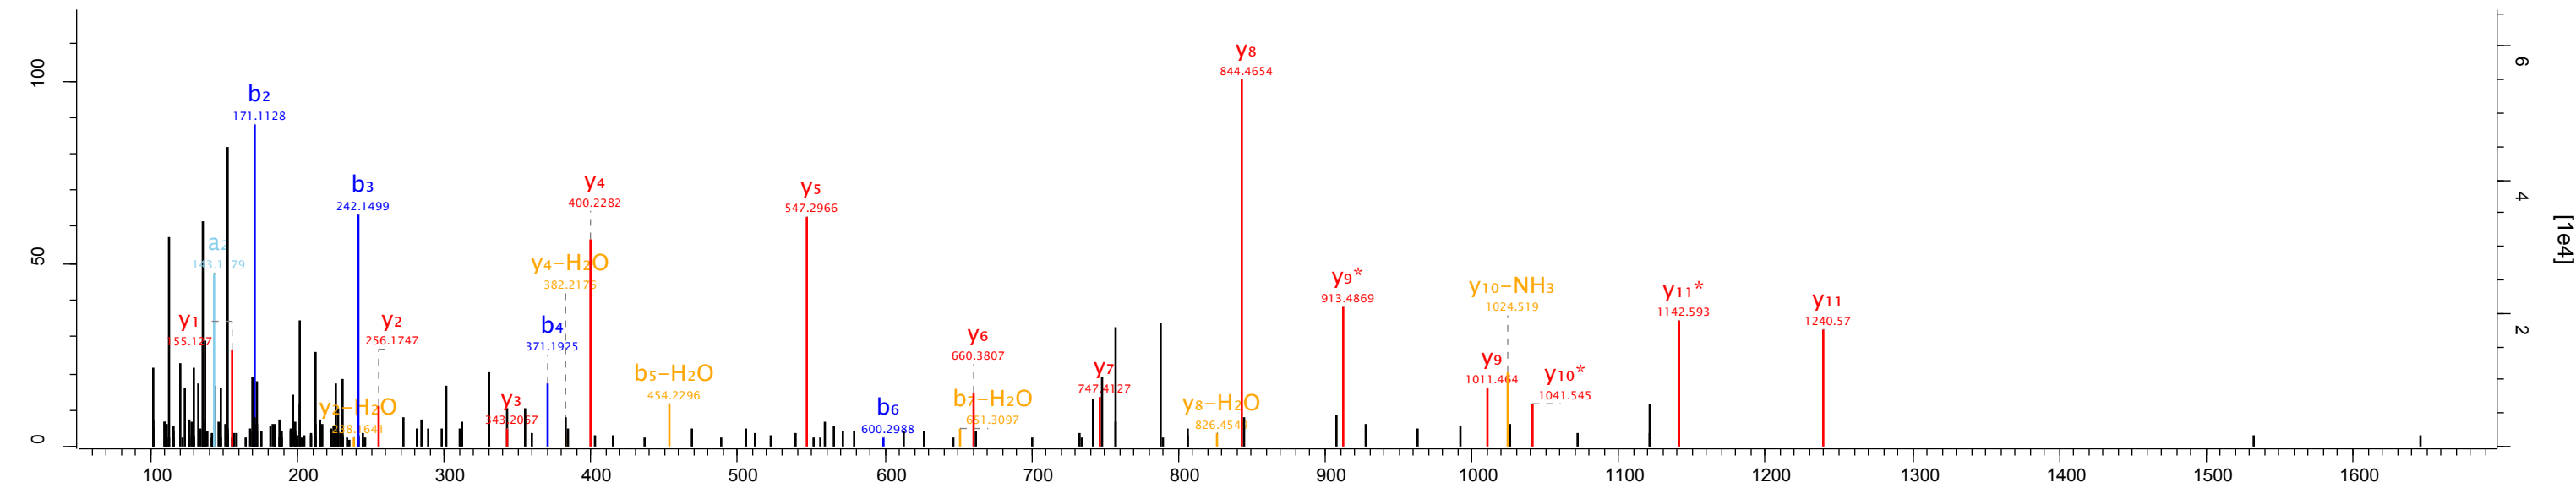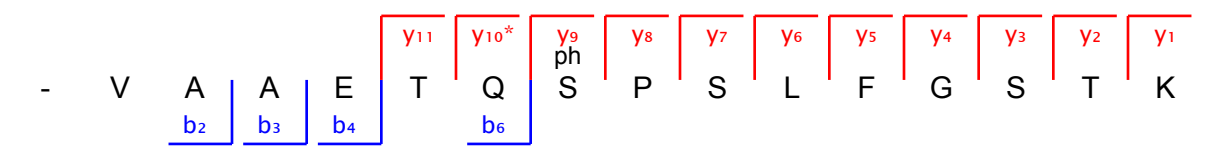

Raw file 20171215\_MaS\_33SR\_LMH\_phospho\_09 Scan 1981 Method FTMS; HCD Score 70.99 m/z 637.62 Gene names NKAP

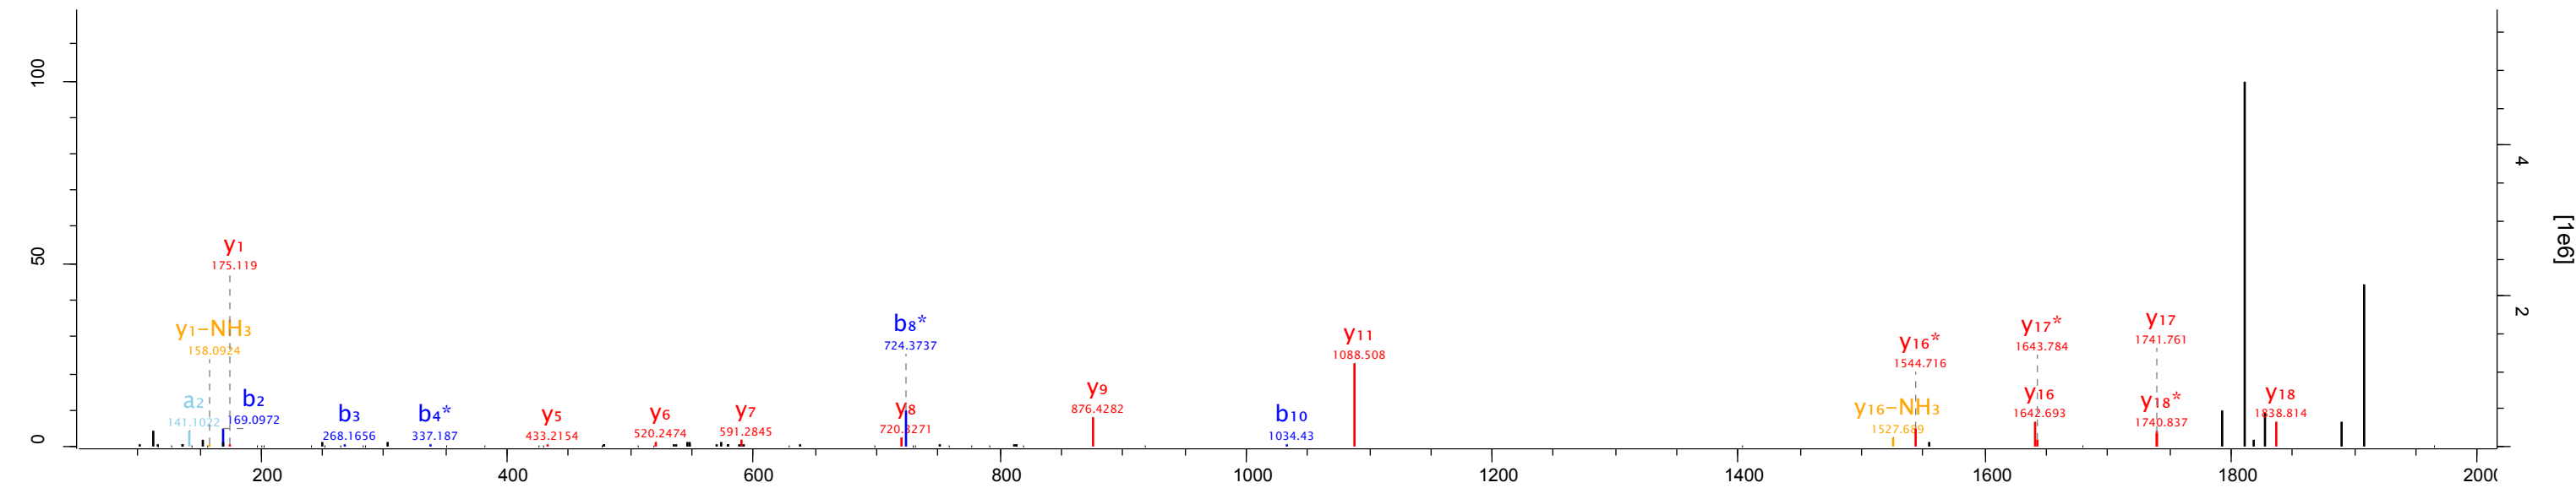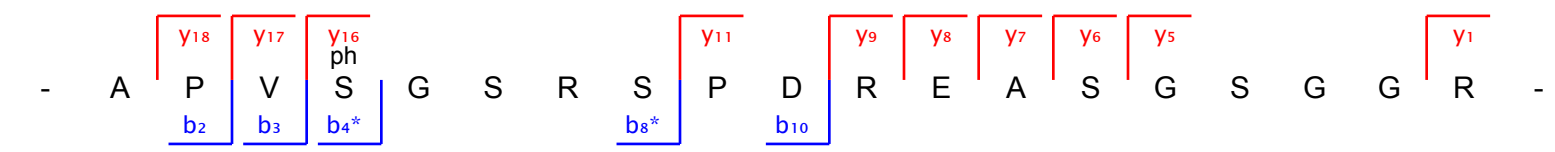

Raw file 20171215\_MaS\_33SR\_LMH\_phospho\_09 Scan 2591 Method FTMS; HCD Score 141.3 m/z 580.6 Gene names TCEAL1

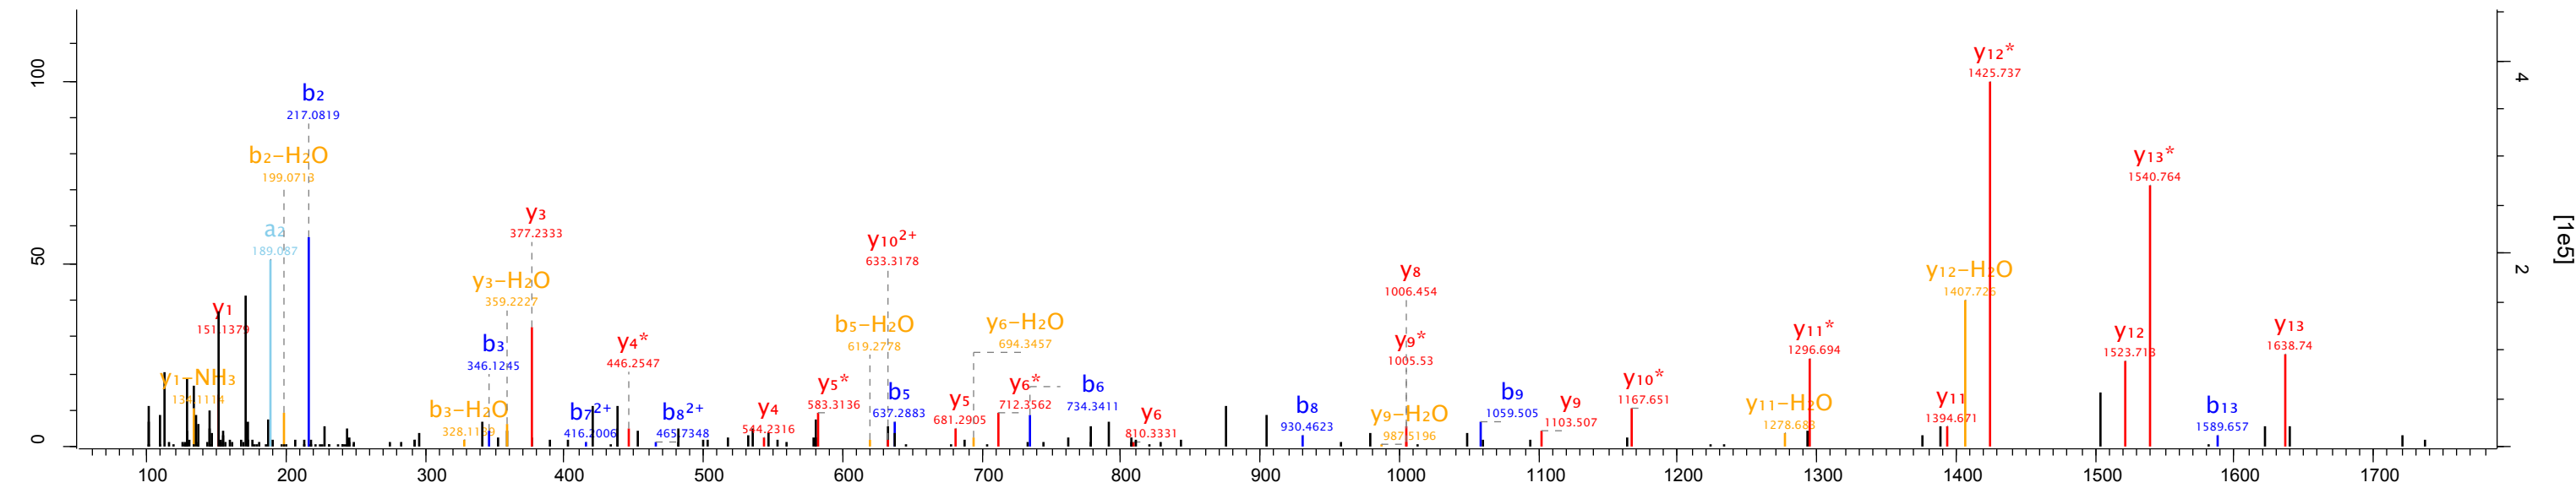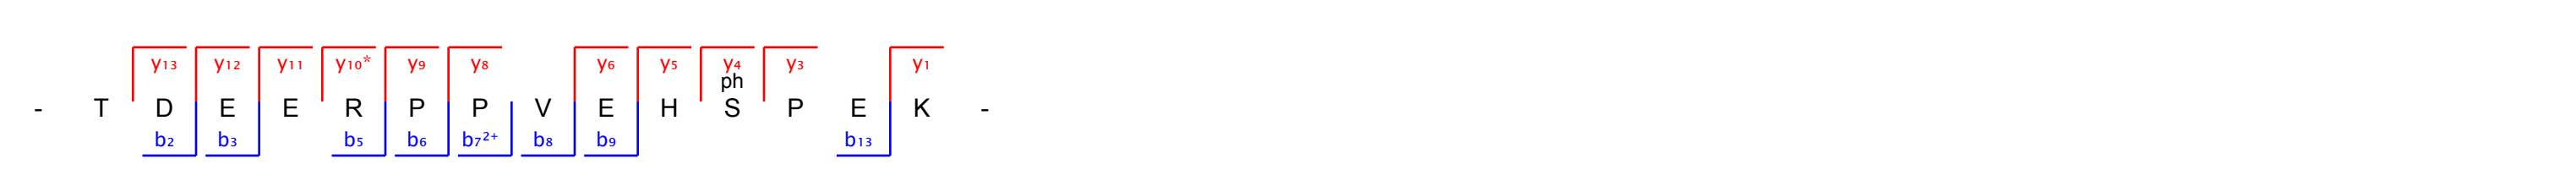



Raw file 20171215\_MaS\_33SR\_LMH\_phospho\_09 Scan 2701 Method FTMS; HCD Score 111.63 m/z 555.24 Gene names S100A11

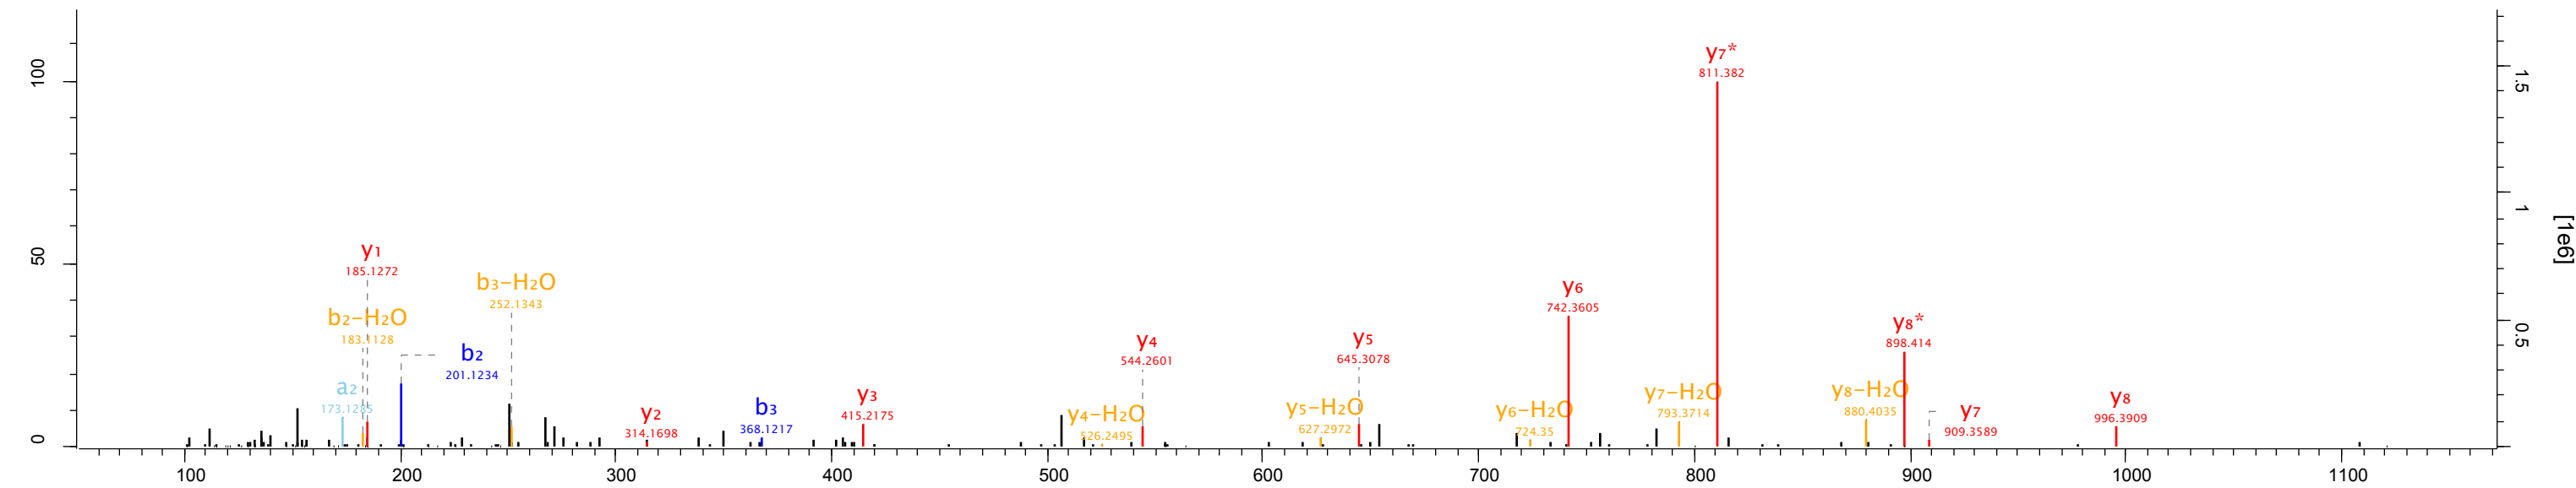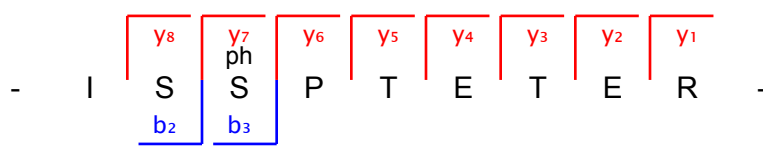

20171215\_MaS\_33SR\_LMH\_phospho\_09

2801 FTMS; HCD 97.8 580.79 ZYX

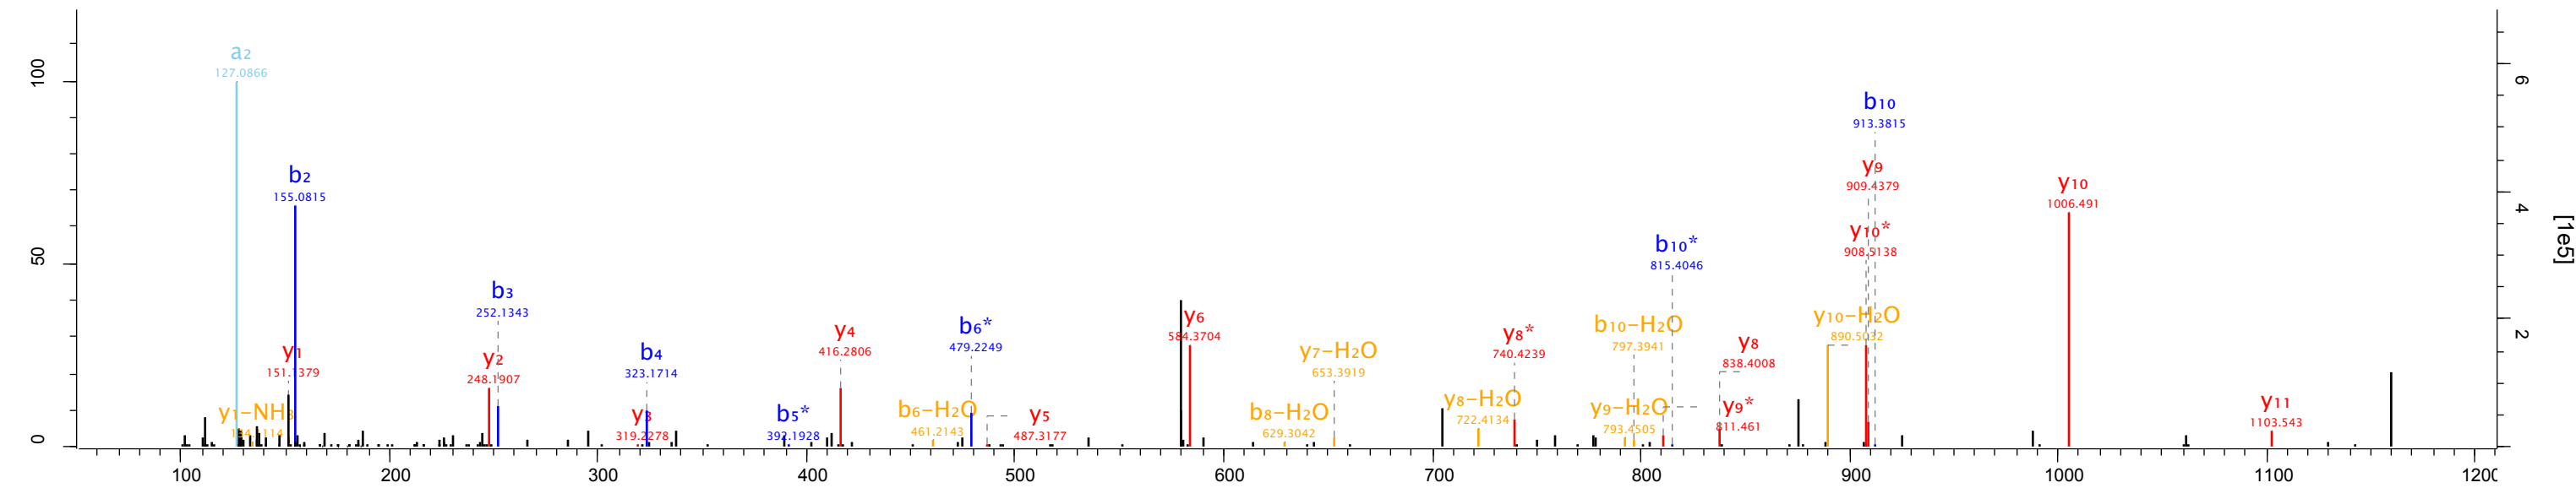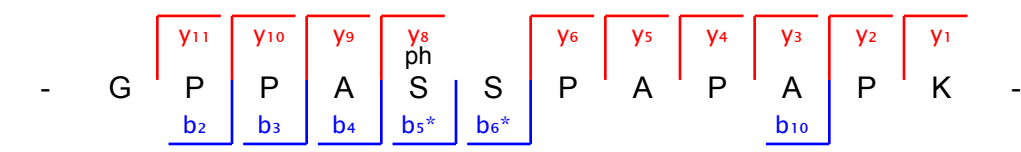

Raw file 20171215\_MaS\_33SR\_LMH\_phospho\_09 Scan 2841 Method FTMS; HCD Score 46.16 m/z 489.58 Gene names SPECC1L-ADORA2A;SPECC1L

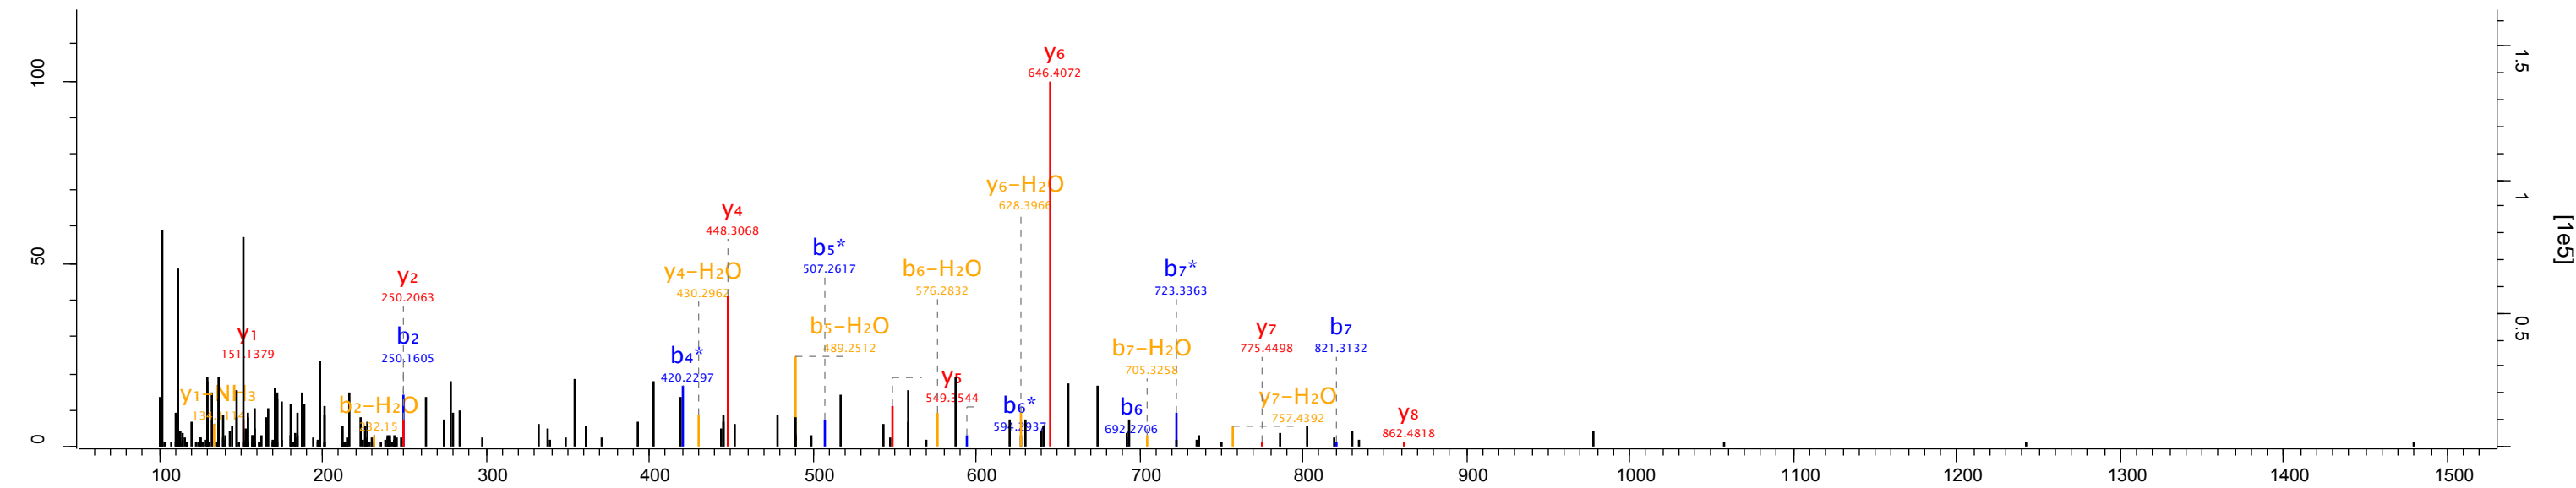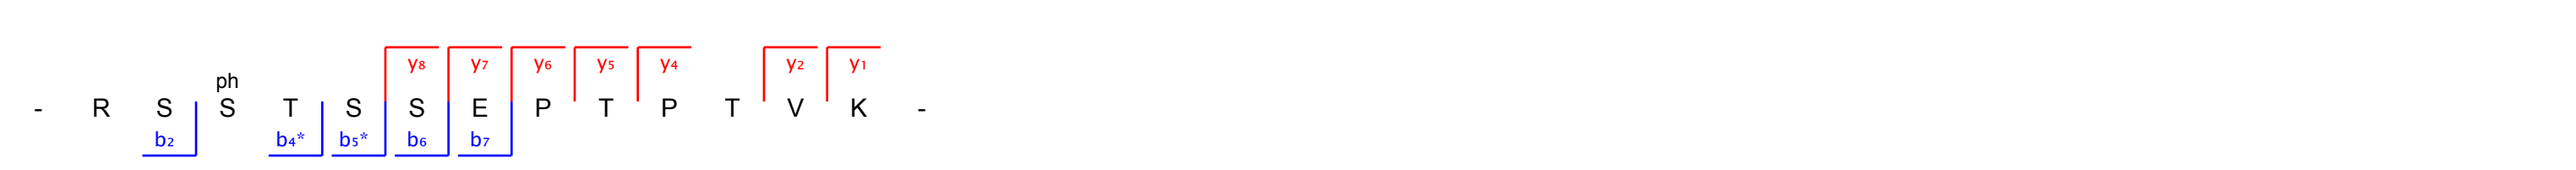

Raw file 20171215\_MaS\_33SR\_LMH\_phospho\_09 Scan 3171 Method FTMS; HCD Score 107.98 m/z 677.8 Gene names LMNB2

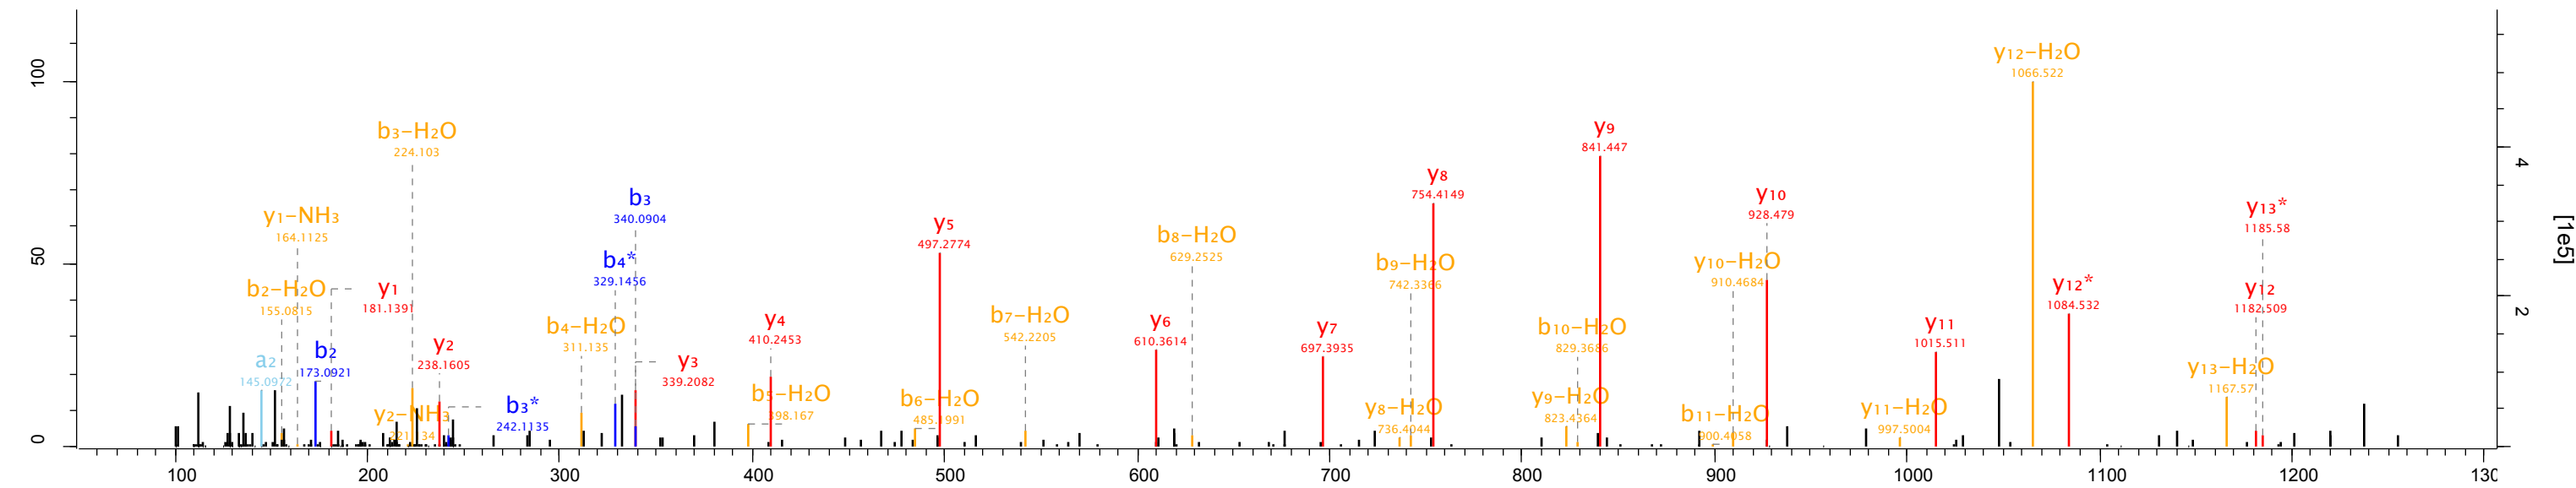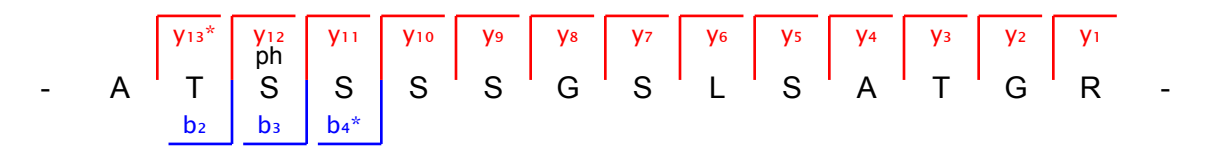

Raw file 20171215\_MaS\_33SR\_LMH\_phospho\_09 Scan 4671 Method FTMS; HCD Score 116.58 m/z 552.24 Gene names TNKS1BP1

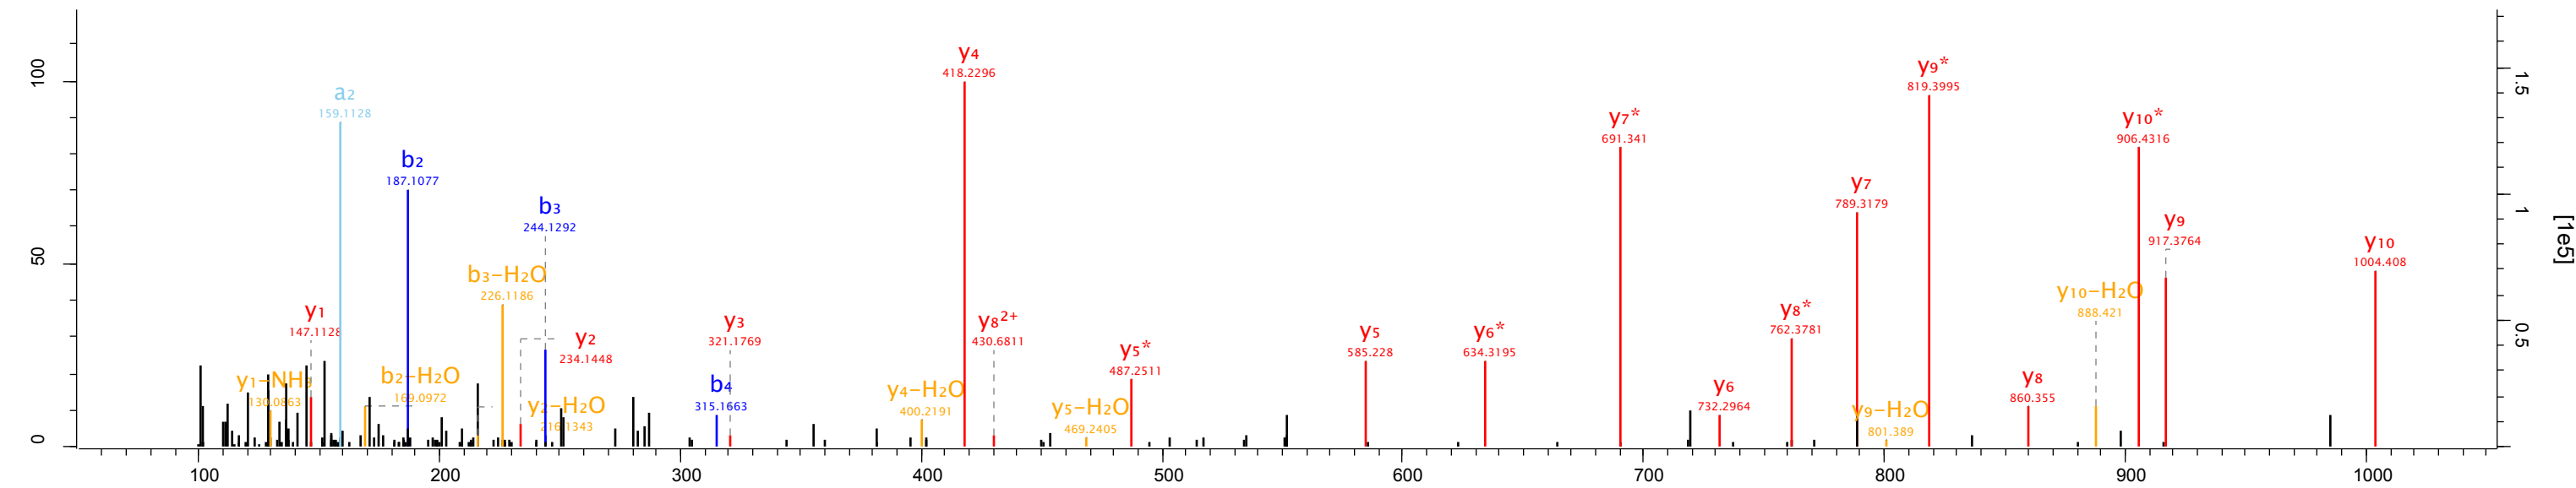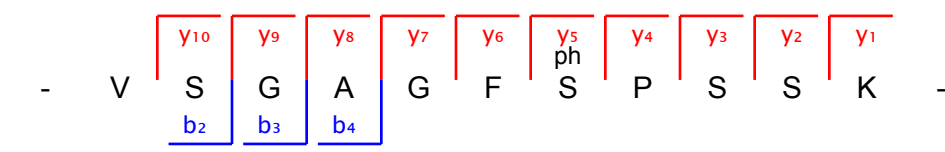

Raw file 20171215\_MaS\_33SR\_LMH\_phospho\_09 Scan 6051 Method FTMS; HCD Score 210.66 m/z 771.83 Gene names C9orf40

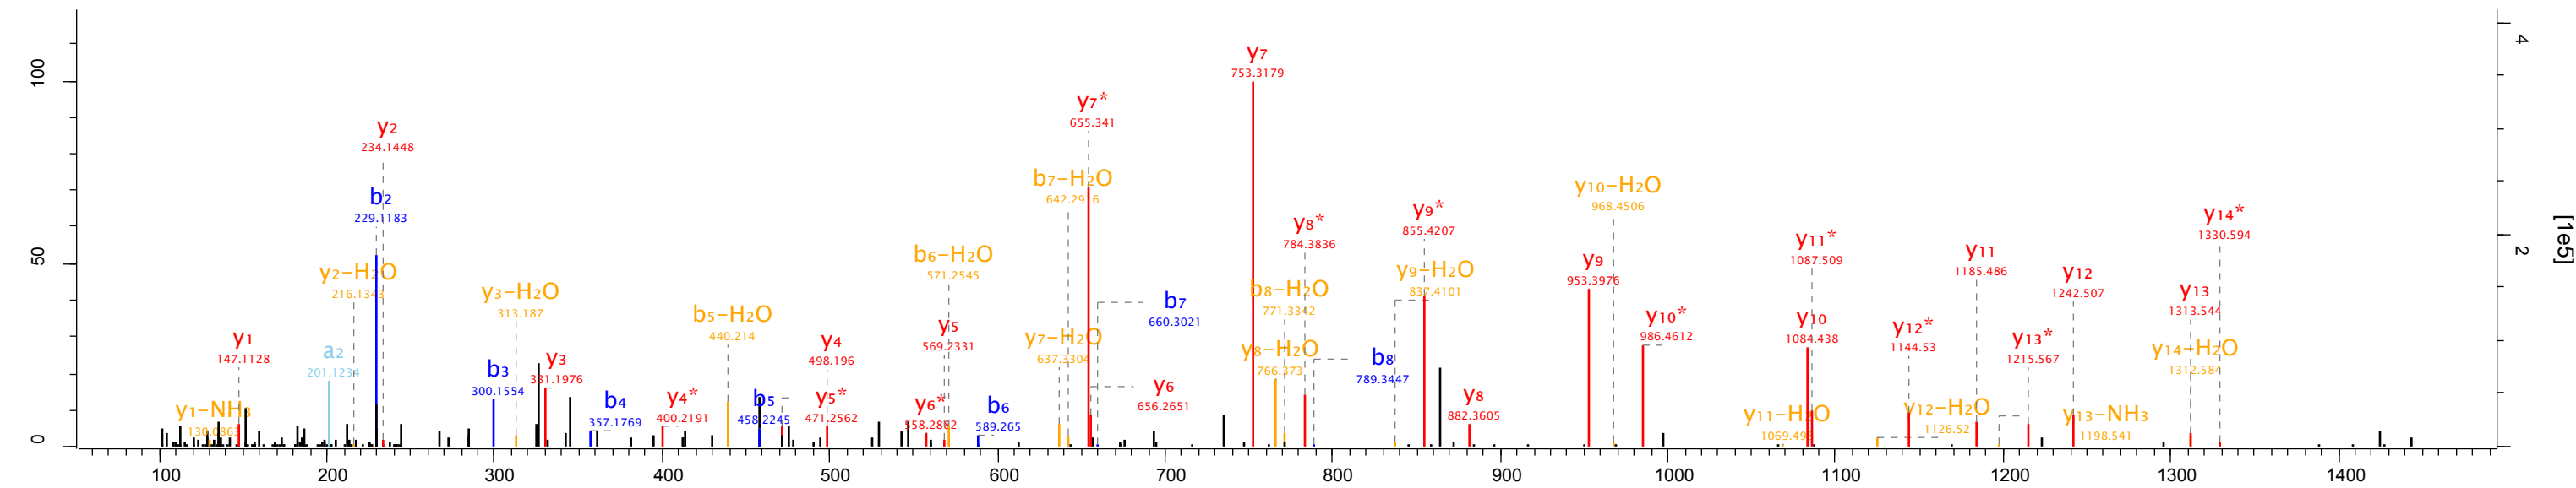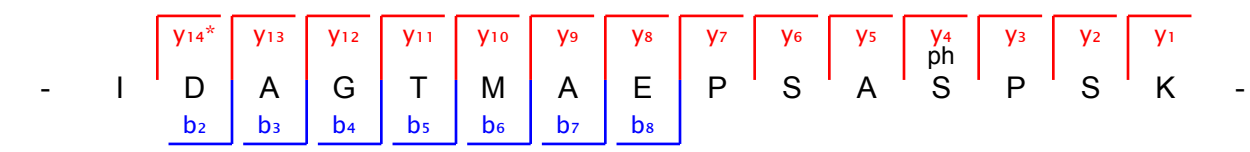

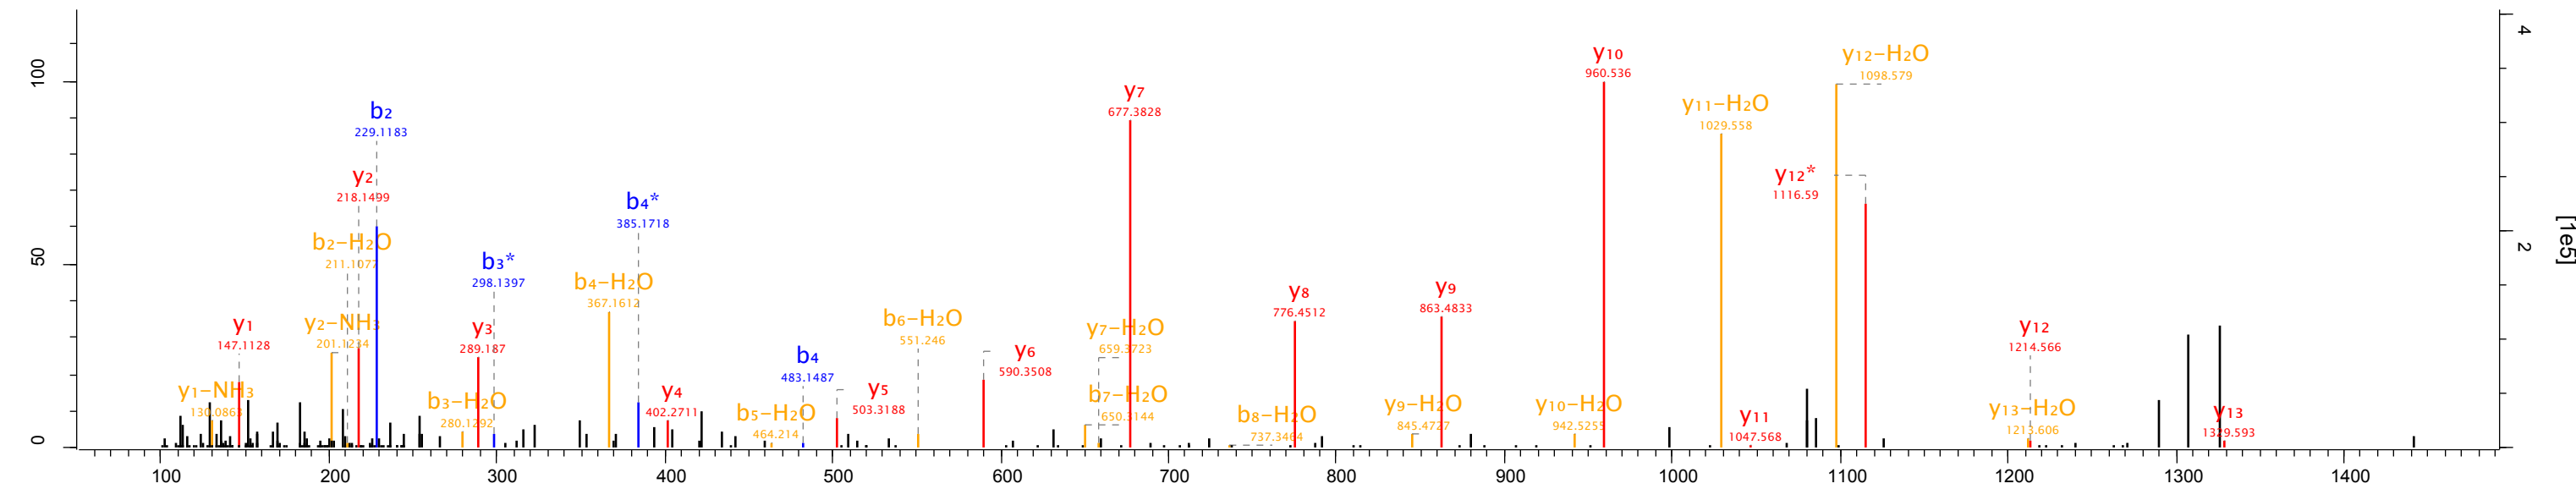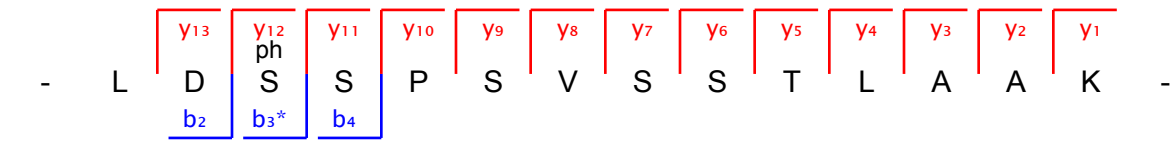

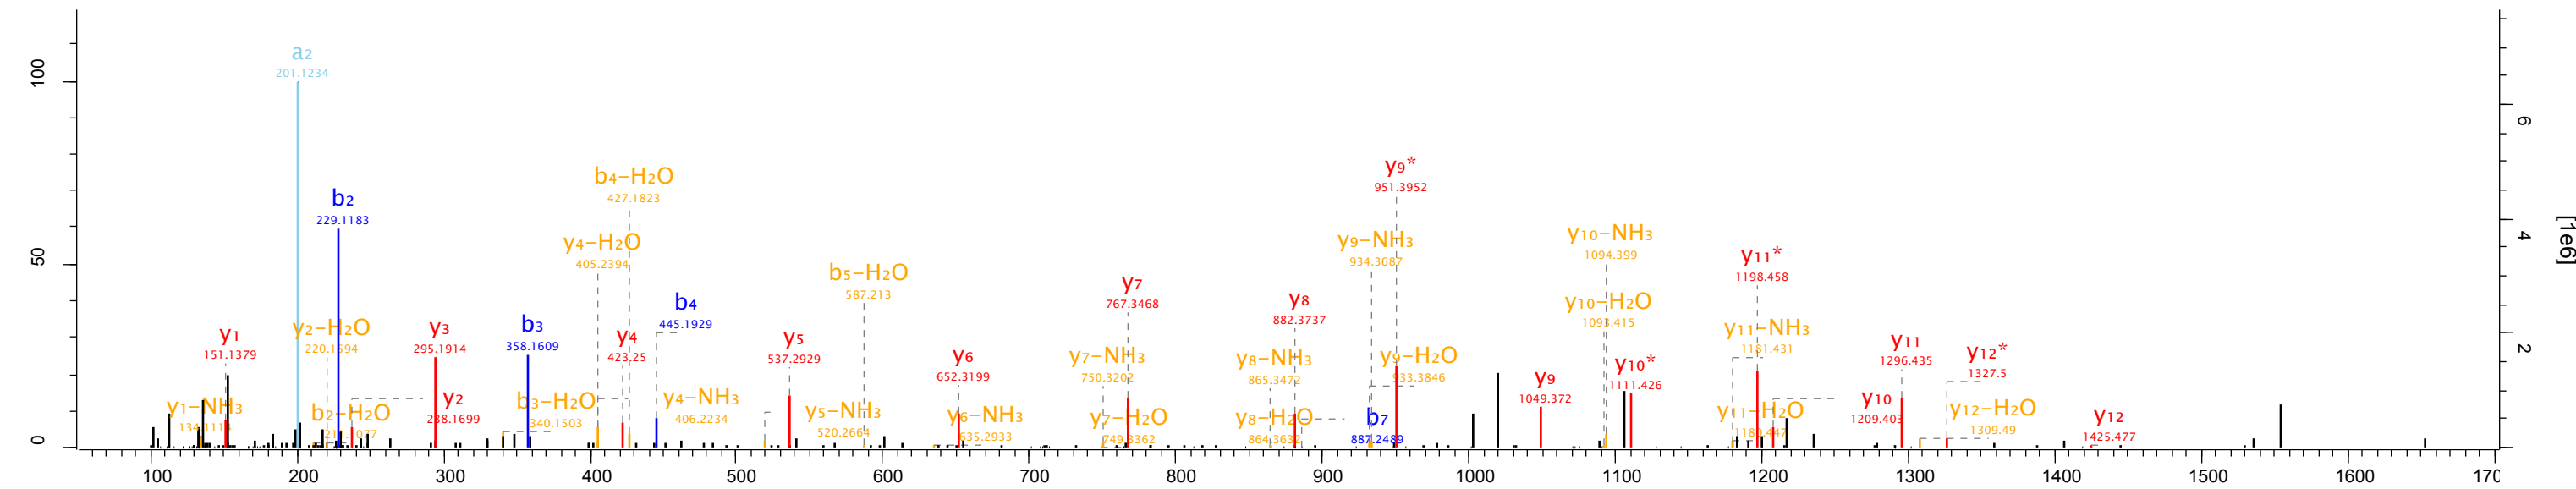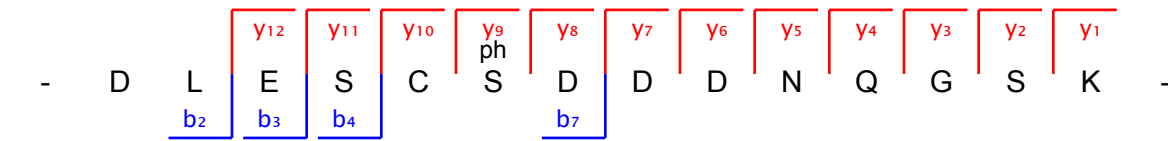



Raw file

20171215\_MaS\_33SR\_LMH\_phospho2\_01

| Scan | Method    | Score | m/z   | Gene names |
|------|-----------|-------|-------|------------|
| 2901 | FTMS; HCD | 62.66 | 759.3 | SMG8       |

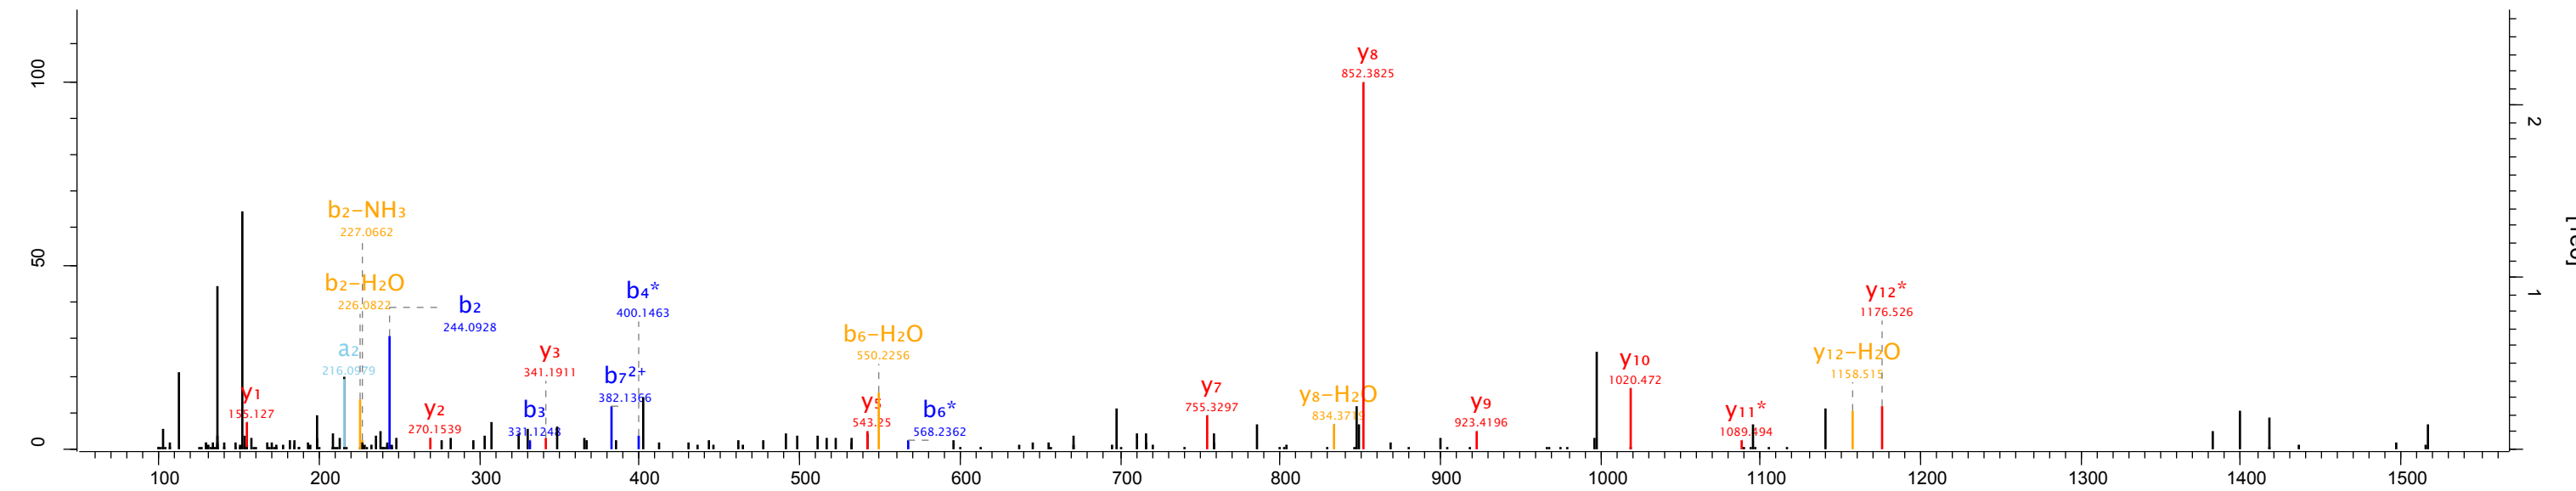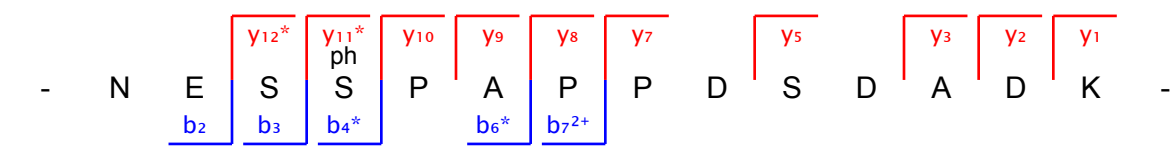

Raw file: 20171215\_MaS\_33SR\_LMH\_phospho2\_01  
 Scan: 3101 Method: FTMS; HCD Score: 109.57 m/z: 676.28 Gene names: HECTD1

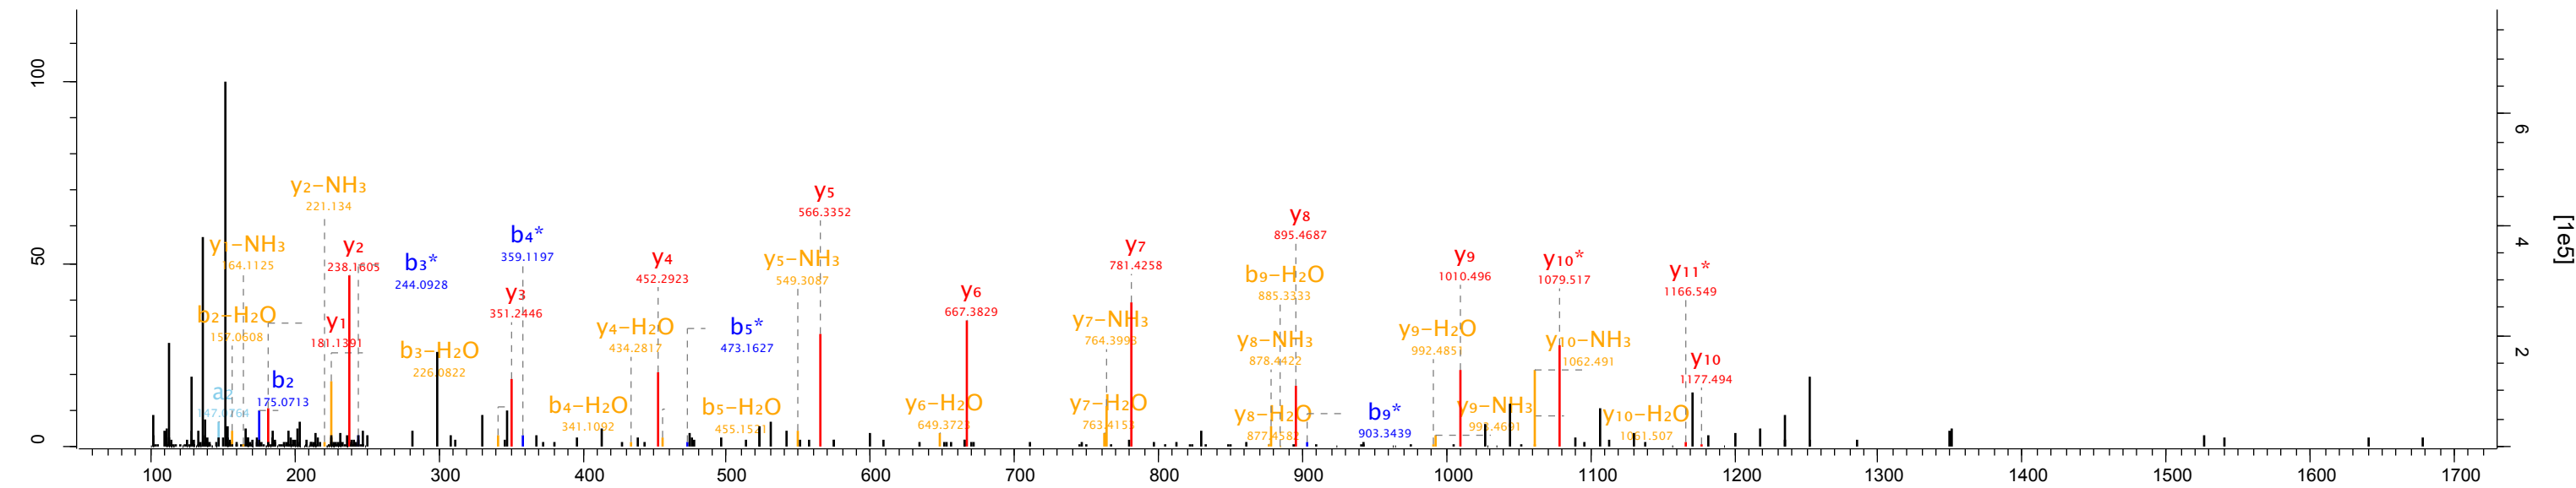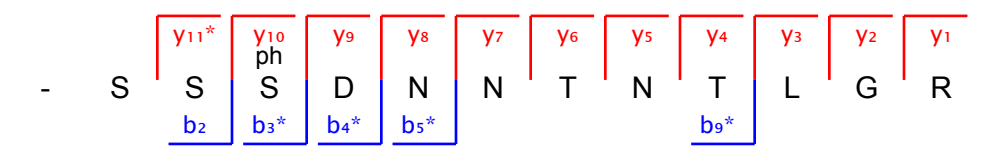

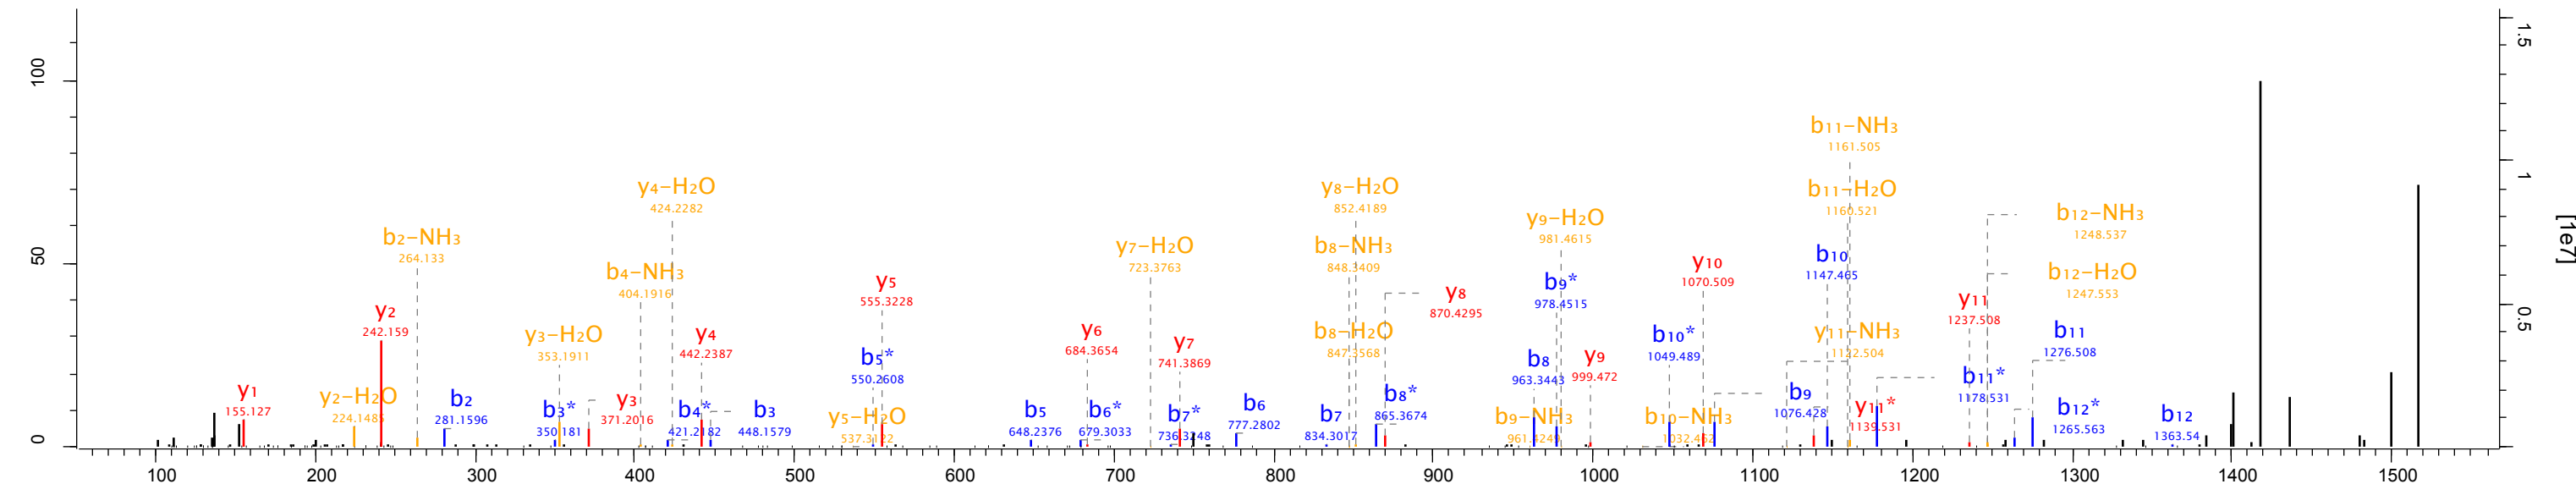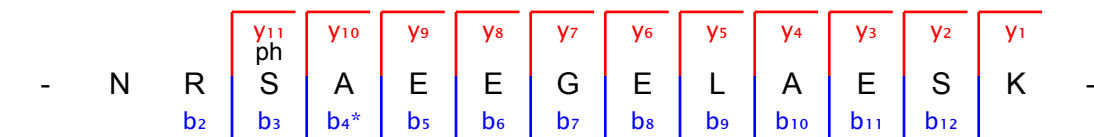

20171215\_MaS\_33SR\_LMH\_phospho2\_01

3541 FTMS; HCD 138.04 887.89 EDC3

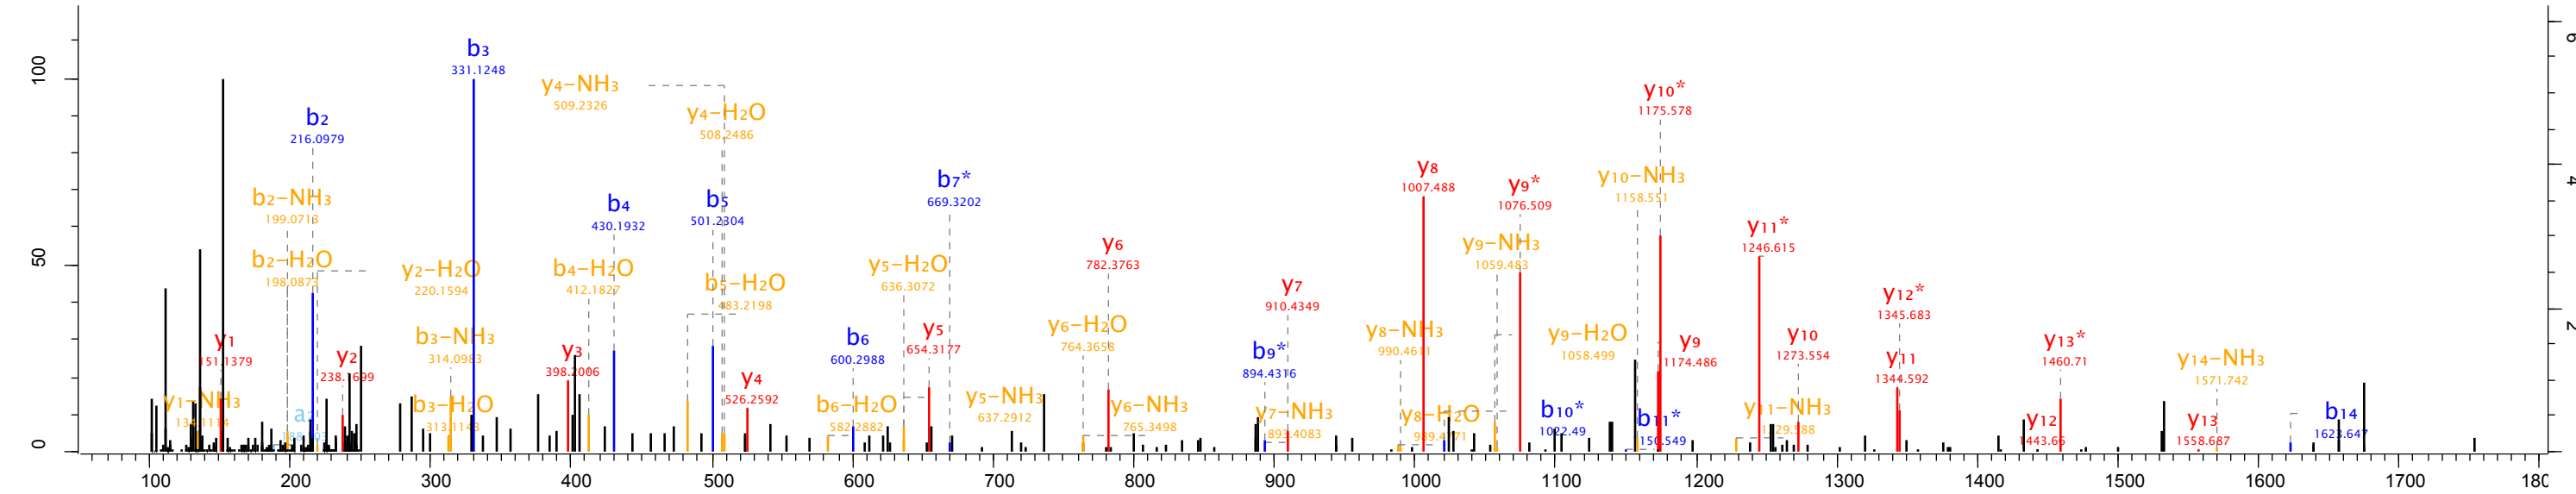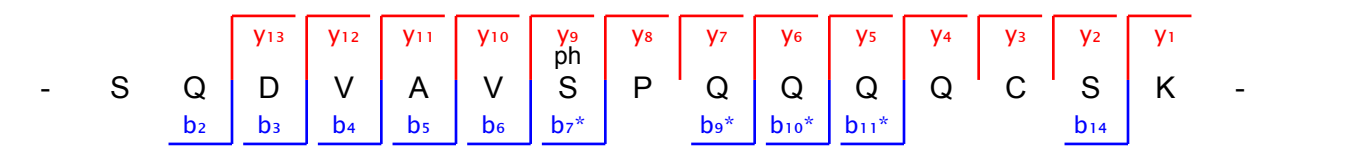

Raw file 20171215\_MaS\_33SR\_LMH\_phospho2\_01 Scan 3581 Method FTMS; HCD Score 88.27 m/z 517.2 Gene names EIF3C;EIF3CL

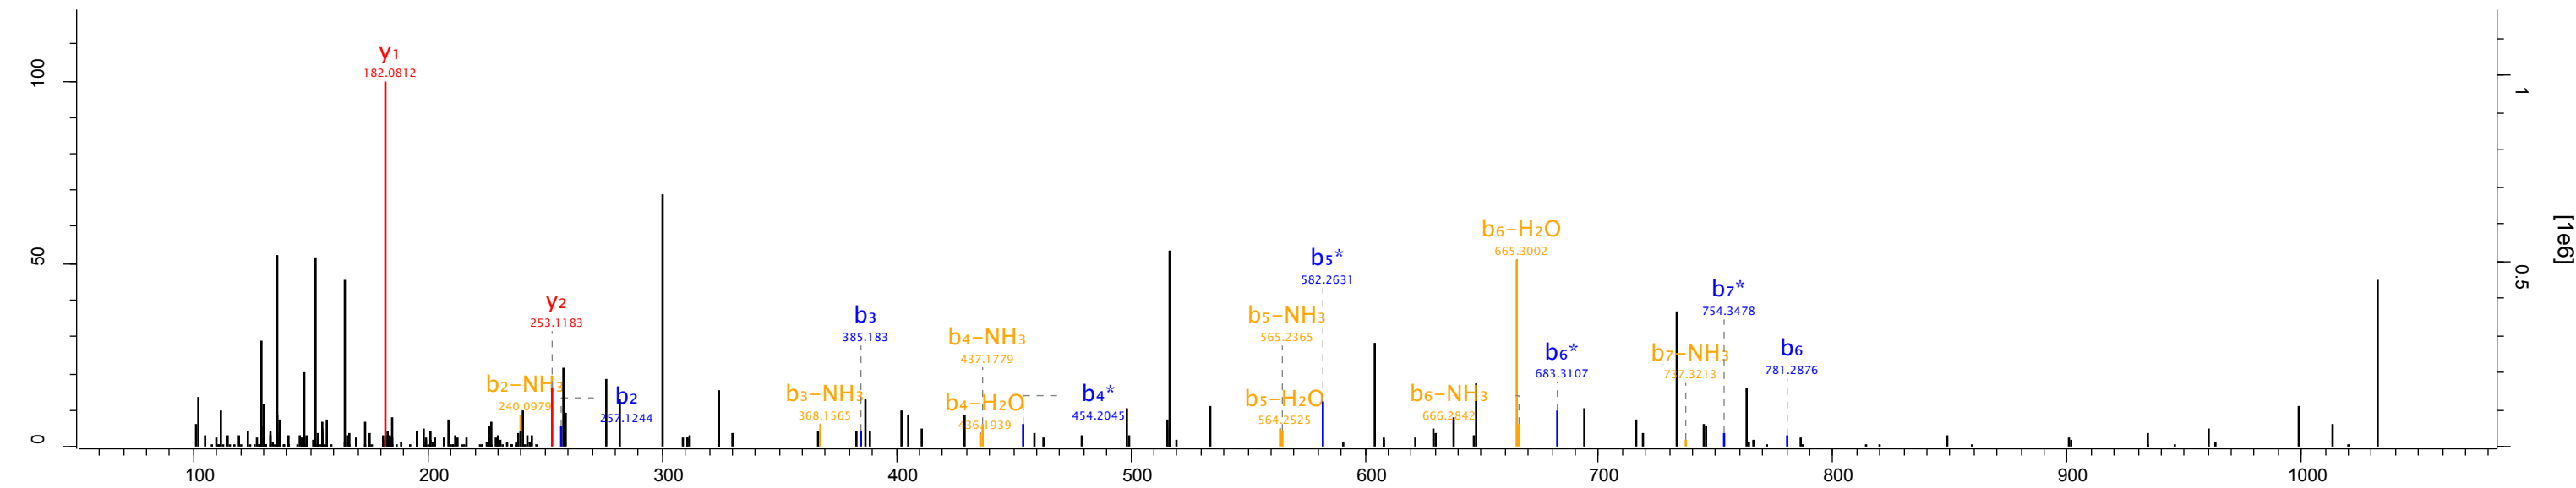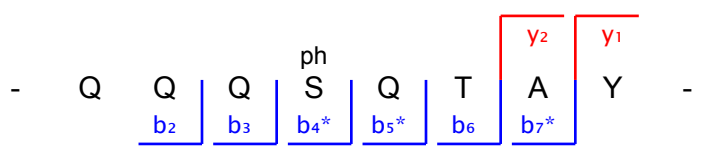

Raw file: 20171215\_MaS\_33SR\_LMH\_phospho2\_01  
 Scan: 3591 Method: FTMS; HCD Score: 193.19 m/z: 666.25 Gene names: BCL10

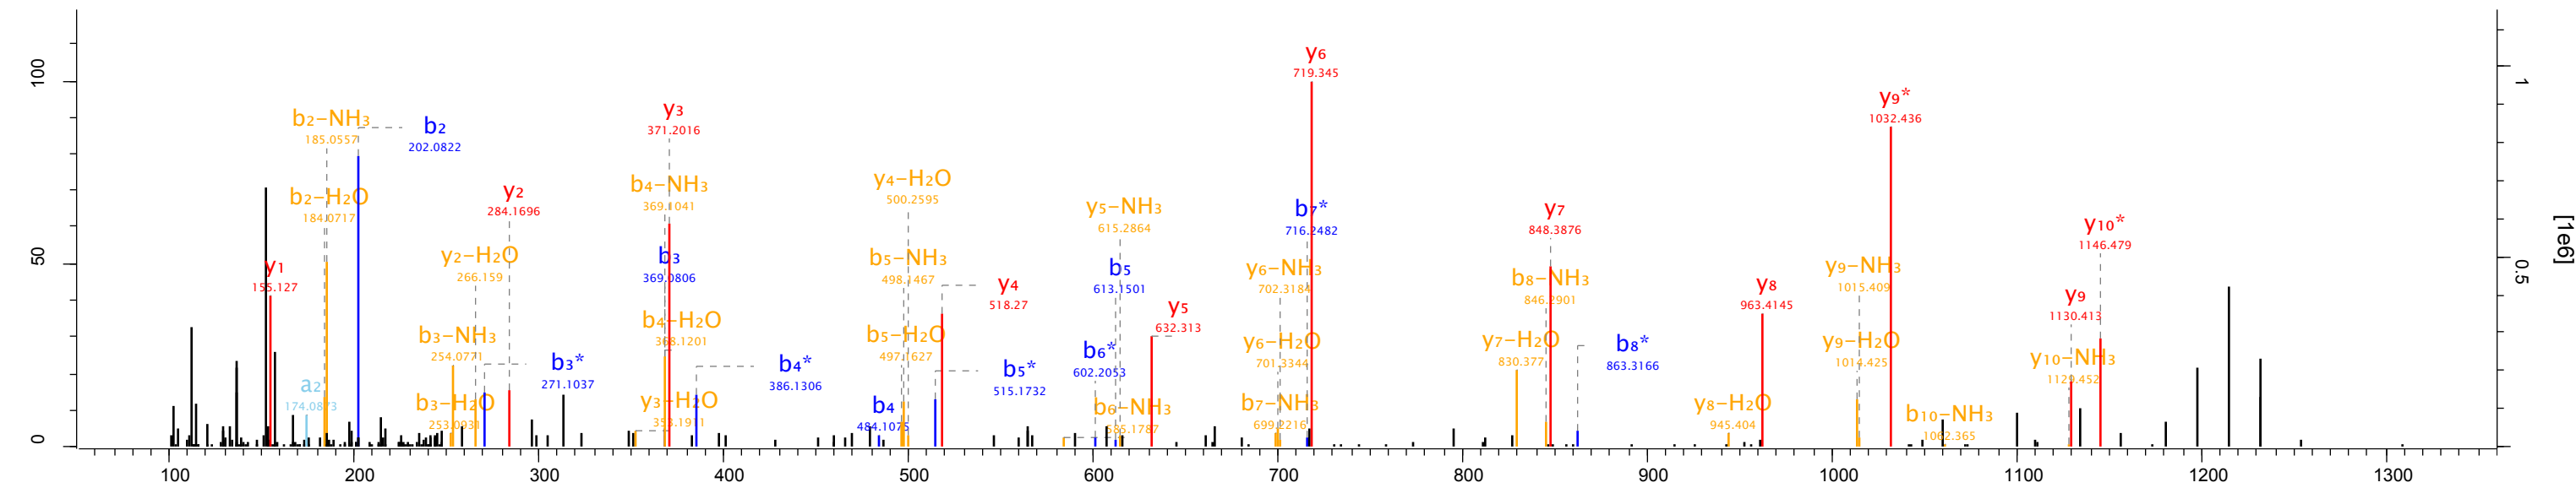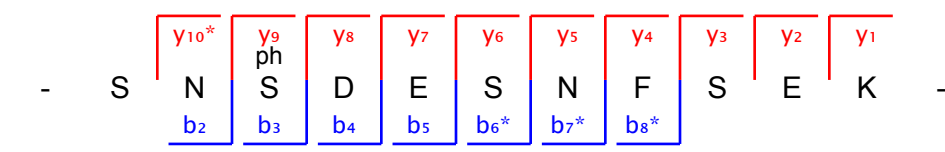

Raw file: 20171215\_MaS\_33SR\_LMH\_phospho2\_01  
 Scan: 3881 Method: FTMS; HCD Score: 134 m/z: 753.66 Gene names: HSF1

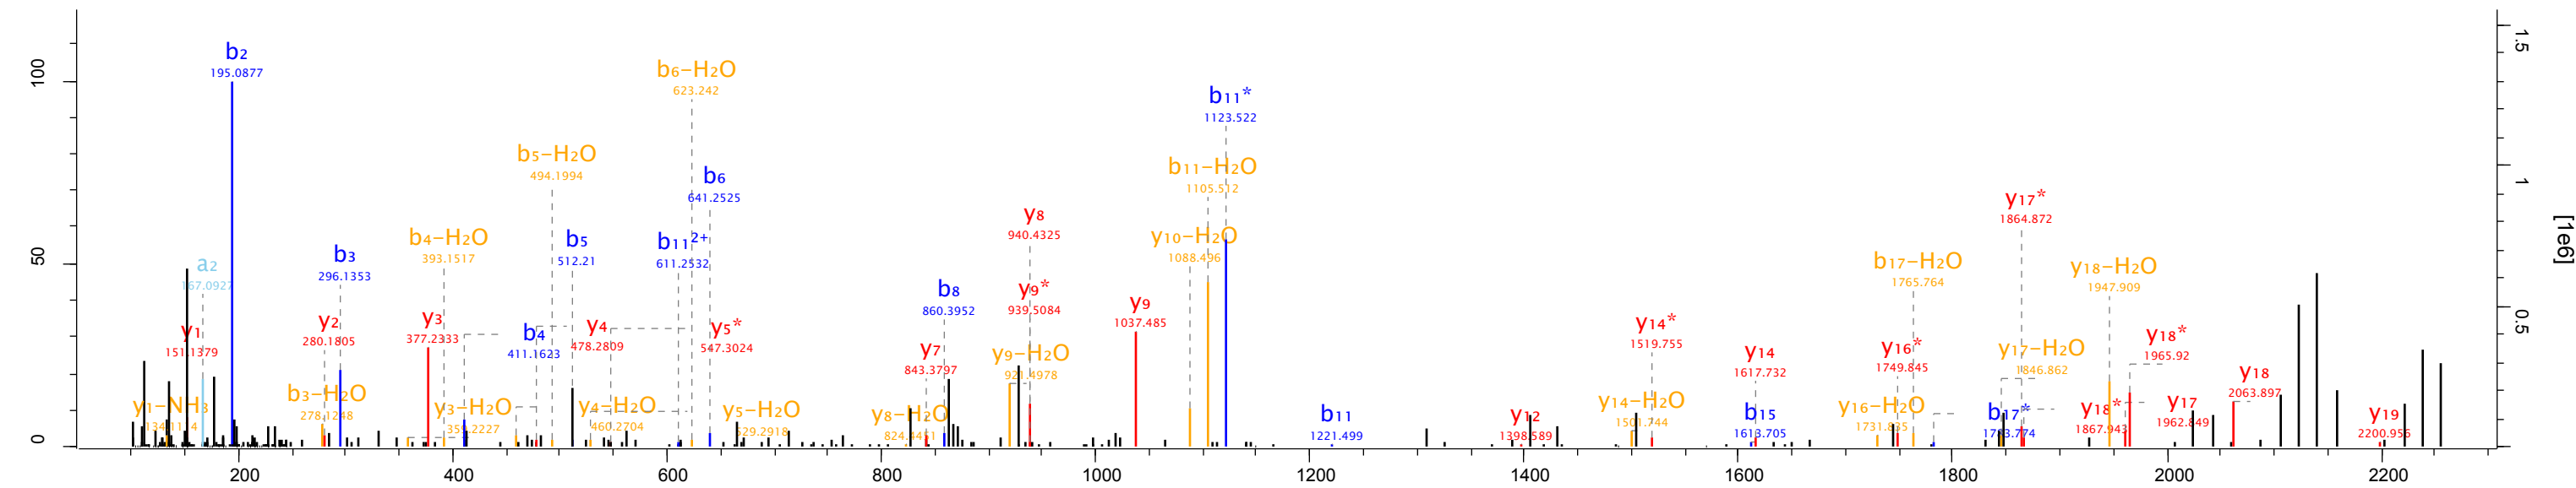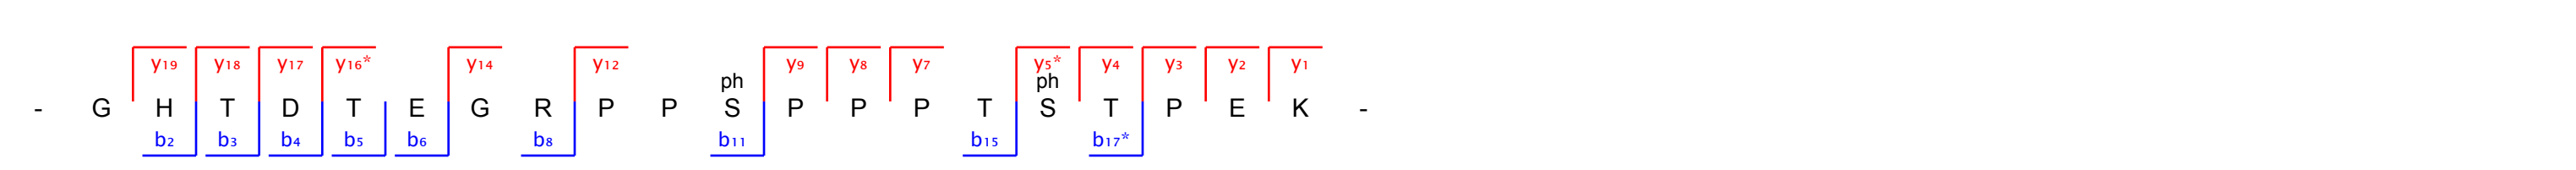

Raw file 20171215\_MaS\_33SR\_LMH\_phospho2\_01 Scan 4591 Method FTMS; HCD Score 57.86 m/z 578.78

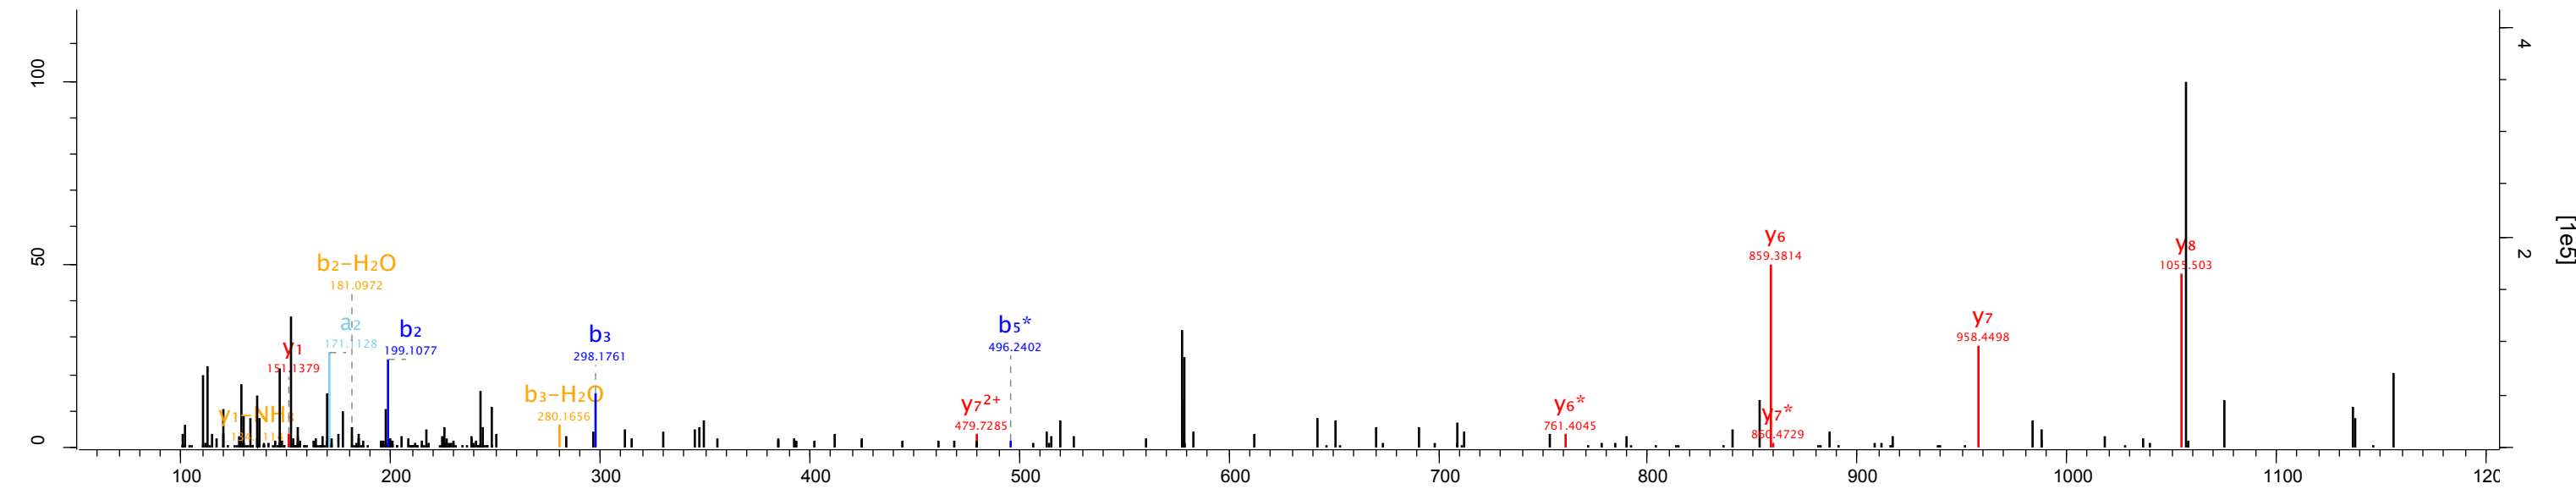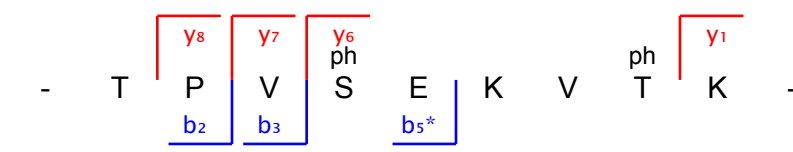



Raw file

20171215\_MaS\_33SR\_LMH\_phospho2\_01

| Scan | Method    | Score | m/z    | Gene names |
|------|-----------|-------|--------|------------|
| 4781 | FTMS; HCD | 76.97 | 830.72 | HMGA2      |

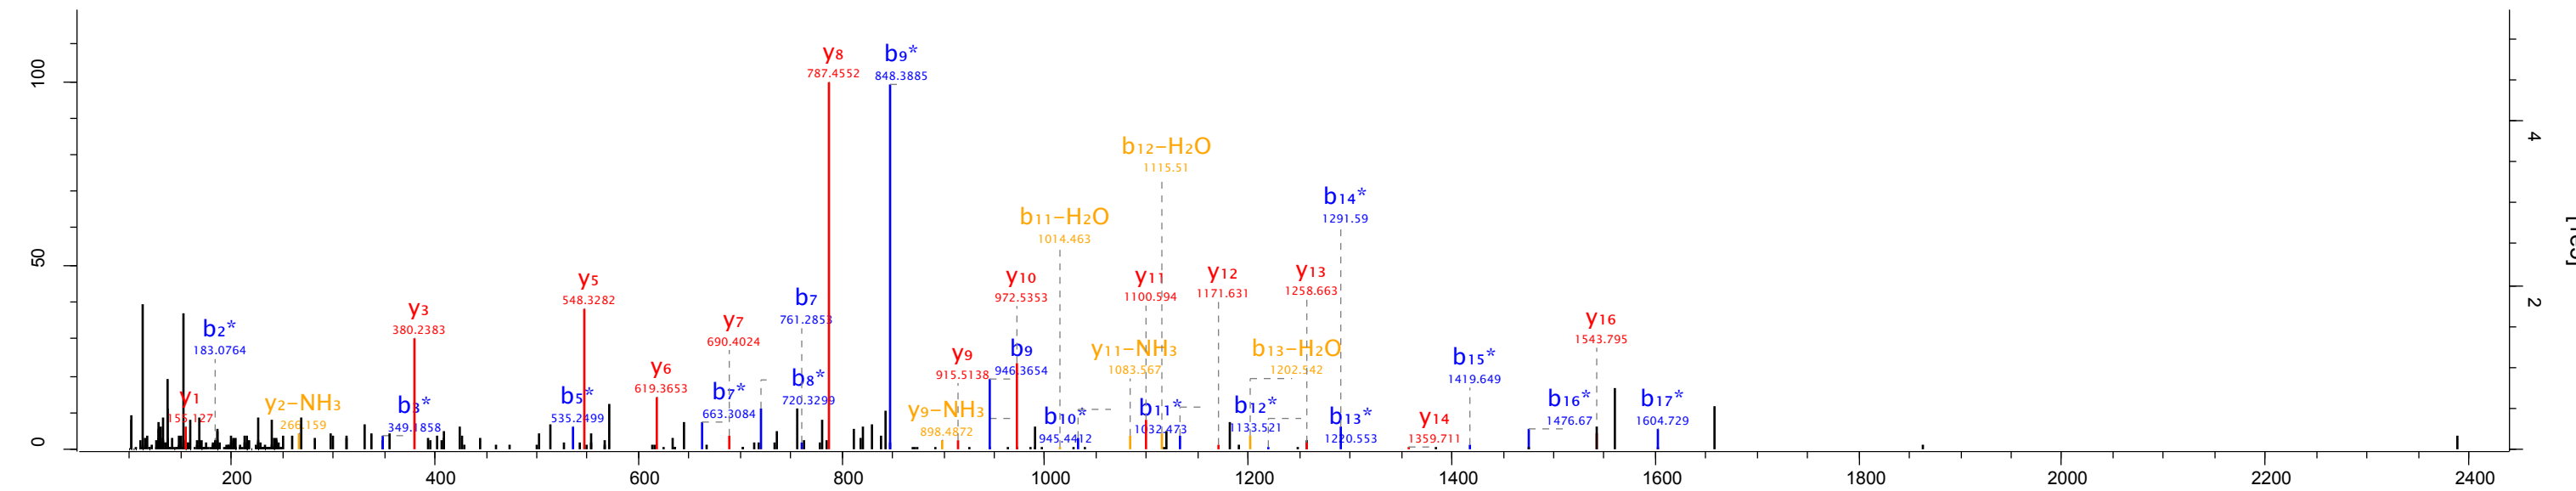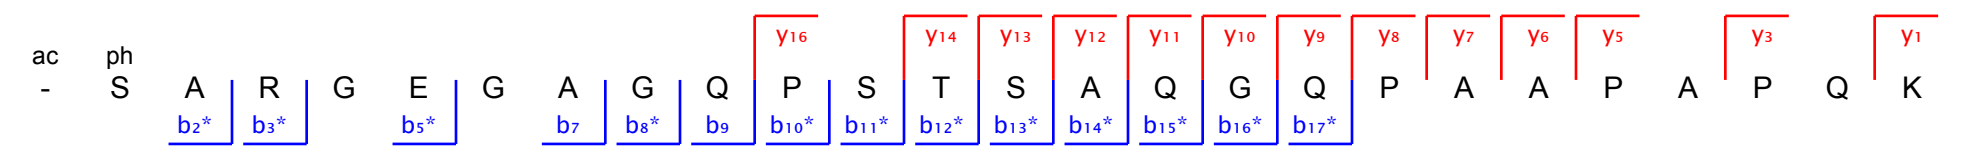

Raw file  
20171215\_MaS\_33SR\_LMH\_phospho2\_01

Scan Method Score m/z Gene names  
4831 FTMS; HCD 255.88 1140.96 BAG3

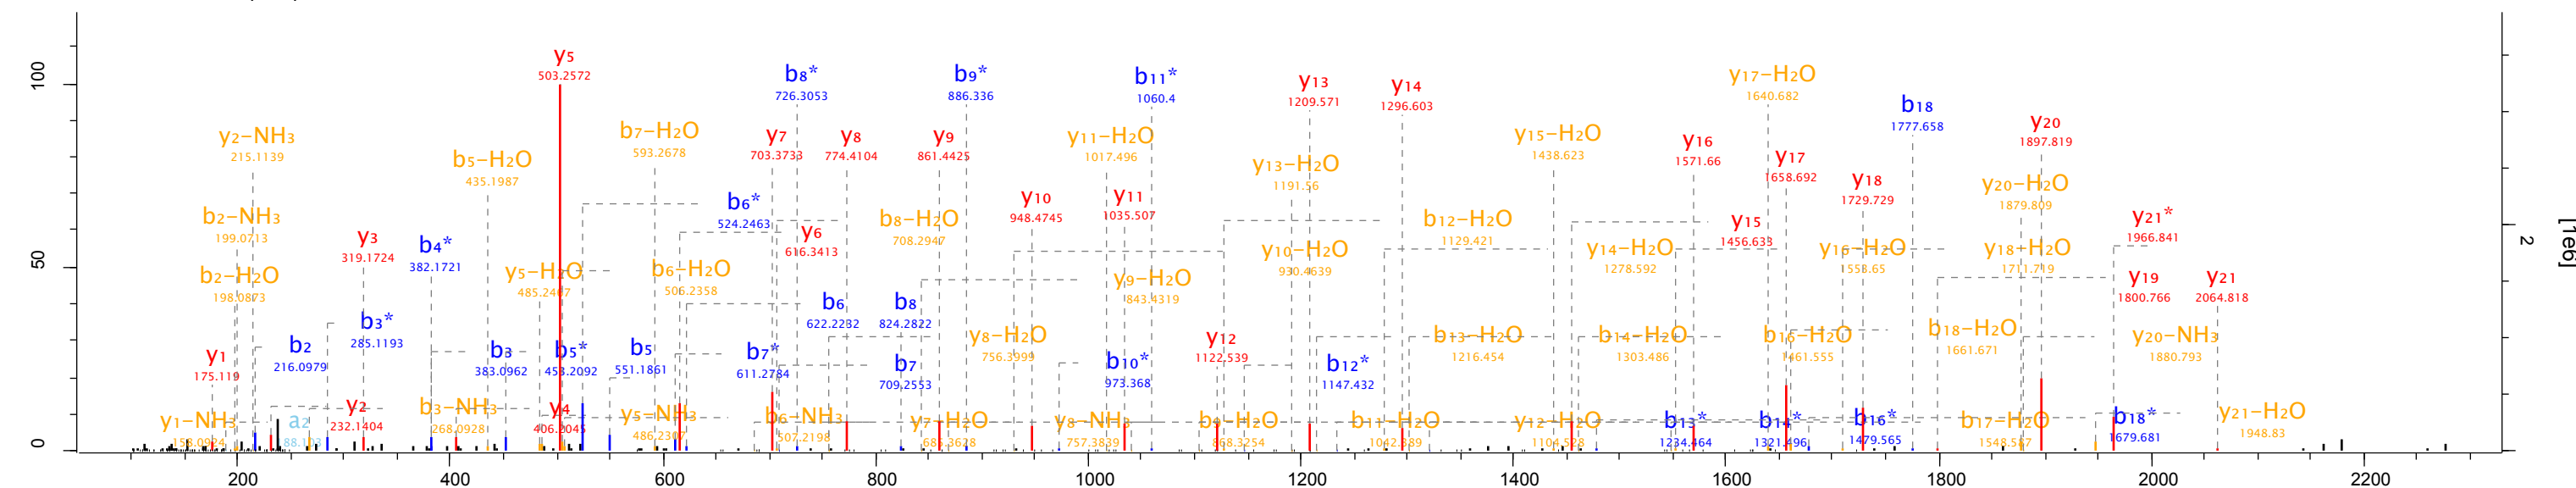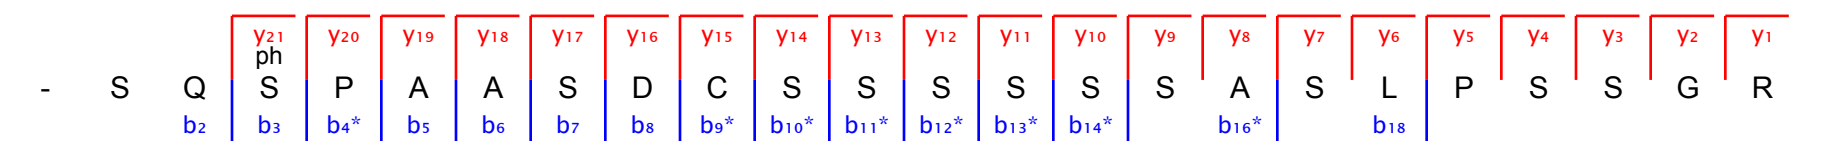

Raw file: 20171215\_MaS\_33SR\_LMH\_phospho2\_01  
 Scan: 4991 Method: FTMS; HCD Score: 201.09 m/z: 516.72 Gene names: AKT1S1

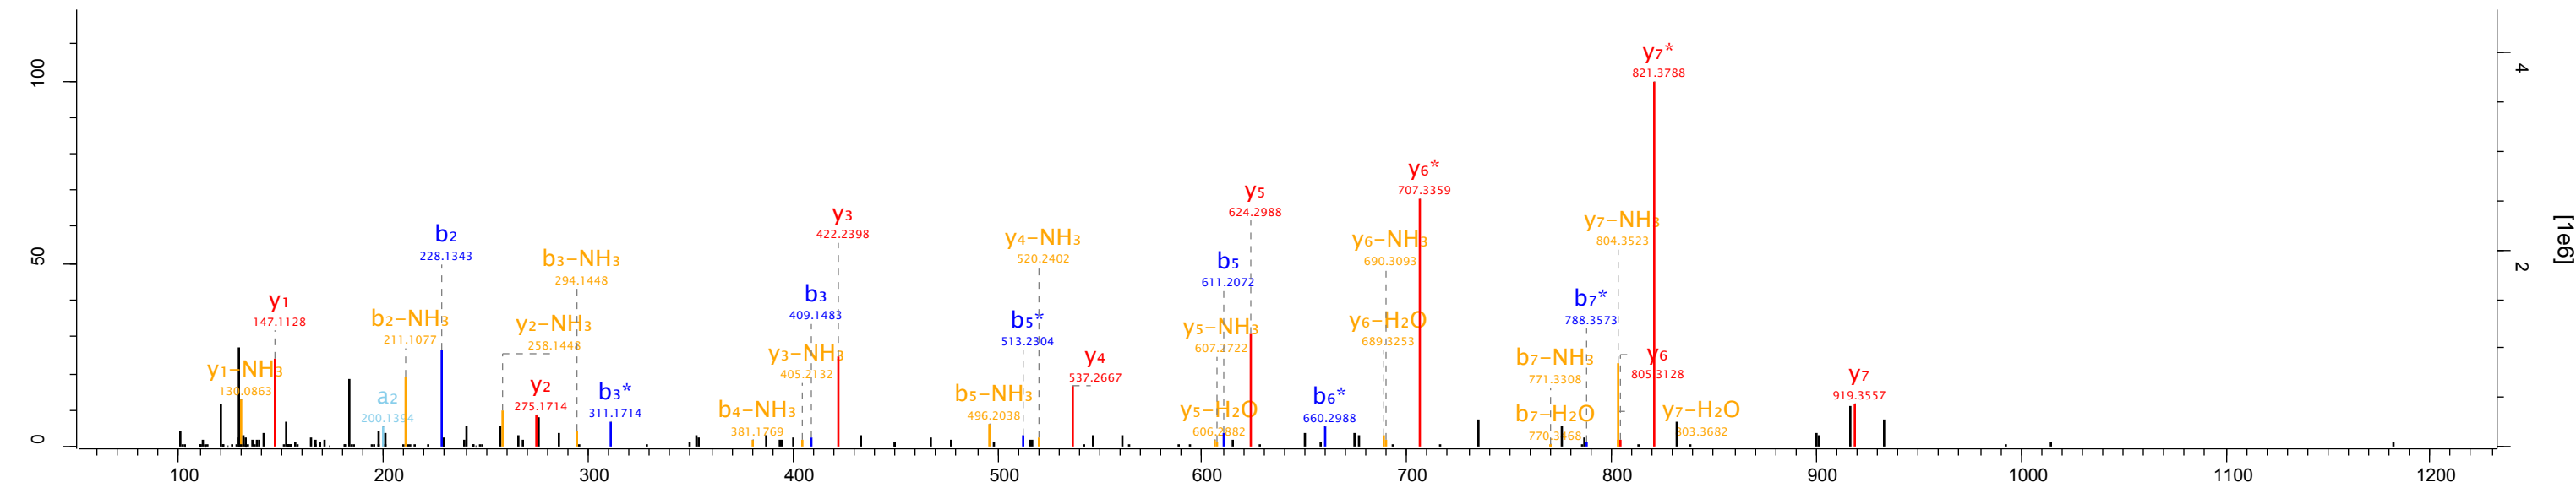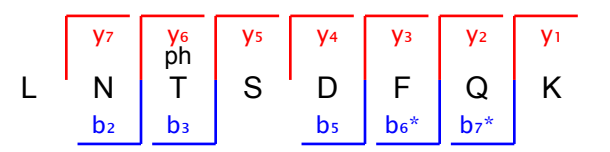

Raw file 20171215\_MaS\_33SR\_LMH\_phospho2\_01 Scan 5471 Method FTMS; HCD Score 79.59 m/z 655.98 Gene names ZNF106

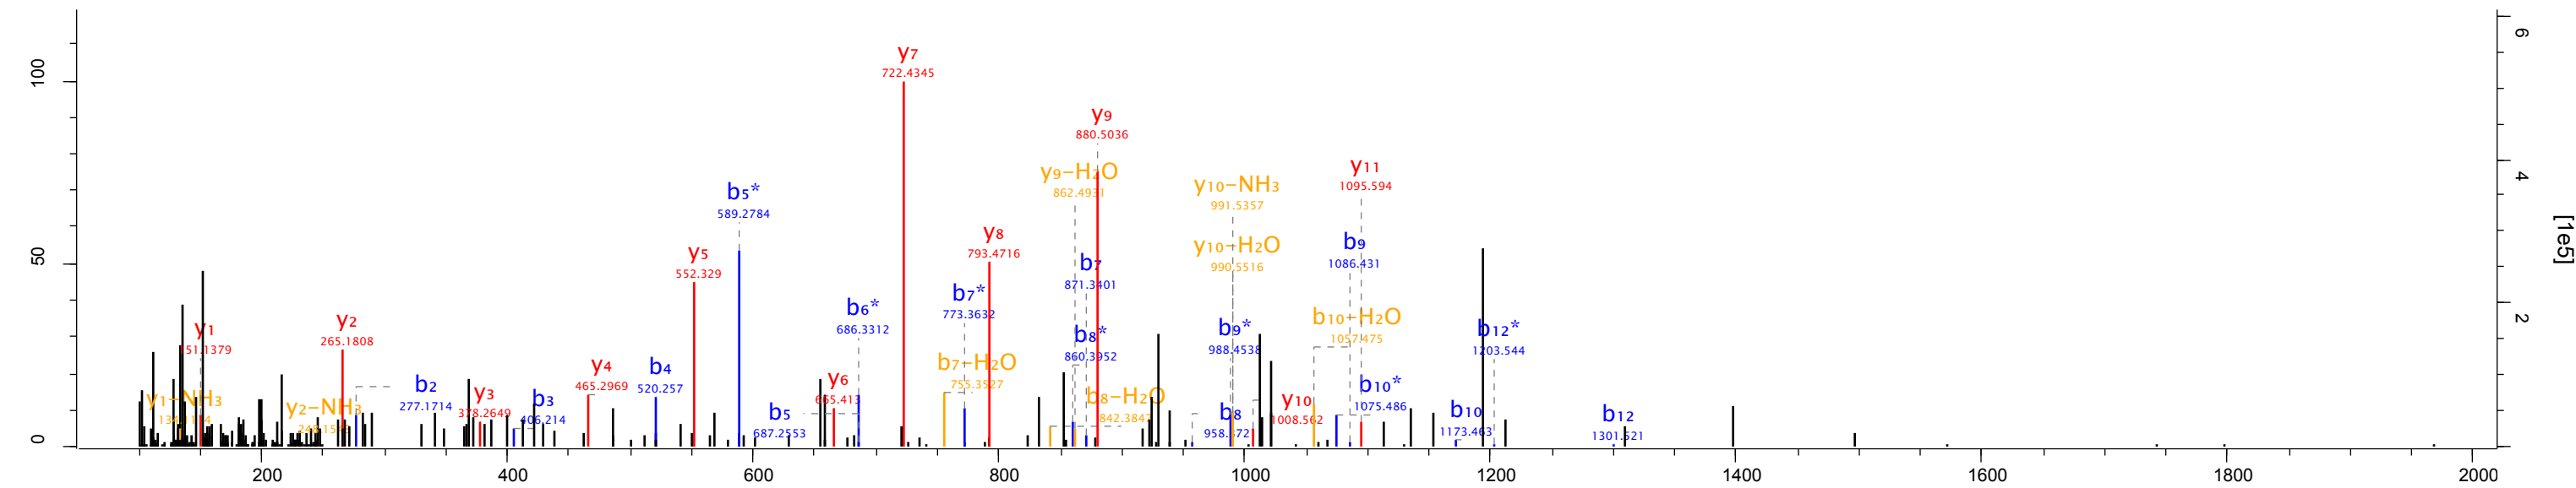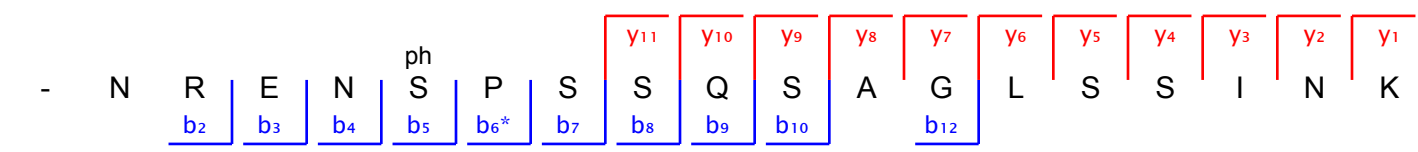

Raw file 20171215\_MaS\_33SR\_LMH\_phospho2\_01 Scan 5641 Method FTMS; HCD Score 98.18 m/z 891.9 Gene names CDC25B

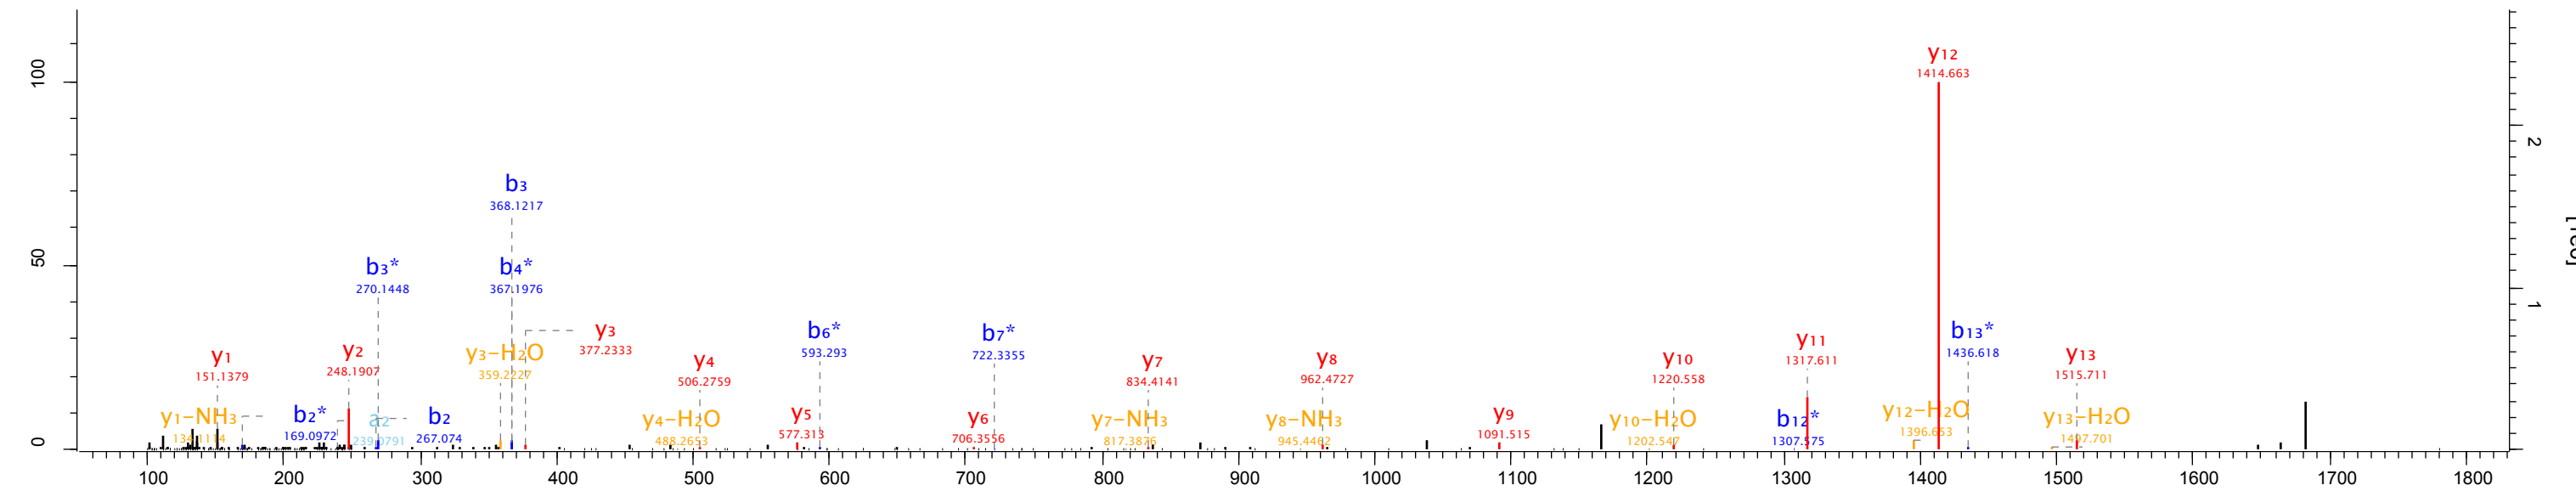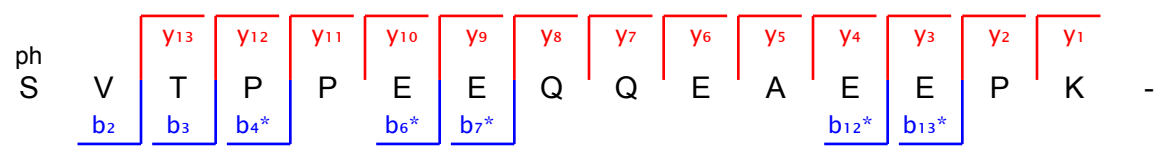

Raw file 20171215\_MaS\_33SR\_LMH\_phospho2\_01 Scan 5711 Method FTMS; HCD Score 66 m/z 609.8 Gene names PFKFB2

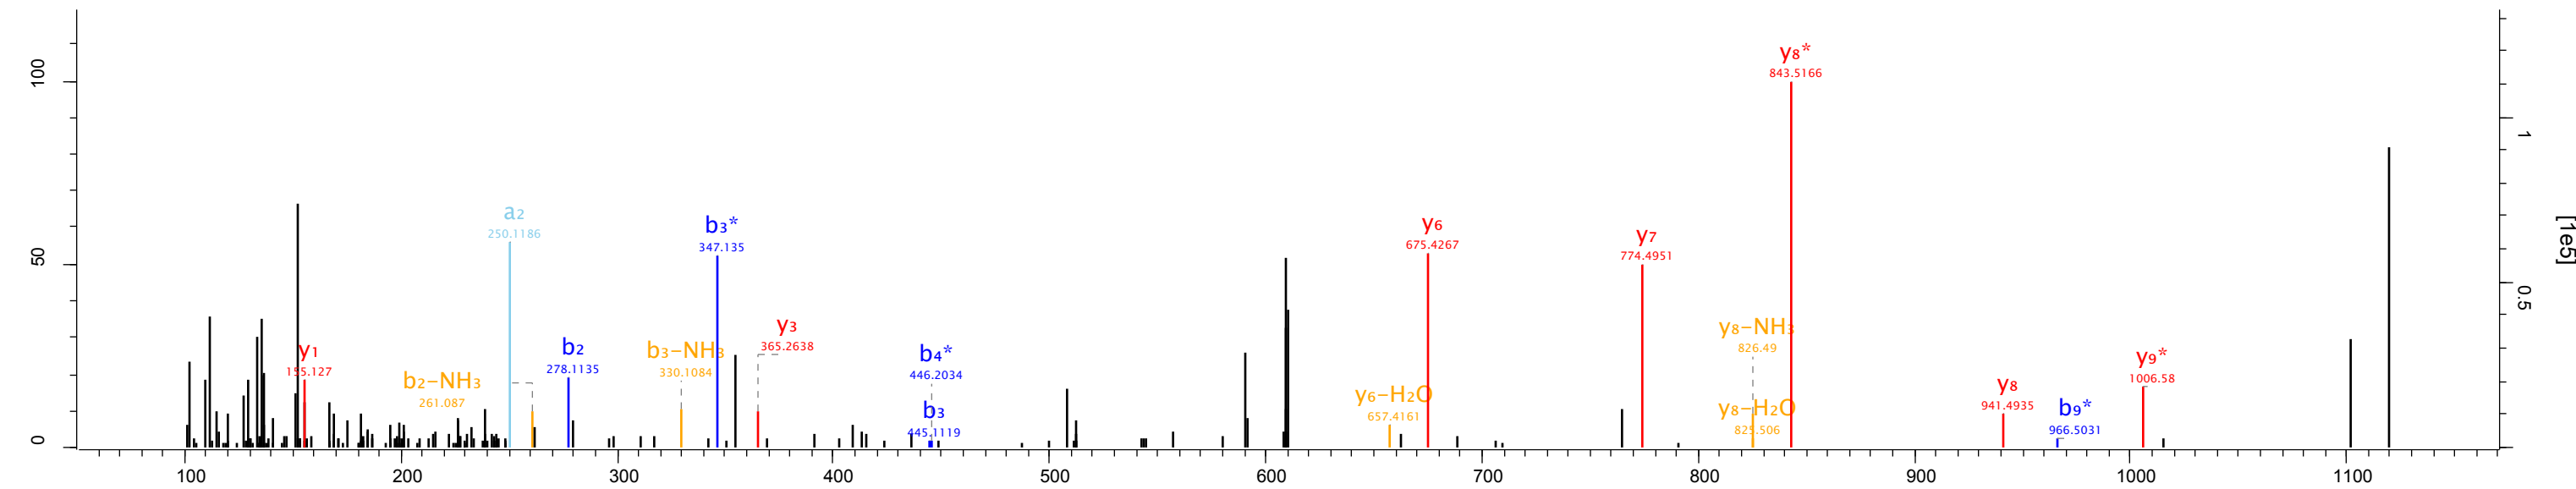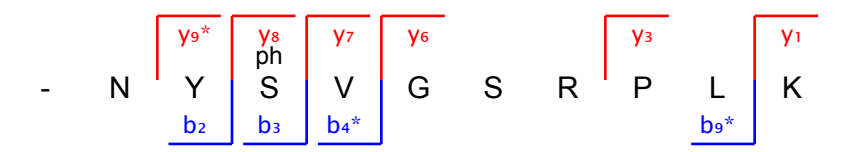

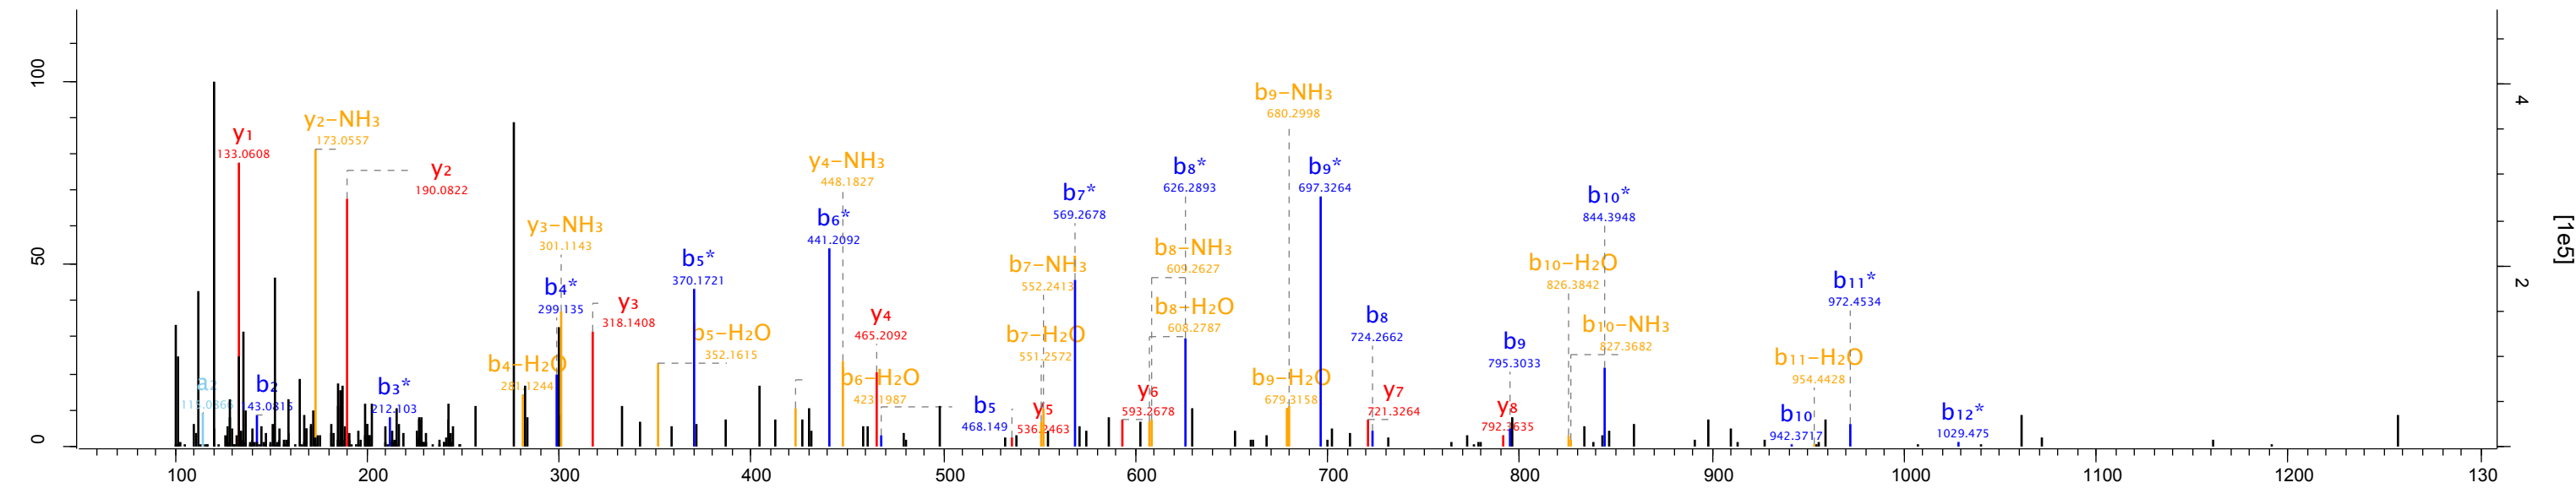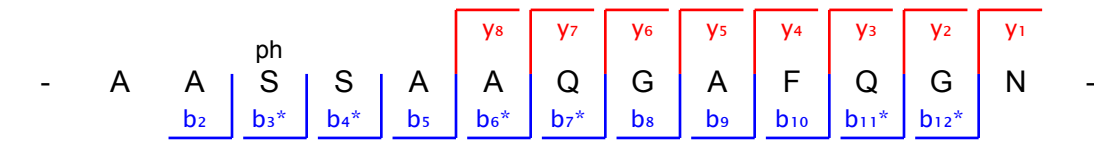

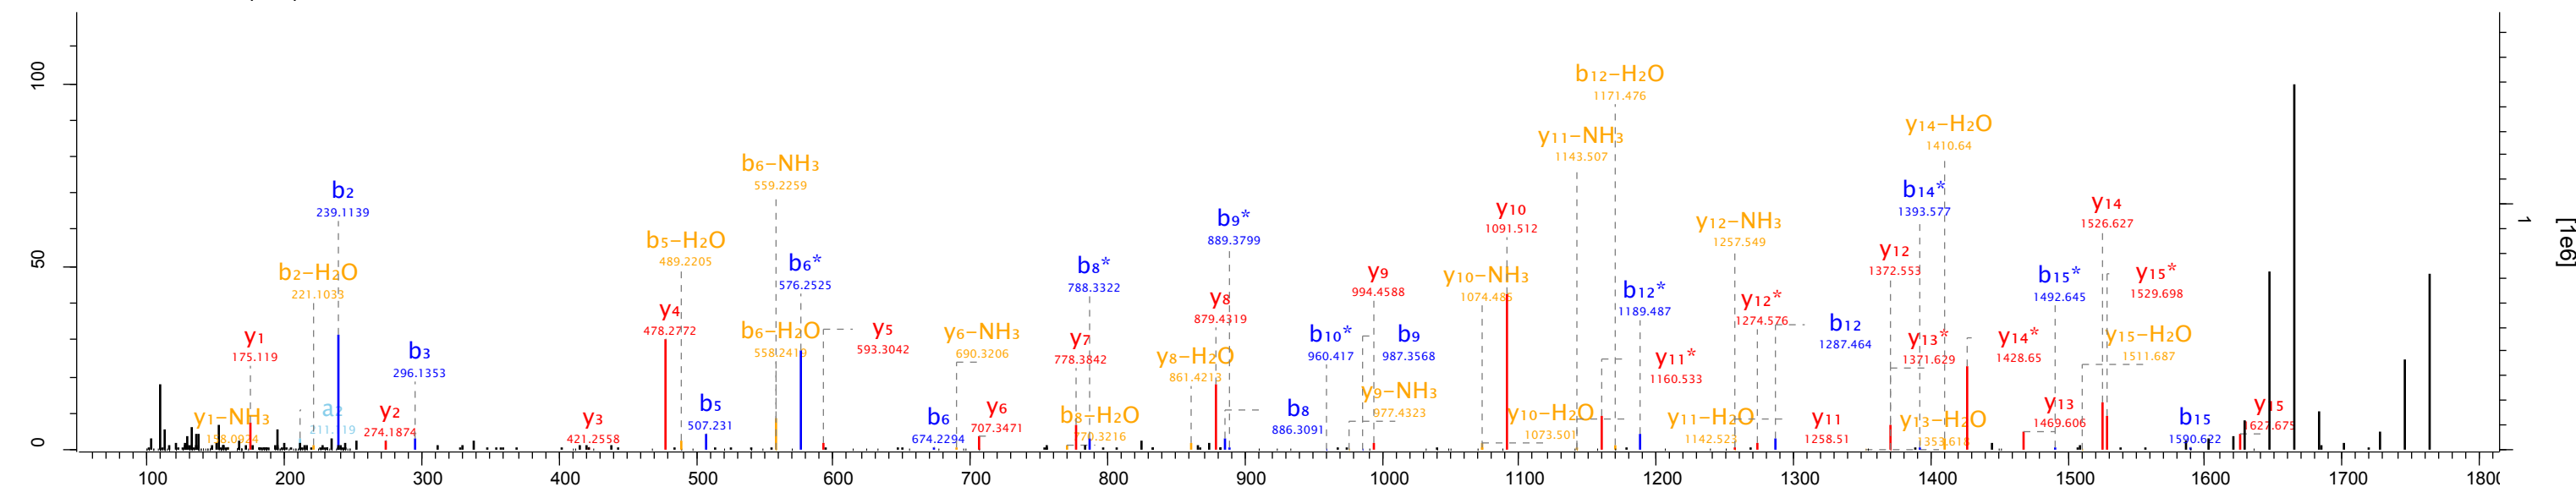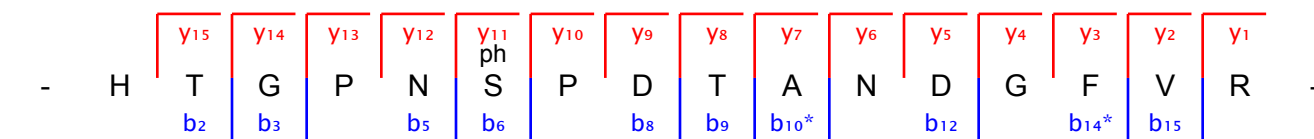



Raw file 20171215\_MaS\_33SR\_LMH\_phospho2\_01 Scan 6681 Method FTMS; HCD Score 118.62 m/z 707.34 Gene names LMNA

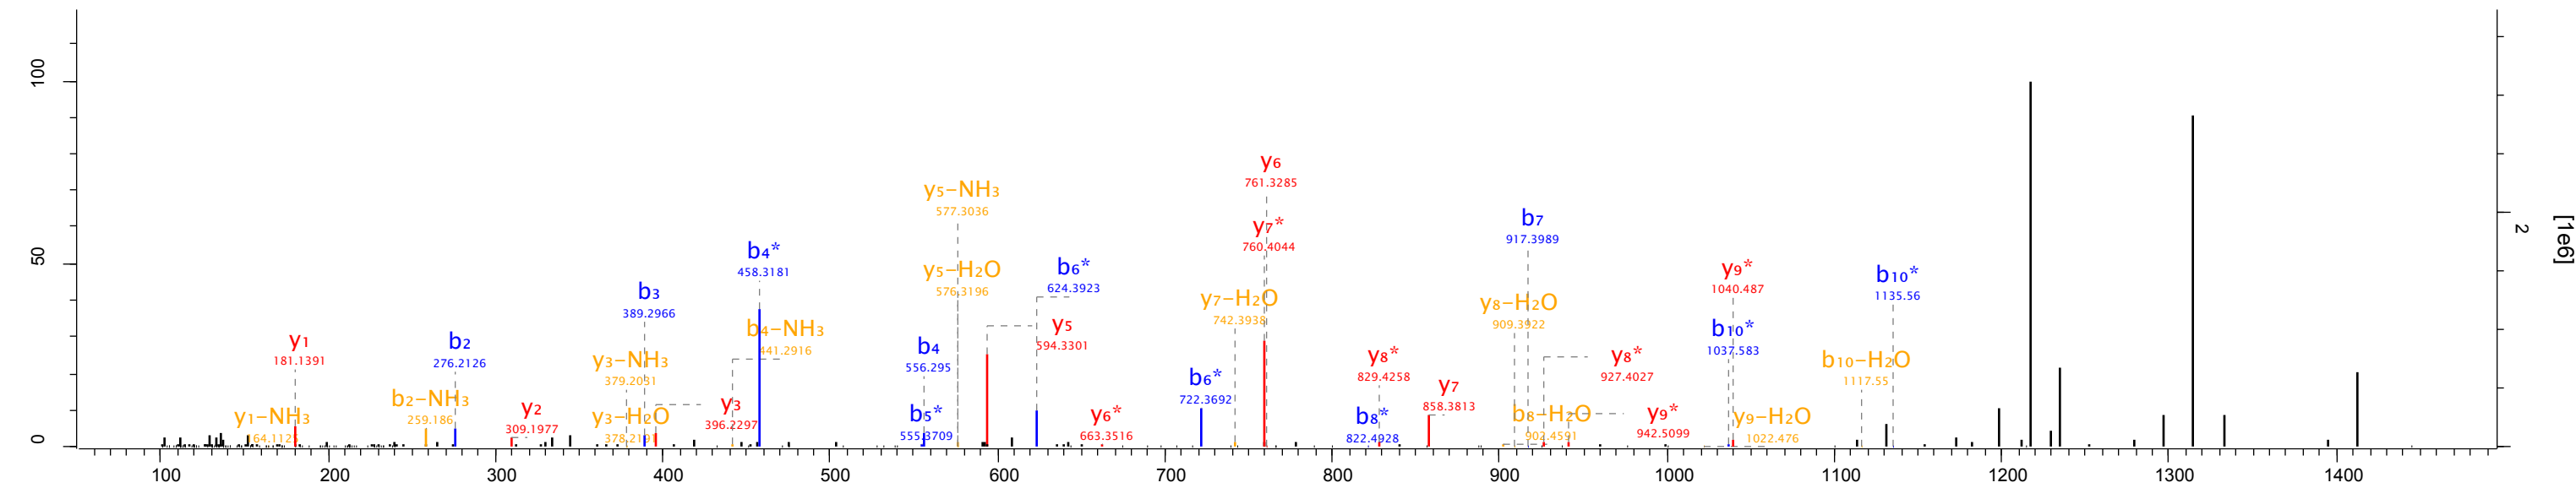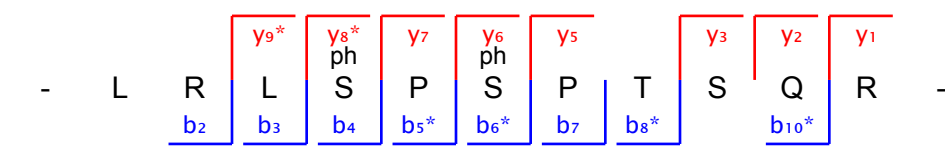

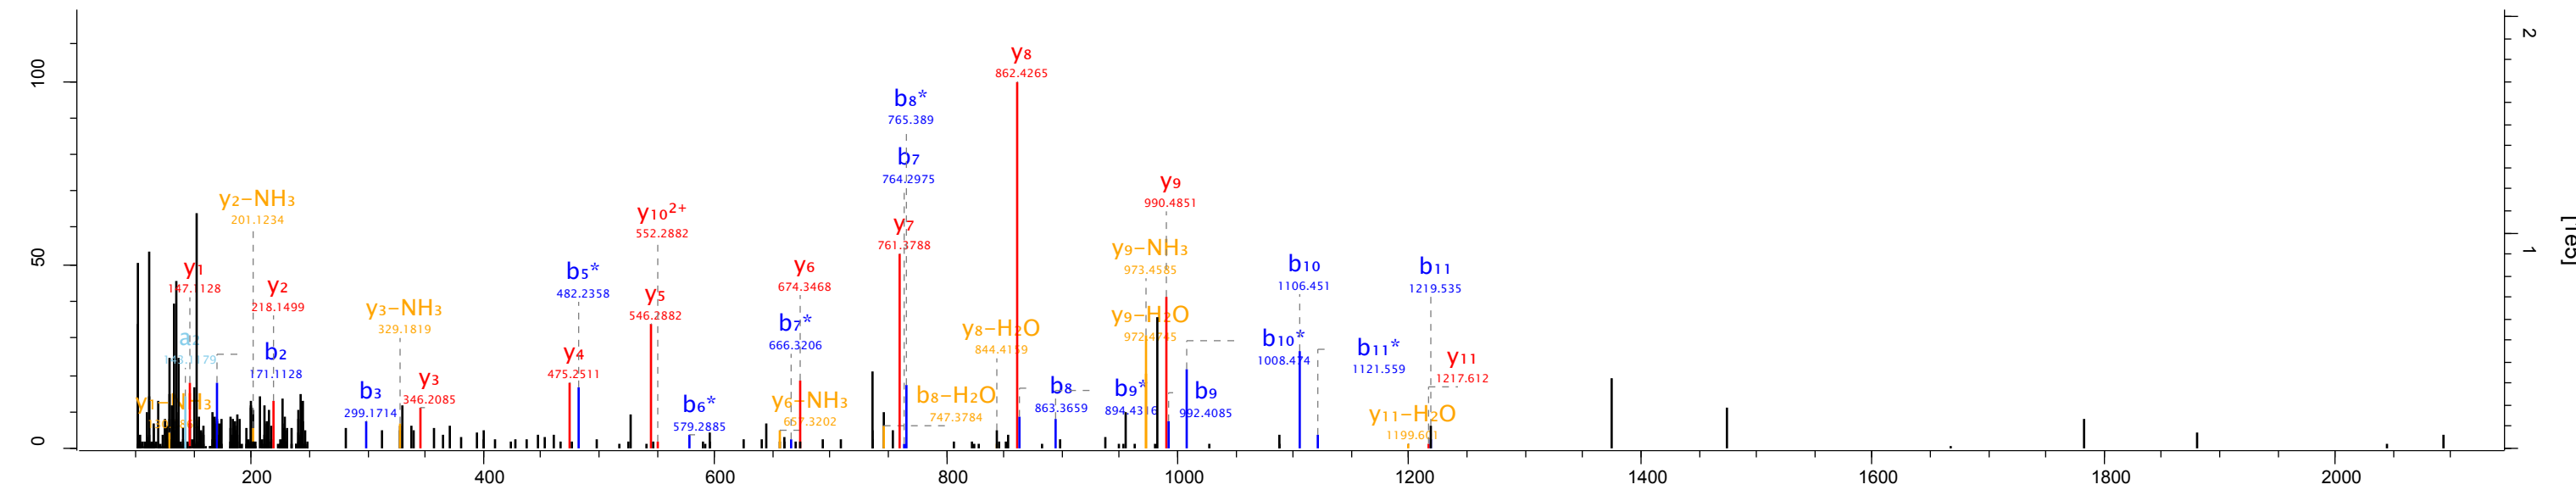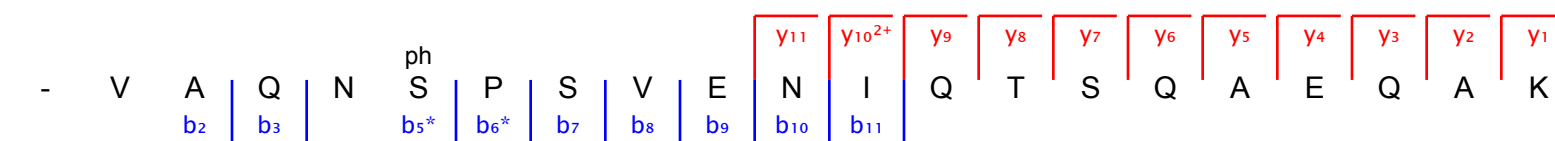

Raw file 20171215\_MaS\_33SR\_LMH\_phospho2\_01 Scan 7391 Method FTMS; HCD Score 99.93 m/z 983.46 Gene names DYNC1LI1

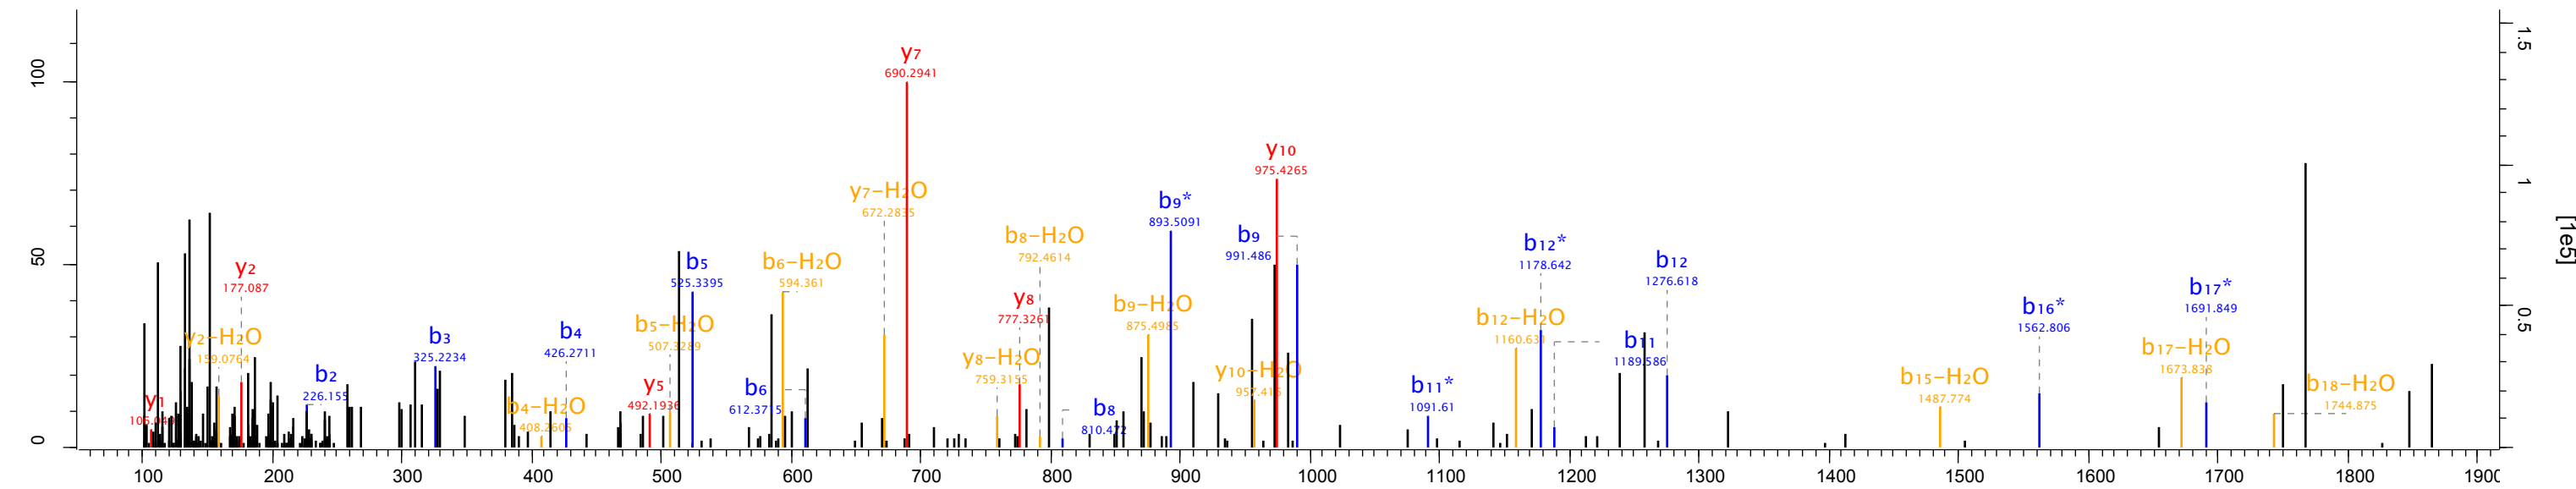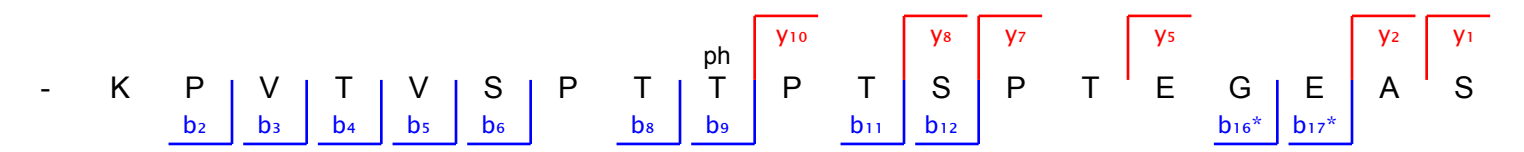

Raw file 20171215\_MaS\_33SR\_LMH\_phospho2\_01 Scan 7801 Method FTMS; HCD Score 74.99 m/z 533.76 Gene names PDCD4

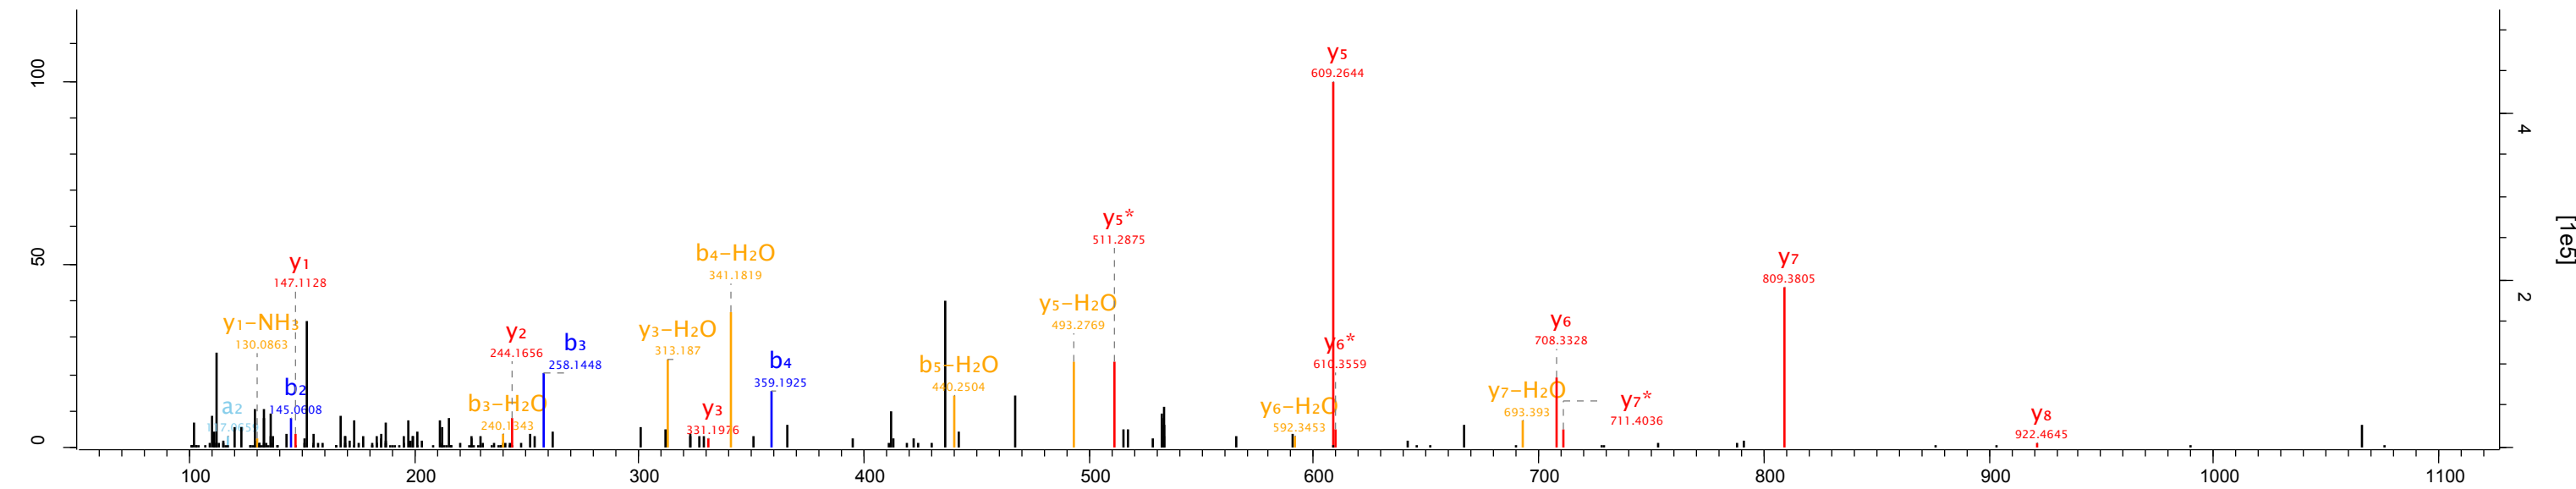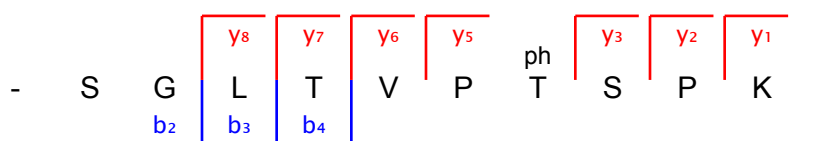

Raw file: 20171215\_MaS\_33SR\_LMH\_phospho2\_01  
 Scan: 8141 Method: FTMS; HCD Score: 120.55 m/z: 684.29 Gene names: GSK3B;GSK3A

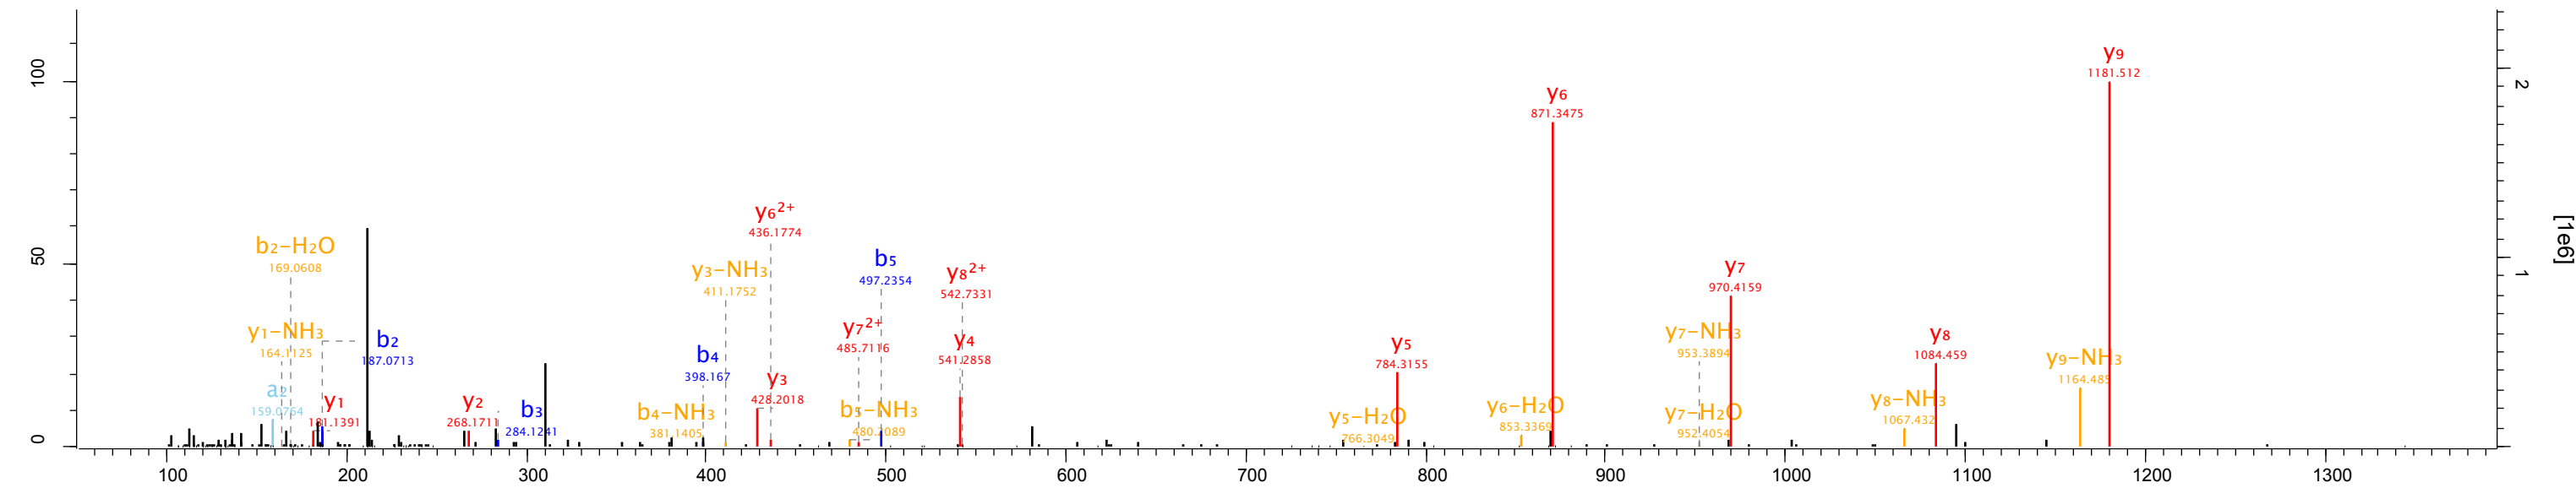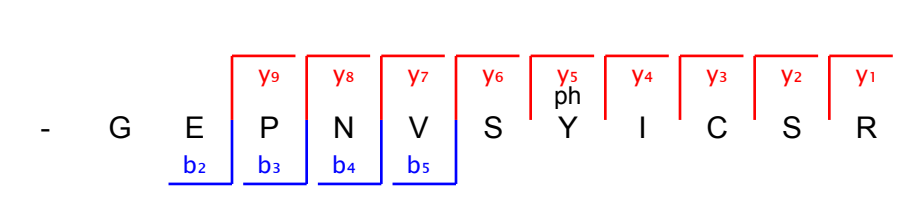

Raw file 20171215\_MaS\_33SR\_LMH\_phospho2\_01 Scan 8911 Method FTMS; HCD Score 239.45 m/z 1236.18 Gene names MARCKSL1

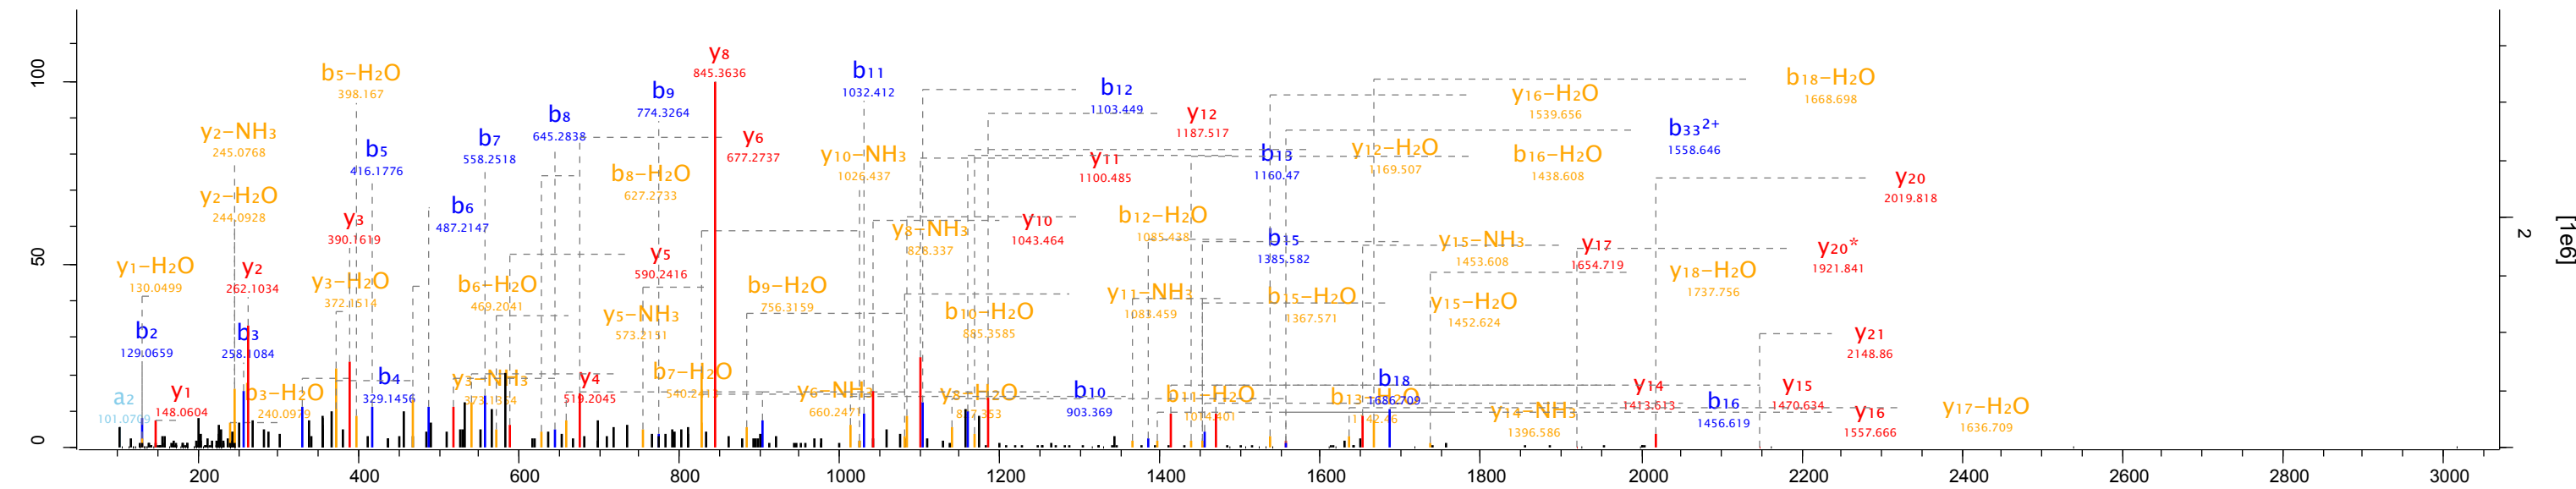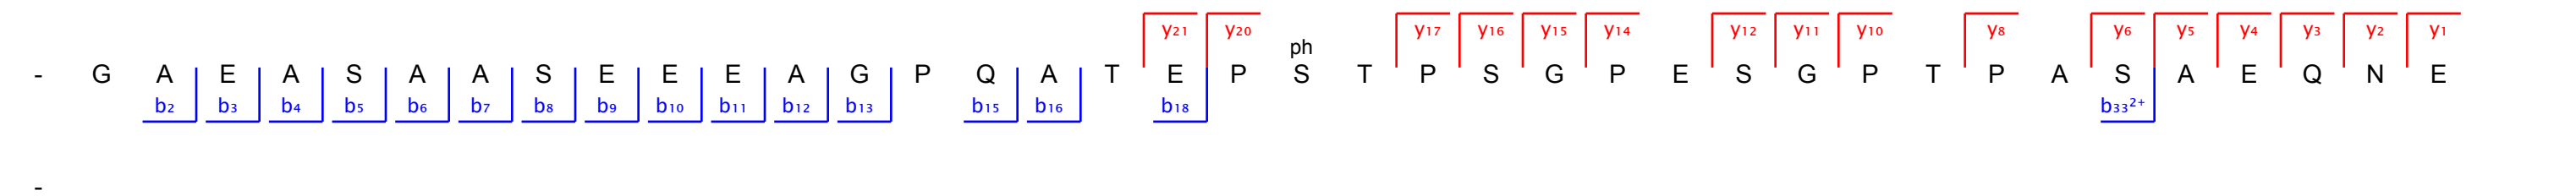

Raw file 20171215\_MaS\_33SR\_LMH\_phospho2\_02 Scan 10671 Method FTMS; HCD Score 57.39 m/z 494.73 Gene names ANLN

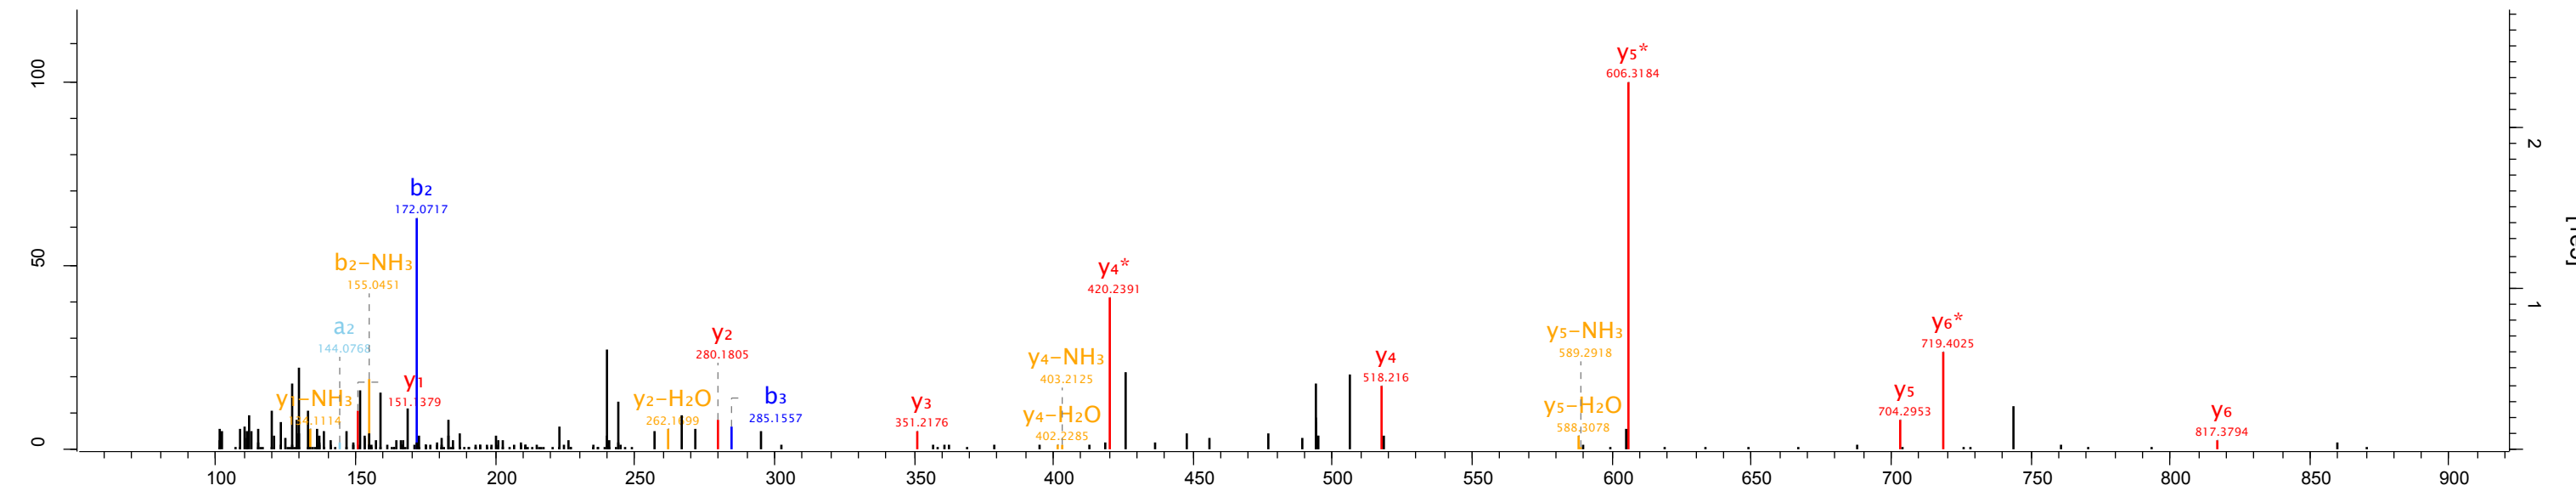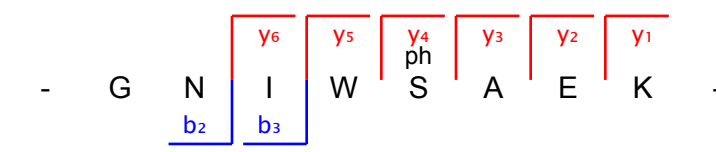

Raw file 20171215\_MaS\_33SR\_LMH\_phospho2\_02 Scan 11161 Method FTMS; HCD Score 63.3 m/z 603.29 Gene names SLC6A15

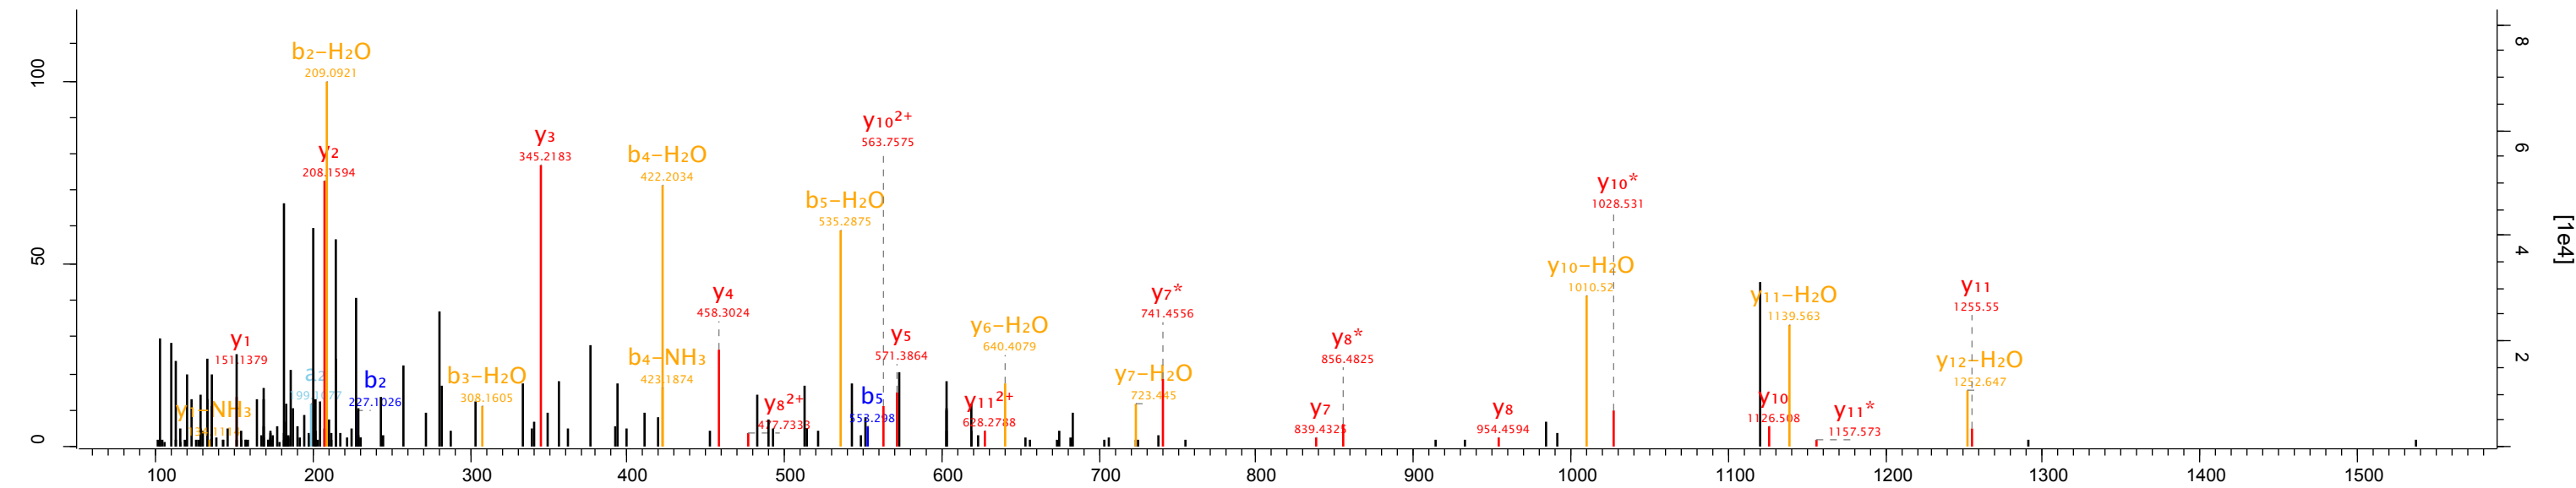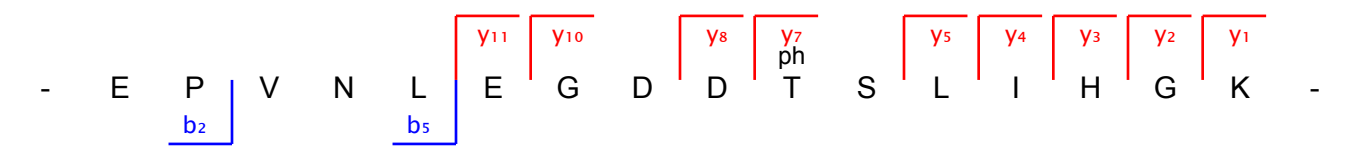



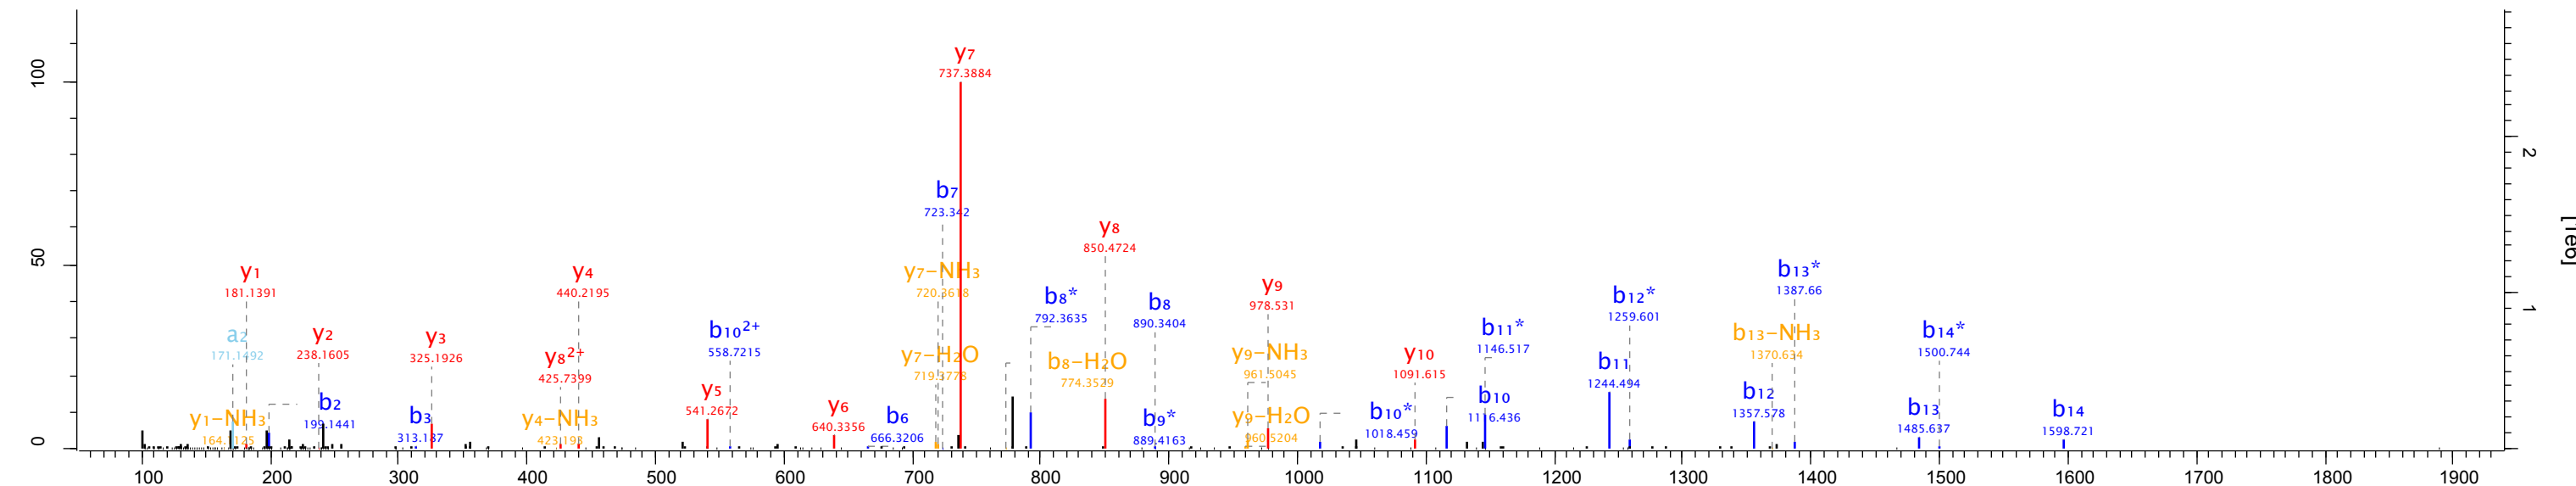

- V V N T D H G S P E Q L Q I P V T D S G R -

ph

b<sub>2</sub> b<sub>3</sub> b<sub>6</sub> b<sub>7</sub> b<sub>8</sub> b<sub>9</sub>\* b<sub>10</sub> b<sub>11</sub> b<sub>12</sub> b<sub>13</sub> b<sub>14</sub> y<sub>10</sub> y<sub>9</sub> y<sub>8</sub> y<sub>7</sub> y<sub>6</sub> y<sub>5</sub> y<sub>4</sub> y<sub>3</sub> y<sub>2</sub> y<sub>1</sub>

Raw file 20171215\_MaS\_33SR\_LMH\_phospho2\_02 Scan 11351 Method FTMS; HCD Score 115.06 m/z 1030.46 Gene names CTDSPL2

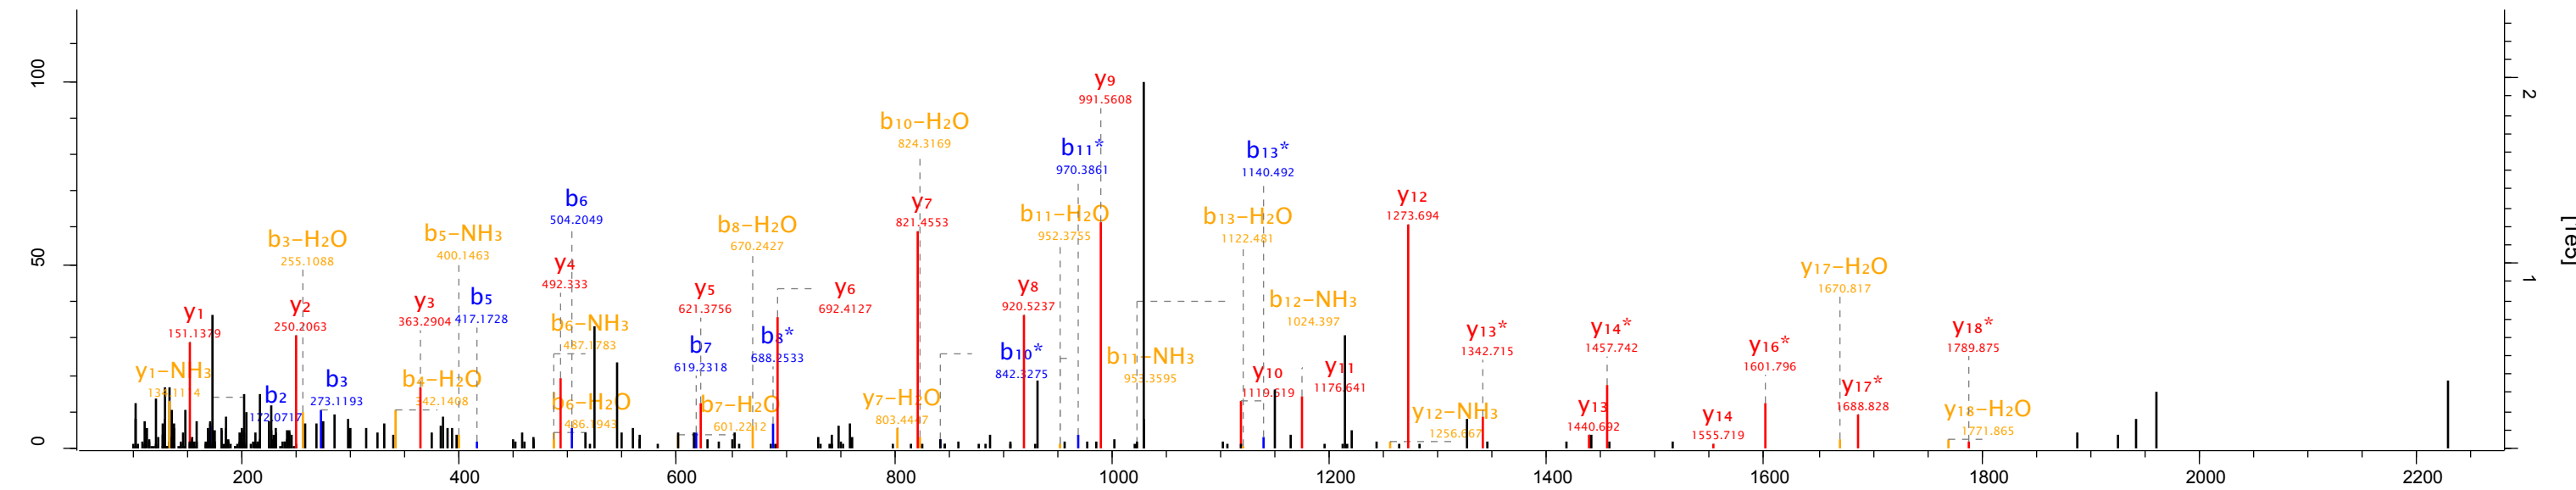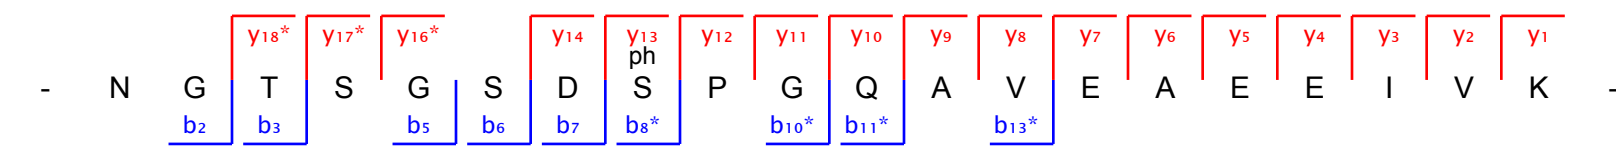

Raw file 20171215\_MaS\_33SR\_LMH\_phospho2\_02 Scan 11451 Method FTMS; HCD Score 223.07 m/z 981.93 Gene names KPNA2;POU2F2

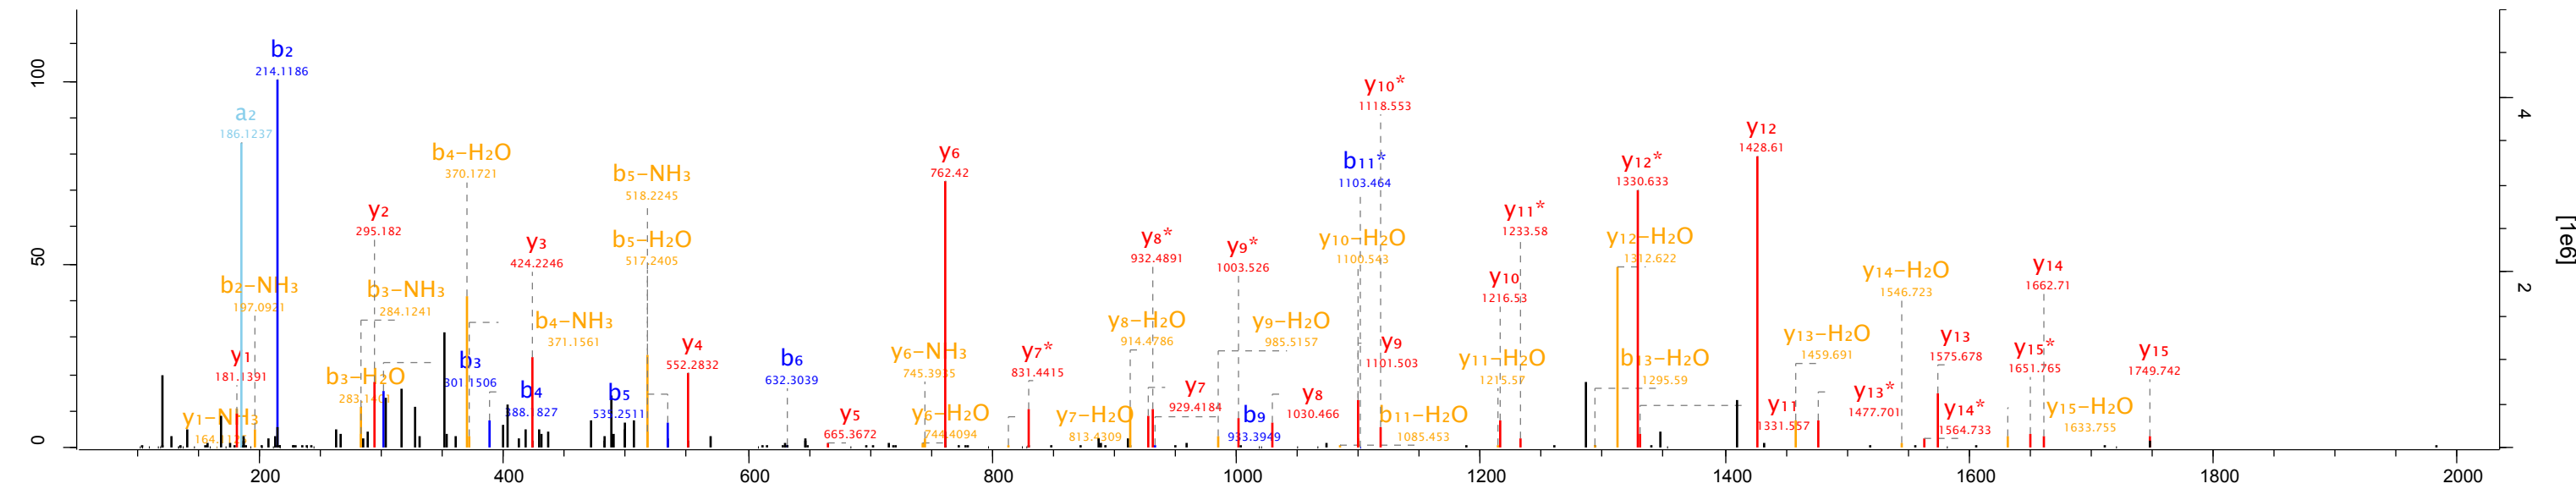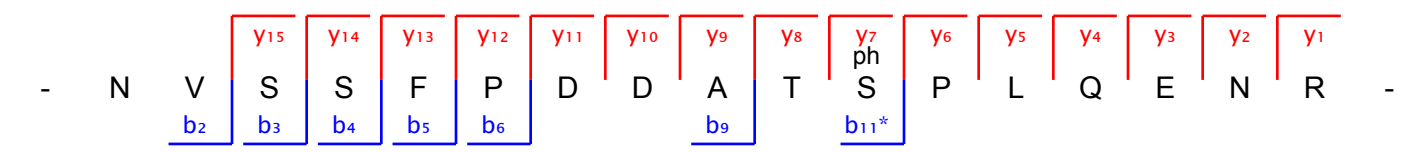

Raw file 20171215\_MaS\_33SR\_LMH\_phospho2\_02 Scan 11461 Method FTMS; HCD Score 196.36 m/z 823.86 Gene names LMNA

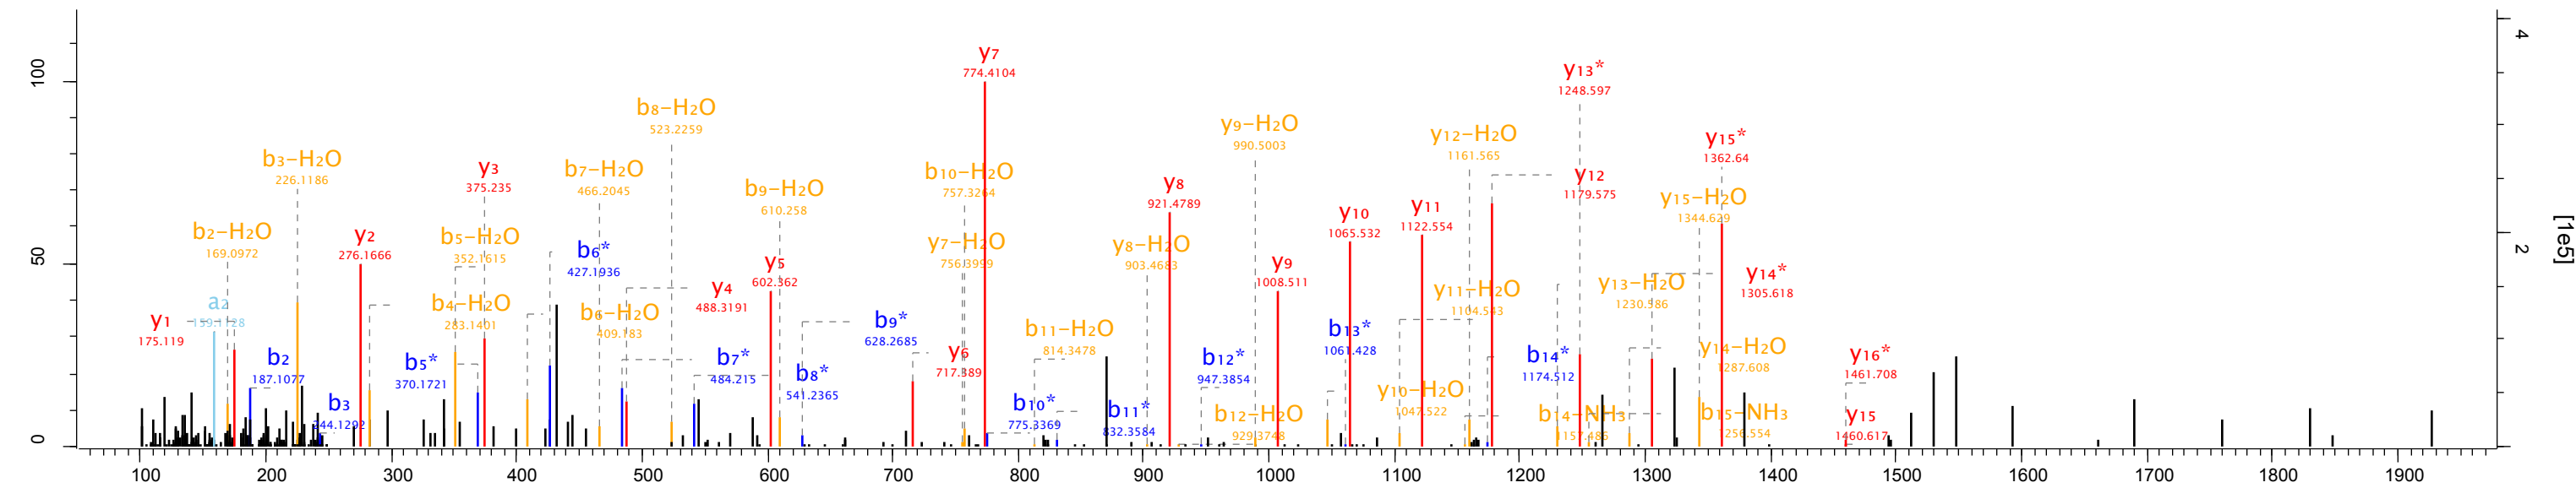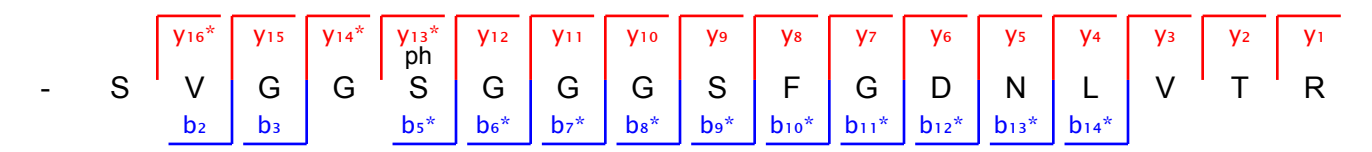

Raw file 20171215\_MaS\_33SR\_LMH\_phospho2\_02 Scan 12451 Method FTMS; HCD Score 200.4 m/z 1078.9 Gene names EIF4B

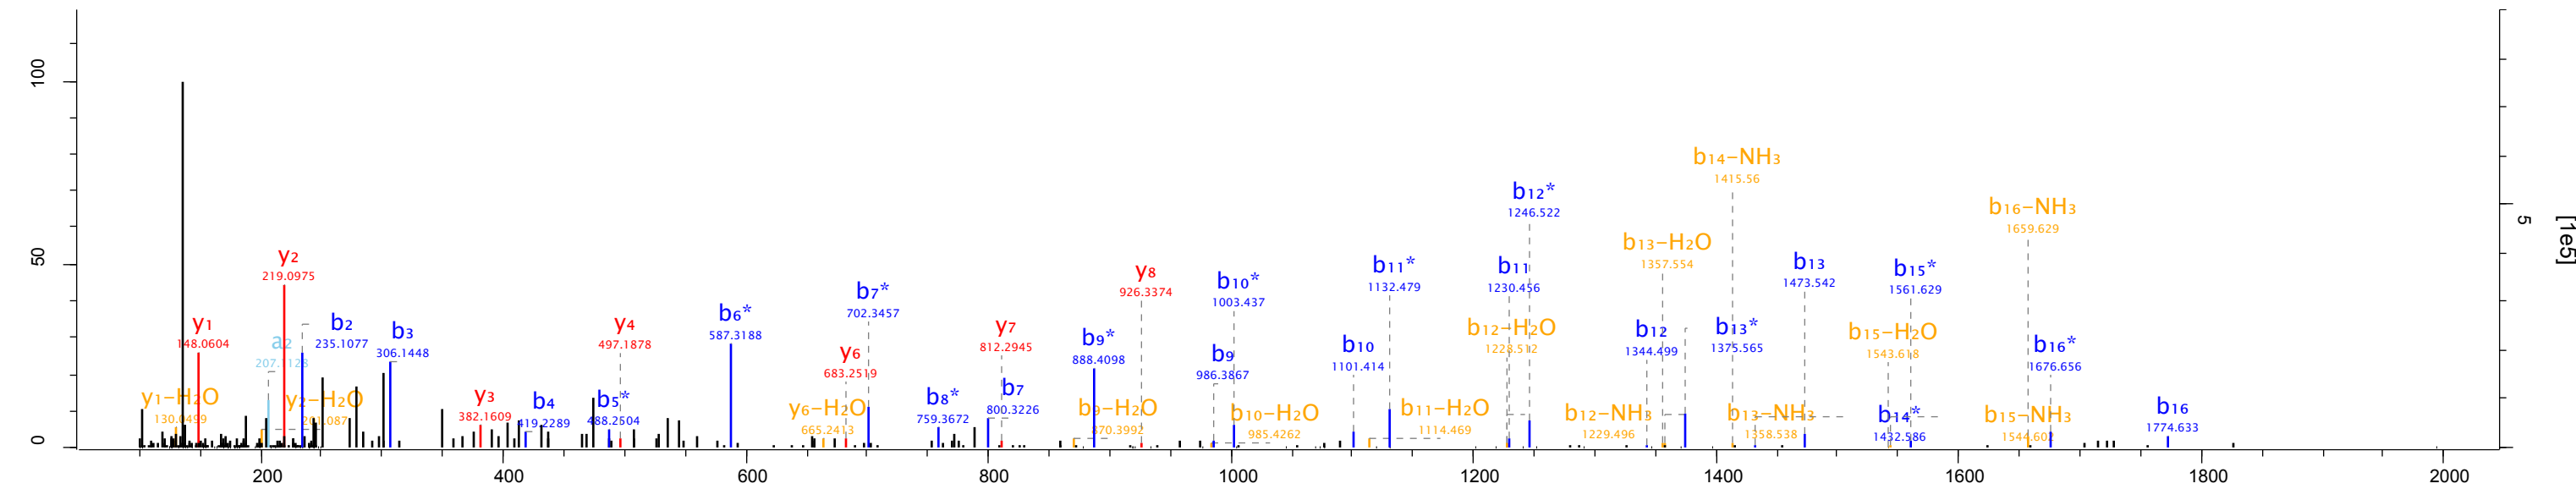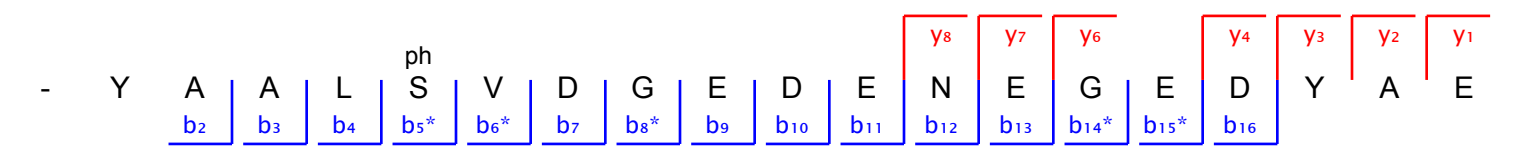

Raw file 20171215\_MaS\_33SR\_LMH\_phospho2\_02 Scan 12691 Method FTMS; HCD Score 42.35 m/z 726.33 Gene names NIFK

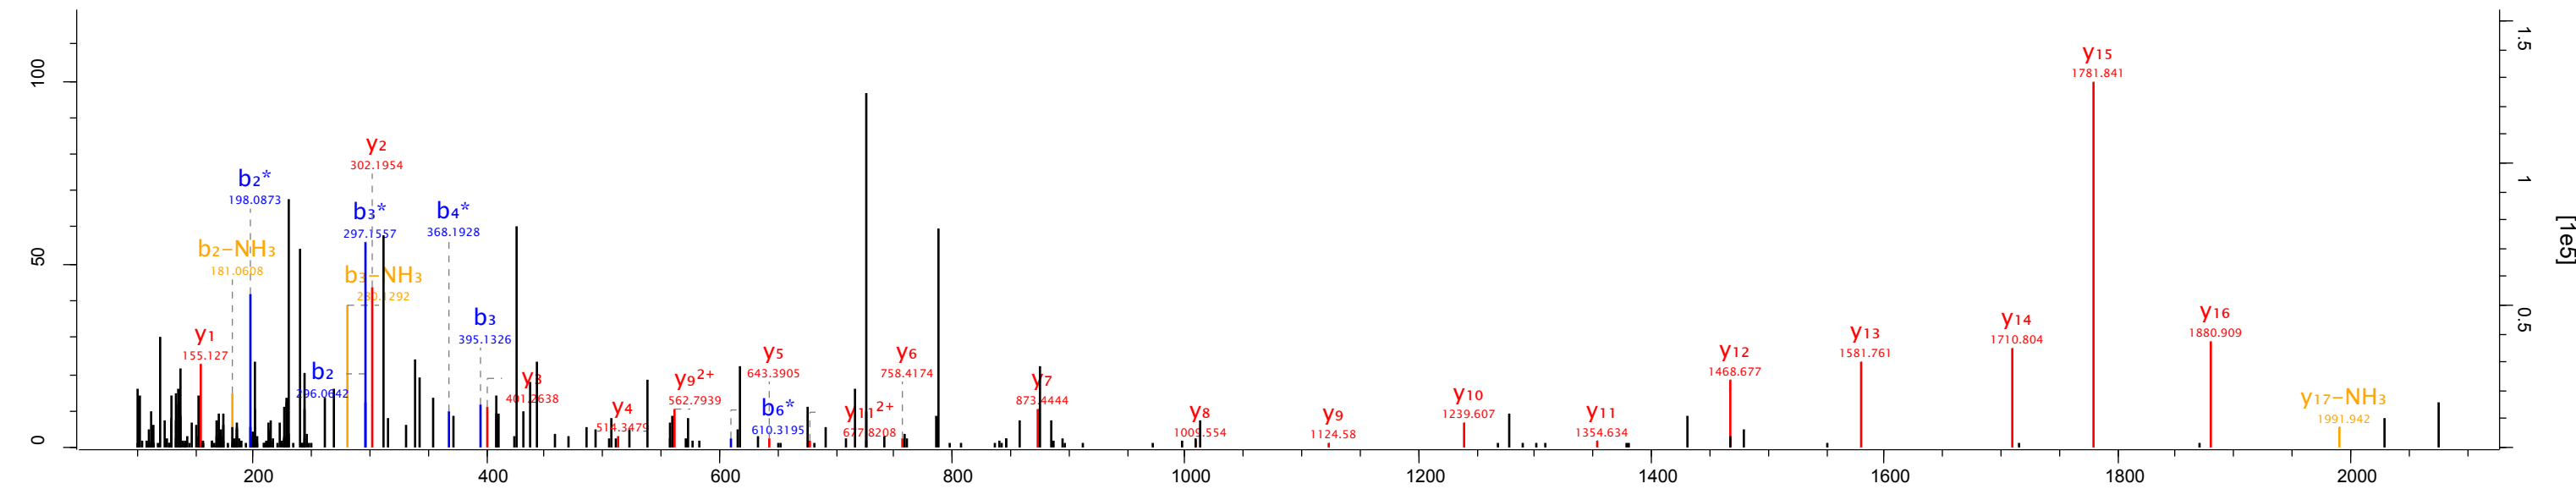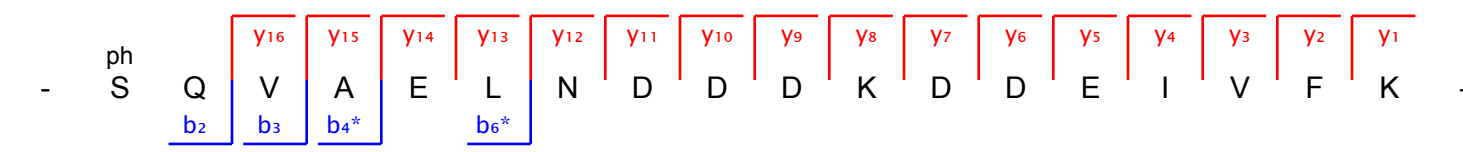

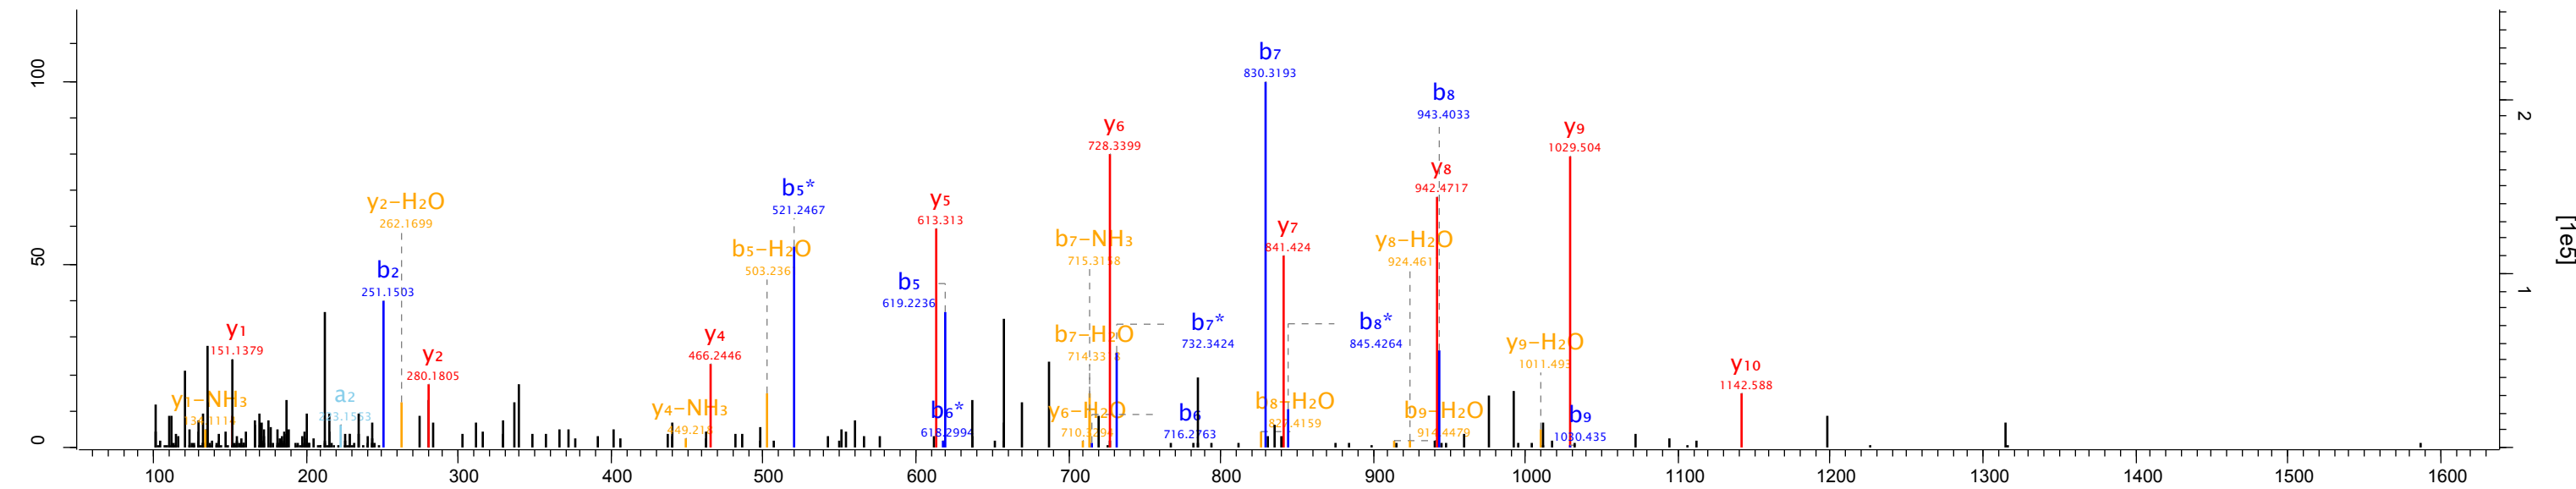

Raw file 20171215\_MaS\_33SR\_LMH\_phospho2\_02 Scan 13091 Method FTMS; HCD Score 145.22 m/z 1261.58 Gene names ARHGEF2

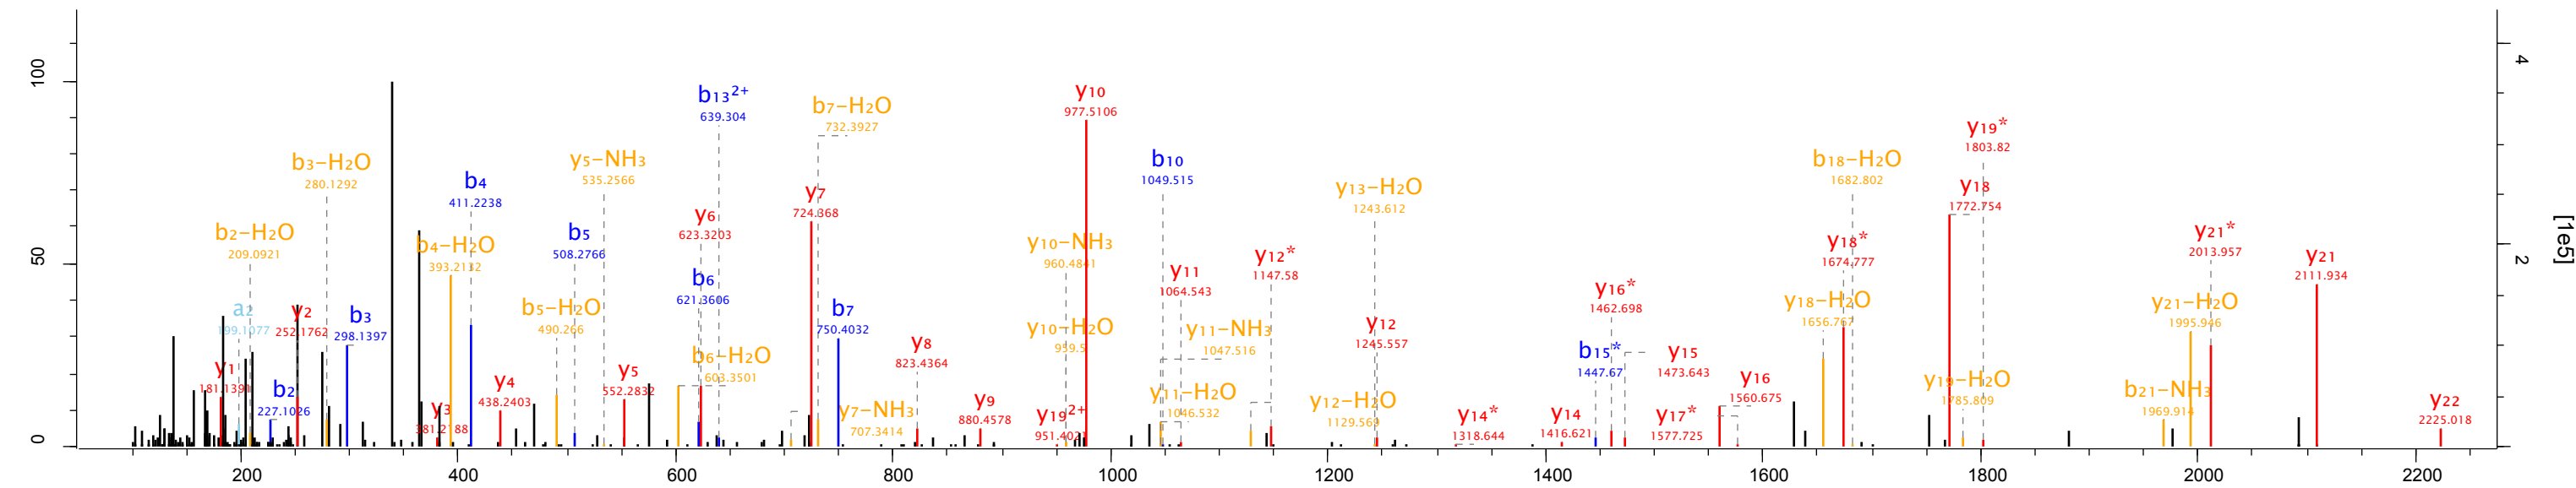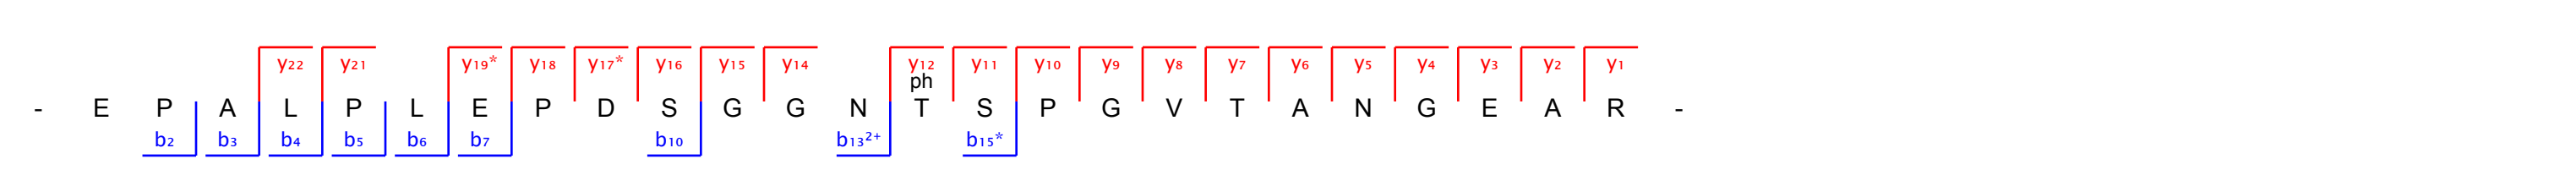



Raw file 20171215\_MaS\_33SR\_LMH\_phospho2\_02 Scan 13191 Method FTMS; HCD Score 140.27 m/z 852.9 Gene names DPYSL2

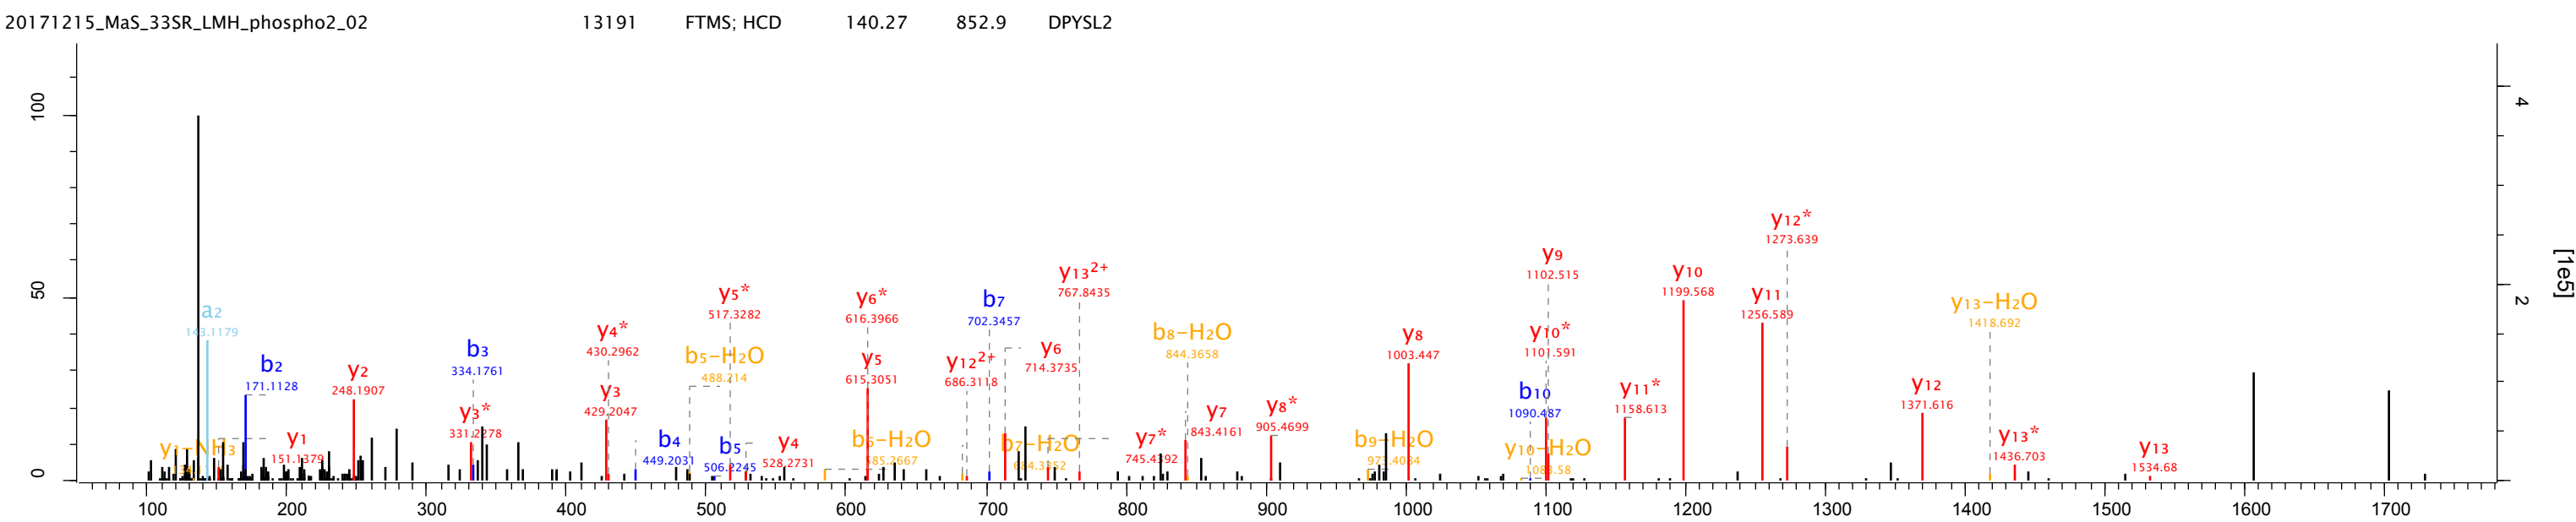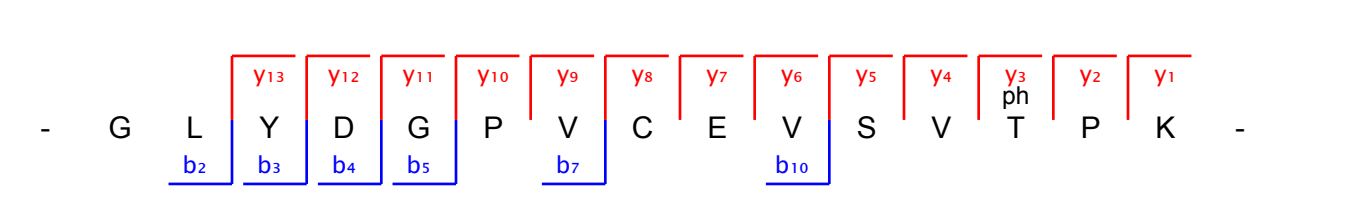

Raw file 20171215\_MaS\_33SR\_LMH\_phospho2\_02 Scan 13211 Method FTMS; HCD Score 134.14 m/z 741.36 Gene names PITPNC1

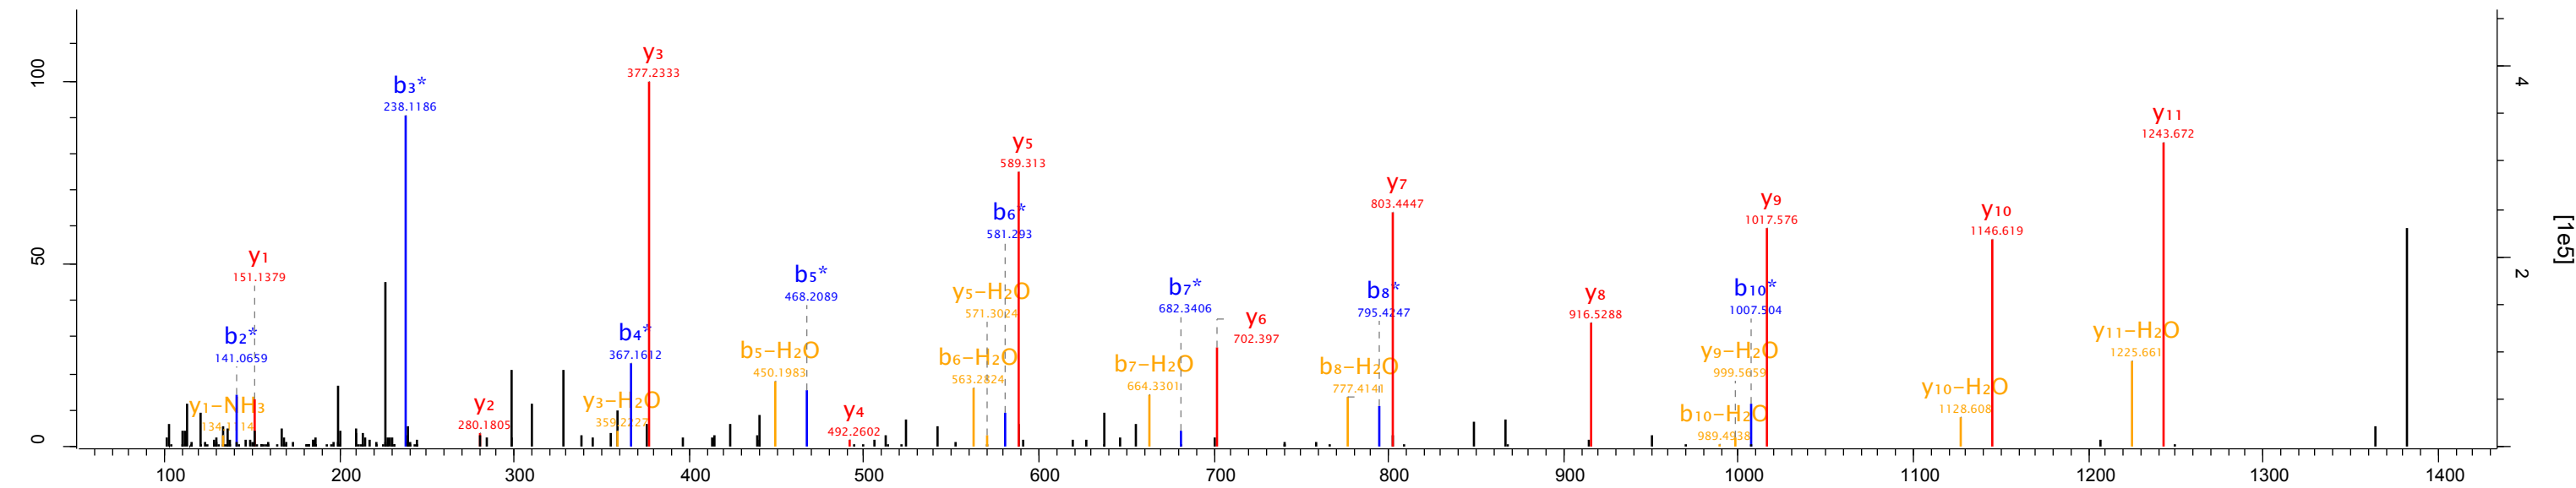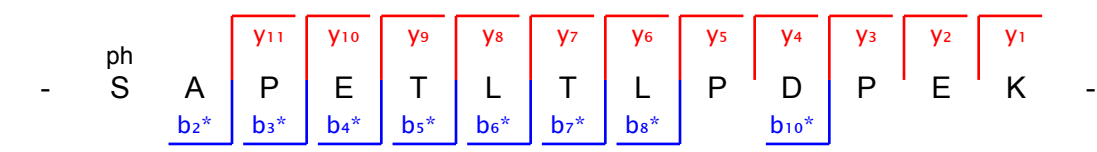

Raw file 20171215\_MaS\_33SR\_LMH\_phospho2\_02 Scan 13871 Method FTMS; HCD Score 200.98 m/z 1209.57 Gene names TP53BP1

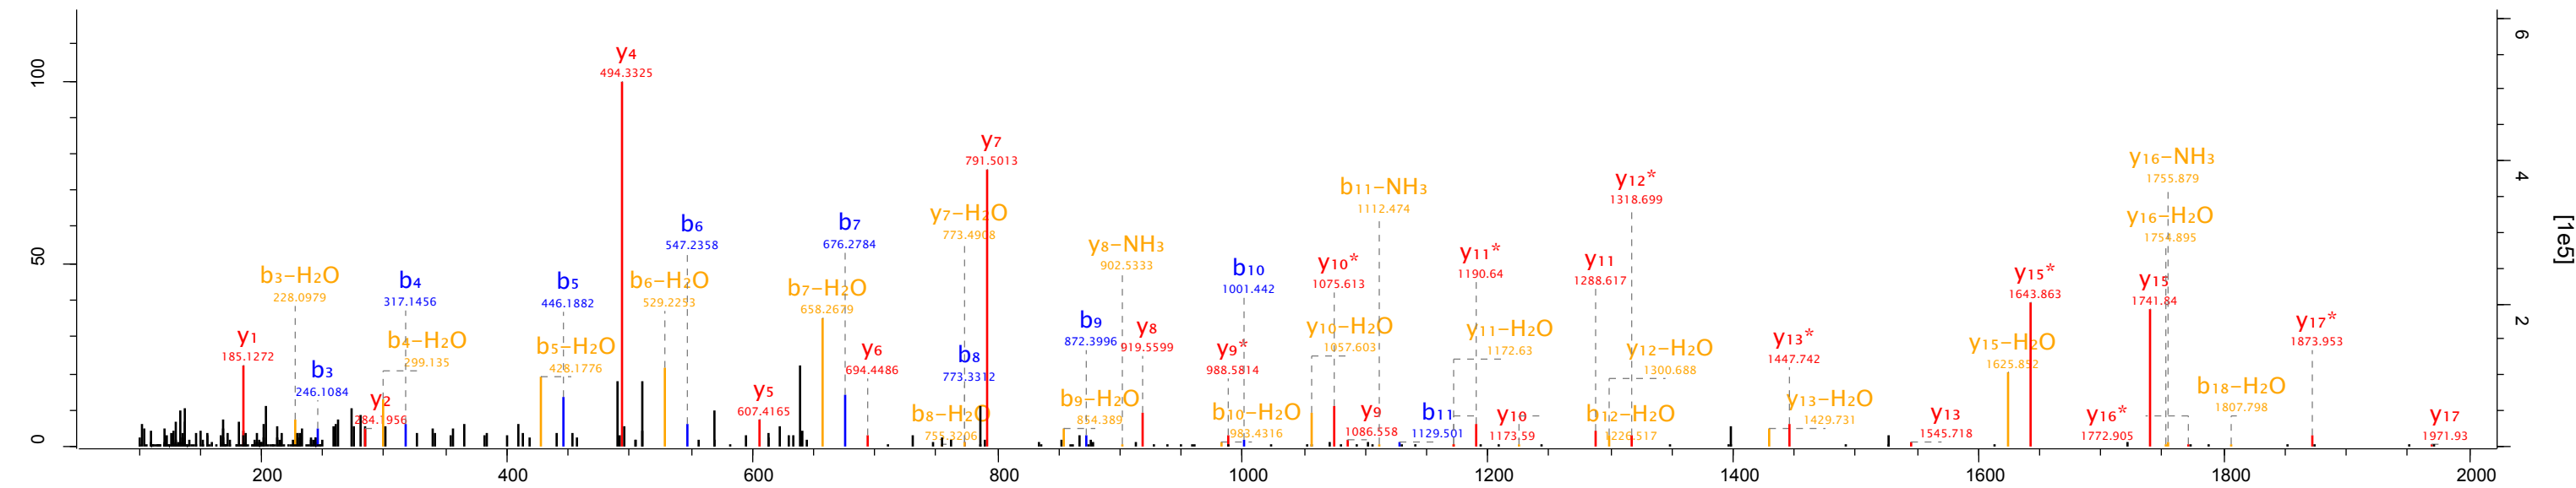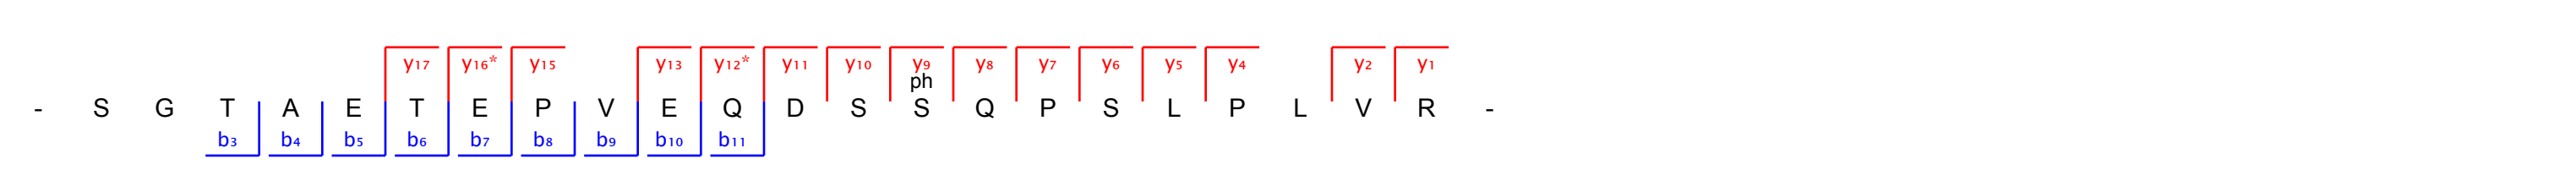

Raw file

20171215\_MaS\_33SR\_LMH\_phospho2\_02

| Scan  | Method    | Score  | m/z    | Gene names |
|-------|-----------|--------|--------|------------|
| 14531 | FTMS; HCD | 104.84 | 781.37 | FAM208A    |

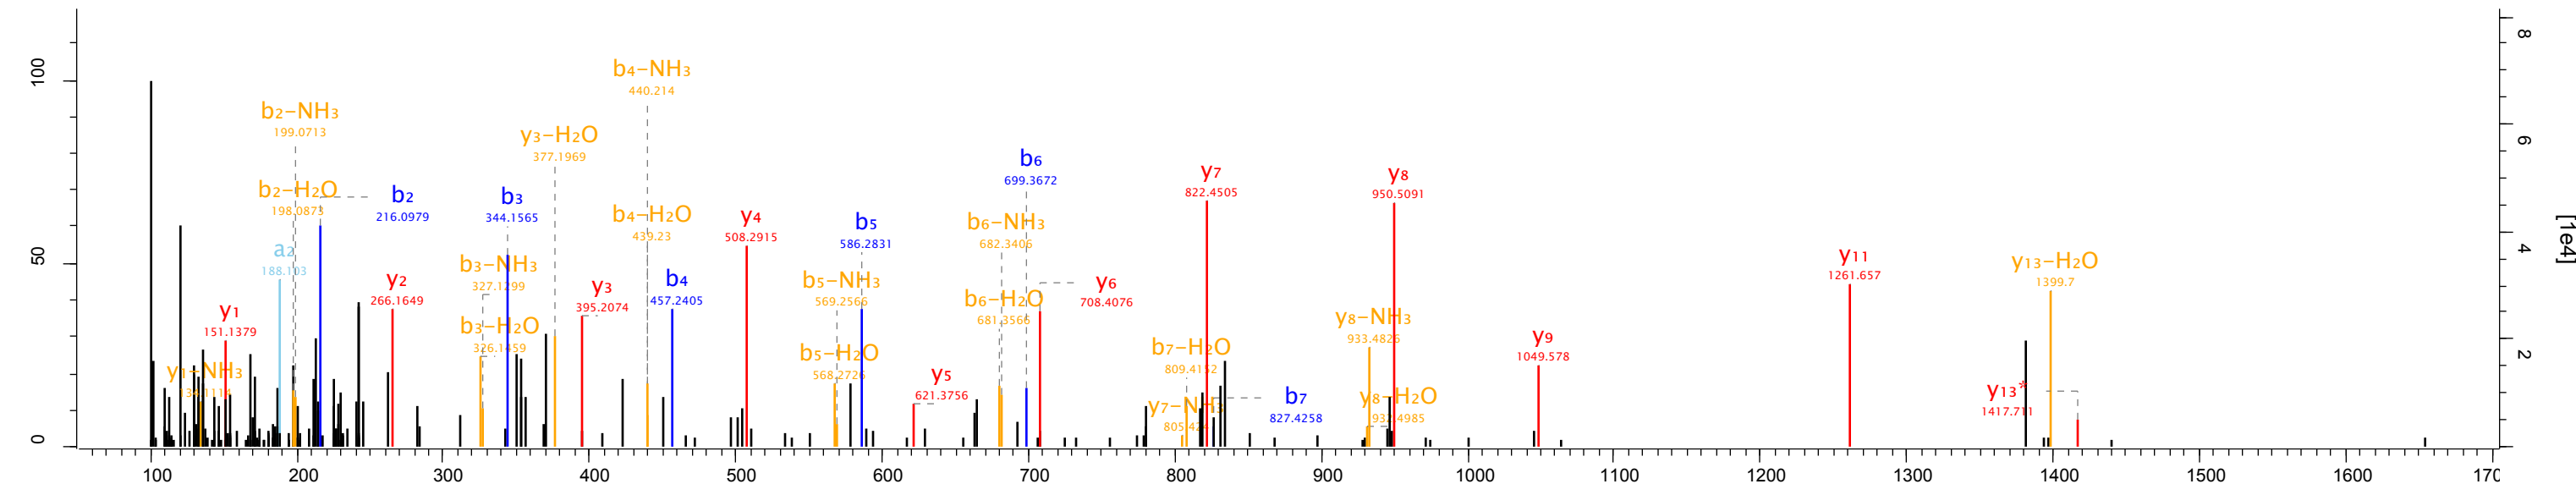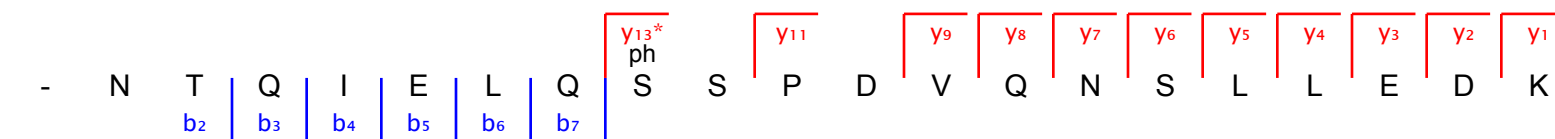

Raw file 20171215\_MaS\_33SR\_LMH\_phospho2\_02 Scan 2691 Method FTMS; HCD Score 92.73 m/z 442.19 Gene names LUZP1

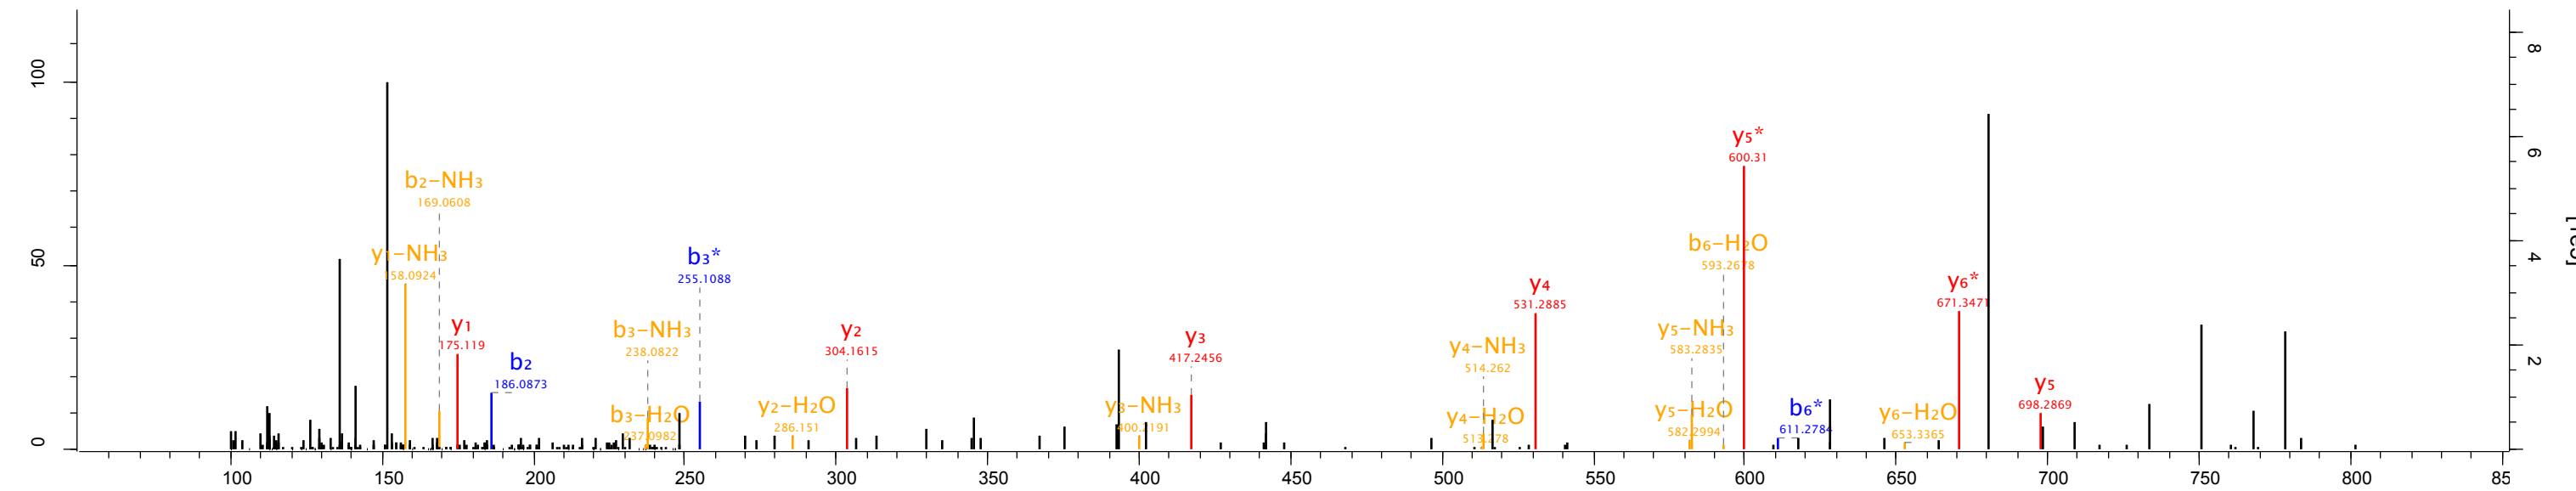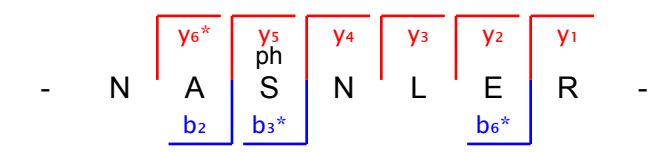

Raw file 20171215\_MaS\_33SR\_LMH\_phospho2\_02 Scan 3231 Method FTMS; HCD Score 123.58 m/z 791.33 Gene names MARCKS

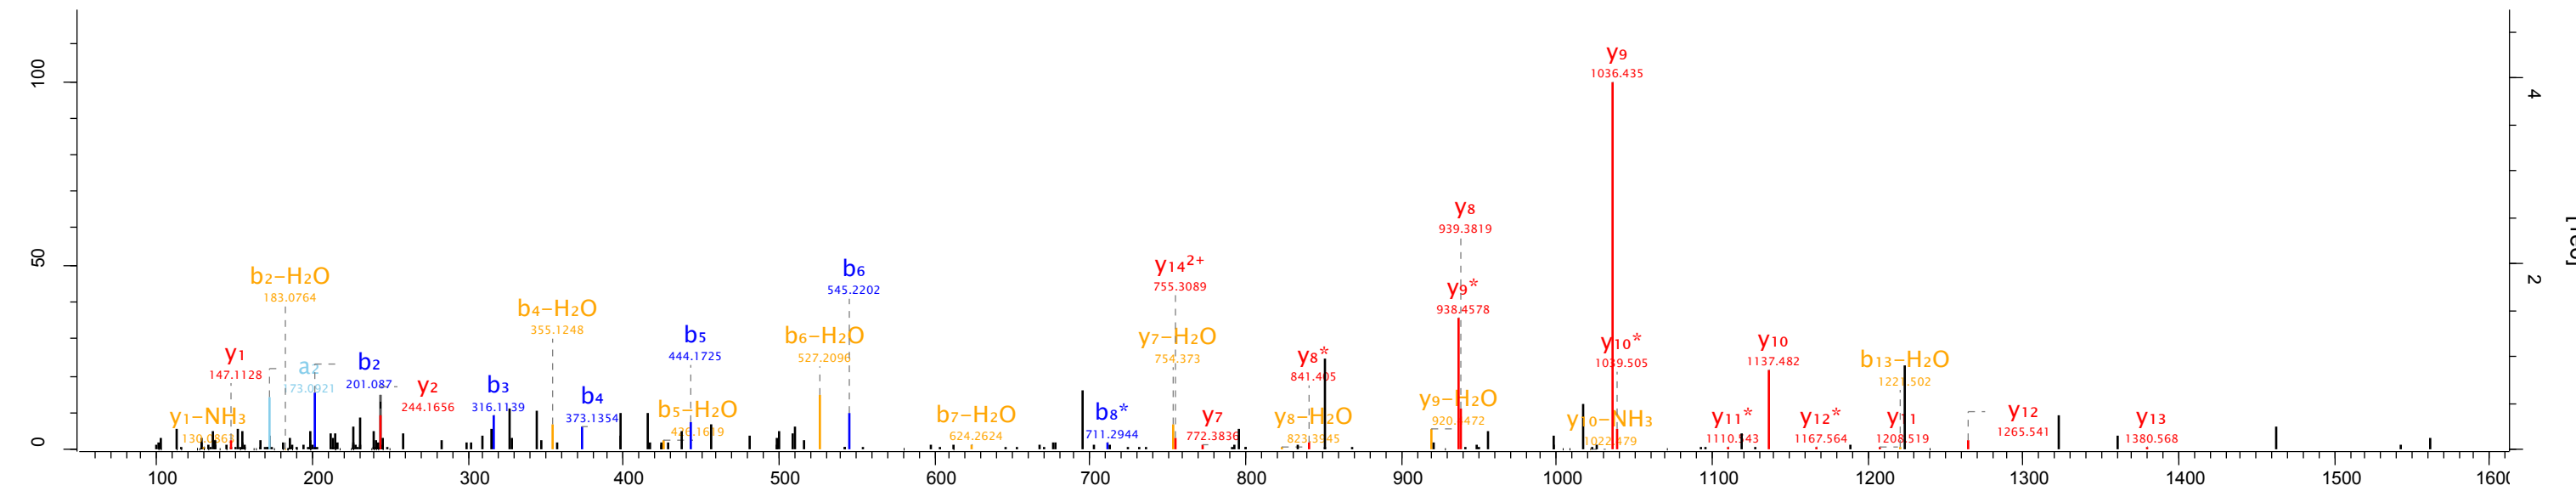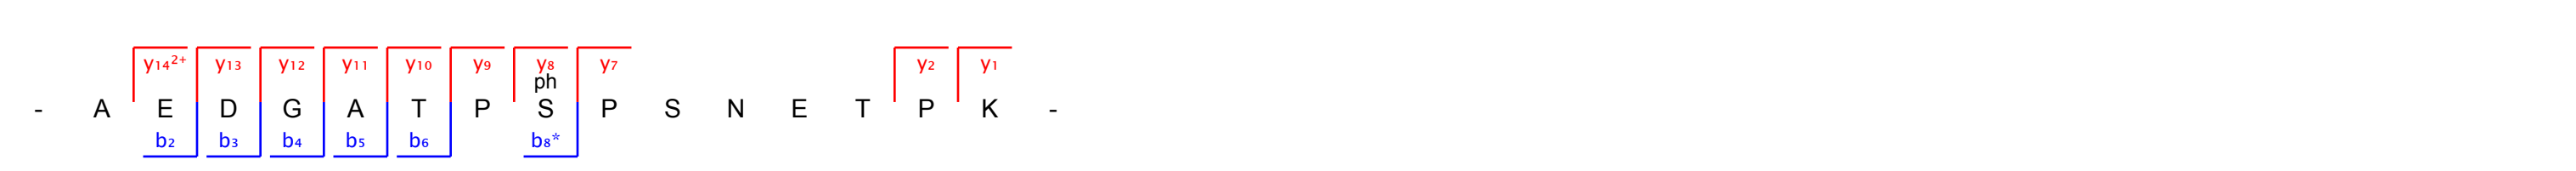

Raw file  
20171215\_MaS\_33SR\_LMH\_phospho2\_02

Scan 3391 Method FTMS; HCD Score 129.06 m/z 982.44 Gene names SRGAP2

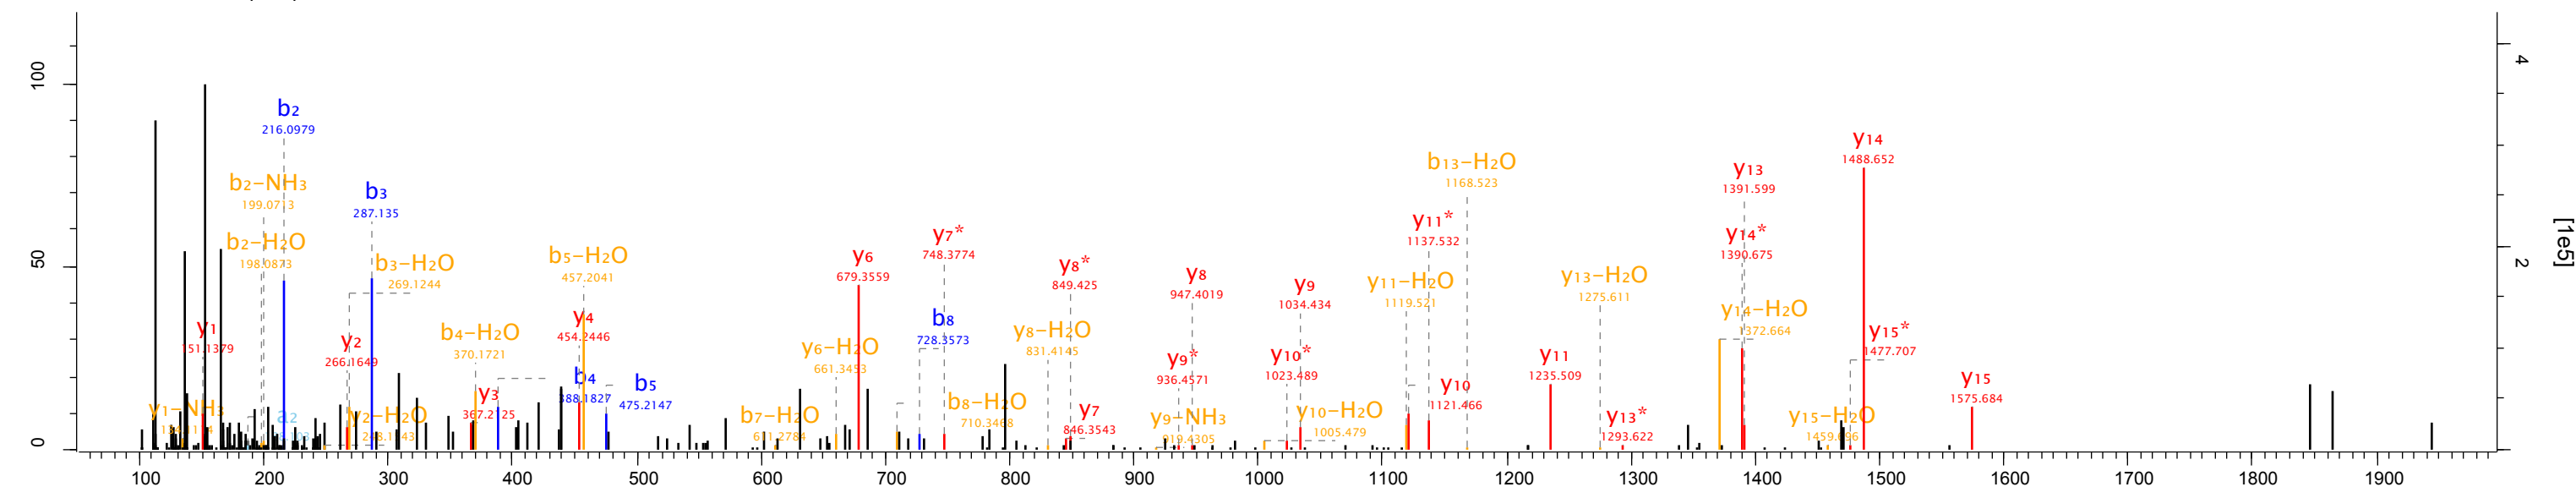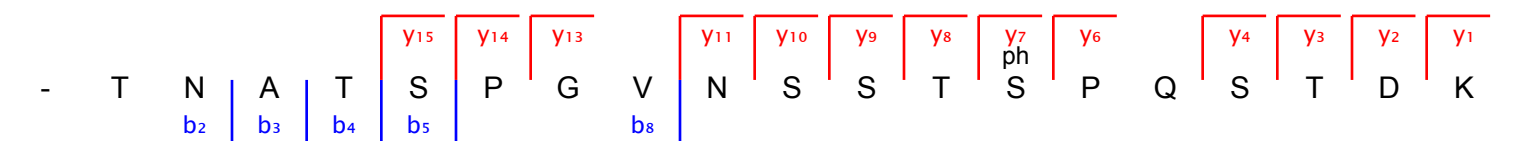

Raw file 20171215\_MaS\_33SR\_LMH\_phospho2\_02 Scan 3401 Method FTMS; HCD Score 114.4 m/z 451.22 Gene names AMPD2

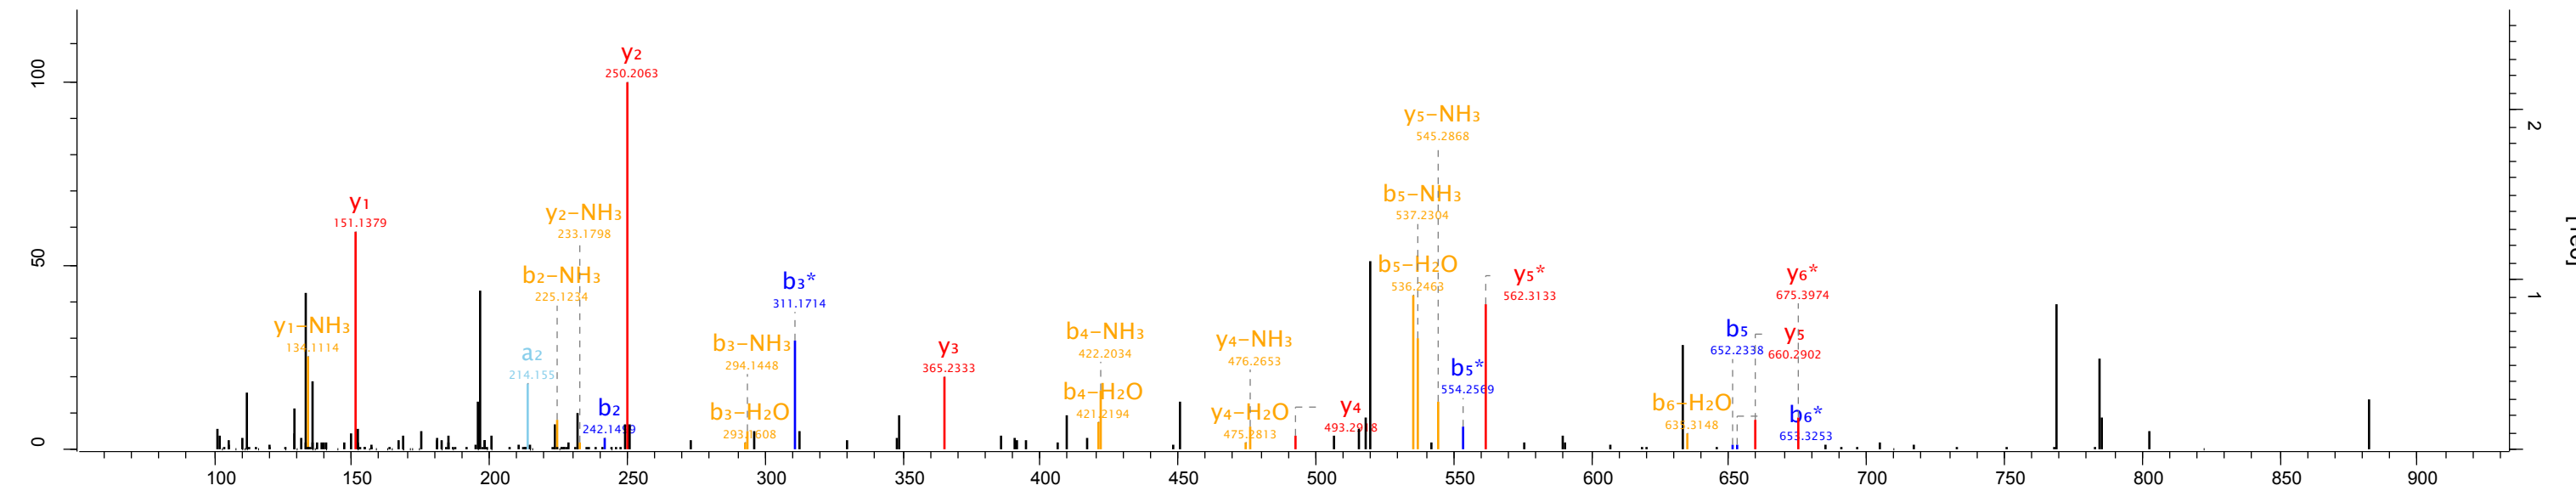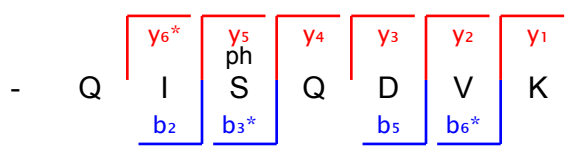

- Q I S Q D V K -



Raw file 20171215\_MaS\_33SR\_LMH\_phospho2\_02 Scan 3581 Method FTMS; HCD Score 70.65 m/z 626.79 Gene names PAN2

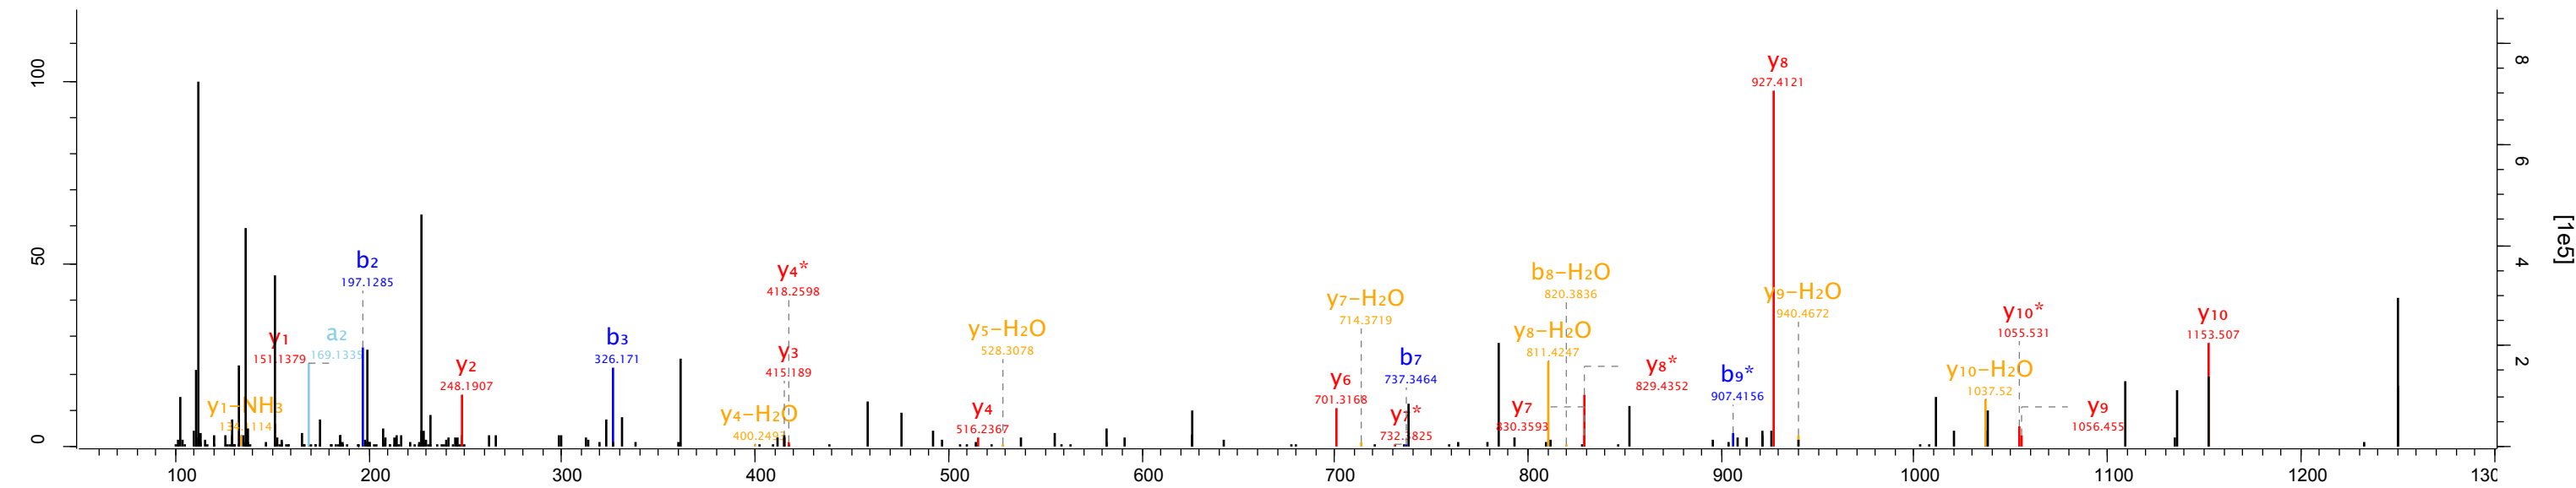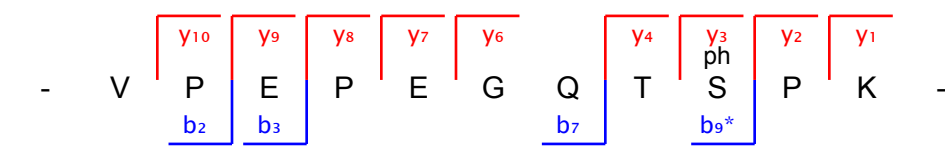

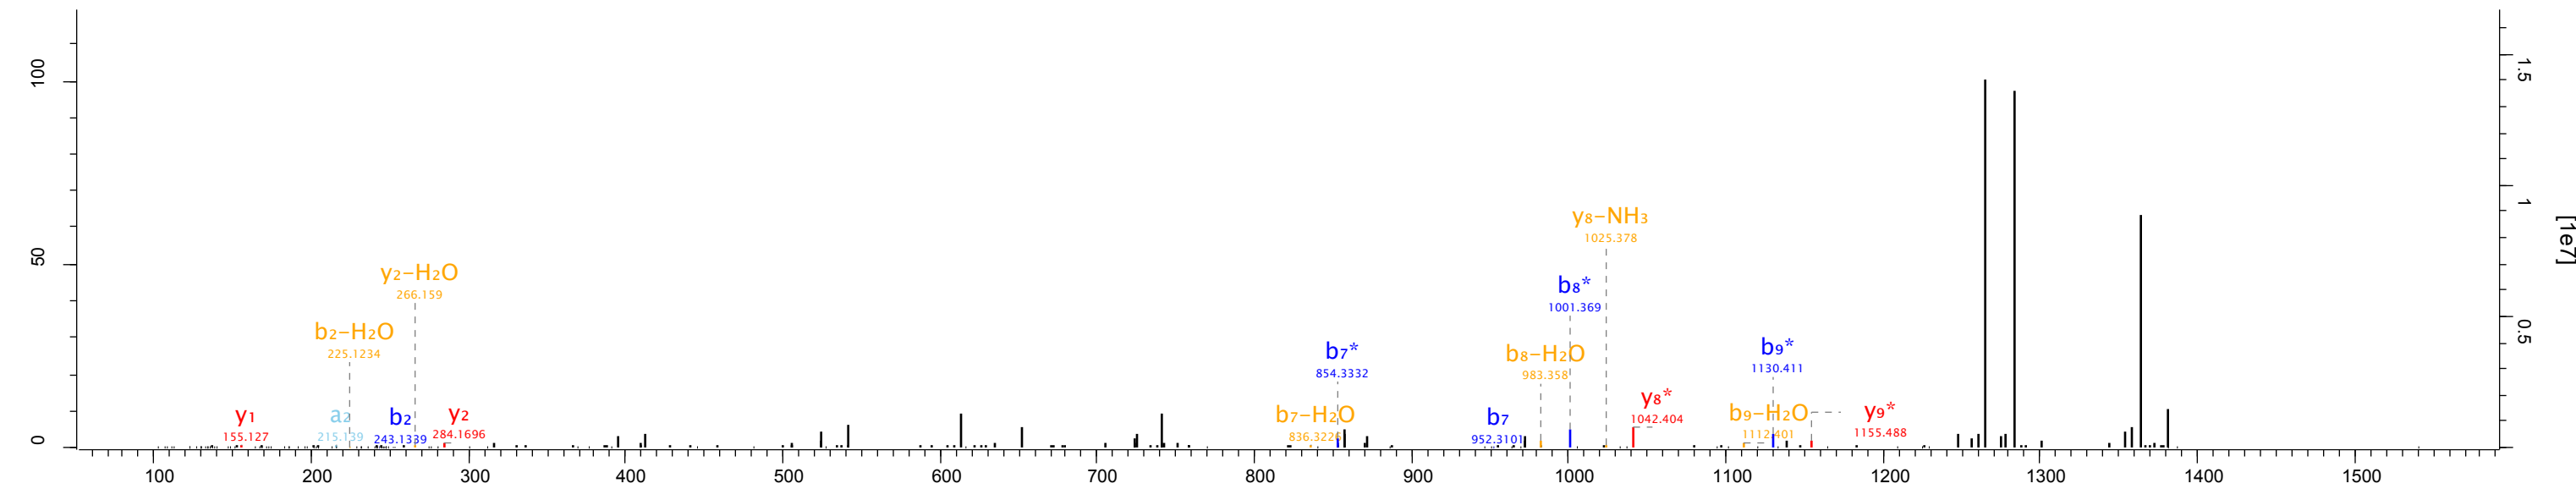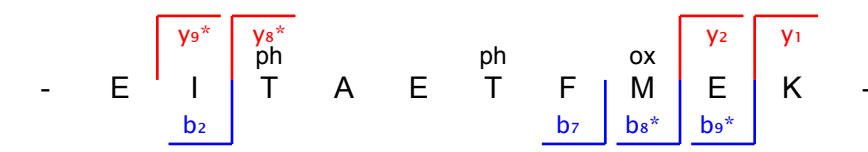

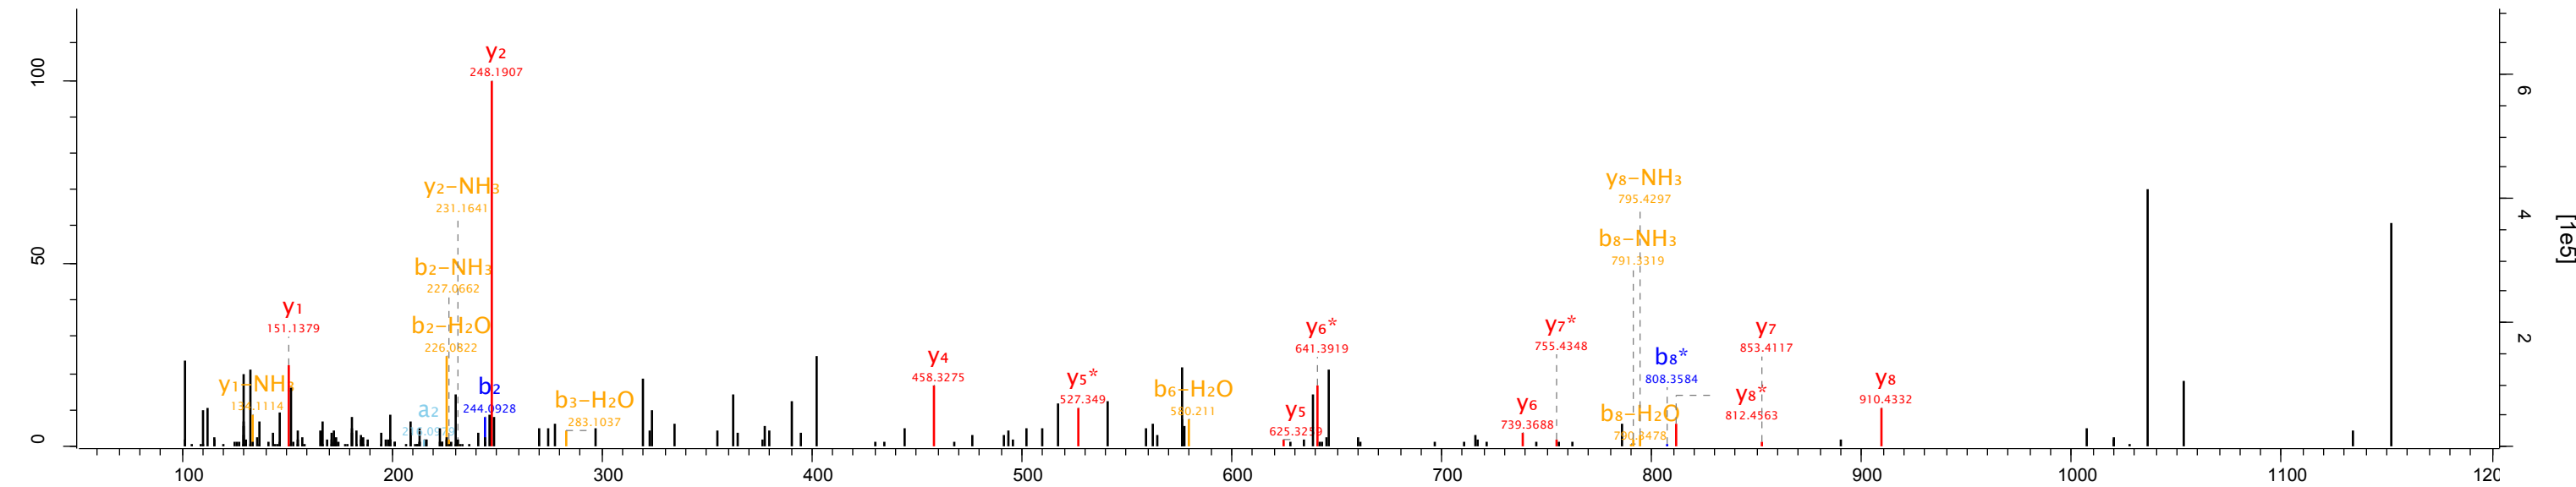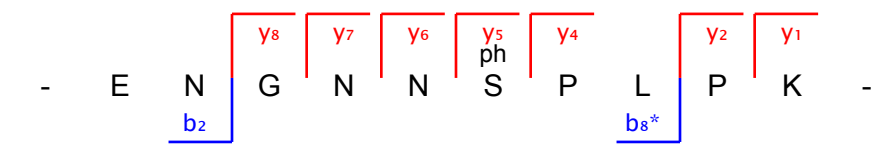

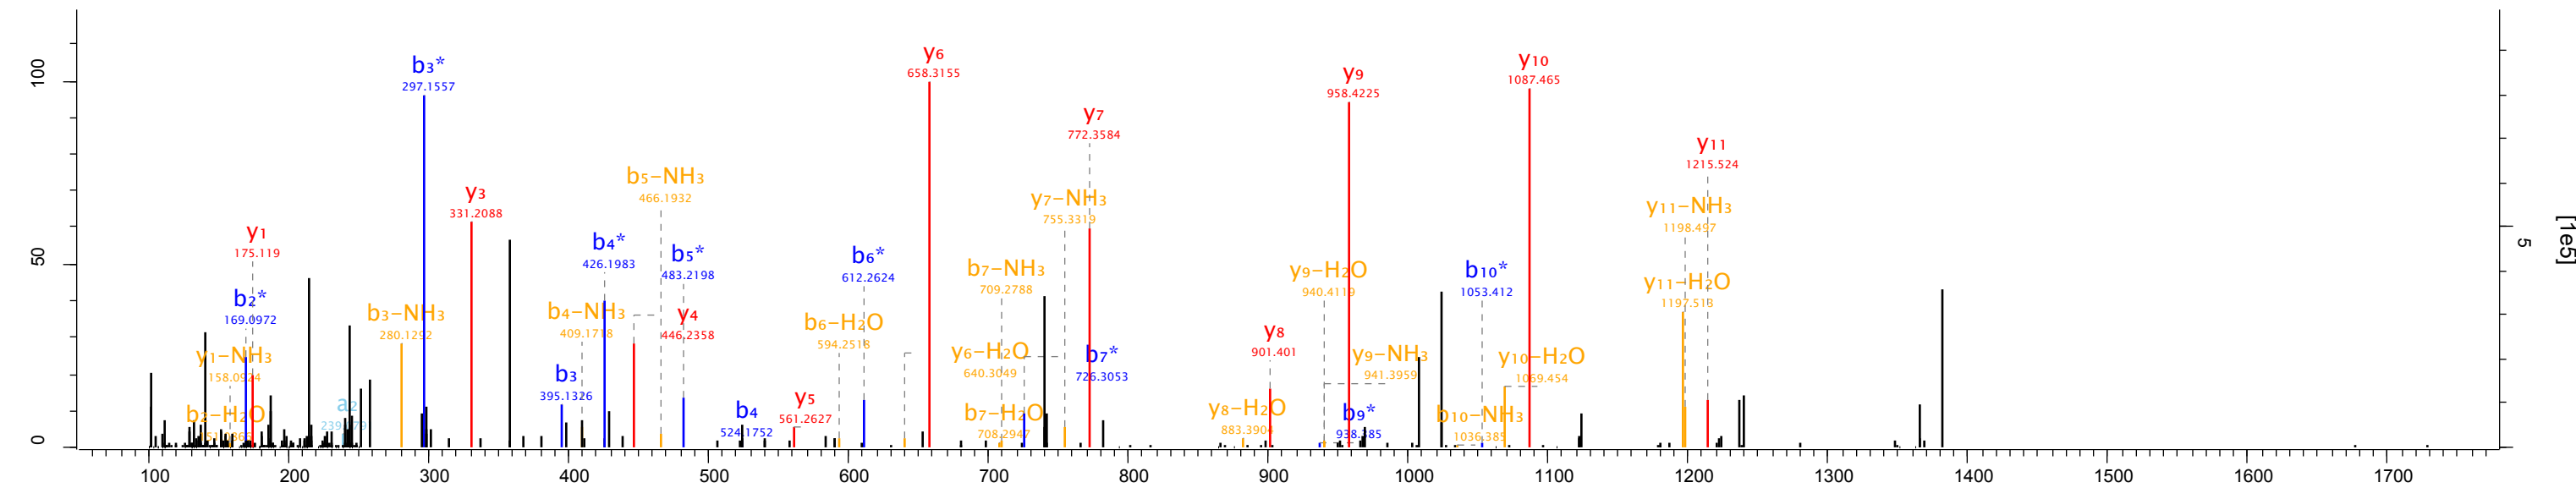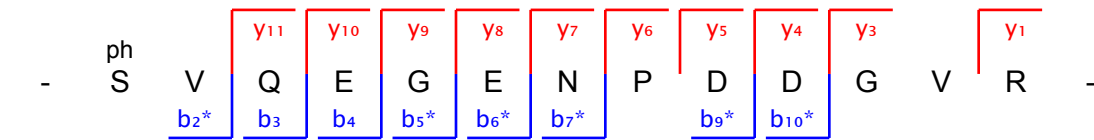

Raw file: 20171215\_MaS\_33SR\_LMH\_phospho2\_02  
 Scan: 4231 Method: FTMS; HCD Score: 145.25 m/z: 493.23 Gene names: UIMC1

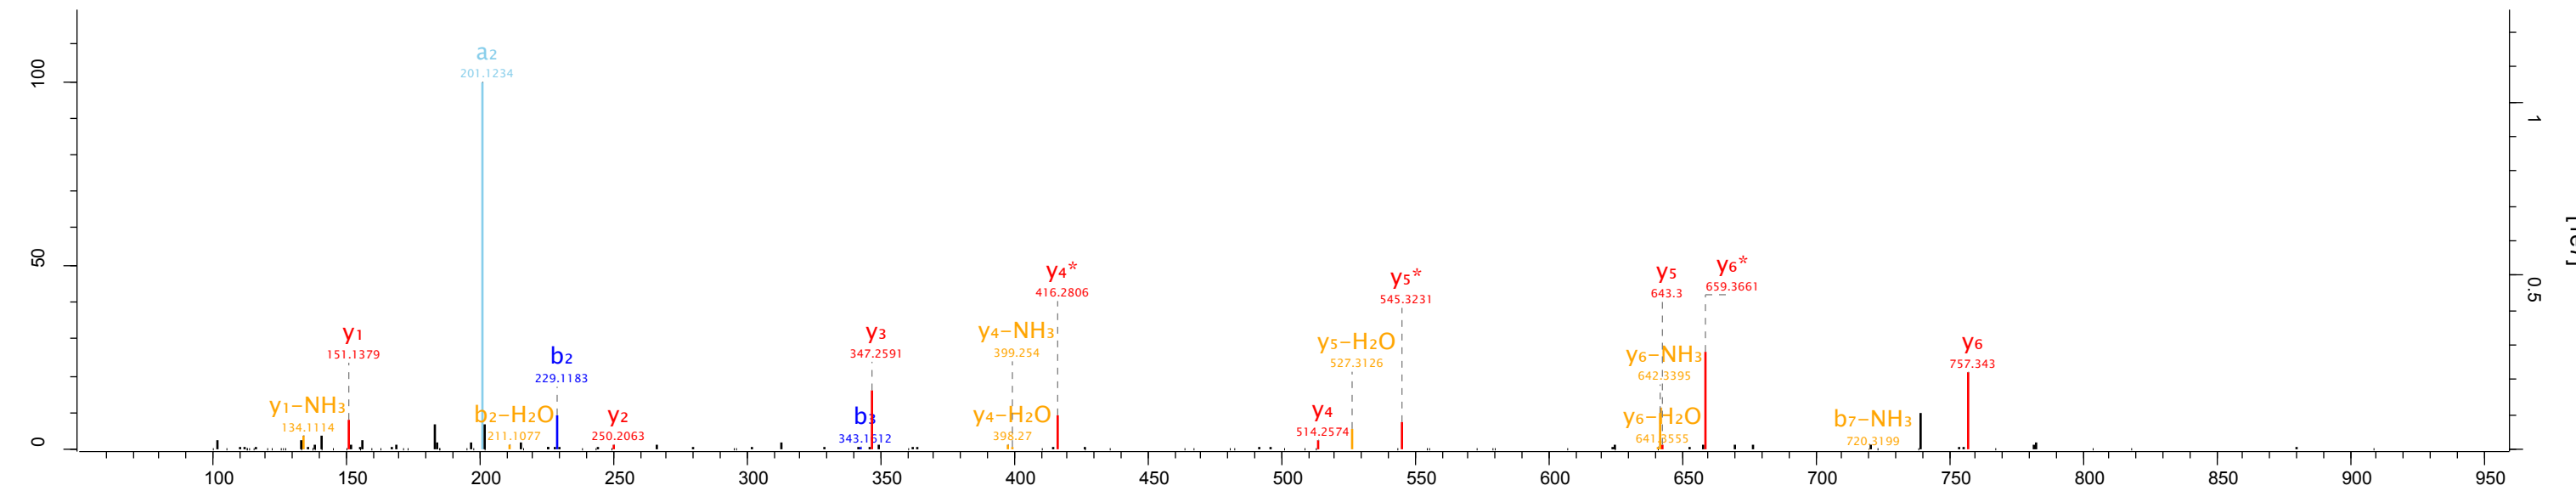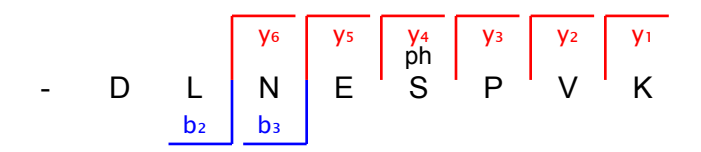

Raw file 20171215\_MaS\_33SR\_LMH\_phospho2\_02 Scan 4301 Method FTMS; HCD Score 63.18 m/z 524.73 Gene names MGA

20171215\_MaS\_33SR\_LMH\_phospho2\_02

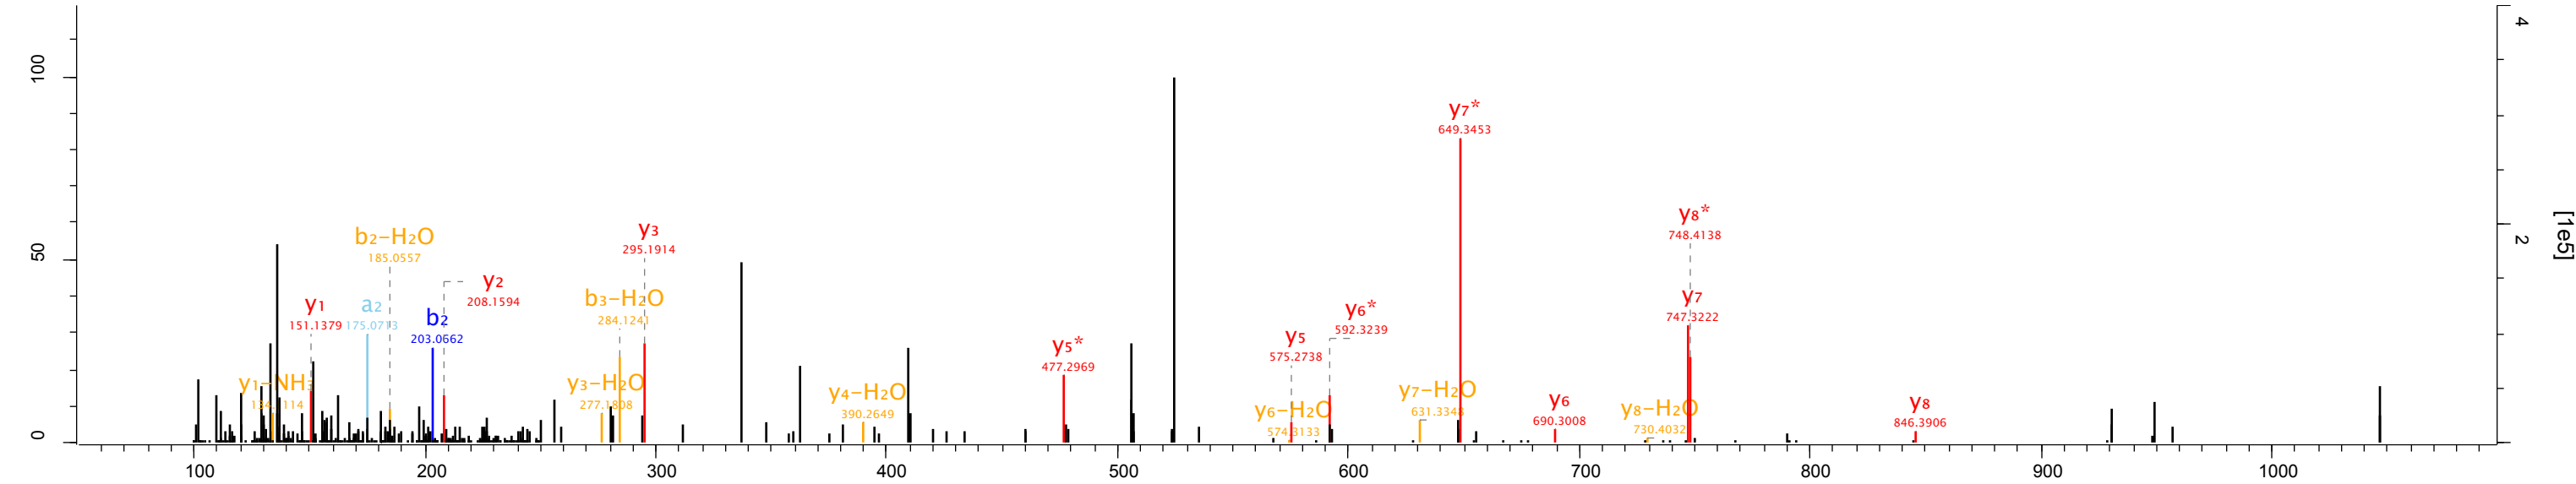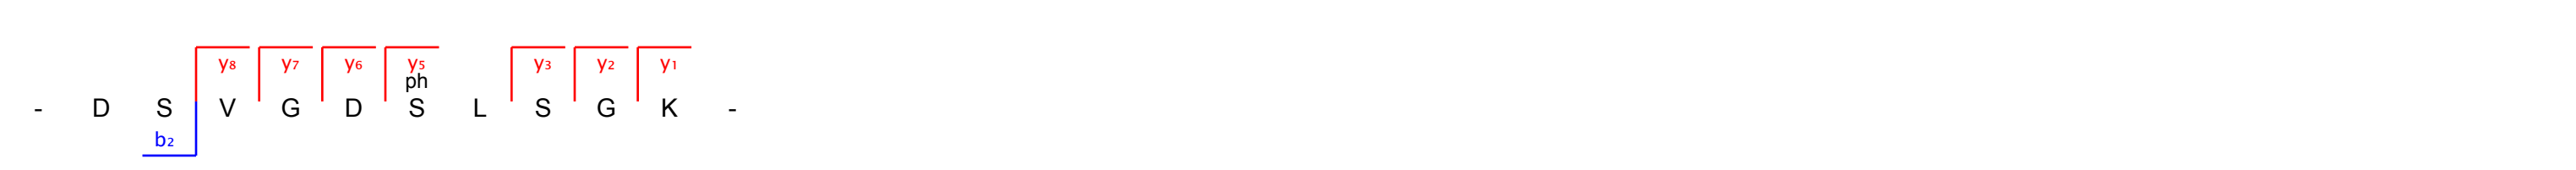

Raw file 20171215\_MaS\_33SR\_LMH\_phospho2\_02 Scan 4431 Method FTMS; HCD Score 58.7 m/z 442.7 Gene names USP24

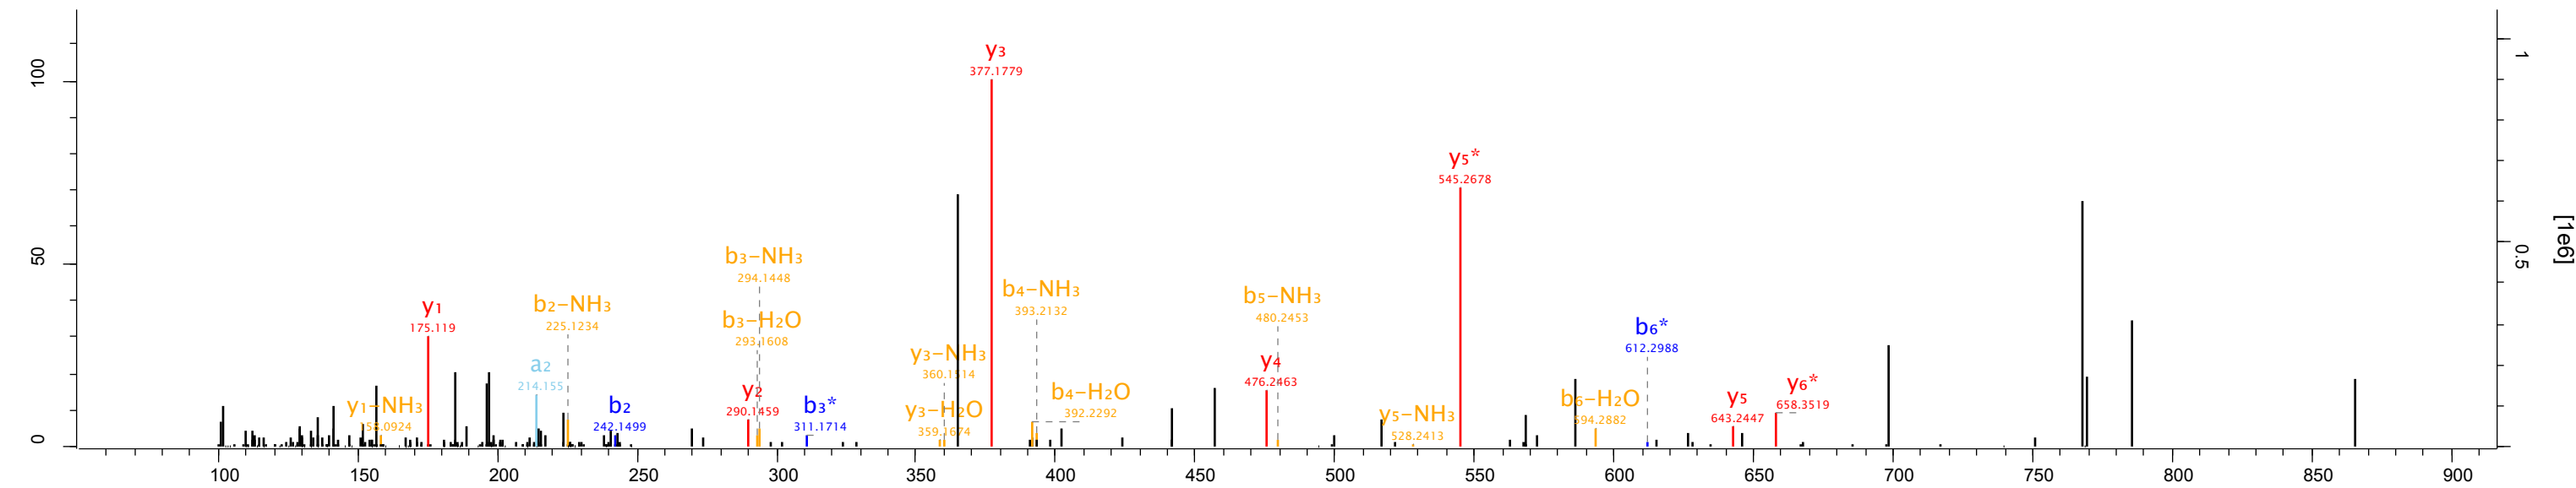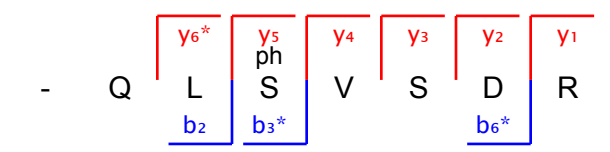

Raw file 20171215\_MaS\_33SR\_LMH\_phospho2\_02 Scan 4611 Method FTMS; HCD Score 41.58 m/z 606.28 Gene names BTBD2

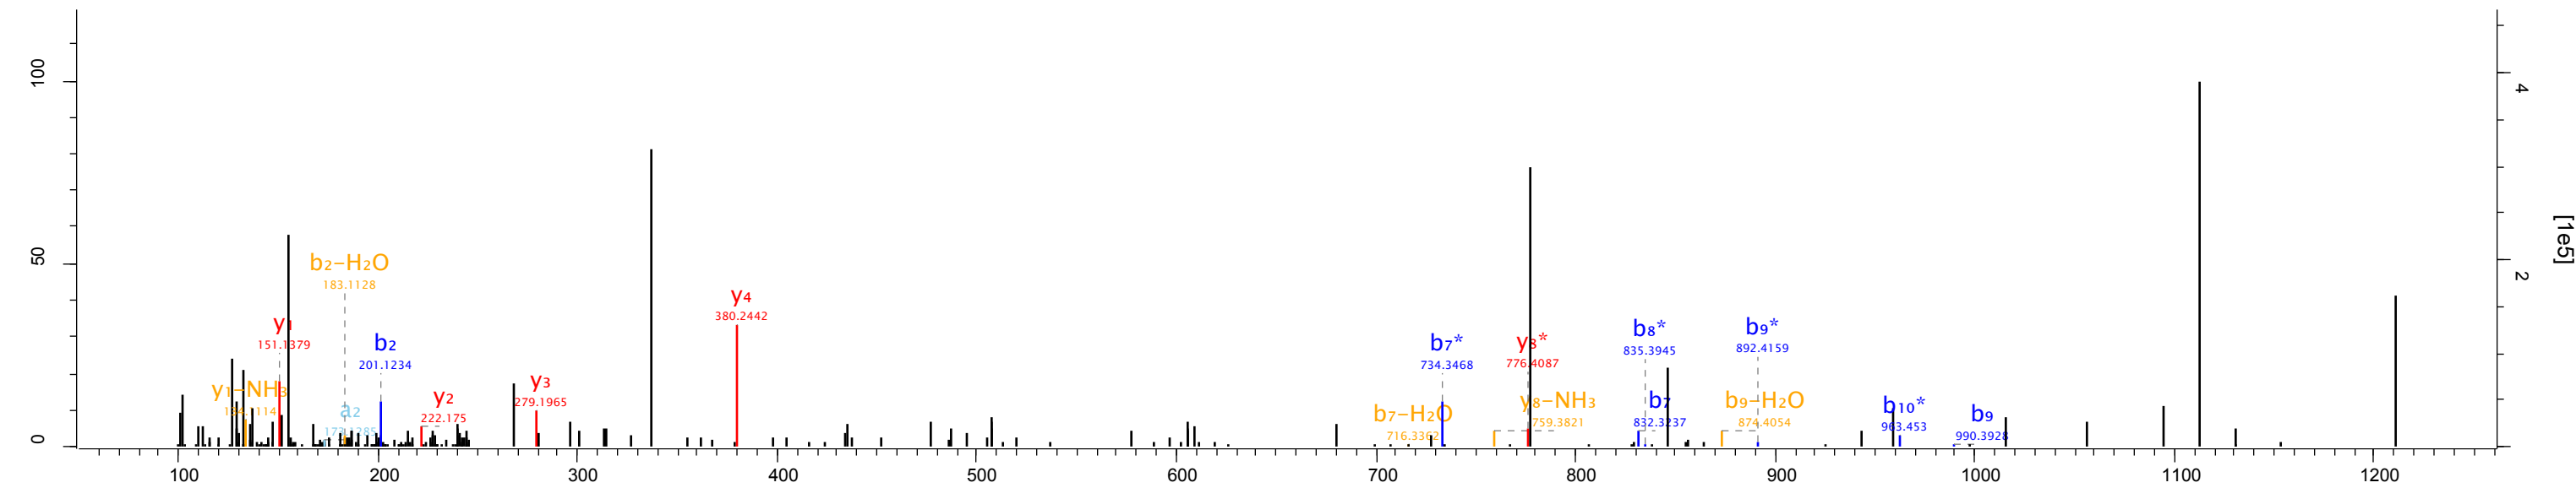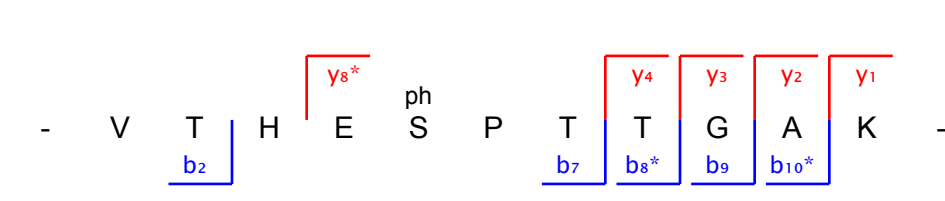



Raw file 20171215\_MaS\_33SR\_LMH\_phospho2\_02 Scan 4791 Method FTMS; HCD Score 97.82 m/z 711.81 Gene names ZNF768

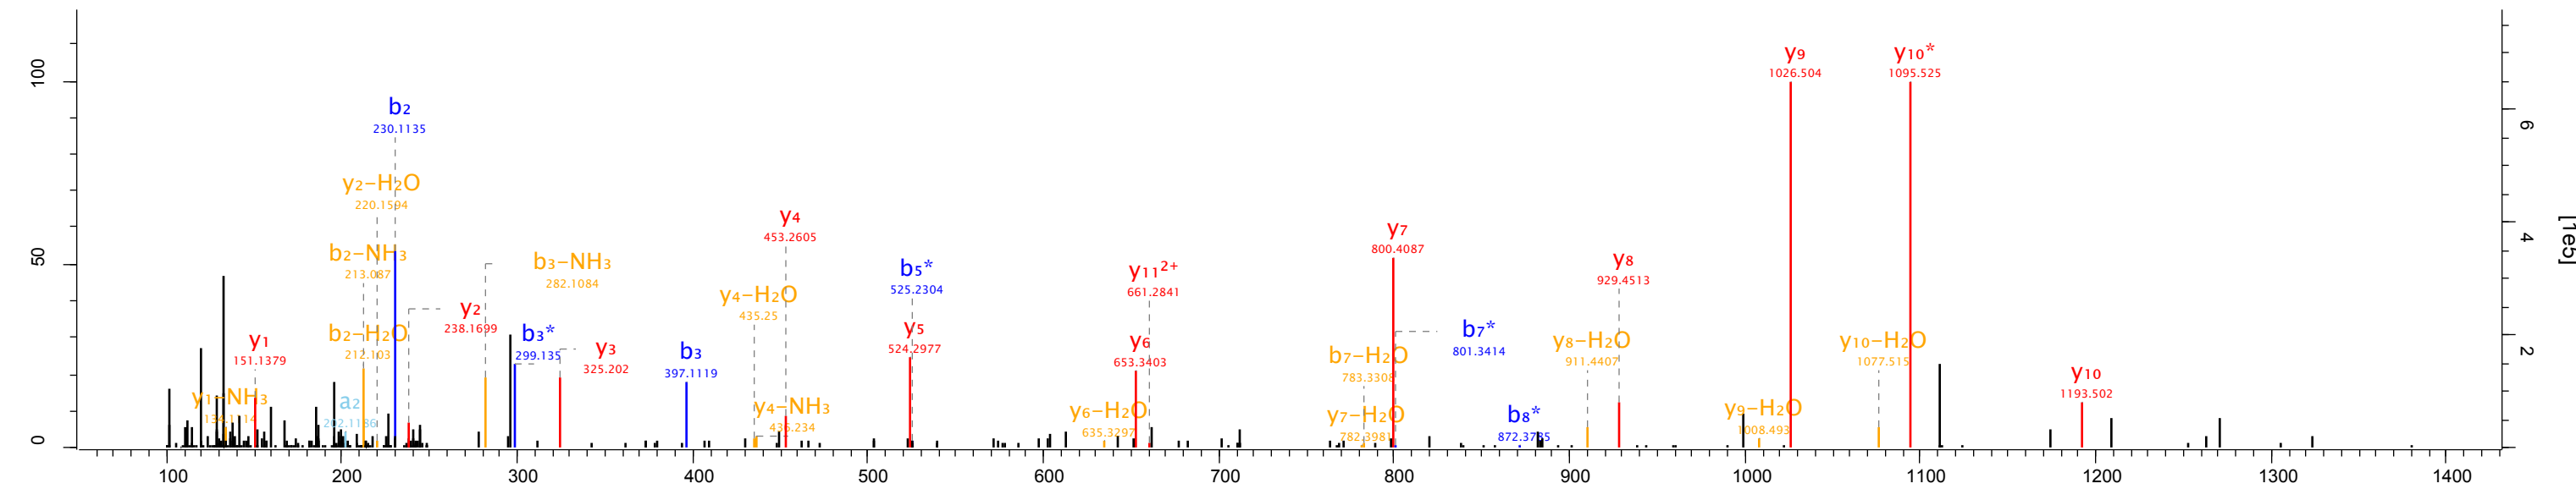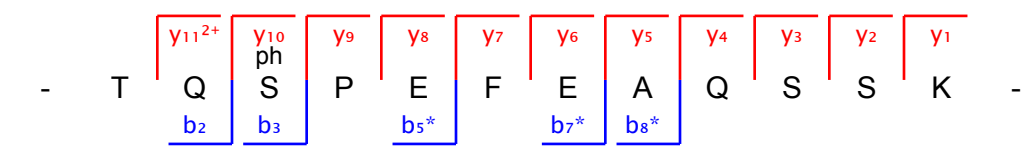

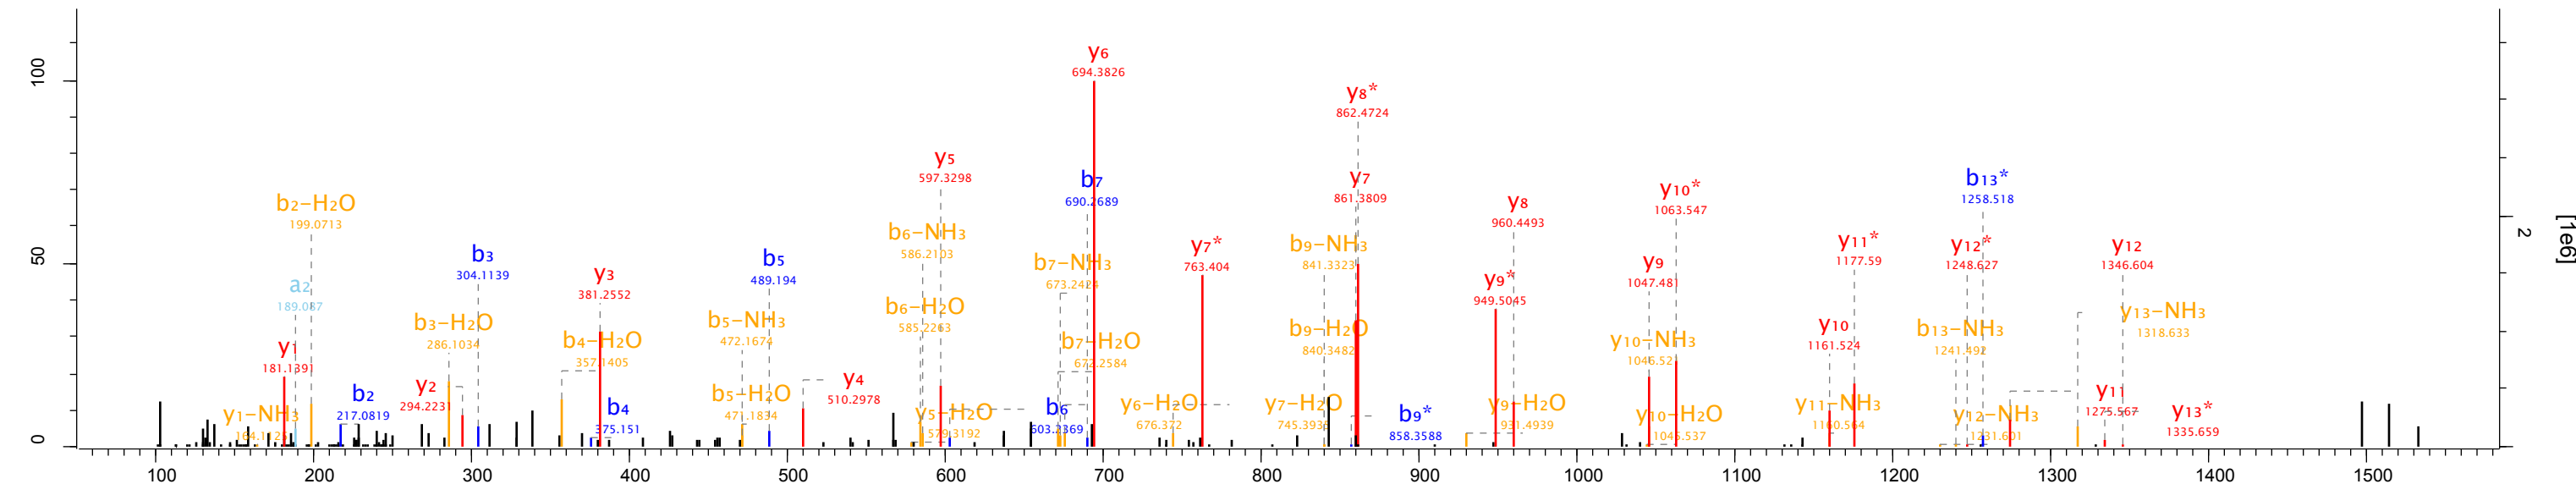

- E S S A N N S V S P S E S L R -

b<sub>2</sub>
b<sub>3</sub>
b<sub>4</sub>
b<sub>5</sub>
b<sub>6</sub>
b<sub>7</sub>
b<sub>9</sub>\*
b<sub>13</sub>\*

y<sub>13</sub>\*
y<sub>12</sub>
y<sub>11</sub>
y<sub>10</sub>
y<sub>9</sub>
y<sub>8</sub>
y<sub>7</sub>
y<sub>6</sub>
y<sub>5</sub>
y<sub>4</sub>
y<sub>3</sub>
y<sub>2</sub>
y<sub>1</sub>

Raw file 20171215\_MaS\_33SR\_LMH\_phospho2\_02 Scan 6231 Method FTMS; HCD Score 147.36 m/z 697.79 Gene names PRRC2B

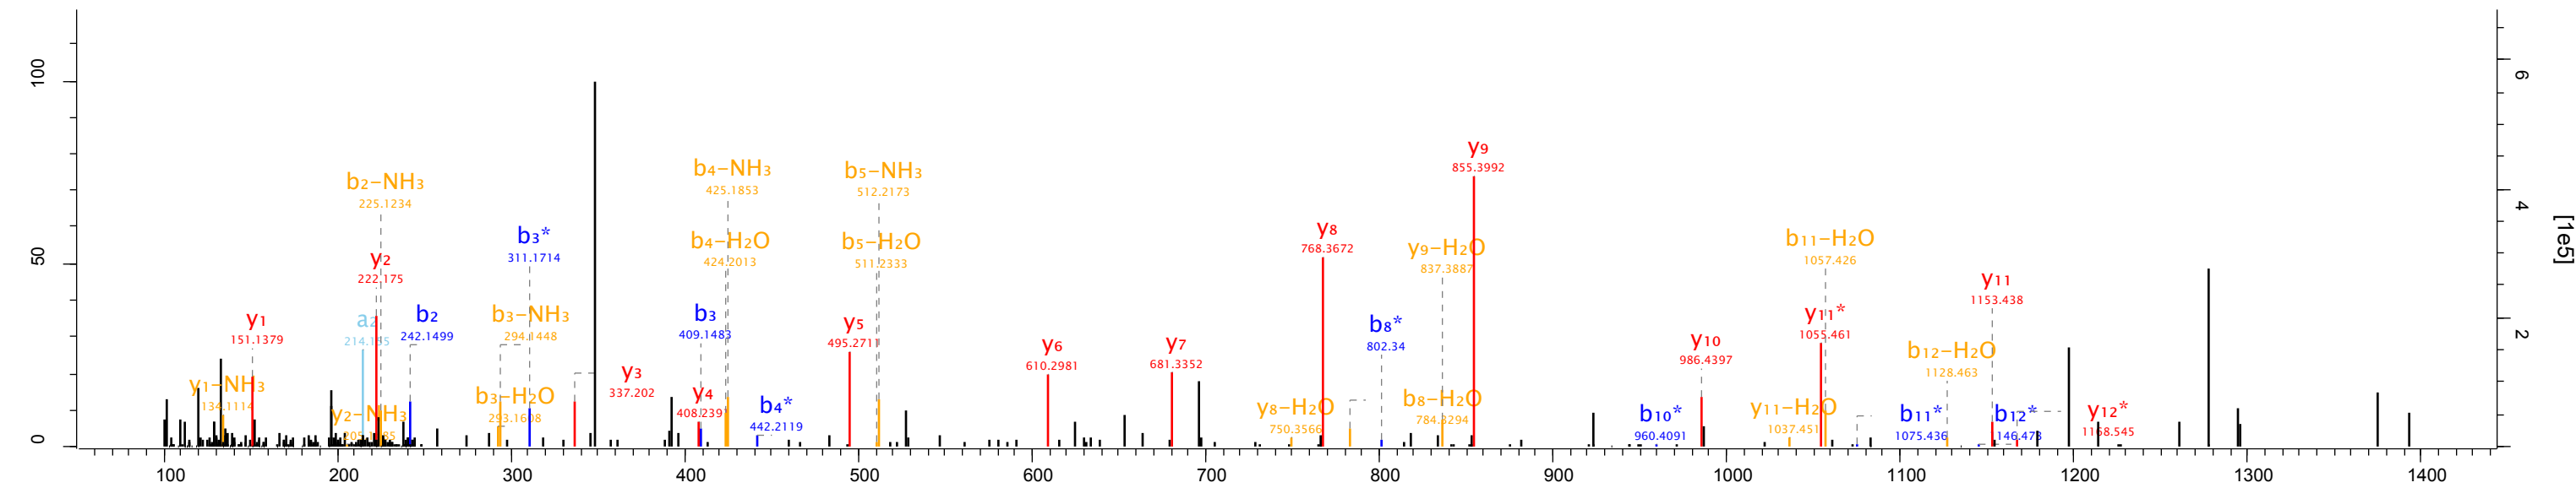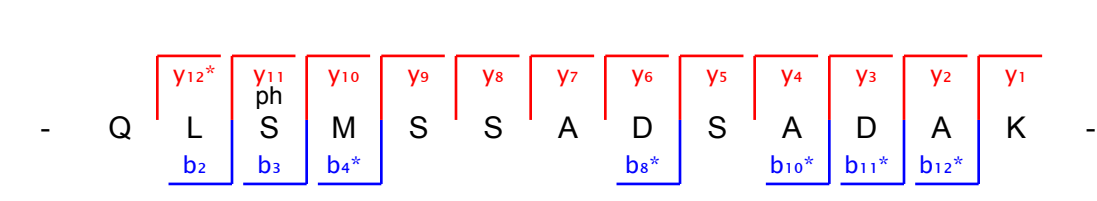

Raw file: 20171215\_MaS\_33SR\_LMH\_phospho2\_02  
 Scan: 6831 Method: FTMS; HCD Score: 429.97 m/z: 1031.45 Gene names: PPP4R2

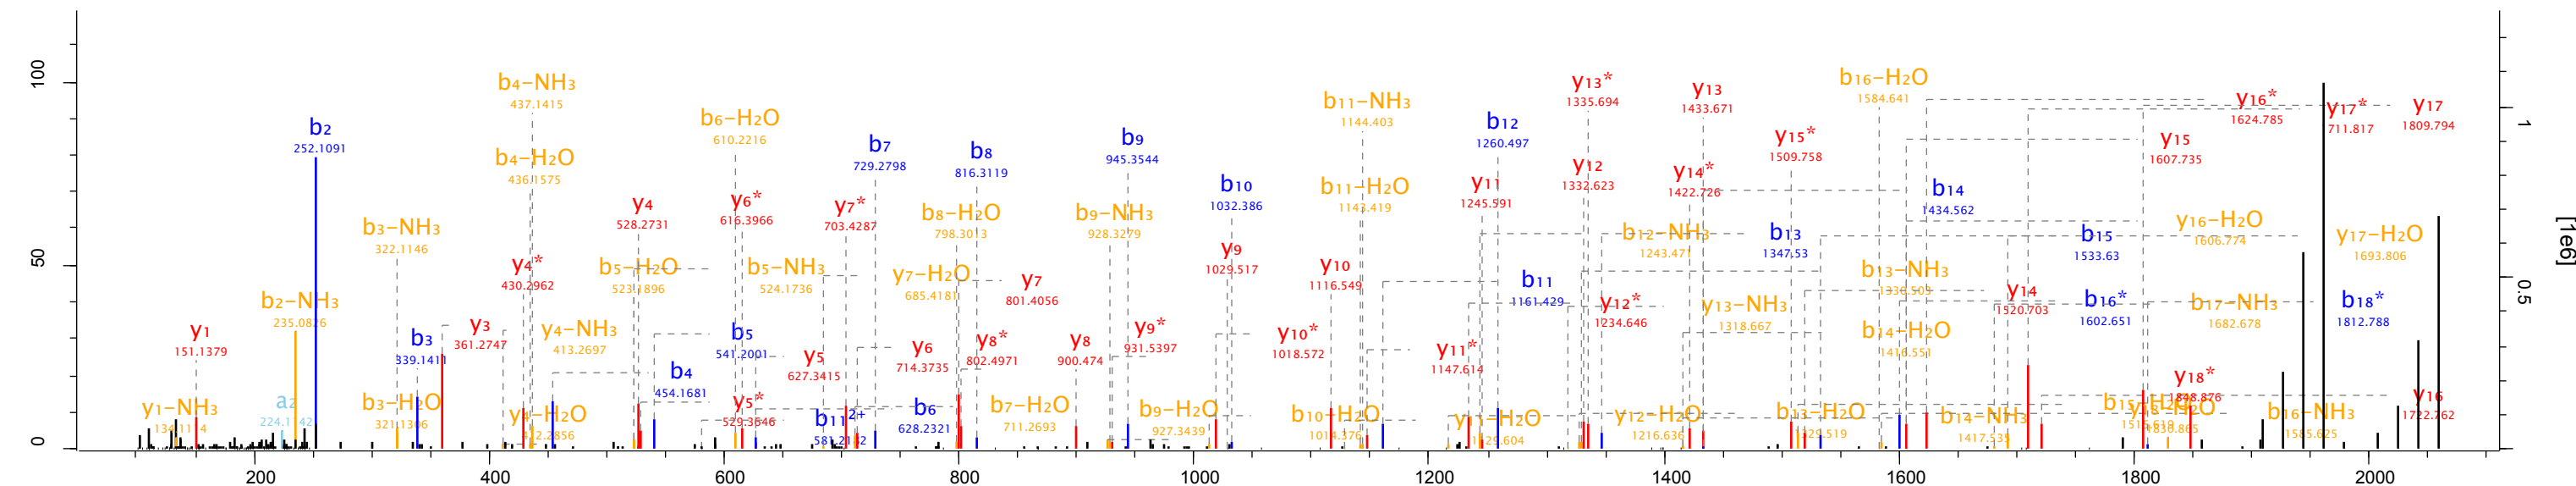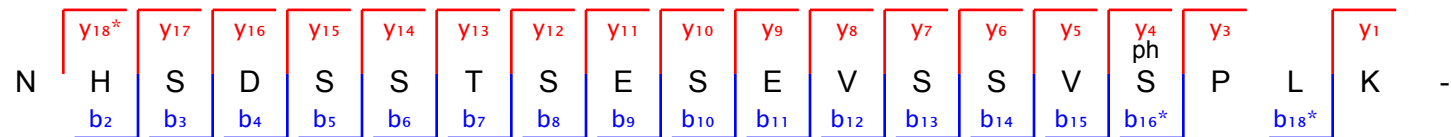

Raw file  
20171215\_MaS\_33SR\_LMH\_phospho2\_02

Scan 6871 Method FTMS; HCD Score 77.06 m/z 534.74 Gene names RPTOR

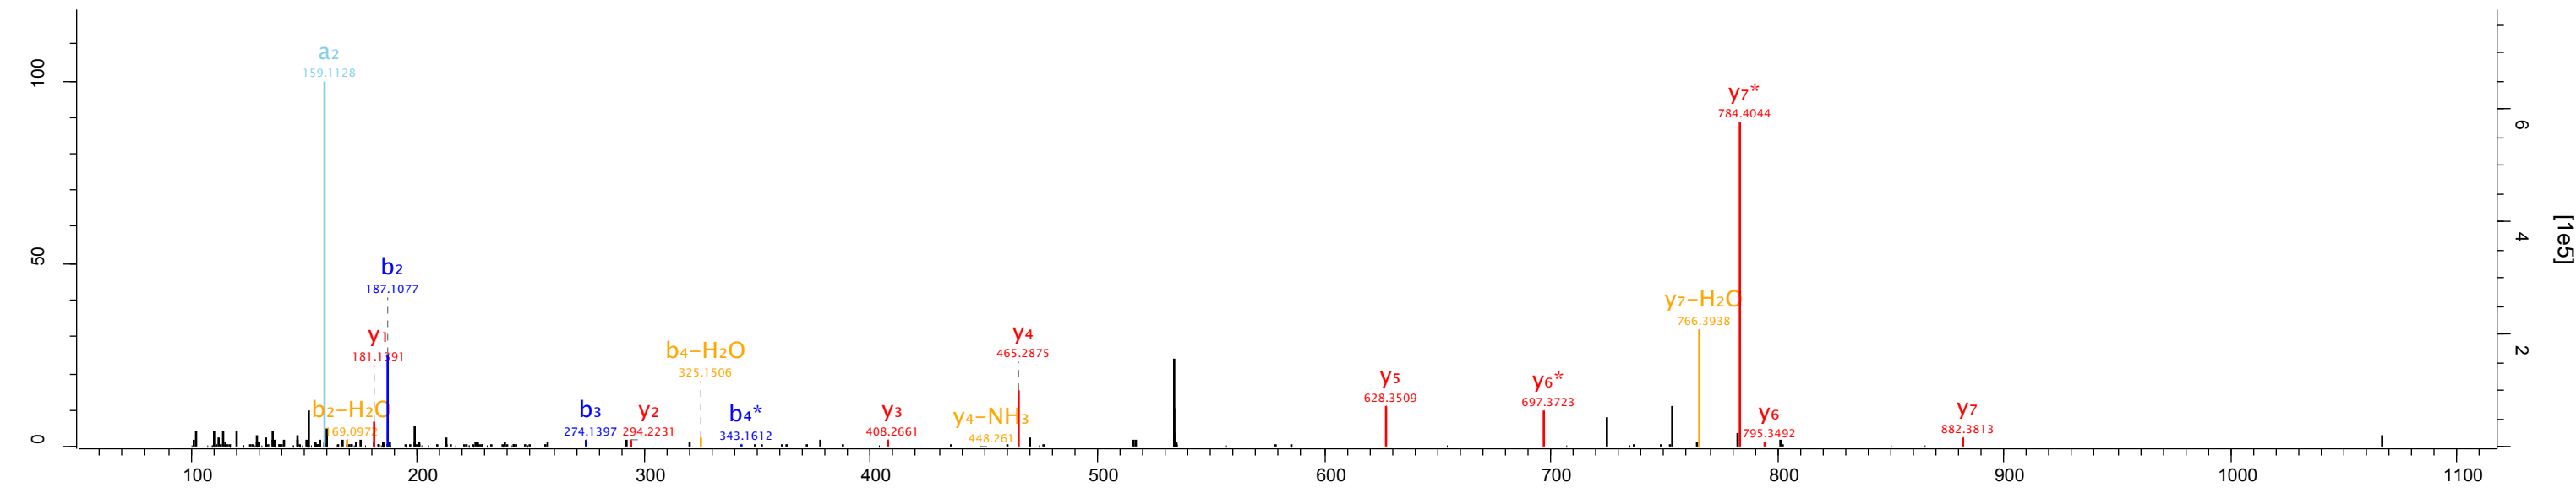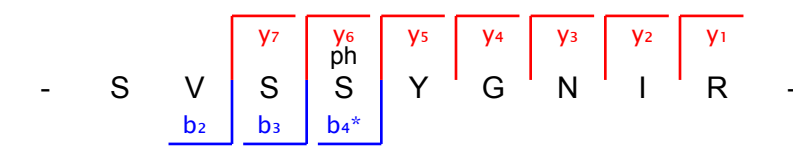



Raw file  
20171215\_MaS\_33SR\_LMH\_phospho2\_02

Scan 7091 Method FTMS; HCD Score 133.47 m/z 664.3 Gene names ZC3H13

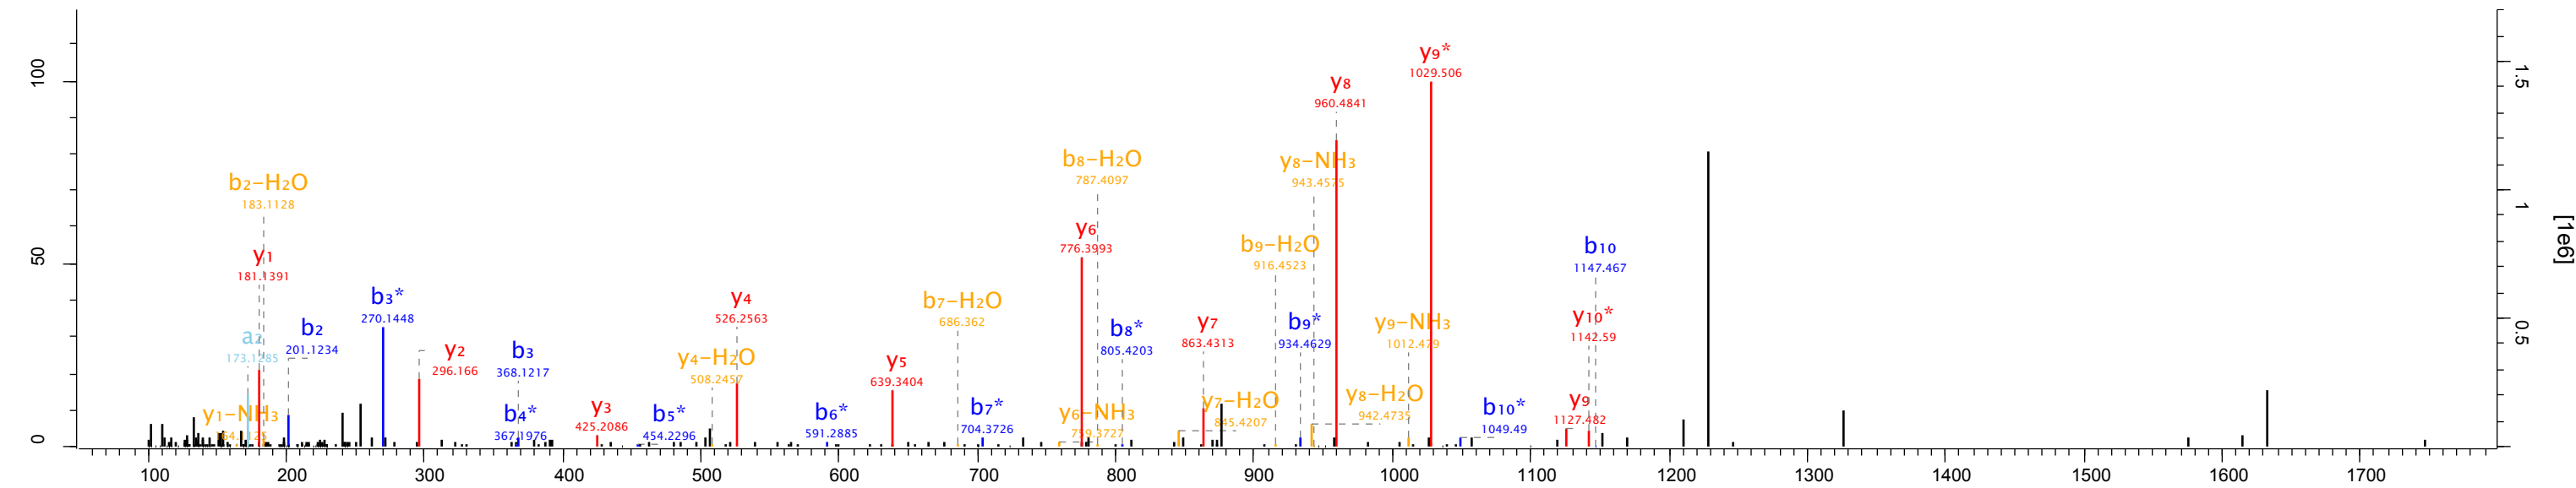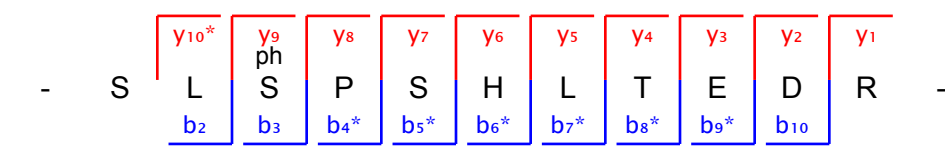

Raw file: 20171215\_MaS\_33SR\_LMH\_phospho2\_02  
 Scan: 7171 Method: FTMS; HCD Score: 251.71 m/z: 1122.46 Gene names: MAP1B

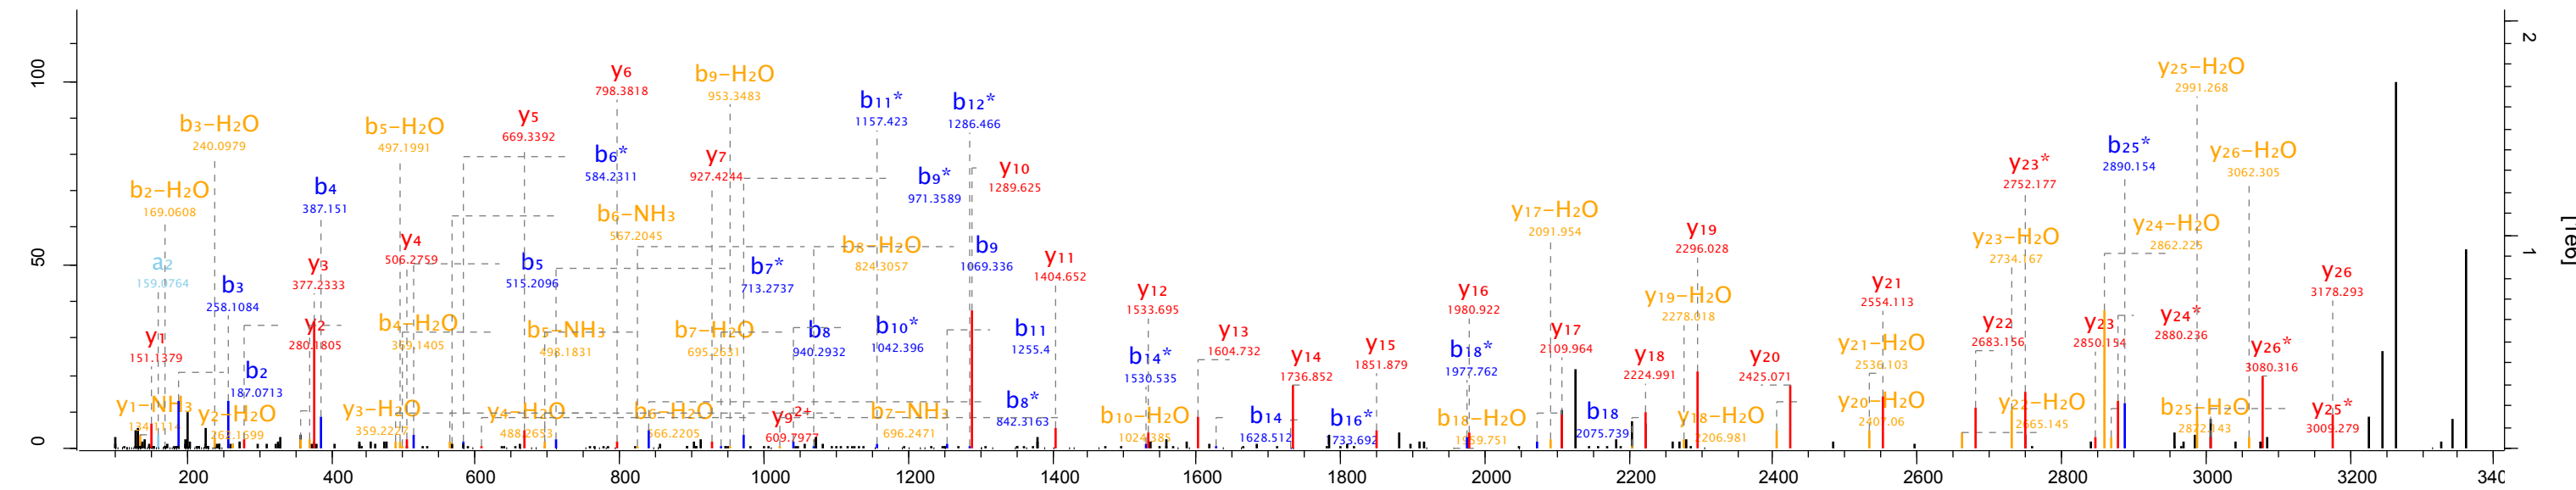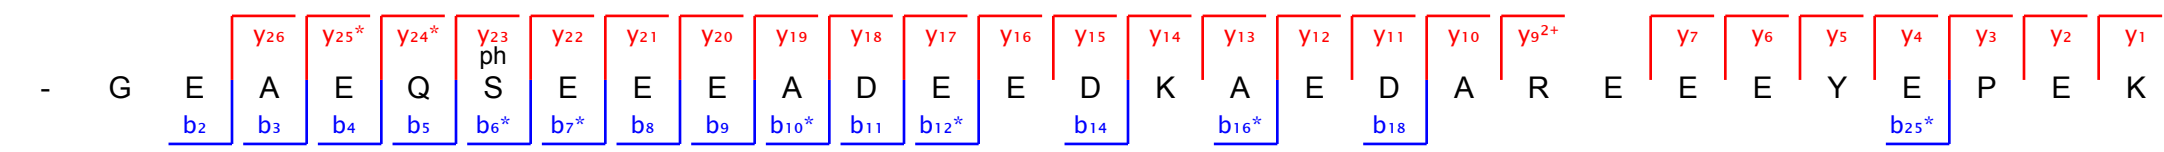



Raw file 20171215\_MaS\_33SR\_LMH\_phospho2\_02 Scan 7261 Method FTMS; HCD Score 78.69 m/z 659.33 Gene names SIPA1L1

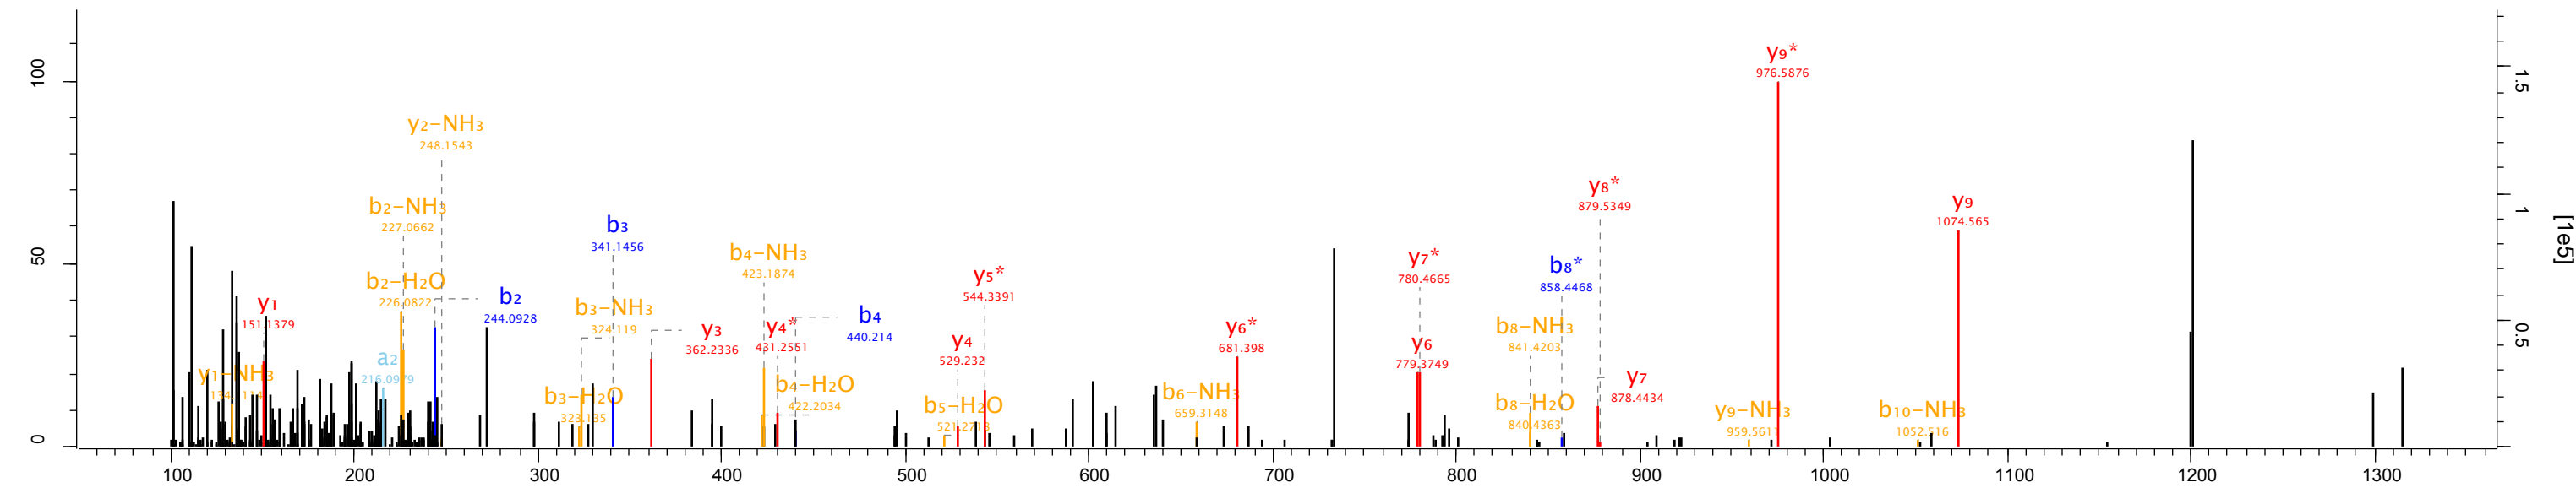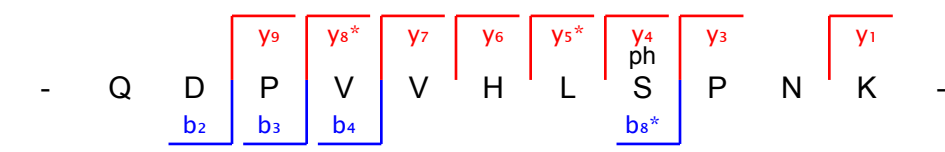

Raw file 20171215\_MaS\_33SR\_LMH\_phospho2\_02 Scan 8711 Method FTMS; HCD Score 90.7 m/z 554.26 Gene names NES

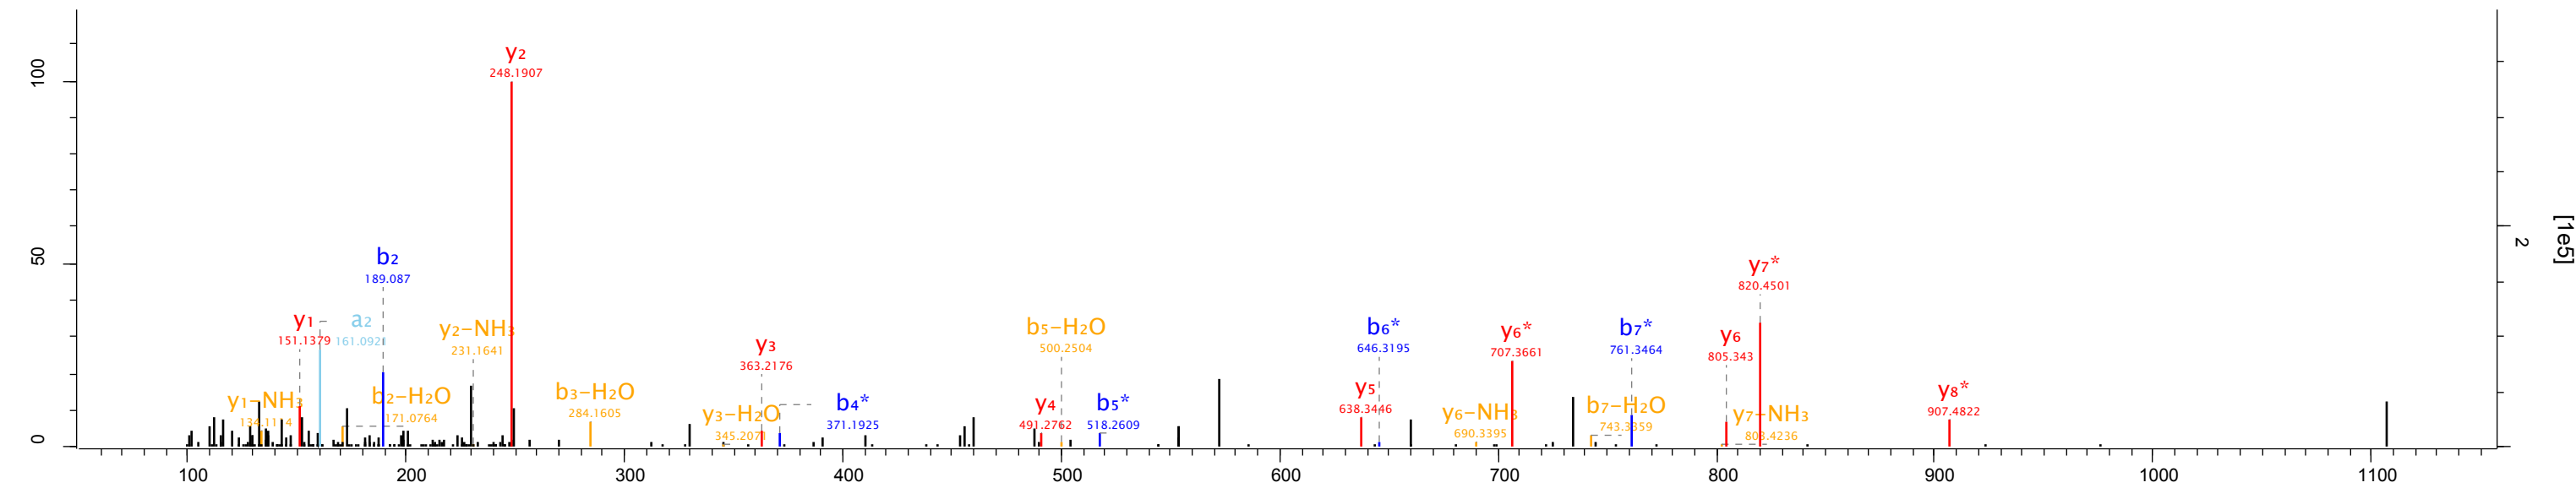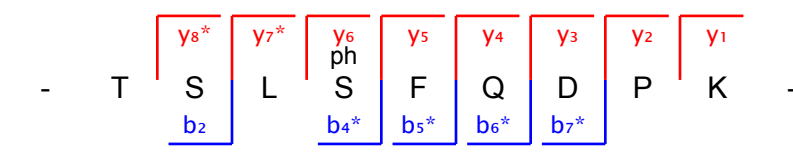

Raw file 20171215\_MaS\_33SR\_LMH\_phospho2\_02 Scan 9071 Method FTMS; HCD Score 64.12 m/z 556.27

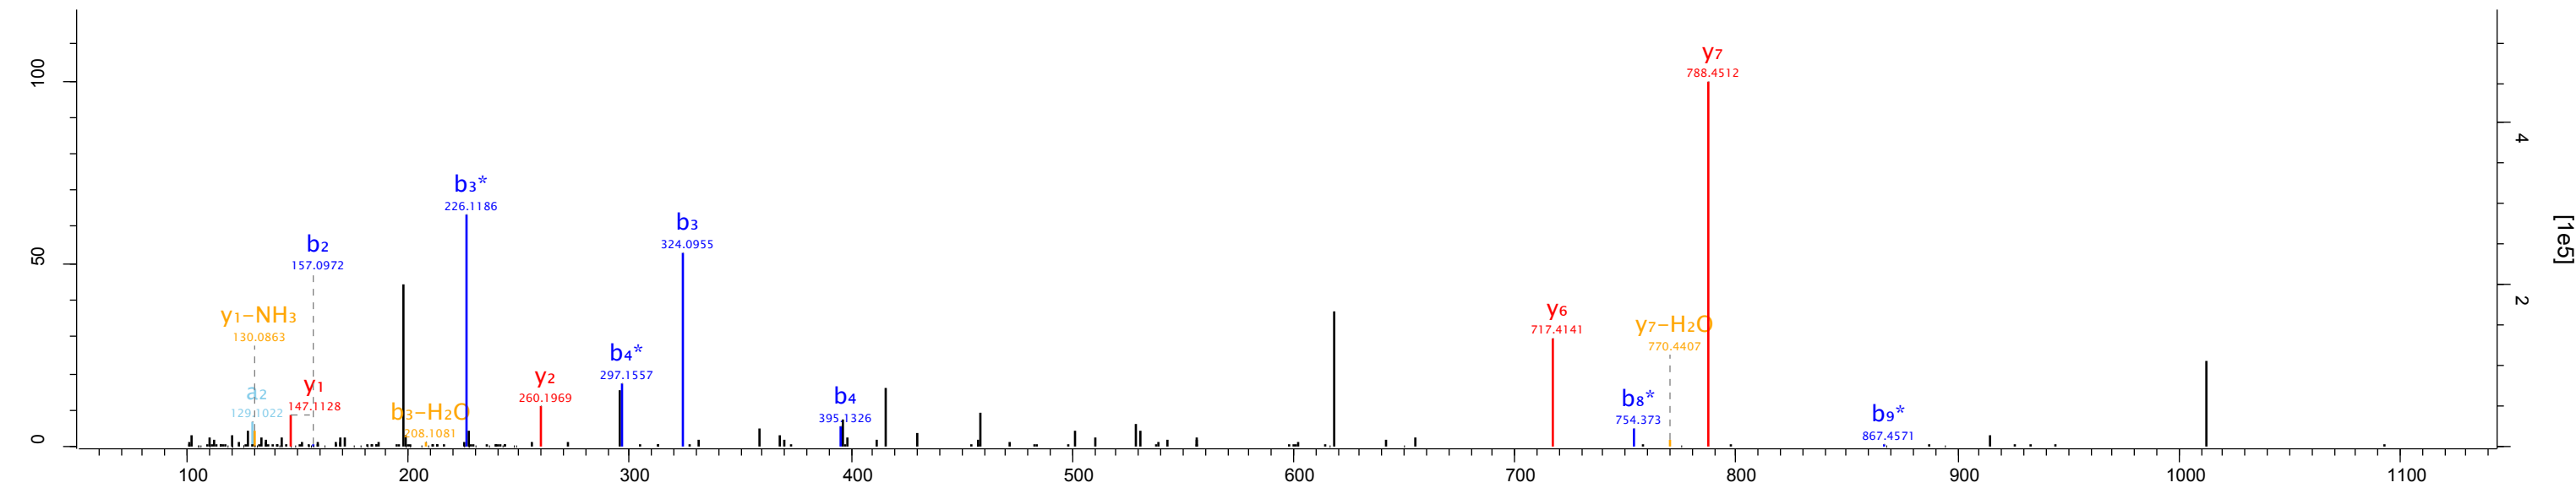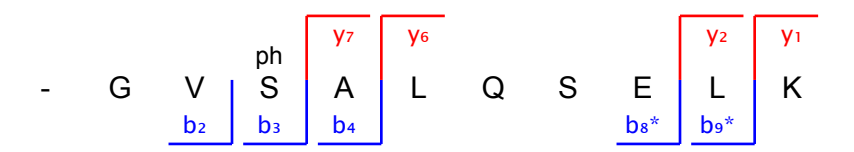



Raw file  
20171215\_MaS\_33SR\_LMH\_phospho2\_02

Scan 9461 Method FTMS; HCD Score 125.23 m/z 869.4 Gene names TMPO

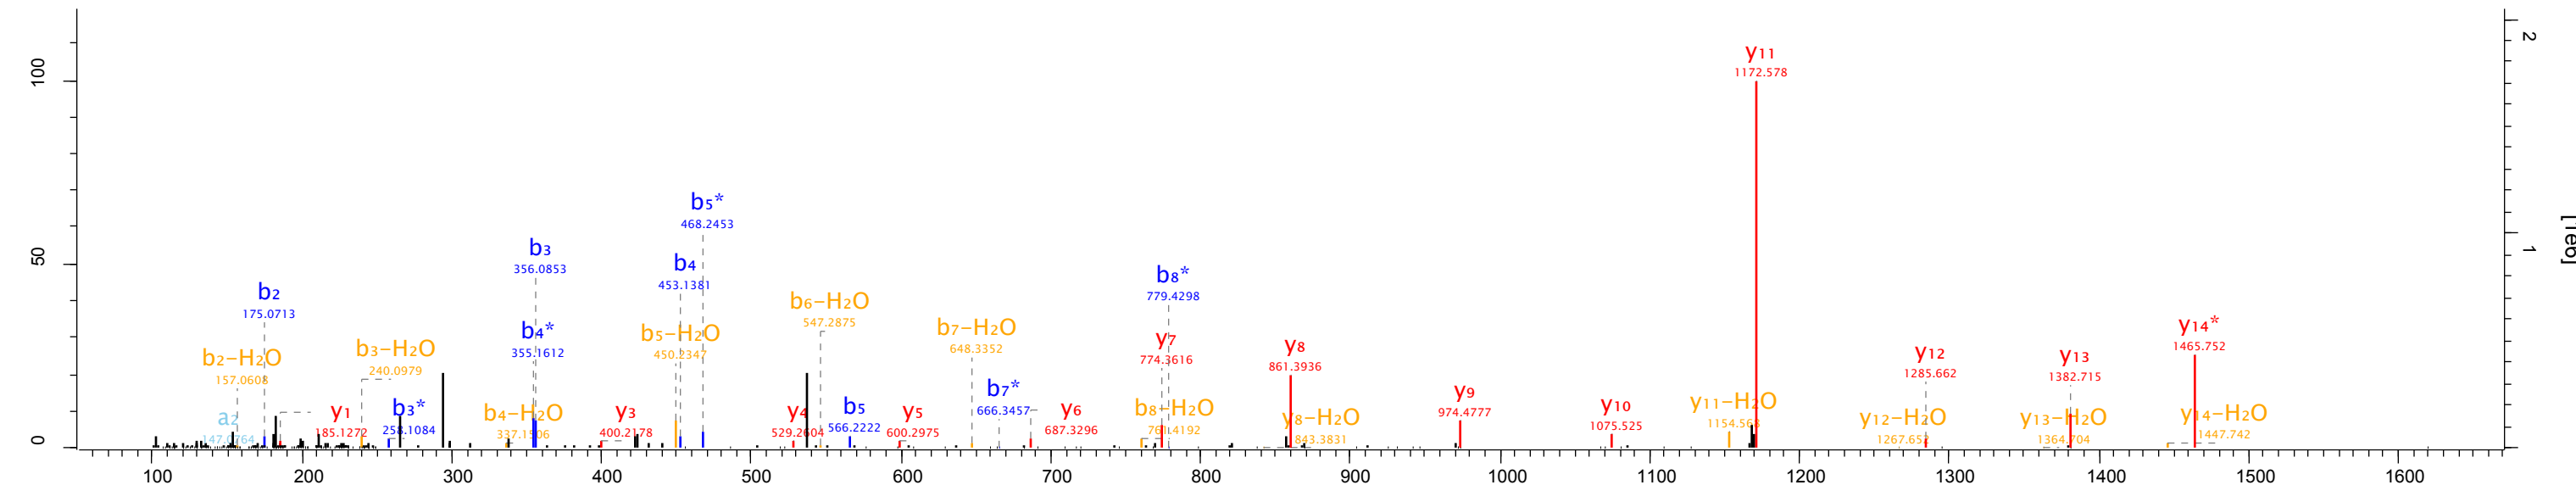

- S S S T P L P T I S S S A E N T R -

Fragmentation mapping:  
- b2 (S) b3 (S) b4 (P) b5 (L) b7\* (T) b8\* (I) y1 (R) -

Raw file 20171215\_MaS\_33SR\_LMH\_phospho2\_03 Scan 10031 Method FTMS; HCD Score 181.92 m/z 1081.91 Gene names PRRC2A

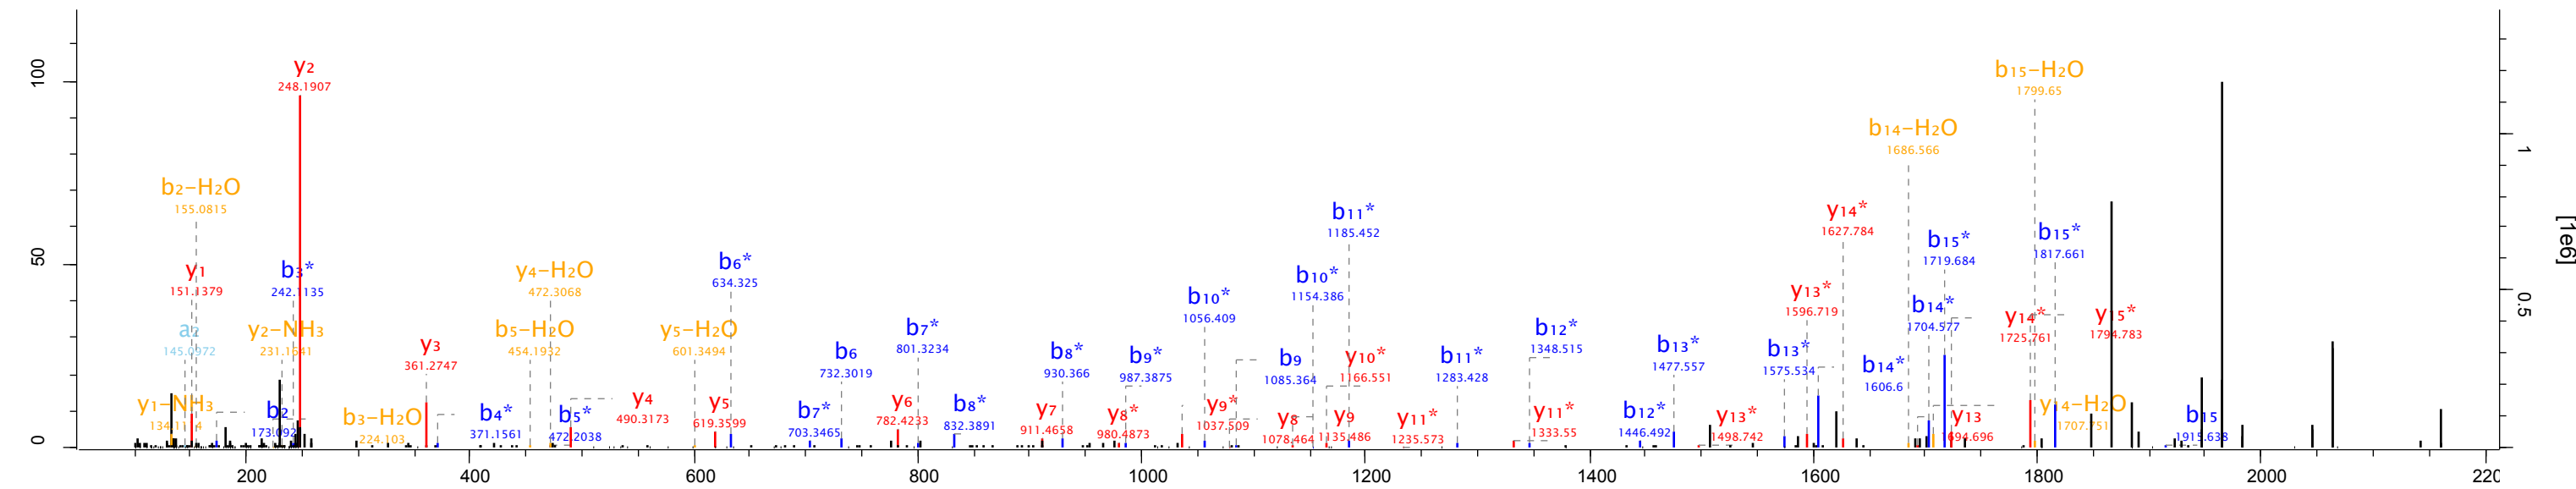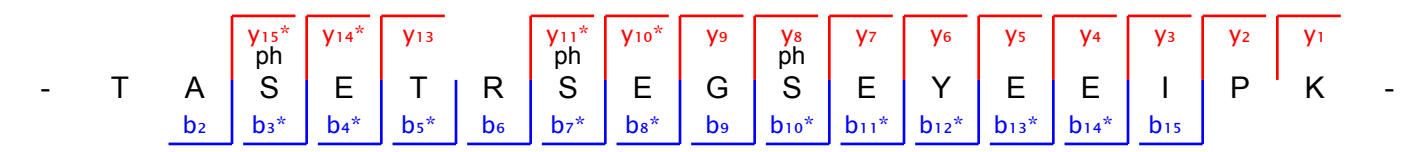

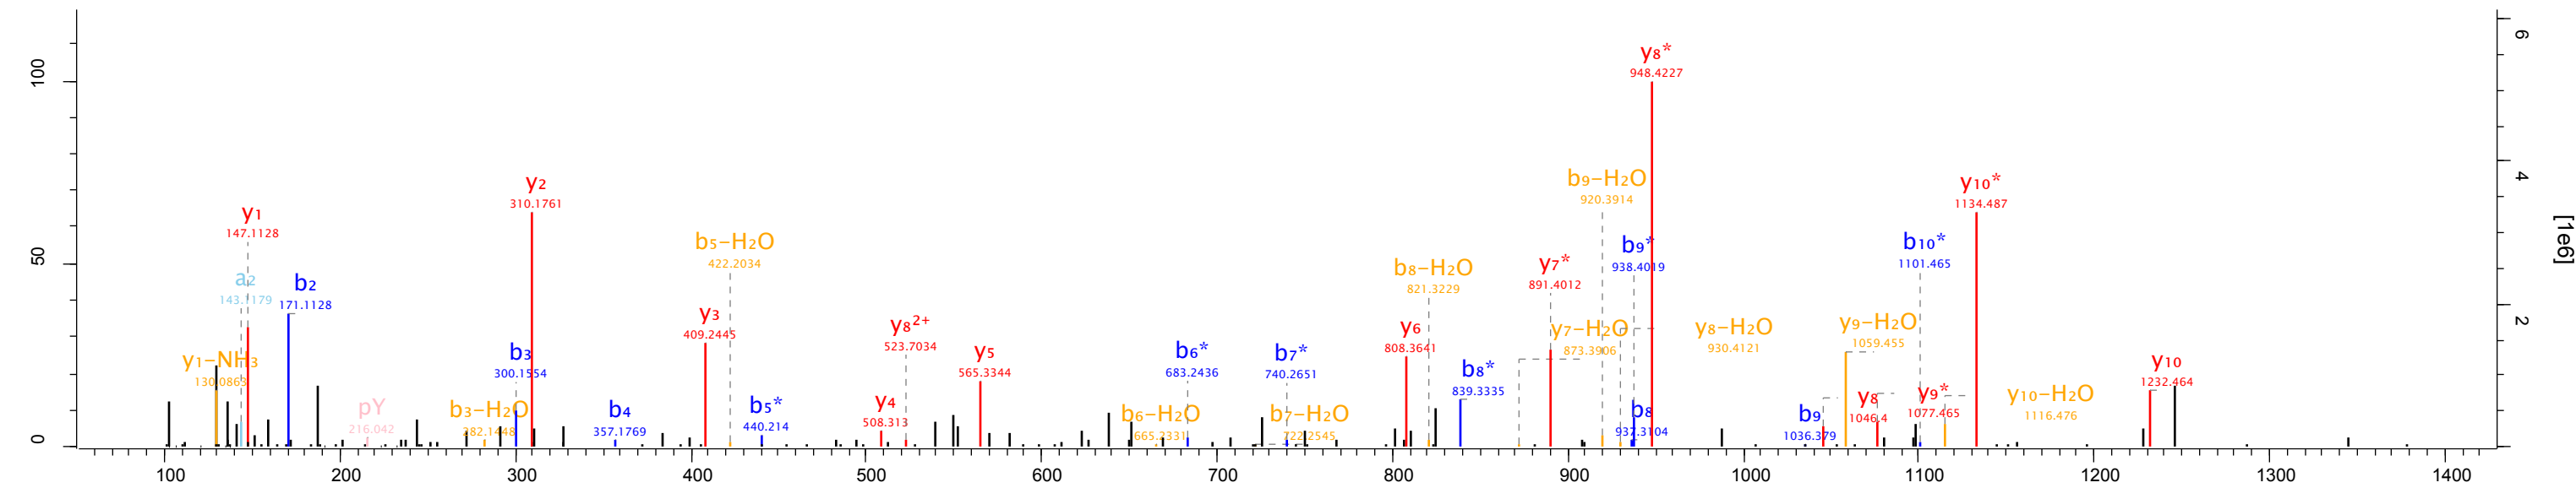

- I y10 y9\* y8 y7<sup>ph</sup> y6<sup>ph</sup> y5 y4 y3 y2 y1 -  
G E G T Y G V V Y K -  
b2 b3 b4 b5\* b6\* b7\* b8 b9 b10\*

20171215\_MaS\_33SR\_LMH\_phospho2\_03 10221 FTMS; HCD 103.01 624.27 SOS1

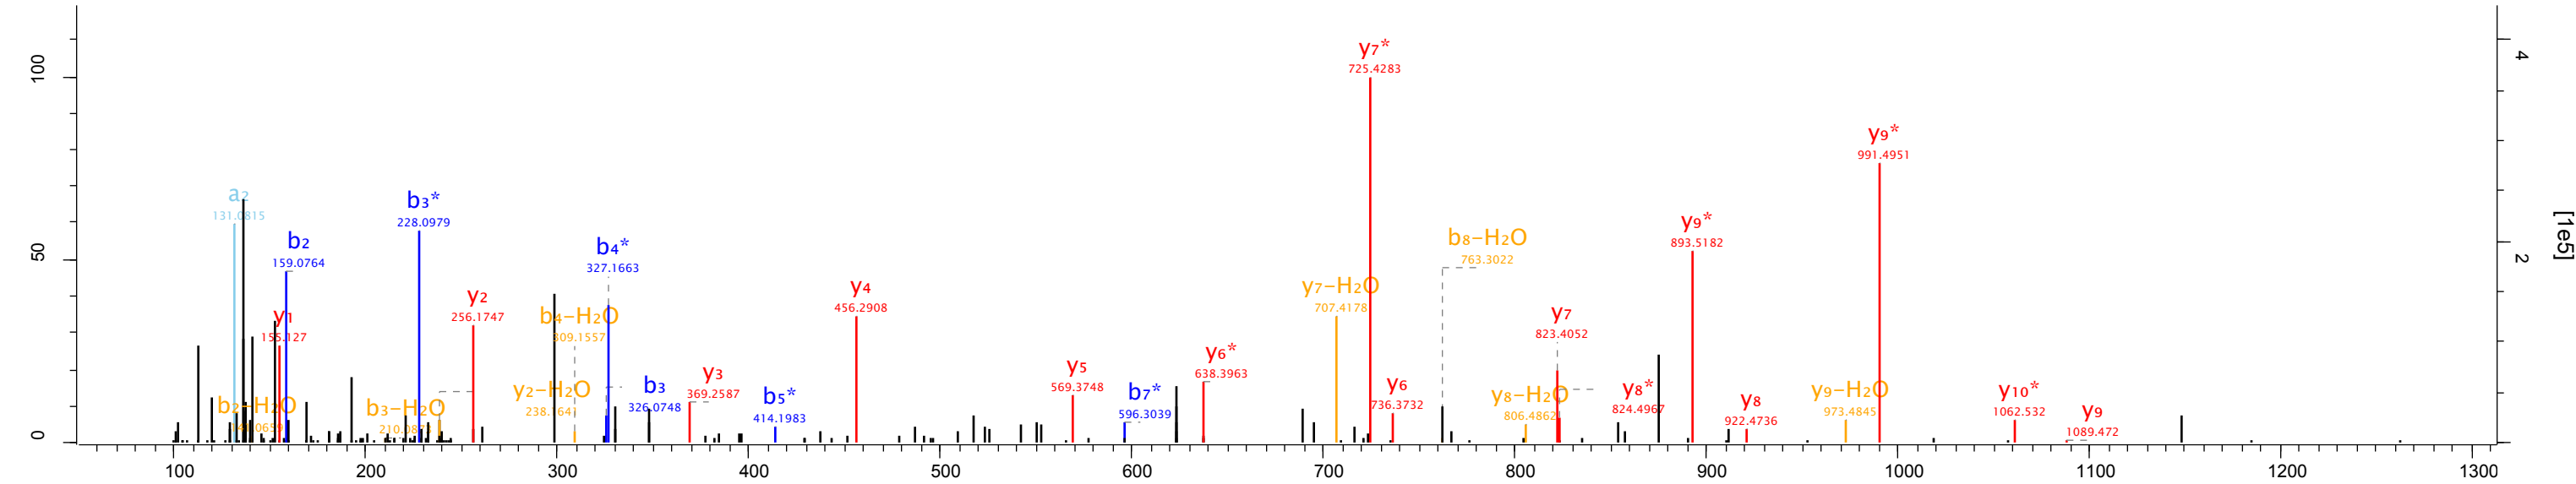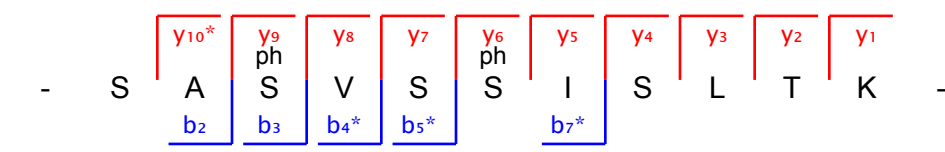



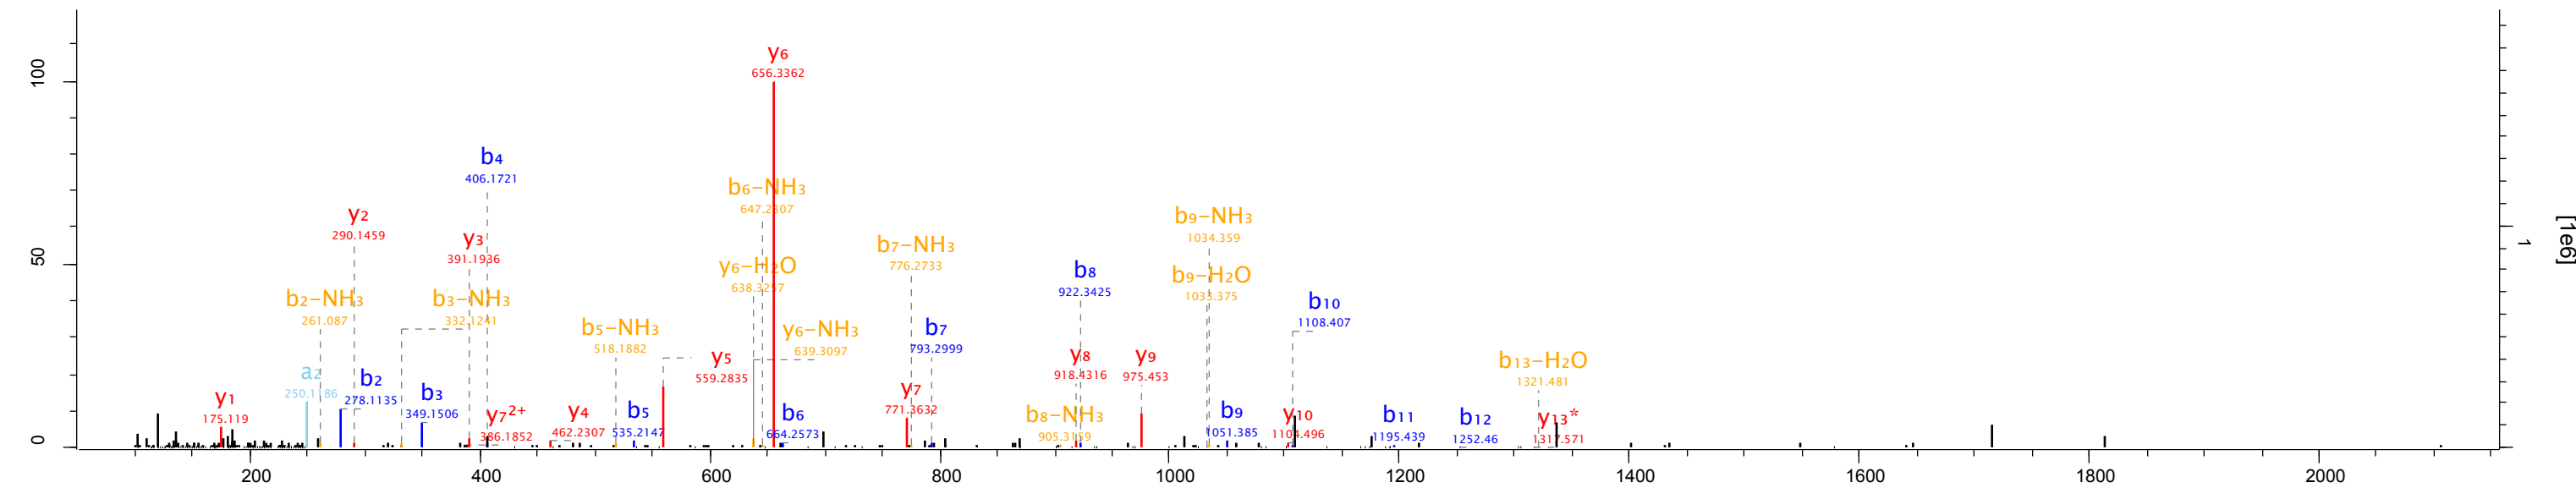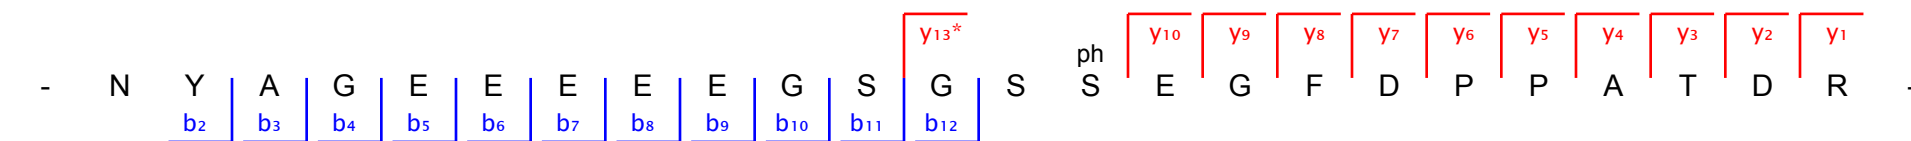

Raw file 20171215\_MaS\_33SR\_LMH\_phospho2\_03 Scan 10371 Method FTMS; HCD Score 64.45 m/z 1117.84 Gene names TBC1D9B

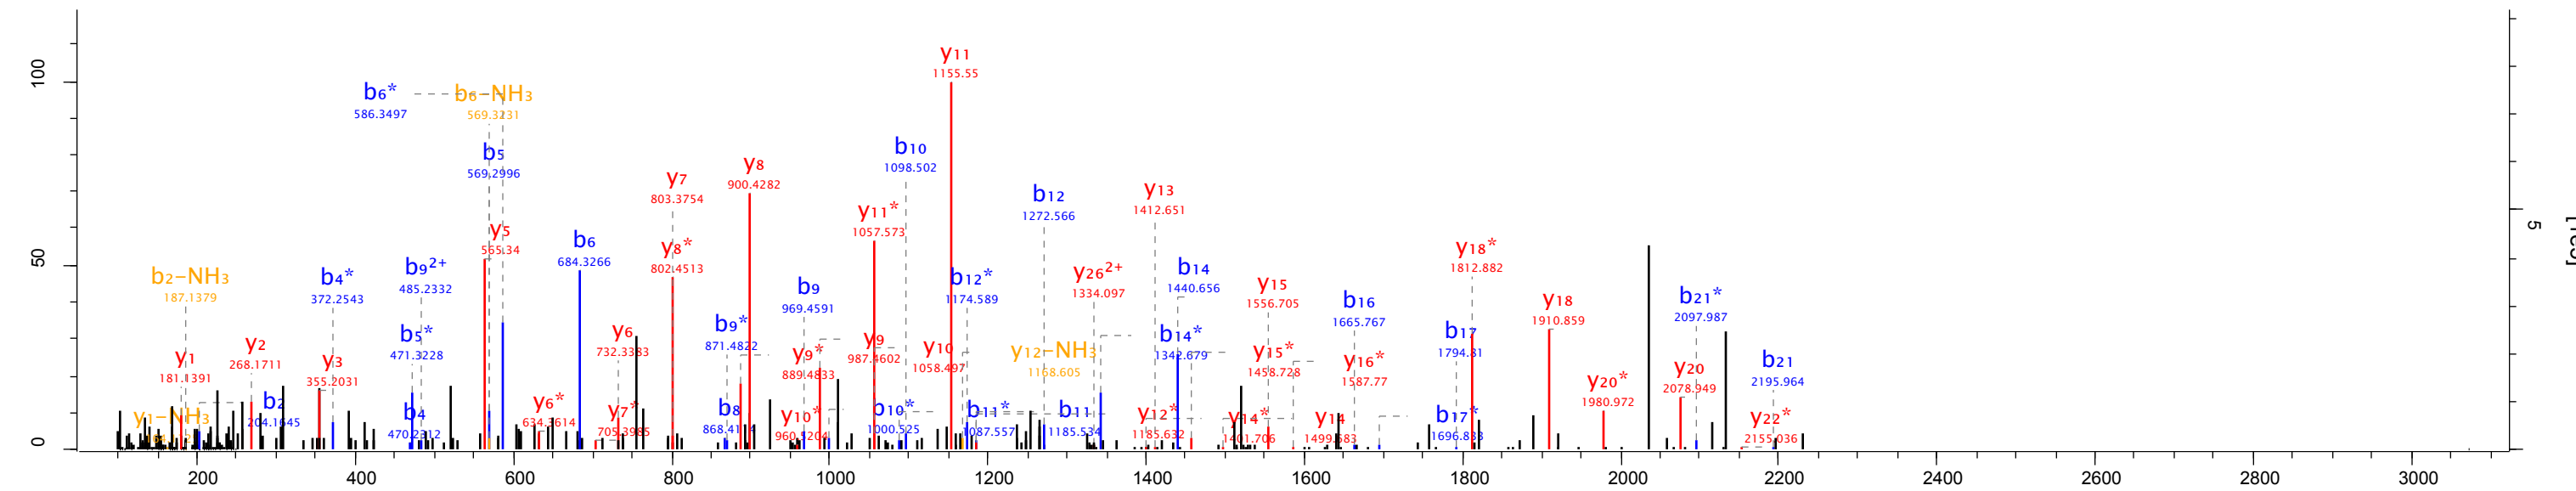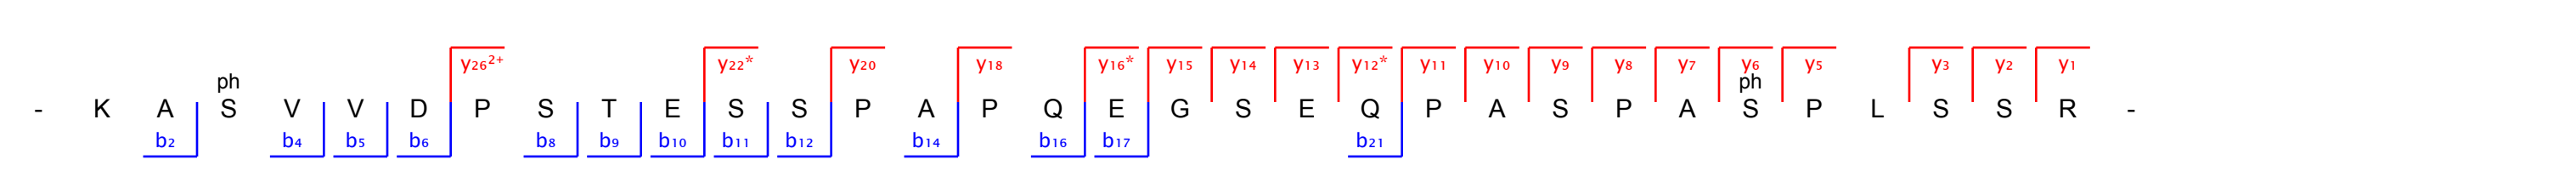

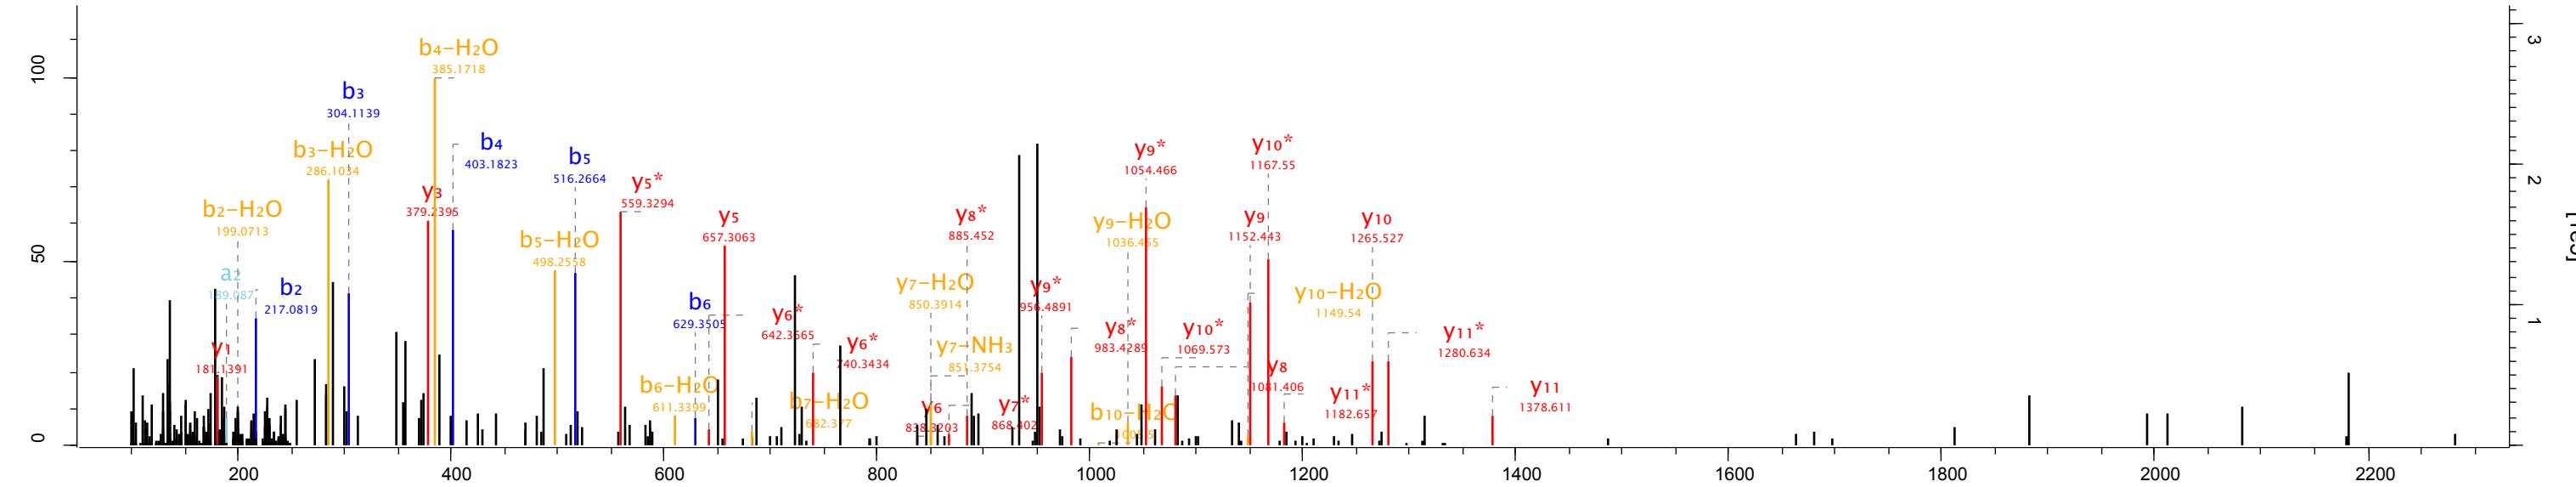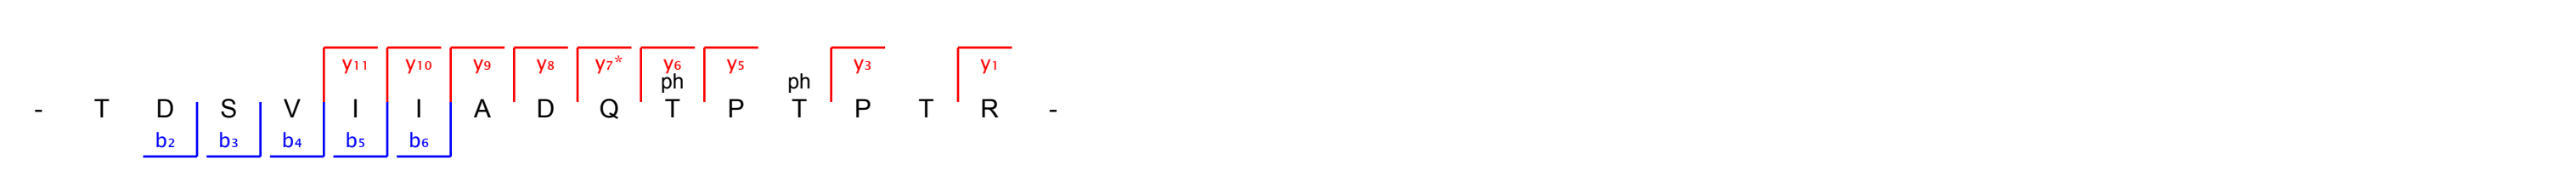

Raw file: 20171215\_MaS\_33SR\_LMH\_phospho2\_03  
 Scan: 10631 Method: FTMS; HCD Score: 94.43 m/z: 862.61 Gene names: ARHGEF2

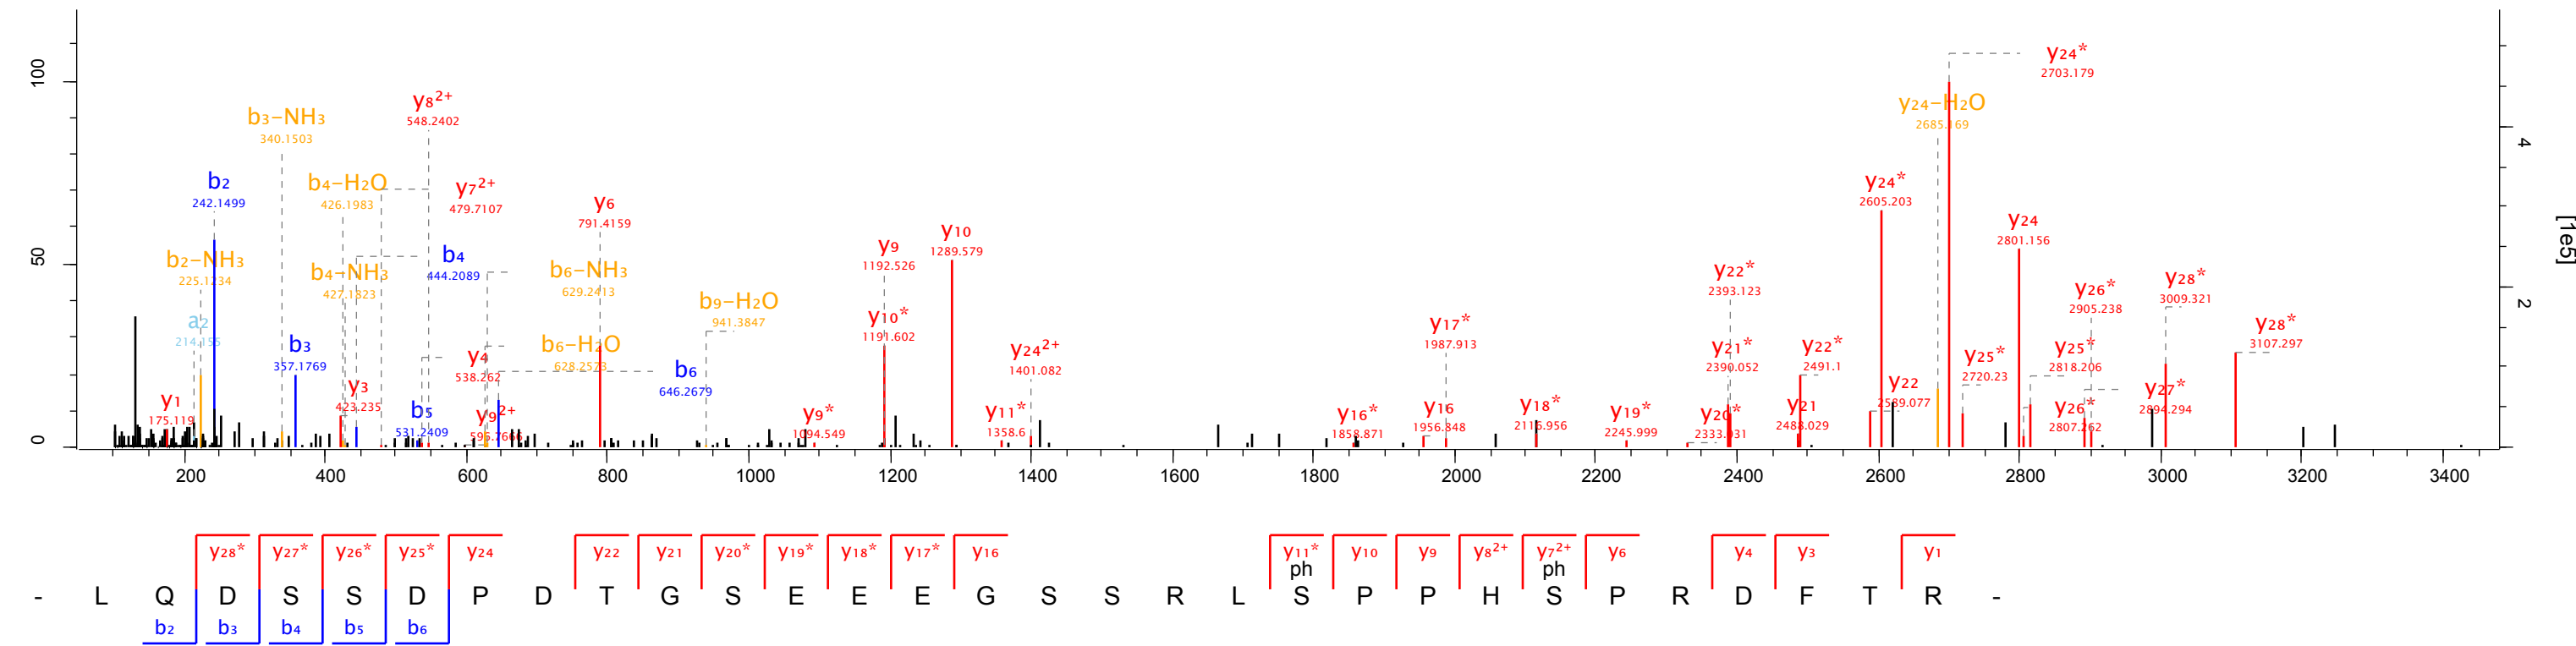

Raw file 20171215\_MaS\_33SR\_LMH\_phospho2\_03 Scan 10691 Method FTMS; HCD Score 236.35 m/z 1185.01 Gene names KANSL3

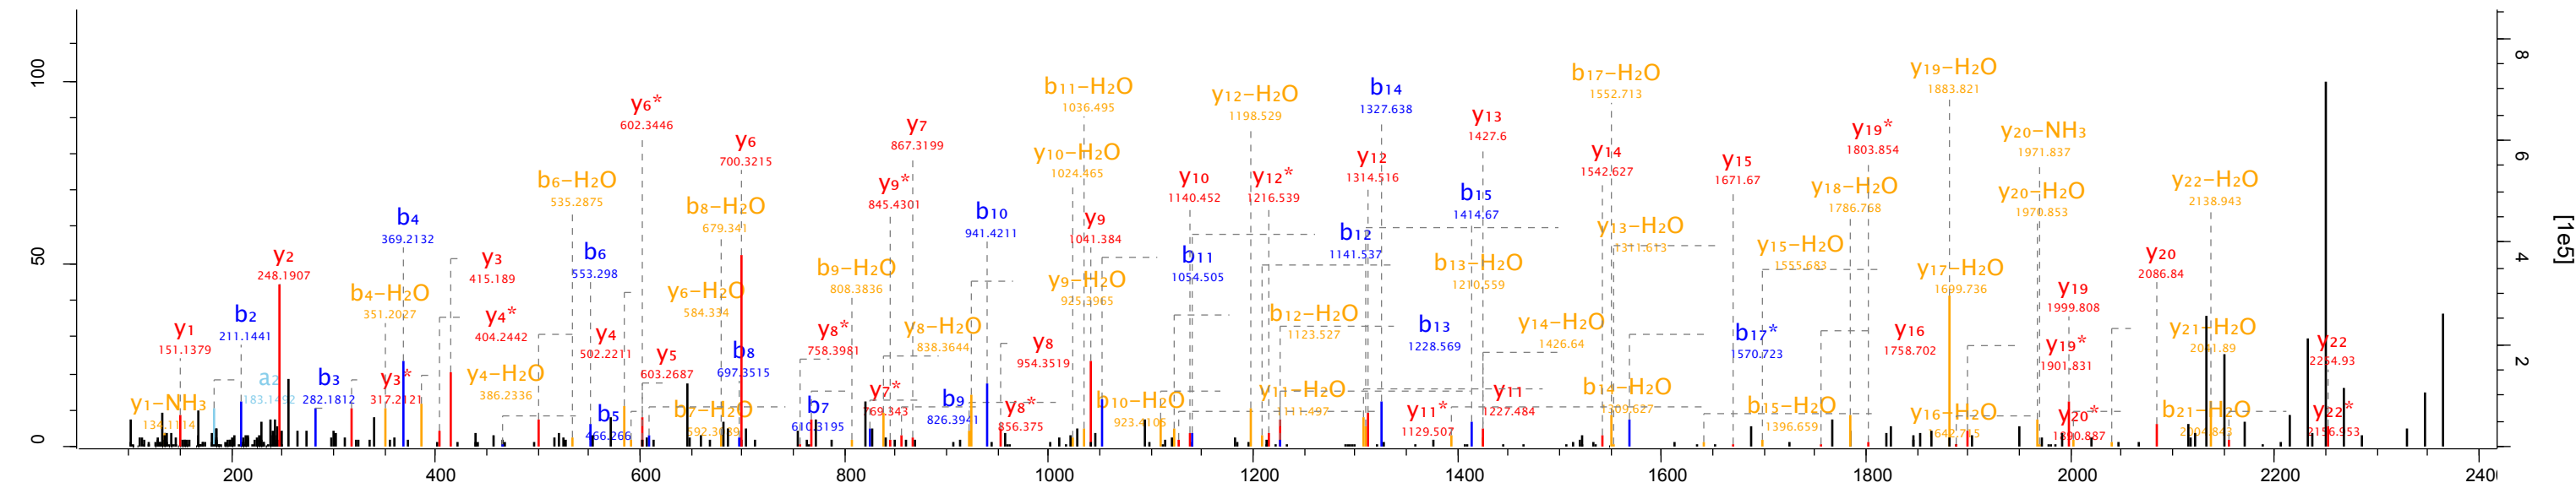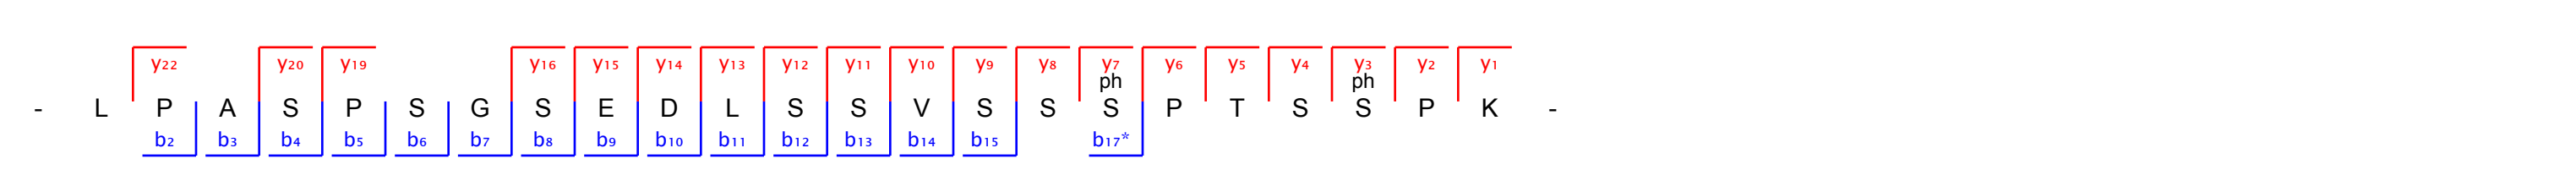

Raw file 20171215\_MaS\_33SR\_LMH\_phospho2\_03 Scan 10721 Method FTMS; HCD Score 179.17 m/z 1065.9 Gene names EIF5B

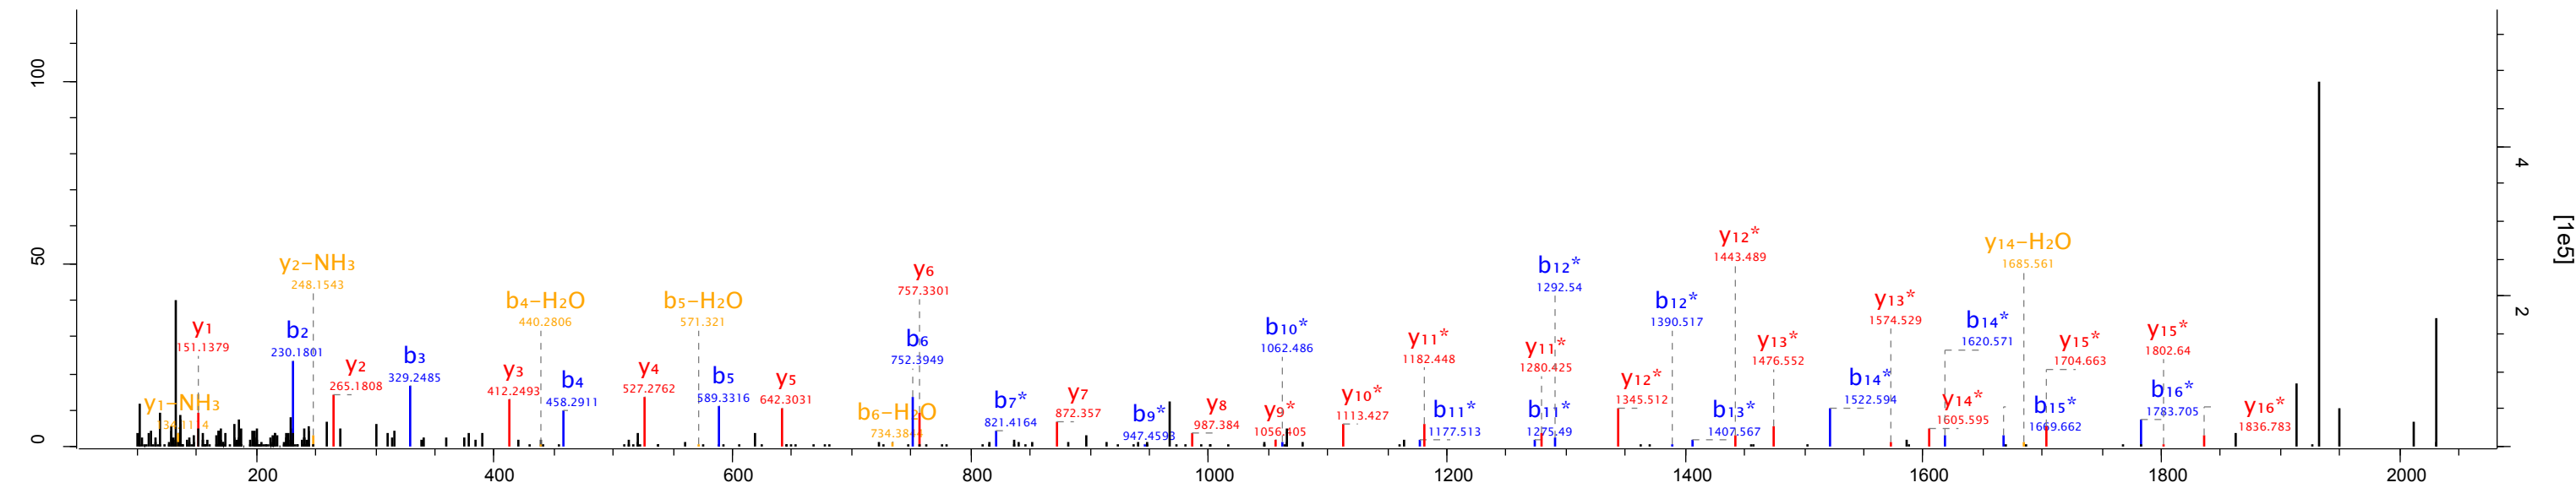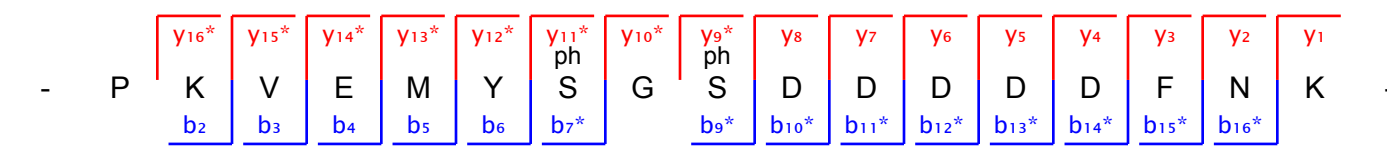

Raw file: 20171215\_MaS\_33SR\_LMH\_phospho2\_03  
 Scan: 10791 Method: FTMS; HCD Score: 163.95 m/z: 1014.1 Gene names: INCENP

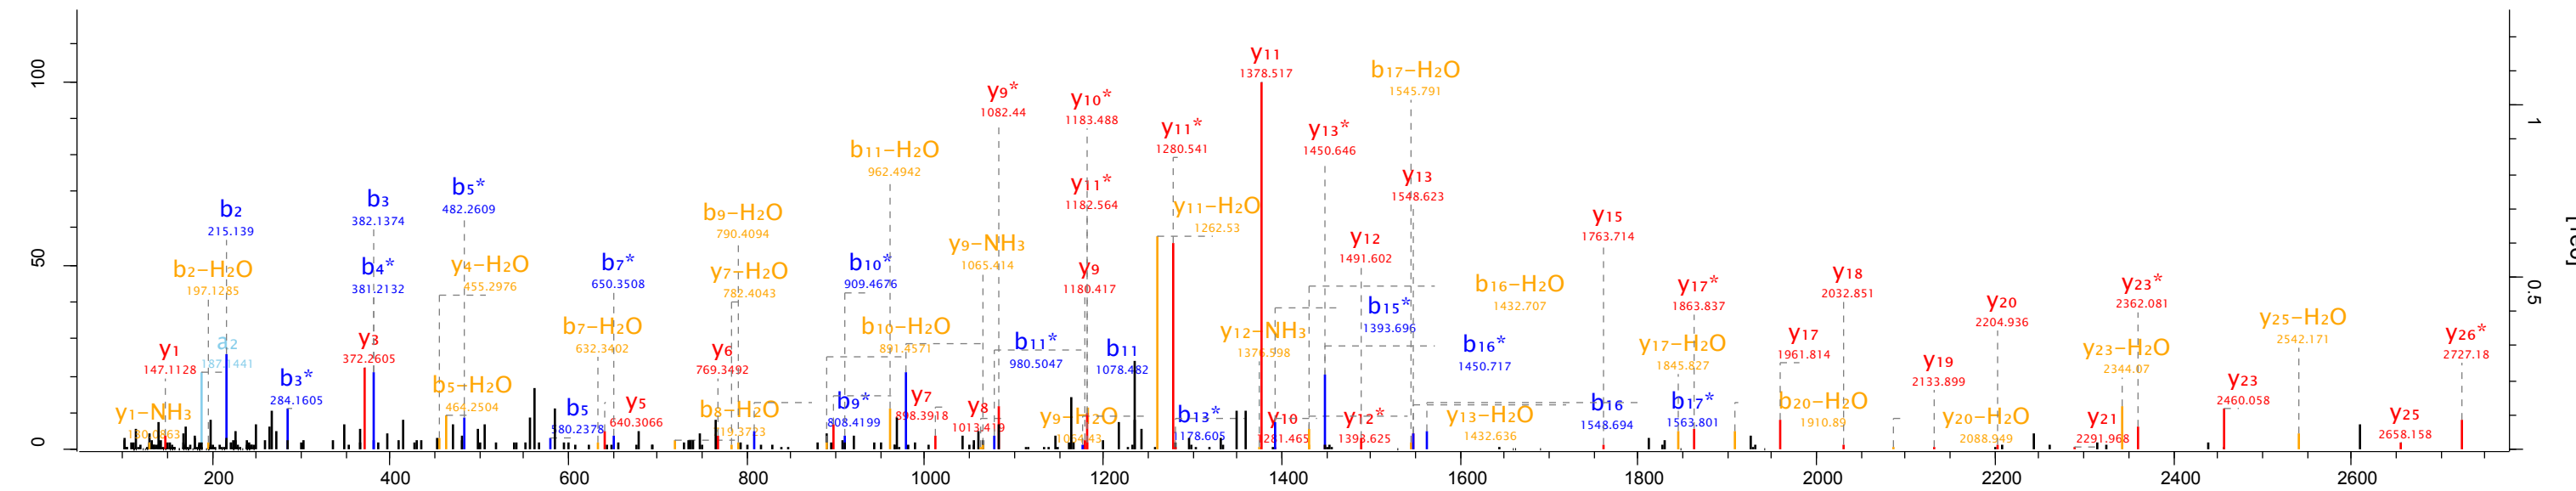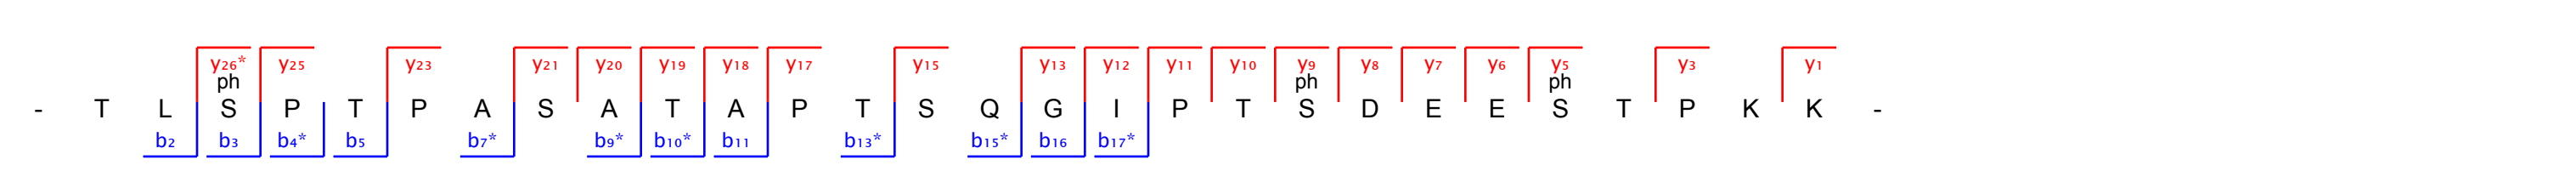

Raw file 20171215\_MaS\_33SR\_LMH\_phospho2\_03 Scan 10861 Method FTMS; HCD Score 96.05 m/z 1100.43 Gene names HLA-B

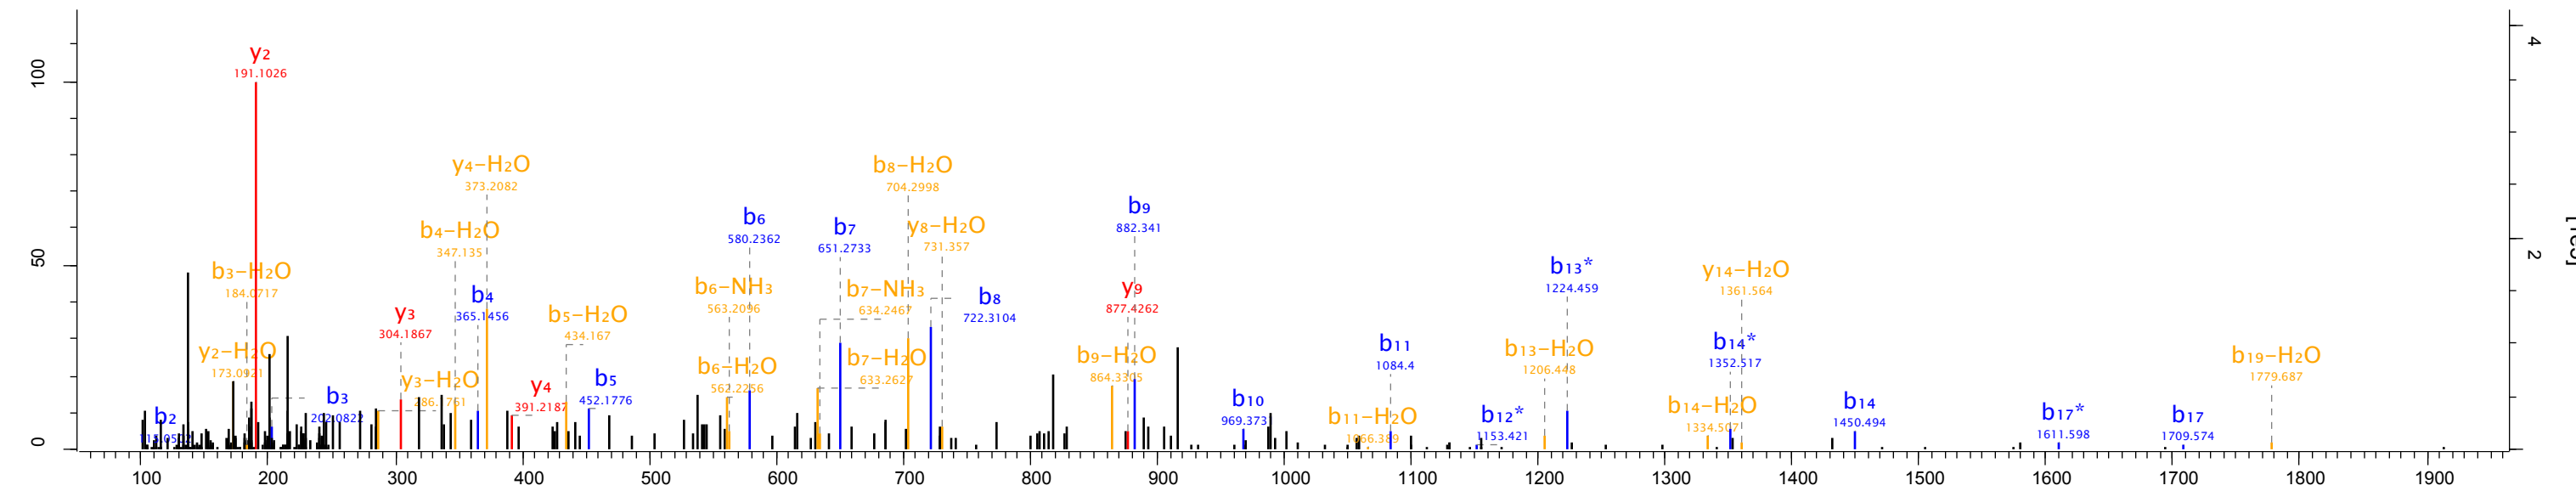

- G G S Y S Q A A C S D S A Q G S D V S L T A -

b2
b3
b4
b5
b6
b7
b8
b9
b10
b11
b12\*
b13\*
b14
b17

y9
y4
y3
y2



Raw file: 20171215\_MaS\_33SR\_LMH\_phospho2\_03  
 Scan: 10911 Method: FTMS; HCD Score: 209.17 m/z: 974.88 Gene names: PLEC

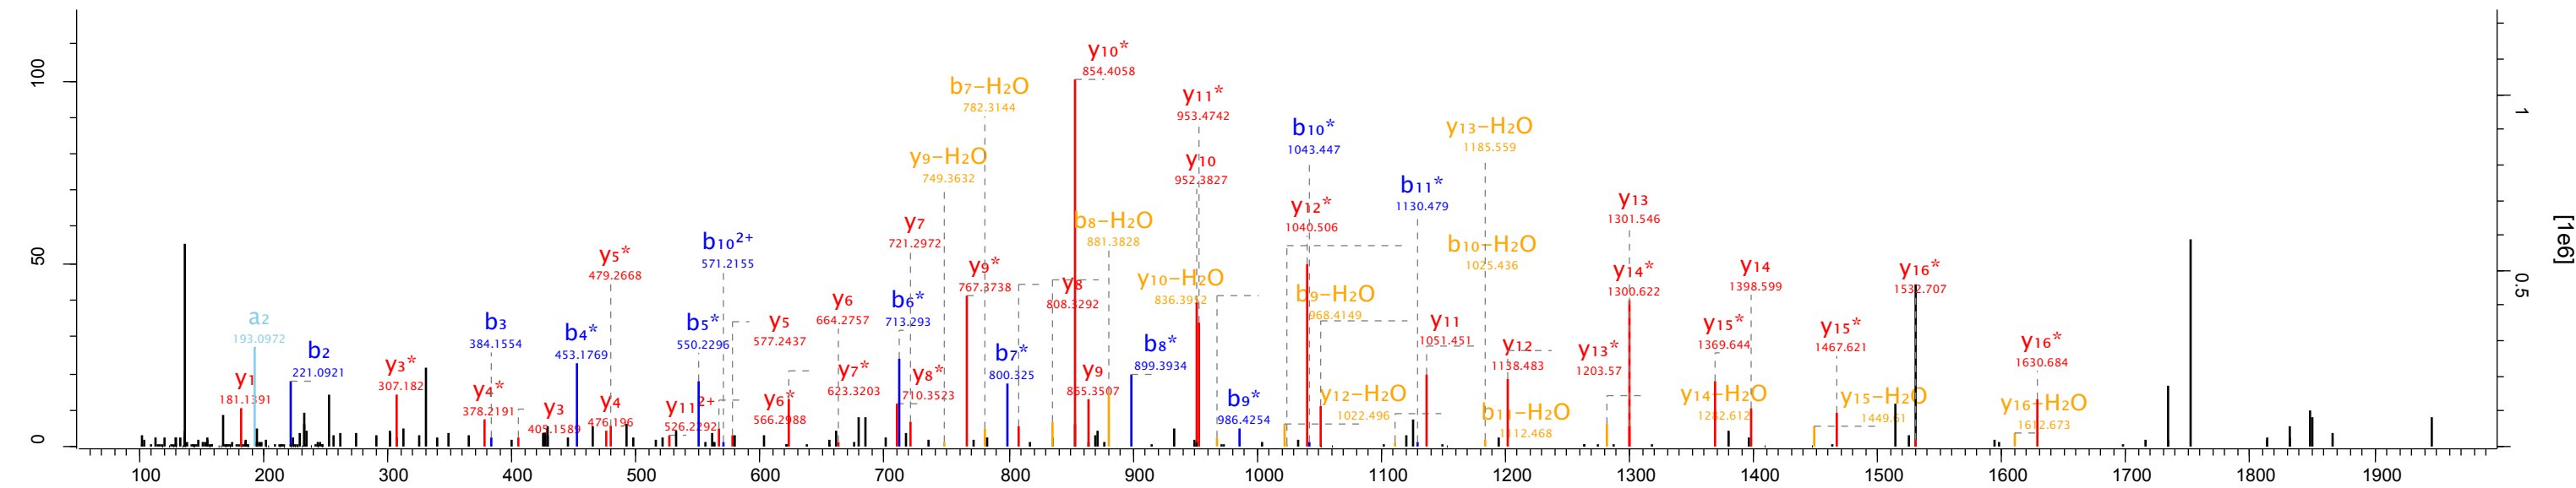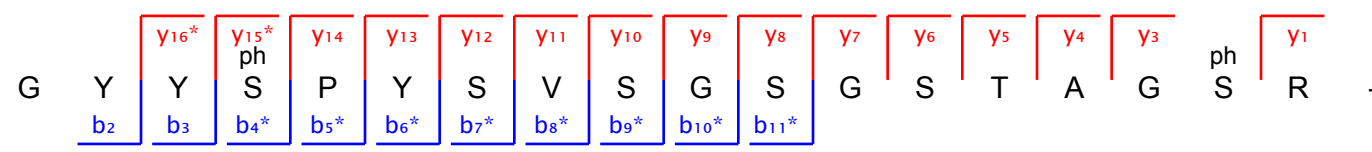

Raw file: 20171215\_MaS\_33SR\_LMH\_phospho2\_03  
 Scan: 11041 Method: FTMS; HCD Score: 319.18 m/z: 999.94 Gene names: SP100

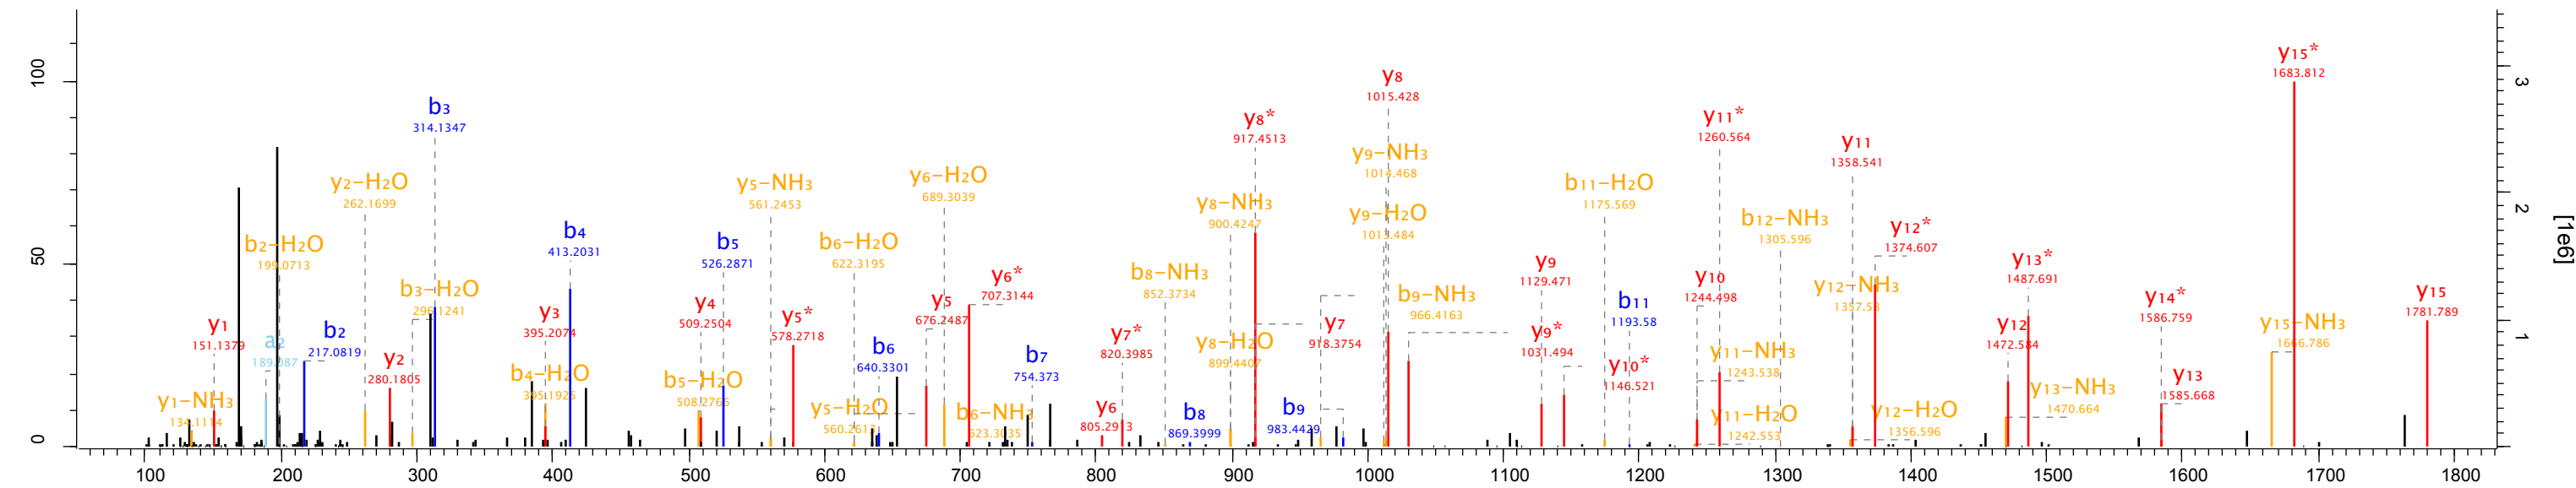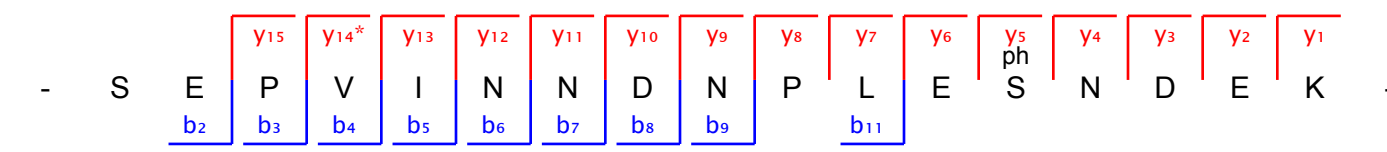

Raw file 20171215\_MaS\_33SR\_LMH\_phospho2\_03 Scan 11441 Method FTMS; HCD Score 81.83 m/z 1071.8 Gene names TBC1D9B

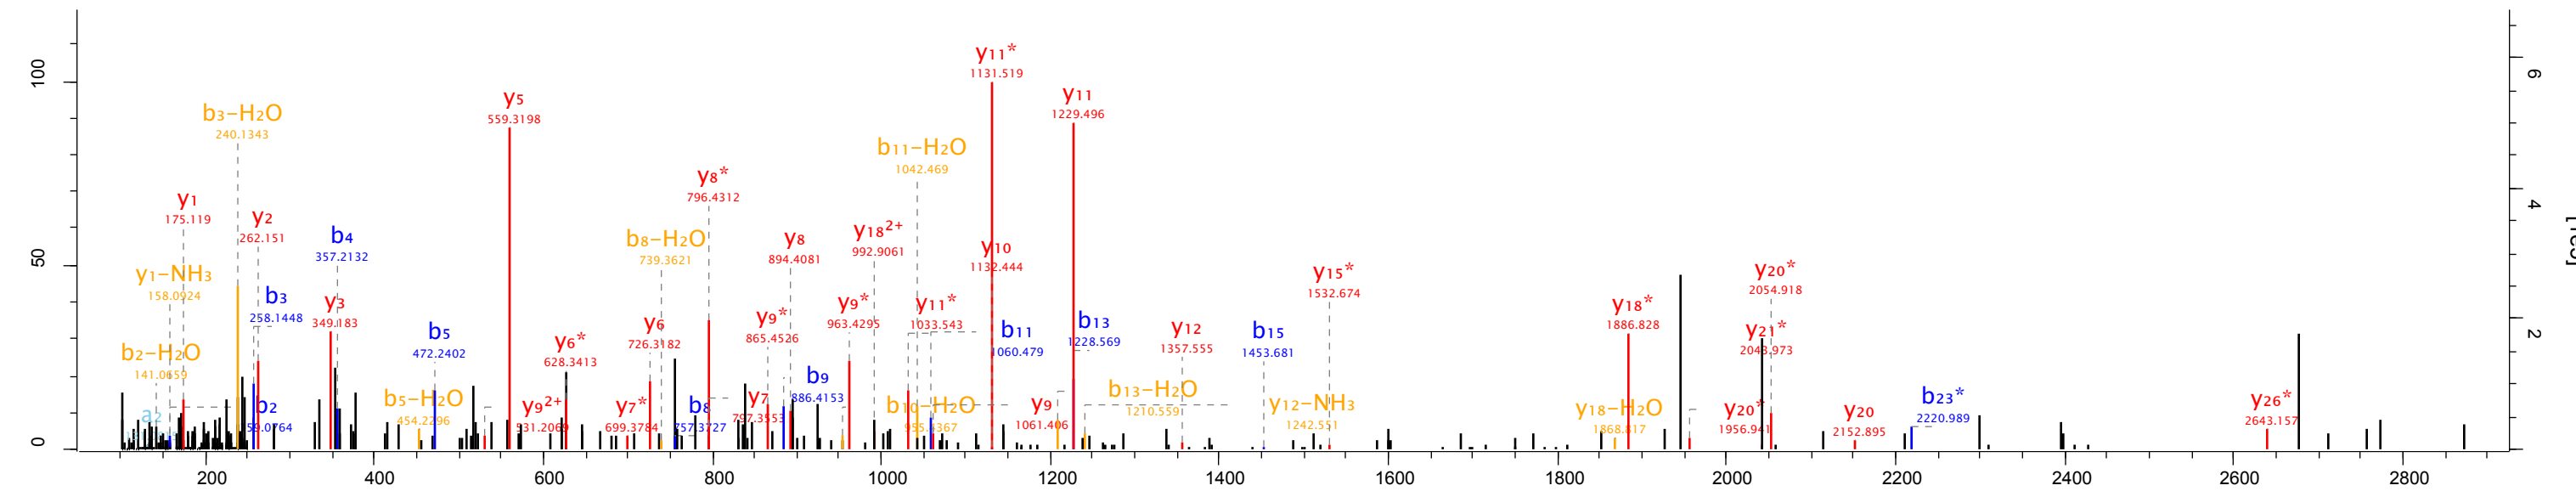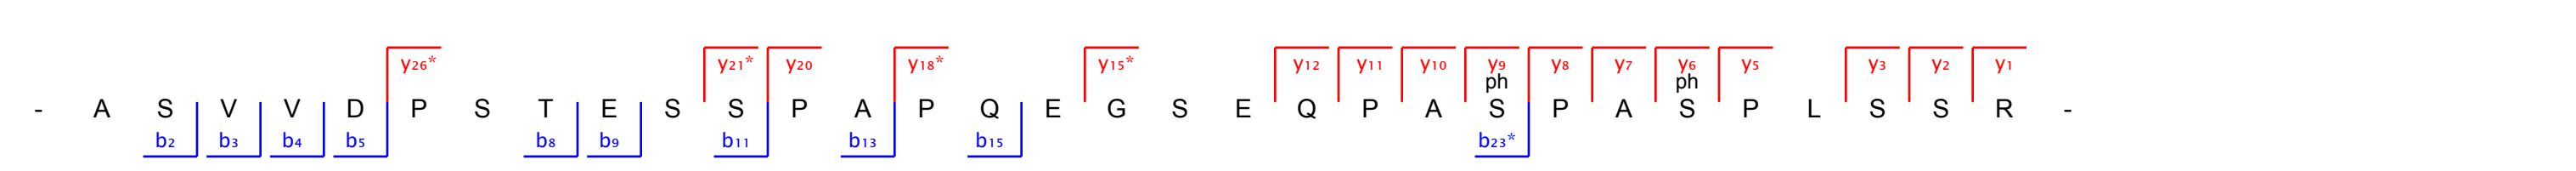

Raw file 20171215\_MaS\_33SR\_LMH\_phospho2\_03 Scan 11501 Method FTMS; HCD Score 108.12 m/z 744.82 Gene names MED1

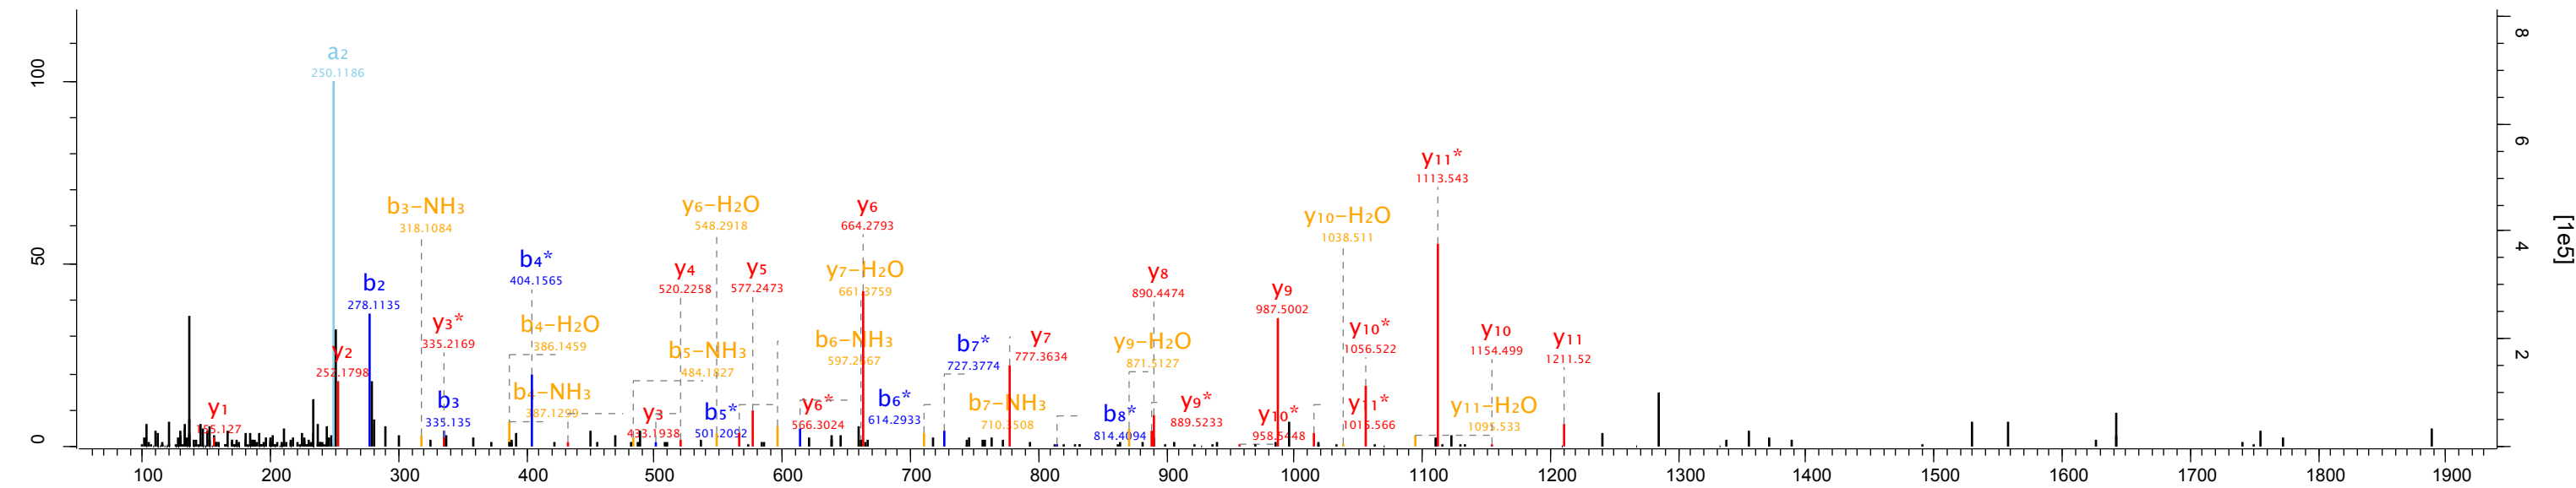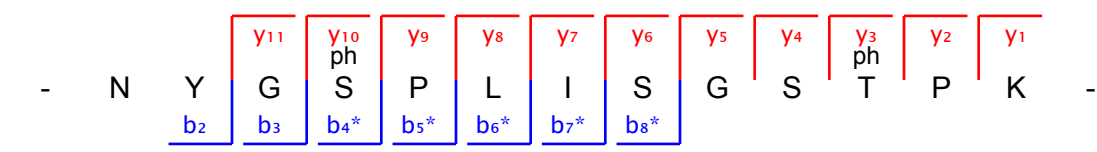

Raw file 20171215\_MaS\_33SR\_LMH\_phospho2\_03 Scan 11621 Method FTMS; HCD Score 165.97 m/z 1056.78 Gene names ILF3

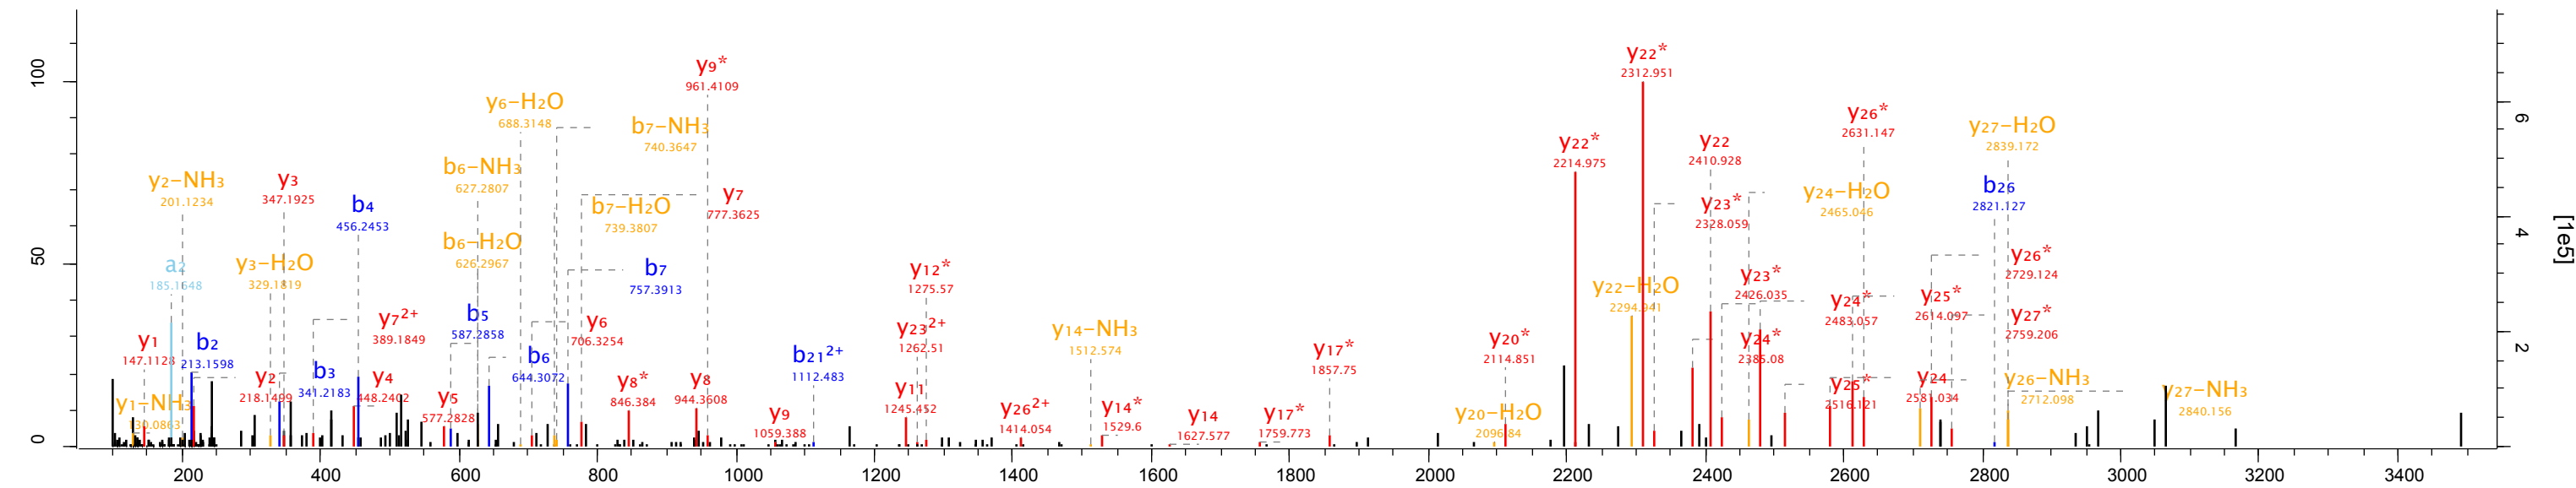

- V L Q D M G L P T G A E G R D S S K G E D S A E E T E A K -

Fragmentation mapping (b and y ions) is shown below the sequence:

- Red boxes (y ions): y27\* (Q), y26\* (D), y25\* (M), y24 (G), y23\* (L), y22 (P), y20\* (G), y17\* (G), y14 (S), y12\* (K), y11 (G), y9 (D), y8 ph (S), y7 (A), y6 (E), y5 (E), y4 (T), y3 (E), y2 (A), y1 (K).
- Blue boxes (b ions): b2 (L), b3 (Q), b4 (D), b5 (M), b6 (G), b7 (L), b21<sup>2+</sup> (D), b26 (T).

Raw file 20171215\_MaS\_33SR\_LMH\_phospho2\_03 Scan 11911 Method FTMS; HCD Score 143.24 m/z 1062.45 Gene names RERE

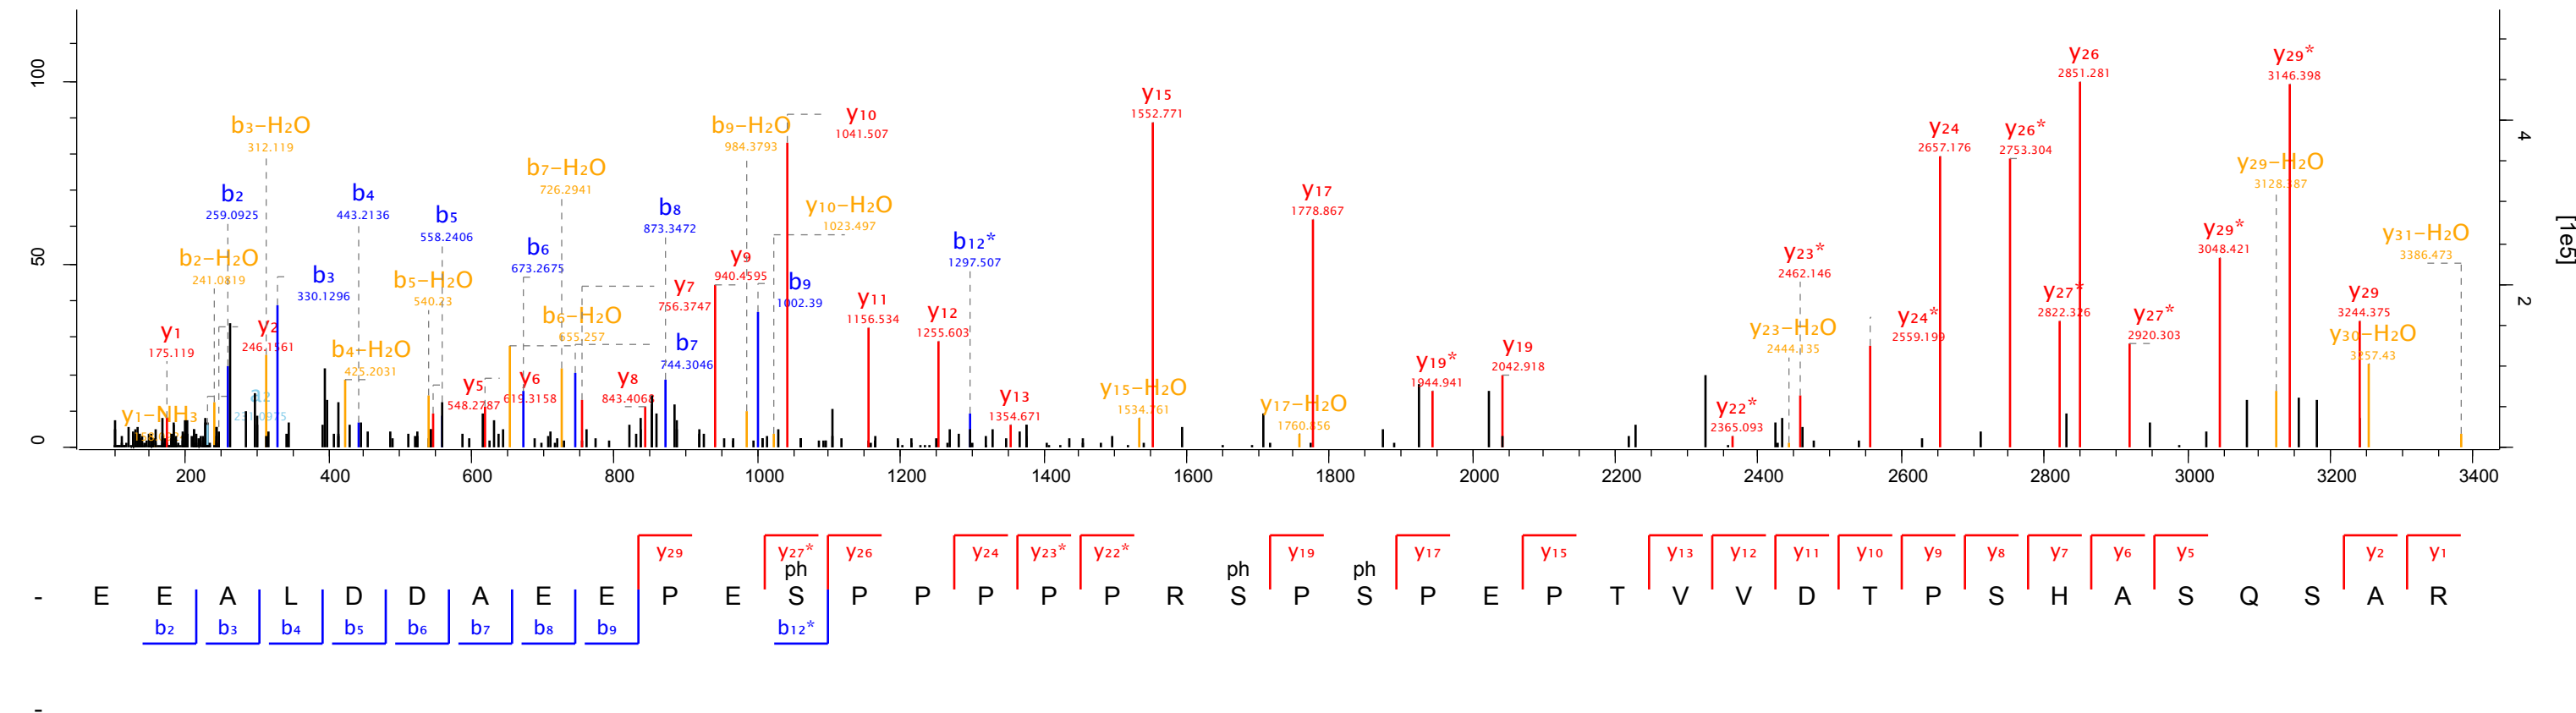

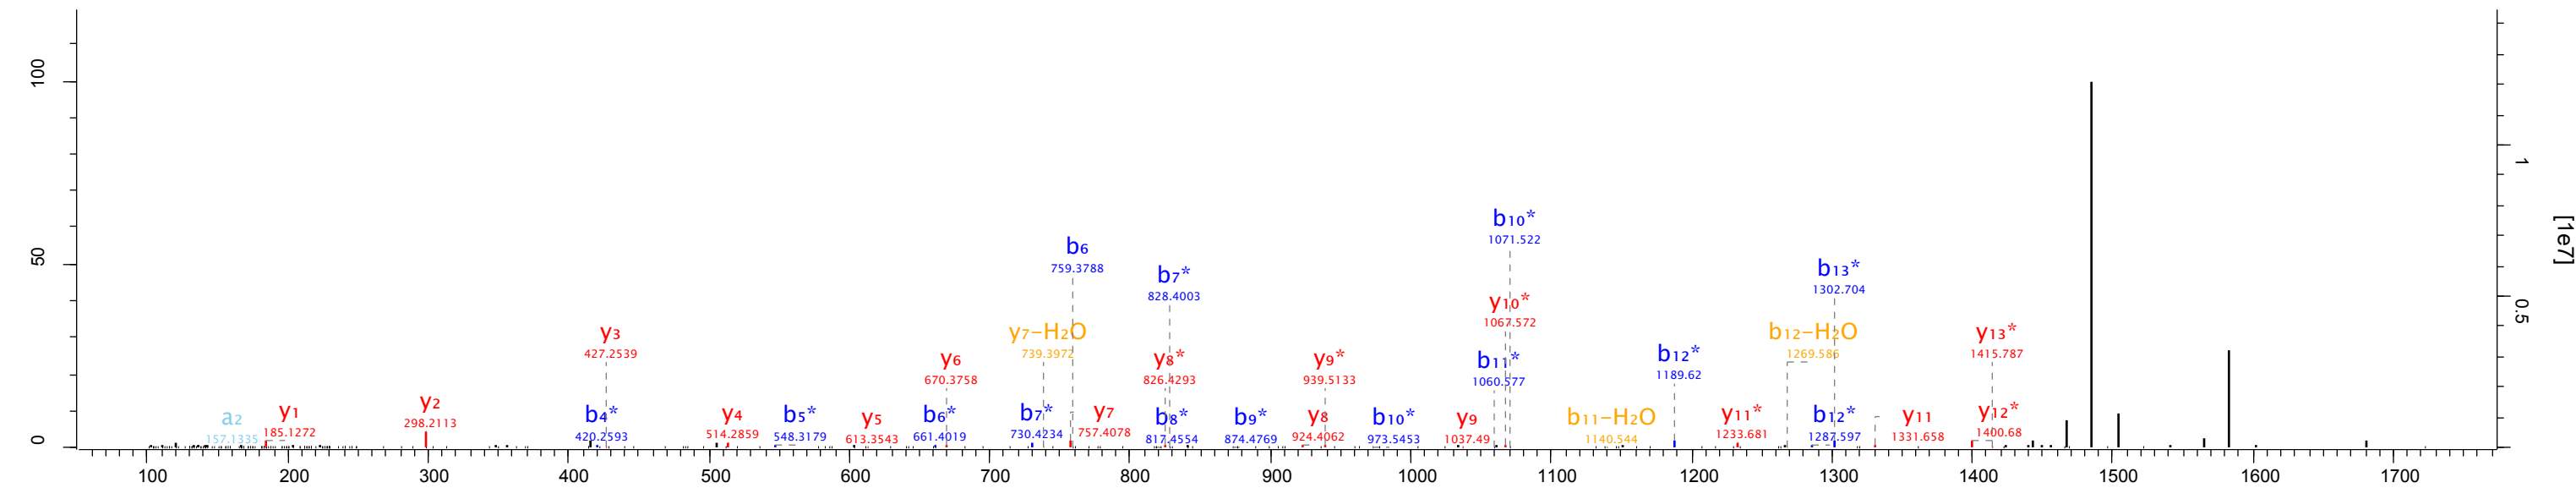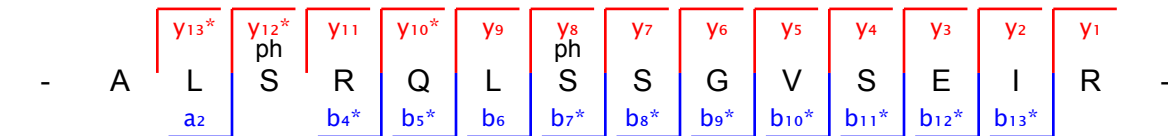

Raw file 20171215\_MaS\_33SR\_LMH\_phospho2\_03 Scan 11971 Method FTMS; HCD Score 340.34 m/z 1248.02 Gene names ZC3H4

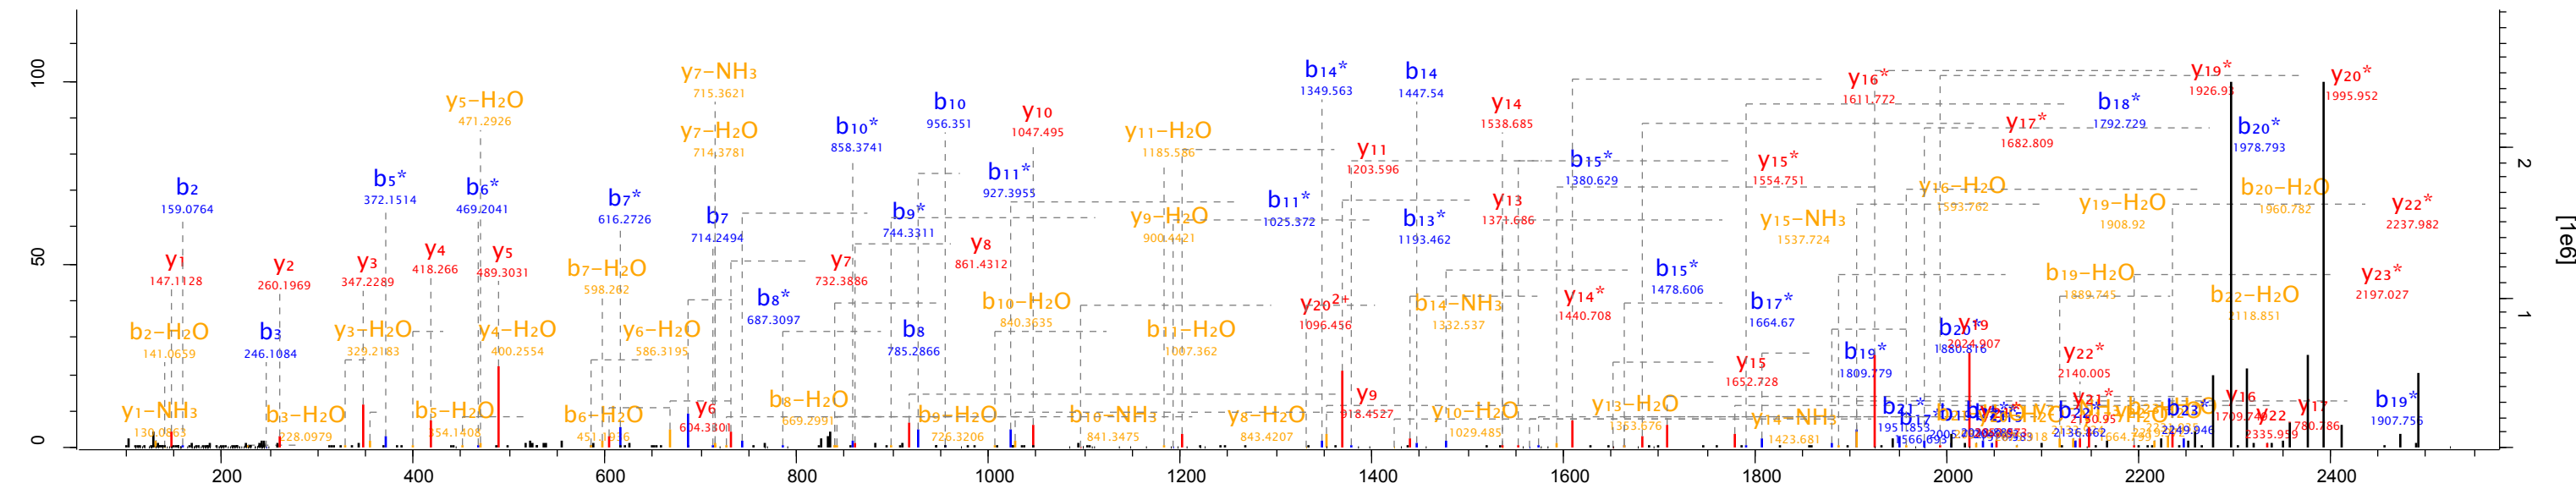

- T G S G S P F A G N S P A R E G E Q D A A S L K -

b<sub>2</sub> b<sub>3</sub> b<sub>5</sub>\* b<sub>6</sub>\* b<sub>7</sub> b<sub>8</sub> b<sub>9</sub>\* b<sub>10</sub> b<sub>11</sub>\* b<sub>13</sub>\* b<sub>14</sub> b<sub>15</sub> b<sub>17</sub>\* b<sub>18</sub>\* b<sub>19</sub> b<sub>20</sub>\* b<sub>21</sub>\* b<sub>22</sub>\* b<sub>23</sub>\*



Raw file: 20171215\_MaS\_33SR\_LMH\_phospho2\_03  
 Scan: 12171 Method: FTMS; HCD Score: 228.55 m/z: 979.04 Gene names: SSRP1

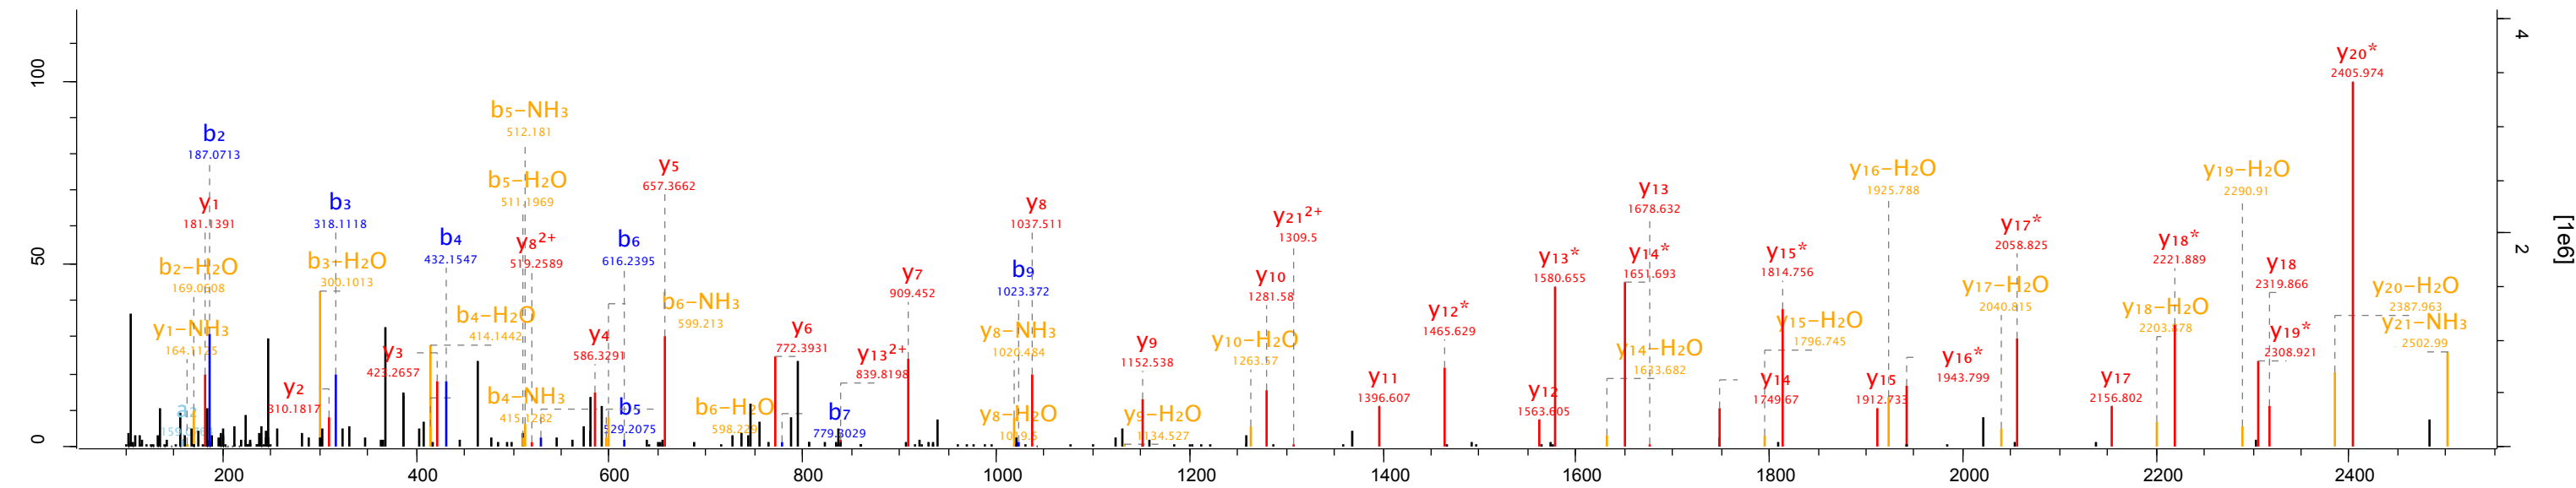

- E G M N P S Y D E Y A D S D E D Q H D A Y L E R -  
 (b2) (b3) (b4) (b5) (b6) (b7) (b9)





Raw file 20171215\_MaS\_33SR\_LMH\_phospho2\_03 Scan 12451 Method FTMS; HCD Score 131.76 m/z 1009.11 Gene names REPS1

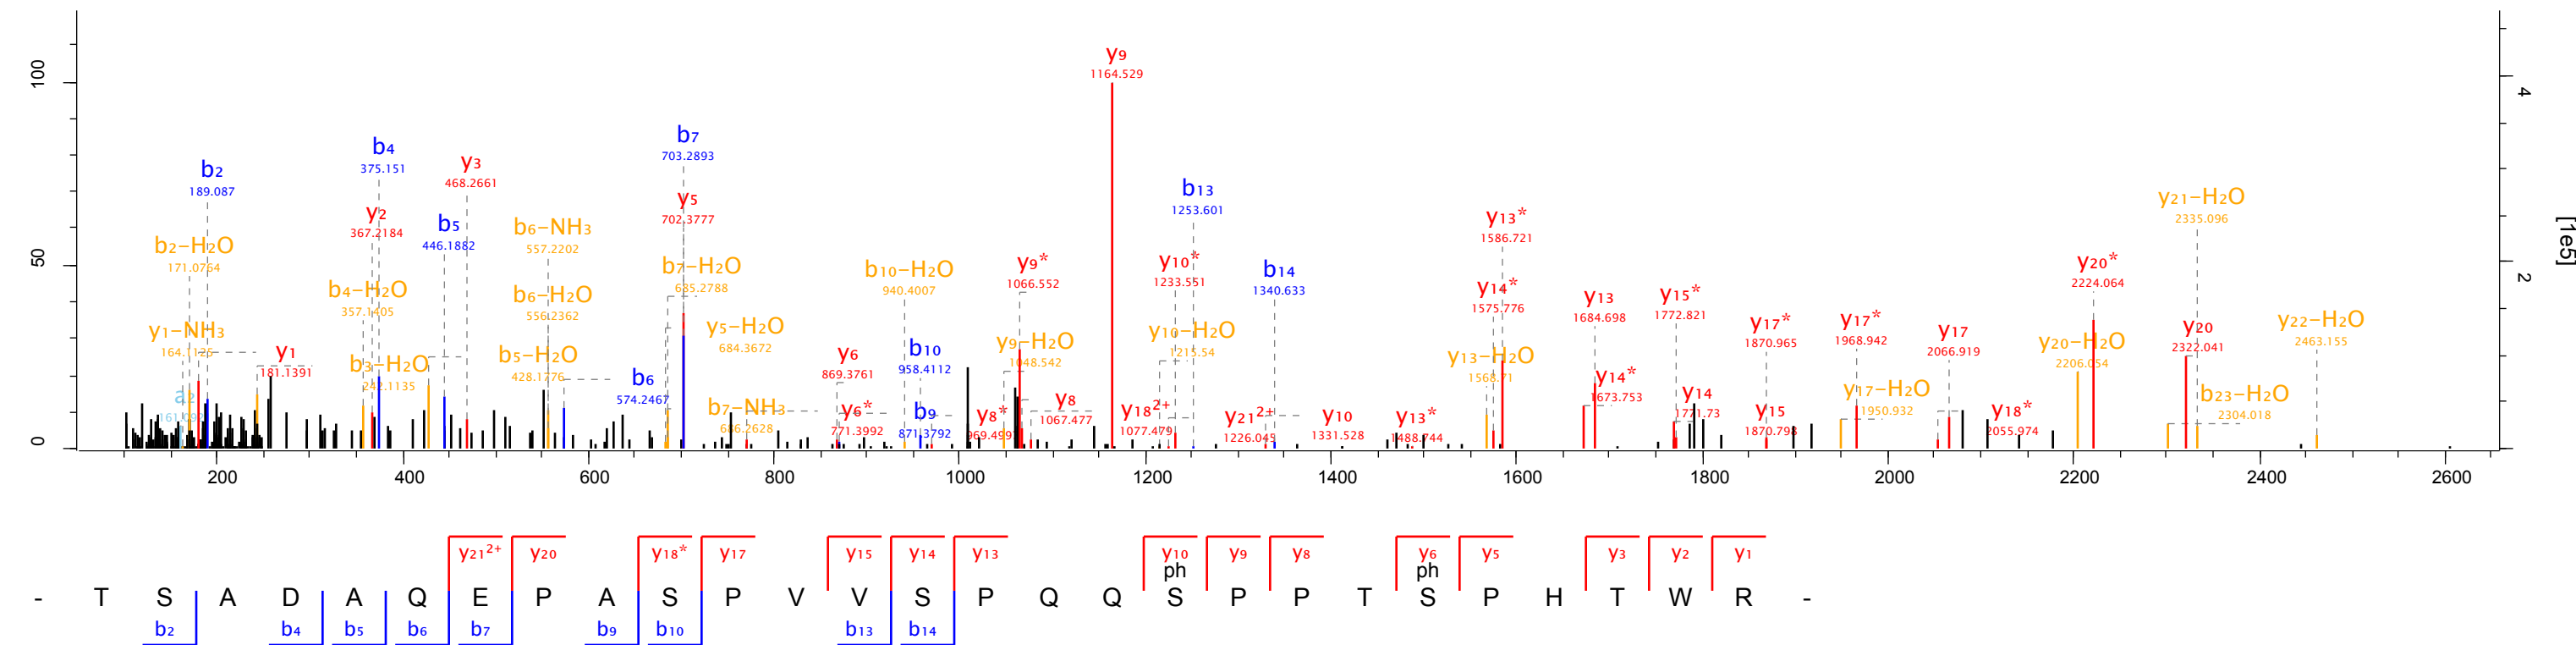

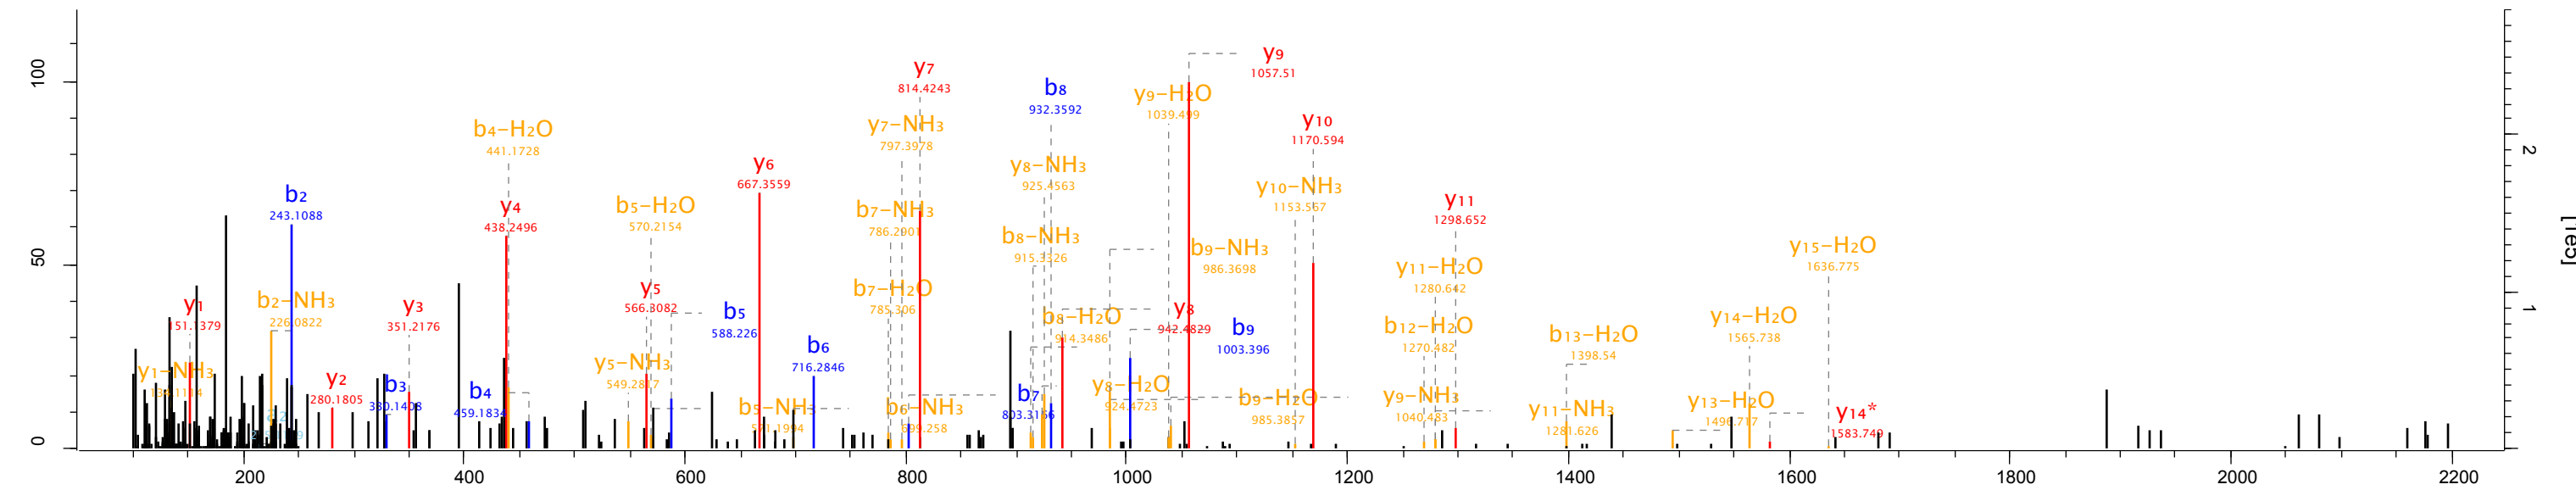

- N Q S E E Q S E A S S E Q L D Q F T Q S A E K -

Fragmentation sites are indicated by brackets below the amino acid sequence:

- b2: N-Q
- b3: Q-S
- b4: S-E
- b5: E-E
- b6: E-Q
- b7: Q-S
- b8: S-E
- b9: E-A
- y14\*ph: A-S
- y11: Q-L
- y10: L-D
- y9: D-Q
- y8: Q-F
- y7: F-T
- y6: T-Q
- y5: Q-S
- y4: S-A
- y3: A-E
- y2: E-K

Raw file: 20171215\_MaS\_33SR\_LMH\_phospho2\_03  
 Scan: 13031 Method: FTMS; HCD Score: 199.41 m/z: 774.85 Gene names: NCOR2

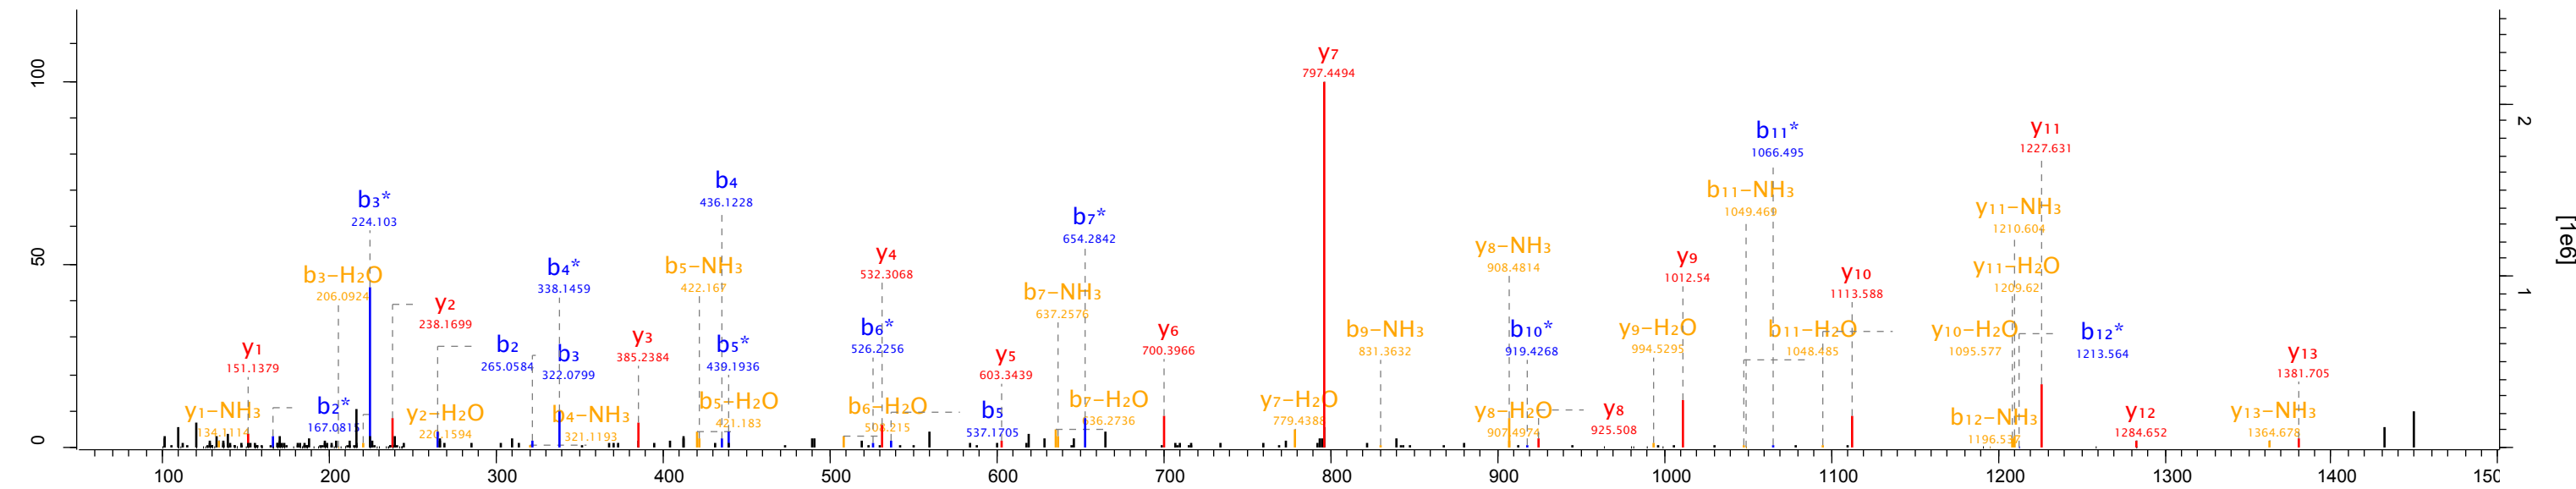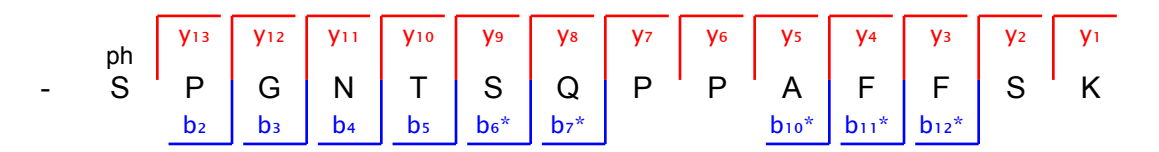

Raw file 20171215\_MaS\_33SR\_LMH\_phospho2\_03 Scan 13221 Method FTMS; HCD Score 151.19 m/z 1159.05 Gene names CARHSP1

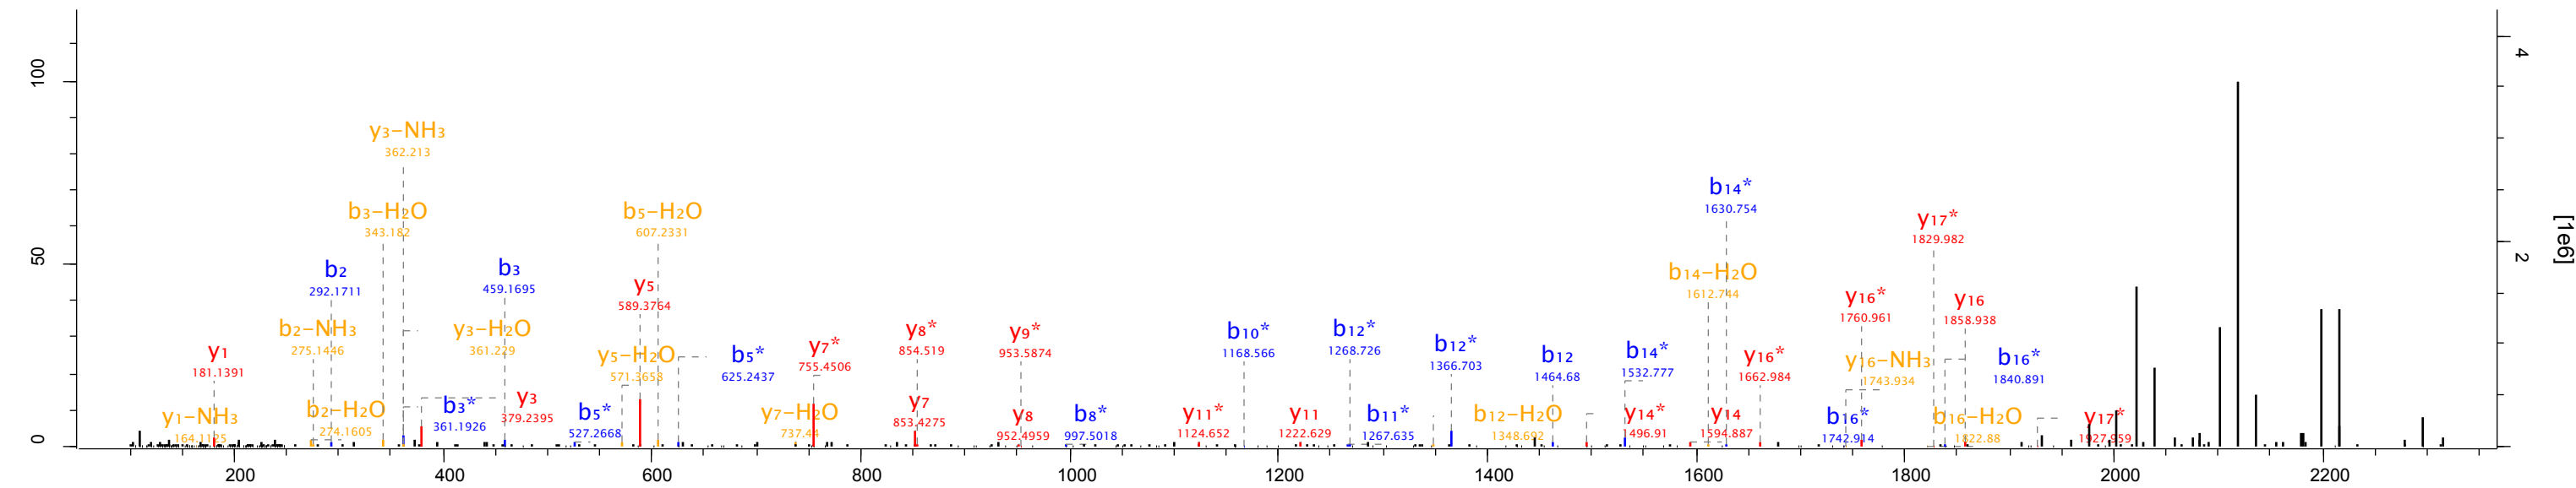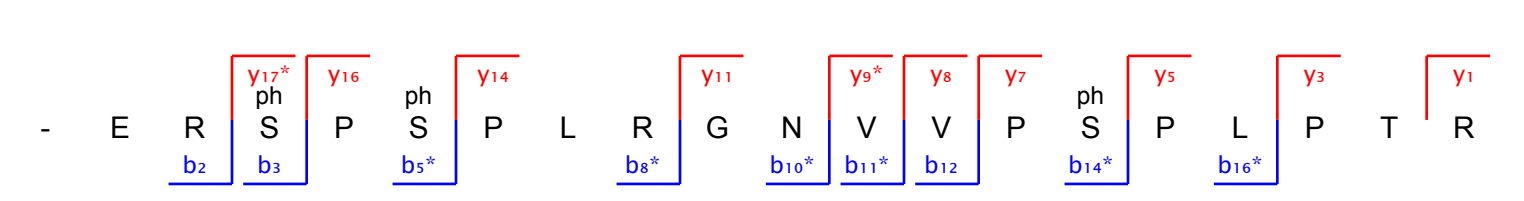

Raw file 20171215\_MaS\_33SR\_LMH\_phospho2\_03 Scan 13351 Method FTMS; HCD Score 180.69 m/z 1175.49 Gene names TJP1

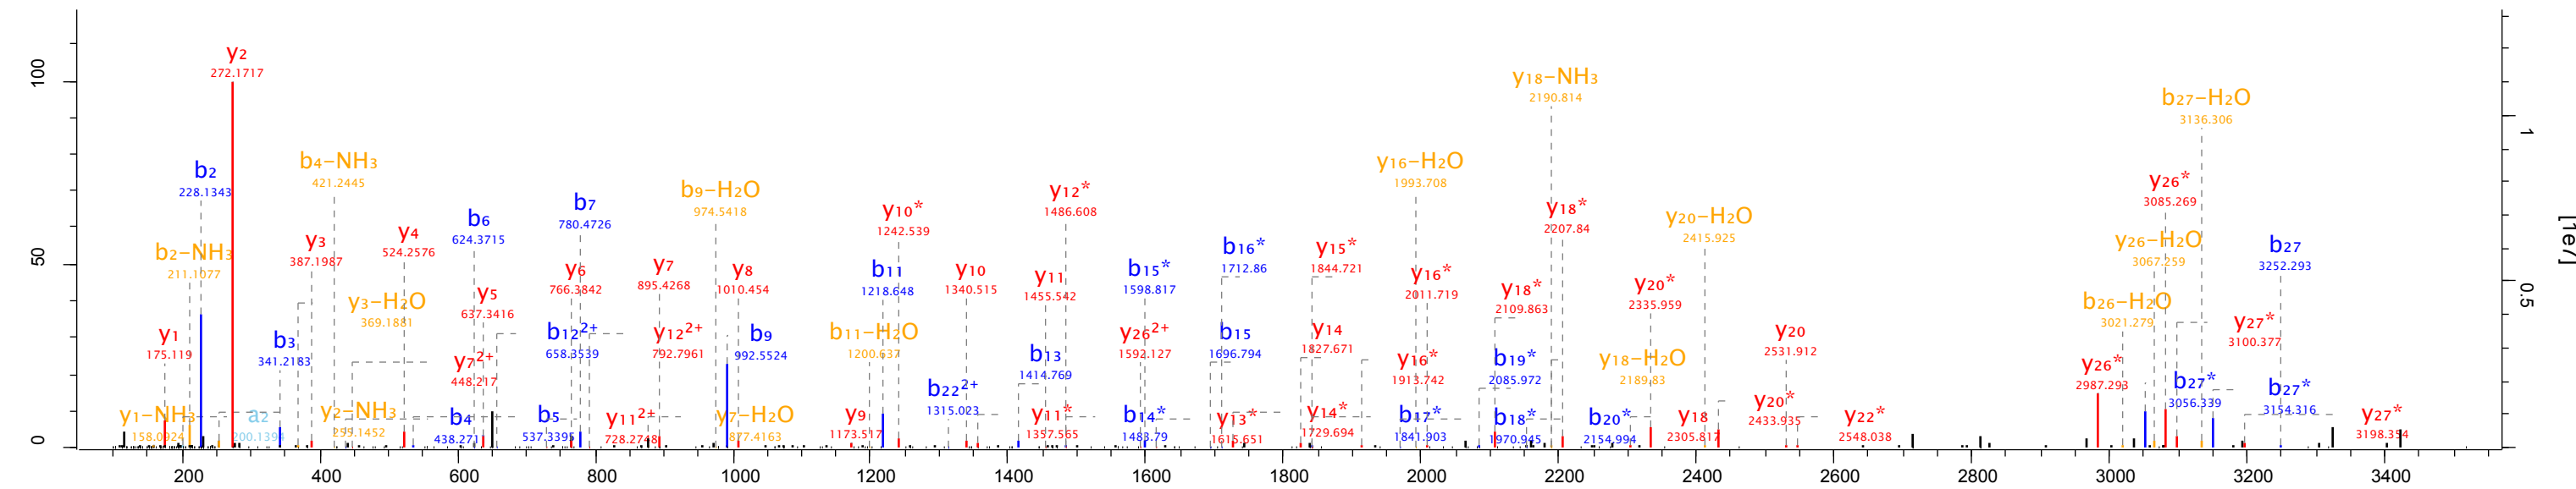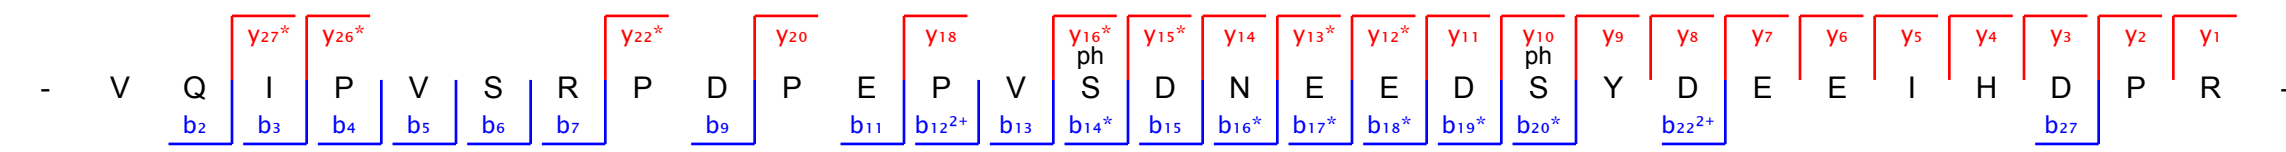



Raw file: 20171215\_MaS\_33SR\_LMH\_phospho2\_03  
 Scan: 13381 Method: FTMS; HCD Score: 169.22 m/z: 1054.46 Gene names: NCOR2

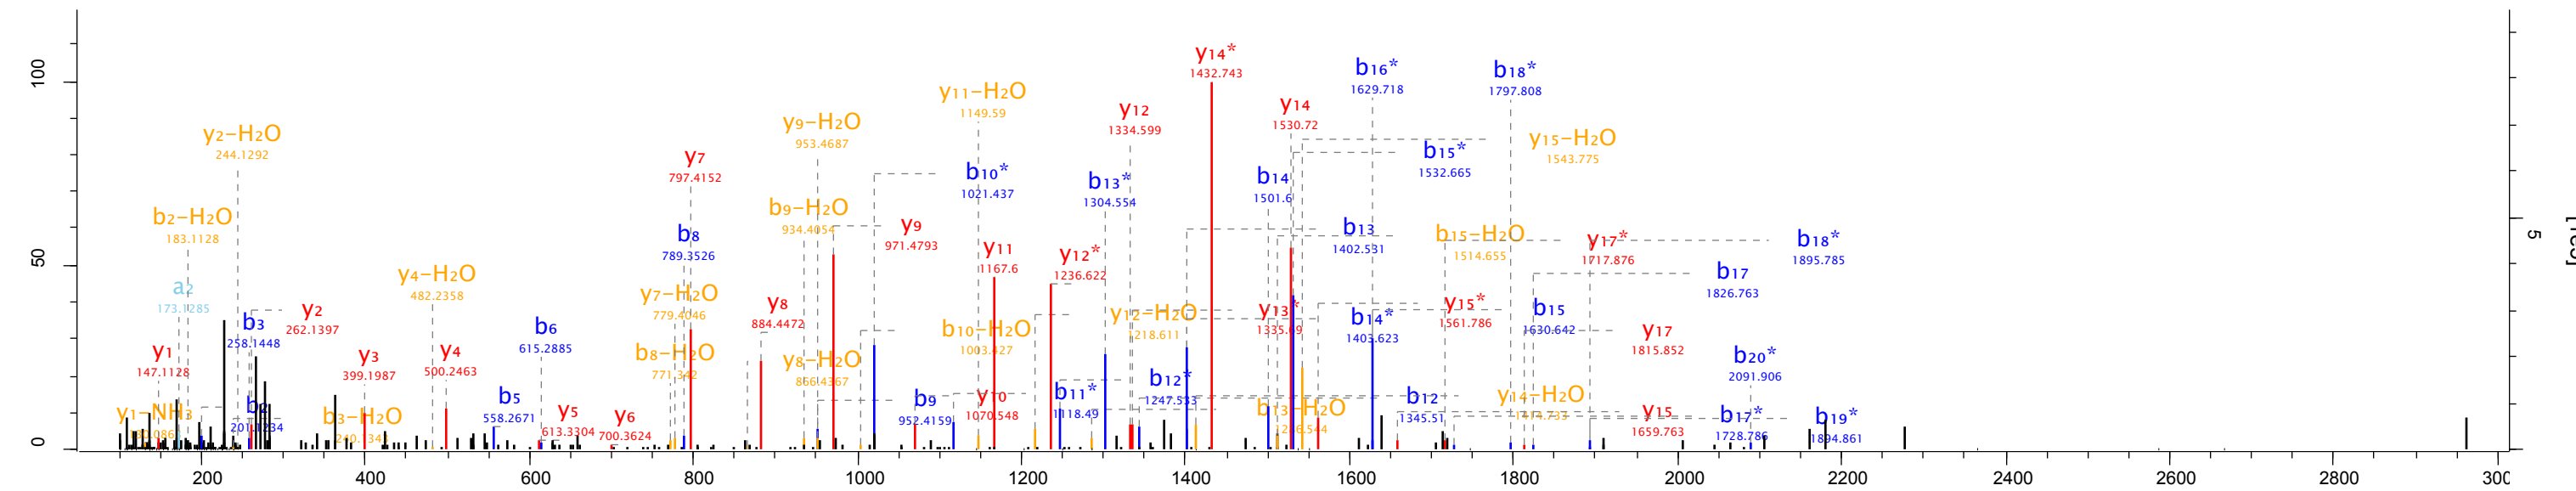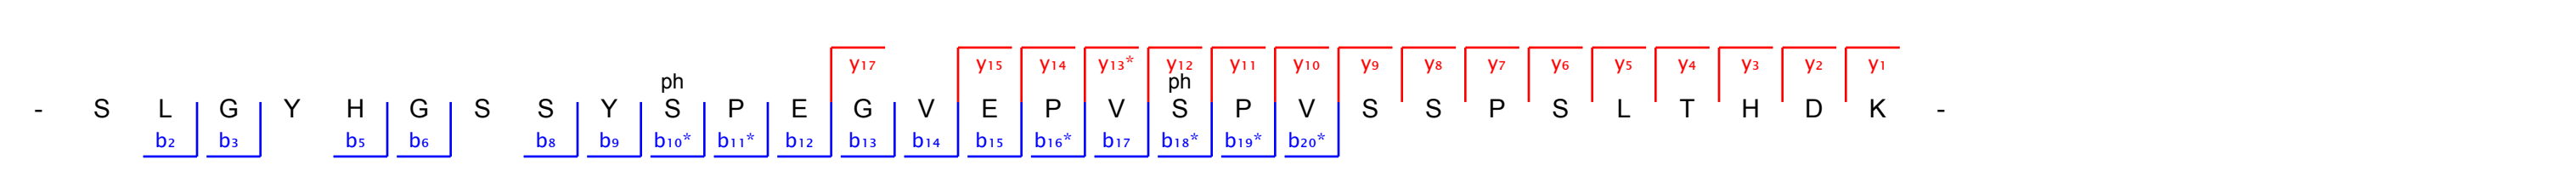

Raw file 20171215\_MaS\_33SR\_LMH\_phospho2\_03 Scan 13501 Method FTMS; HCD Score 88.71 m/z 766.7 Gene names ITSN2

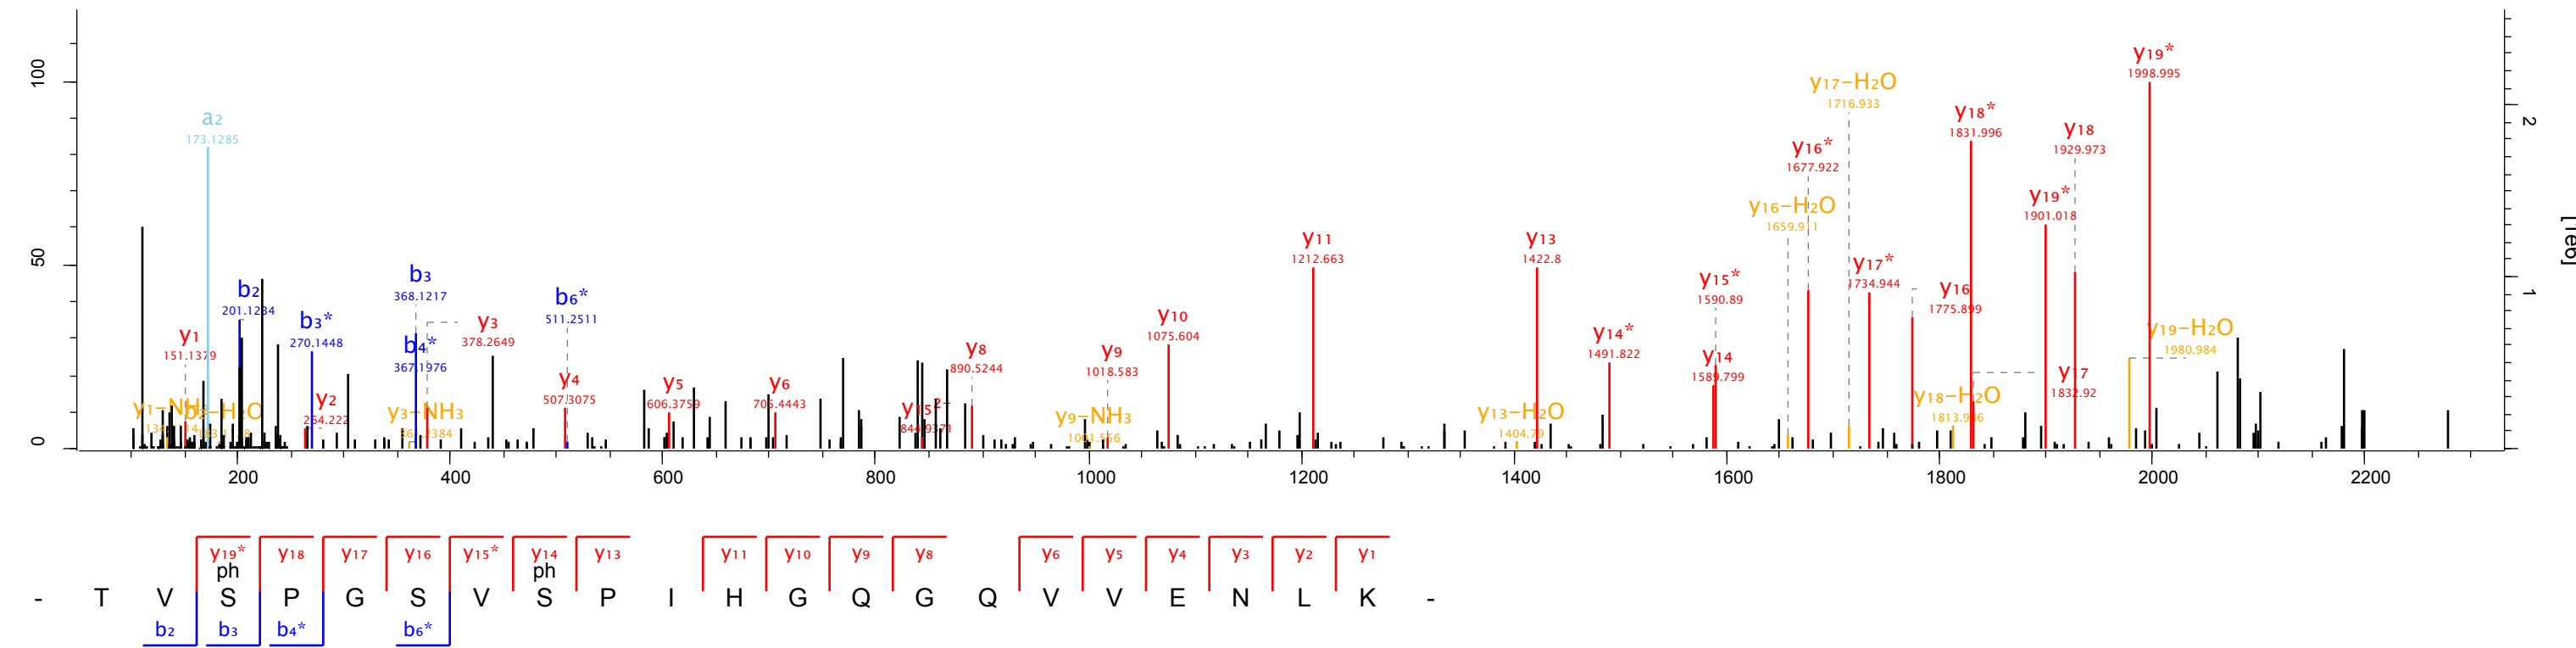

Raw file 20171215\_MaS\_33SR\_LMH\_phospho2\_03 Scan 13521 Method FTMS; HCD Score 140.55 m/z 1031.89 Gene names AKT1

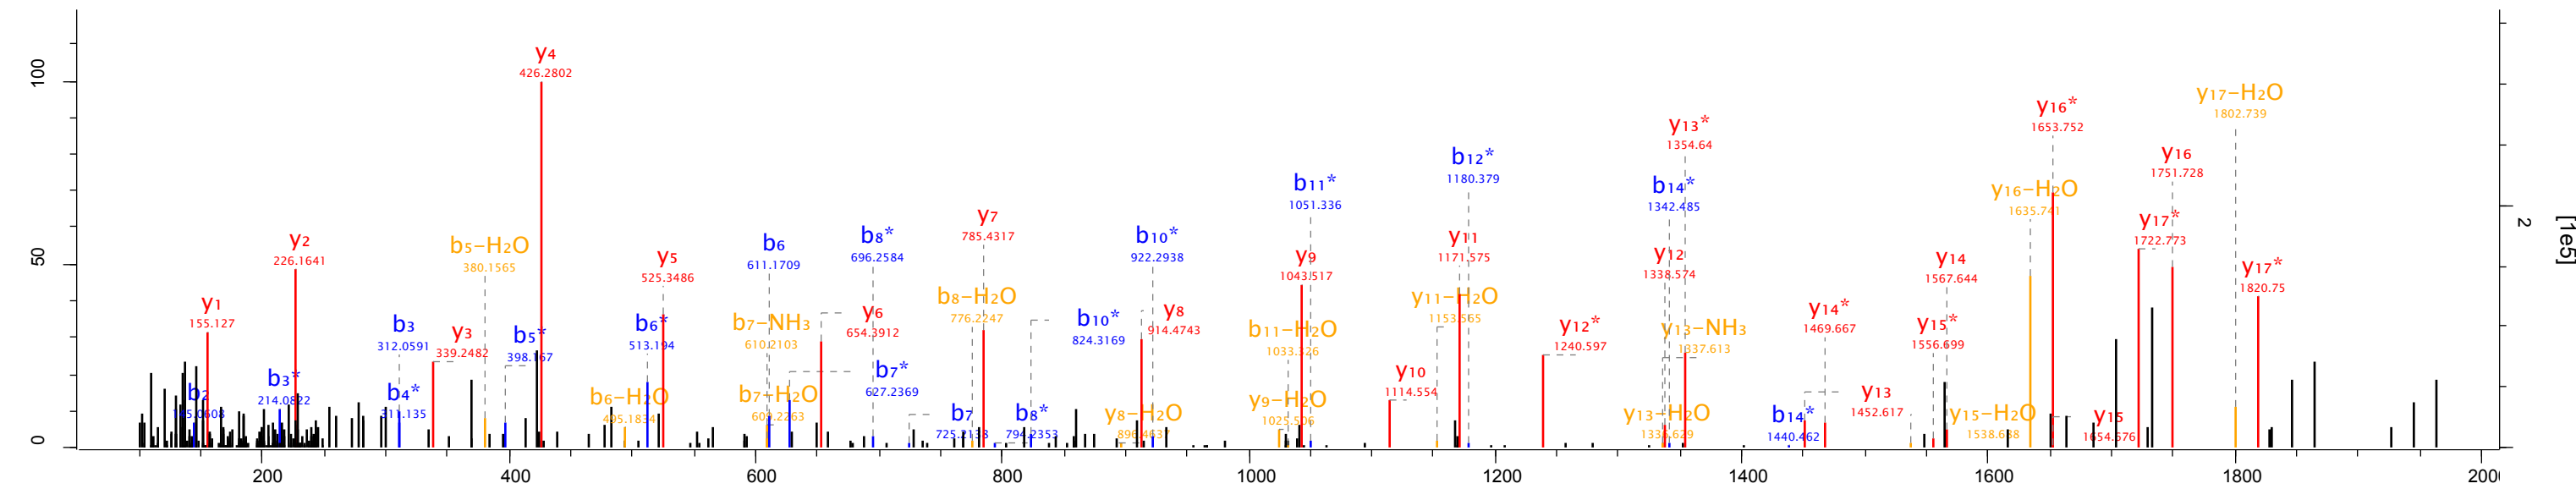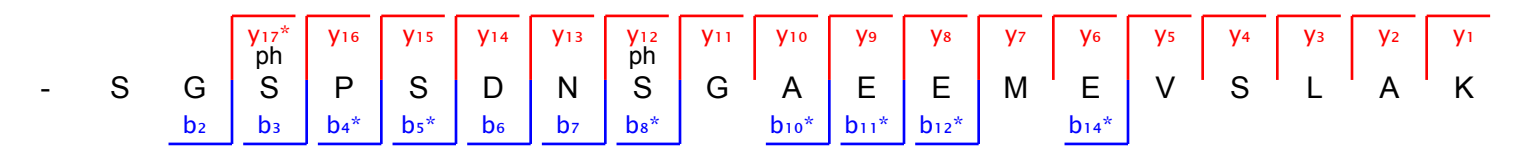

Raw file 20171215\_MaS\_33SR\_LMH\_phospho2\_03 Scan 13911 Method FTMS; HCD Score 96 m/z 793.87 Gene names NAB2

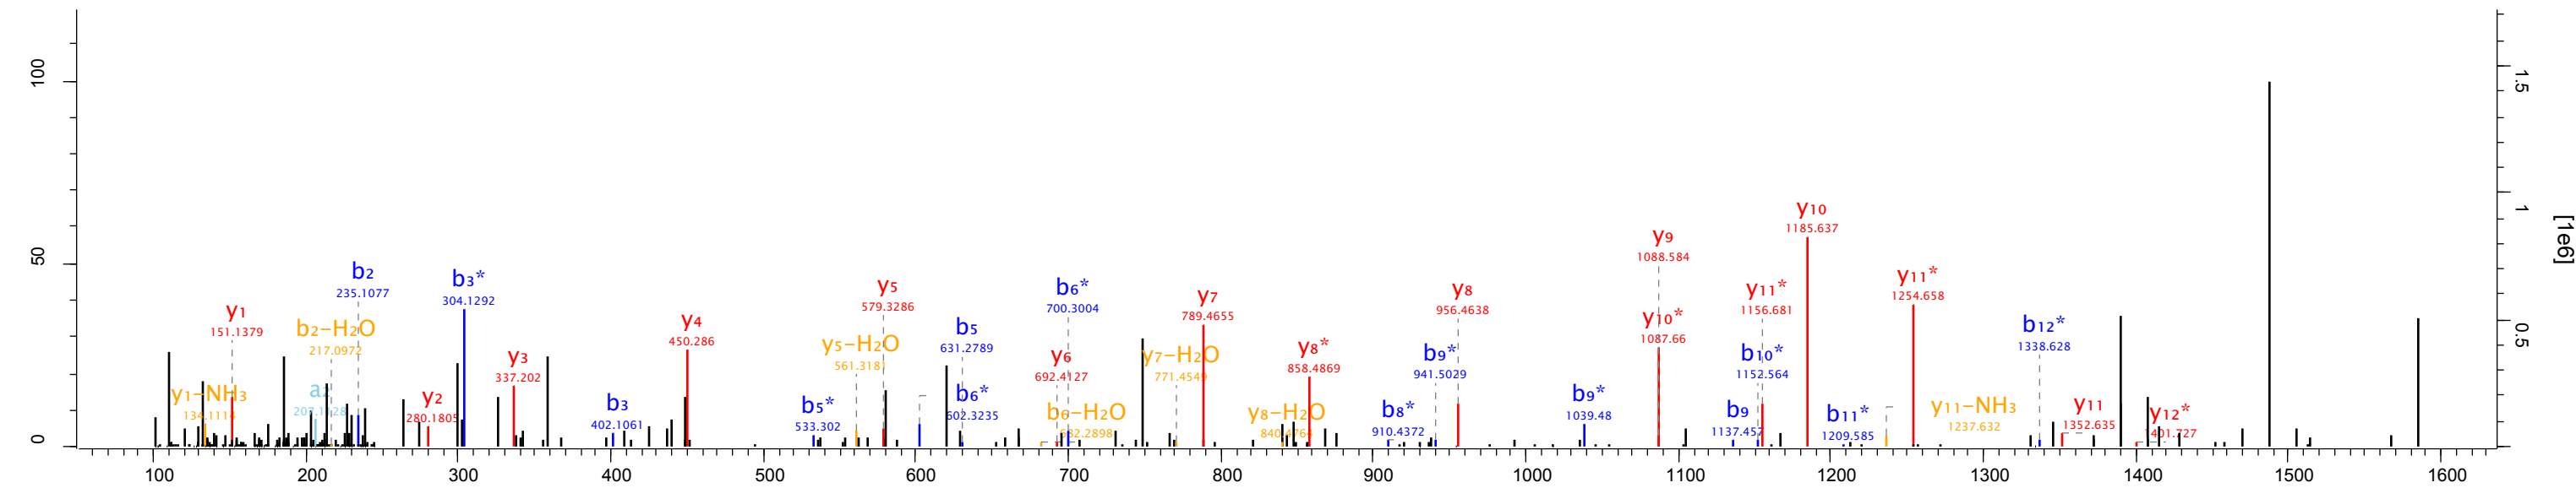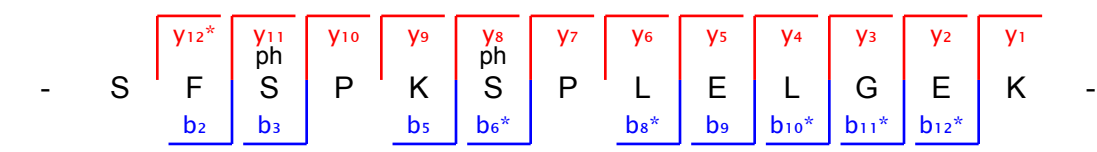

Raw file 20171215\_MaS\_33SR\_LMH\_phospho2\_03 Scan 13941 Method FTMS; HCD Score 84.21 m/z 531.57 Gene names FAM21A;FAM21C

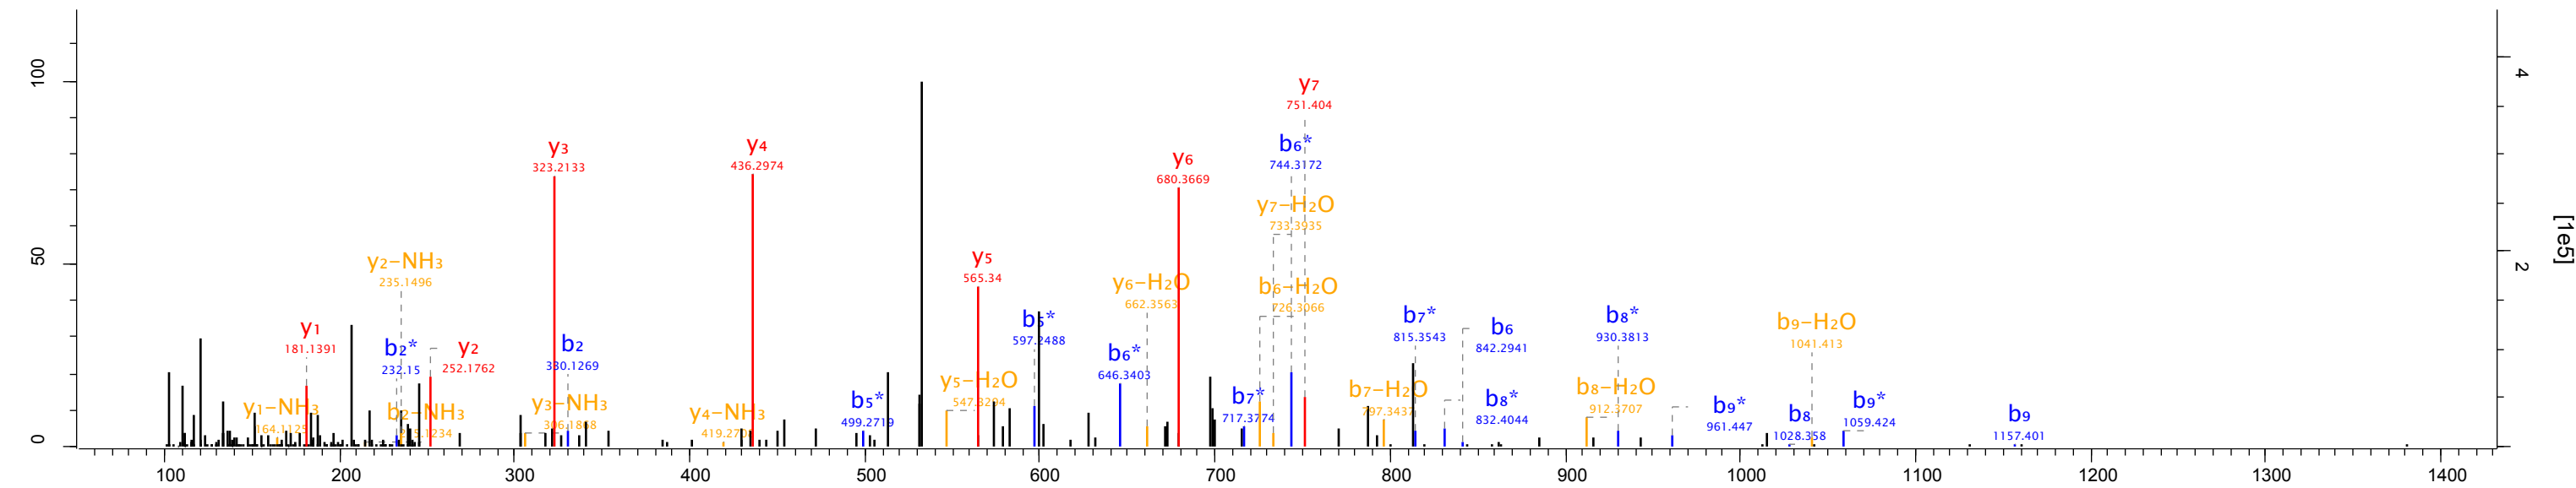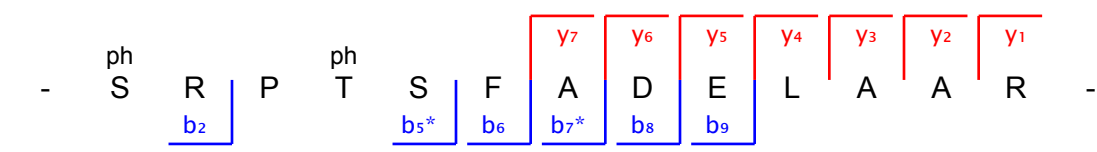

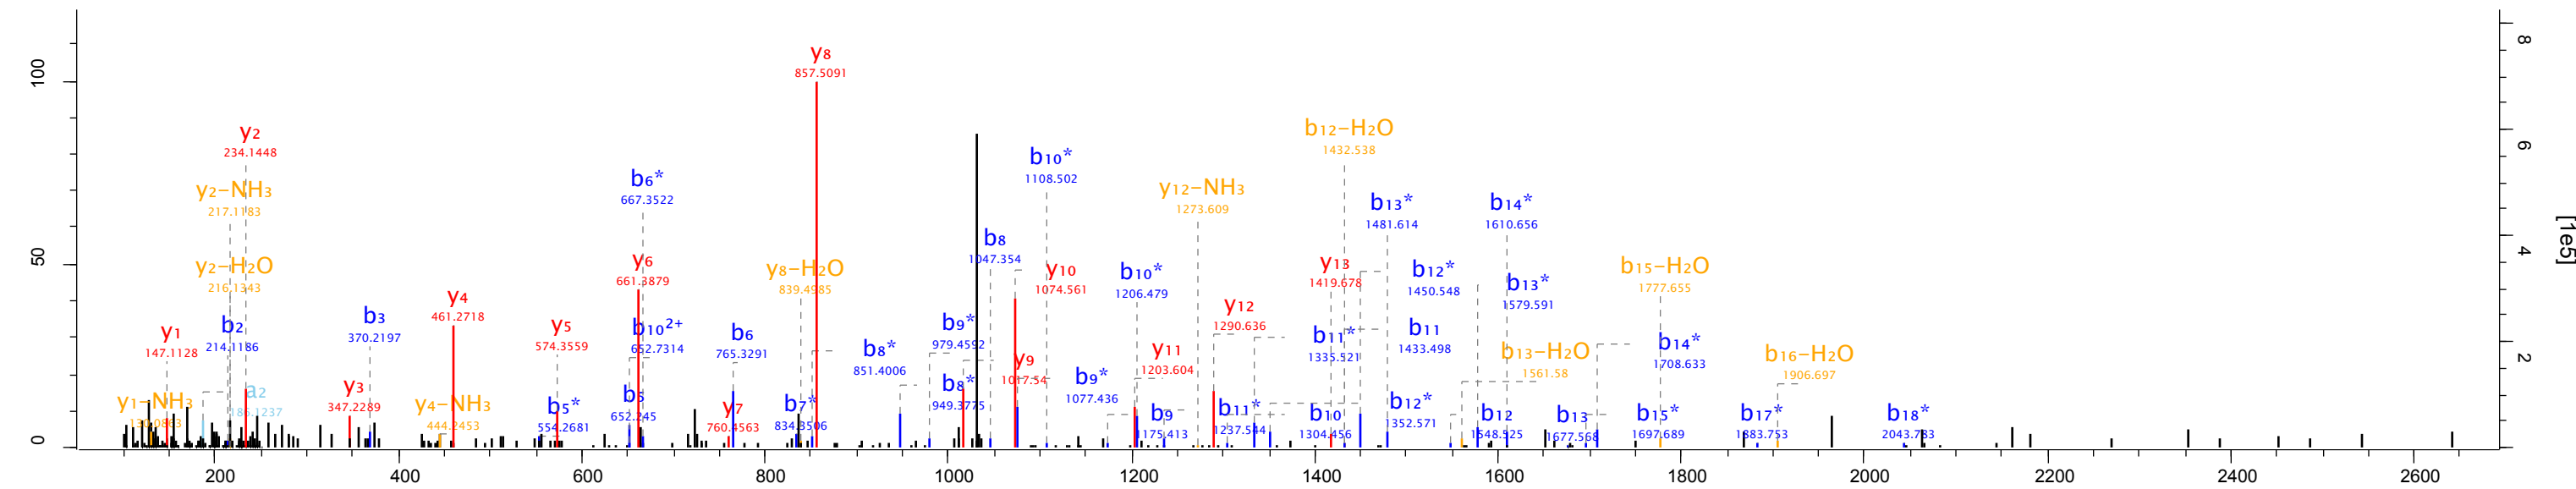

- N V R S D I S D Q E E D E E S E G C P V S I N L S K -

ph ph

b<sub>2</sub> b<sub>3</sub> b<sub>5</sub> b<sub>6</sub> b<sub>7</sub><sup>\*</sup> b<sub>8</sub> b<sub>9</sub> b<sub>10</sub> b<sub>11</sub> b<sub>12</sub> b<sub>13</sub> b<sub>14</sub><sup>\*</sup> b<sub>15</sub><sup>\*</sup> b<sub>17</sub><sup>\*</sup> b<sub>18</sub><sup>\*</sup> y<sub>13</sub> y<sub>12</sub> y<sub>11</sub> y<sub>10</sub> y<sub>9</sub> y<sub>8</sub> y<sub>7</sub> y<sub>6</sub> y<sub>5</sub> y<sub>4</sub> y<sub>3</sub> y<sub>2</sub> y<sub>1</sub>

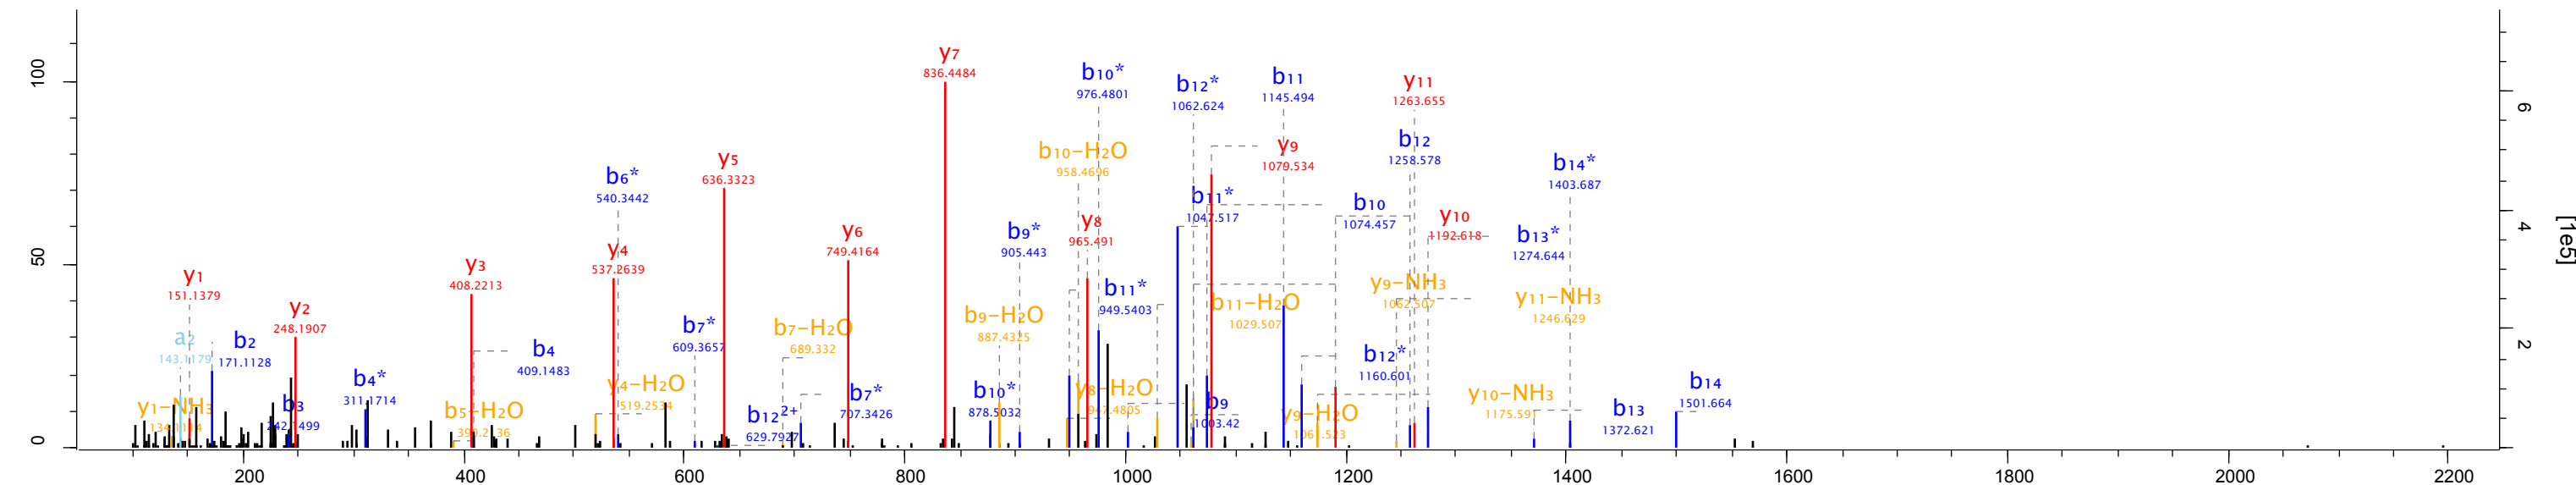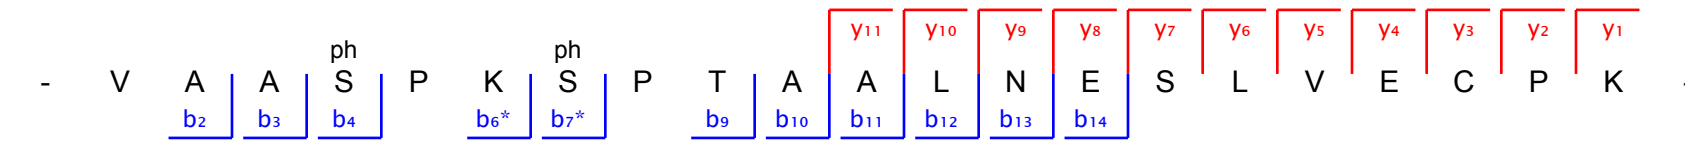





Raw file 20171215\_MaS\_33SR\_LMH\_phospho2\_03 Scan 15031 Method FTMS; HCD Score 128.71 m/z 1283.6 Gene names ARHGAP12

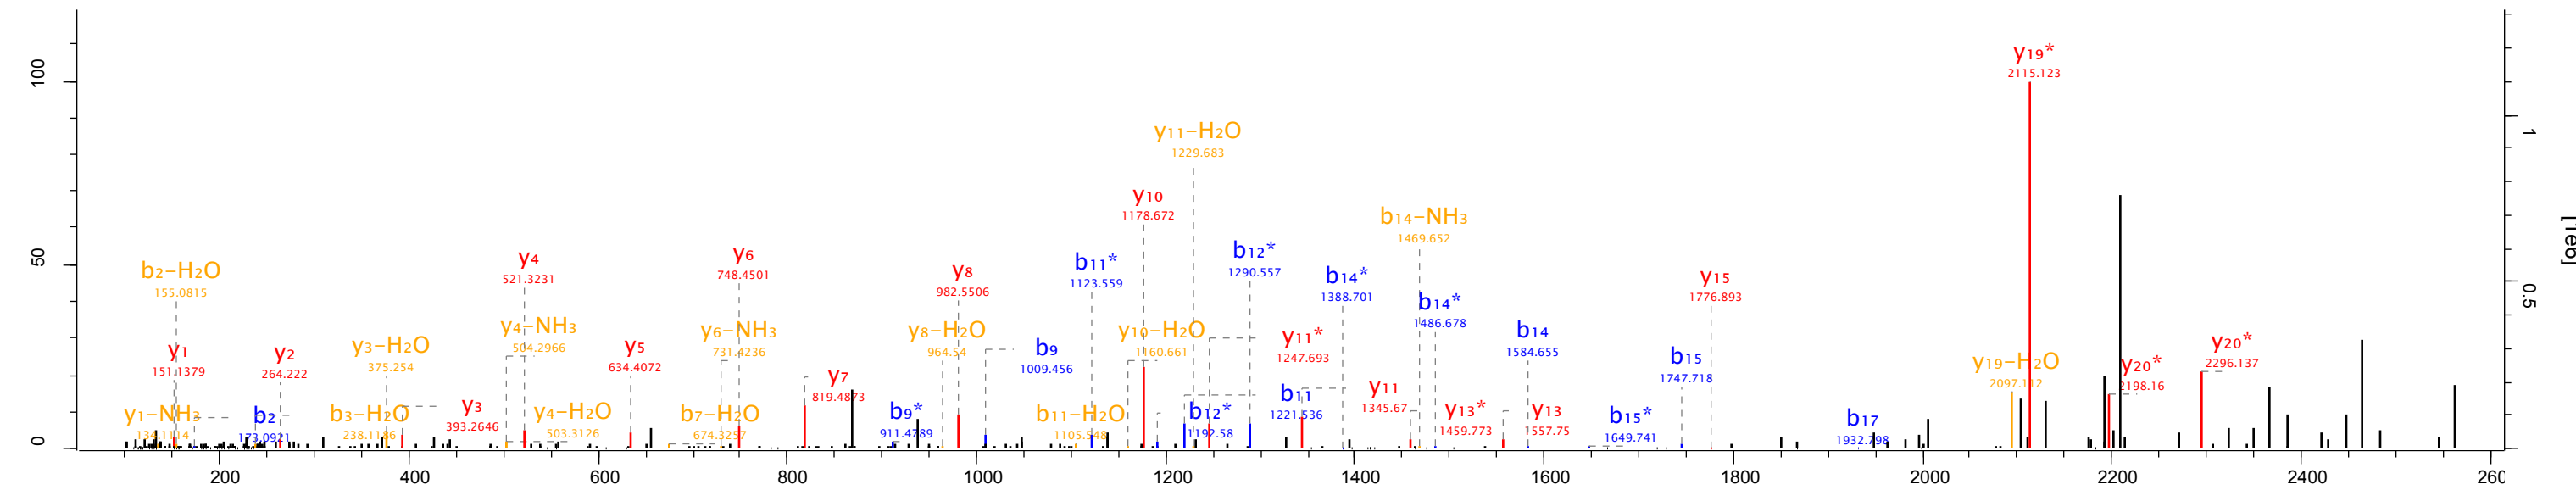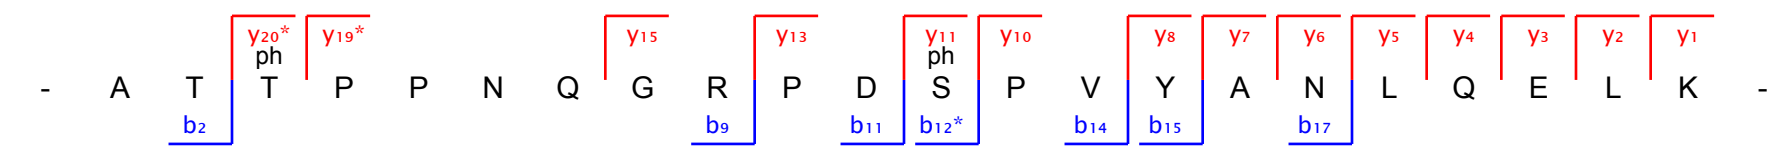

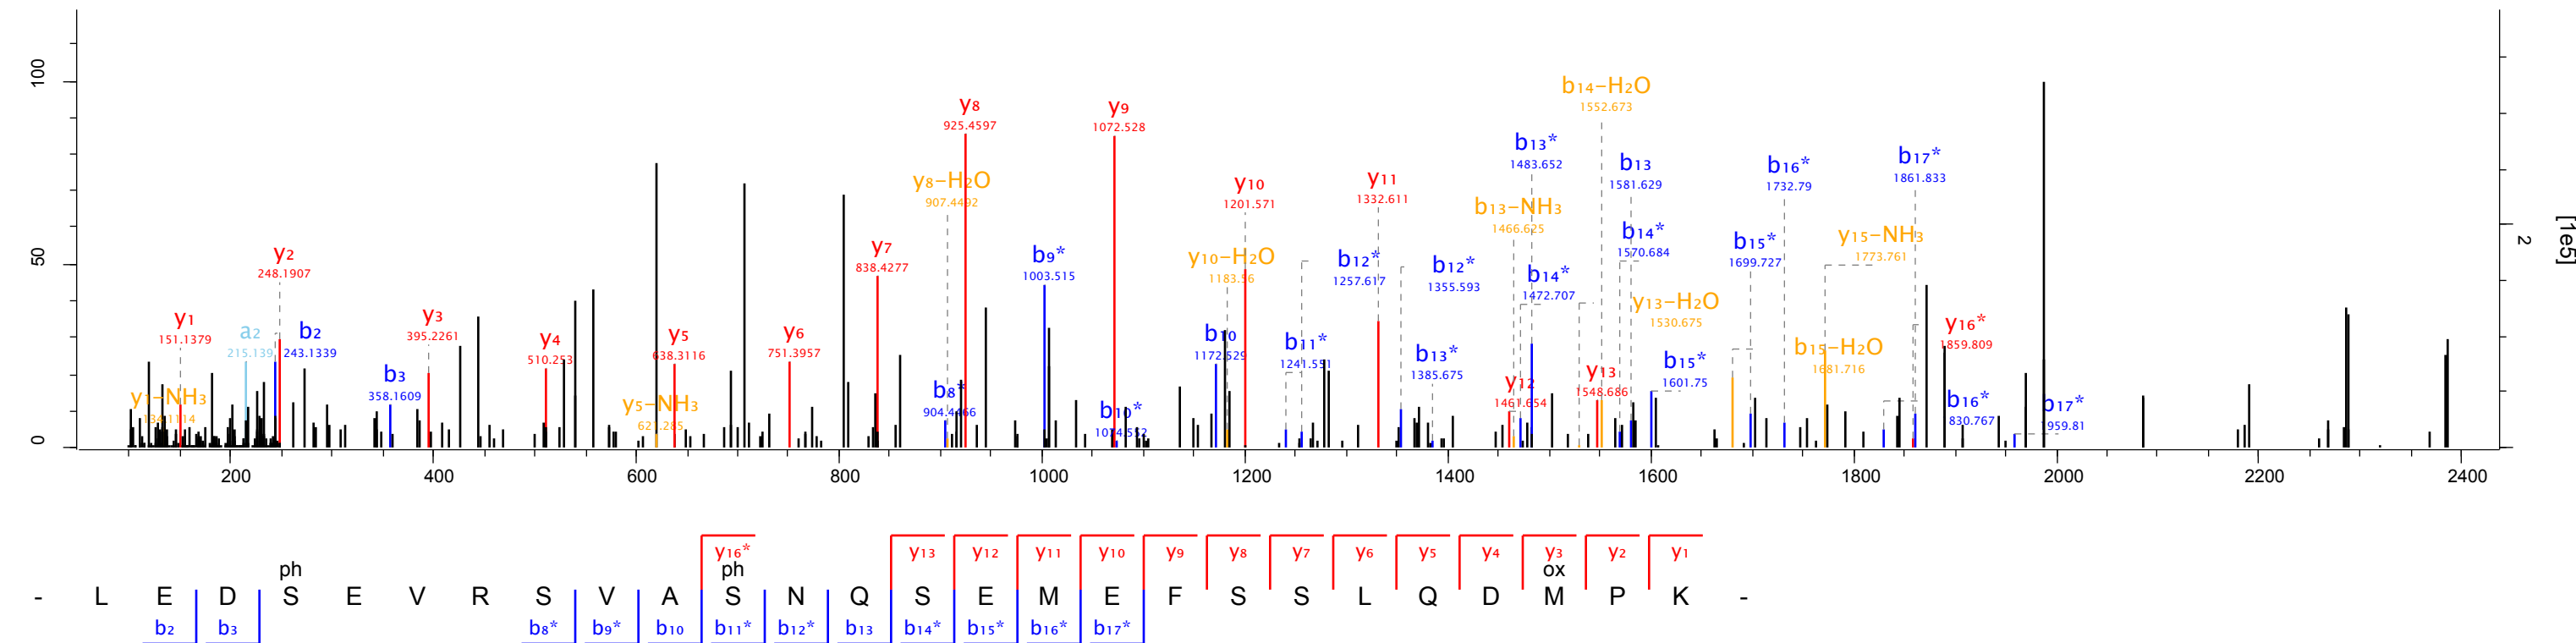

Raw file 20171215\_MaS\_33SR\_LMH\_phospho2\_03 Scan 15201 Method FTMS; HCD Score 102.33 m/z 621.25 Gene names PAK2

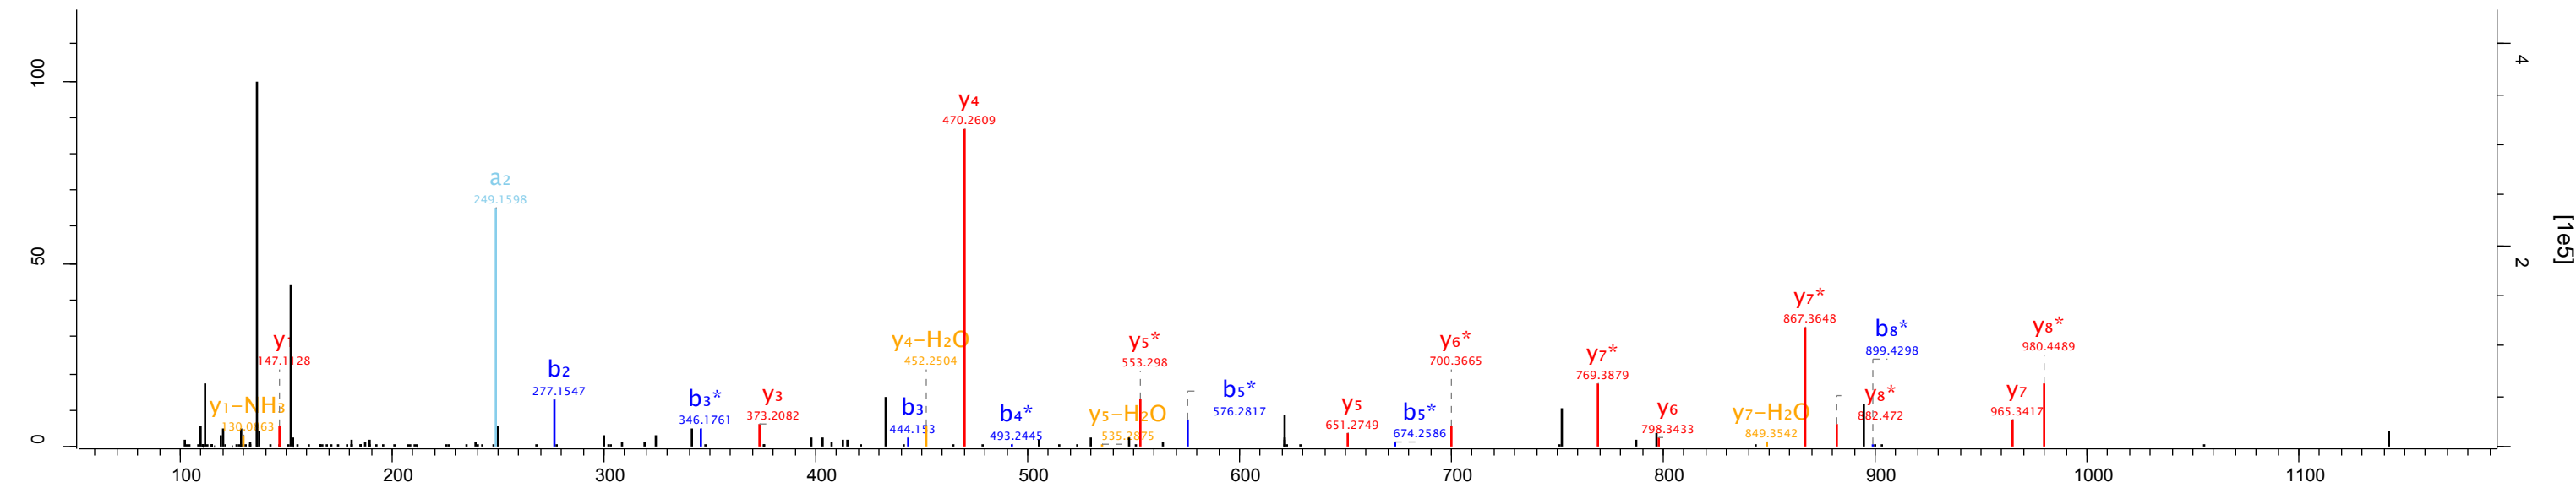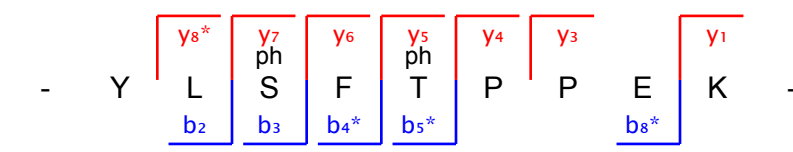

Raw file 20171215\_MaS\_33SR\_LMH\_phospho2\_03 Scan 15521 Method FTMS; HCD Score 85.42 m/z 652.99 Gene names SCML2

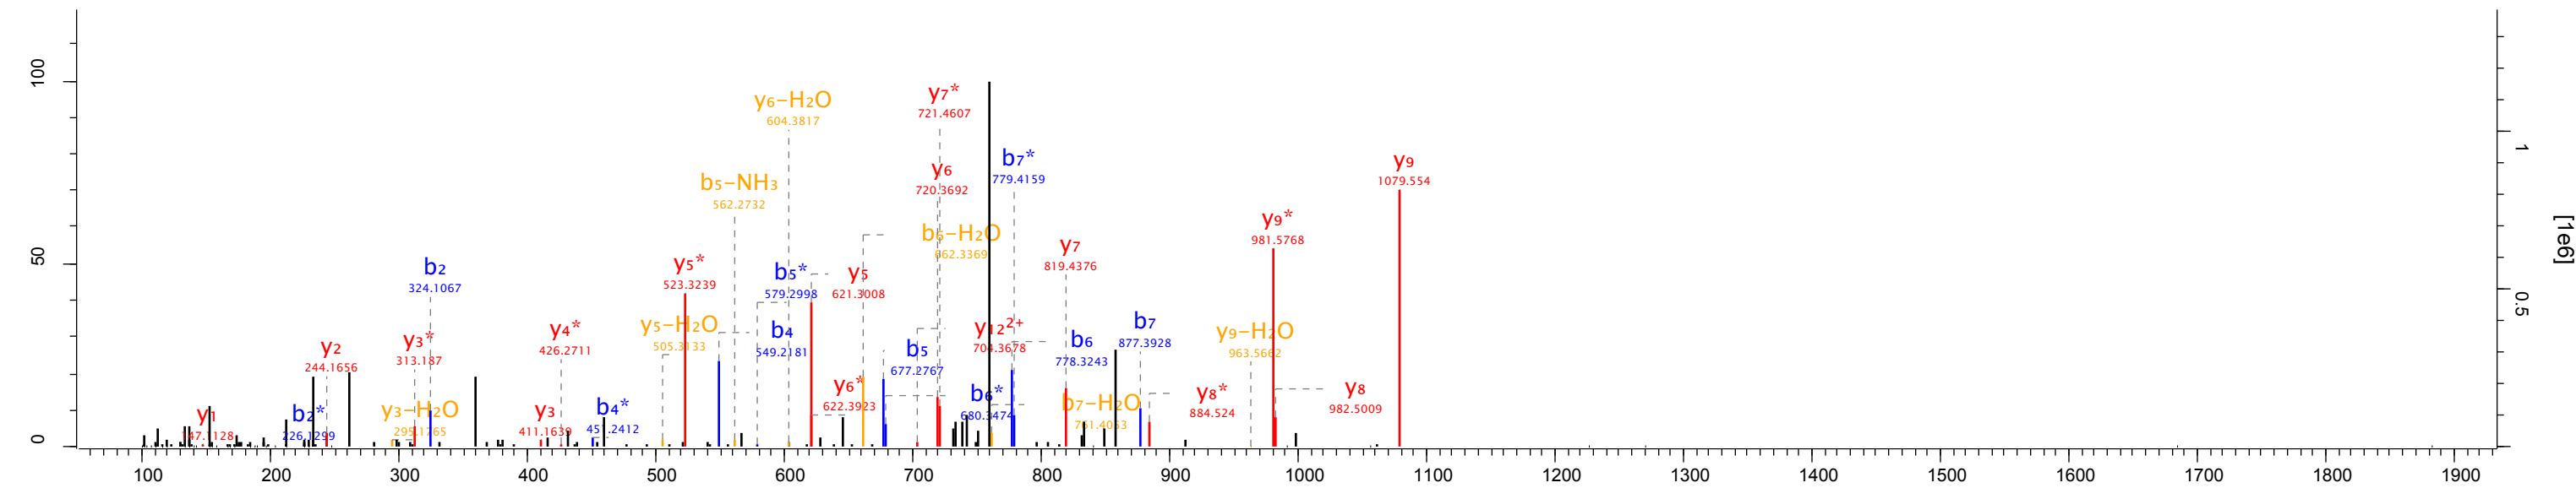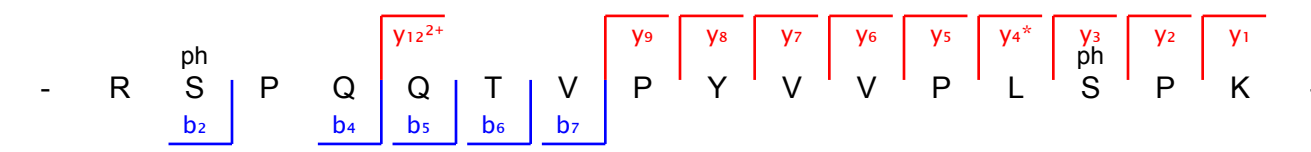

Raw file 20171215\_MaS\_33SR\_LMH\_phospho2\_03 Scan 15581 Method FTMS; HCD Score 45.14 m/z 833.37 Gene names TP53BP1

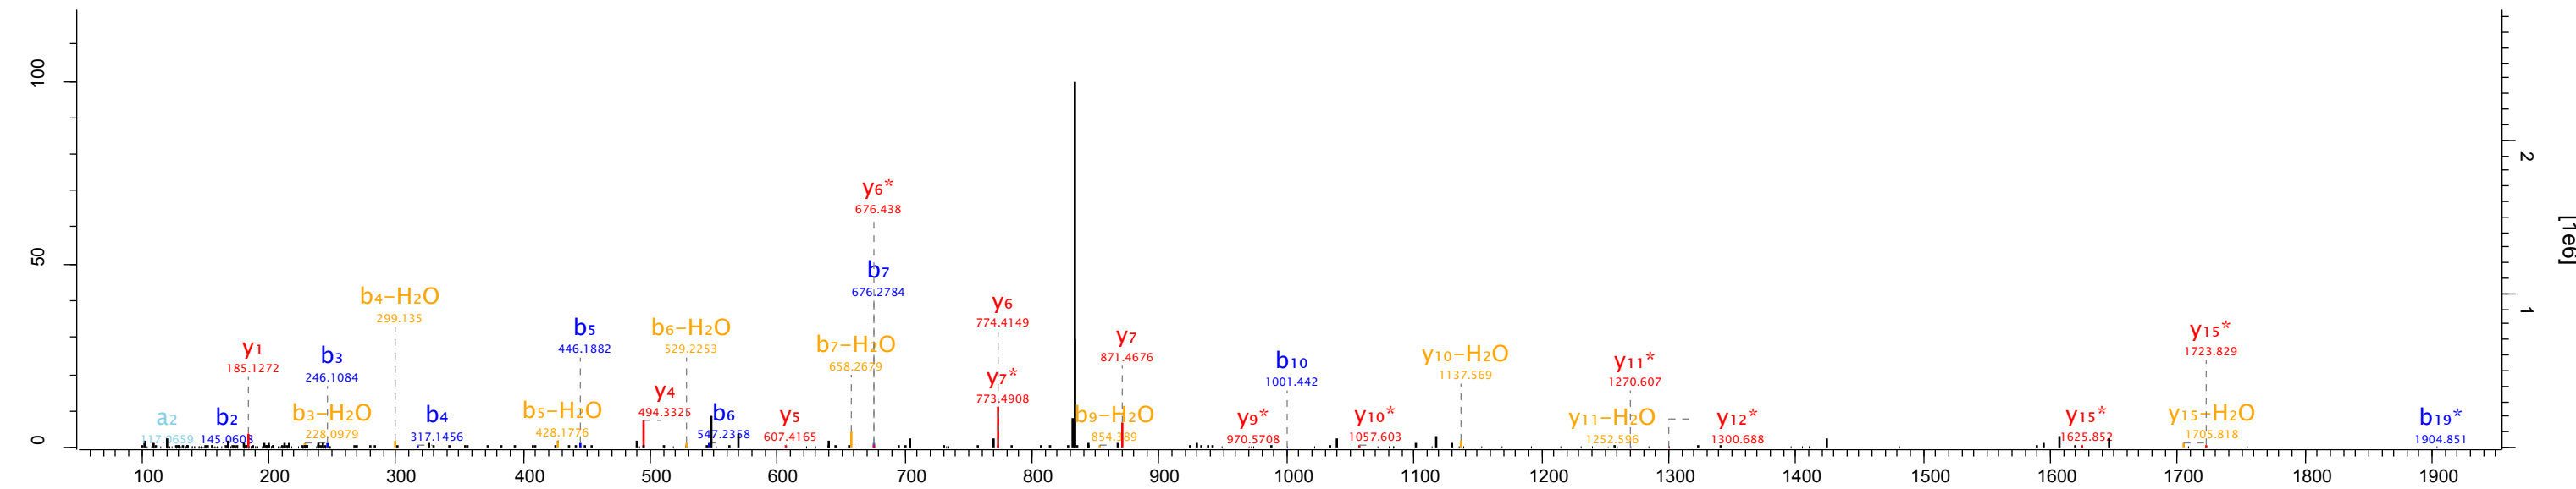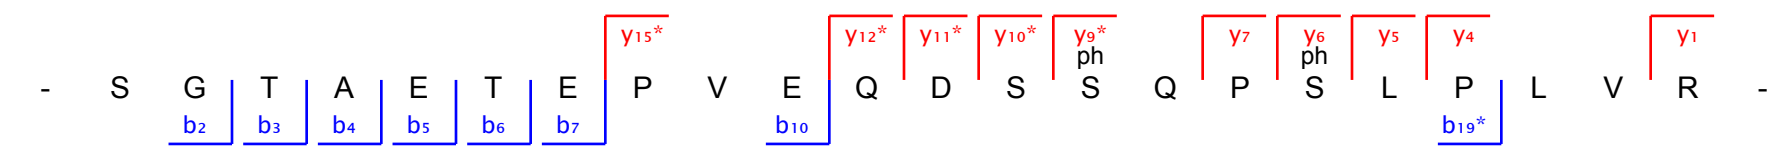

Raw file 20171215\_MaS\_33SR\_LMH\_phospho2\_03 Scan 15601 Method FTMS; HCD Score 70.12 m/z 928.44 Gene names AKAP11

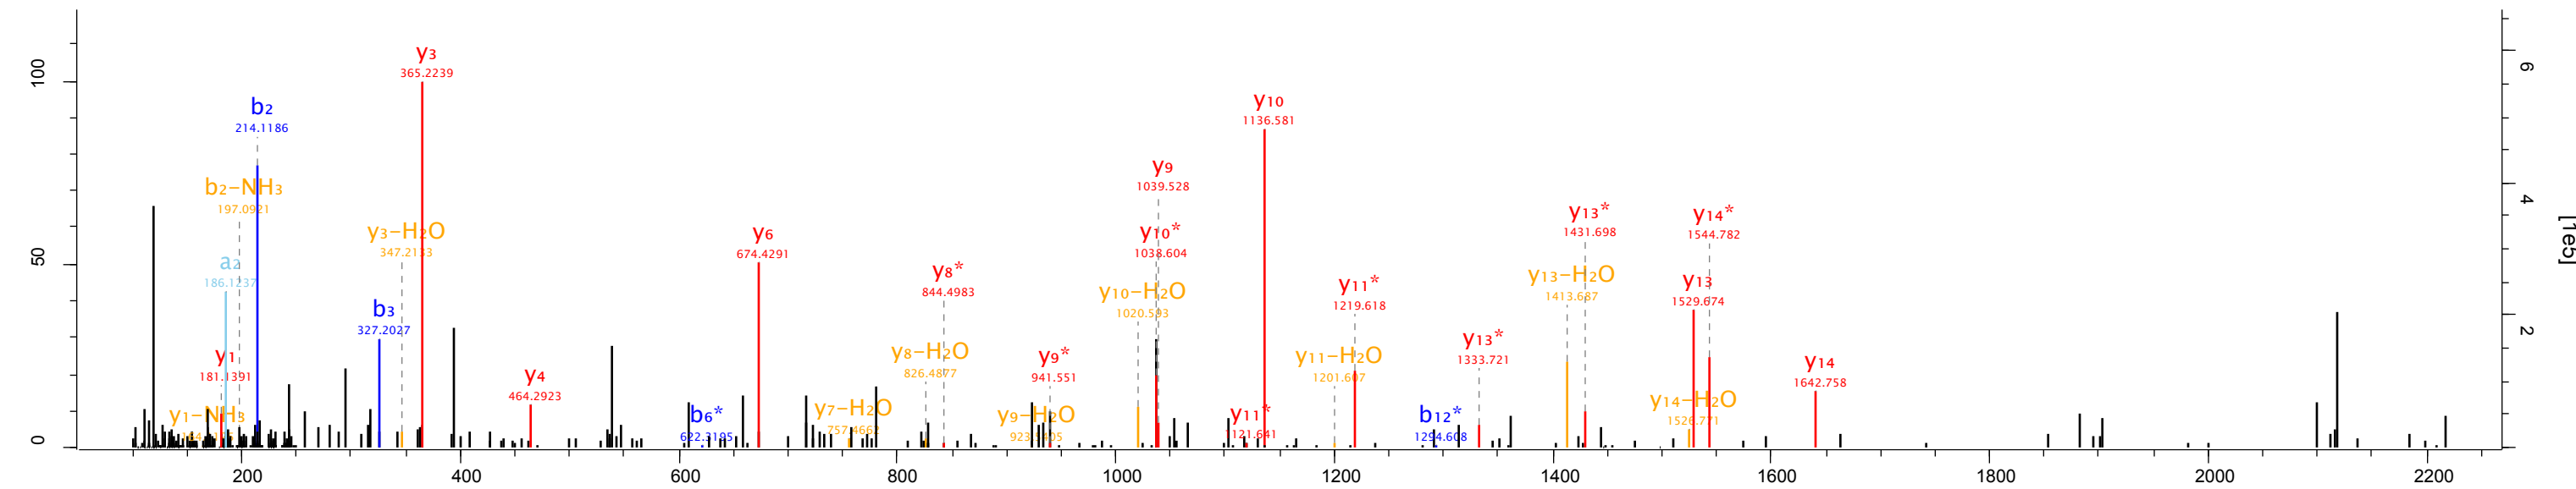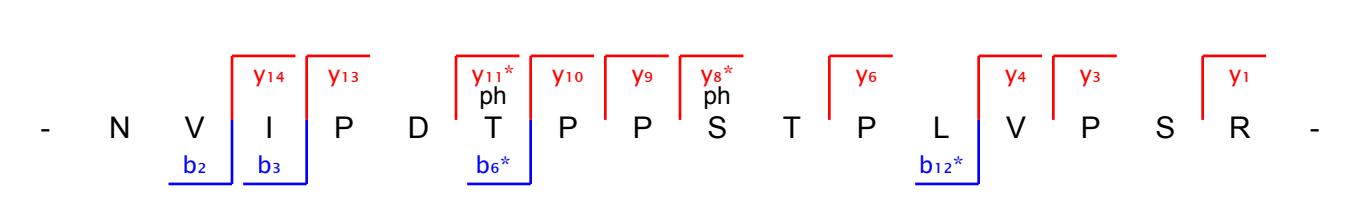

Raw file 20171215\_MaS\_33SR\_LMH\_phospho2\_03 Scan 15821 Method FTMS; HCD Score 54.11 m/z 856.36 Gene names SAMHD1

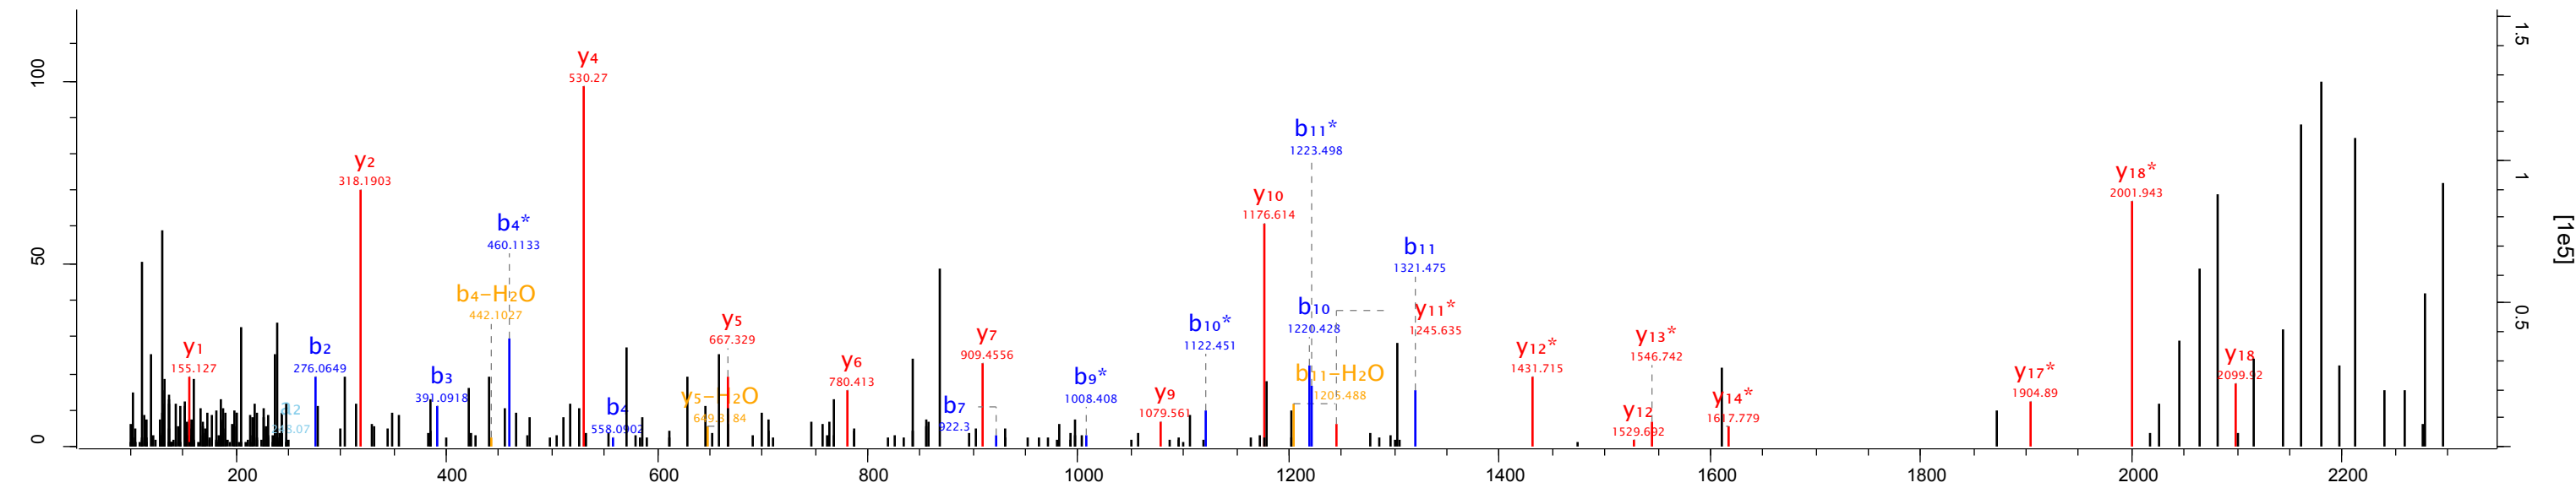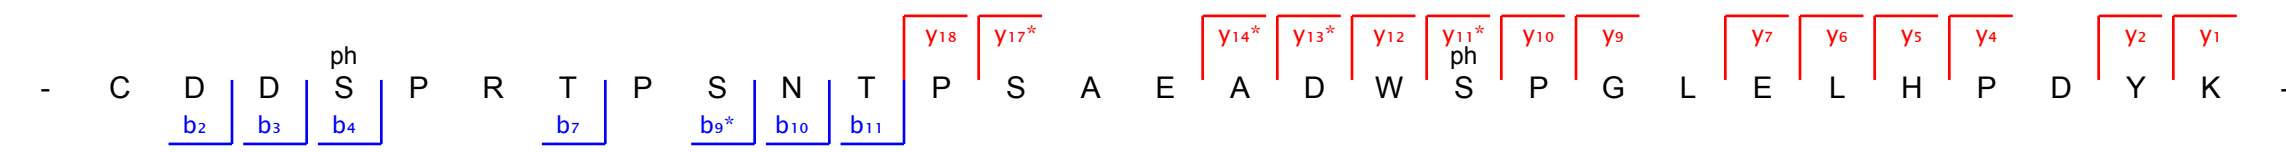

Raw file  
20171215\_MaS\_33SR\_LMH\_phospho2\_03

Scan 15921 Method FTMS; HCD Score 61.4 m/z 1050.96 Gene names DIDO1

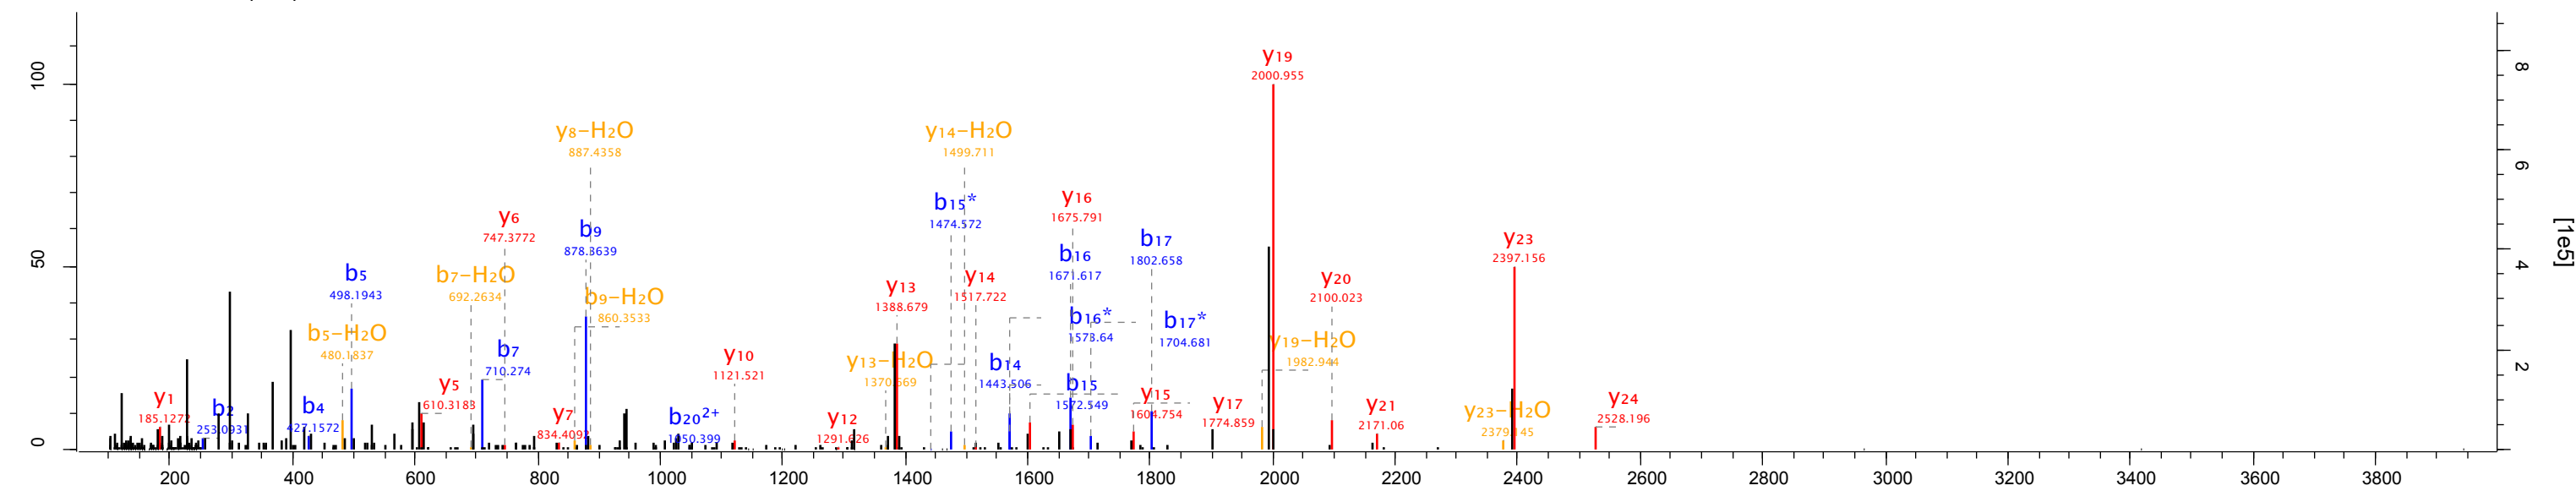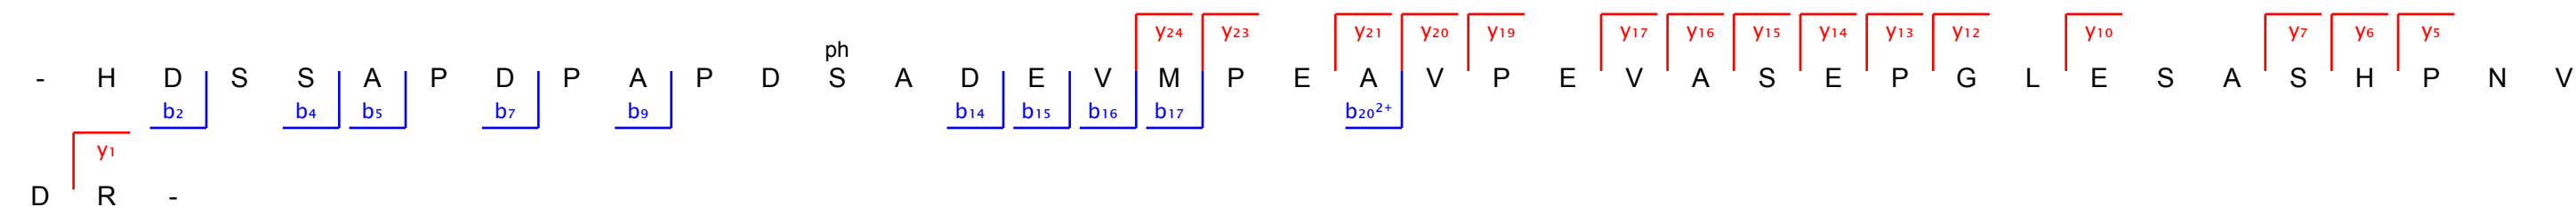



Raw file 20171215\_MaS\_33SR\_LMH\_phospho2\_03 Scan 16021 Method FTMS; HCD Score 55.18 m/z 1092.47 Gene names SPAG5

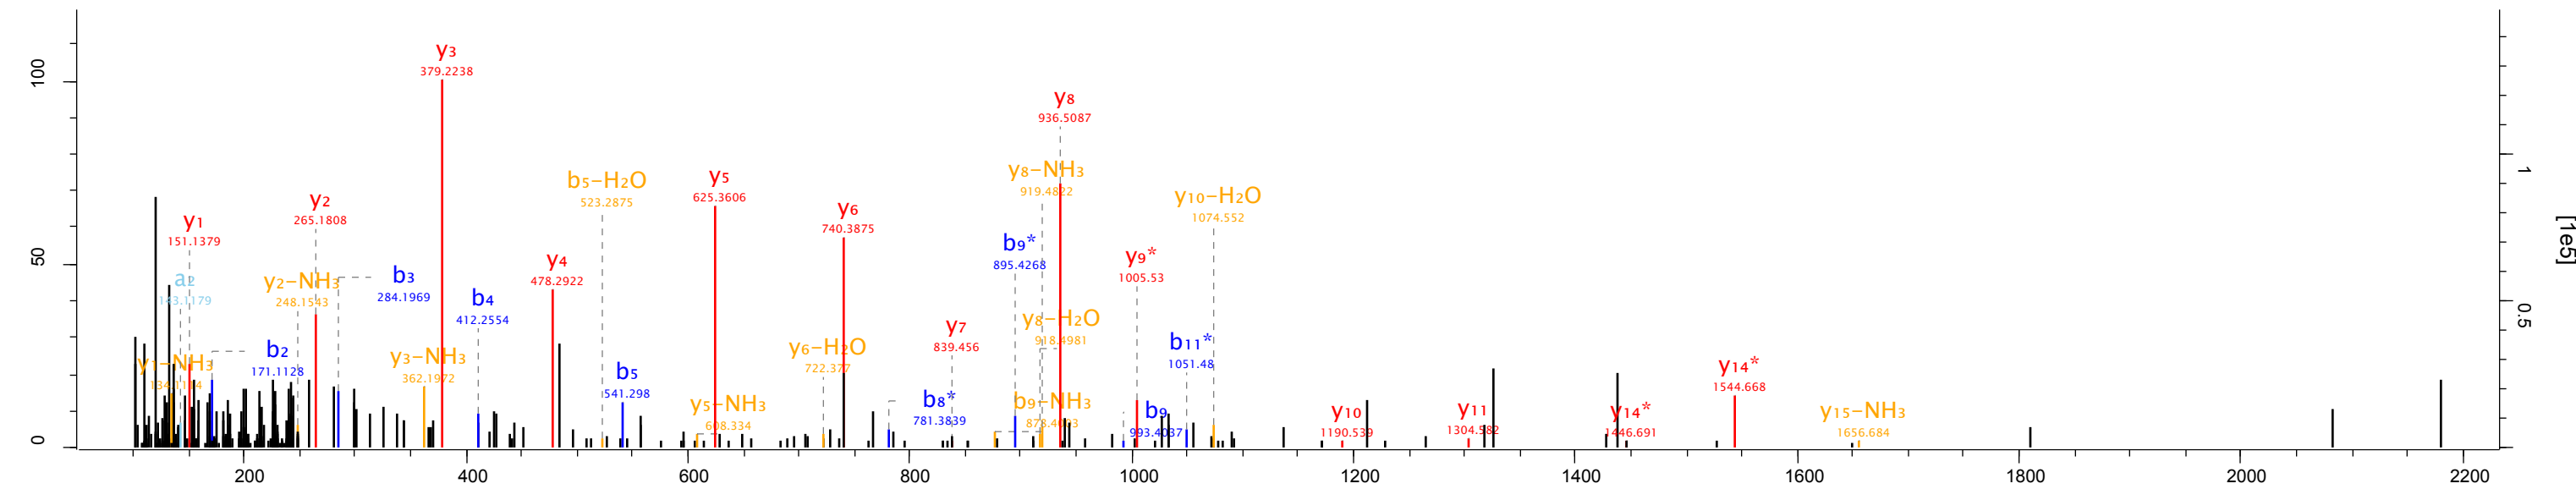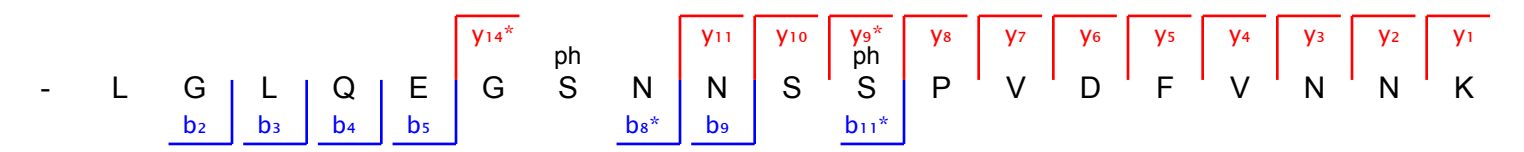

Raw file: 20171215\_MaS\_33SR\_LMH\_phospho2\_03  
 Scan: 16041 Method: FTMS; HCD Score: 171.73 m/z: 1338.88 Gene names: DNAJC21

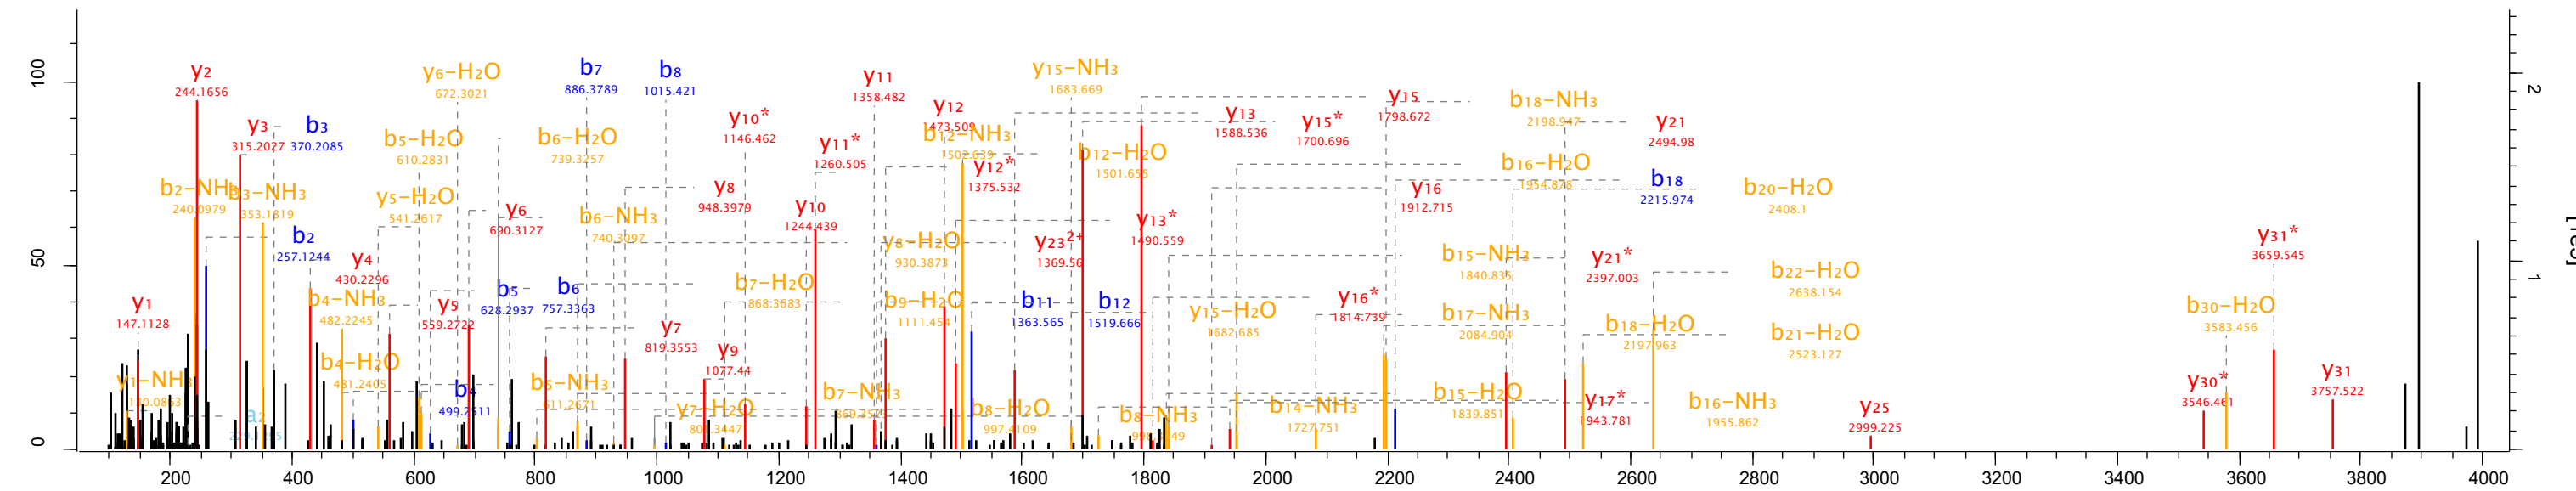

Protein sequence: - Q Q L E E E E N F S R P Q I D E N P L D D N S E E E M E D A P K -

Fragmentation sites are indicated by brackets below the sequence:

- Red brackets (y ions): y<sub>31</sub>, y<sub>30</sub>\*, y<sub>25</sub>, y<sub>23</sub><sup>2+</sup>, y<sub>21</sub>, y<sub>17</sub>\*, y<sub>16</sub>, y<sub>15</sub>, y<sub>13</sub>, y<sub>12</sub>, y<sub>11</sub>, y<sub>10</sub>ph, y<sub>9</sub>, y<sub>8</sub>, y<sub>7</sub>, y<sub>6</sub>, y<sub>5</sub>, y<sub>4</sub>, y<sub>3</sub>, y<sub>2</sub>, y<sub>1</sub>
- Blue brackets (b ions): b<sub>2</sub>, b<sub>3</sub>, b<sub>4</sub>, b<sub>5</sub>, b<sub>6</sub>, b<sub>7</sub>, b<sub>8</sub>, b<sub>11</sub>, b<sub>12</sub>, b<sub>18</sub>

Raw file 20171215\_MaS\_33SR\_LMH\_phospho2\_03 Scan 16161 Method FTMS; HCD Score 202.47 m/z 738.34 Gene names PLEKHA5

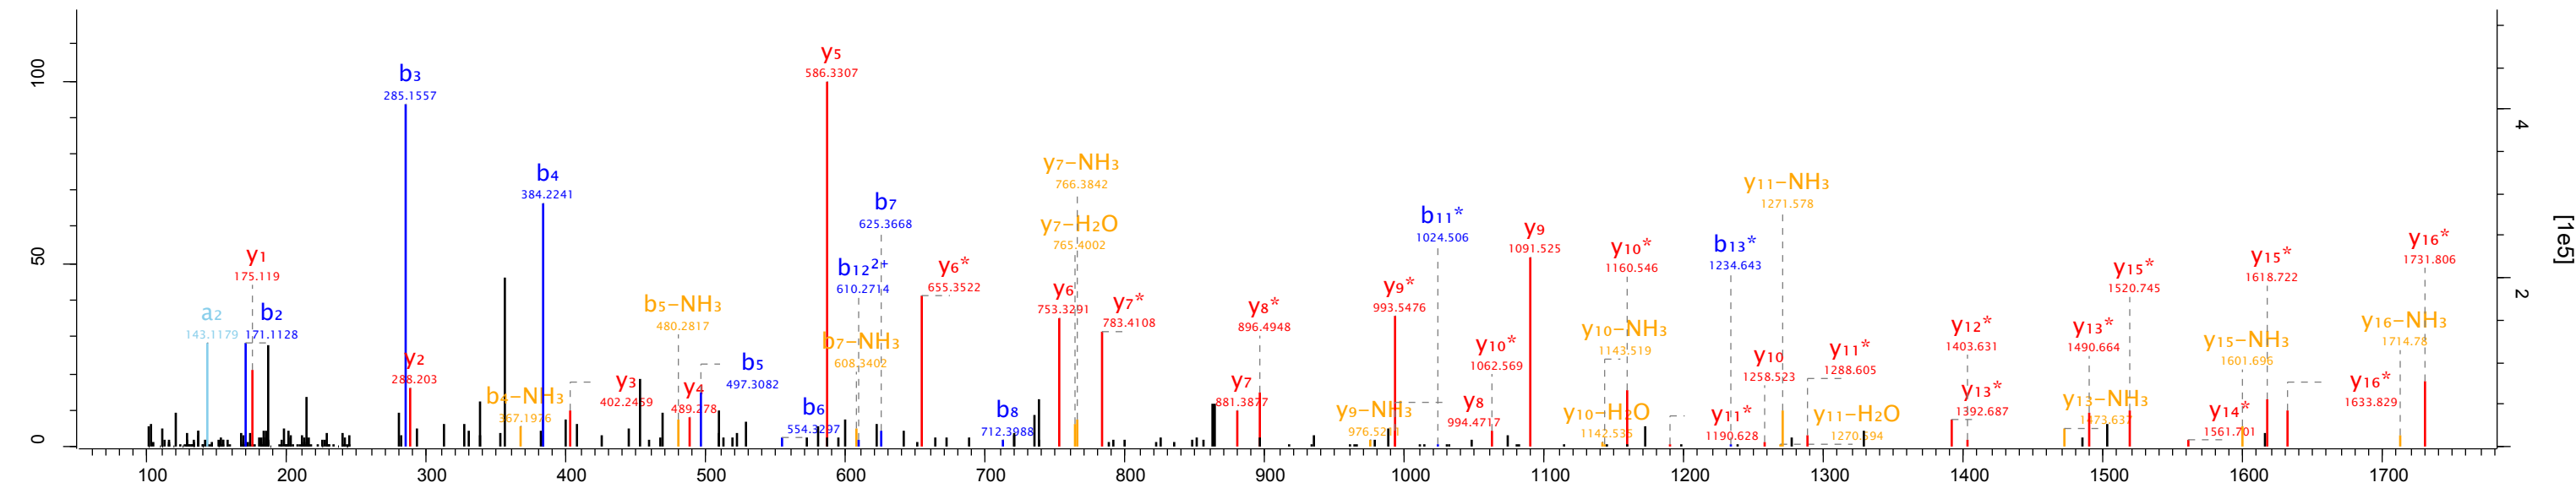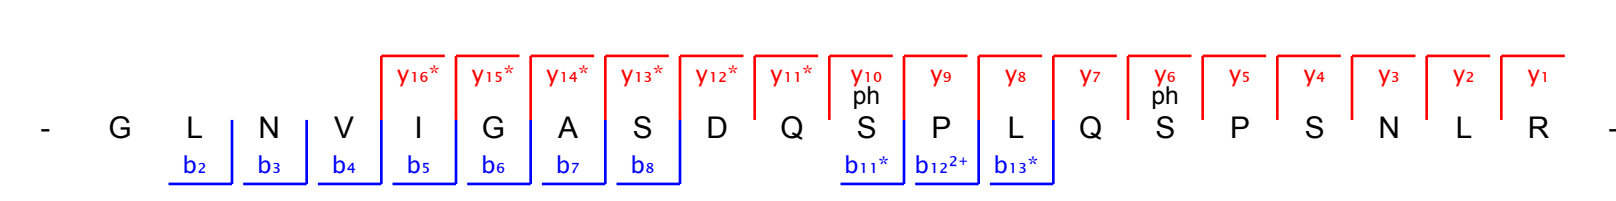

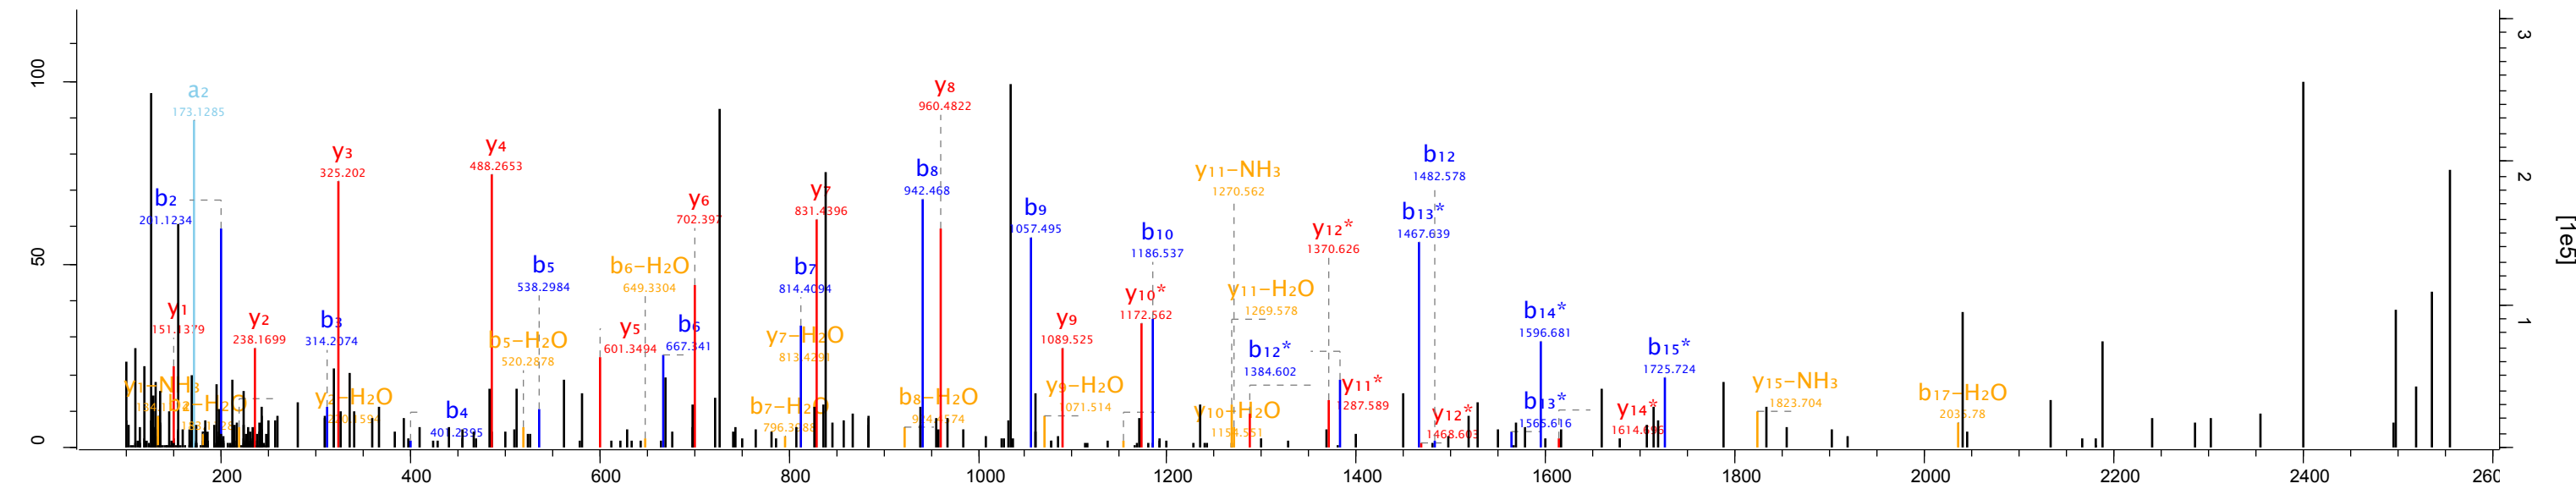

- S L L S H E F Q D E T D D T E E E T L Y S S K -

b<sub>2</sub>
b<sub>3</sub>
b<sub>4</sub>
b<sub>5</sub>
b<sub>6</sub>
b<sub>7</sub>
b<sub>8</sub>
b<sub>9</sub>
b<sub>10</sub>
y<sub>14</sub>\*
y<sub>12</sub>\*
ph
y<sub>11</sub>\*
y<sub>10</sub>\*
ph
T
y<sub>9</sub>
y<sub>8</sub>
y<sub>7</sub>
y<sub>6</sub>
y<sub>5</sub>
y<sub>4</sub>
y<sub>3</sub>
y<sub>2</sub>
y<sub>1</sub>

Raw file 20171215\_MaS\_33SR\_LMH\_phospho2\_03 Scan 16811 Method FTMS; HCD Score 134.93 m/z 886.64 Gene names TOP2B

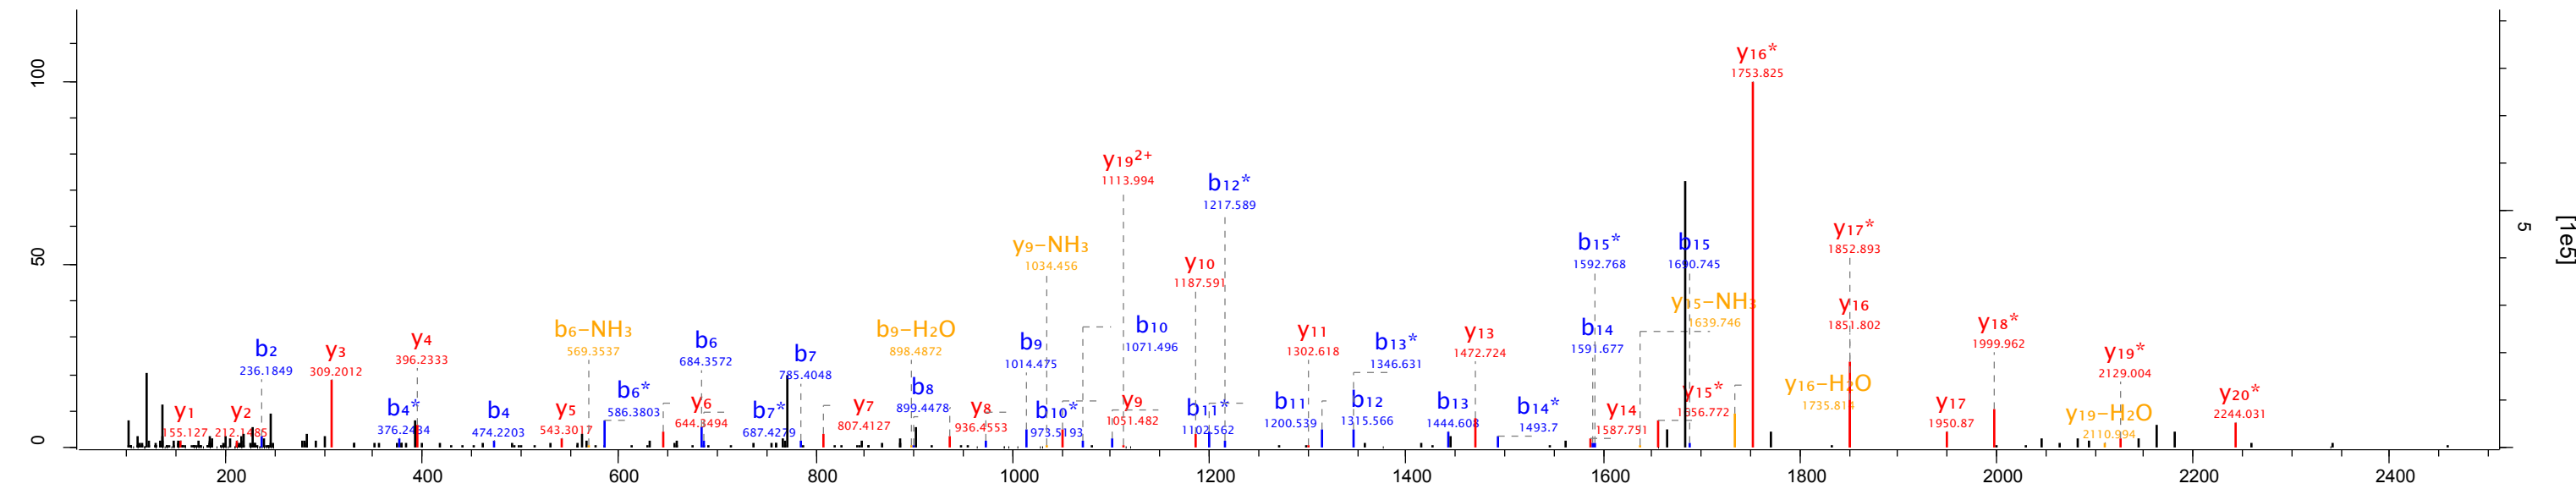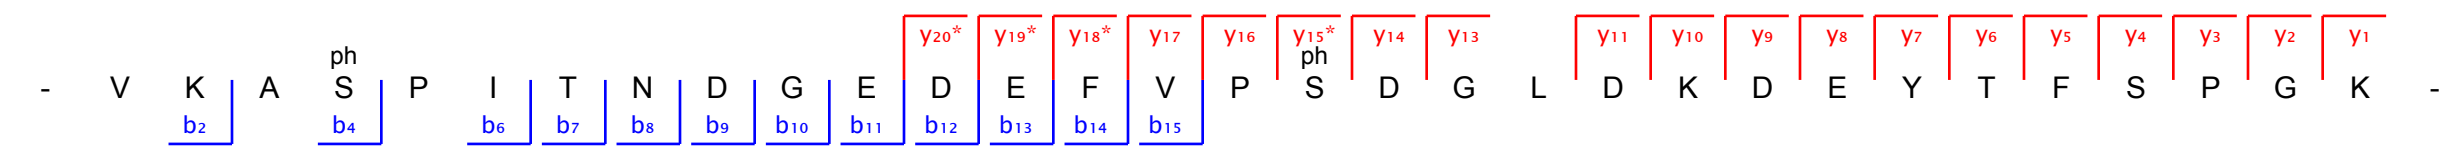

Raw file: 20171215\_MaS\_33SR\_LMH\_phospho2\_03  
 Scan: 16851 Method: FTMS; HCD Score: 65.53 m/z: 1032.71 Gene names: EIF4EBP1

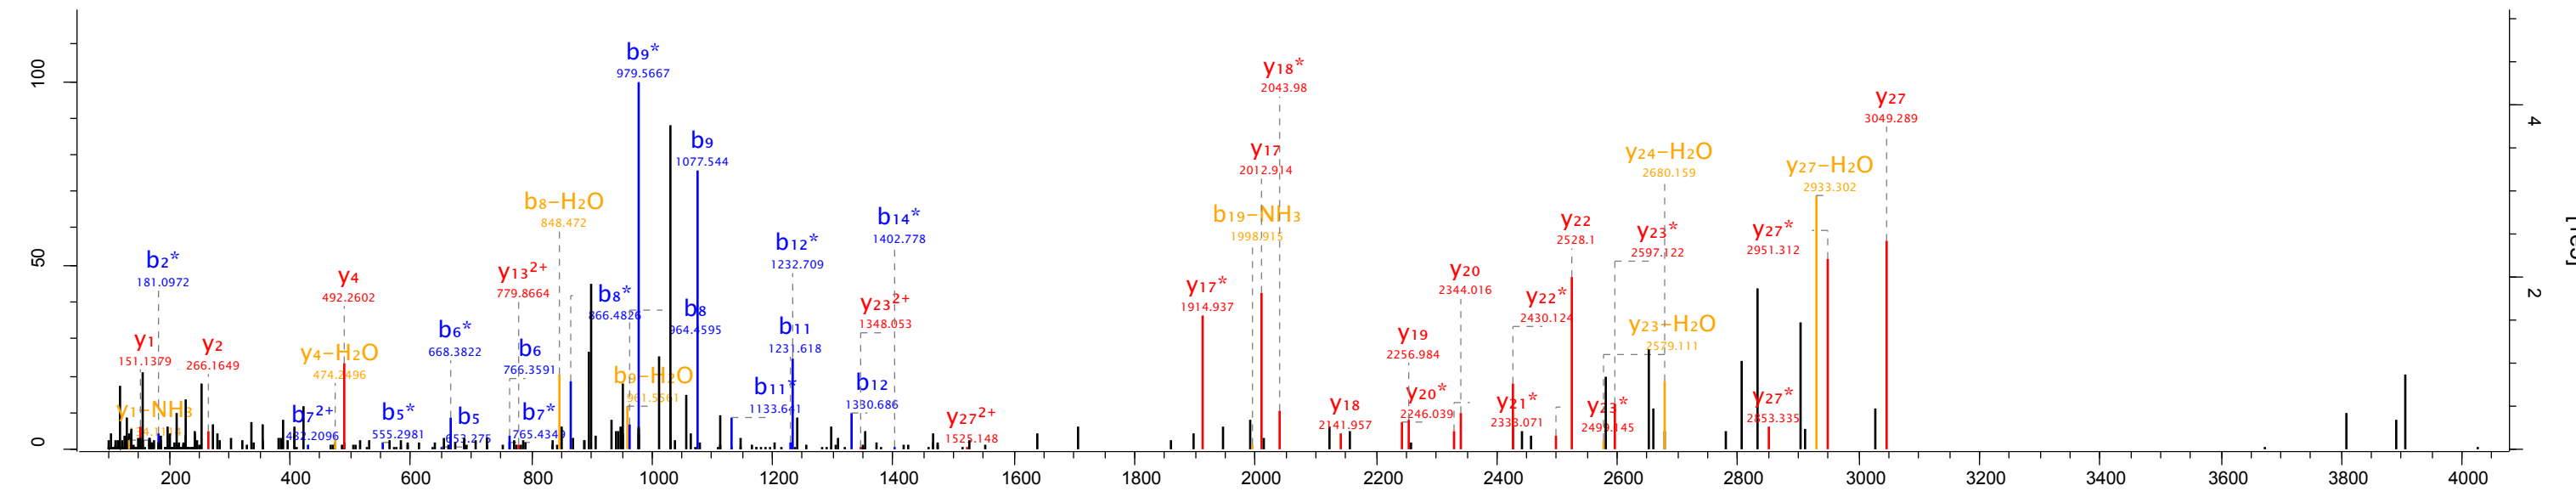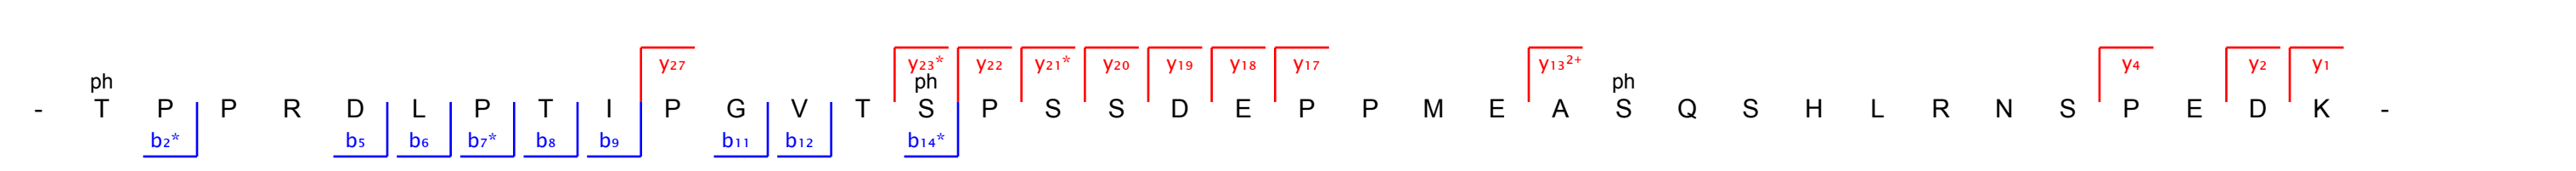

Raw file: 20171215\_MaS\_33SR\_LMH\_phospho2\_03  
 Scan: 16961 Method: FTMS; HCD Score: 102.47 m/z: 1022.1 Gene names: BIVM-ERCC5;ERCC5

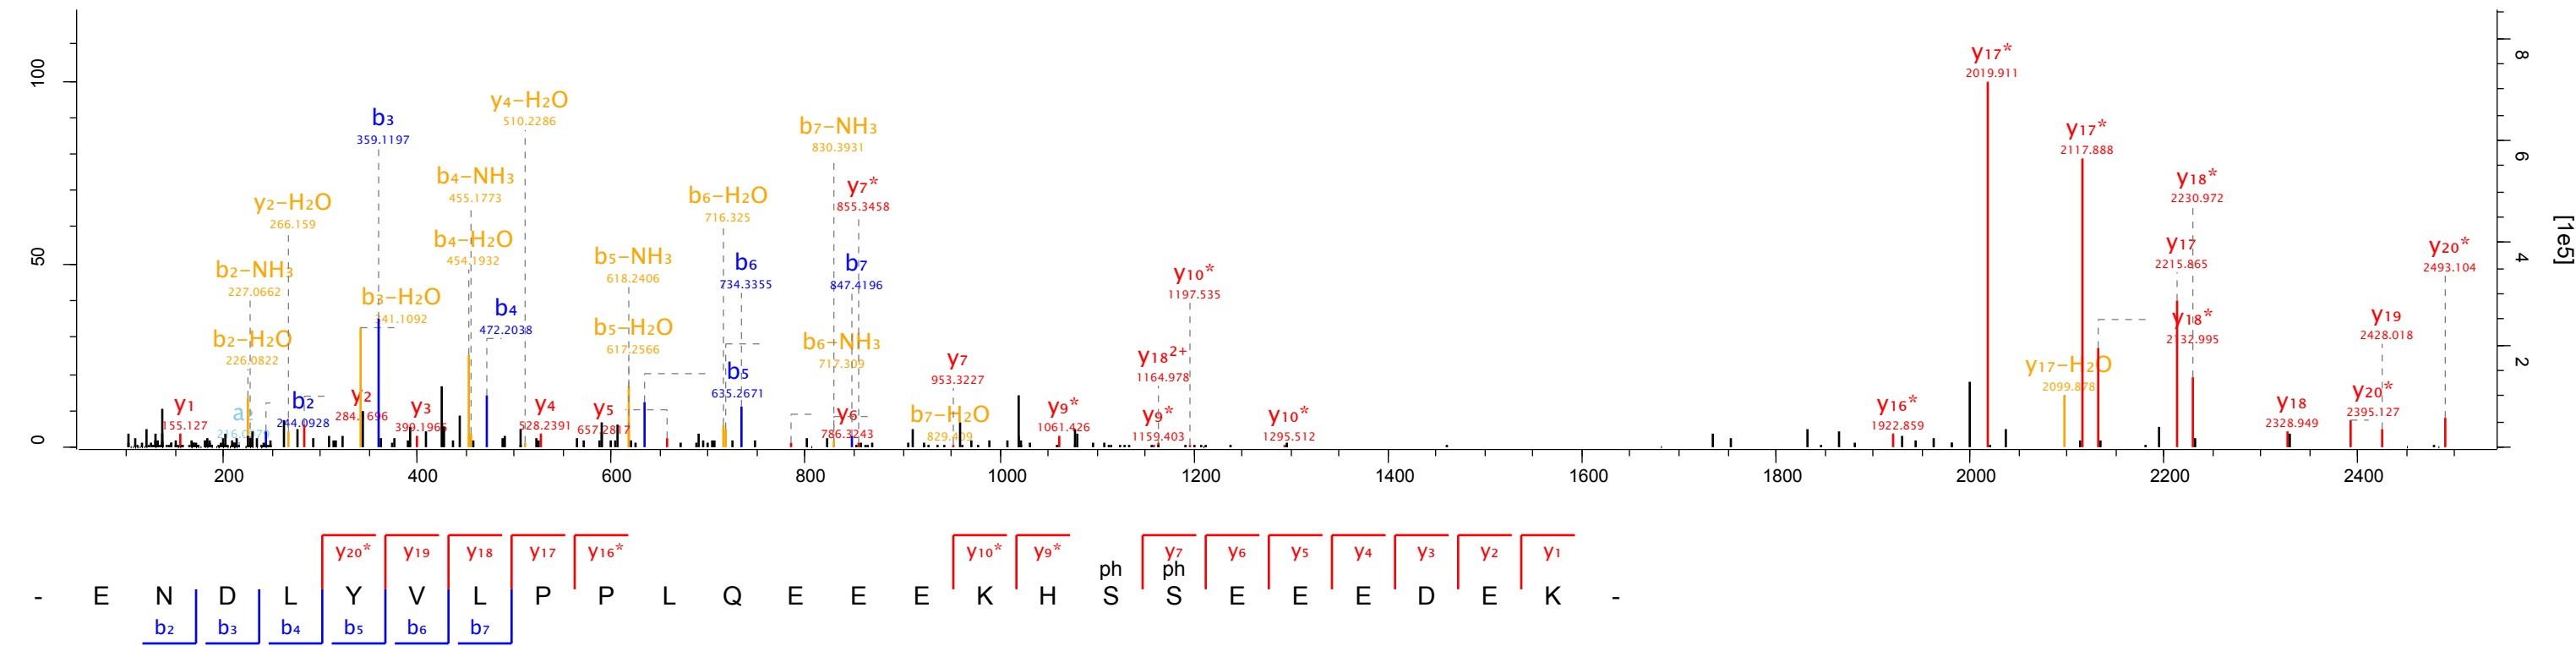

Raw file 20171215\_MaS\_33SR\_LMH\_phospho2\_03 Scan 17031 Method FTMS; HCD Score 132.28 m/z 937.4 Gene names C11orf84

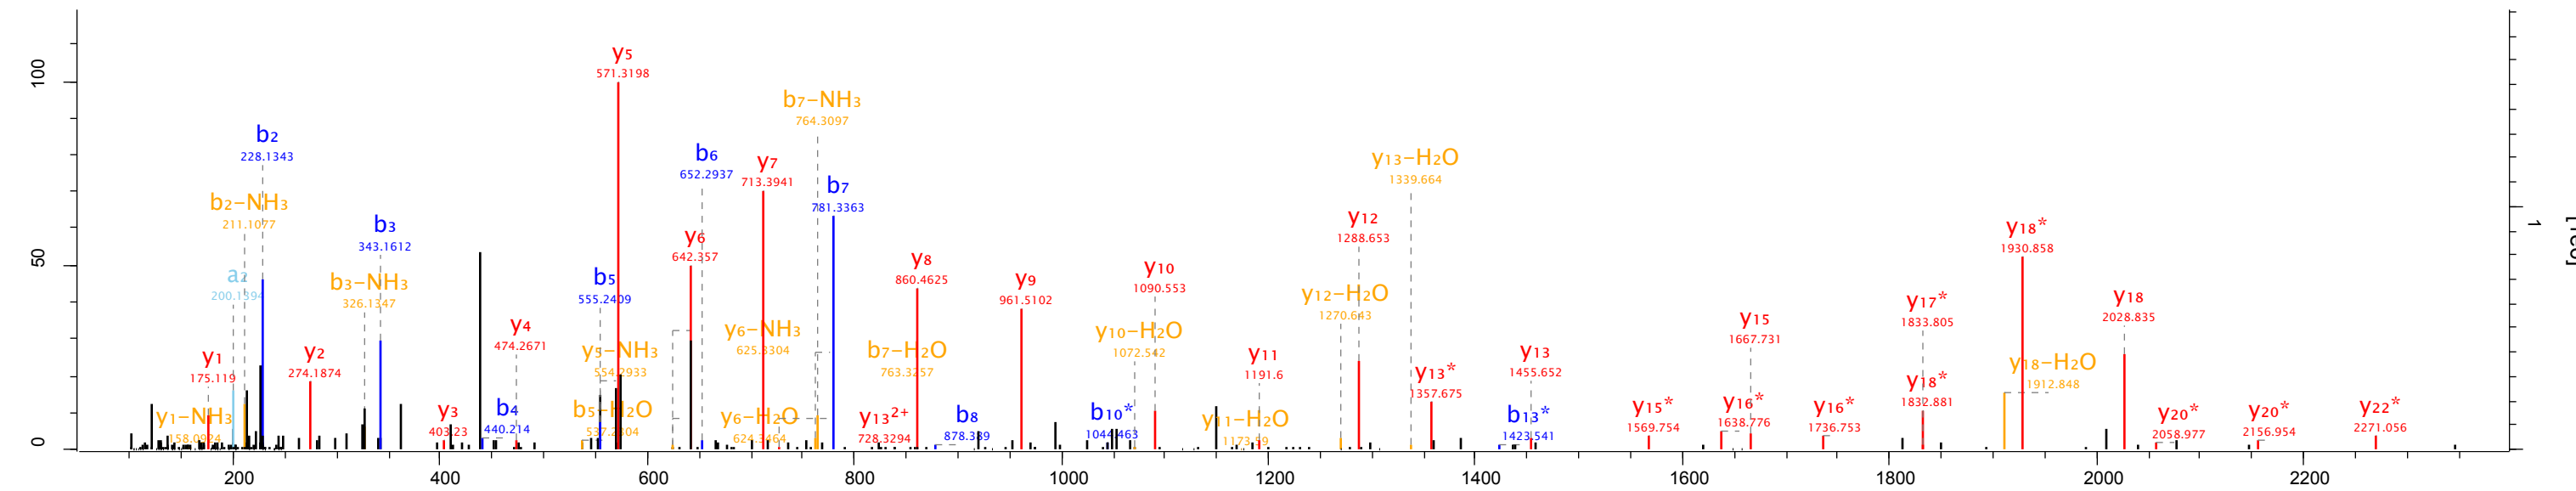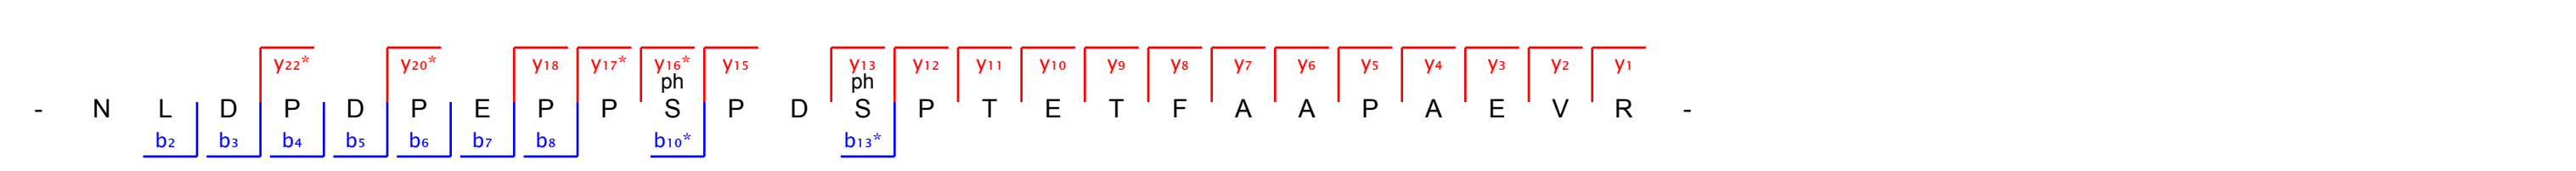



Raw file 20171215\_MaS\_33SR\_LMH\_phospho2\_03 Scan 17691 Method FTMS; HCD Score 116.05 m/z 726.33 Gene names GATAD2B

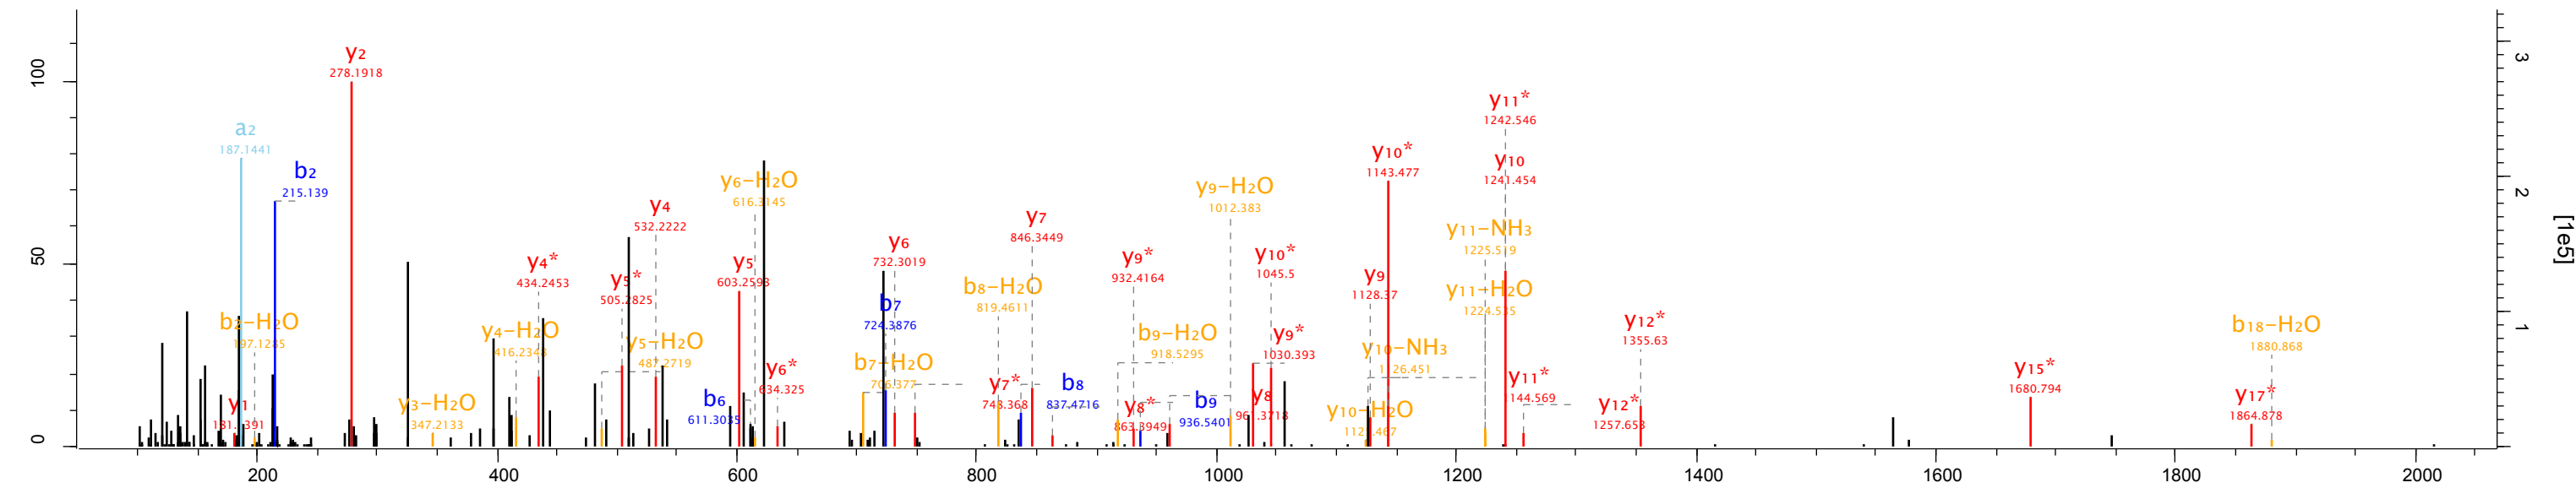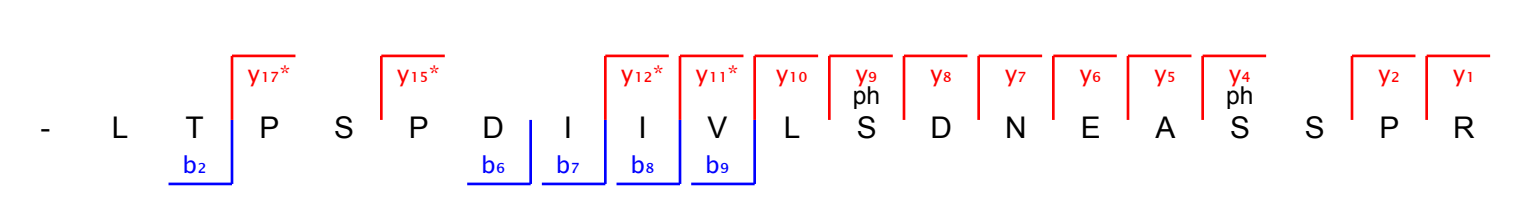

Raw file 20171215\_MaS\_33SR\_LMH\_phospho2\_03 Scan 18081 Method FTMS; HCD Score 159.41 m/z 637.28 Gene names CDC23

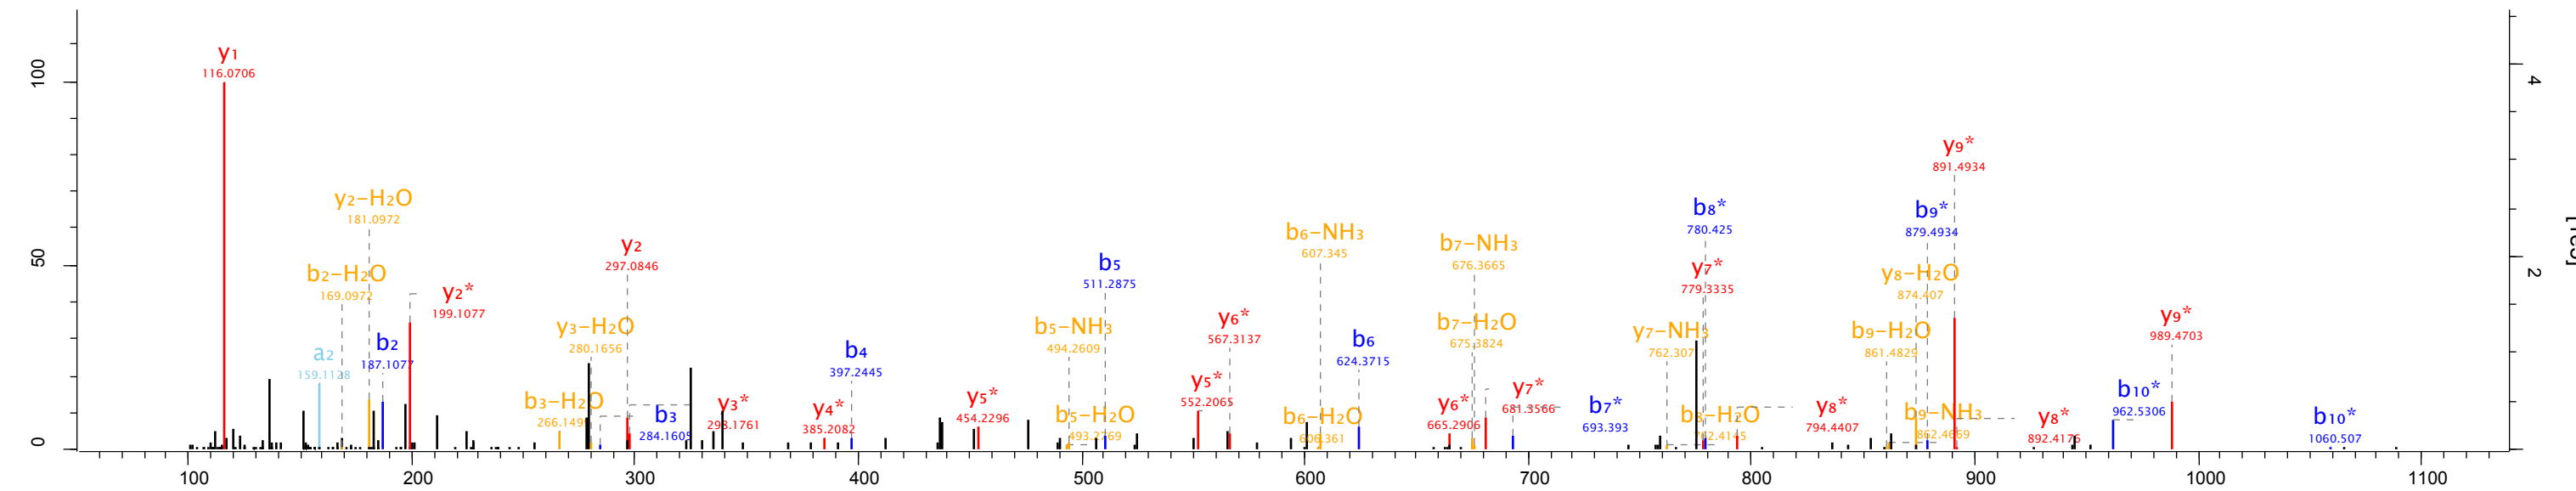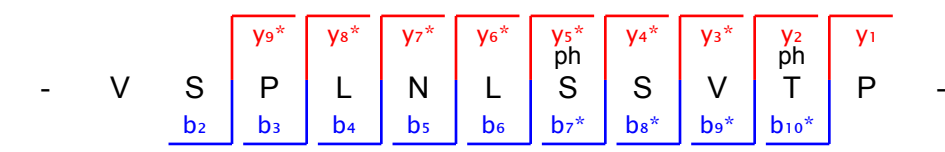

Raw file: 20171215\_MaS\_33SR\_LMH\_phospho2\_03  
 Scan: 18761 Method: FTMS; HCD Score: 180.65 m/z: 909.41 Gene names: EIF3J

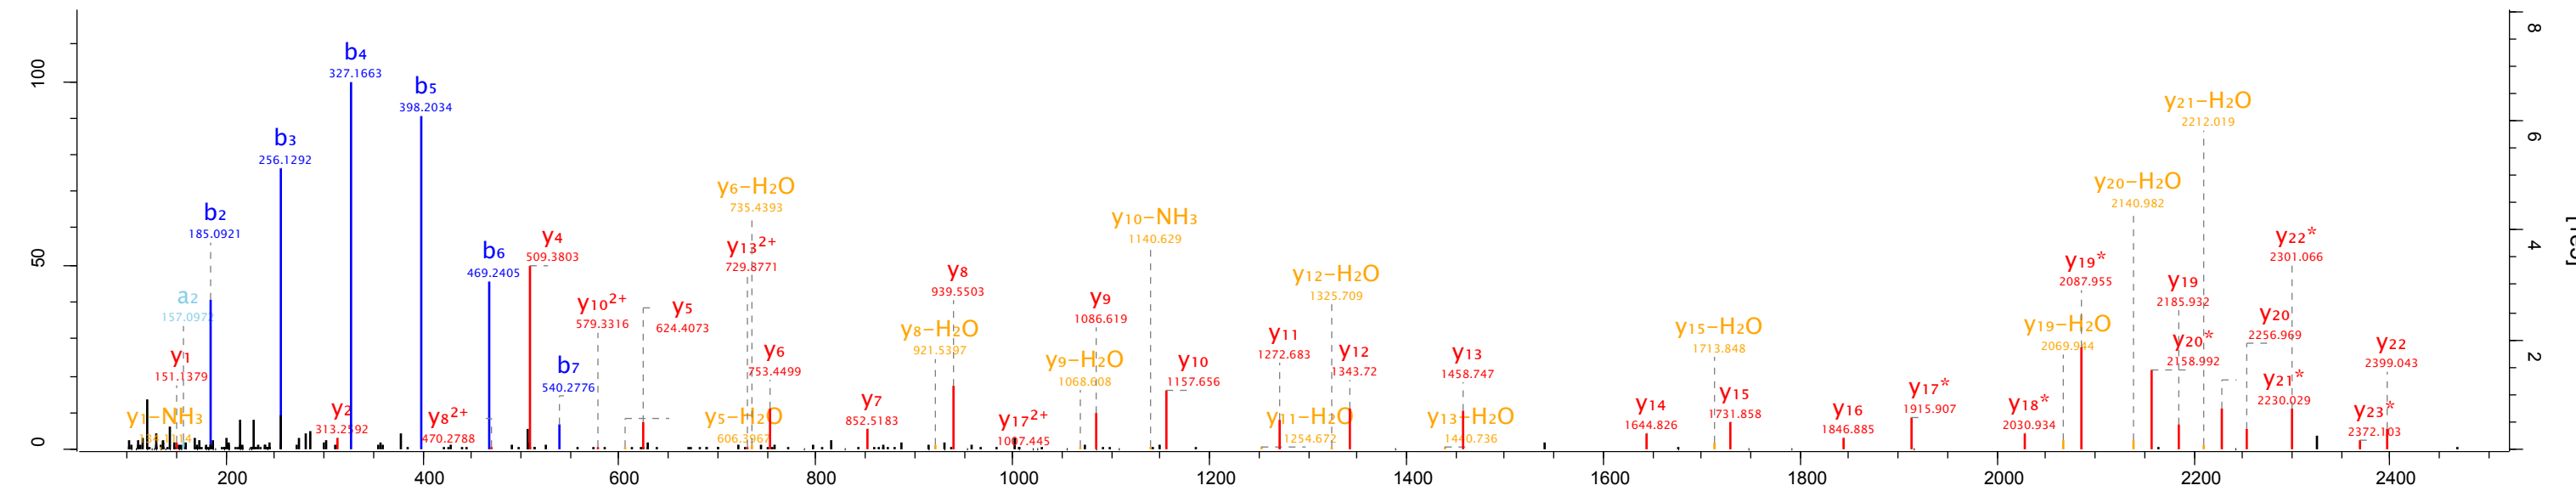

ac - A A A A A A G D S D S W D A D A F S V E D P V R K -

Fragmentation mapping (b-ions in blue, y-ions in red):

- b<sub>2</sub> (A), b<sub>3</sub> (A), b<sub>4</sub> (A), b<sub>5</sub> (A), b<sub>6</sub> (A), b<sub>7</sub> (A)
- y<sub>23</sub>\* (A), y<sub>22</sub> (A), y<sub>21</sub>\* (A), y<sub>20</sub> (A), y<sub>19</sub> (G), y<sub>18</sub>\* (D), y<sub>17</sub>\* (S), y<sub>16</sub> (D), y<sub>15</sub> (S), y<sub>14</sub> (W), y<sub>13</sub> (D), y<sub>12</sub> (A), y<sub>11</sub> (D), y<sub>10</sub> (A), y<sub>9</sub> (F), y<sub>8</sub> (S), y<sub>7</sub> (V), y<sub>6</sub> (E), y<sub>5</sub> (D), y<sub>4</sub> (P), y<sub>2</sub> (V), y<sub>1</sub> (R), y<sub>1</sub> (K)

Raw file: 20171215\_MaS\_33SR\_LMH\_phospho2\_03  
 Scan: 18851 Method: FTMS; HCD Score: 208.93 m/z: 1131.98 Gene names: SMN1

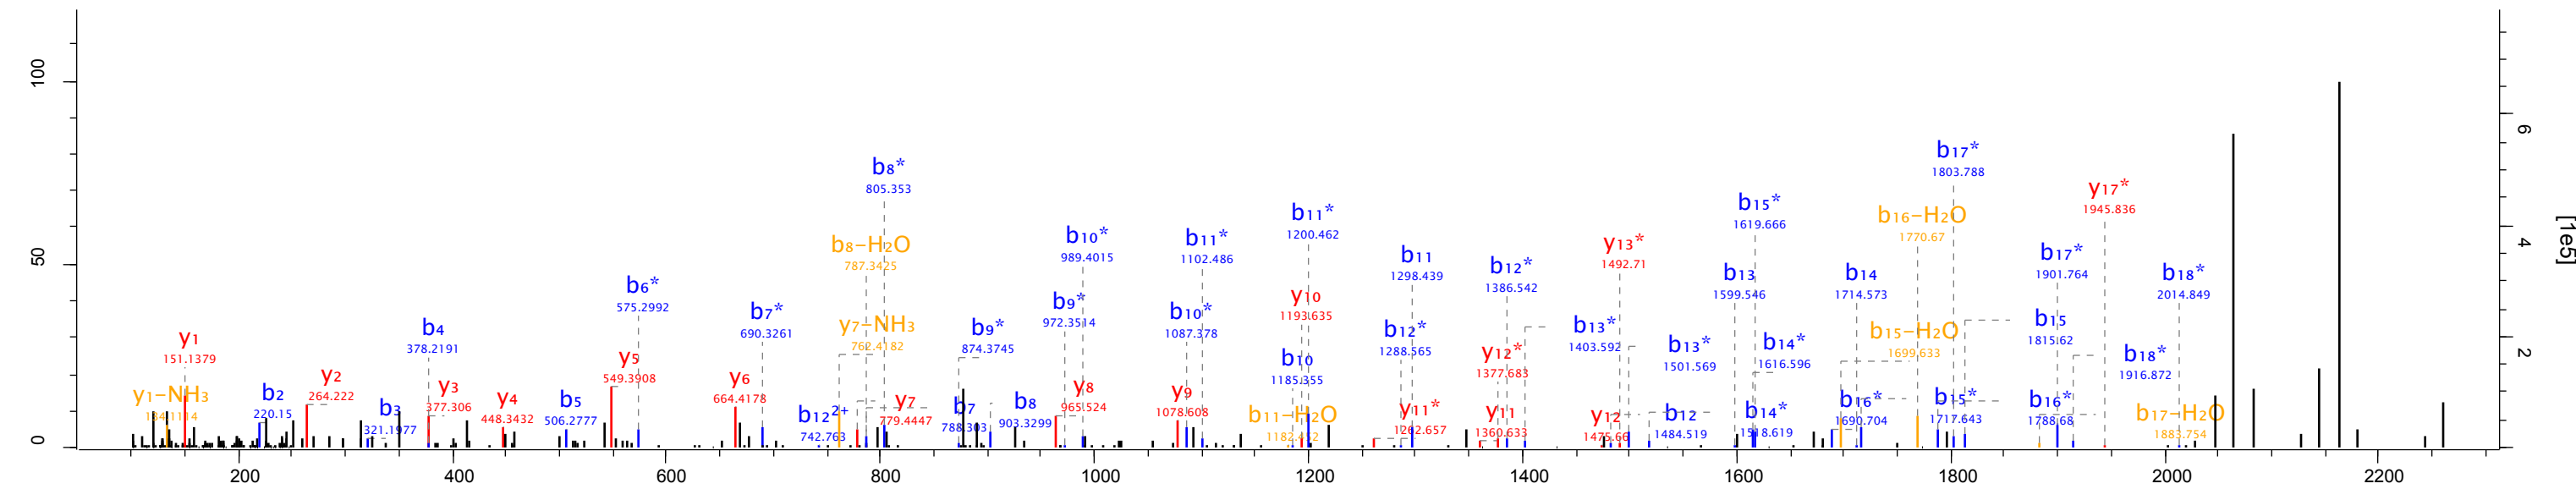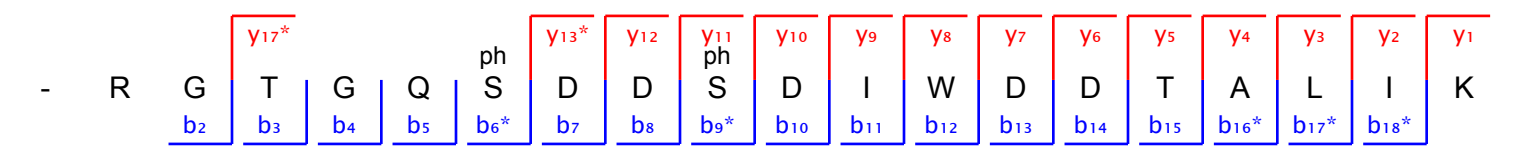

Raw file 20171215\_MaS\_33SR\_LMH\_phospho2\_03 Scan 19071 Method FTMS; HCD Score 197.35 m/z 1139.07 Gene names FOXK1

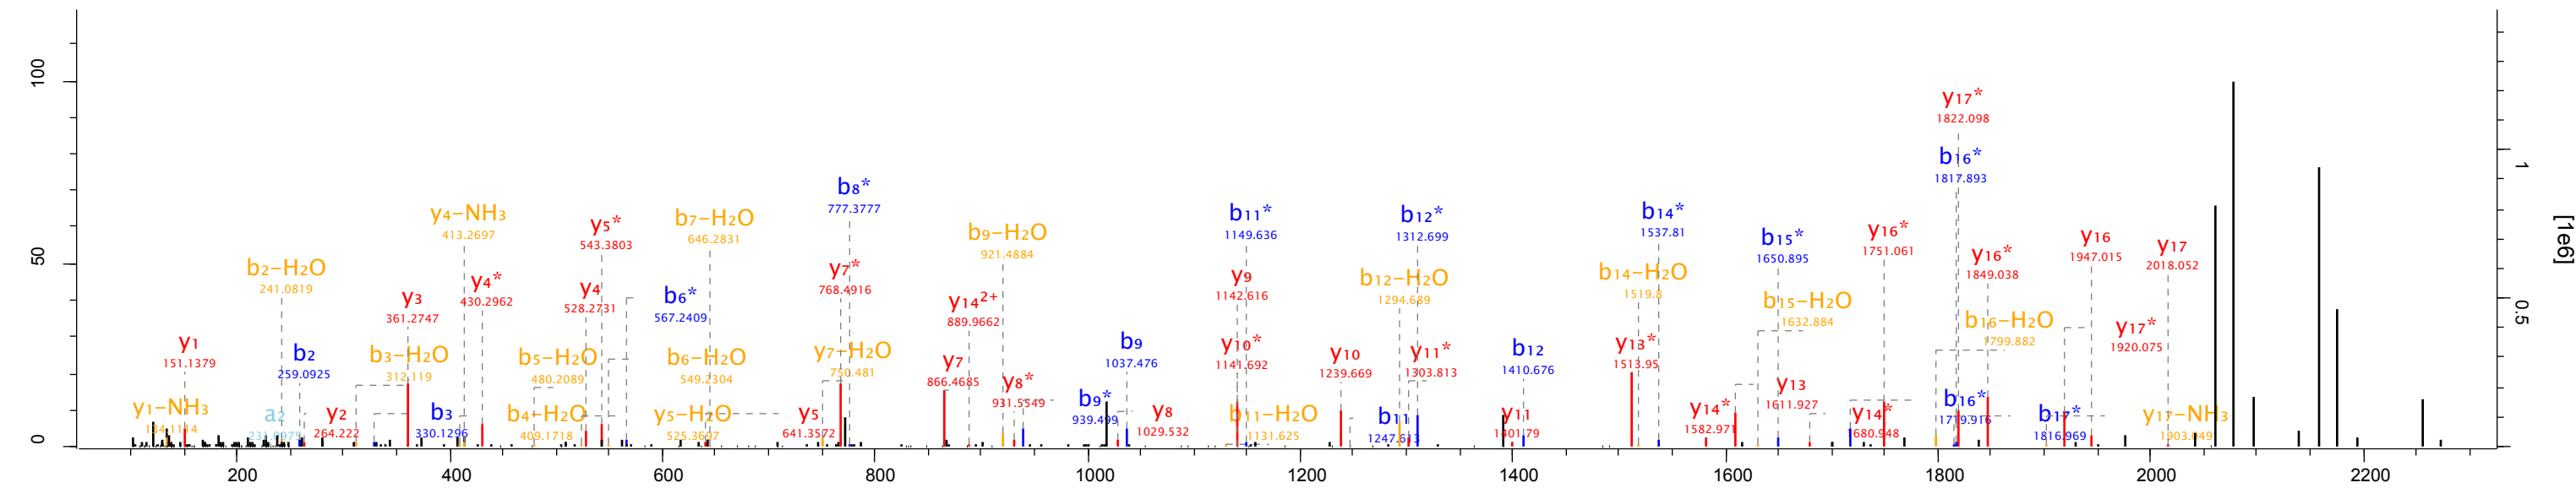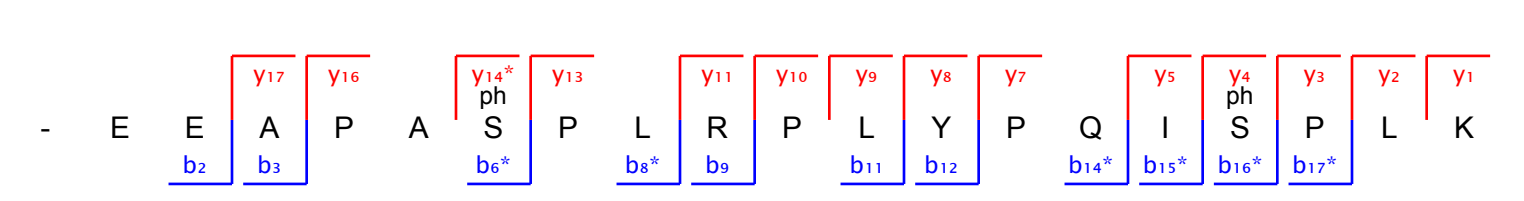

Raw file

20171215\_MaS\_33SR\_LMH\_phospho2\_03

| Scan  | Method    | Score | m/z    | Gene names |
|-------|-----------|-------|--------|------------|
| 19851 | FTMS; HCD | 46.43 | 935.38 | RNF113A    |

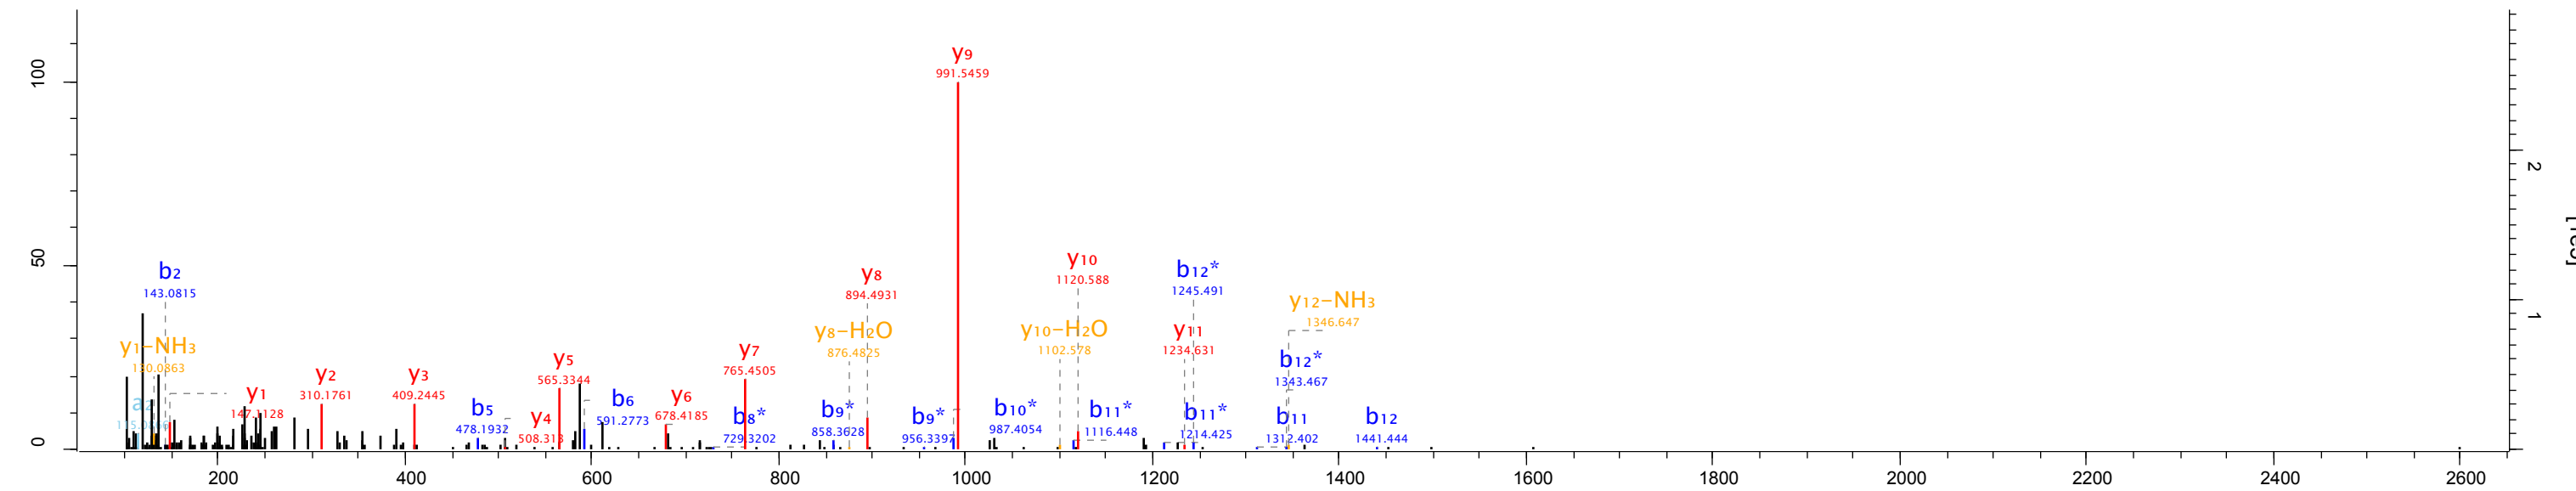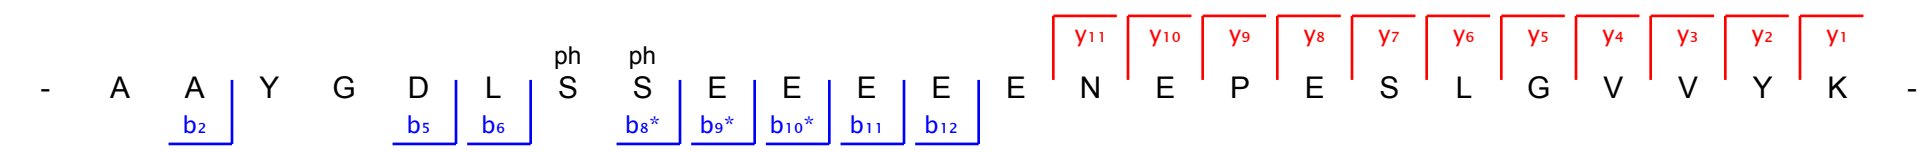

Raw file 20171215\_MaS\_33SR\_LMH\_phospho2\_03 Scan 1991 Method FTMS; HCD Score 58.59 m/z 343.82 Gene names SRRM2

20171215\_MaS\_33SR\_LMH\_phospho2\_03

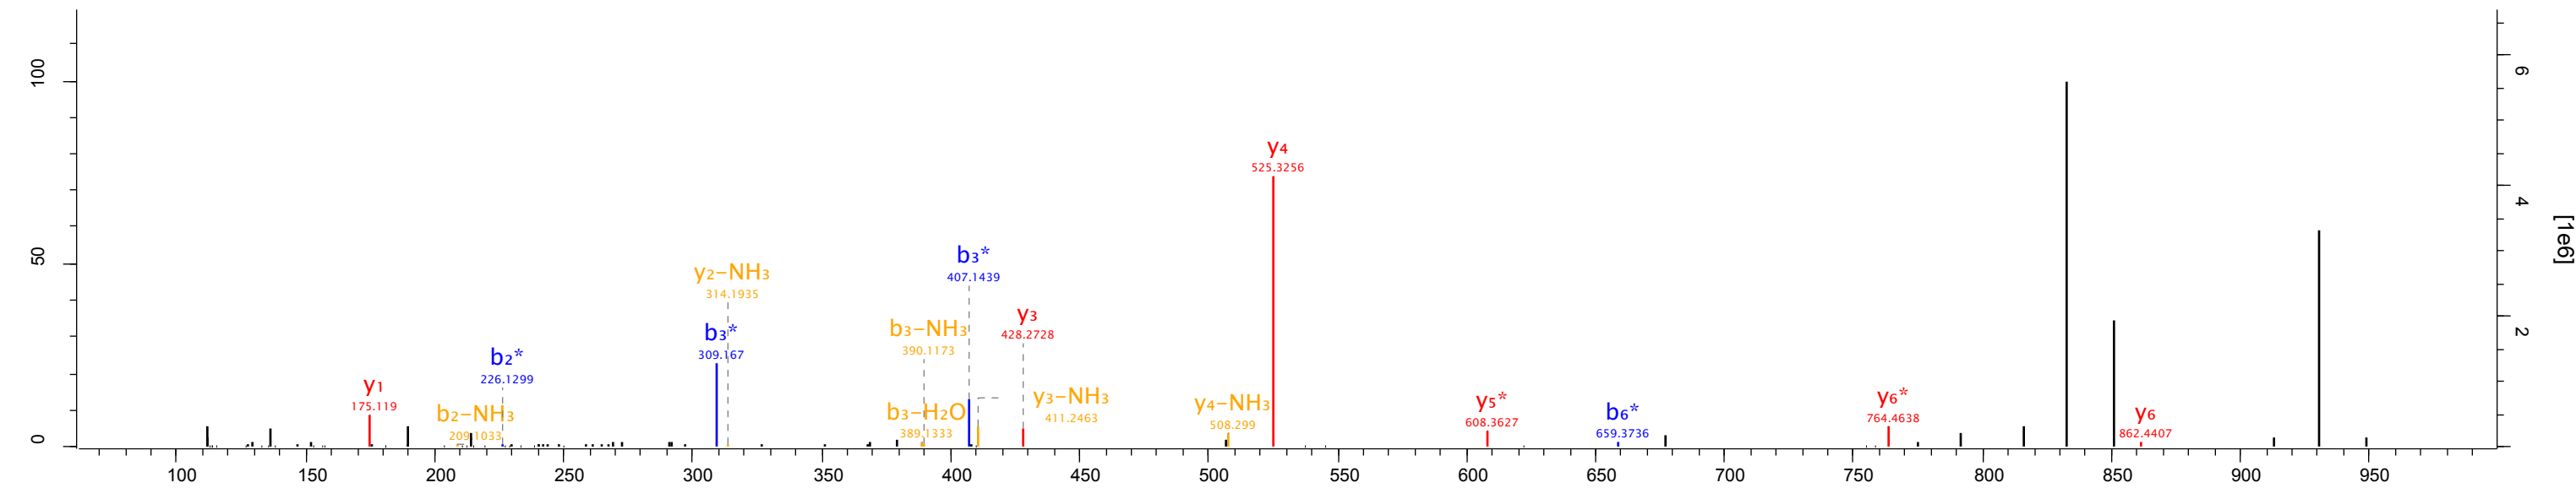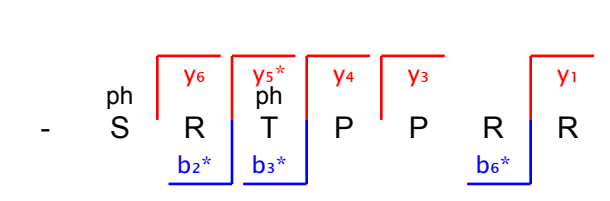

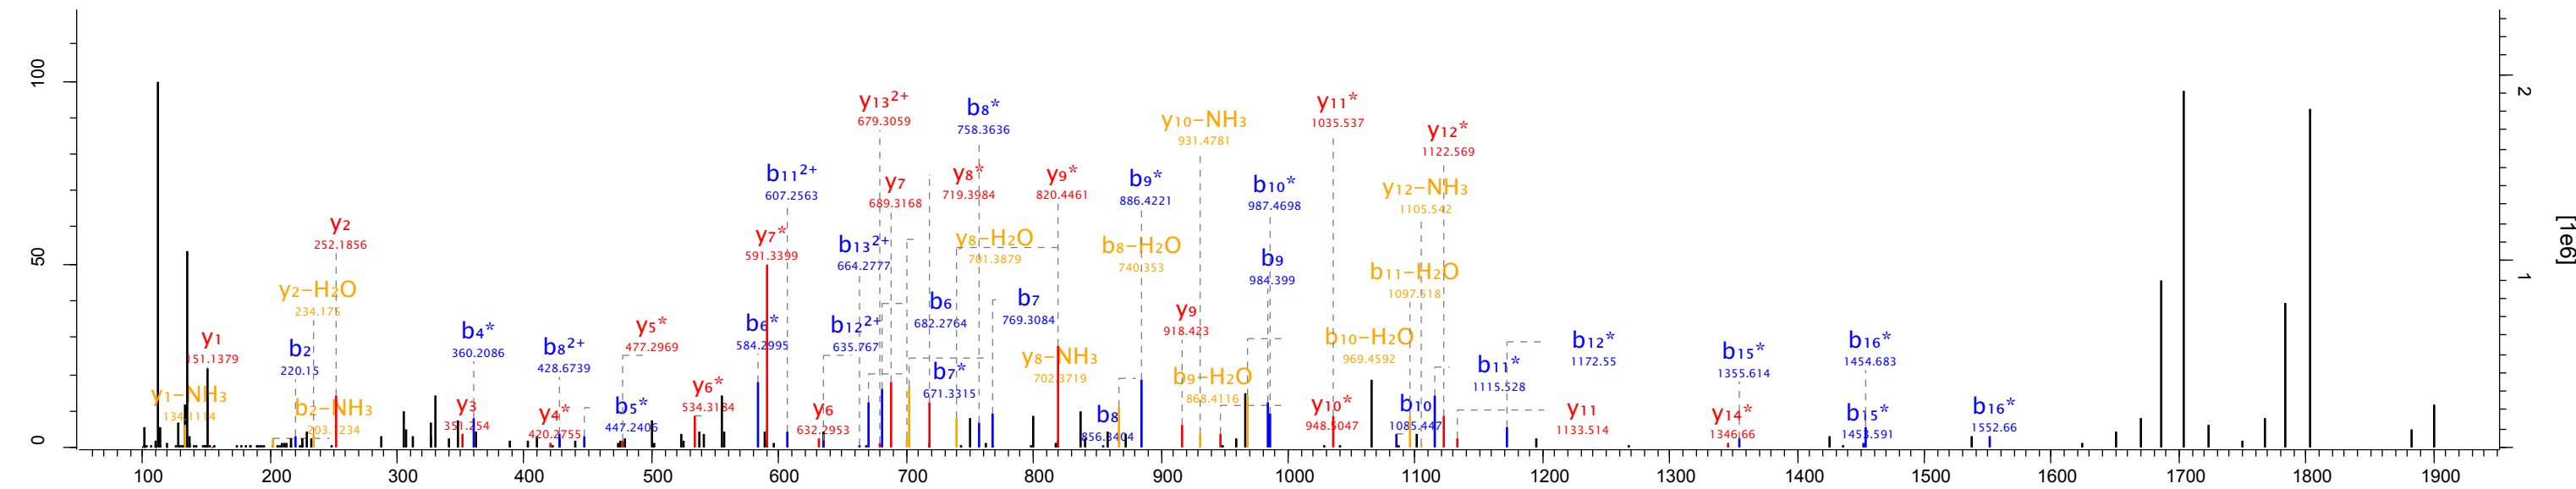

- G R A ph S S H S S Q T Q G G G S ph S V T K -  
 b<sub>2</sub>\* b<sub>4</sub>\* b<sub>5</sub>\* b<sub>6</sub> b<sub>7</sub> b<sub>8</sub> b<sub>9</sub> b<sub>10</sub> b<sub>11</sub>\* b<sub>12</sub>\* b<sub>13</sub><sup>2+</sup> b<sub>15</sub>\* b<sub>16</sub>\*



Raw file 20171215\_MaS\_33SR\_LMH\_phospho2\_03 Scan 21201 Method FTMS; HCD Score 89.97 m/z 792.33 Gene names DNTTIP2

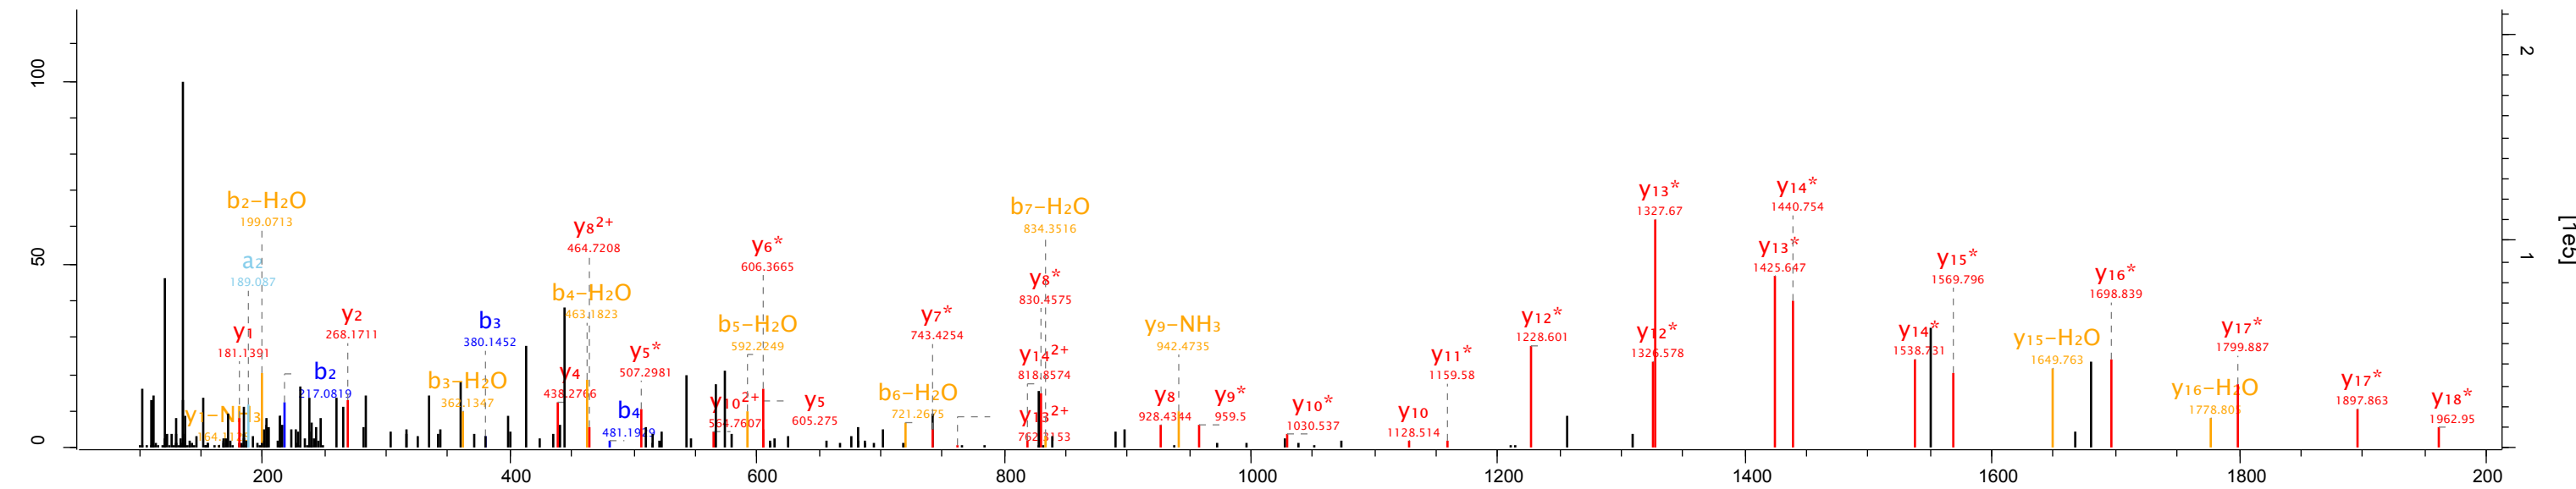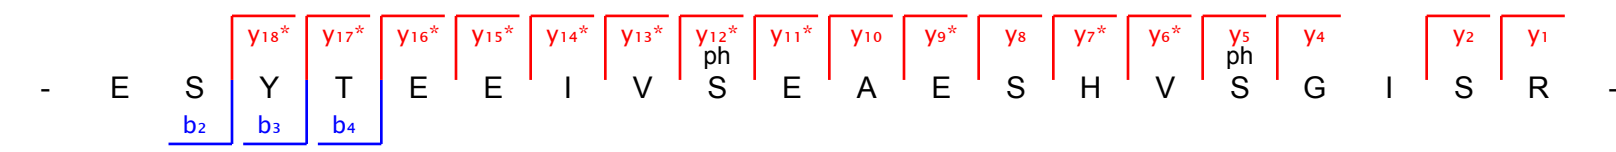

Raw file 20171215\_MaS\_33SR\_LMH\_phospho2\_03 Scan 22201 Method FTMS; HCD Score 157.09 m/z 1241.57 Gene names FAM129B

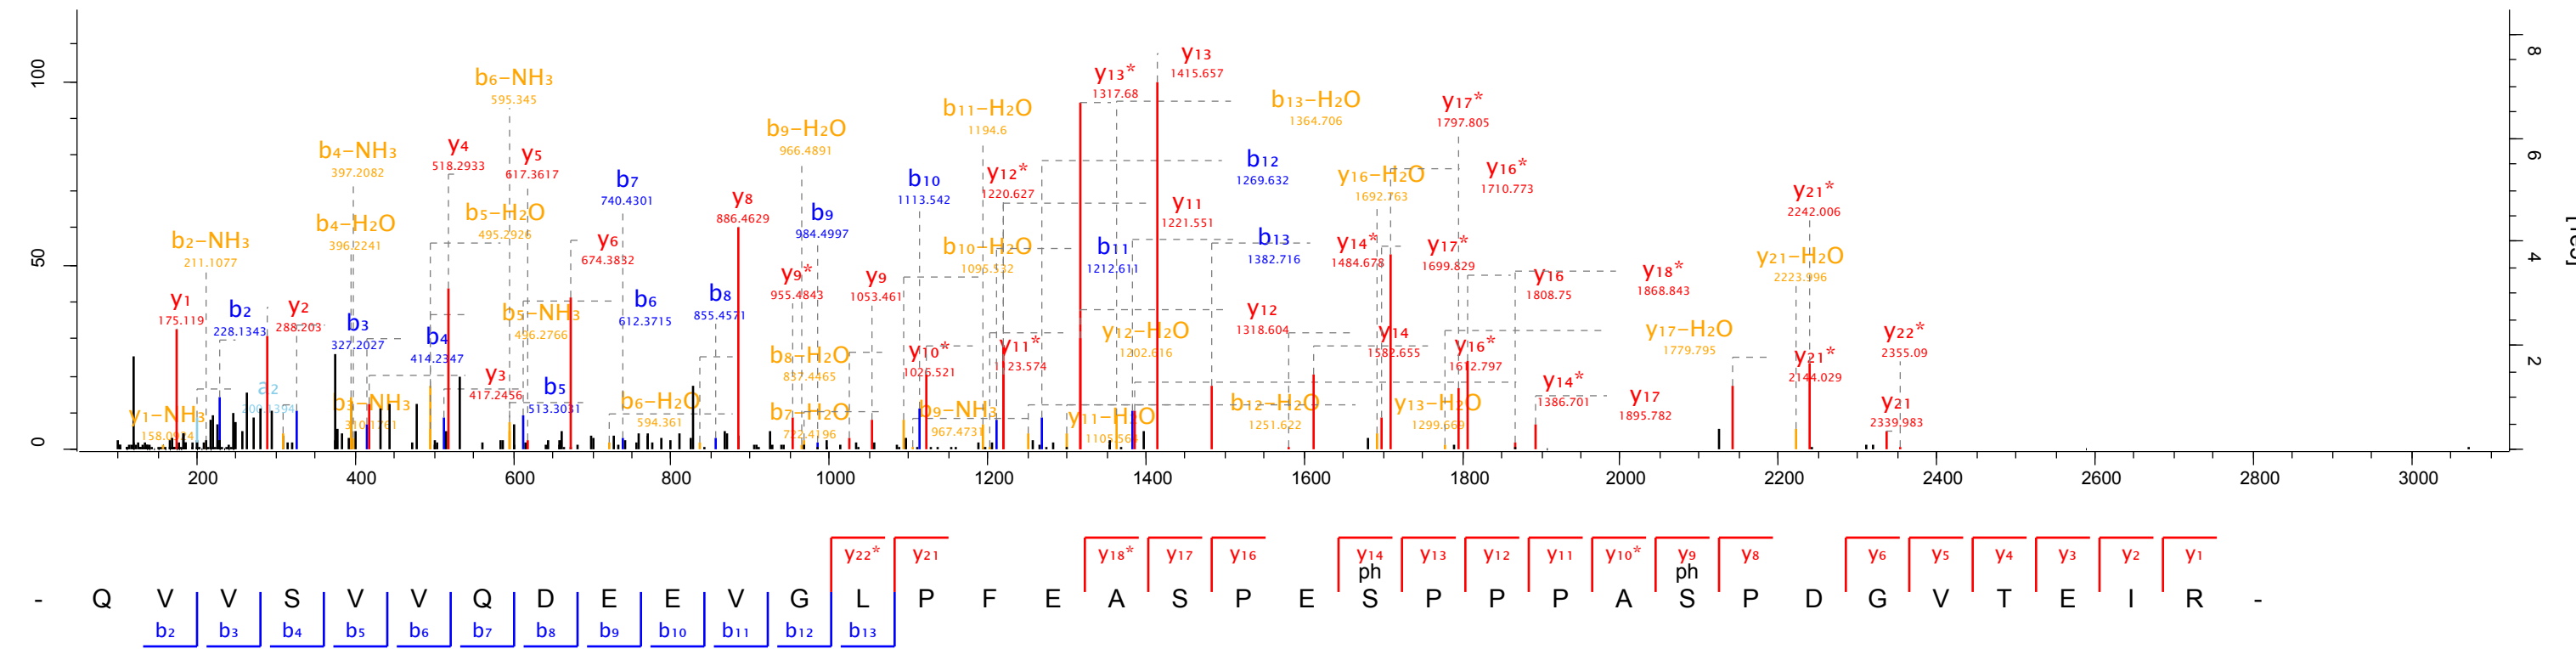

Raw file 20171215\_MaS\_33SR\_LMH\_phospho2\_03 Scan 22581 Method FTMS; HCD Score 196.07 m/z 1134.01 Gene names FOSL1

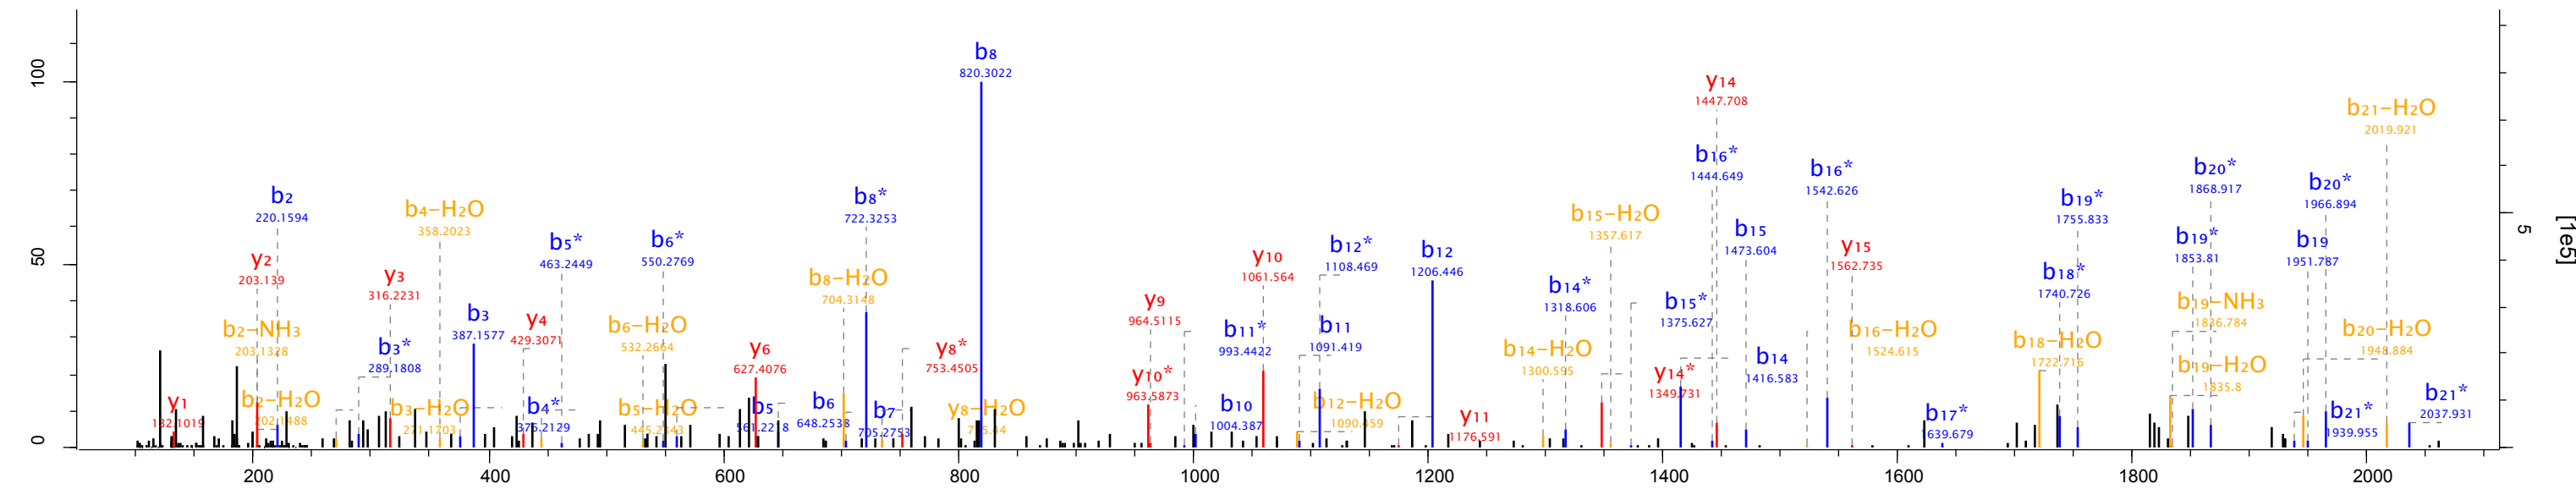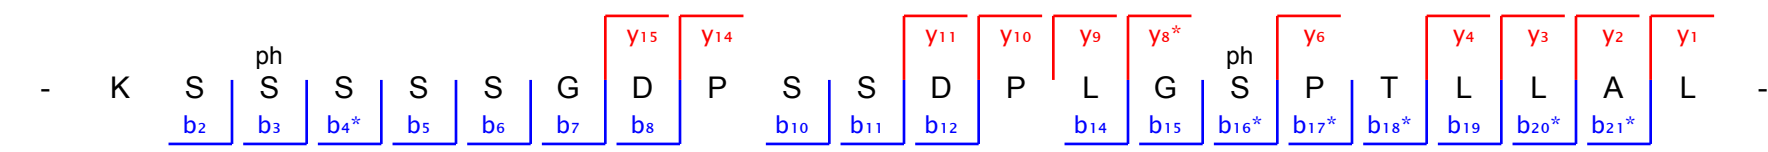

Raw file 20171215\_MaS\_33SR\_LMH\_phospho2\_03 Scan 2281 Method FTMS; HCD Score 81.03 m/z 697.28 Gene names IGF2BP3

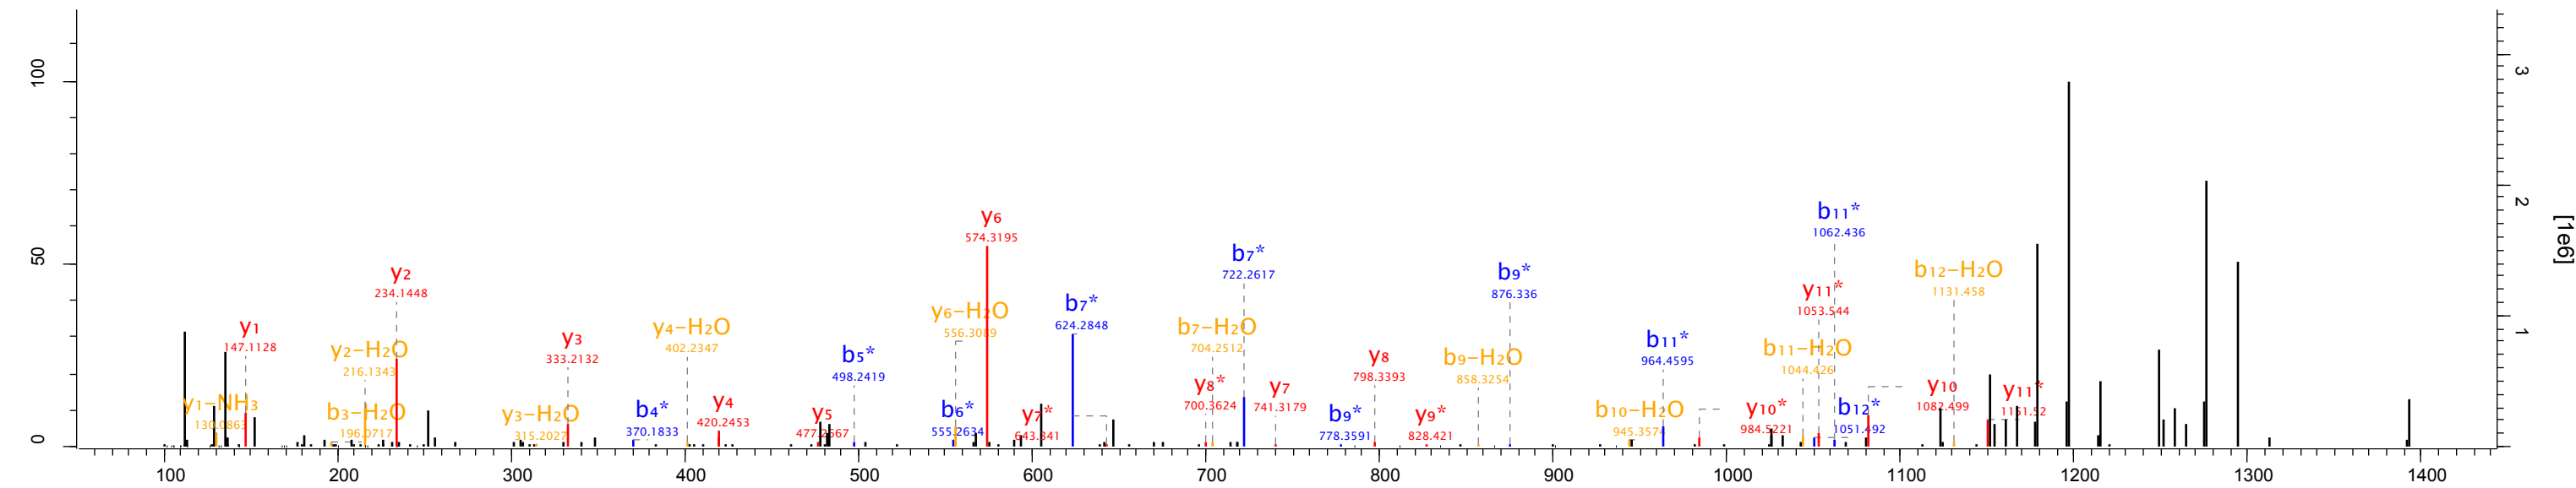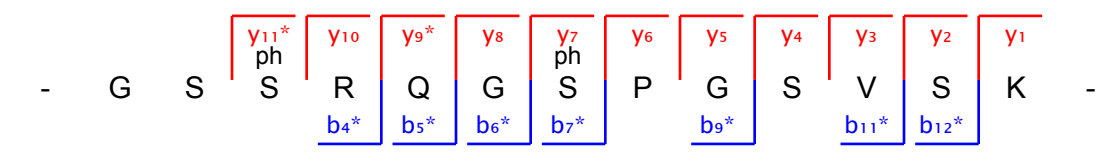

Raw file

20171215\_MaS\_33SR\_LMH\_phospho2\_03

| Scan | Method    | Score | m/z    | Gene names |
|------|-----------|-------|--------|------------|
| 2511 | FTMS; HCD | 40.43 | 521.89 | ERC1       |

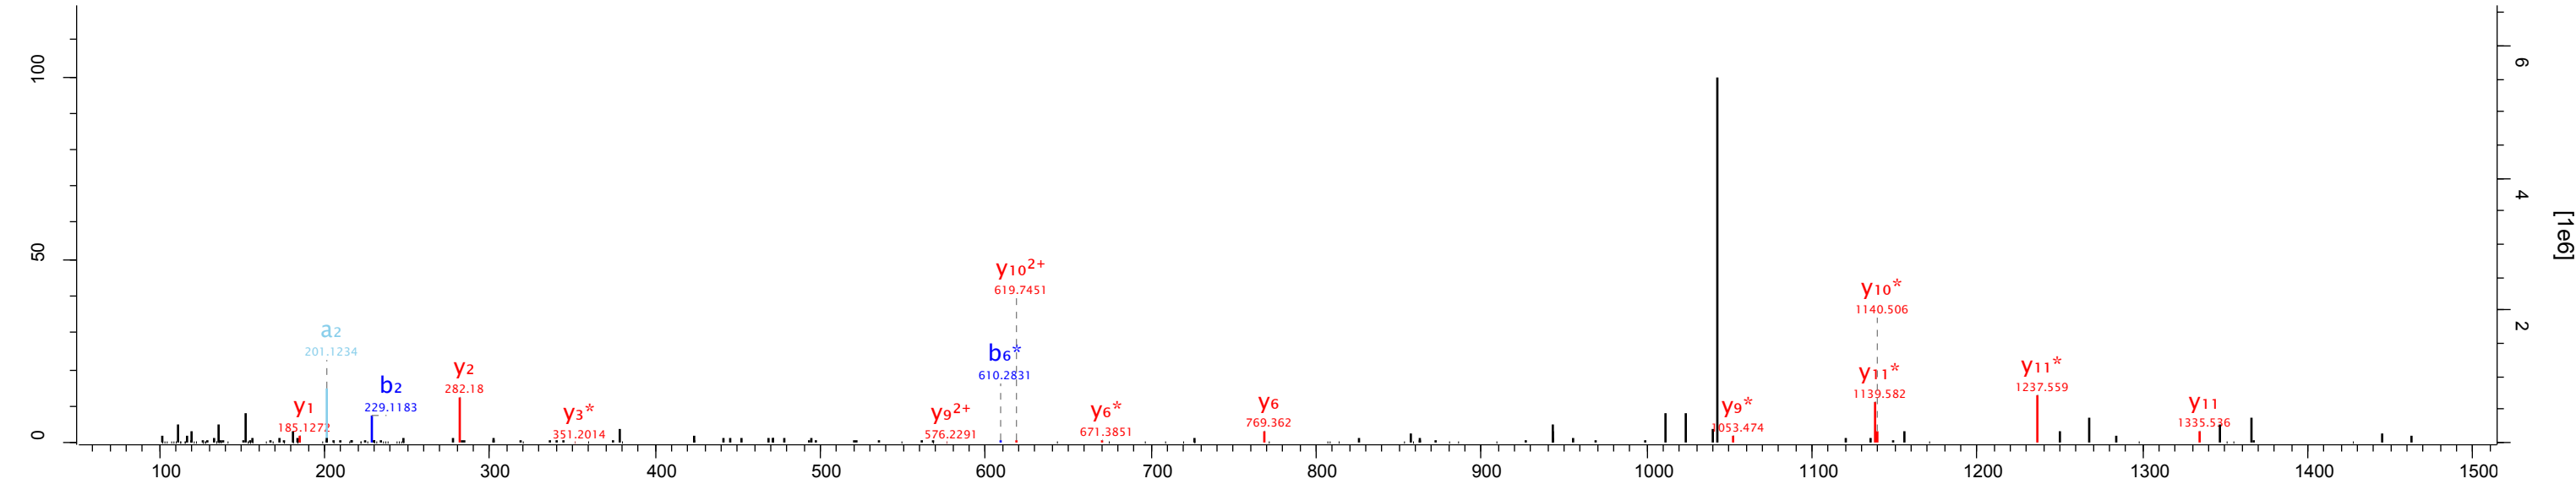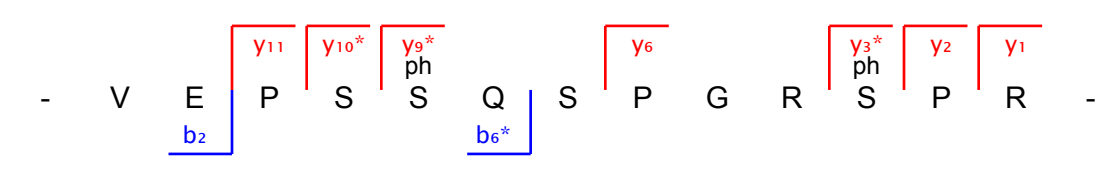

Raw file: 20171215\_MaS\_33SR\_LMH\_phospho2\_03  
 Scan: 2811 Method: FTMS; HCD Score: 119.62 m/z: 591.25 Gene names: THRAP3

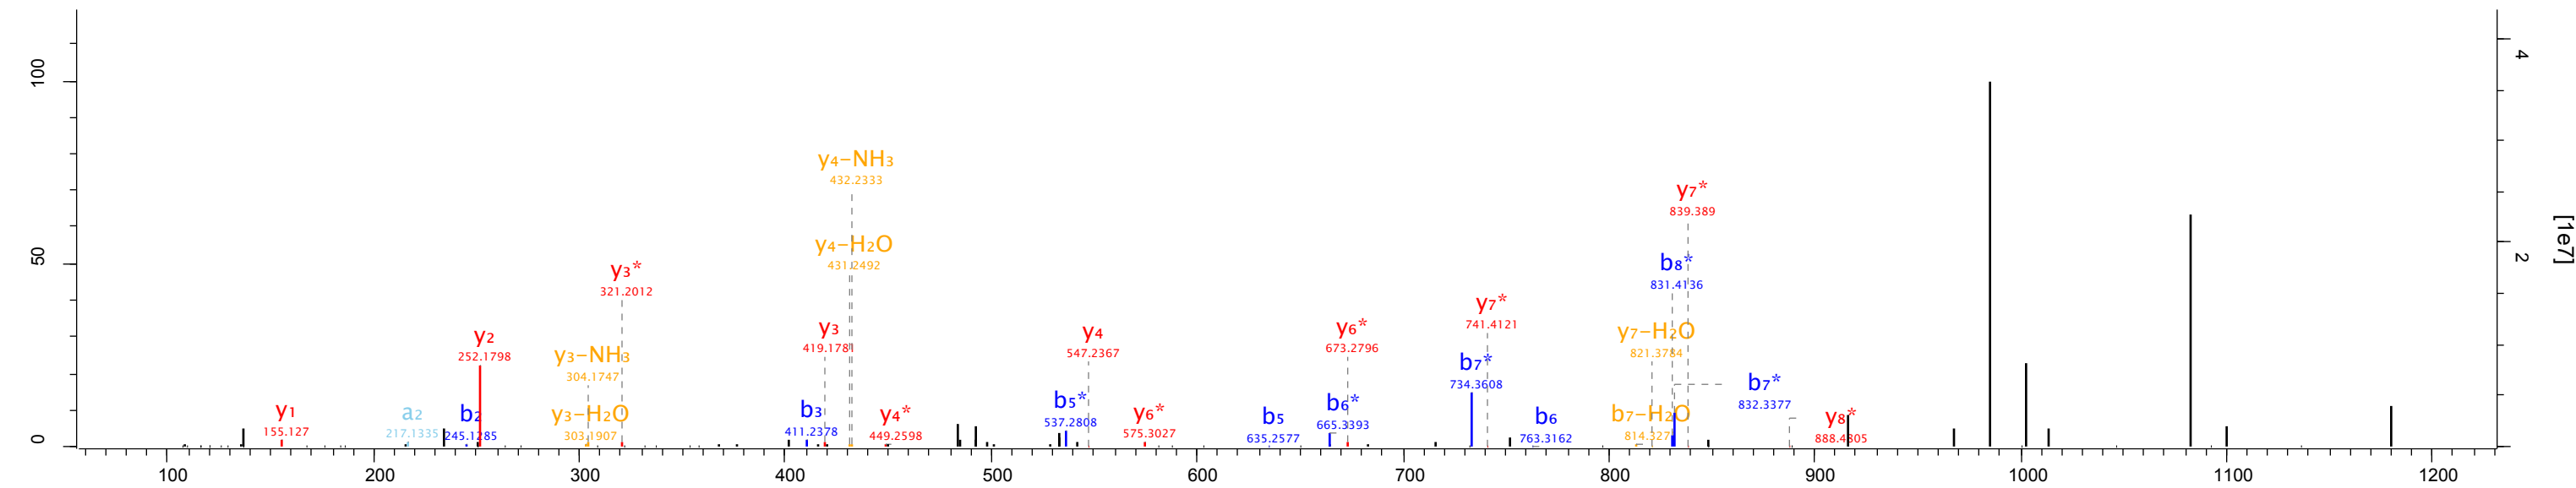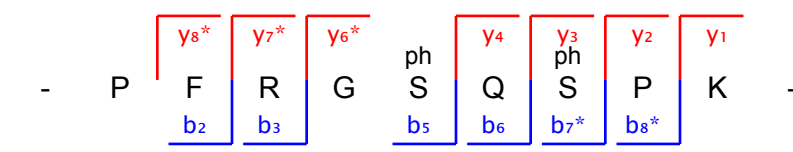

Raw file 20171215\_MaS\_33SR\_LMH\_phospho2\_03 Scan 3131 Method FTMS; HCD Score 72.43 m/z 738.84 Gene names EIF4G1

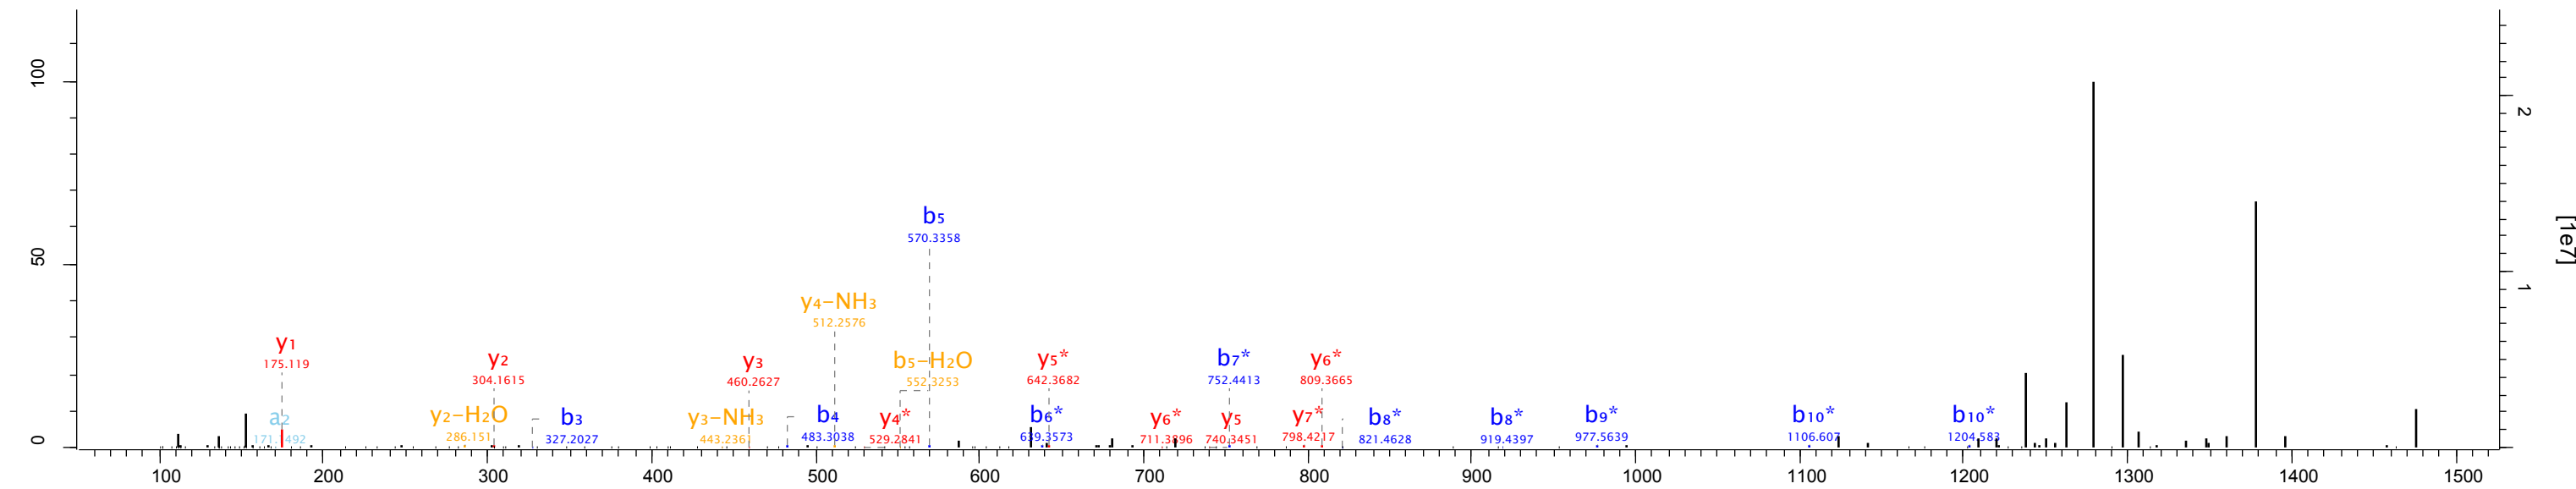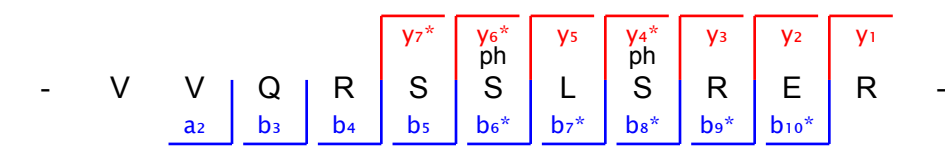

Raw file 20171215\_MaS\_33SR\_LMH\_phospho2\_03 Scan 3151 Method FTMS; HCD Score 112.07 m/z 743.32 Gene names SRRM2

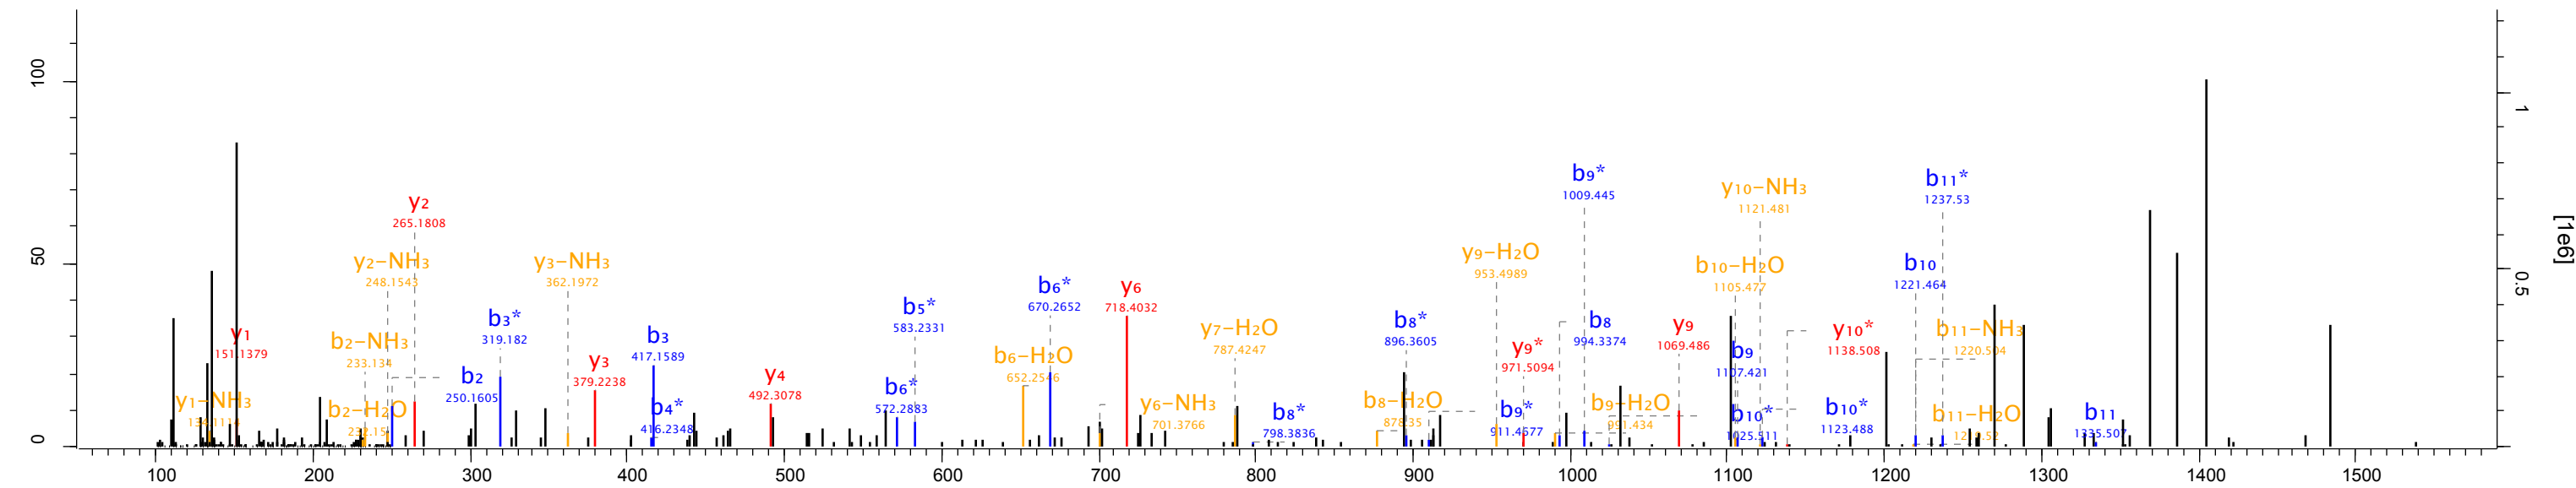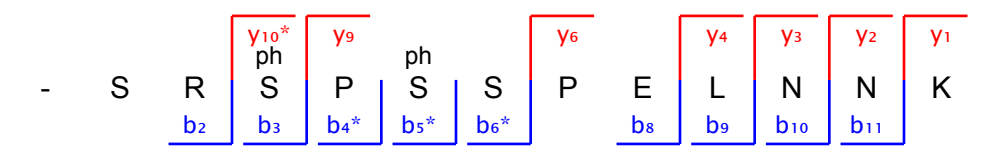



Raw file

20171215\_MaS\_33SR\_LMH\_phospho2\_03

Scan 3181 Method FTMS; HCD Score 48.37 m/z 570.76 Gene names STK11IP

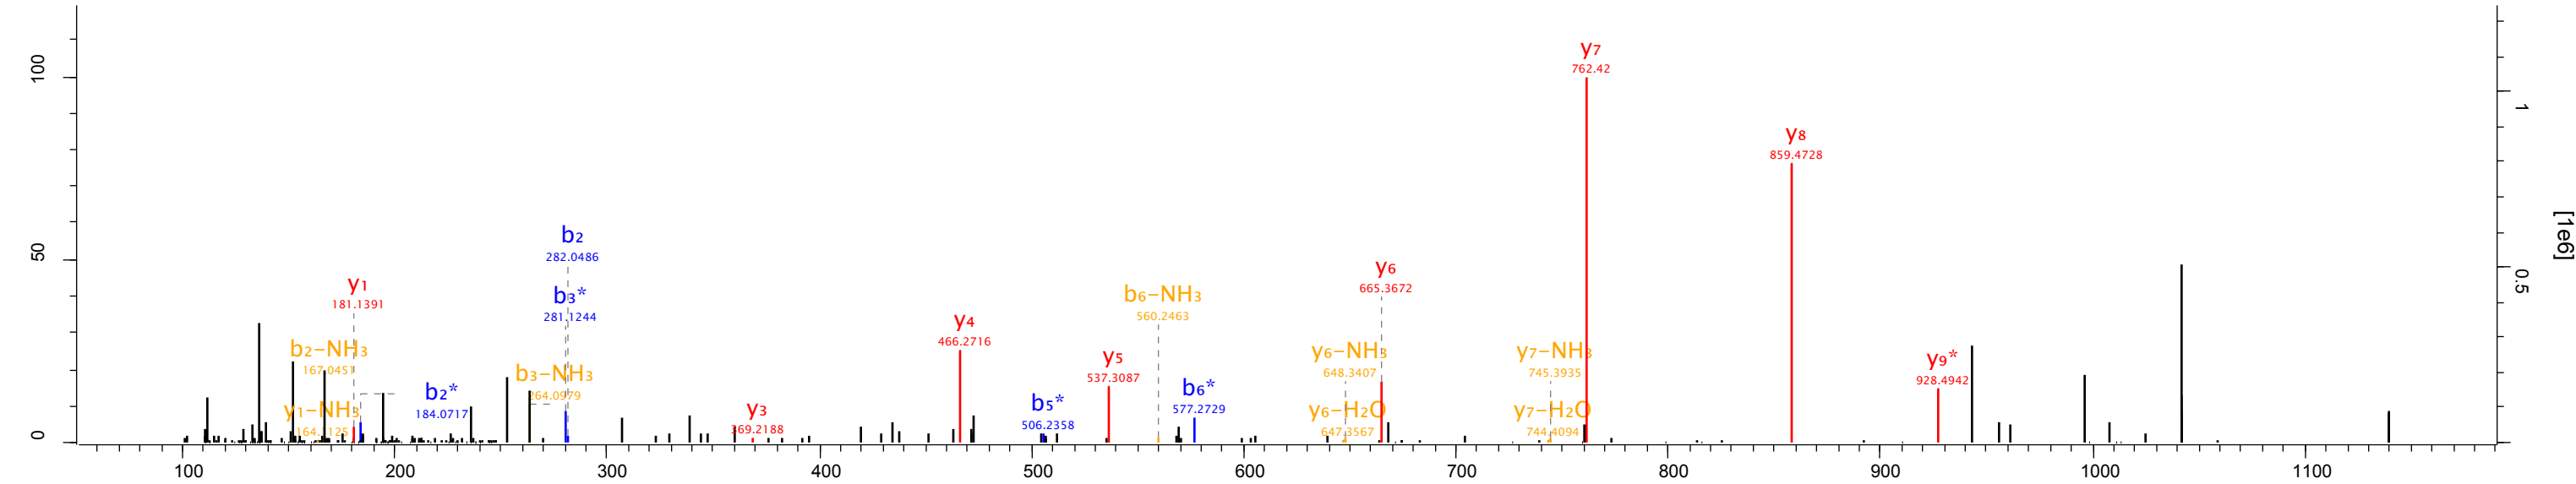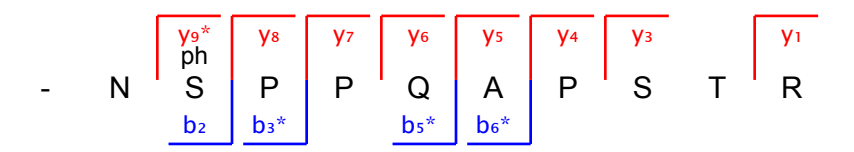

Raw file 20171215\_MaS\_33SR\_LMH\_phospho2\_03 Scan 3741 Method FTMS; HCD Score 106.82 m/z 451.18 Gene names SRSF1

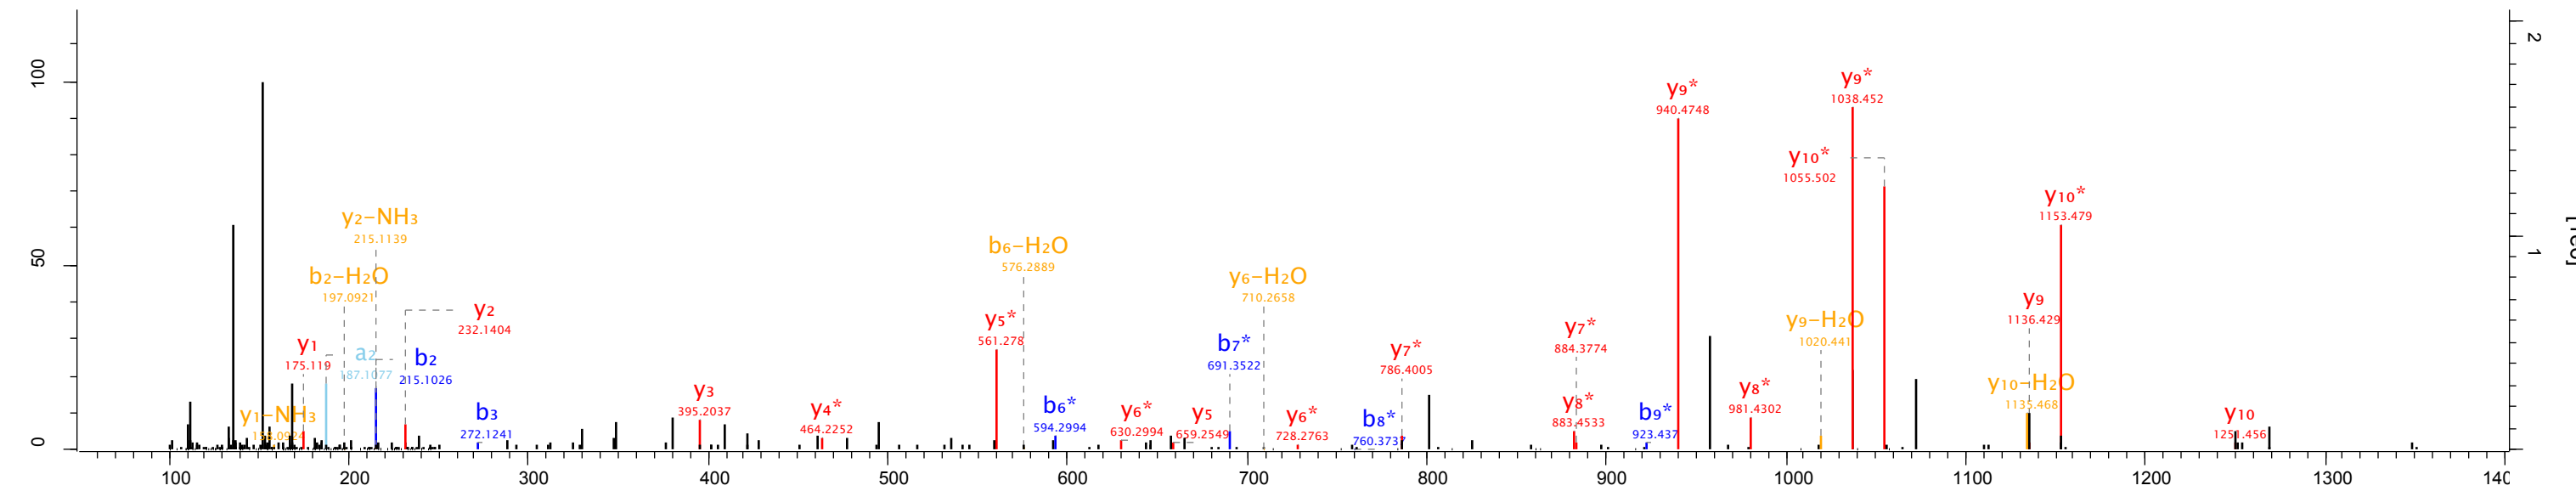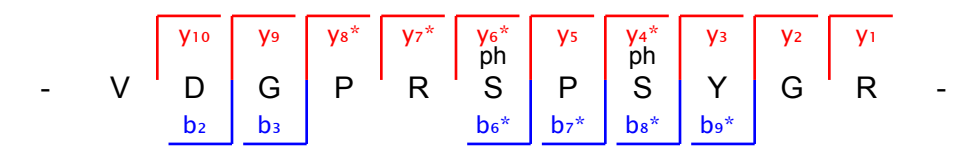

Raw file: 20171215\_MaS\_33SR\_LMH\_phospho2\_03  
 Scan: 3851 Method: FTMS; HCD Score: 299.69 m/z: 1017.9 Gene names: HIRIP3

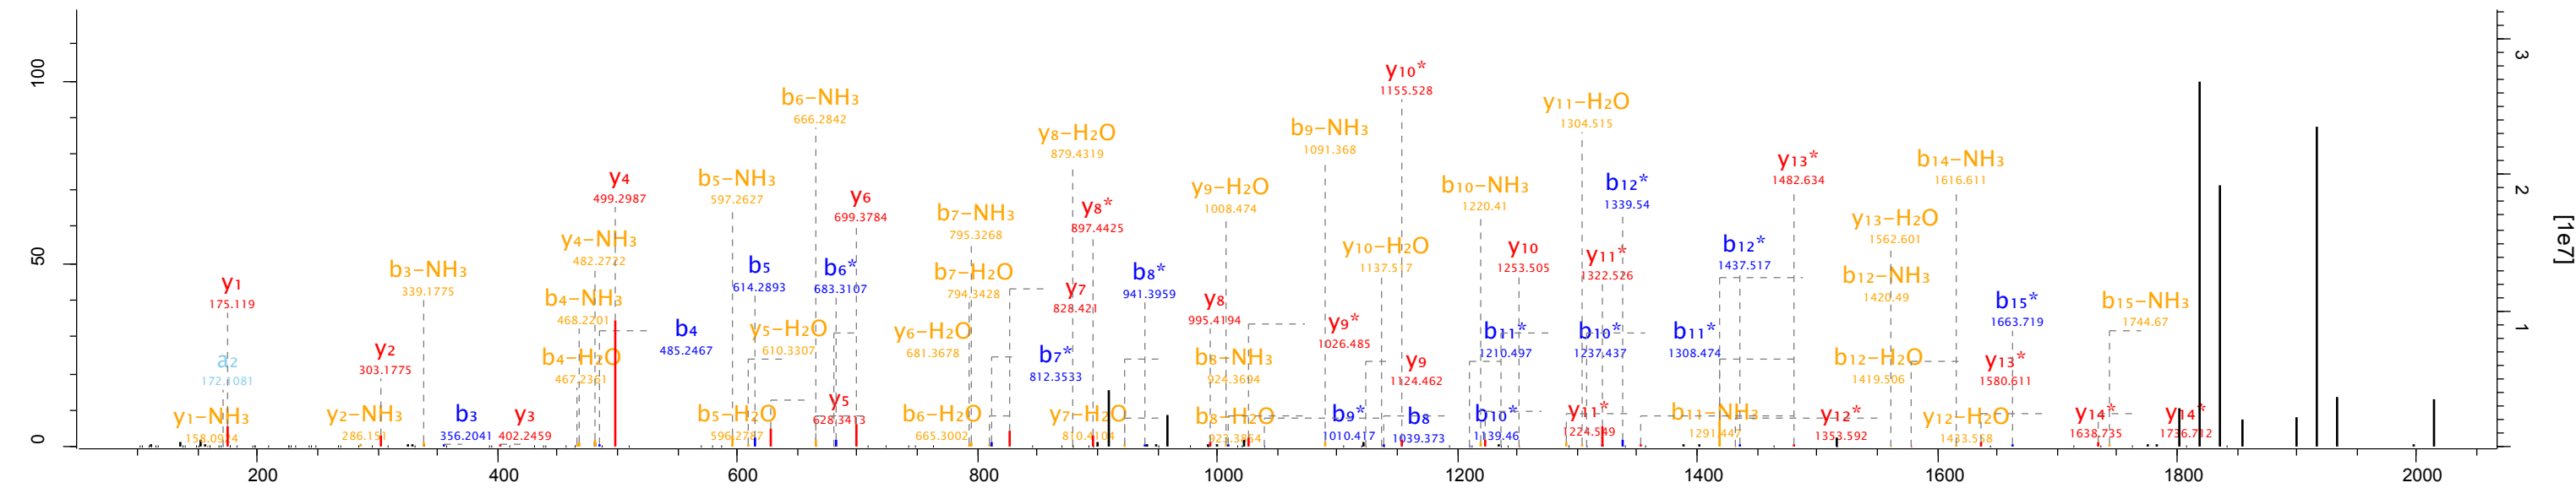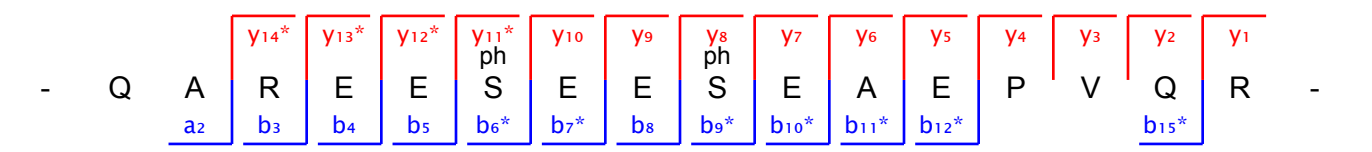

20171215\_MaS\_33SR\_LMH\_phospho2\_03 3901 FTMS; HCD 119.34 498.74 STMN1

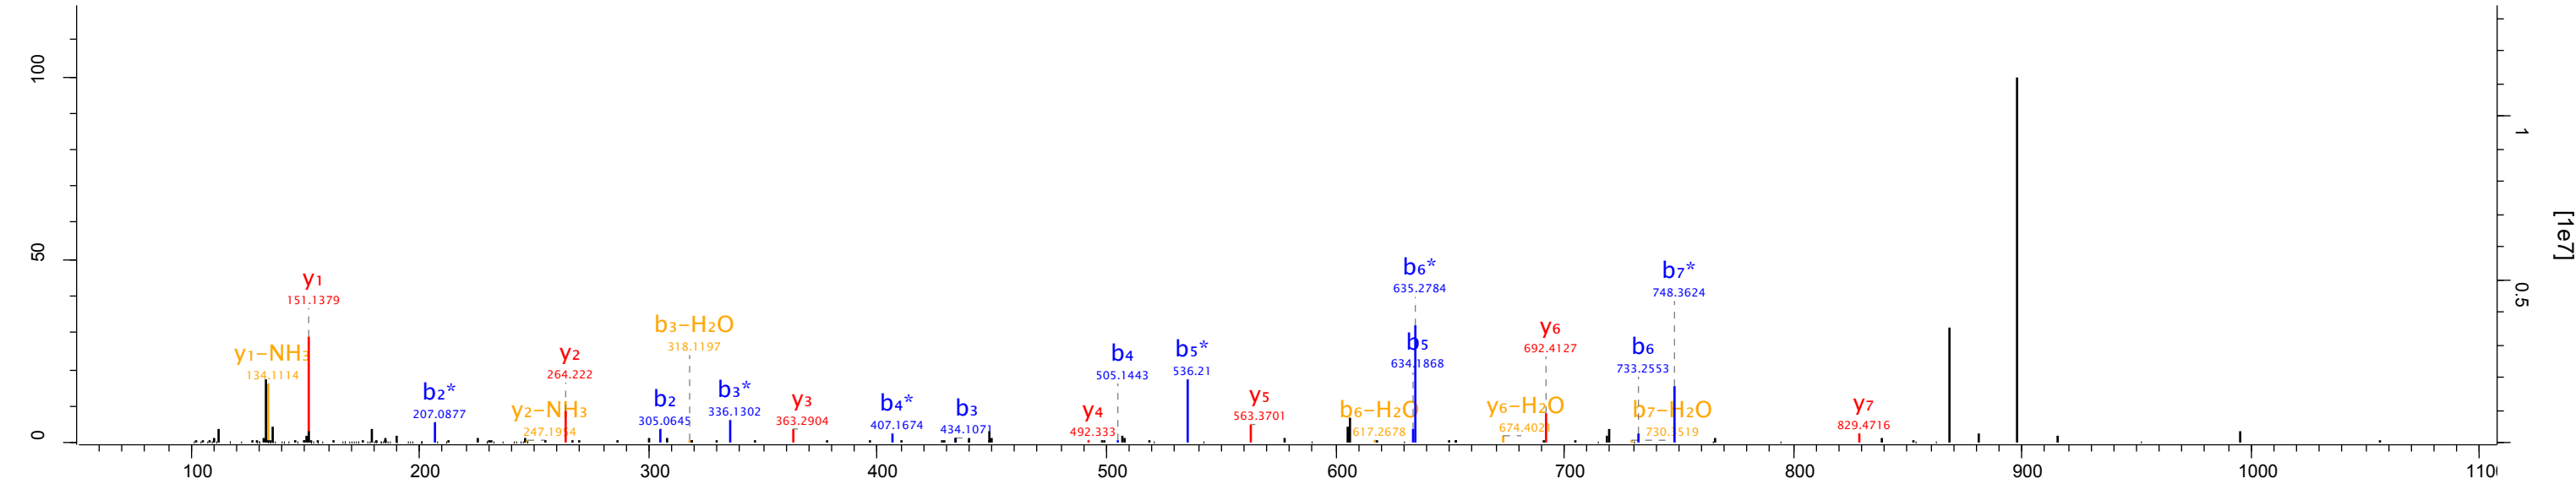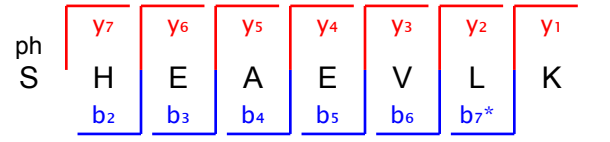

Raw file 20171215\_MaS\_33SR\_LMH\_phospho2\_03 Scan 3931 Method FTMS; HCD Score 104.15 m/z 592.22 Gene names PHLDB2

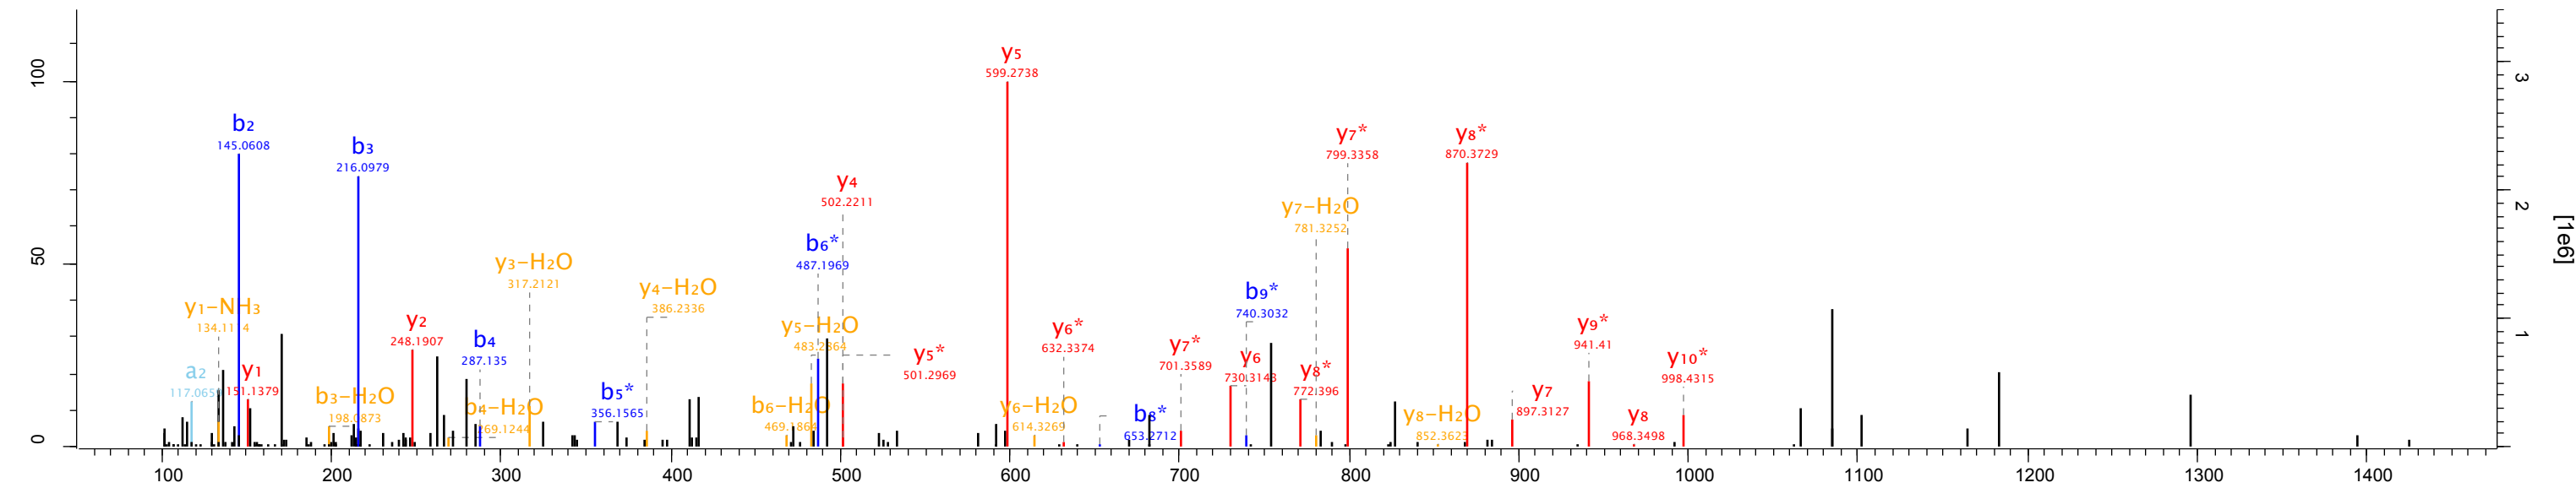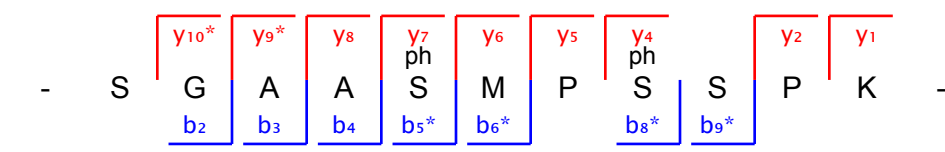

Raw file 20171215\_MaS\_33SR\_LMH\_phospho2\_03 Scan 4011 Method FTMS; HCD Score 70.44 m/z 604.75 Gene names PPP1R3D

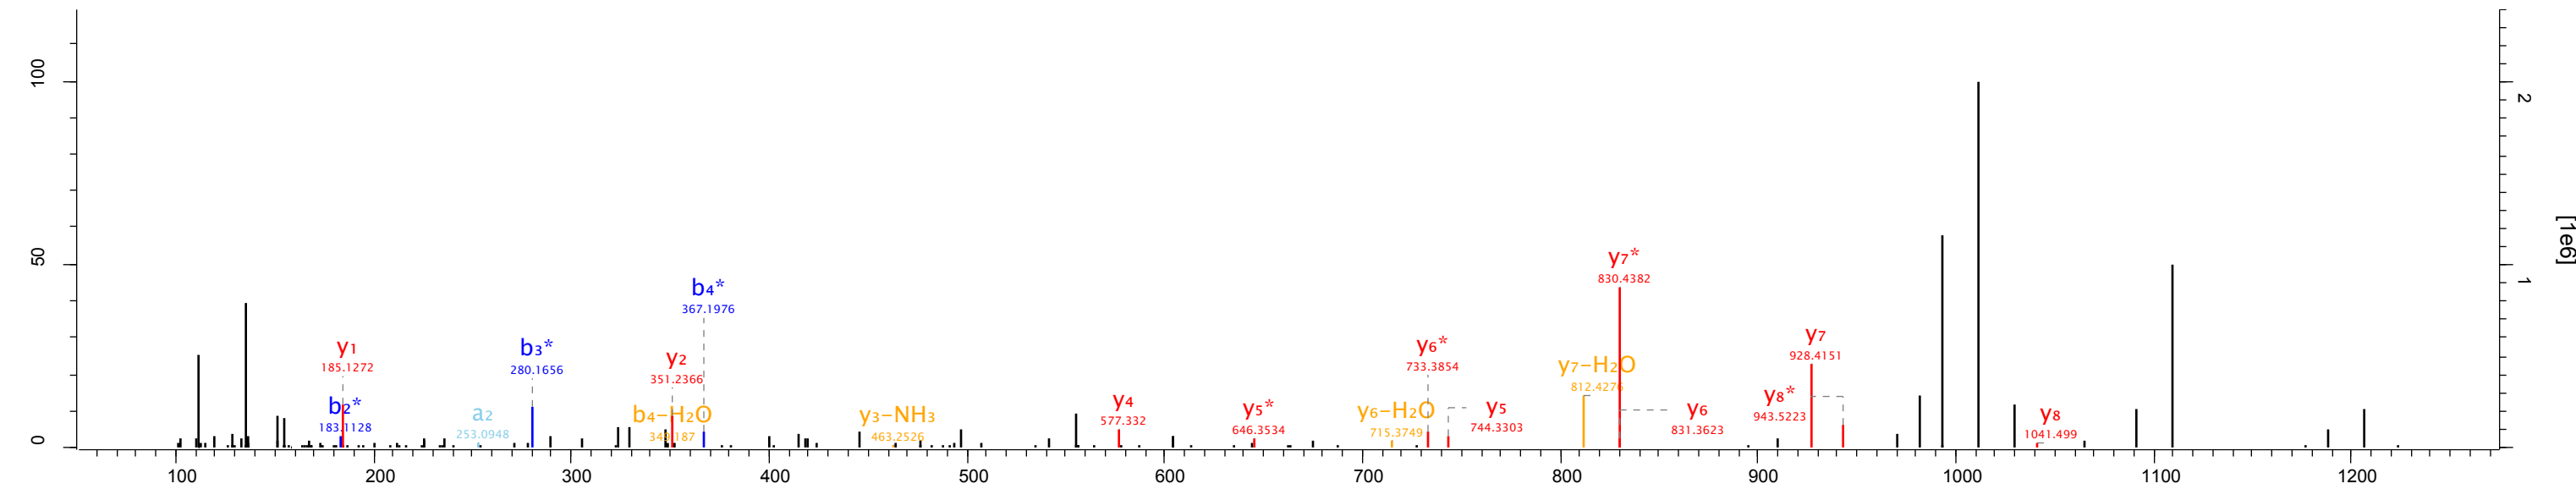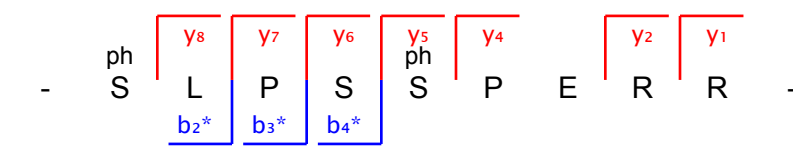

Raw file 20171215\_MaS\_33SR\_LMH\_phospho2\_03 Scan 4091 Method FTMS; HCD Score 147.25 m/z 817.4 Gene names FOXH1;XRCC1

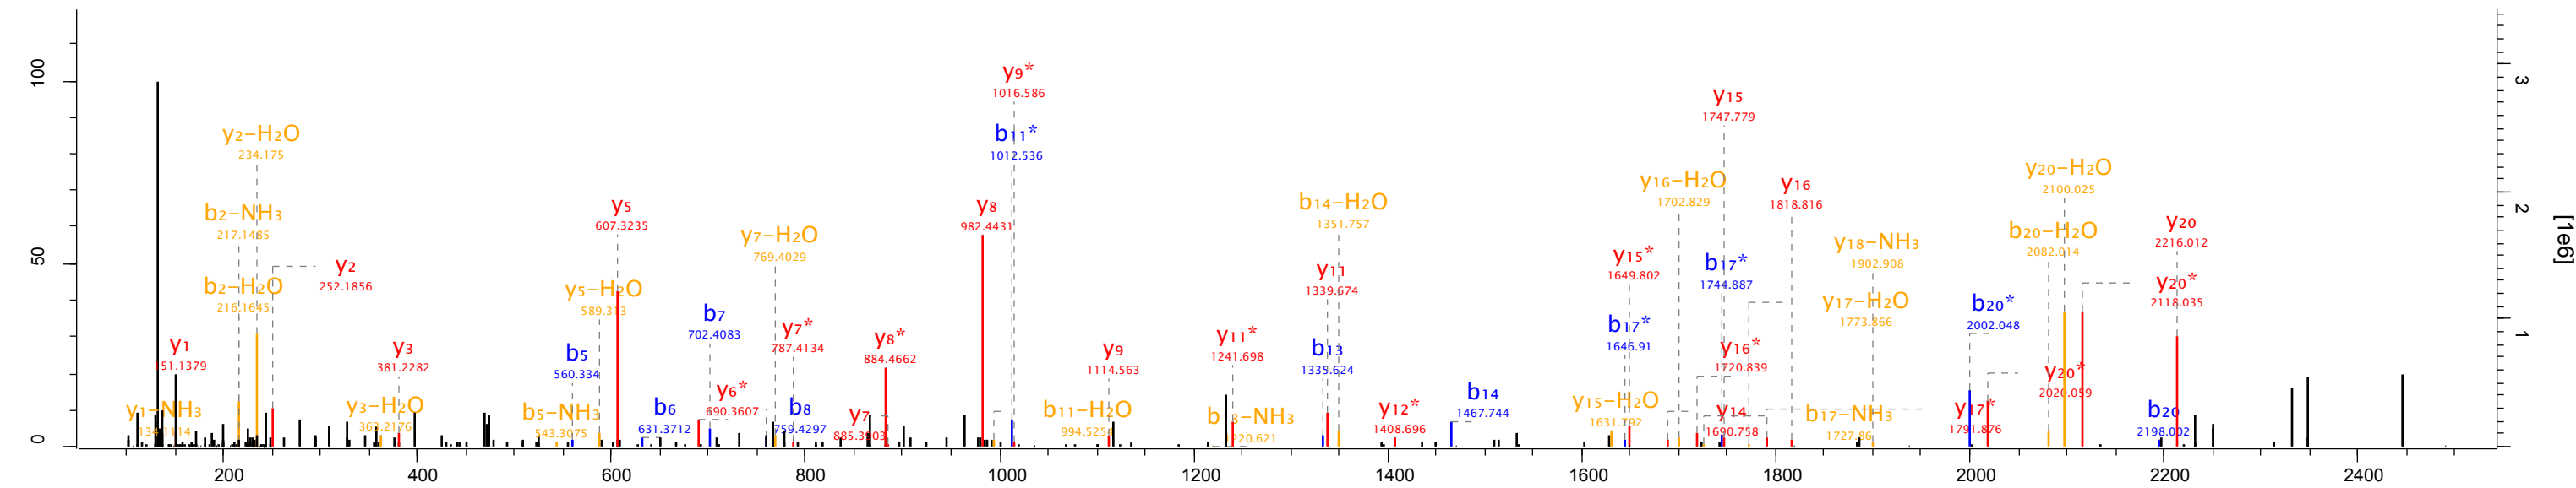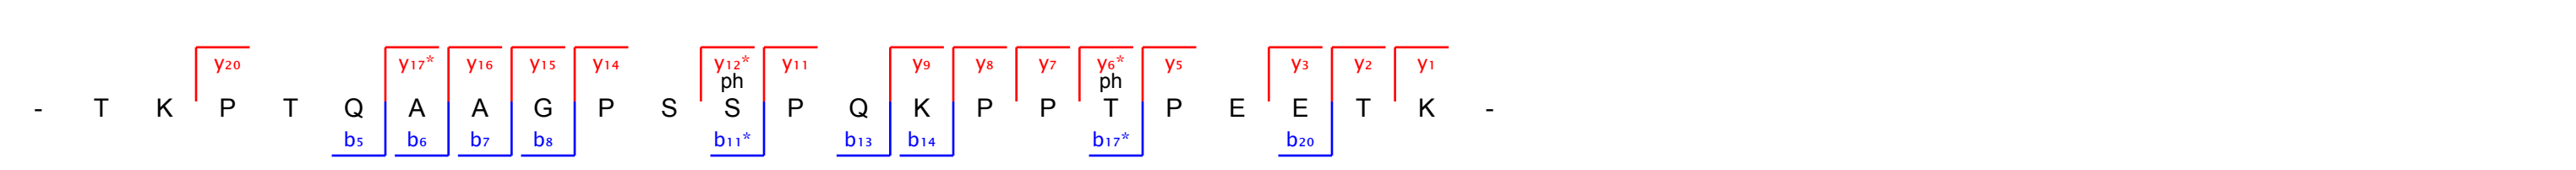

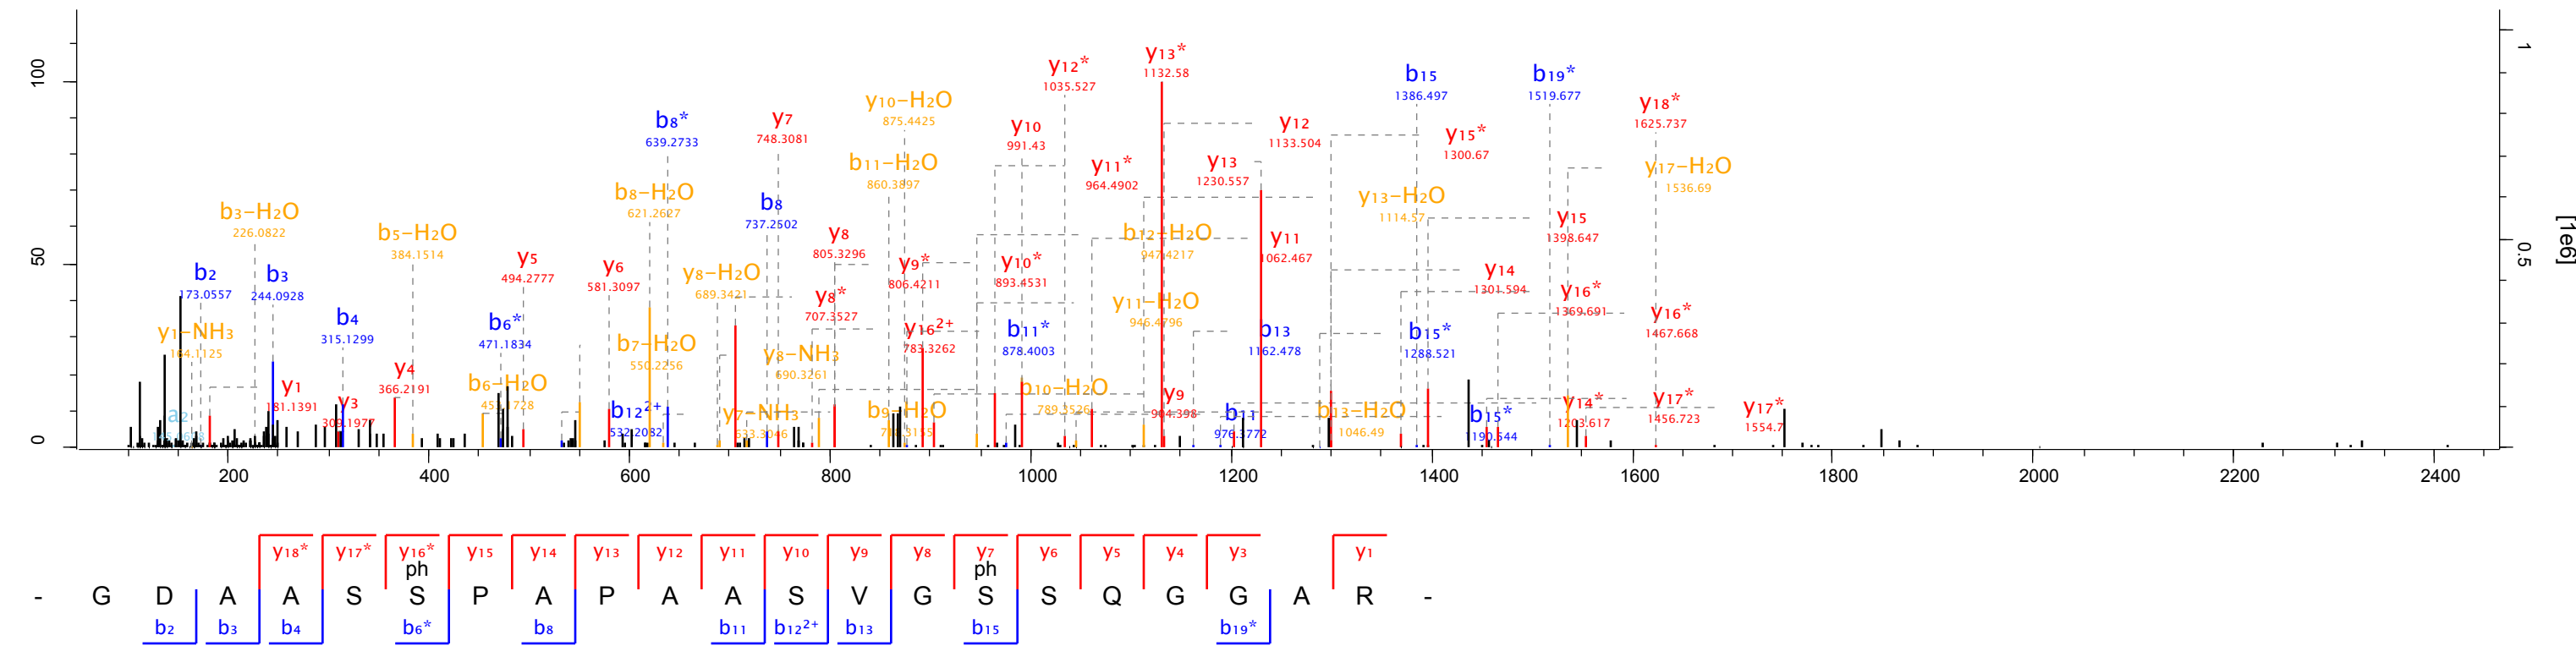



Raw file  
20171215\_MaS\_33SR\_LMH\_phospho2\_03

Scan 4811 Method FTMS; HCD Score 246.31 m/z 1019.9 Gene names IWS1

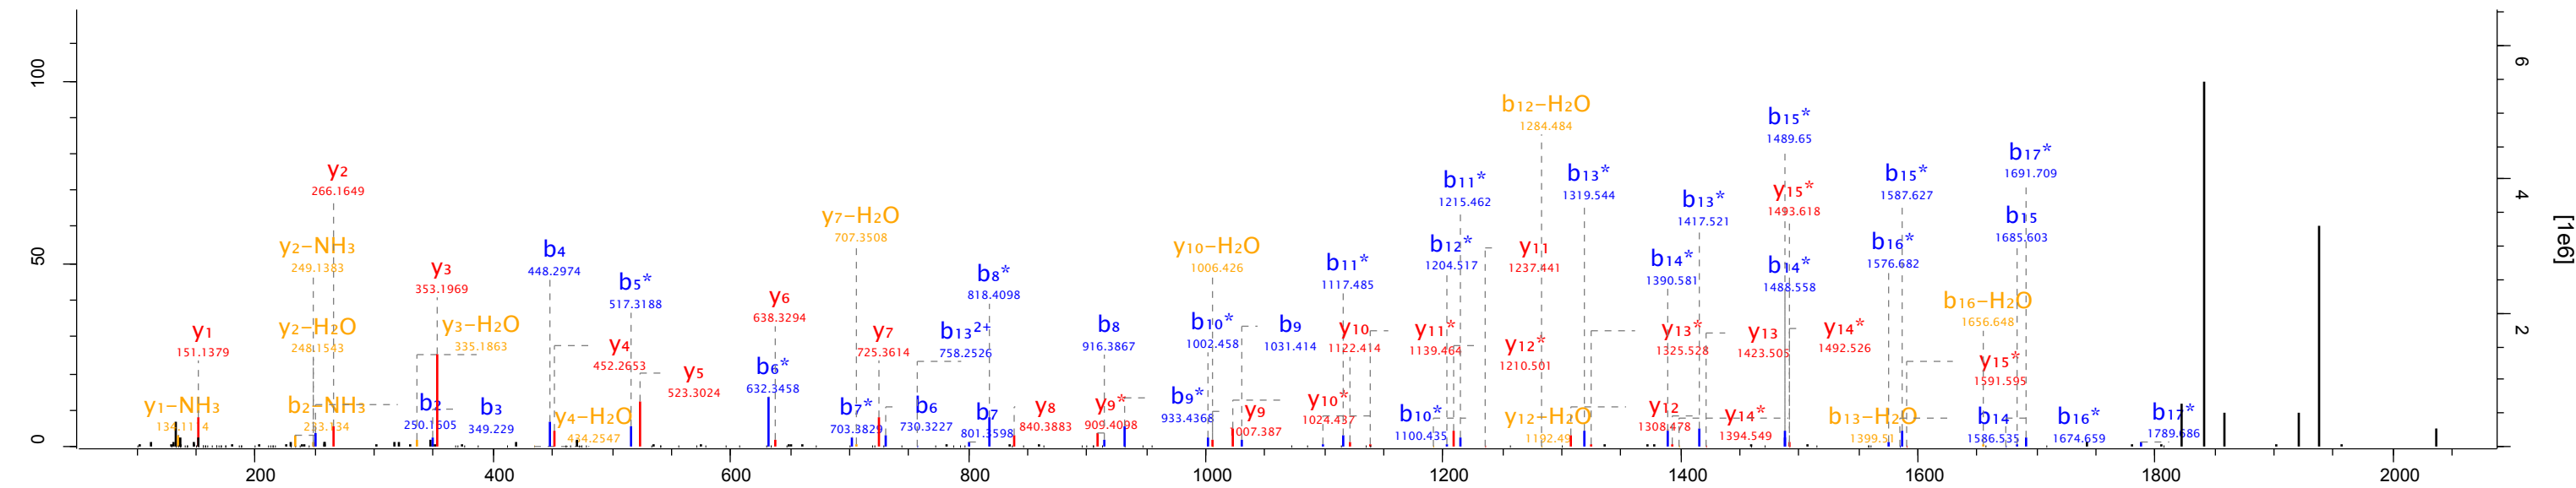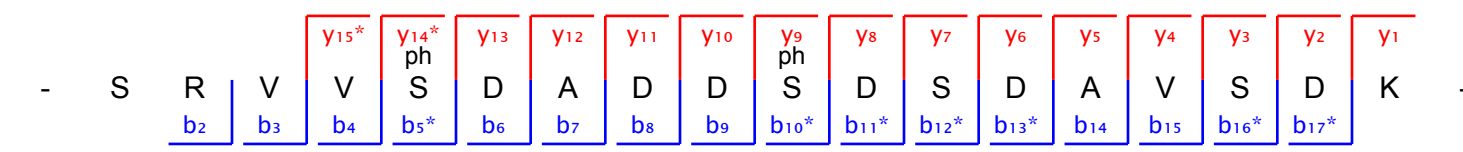

Raw file: 20171215\_MaS\_33SR\_LMH\_phospho2\_03  
 Scan: 4981 Method: FTMS; HCD Score: 89.86 m/z: 649.24 Gene names: ZNF638

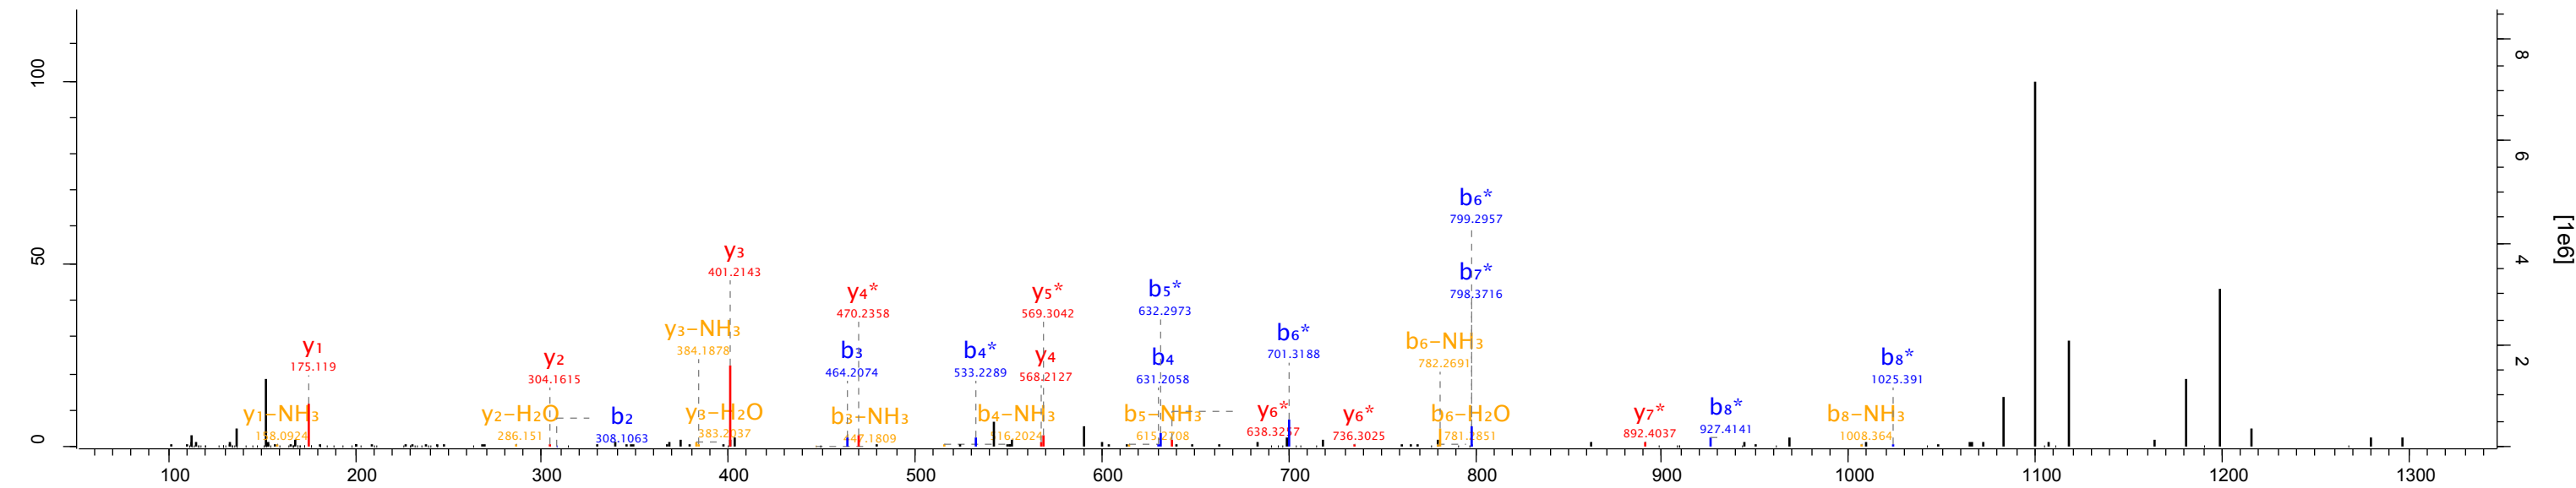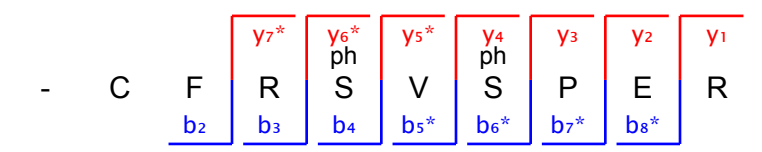

Raw file: 20171215\_MaS\_33SR\_LMH\_phospho2\_03  
 Scan: 5071 Method: FTMS; HCD Score: 138.01 m/z: 609.26 Gene names: PLEKHA7

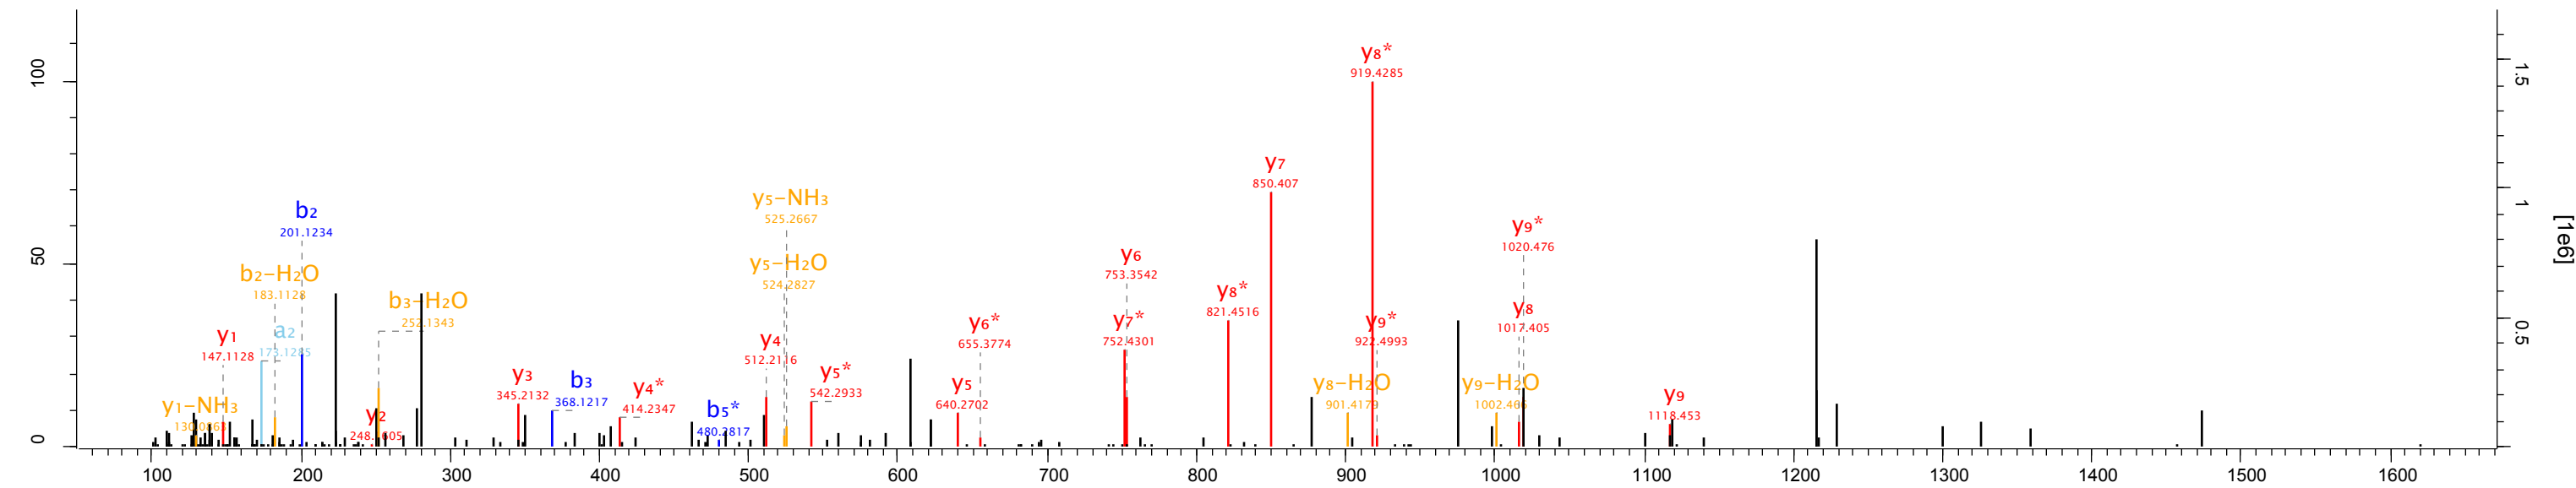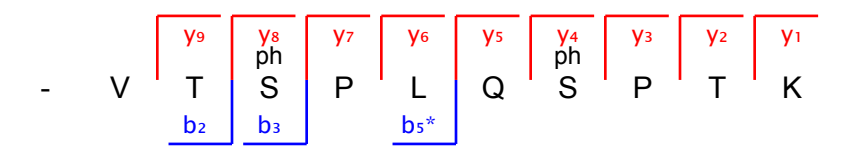

Raw file 20171215\_MaS\_33SR\_LMH\_phospho2\_03 Scan 5141 Method FTMS; HCD Score 112.44 m/z 876.36 Gene names CDK13

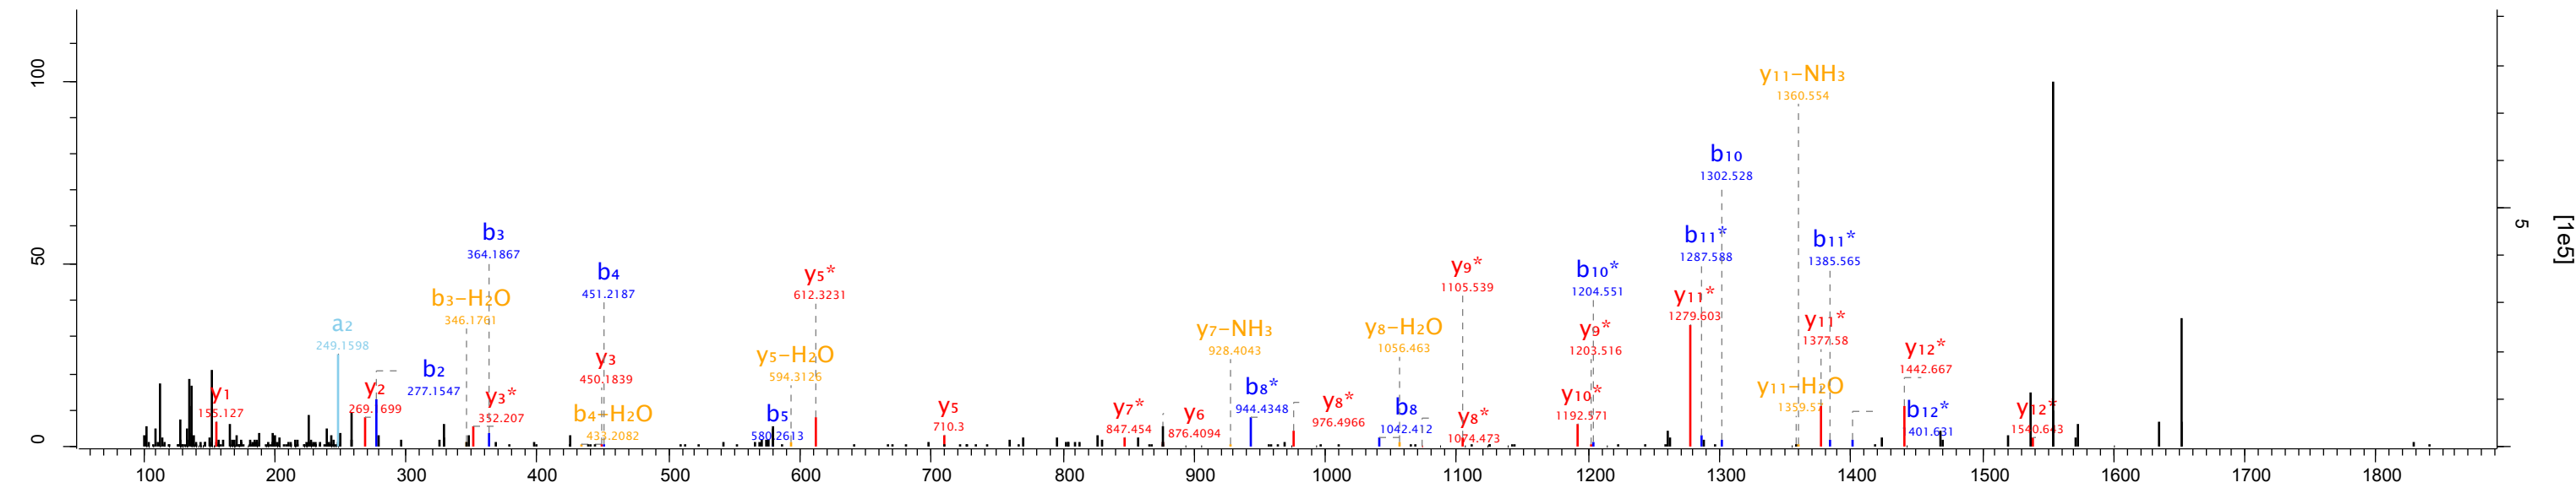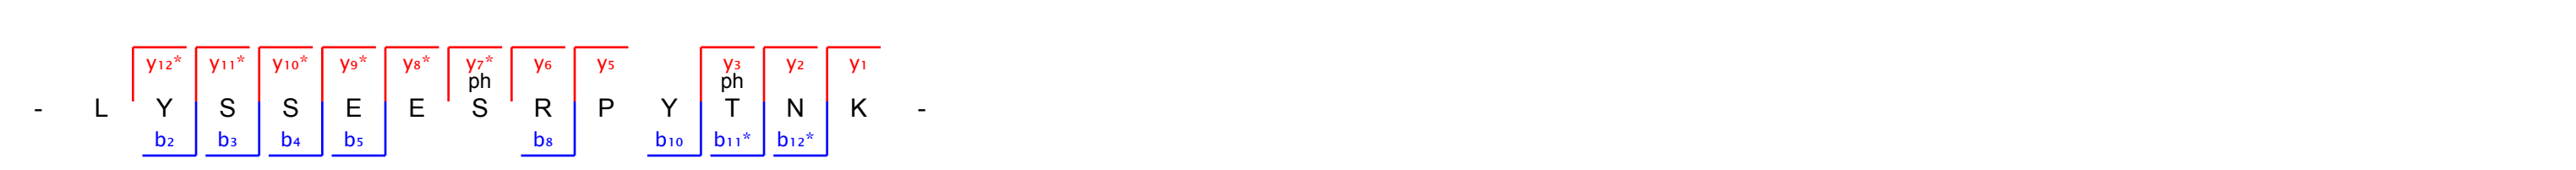

Raw file 20171215\_MaS\_33SR\_LMH\_phospho2\_03 Scan 5151 Method FTMS; HCD Score 83.17 m/z 756.79 Gene names CEP170

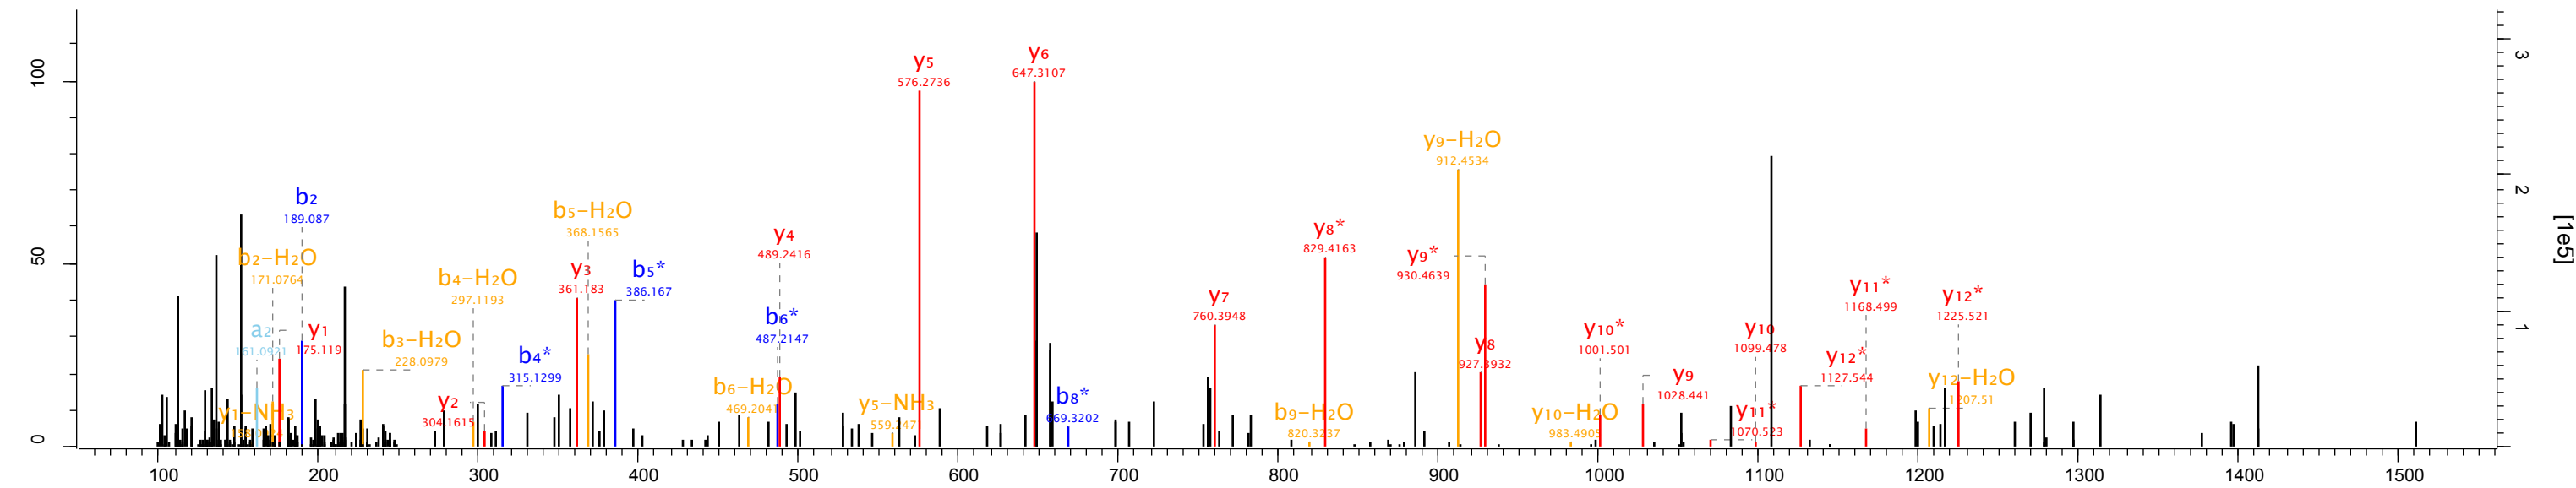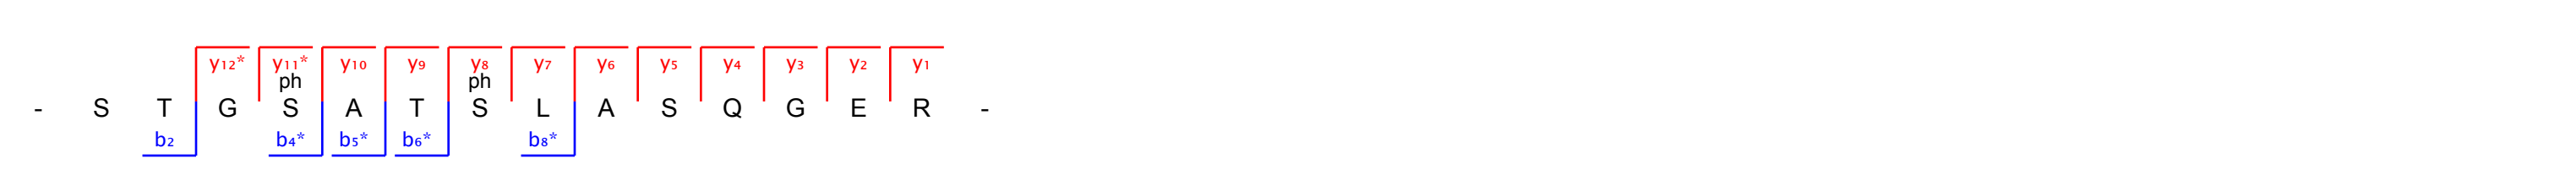

Raw file 20171215\_MaS\_33SR\_LMH\_phospho2\_03 Scan 5191 Method FTMS; HCD Score 197.67 m/z 737.8 Gene names CNOT2

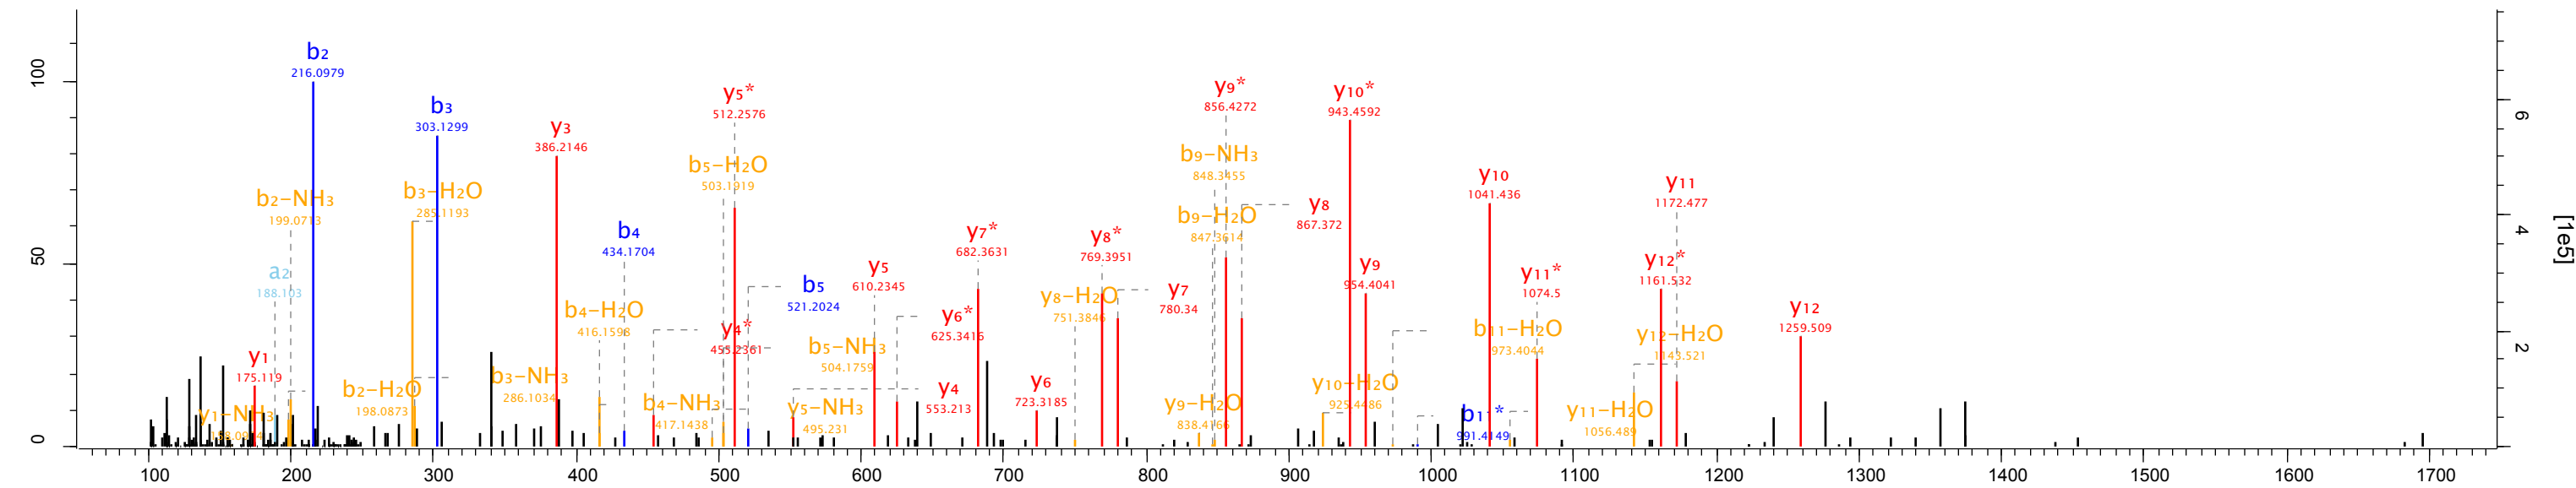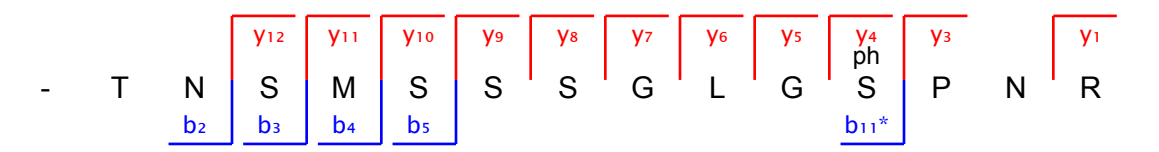

Raw file: 20171215\_MaS\_33SR\_LMH\_phospho2\_03  
 Scan: 5211 Method: FTMS; HCD Score: 88.72 m/z: 724.98 Gene names: DPYSL3

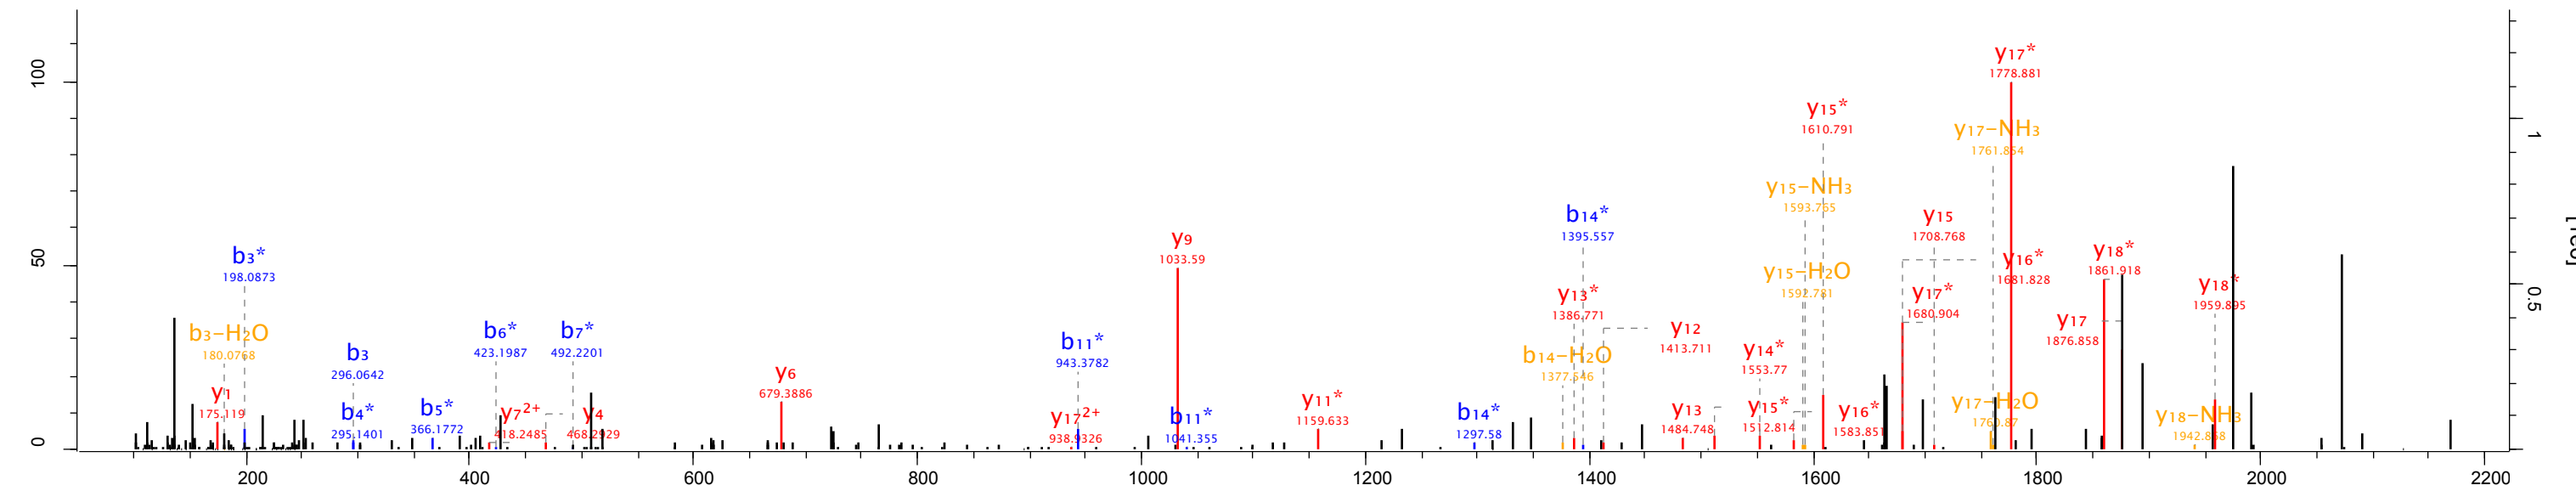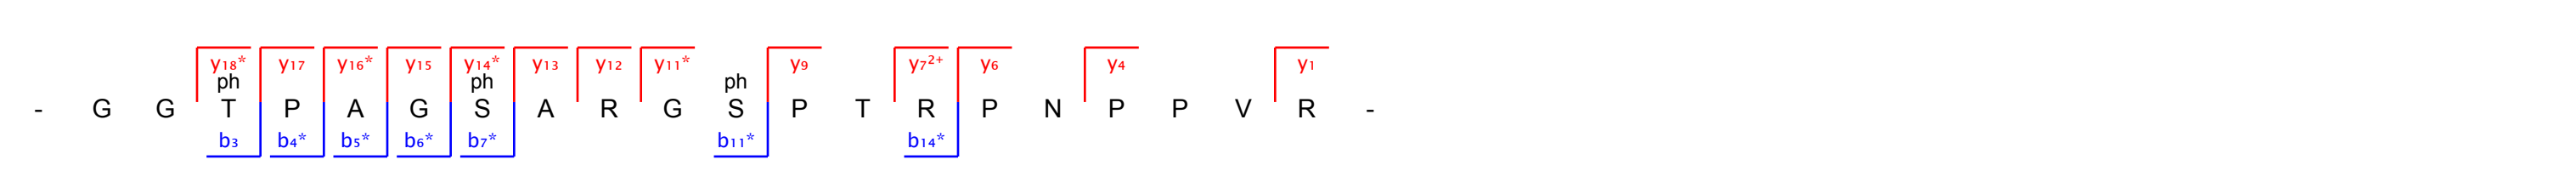

Raw file 20171215\_MaS\_33SR\_LMH\_phospho2\_03 Scan 5251 Method FTMS; HCD Score 105.36 m/z 484.7 Gene names ACIN1

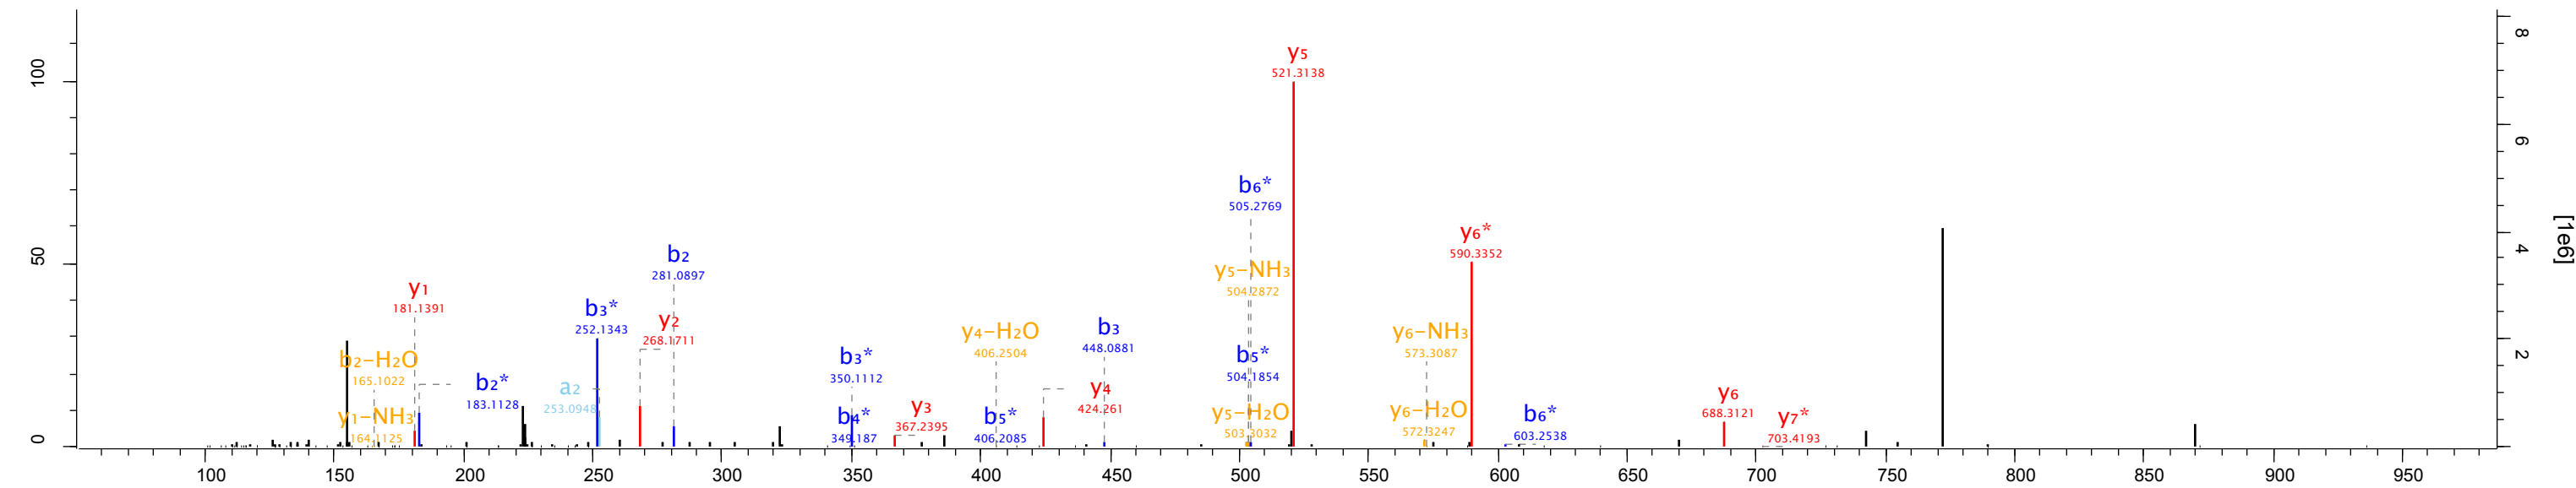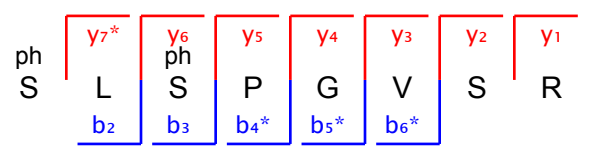



Raw file: 20171215\_MaS\_33SR\_LMH\_phospho2\_03  
 Scan: 5461 Method: FTMS; HCD Score: 166.98 m/z: 961.87 Gene names: FXR2

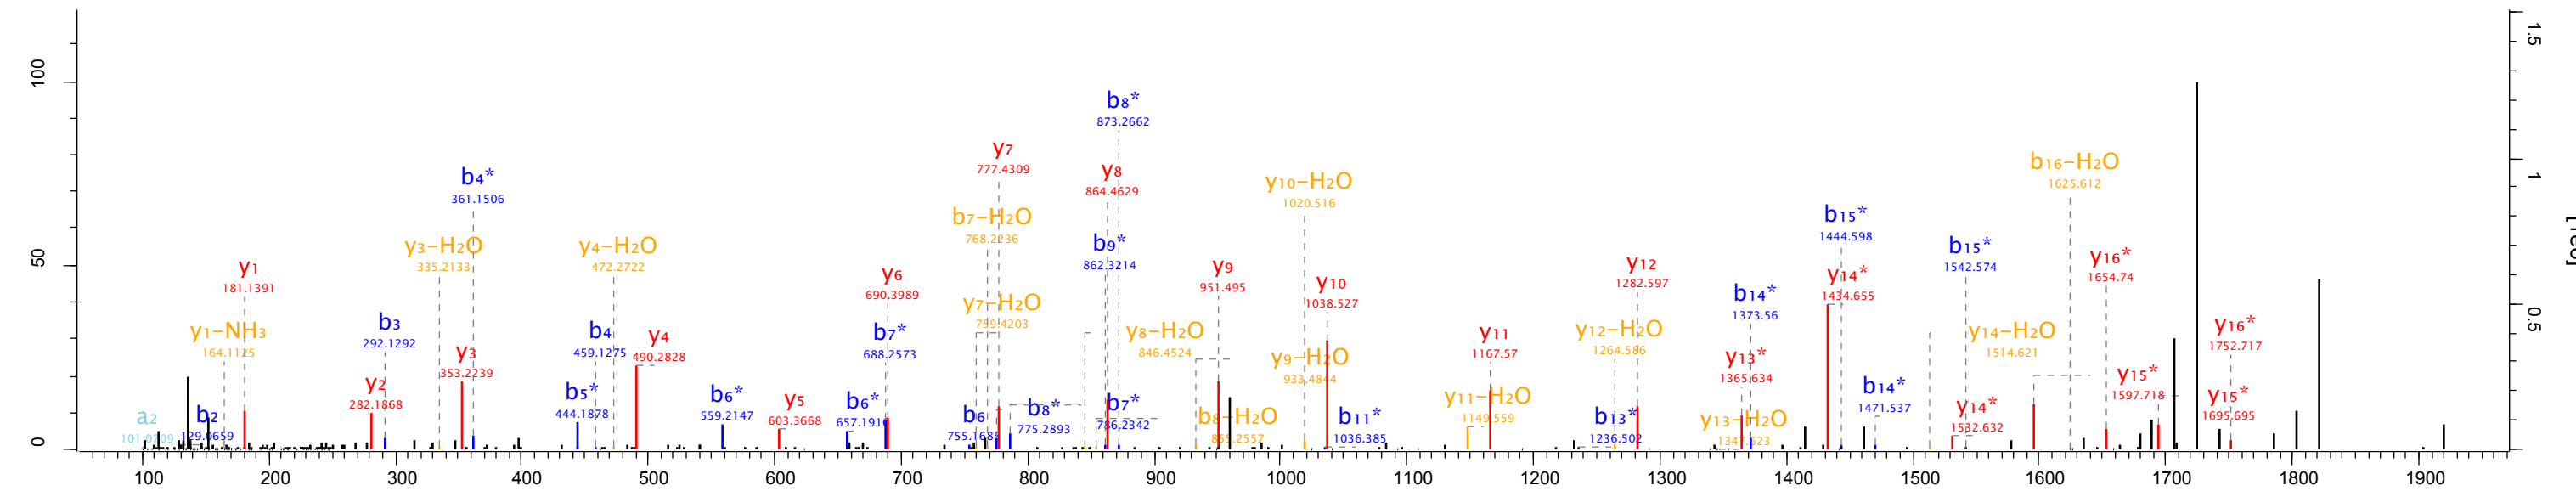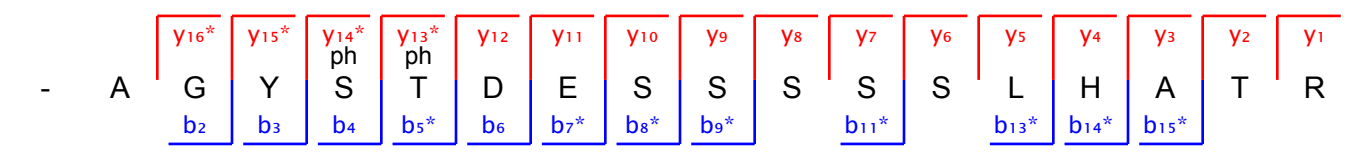

Raw file: 20171215\_MaS\_33SR\_LMH\_phospho2\_03  
 Scan: 5551 Method: FTMS; HCD Score: 114.03 m/z: 750.36 Gene names: BAIAP2L2

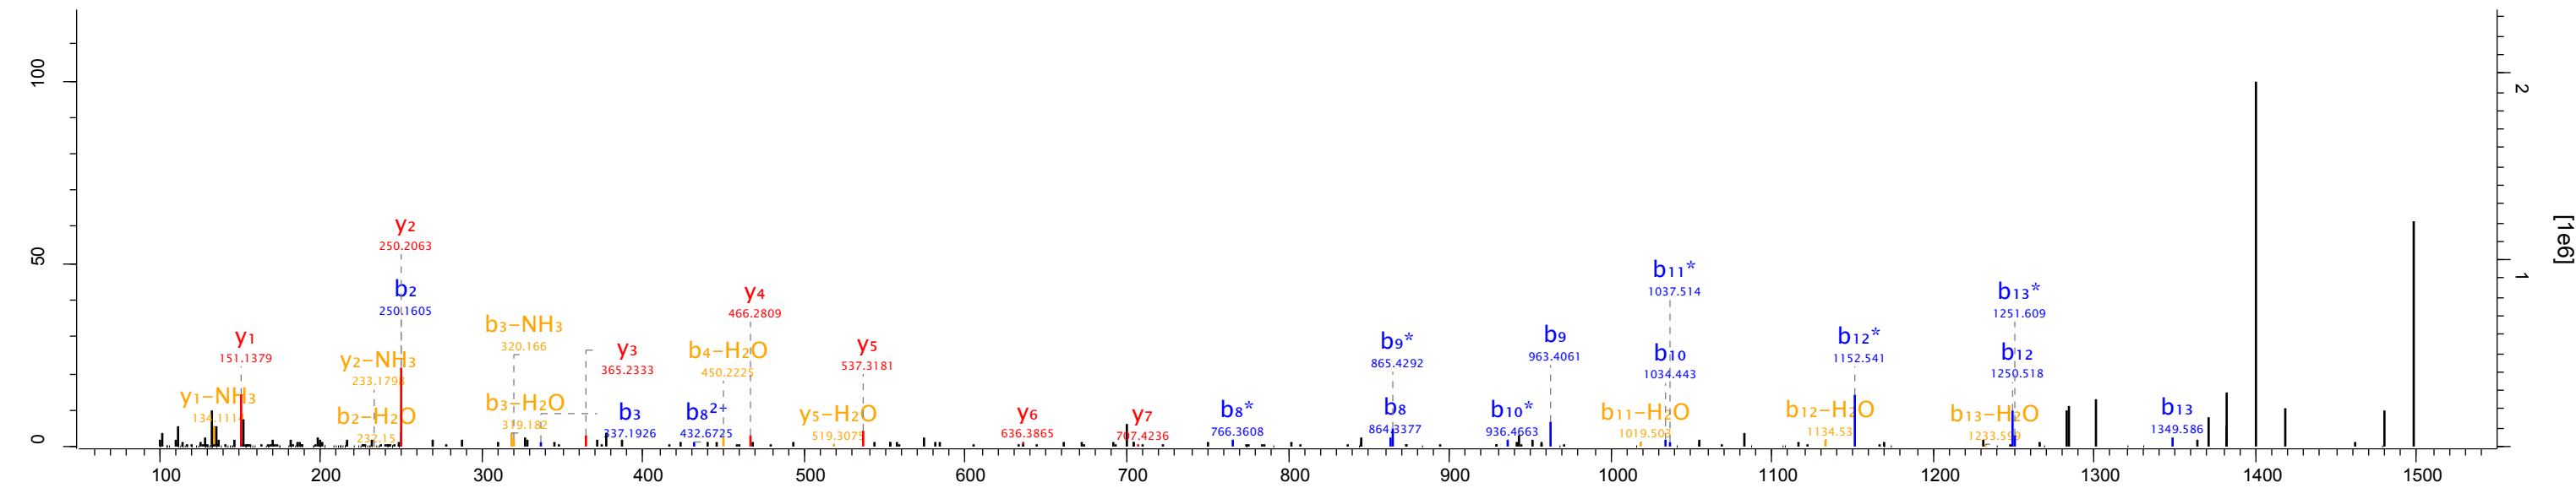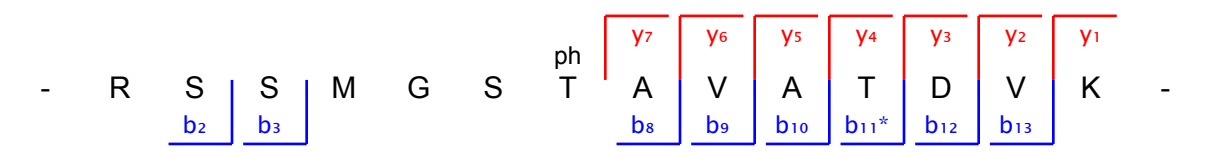

Raw file 20171215\_MaS\_33SR\_LMH\_phospho2\_03 Scan 5561 Method FTMS; HCD Score 86.54 m/z 815.35 Gene names ACIN1

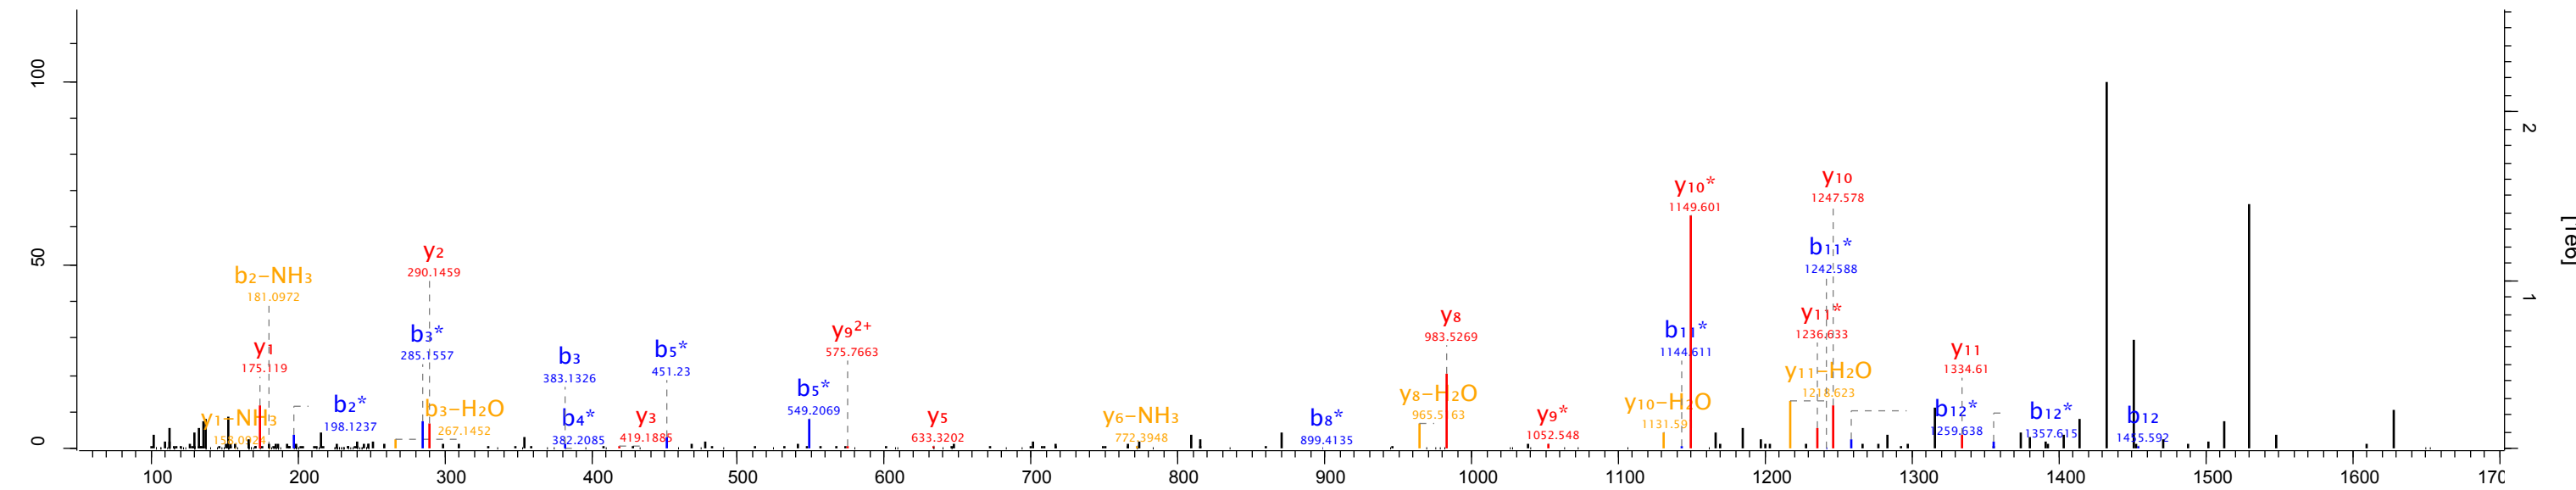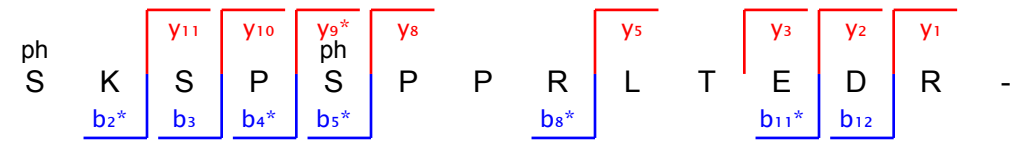

Raw file: 20171215\_MaS\_33SR\_LMH\_phospho2\_03  
 Scan: 5711 Method: FTMS; HCD Score: 181.75 m/z: 899.41 Gene names: IRF2BPL

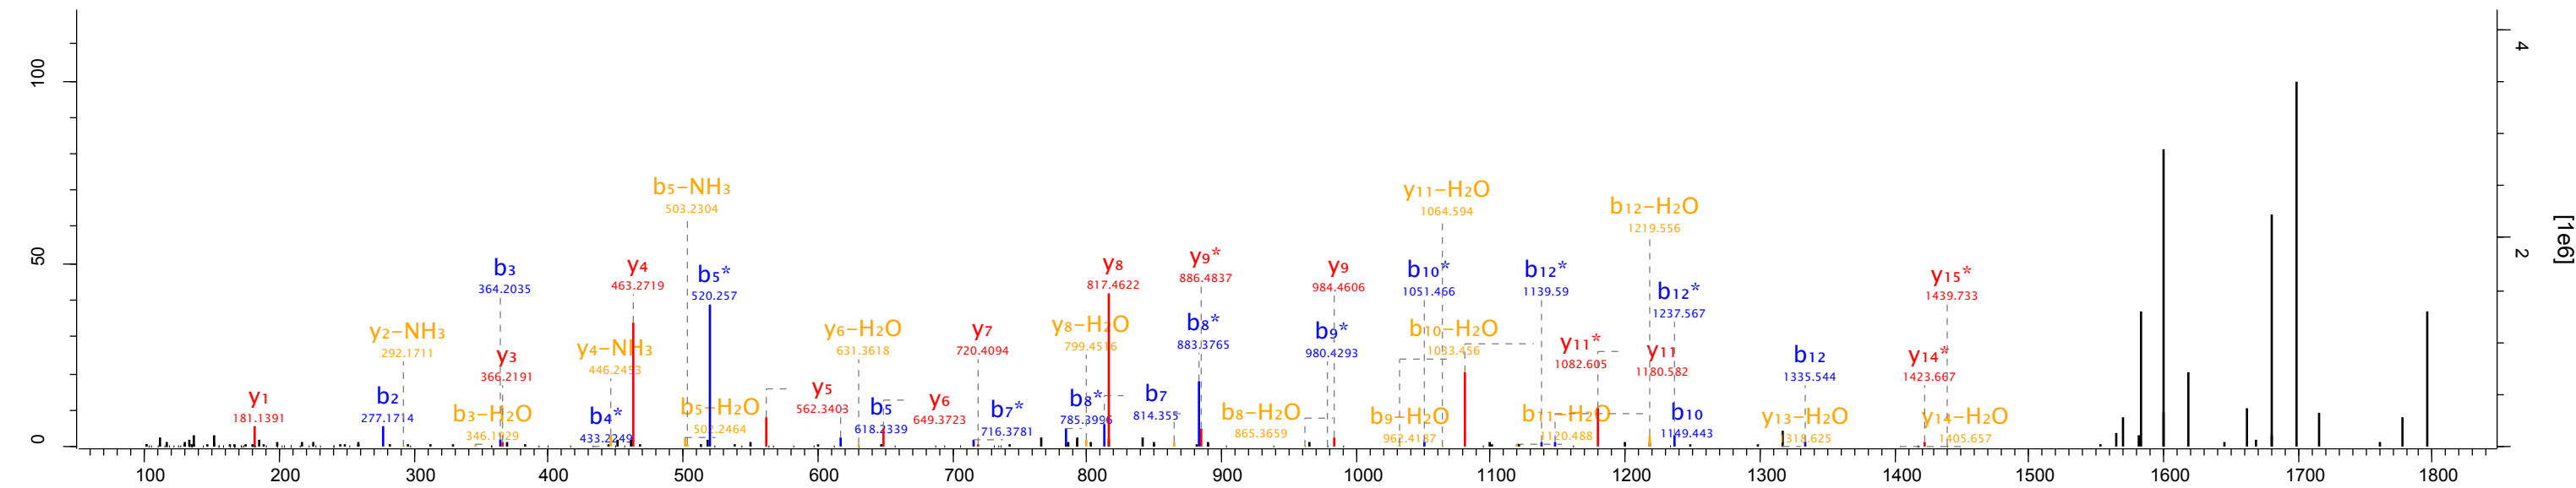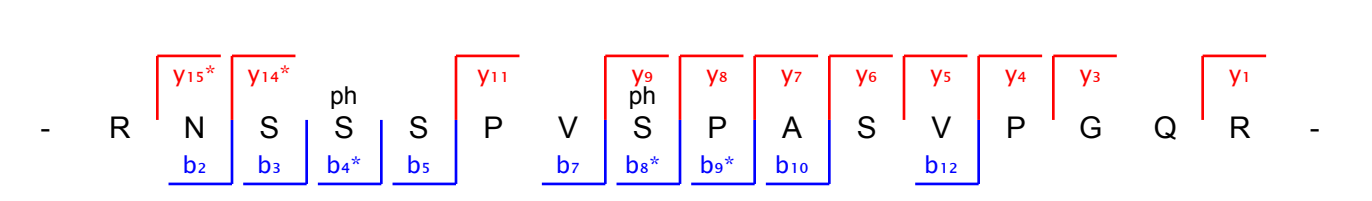

Raw file 20171215\_MaS\_33SR\_LMH\_phospho2\_03 Scan 5881 Method FTMS; HCD Score 126.8 m/z 667.81 Gene names AHNAK

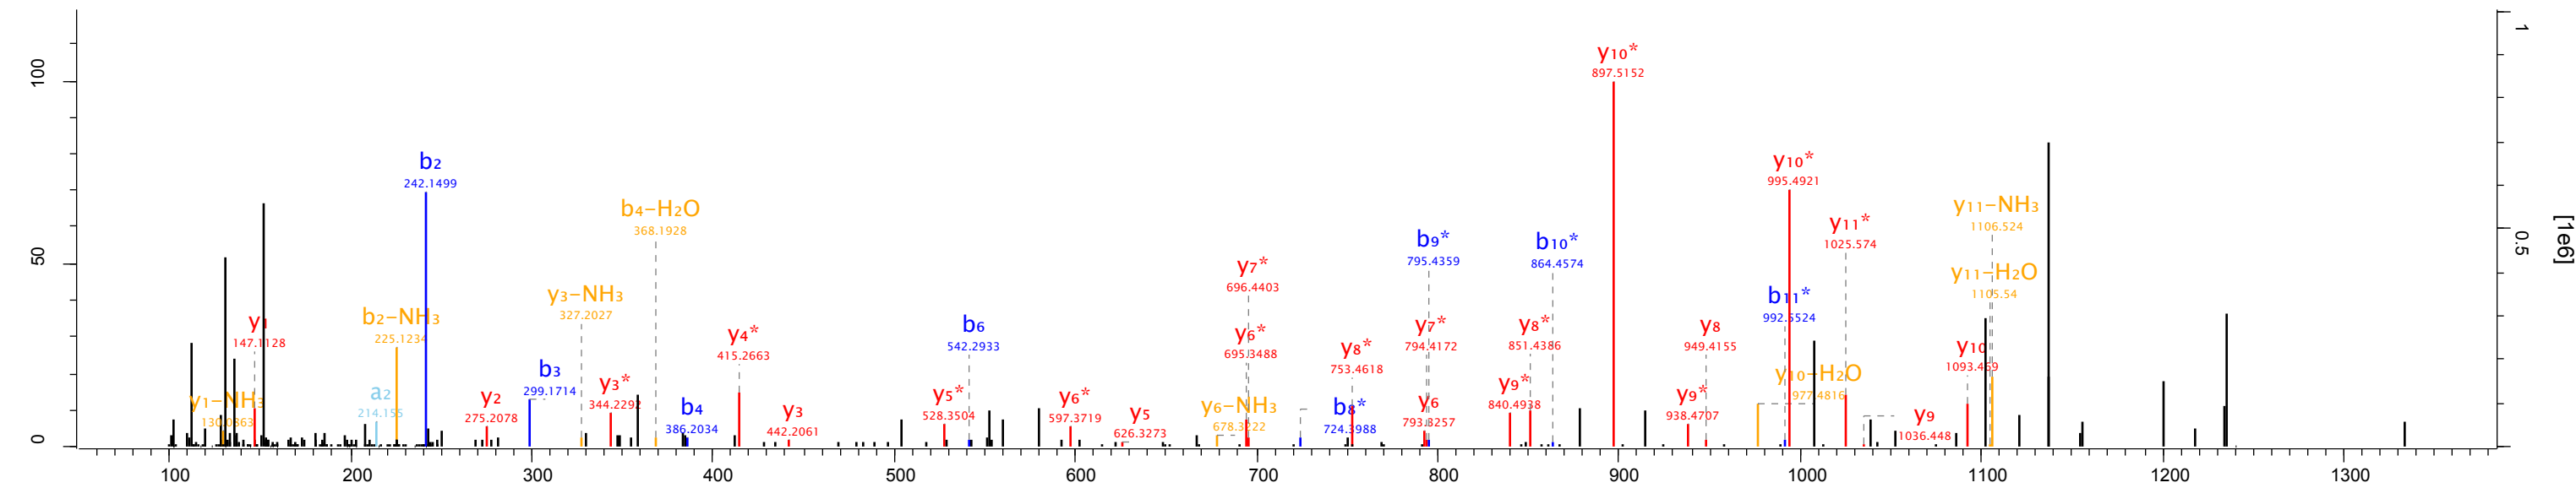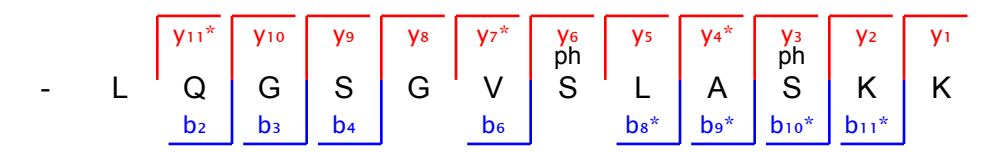

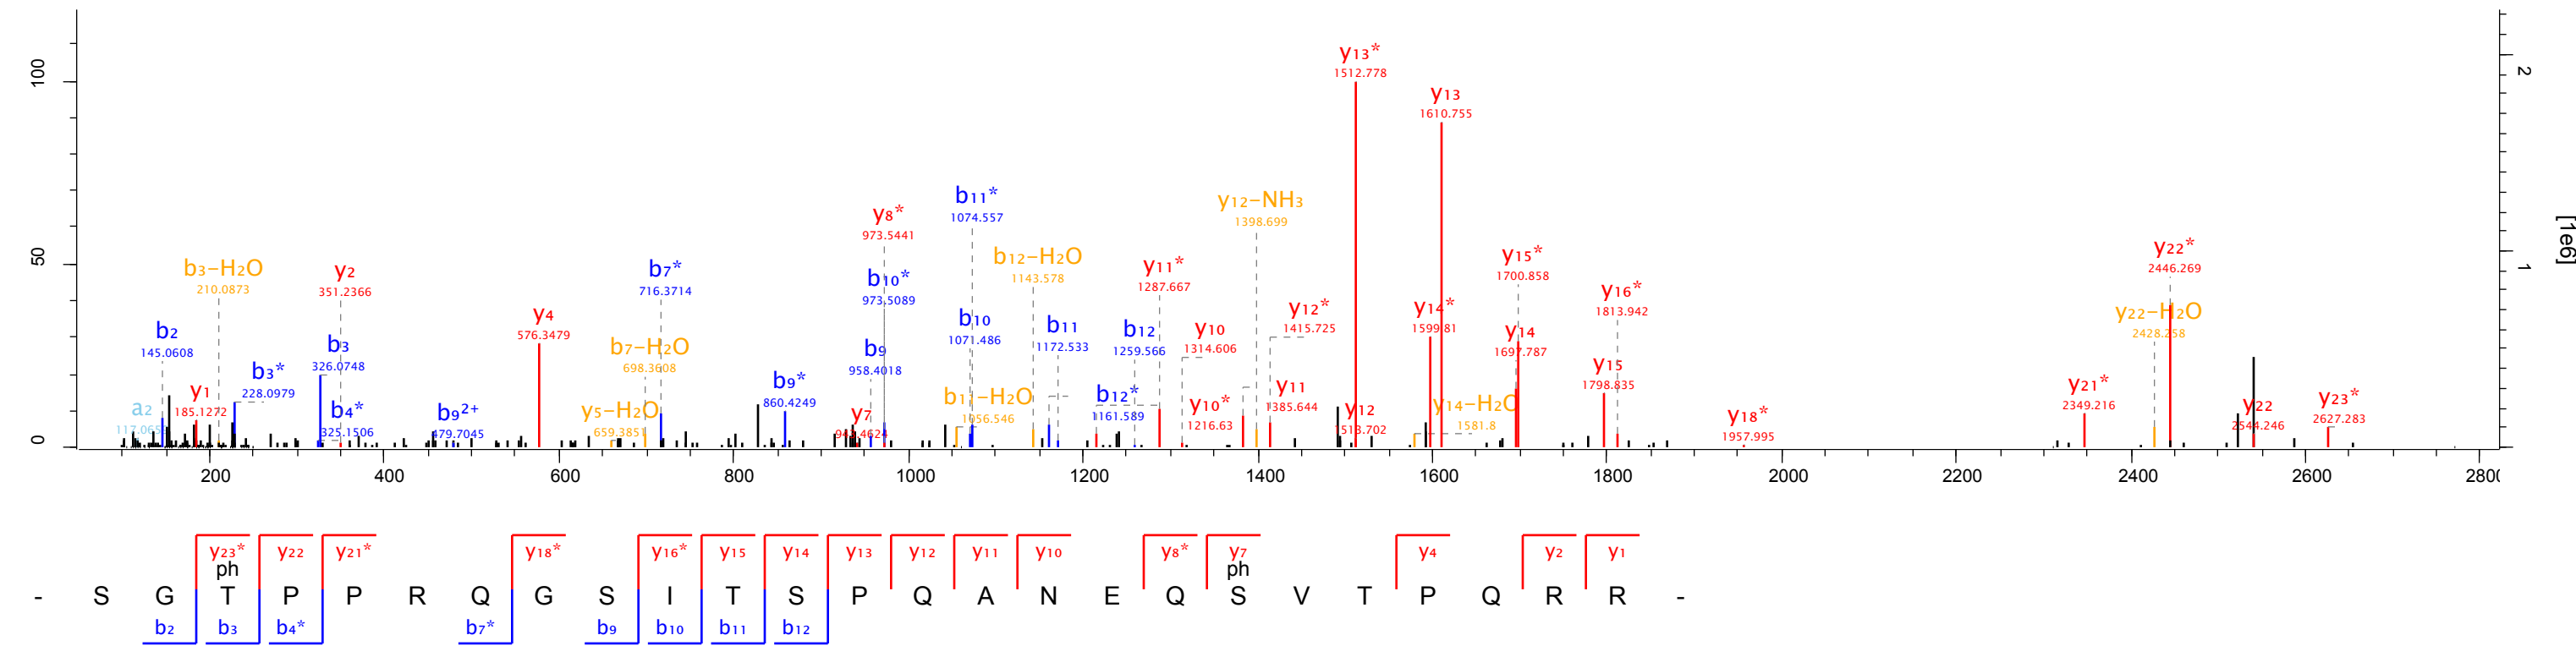

20171215\_MaS\_33SR\_LMH\_phospho2\_03 6111 FTMS; HCD 78.4 787.34 ZNF148

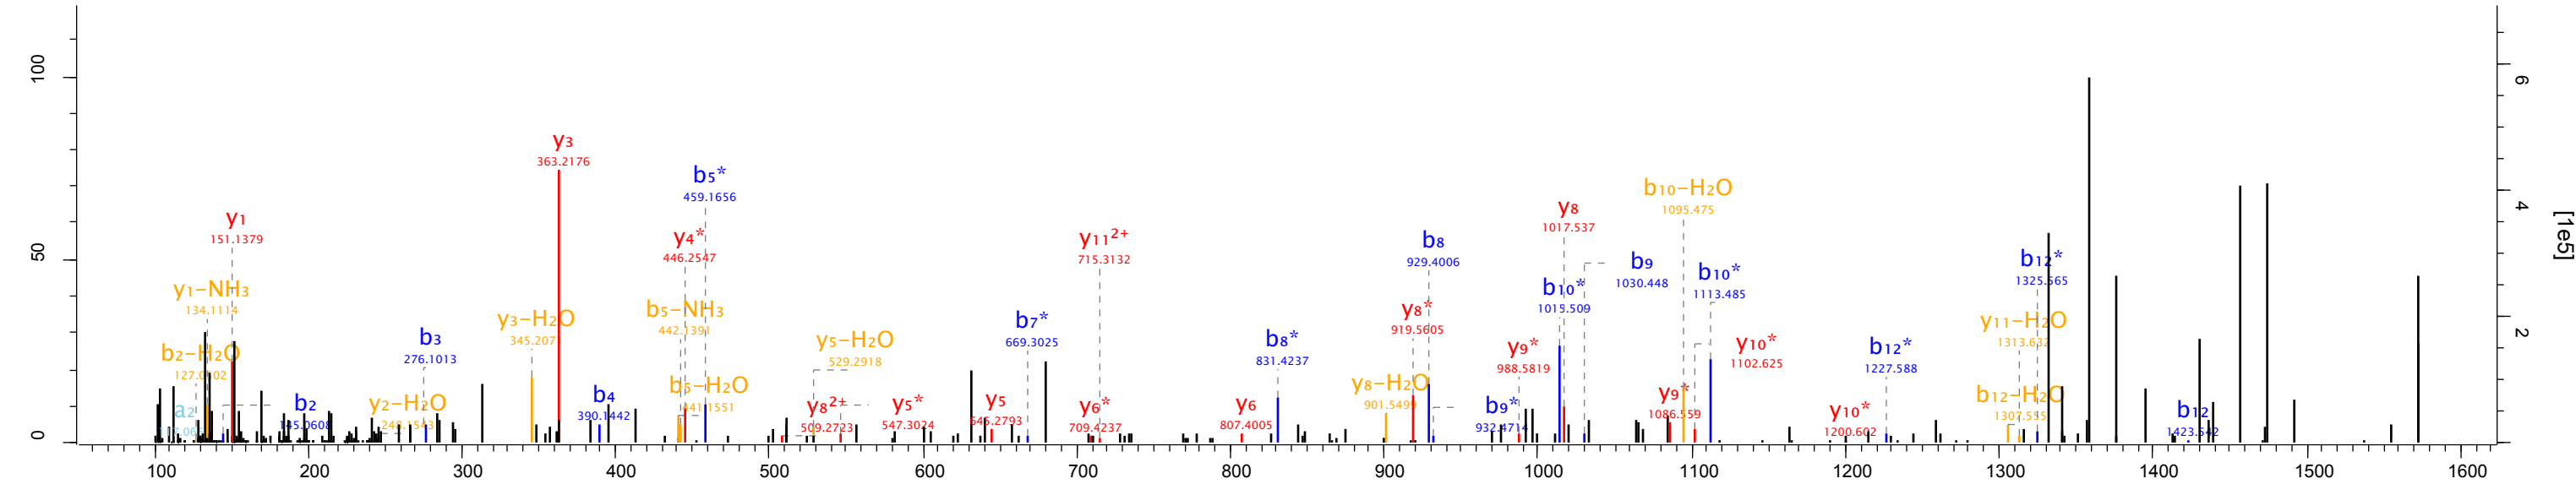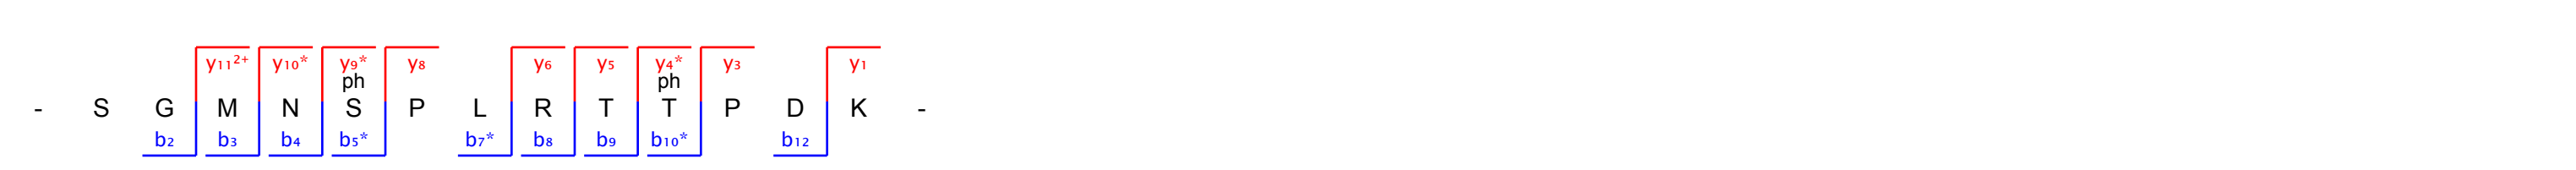

Raw file: 20171215\_MaS\_33SR\_LMH\_phospho2\_03  
 Scan: 6371 Method: FTMS; HCD Score: 183.75 m/z: 916.39 Gene names: PCM1

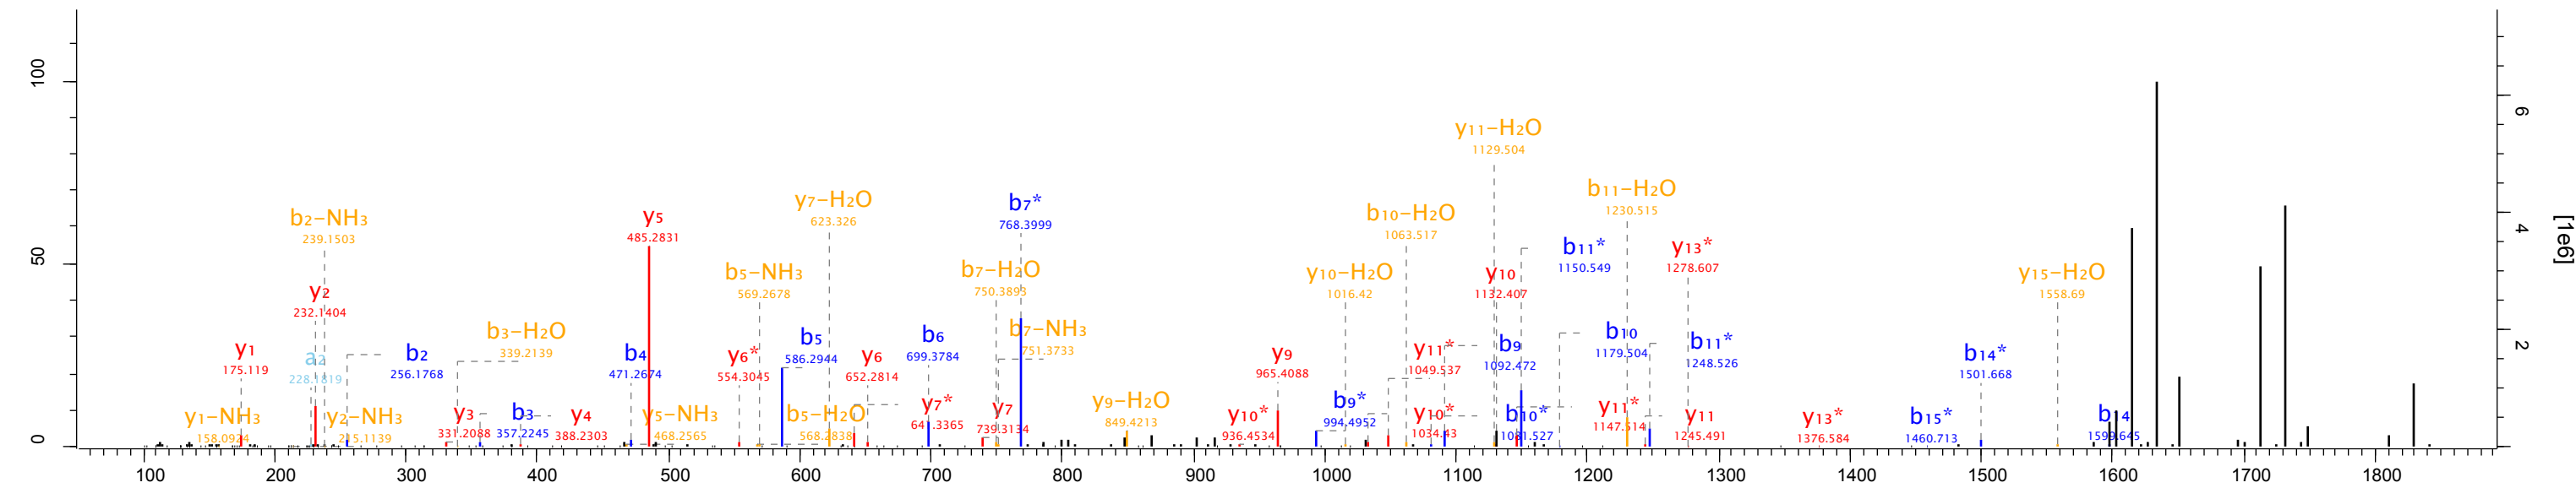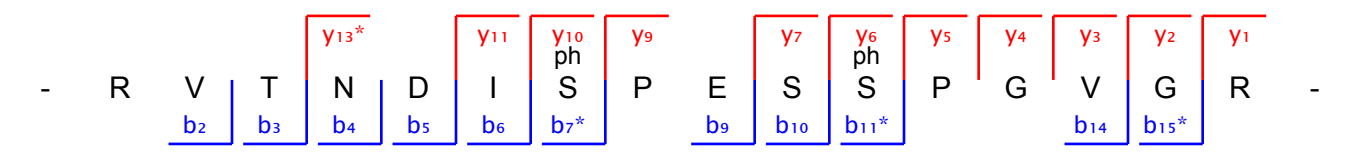



Raw file  
20171215\_MaS\_33SR\_LMH\_phospho2\_03

Scan 6471 Method FTMS; HCD Score 239.25 m/z 936.91 Gene names STUB1

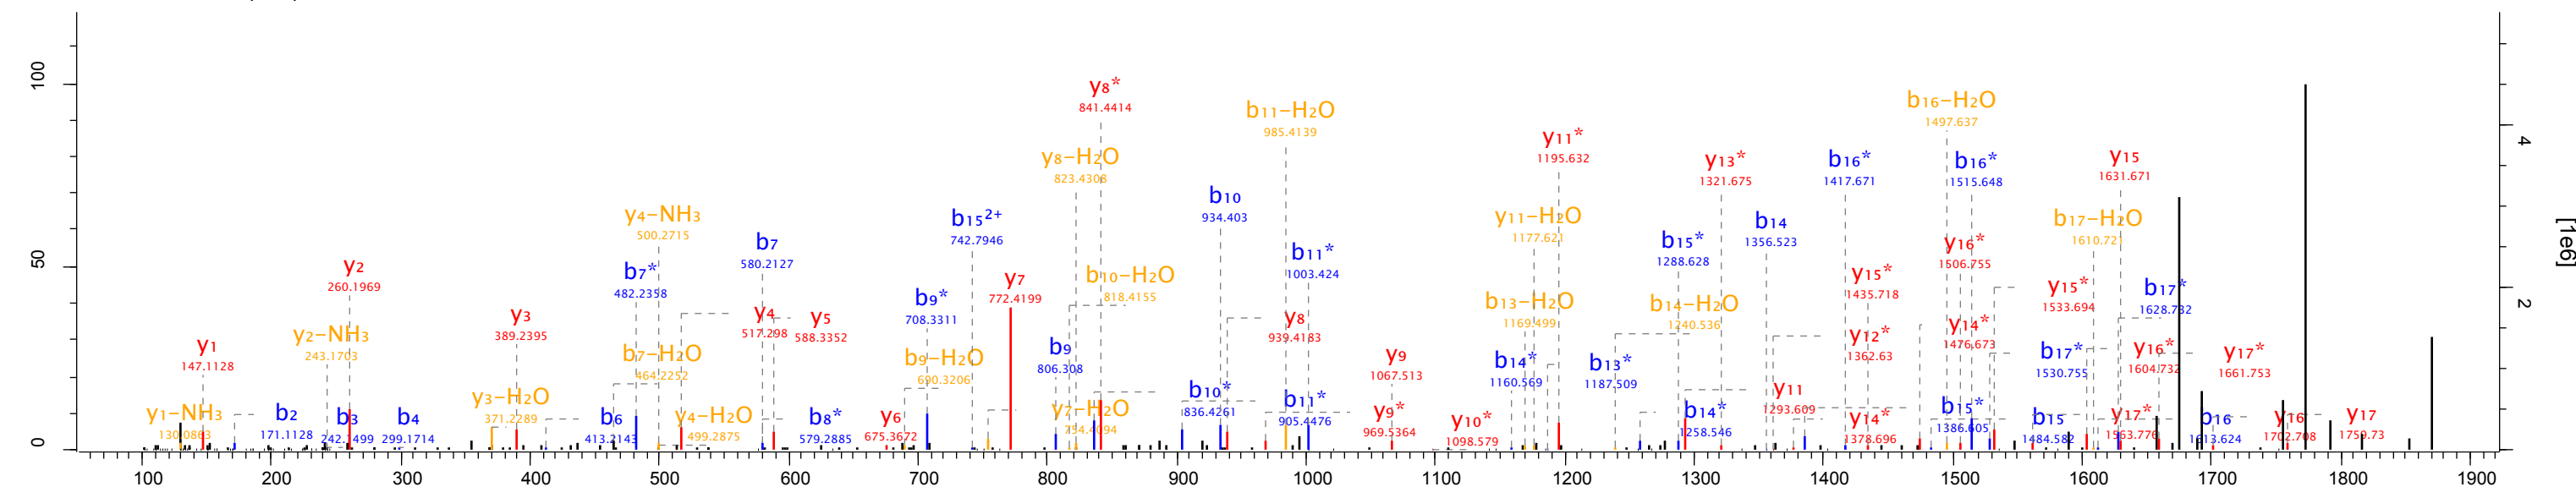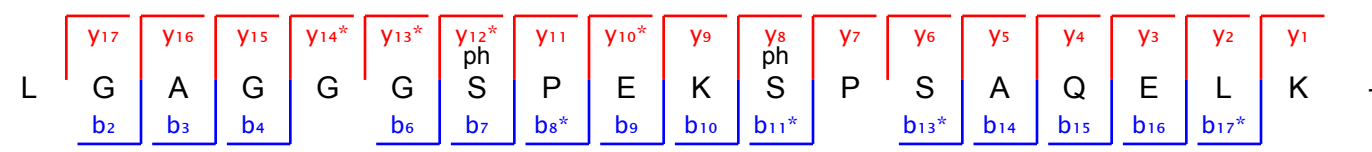

Raw file 20171215\_MaS\_33SR\_LMH\_phospho2\_03 Scan 6661 Method FTMS; HCD Score 126.68 m/z 1111.49 Gene names SRRM2

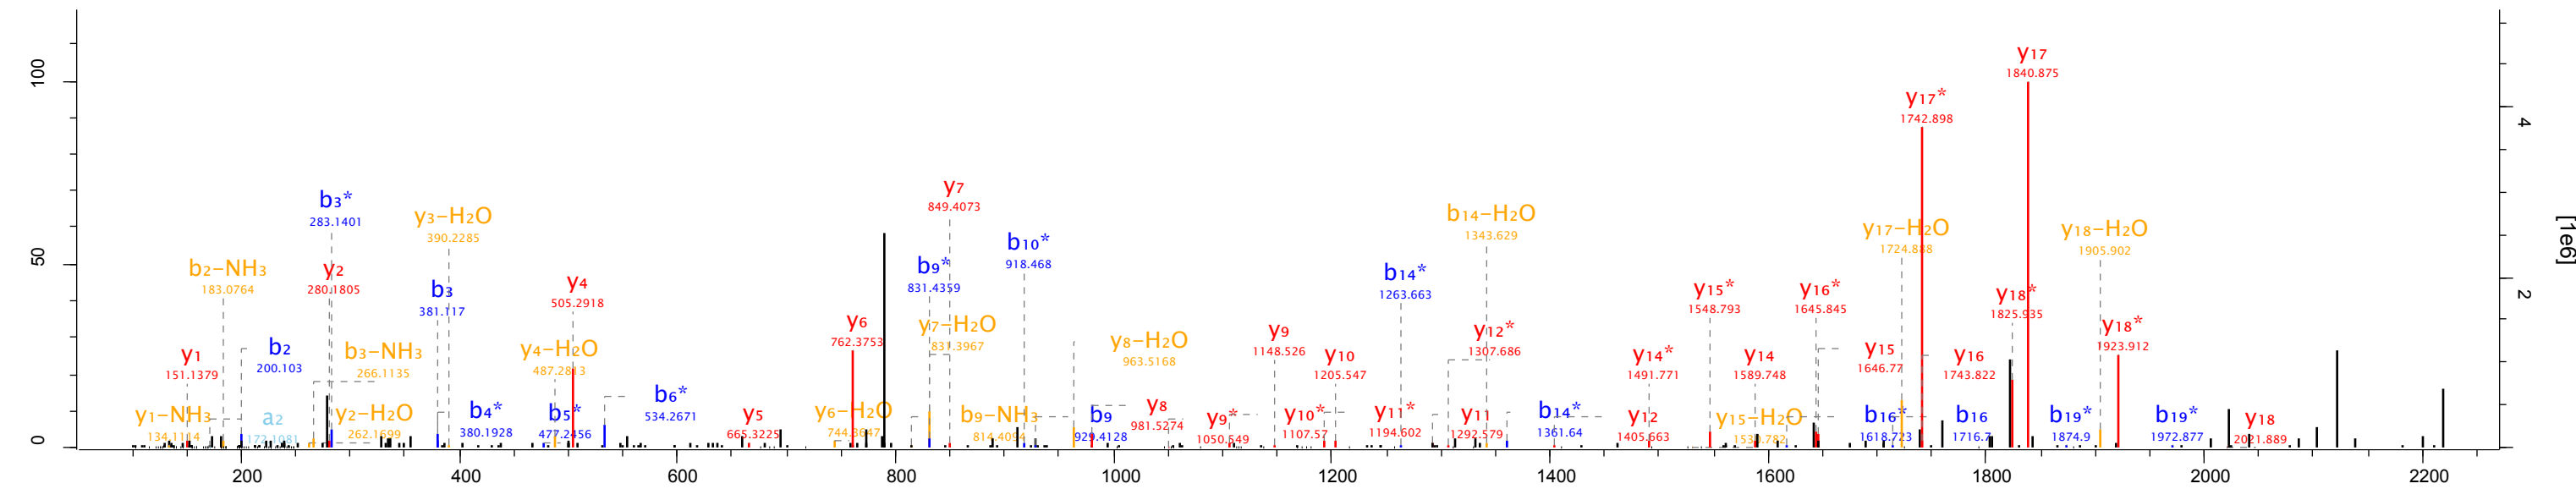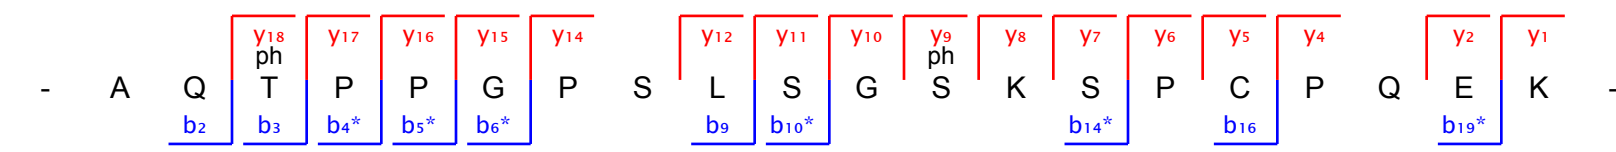

Raw file: 20171215\_MaS\_33SR\_LMH\_phospho2\_03  
 Scan: 6891 Method: FTMS; HCD Score: 199.28 m/z: 747.3 Gene names: AHNAK

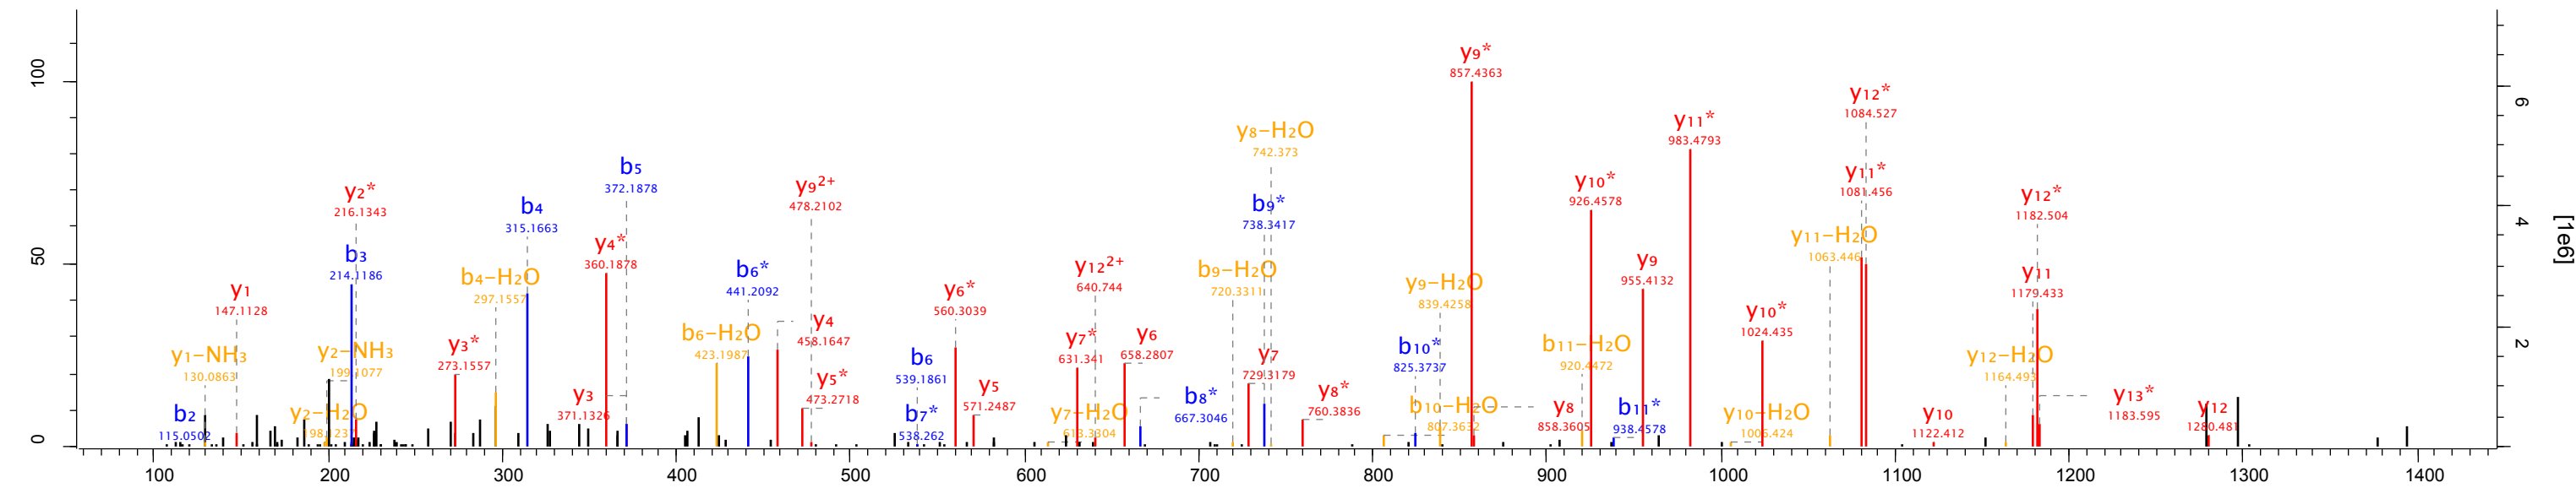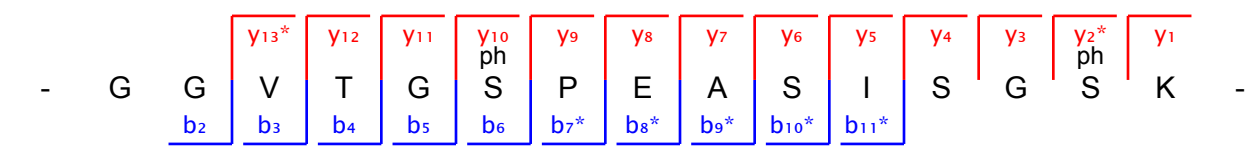

Raw file: 20171215\_MaS\_33SR\_LMH\_phospho2\_03  
 Scan: 7141 Method: FTMS; HCD Score: 101.1 m/z: 854.31 Gene names: TBC1D9B

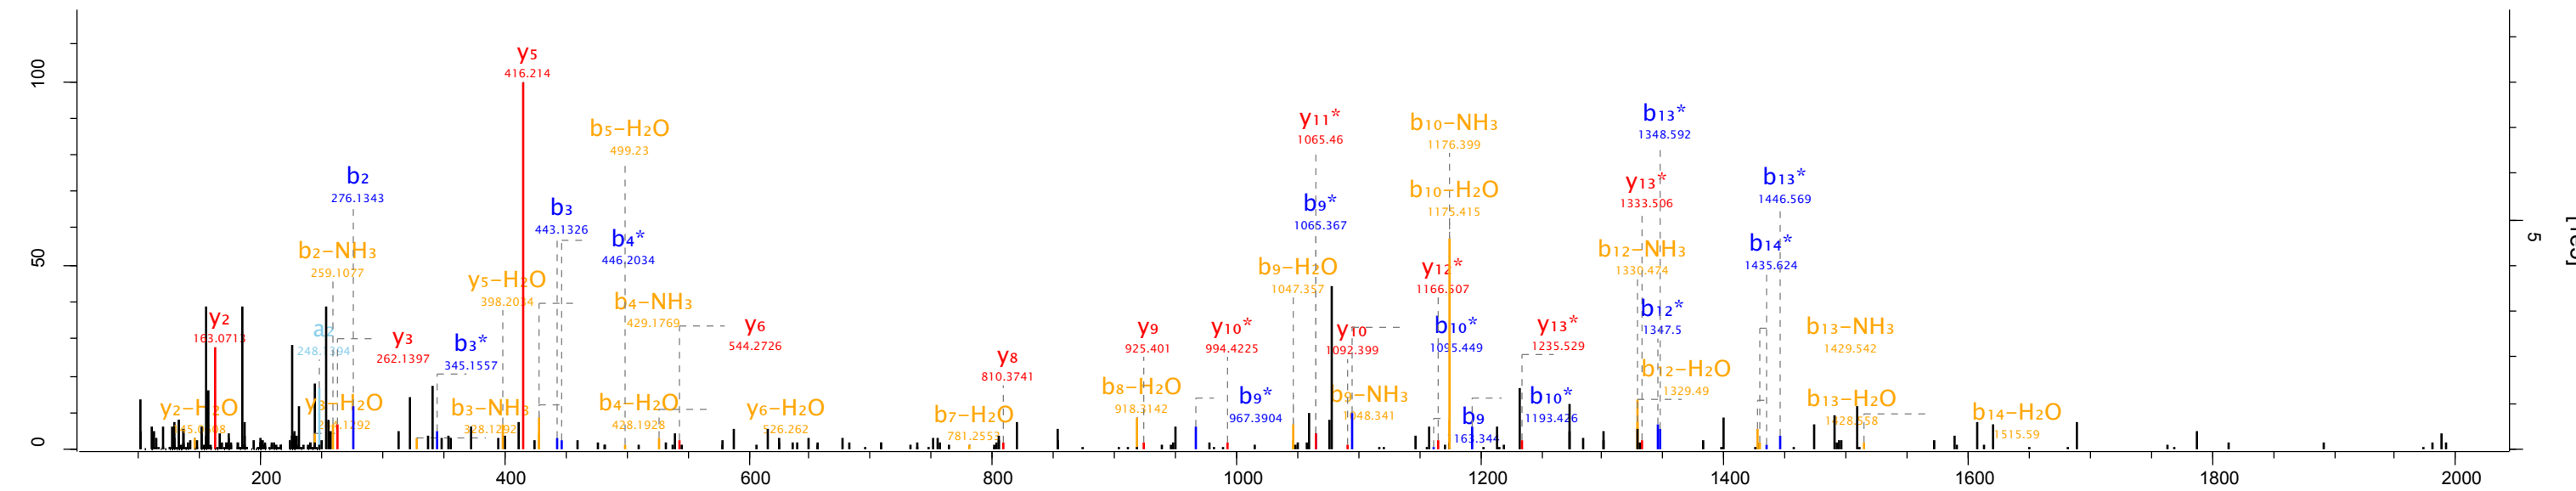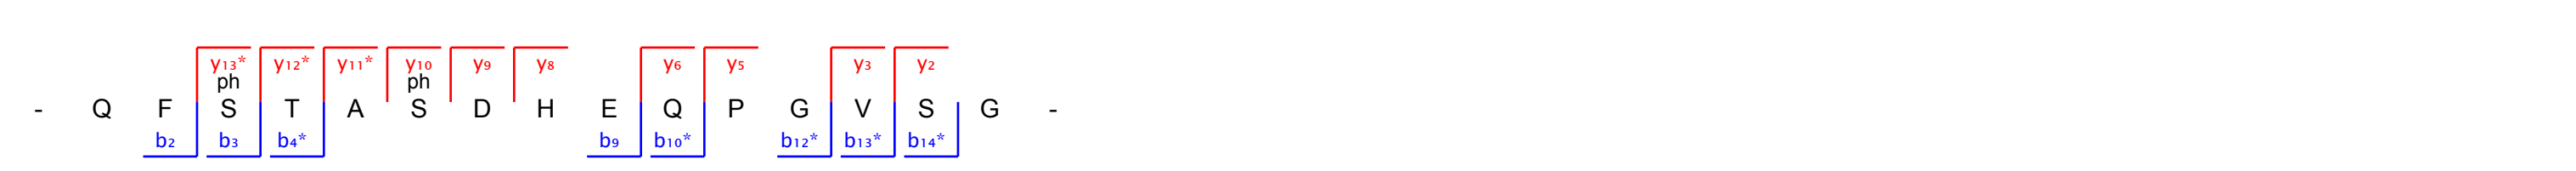

Raw file 20171215\_MaS\_33SR\_LMH\_phospho2\_03 Scan 7241 Method FTMS; HCD Score 144.23 m/z 712.3 Gene names CCDC6

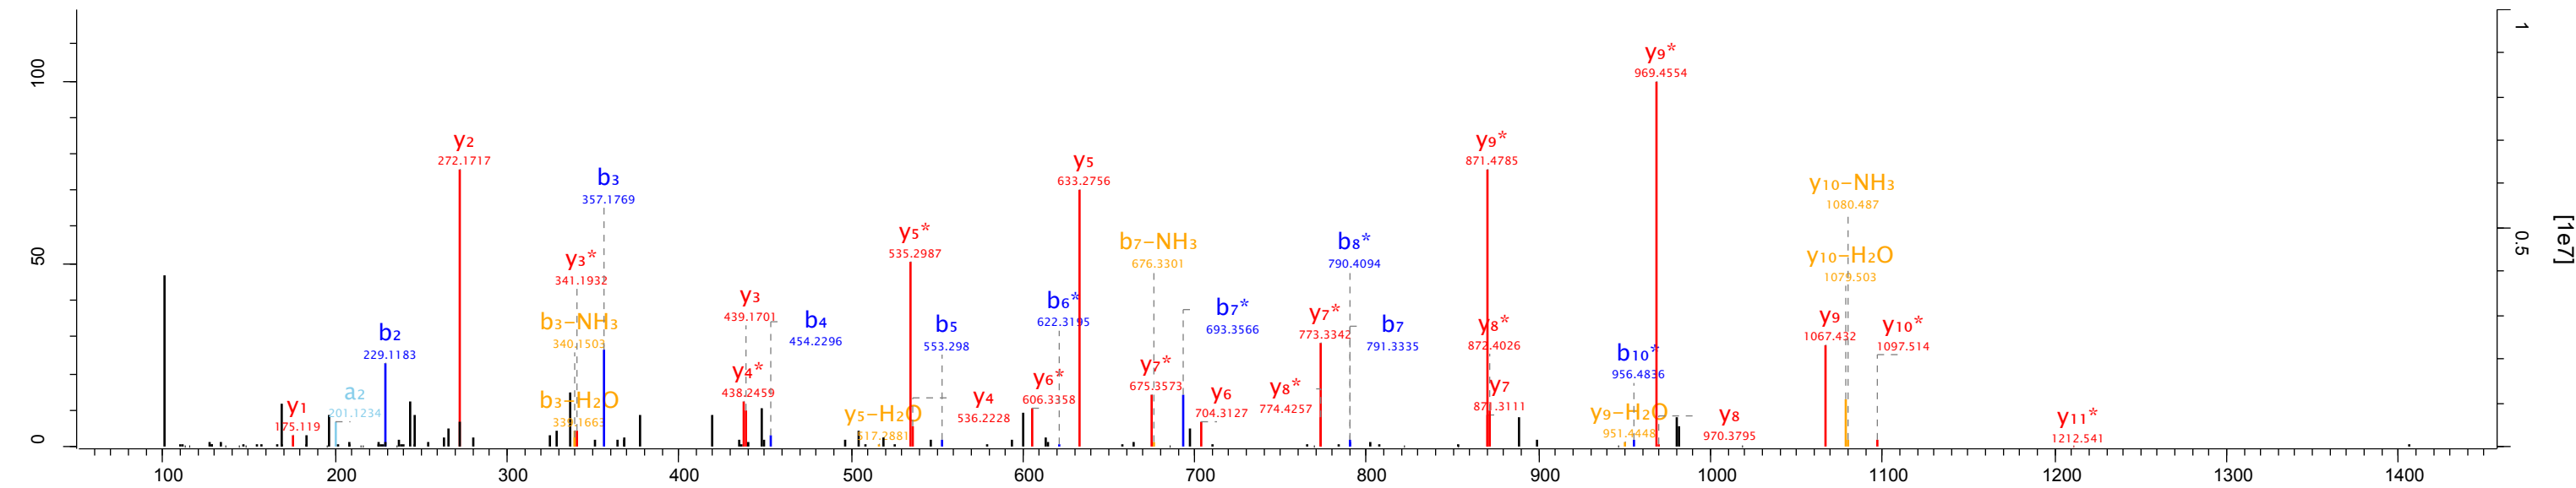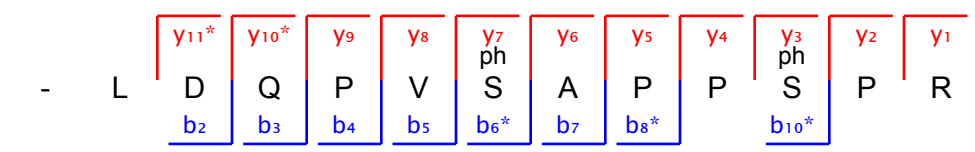

Raw file  
20171215\_MaS\_33SR\_LMH\_phospho2\_03

Scan 7251 Method FTMS; HCD Score 199.33 m/z 764.85 Gene names CANX

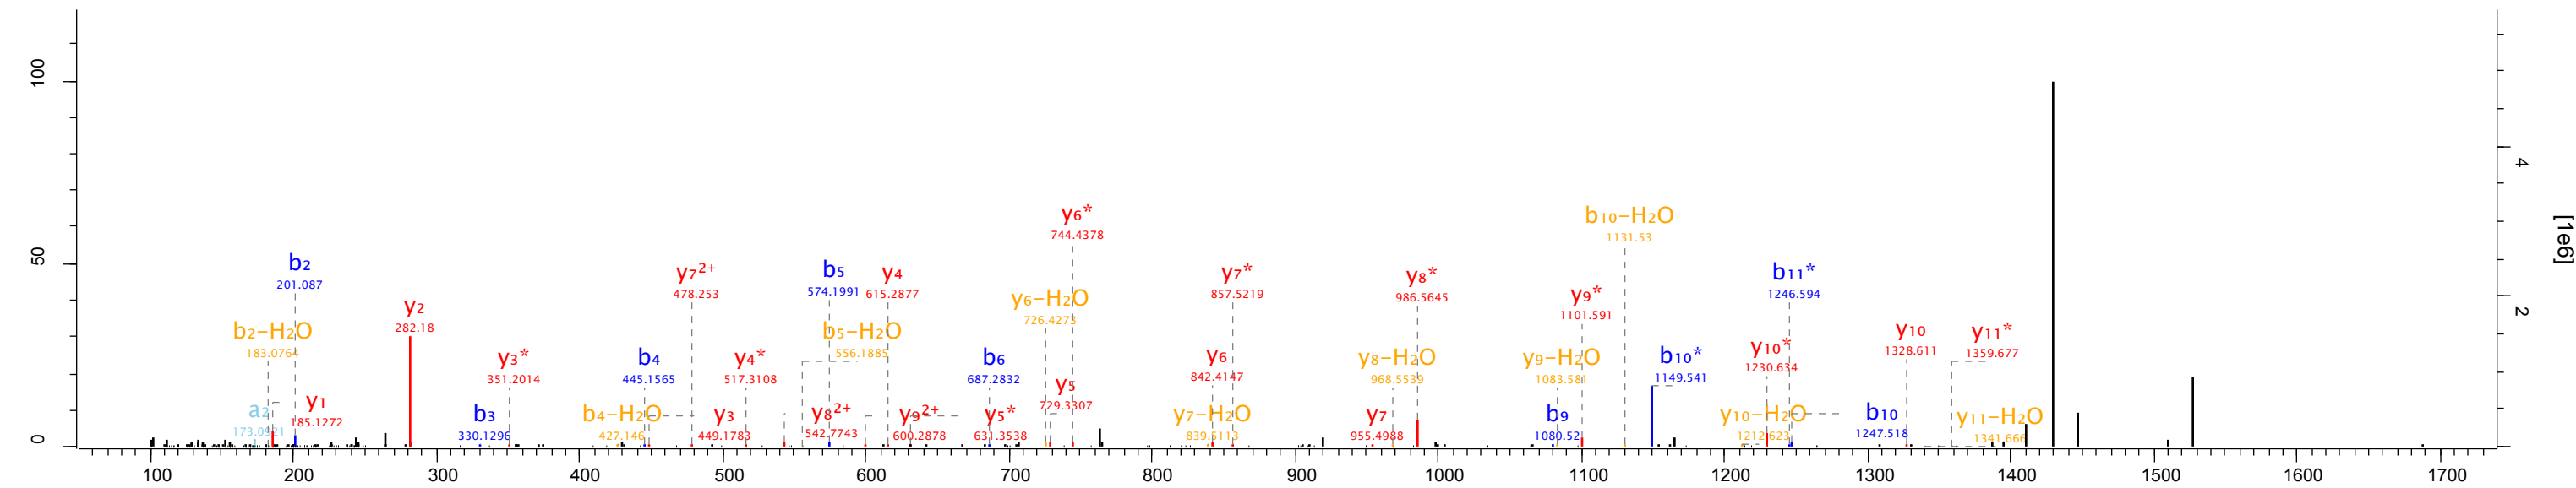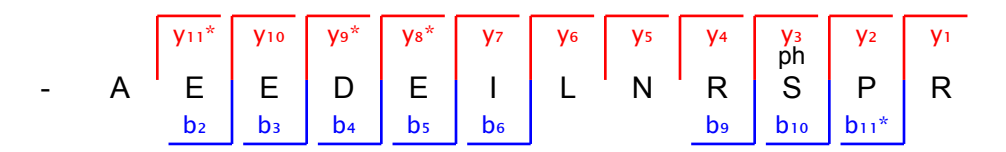

Raw file 20171215\_MaS\_33SR\_LMH\_phospho2\_03 Scan 7601 Method FTMS; HCD Score 174.81 m/z 828.36 Gene names SLC20A2

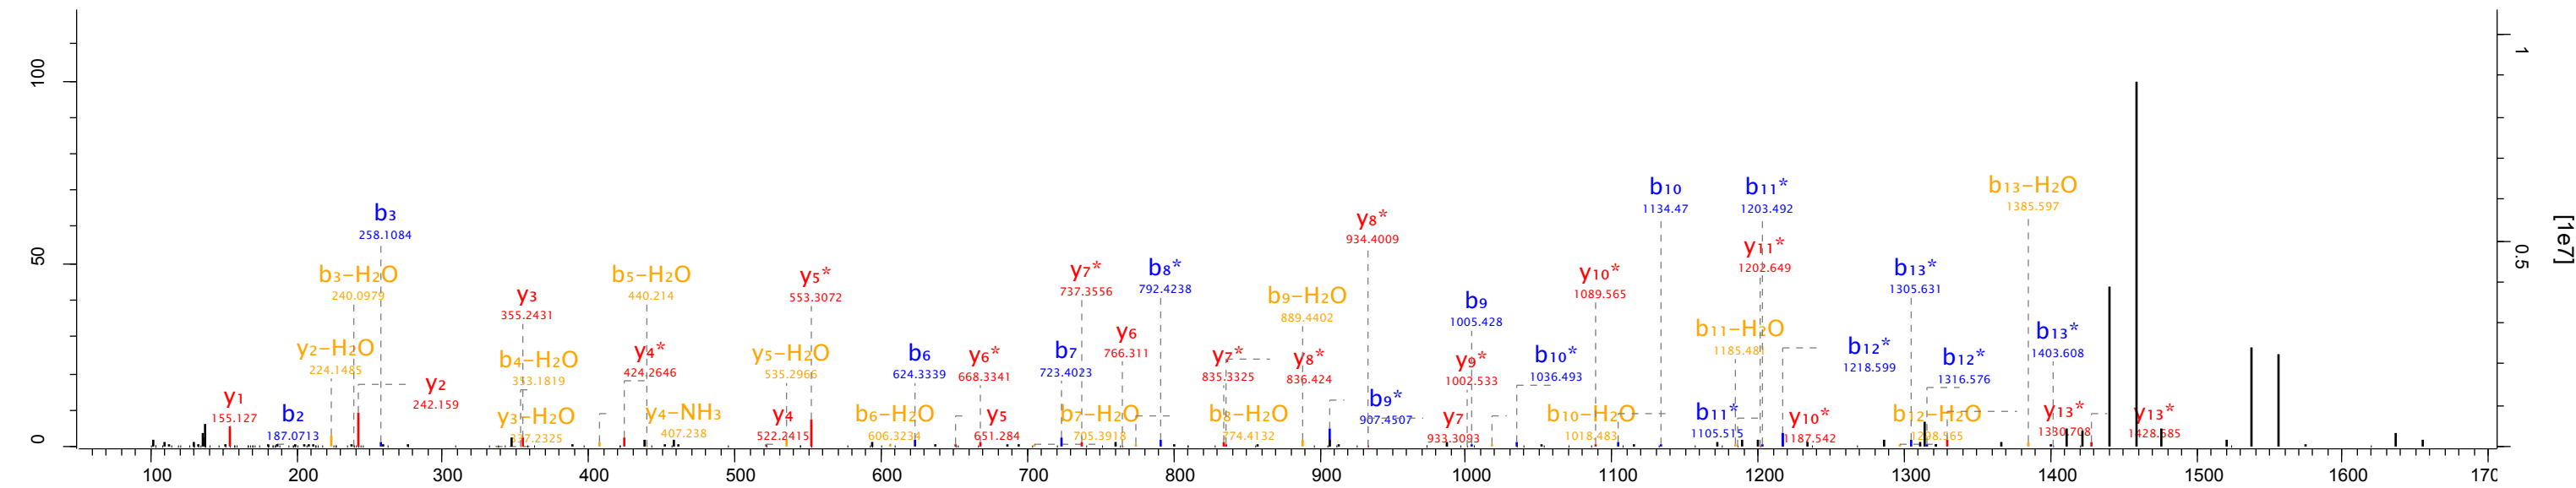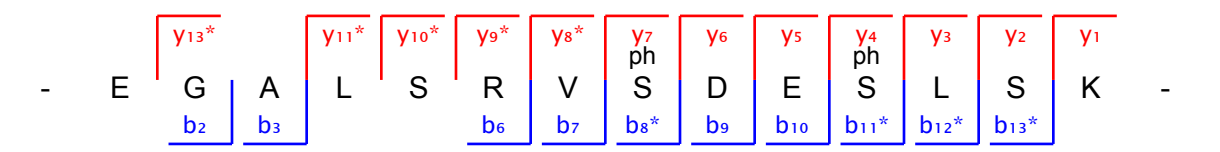

Raw file 20171215\_MaS\_33SR\_LMH\_phospho2\_03 Scan 7641 Method FTMS; HCD Score 90.59 m/z 866.37 Gene names BCOR

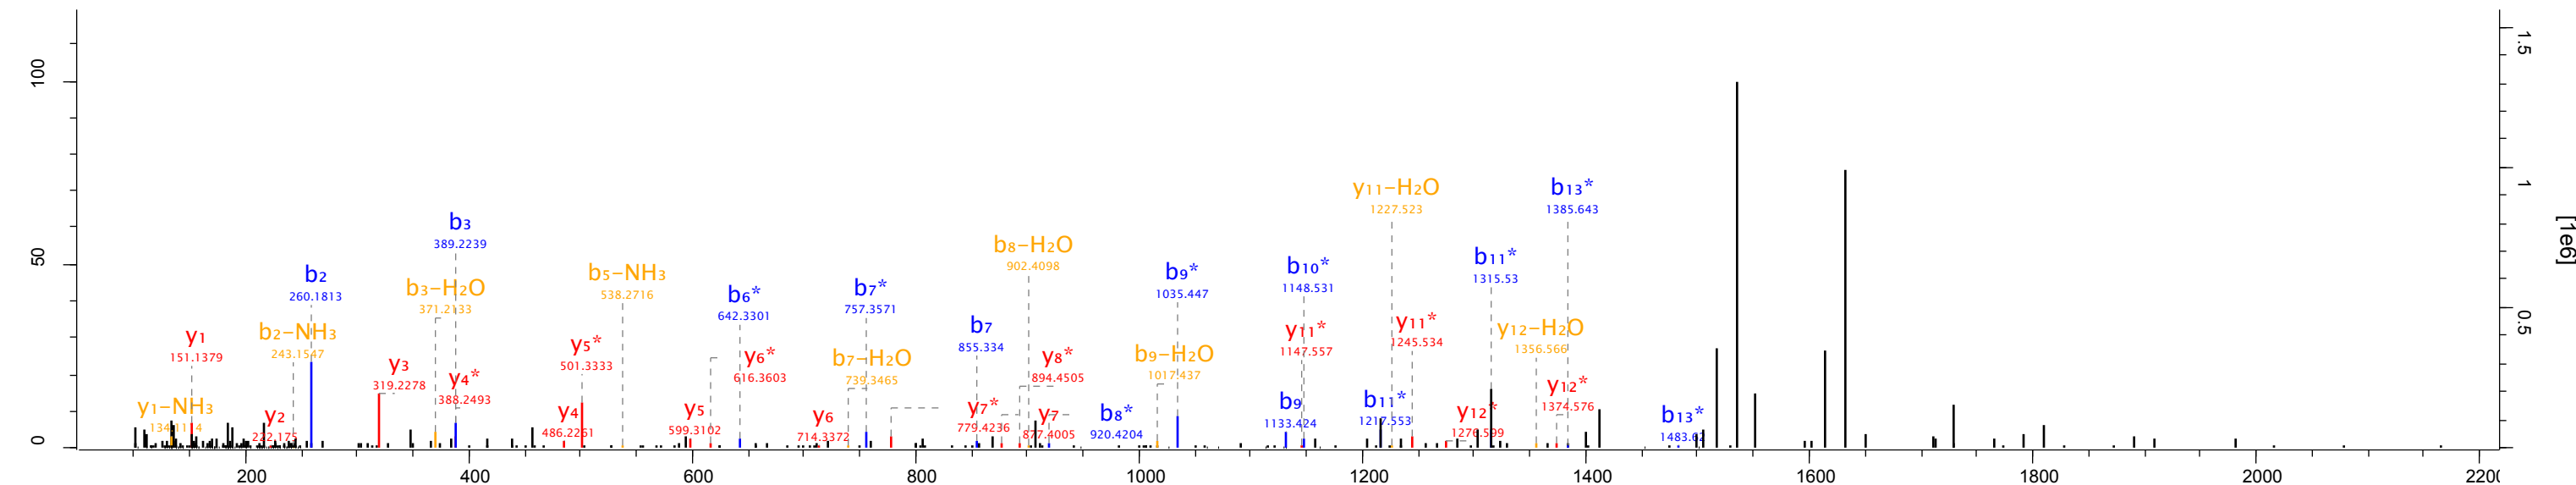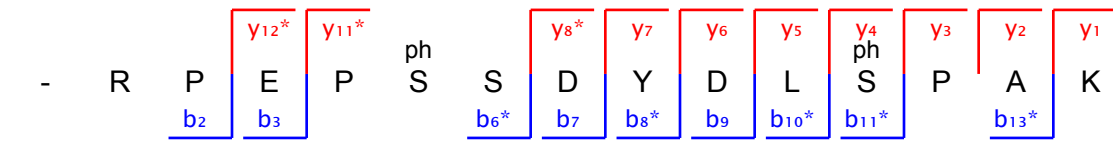



Raw file 20171215\_MaS\_33SR\_LMH\_phospho2\_03 Scan 7671 Method FTMS; HCD Score 102.67 m/z 883.83 Gene names MYO18A

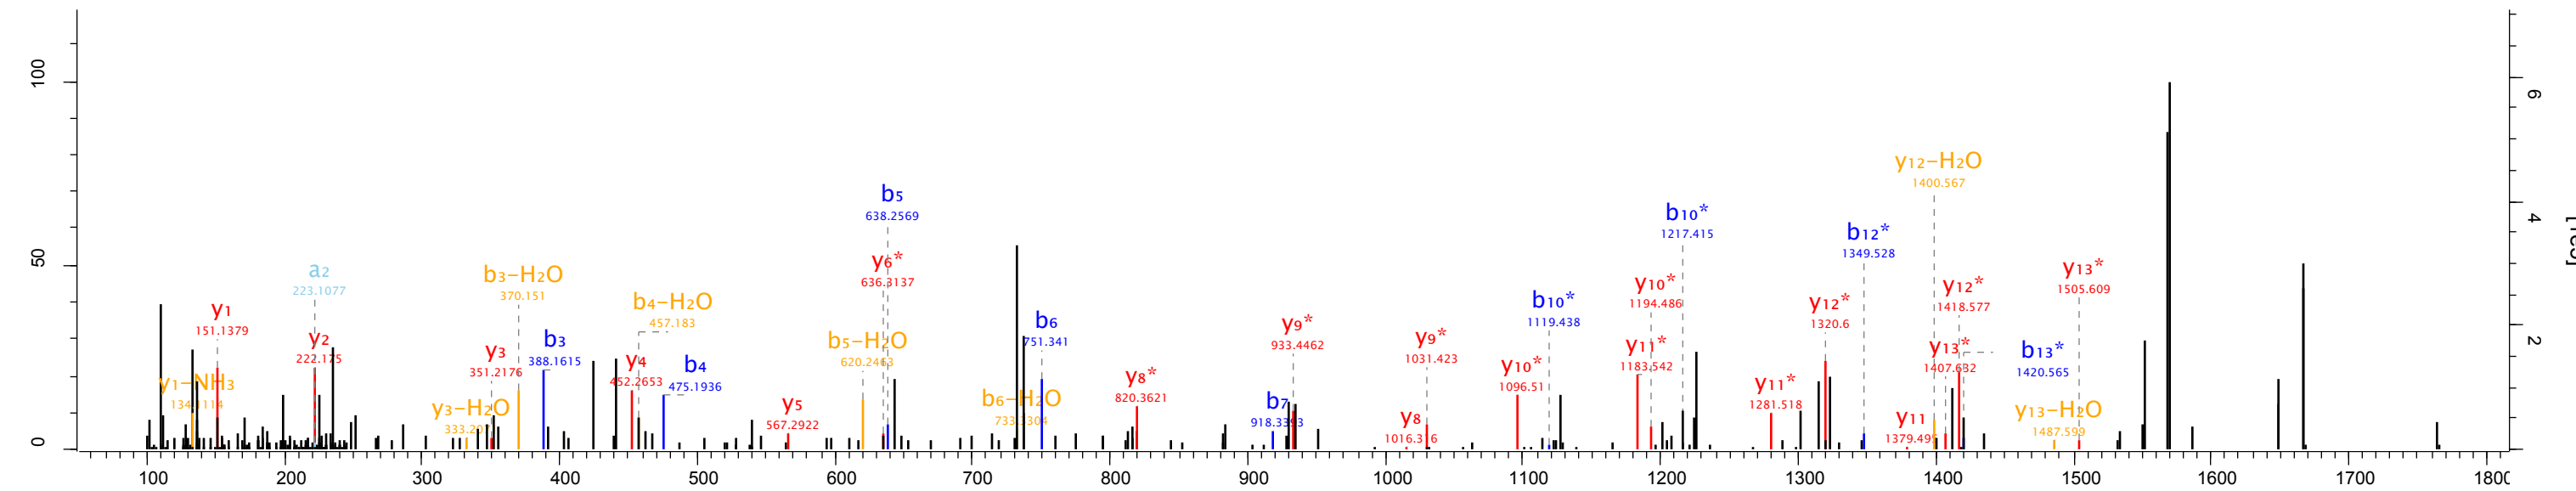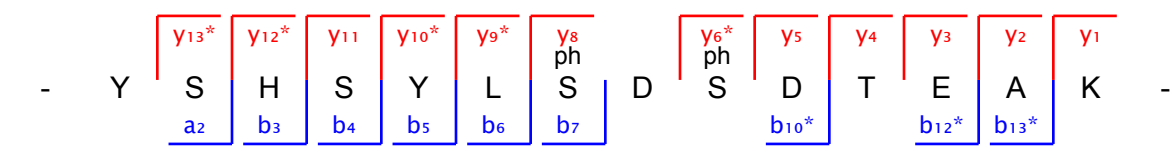

Raw file 20171215\_MaS\_33SR\_LMH\_phospho2\_03 Scan 7901 Method FTMS; HCD Score 99.93 m/z 591.25 Gene names CLASP2

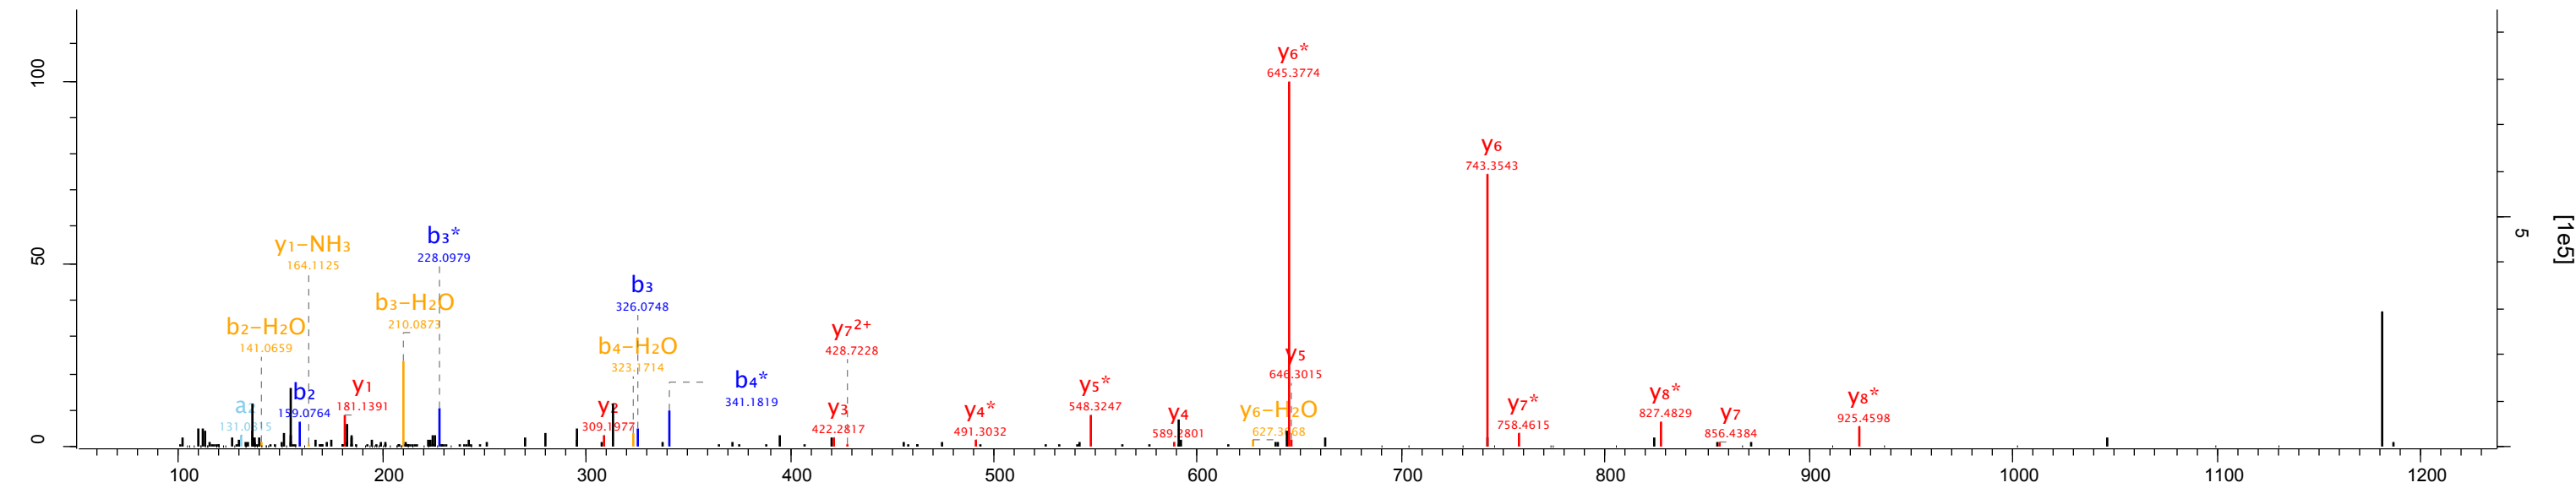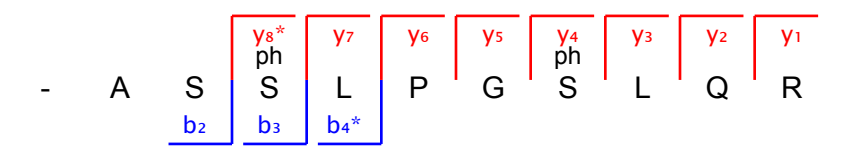

Raw file 20171215\_MaS\_33SR\_LMH\_phospho2\_03 Scan 8271 Method FTMS; HCD Score 122.2 m/z 621.31 Gene names TPD52L2

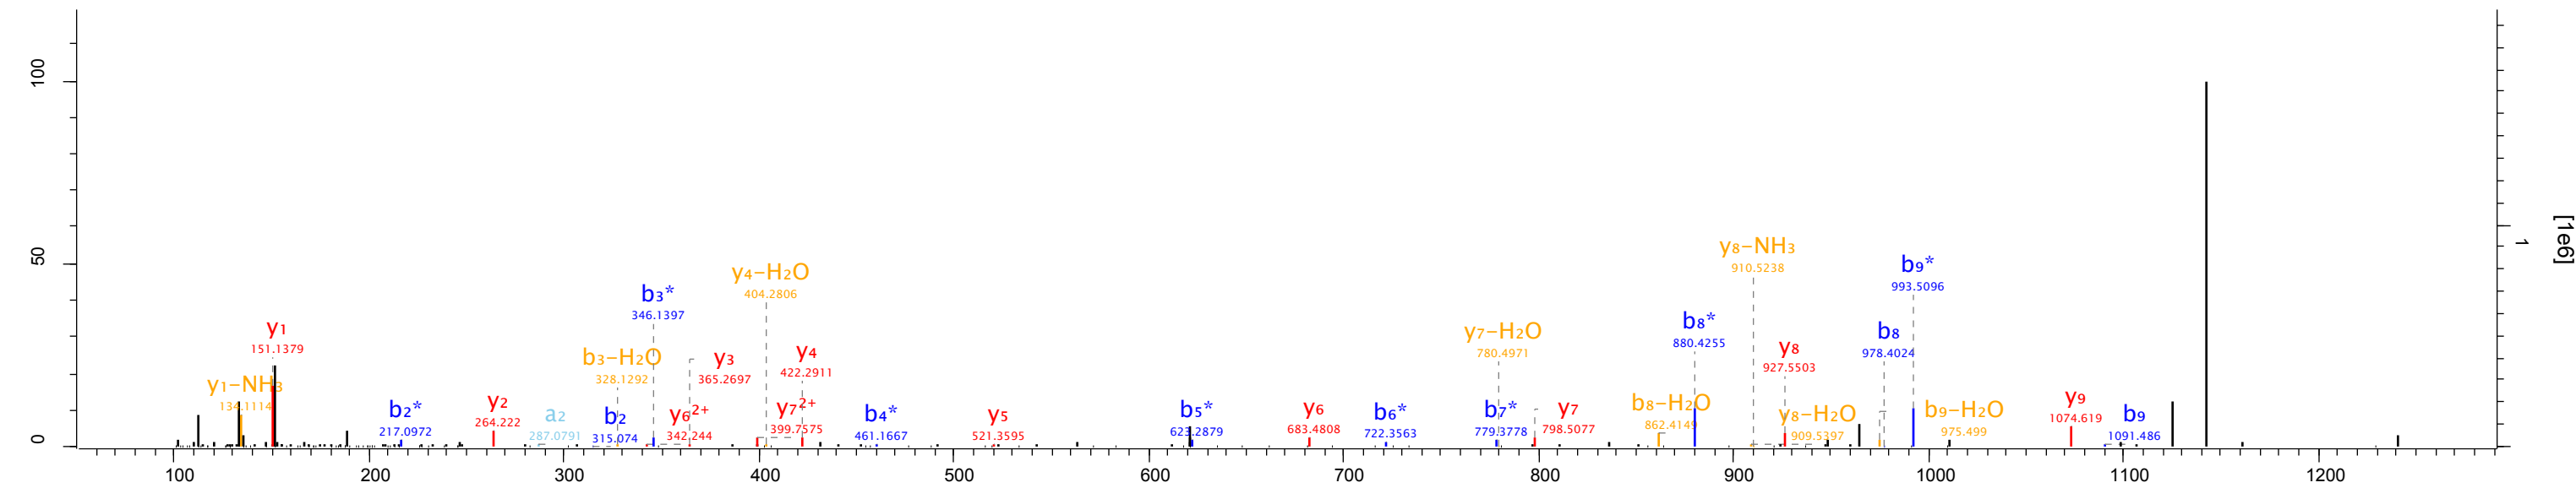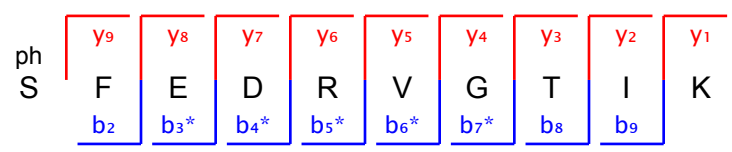

Raw file 20171215\_MaS\_33SR\_LMH\_phospho2\_03 Scan 8301 Method FTMS; HCD Score 301.82 m/z 1232.54 Gene names CCDC86

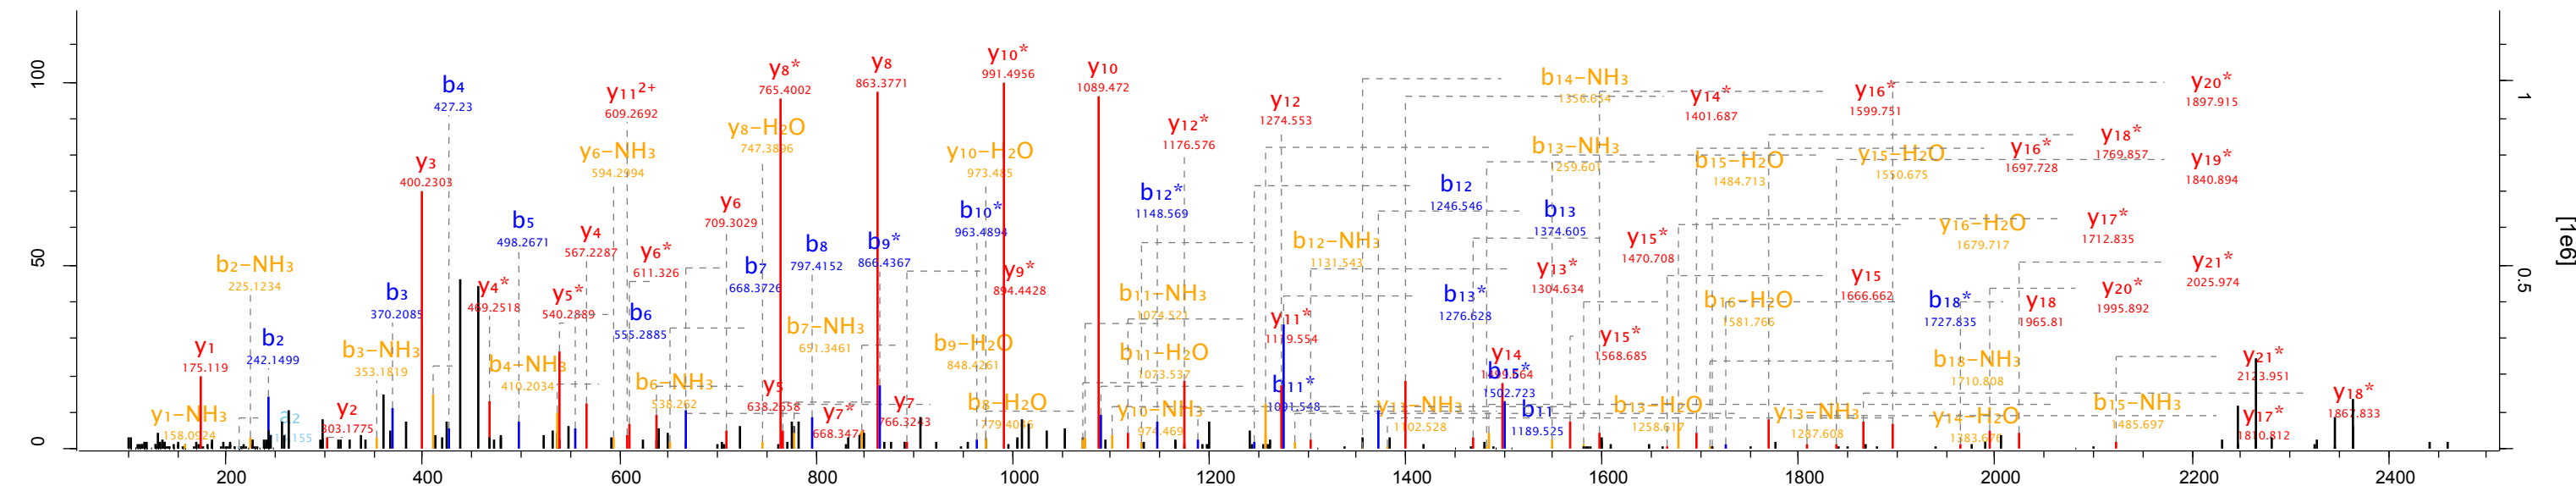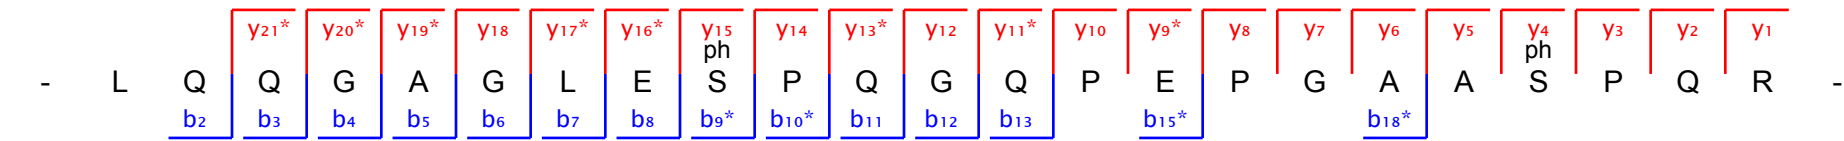

Raw file: 20171215\_MaS\_33SR\_LMH\_phospho2\_03  
 Scan: 8321 Method: FTMS; HCD Score: 143.69 m/z: 838.84 Gene names: POLR2A

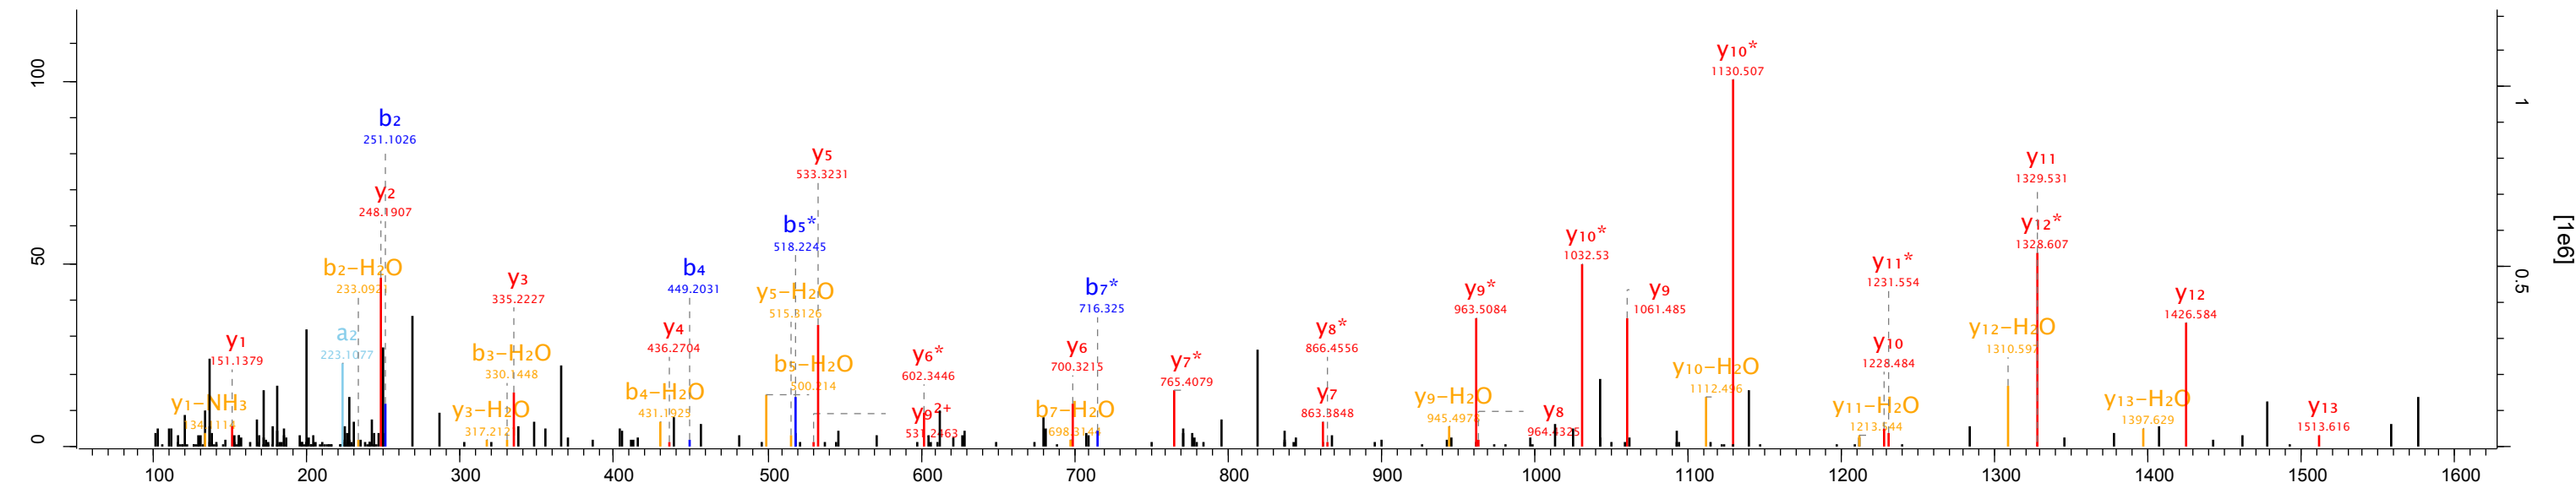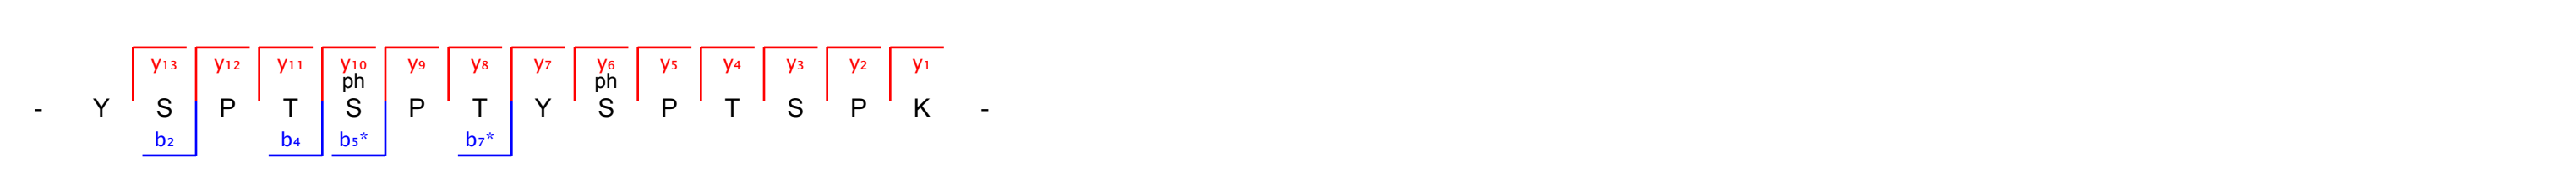

20171215\_MaS\_33SR\_LMH\_phospho2\_03 8621 FTMS; HCD 202.62 821.38 RBL1

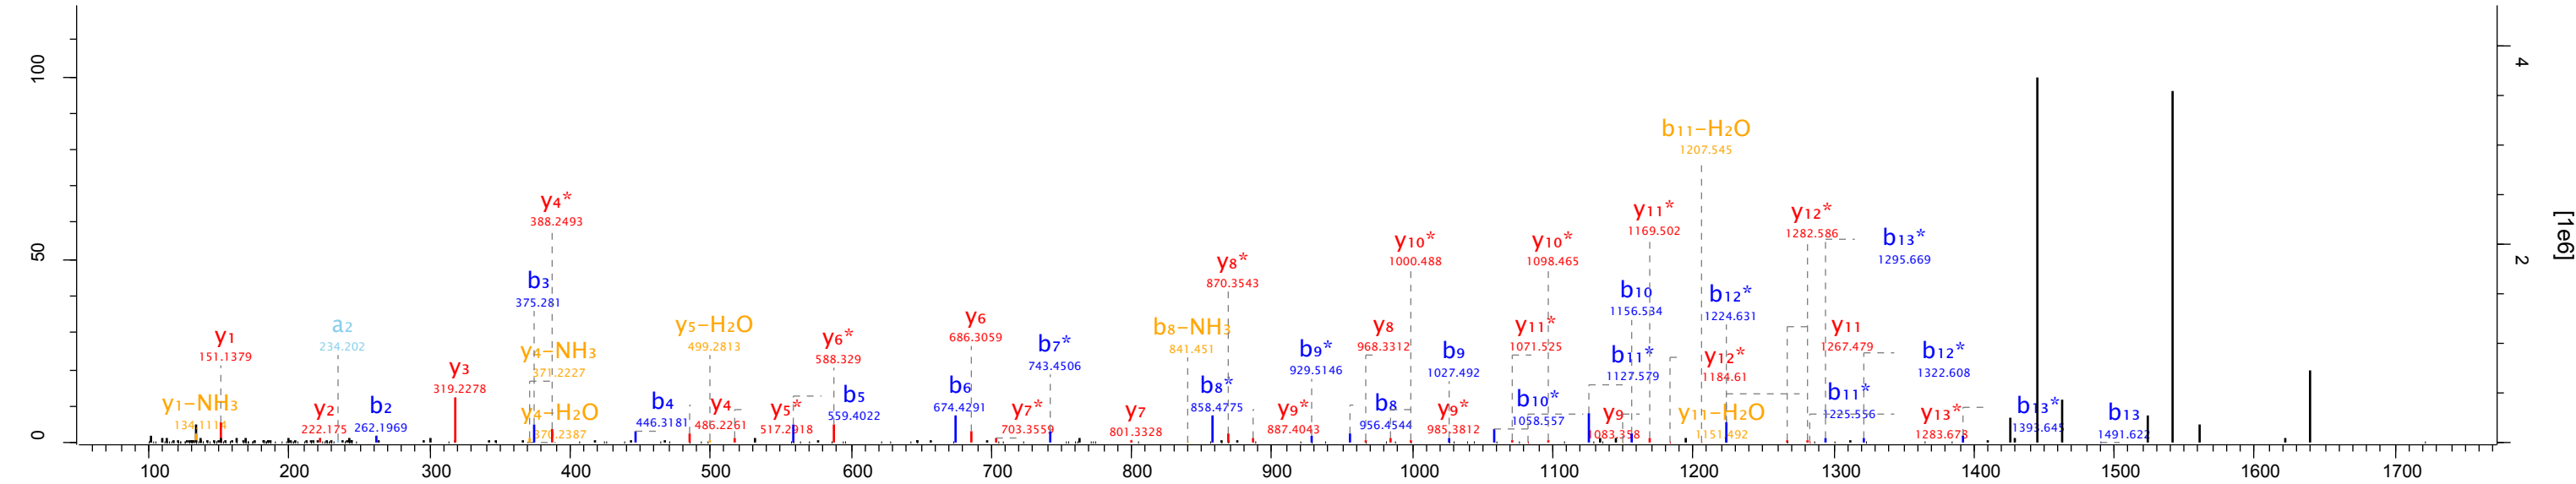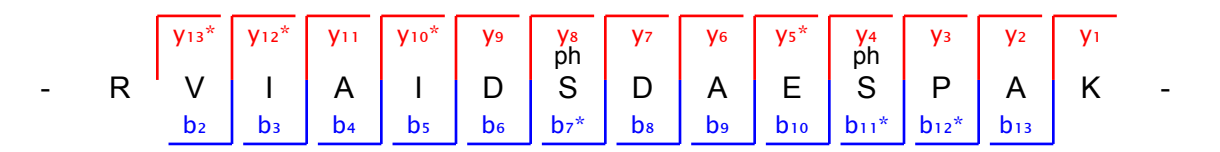

Raw file 20171215\_MaS\_33SR\_LMH\_phospho2\_03 Scan 8761 Method FTMS; HCD Score 138.49 m/z 905.34 Gene names NRBP1

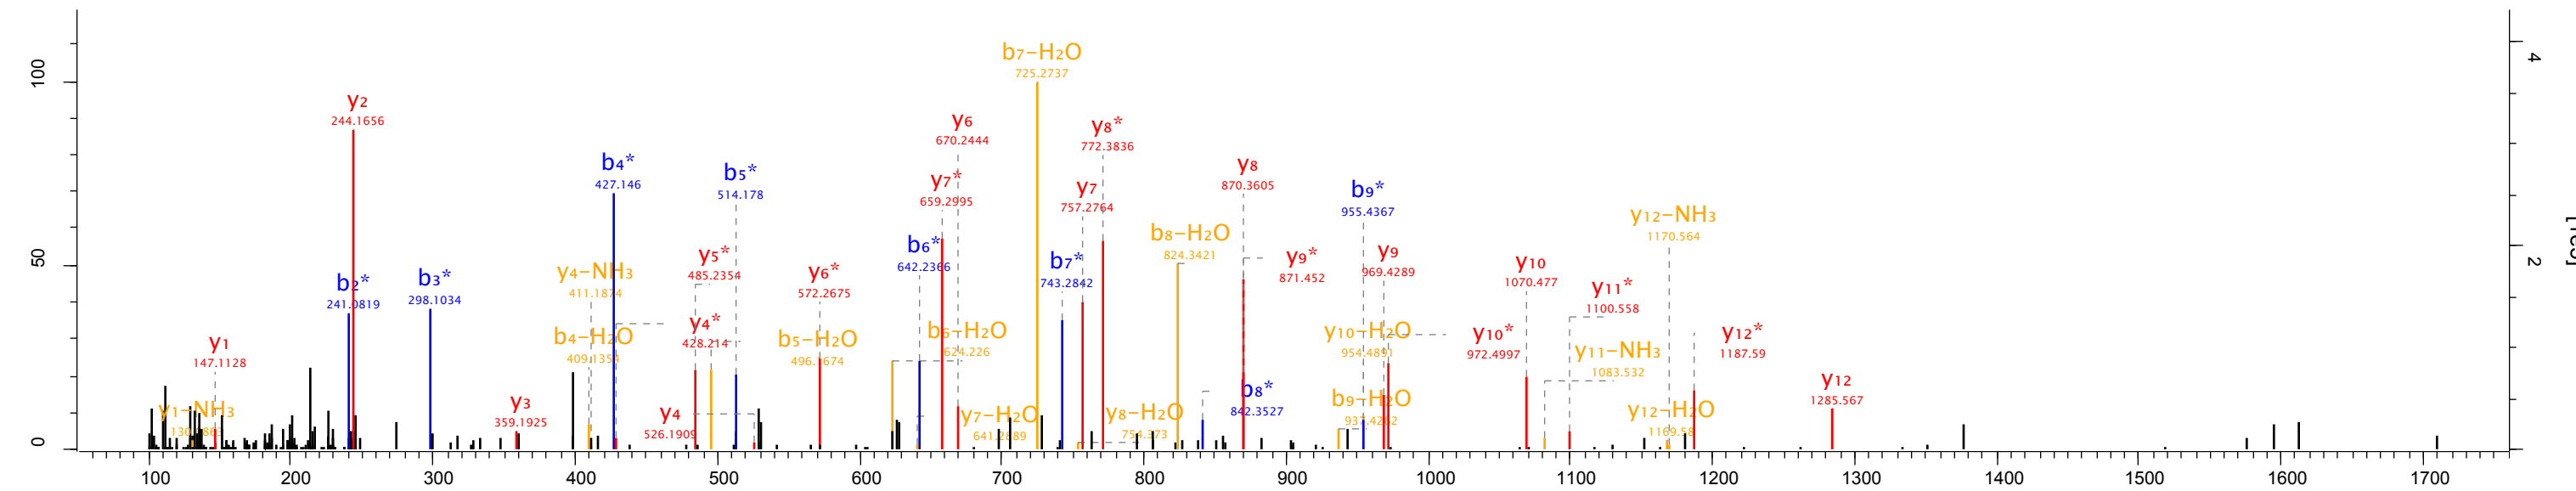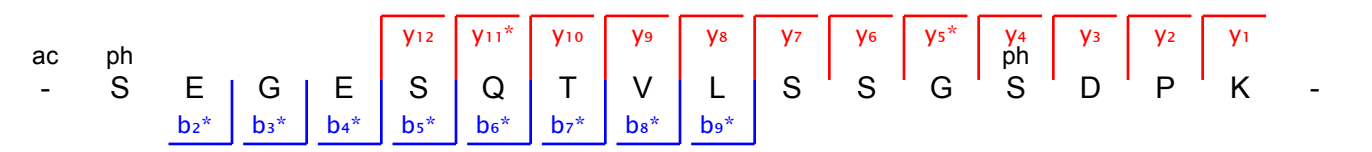

Raw file: 20171215\_MaS\_33SR\_LMH\_phospho2\_03  
 Scan: 9041 Method: FTMS; HCD Score: 234.64 m/z: 1042.87 Gene names: MAX

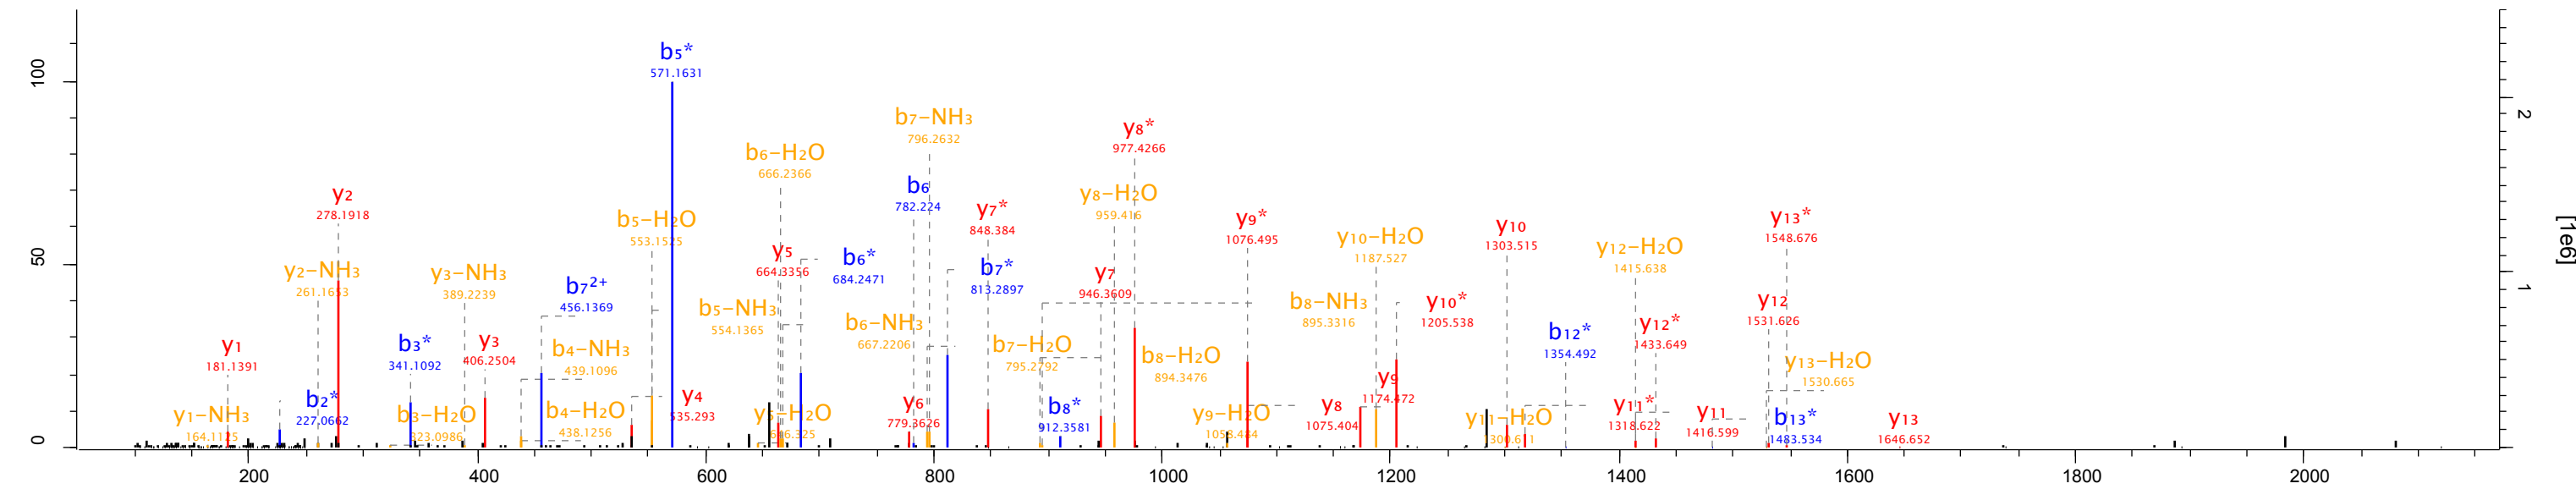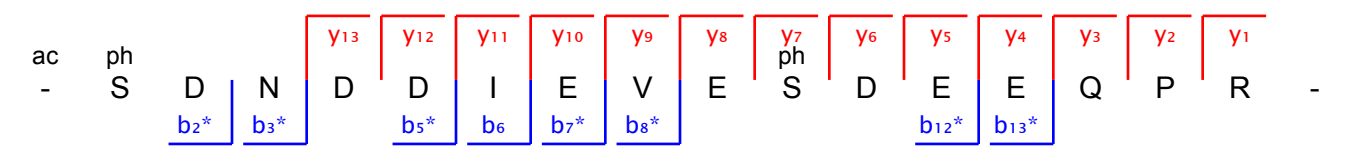



Raw file 20171215\_MaS\_33SR\_LMH\_phospho2\_03 Scan 9141 Method FTMS; HCD Score 115.42 m/z 678.22 Gene names FRA10AC1

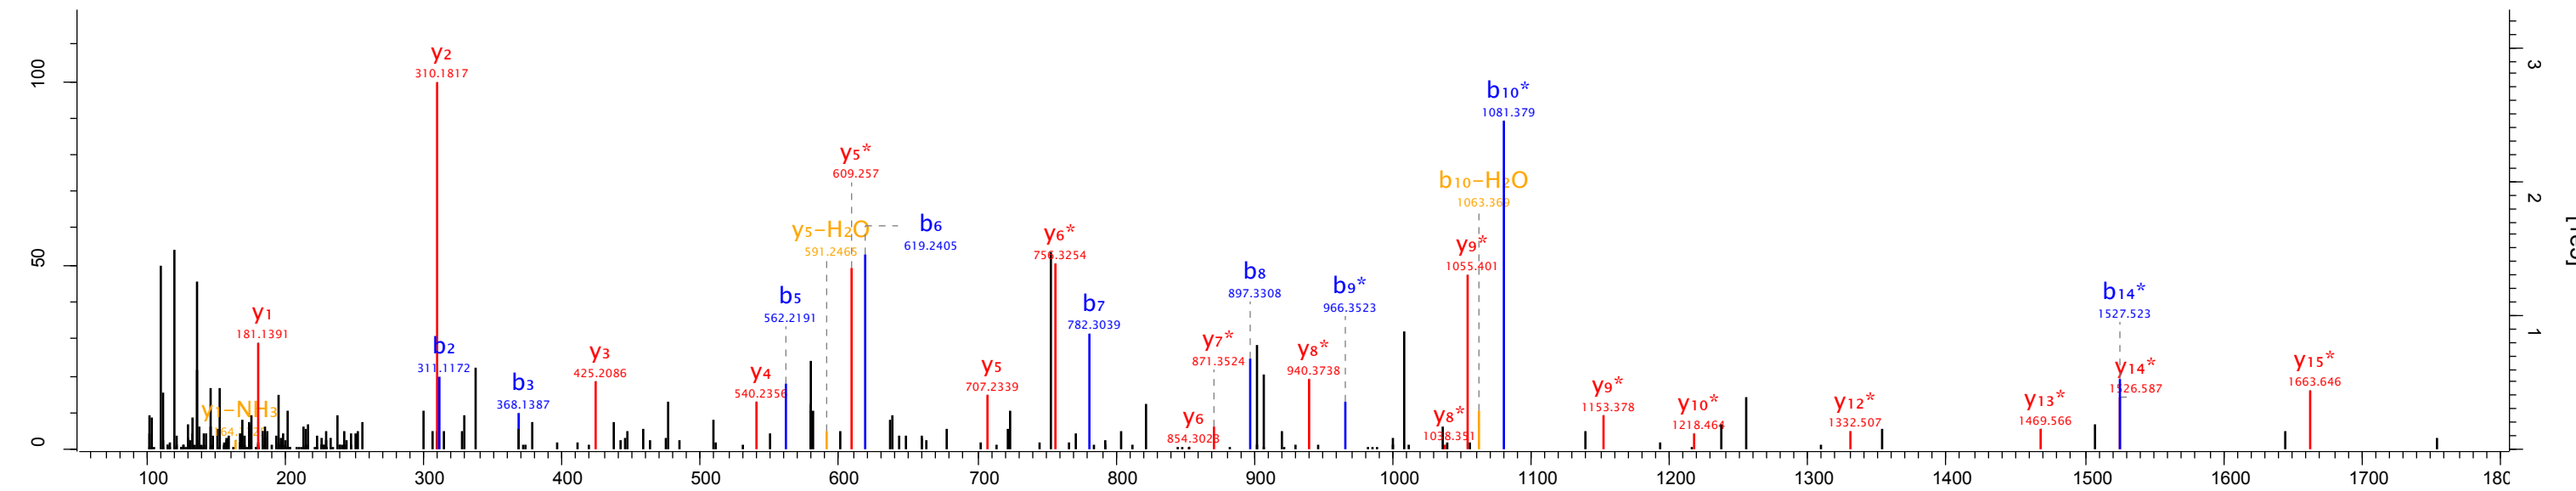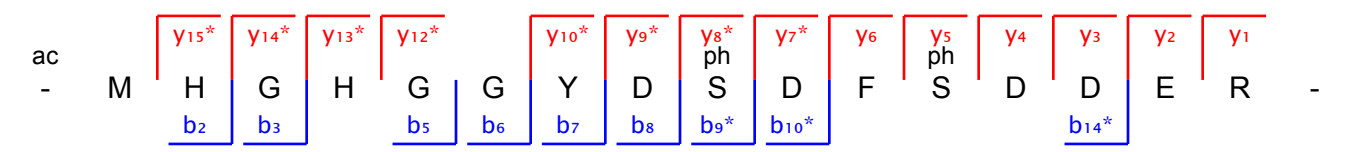

Raw file 20171215\_MaS\_33SR\_LMH\_phospho2\_03 Scan 9161 Method FTMS; HCD Score 162.9 m/z 1211.52 Gene names MICALL1

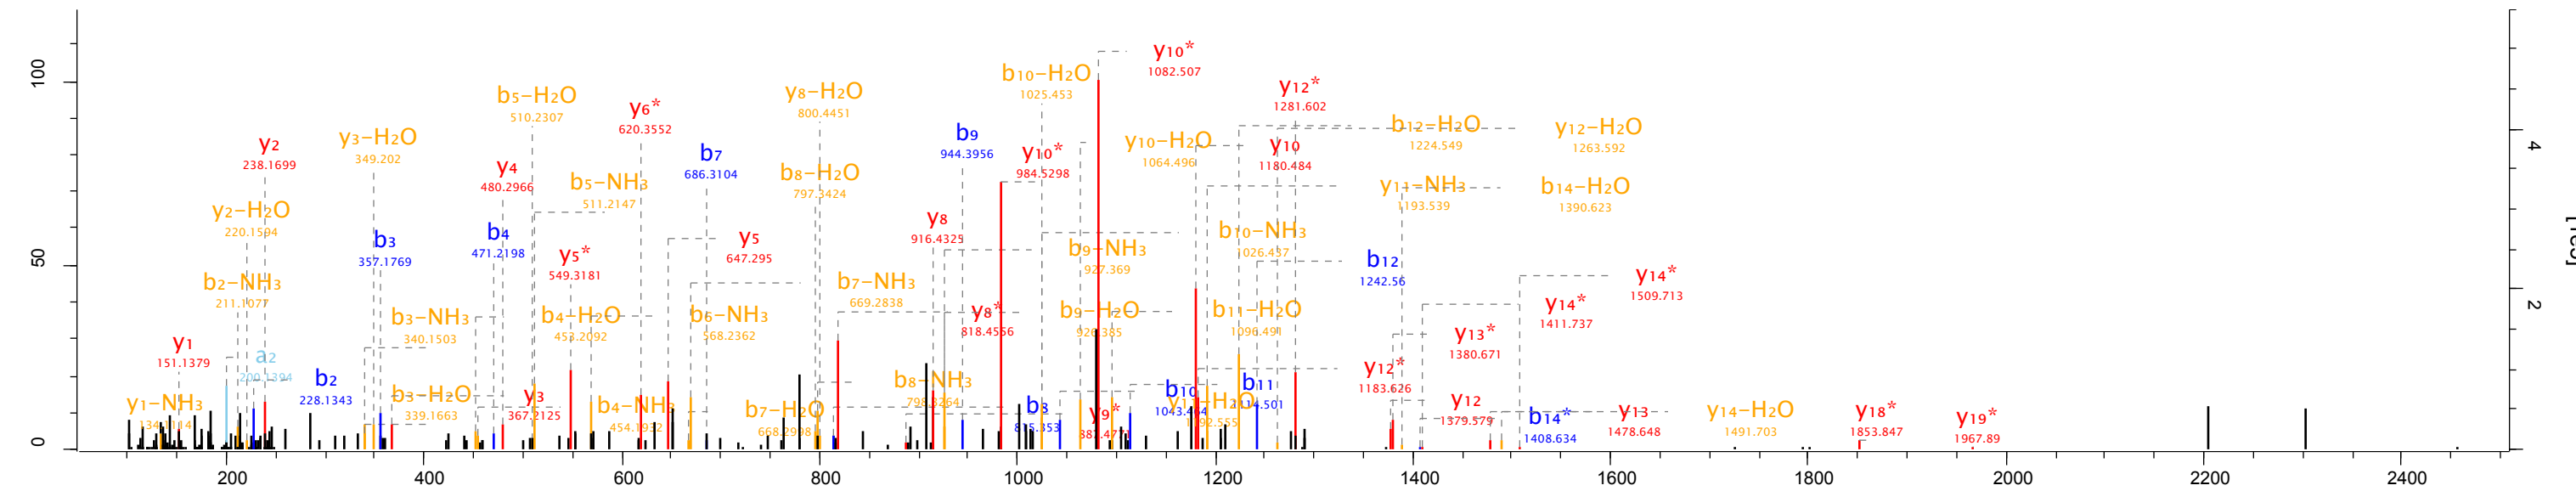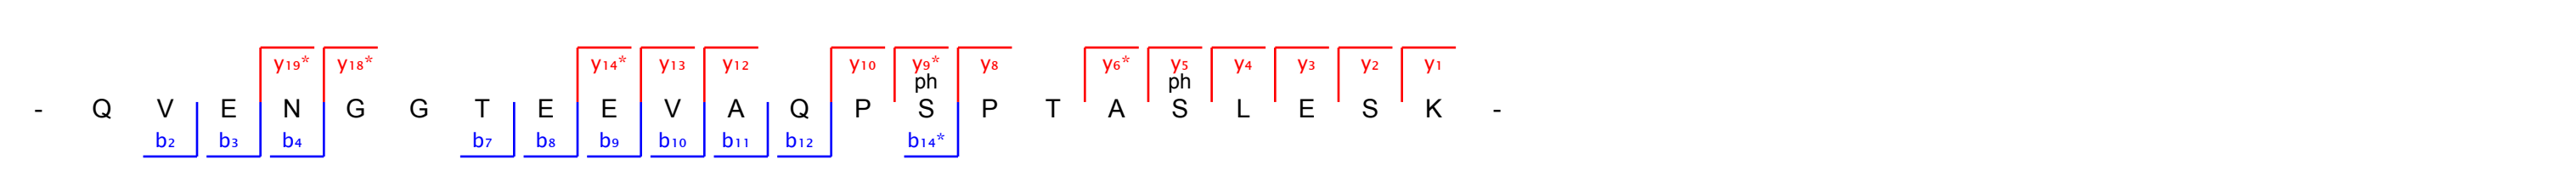

Raw file 20171215\_MaS\_33SR\_LMH\_phospho2\_03 Scan 9271 Method FTMS; HCD Score 51.57 m/z 569.9 Gene names SMARCA1

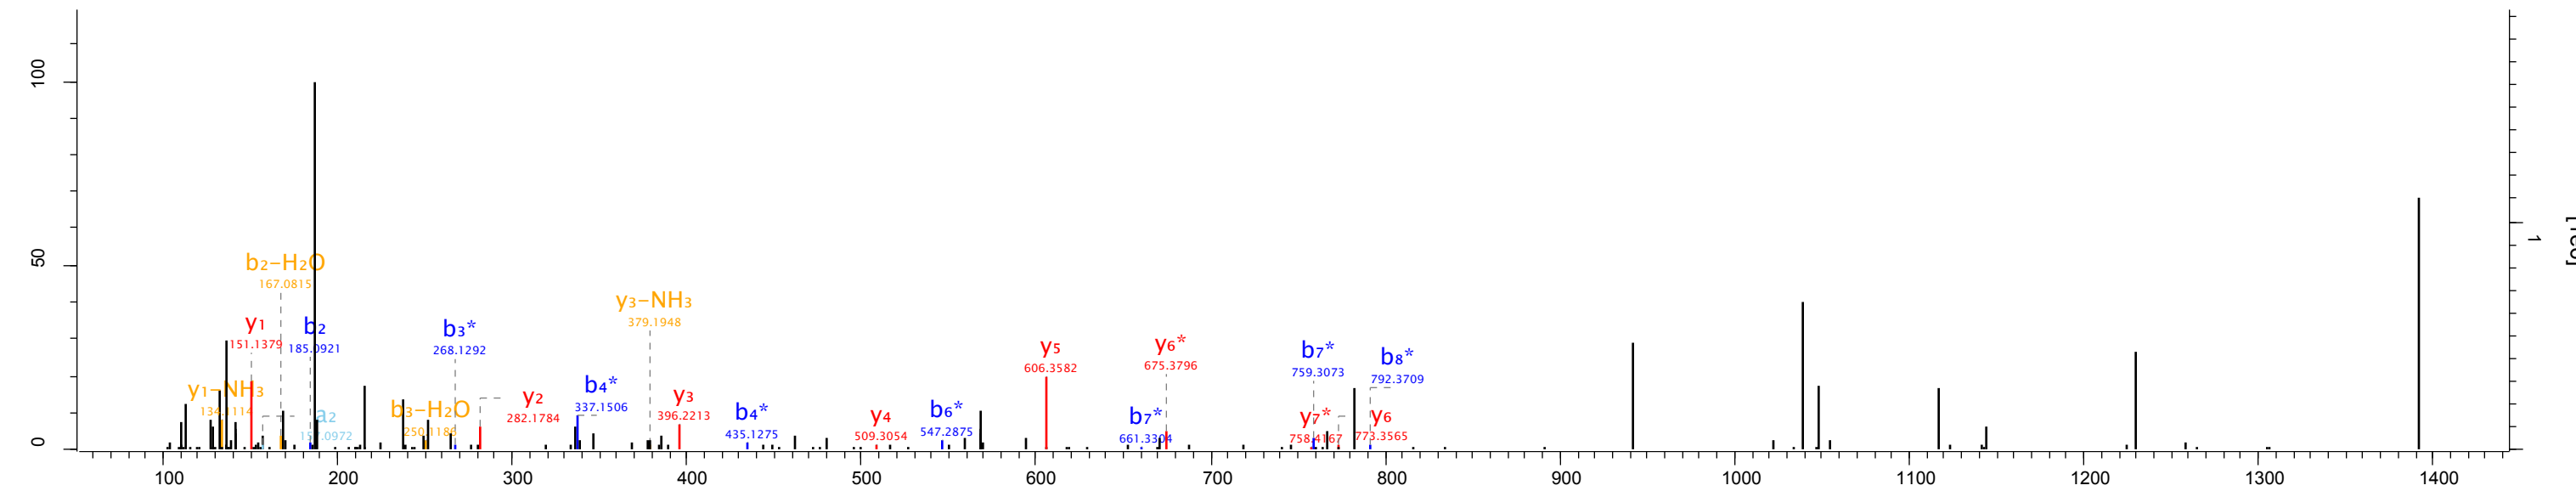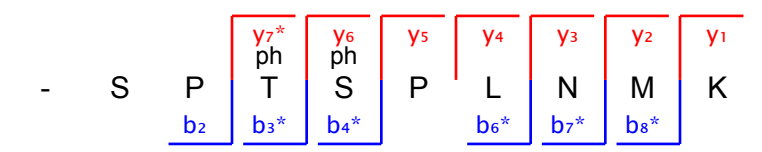

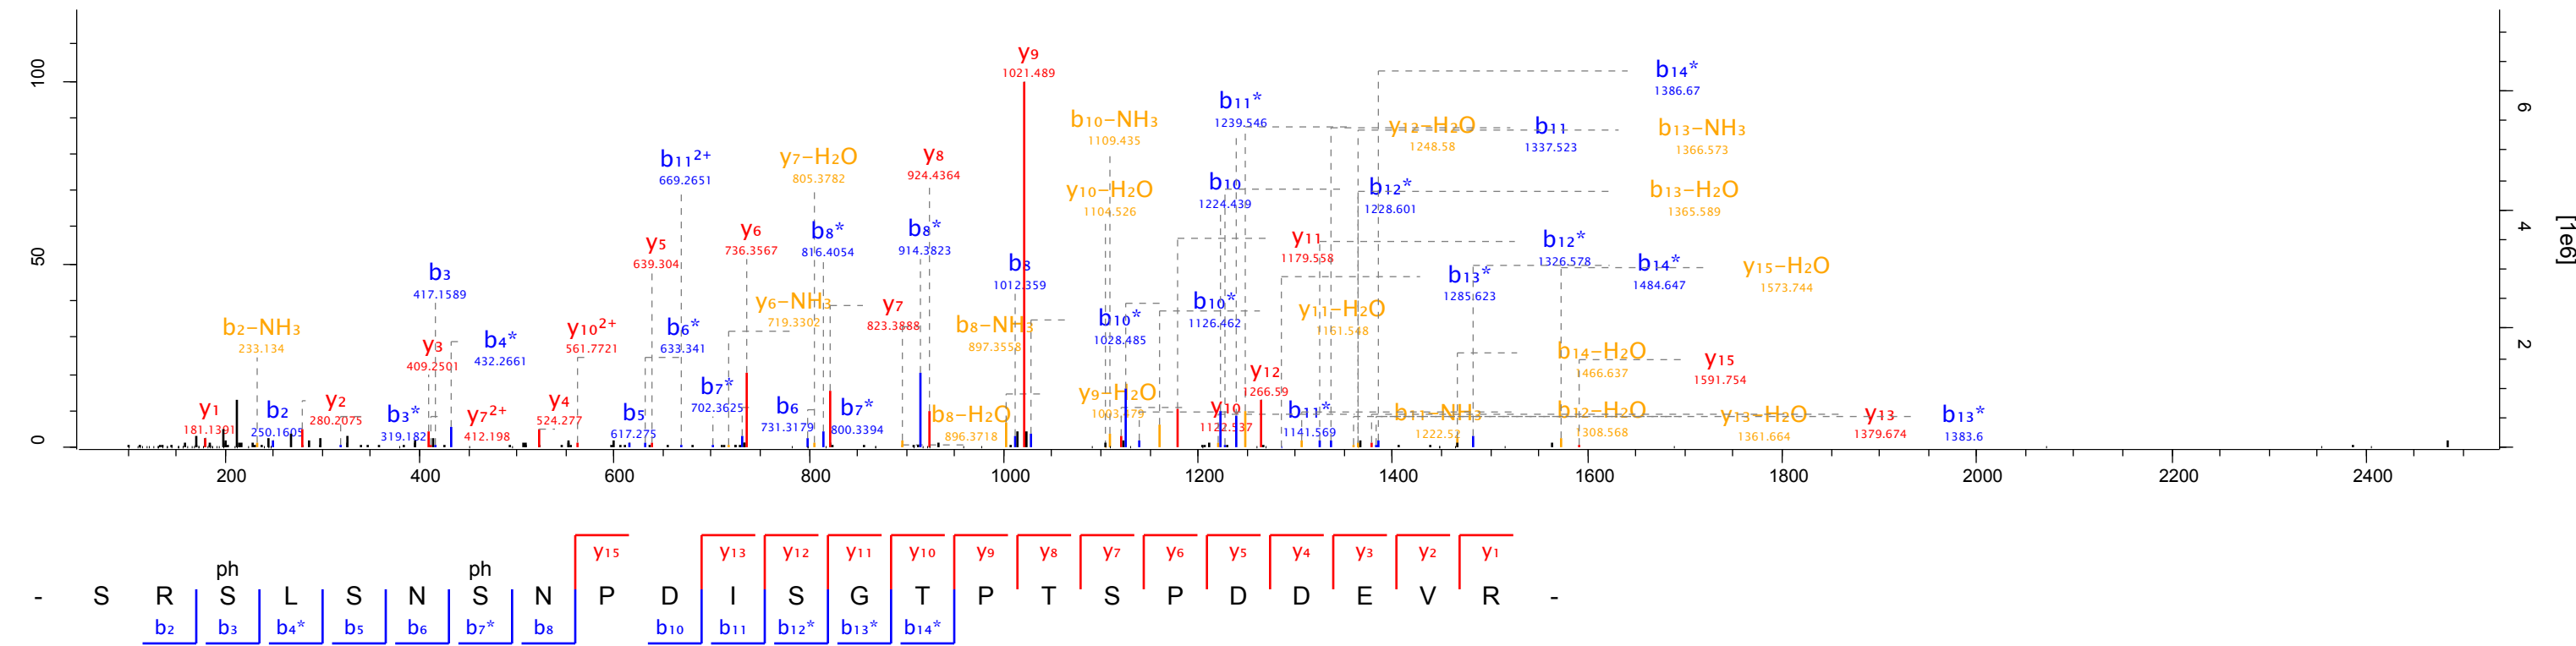

Raw file: 20171215\_MaS\_33SR\_LMH\_phospho2\_03  
 Scan: 9691 Method: FTMS; HCD Score: 205 m/z: 762.31 Gene names: NCKAP5L

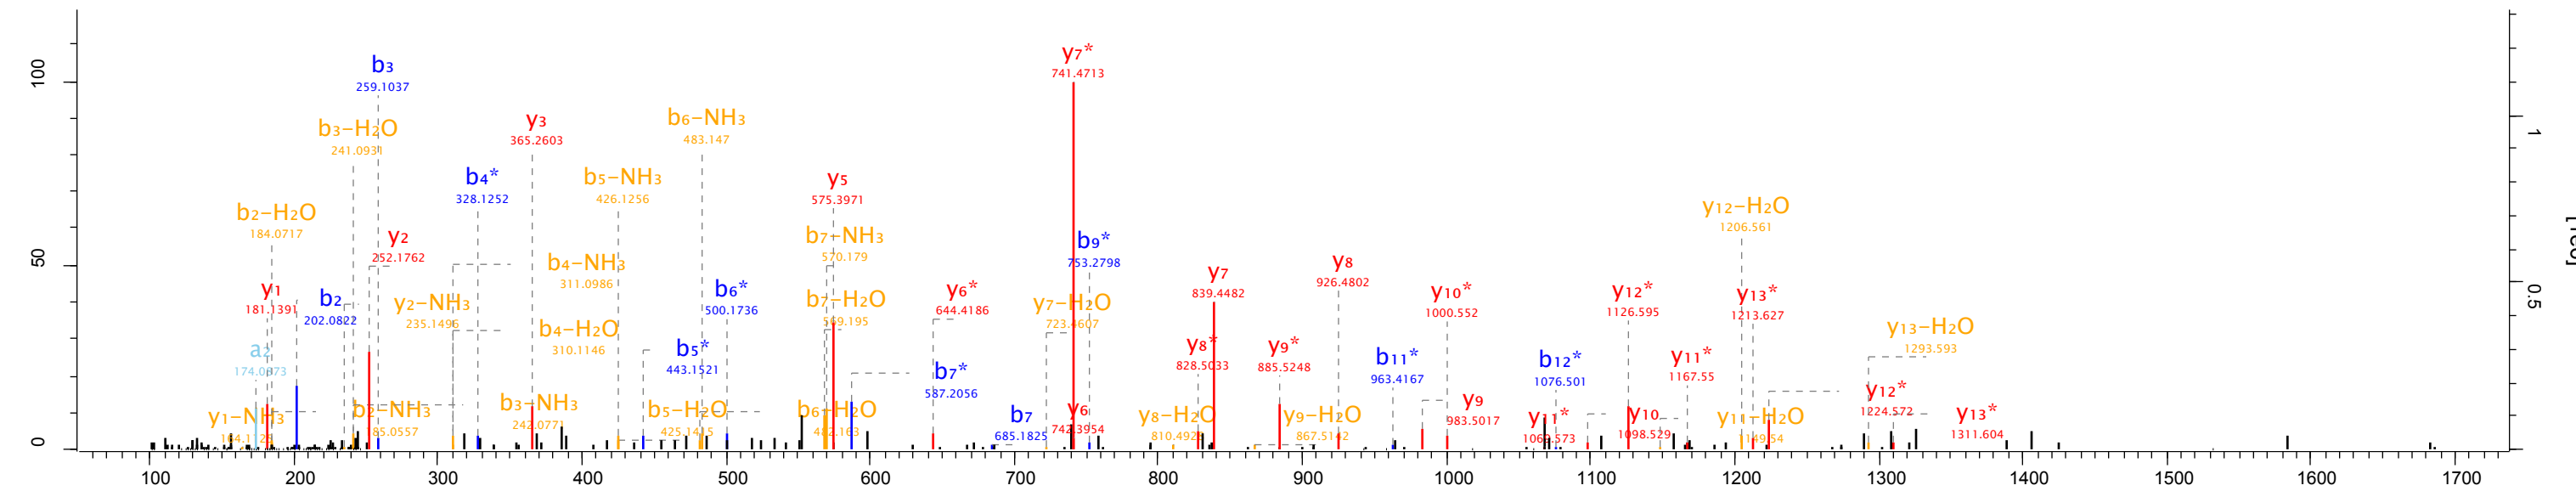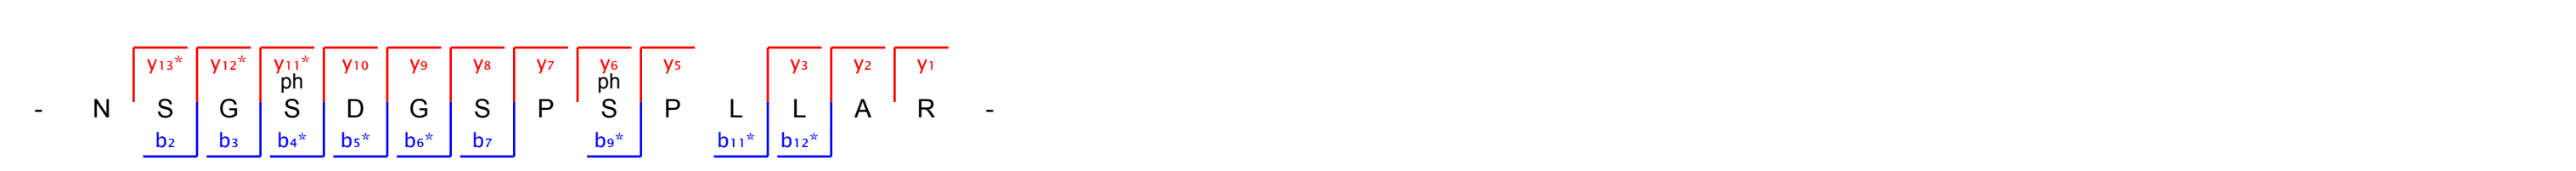

Raw file 20171215\_MaS\_33SR\_LMH\_phospho2\_04 Scan 11961 Method FTMS; HCD Score 54.28 m/z 953.41 Gene names LARP1

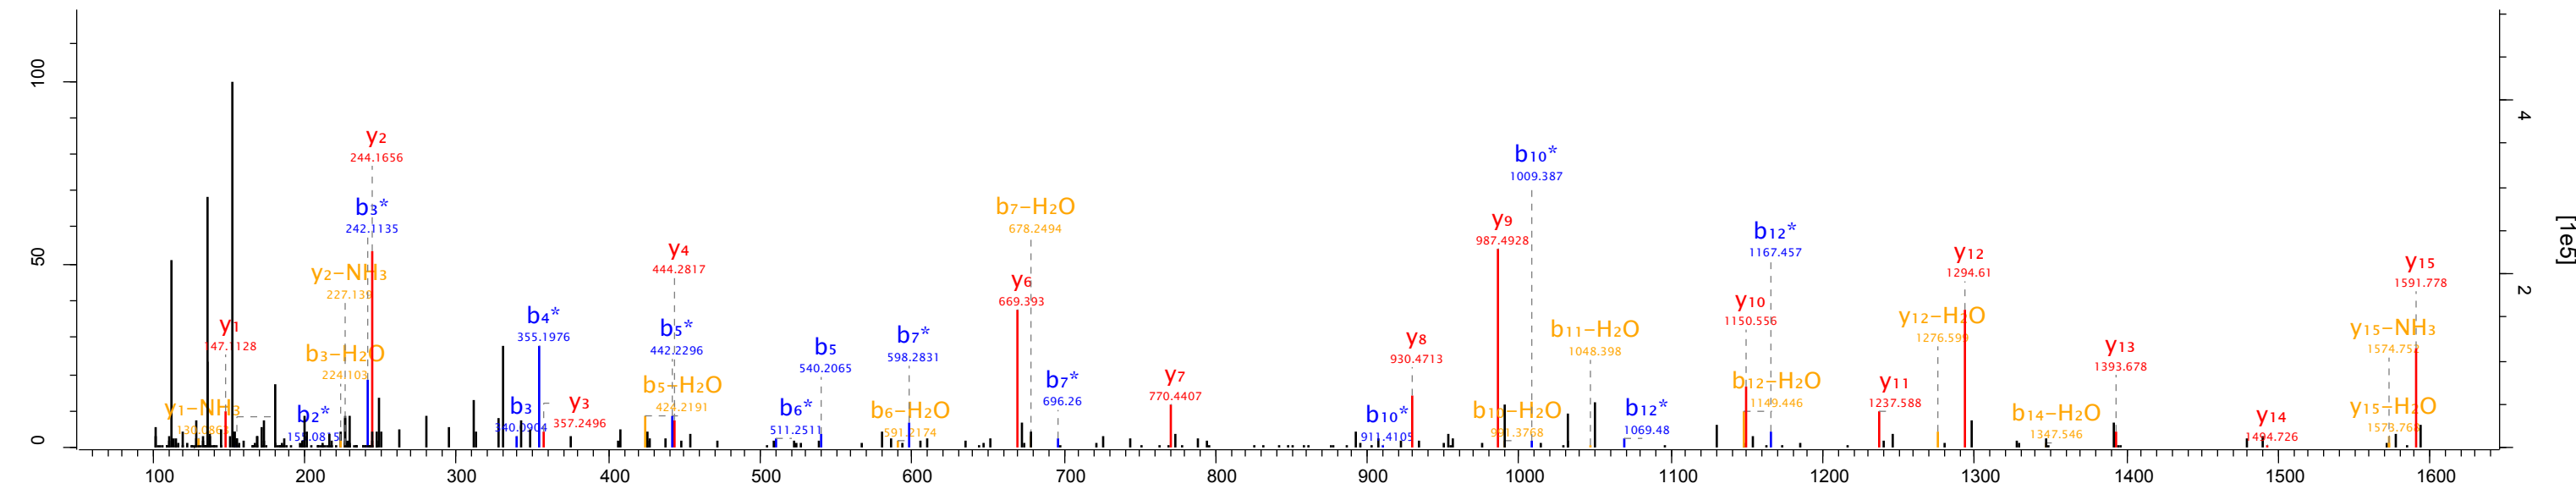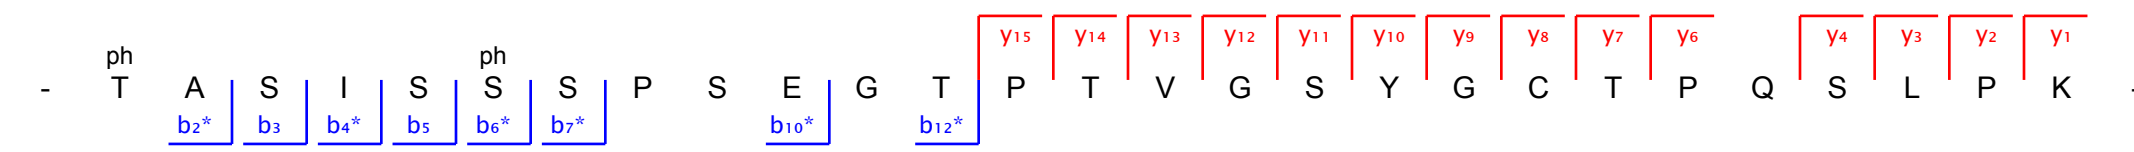

Raw file 20171215\_MaS\_33SR\_LMH\_phospho2\_04 Scan 11981 Method FTMS; HCD Score 121.83 m/z 898.38 Gene names C11orf58;SMAP

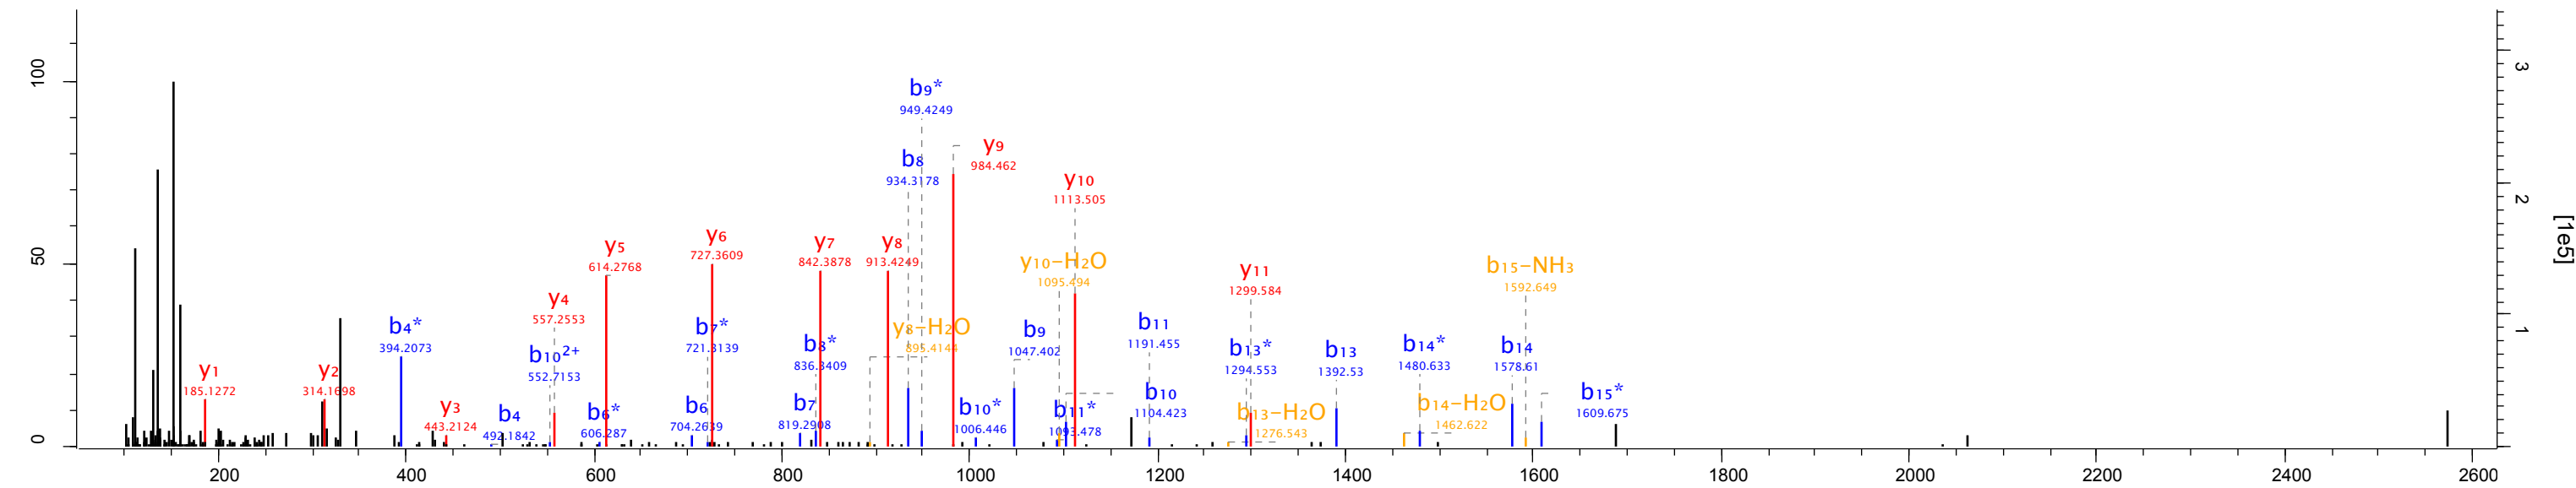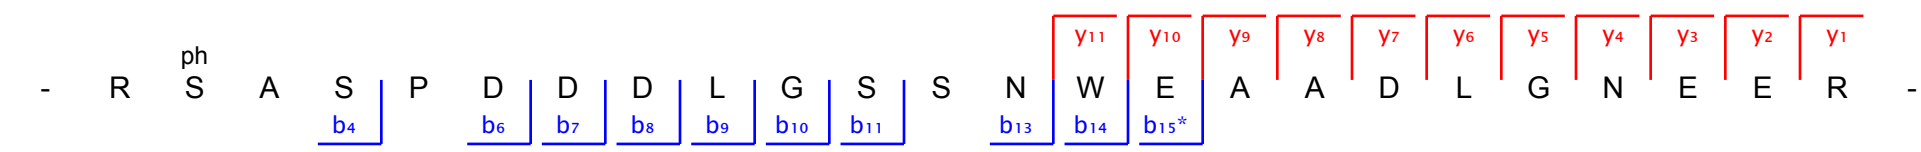

Raw file 20171215\_MaS\_33SR\_LMH\_phospho2\_04 Scan 12071 Method FTMS; HCD Score 63.01 m/z 771.02 Gene names BCL9L

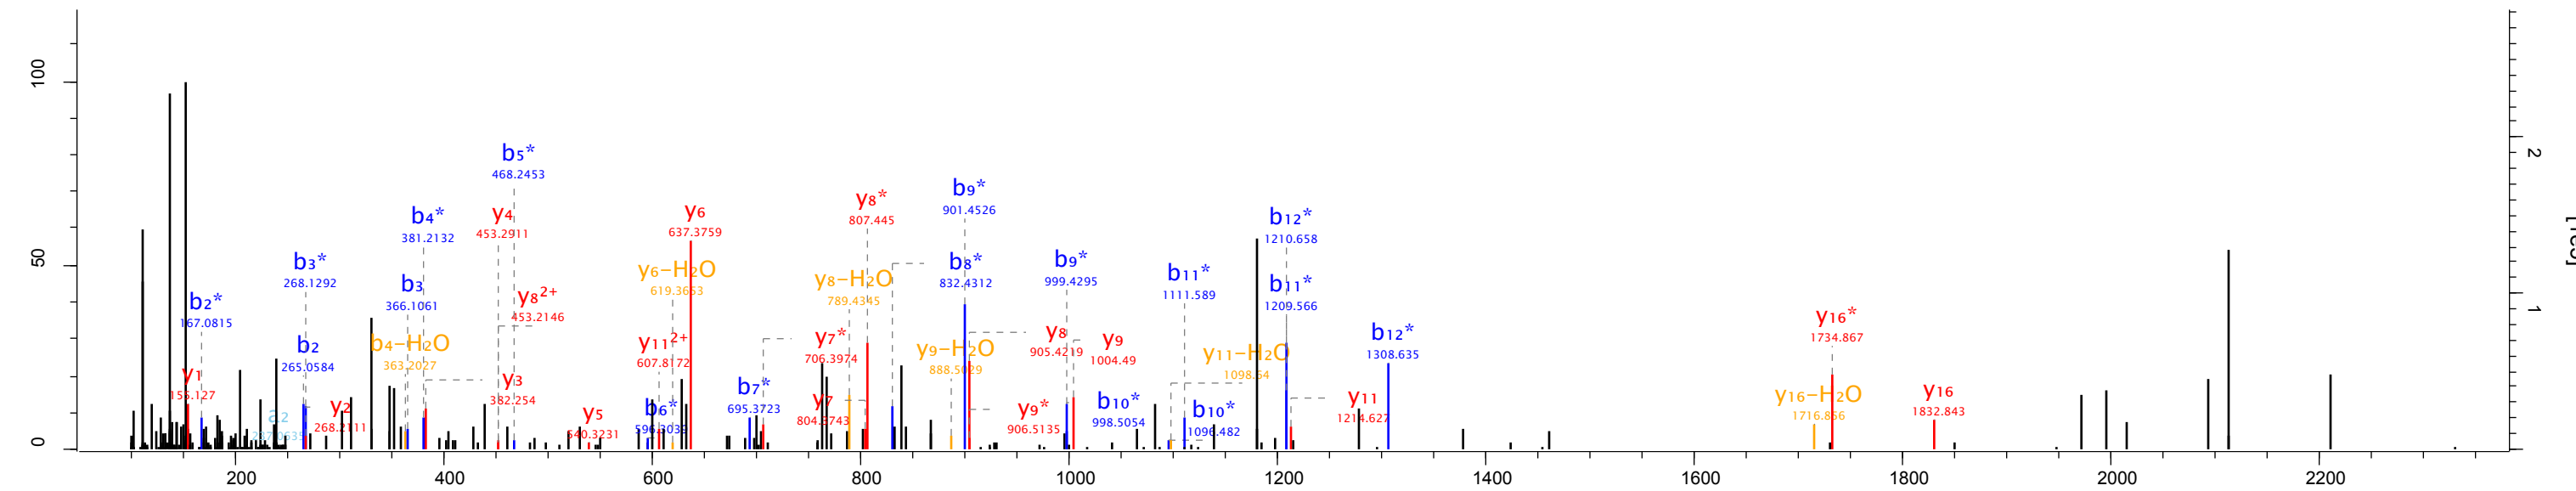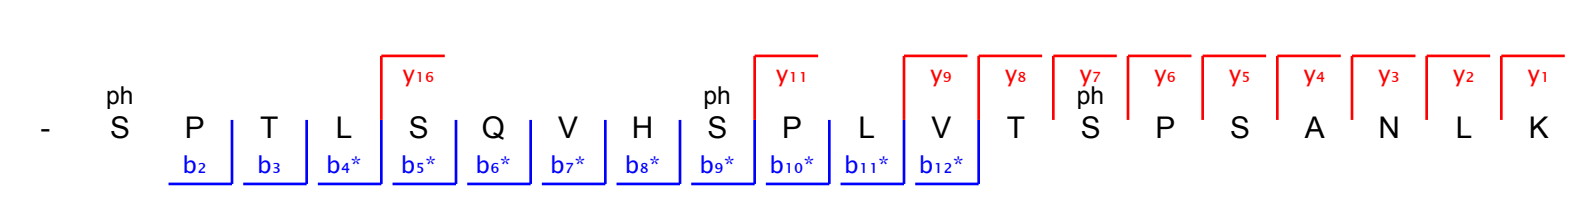



Raw file Scan Method Score m/z Gene names

20171215\_MaS\_33SR\_LMH\_phospho2\_04 4081 FTMS; HCD 174.55 701.59 SRRM2

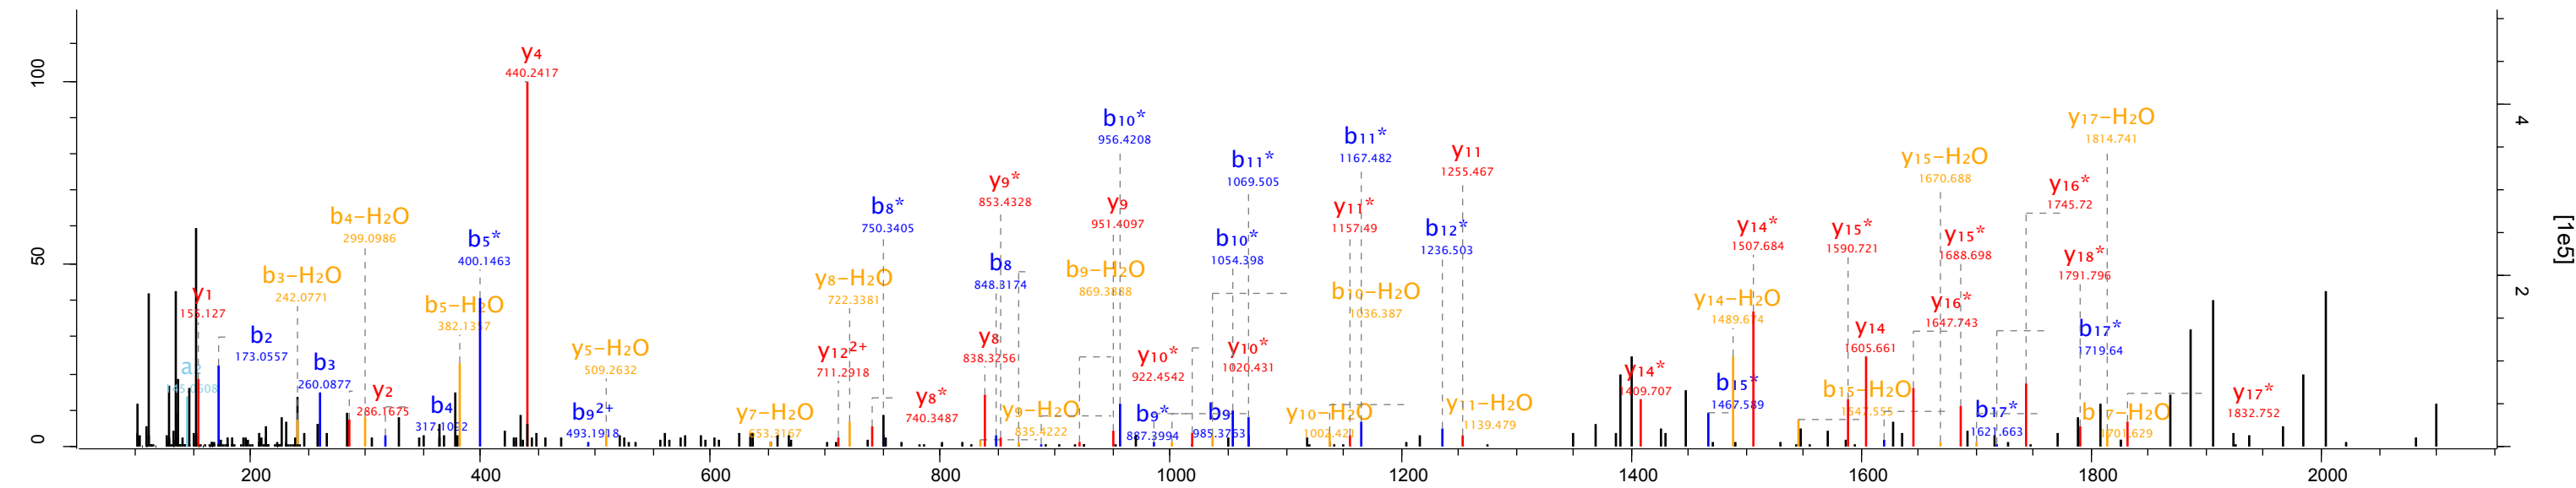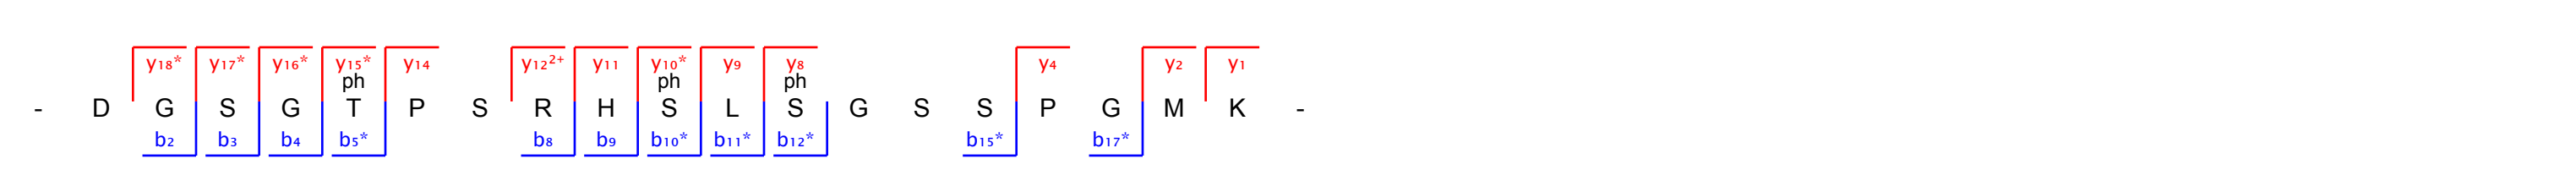

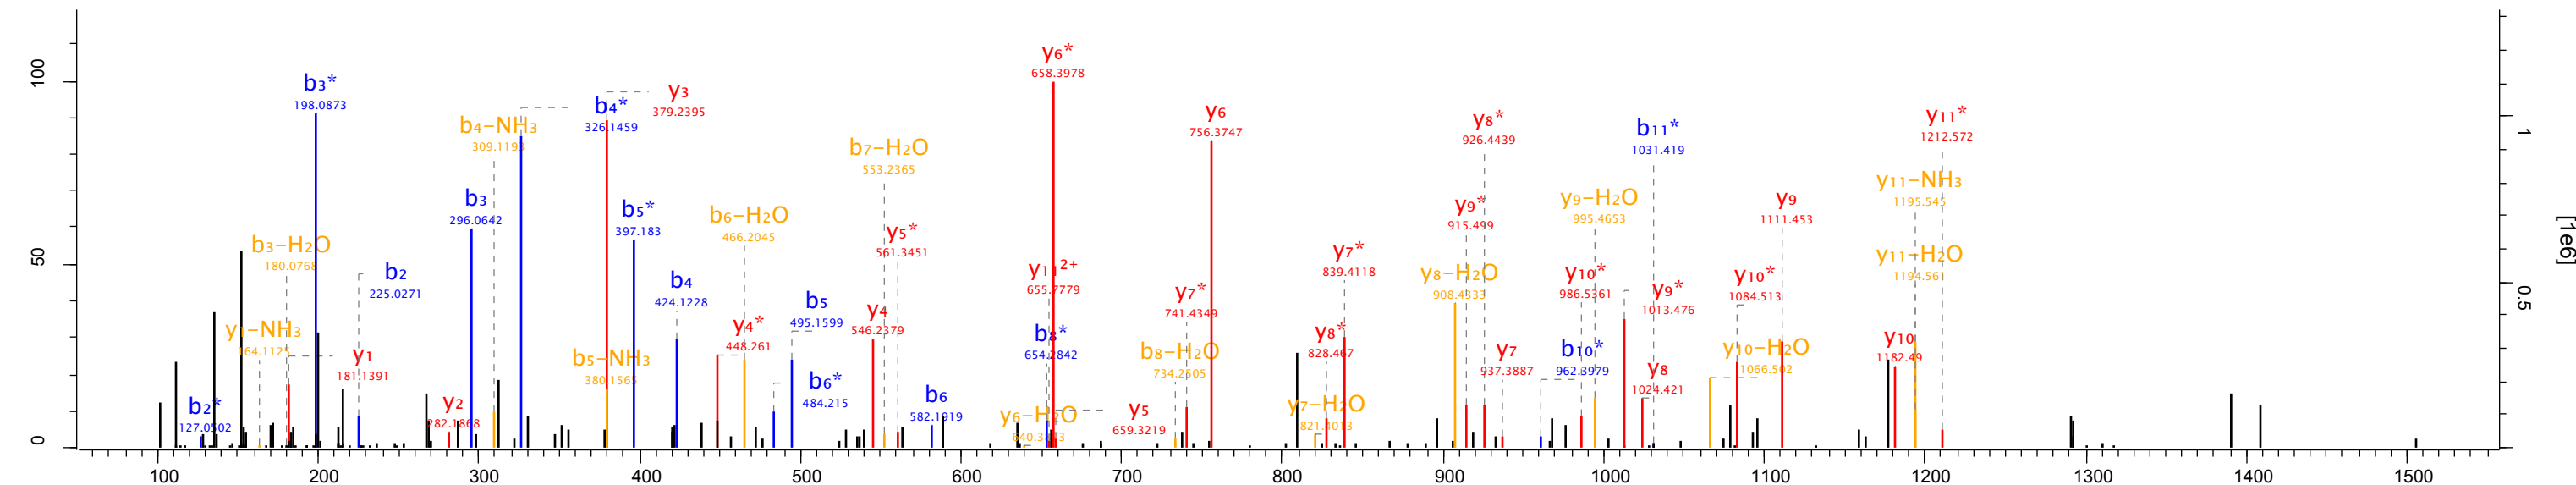ph  
S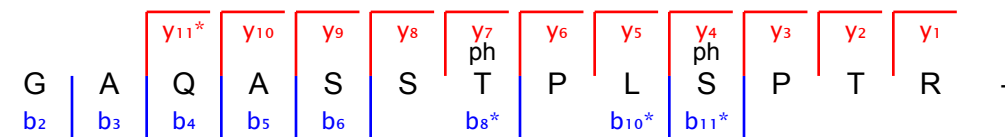

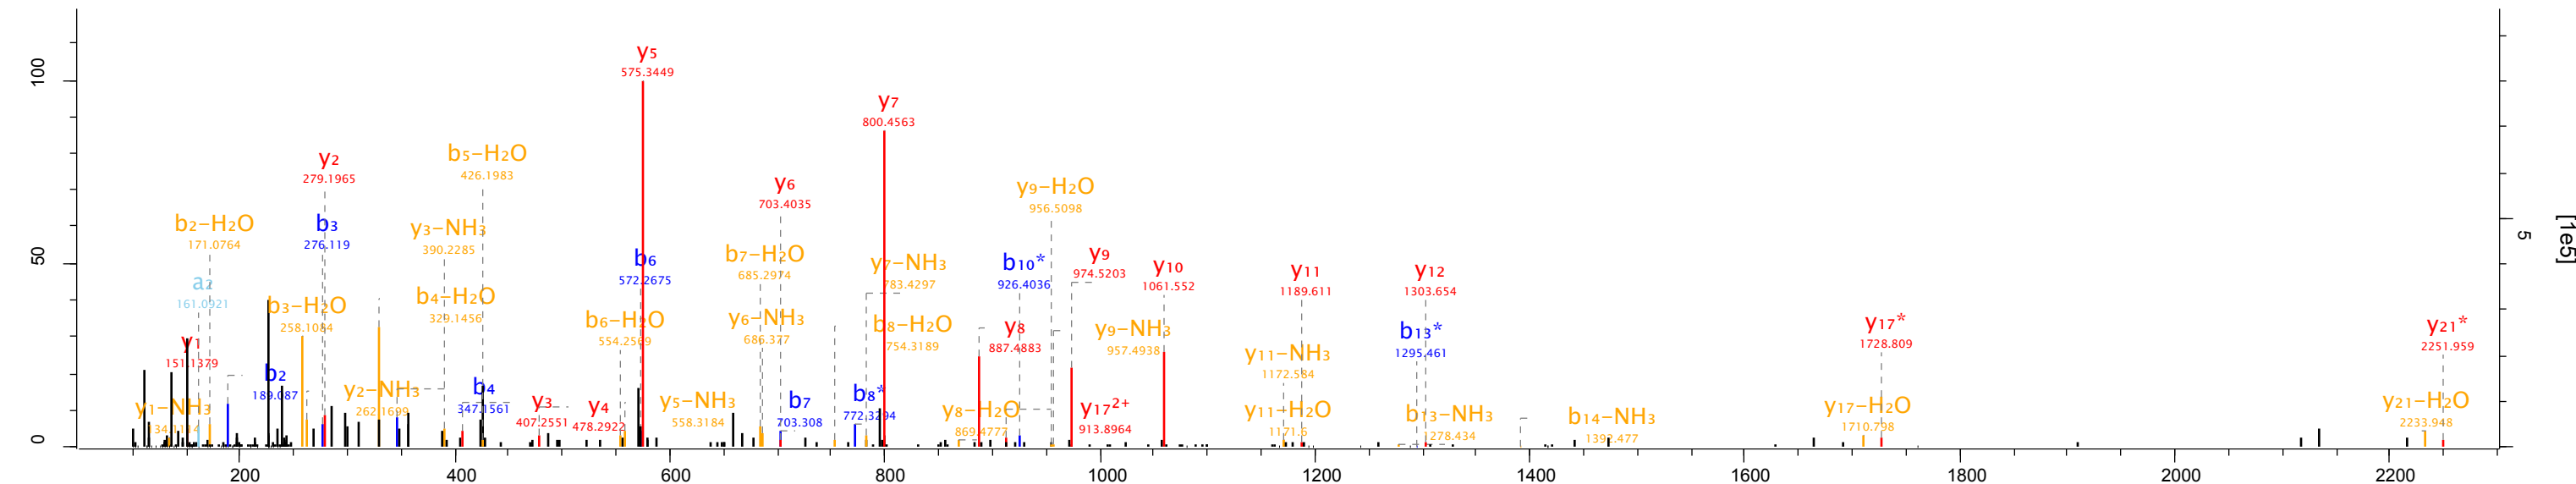

- S T S A P Q M S P G S S D N Q S S S P Q P A Q Q K -

Fragmentation mapping (b and y ions):

- b2: T
- b3: S
- b4: A
- b6: Q
- b7: M
- b8\*: S
- b10\*: G
- b13\*: D
- y1: K
- y2: Q
- y3: A
- y4: P
- y5: Q
- y6: P
- y7: S
- y8: S
- y9: S
- y10: S
- y11: N
- y12: D
- y17\*: P
- y21\*: P

Raw file 20171215\_MaS\_33SR\_LMH\_phospho2\_04 Scan 4821 Method FTMS; HCD Score 86.54 m/z 833.3 Gene names SSRP1

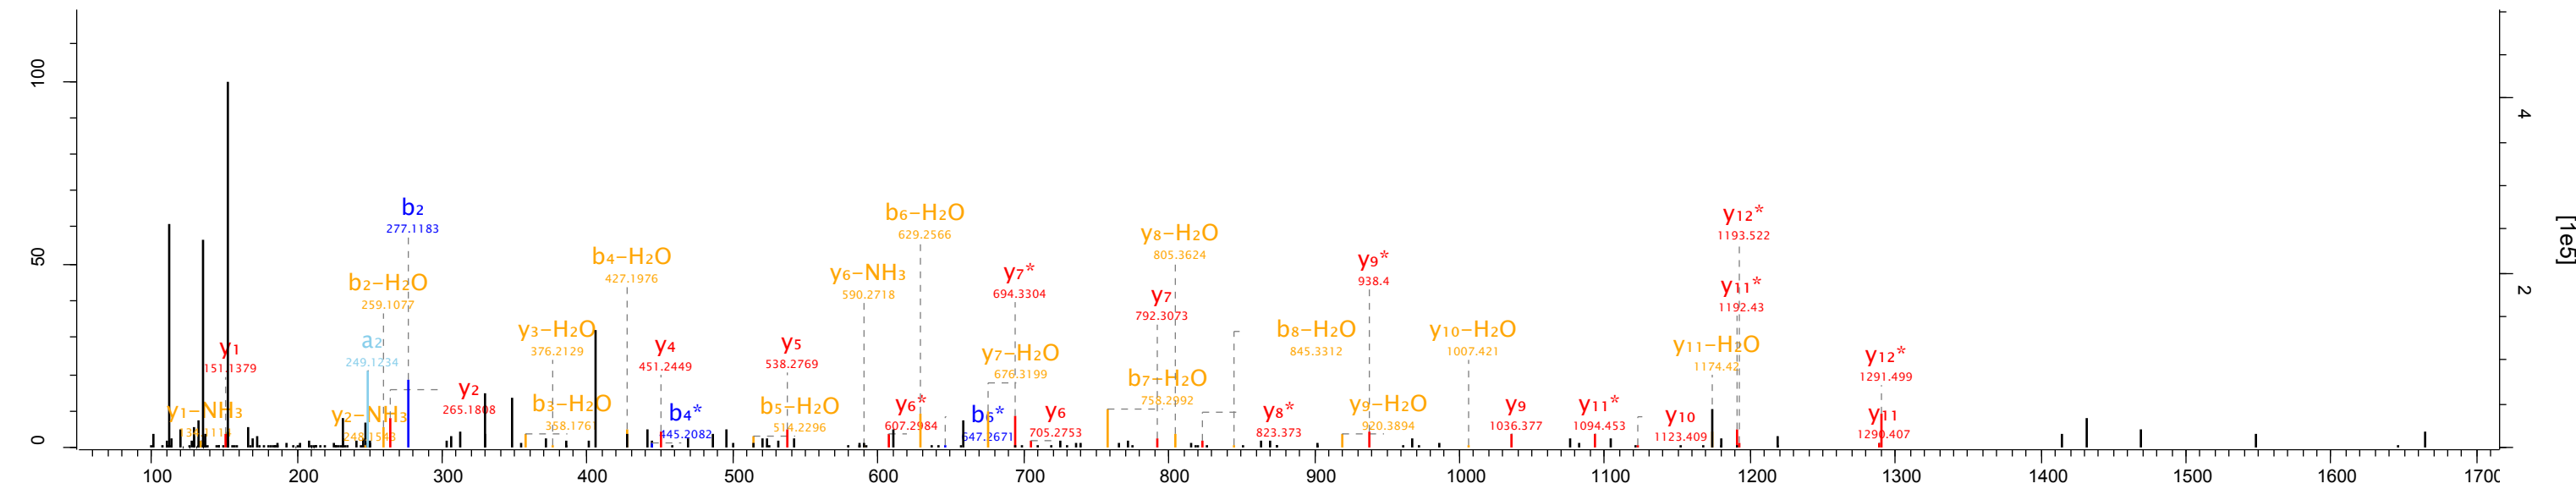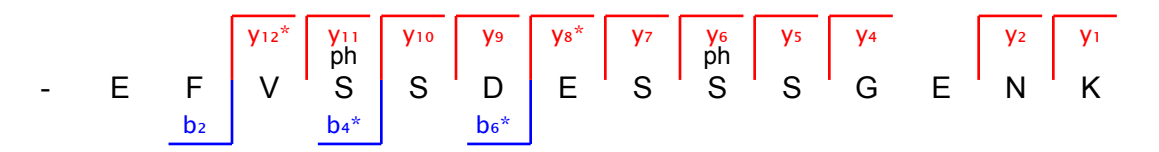

Raw file 20171215\_MaS\_33SR\_LMH\_phospho2\_04 Scan 5501 Method FTMS; HCD Score 63.44 m/z 818.31 Gene names DBNL

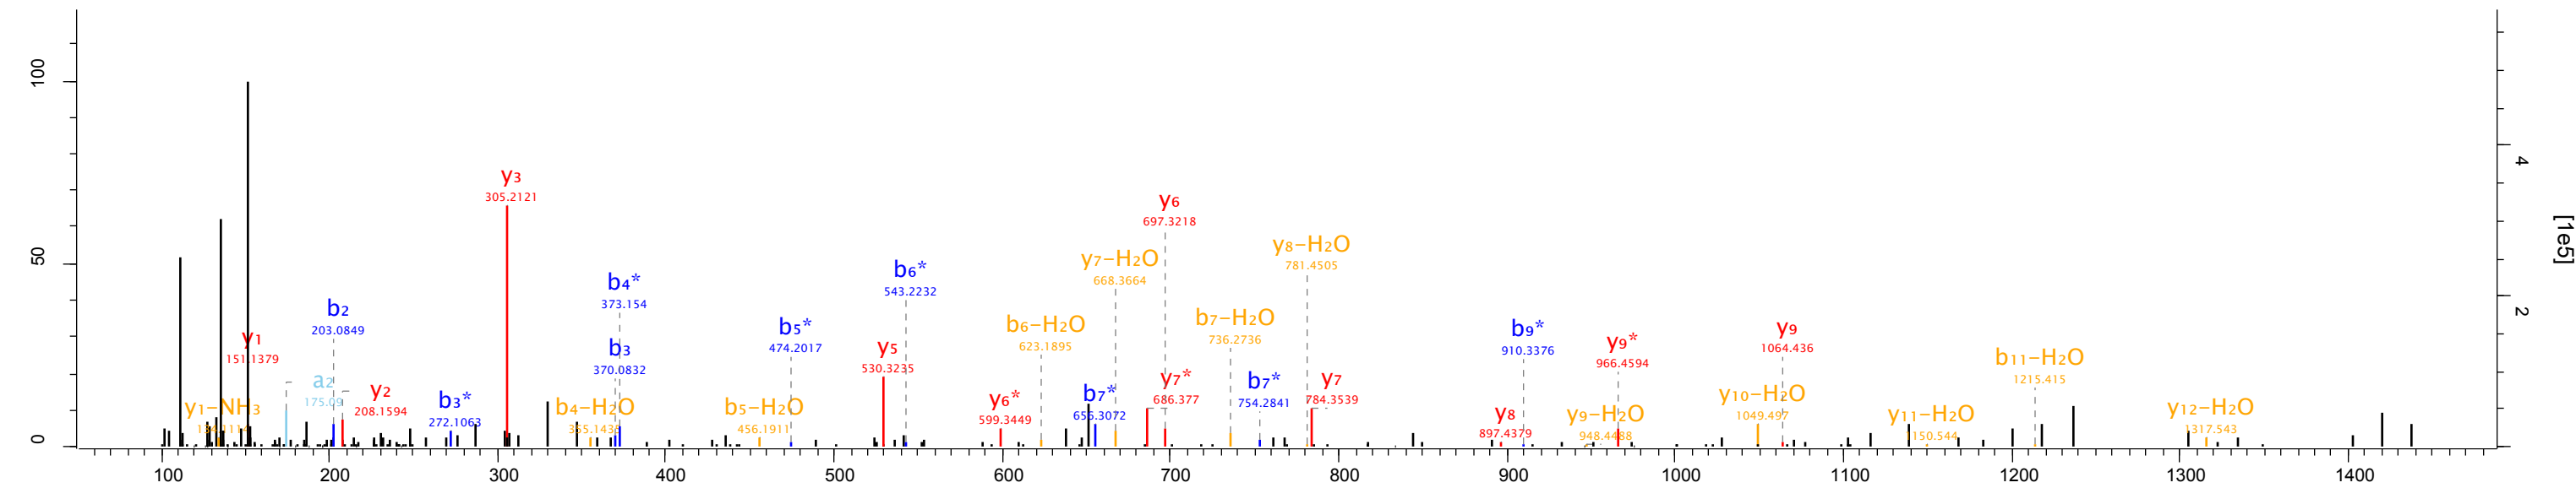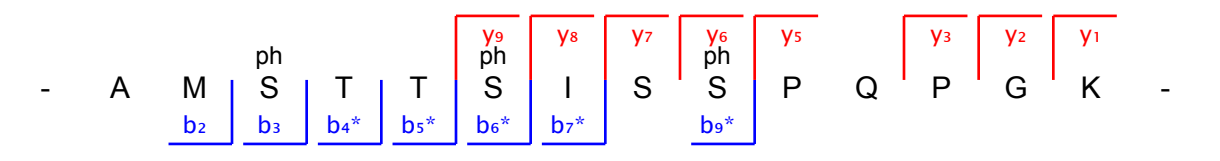

Raw file 20171215\_MaS\_33SR\_LMH\_phospho2\_04 Scan 5911 Method FTMS; HCD Score 101.6 m/z 831.29 Gene names NFIC

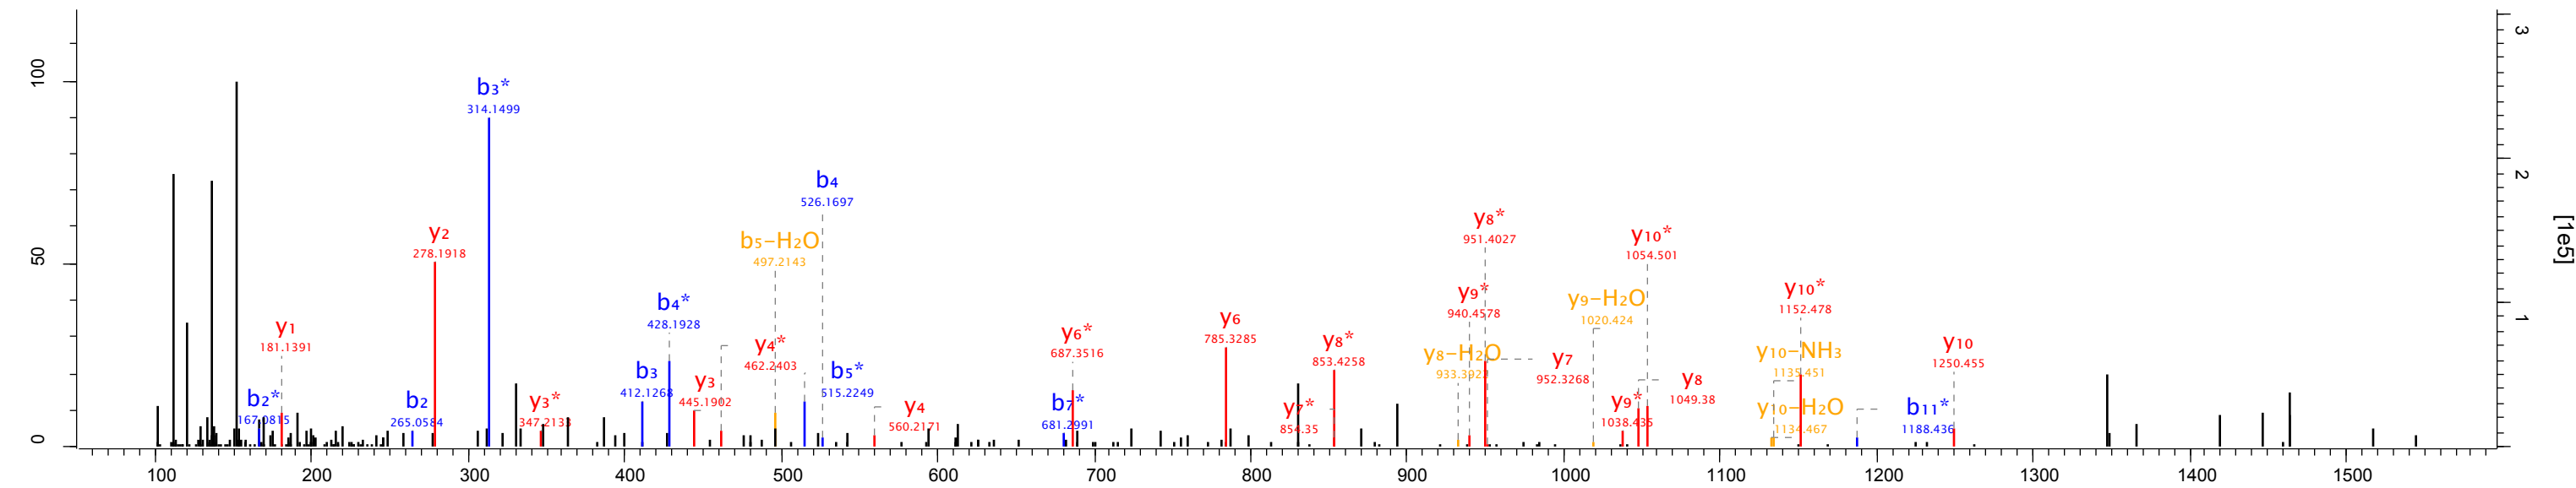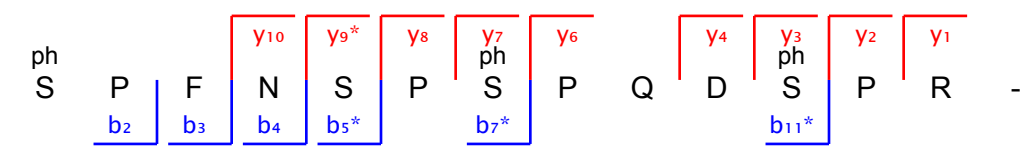

Raw file 20171215\_MaS\_33SR\_LMH\_phospho2\_04 Scan 5951 Method FTMS; HCD Score 91.59 m/z 617.74 Gene names RAI14

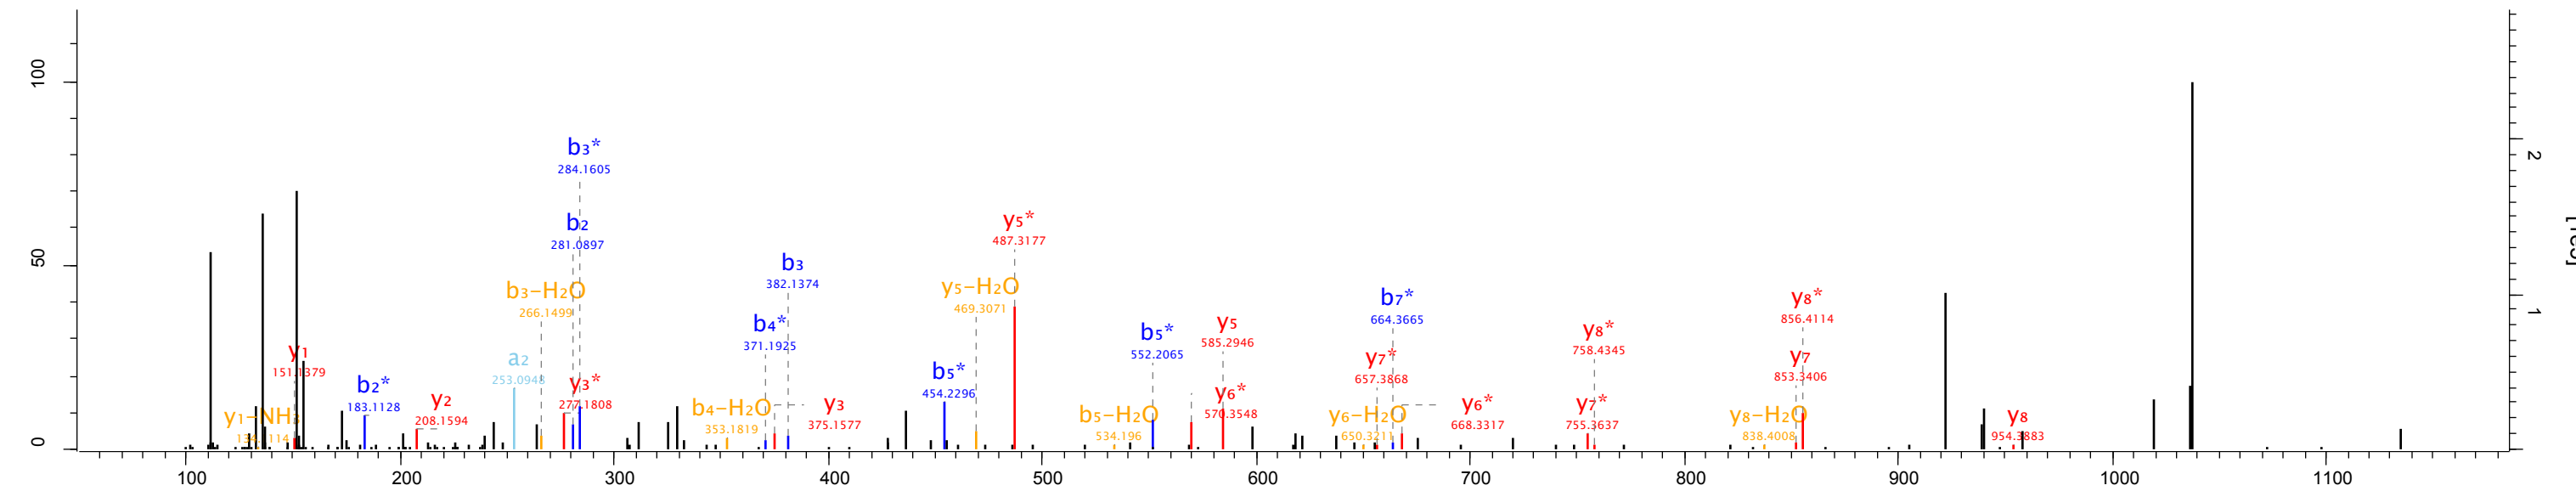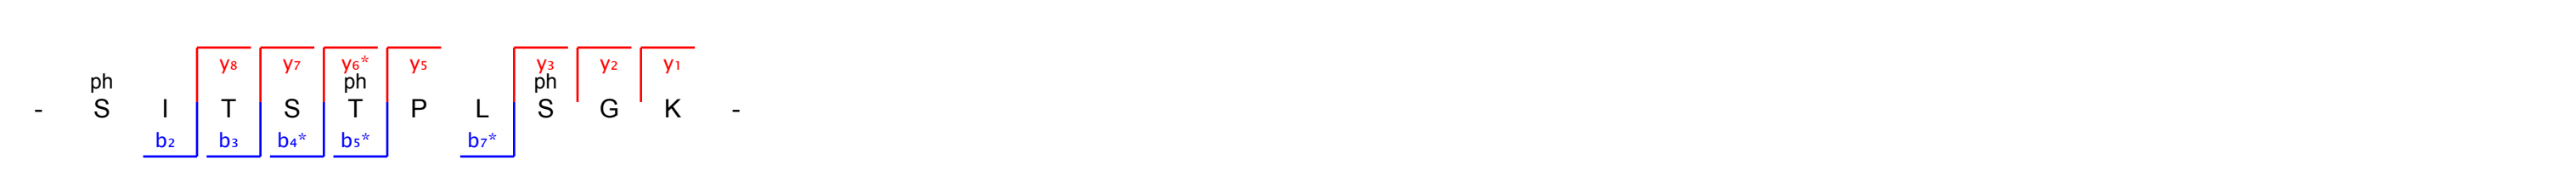

Raw file: 20171215\_MaS\_33SR\_LMH\_phospho2\_04  
 Scan: 6201 Method: FTMS; HCD Score: 134.4 m/z: 753.84 Gene names: RRP1B

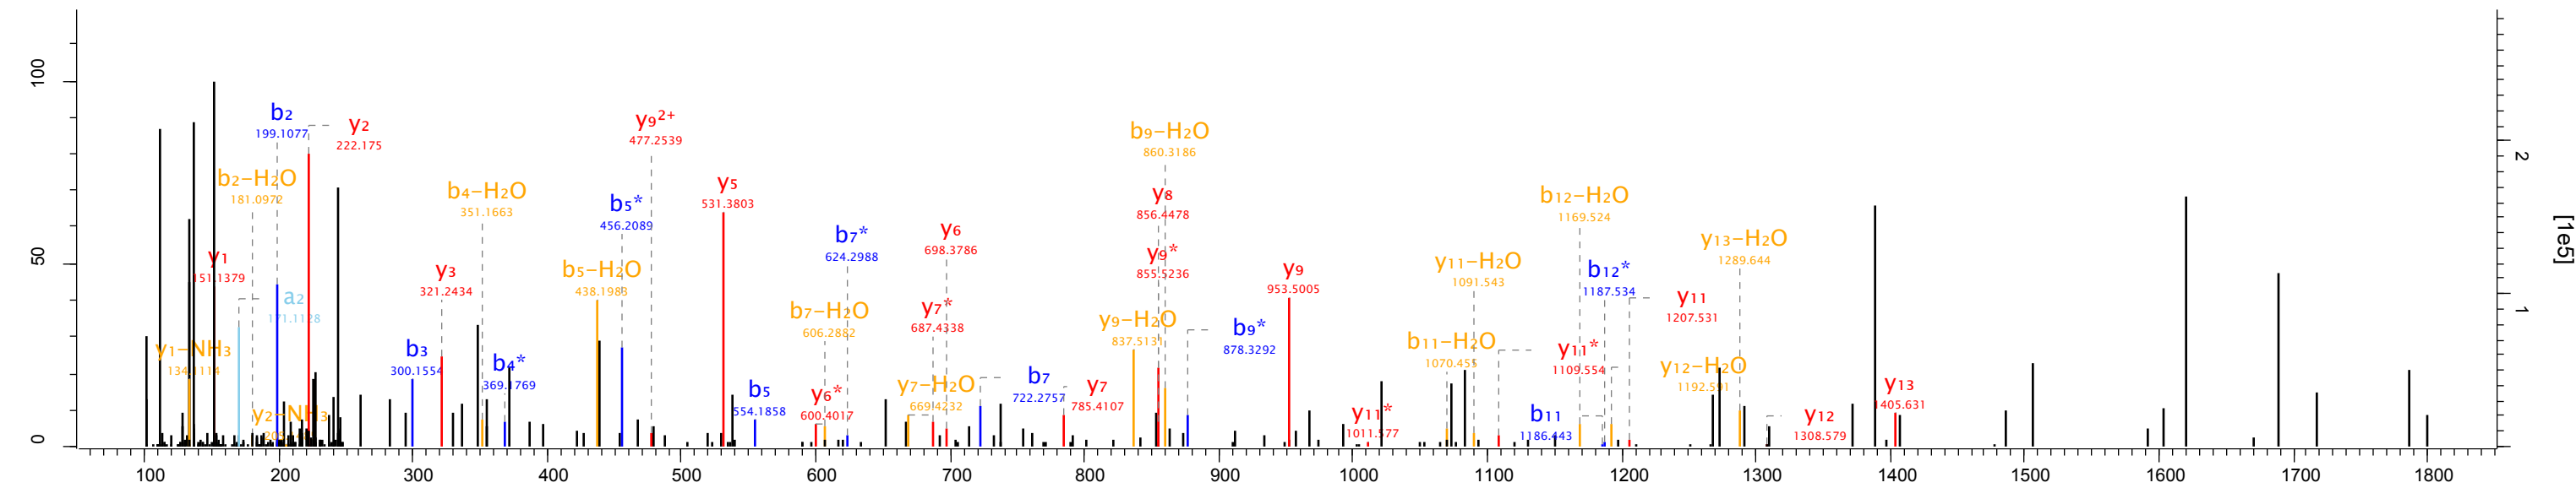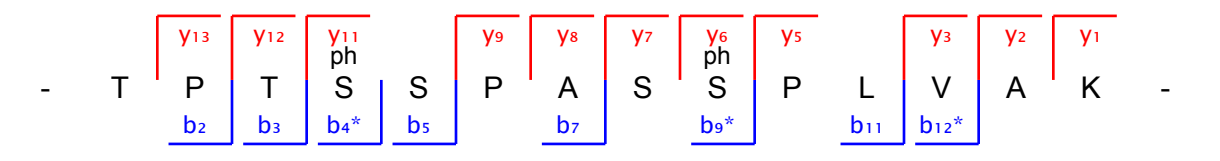



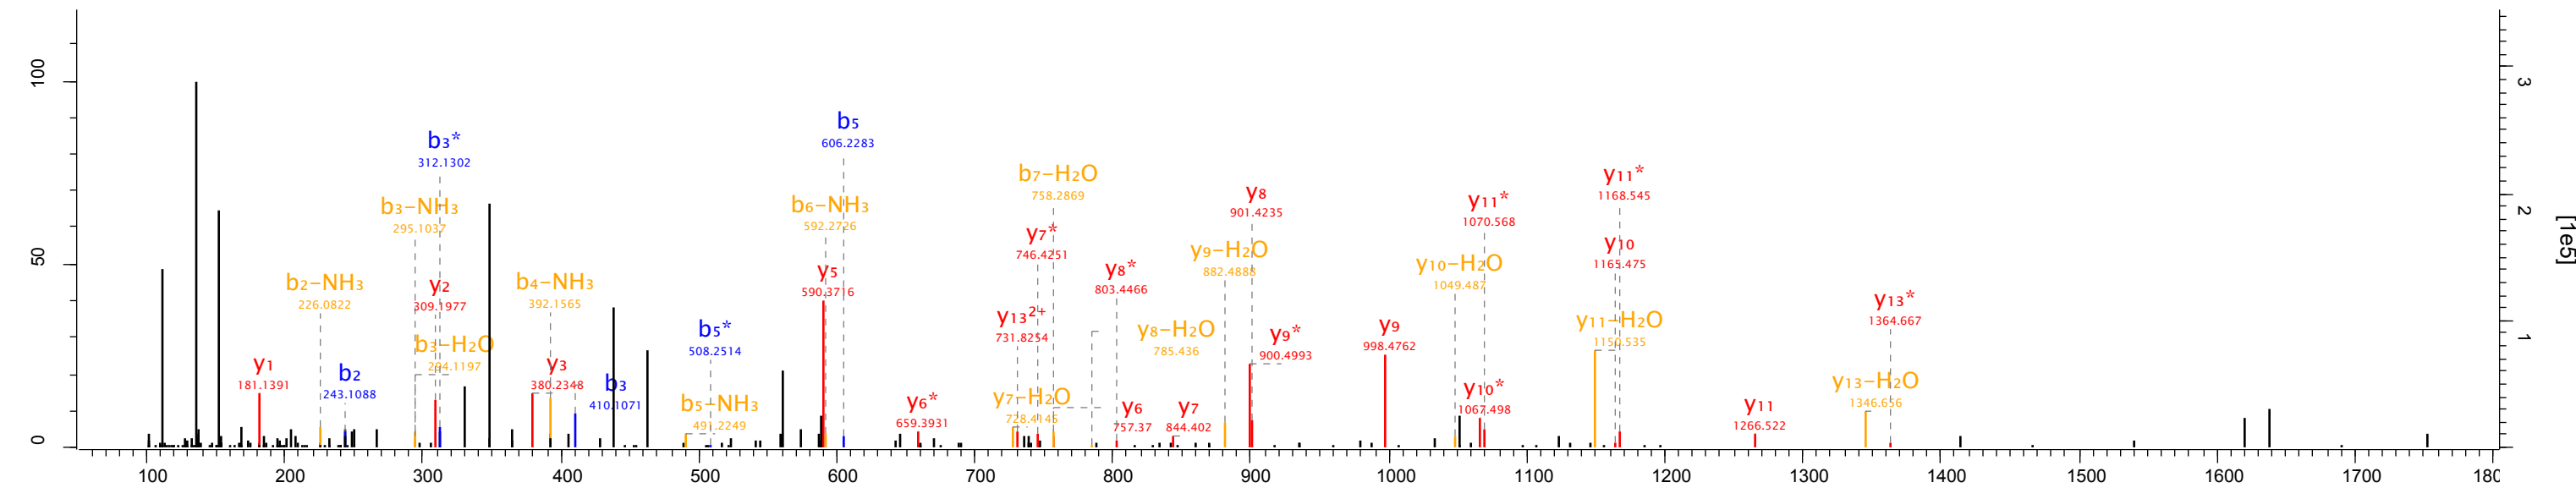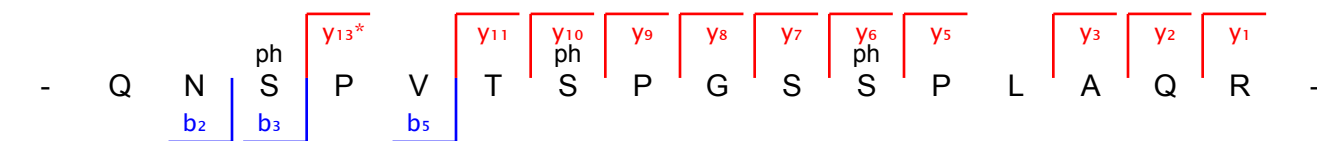

Raw file: 20171215\_MaS\_33SR\_LMH\_phospho2\_04  
 Scan: 7651 Method: FTMS; HCD Score: 62.21 m/z: 1028.76 Gene names: MARCKS

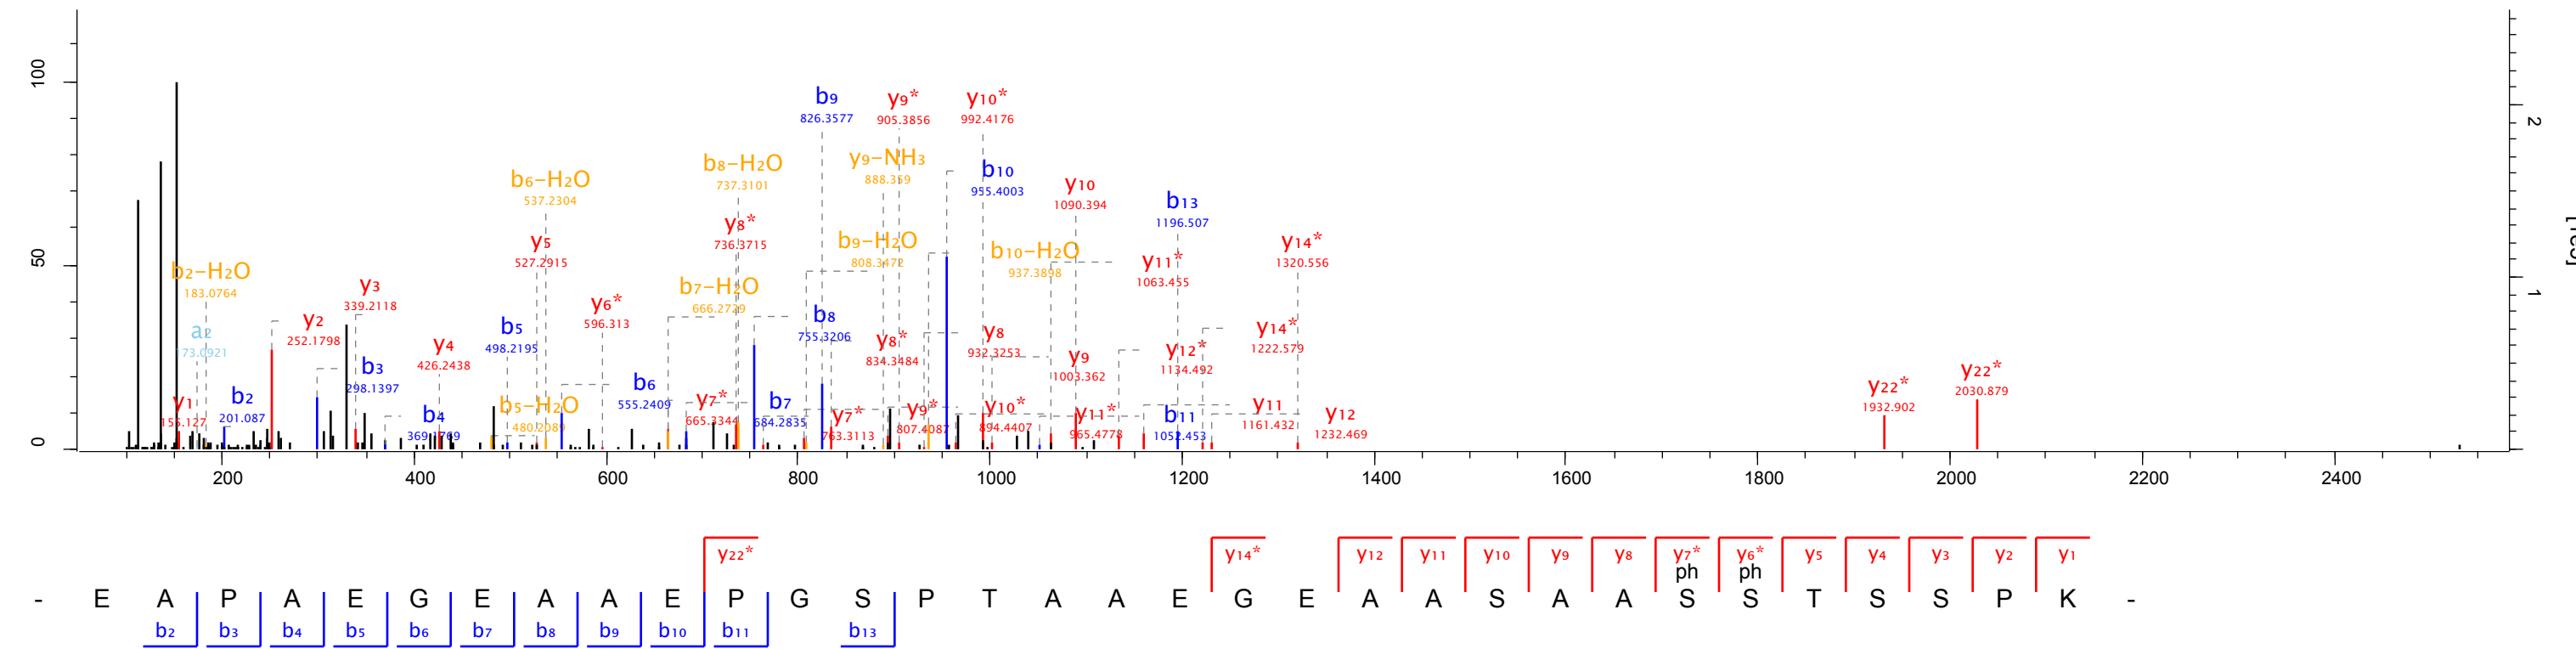

Raw file 20171215\_MaS\_33SR\_LMH\_phospho2\_04 Scan 7711 Method FTMS; HCD Score 138.02 m/z 819.82 Gene names RANBP10

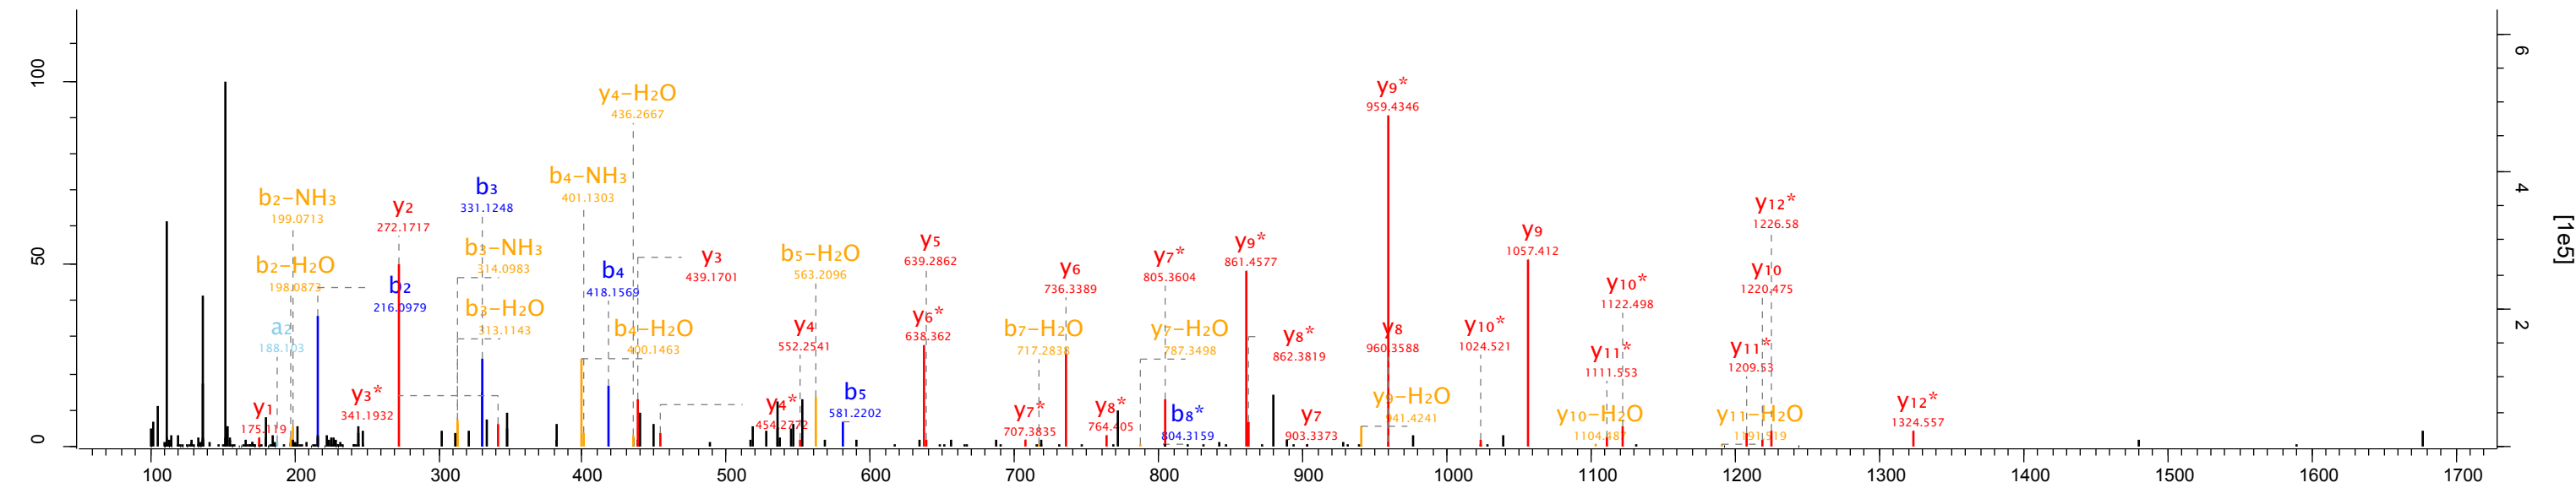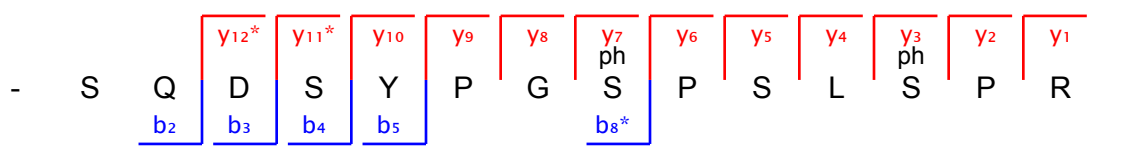

Raw file: 20171215\_MaS\_33SR\_LMH\_phospho2\_05  
 Scan: 10881 Method: FTMS; HCD Score: 106.3 m/z: 975.08 Gene names: UBE4B

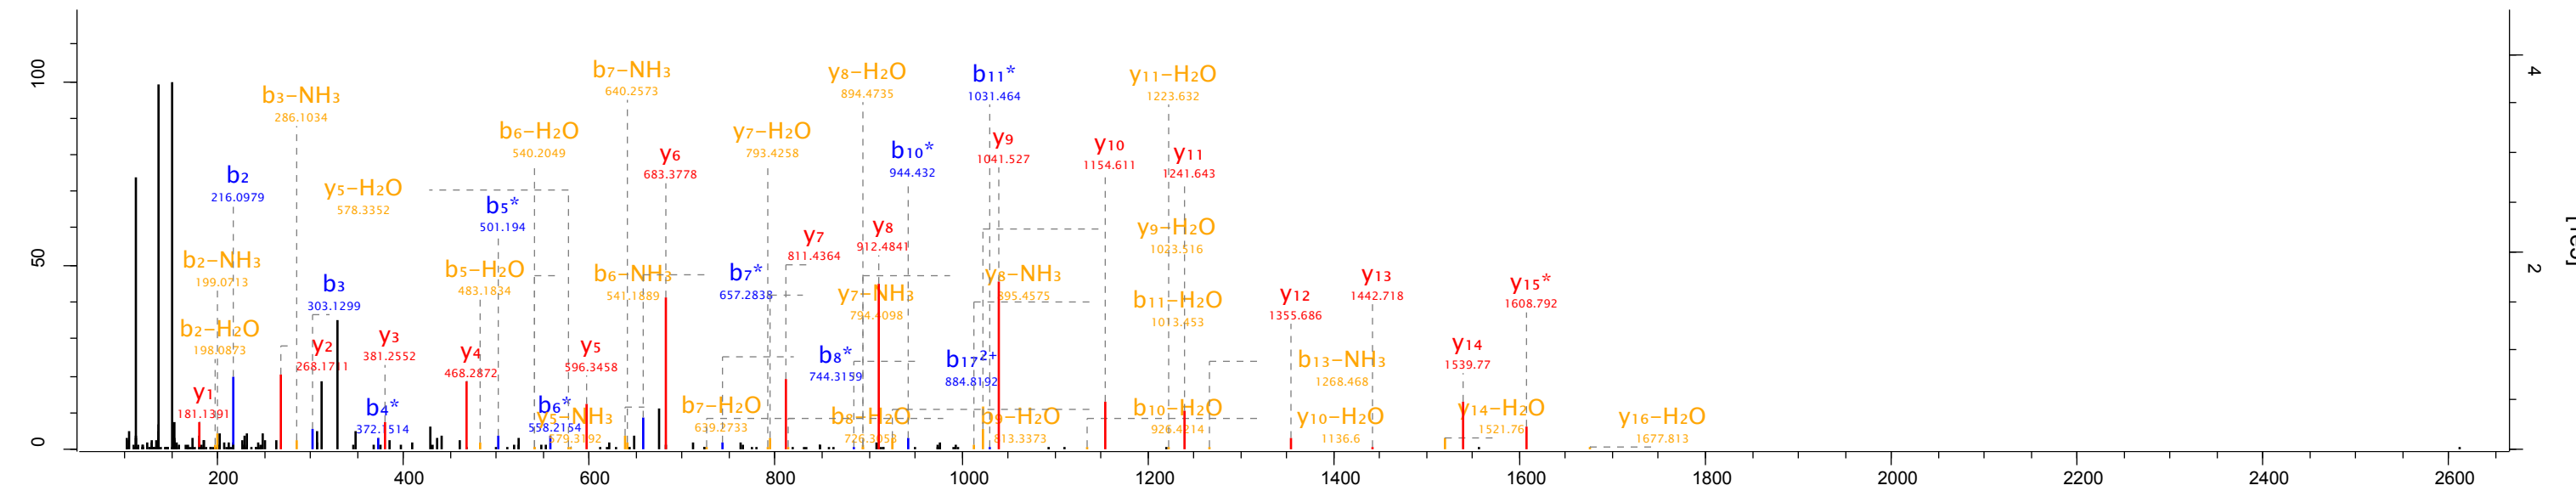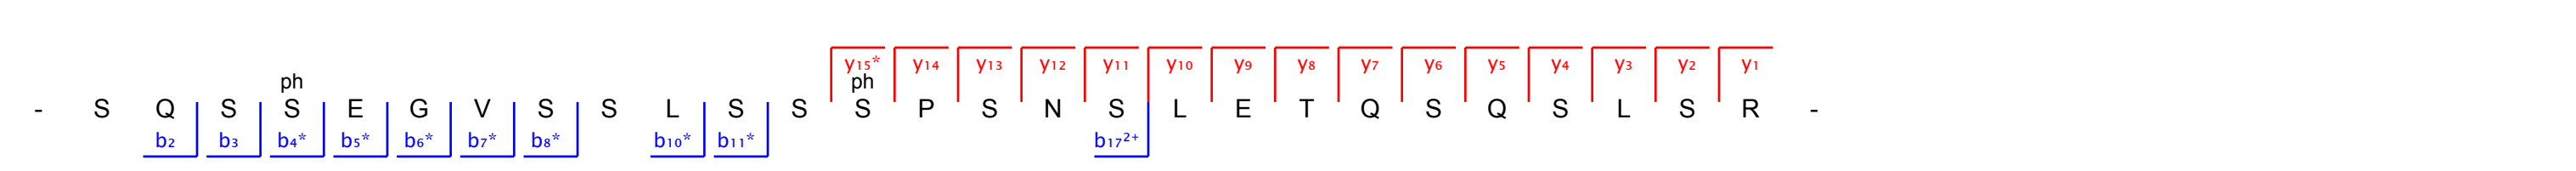

Raw file 20171215\_MaS\_33SR\_LMH\_phospho2\_05 Scan 12971 Method FTMS; HCD Score 96.6 m/z 732.65 Gene names AHNAK

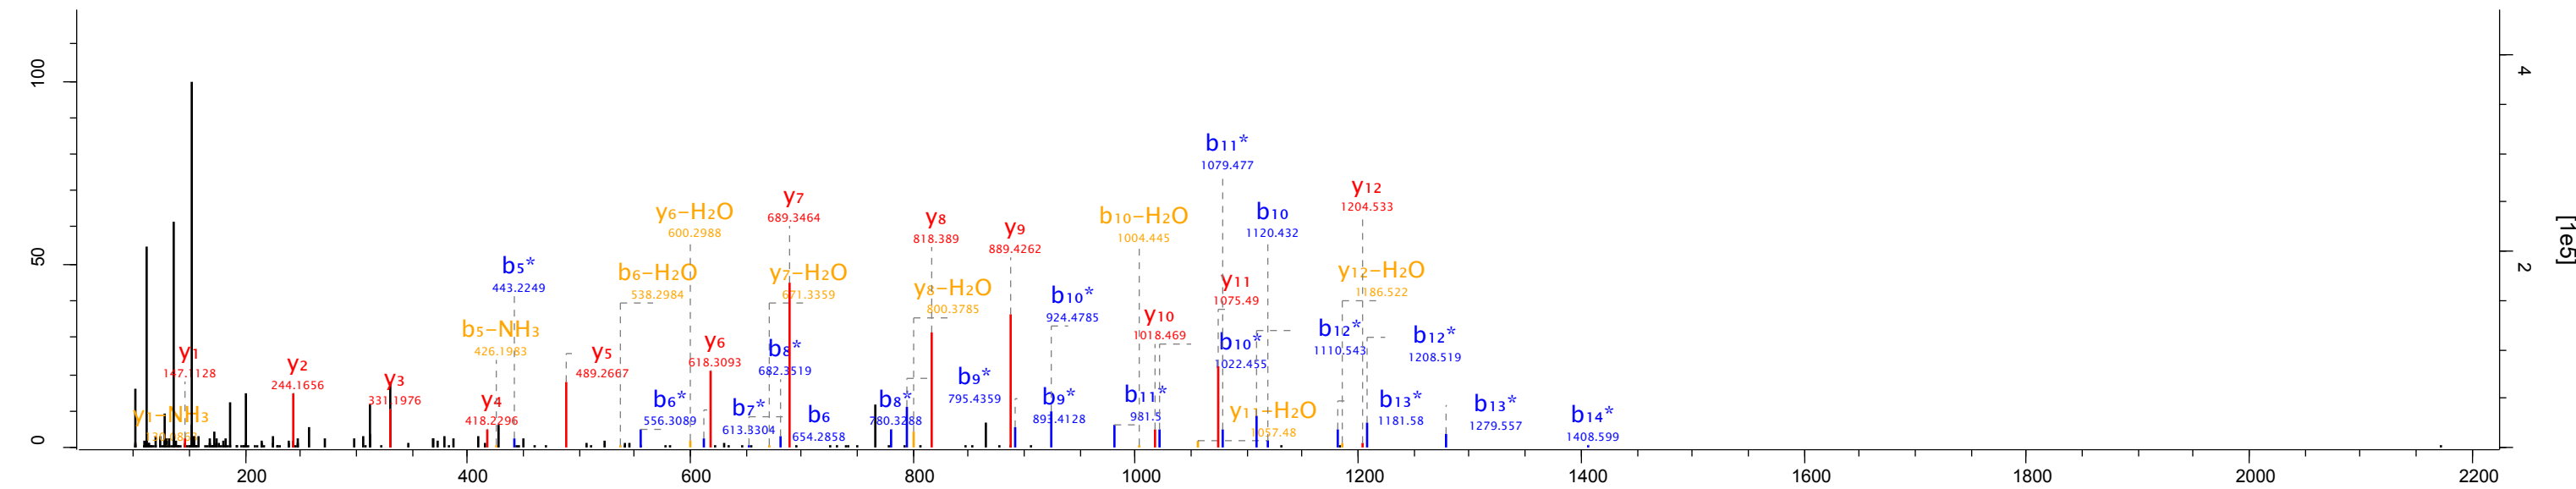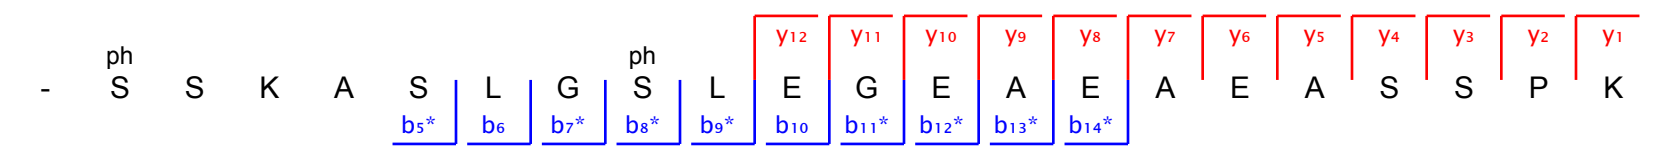

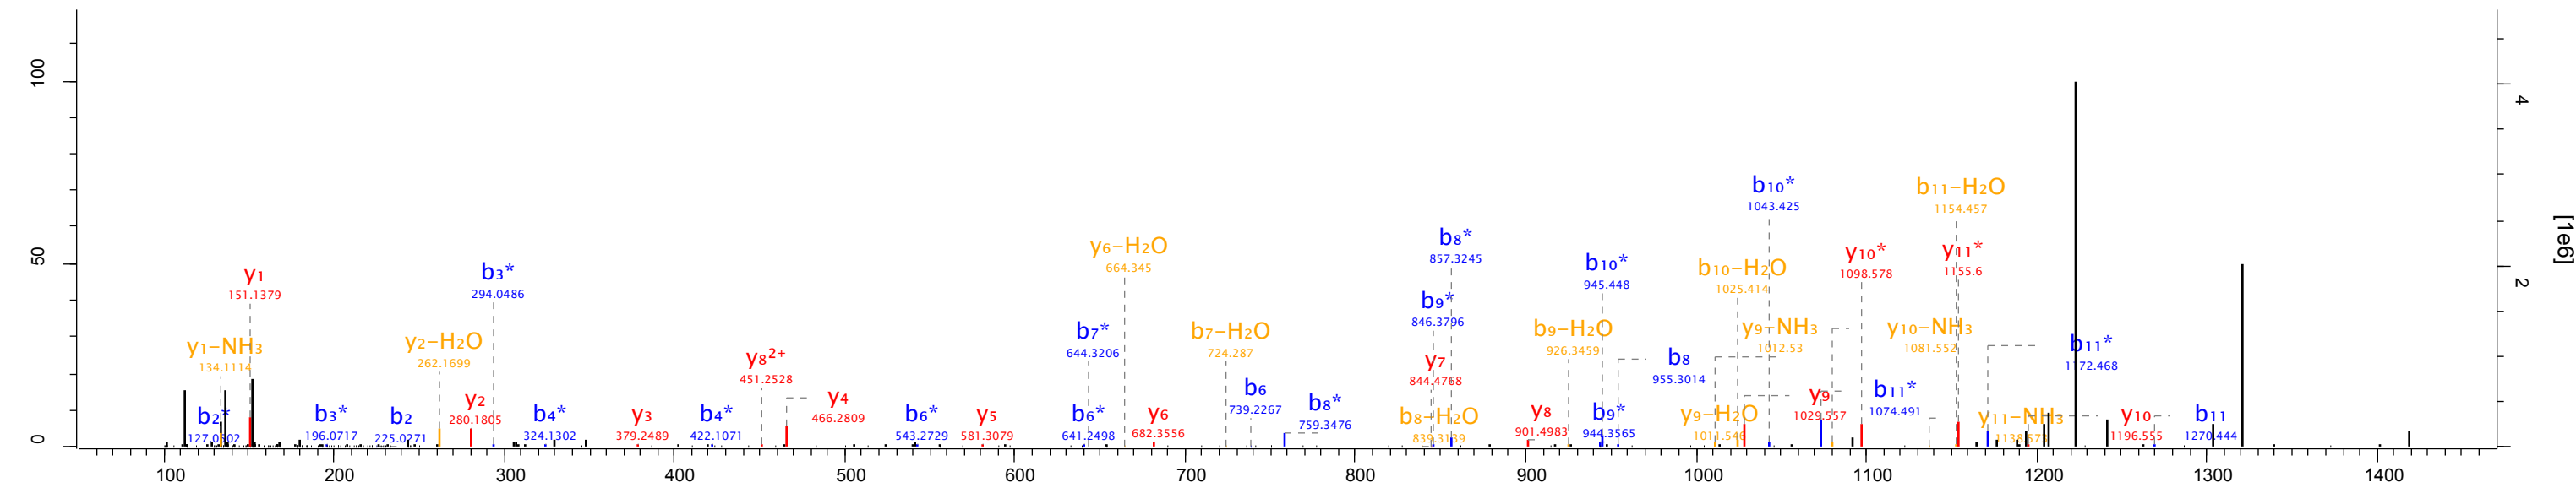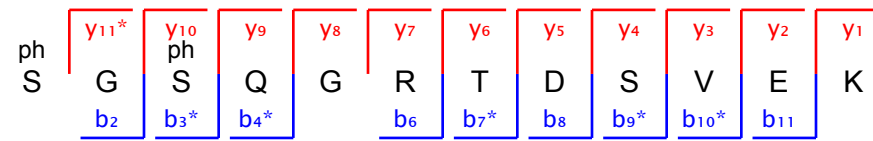

Raw file 20171215\_MaS\_33SR\_LMH\_phospho2\_05 Scan 2831 Method FTMS; HCD Score 123.05 m/z 1043.84 Gene names IFRD2

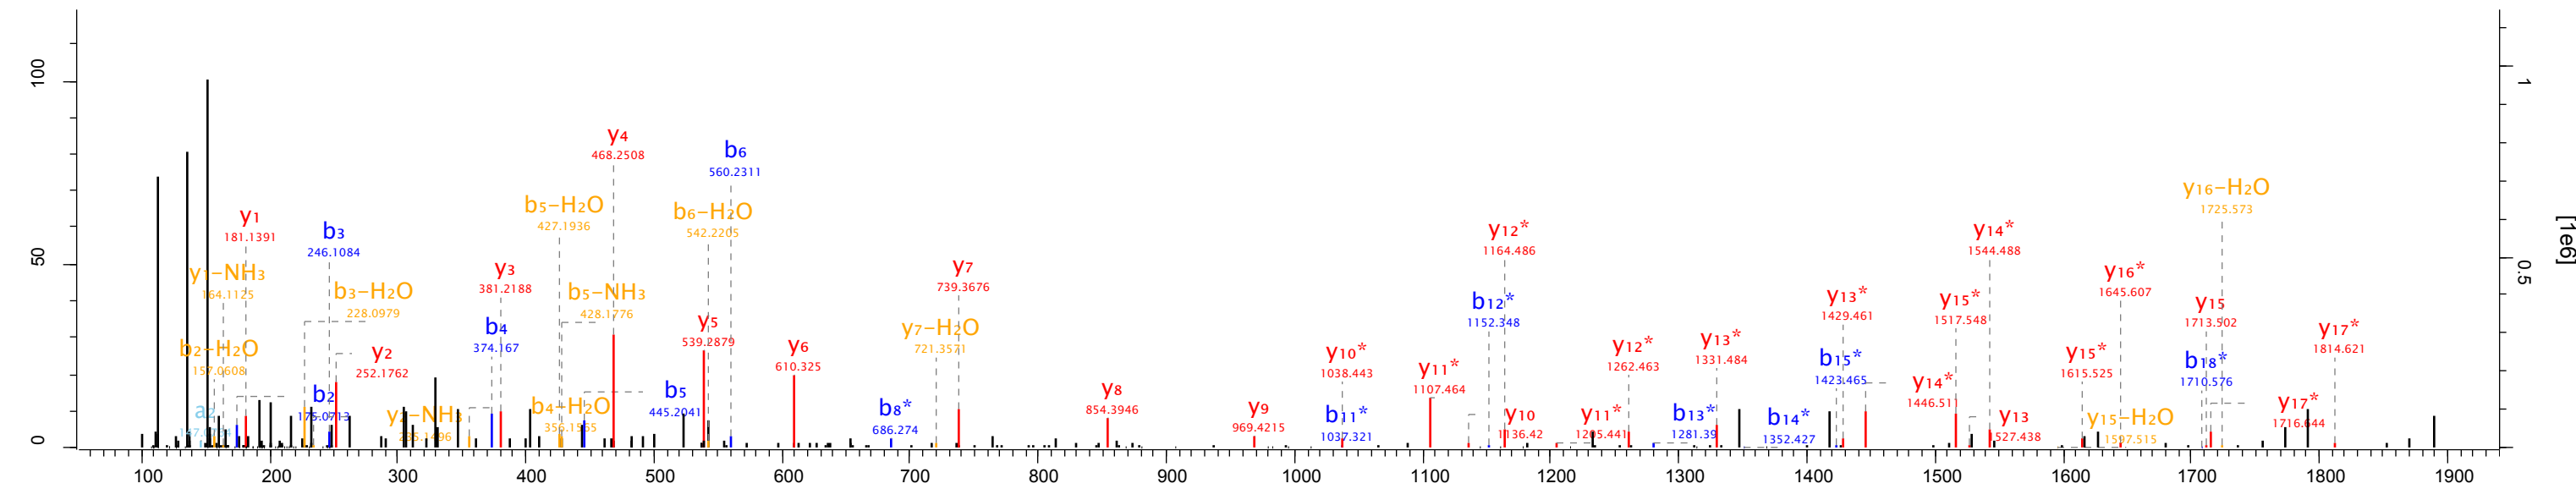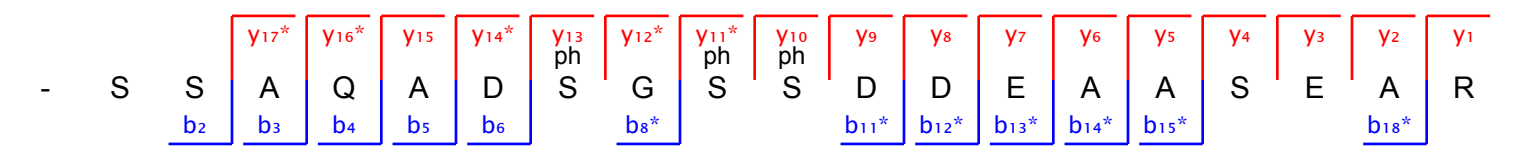

Raw file 20171215\_MaS\_33SR\_LMH\_phospho2\_05 Scan 3451 Method FTMS; HCD Score 144.07 m/z 942.76 Gene names LEO1

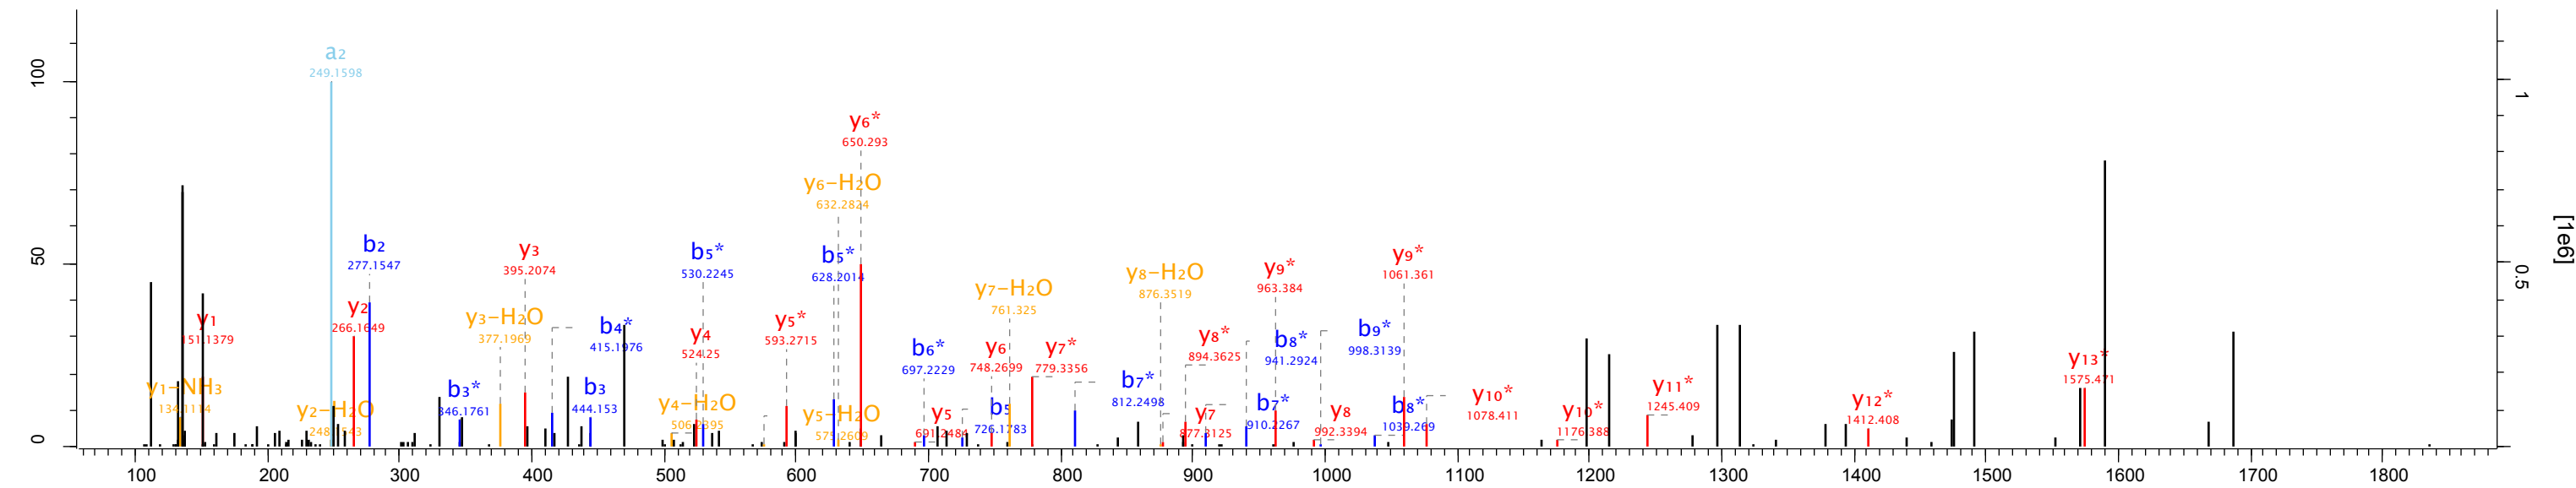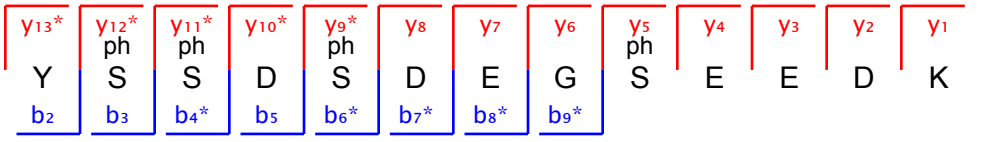



Raw file 20171215\_MaS\_33SR\_LMH\_phospho2\_05 Scan 4621 Method FTMS; HCD Score 271.53 m/z 1102.88 Gene names CLSPN

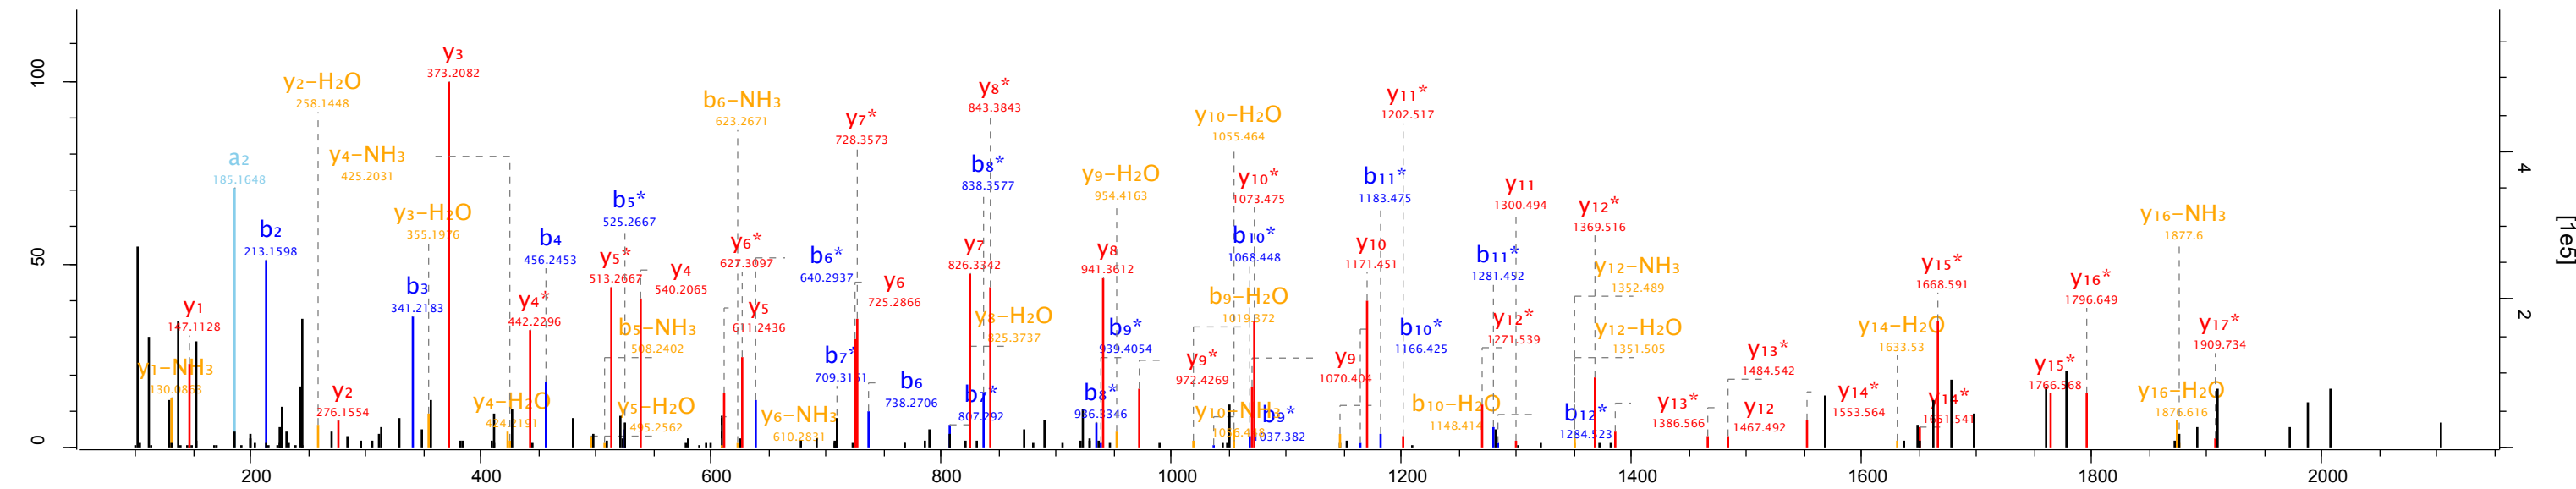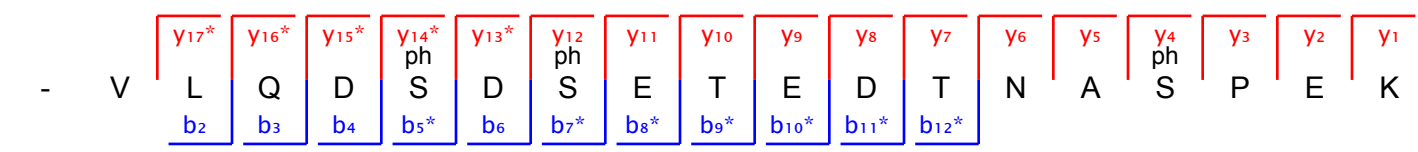

Raw file 20171215\_MaS\_33SR\_LMH\_phospho2\_05 Scan 5181 Method FTMS; HCD Score 109.09 m/z 777.76 Gene names PRRC2B

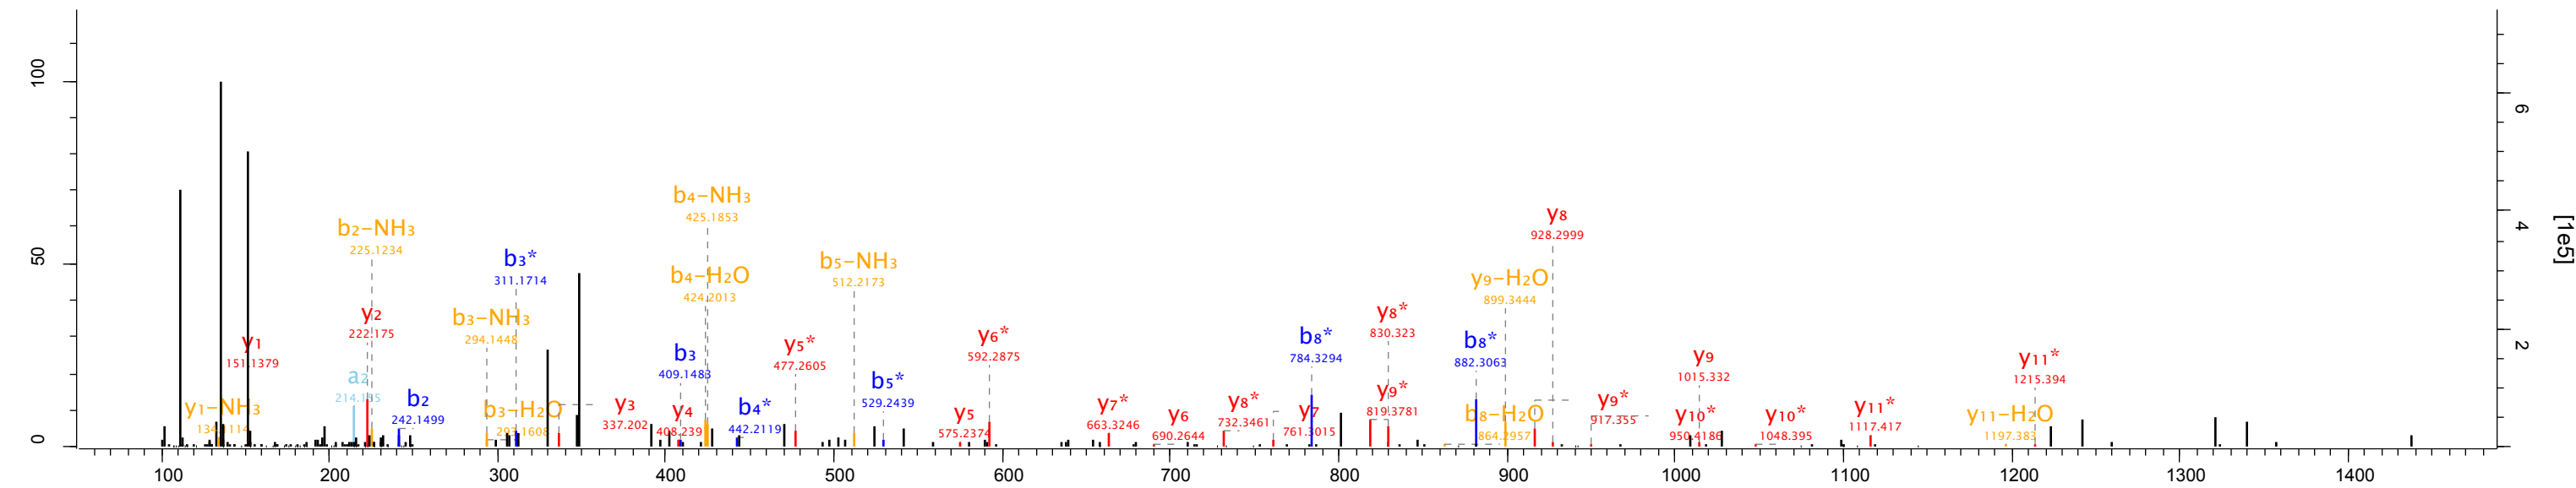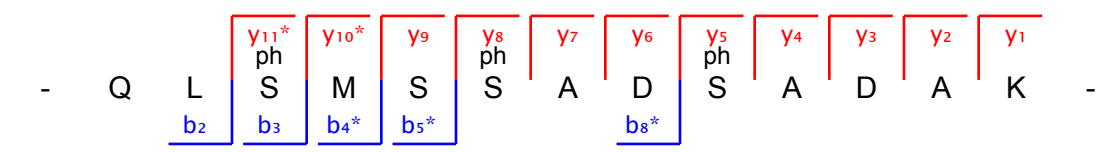

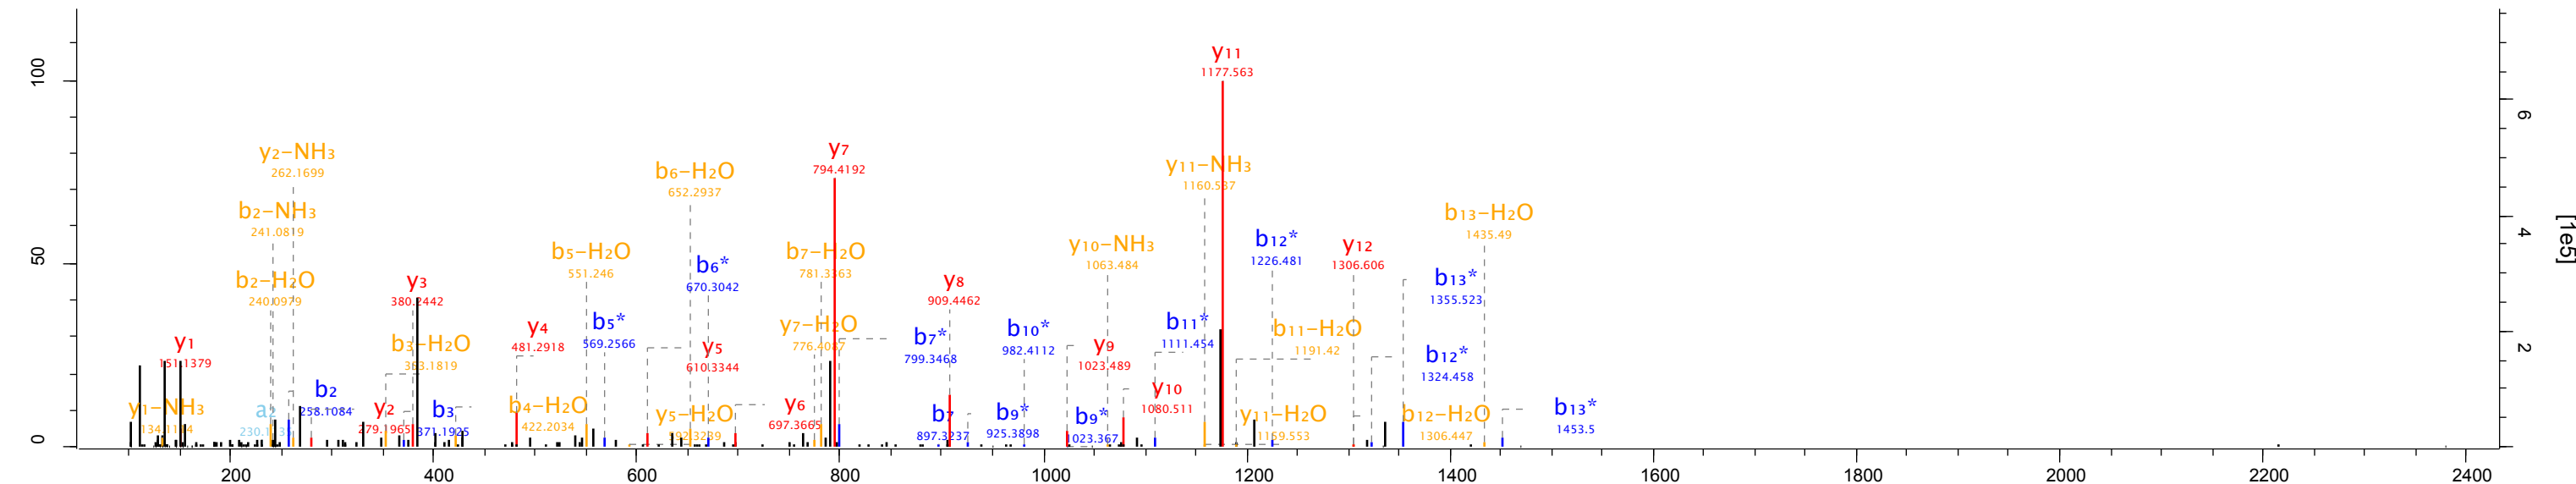

- E Q L S E T E G S G E D E P G N D P S E T T Q K -

ph ph

b<sub>2</sub> b<sub>3</sub> b<sub>5</sub>\* b<sub>6</sub>\* b<sub>7</sub> b<sub>9</sub>\* b<sub>10</sub>\* b<sub>11</sub>\* b<sub>12</sub>\* b<sub>13</sub>\* y<sub>12</sub> y<sub>11</sub> y<sub>10</sub> y<sub>9</sub> y<sub>8</sub> y<sub>7</sub> y<sub>6</sub> y<sub>5</sub> y<sub>4</sub> y<sub>3</sub> y<sub>2</sub> y<sub>1</sub>

Raw file: 20171215\_MaS\_33SR\_LMH\_phospho2\_05  
 Scan: 5931 Method: FTMS; HCD Score: 165.88 m/z: 749.31 Gene names: AHNAK

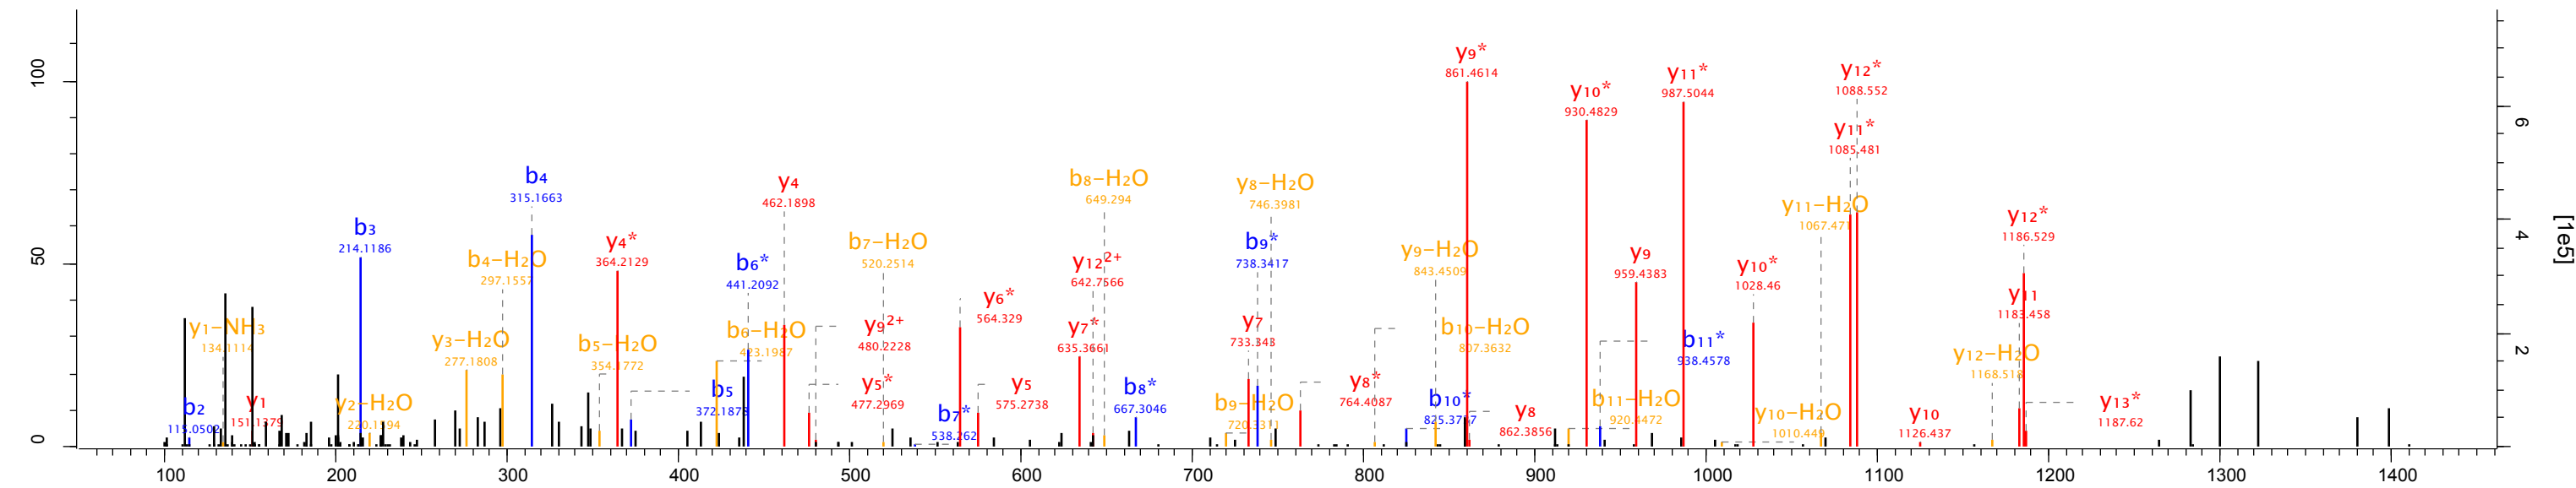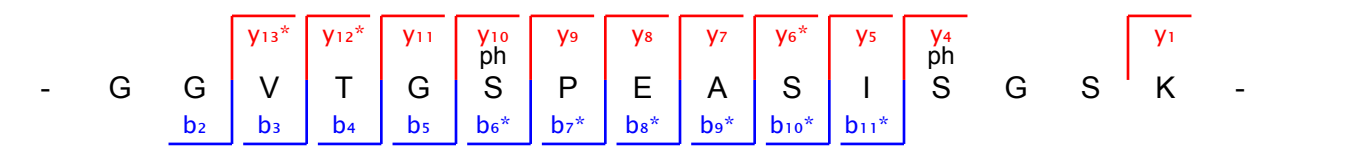

Raw file 20171215\_MaS\_33SR\_LMH\_phospho2\_05 Scan 9481 Method FTMS; HCD Score 104.97 m/z 722.7 Gene names KRT80

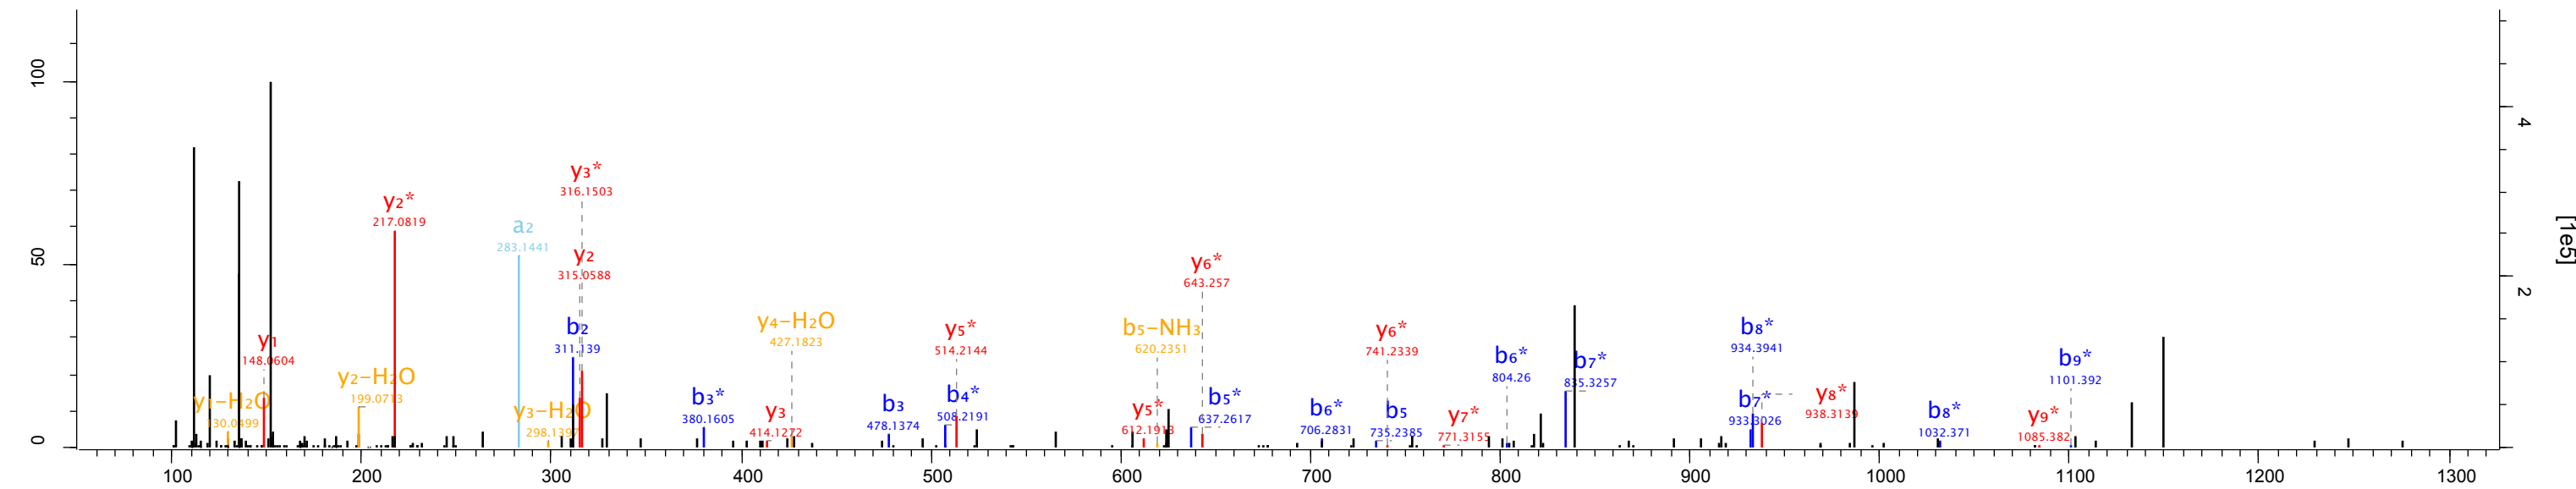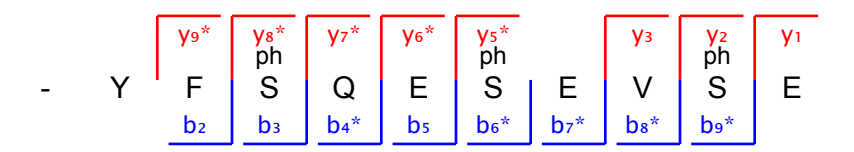

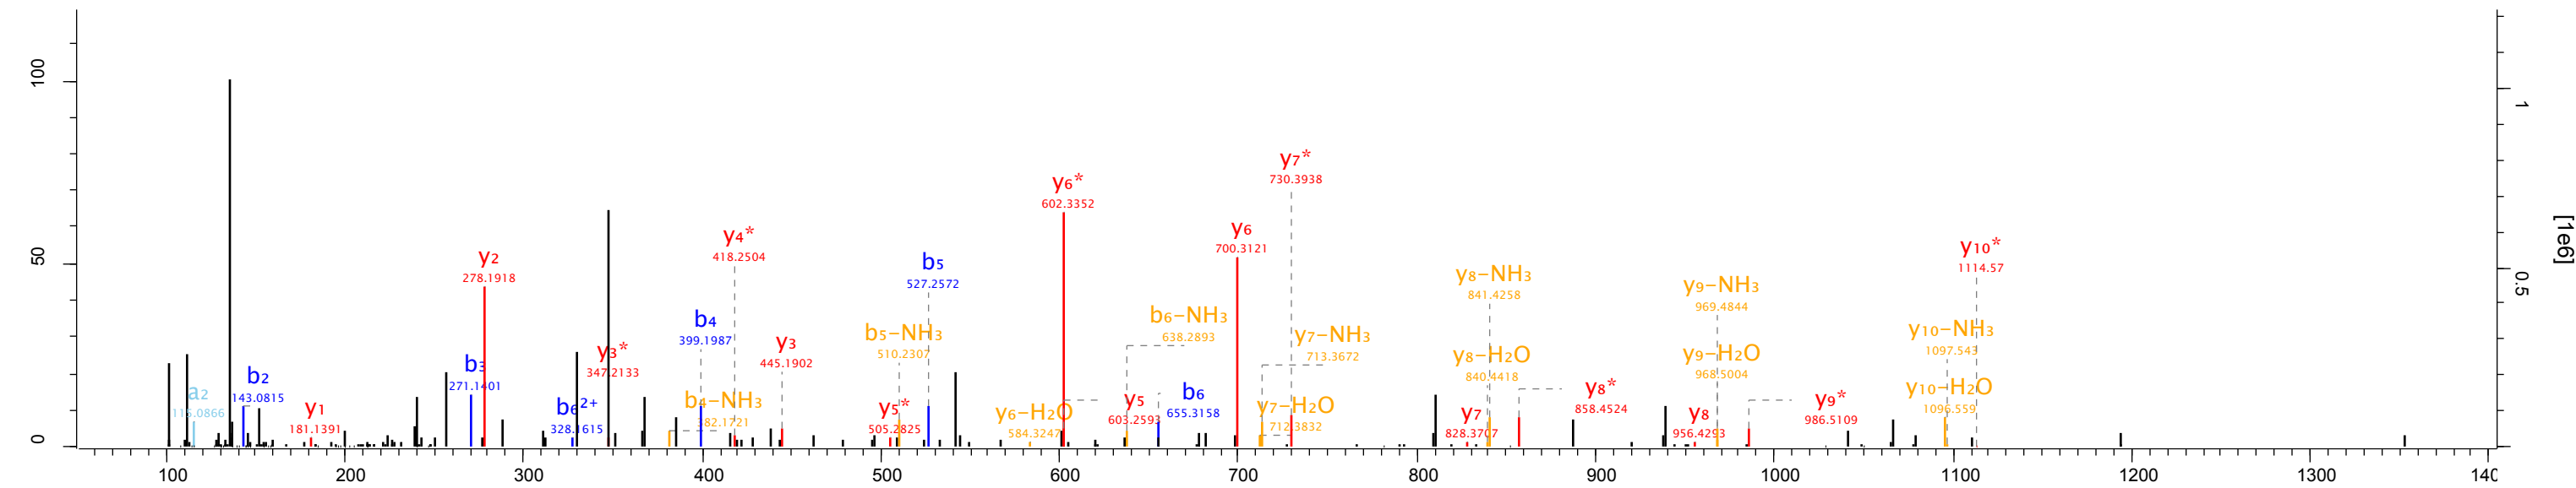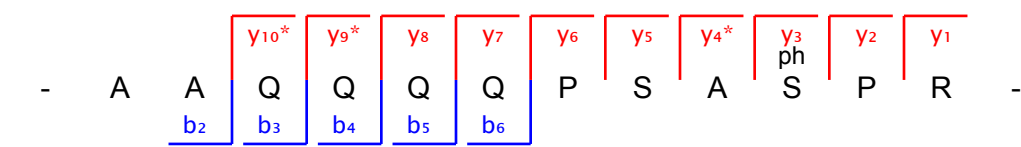

Raw file 20171215\_MaS\_33SR\_LMH\_phospho2\_06 Scan 3171 Method FTMS; HCD Score 164.9 m/z 870.89 Gene names INCENP

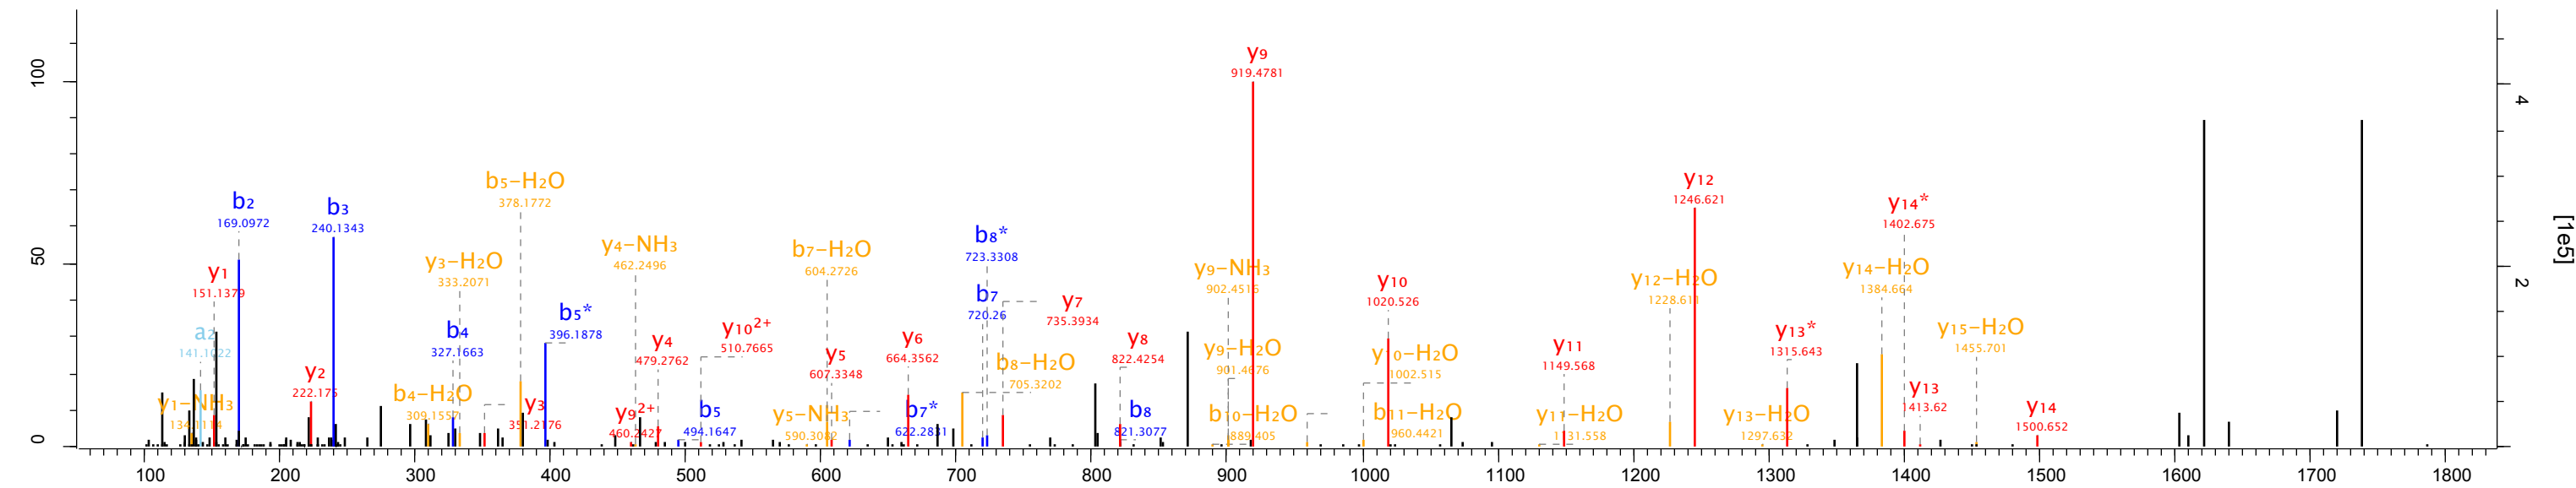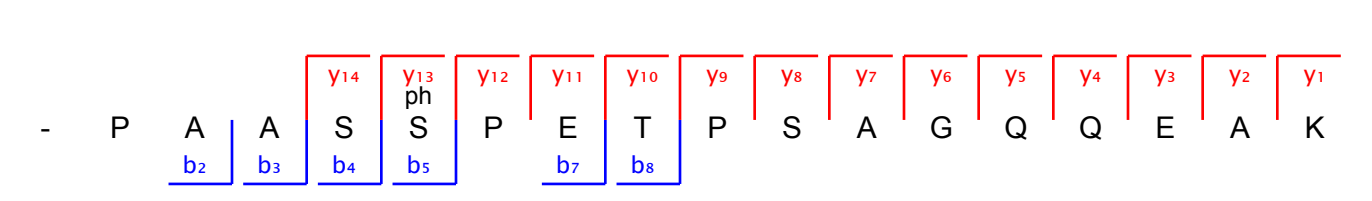

Raw file 20171215\_MaS\_33SR\_LMH\_phospho2\_06 Scan 3611 Method FTMS; HCD Score 106.37 m/z 445.7 Gene names NPM1

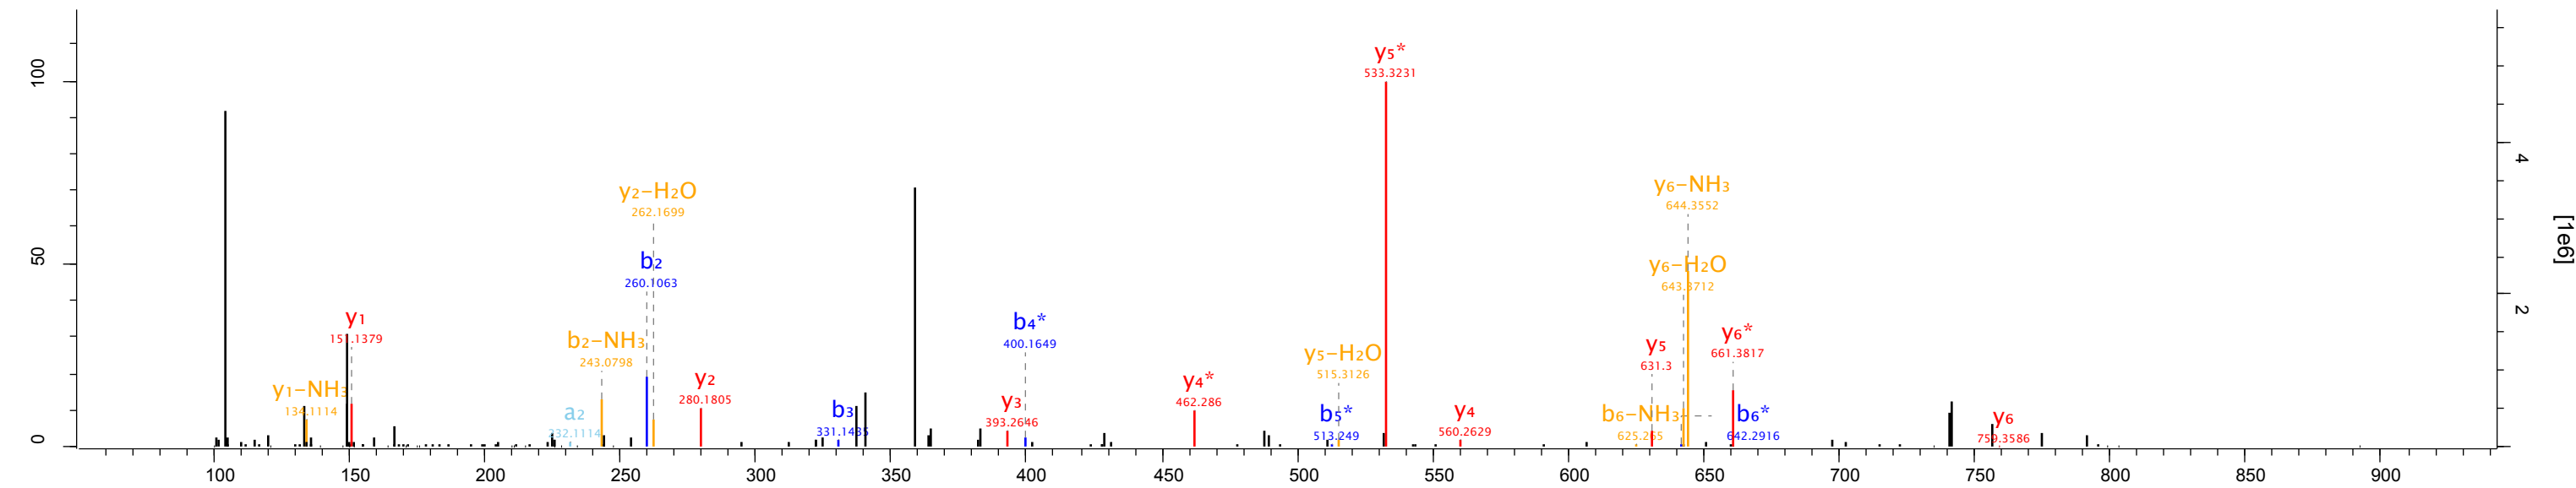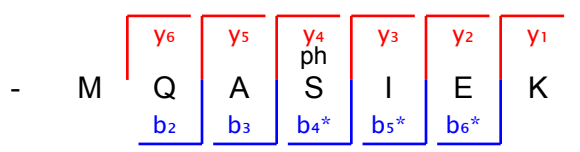



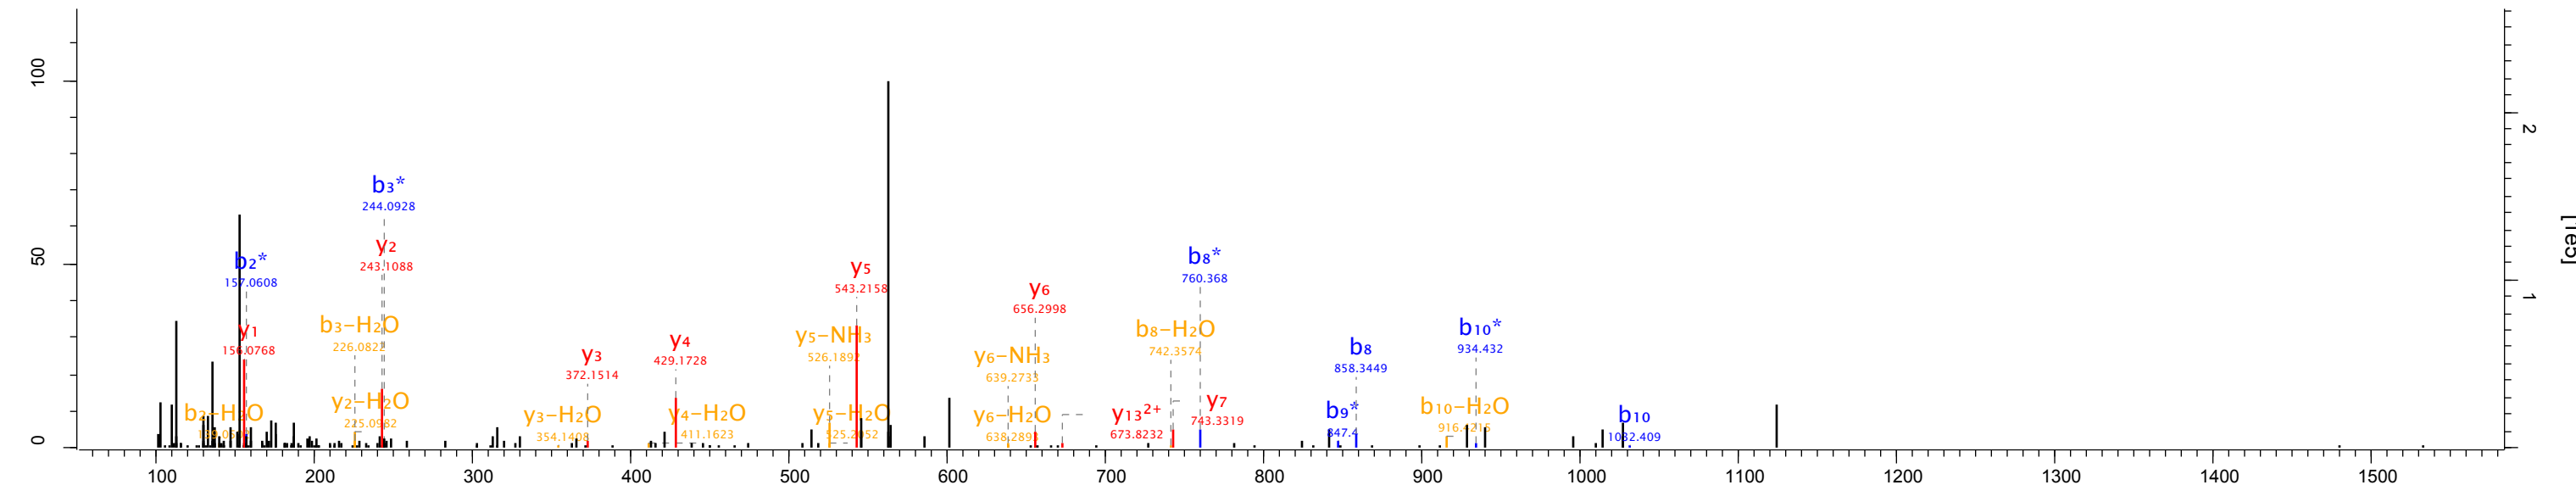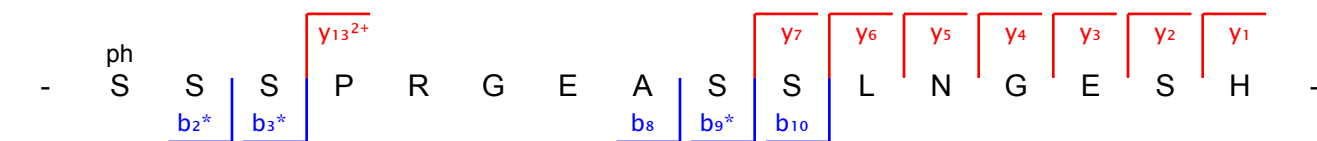

Raw file 20171215\_MaS\_33SR\_LMH\_phospho2\_06 Scan 5141 Method FTMS; HCD Score 93.65 m/z 608.76 Gene names NCOR1

20171215\_MaS\_33SR\_LMH\_phospho2\_06

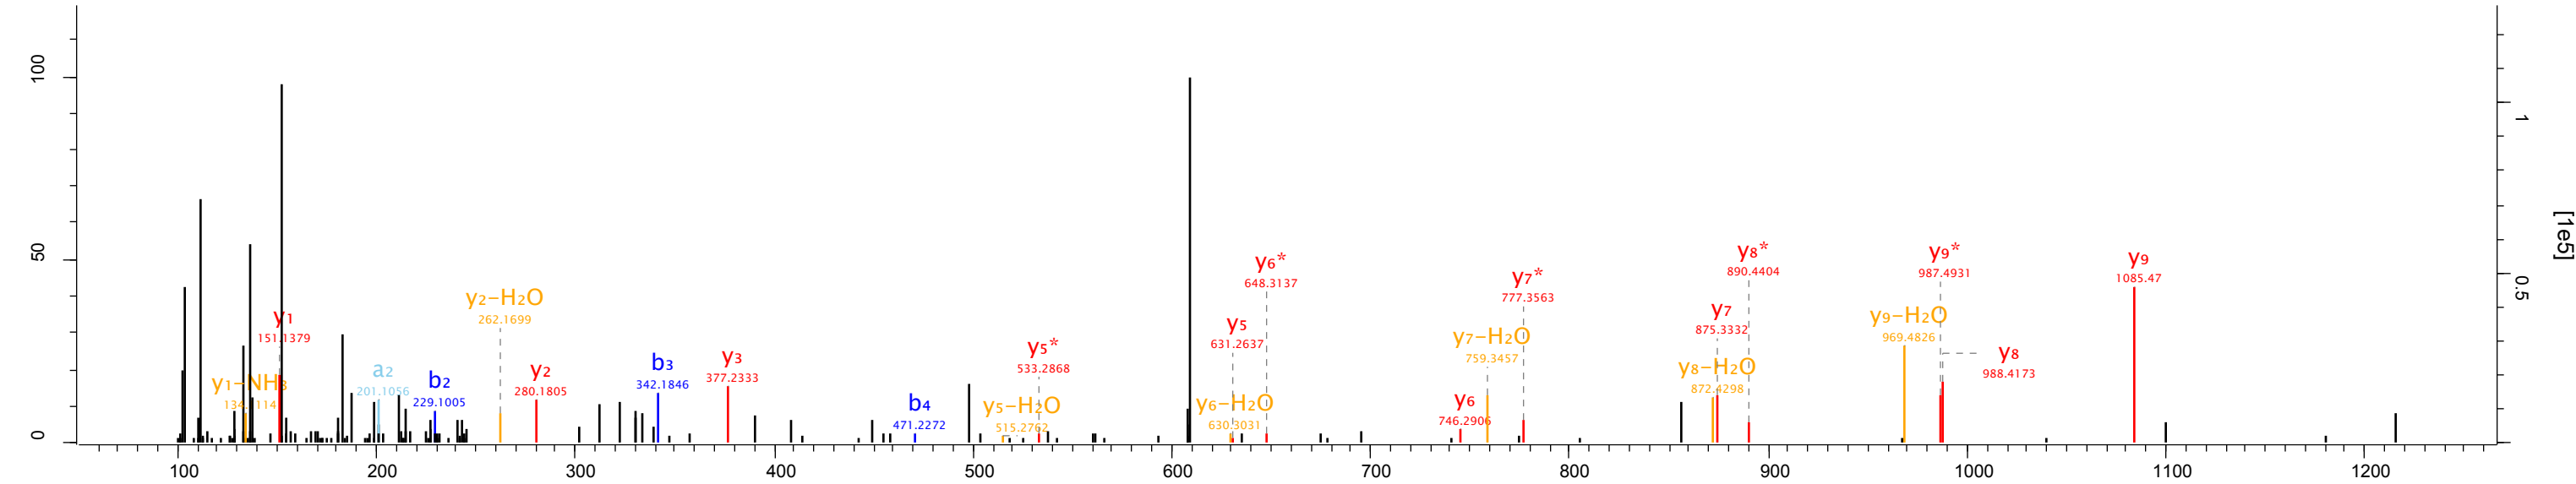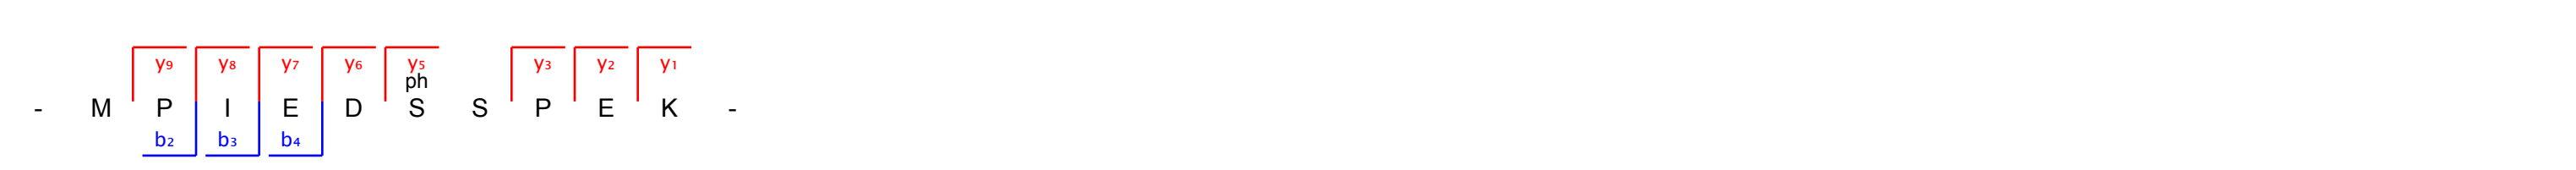

Raw file 20171215\_MaS\_33SR\_LMH\_phospho2\_06 Scan 5191 Method FTMS; HCD Score 44.31 m/z 608.77 Gene names EML3

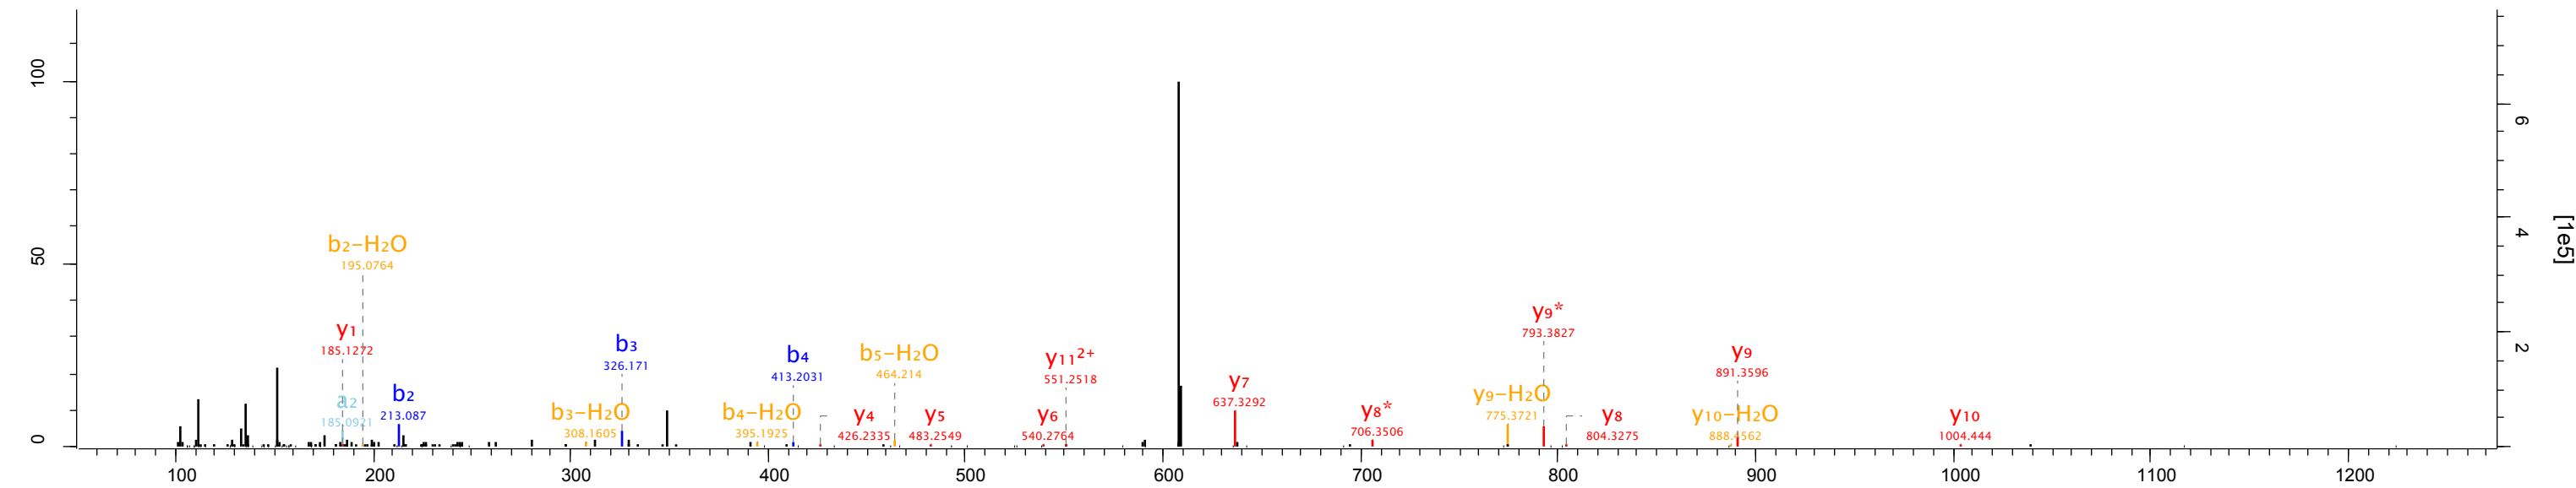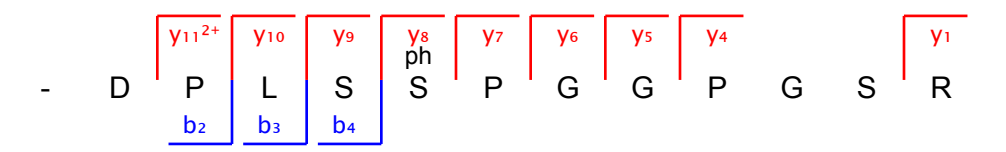

Raw file 20171215\_MaS\_33SR\_LMH\_phospho2\_08 Scan 2481 Method FTMS; HCD Score 109 m/z 584.26 Gene names ATXN2L

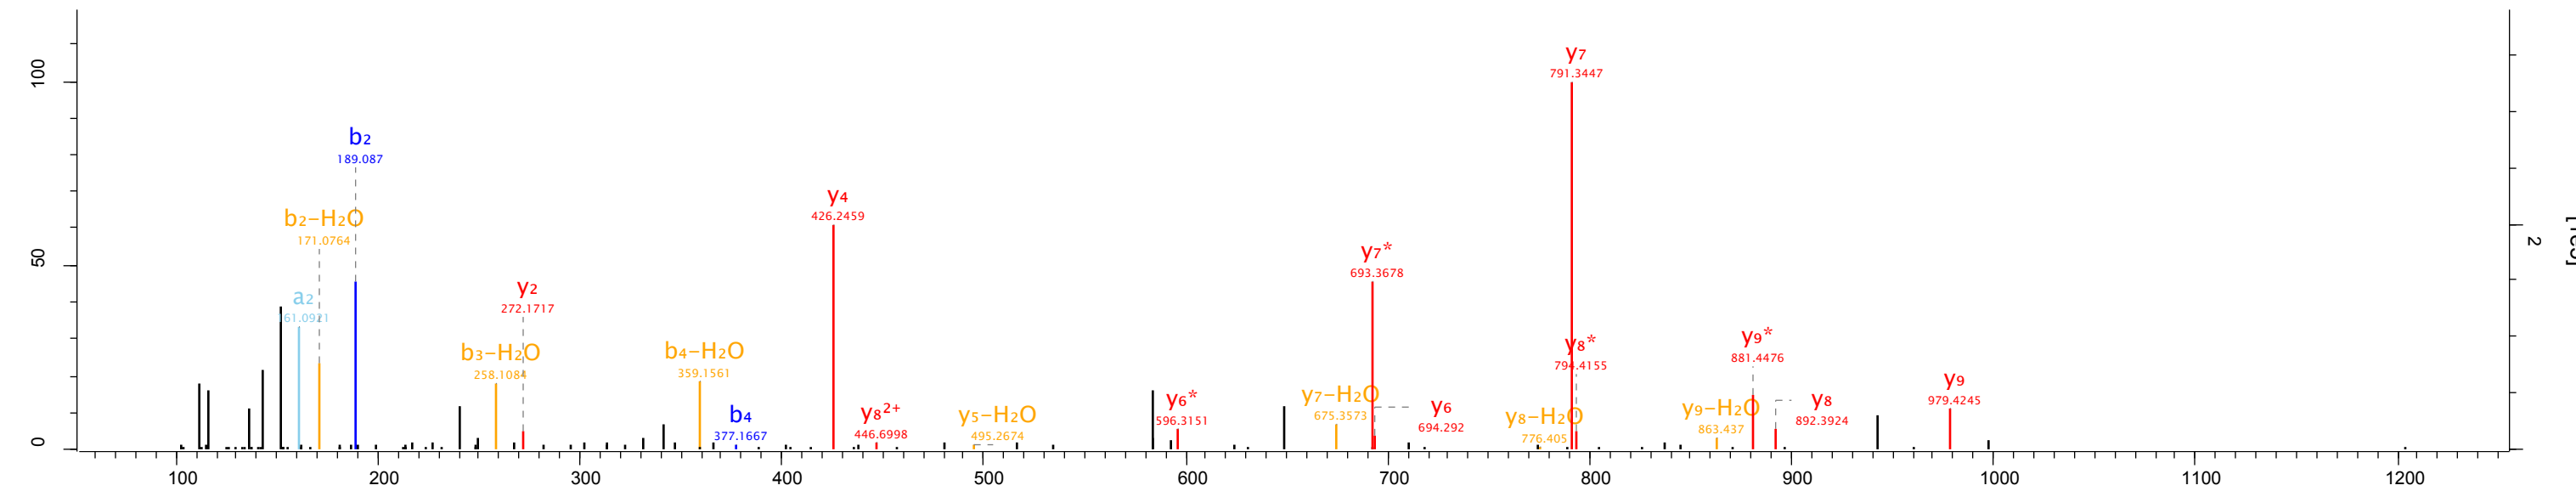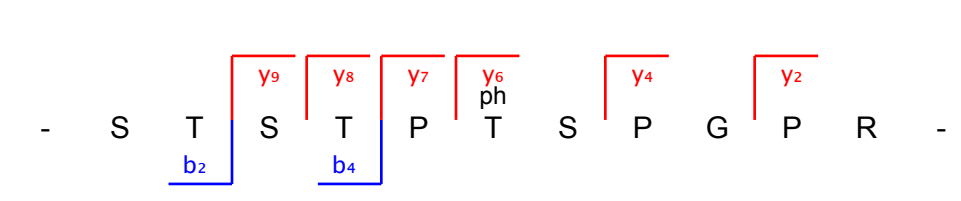

Raw file Scan Method Score m/z Gene names

20171215\_MaS\_33SR\_LMH\_phospho2\_08 2801 FTMS; HCD 124.18 490.25 SCAMP3

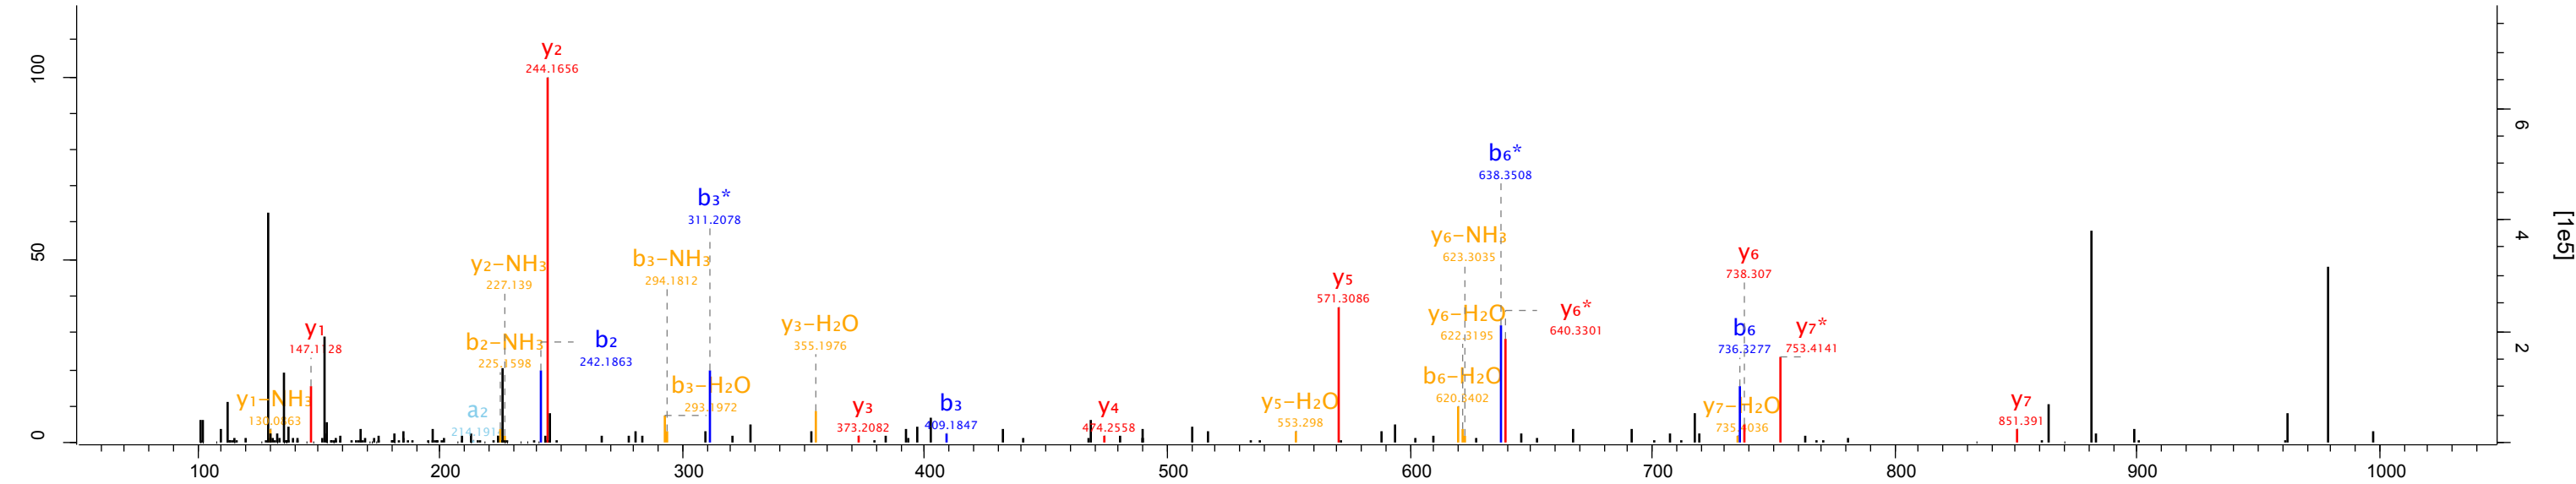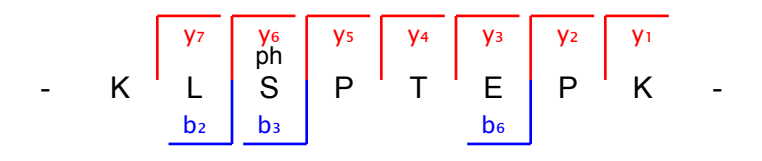

Raw file 20171215\_MaS\_33SR\_LMH\_phospho2\_08 Scan 4861 Method FTMS; HCD Score 64.91 m/z 436.72 Gene names BAZ1B

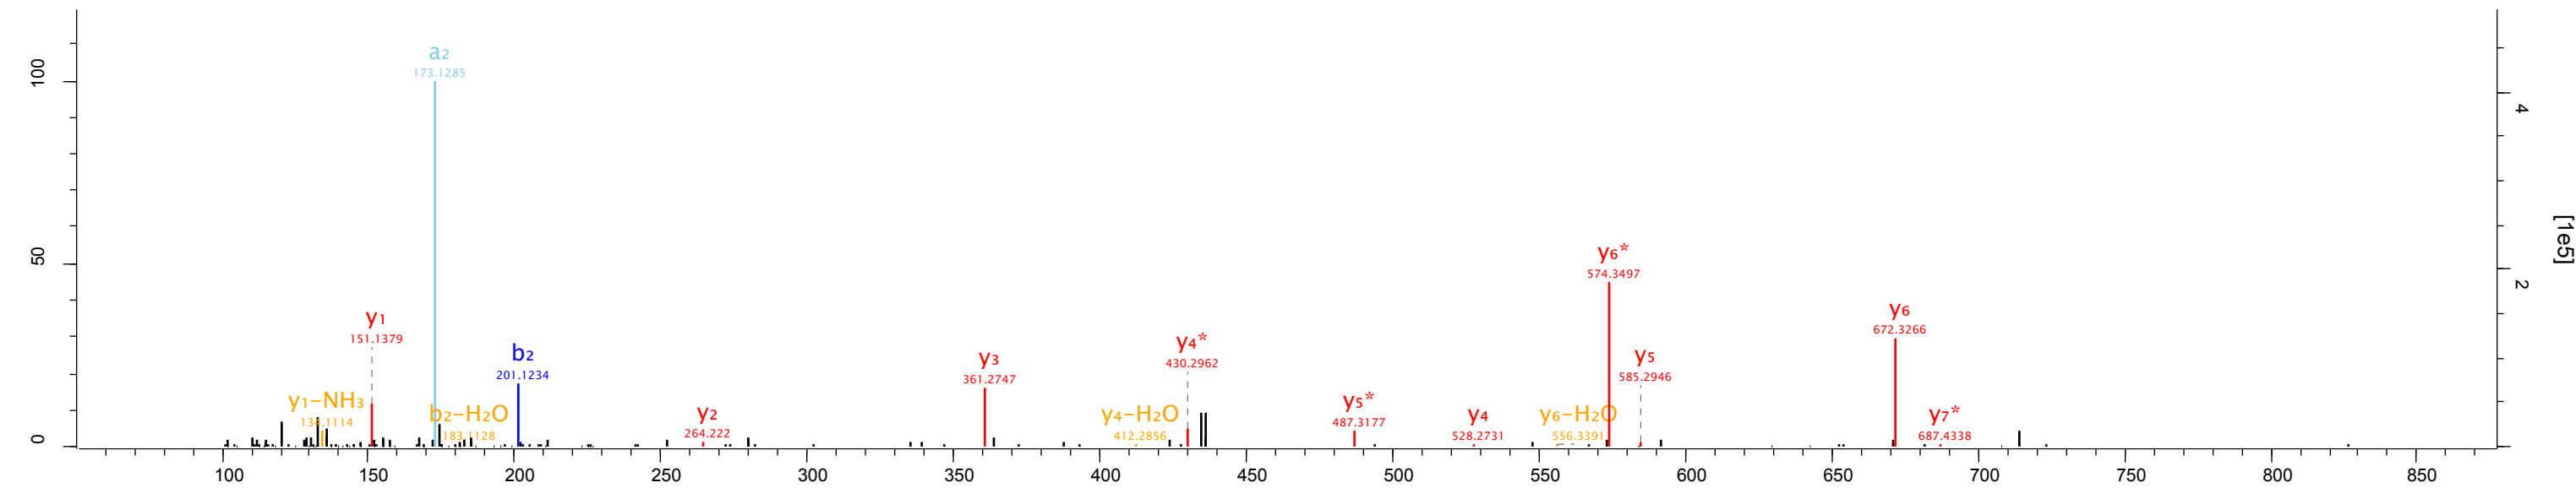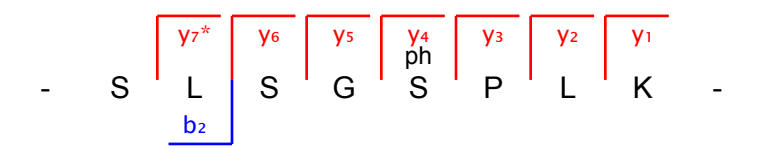

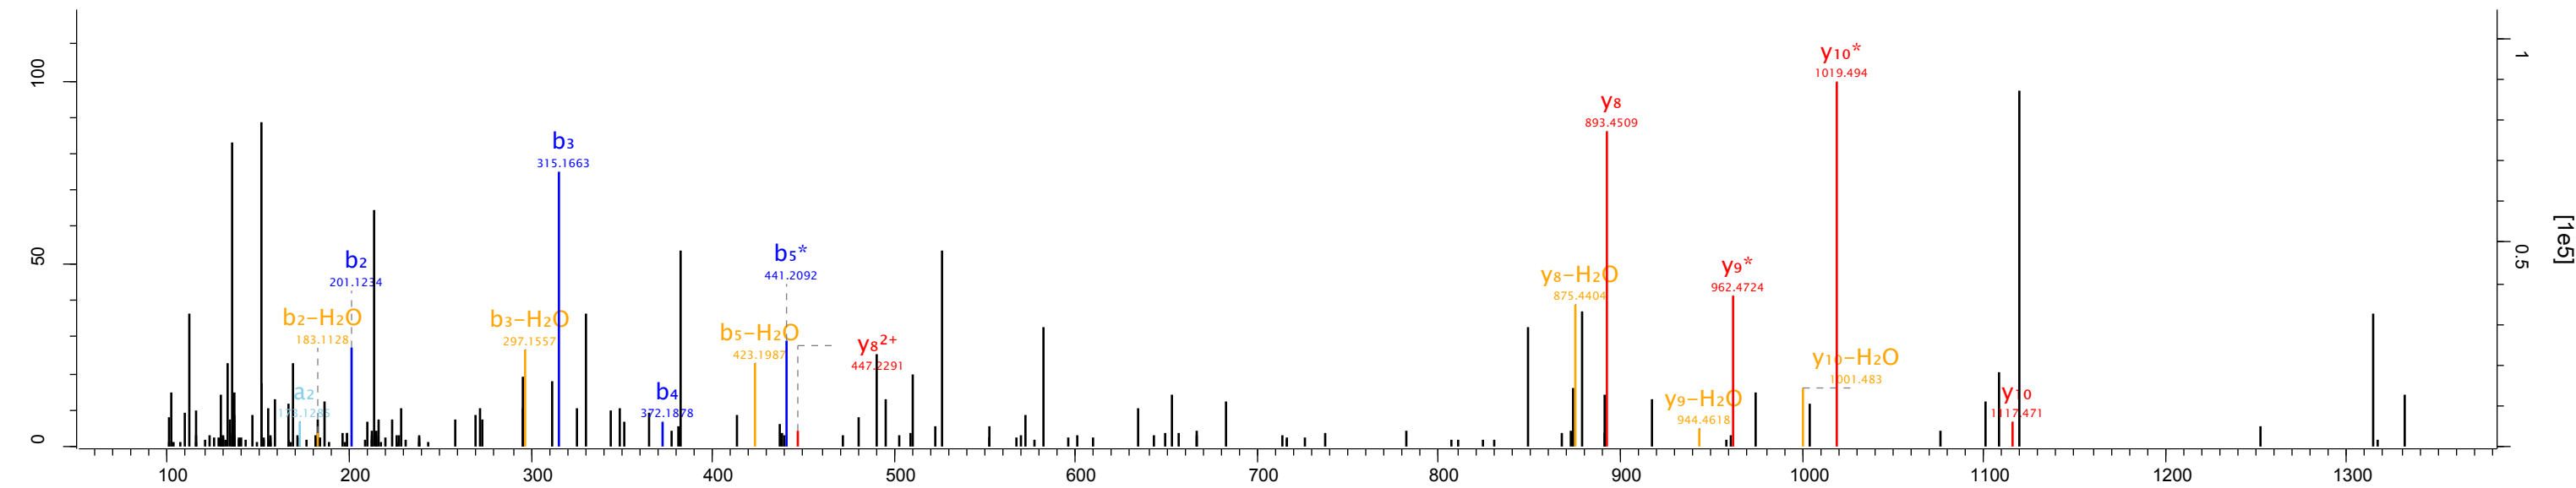

- S L N G S L S V Q M S G R -

Fragmentation sites are indicated by brackets below the sequence:

- Blue brackets: b<sub>2</sub> (L), b<sub>3</sub> (N), b<sub>4</sub> (G), b<sub>5</sub>\* (S)
- Red brackets: y<sub>10</sub> (G), y<sub>9</sub>\* (S), y<sub>8</sub> (L)

Other labels: ox (M)

Raw file

20171215\_MaS\_33SR\_LMH\_phospho2\_09

| Scan | Method    | Score | m/z    | Gene names |
|------|-----------|-------|--------|------------|
| 2021 | FTMS; HCD | 41.94 | 610.75 | TADA3      |

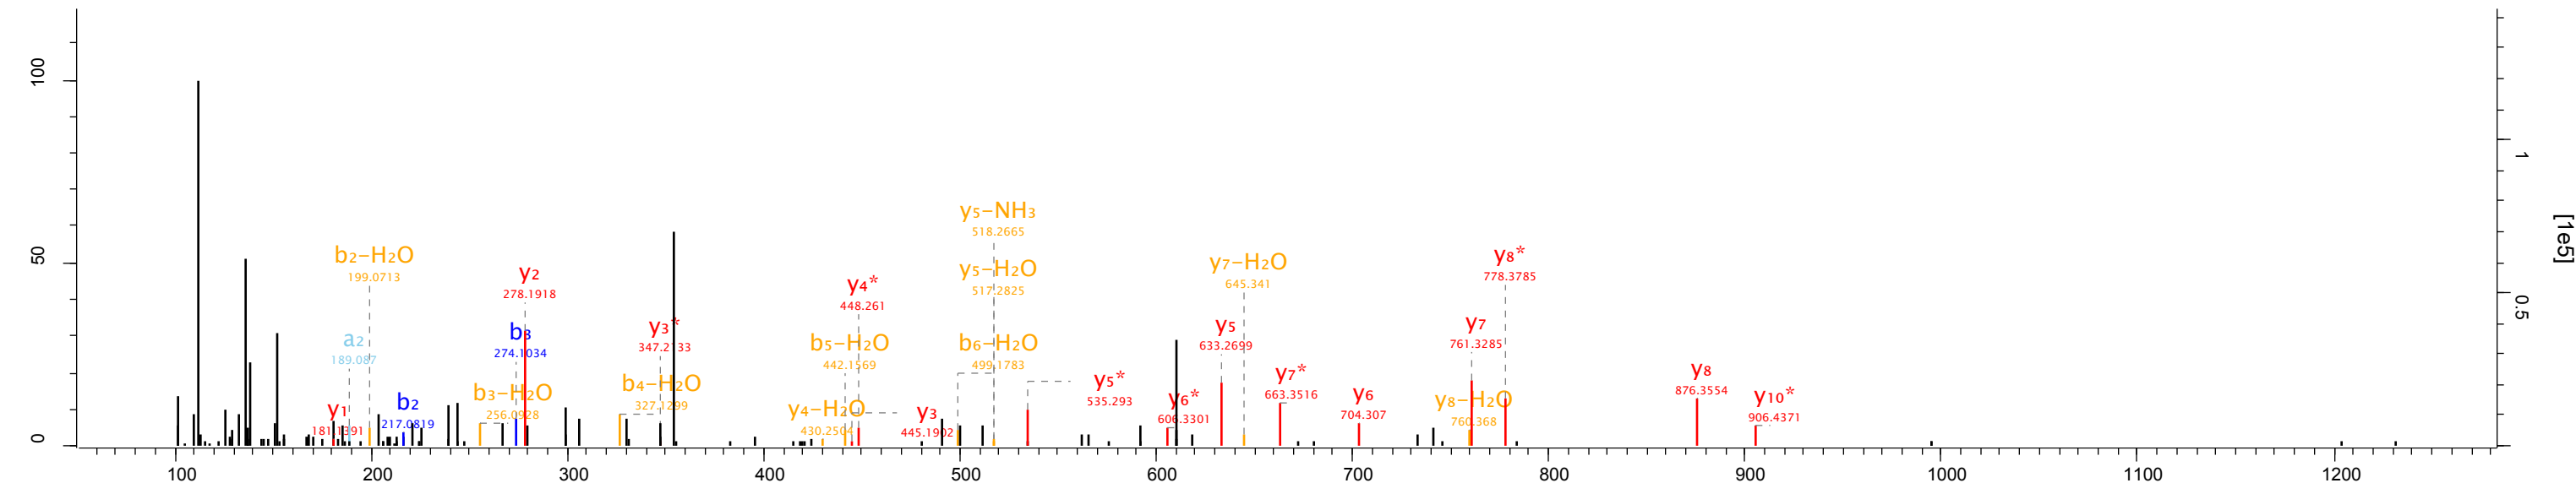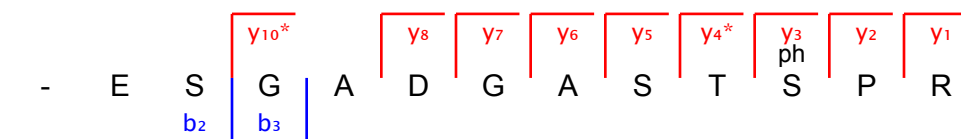



Raw file  
20171215\_MaS\_33SR\_LMH\_phospho2\_09

Scan 2781 Method FTMS; HCD Score 101.23 m/z 766.33 Gene names OXSR1

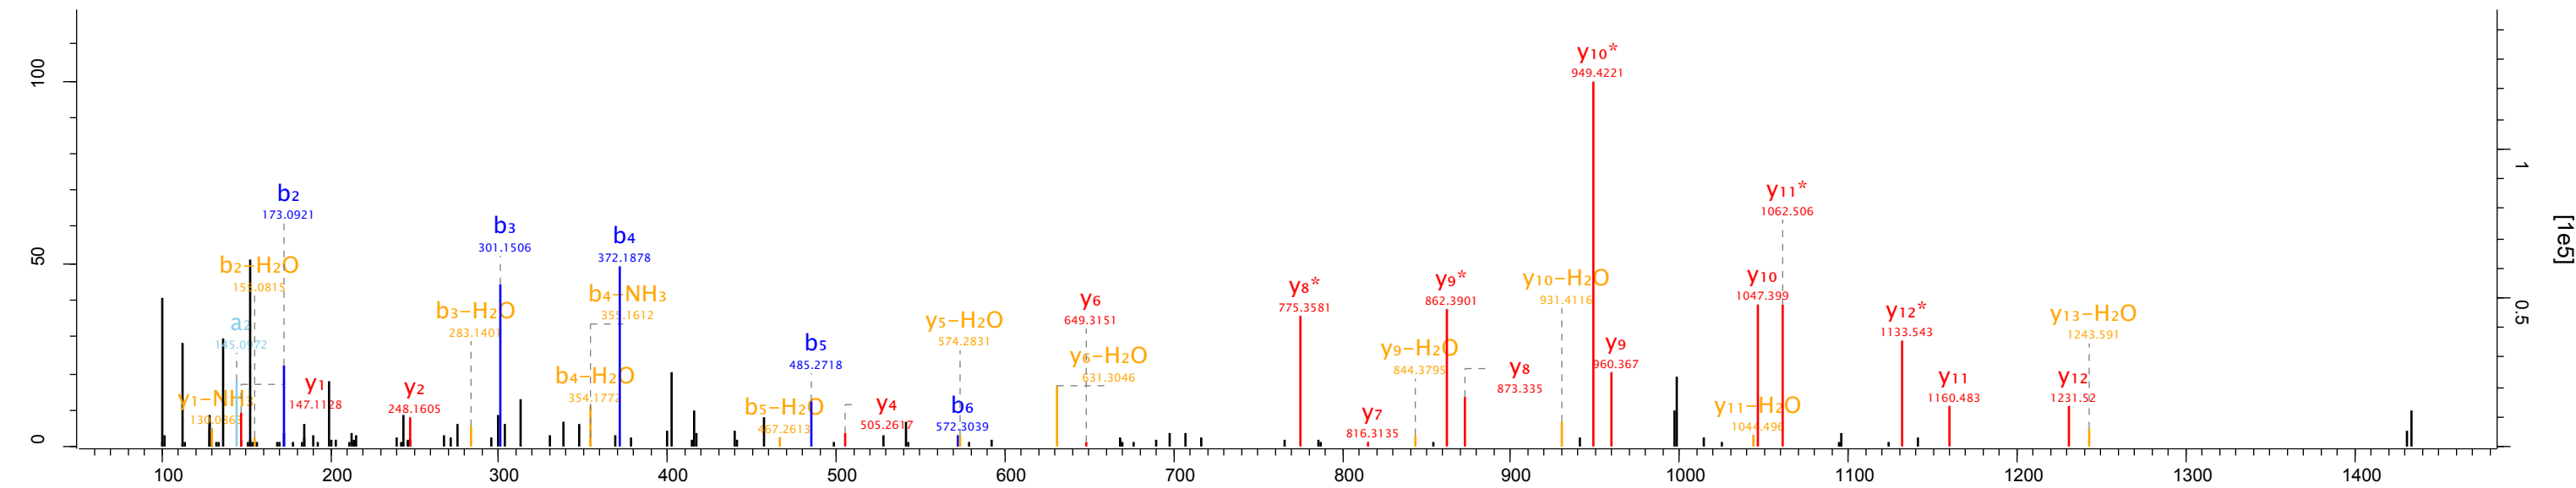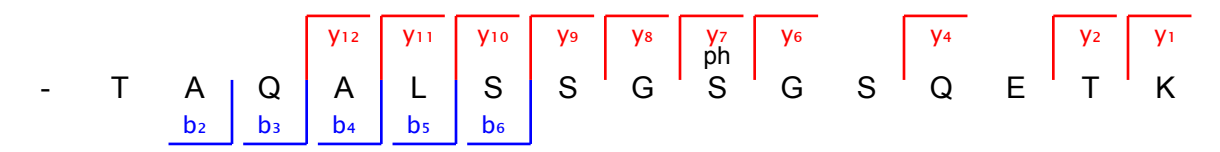

Raw file

20171215\_MaS\_33SR\_LMH\_phospho2\_09

| Scan | Method    | Score  | m/z    | Gene names |
|------|-----------|--------|--------|------------|
| 2901 | FTMS; HCD | 113.22 | 535.24 | RAF1;ARAF  |

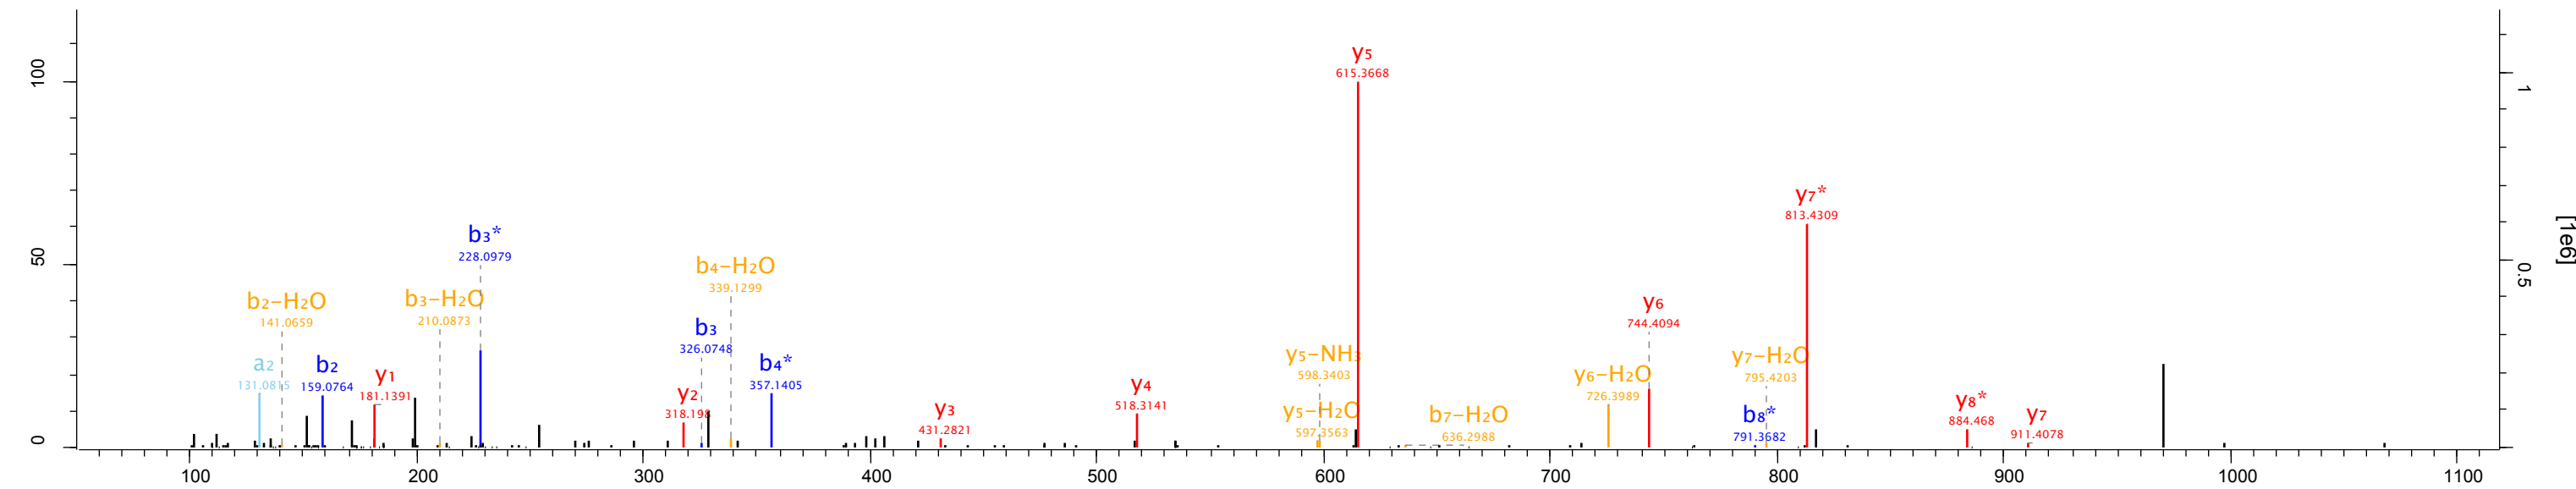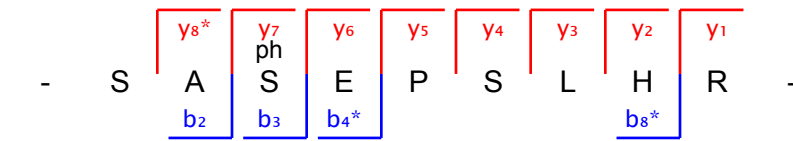

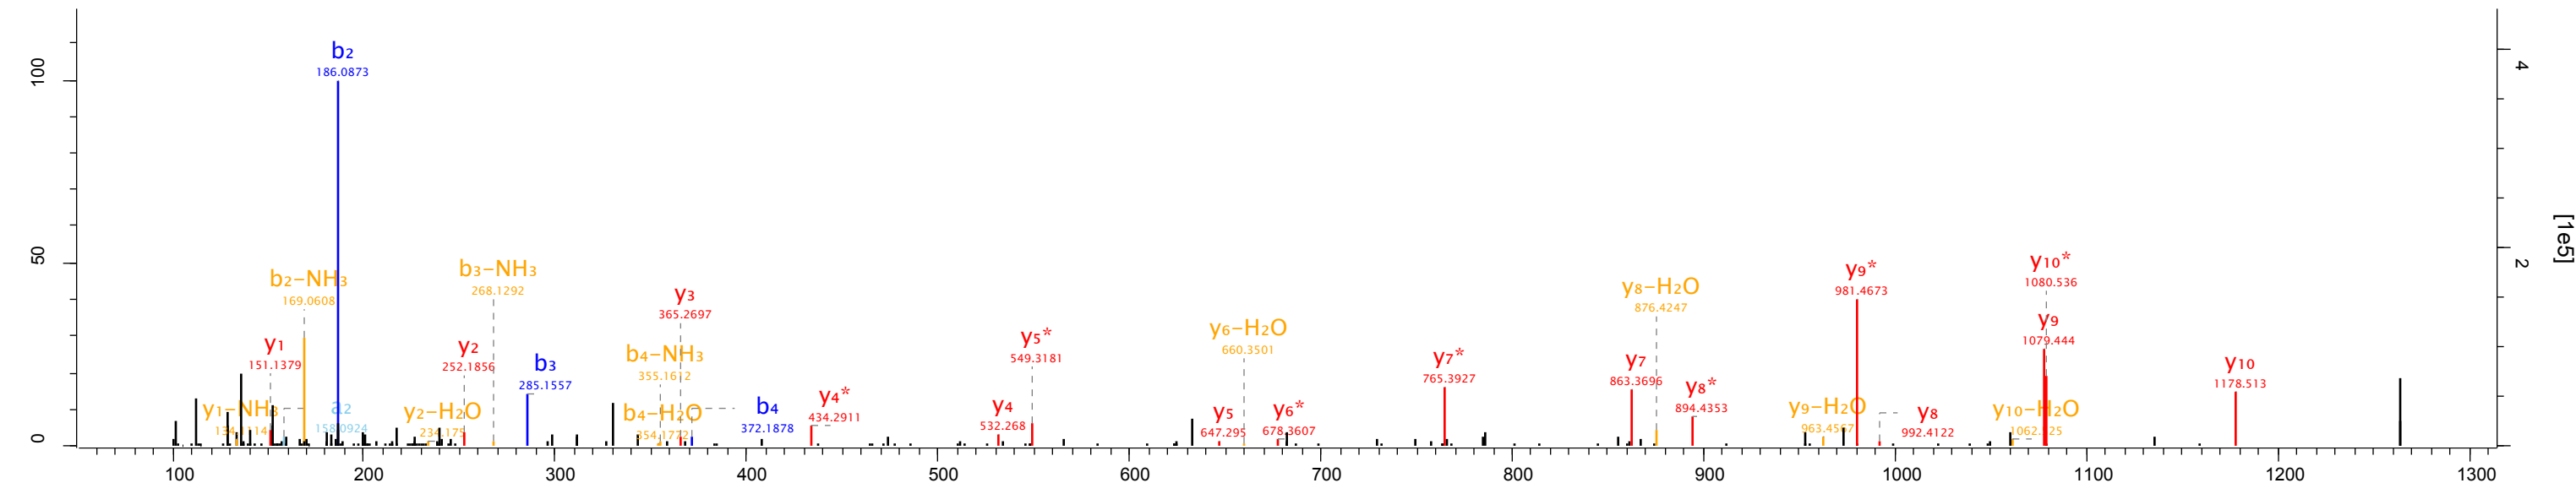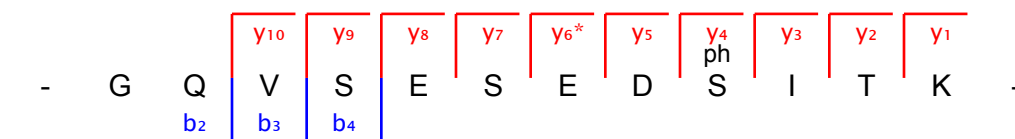

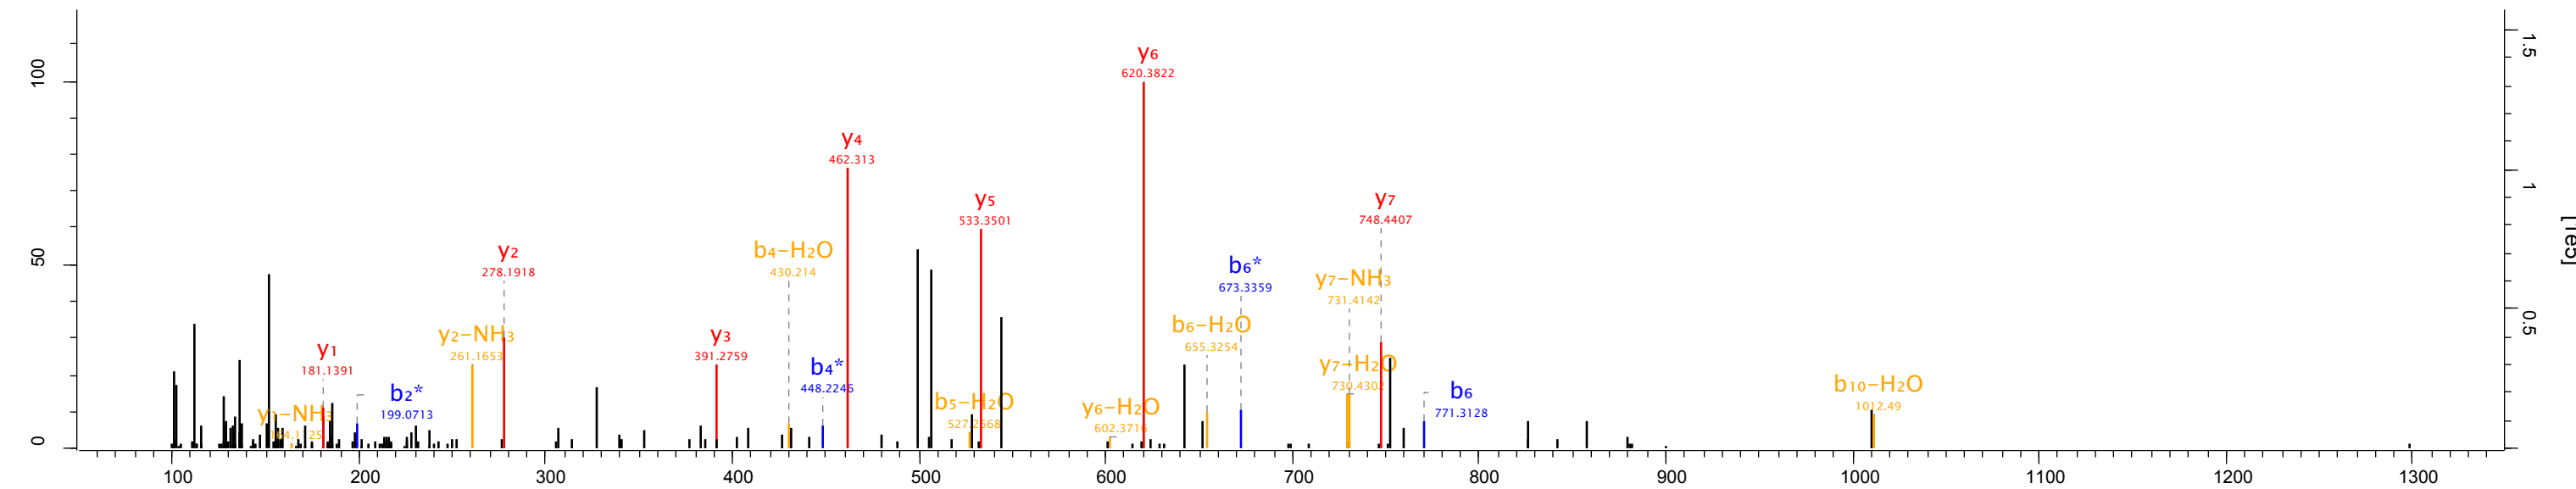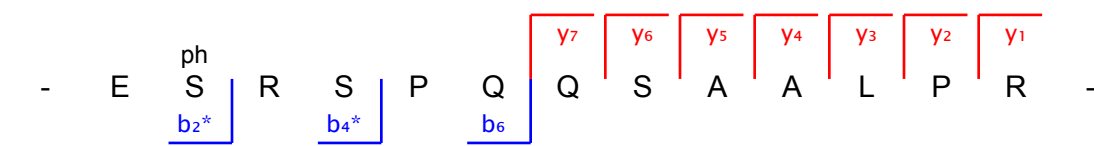

Raw file: 20171215\_MaS\_33SR\_LMH\_phospho2\_09  
 Scan: 4031 Method: FTMS; HCD Score: 132.86 m/z: 552.79 Gene names: NFKB2

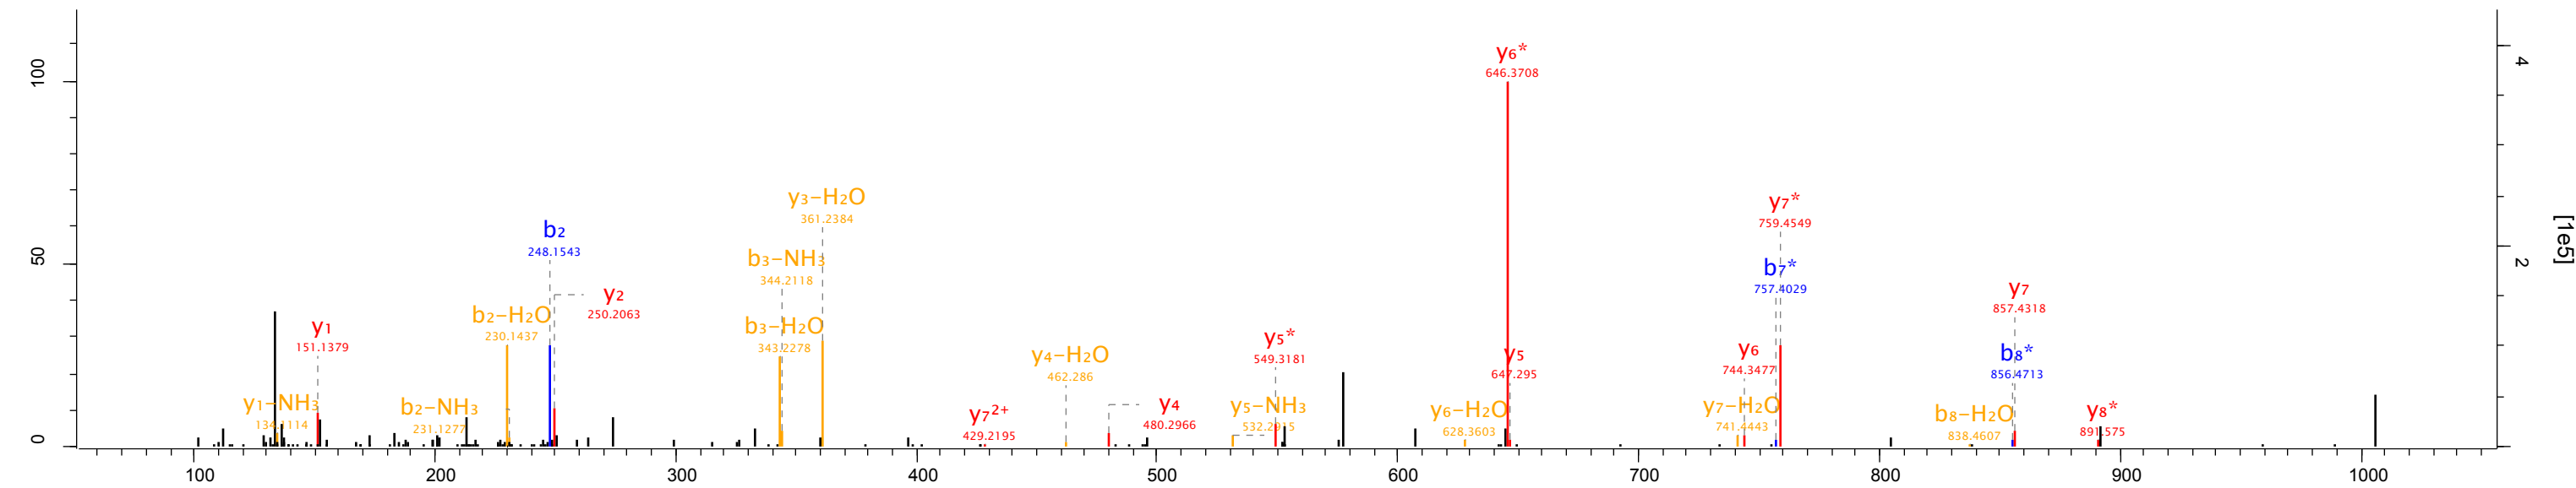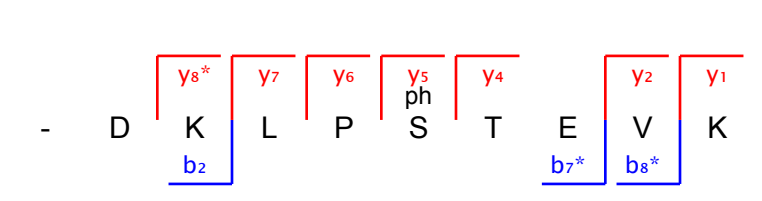

20171215\_MaS\_33SR\_LMH\_phospho2\_09 4541 FTMS; HCD 45.35 570.73 ATF7IP

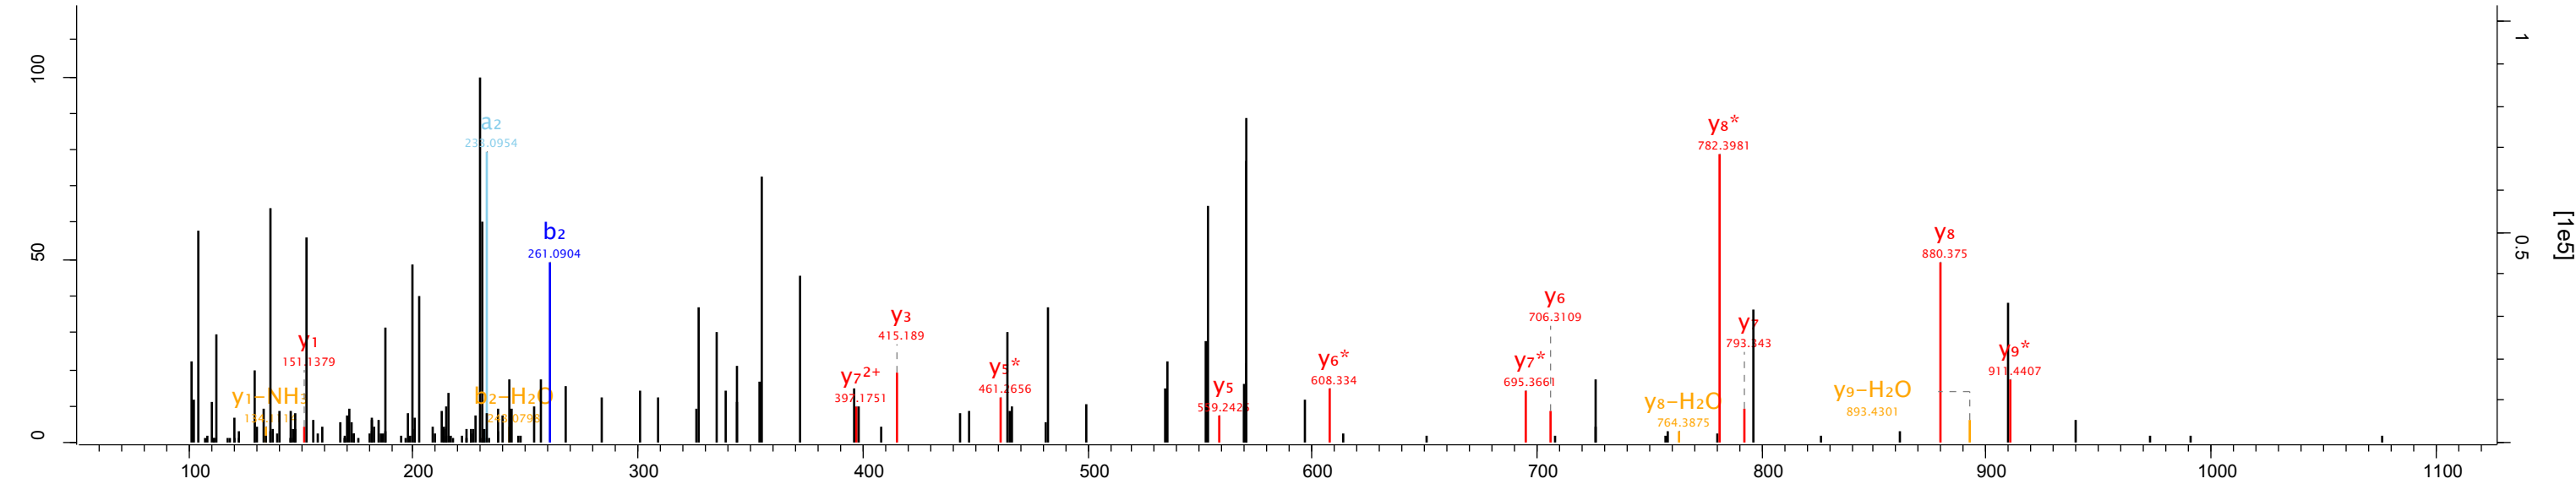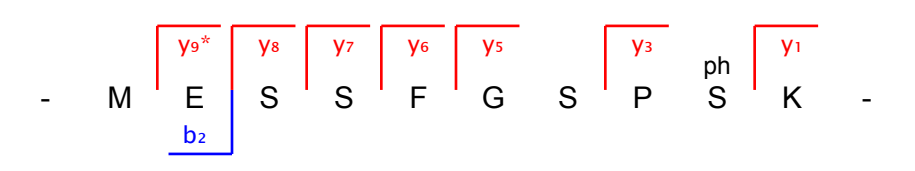

Raw file 20171215\_MaS\_33SR\_LMH\_phospho2\_09 Scan 5031 Method FTMS; HCD Score 79.47 m/z 828.34 Gene names ITSN1

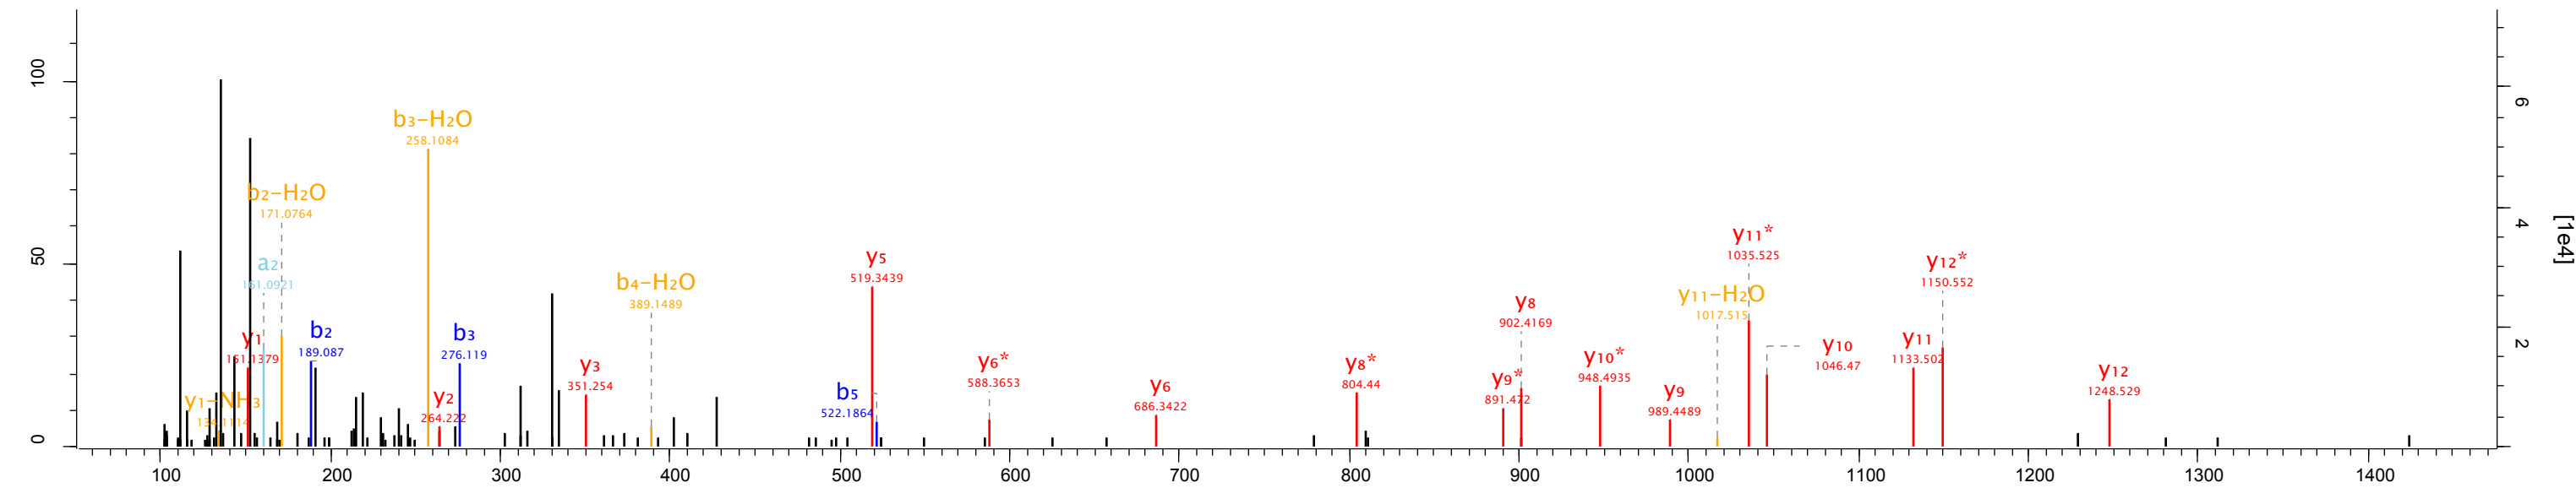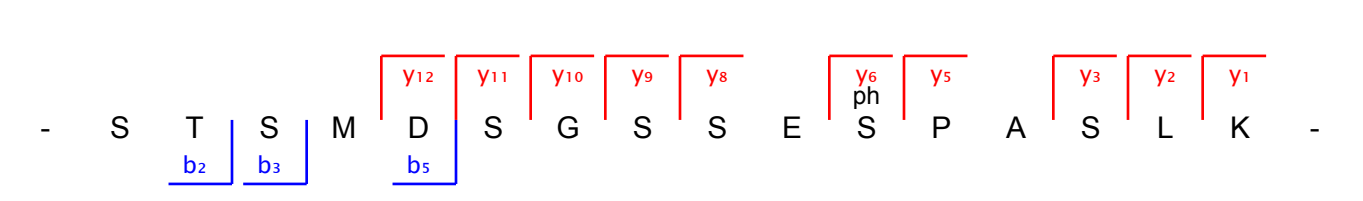

Raw file

20171215\_MaS\_33SR\_LMH\_proteome\_01

Scan 101441 Method FTMS; HCD Score 47.43 m/z 760.39

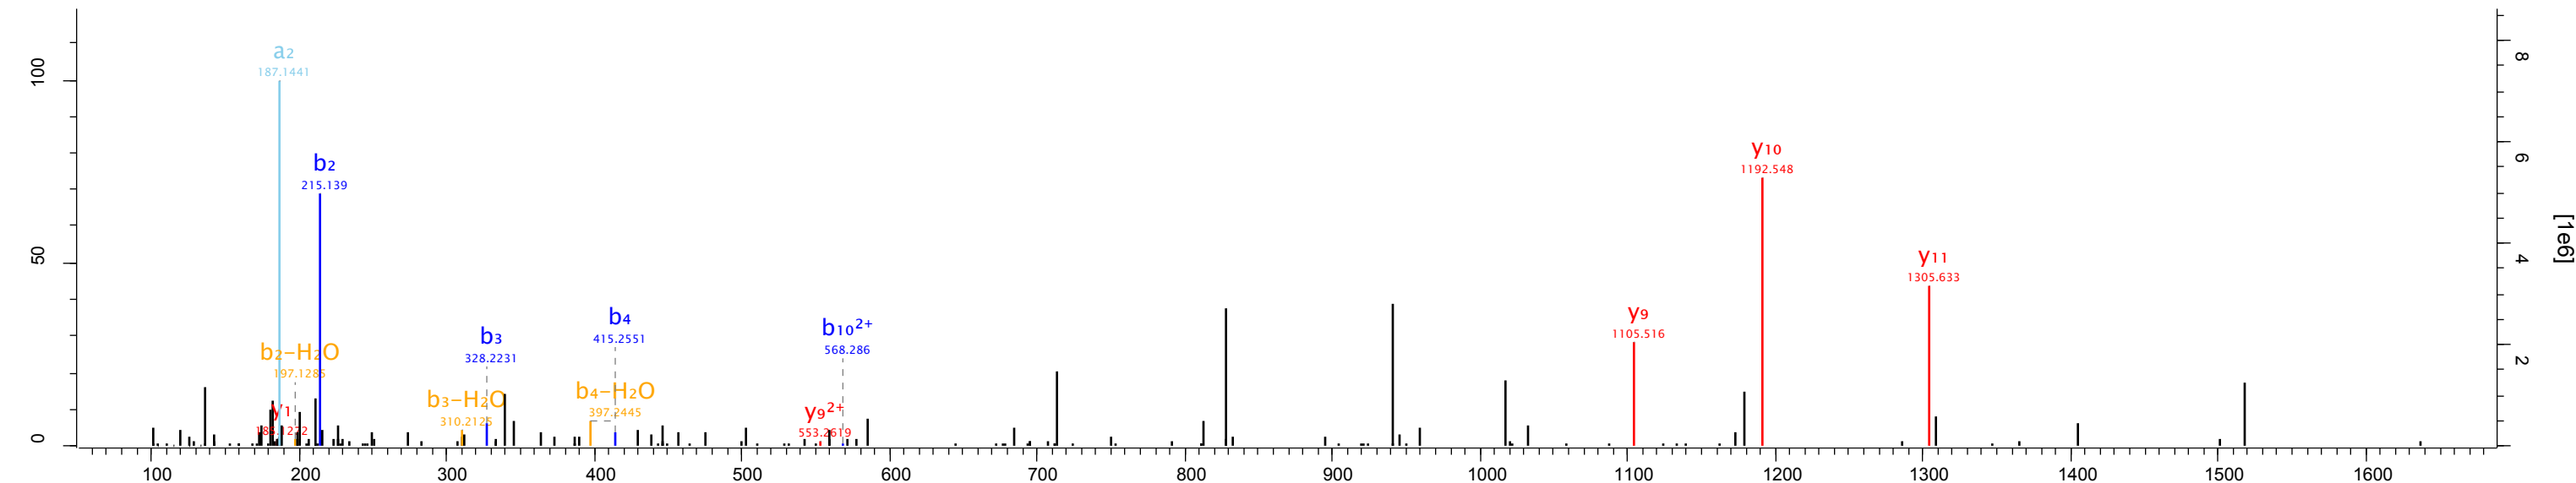

- L T I S L S P L T E A E R -

Fragmentation mapping:

- Red boxes: y11 (I), y10 (S), y9 (L)
- Blue boxes: b2 (L), b3 (I), b4 (S), b10<sup>2+</sup> (E)



Raw file: 20171215\_MaS\_33SR\_LMH\_proteome\_01  
 Scan: 2661 Method: FTMS; HCD Score: 54.26 m/z: 717.3 Gene names: TNFSF10

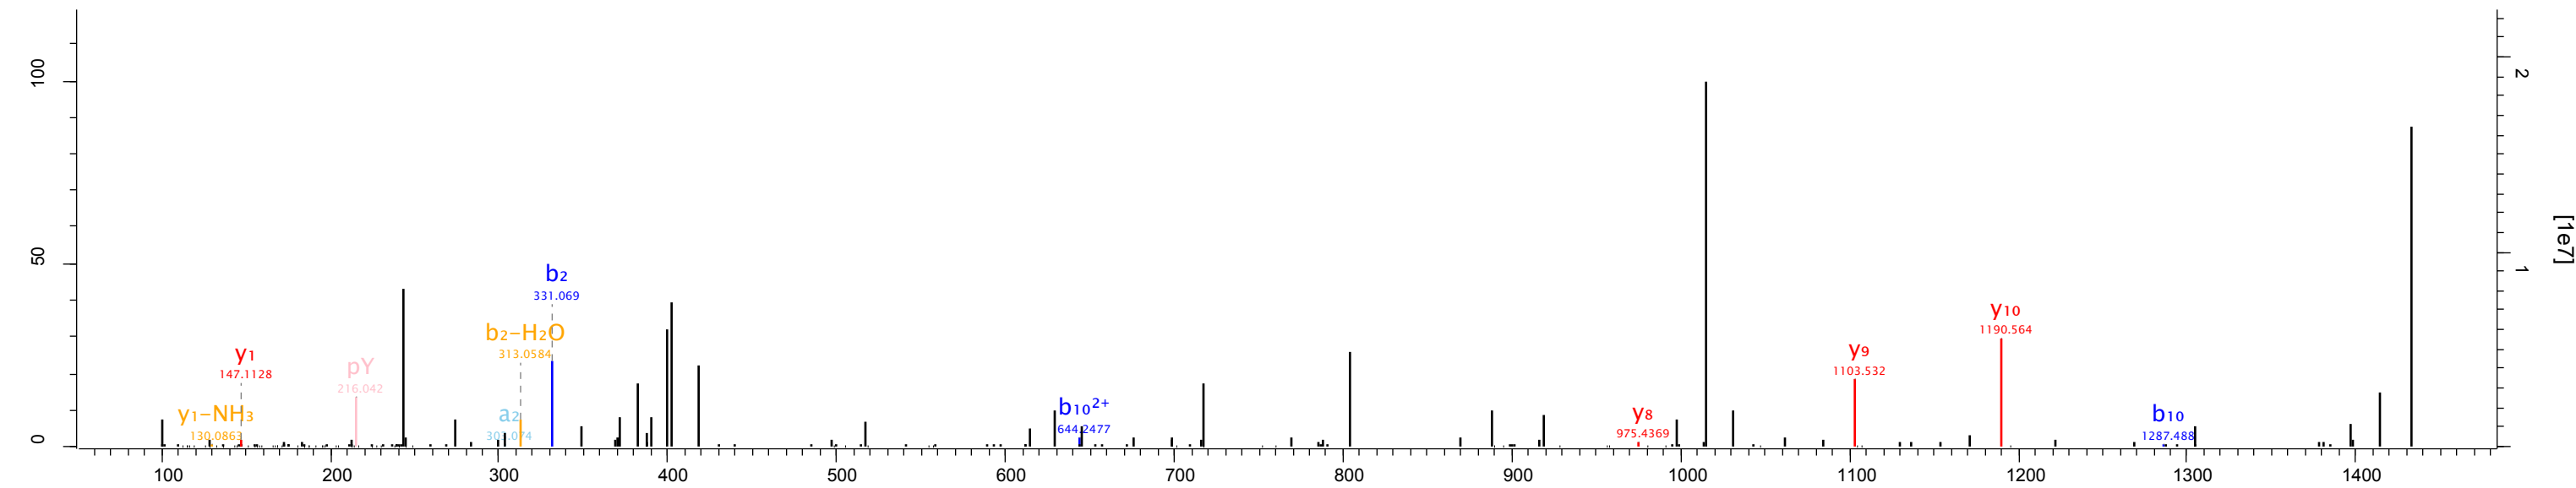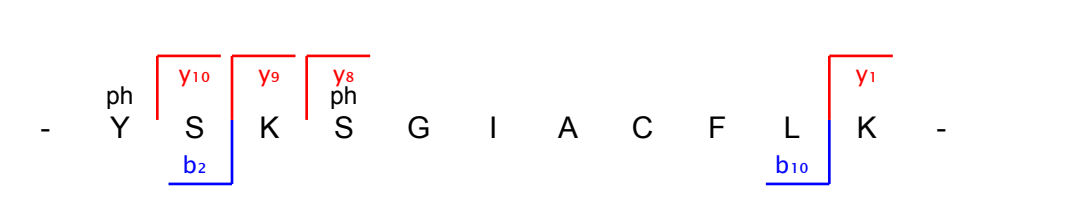

Raw file 20171215\_MaS\_33SR\_LMH\_proteome\_01 Scan 3731 Method FTMS; HCD Score 48.42 m/z 471.23 Gene names DGAT2L6

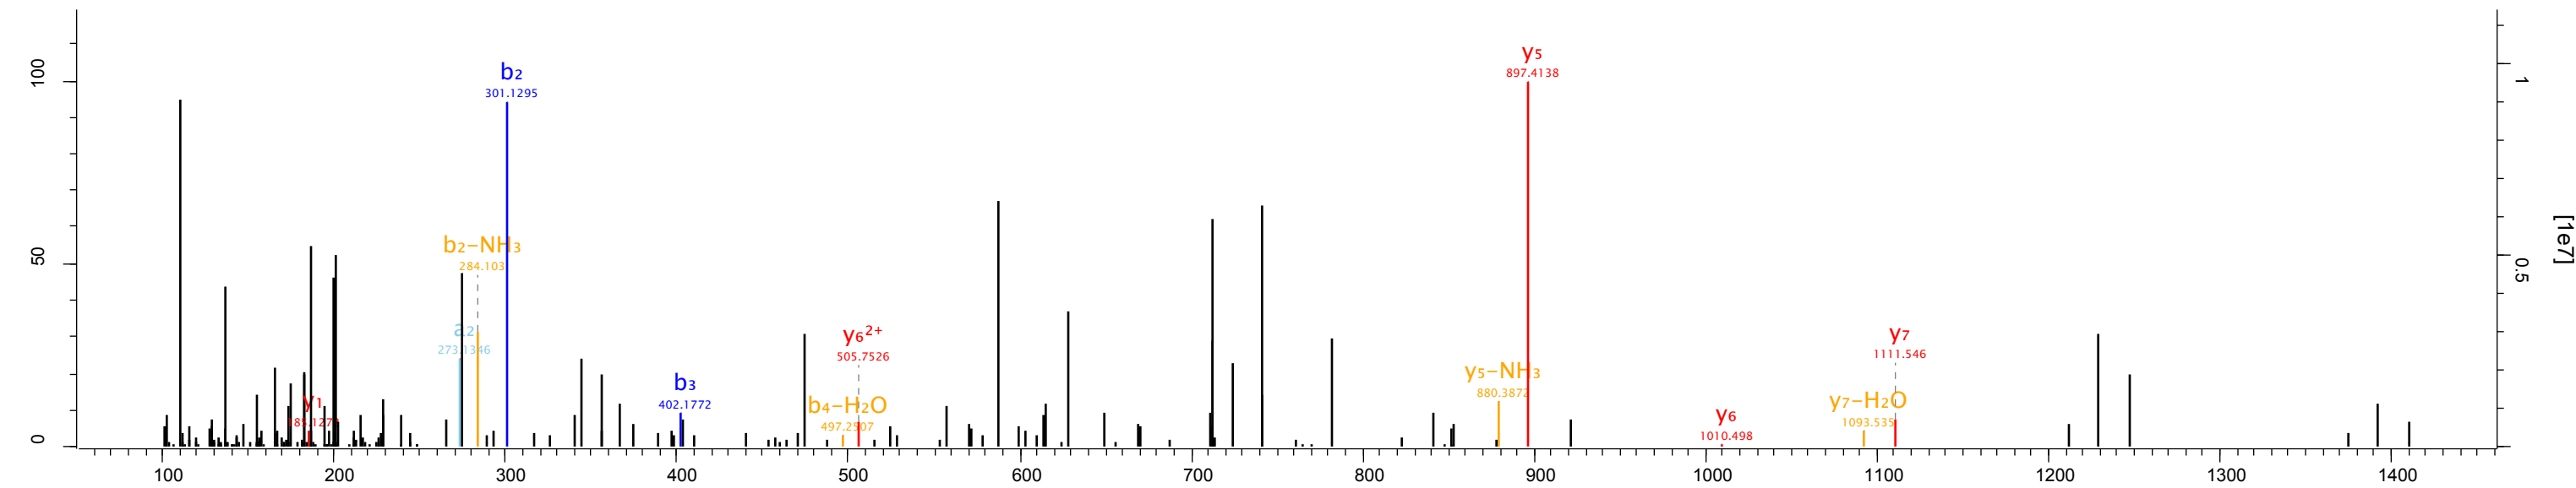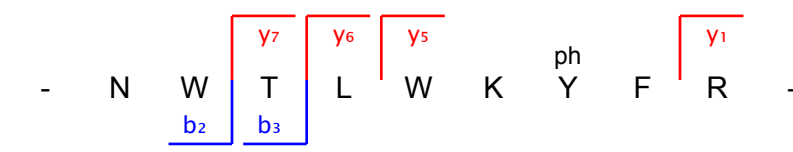

Raw file 20171215\_MaS\_33SR\_LMH\_proteome\_01 Scan 3791 Method FTMS; HCD Score 67.21 m/z 735.84

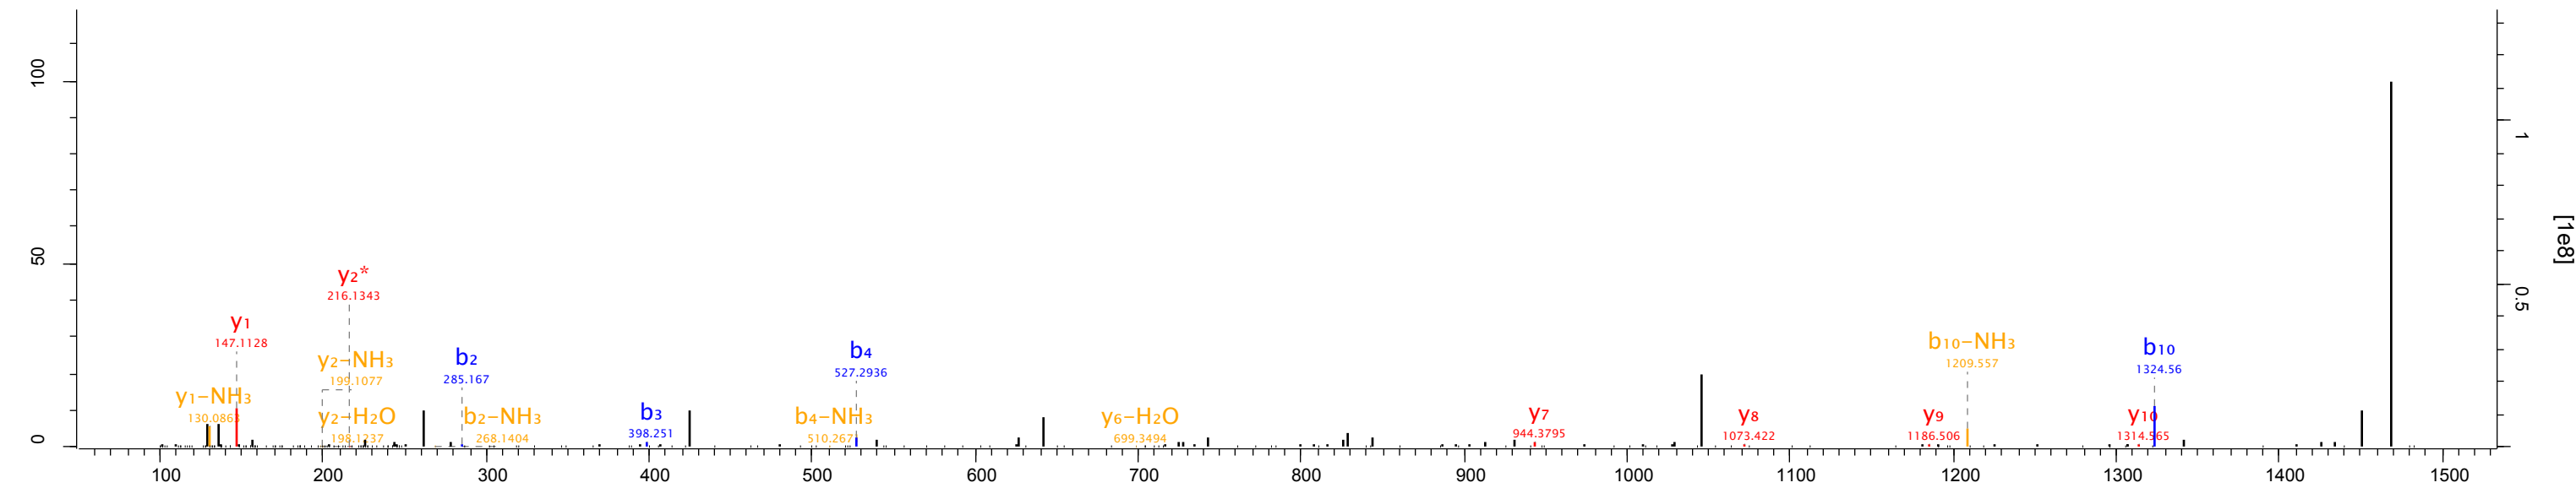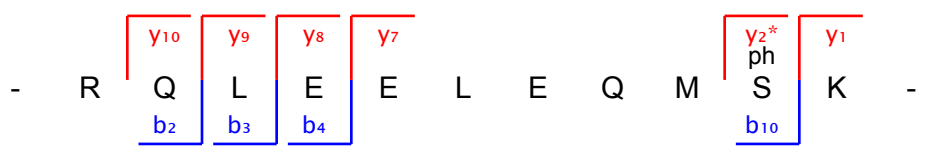

Raw file

20171215\_MaS\_33SR\_LMH\_proteome\_01

| Scan  | Method    | Score | m/z    | Gene names |
|-------|-----------|-------|--------|------------|
| 62491 | FTMS; HCD | 48.47 | 893.47 | FAM81B     |

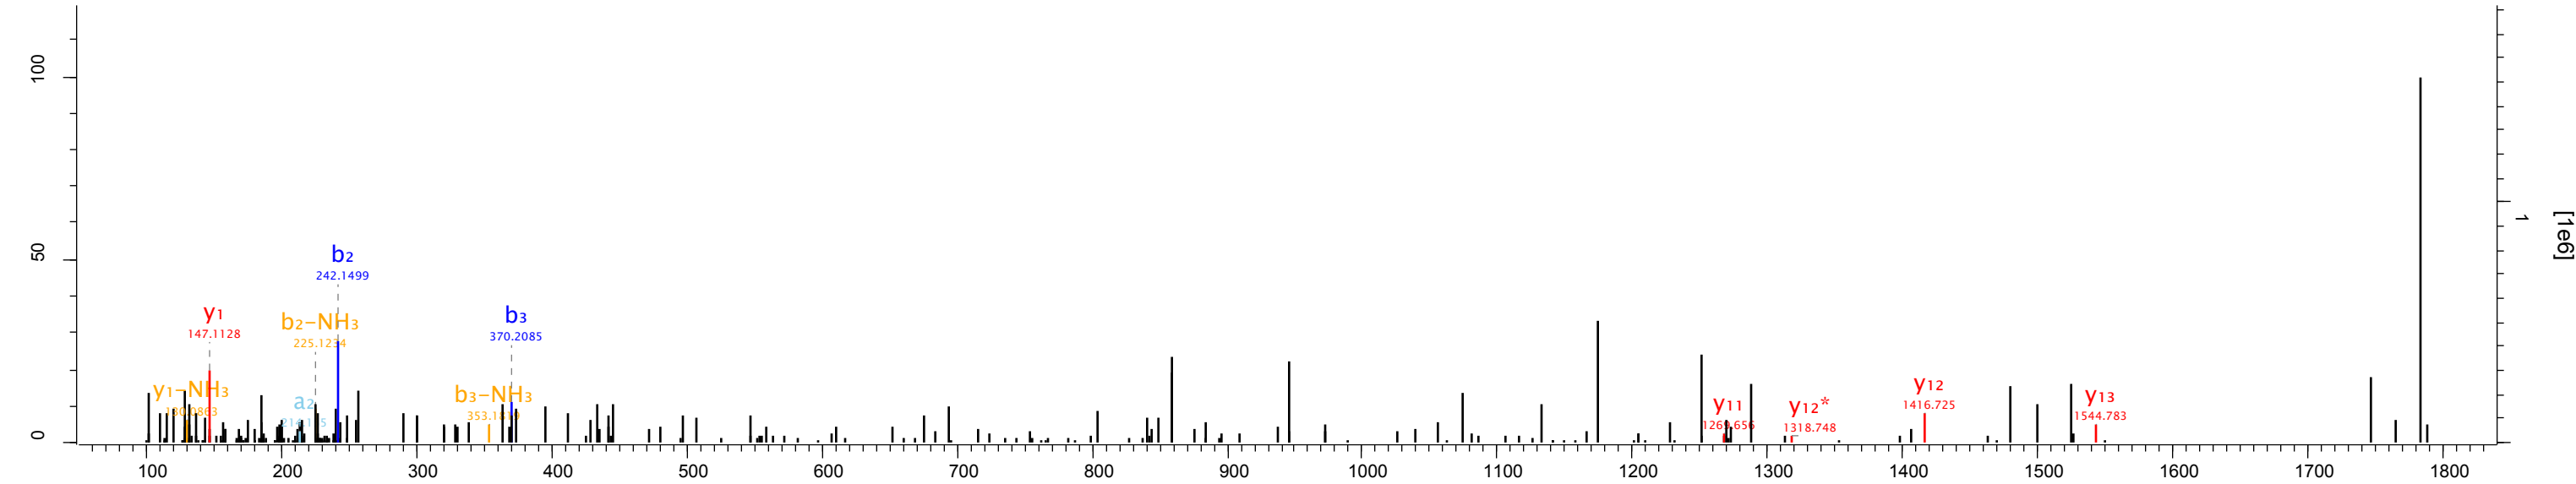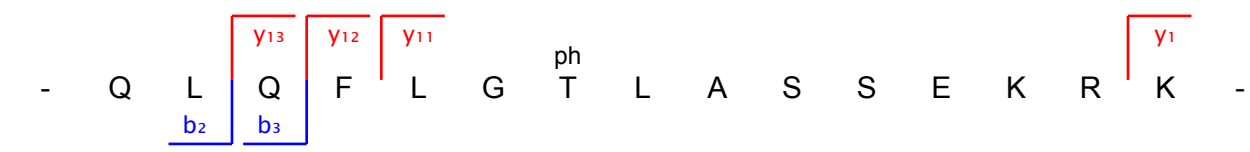

Raw file 20171215\_MaS\_33SR\_LMH\_proteome\_01 Scan 7421 Method FTMS; HCD Score 52.68 m/z 434.71

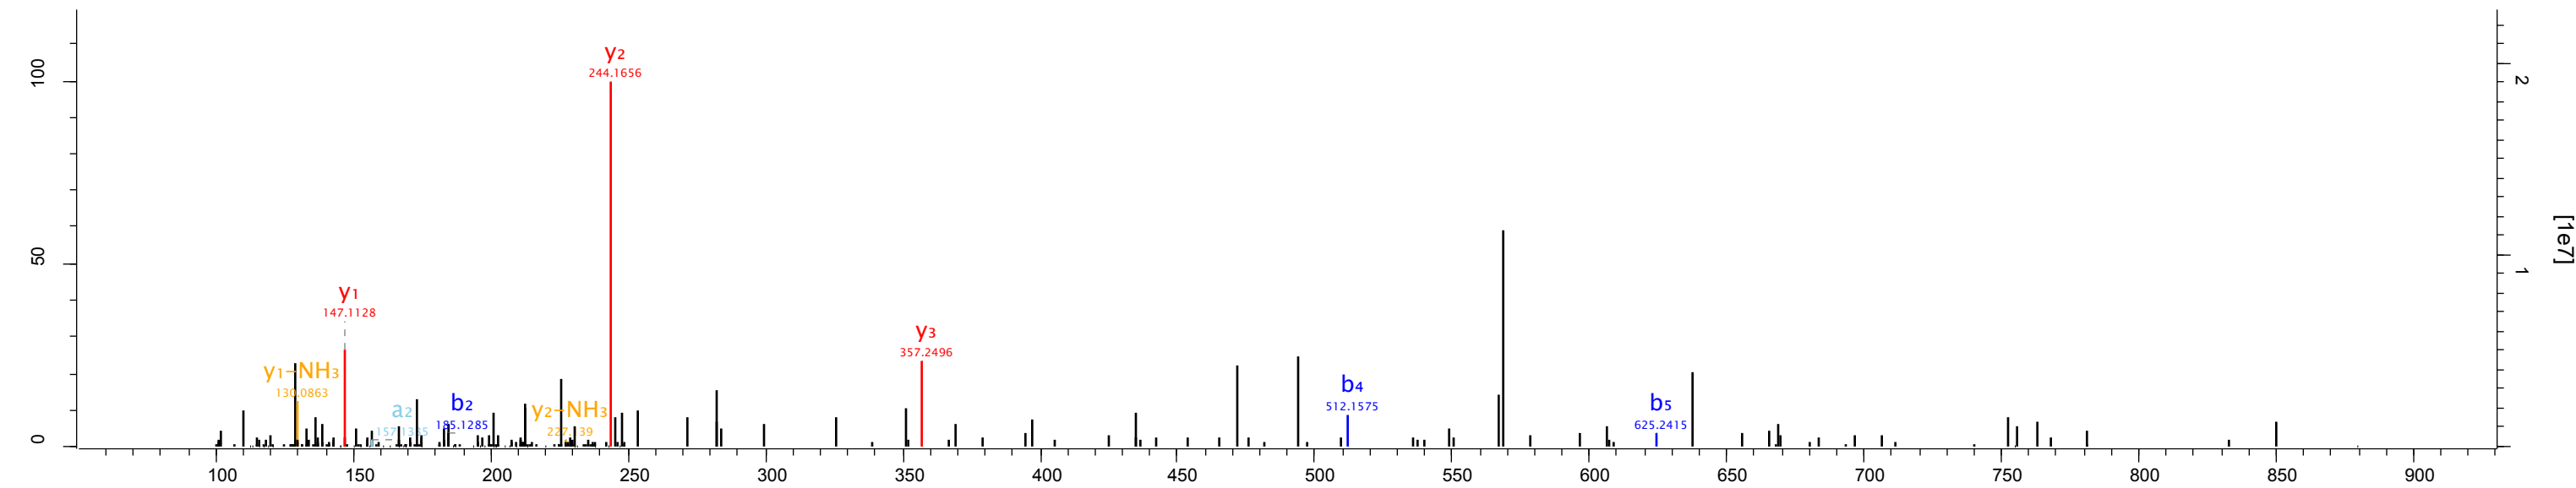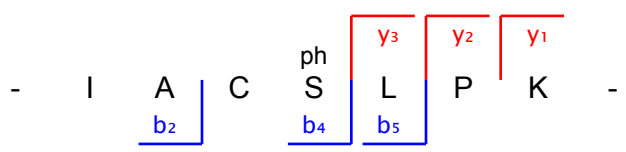

Raw file 20171215\_MaS\_33SR\_LMH\_proteome\_01 Scan 9951 Method FTMS; HCD Score 46.07 m/z 819.41 Gene names AHCTF1

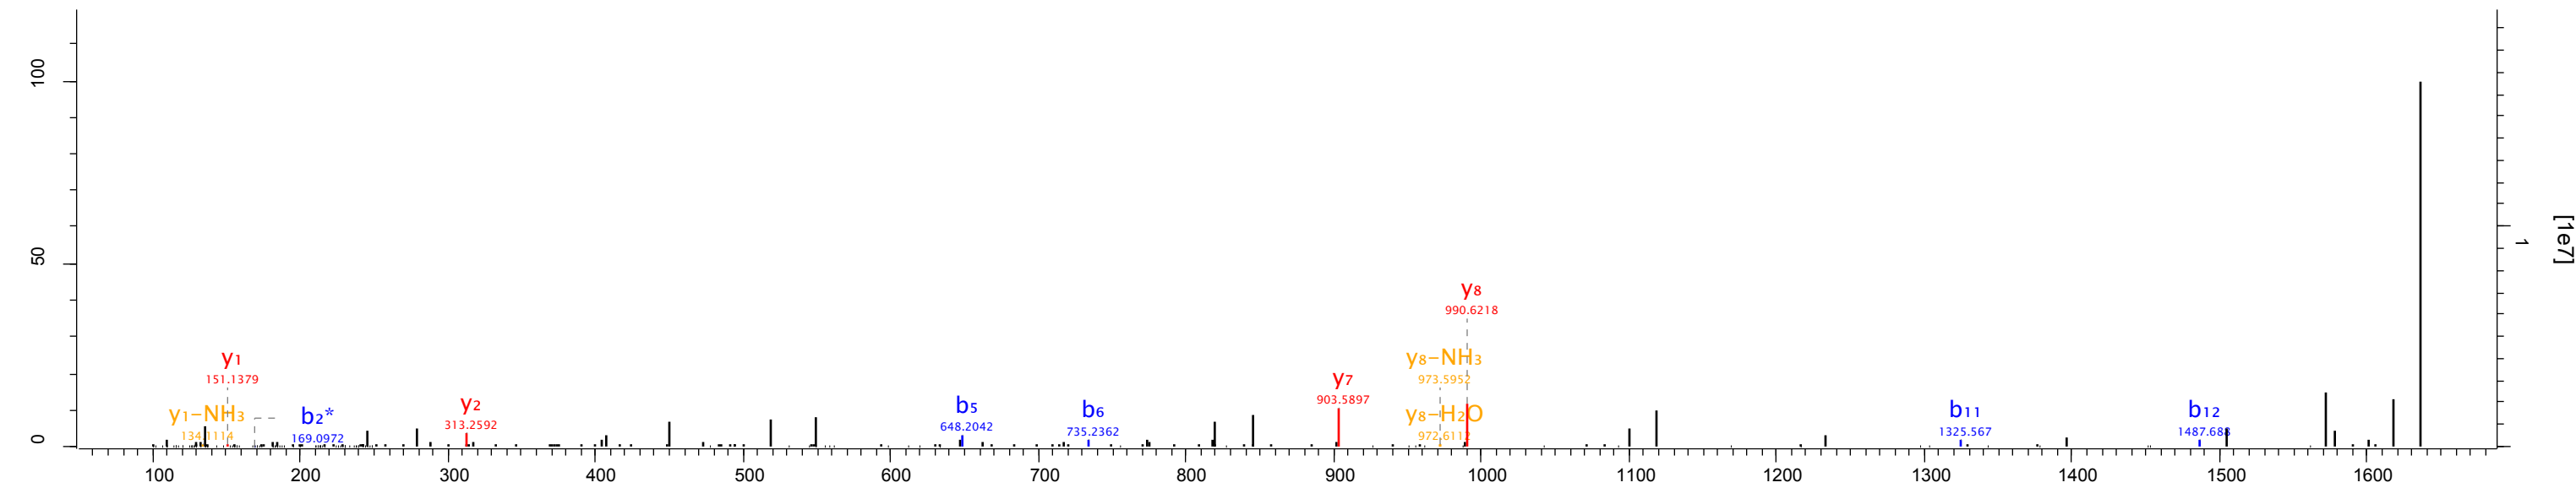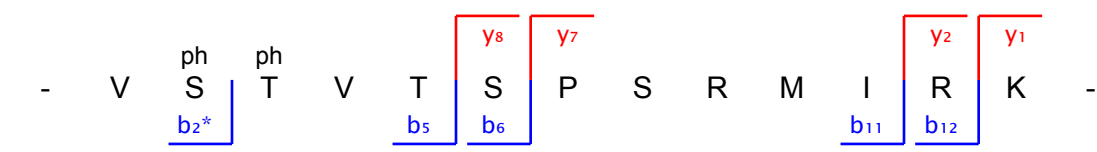

Raw file 20171215\_MaS\_33SR\_LMH\_proteome\_02 Scan 22131 Method FTMS; HCD Score 62.47 m/z 676.85

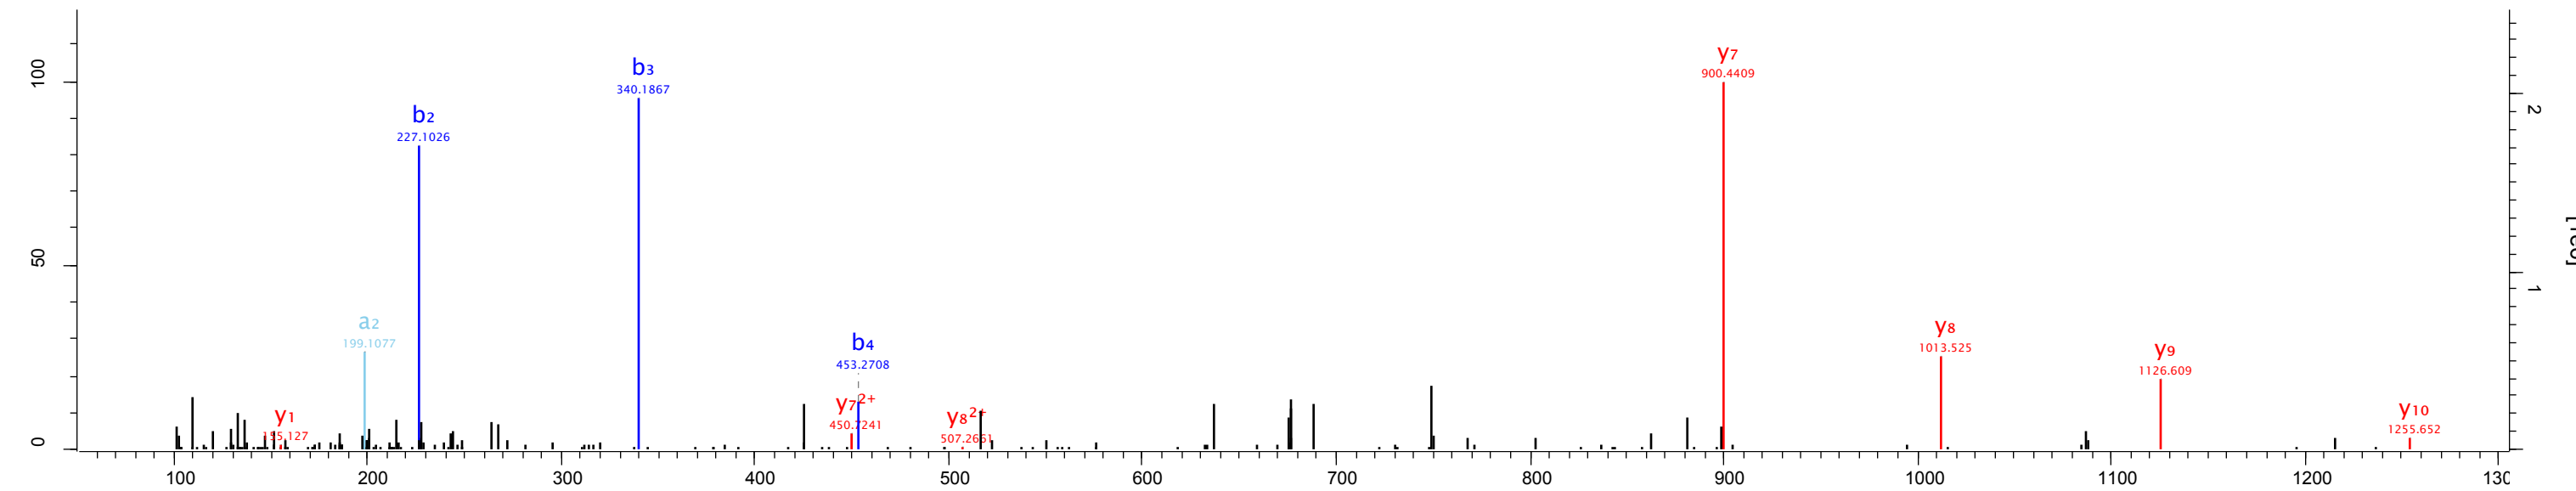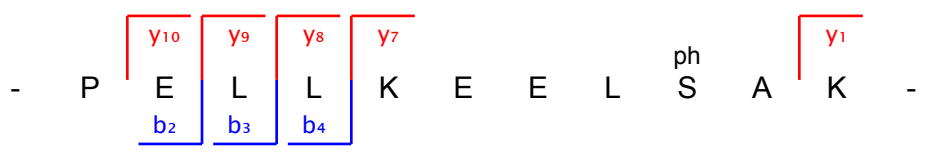

Raw file: 20171215\_MaS\_33SR\_LMH\_proteome\_02  
 Scan: 48531 Method: FTMS; HCD Score: 51.77 m/z: 971.93 Gene names: TEX33

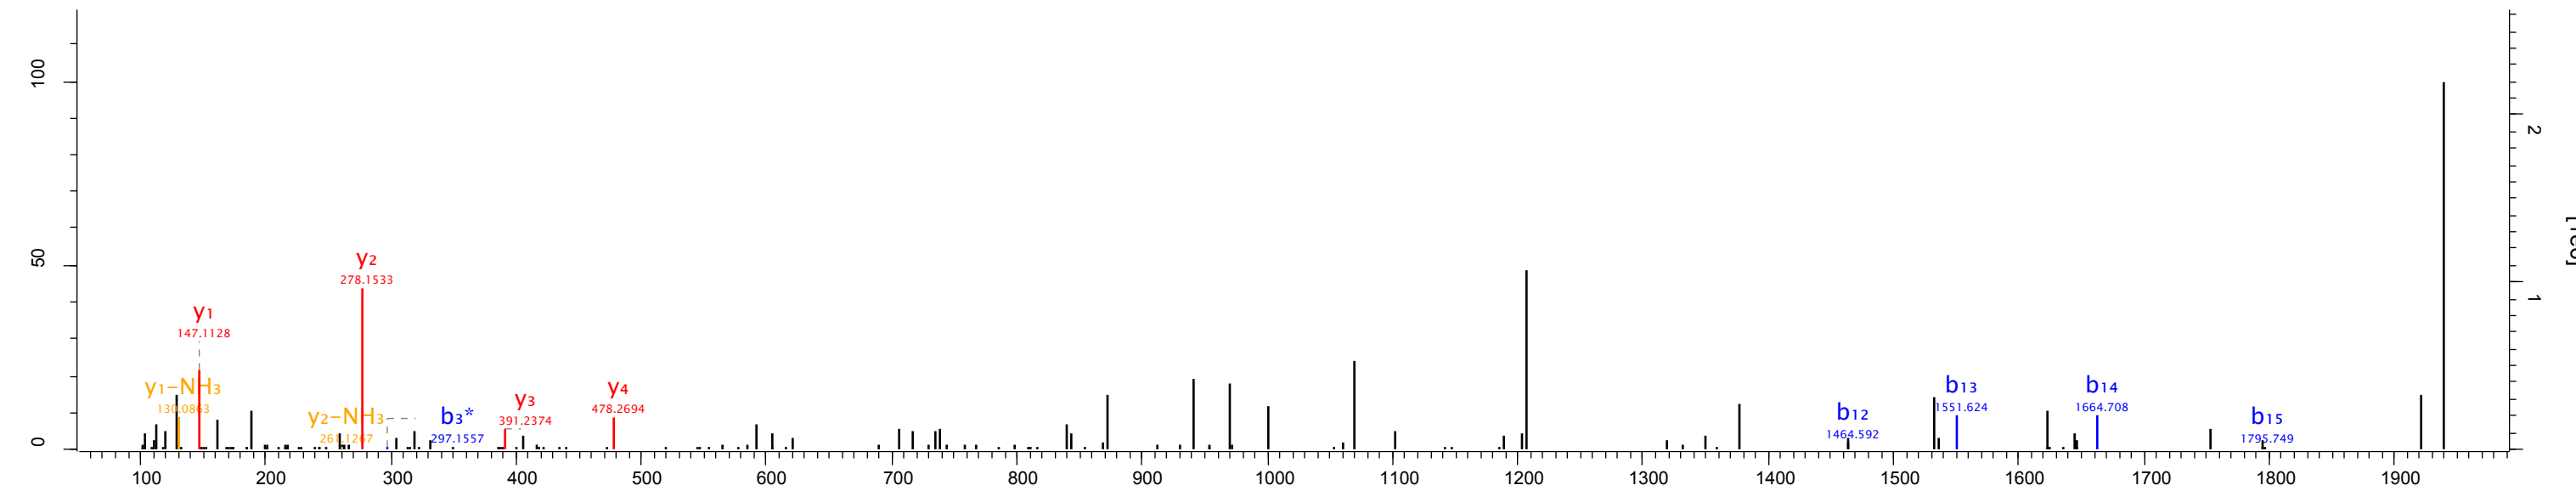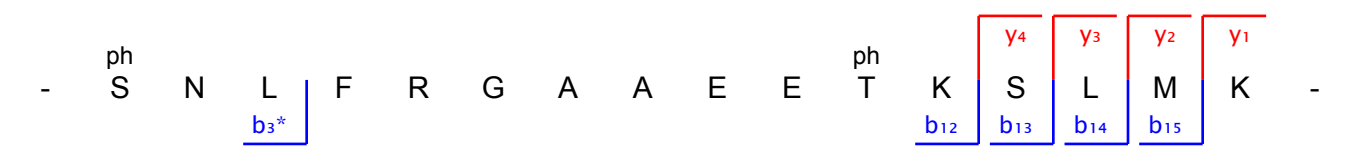



Raw file: 20171215\_MaS\_33SR\_LMH\_phospho\_01  
 Scan: 11432 Method: FTMS; HCD Score: 145.72 m/z: 909.86 Gene names: SMG9

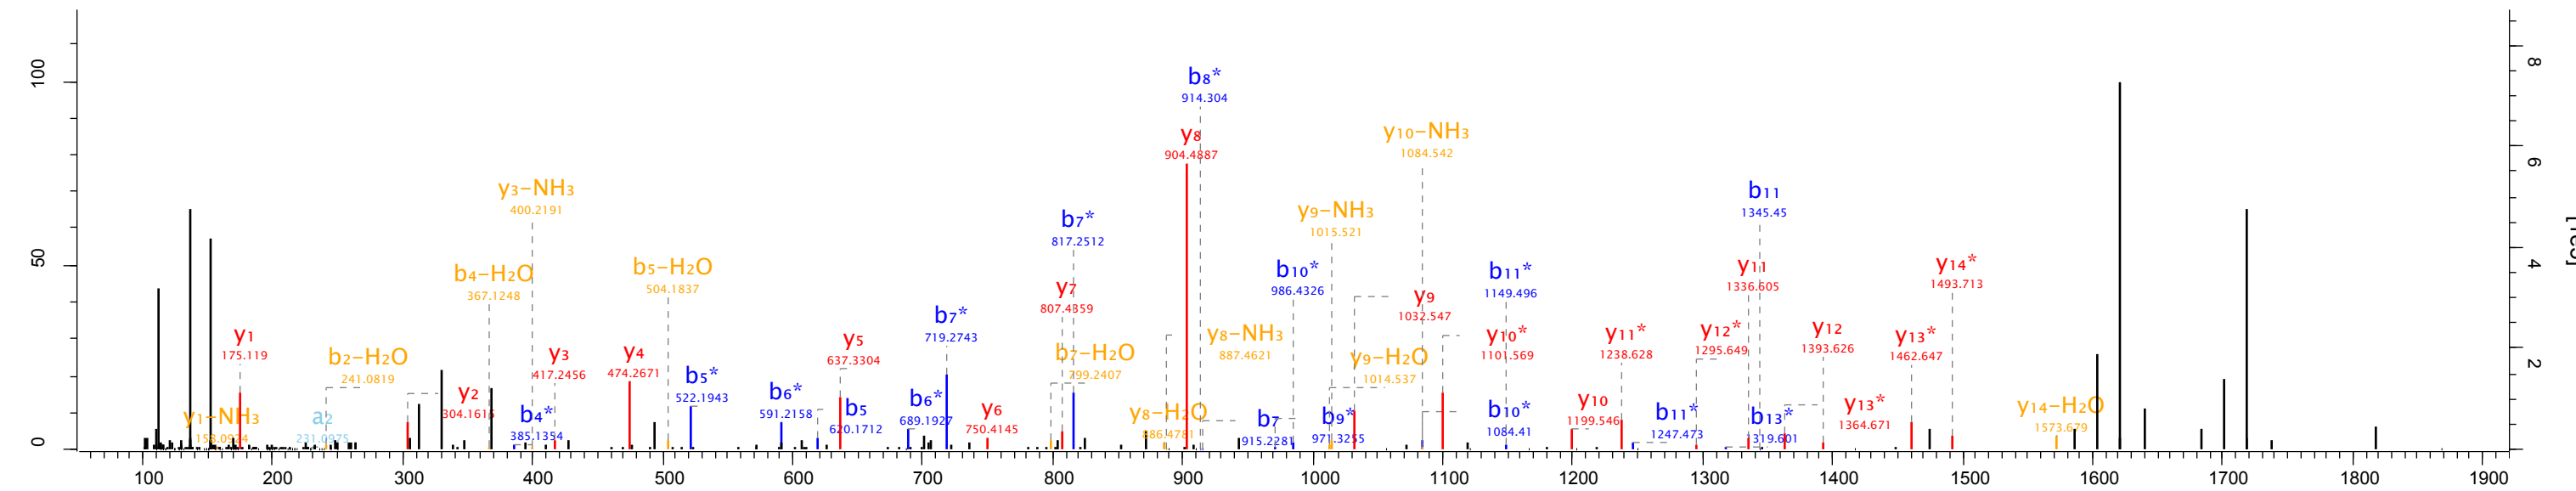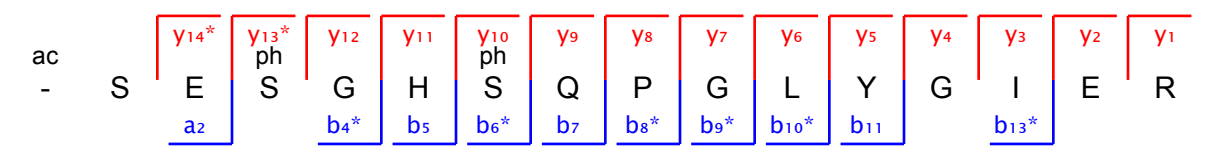

Raw file 20171215\_MaS\_33SR\_LMH\_phospho\_01 Scan 12032 Method FTMS; HCD Score 70.72 m/z 1211.53 Gene names POLR2A

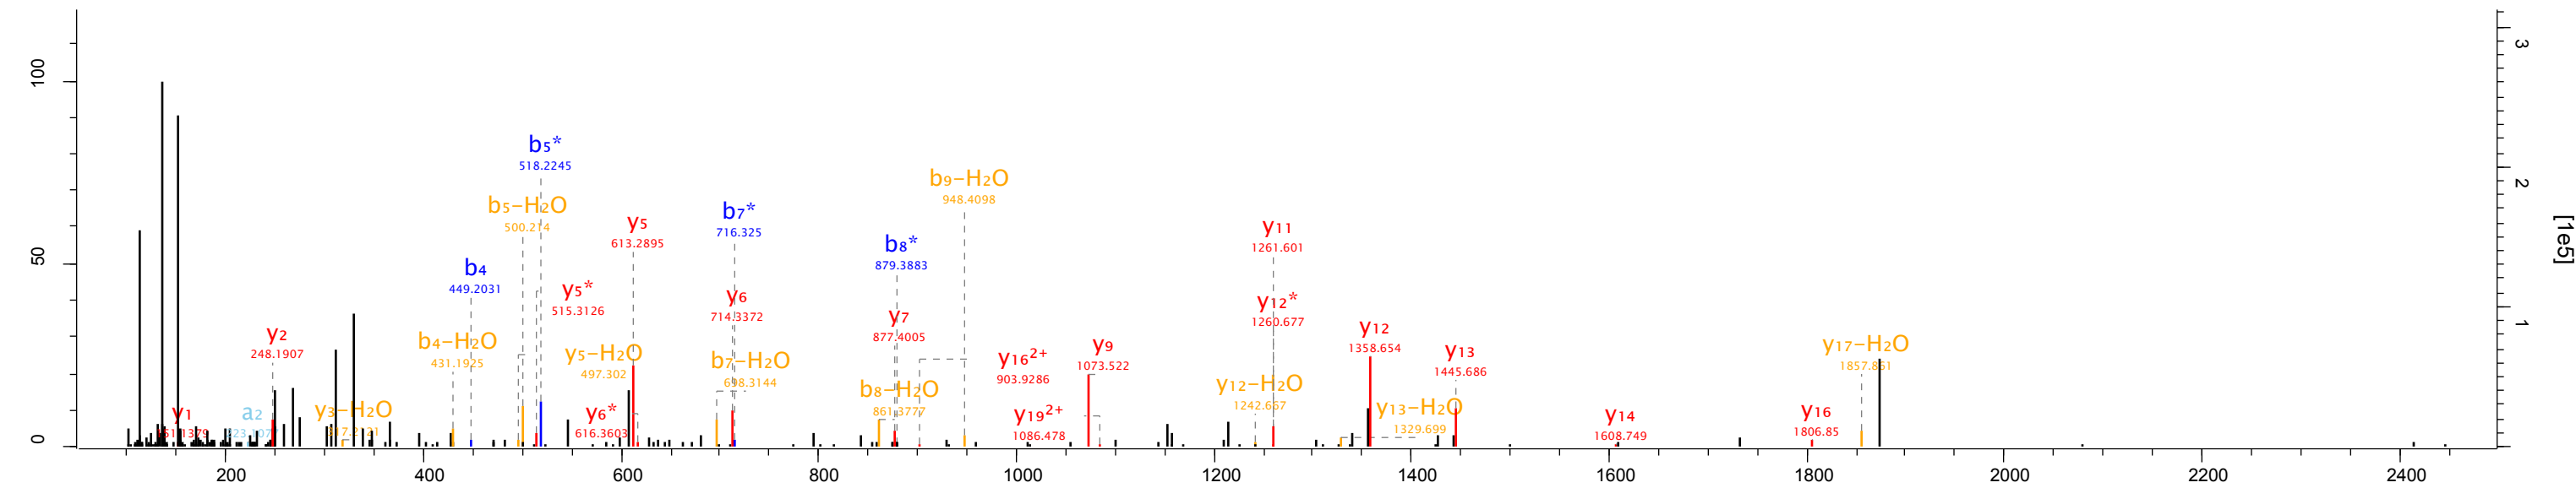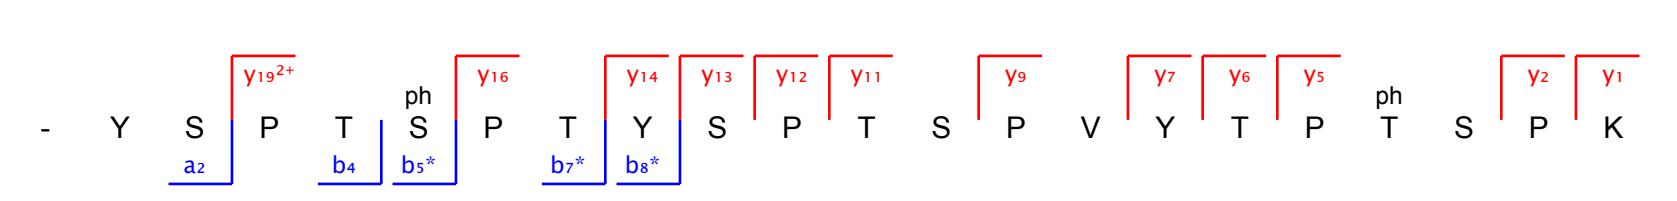

Raw file: 20171215\_MaS\_33SR\_LMH\_phospho\_01  
 Scan: 12492 Method: FTMS; HCD Score: 60.65 m/z: 991.41 Gene names: EDC4

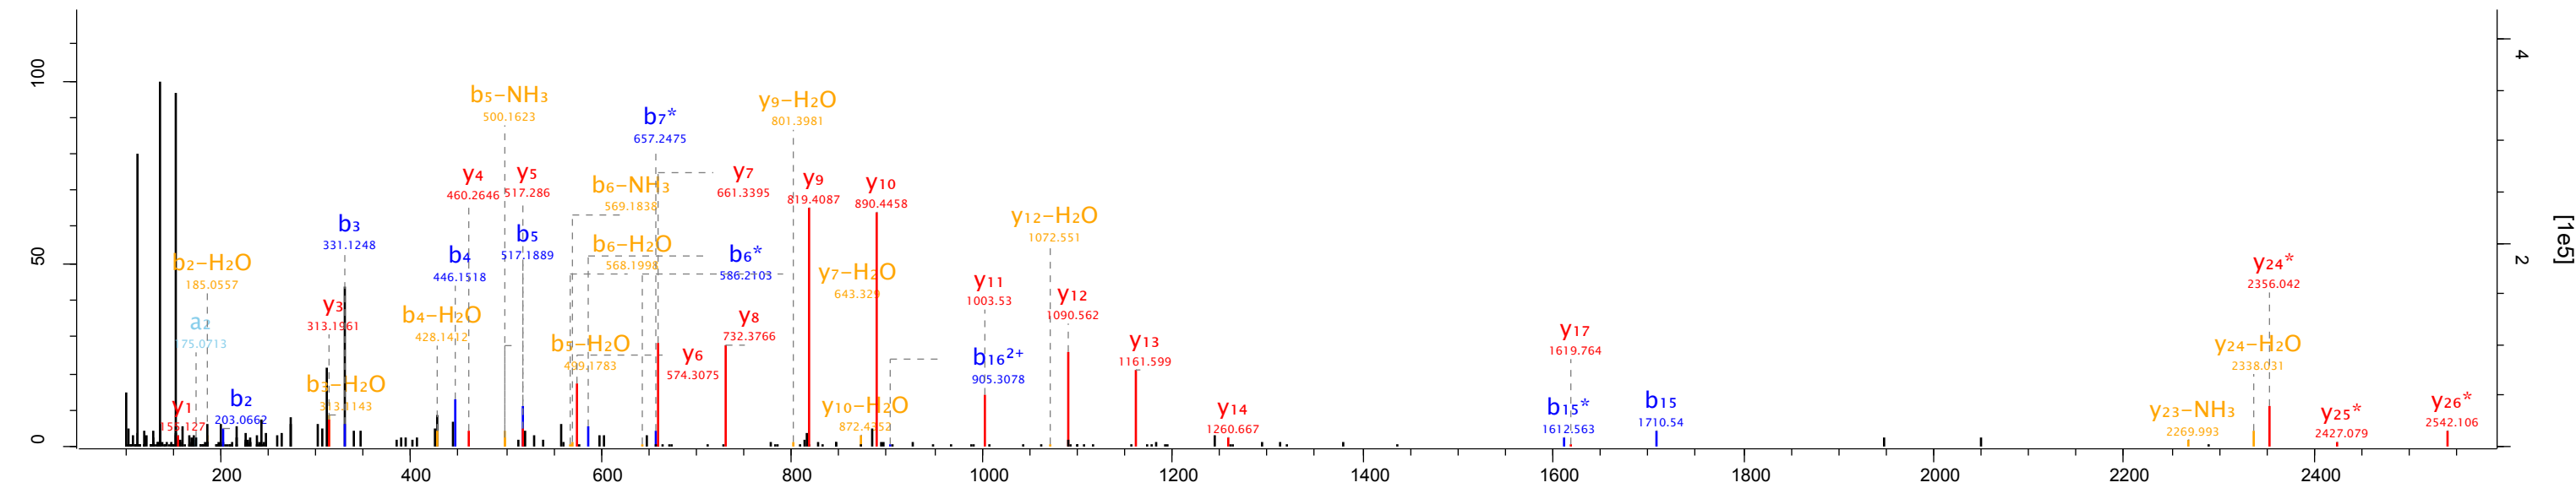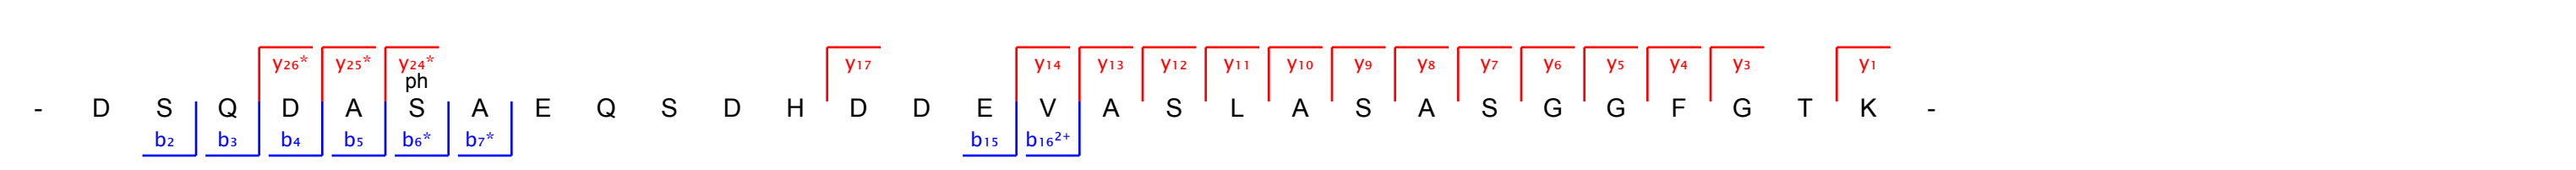

Raw file 20171215\_MaS\_33SR\_LMH\_phospho\_01 Scan 2452 Method FTMS; HCD Score 84.89 m/z 693.77 Gene names SRRM2

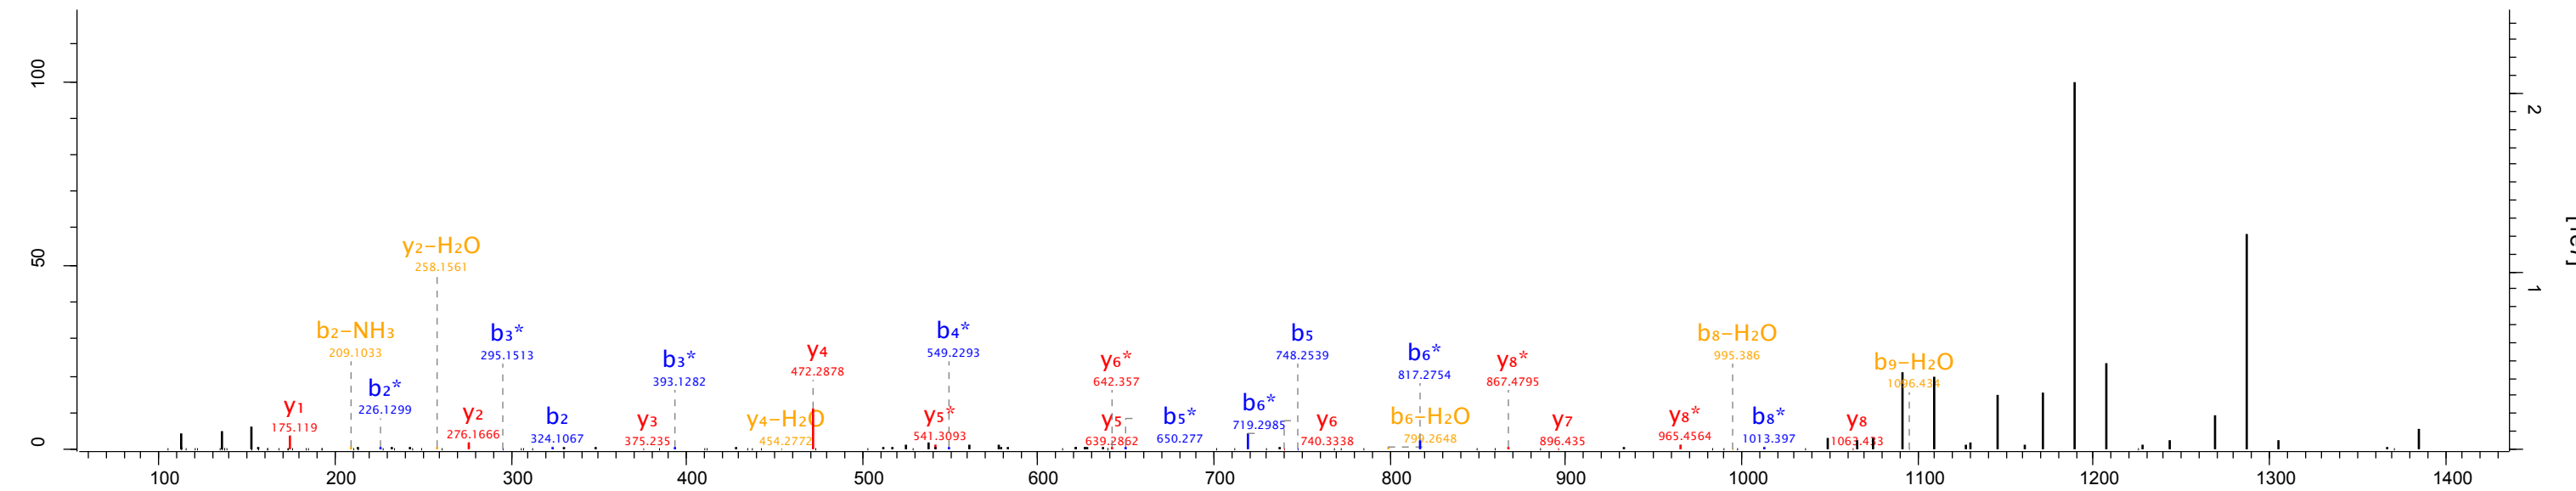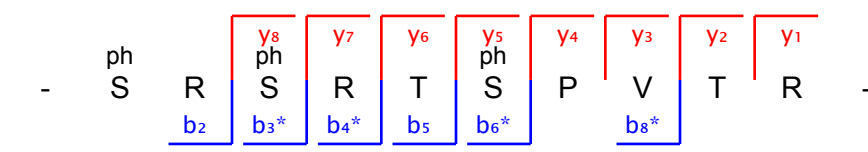

Raw file 20171215\_MaS\_33SR\_LMH\_phospho\_01 Scan 2642 Method FTMS; HCD Score 48.98 m/z 491.68 Gene names CHERP

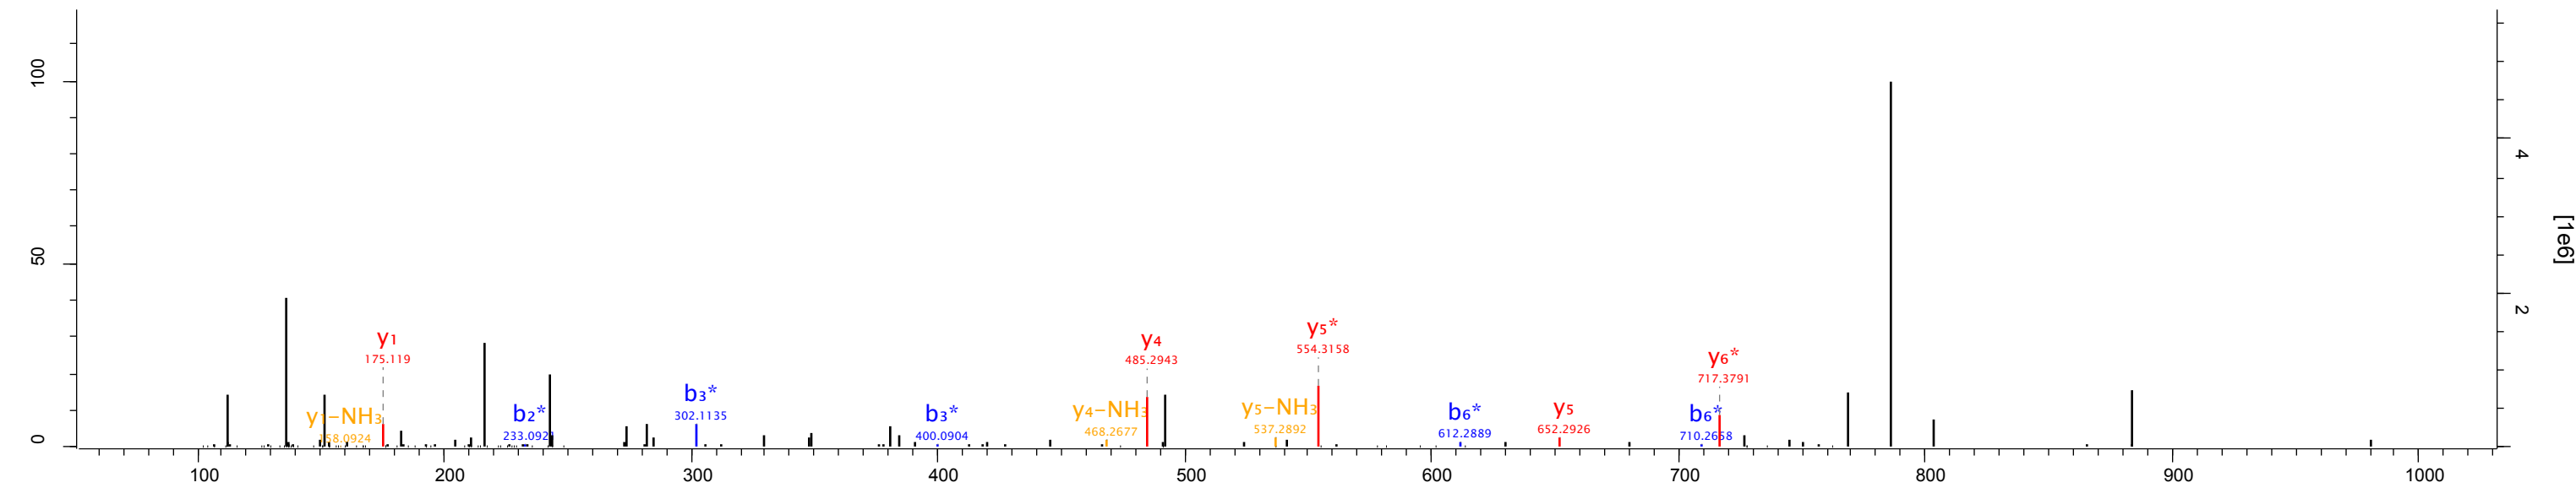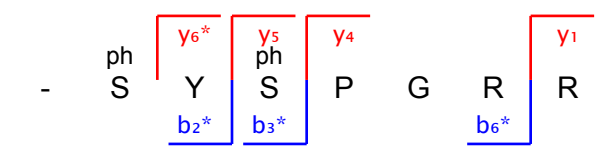

Raw file 20171215\_MaS\_33SR\_LMH\_phospho\_01 Scan 3062 Method FTMS; HCD Score 102.93 m/z 845.78 Gene names SRRM2

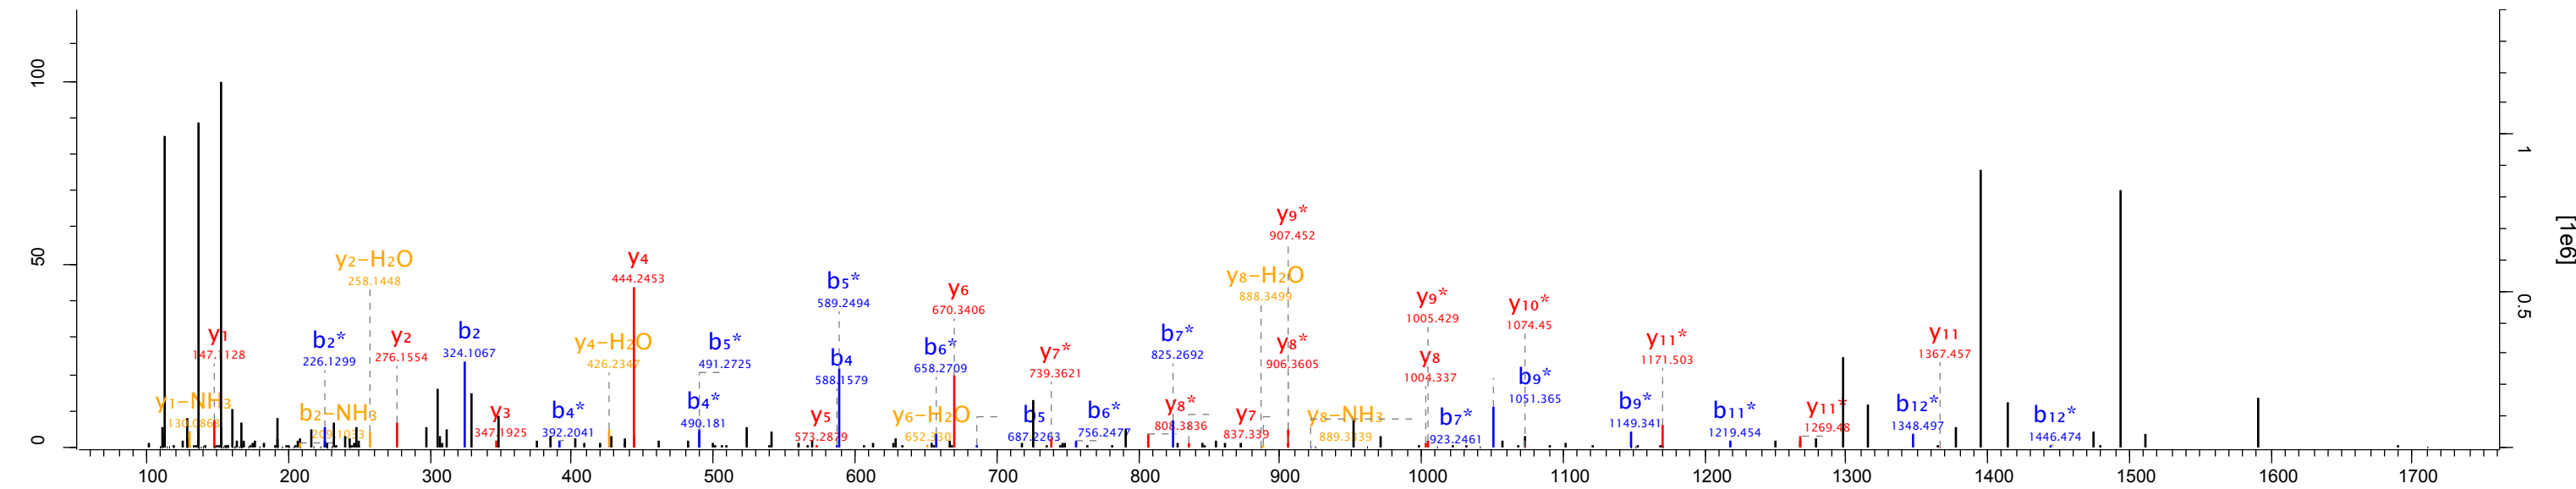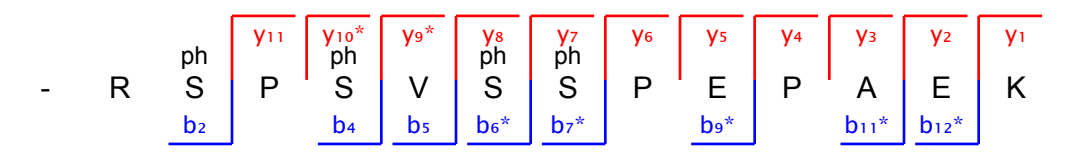

Raw file 20171215\_MaS\_33SR\_LMH\_phospho\_01 Scan 3072 Method FTMS; HCD Score 79.24 m/z 596.89 Gene names ZC3H13

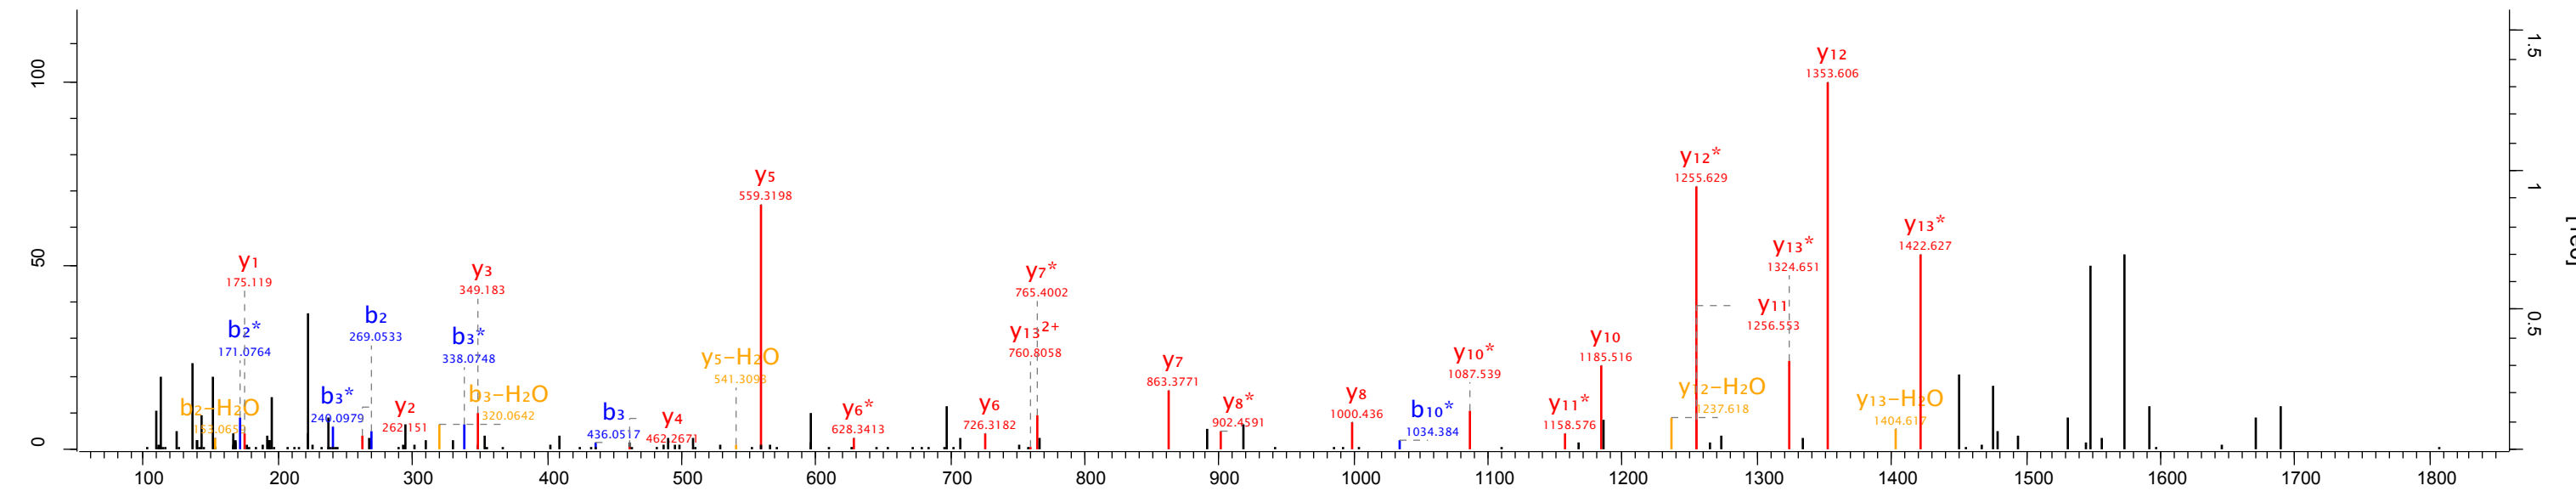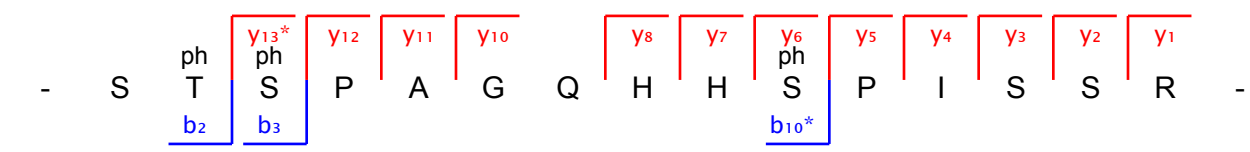

Raw file 20171215\_MaS\_33SR\_LMH\_phospho\_01 Scan 3242 Method FTMS; HCD Score 61.34 m/z 472.7 Gene names PRPF4B

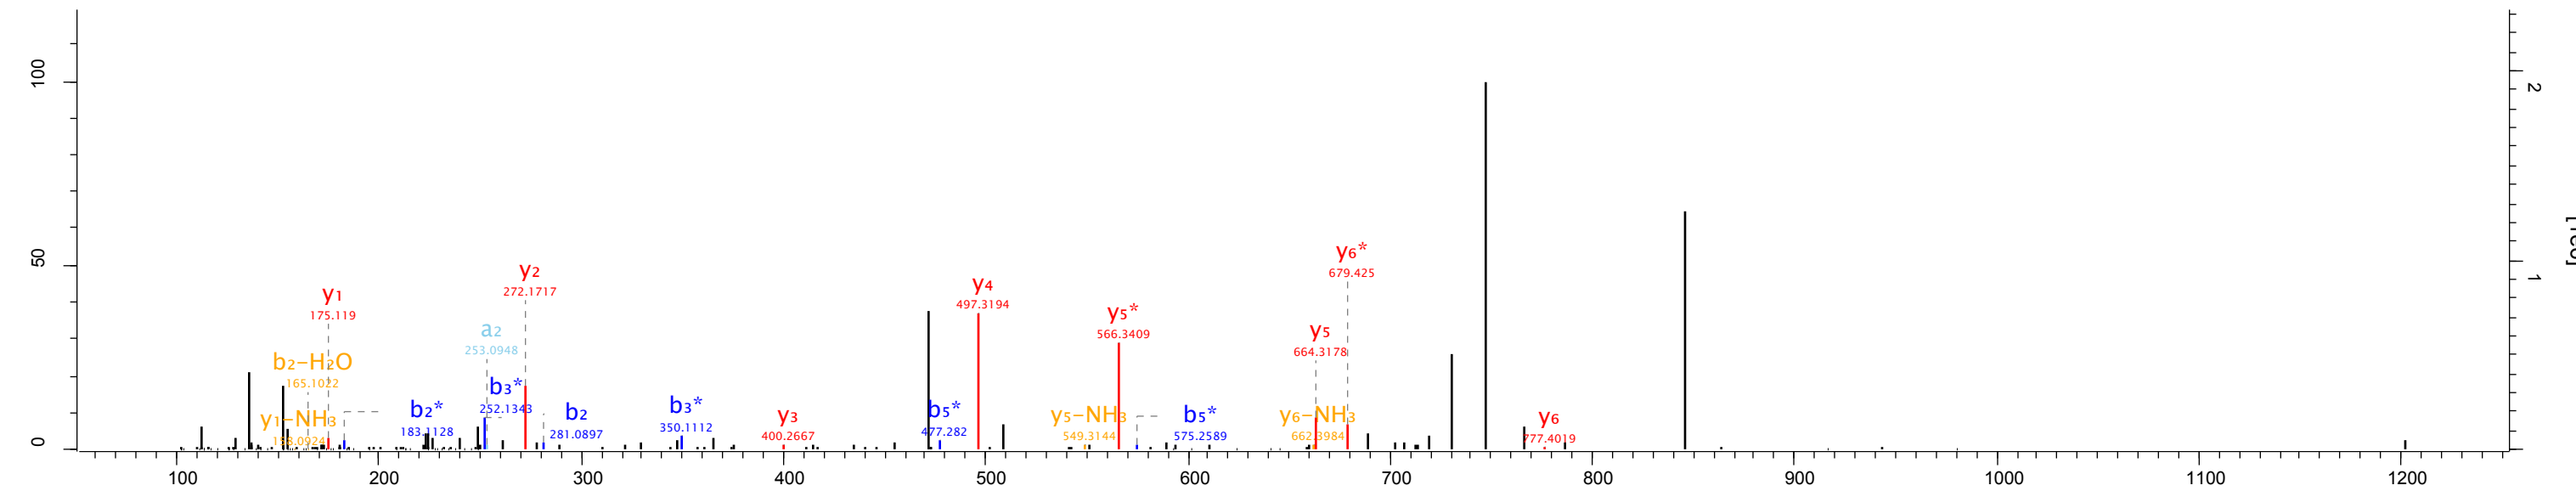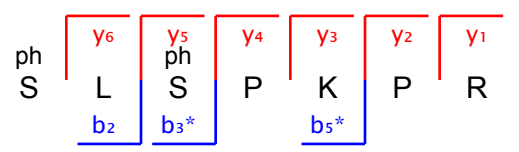



Raw file 20171215\_MaS\_33SR\_LMH\_phospho\_01 Scan 3372 Method FTMS; HCD Score 105.13 m/z 533.21 Gene names SRRM1

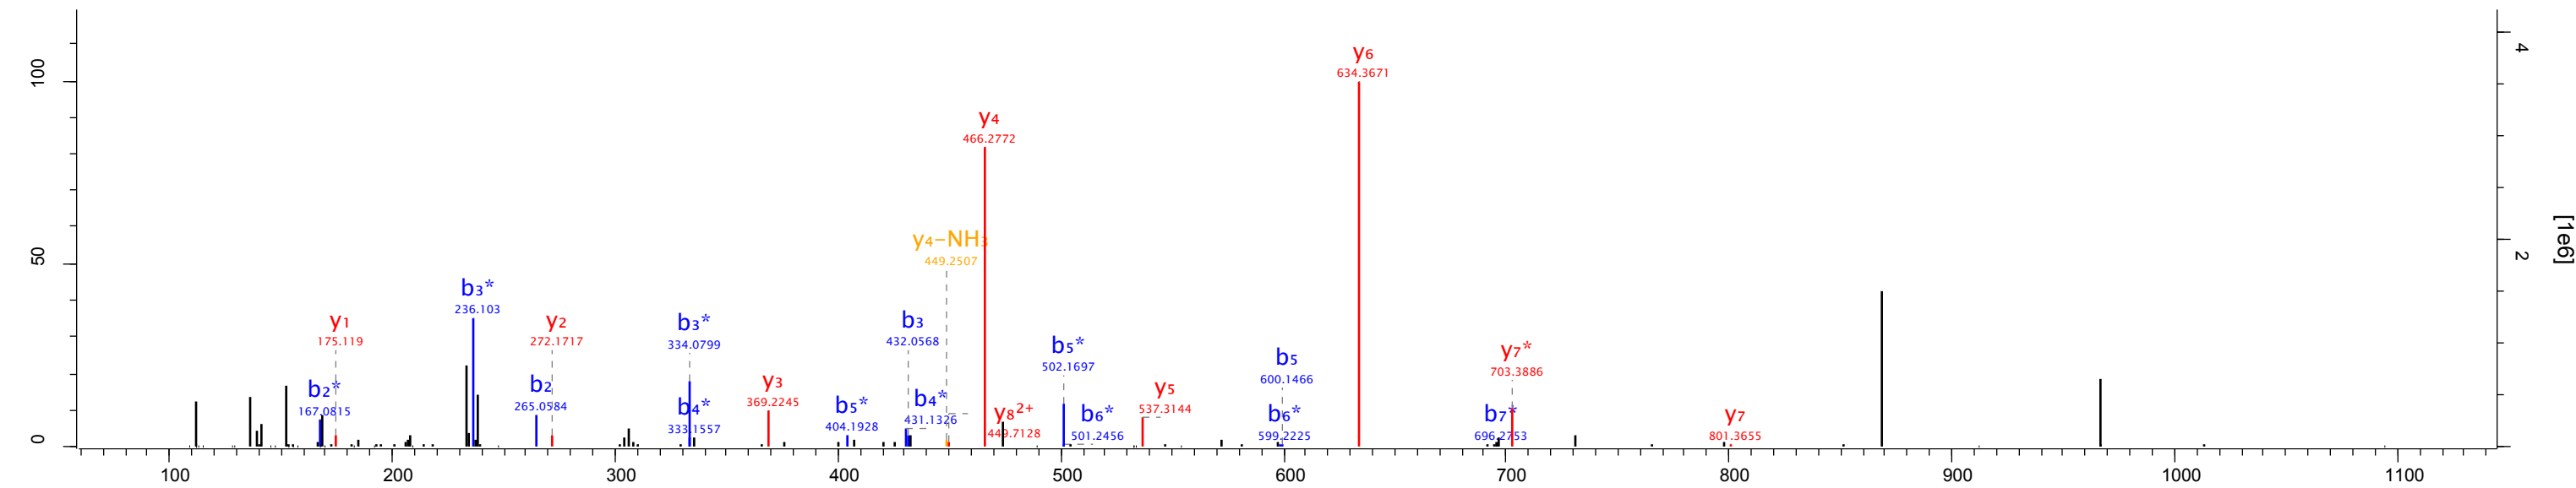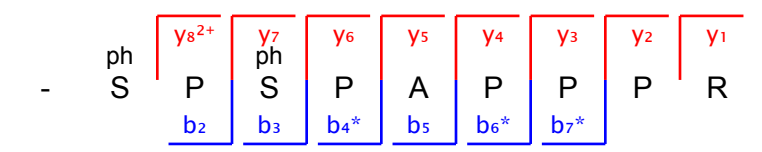

Raw file 20171215\_MaS\_33SR\_LMH\_phospho\_01 Scan 3382 Method FTMS; HCD Score 188.51 m/z 1015.79 Gene names PLEKHF1

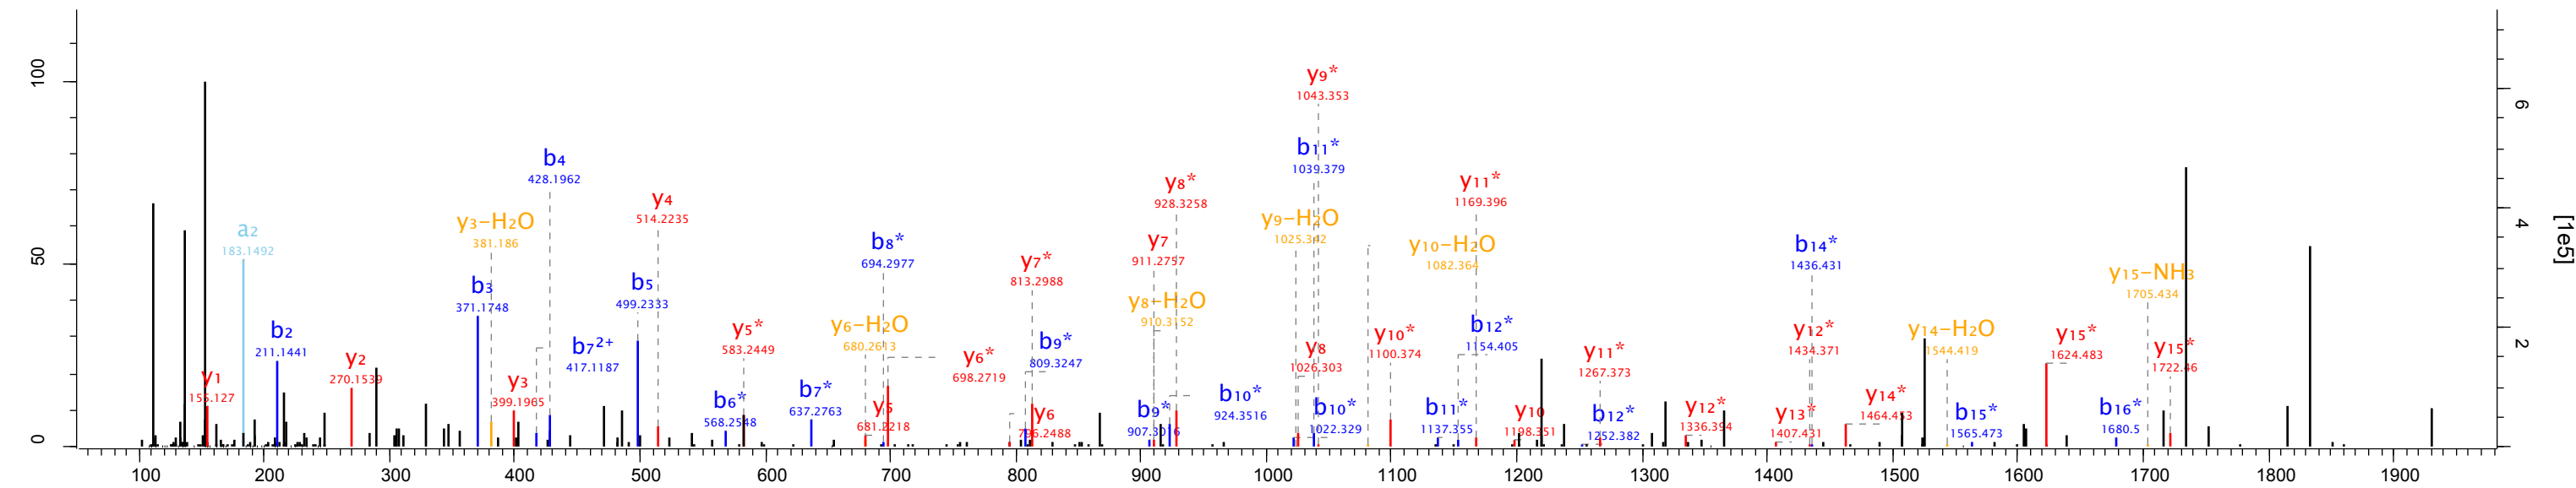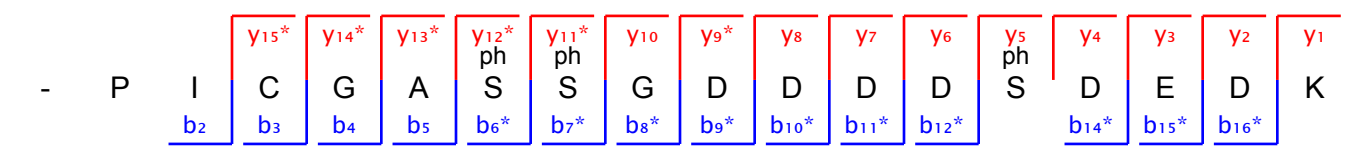

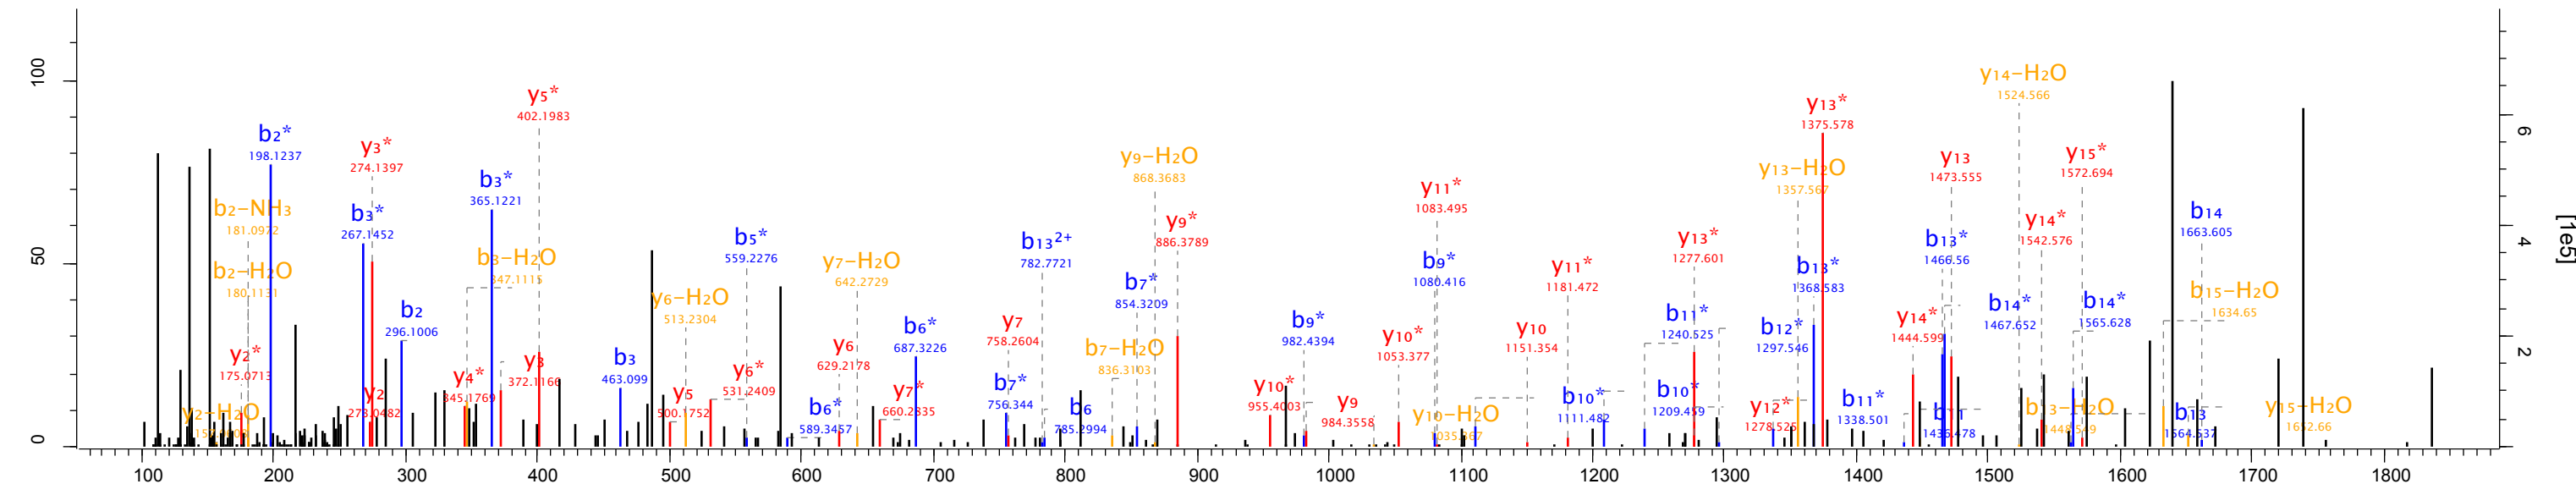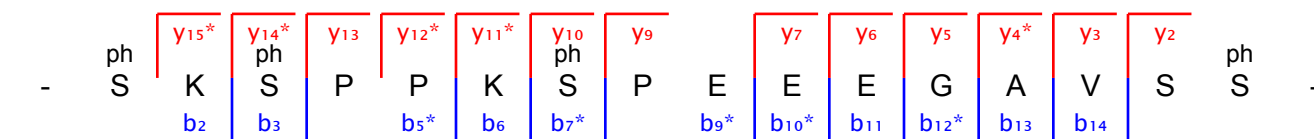

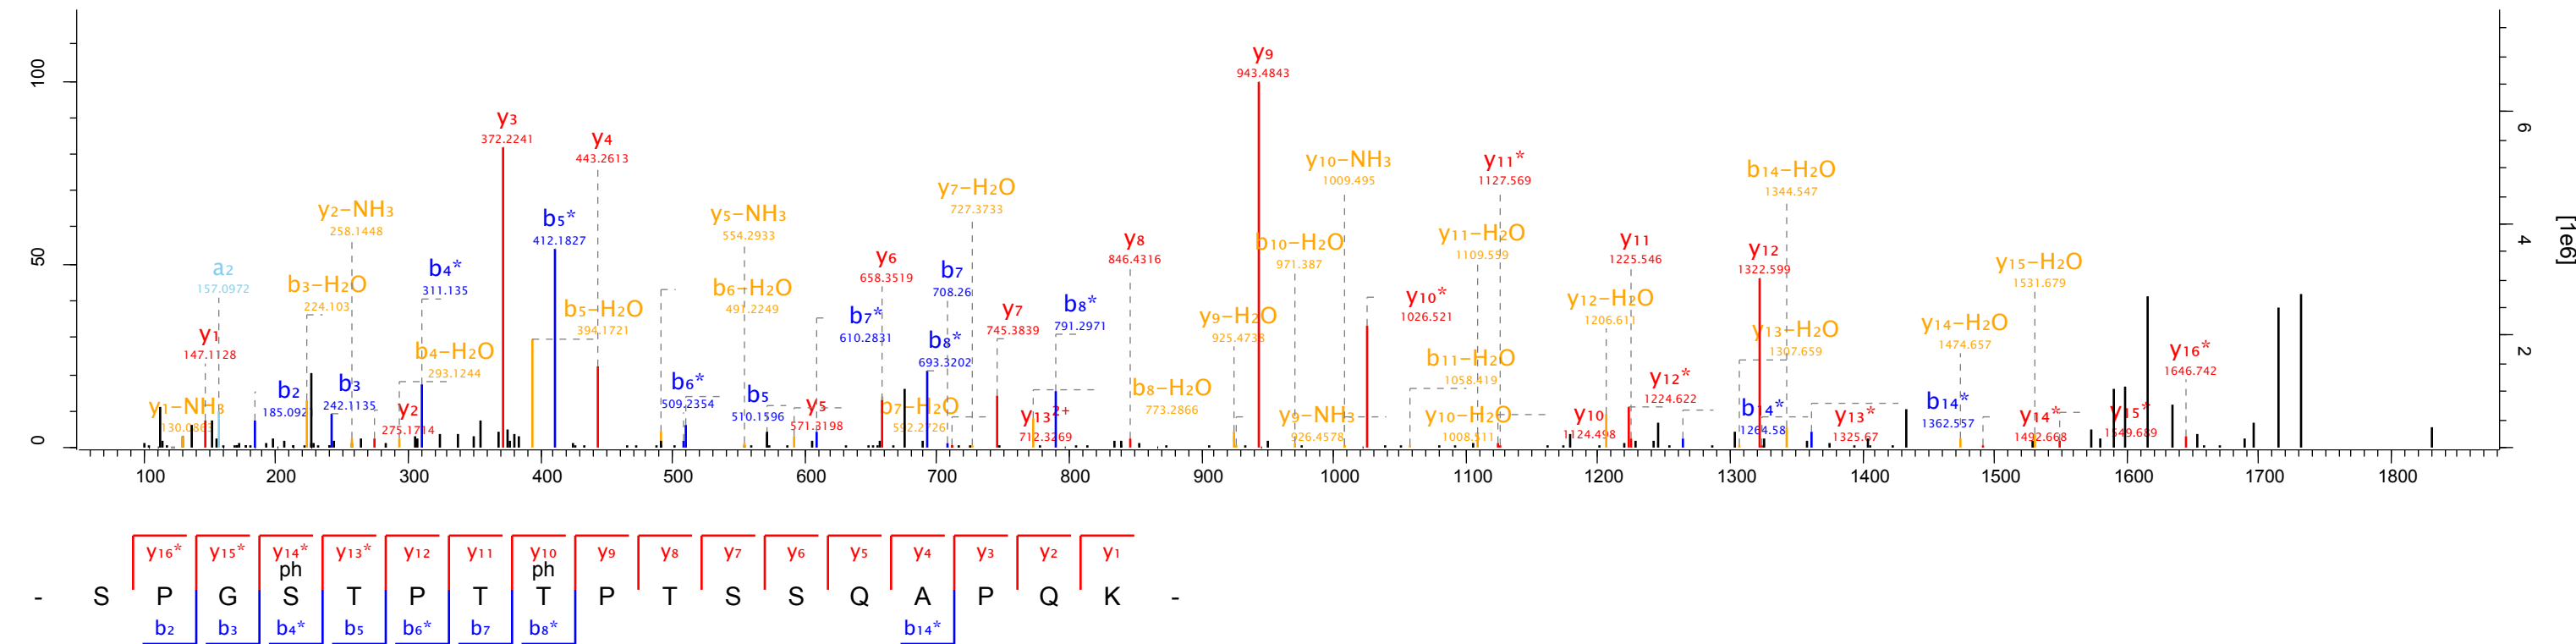

Raw file 20171215\_MaS\_33SR\_LMH\_phospho\_01 Scan 3612 Method FTMS; HCD Score 235.79 m/z 738.3 Gene names SRRM2

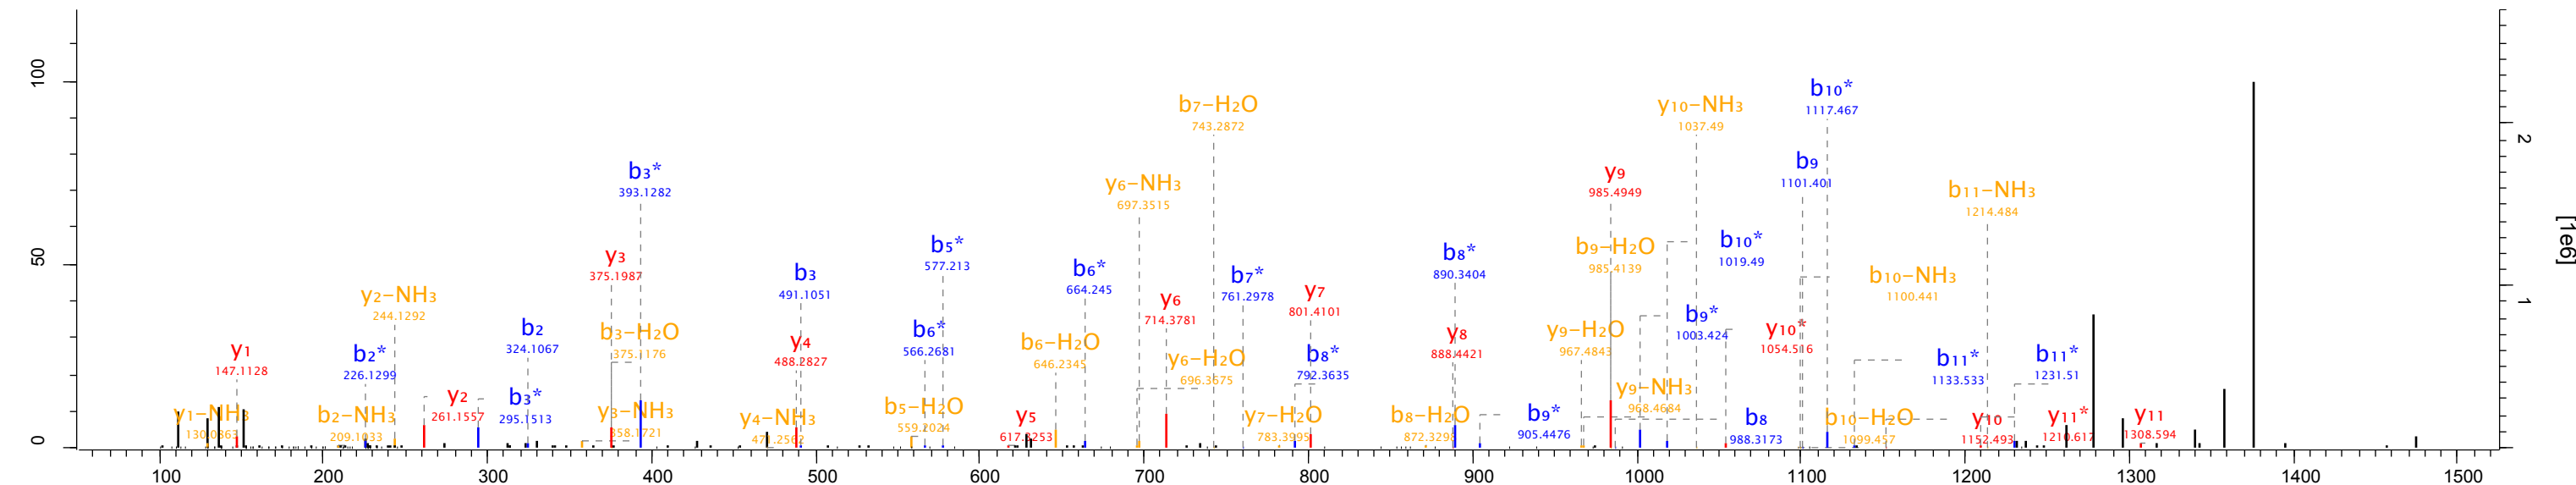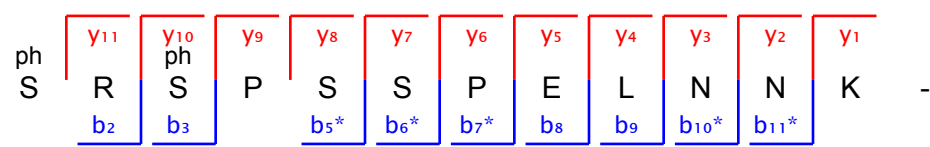

Raw file 20171215\_MaS\_33SR\_LMH\_phospho\_01 Scan 3642 Method FTMS; HCD Score 139.63 m/z 989.79 Gene names HMGA1

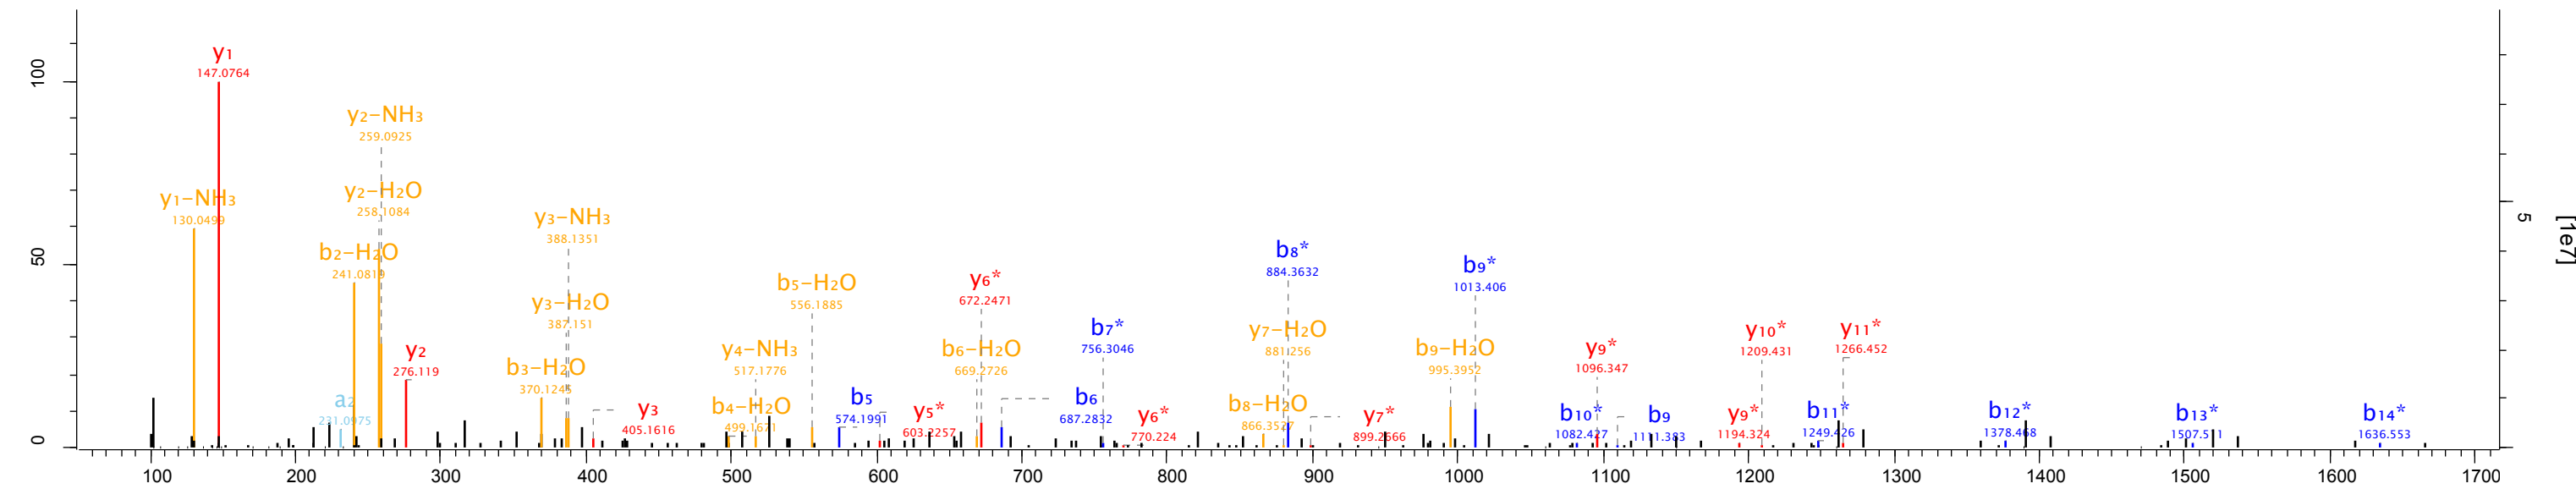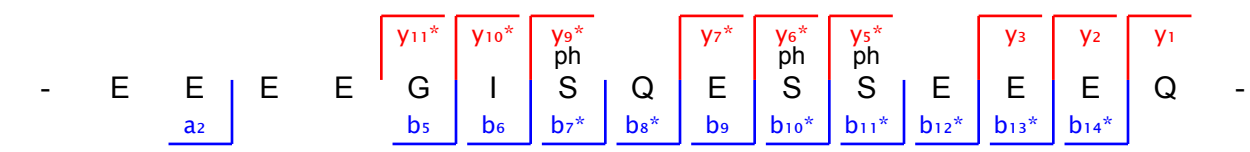

Raw file 20171215\_MaS\_33SR\_LMH\_phospho\_01 Scan 3662 Method FTMS; HCD Score 70.72 m/z 756.95 Gene names HIRIP3

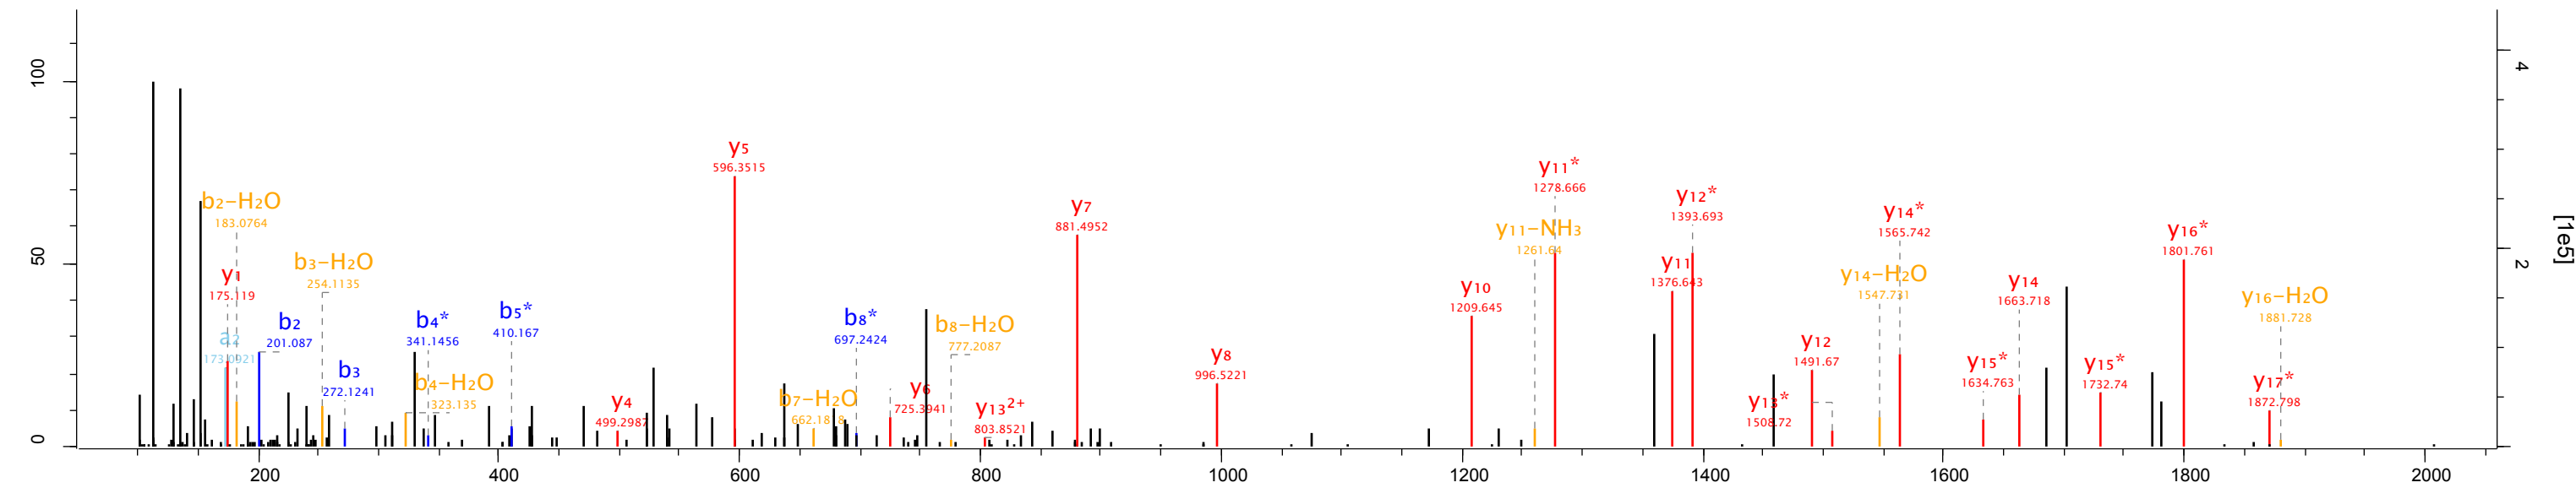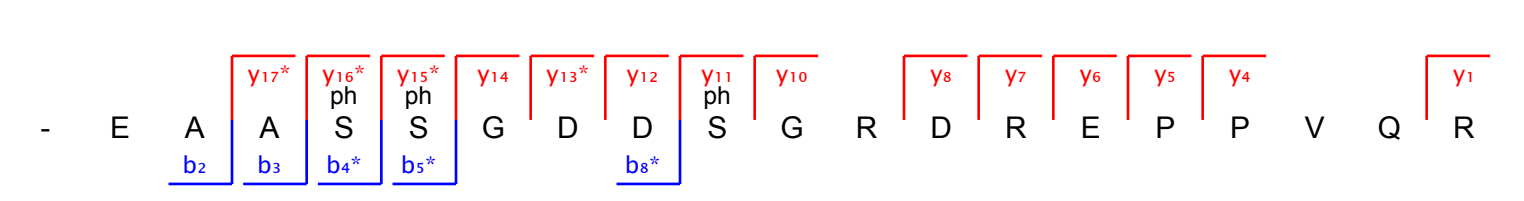

Raw file 20171215\_MaS\_33SR\_LMH\_phospho\_01 Scan 3852 Method FTMS; HCD Score 265.93 m/z 718.33 Gene names RBM25

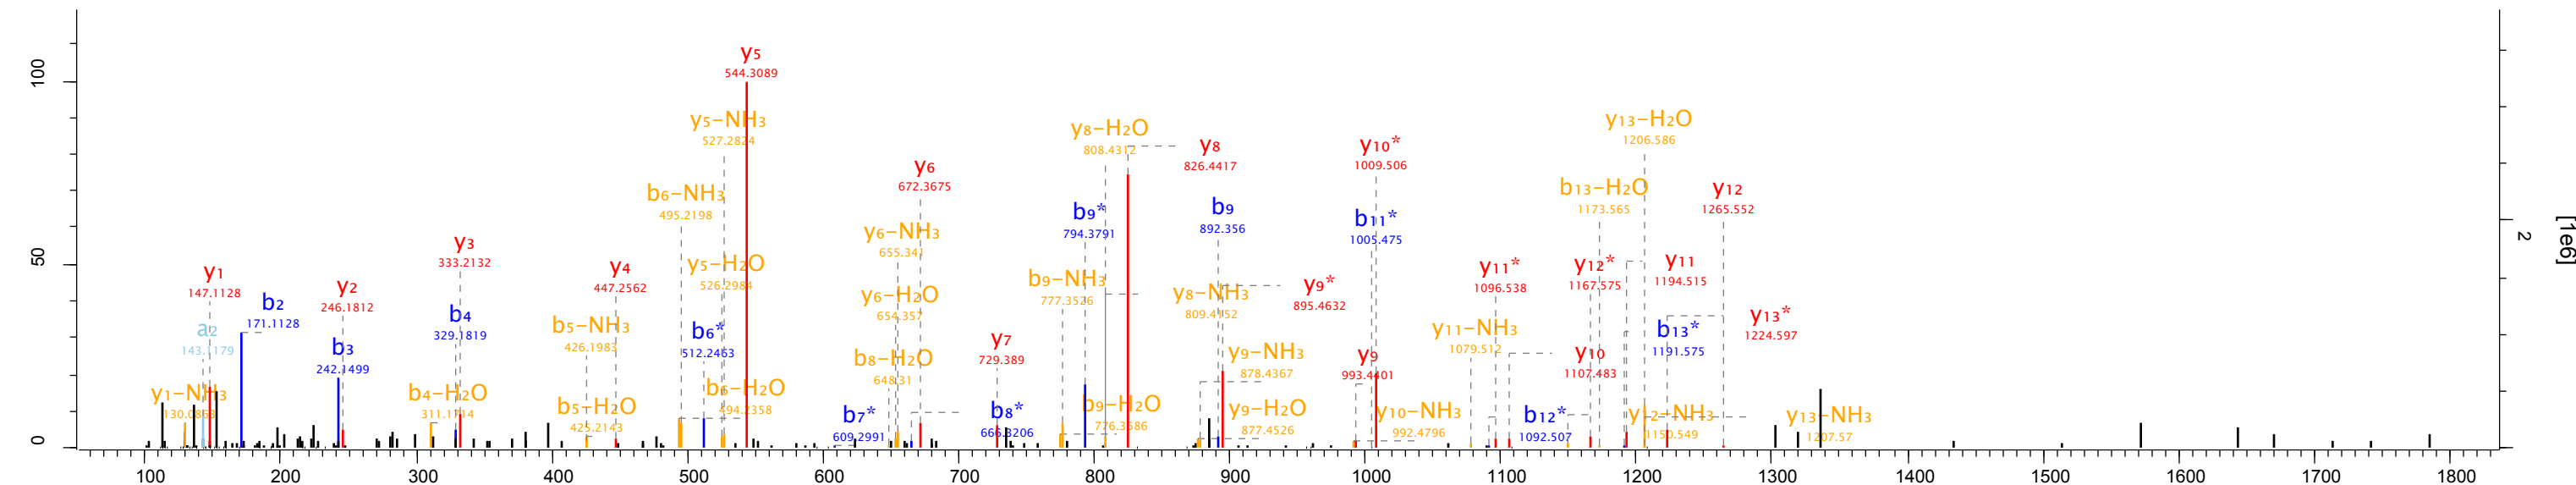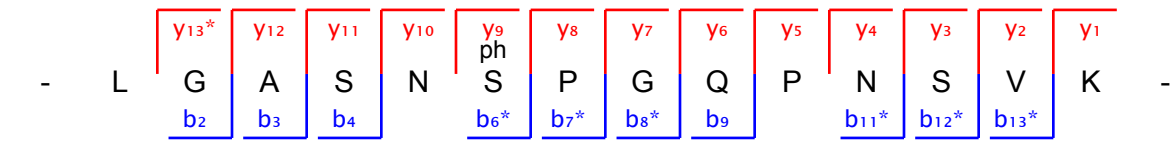



Raw file 20171215\_MaS\_33SR\_LMH\_phospho\_01 Scan 3882 Method FTMS; HCD Score 40.14 m/z 609.28 Gene names MCM4

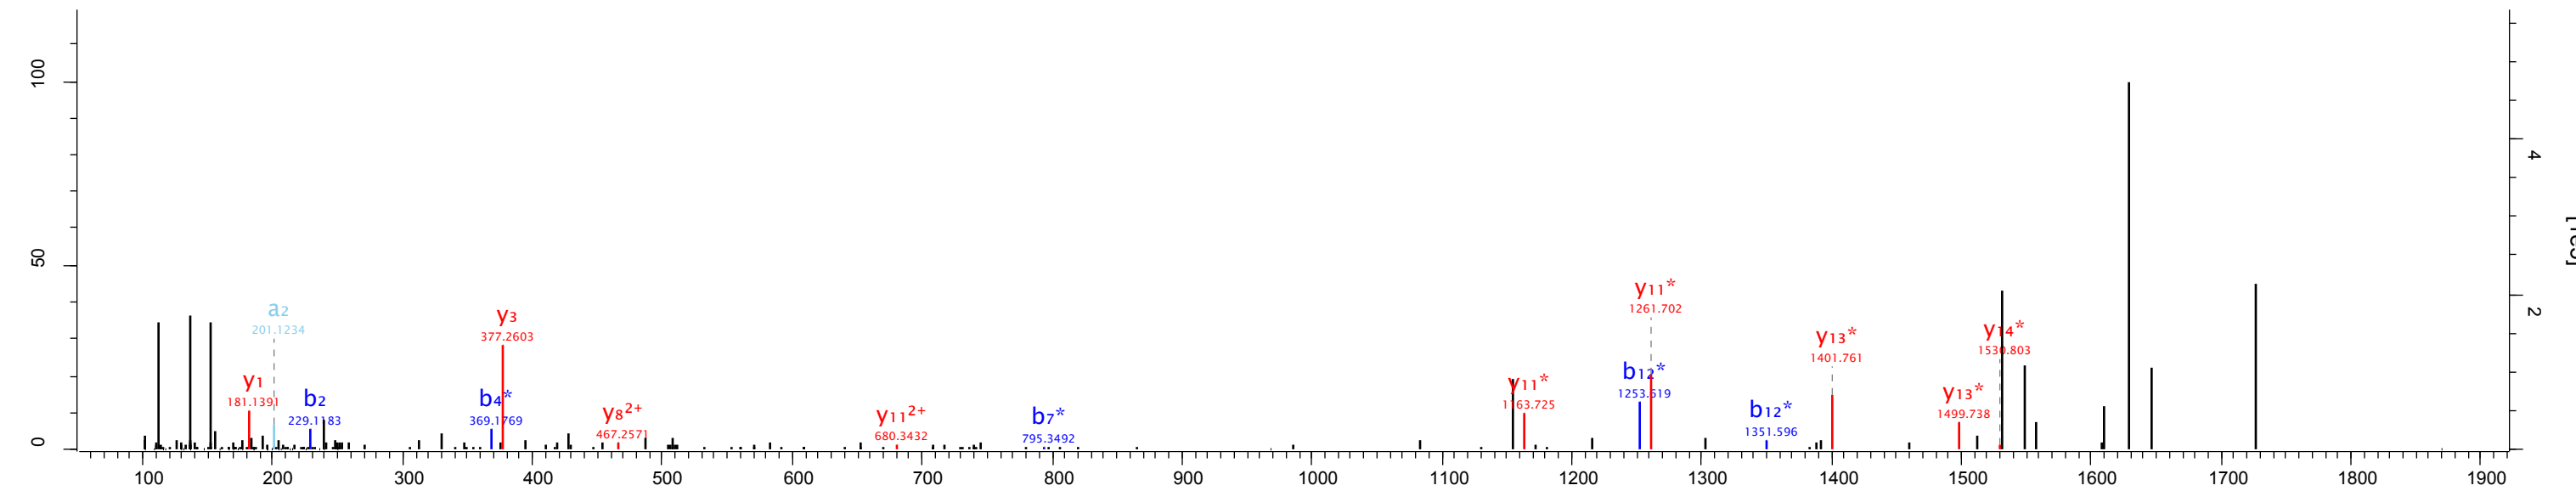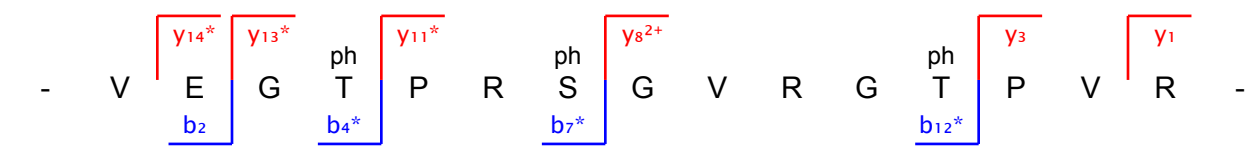

Raw file 20171215\_MaS\_33SR\_LMH\_phospho\_01 Scan 4112 Method FTMS; HCD Score 147.01 m/z 698.94 Gene names SRRM2

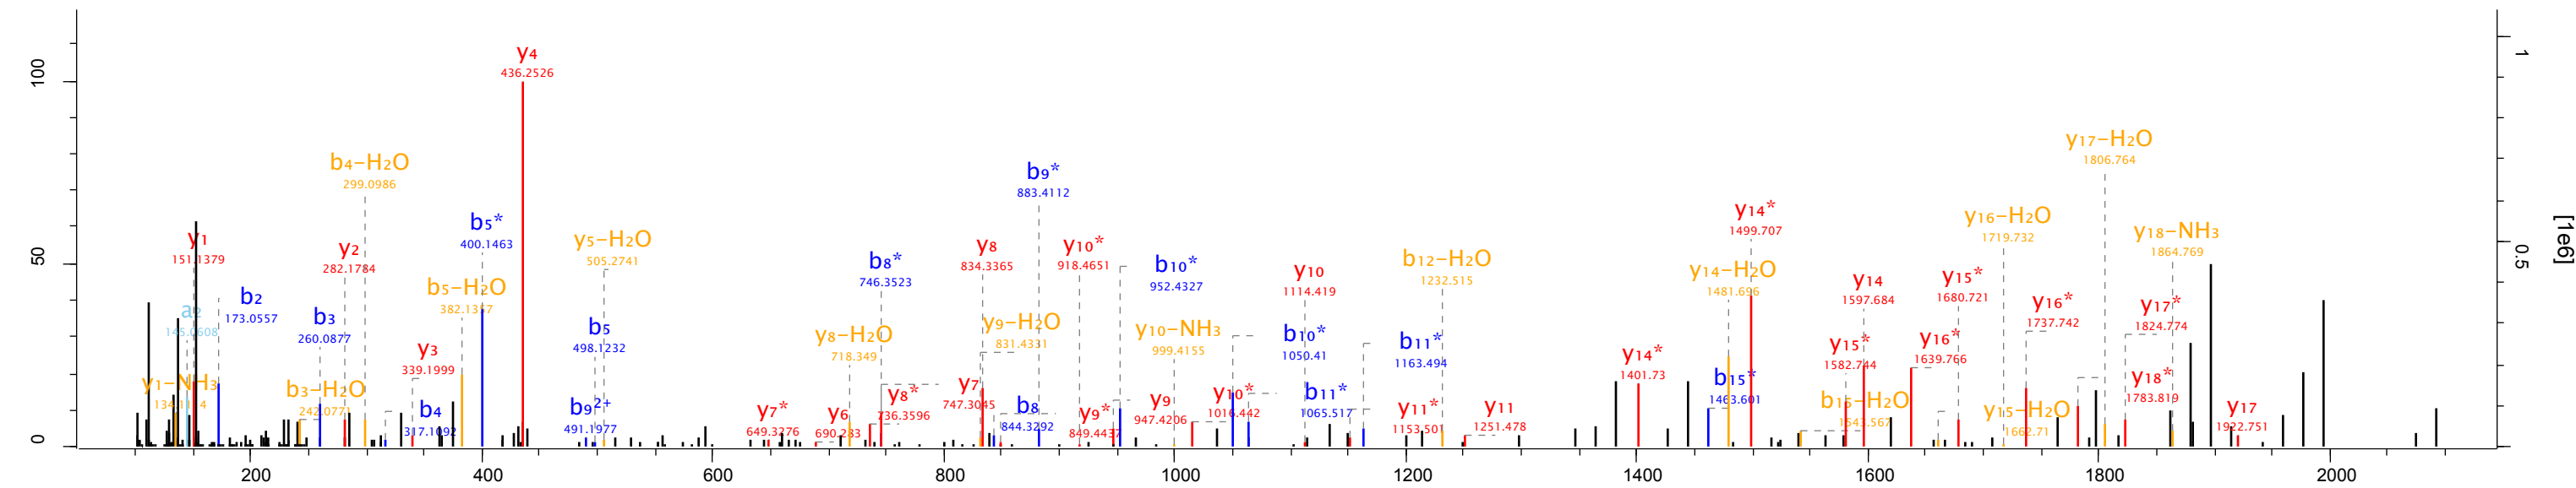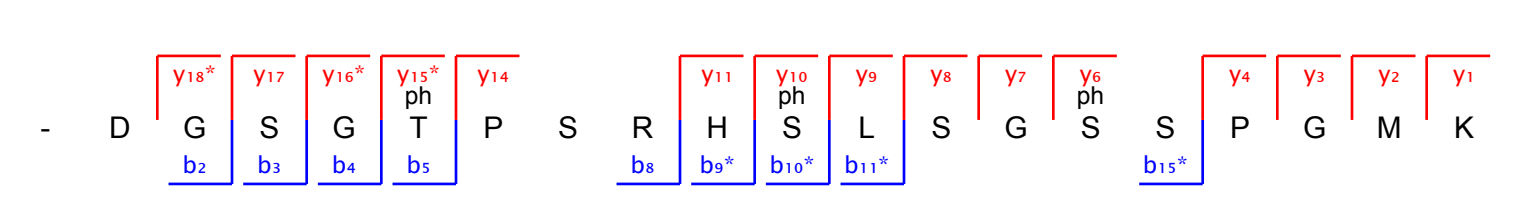

Raw file: 20171215\_MaS\_33SR\_LMH\_phospho\_01  
 Scan: 4152 Method: FTMS; HCD Score: 147.3 m/z: 932.79 Gene names: IWS1

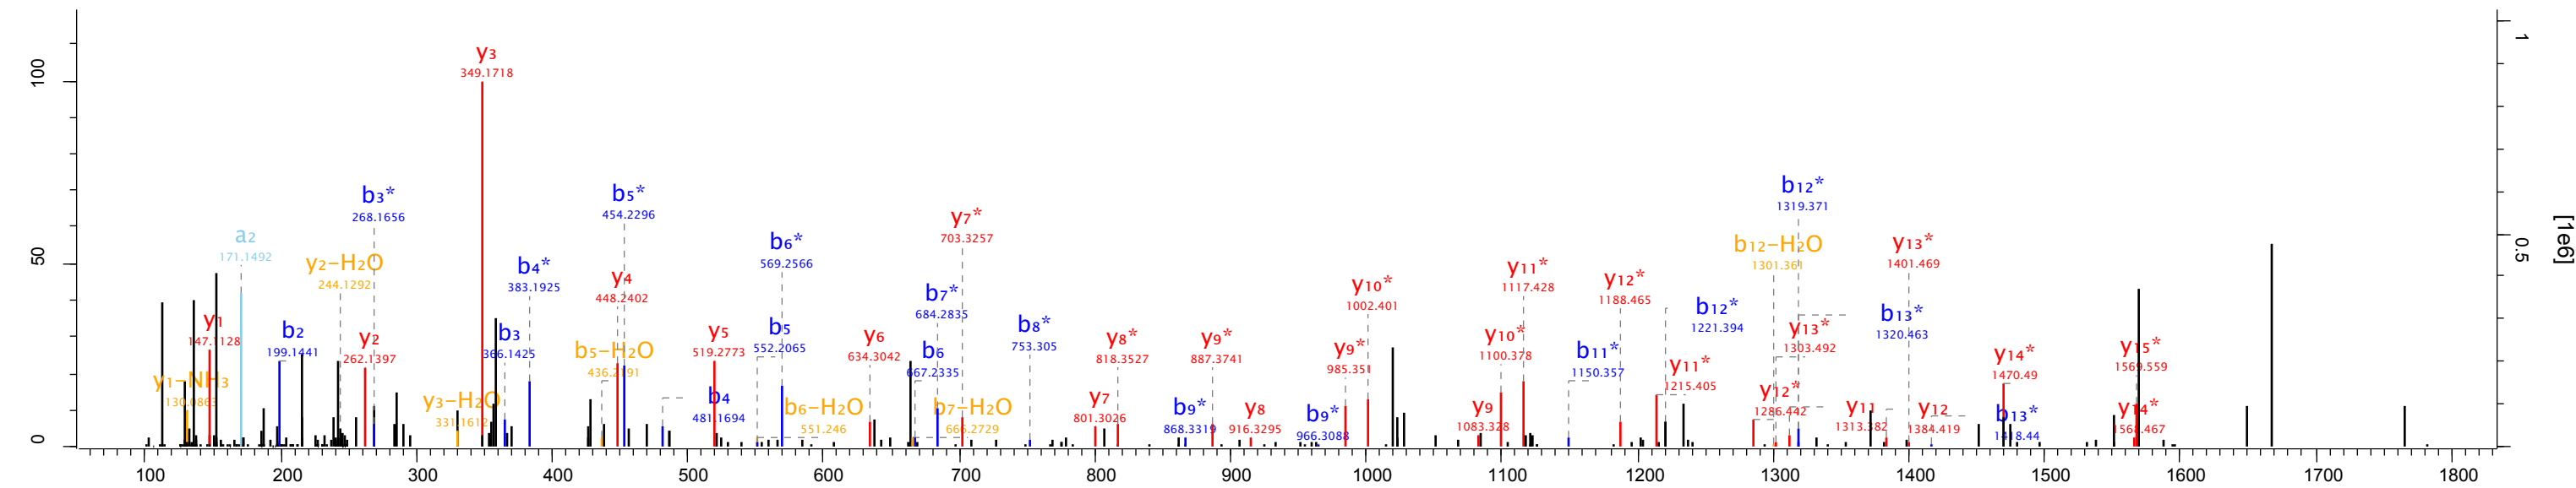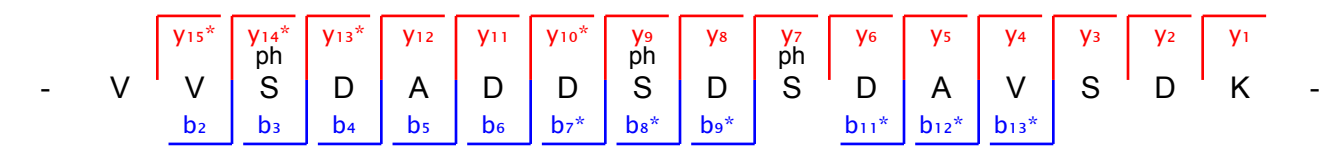

Raw file 20171215\_MaS\_33SR\_LMH\_phospho\_01 Scan 4512 Method FTMS; HCD Score 57.53 m/z 474.22 Gene names HNRNPU

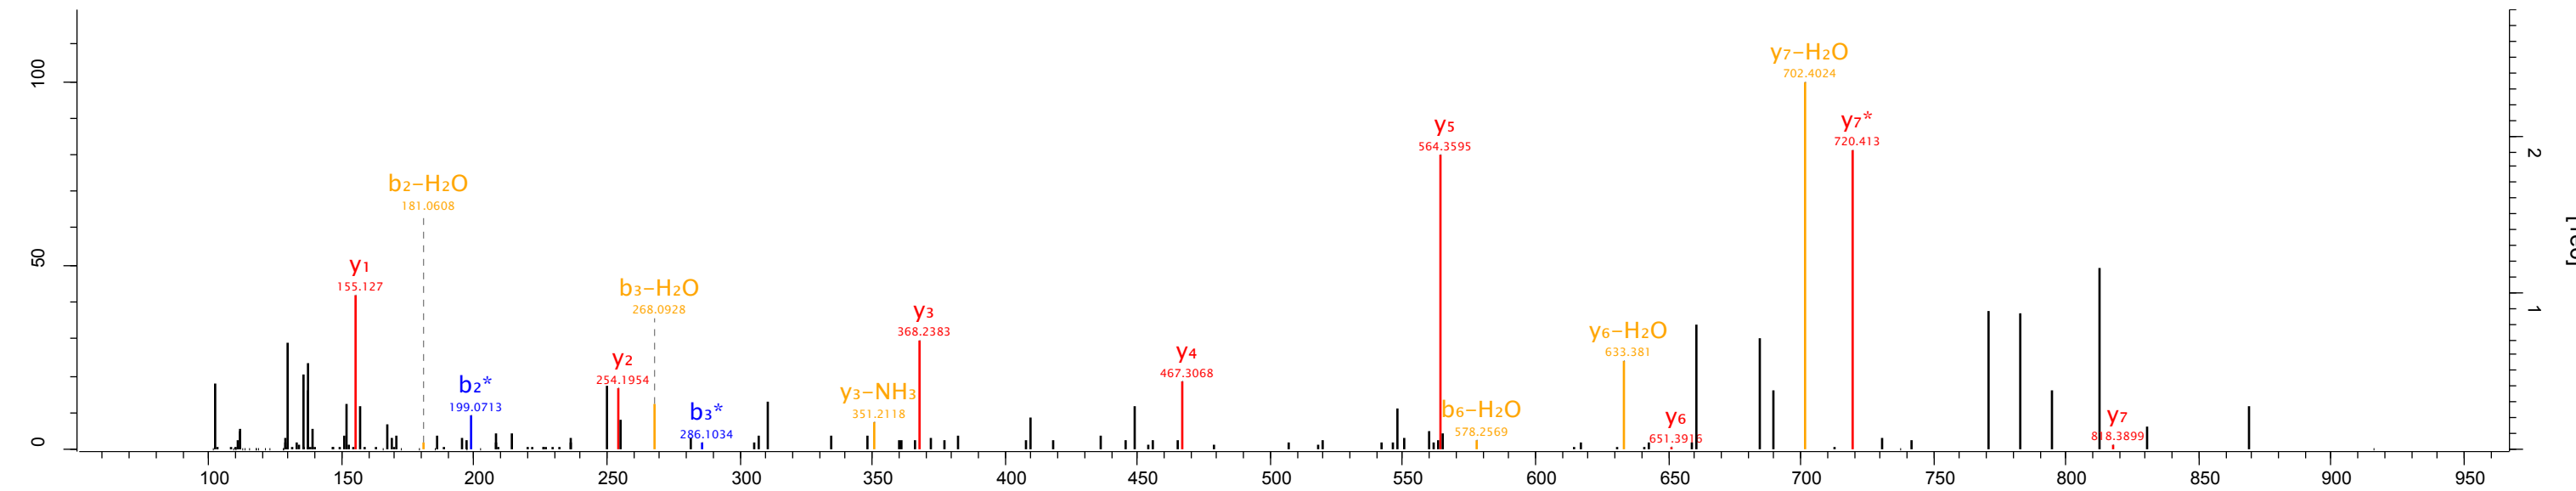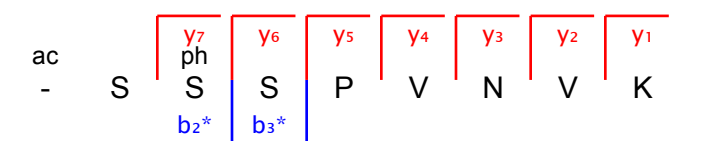

Raw file 20171215\_MaS\_33SR\_LMH\_phospho\_01 Scan 5062 Method FTMS; HCD Score 141.6 m/z 761.32 Gene names PEAK1

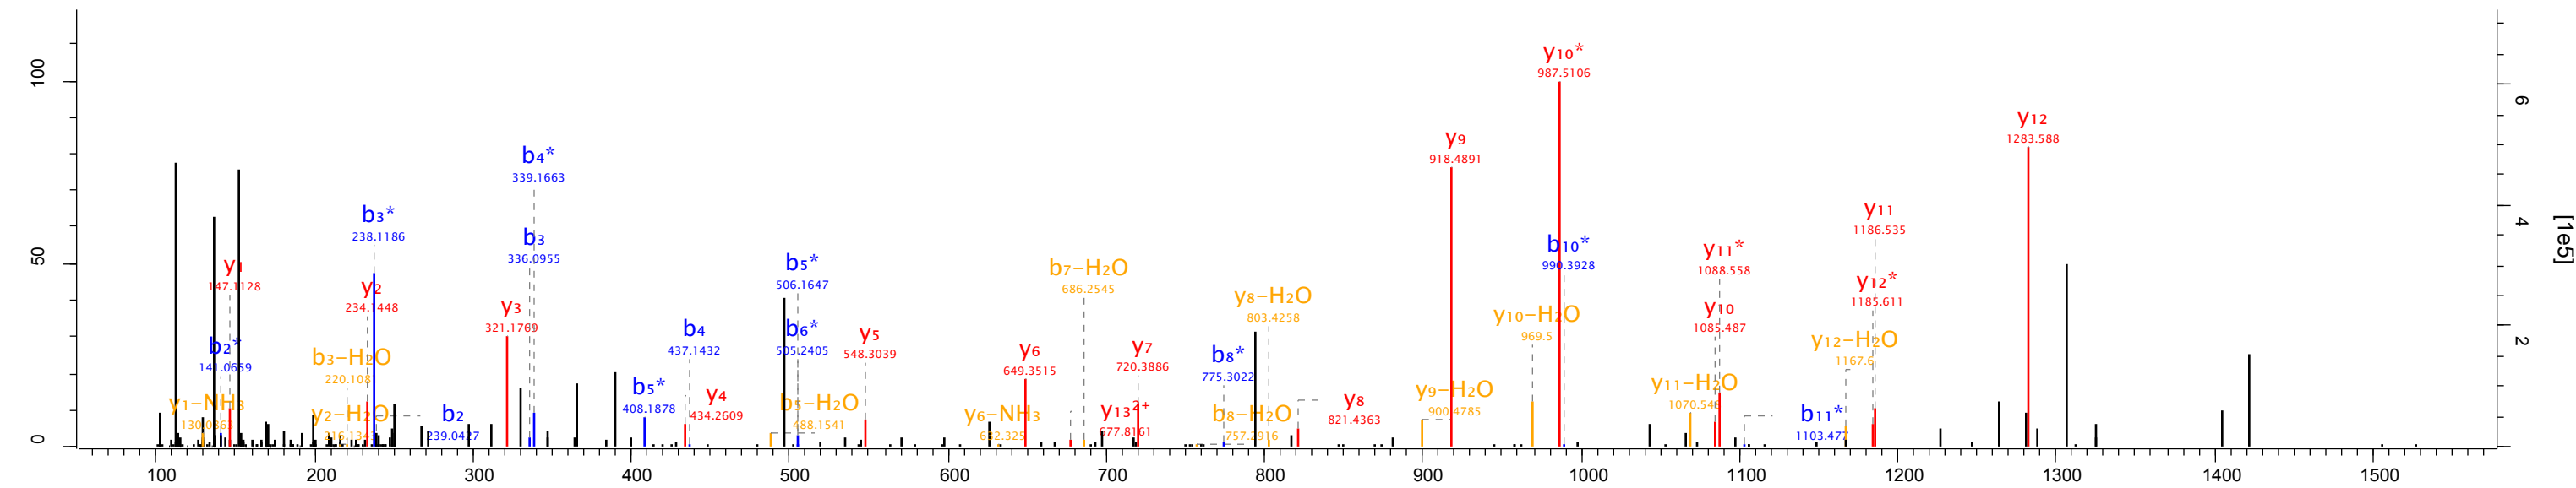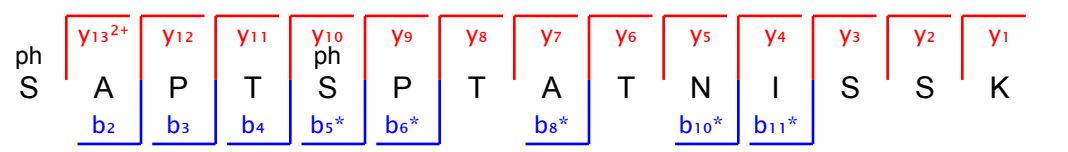

Raw file 20171215\_MaS\_33SR\_LMH\_phospho\_01 Scan 5262 Method FTMS; HCD Score 174.46 m/z 854 Gene names ADD2

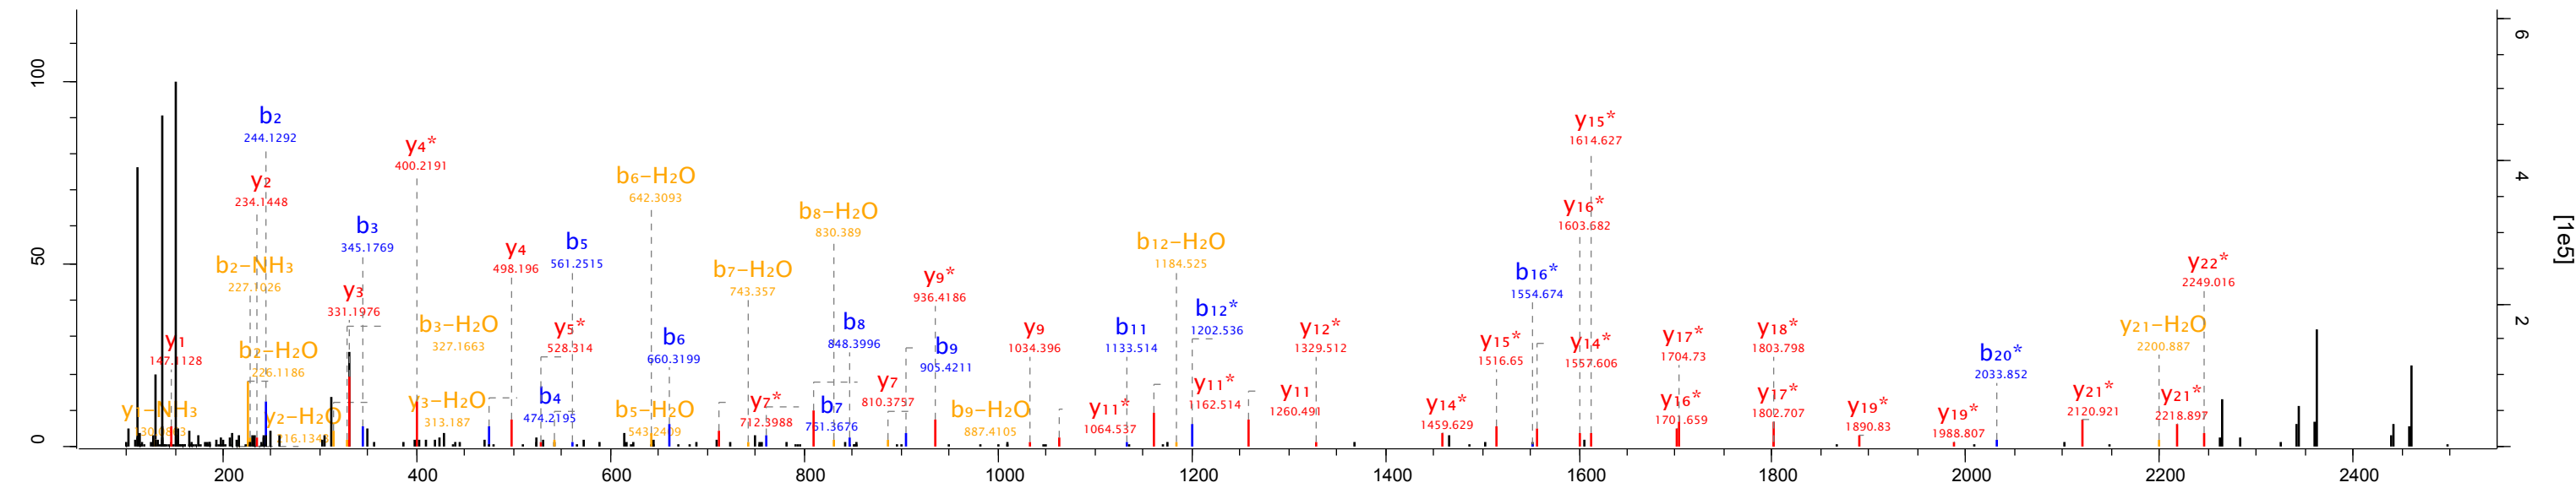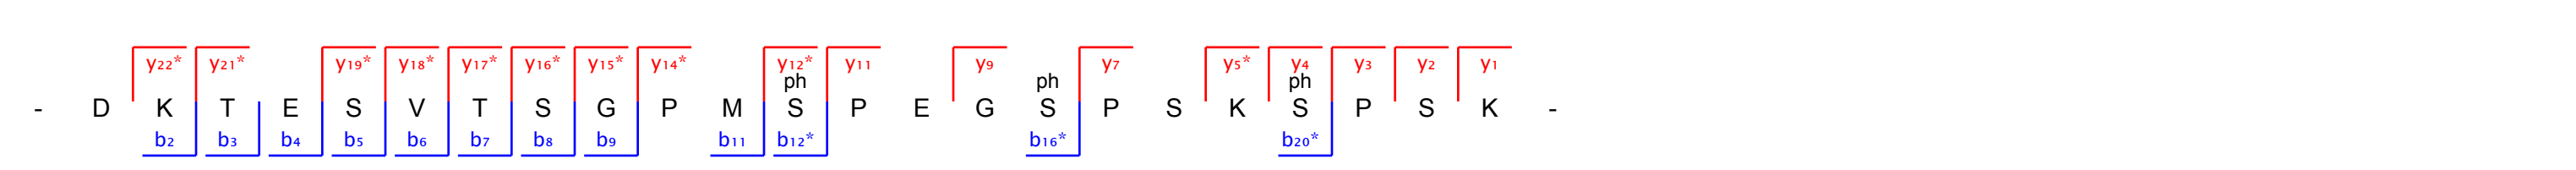

Raw file 20171215\_MaS\_33SR\_LMH\_phospho\_01 Scan 6152 Method FTMS; HCD Score 89.66 m/z 592.89 Gene names SRRM2

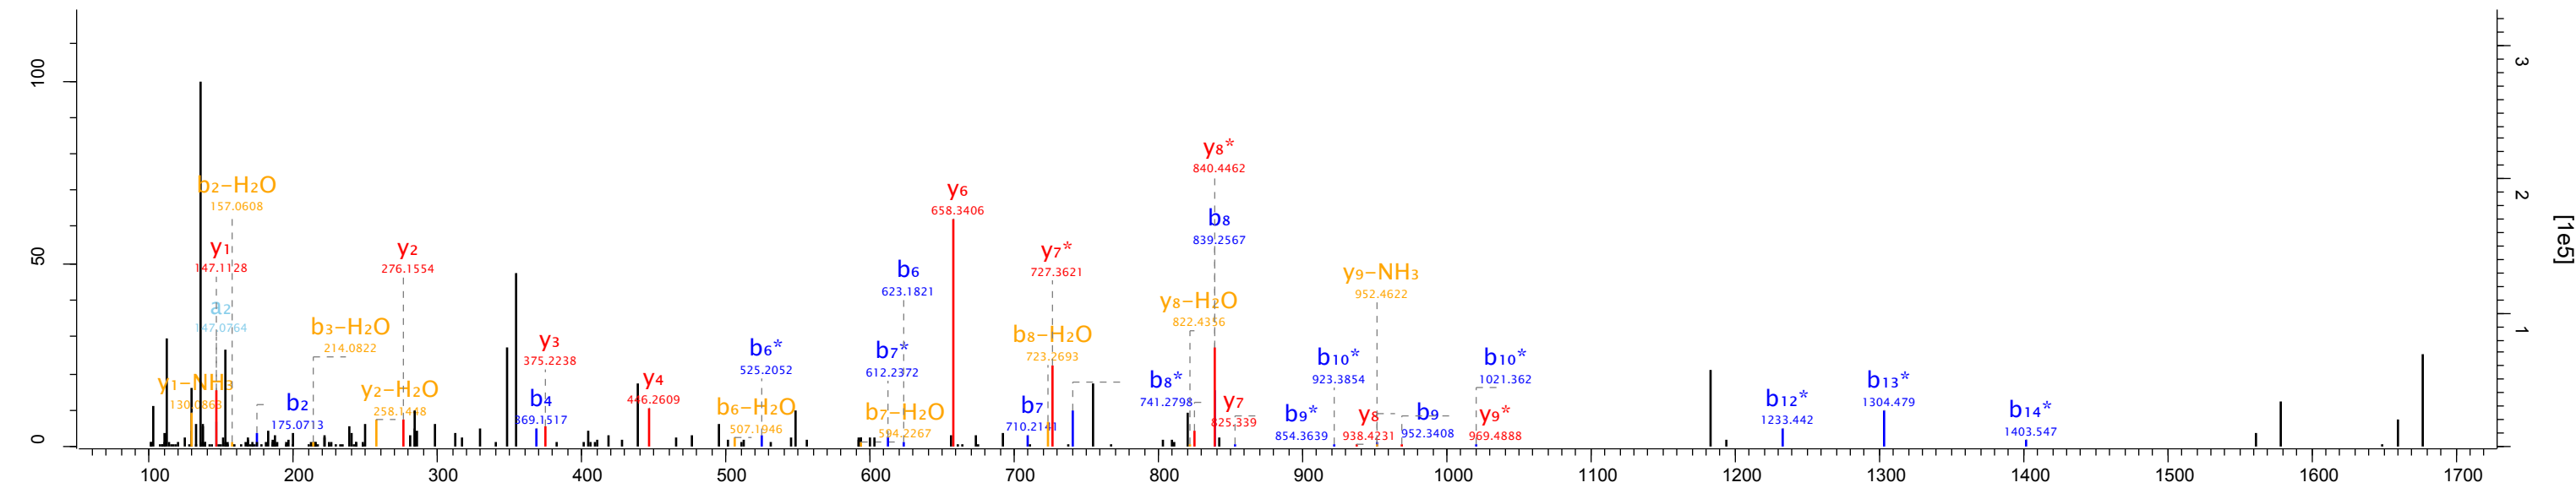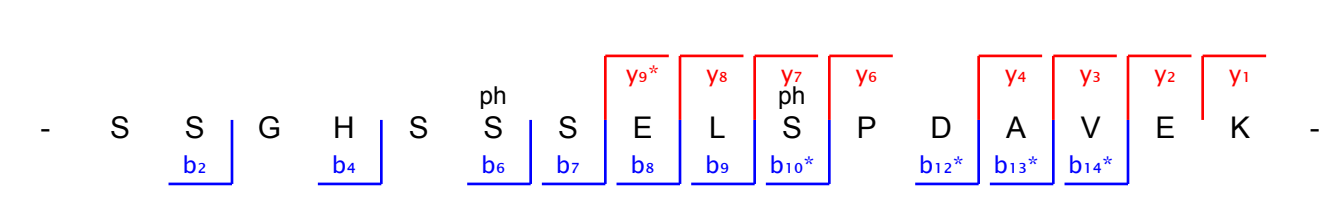

Raw file 20171215\_MaS\_33SR\_LMH\_phospho\_01 Scan 6452 Method FTMS; HCD Score 90.08 m/z 955.8 Gene names IRS2

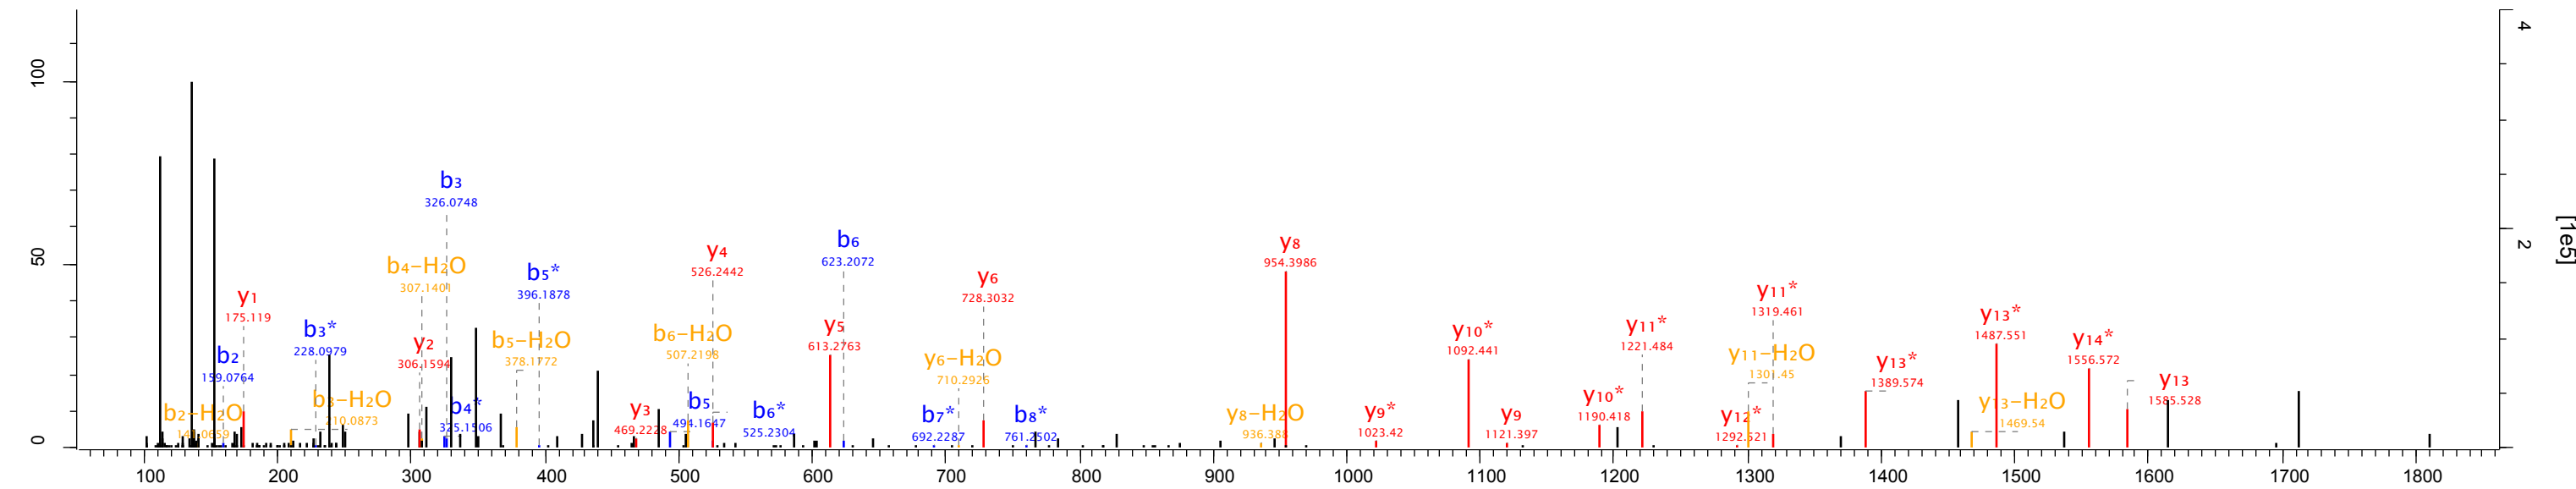

- A S S P A E S S P E D S G Y M R -

b<sub>2</sub>
b<sub>3</sub>
b<sub>4</sub>\*
b<sub>5</sub>
b<sub>6</sub>
b<sub>7</sub>\*
b<sub>8</sub>\*
y<sub>14</sub>\*
y<sub>13</sub>
y<sub>12</sub>\*
y<sub>11</sub>\*
y<sub>10</sub>\*
y<sub>9</sub>ph
y<sub>8</sub>
y<sub>6</sub>
y<sub>5</sub>
y<sub>4</sub>
y<sub>3</sub>
y<sub>2</sub>
y<sub>1</sub>



Raw file 20171215\_MaS\_33SR\_LMH\_phospho\_01 Scan 6732 Method FTMS; HCD Score 41.48 m/z 1057.88 Gene names SPEN

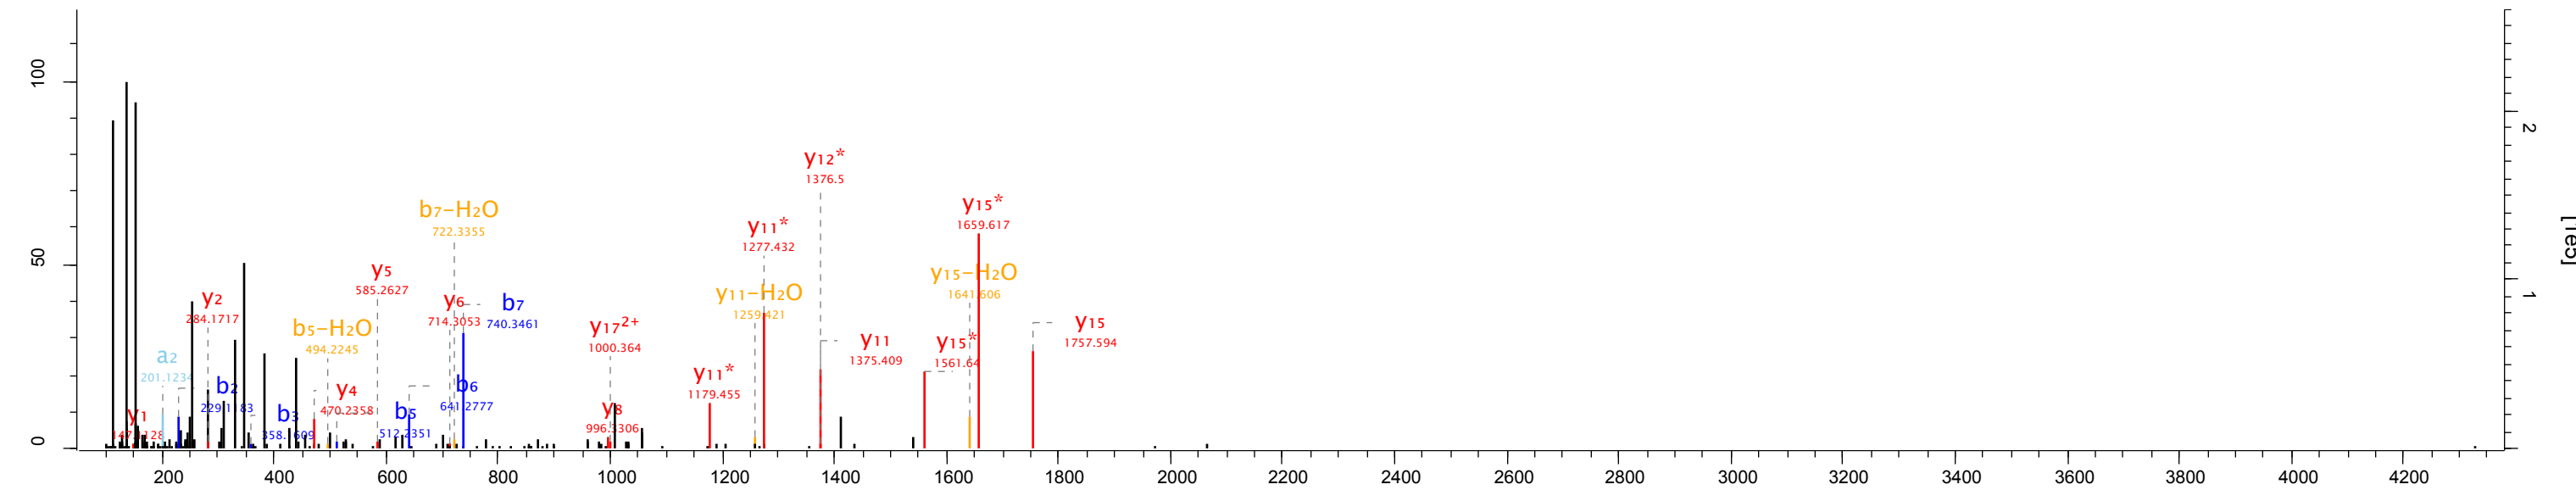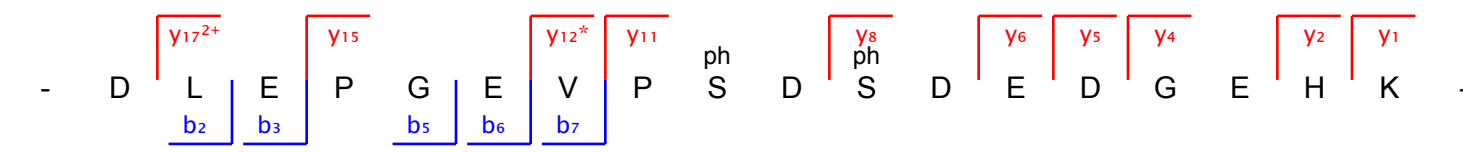

Raw file 20171215\_MaS\_33SR\_LMH\_phospho\_01 Scan 7332 Method FTMS; HCD Score 199.07 m/z 748.25 Gene names HTATSF1

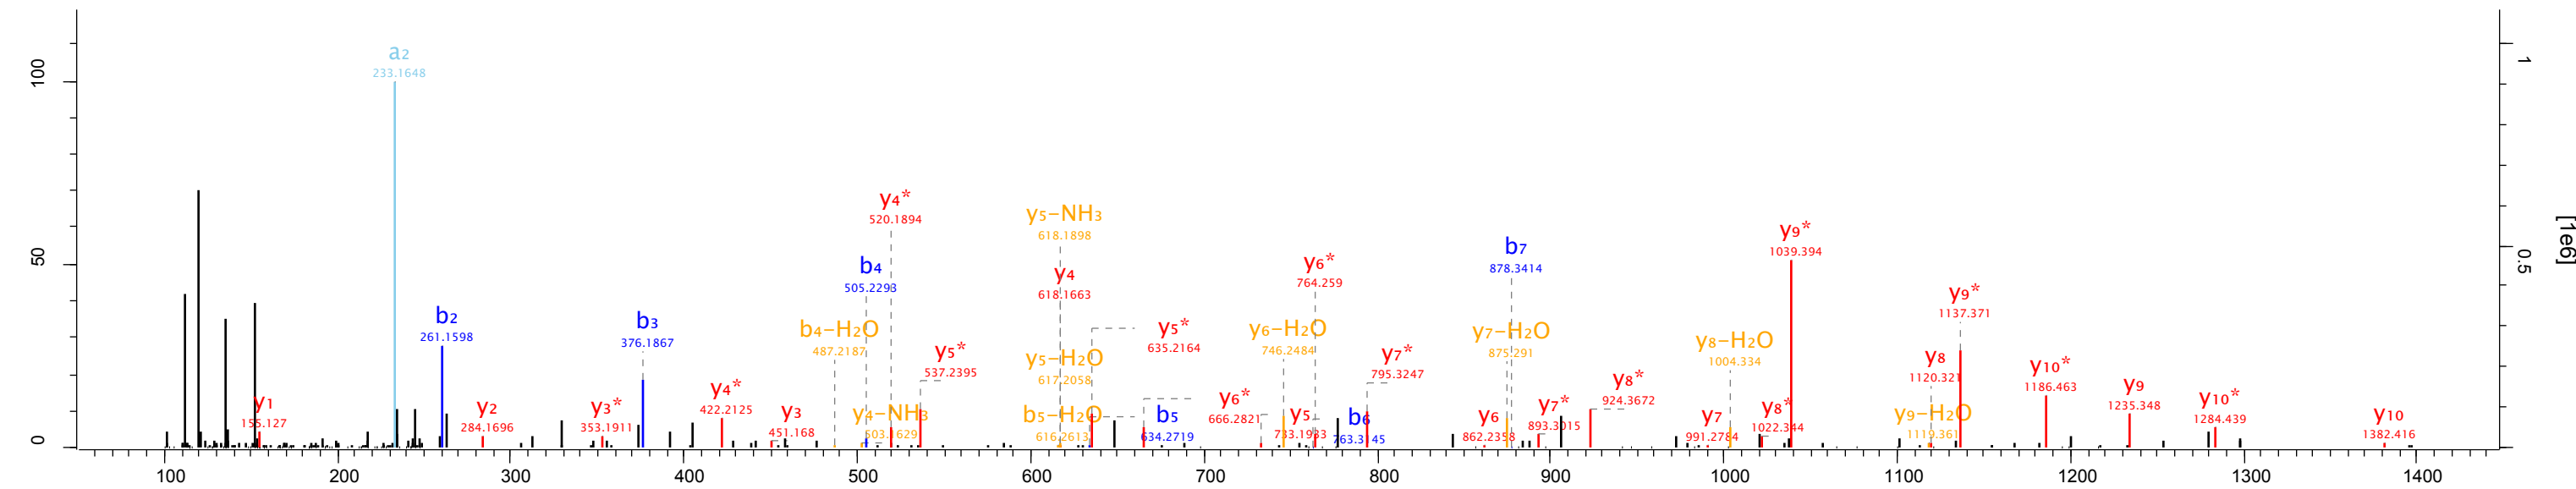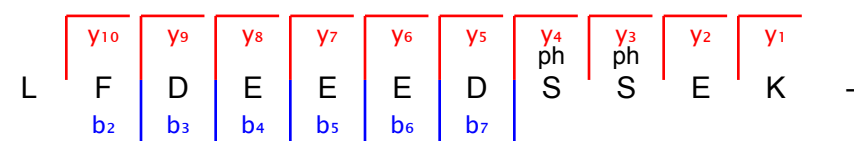

Raw file 20171215\_MaS\_33SR\_LMH\_phospho\_01 Scan 8142 Method FTMS; HCD Score 109.12 m/z 926.8 Gene names PDCL

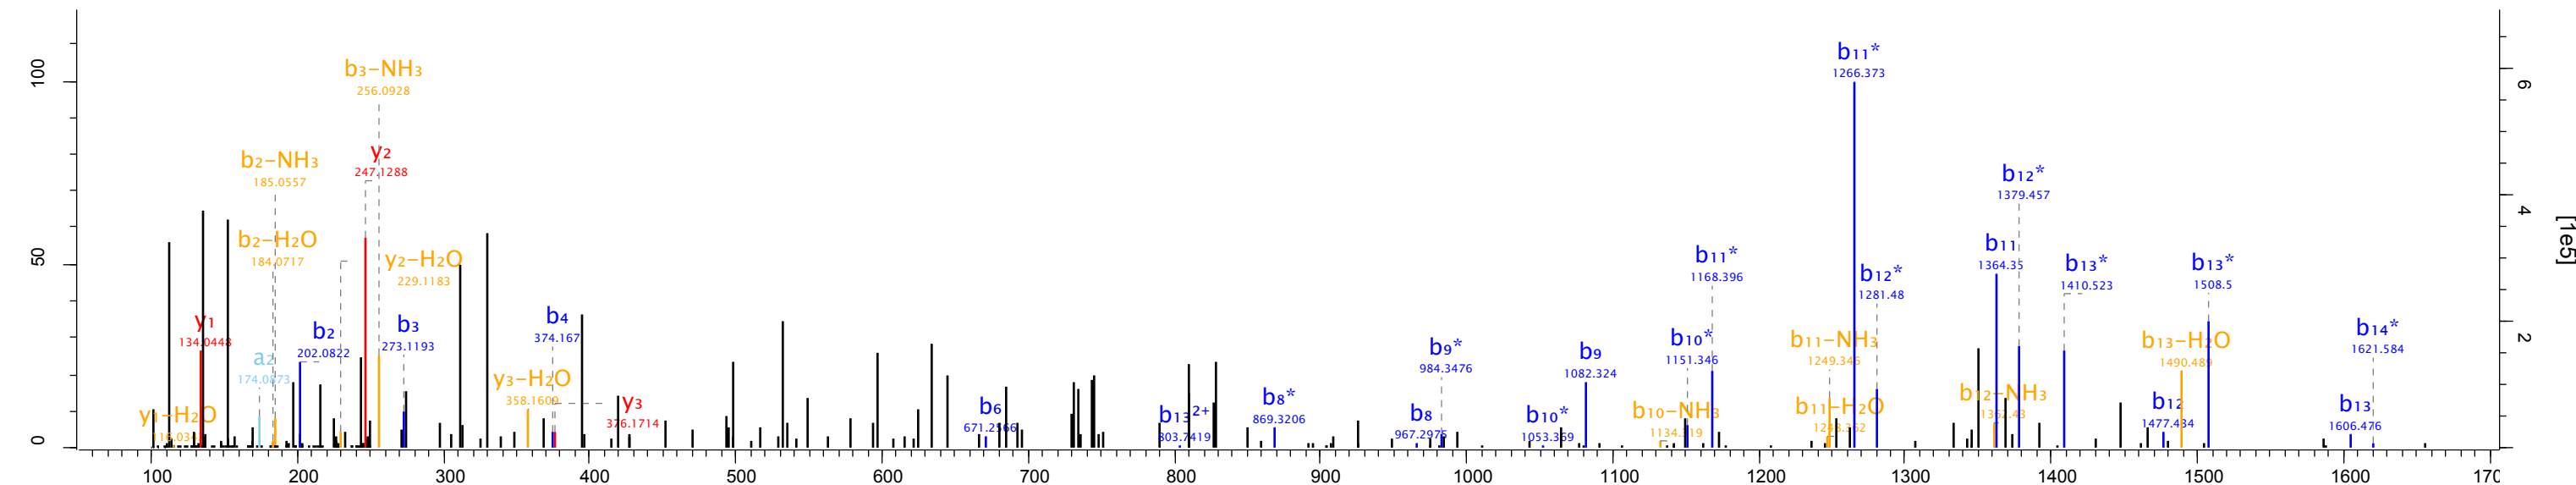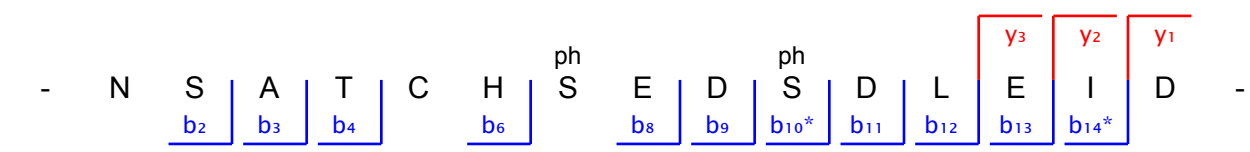

Raw file 20171215\_MaS\_33SR\_LMH\_phospho\_01 Scan 8352 Method FTMS; HCD Score 199.29 m/z 1006.85 Gene names BOP1

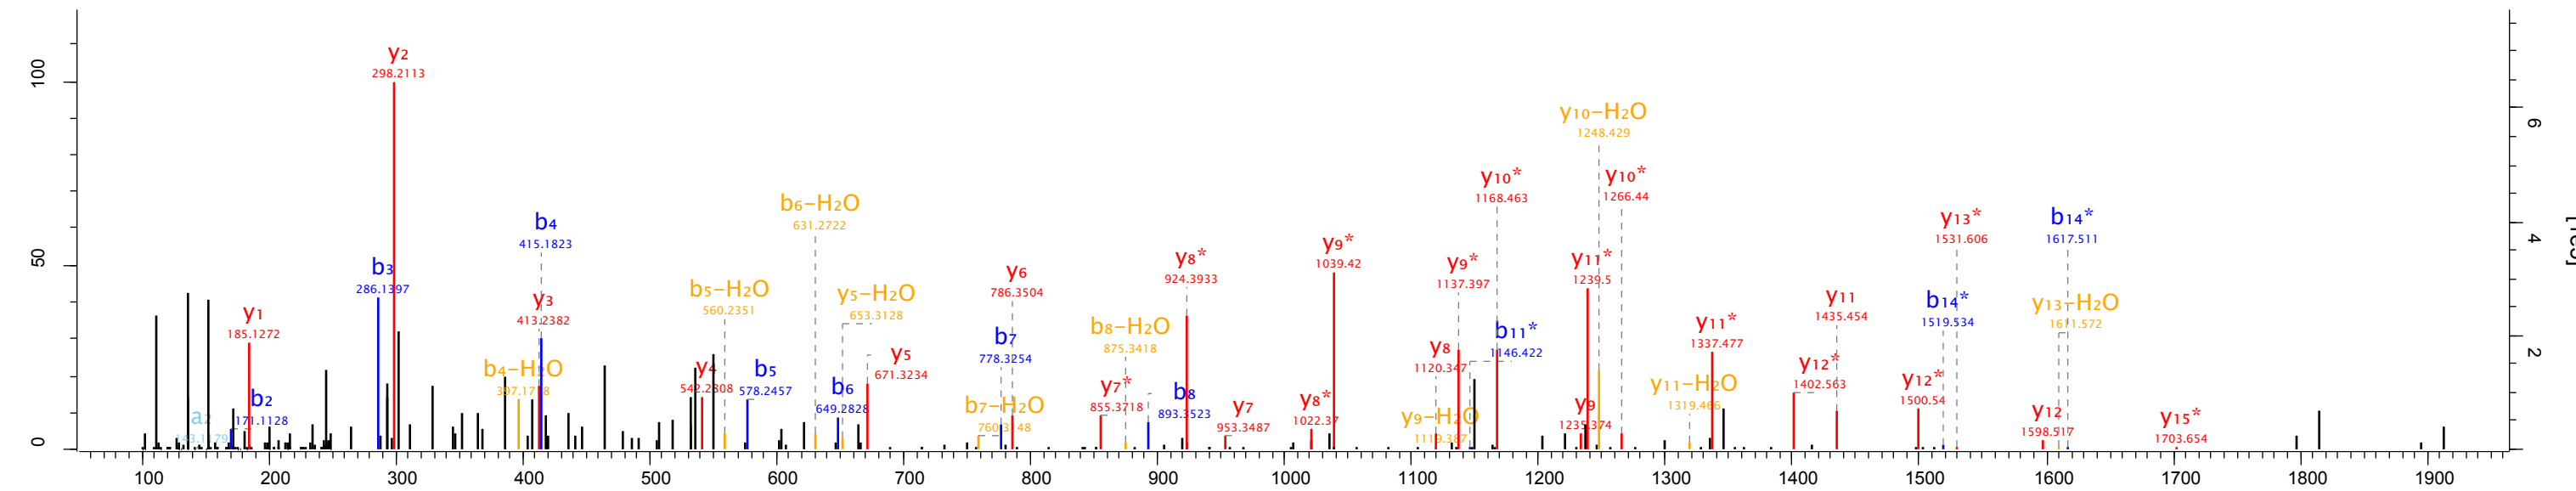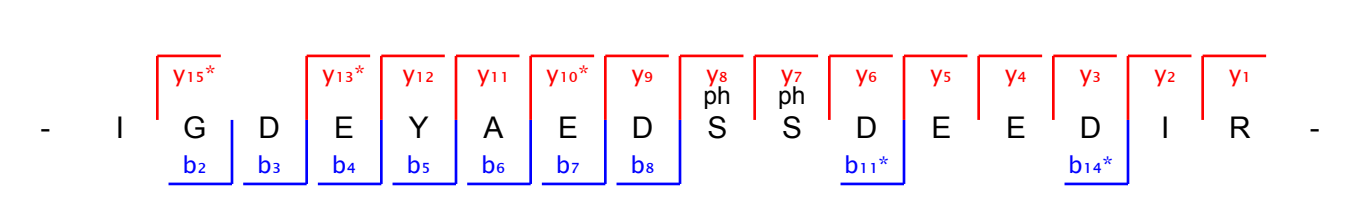

Raw file 20171215\_MaS\_33SR\_LMH\_phospho\_01 Scan 9872 Method FTMS; HCD Score 137.82 m/z 768.3 Gene names JUNB

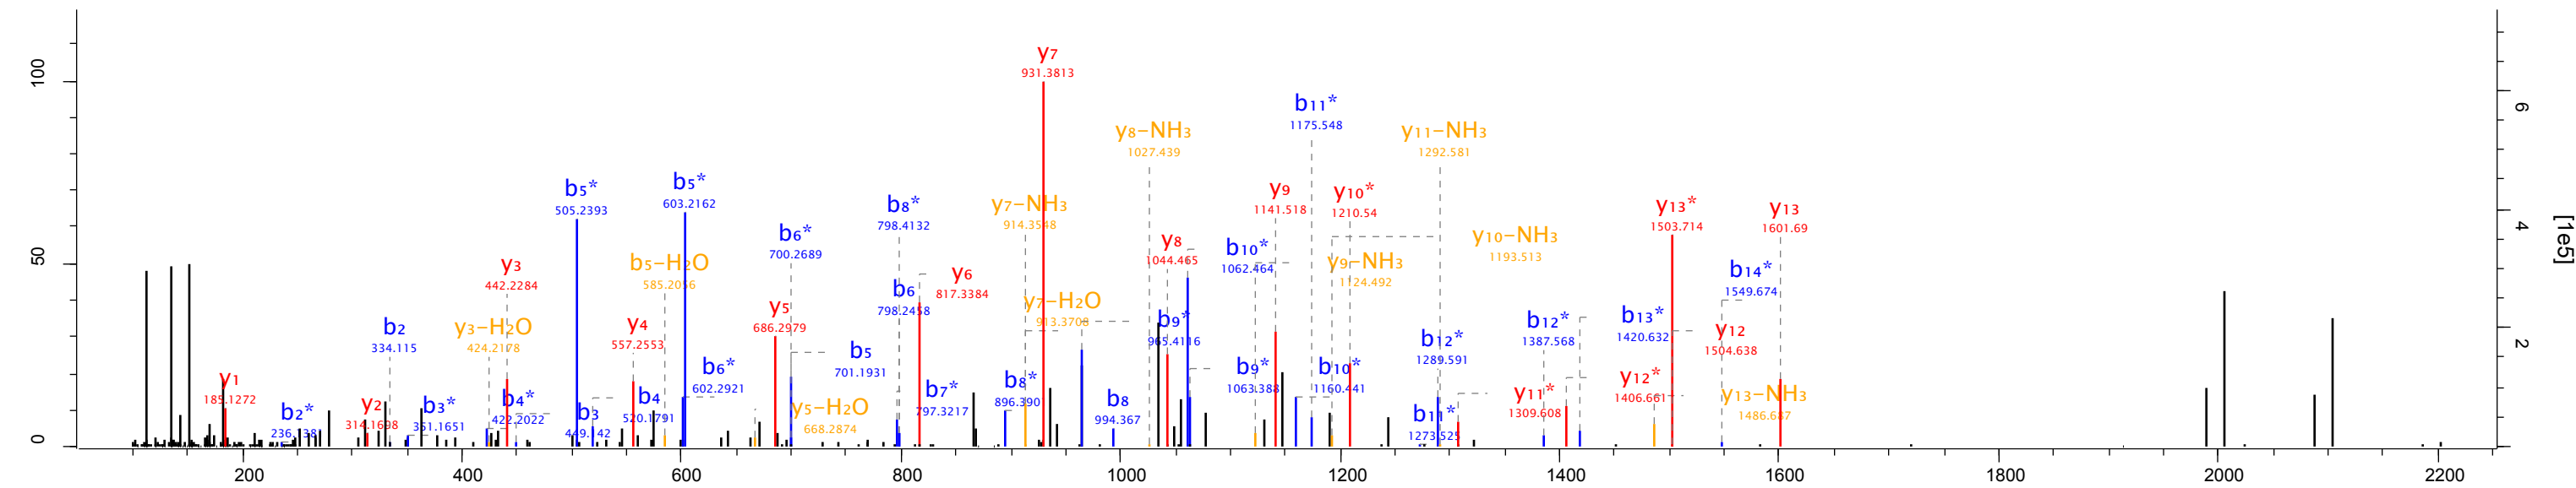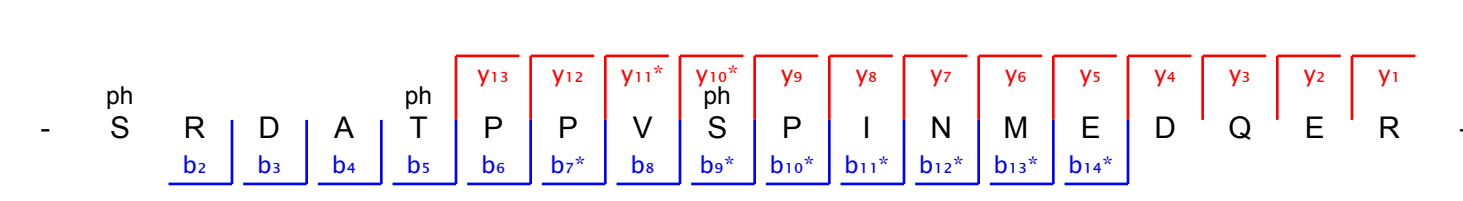

Raw file 20171215\_MaS\_33SR\_LMH\_phospho\_02 Scan 10412 Method FTMS; HCD Score 58.81 m/z 812.66 Gene names POLR2A

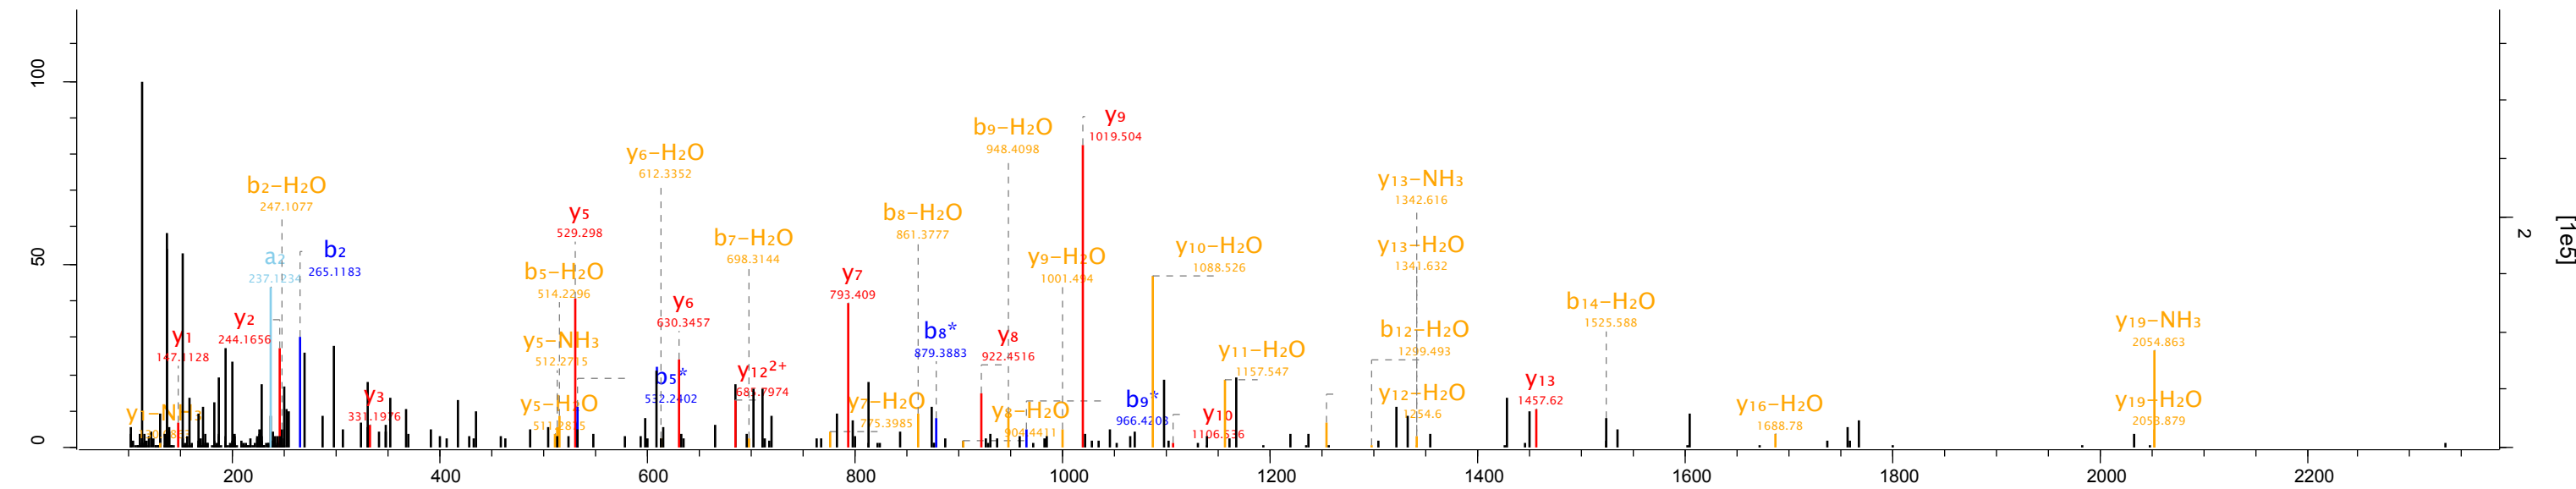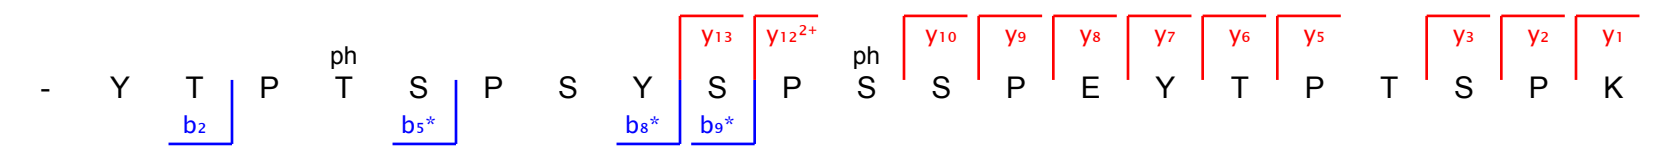

Raw file 20171215\_MaS\_33SR\_LMH\_phospho\_02 Scan 11522 Method FTMS; HCD Score 225.69 m/z 791.84 Gene names MAP1B

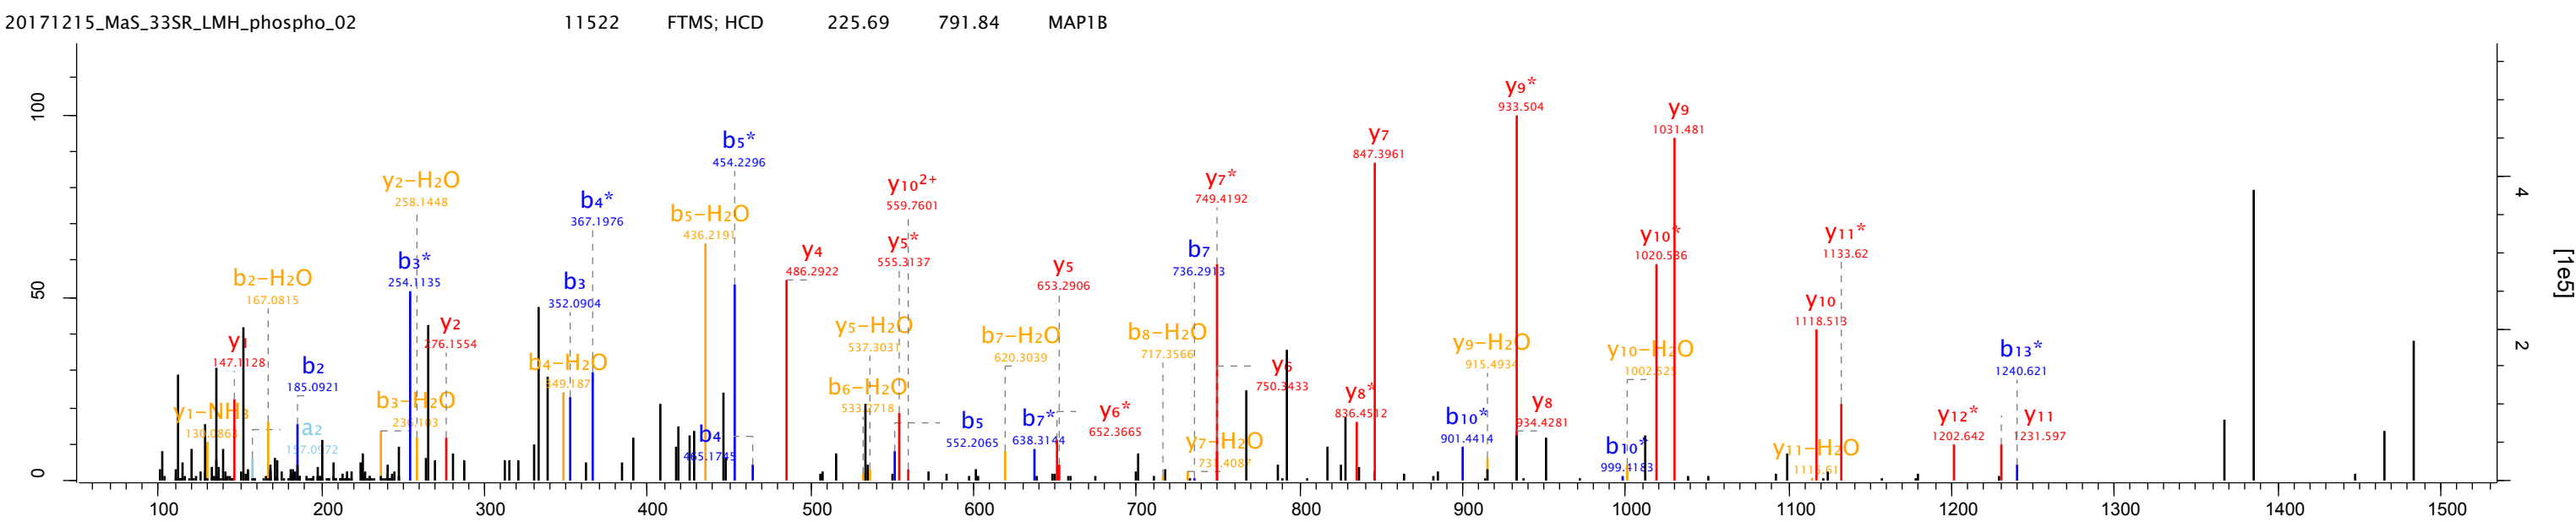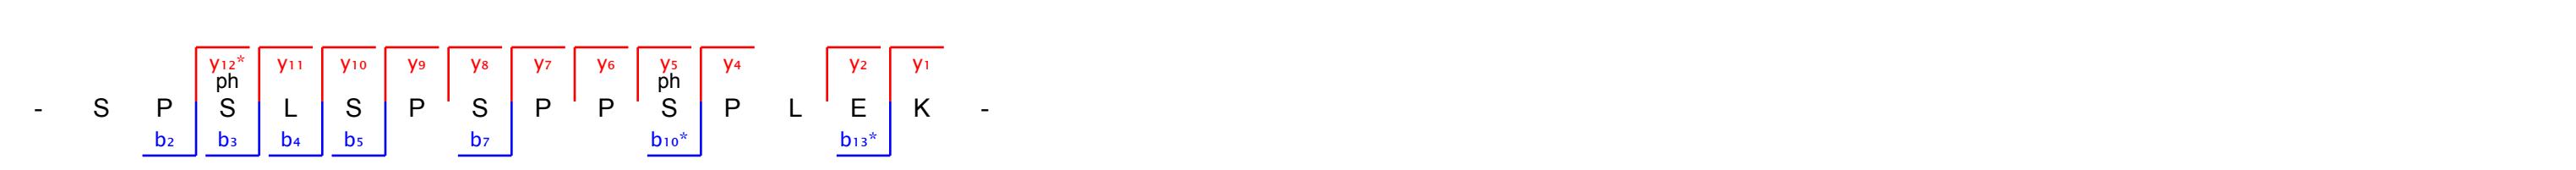

Raw file 20171215\_MaS\_33SR\_LMH\_phospho\_02 Scan 11962 Method FTMS; HCD Score 172.2 m/z 950.84 Gene names RPL22L1

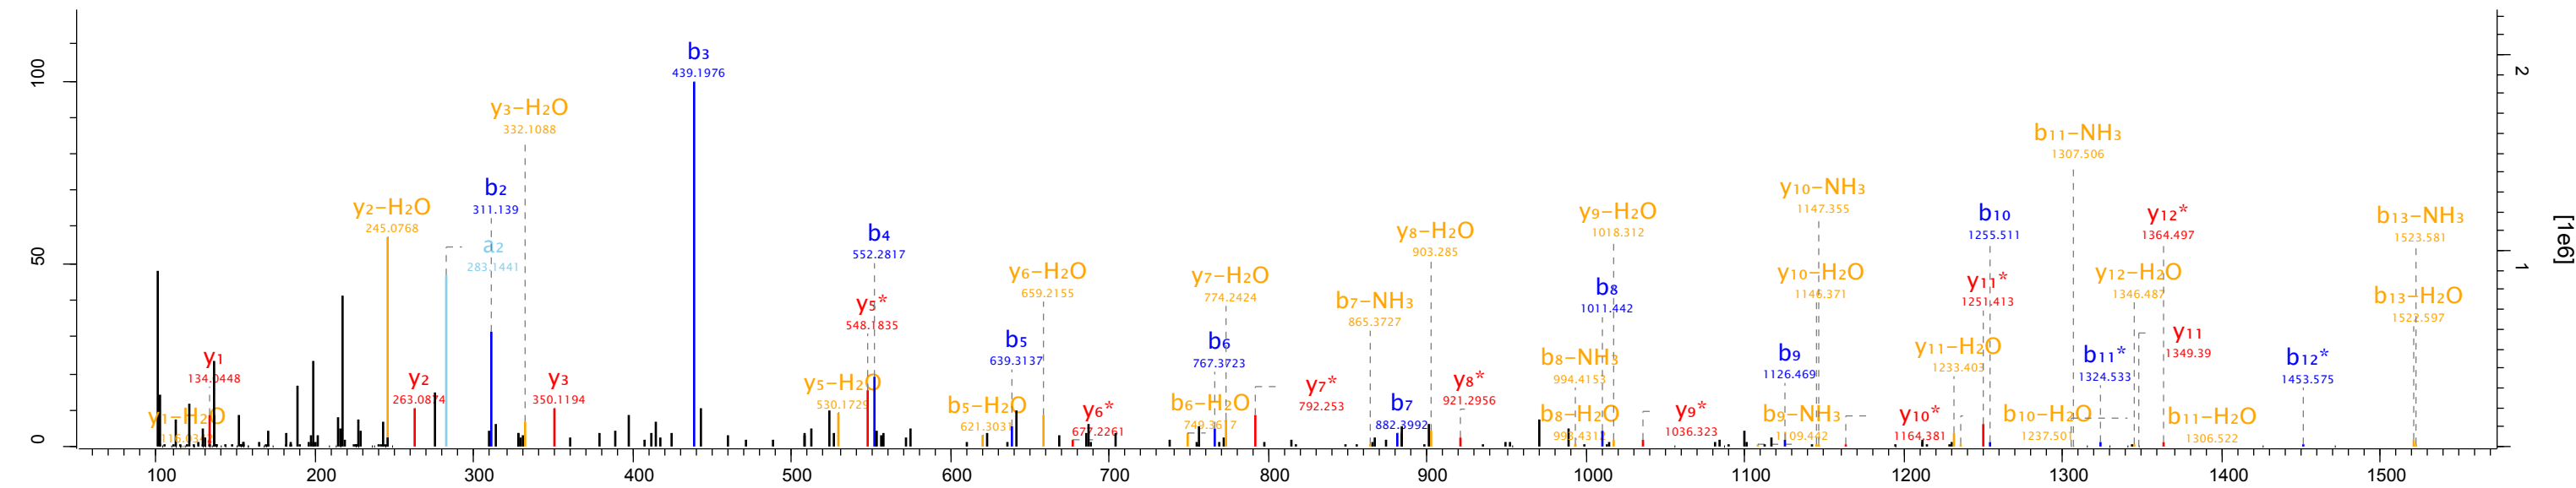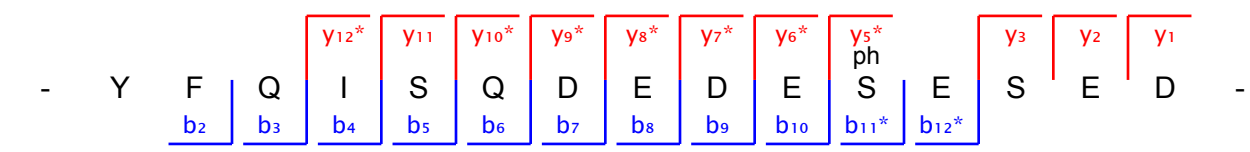



Raw file 20171215\_MaS\_33SR\_LMH\_phospho\_02 Scan 12092 Method FTMS; HCD Score 316.8 m/z 808.82 Gene names LMNA

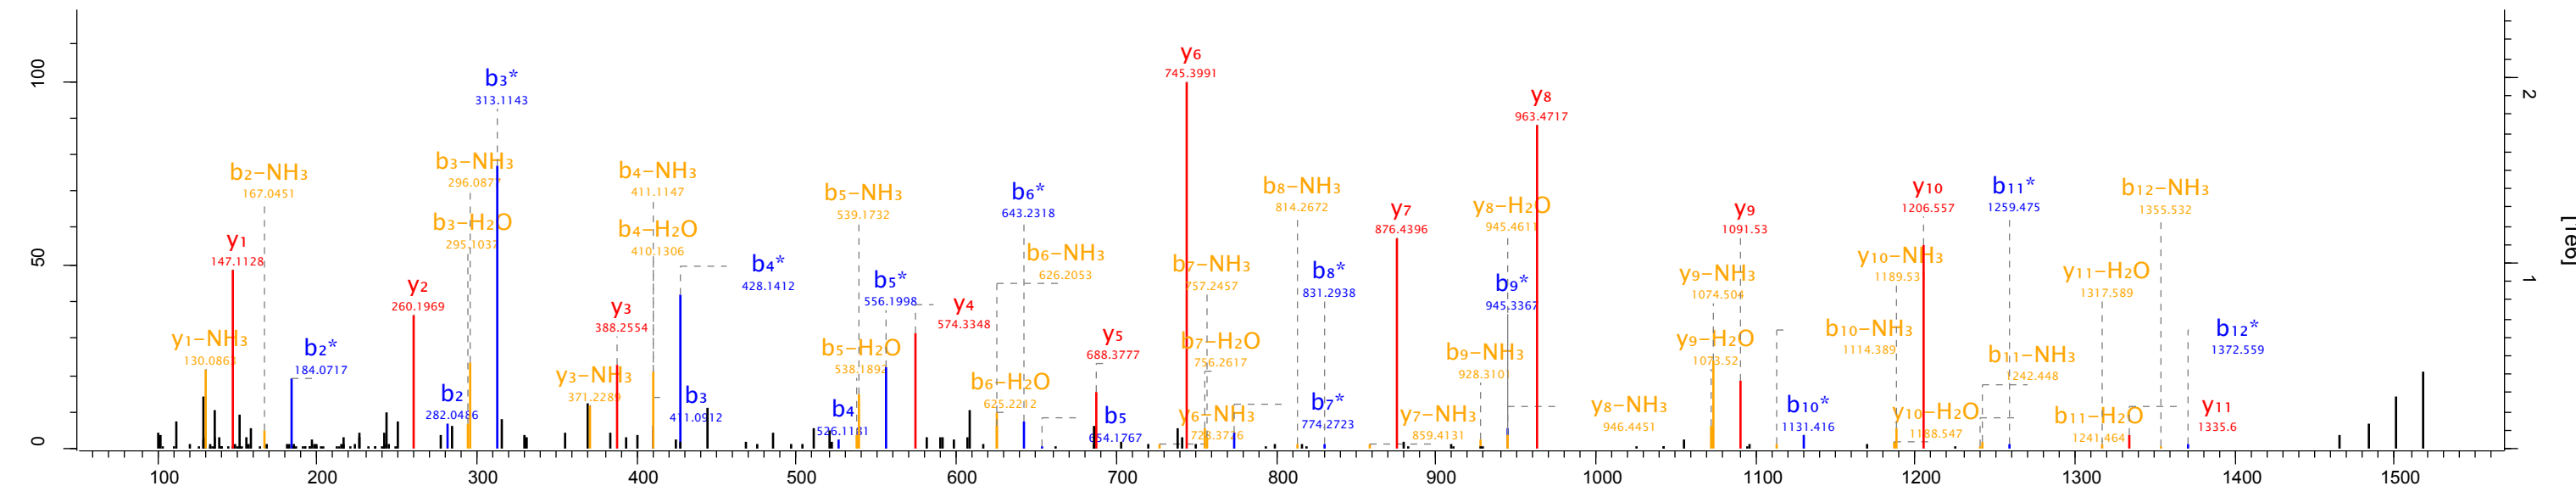

ph S

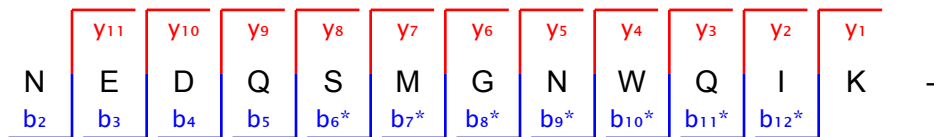

Raw file 20171215\_MaS\_33SR\_LMH\_phospho\_02 Scan 12232 Method FTMS; HCD Score 292.87 m/z 1367.03 Gene names USP7

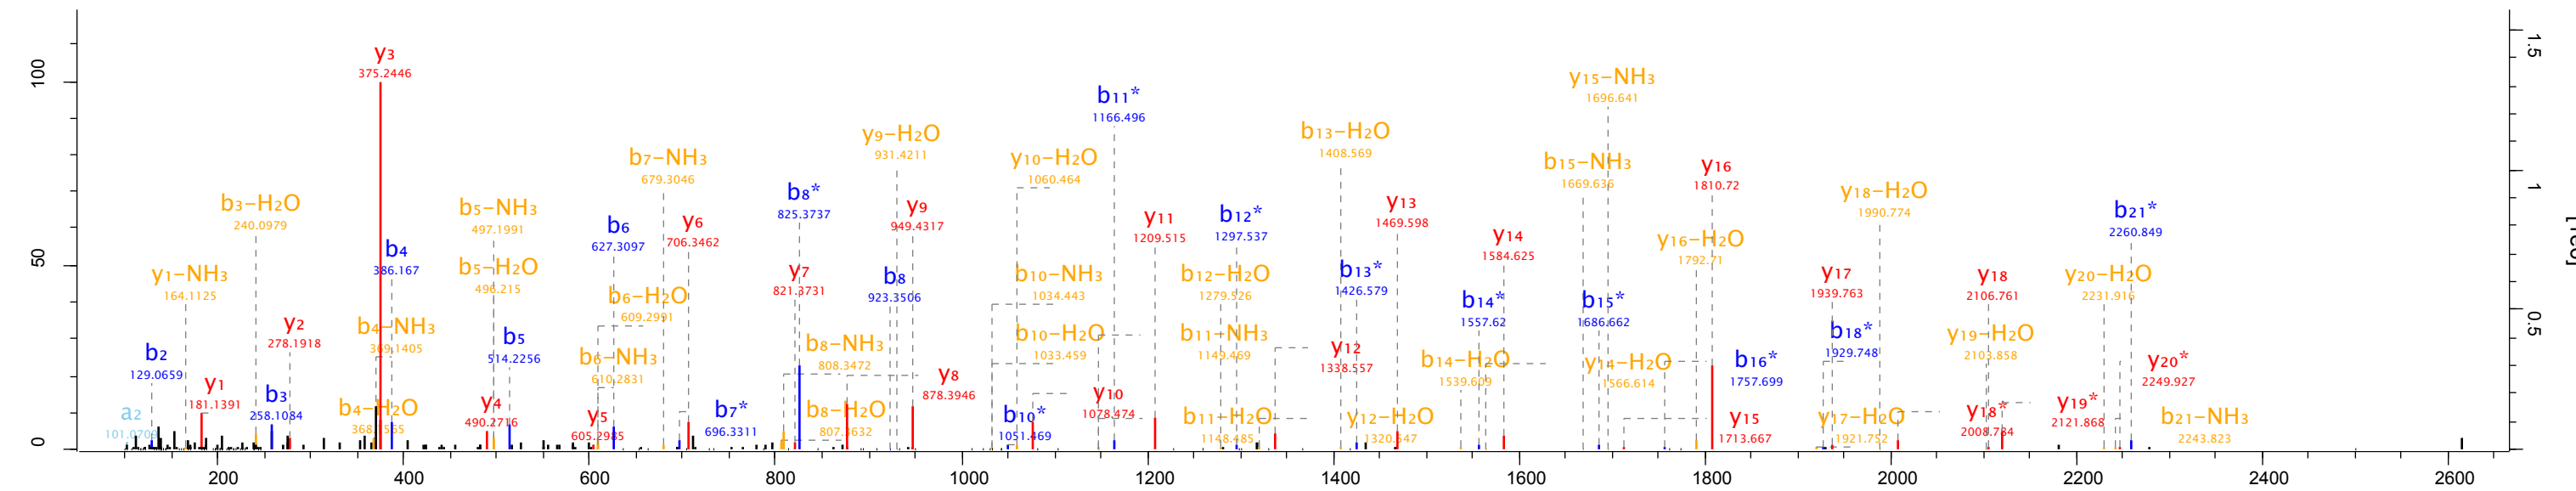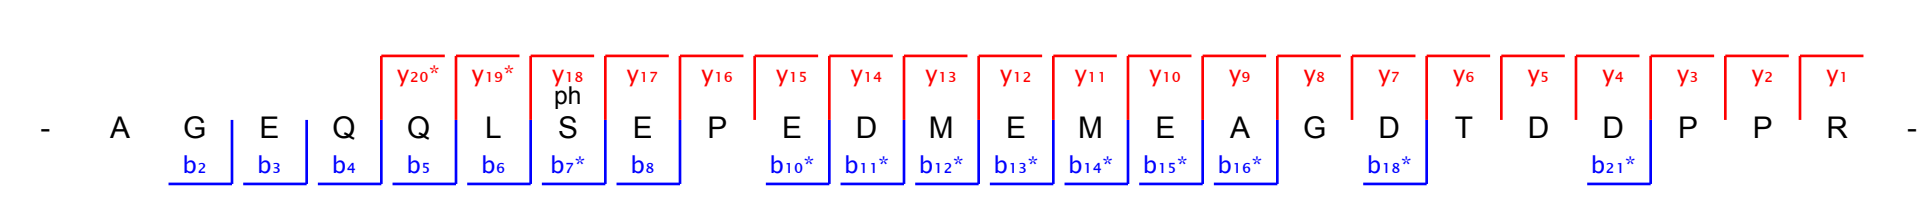

Raw file 20171215\_MaS\_33SR\_LMH\_phospho\_02 Scan 12512 Method FTMS; HCD Score 211.5 m/z 771.99 Gene names MAPK1

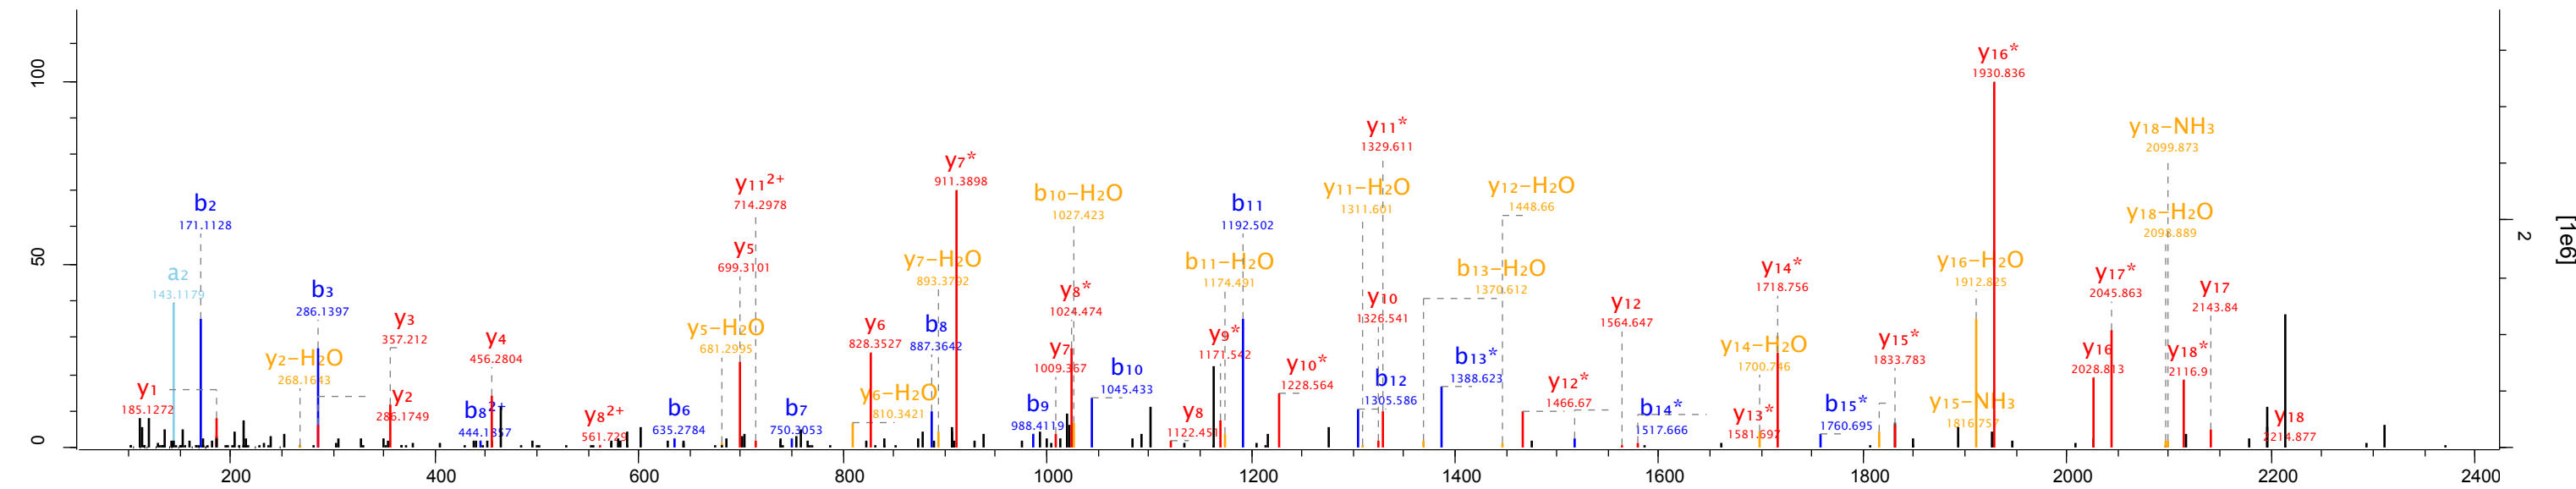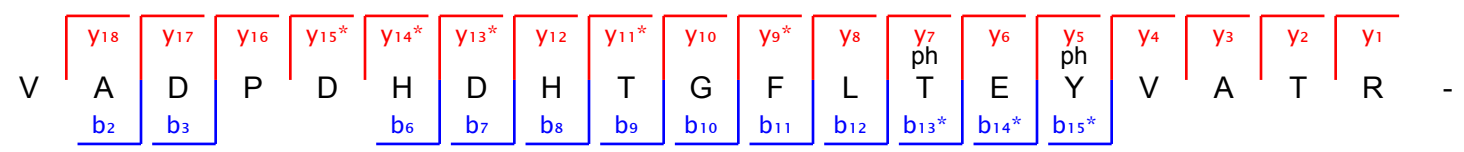

Raw file 20171215\_MaS\_33SR\_LMH\_phospho\_02 Scan 12862 Method FTMS; HCD Score 147.1 m/z 796.36 Gene names PPFIBP1

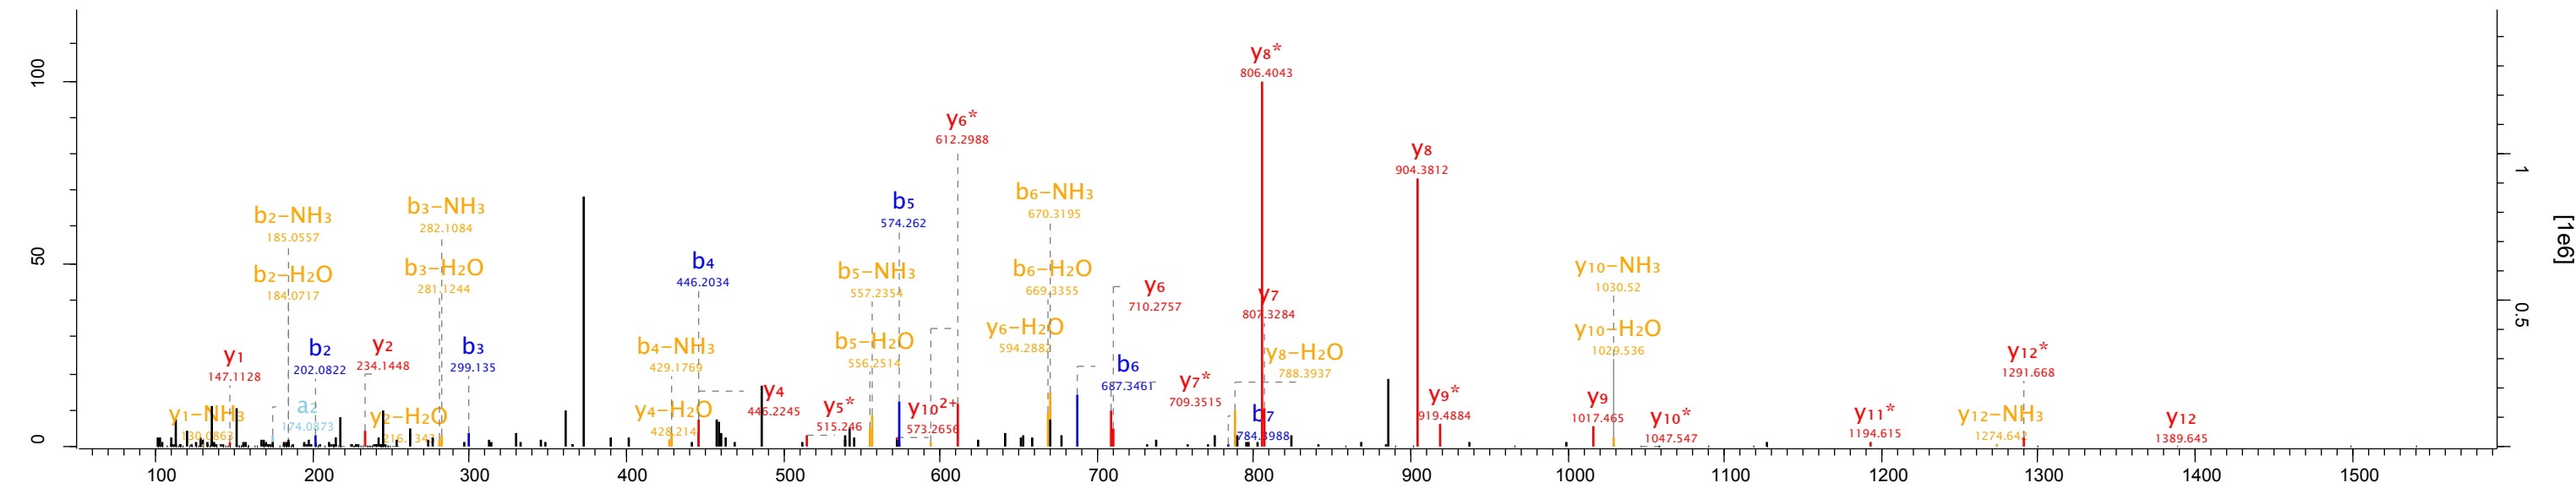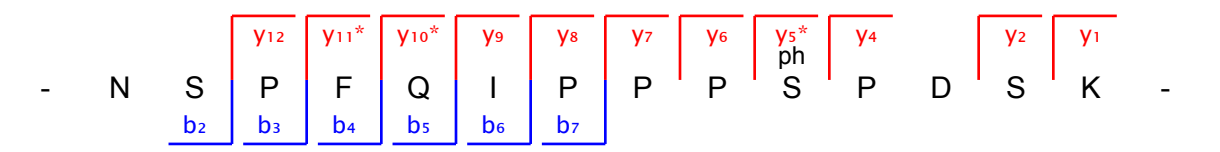

Raw file 20171215\_MaS\_33SR\_LMH\_phospho\_02 Scan 13712 Method FTMS; HCD Score 77.22 m/z 1177.52 Gene names EPRS

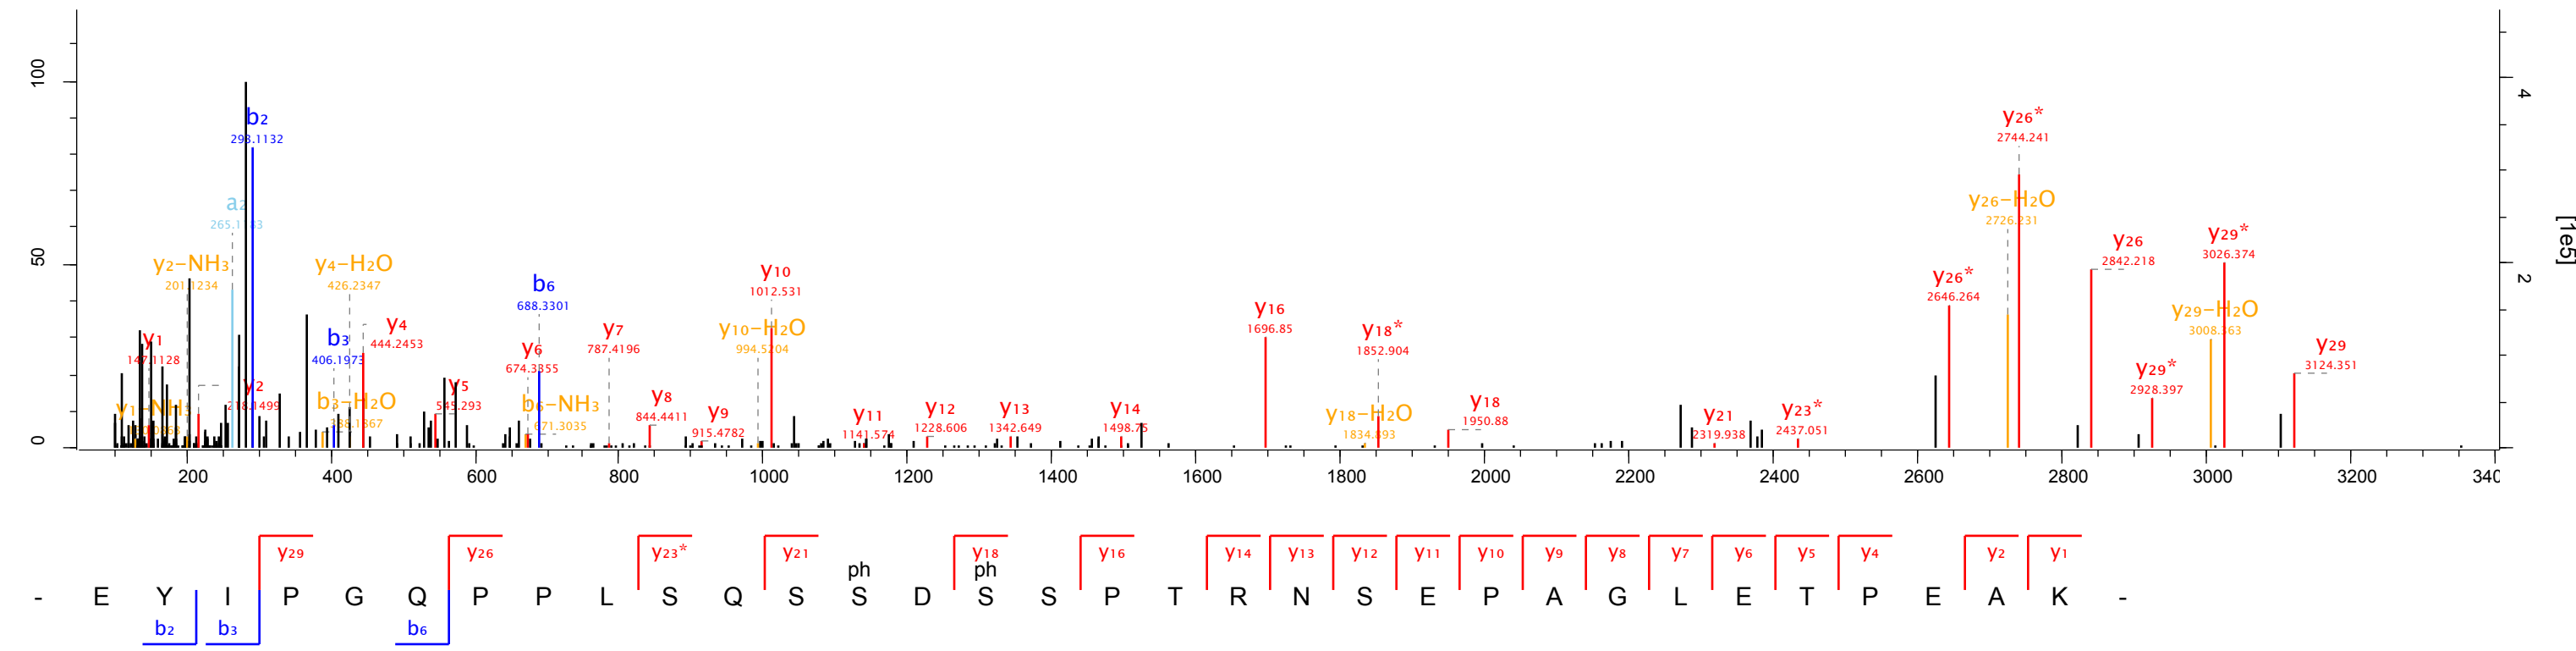

Raw file: 20171215\_MaS\_33SR\_LMH\_phospho\_02  
 Scan: 14372 Method: FTMS; HCD Score: 82.6 m/z: 828.7 Gene names: SIPA1L3

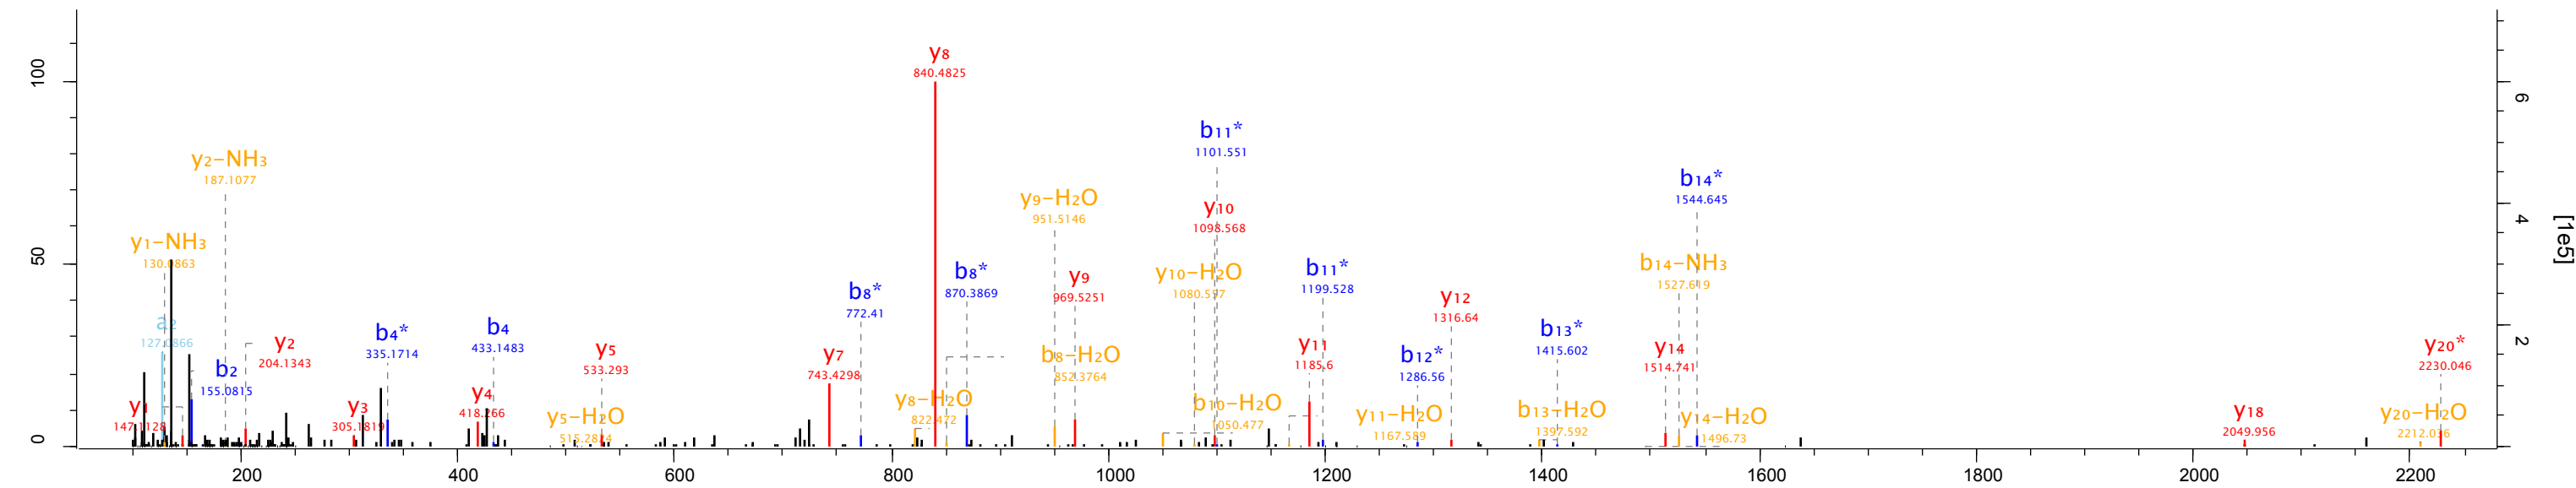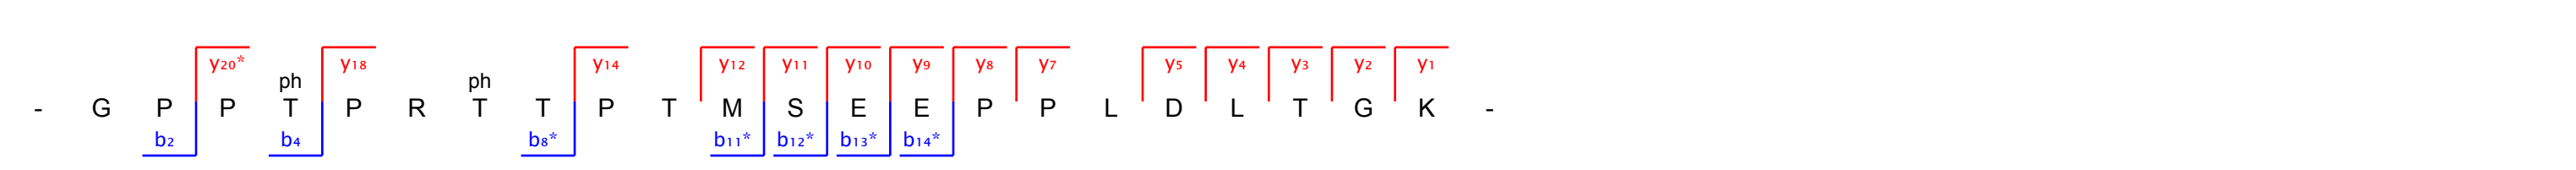

Raw file 20171215\_MaS\_33SR\_LMH\_phospho\_02 Scan 14552 Method FTMS; HCD Score 197.38 m/z 720.33 Gene names CDC23

20171215\_MaS\_33SR\_LMH\_phospho\_02

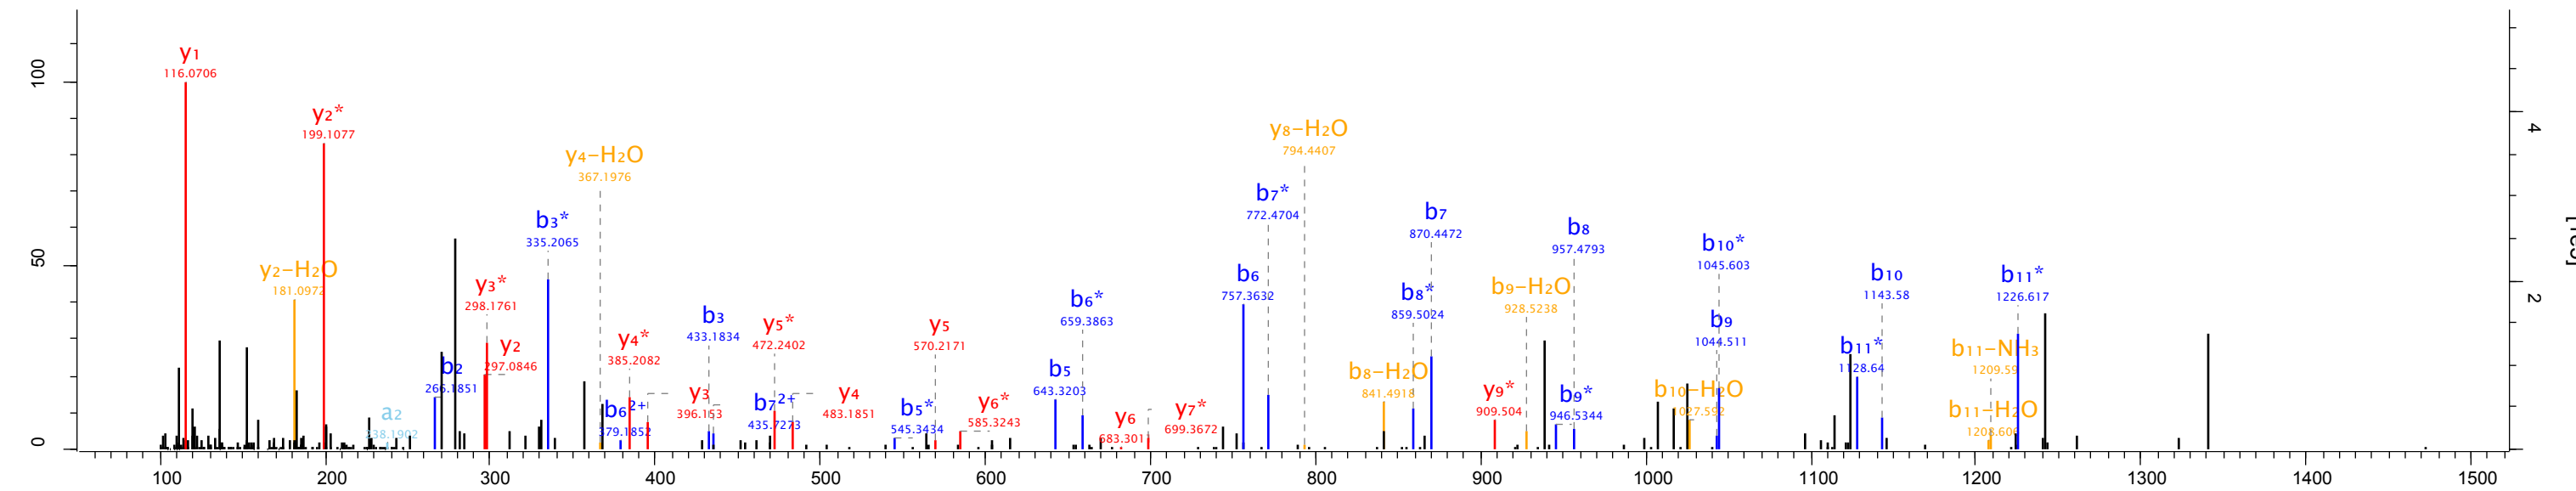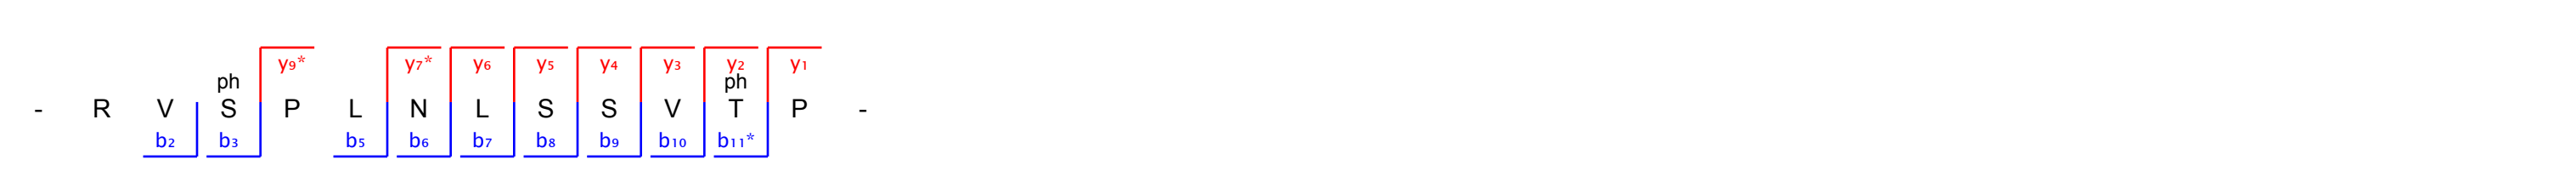

Raw file 20171215\_MaS\_33SR\_LMH\_phospho\_02 Scan 14562 Method FTMS; HCD Score 156.03 m/z 1163.48 Gene names USP9X

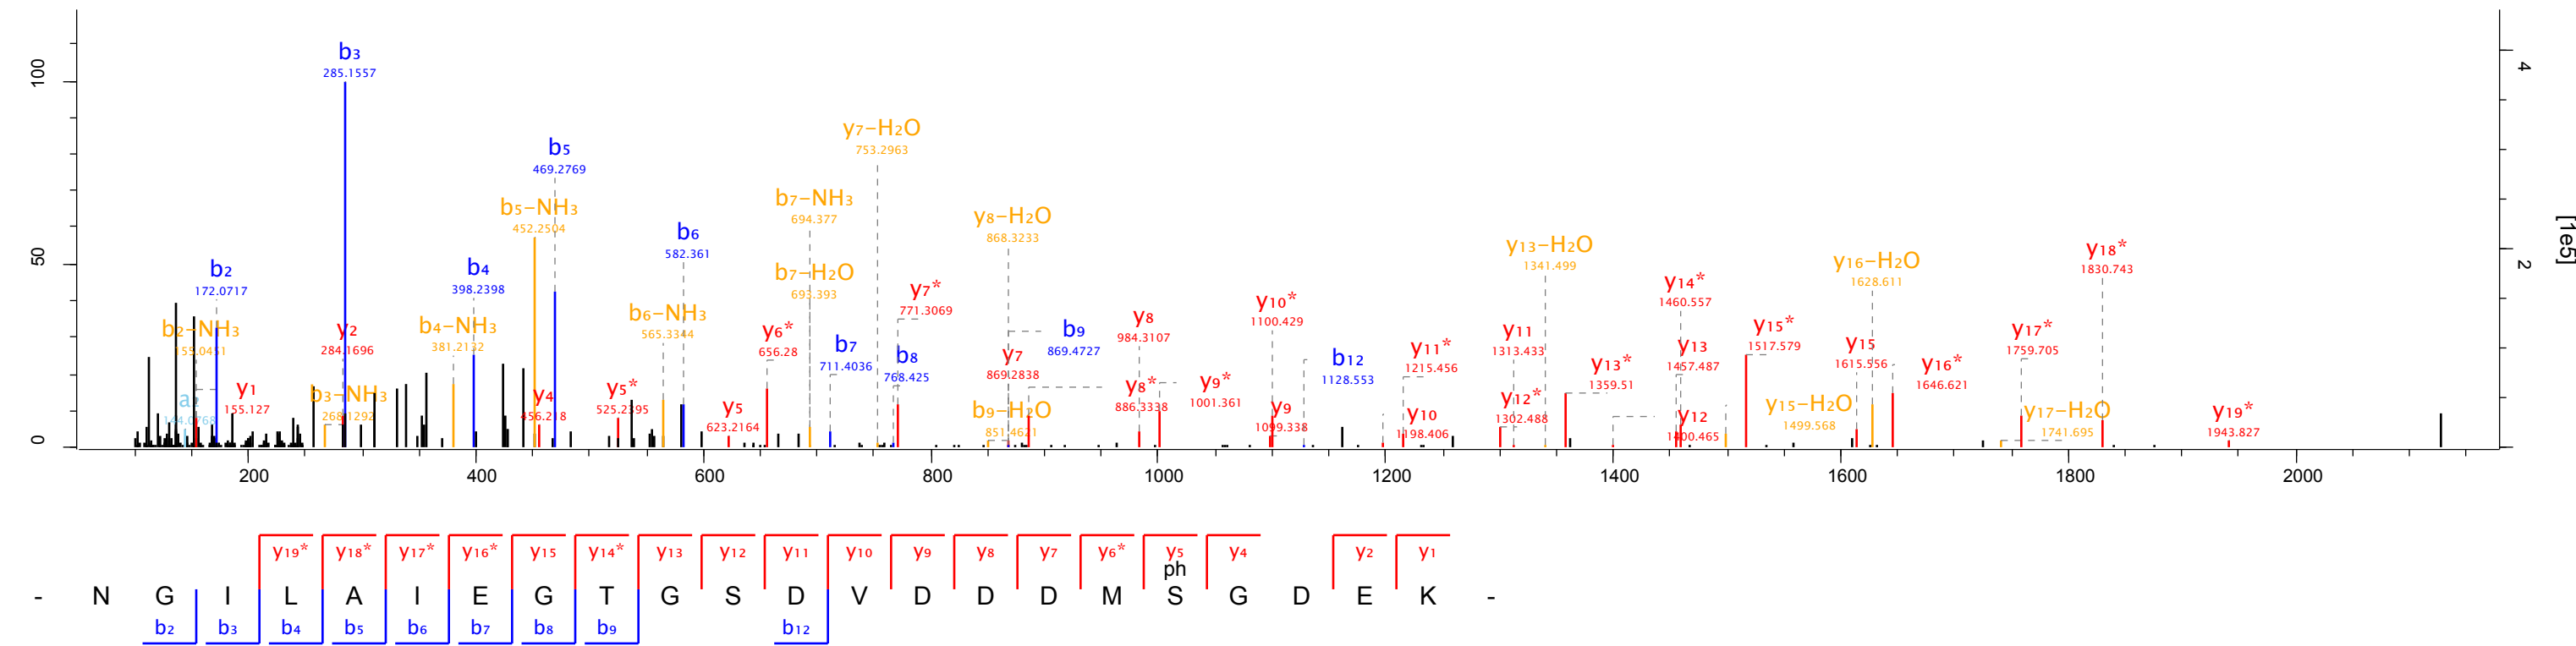



Raw file: 20171215\_MaS\_33SR\_LMH\_phospho\_02  
 Scan: 15172 Method: FTMS; HCD Score: 123.55 m/z: 879.37 Gene names: CRAMP1L

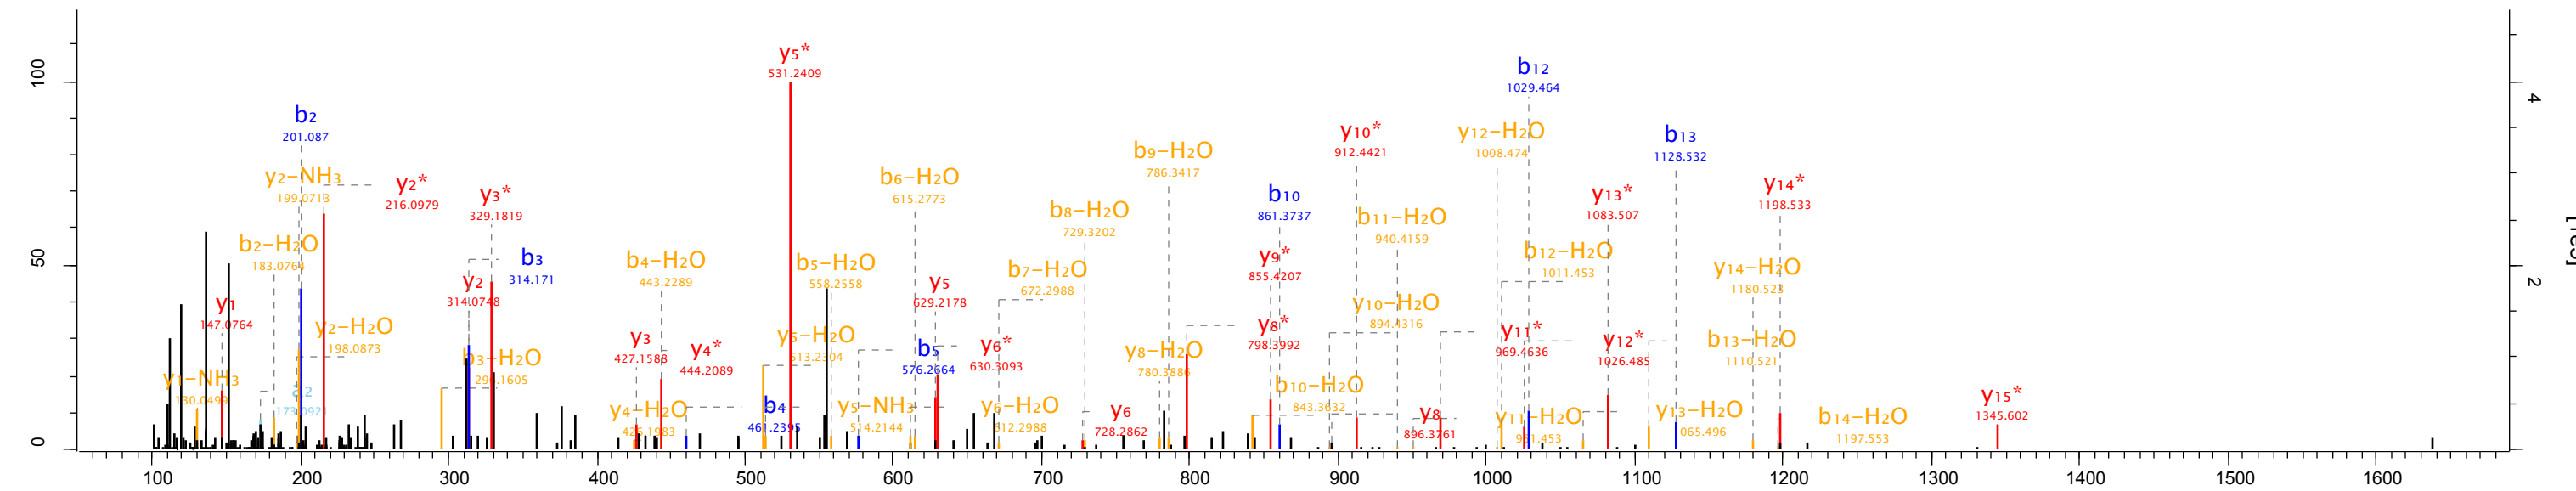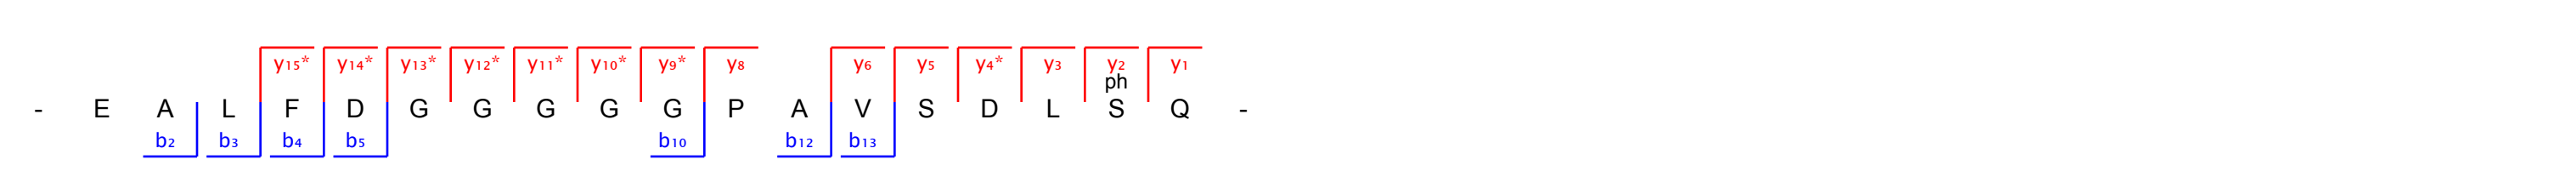

Raw file 20171215\_MaS\_33SR\_LMH\_phospho\_02 Scan 16702 Method FTMS; HCD Score 126.74 m/z 1229.86 Gene names SQSTM1

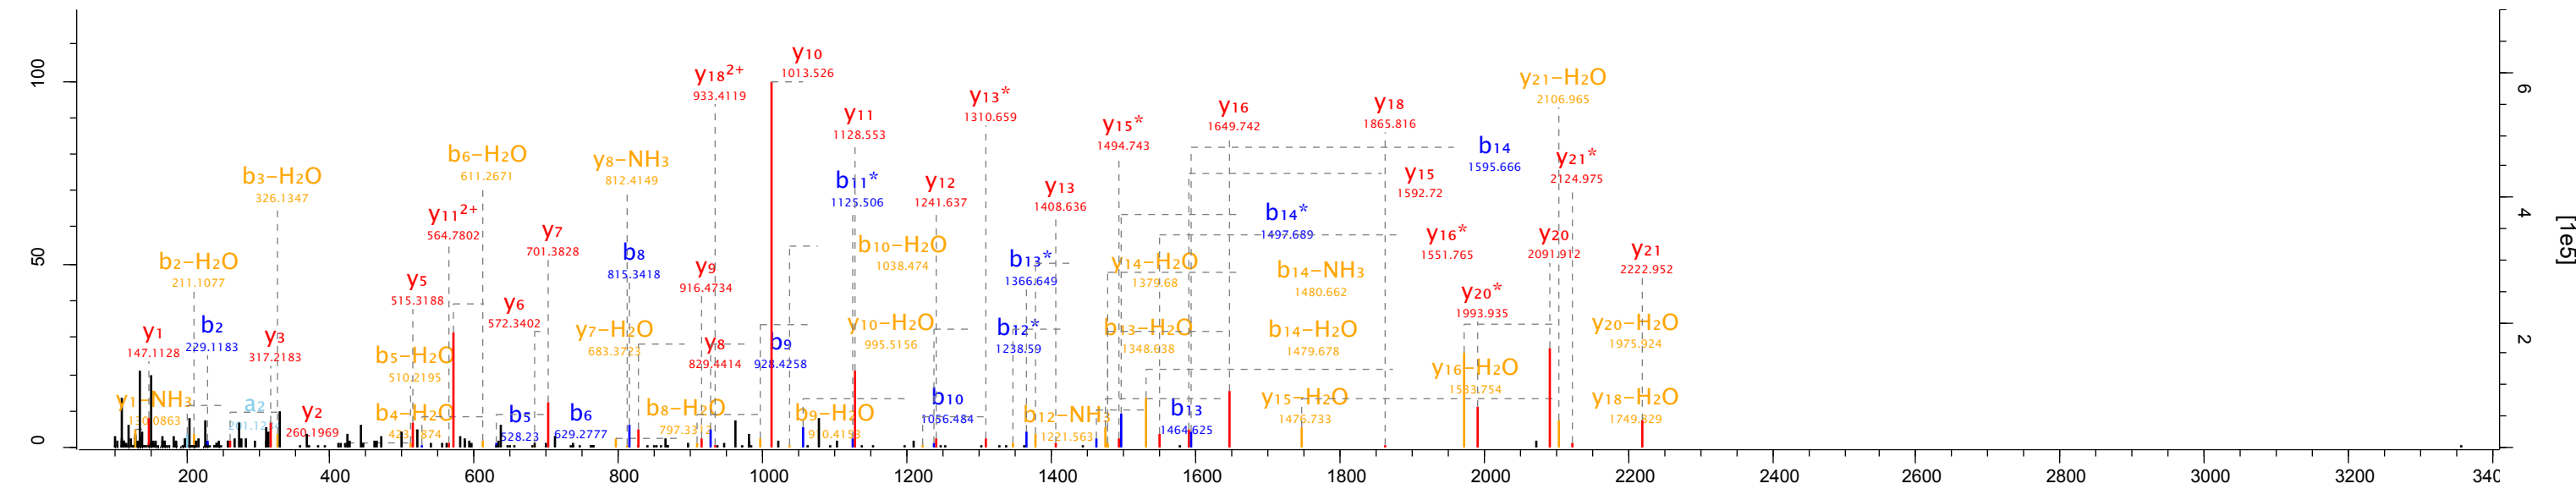

- E V D P S T G E L Q S L Q M P E S E G P S S L D P S Q E G P T G L K -

Annotations below the sequence indicate the fragmentation sites for b and y ions:

- Blue boxes under V, S, T, E, L, Q, S, L, Q, M, P indicate b-ion cleavage sites (b<sub>2</sub> to b<sub>14</sub>).
- Red boxes above S, L, D, P, S, Q, E, G, P, T, G, L, K indicate y-ion cleavage sites (y<sub>1</sub> to y<sub>21</sub>).
- A red box above S indicates a phospho site (ph).

Raw file 20171215\_MaS\_33SR\_LMH\_phospho\_02 Scan 1952 Method FTMS; HCD Score 227.34 m/z 791.78 Gene names PPP1R7

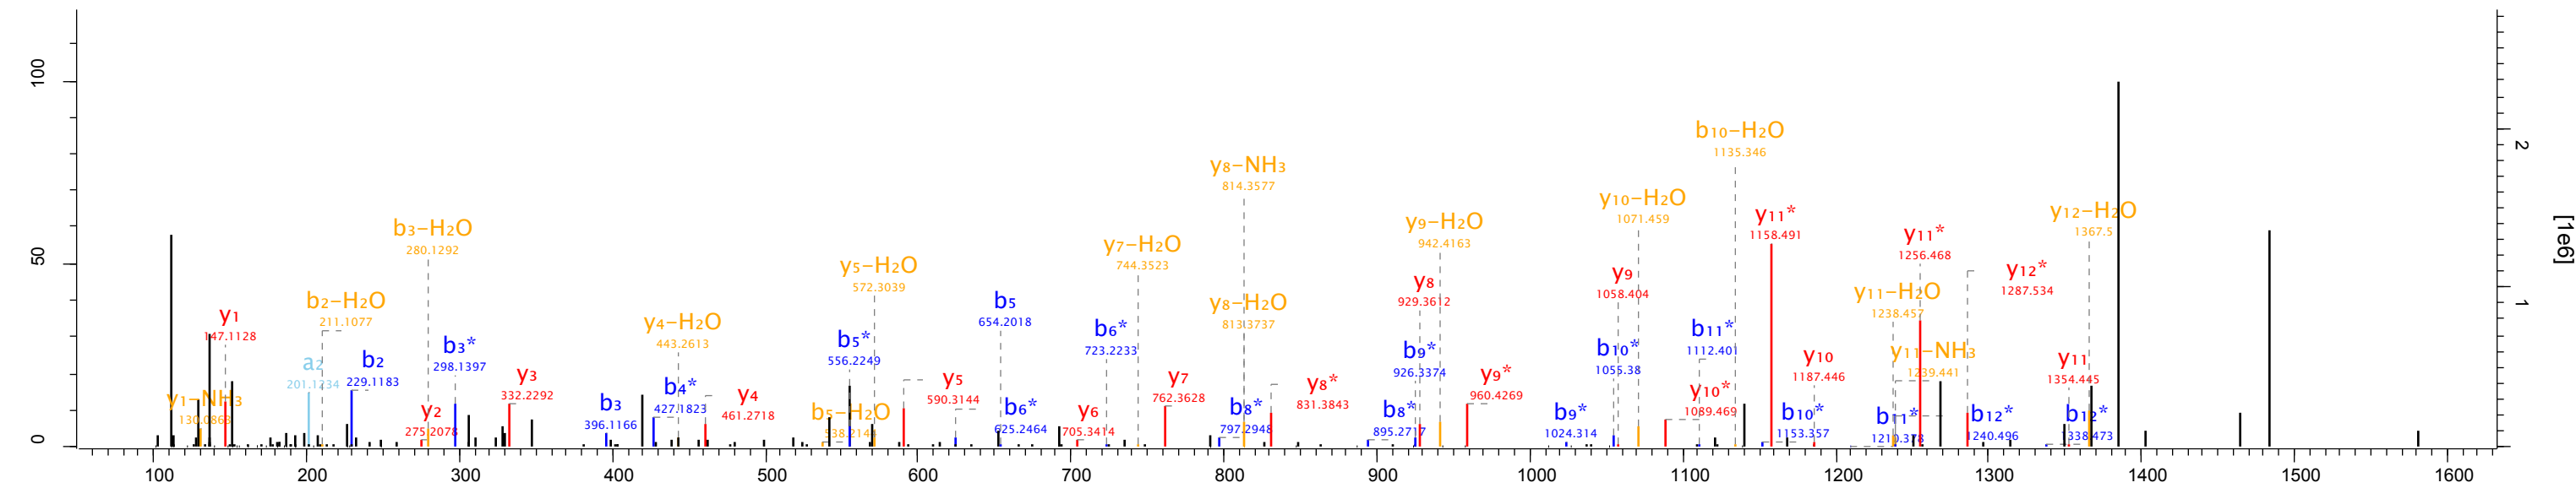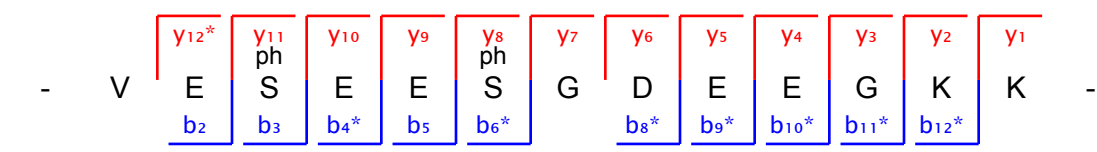

Raw file 20171215\_MaS\_33SR\_LMH\_phospho\_02 Scan 2082 Method FTMS; HCD Score 140.01 m/z 531.21 Gene names SRRM2

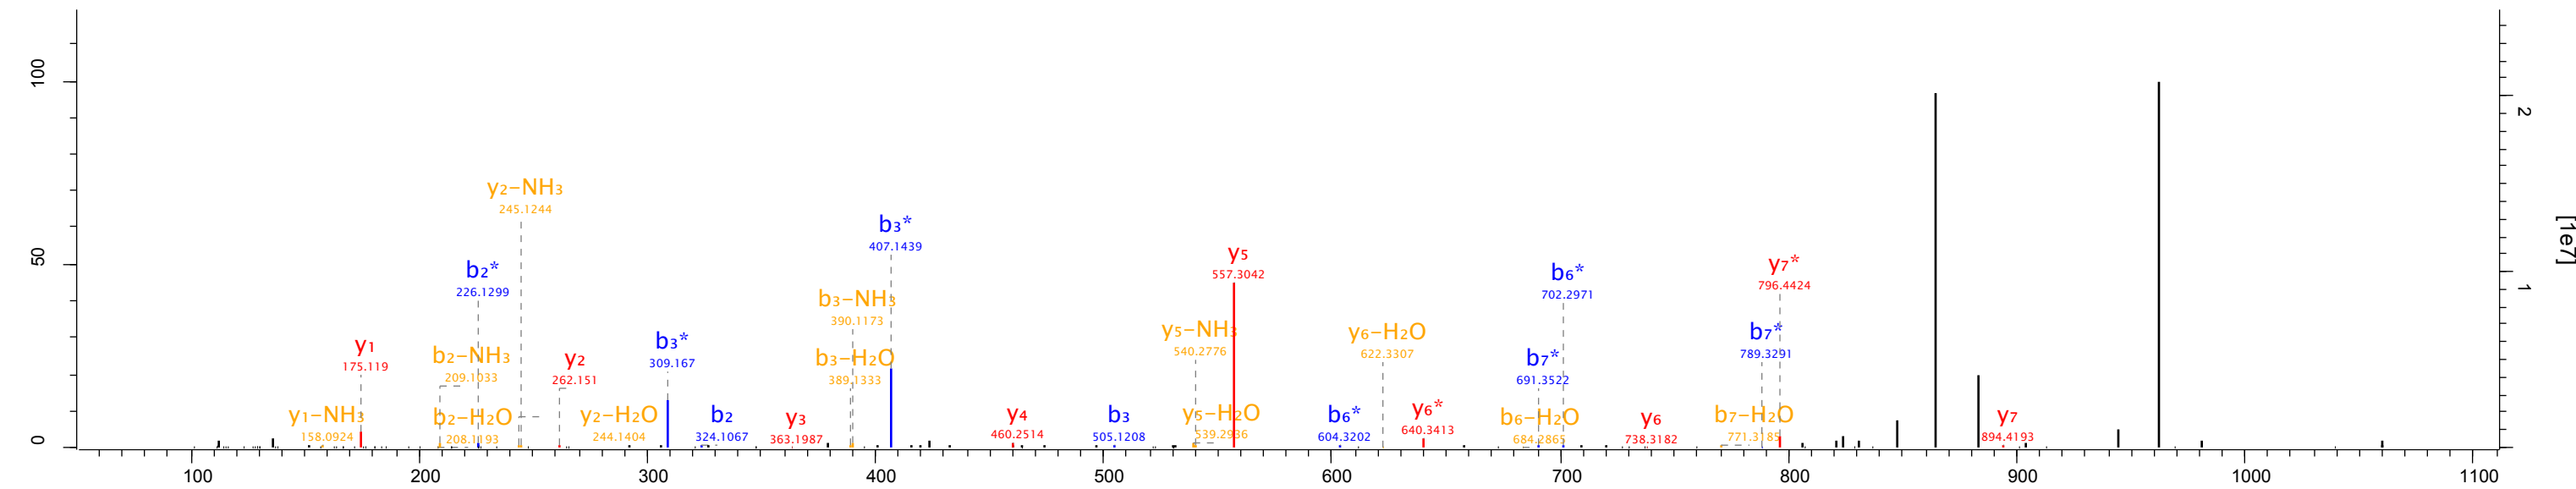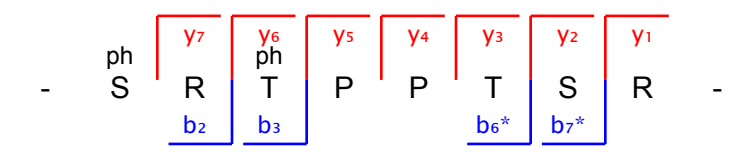

Raw file: 20171215\_MaS\_33SR\_LMH\_phospho\_02  
 Scan: 2092 Method: FTMS; HCD Score: 87.62 m/z: 510.21 Gene names: SRRM2

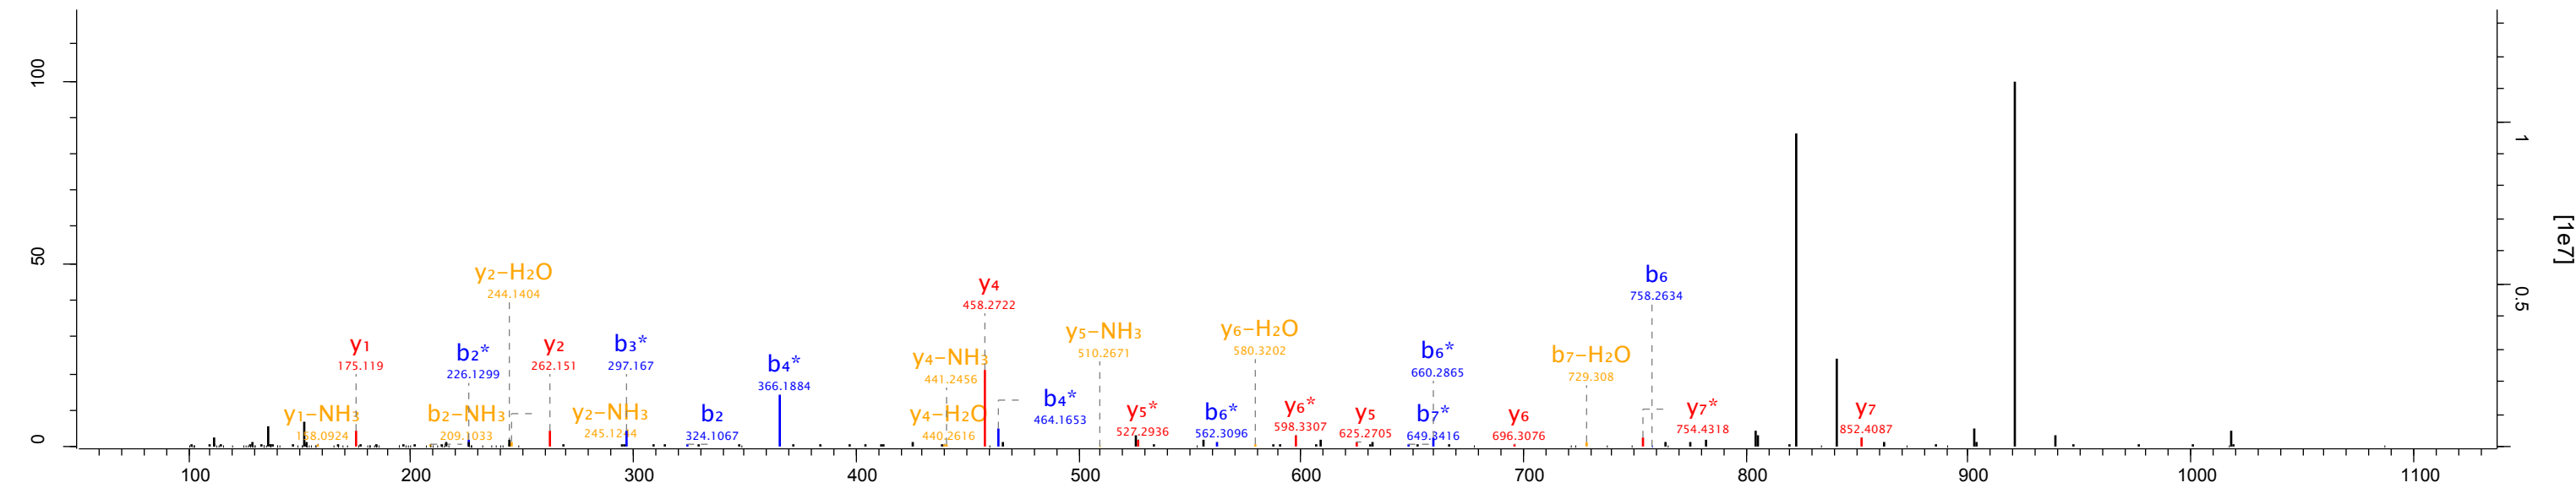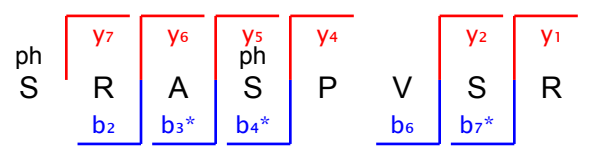

Raw file Scan Method Score m/z Gene names

20171215\_MaS\_33SR\_LMH\_phospho\_02 2142 FTMS; HCD 72.68 408.51 MATR3

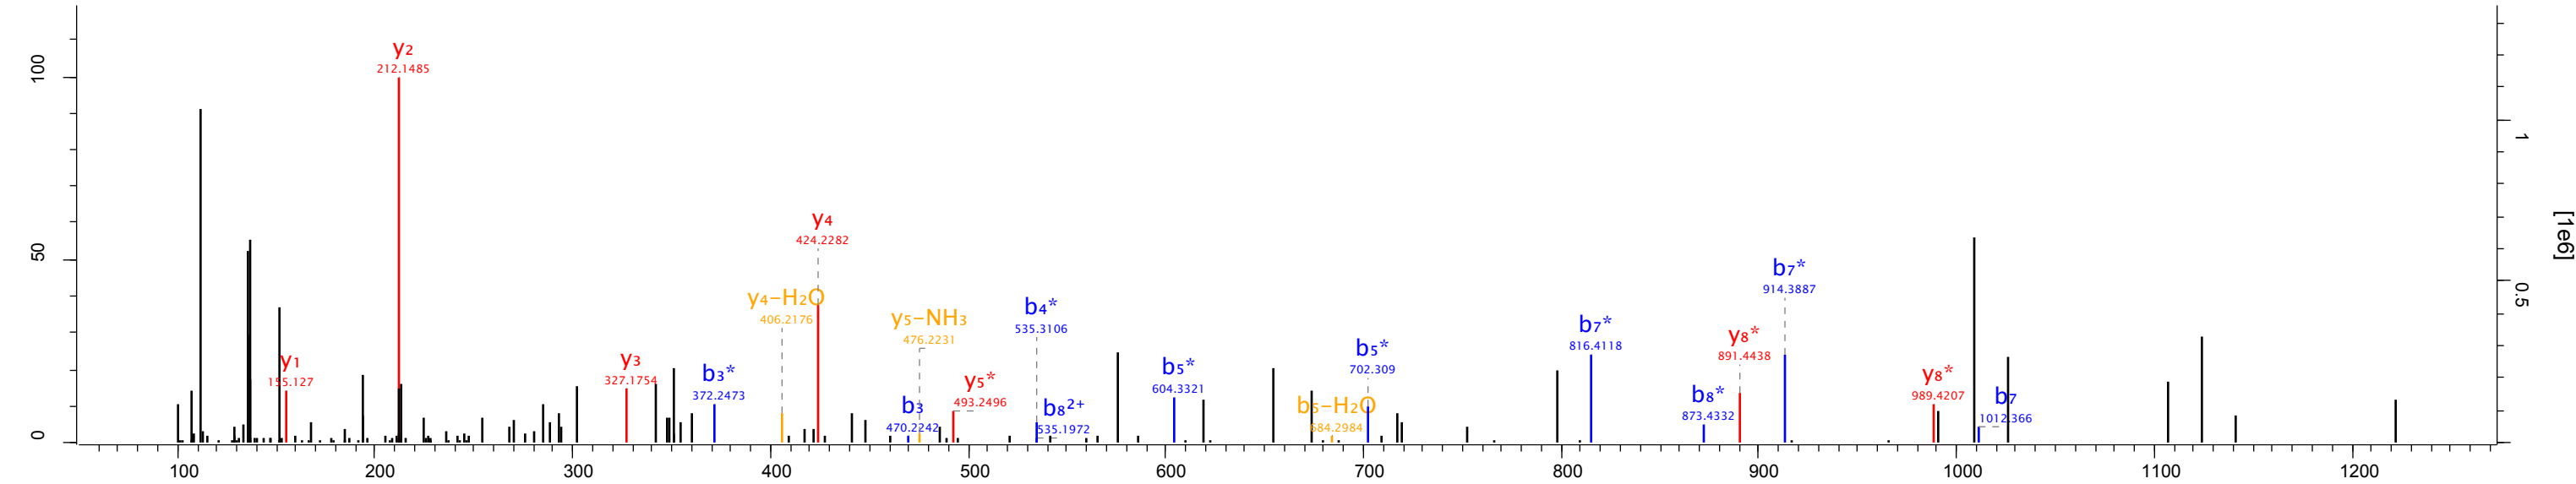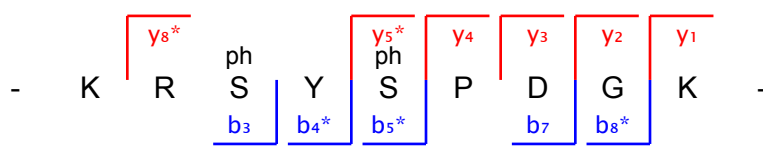

Raw file 20171215\_MaS\_33SR\_LMH\_phospho\_02 Scan 2292 Method FTMS; HCD Score 140.01 m/z 532.22 Gene names SRRM2

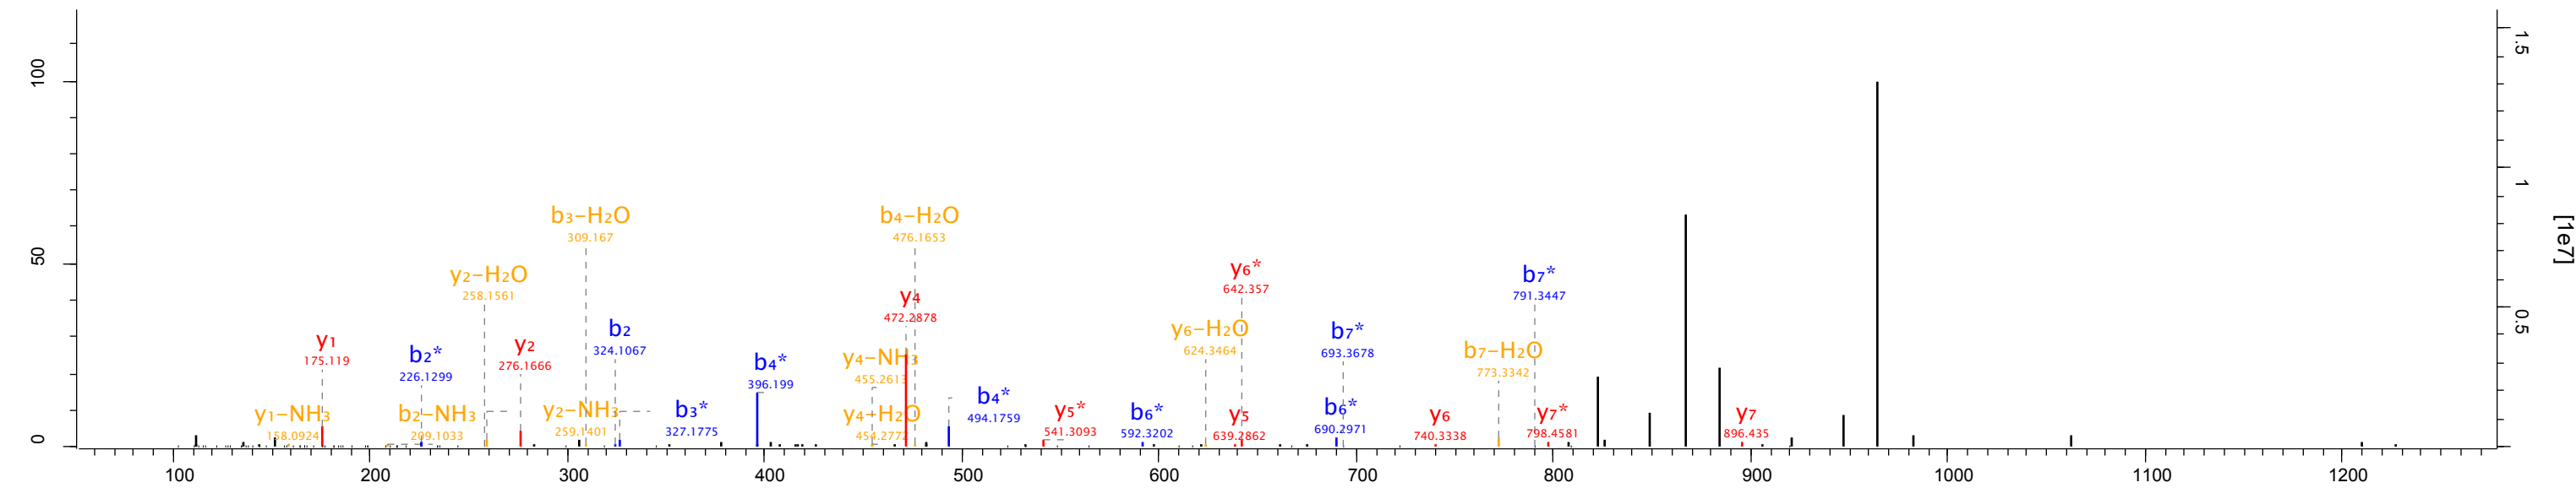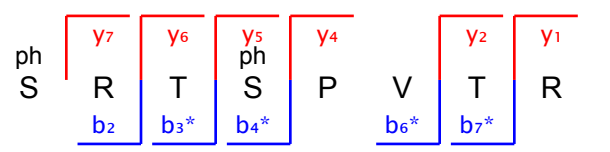

Raw file 20171215\_MaS\_33SR\_LMH\_phospho\_02 Scan 2302 FTMS; HCD Score 188.05 m/z 778.33 Gene names PCMI

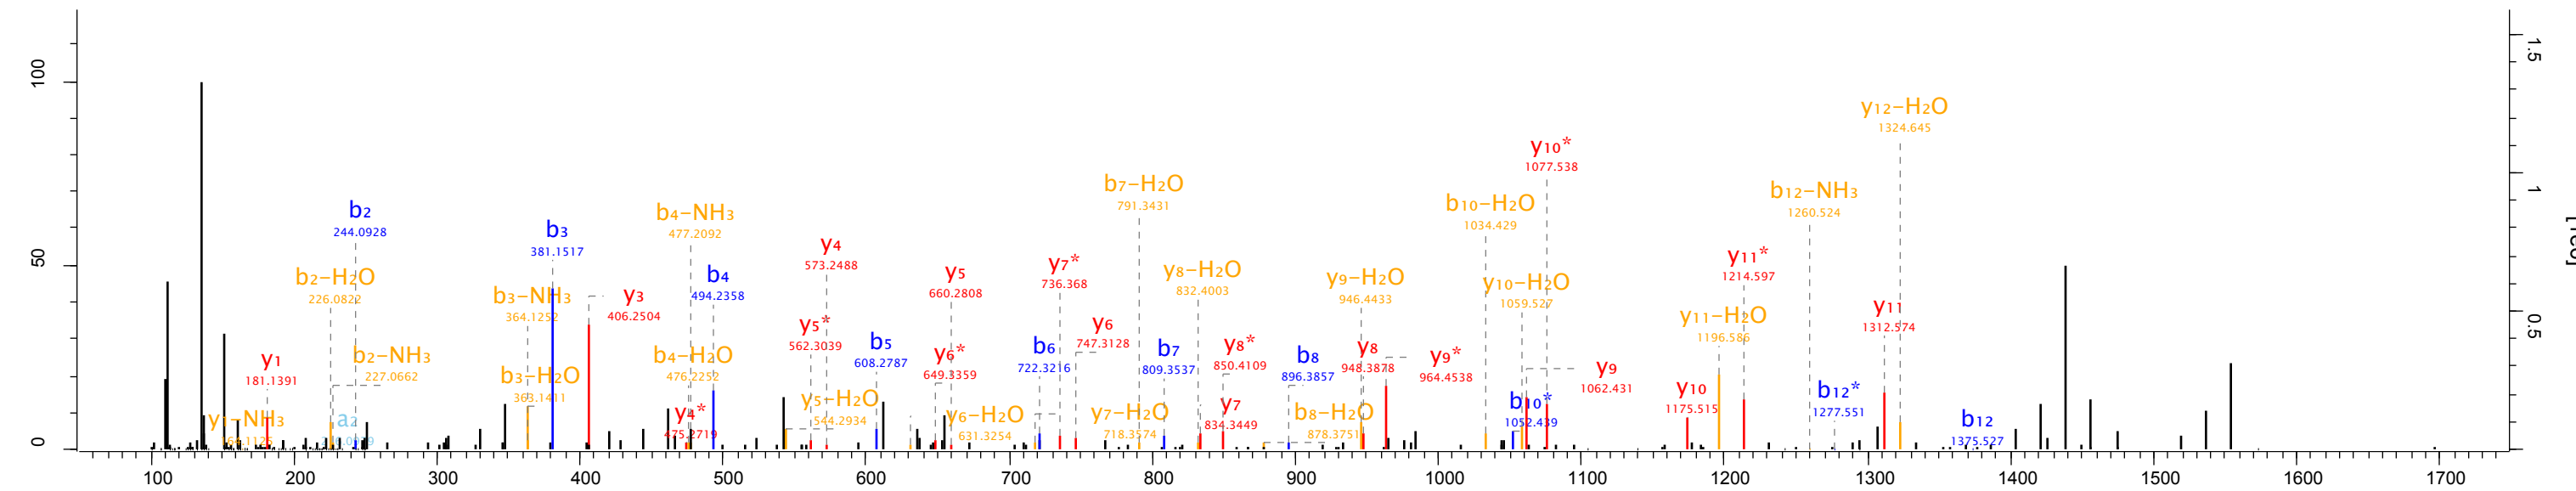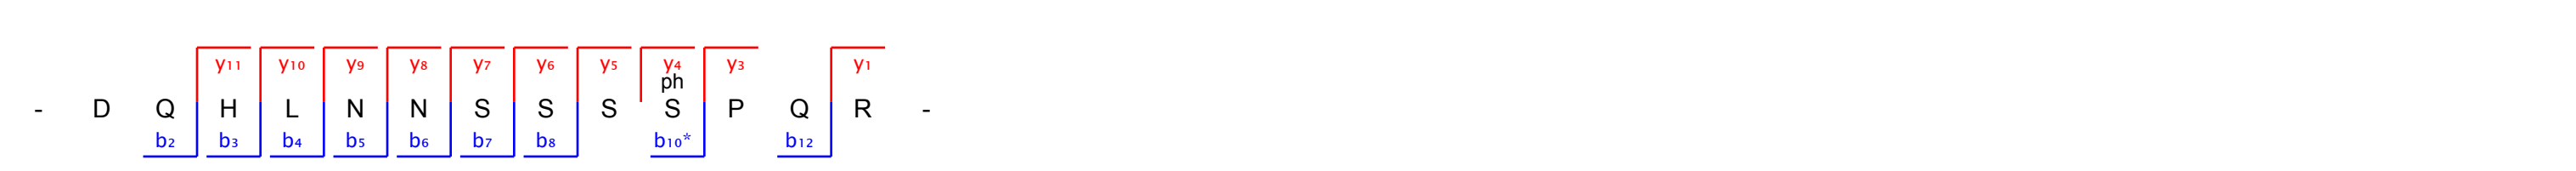



Raw file 20171215\_MaS\_33SR\_LMH\_phospho\_02 Scan 3542 Method FTMS; HCD Score 92.86 m/z 585.26 Gene names VCL

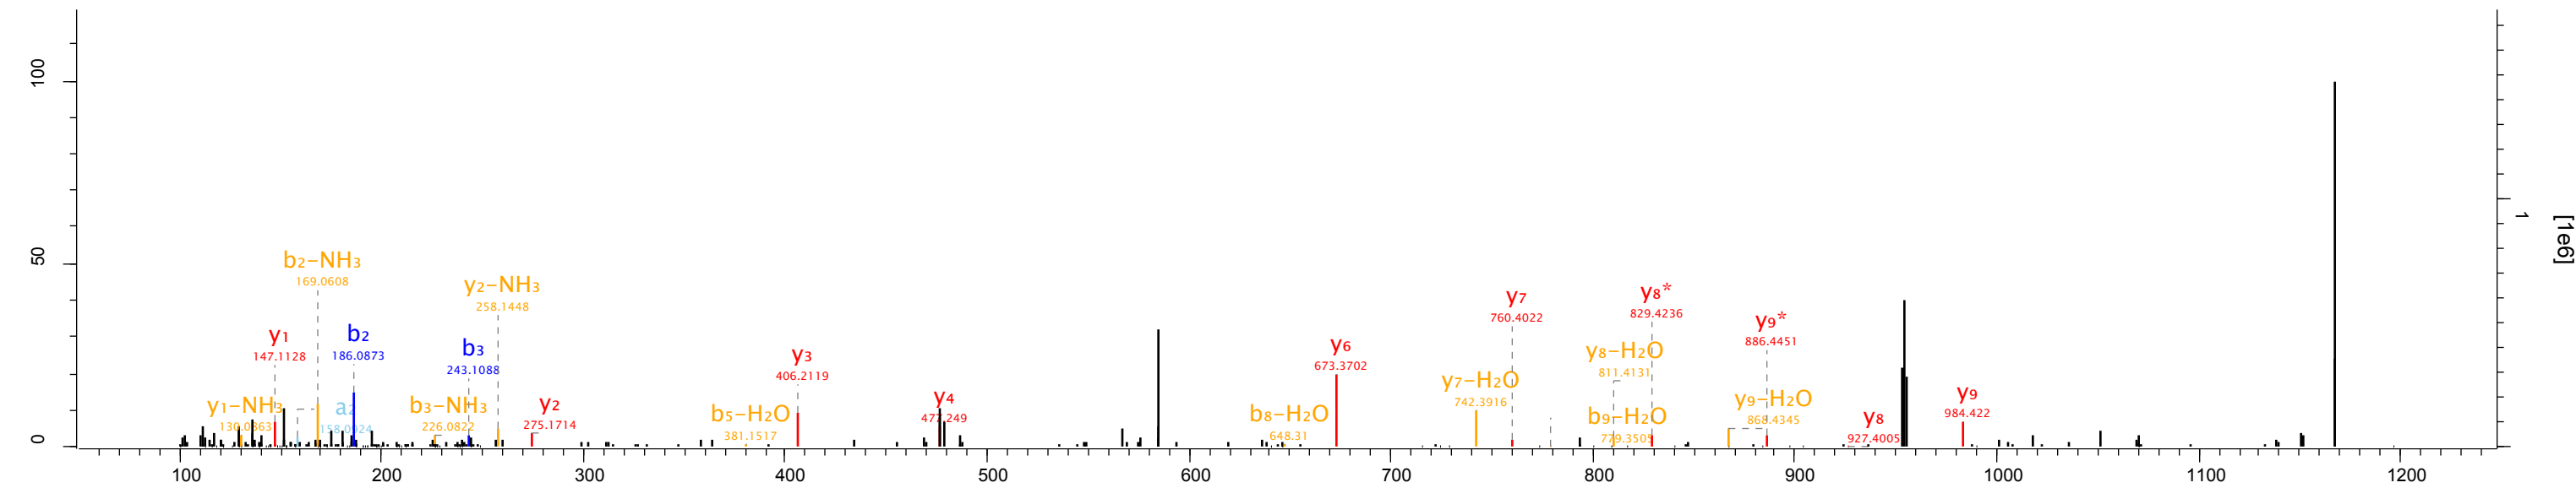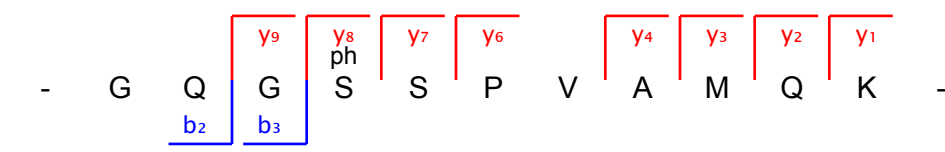

Raw file 20171215\_MaS\_33SR\_LMH\_phospho\_02 Scan 3712 Method FTMS; HCD Score 54.28 m/z 556.22 Gene names SORBS3

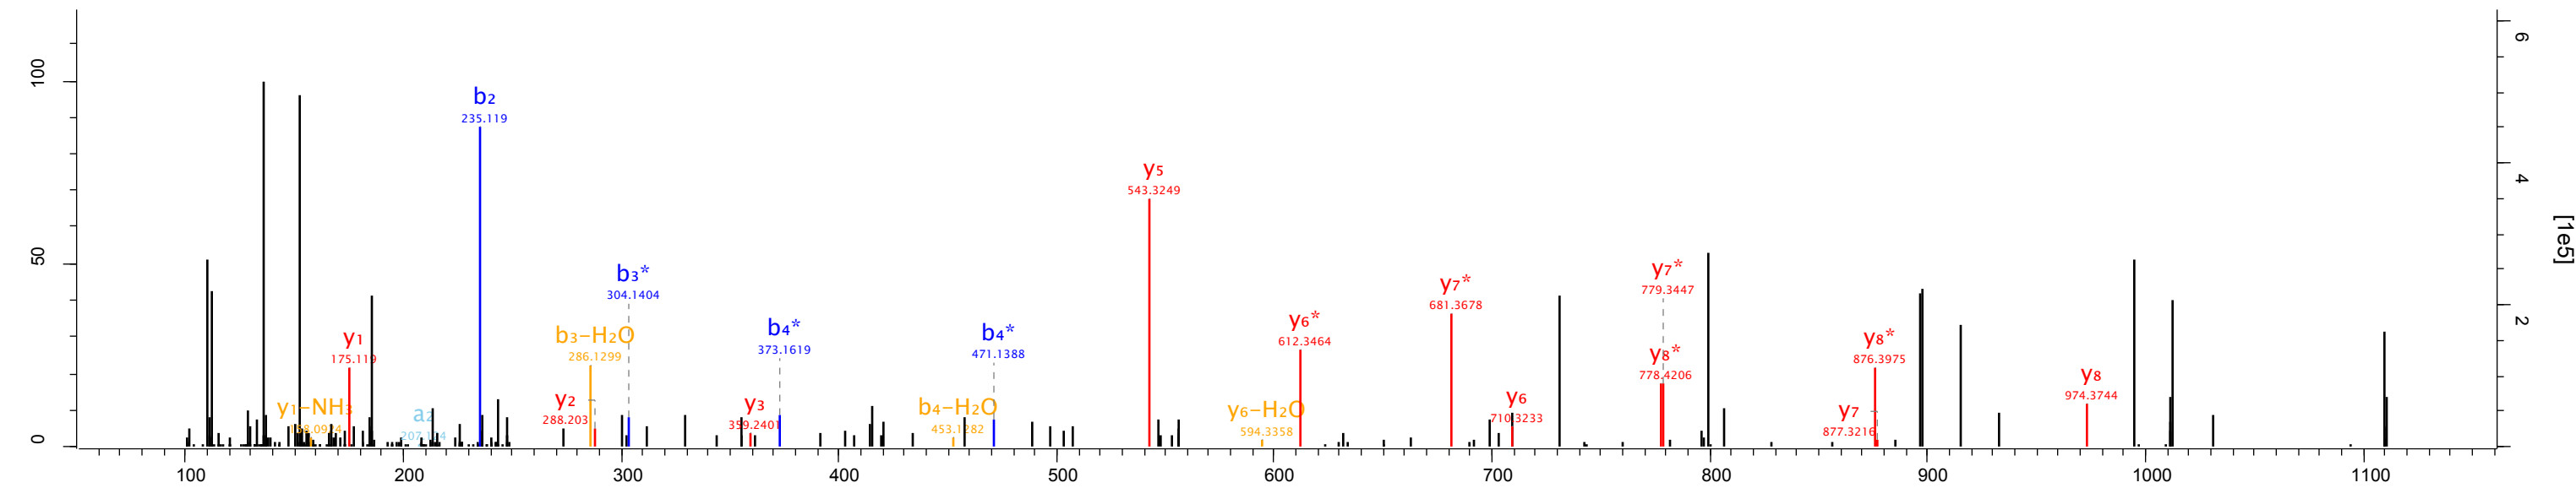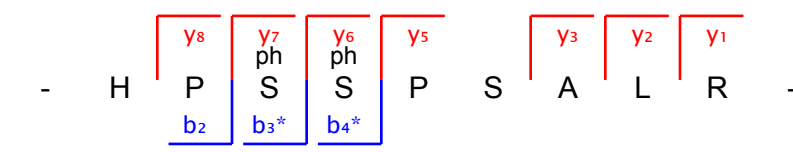

Raw file 20171215\_MaS\_33SR\_LMH\_phospho\_02 Scan 3802 Method FTMS; HCD Score 147.39 m/z 584.24 Gene names EXOC1

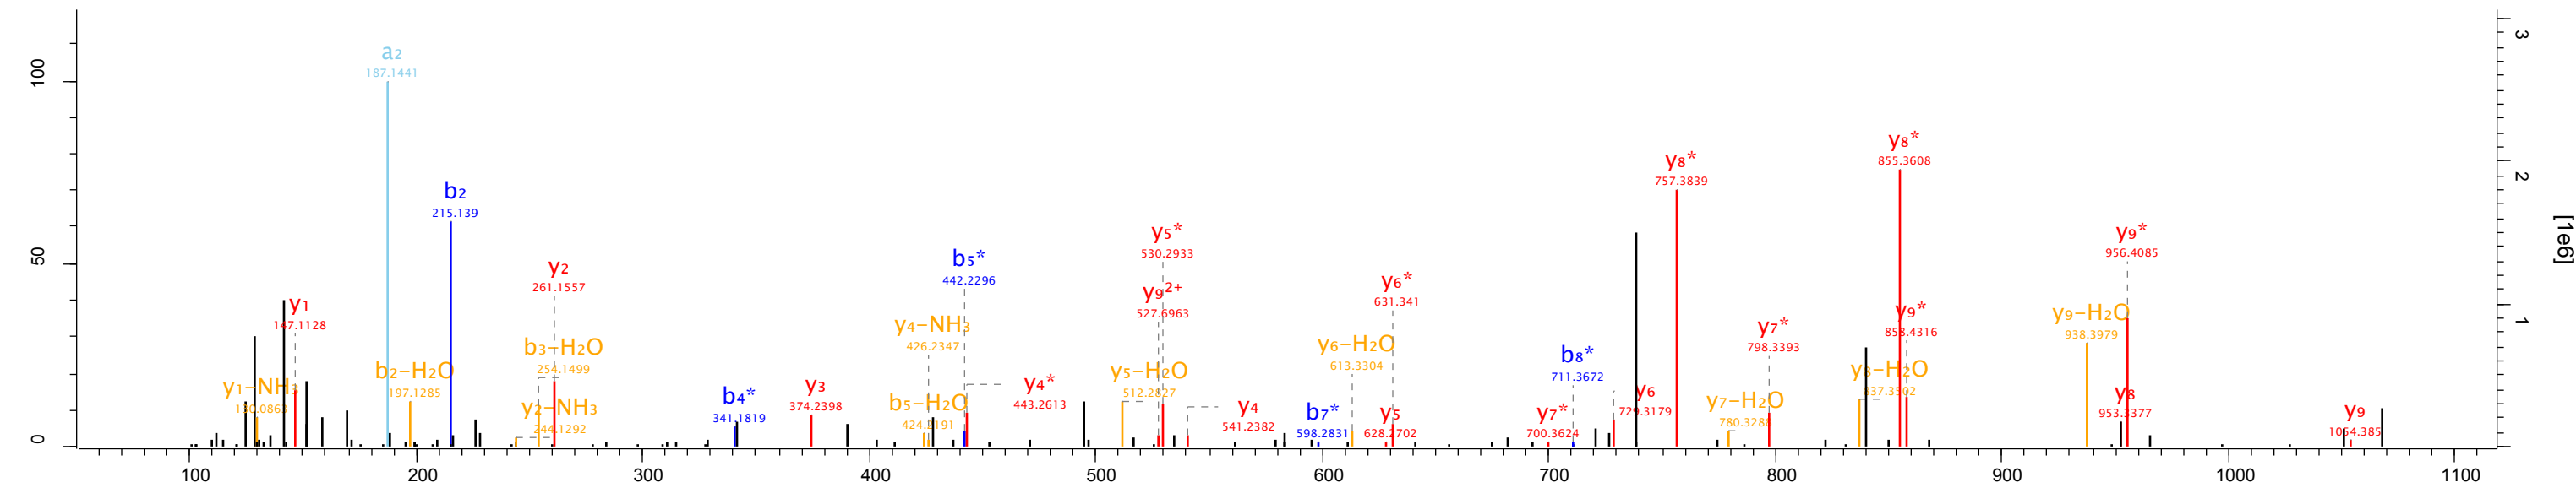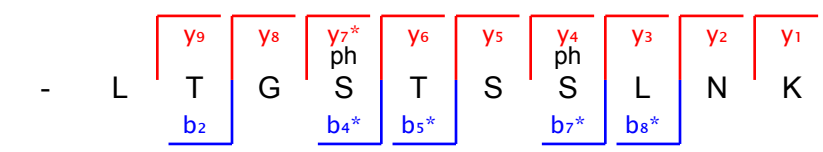

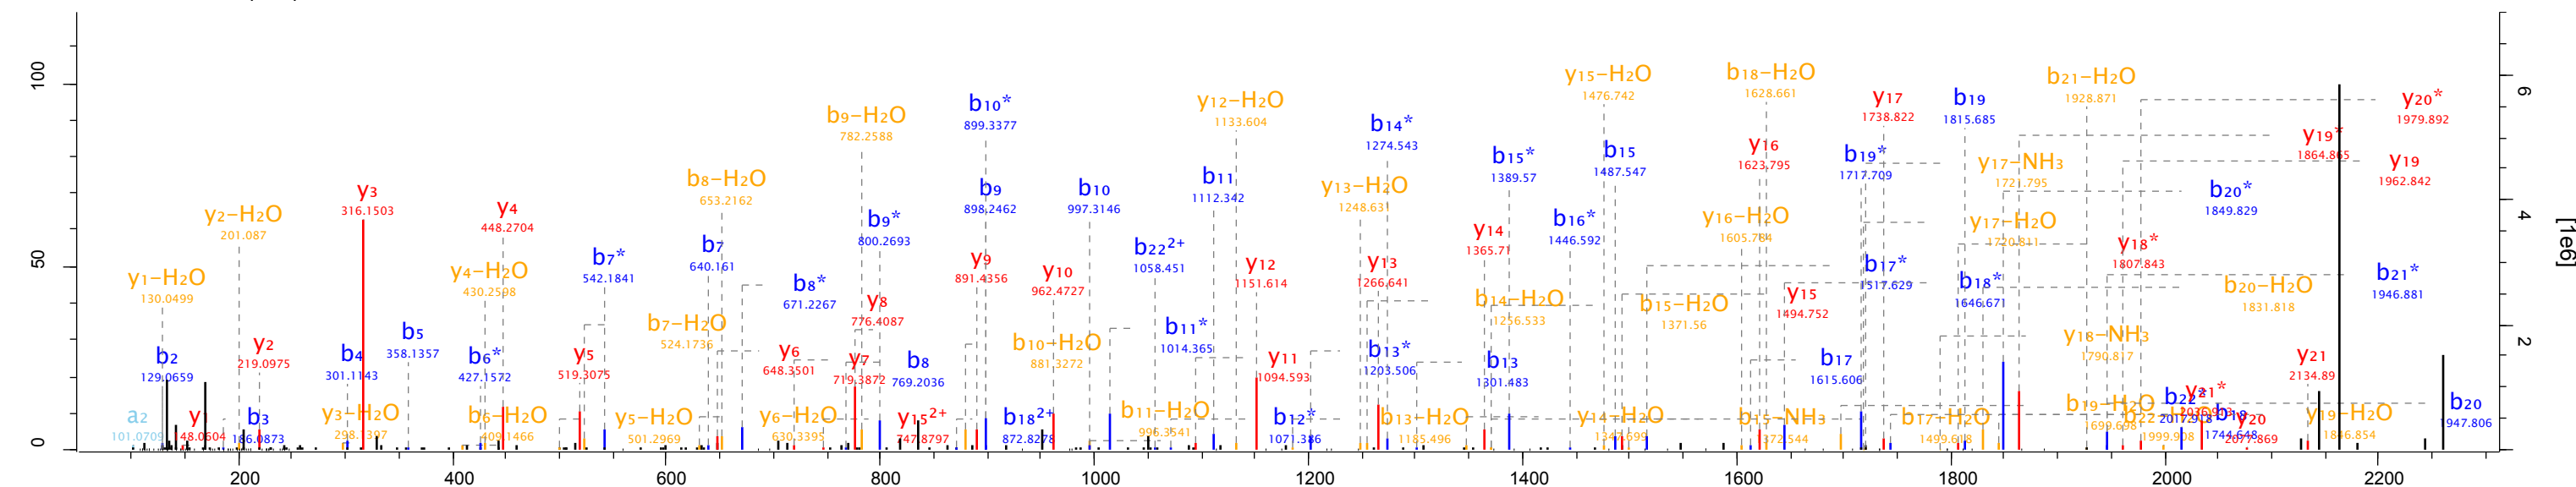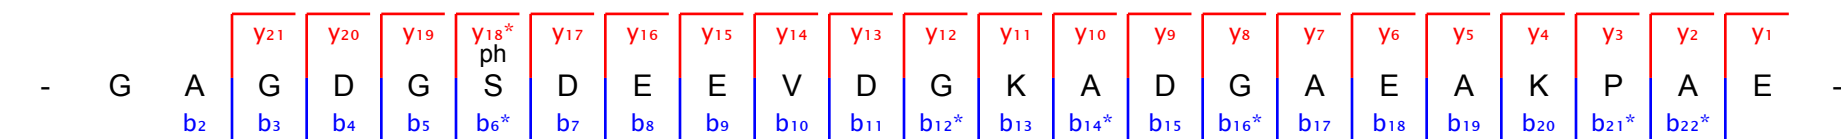

Raw file 20171215\_MaS\_33SR\_LMH\_phospho\_02 Scan 4532 Method FTMS; HCD Score 248.41 m/z 740.32 Gene names TCEA1

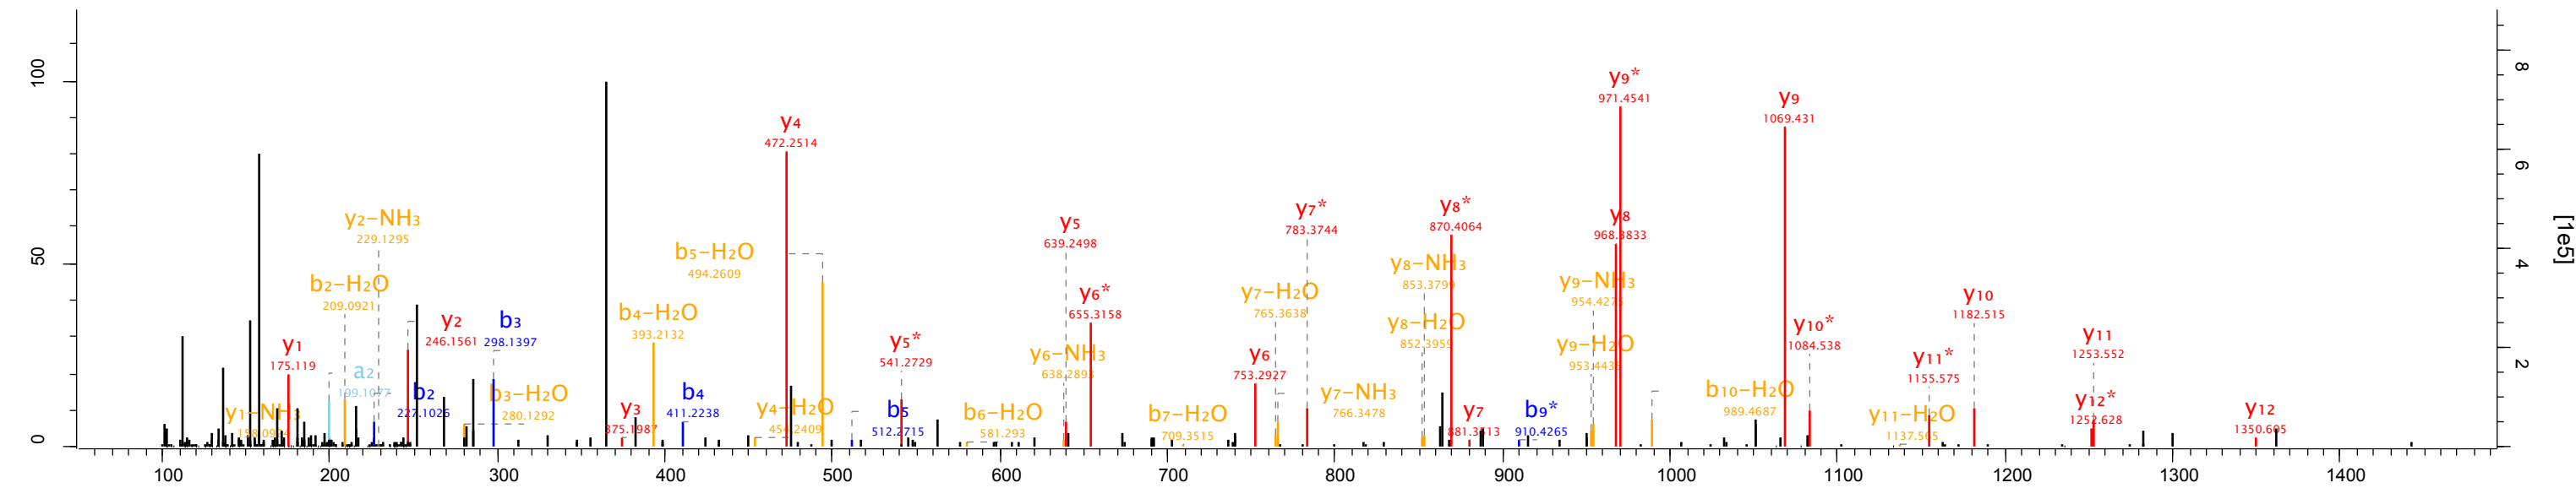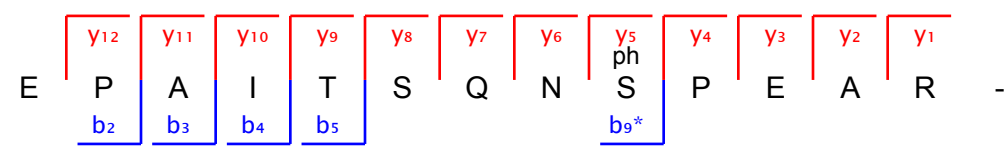

Raw file 20171215\_MaS\_33SR\_LMH\_phospho\_02 Scan 4742 Method FTMS; HCD Score 66.88 m/z 913.39 Gene names RAD23B

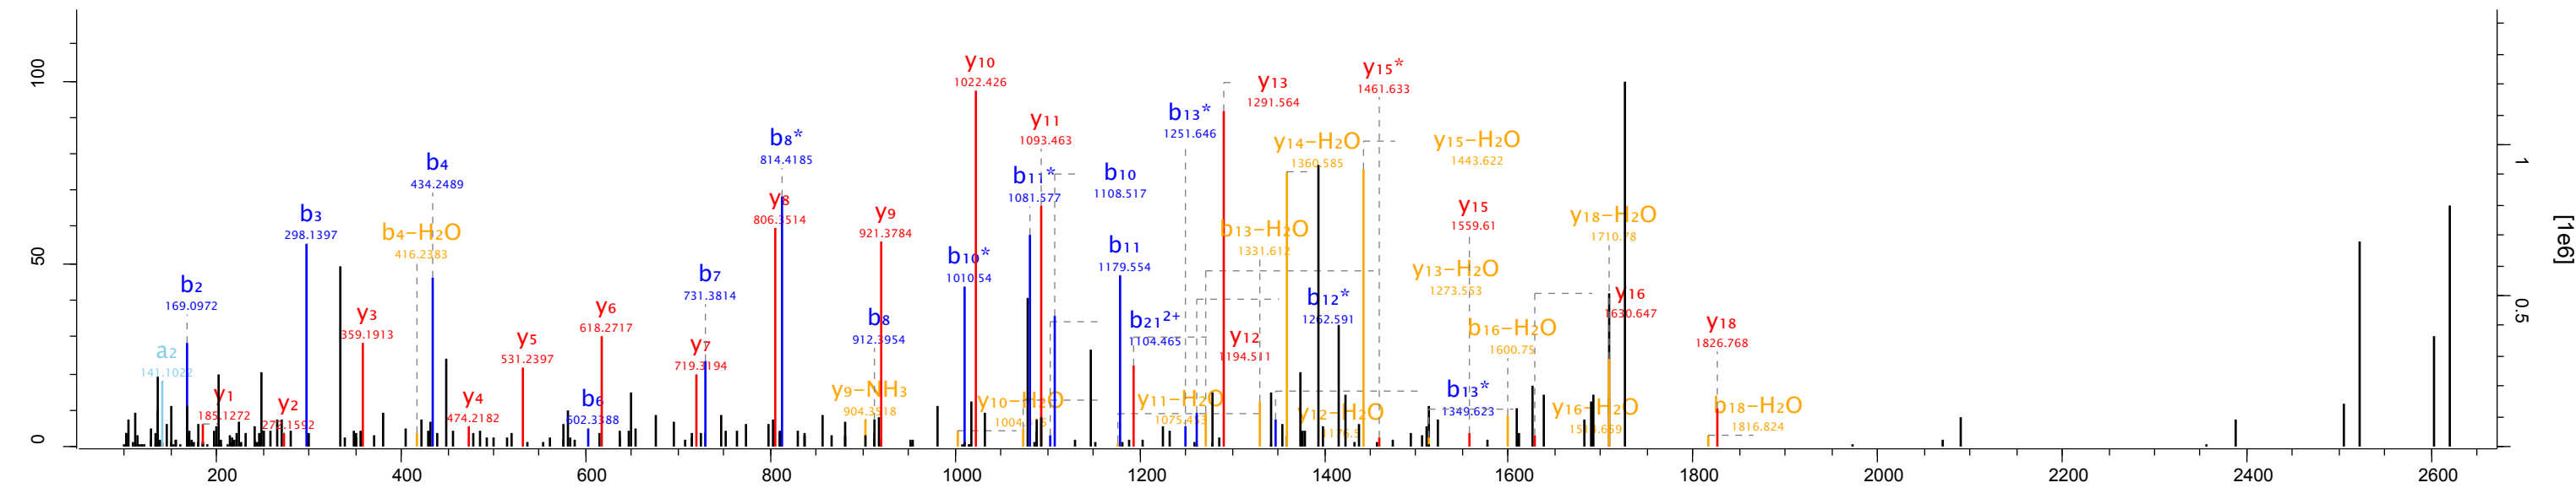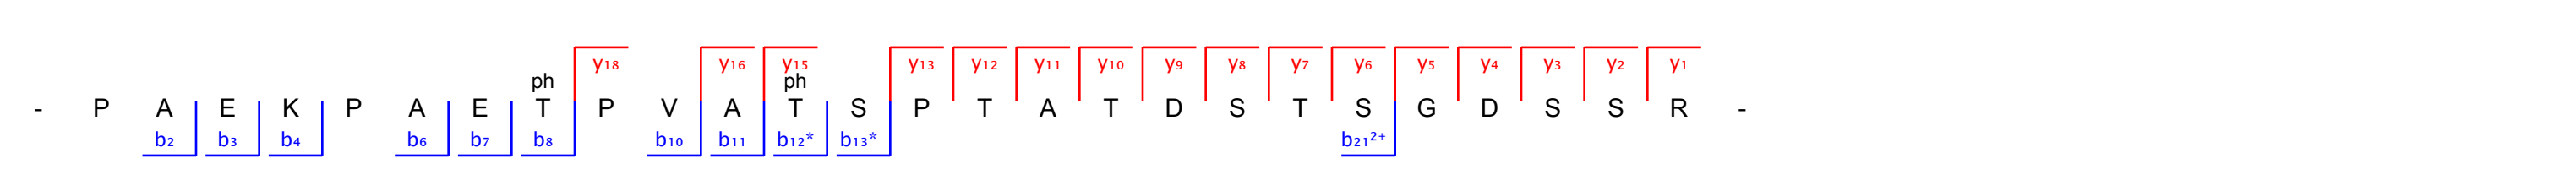

Raw file

20171215\_MaS\_33SR\_LMH\_phospho\_02

Scan Method Score m/z Gene names  
5012 FTMS; HCD 65.72 522.68 SRSF7

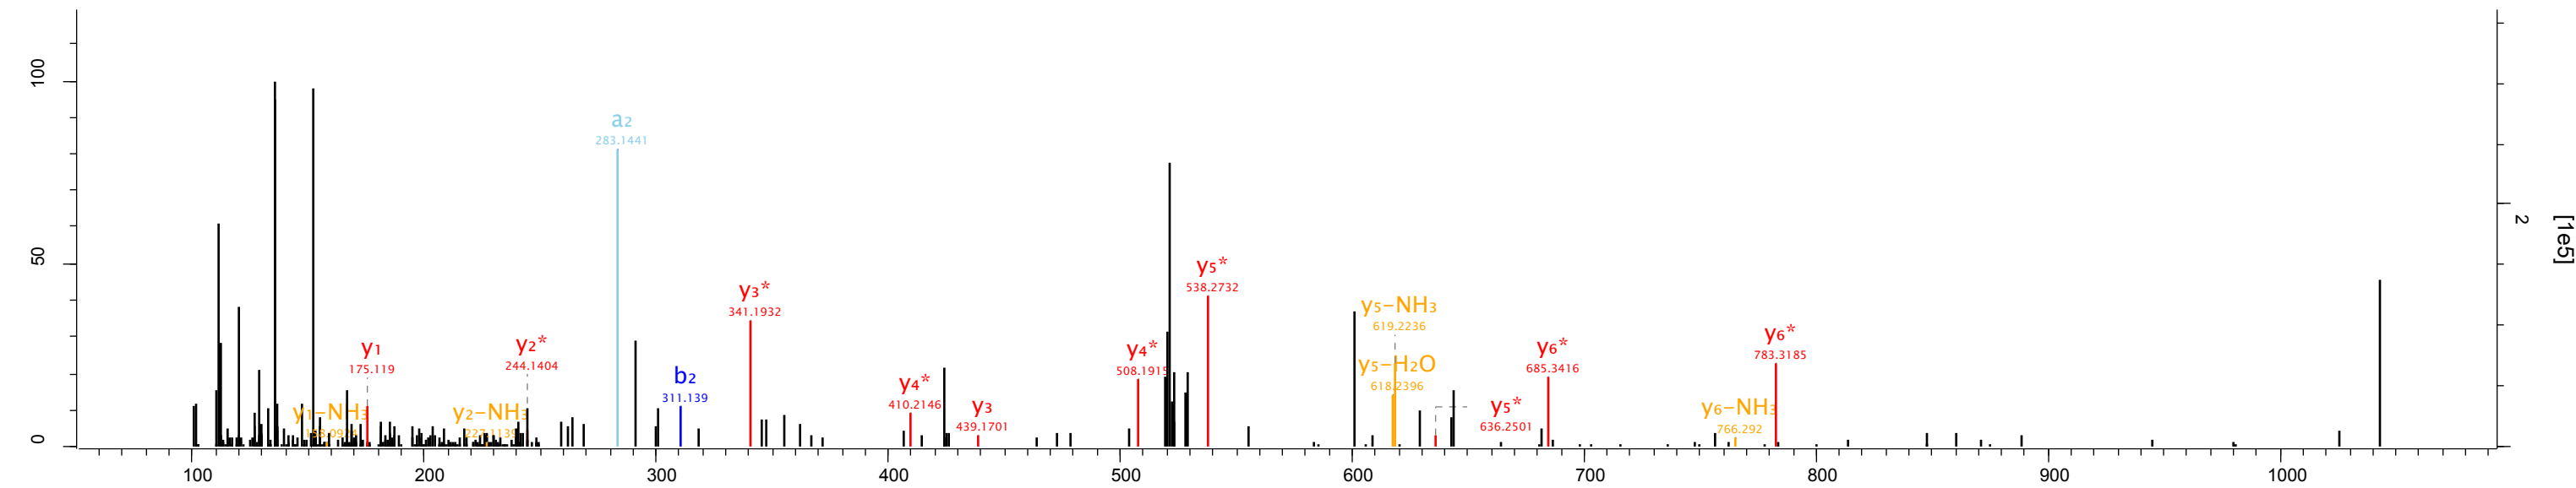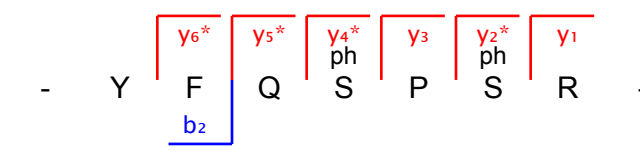

Raw file: 20171215\_MaS\_33SR\_LMH\_phospho\_02  
 Scan: 5082 Method: FTMS; HCD Score: 98.68 m/z: 714.81 Gene names: PARVA

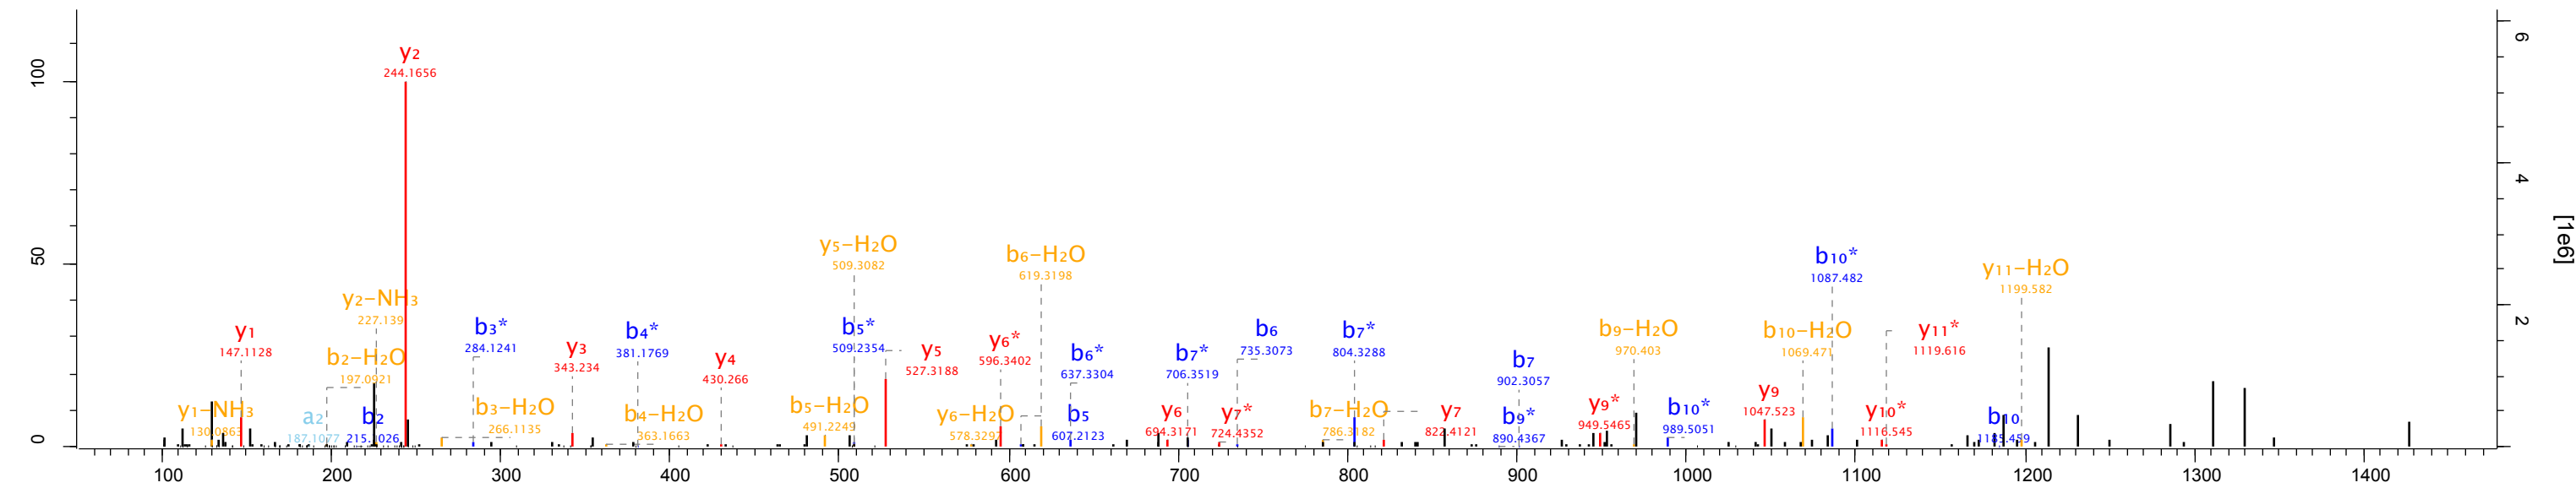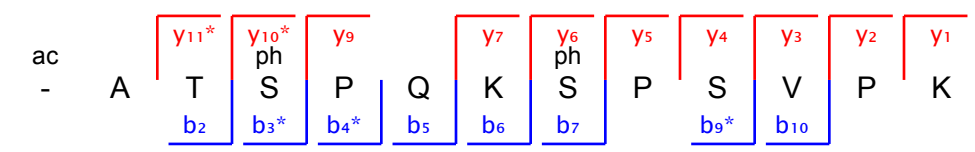



Raw file 20171215\_MaS\_33SR\_LMH\_phospho\_02 Scan 5802 Method FTMS; HCD Score 140.51 m/z 645.78 Gene names LMNB2

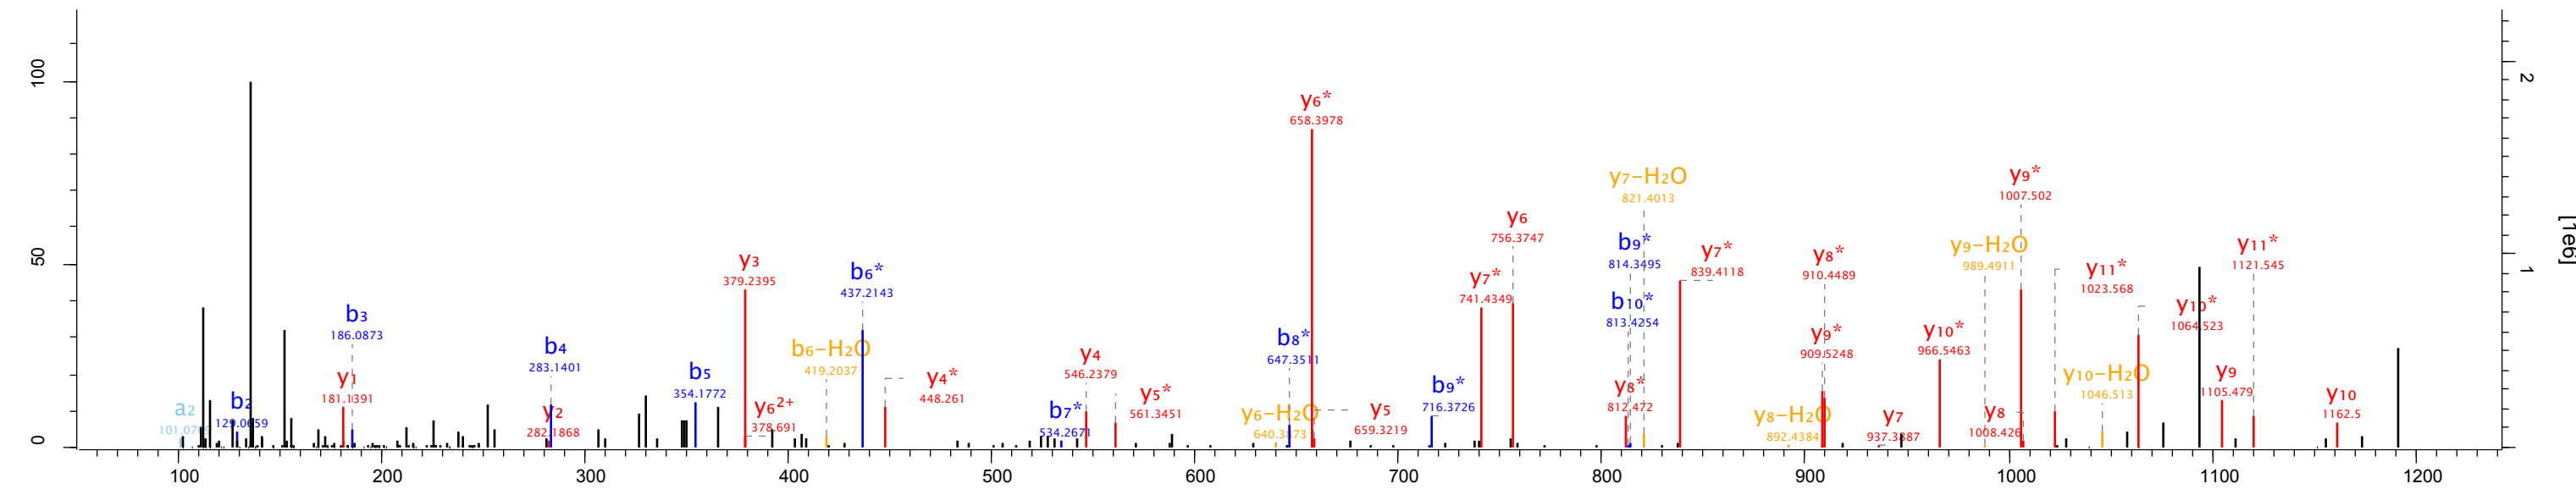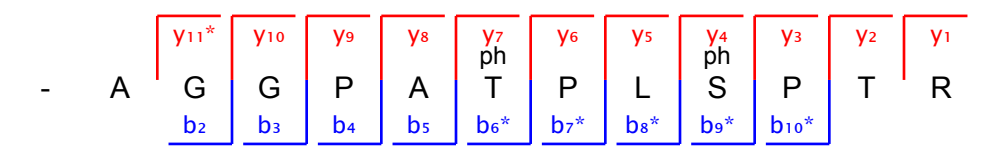

Raw file: 20171215\_MaS\_33SR\_LMH\_phospho\_02  
 Scan: 5892 Method: FTMS; HCD Score: 172.32 m/z: 1125.43 Gene names: LEO1

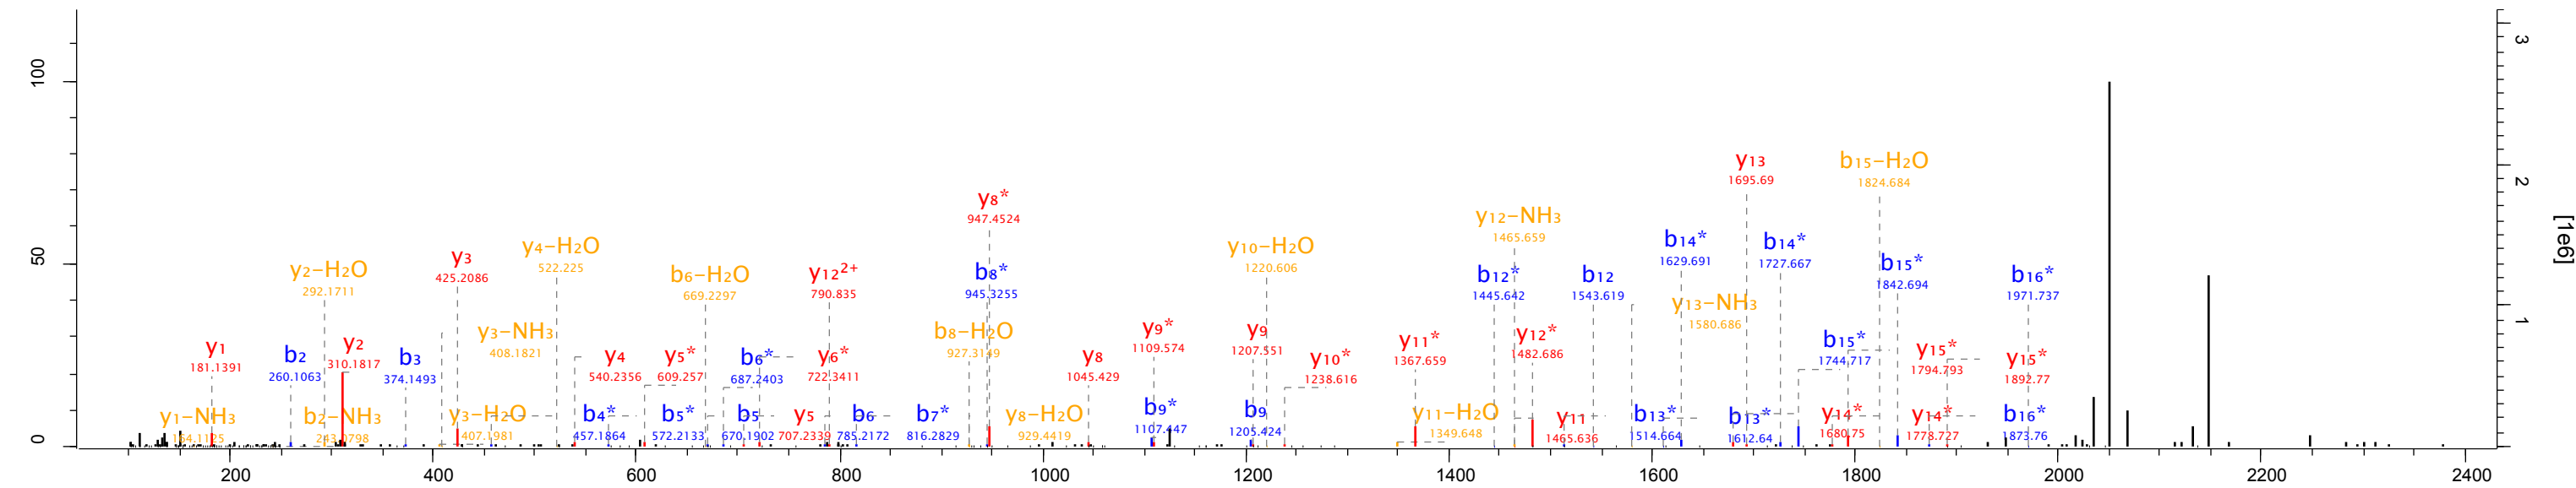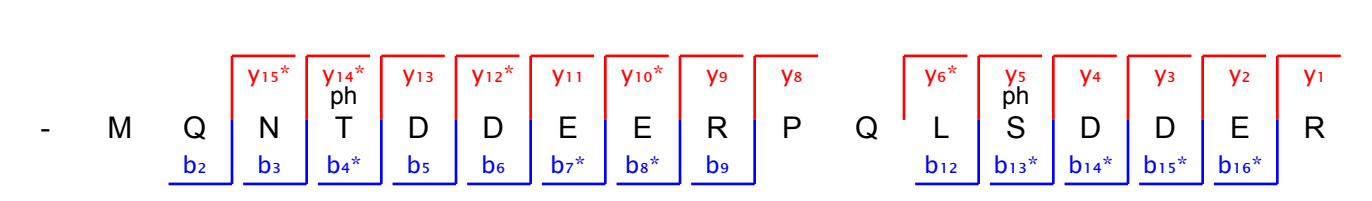

Raw file 20171215\_MaS\_33SR\_LMH\_phospho\_02 Scan 6142 Method FTMS; HCD Score 105.13 m/z 525.73 Gene names PLCB3

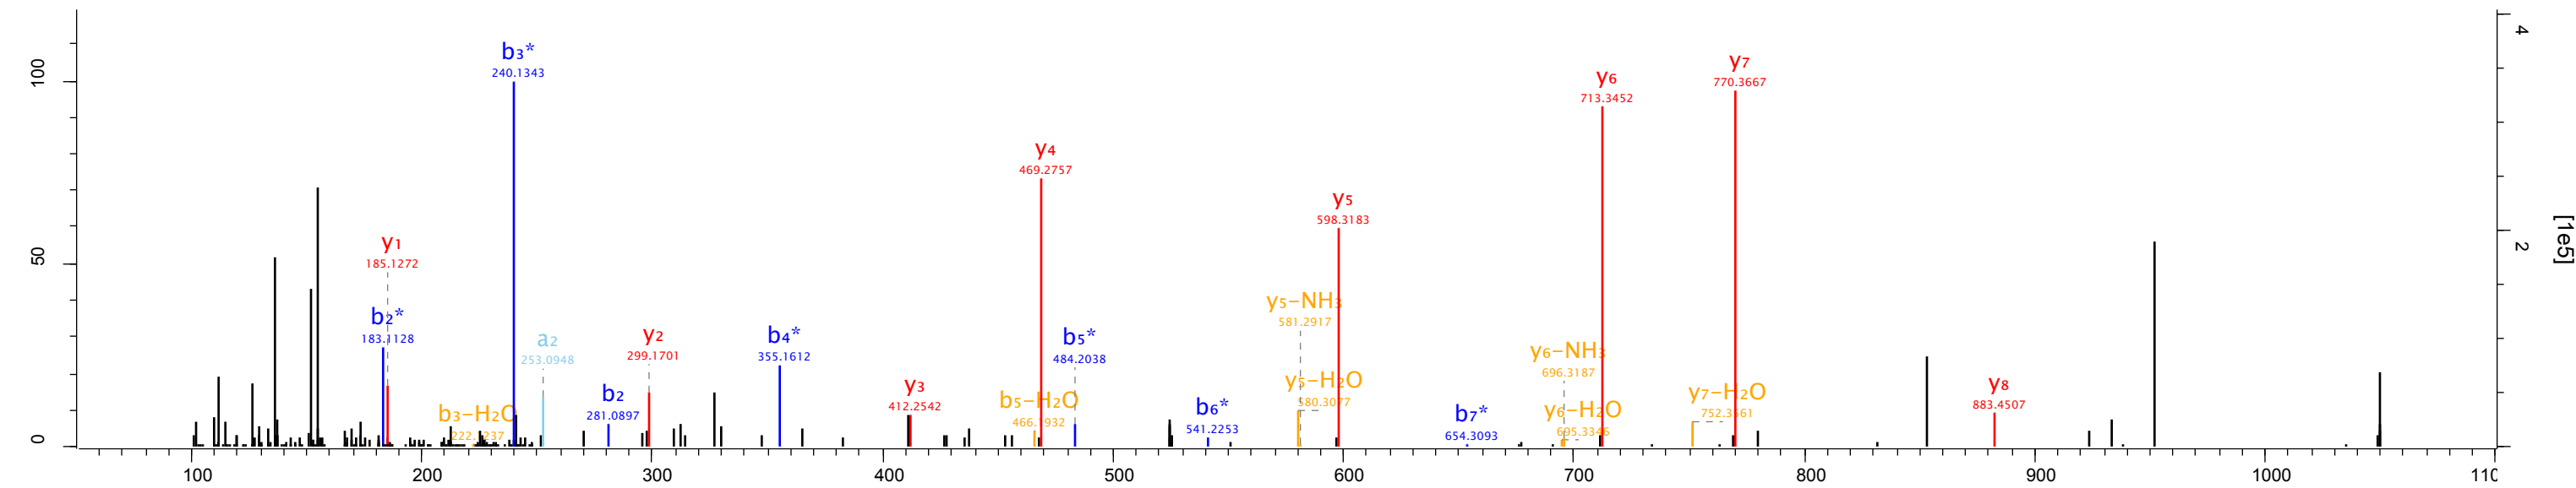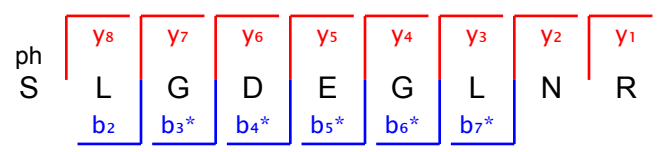

Raw file 20171215\_MaS\_33SR\_LMH\_phospho\_02 Scan 6372 Method FTMS; HCD Score 127.01 m/z 893.38 Gene names MYBBP1A

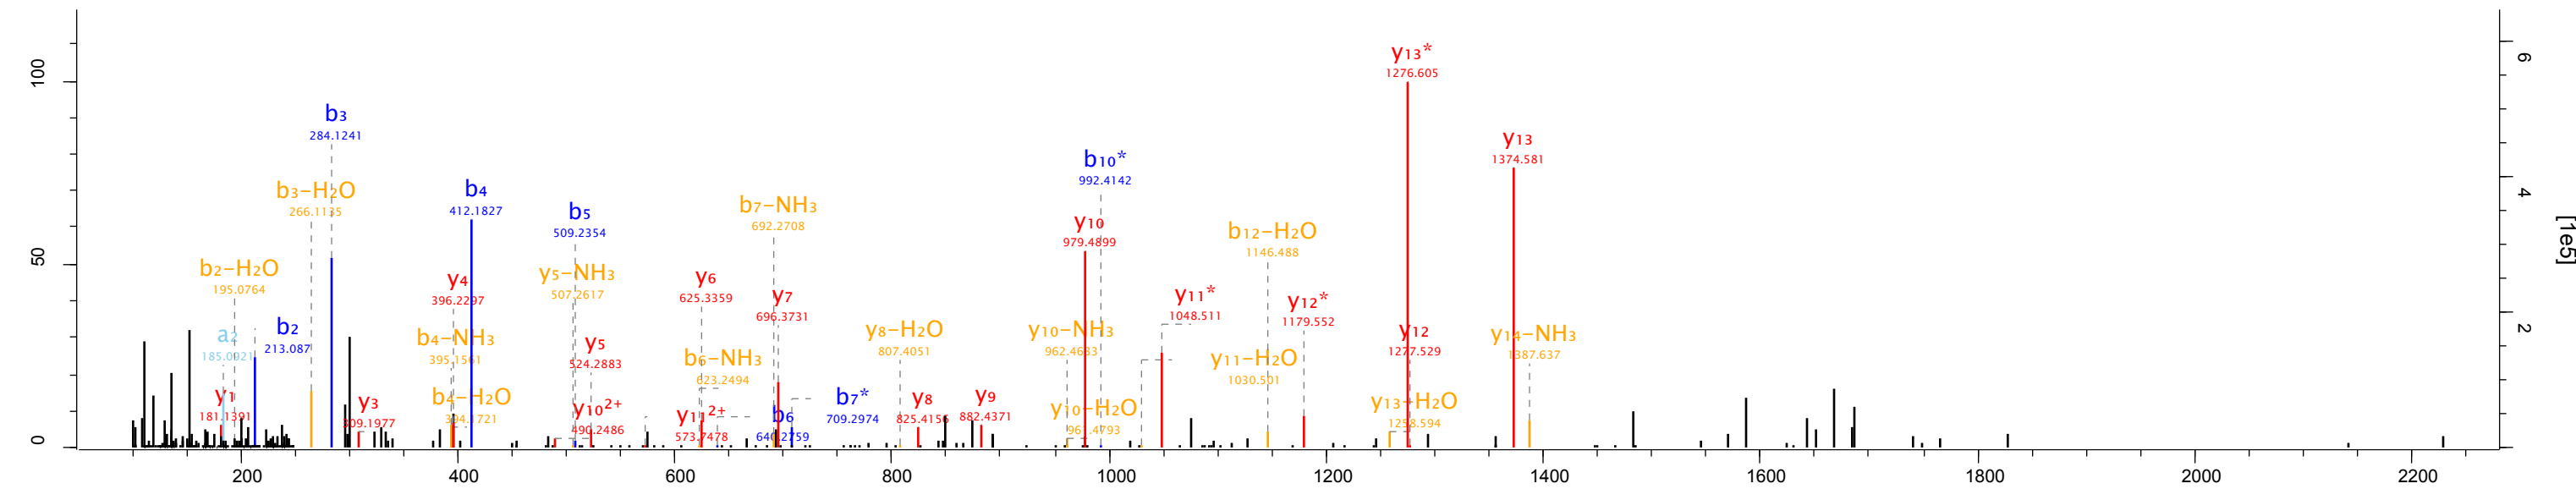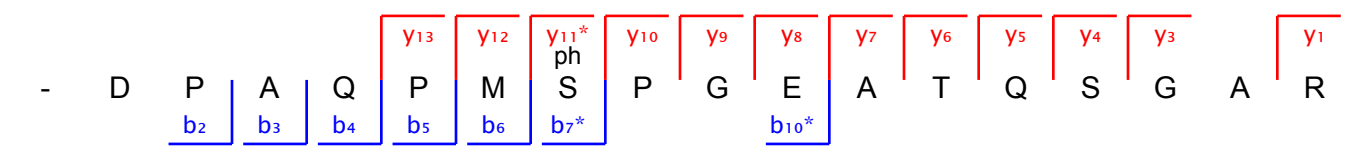

Raw file 20171215\_MaS\_33SR\_LMH\_phospho\_02 Scan 6812 Method FTMS; HCD Score 49.59 m/z 652.32 Gene names EIF2A

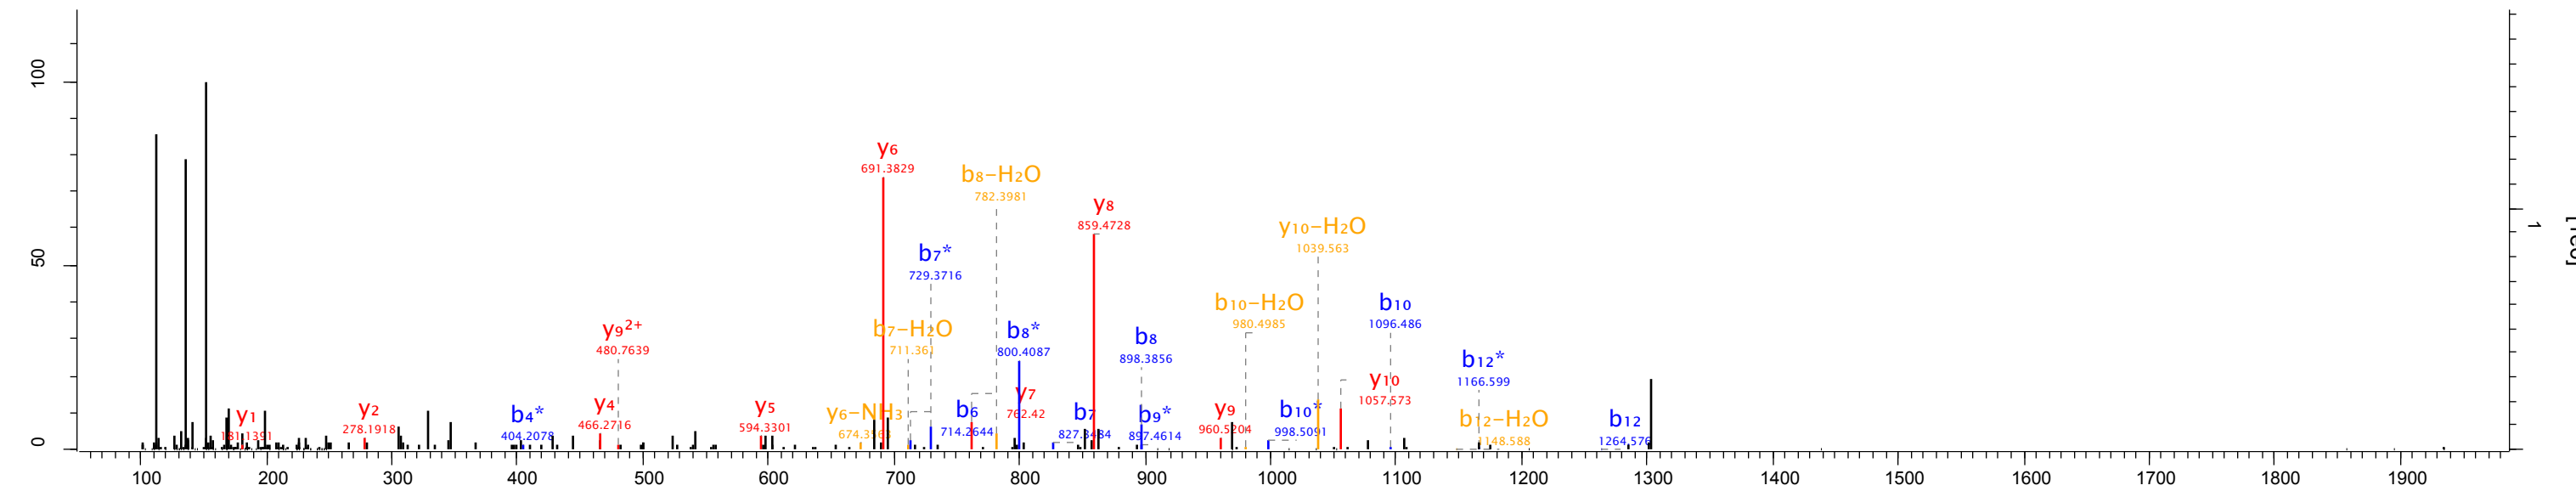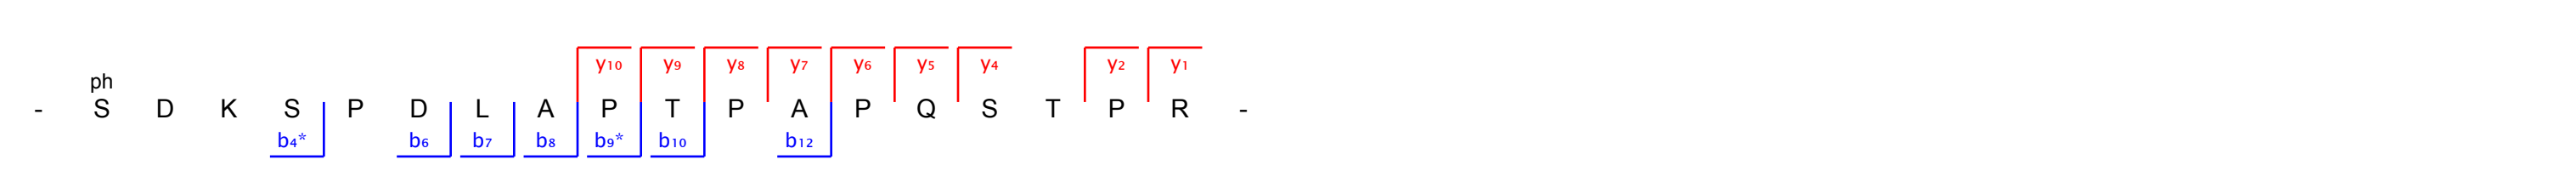

Raw file 20171215\_MaS\_33SR\_LMH\_phospho\_02 Scan 7692 Method FTMS; HCD Score 197.69 m/z 919.89 Gene names LIG1

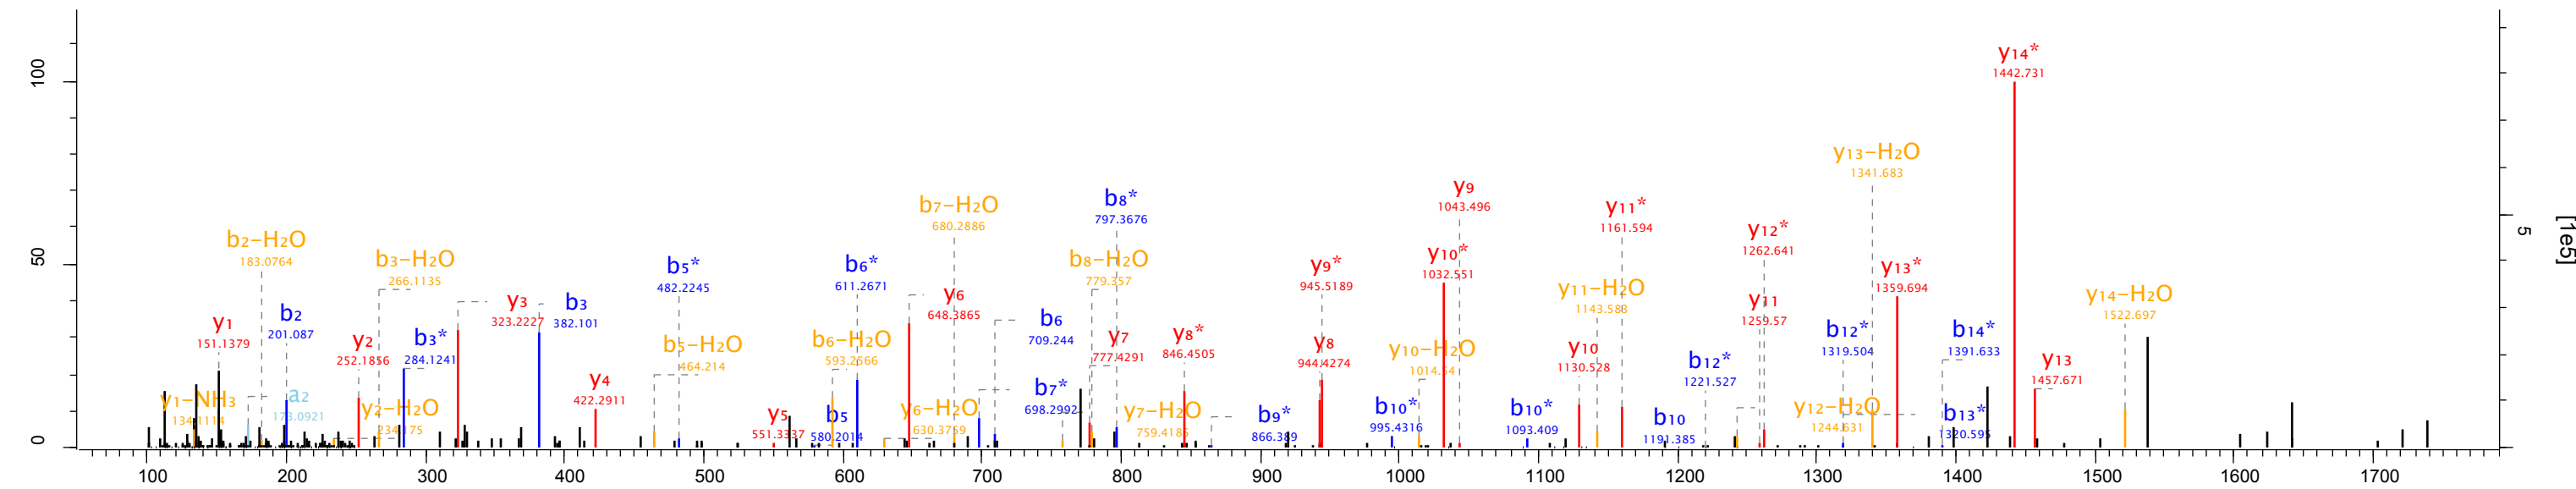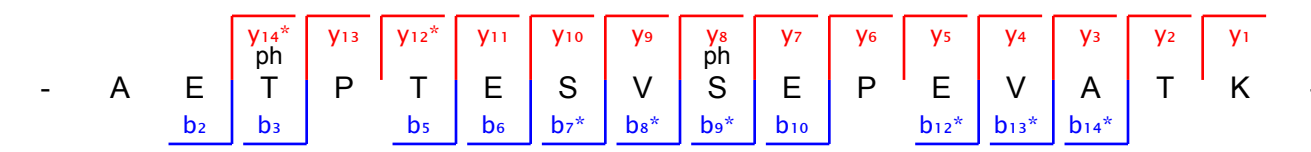

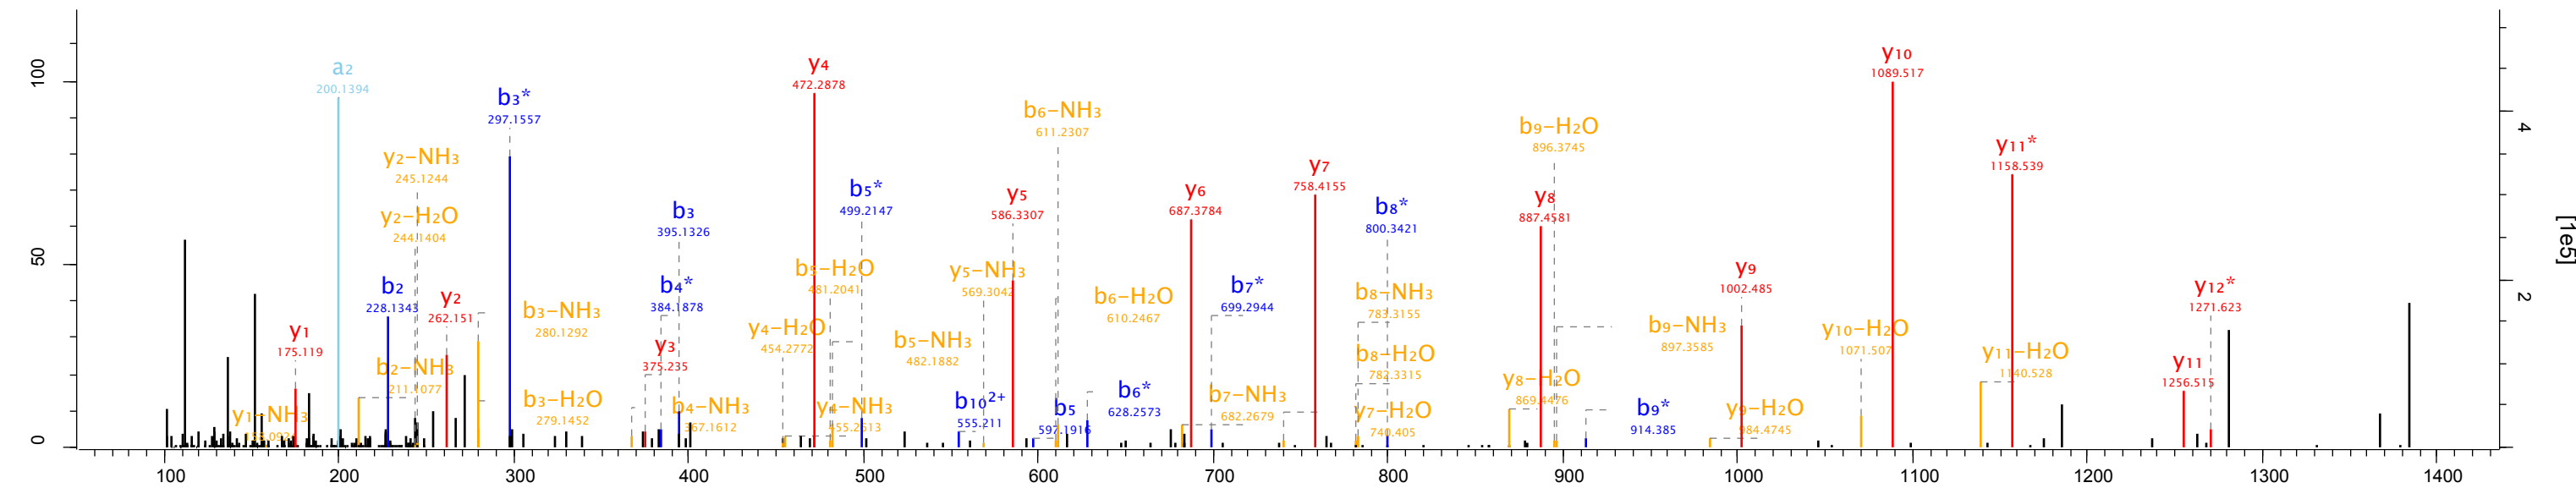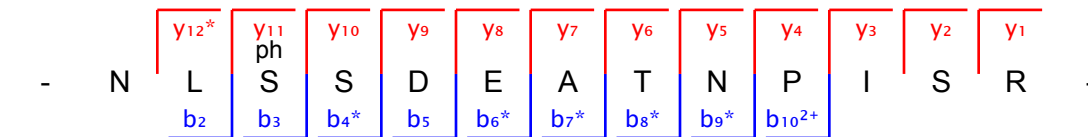

20171215\_MaS\_33SR\_LMH\_phospho\_02 8702 FTMS; HCD 194.7 833.35 FOXK1

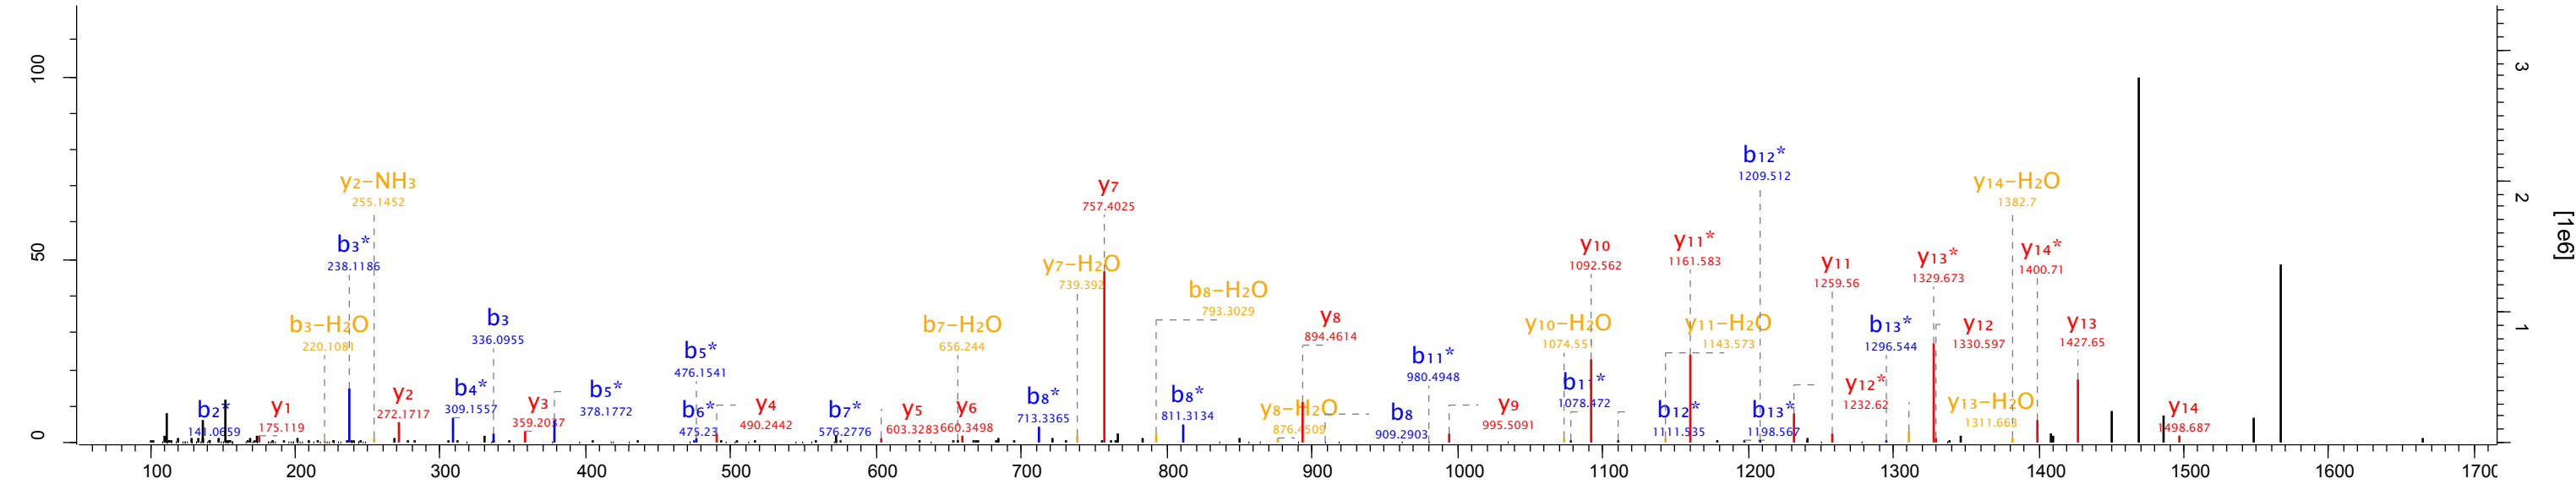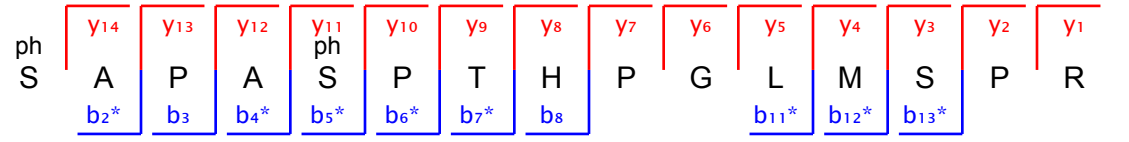



Raw file 20171215\_MaS\_33SR\_LMH\_phospho\_02 Scan 9212 Method FTMS; HCD Score 77.96 m/z 1011.76 Gene names UBQLN1

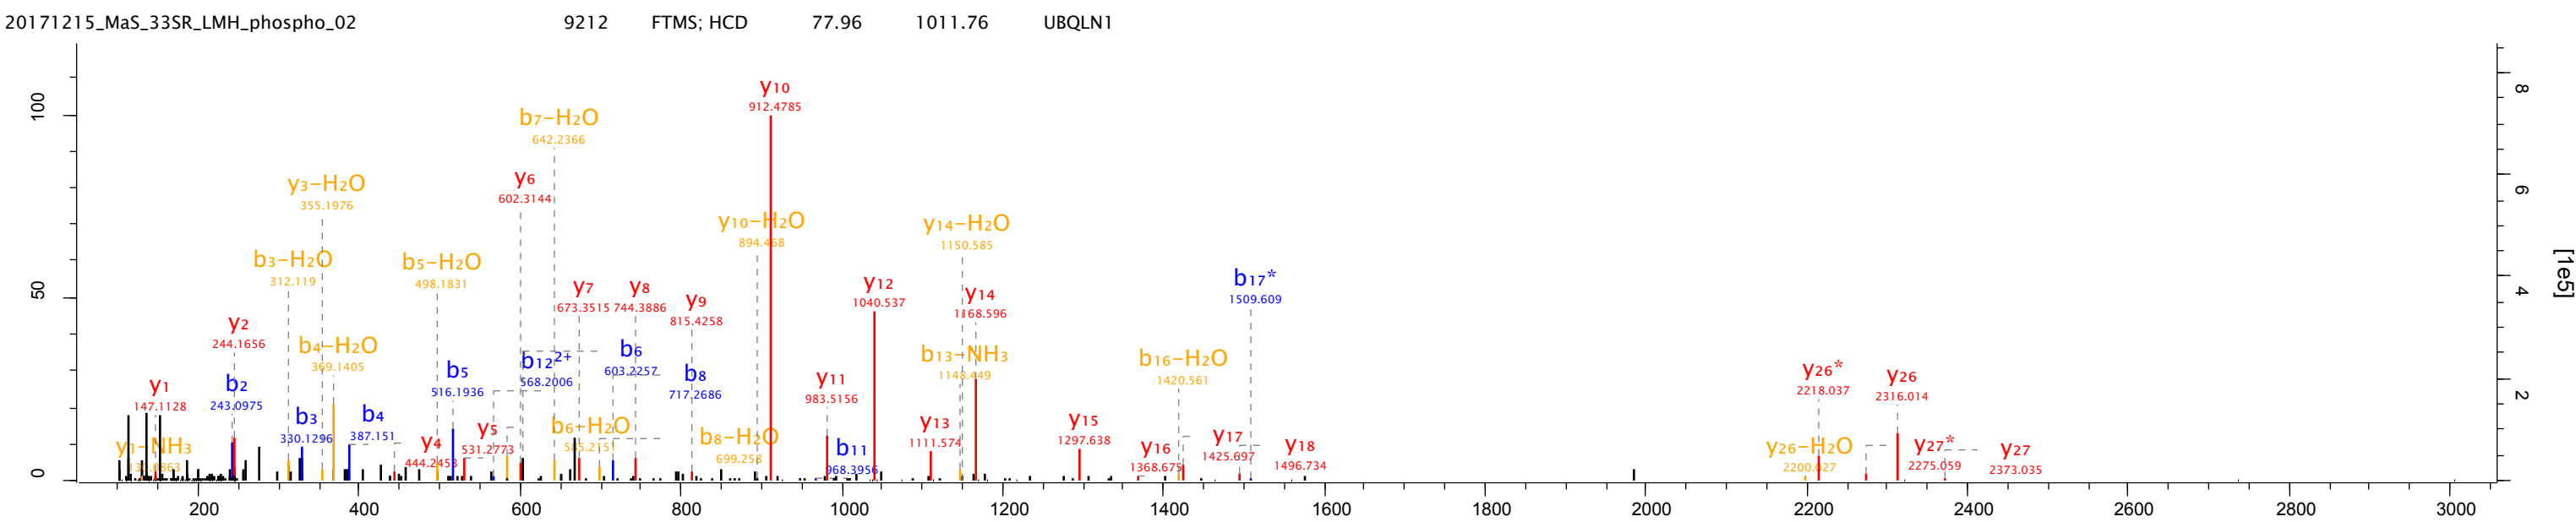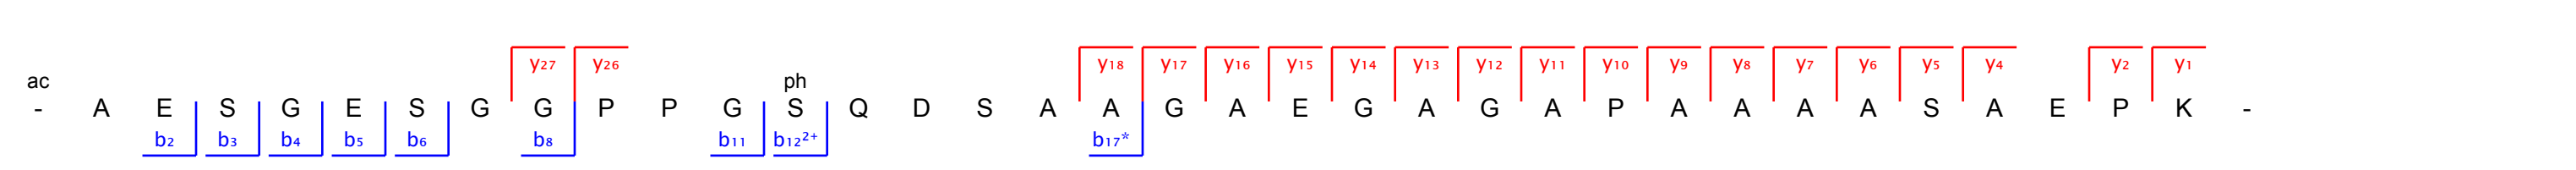

Raw file 20171215\_MaS\_33SR\_LMH\_phospho\_03 Scan 10292 Method FTMS; HCD Score 77.7 m/z 1137.22 Gene names HNRNPUL1

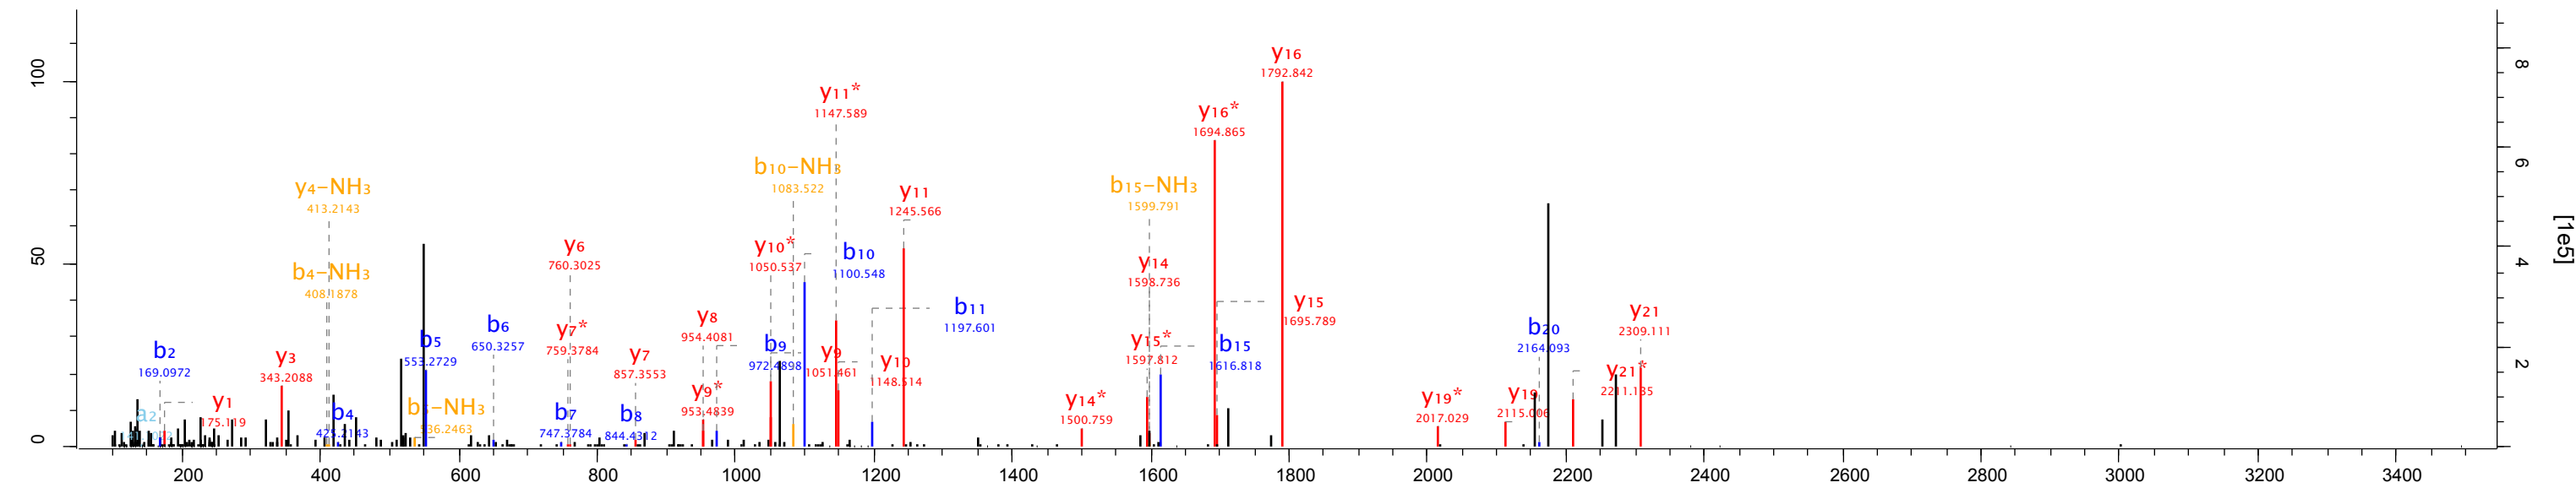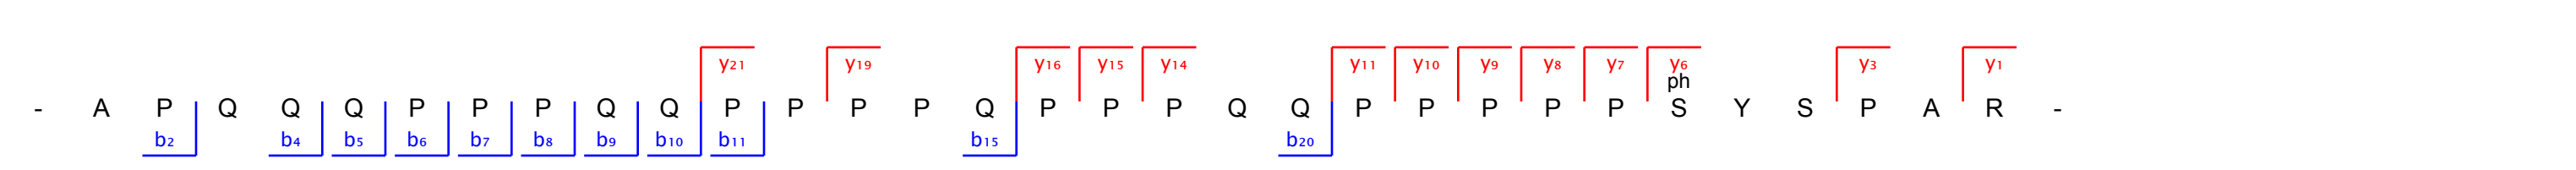

20171215\_MaS\_33SR\_LMH\_phospho\_03 10442 FTMS; HCD 189.84 863.67 STK3

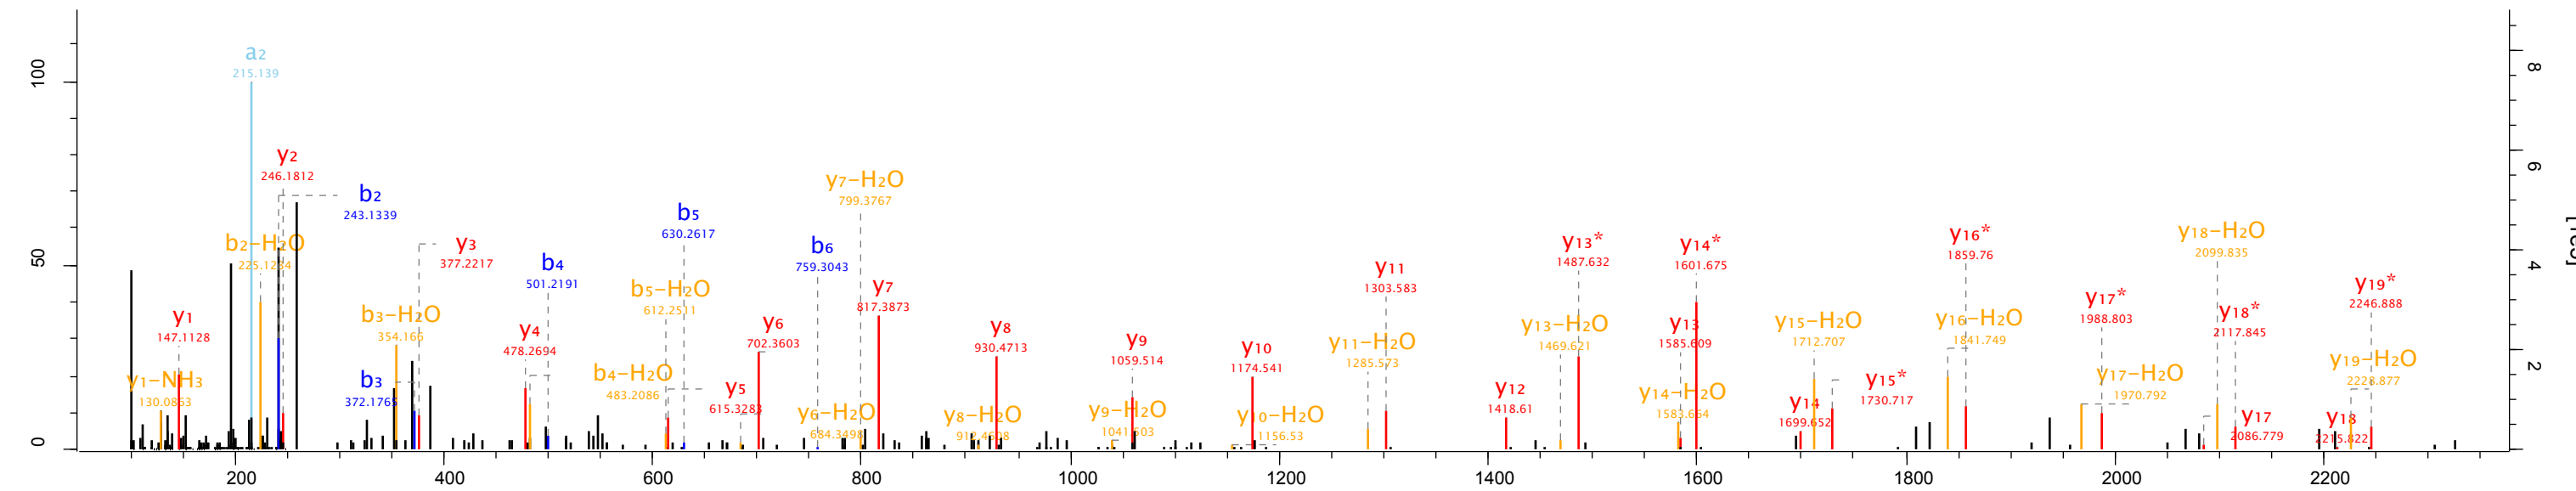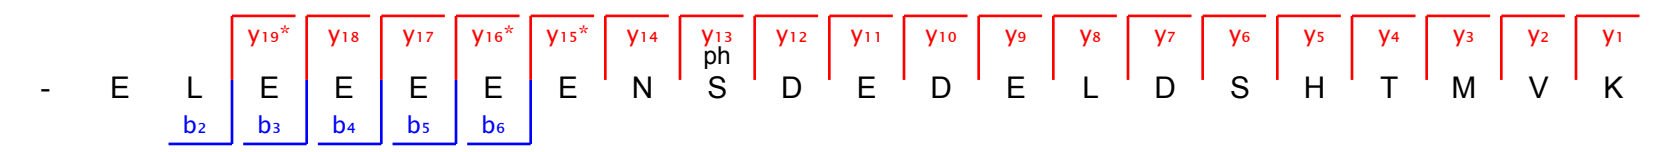

Raw file 20171215\_MaS\_33SR\_LMH\_phospho\_03 Scan 10462 Method FTMS; HCD Score 73.44 m/z 568.26 Gene names FRMD6

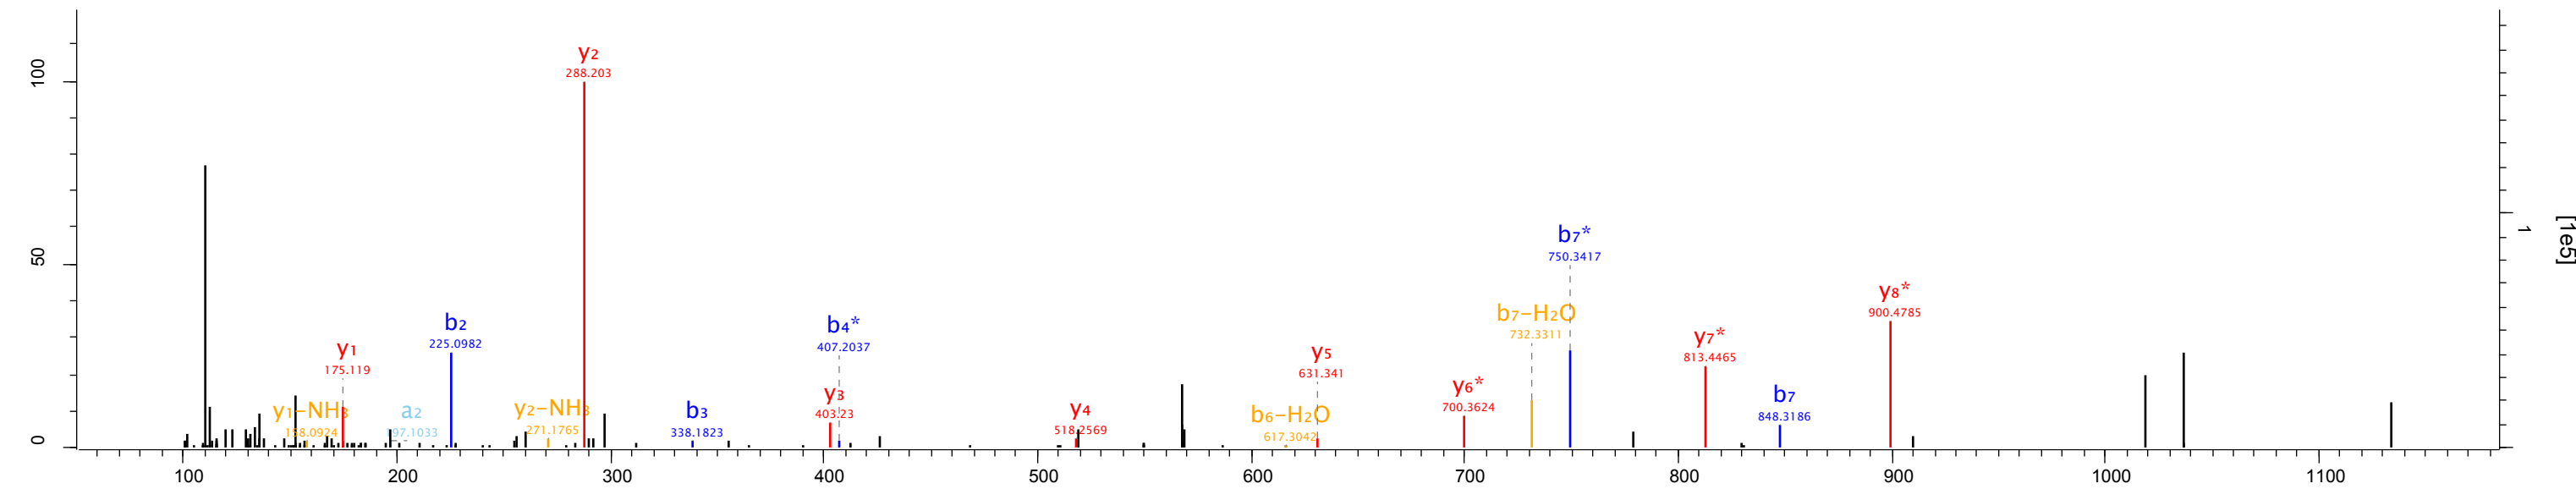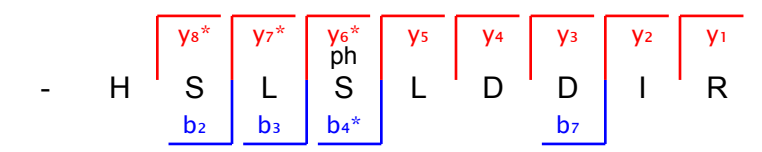

Raw file 20171215\_MaS\_33SR\_LMH\_phospho\_03 Scan 11282 Method FTMS; HCD Score 92.96 m/z 826.36 Gene names AAK1

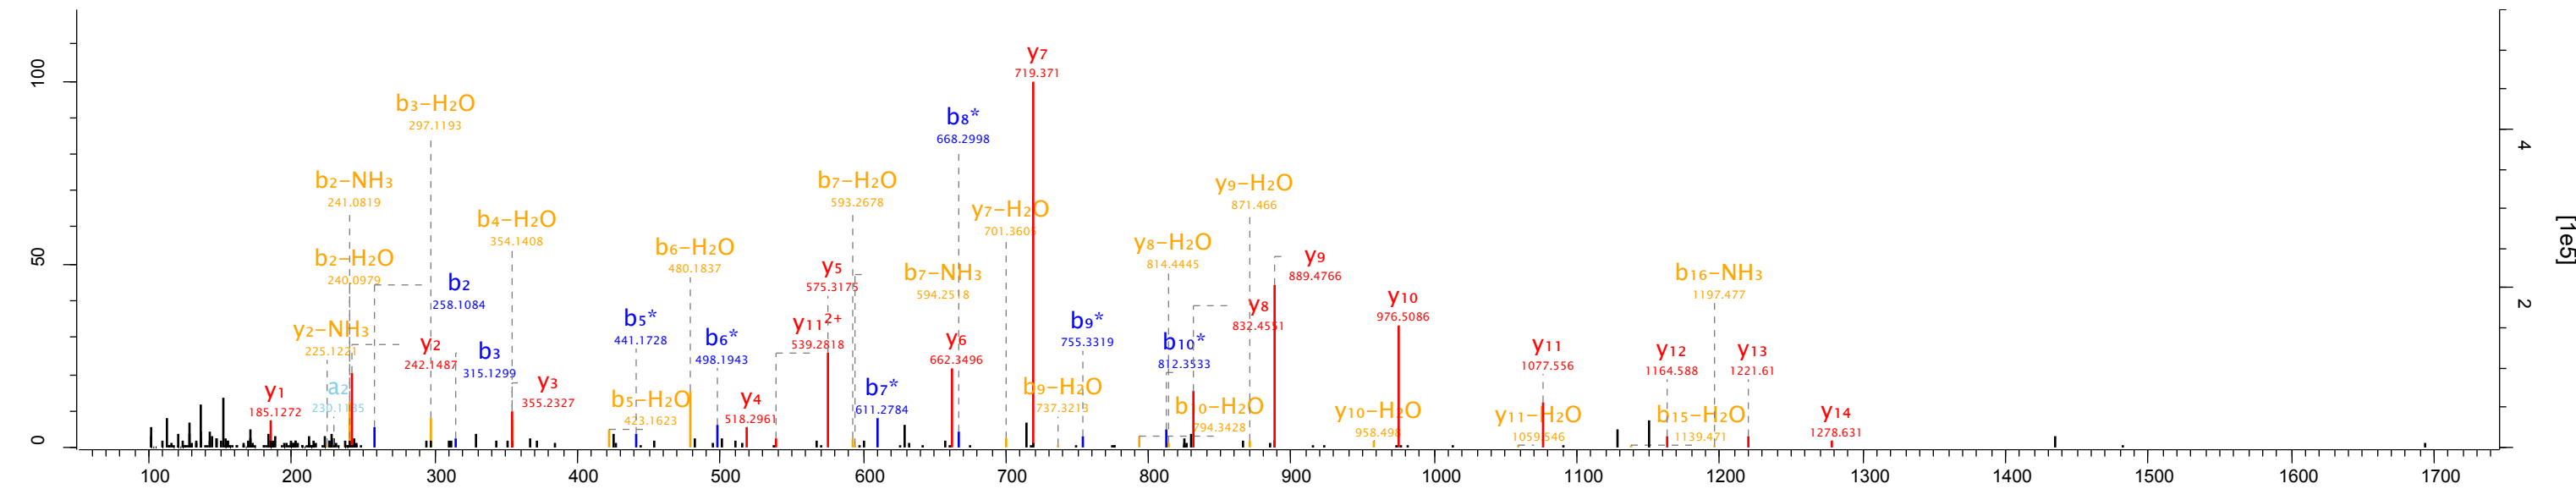

- E Q G G ph S G L G S G S S G G G G G S G L G S G Y I G R -

Fragmentation mapping (b and y ions):

- b2: Q
- b3: G
- b5\*: S
- b6\*: G
- b7\*: L
- b8\*: G
- b9\*: S
- b10\*: G
- y1: R
- y2: G
- y3: I
- y4: Y
- y5: S
- y6: S
- y7: G
- y8: L
- y9: G
- y10: S
- y11: T
- y12: S
- y13: G
- y14: G

Raw file 20171215\_MaS\_33SR\_LMH\_phospho\_03 Scan 11652 Method FTMS; HCD Score 63.19 m/z 969.43 Gene names TRIM28

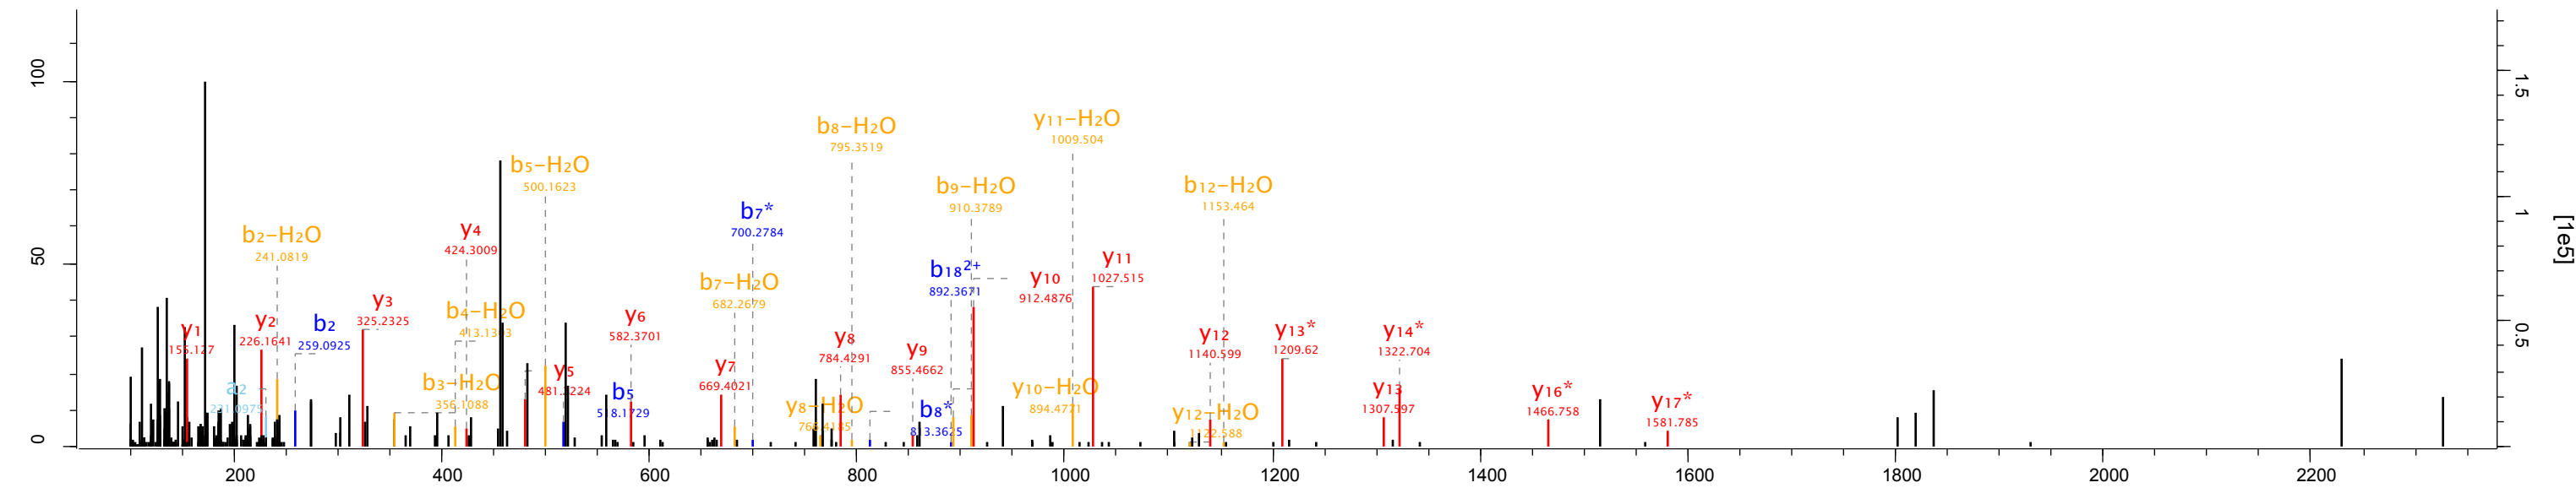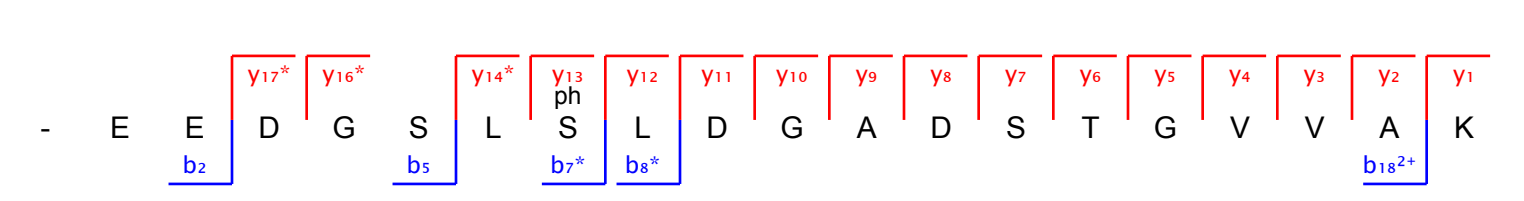

20171215\_MaS\_33SR\_LMH\_phospho\_03 11852 FTMS; HCD 290.45 916.37 ZC3H18

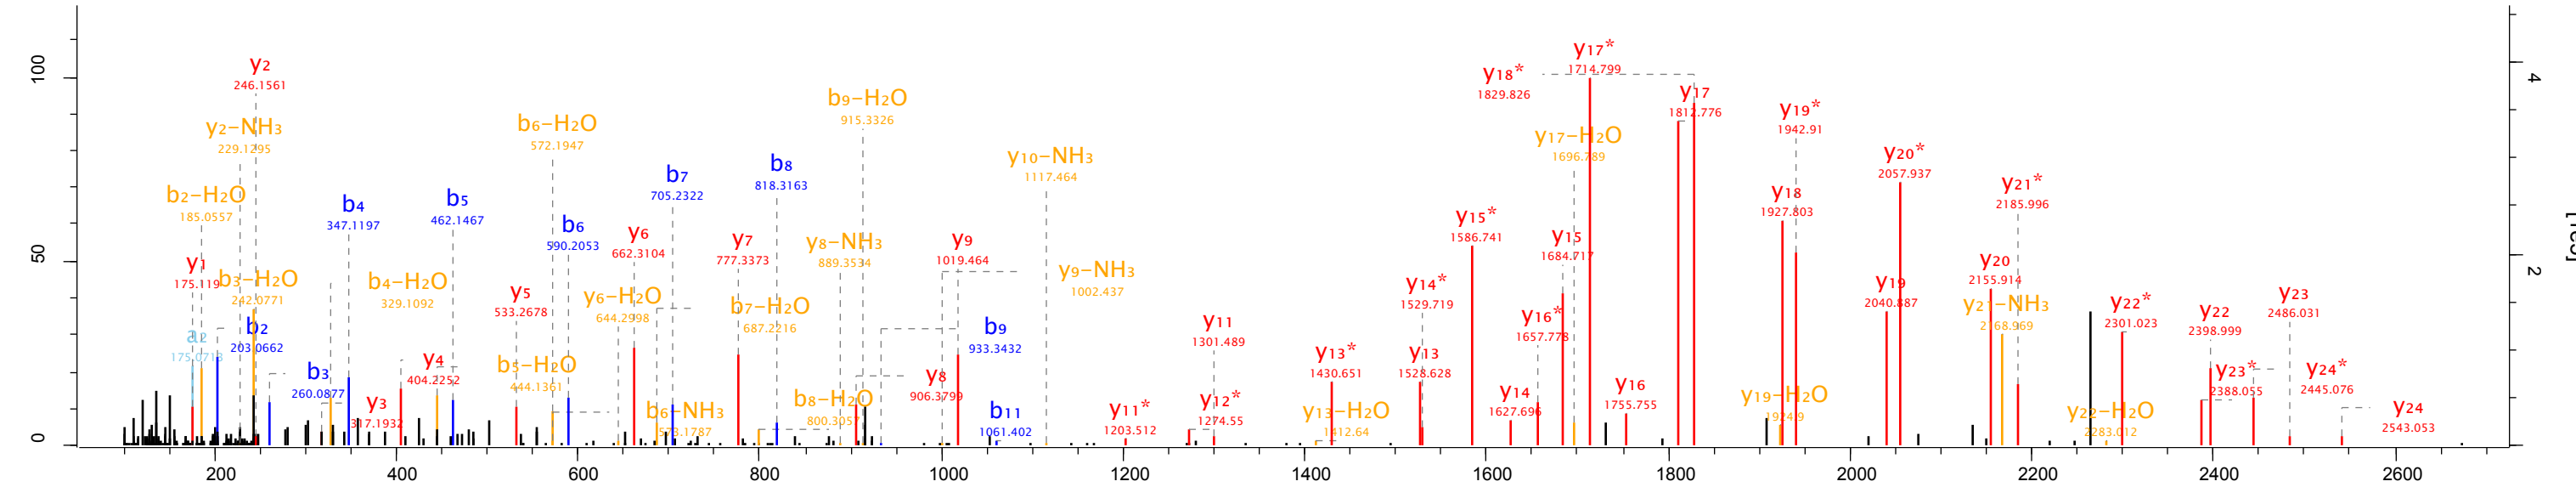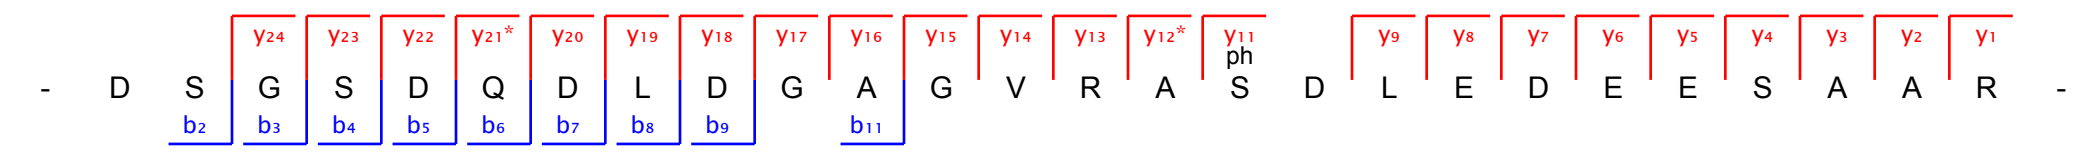

Raw file 20171215\_MaS\_33SR\_LMH\_phospho\_03 Scan 11982 Method FTMS; HCD Score 66 m/z 733.33 Gene names NEDD4L;ZNF227

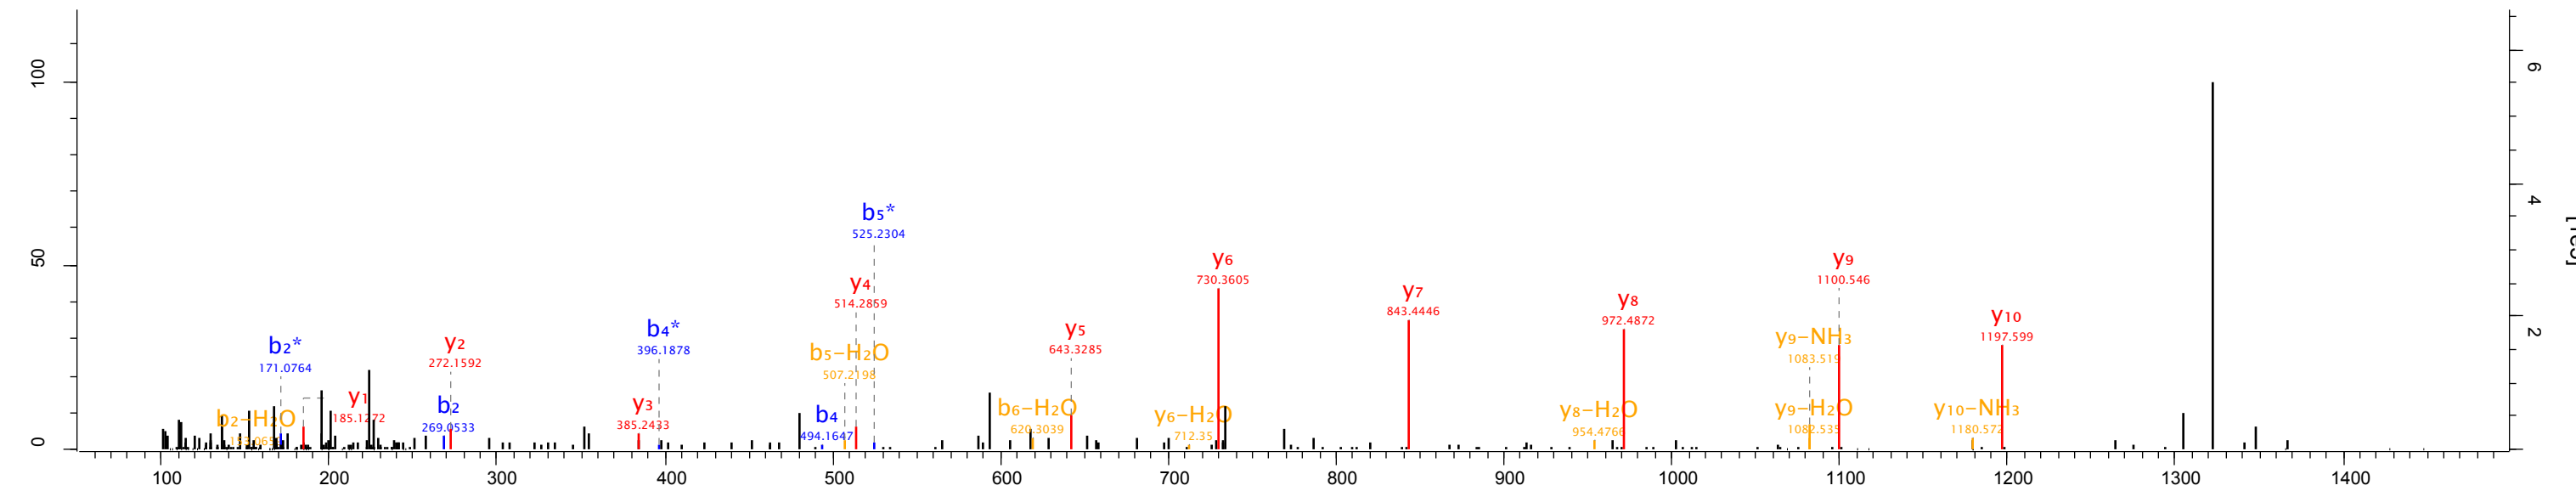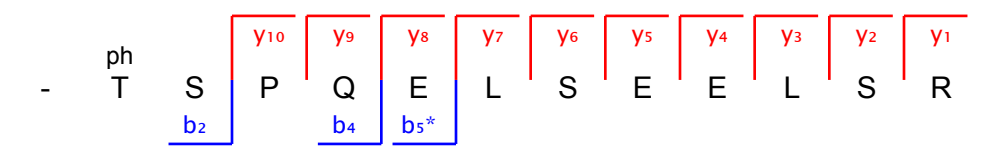





Raw file 20171215\_MaS\_33SR\_LMH\_phospho\_03 Scan 12172 Method FTMS; HCD Score 159.14 m/z 696.31 Gene names SLC6A15

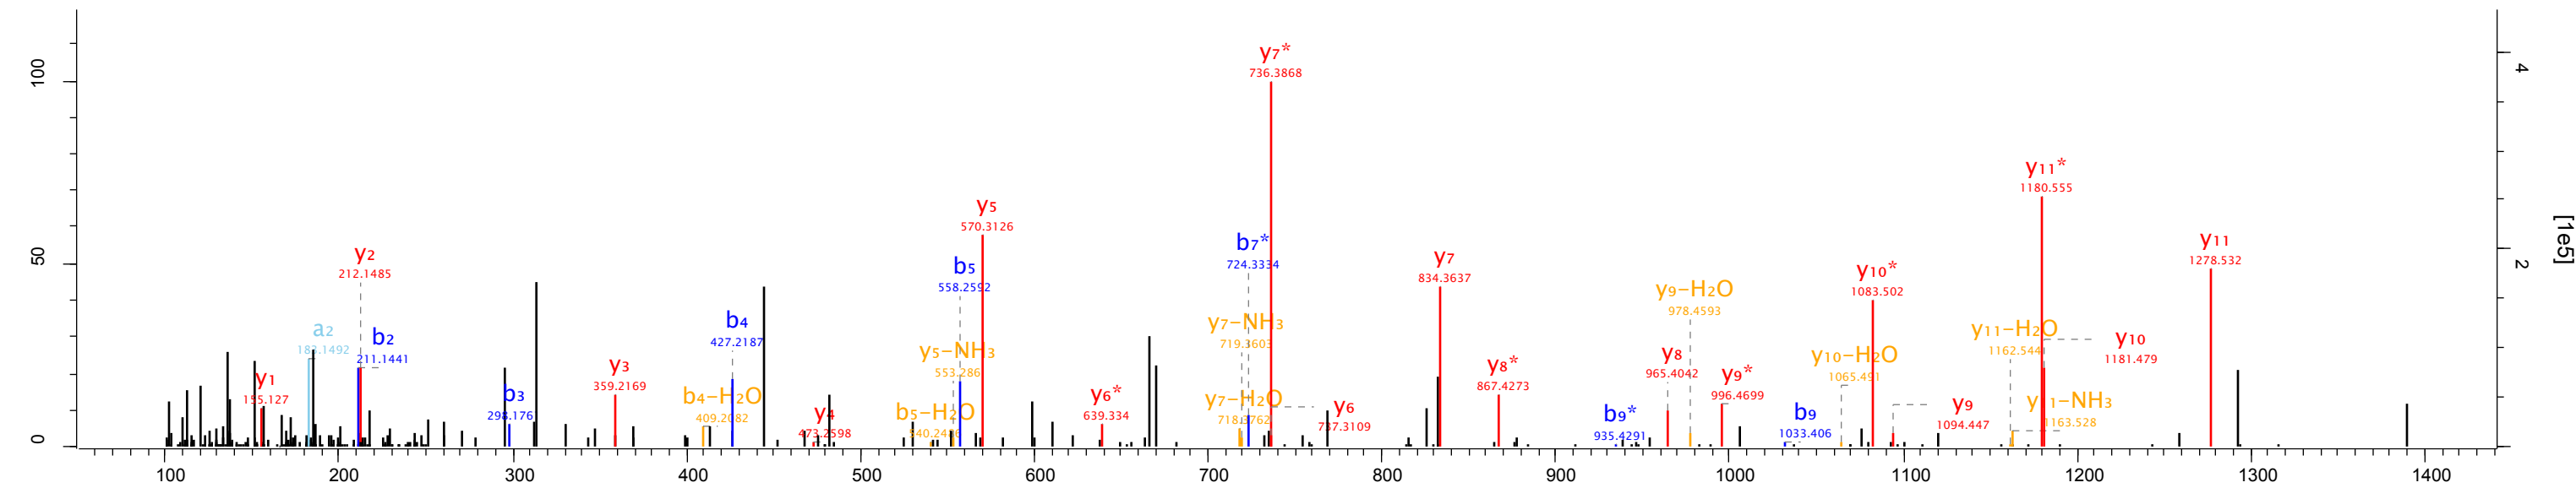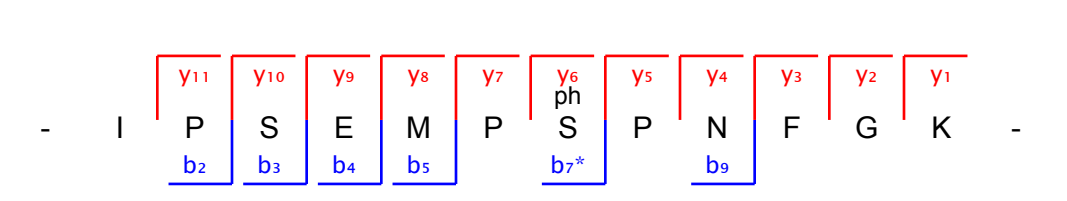

20171215\_MaS\_33SR\_LMH\_phospho\_03 12422 FTMS; HCD 138.02 946.12 TCOF1

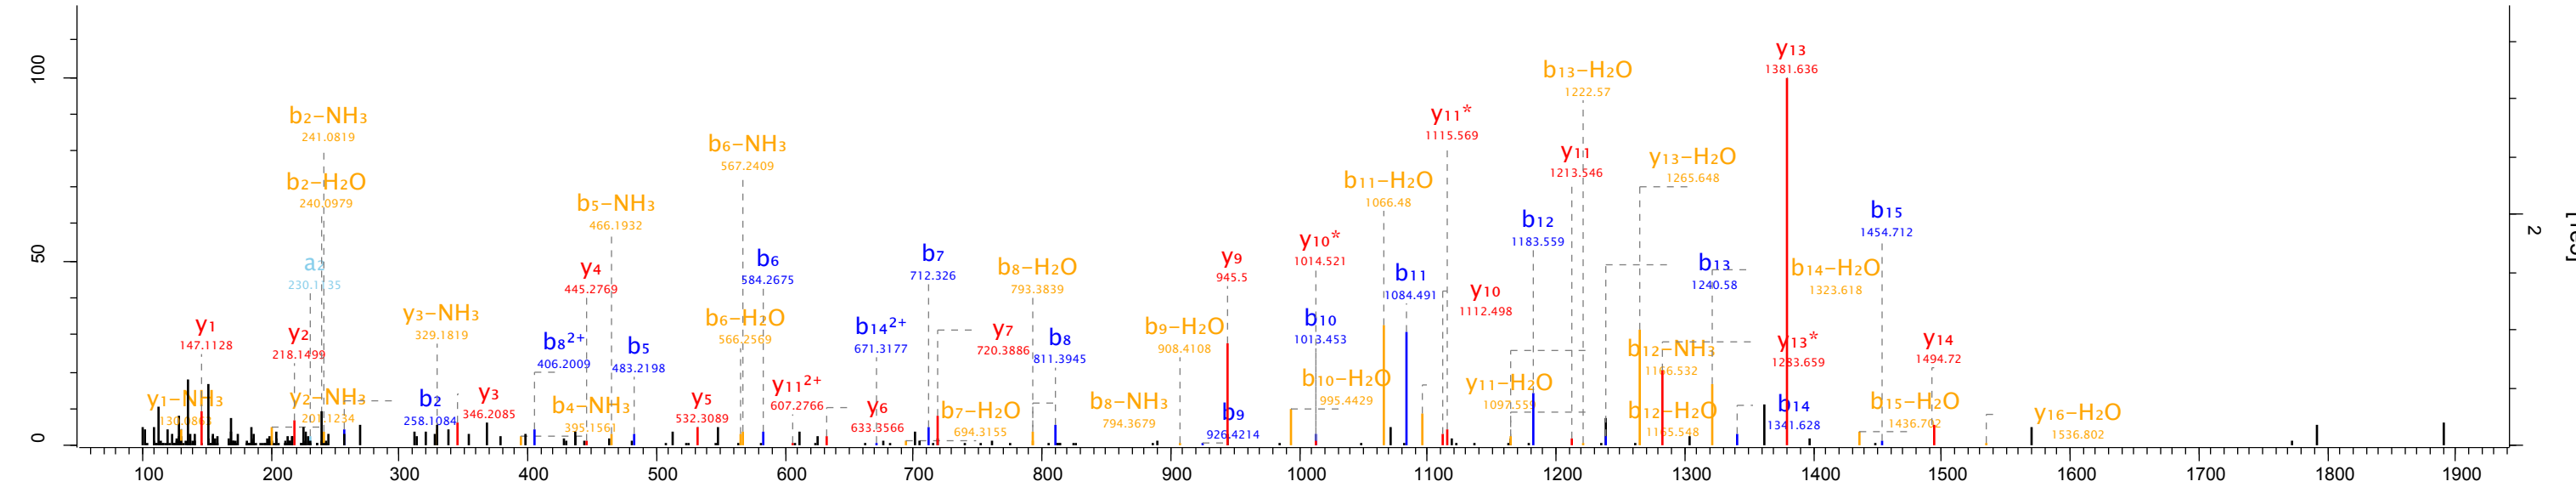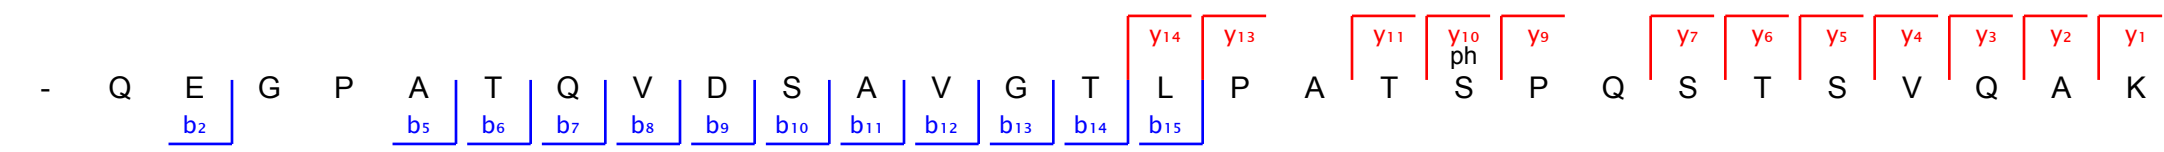

Raw file 20171215\_MaS\_33SR\_LMH\_phospho\_03 Scan 12582 Method FTMS; HCD Score 290.35 m/z 1060.42 Gene names PRPF40A

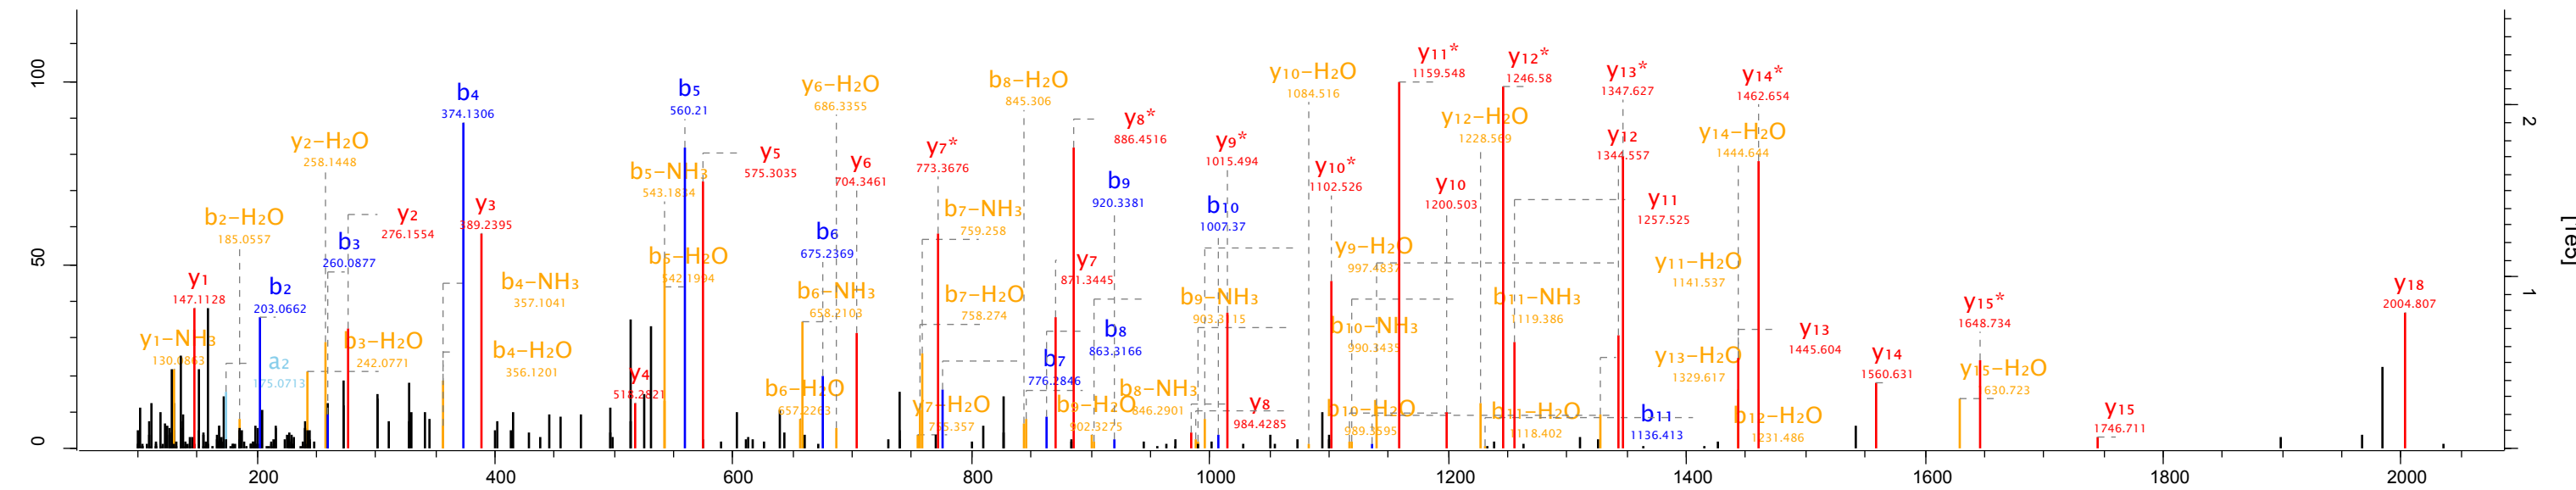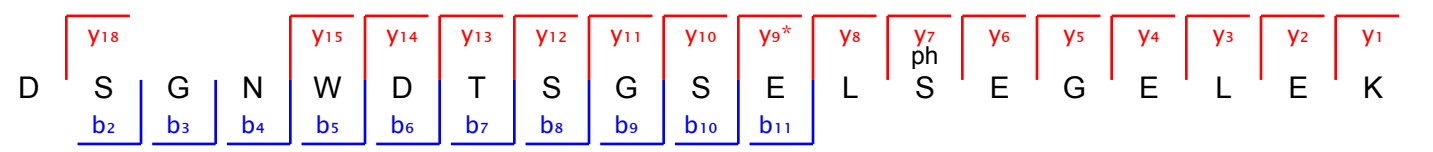

Raw file 20171215\_MaS\_33SR\_LMH\_phospho\_03 Scan 12932 Method FTMS; HCD Score 130.01 m/z 849.33 Gene names RIOK2

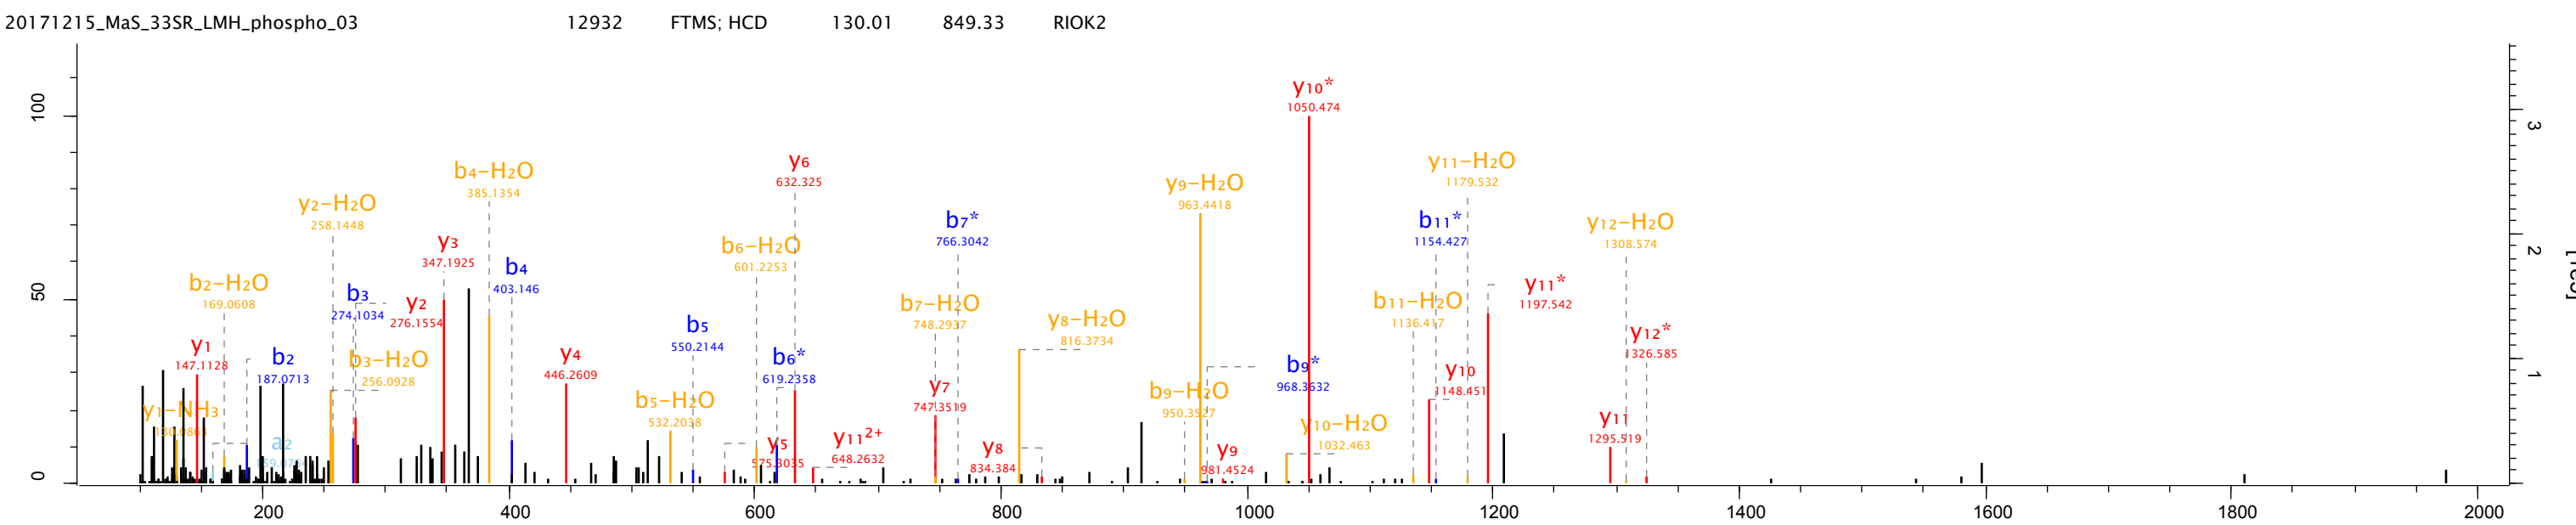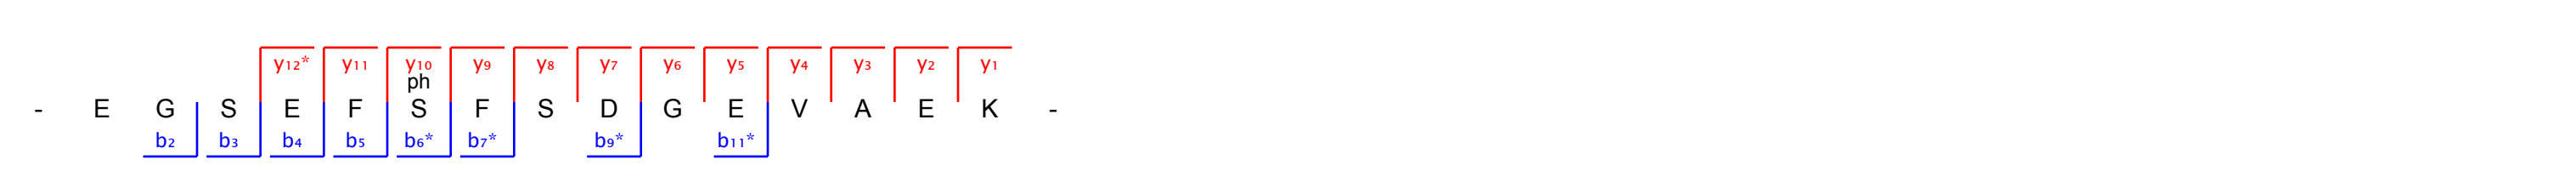

20171215\_MaS\_33SR\_LMH\_phospho\_03 13202 FTMS; HCD 105.79 825.35 MELK

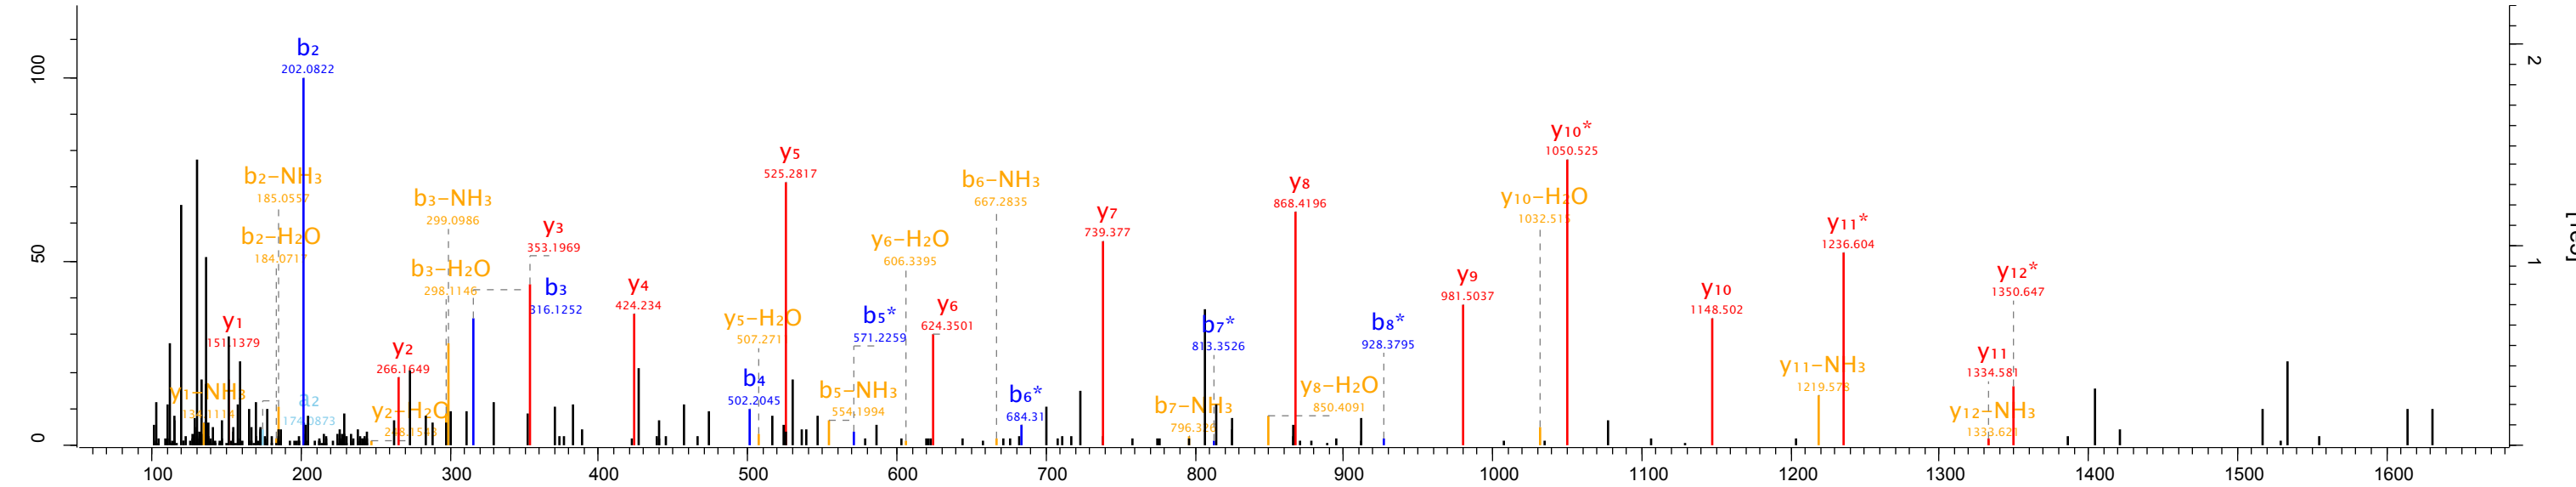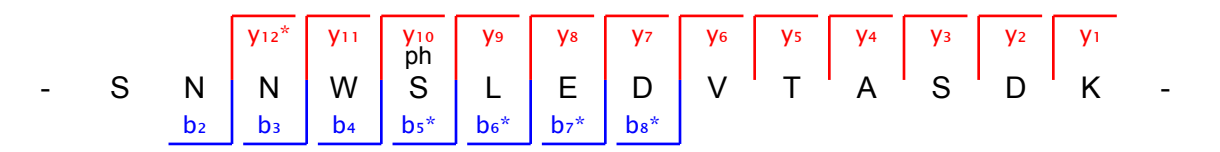

Raw file 20171215\_MaS\_33SR\_LMH\_phospho\_03 Scan 13892 Method FTMS; HCD Score 218.44 m/z 790.01 Gene names DYNC1LI1

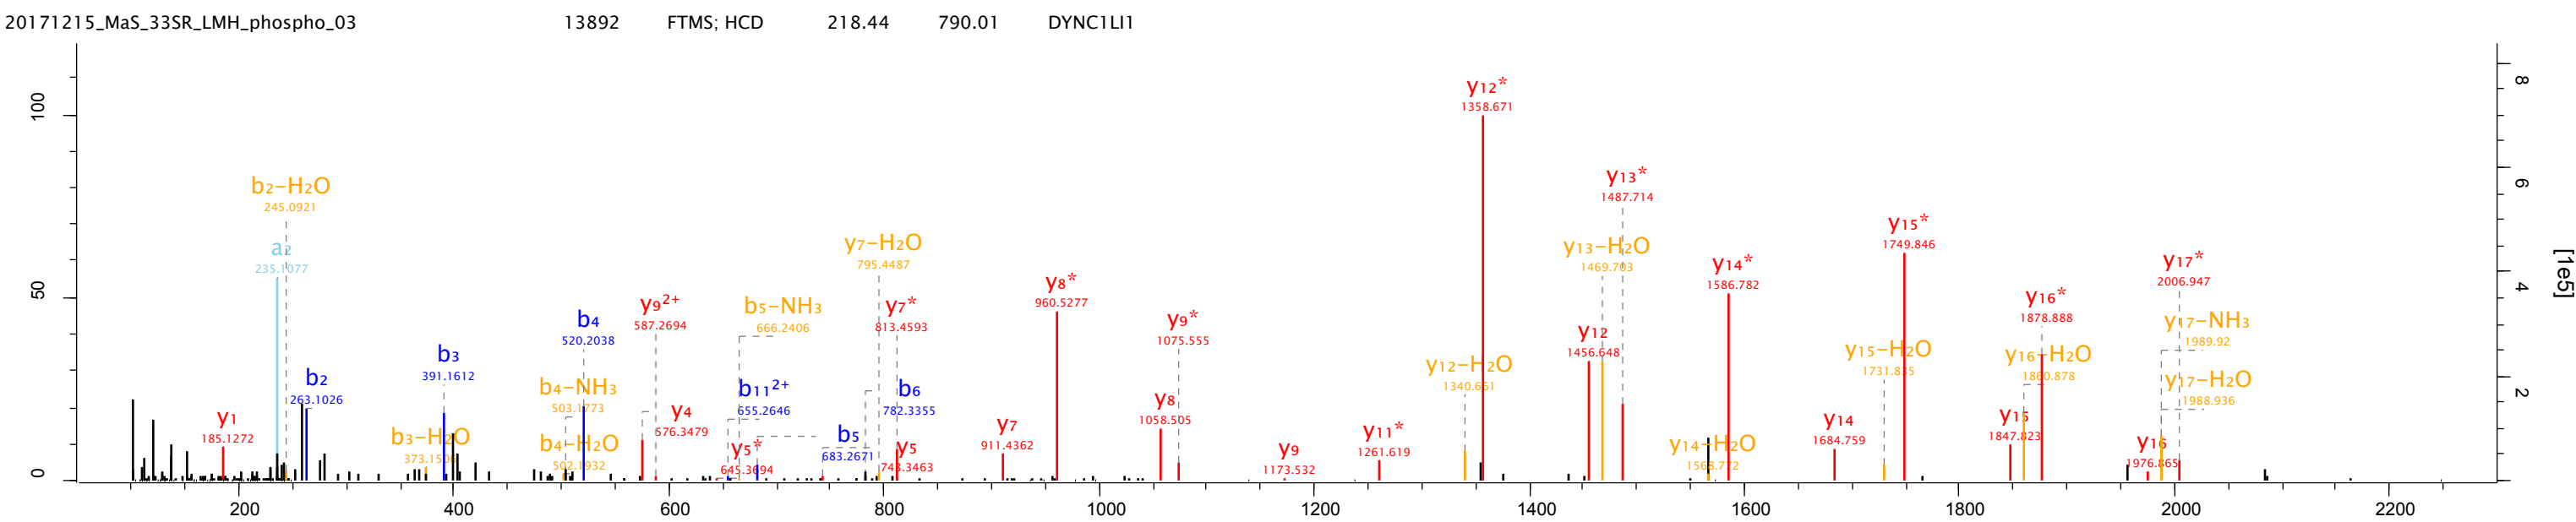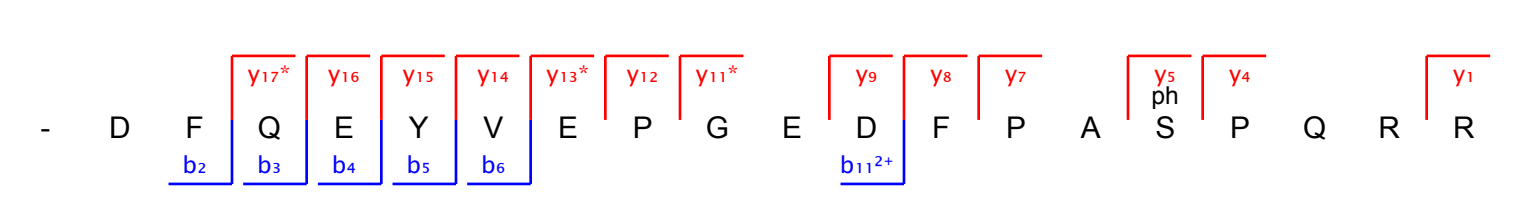

Raw file 20171215\_MaS\_33SR\_LMH\_phospho\_03 Scan 14192 Method FTMS; HCD Score 237.05 m/z 1099.46 Gene names ARID1A

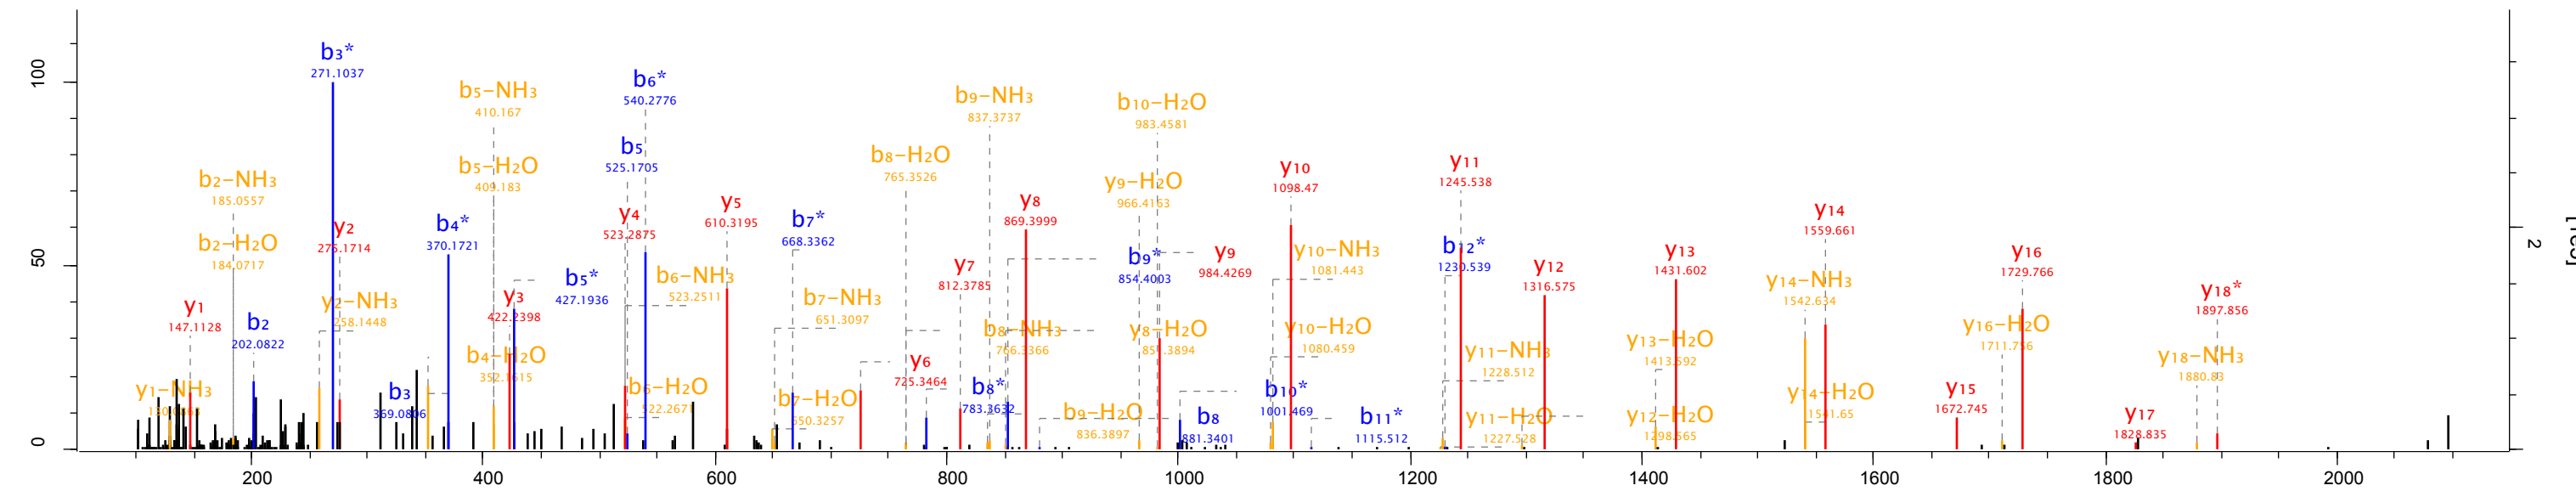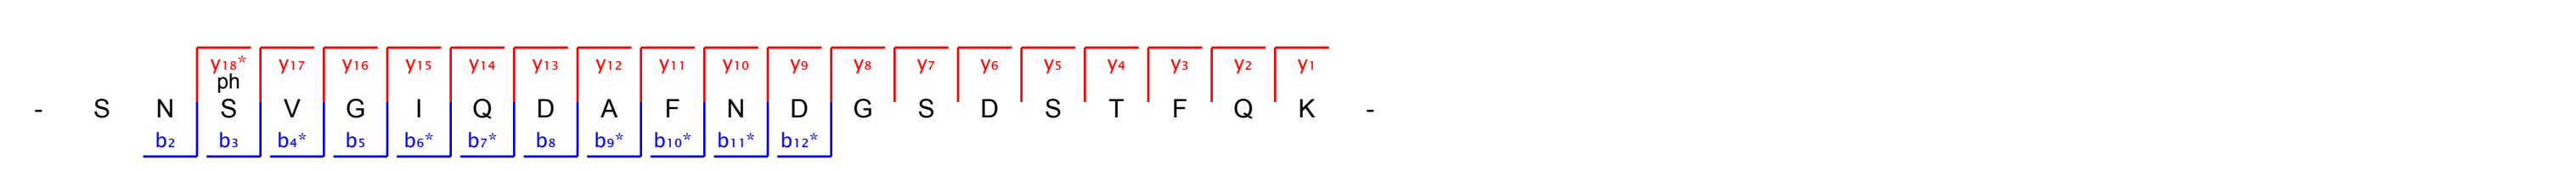



Raw file 20171215\_MaS\_33SR\_LMH\_phospho\_03 Scan 15212 Method FTMS; HCD Score 49.51 m/z 1259.56 Gene names RBM14

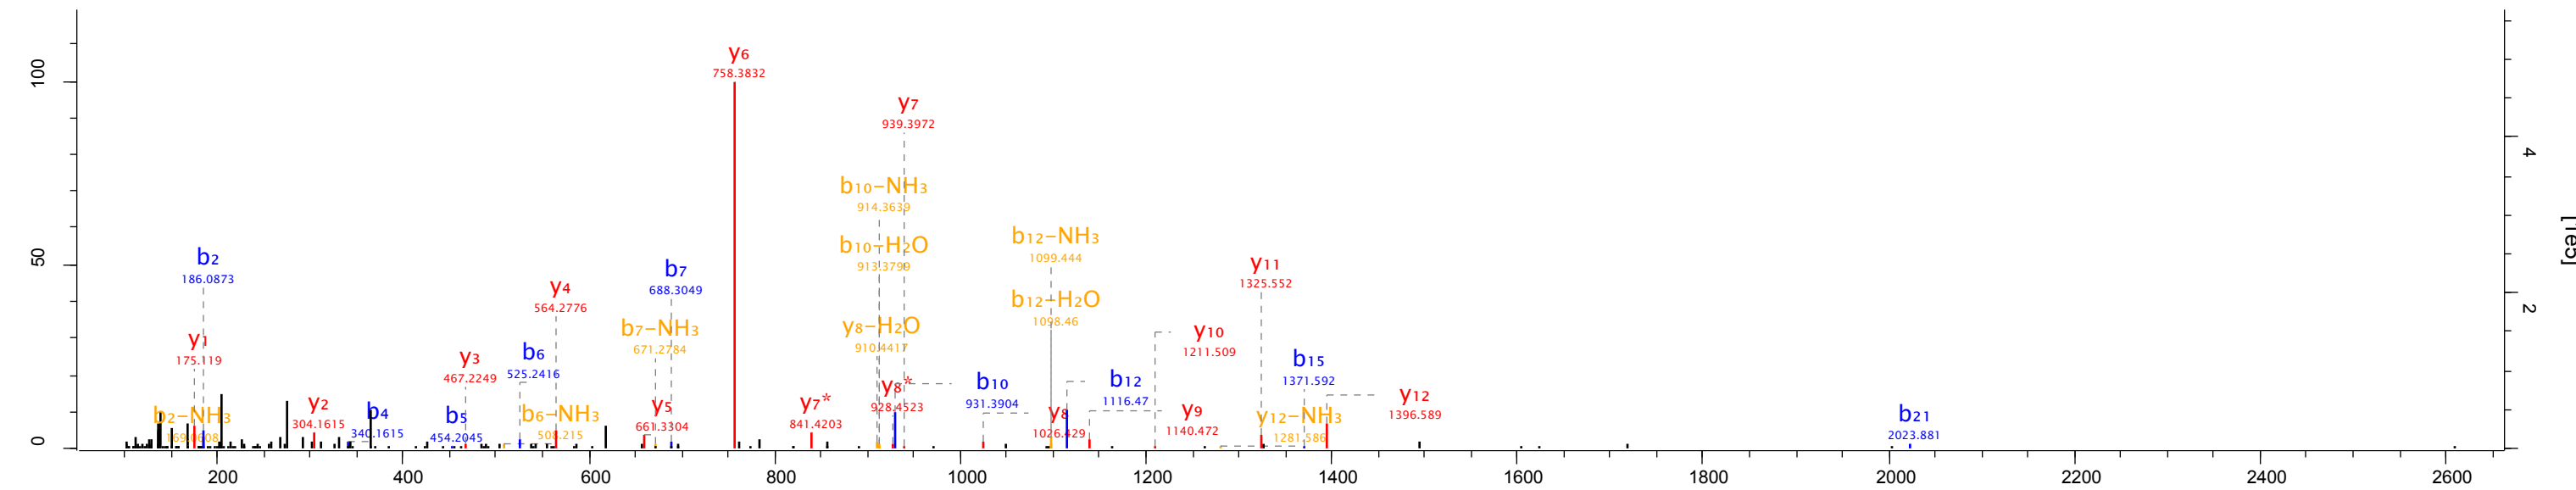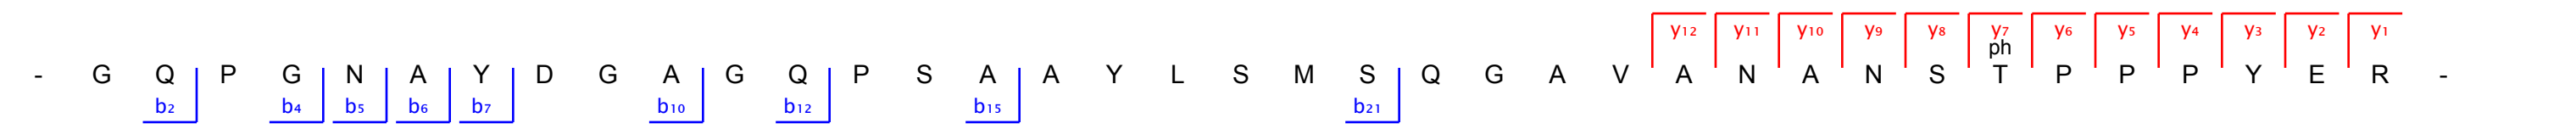

Raw file 20171215\_MaS\_33SR\_LMH\_phospho\_03 Scan 15742 Method FTMS; HCD Score 314.11 m/z 978.32 Gene names PTGES3

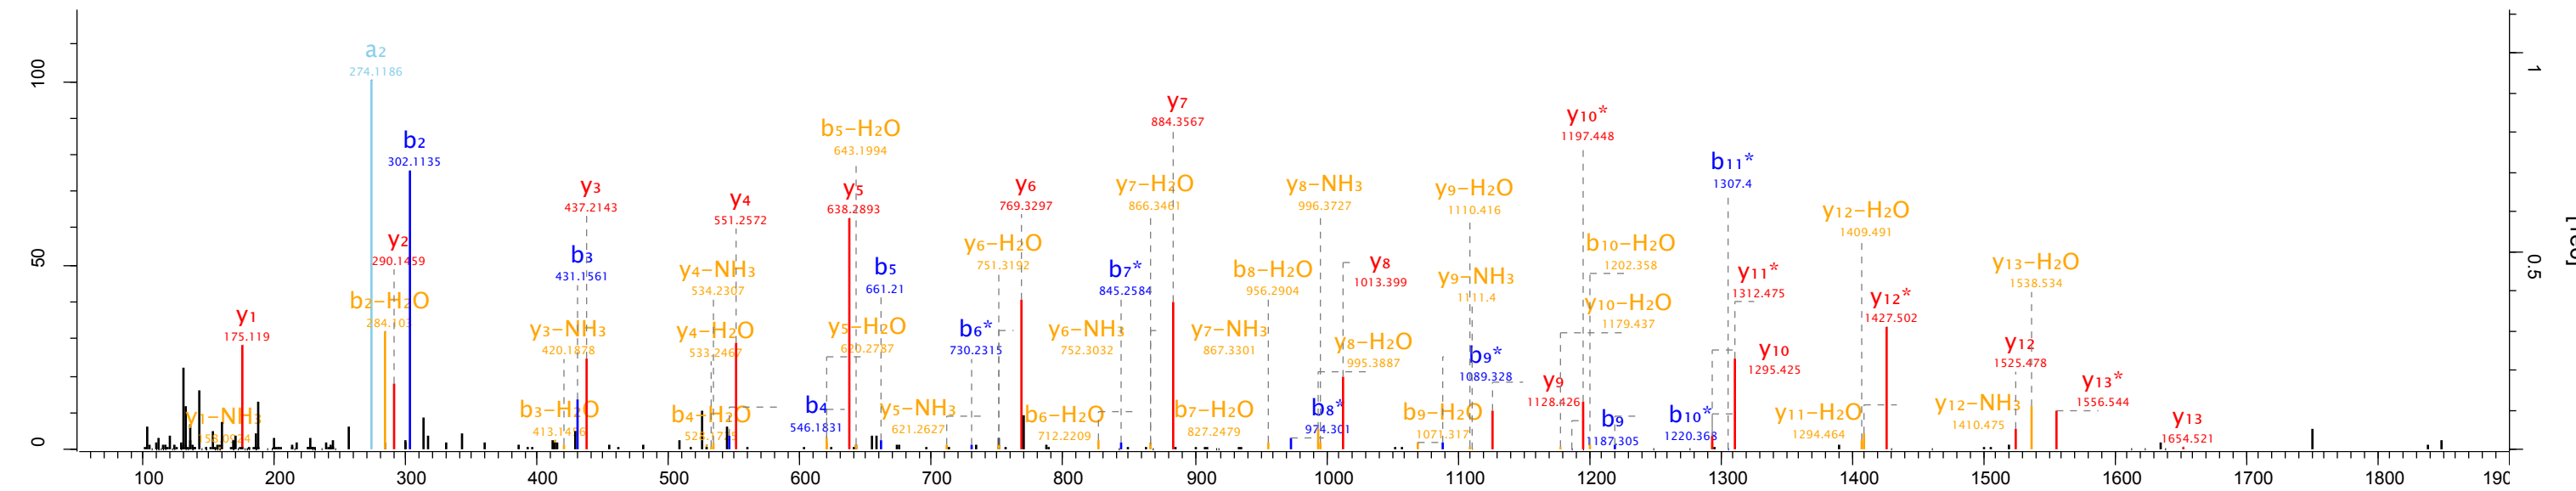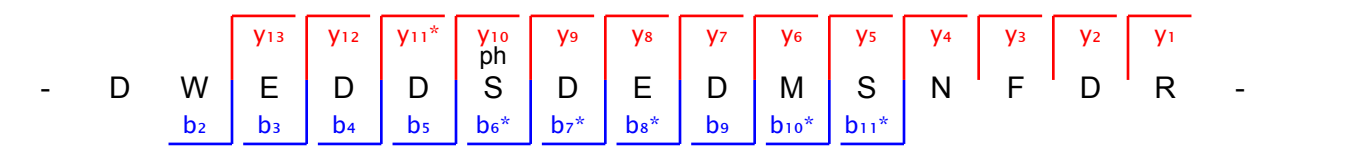

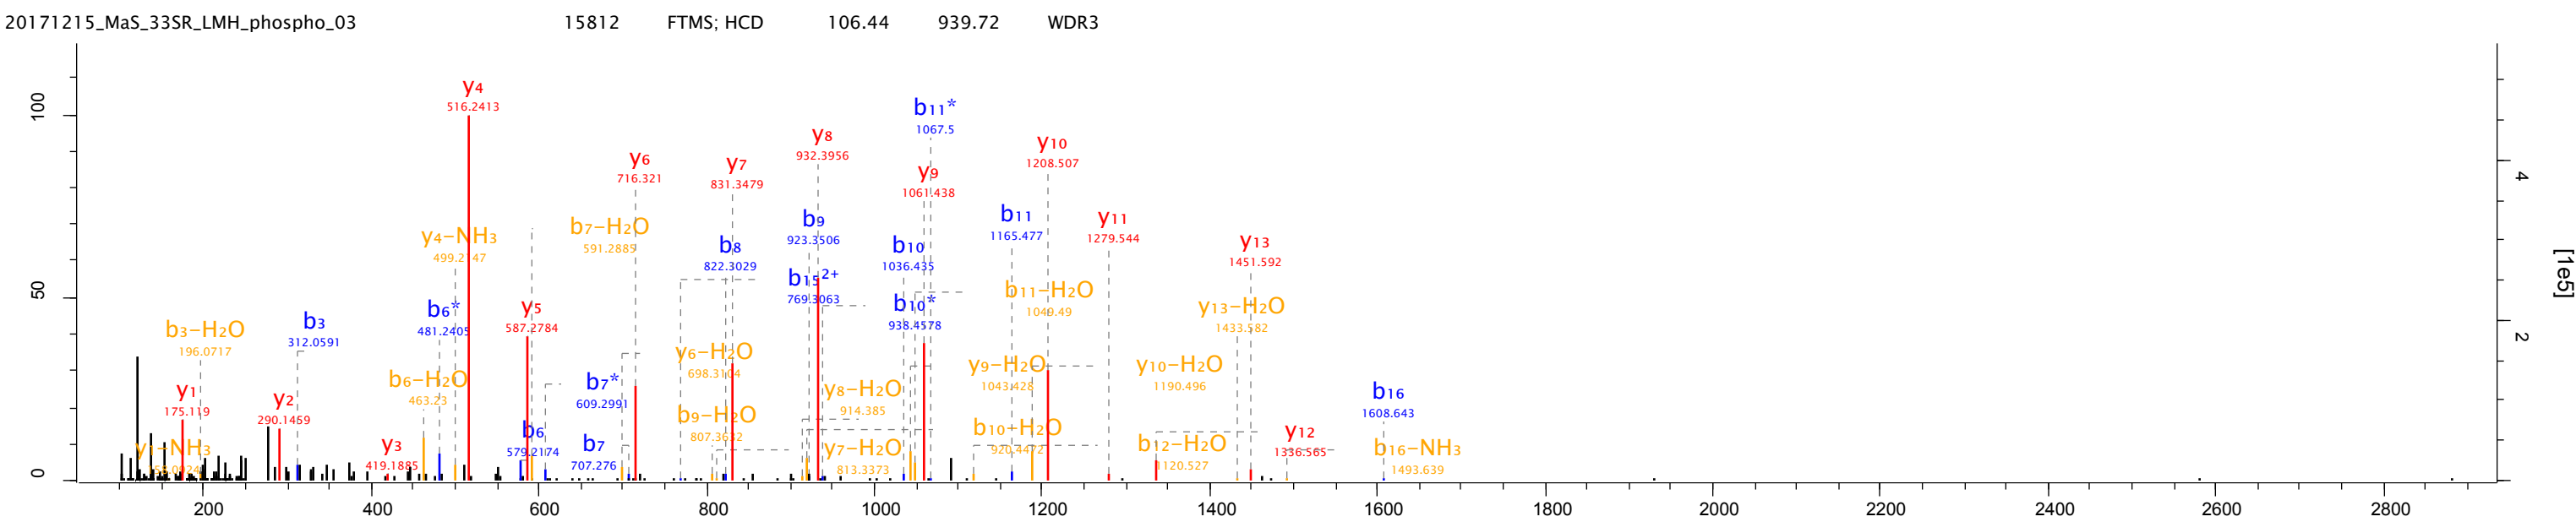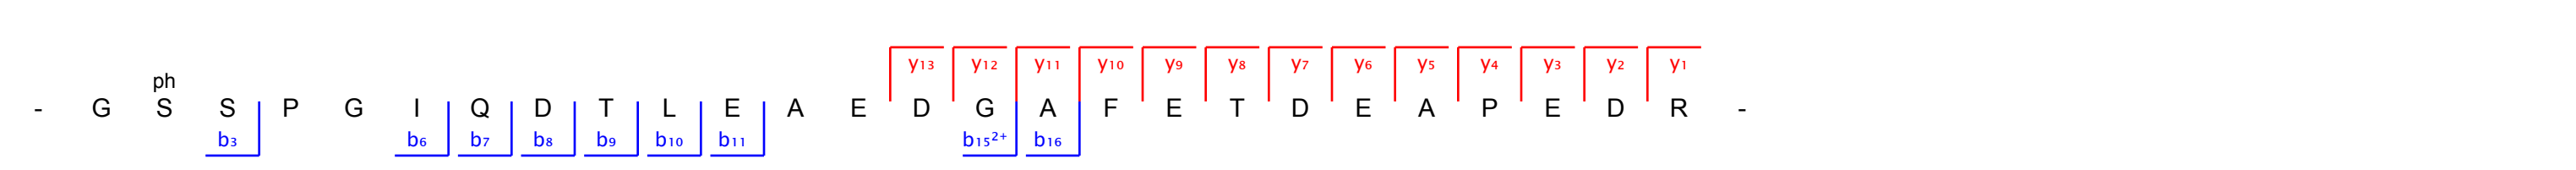

Raw file 20171215\_MaS\_33SR\_LMH\_phospho\_03 Scan 17642 Method FTMS; HCD Score 48.23 m/z 905.72 Gene names EIF3J

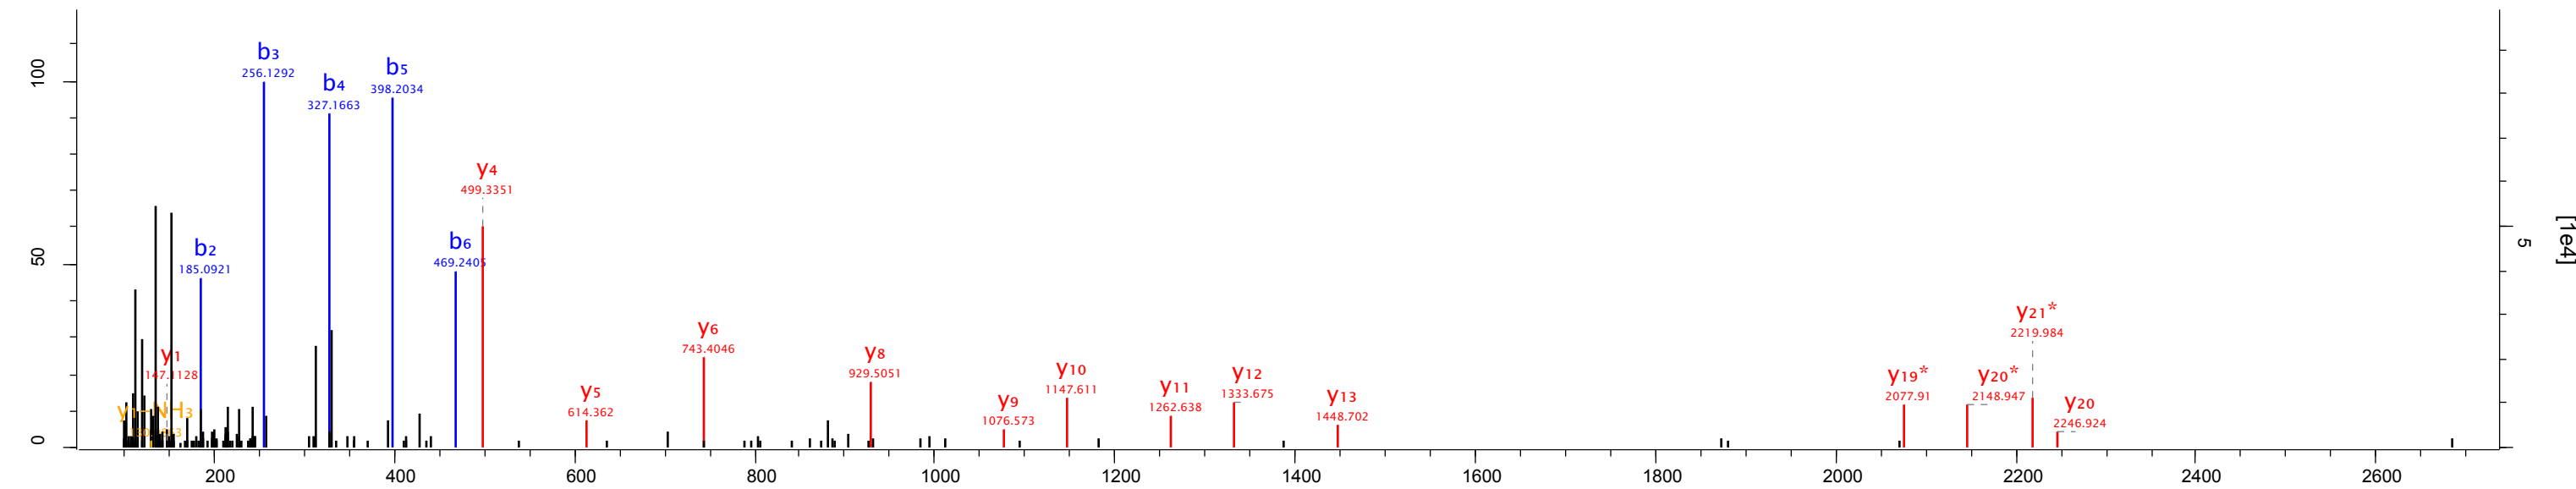

ac - A A A A A A A G D S D S W D A D A F S V E D P V R K -

ph

b2 b3 b4 b5 b6 y21\* y20 y19\* y13 y12 y11 y10 y9 y8 y6 y5 y4 y1

Raw file: 20171215\_MaS\_33SR\_LMH\_phospho\_03  
 Scan: 2132 Method: FTMS; HCD Score: 243.35 m/z: 1052.49 Gene names: HNRNPC

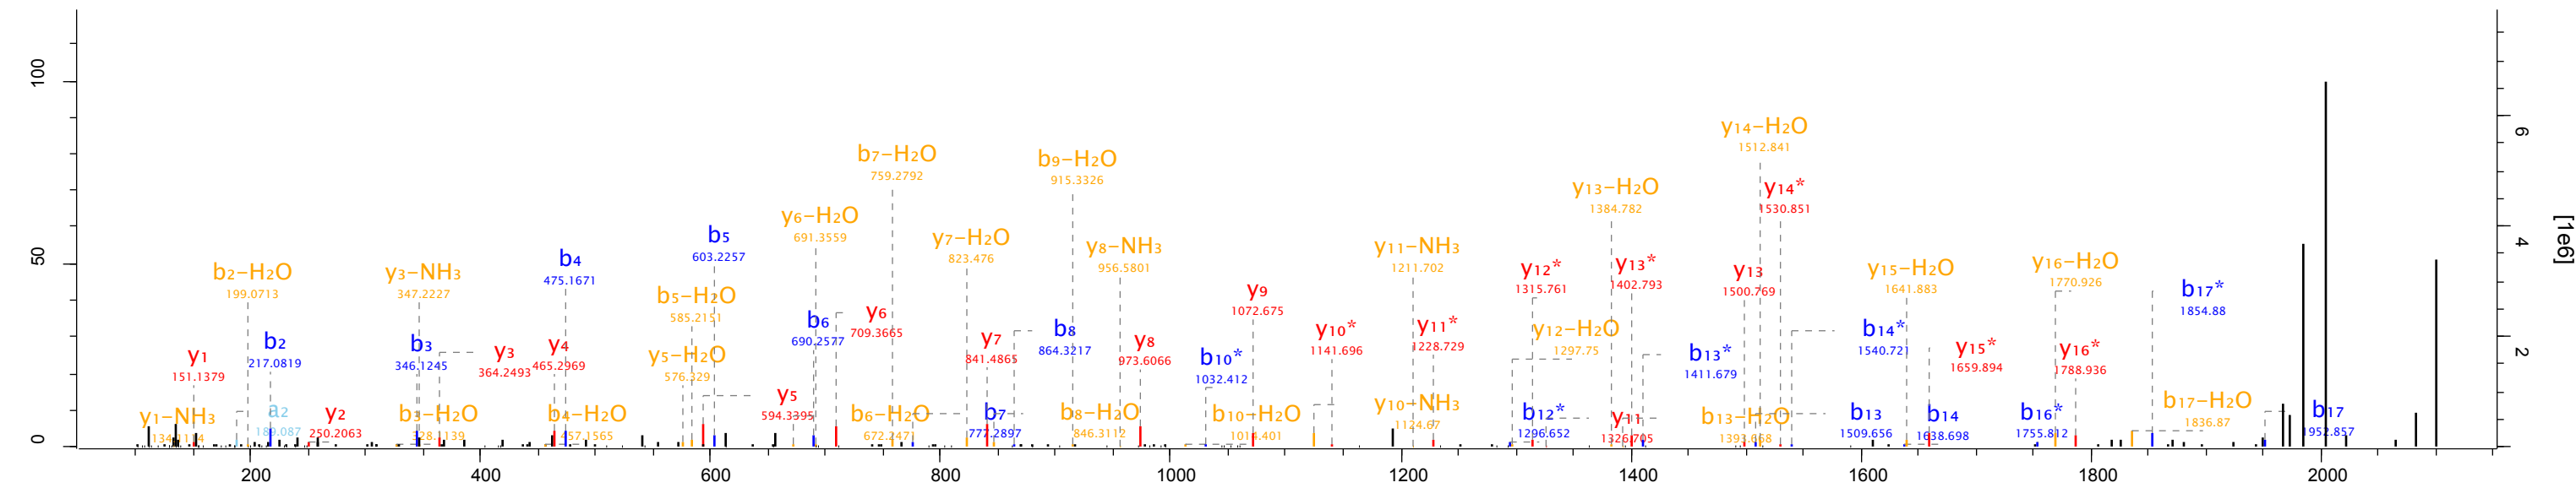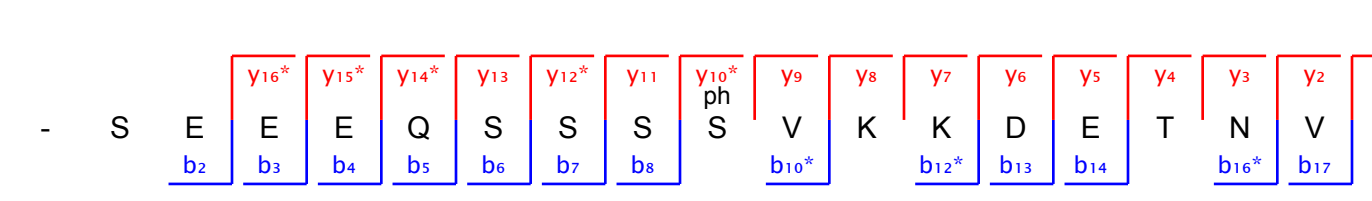

Raw file 20171215\_MaS\_33SR\_LMH\_phospho\_03 Scan 2232 Method FTMS; HCD Score 69.98 m/z 587.57 Gene names LUC7L2

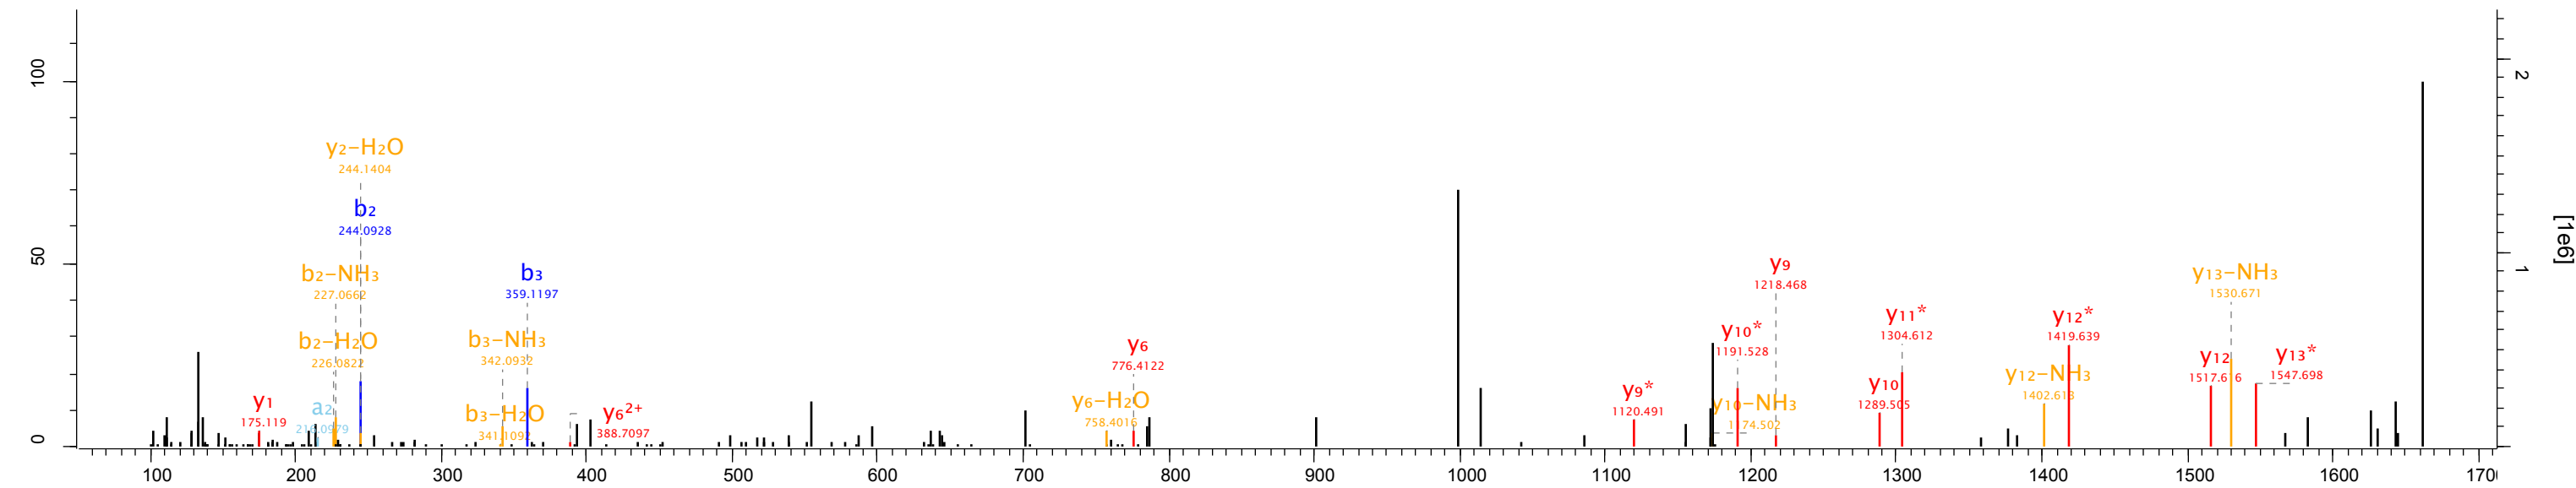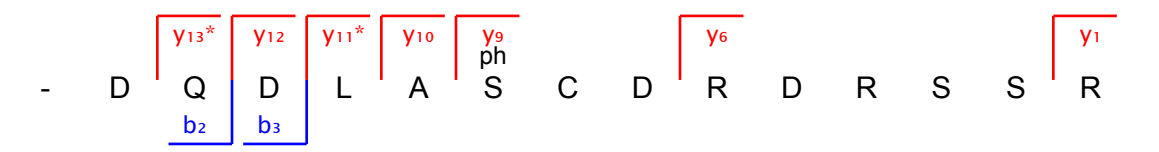

Raw file 20171215\_MaS\_33SR\_LMH\_phospho\_03 Scan 2412 Method FTMS; HCD Score 98.93 m/z 689.79 Gene names C7orf43

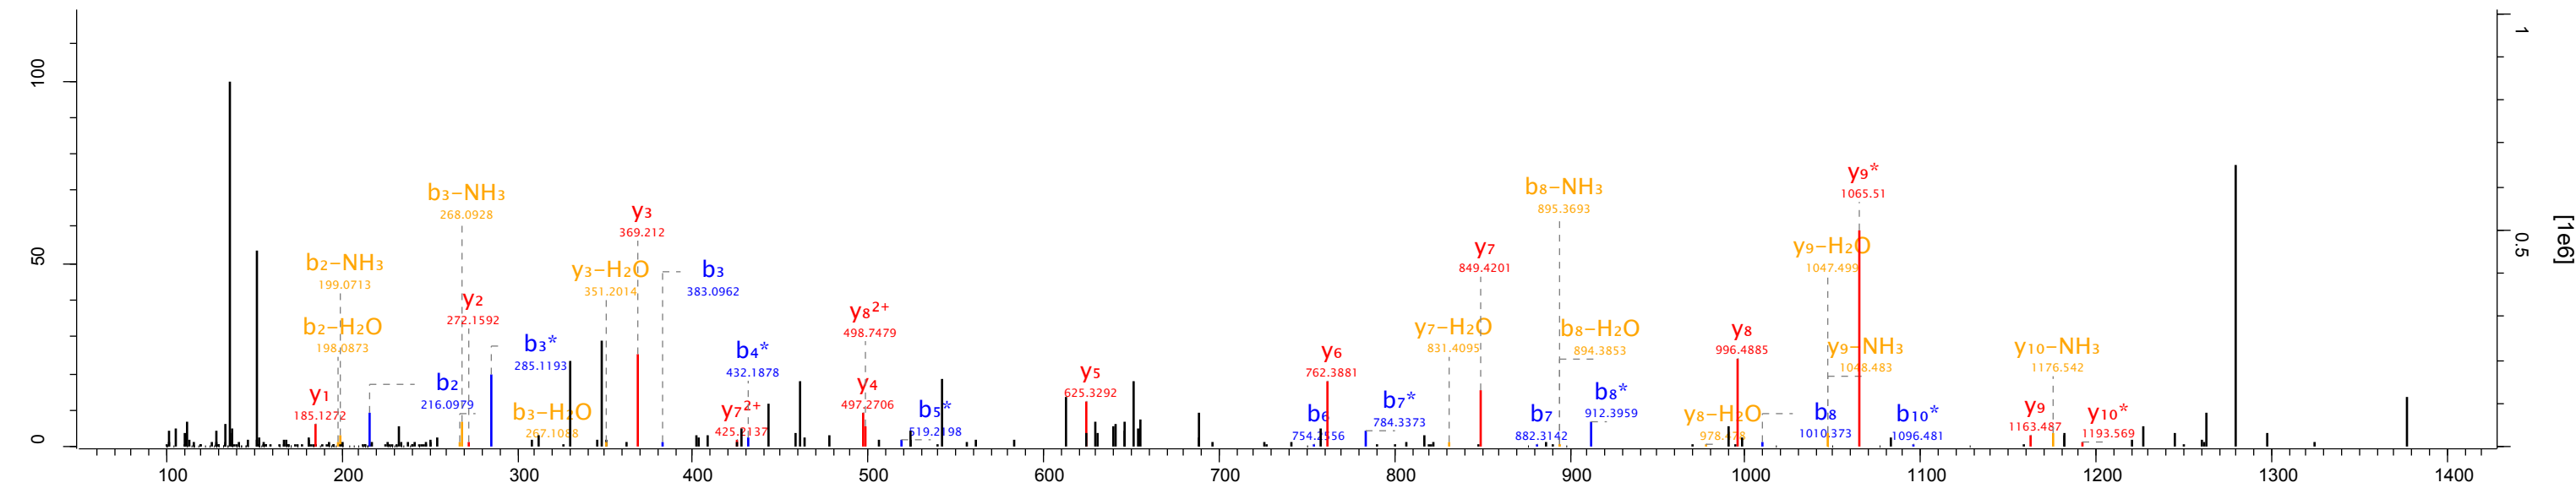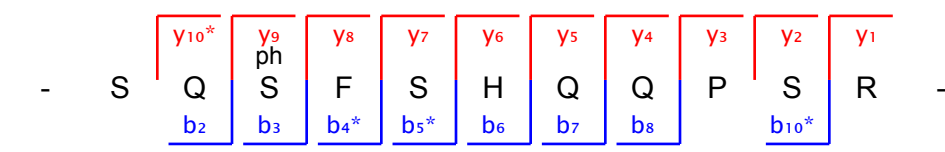

Raw file 20171215\_MaS\_33SR\_LMH\_phospho\_03 Scan 2622 Method FTMS; HCD Score 173.51 m/z 770.79 Gene names EIF3C;EIF3CL

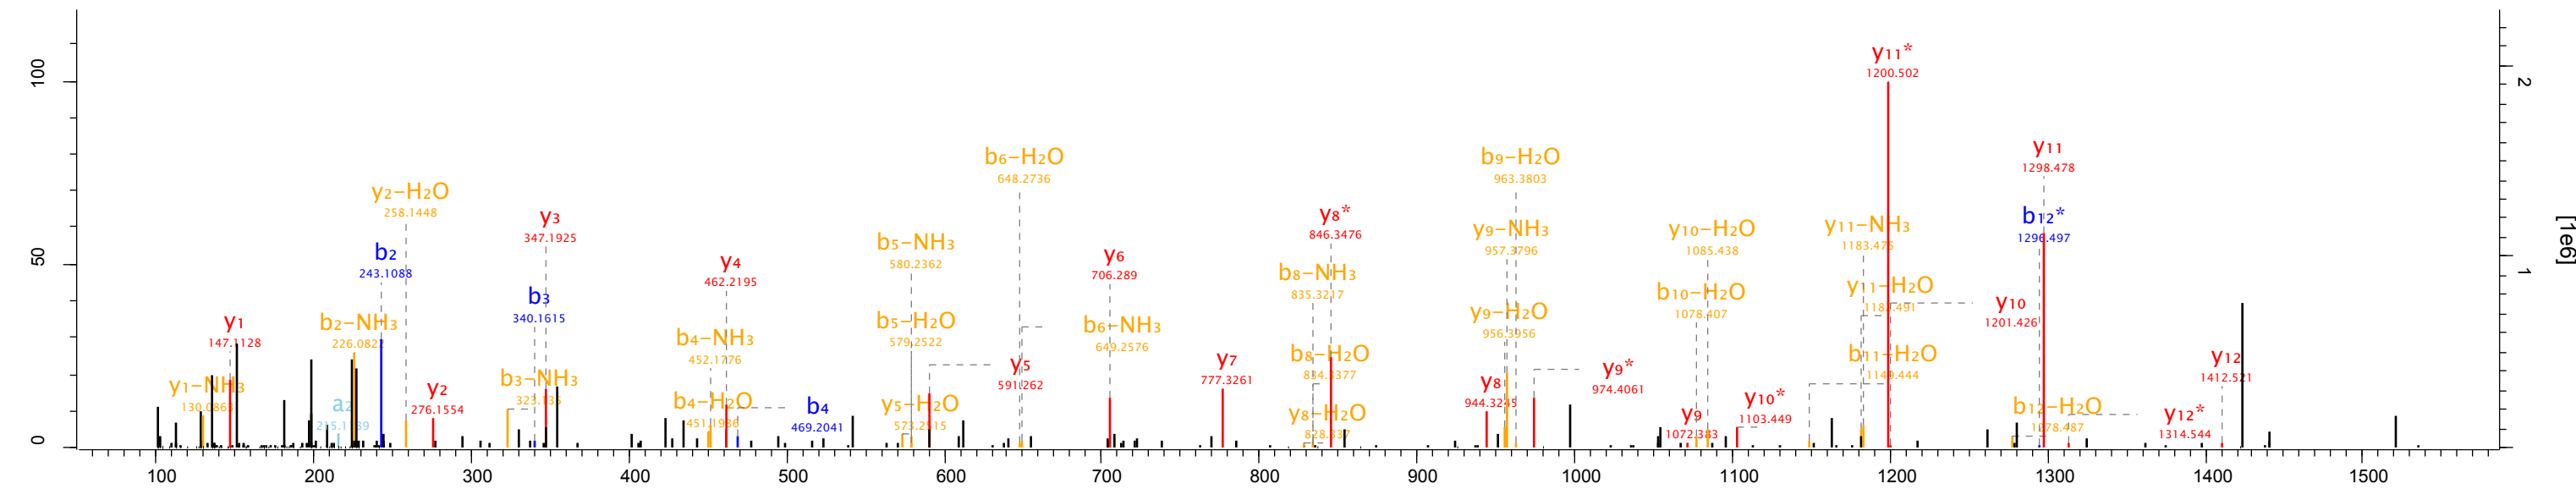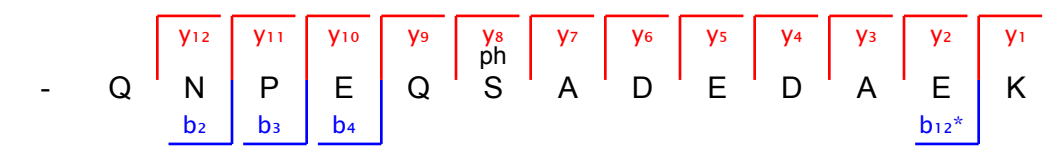



Raw file 20171215\_MaS\_33SR\_LMH\_phospho\_03 Scan 2832 Method FTMS; HCD Score 110.97 m/z 595.76 Gene names SLC1A5

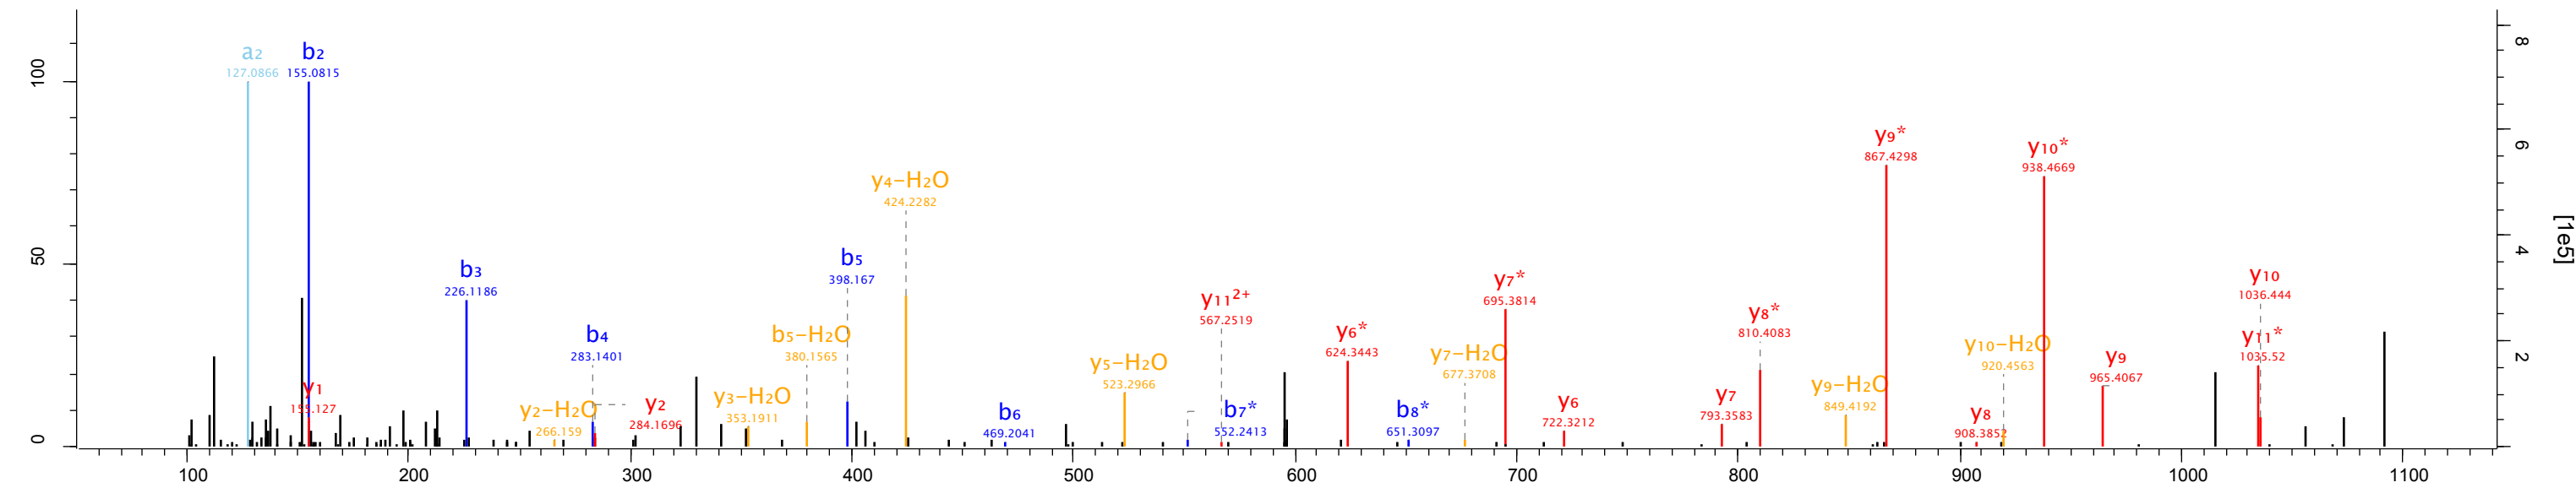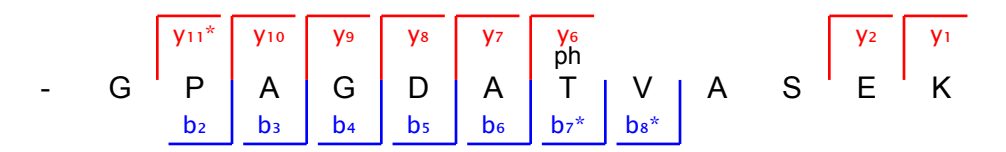

Raw file 20171215\_MaS\_33SR\_LMH\_phospho\_03 Scan 3292 Method FTMS; HCD Score 282.05 m/z 761.7 Gene names EIF4B

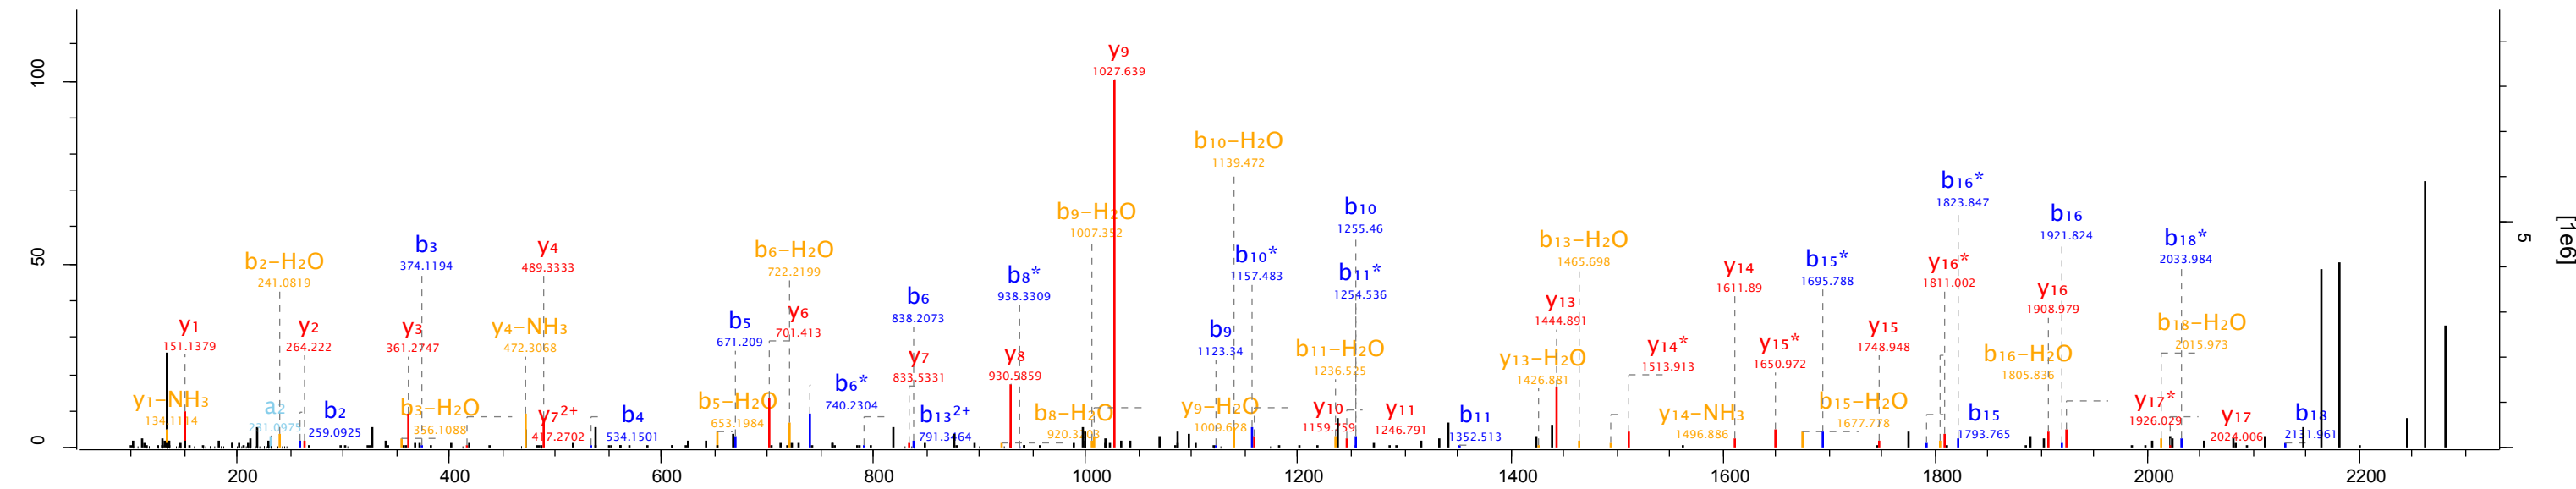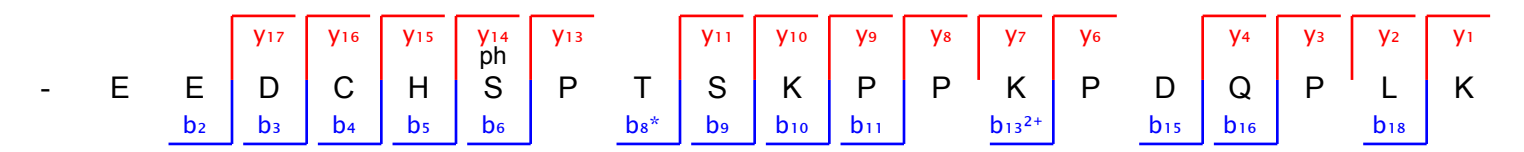

Raw file 20171215\_MaS\_33SR\_LMH\_phospho\_03 Scan 3422 Method FTMS; HCD Score 64.53 m/z 573.26 Gene names SPACIA2;FAM122B

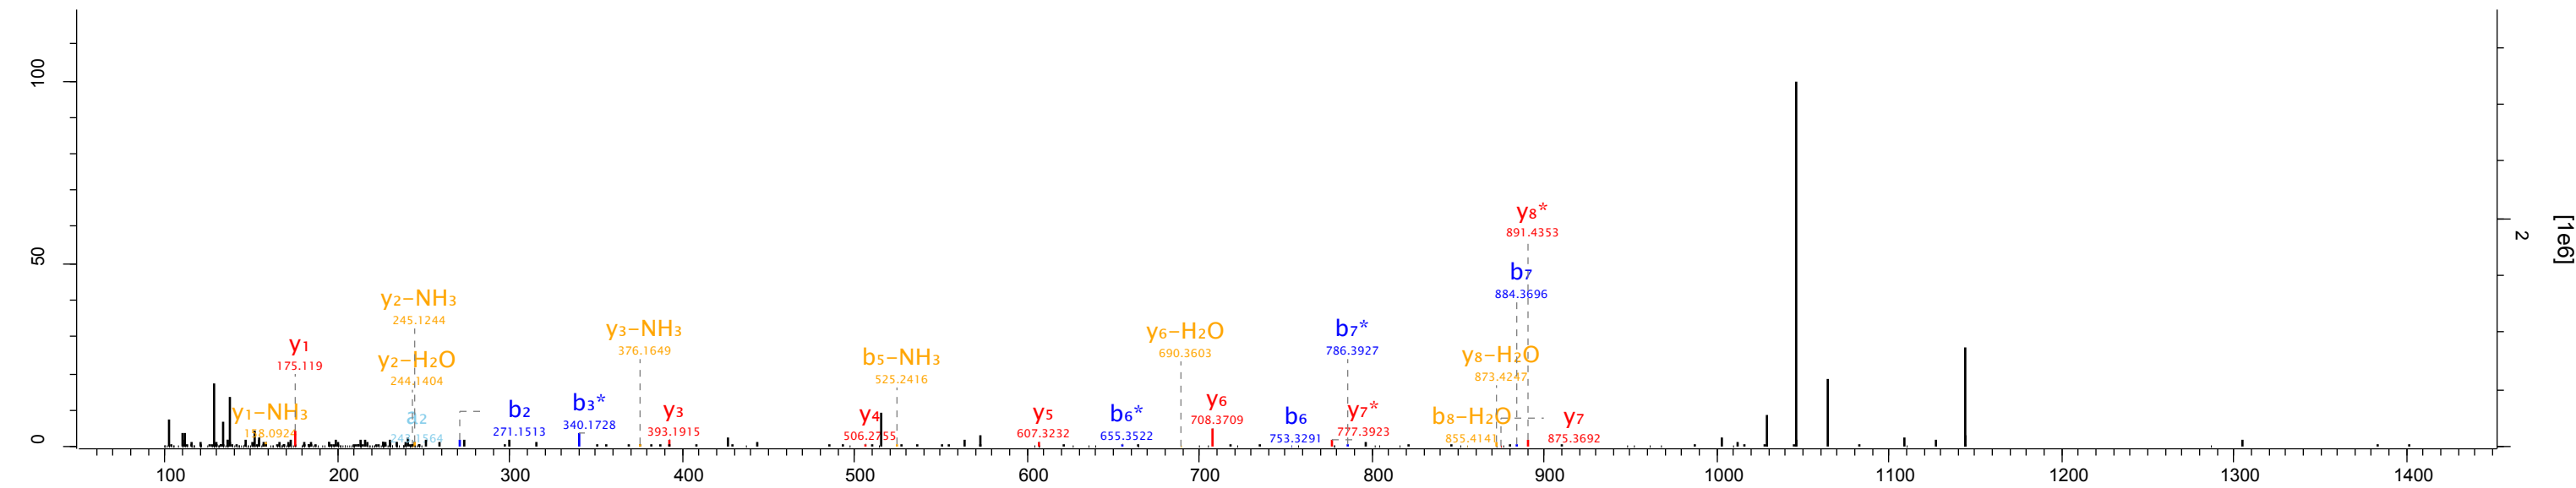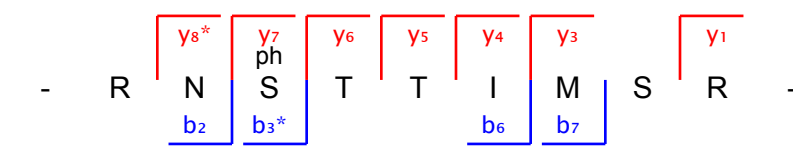

Raw file 20171215\_MaS\_33SR\_LMH\_phospho\_03 Scan 3452 Method FTMS; HCD Score 100.73 m/z 572.28 Gene names CDK16

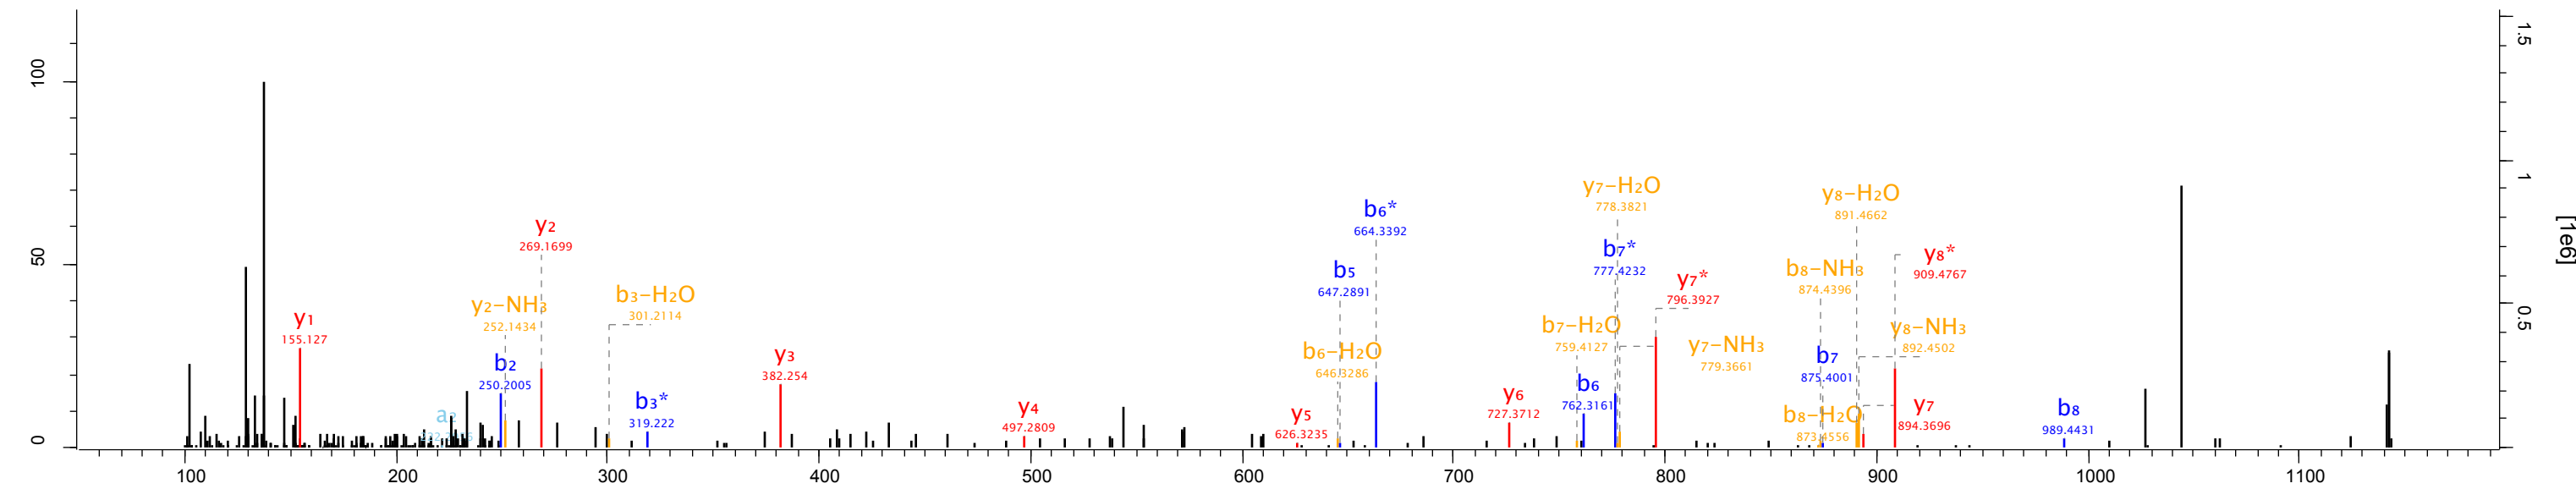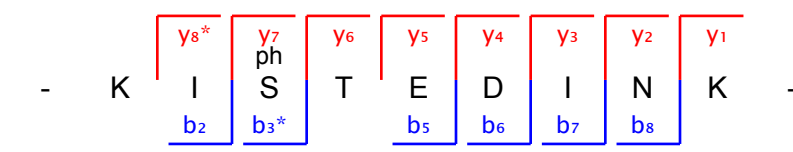

Raw file 20171215\_MaS\_33SR\_LMH\_phospho\_03 Scan 3872 Method FTMS; HCD Score 76.01 m/z 580.27 Gene names RIN1

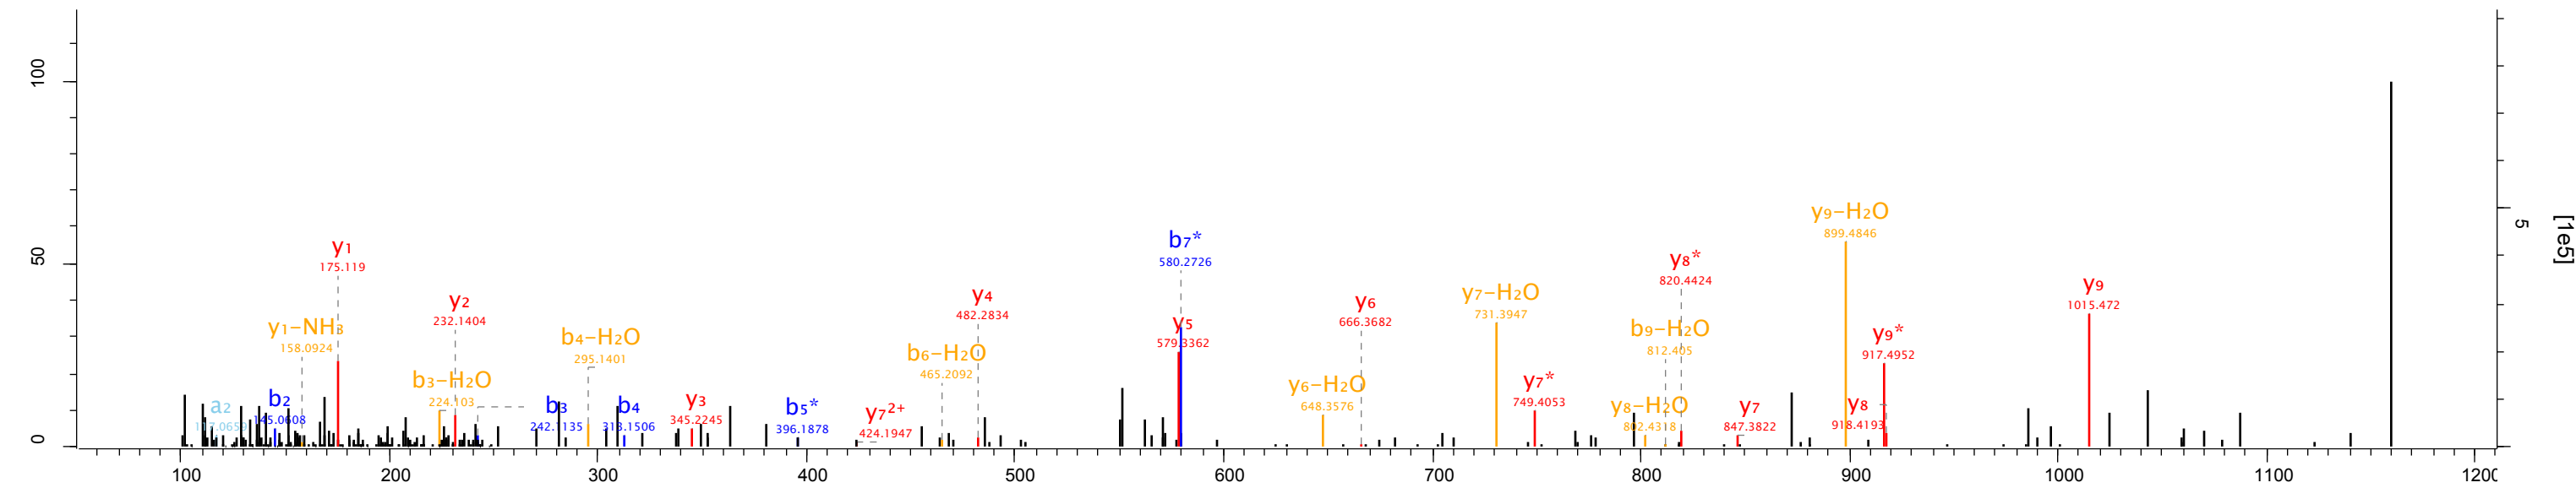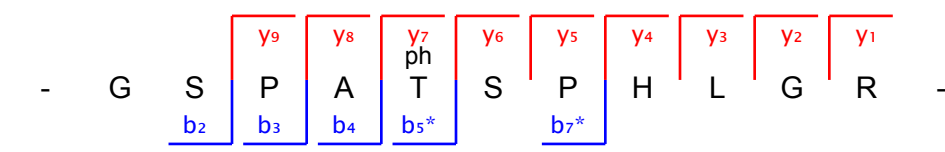

Raw file 20171215\_MaS\_33SR\_LMH\_phospho\_03 Scan 4032 Method FTMS; HCD Score 111.11 m/z 679.8 Gene names TAOK1

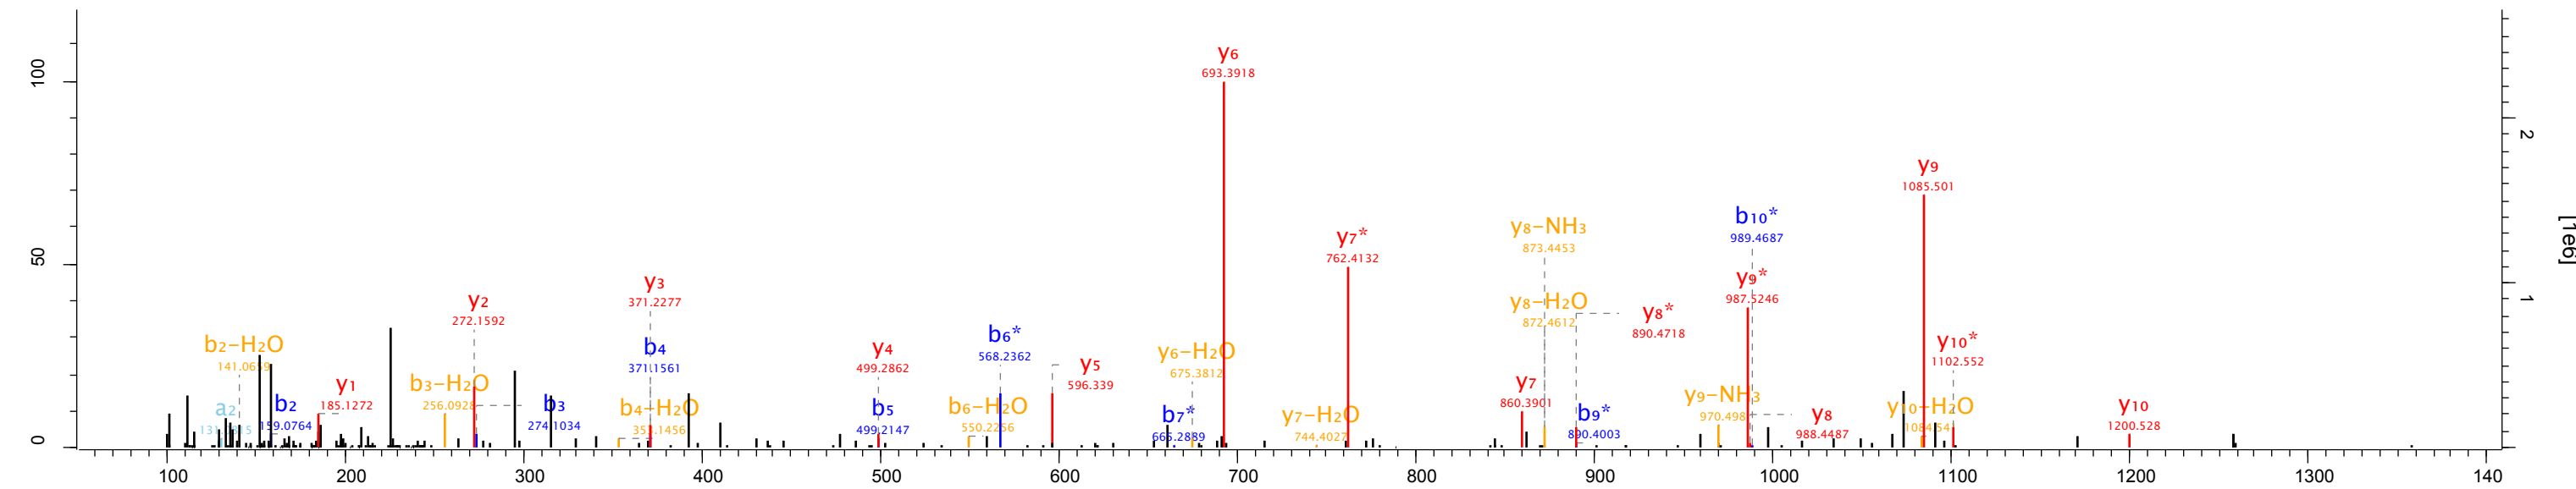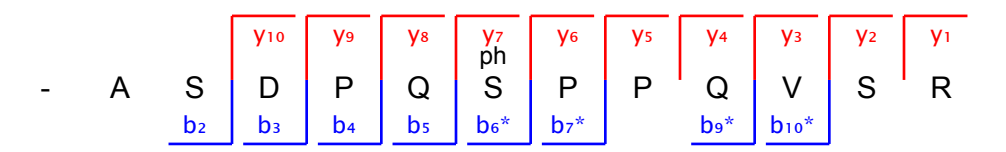

Raw file 20171215\_MaS\_33SR\_LMH\_phospho\_03 Scan 4092 Method FTMS; HCD Score 144.41 m/z 631.31 Gene names TOMM34

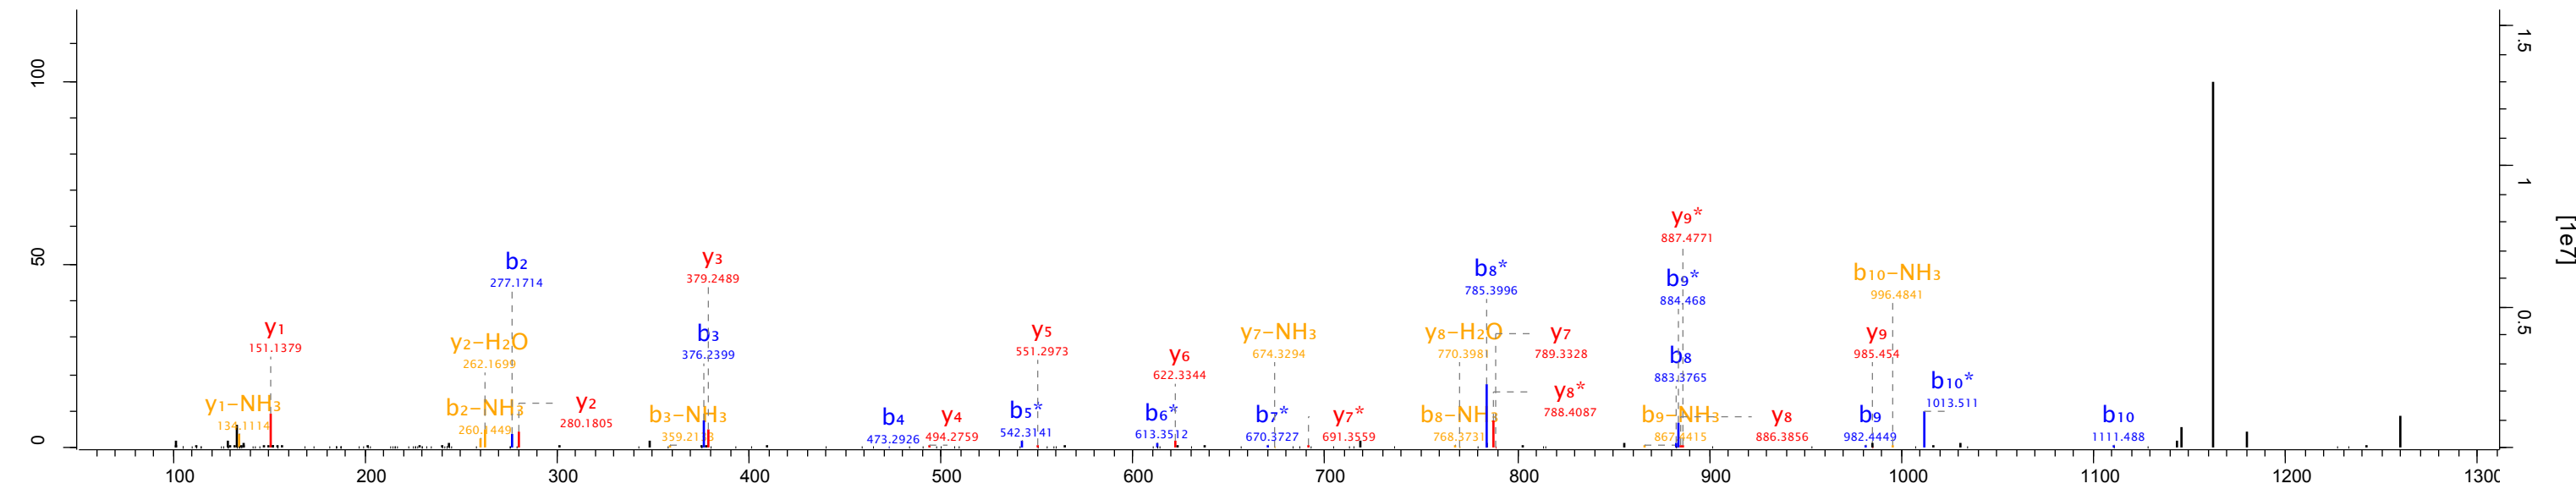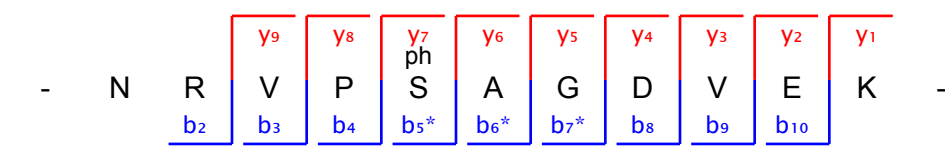

Raw file 20171215\_MaS\_33SR\_LMH\_phospho\_03 Scan 4192 Method FTMS; HCD Score 130.01 m/z 567.26 Gene names CDK12

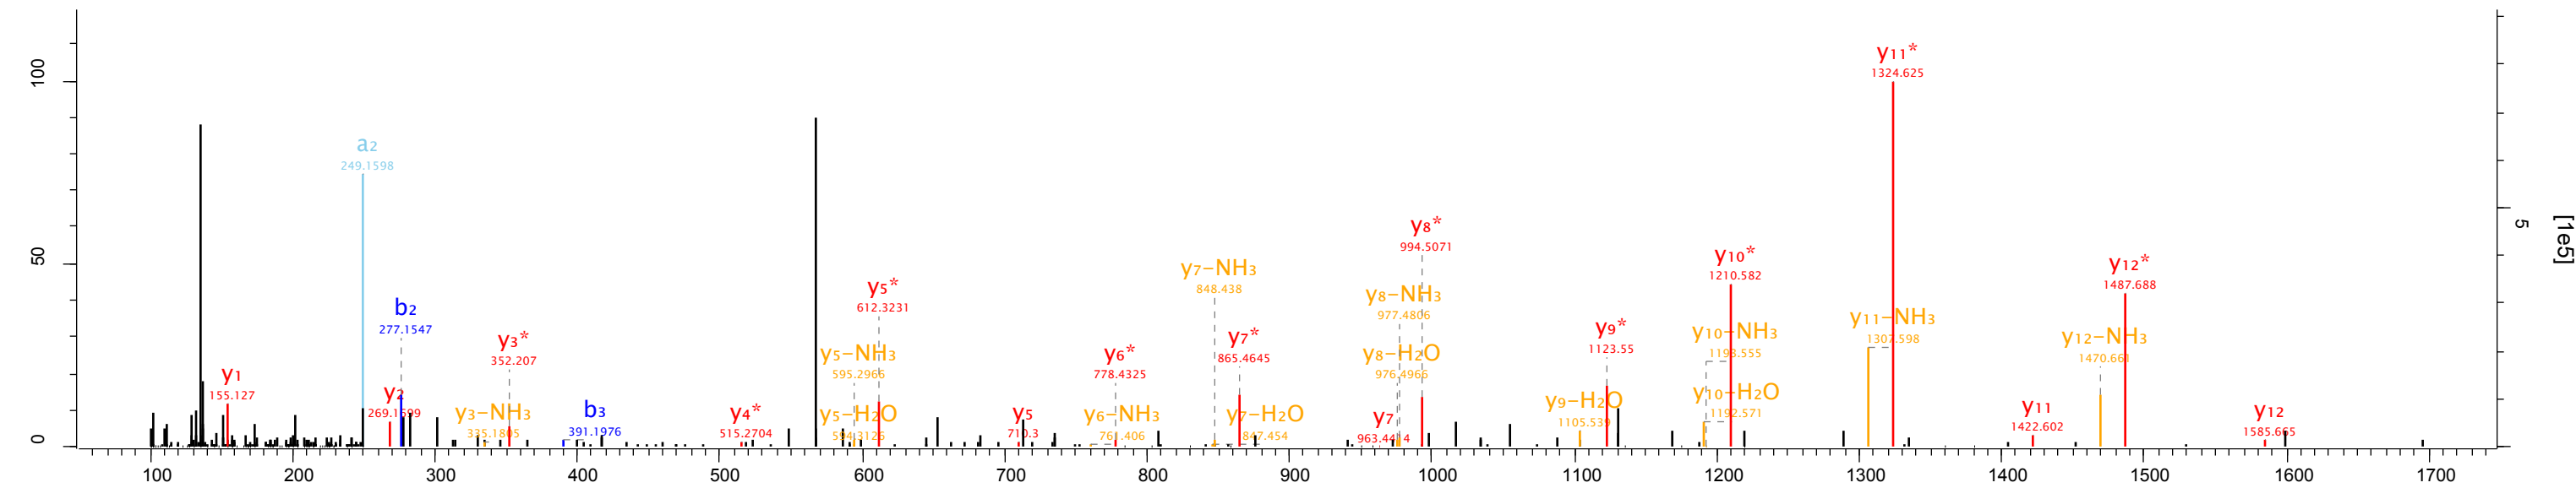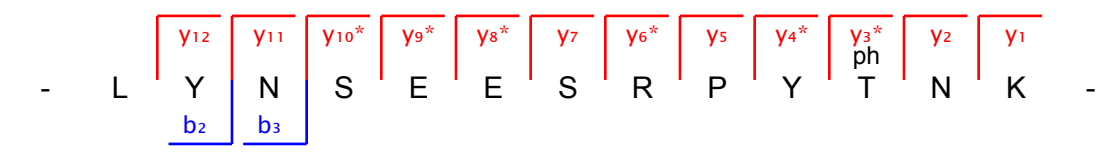



Raw file 20171215\_MaS\_33SR\_LMH\_phospho\_03 Scan 4252 Method FTMS; HCD Score 69.37 m/z 507.25 Gene names NCAPH2

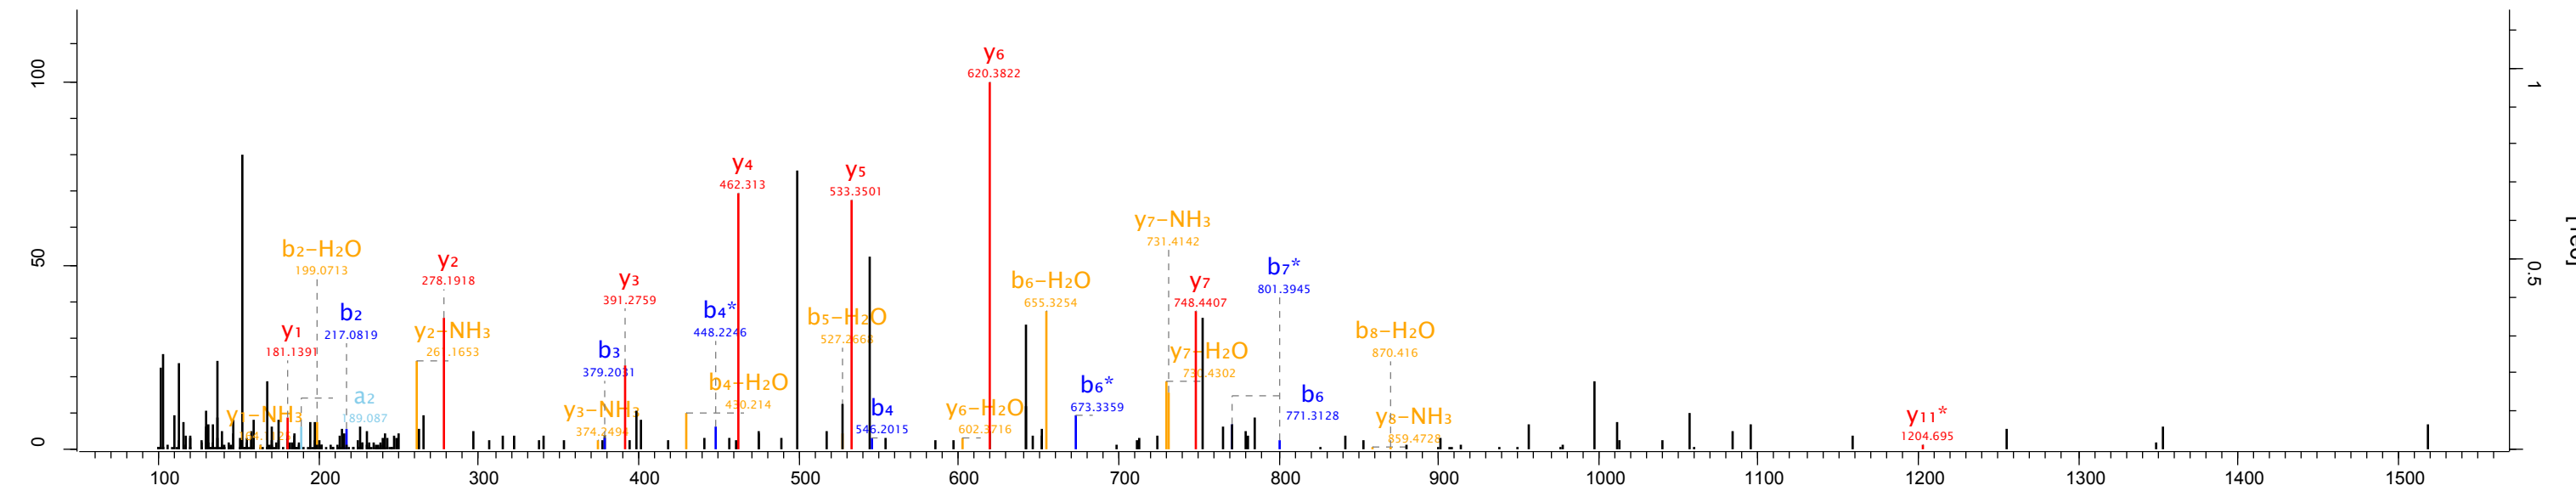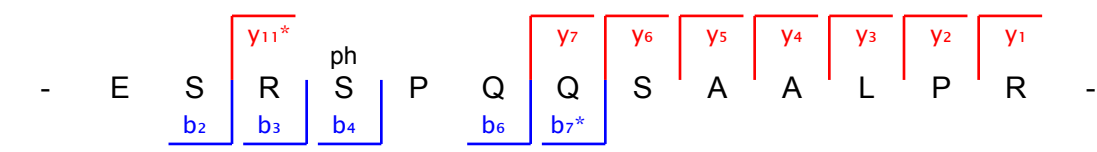

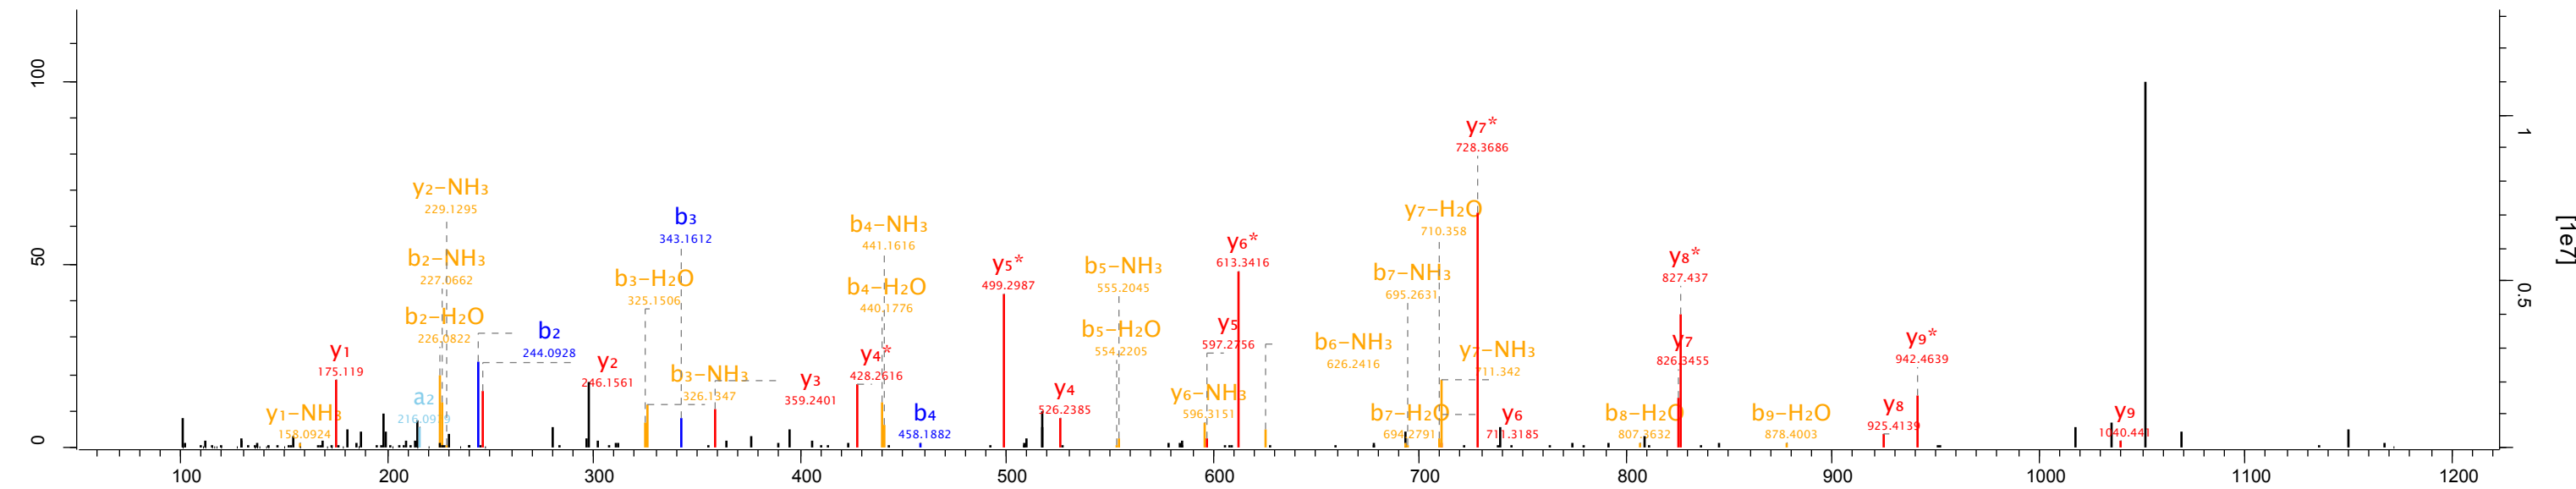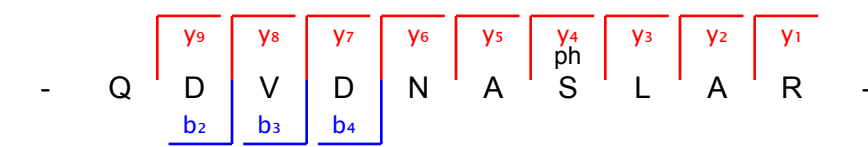

Raw file: 20171215\_MaS\_33SR\_LMH\_phospho\_03  
 Scan: 4552 Method: FTMS; HCD Score: 97.64 m/z: 499.19 Gene names: GIGYF2

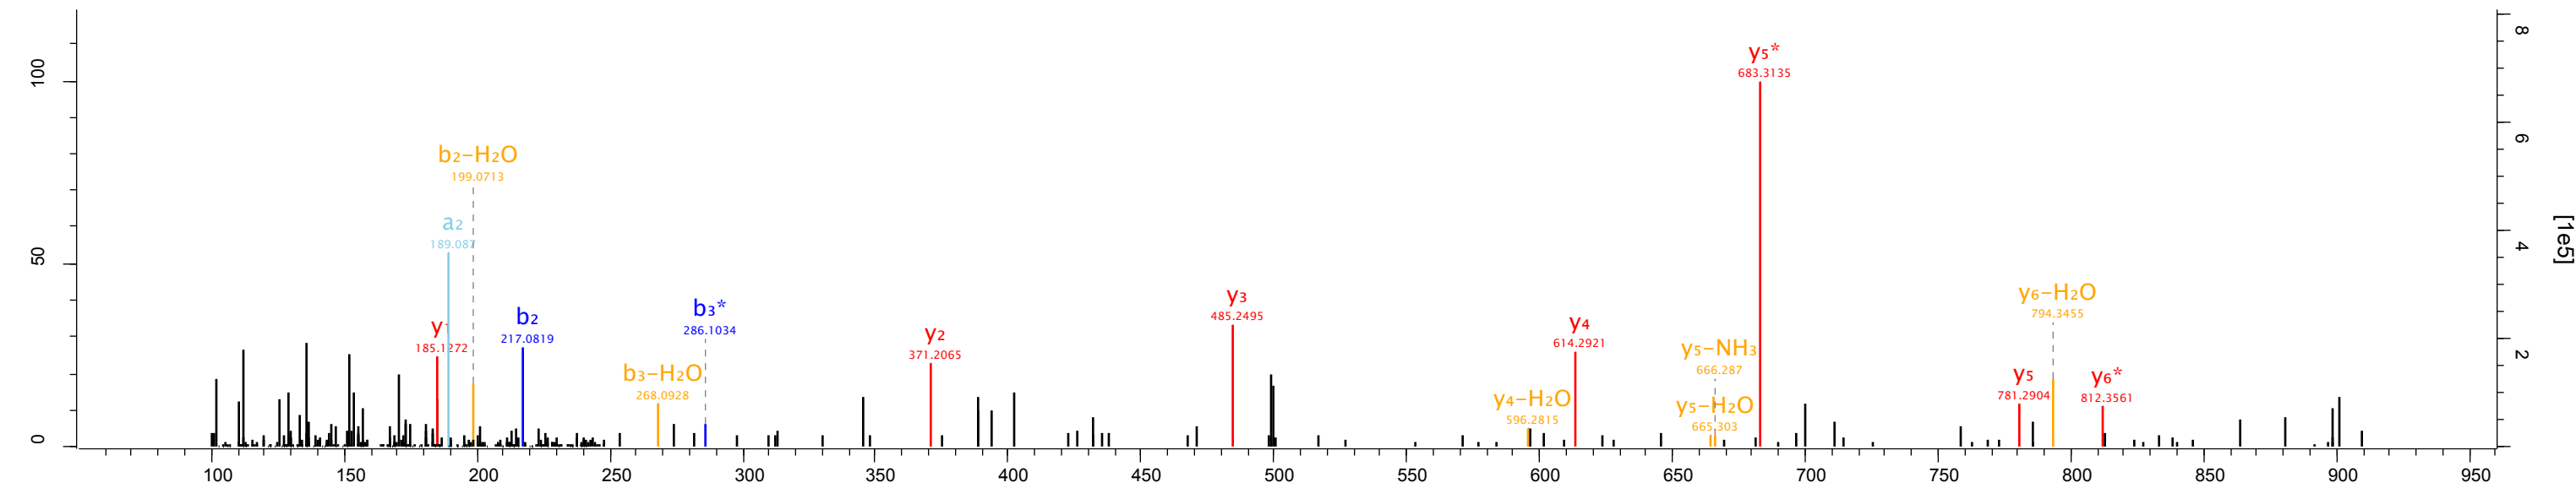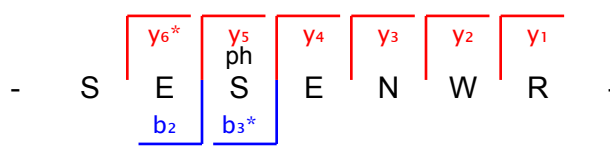

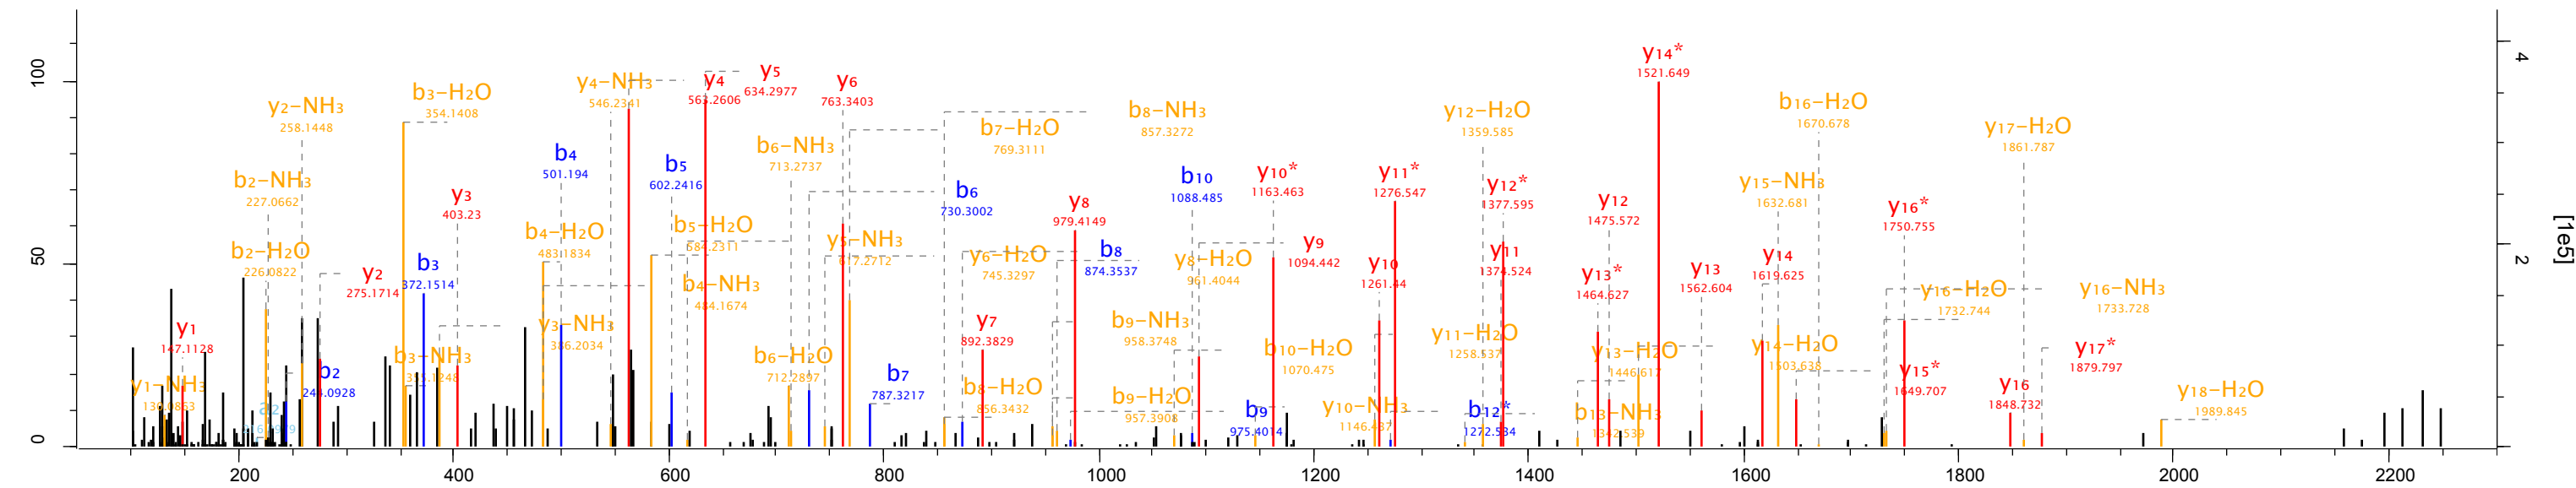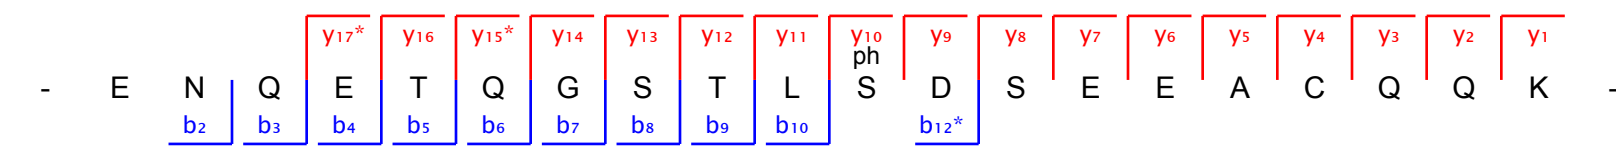

Raw file 20171215\_MaS\_33SR\_LMH\_phospho\_03 Scan 4692 Method FTMS; HCD Score 41.01 m/z 537.6 Gene names GPATCH8

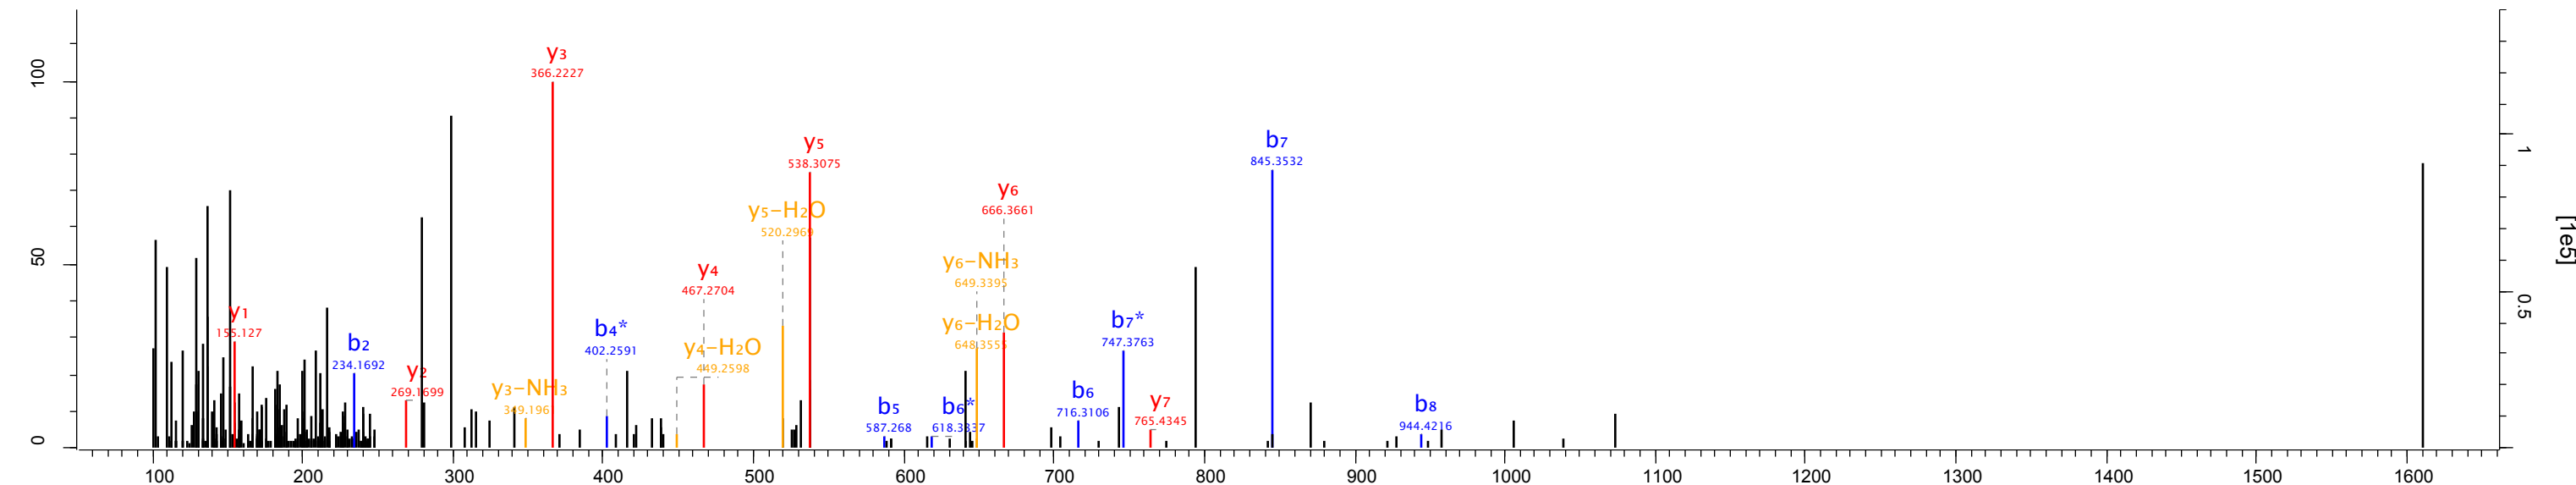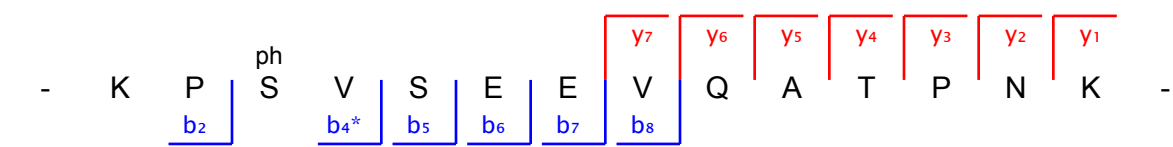

Raw file 20171215\_MaS\_33SR\_LMH\_phospho\_03 Scan 5612 Method FTMS; HCD Score 142.73 m/z 710.31 Gene names RPS3A

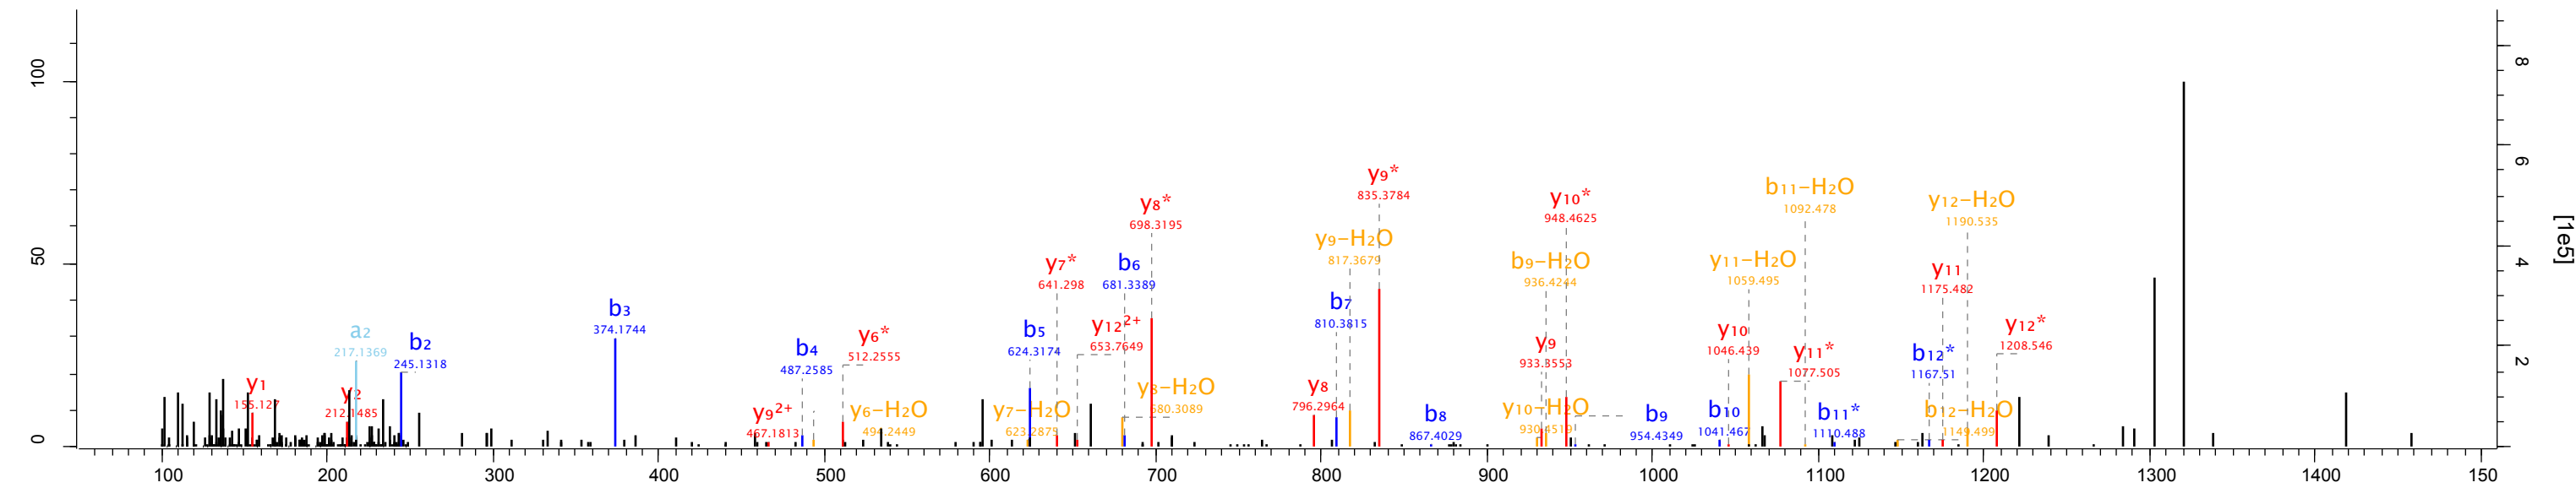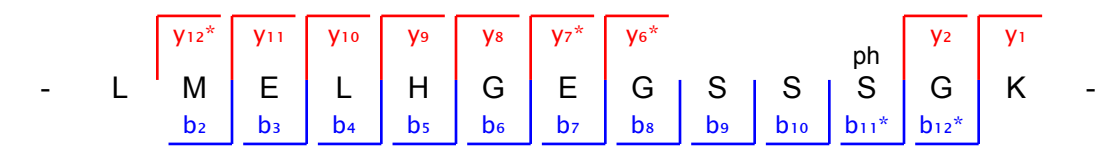

Raw file 20171215\_MaS\_33SR\_LMH\_phospho\_03 Scan 6382 Method FTMS; HCD Score 100.31 m/z 591.73 Gene names SLC3A2

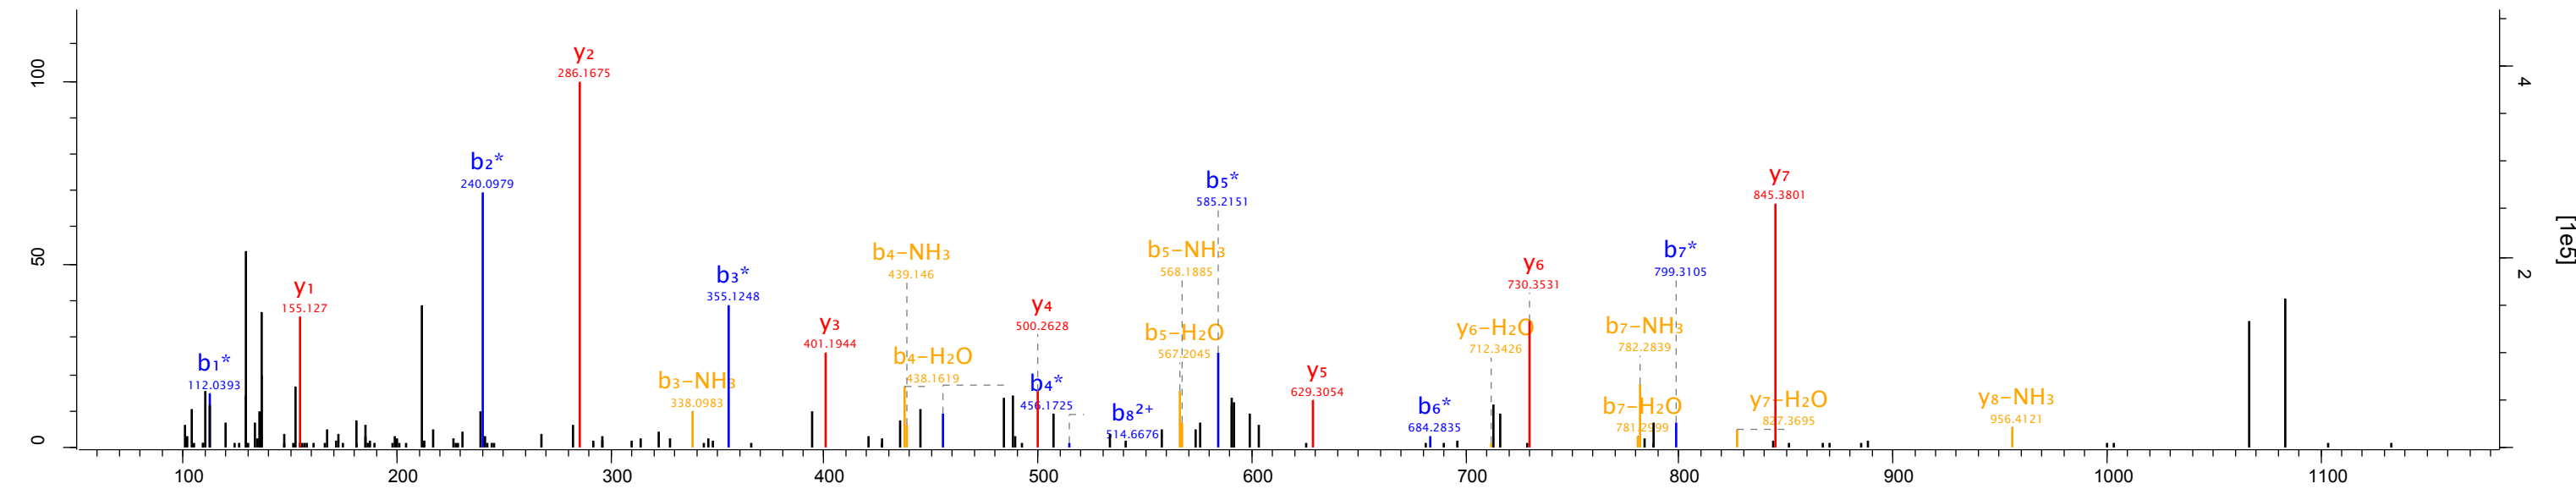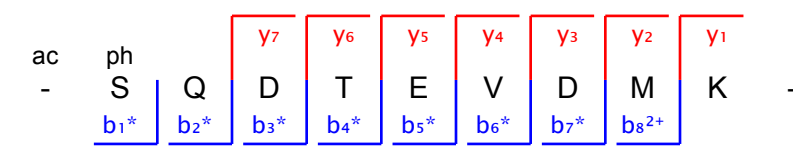

Raw file 20171215\_MaS\_33SR\_LMH\_phospho\_03 Scan 6432 Method FTMS; HCD Score 179.2 m/z 1094.44 Gene names BABAM1

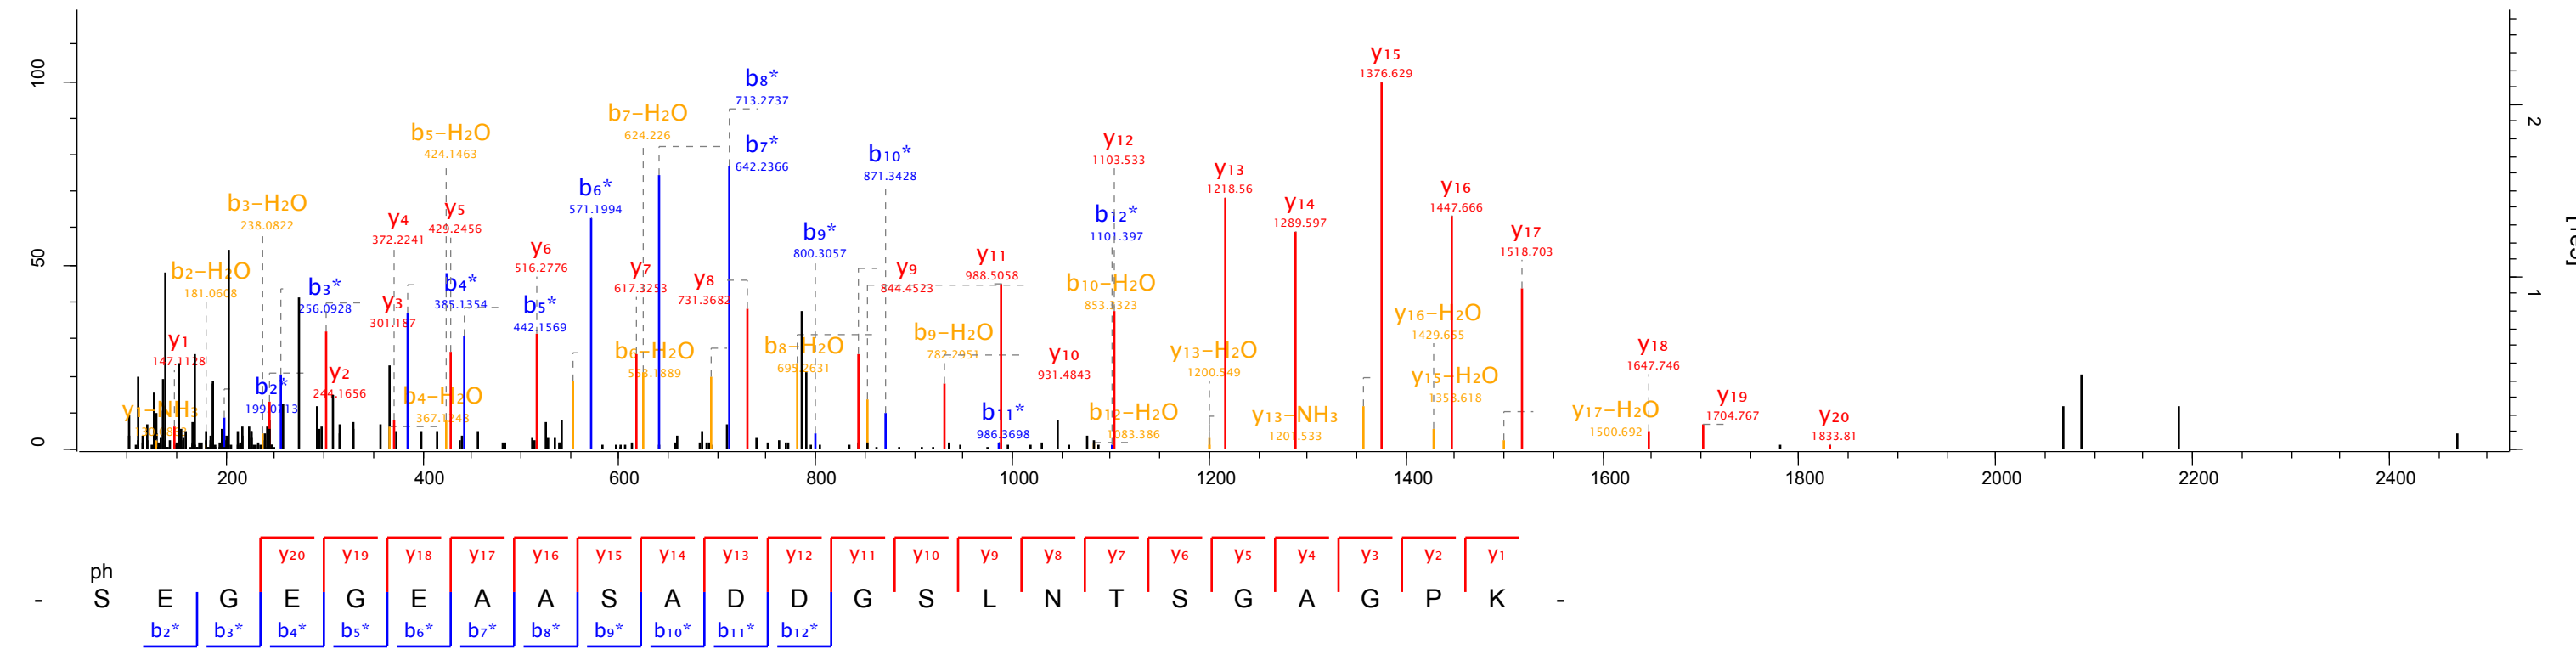



Raw file 20171215\_MaS\_33SR\_LMH\_phospho\_03 Scan 6822 Method FTMS; HCD Score 125.79 m/z 762.66 Gene names ARHGAP12

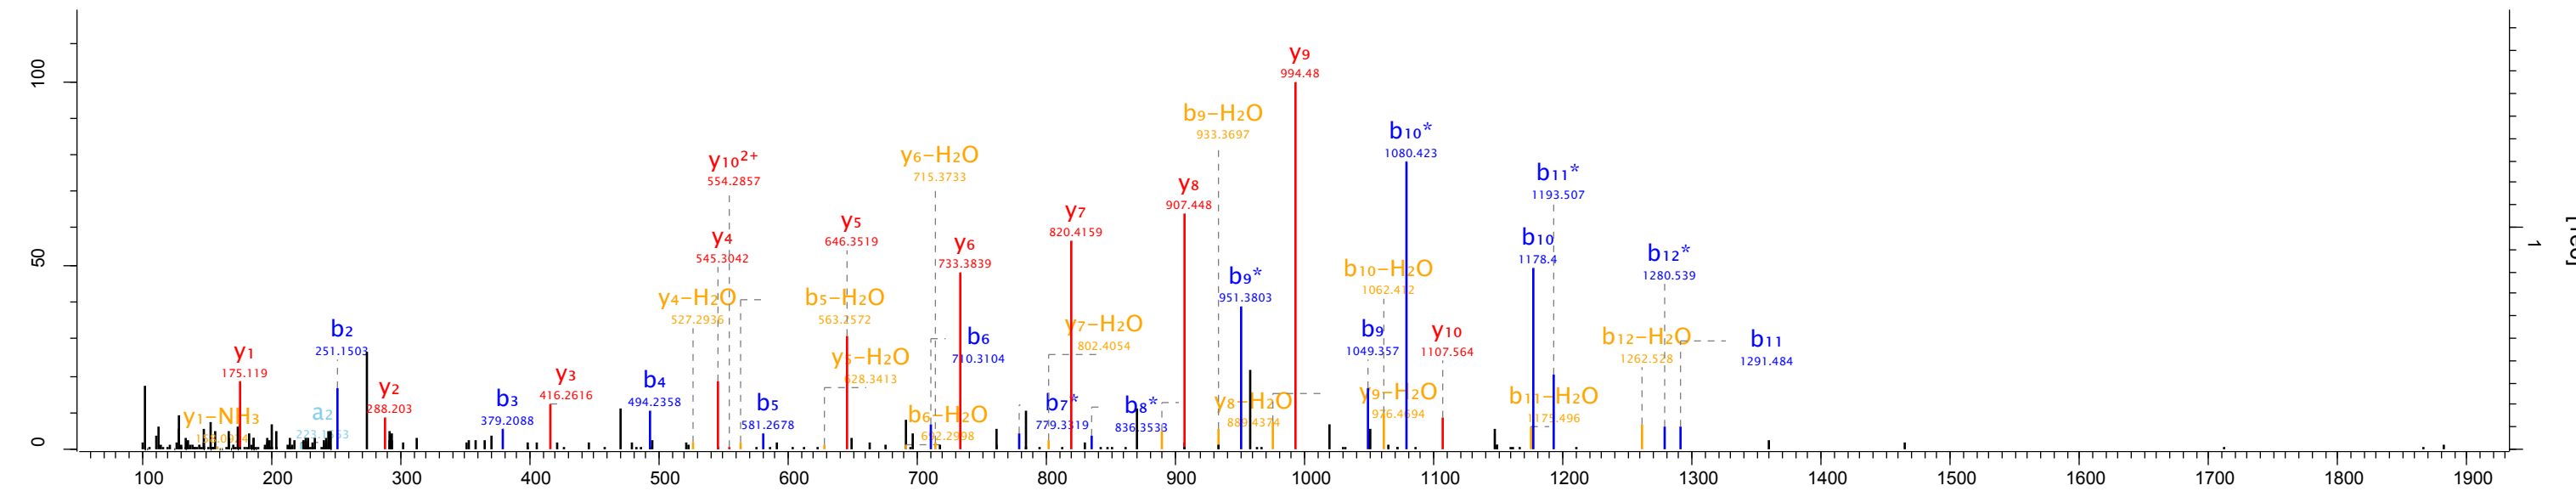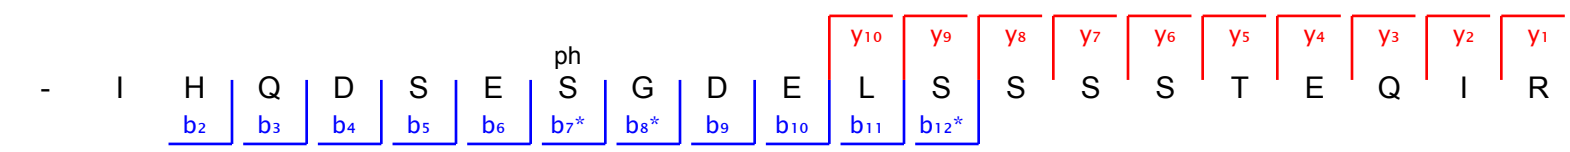

Raw file 20171215\_MaS\_33SR\_LMH\_phospho\_03 Scan 7092 Method FTMS; HCD Score 346.18 m/z 1004.36 Gene names BCLAF1

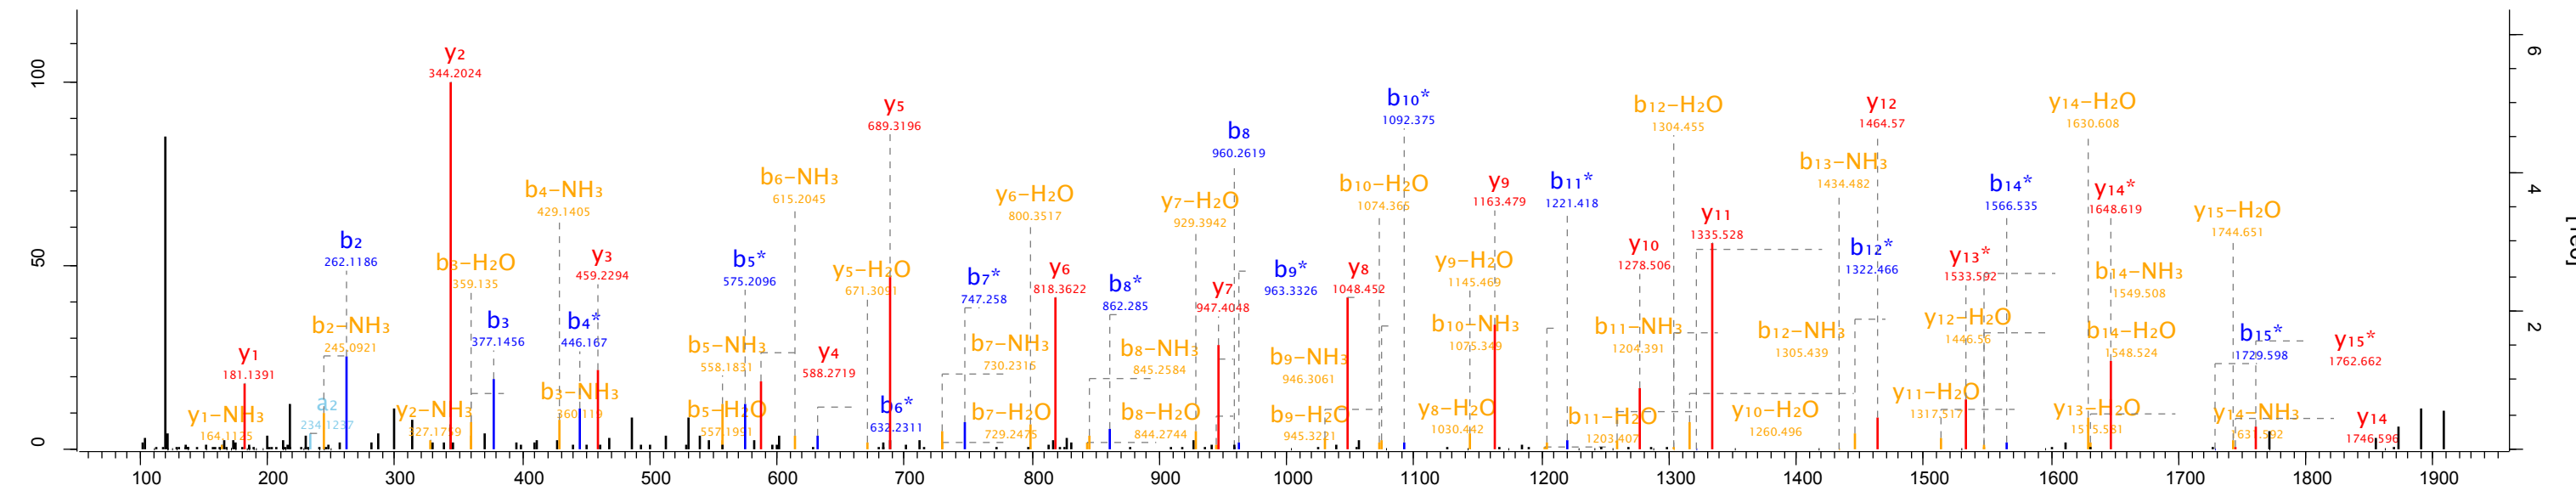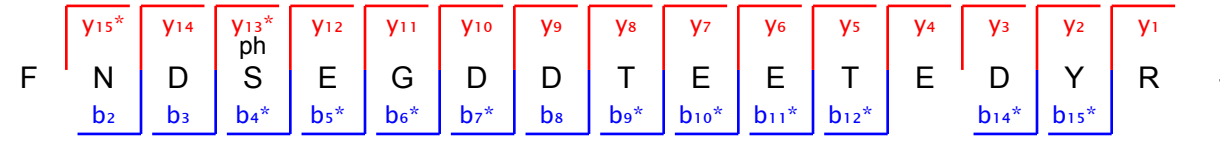

Raw file 20171215\_MaS\_33SR\_LMH\_phospho\_03 Scan 7432 Method FTMS; HCD Score 257.82 m/z 1057.44 Gene names EIF5B

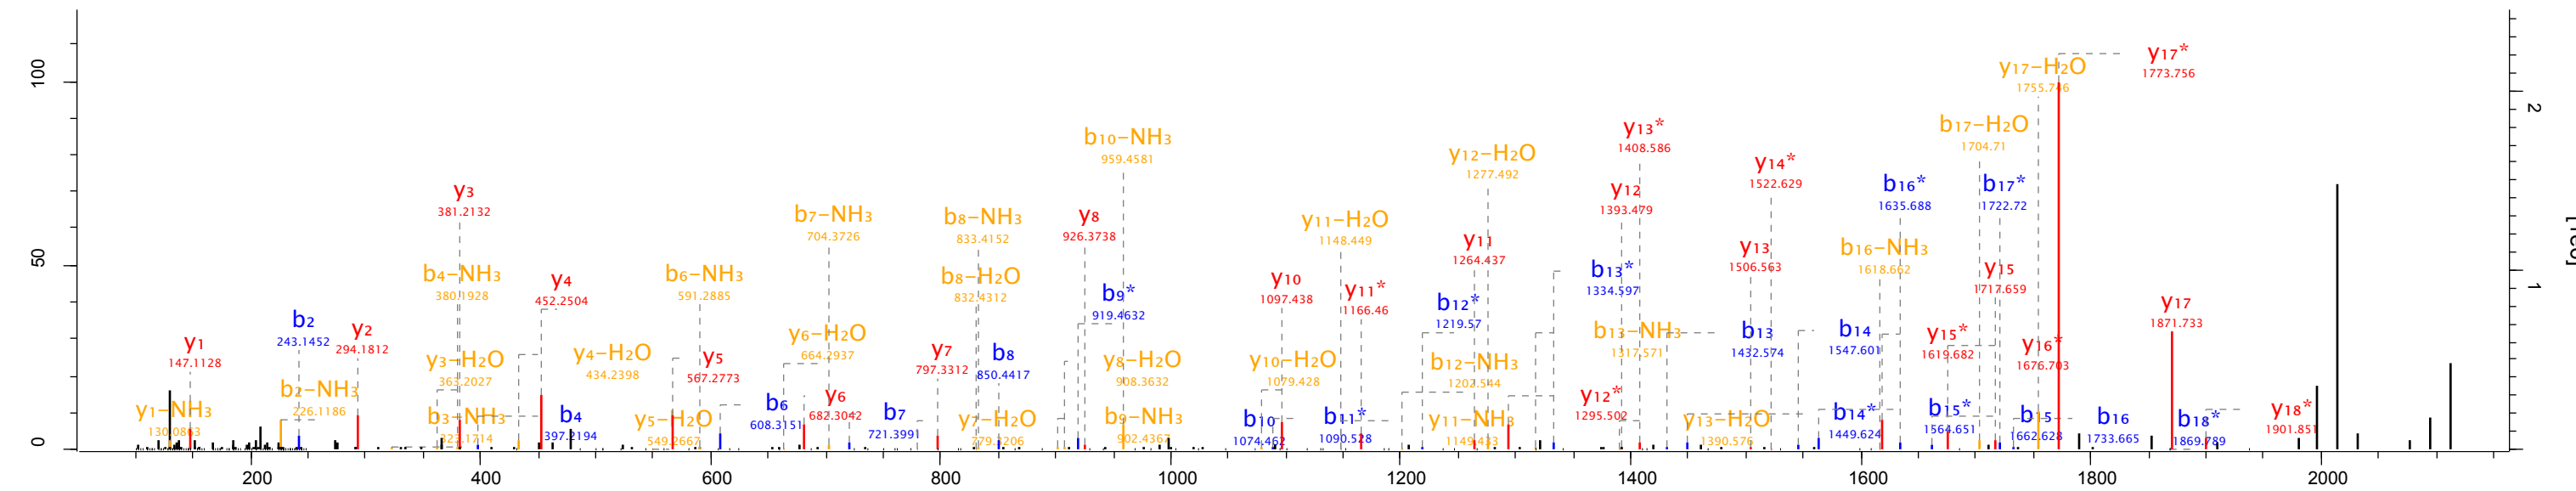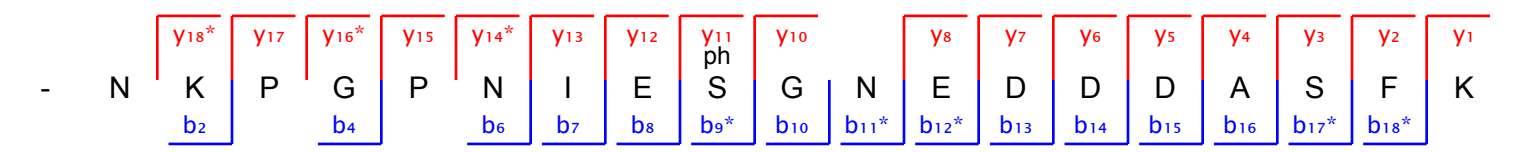

Raw file 20171215\_MaS\_33SR\_LMH\_phospho\_03 Scan 7592 Method FTMS; HCD Score 219.23 m/z 892.86 Gene names PPP1R7

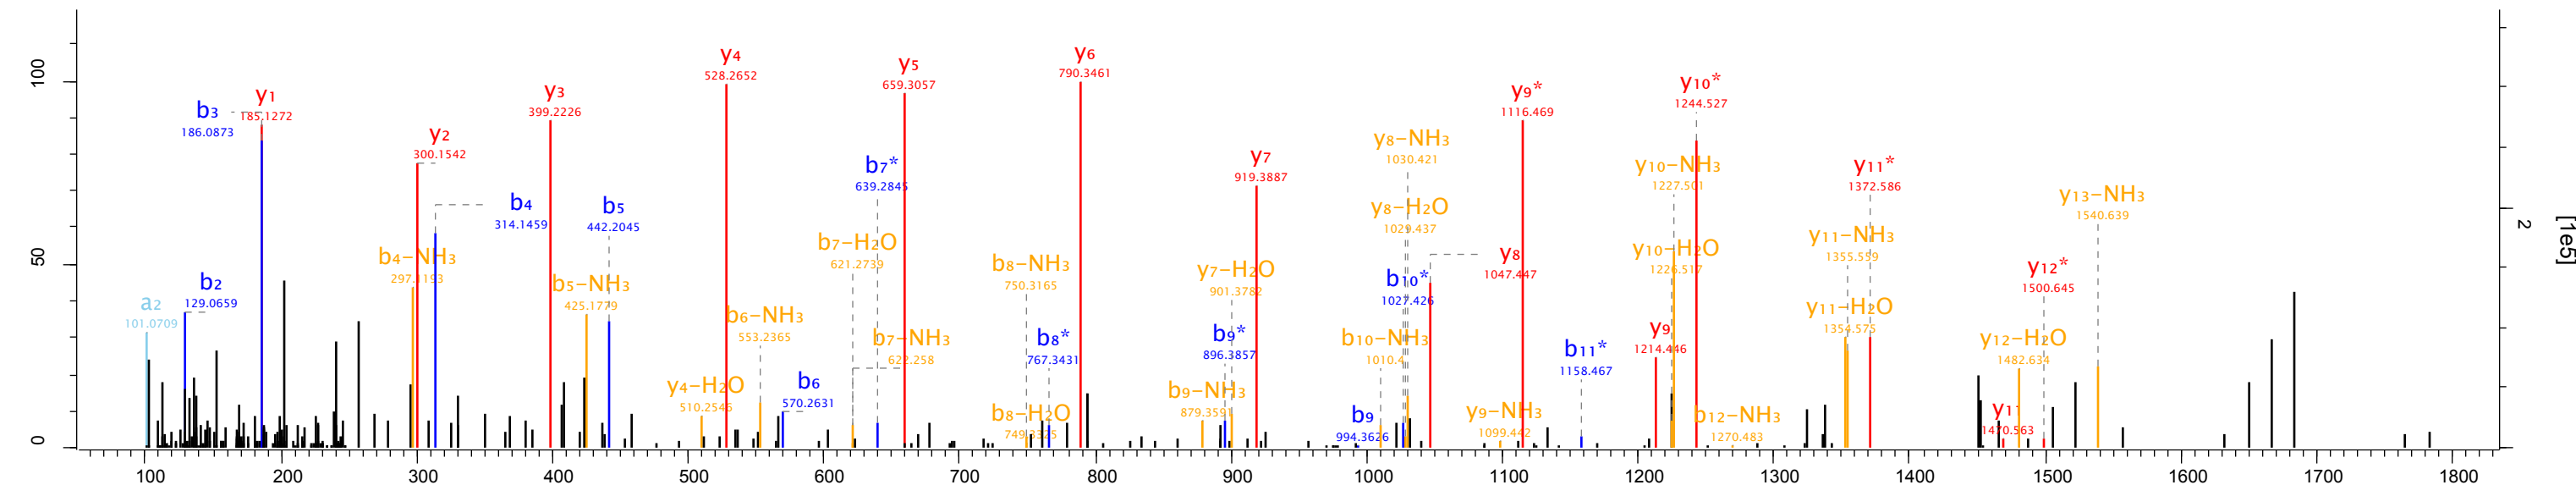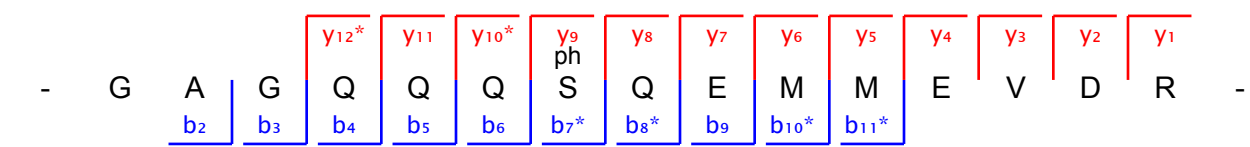

Raw file 20171215\_MaS\_33SR\_LMH\_phospho\_03 Scan 7832 Method FTMS; HCD Score 173.03 m/z 826.3 Gene names L1CAM

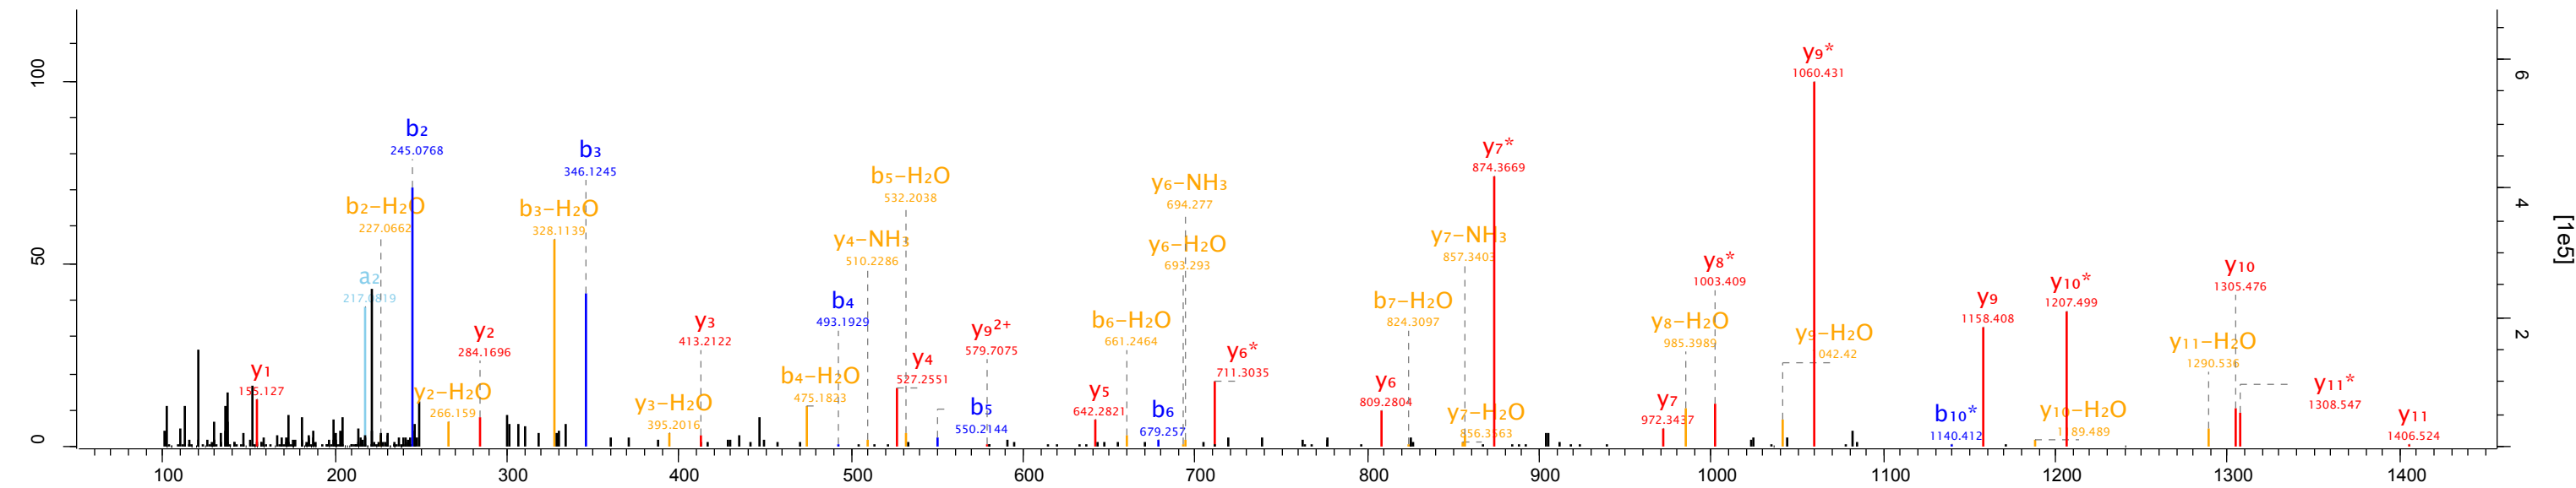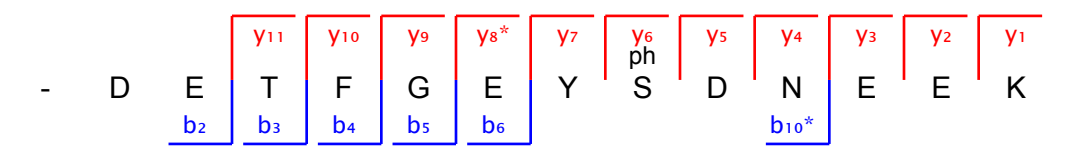

Raw file 20171215\_MaS\_33SR\_LMH\_phospho\_03 Scan 8082 Method FTMS; HCD Score 147.67 m/z 639.63 Gene names ZC3H13

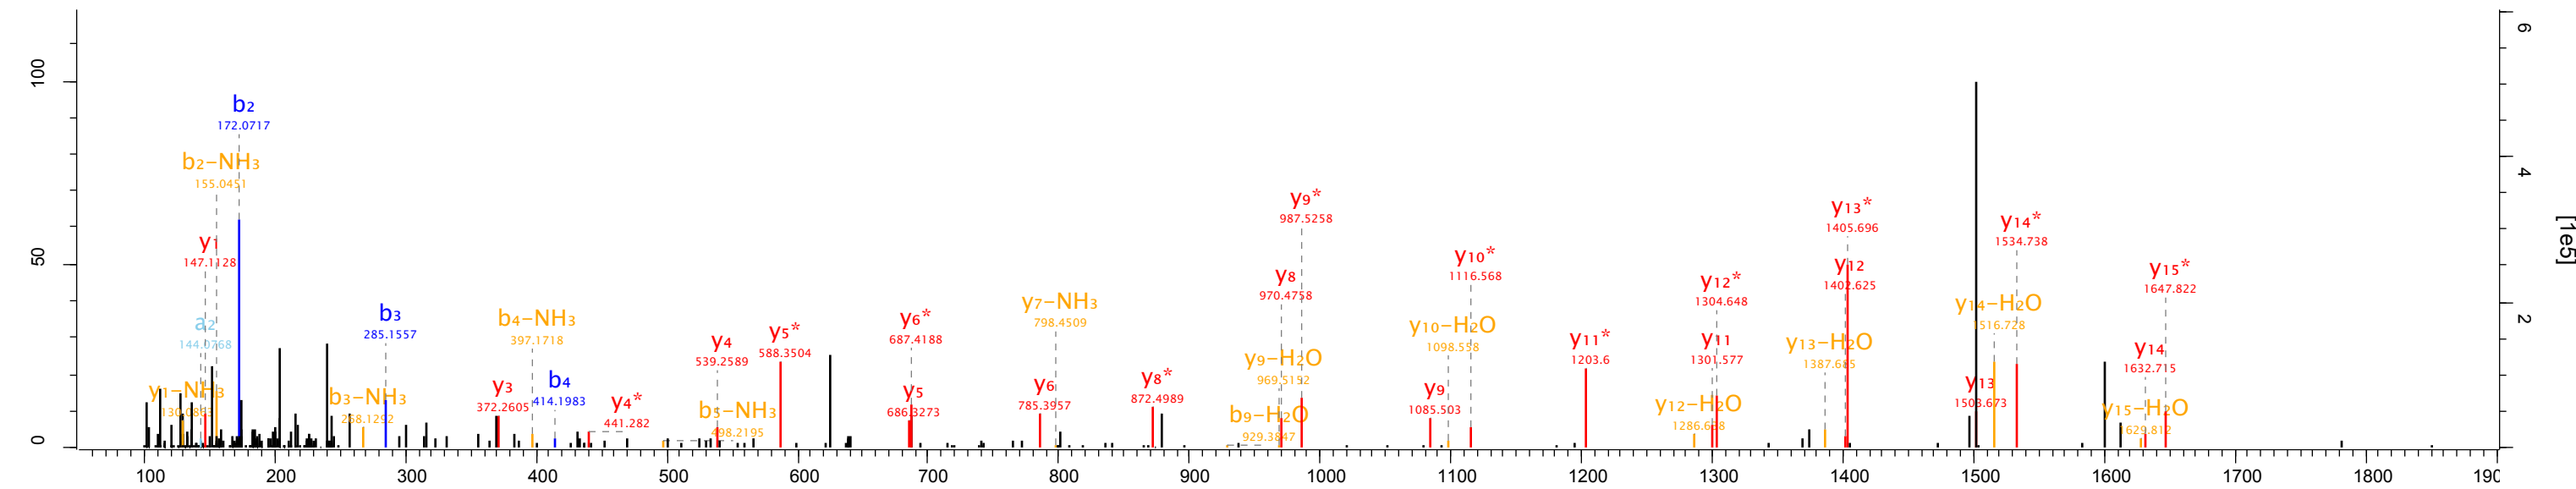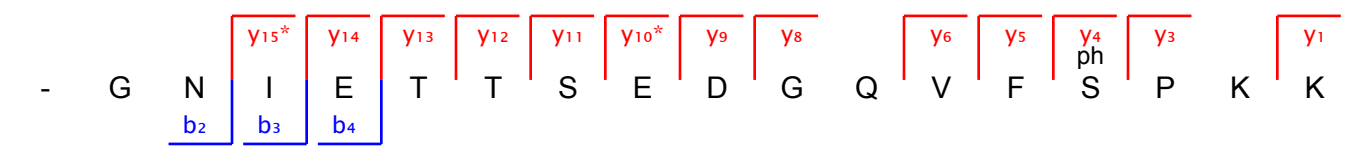

Raw file 20171215\_MaS\_33SR\_LMH\_phospho\_03 Scan 8302 Method FTMS; HCD Score 149.84 m/z 959.38 Gene names RIOK1

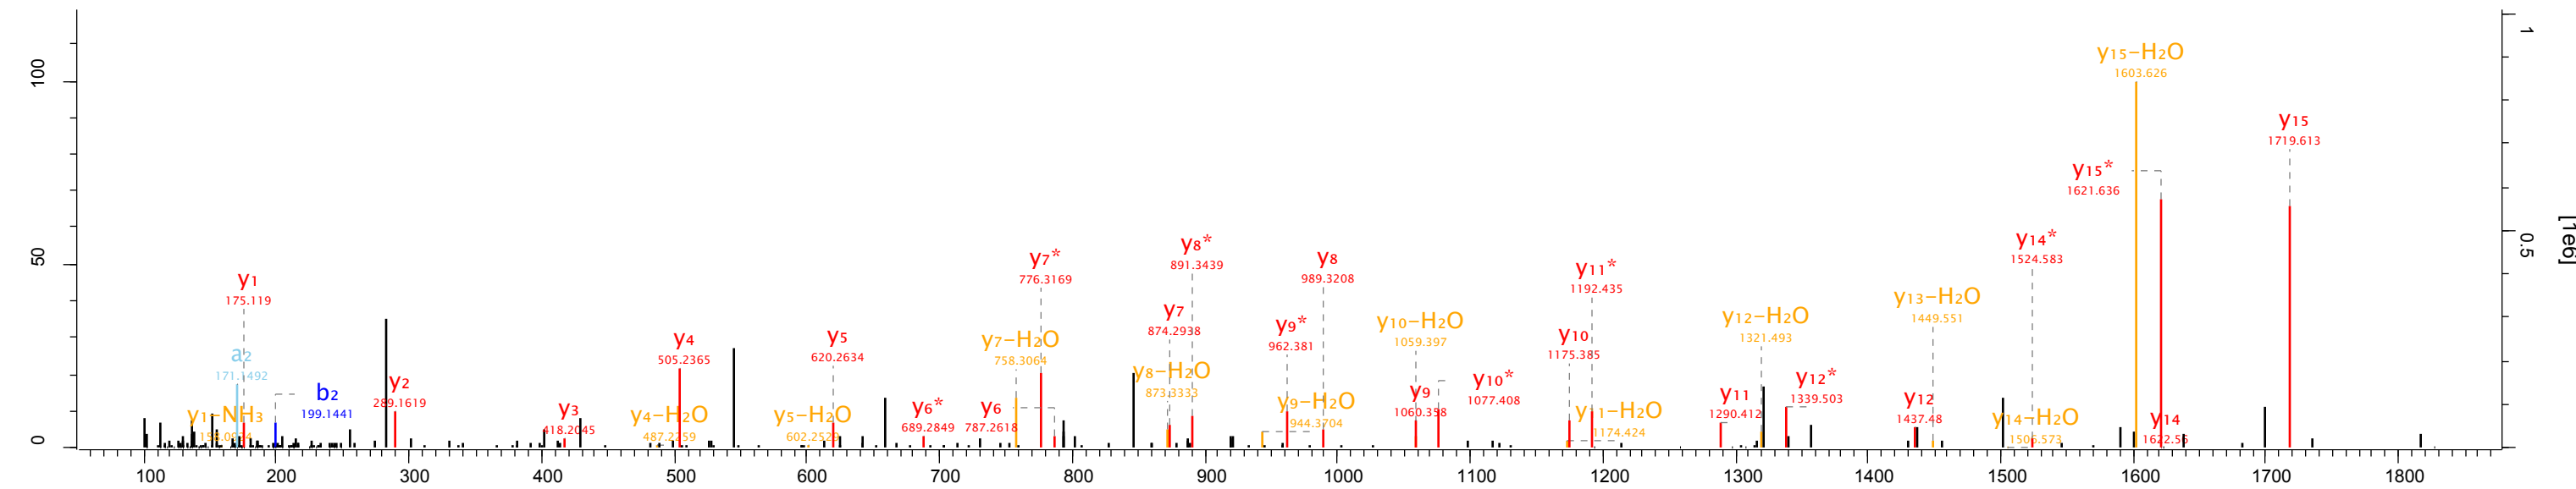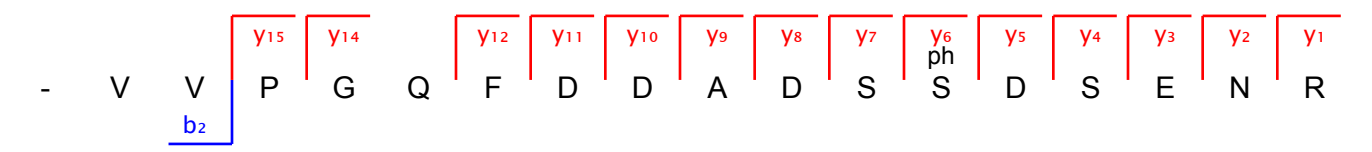

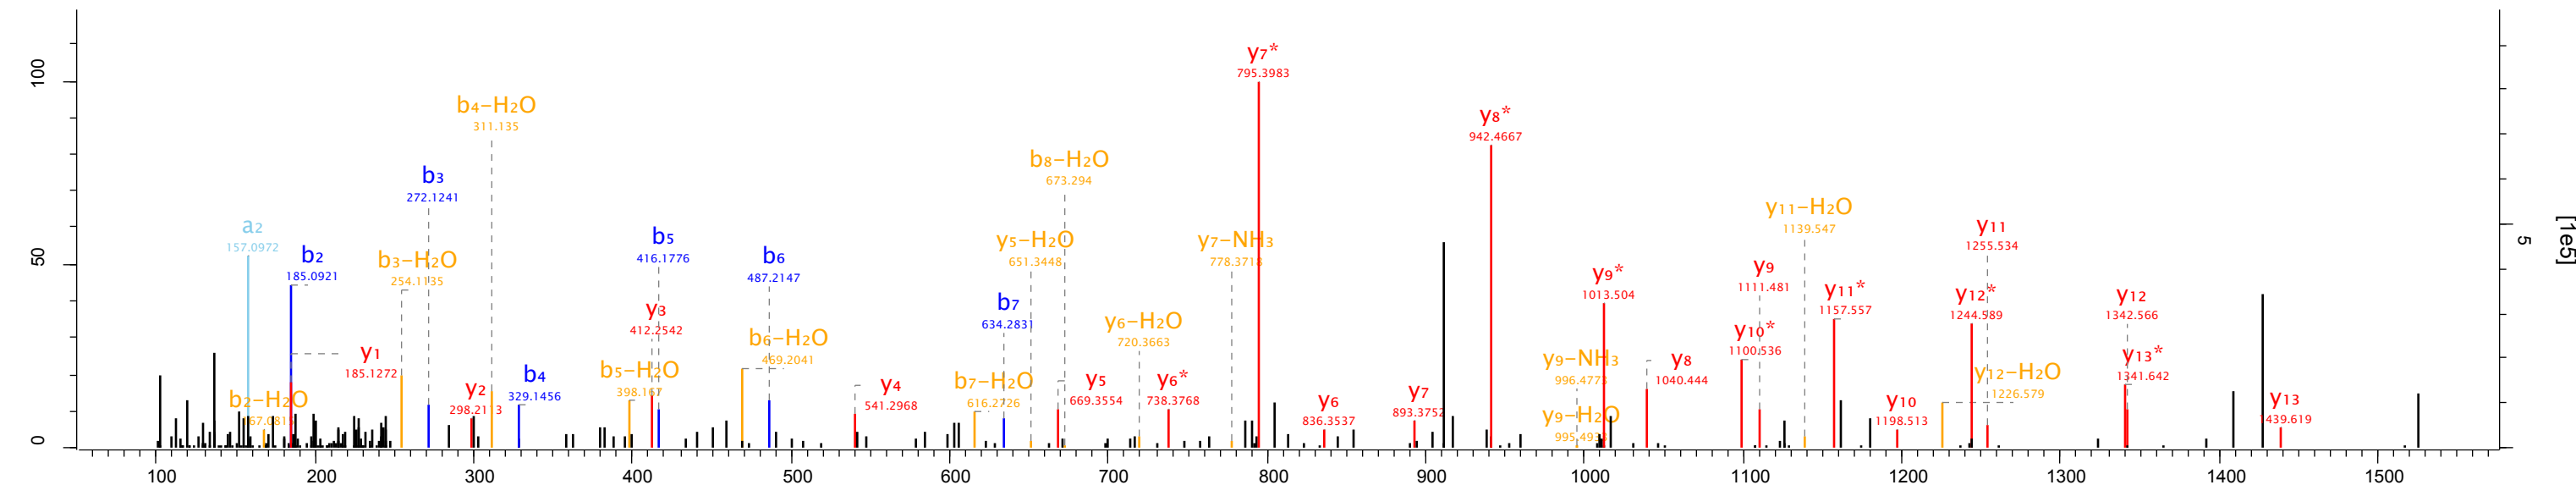

- S P S G S A F G S Q E N L R -

b<sub>2</sub>
b<sub>3</sub>
b<sub>4</sub>
b<sub>5</sub>
b<sub>6</sub>
b<sub>7</sub>
y<sub>13</sub>
y<sub>12</sub>
y<sub>11</sub>
y<sub>10</sub>
y<sub>9</sub>
y<sub>8</sub>
y<sub>7</sub>
y<sub>6</sub><sub>ph</sub>
y<sub>5</sub>
y<sub>4</sub>
y<sub>3</sub>
y<sub>2</sub>
y<sub>1</sub>



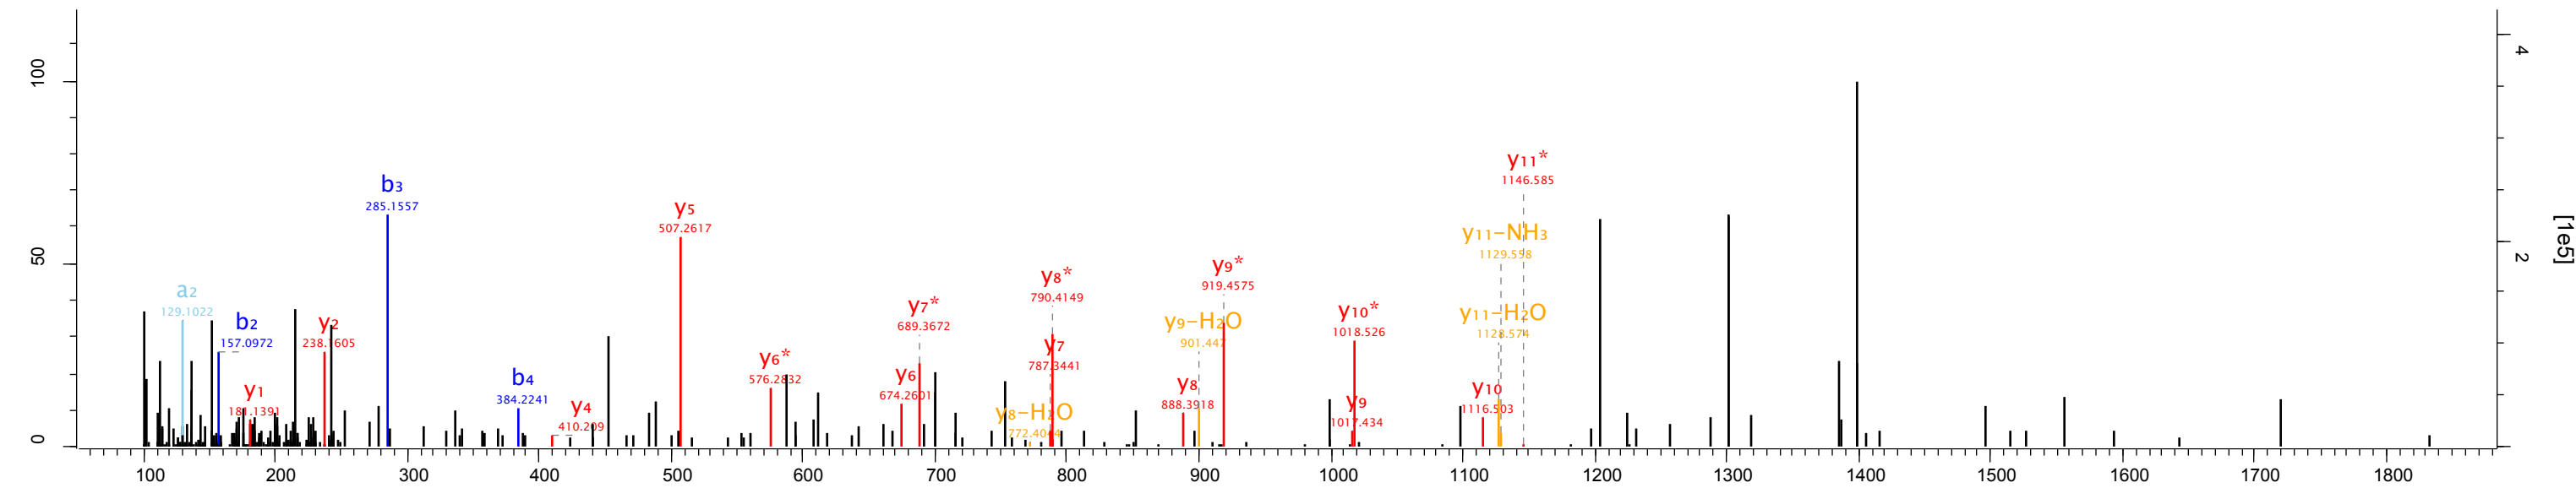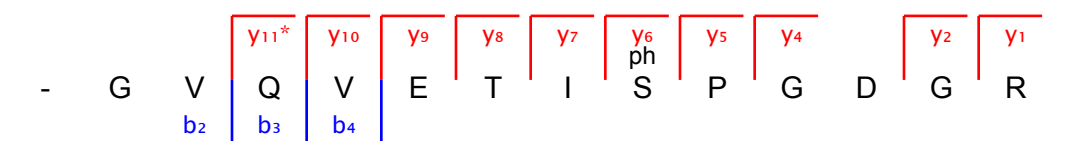

Raw file 20171215\_MaS\_33SR\_LMH\_phospho\_03 Scan 8542 Method FTMS; HCD Score 214.81 m/z 1008.94 Gene names SYNM

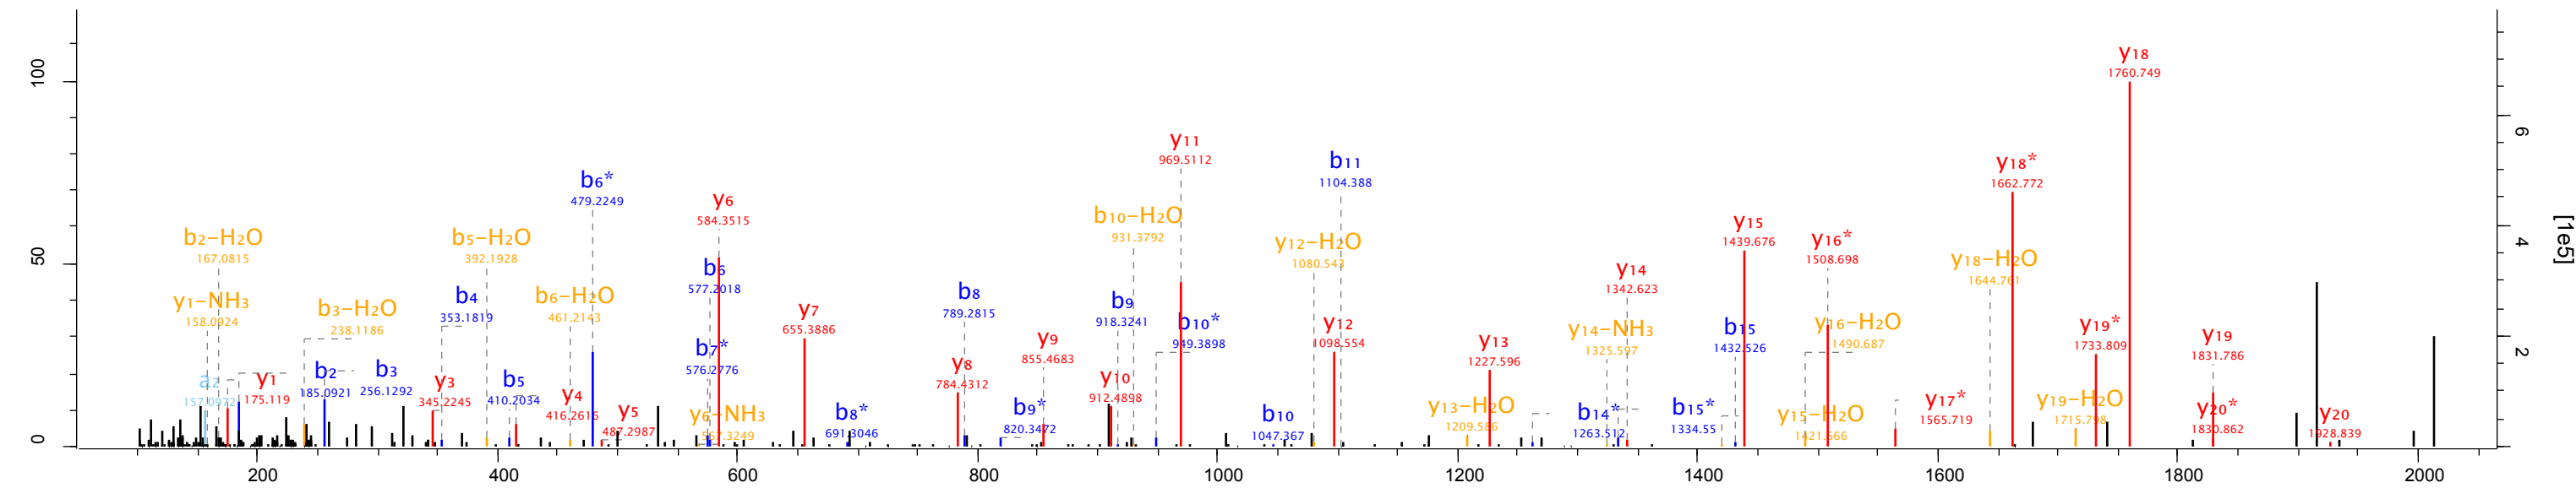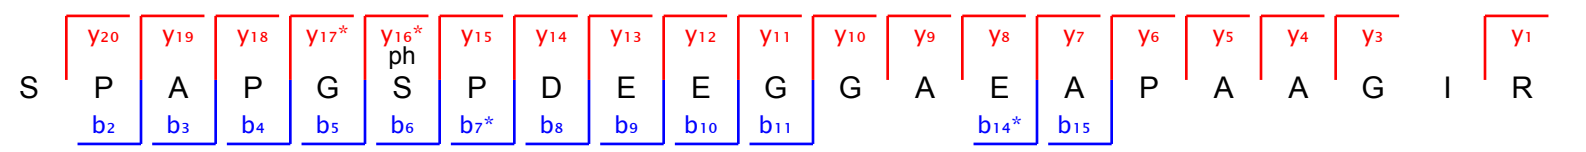

Raw file 20171215\_MaS\_33SR\_LMH\_phospho\_03 Scan 8702 Method FTMS; HCD Score 282.72 m/z 818.88 Gene names HEATR6

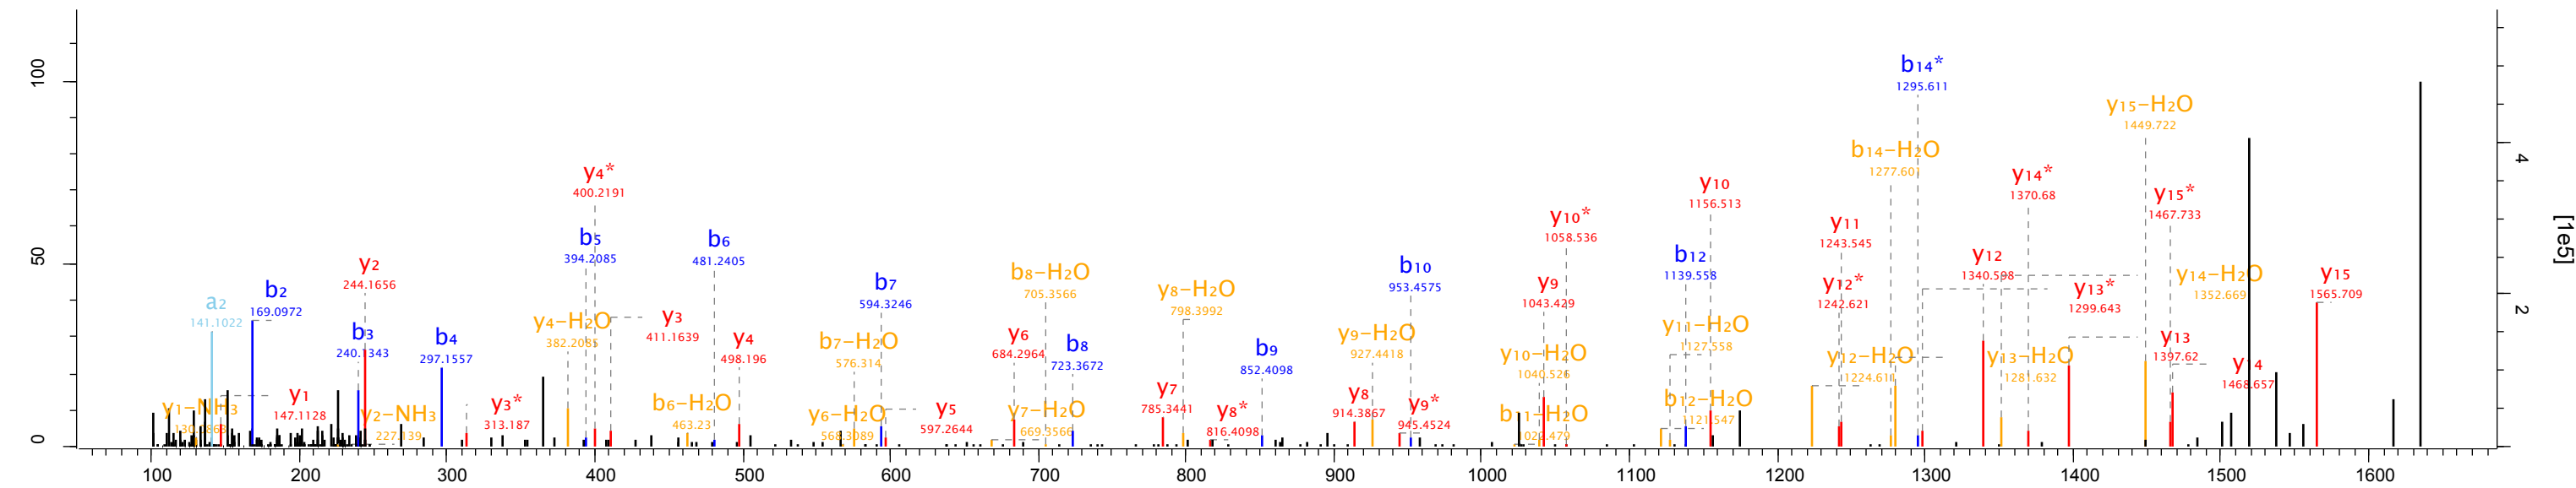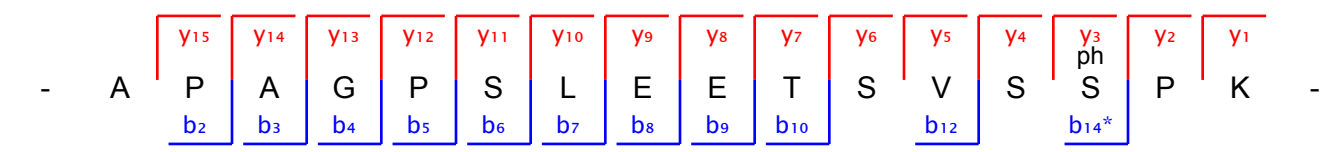

Raw file 20171215\_MaS\_33SR\_LMH\_phospho\_03 Scan 8742 Method FTMS; HCD Score 110.52 m/z 485.23 Gene names RASSF8

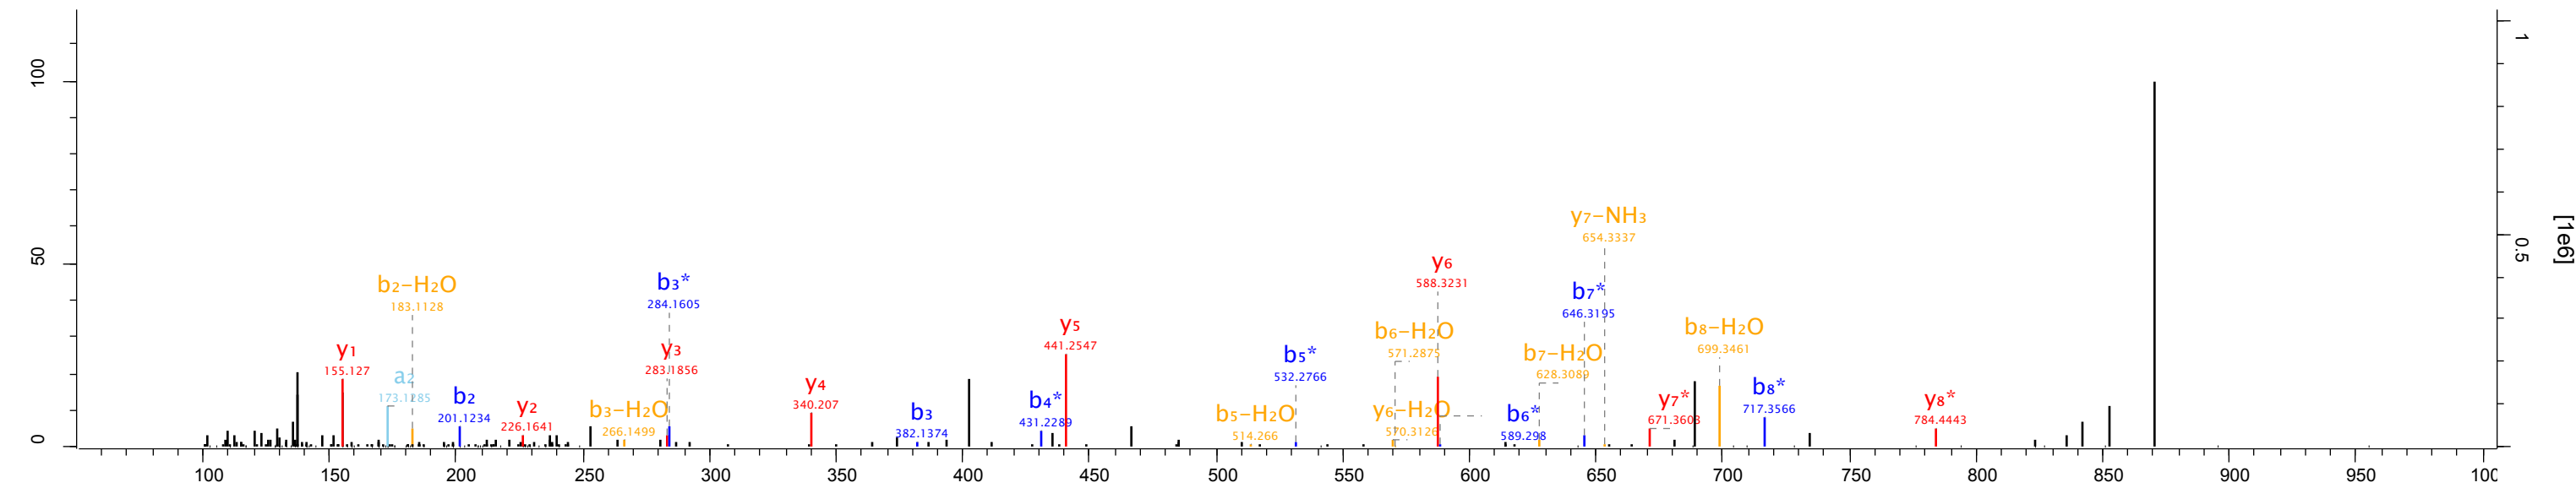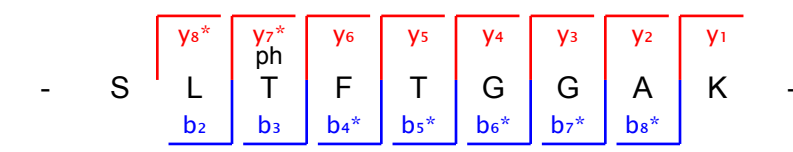

Raw file 20171215\_MaS\_33SR\_LMH\_phospho\_03 Scan 9122 Method FTMS; HCD Score 80.75 m/z 401.22 Gene names NPM1

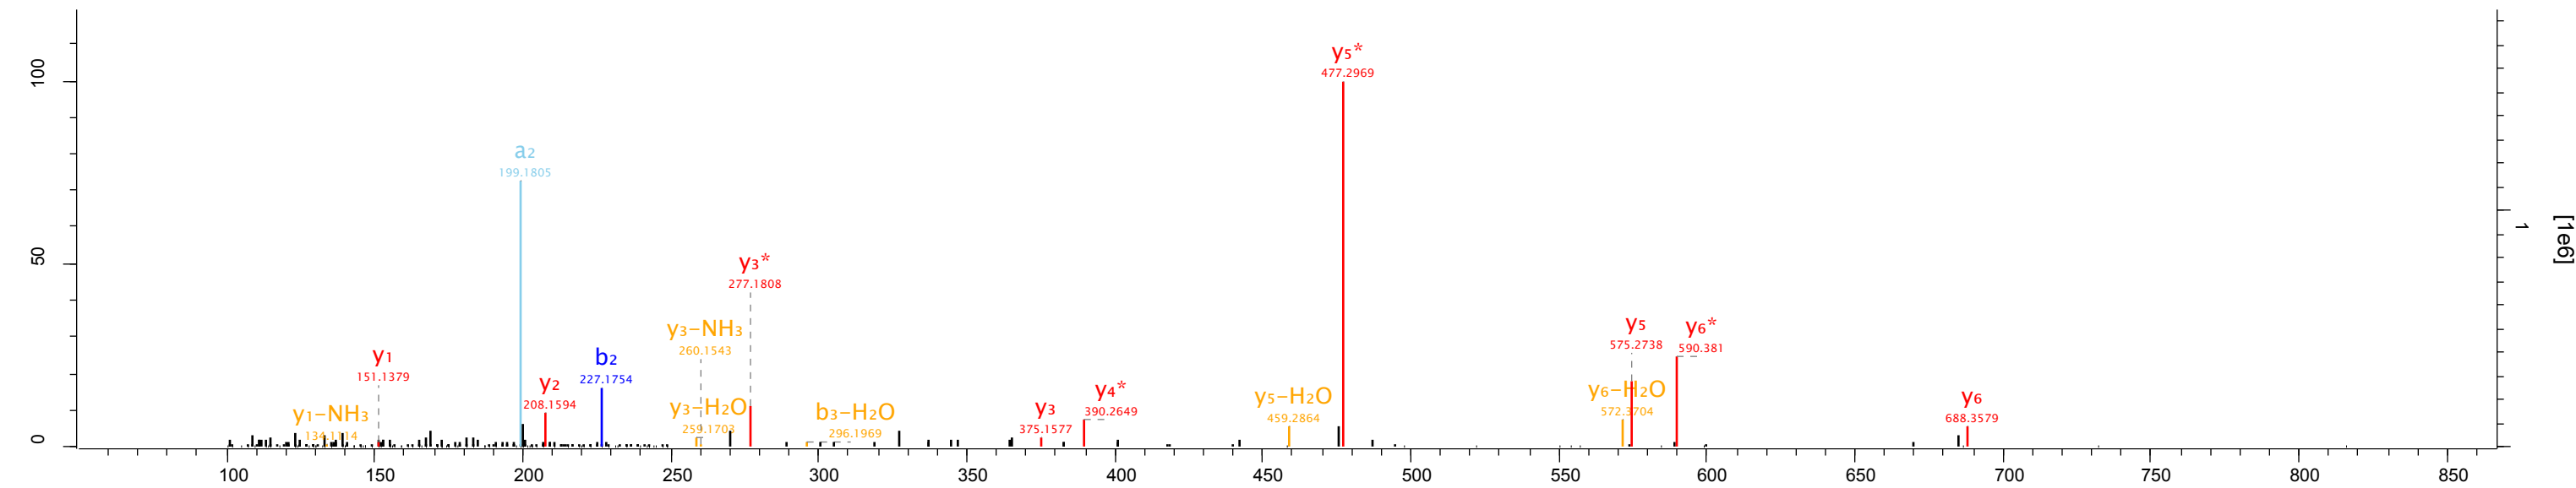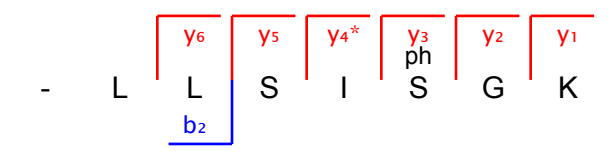

Raw file 20171215\_MaS\_33SR\_LMH\_phospho\_03 Scan 9322 Method FTMS; HCD Score 199.28 m/z 833.87 Gene names LIMCH1

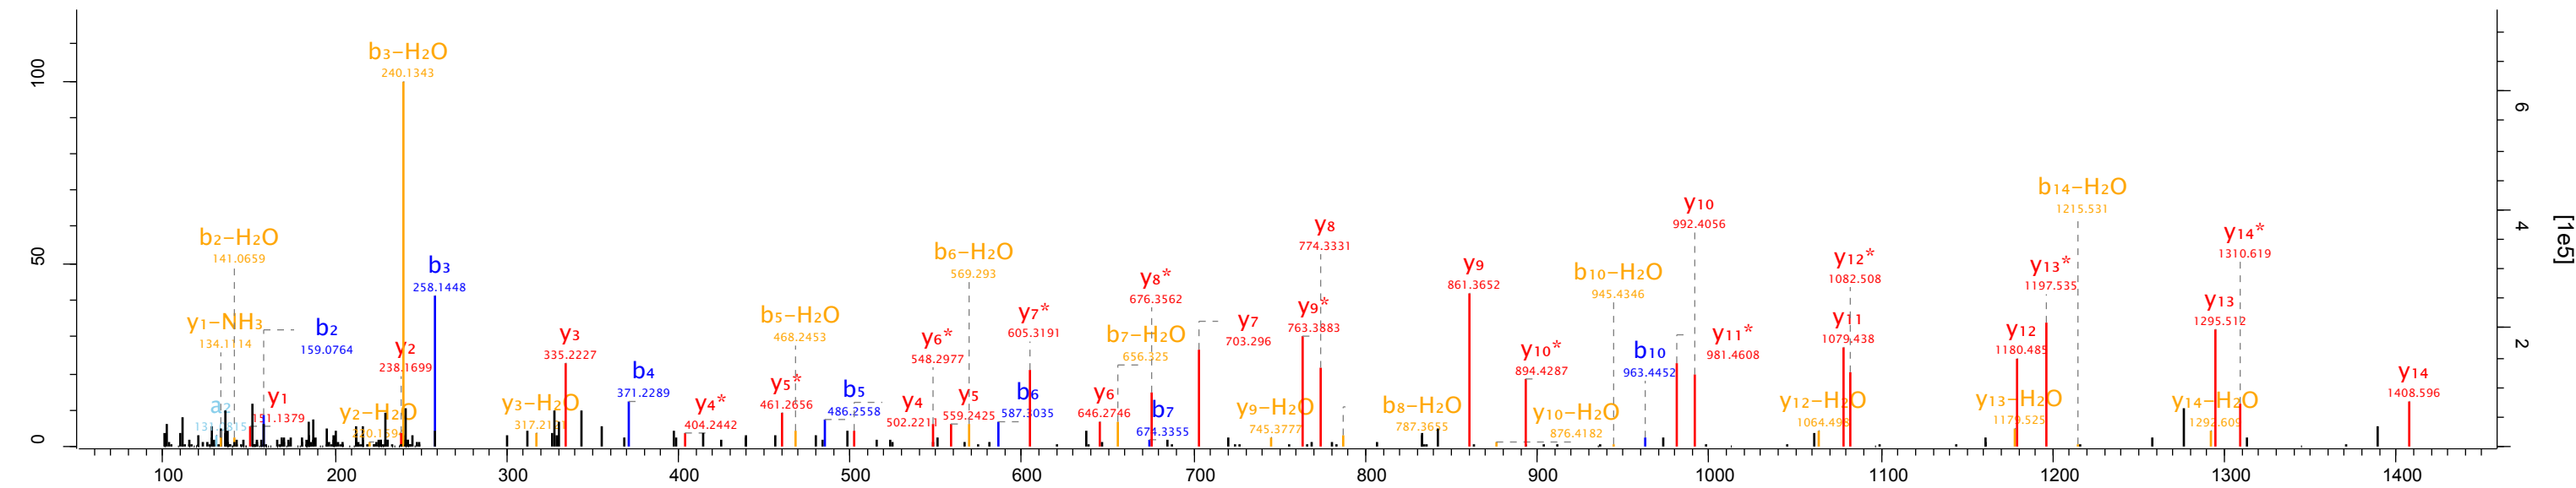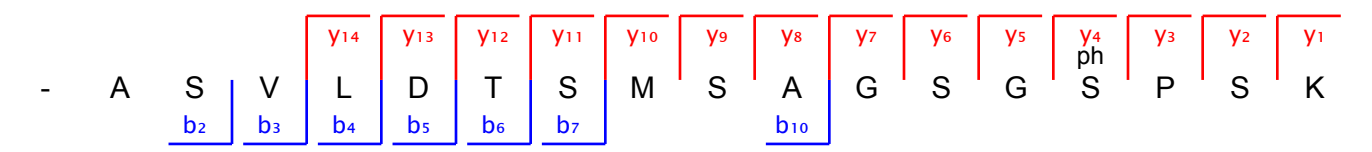

Raw file 20171215\_MaS\_33SR\_LMH\_phospho\_03 Scan 9512 Method FTMS; HCD Score 130.36 m/z 805.43 Gene names UFD1L

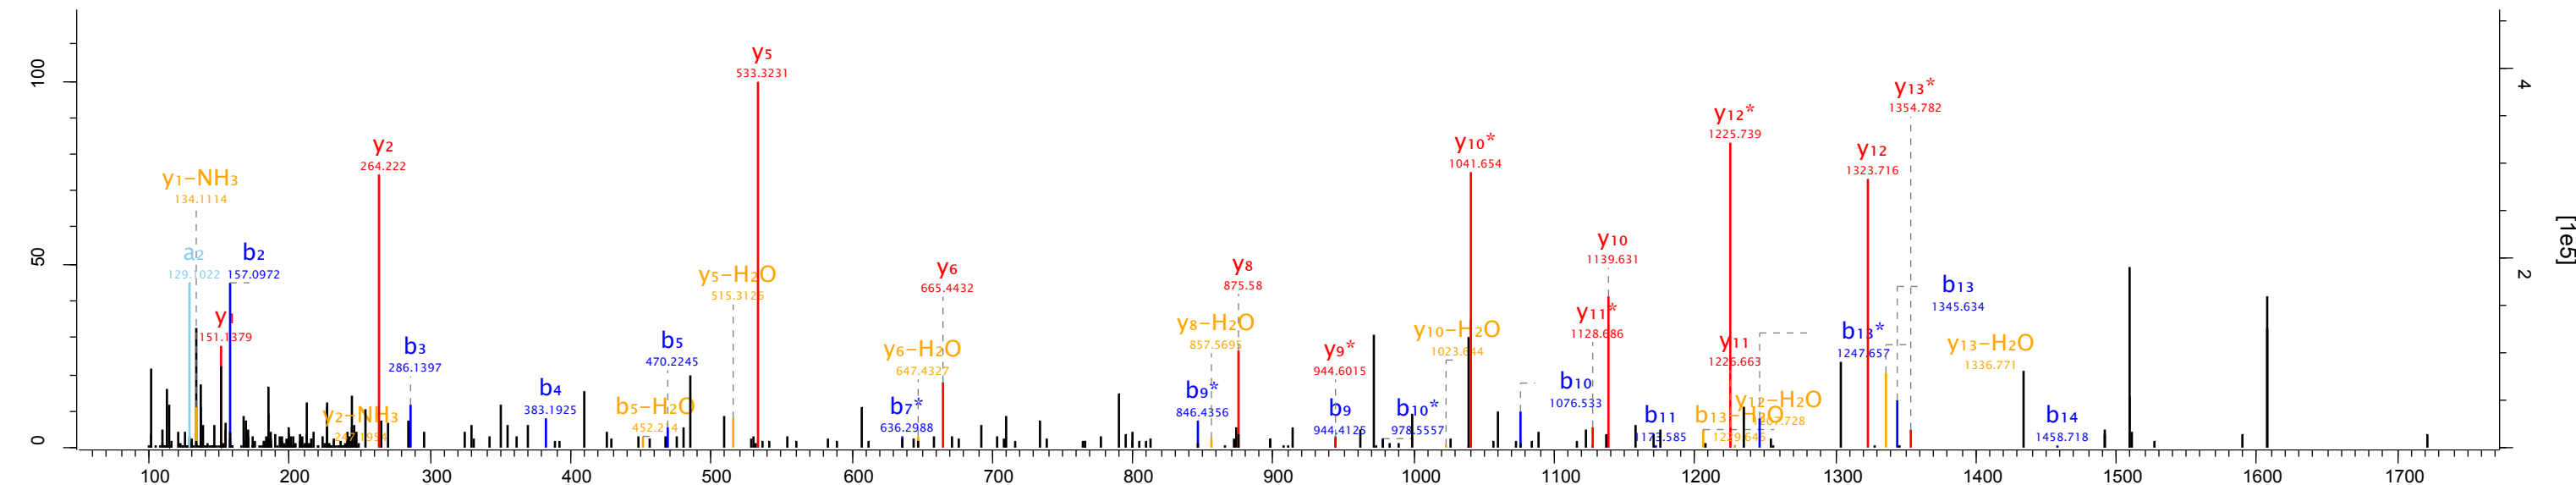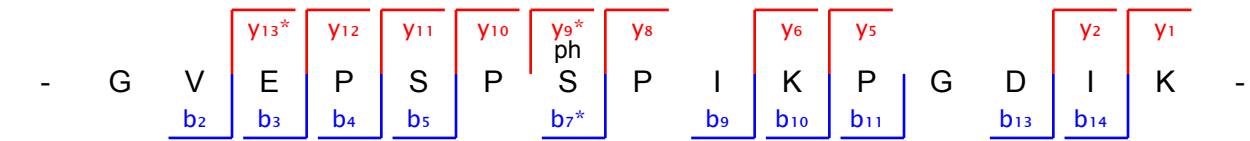

Raw file 20171215\_MaS\_33SR\_LMH\_phospho\_03 Scan 9552 Method FTMS; HCD Score 89.3 m/z 555.25 Gene names NEK1

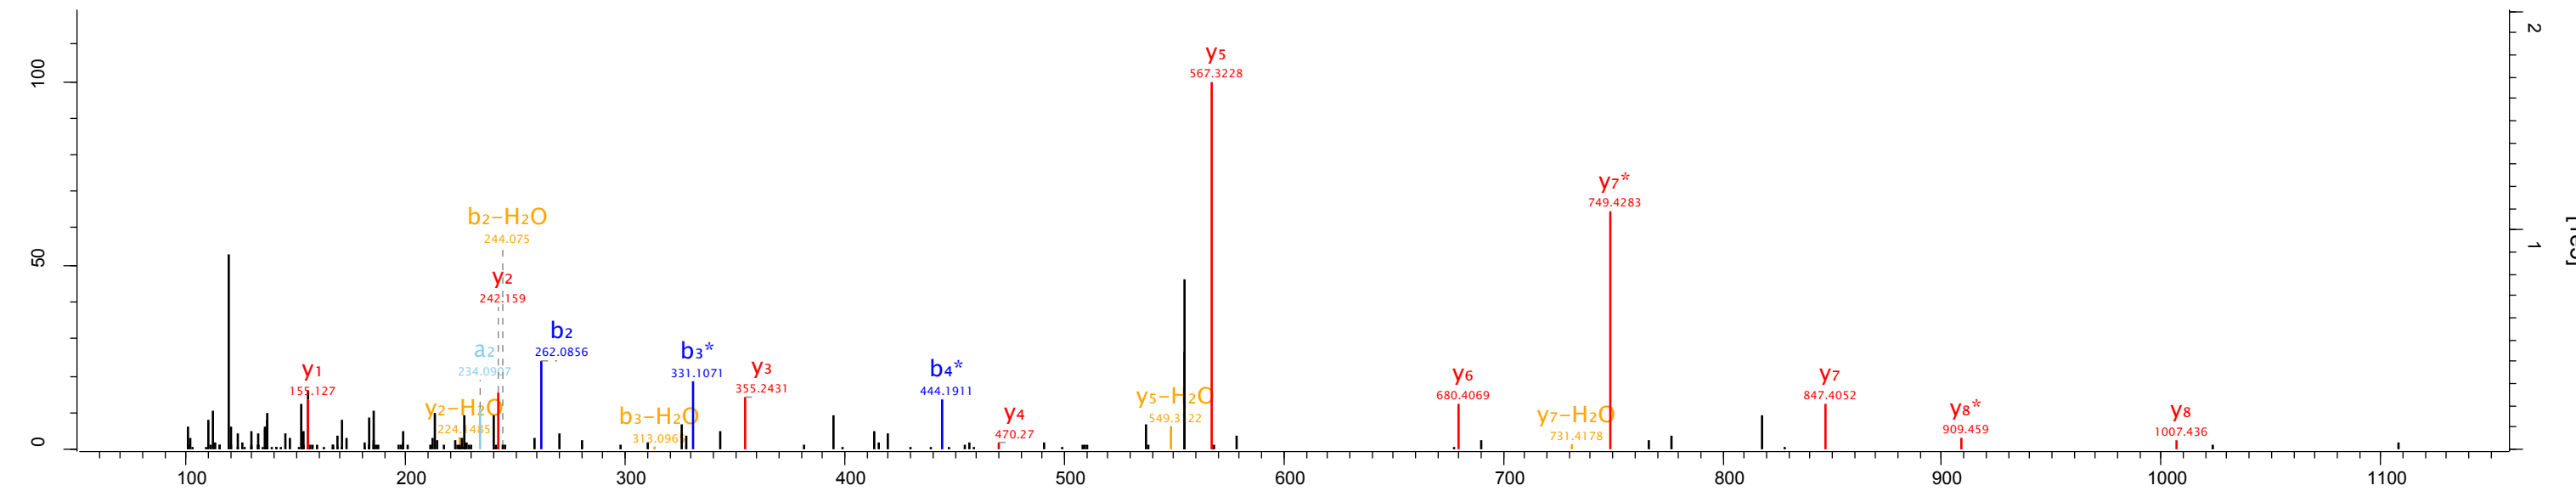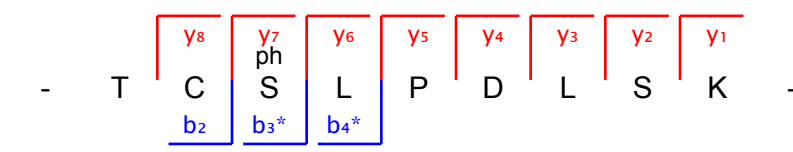



Raw file 20171215\_MaS\_33SR\_LMH\_phospho\_03 Scan 9672 Method FTMS; HCD Score 77.9 m/z 729.3 Gene names HNRNPA2B1

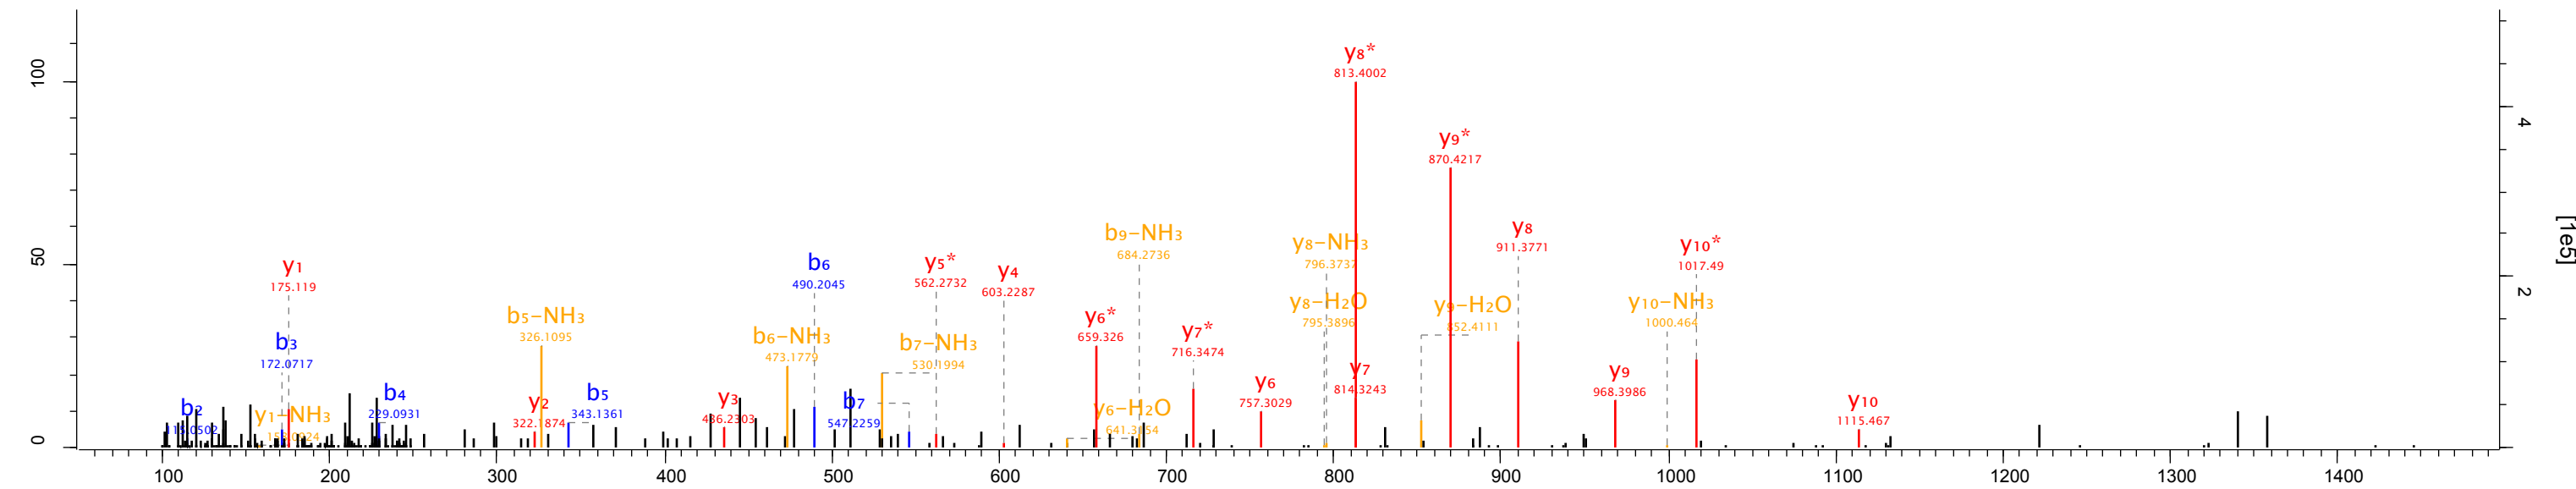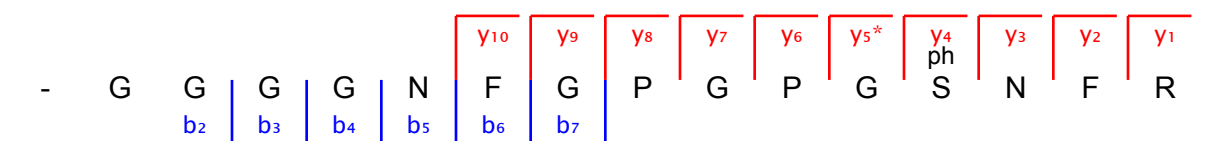

Raw file 20171215\_MaS\_33SR\_LMH\_phospho\_03 Scan 9832 Method FTMS; HCD Score 63.66 m/z 581.77 Gene names MAP7D1

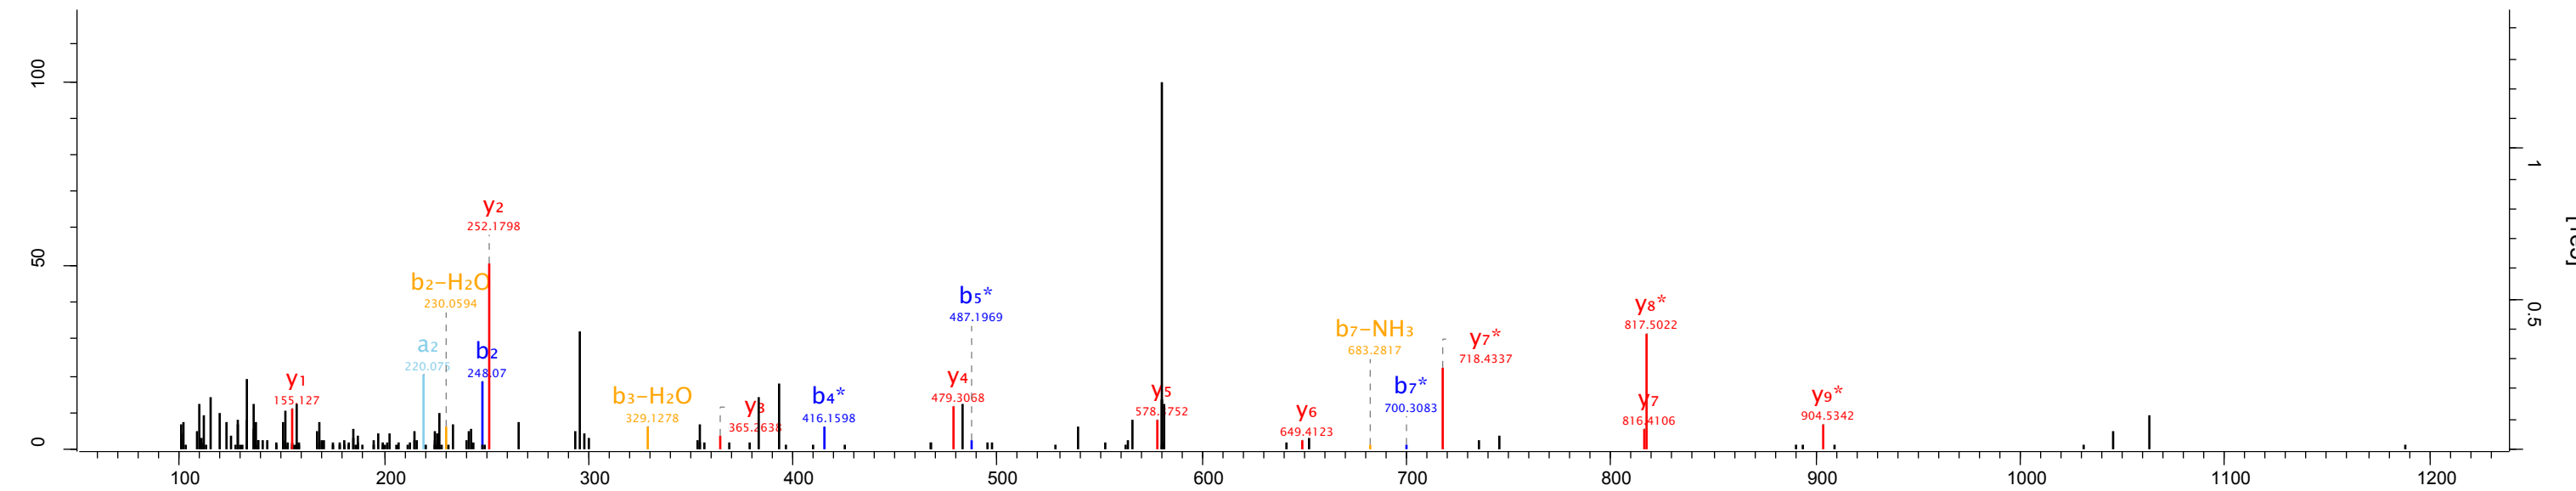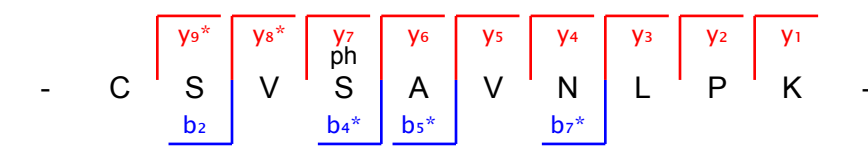

Raw file 20171215\_MaS\_33SR\_LMH\_phospho\_03 Scan 9972 Method FTMS; HCD Score 107.72 m/z 665.62 Gene names MCM2

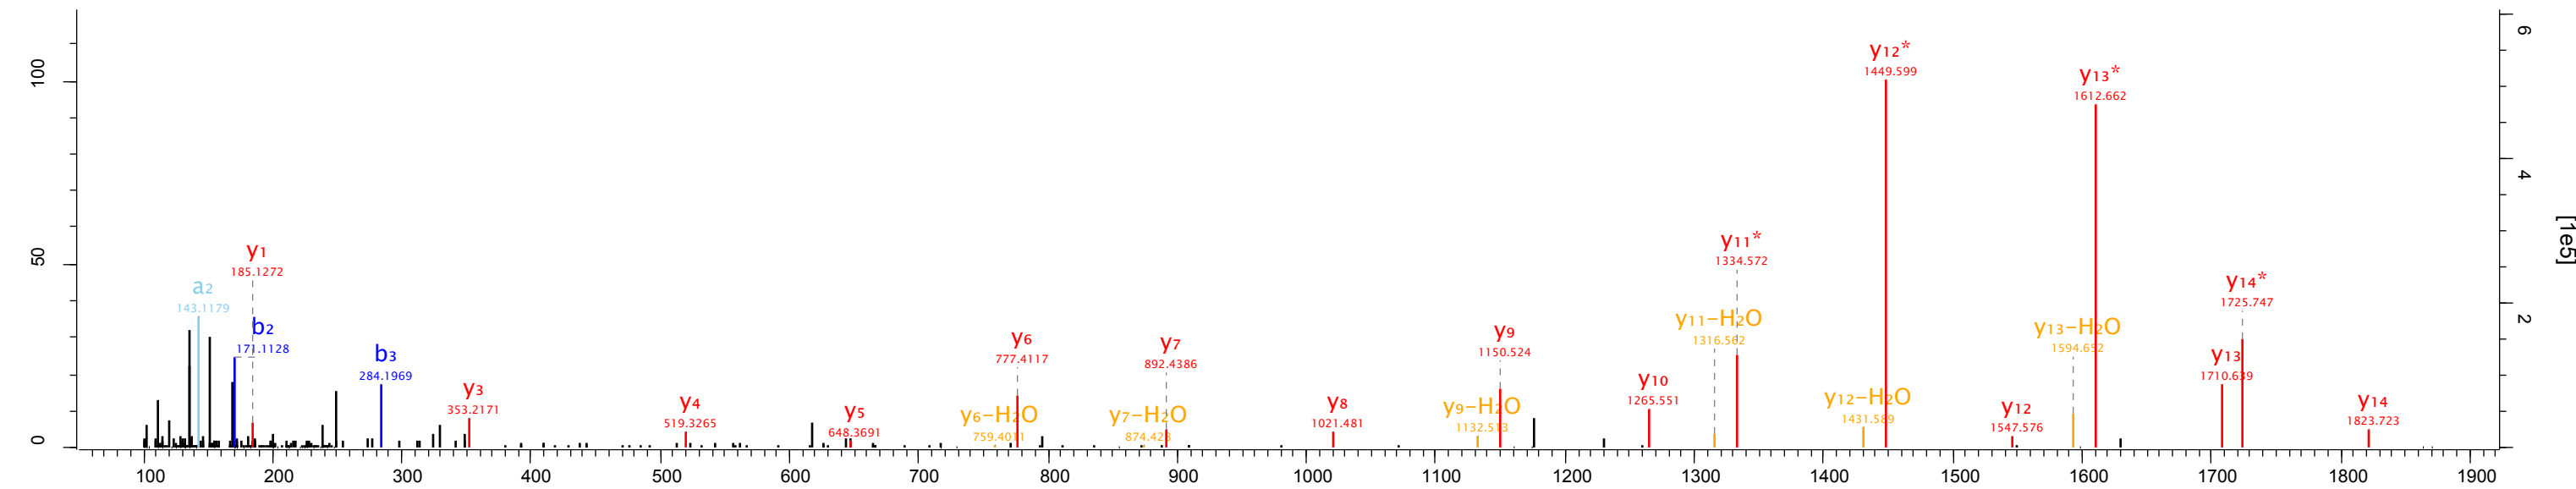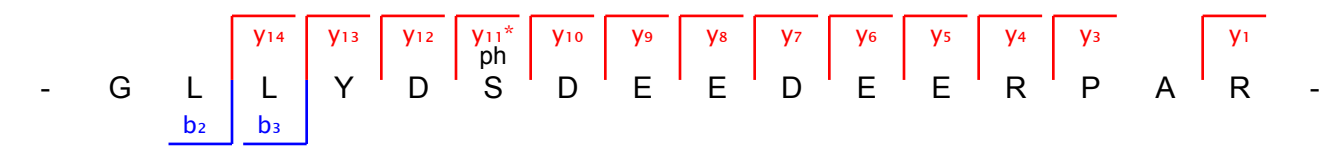

Raw file 20171215\_MaS\_33SR\_LMH\_phospho\_03 Scan 9982 Method FTMS; HCD Score 130.21 m/z 820.04 Gene names MYEF2

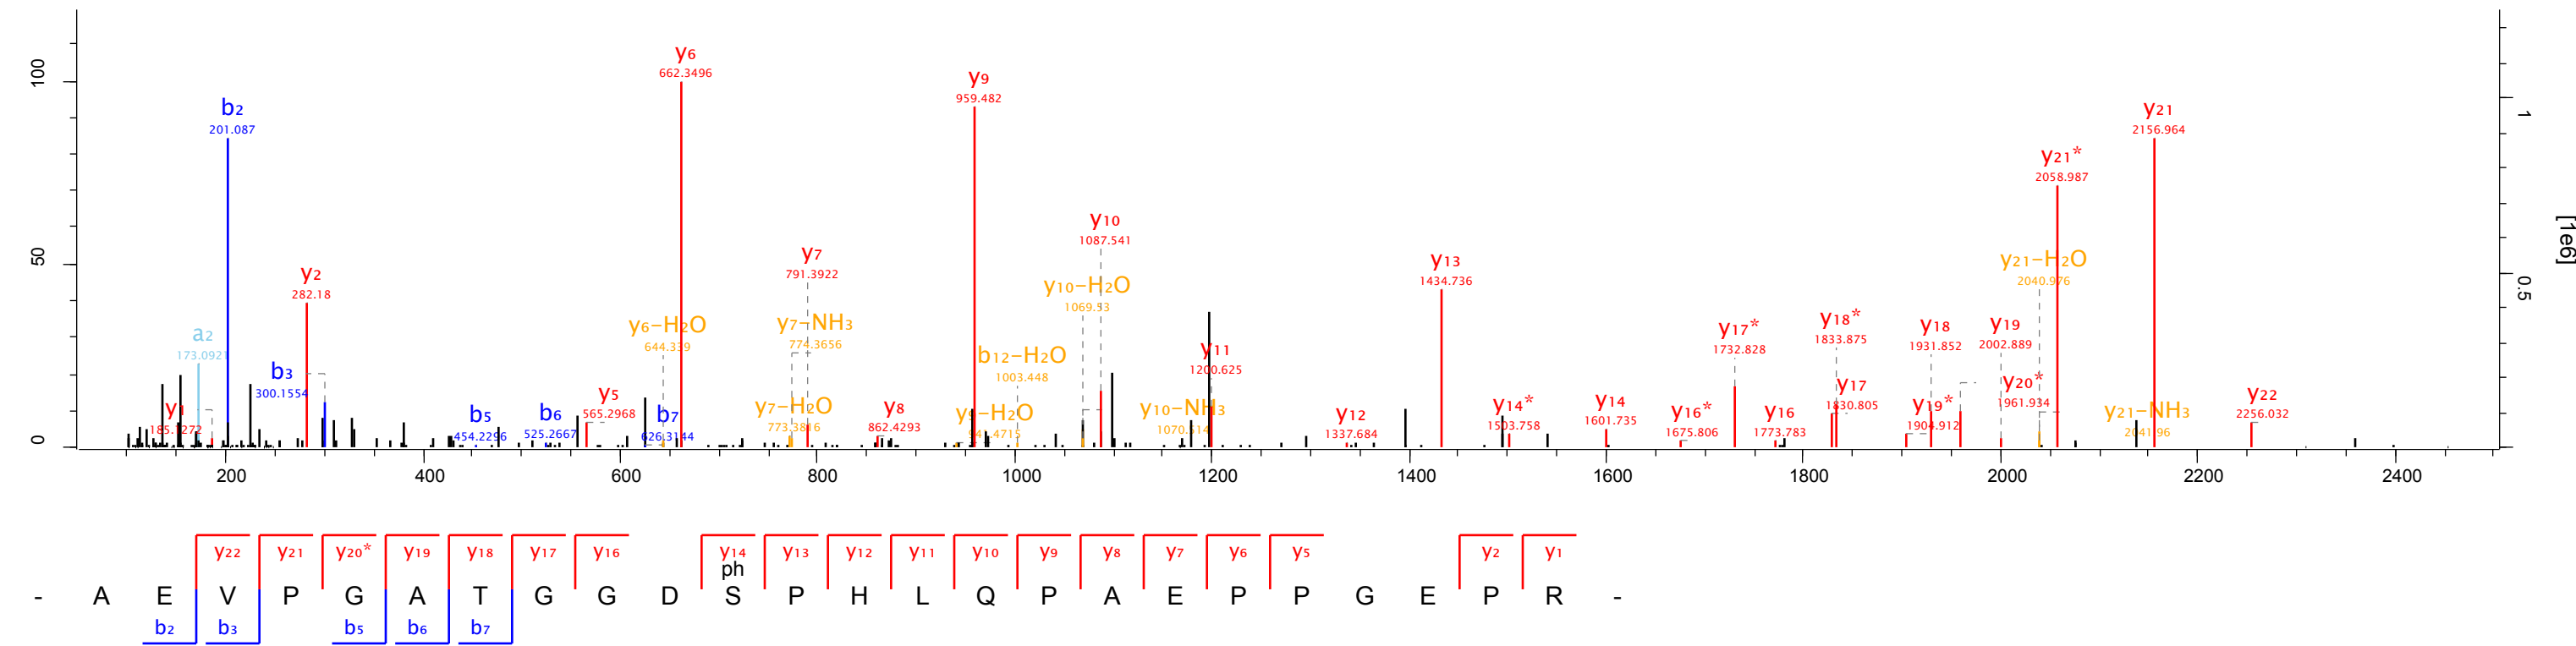

Raw file 20171215\_MaS\_33SR\_LMH\_phospho\_03 Scan 9992 Method FTMS; HCD Score 183.73 m/z 685.32 Gene names ABL2

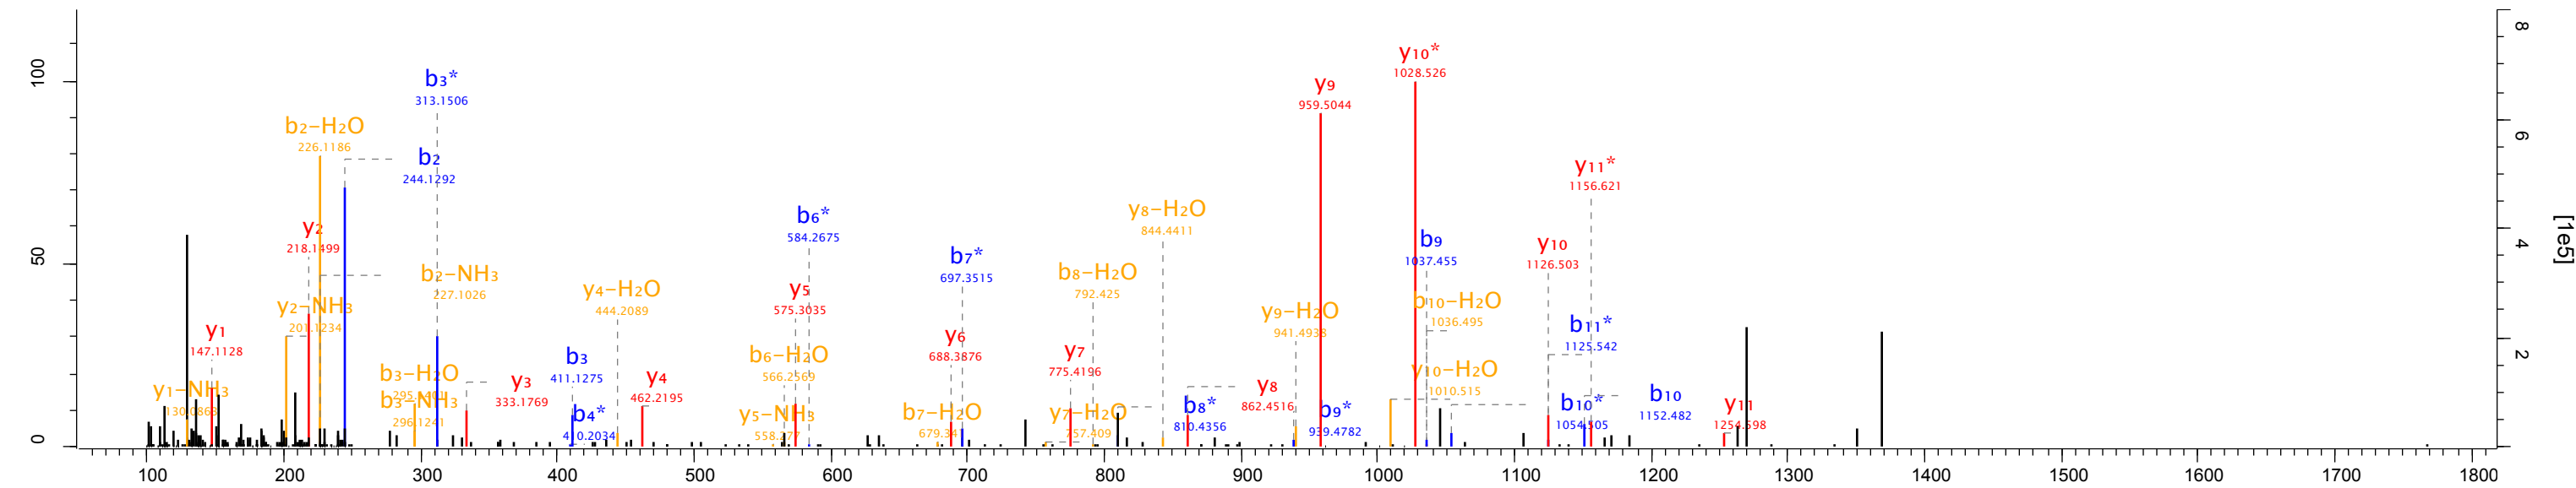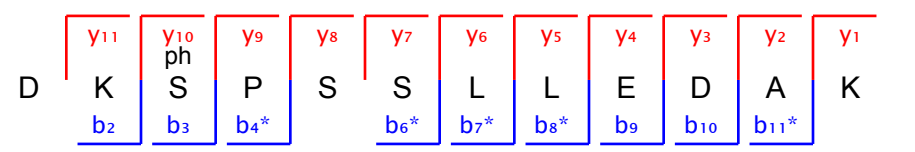

Raw file 20171215\_MaS\_33SR\_LMH\_phospho\_05 Scan 10002 Method FTMS; HCD Score 86.52 m/z 771.33 Gene names UBR4

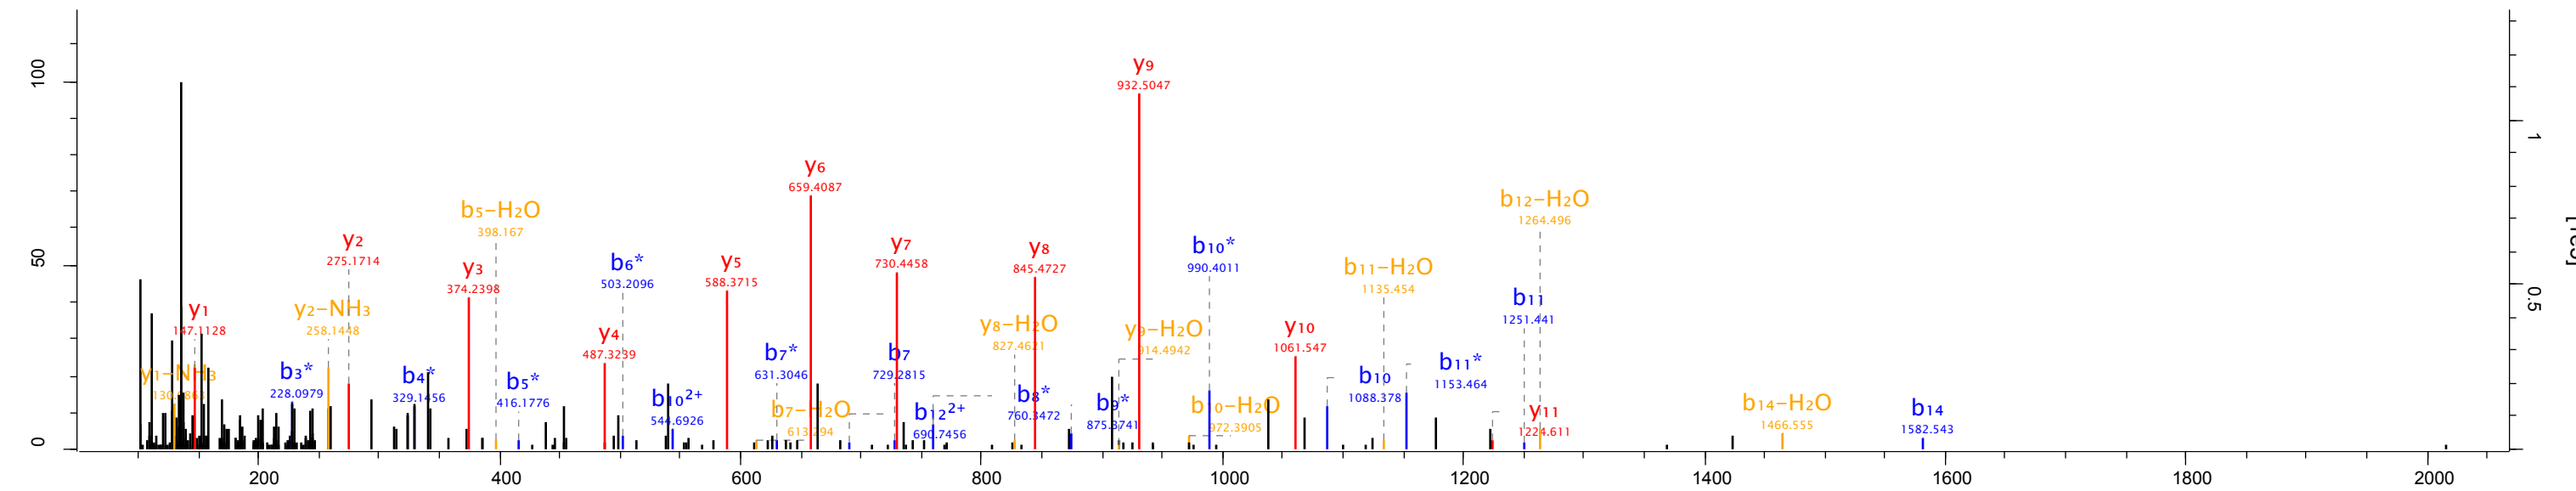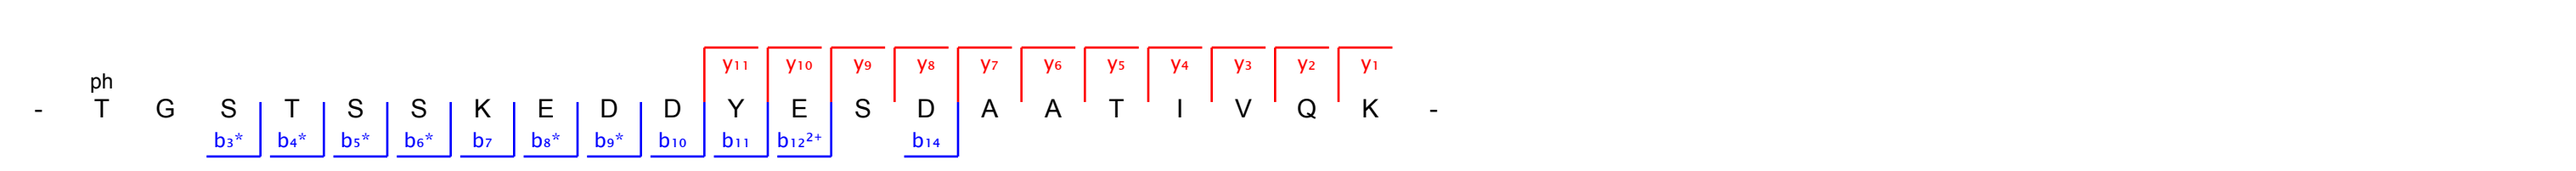

Raw file 20171215\_MaS\_33SR\_LMH\_phospho\_05 Scan 10382 Method FTMS; HCD Score 42.04 m/z 927.4 Gene names LRRFIP1

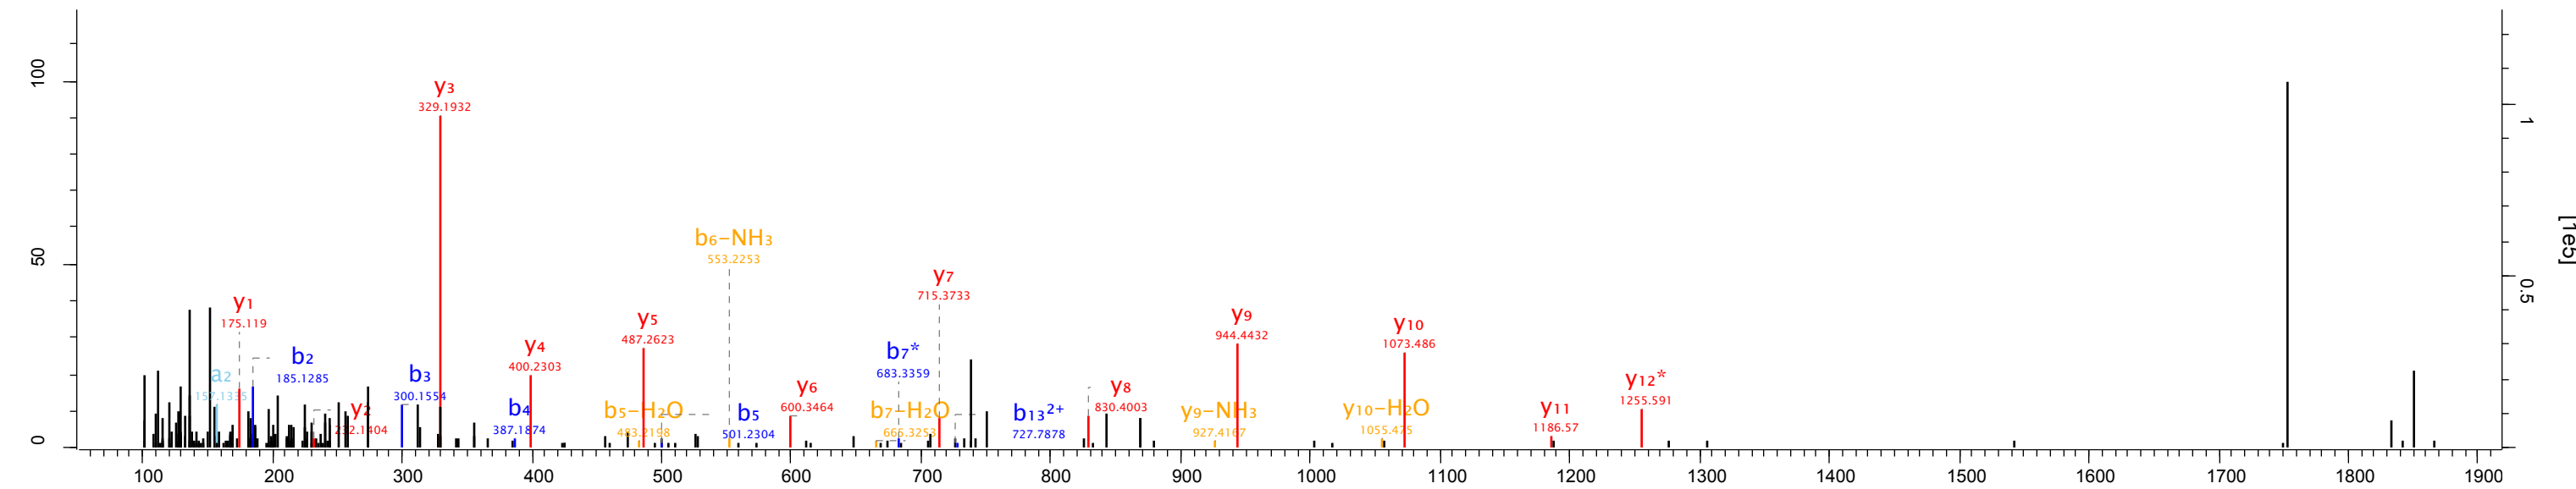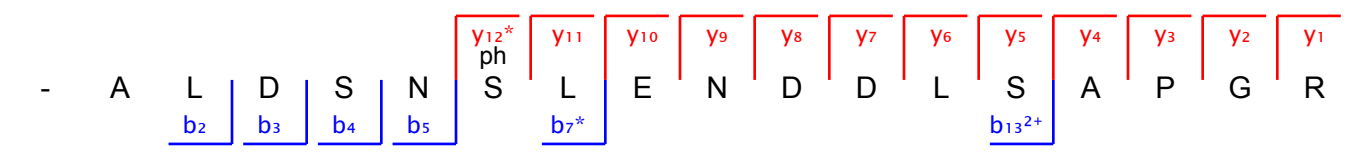

Raw file 20171215\_MaS\_33SR\_LMH\_phospho\_05 Scan 11092 Method FTMS; HCD Score 95.5 m/z 864.89 Gene names RASAL2

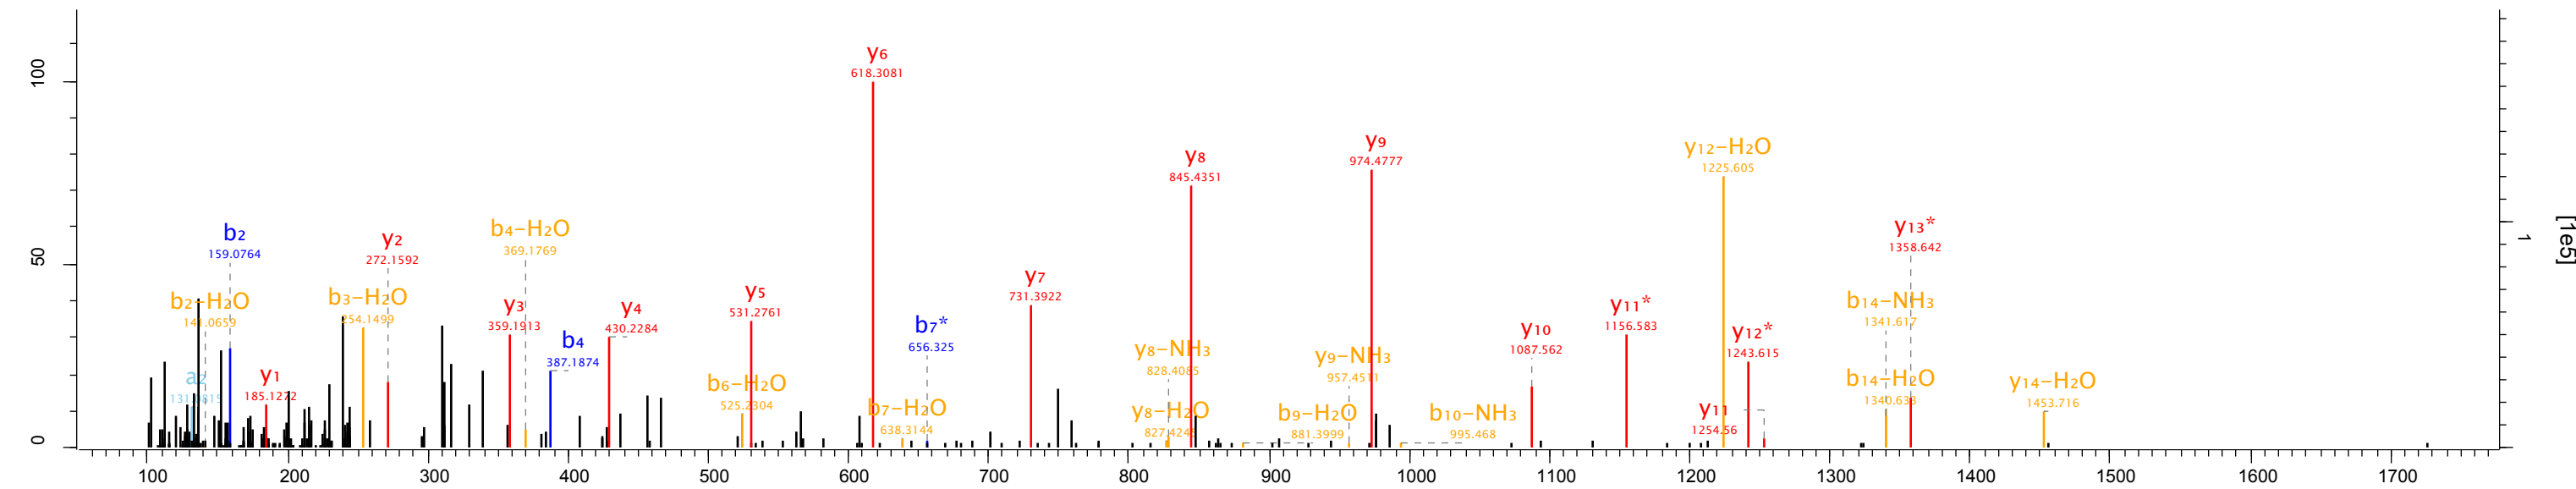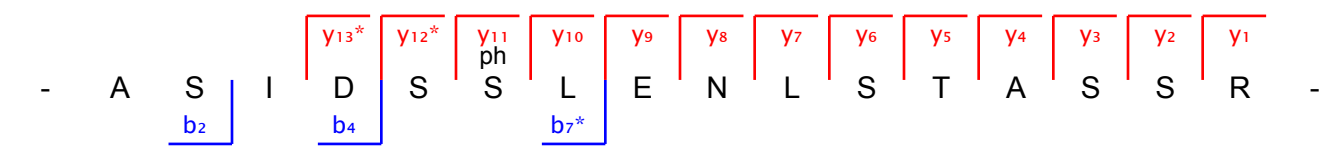



Raw file: 20171215\_MaS\_33SR\_LMH\_phospho\_05  
 Scan: 11162 Method: FTMS; HCD Score: 110.38 m/z: 969.43 Gene names: TRIM28

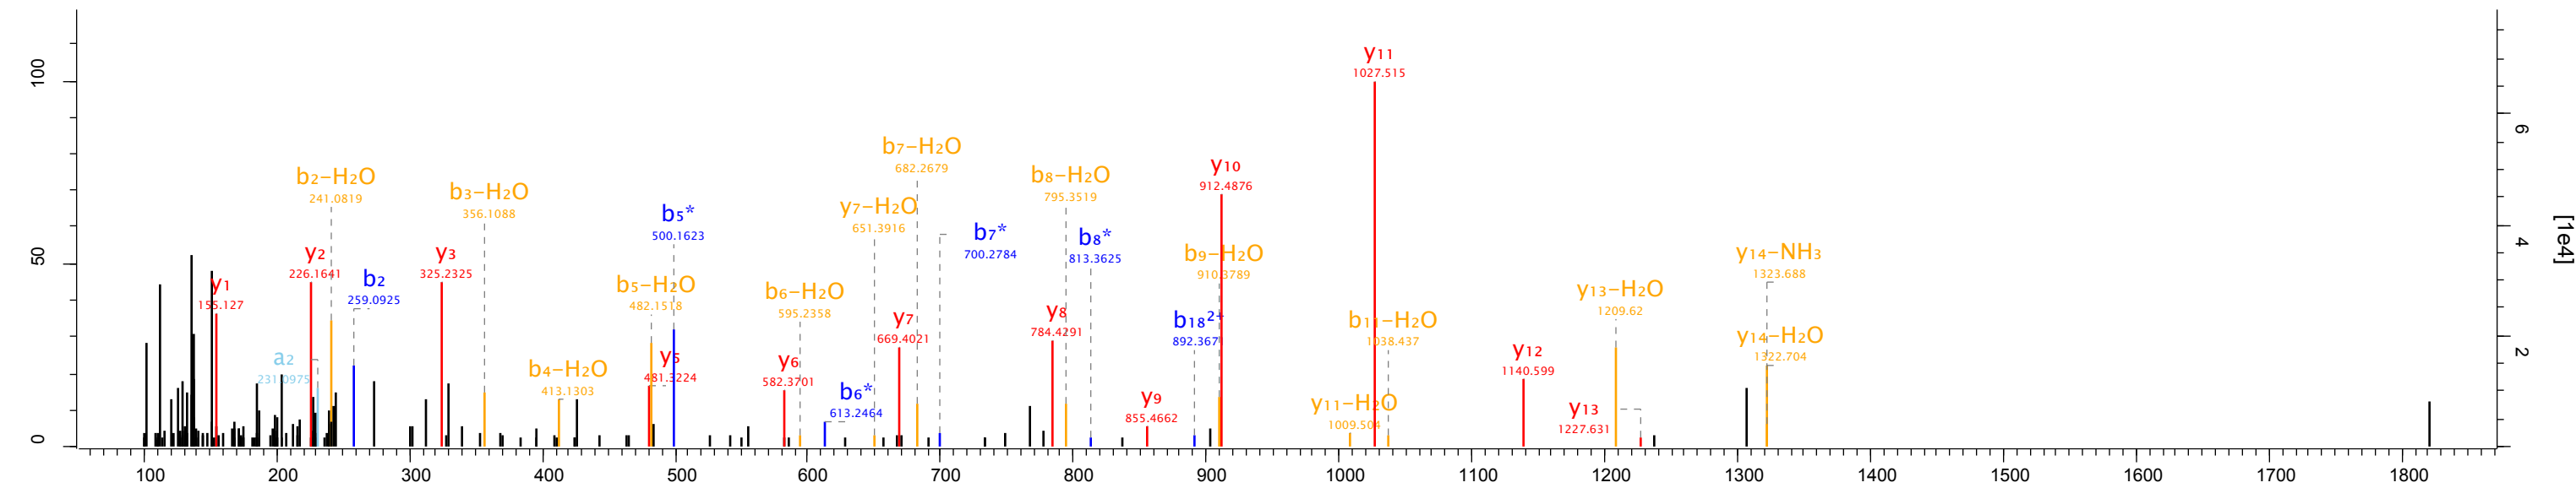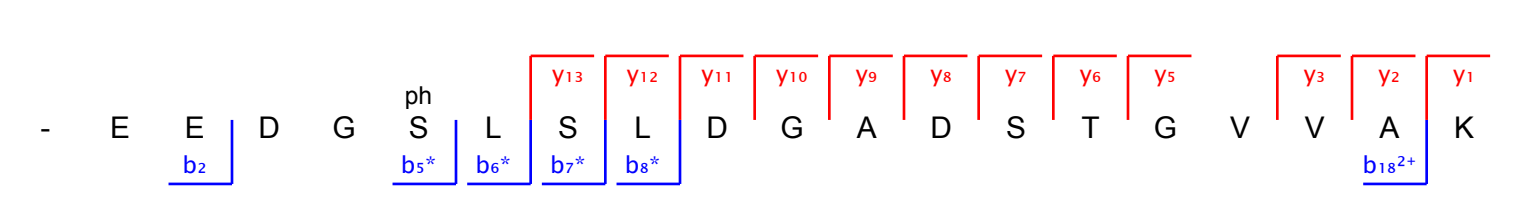

Raw file 20171215\_MaS\_33SR\_LMH\_phospho\_05 Scan 3172 Method FTMS; HCD Score 138.35 m/z 564.73 Gene names BUD13

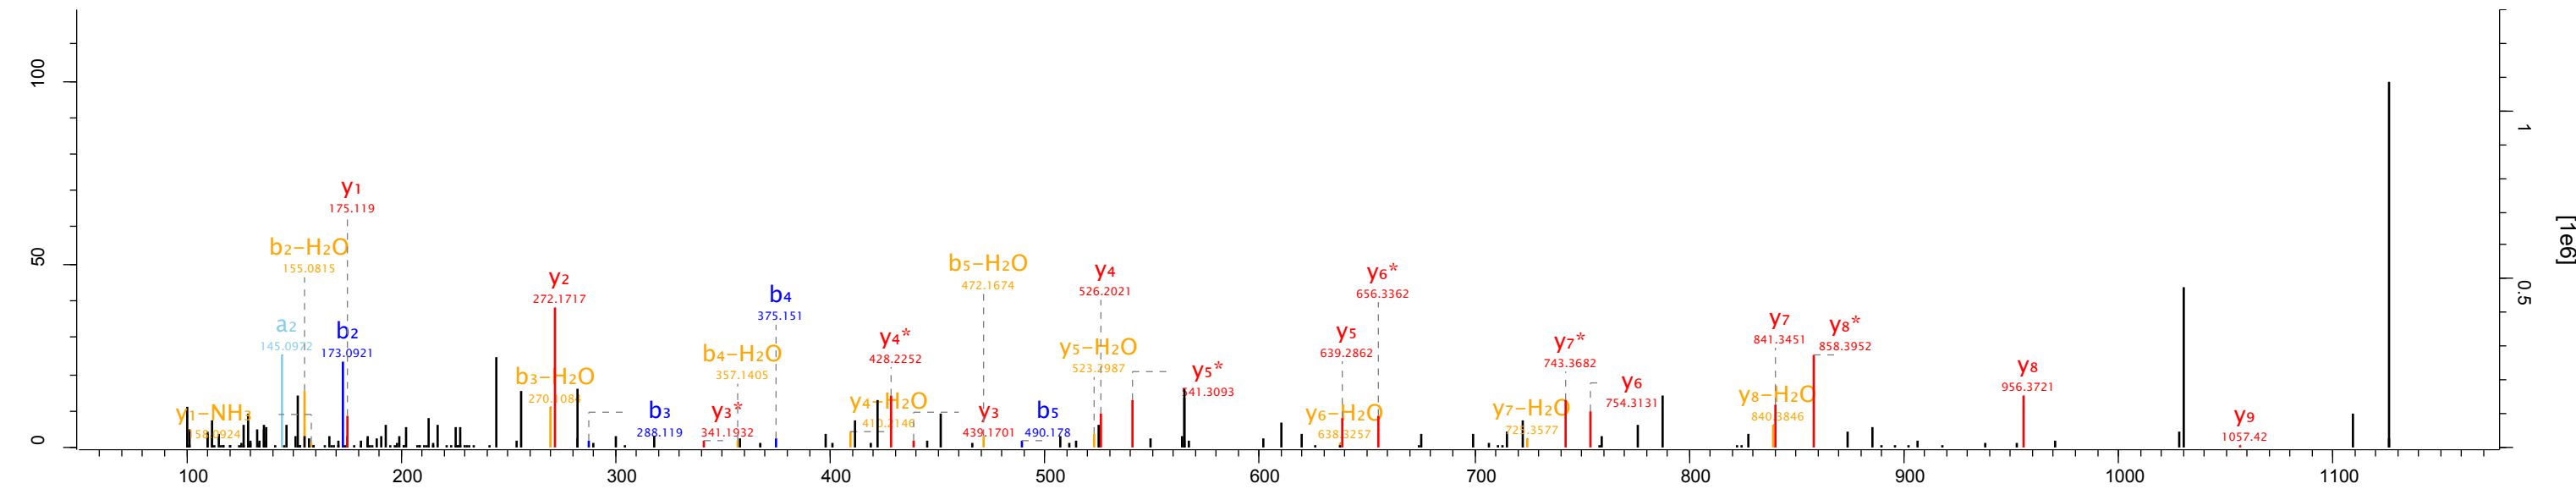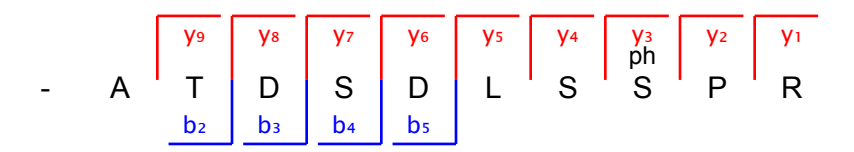

Raw file 20171215\_MaS\_33SR\_LMH\_phospho\_05 Scan 6482 Method FTMS; HCD Score 129.51 m/z 874.36 Gene names EIF2B1

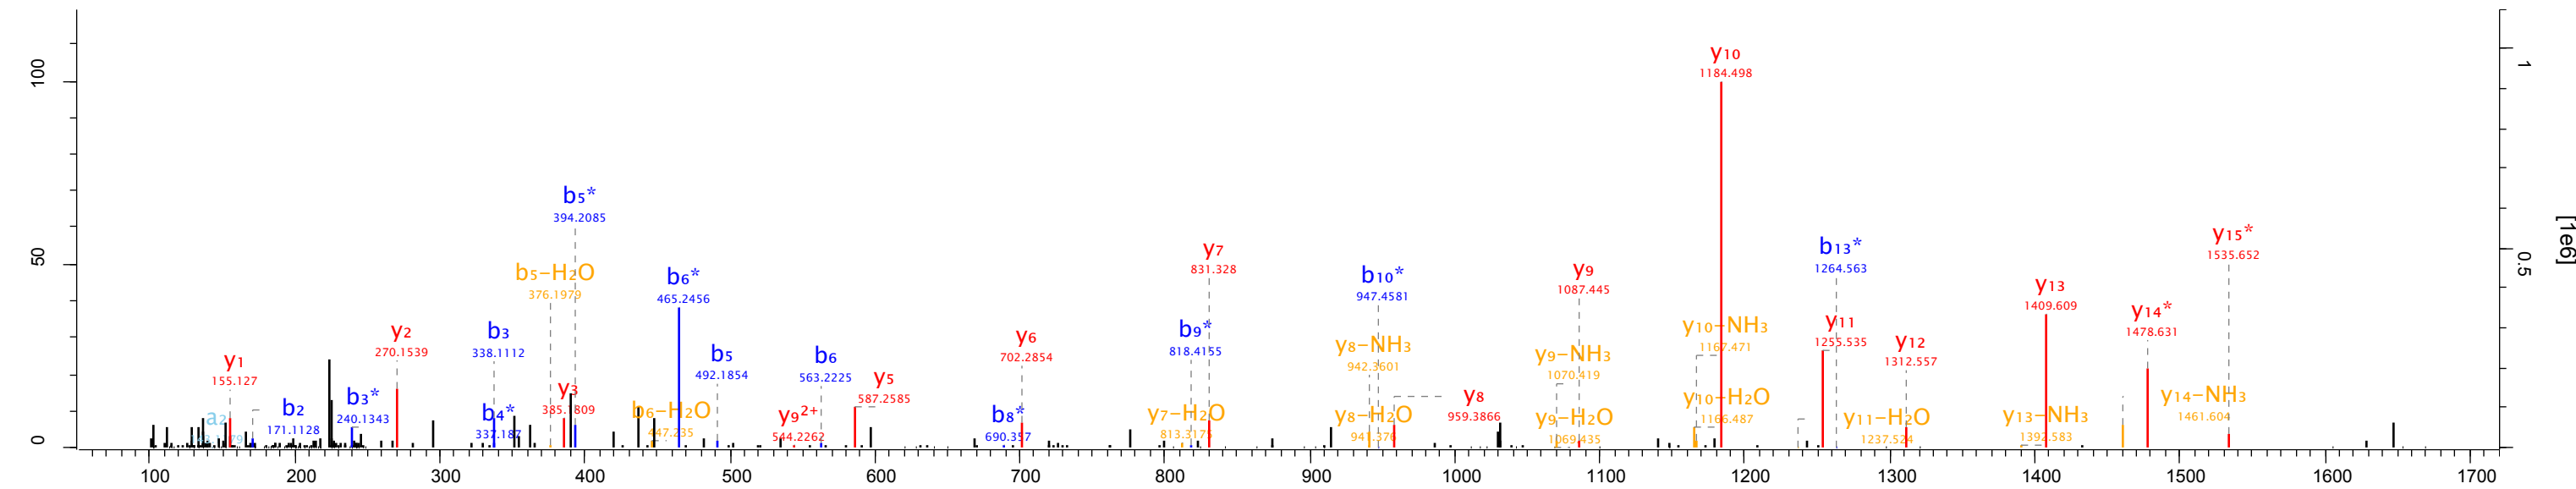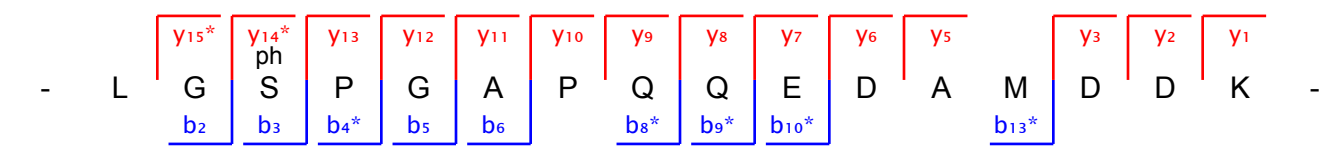

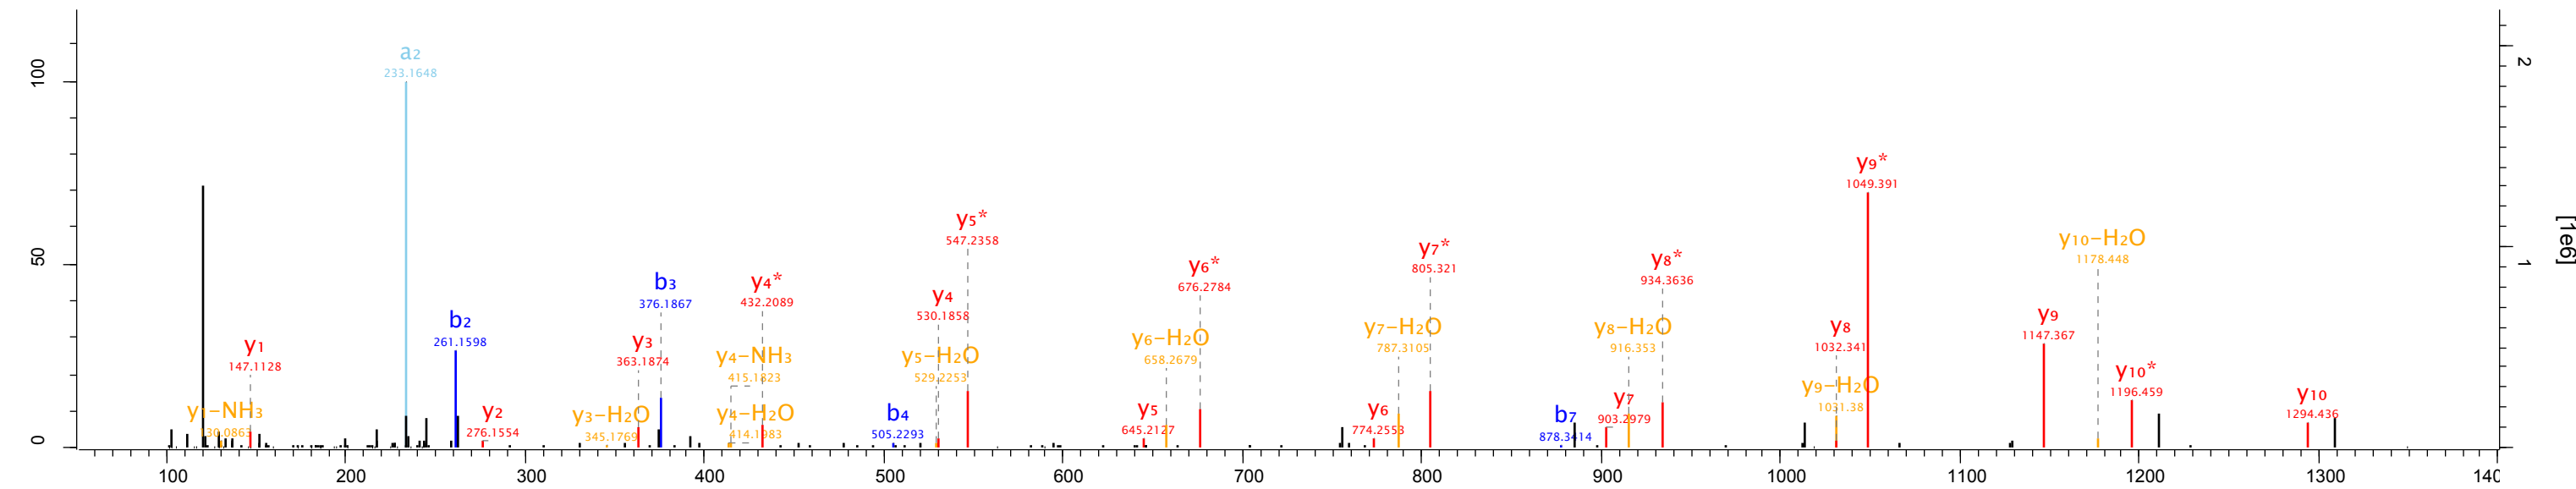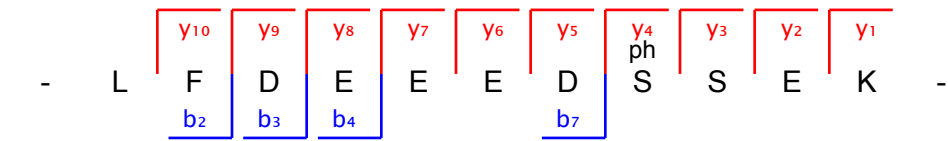

Raw file 20171215\_MaS\_33SR\_LMH\_phospho\_05 Scan 7302 Method FTMS; HCD Score 104.82 m/z 511.23 Gene names SCRIB

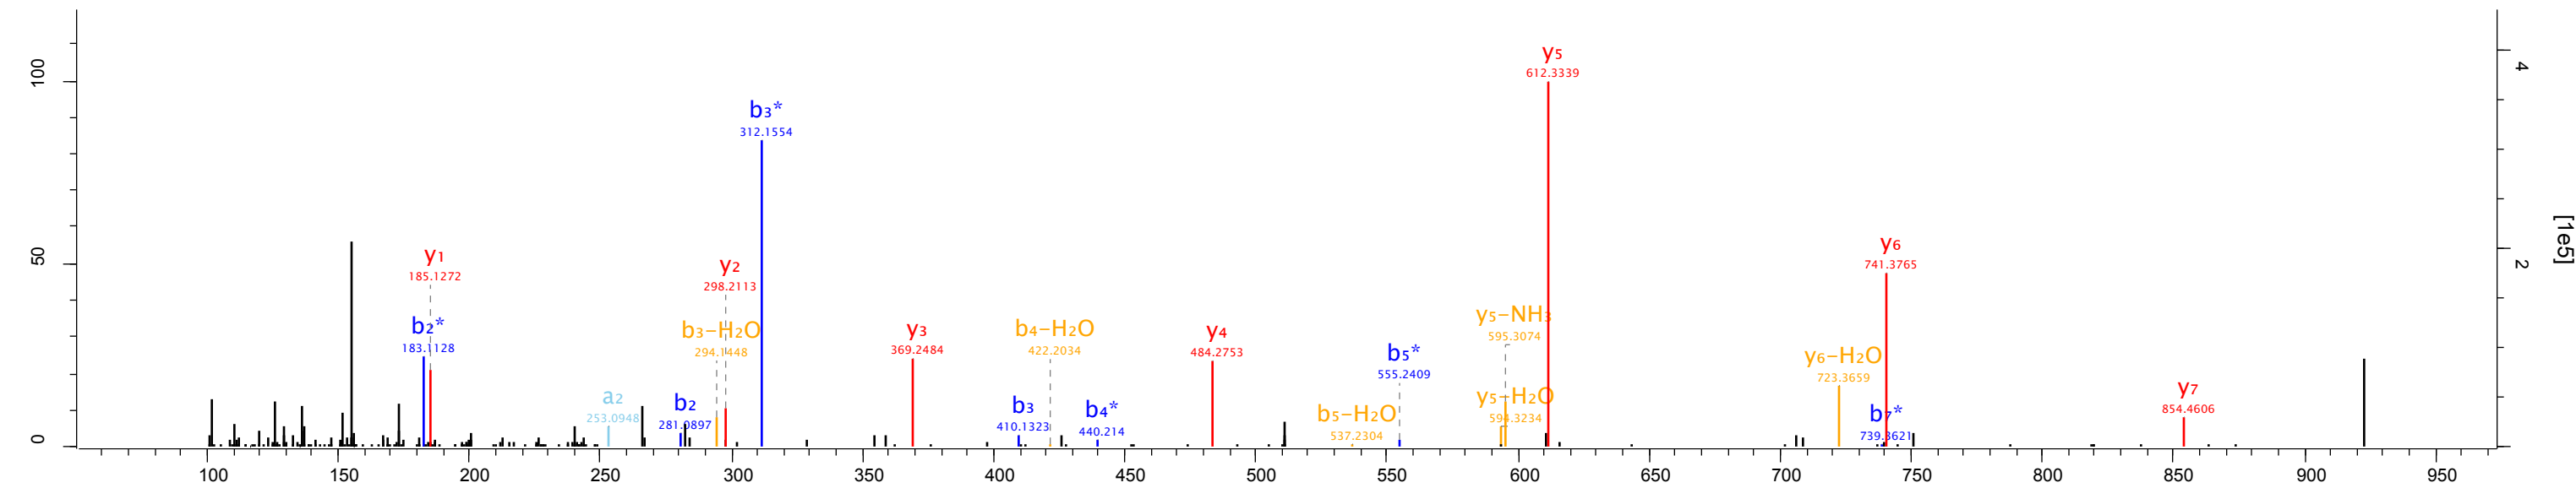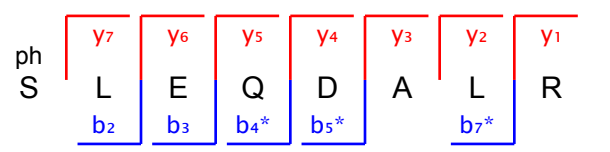

Raw file

20171215\_MaS\_33SR\_LMH\_phospho\_05

| Scan | Method    | Score | m/z    | Gene names |
|------|-----------|-------|--------|------------|
| 7712 | FTMS; HCD | 42.63 | 569.74 | AQR        |

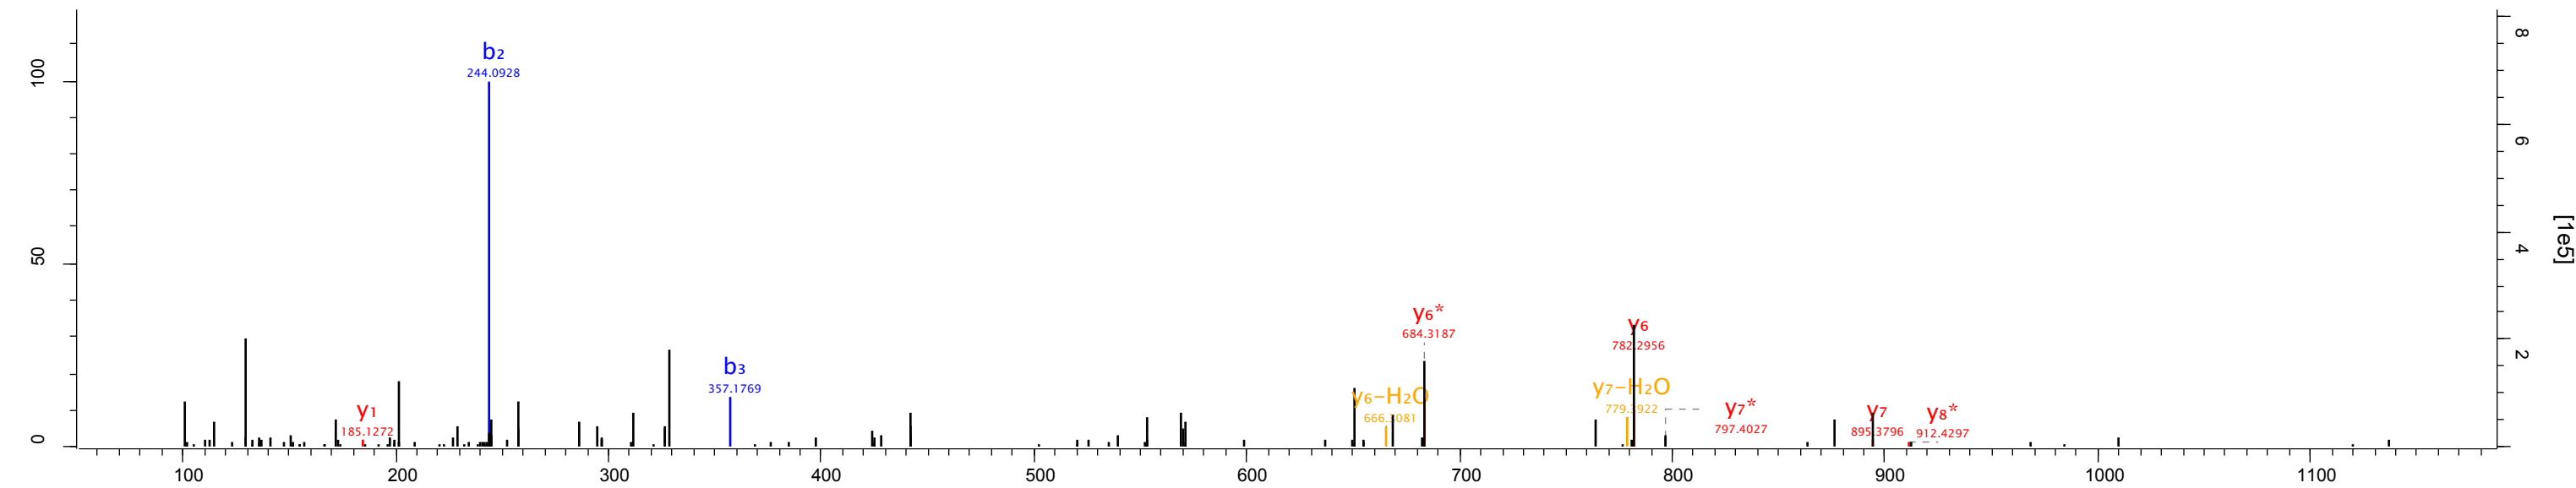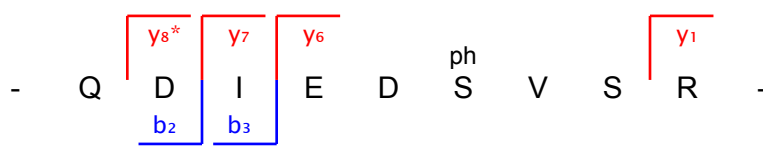

Raw file 20171215\_MaS\_33SR\_LMH\_phospho\_05 Scan 8712 Method FTMS; HCD Score 122.7 m/z 567.74 Gene names ARHGEF7;ARHGEF6

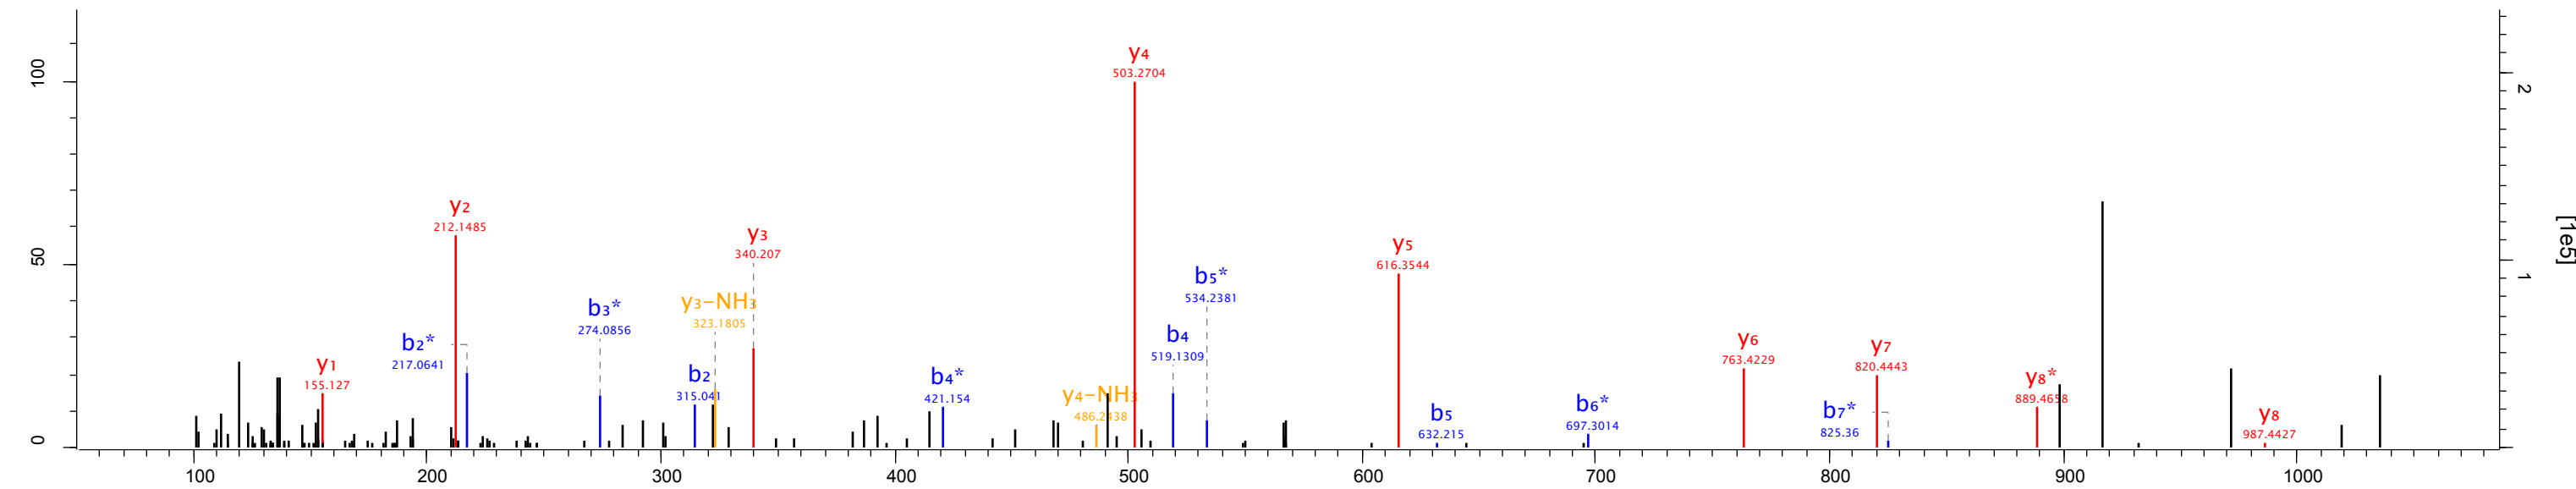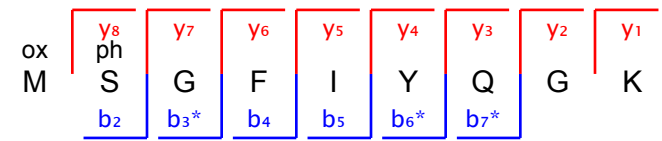

Raw file 20171215\_MaS\_33SR\_LMH\_phospho\_06 Scan 10292 Method FTMS; HCD Score 83.42 m/z 594.29 Gene names SETDB1

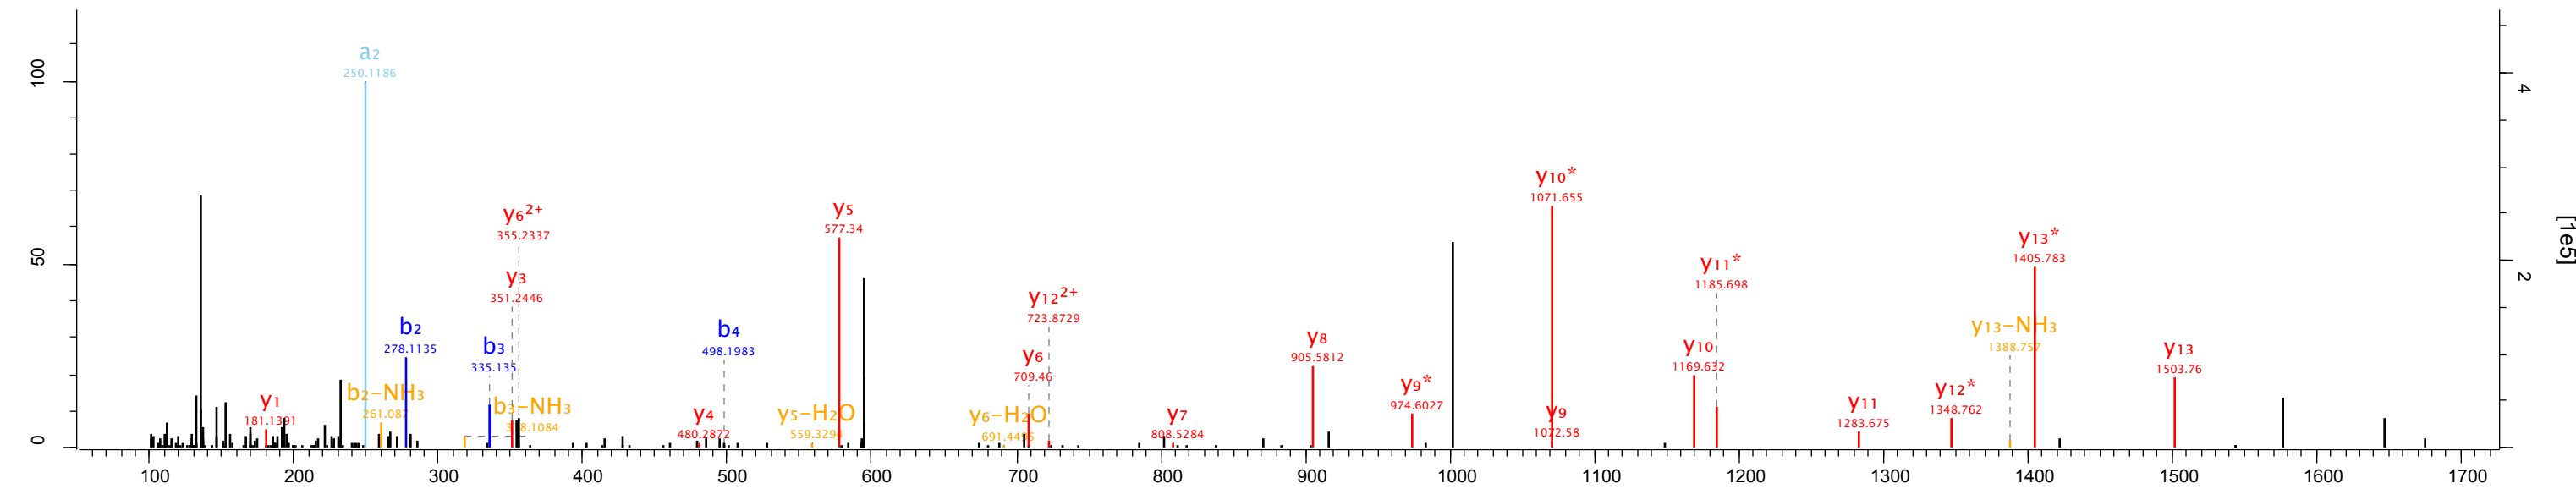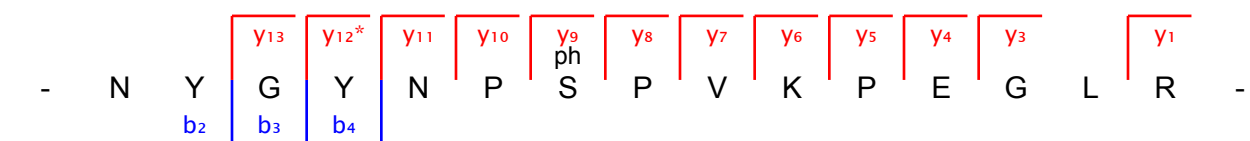



Raw file 20171215\_MaS\_33SR\_LMH\_phospho\_06 Scan 10372 Method FTMS; HCD Score 178.88 m/z 1109.76 Gene names USO1

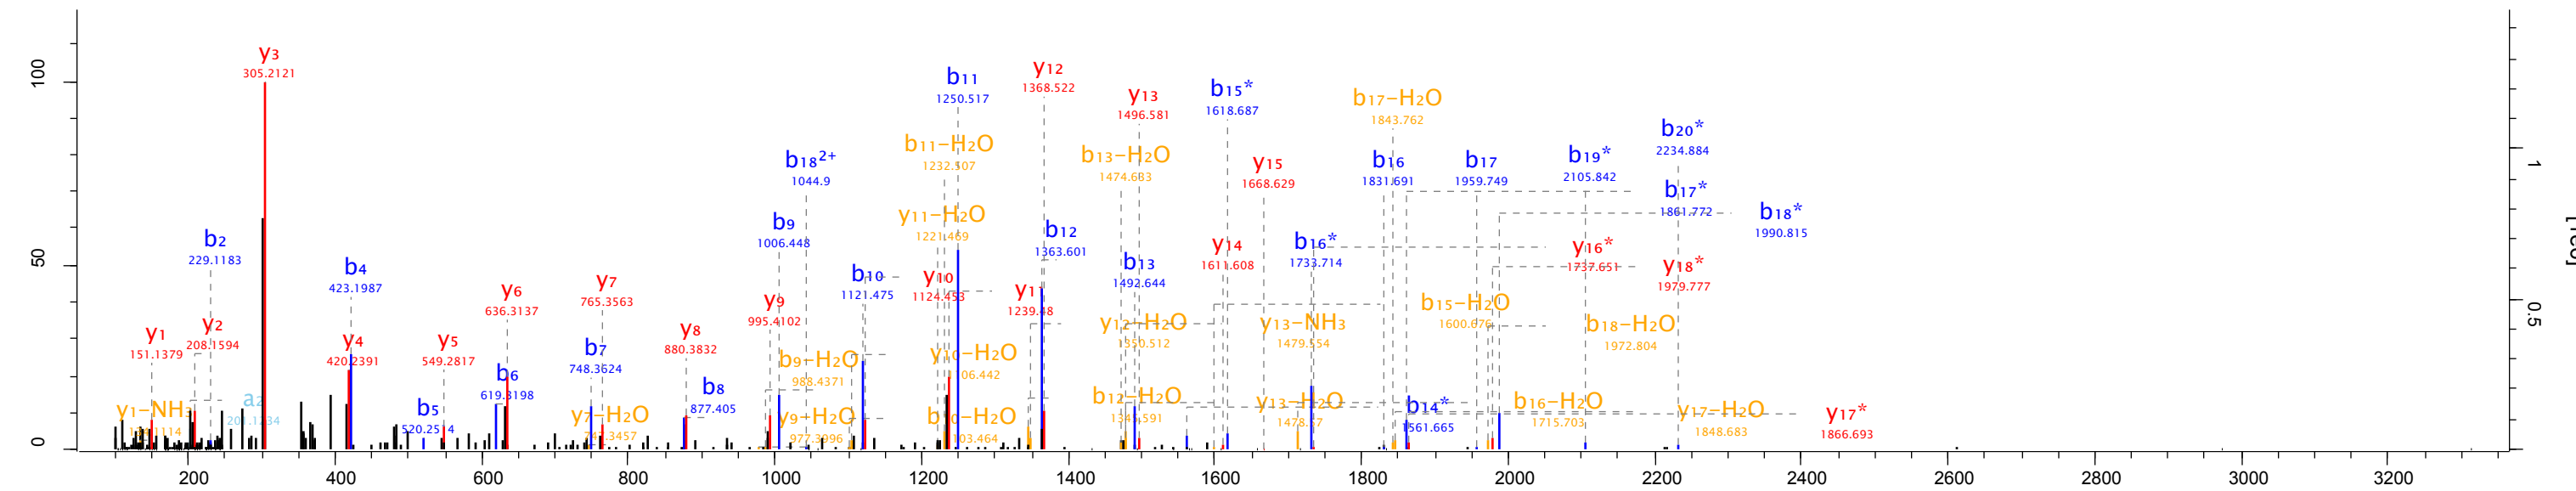

- D L G H P V E E E D E L E S G D Q E D E D D E S E D P G K -

b<sub>2</sub>
b<sub>4</sub>
b<sub>5</sub>
b<sub>6</sub>
b<sub>7</sub>
b<sub>8</sub>
b<sub>9</sub>
b<sub>10</sub>
b<sub>11</sub>
b<sub>12</sub>
b<sub>13</sub>
b<sub>14</sub>\*
b<sub>15</sub>\*
b<sub>16</sub>
b<sub>17</sub>
b<sub>18</sub>\*
b<sub>19</sub>\*
b<sub>20</sub>\*
y<sub>18</sub>\*
y<sub>17</sub>\*
y<sub>16</sub>\*
y<sub>15</sub>
y<sub>14</sub>
y<sub>13</sub>
y<sub>12</sub>
y<sub>11</sub>
y<sub>10</sub>
y<sub>9</sub>
y<sub>8</sub>
y<sub>7</sub>
y<sub>6</sub>
y<sub>5</sub>
y<sub>4</sub>
y<sub>3</sub>
y<sub>2</sub>
y<sub>1</sub>

Raw file 20171215\_MaS\_33SR\_LMH\_phospho\_06 Scan 10402 Method FTMS; HCD Score 124.73 m/z 843.46 Gene names MLLT3

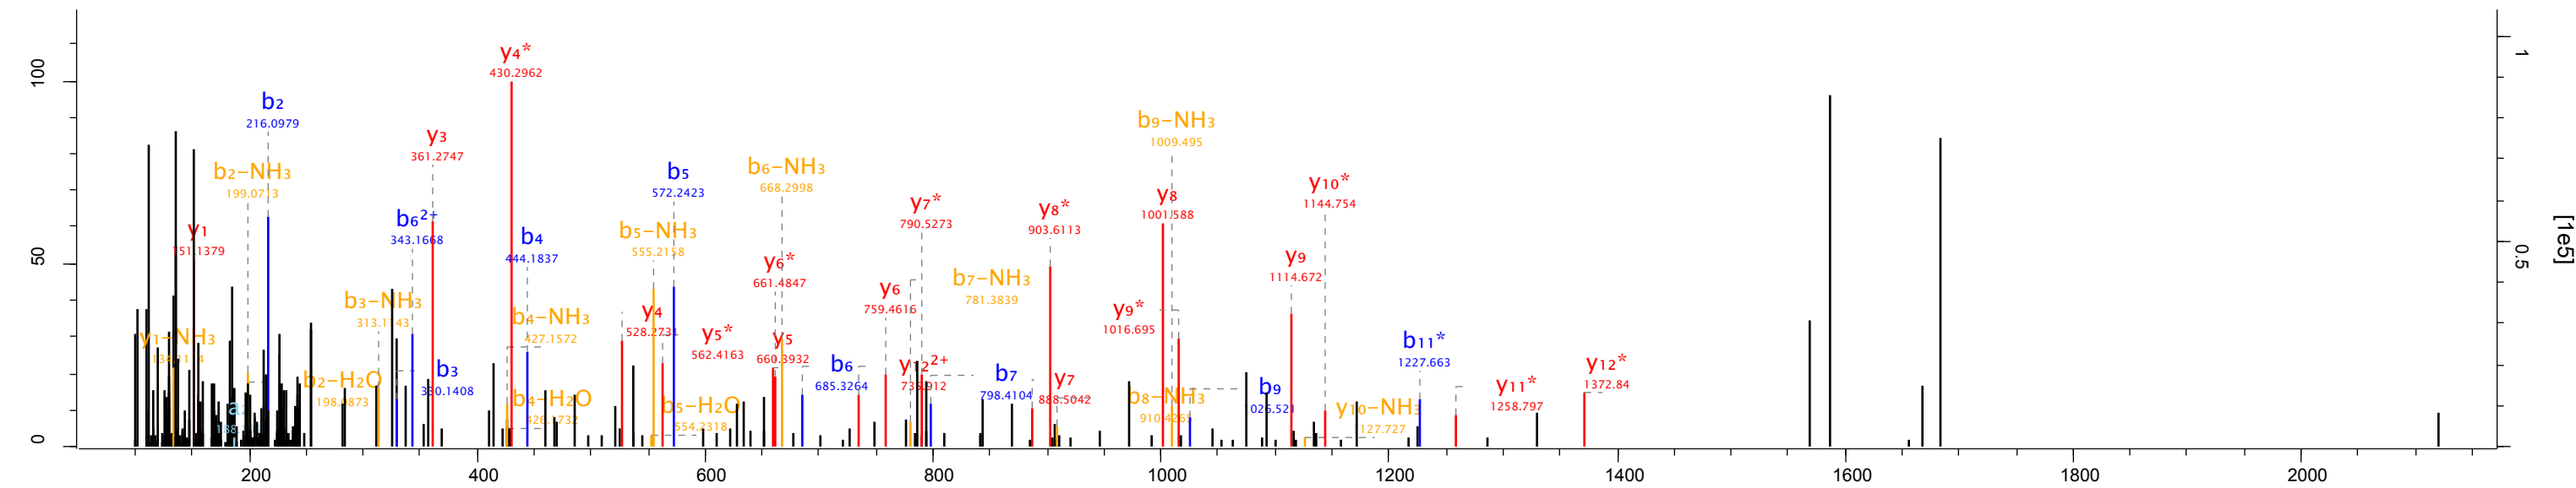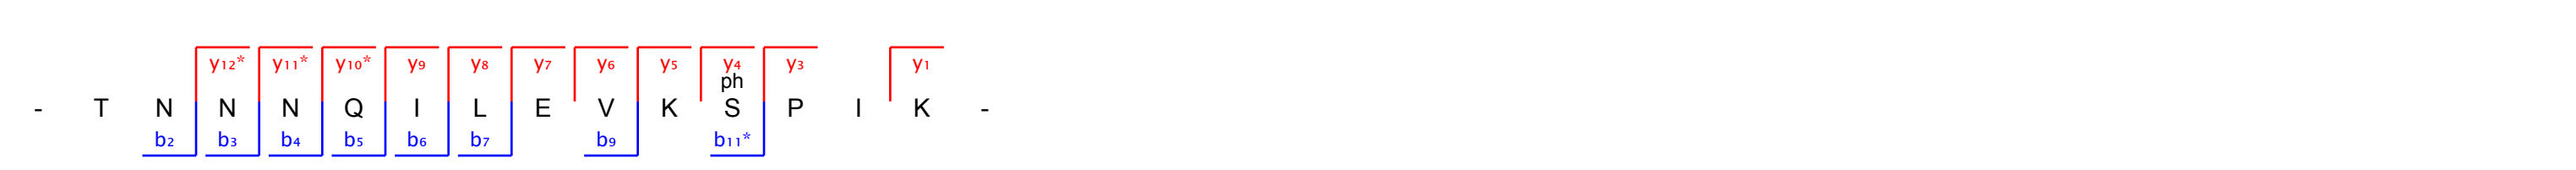

Raw file 20171215\_MaS\_33SR\_LMH\_phospho\_06 Scan 11092 Method FTMS; HCD Score 110.26 m/z 764.37 Gene names USP5

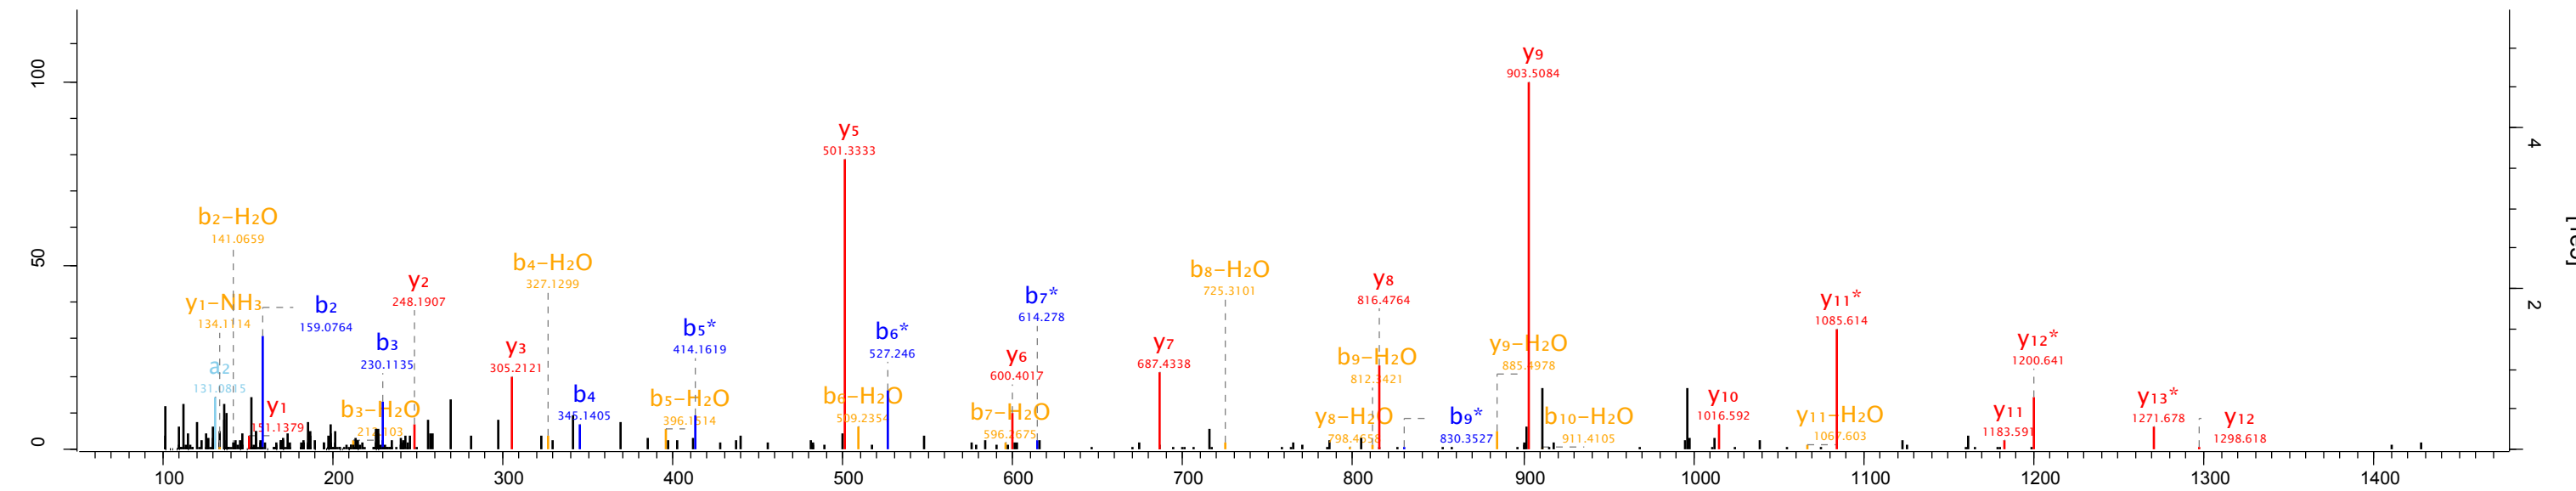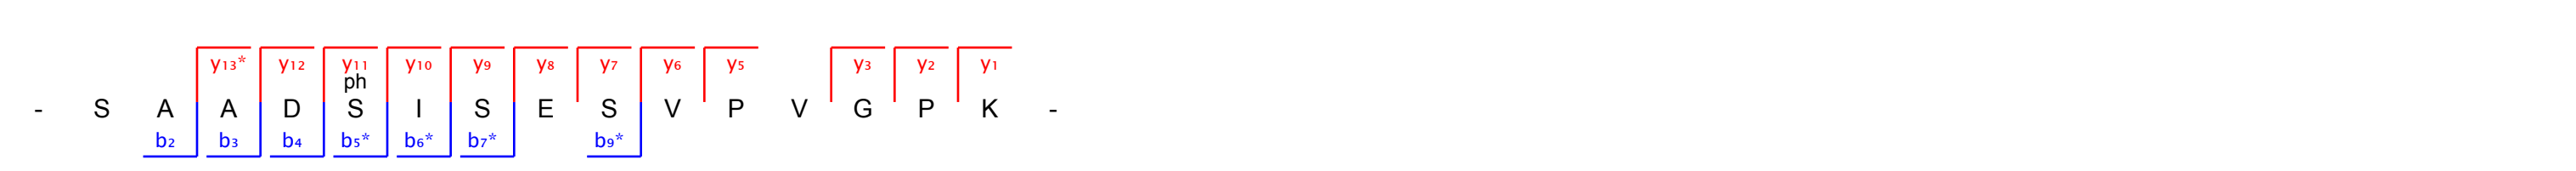

Raw file: 20171215\_MaS\_33SR\_LMH\_phospho\_06  
 Scan: 11152 Method: FTMS; HCD Score: 243.39 m/z: 1059.43 Gene names: MAP1B

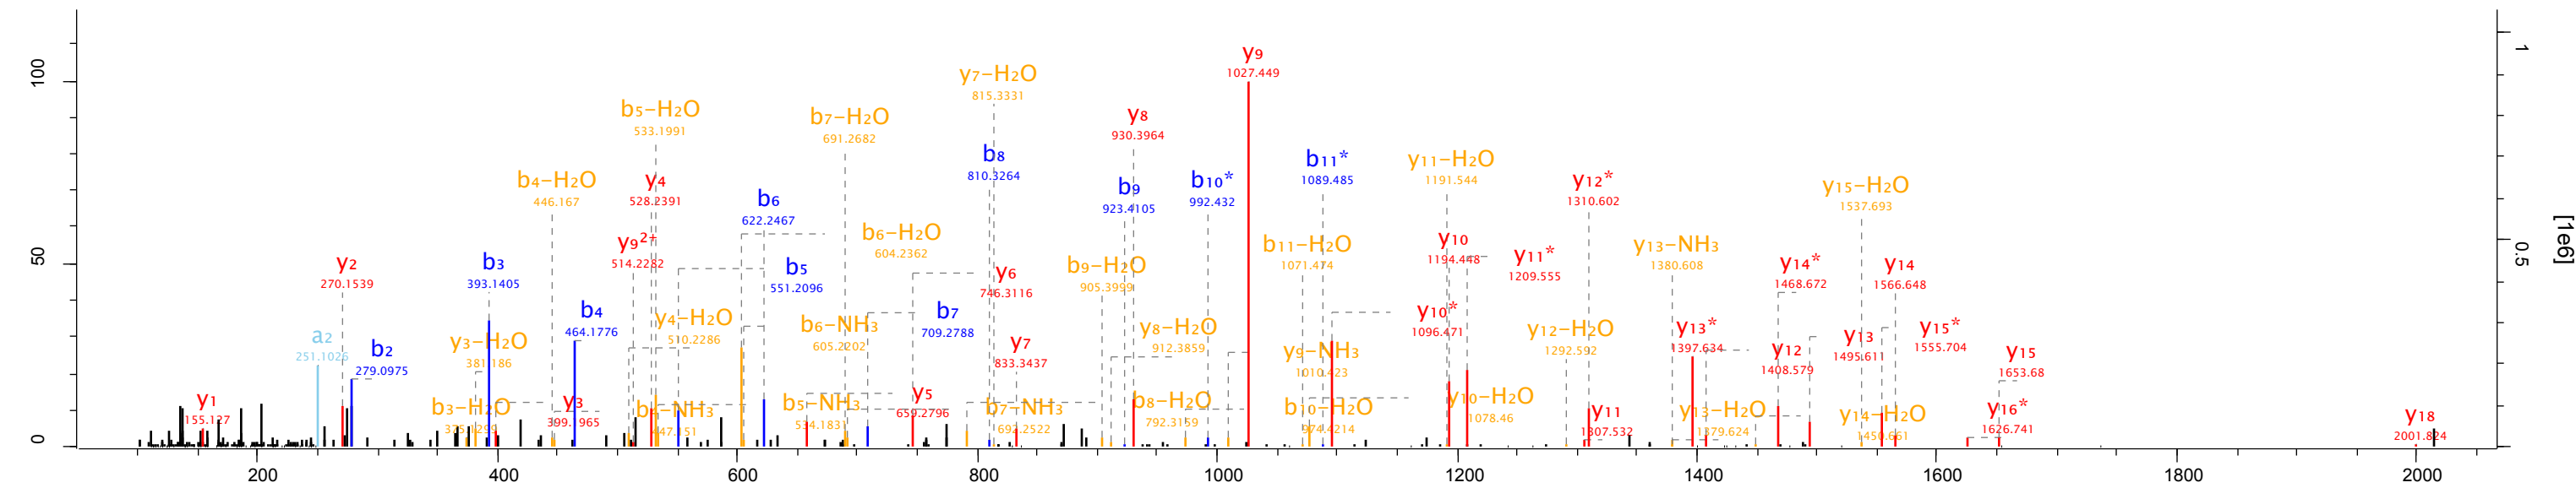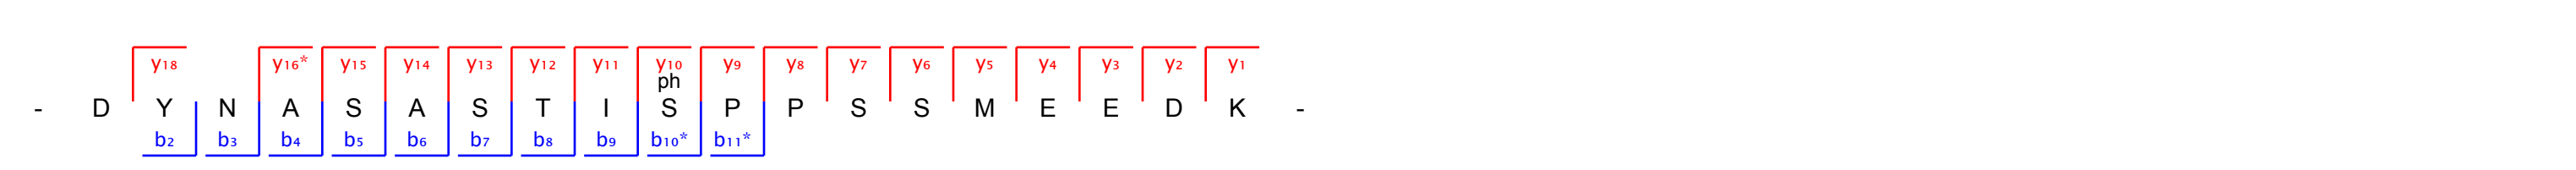

Raw file: 20171215\_MaS\_33SR\_LMH\_phospho\_06  
 Scan: 11462 Method: FTMS; HCD Score: 159.98 m/z: 715.32 Gene names: ATG16L1

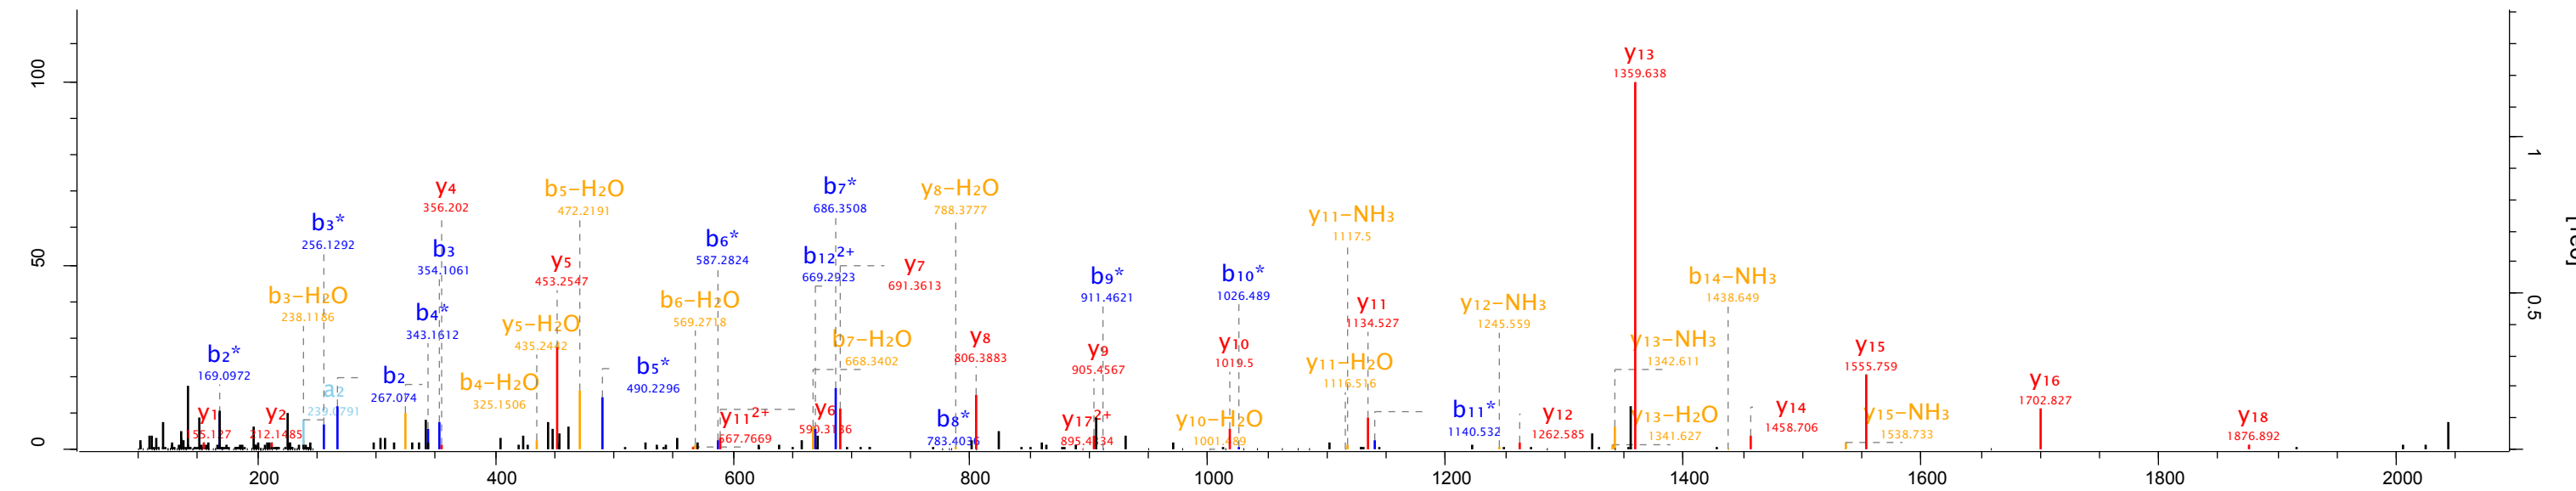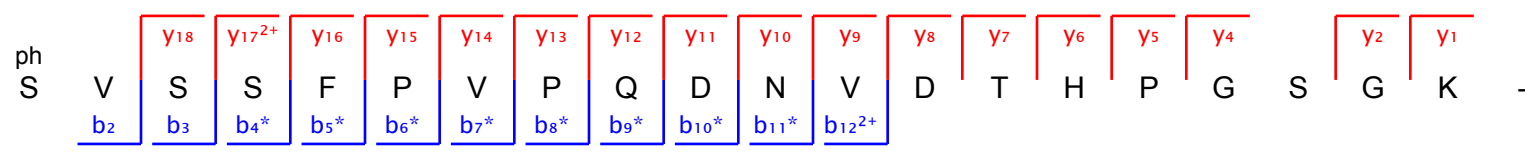

Raw file 20171215\_MaS\_33SR\_LMH\_phospho\_06 Scan 11522 Method FTMS; HCD Score 118.81 m/z 495.73 Gene names EIF3S3;EIF3H

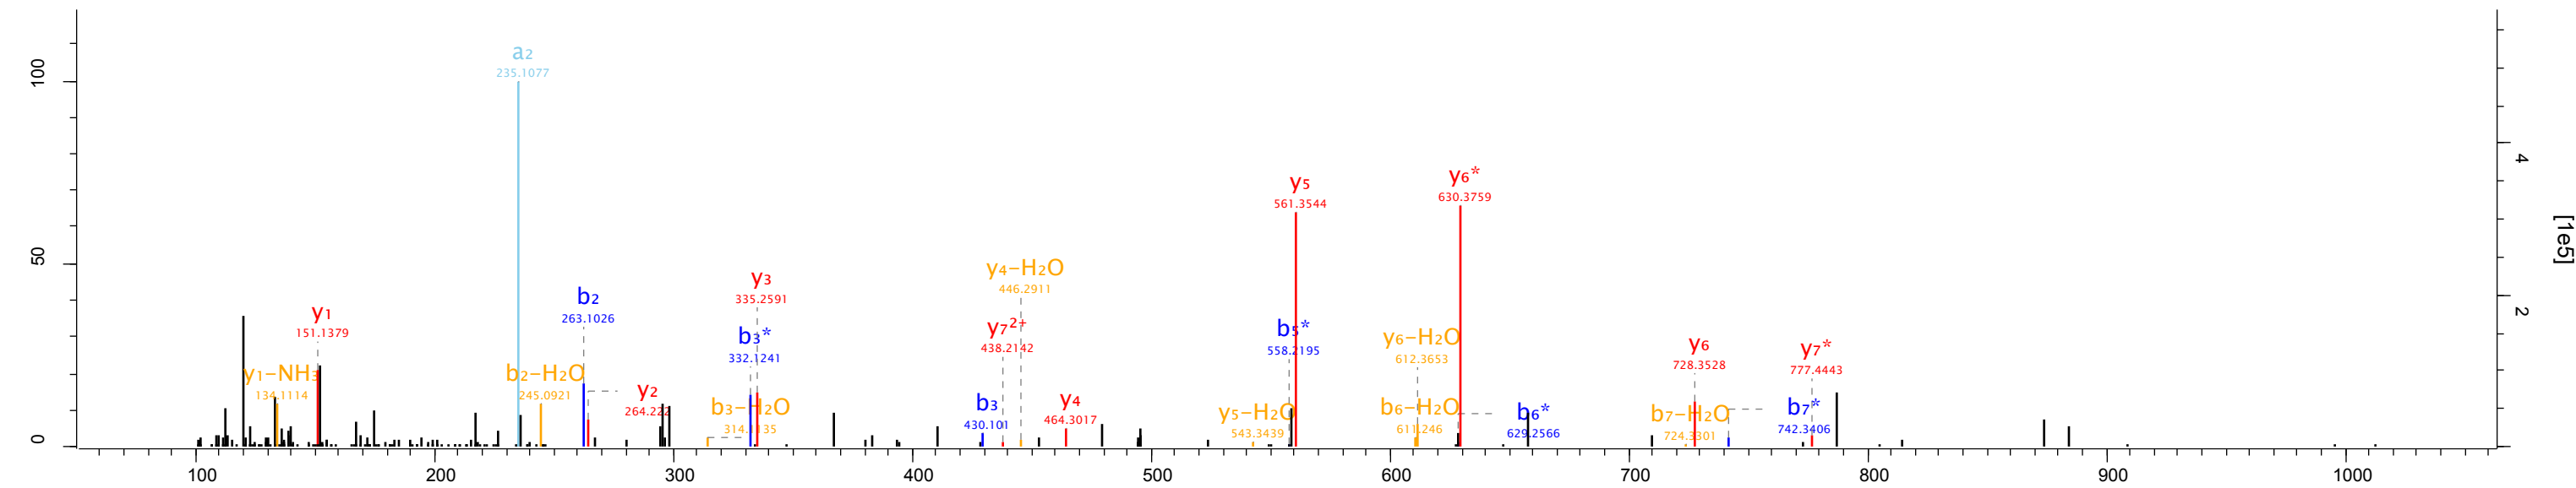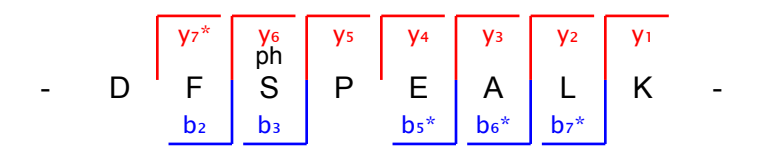

Raw file 20171215\_MaS\_33SR\_LMH\_phospho\_06 Scan 11532 Method FTMS; HCD Score 157.3 m/z 1085.96 Gene names SYNM

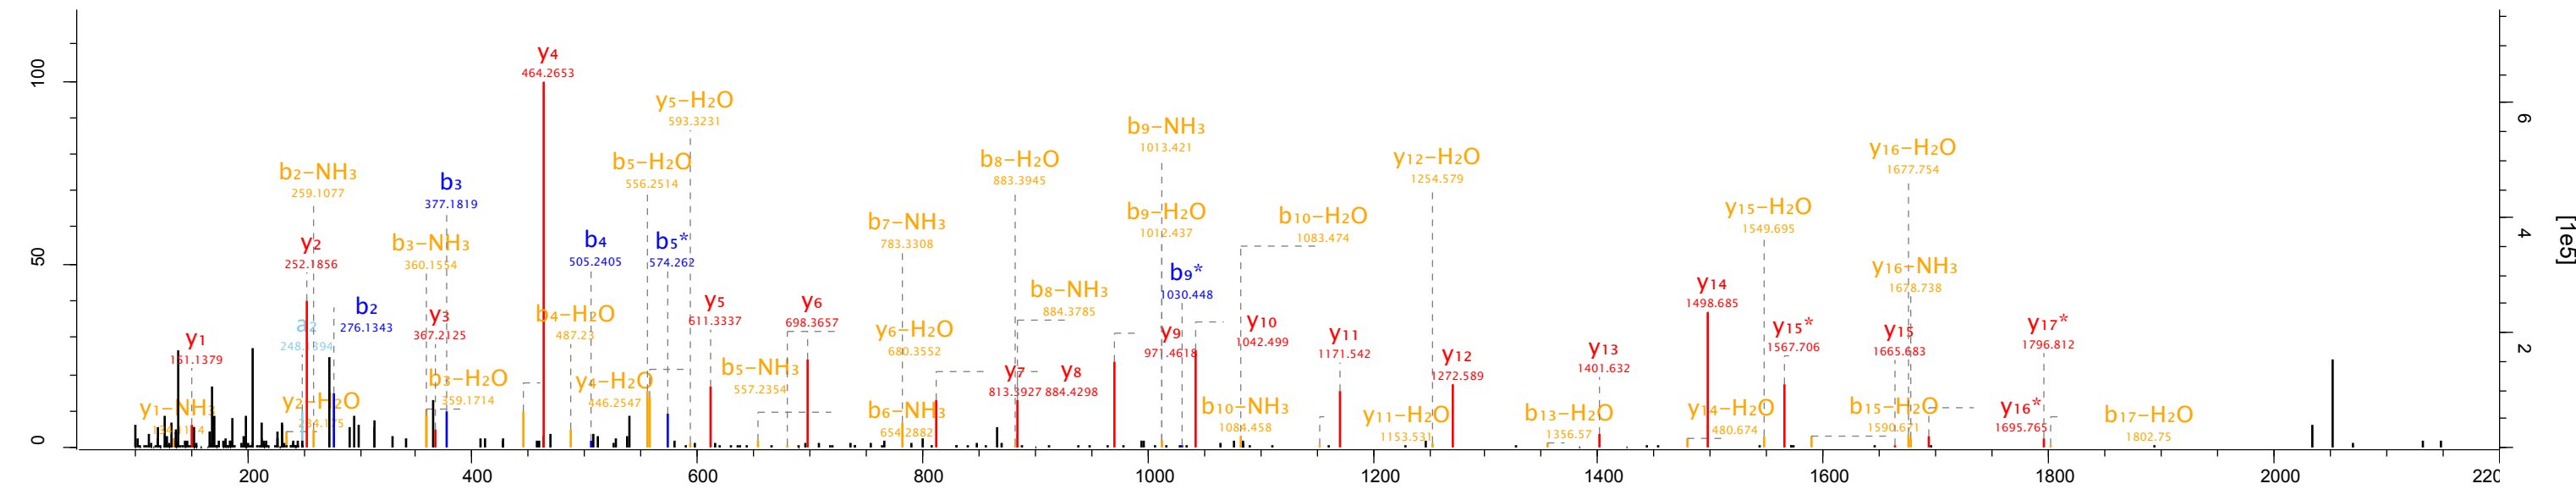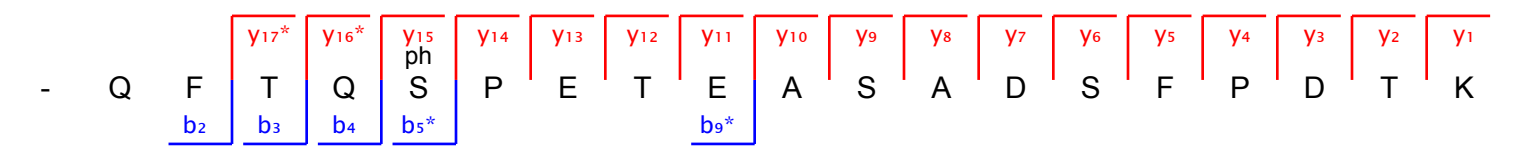

Raw file 20171215\_MaS\_33SR\_LMH\_phospho\_06 Scan 12172 Method FTMS; HCD Score 132.14 m/z 721.86 Gene names TRUB1

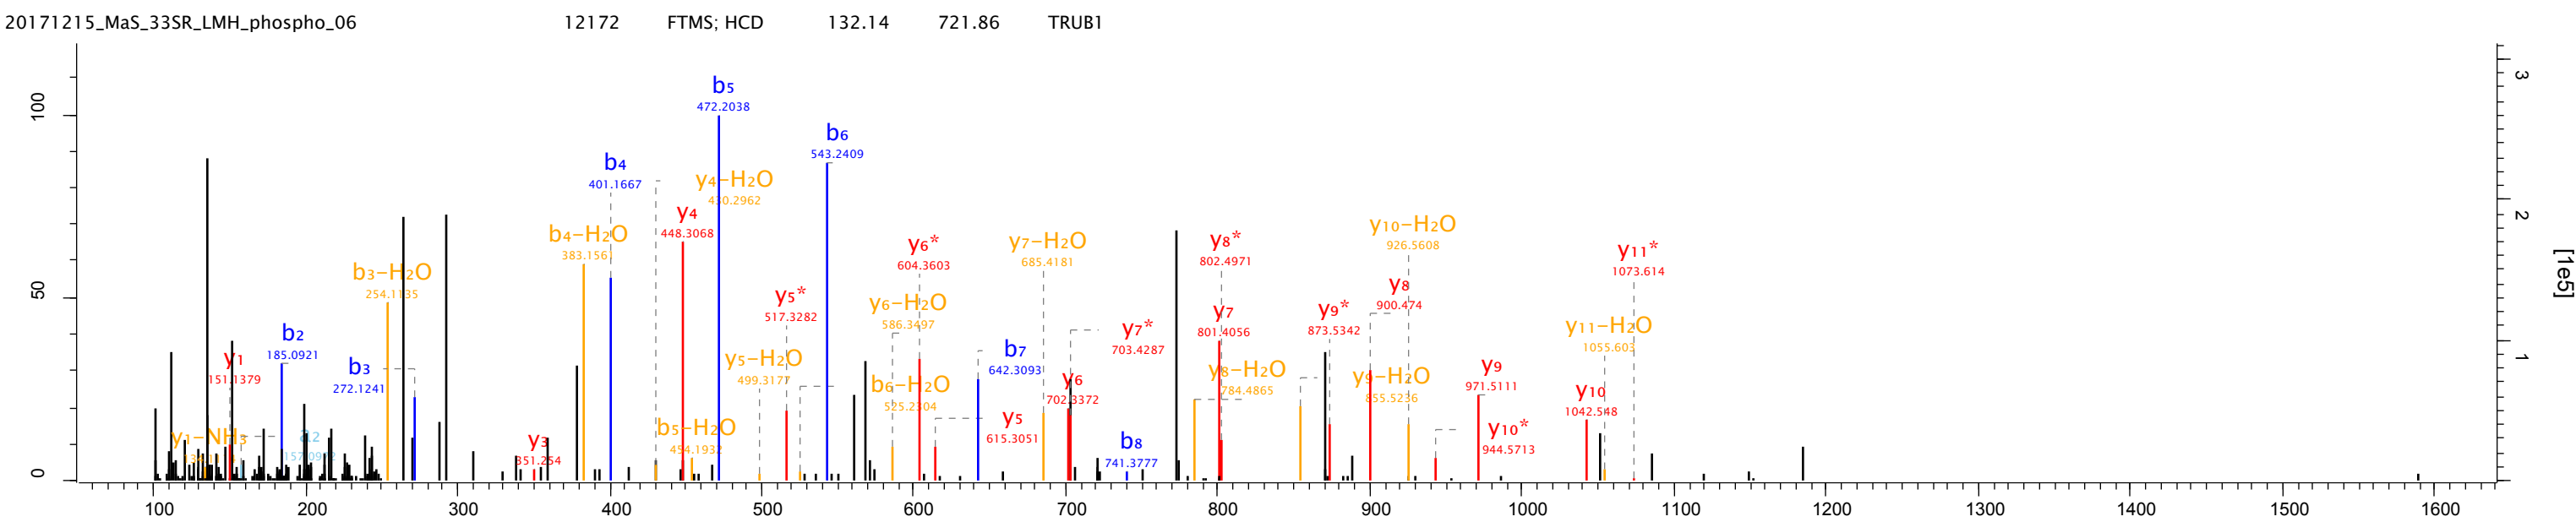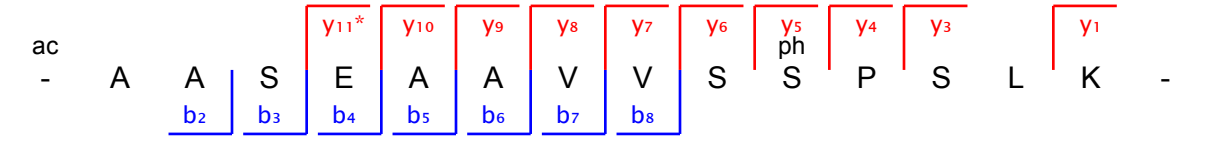



Raw file 20171215\_MaS\_33SR\_LMH\_phospho\_06 Scan 12372 Method FTMS; HCD Score 158.64 m/z 1039.13 Gene names CT45A3;CT45A1

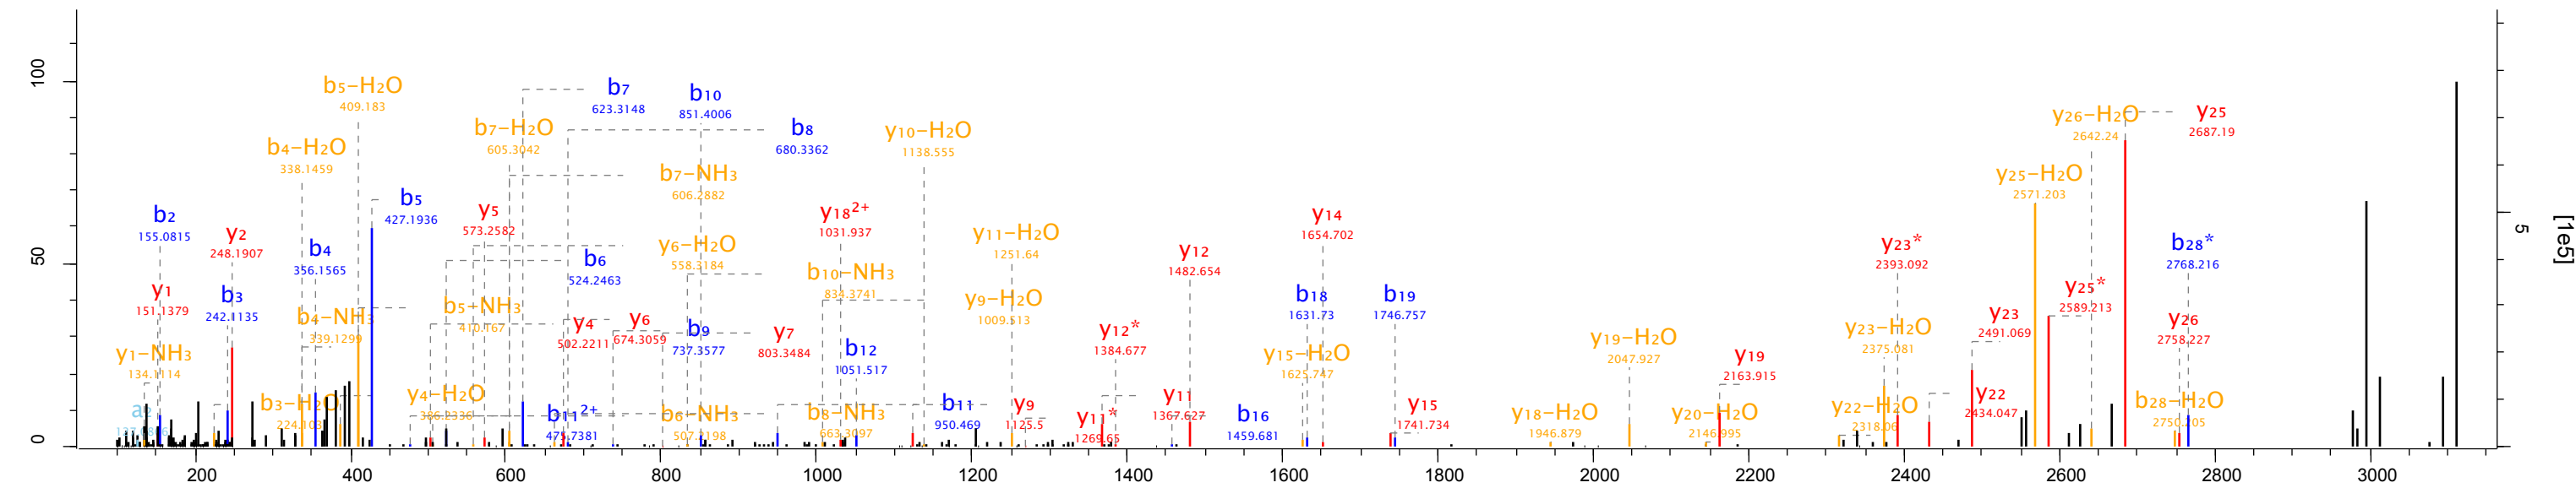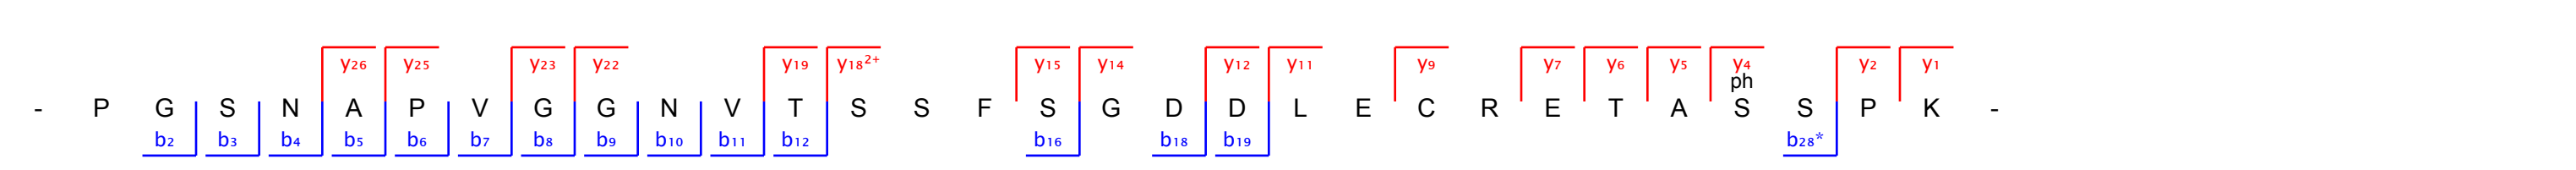

Raw file 20171215\_MaS\_33SR\_LMH\_phospho\_06 Scan 12412 Method FTMS; HCD Score 135.02 m/z 644.75 Gene names ZNF318

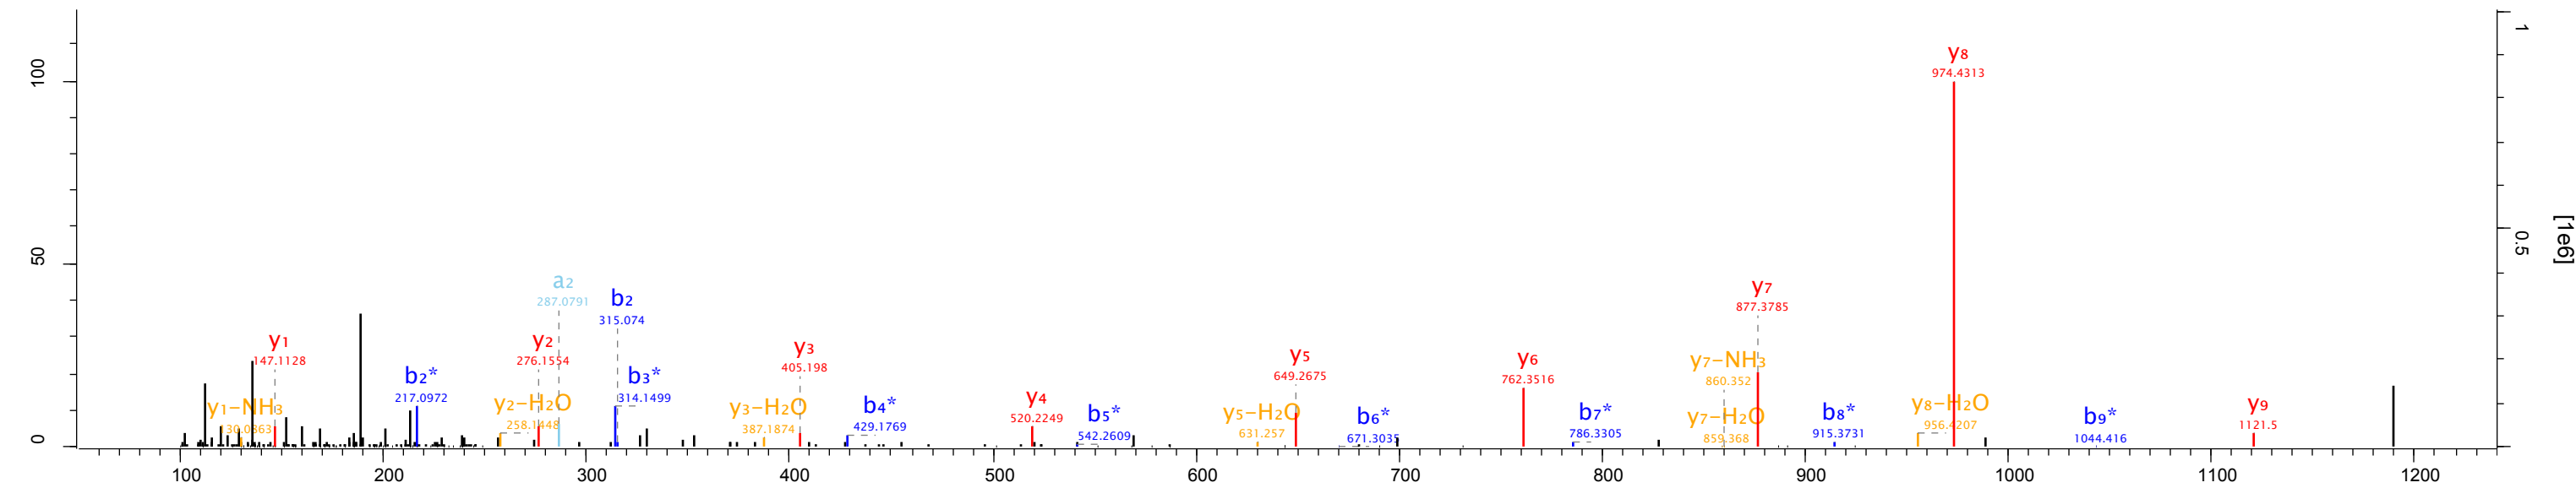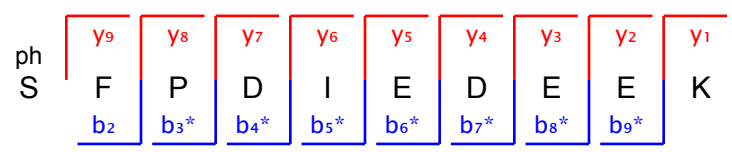

Raw file: 20171215\_MaS\_33SR\_LMH\_phospho\_06  
 Scan: 12532 Method: FTMS; HCD Score: 107.82 m/z: 702.34 Gene names: MKI67

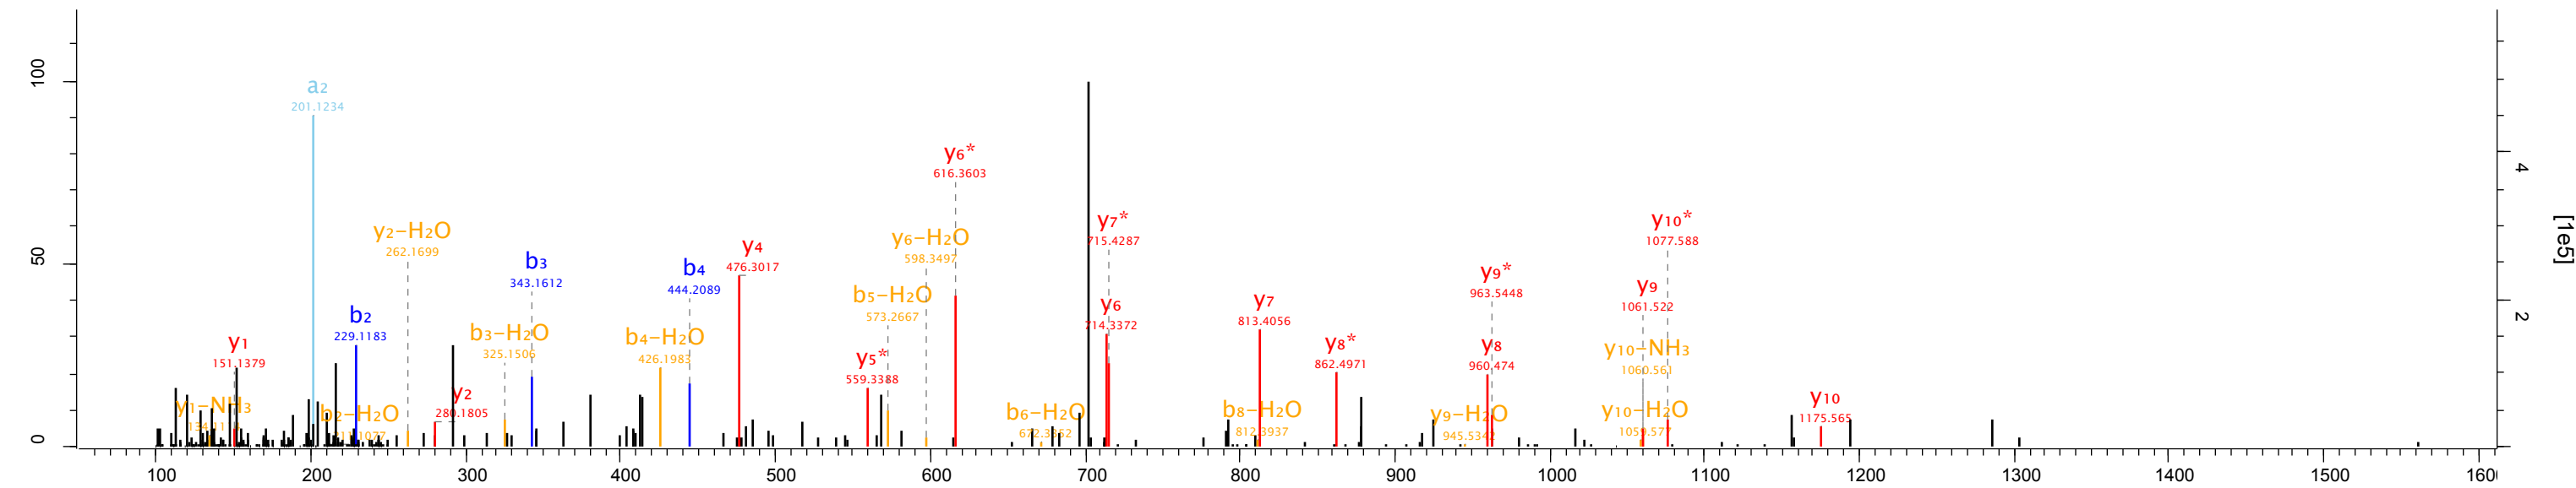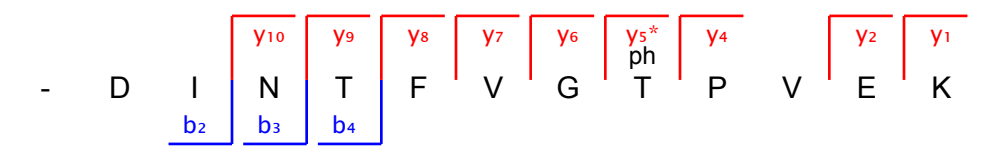



Raw file 20171215\_MaS\_33SR\_LMH\_phospho\_06 Scan 12692 Method FTMS; HCD Score 74.33 m/z 955.15 Gene names RPLP2

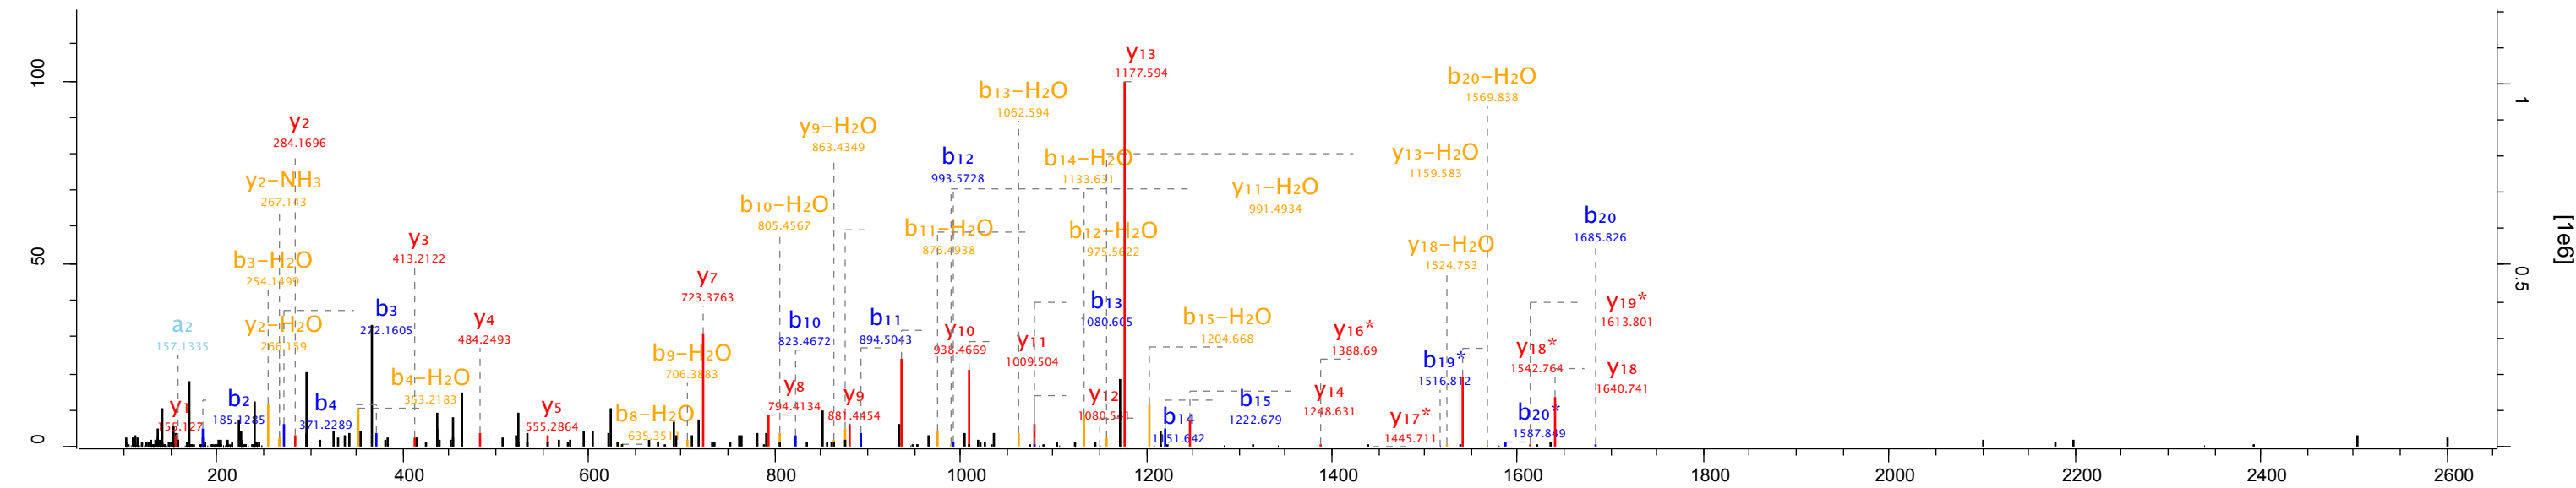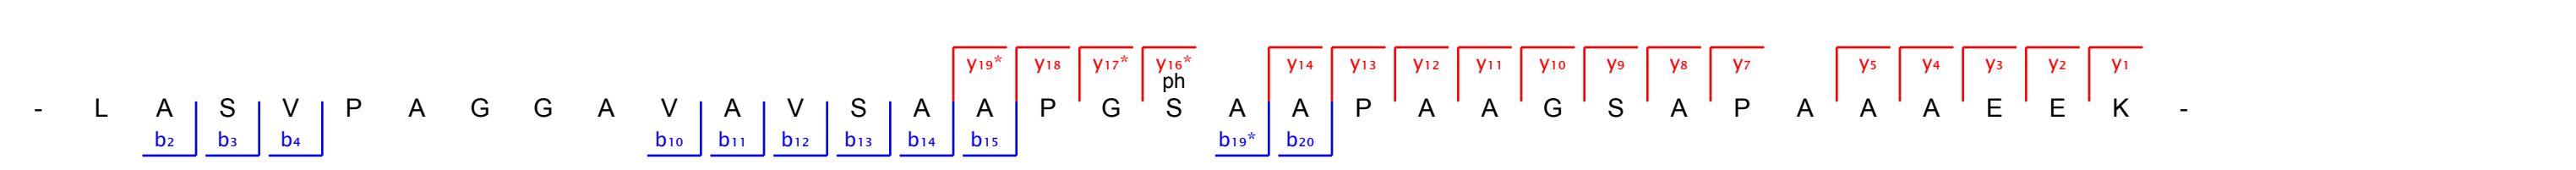

Raw file 20171215\_MaS\_33SR\_LMH\_phospho\_06 Scan 13512 Method FTMS; HCD Score 62.47 m/z 529.23 Gene names KIDINS220

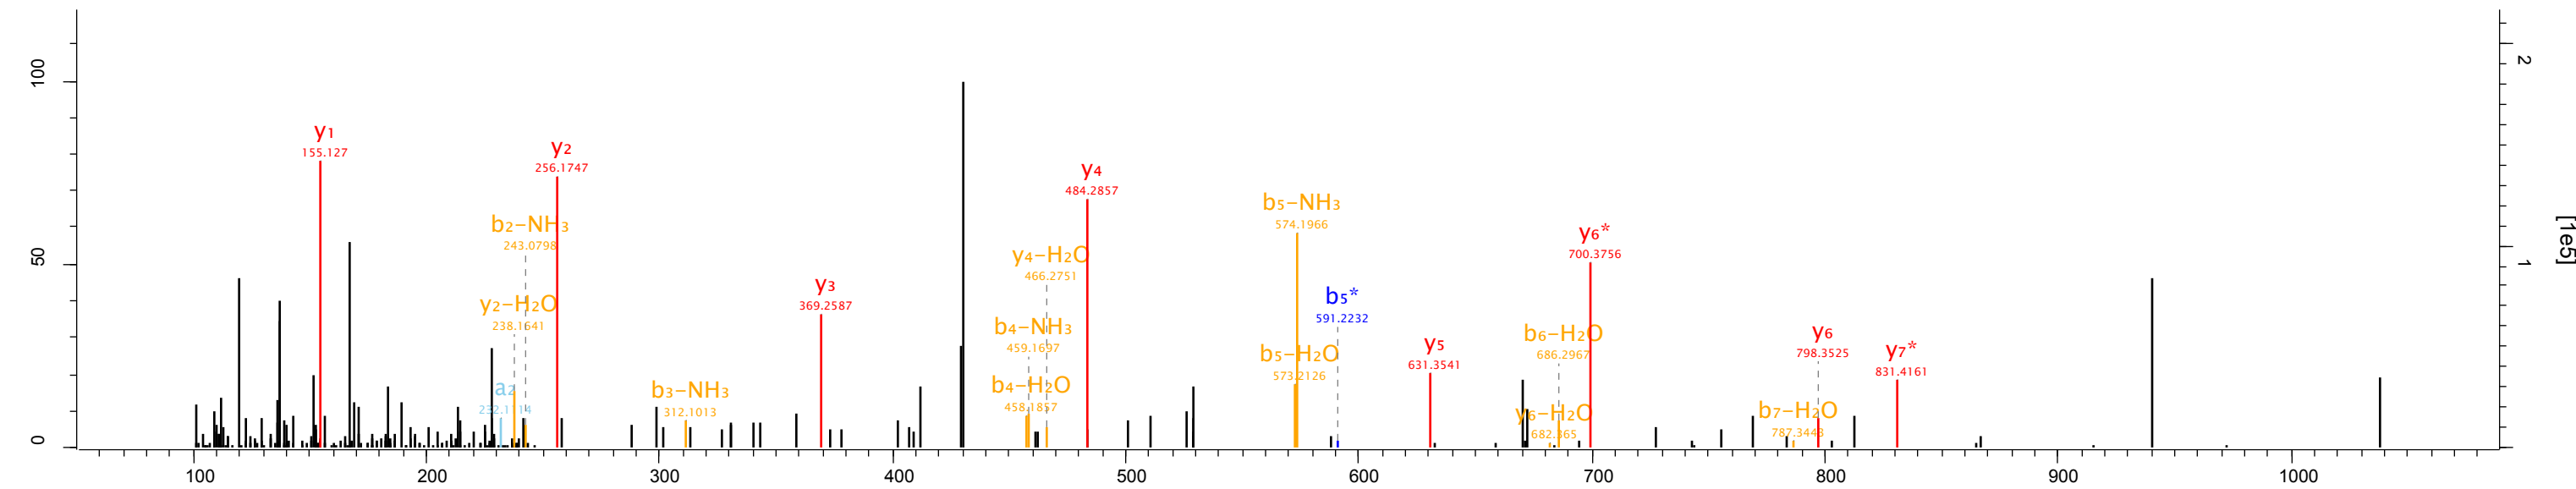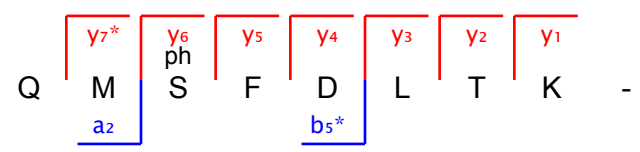

Raw file 20171215\_MaS\_33SR\_LMH\_phospho\_06 Scan 14162 Method FTMS; HCD Score 85.2 m/z 888.9 Gene names MISP

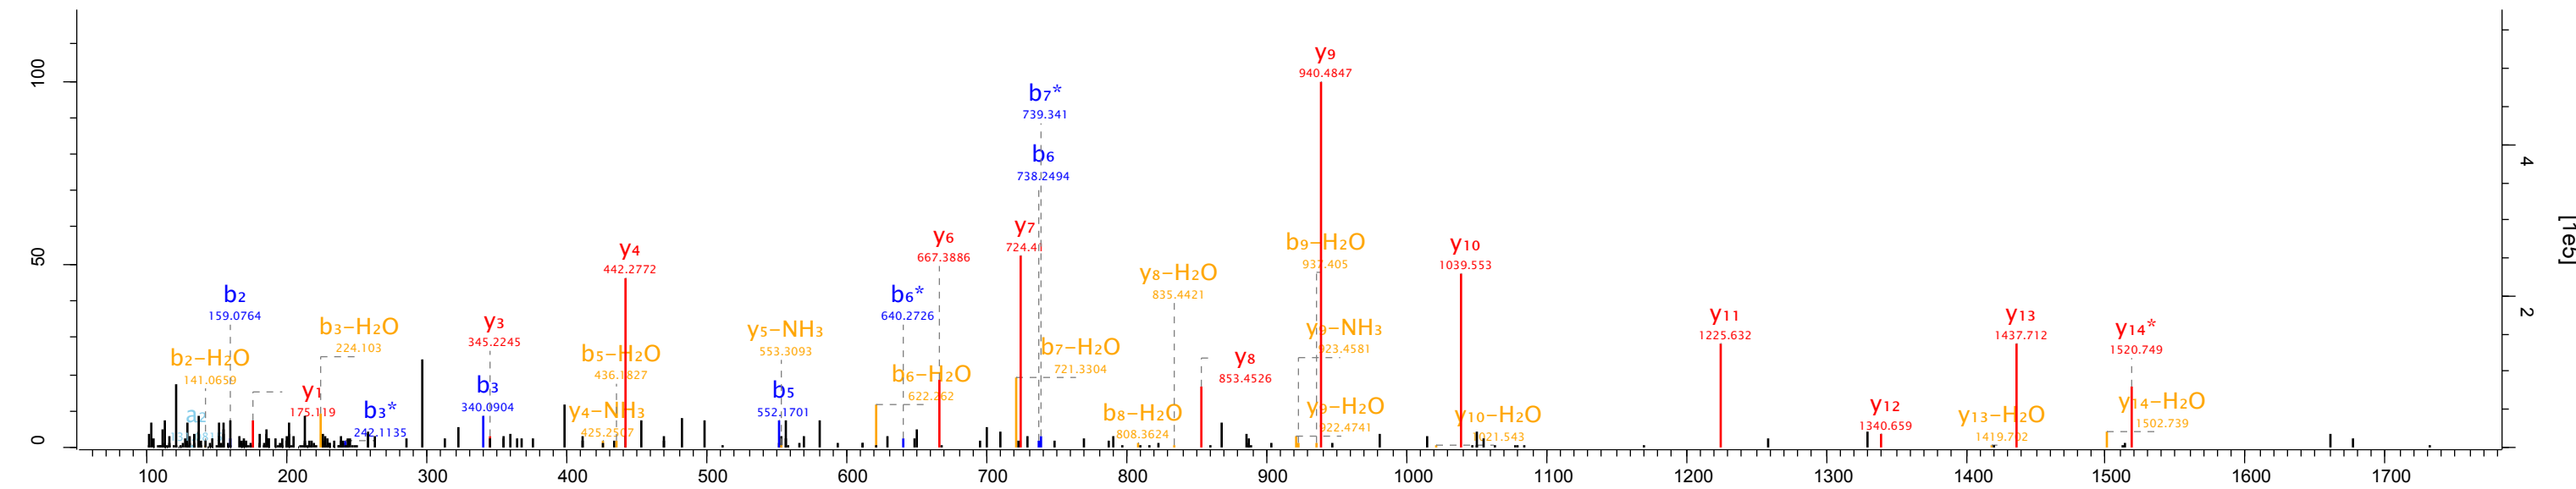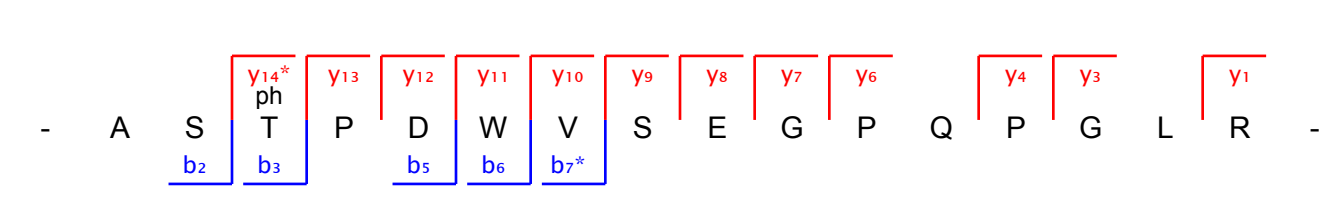

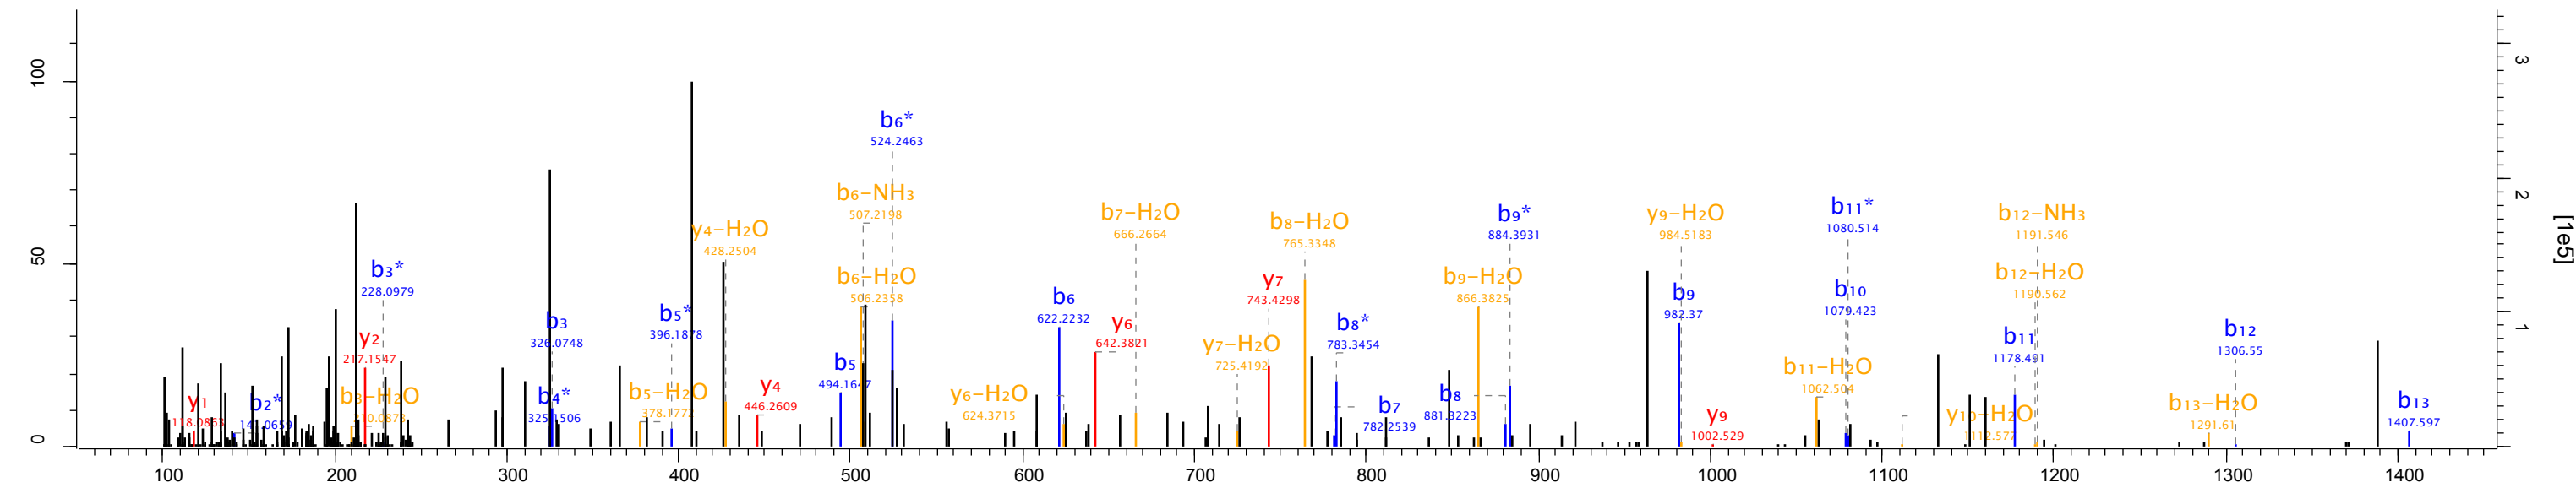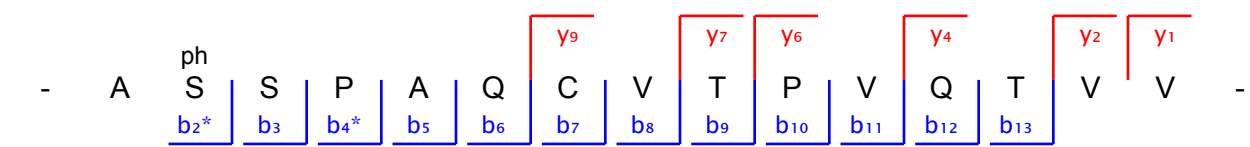



Raw file 20171215\_MaS\_33SR\_LMH\_phospho\_06 Scan 14362 Method FTMS; HCD Score 142.71 m/z 561.27 Gene names THRAP3

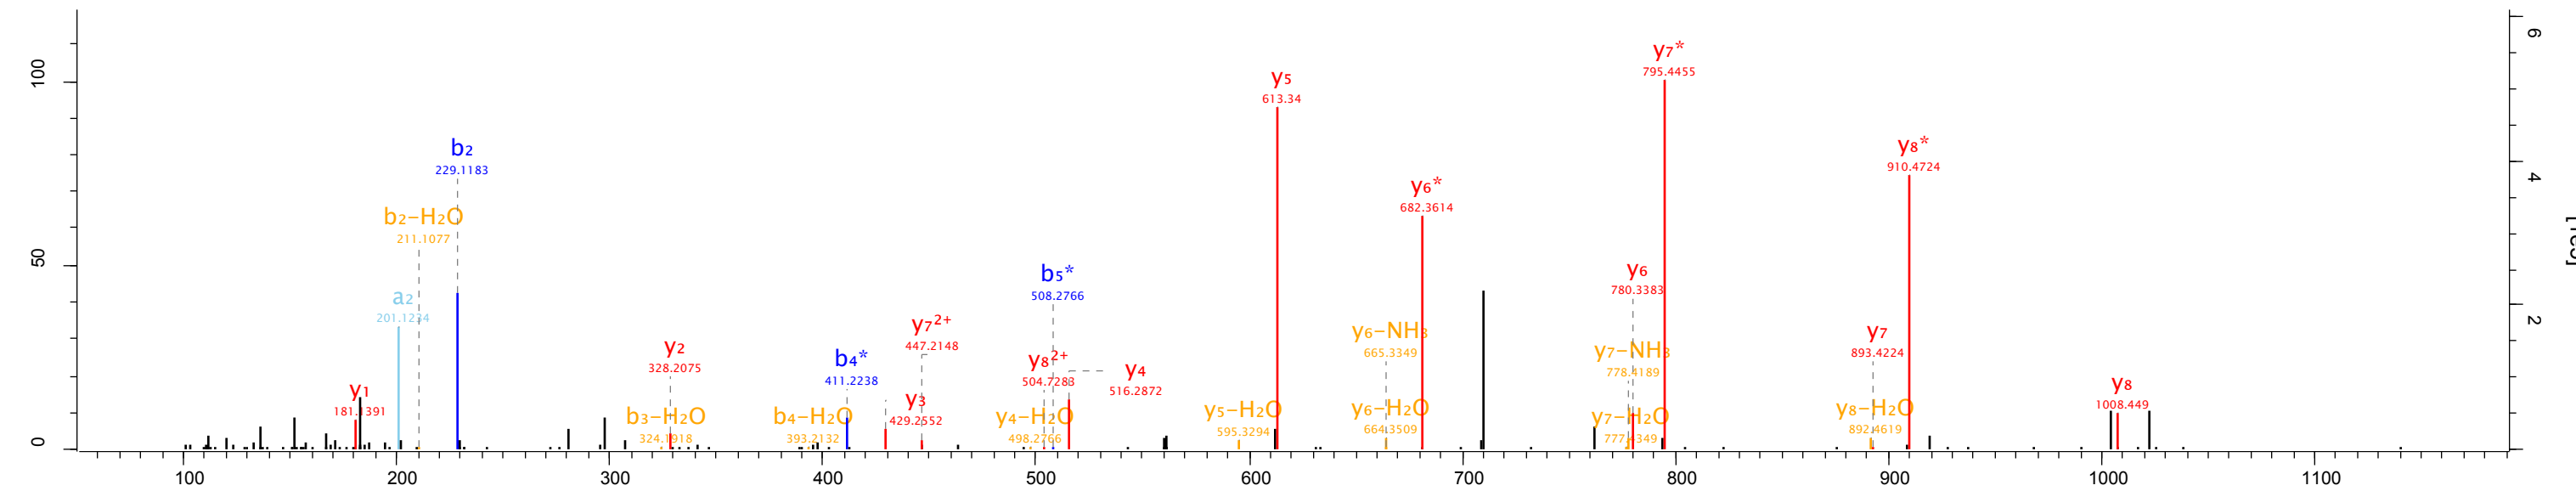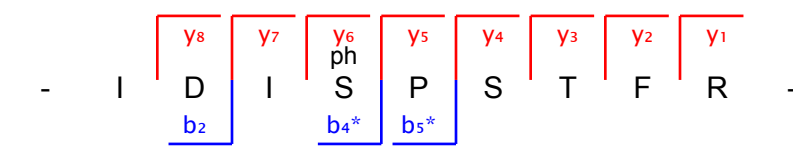

20171215\_MaS\_33SR\_LMH\_phospho\_06 14662 FTMS; HCD 166.59 992.36 FADD

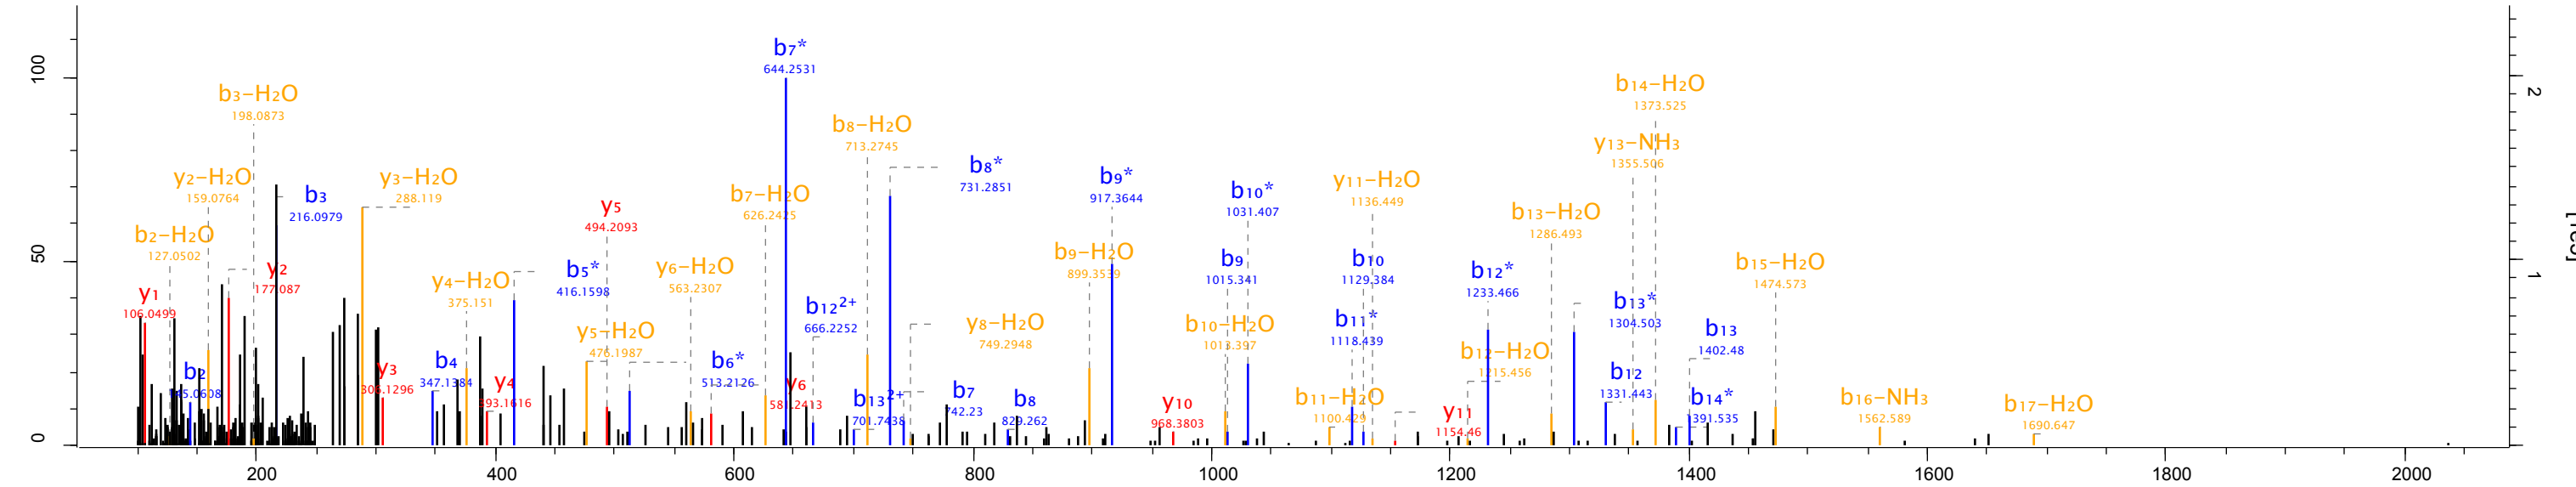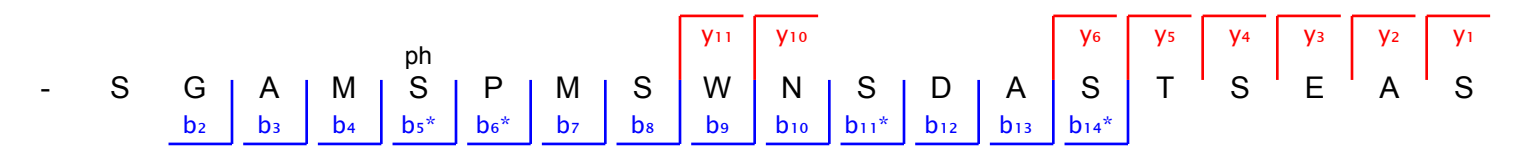

Raw file 20171215\_MaS\_33SR\_LMH\_phospho\_06 Scan 14682 Method FTMS; HCD Score 149 m/z 708.86 Gene names MKI67

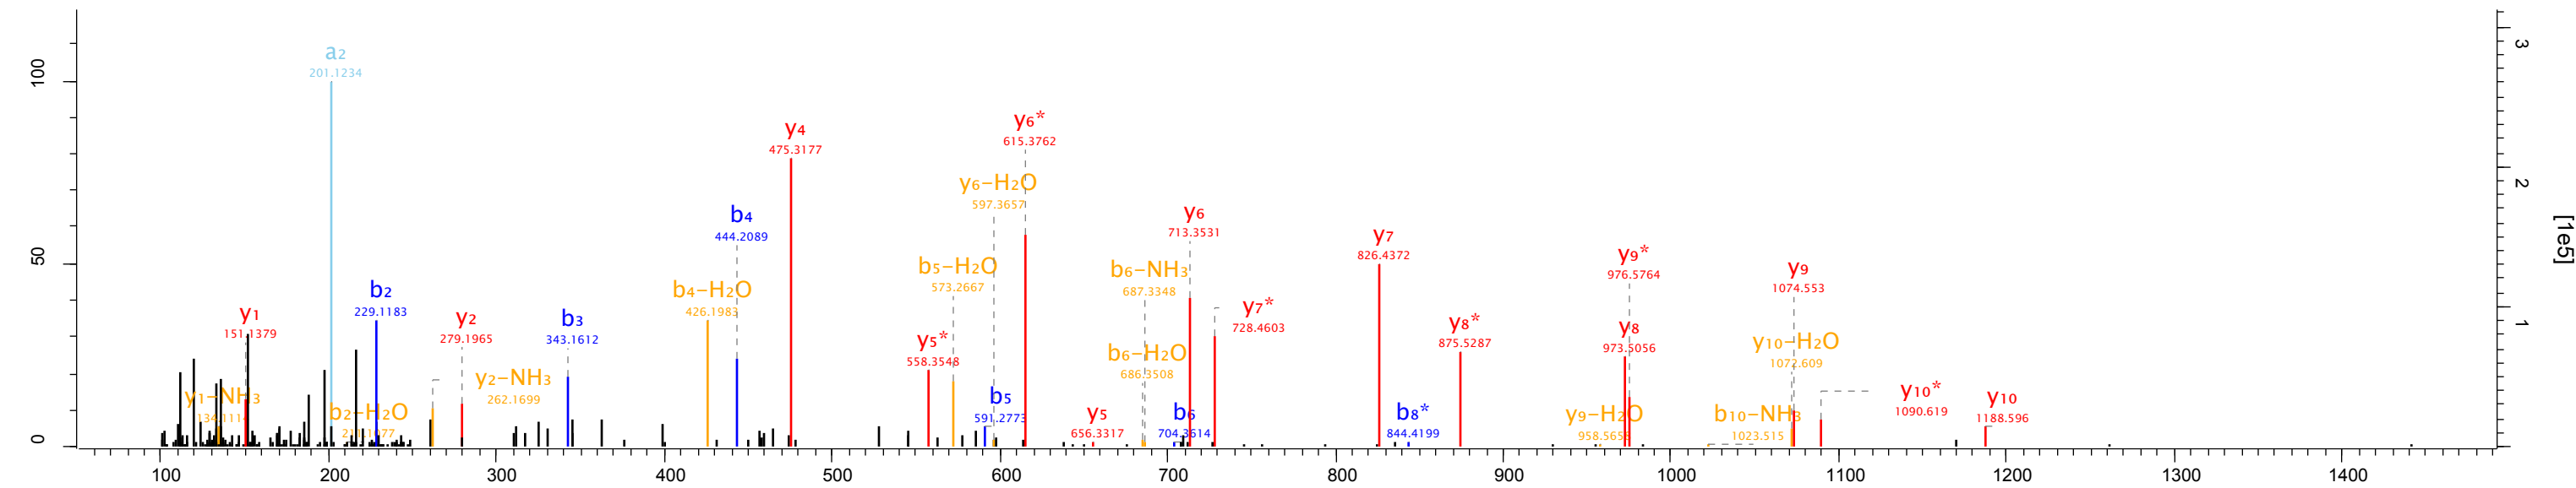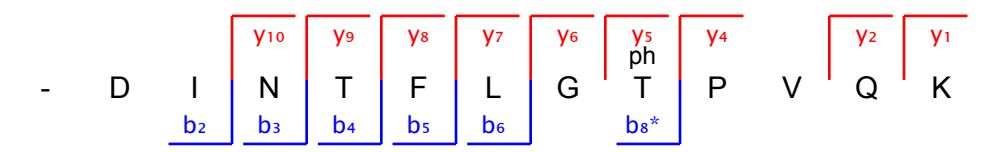

Raw file 20171215\_MaS\_33SR\_LMH\_phospho\_06 Scan 16302 Method FTMS; HCD Score 105.65 m/z 581.8 Gene names SKIV2L

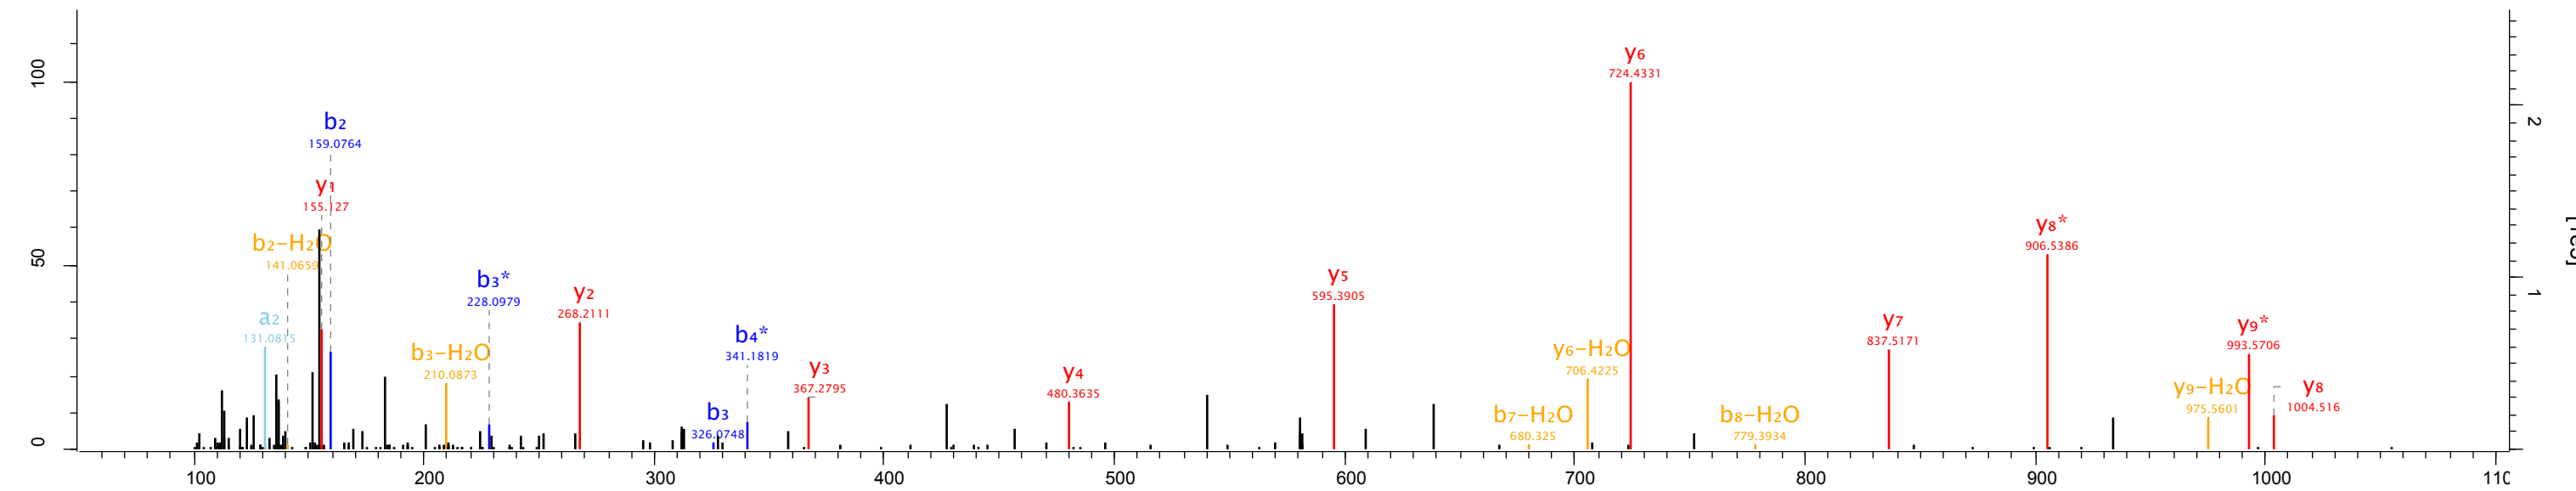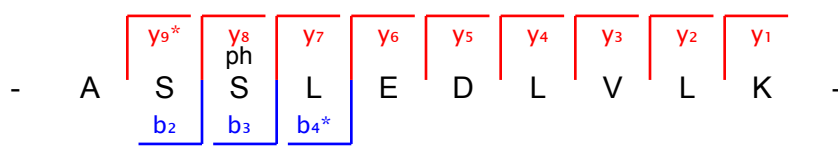

Raw file: 20171215\_MaS\_33SR\_LMH\_phospho\_06  
 Scan: 17832 Method: FTMS; HCD Score: 55.09 m/z: 789.32 Gene names: RAB11FIP1;RAB11FIP2

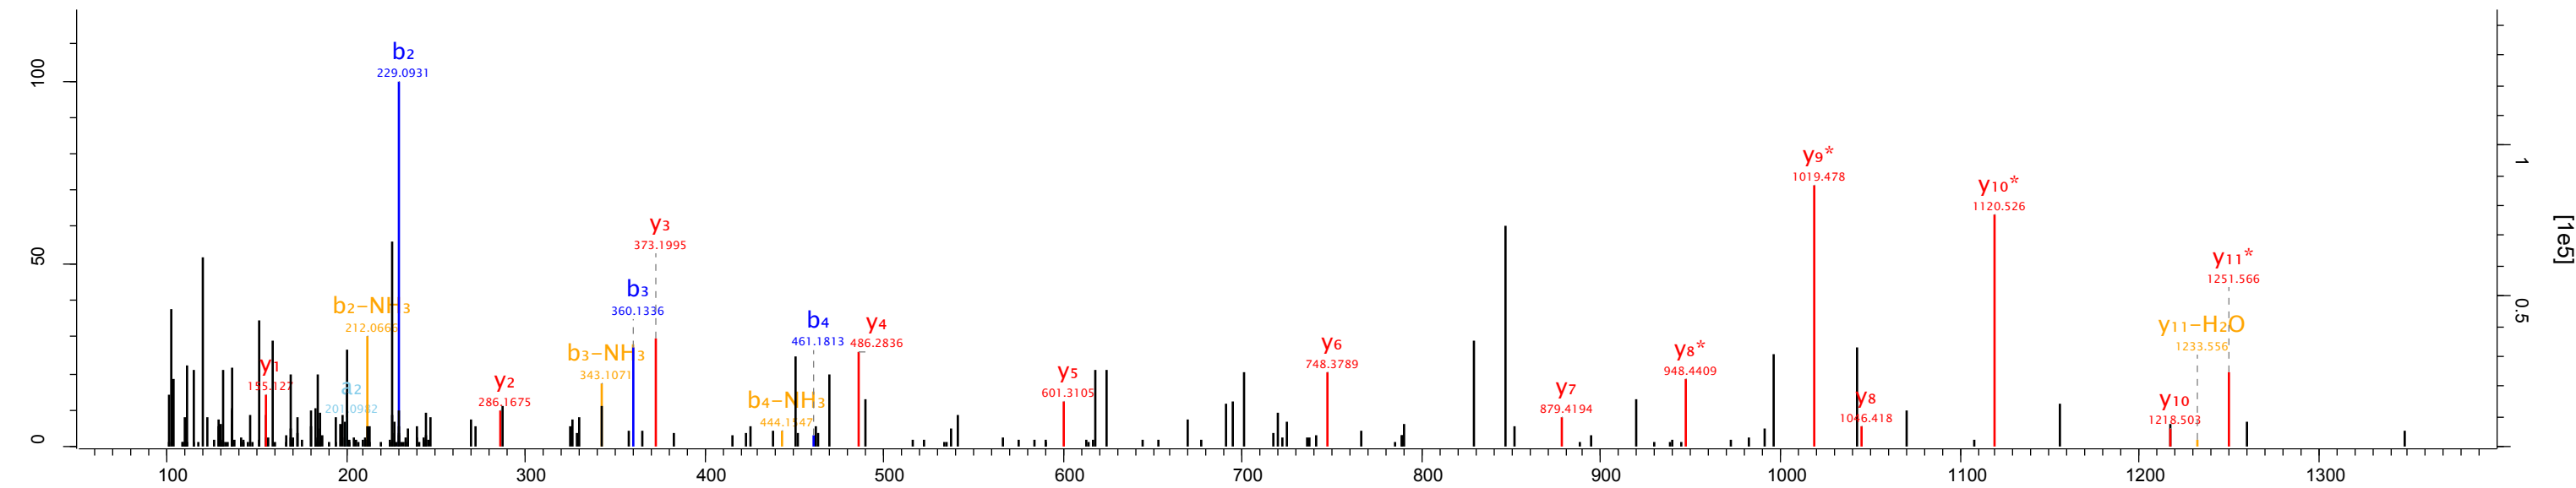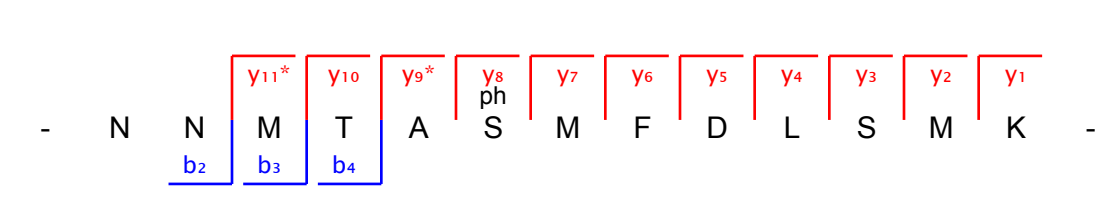

Raw file: 20171215\_MaS\_33SR\_LMH\_phospho\_06  
 Scan: 18332 Method: FTMS; HCD Score: 170.09 m/z: 812.37 Gene names: TJAP1

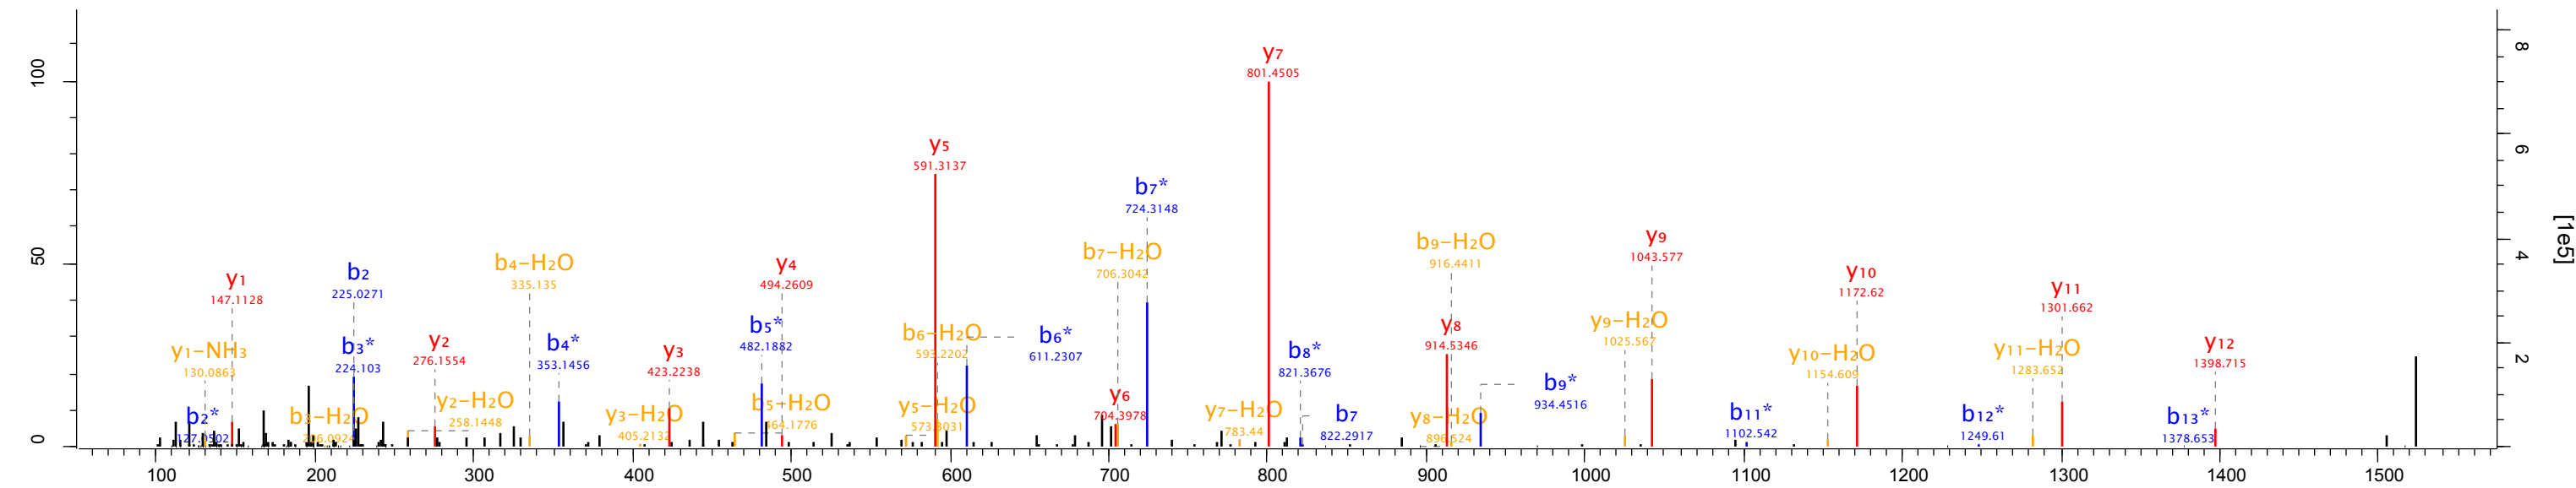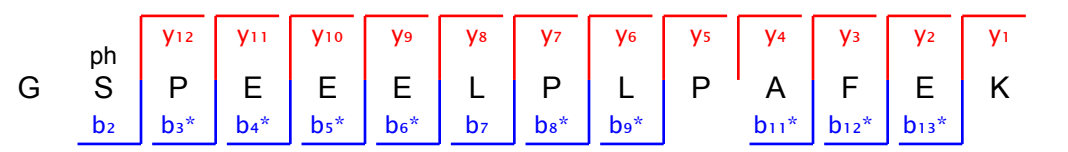

Raw file 20171215\_MaS\_33SR\_LMH\_phospho\_06 Scan 19152 Method FTMS; HCD Score 132.67 m/z 848.92 Gene names TK1

20171215\_MaS\_33SR\_LMH\_phospho\_06

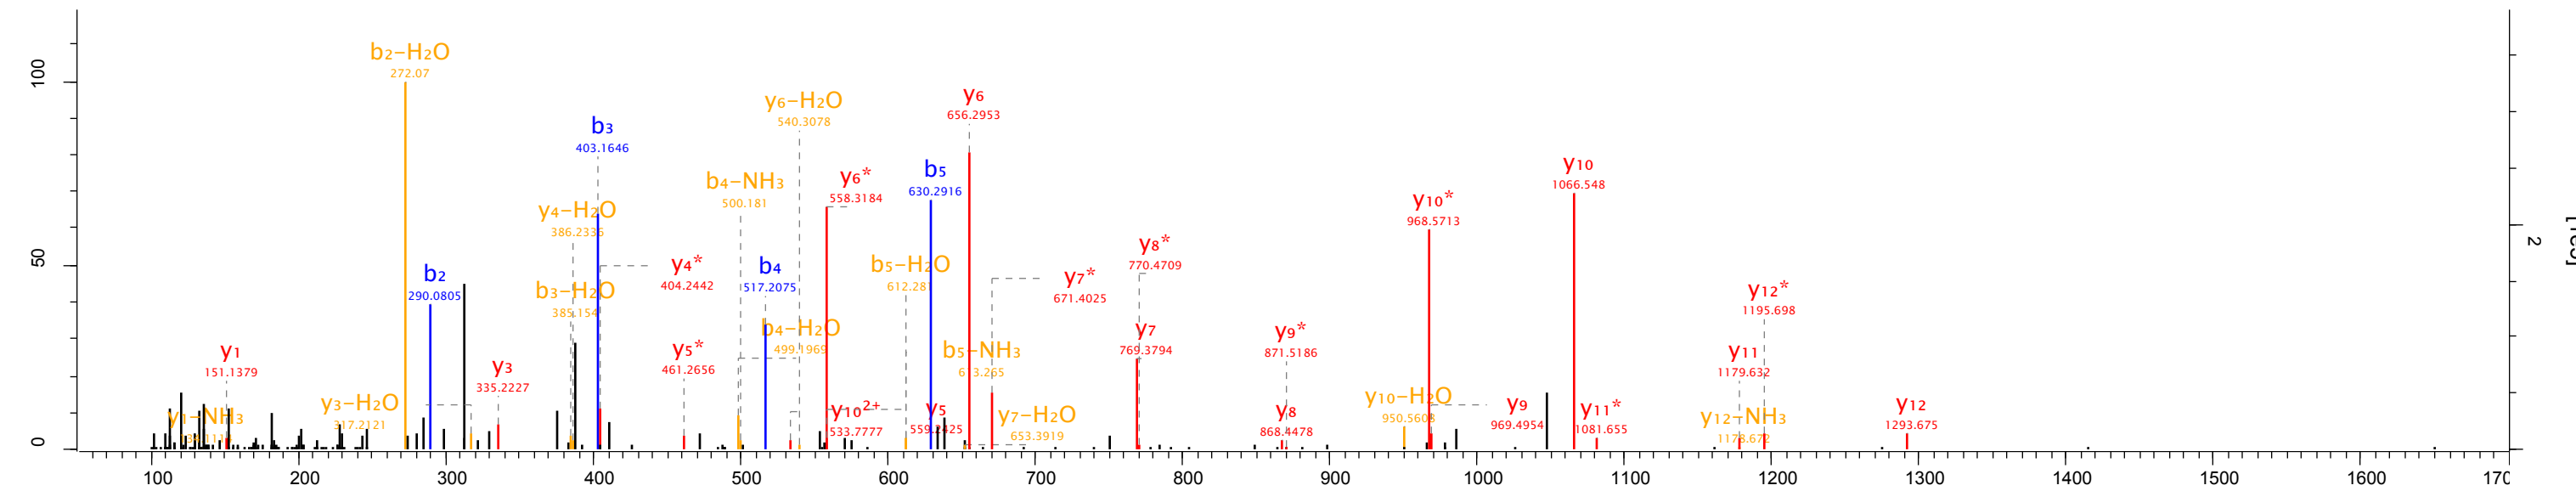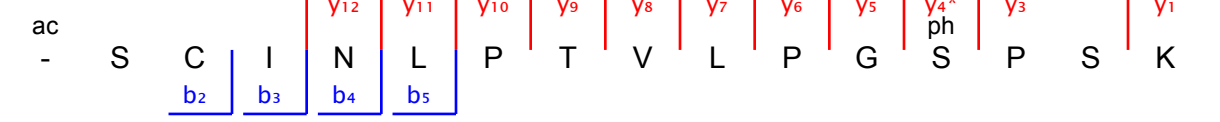

[1e5]

Raw file 20171215\_MaS\_33SR\_LMH\_phospho\_06 Scan 2332 Method FTMS; HCD Score 73.89 m/z 352.84 Gene names NOLC1

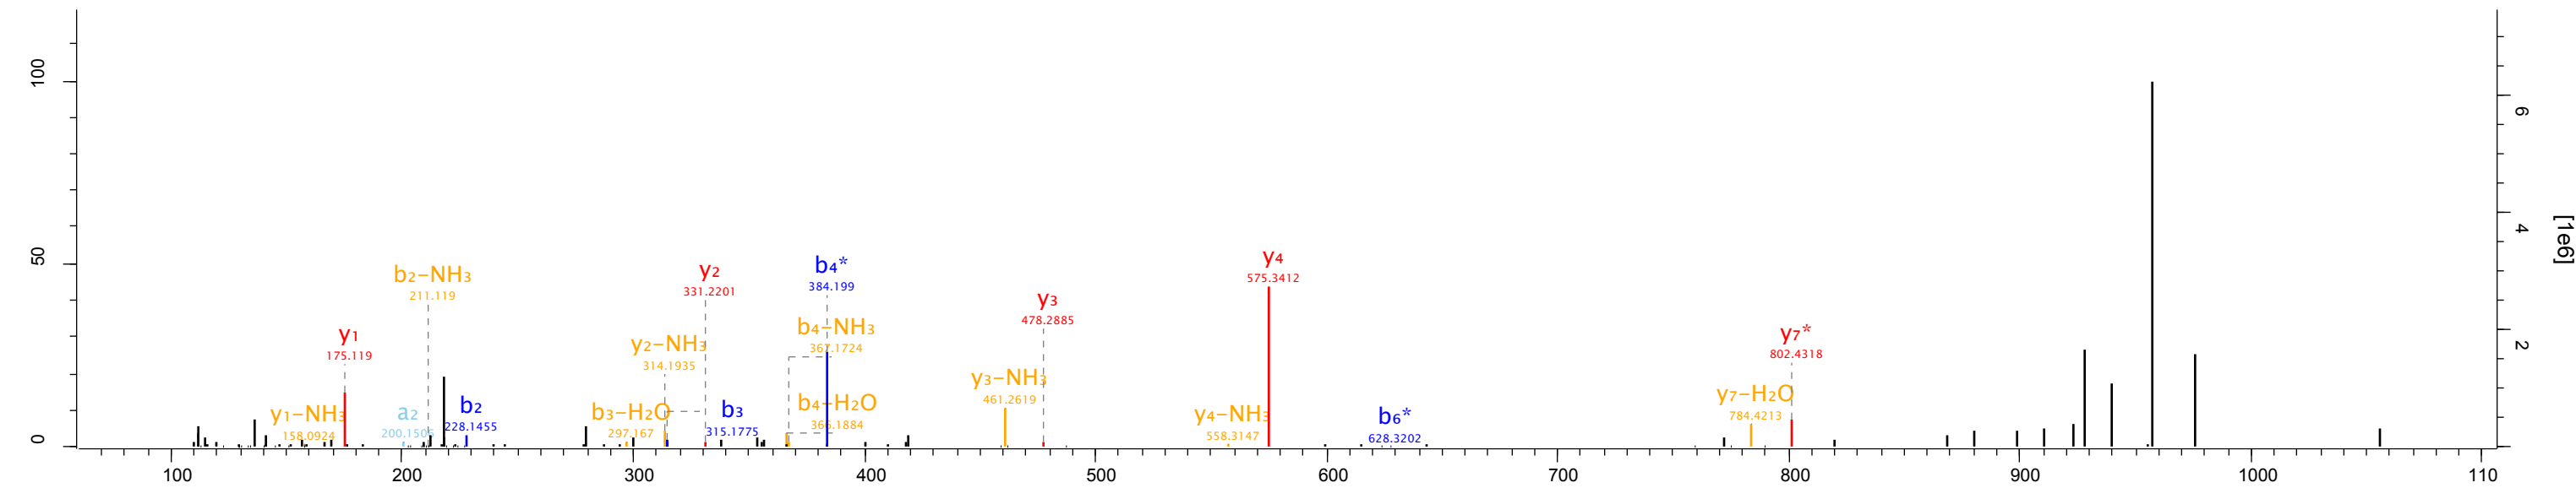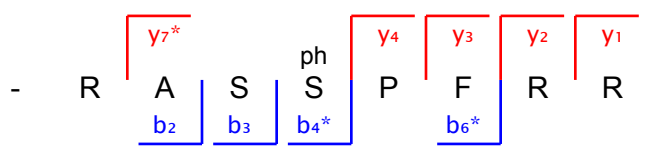



Raw file 20171215\_MaS\_33SR\_LMH\_phospho\_06 Scan 2882 Method FTMS; HCD Score 171.26 m/z 607.26 Gene names EIF4G1

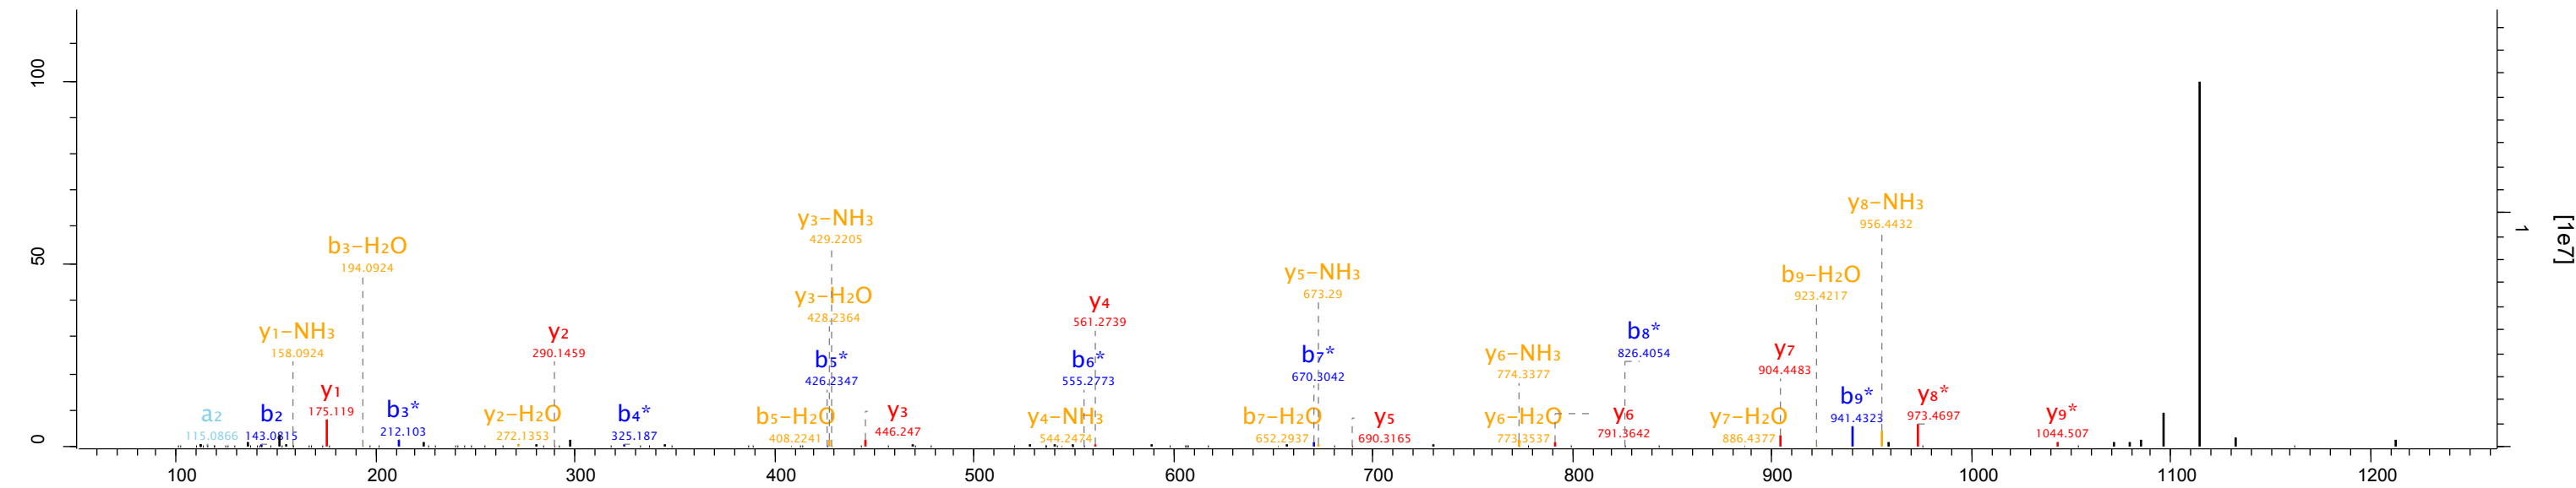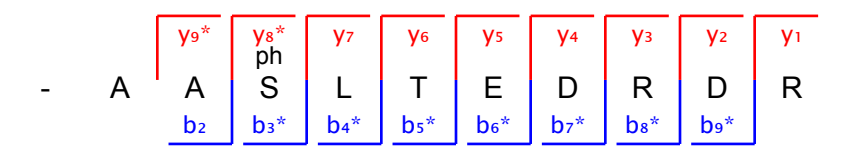

Raw file 20171215\_MaS\_33SR\_LMH\_phospho\_06 Scan 3492 Method FTMS; HCD Score 96.14 m/z 397.87 Gene names ZFP36L1

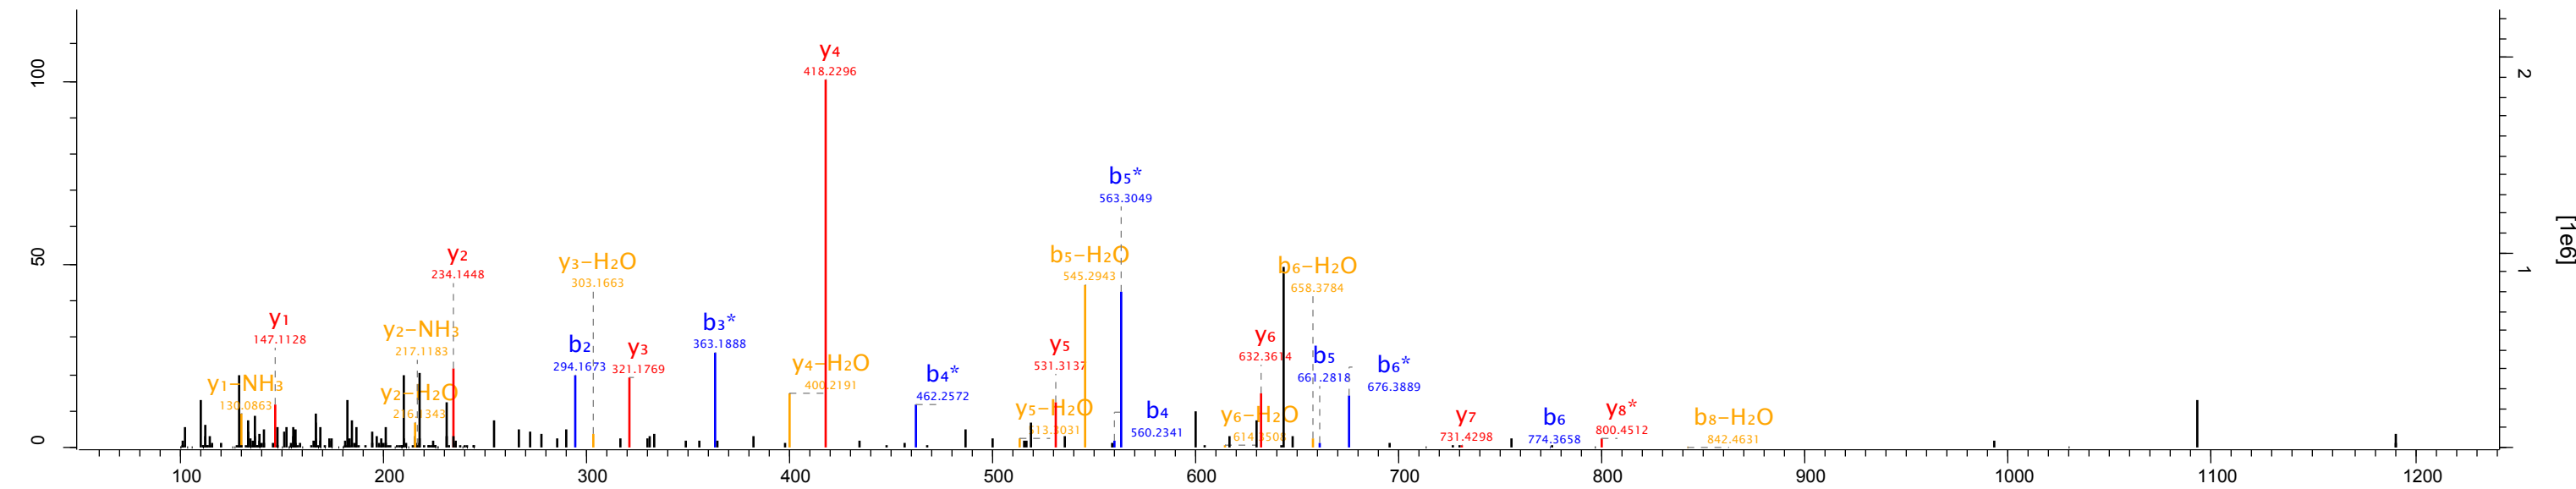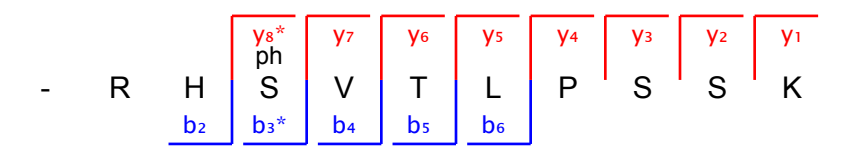

Raw file 20171215\_MaS\_33SR\_LMH\_phospho\_06 Scan 4202 Method FTMS; HCD Score 94.8 m/z 775.01 Gene names TCEAL4

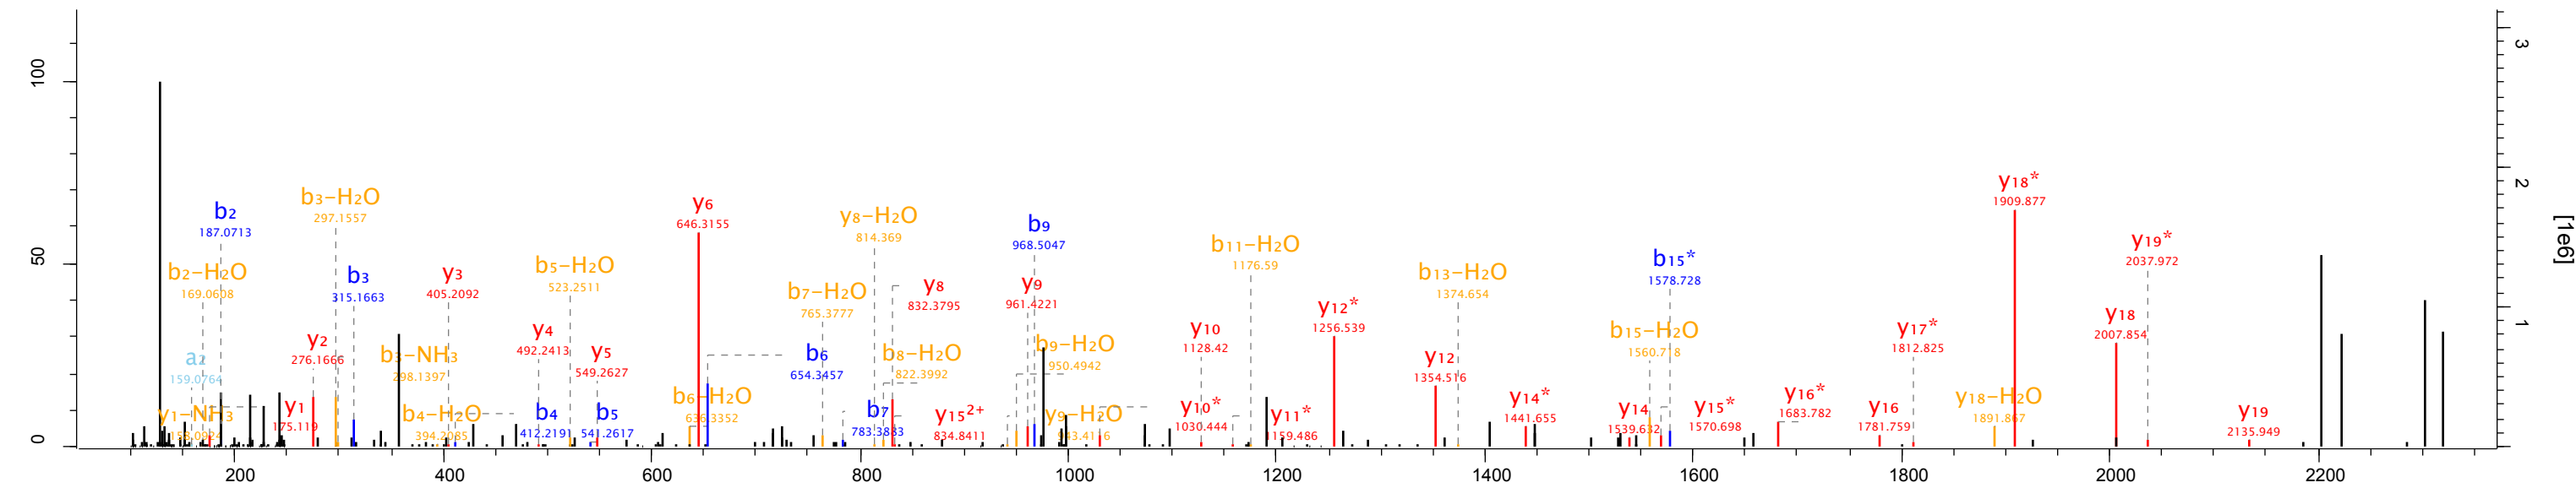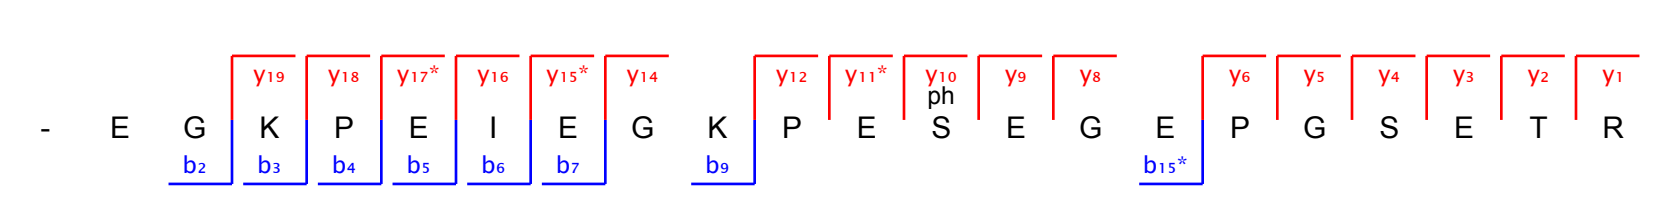

Raw file 20171215\_MaS\_33SR\_LMH\_phospho\_06 Scan 4252 Method FTMS; HCD Score 100.92 m/z 478.23 Gene names PHLDB1

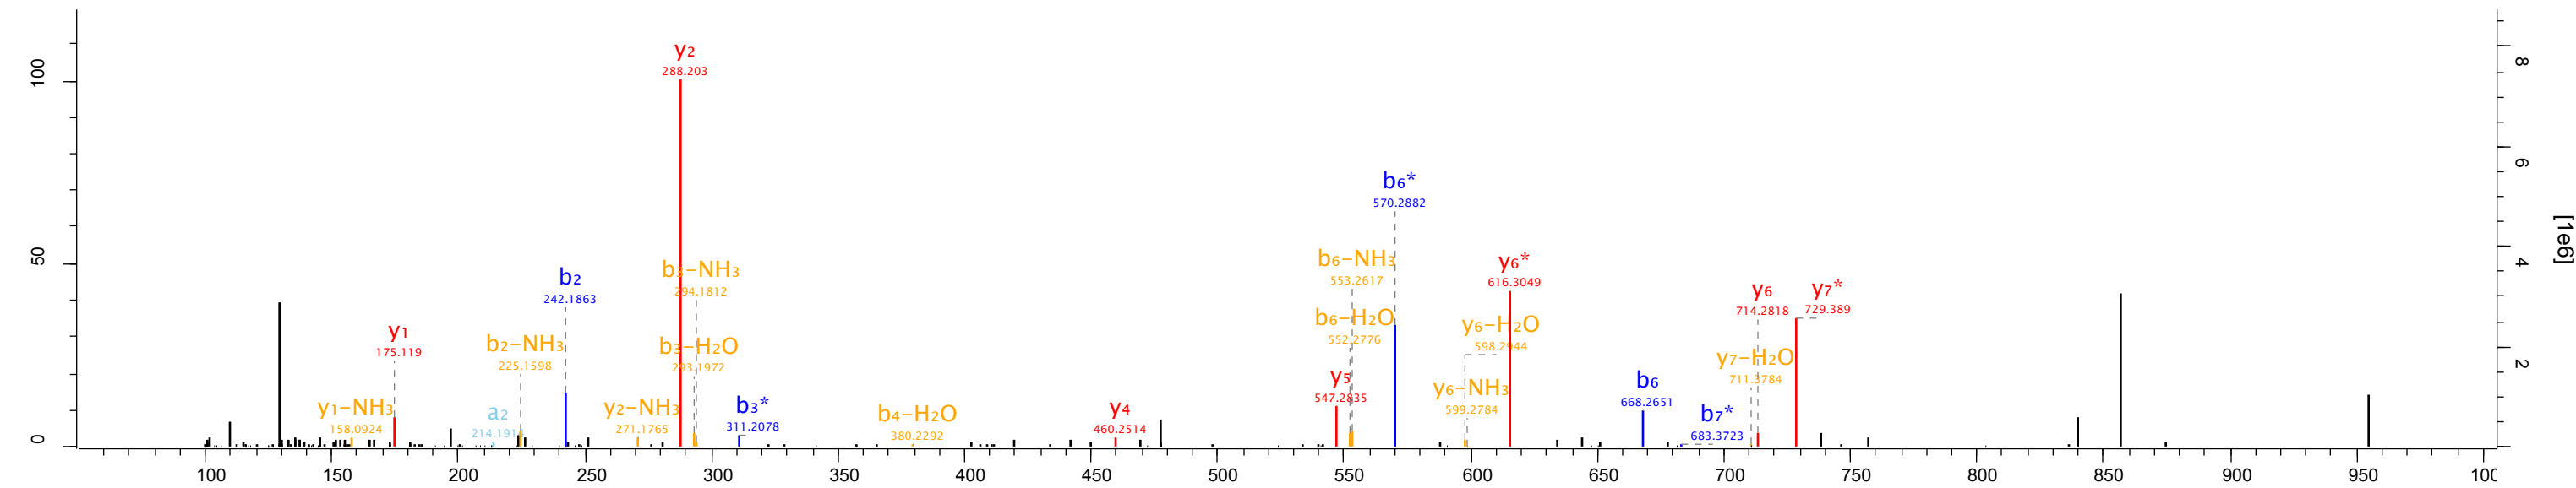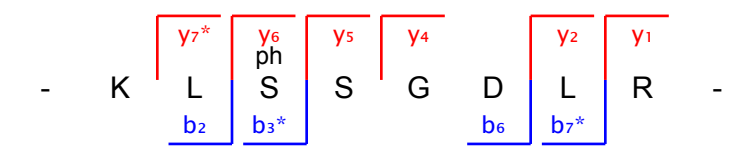

Raw file 20171215\_MaS\_33SR\_LMH\_phospho\_06 Scan 4532 Method FTMS; HCD Score 58.59 m/z 489.26 Gene names LIMA1;TRMT1

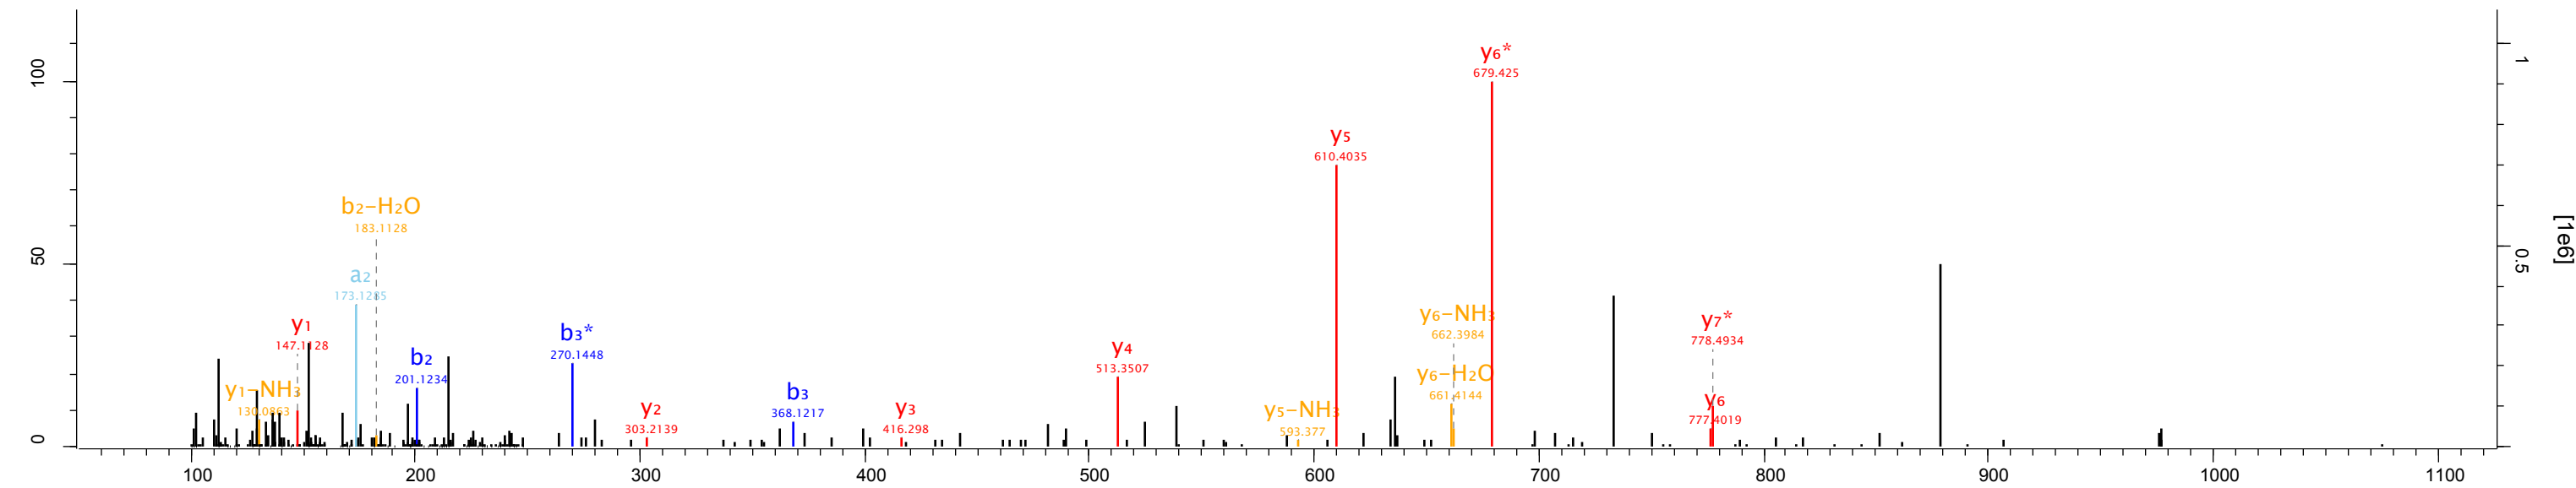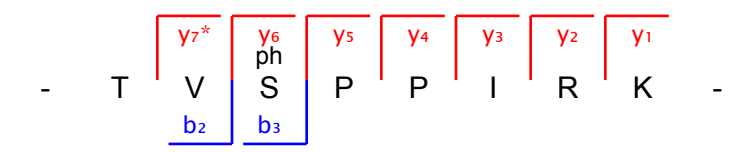

Raw file 20171215\_MaS\_33SR\_LMH\_phospho\_06 Scan 4562 Method FTMS; HCD Score 102.43 m/z 674.28 Gene names GNL1

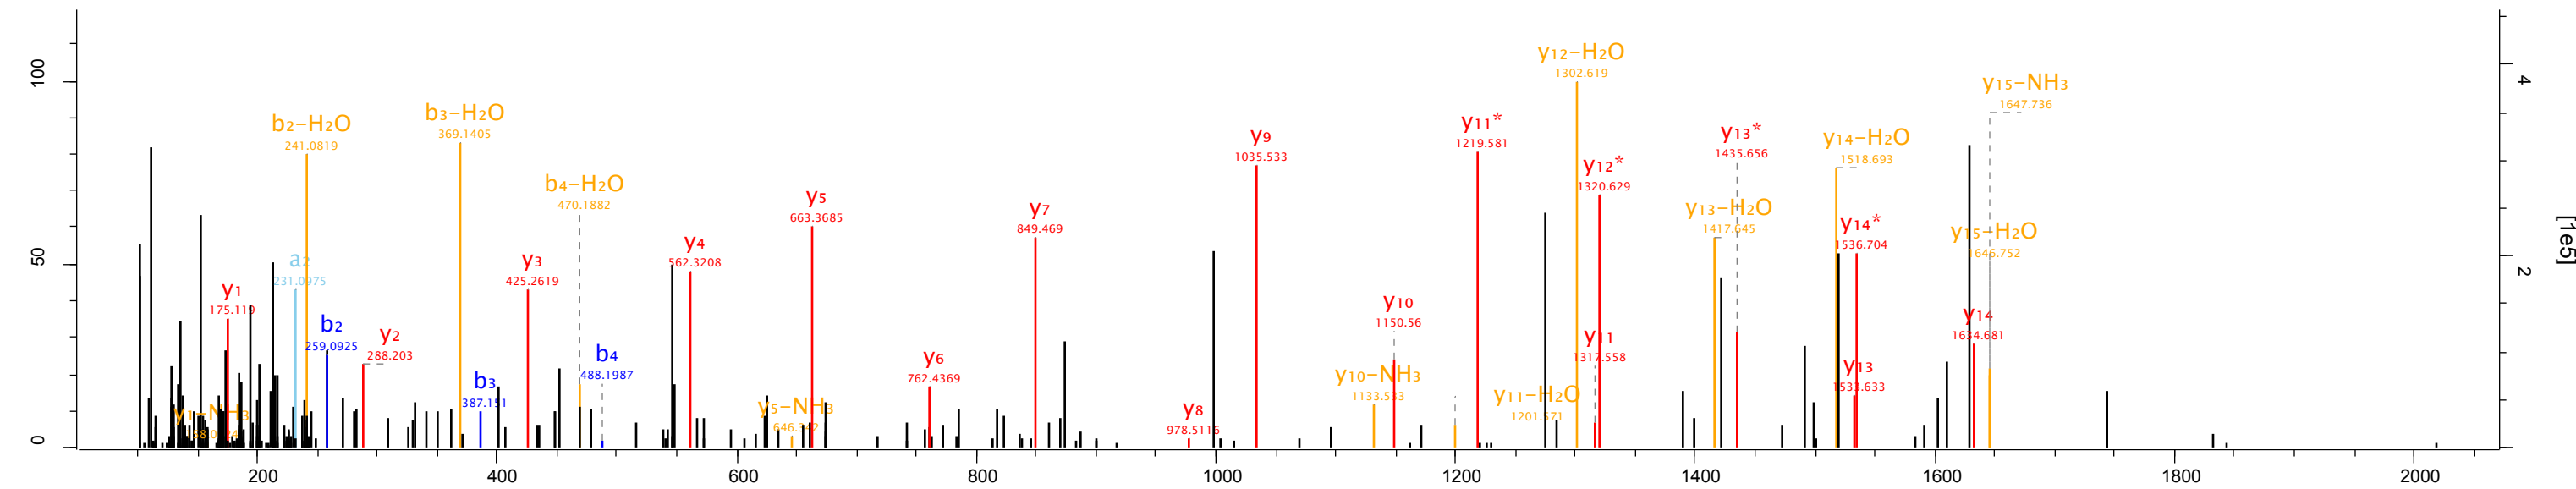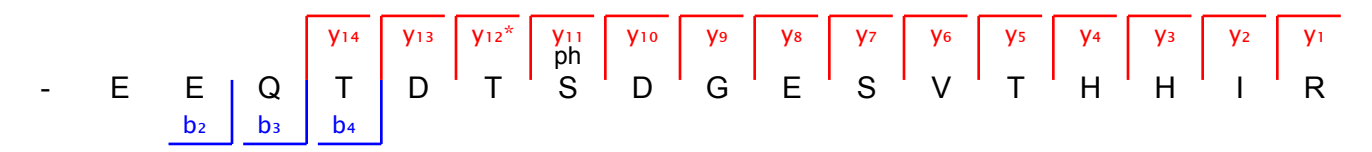

Raw file: 20171215\_MaS\_33SR\_LMH\_phospho\_06  
 Scan: 4762 Method: FTMS; HCD Score: 82.7 m/z: 388.54 Gene names: MARK2

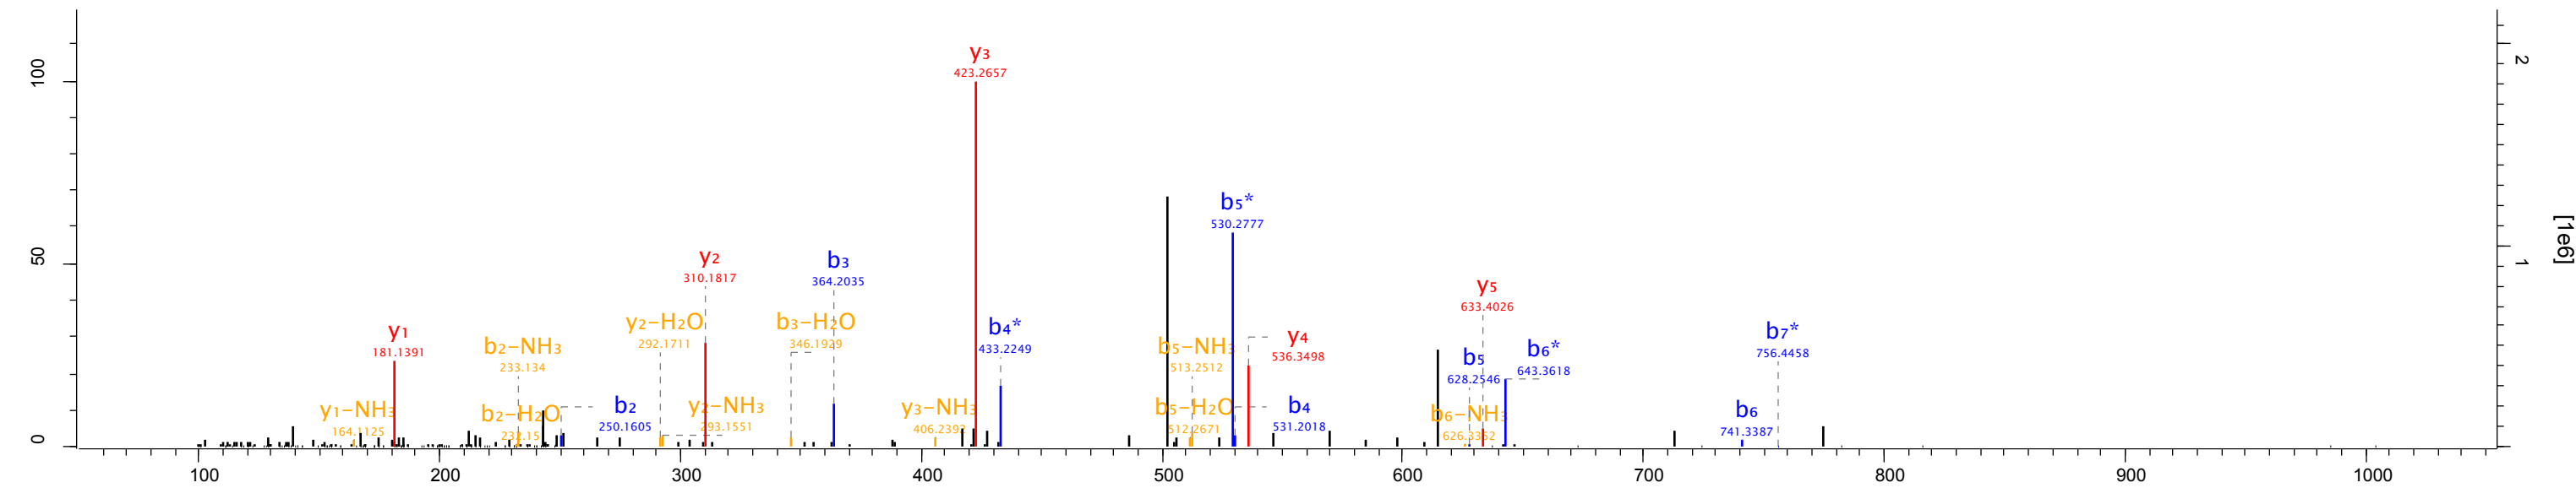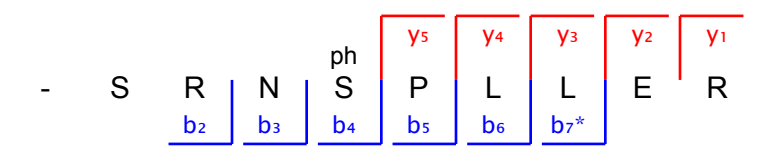

Raw file 20171215\_MaS\_33SR\_LMH\_phospho\_06 Scan 4772 Method FTMS; HCD Score 89.48 m/z 708.81 Gene names ADNP

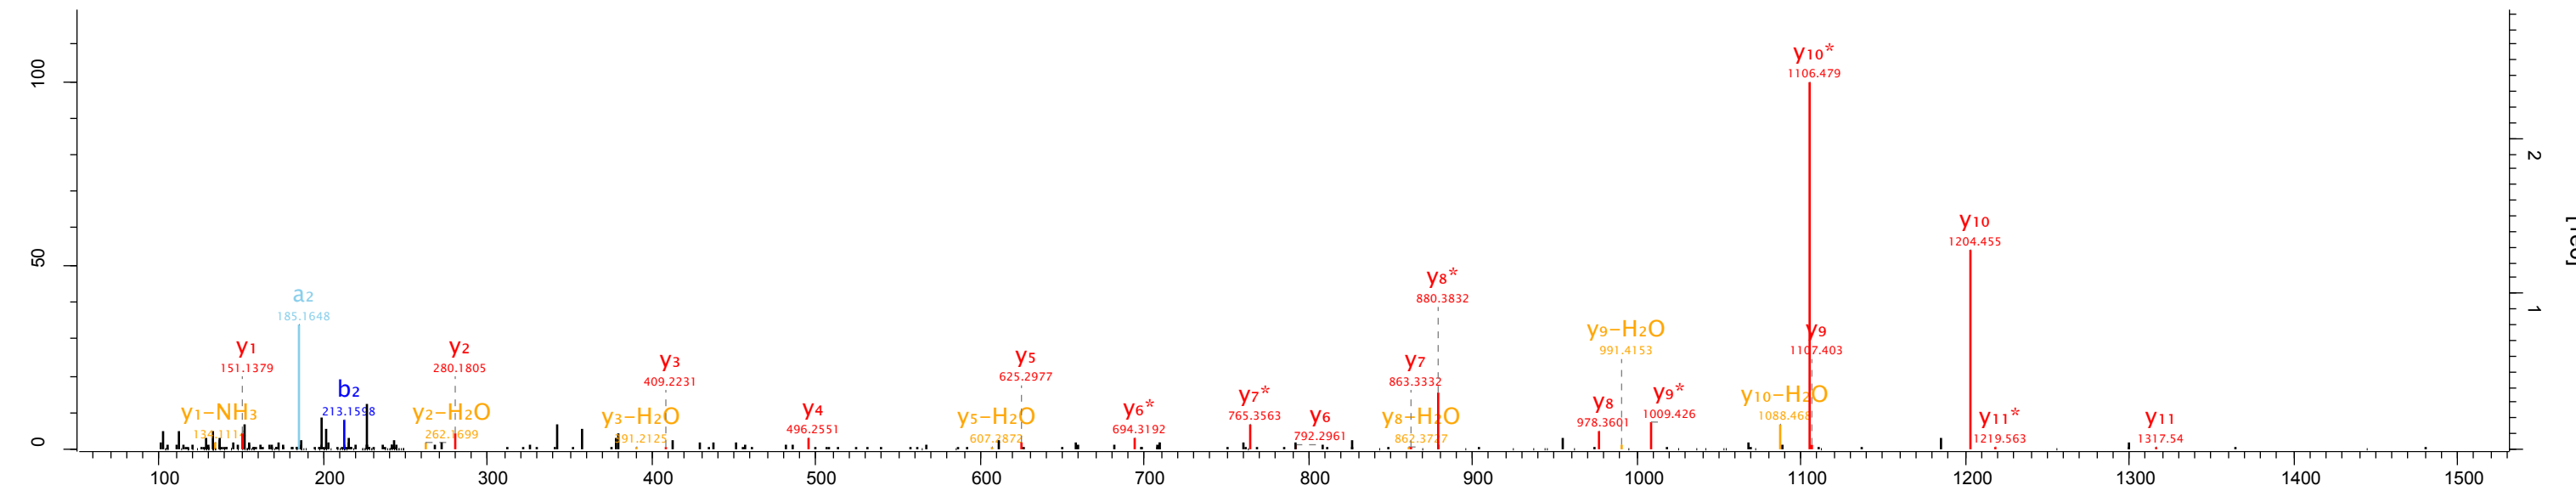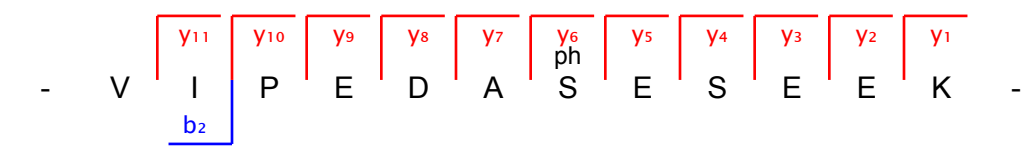



Raw file 20171215\_MaS\_33SR\_LMH\_phospho\_06 Scan 4792 Method FTMS; HCD Score 158.29 m/z 719.02 Gene names ZFP91

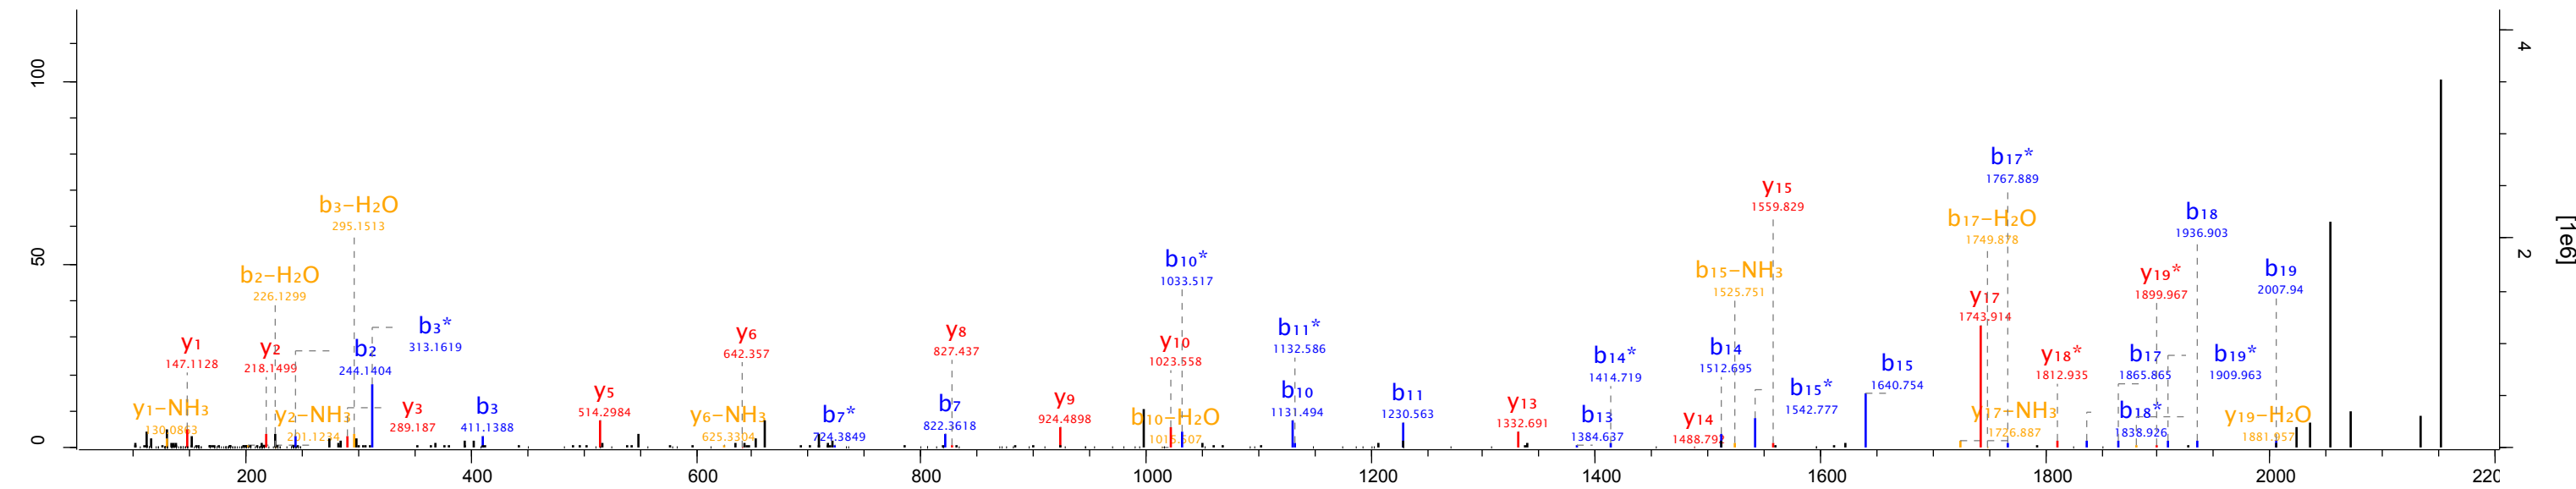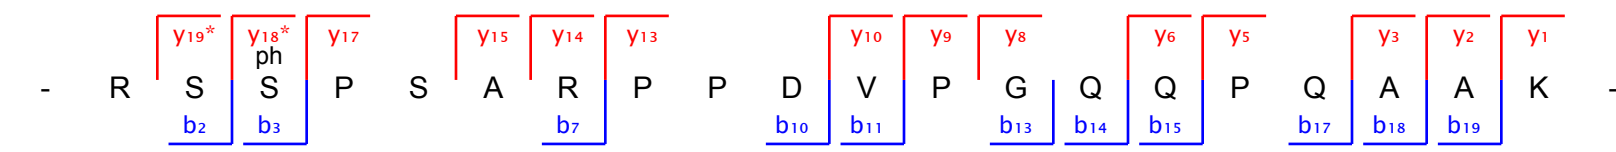

Raw file 20171215\_MaS\_33SR\_LMH\_phospho\_06 Scan 4802 Method FTMS; HCD Score 245.82 m/z 809.35 Gene names IRS2

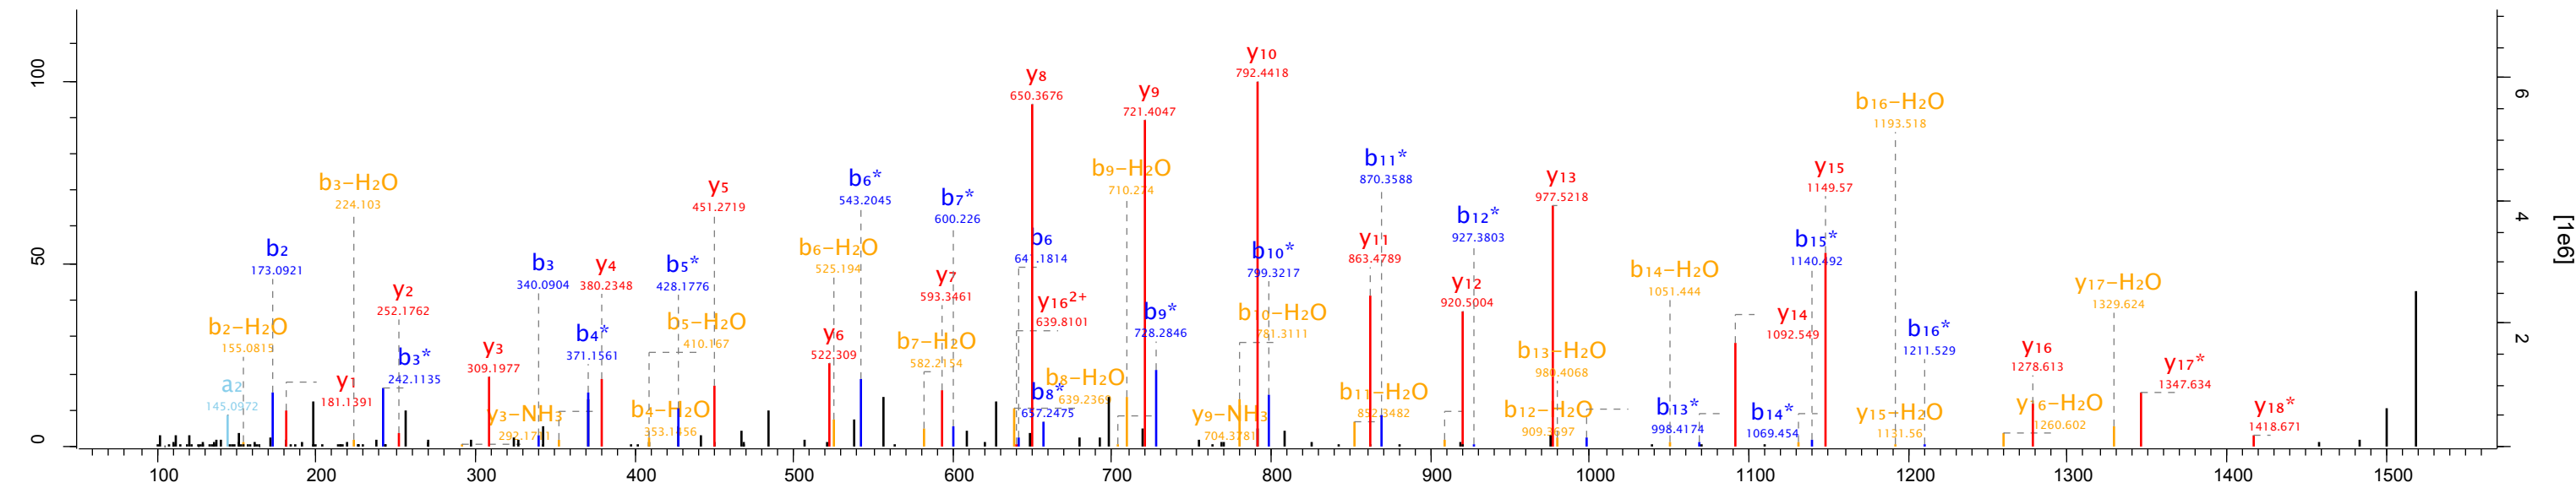

- T A S E G D G G A A A G A A A G A R -  
 b<sub>2</sub> b<sub>3</sub> b<sub>4</sub><sup>\*</sup> b<sub>5</sub><sup>\*</sup> b<sub>6</sub> b<sub>7</sub><sup>\*</sup> b<sub>8</sub><sup>\*</sup> b<sub>9</sub><sup>\*</sup> b<sub>10</sub><sup>\*</sup> b<sub>11</sub><sup>\*</sup> b<sub>12</sub><sup>\*</sup> b<sub>13</sub><sup>\*</sup> b<sub>14</sub><sup>\*</sup> b<sub>15</sub><sup>\*</sup> b<sub>16</sub><sup>\*</sup>

Raw file 20171215\_MaS\_33SR\_LMH\_phospho\_06 Scan 4872 Method FTMS; HCD Score 81.64 m/z 547.72 Gene names PLEKHF2

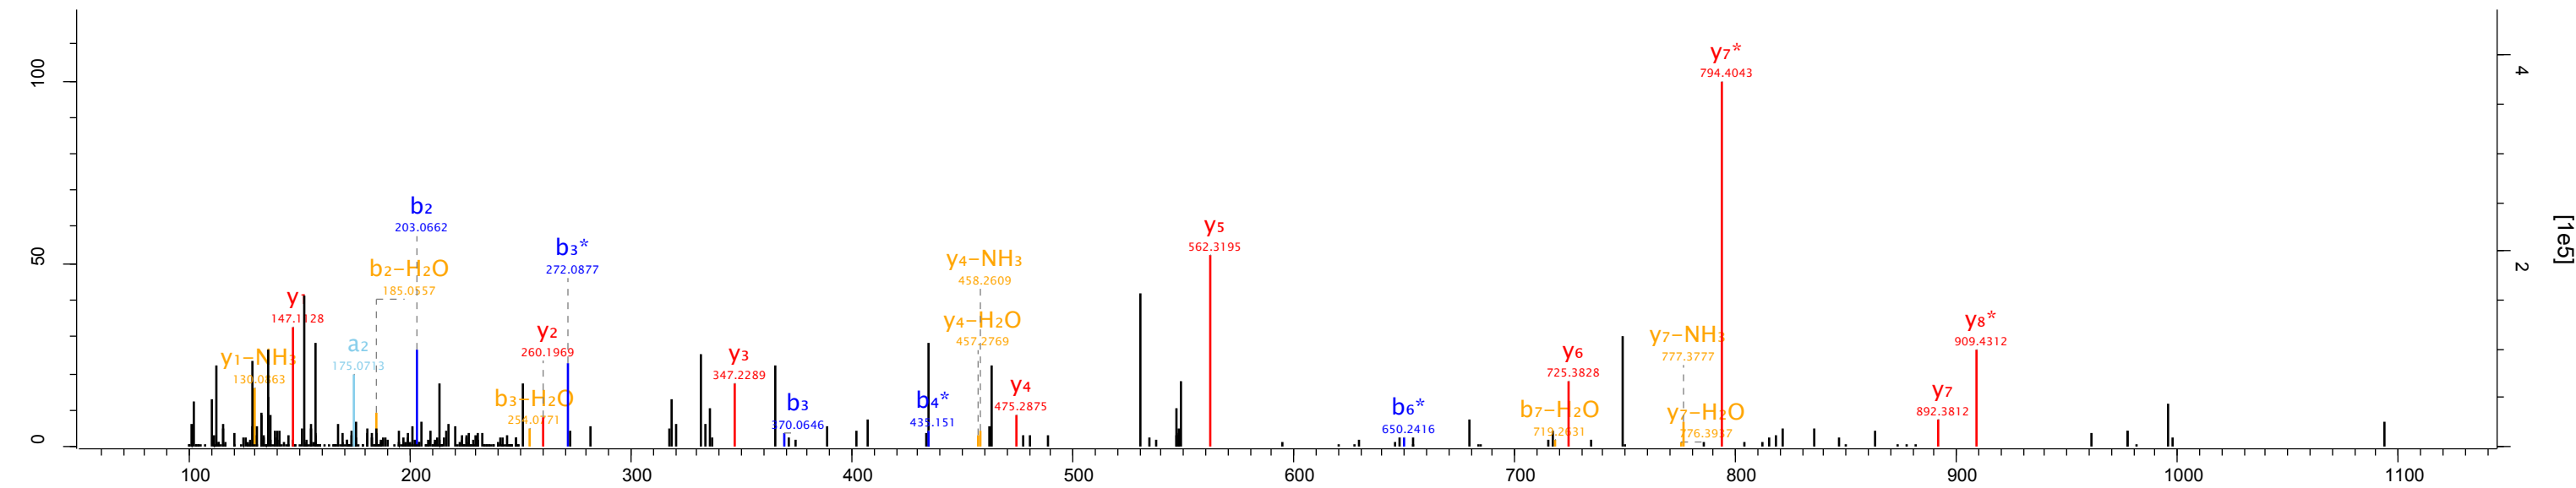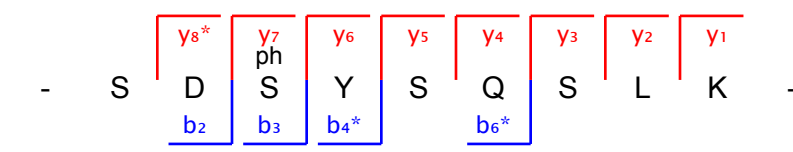

Raw file 20171215\_MaS\_33SR\_LMH\_phospho\_06 Scan 5032 Method FTMS; HCD Score 142.91 m/z 601.78 Gene names IRF2BP1

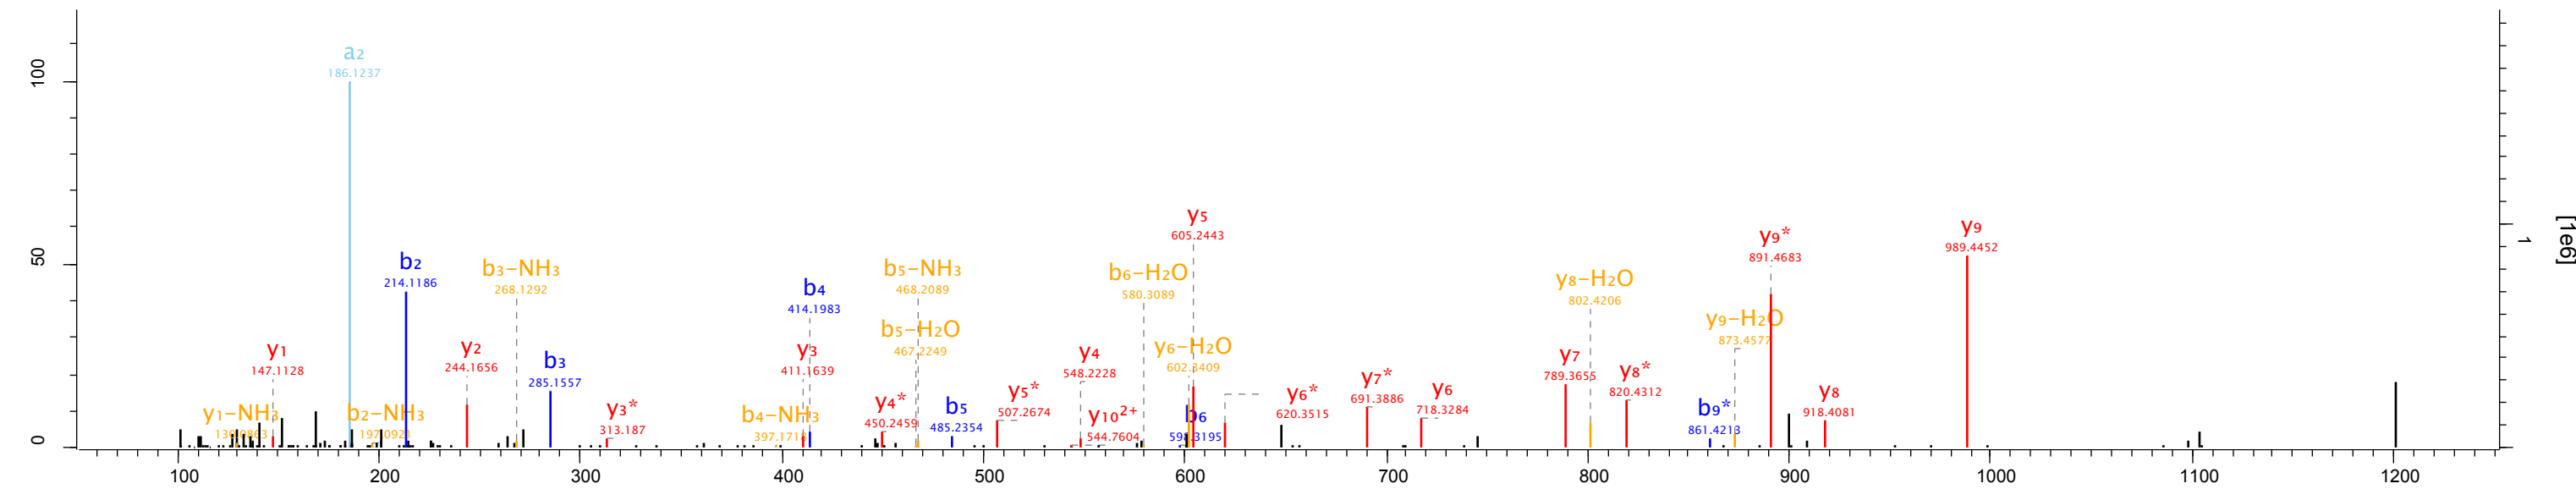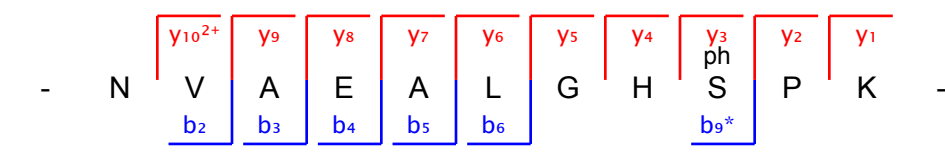

Raw file 20171215\_MaS\_33SR\_LMH\_phospho\_06 Scan 5362 Method FTMS; HCD Score 405.61 m/z 1268 Gene names TMX1

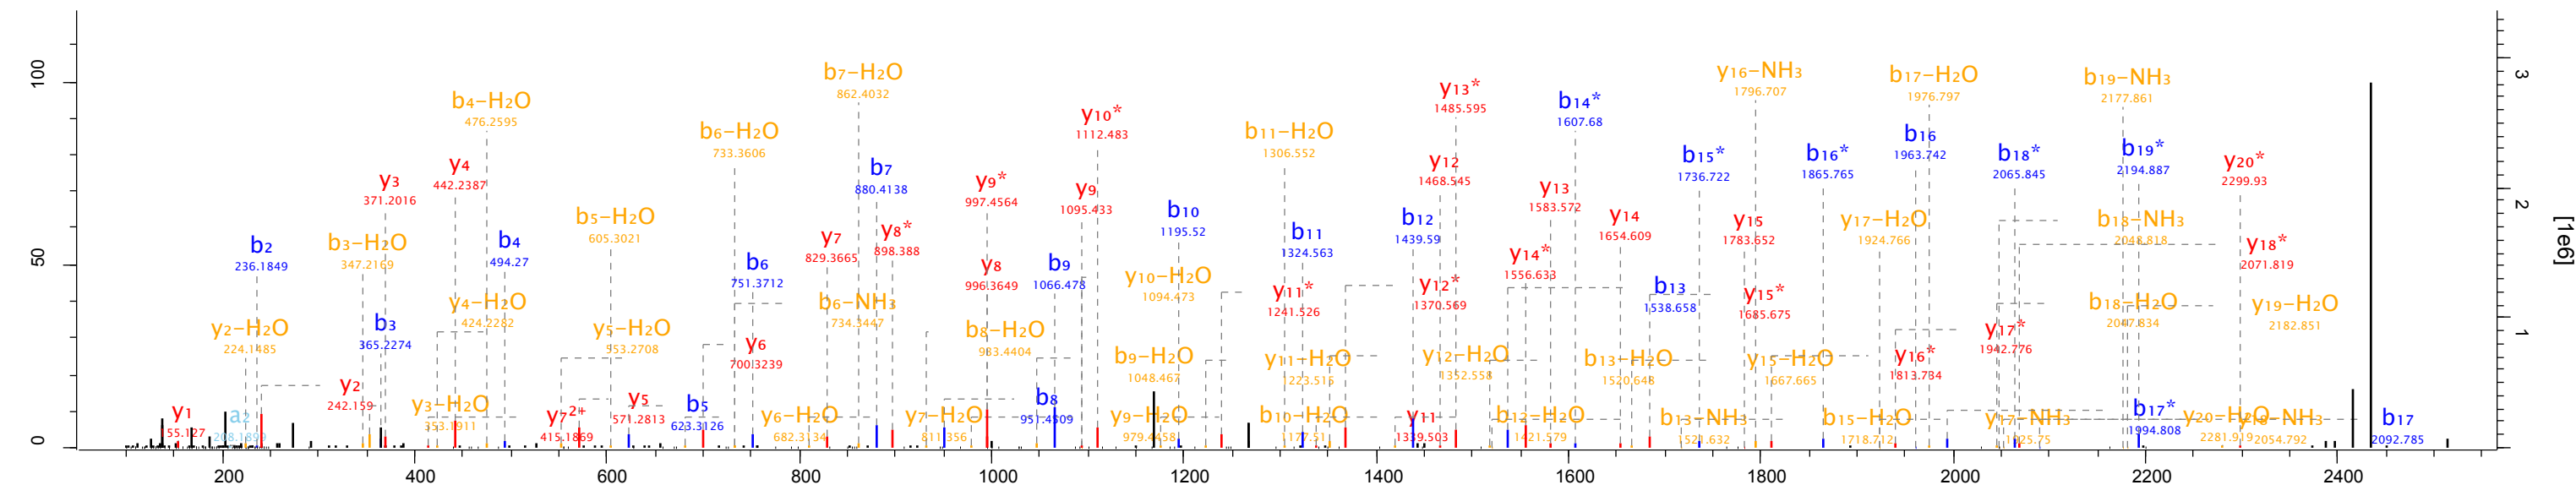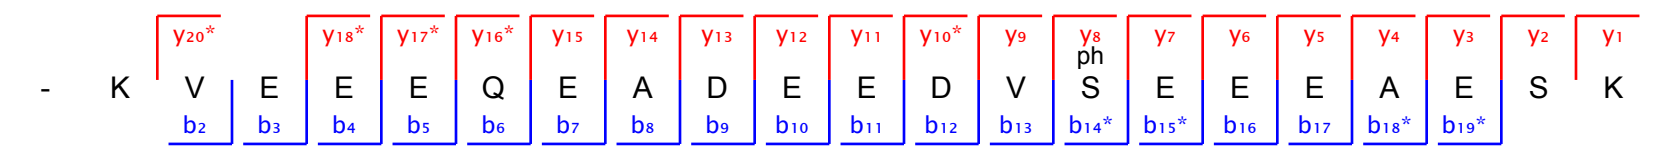

Raw file 20171215\_MaS\_33SR\_LMH\_phospho\_06 Scan 5442 Method FTMS; HCD Score 93.73 m/z 849.41 Gene names CAD

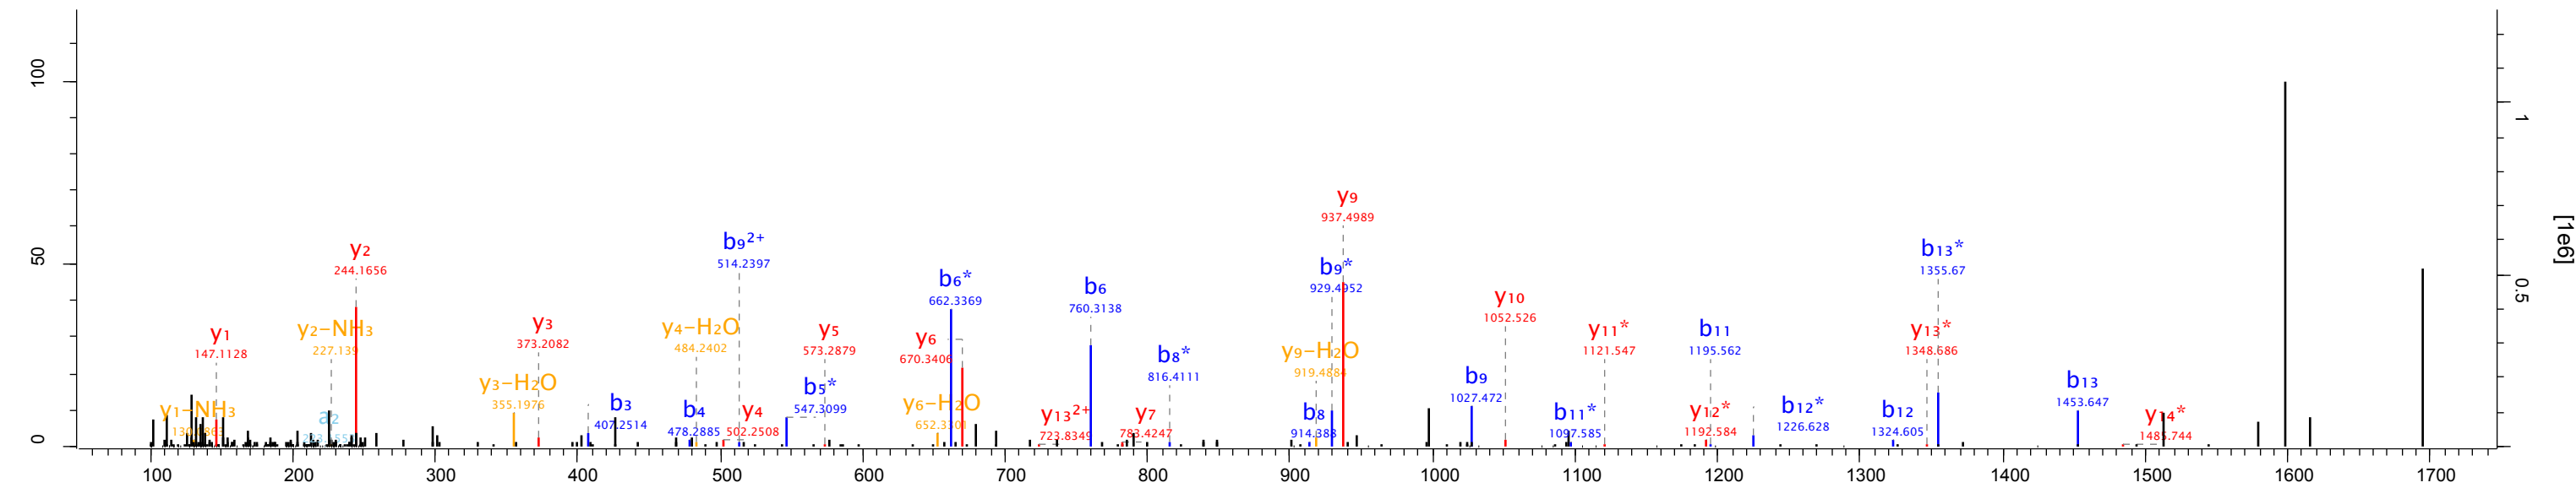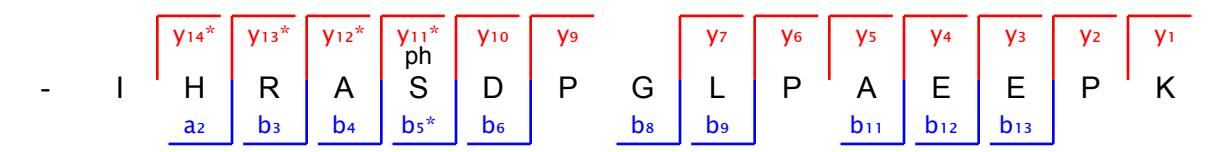

Raw file 20171215\_MaS\_33SR\_LMH\_phospho\_06 Scan 5452 Method FTMS; HCD Score 110.98 m/z 837.88 Gene names TRIM3

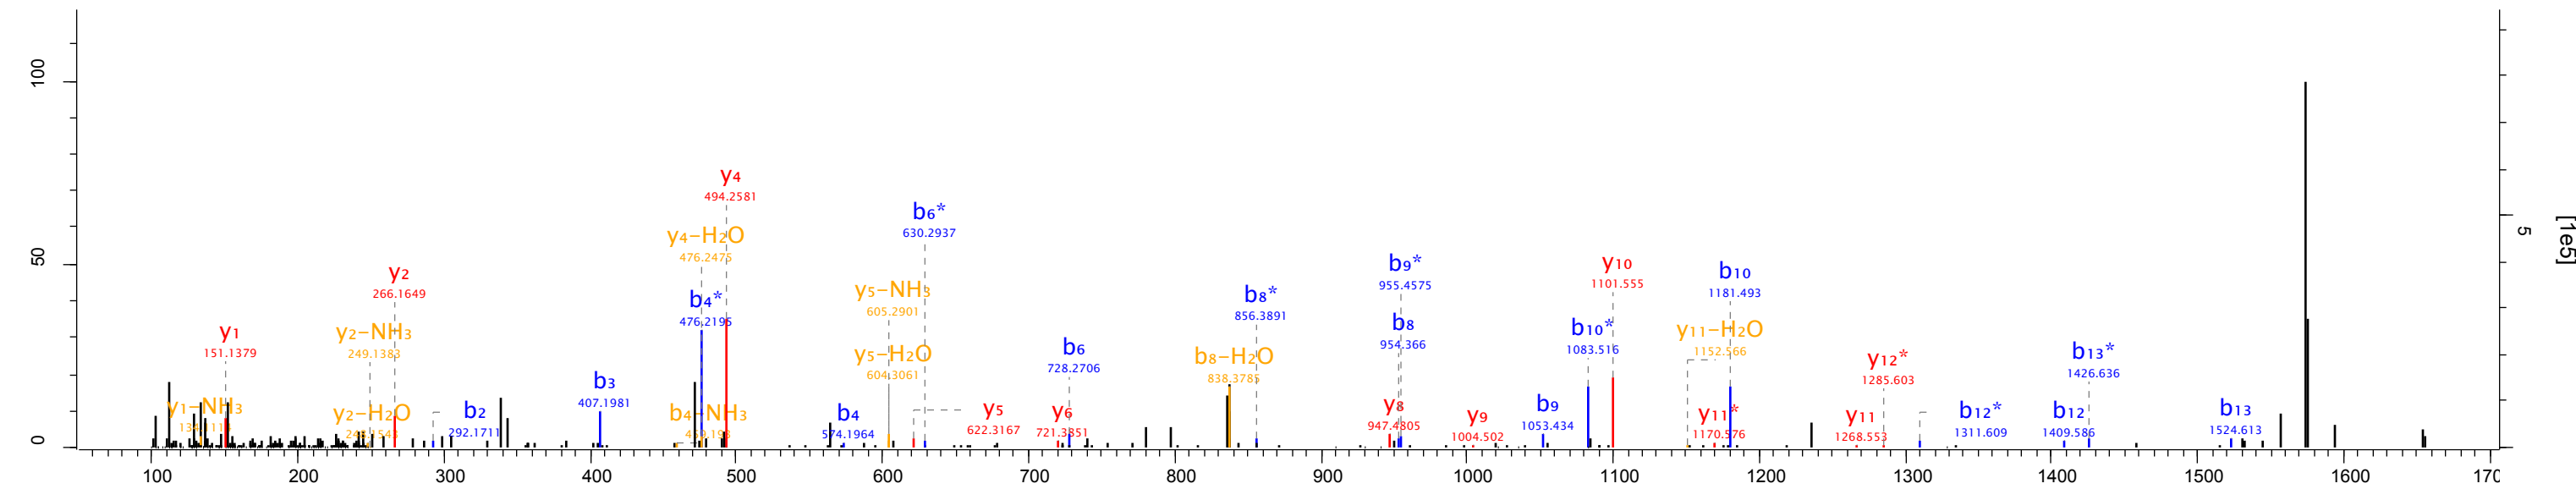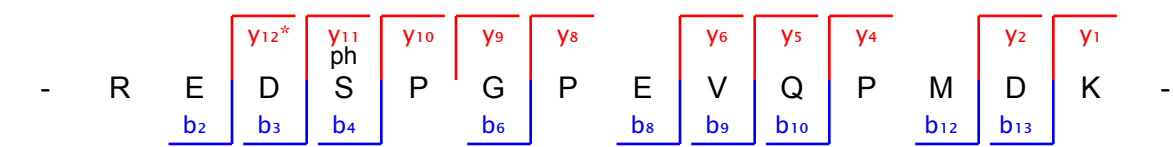

Raw file 20171215\_MaS\_33SR\_LMH\_phospho\_06 Scan 6482 Method FTMS; HCD Score 191.65 m/z 704.01 Gene names EHBP1

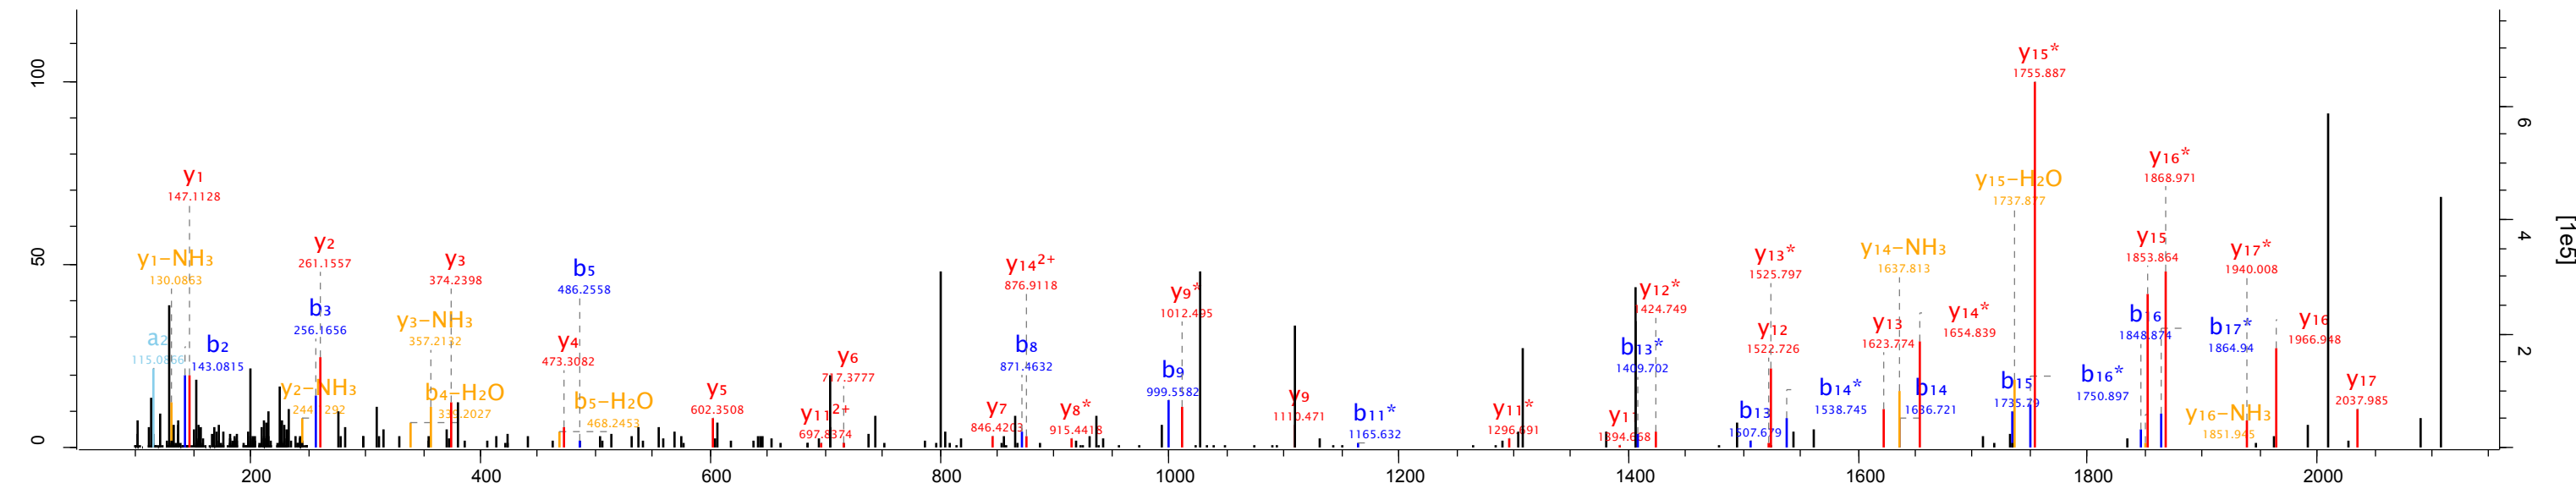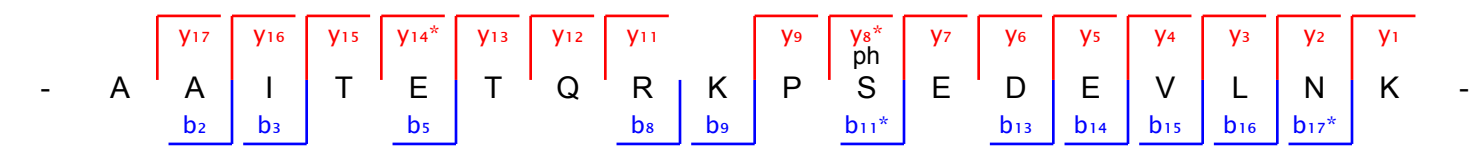



Raw file 20171215\_MaS\_33SR\_LMH\_phospho\_06 Scan 6972 Method FTMS; HCD Score 81.97 m/z 677.66 Gene names SCFD1

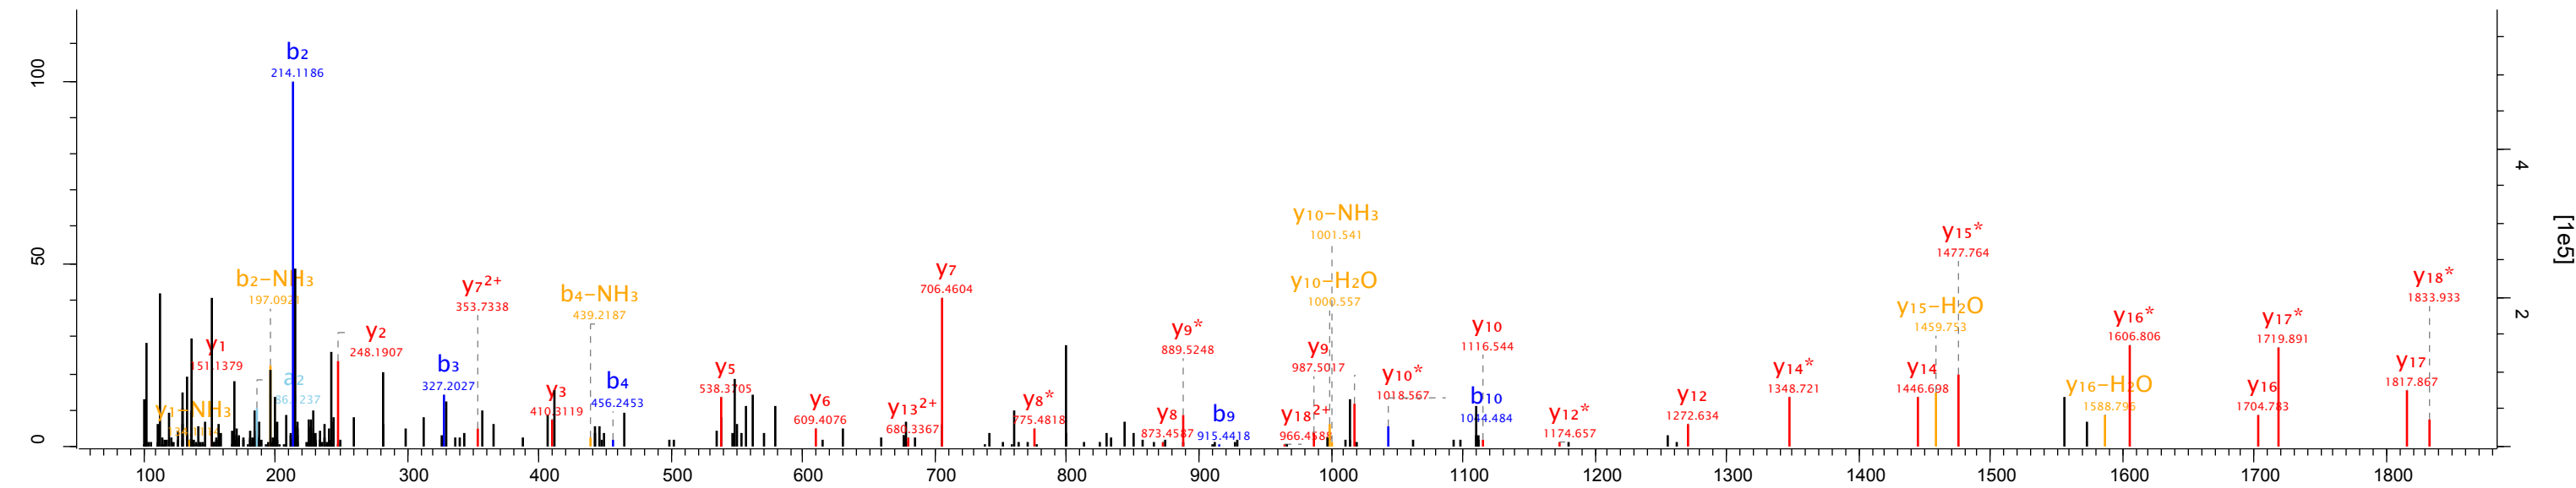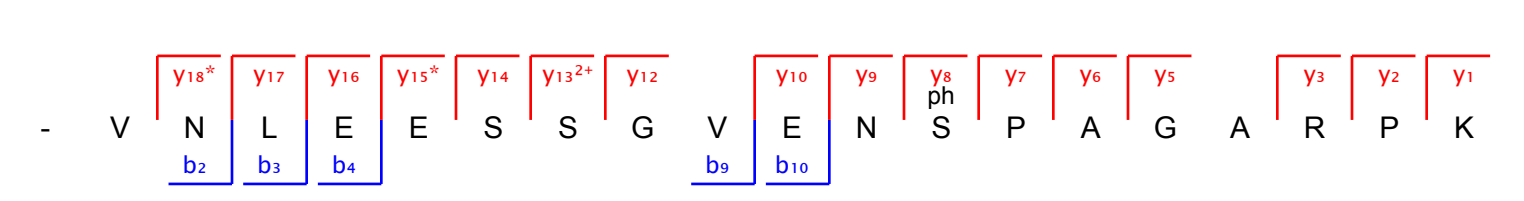

Raw file  
 20171215\_MaS\_33SR\_LMH\_phospho\_06  
 Scan 7062 Method FTMS; HCD Score 135.98 m/z 635.3 Gene names TP53BP2

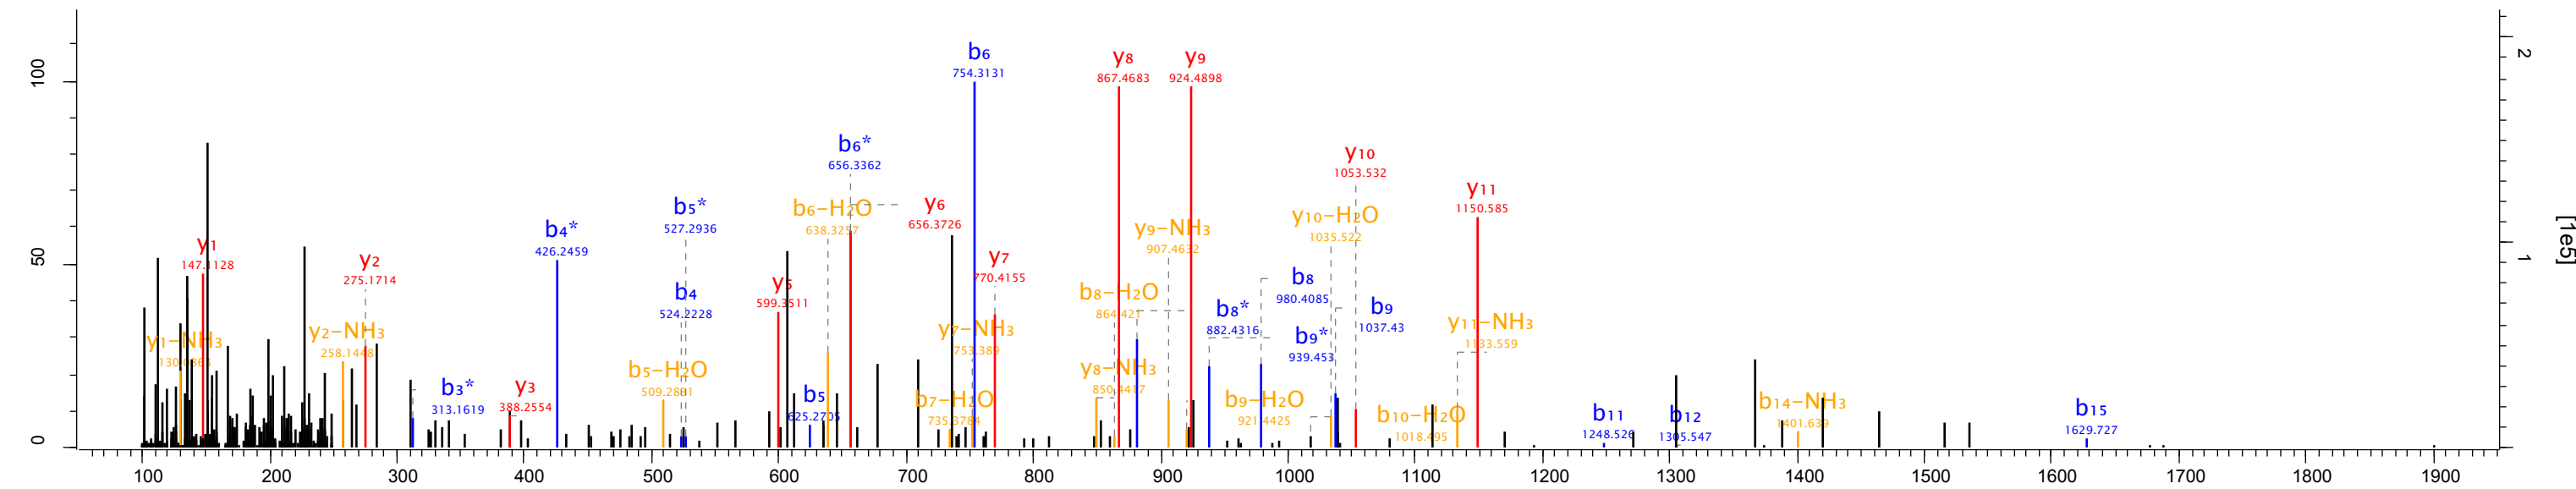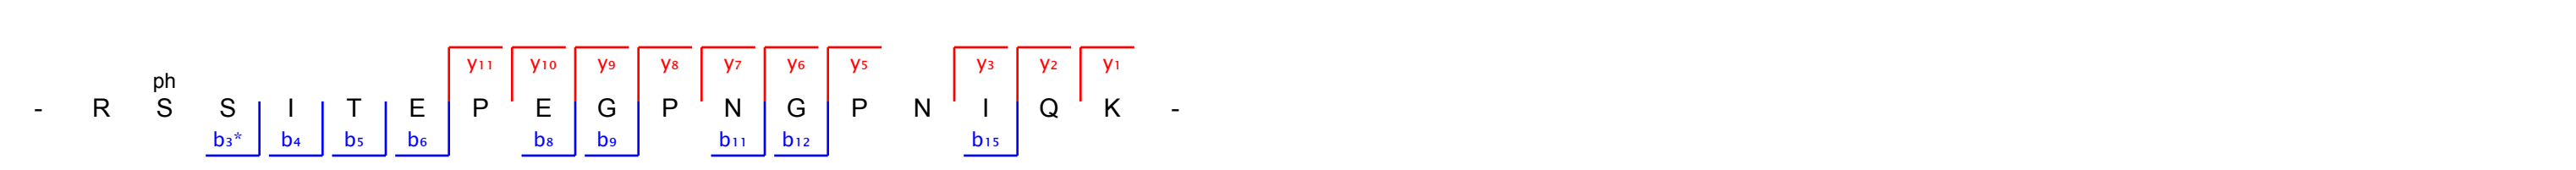

Raw file 20171215\_MaS\_33SR\_LMH\_phospho\_06 Scan 7952 Method FTMS; HCD Score 120.42 m/z 840.71 Gene names KIF21A

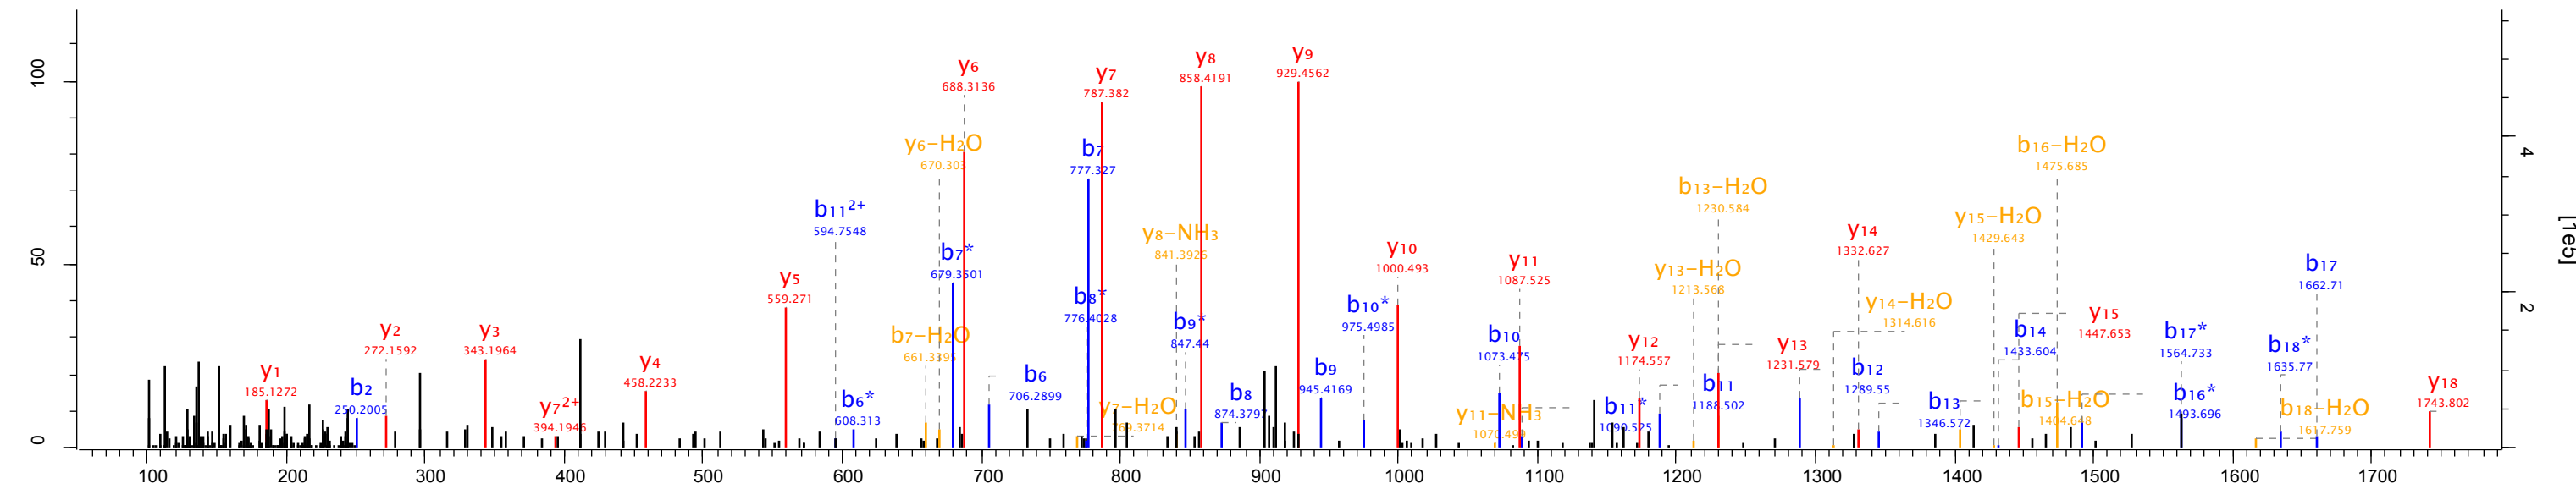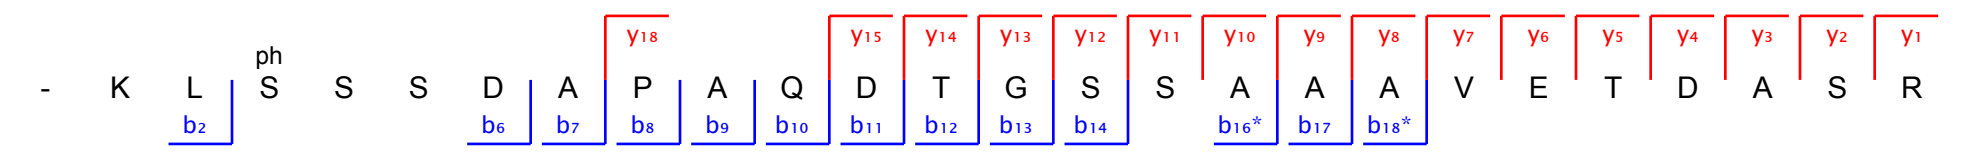

Raw file 20171215\_MaS\_33SR\_LMH\_phospho\_06 Scan 8722 Method FTMS; HCD Score 278.01 m/z 749.83 Gene names C2orf44

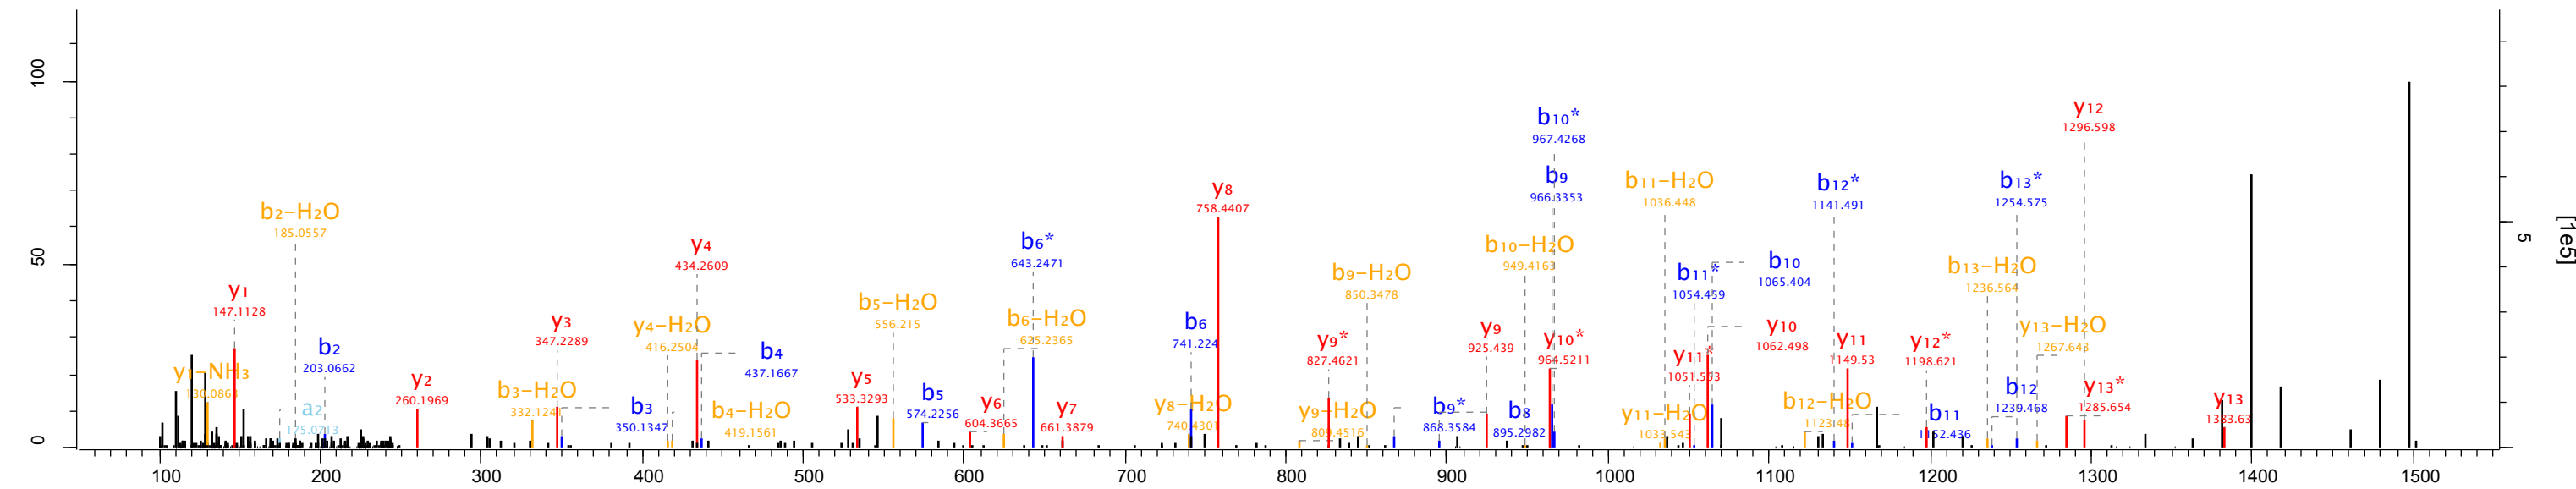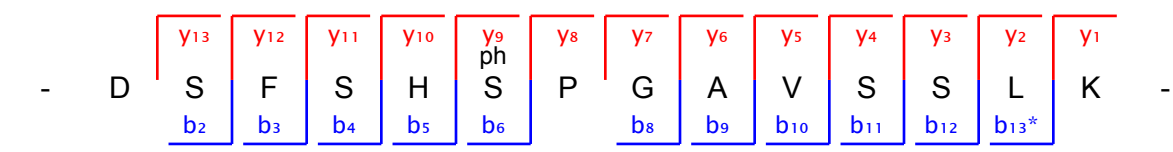

Raw file: 20171215\_MaS\_33SR\_LMH\_phospho\_06  
 Scan: 8812 Method: FTMS; HCD Score: 83.4 m/z: 561.31 Gene names: HMGA1

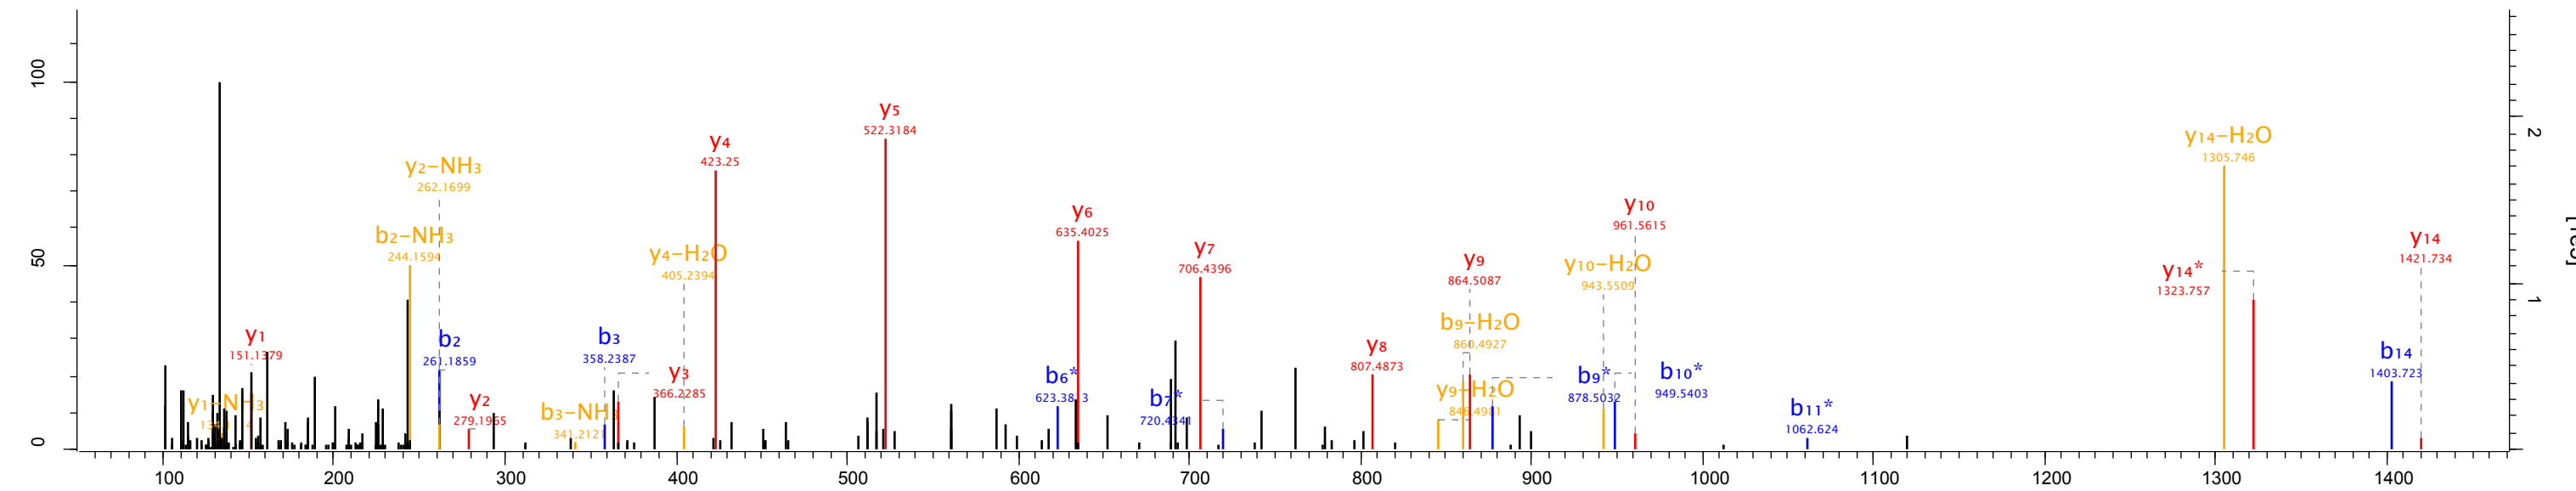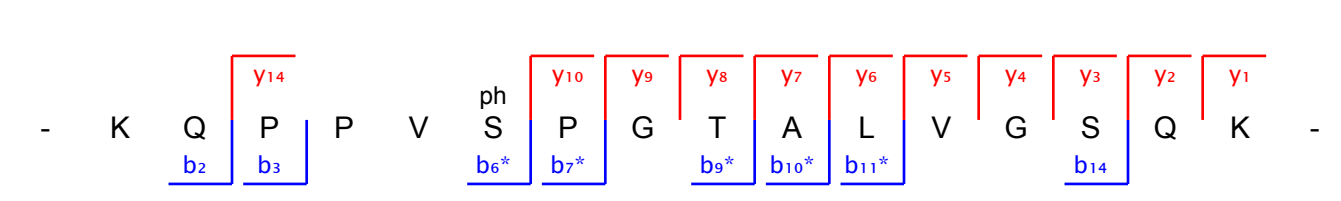

Raw file: 20171215\_MaS\_33SR\_LMH\_phospho\_06  
 Scan: 8842 Method: FTMS; HCD Score: 114.3 m/z: 864.9 Gene names: HIST1H1B

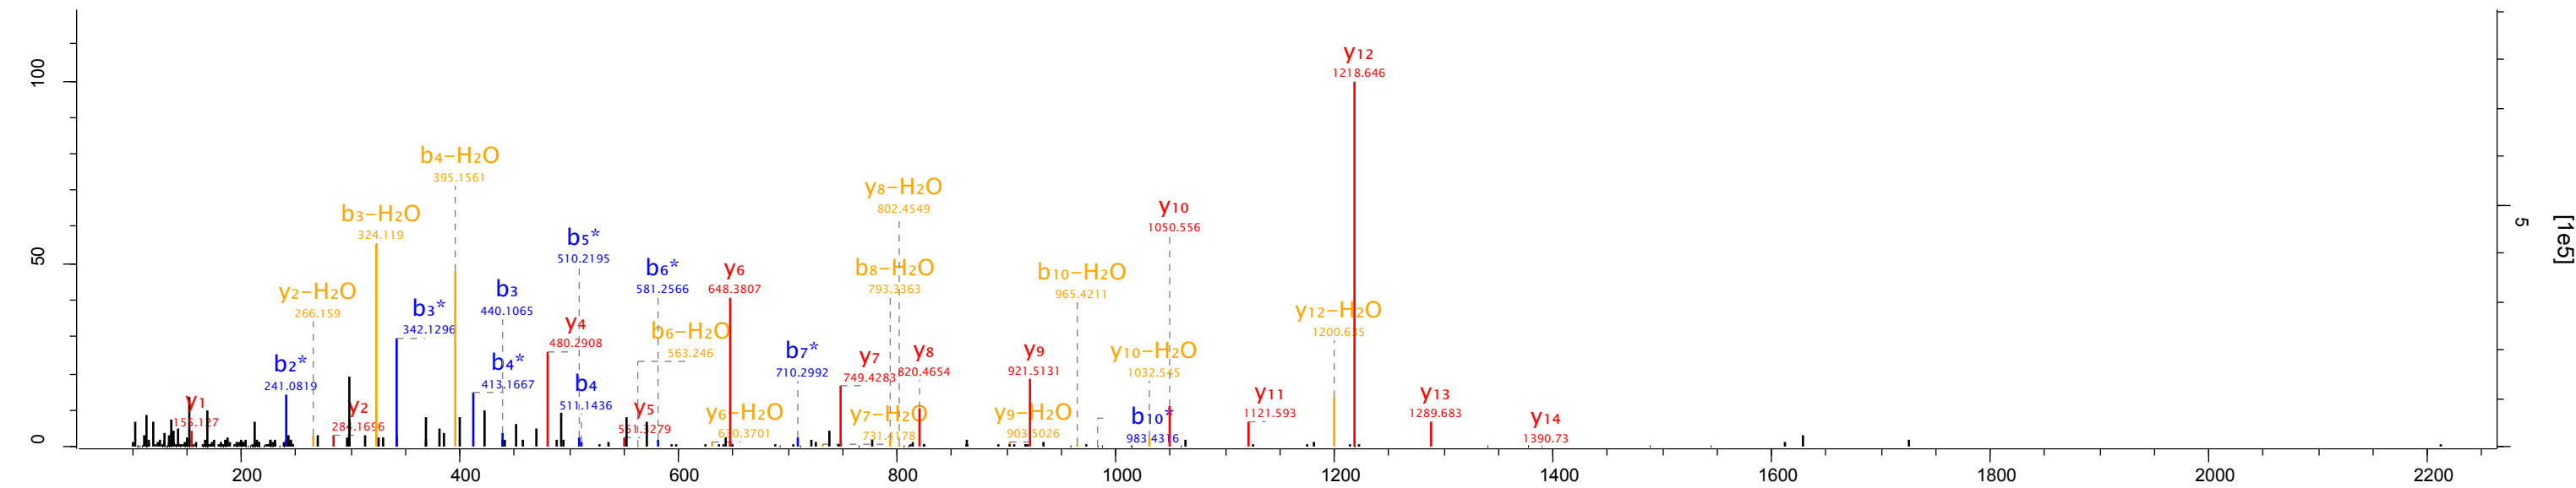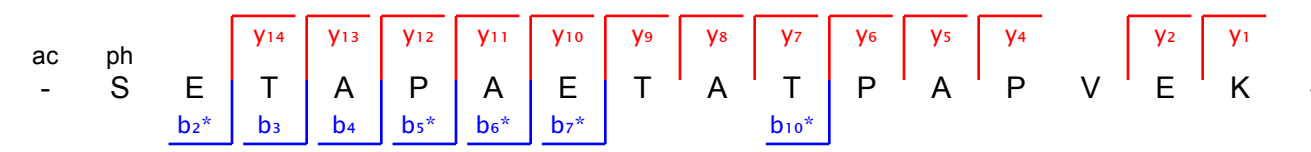

Raw file 20171215\_MaS\_33SR\_LMH\_phospho\_06 Scan 8882 Method FTMS; HCD Score 237.71 m/z 1032.41 Gene names CTNND1

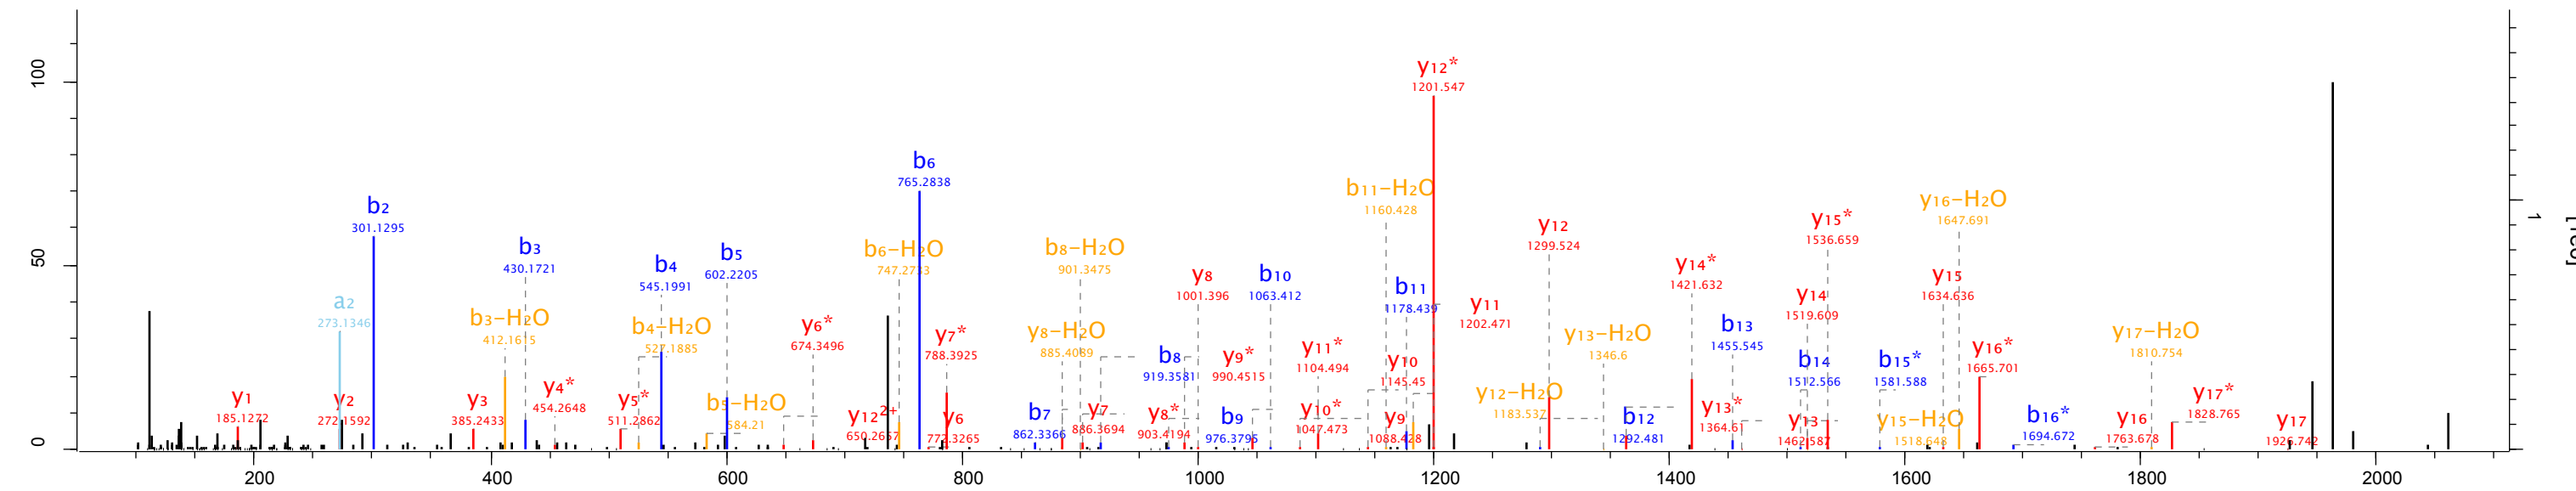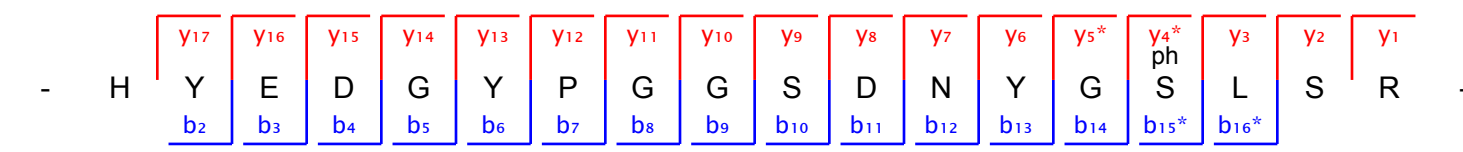

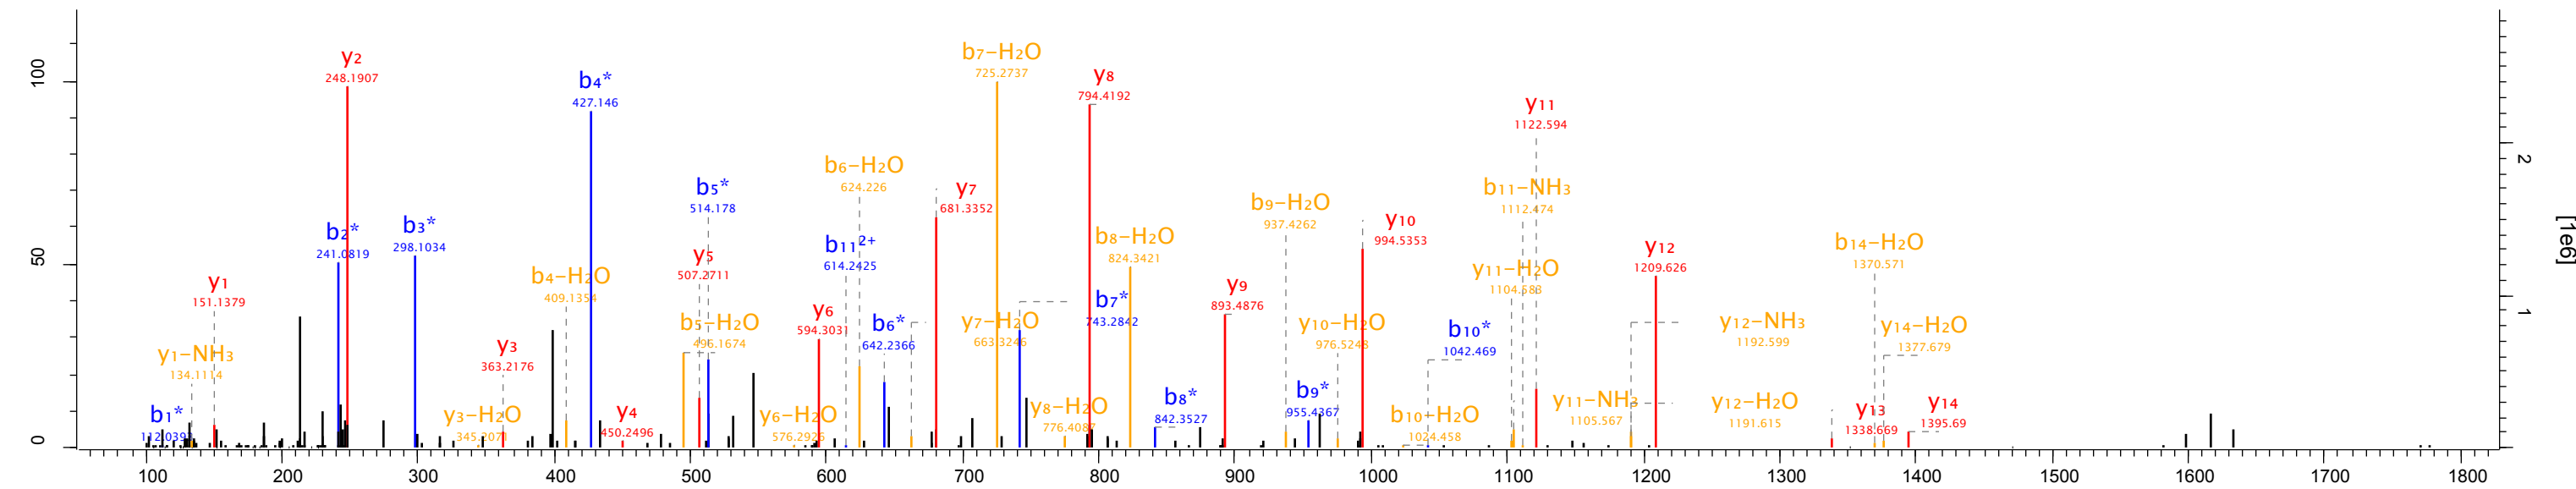

ac

ph  
S E G E S Q T V L S S G S D P K -  
b<sub>1</sub>\* b<sub>2</sub>\* b<sub>3</sub>\* b<sub>4</sub>\* b<sub>5</sub>\* b<sub>6</sub>\* b<sub>7</sub>\* b<sub>8</sub>\* b<sub>9</sub>\* b<sub>10</sub>\* b<sub>11</sub><sup>2+</sup>



Raw file 20171215\_MaS\_33SR\_LMH\_phospho\_06 Scan 9452 Method FTMS; HCD Score 121.23 m/z 862.06 Gene names AFAP1

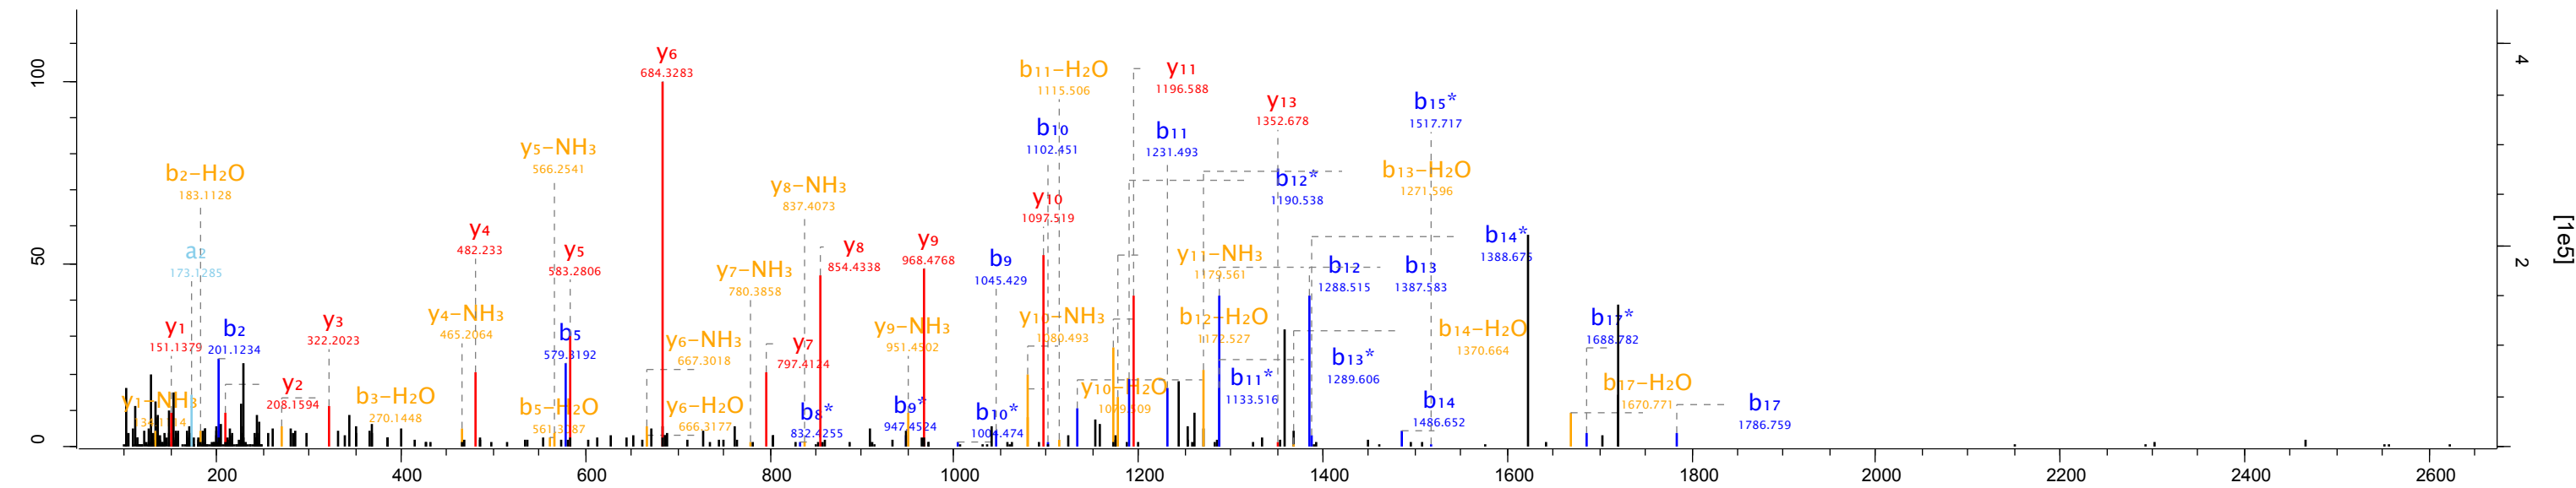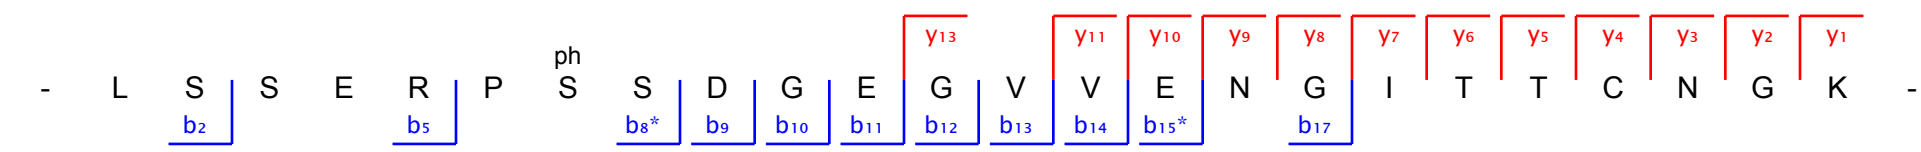

Raw file 20171215\_MaS\_33SR\_LMH\_phospho\_06 Scan 9512 Method FTMS; HCD Score 153.56 m/z 880.86 Gene names DLG1

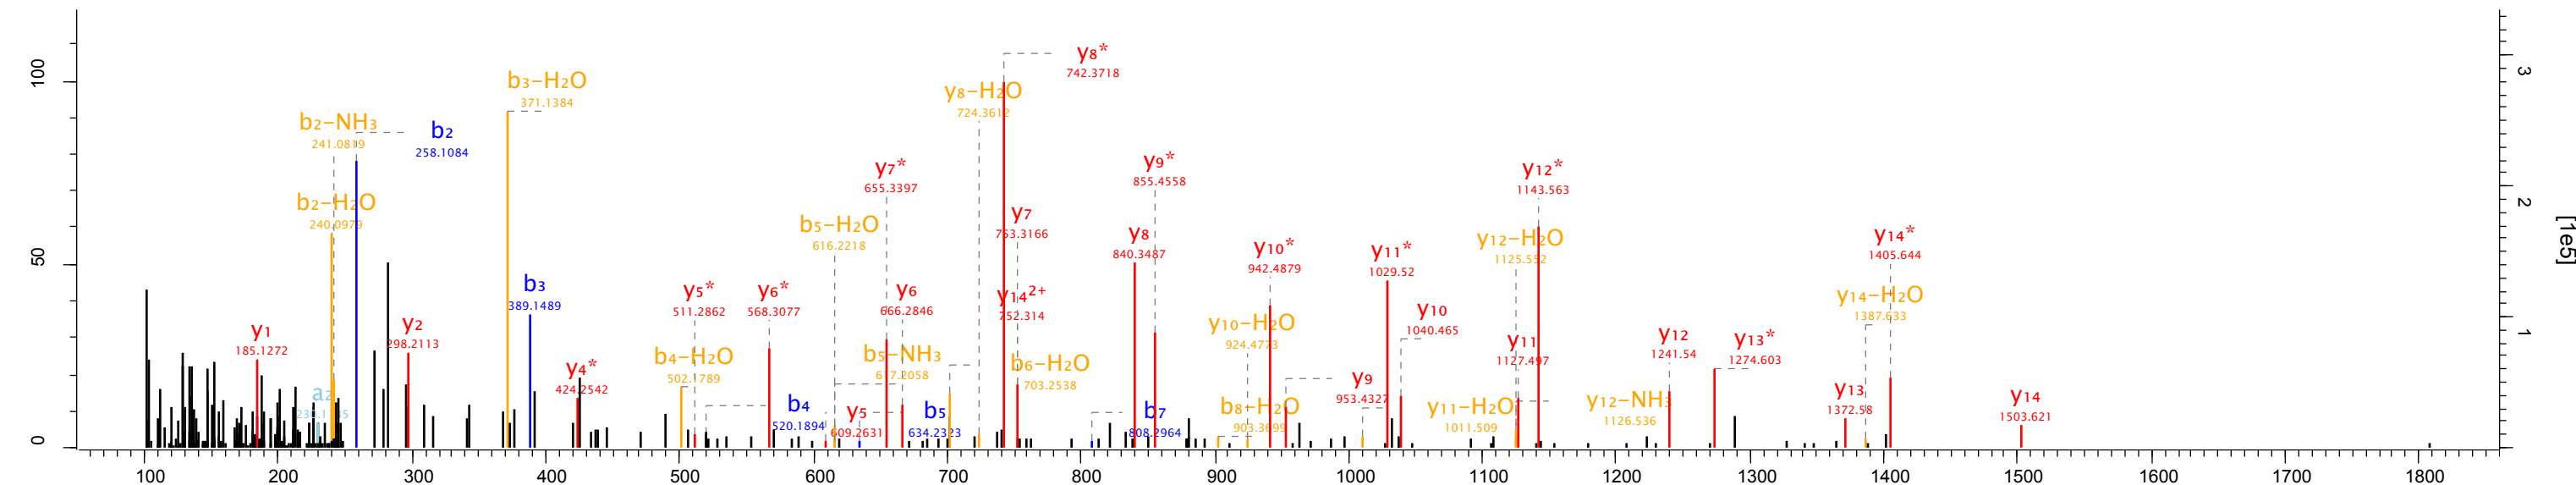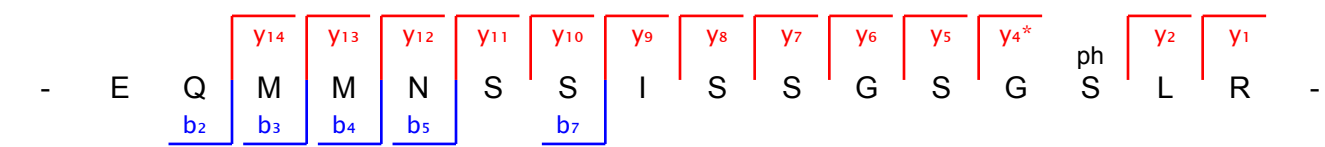

Raw file 20171215\_MaS\_33SR\_LMH\_phospho\_06 Scan 9692 Method FTMS; HCD Score 263.49 m/z 1169.53 Gene names MICALL1

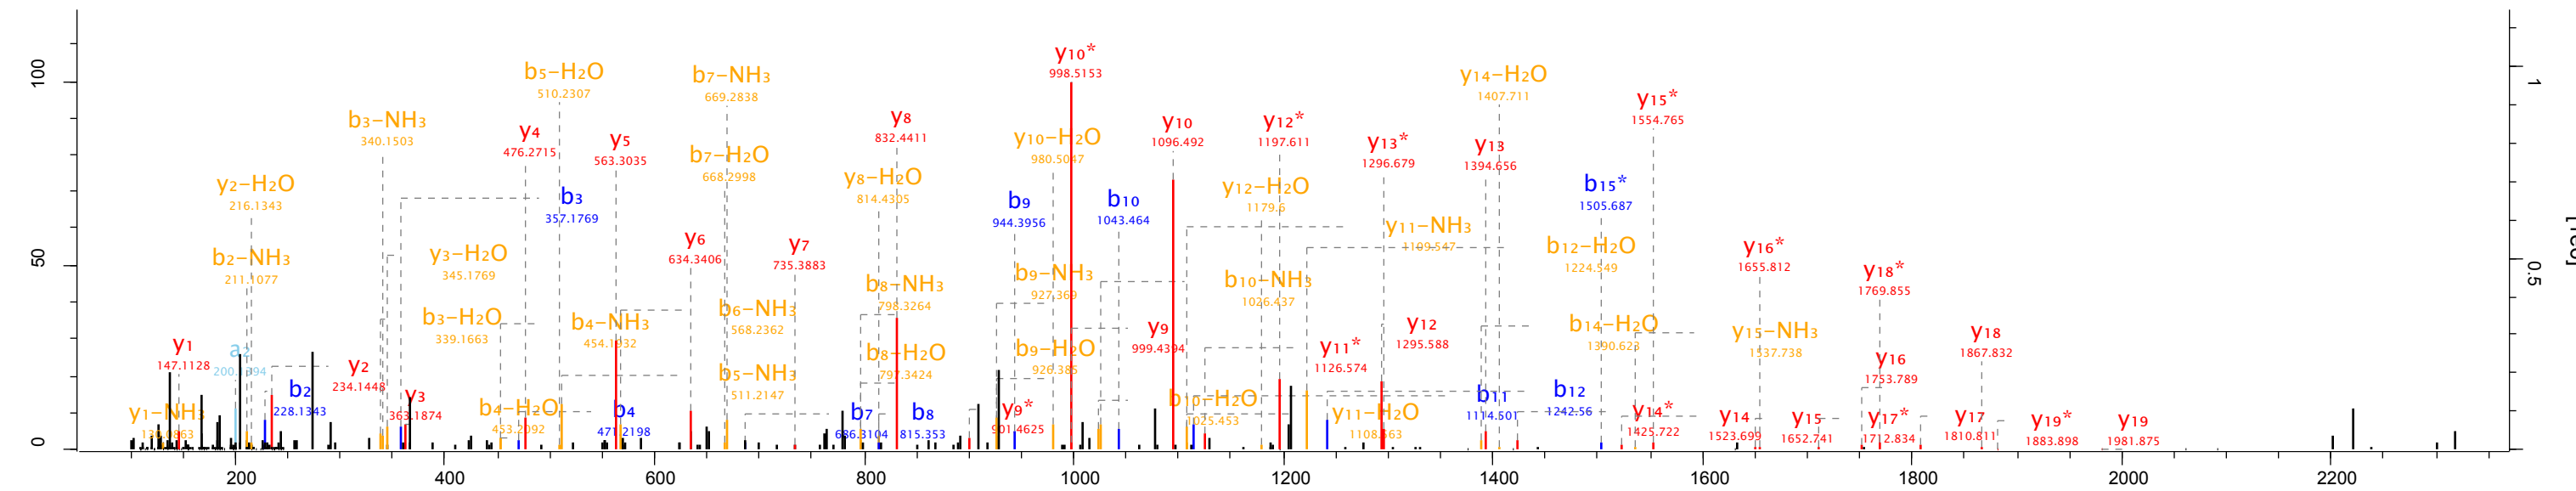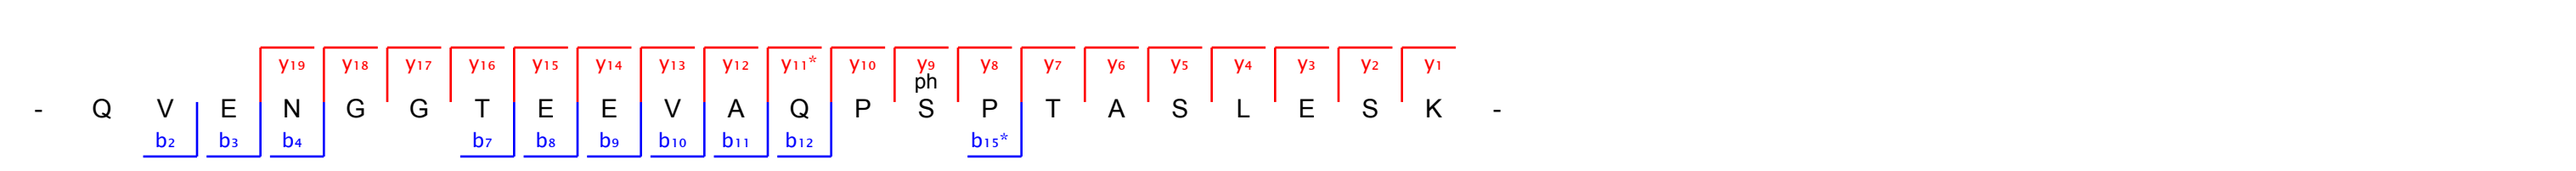

Raw file 20171215\_MaS\_33SR\_LMH\_phospho\_06 Scan 9832 Method FTMS; HCD Score 162.76 m/z 848.39 Gene names MAP4K4

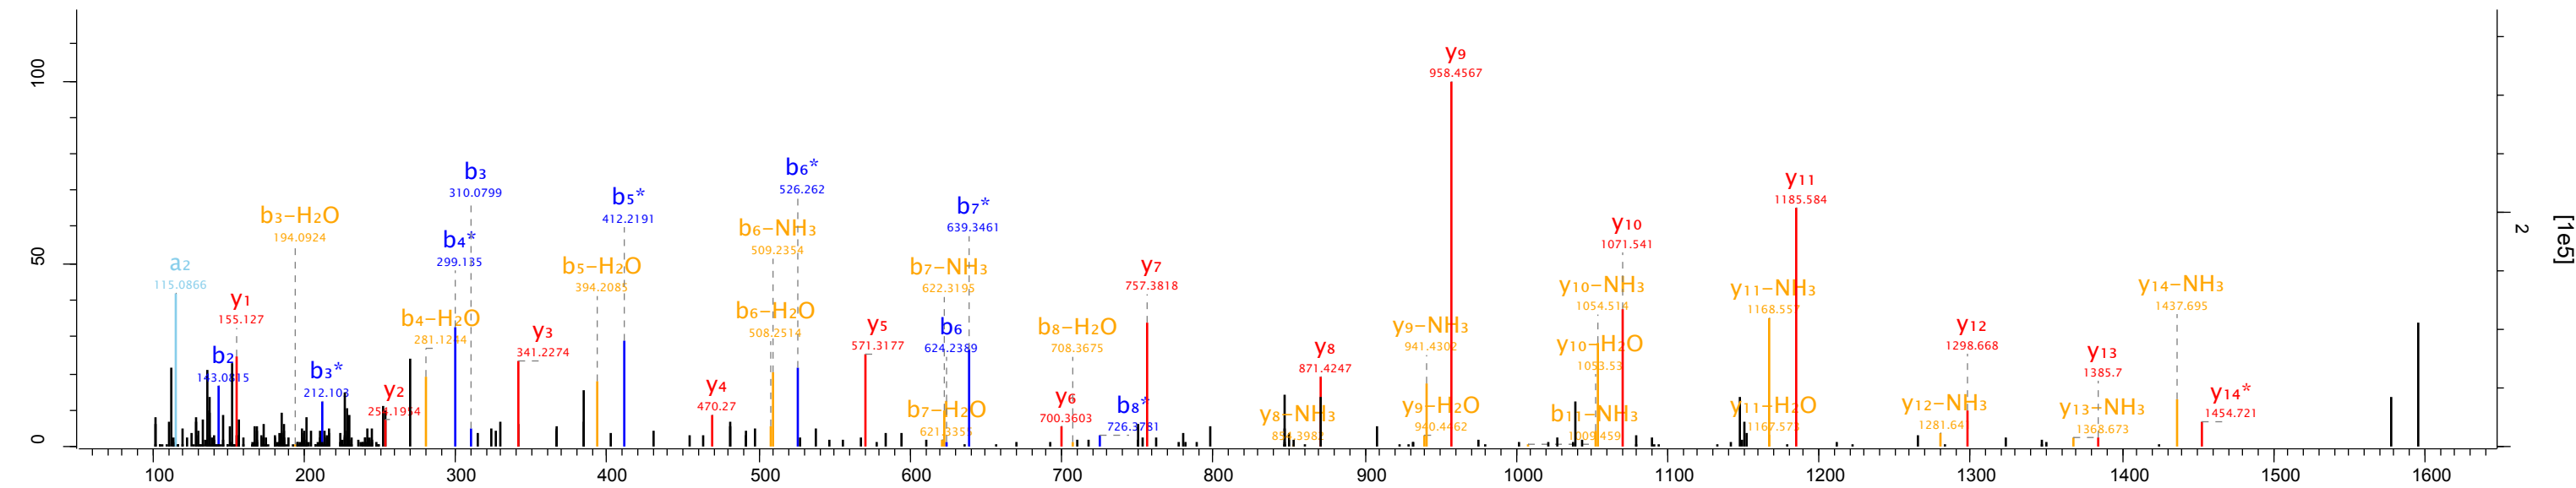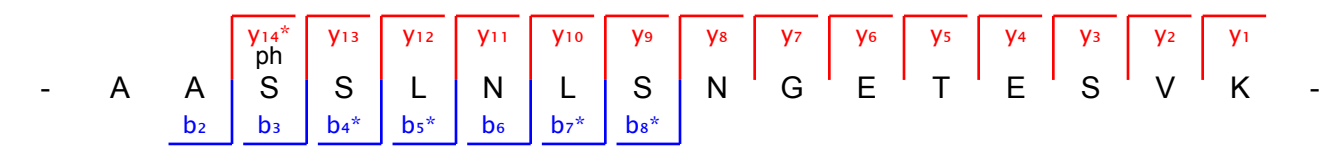

Raw file 20171215\_MaS\_33SR\_LMH\_phospho\_06 Scan 9892 Method FTMS; HCD Score 210.29 m/z 976.43 Gene names DBN1

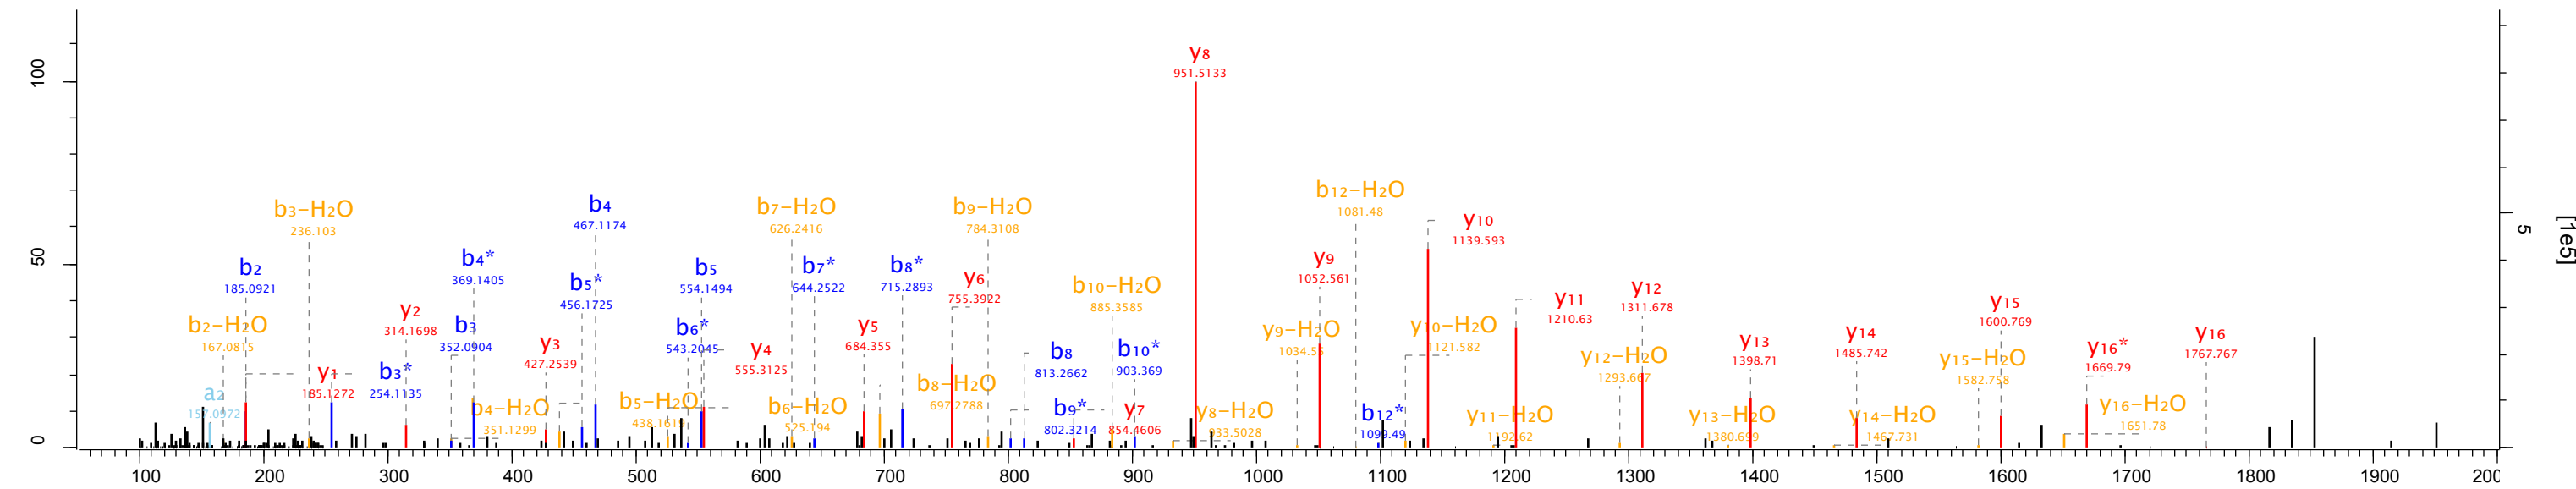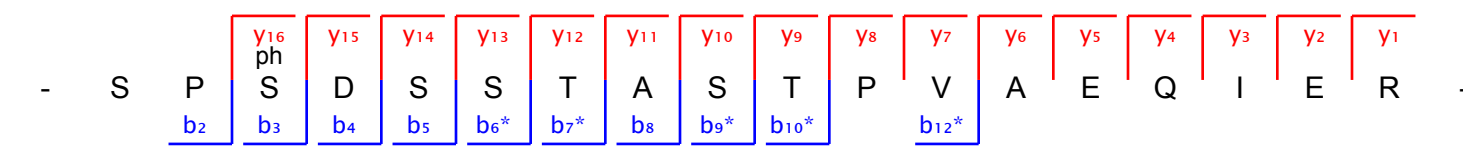

Raw file 20171215\_MaS\_33SR\_LMH\_phospho\_07 Scan 2842 Method FTMS; HCD Score 107.21 m/z 430.18 Gene names POLR2A

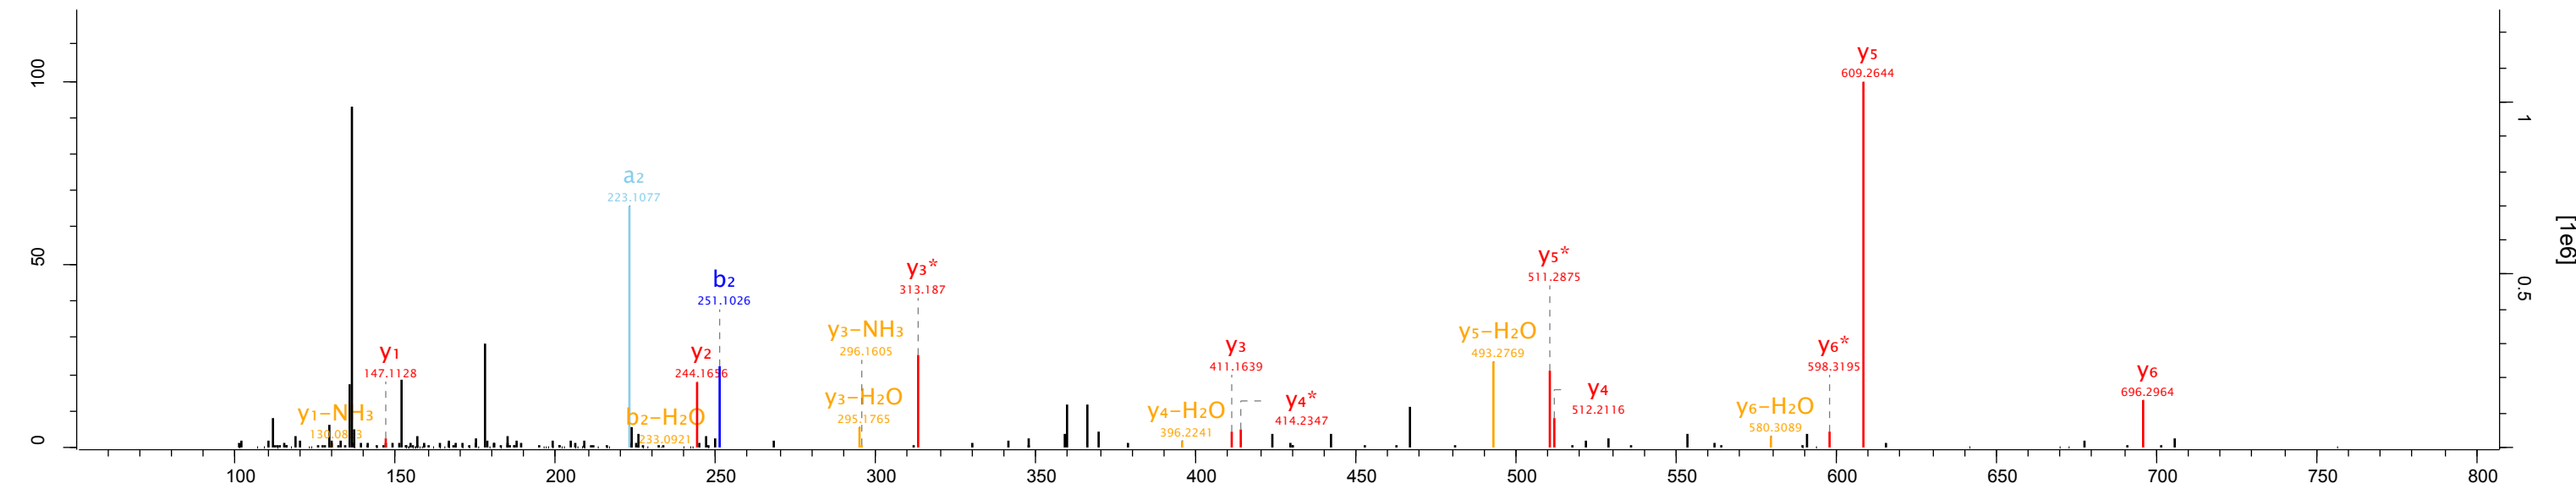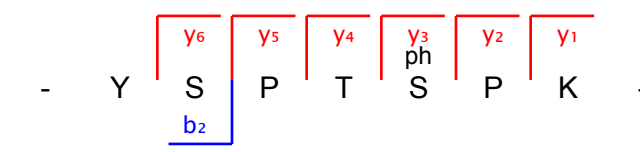

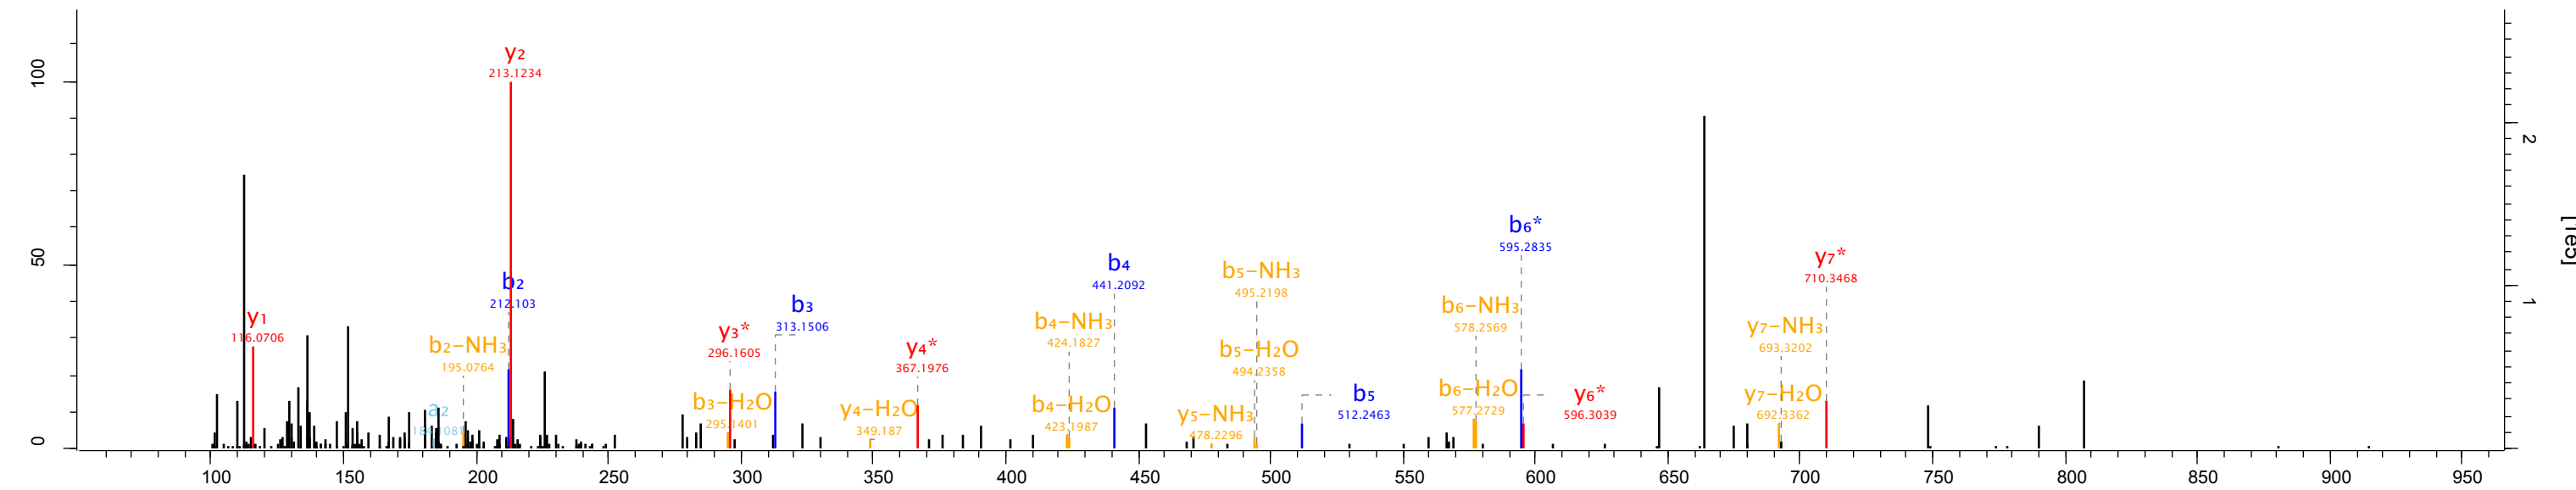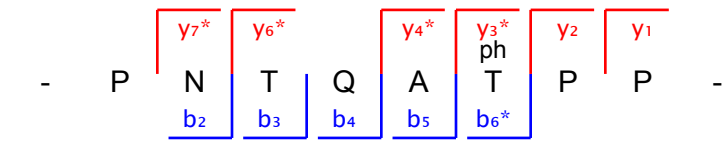

Raw file 20171215\_MaS\_33SR\_LMH\_phospho\_07 Scan 4092 Method FTMS; HCD Score 49.72 m/z 470.72 Gene names RYBP

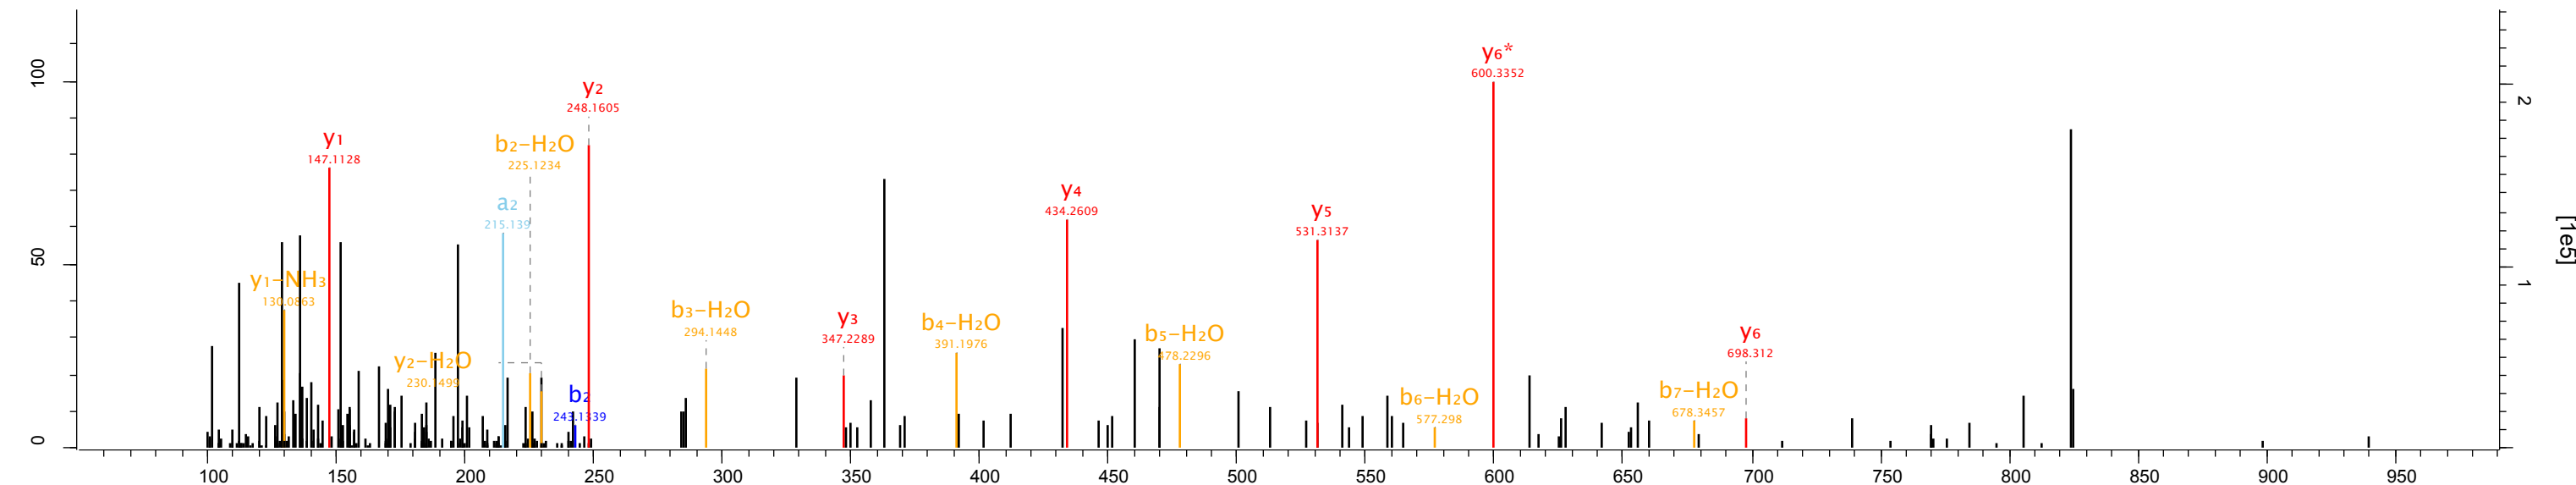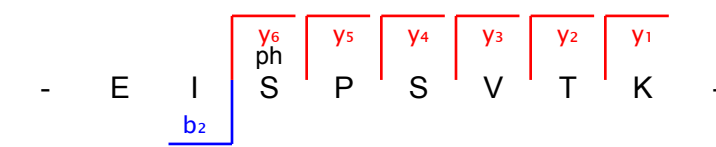



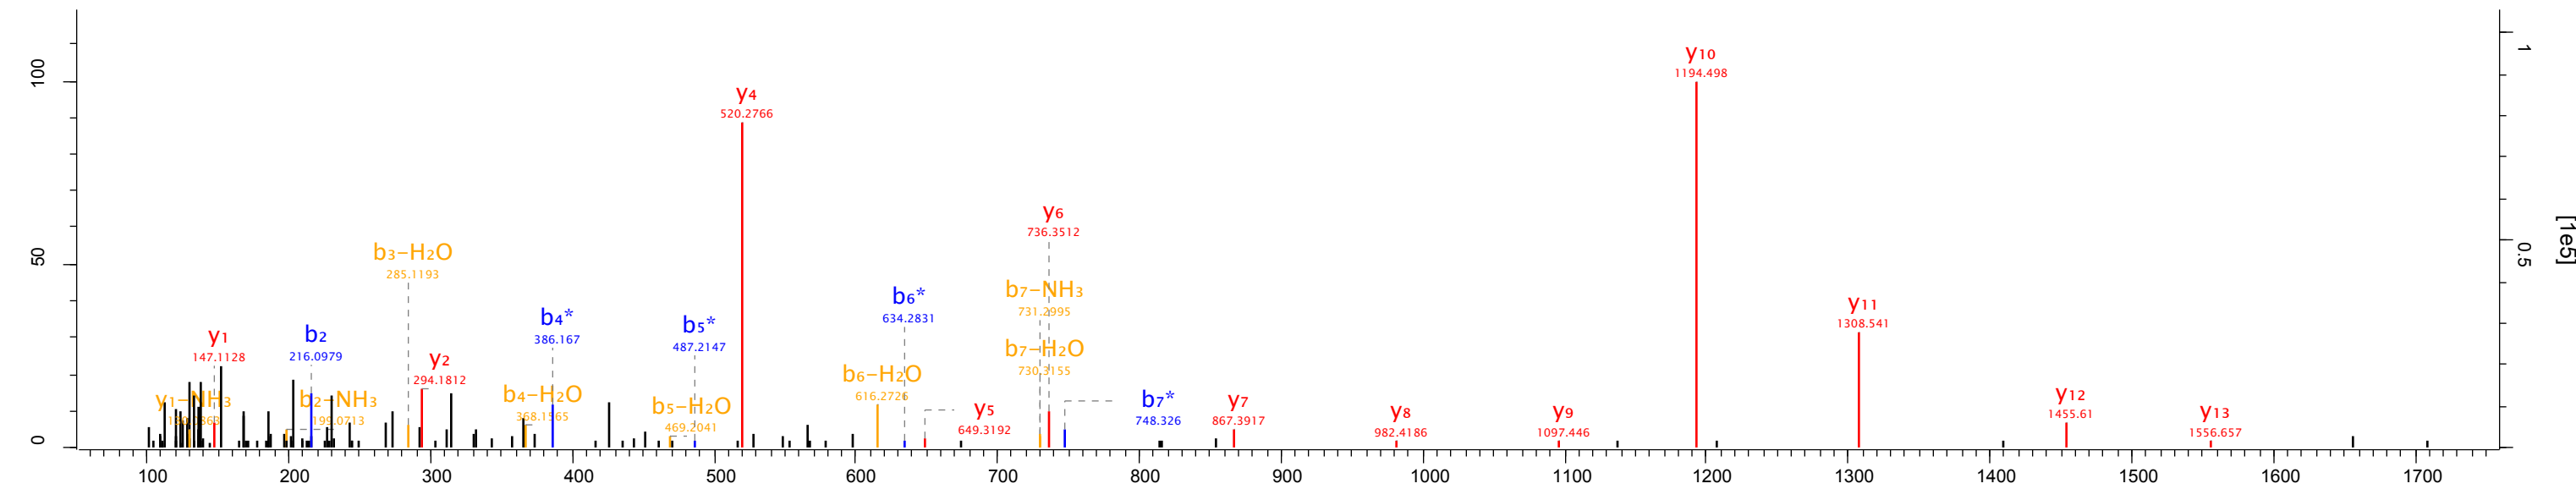

- S Q S ph T T F N P D D M S E P E F K -

b<sub>2</sub>
b<sub>4</sub>\*
b<sub>5</sub>\*
b<sub>6</sub>\*
b<sub>7</sub>\*
y<sub>13</sub>
y<sub>12</sub>
y<sub>11</sub>
y<sub>10</sub>
y<sub>9</sub>
y<sub>8</sub>
y<sub>7</sub>
y<sub>6</sub>
y<sub>5</sub>
y<sub>4</sub>
y<sub>2</sub>
y<sub>1</sub>

Raw file 20171215\_MaS\_33SR\_LMH\_phospho\_08 Scan 1902 Method FTMS; HCD Score 201.1 m/z 576.27 Gene names NUCKS1

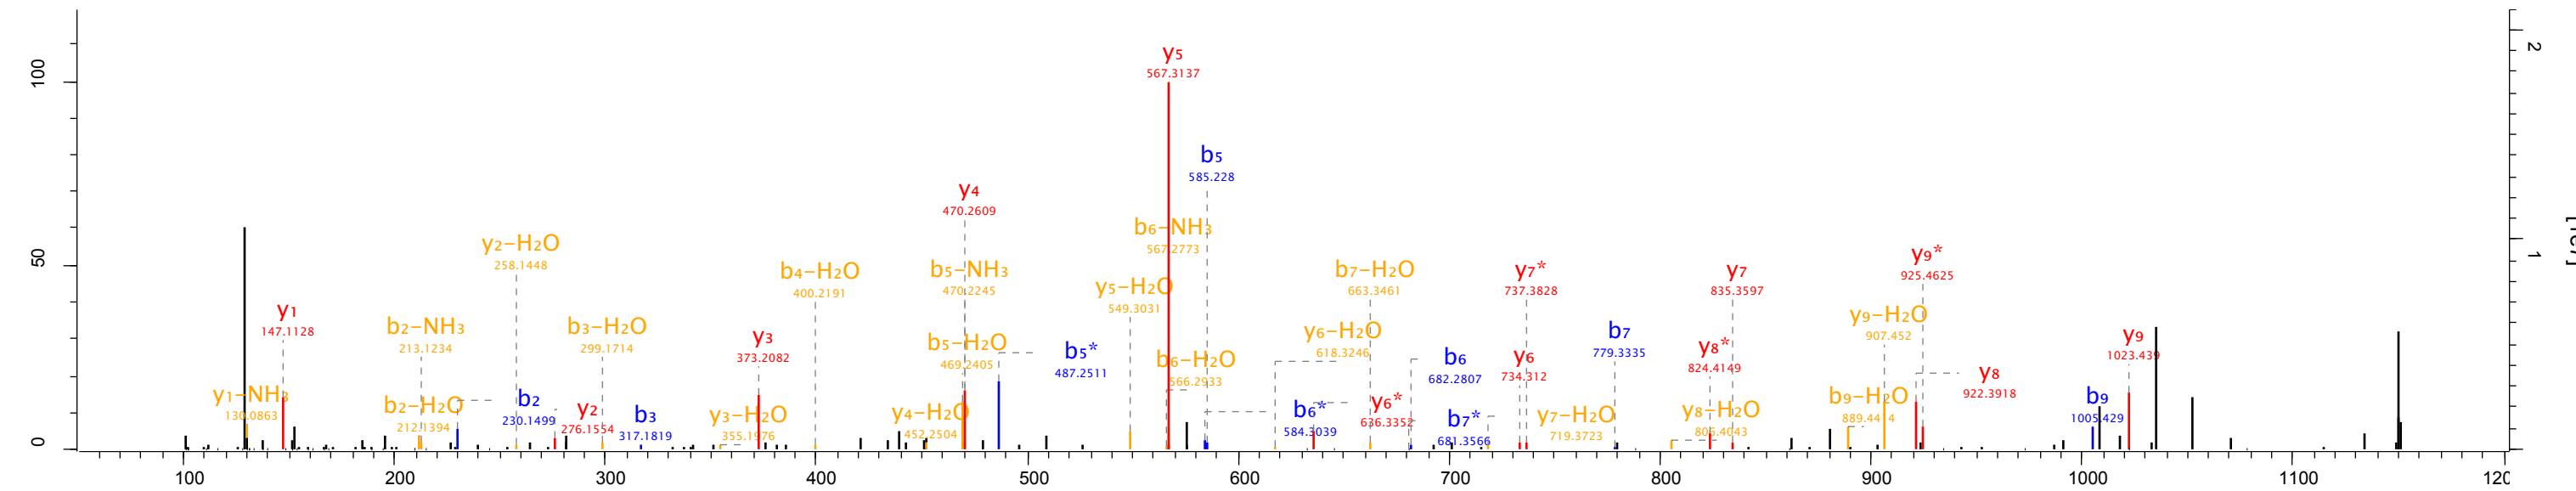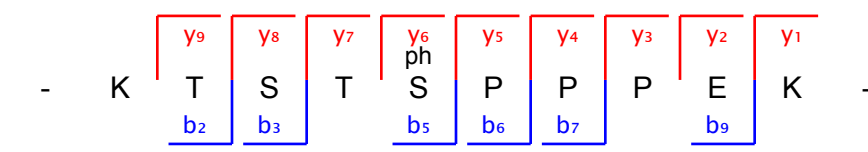

Raw file: 20171215\_MaS\_33SR\_LMH\_phospho\_08  
 Scan: 2222 Method: FTMS; HCD Score: 108.36 m/z: 378.52 Gene names: PARVA

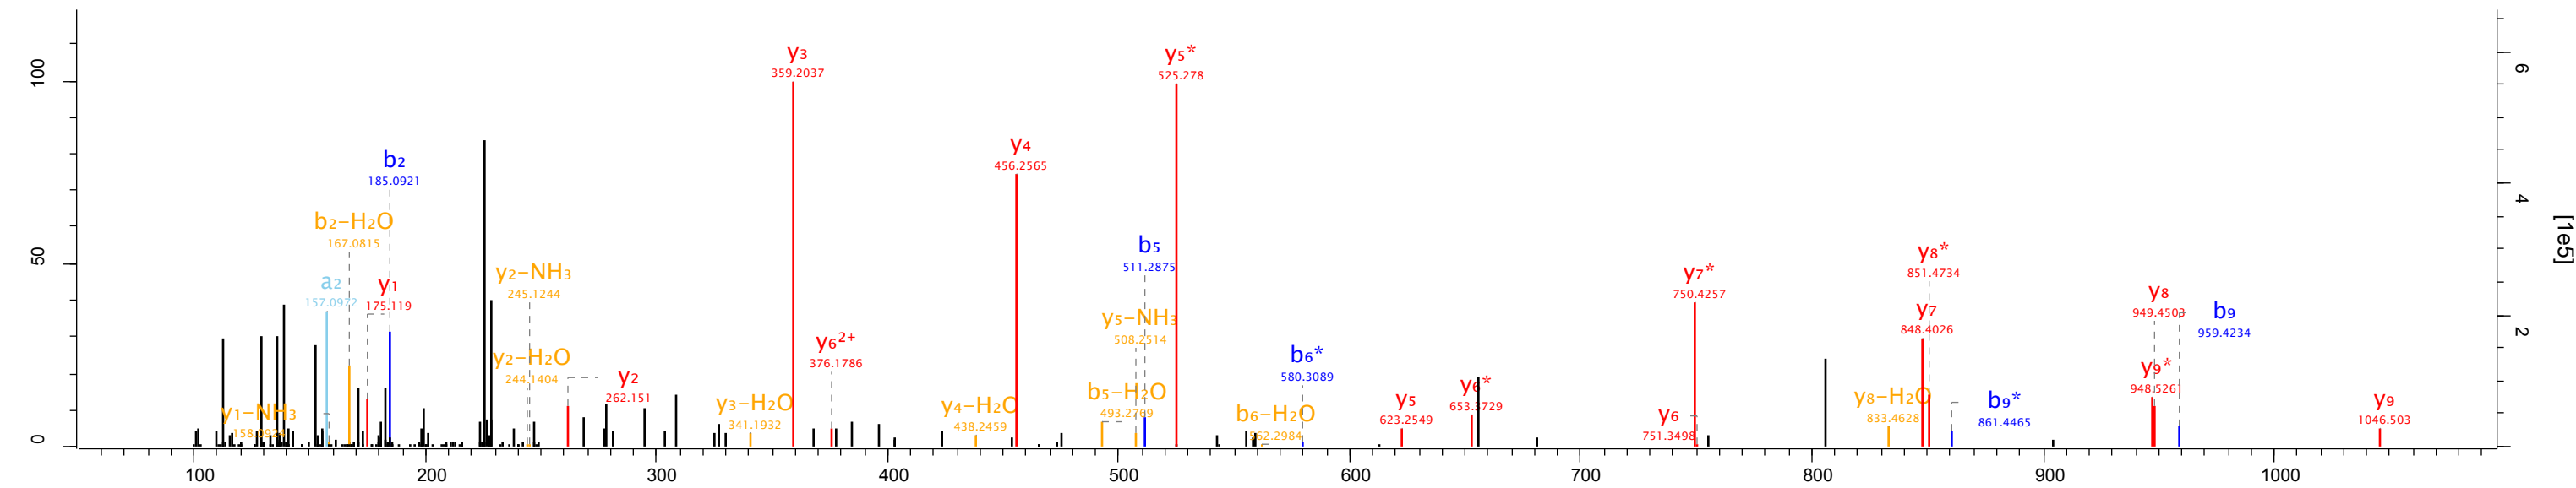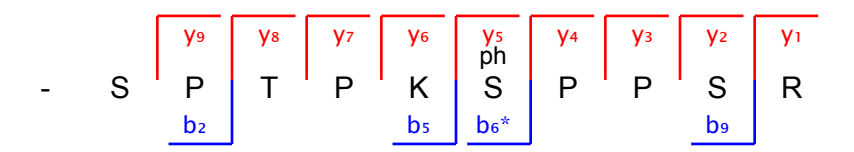

Raw file 20171215\_MaS\_33SR\_LMH\_phospho\_08 Scan 2272 Method FTMS; HCD Score 127.66 m/z 675.81 Gene names SRRM2

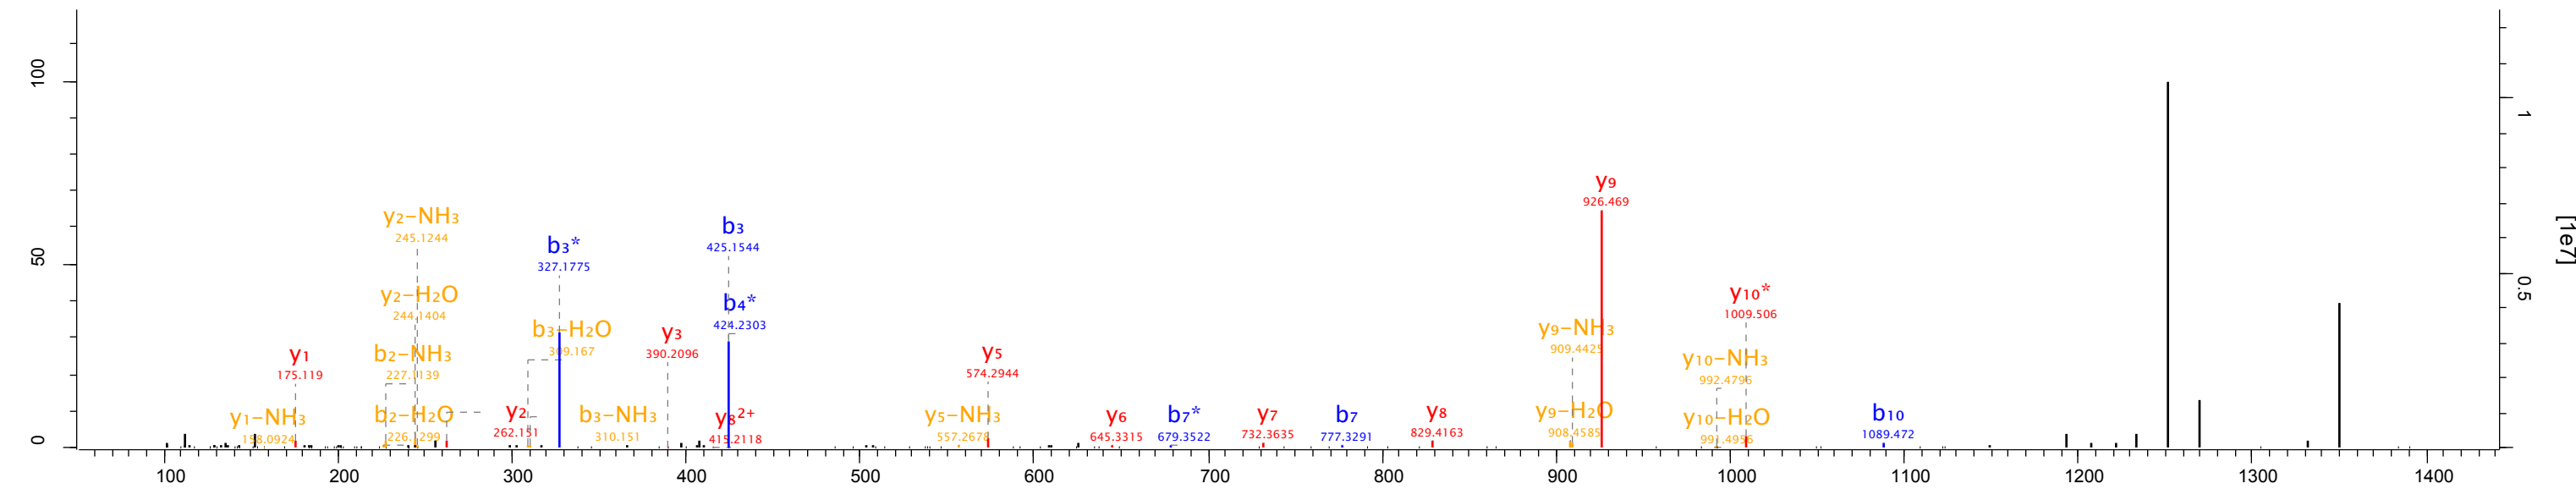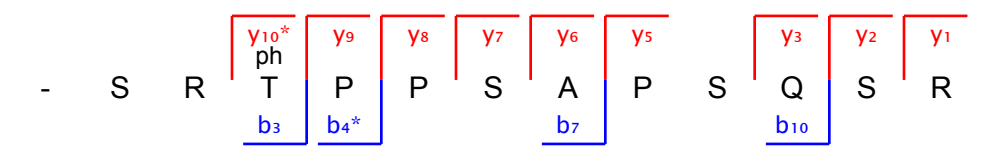

Raw file 20171215\_MaS\_33SR\_LMH\_phospho\_08 Scan 3132 Method FTMS; HCD Score 98.94 m/z 564.73 Gene names BUD13

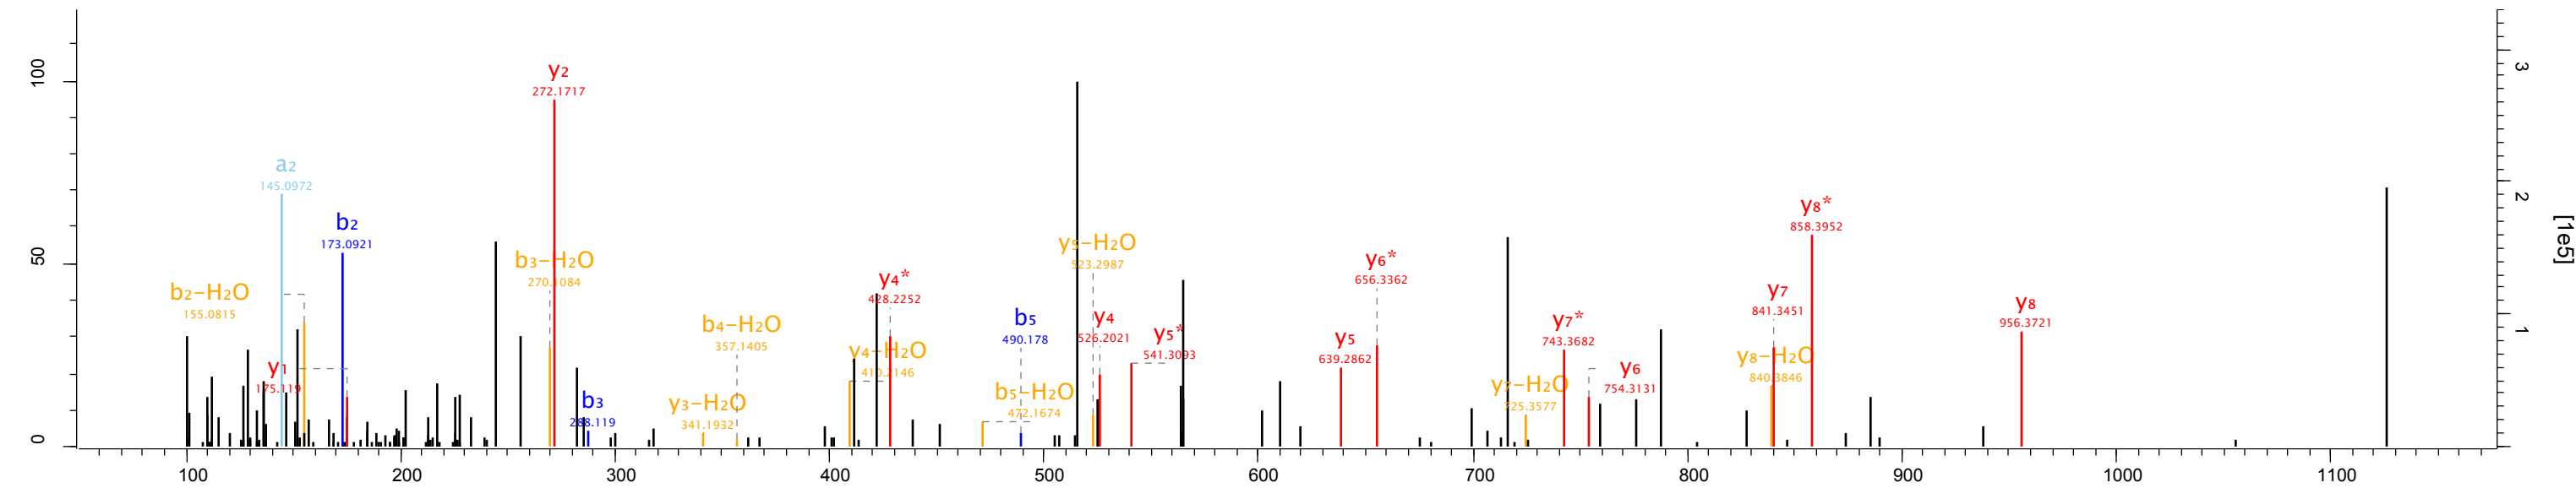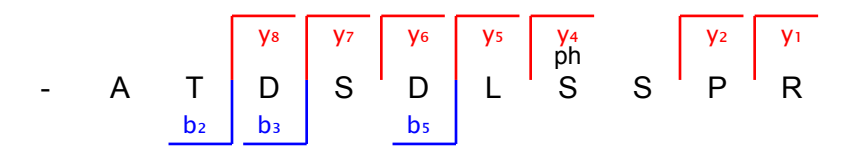

Raw file 20171215\_MaS\_33SR\_LMH\_phospho\_08 Scan 3572 Method FTMS; HCD Score 86.26 m/z 632.27 Gene names ARHGEF7

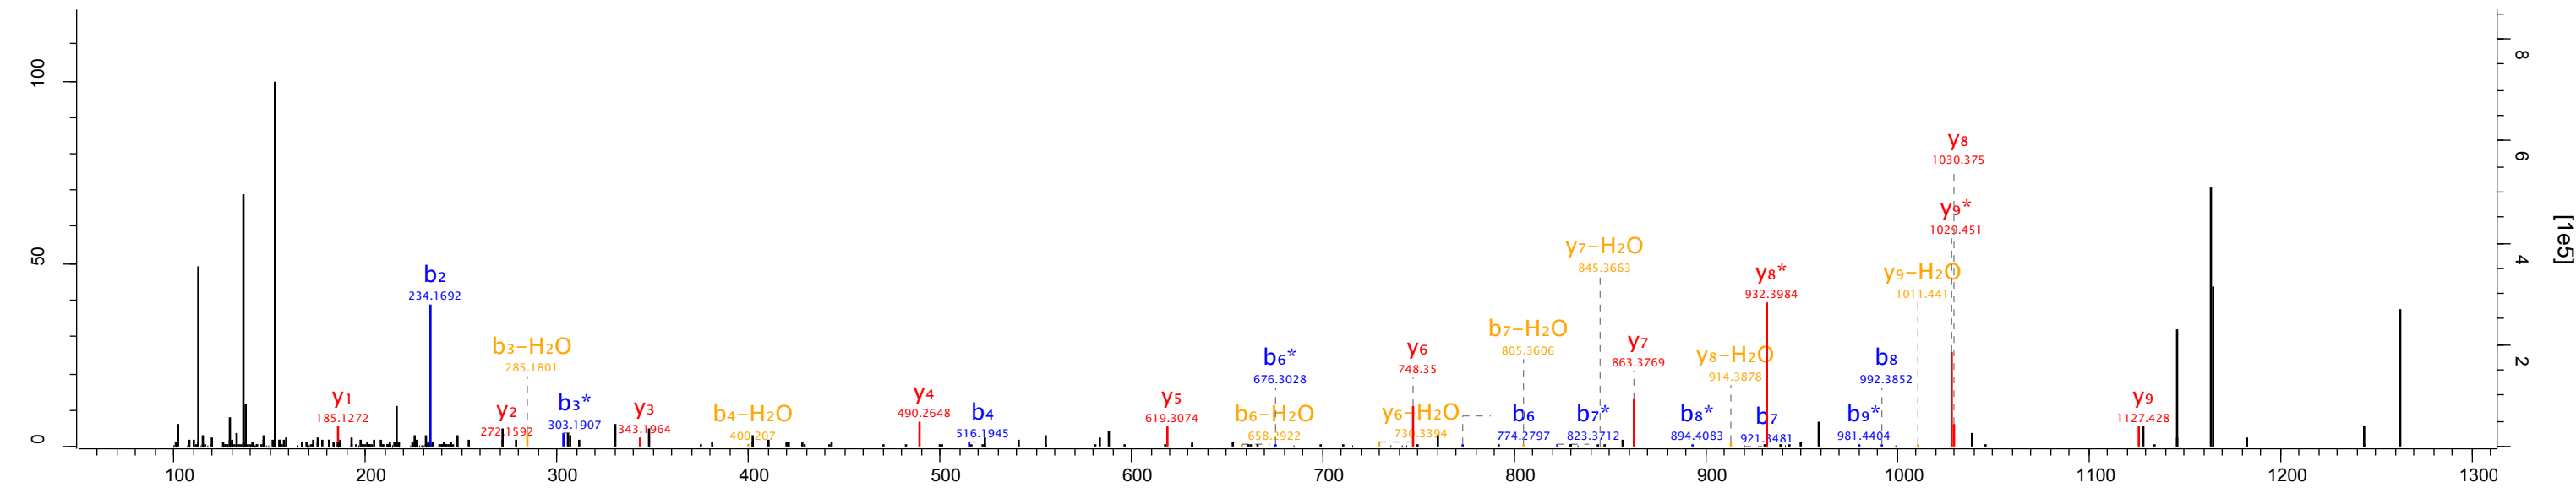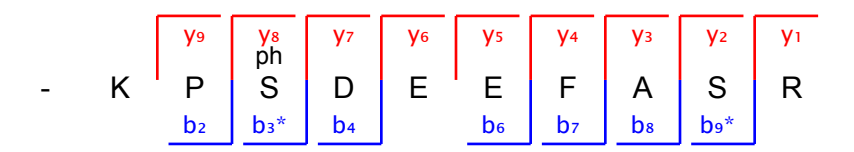

Raw file 20171215\_MaS\_33SR\_LMH\_phospho\_08 Scan 3892 Method FTMS; HCD Score 71.81 m/z 530.24 Gene names CIT

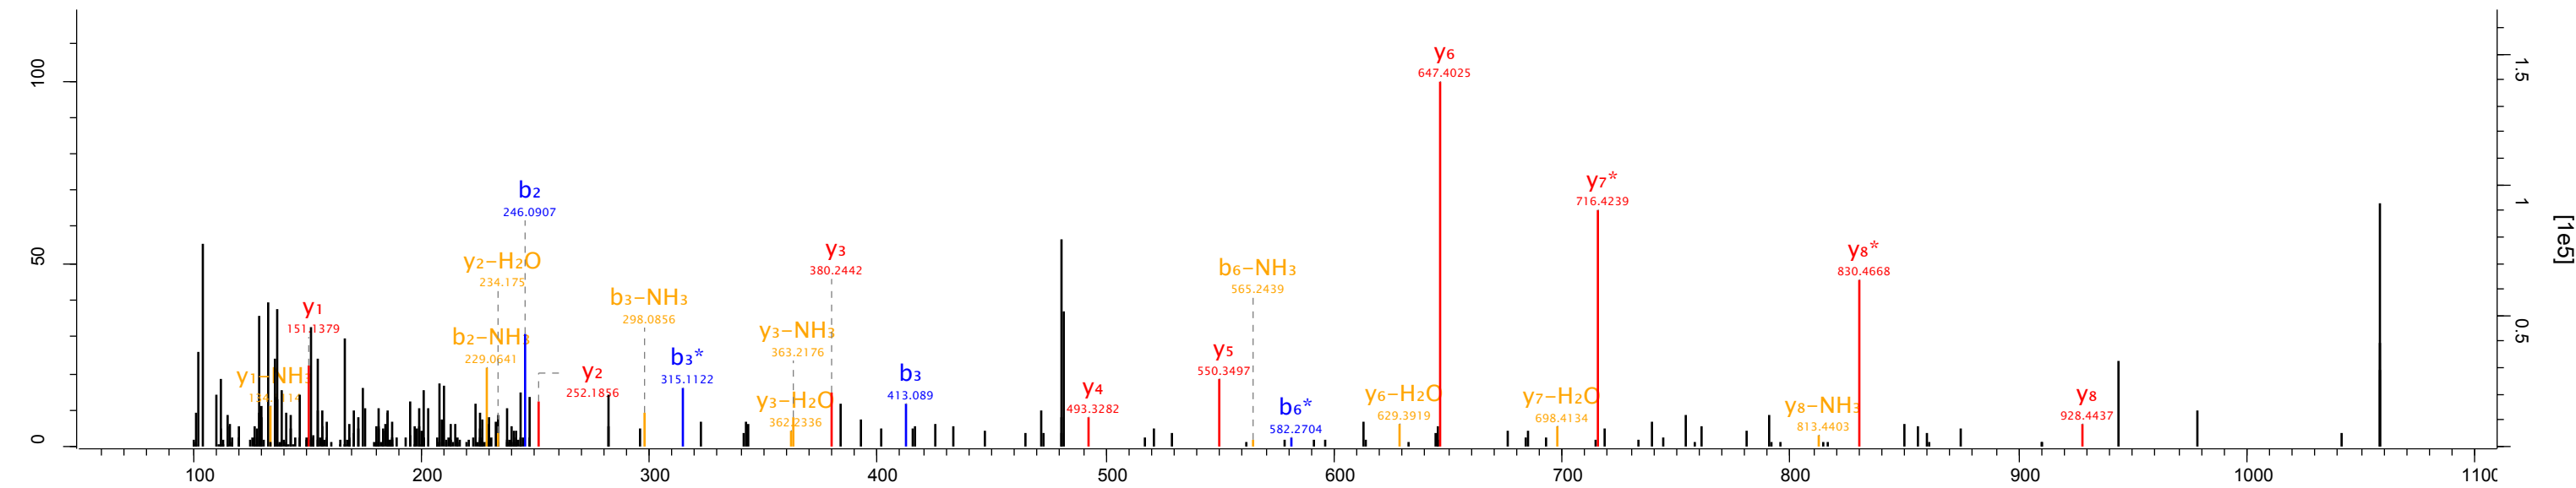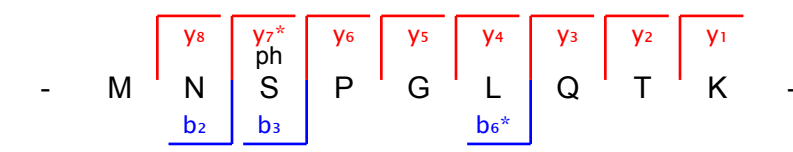

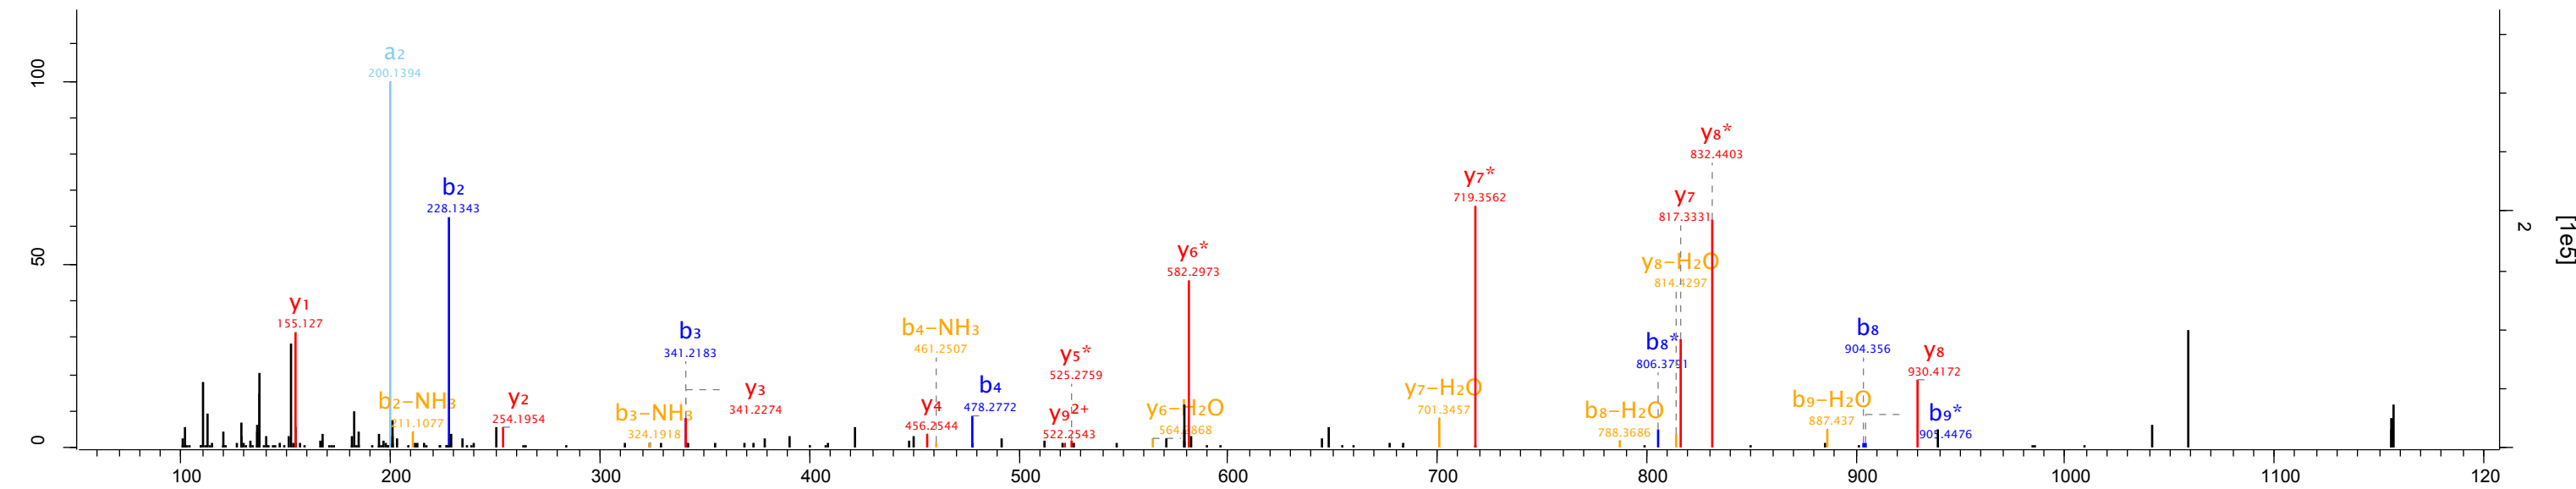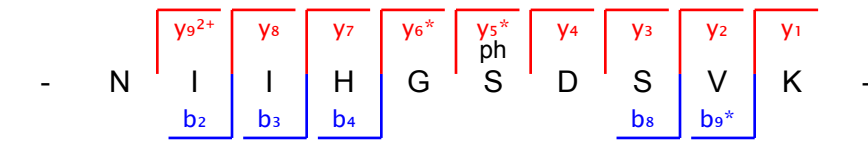



Raw file: 20171215\_MaS\_33SR\_LMH\_phospho\_08  
 Scan: 5592 Method: FTMS; HCD Score: 64.48 m/z: 397.2 Gene names: ARHGEF2

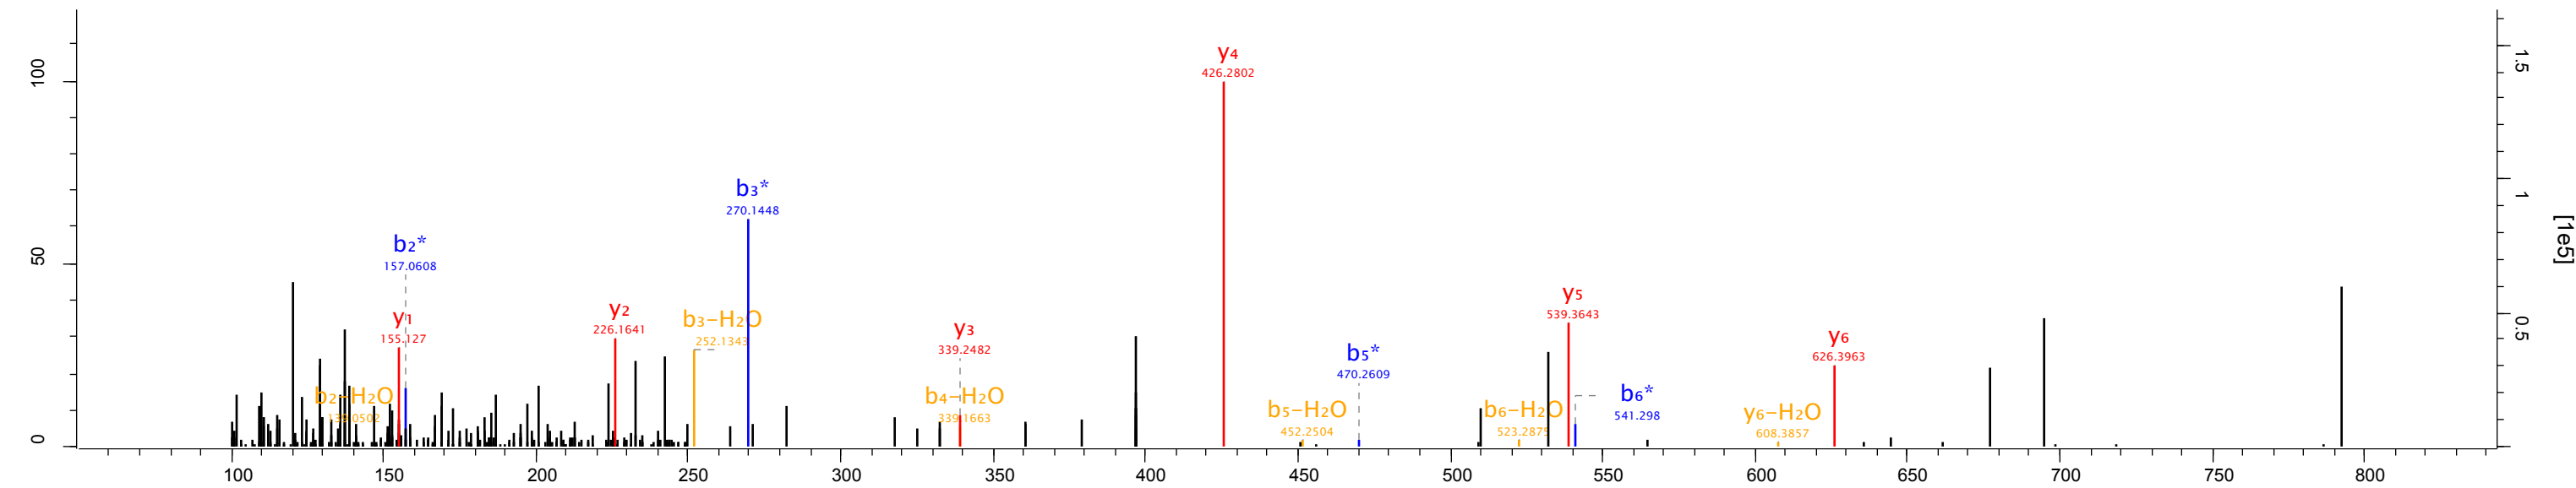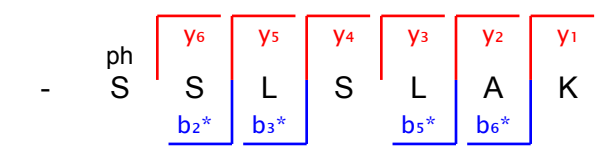

Raw file 20171215\_MaS\_33SR\_LMH\_phospho\_08 Scan 6632 Method FTMS; HCD Score 134.37 m/z 665.29 Gene names AFAP1

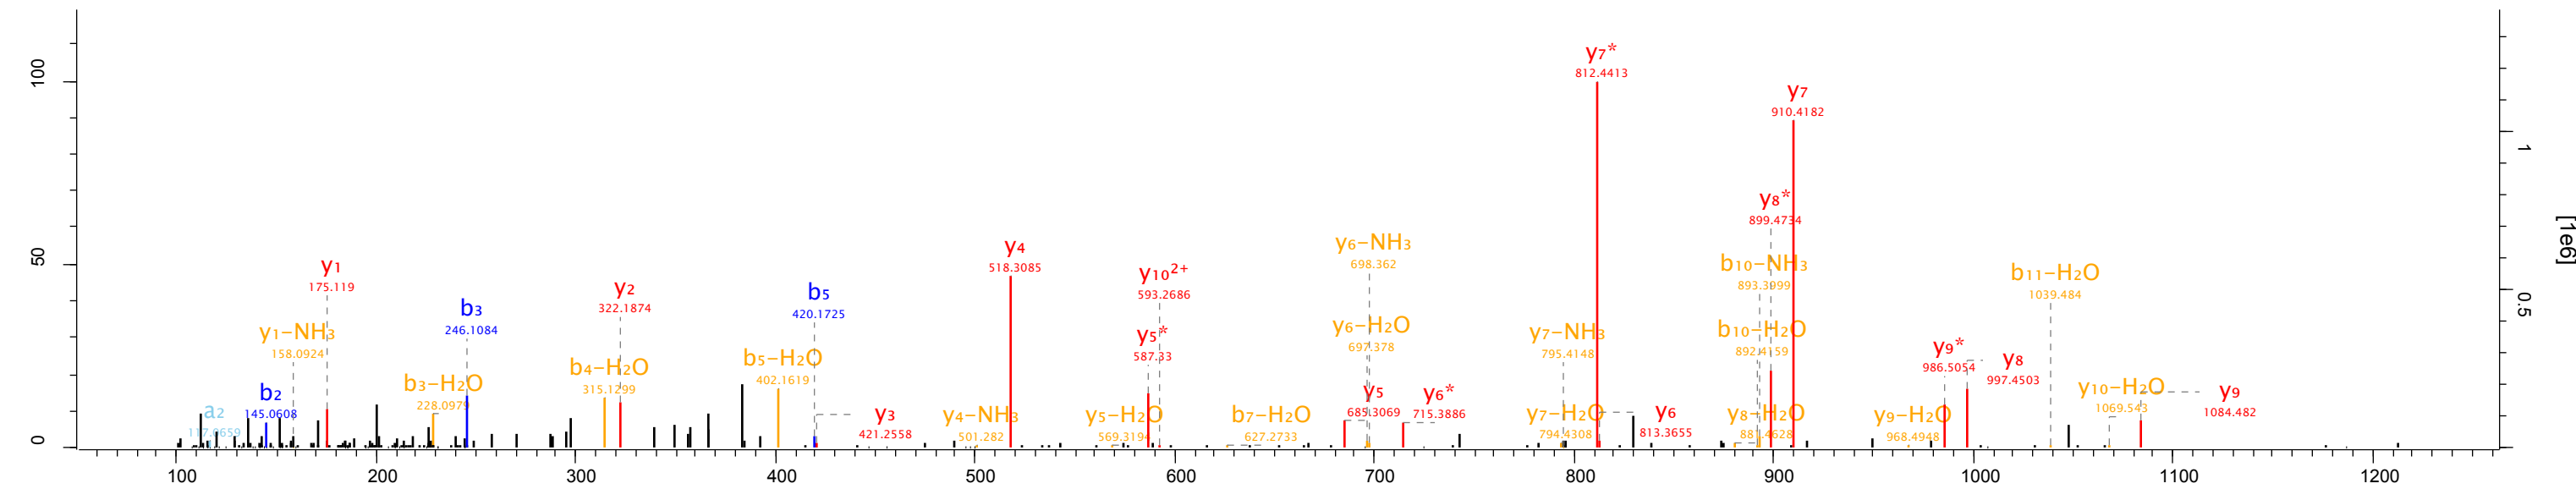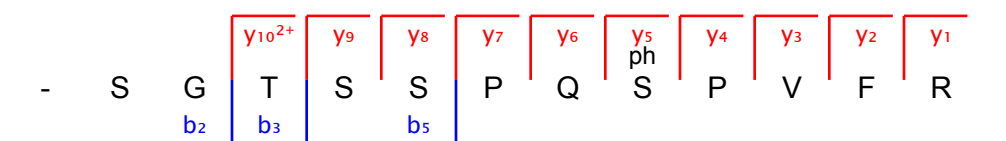

Raw file 20171215\_MaS\_33SR\_LMH\_phospho\_08 Scan 8612 Method FTMS; HCD Score 43.79 m/z 802.84 Gene names TXLNG

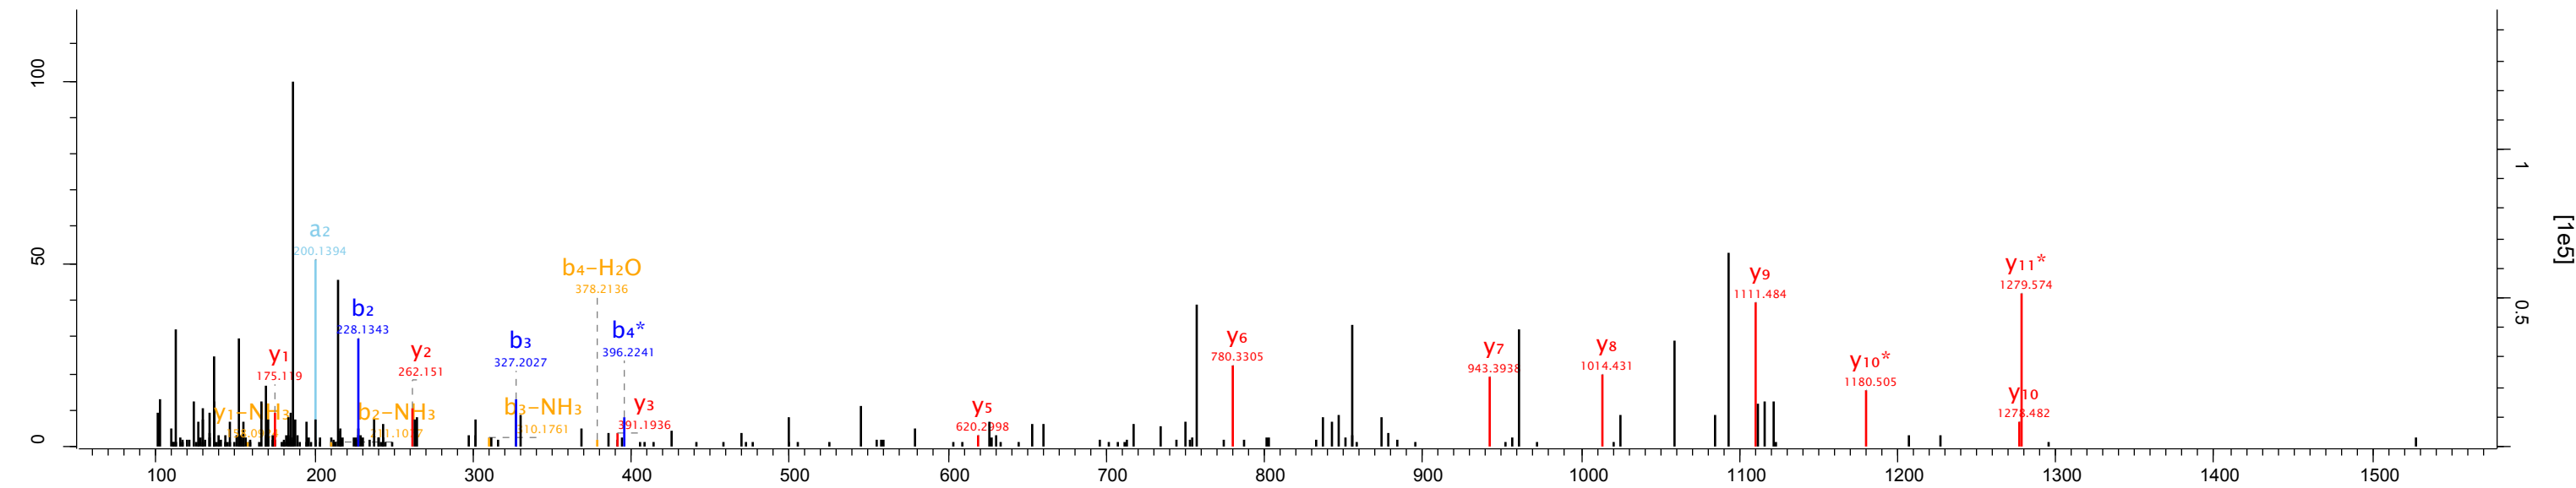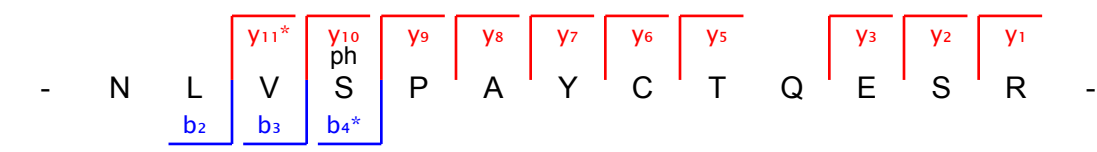

Raw file 20171215\_MaS\_33SR\_LMH\_phospho\_08 Scan 9672 Method FTMS; HCD Score 73.29 m/z 892.89 Gene names ZNF8;RANBP3

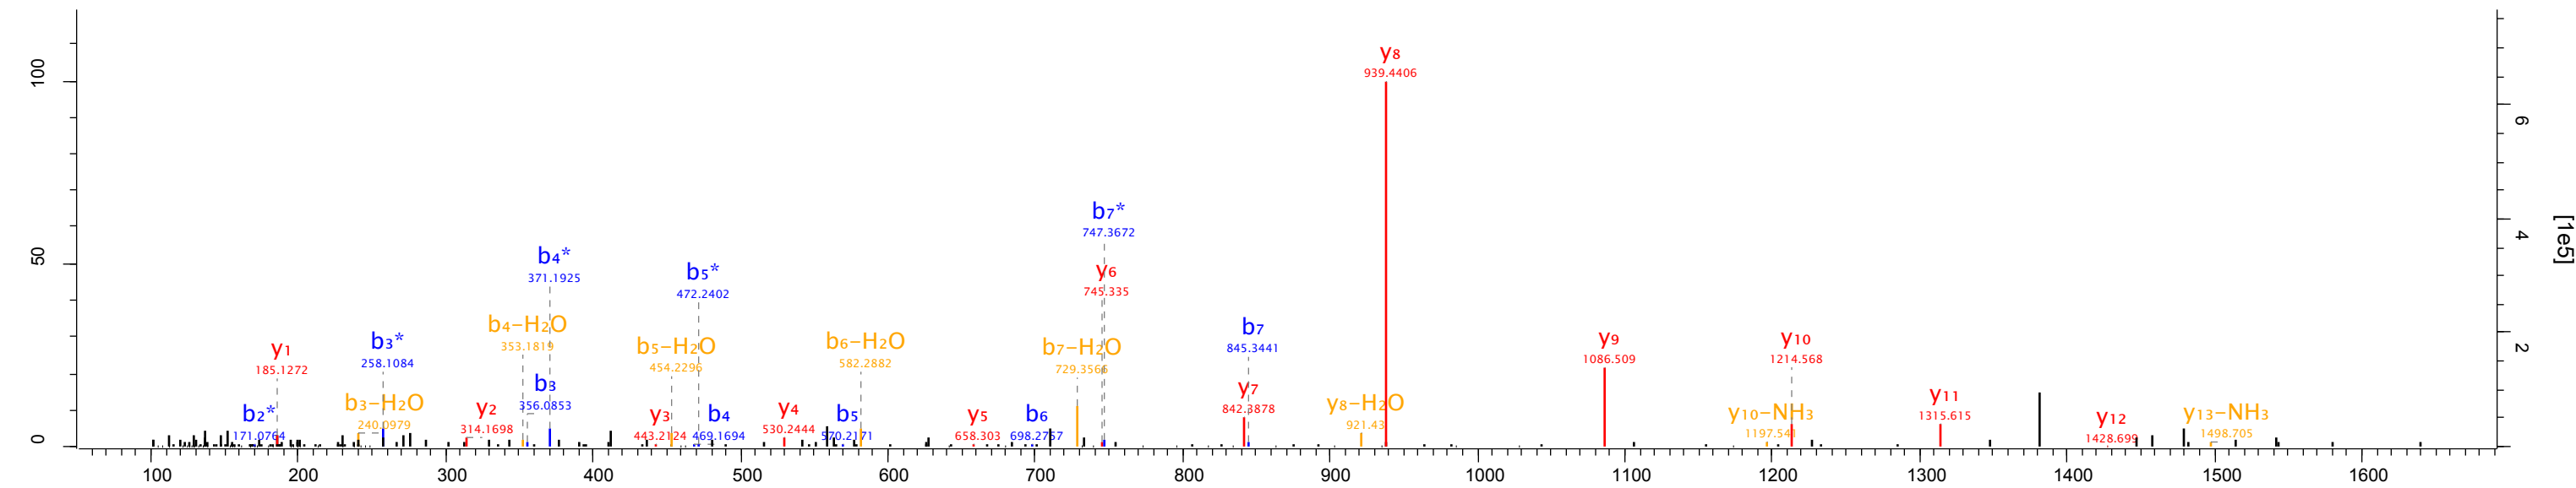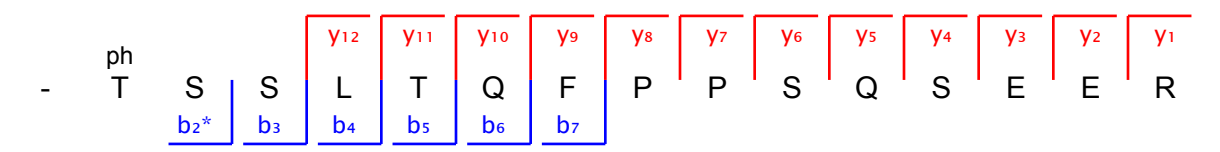

Raw file 20171215\_MaS\_33SR\_LMH\_phospho\_09 Scan 1982 Method FTMS; HCD Score 103.91 m/z 395.2 Gene names RPS2

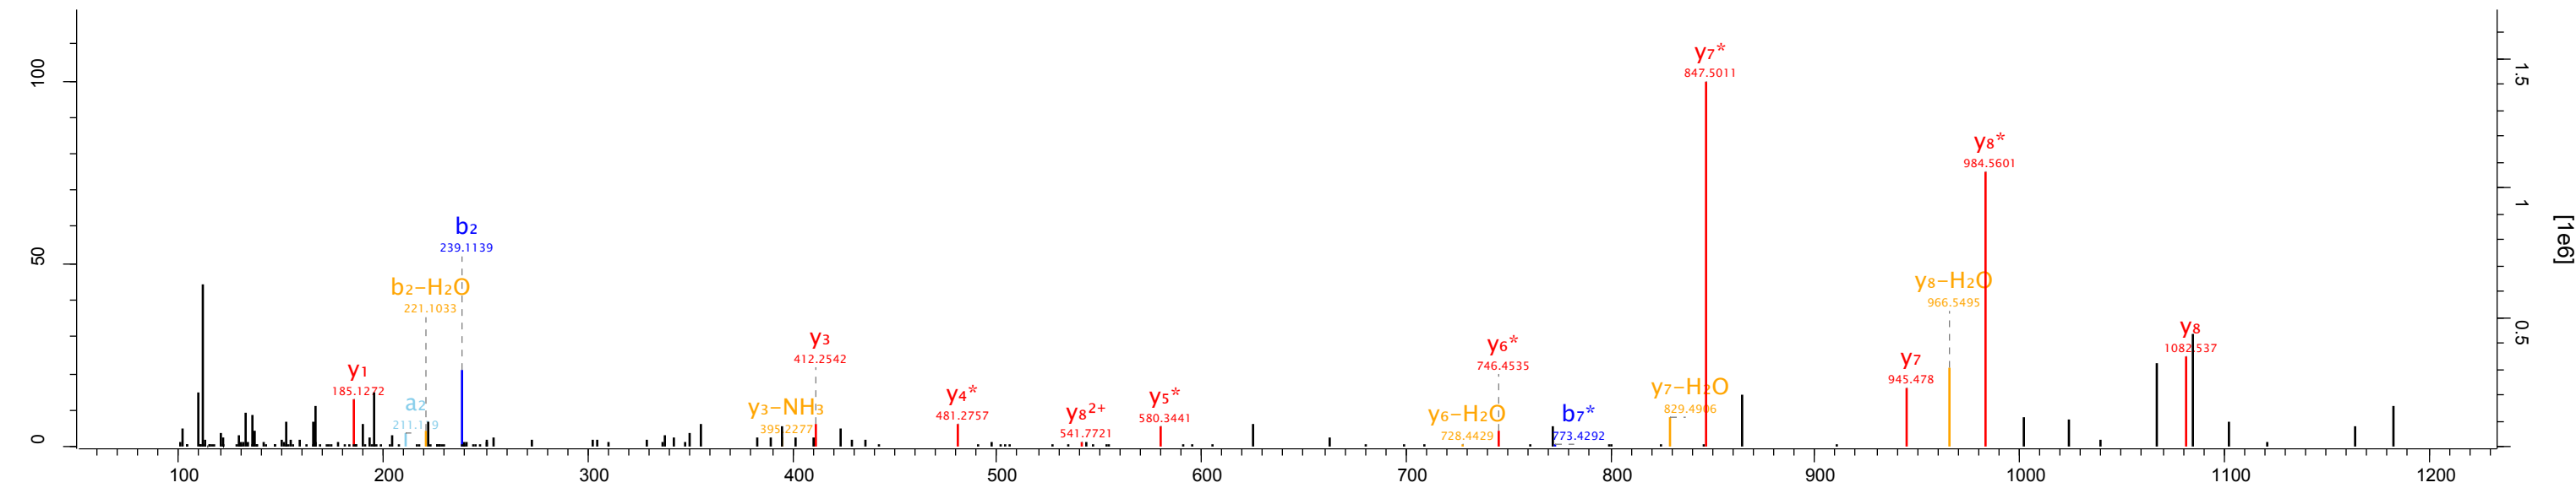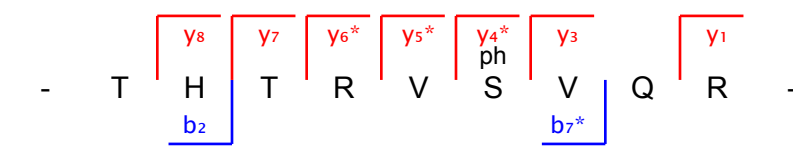

Raw file 20171215\_MaS\_33SR\_LMH\_phospho\_09 Scan 2062 Method FTMS; HCD Score 81.87 m/z 650.35 Gene names NOLC1

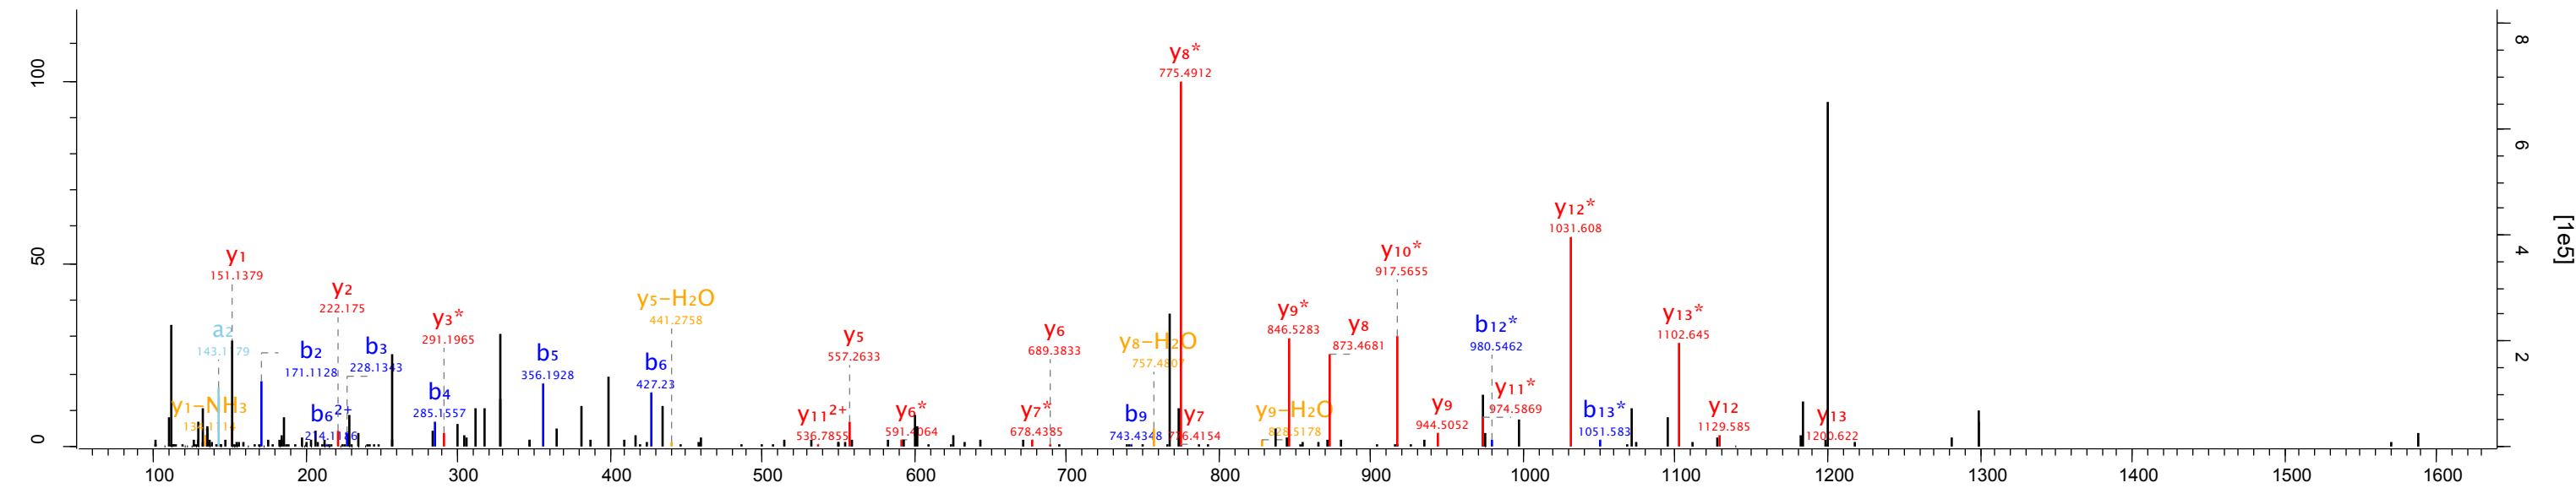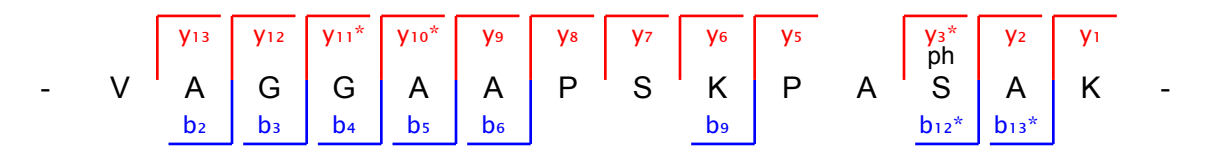

Raw file 20171215\_MaS\_33SR\_LMH\_phospho\_09 Scan 2132 Method FTMS; HCD Score 78.51 m/z 667.32 Gene names SEPT9

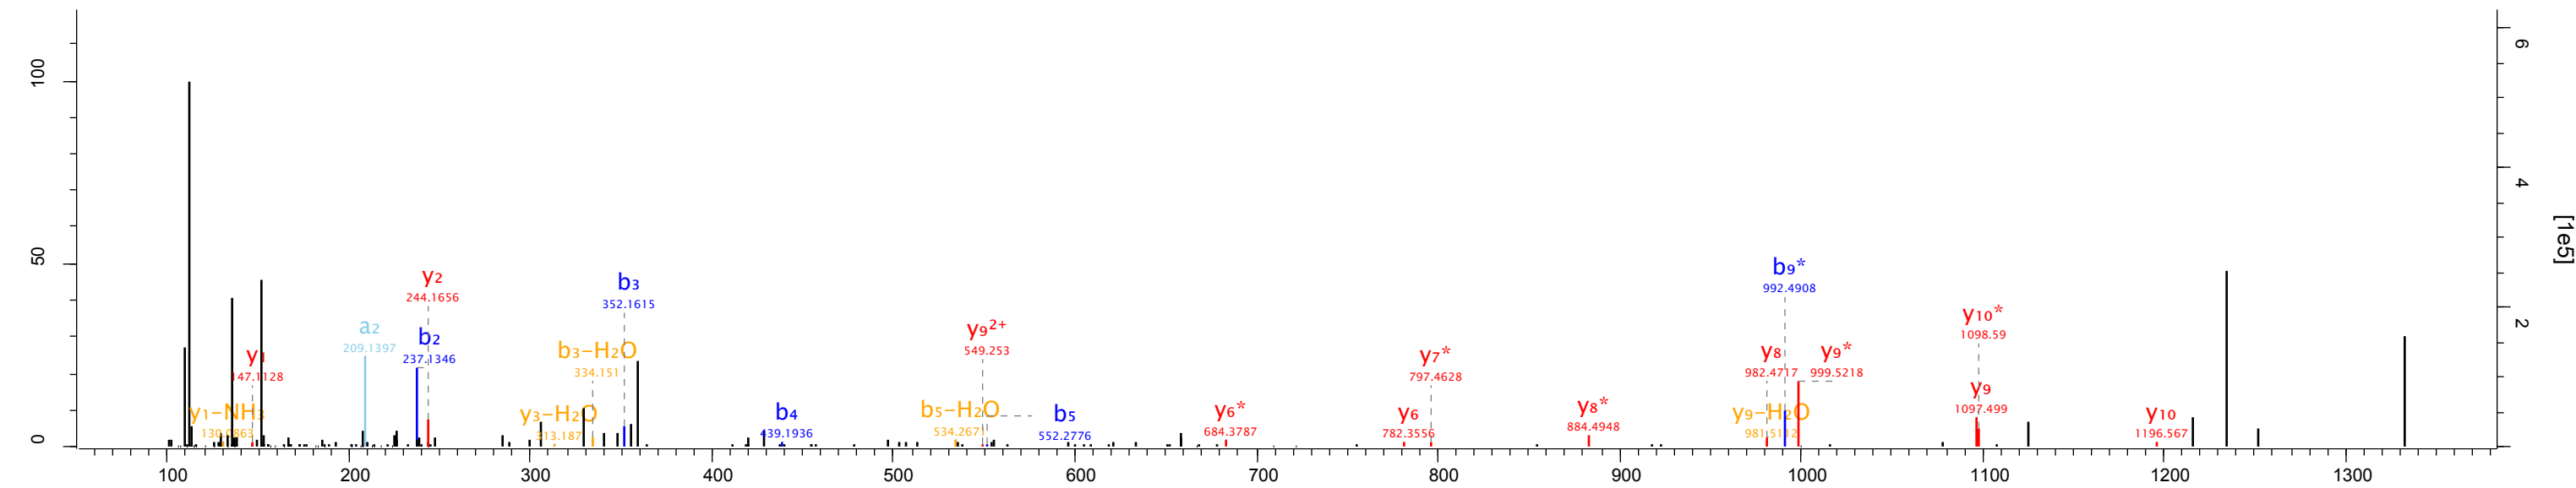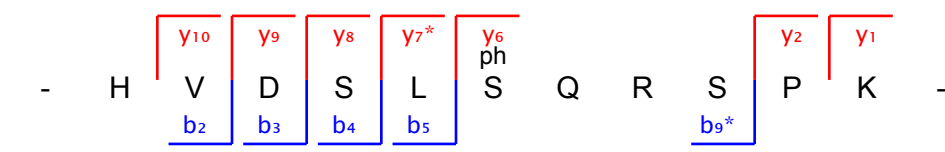

Raw file 20171215\_MaS\_33SR\_LMH\_phospho\_09 Scan 2382 Method FTMS; HCD Score 45.68 m/z 368.17 Gene names STIP1

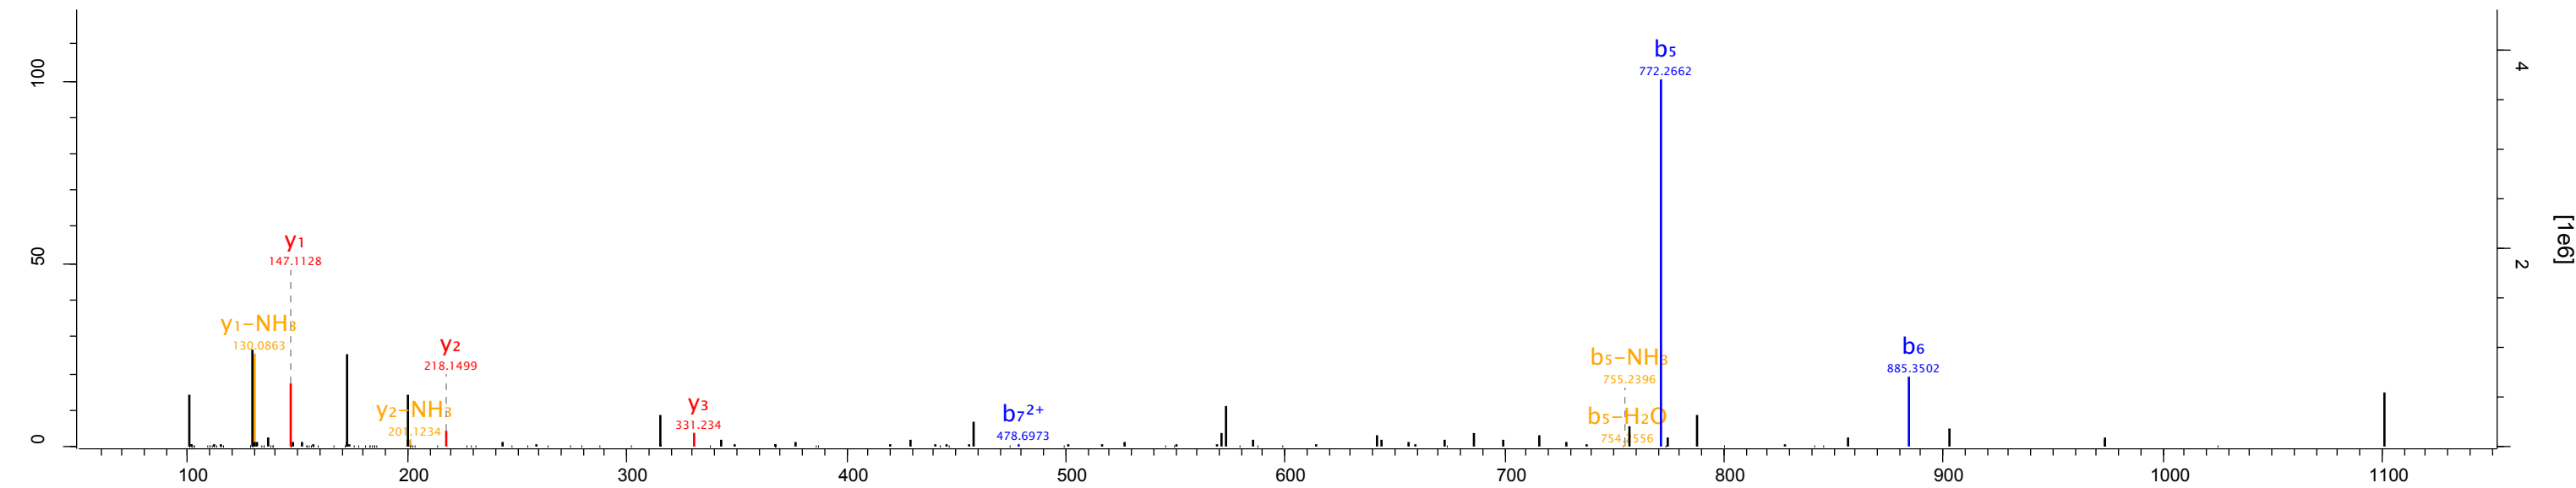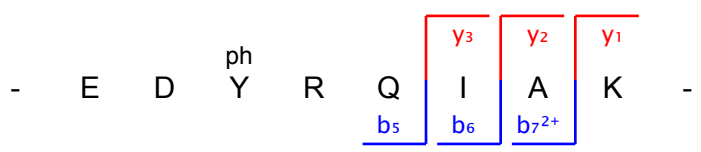



Raw file 20171215\_MaS\_33SR\_LMH\_phospho\_09 Scan 3102 Method FTMS; HCD Score 107.39 m/z 827.37 Gene names ADRM1

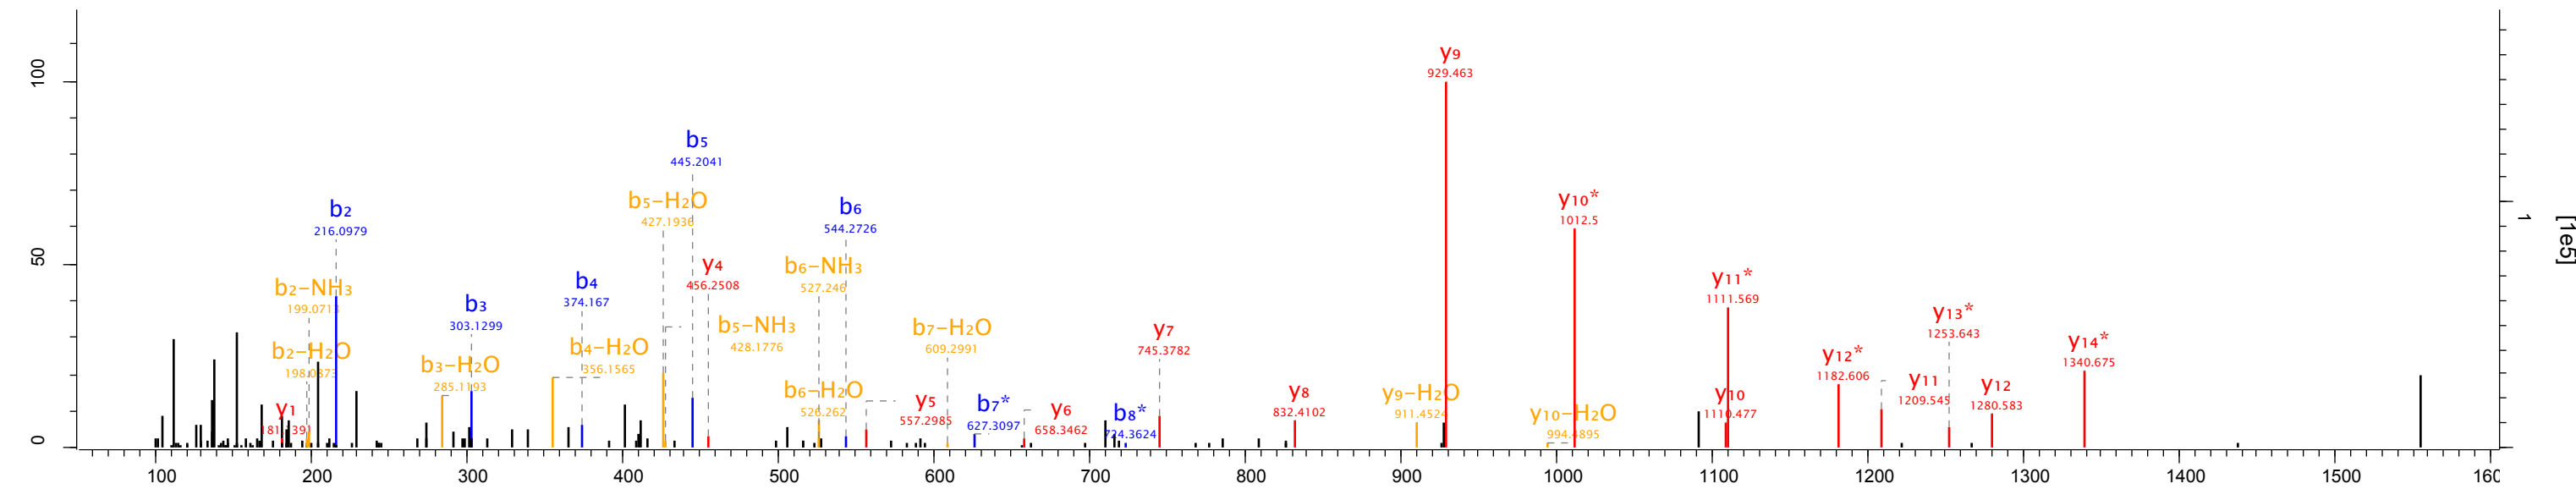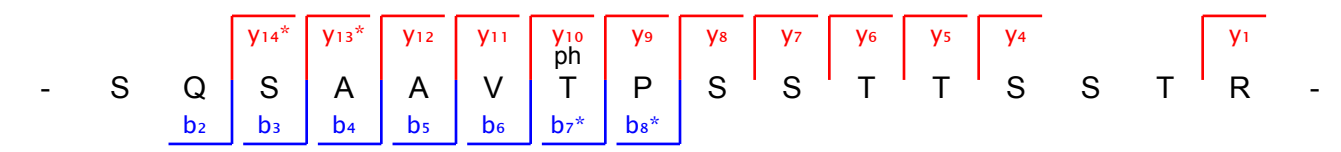

Raw file 20171215\_MaS\_33SR\_LMH\_phospho\_09 Scan 3732 Method FTMS; HCD Score 51.13 m/z 541.74 Gene names NAV1

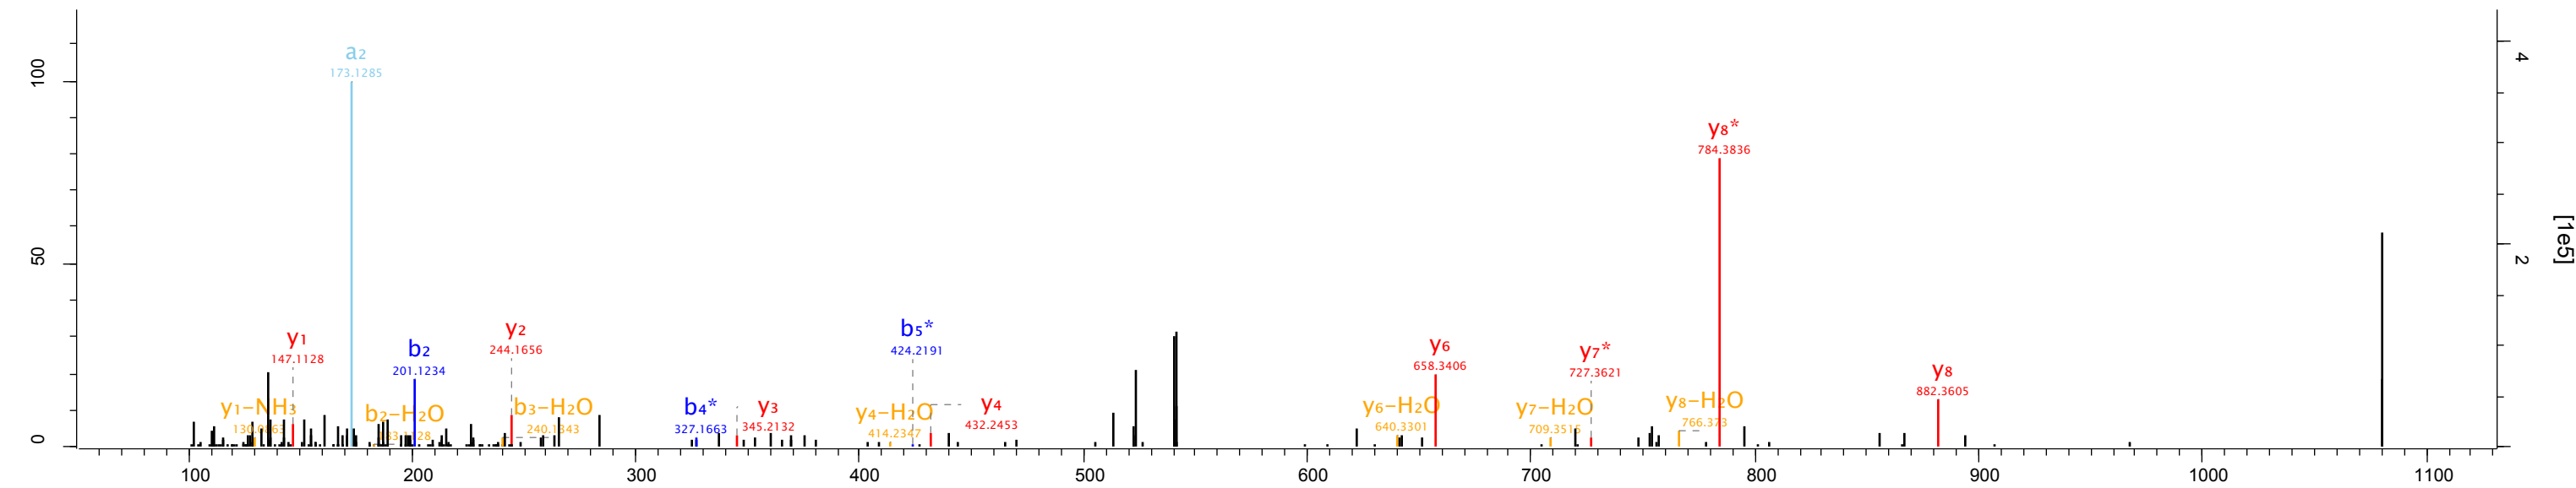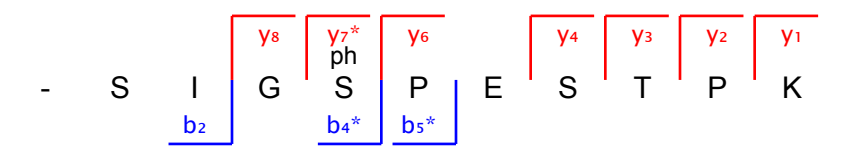

Raw file 20171215\_MaS\_33SR\_LMH\_phospho\_09 Scan 4272 Method FTMS; HCD Score 74.78 m/z 705.8 Gene names ARHGEF40

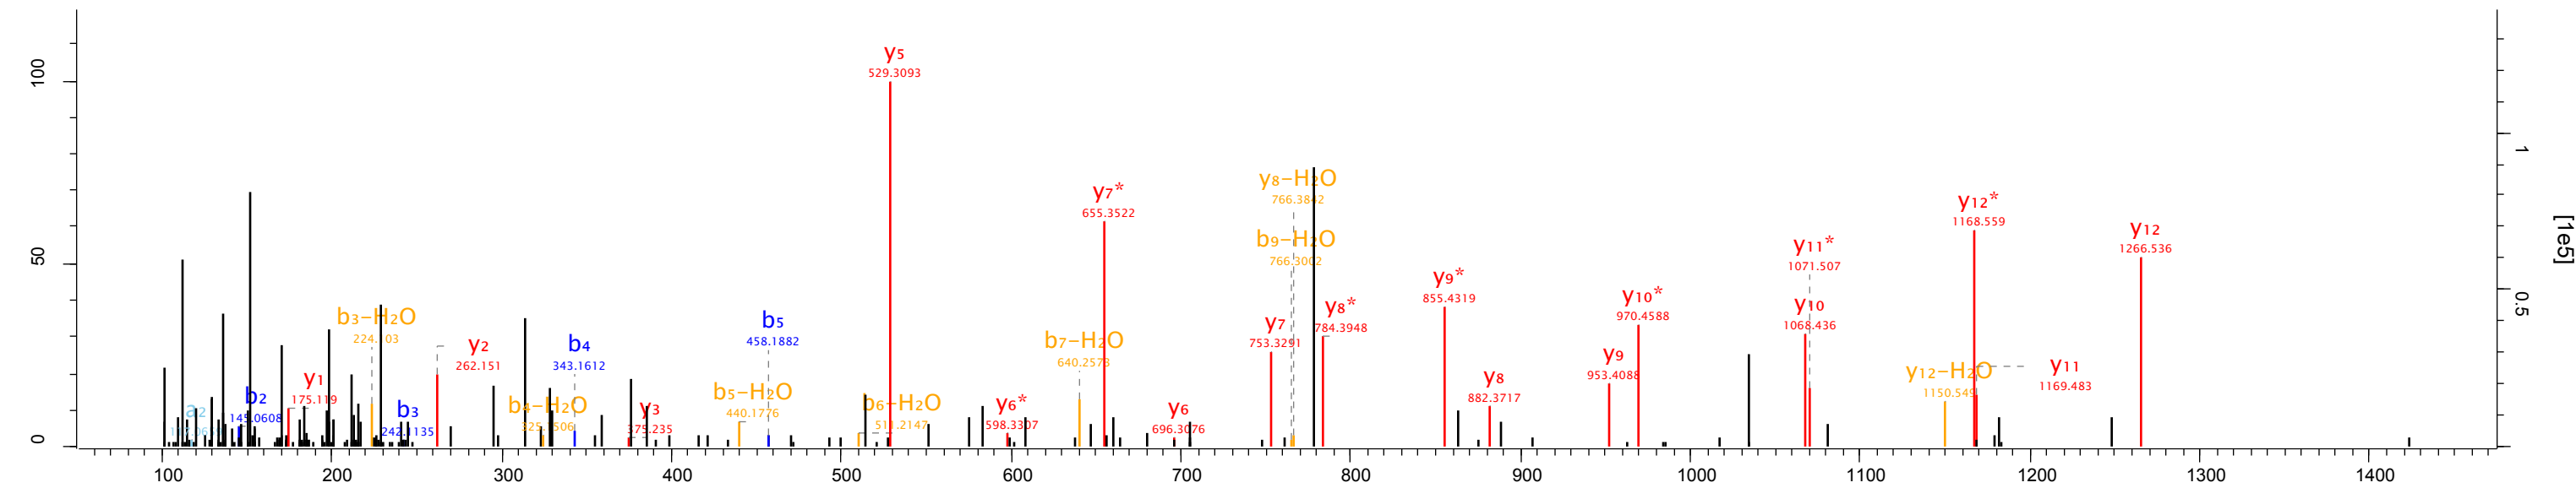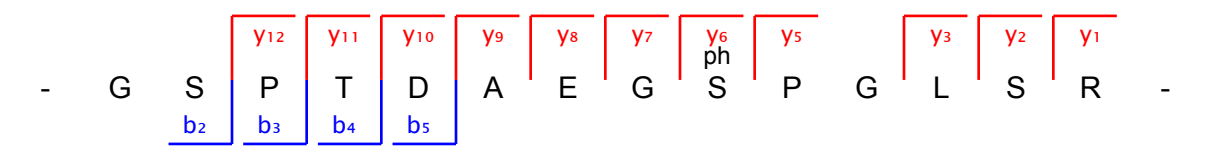

Raw file 20171215\_MaS\_33SR\_LMH\_phospho\_09 Scan 4622 Method FTMS; HCD Score 89.91 m/z 648.78 Gene names TBC1D5

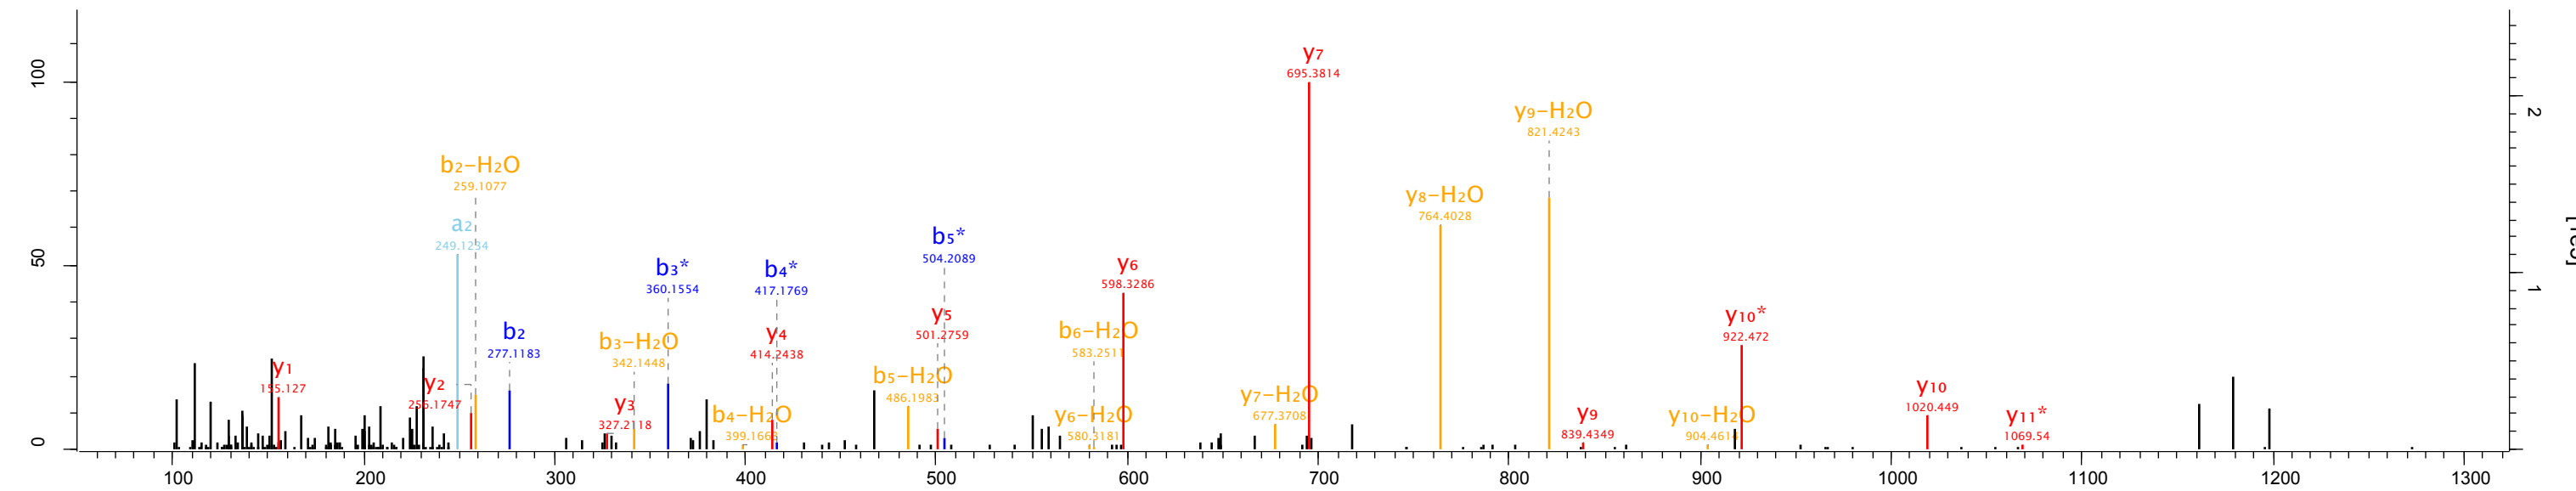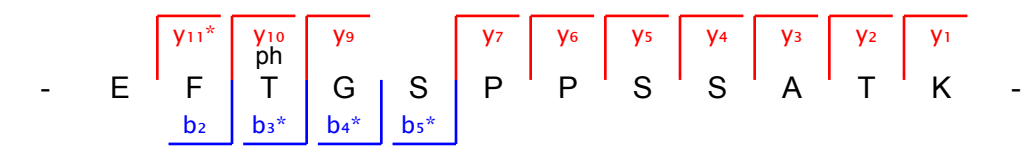



Raw file 20171215\_MaS\_33SR\_LMH\_phospho\_09 Scan 6672 Method FTMS; HCD Score 104.84 m/z 877.89 Gene names LIG1

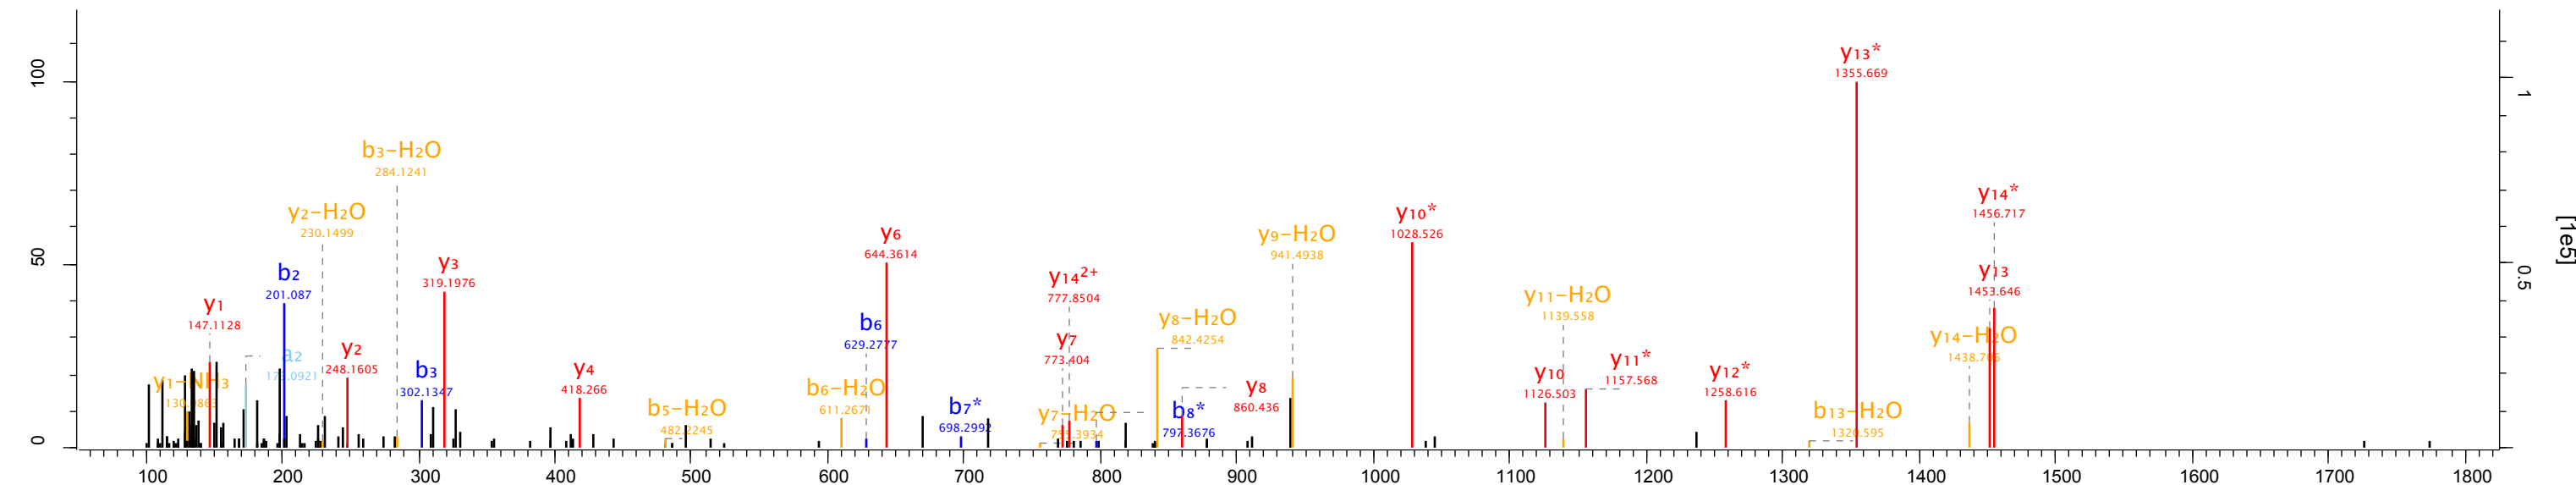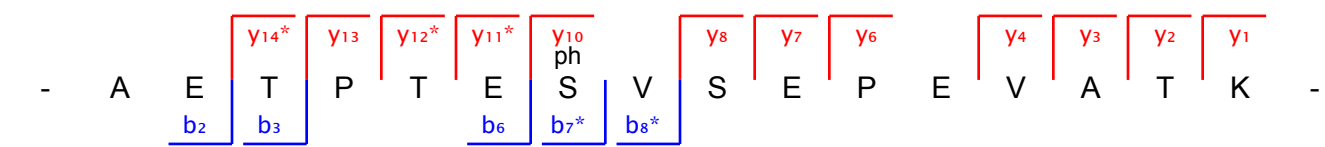

Raw file 20171215\_MaS\_33SR\_LMH\_phospho2\_01  
 Scan 2442 Method FTMS; HCD Score 44.24 m/z 537.92 Gene names MED1

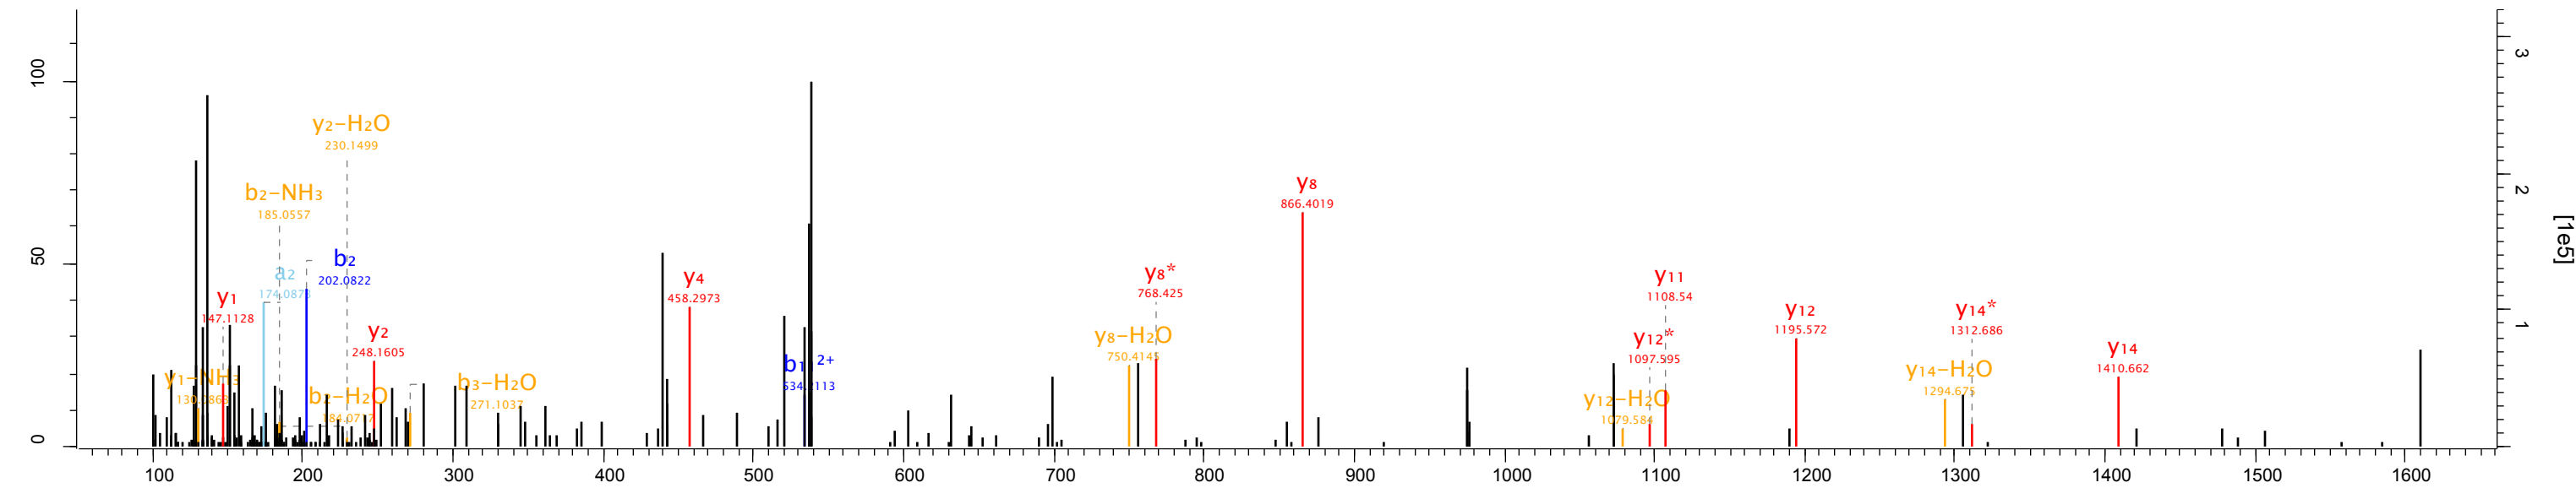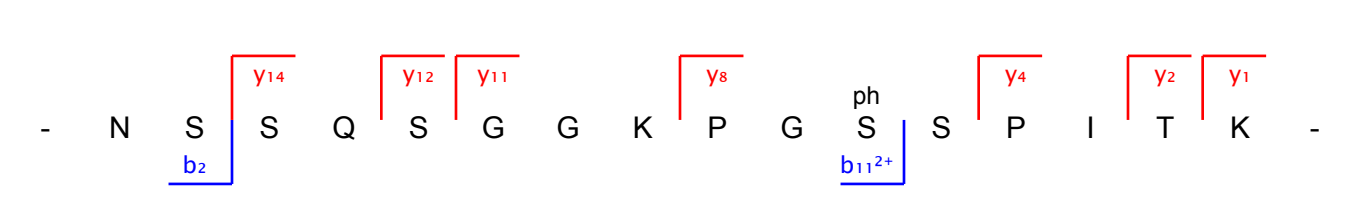

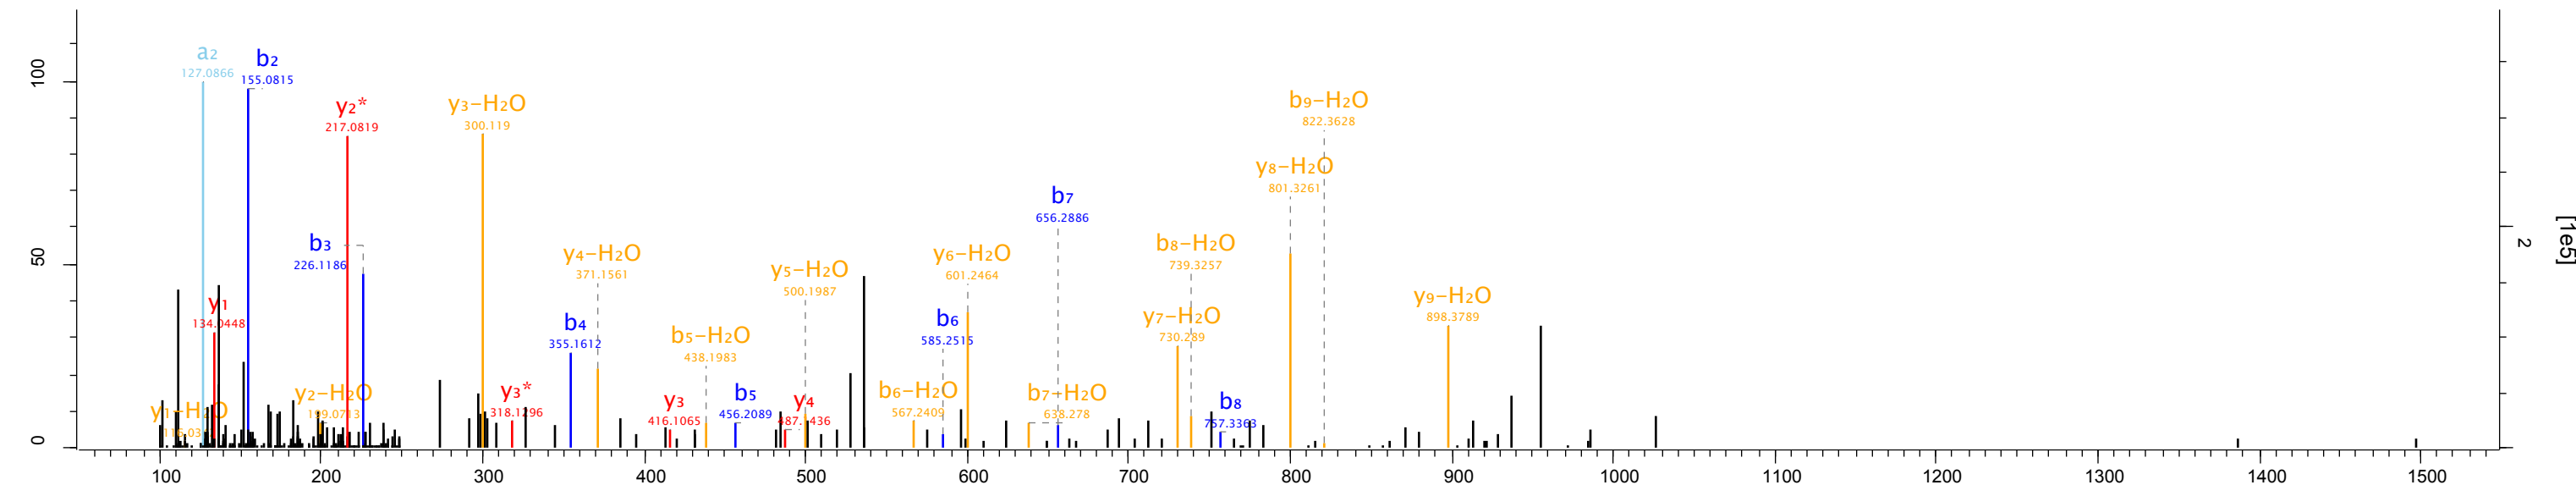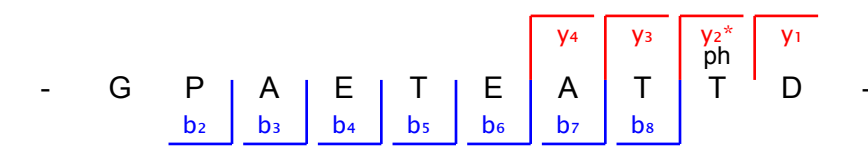



Raw file 20171215\_MaS\_33SR\_LMH\_phospho2\_01 Scan 2772 Method FTMS; HCD Score 116.58 m/z 595.75 Gene names NAA10

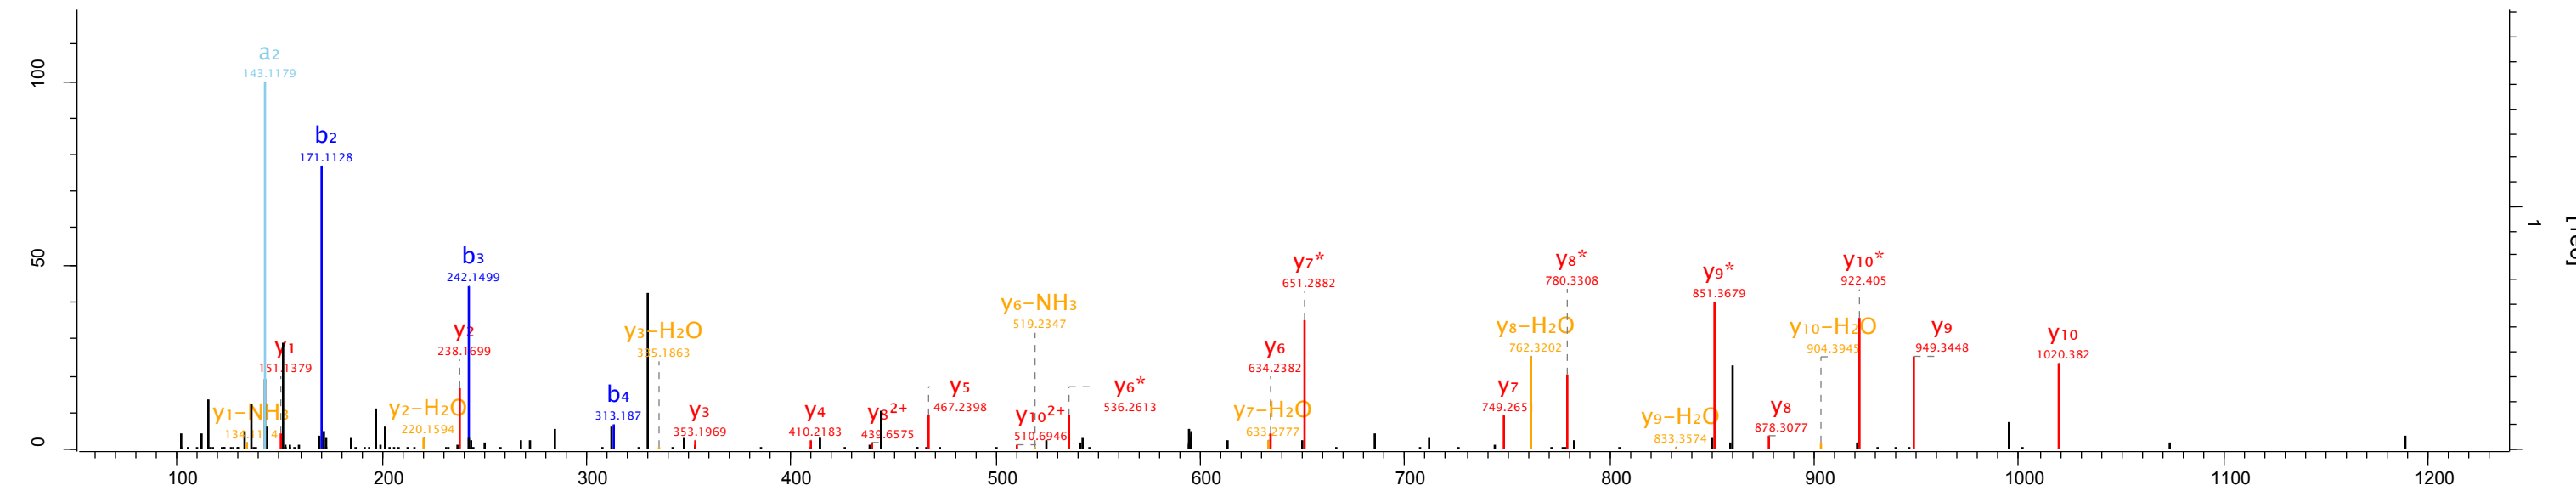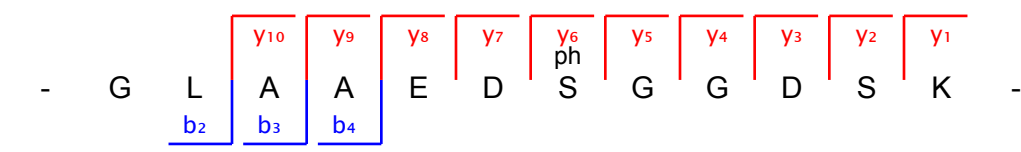

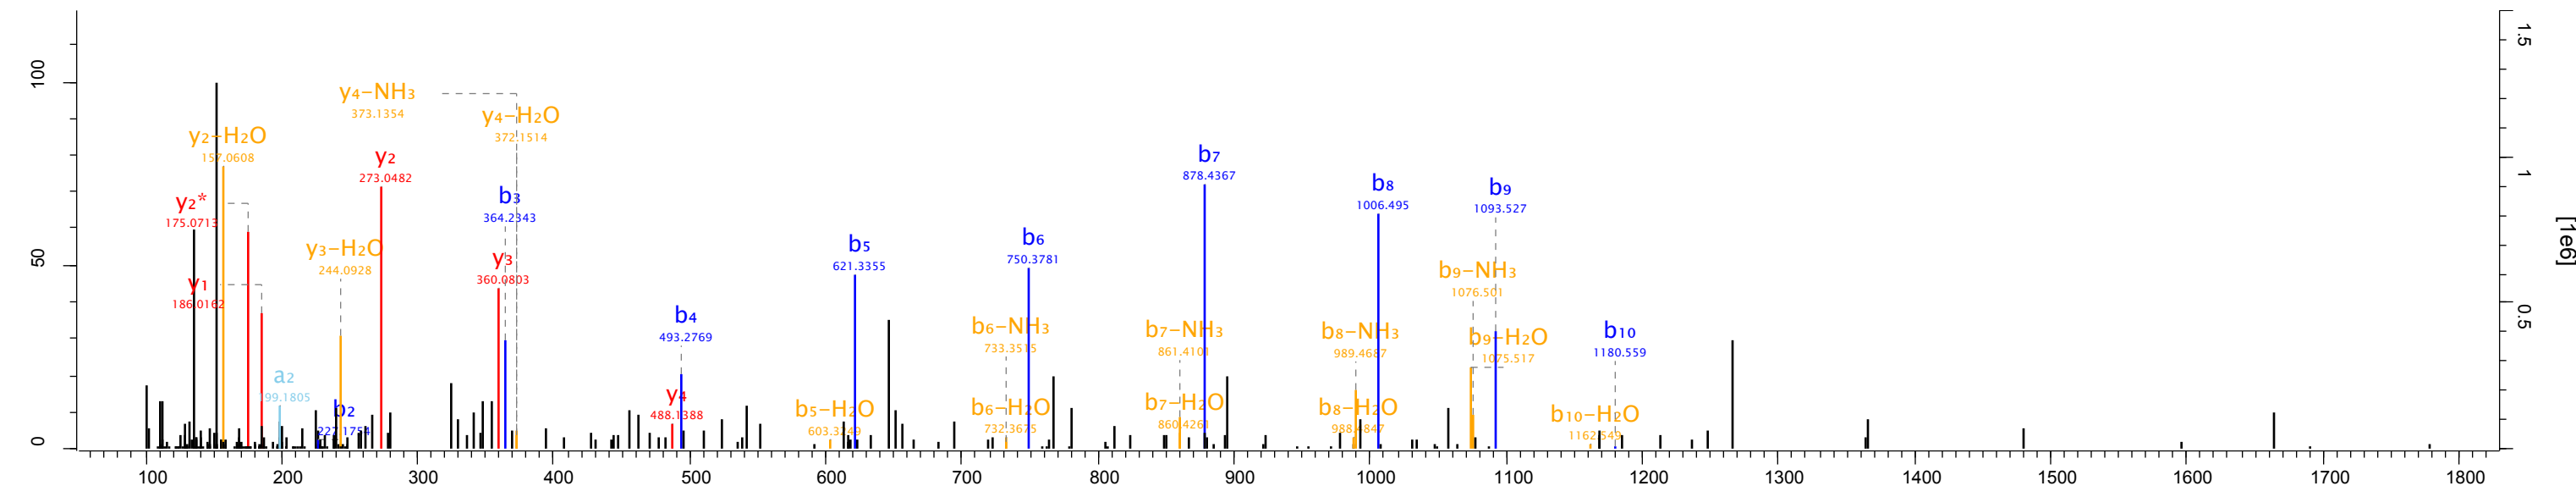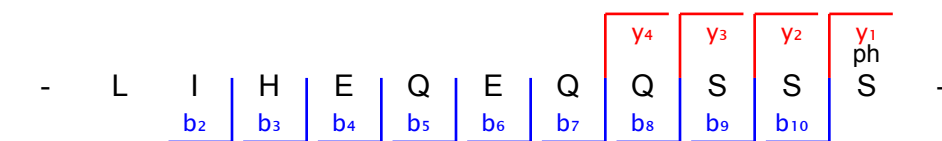

Raw file 20171215\_MaS\_33SR\_LMH\_phospho2\_01 Scan 2962 Method FTMS; HCD Score 353.66 m/z 1038.96 Gene names TGOLN2

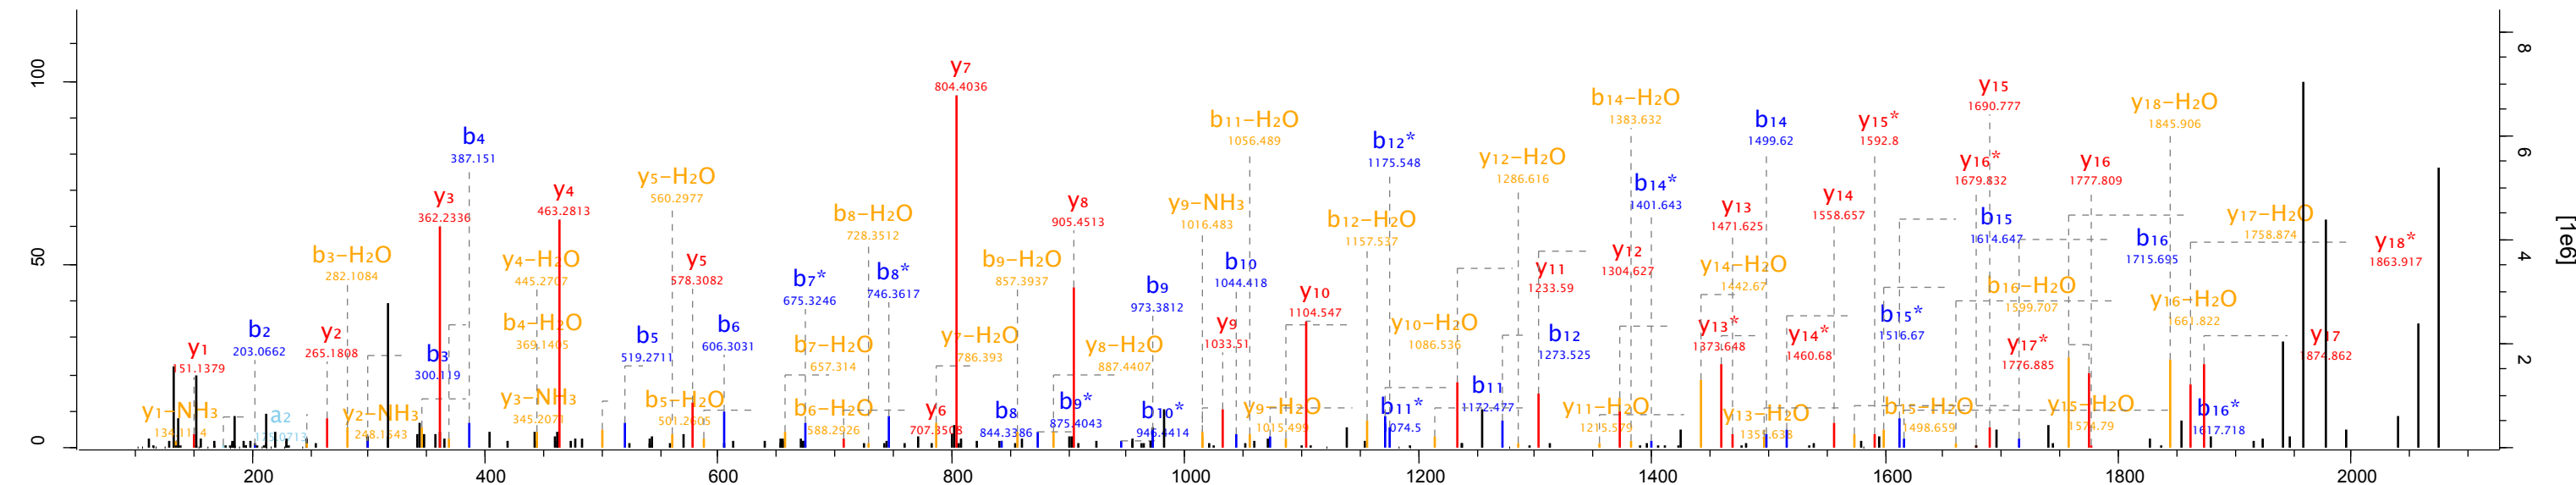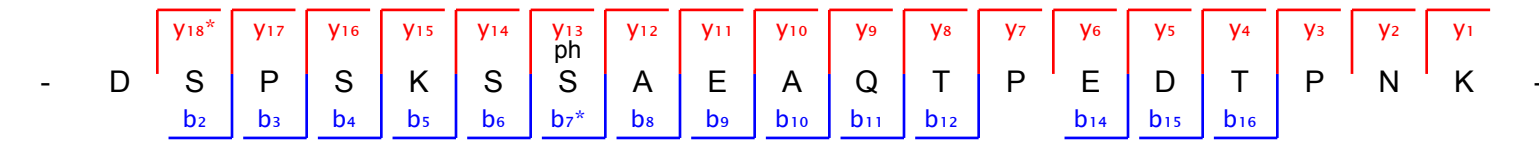

Raw file 20171215\_MaS\_33SR\_LMH\_phospho2\_01 Scan 2982 Method FTMS; HCD Score 178.35 m/z 677.62 Gene names SCML2

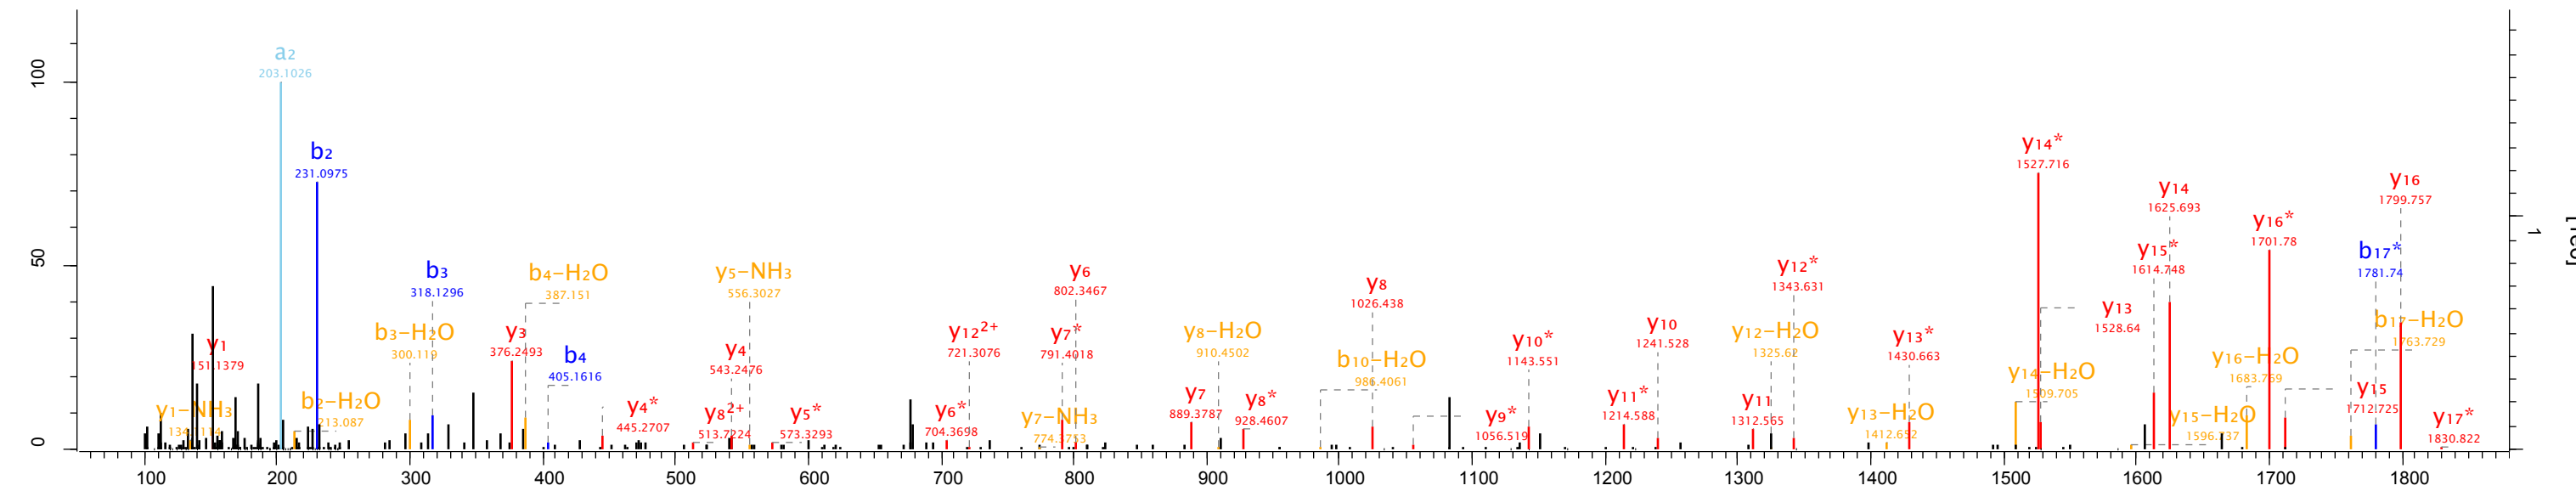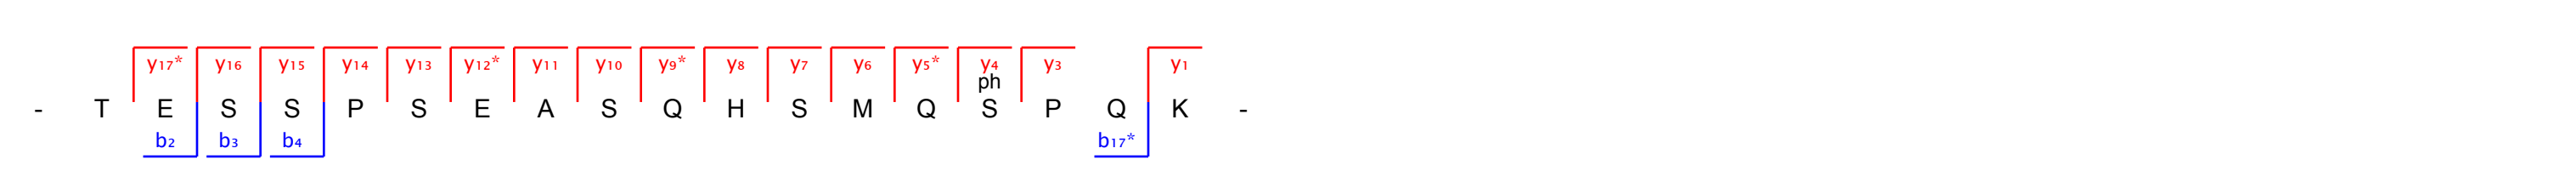

Raw file 20171215\_MaS\_33SR\_LMH\_phospho2\_01 Scan 3322 Method FTMS; HCD Score 69.33 m/z 701.85 Gene names RAB13

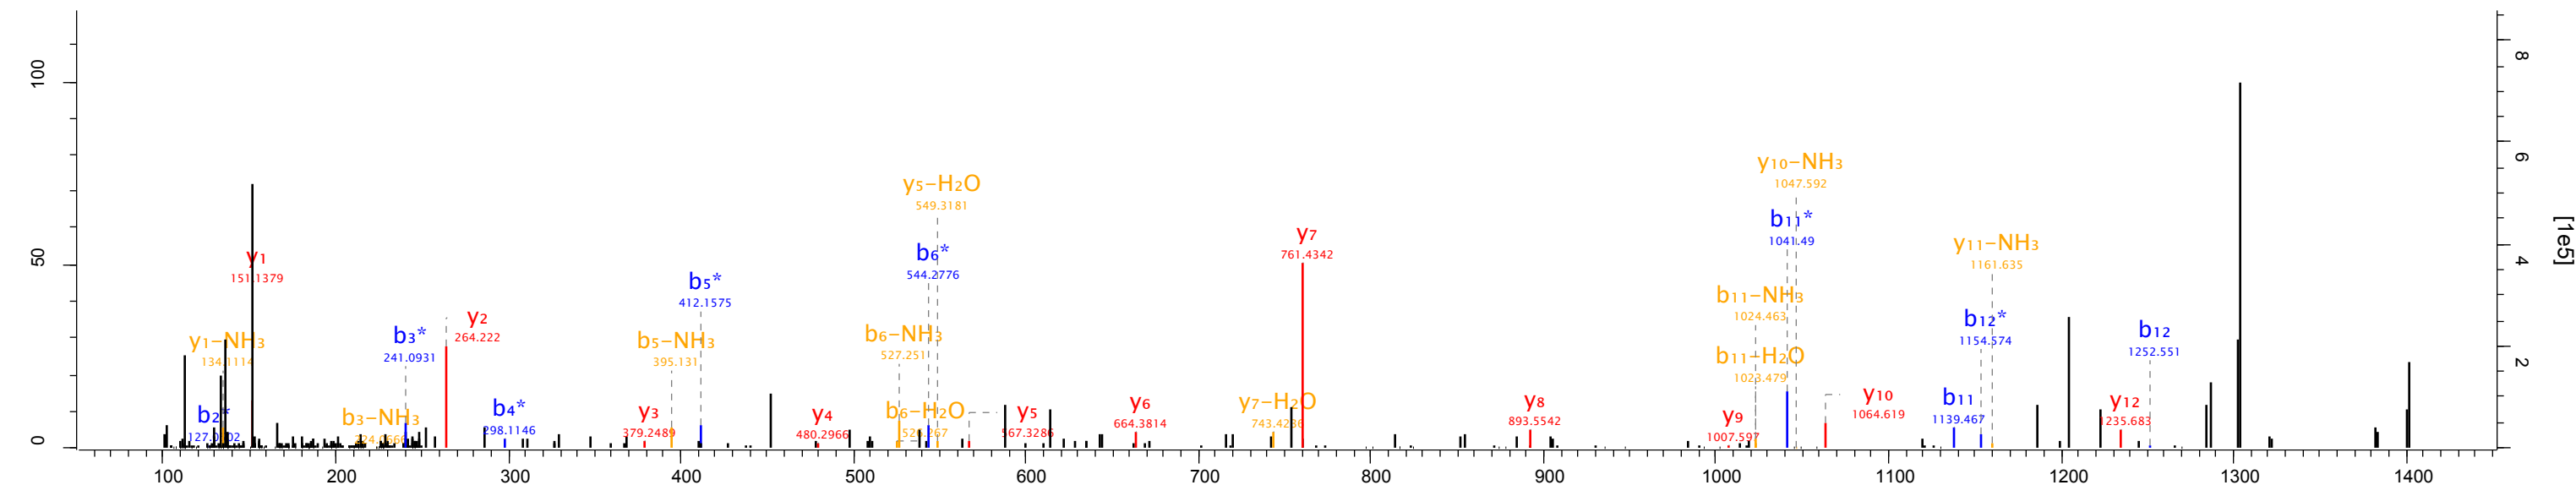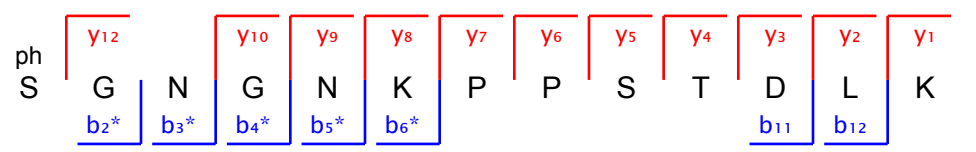

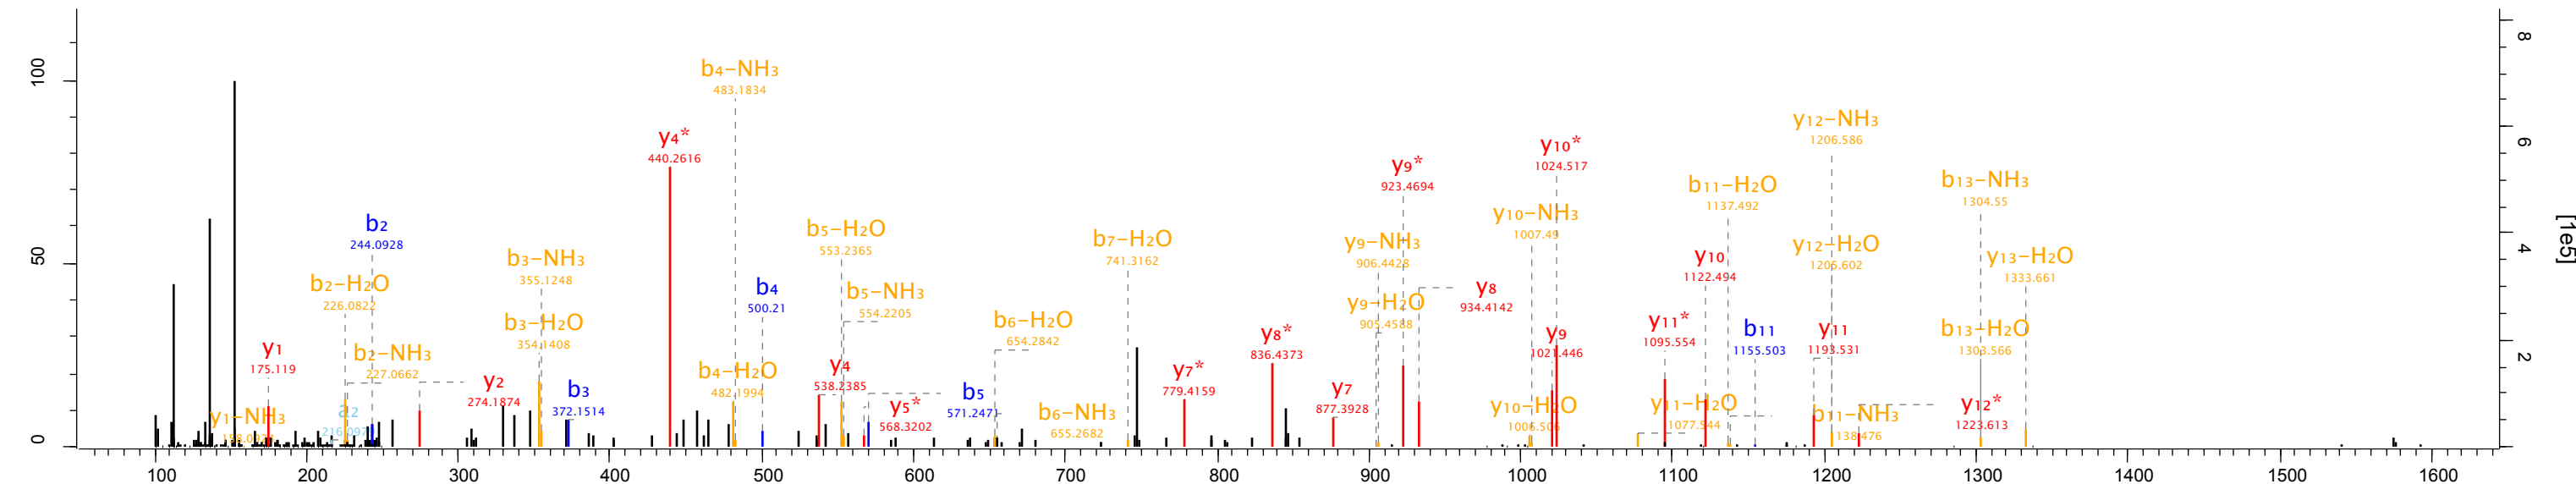

- E N Q Q A T S G P N Q P ph S V R -

Fragmentation mapping (b and y ions):

- b2: N
- b3: Q
- b4: Q
- b5: A
- b11: Q
- y12\*: Q
- y11: A
- y10: T
- y9: S
- y8: G
- y7: P
- y5\*: Q
- y4: P
- y2: V
- y1: R



Raw file: 20171215\_MaS\_33SR\_LMH\_phospho2\_01  
 Scan: 3532 Method: FTMS; HCD Score: 176.19 m/z: 670.81 Gene names: RRBP1

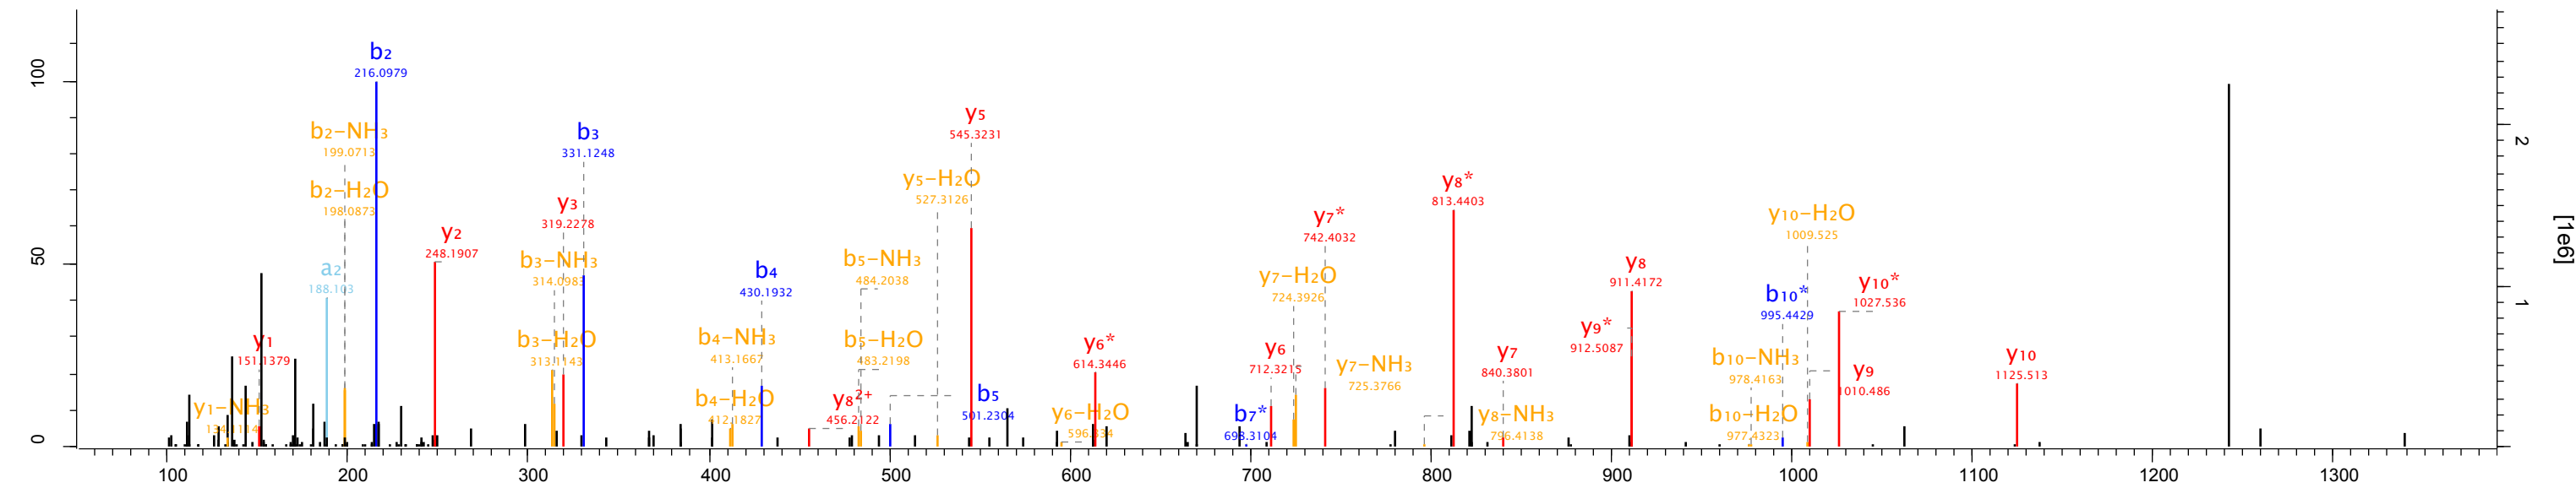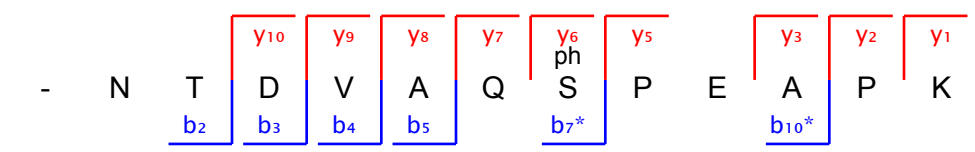



Raw file 20171215\_MaS\_33SR\_LMH\_phospho2\_01 Scan 4052 Method FTMS; HCD Score 185.74 m/z 724.29 Gene names SLC16A1

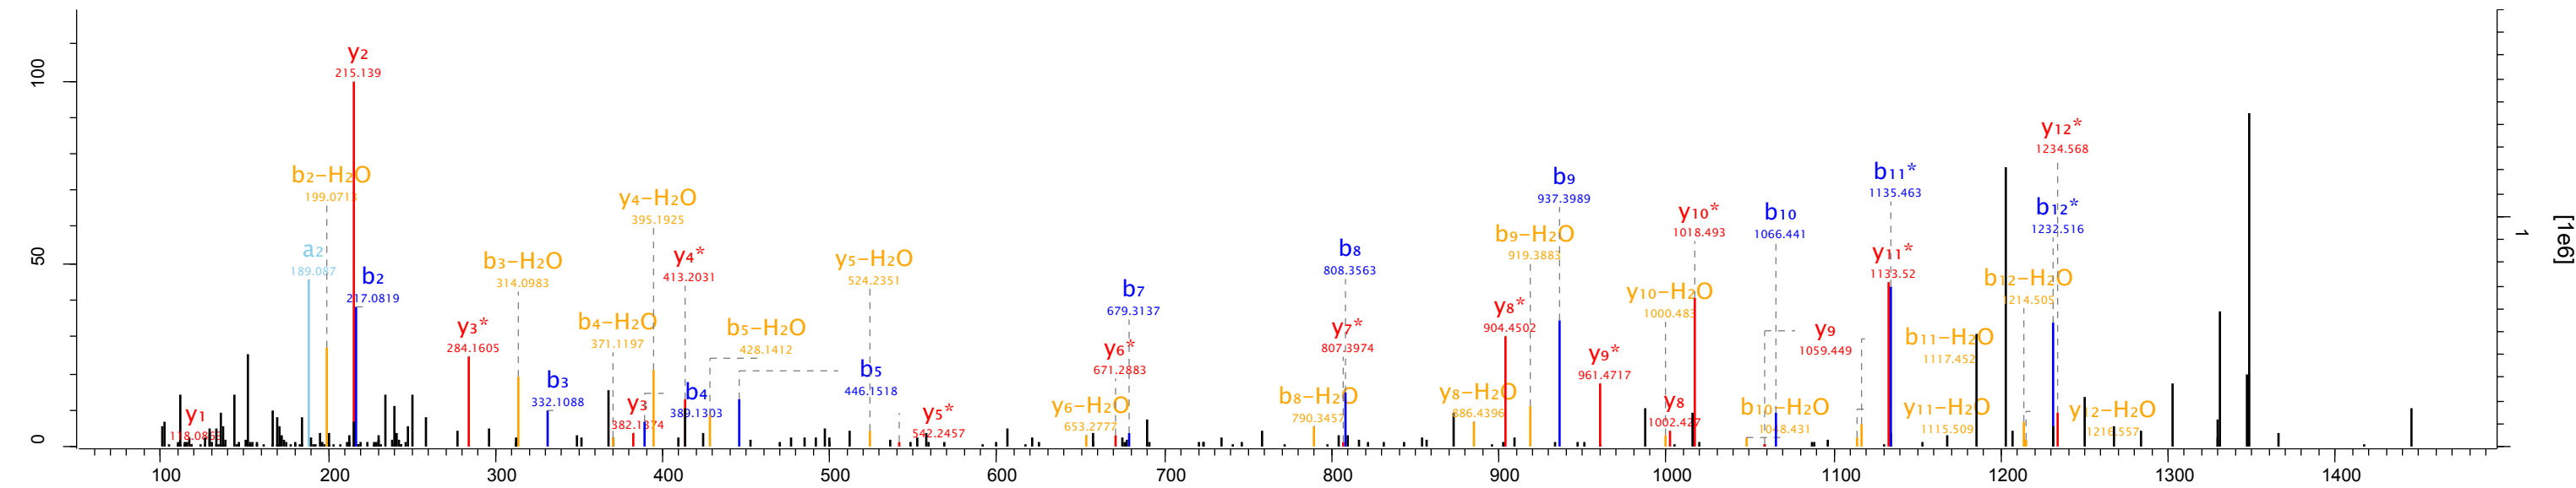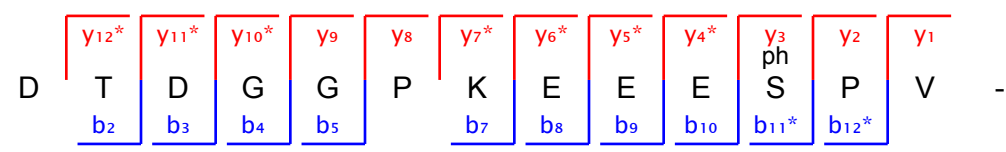

Raw file: 20171215\_MaS\_33SR\_LMH\_phospho2\_01  
 Scan: 4262 Method: FTMS; HCD Score: 164.04 m/z: 976.39 Gene names: SPANXB1

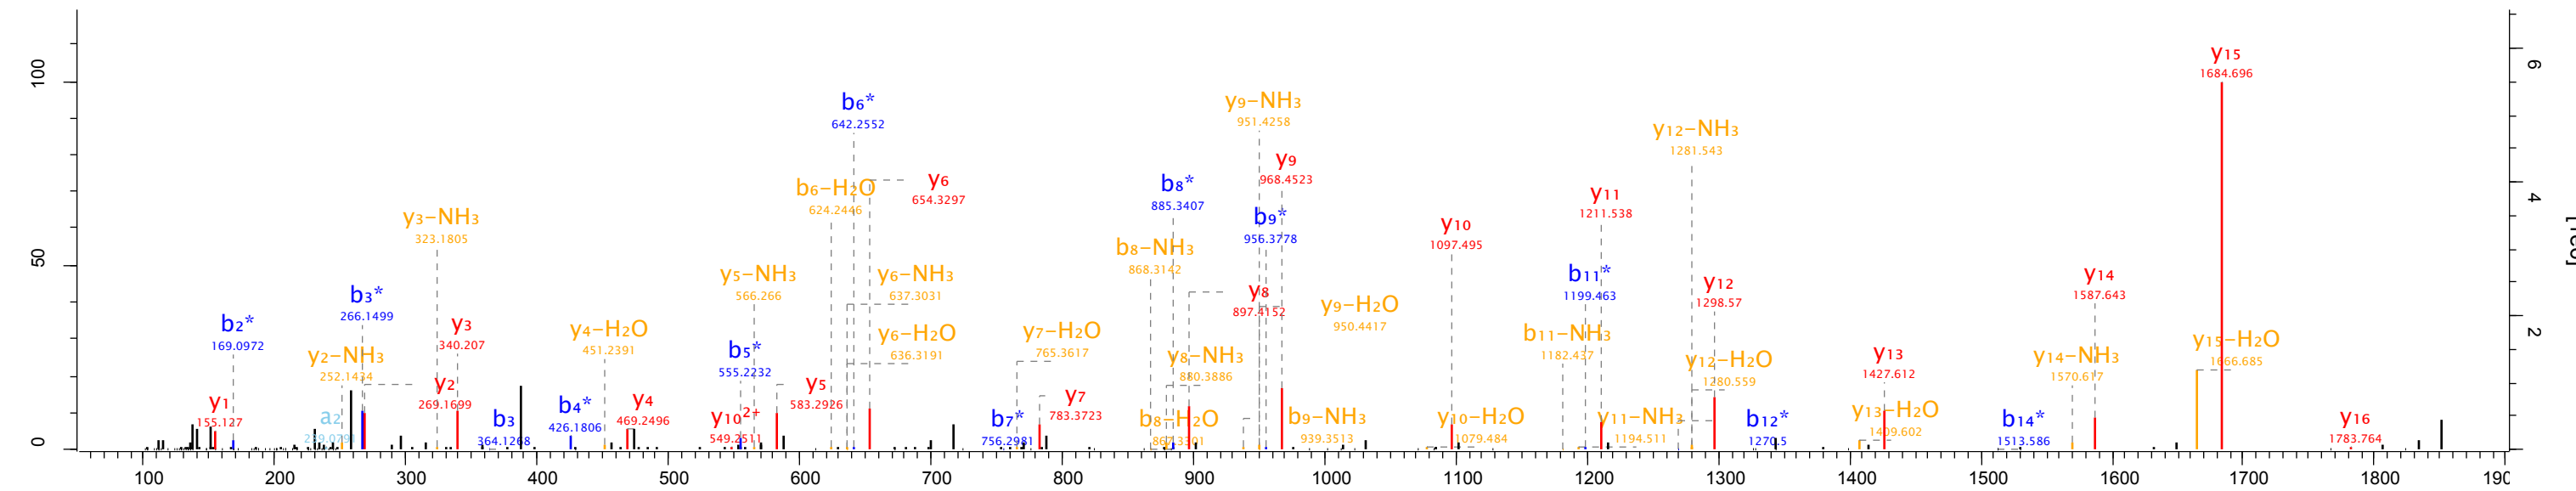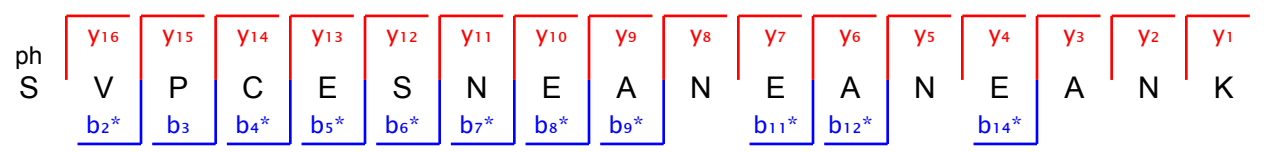

Raw file: 20171215\_MaS\_33SR\_LMH\_phospho2\_01  
 Scan: 4272 Method: FTMS; HCD Score: 264.96 m/z: 996.42 Gene names: PRPF4B

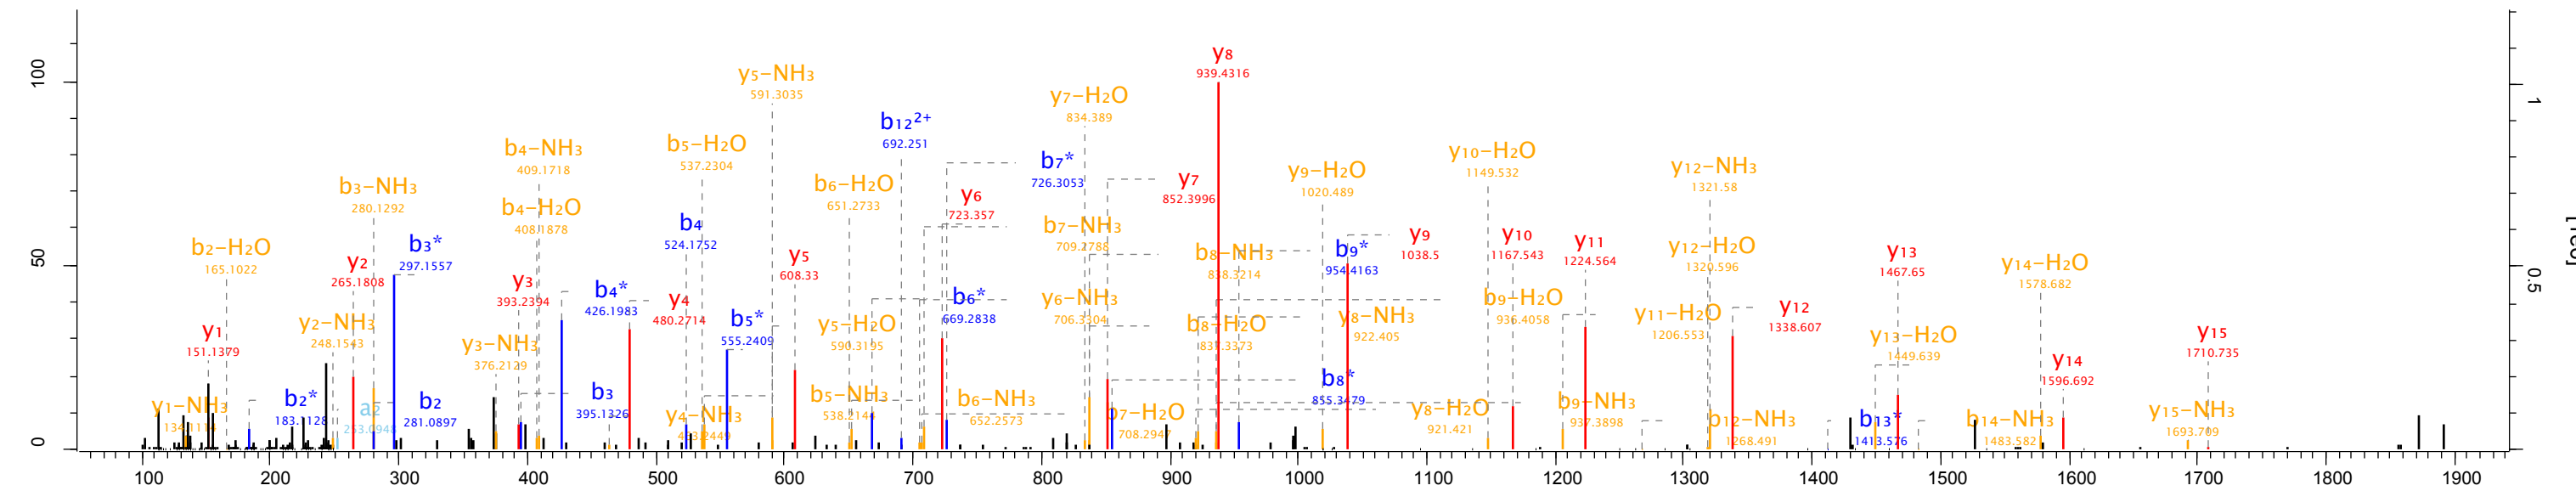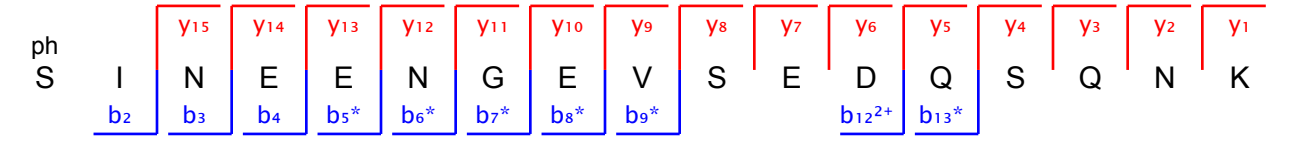



Raw file: 20171215\_MaS\_33SR\_LMH\_phospho2\_01  
 Scan: 5692 Method: FTMS; HCD Score: 150.95 m/z: 924.41 Gene names: LITAF;TLE3

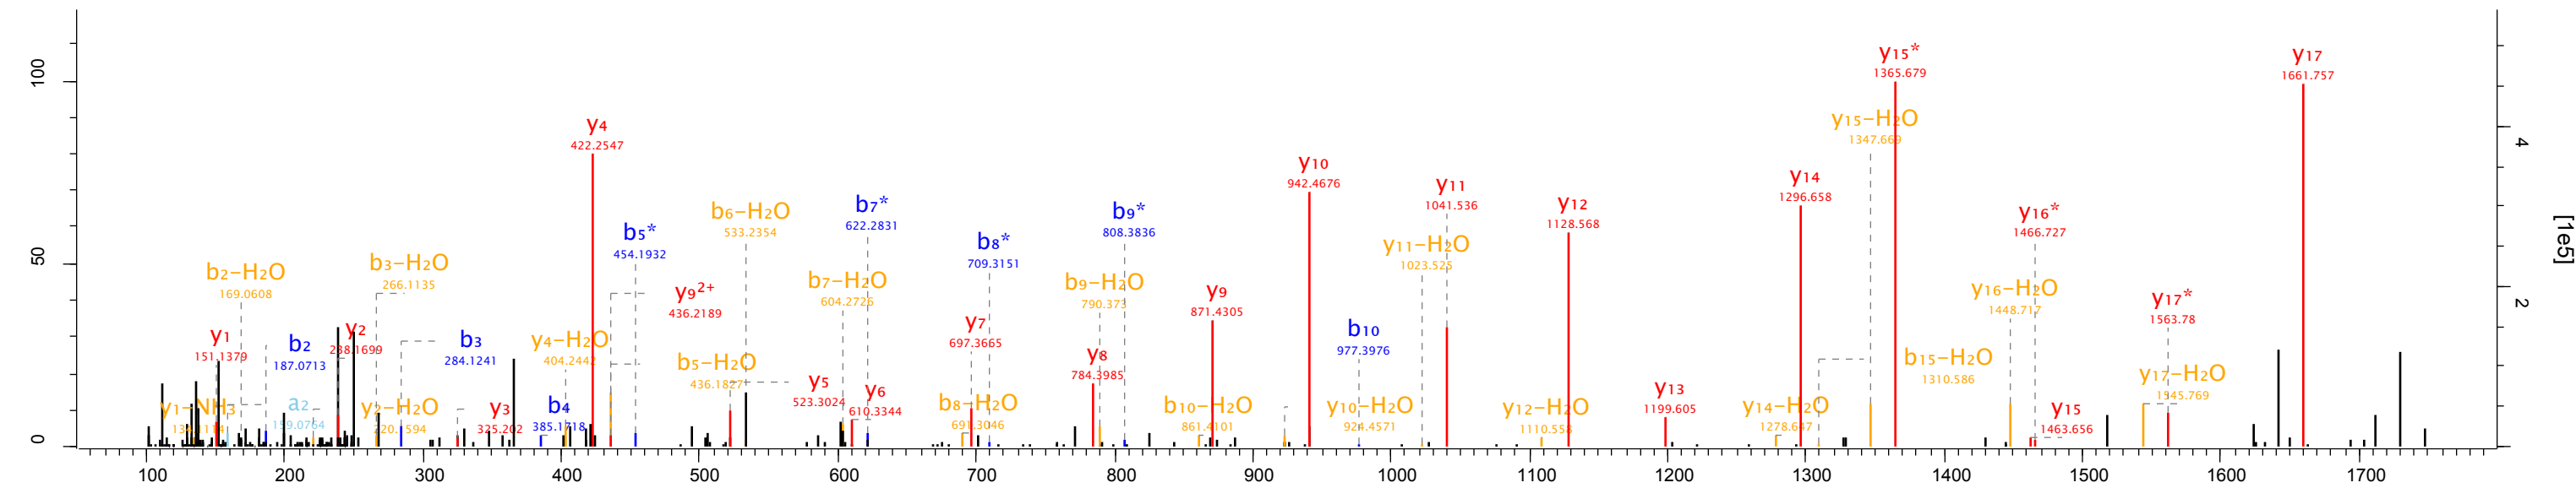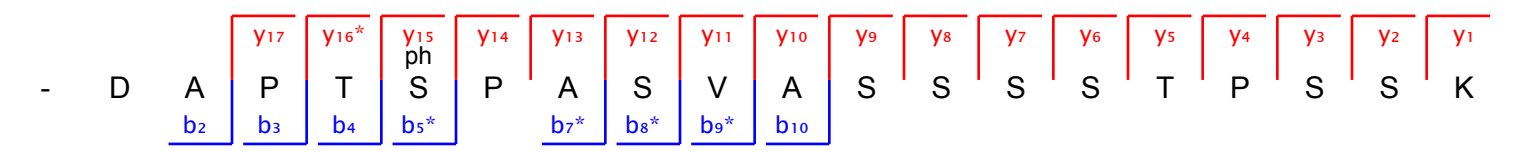

Raw file 20171215\_MaS\_33SR\_LMH\_phospho2\_01 Scan 6122 Method FTMS; HCD Score 98.58 m/z 610.76 Gene names ARHGAP35;GRLF1

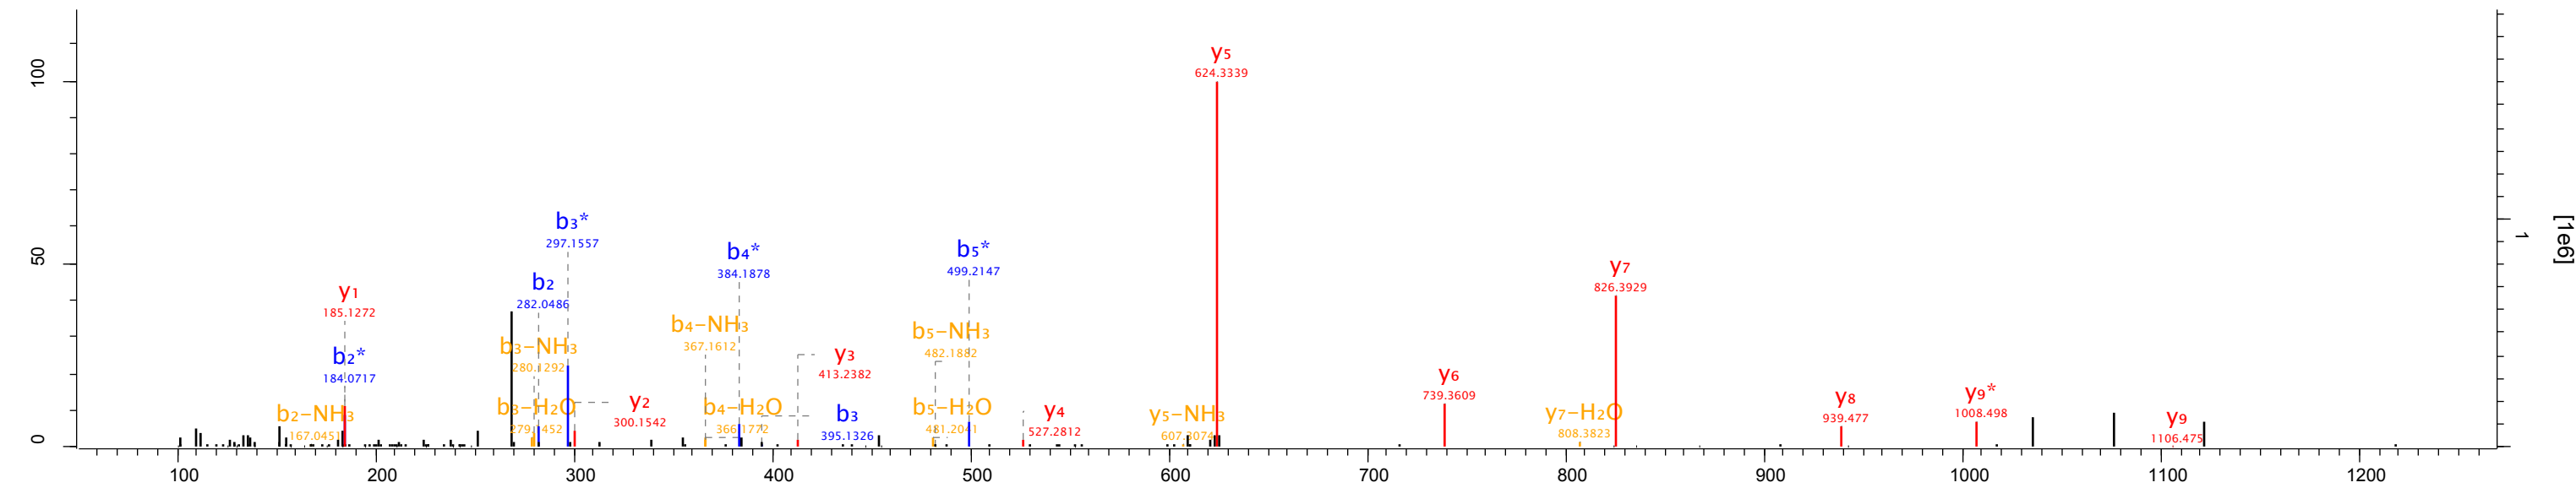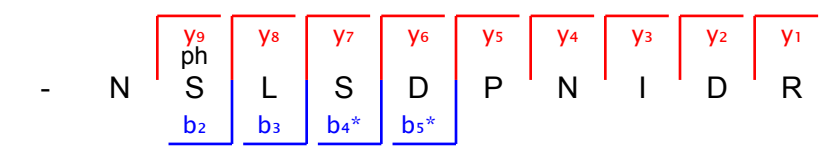

Raw file: 20171215\_MaS\_33SR\_LMH\_phospho2\_01  
 Scan: 6262 Method: FTMS; HCD Score: 161.87 m/z: 562.29 Gene names: MPRIP

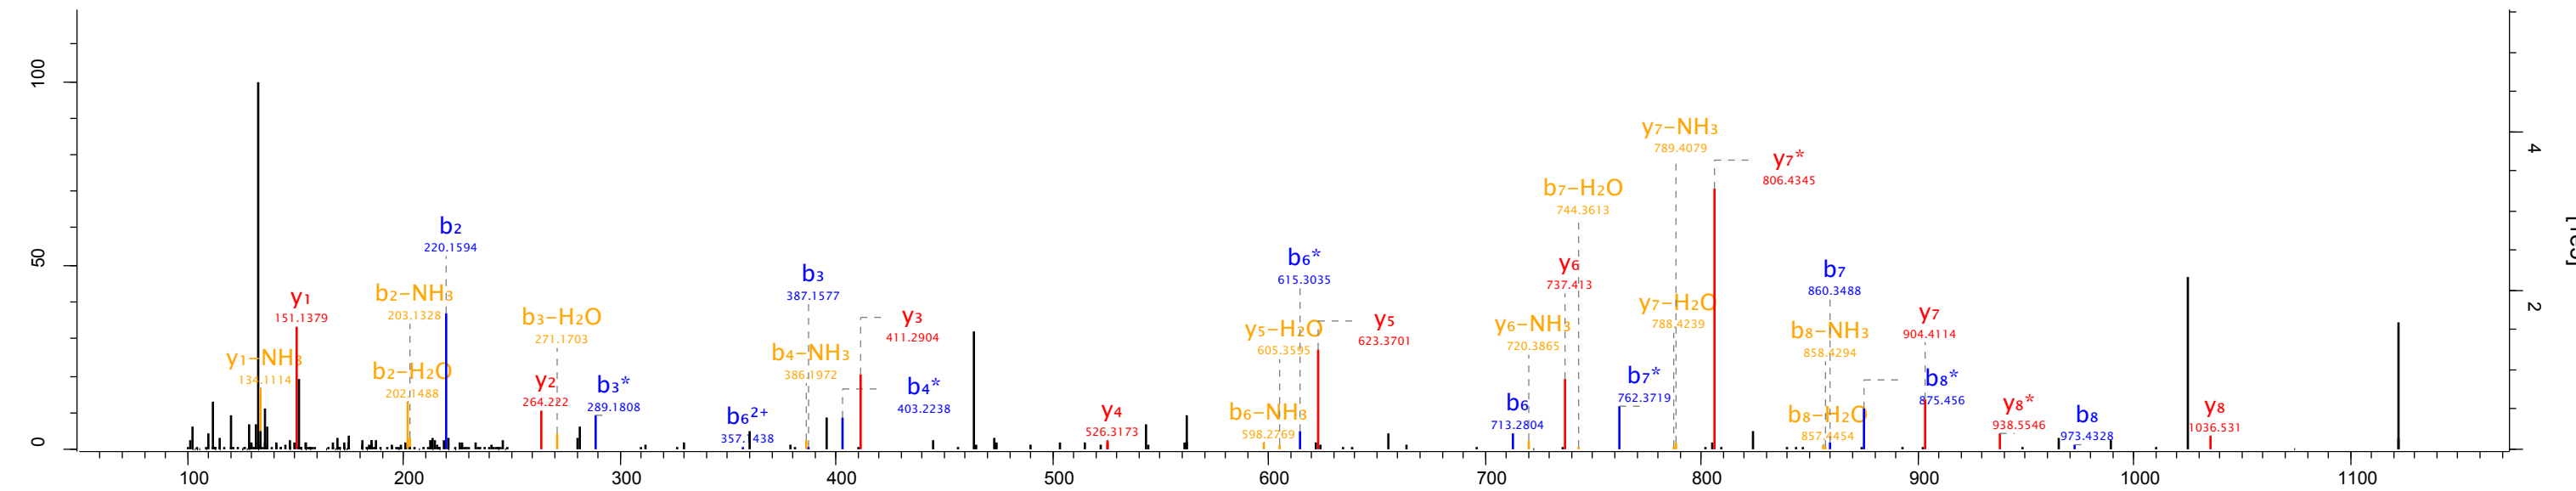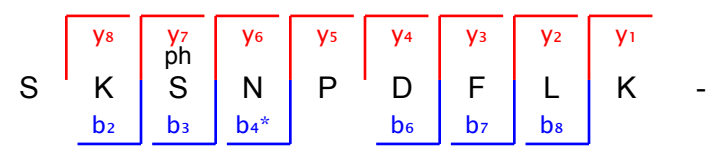

Raw file 20171215\_MaS\_33SR\_LMH\_phospho2\_01 Scan 8692 Method FTMS; HCD Score 120.29 m/z 617.29

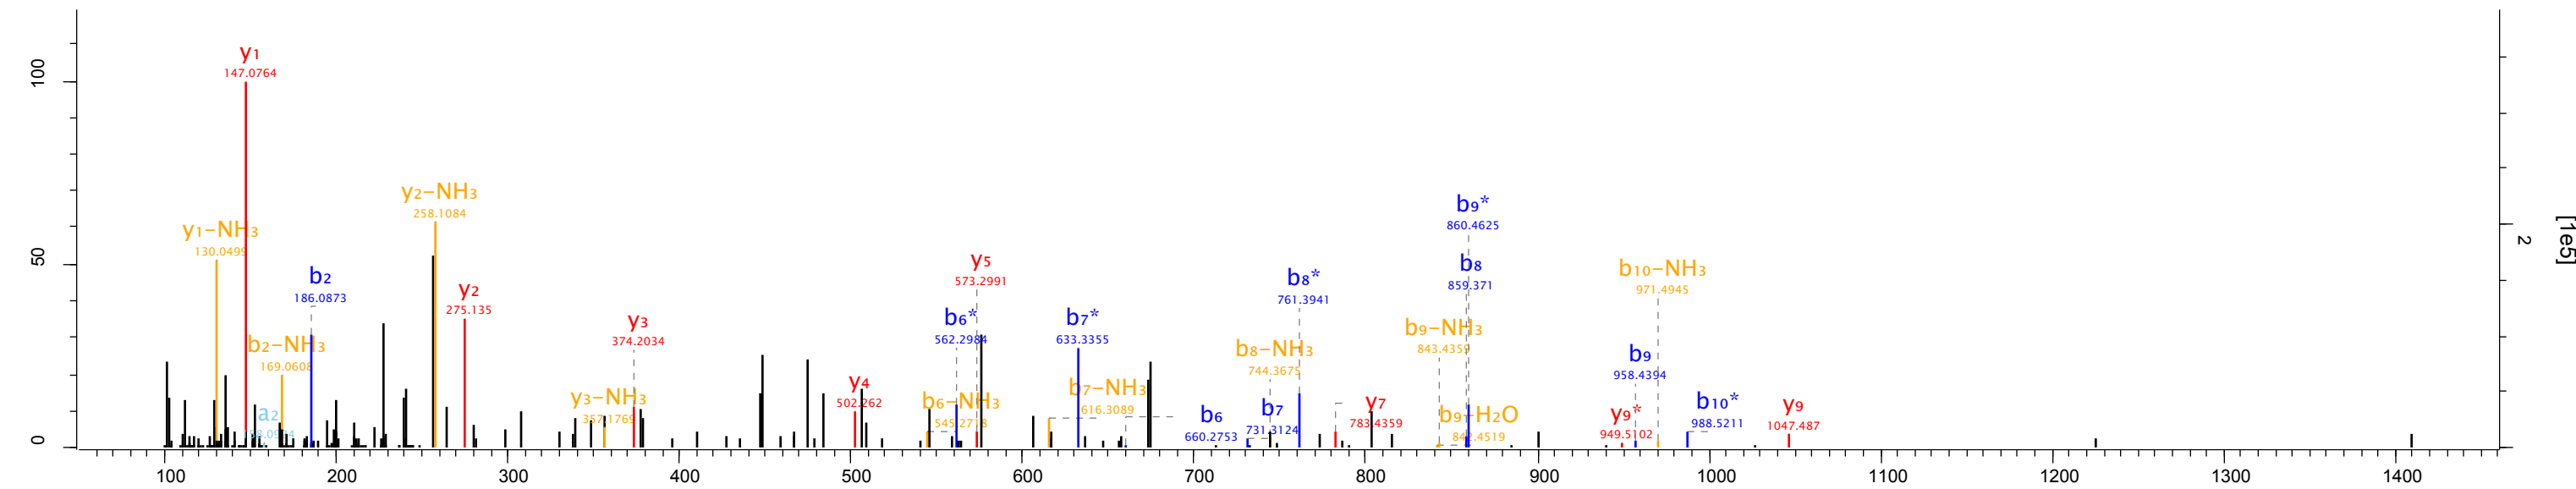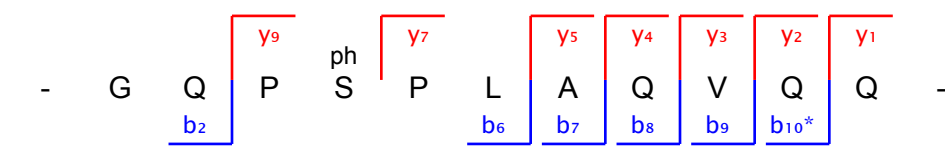



Raw file 20171215\_MaS\_33SR\_LMH\_phospho2\_01 Scan 8932 Method FTMS; HCD Score 66.92 m/z 1041 Gene names HDAC7

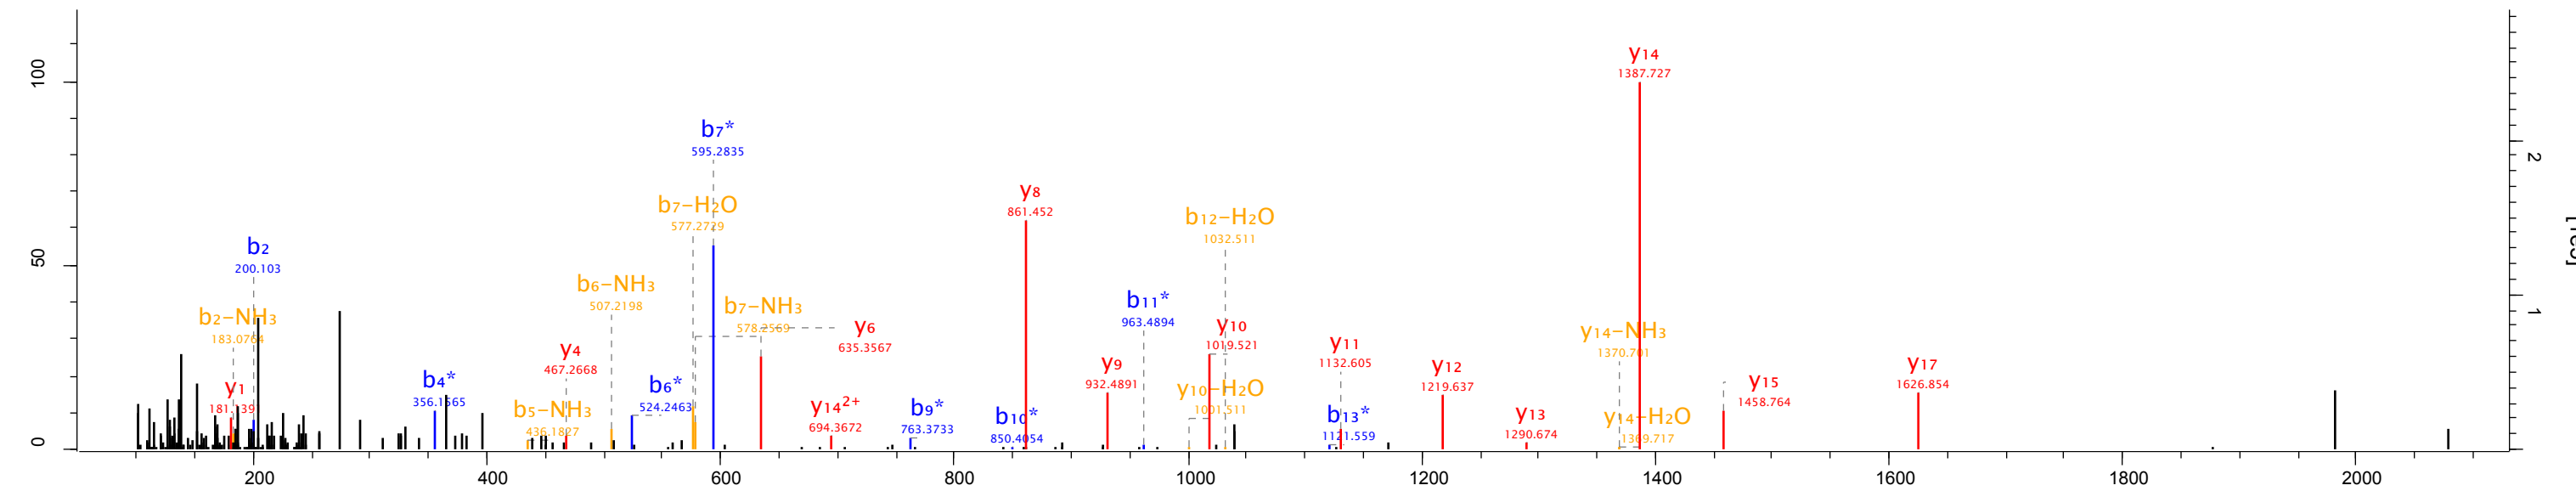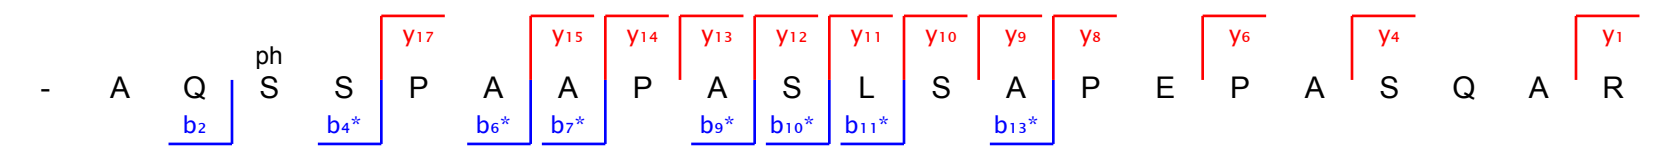

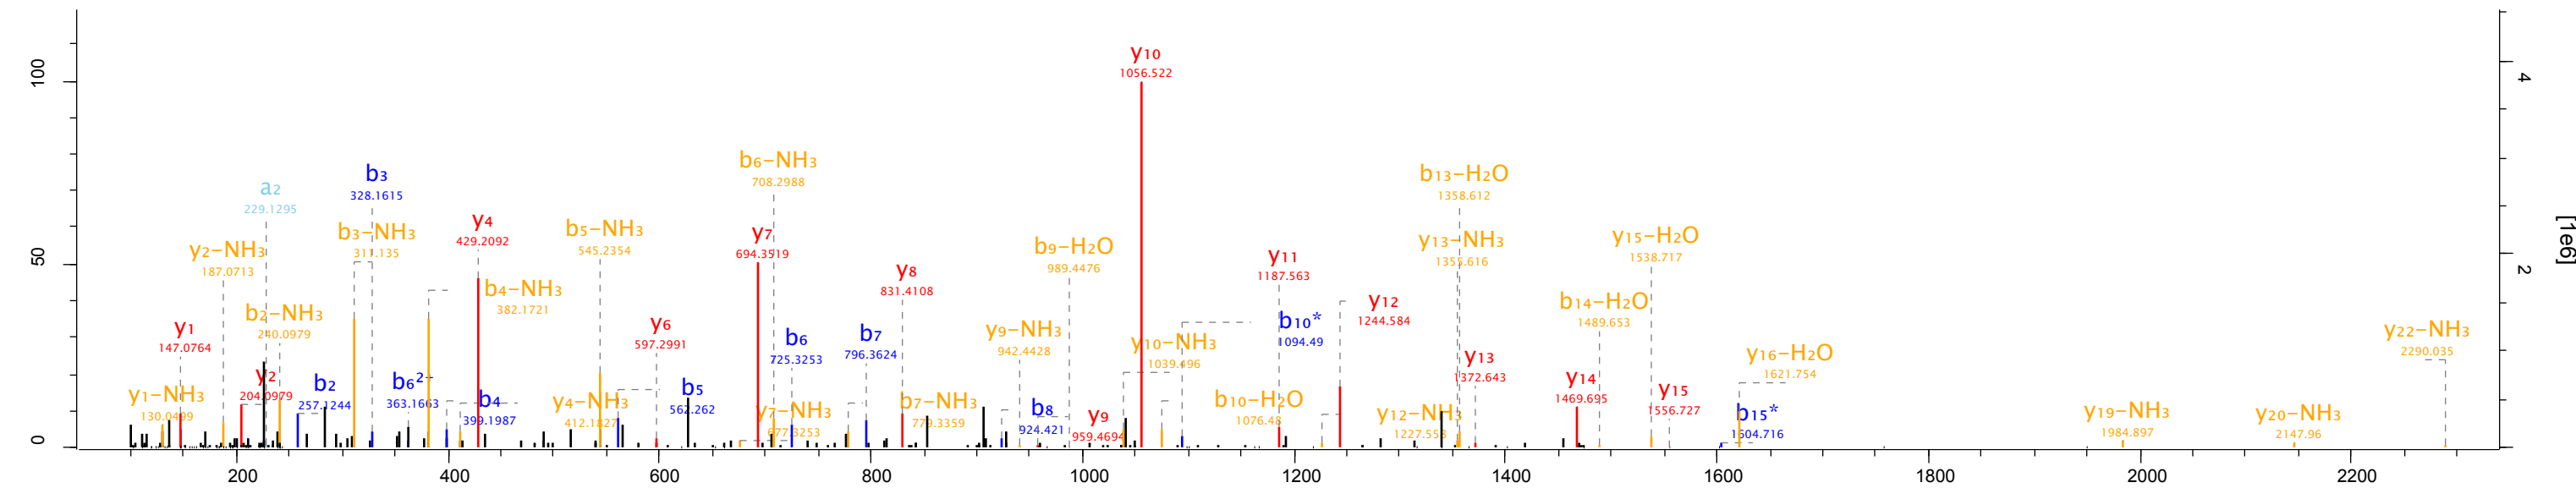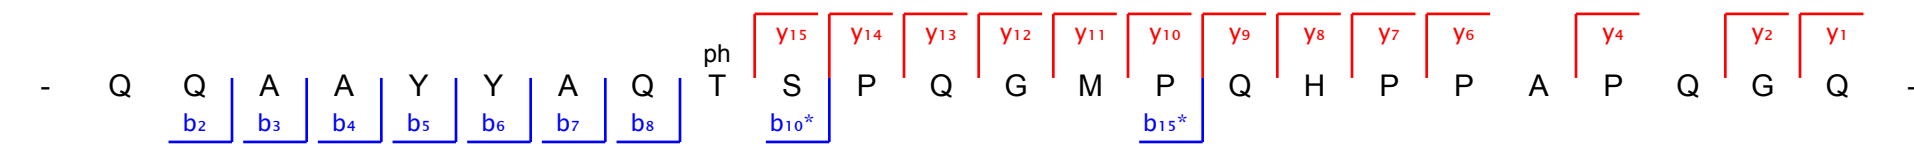

Raw file 20171215\_MaS\_33SR\_LMH\_phospho2\_02 Scan 10062 Method FTMS; HCD Score 83.53 m/z 584.78 Gene names DLG5

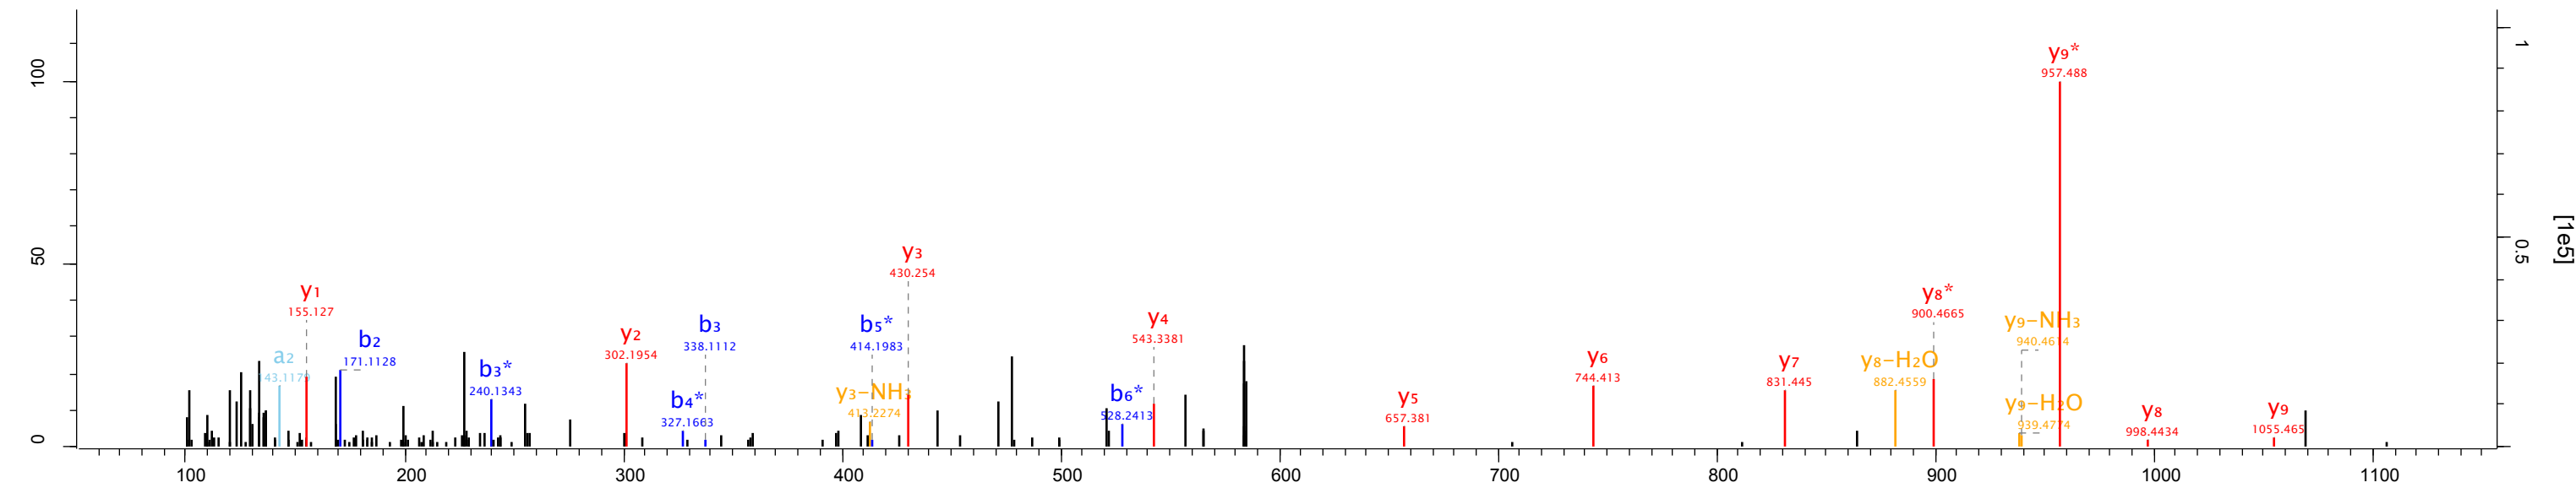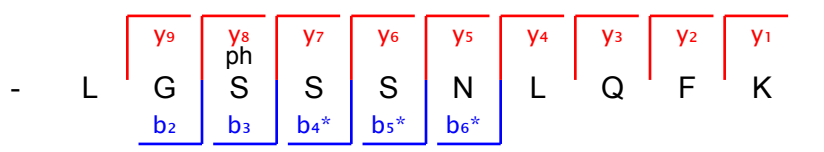

Raw file: 20171215\_MaS\_33SR\_LMH\_phospho2\_02  
 Scan: 10392 Method: FTMS; HCD Score: 219.61 m/z: 939.95 Gene names: TP53BP2

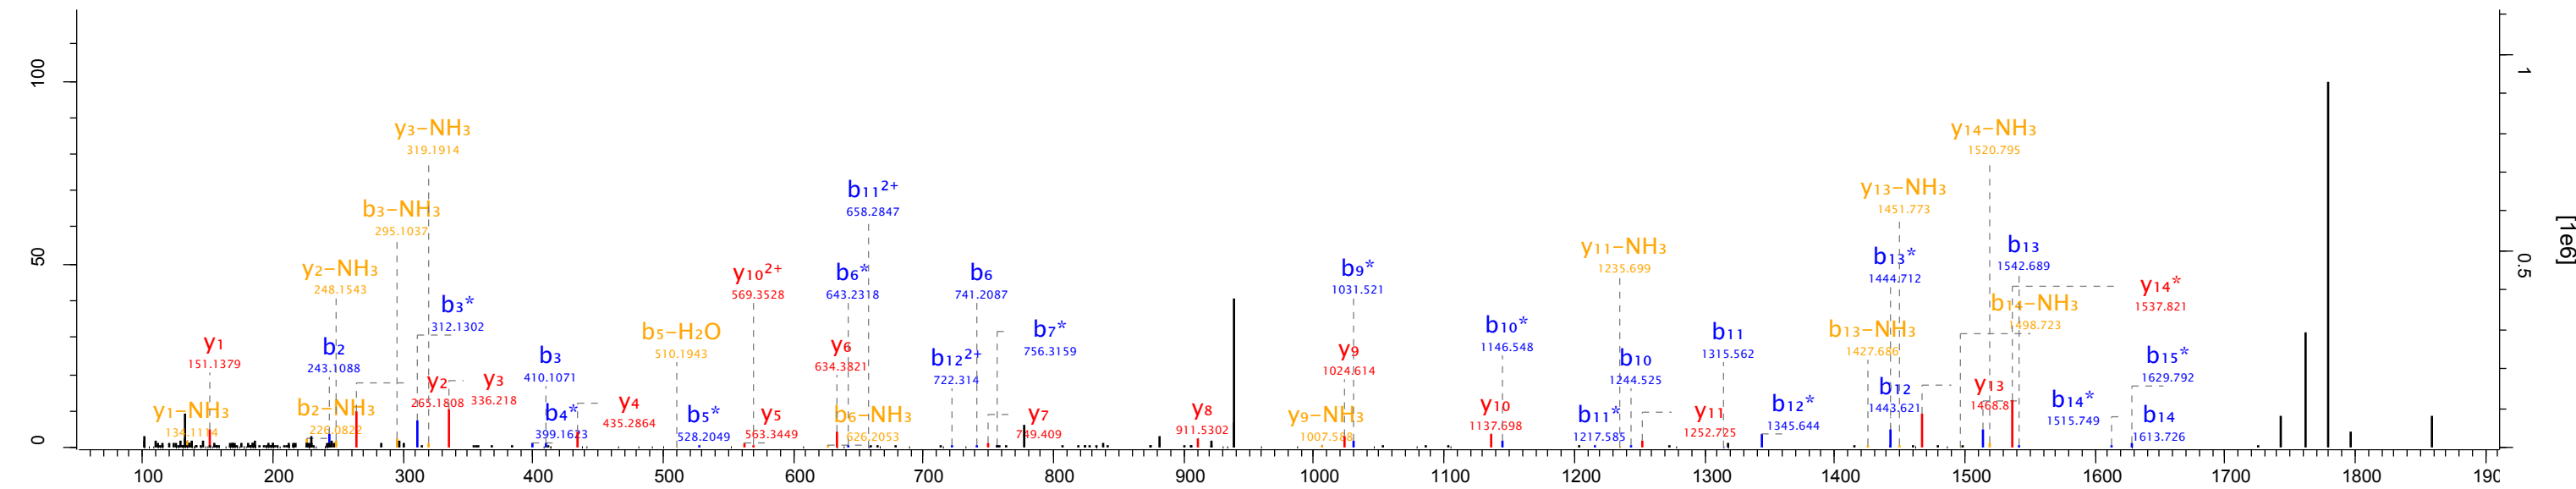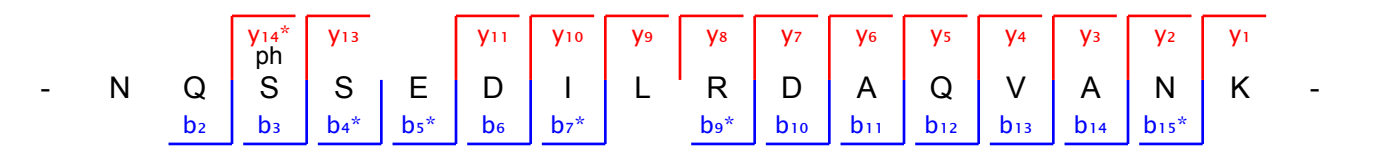

Raw file 20171215\_MaS\_33SR\_LMH\_phospho2\_02 Scan 11212 Method FTMS; HCD Score 124.7 m/z 823.86 Gene names LMNA

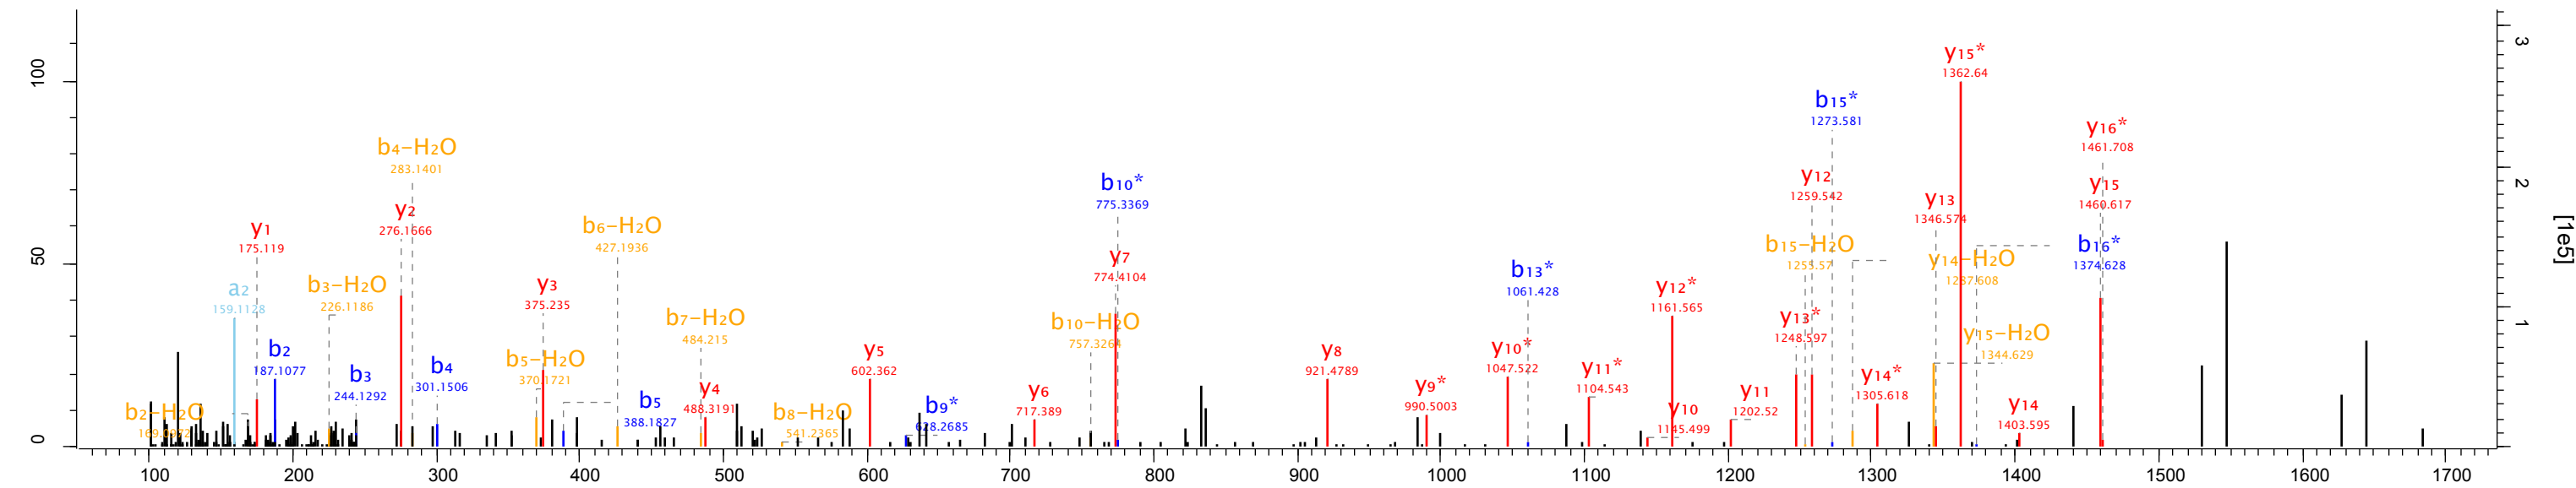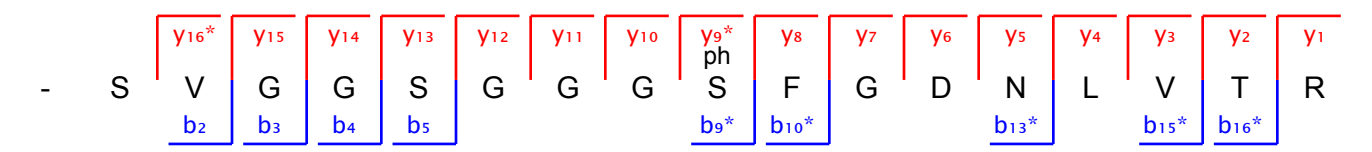

Raw file 20171215\_MaS\_33SR\_LMH\_phospho2\_02 Scan 11582 Method FTMS; HCD Score 151 m/z 988.4 Gene names AKT1

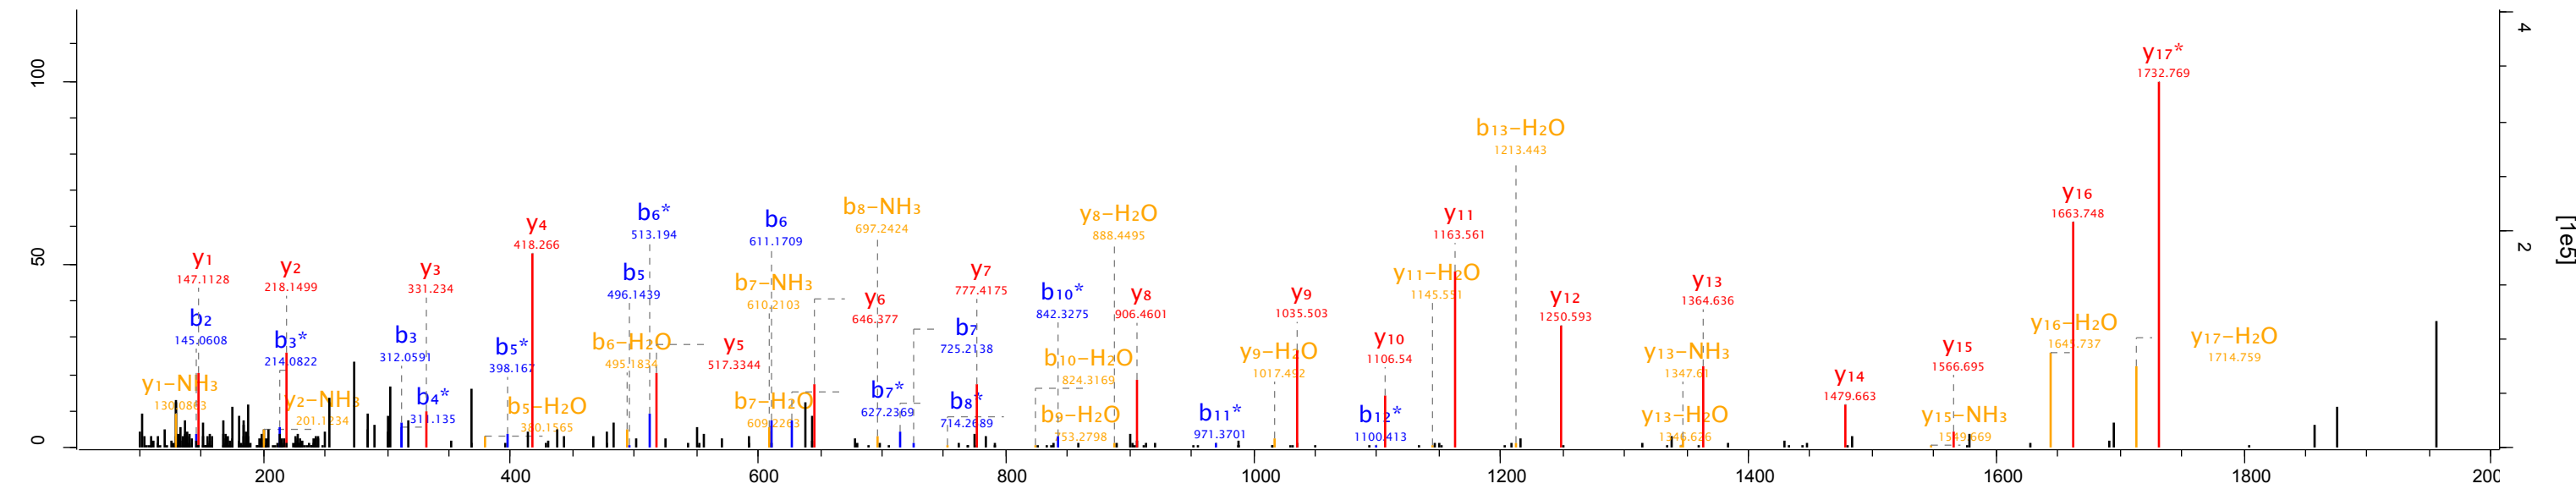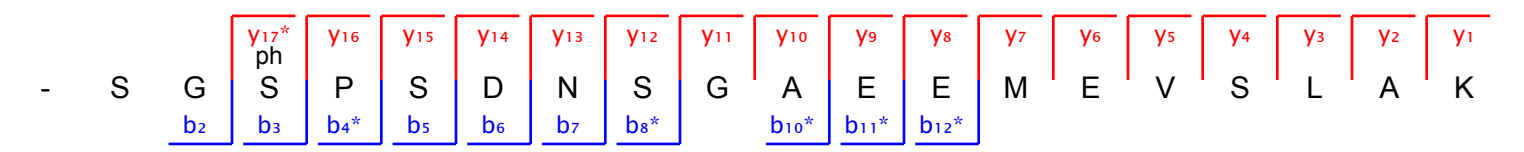

Raw file 20171215\_MaS\_33SR\_LMH\_phospho2\_02 Scan 11712 Method FTMS; HCD Score 54.29 m/z 502.25 Gene names MFF

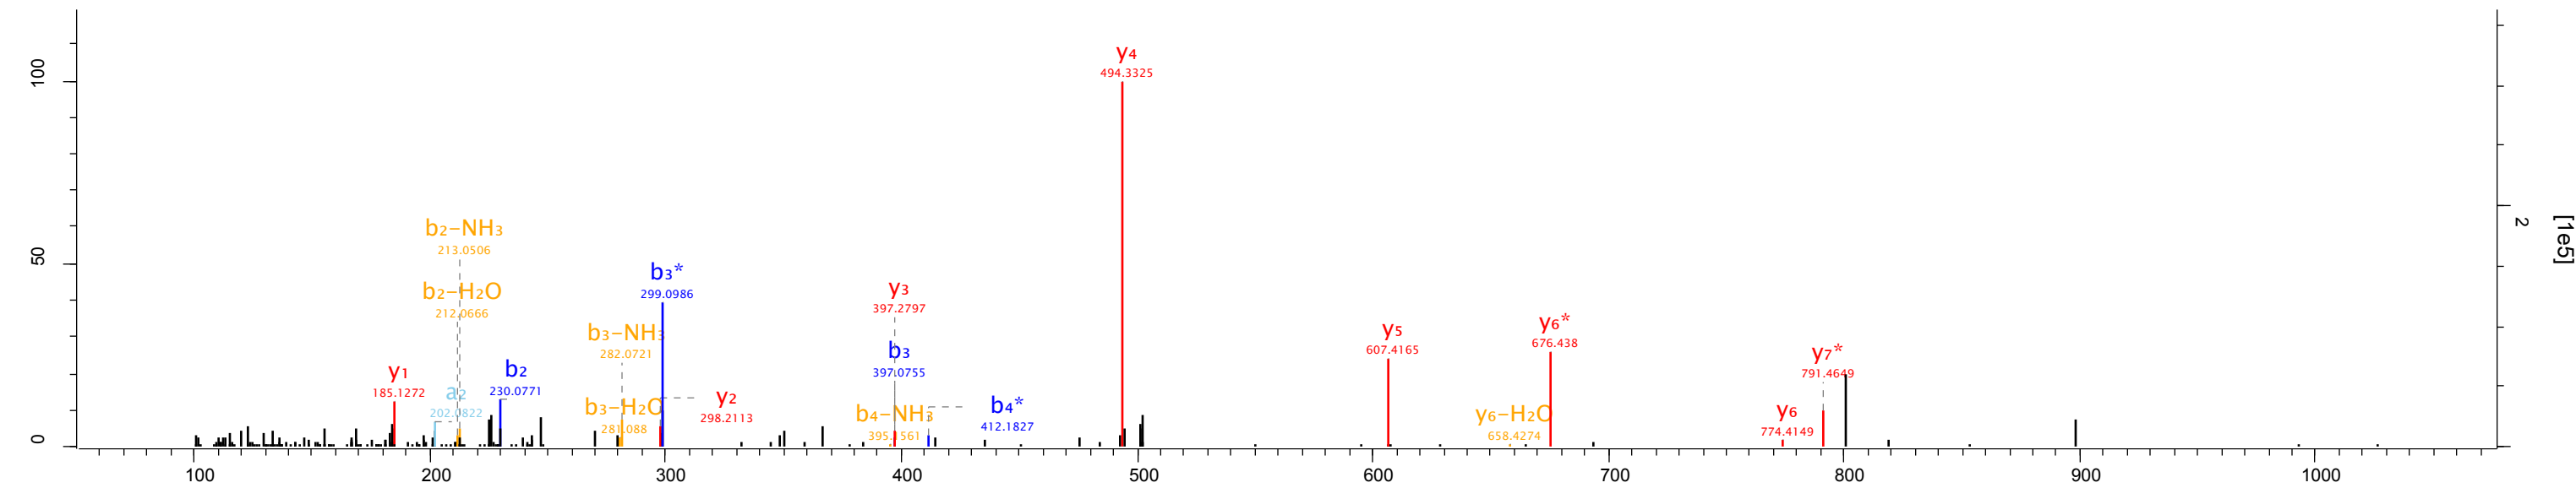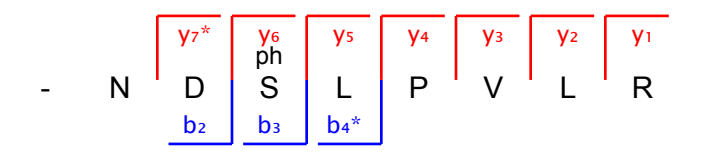

Raw file 20171215\_MaS\_33SR\_LMH\_phospho2\_02 Scan 11722 Method FTMS; HCD Score 91.44 m/z 1016.08 Gene names ARHGEF11

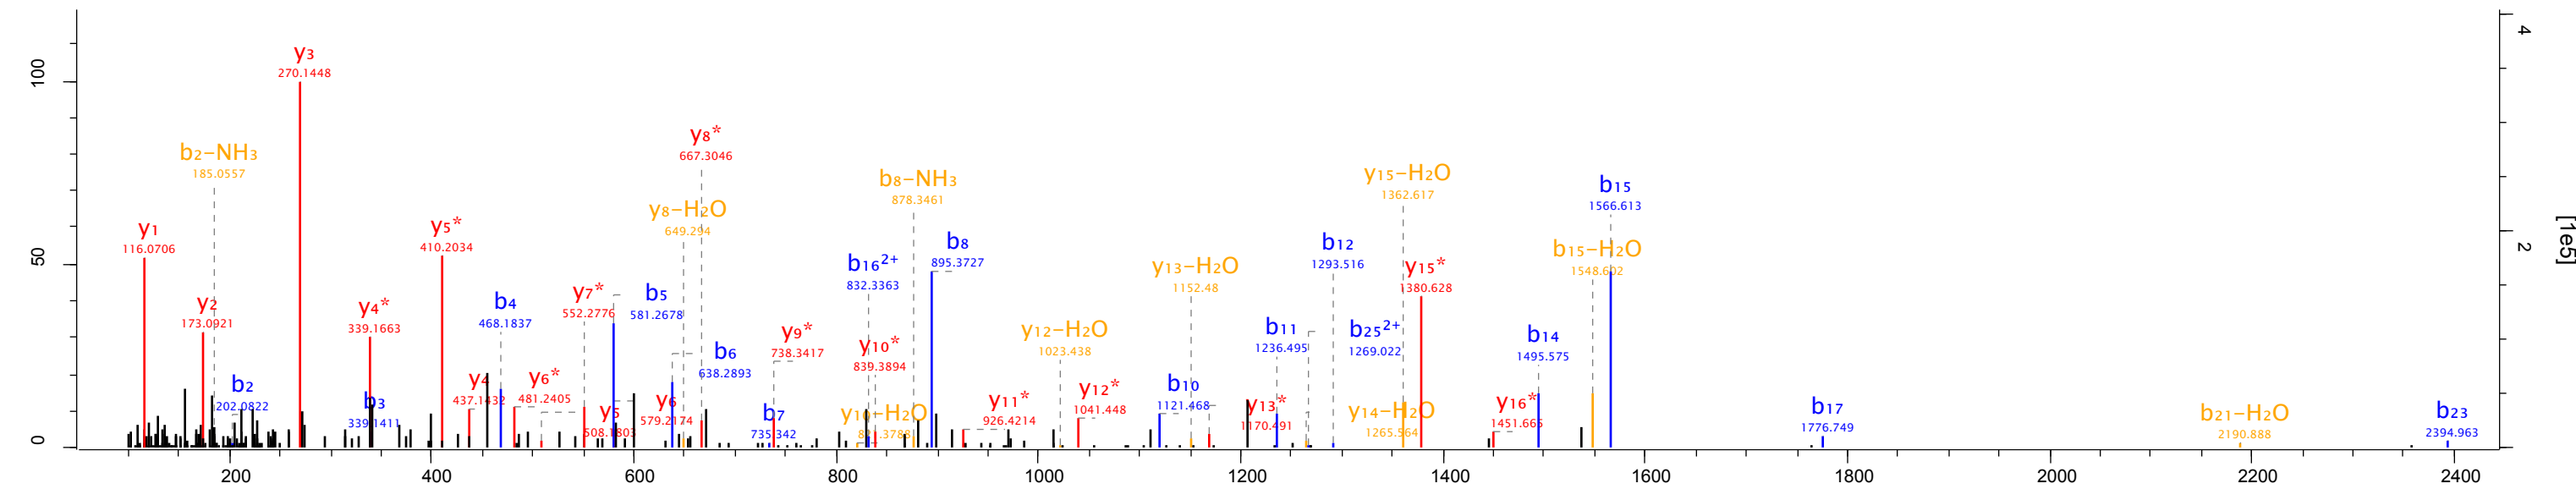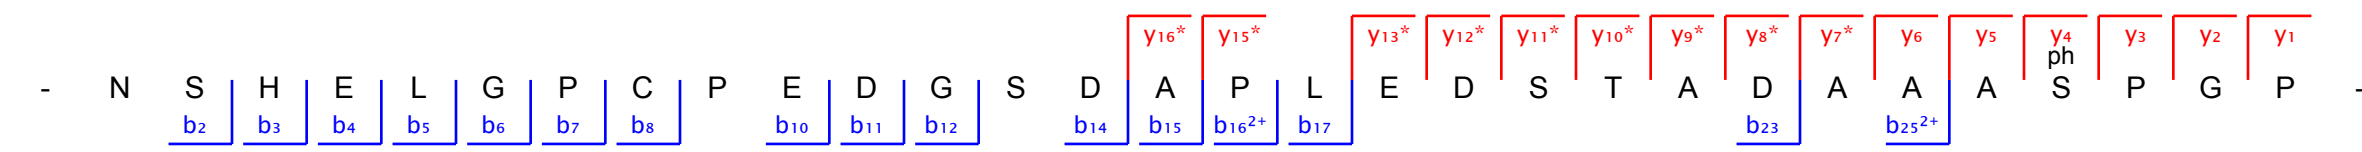



Raw file 20171215\_MaS\_33SR\_LMH\_phospho2\_02 Scan 11872 Method FTMS; HCD Score 126.11 m/z 1155.49 Gene names NPM1

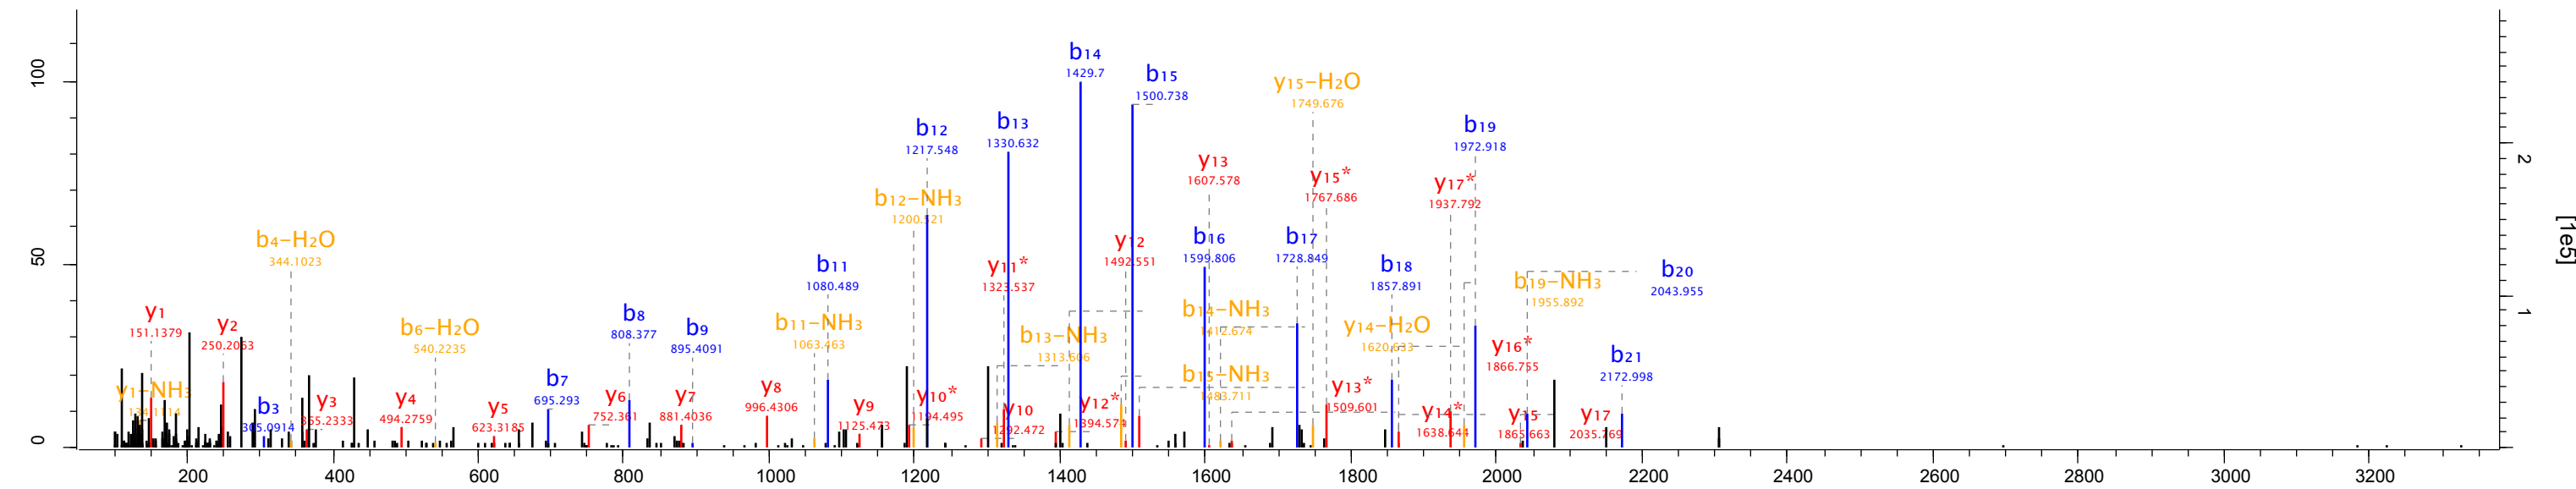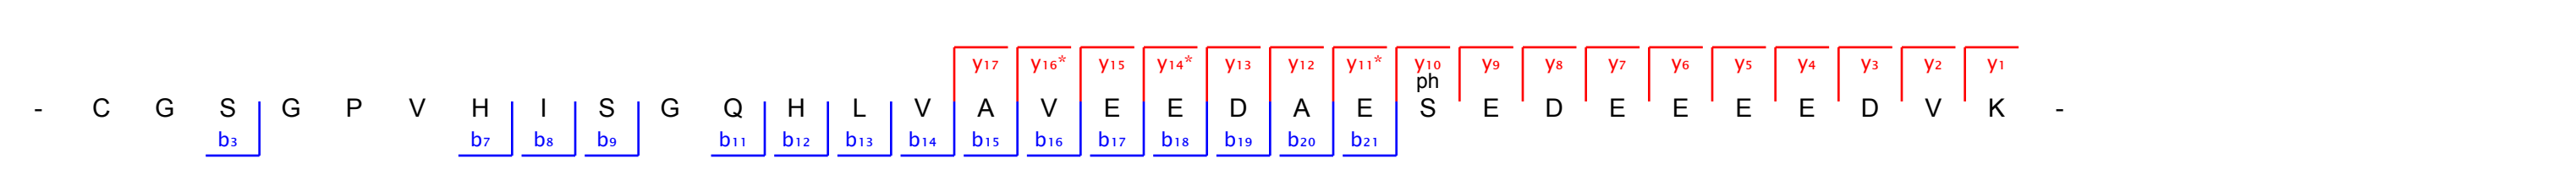

Raw file 20171215\_MaS\_33SR\_LMH\_phospho2\_02 Scan 12252 Method FTMS; HCD Score 205.21 m/z 687.64 Gene names USP8

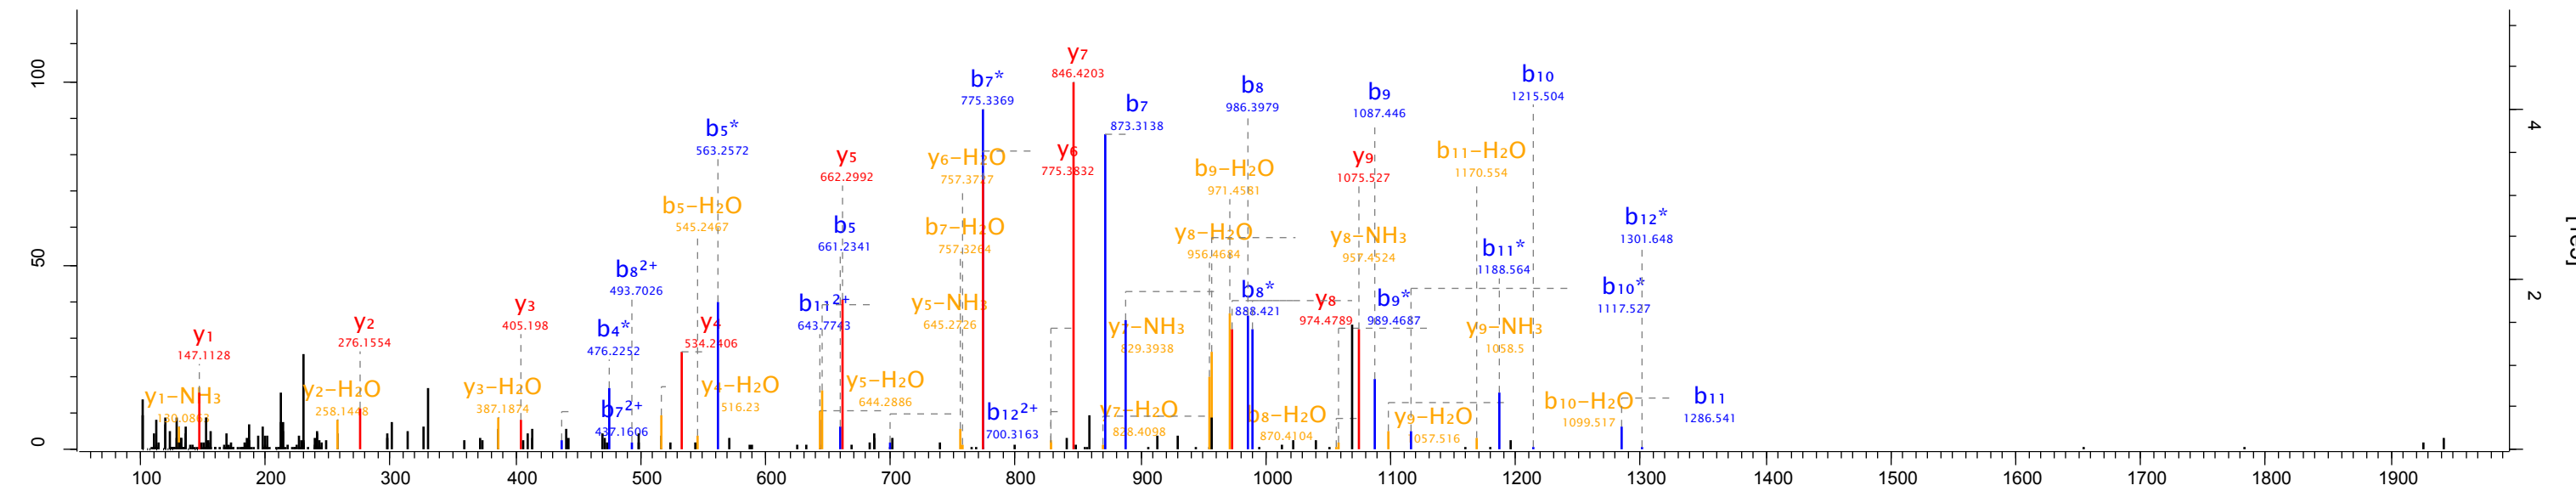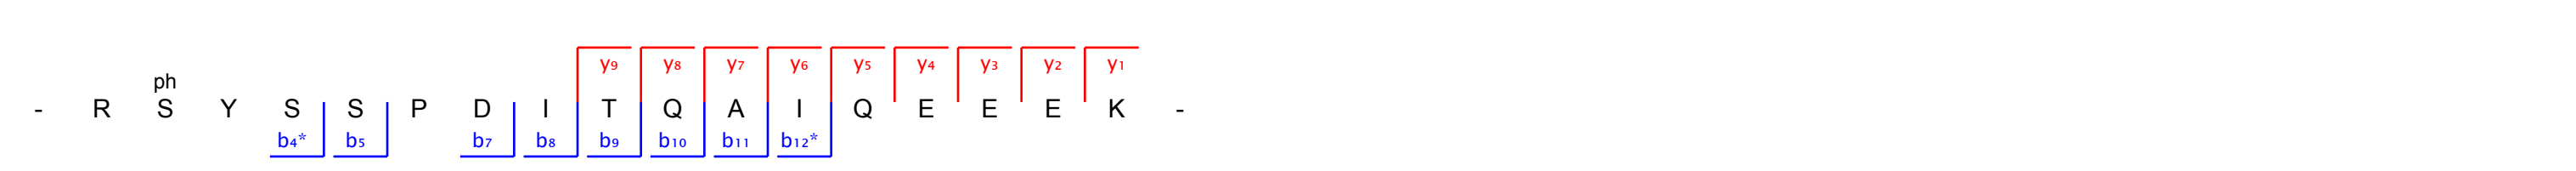

Raw file: 20171215\_MaS\_33SR\_LMH\_phospho2\_02  
 Scan: 13022 Method: FTMS; HCD Score: 79.47 m/z: 852.41 Gene names: PPP1R12A

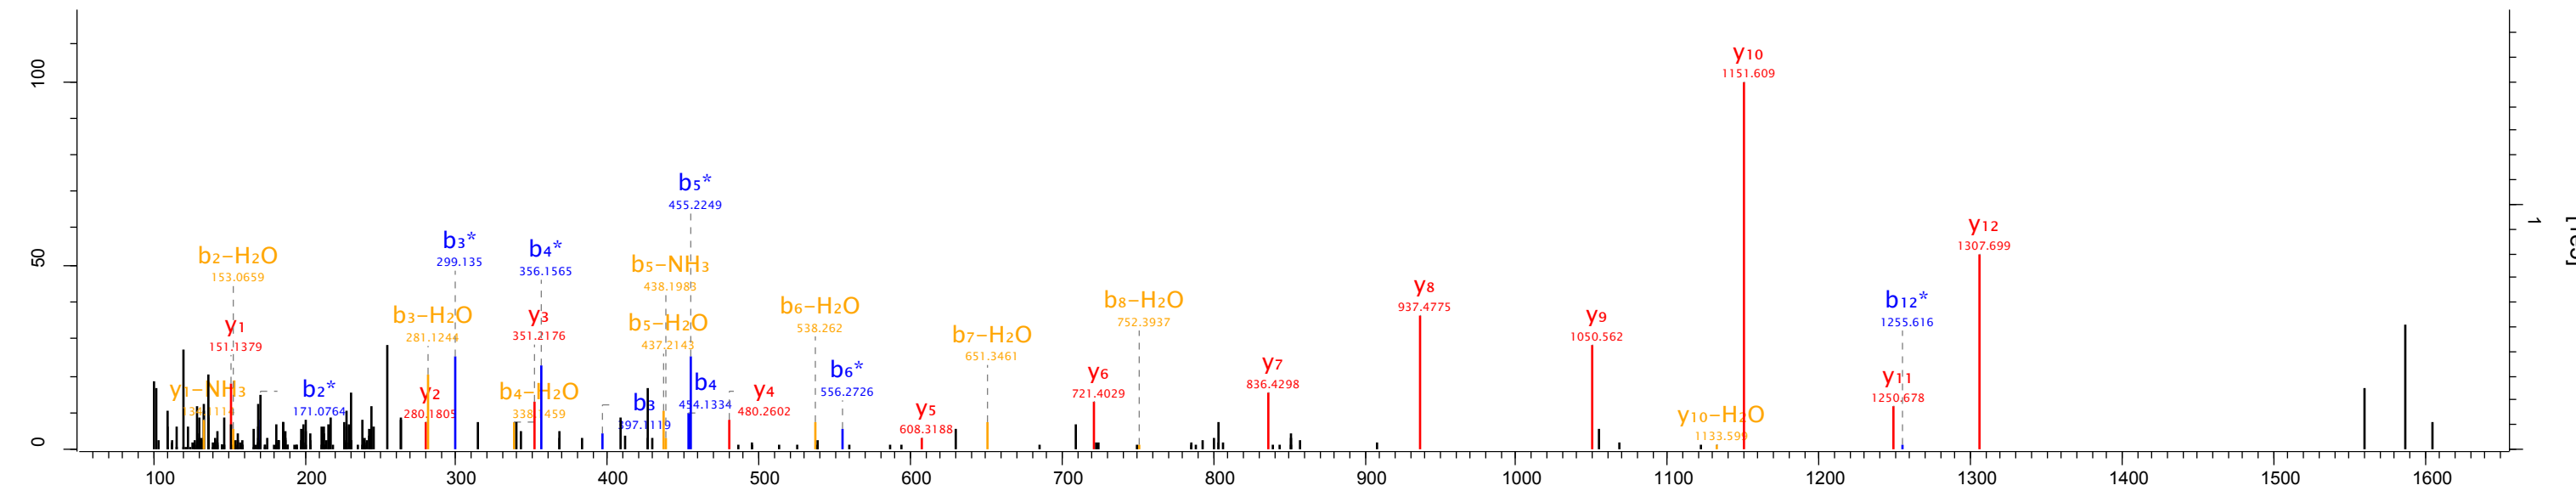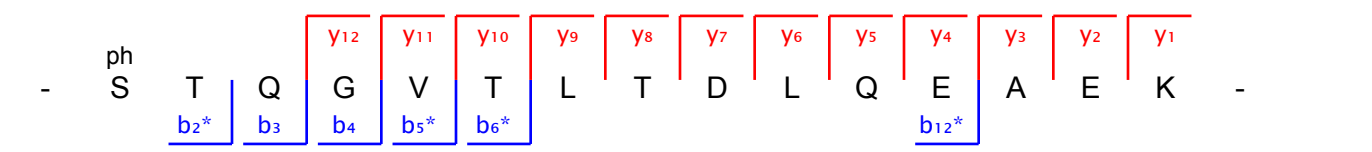

Raw file 20171215\_MaS\_33SR\_LMH\_phospho2\_02 Scan 14292 Method FTMS; HCD Score 140.81 m/z 844.87 Gene names GINS2

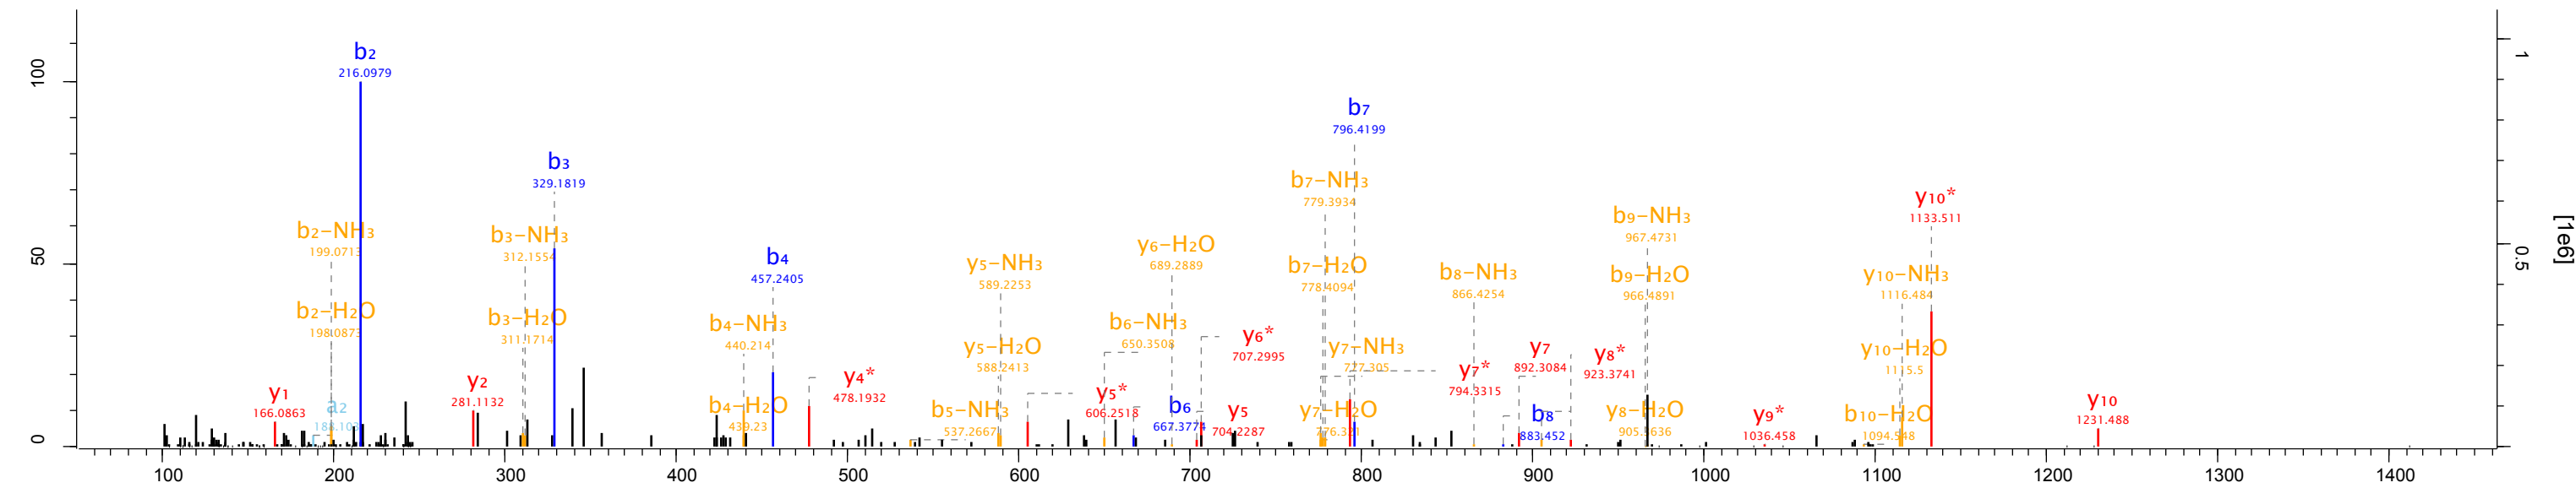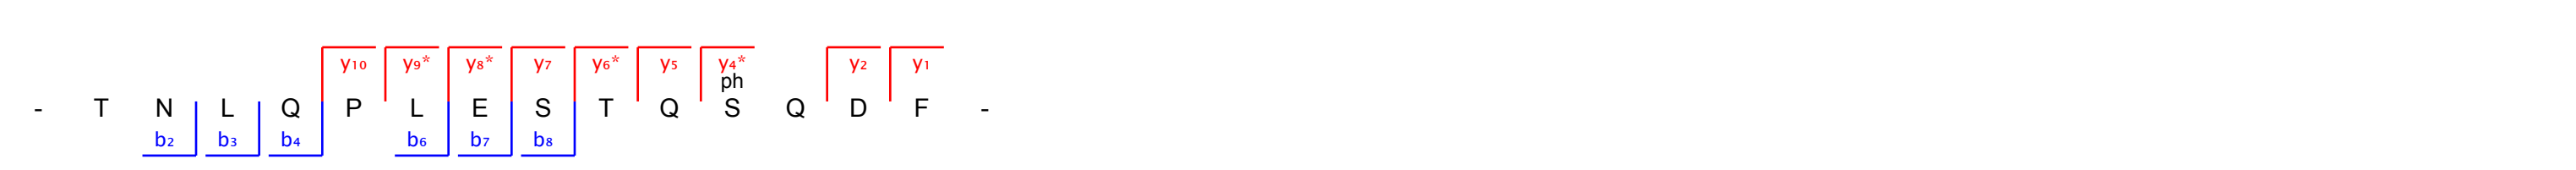

Raw file

20171215\_MaS\_33SR\_LMH\_phospho2\_02

| Scan  | Method    | Score  | m/z    | Gene names |
|-------|-----------|--------|--------|------------|
| 14522 | FTMS; HCD | 137.79 | 726.32 | RBM15B     |

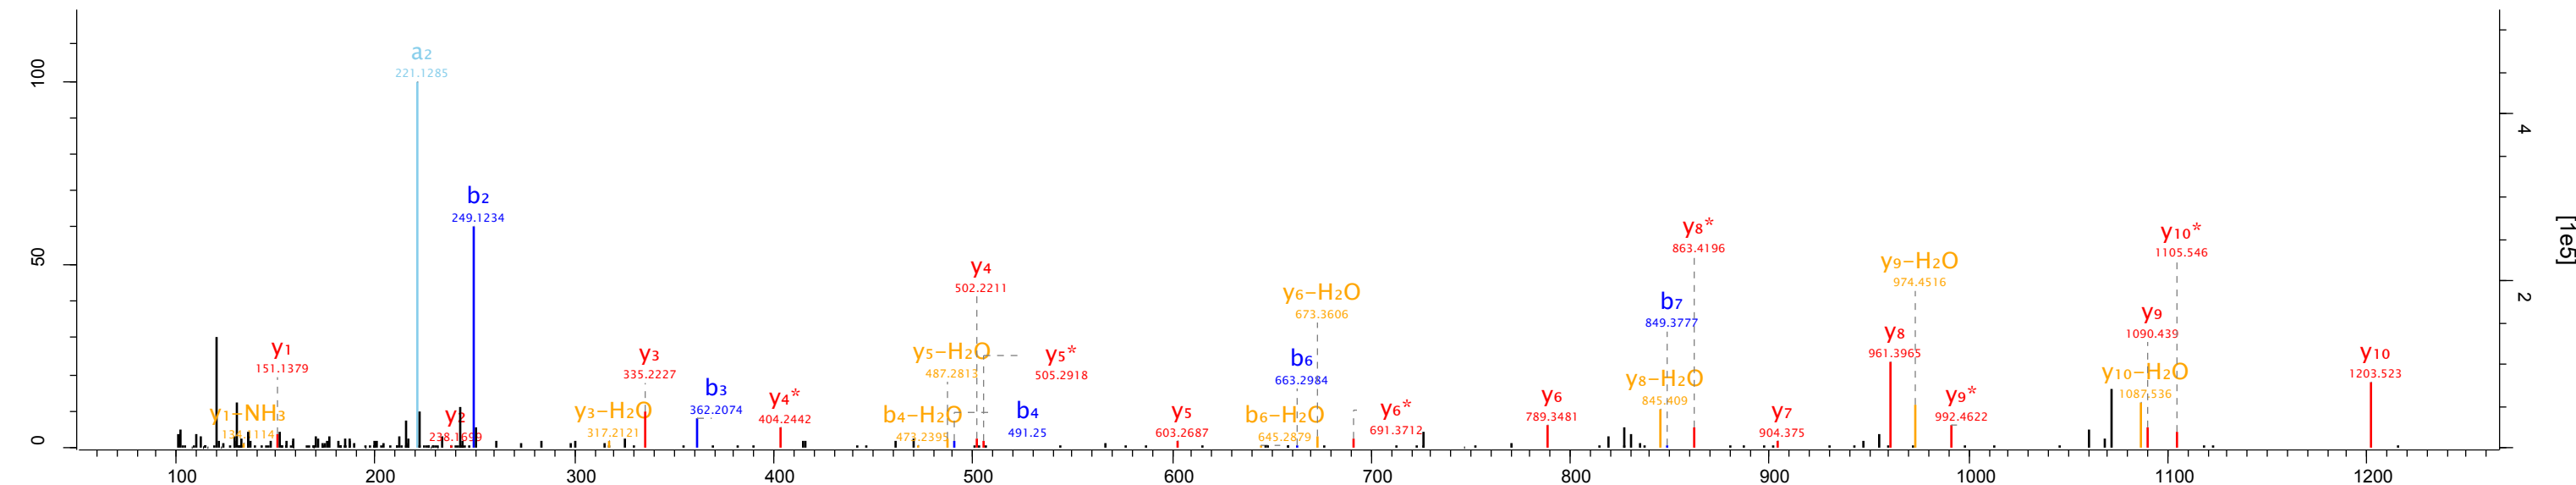

- T F L E G D W T S P S K -

Fragmentation sites are indicated by brackets below the sequence:

- b2: F
- b3: L
- b4: E
- b6: D
- b7: W
- y1: K
- y2: S
- y3: P
- y4-ph: S
- y5: T
- y6: W
- y7: D
- y8: G
- y9: E
- y10: L

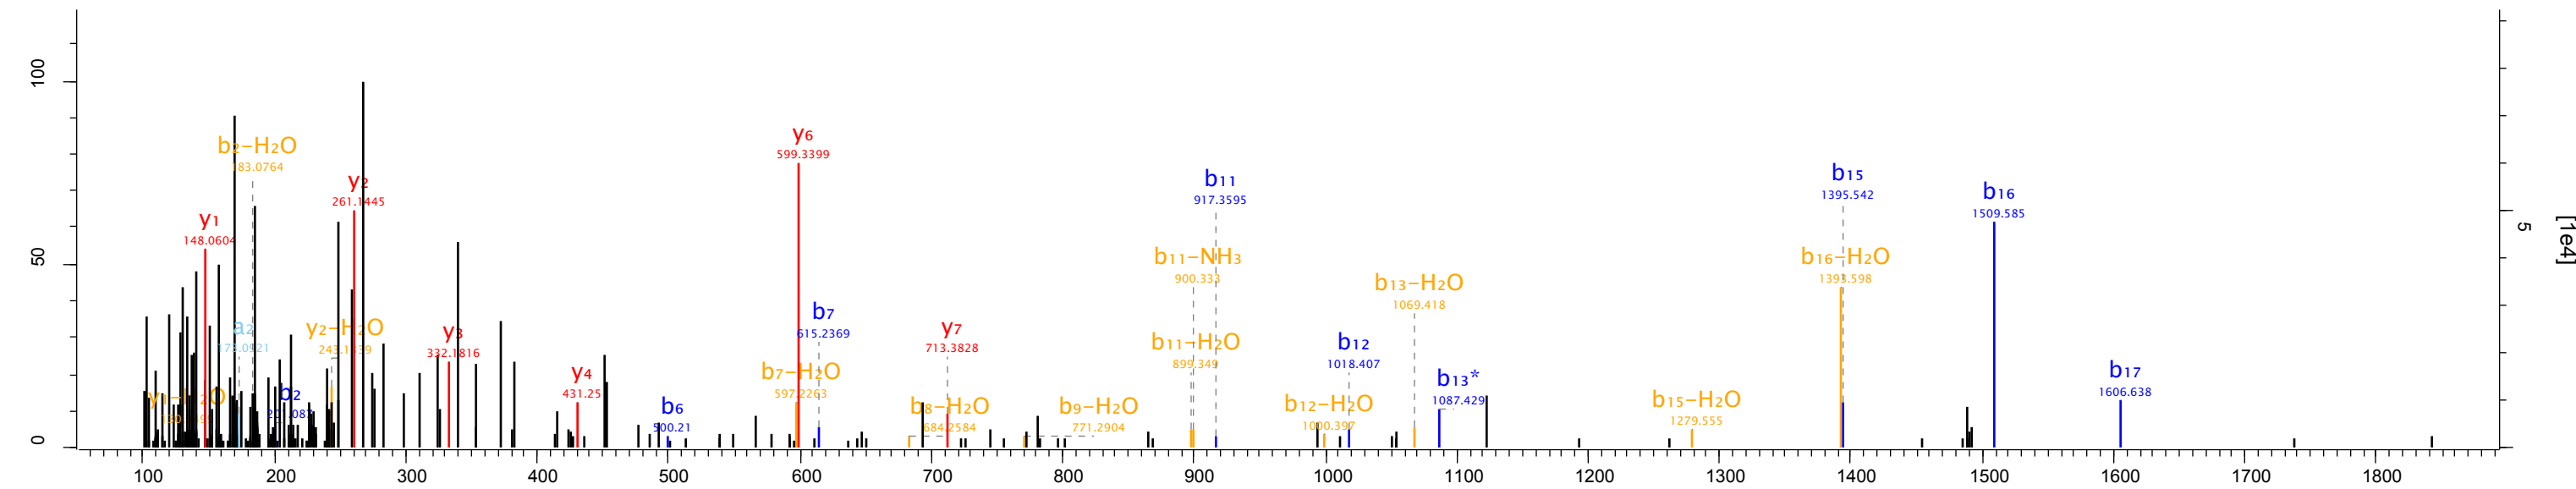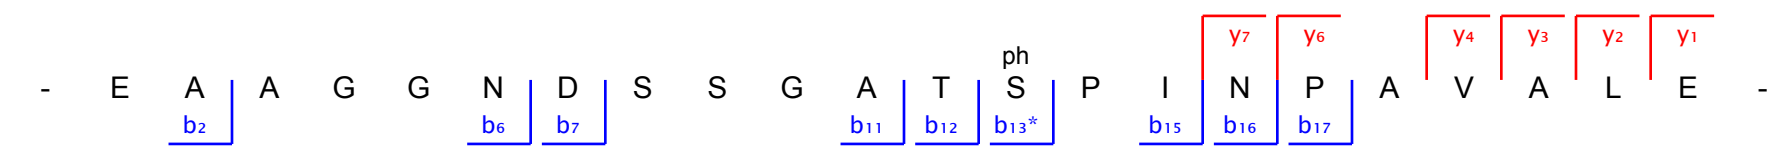

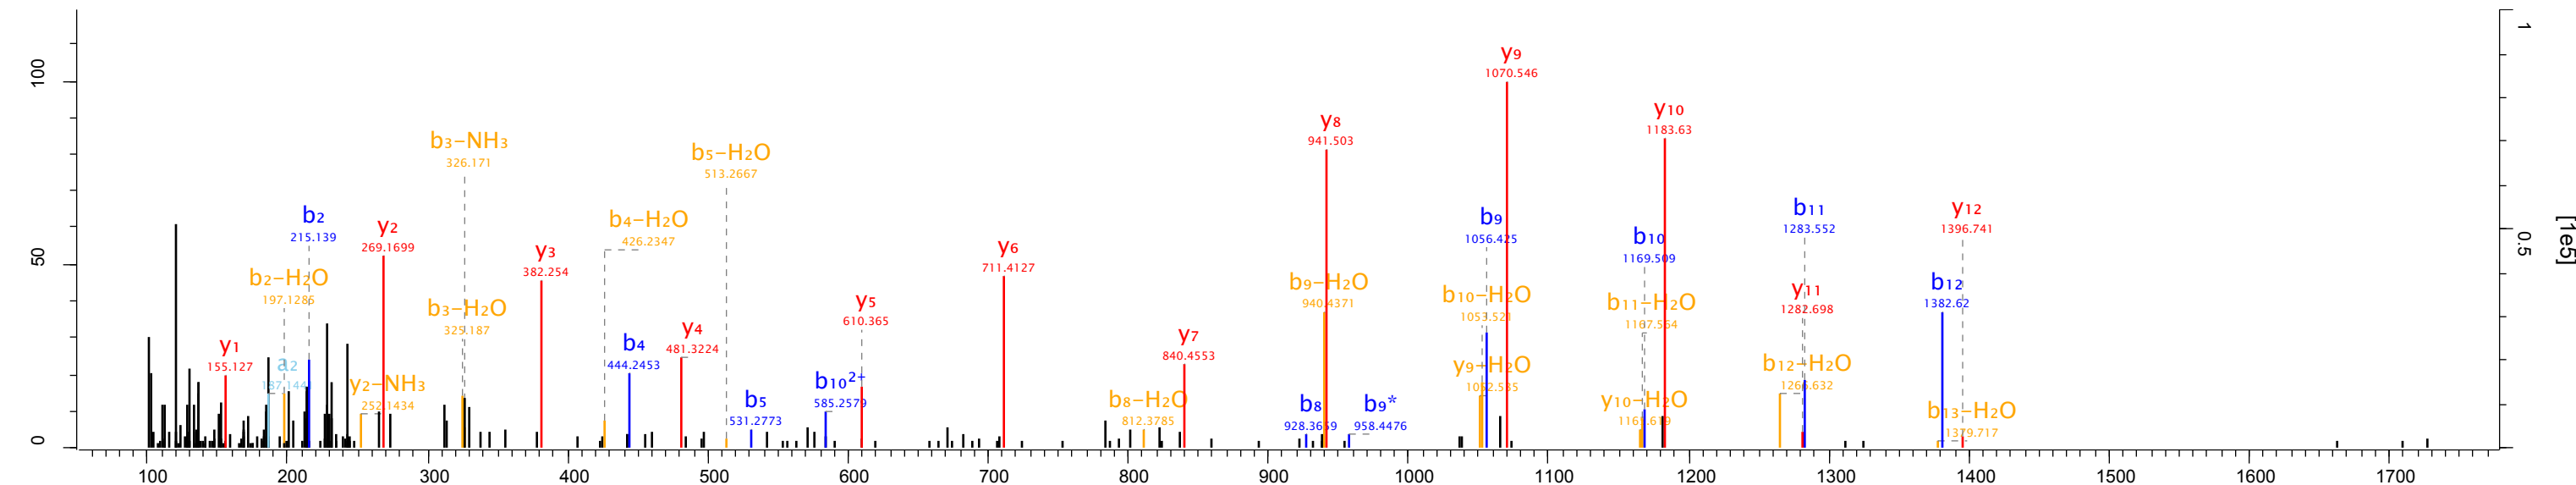

- L T Q T S ph S T E Q L N V L E T E T E V L N K -

Fragmentation mapping (b and y ions) is shown below the sequence:

- b2: L T
- b4: T T
- b5: T S
- b8: E E
- b9: E Q
- b10: E Q L
- b11: E Q L N
- b12: E Q L N V

Fragmentation mapping (y ions) is shown above the sequence:

- y1: K
- y2: N
- y3: L
- y4: V
- y5: E
- y6: T
- y7: E
- y8: T
- y9: E
- y10: L
- y11: V
- y12: N

Raw file  
20171215\_MaS\_33SR\_LMH\_phospho2\_02

Scan 1972 Method FTMS; HCD Score 326.2 m/z 961.92 Gene names BCLAF1

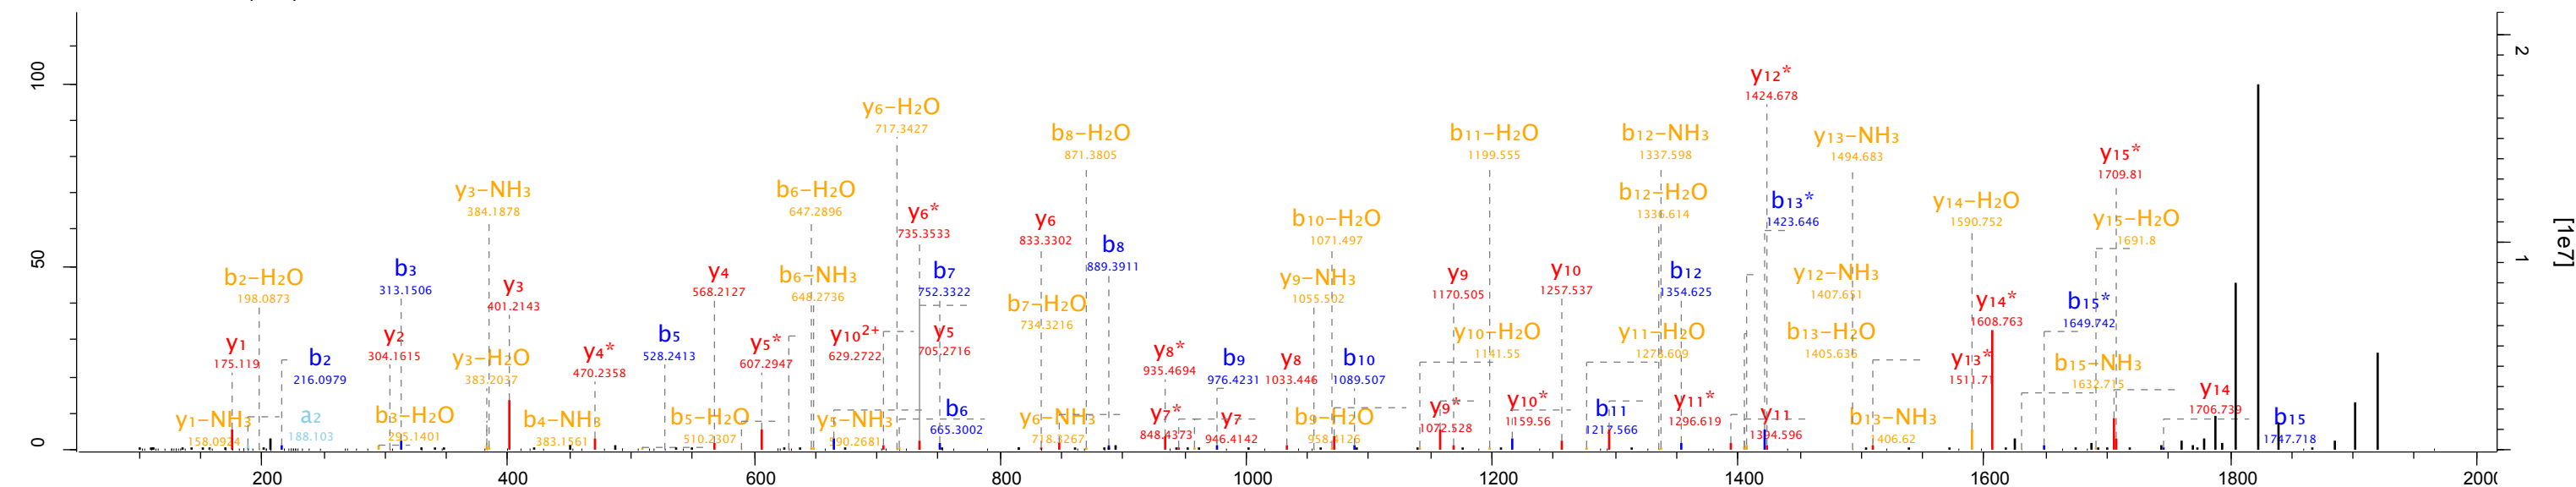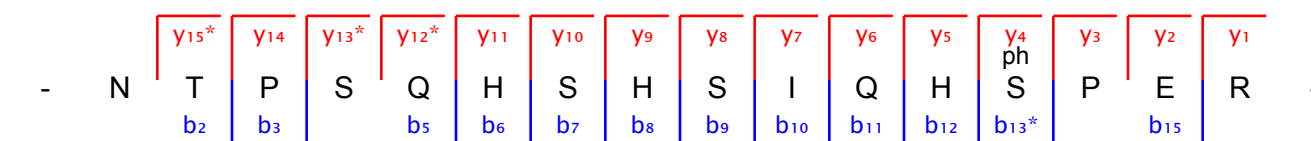



Raw file 20171215\_MaS\_33SR\_LMH\_phospho2\_02 Scan 2812 Method FTMS; HCD Score 246.9 m/z 873.83 Gene names TOP2A

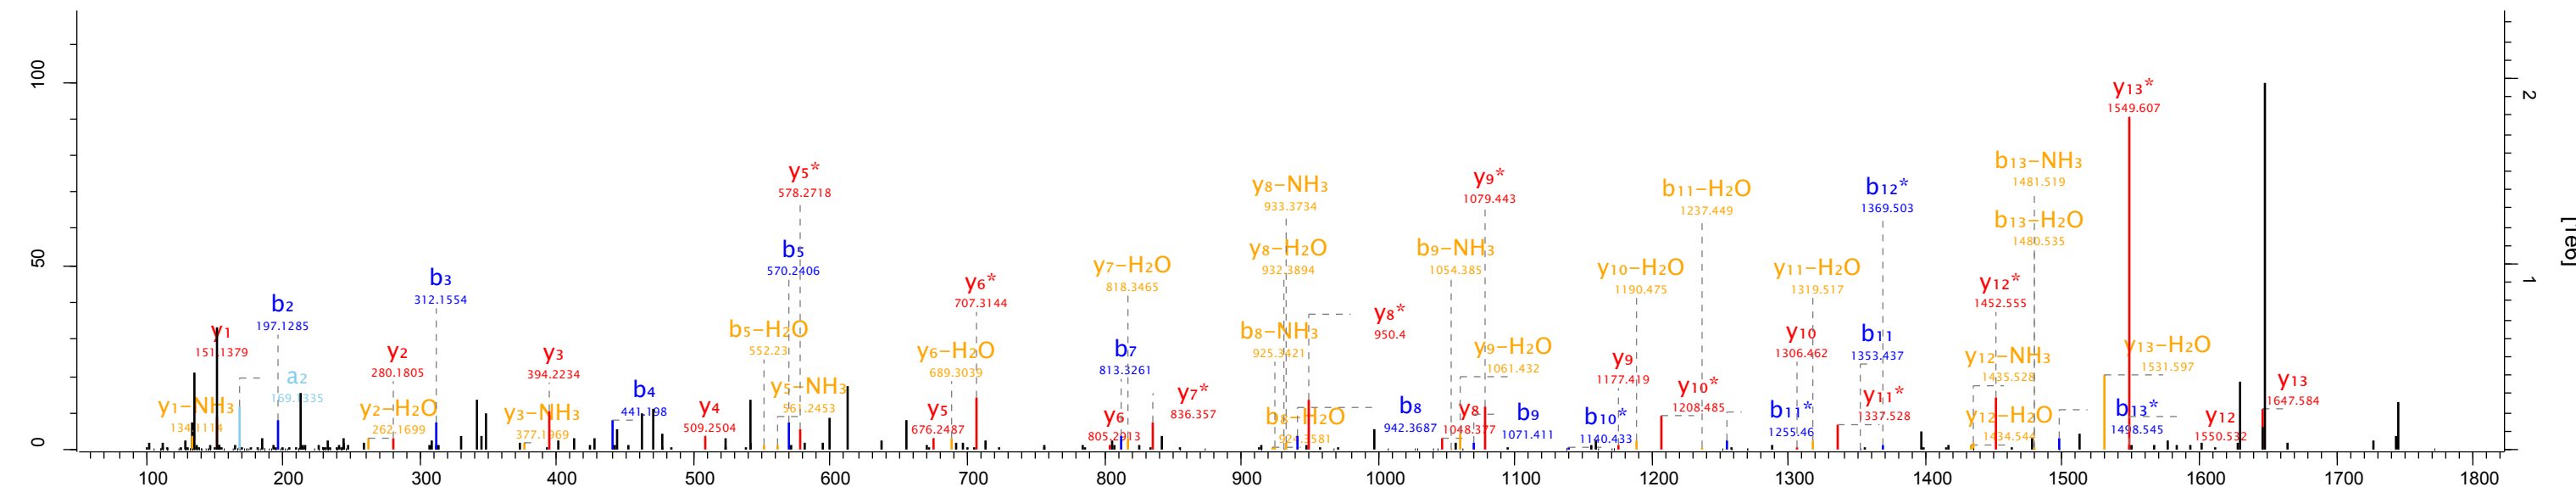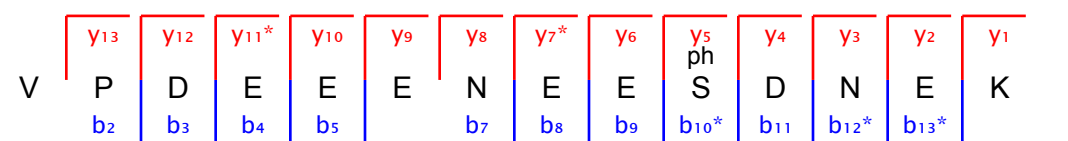

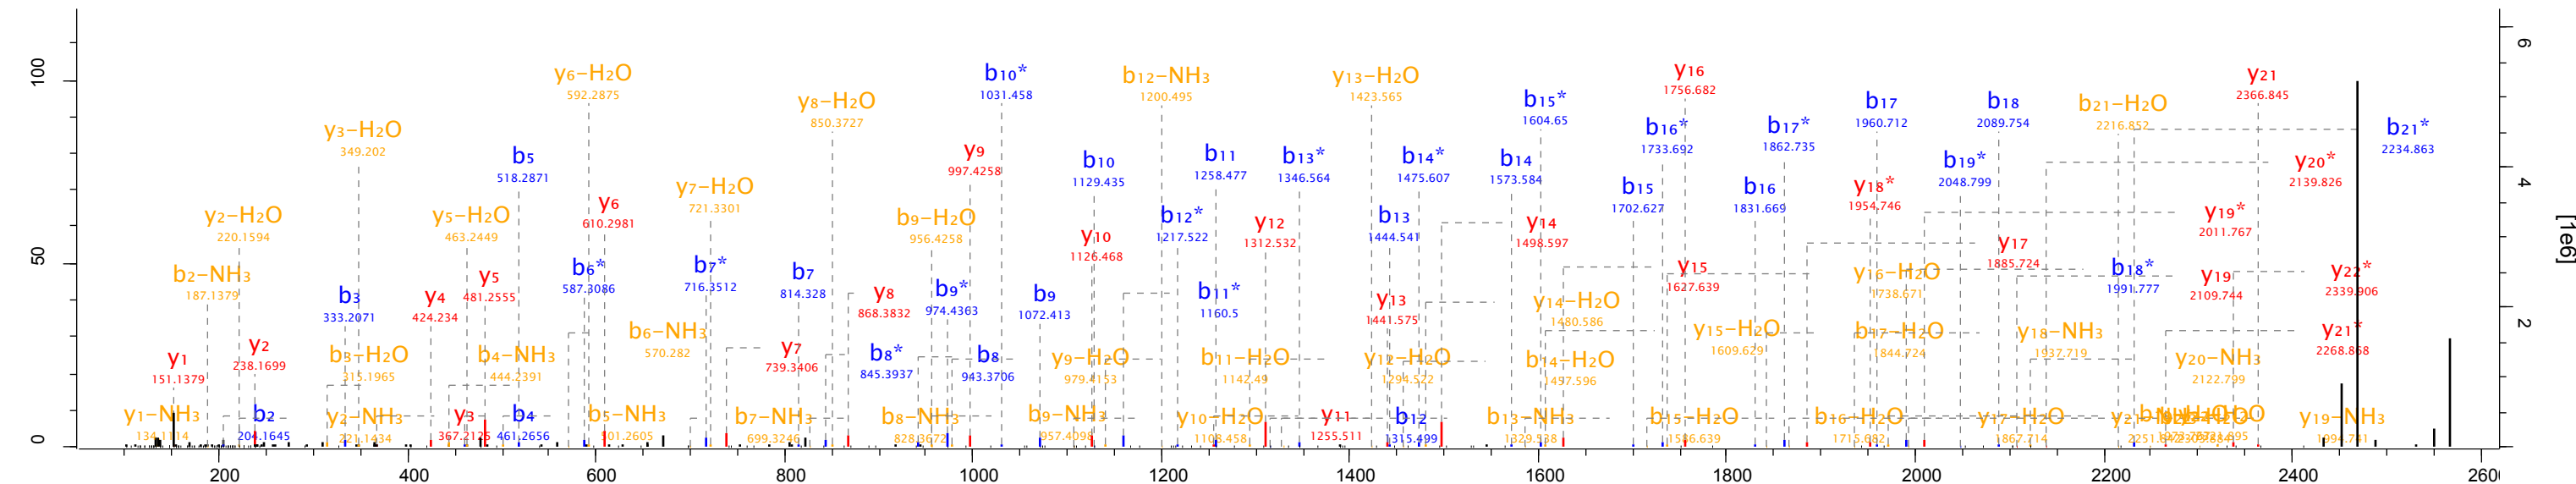

- K y<sub>22</sub>\* y<sub>21</sub> y<sub>20</sub>\* y<sub>19</sub> y<sub>18</sub>\* y<sub>17</sub> y<sub>16</sub> y<sub>15</sub> y<sub>14</sub> y<sub>13</sub> y<sub>12</sub> y<sub>11</sub> y<sub>10</sub> y<sub>9</sub> y<sub>8</sub> y<sub>7</sub> y<sub>6</sub> y<sub>5</sub> y<sub>4</sub> y<sub>3</sub> y<sub>2</sub> y<sub>1</sub> -

b<sub>2</sub> b<sub>3</sub> b<sub>4</sub> b<sub>5</sub> b<sub>6</sub>\* b<sub>7</sub> b<sub>8</sub> b<sub>9</sub> b<sub>10</sub> b<sub>11</sub> b<sub>12</sub> b<sub>13</sub> b<sub>14</sub> b<sub>15</sub> b<sub>16</sub> b<sub>17</sub> b<sub>18</sub> b<sub>19</sub>\* G b<sub>21</sub>\* S K -

Raw file 20171215\_MaS\_33SR\_LMH\_phospho2\_02 Scan 3232 Method FTMS; HCD Score 209.66 m/z 511.92 Gene names HNRNPA1

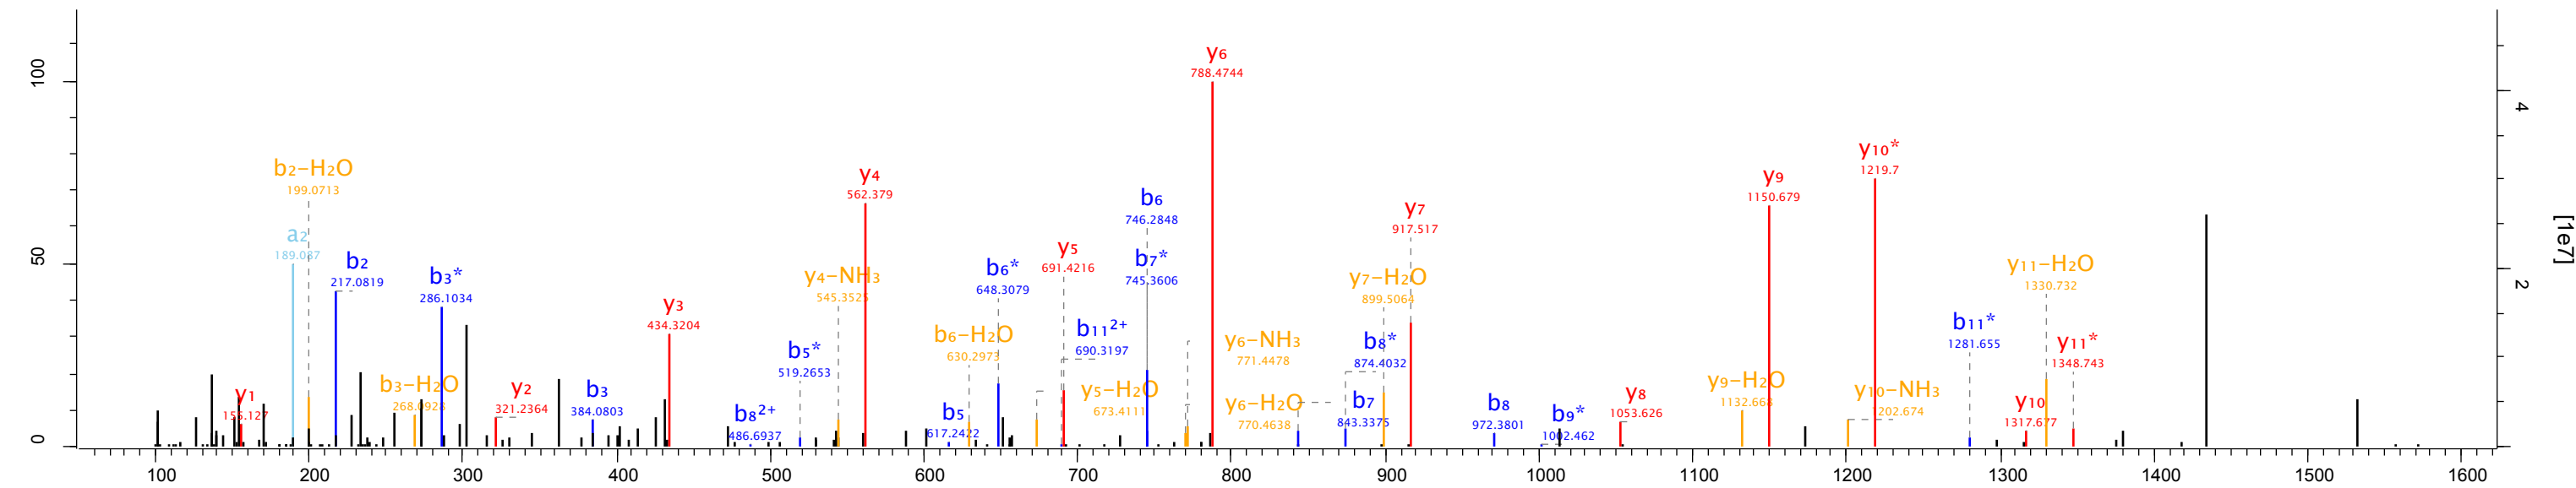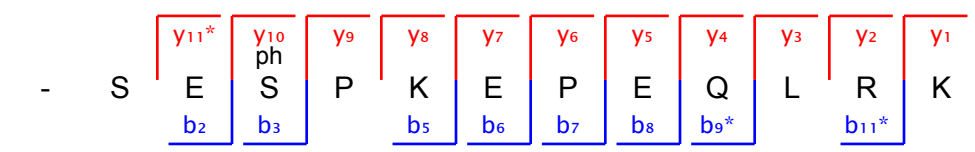

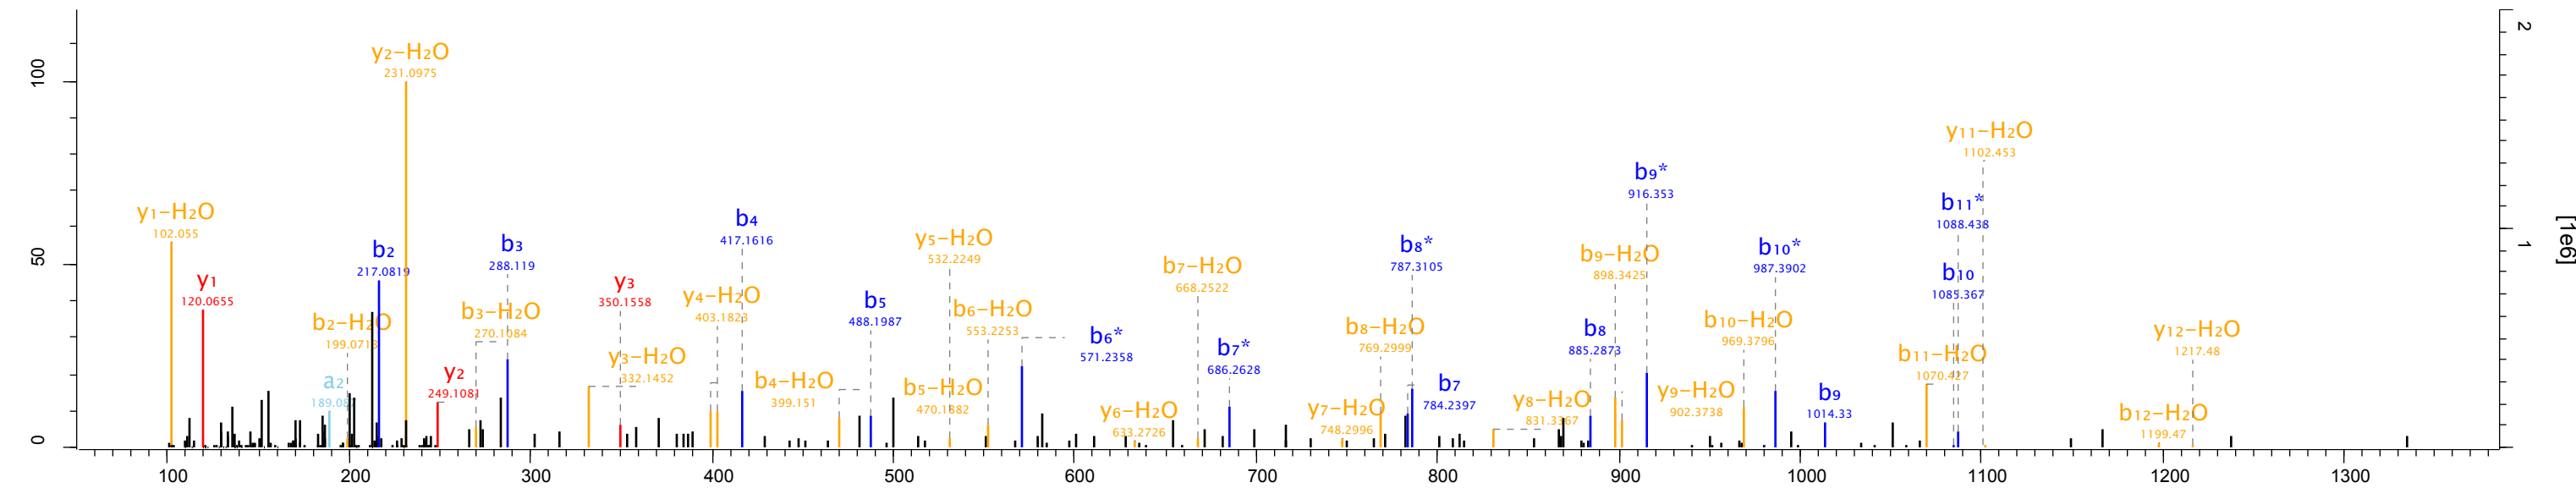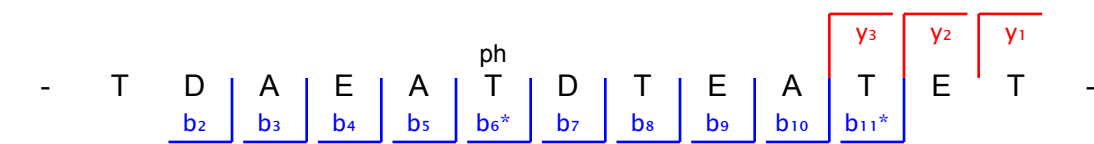

Raw file: 20171215\_MaS\_33SR\_LMH\_phospho2\_02  
 Scan: 3472 Method: FTMS; HCD Score: 237.86 m/z: 857.37 Gene names: NASP

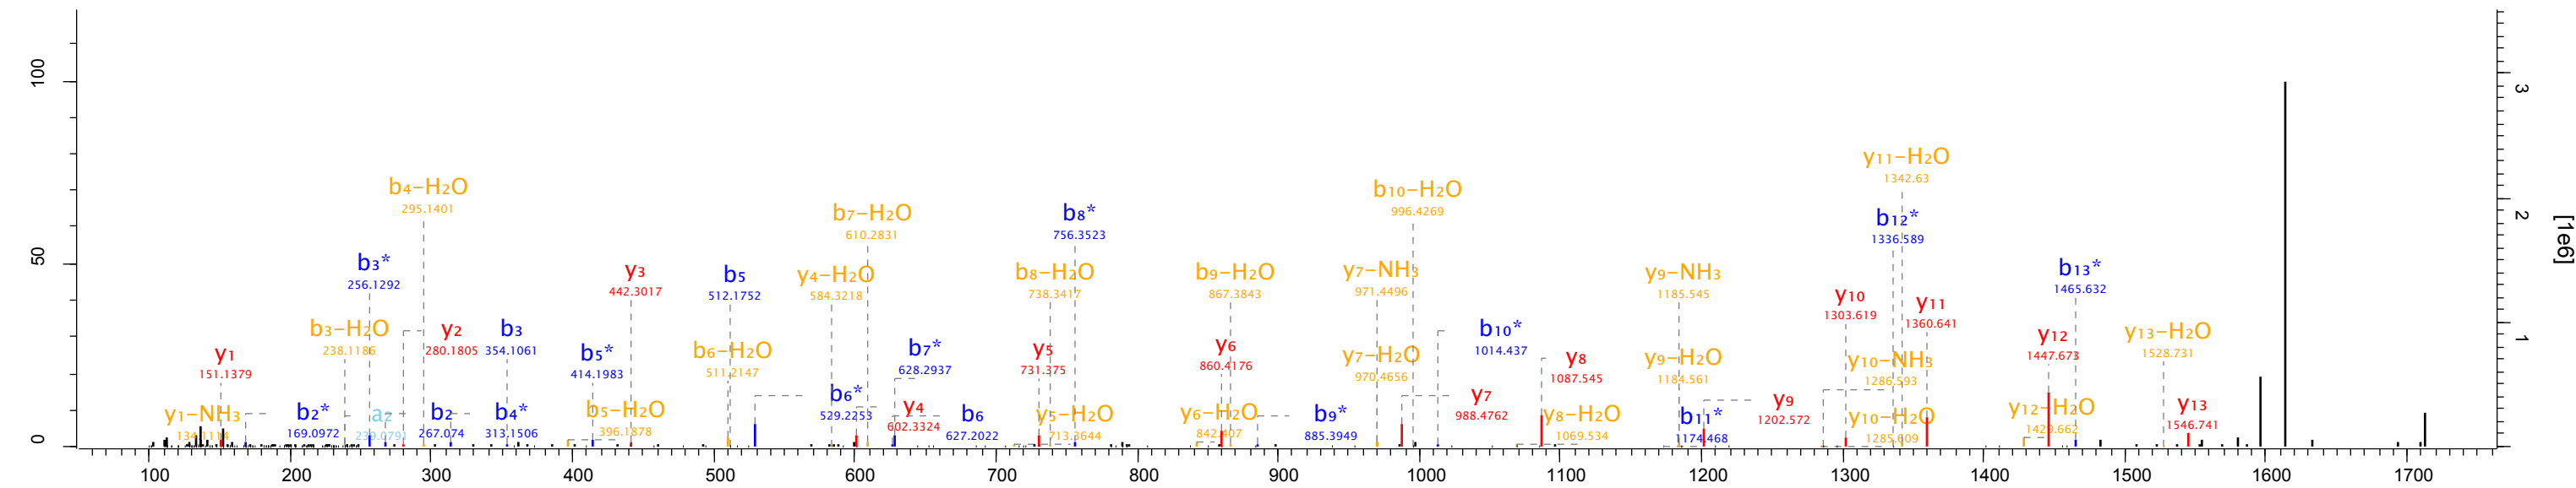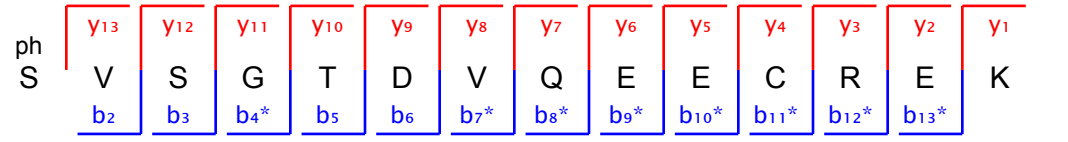

Raw file 20171215\_MaS\_33SR\_LMH\_phospho2\_02 Scan 3772 Method FTMS; HCD Score 277.1 m/z 892.35 Gene names WDR44

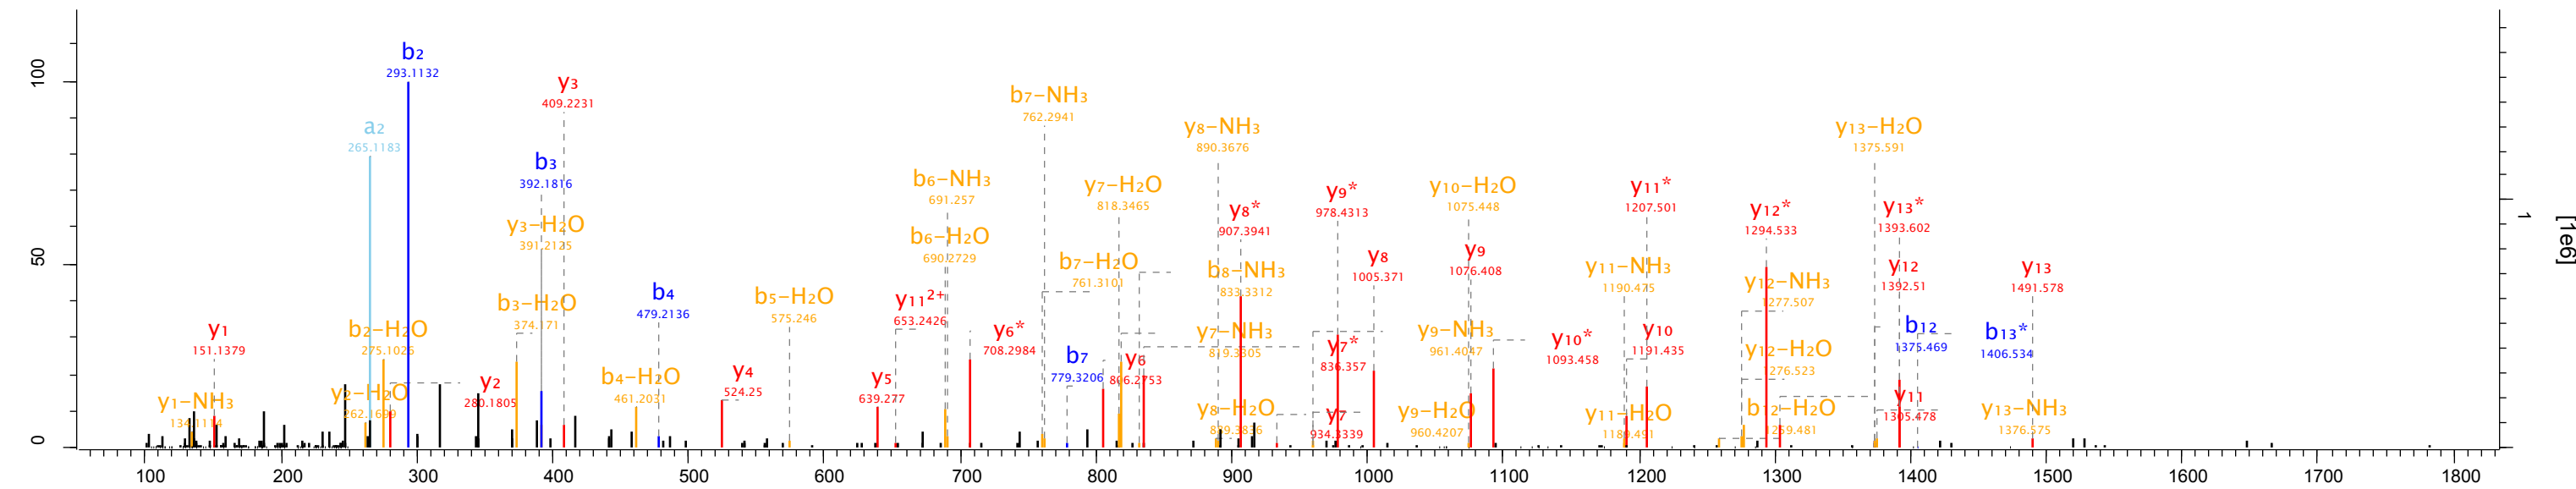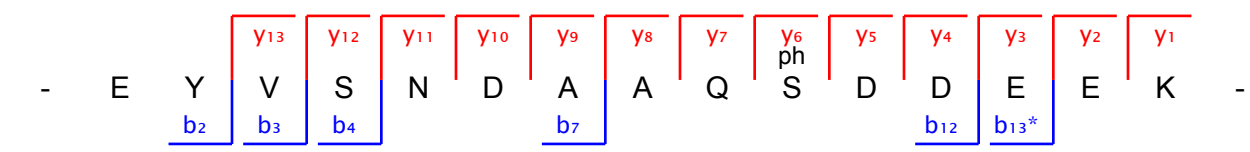

Raw file  
20171215\_MaS\_33SR\_LMH\_phospho2\_02

Scan 3792 Method FTMS; HCD Score 221.91 m/z 1002.43 Gene names SERBP1

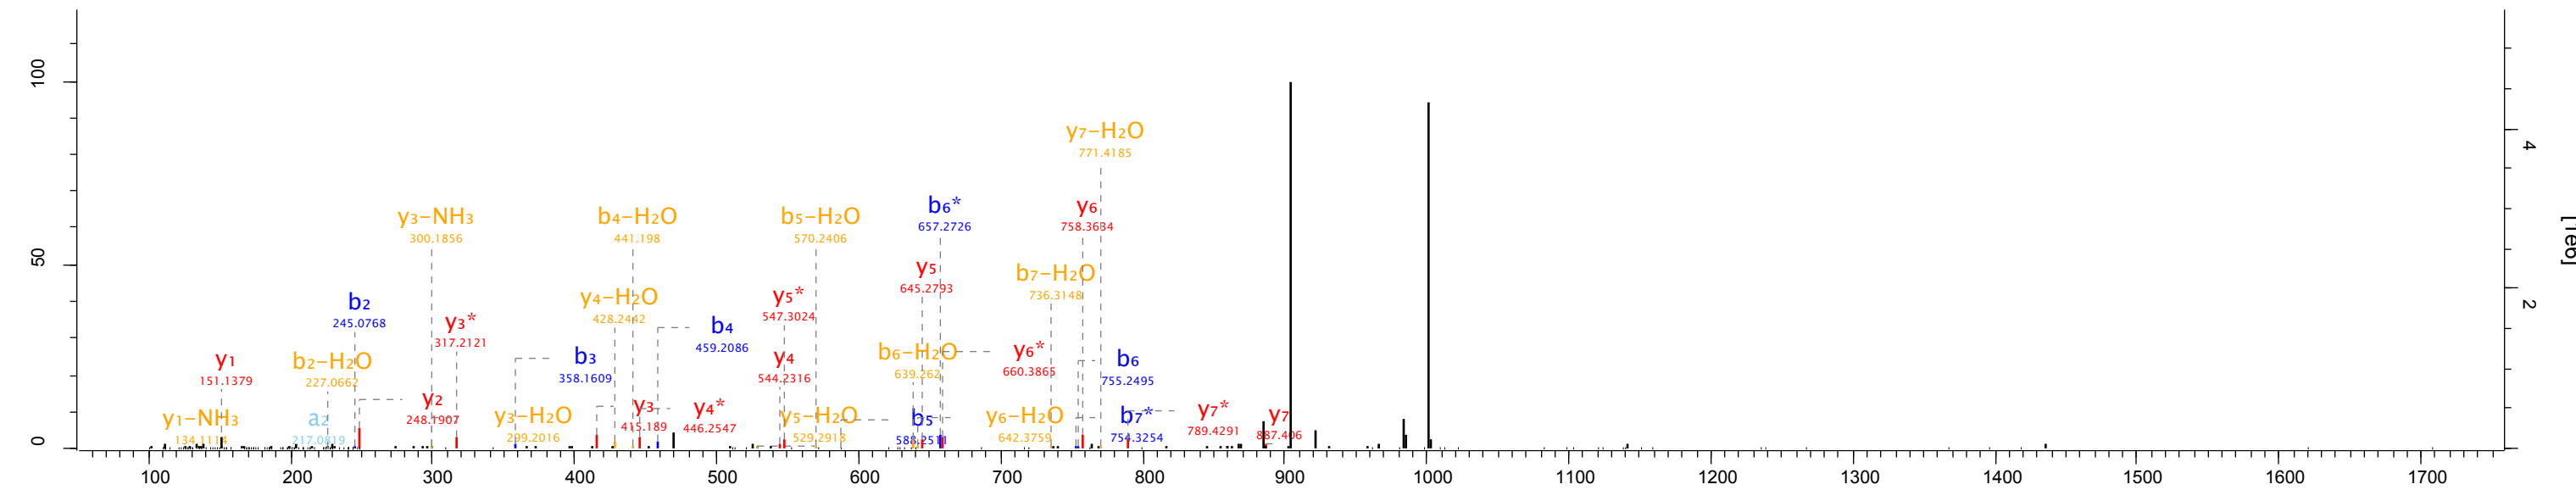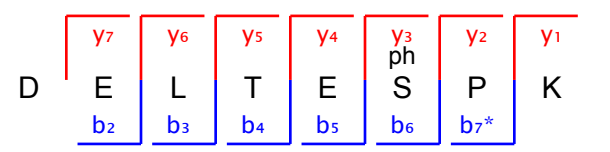

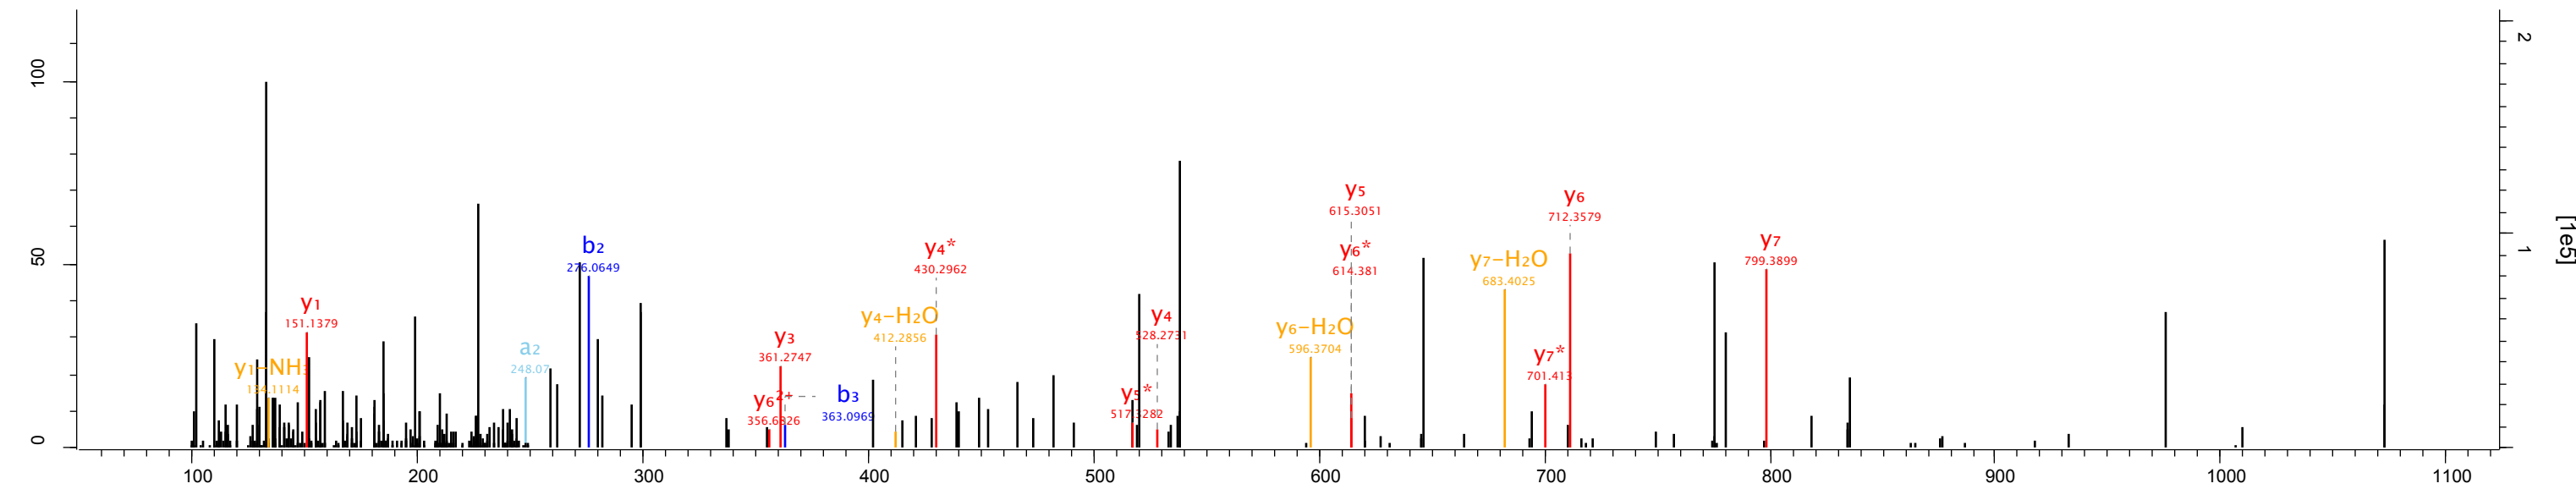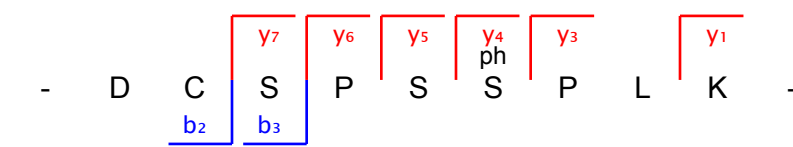



Raw file 20171215\_MaS\_33SR\_LMH\_phospho2\_02 Scan 5172 Method FTMS; HCD Score 50.11 m/z 410.18

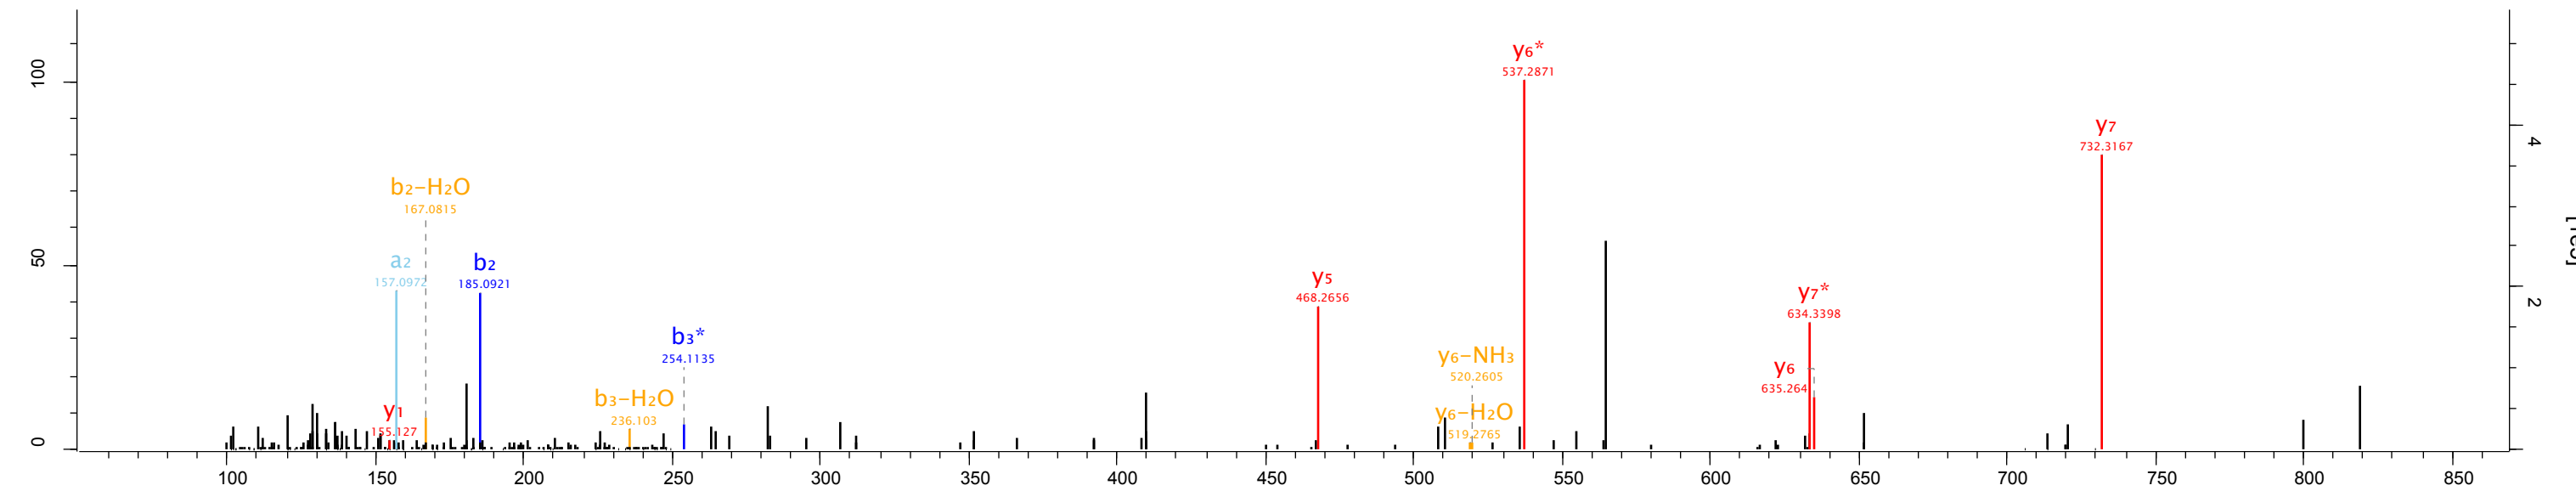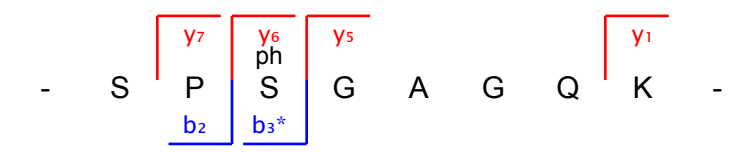

20171215\_MaS\_33SR\_LMH\_phospho2\_02 5452 FTMS; HCD 101.32 588.31 NFKB2

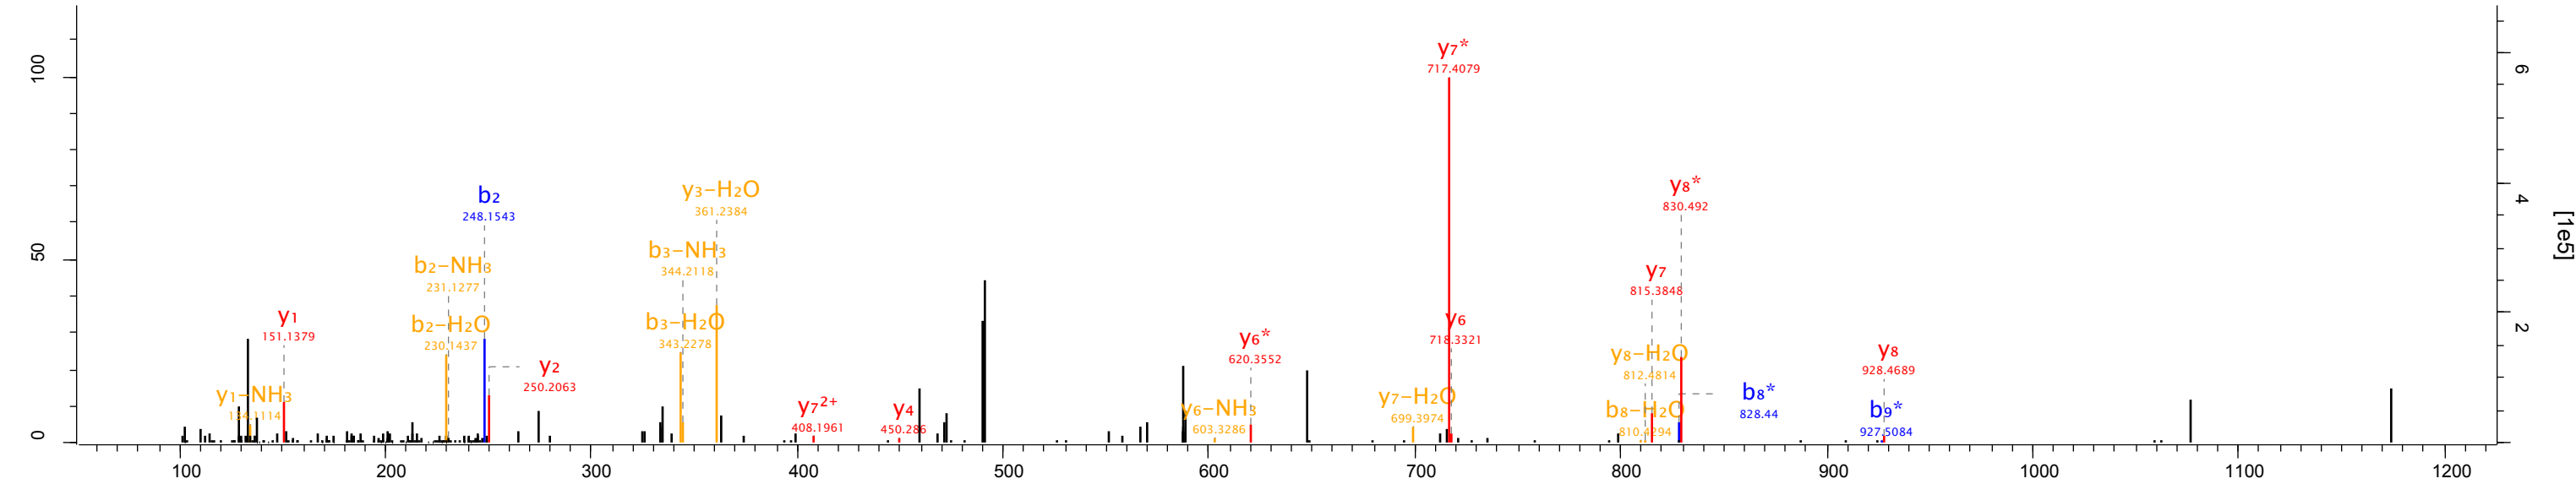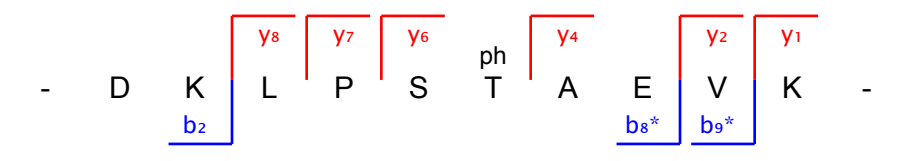

Raw file: 20171215\_MaS\_33SR\_LMH\_phospho2\_02  
 Scan: 6112 Method: FTMS; HCD Score: 78.61 m/z: 654.28 Gene names: TFPI2

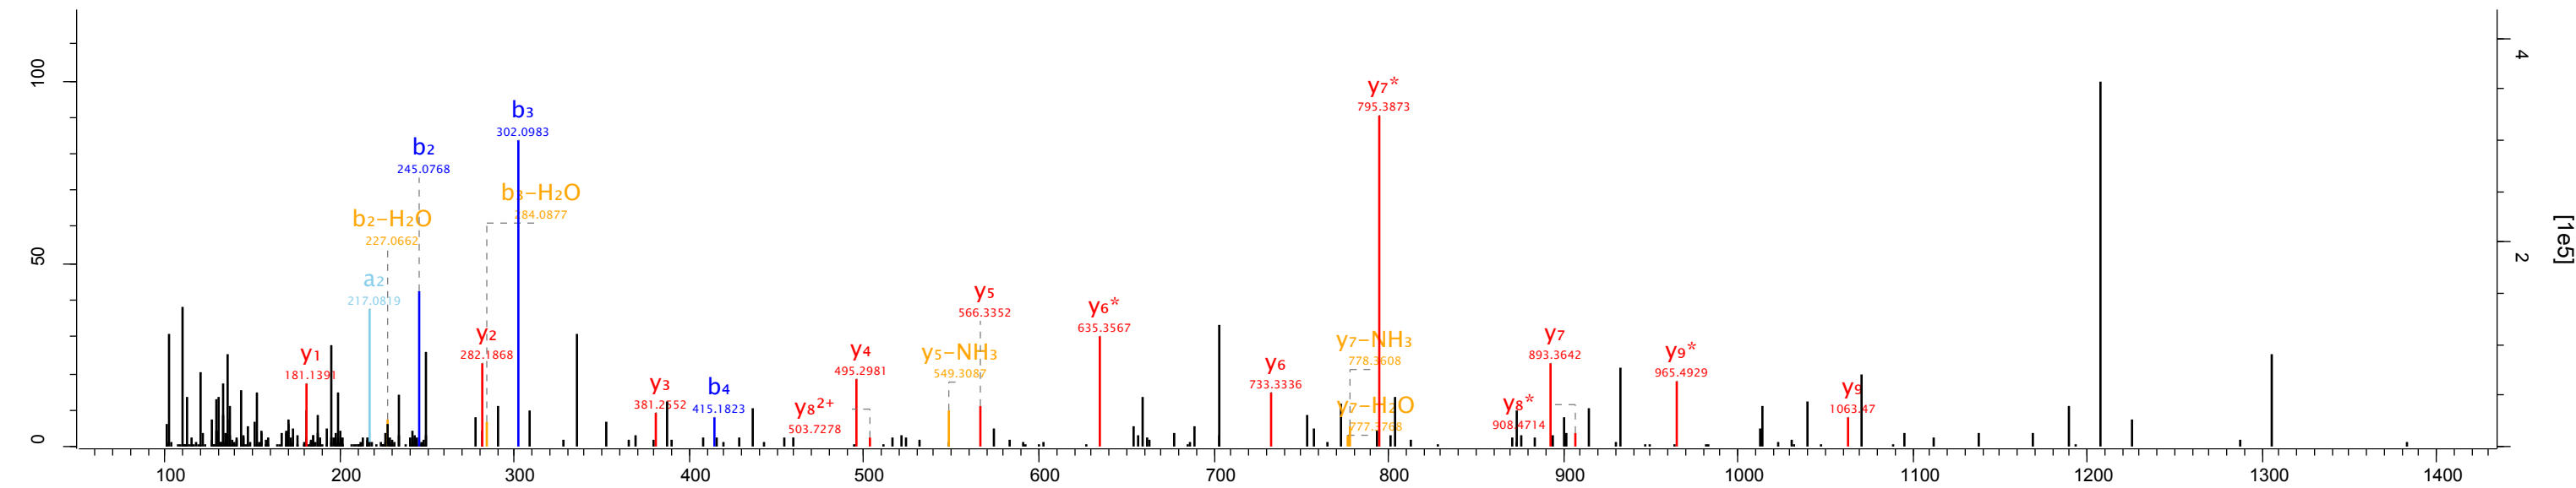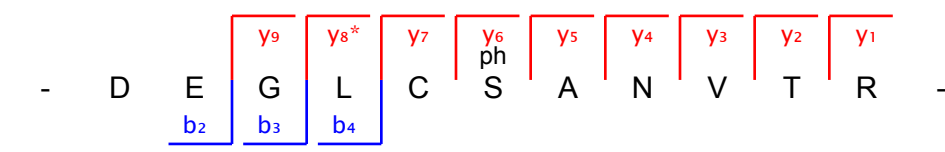

Raw file: 20171215\_MaS\_33SR\_LMH\_phospho2\_02  
 Scan: 7482 Method: FTMS; HCD Score: 278.57 m/z: 1403.66 Gene names: DENR

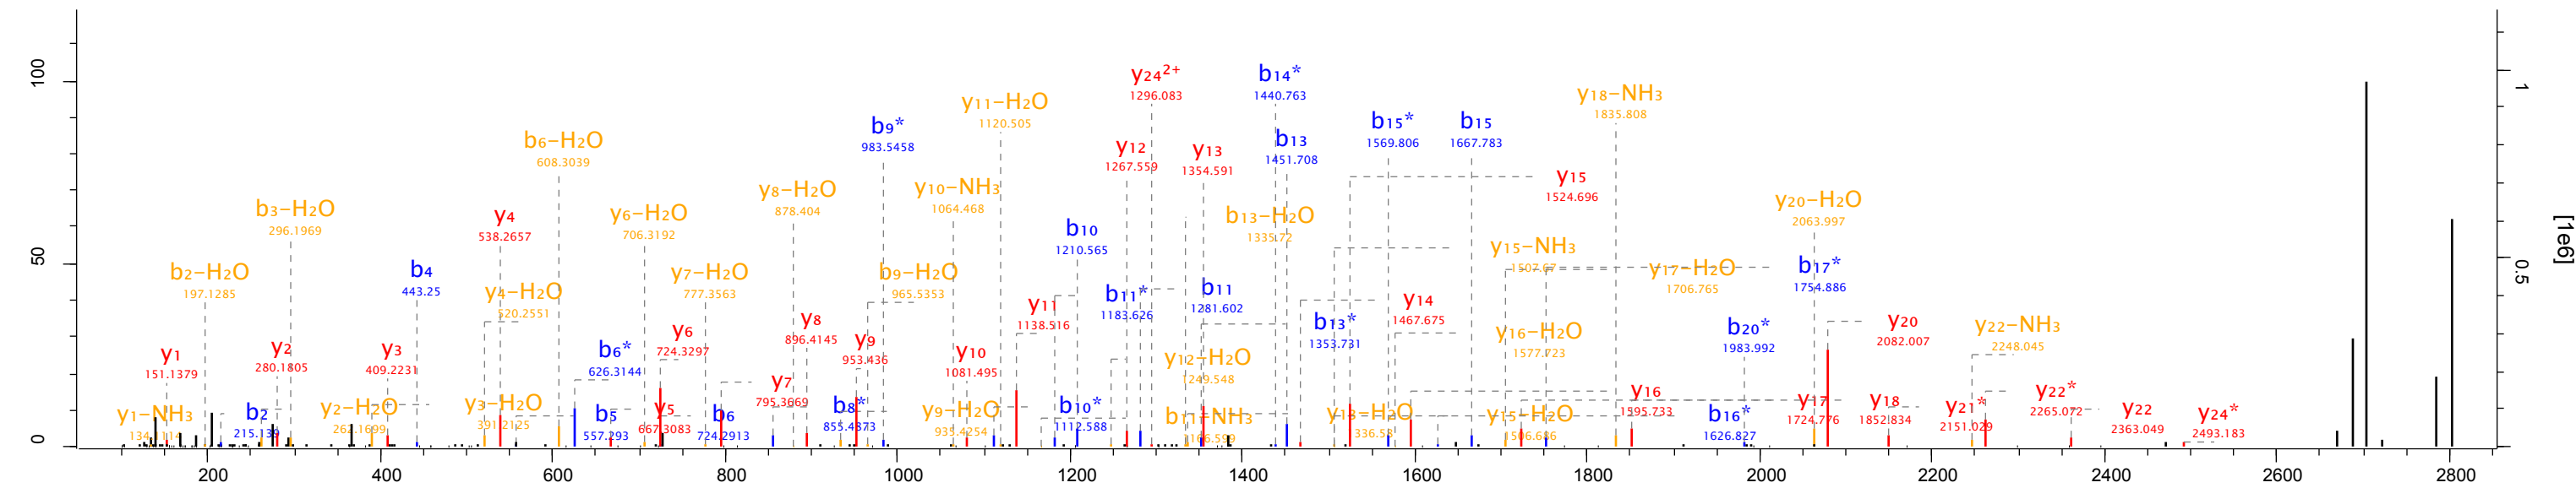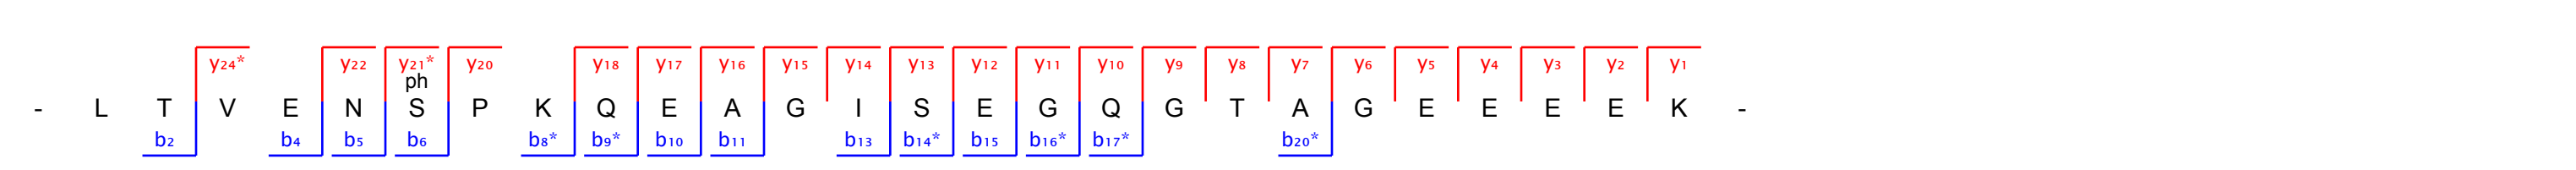

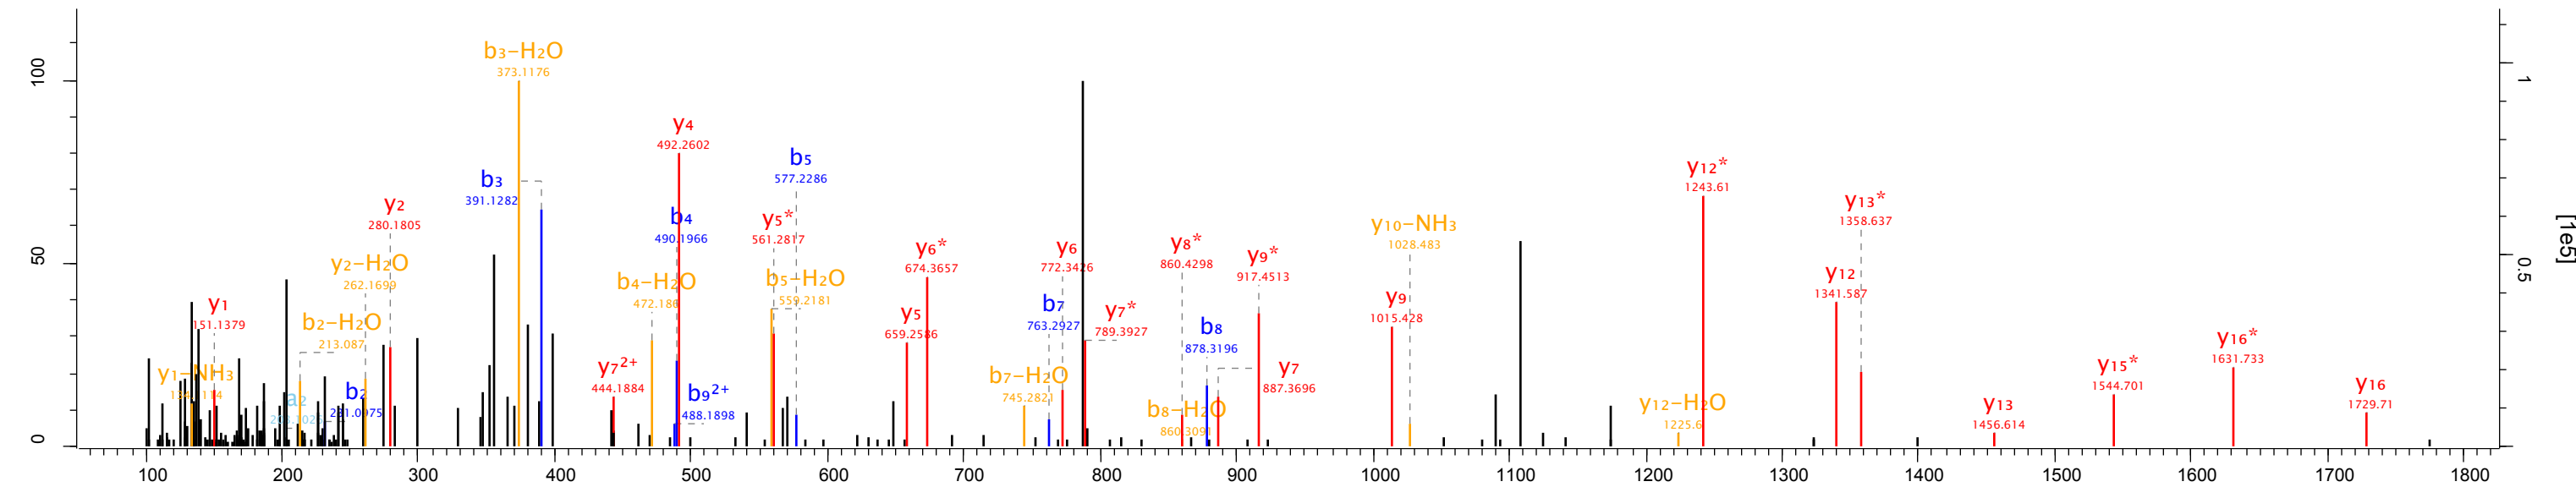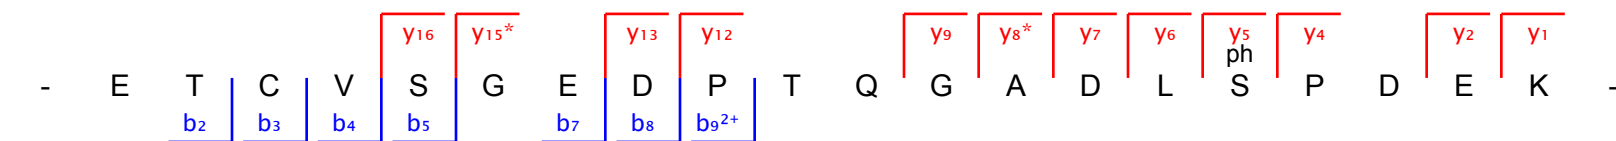

Raw file  
20171215\_MaS\_33SR\_LMH\_phospho2\_02  
Scan 8262 Method FTMS; HCD Score 49.1 m/z 502.76

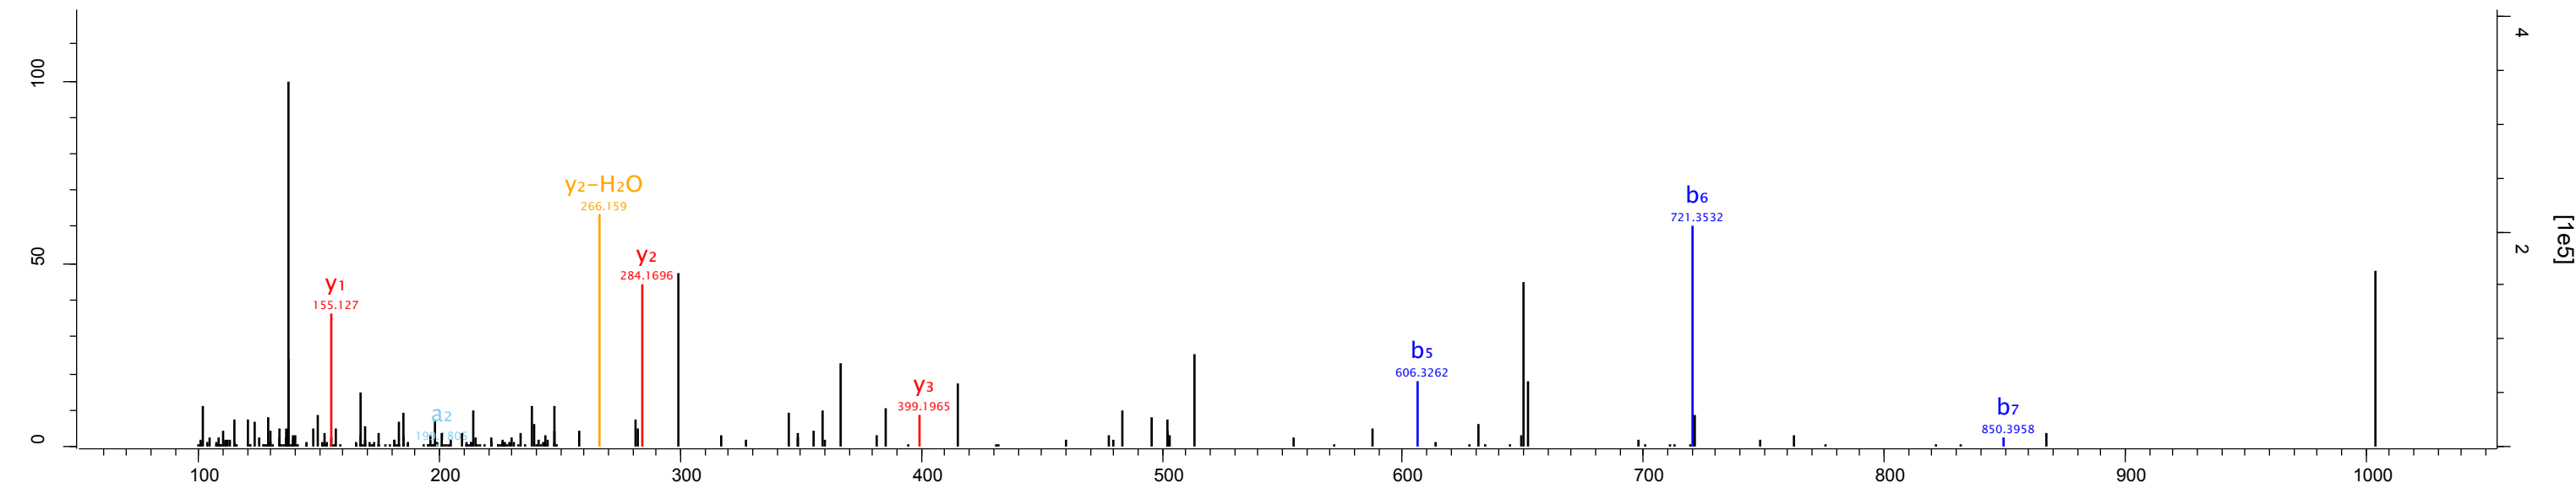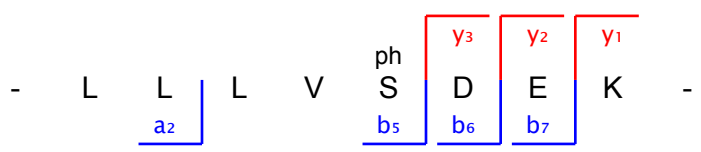

Raw file 20171215\_MaS\_33SR\_LMH\_phospho2\_02 Scan 9062 Method FTMS; HCD Score 89.47 m/z 640.99 Gene names CIZ1

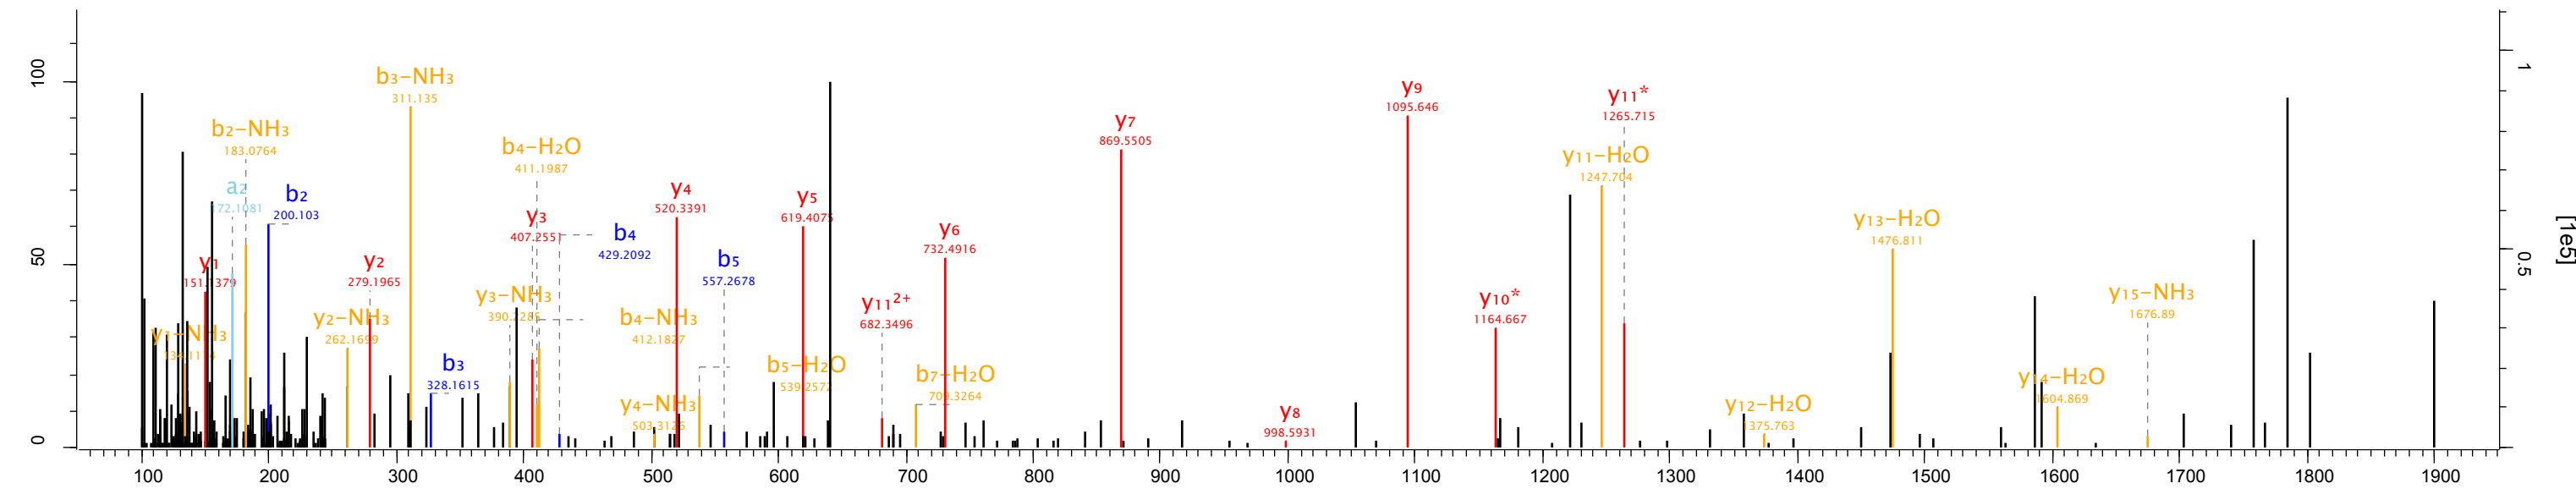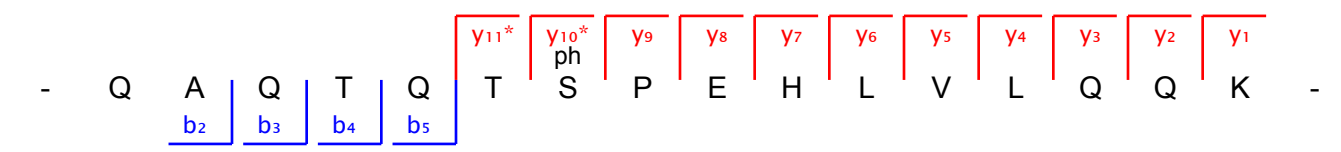

Raw file: 20171215\_MaS\_33SR\_LMH\_phospho2\_02  
 Scan: 9252 Method: FTMS; HCD Score: 129.28 m/z: 964.37 Gene names: PSME3

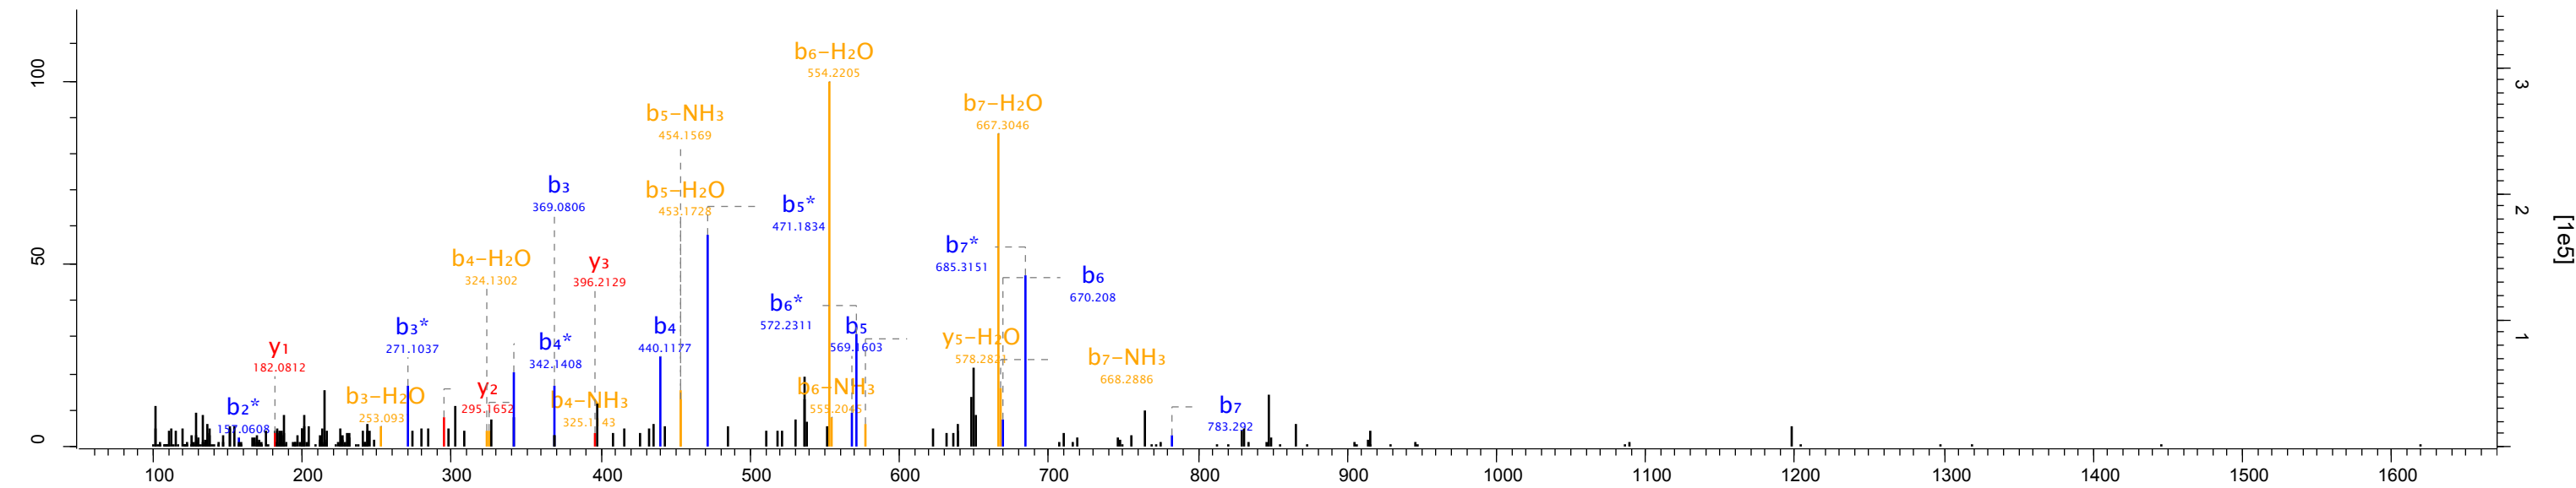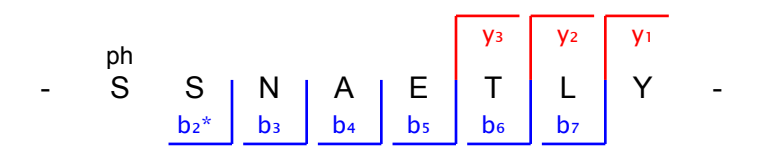



Raw file 20171215\_MaS\_33SR\_LMH\_phospho2\_03 Scan 10162 Method FTMS; HCD Score 154.46 m/z 758.33 Gene names DDB2

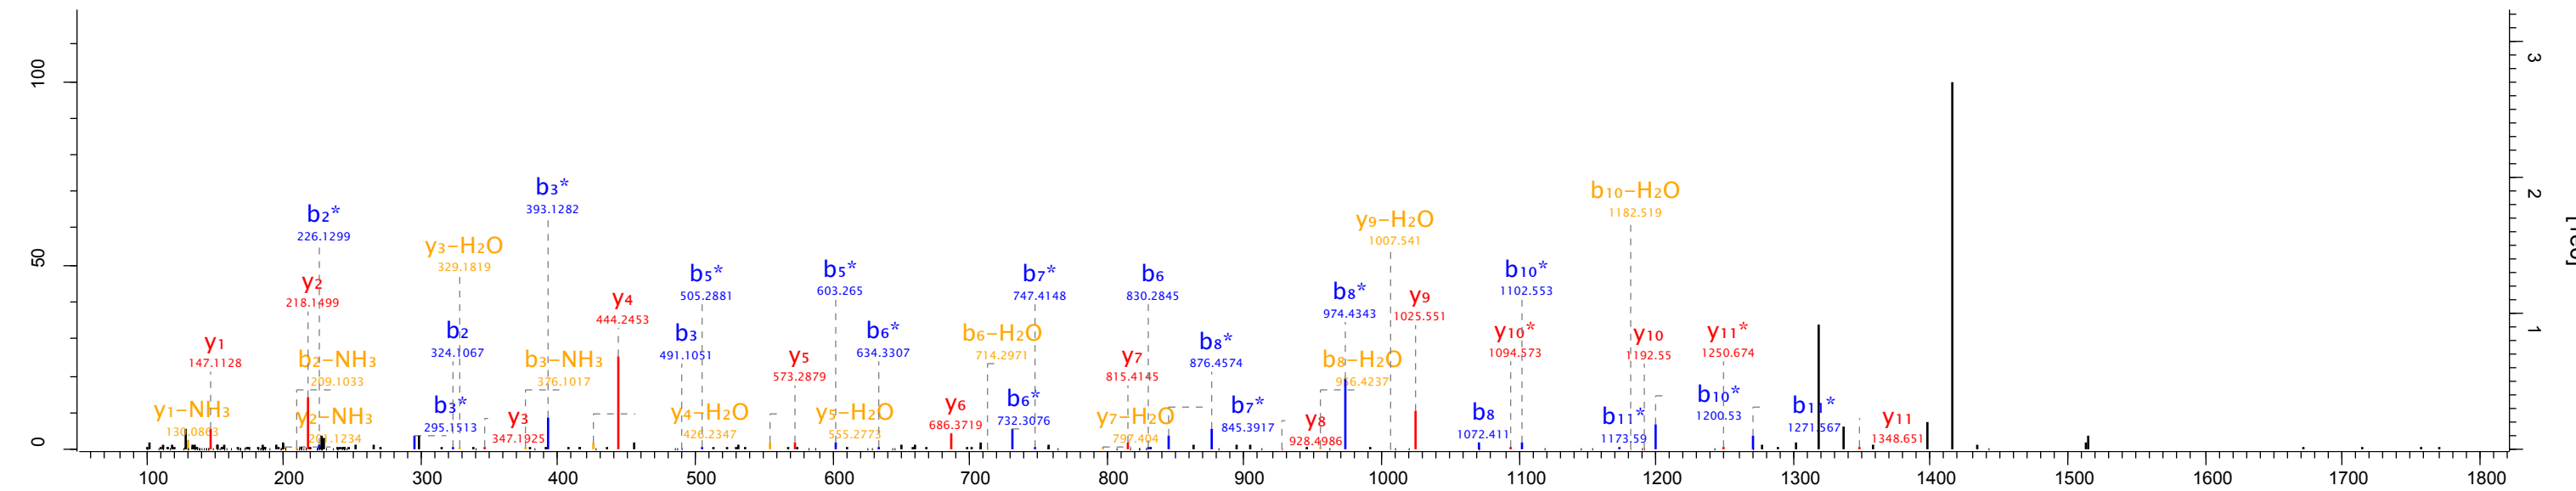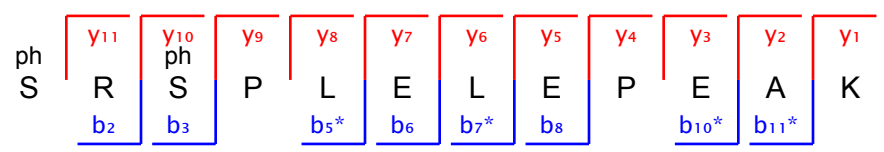

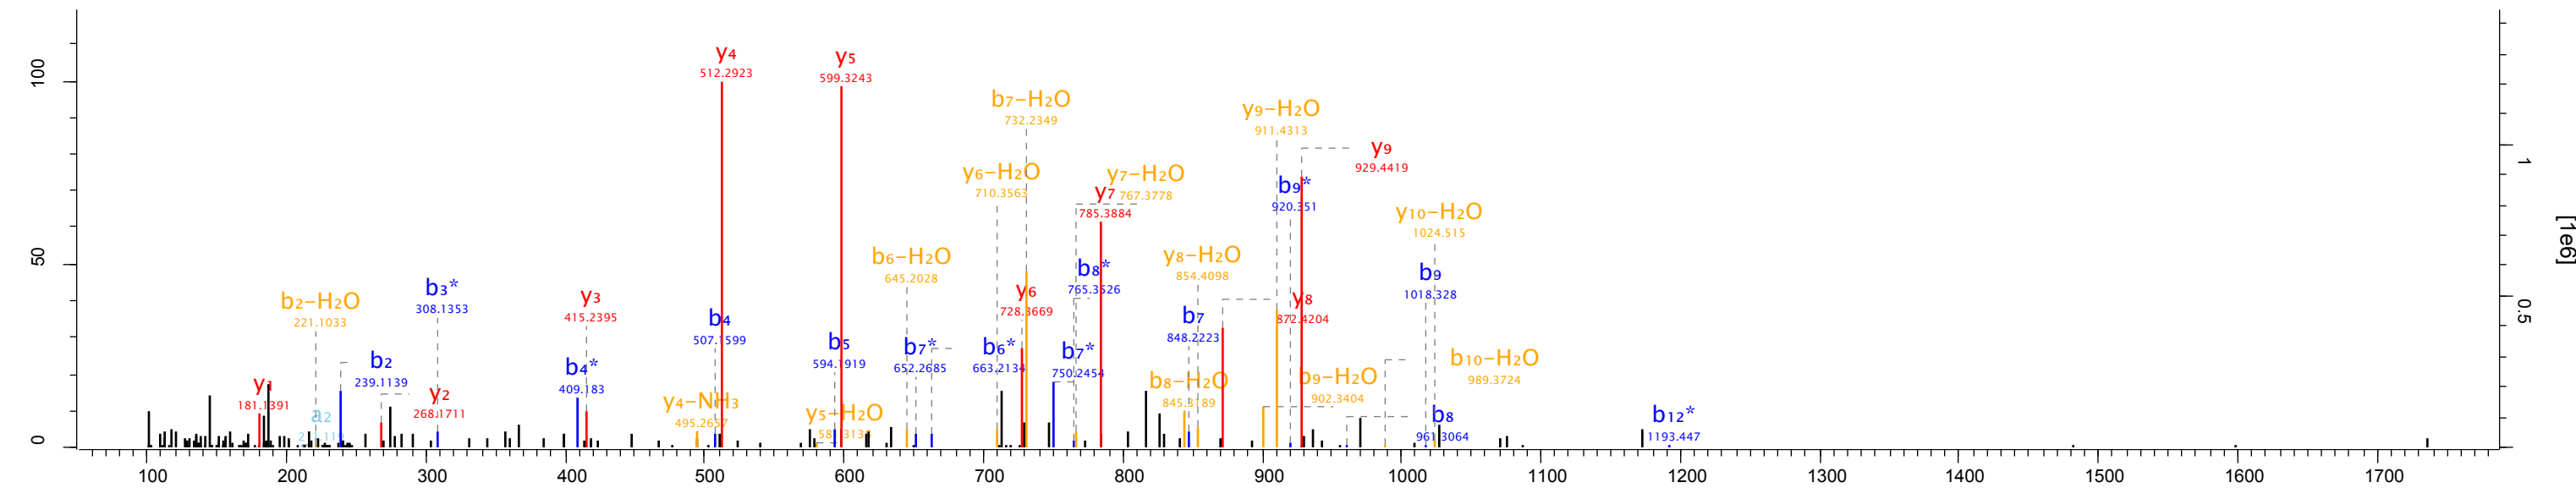

- T H S T S S L G S G E S P F S R -

ph ph

b<sub>2</sub> b<sub>3</sub>\* b<sub>4</sub> b<sub>5</sub> b<sub>6</sub>\* b<sub>7</sub> b<sub>8</sub> b<sub>9</sub> b<sub>12</sub>\*

y<sub>9</sub> y<sub>8</sub> y<sub>7</sub> y<sub>6</sub> y<sub>5</sub> y<sub>4</sub> y<sub>3</sub> y<sub>2</sub> y<sub>1</sub>

Raw file: 20171215\_MaS\_33SR\_LMH\_phospho2\_03  
 Scan: 10402 Method: FTMS; HCD Score: 276.8 m/z: 1245.99 Gene names: SCAF11

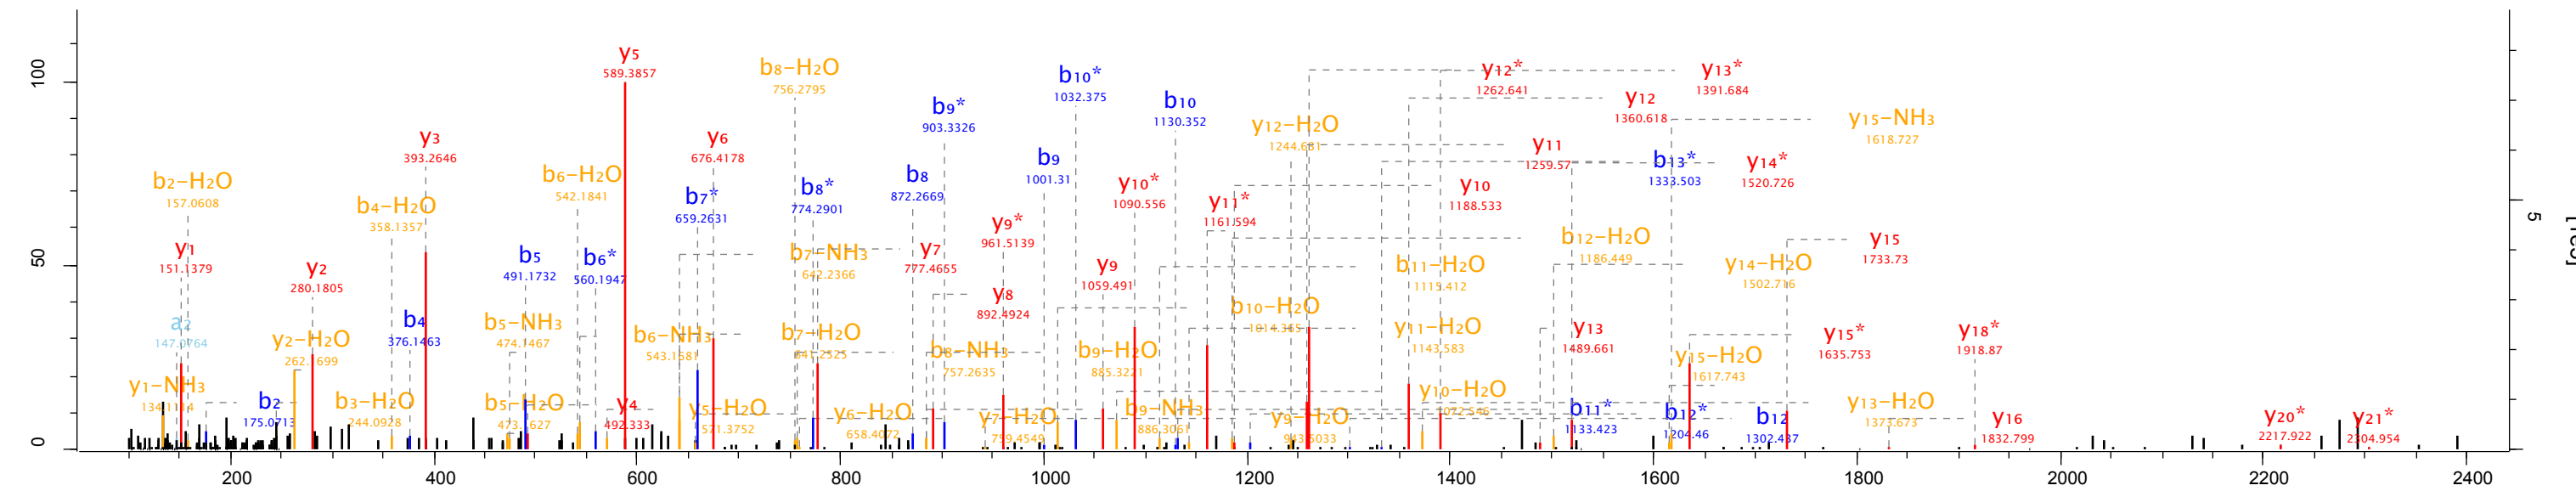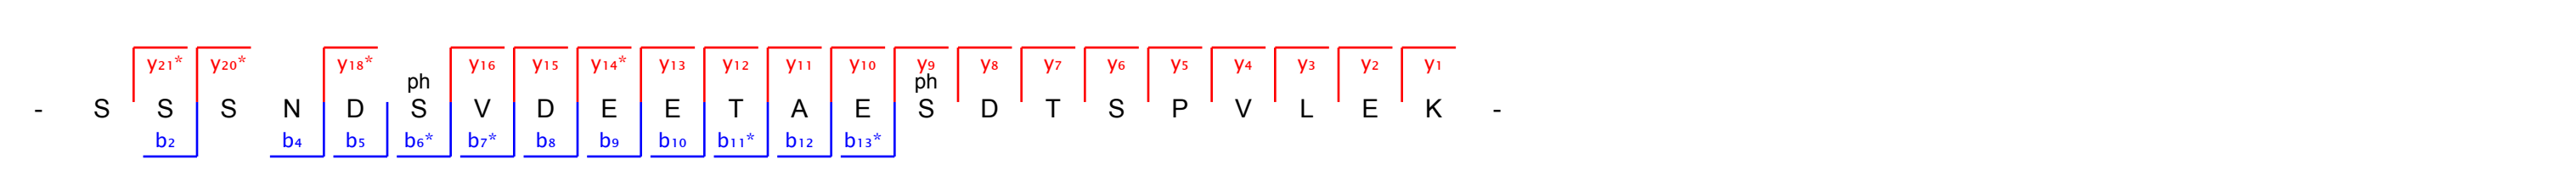

Raw file: 20171215\_MaS\_33SR\_LMH\_phospho2\_03  
 Scan: 10522 Method: FTMS; HCD Score: 179.21 m/z: 650.28 Gene names: LATS1

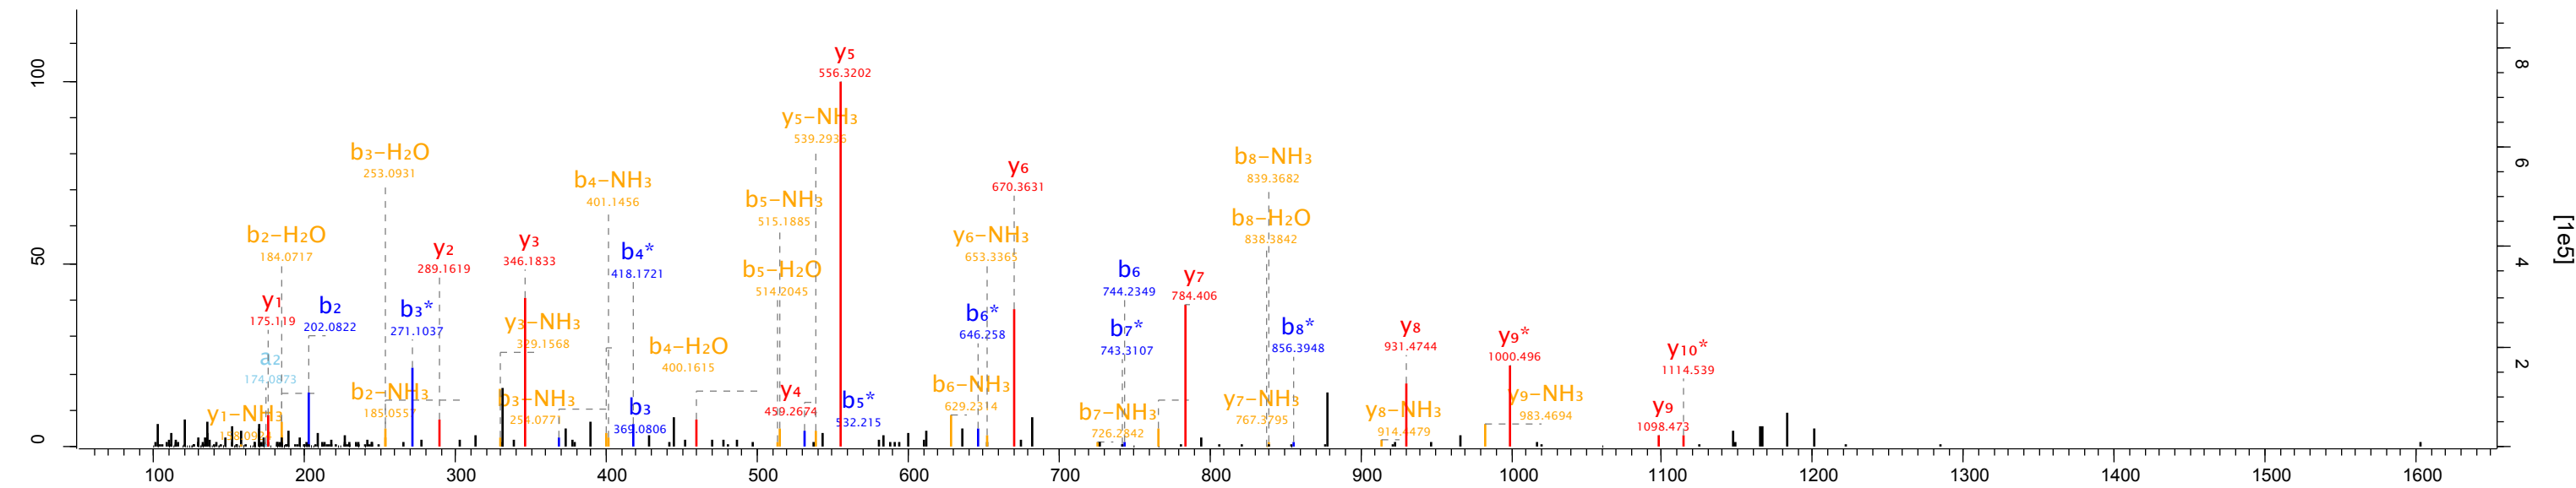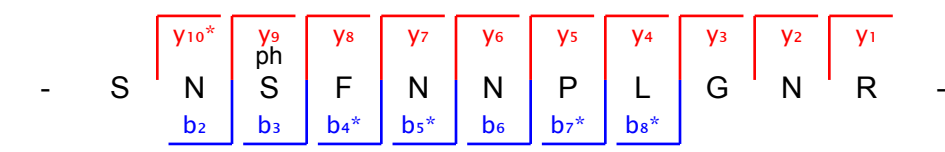

Raw file 20171215\_MaS\_33SR\_LMH\_phospho2\_03 Scan 10602 Method FTMS; HCD Score 149.97 m/z 780.29 Gene names SRRM2

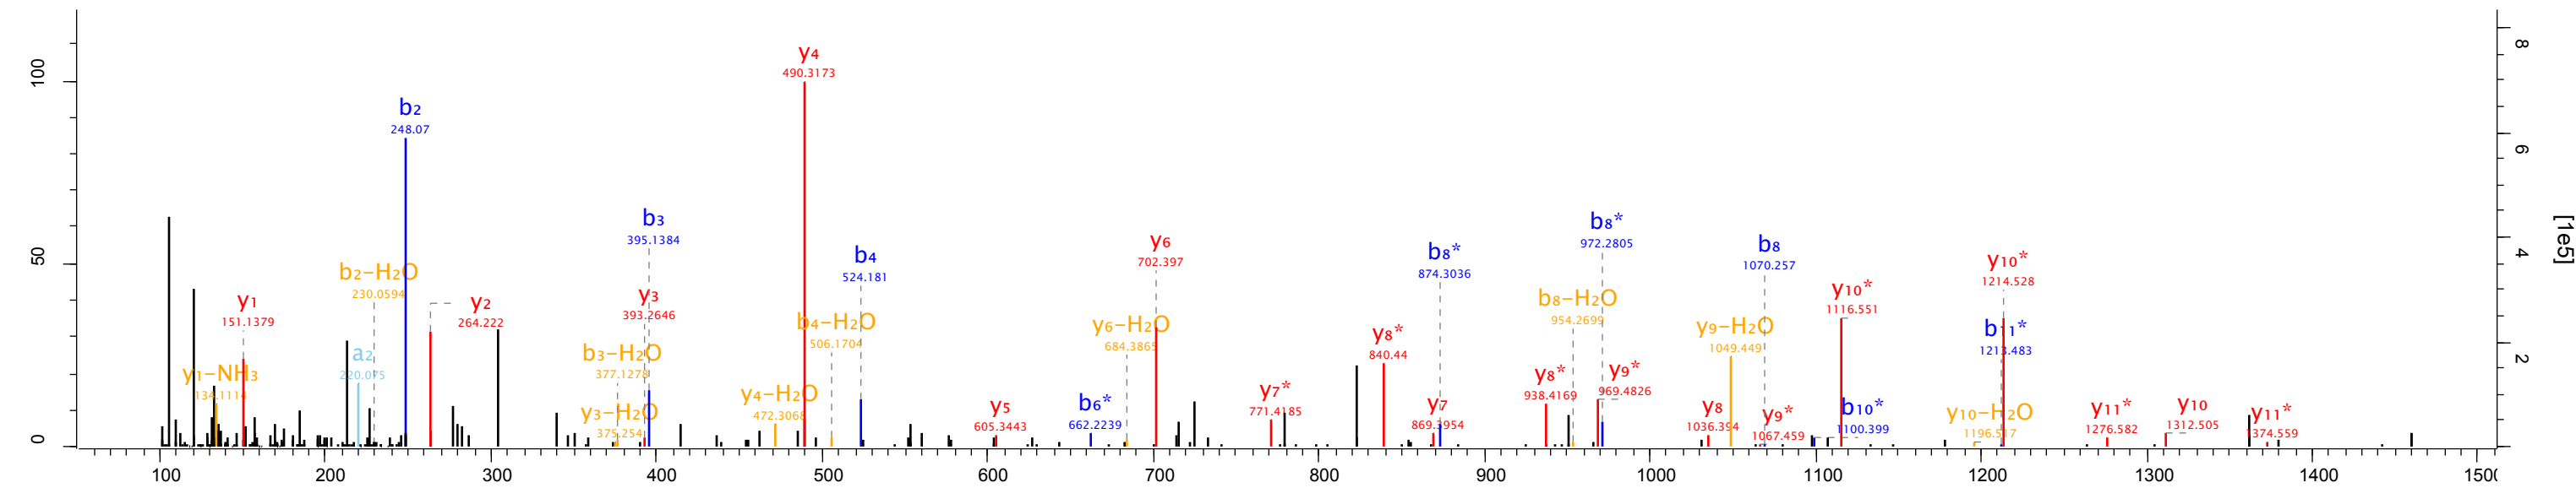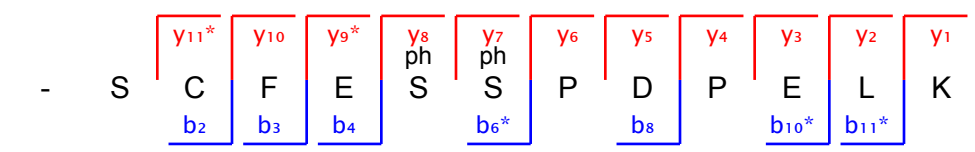

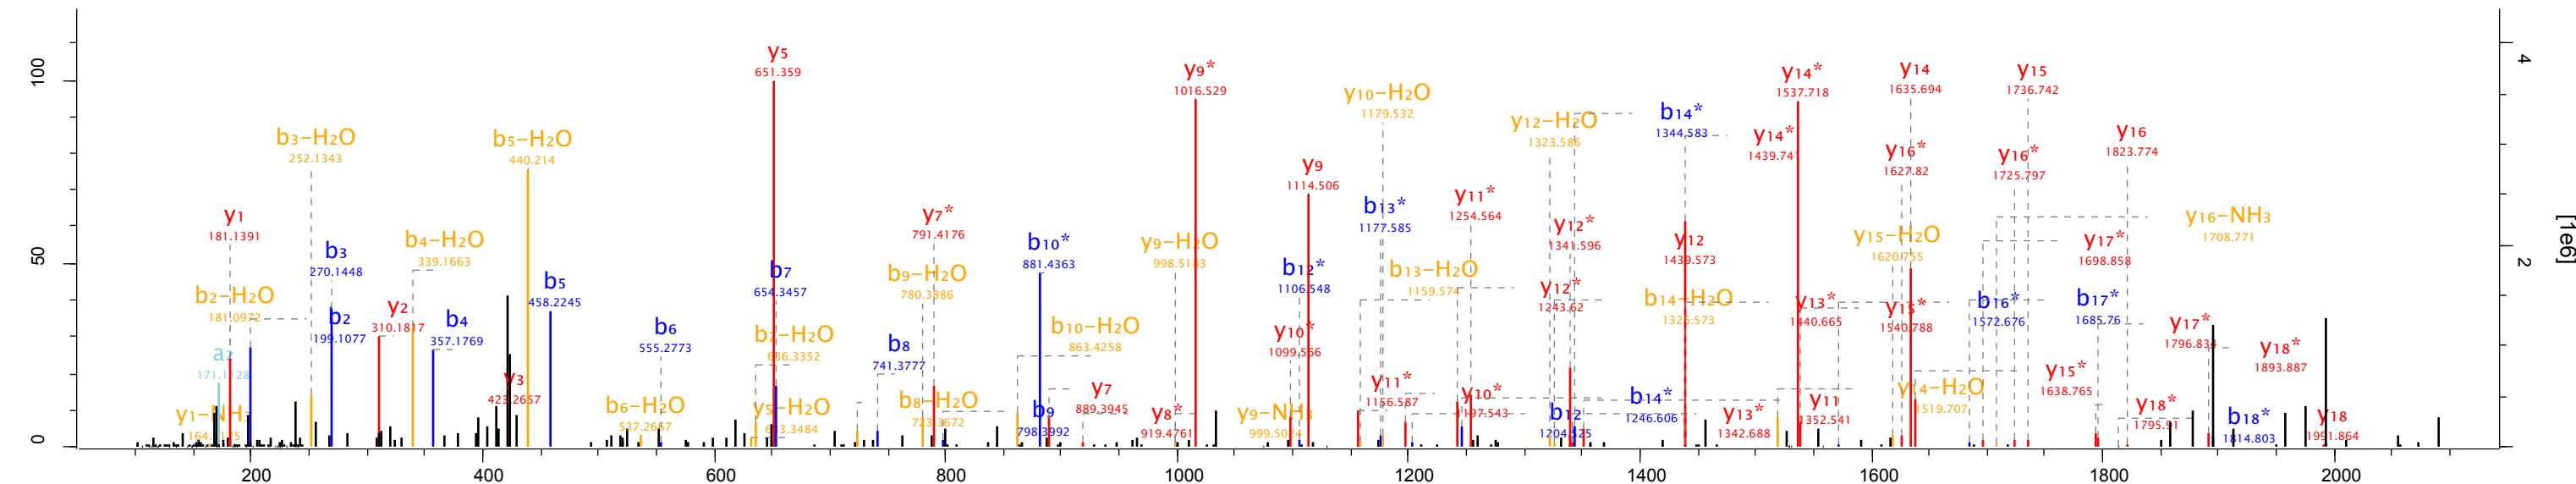

- T P A S T P V S G ph T P Q A S P M I E R -

y<sub>18</sub>
y<sub>17</sub>\*
y<sub>16</sub>
y<sub>15</sub>
y<sub>14</sub>
y<sub>13</sub>\*
y<sub>12</sub>
y<sub>11</sub>
y<sub>10</sub>\*
ph
T
P
y<sub>9</sub>
y<sub>8</sub>\*
y<sub>7</sub>
ph
y<sub>5</sub>
M
y<sub>3</sub>
y<sub>2</sub>
y<sub>1</sub>

b<sub>2</sub>
b<sub>3</sub>
b<sub>4</sub>
b<sub>5</sub>
b<sub>6</sub>
b<sub>7</sub>
b<sub>8</sub>
b<sub>9</sub>
b<sub>10</sub>\*
b<sub>12</sub>
b<sub>13</sub>\*
b<sub>14</sub>\*
b<sub>16</sub>\*
b<sub>17</sub>\*
b<sub>18</sub>\*

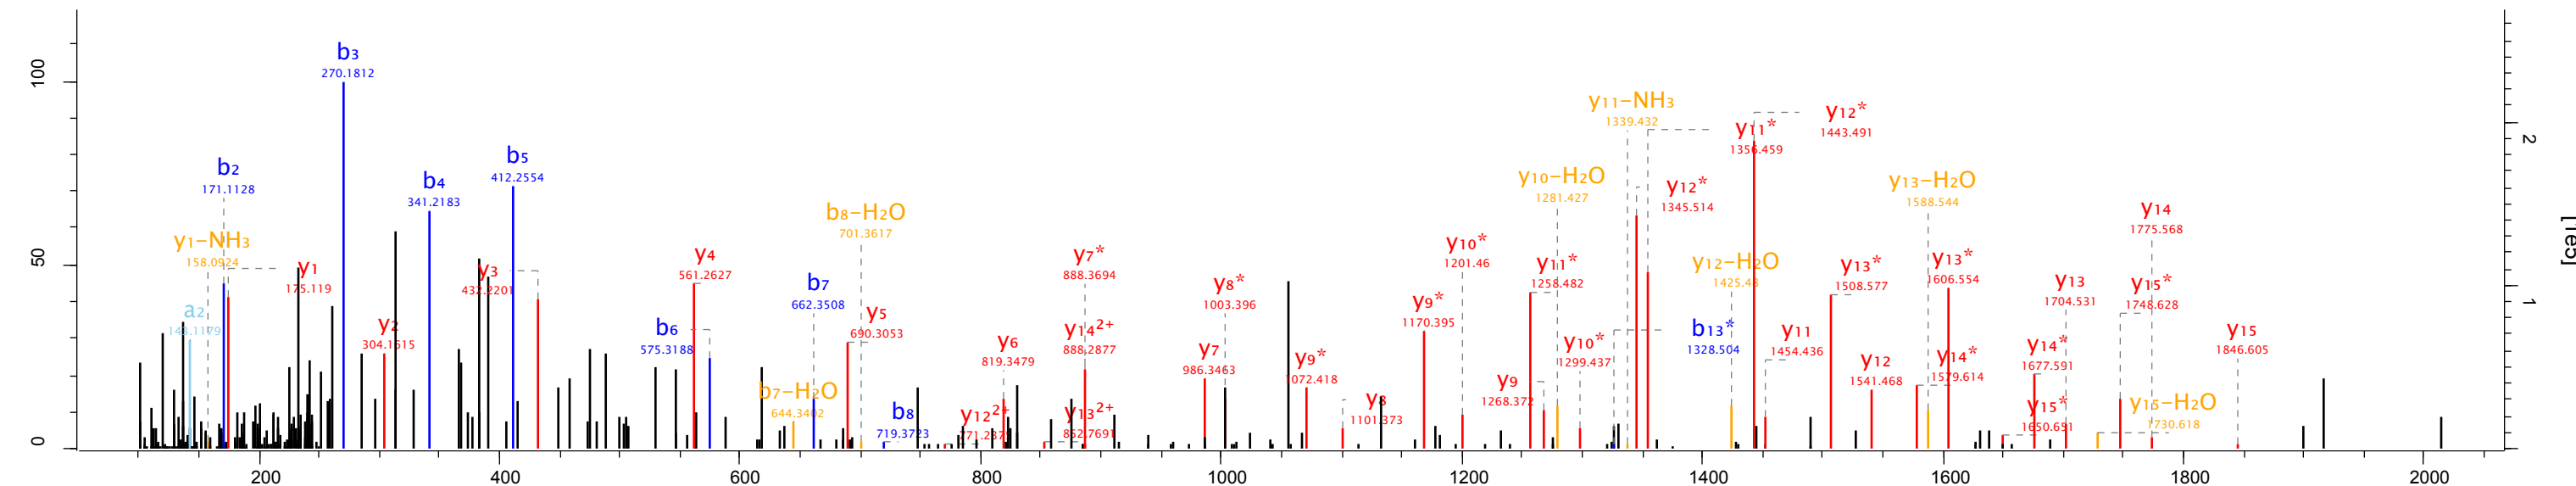

- G L V A A Y S G E S D S E E E Q E R -

Fragmentation sites are indicated by boxes below the sequence:

- b<sub>2</sub> (L)
- b<sub>3</sub> (V)
- b<sub>4</sub> (A)
- b<sub>5</sub> (A)
- b<sub>6</sub> (Y)
- b<sub>7</sub> (S)
- b<sub>8</sub> (G)
- b<sub>13</sub><sup>\*</sup> (E)
- y<sub>15</sub> (A)
- y<sub>14</sub> (A)
- y<sub>13</sub> (Y)
- y<sub>12</sub> (S)
- y<sub>11</sub> (G)
- y<sub>10</sub><sup>\*</sup> (E)
- y<sub>9</sub> (S)
- y<sub>8</sub> (D)
- y<sub>7</sub> (S)
- y<sub>6</sub> (E)
- y<sub>5</sub> (E)
- y<sub>4</sub> (E)
- y<sub>3</sub> (Q)
- y<sub>2</sub> (E)
- y<sub>1</sub> (R)

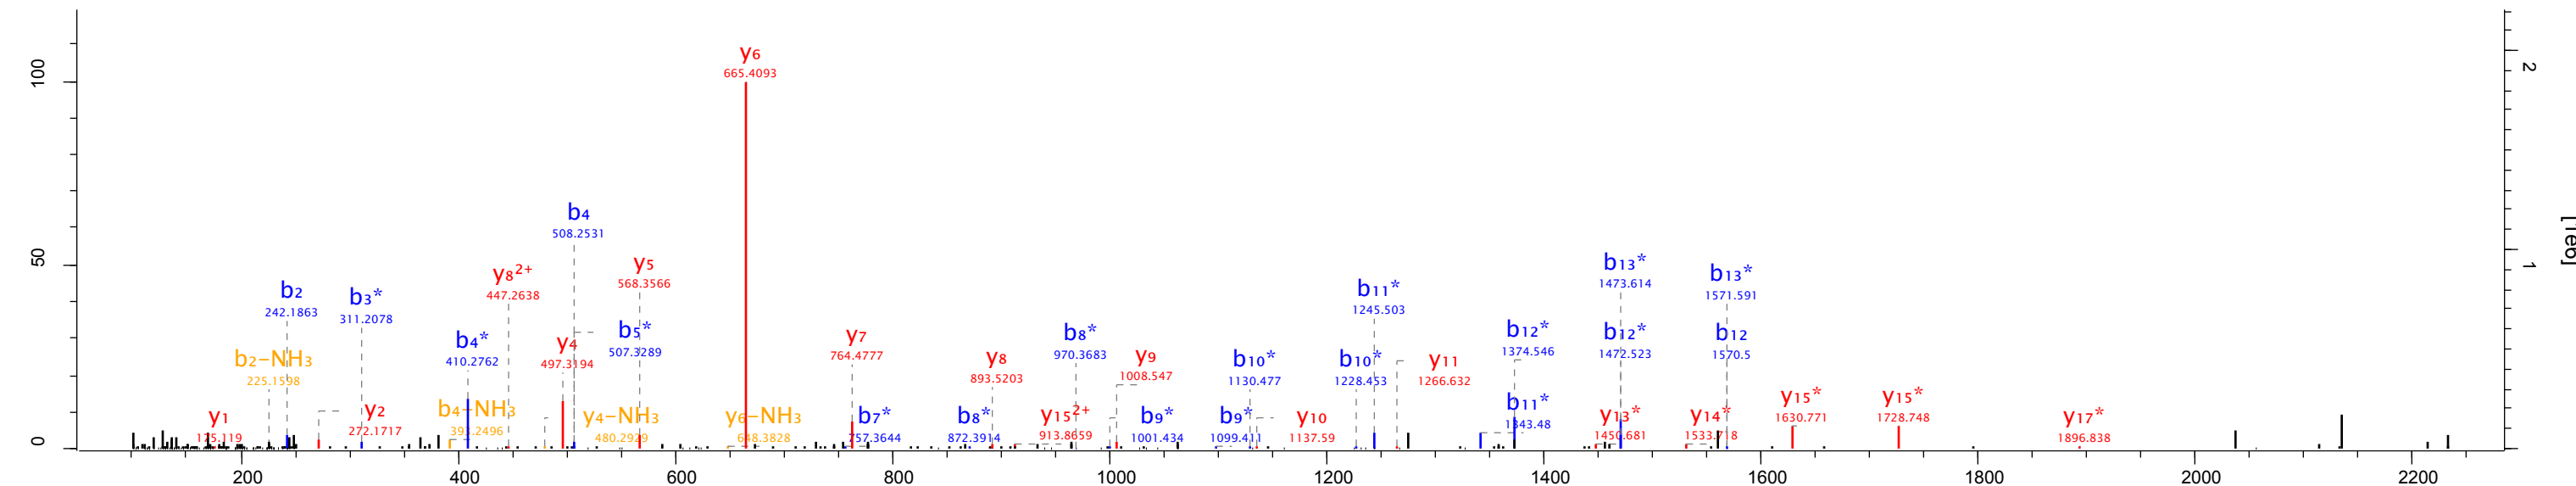

- K L S V P T S D E E D E V P A P K P R -

b<sub>2</sub>
b<sub>3</sub>\*
b<sub>4</sub>
b<sub>5</sub>\*
b<sub>7</sub>\*
b<sub>8</sub>\*
b<sub>9</sub>\*
b<sub>10</sub>\*
b<sub>11</sub>\*
b<sub>12</sub>
b<sub>13</sub>\*
y<sub>17</sub>\*
y<sub>15</sub>\*
y<sub>14</sub>\*
y<sub>13</sub>\*
y<sub>11</sub>
y<sub>10</sub>
y<sub>9</sub>
y<sub>8</sub>
y<sub>7</sub>
y<sub>6</sub>
y<sub>5</sub>
y<sub>4</sub>
y<sub>2</sub>
y<sub>1</sub>



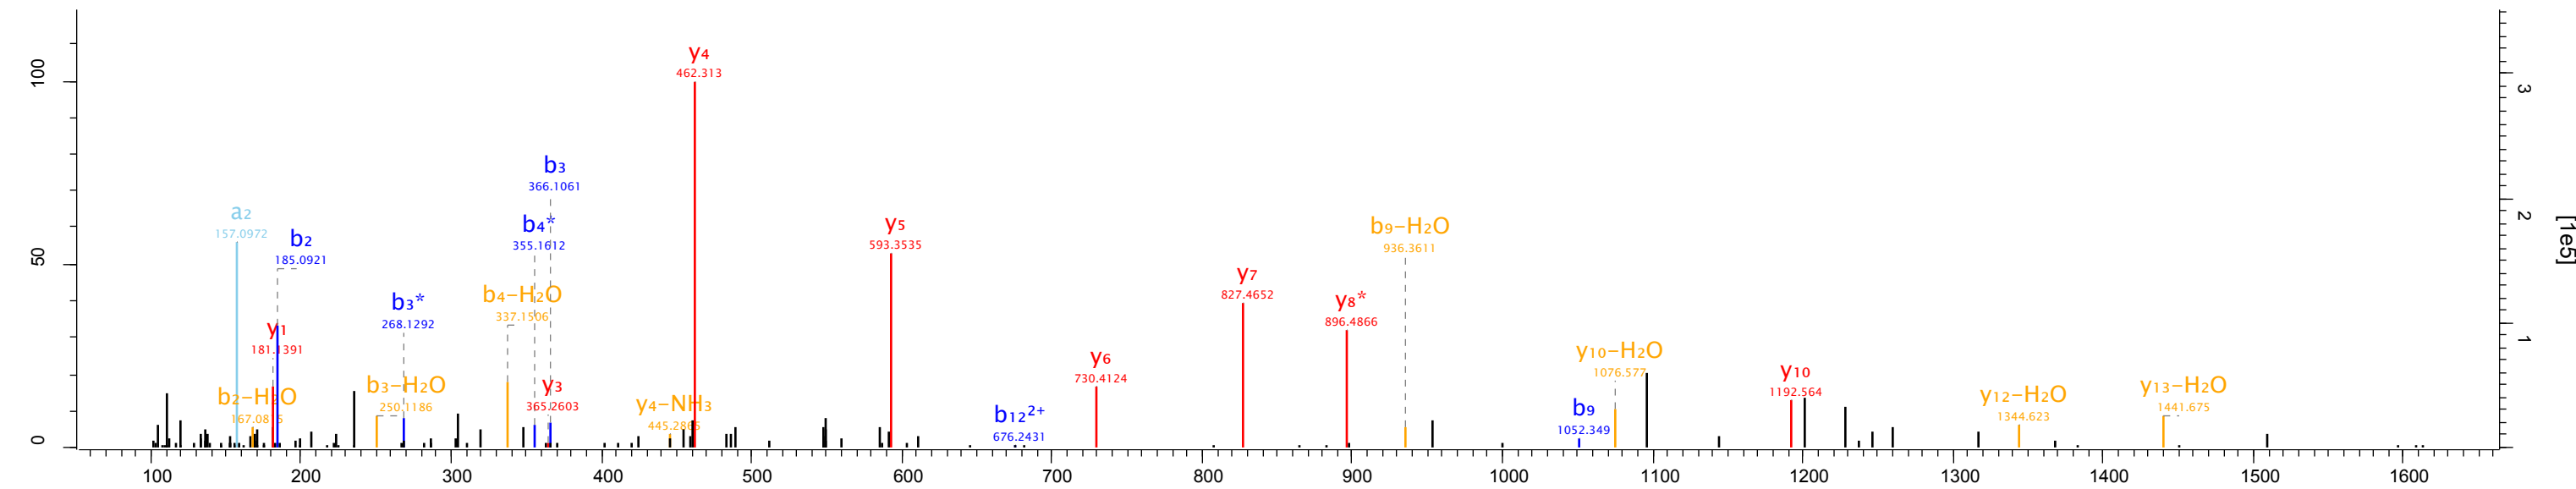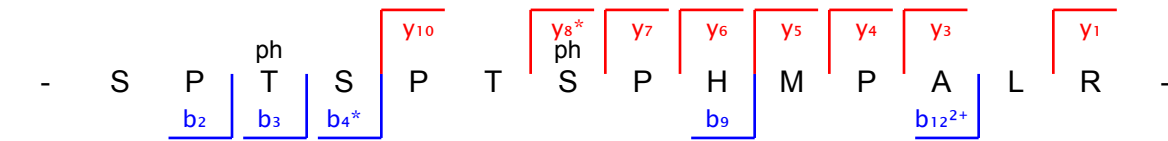

Raw file 20171215\_MaS\_33SR\_LMH\_phospho2\_03 Scan 11732 Method FTMS; HCD Score 108.37 m/z 927.85 Gene names ATRX

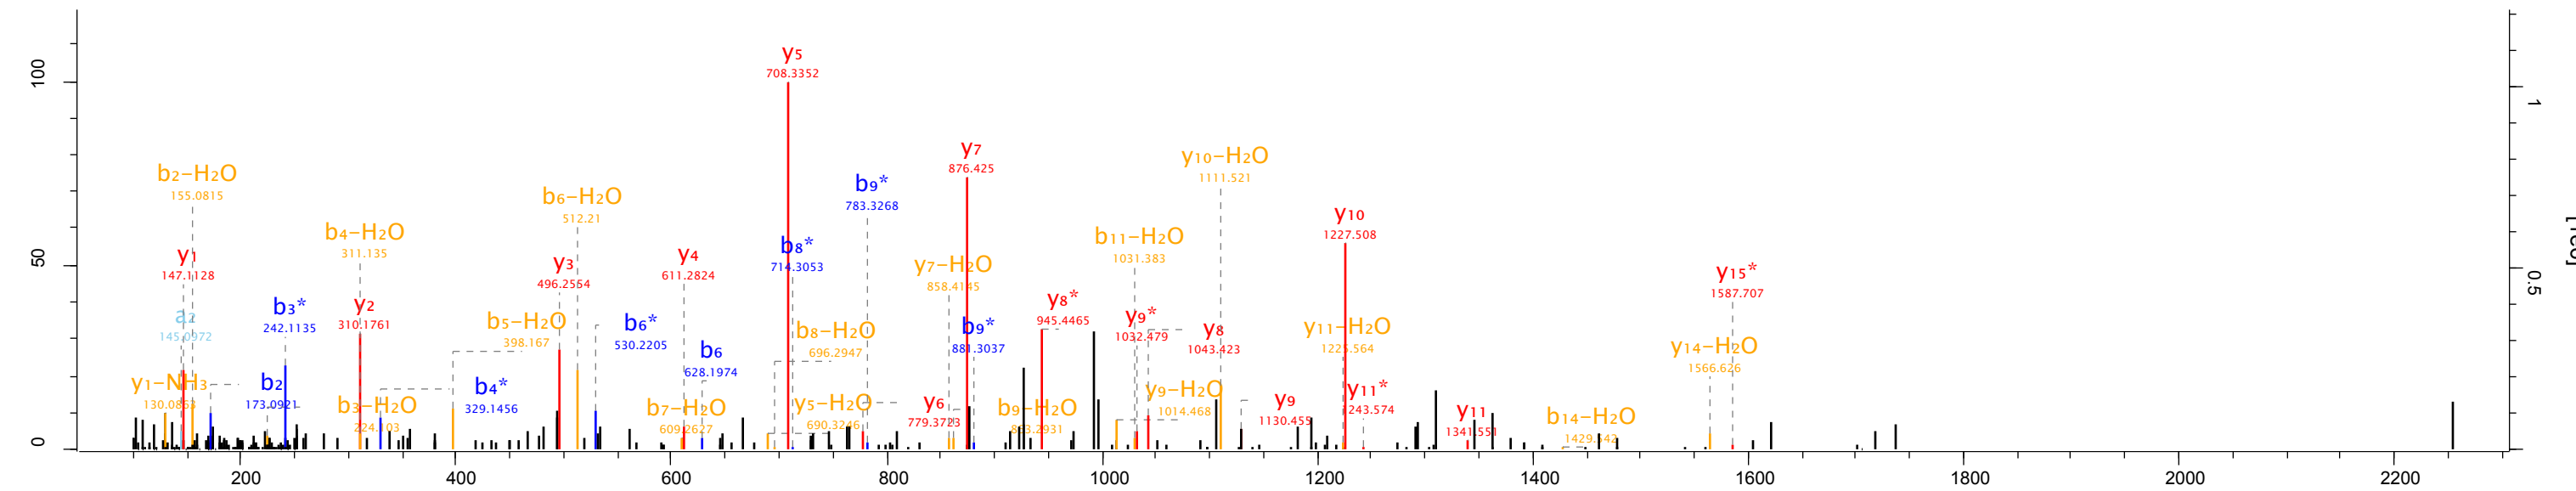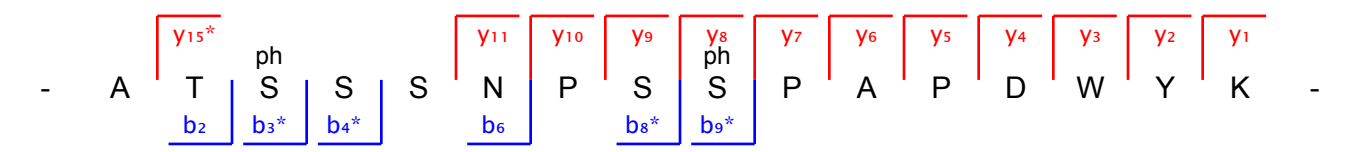

Raw file: 20171215\_MaS\_33SR\_LMH\_phospho2\_03  
 Scan: 11772 Method: FTMS; HCD Score: 131.27 m/z: 1051.46 Gene names: NES

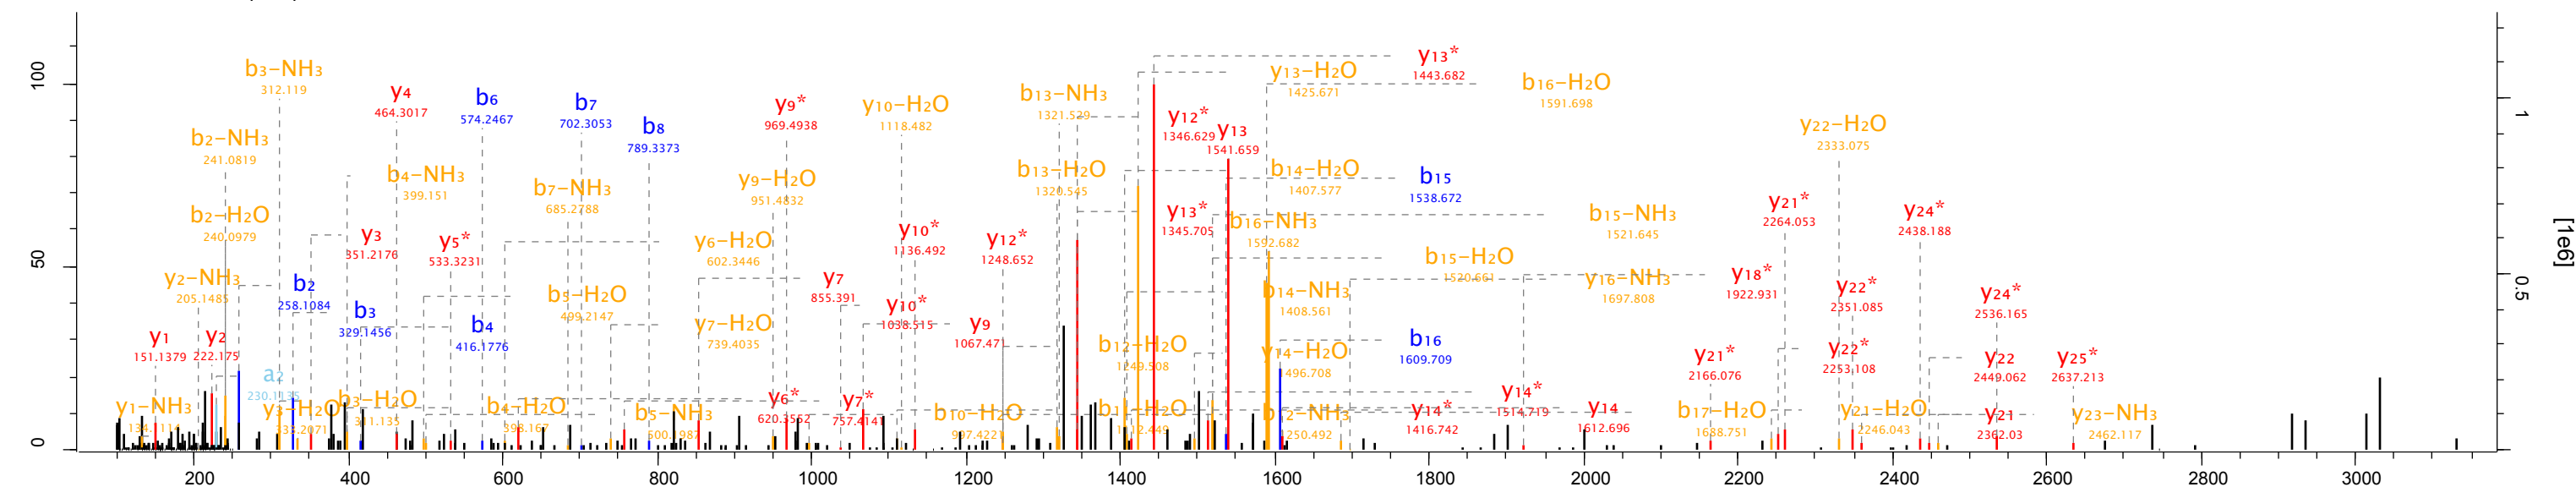

- Q E A S T G Q S P E D H A S L A P P L S P D H S S L E A K -

b<sub>2</sub> b<sub>3</sub> b<sub>4</sub> y<sub>25</sub>\* y<sub>24</sub>\* y<sub>22</sub> y<sub>21</sub>  
b<sub>6</sub> b<sub>7</sub> b<sub>8</sub> y<sub>18</sub>\* y<sub>14</sub> y<sub>13</sub> y<sub>12</sub>\* y<sub>10</sub>\* y<sub>9</sub> y<sub>7</sub> y<sub>6</sub>\* y<sub>5</sub>\* y<sub>4</sub> y<sub>3</sub> y<sub>2</sub> y<sub>1</sub>

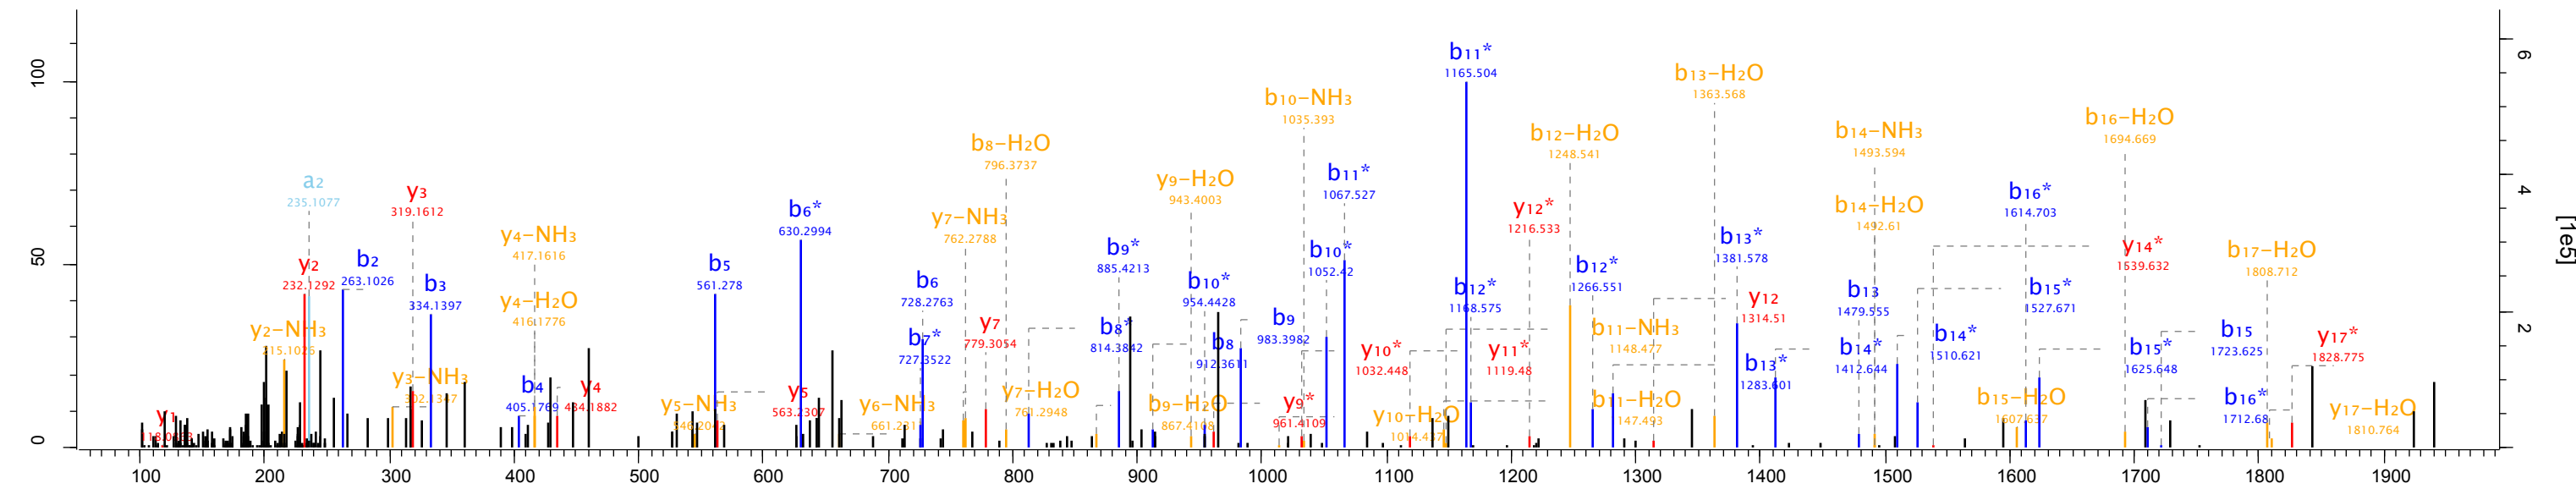

- D F A A R S P S A S I T D E D S N V -

Fragmentation labels (b and y ions) are shown below the corresponding amino acids:

- F: b<sub>2</sub>
- A: b<sub>3</sub>
- A: b<sub>4</sub>
- R: b<sub>5</sub>
- S: b<sub>6</sub>
- P: b<sub>7</sub>\*
- S: b<sub>8</sub>
- A: b<sub>9</sub>
- S: b<sub>10</sub>\*
- I: b<sub>11</sub>\*
- T: b<sub>12</sub>\*
- D: b<sub>13</sub>
- E: b<sub>14</sub>\*
- D: b<sub>15</sub>
- S: b<sub>16</sub>\*
- N: y<sub>17</sub>\*
- V: y<sub>14</sub>\*



Raw file 20171215\_MaS\_33SR\_LMH\_phospho2\_03 Scan 12342 Method FTMS; HCD Score 217.02 m/z 1100.97 Gene names TRIM32

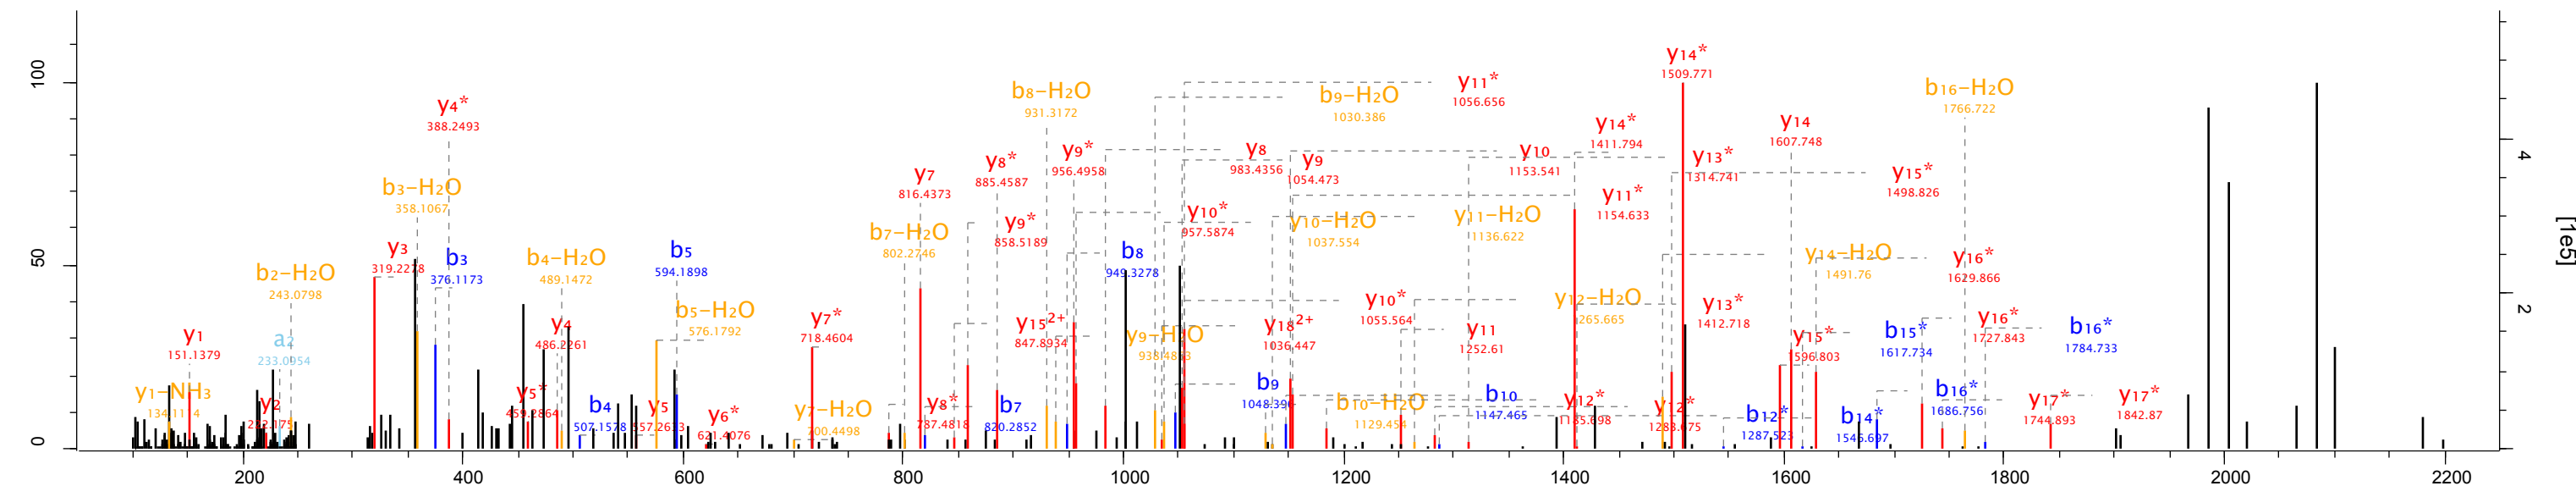

E M D M S P E E V V A S P R A S P A K -  
 a<sub>2</sub> b<sub>3</sub> b<sub>4</sub> b<sub>5</sub> b<sub>7</sub> b<sub>8</sub> b<sub>9</sub> b<sub>10</sub> b<sub>12</sub>\* b<sub>14</sub>\* b<sub>15</sub>\* b<sub>16</sub>\*

Raw file 20171215\_MaS\_33SR\_LMH\_phospho2\_03 Scan 12362 Method FTMS; HCD Score 115.26 m/z 662.81 Gene names CTNND1

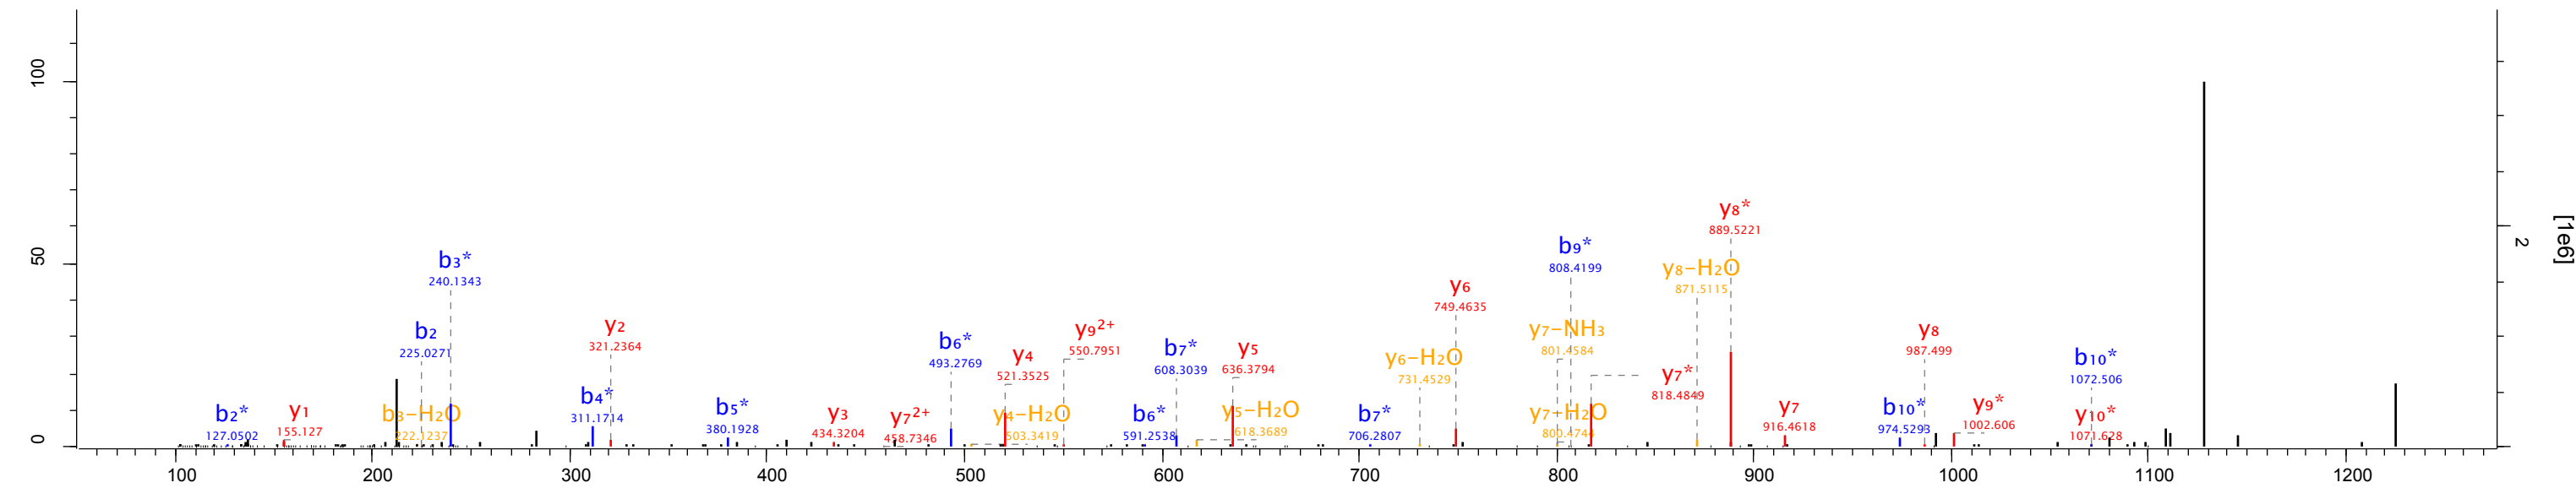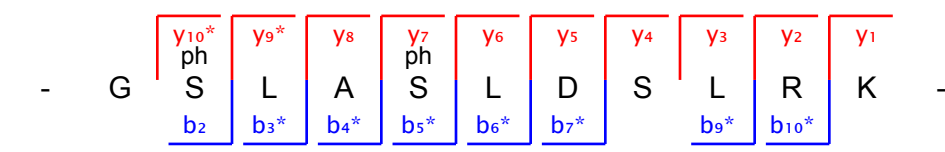

Raw file

20171215\_MaS\_33SR\_LMH\_phospho2\_03

| Scan  | Method    | Score  | m/z    | Gene names |
|-------|-----------|--------|--------|------------|
| 12652 | FTMS; HCD | 114.76 | 805.03 | ATN1       |

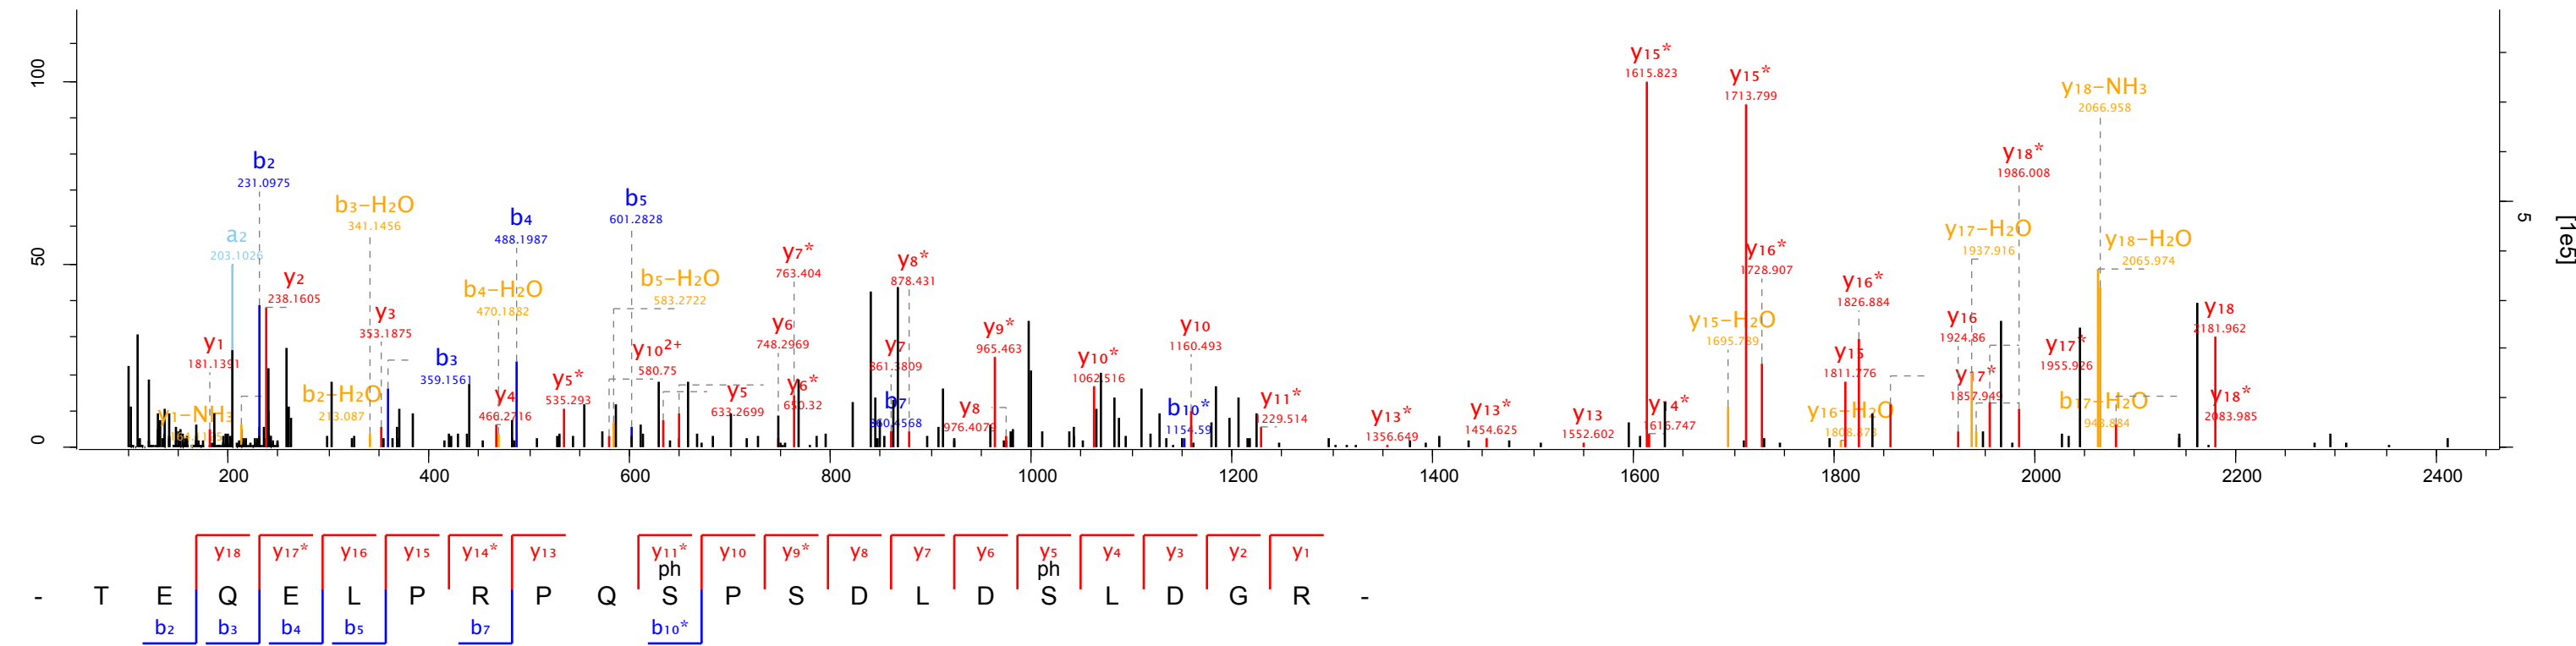



Raw file 20171215\_MaS\_33SR\_LMH\_phospho2\_03 Scan 12732 Method FTMS; HCD Score 246.44 m/z 1087.94 Gene names MAP1B

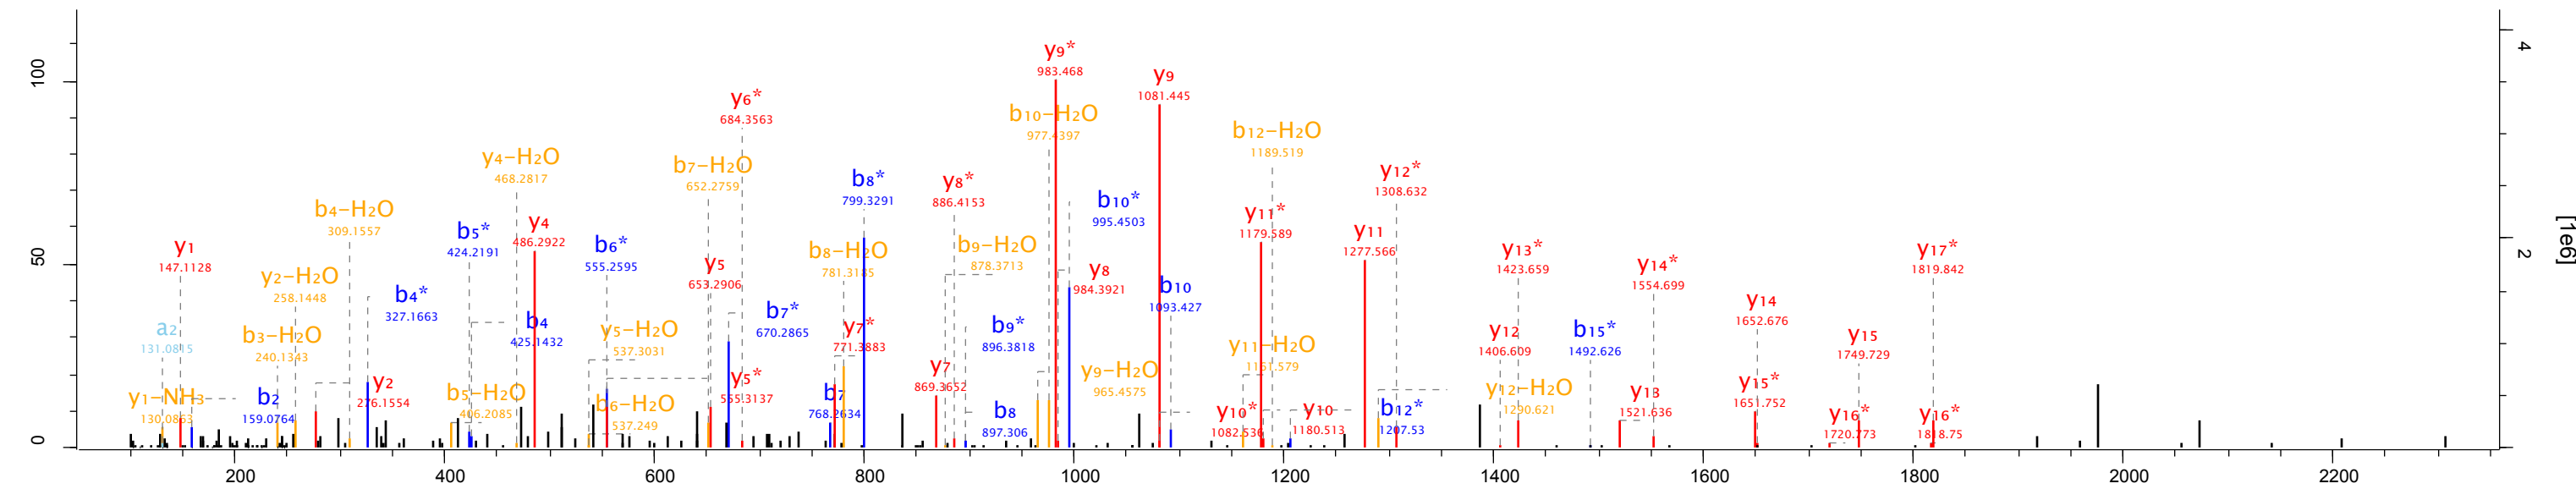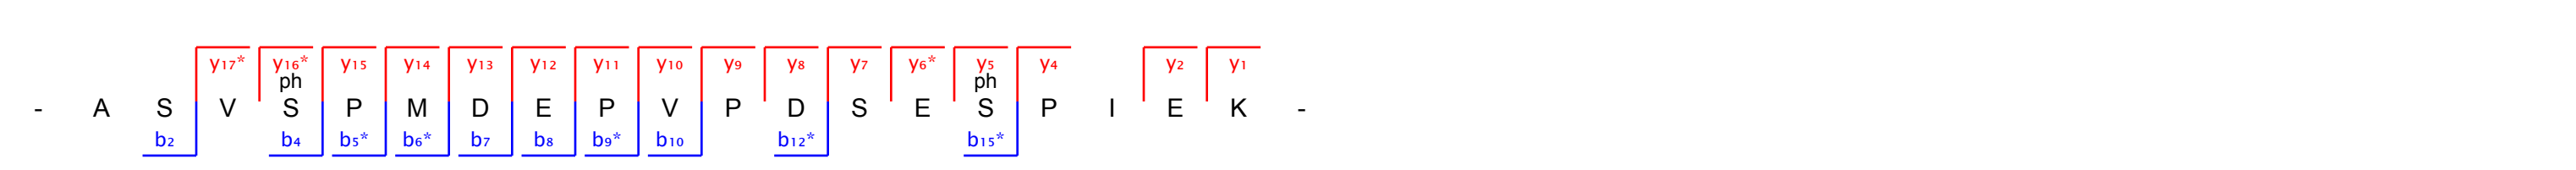

Raw file 20171215\_MaS\_33SR\_LMH\_phospho2\_03 Scan 13462 Method FTMS; HCD Score 181.81 m/z 1130.43 Gene names DYNC1LI2

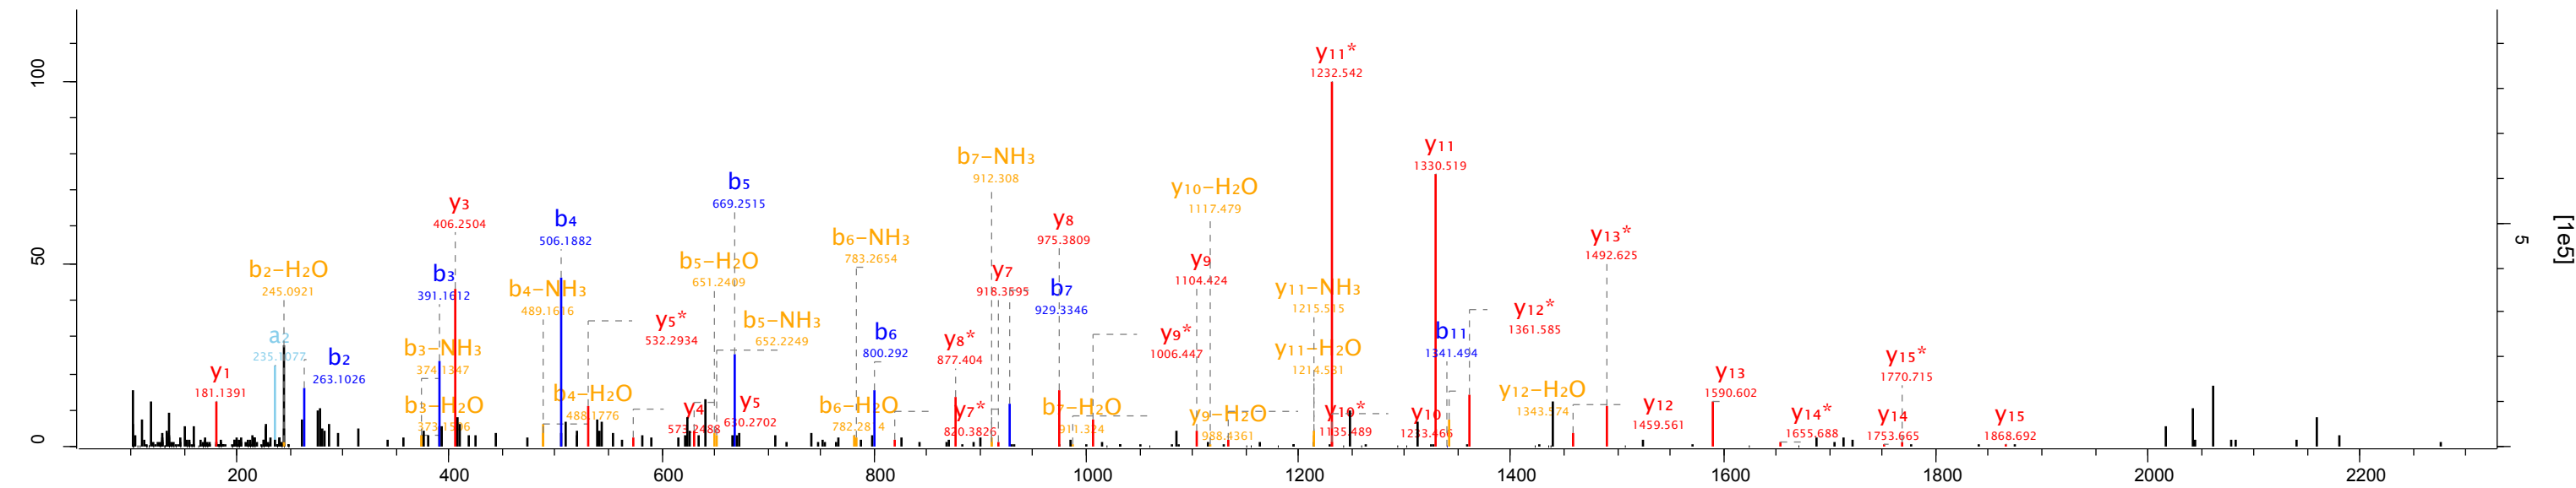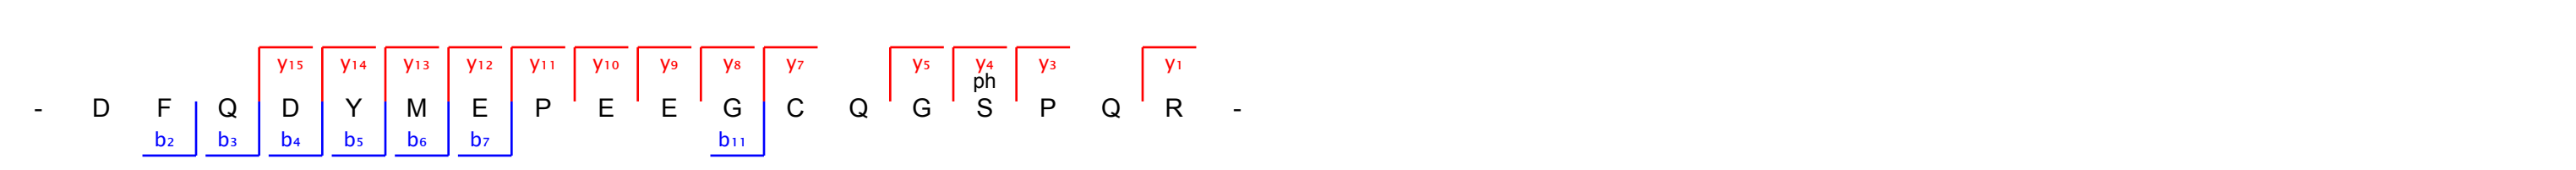

Raw file  
20171215\_MaS\_33SR\_LMH\_phospho2\_03

Scan 13522 Method FTMS; HCD Score 196.68 m/z 1055.43 Gene names CEP170

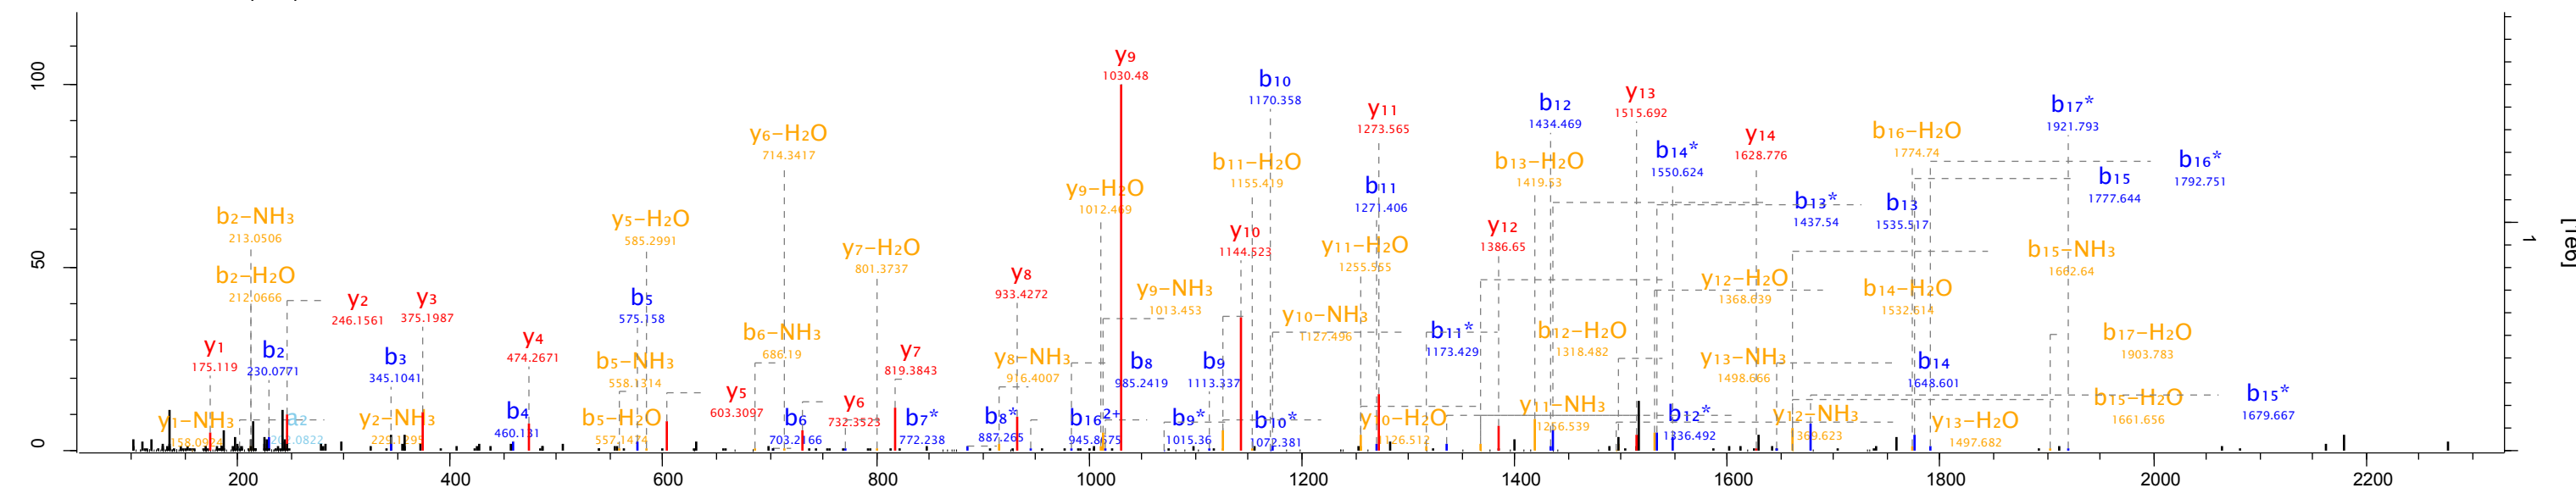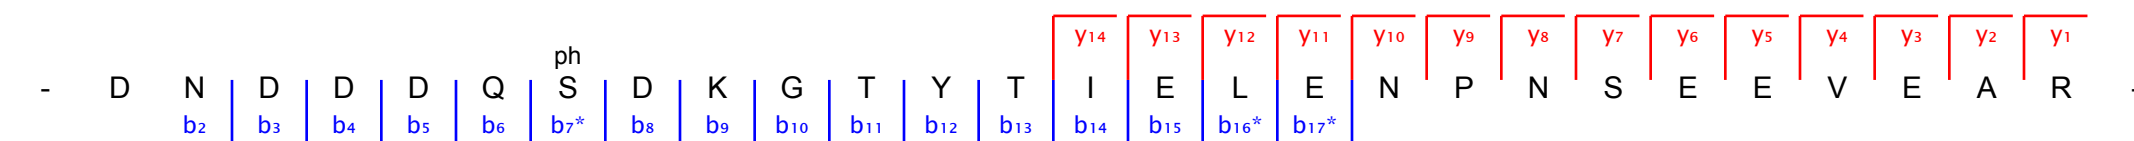

Raw file 20171215\_MaS\_33SR\_LMH\_phospho2\_03 Scan 13662 Method FTMS; HCD Score 118.77 m/z 893.71 Gene names RALBP1

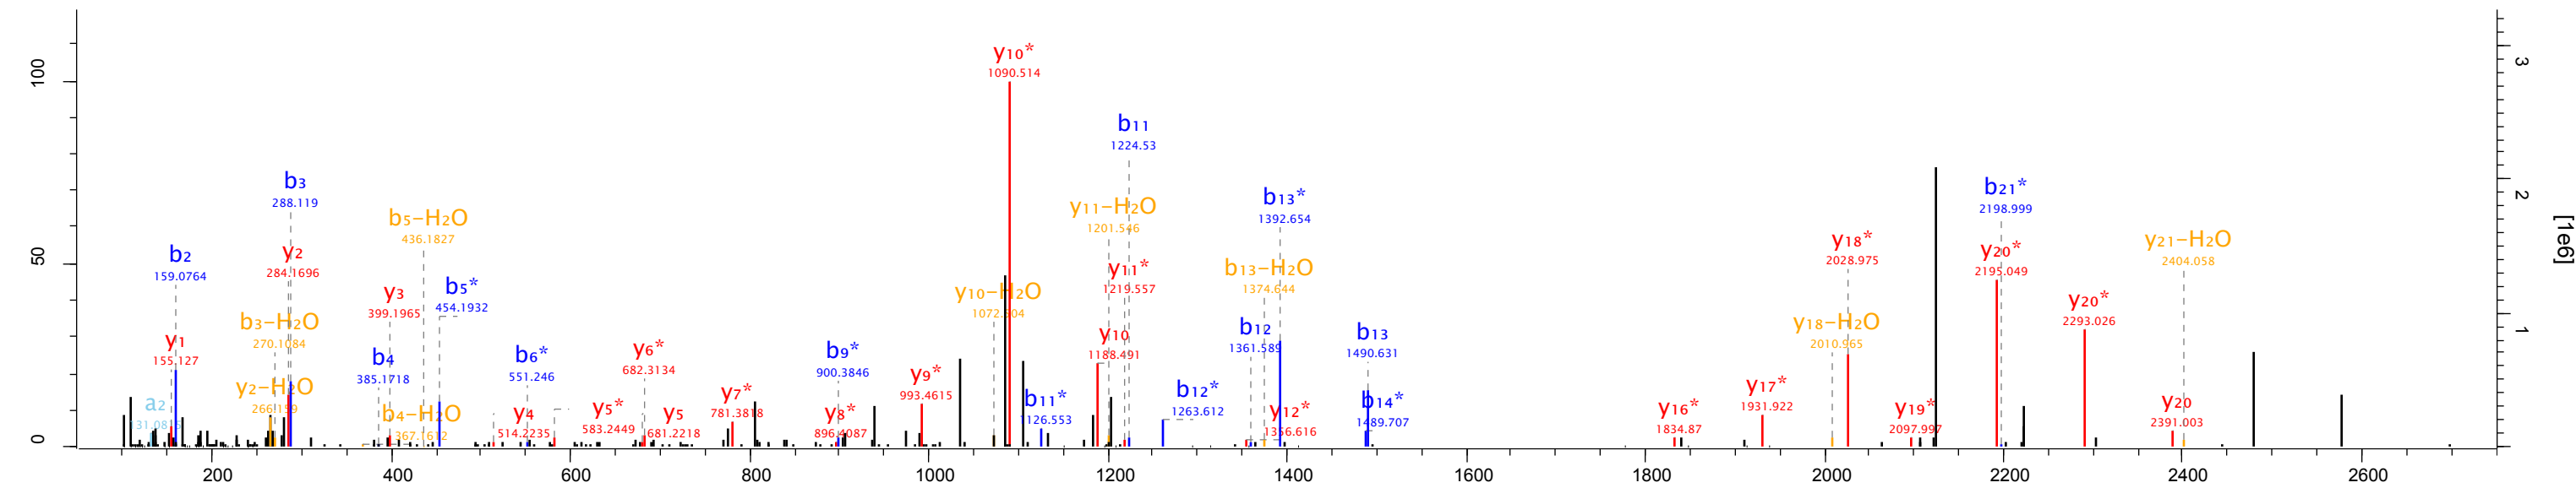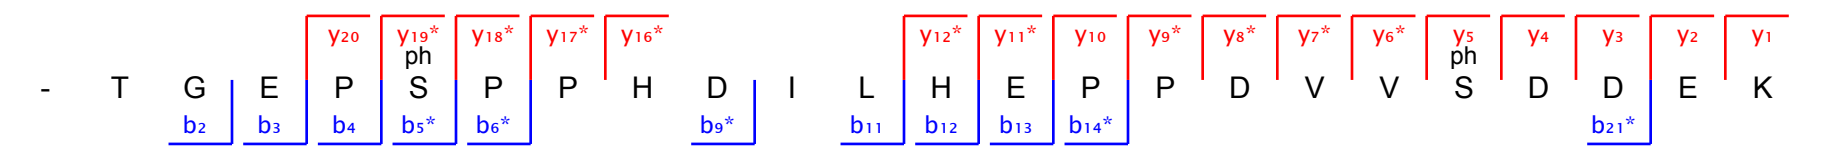



Raw file 20171215\_MaS\_33SR\_LMH\_phospho2\_03 Scan 13992 Method FTMS; HCD Score 94.4 m/z 1100.91 Gene names PRPF40A

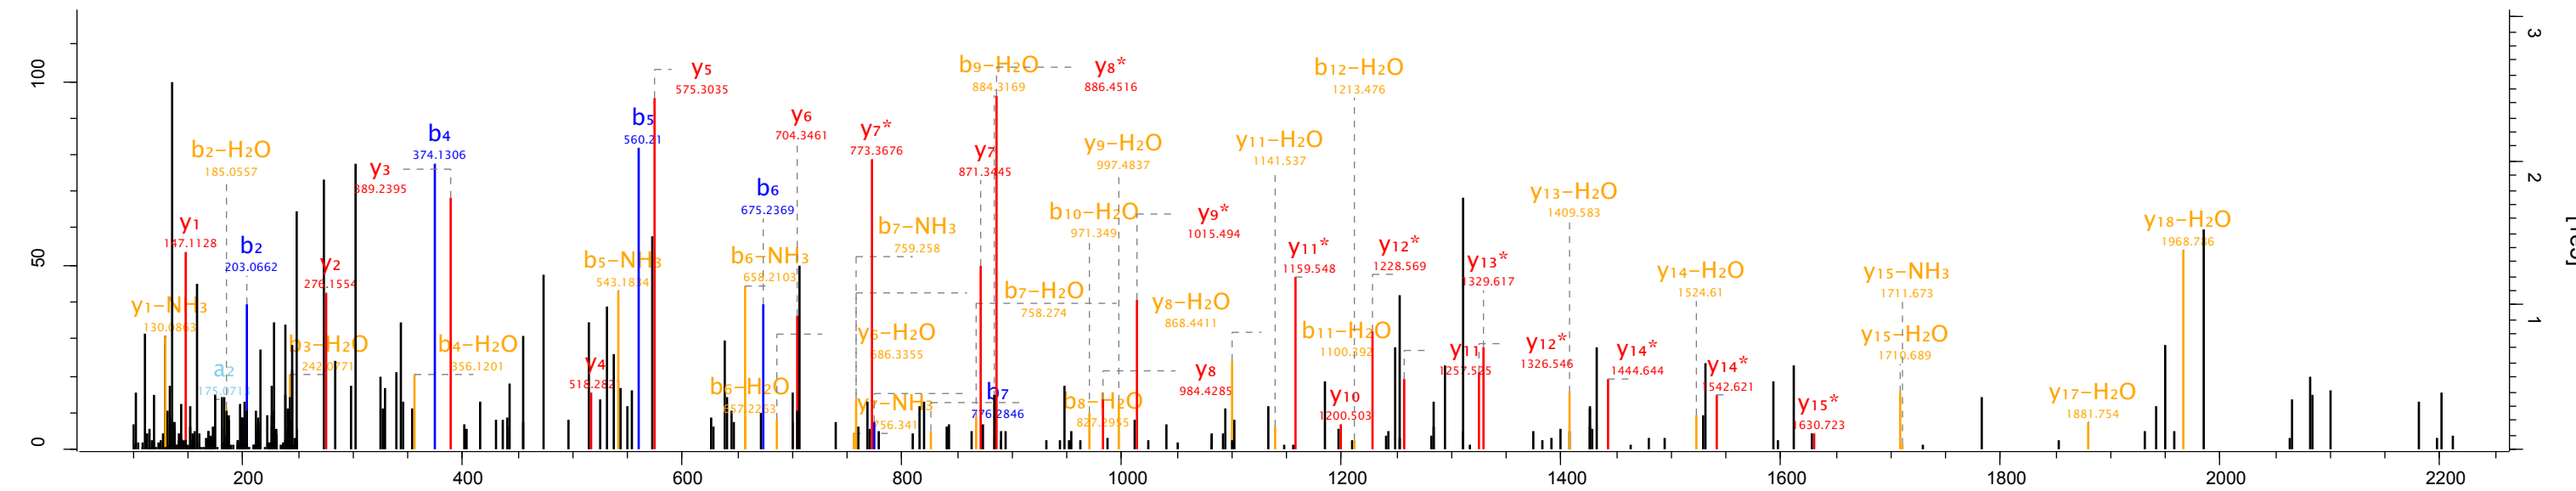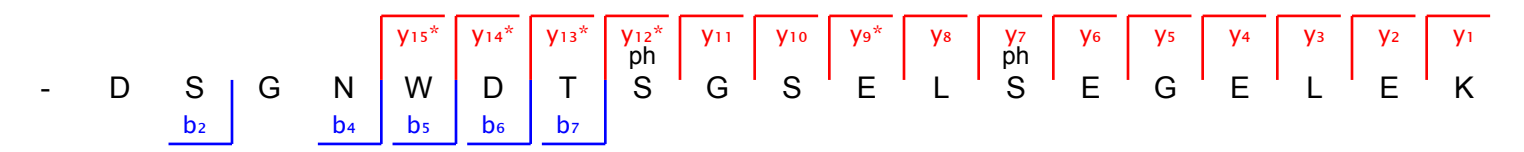



Raw file: 20171215\_MaS\_33SR\_LMH\_phospho2\_03  
 Scan: 14112 Method: FTMS; HCD Score: 59.53 m/z: 1014.08 Gene names: FOXK1

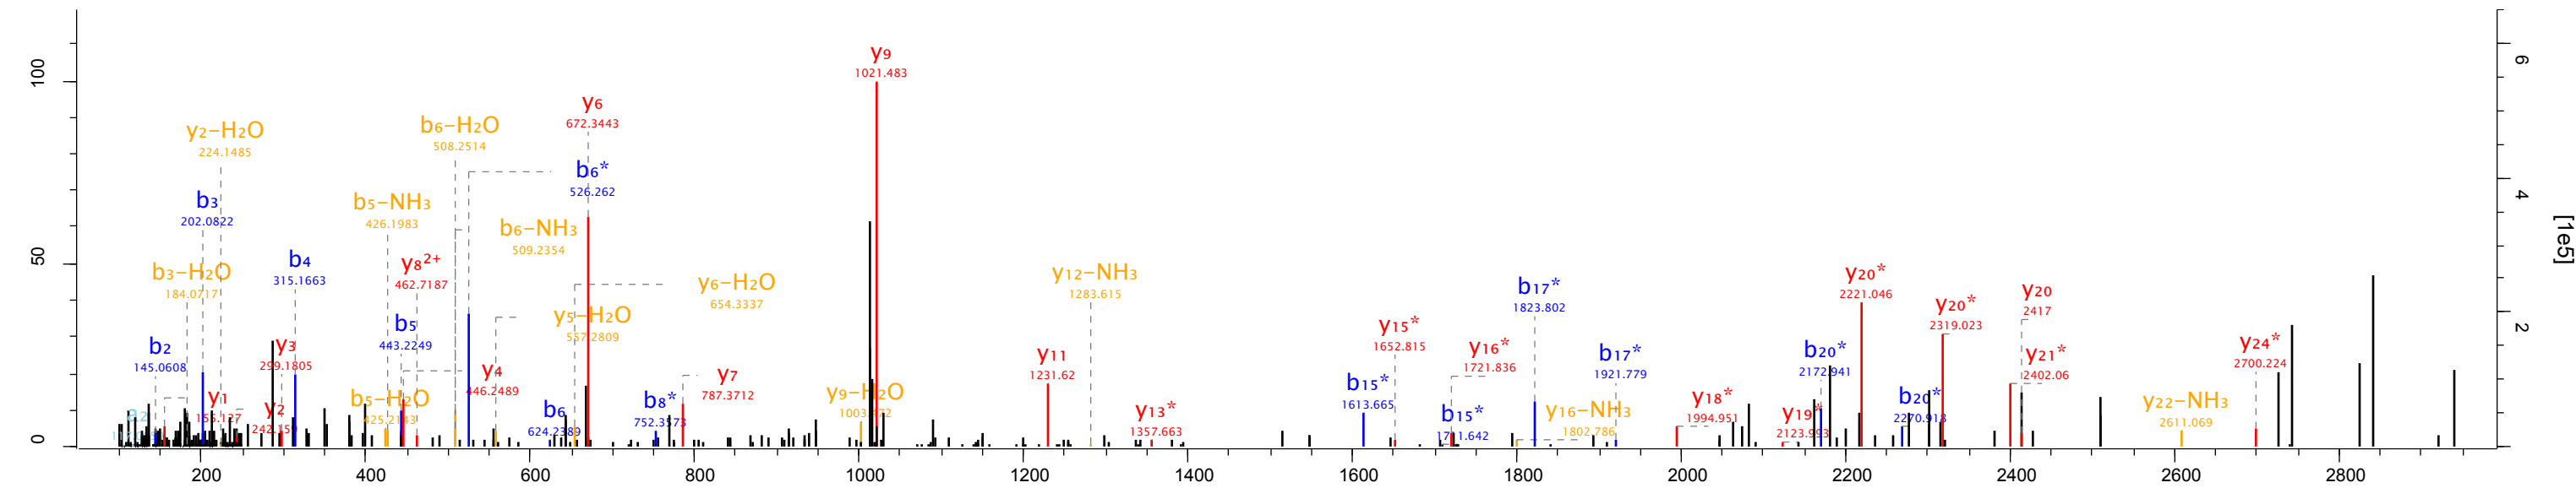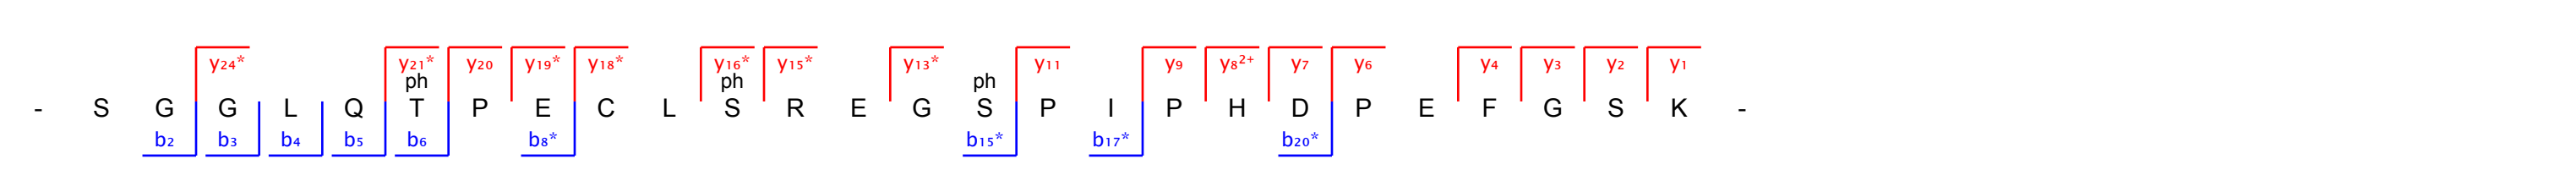





Raw file 20171215\_MaS\_33SR\_LMH\_phospho2\_03 Scan 14572 Method FTMS; HCD Score 276.3 m/z 1066.49 Gene names SF1

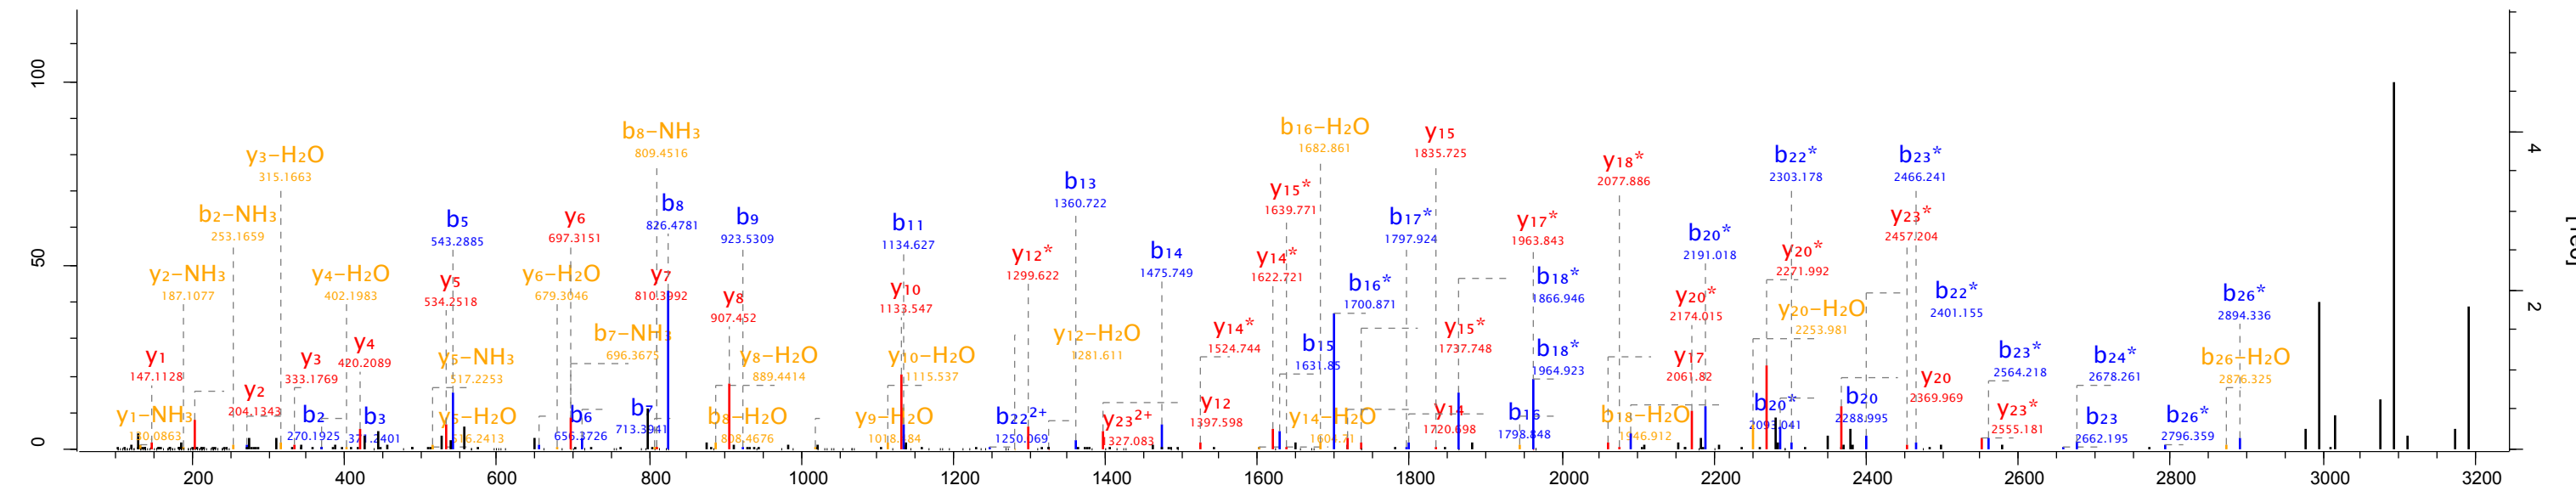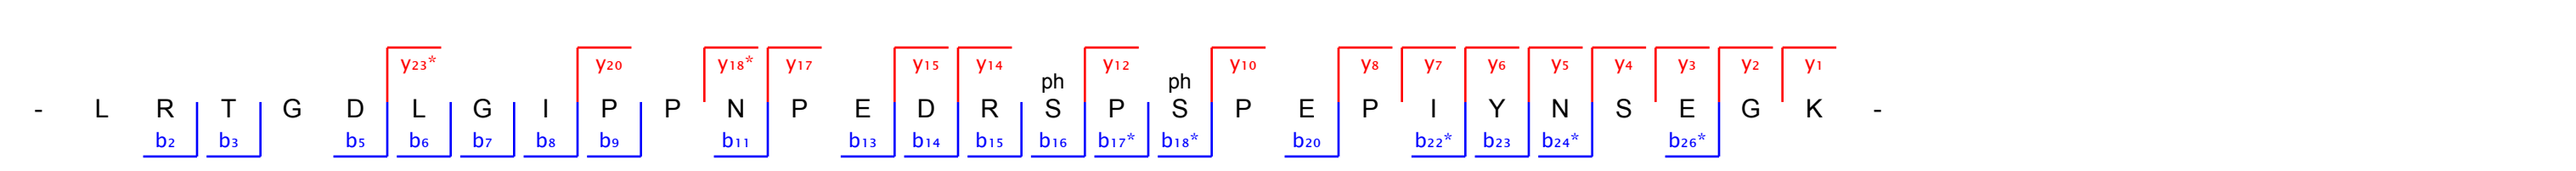

Raw file 20171215\_MaS\_33SR\_LMH\_phospho2\_03 Scan 14742 Method FTMS; HCD Score 143.99 m/z 732.79 Gene names CAMSAP2

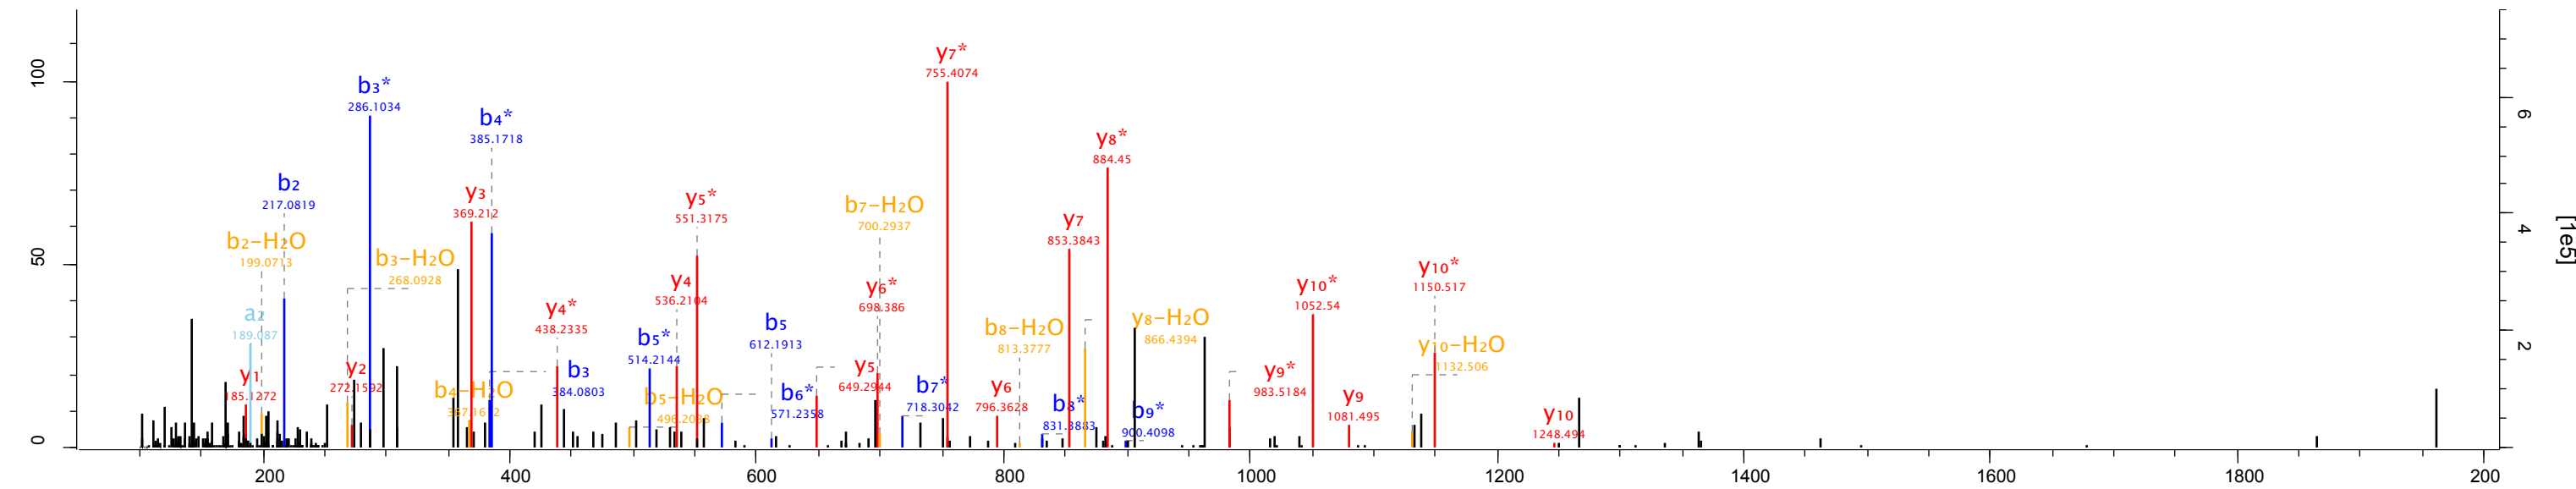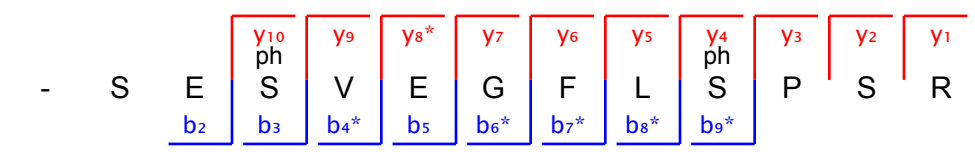

Raw file 20171215\_MaS\_33SR\_LMH\_phospho2\_03 Scan 15582 Method FTMS; HCD Score 43.36 m/z 901.71 Gene names PCNP

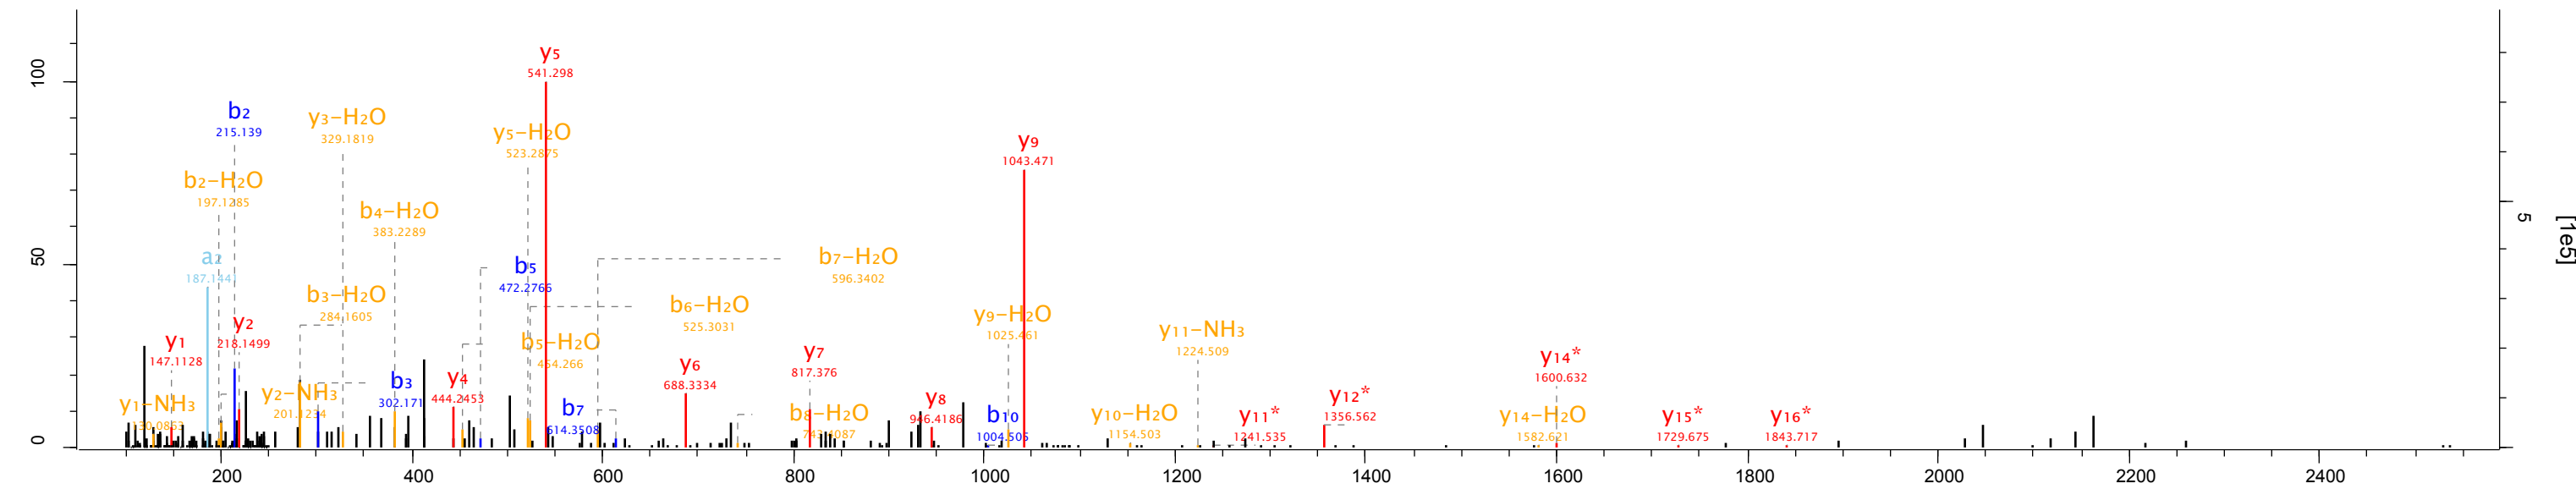

- T L S V A A F N E D E D S E P E E M P P E A K -

Fragmentation mapping (b and y ions) is shown below the sequence:

- b2: L, S
- b3: S, V
- b5: A, A
- b7: A, F
- b10: E, D, S
- y1: K
- y2: A
- y4: P, P
- y5: M, P
- y6: M
- y7: E
- y8: E
- y9: P
- y11: S
- y12: D
- y14: F
- y15: E
- y16: N

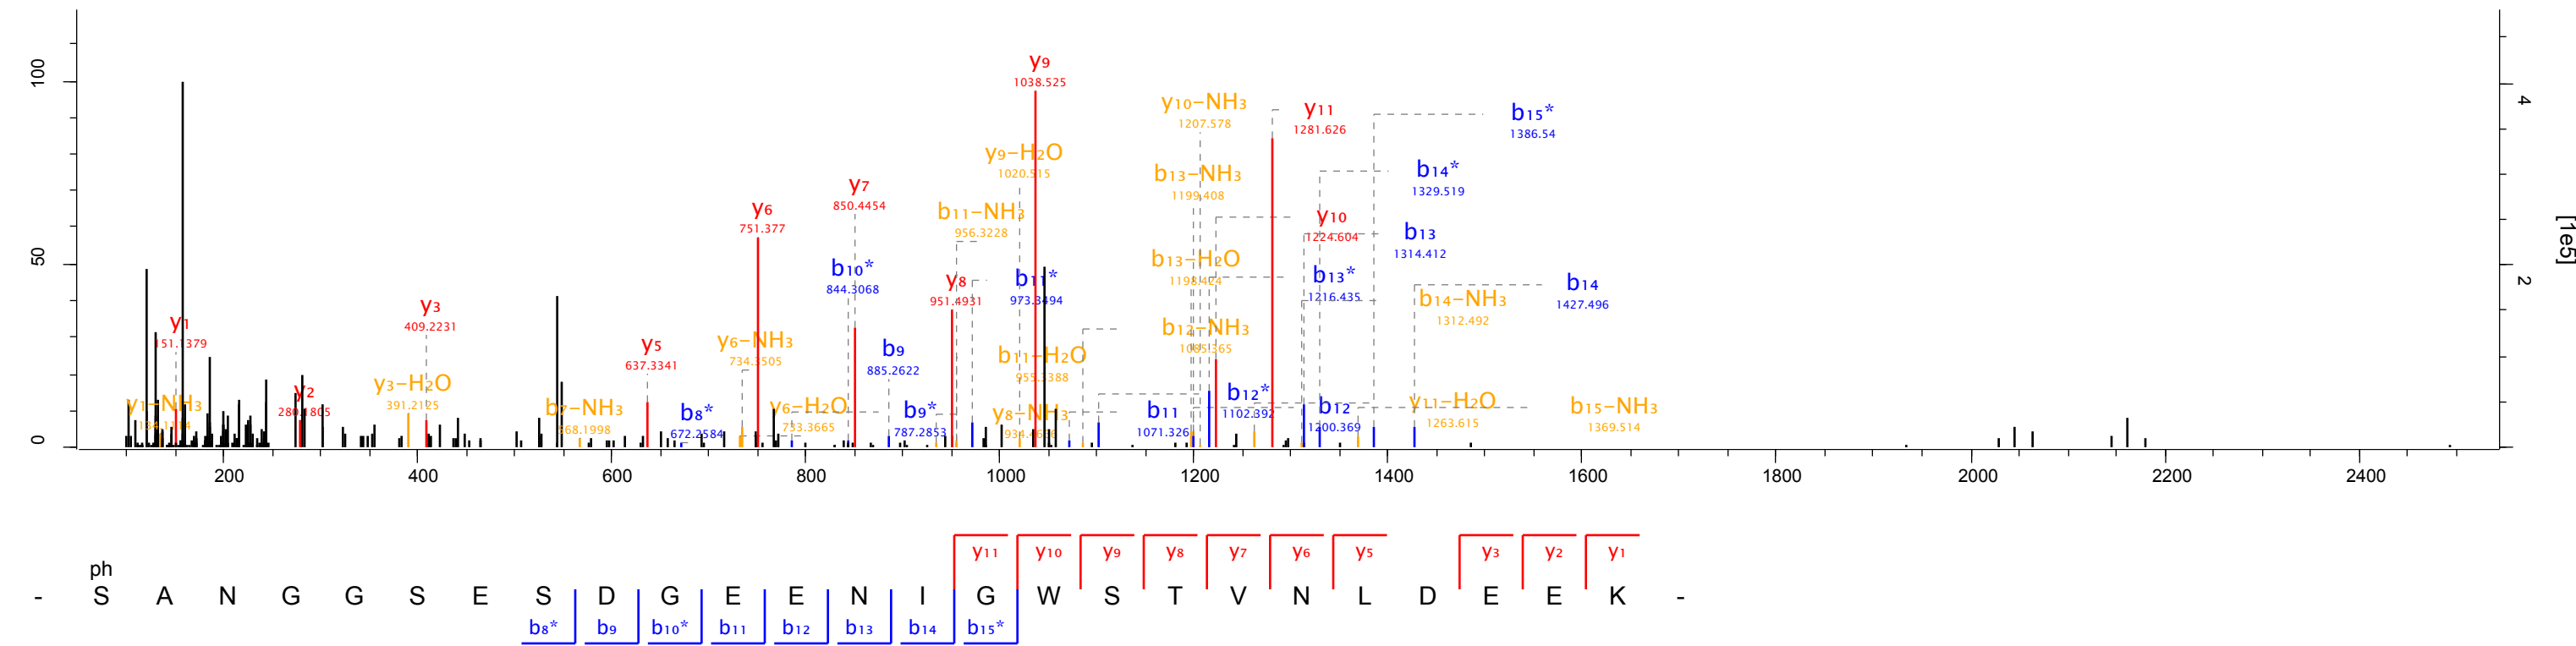

Raw file 20171215\_MaS\_33SR\_LMH\_phospho2\_03 Scan 16182 Method FTMS; HCD Score 79.18 m/z 765.34 Gene names GPHN

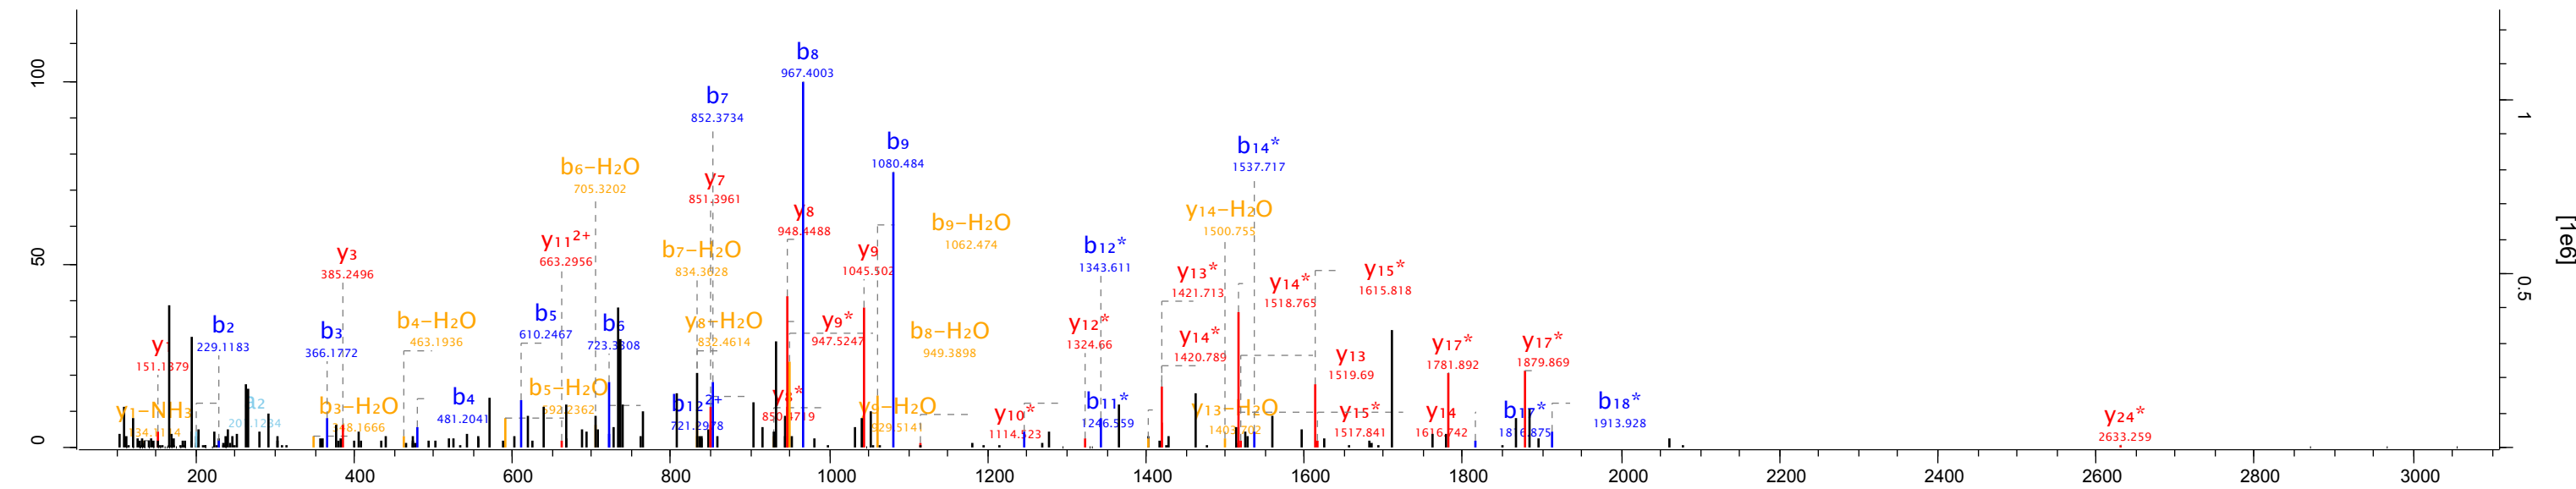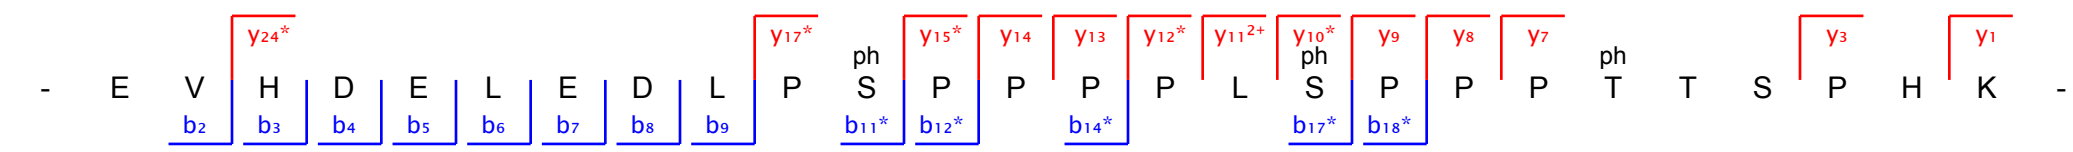

Raw file 20171215\_MaS\_33SR\_LMH\_phospho2\_03 Scan 16402 Method FTMS; HCD Score 79.51 m/z 793.02 Gene names HUWE1

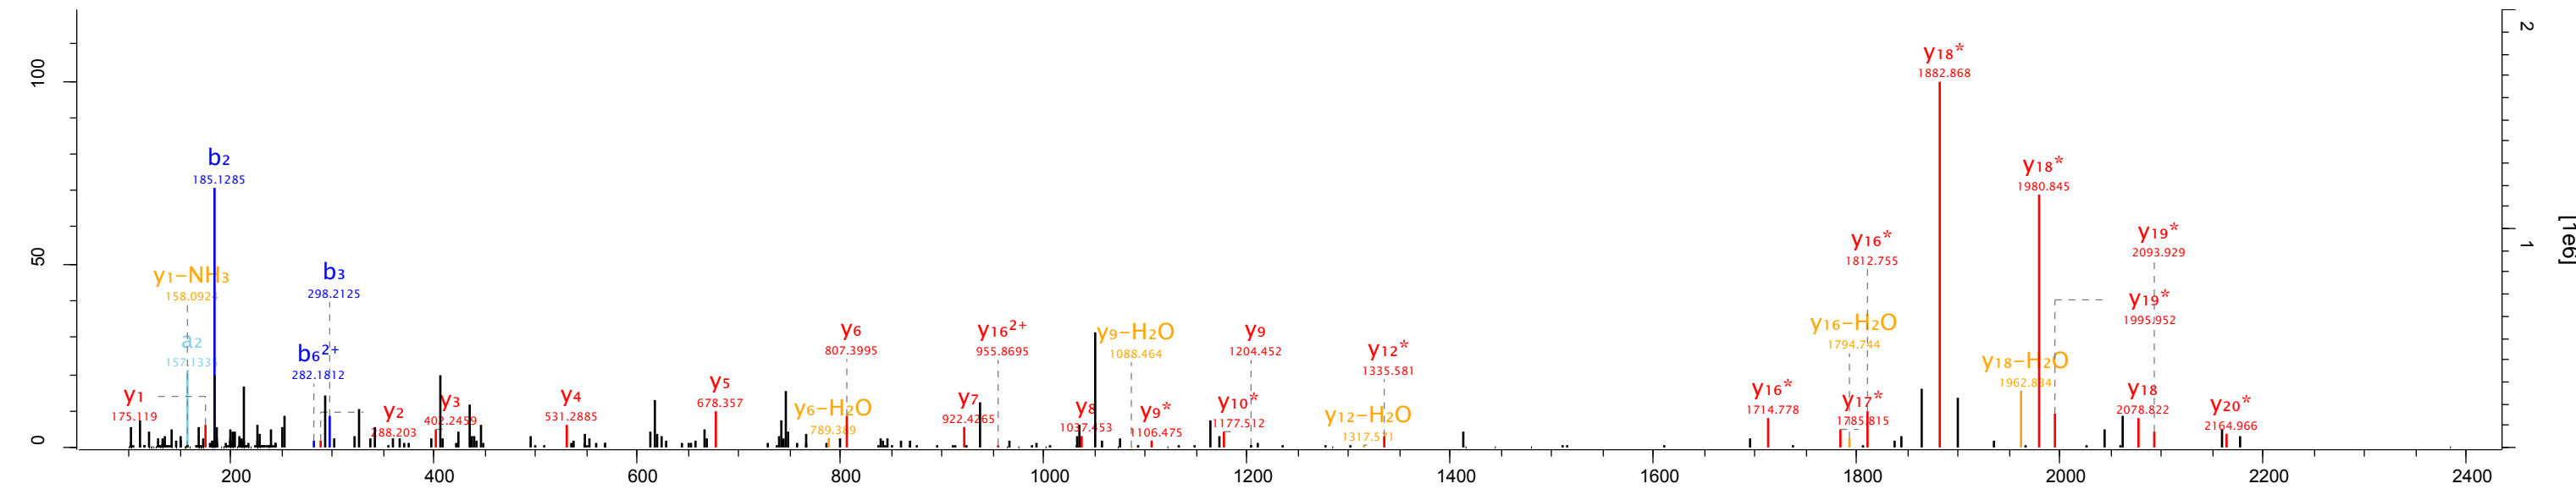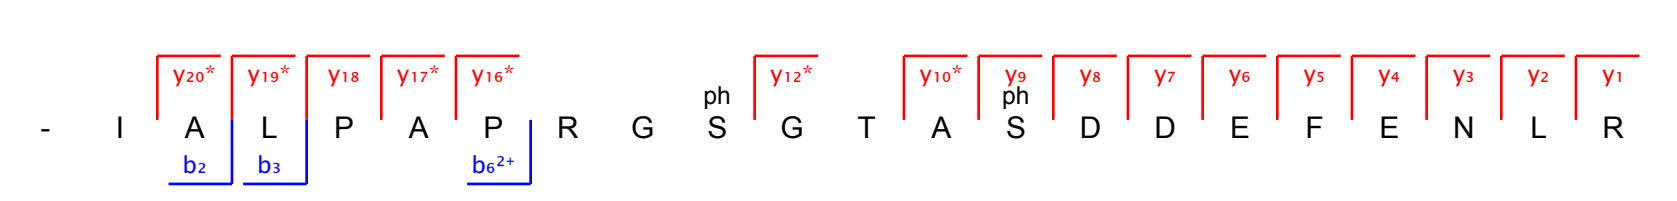

Raw file 20171215\_MaS\_33SR\_LMH\_phospho2\_03 Scan 16452 Method FTMS; HCD Score 114.53 m/z 875.34 Gene names ITGB4

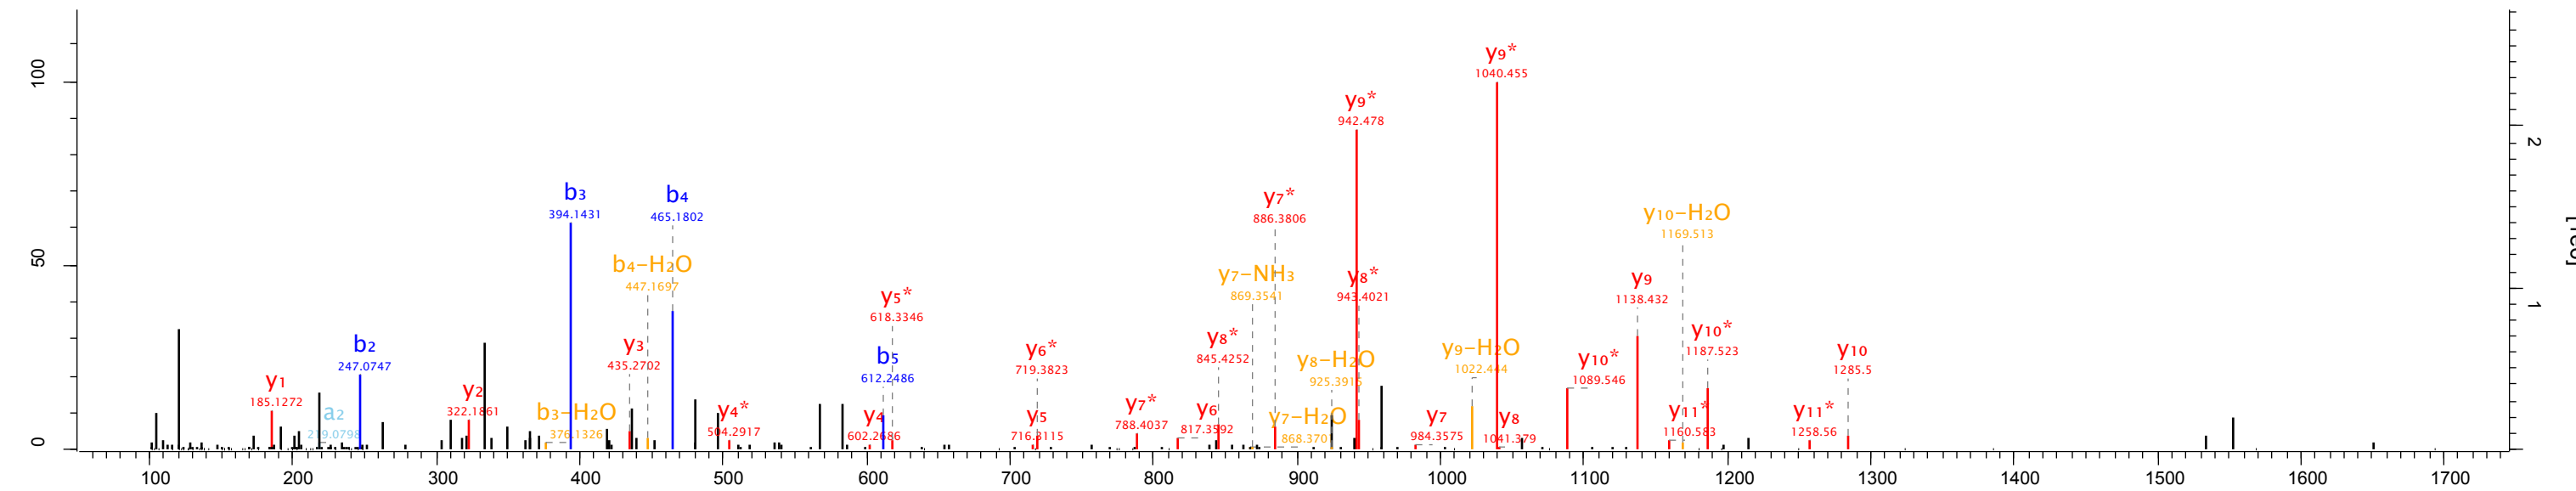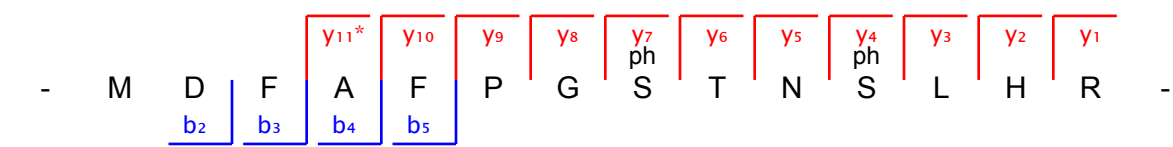



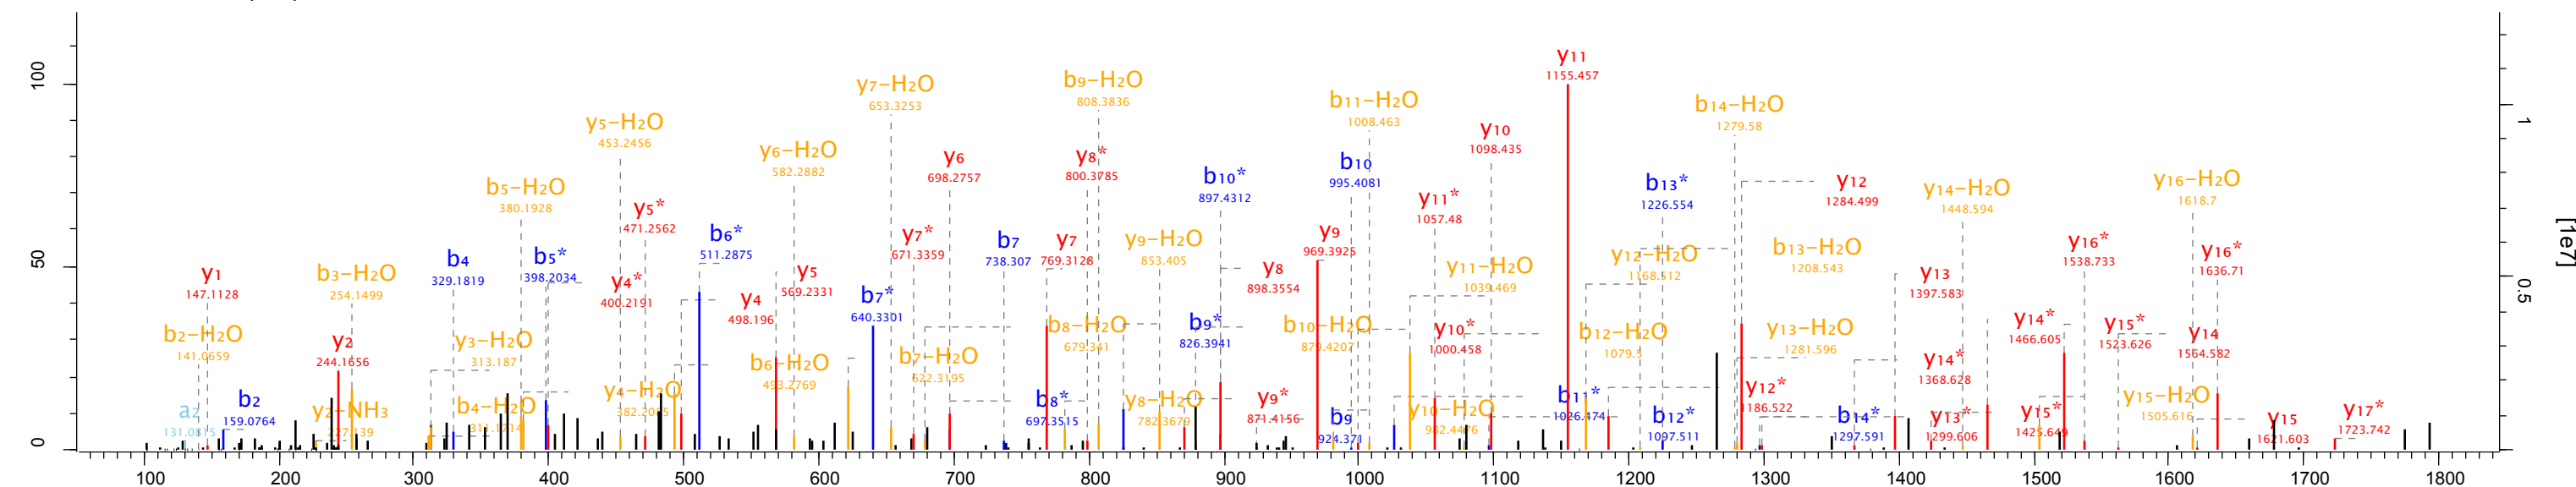

- A S L G S L E G E A E A S S P K -

b<sub>2</sub>
b<sub>4</sub>
b<sub>5</sub><sup>\*</sup>
b<sub>6</sub><sup>\*</sup>
b<sub>7</sub>
b<sub>8</sub><sup>\*</sup>
b<sub>9</sub>
b<sub>10</sub>
b<sub>11</sub><sup>\*</sup>
b<sub>12</sub><sup>\*</sup>
b<sub>13</sub><sup>\*</sup>
b<sub>14</sub><sup>\*</sup>
y<sub>4</sub>ph
y<sub>5</sub>
y<sub>6</sub>
y<sub>7</sub>
y<sub>8</sub>
y<sub>9</sub>
y<sub>10</sub>
y<sub>11</sub>
y<sub>12</sub>
y<sub>13</sub>
y<sub>14</sub>ph
y<sub>15</sub>
y<sub>16</sub><sup>\*</sup>
y<sub>17</sub><sup>\*</sup>

Raw file: 20171215\_MaS\_33SR\_LMH\_phospho2\_03  
 Scan: 16722 Method: FTMS; HCD Score: 115.88 m/z: 1101.93 Gene names: UCKL1

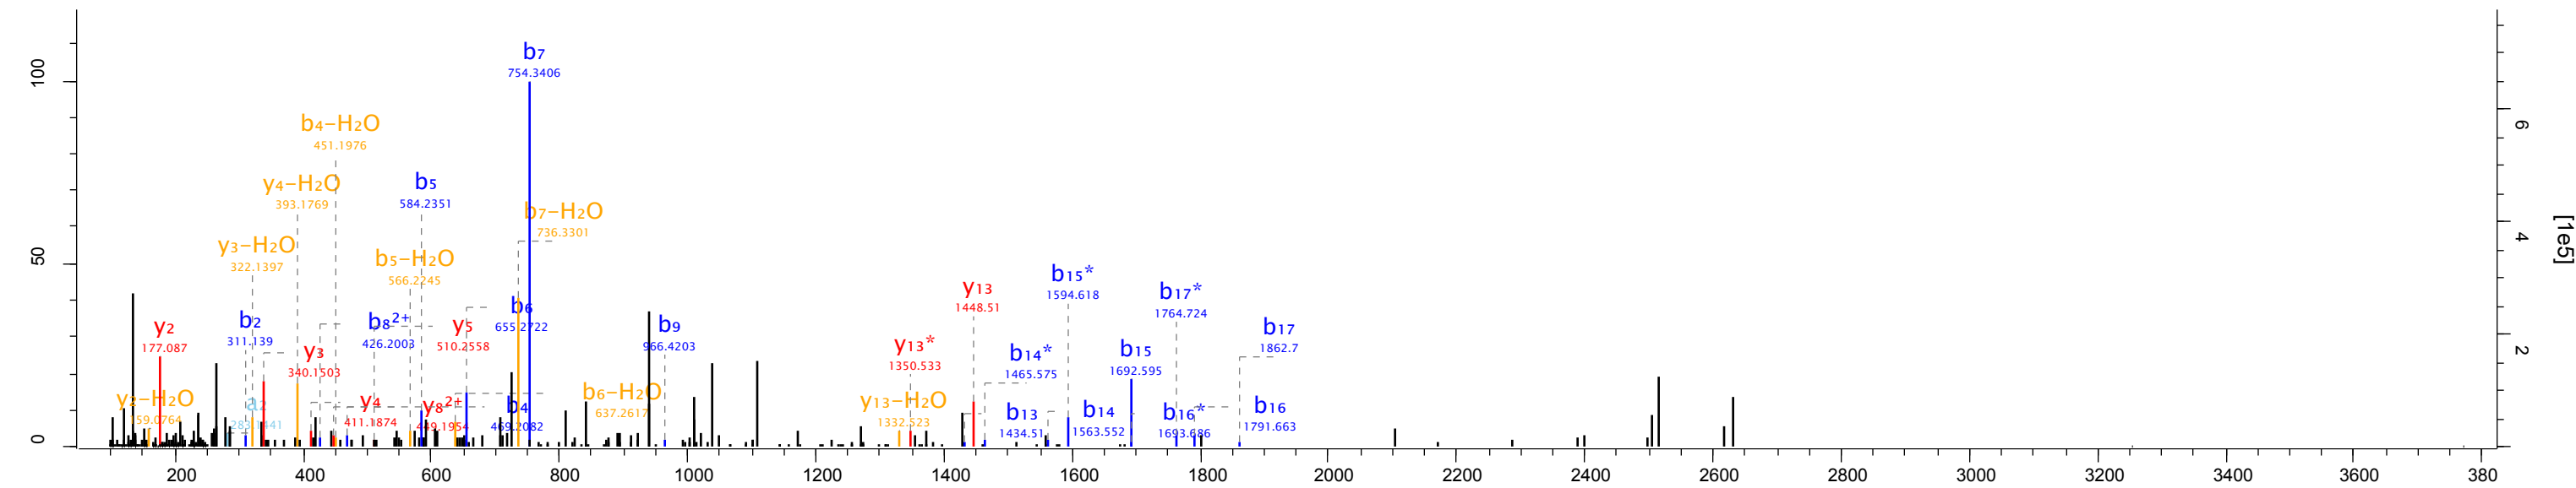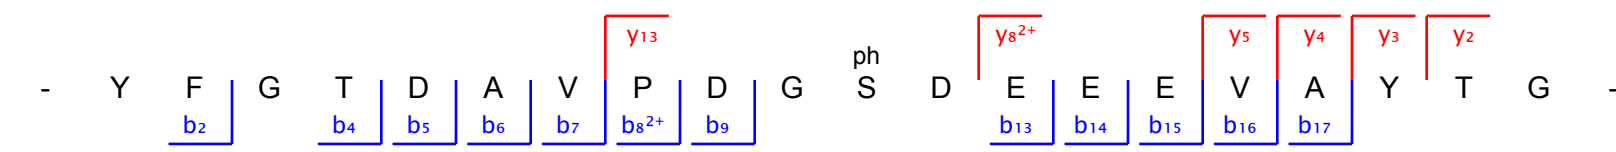

Raw file 20171215\_MaS\_33SR\_LMH\_phospho2\_03 Scan 16822 Method FTMS; HCD Score 48.61 m/z 1104.5 Gene names GBF1

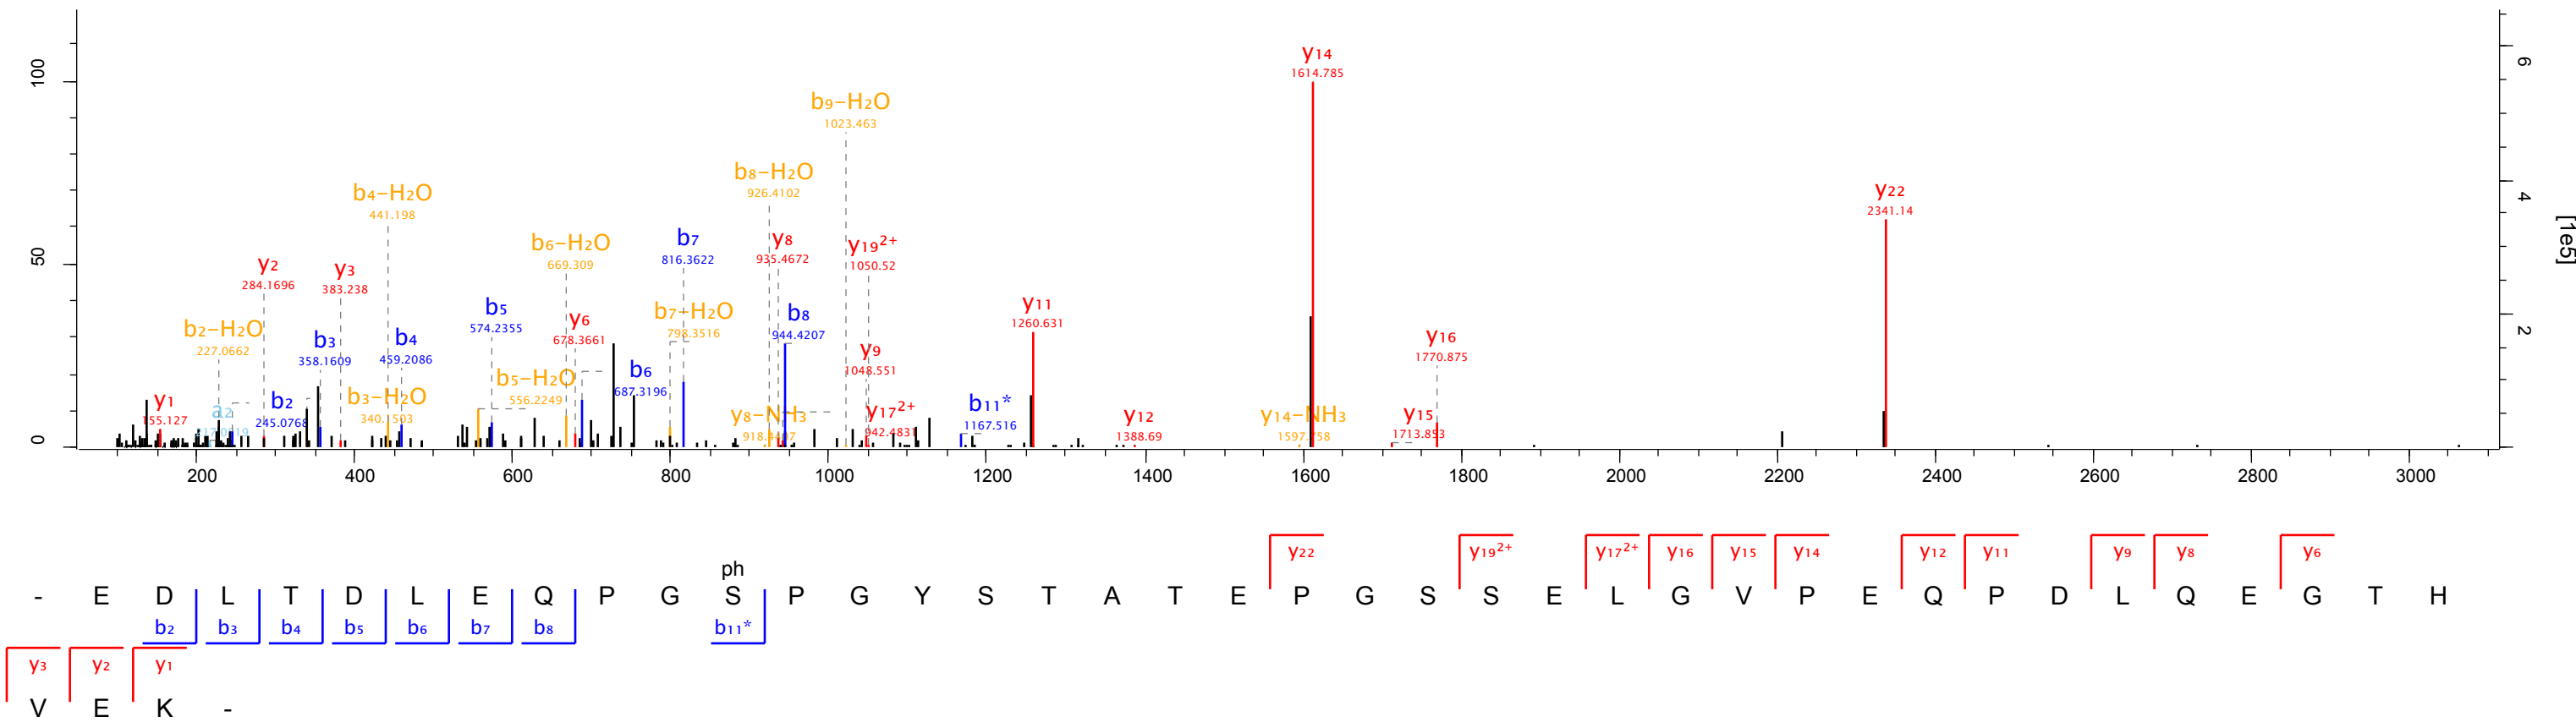

Raw file  
20171215\_MaS\_33SR\_LMH\_phospho2\_03

Scan 16882 Method FTMS; HCD Score 132 m/z 867.88 Gene names CTTN

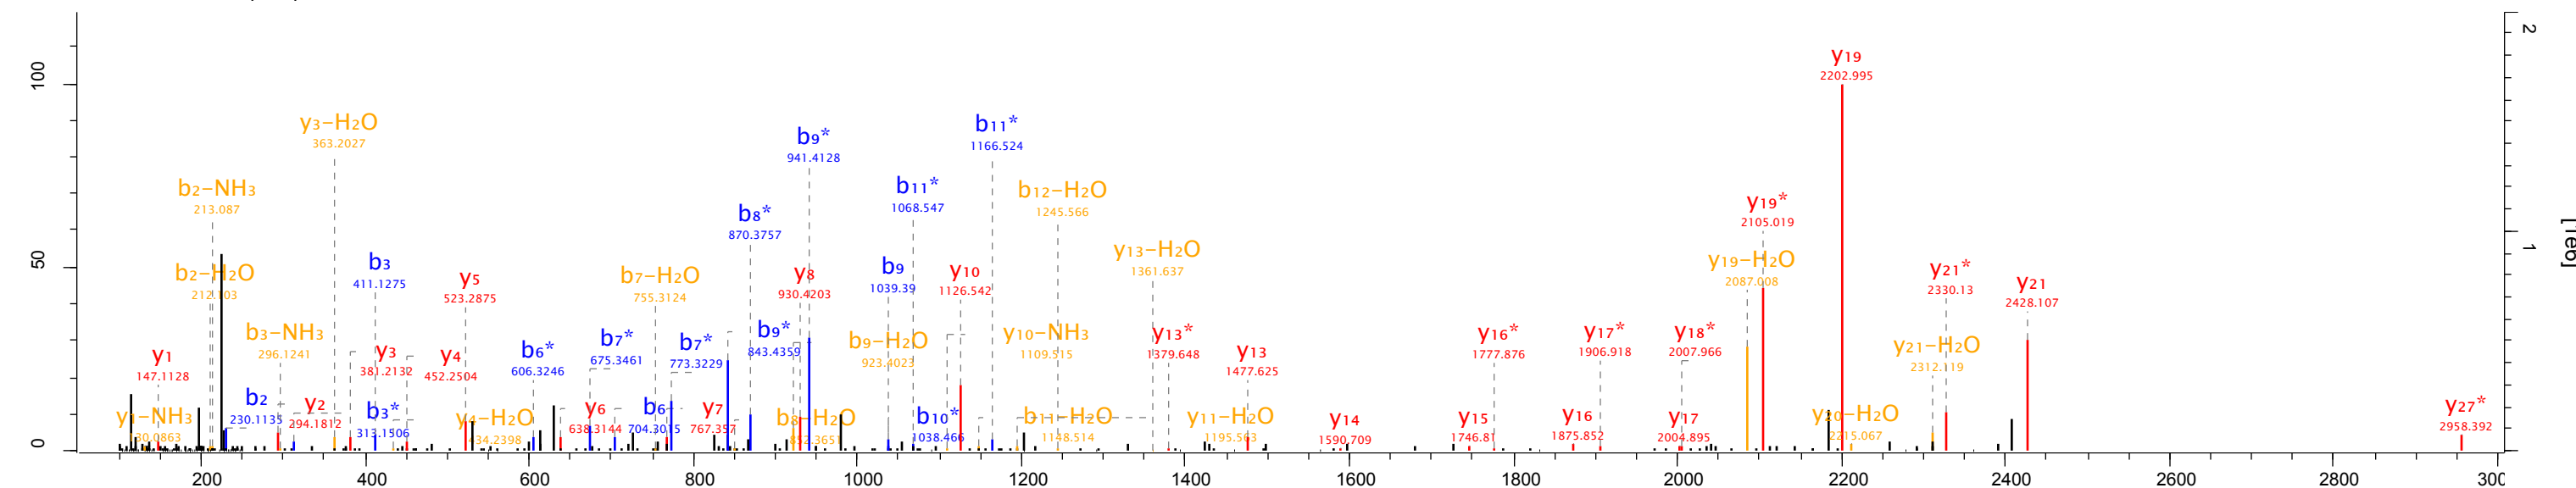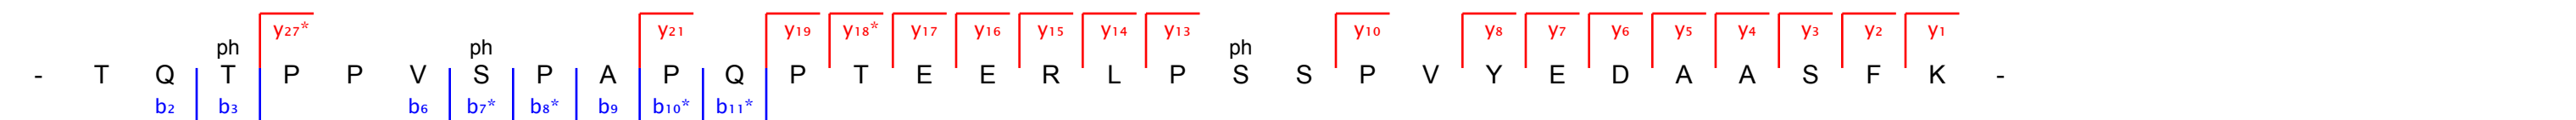

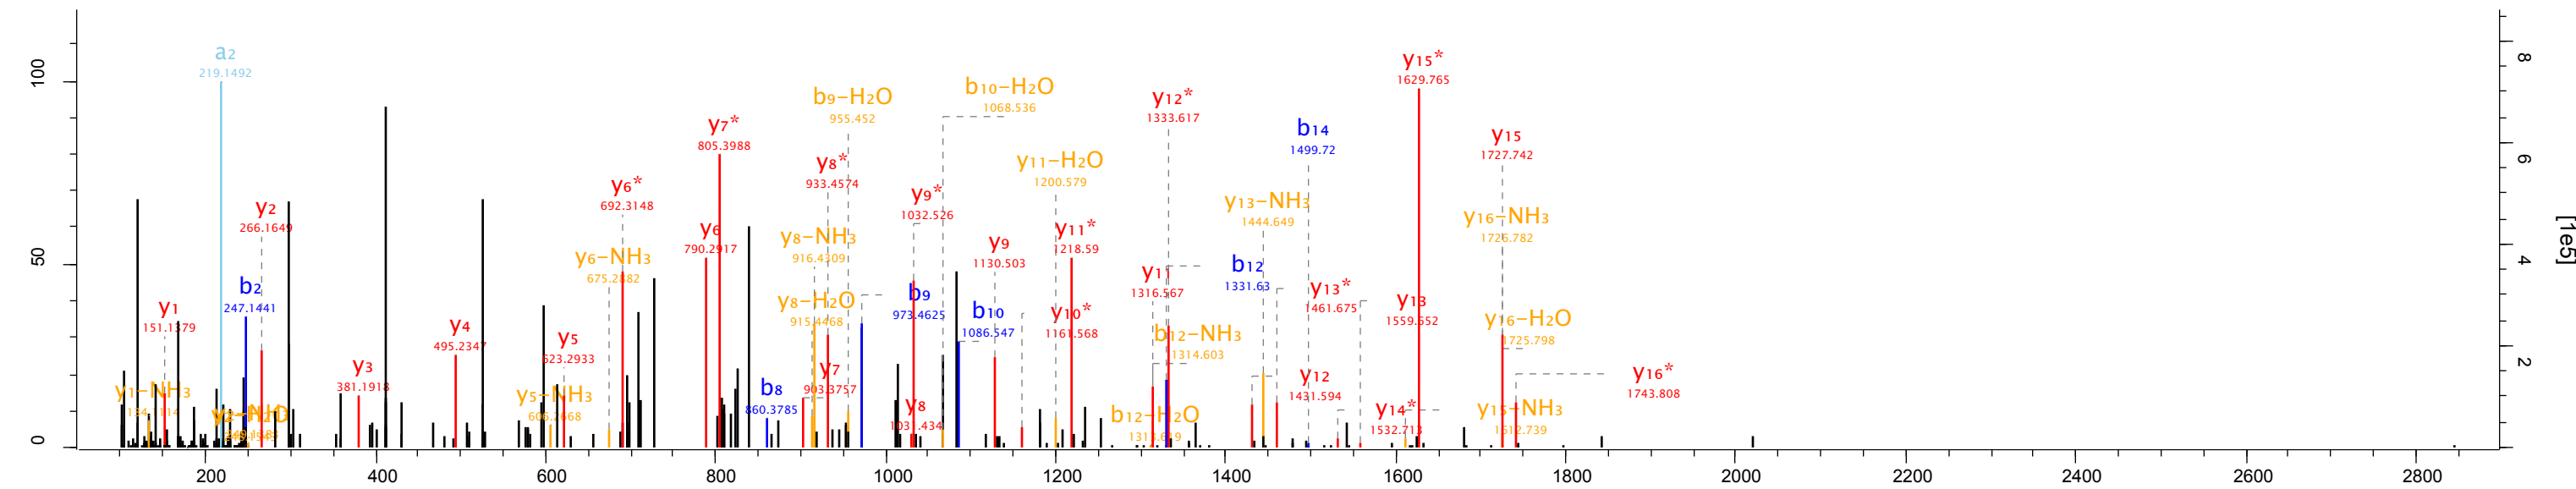

- F V P A E N D S I L M N P A Q D G E V Q L S Q N D D K -

Fragmentation sites are indicated by brackets below the sequence:

- b<sub>2</sub> (under V)
- b<sub>8</sub> (under S), b<sub>9</sub> (under I), b<sub>10</sub> (under L)
- b<sub>12</sub> (under N), b<sub>14</sub> (under A)
- y<sub>16</sub><sup>\*</sup> (under N), y<sub>15</sub> (under P), y<sub>14</sub><sup>\*</sup> (under A), y<sub>13</sub> (under Q), y<sub>12</sub> (under D), y<sub>11</sub> (under G), y<sub>10</sub><sup>\*</sup> (under E), y<sub>9</sub> (under V), y<sub>8</sub> (under Q), y<sub>7</sub> (under L), y<sub>6</sub><sup>ph</sup> (under S), y<sub>5</sub> (under Q), y<sub>4</sub> (under N), y<sub>3</sub> (under D), y<sub>2</sub> (under D), y<sub>1</sub> (under K)

Raw file 20171215\_MaS\_33SR\_LMH\_phospho2\_03 Scan 18002 Method FTMS; HCD Score 117.15 m/z 1148.84 Gene names FXR2

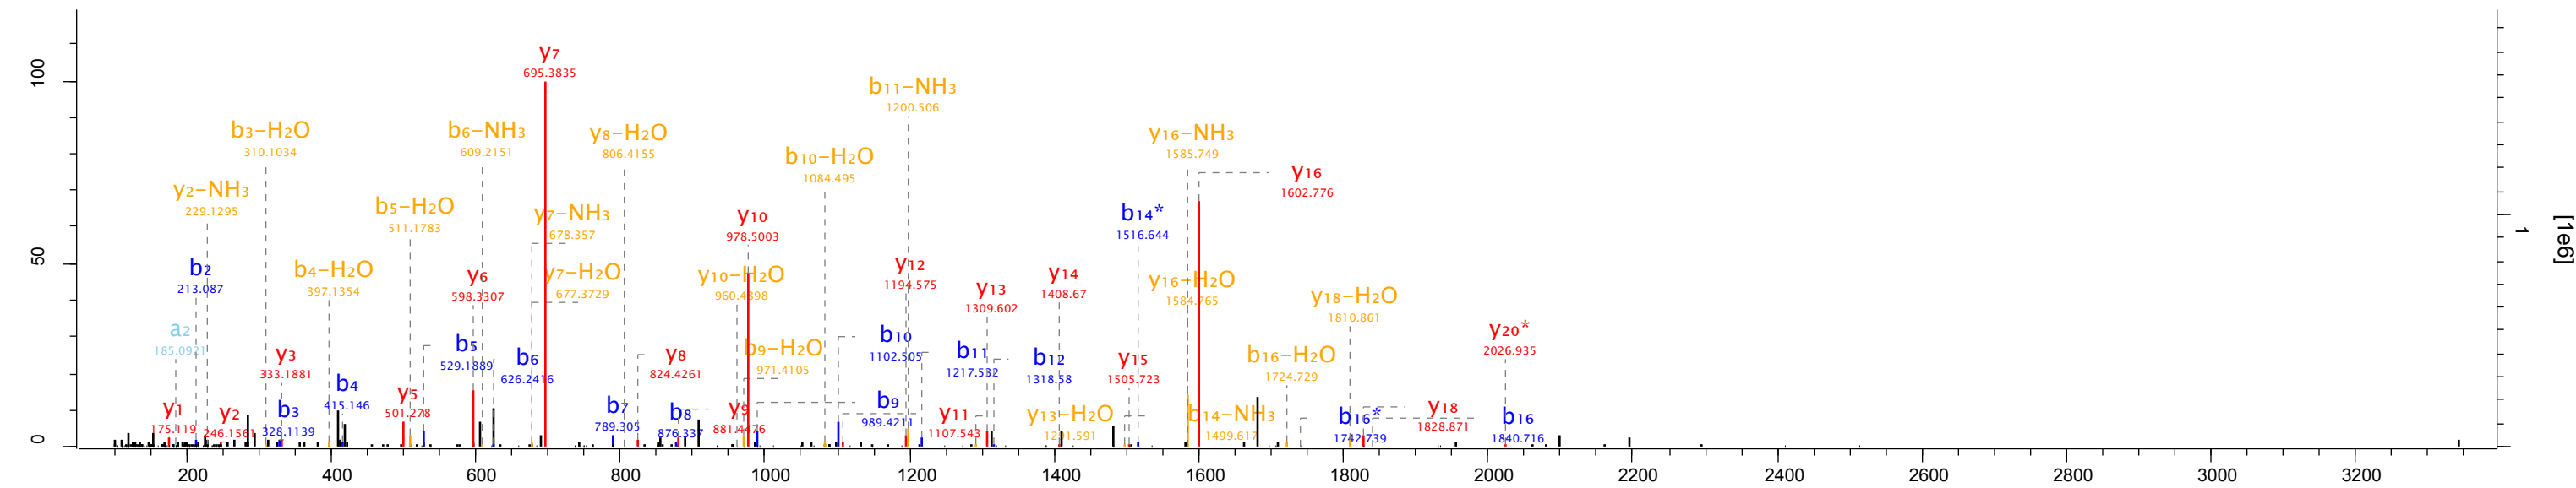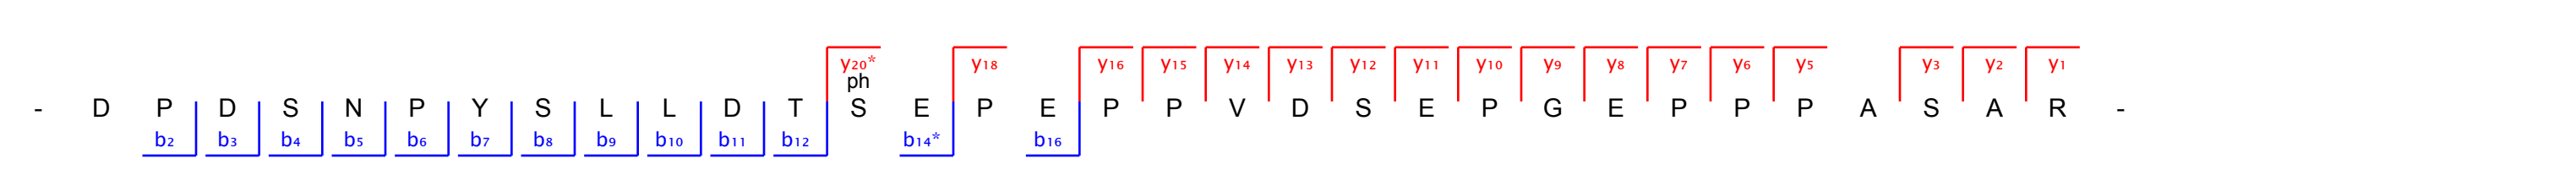

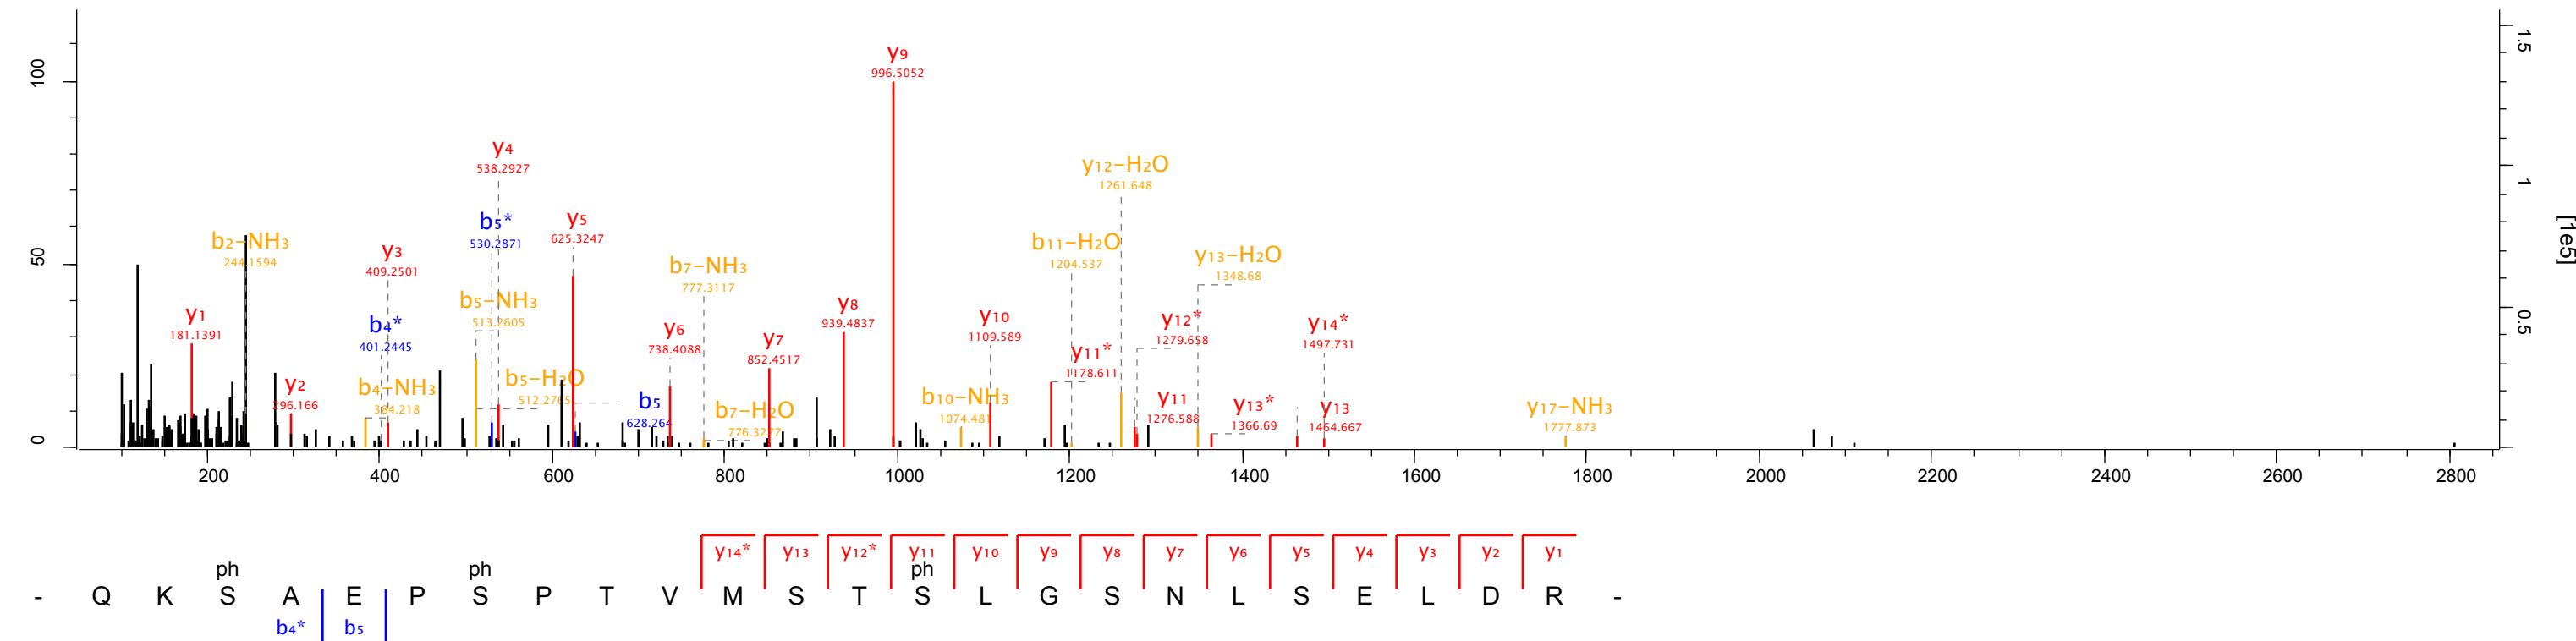

Raw file: 20171215\_MaS\_33SR\_LMH\_phospho2\_03  
 Scan: 19132 Method: FTMS; HCD Score: 239.34 m/z: 932.45 Gene names: RANBP2

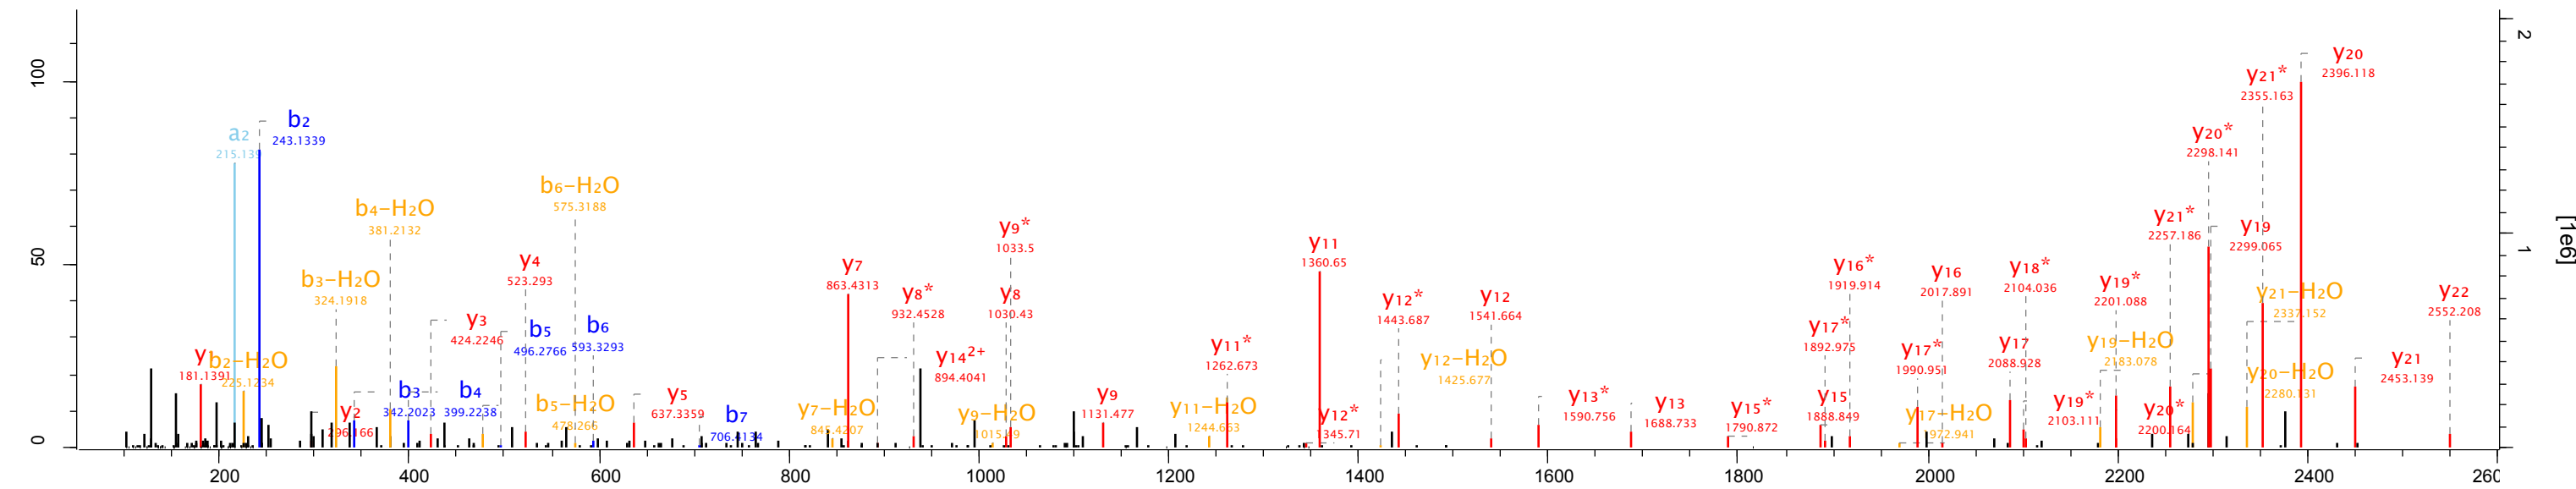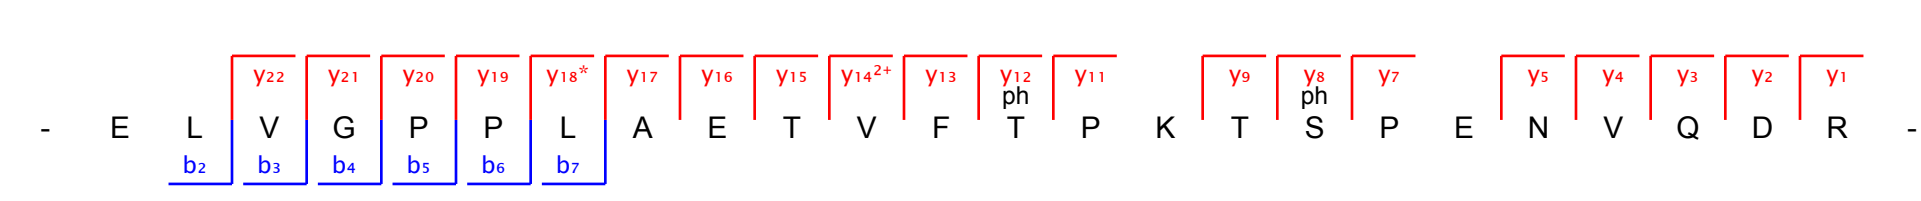



Raw file 20171215\_MaS\_33SR\_LMH\_phospho2\_03 Scan 19142 Method FTMS; HCD Score 165.78 m/z 815.34 Gene names TRMT112

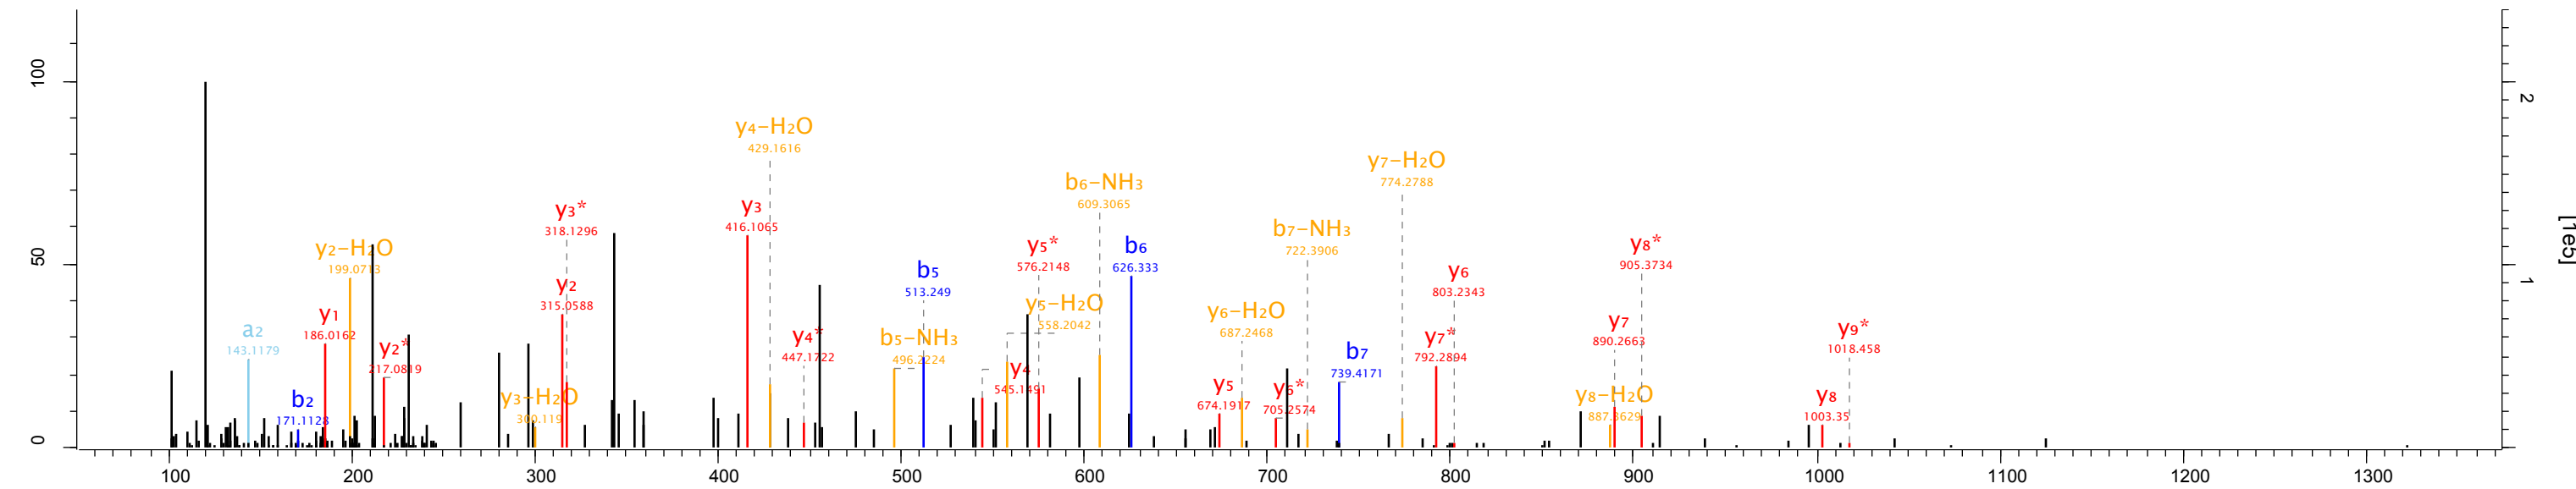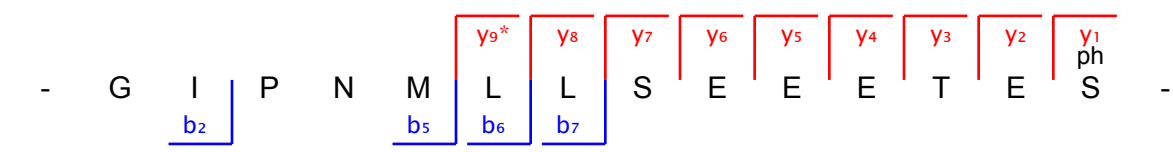

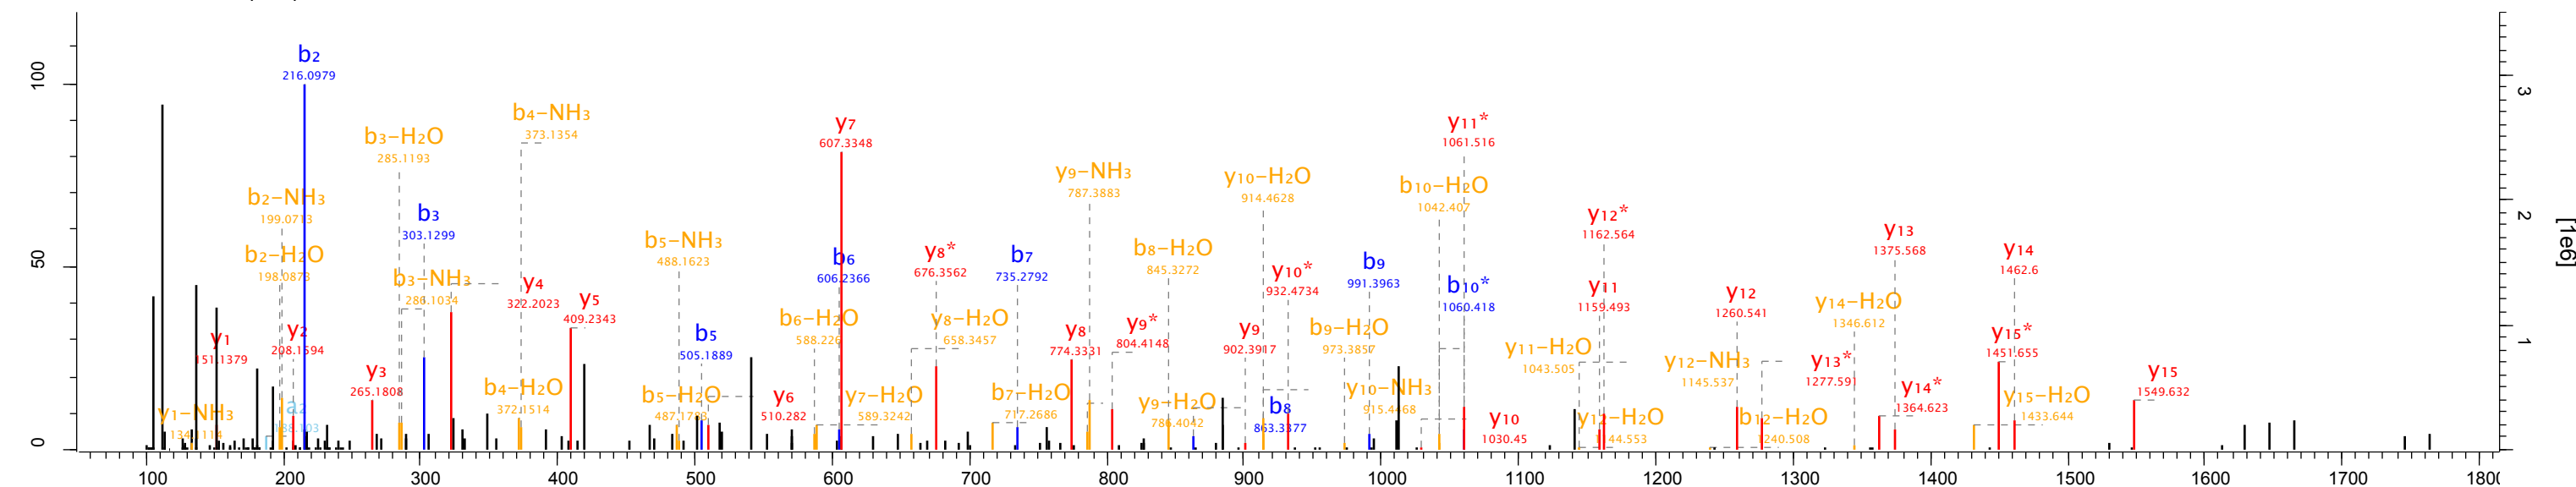

- S Q S S D T E Q Q S P T S G G G K -

b<sub>2</sub>
b<sub>3</sub>
y<sub>15</sub>
y<sub>14</sub>
y<sub>13</sub>
y<sub>12</sub>
y<sub>11</sub>
y<sub>10</sub>
y<sub>9</sub>
y<sub>8</sub>ph
S
y<sub>7</sub>
y<sub>6</sub>
y<sub>5</sub>
y<sub>4</sub>
y<sub>3</sub>
y<sub>2</sub>
y<sub>1</sub>
b<sub>5</sub>
b<sub>6</sub>
b<sub>7</sub>
b<sub>8</sub>
b<sub>9</sub>
b<sub>10</sub>\*

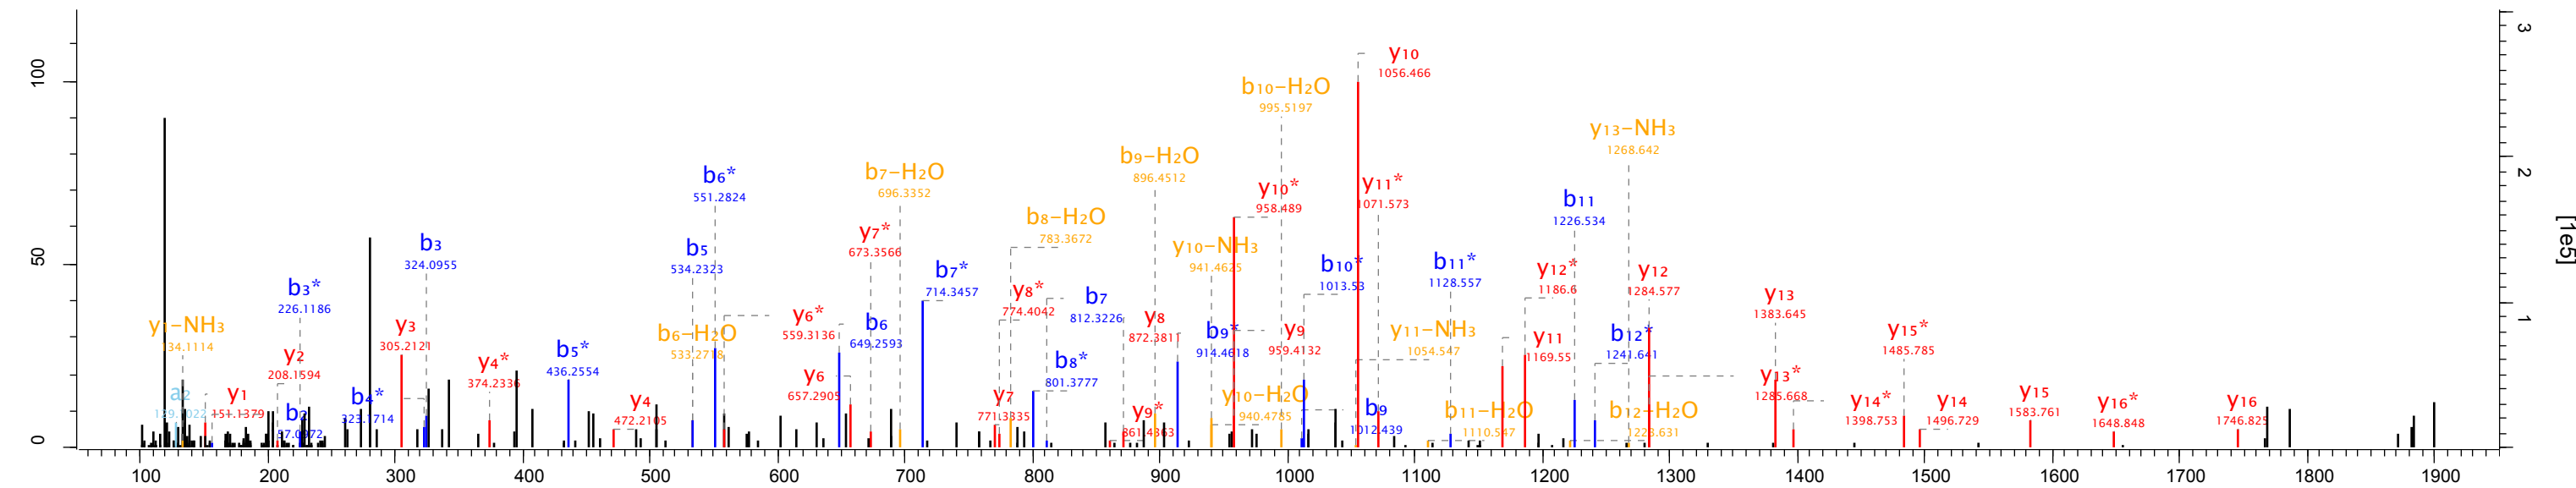

- V G S P L D Y S L V D L P S T N G Q S P G K -

ph  
 b<sub>2</sub> b<sub>3</sub> b<sub>4</sub><sup>\*</sup> b<sub>5</sub> b<sub>6</sub> b<sub>7</sub> b<sub>8</sub><sup>\*</sup> b<sub>9</sub> b<sub>10</sub><sup>\*</sup> b<sub>11</sub> b<sub>12</sub><sup>\*</sup> y<sub>16</sub> y<sub>15</sub> y<sub>14</sub> y<sub>13</sub> y<sub>12</sub> y<sub>11</sub> y<sub>10</sub> y<sub>9</sub> y<sub>8</sub> y<sub>7</sub> y<sub>6</sub> y<sub>4</sub> ph y<sub>3</sub> y<sub>2</sub> y<sub>1</sub>

Raw file 20171215\_MaS\_33SR\_LMH\_phospho2\_03 Scan 2052 Method FTMS; HCD Score 75.96 m/z 659.59 Gene names EIF4B

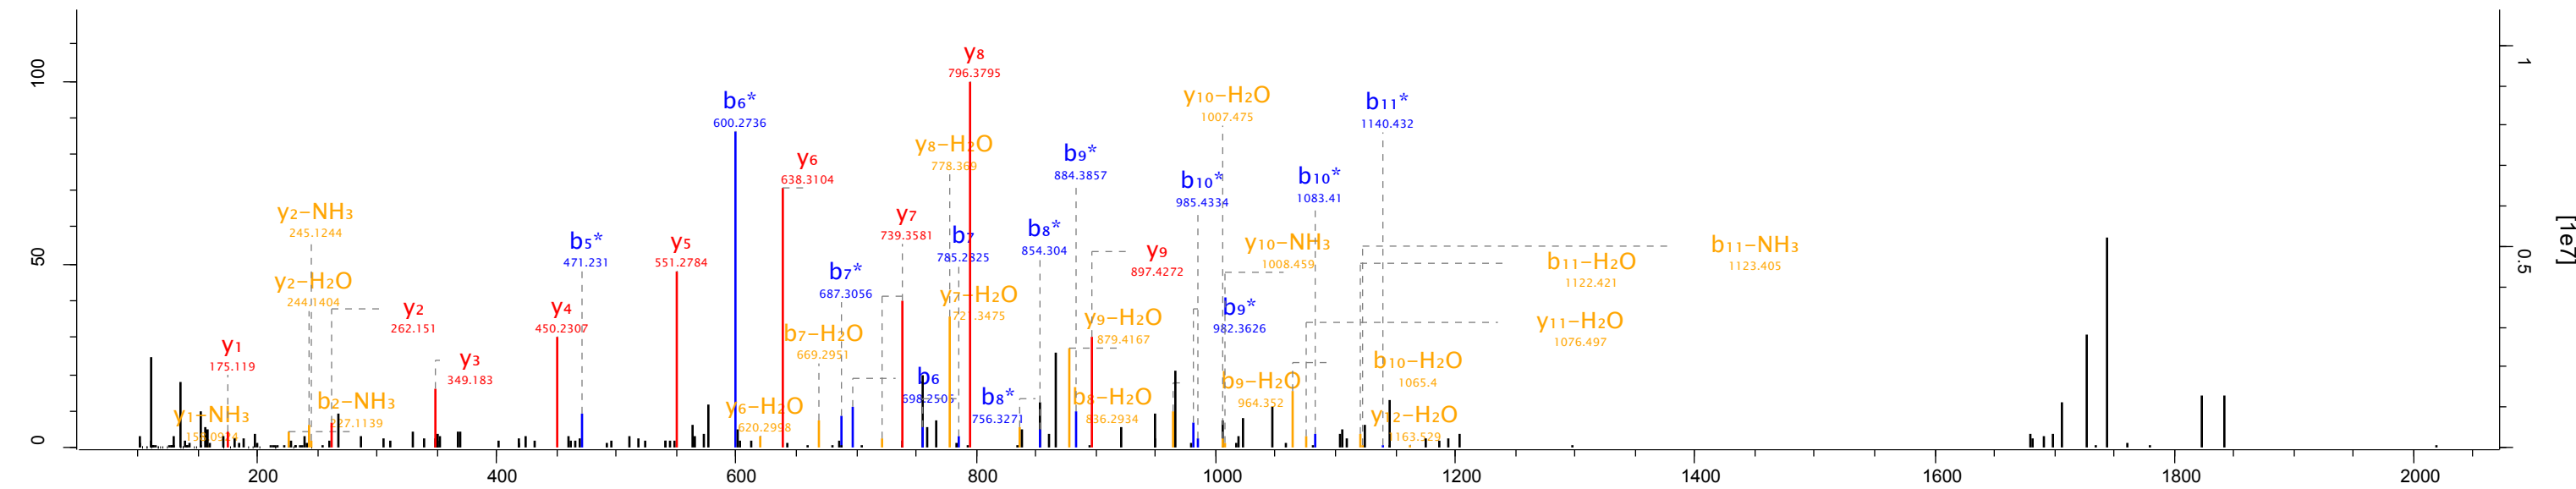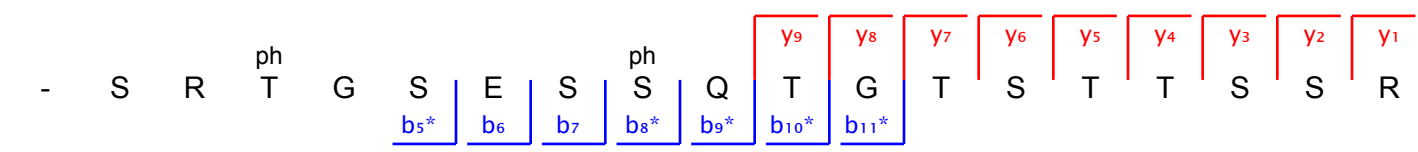

Raw file  
20171215\_MaS\_33SR\_LMH\_phospho2\_03

Scan 2102 Method FTMS; HCD Score 202.52 m/z 841.84 Gene names LMNA

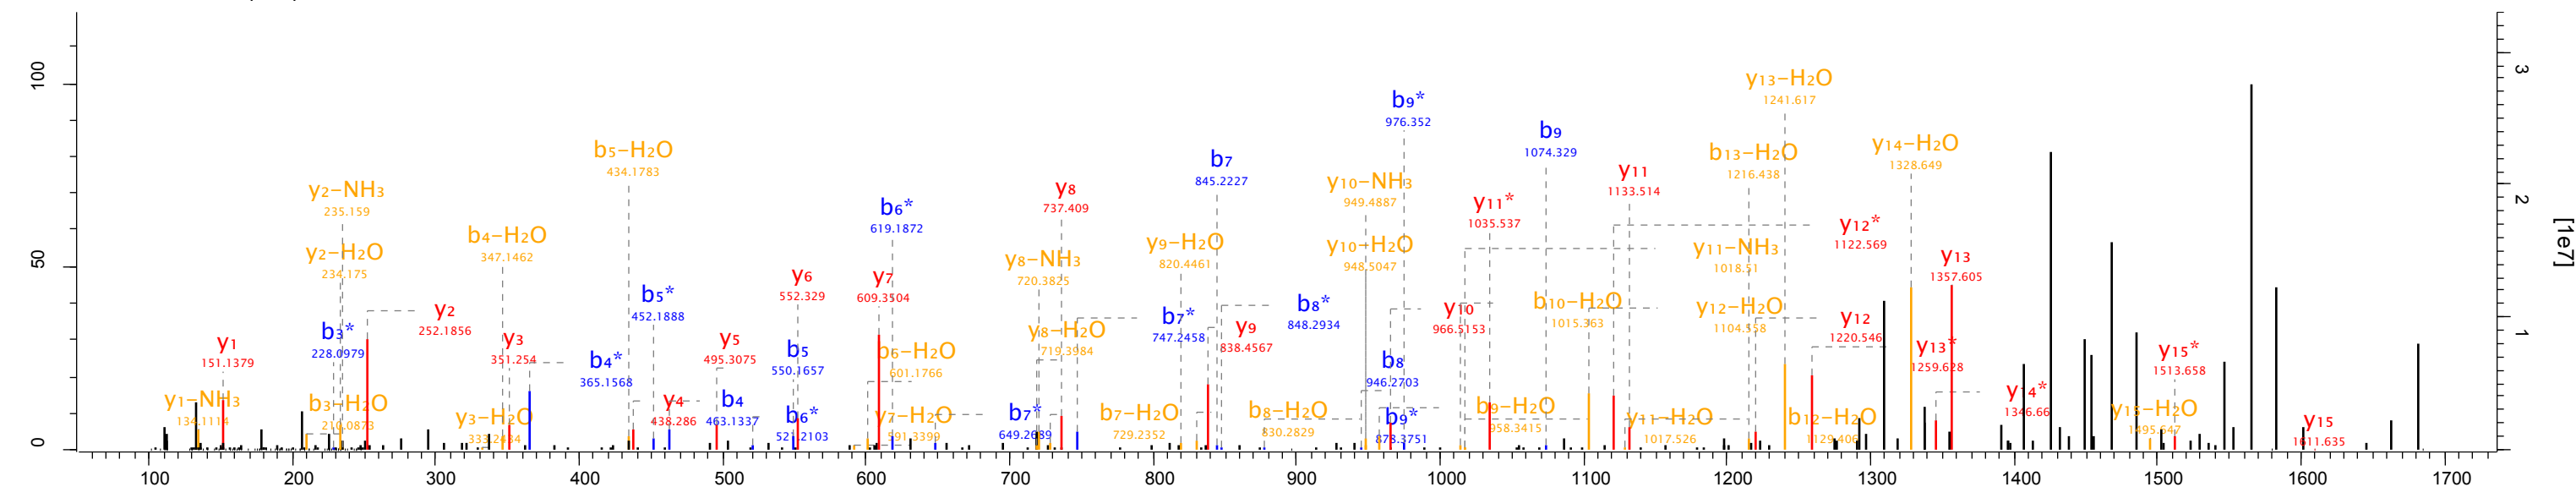

- A S S H S S Q T Q G G G S V T K -

y15 ph
y14\*
y13
y12
y11 ph
y10
y9
y8
y7
y6
y5
y4
y3
y2
y1

b3\*
b4
b5
b6\*
b7
b8
b9

Raw file: 20171215\_MaS\_33SR\_LMH\_phospho2\_03  
 Scan: 21172 Method: FTMS; HCD Score: 235.5 m/z: 1017.88 Gene names: RPLP2;RPLP1

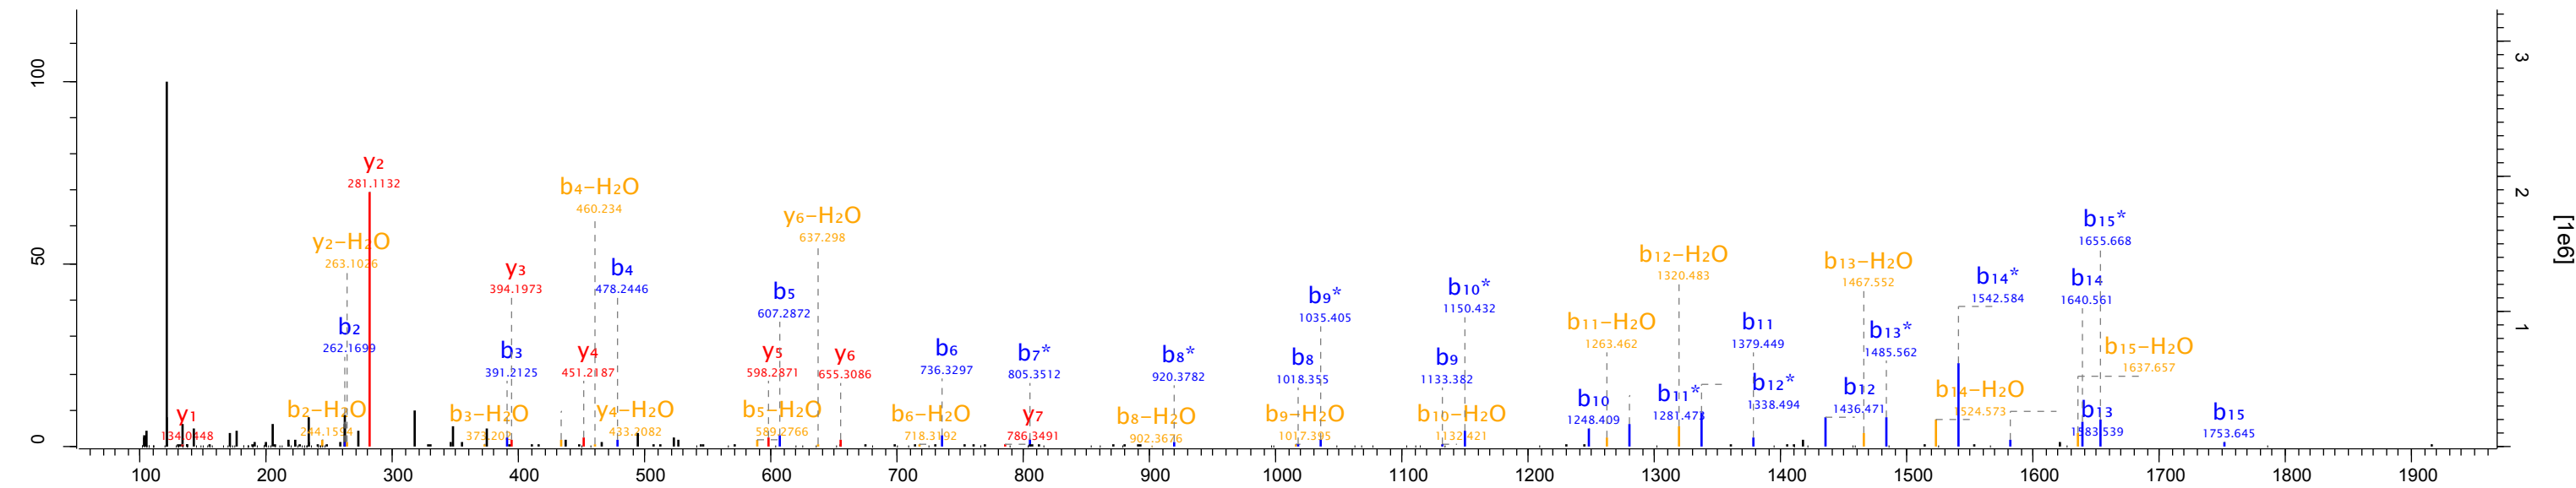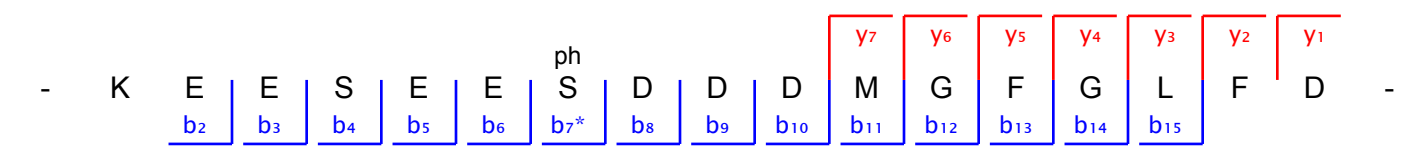

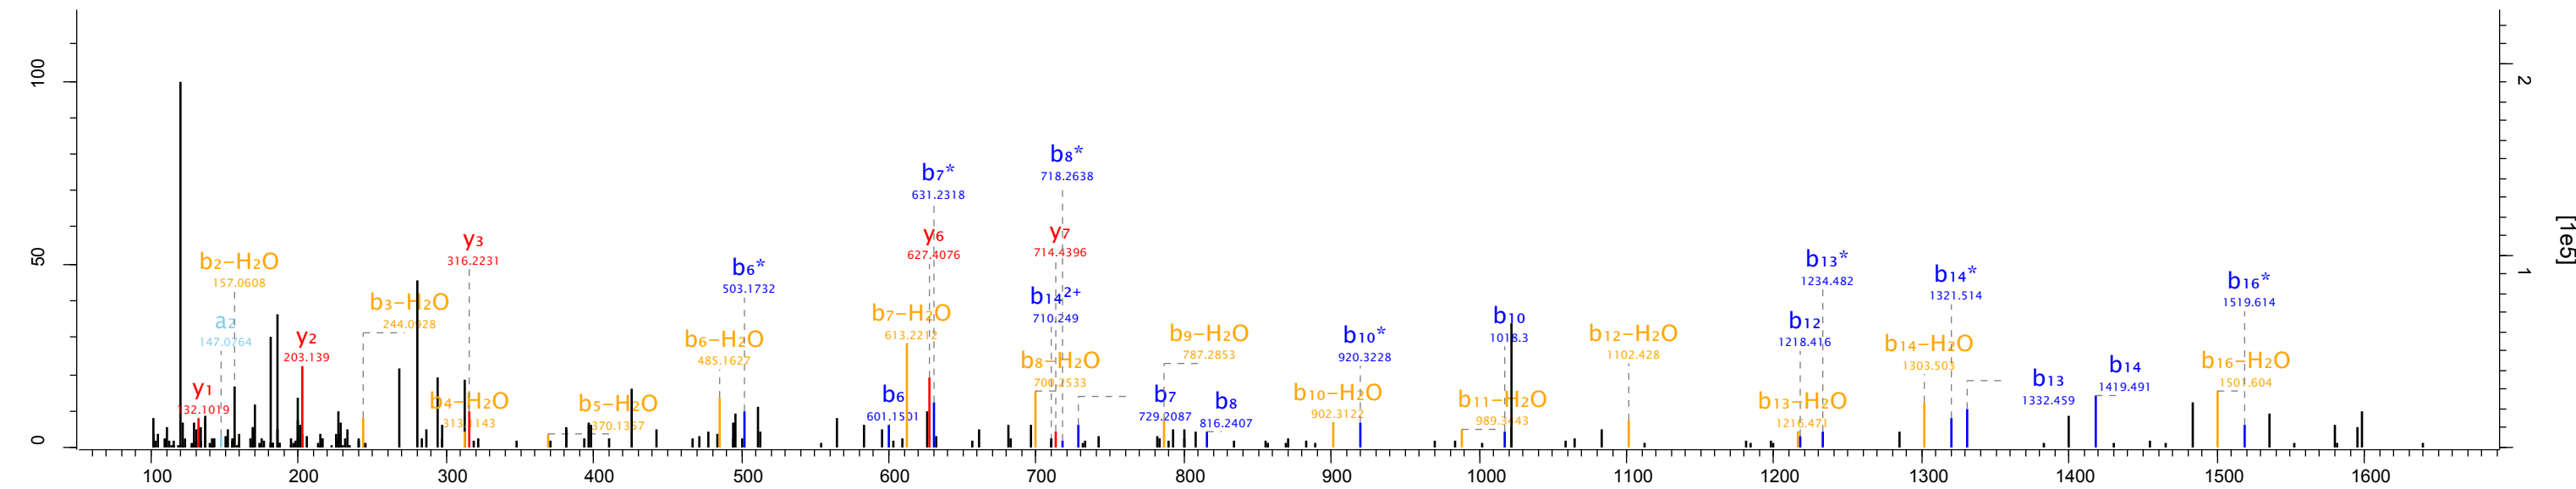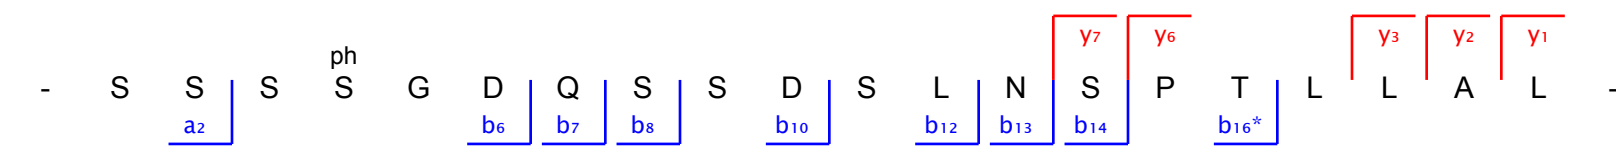

Raw file 20171215\_MaS\_33SR\_LMH\_phospho2\_03 Scan 2882 Method FTMS; HCD Score 72.58 m/z 508.72 Gene names TJP1

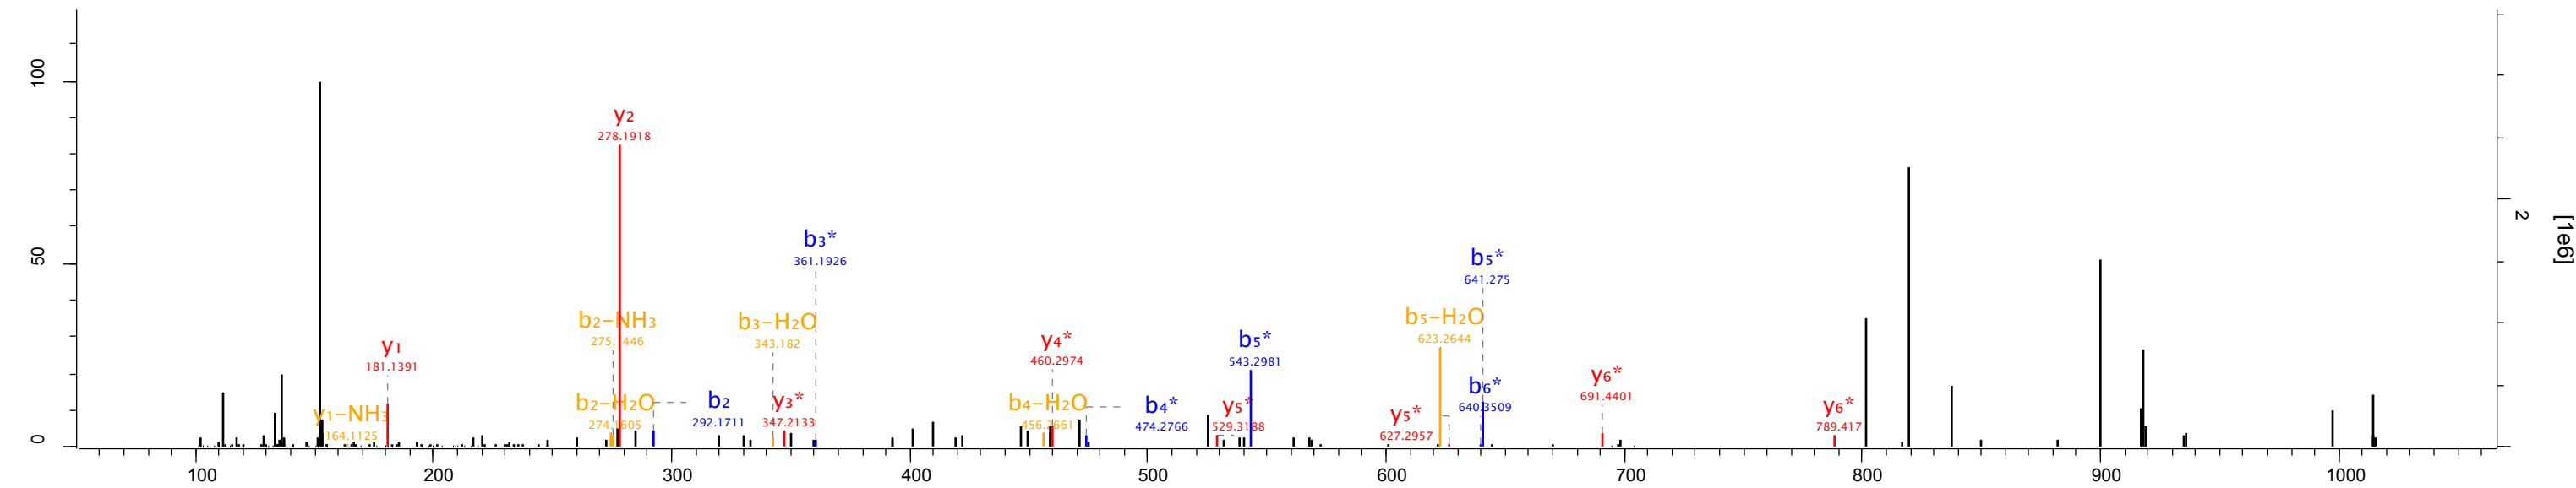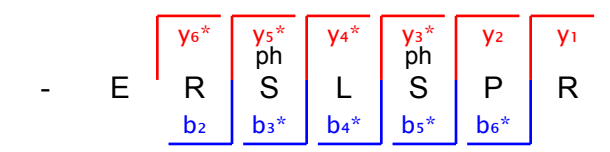



Raw file: 20171215\_MaS\_33SR\_LMH\_phospho2\_03  
 Scan: 2932 Method: FTMS; HCD Score: 338.02 m/z: 884.38 Gene names: PSIP1

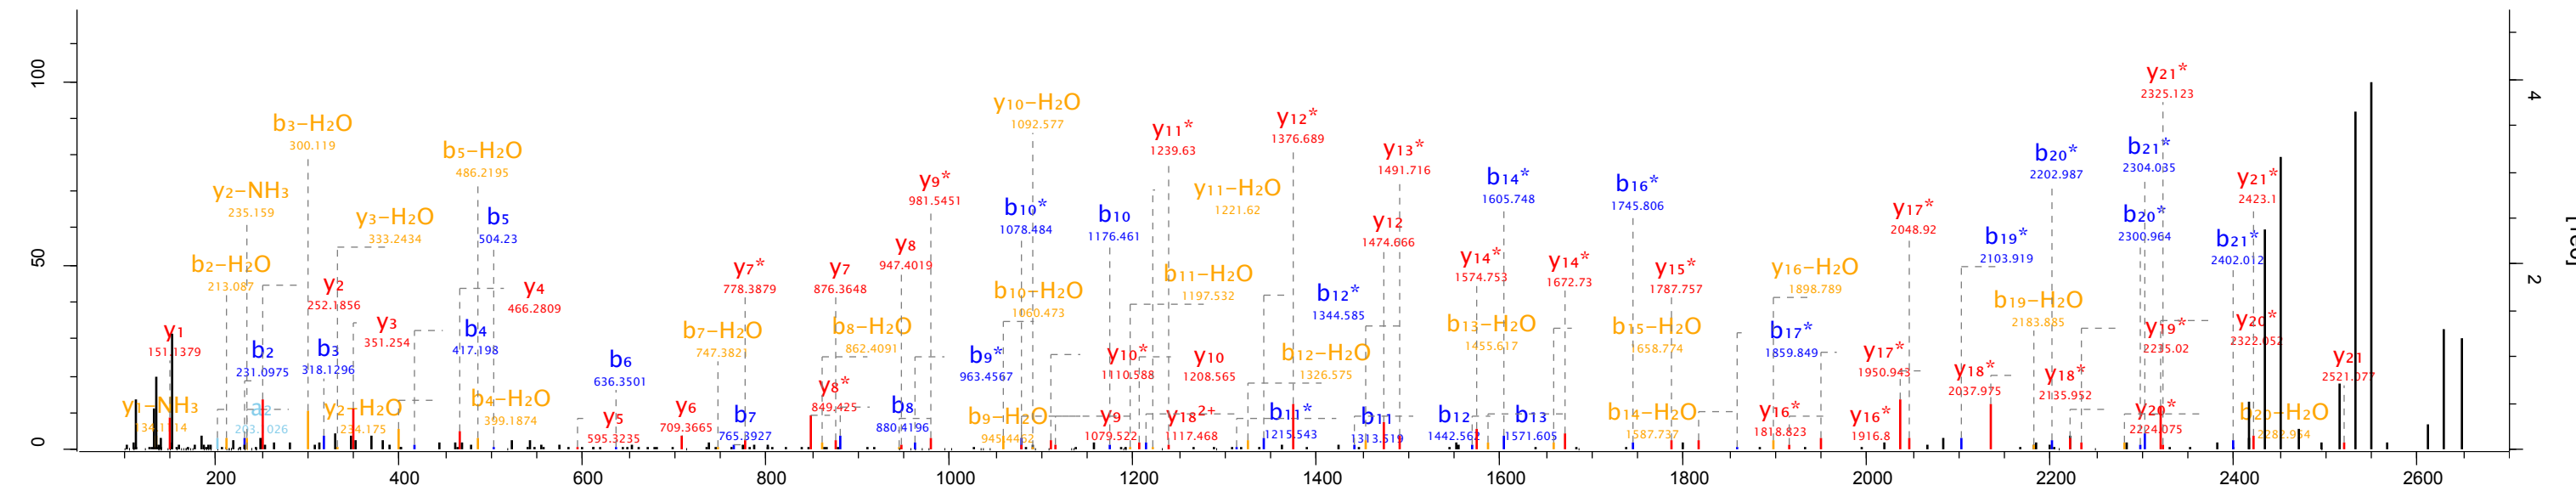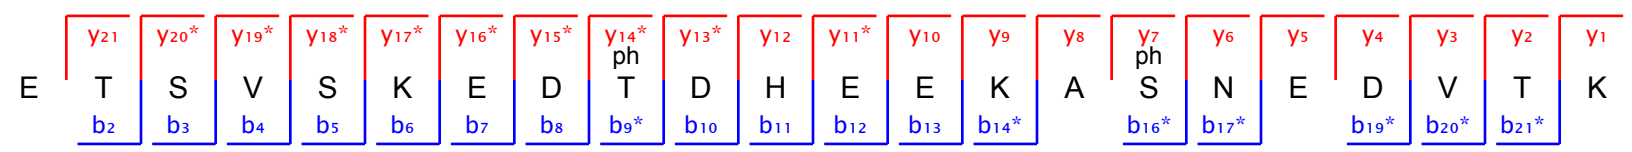

Raw file  
20171215\_MaS\_33SR\_LMH\_phospho2\_03

Scan Method Score m/z Gene names  
3212 FTMS; HCD 231.15 755.26 PRPF40A

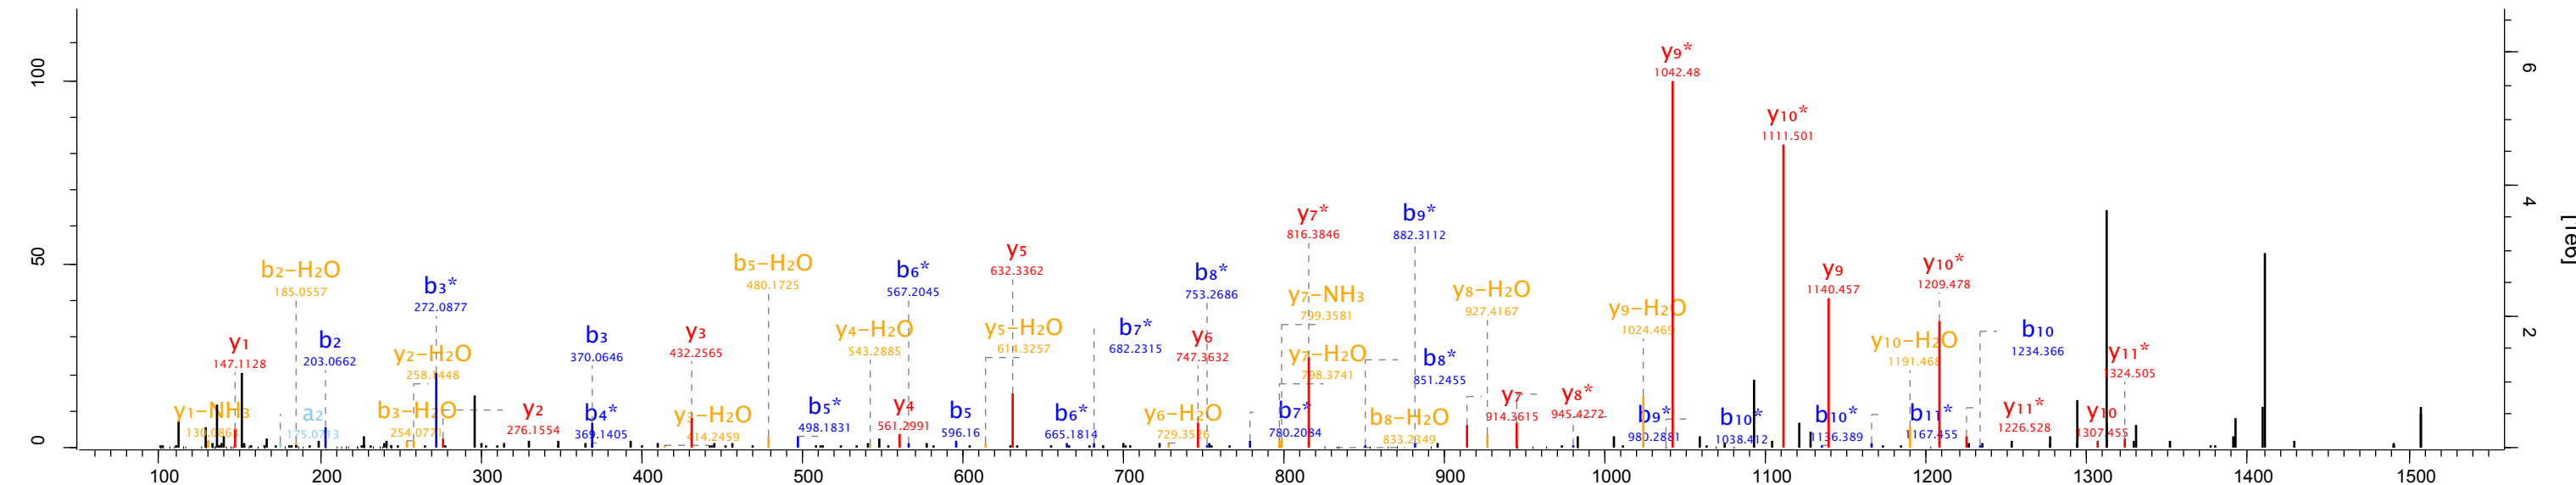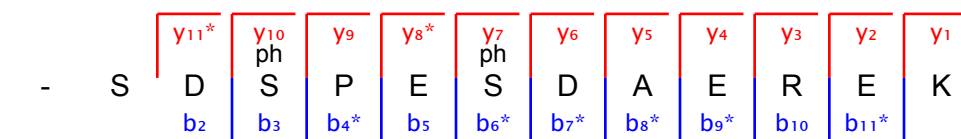

Raw file 20171215\_MaS\_33SR\_LMH\_phospho2\_03 Scan 3412 Method FTMS; HCD Score 84.94 m/z 671.81 Gene names ZFC3H1

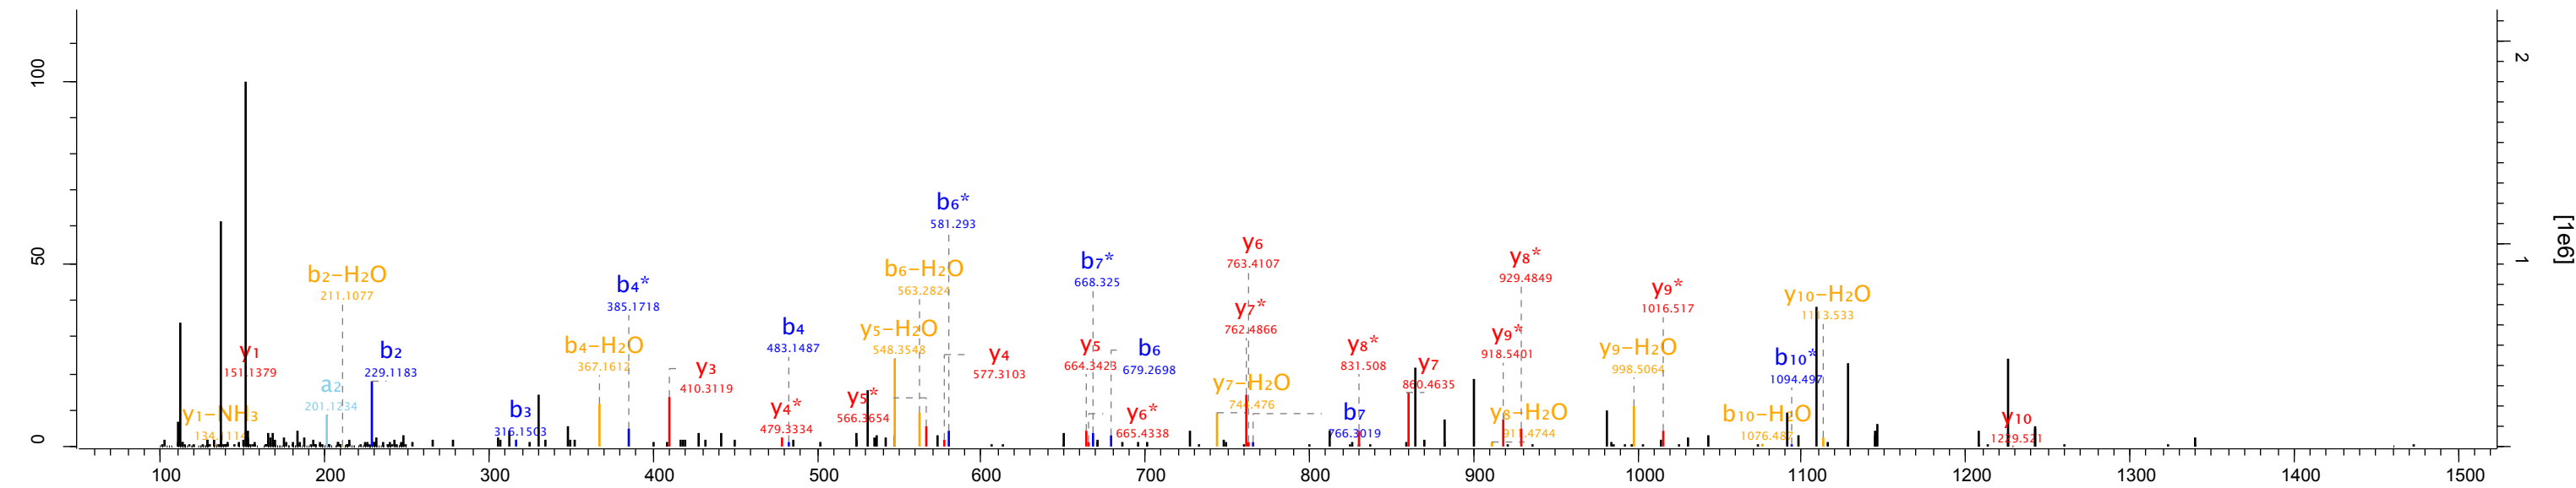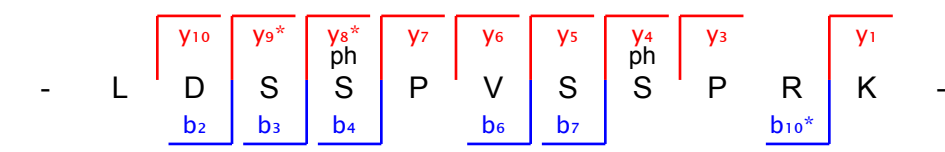

Raw file 20171215\_MaS\_33SR\_LMH\_phospho2\_03 Scan 3622 Method FTMS; HCD Score 76.01 m/z 427.17 Gene names SRRM2

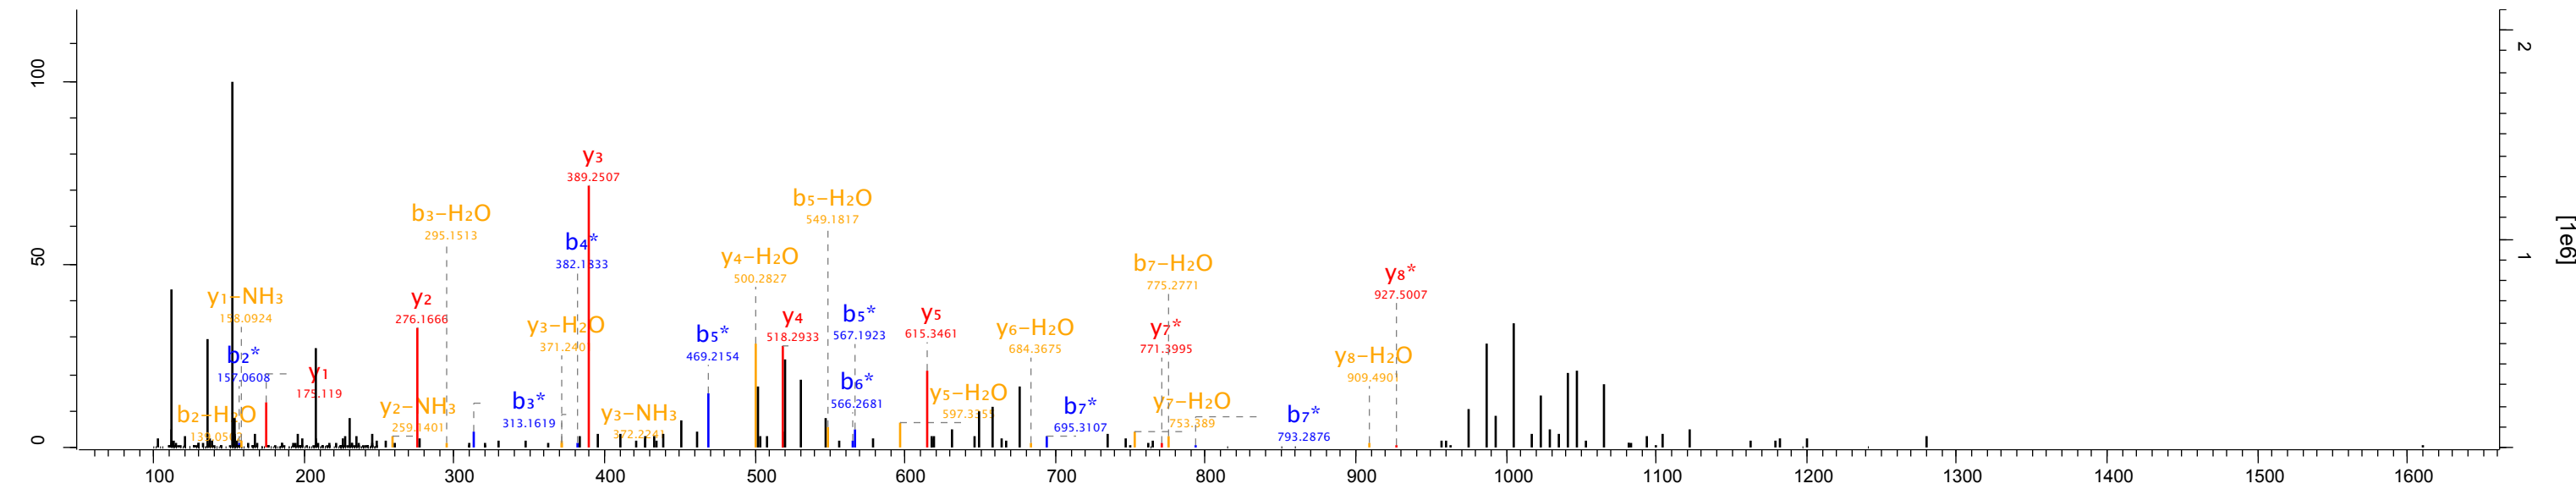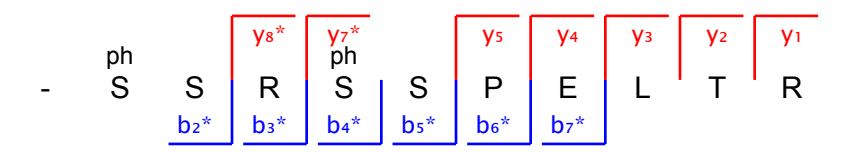

Raw file  
20171215\_MaS\_33SR\_LMH\_phospho2\_03

Scan 3922 Method FTMS; HCD Score 64.25 m/z 546.22 Gene names SRRM2

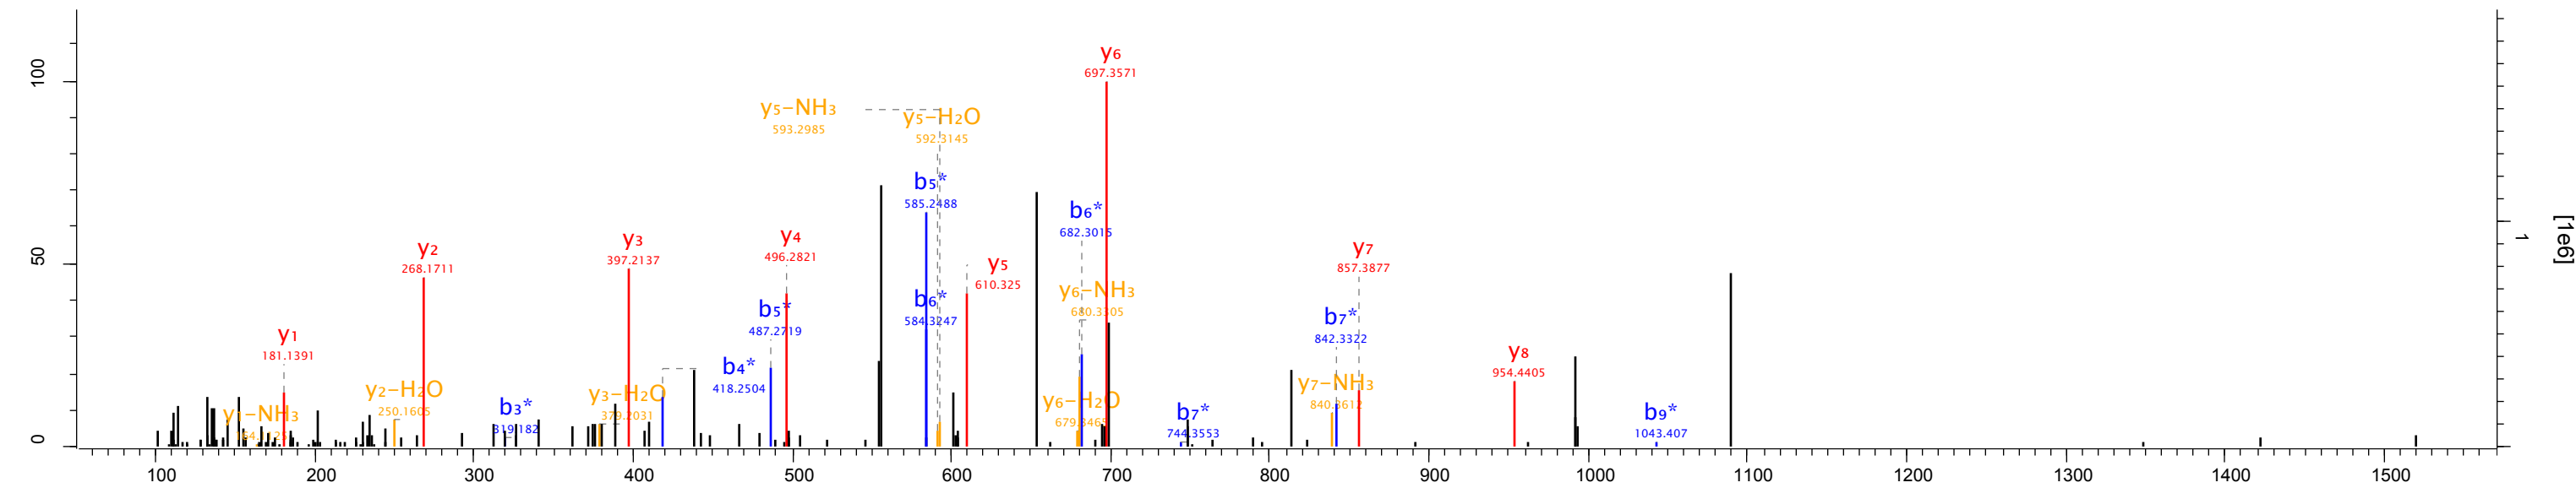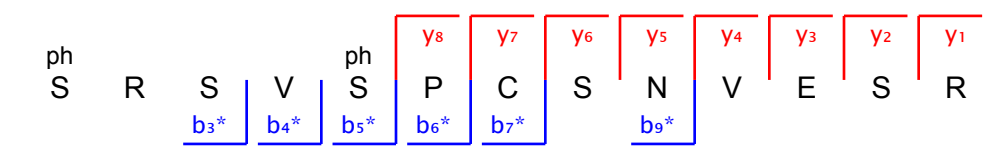

Raw file 20171215\_MaS\_33SR\_LMH\_phospho2\_03 Scan 4022 Method FTMS; HCD Score 56.57 m/z 585.75 Gene names GOLGA4

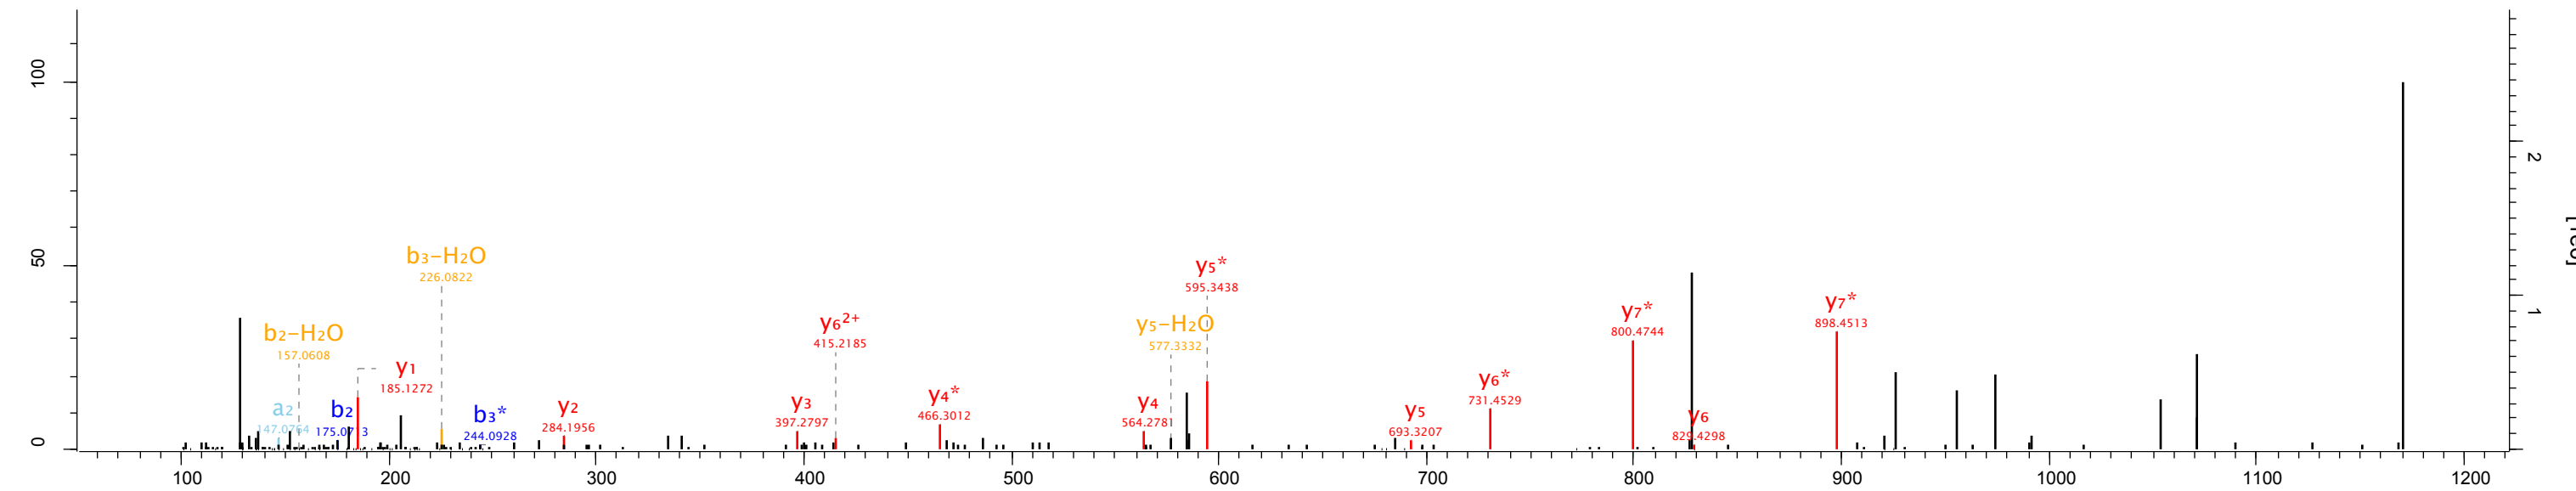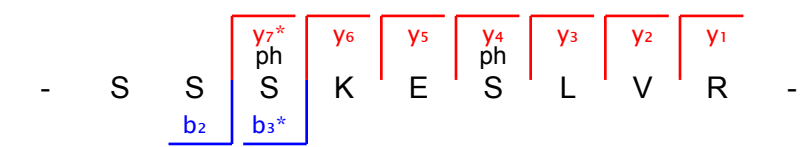

Raw file 20171215\_MaS\_33SR\_LMH\_phospho2\_03 Scan 4042 Method FTMS; HCD Score 60.62 m/z 473.24 Gene names ZNF592

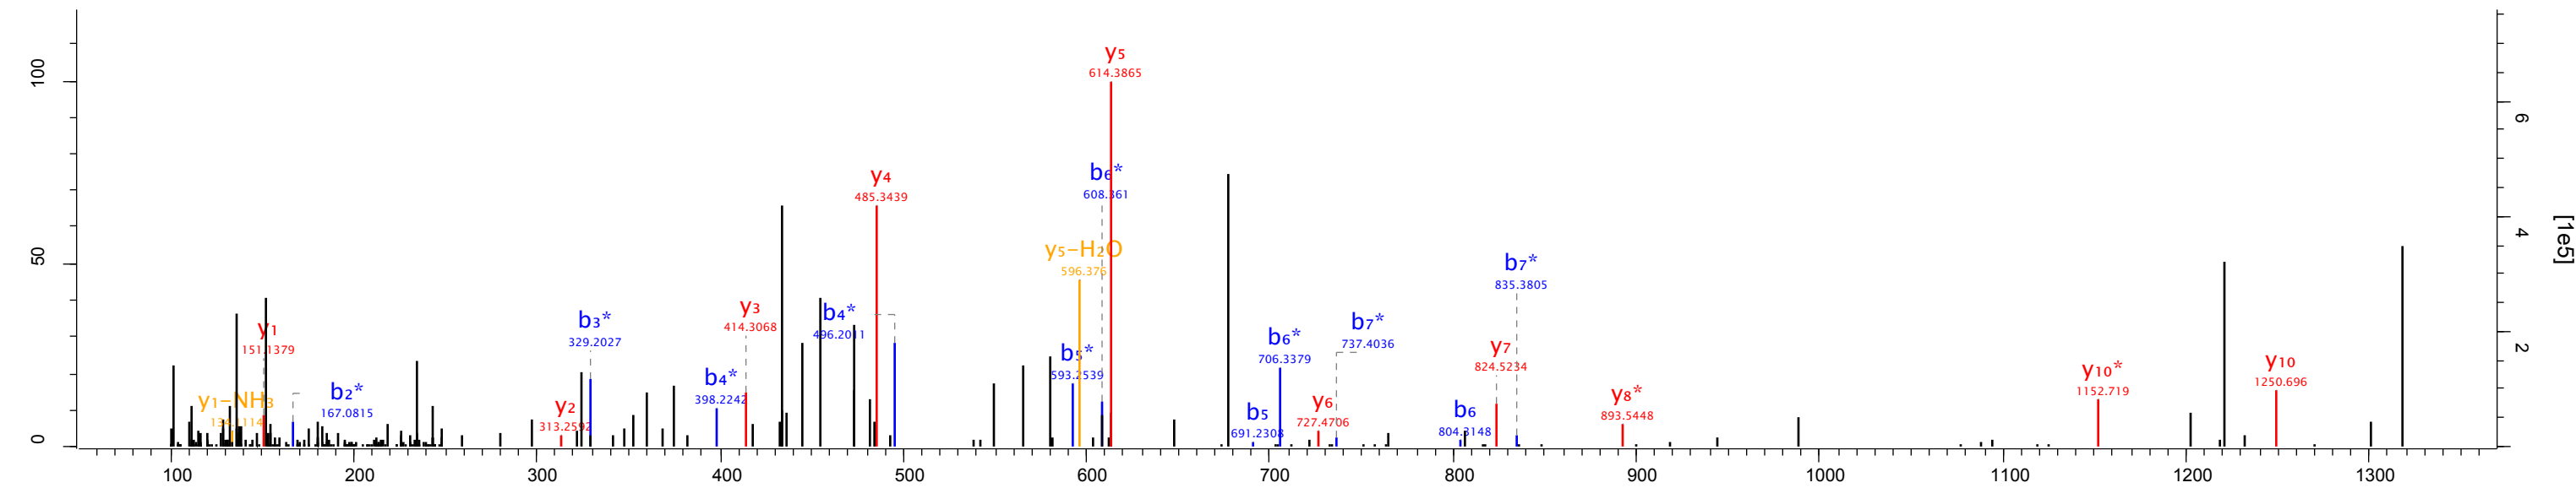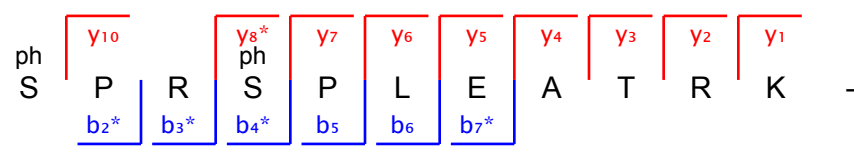

Raw file 20171215\_MaS\_33SR\_LMH\_phospho2\_03 Scan 4122 Method FTMS; HCD Score 72.93 m/z 959.37 Gene names RRP8

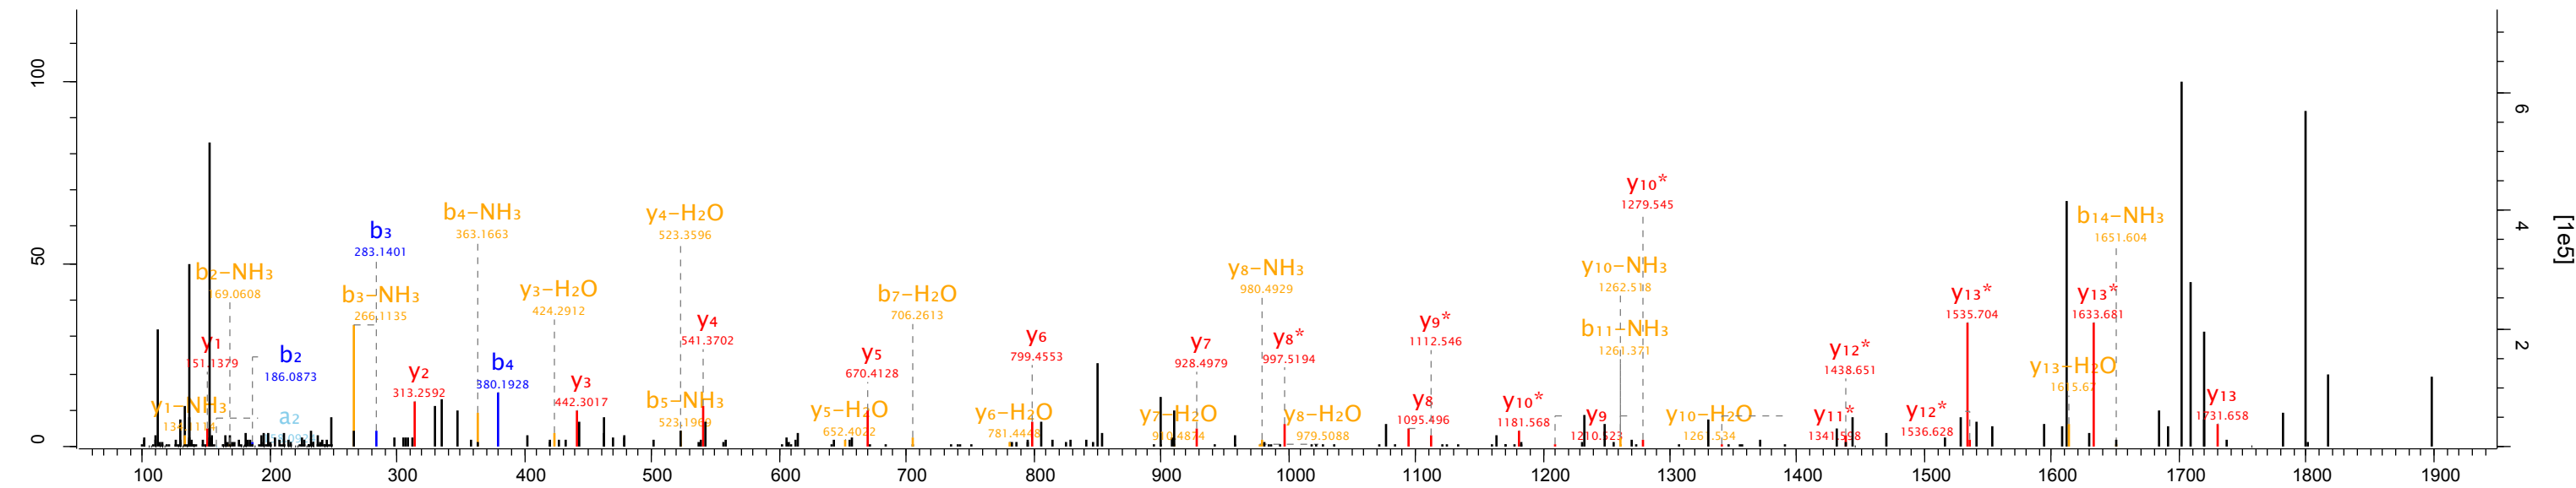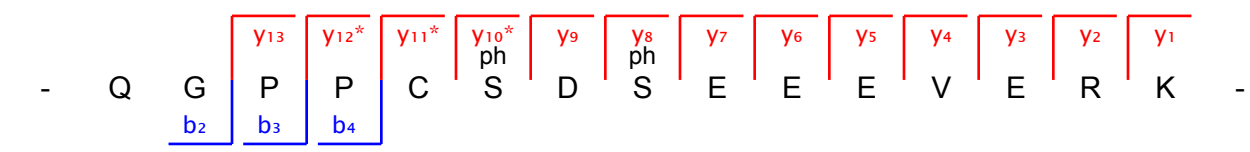



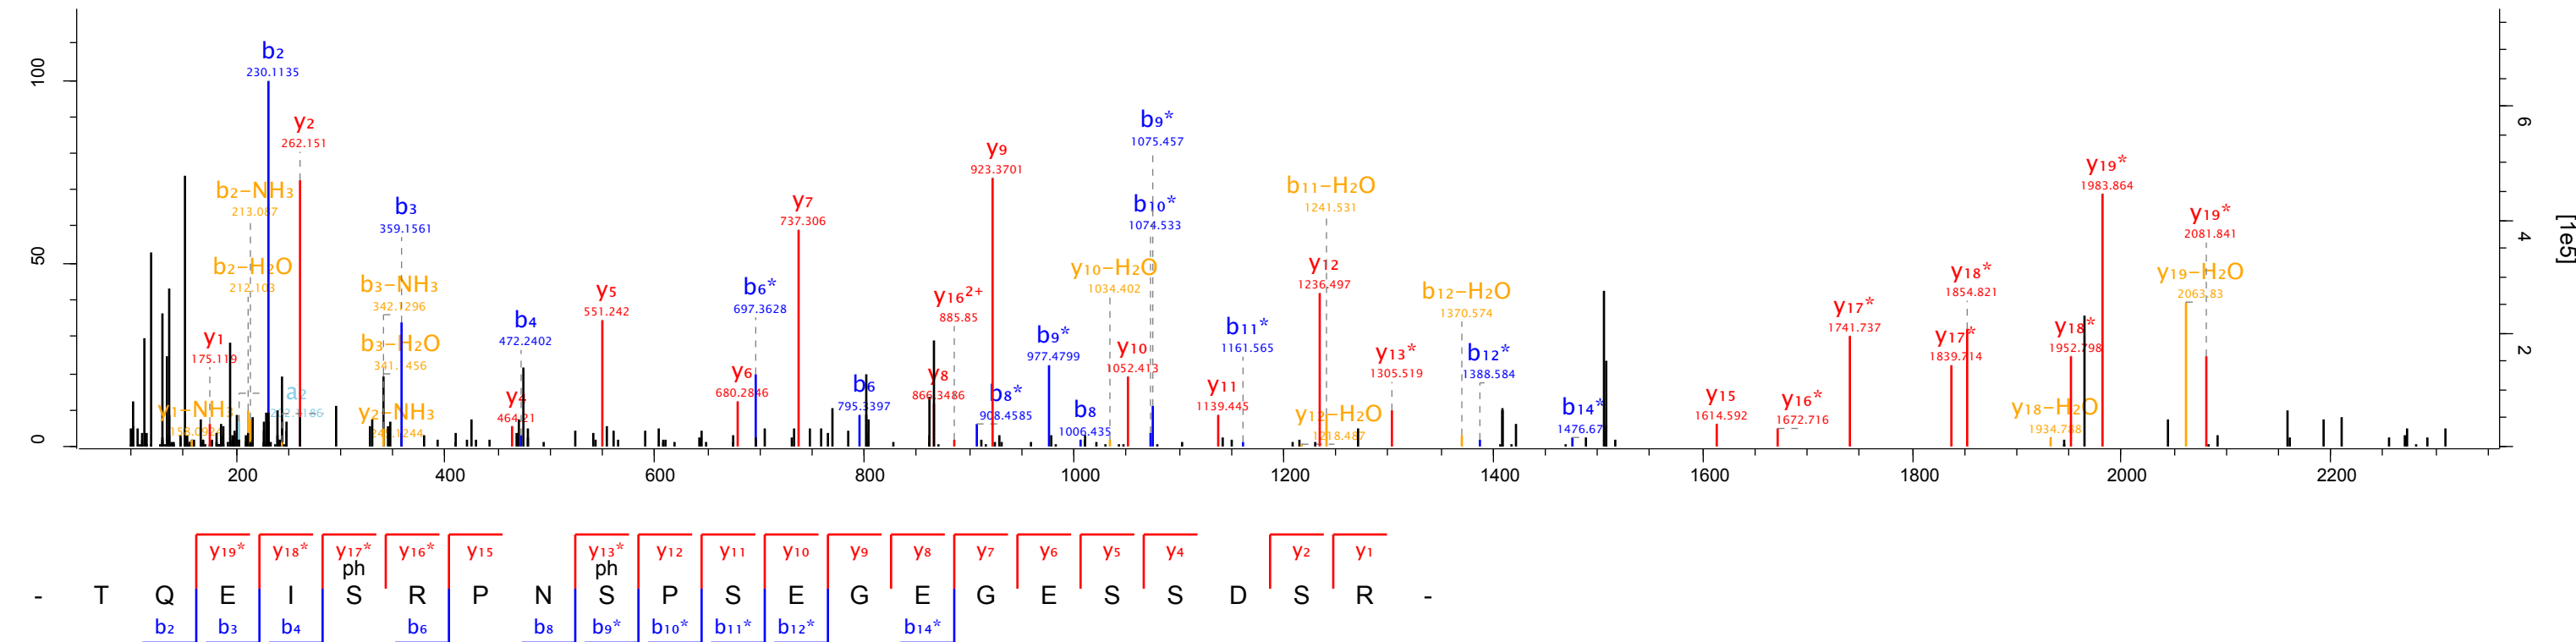

Raw file 20171215\_MaS\_33SR\_LMH\_phospho2\_03 Scan 4252 Method FTMS; HCD Score 163.84 m/z 744.8 Gene names FKBP4

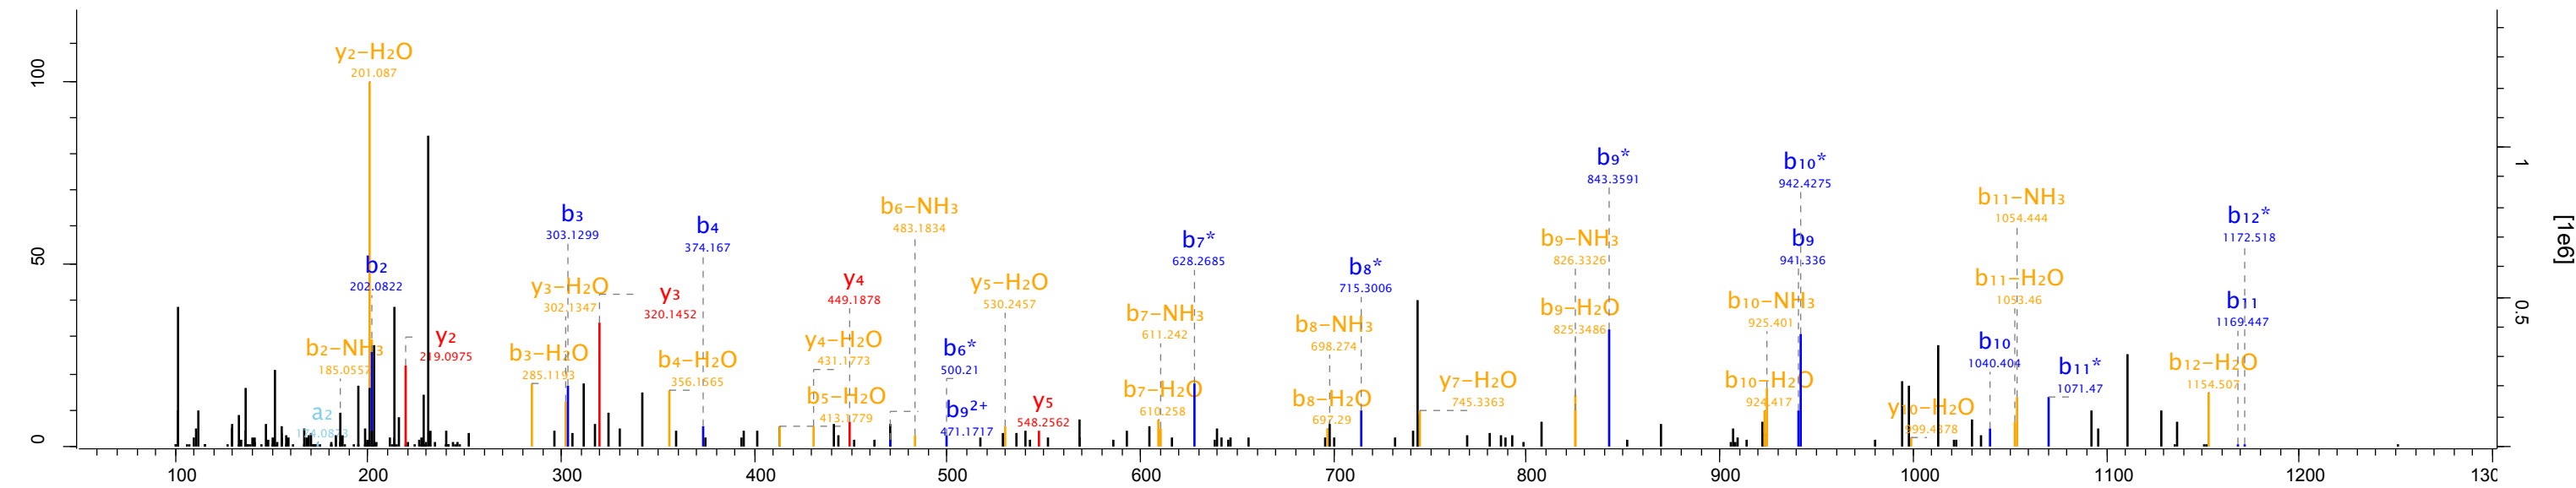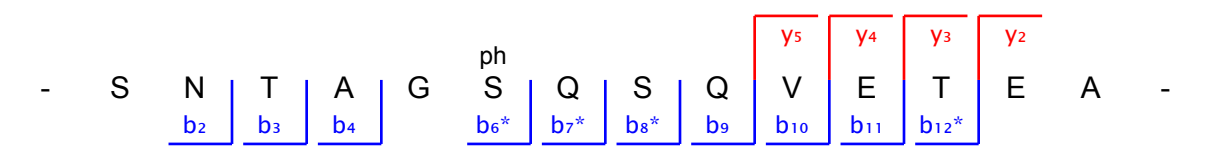

Raw file: 20171215\_MaS\_33SR\_LMH\_phospho2\_03  
 Scan: 4282 Method: FTMS; HCD Score: 222.24 m/z: 850.33 Gene names: EEF2K

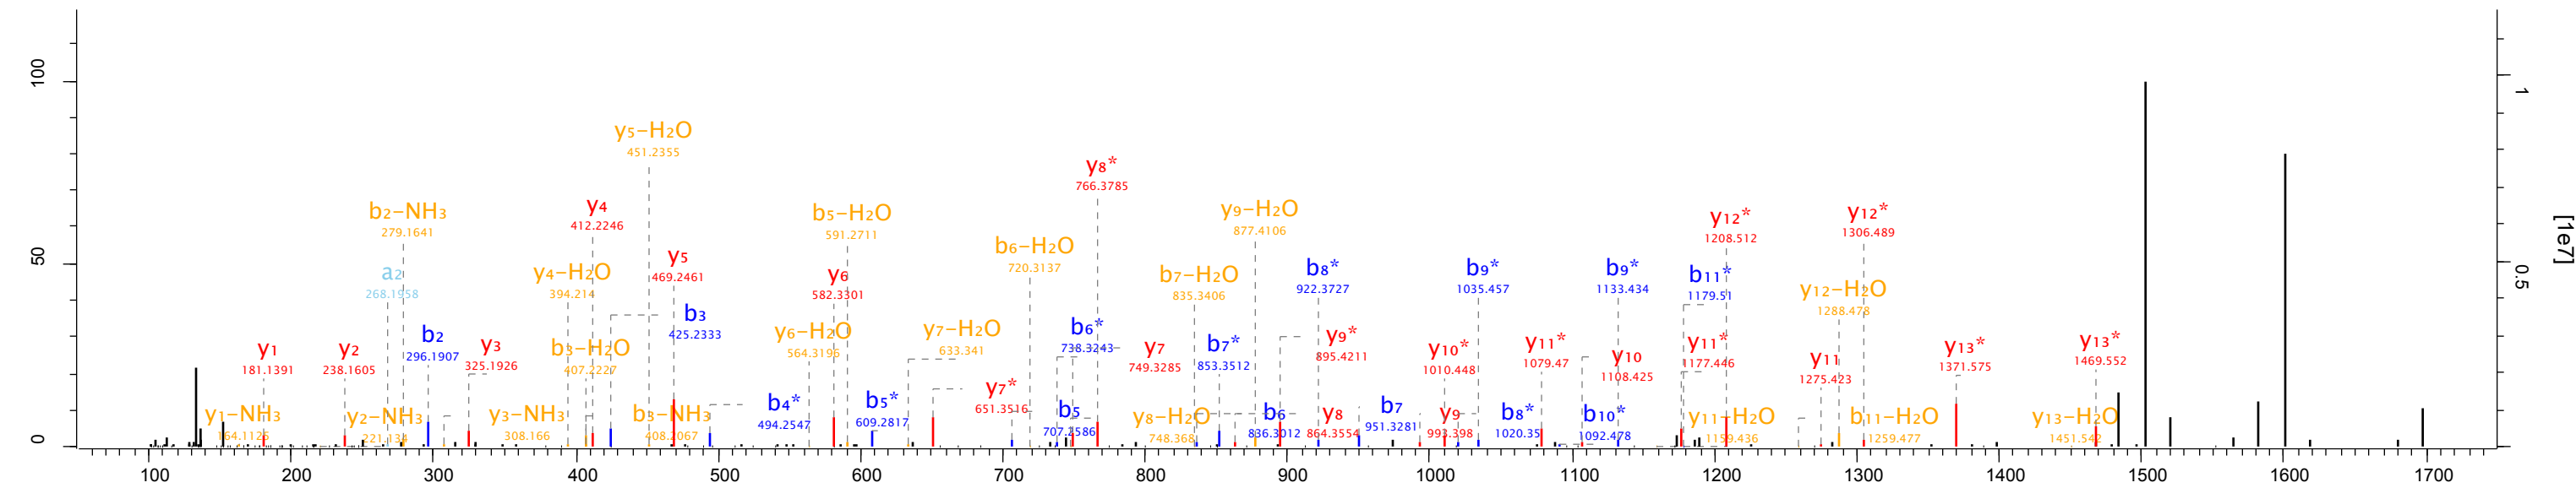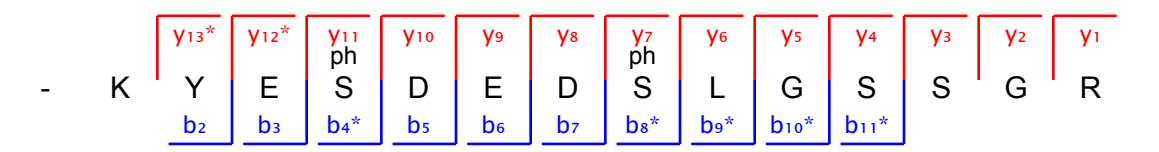

Raw file: 20171215\_MaS\_33SR\_LMH\_phospho2\_03  
 Scan: 4572 Method: FTMS; HCD Score: 118.24 m/z: 544.22 Gene names: STXBP5

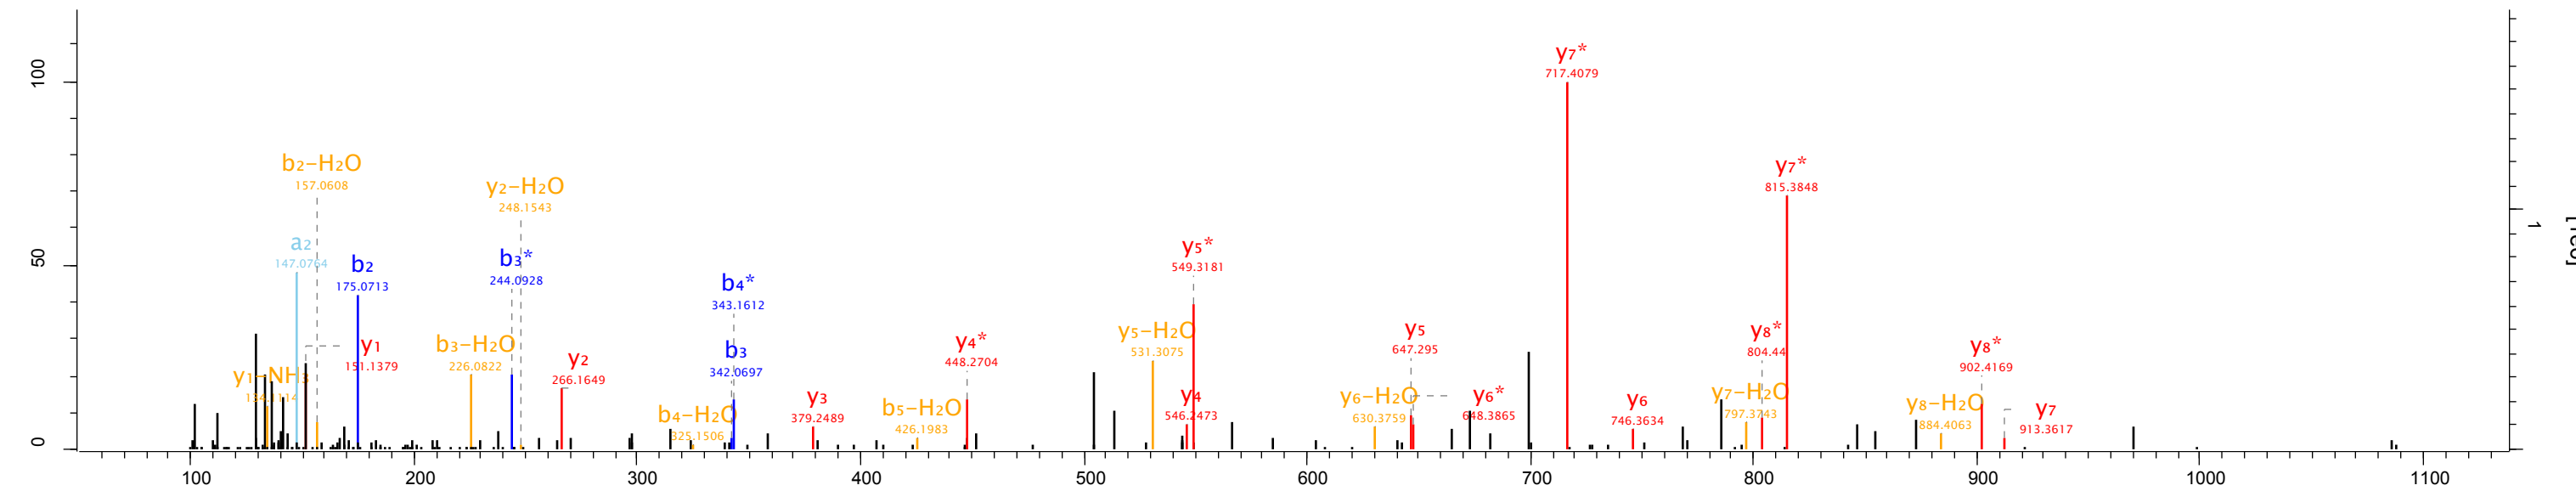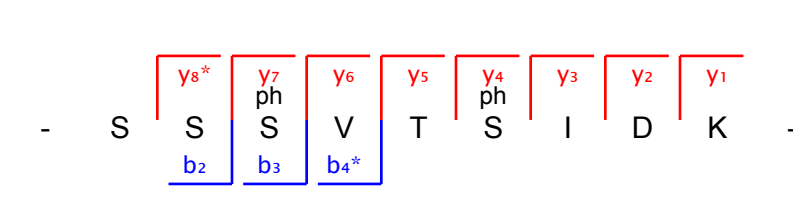

Raw file  
20171215\_MaS\_33SR\_LMH\_phospho2\_03

Scan Method Score m/z Gene names  
4822 FTMS; HCD 200.71 752.36 ZNF638

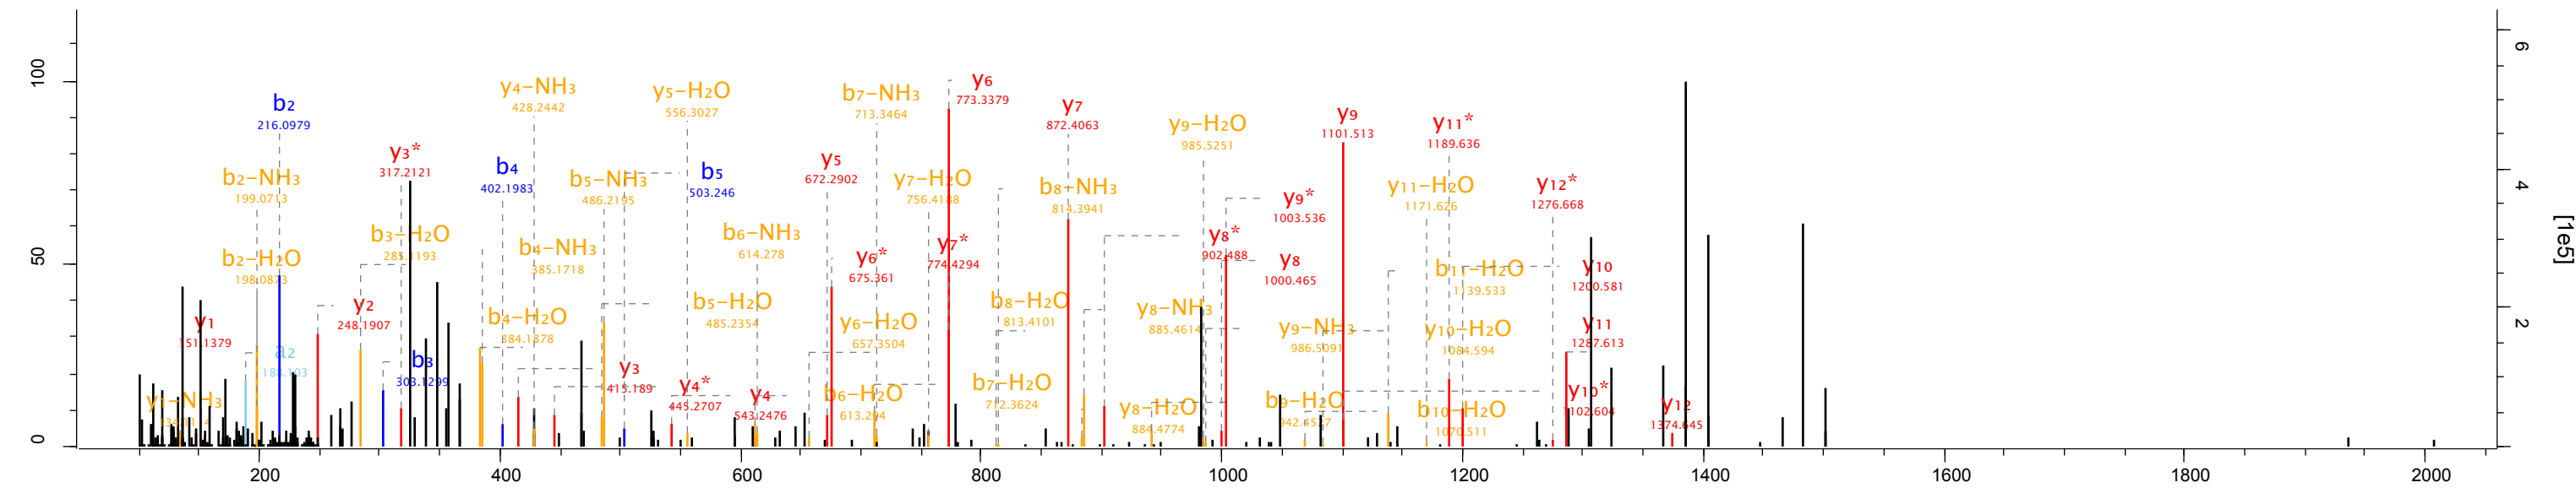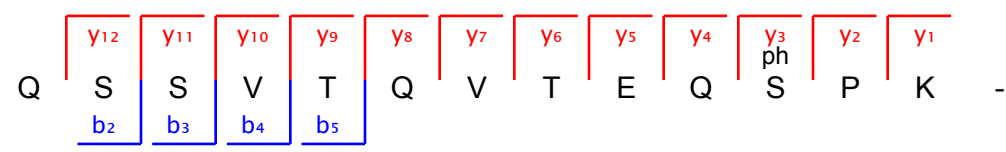

Raw file  
20171215\_MaS\_33SR\_LMH\_phospho2\_03

Scan 5222 Method FTMS; HCD Score 196.19 m/z 753.03 Gene names SCAF1

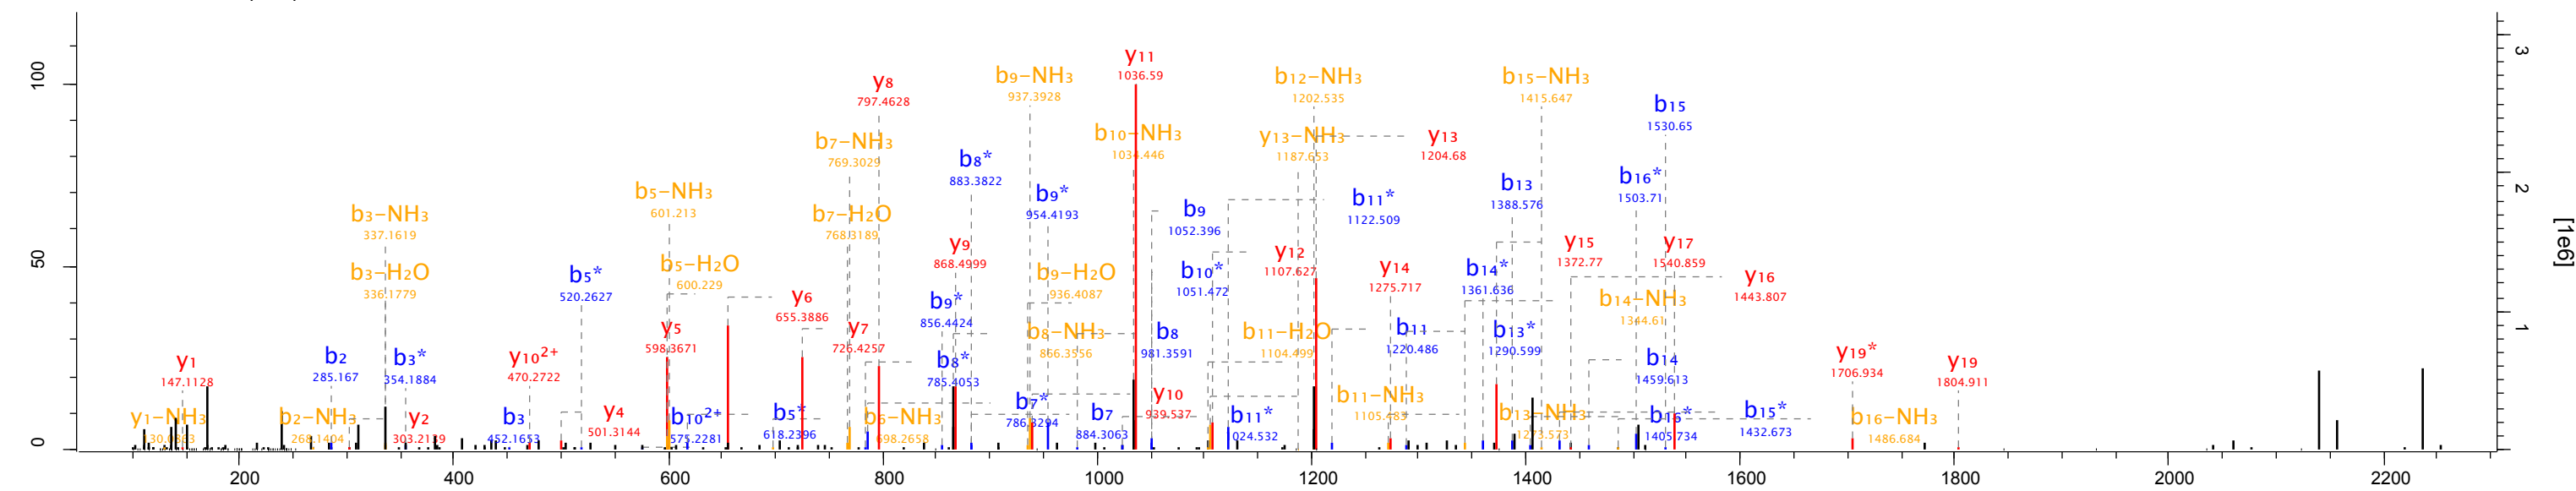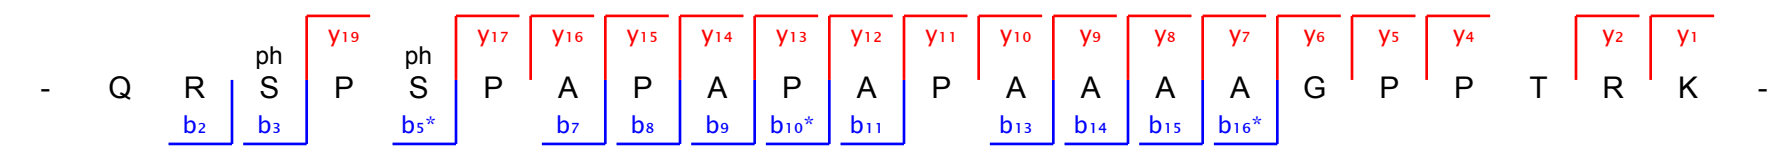

Raw file: 20171215\_MaS\_33SR\_LMH\_phospho2\_03  
 Scan: 5532 Method: FTMS; HCD Score: 224.12 m/z: 908.42 Gene names: NAV3

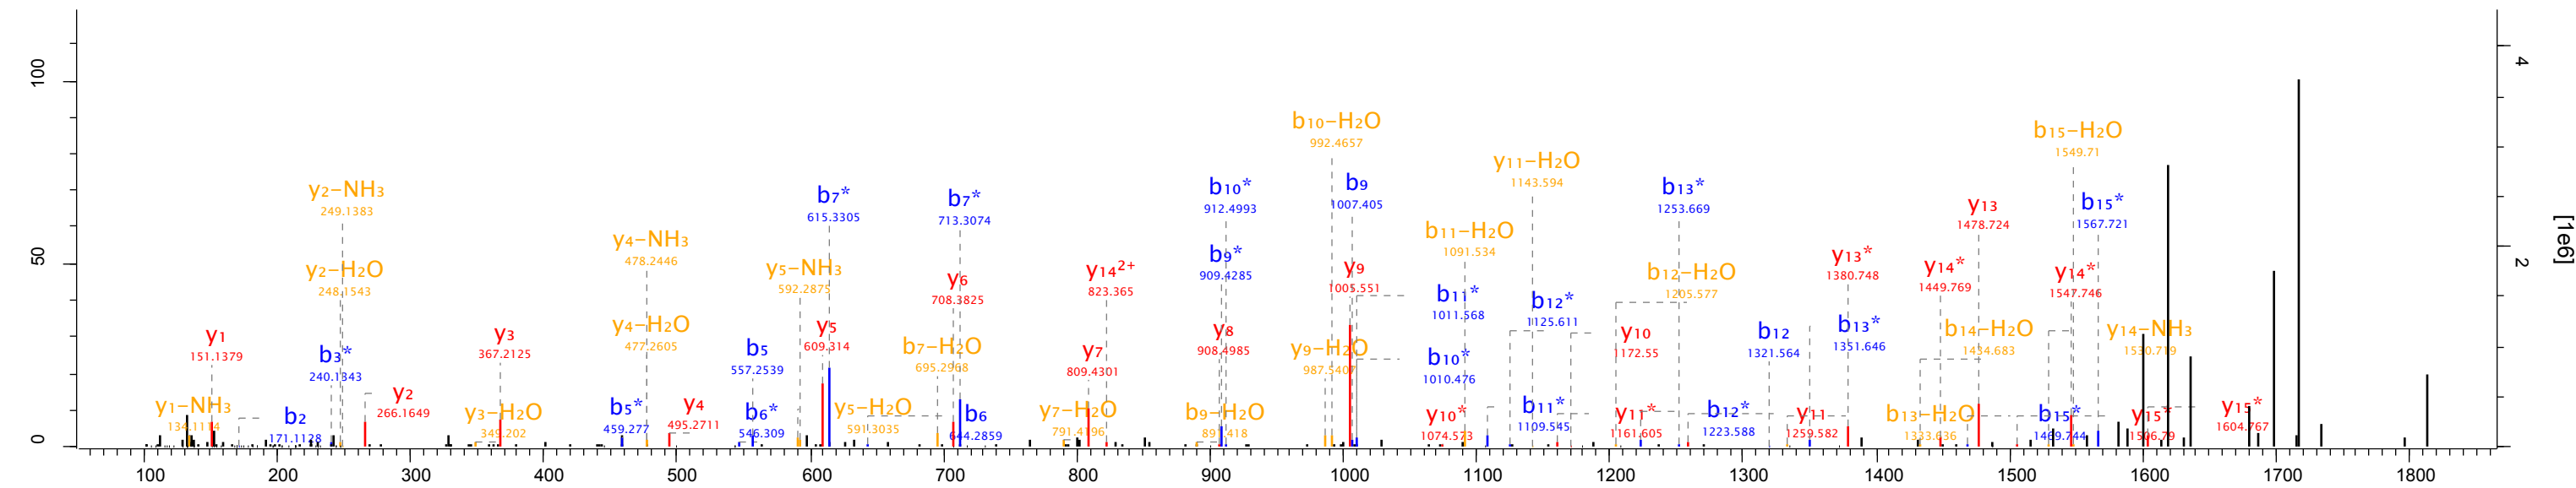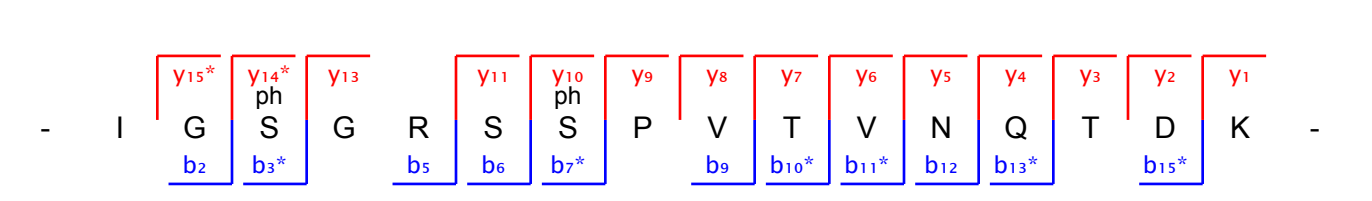

Raw file: 20171215\_MaS\_33SR\_LMH\_phospho2\_03  
 Scan: 5852 Method: FTMS; HCD Score: 52.5 m/z: 626.75 Gene names: CAMSAP2

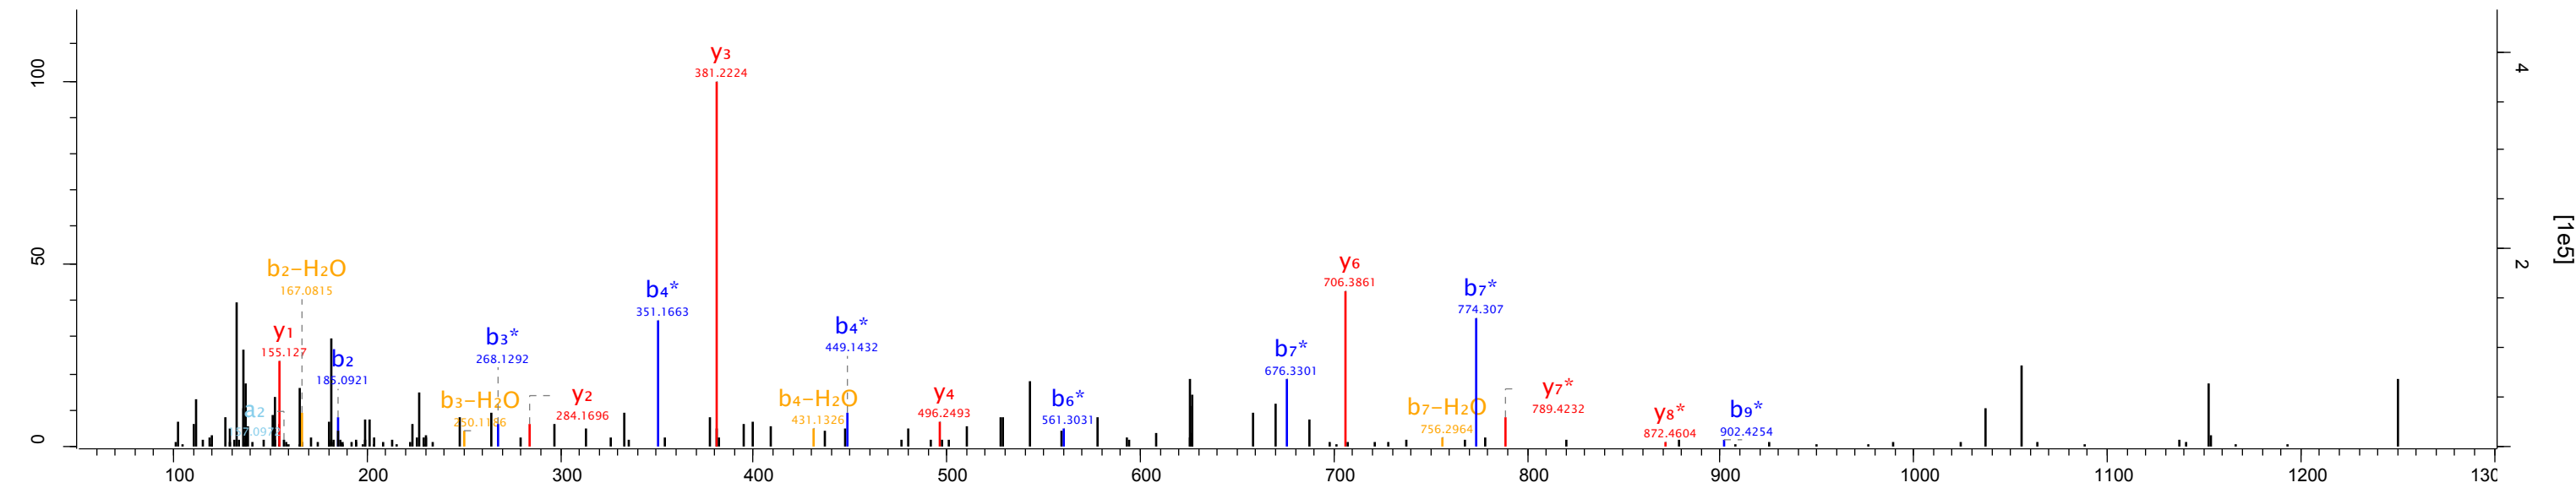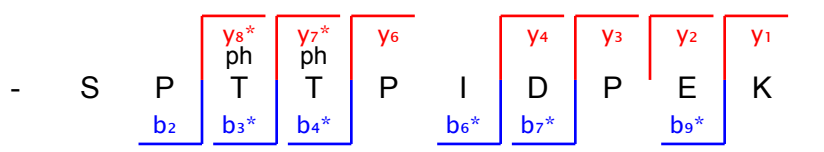



Raw file 20171215\_MaS\_33SR\_LMH\_phospho2\_03 Scan 5972 Method FTMS; HCD Score 168.46 m/z 900.41 Gene names DDX21

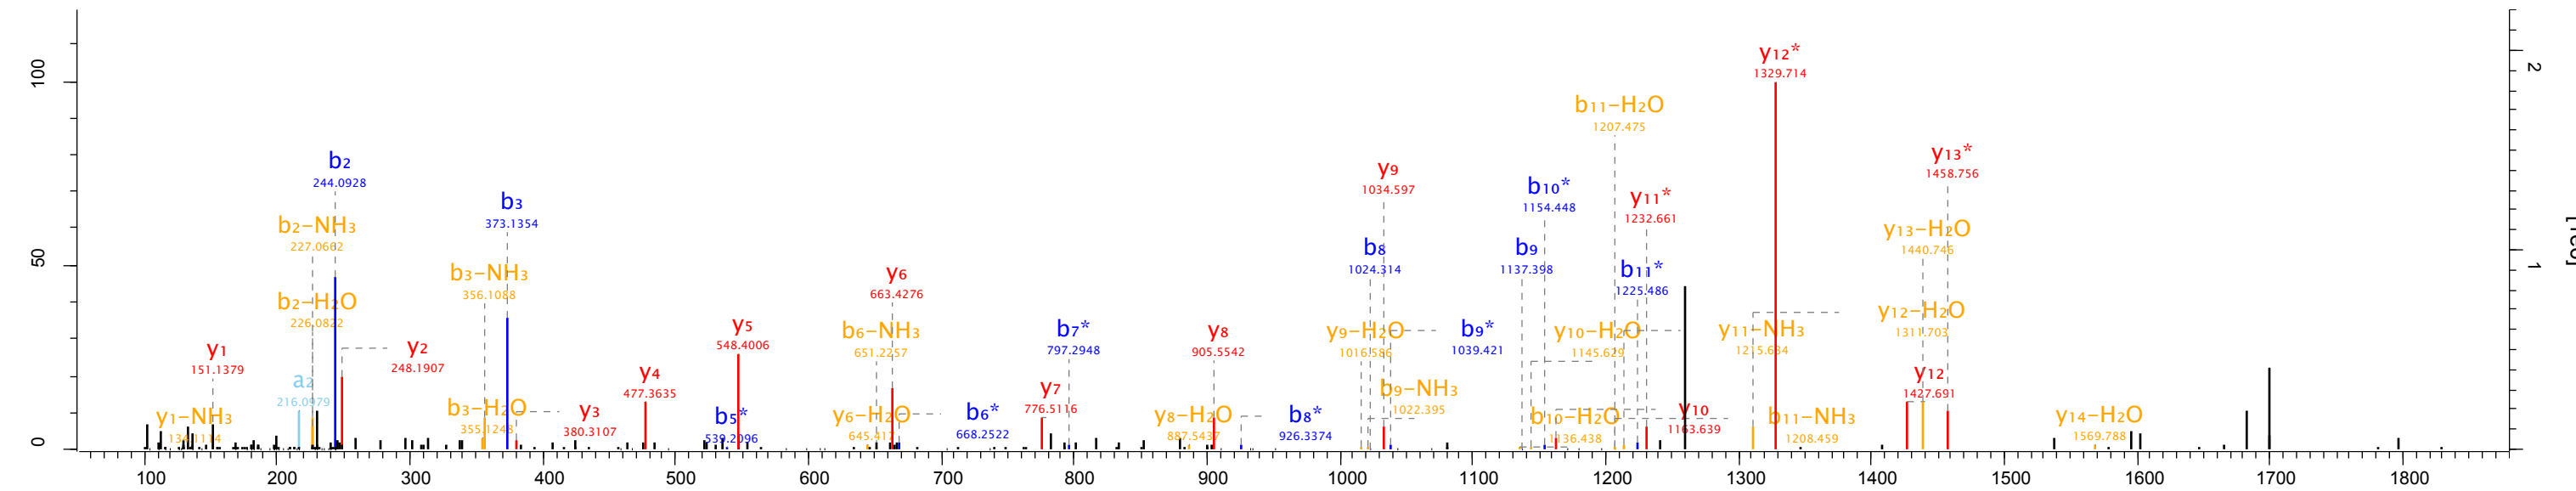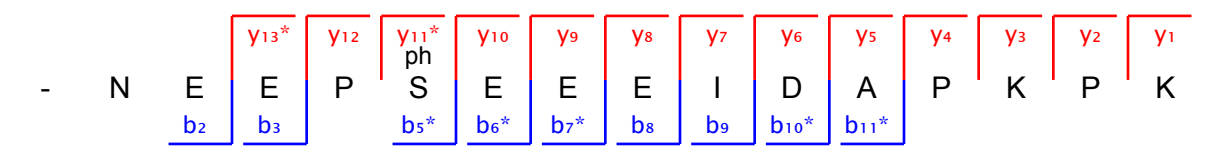

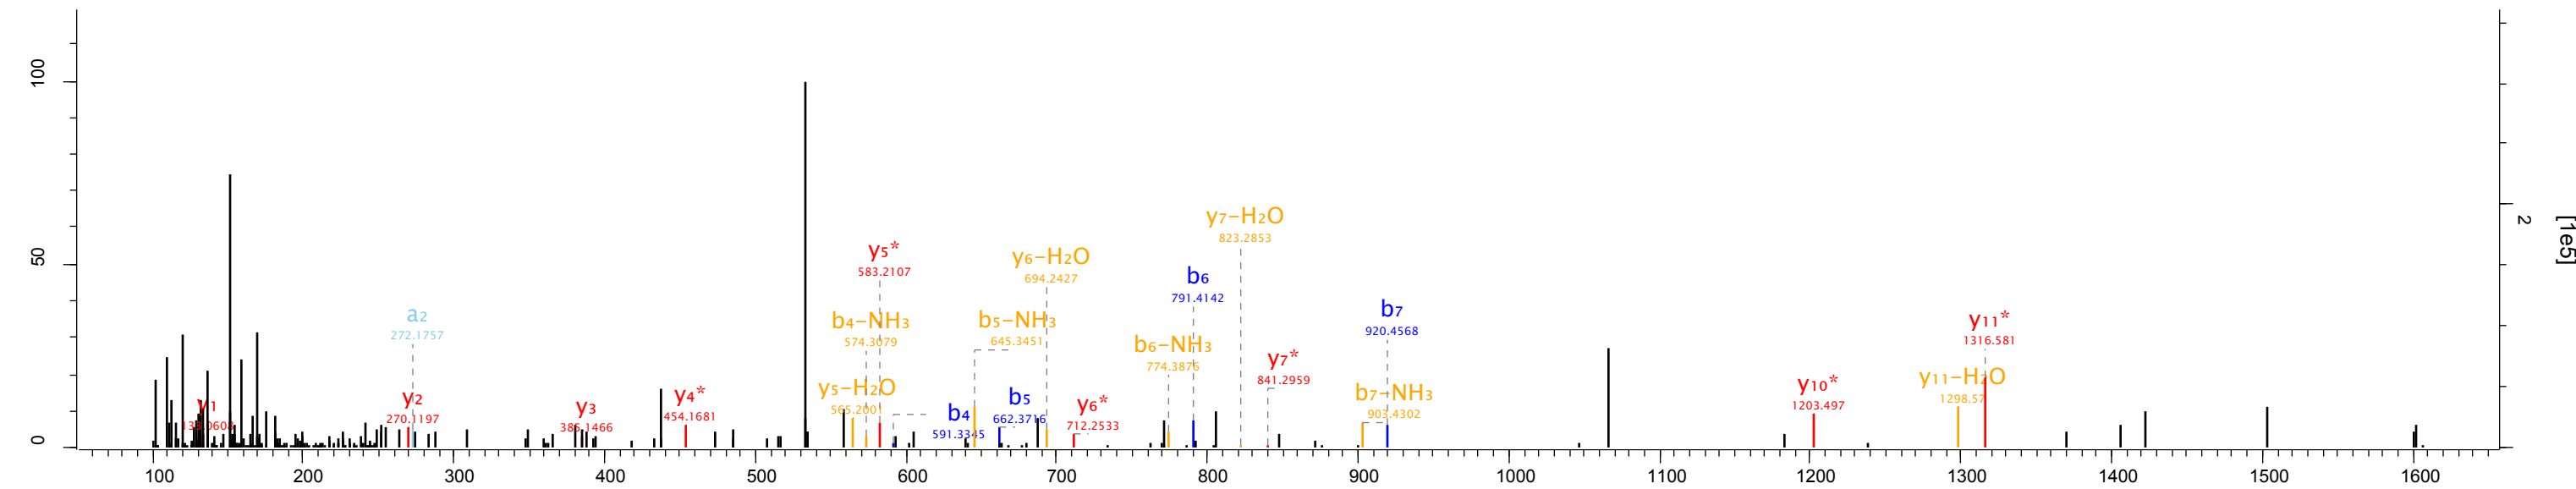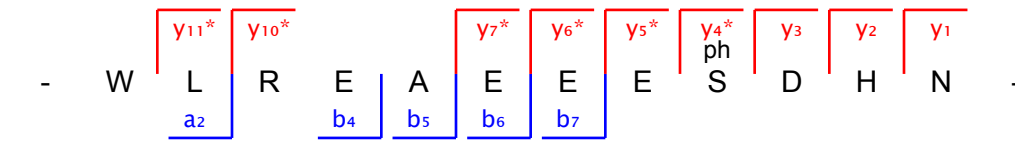

20171215\_MaS\_33SR\_LMH\_phospho2\_03 6342 FTMS; HCD 208.28 833.32 HIRIP3

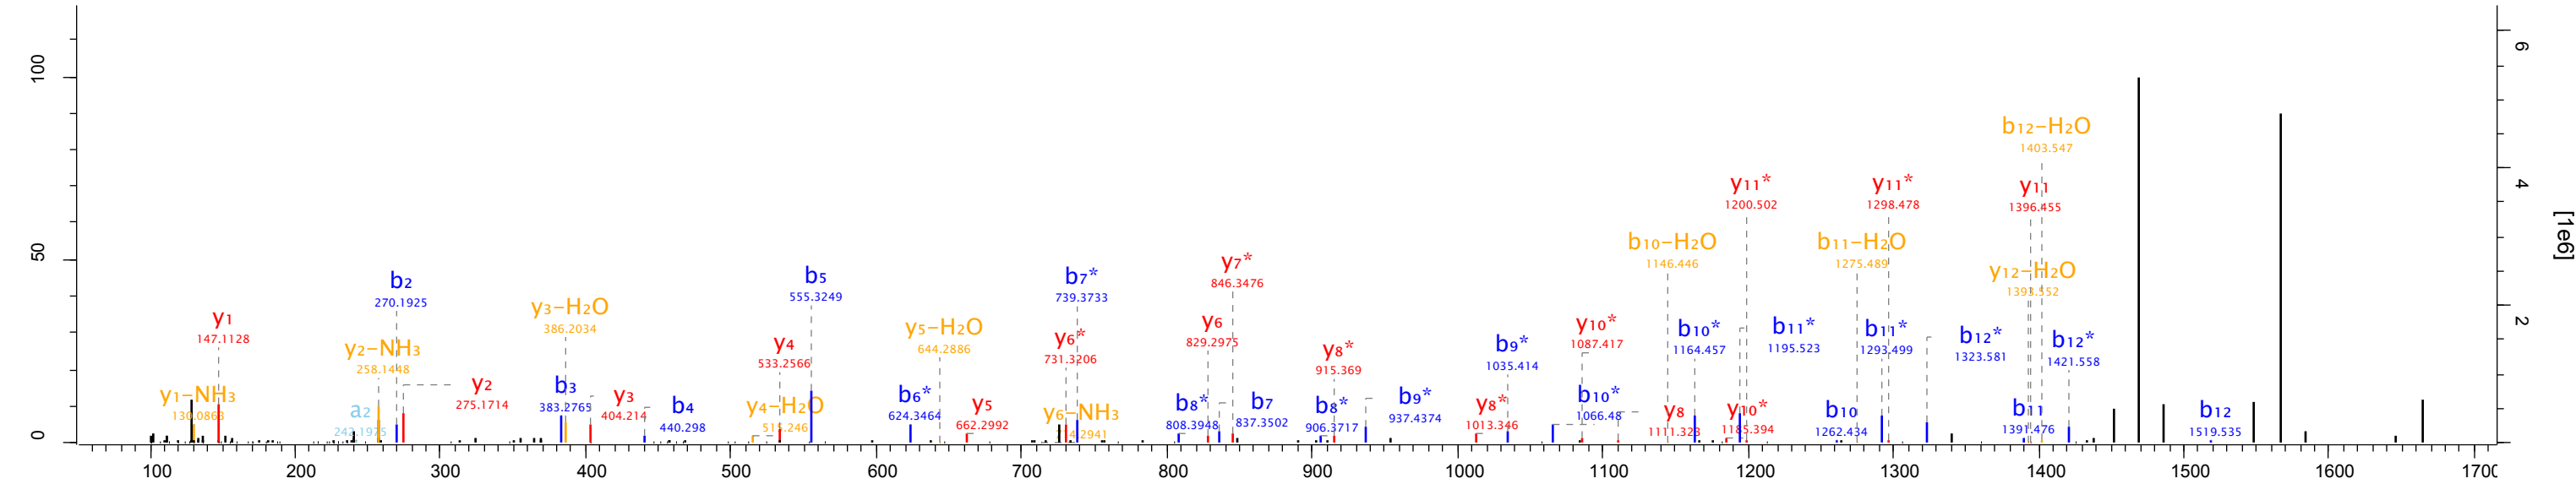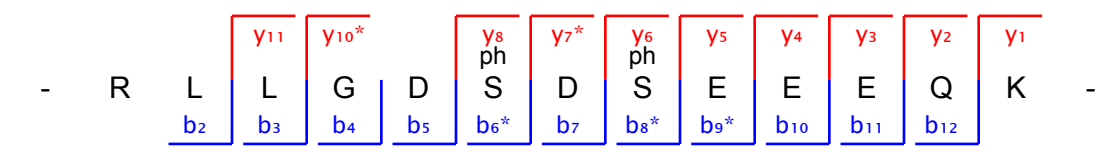

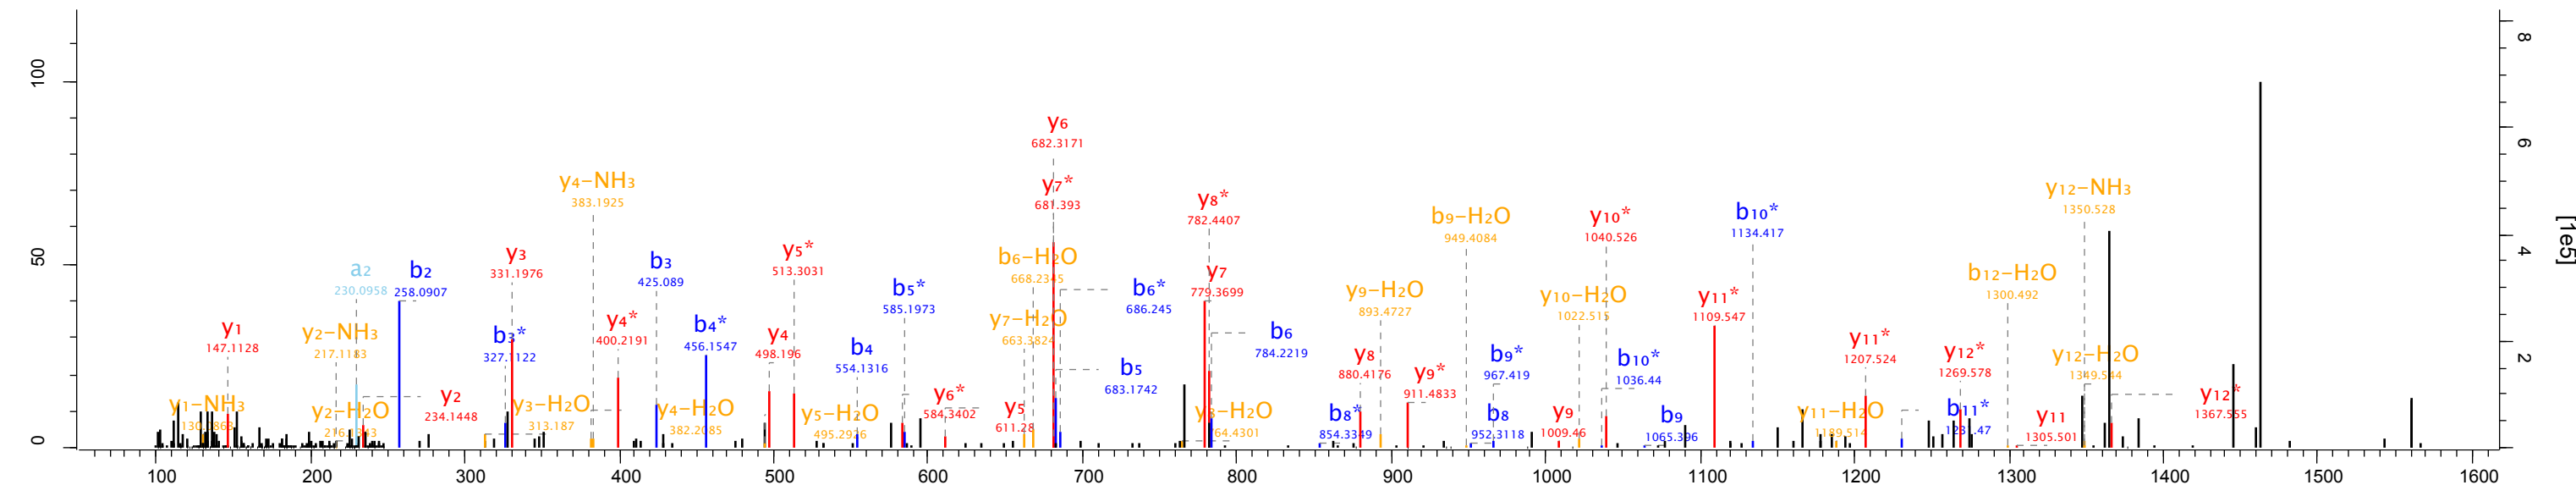

- P C S E E T P A I S P S K -

Fragmentation mapping (b and y ions):

- Red boxes (y ions): y12\*, y11 ph, y10\*, y9, y8, y7, y6, y5, y4 ph, y3, y2, y1
- Blue boxes (b ions): b2, b3, b4, b5, b6, b8, b9, b10\*, b11\*

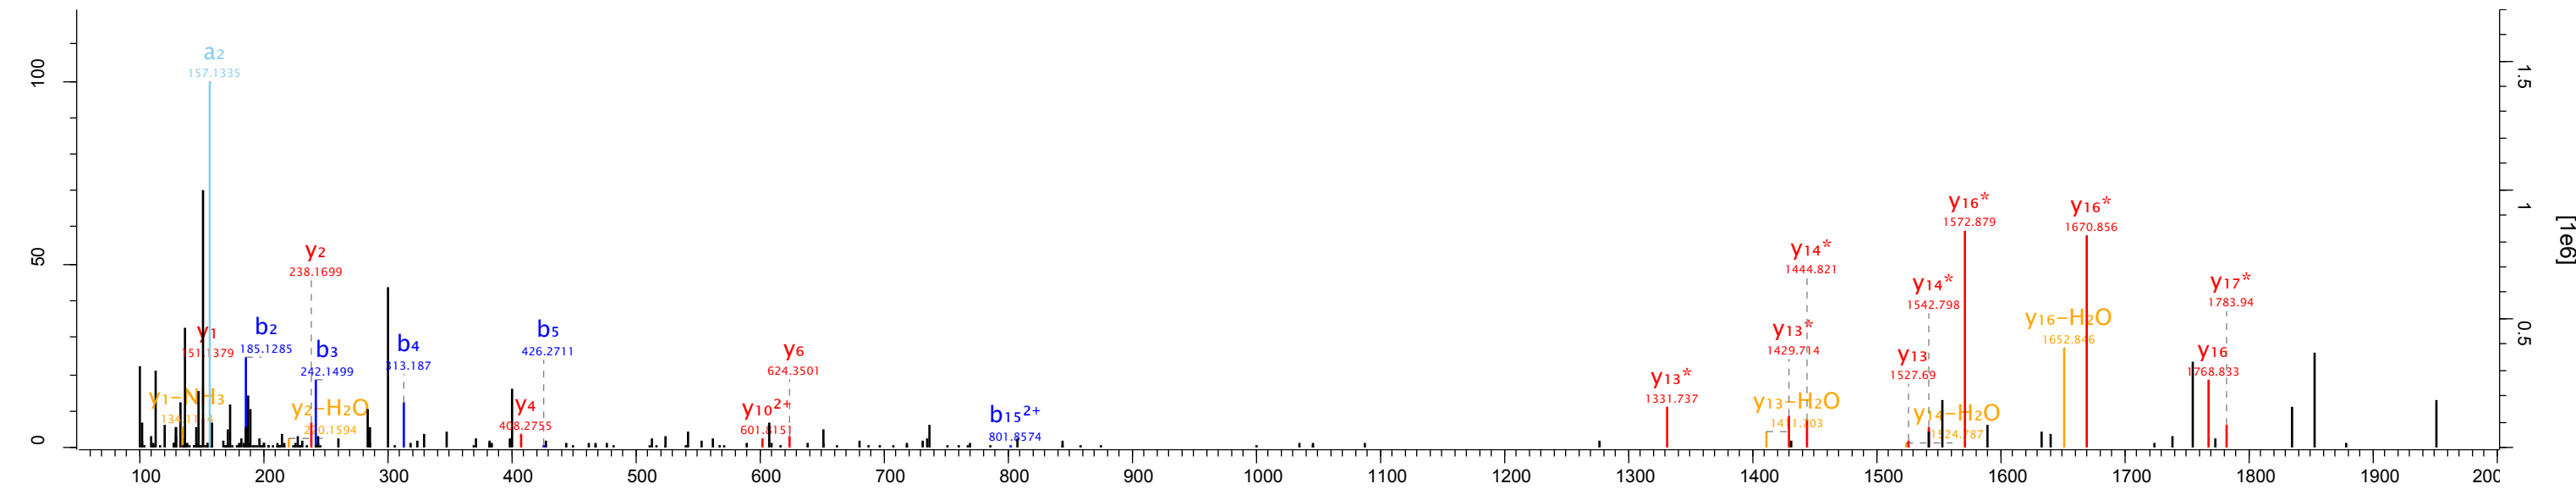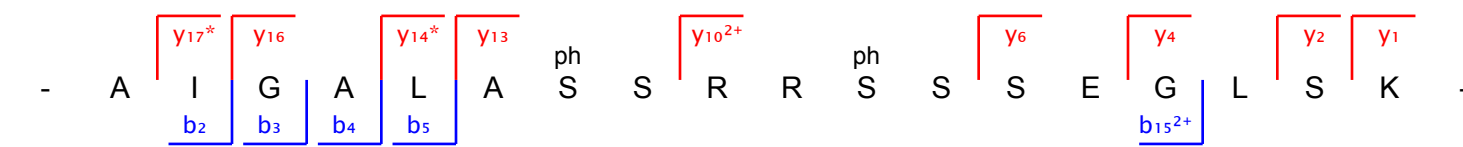

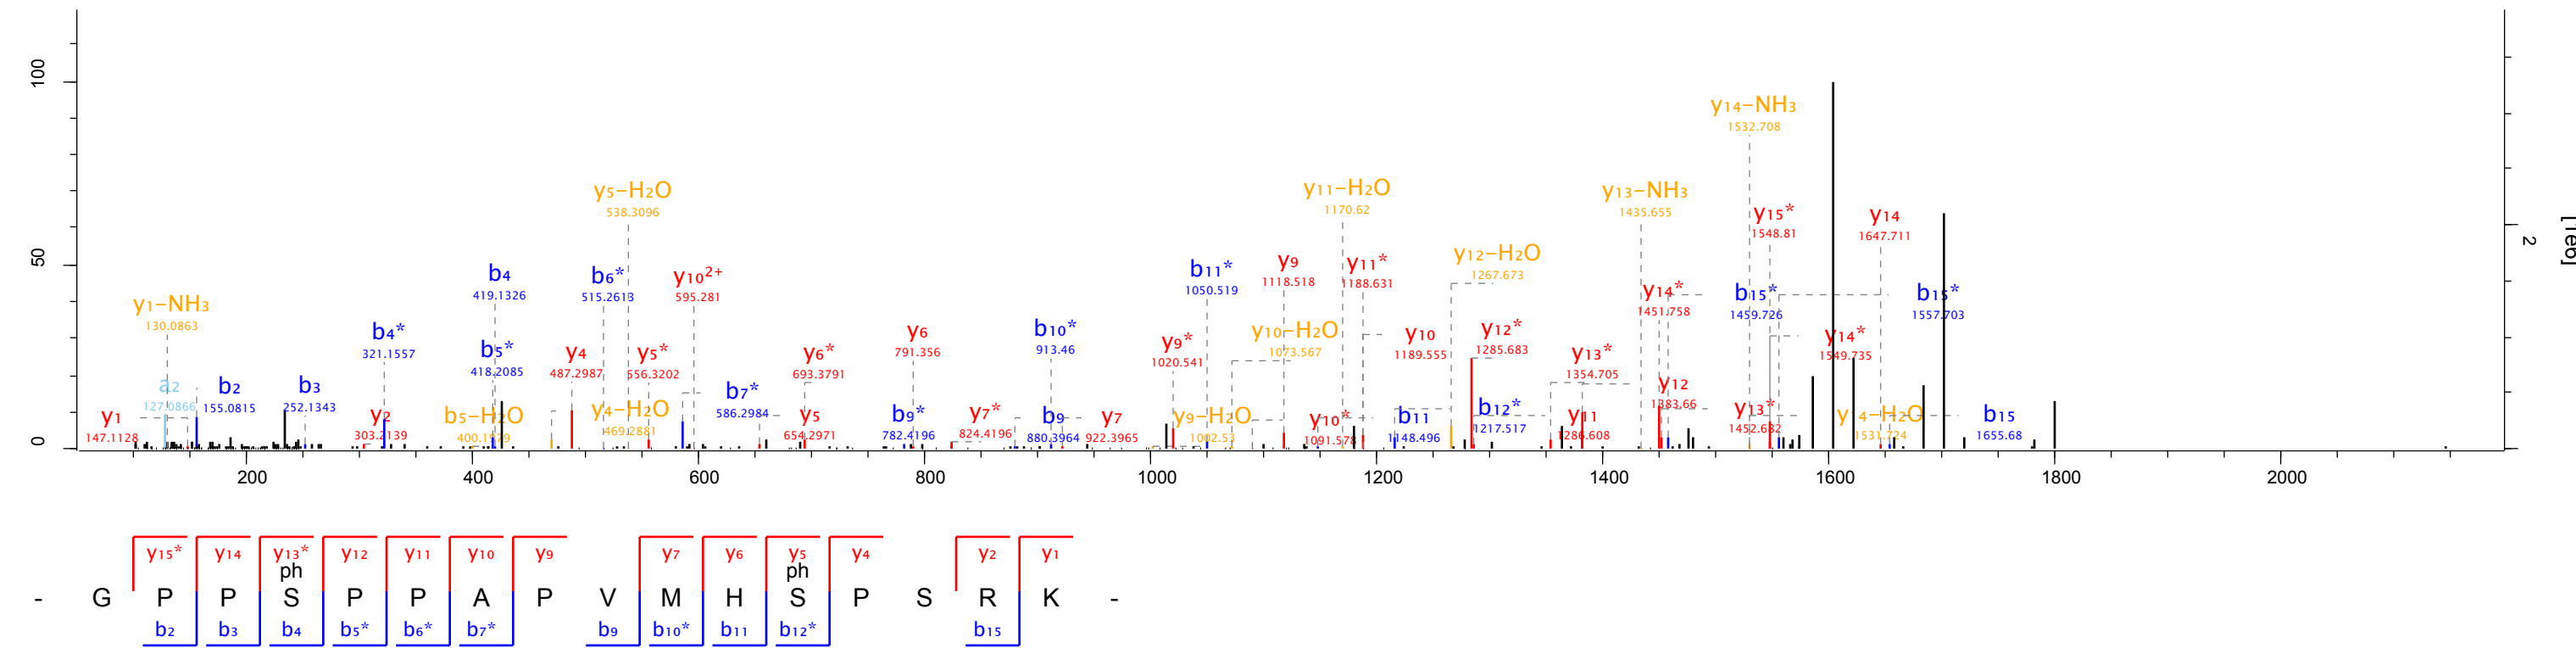

Raw file  
20171215\_MaS\_33SR\_LMH\_phospho2\_03

Scan 7802 Method FTMS; HCD Score 176.9 m/z 664.63 Gene names CDK7

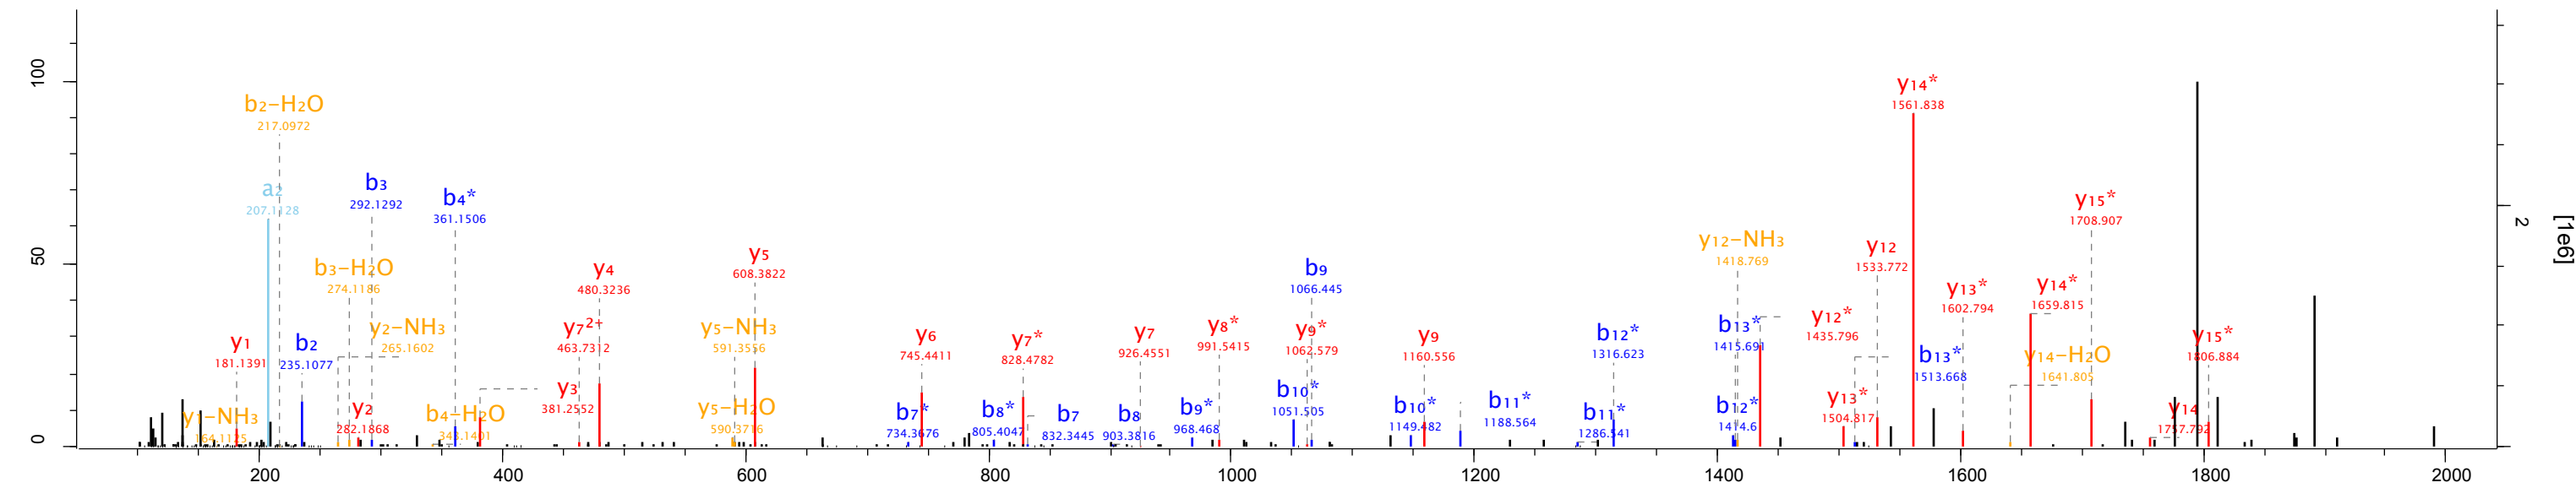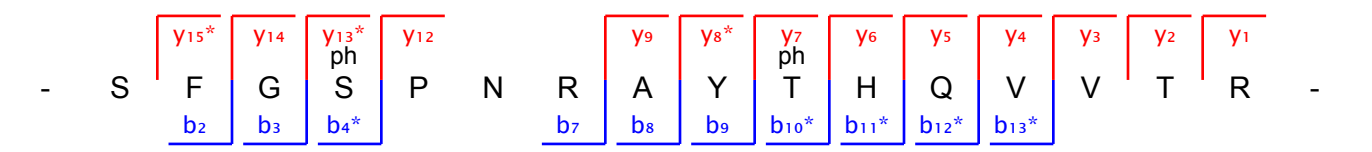

Raw file Scan Method Score m/z Gene names

20171215\_MaS\_33SR\_LMH\_phospho2\_03 8062 FTMS; HCD 100.27 816.88 KIF7

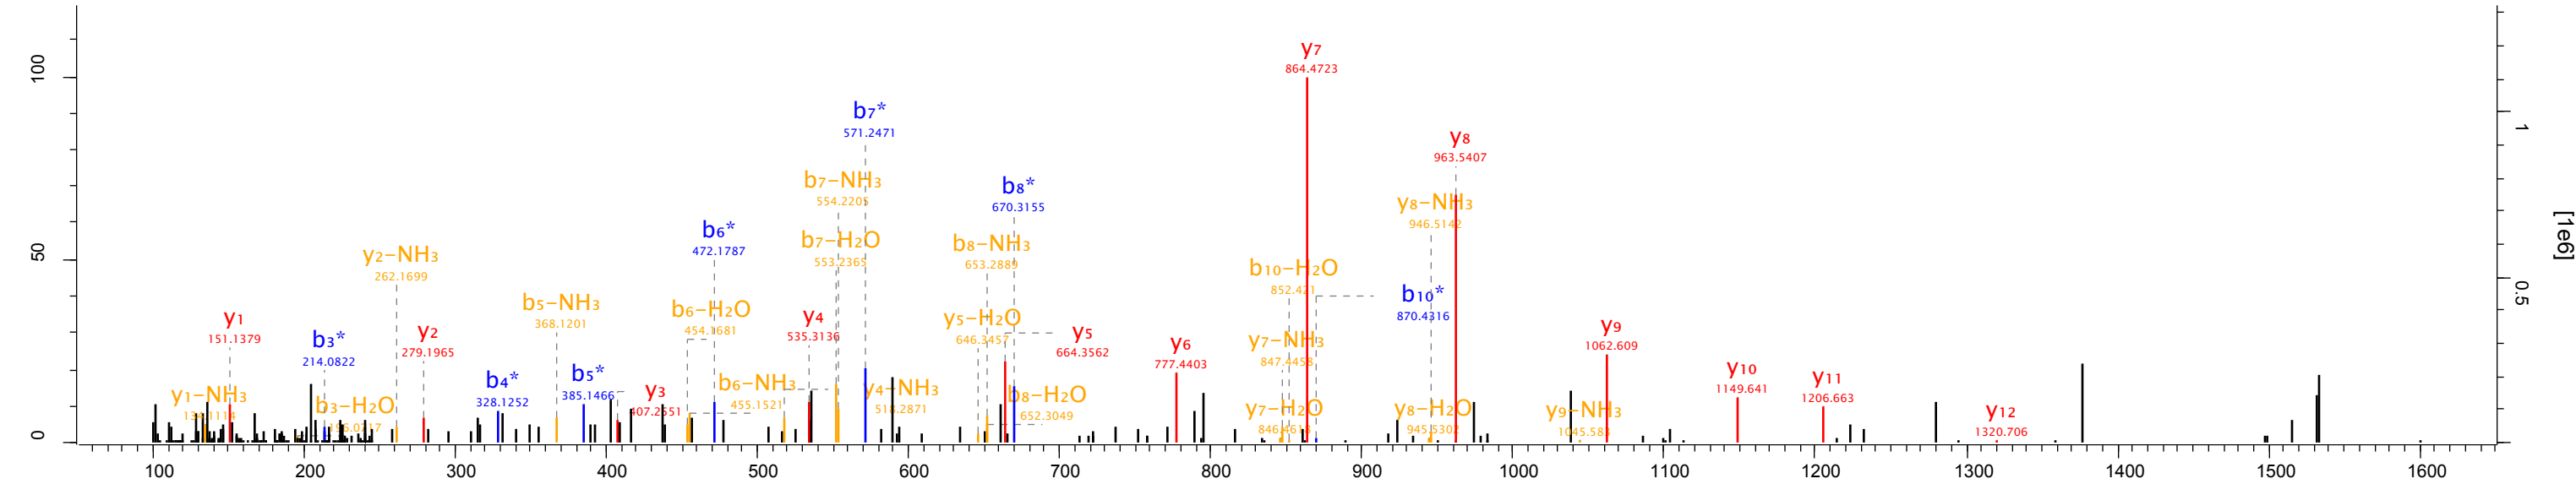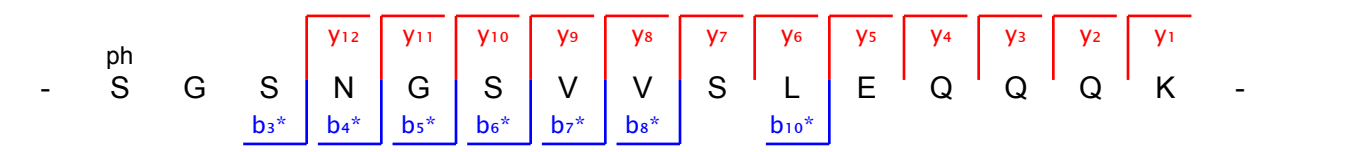



Raw file: 20171215\_MaS\_33SR\_LMH\_phospho2\_03  
 Scan: 8112 Method: FTMS; HCD Score: 197.51 m/z: 776.81 Gene names: SCAF11

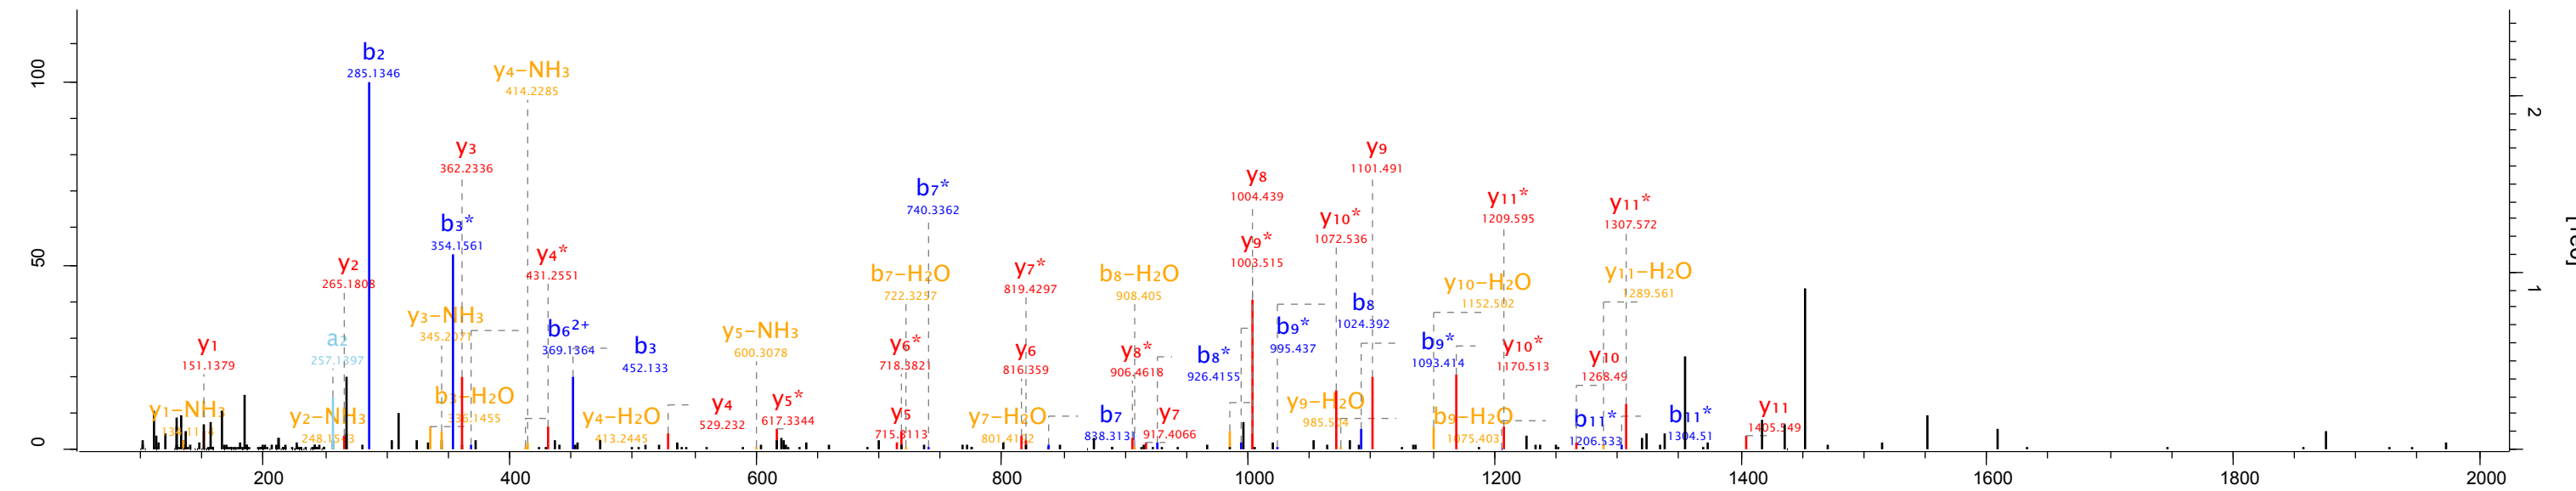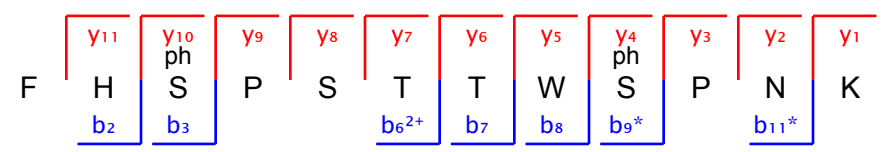

Raw file  
20171215\_MaS\_33SR\_LMH\_phospho2\_03

Scan 8152 Method FTMS; HCD Score 147.8 m/z 815.37 Gene names SUDS3

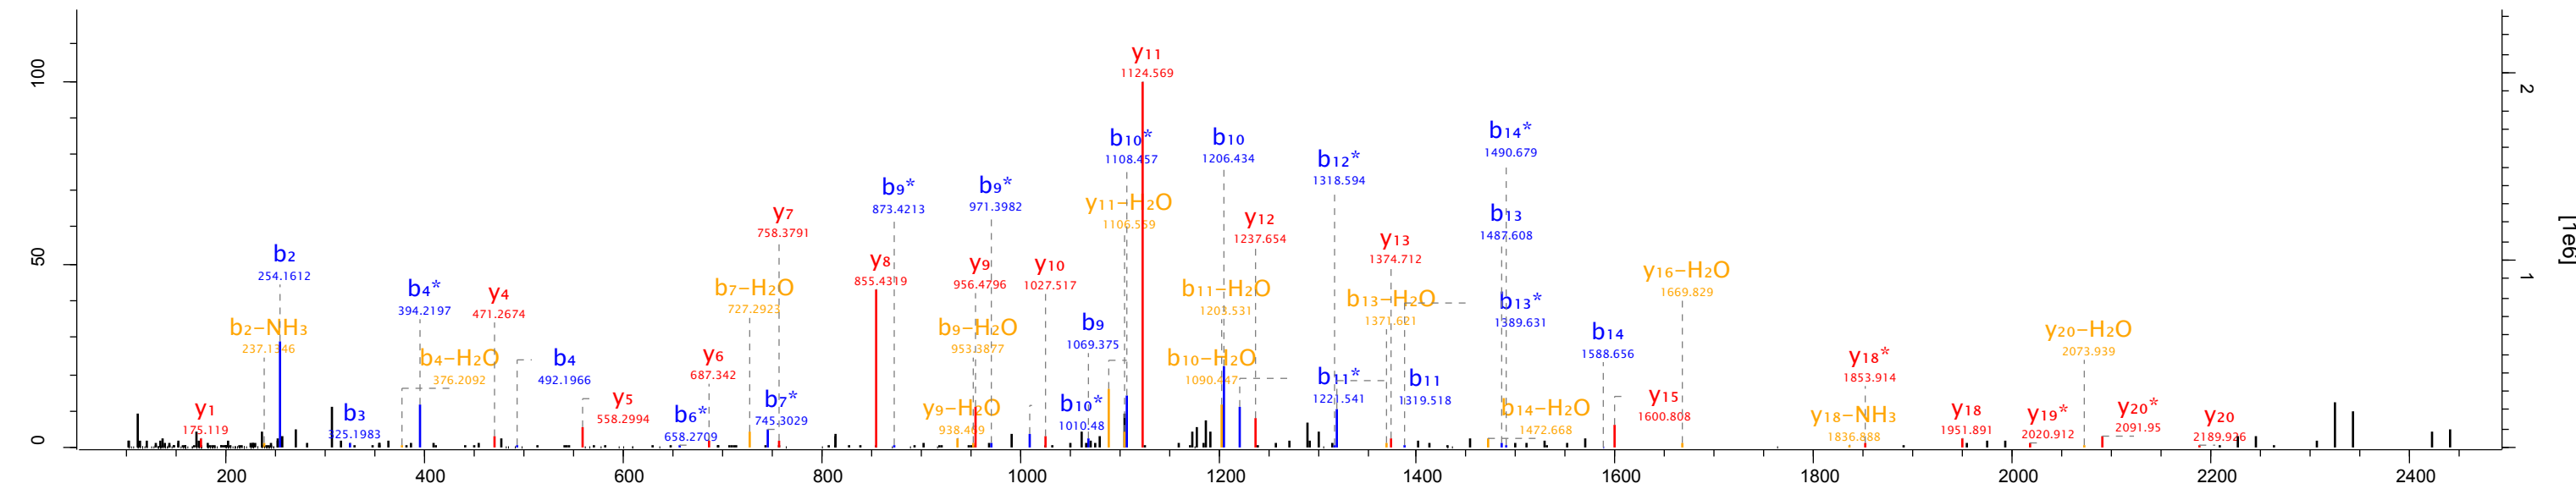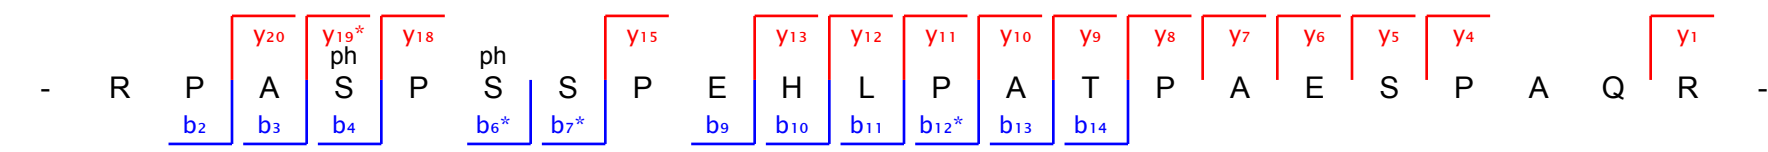

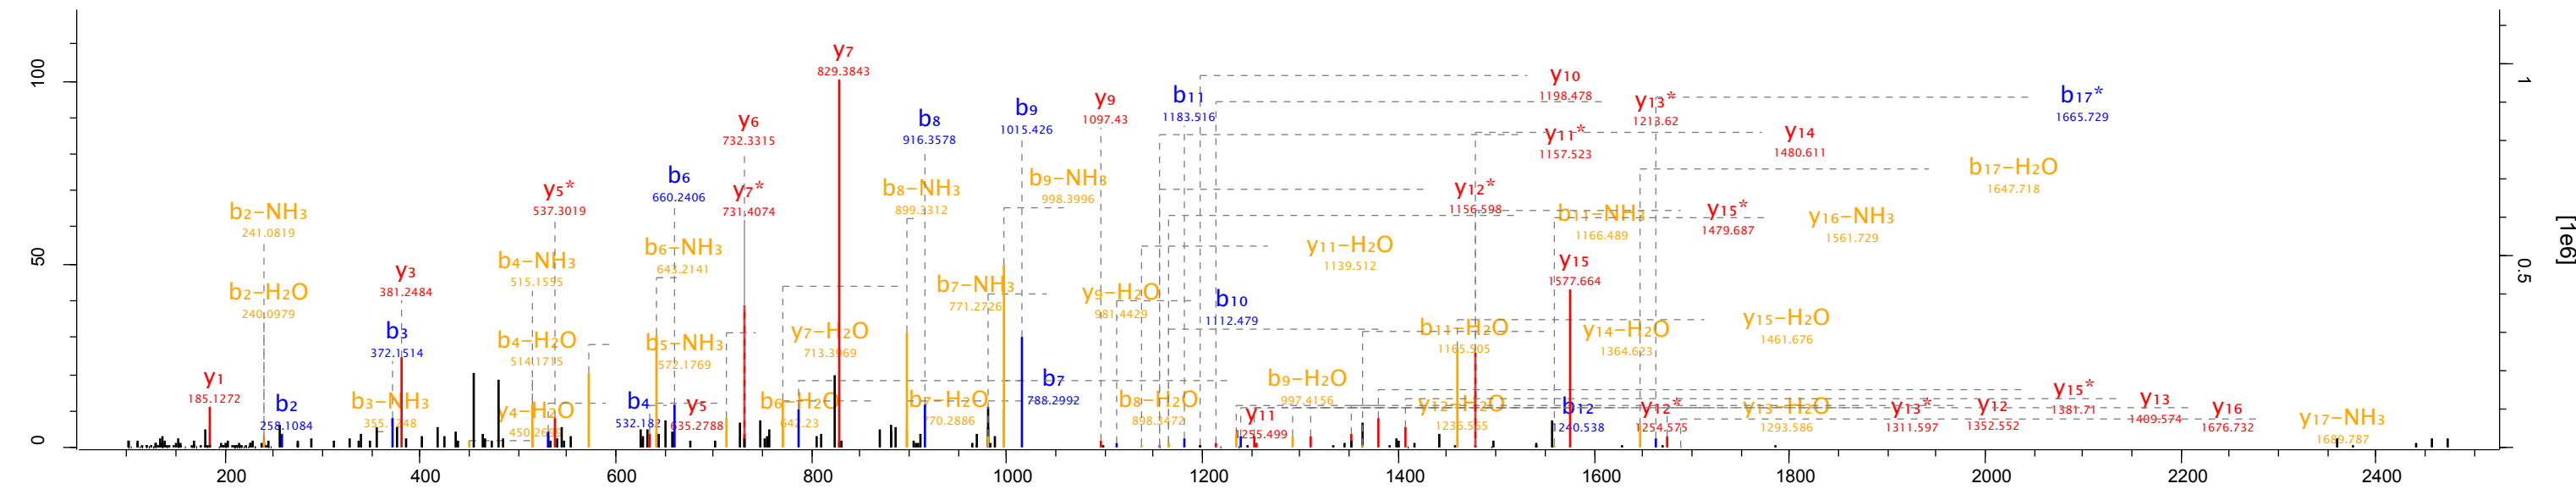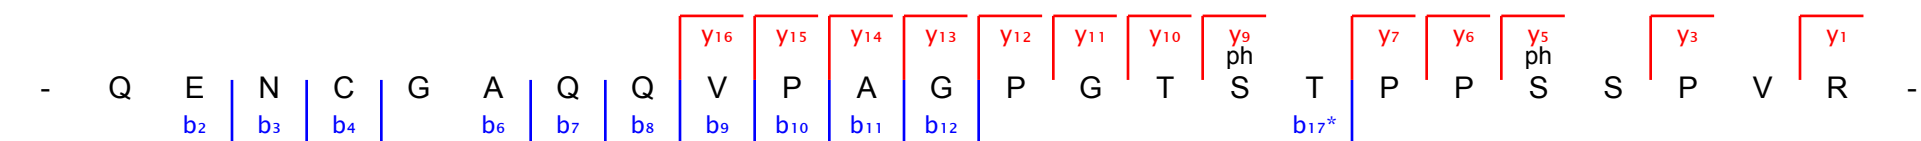

Raw file: 20171215\_MaS\_33SR\_LMH\_phospho2\_03  
 Scan: 8522 Method: FTMS; HCD Score: 106.56 m/z: 1031.91 Gene names: IRS2

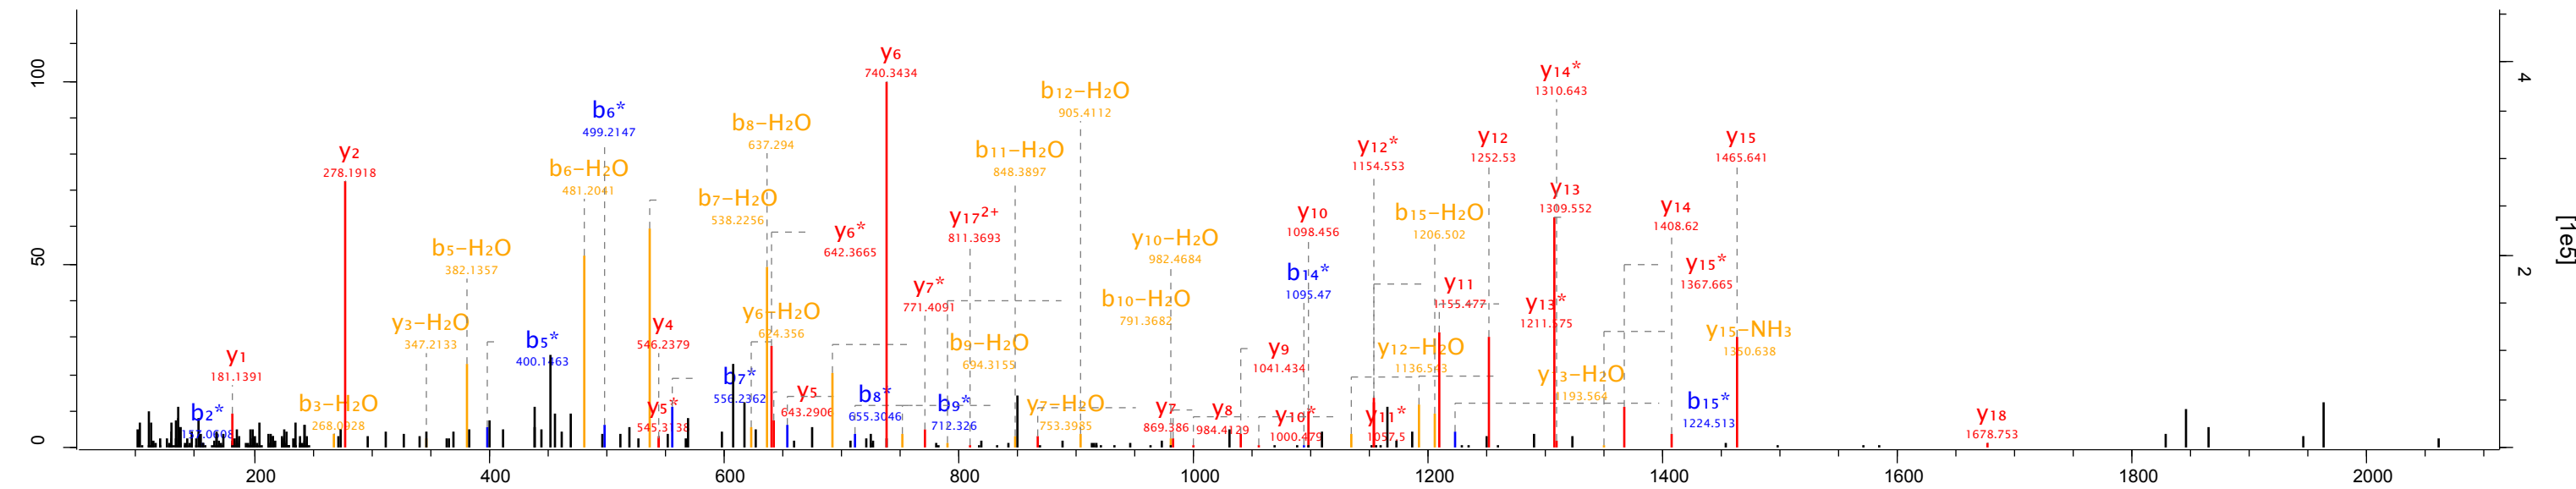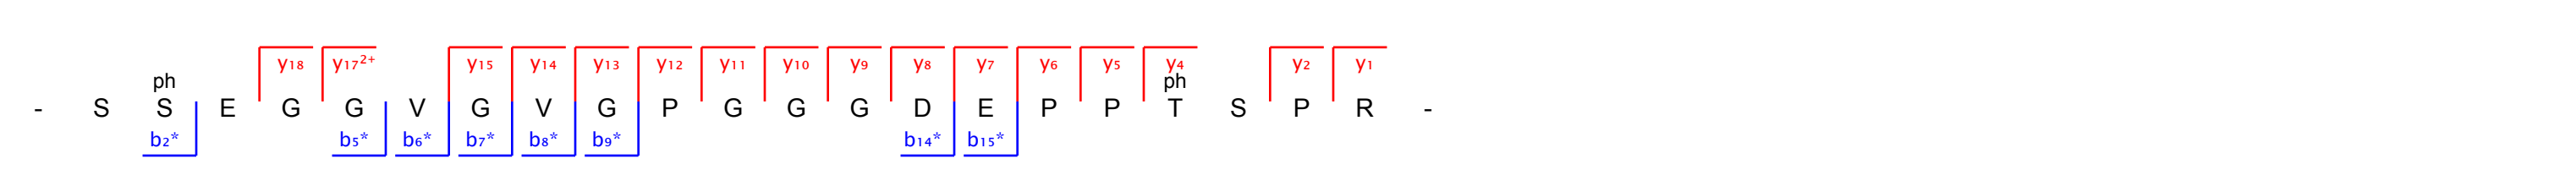

20171215\_MaS\_33SR\_LMH\_phospho2\_03 8642 FTMS; HCD 124.82 775.36 PUM2

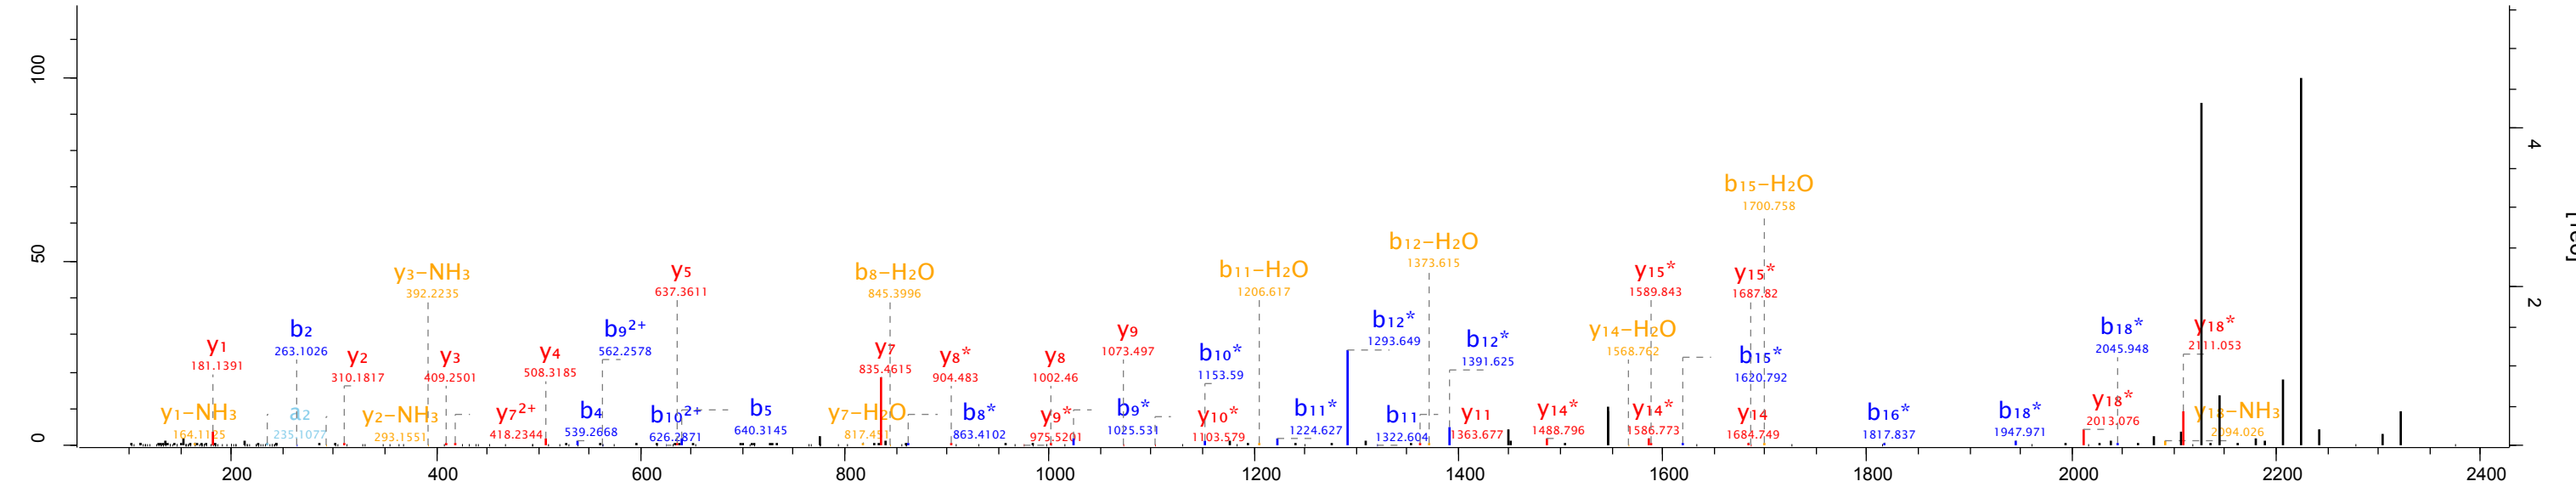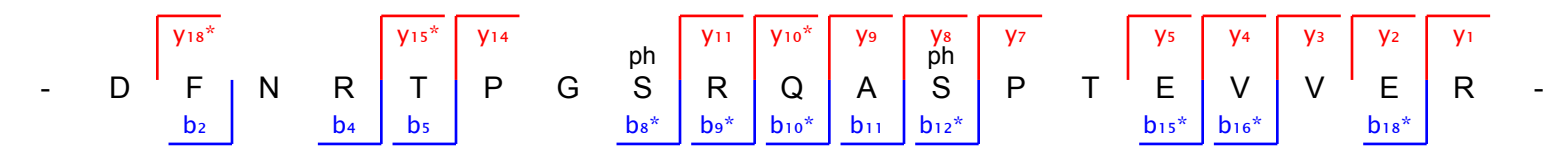

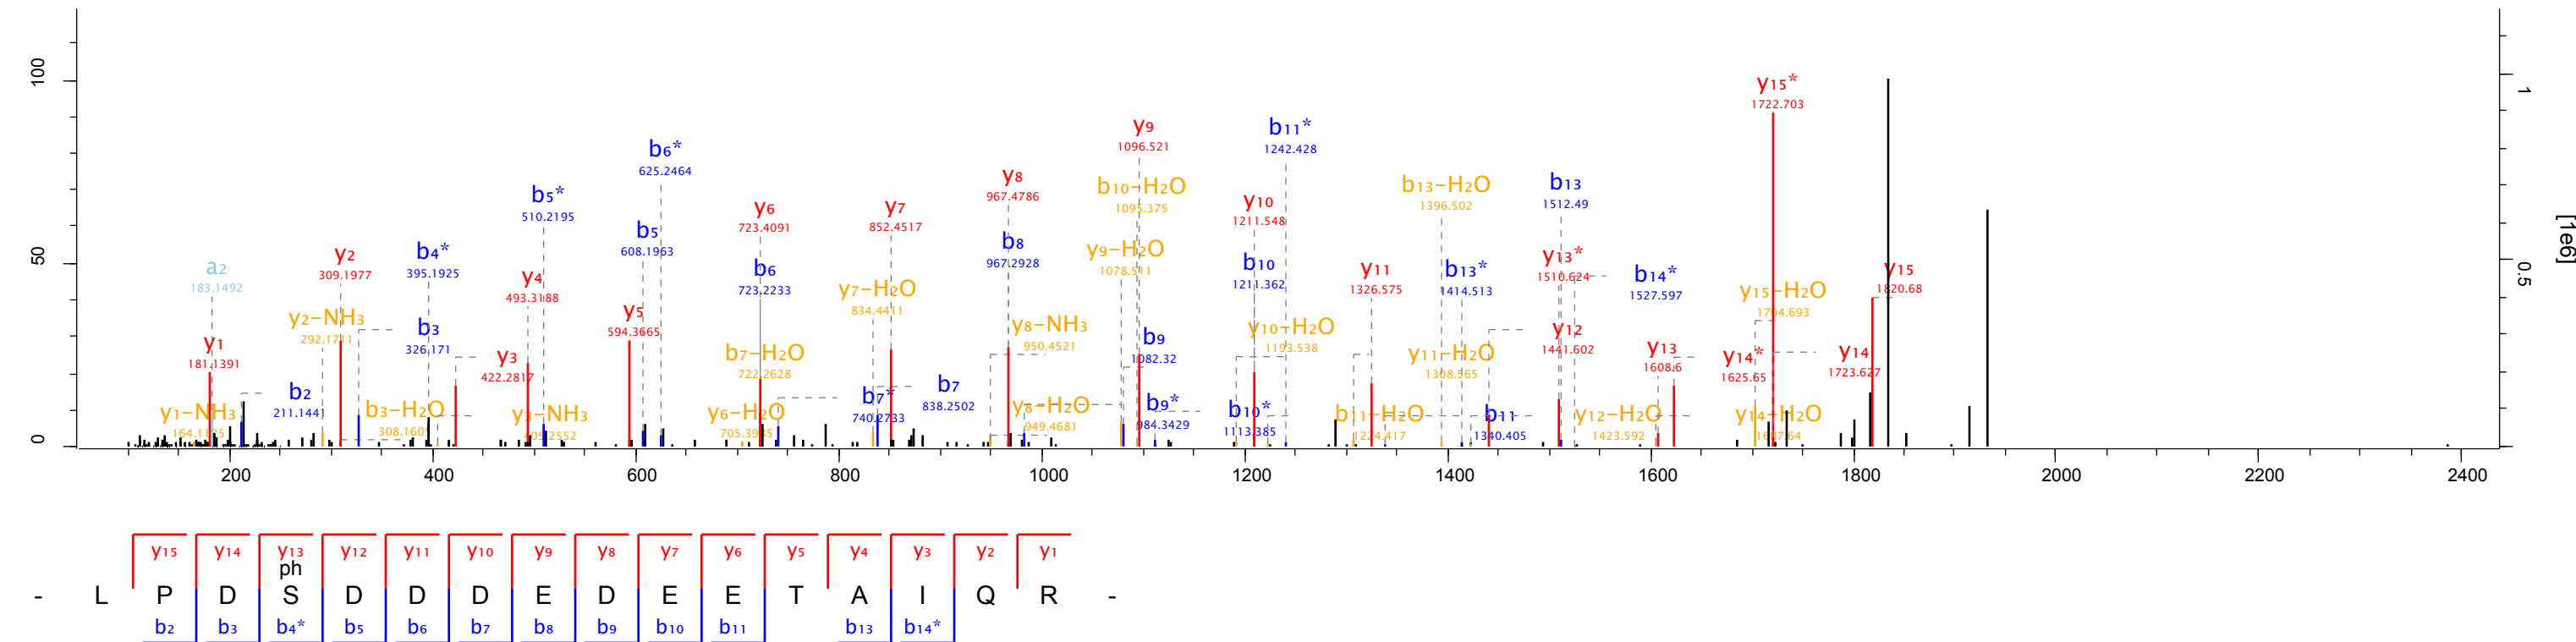

Raw file: 20171215\_MaS\_33SR\_LMH\_phospho2\_03  
 Scan: 8912 Method: FTMS; HCD Score: 122.65 m/z: 716.63 Gene names: NDRG3

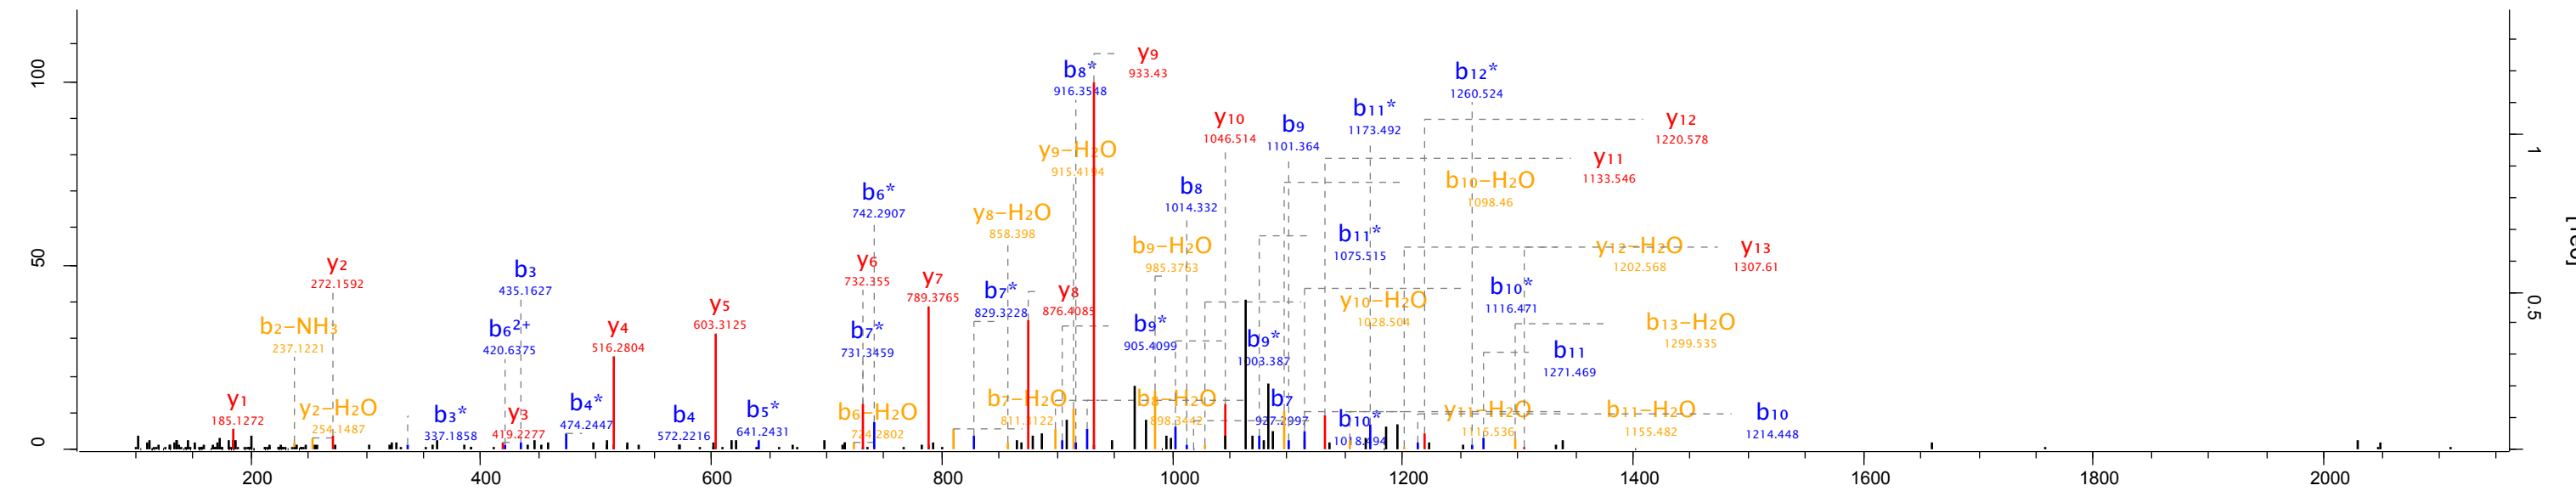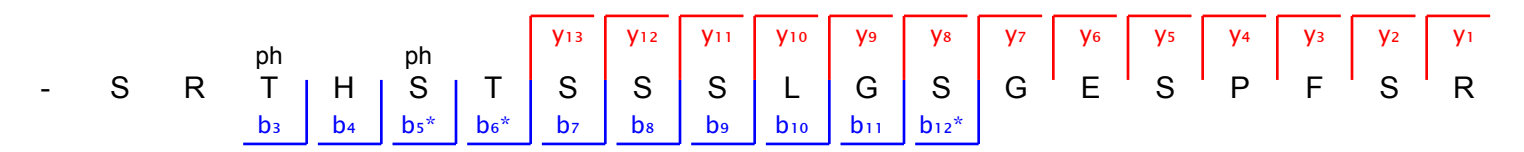

Raw file 20171215\_MaS\_33SR\_LMH\_phospho2\_03 Scan 8942 Method FTMS; HCD Score 85.67 m/z 550.25 Gene names SRRM2

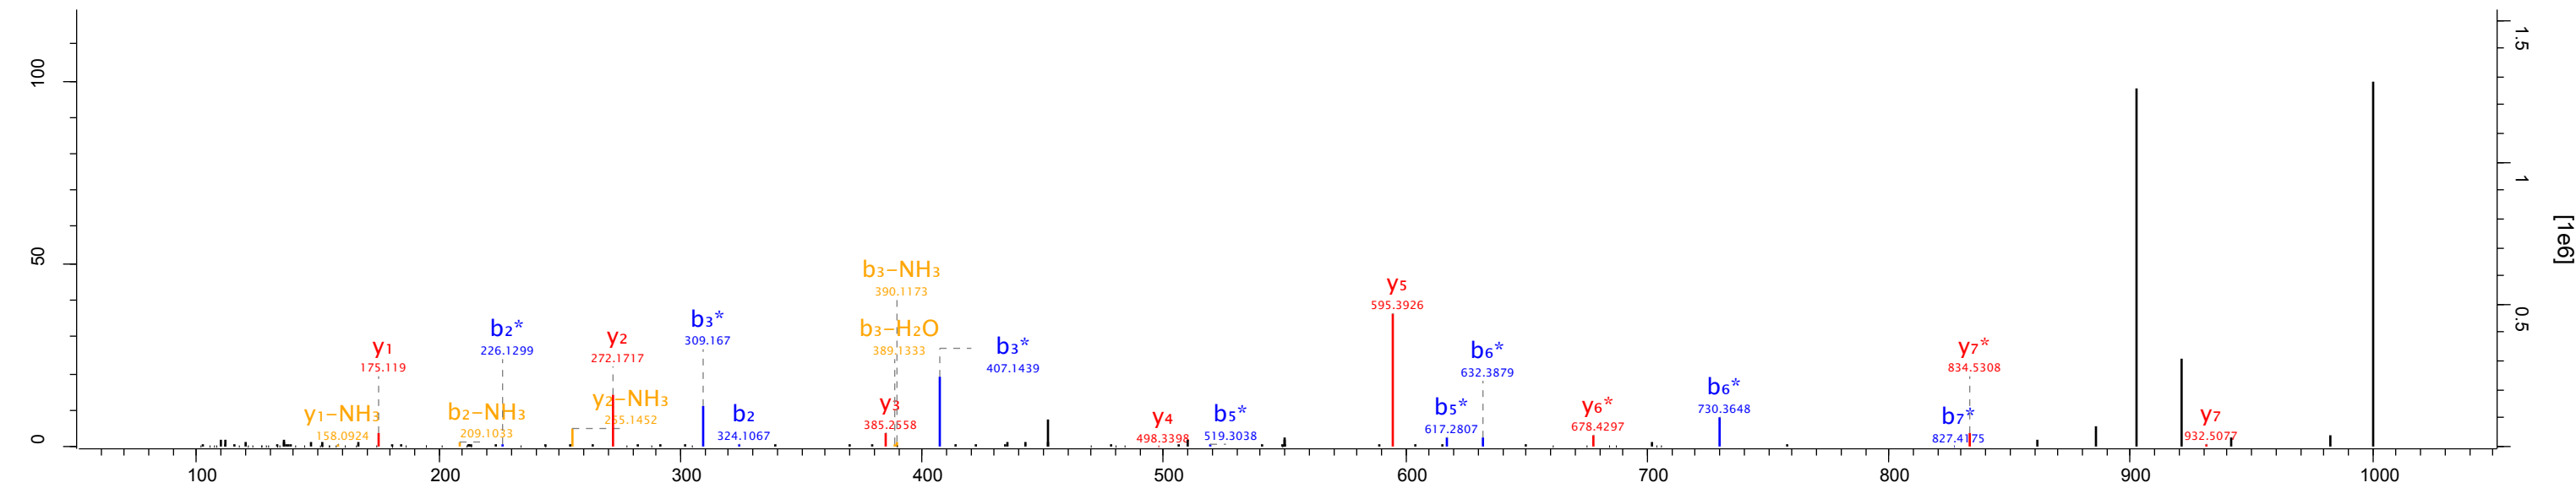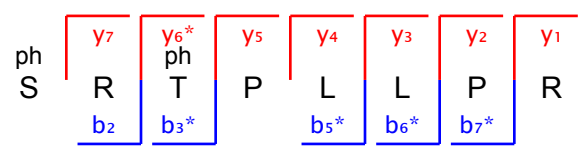



Raw file: 20171215\_MaS\_33SR\_LMH\_phospho2\_03  
 Scan: 8972 Method: FTMS; HCD Score: 164.92 m/z: 690.26 Gene names: SRSF10

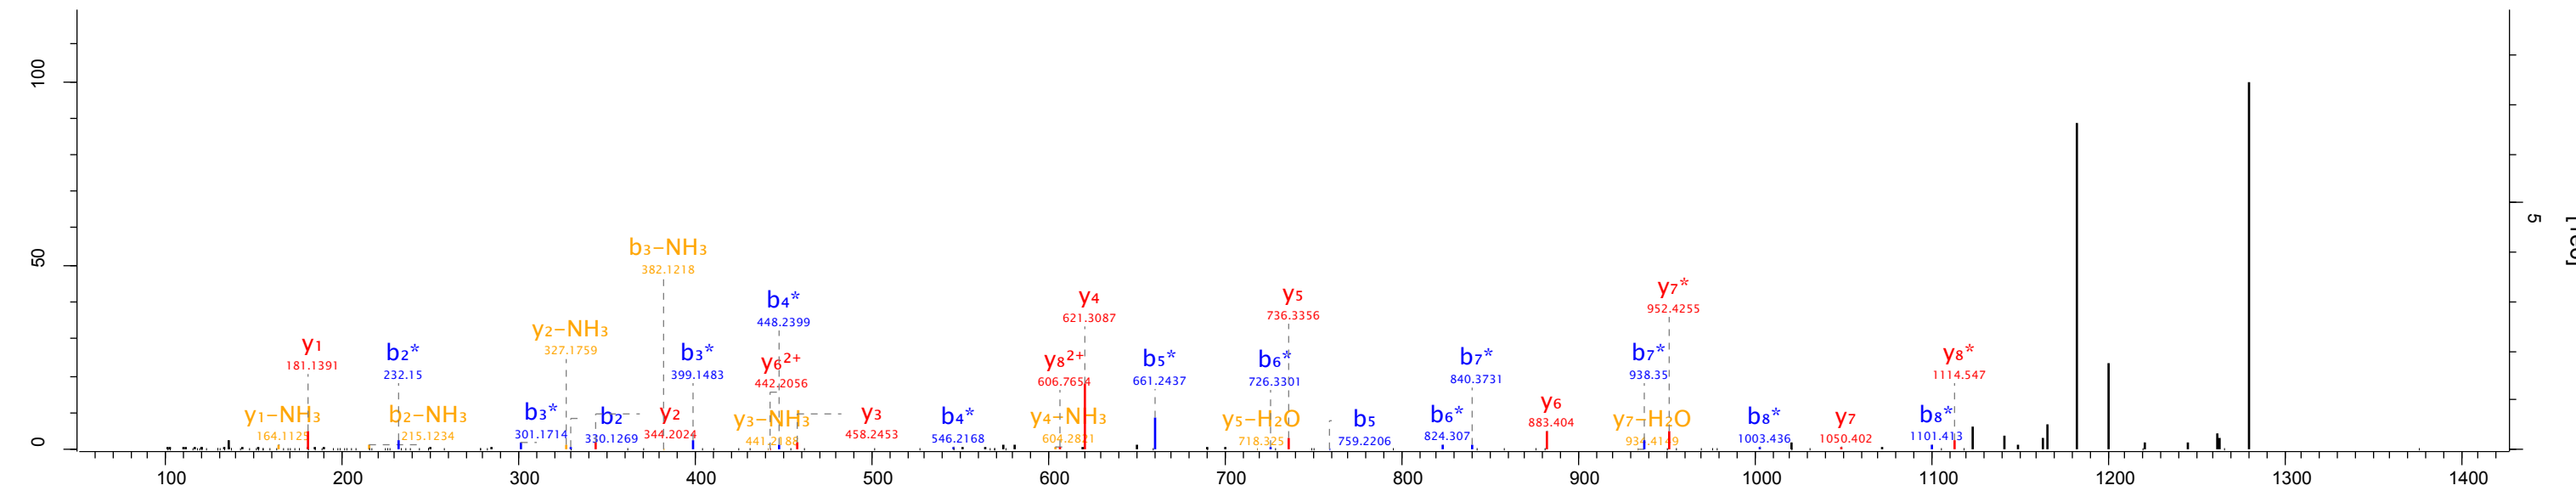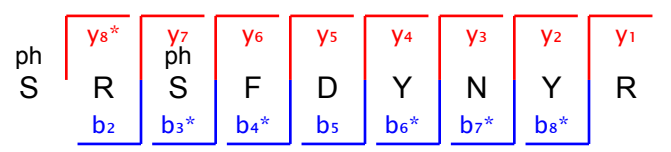

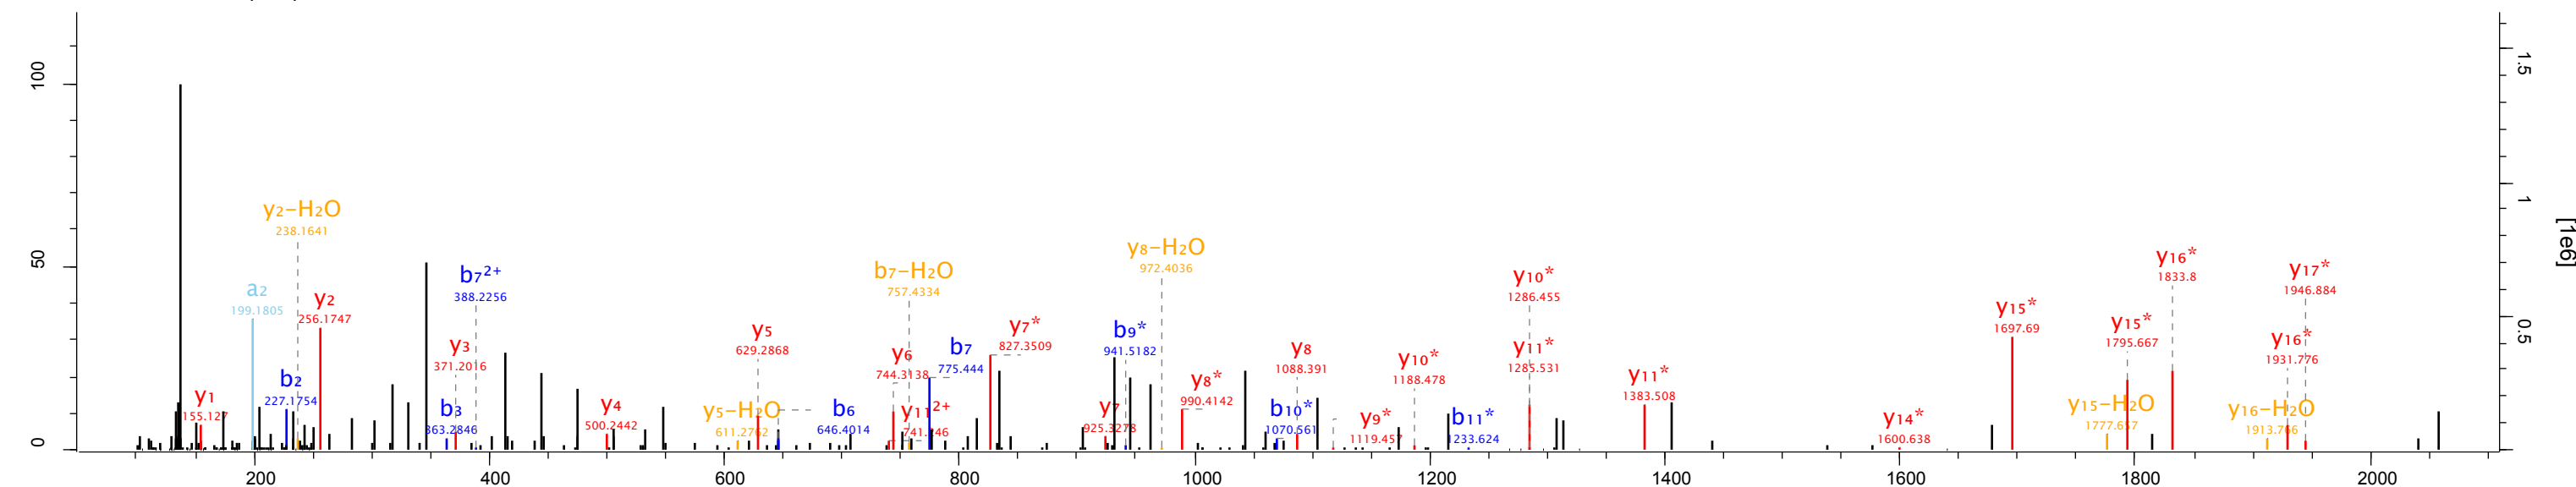

- L L K P G E E P S E Y T D E E D T K -  
 b<sub>2</sub> b<sub>3</sub> b<sub>6</sub> b<sub>7</sub> b<sub>9</sub>\* b<sub>10</sub>\* b<sub>11</sub>\* y<sub>17</sub>\* y<sub>16</sub>\* y<sub>15</sub>\* y<sub>14</sub>\* y<sub>11</sub>\* y<sub>10</sub>\*<sub>ph</sub> y<sub>9</sub>\* y<sub>8</sub> y<sub>7</sub><sub>ph</sub> y<sub>6</sub> y<sub>5</sub> y<sub>4</sub> y<sub>3</sub> y<sub>2</sub> y<sub>1</sub>

Raw file  
20171215\_MaS\_33SR\_LMH\_phospho2\_03

Scan 9202 Method FTMS; HCD Score 269.75 m/z 911.41 Gene names CEP170

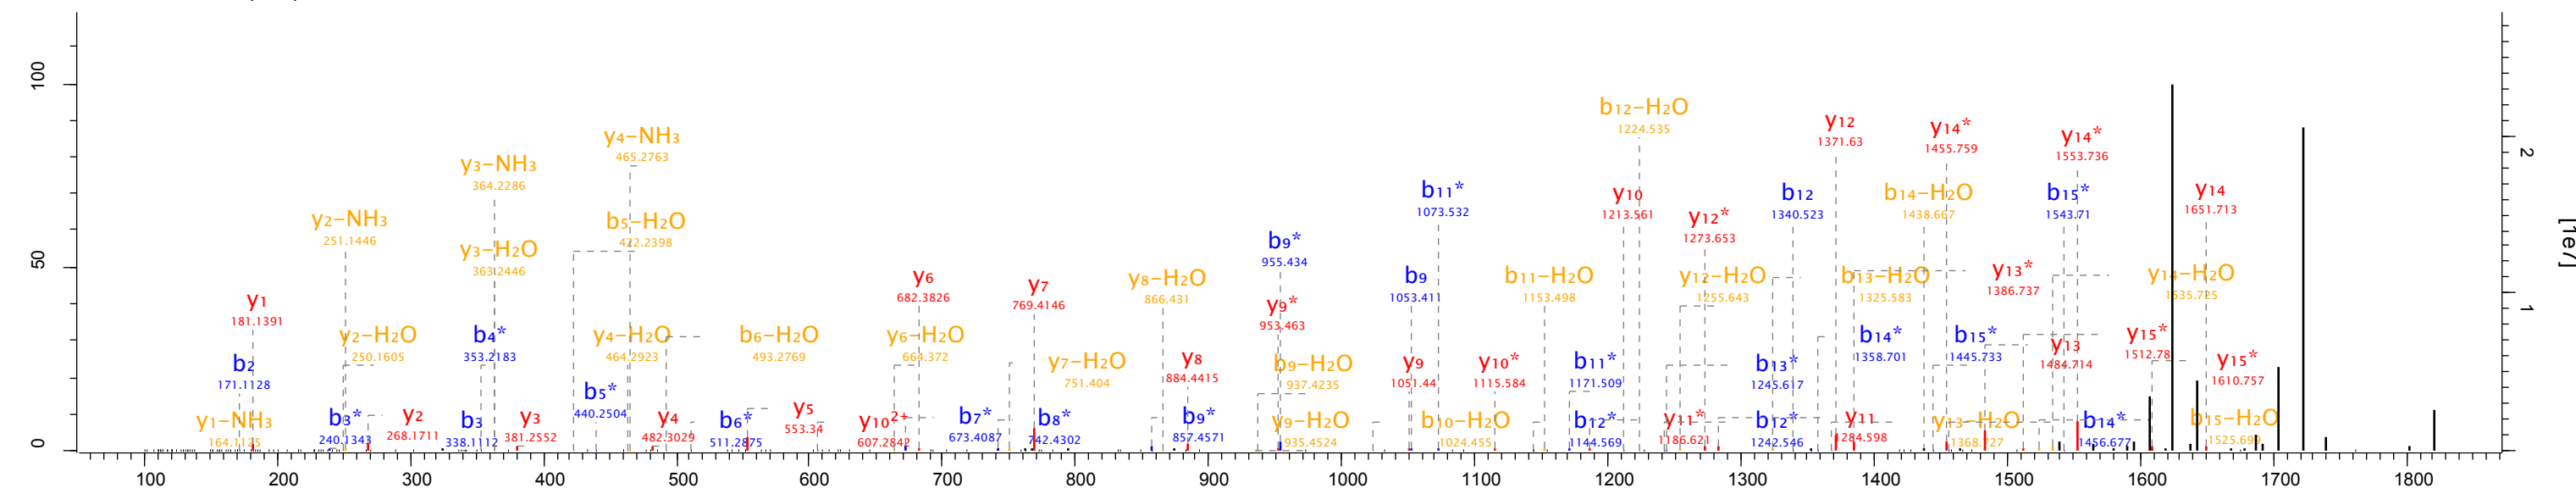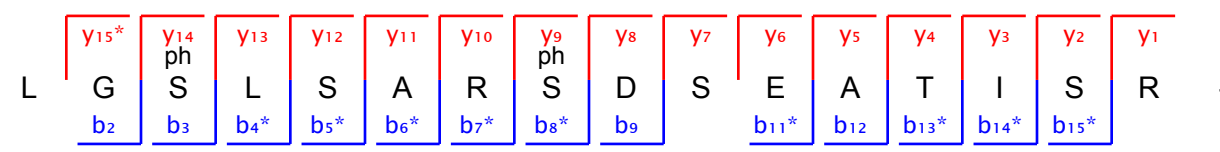

Raw file: 20171215\_MaS\_33SR\_LMH\_phospho2\_03  
 Scan: 9382 Method: FTMS; HCD Score: 229.96 m/z: 813.83 Gene names: DNAJC2

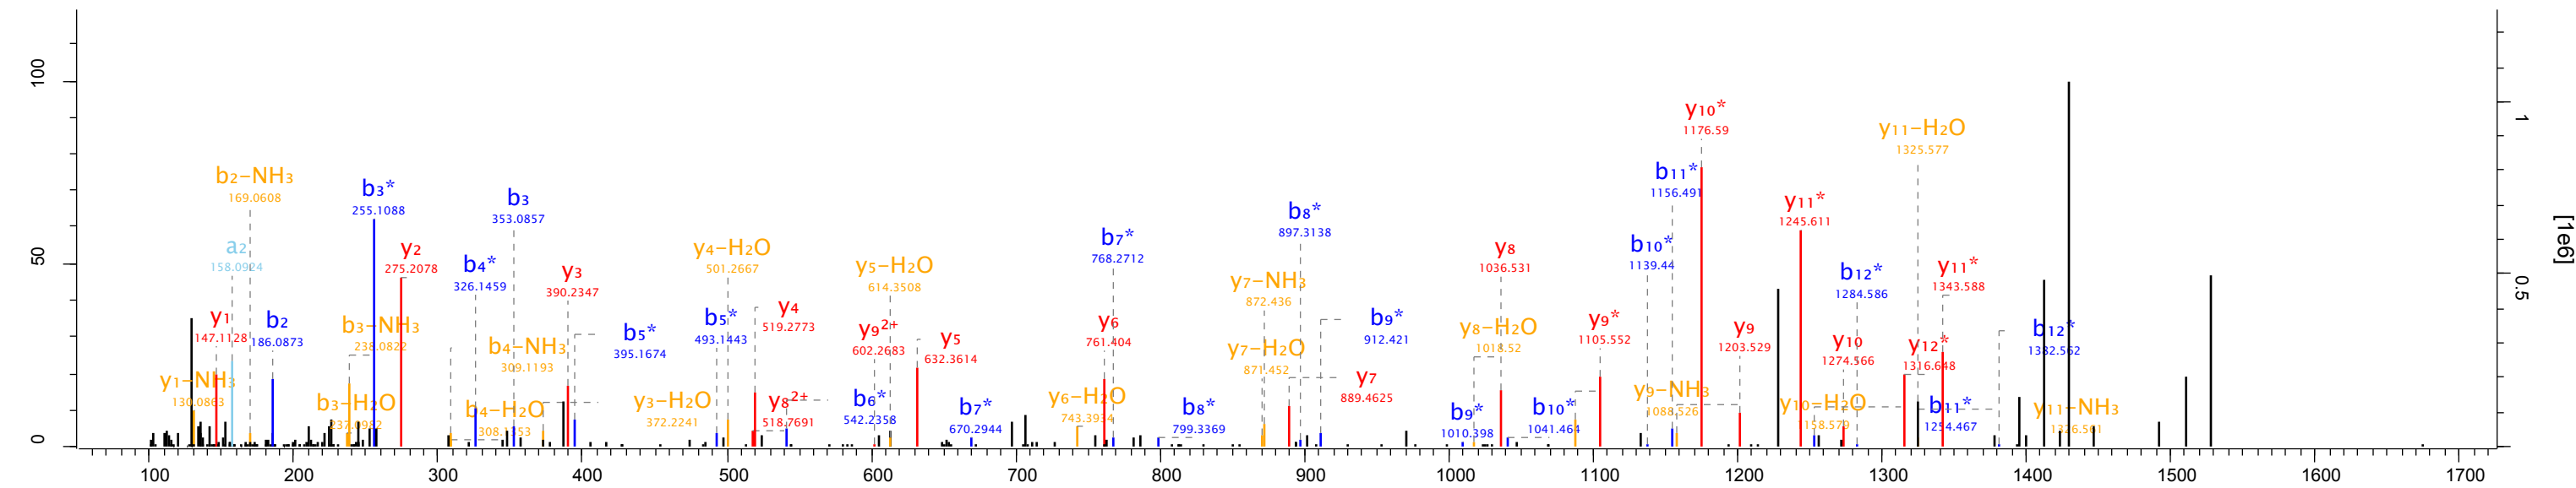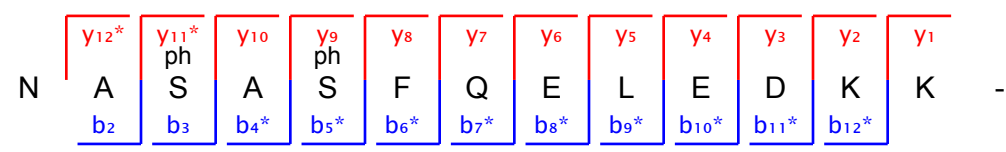

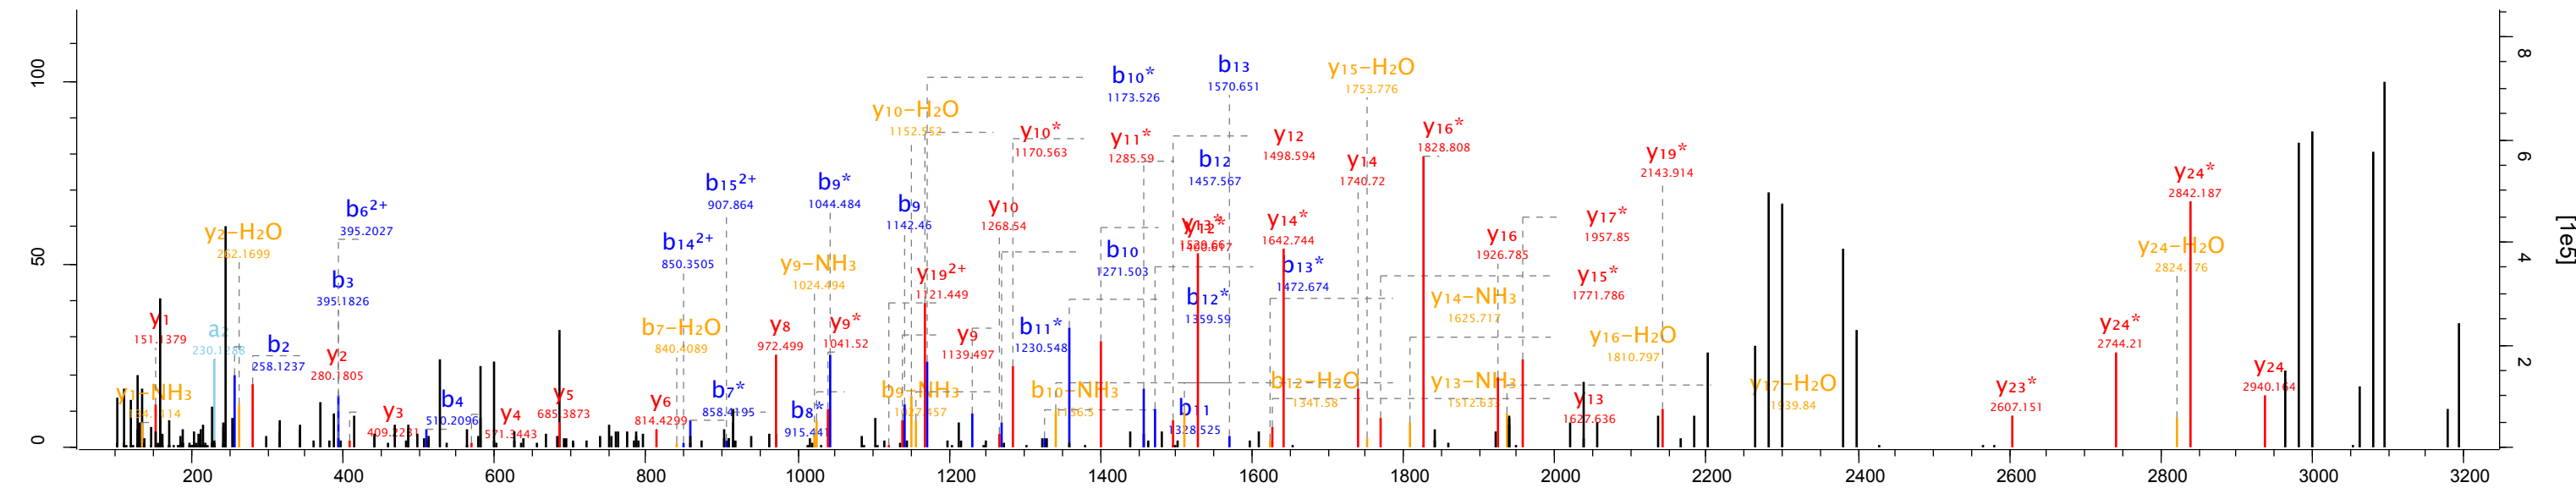

- W A H D K F S G E E G E I E D D E S G T E N R E E K -  
 b<sub>2</sub> b<sub>3</sub> b<sub>4</sub> b<sub>6</sub><sup>2+</sup> b<sub>7</sub><sup>\*</sup> b<sub>8</sub><sup>\*</sup> b<sub>9</sub> b<sub>10</sub> b<sub>11</sub> b<sub>12</sub> b<sub>13</sub> b<sub>14</sub><sup>2+</sup> b<sub>15</sub><sup>2+</sup> y<sub>19</sub><sup>\*</sup> y<sub>17</sub><sup>\*</sup> y<sub>16</sub> y<sub>15</sub><sup>\*</sup> y<sub>14</sub> y<sub>13</sub> y<sub>12</sub> y<sub>11</sub><sup>\*</sup> y<sub>10</sub> y<sub>9</sub> y<sub>8</sub> y<sub>6</sub> y<sub>5</sub> y<sub>4</sub> y<sub>3</sub> y<sub>2</sub> y<sub>1</sub>

Raw file  
20171215\_MaS\_33SR\_LMH\_phospho2\_03

Scan 9652 Method FTMS; HCD Score 114.33 m/z 1139.91 Gene names HLA-B

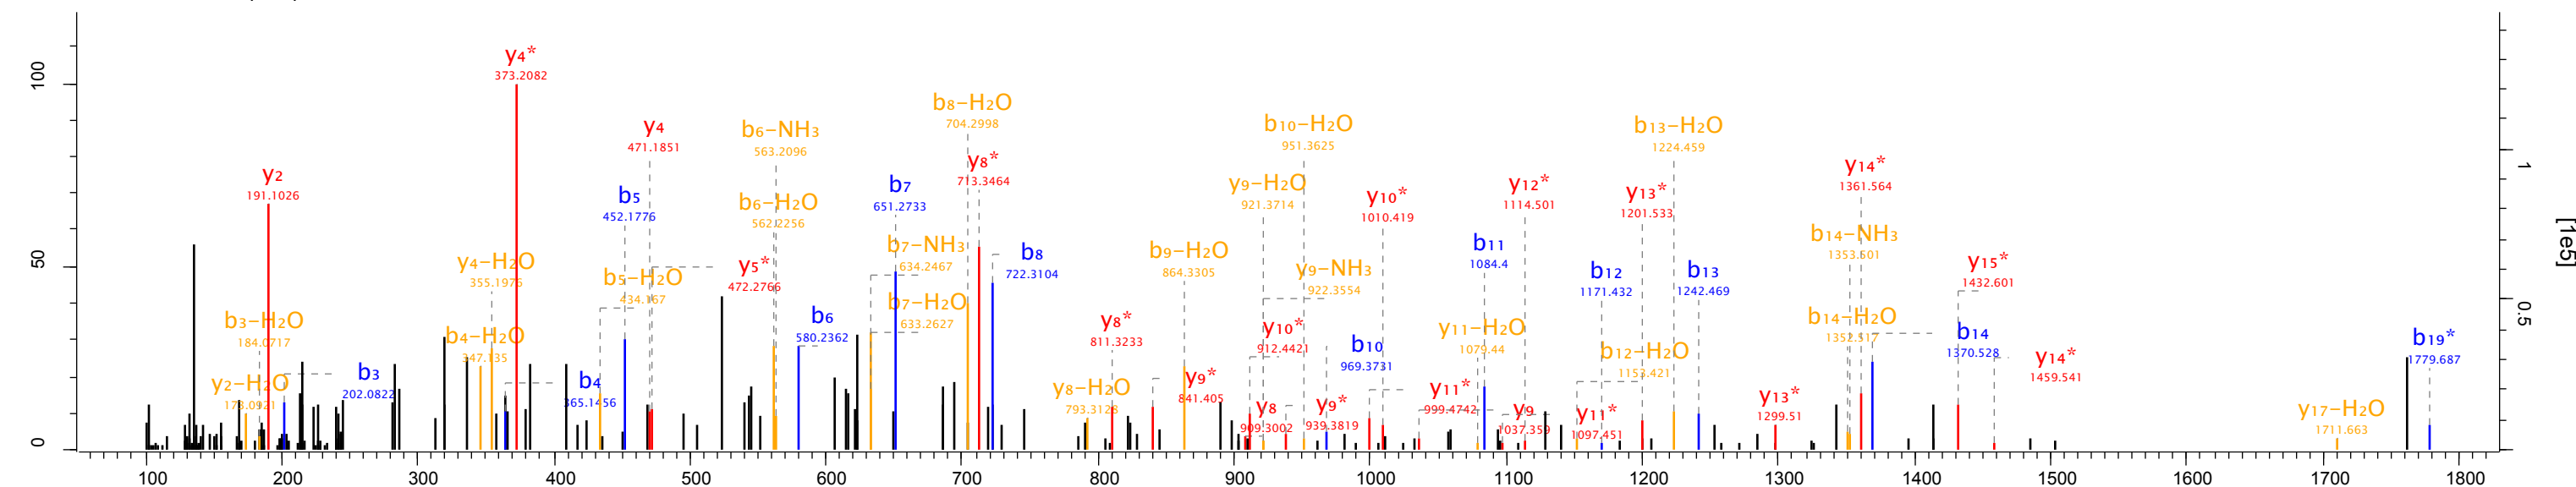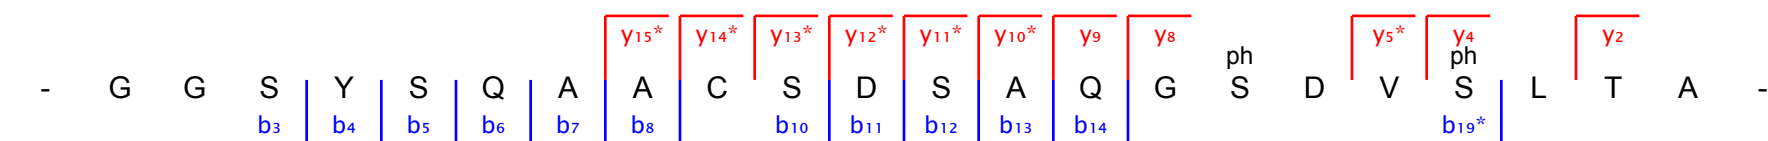

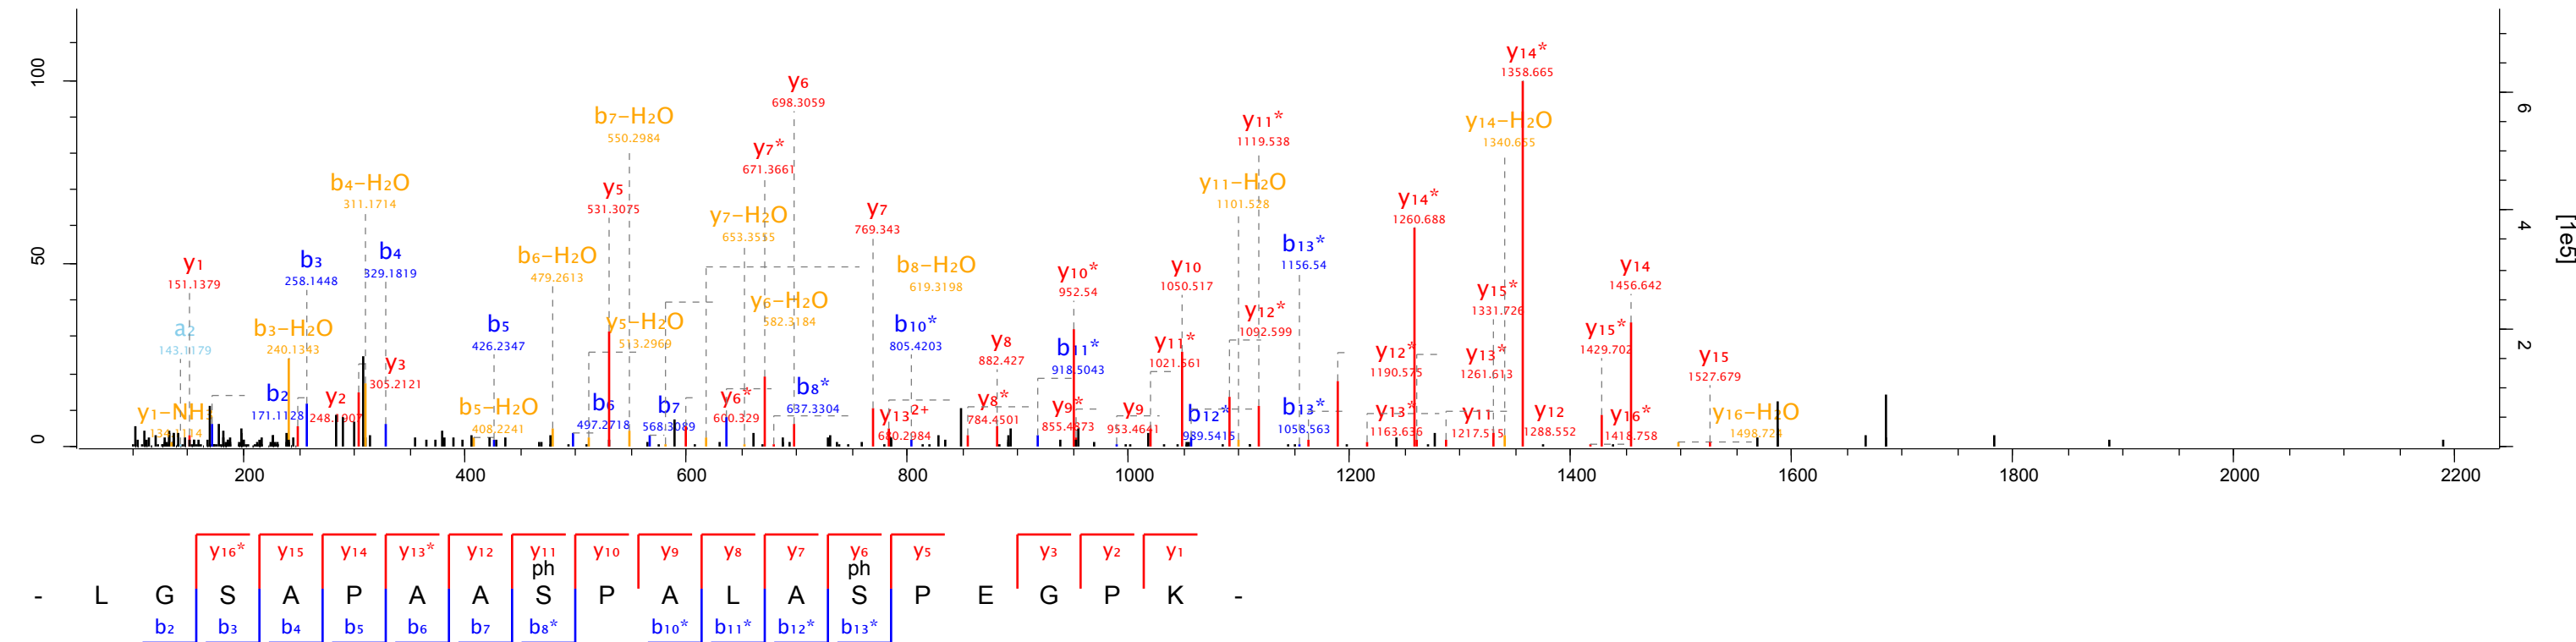

Raw file  
20171215\_MaS\_33SR\_LMH\_phospho2\_03

| Scan | Method    | Score | m/z     | Gene names |
|------|-----------|-------|---------|------------|
| 9932 | FTMS; HCD | 62.94 | 1010.46 | FIS1       |

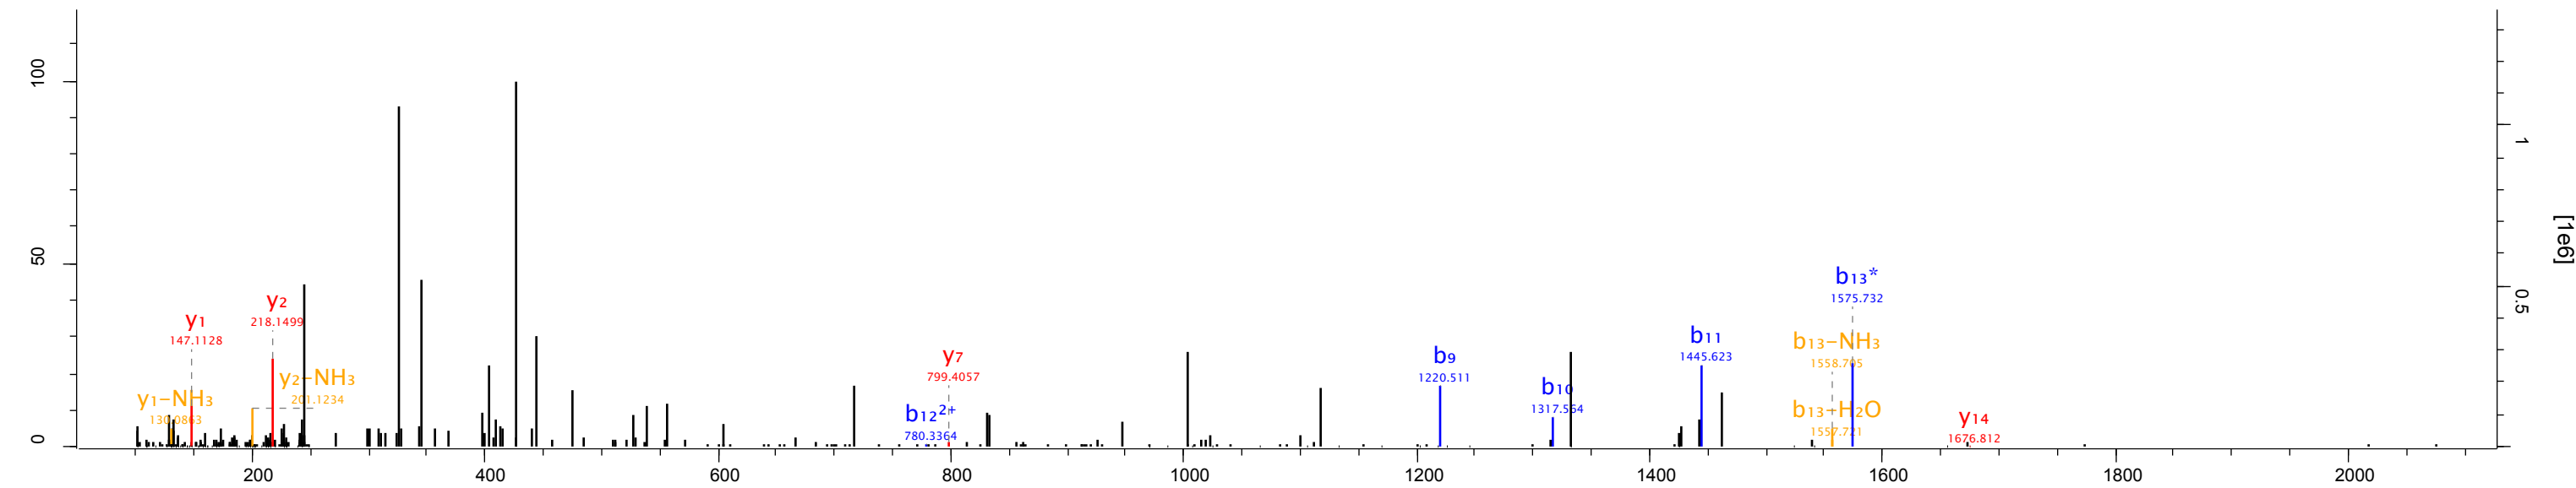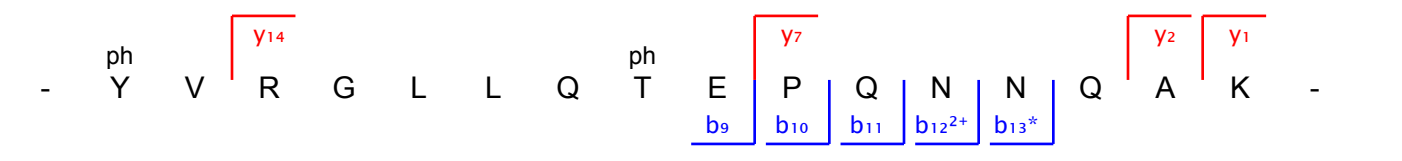



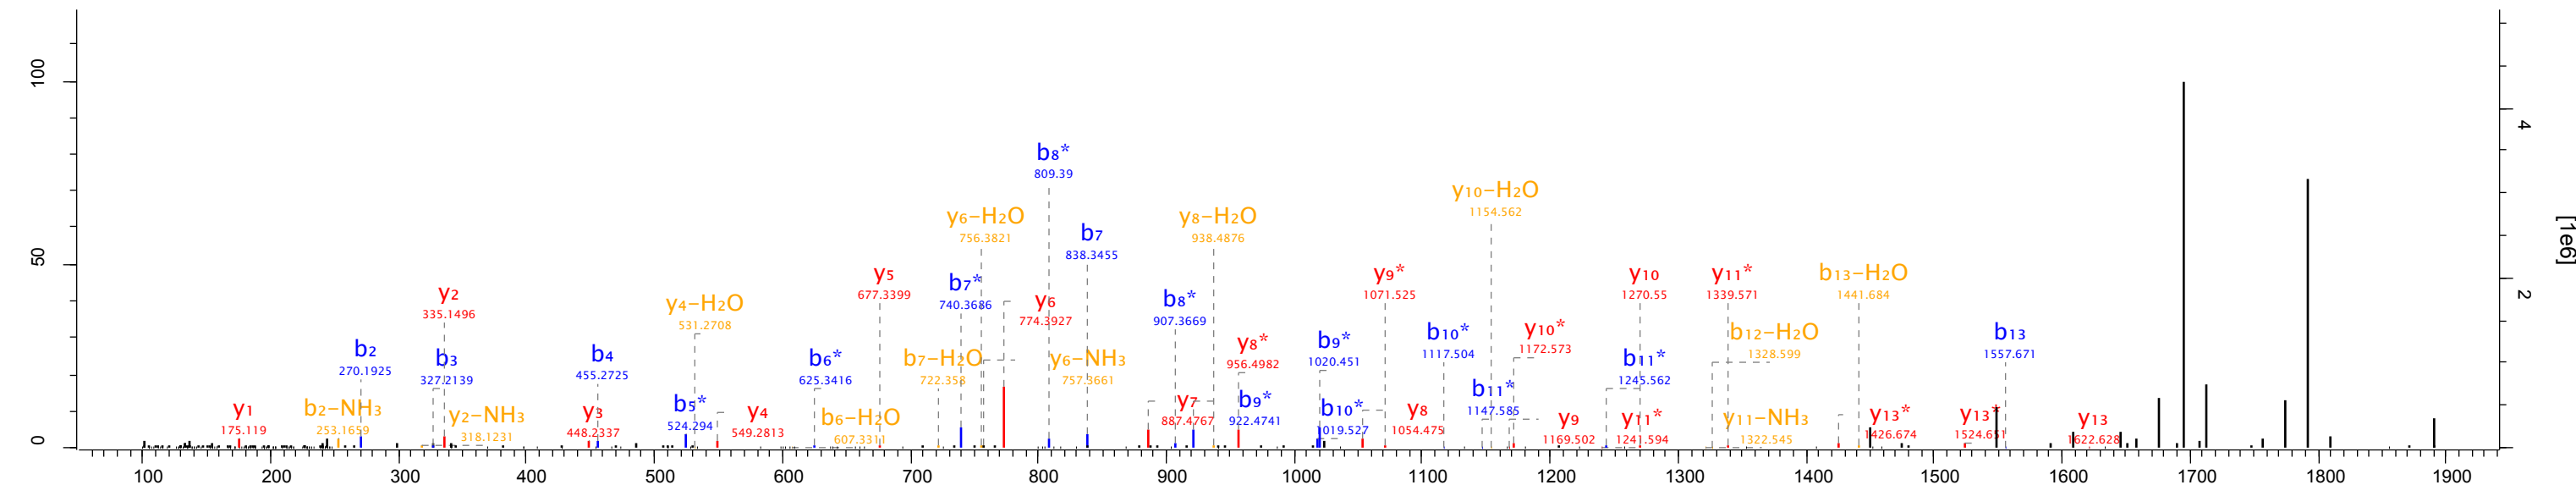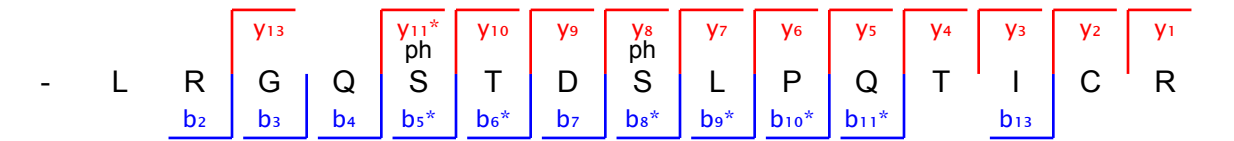

Raw file  
20171215\_MaS\_33SR\_LMH\_phospho2\_03

Scan 9972 Method FTMS; HCD Score 136.02 m/z 888.35 Gene names RBMX;RBMXL1

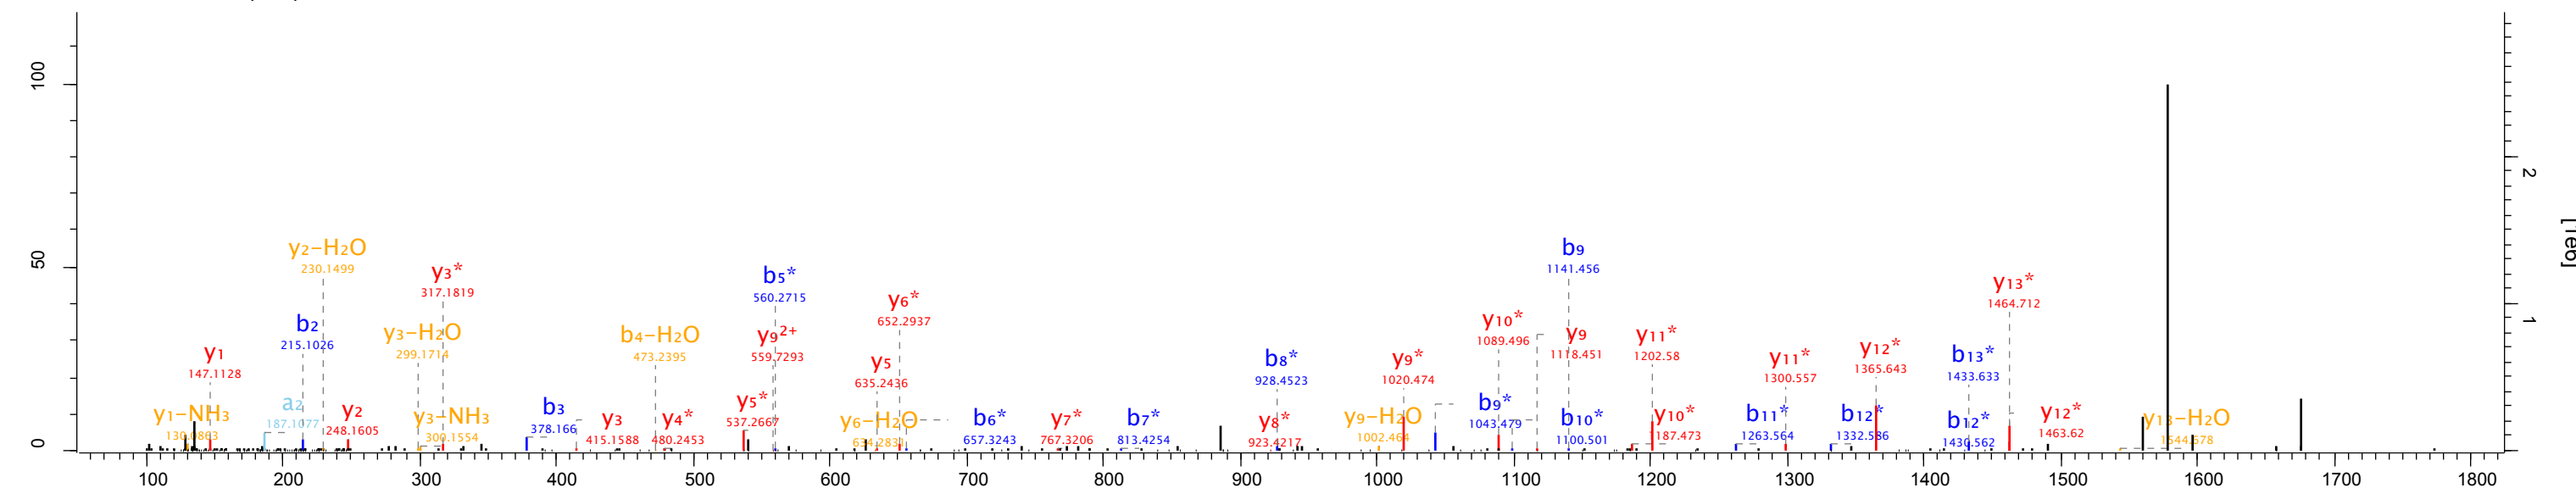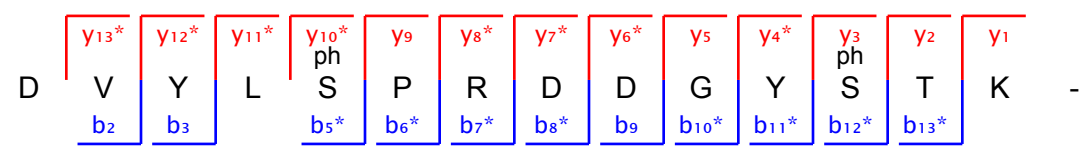

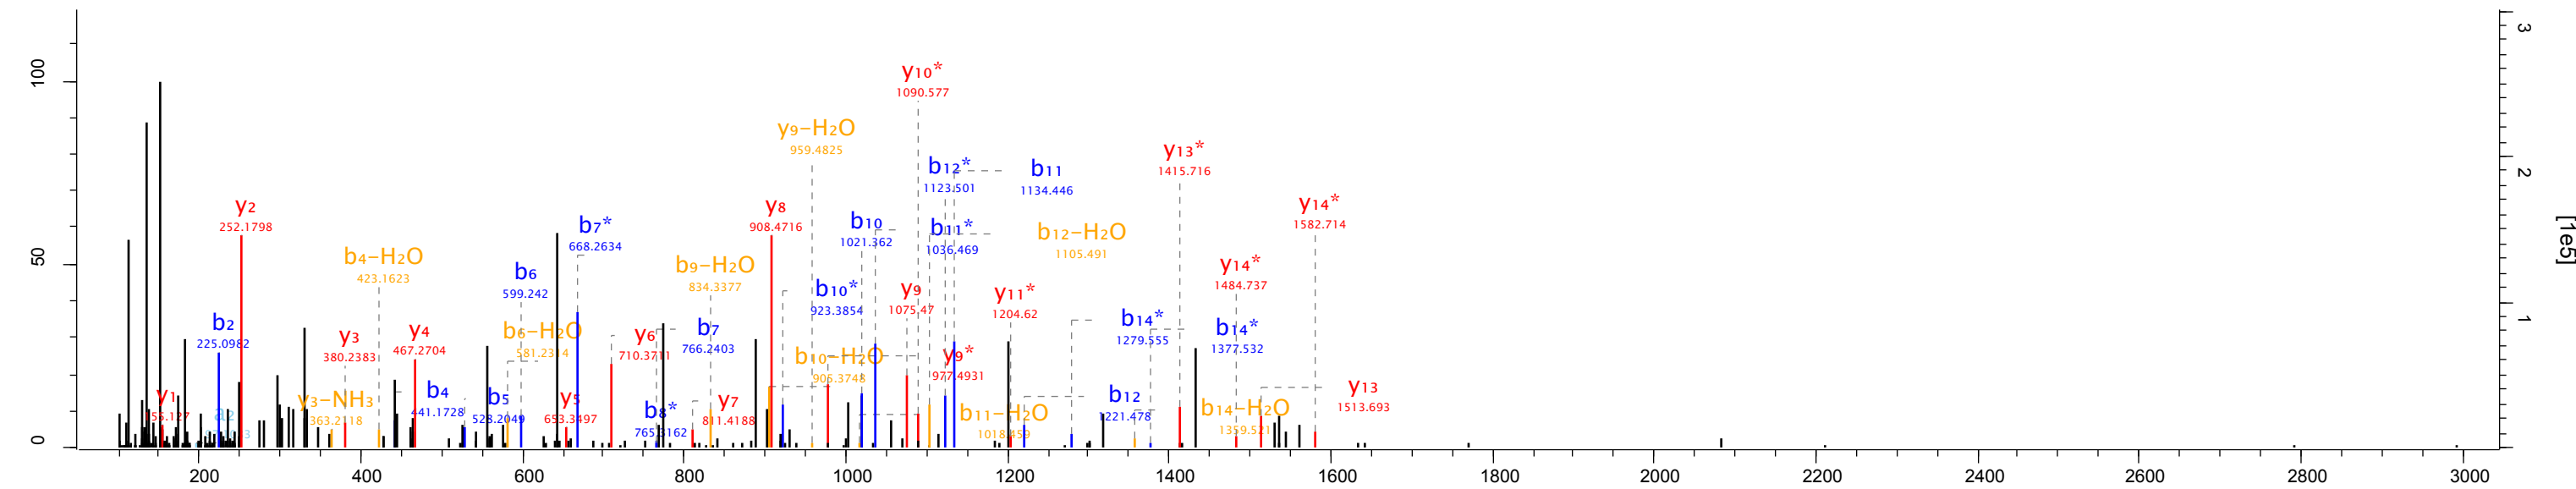

- S H S E S A S P S A L S S y14\* ph y13 y11\* y10\* y9 ph y8 y7 y6 y5 y4 y3 y2 y1  
 b2 b4 b5 b6 b7 b8\* b10 b11 b12 b14\*

Raw file 20171215\_MaS\_33SR\_LMH\_phospho2\_04 Scan 2552 Method FTMS; HCD Score 140.26 m/z 684.82 Gene names TJP1

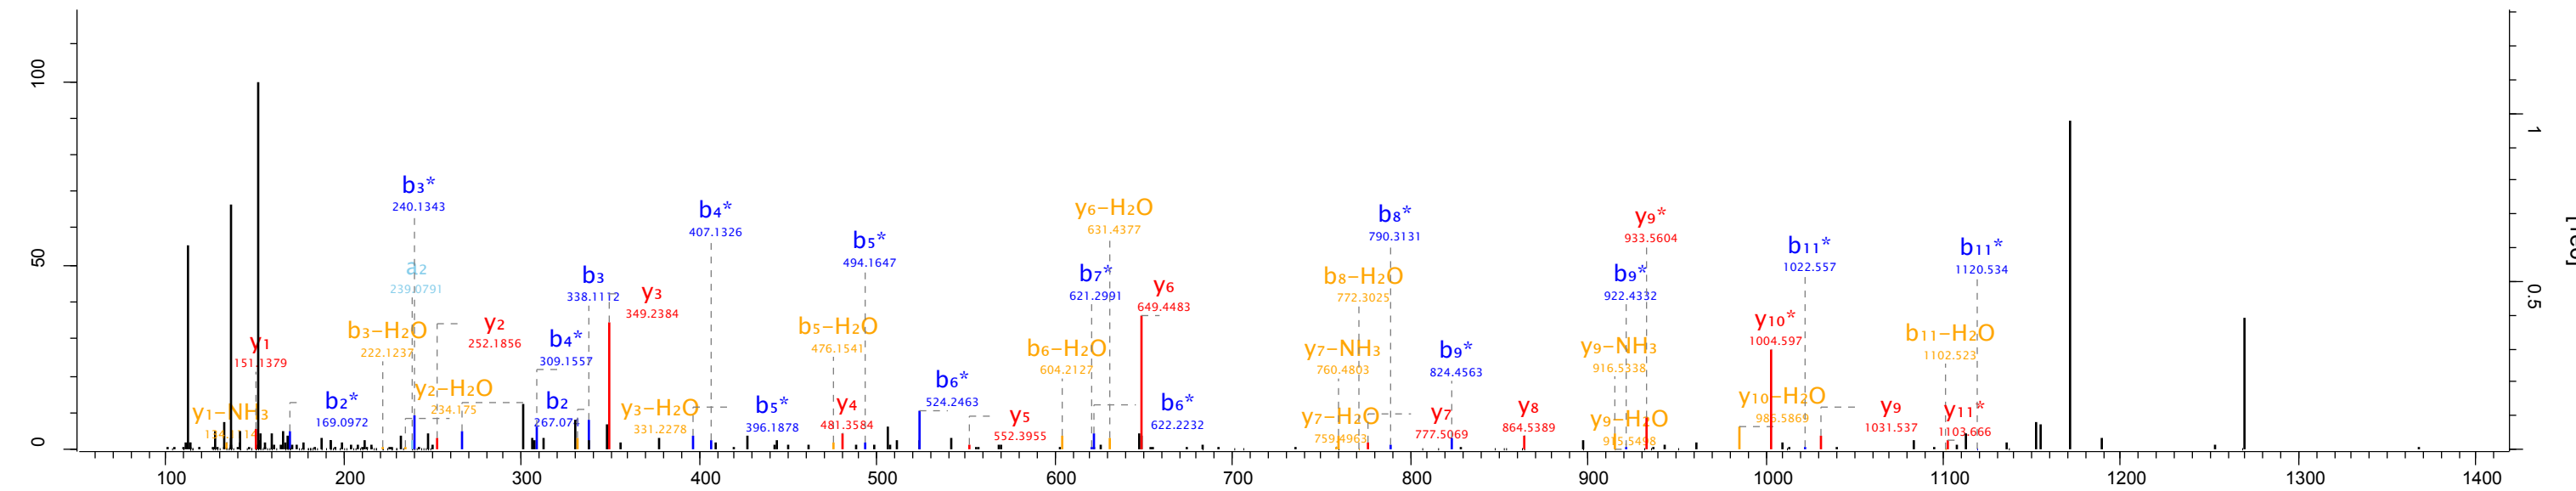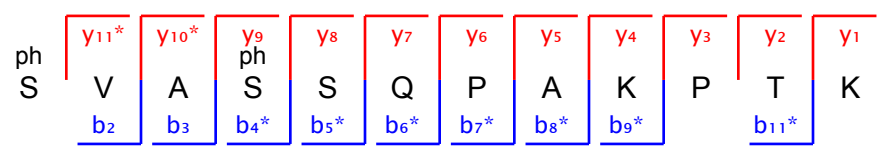

Raw file 20171215\_MaS\_33SR\_LMH\_phospho2\_04 Scan 2602 Method FTMS; HCD Score 139.03 m/z 842.74 Gene names BZW1

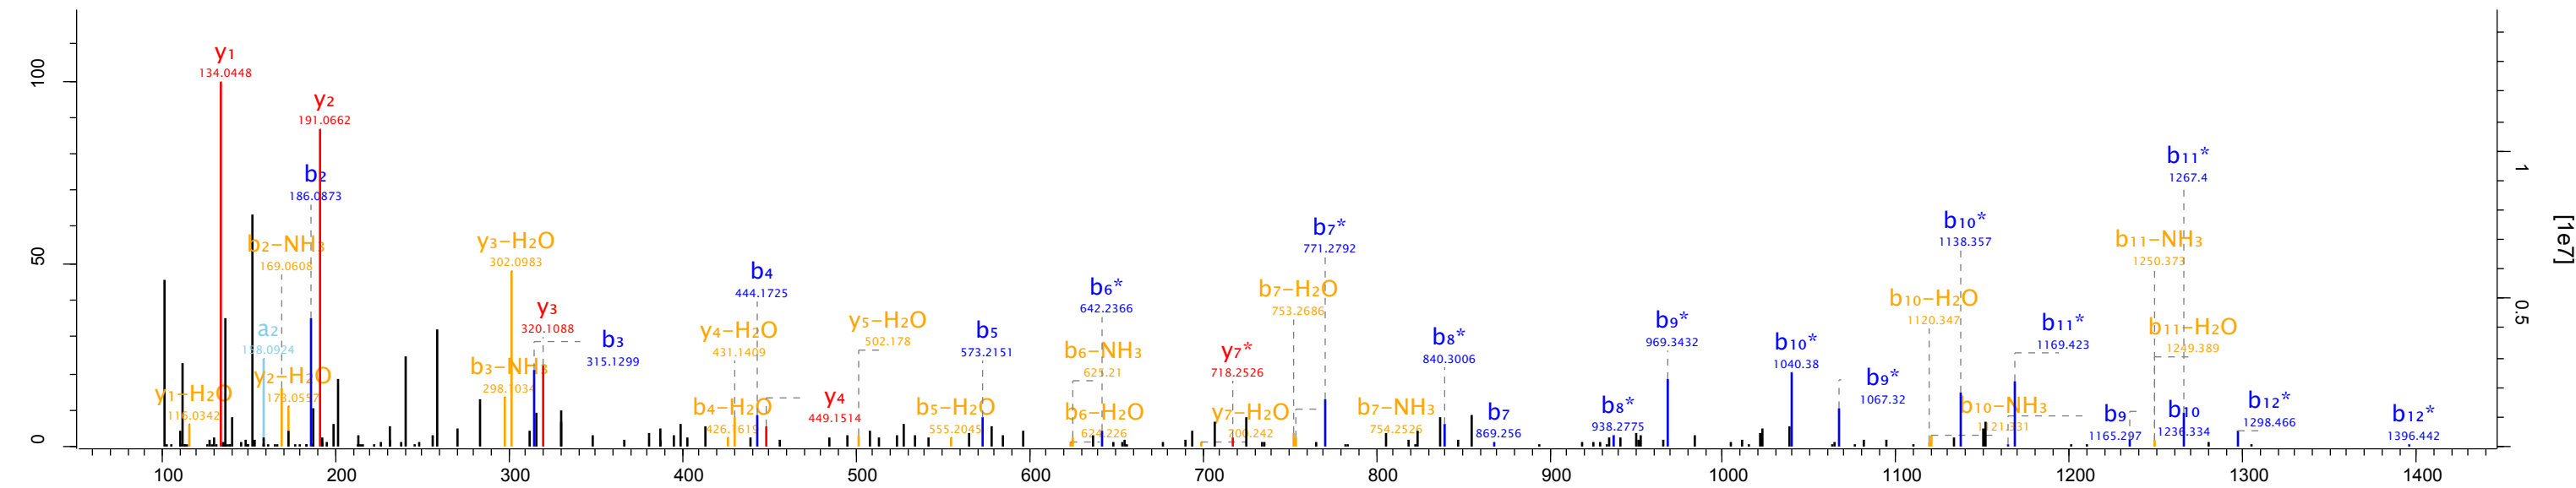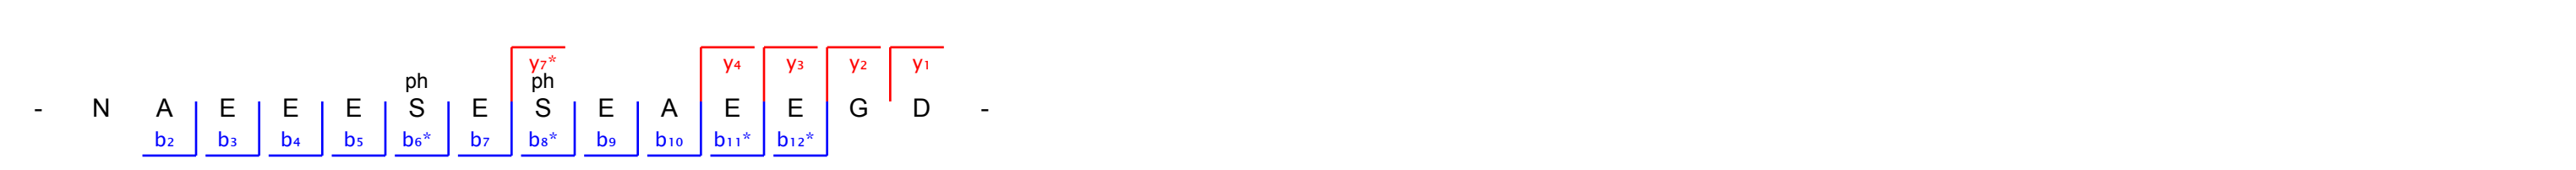

Raw file 20171215\_MaS\_33SR\_LMH\_phospho2\_04 Scan 2872 Method FTMS; HCD Score 91.38 m/z 1056.82 Gene names RRP15

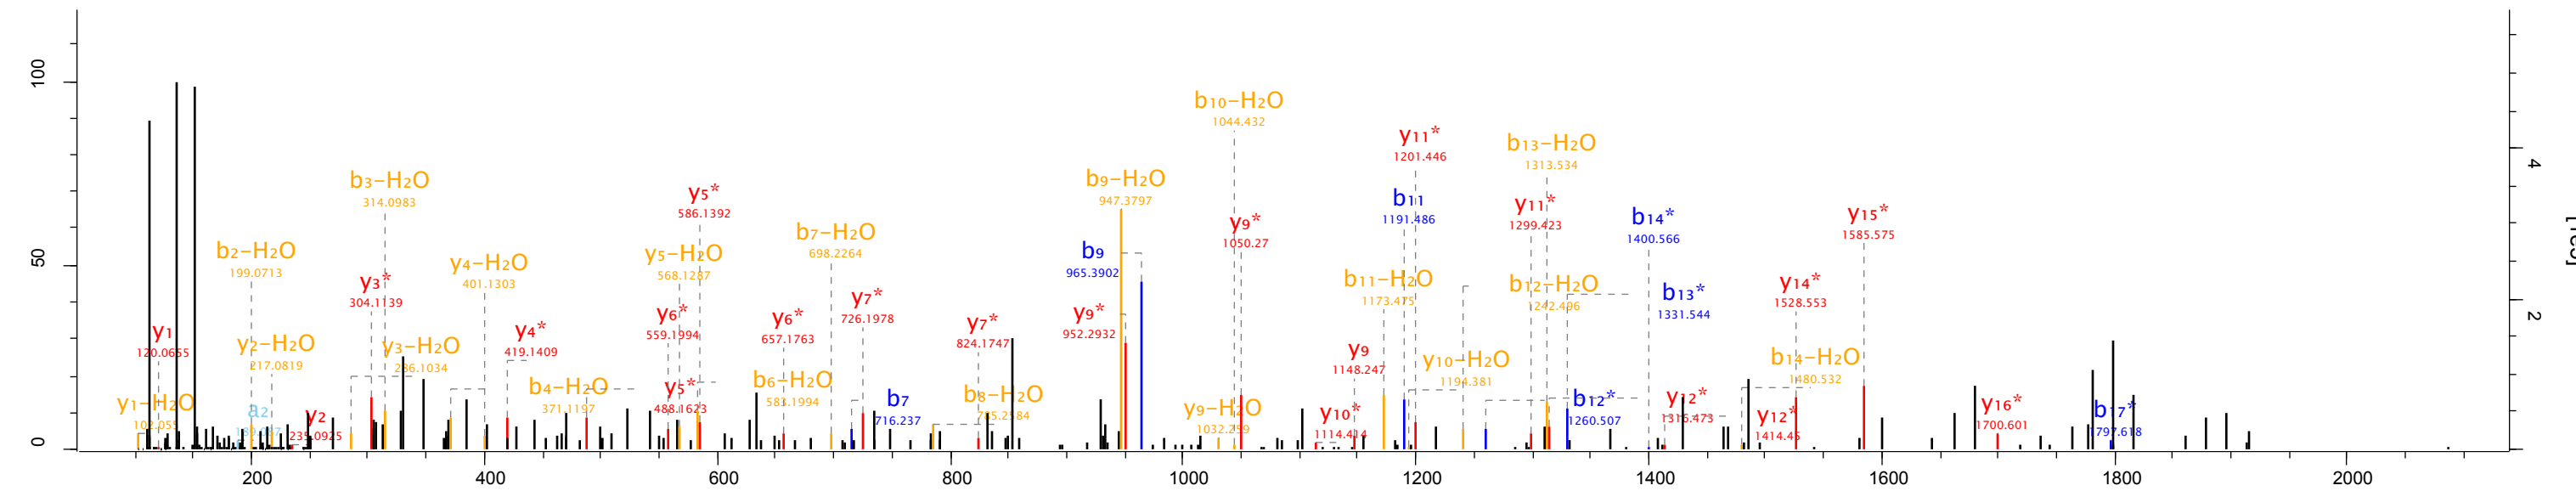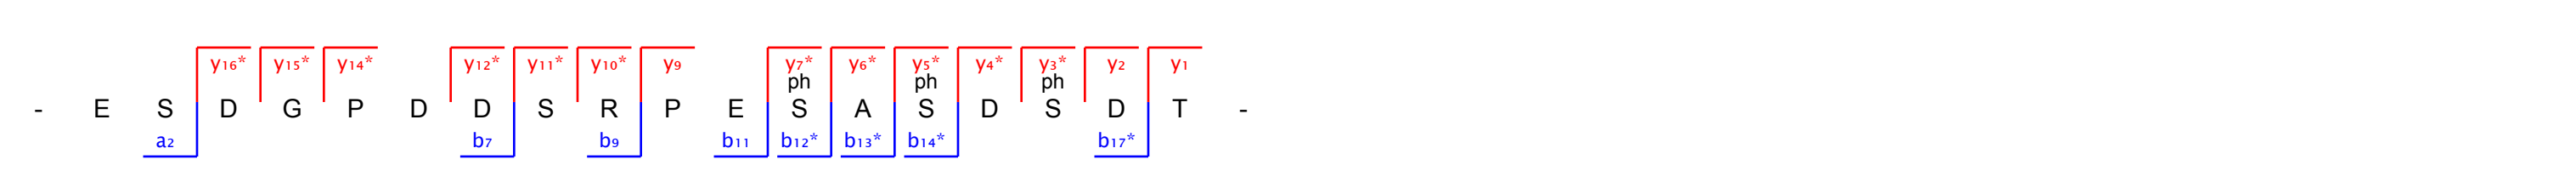

Raw file 20171215\_MaS\_33SR\_LMH\_phospho2\_04 Scan 2892 Method FTMS; HCD Score 101.53 m/z 707.23 Gene names MADD

20171215\_MaS\_33SR\_LMH\_phospho2\_04

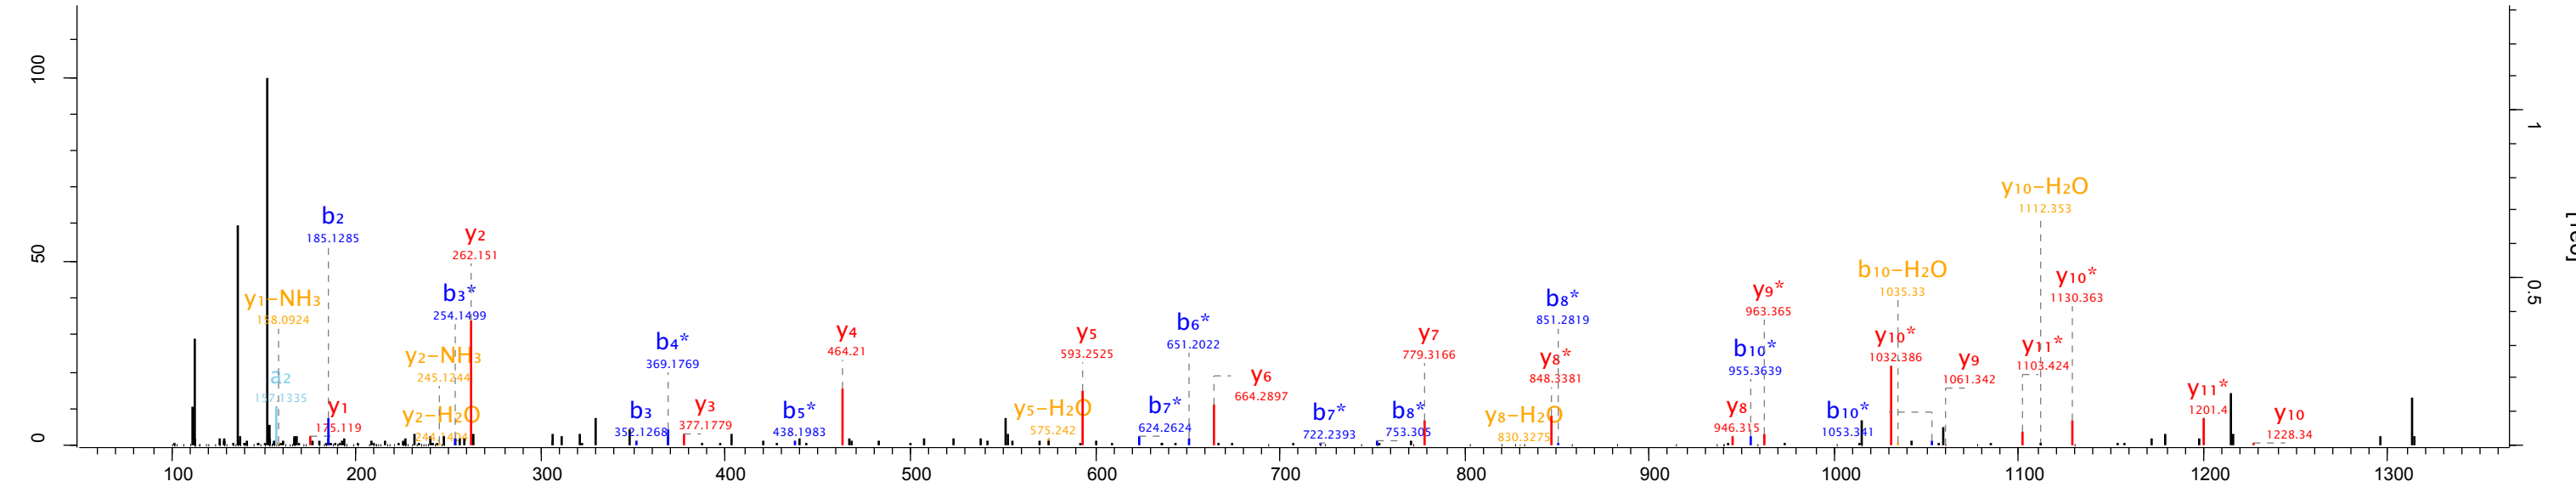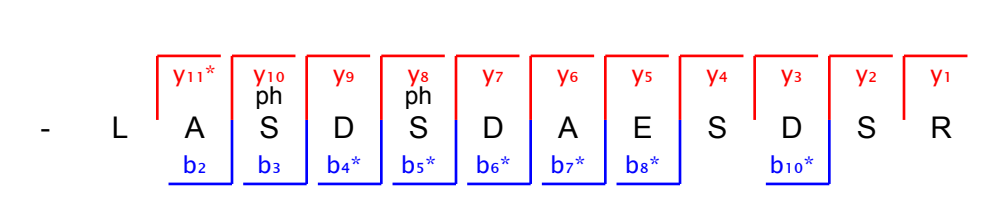

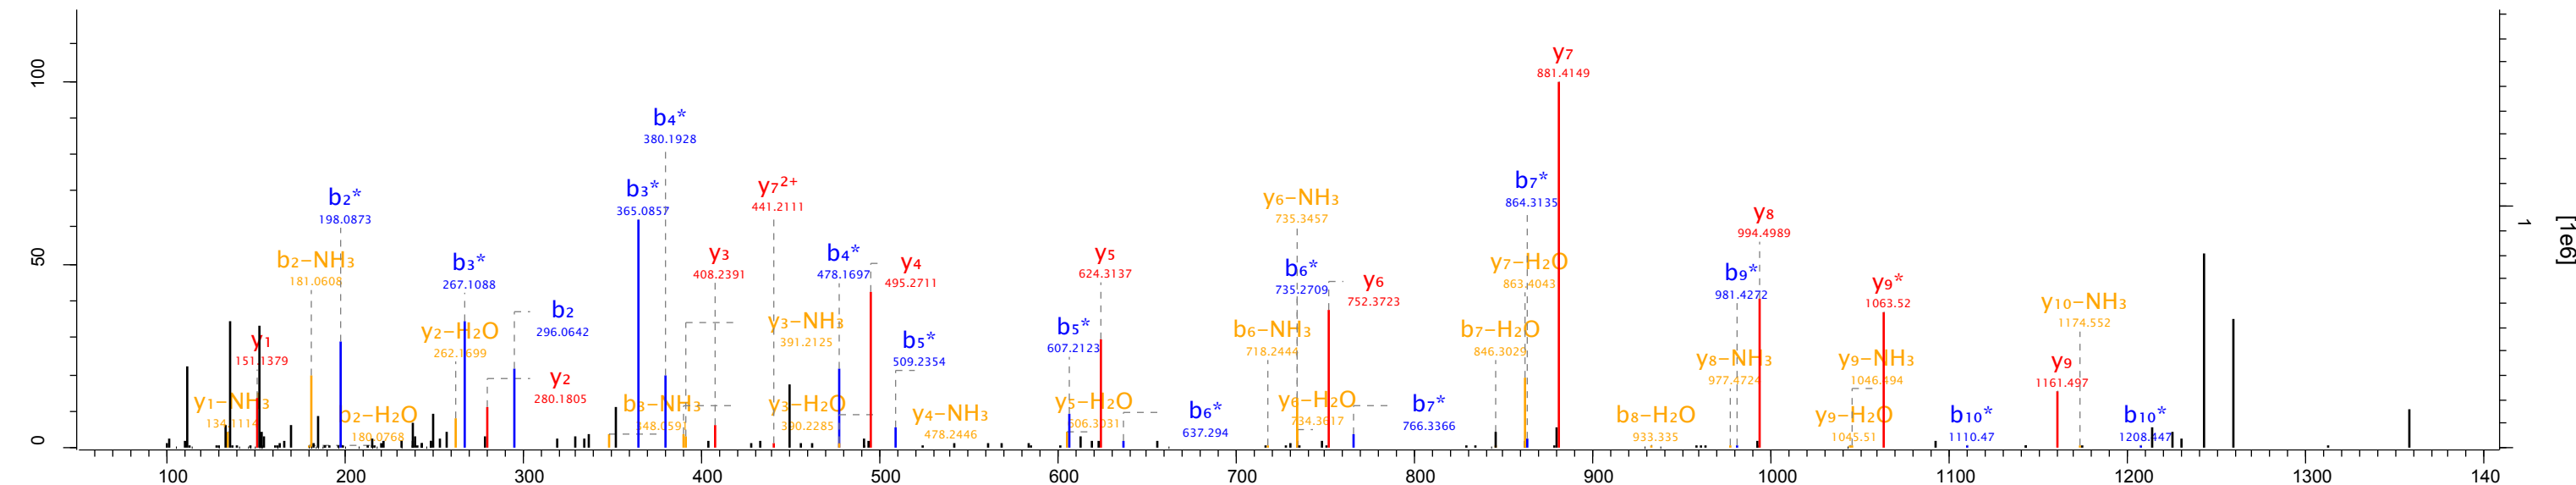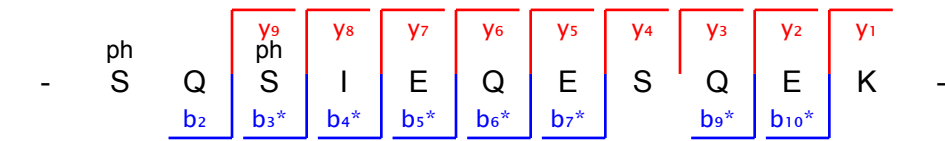



Raw file  
20171215\_MaS\_33SR\_LMH\_phospho2\_04

Scan 3412 Method FTMS; HCD Score 71.7 m/z 781.92 Gene names PSIP1

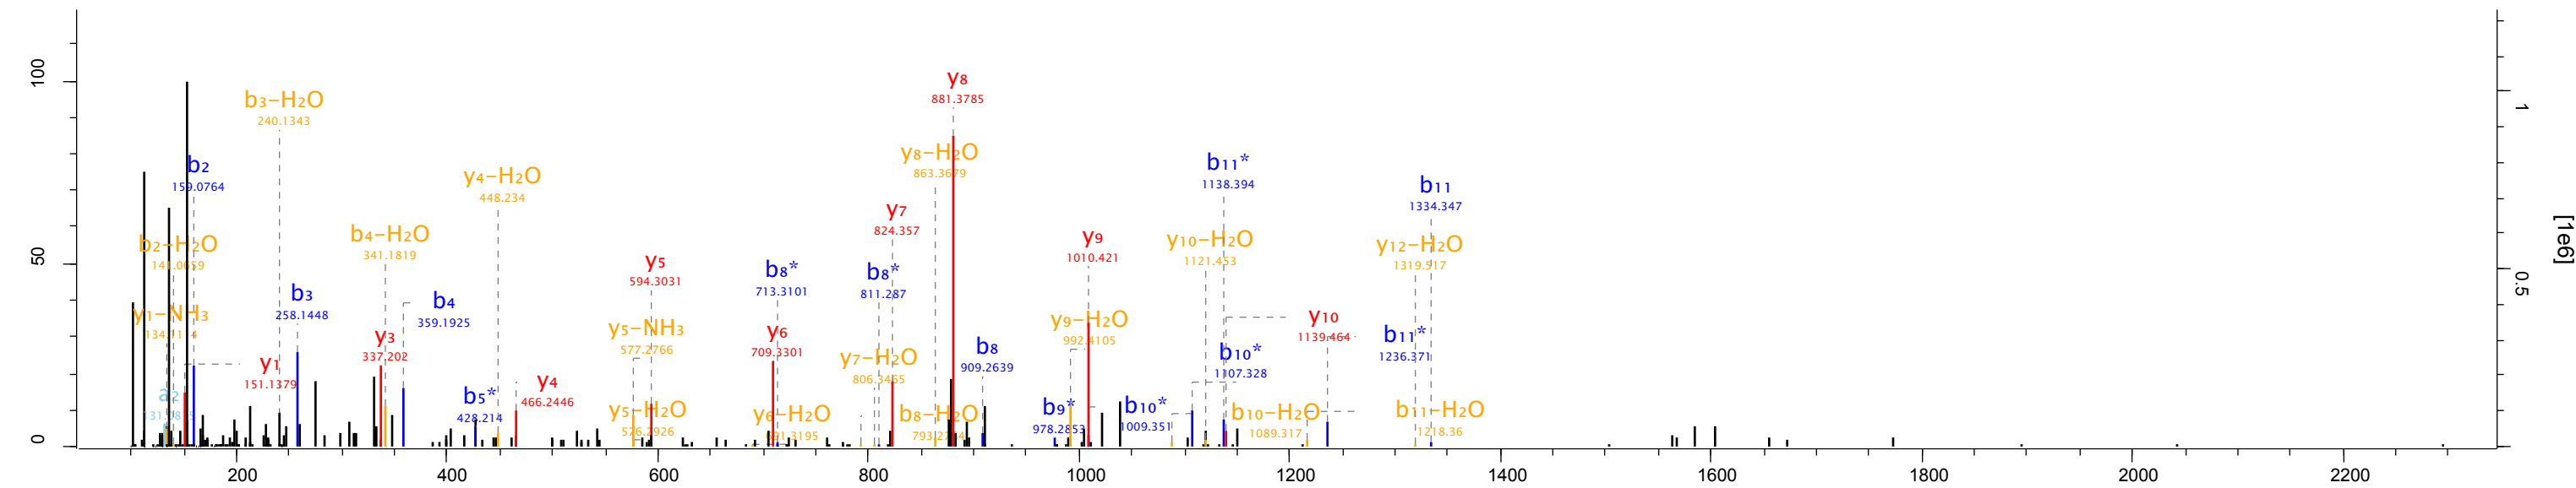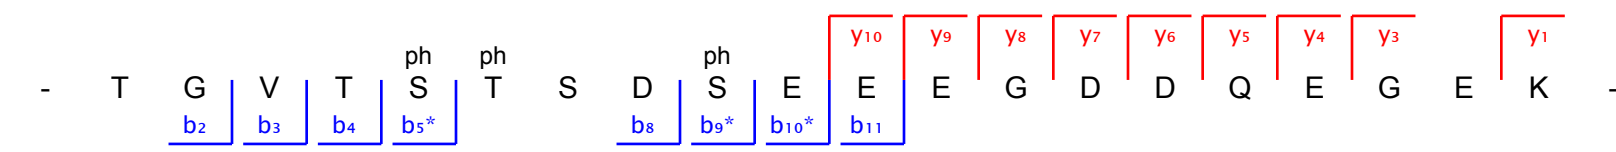

Raw file 20171215\_MaS\_33SR\_LMH\_phospho2\_04 Scan 3732 Method FTMS; HCD Score 45.68 m/z 860.83 Gene names HMGA1;C2orf81

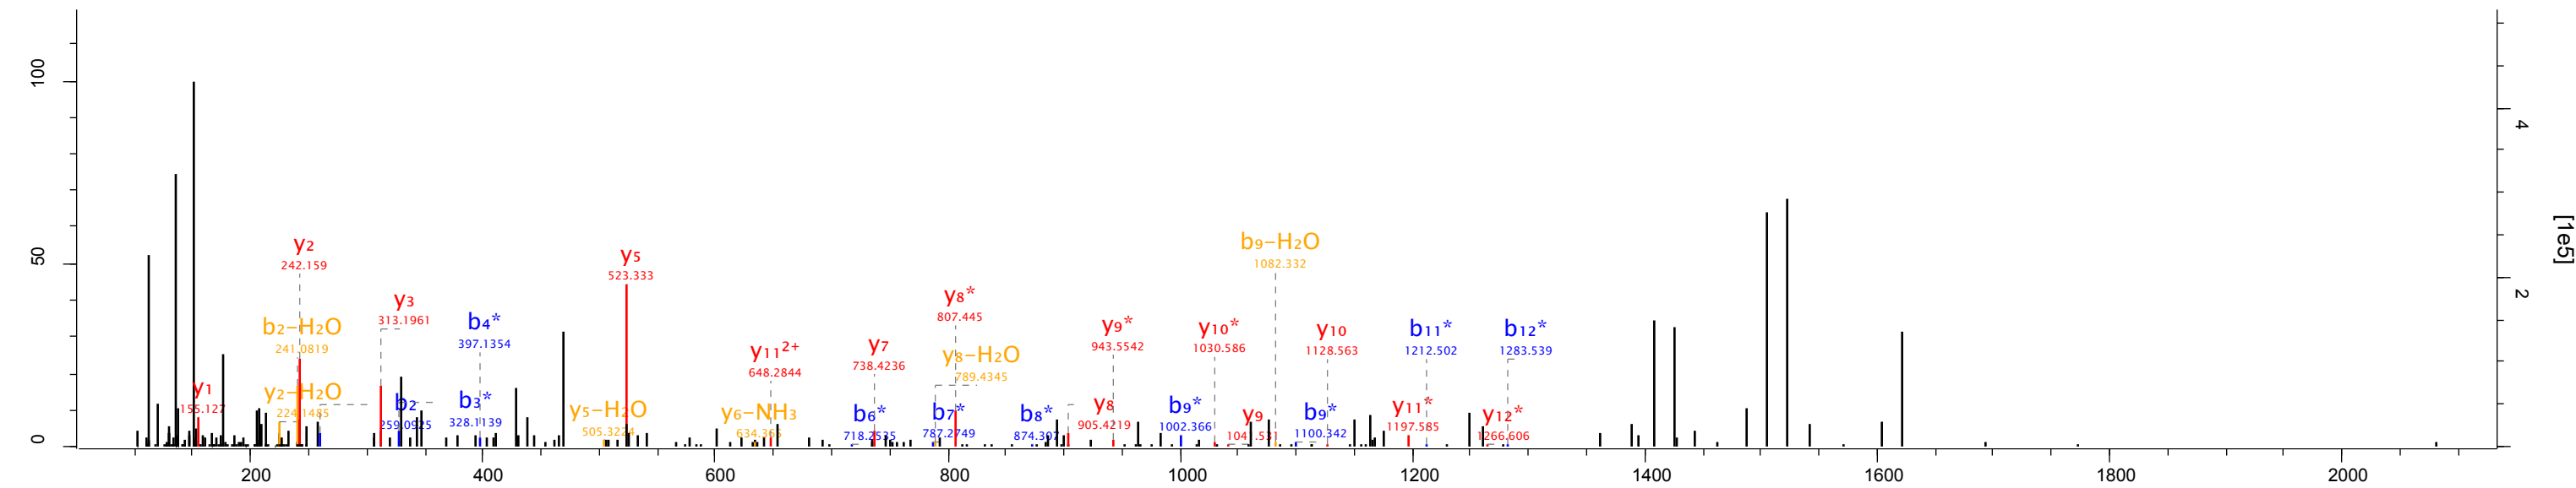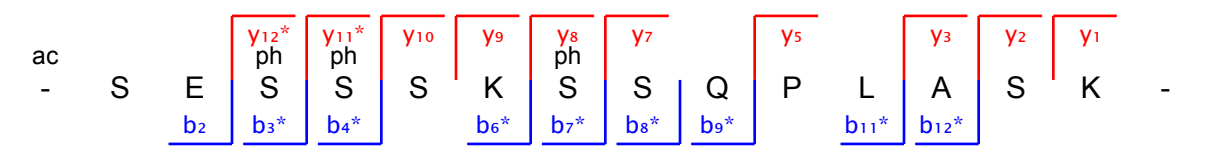

Raw file 20171215\_MaS\_33SR\_LMH\_phospho2\_04 Scan 4272 Method FTMS; HCD Score 191.07 m/z 949.81 Gene names HMGA1

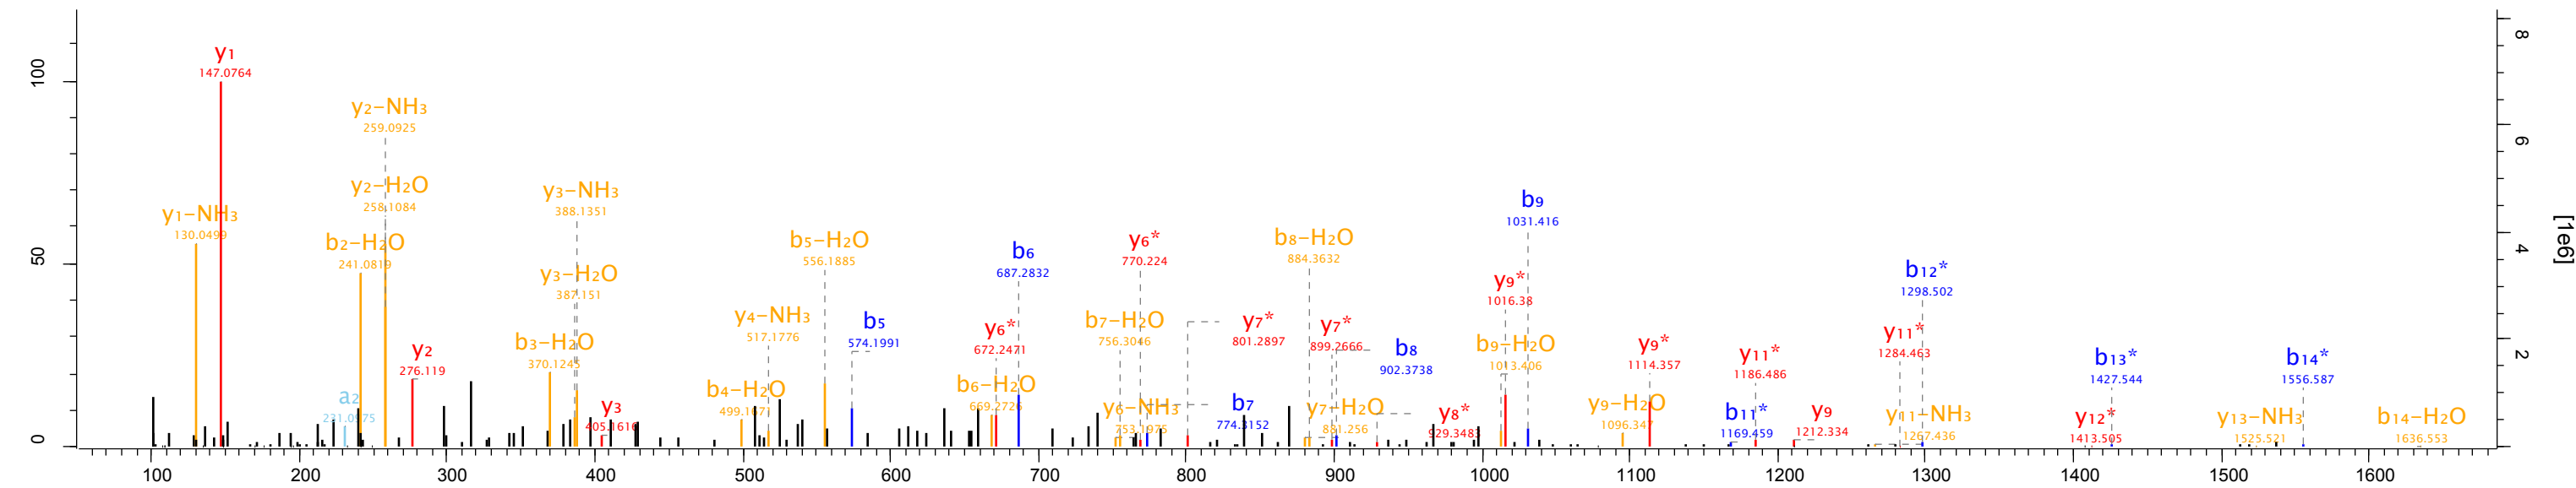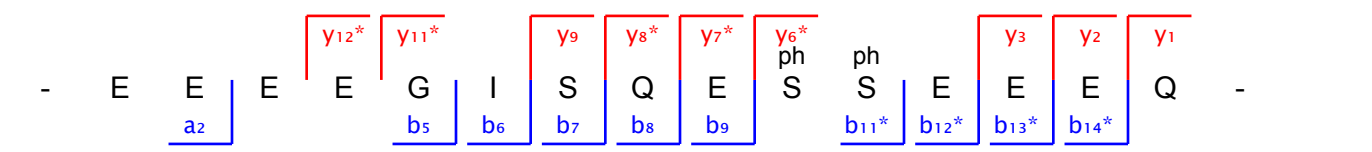

Raw file: 20171215\_MaS\_33SR\_LMH\_phospho2\_04  
 Scan: 4372 Method: FTMS; HCD Score: 164.57 m/z: 646.27 Gene names: ANKRD17

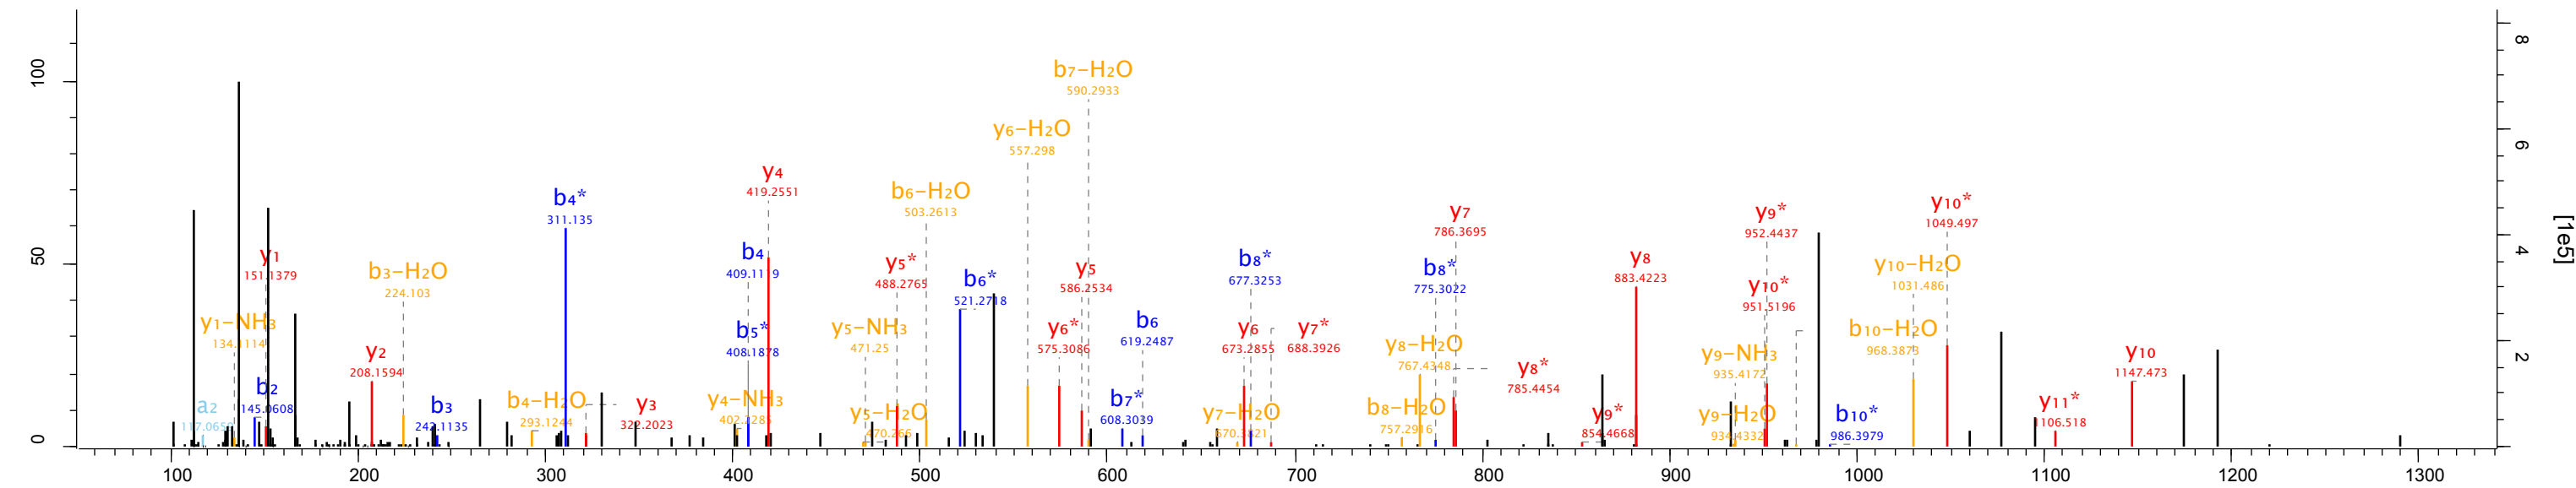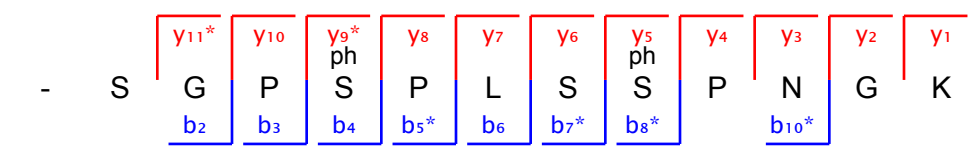

Raw file 20171215\_MaS\_33SR\_LMH\_phospho2\_04 Scan 4962 Method FTMS; HCD Score 157.47 m/z 729.76 Gene names ZMYM4

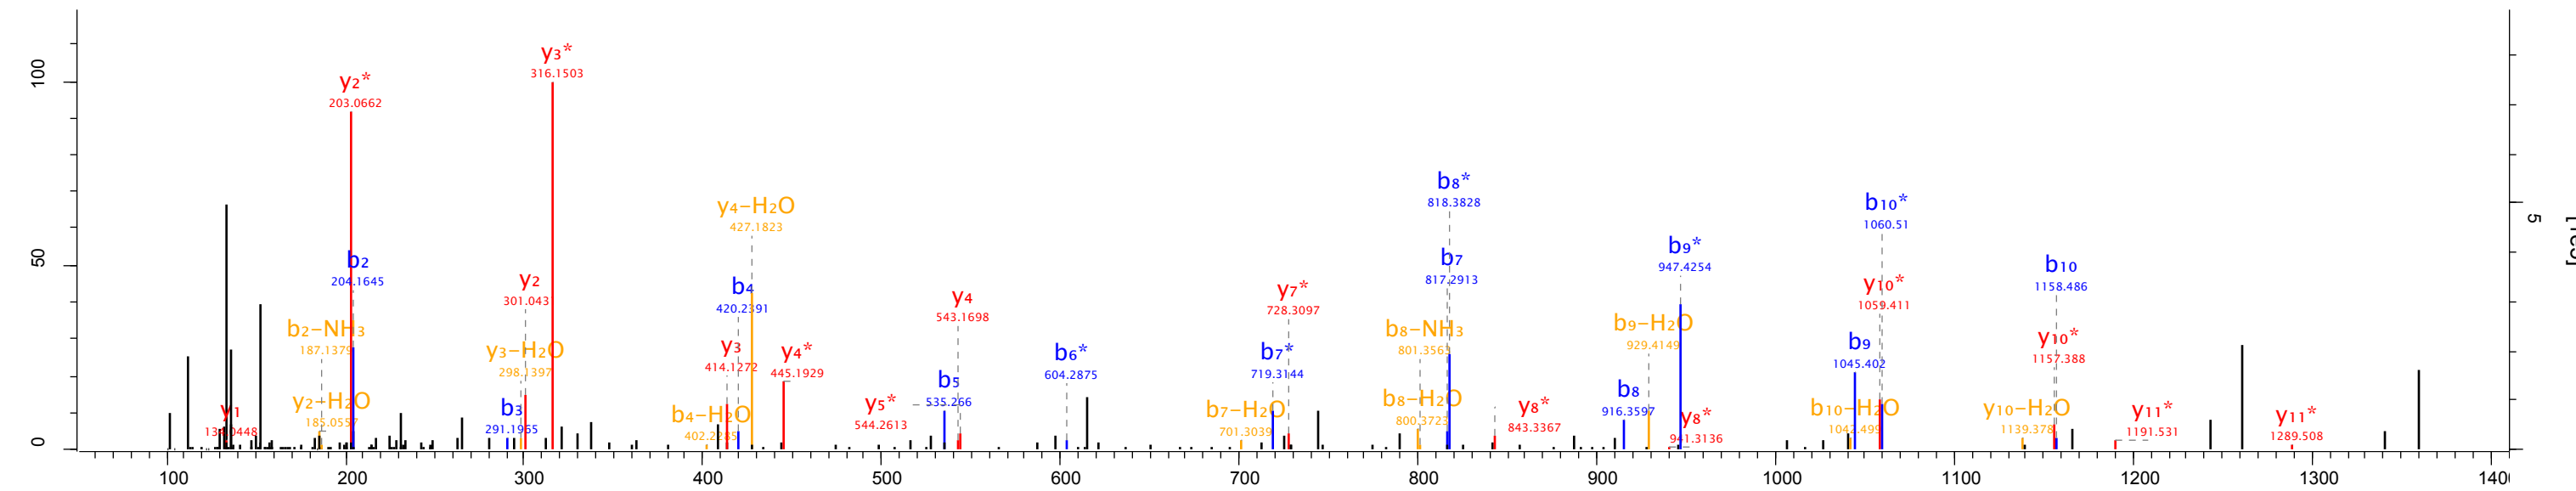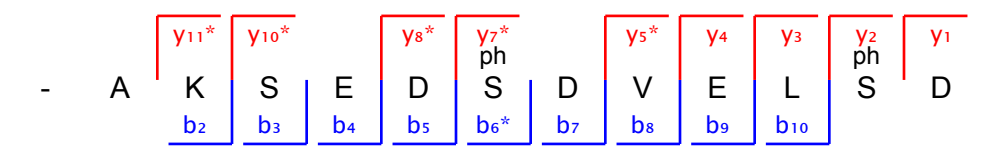

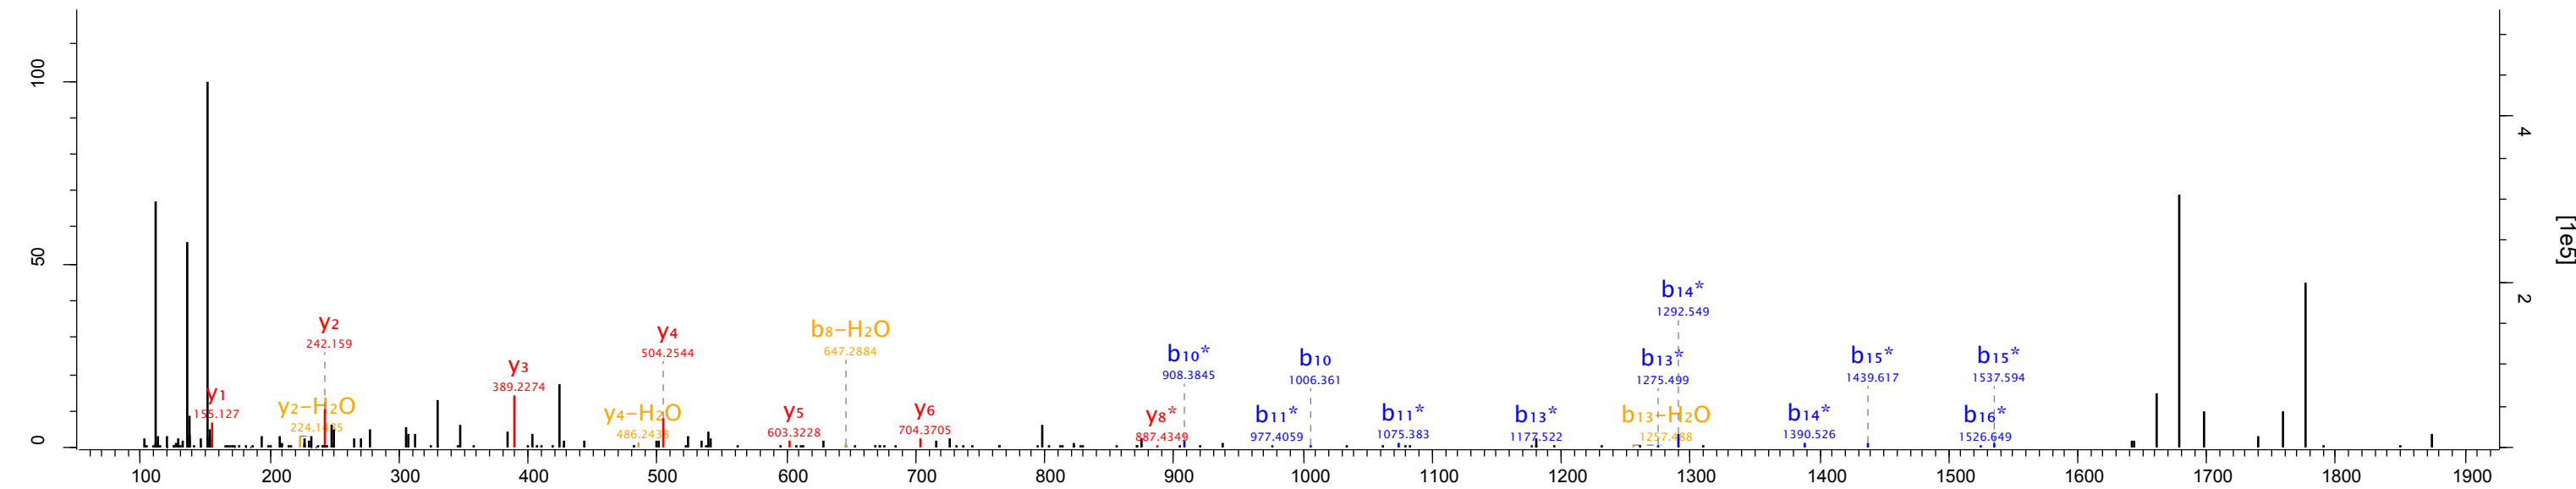

- G N G S G G S R E N S T V D F S K -

ph ph

y8\* y6 y5 y4 y3 y2 y1

b10 b11\* b13\* b14\* b15\* b16\*

Raw file 20171215\_MaS\_33SR\_LMH\_phospho2\_04 Scan 5042 Method FTMS; HCD Score 95.26 m/z 631.71 Gene names SLC3A2

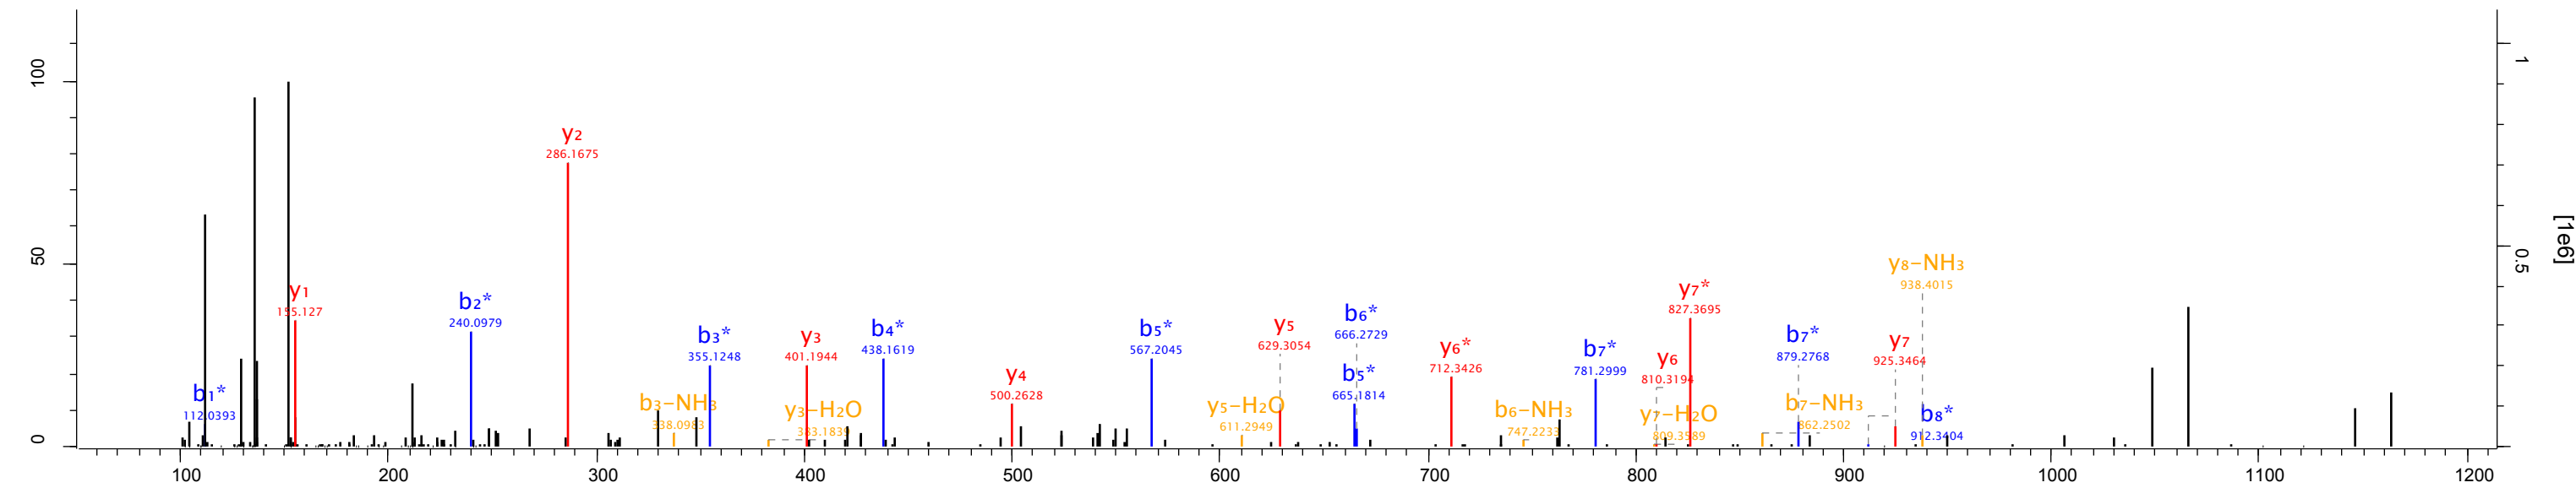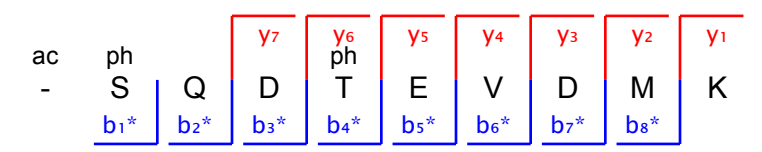

Raw file: 20171215\_MaS\_33SR\_LMH\_phospho2\_04  
 Scan: 5052 Method: FTMS; HCD Score: 80.6 m/z: 734.25 Gene names: ARHGAP30

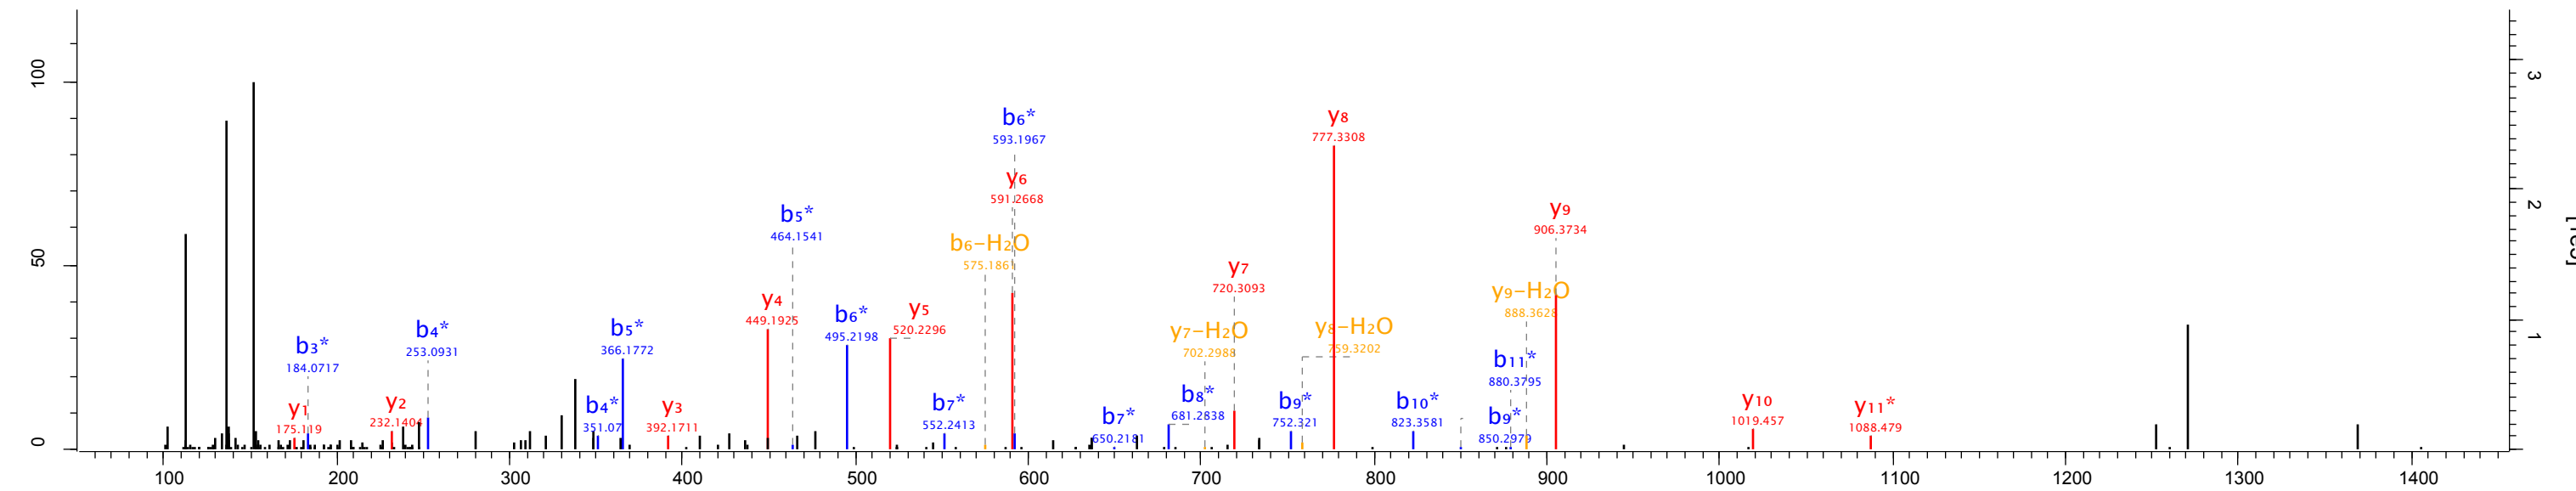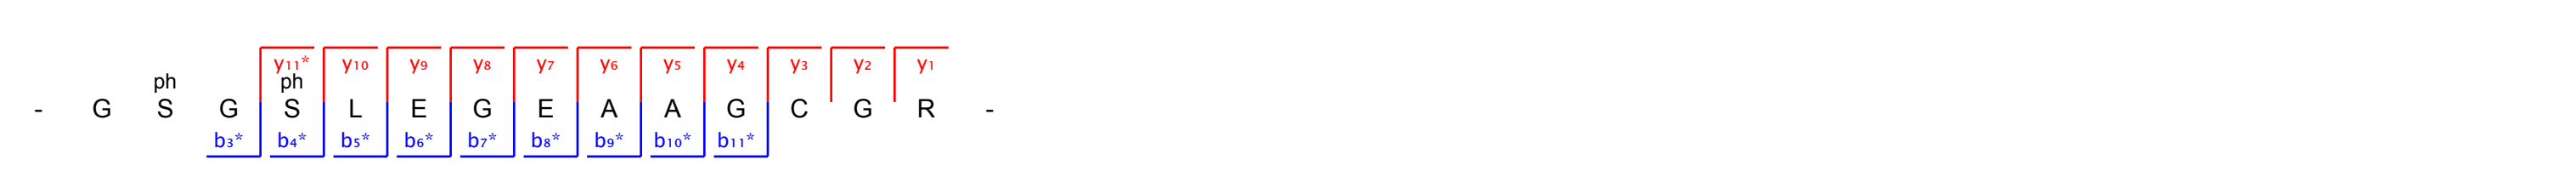



Raw file: 20171215\_MaS\_33SR\_LMH\_phospho2\_04  
 Scan: 5122 Method: FTMS; HCD Score: 98.57 m/z: 691.75 Gene names: MAGED2

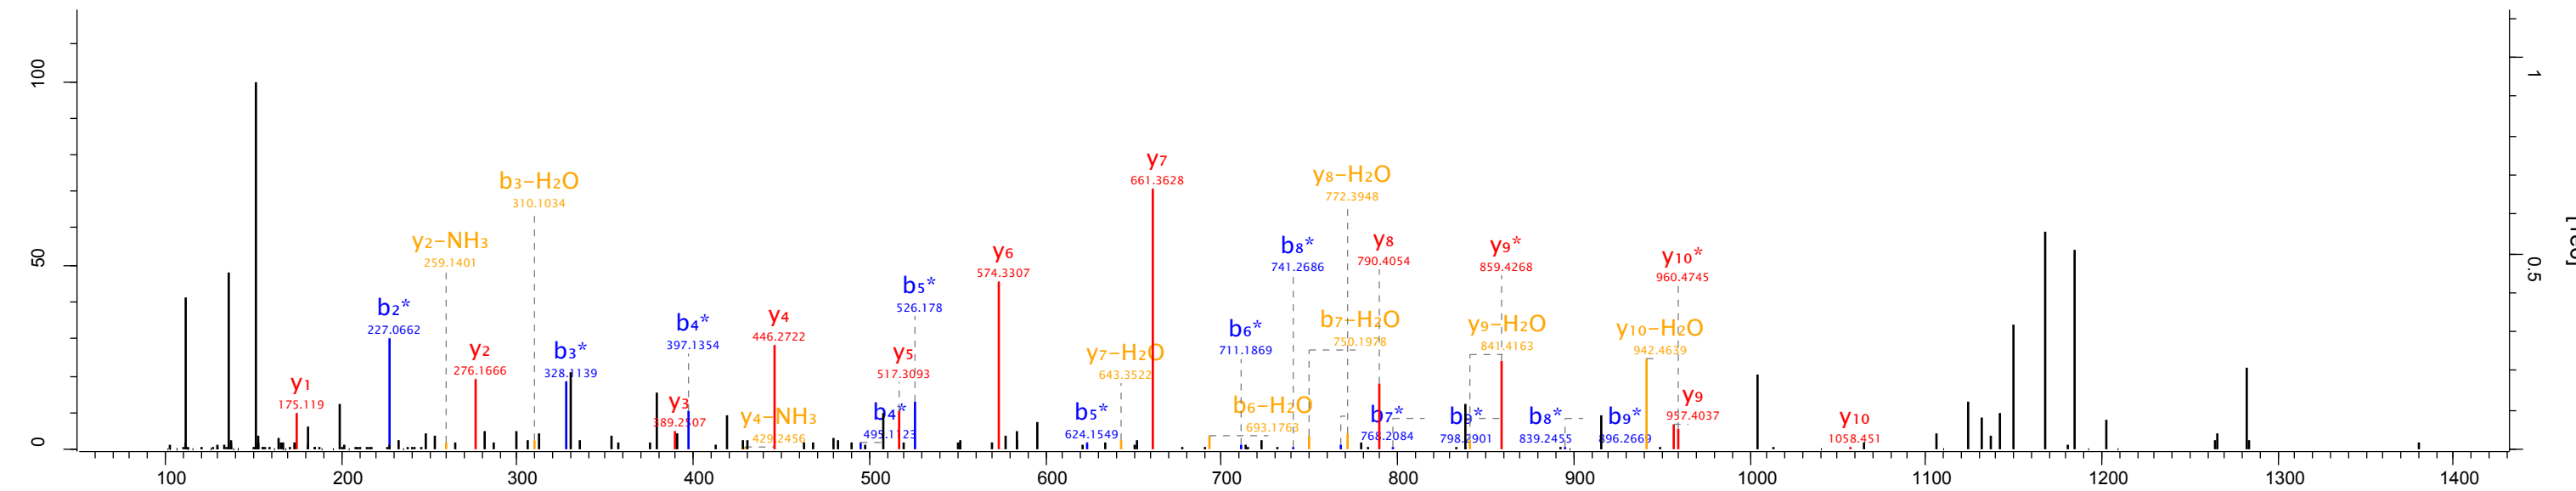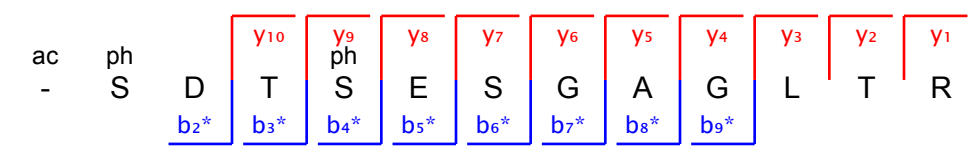

Raw file 20171215\_MaS\_33SR\_LMH\_phospho2\_04 Scan 5552 Method FTMS; HCD Score 116.88 m/z 1021.89 Gene names YBX3

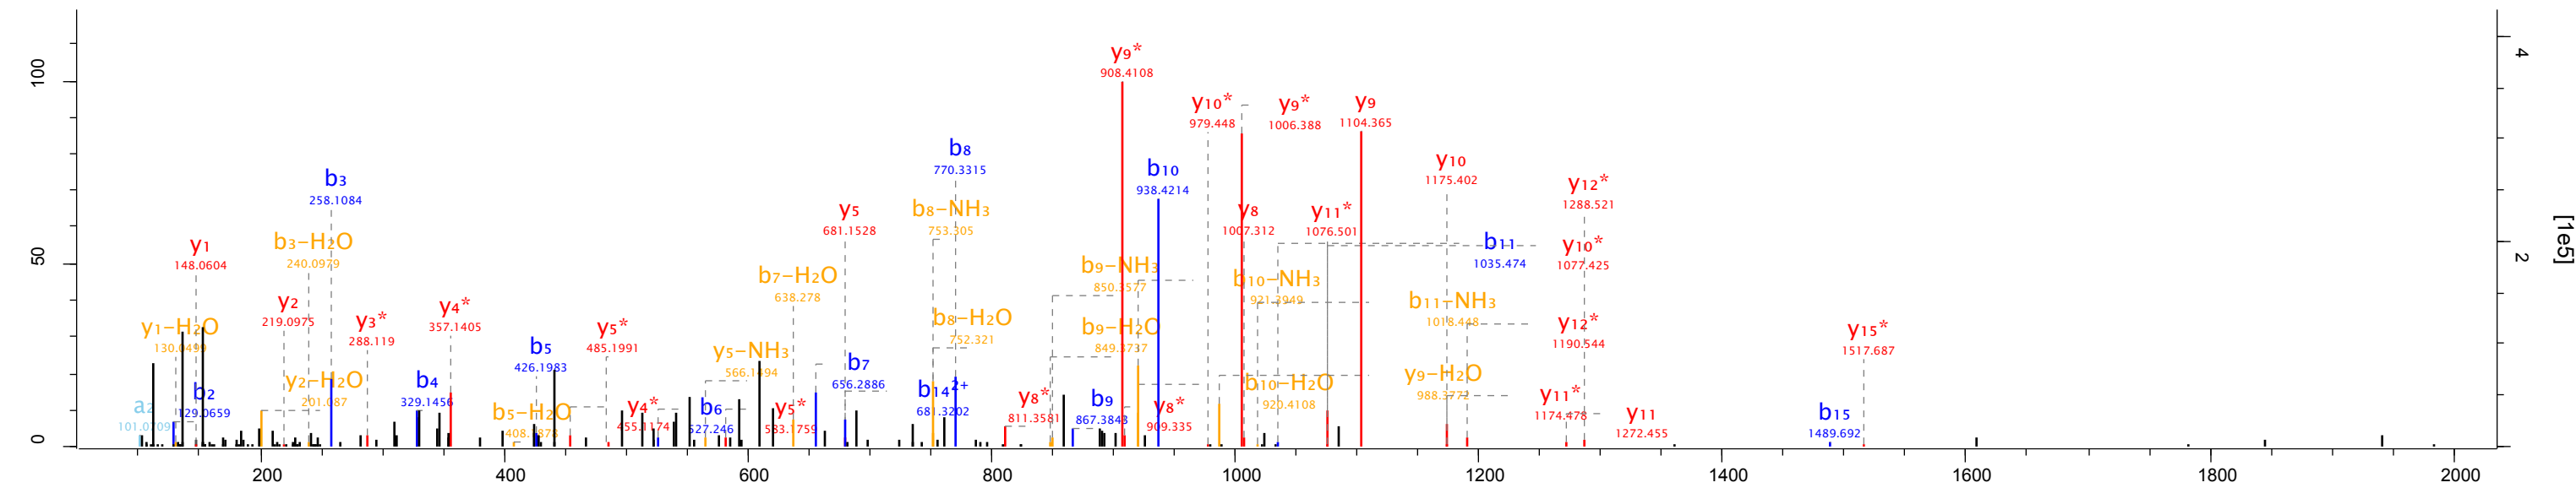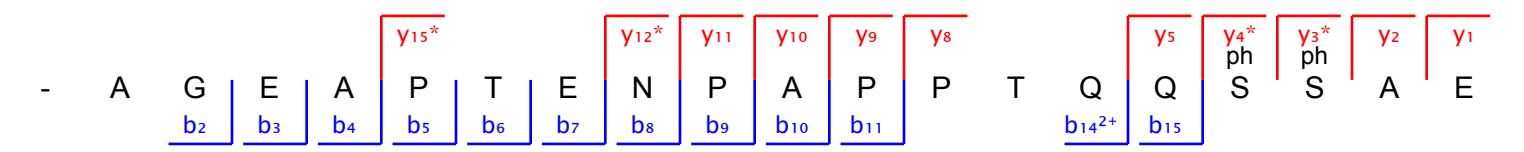

Raw file 20171215\_MaS\_33SR\_LMH\_phospho2\_04 Scan 6642 Method FTMS; HCD Score 77.06 m/z 901.05 Gene names ZC3HC1

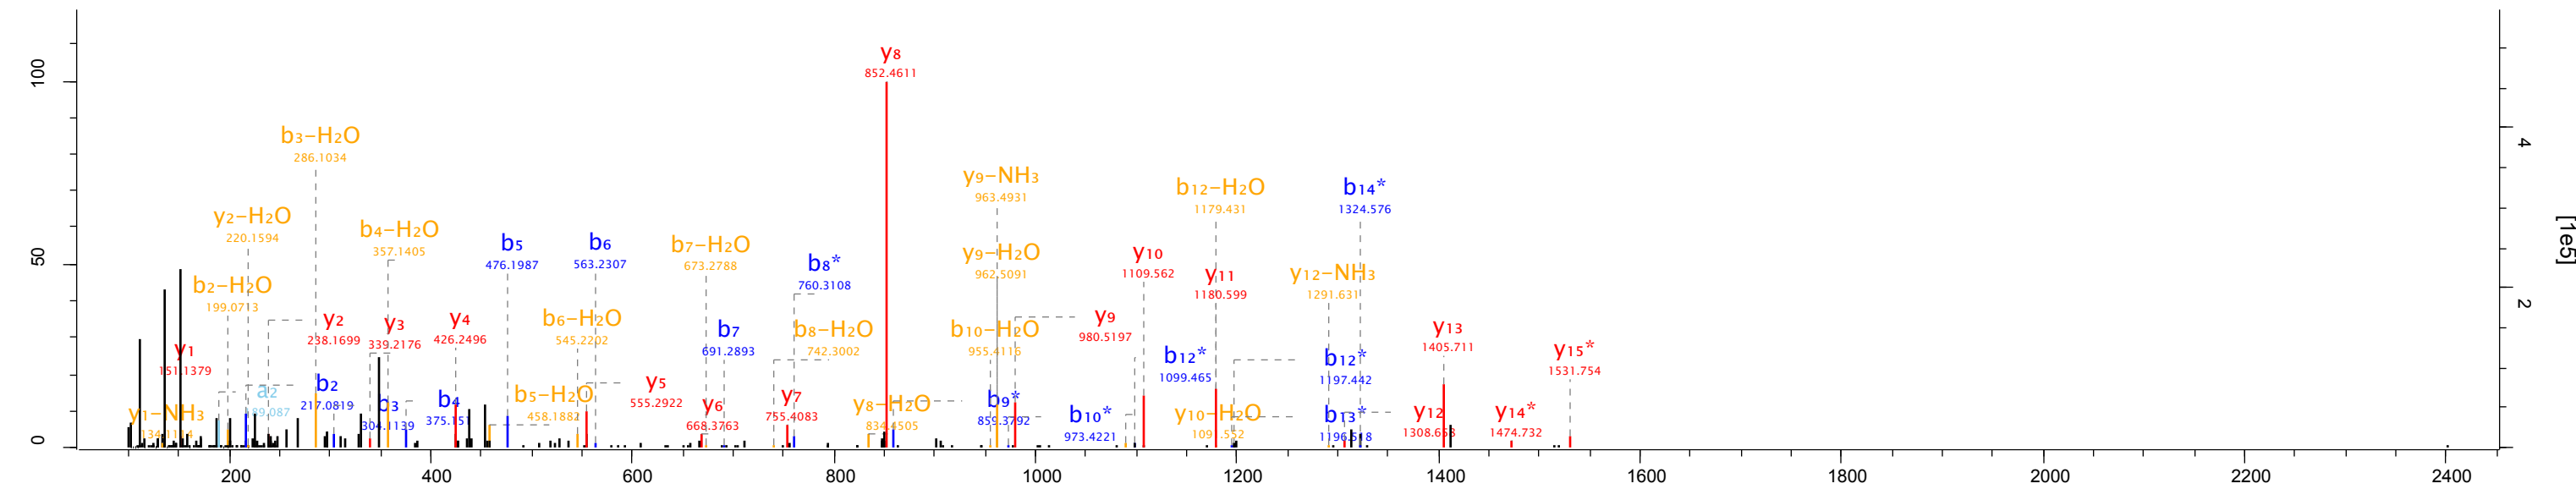

- D T S A T S Q S V N G S P Q A E Q P S L E S T S K -

b<sub>2</sub>
b<sub>3</sub>
b<sub>4</sub>
b<sub>5</sub>
b<sub>6</sub>
b<sub>7</sub>
b<sub>8</sub><sup>\*</sup>
b<sub>9</sub><sup>\*</sup>
b<sub>10</sub><sup>\*</sup>
y<sub>15</sub><sup>\*</sup>
y<sub>14</sub><sup>\*</sup>
y<sub>13</sub>
y<sub>12</sub>
y<sub>11</sub>
y<sub>10</sub>
y<sub>9</sub>
y<sub>8</sub>
y<sub>7</sub>
y<sub>6</sub>
y<sub>5</sub>
y<sub>4</sub>
y<sub>3</sub>
y<sub>2</sub>
y<sub>1</sub>

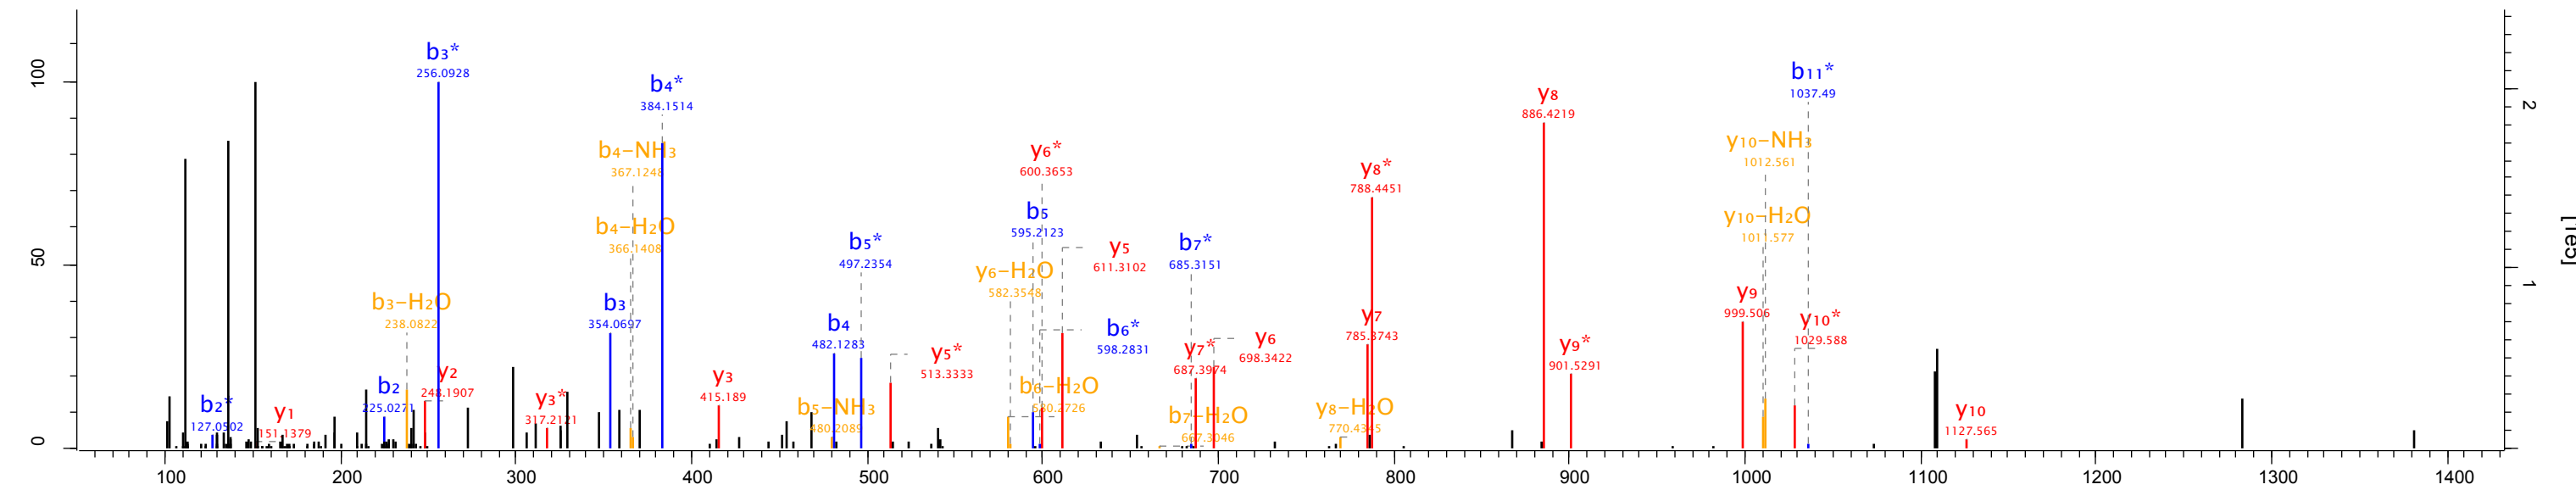

ph

S

G

E

y<sub>10</sub>

Q

y<sub>9</sub>

I

y<sub>8</sub>

T

y<sub>7</sub>

S

y<sub>6</sub>

S

y<sub>5</sub>

P

y<sub>3</sub>

S

y<sub>2</sub>

P

y<sub>1</sub>

K

-

b<sub>2</sub>b<sub>3</sub>b<sub>4</sub>b<sub>5</sub>b<sub>6</sub>\*b<sub>7</sub>\*b<sub>11</sub>\*

[1e5]

20171215\_MaS\_33SR\_LMH\_phospho2\_04 8722 FTMS; HCD 154.88 719.97 EPHA2

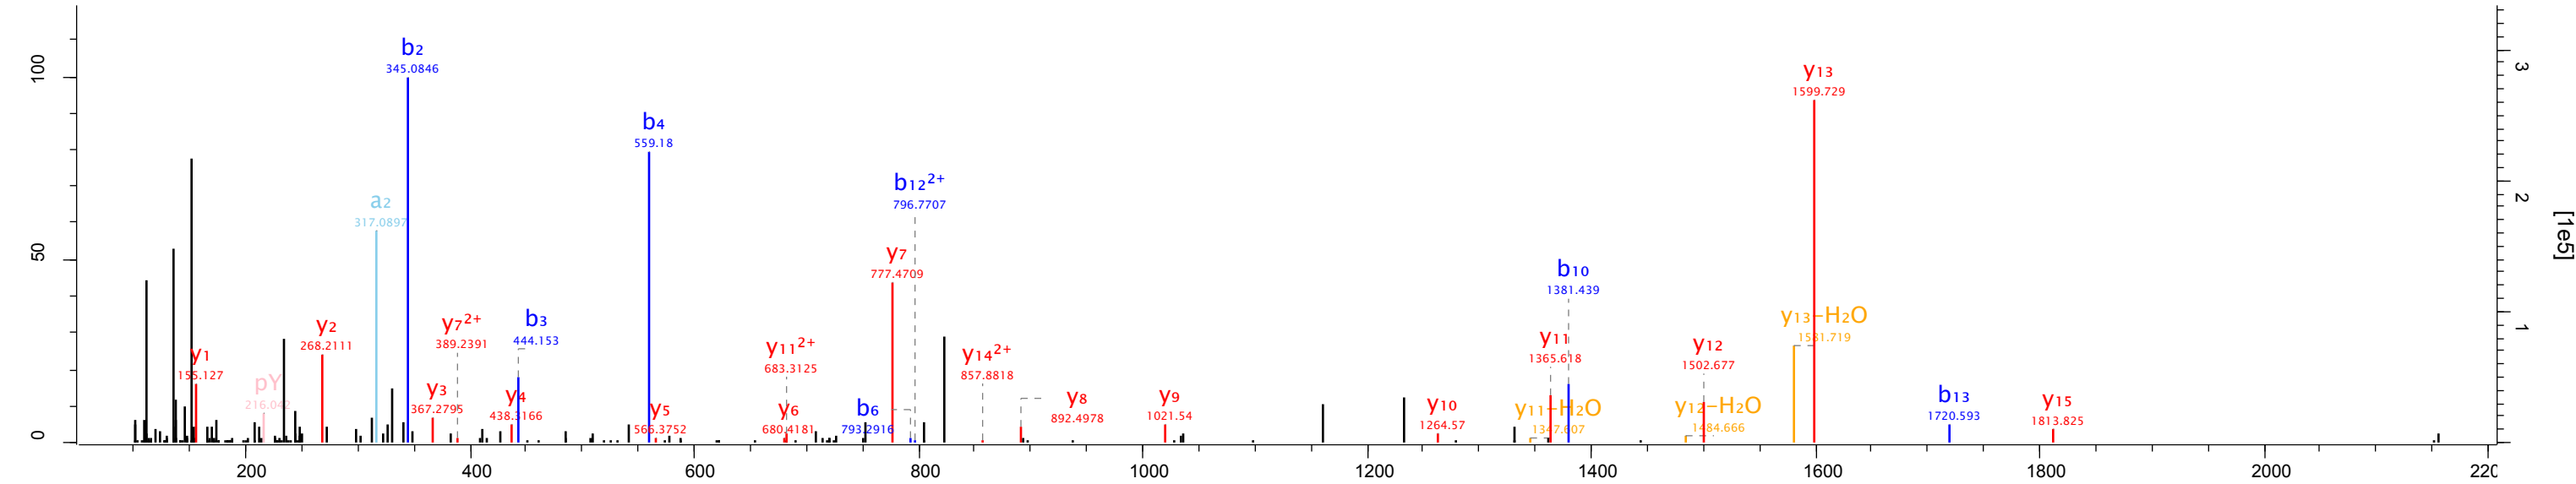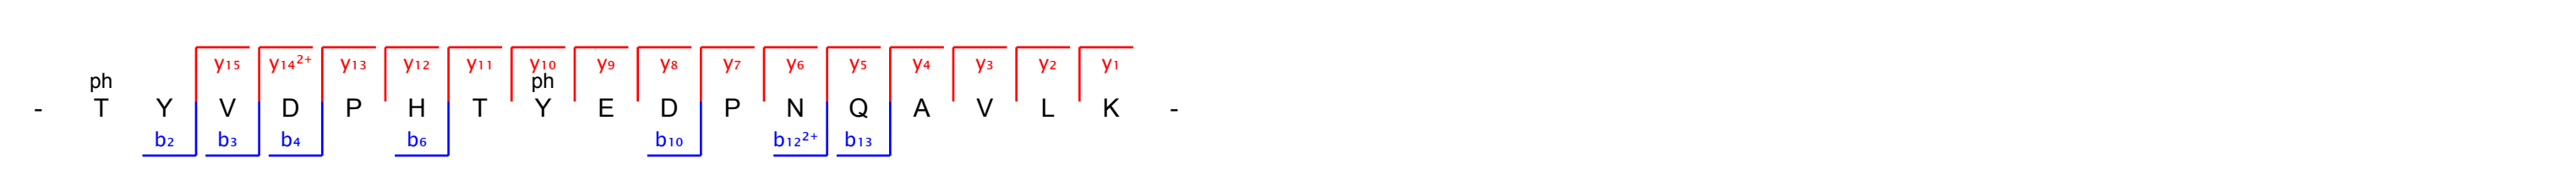

Raw file 20171215\_MaS\_33SR\_LMH\_phospho2\_04 Scan 9902 Method FTMS; HCD Score 59.98 m/z 836.32 Gene names PLEC

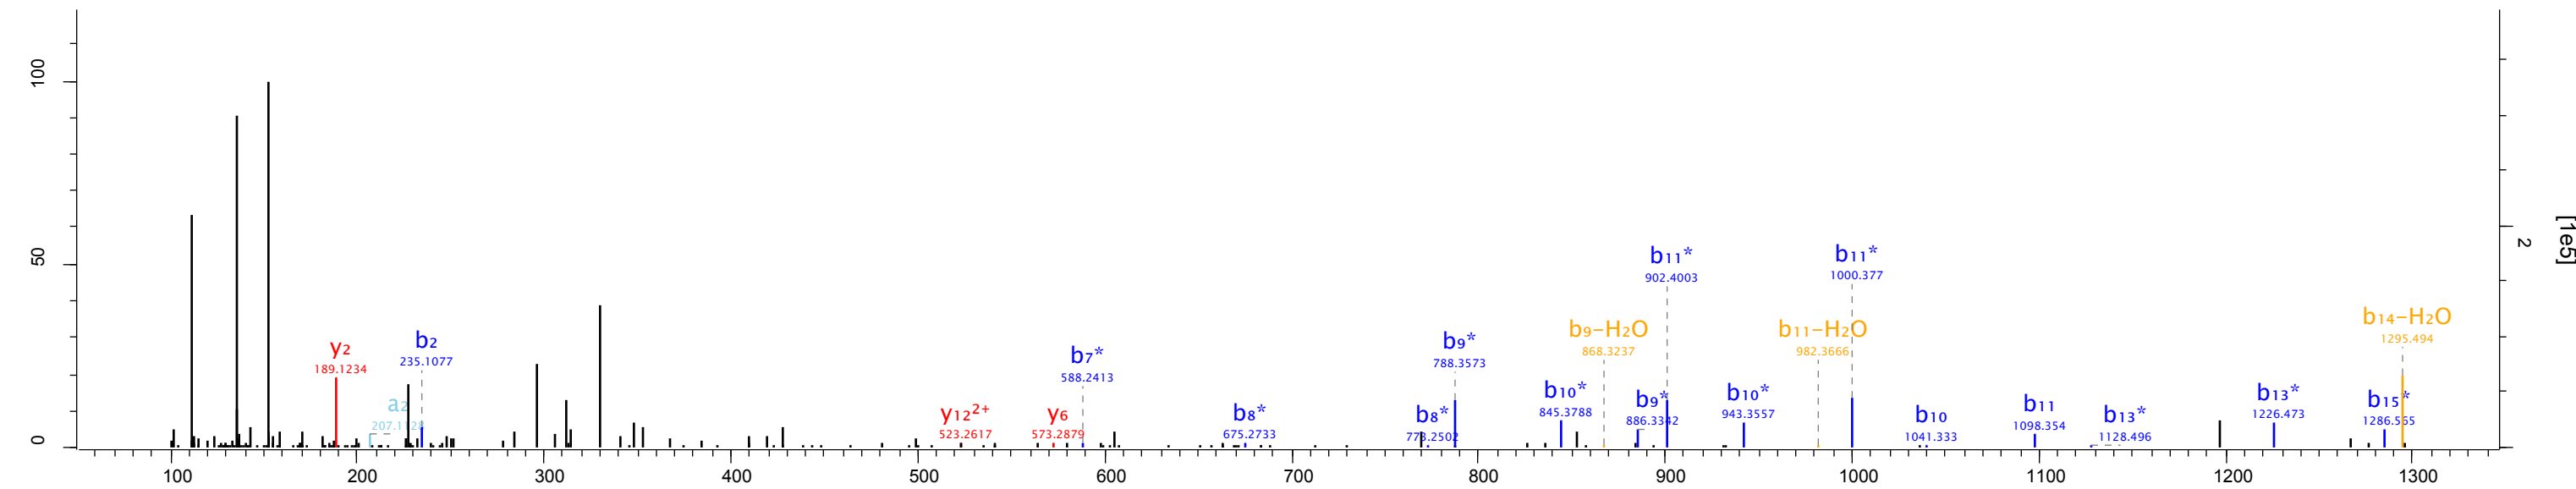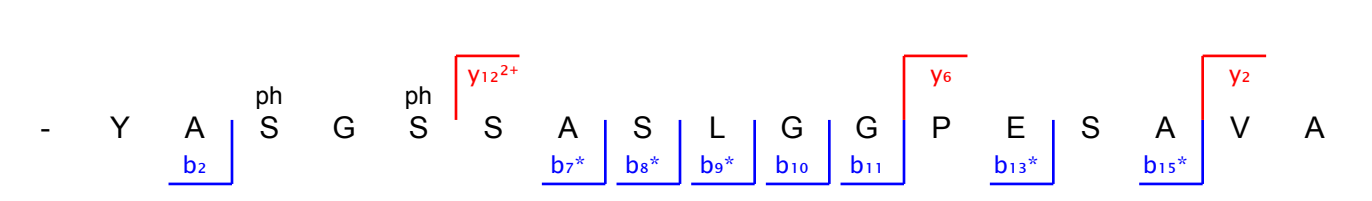

20171215\_MaS\_33SR\_LMH\_phospho2\_05 16172 FTMS; HCD 165.49 931.3 OSTF1

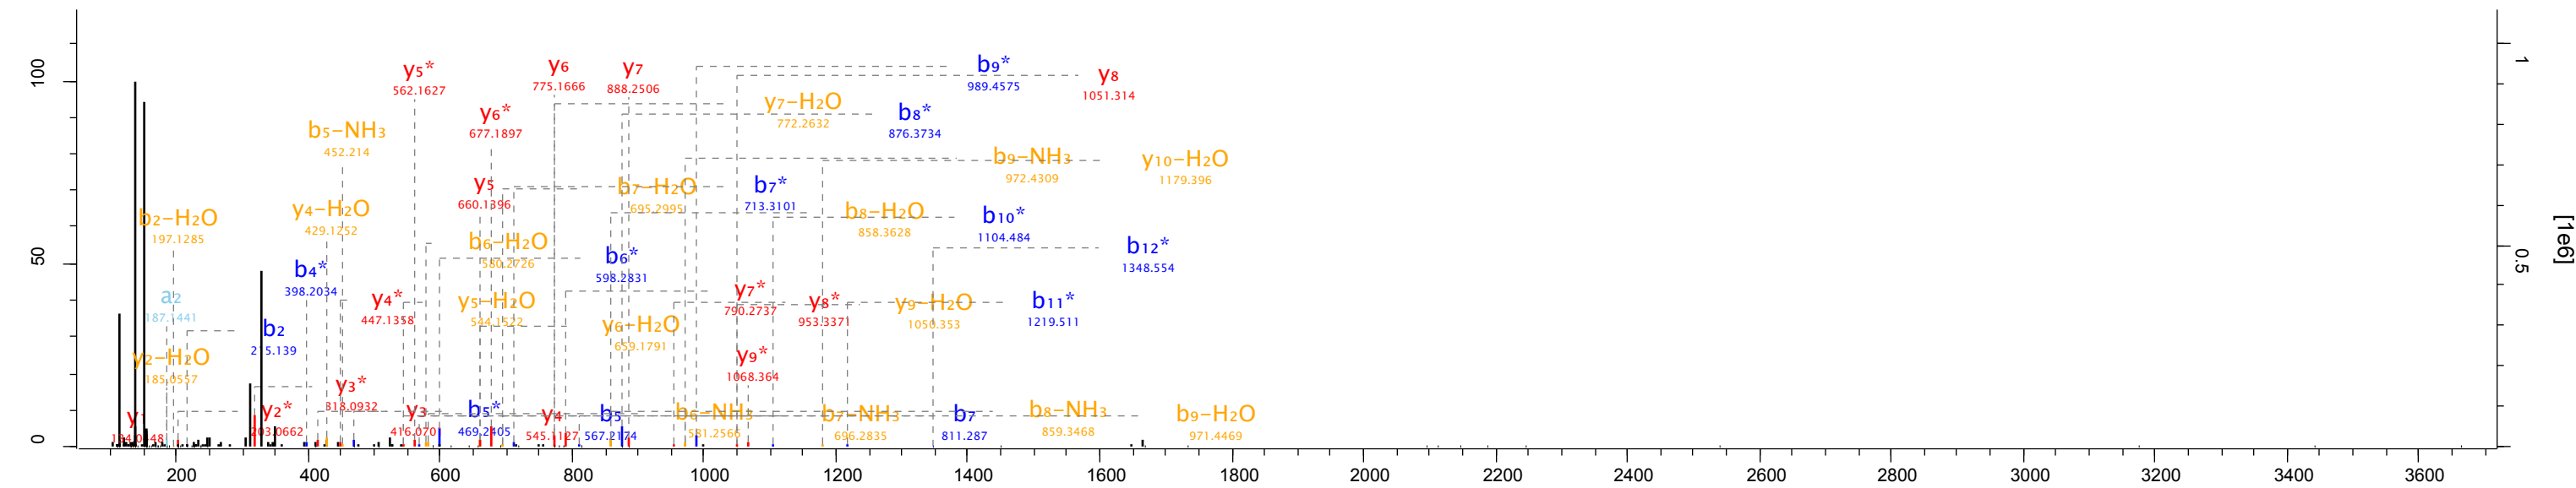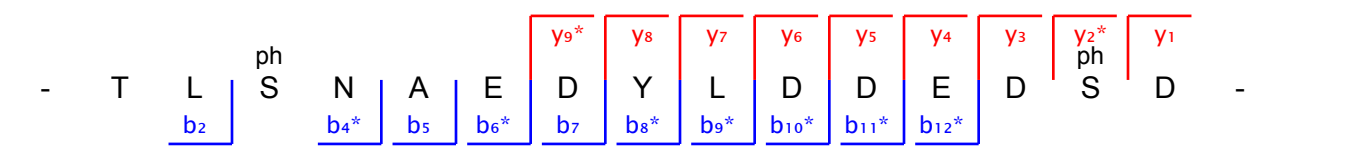

Raw file 20171215\_MaS\_33SR\_LMH\_phospho2\_05 Scan 3012 Method FTMS; HCD Score 97.29 m/z 738.24 Gene names SSH3

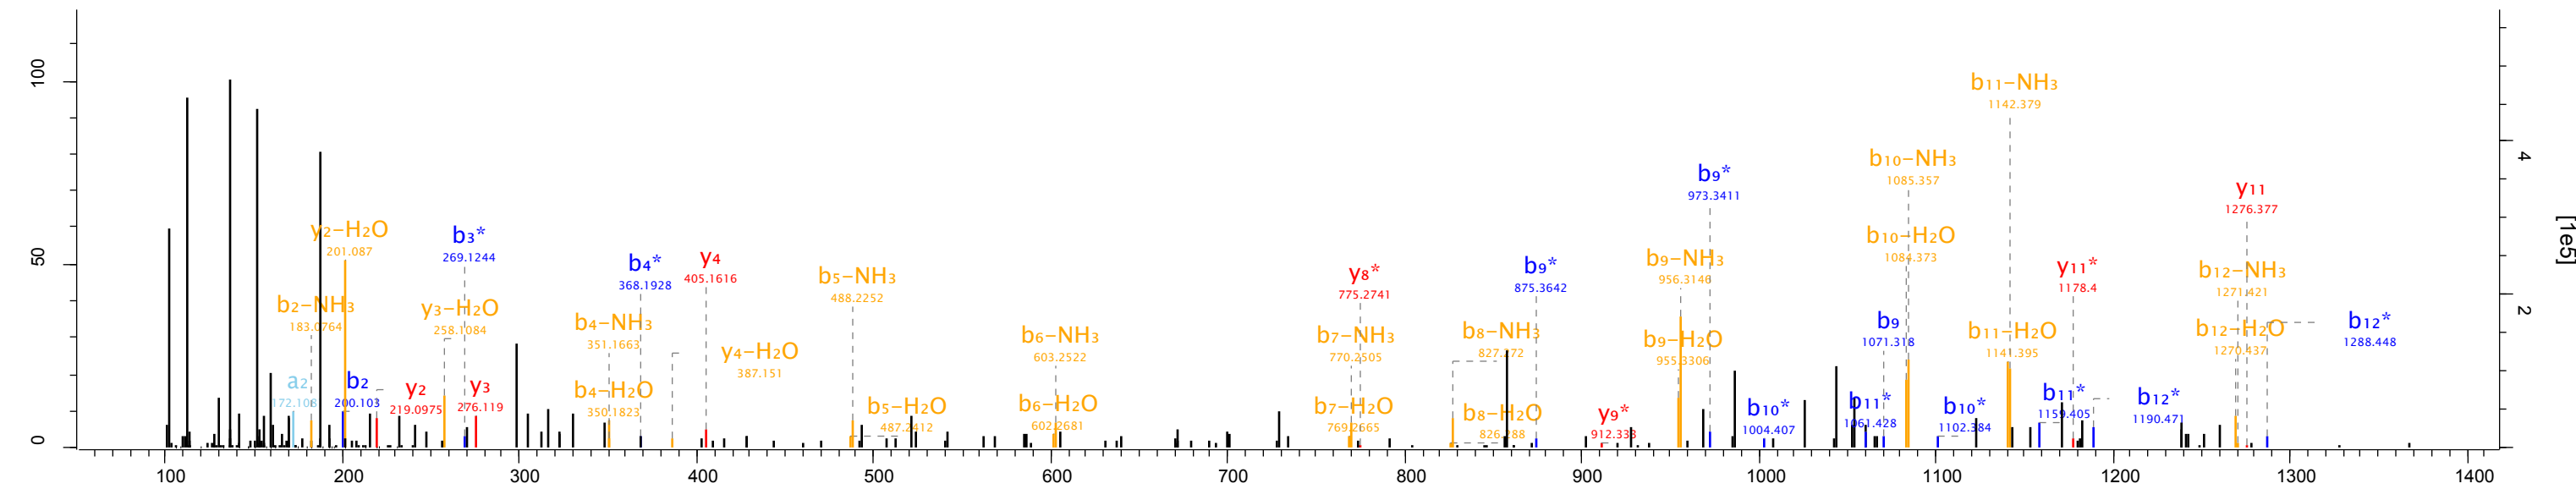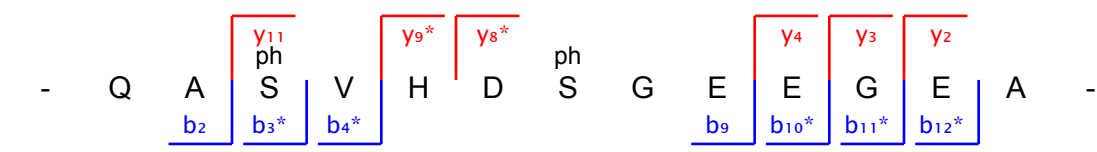



Raw file 20171215\_MaS\_33SR\_LMH\_phospho2\_06 Scan 1862 Method FTMS; HCD Score 154.6 m/z 803.85 Gene names LMNA

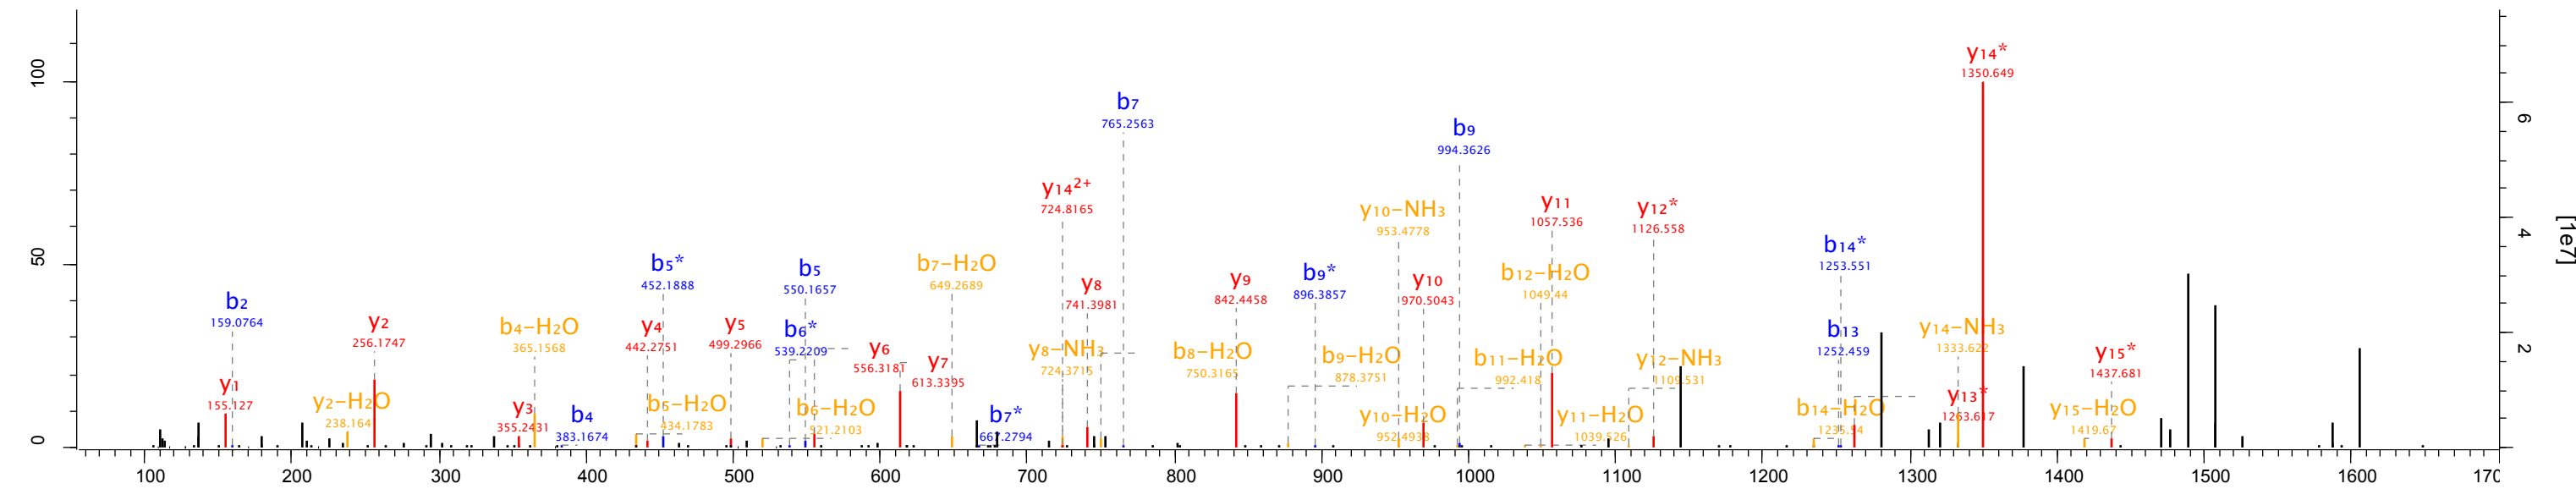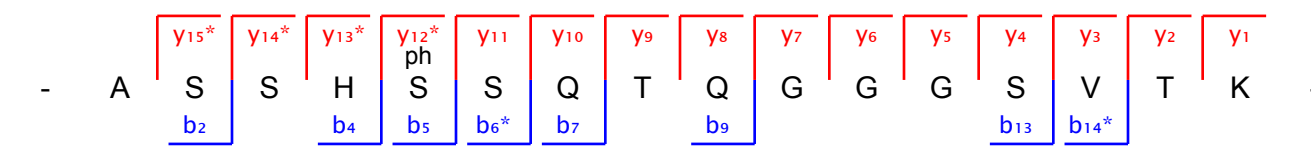

Raw file  
20171215\_MaS\_33SR\_LMH\_phospho2\_06

Scan 2372 Method FTMS; HCD Score 205.52 m/z 819.31 Gene names USP16

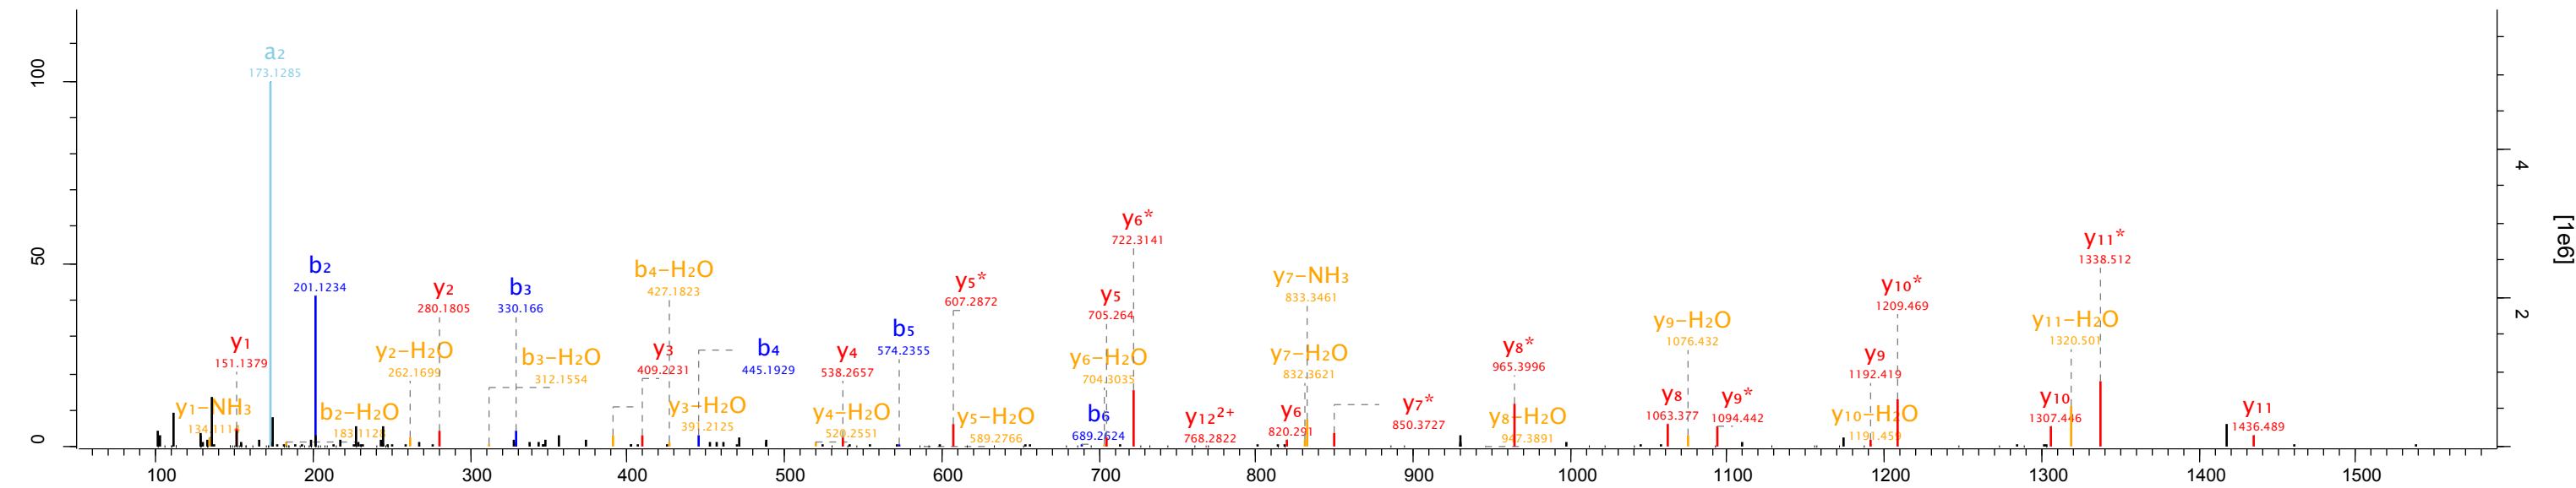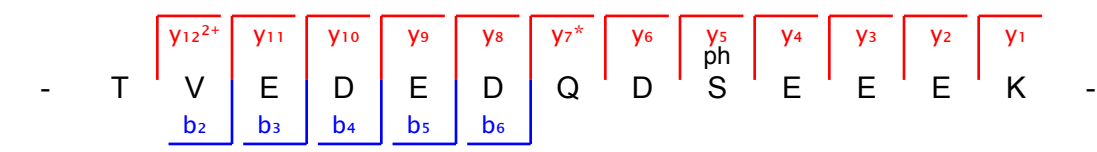

Raw file 20171215\_MaS\_33SR\_LMH\_phospho2\_06 Scan 2382 Method FTMS; HCD Score 88.64 m/z 436.21 Gene names TRIM28

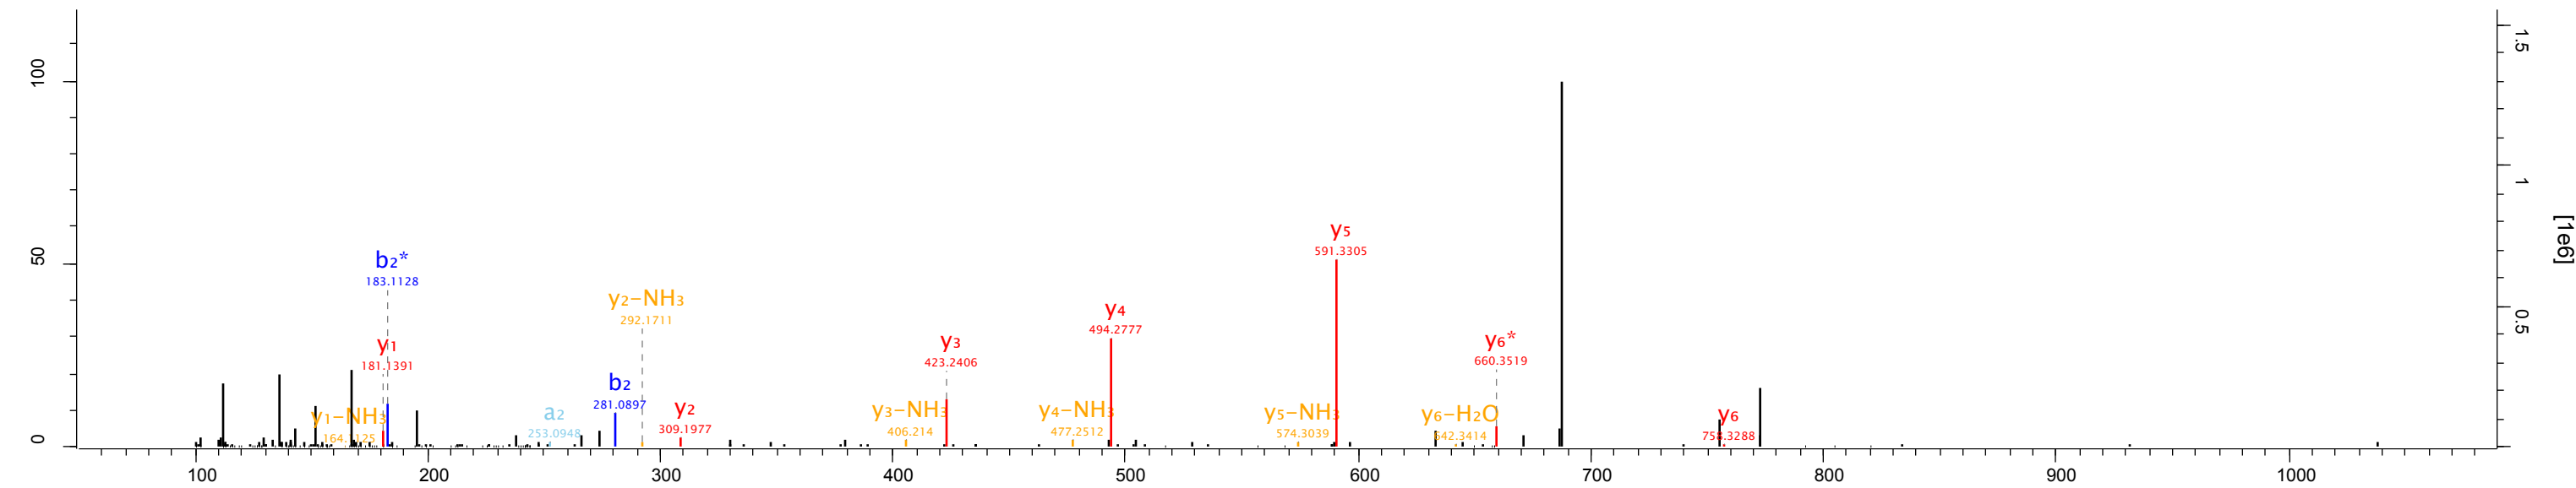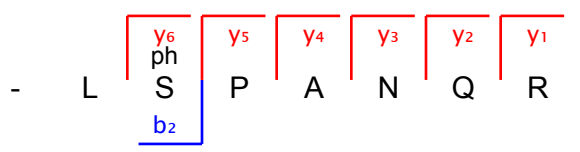

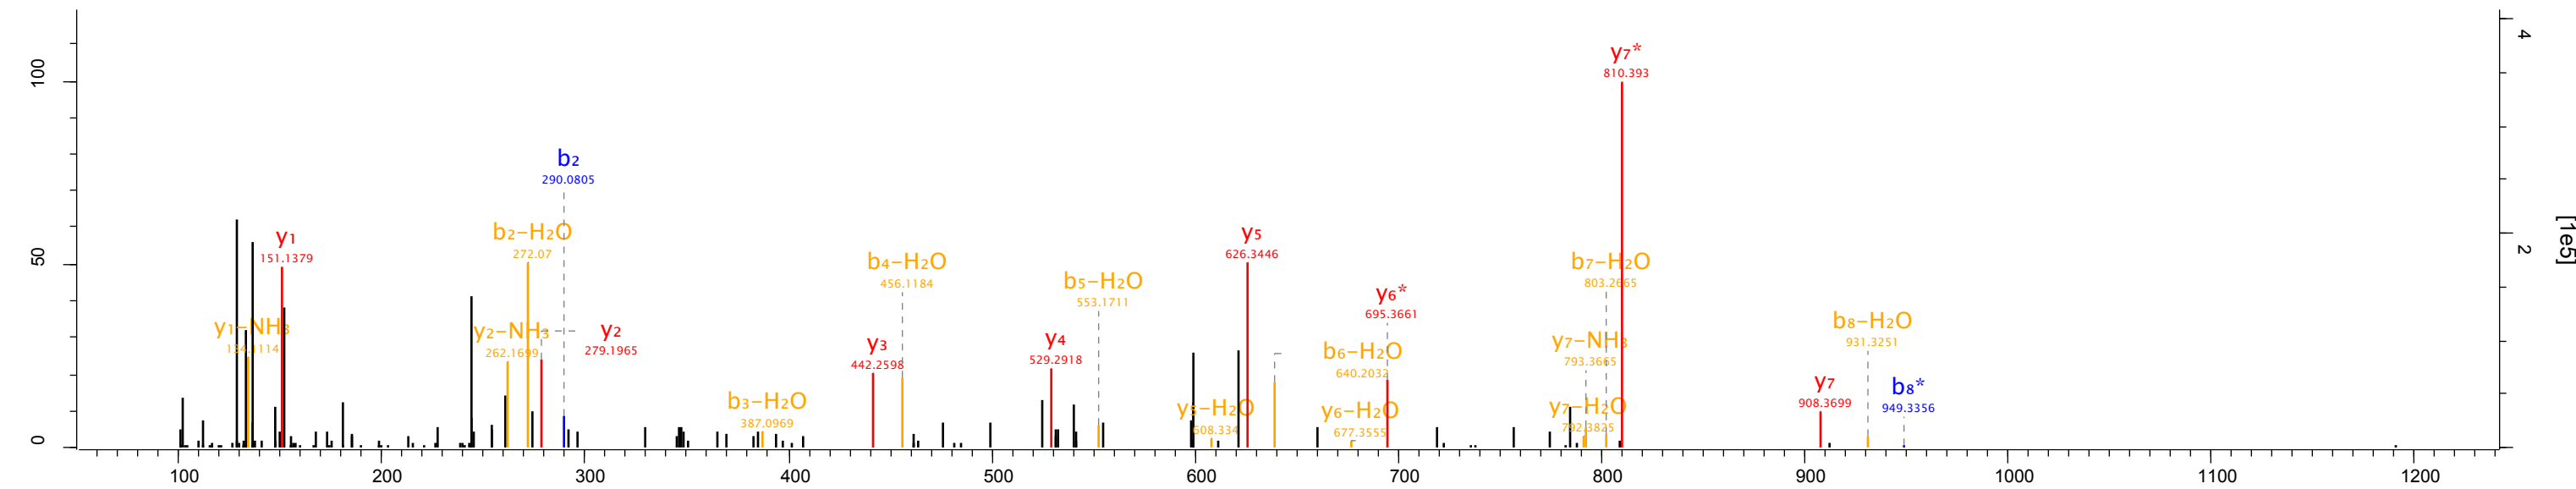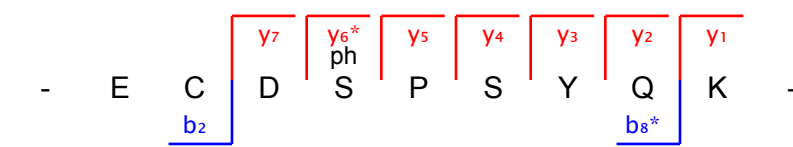

Raw file  
20171215\_MaS\_33SR\_LMH\_phospho2\_06

Scan 2512 Method FTMS; HCD Score 279.15 m/z 733.82 Gene names LIG3

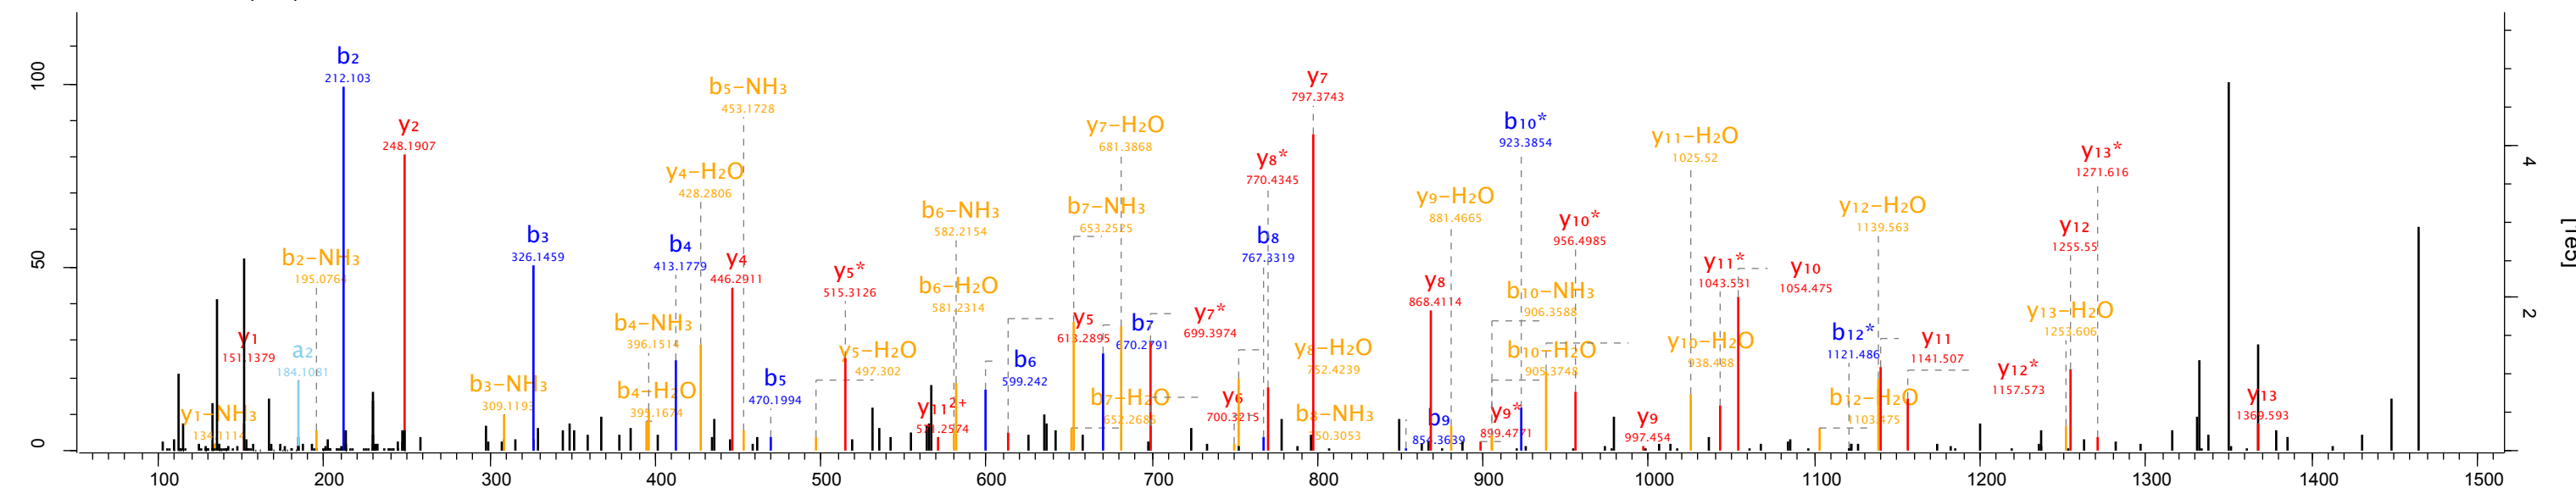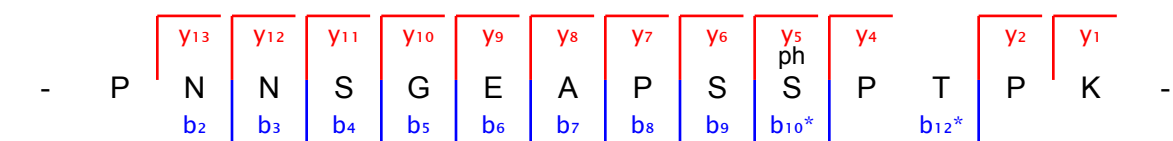

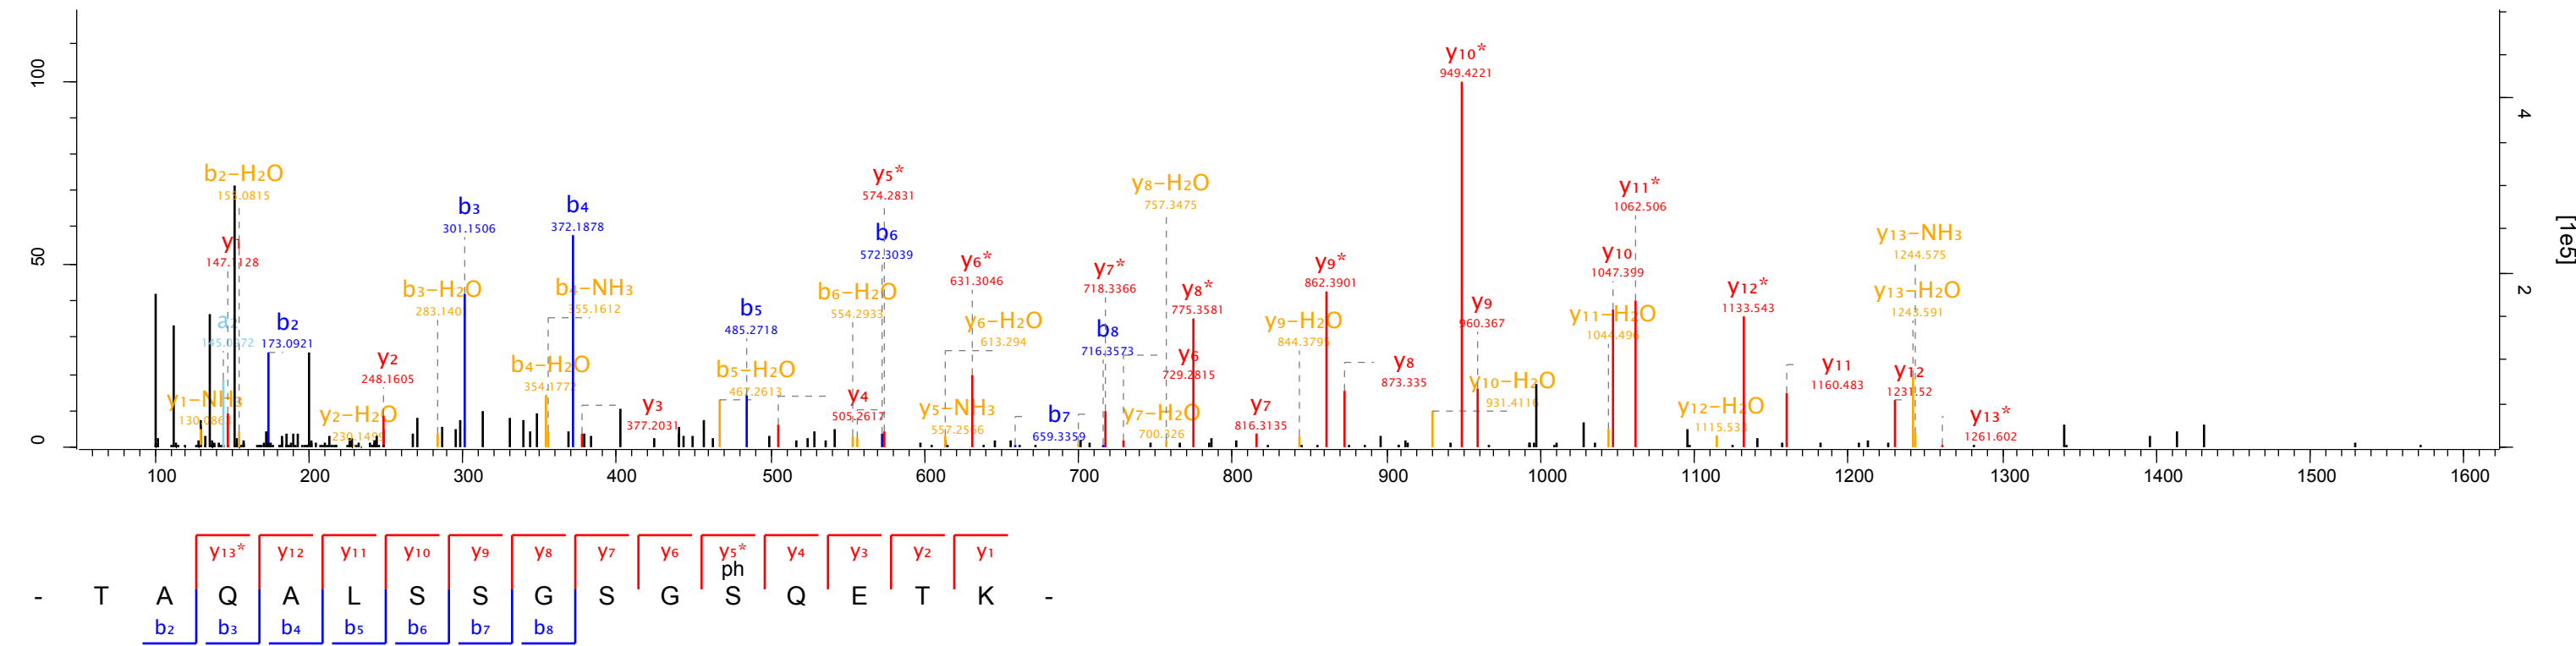

20171215\_MaS\_33SR\_LMH\_phospho2\_06 2972 FTMS; HCD 89.3 552.24 SRRM2

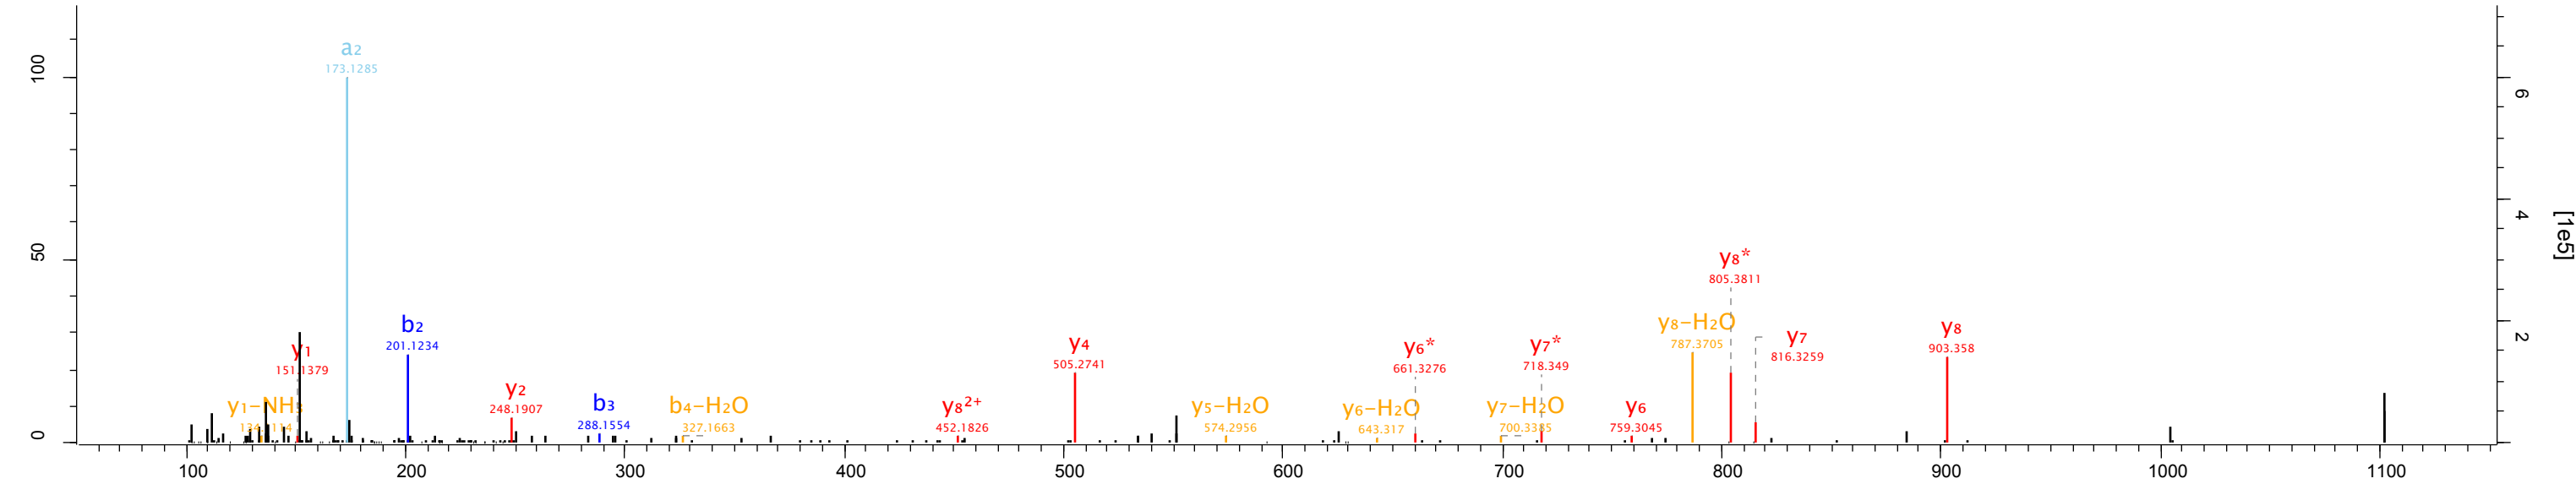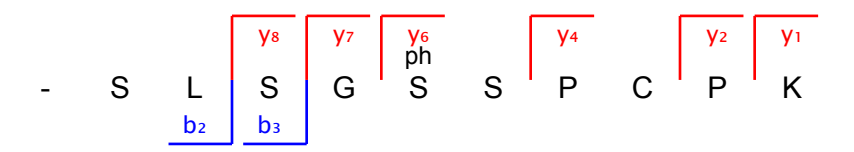

20171215\_MaS\_33SR\_LMH\_phospho2\_06

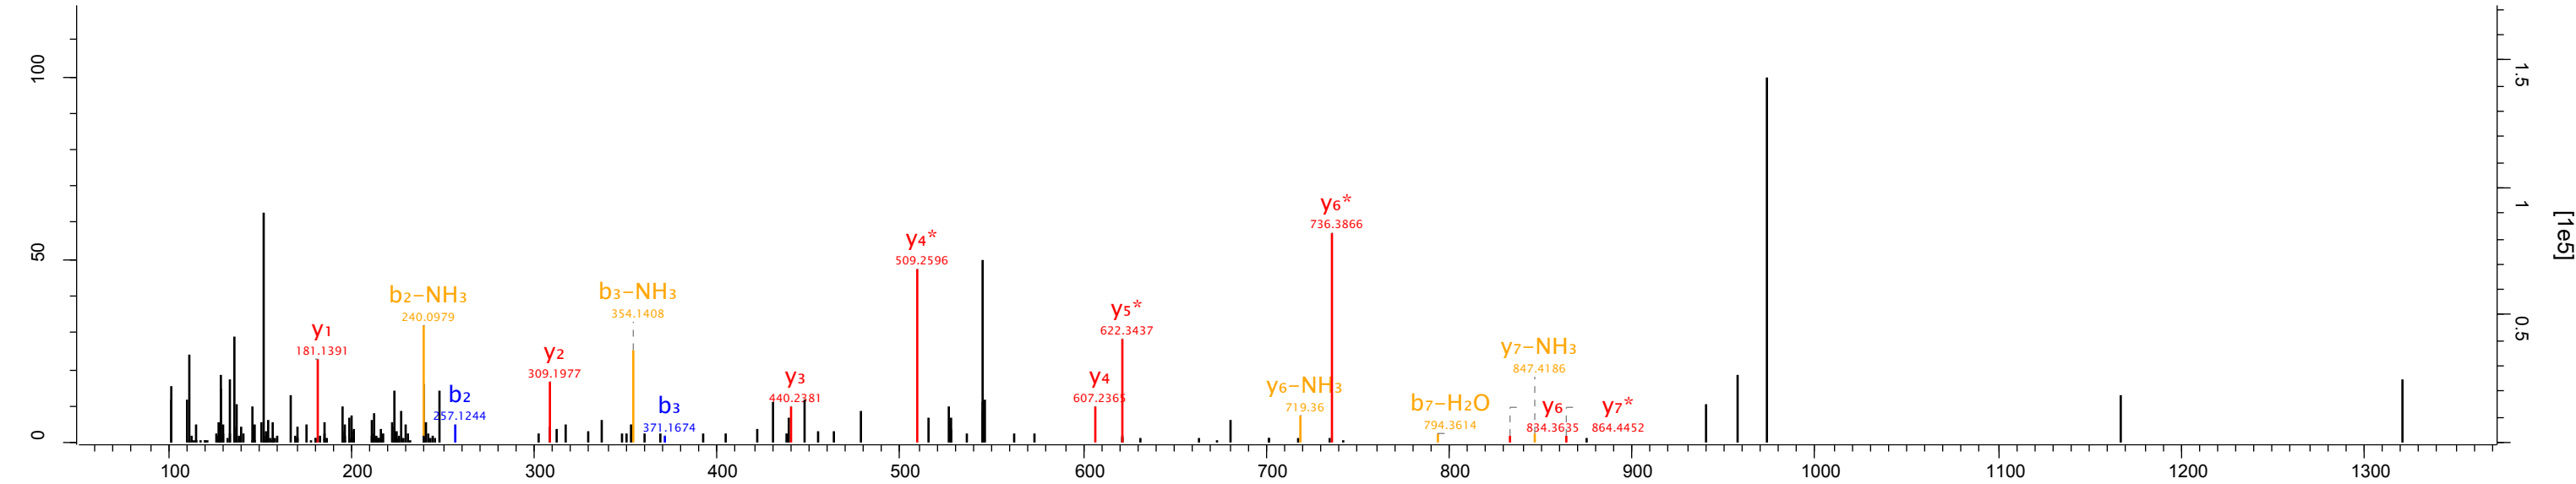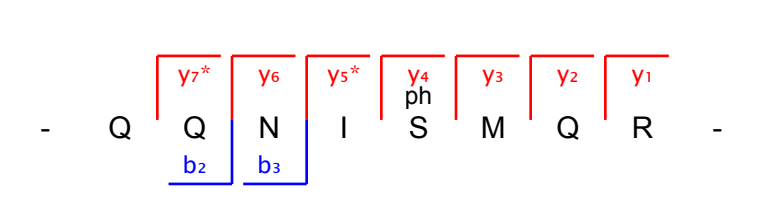



Raw file  
20171215\_MaS\_33SR\_LMH\_phospho2\_06

Scan 3972 Method FTMS; HCD Score 235.72 m/z 717.32 Gene names ADD1

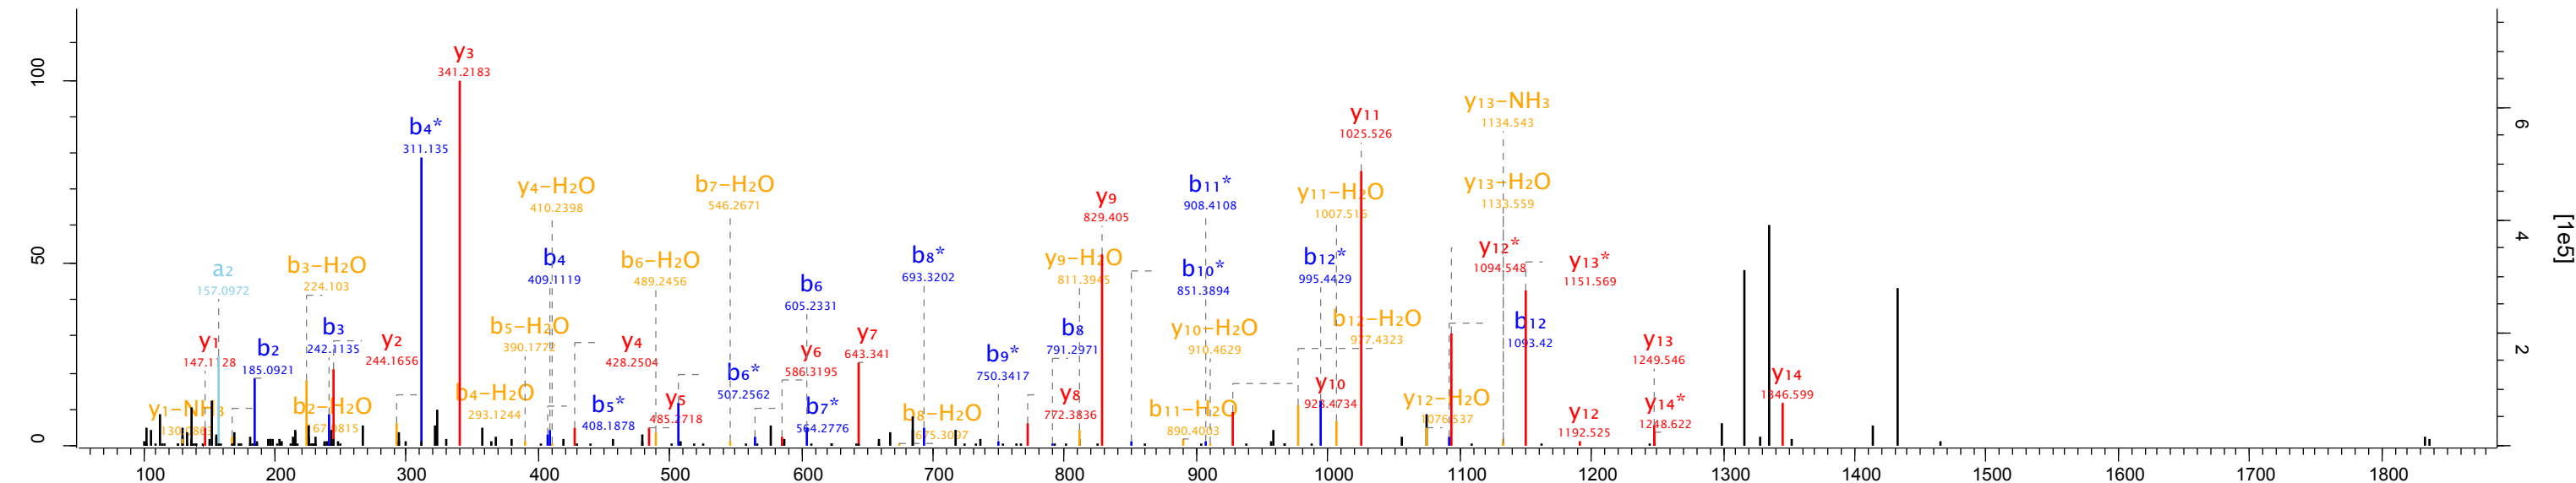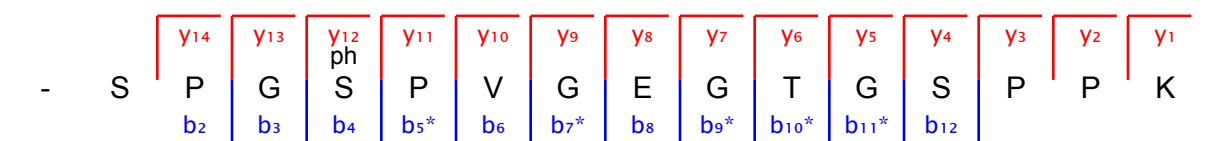

Raw file 20171215\_MaS\_33SR\_LMH\_phospho2\_06 Scan 4212 Method FTMS; HCD Score 84.51 m/z 548.94 Gene names SEPT7;DKFZp586I031

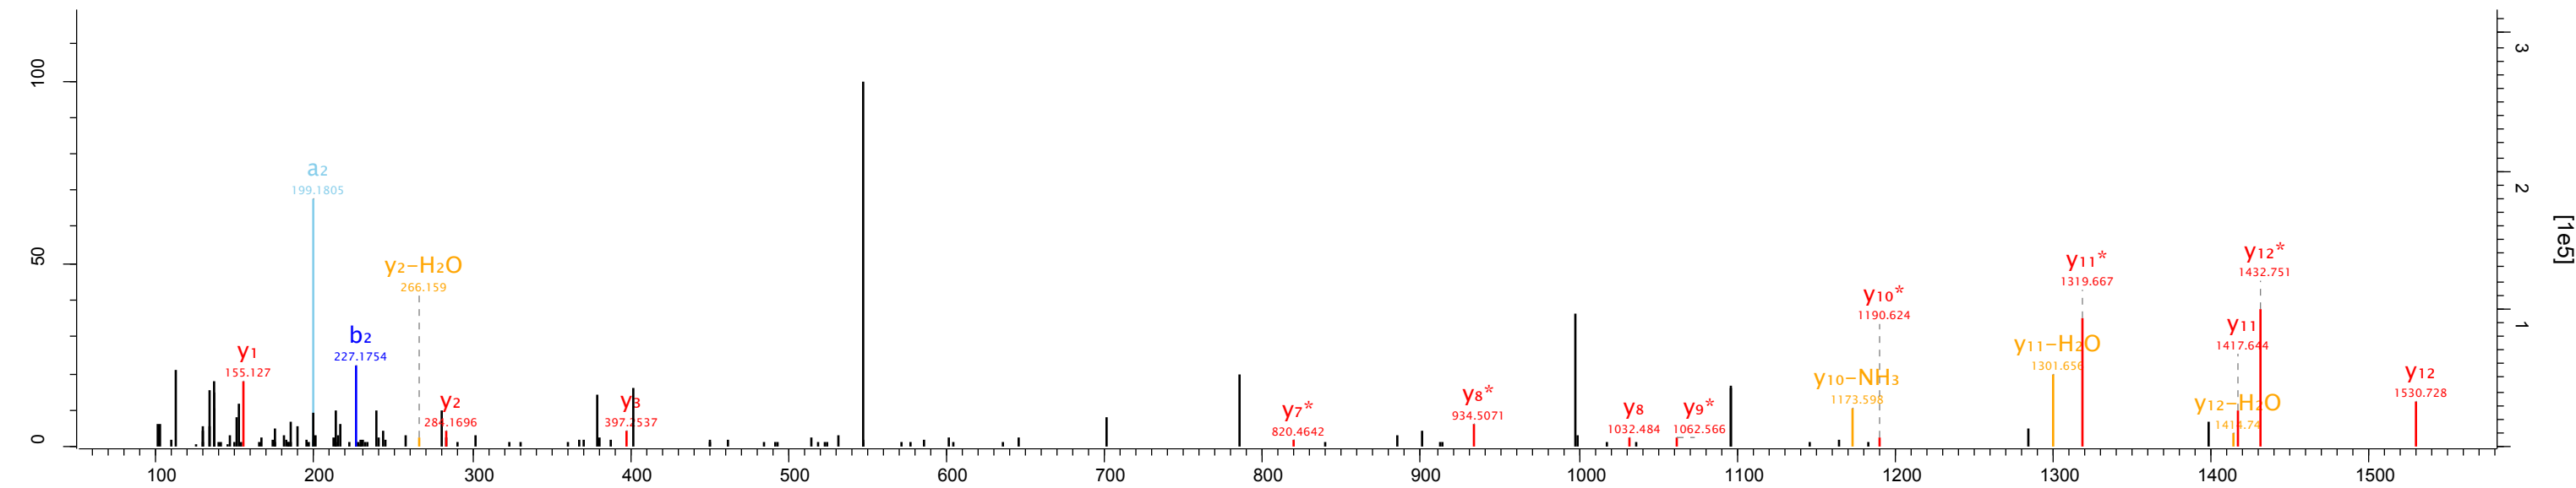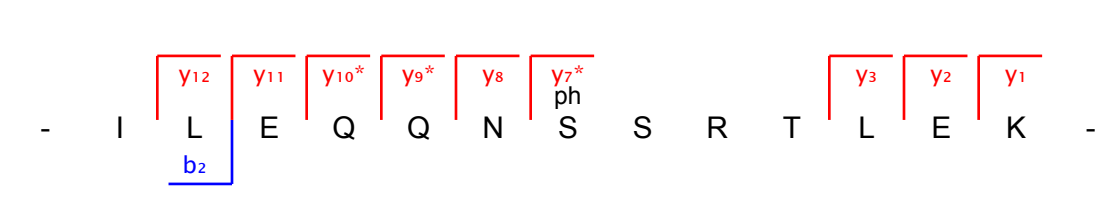

Raw file: 20171215\_MaS\_33SR\_LMH\_phospho2\_06  
 Scan: 4682 Method: FTMS; HCD Score: 88.6 m/z: 498.23 Gene names: PRPF4B

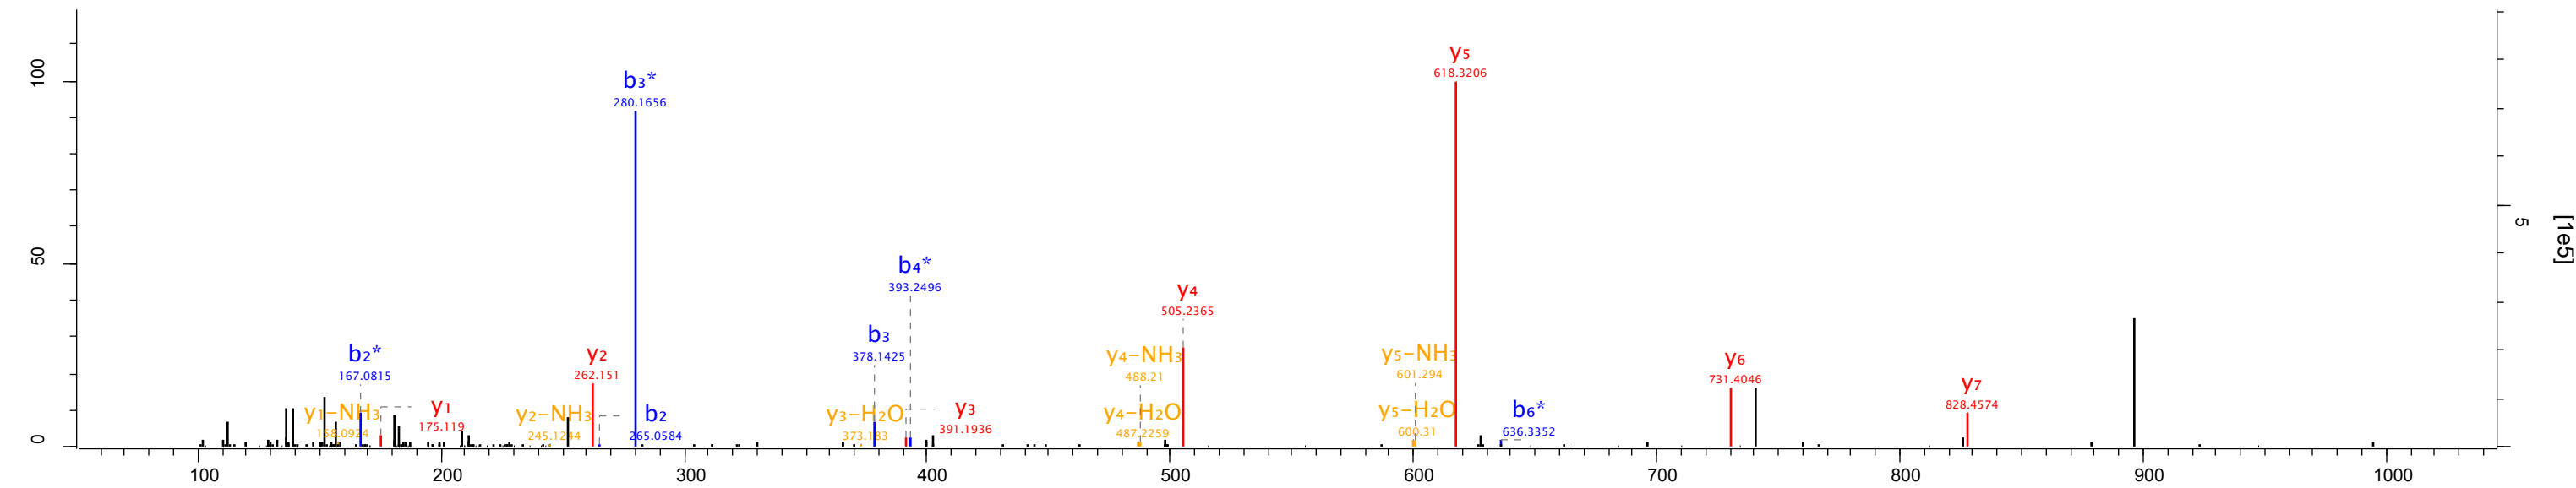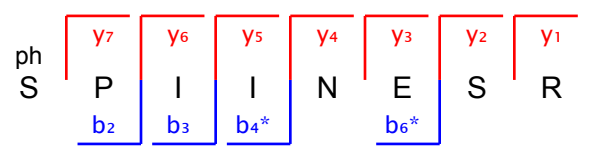

Raw file  
20171215\_MaS\_33SR\_LMH\_phospho2\_06

Scan 6382 Method FTMS; HCD Score 184.78 m/z 871.88 Gene names POP1

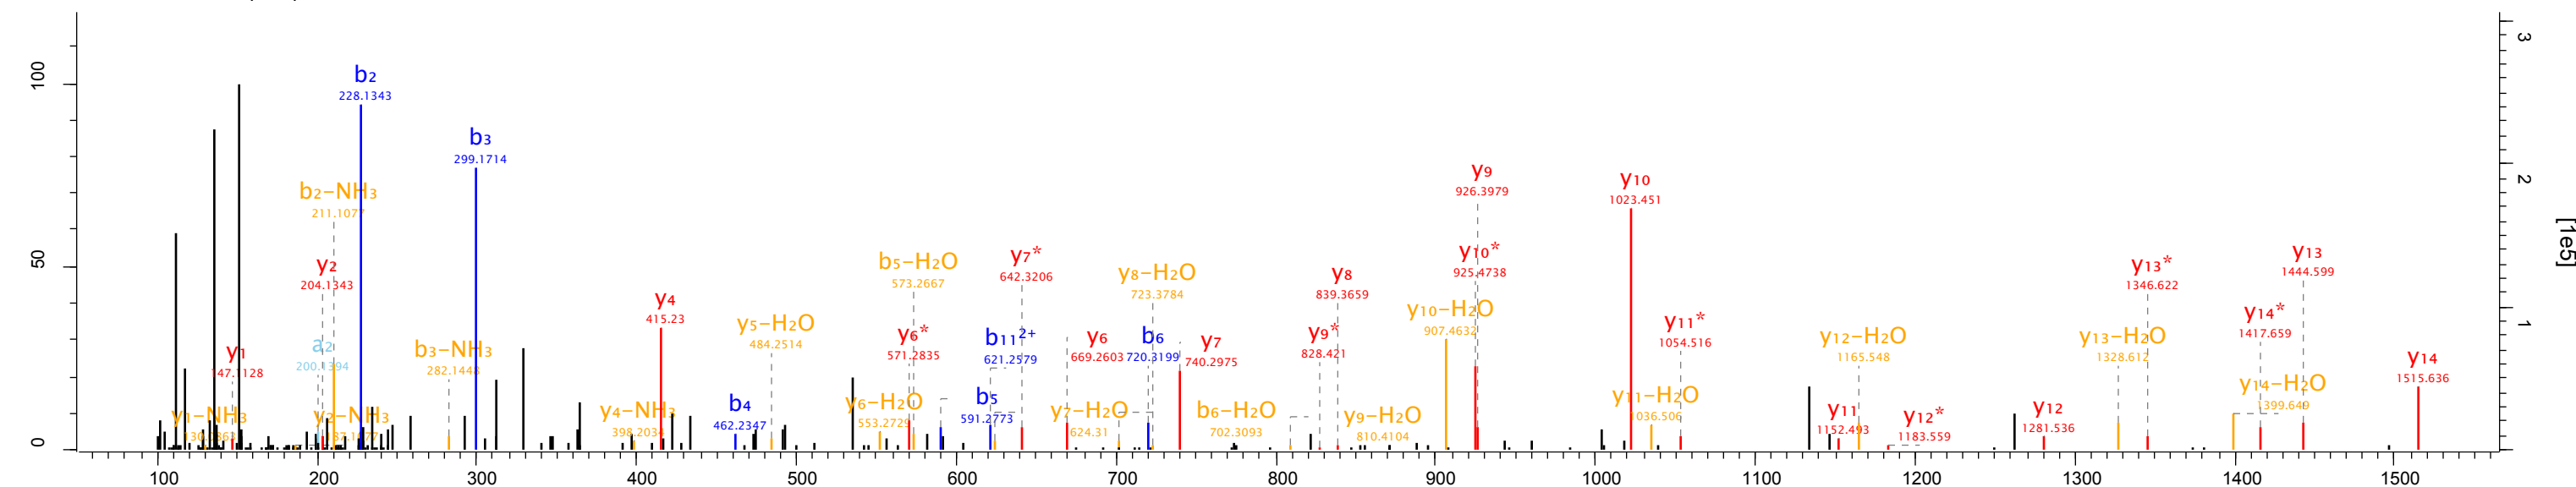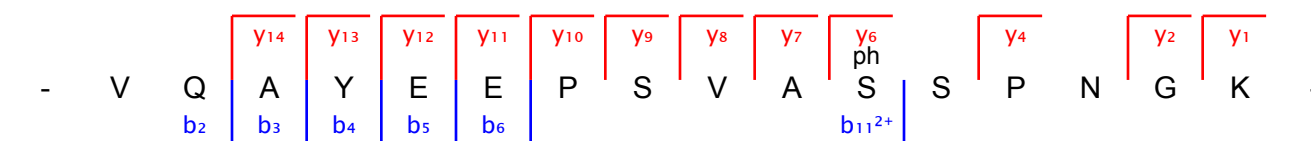

Raw file 20171215\_MaS\_33SR\_LMH\_phospho2\_08 Scan 11522 Method FTMS; HCD Score 40.48 m/z 720.83 Gene names MLPH

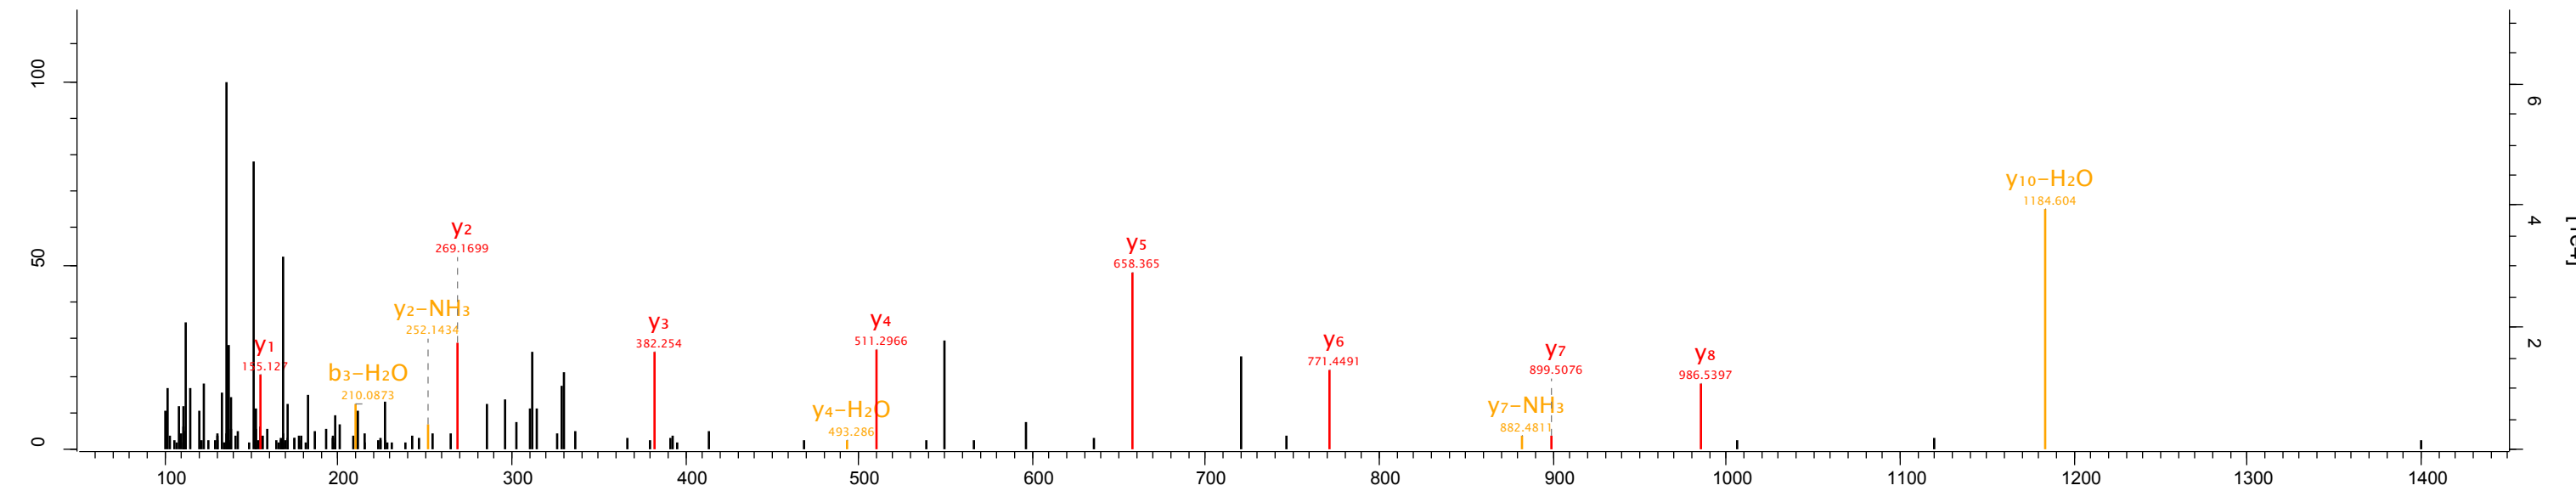

- A ph S S E S Q I F E L N K -

Red brackets above the sequence indicate the fragmentation sites for the labeled ions:

- y8: S
- y7: Q
- y6: I
- y5: F
- y4: E
- y3: L
- y2: N
- y1: K

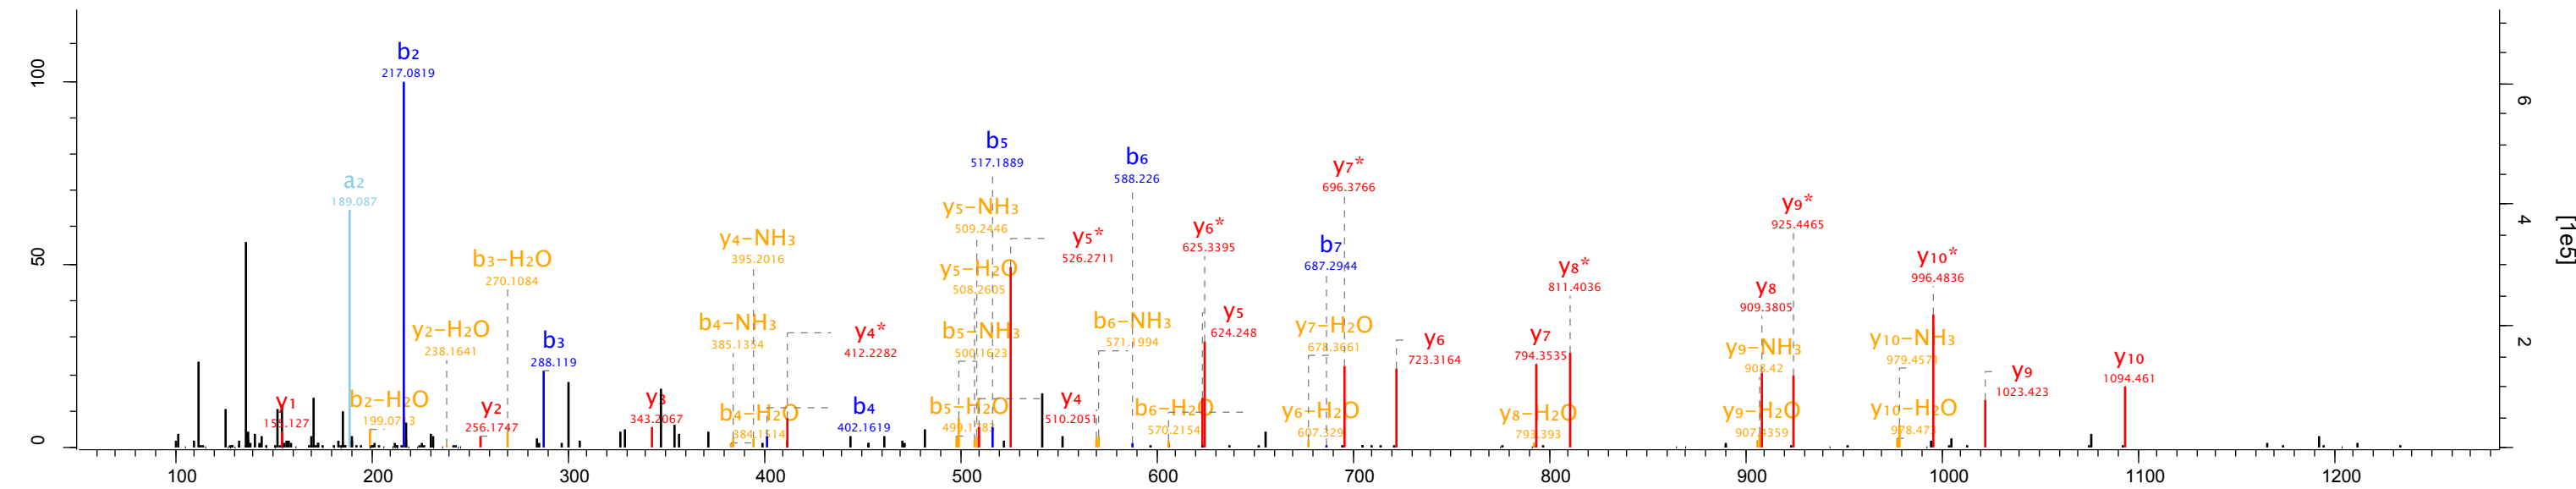

- S E A N D A V N S S T K -

b<sub>2</sub>
b<sub>3</sub>
b<sub>4</sub>
b<sub>5</sub>
b<sub>6</sub>
b<sub>7</sub>
y<sub>10</sub>
y<sub>9</sub>
y<sub>8</sub>
y<sub>7</sub>
y<sub>6</sub>
y<sub>5</sub>
y<sub>4</sub><sub>ph</sub>
y<sub>3</sub>
y<sub>2</sub>
y<sub>1</sub>

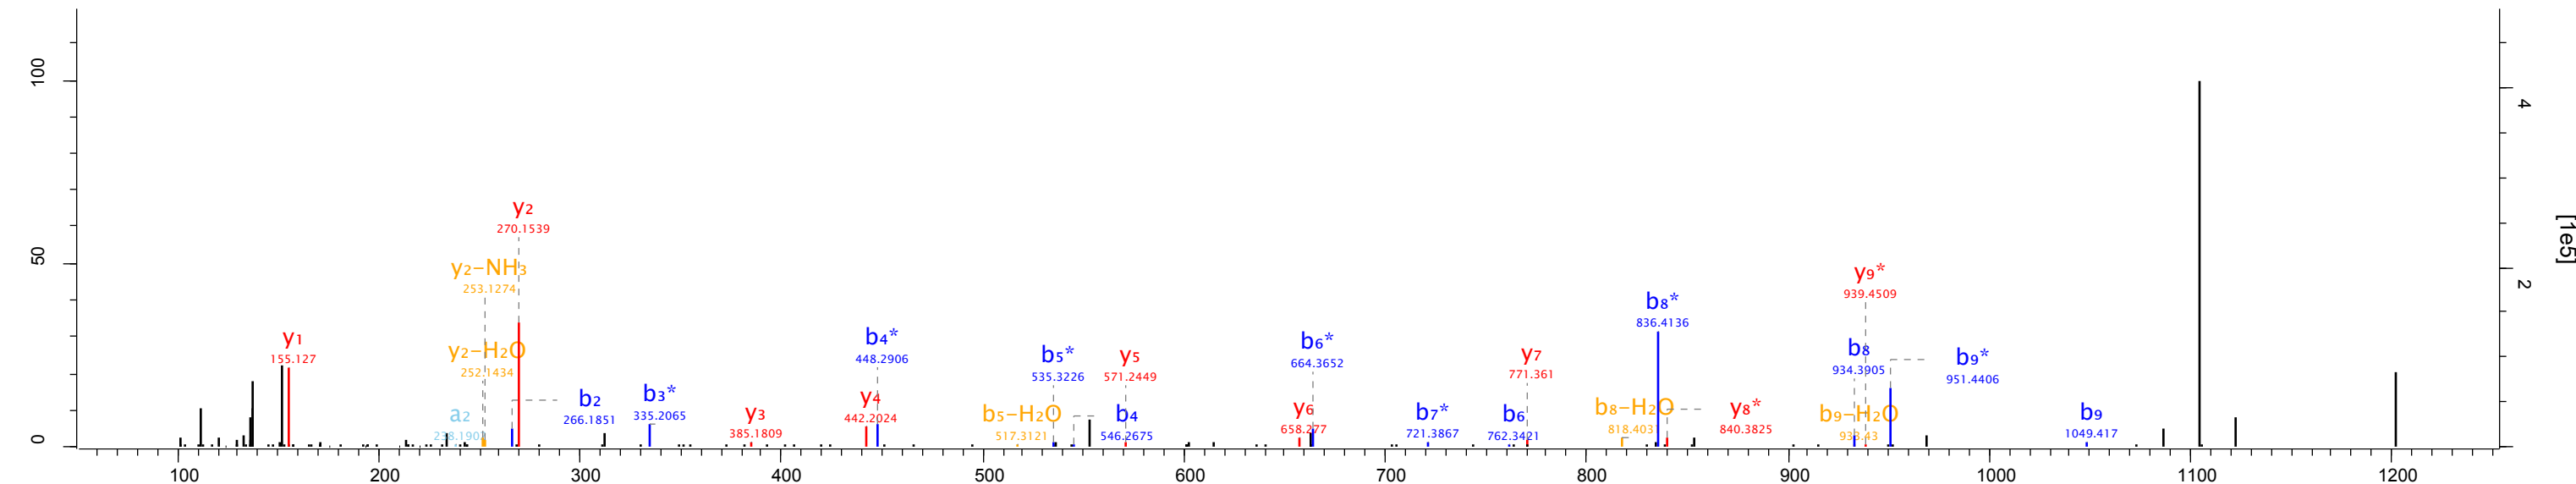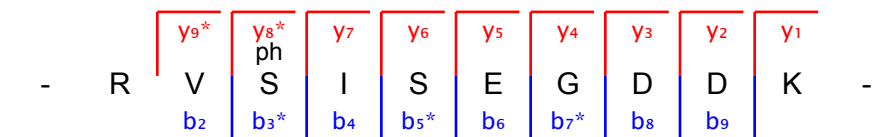

Raw file 20171215\_MaS\_33SR\_LMH\_phospho2\_08 Scan 3262 Method FTMS; HCD Score 117.08 m/z 552.24 Gene names PHLDB2

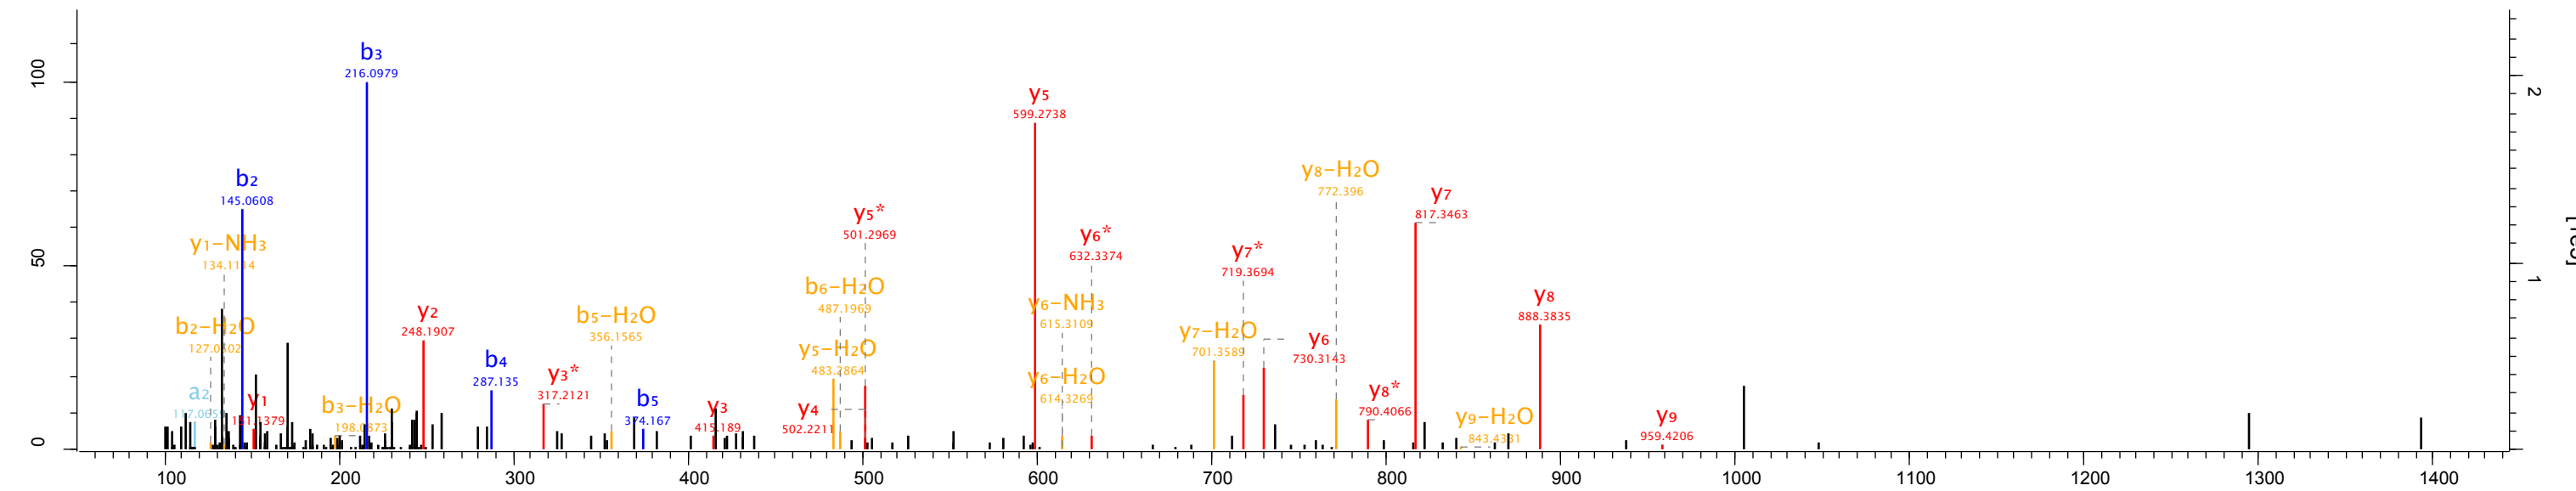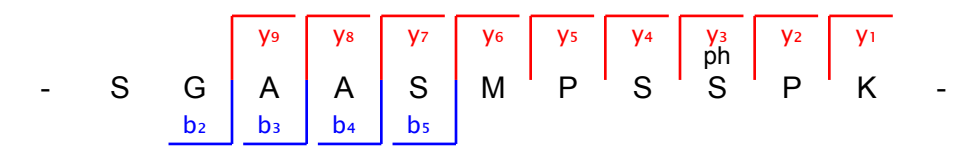



Raw file 20171215\_MaS\_33SR\_LMH\_phospho2\_08 Scan 4292 Method FTMS; HCD Score 47.08 m/z 438.74 Gene names YEATS2

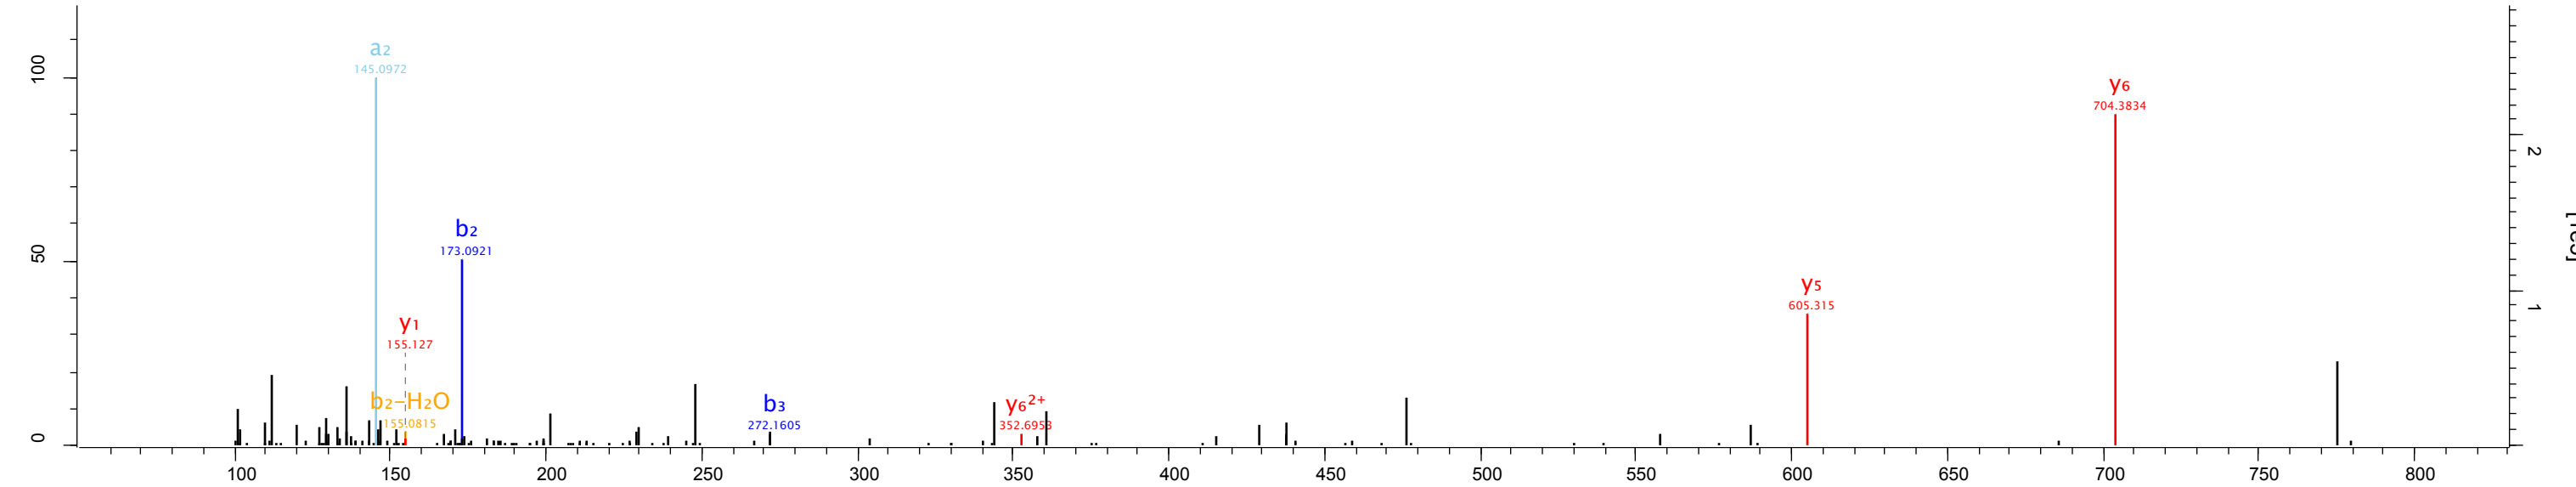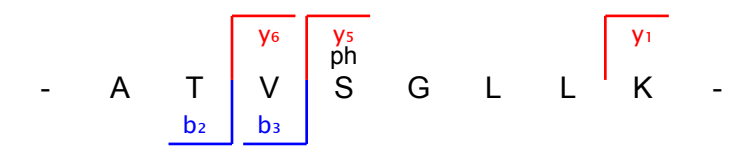

Raw file 20171215\_MaS\_33SR\_LMH\_phospho2\_08 Scan 5042 Method FTMS; HCD Score 70.27 m/z 593.79 Gene names GTF2F1

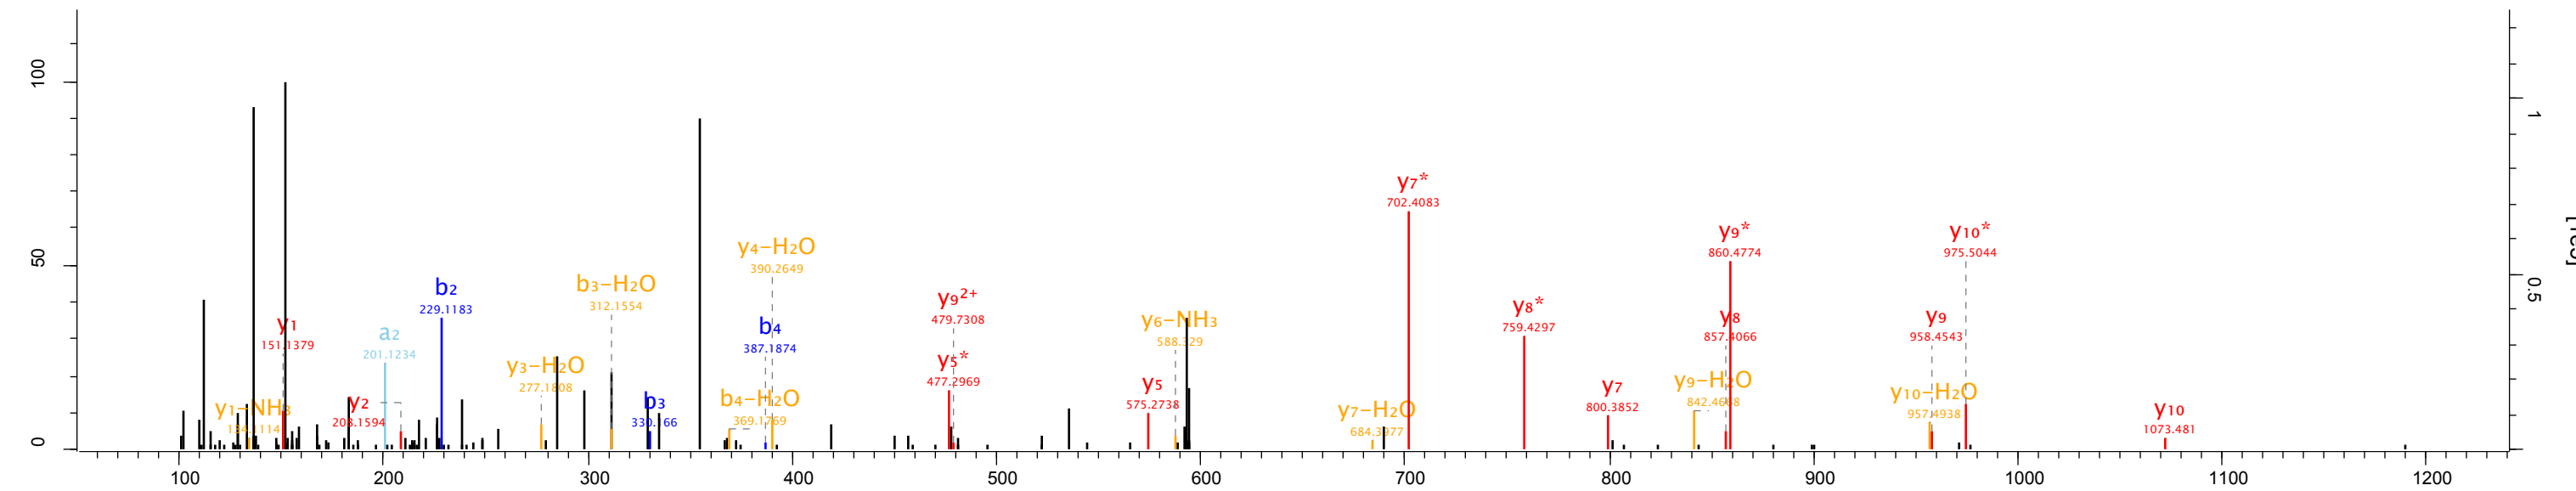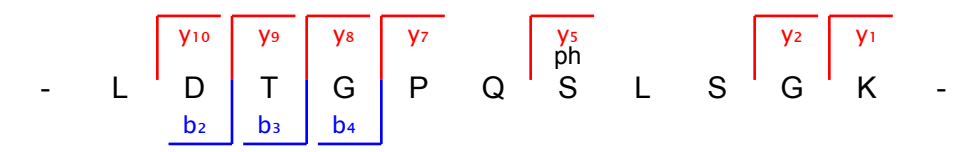

Raw file 20171215\_MaS\_33SR\_LMH\_phospho2\_08 Scan 7522 Method FTMS; HCD Score 56.12 m/z 701.81 Gene names MIOS

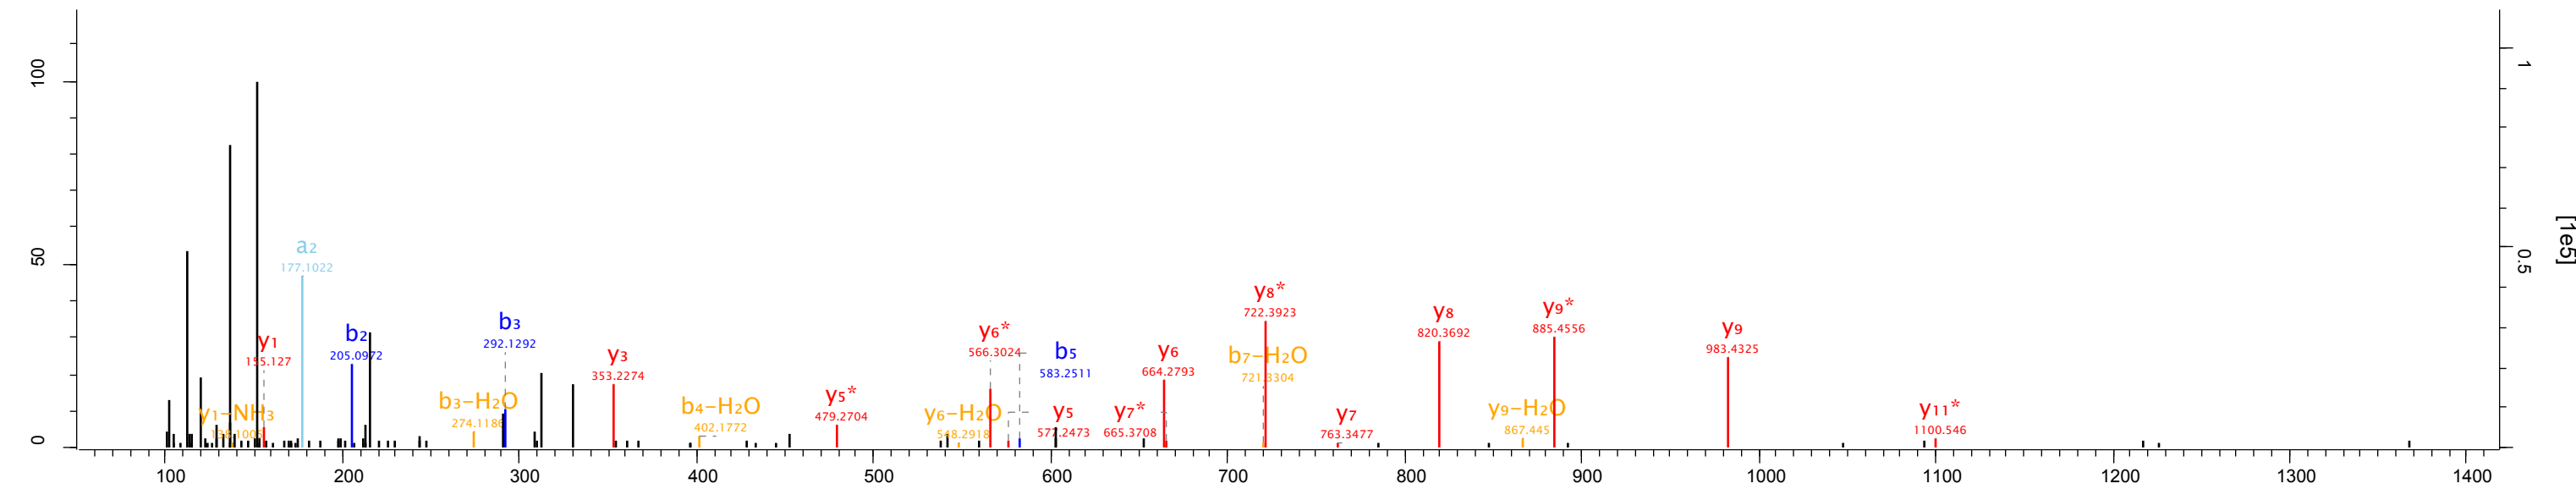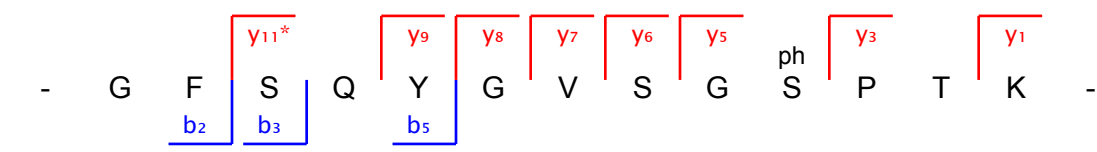

Raw file: 20171215\_MaS\_33SR\_LMH\_phospho2\_09  
 Scan: 1962 Method: FTMS; HCD Score: 266.29 m/z: 705.81 Gene names: RSL1D1

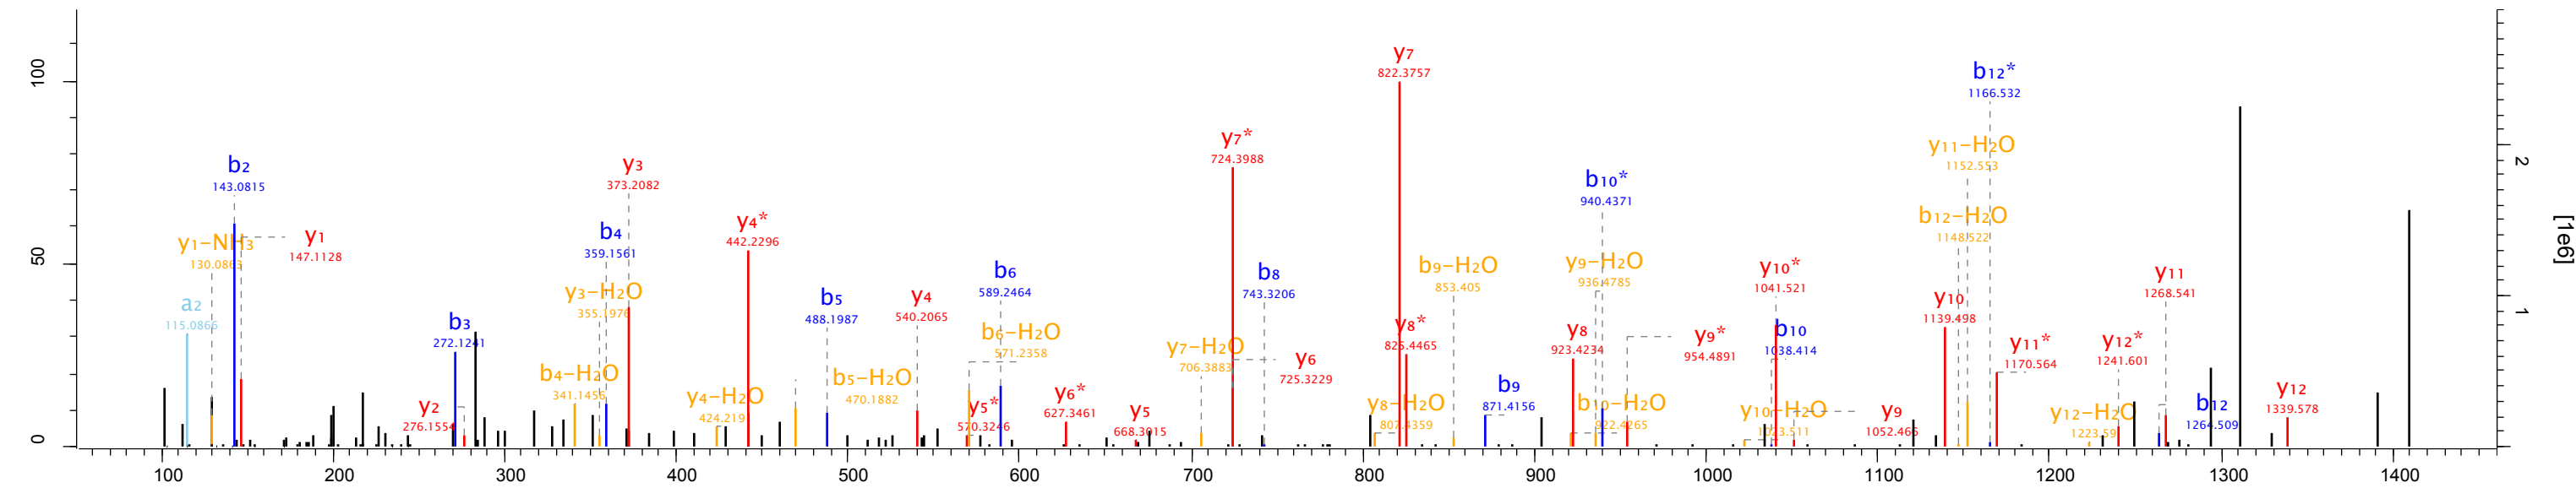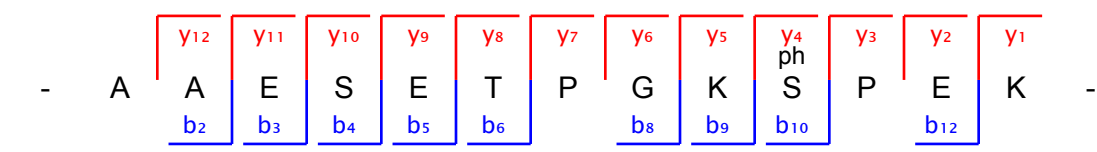

Raw file

20171215\_MaS\_33SR\_LMH\_phospho2\_09

| Scan | Method    | Score | m/z    | Gene names |
|------|-----------|-------|--------|------------|
| 2002 | FTMS; HCD | 53.05 | 431.55 | PP1G       |

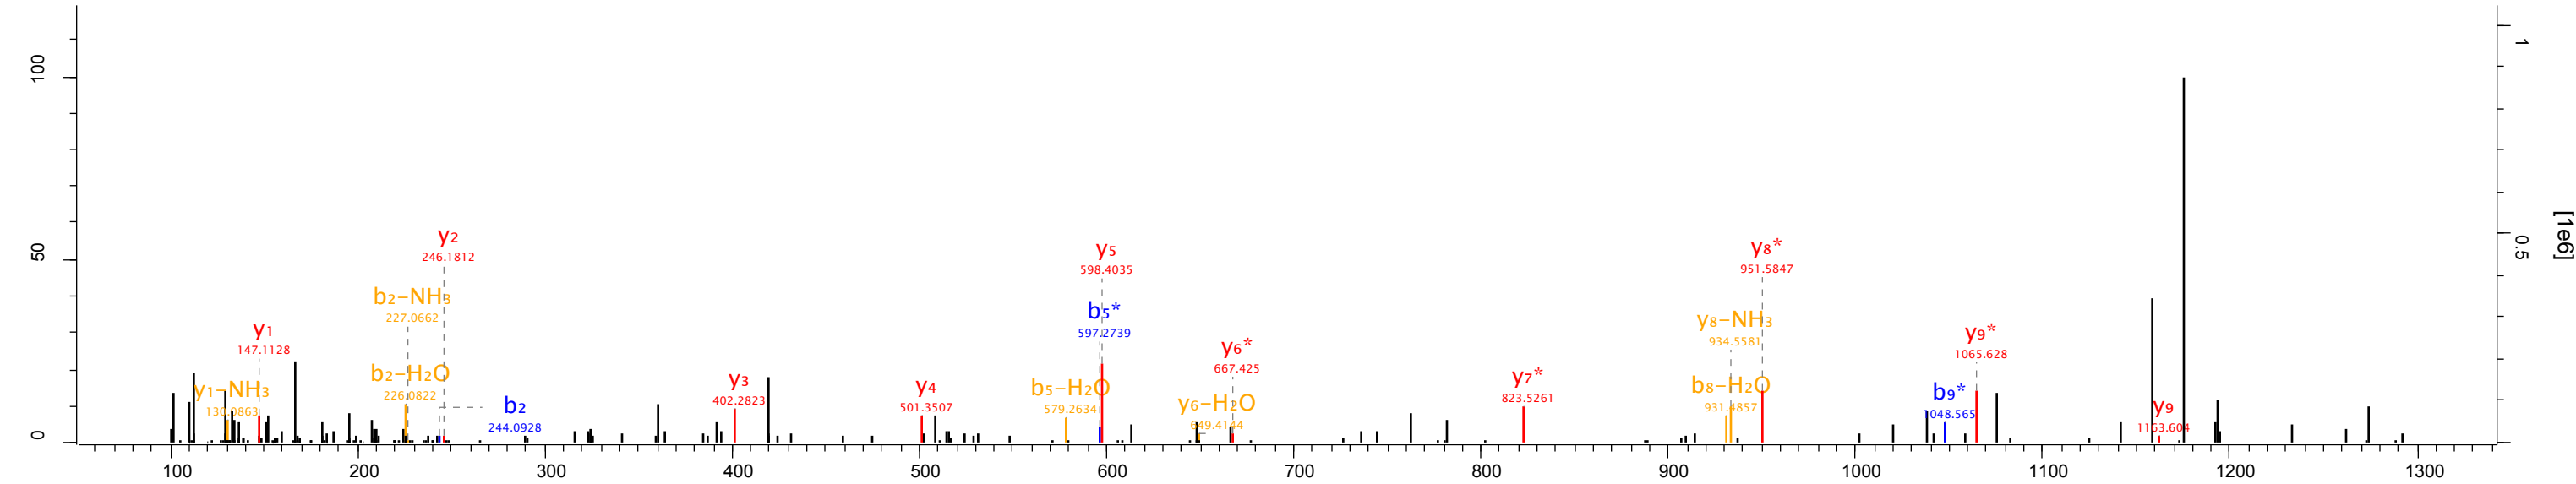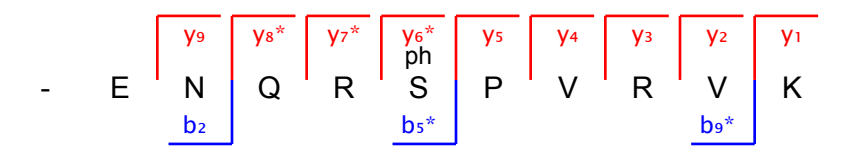

Raw file: 20171215\_MaS\_33SR\_LMH\_phospho2\_09  
 Scan: 2242 Method: FTMS; HCD Score: 269.87 m/z: 653.26 Gene names: RNPEP

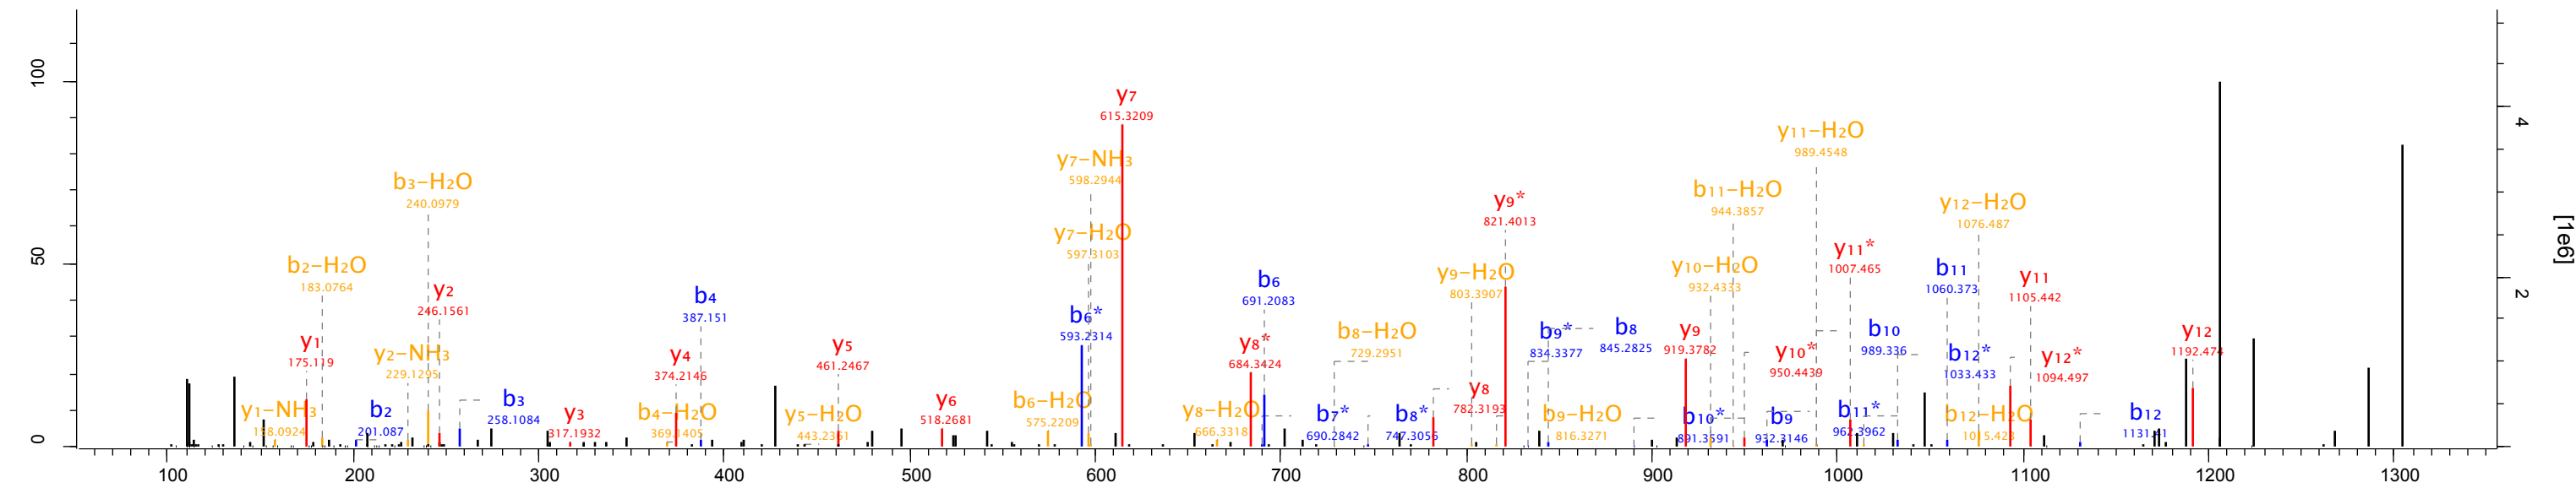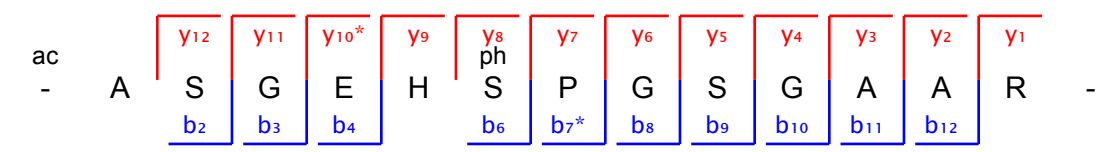

Raw file 20171215\_MaS\_33SR\_LMH\_phospho2\_09 Scan 2562 Method FTMS; HCD Score 134.06 m/z 674.77 Gene names MICAL3

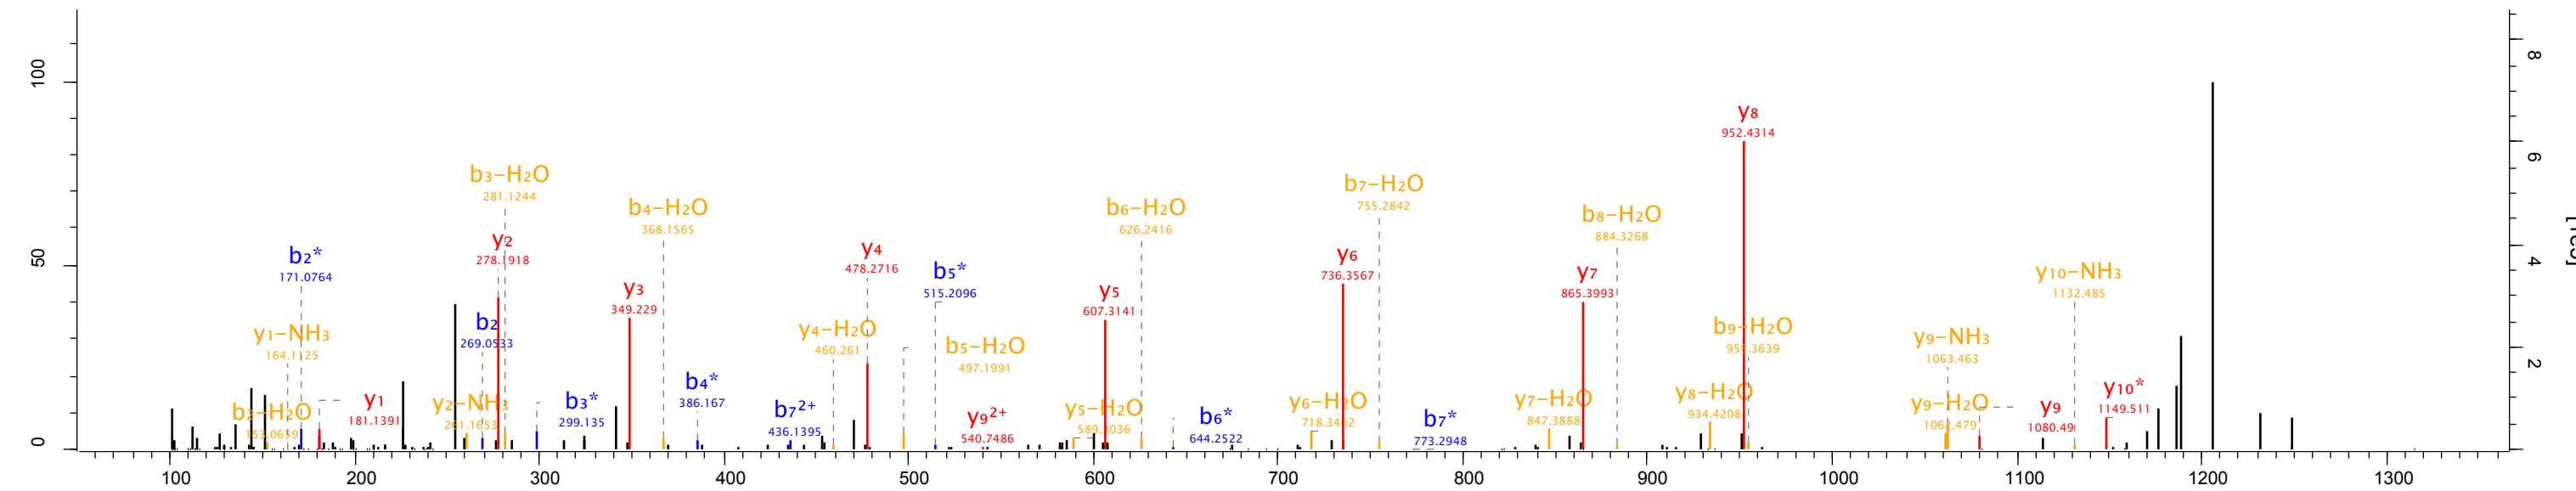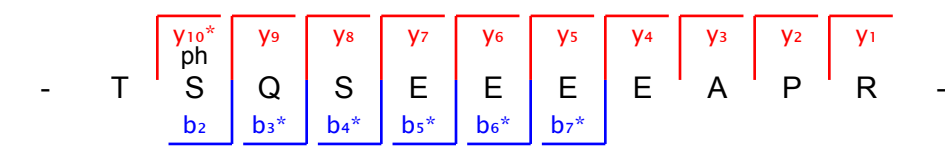

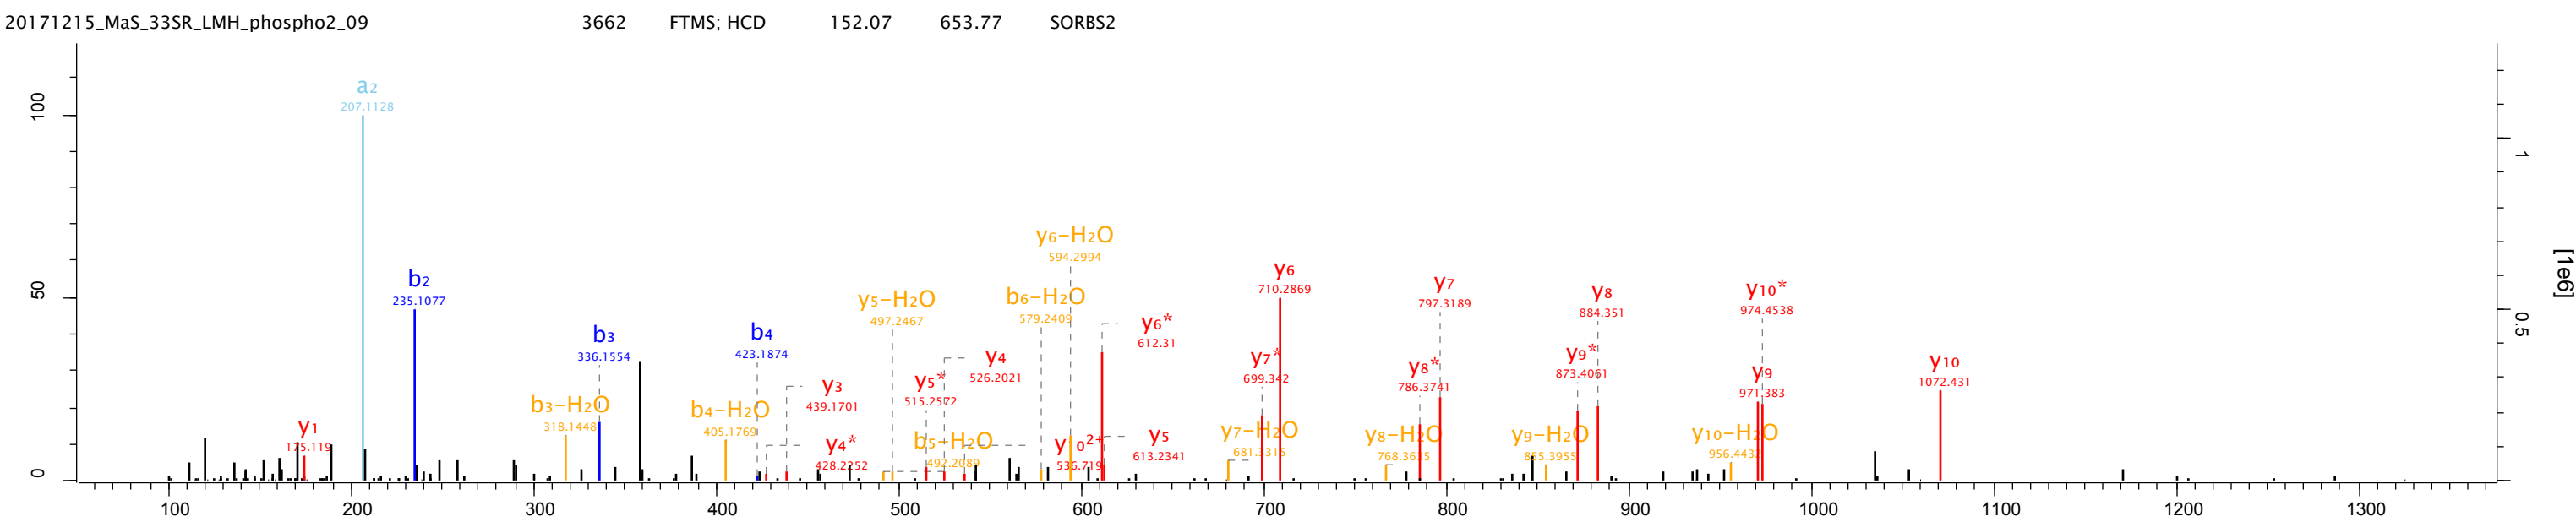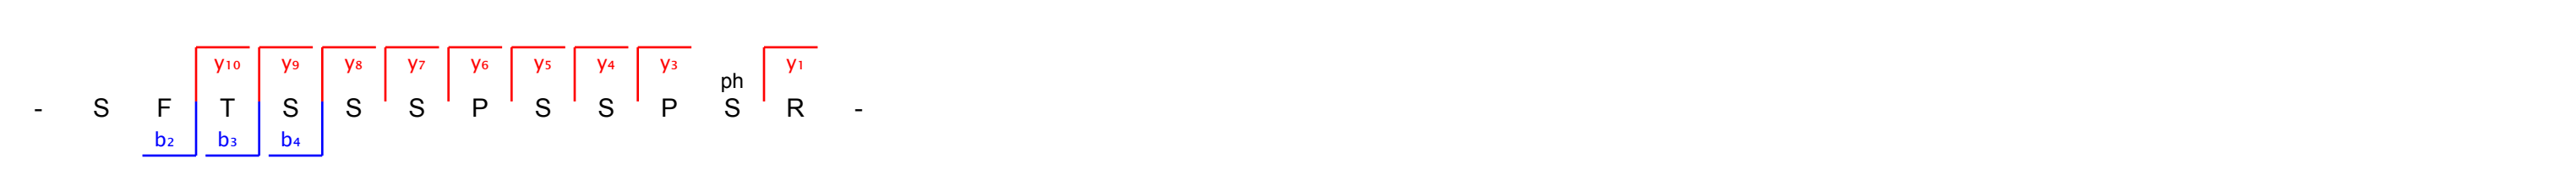



Raw file: 20171215\_MaS\_33SR\_LMH\_phospho2\_09  
 Scan: 3702 Method: FTMS; HCD Score: 156.58 m/z: 752.34 Gene names: CAMSAP2

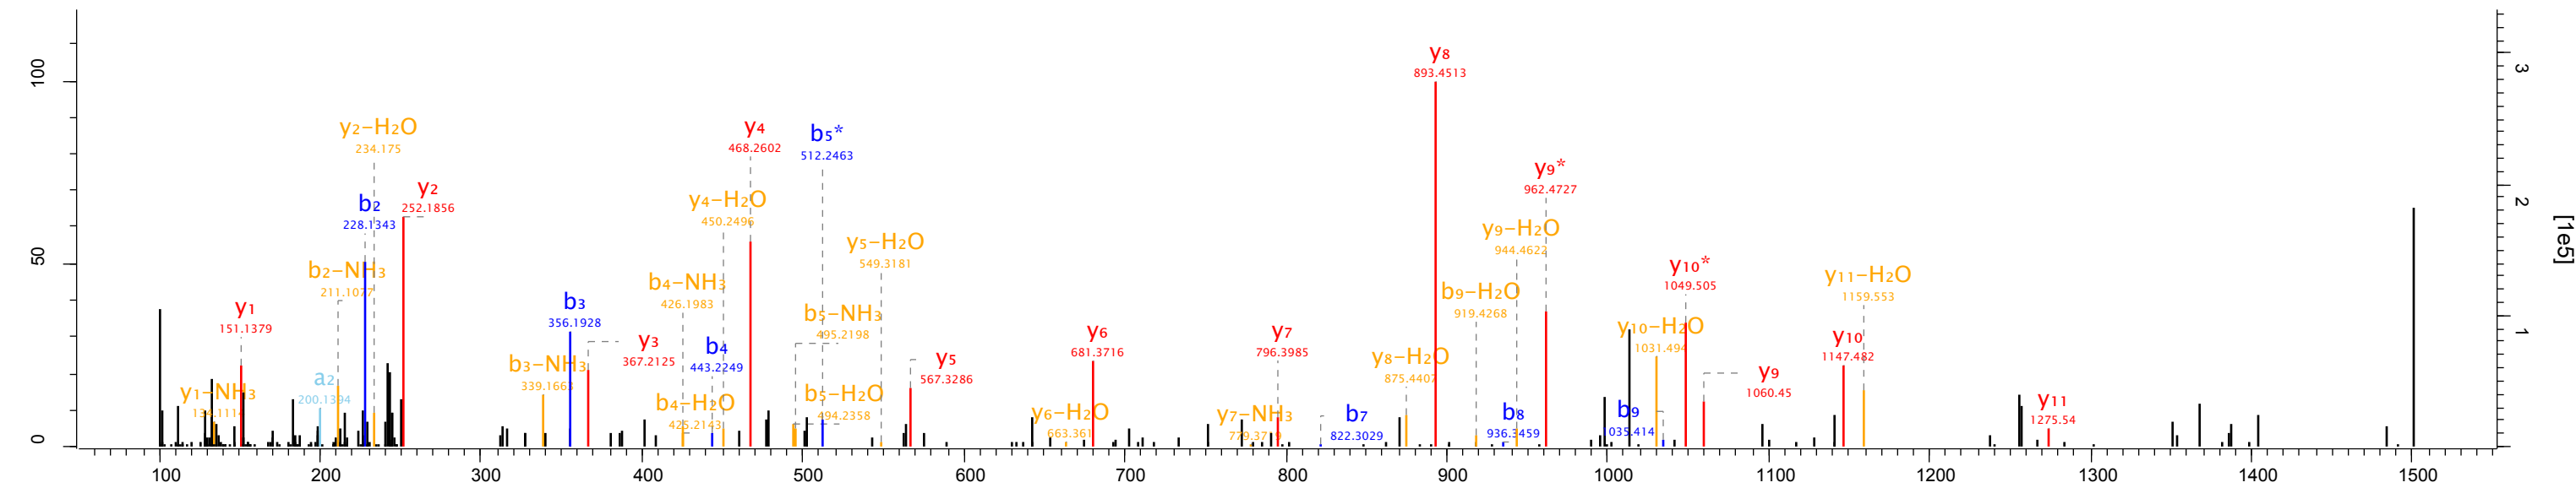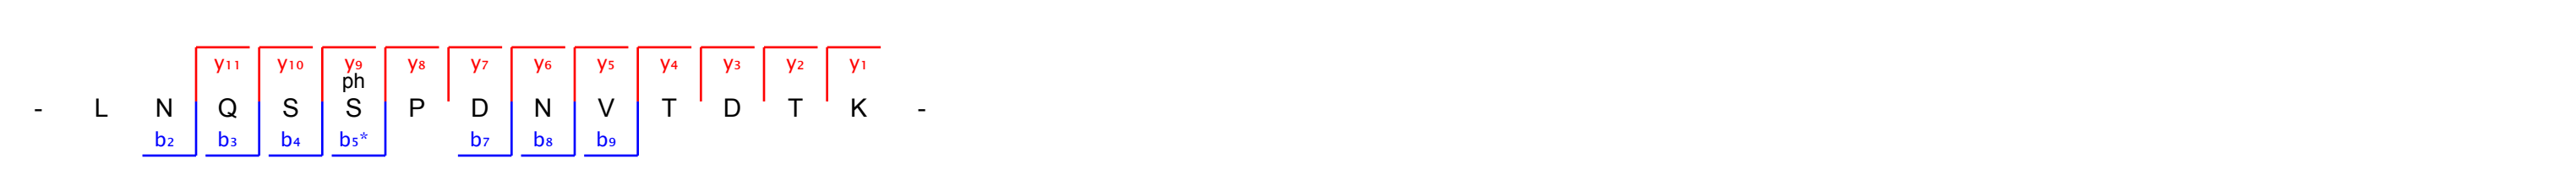

20171215\_MaS\_33SR\_LMH\_phospho2\_09 4622 FTMS; HCD 57.03 646.31 LARP4B

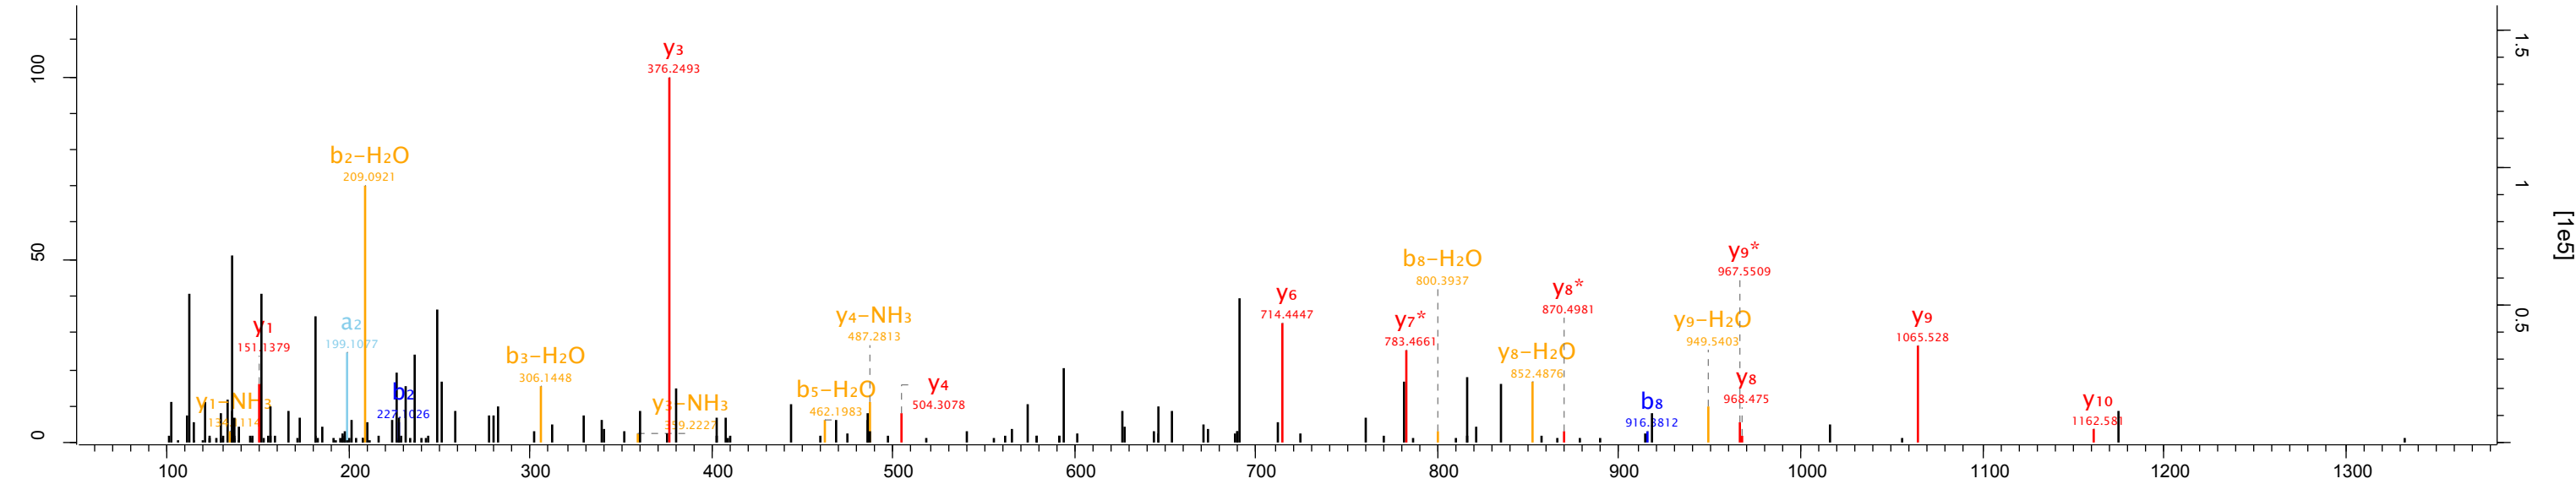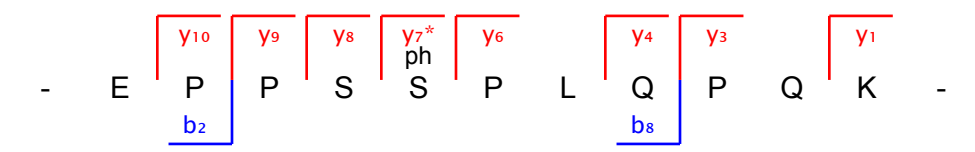

Raw file 20171215\_MaS\_33SR\_LMH\_phospho2\_09 Scan 5042 Method FTMS; HCD Score 96.67 m/z 457.18 Gene names CAV1

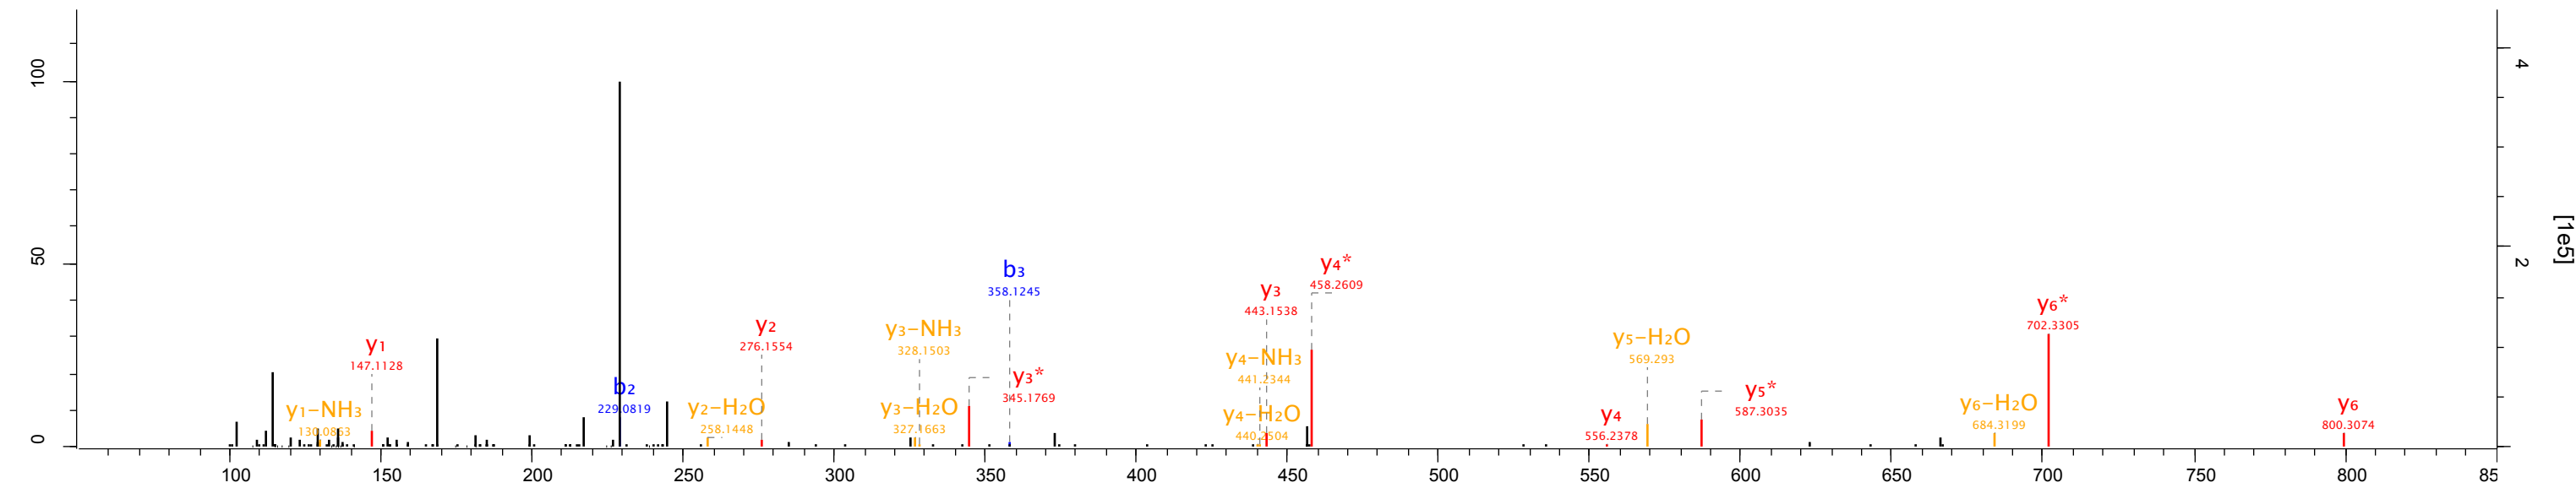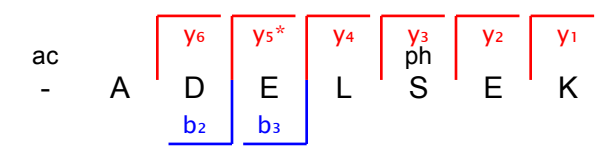

Raw file

20171215\_MaS\_33SR\_LMH\_phospho2\_09

| Scan | Method    | Score | m/z    | Gene names |
|------|-----------|-------|--------|------------|
| 5912 | FTMS; HCD | 60.76 | 785.86 | LITAF;TLE3 |

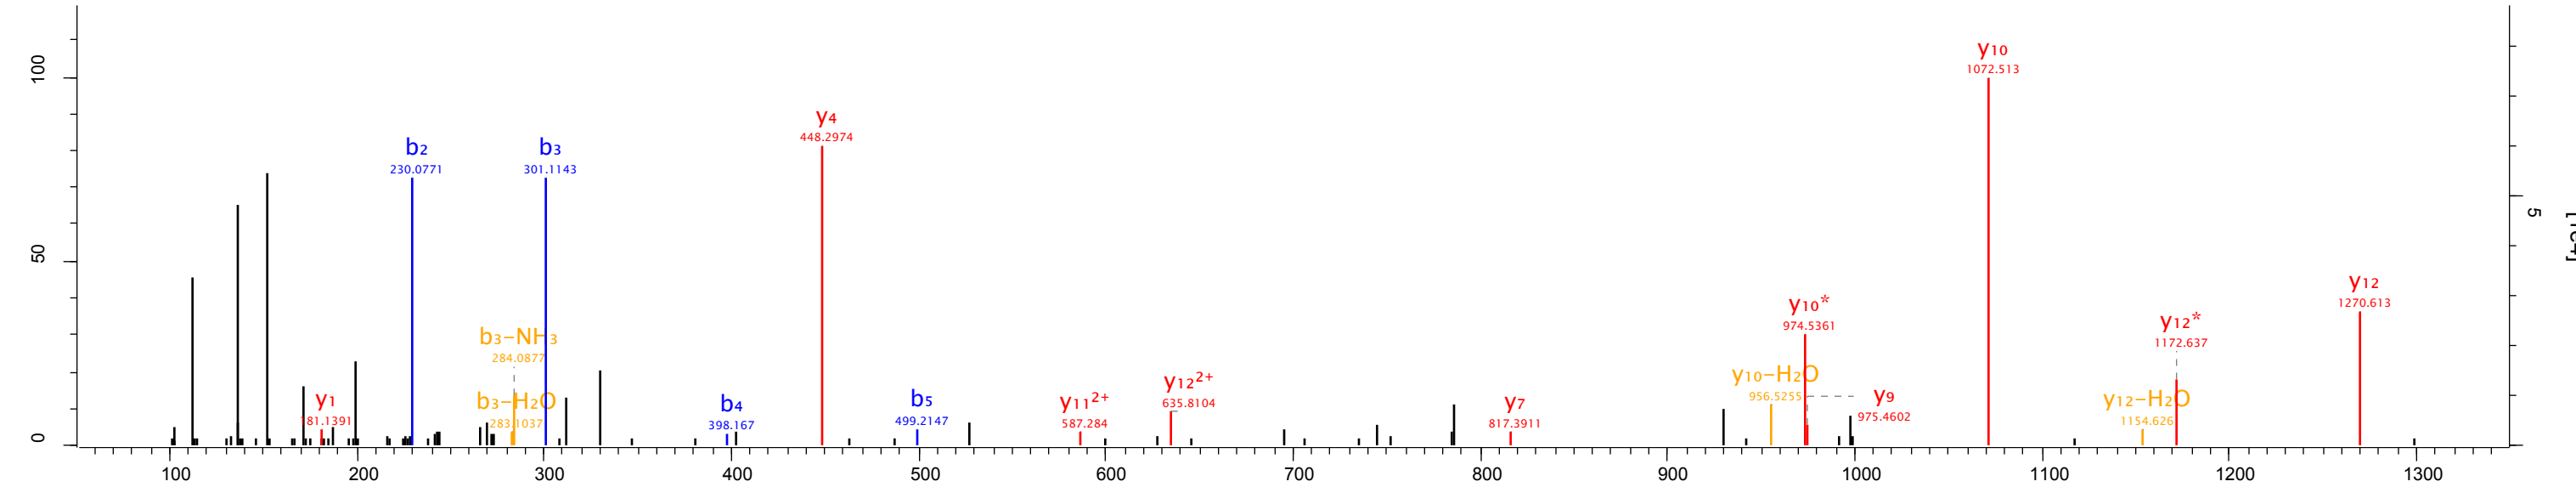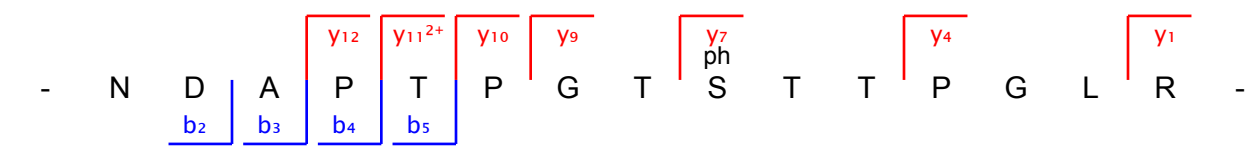

Raw file: 20171215\_MaS\_33SR\_LMH\_proteome\_01  
 Scan: 132552 Method: FTMS; HCD Score: 46.99 m/z: 791.95 Gene names: ARHGEF16

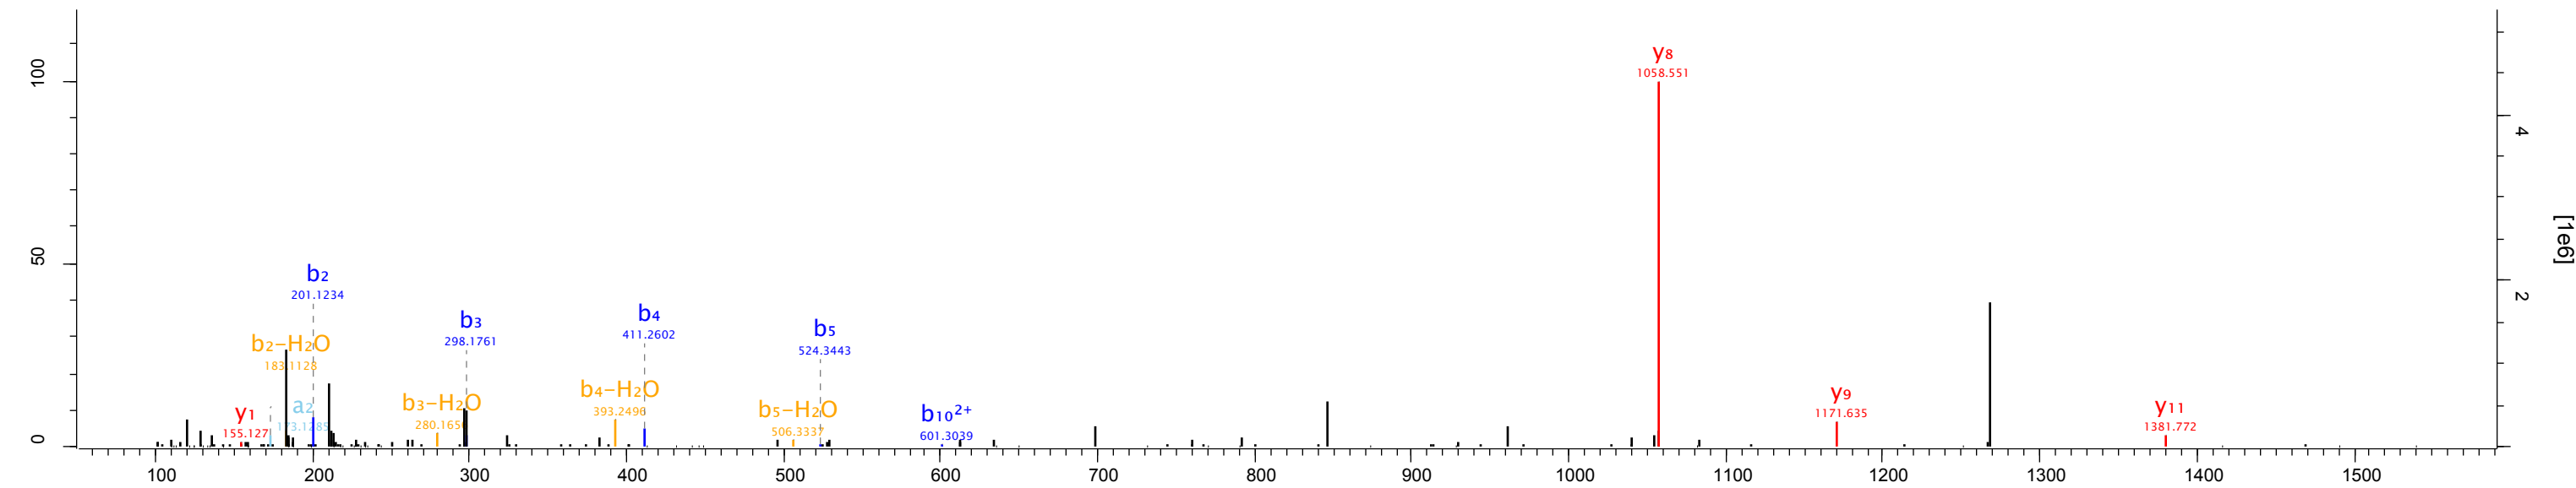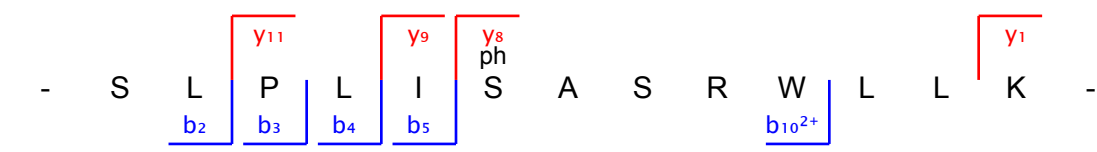

Raw file: 20171215\_MaS\_33SR\_LMH\_proteome\_01  
 Scan: 76552 Method: FTMS; HCD Score: 71.68 m/z: 1103.02 Gene names: ARHGEF2

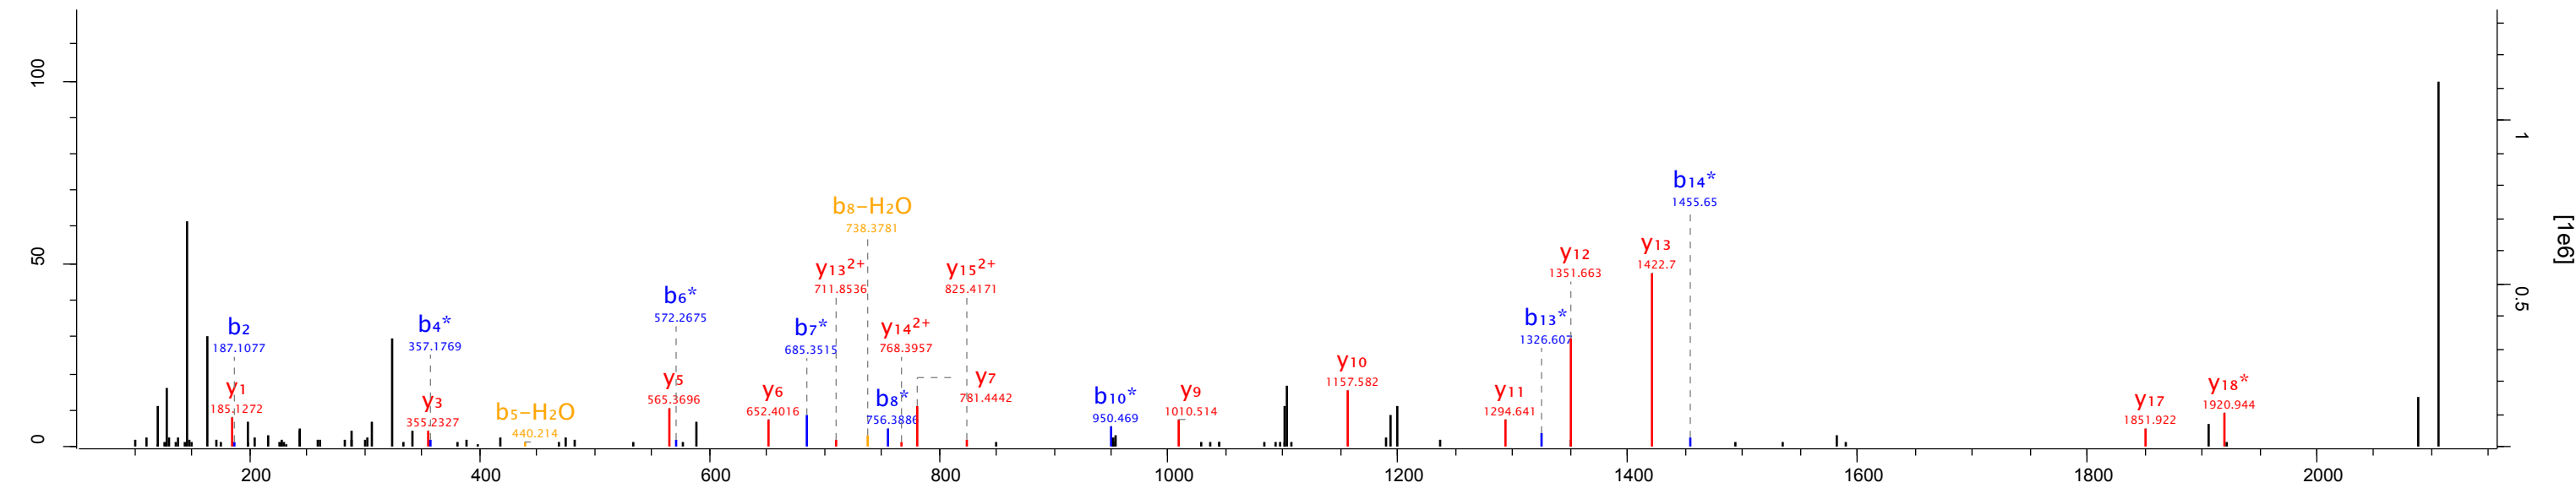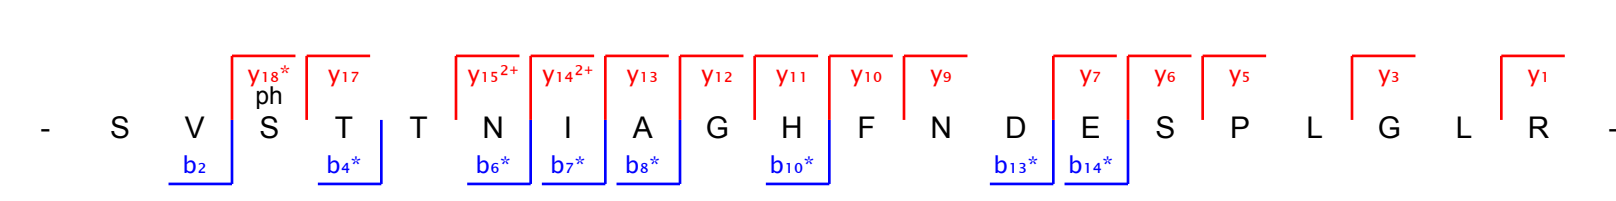

Raw file 20171215\_MaS\_33SR\_LMH\_proteome\_02 Scan 17882 Method FTMS; HCD Score 48.42 m/z 556.77 Gene names C2orf16

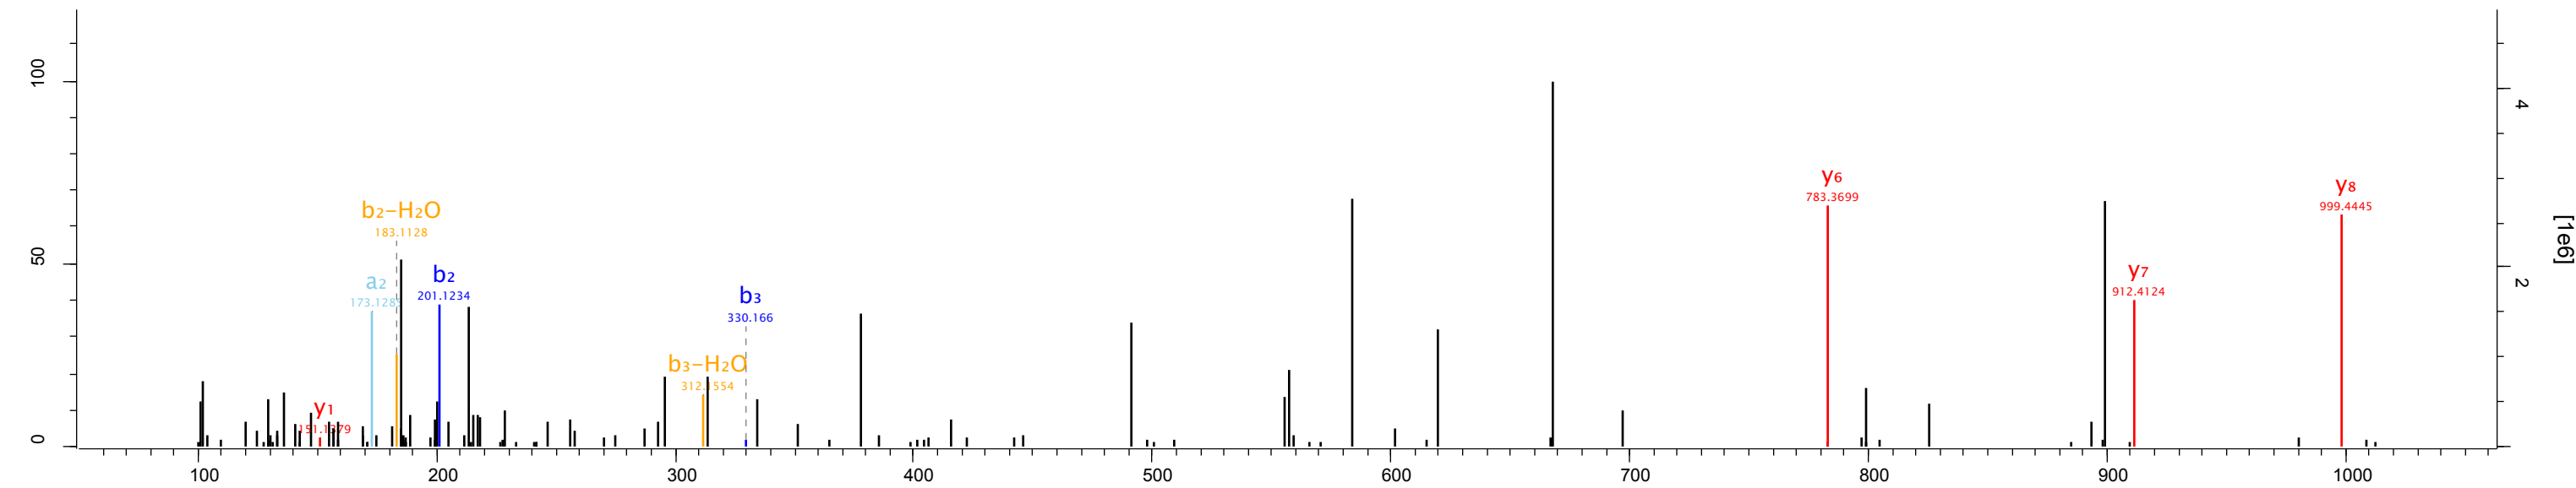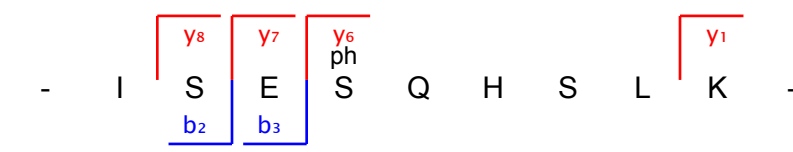

Raw file 20171215\_MaS\_33SR\_LMH\_proteome\_02 Scan 3142 Method FTMS; HCD Score 43.31 m/z 443.55 Gene names CYFIP2

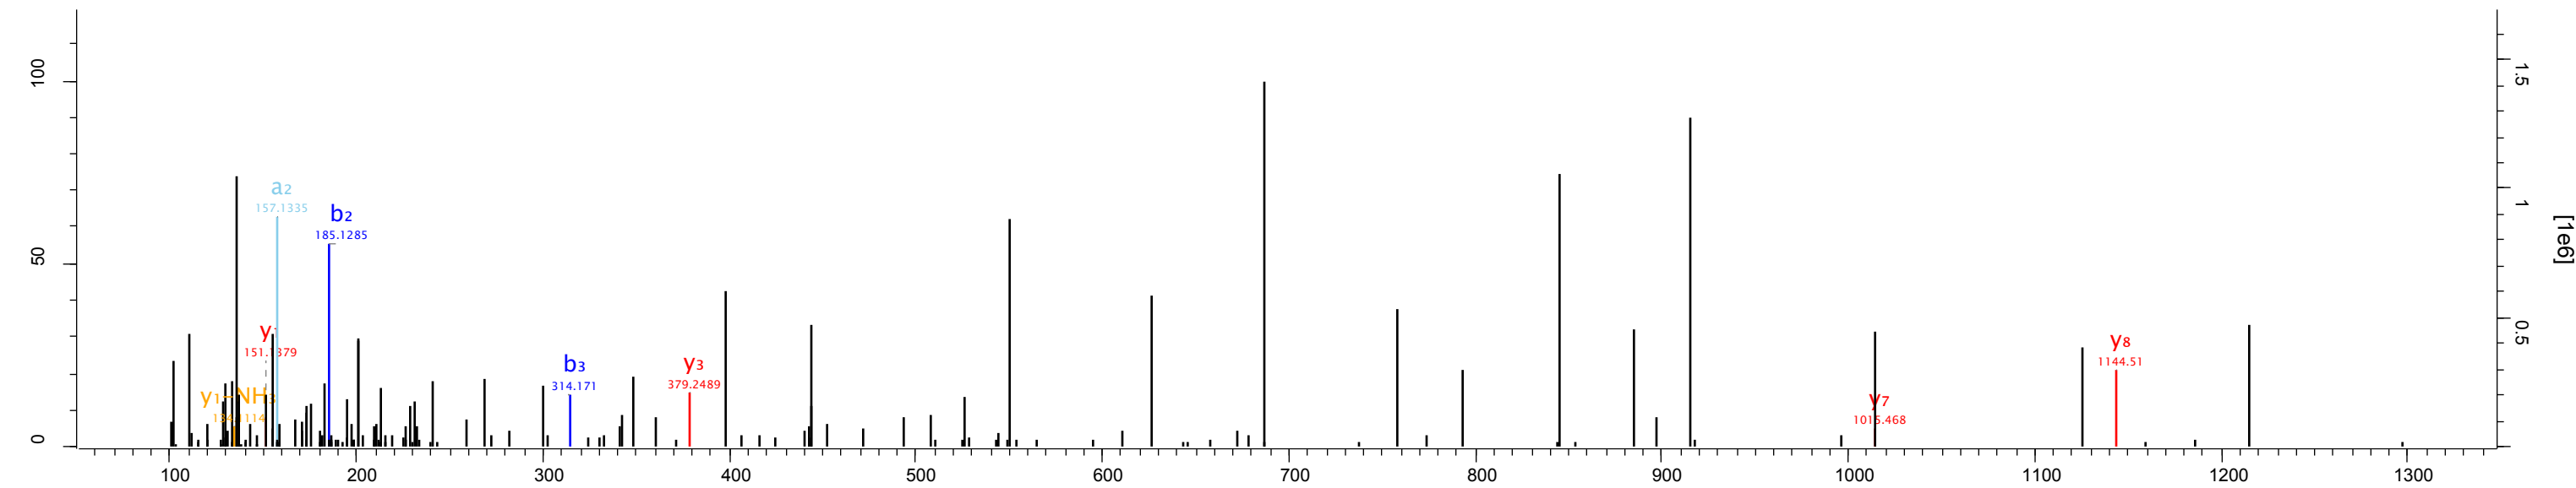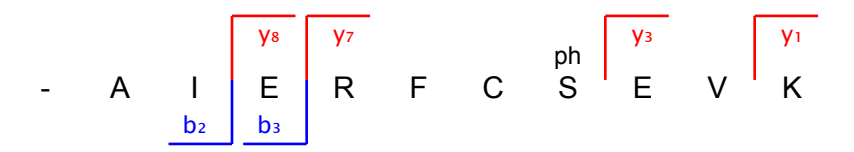



Raw file: 20171215\_MaS\_33SR\_LMH\_phospho\_01  
 Scan: 11813 Method: FTMS; HCD Score: 73.14 m/z: 797.88 Gene names: PPFIBP1

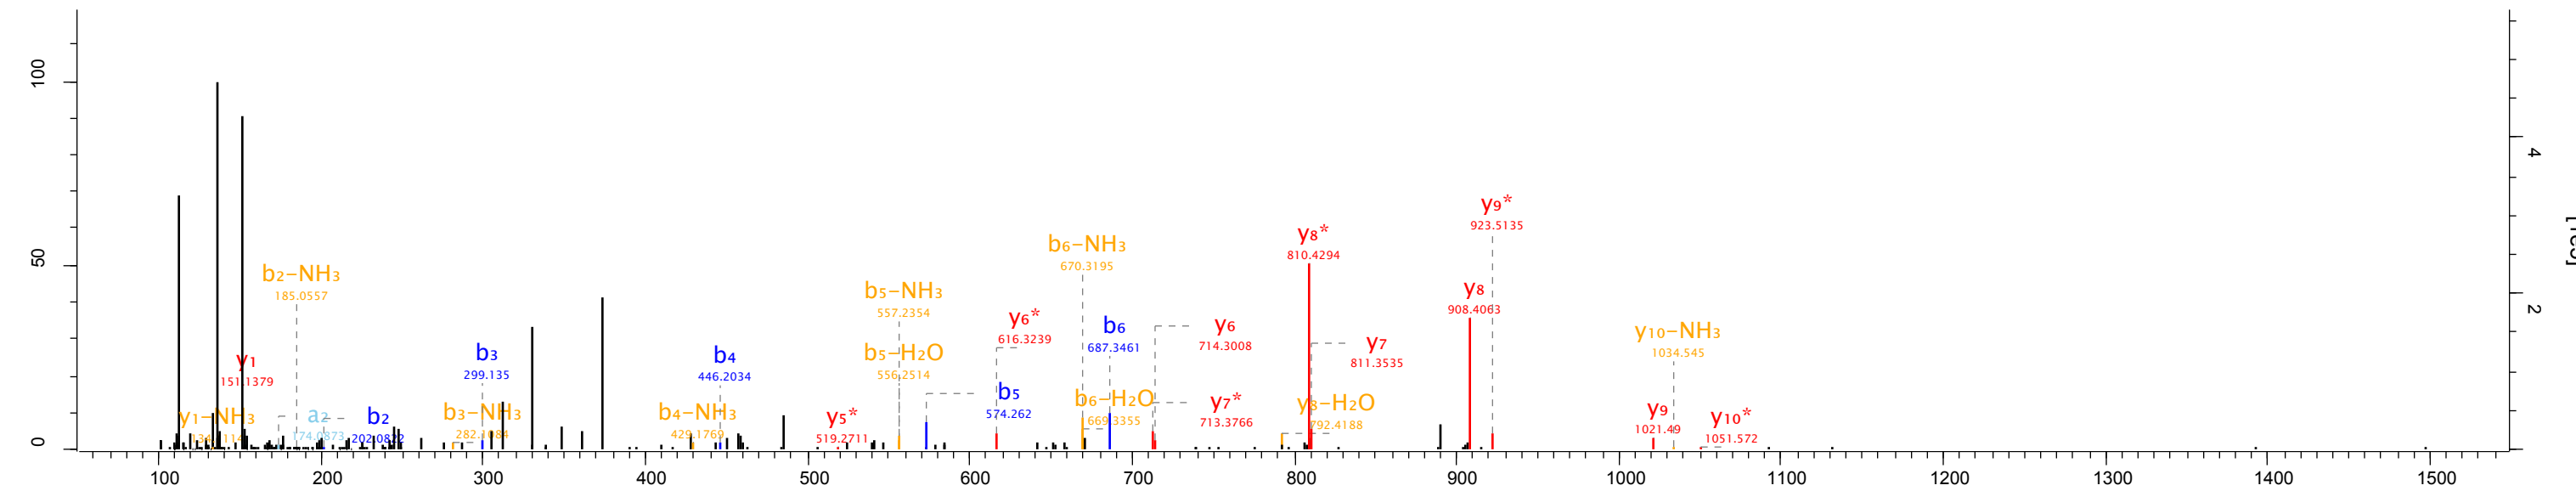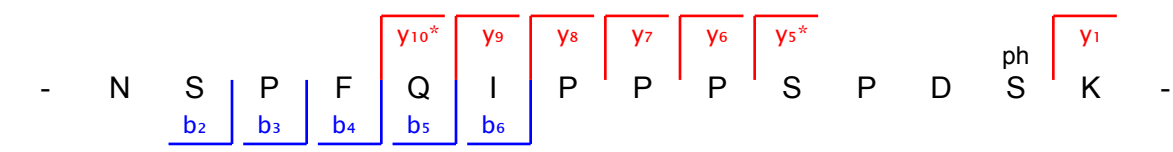

Raw file 20171215\_MaS\_33SR\_LMH\_phospho\_01 Scan 2533 Method FTMS; HCD Score 147.25 m/z 797.34 Gene names DPYSL2

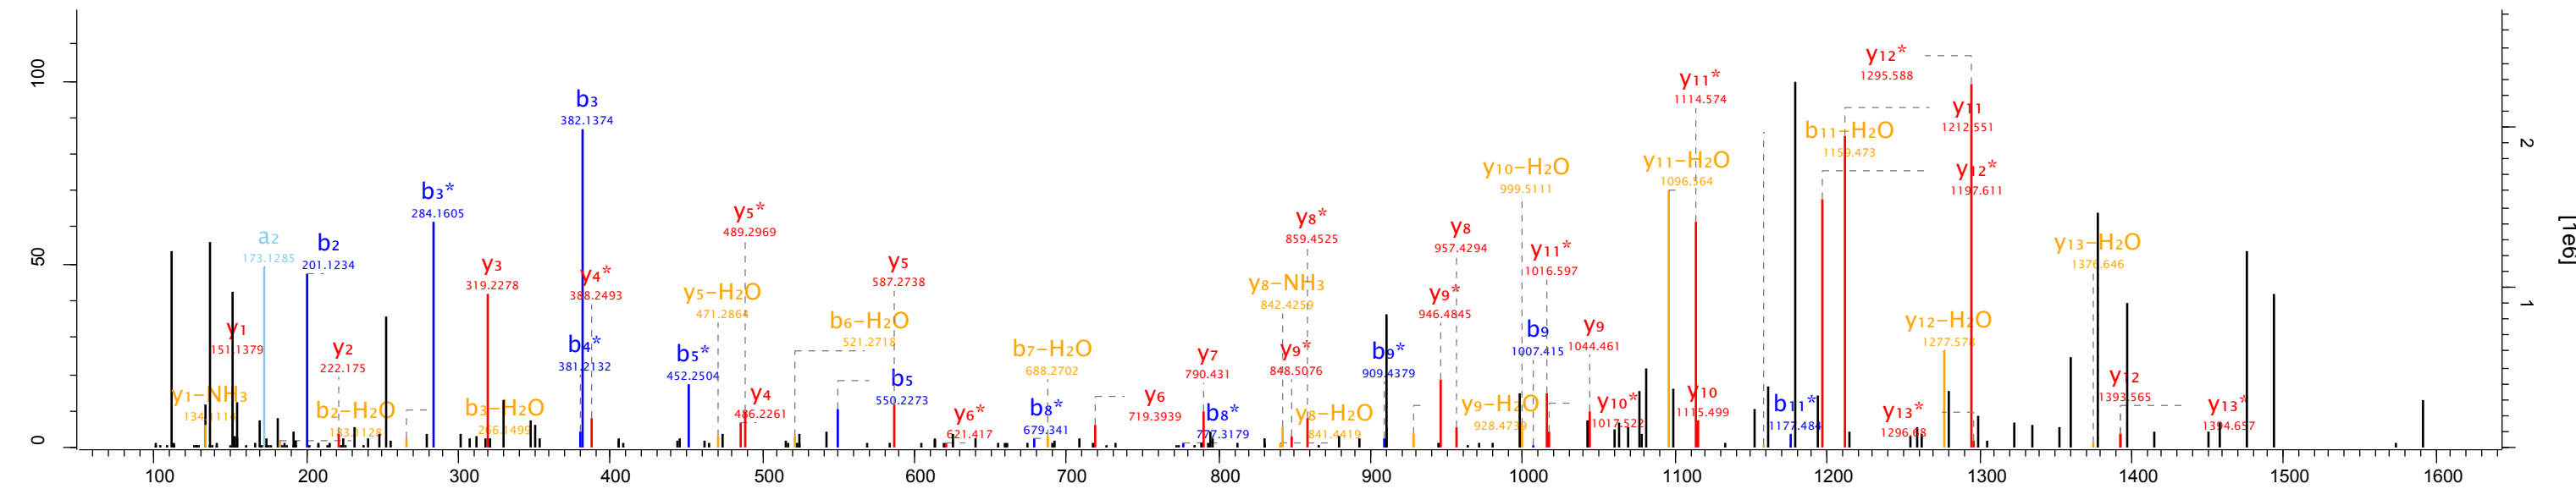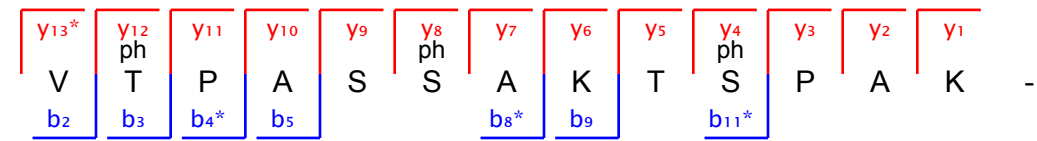

Raw file 20171215\_MaS\_33SR\_LMH\_phospho\_01 Scan 3003 Method FTMS; HCD Score 73.73 m/z 738.28 Gene names LMNA

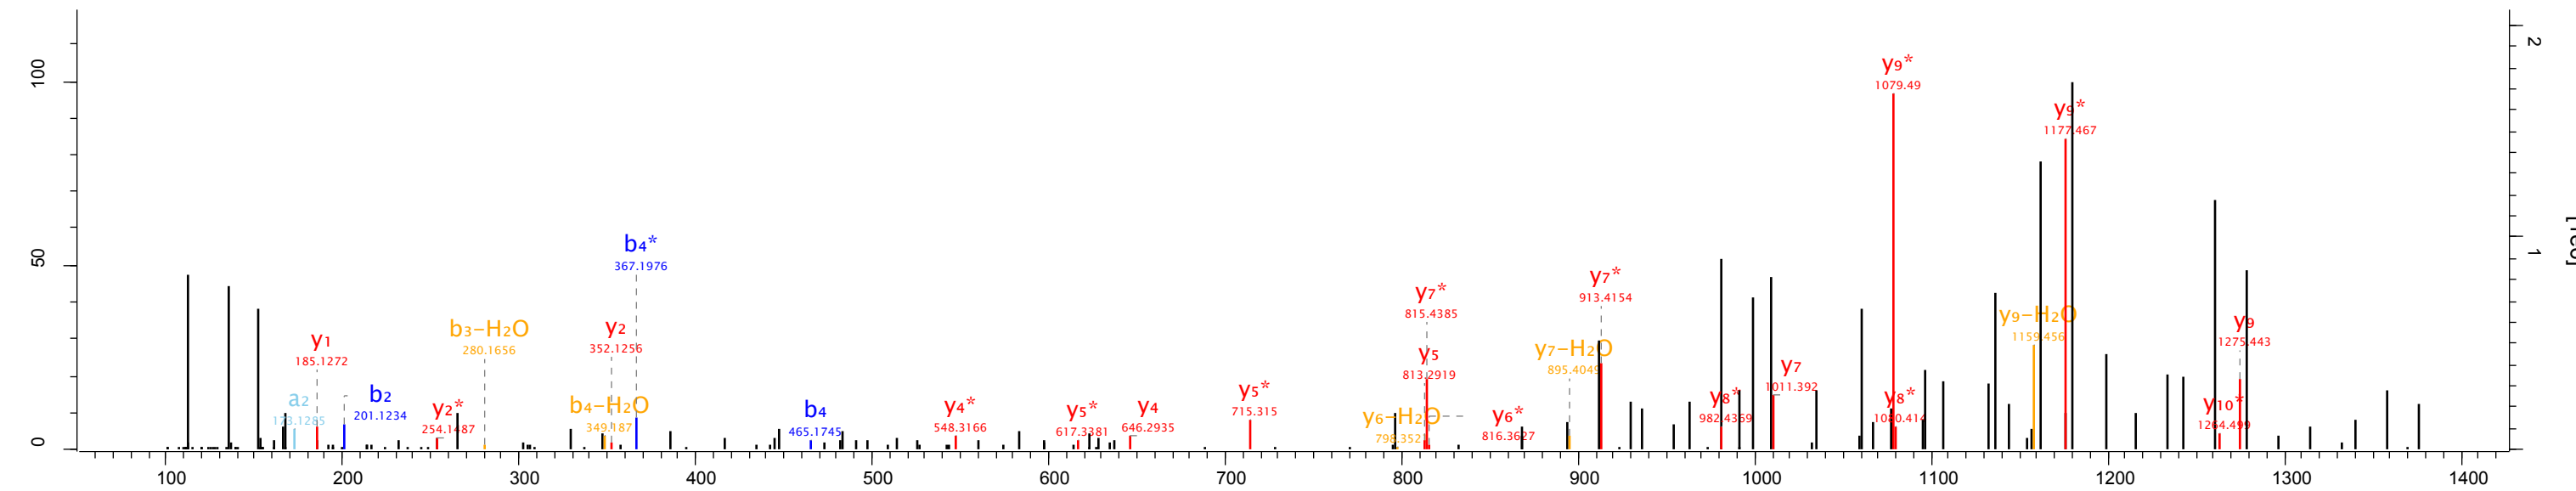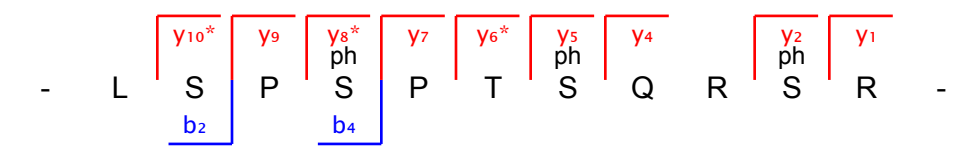

Raw file 20171215\_MaS\_33SR\_LMH\_phospho\_01 Scan 3013 Method FTMS; HCD Score 104.94 m/z 502.22 Gene names PCF11

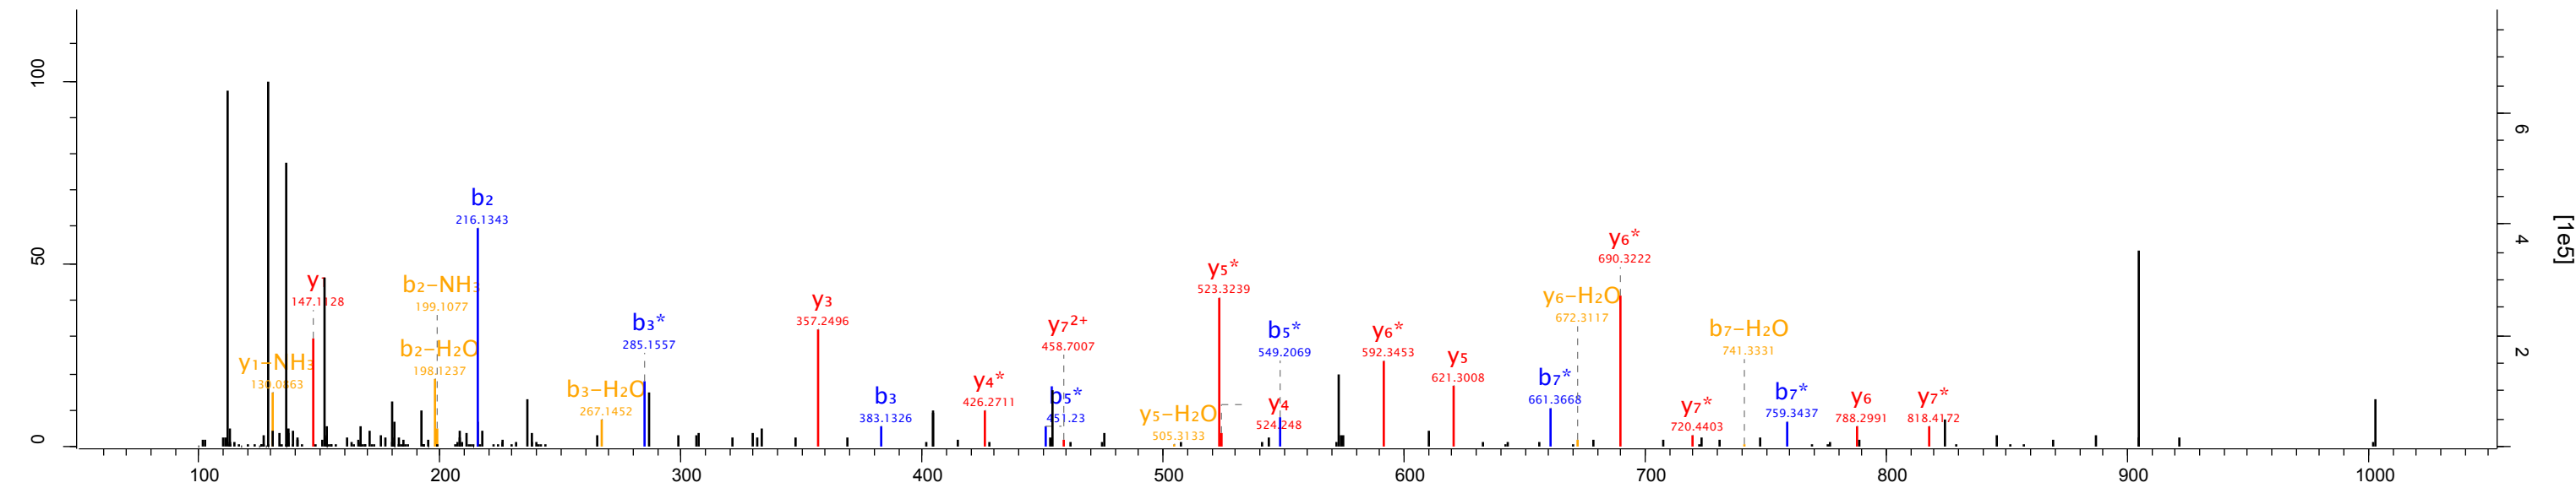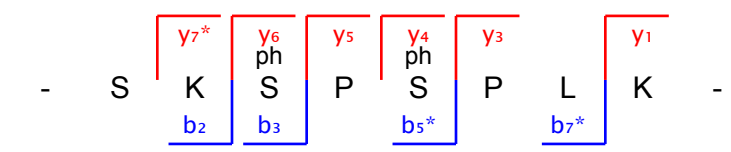

Raw file 20171215\_MaS\_33SR\_LMH\_phospho\_01 Scan 3083 Method FTMS; HCD Score 59.68 m/z 592.24 Gene names SRRM2

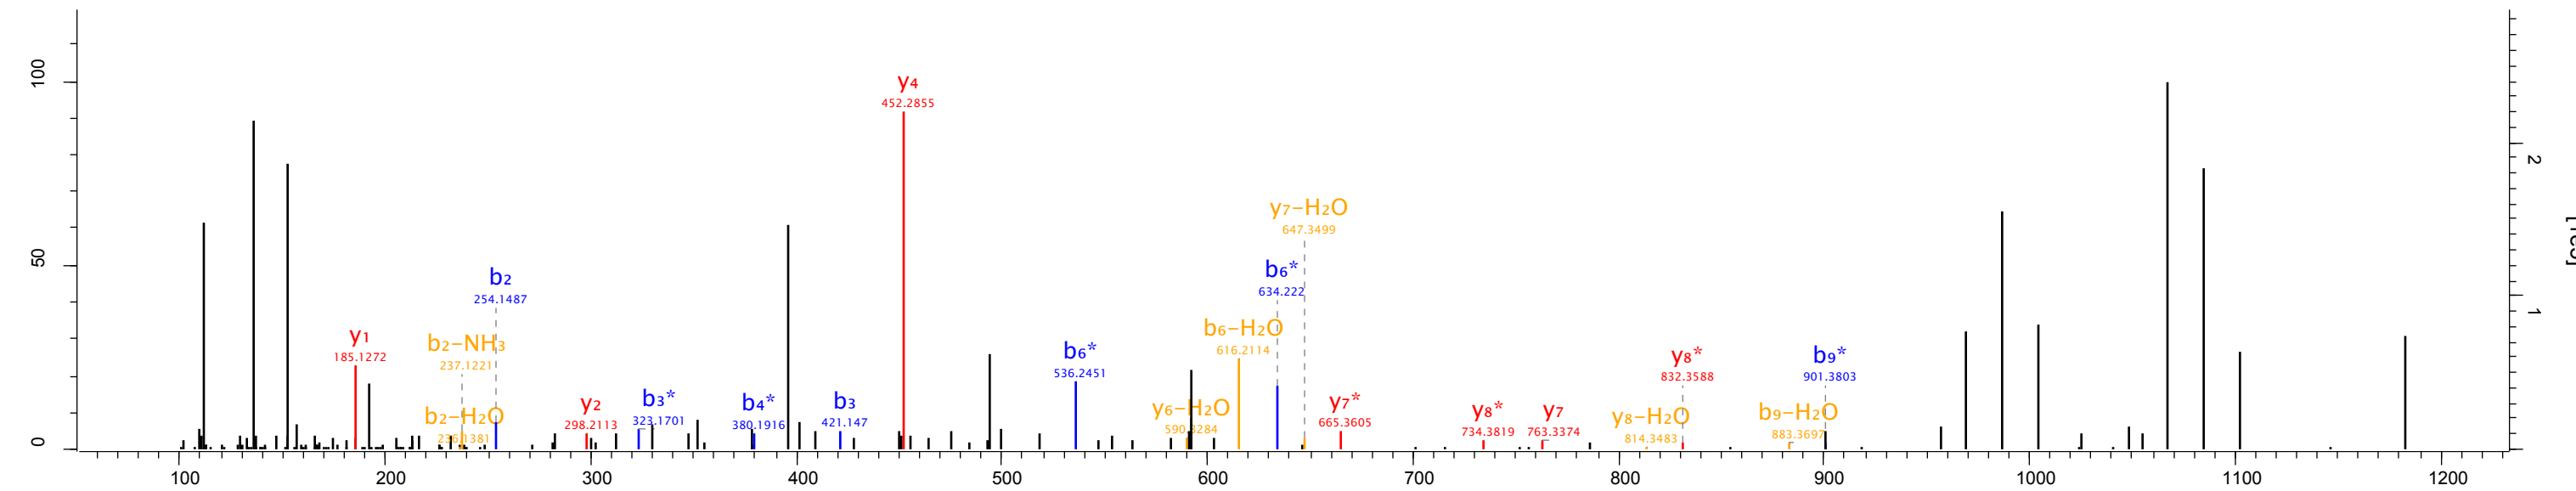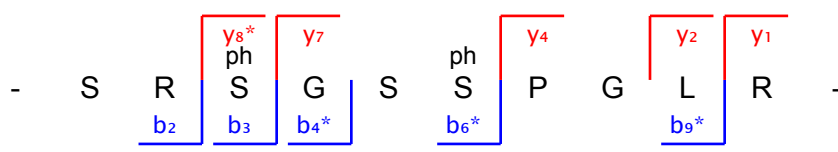

Raw file 20171215\_MaS\_33SR\_LMH\_phospho\_01 Scan 3143 Method FTMS; HCD Score 77.58 m/z 695.97 Gene names TGOLN2

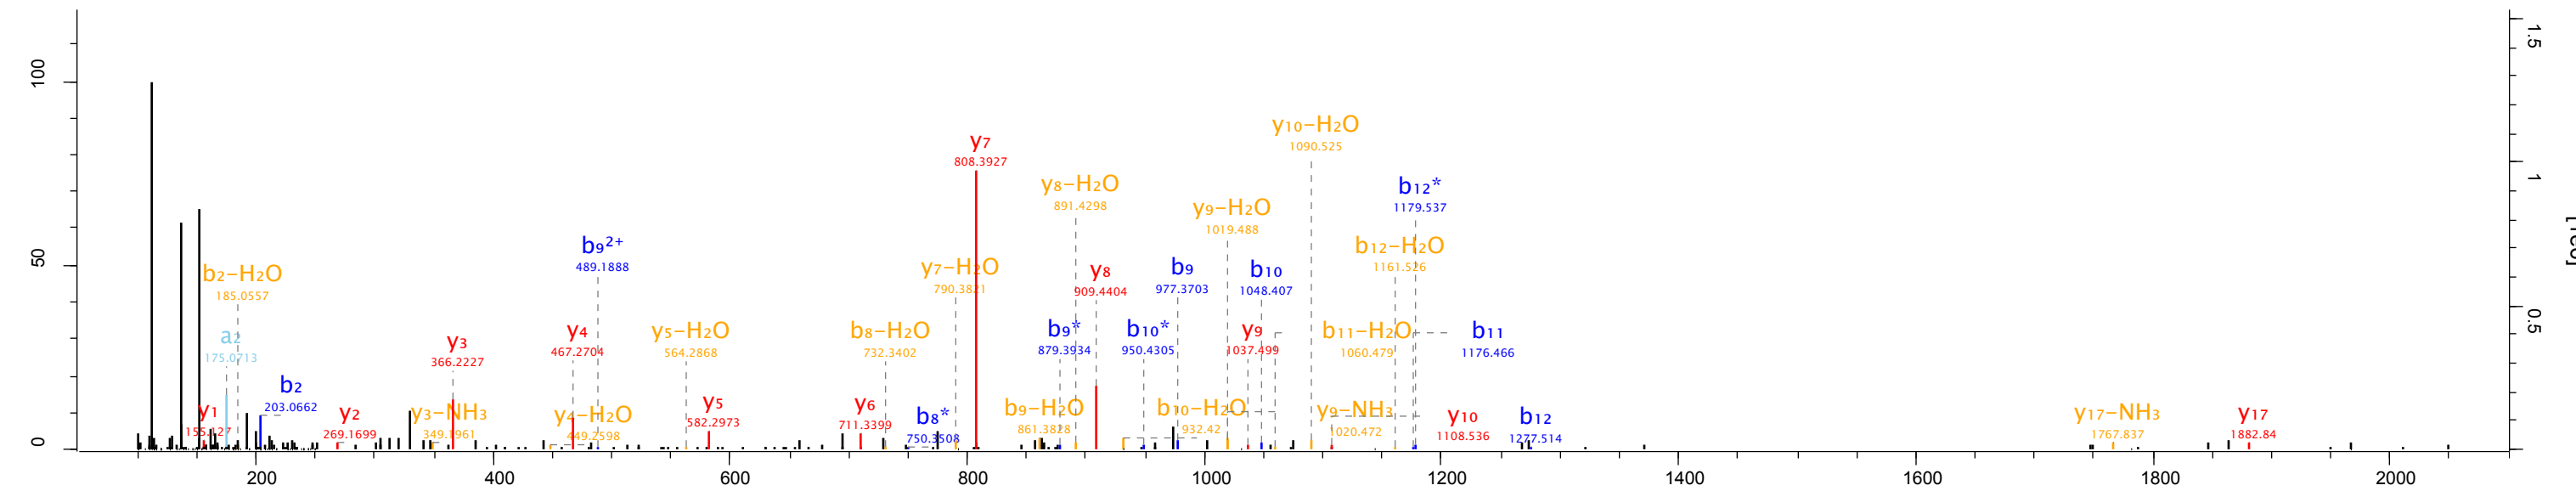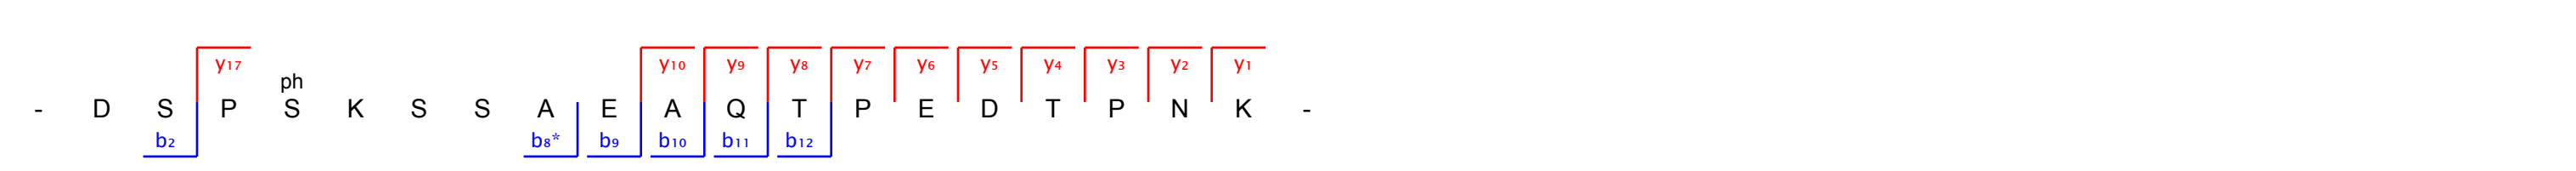

Raw file 20171215\_MaS\_33SR\_LMH\_phospho\_01 Scan 3203 Method FTMS; HCD Score 51.16 m/z 481.7 Gene names VIM

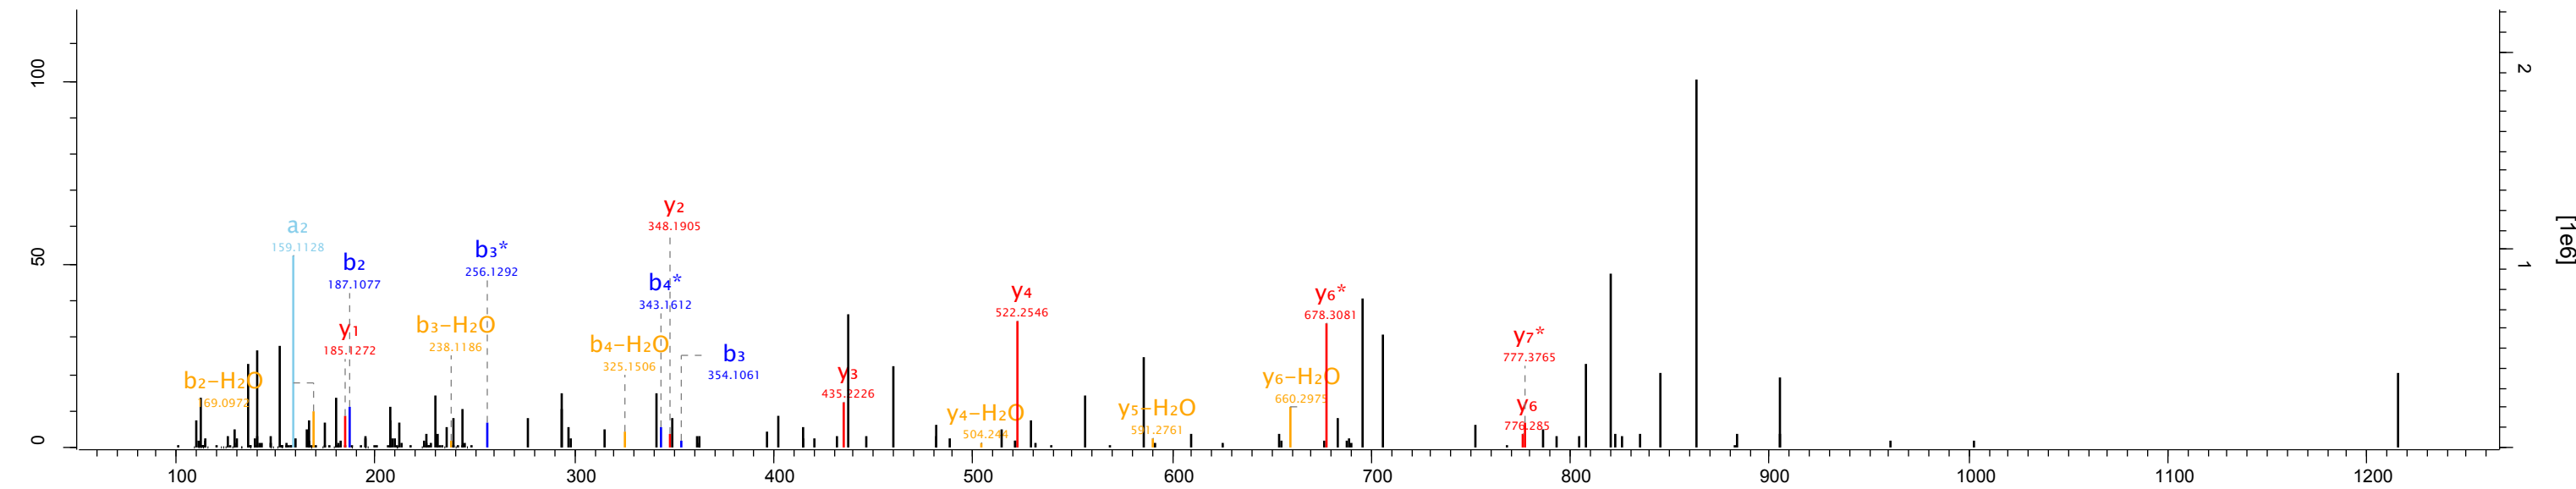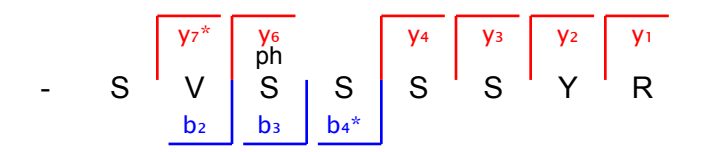

Raw file 20171215\_MaS\_33SR\_LMH\_phospho\_01 Scan 3293 Method FTMS; HCD Score 125.14 m/z 629.24 Gene names SMARCC2

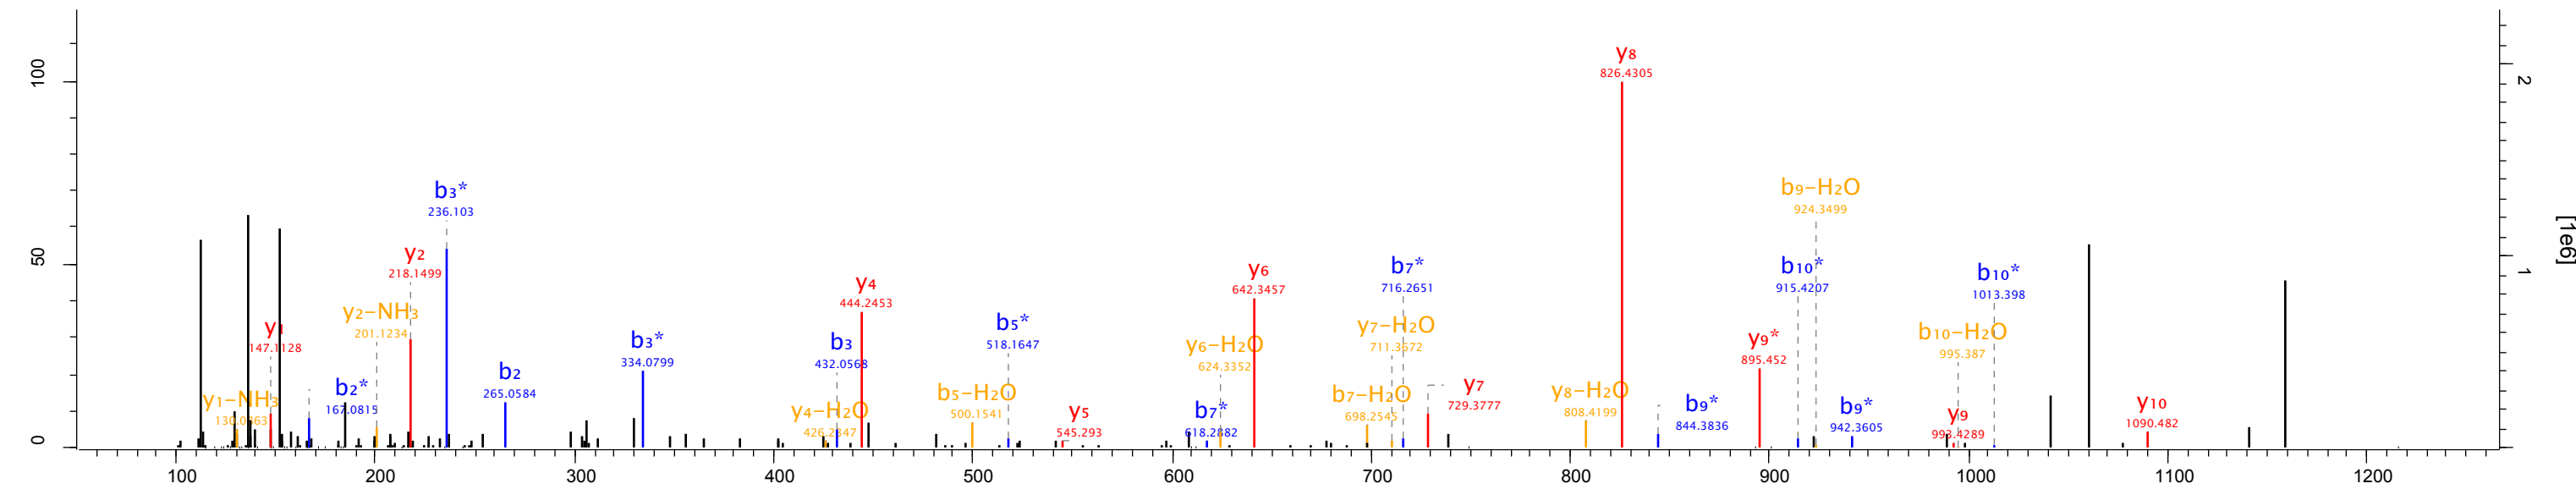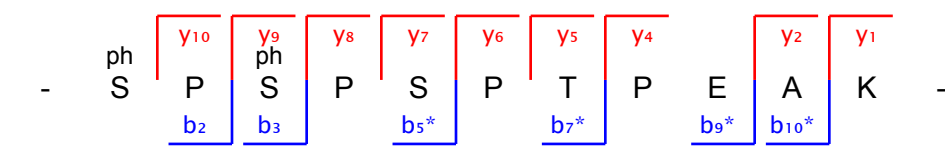



Raw file 20171215\_MaS\_33SR\_LMH\_phospho\_01 Scan 3543 Method FTMS; HCD Score 137.68 m/z 700.76 Gene names IWS1

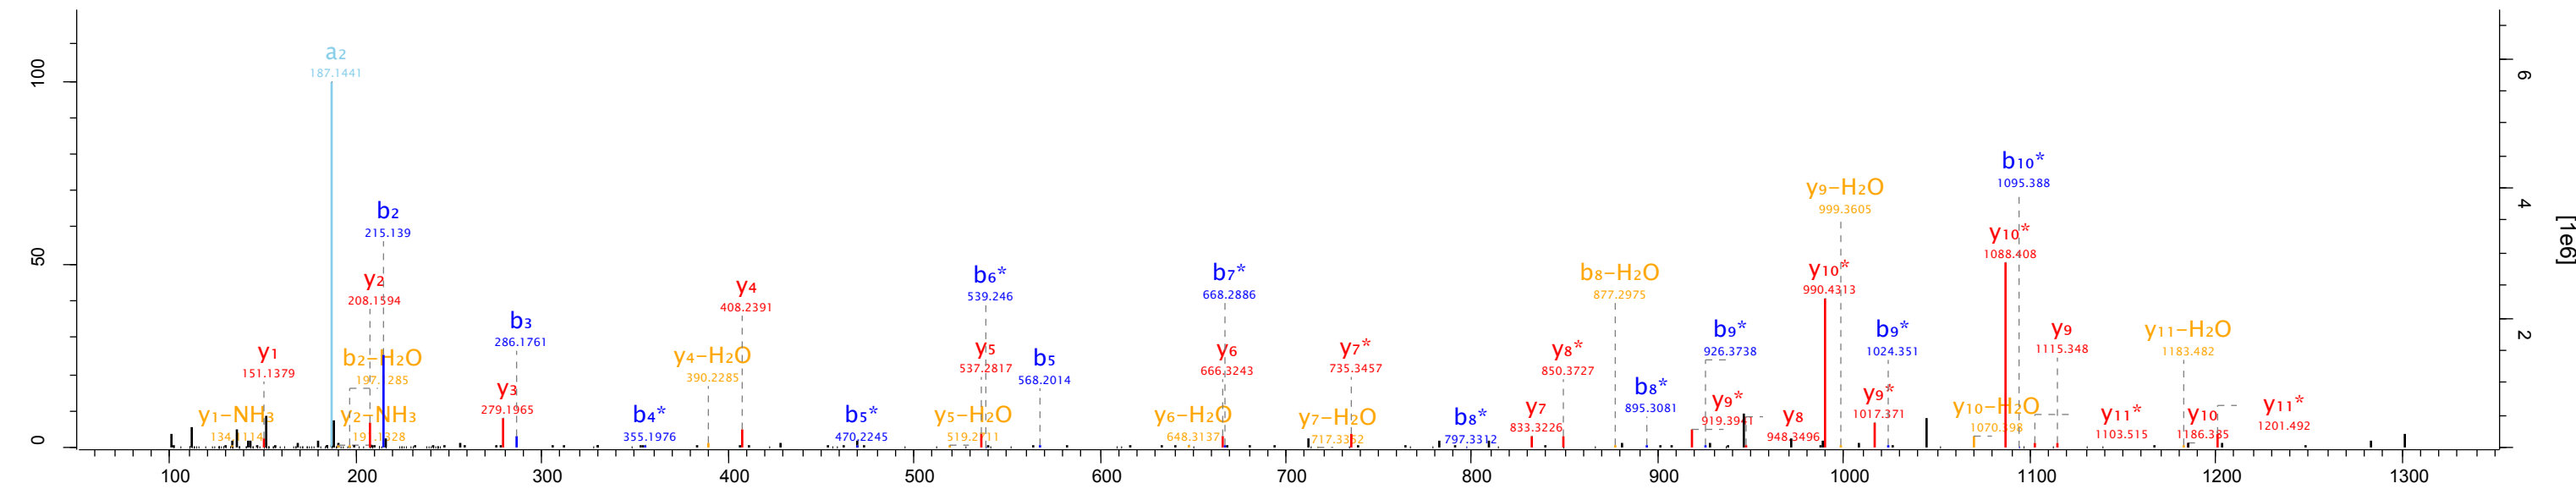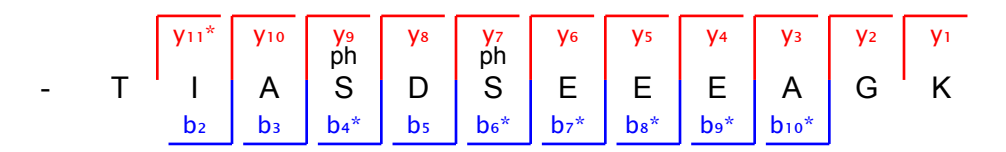

Raw file  
20171215\_MaS\_33SR\_LMH\_phospho\_01

Scan 3653 Method FTMS; HCD Score 90.15 m/z 478.17 Gene names CDK12

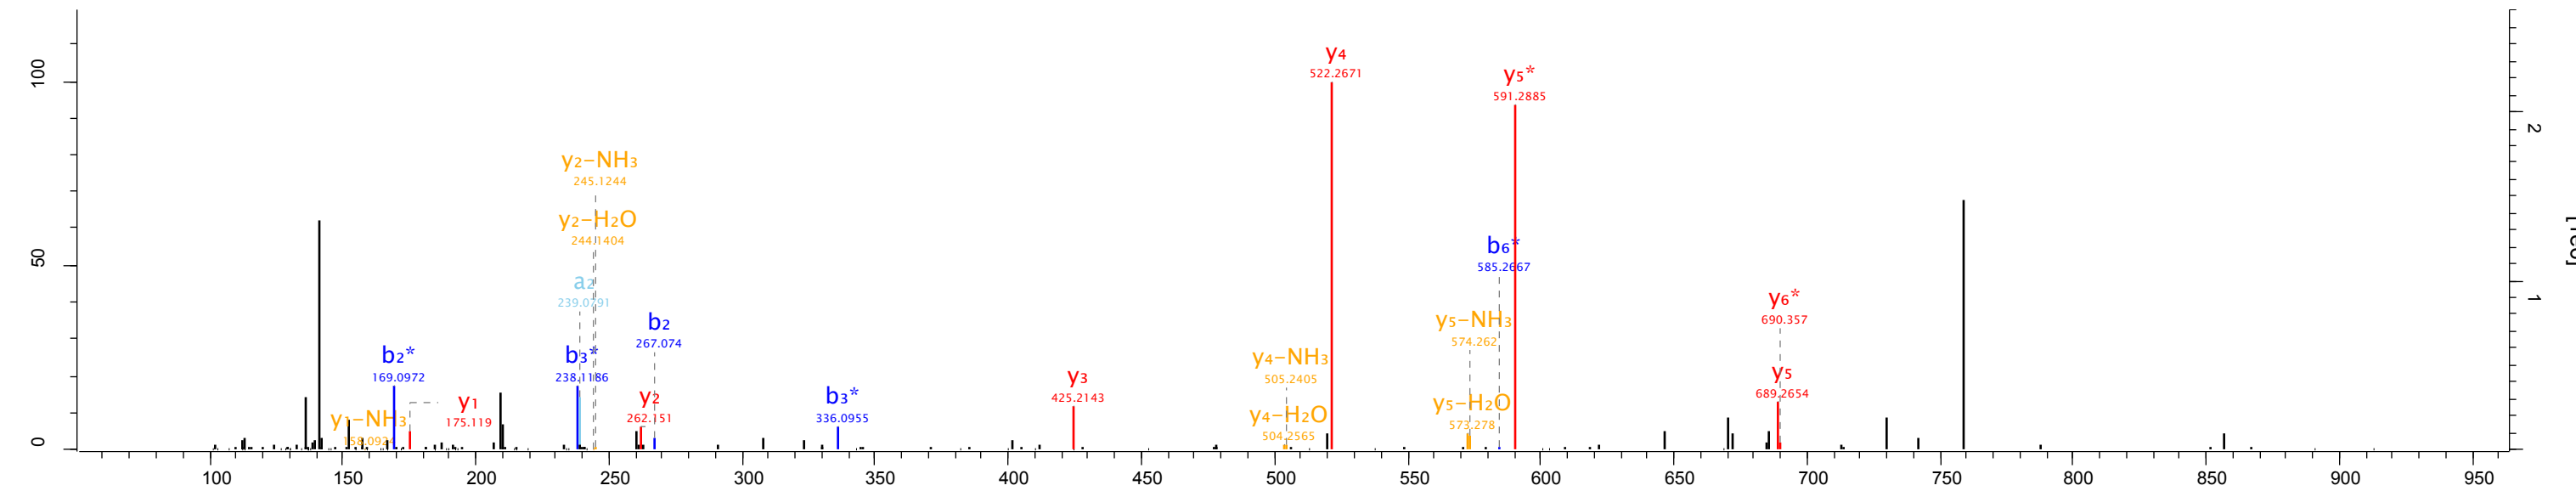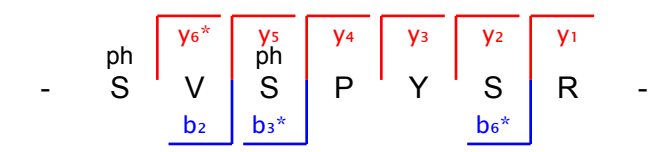

Raw file 20171215\_MaS\_33SR\_LMH\_phospho\_01 Scan 3973 Method FTMS; HCD Score 234.57 m/z 761.34 Gene names BCLAF1

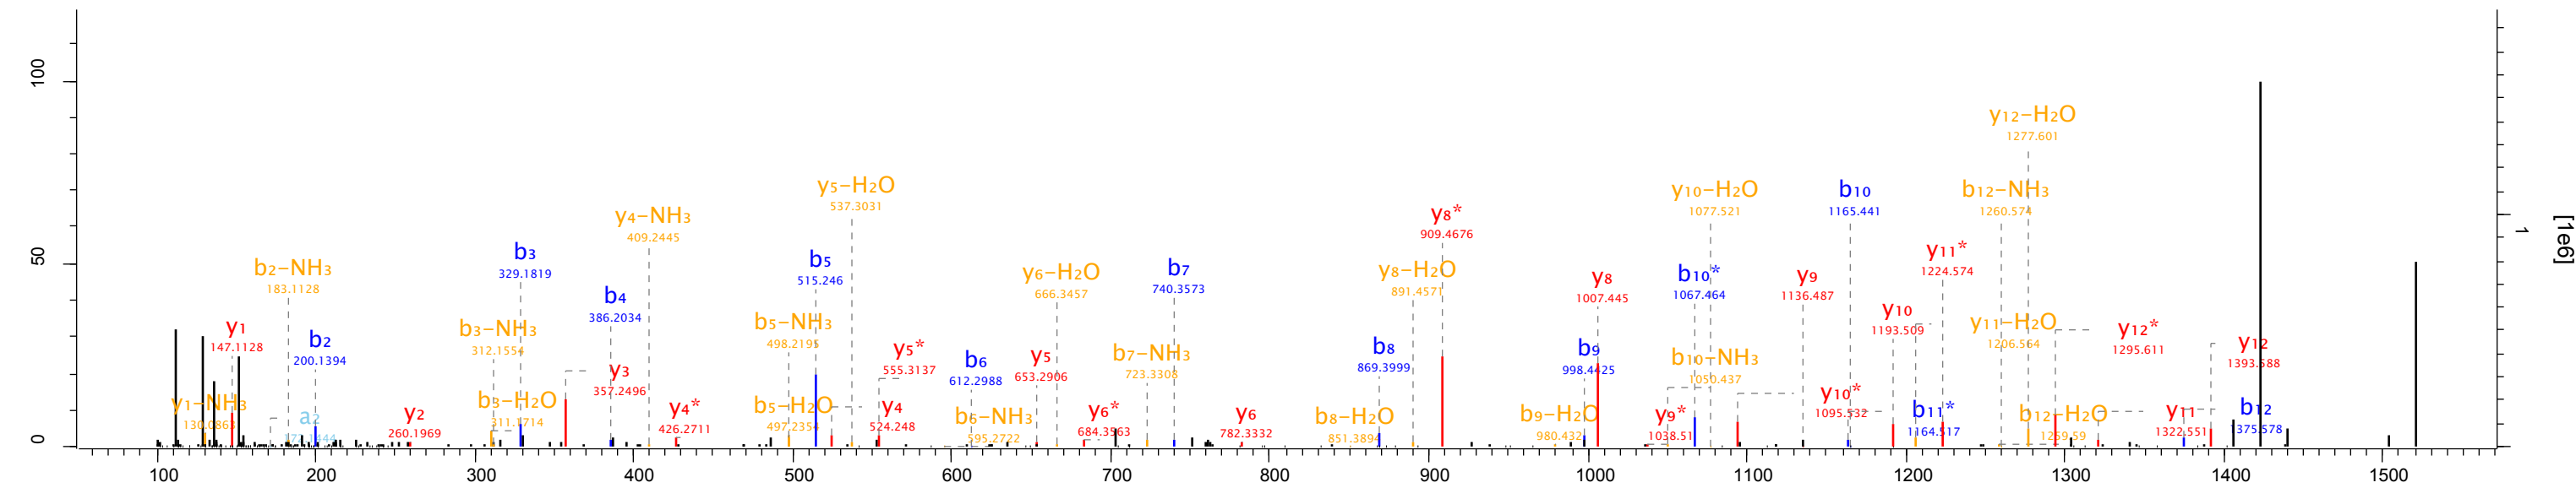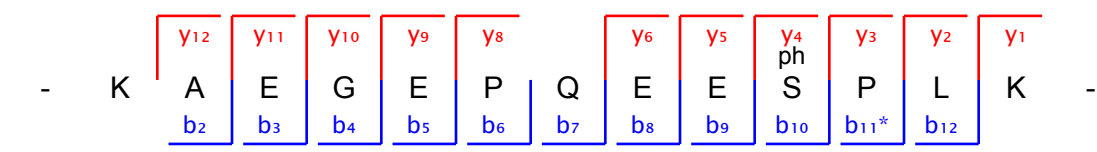

Raw file 20171215\_MaS\_33SR\_LMH\_phospho\_01 Scan 4063 Method FTMS; HCD Score 55.79 m/z 715.6 Gene names PALLD

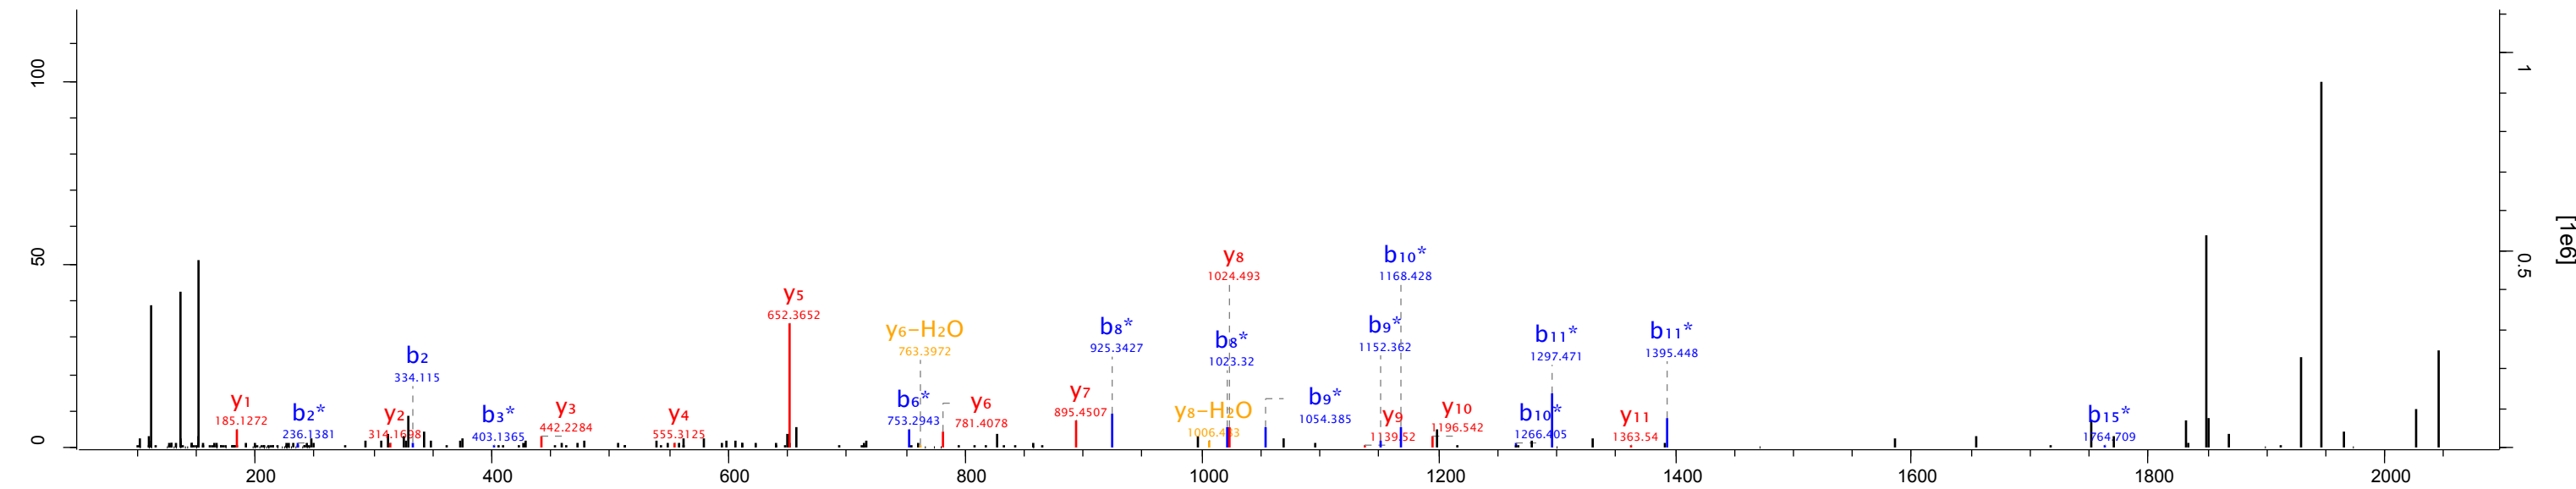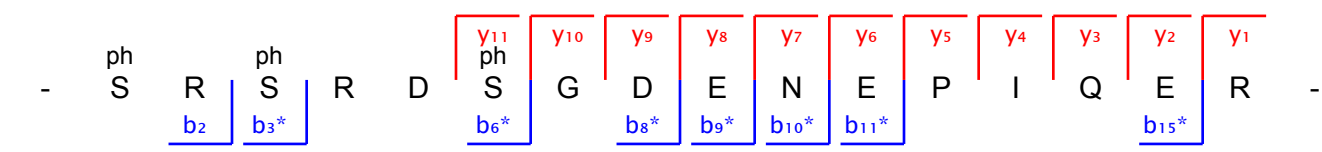

Raw file 20171215\_MaS\_33SR\_LMH\_phospho\_01 Scan 5863 Method FTMS; HCD Score 60.49 m/z 482.54 Gene names RPS6

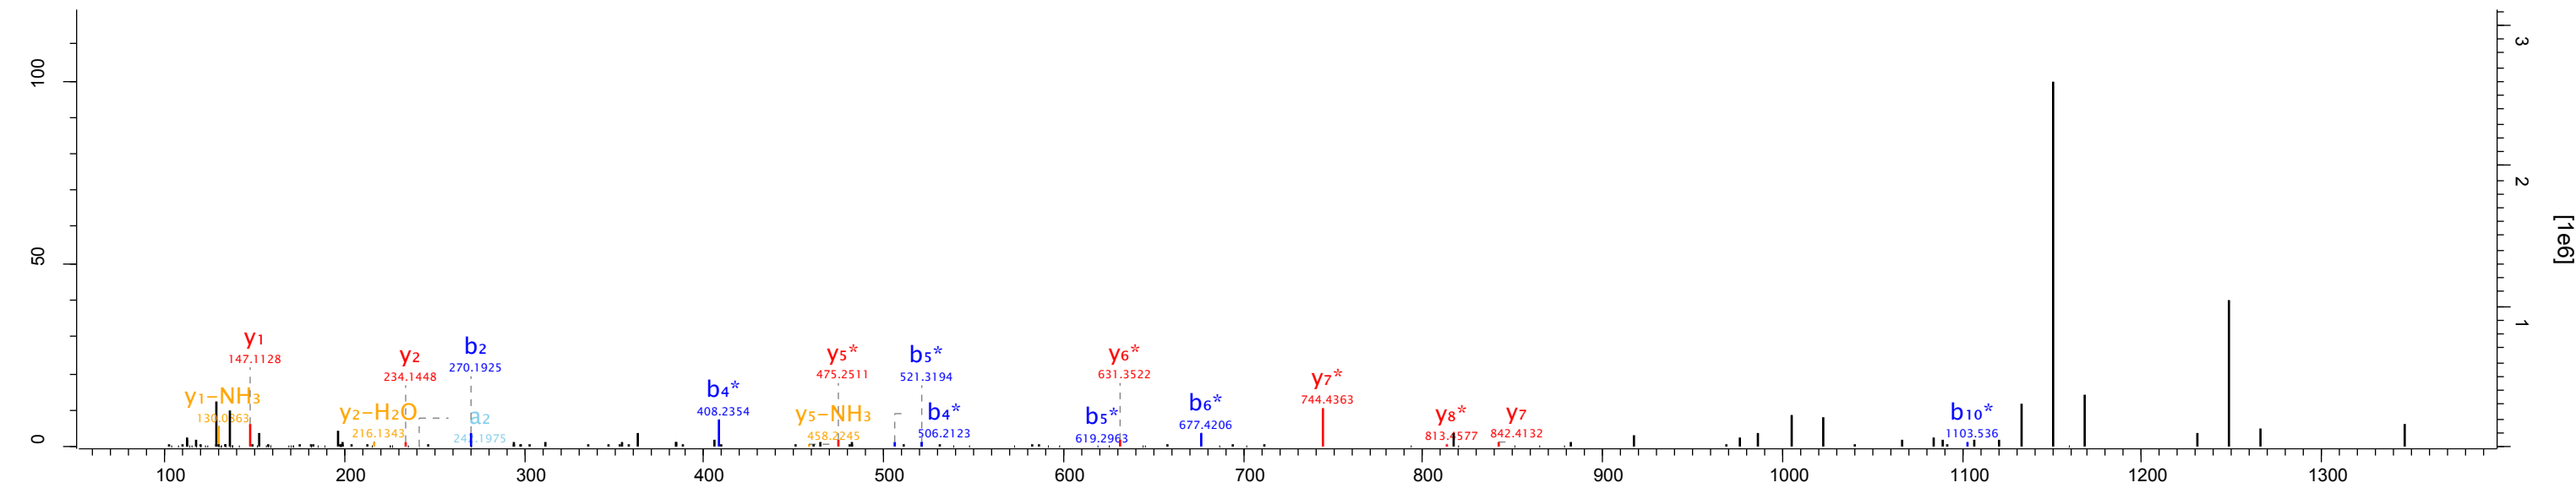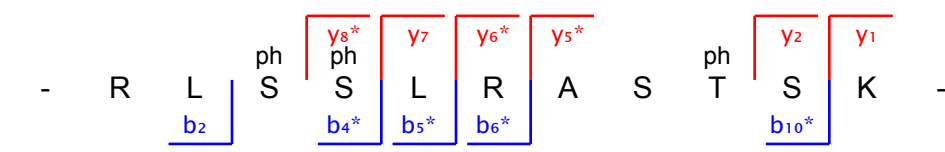

Raw file 20171215\_MaS\_33SR\_LMH\_phospho\_01 Scan 8143 Method FTMS; HCD Score 81.59 m/z 721.29 Gene names PTPN14

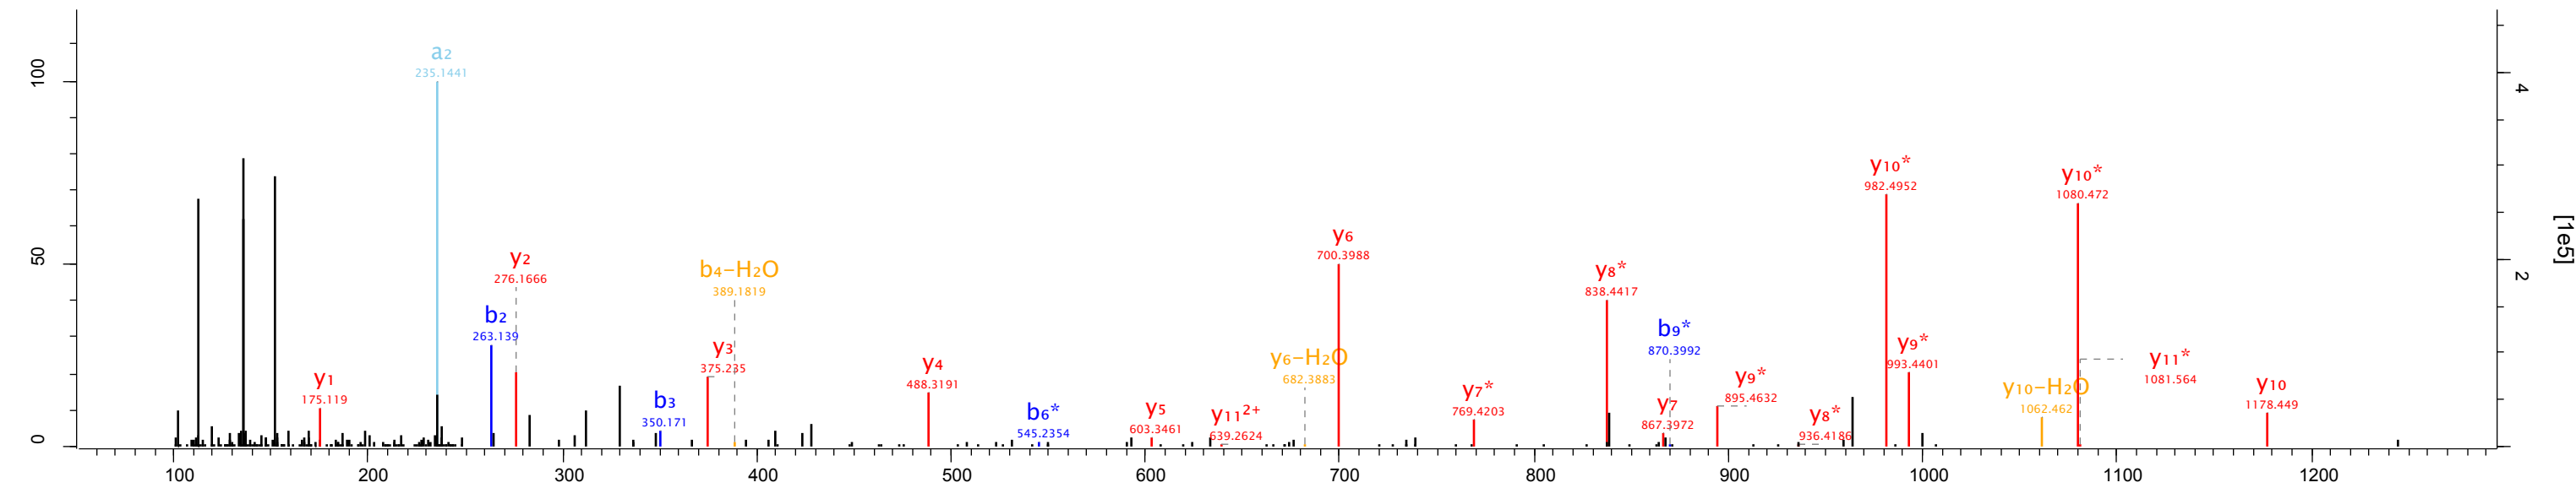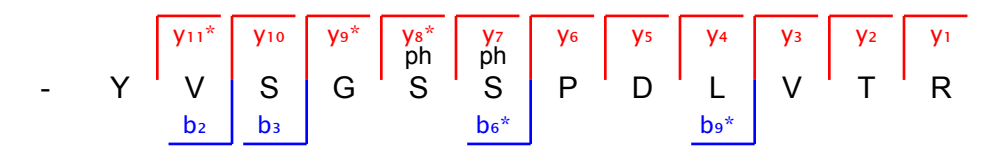

Raw file 20171215\_MaS\_33SR\_LMH\_phospho\_01 Scan 8463 Method FTMS; HCD Score 72.16 m/z 1052.93 Gene names SF3B2

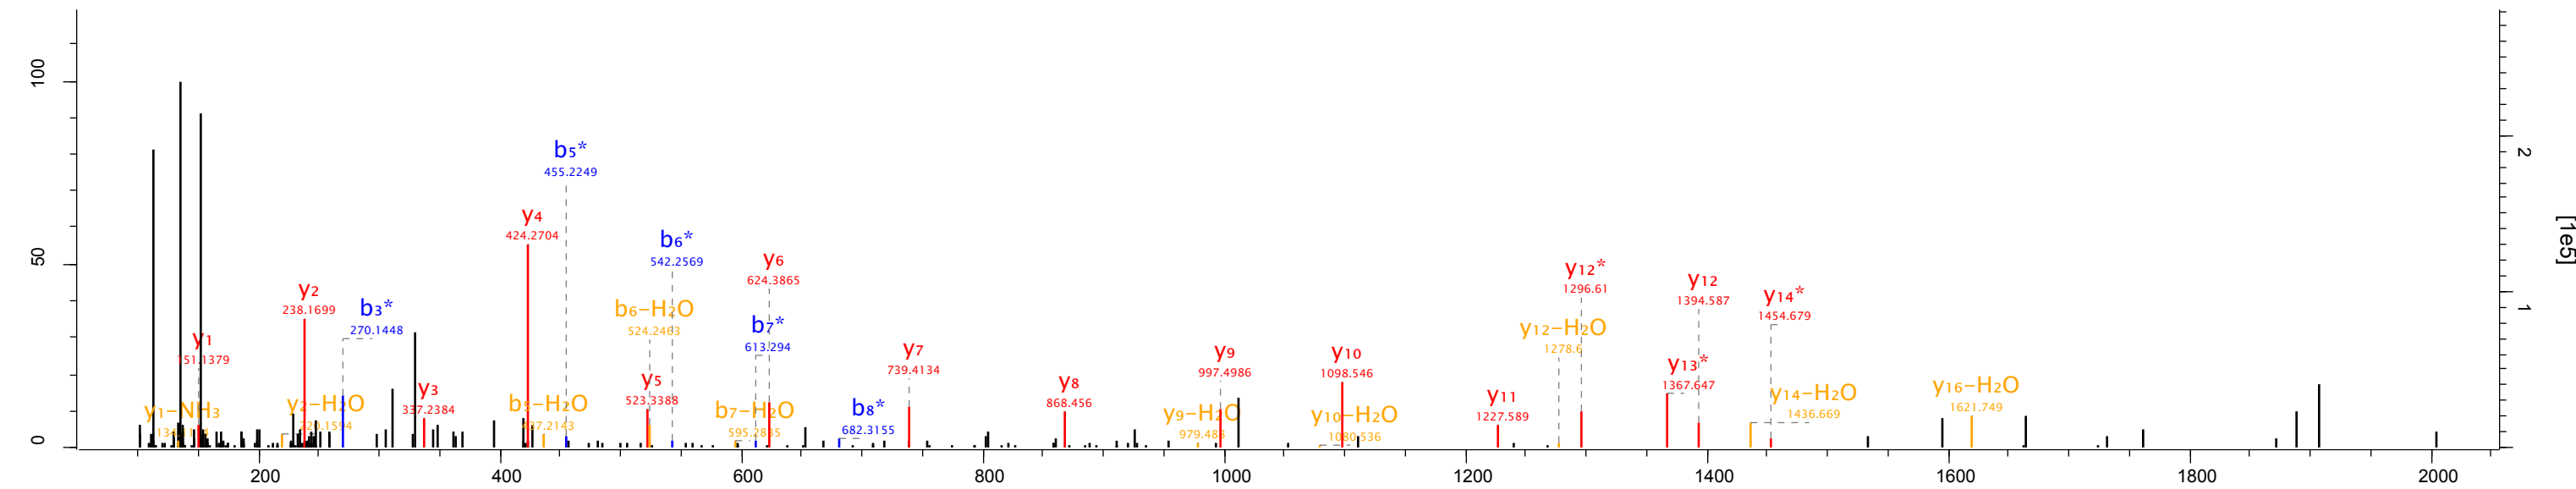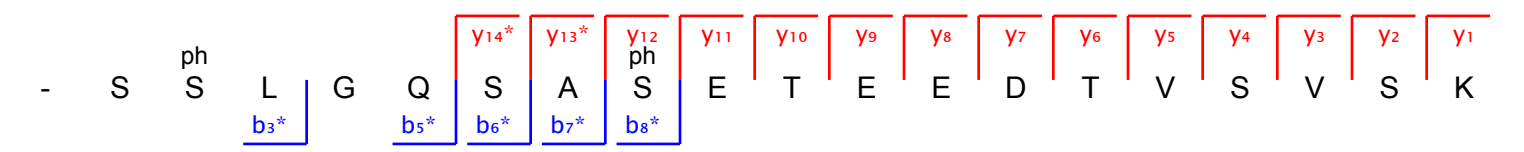

Raw file 20171215\_MaS\_33SR\_LMH\_phospho\_01 Scan 8513 Method FTMS; HCD Score 140.42 m/z 1084.43 Gene names BAIAP2L1

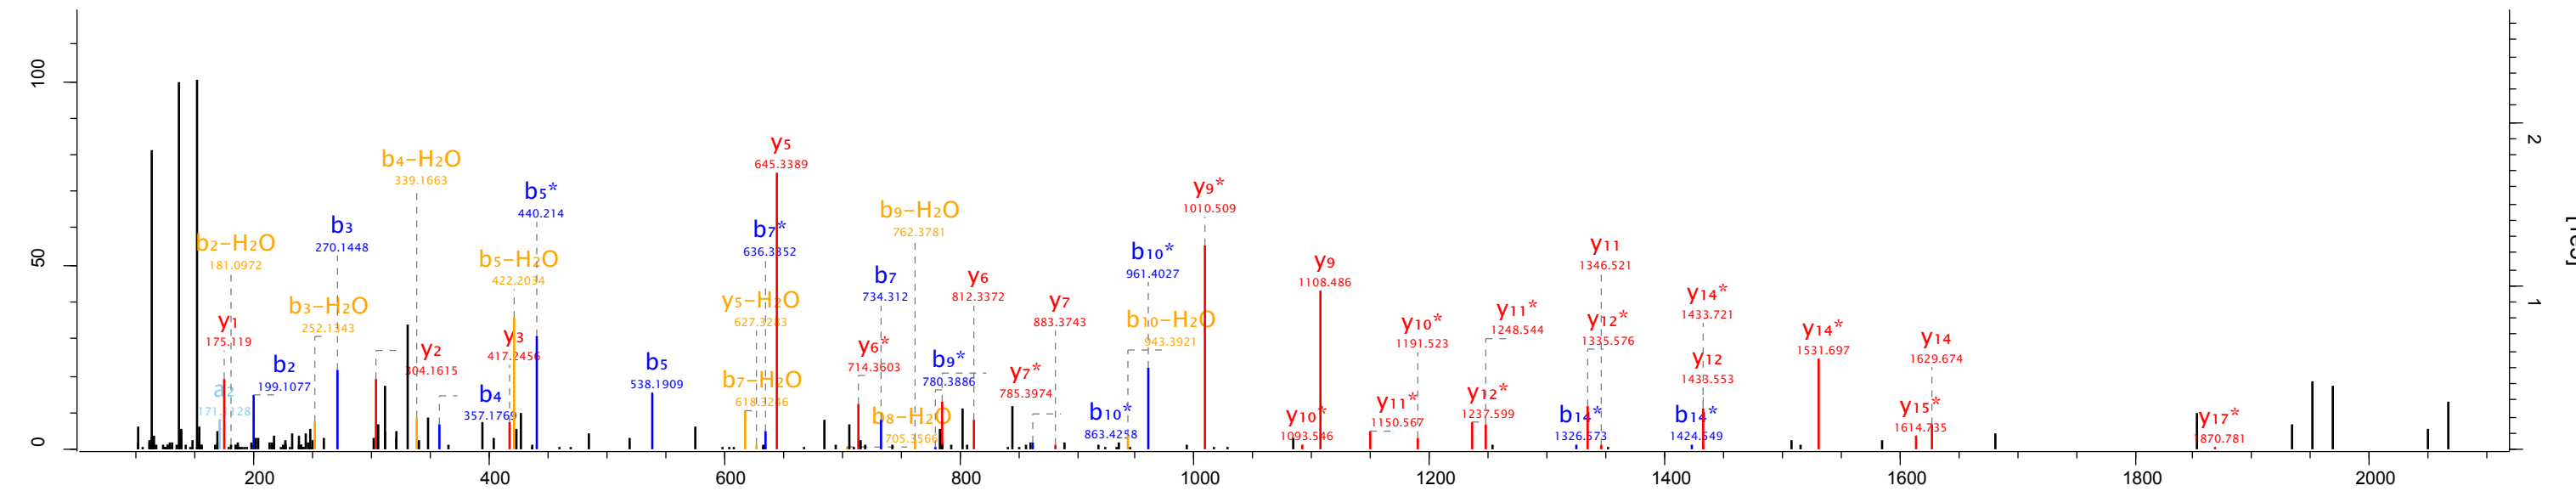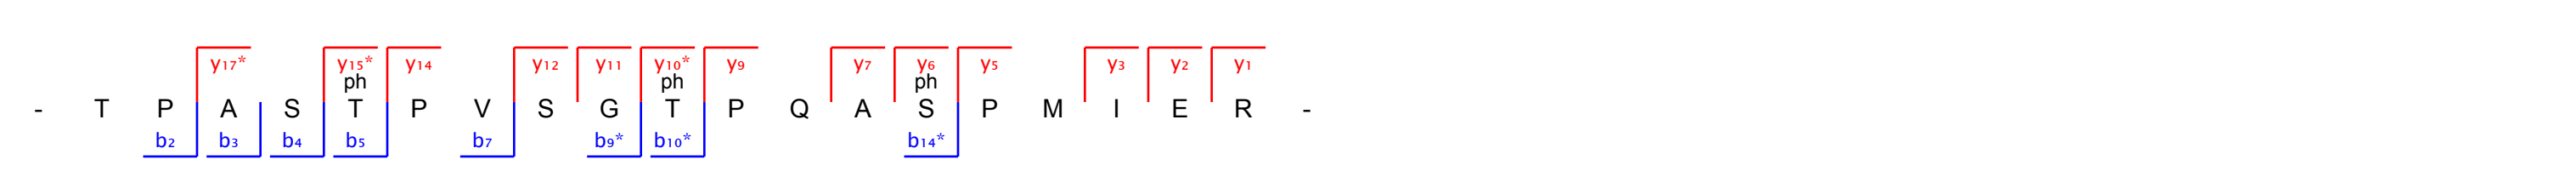



Raw file 20171215\_MaS\_33SR\_LMH\_phospho\_01 Scan 8703 Method FTMS; HCD Score 90.48 m/z 1026.4 Gene names PRRC2B

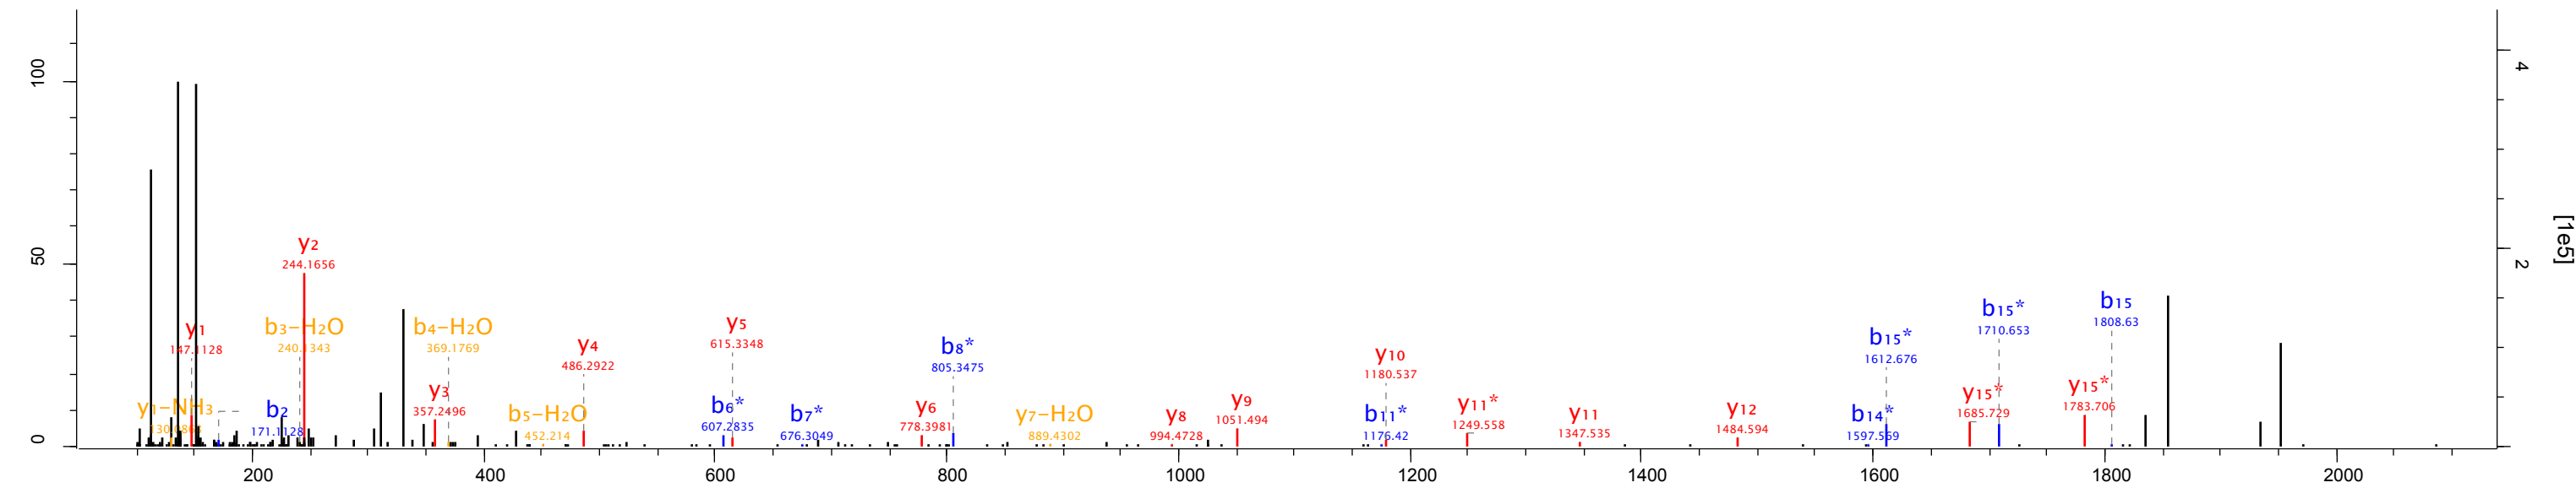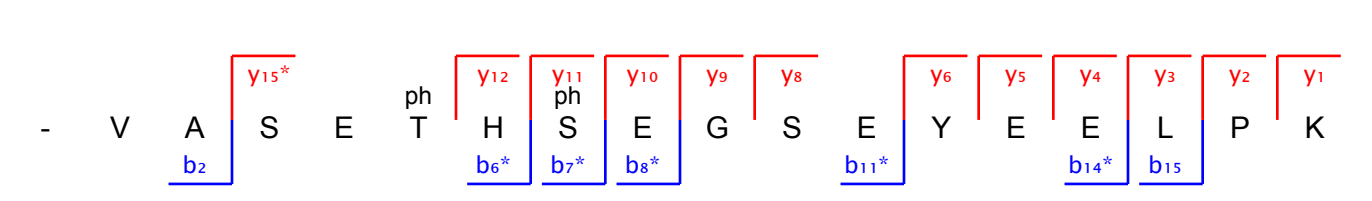

Raw file 20171215\_MaS\_33SR\_LMH\_phospho\_01 Scan 9463 Method FTMS; HCD Score 70.58 m/z 837.38 Gene names TJP2

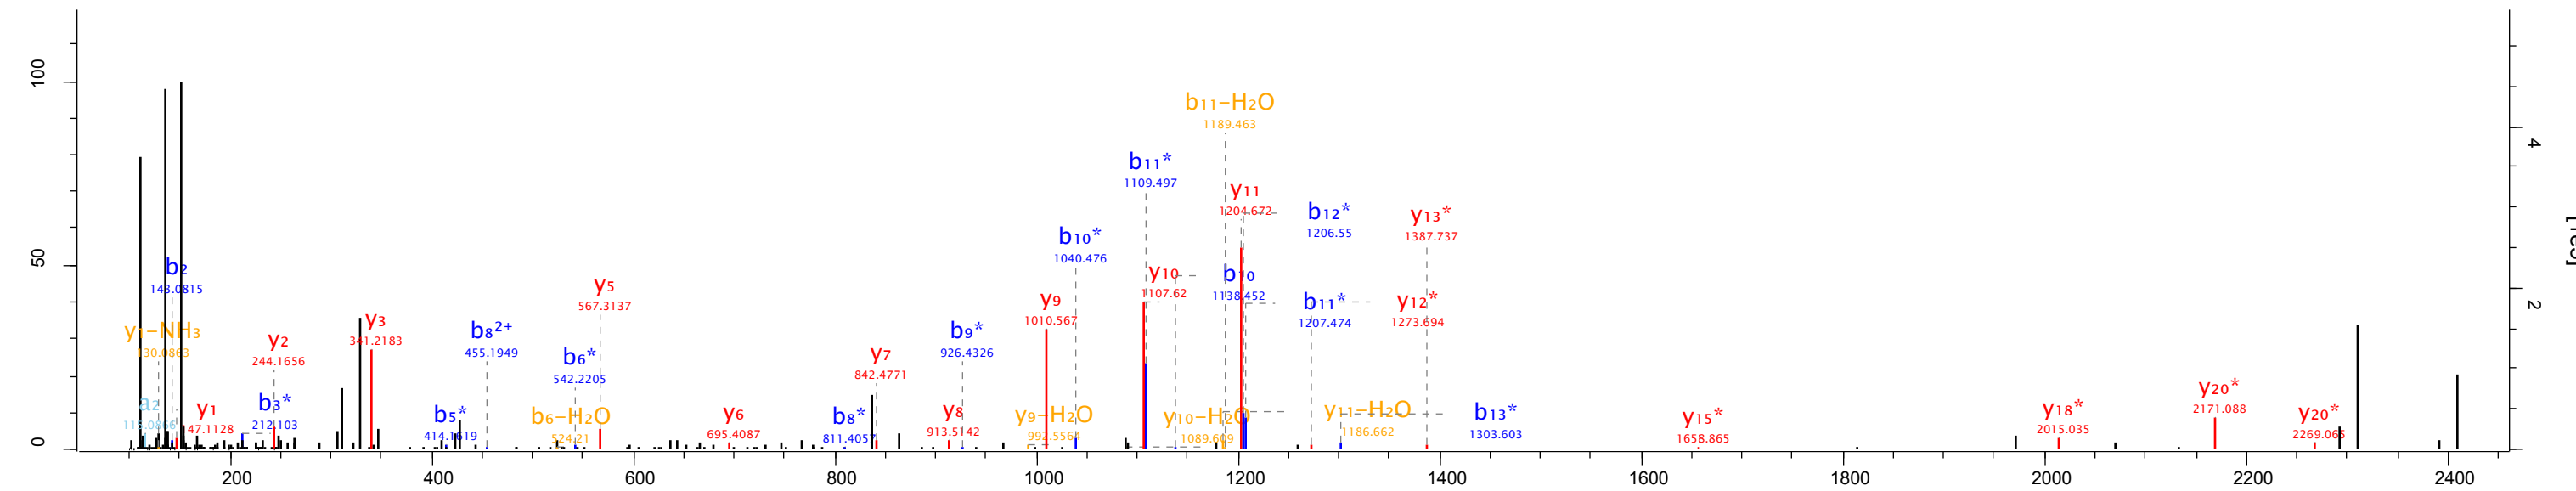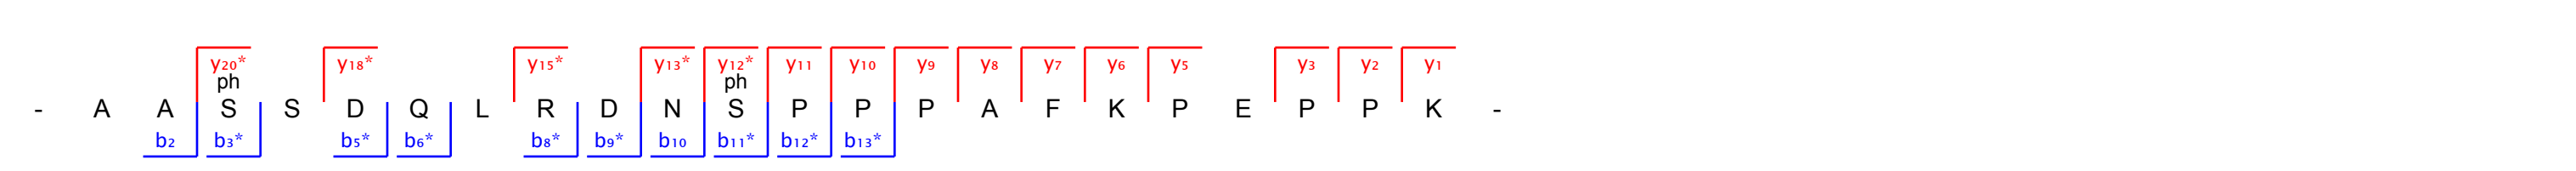

Raw file 20171215\_MaS\_33SR\_LMH\_phospho\_02 Scan 10643 Method FTMS; HCD Score 151.96 m/z 890.86 Gene names ANLN

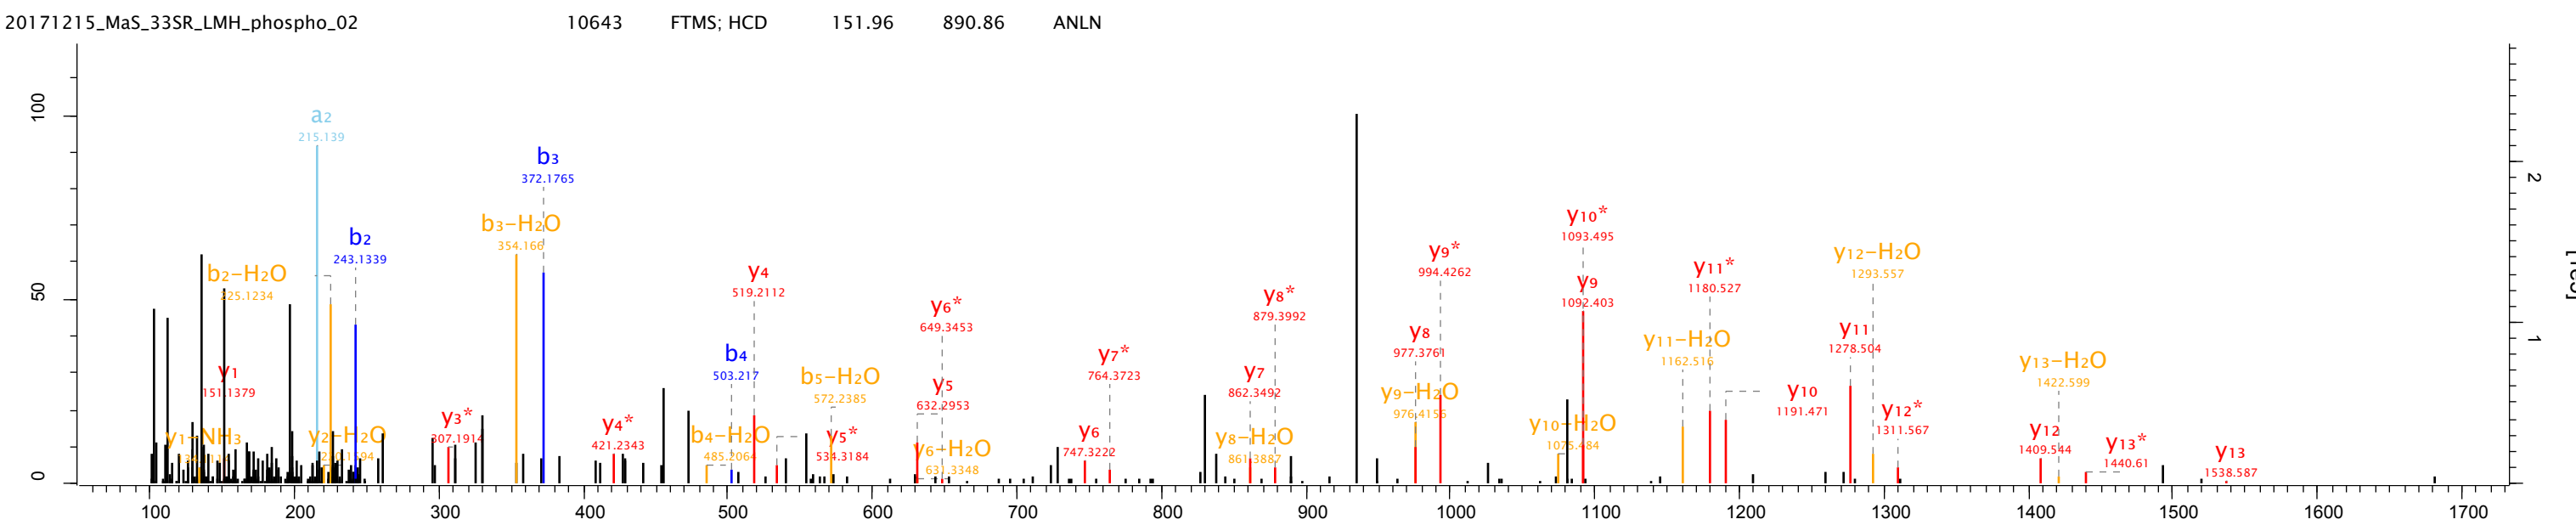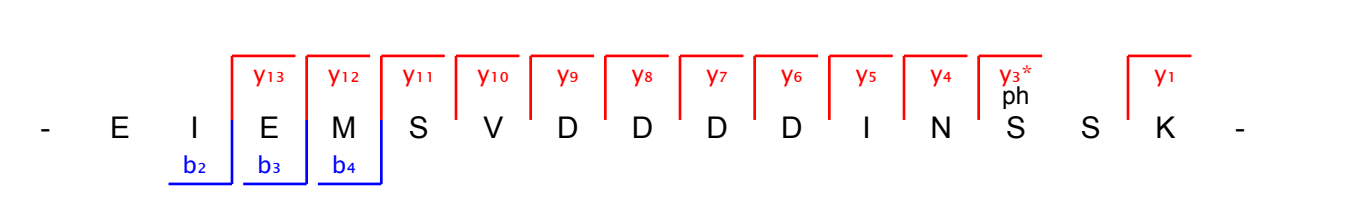

Raw file 20171215\_MaS\_33SR\_LMH\_phospho\_02 Scan 11033 Method FTMS; HCD Score 195.5 m/z 941.39 Gene names ZC3H4

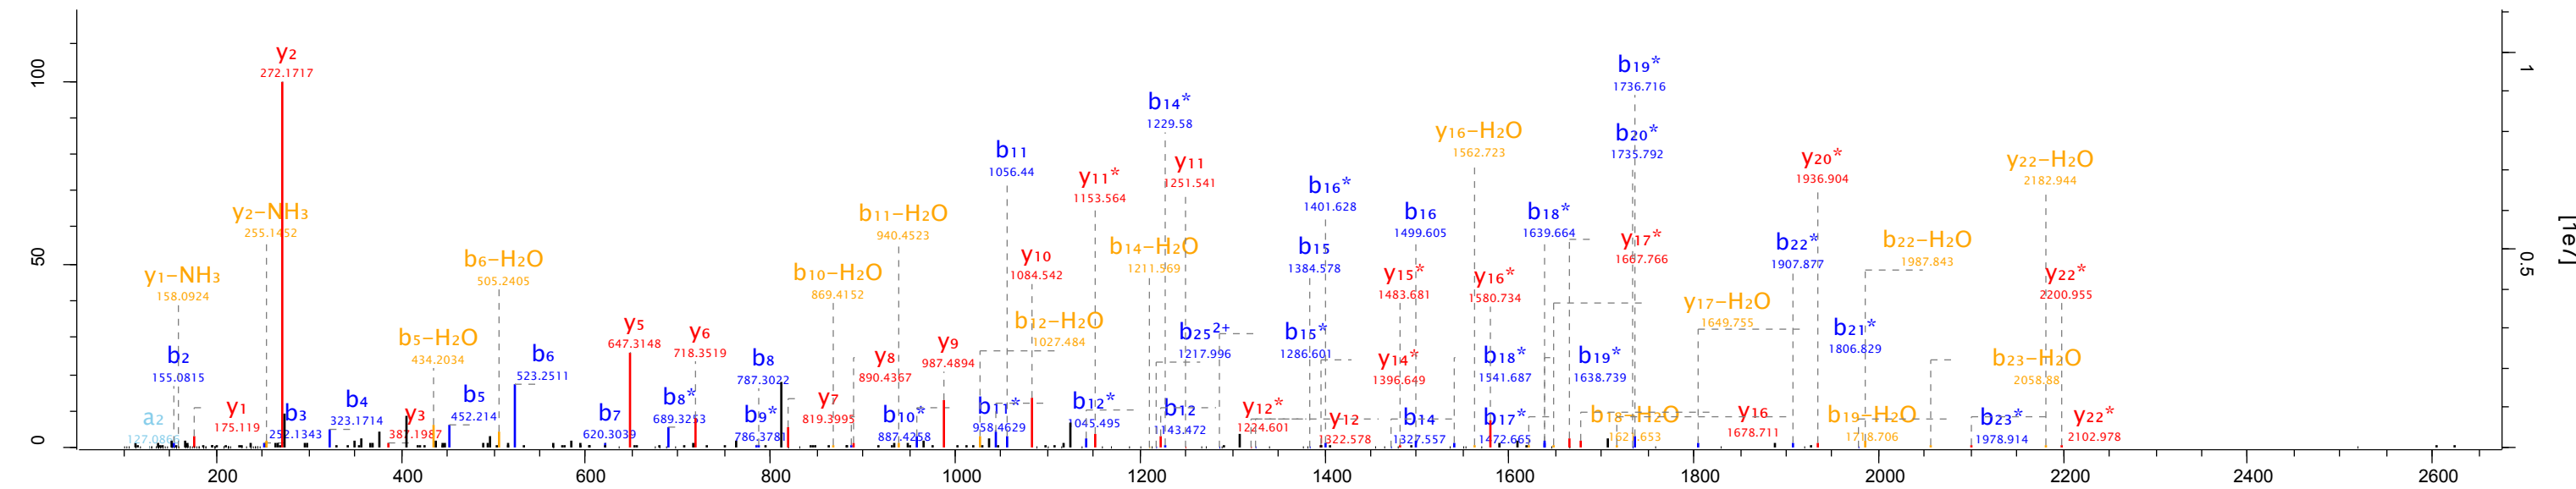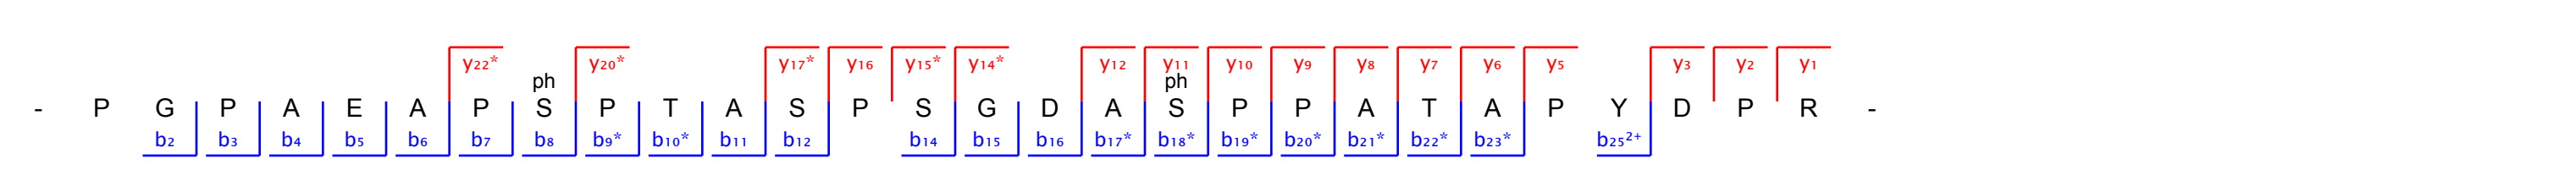

Raw file 20171215\_MaS\_33SR\_LMH\_phospho\_02 Scan 11643 Method FTMS; HCD Score 63.98 m/z 894.37 Gene names FAM169A

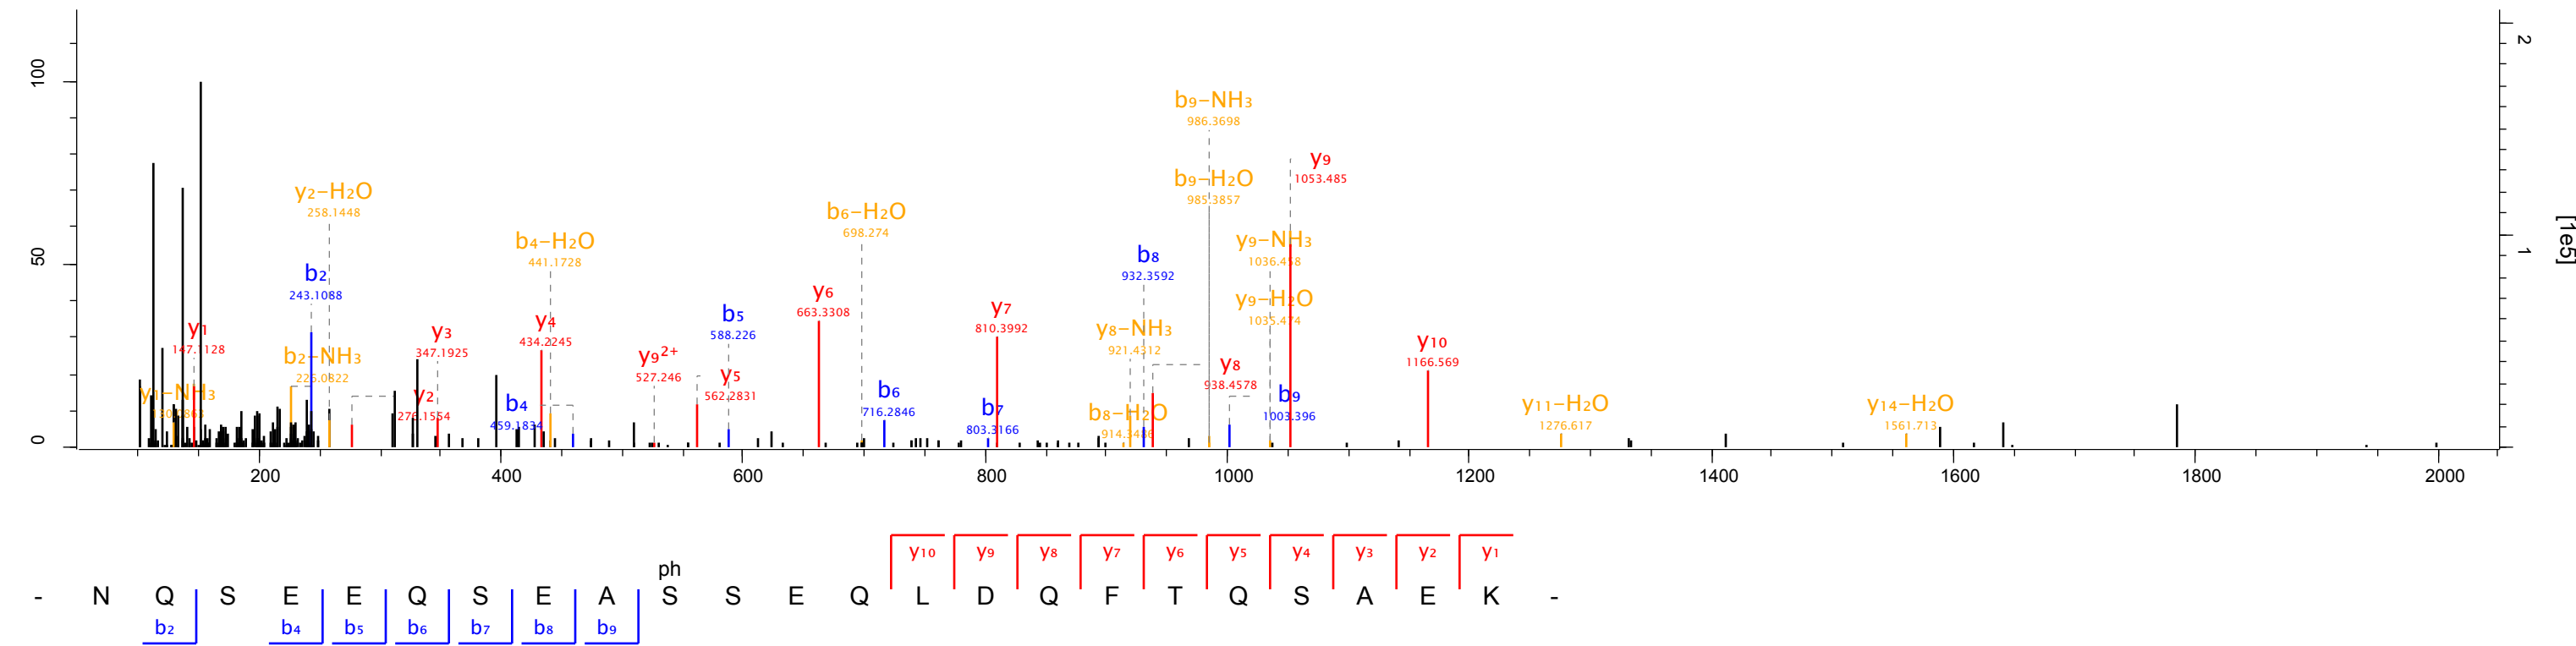

Raw file 20171215\_MaS\_33SR\_LMH\_phospho\_02 Scan 11813 Method FTMS; HCD Score 219.94 m/z 1087.44 Gene names MAP1B

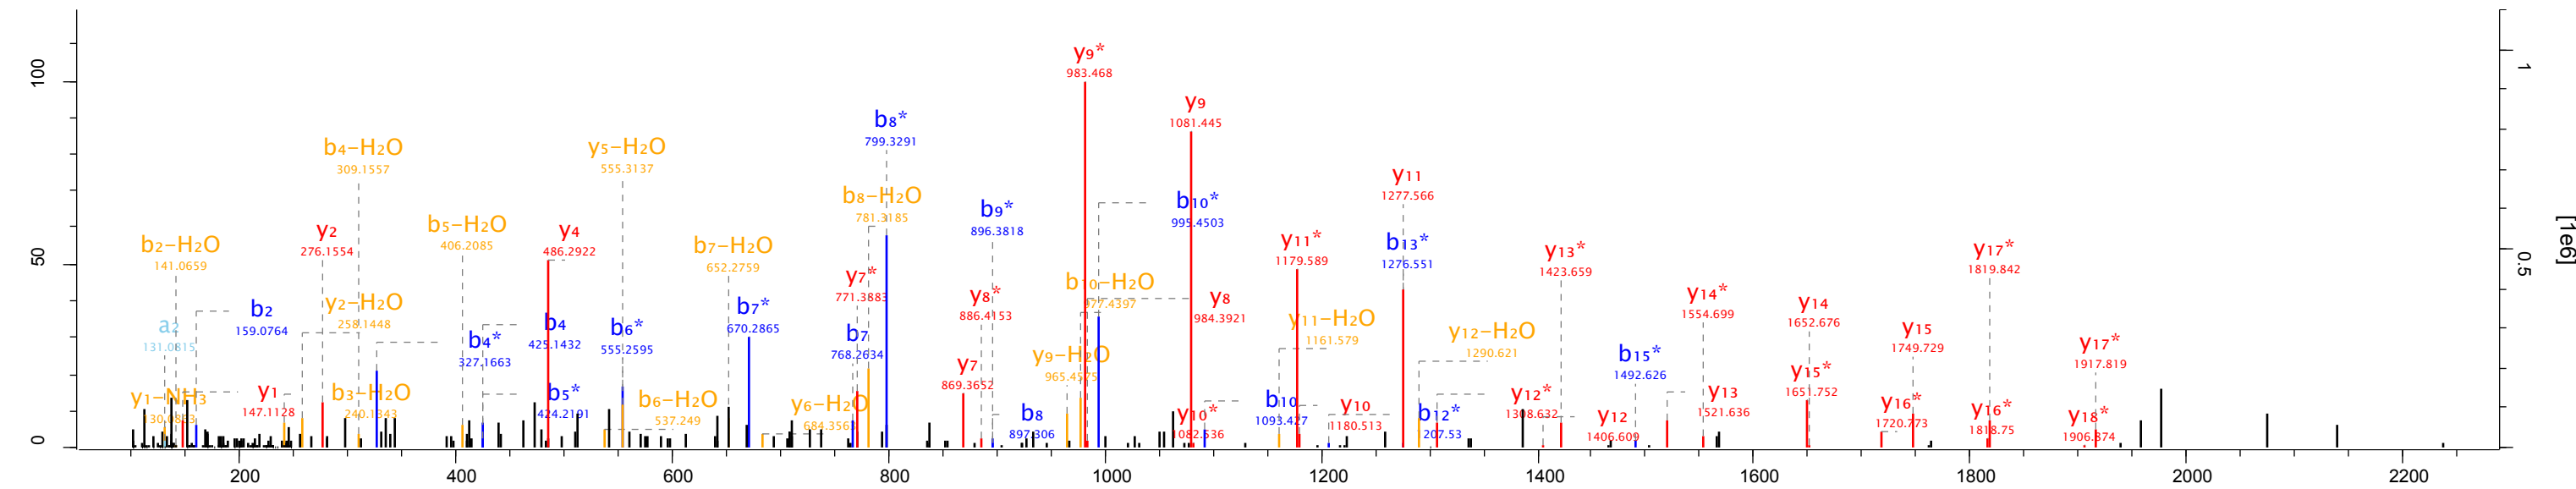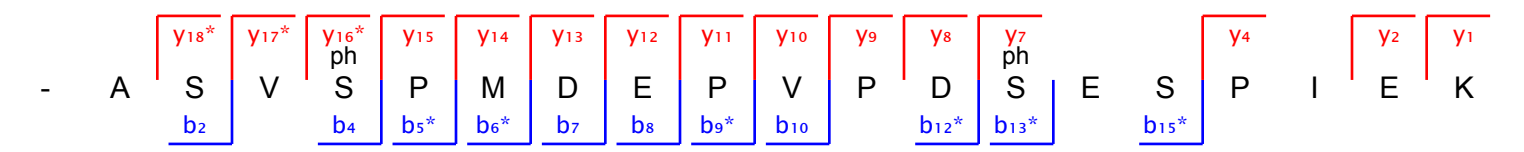

Raw file: 20171215\_MaS\_33SR\_LMH\_phospho\_02  
 Scan: 11893 Method: FTMS; HCD Score: 67.56 m/z: 749.33 Gene names: LIMD1

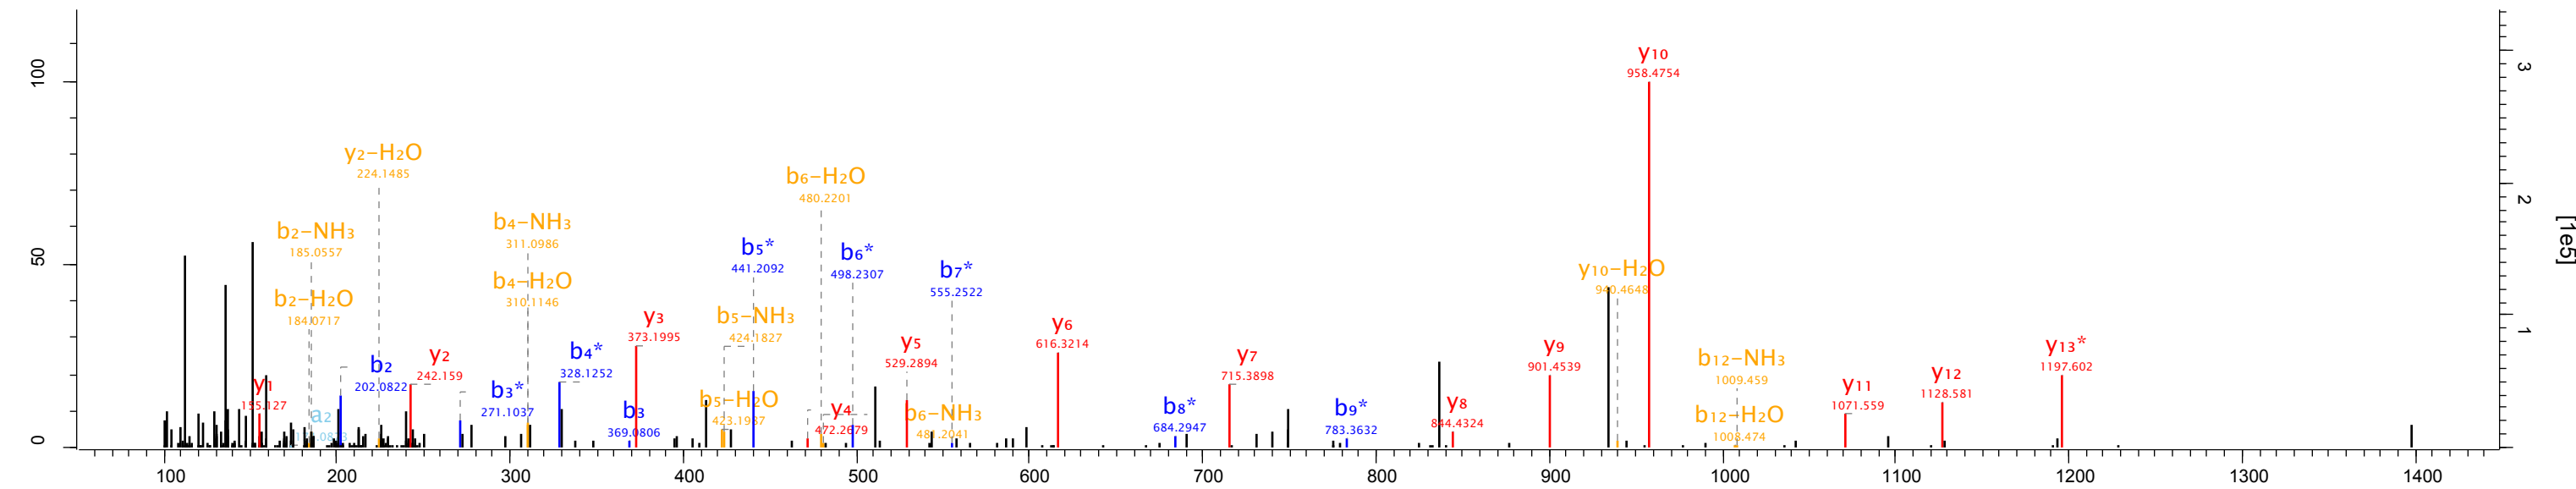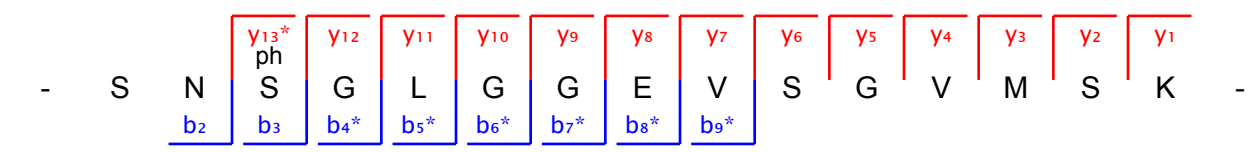





Raw file 20171215\_MaS\_33SR\_LMH\_phospho\_02 Scan 14313 Method FTMS; HCD Score 215.43 m/z 881.41 Gene names EPB41L3

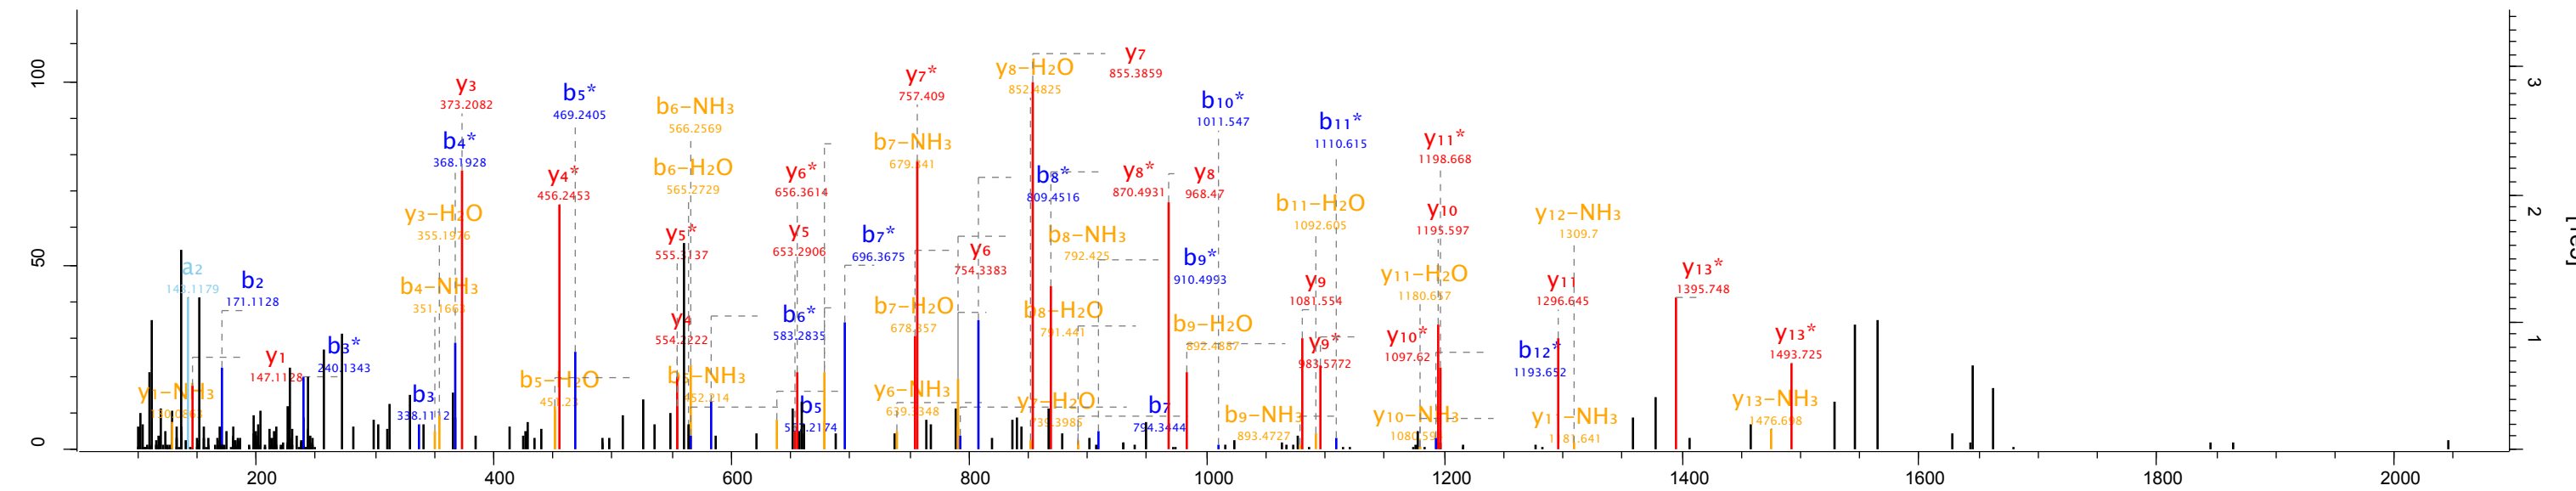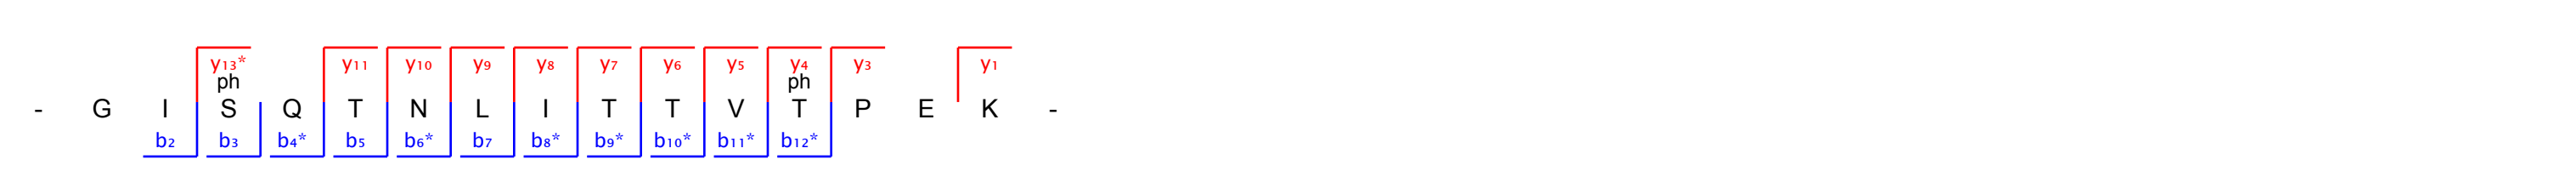

Raw file 20171215\_MaS\_33SR\_LMH\_phospho\_02 Scan 16103 Method FTMS; HCD Score 186.68 m/z 1122.49 Gene names TP53BP1

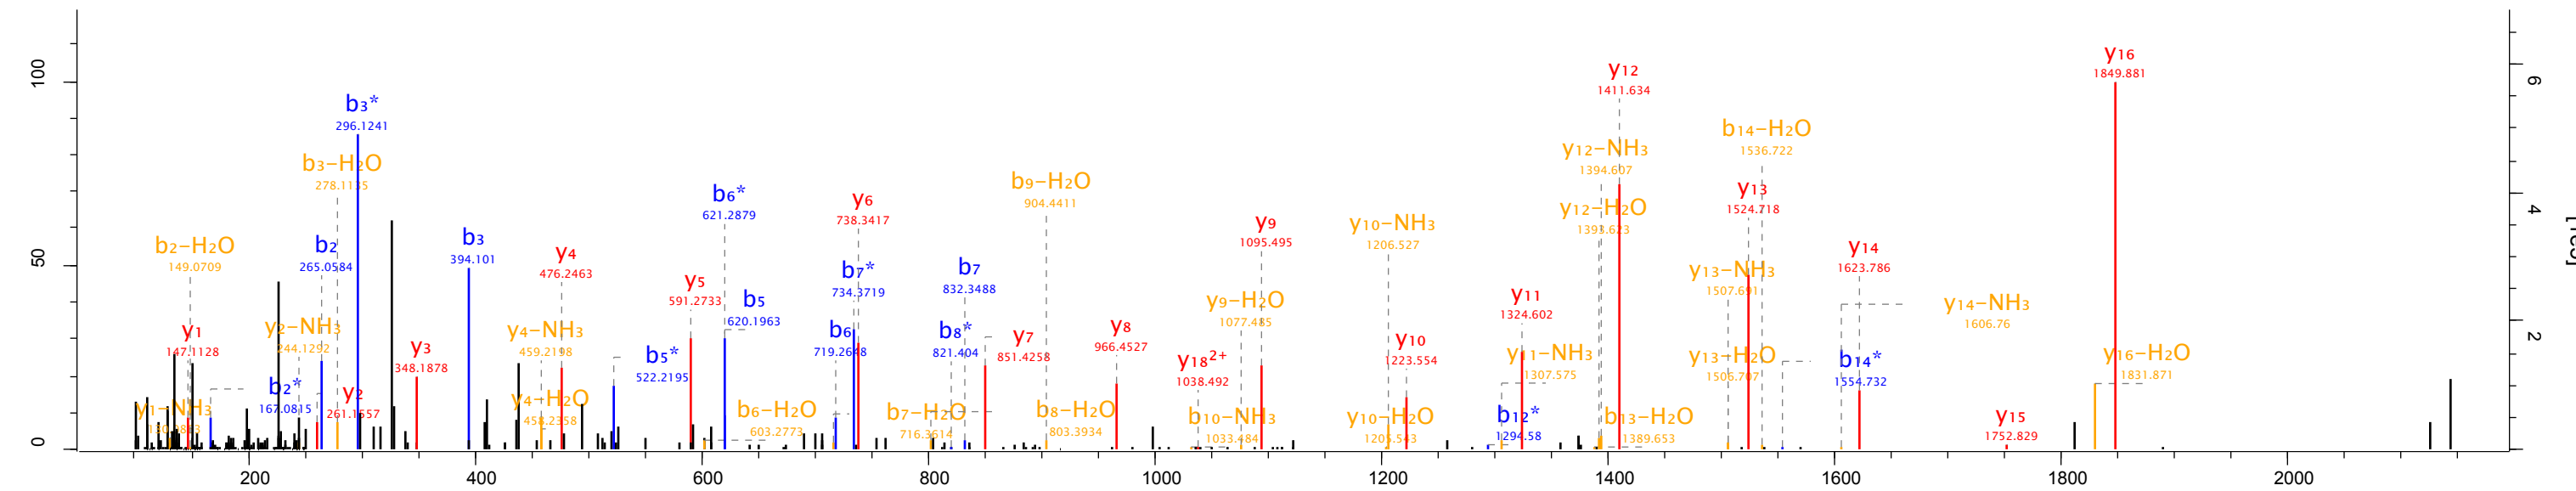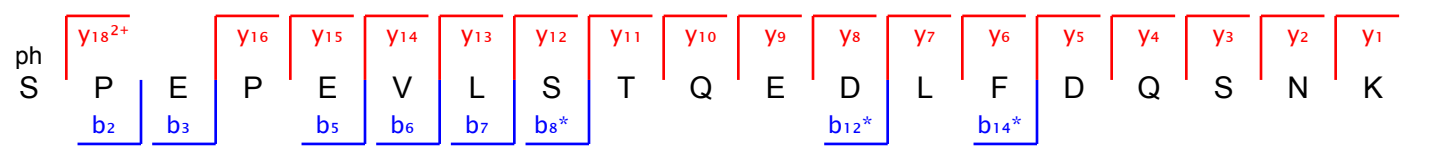

Raw file 20171215\_MaS\_33SR\_LMH\_phospho\_02 Scan 16463 Method FTMS; HCD Score 230.26 m/z 1024.79 Gene names KR11

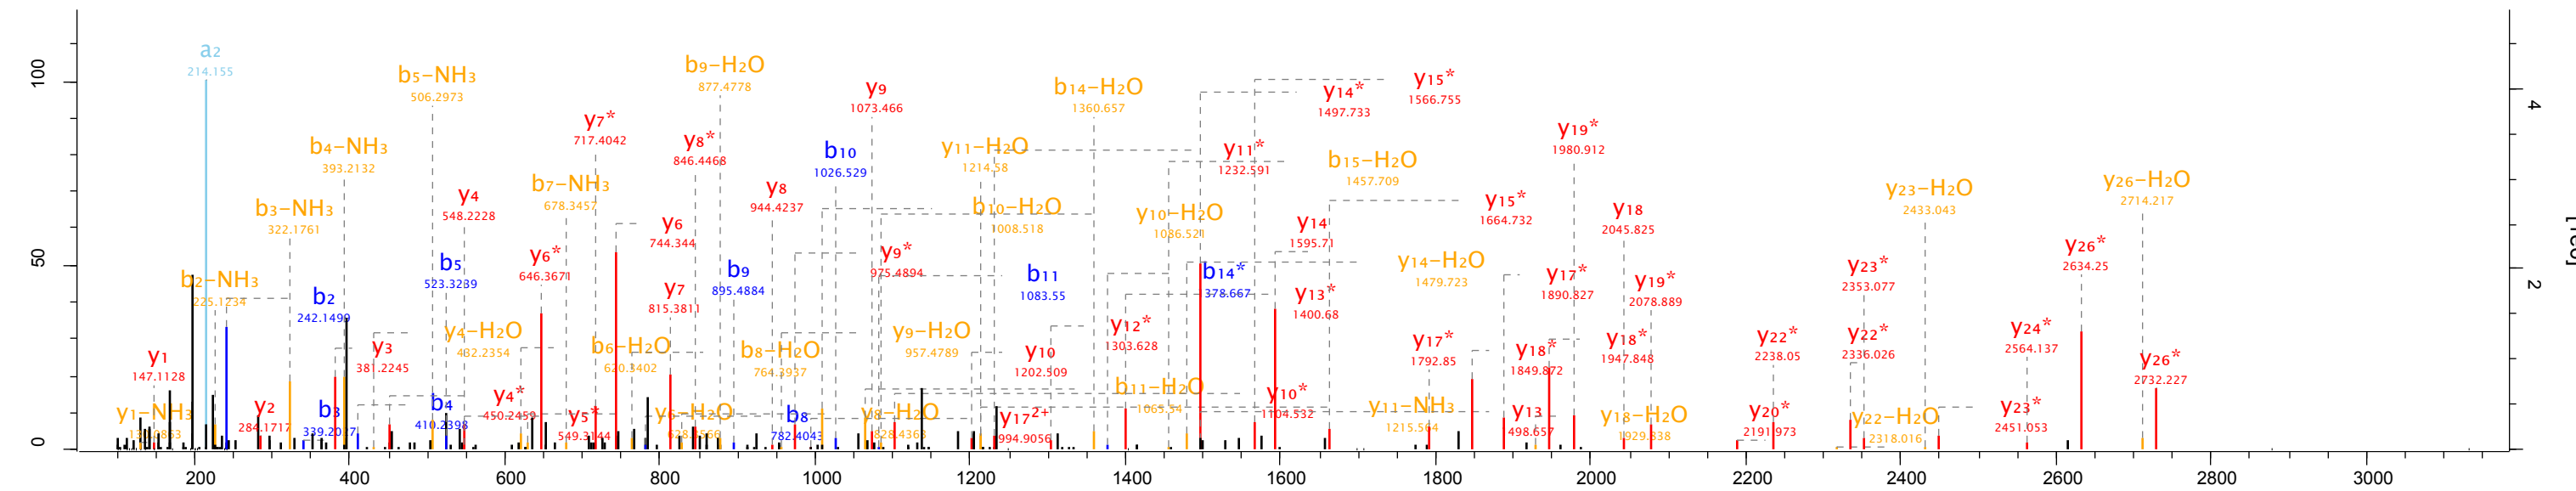

- Q L P A L D G S L M G P E S P P A Q E E E A P V S P H K -

Fragmentation mapping (blue boxes): b2 (L), b3 (P), b4 (A), b5 (L), b8 (S), b9 (L), b10 (M), b11 (G), b14\* (S)

Fragmentation mapping (red boxes): y1 (K), y2 (H), y3 (P), y4 (S), y5 (V), y6 (P), y7 (A), y8 (E), y9 (E), y10 (E), y11 (Q), y12 (A), y13 (P), y14 (S), y15 (ph), y16 (V), y17 (G), y18 (M), y19 (L), y20 (S), y21 (D), y22 (G), y23 (L), y24 (A), y25 (P), y26 (K)

Raw file 20171215\_MaS\_33SR\_LMH\_phospho\_02 Scan 17093 Method FTMS; HCD Score 77.22 m/z 966.43 Gene names CEP170

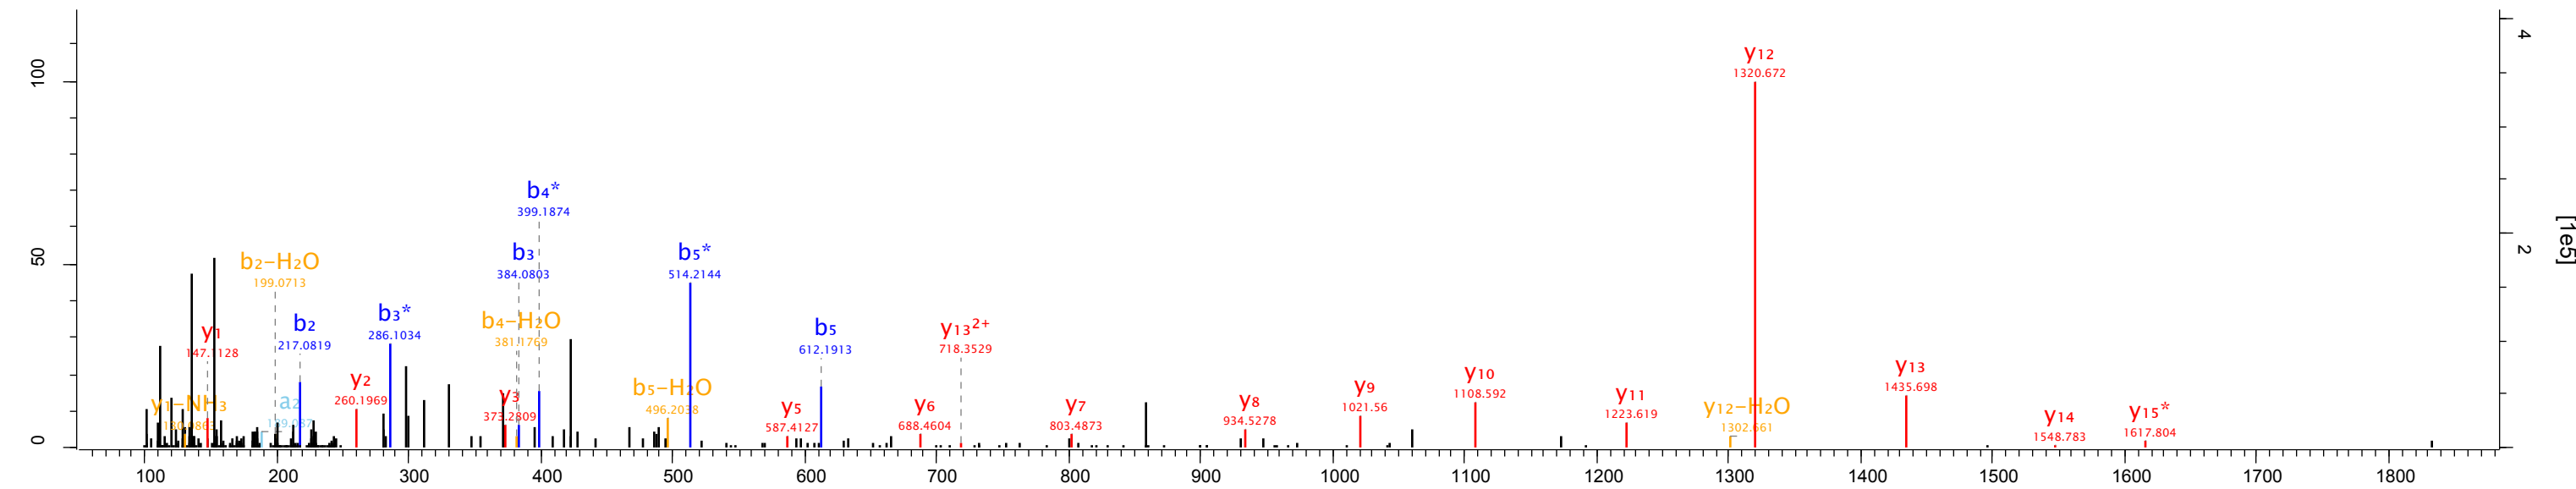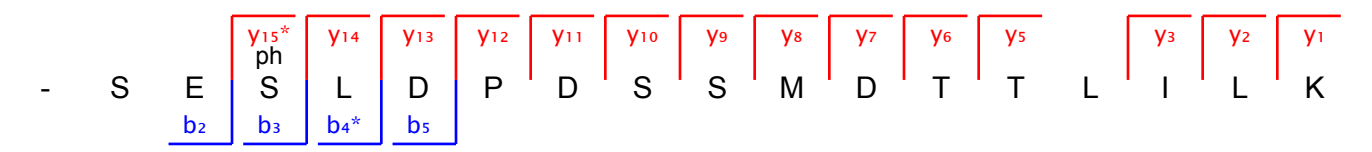

Raw file 20171215\_MaS\_33SR\_LMH\_phospho\_02 Scan 18913 Method FTMS; HCD Score 45.99 m/z 816.7 Gene names SRRM2

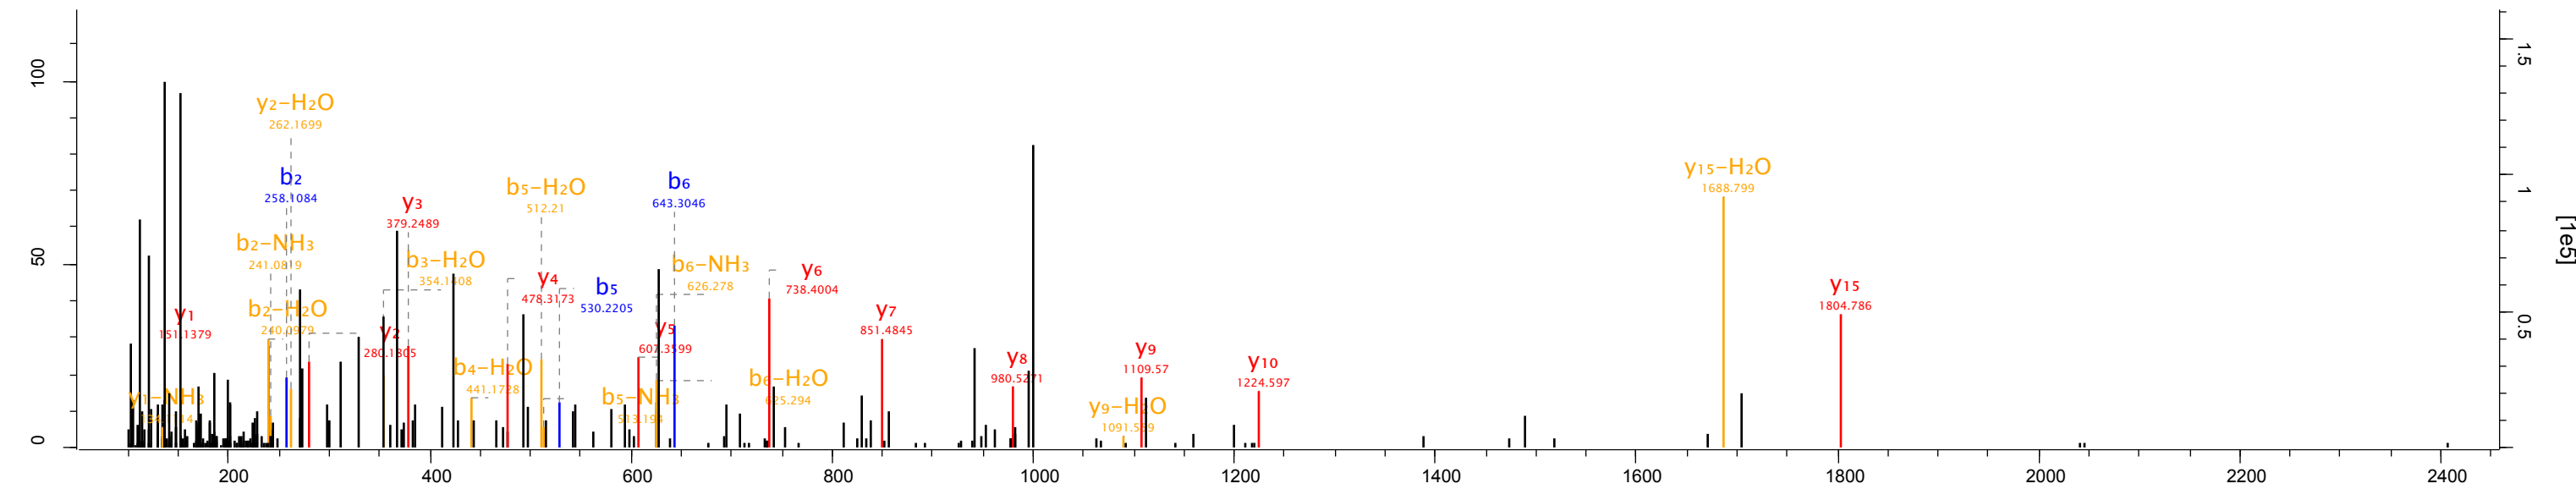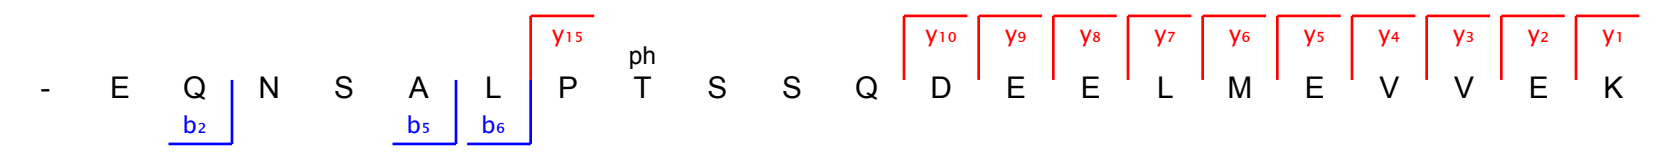

Raw file 20171215\_MaS\_33SR\_LMH\_phospho\_02 Scan 1953 Method FTMS; HCD Score 177.05 m/z 771.78 Gene names CSTF3

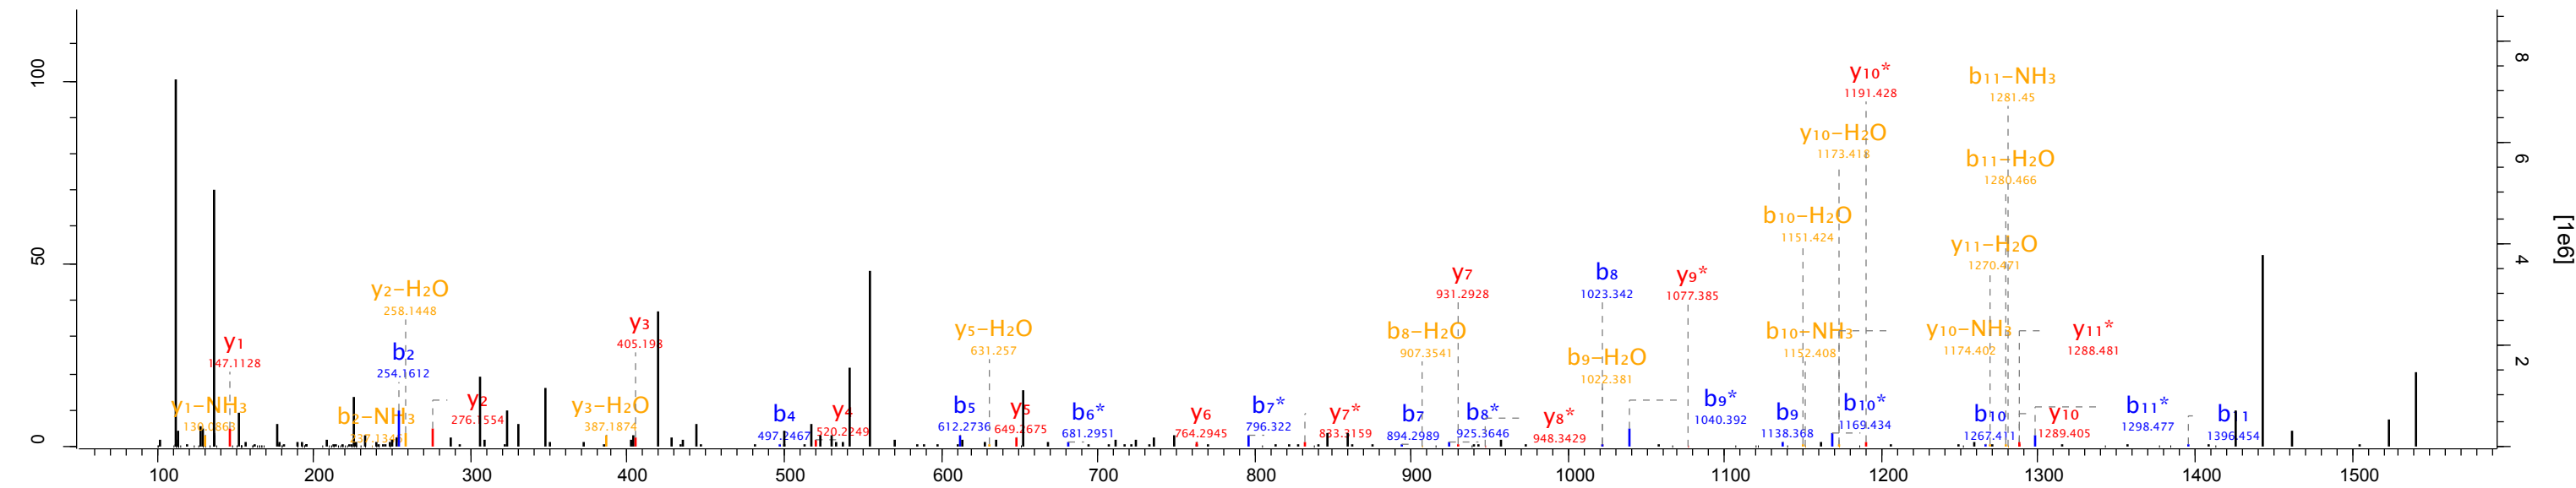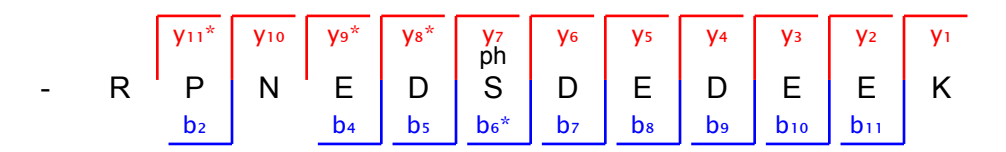

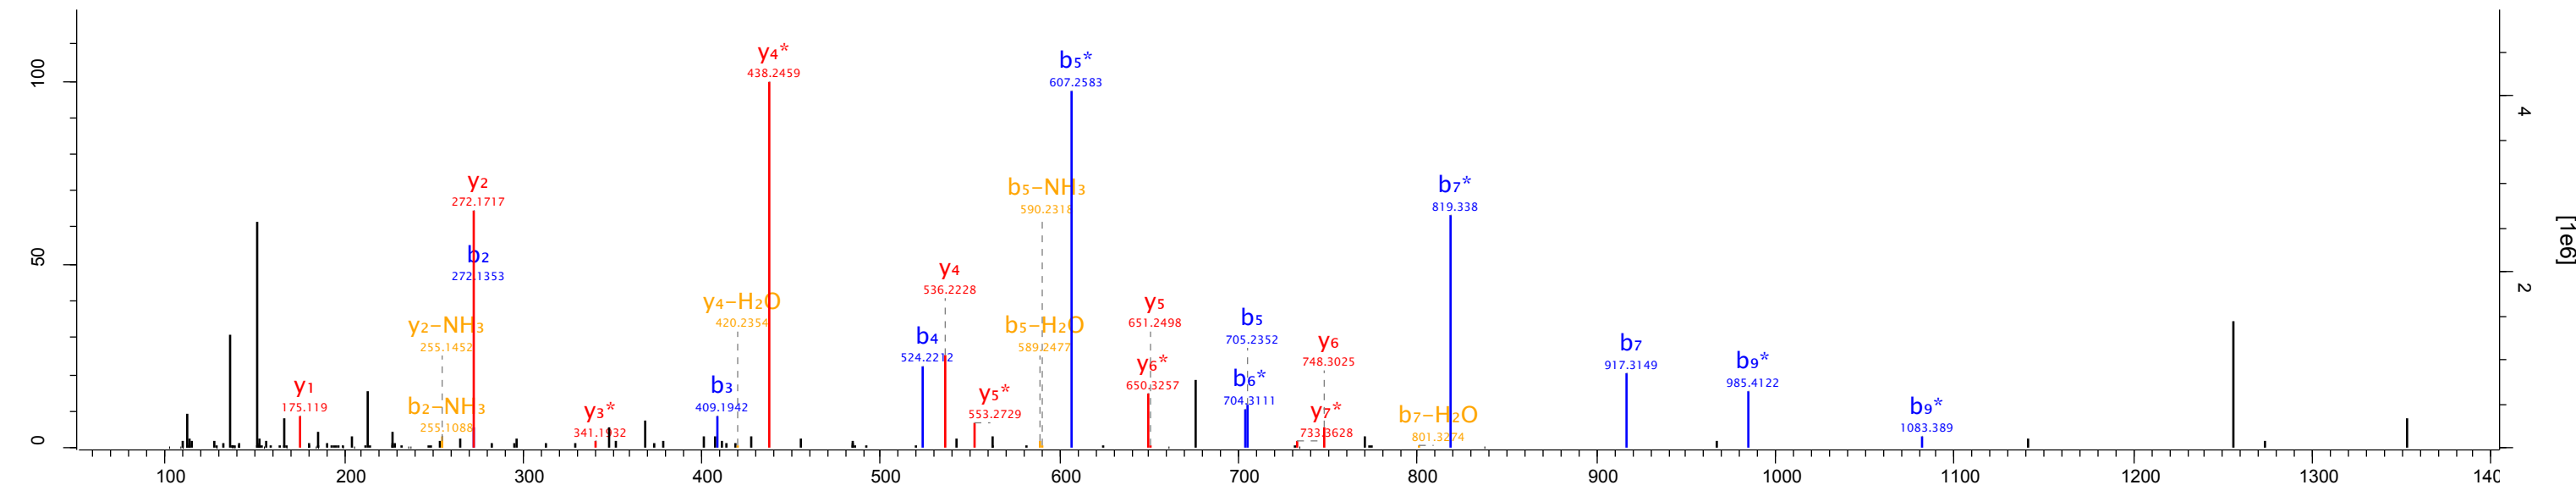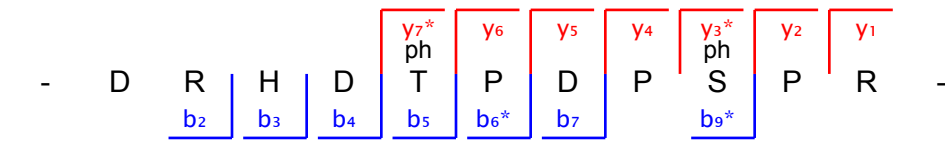

Raw file 20171215\_MaS\_33SR\_LMH\_phospho\_02 Scan 2643 Method FTMS; HCD Score 40.29 m/z 546.76 Gene names ZDHHC8

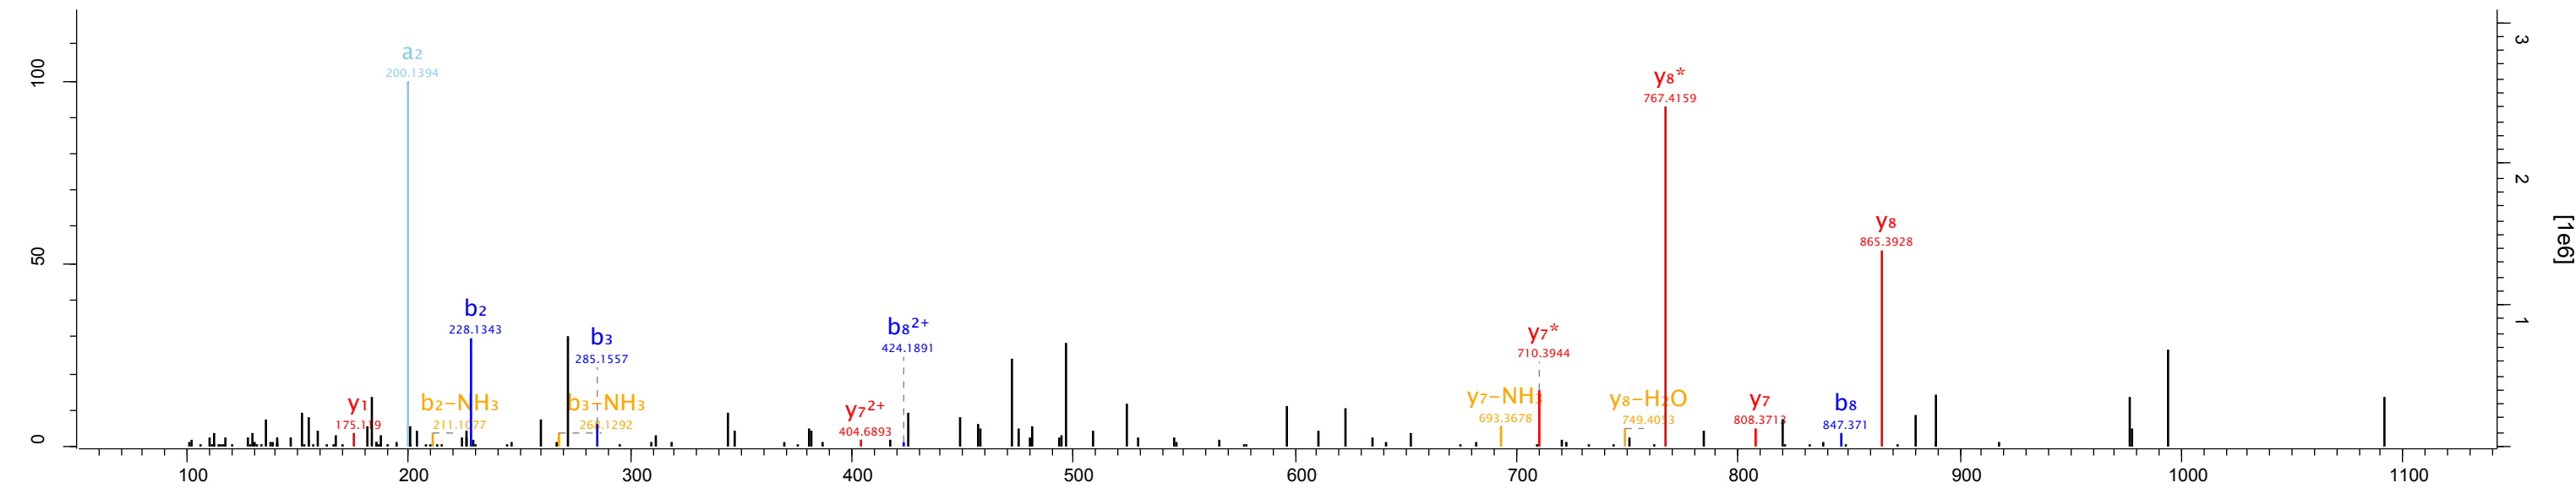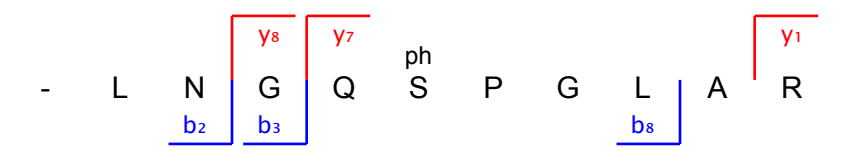



Raw file 20171215\_MaS\_33SR\_LMH\_phospho\_02 Scan 3033 Method FTMS; HCD Score 41.62 m/z 462.86 Gene names SRRM2

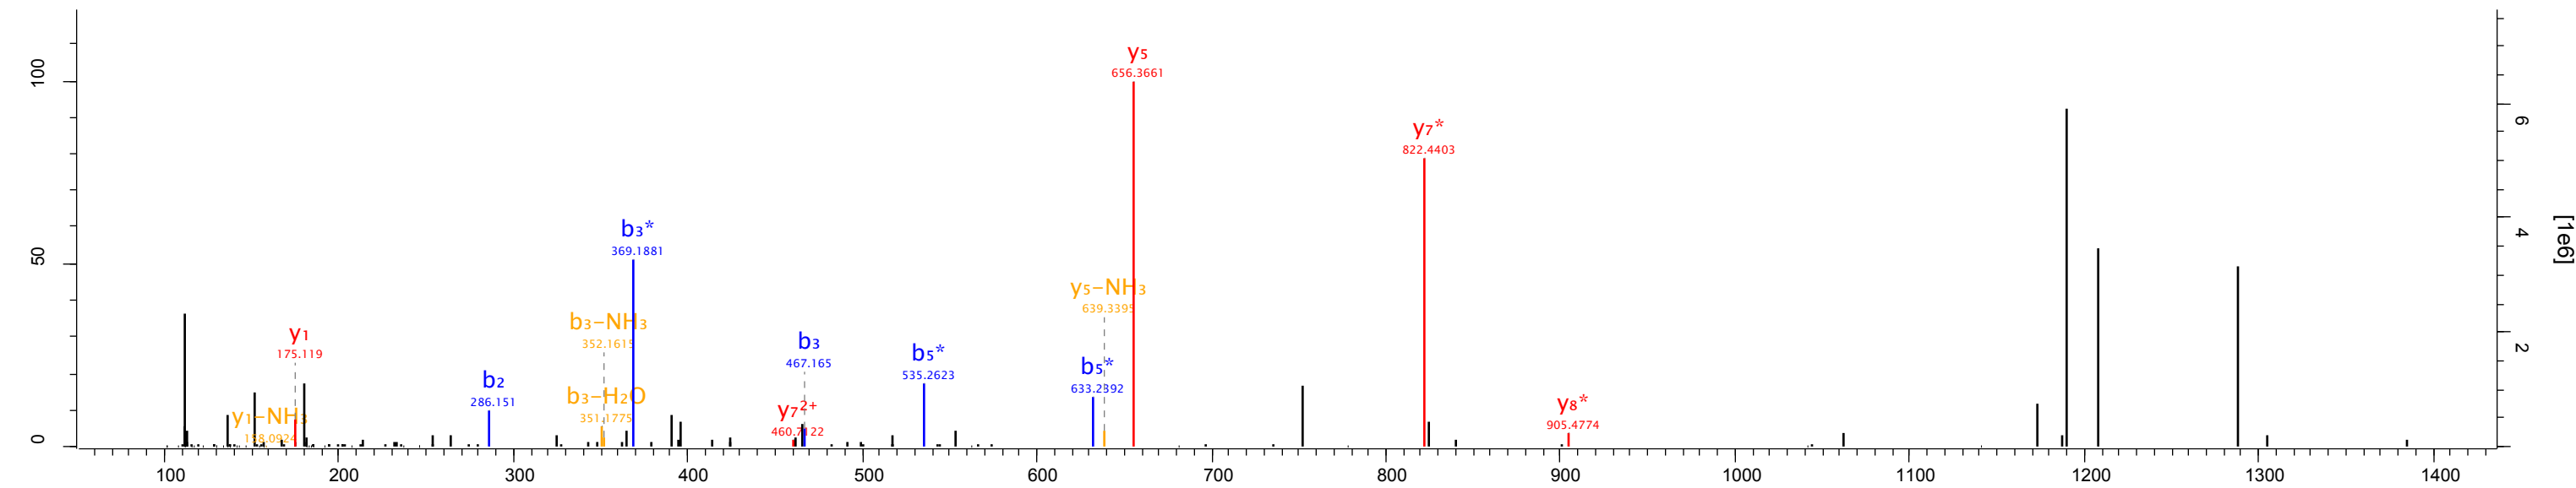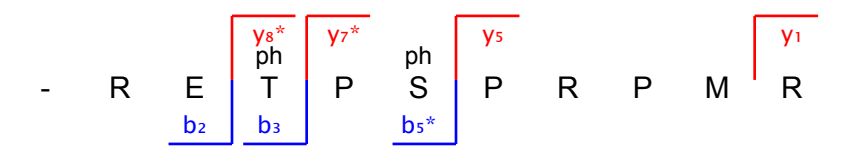

Raw file 20171215\_MaS\_33SR\_LMH\_phospho\_02 Scan 3323 Method FTMS; HCD Score 179.97 m/z 616.77 Gene names RANBP2;RGPD4

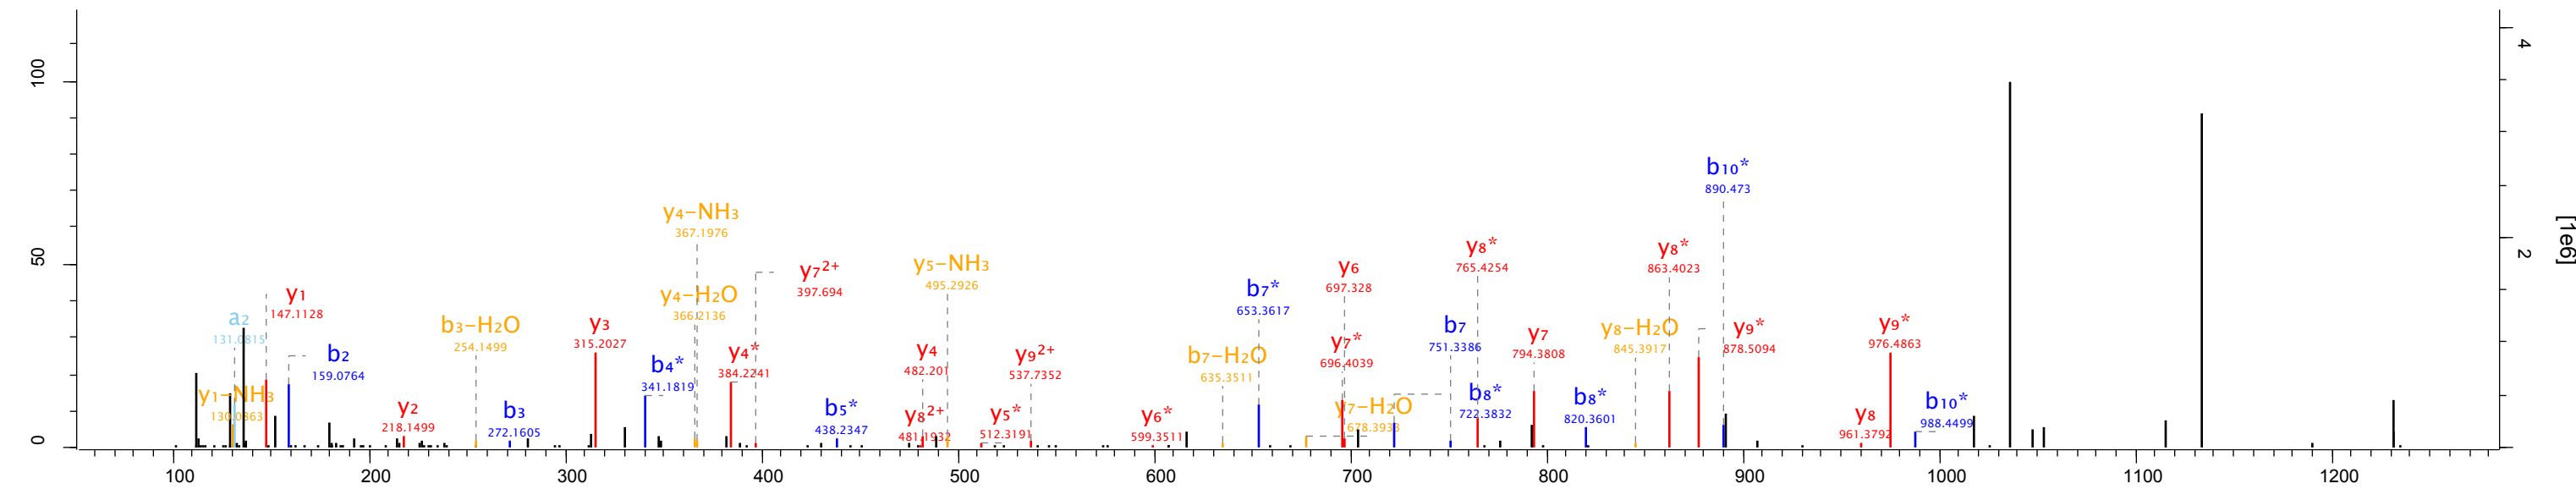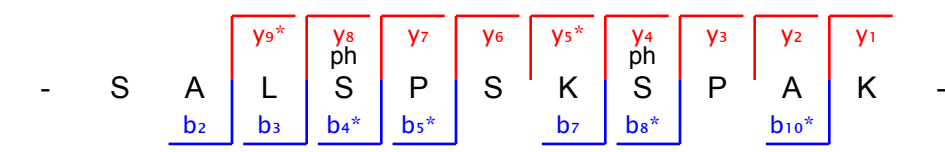

Raw file 20171215\_MaS\_33SR\_LMH\_phospho\_02 Scan 3433 Method FTMS; HCD Score 125.47 m/z 650.26 Gene names SRRM2

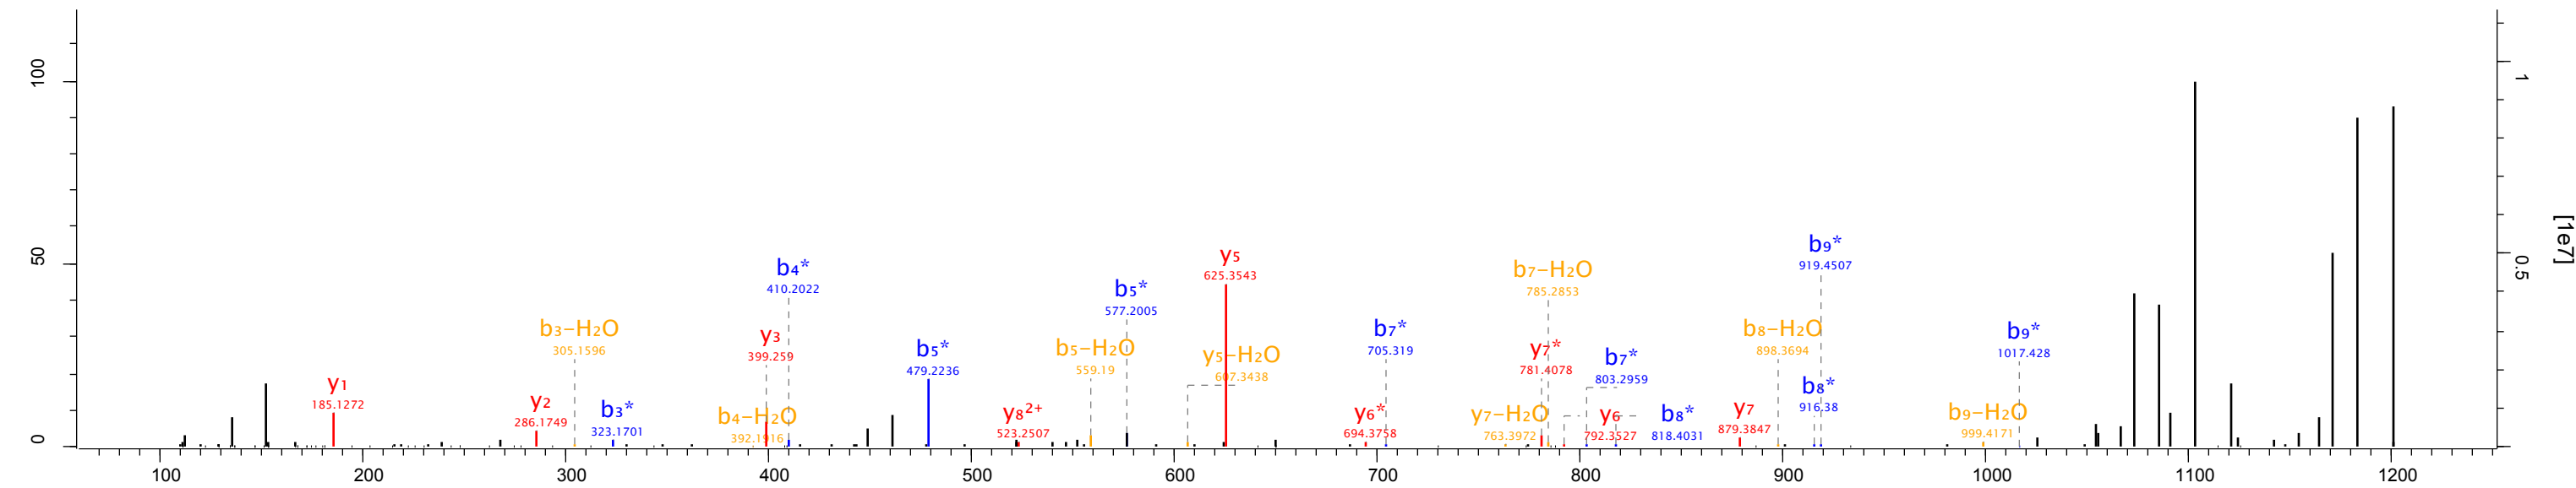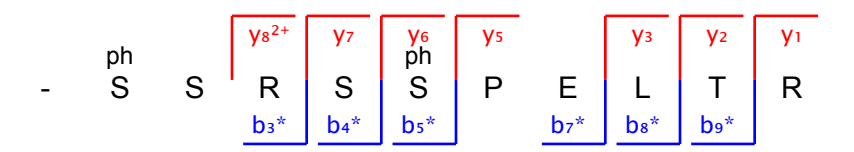

Raw file 20171215\_MaS\_33SR\_LMH\_phospho\_02 Scan 3883 Method FTMS; HCD Score 61.11 m/z 605.94 Gene names PELP1

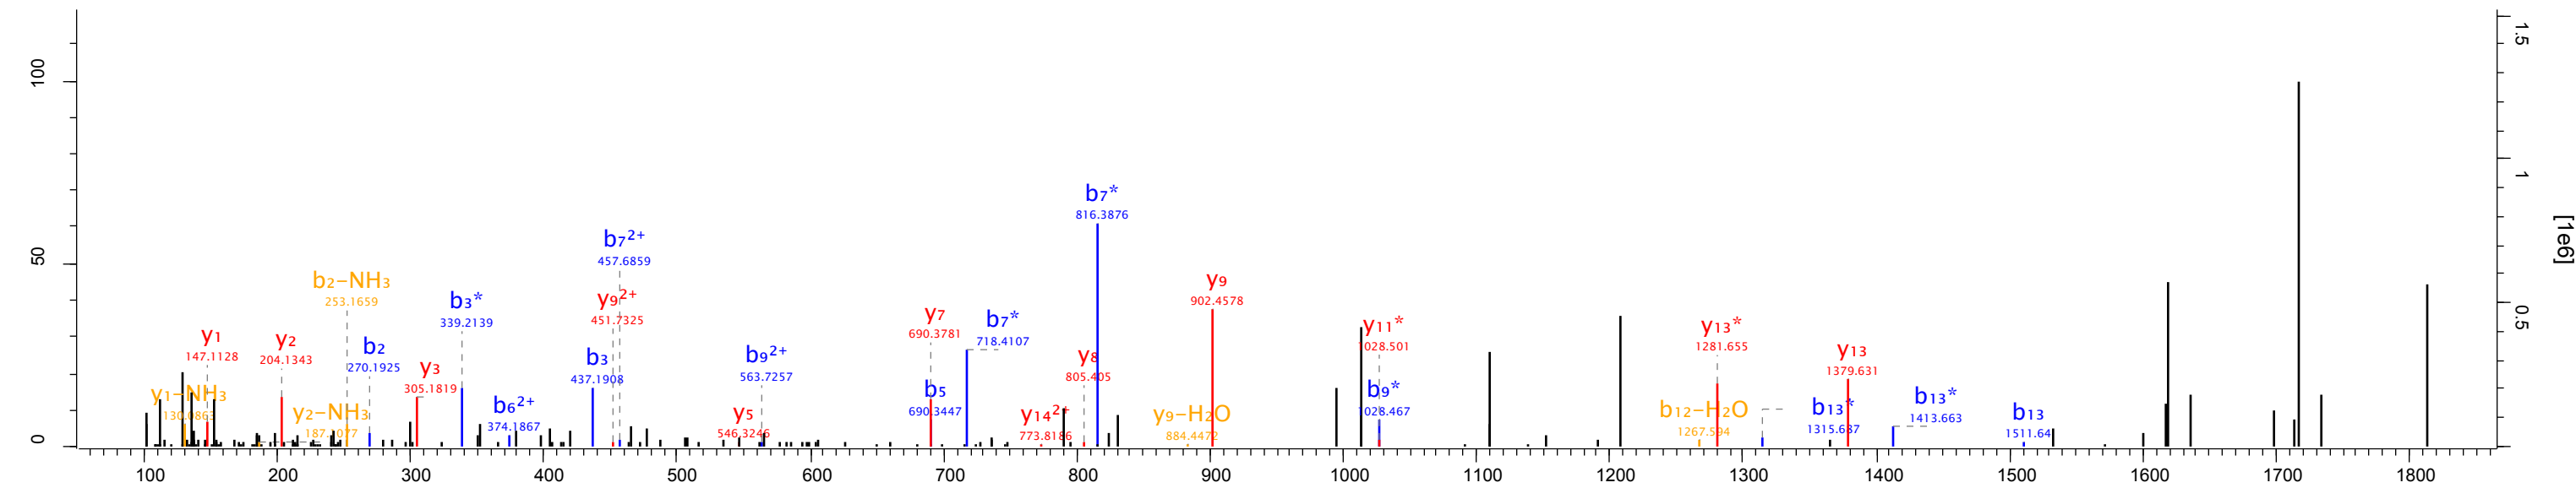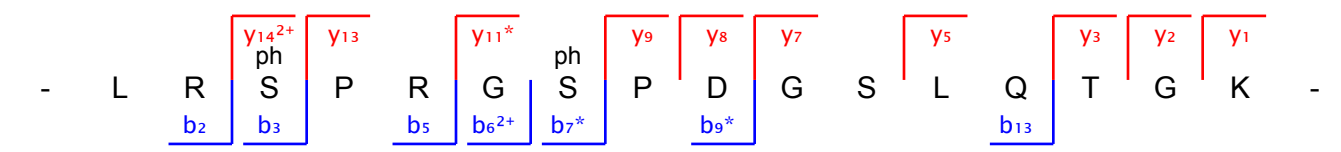

Raw file 20171215\_MaS\_33SR\_LMH\_phospho\_02 Scan 4283 Method FTMS; HCD Score 255.82 m/z 941.45 Gene names SUMO1

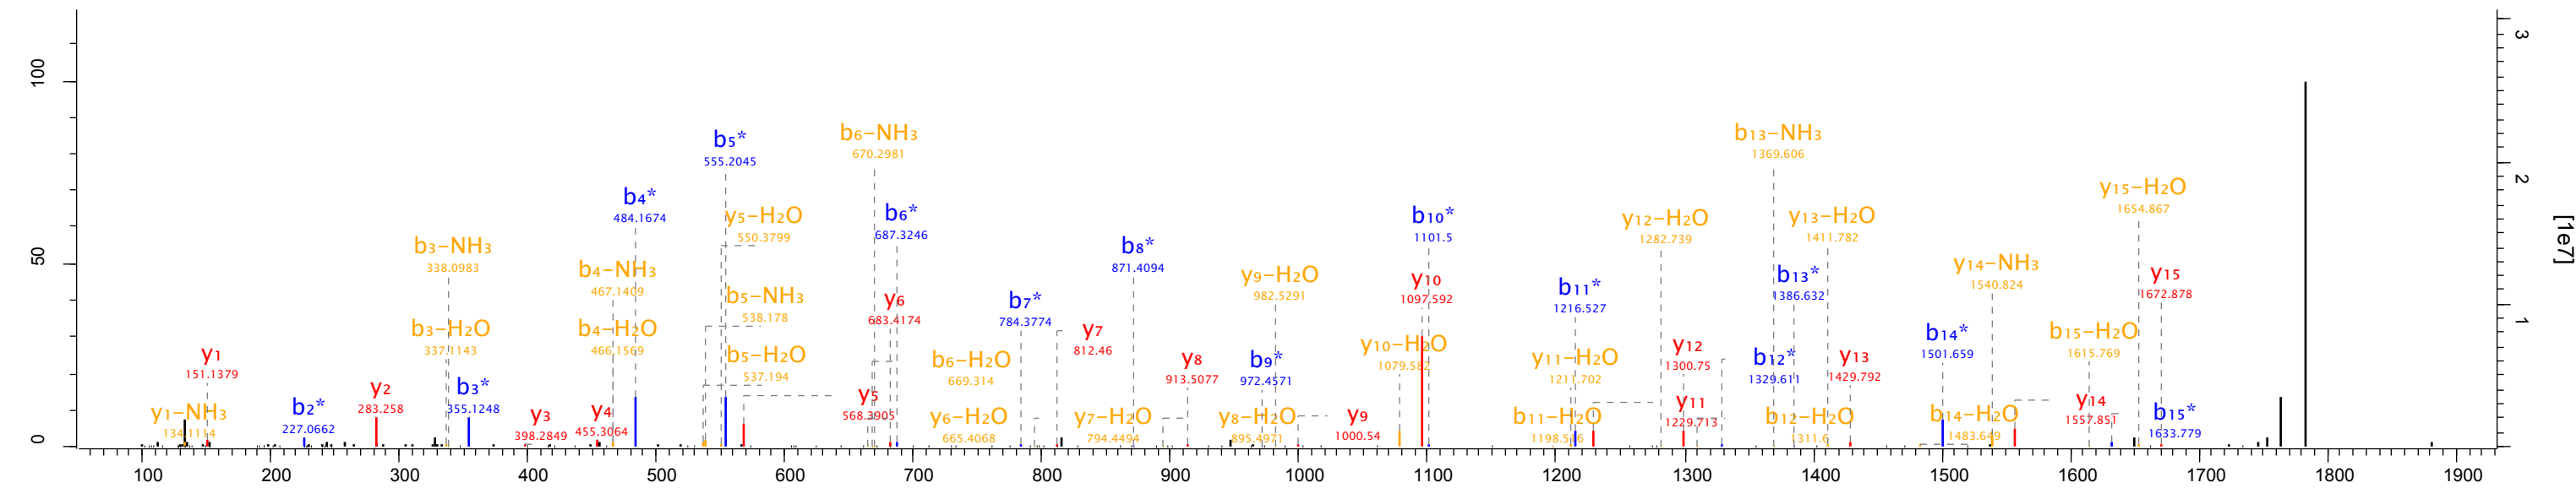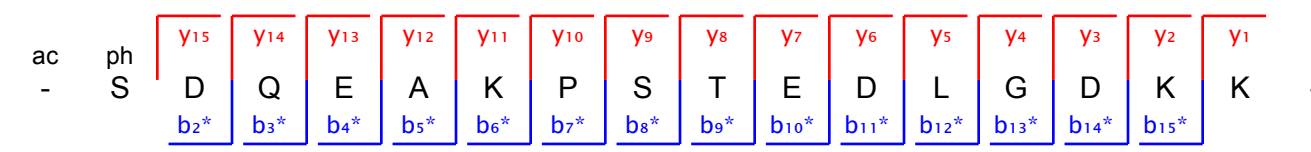

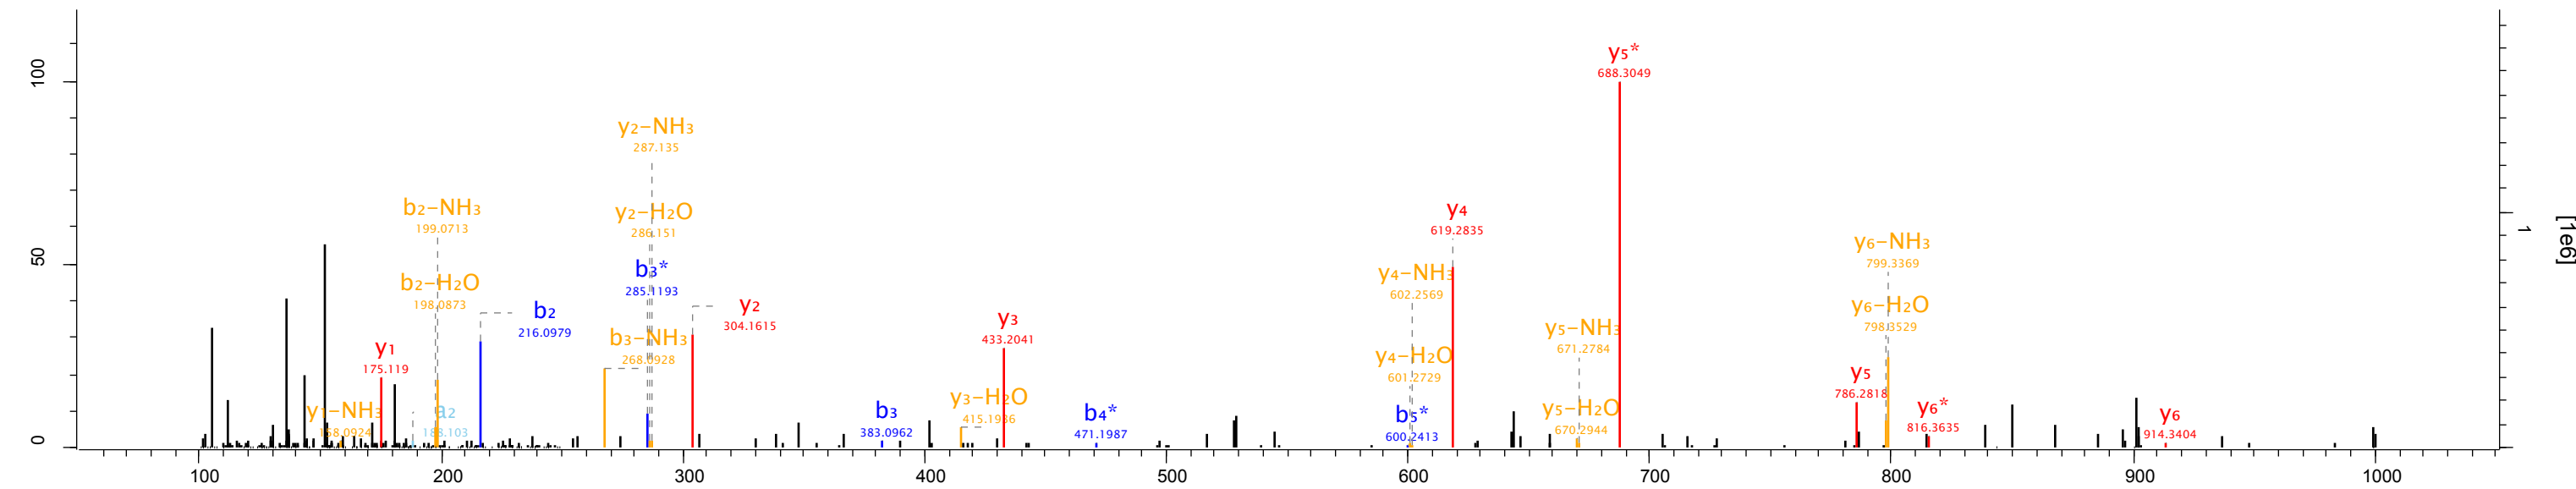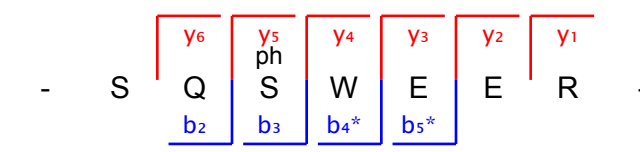

Raw file 20171215\_MaS\_33SR\_LMH\_phospho\_02 Scan 4653 Method FTMS; HCD Score 207.73 m/z 759.69 Gene names FKBP15

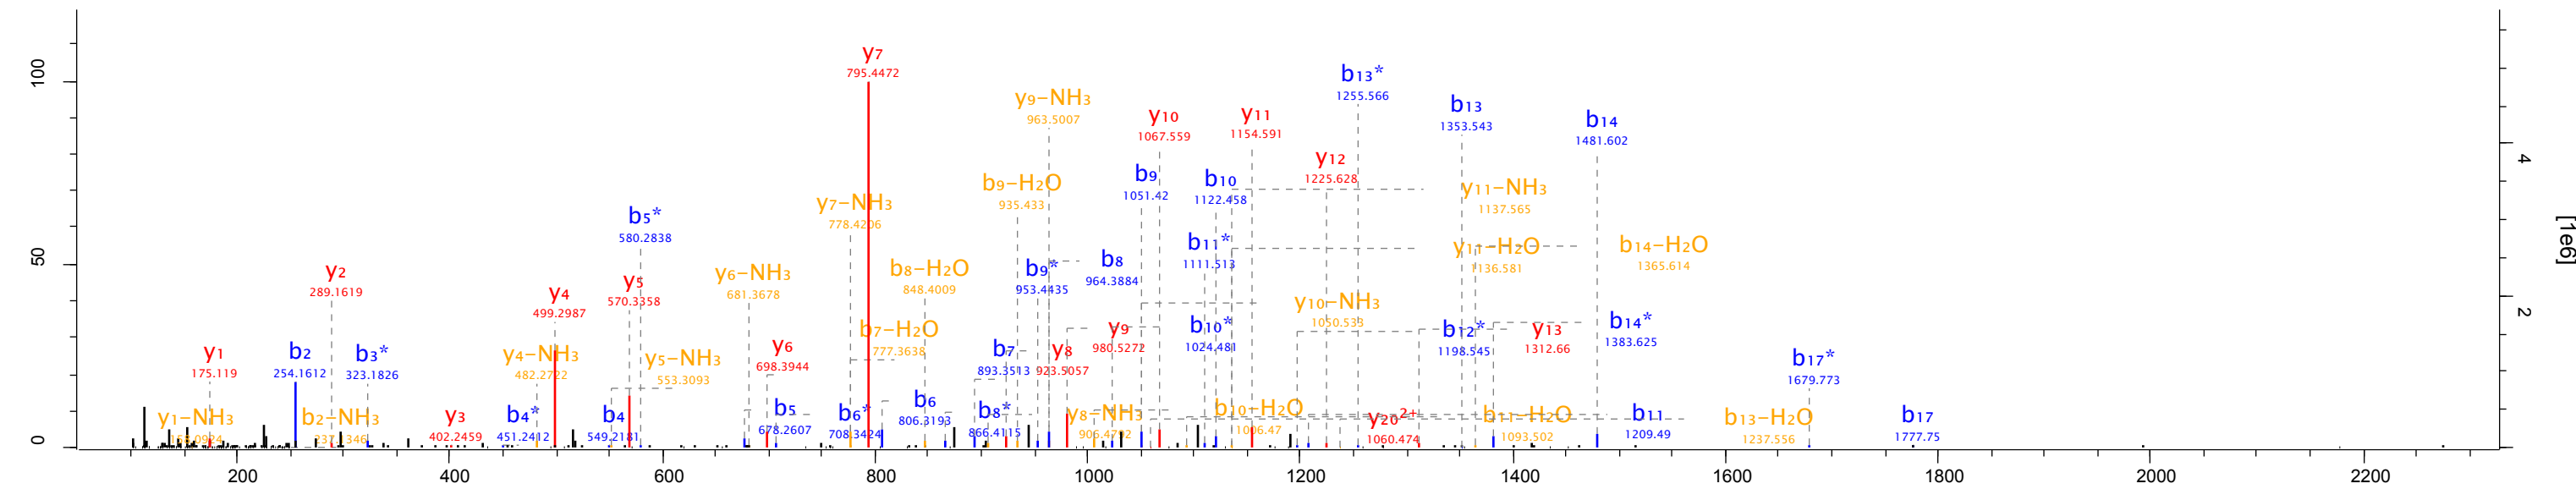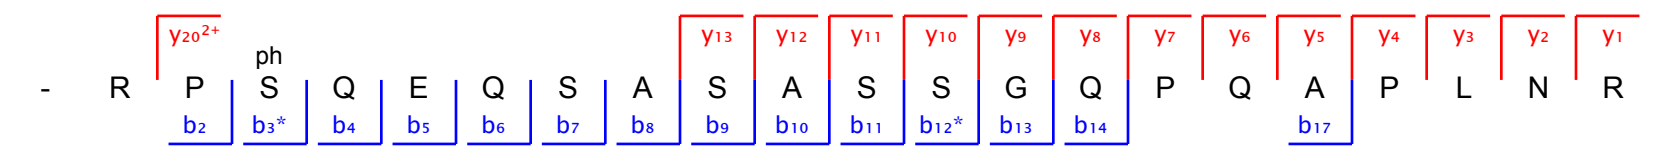

Raw file 20171215\_MaS\_33SR\_LMH\_phospho\_02 Scan 4973 Method FTMS; HCD Score 238.69 m/z 1004.4 Gene names LARP7

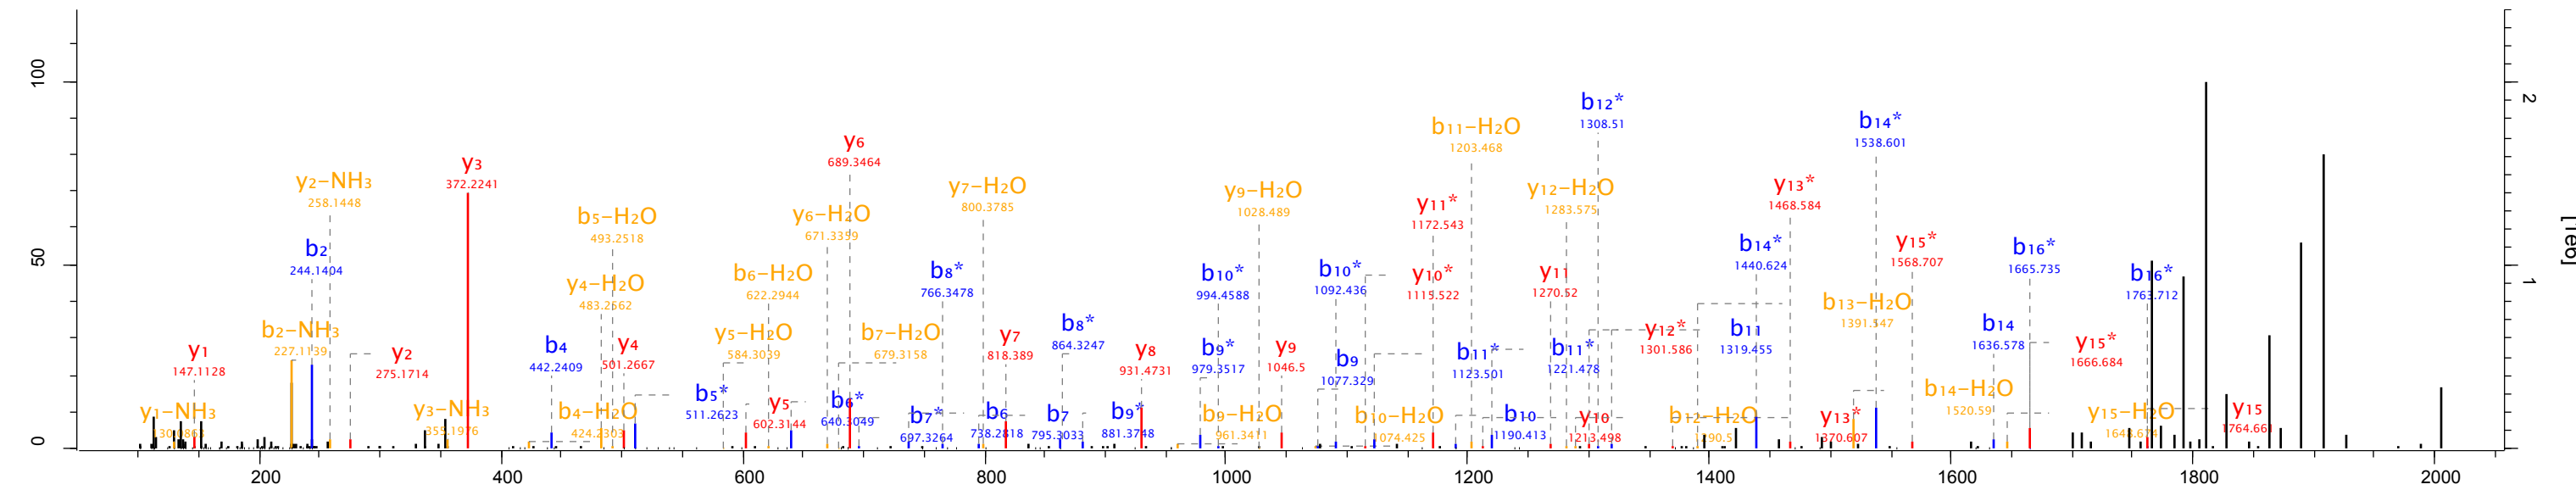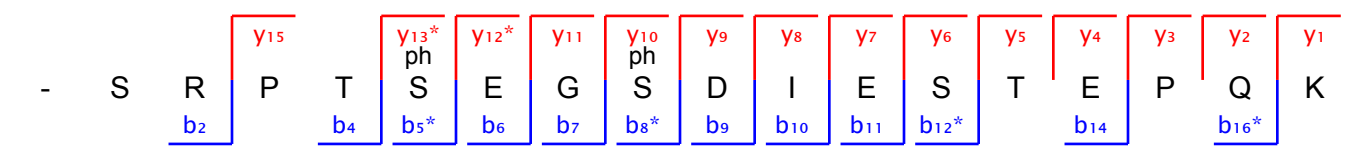



Raw file  
20171215\_MaS\_33SR\_LMH\_phospho\_02

Scan 5643 Method FTMS; HCD Score 183.25 m/z 968.91 Gene names TOE1

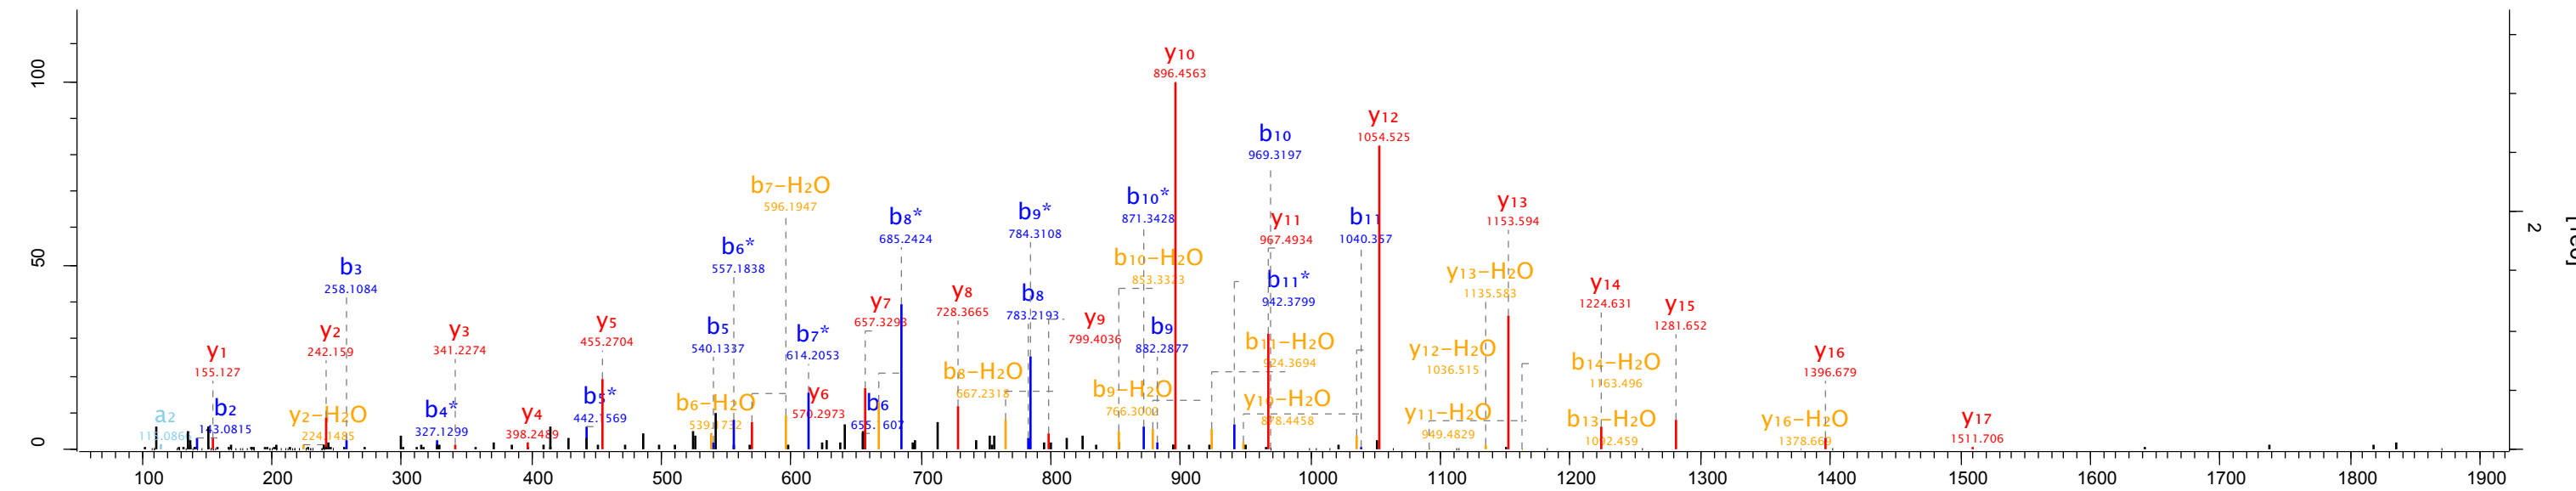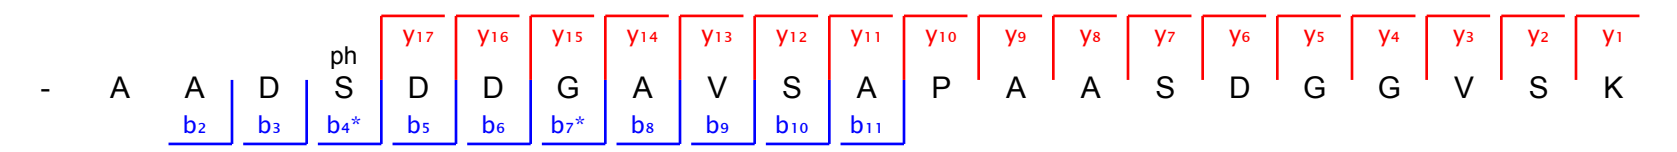

Raw file 20171215\_MaS\_33SR\_LMH\_phospho\_02 Scan 6053 Method FTMS; HCD Score 100.31 m/z 551.27 Gene names SRRM2

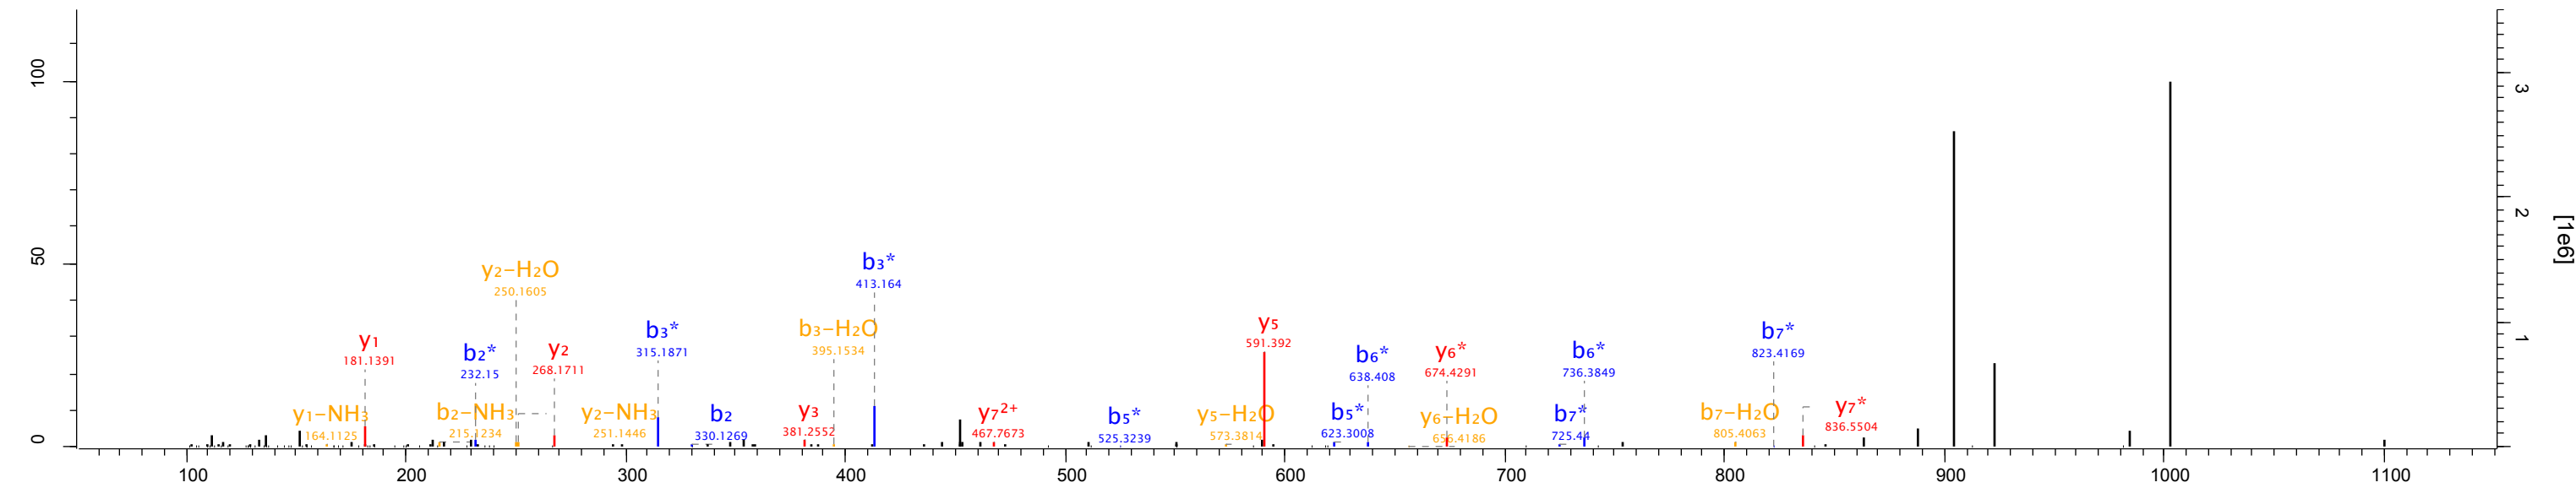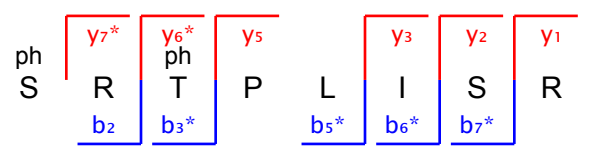

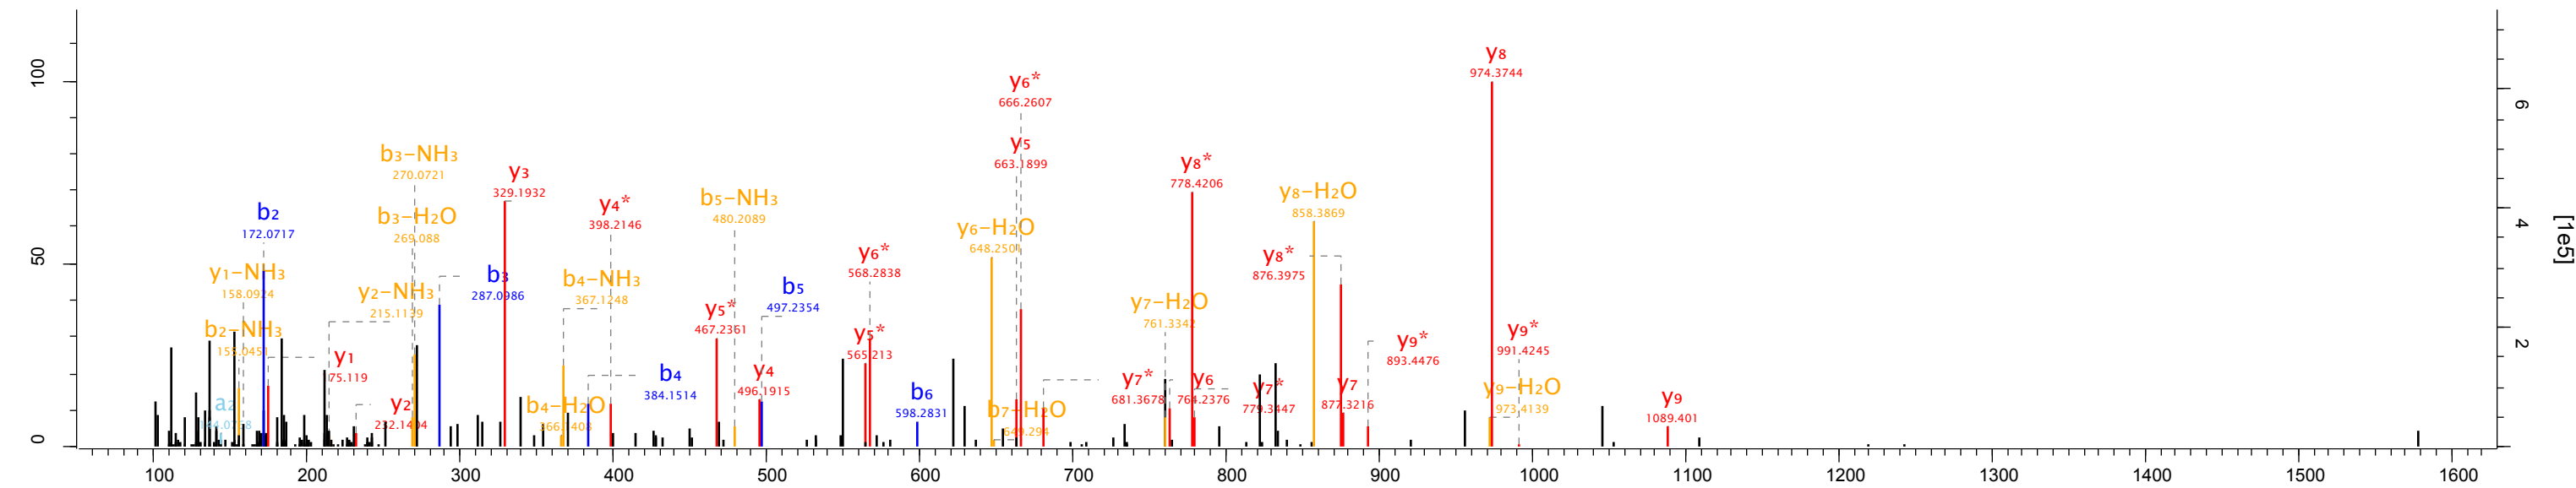

- G N D P L T S S P G R -

Fragmentation scheme diagram showing b and y ions for the peptide sequence: G N D P L T S S P G R. The b ions (b<sub>2</sub> to b<sub>6</sub>) are shown in blue, and the y ions (y<sub>1</sub> to y<sub>9</sub>) are shown in red. The b ions are labeled below the amino acids, and the y ions are labeled above the amino acids. The b<sub>2</sub> ion is shown below the N, b<sub>3</sub> below D, b<sub>4</sub> below P, b<sub>5</sub> below L, and b<sub>6</sub> below T. The y<sub>1</sub> ion is above R, y<sub>2</sub> above G, y<sub>3</sub> above P, y<sub>4</sub> above S, y<sub>5</sub> above S, y<sub>6</sub> above T, y<sub>7</sub> above L, y<sub>8</sub> above P, and y<sub>9</sub> above D.

Raw file 20171215\_MaS\_33SR\_LMH\_phospho\_02 Scan 6313 Method FTMS; HCD Score 113.24 m/z 577.24 Gene names UBR4

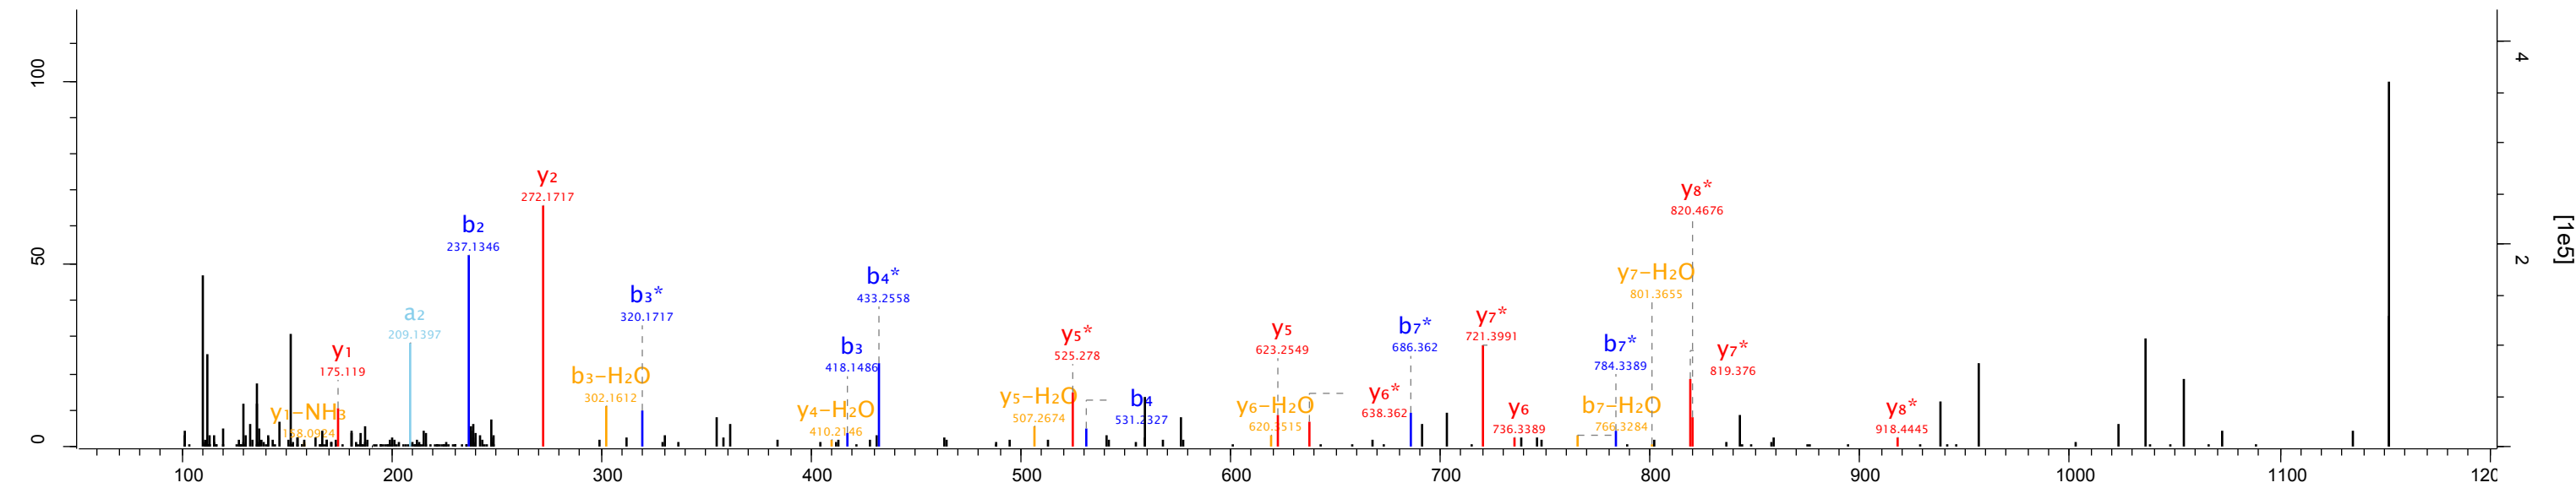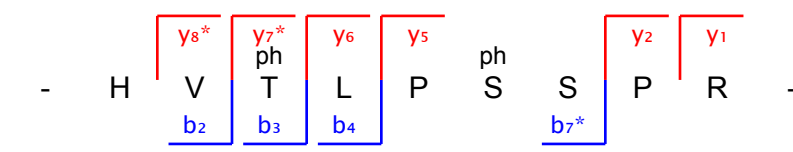

Raw file 20171215\_MaS\_33SR\_LMH\_phospho\_02 Scan 6483 Method FTMS; HCD Score 152.13 m/z 778.32 Gene names DBNL

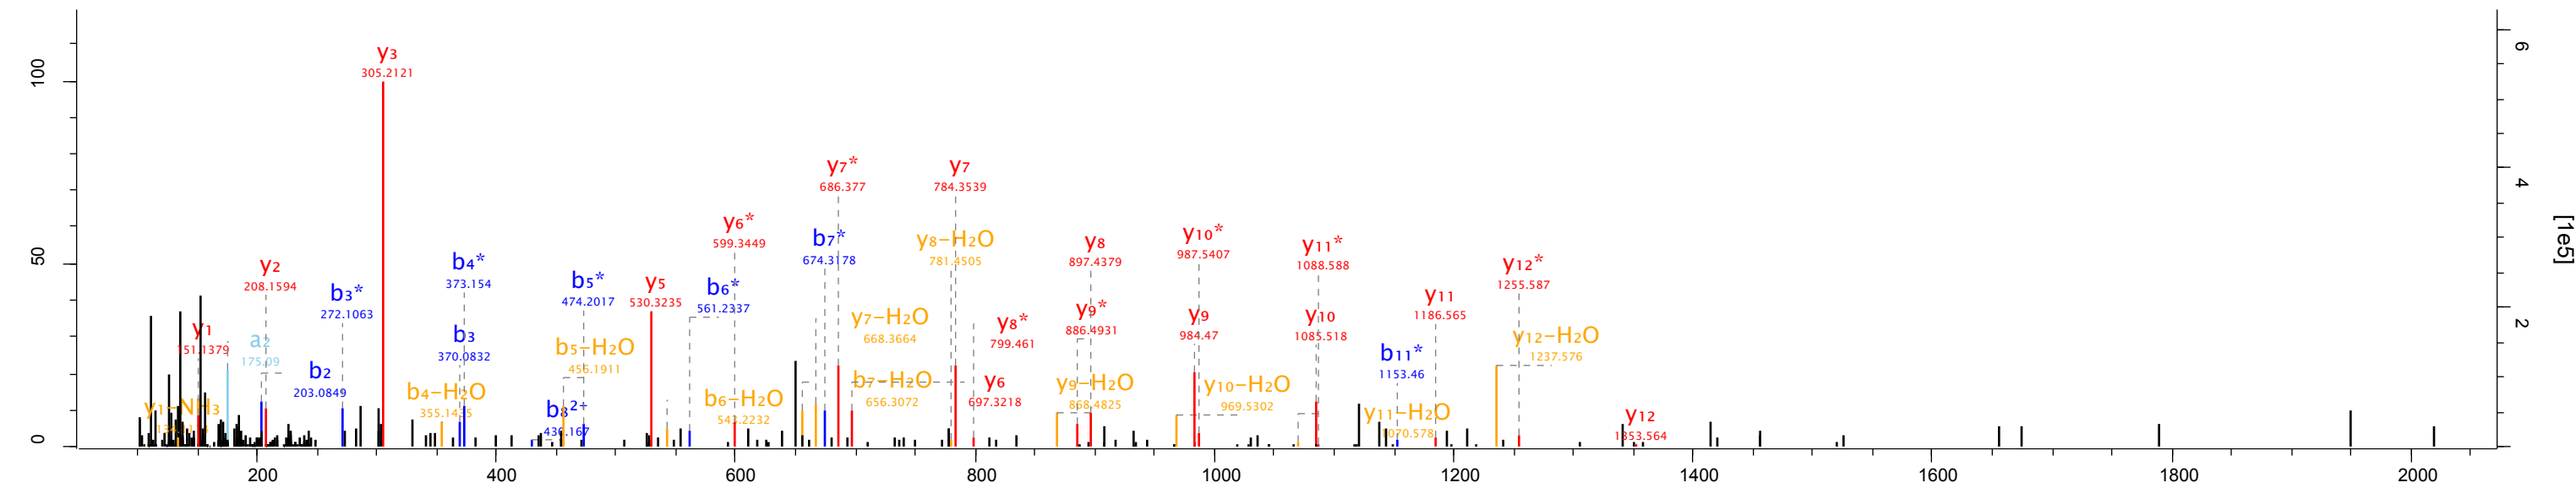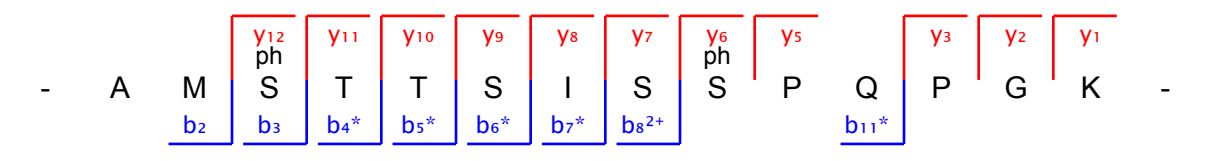

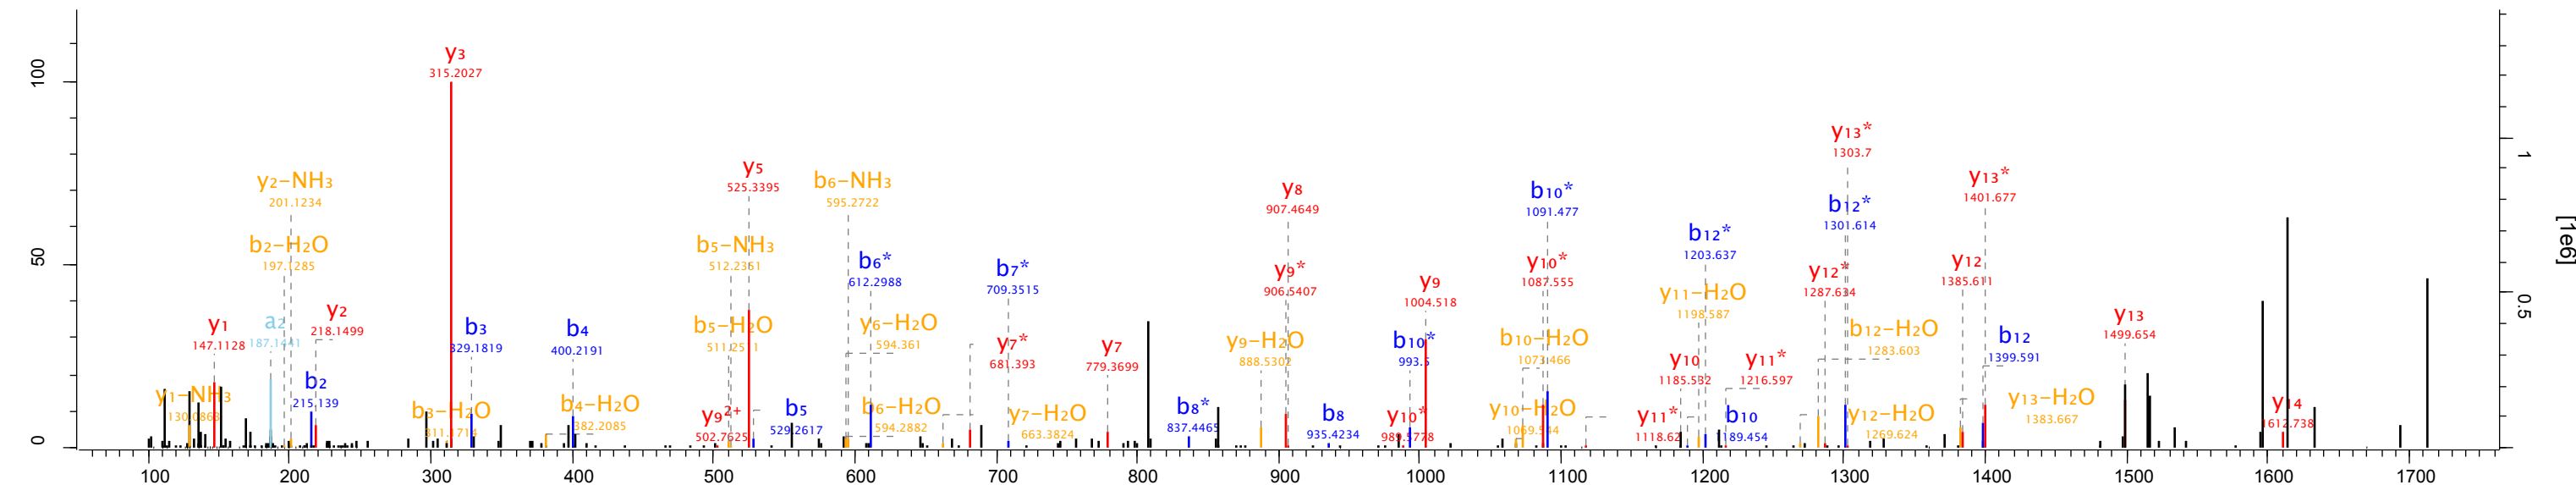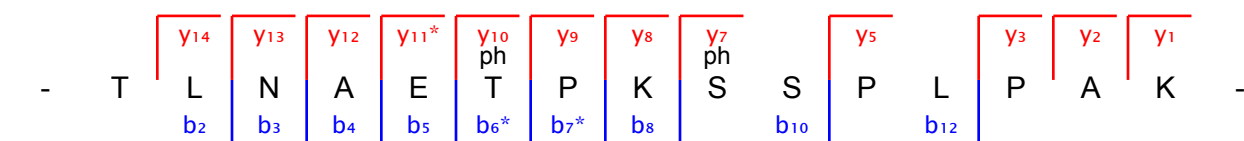

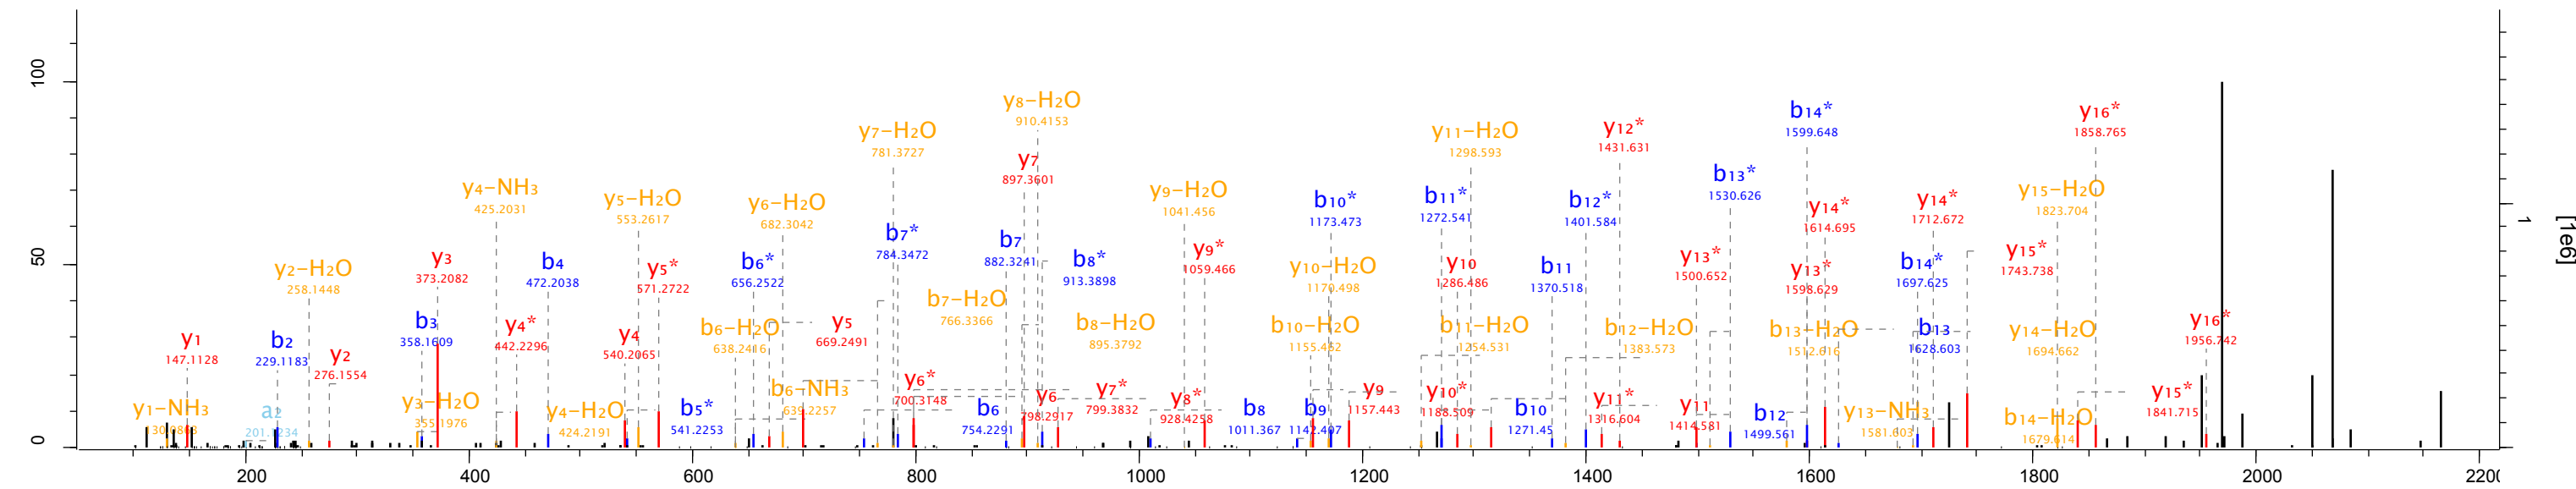

|      |      |      |            |      |     |     |    |     |     |     |     |          |    |    |    |
|------|------|------|------------|------|-----|-----|----|-----|-----|-----|-----|----------|----|----|----|
| y16* | y15* | y14* | y13*<br>ph | y12* | y11 | y10 | y9 | y8* | y7  | y6  | y5  | y4<br>ph | y3 | y2 | y1 |
| D    | E    | N    | S          | D    | K   | E   | M  | E   | V   | E   | E   | S        | P  | E  | K  |
| b2   | b3   | b4   | b5*        | b6   | b7  | b8  | b9 | b10 | b11 | b12 | b13 | b14*     |    |    |    |

Raw file 20171215\_MaS\_33SR\_LMH\_phospho\_02 Scan 7463 Method FTMS; HCD Score 83.2 m/z 1023.94 Gene names DYNC1LI1

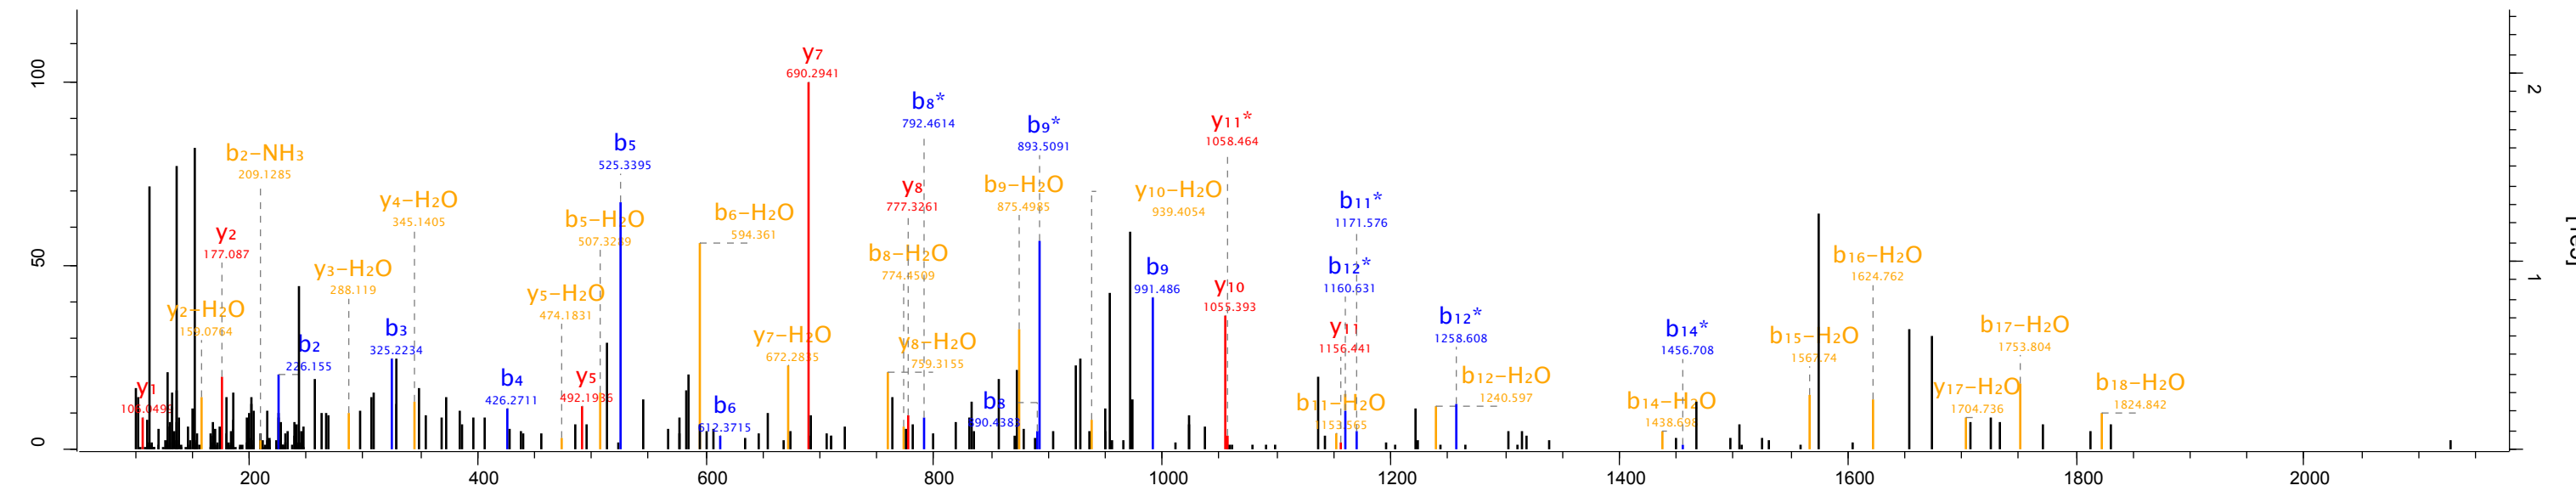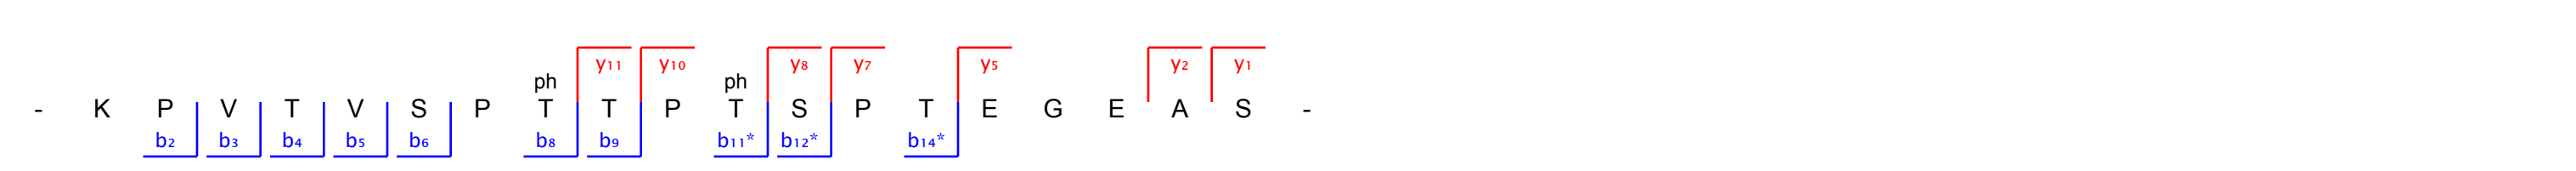



20171215\_MaS\_33SR\_LMH\_phospho\_02 7533 FTMS; HCD 138.24 1129.13 GAK

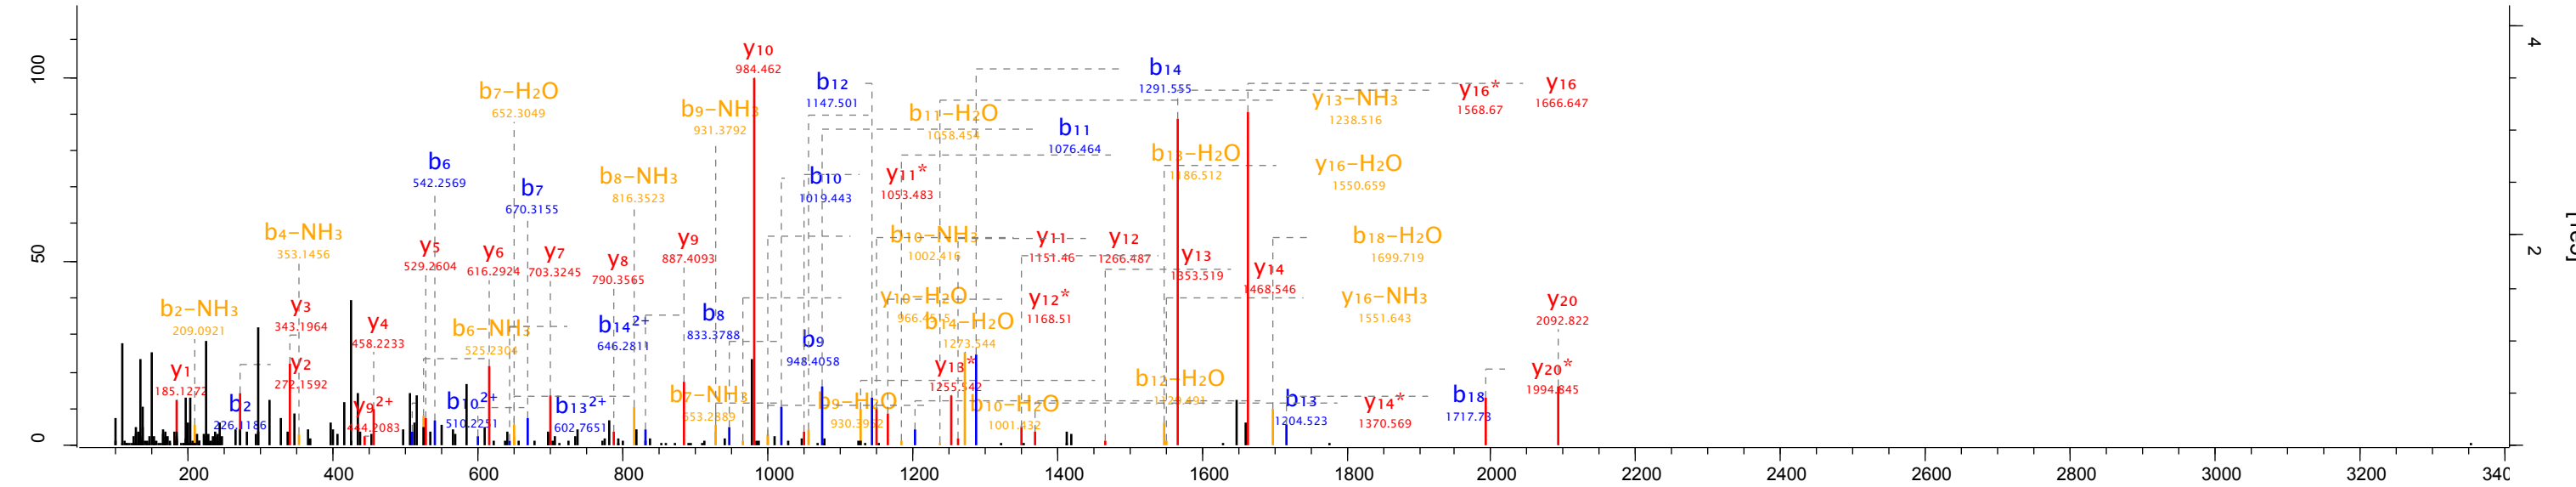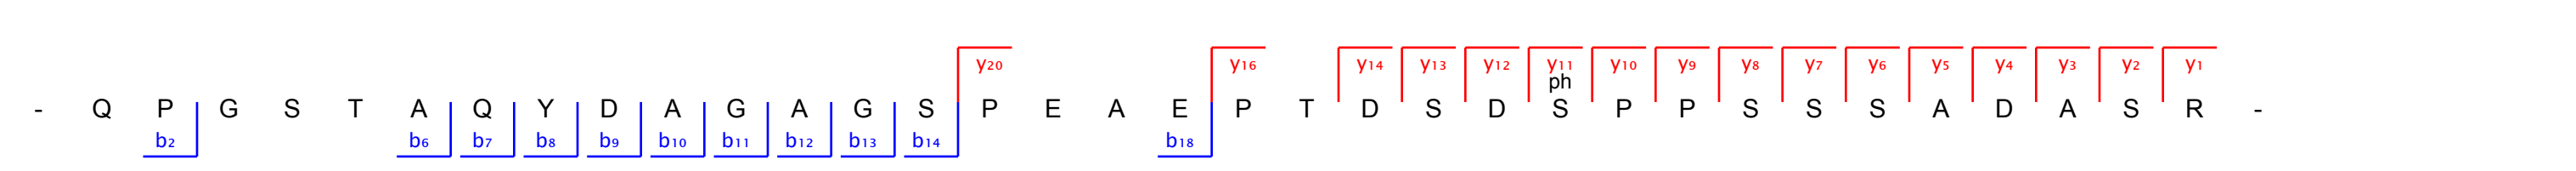

Raw file 20171215\_MaS\_33SR\_LMH\_phospho\_02 Scan 8063 Method FTMS; HCD Score 99.71 m/z 695.27 Gene names PKP2

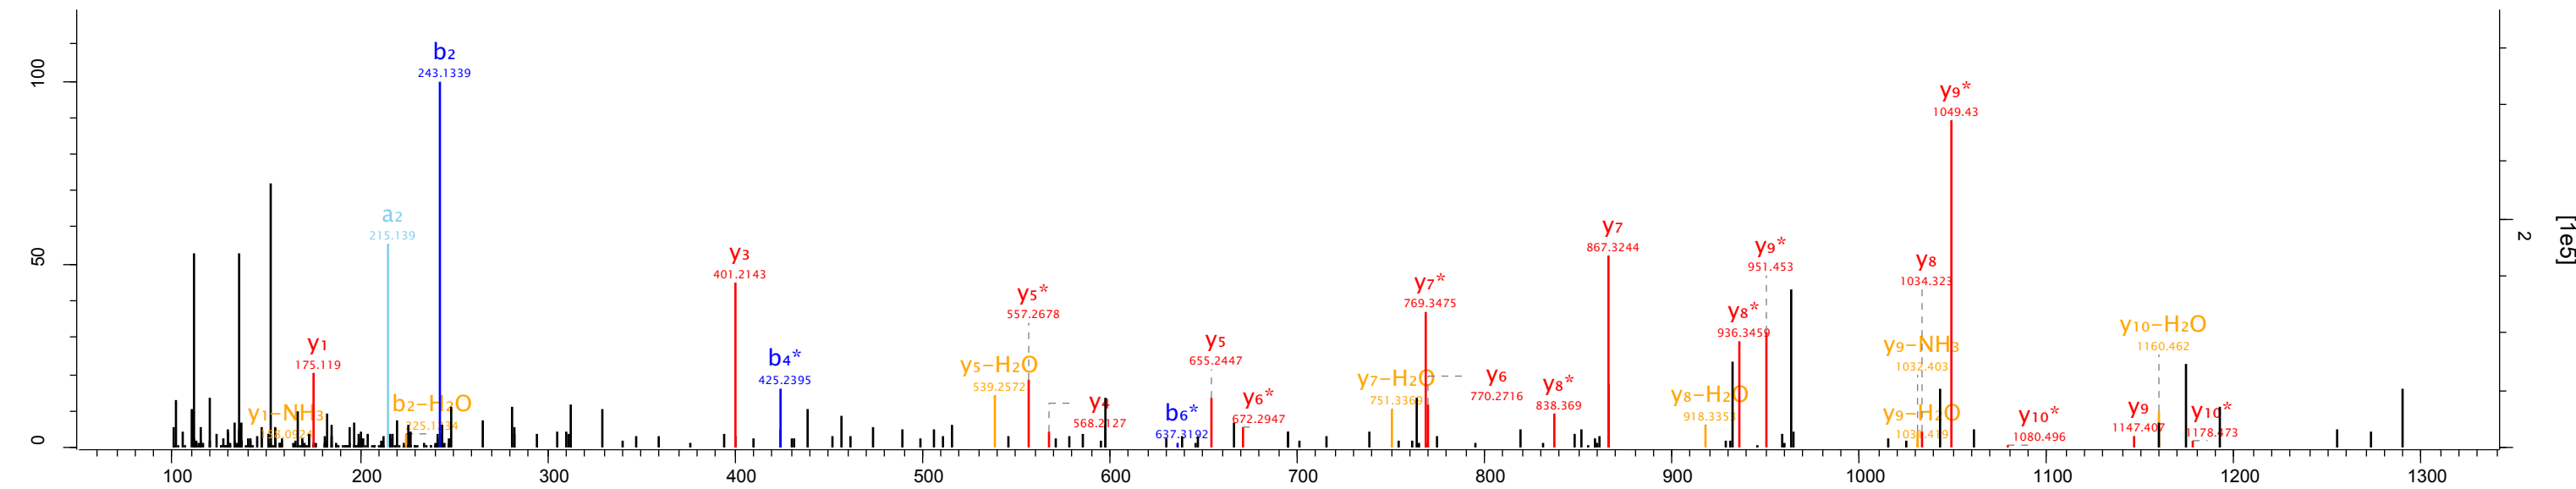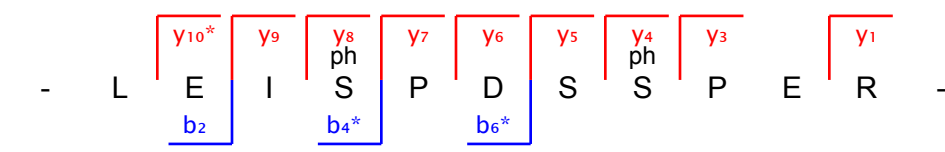

Raw file 20171215\_MaS\_33SR\_LMH\_phospho\_02 Scan 8363 Method FTMS; HCD Score 116.2 m/z 1001.42 Gene names TRIP10

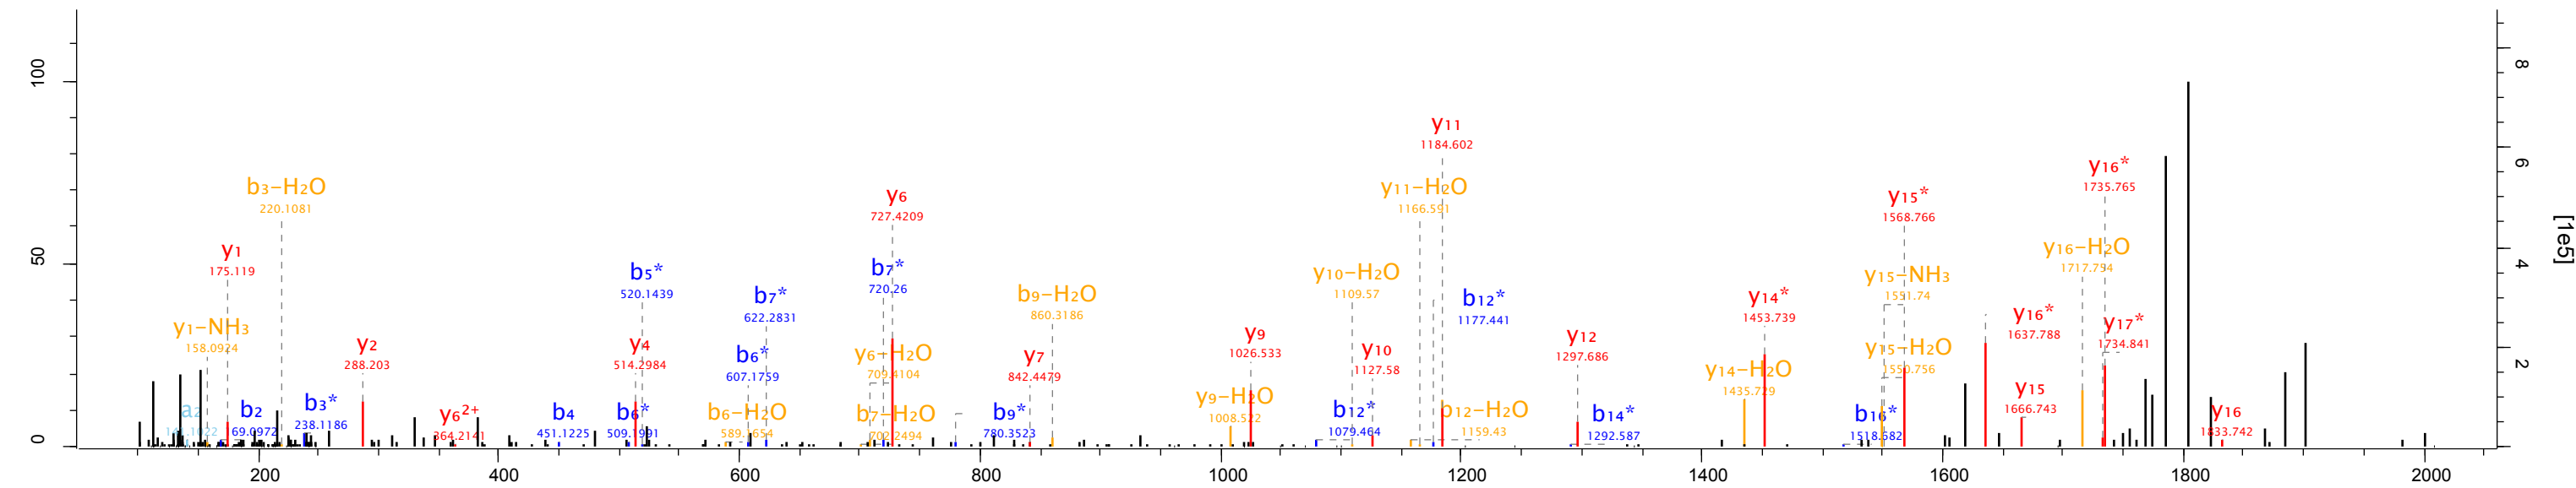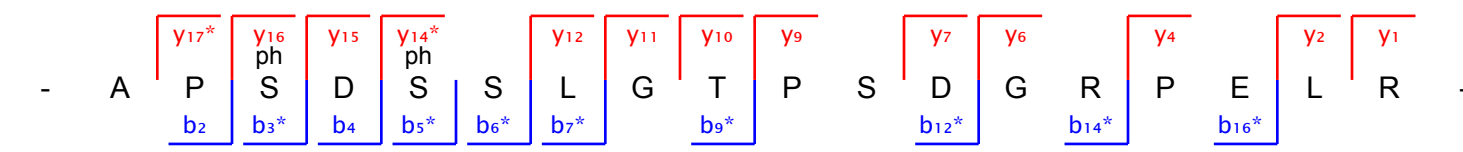

Raw file 20171215\_MaS\_33SR\_LMH\_phospho\_02 Scan 8593 Method FTMS; HCD Score 73.23 m/z 794.34 Gene names ANKRD17

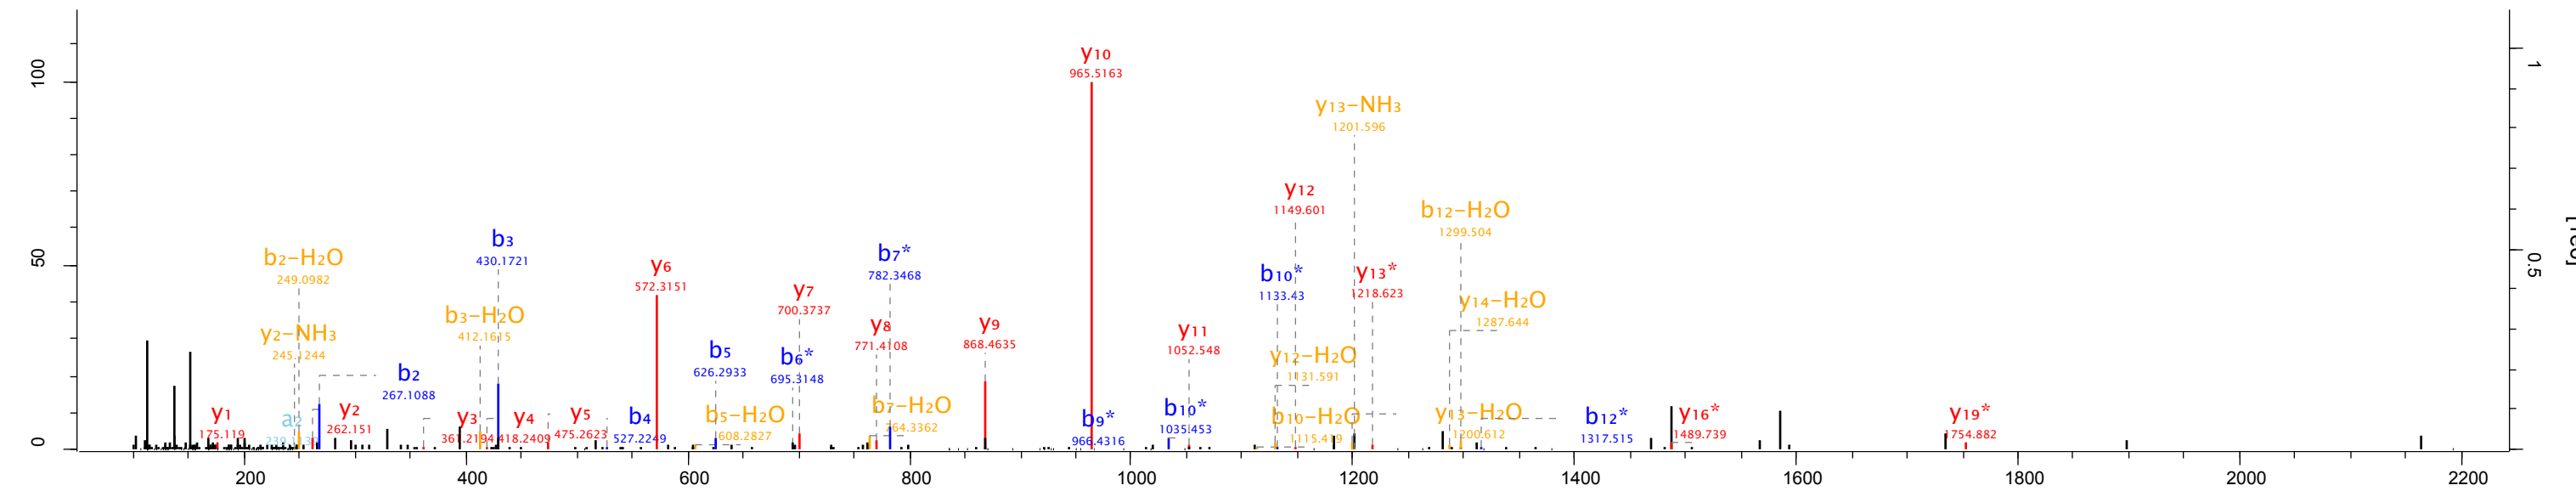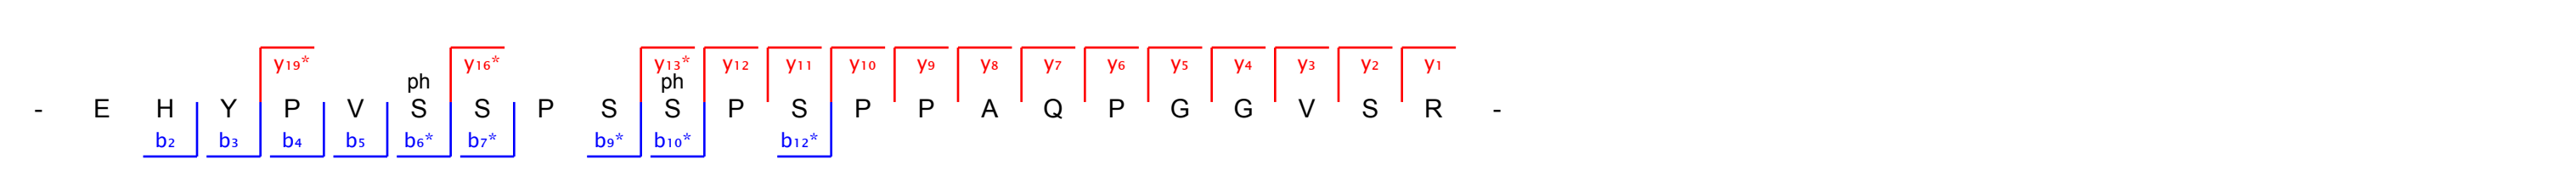

20171215\_MaS\_33SR\_LMH\_phospho\_02 9073 FTMS; HCD 237.6 1048.45 AKAP12

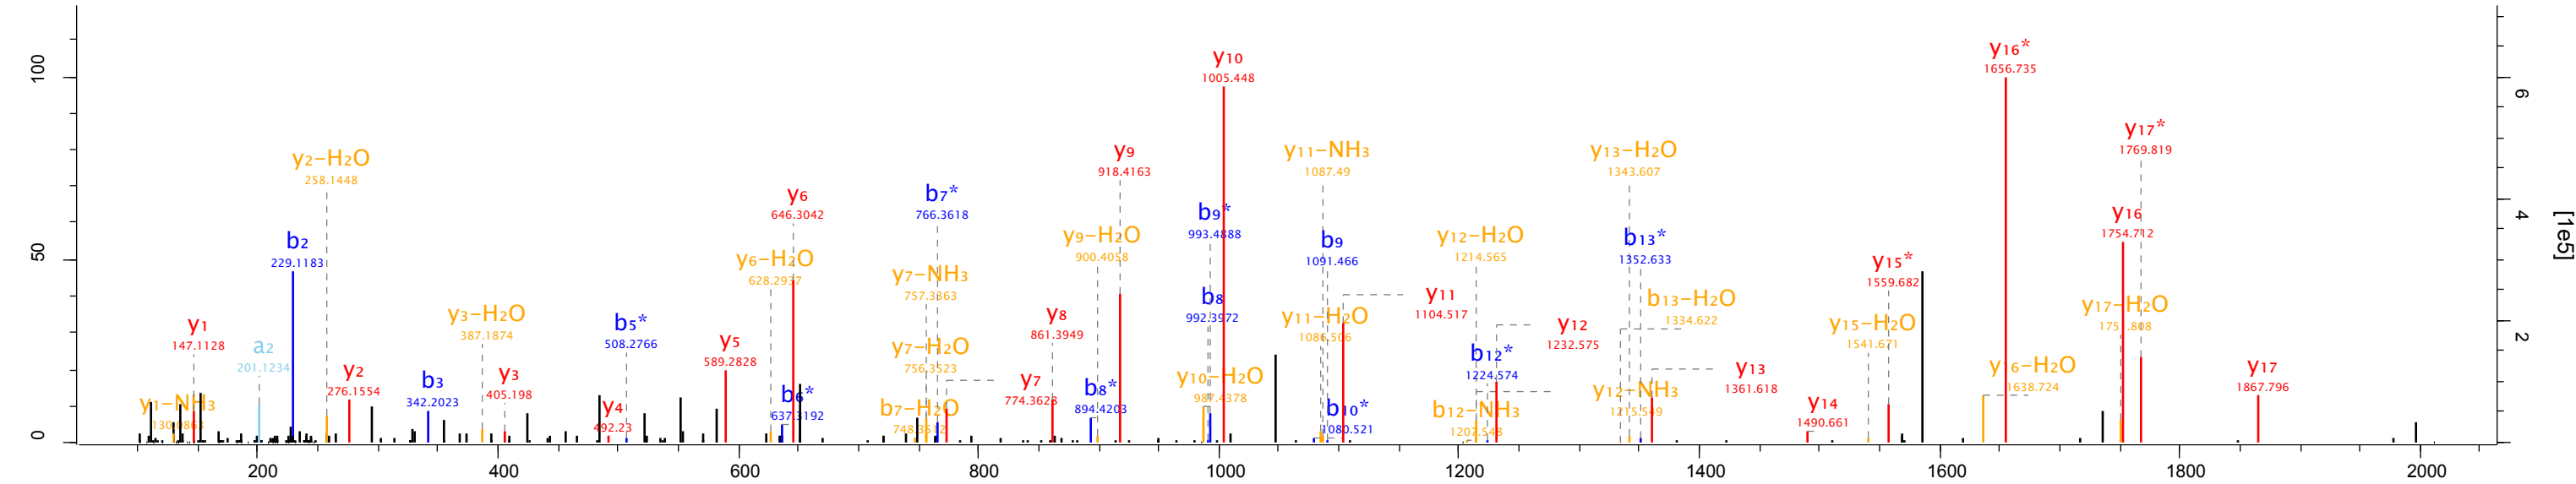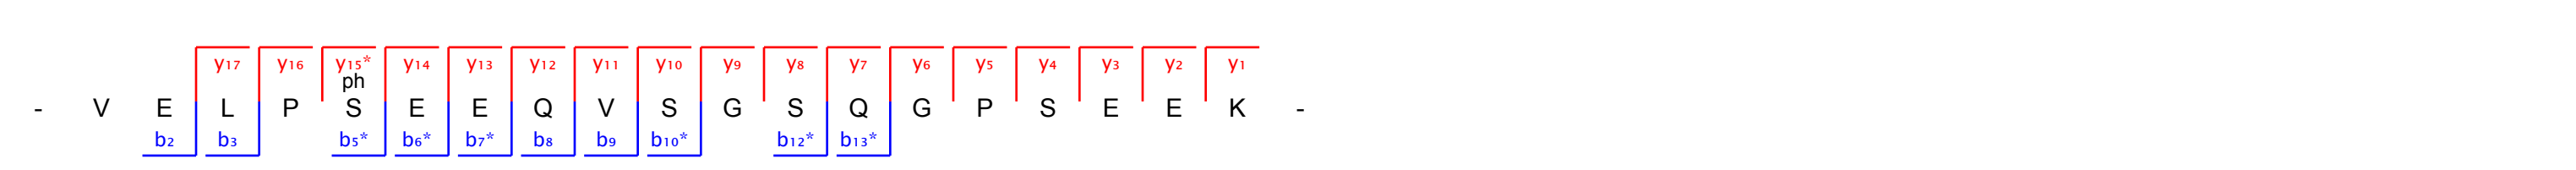

Raw file 20171215\_MaS\_33SR\_LMH\_phospho\_02 Scan 9103 Method FTMS; HCD Score 159.6 m/z 587.75 Gene names LARP6

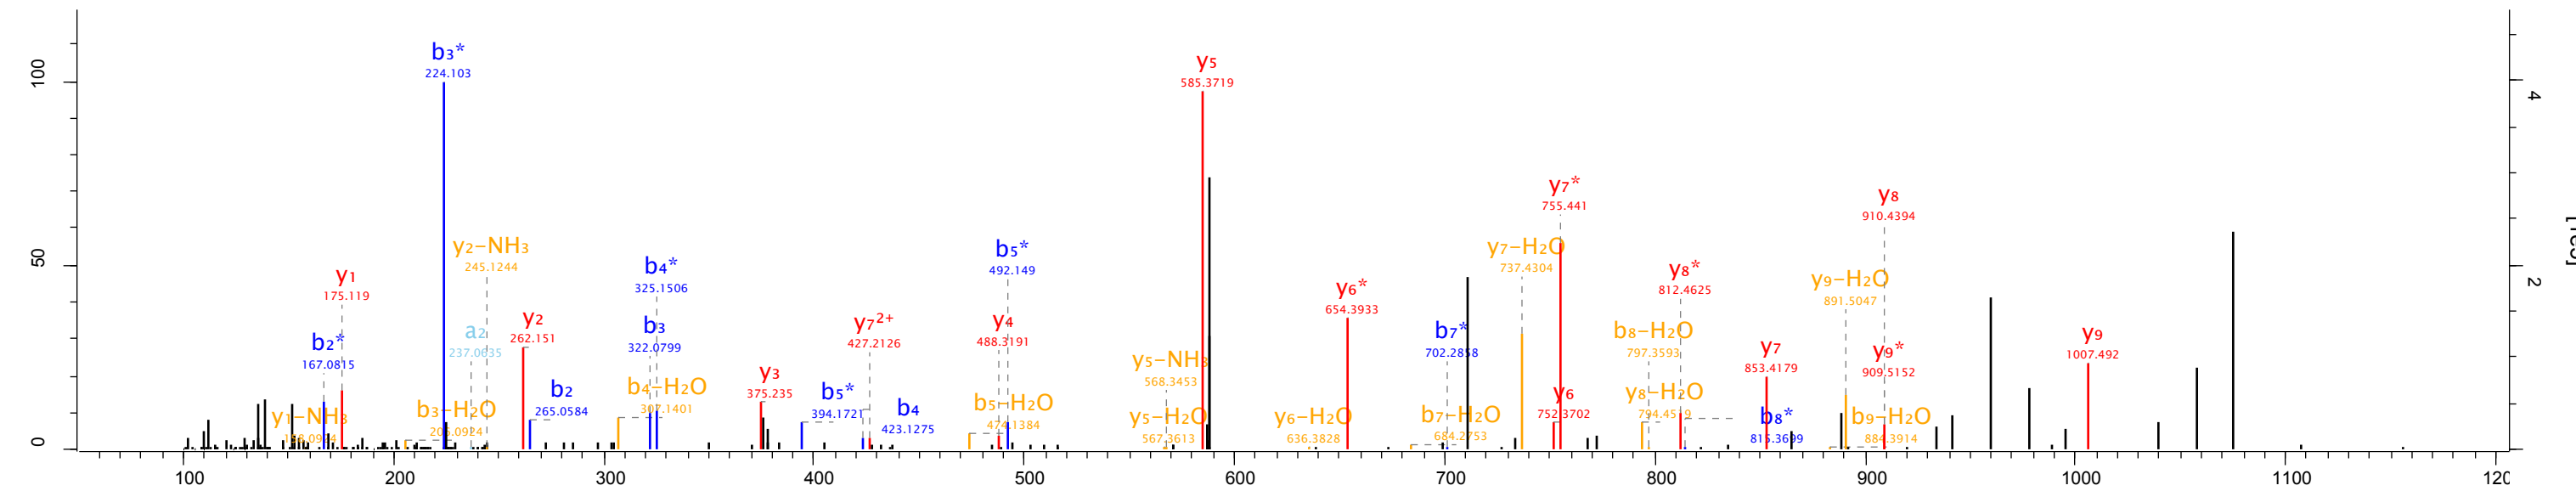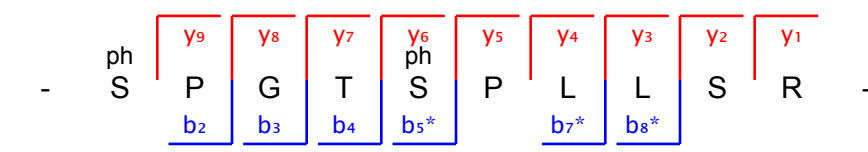

Raw file 20171215\_MaS\_33SR\_LMH\_phospho\_02 Scan 9143 Method FTMS; HCD Score 153.66 m/z 970.39 Gene names BCL7B

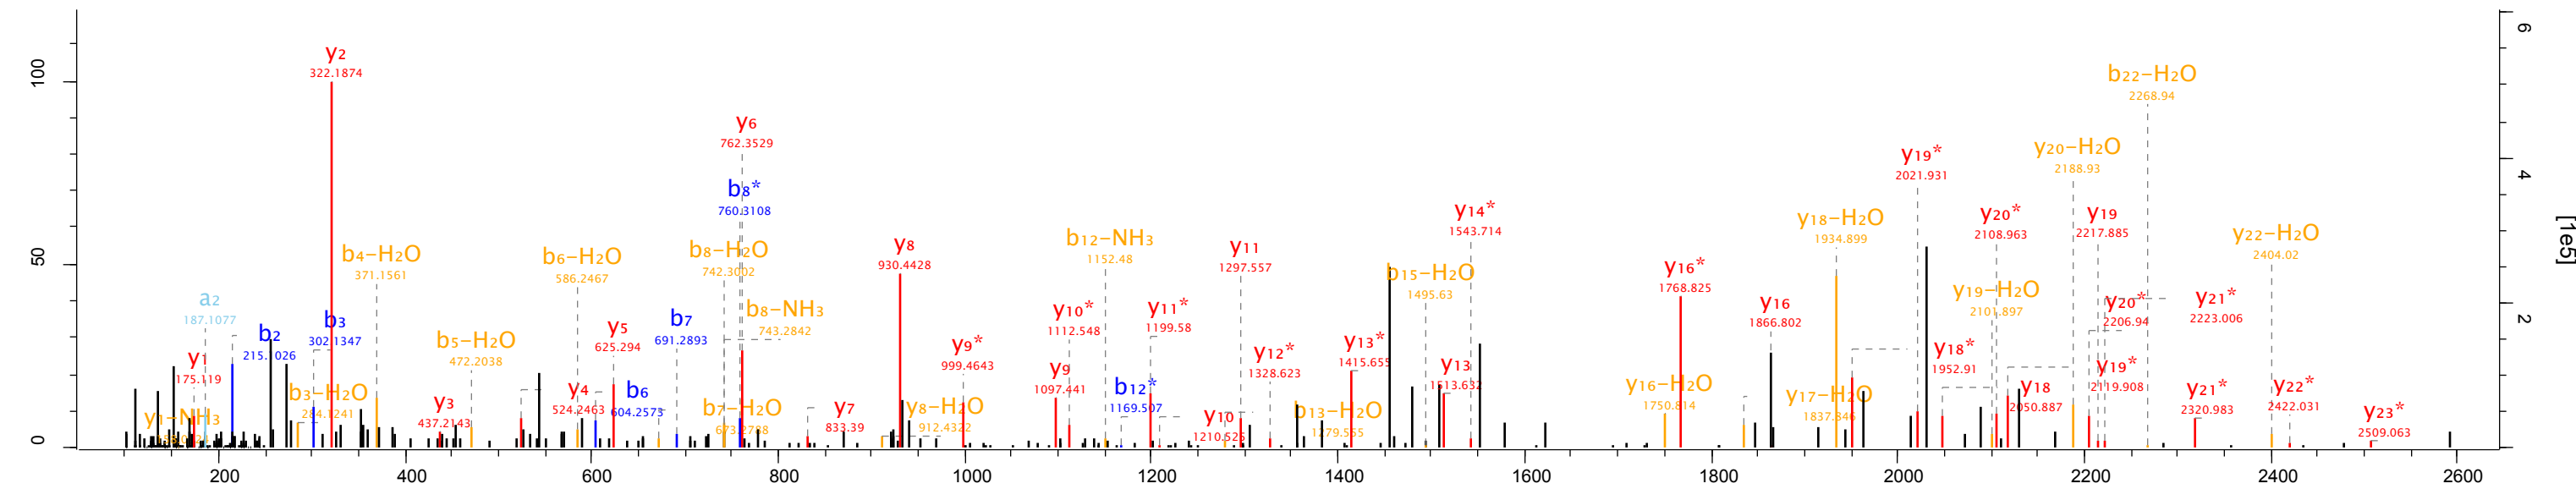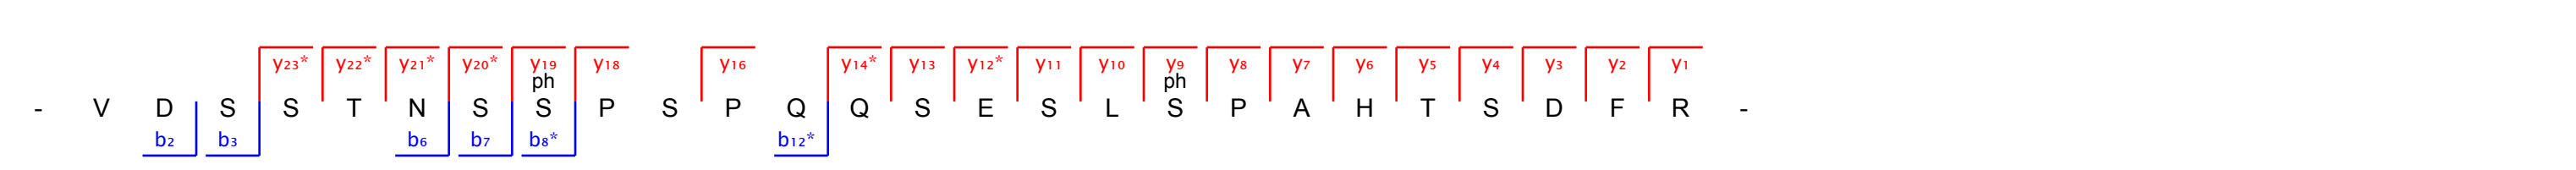

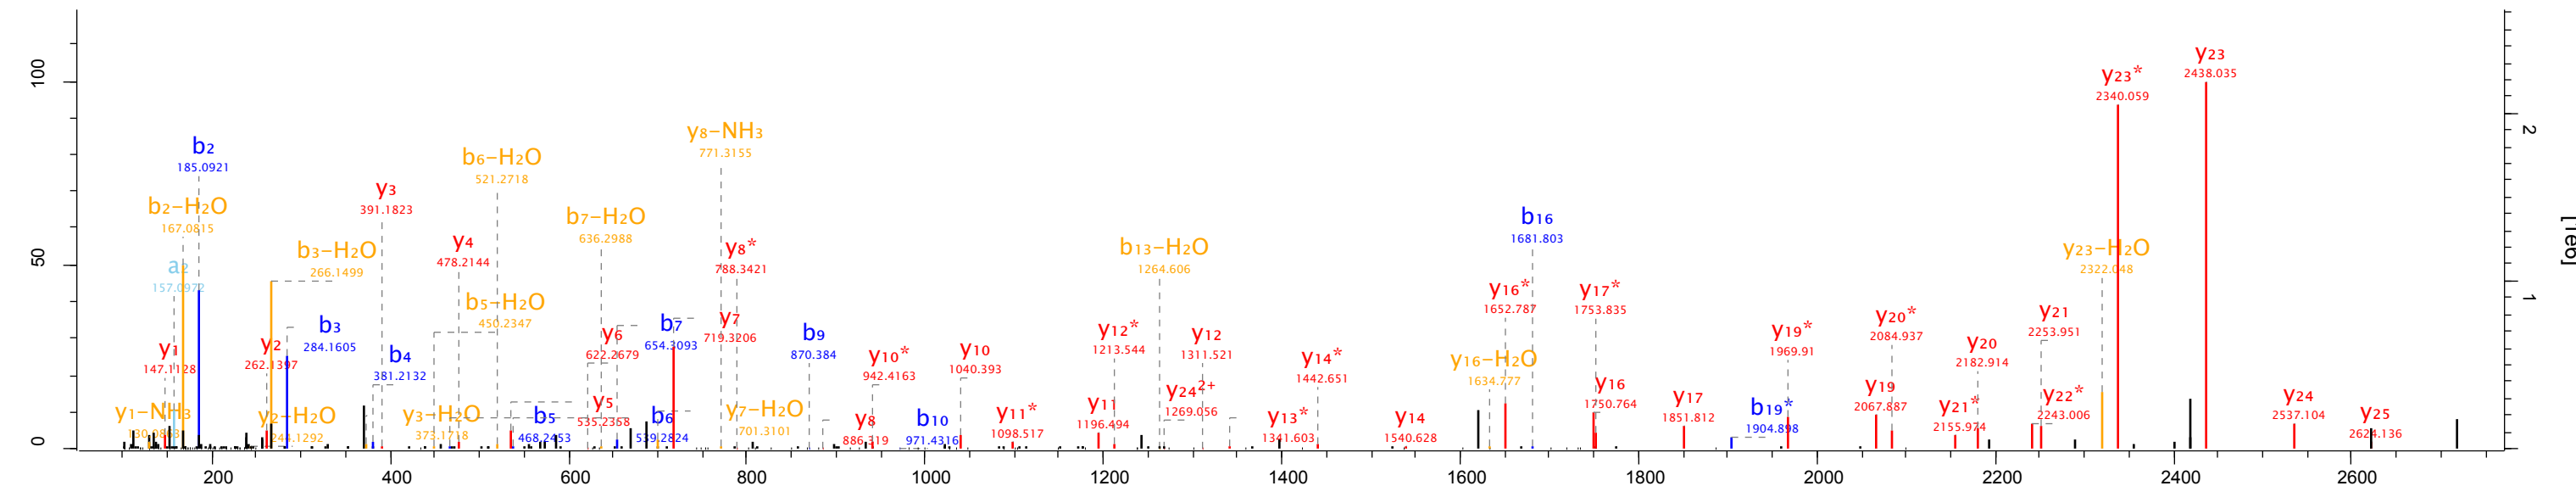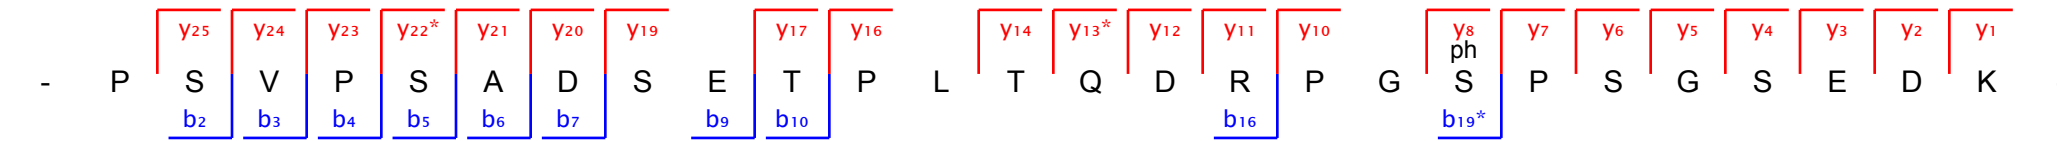



Raw file 20171215\_MaS\_33SR\_LMH\_phospho\_02 Scan 9433 Method FTMS; HCD Score 263.1 m/z 894.72 Gene names CCDC86

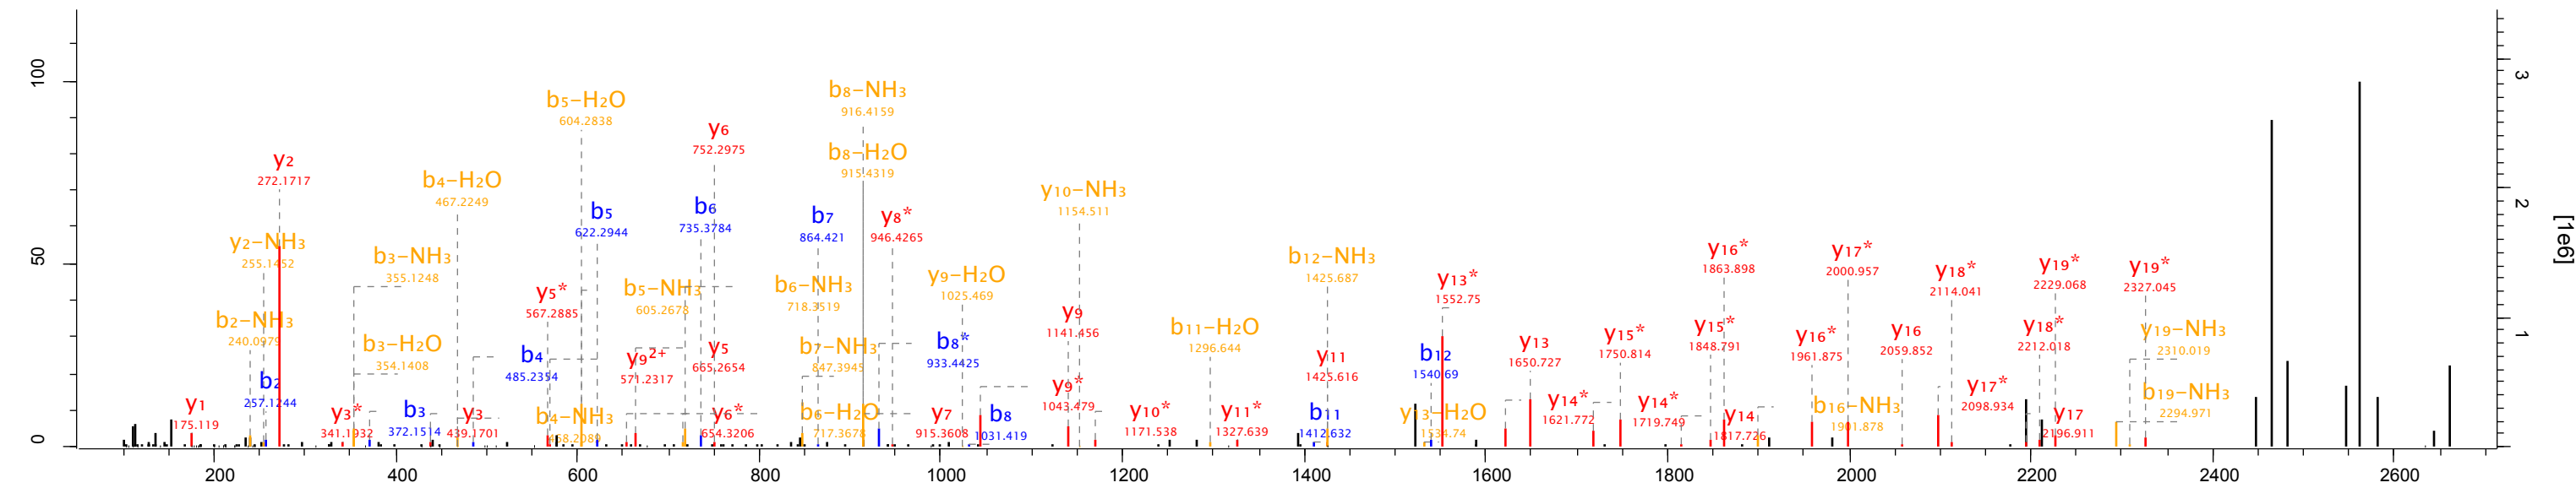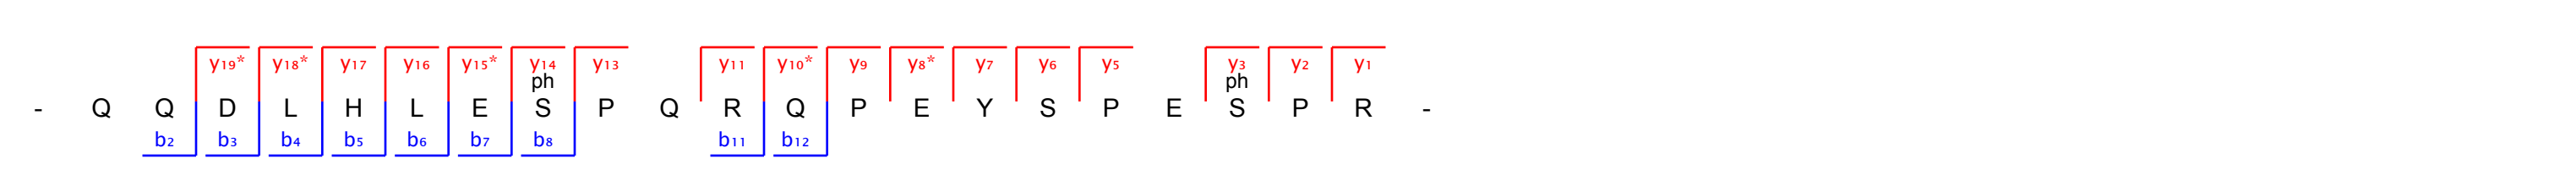

Raw file 20171215\_MaS\_33SR\_LMH\_phospho\_02 Scan 9673 Method FTMS; HCD Score 150.26 m/z 691 Gene names LSM14A

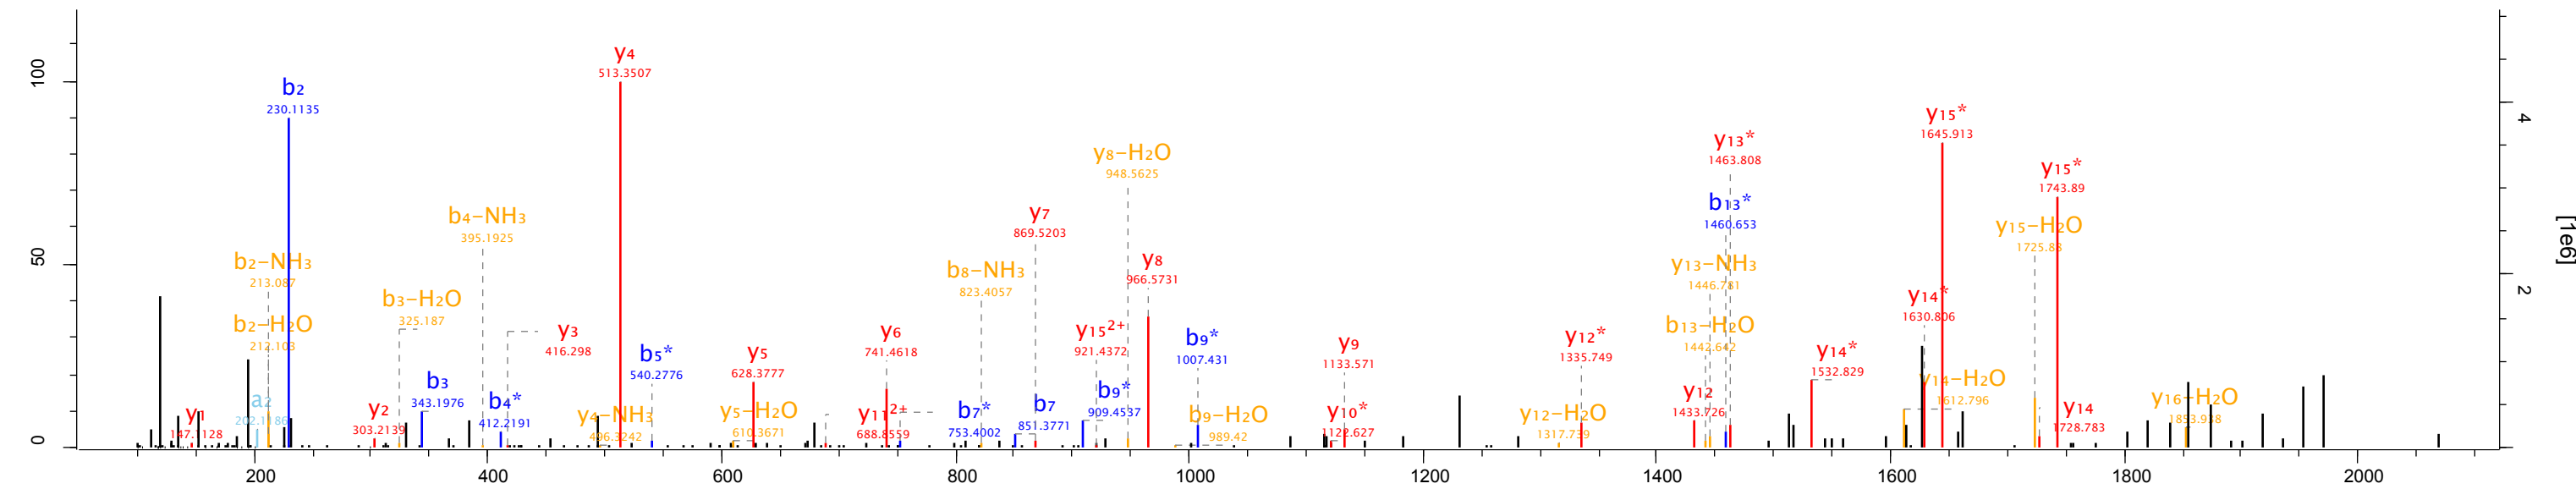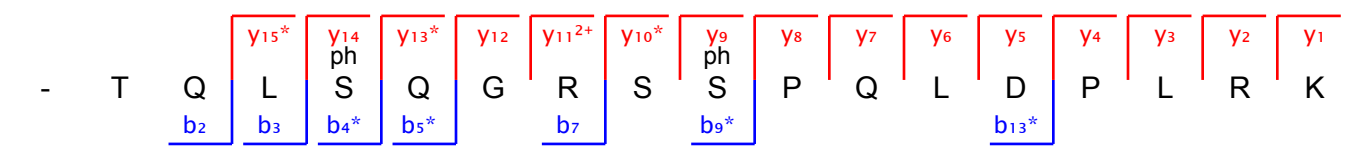

Raw file 20171215\_MaS\_33SR\_LMH\_phospho\_02 Scan 9833 Method FTMS; HCD Score 163.16 m/z 868.36 Gene names RAD9A

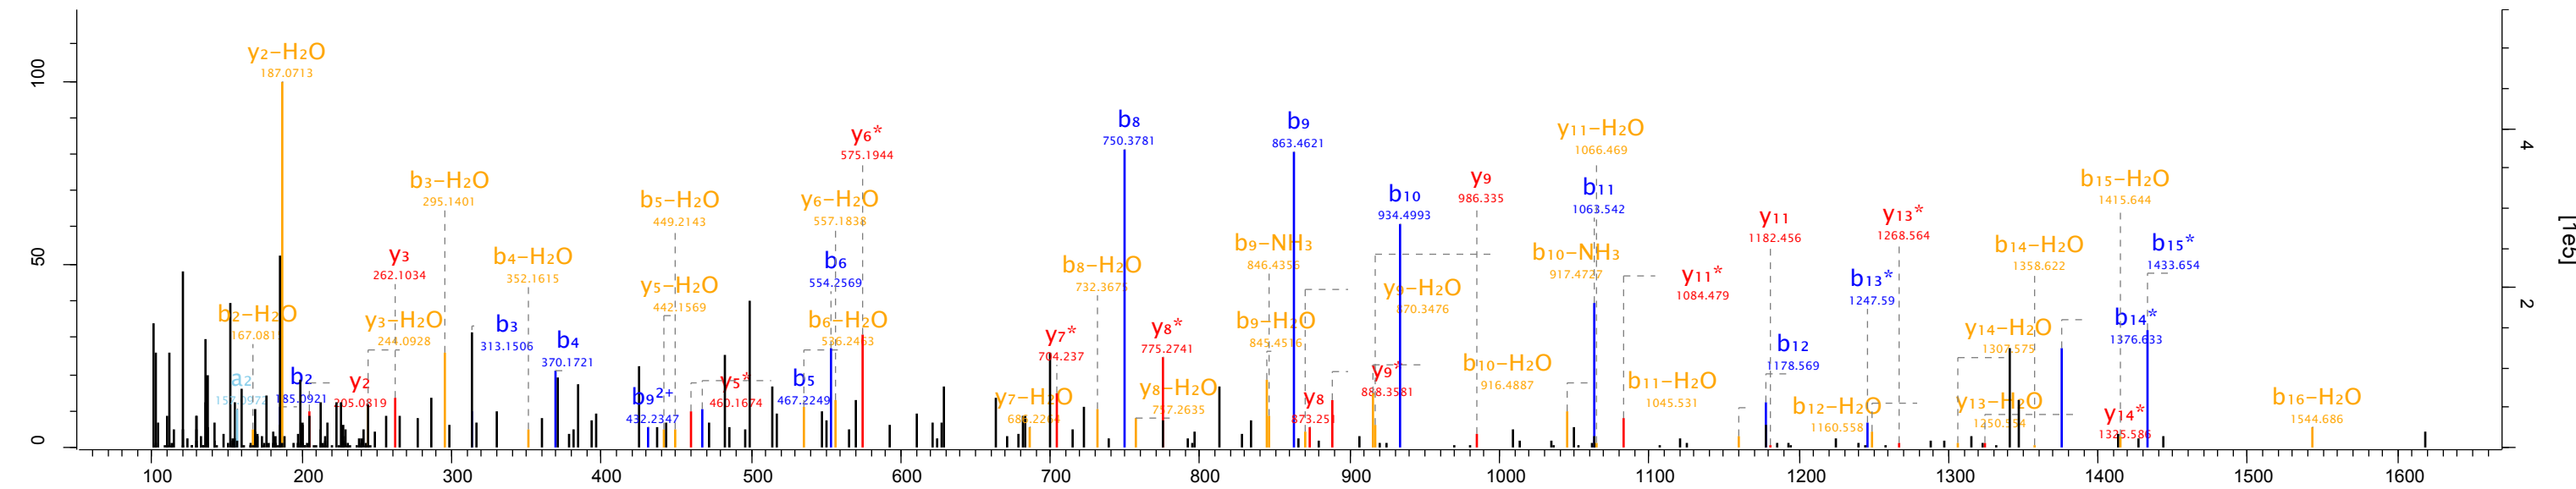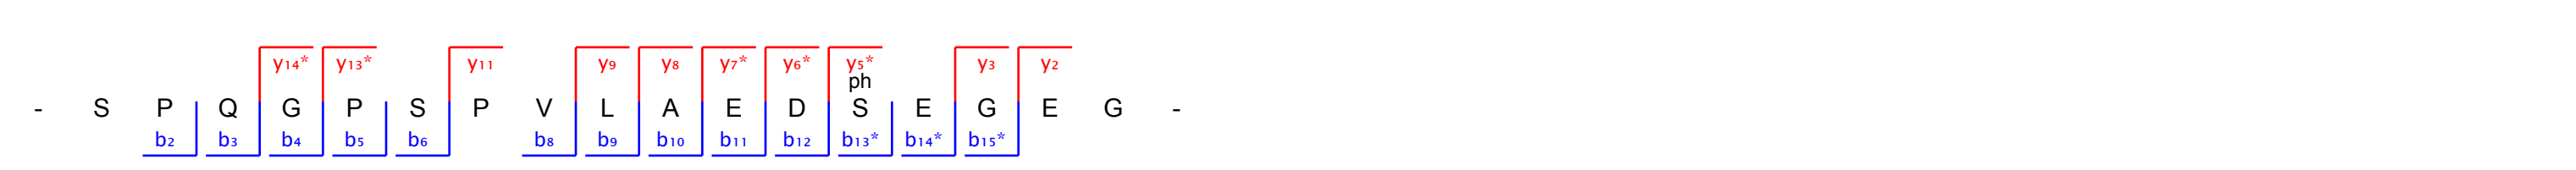

Raw file 20171215\_MaS\_33SR\_LMH\_phospho\_03 Scan 10043 Method FTMS; HCD Score 154.4 m/z 919.75 Gene names EIF4ENIF1

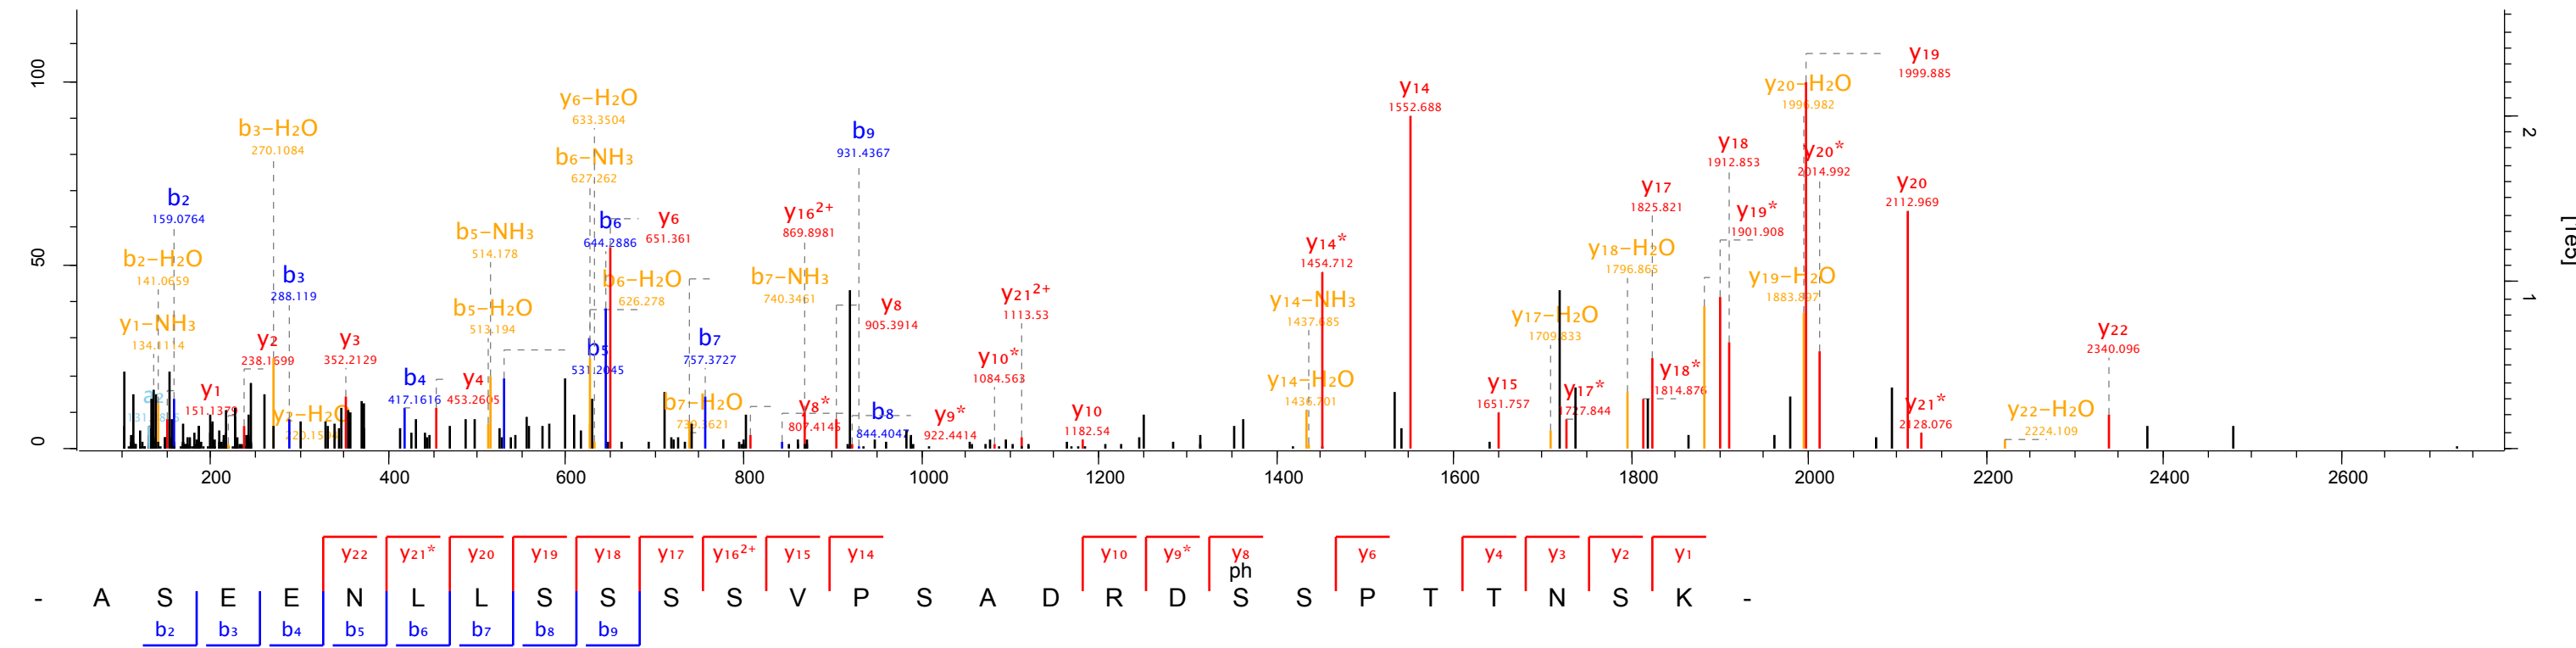

Raw file 20171215\_MaS\_33SR\_LMH\_phospho\_03 Scan 10323 Method FTMS; HCD Score 81.16 m/z 401.22 Gene names NPM1

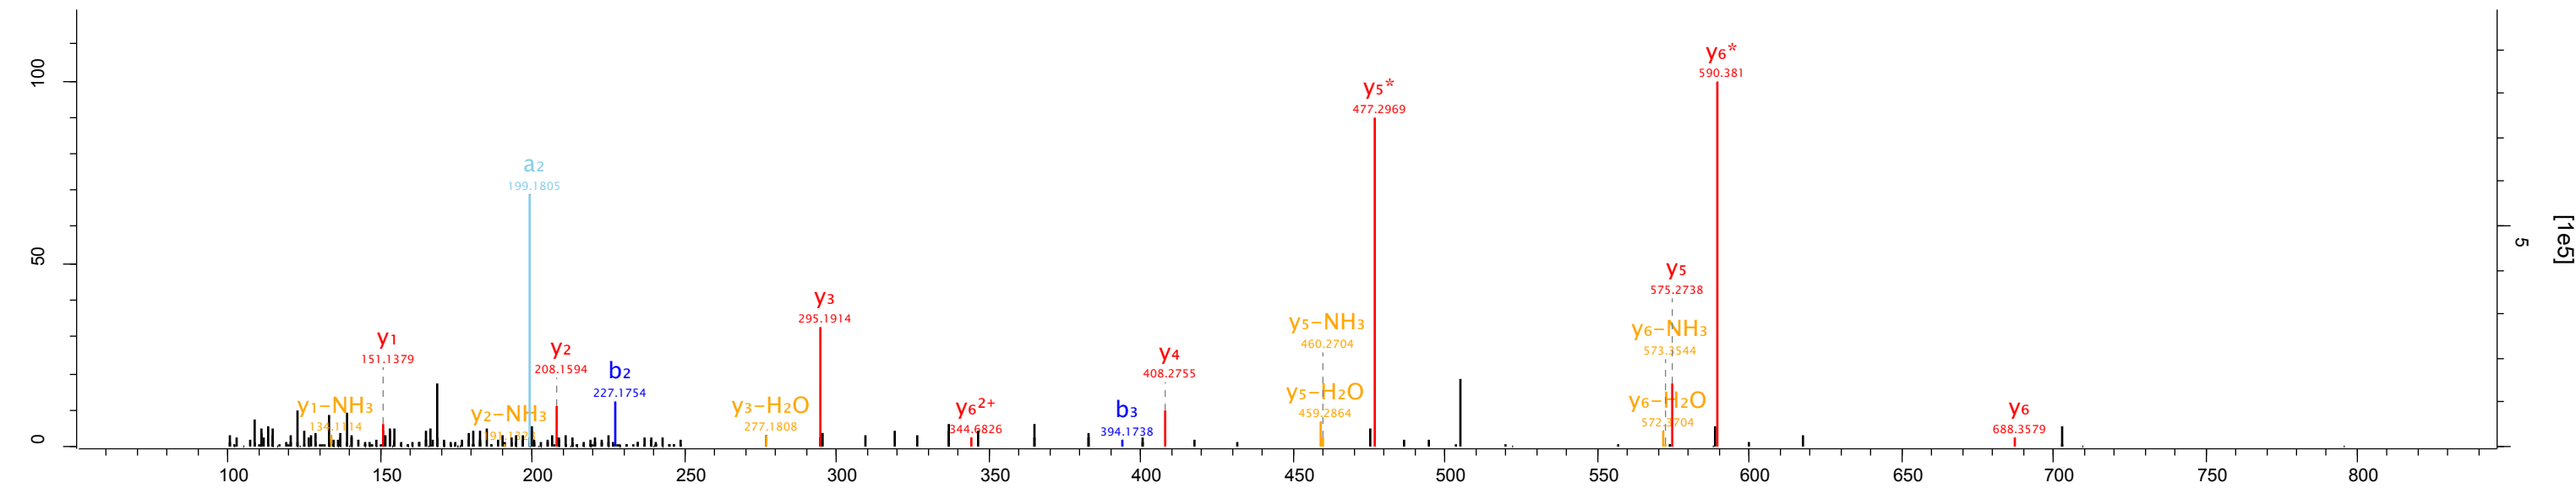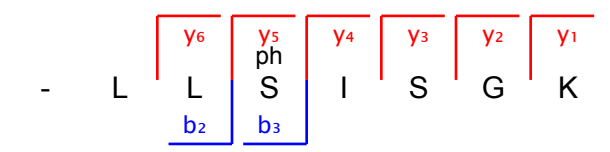

Raw file 20171215\_MaS\_33SR\_LMH\_phospho\_03 Scan 10523 Method FTMS; HCD Score 133.05 m/z 560.79 Gene names SRSF6;SRSF4;SRSF5

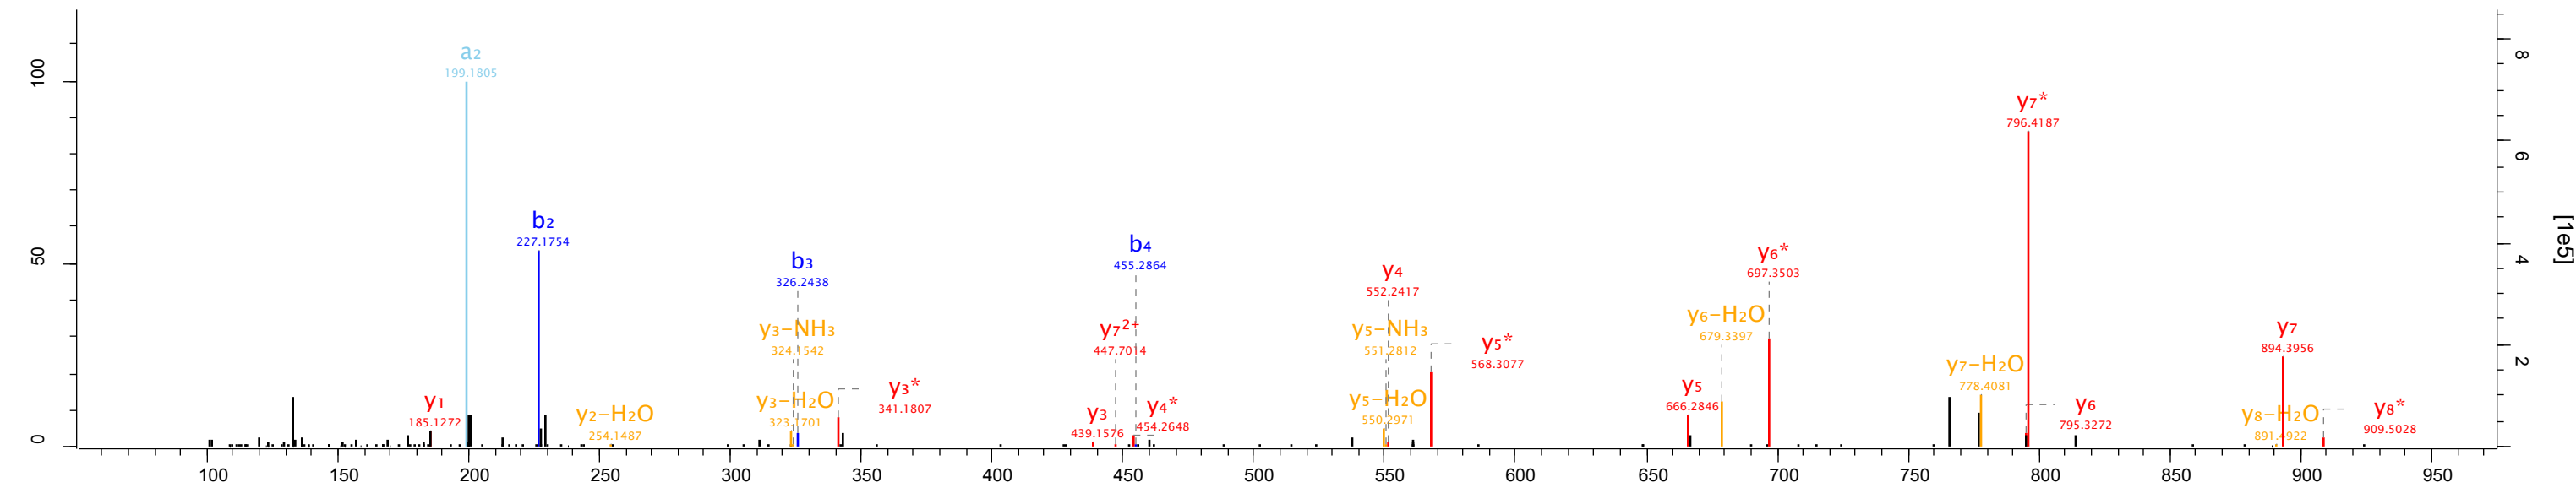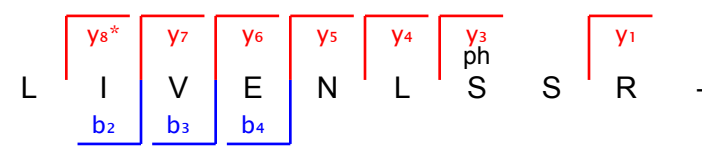

Raw file: 20171215\_MaS\_33SR\_LMH\_phospho\_03  
 Scan: 10773 Method: FTMS; HCD Score: 201.75 m/z: 752.83 Gene names: PPHLN1

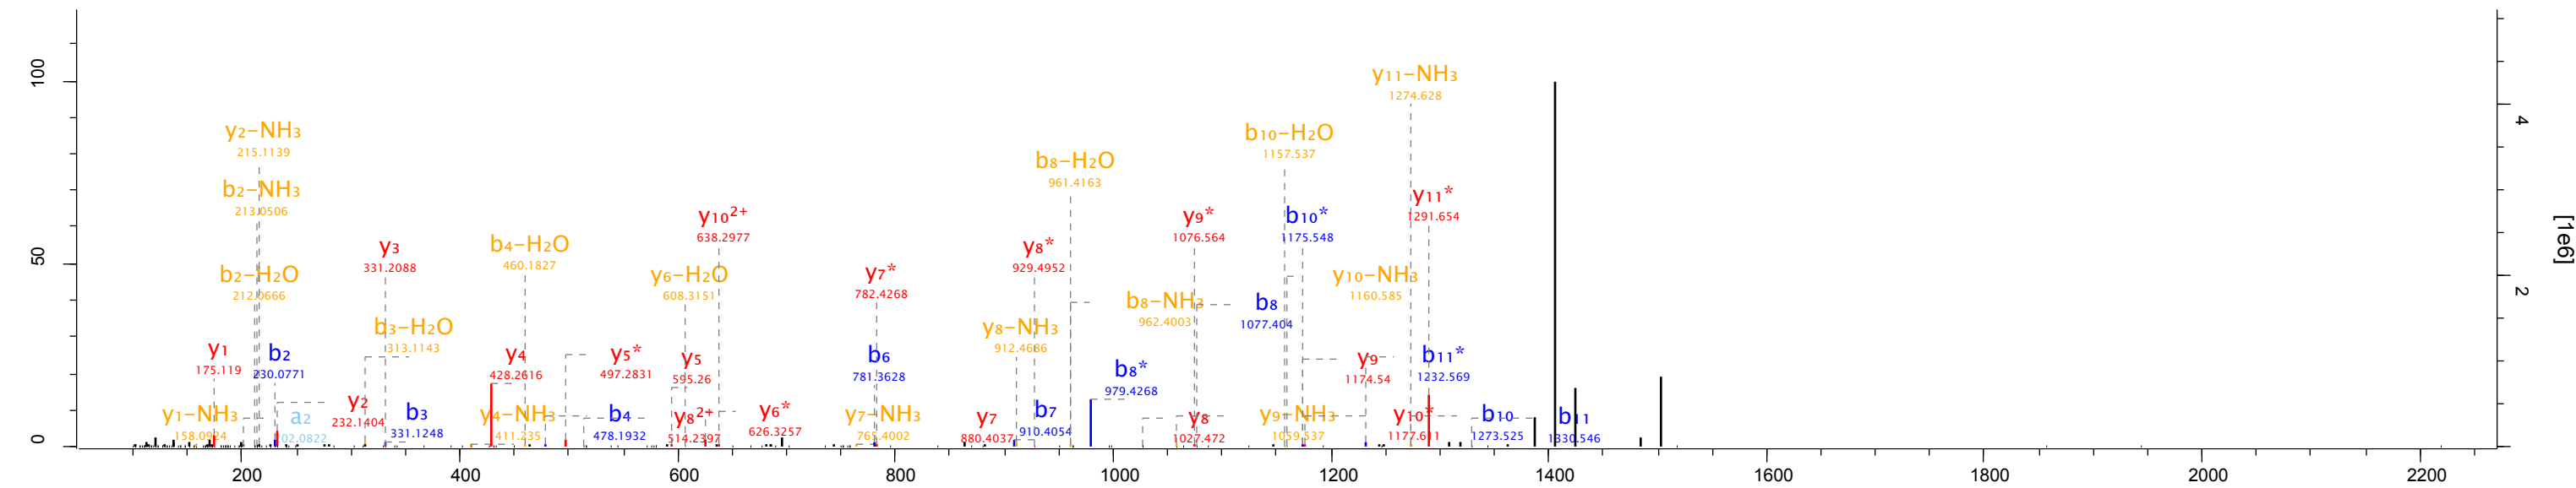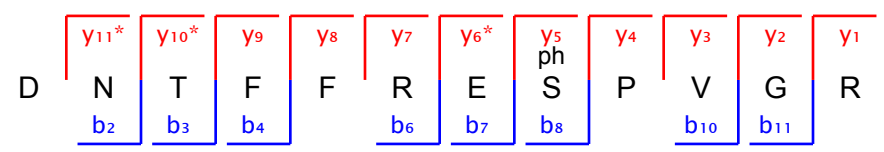

Raw file 20171215\_MaS\_33SR\_LMH\_phospho\_03 Scan 10793 Method FTMS; HCD Score 184.22 m/z 728.33 Gene names ARHGEF2

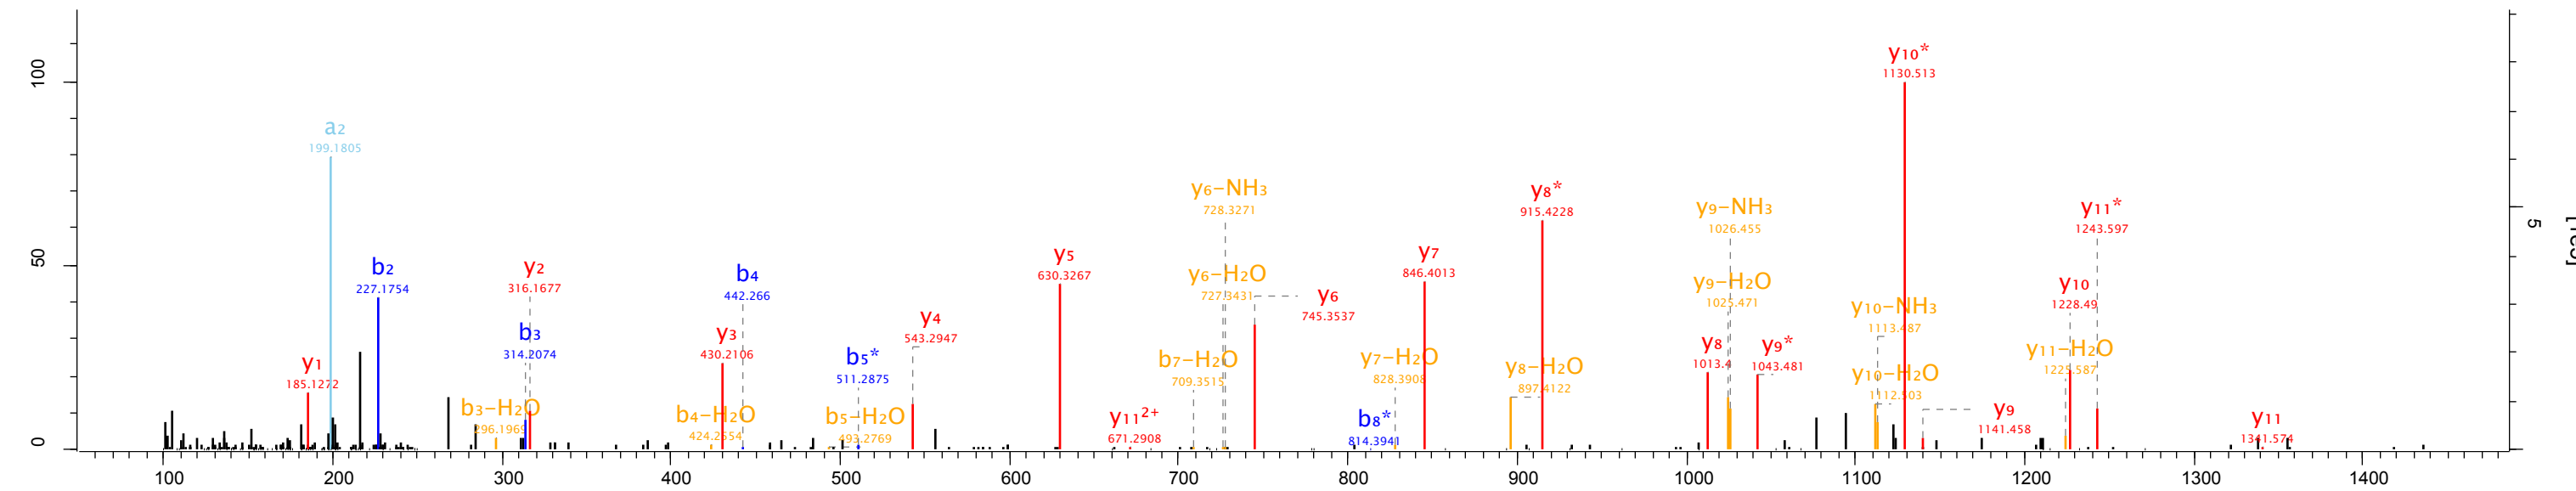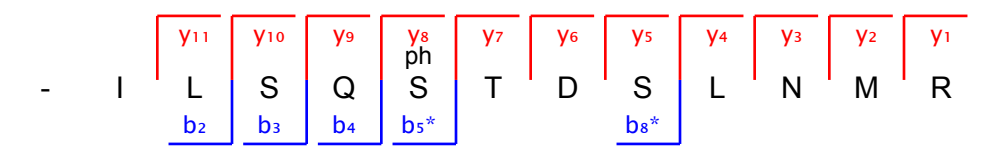



20171215\_MaS\_33SR\_LMH\_phospho\_03 11153 FTMS; HCD 248.76 926.99 HNRNPC

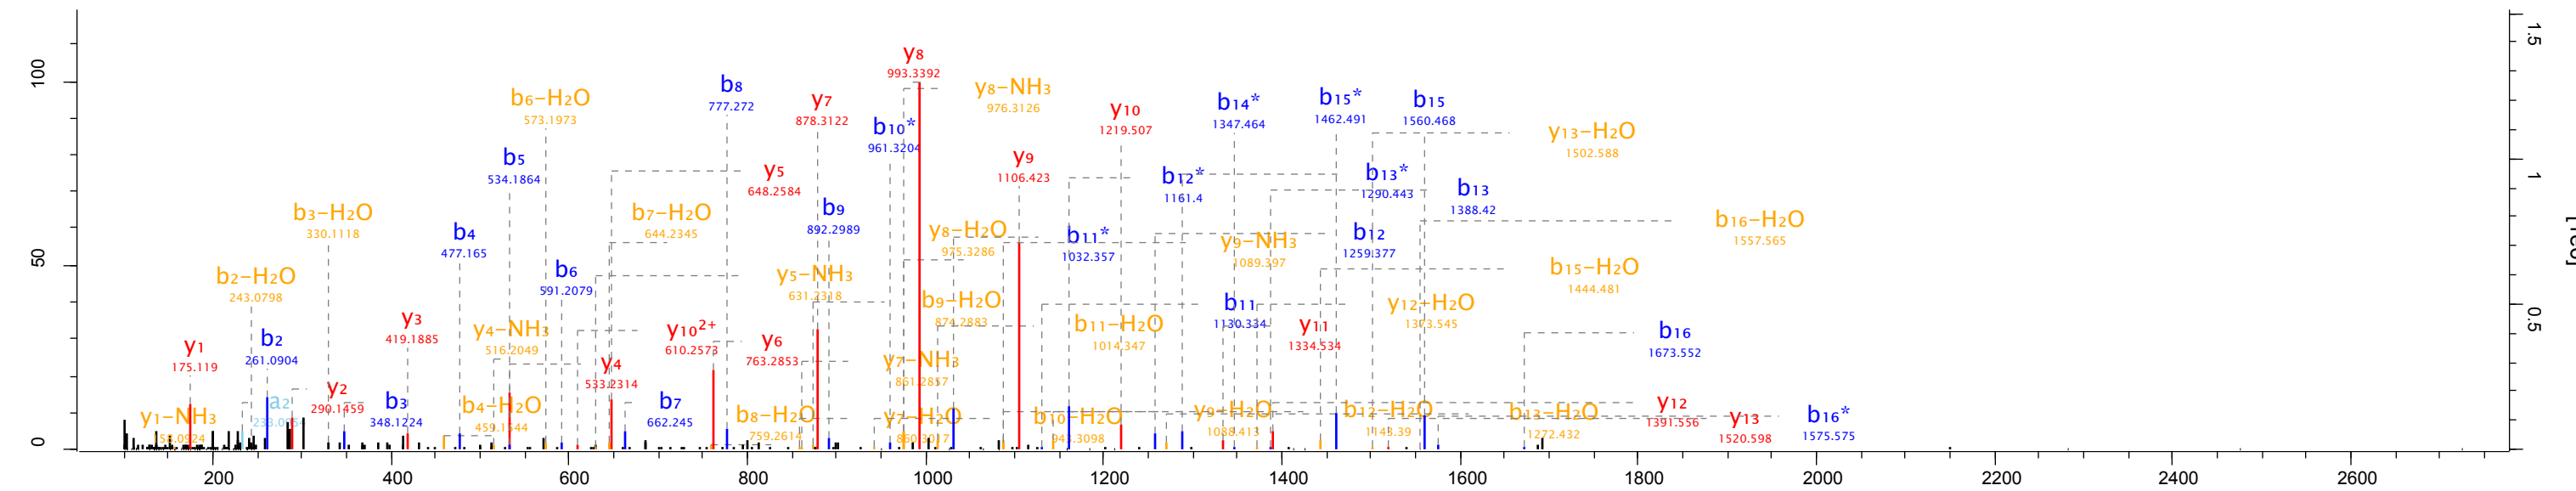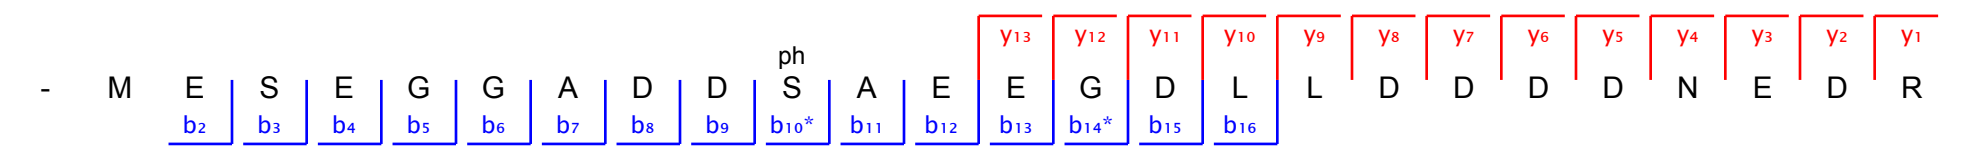

Raw file 20171215\_MaS\_33SR\_LMH\_phospho\_03 Scan 11363 Method FTMS; HCD Score 158.52 m/z 870.38 Gene names SMG9

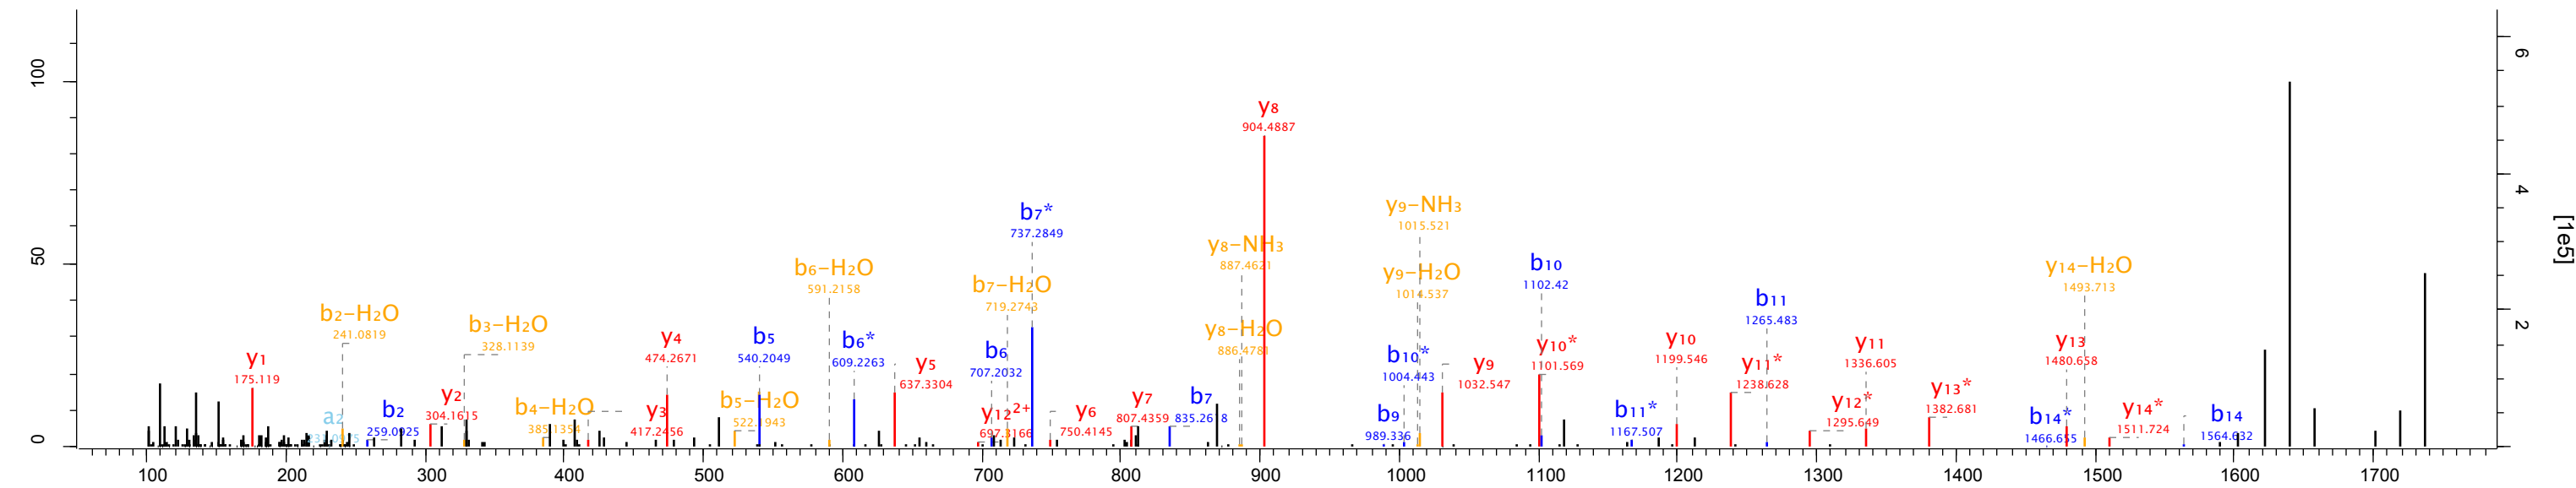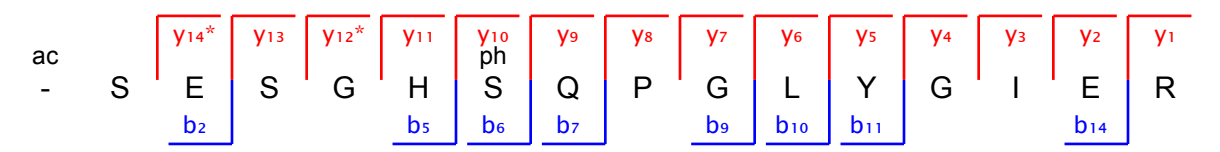

Raw file 20171215\_MaS\_33SR\_LMH\_phospho\_03 Scan 11793 Method FTMS; HCD Score 236.31 m/z 798.86 Gene names EIF3C;EIF3CL

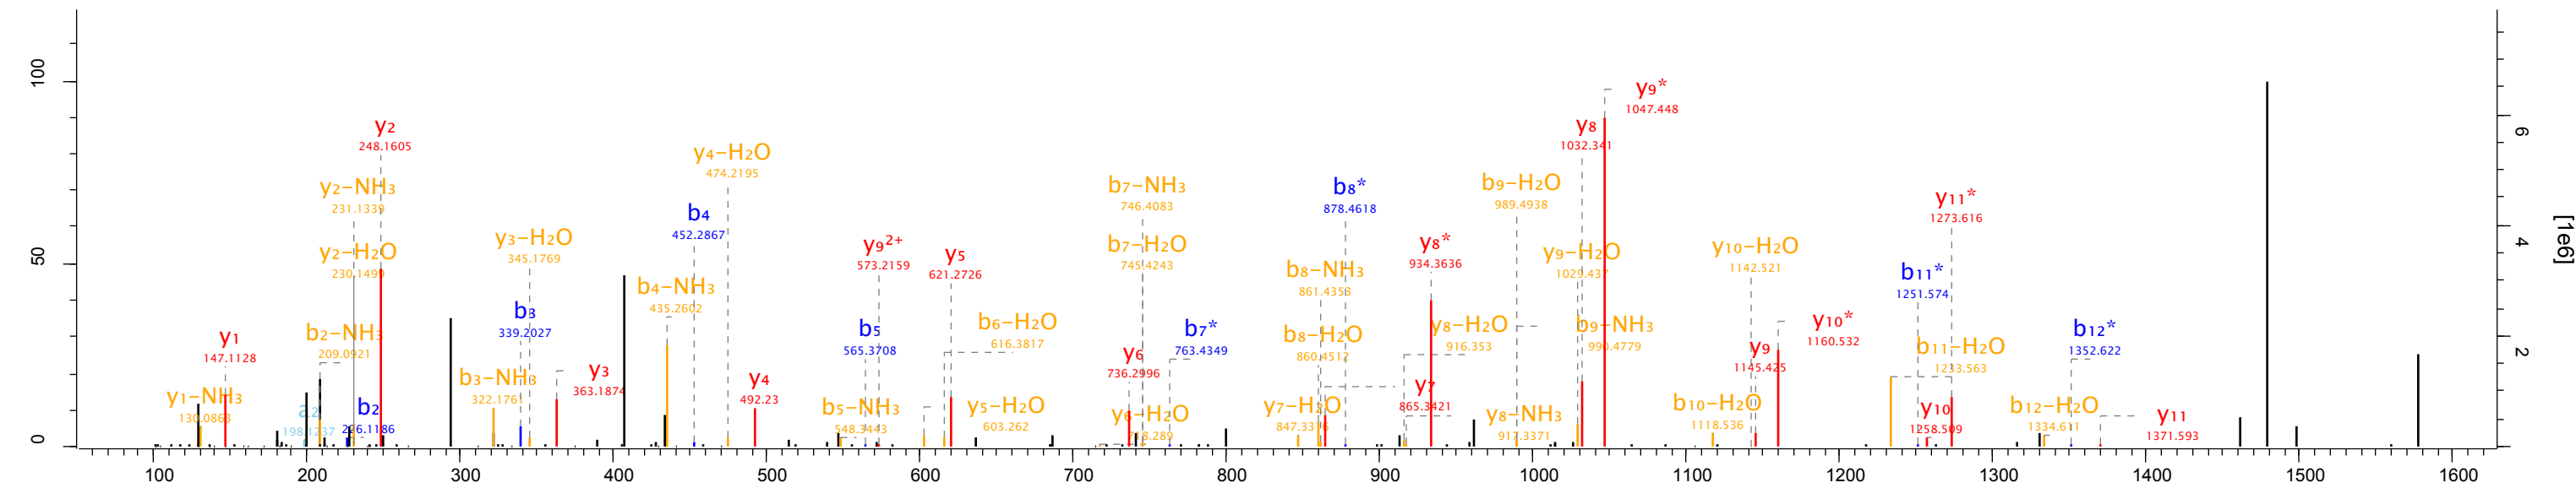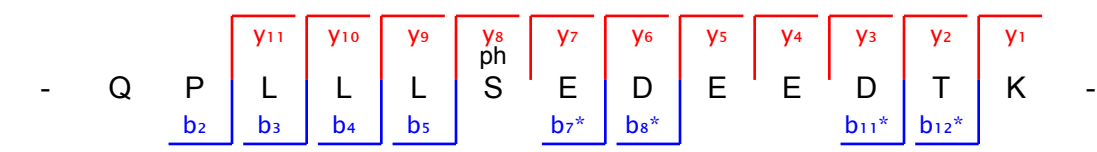

Raw file: 20171215\_MaS\_33SR\_LMH\_phospho\_03  
 Scan: 12283 Method: FTMS; HCD Score: 102.45 m/z: 933.38 Gene names: STAU1

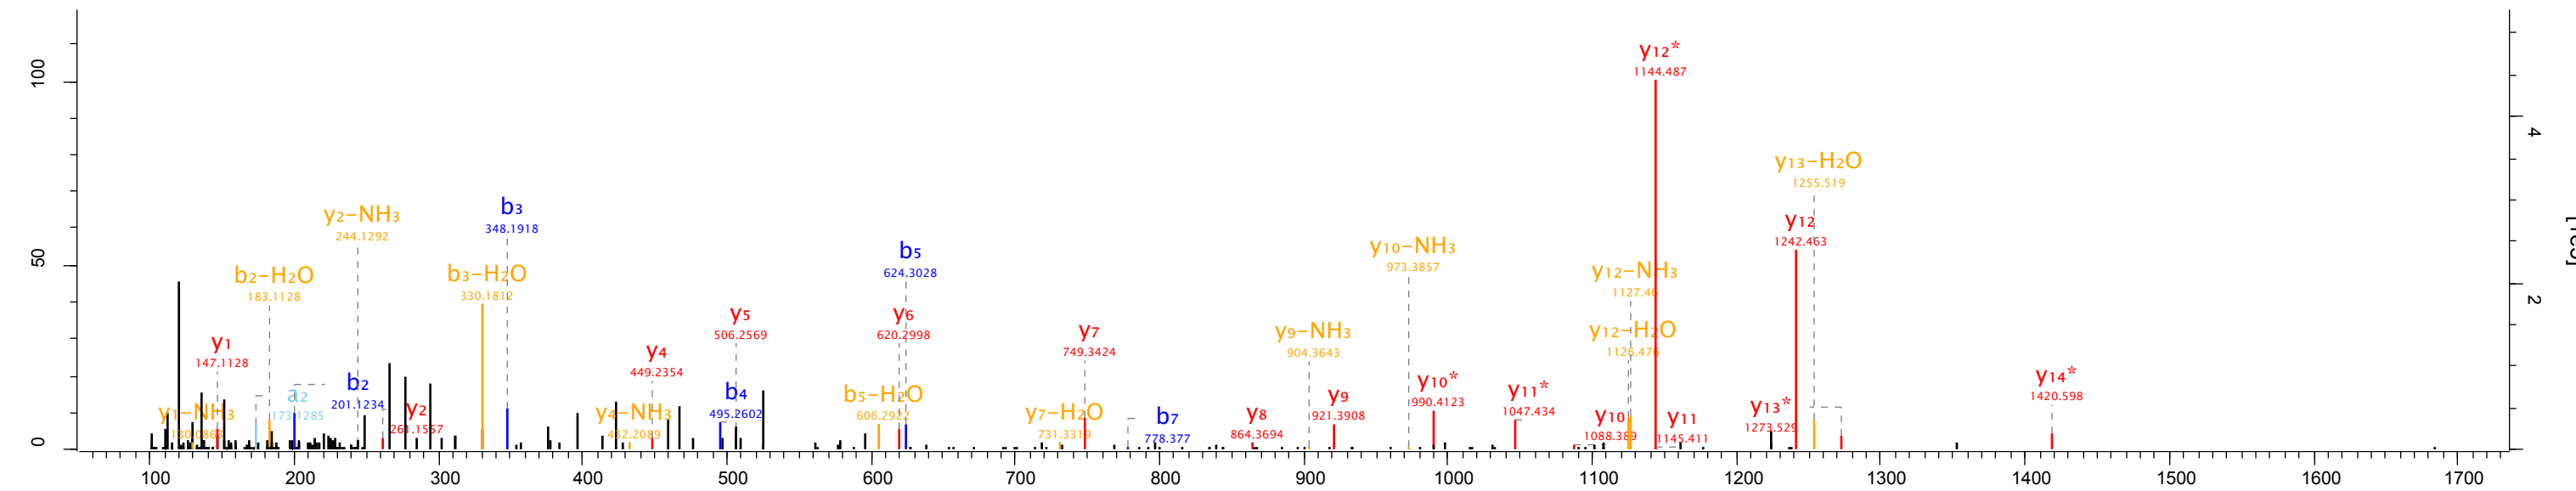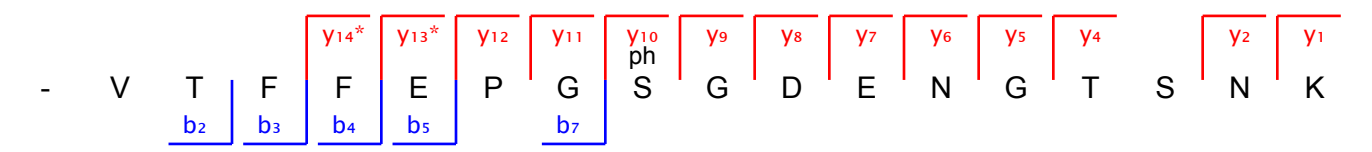

Raw file 20171215\_MaS\_33SR\_LMH\_phospho\_03 Scan 12453 Method FTMS; HCD Score 276.3 m/z 956.92 Gene names AHNAK

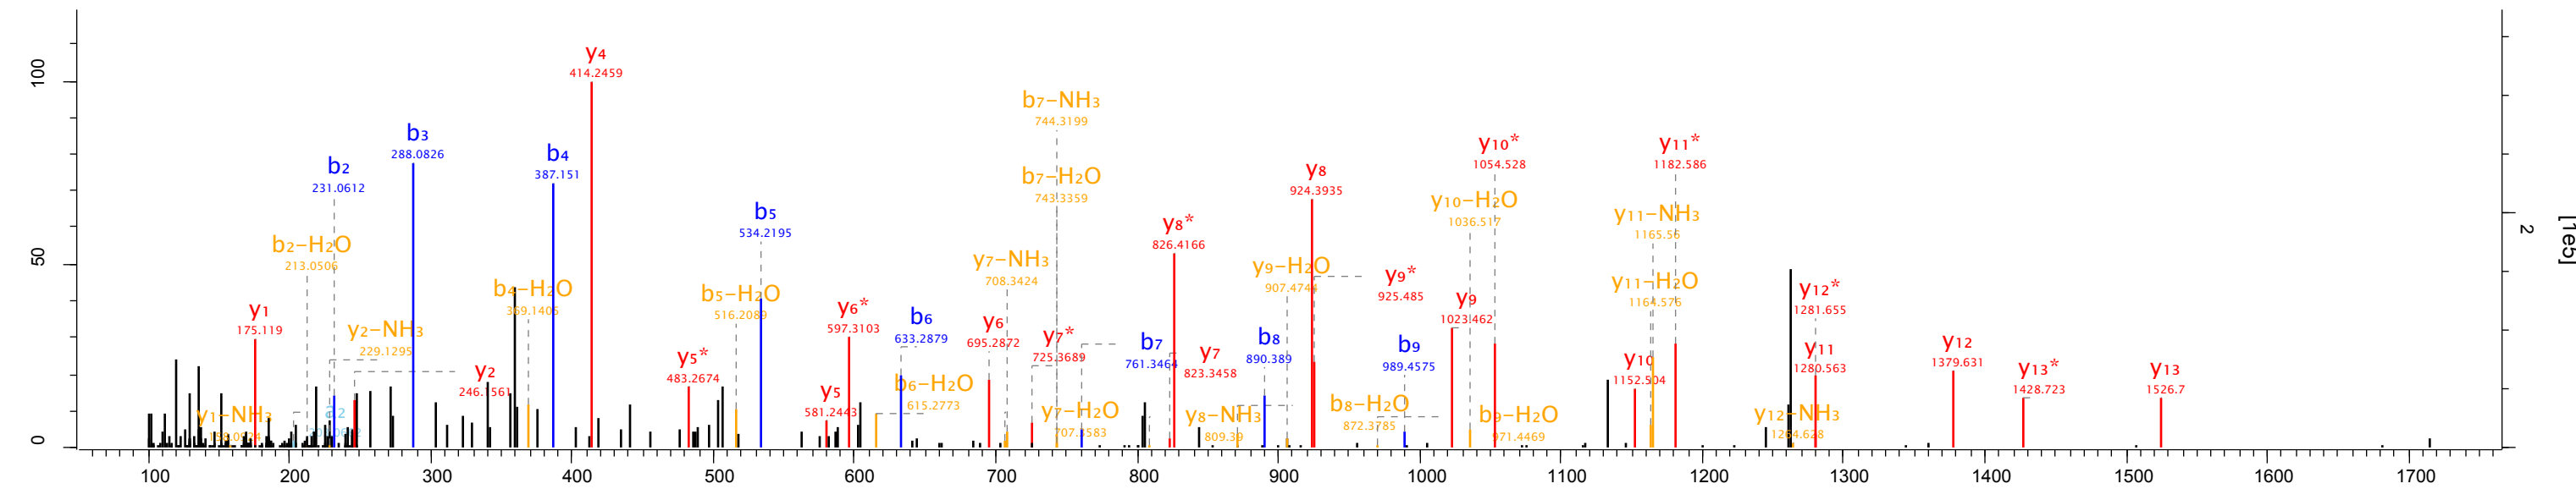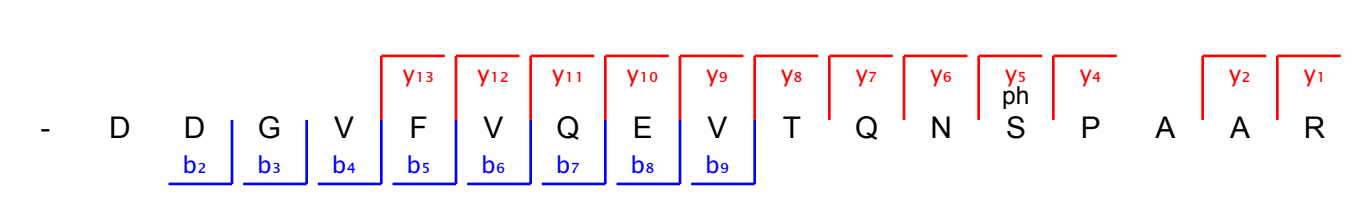

Raw file 20171215\_MaS\_33SR\_LMH\_phospho\_03 Scan 12463 Method FTMS; HCD Score 97.55 m/z 1037.39 Gene names SLU7

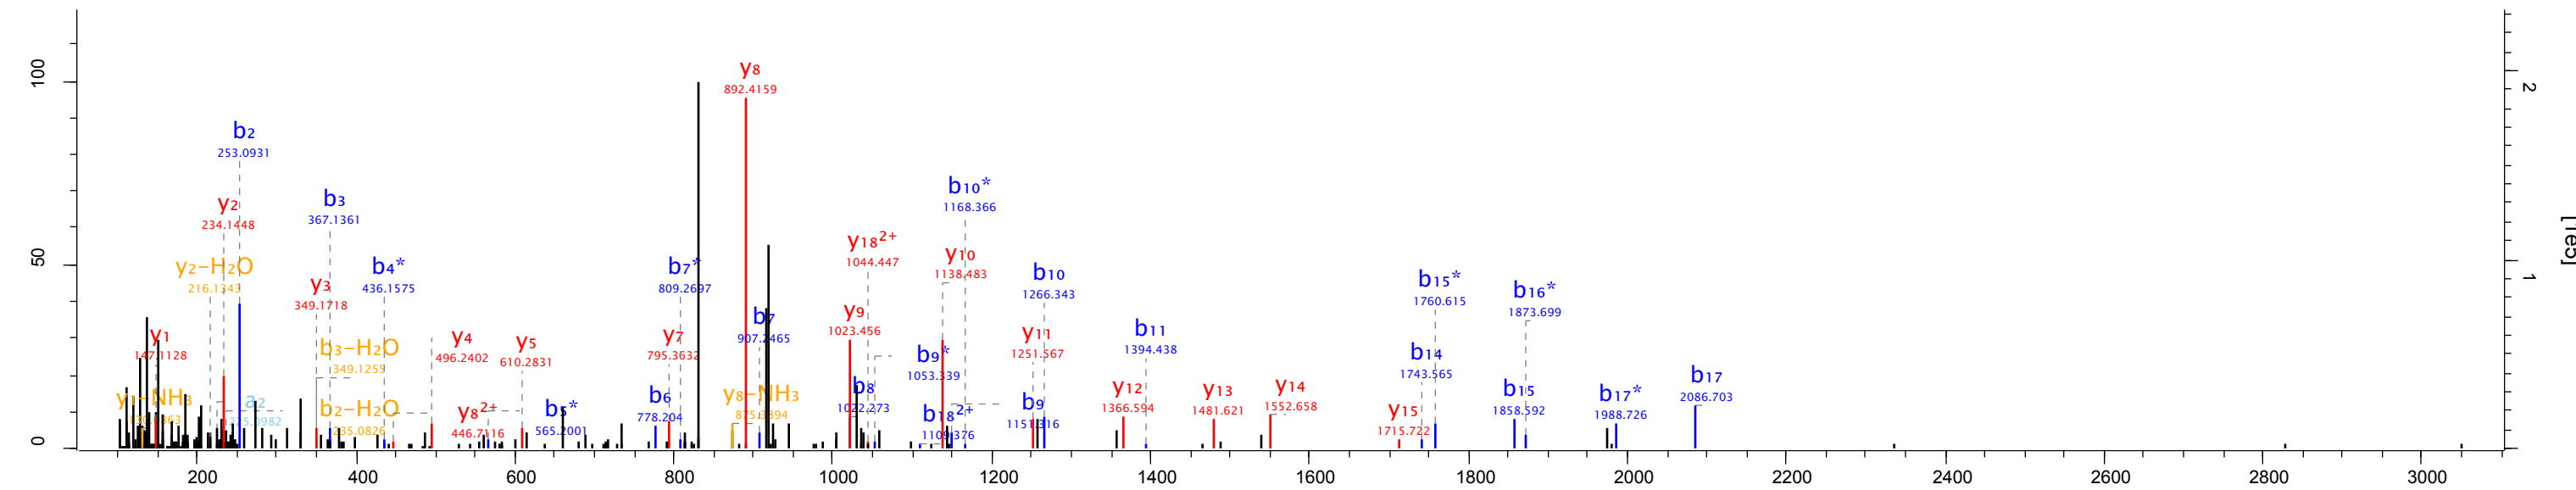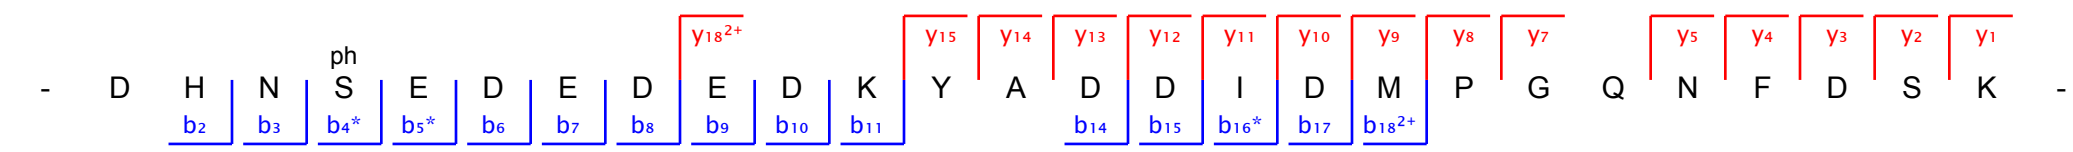

Raw file 20171215\_MaS\_33SR\_LMH\_phospho\_03 Scan 12593 Method FTMS; HCD Score 172.5 m/z 907.85 Gene names SP1

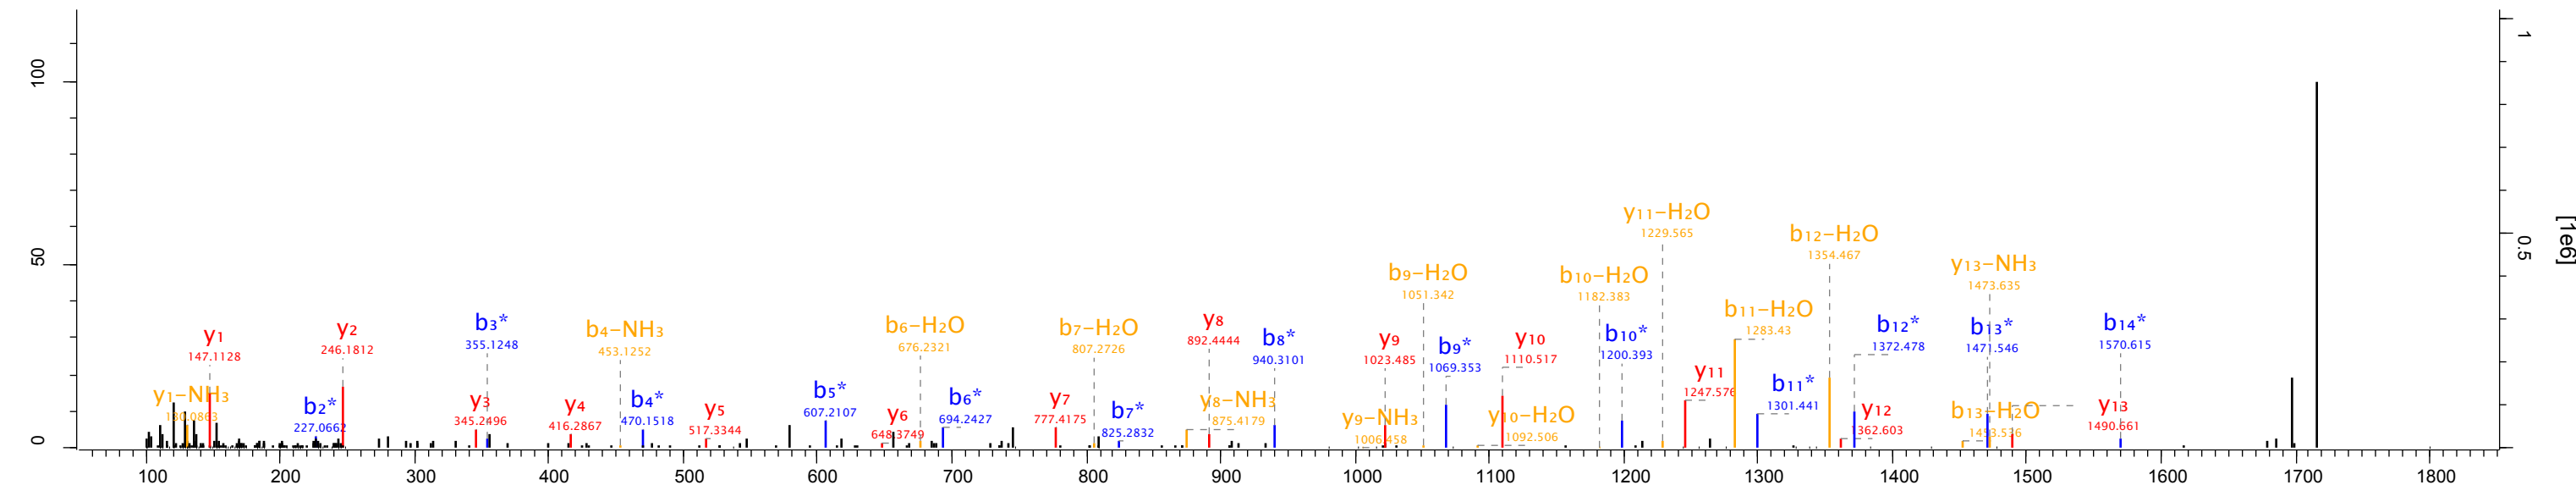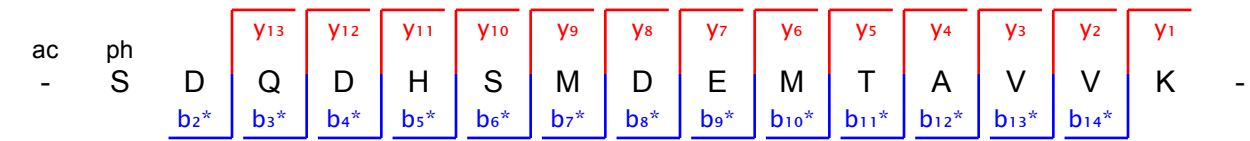

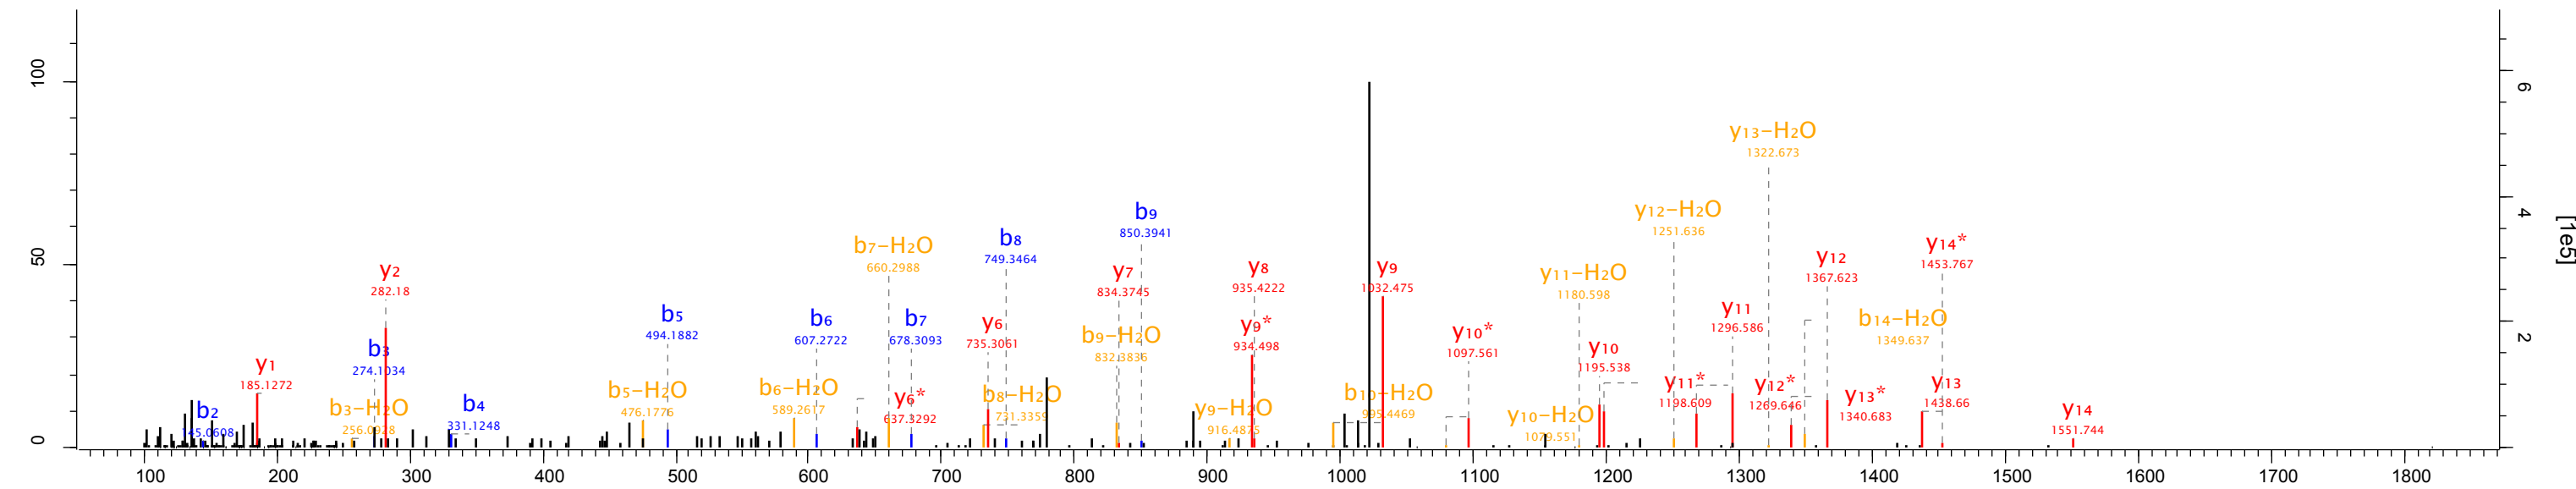

- G S E G Y L A A T Y P T V G Q T S P R -

b<sub>2</sub>
b<sub>3</sub>
b<sub>4</sub>
b<sub>5</sub>
b<sub>6</sub>
b<sub>7</sub>
b<sub>8</sub>
b<sub>9</sub>
y<sub>14</sub>
y<sub>13</sub>
y<sub>12</sub>
y<sub>11</sub>
y<sub>10</sub>
y<sub>9</sub>
y<sub>8</sub>
y<sub>7</sub>
y<sub>6</sub>
y<sub>2</sub>
y<sub>1</sub>



Raw file 20171215\_MaS\_33SR\_LMH\_phospho\_03 Scan 13153 Method FTMS; HCD Score 73.5 m/z 659.63 Gene names OSBPL3

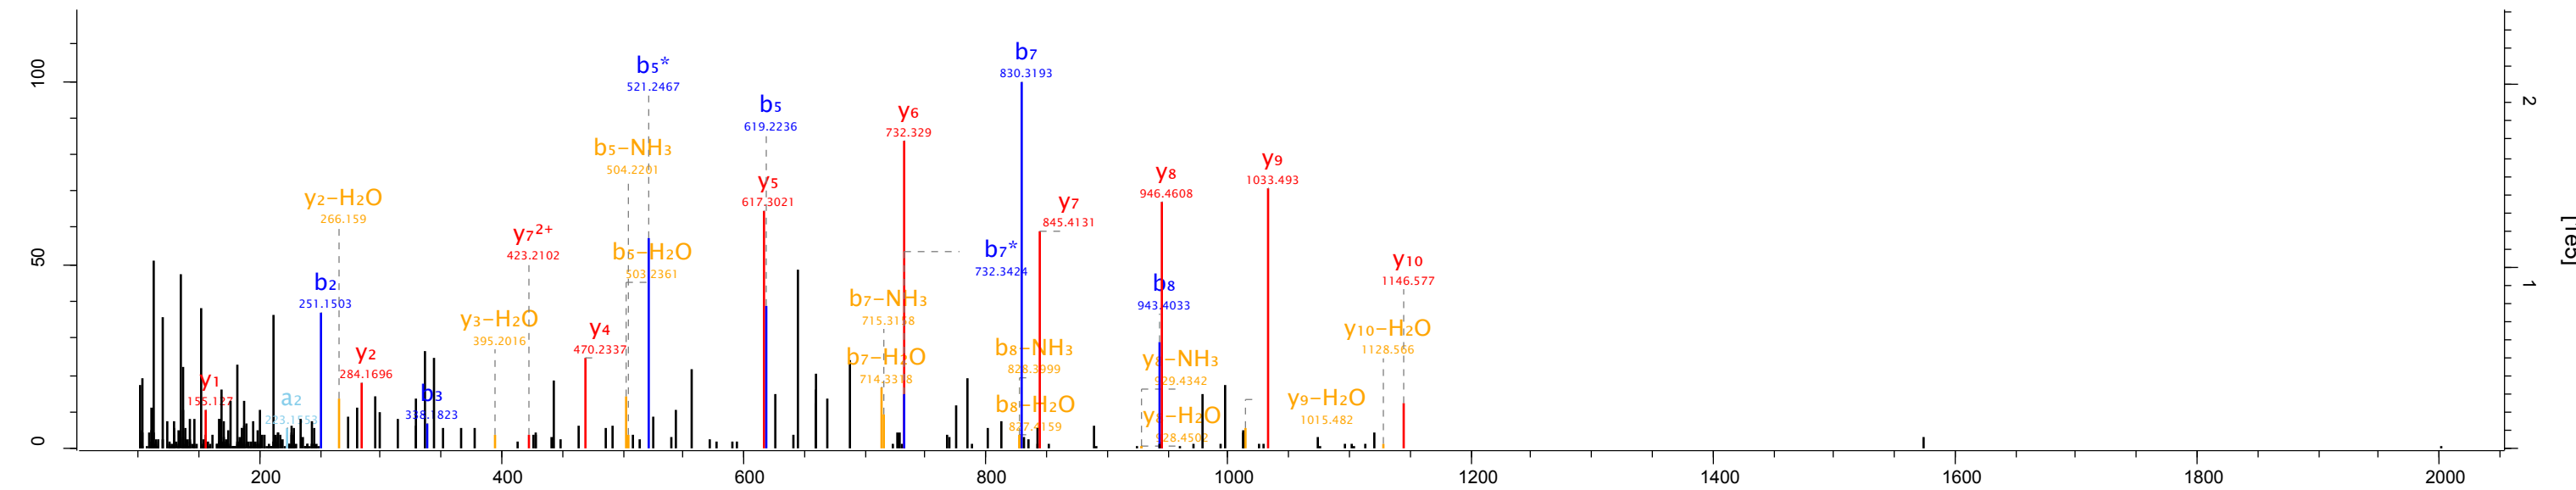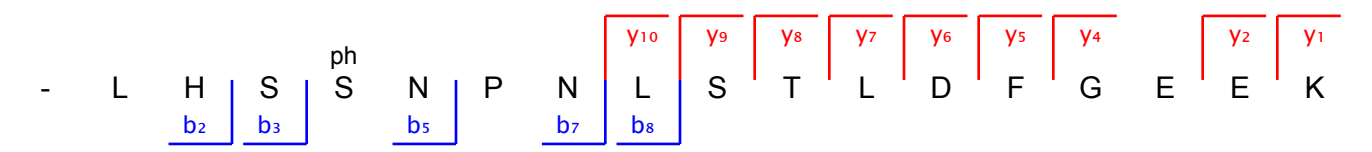

Raw file 20171215\_MaS\_33SR\_LMH\_phospho\_03 Scan 13803 Method FTMS; HCD Score 223.53 m/z 1427.62 Gene names LRRC47

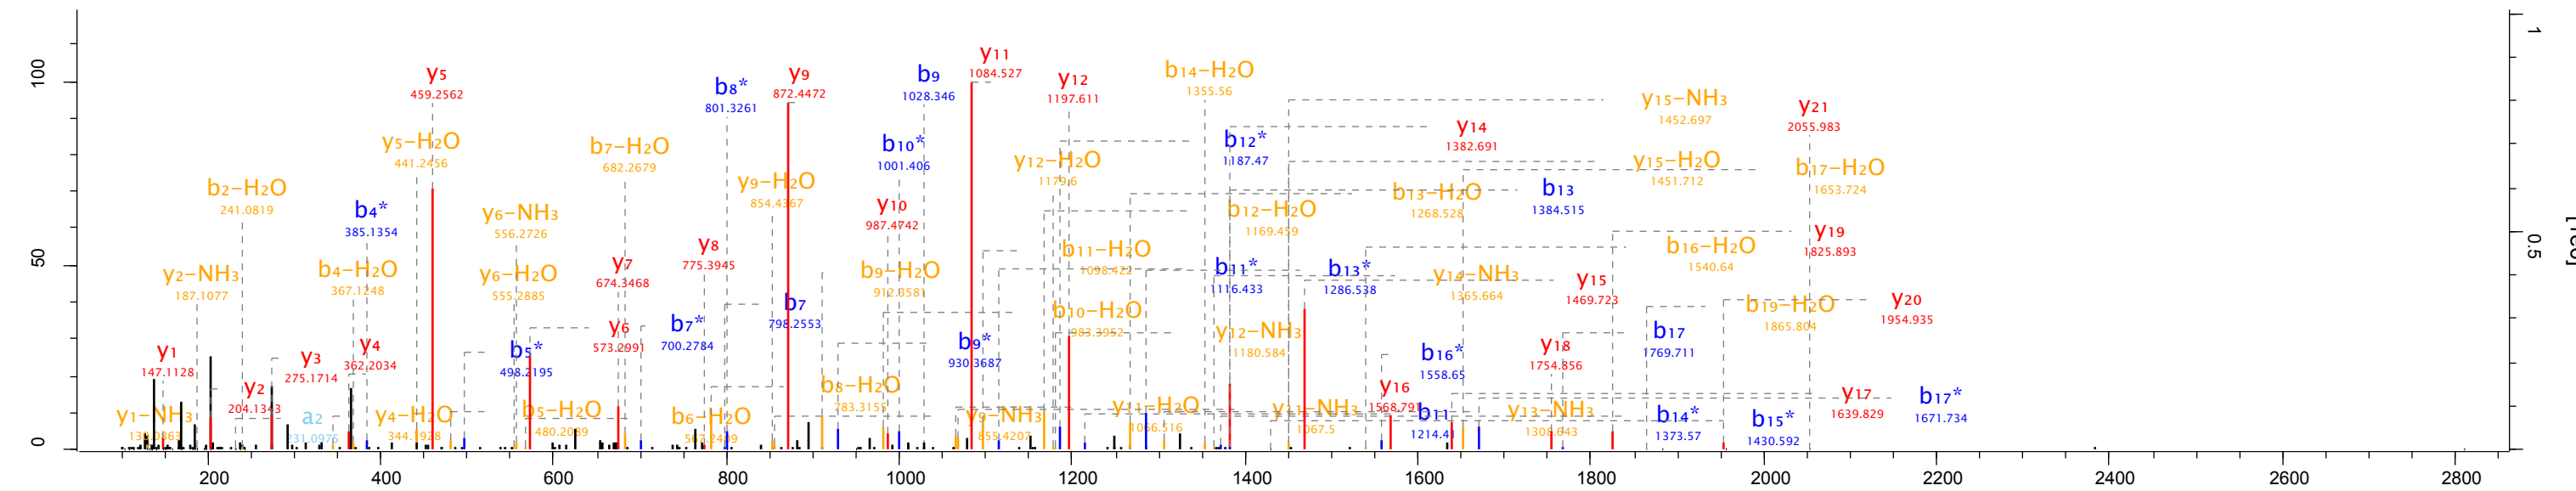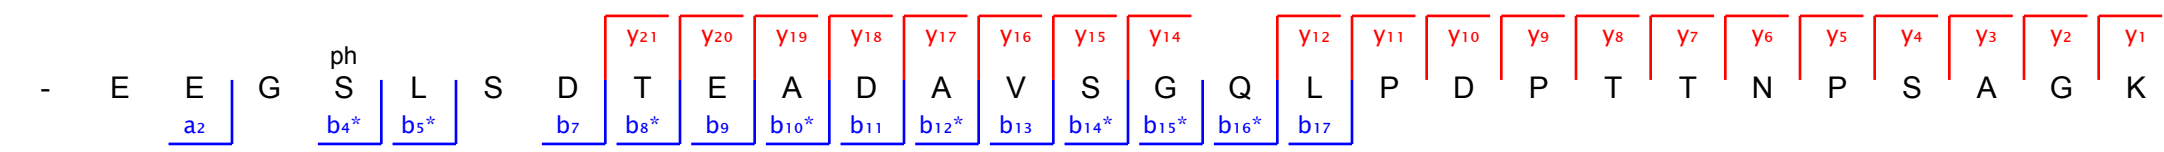

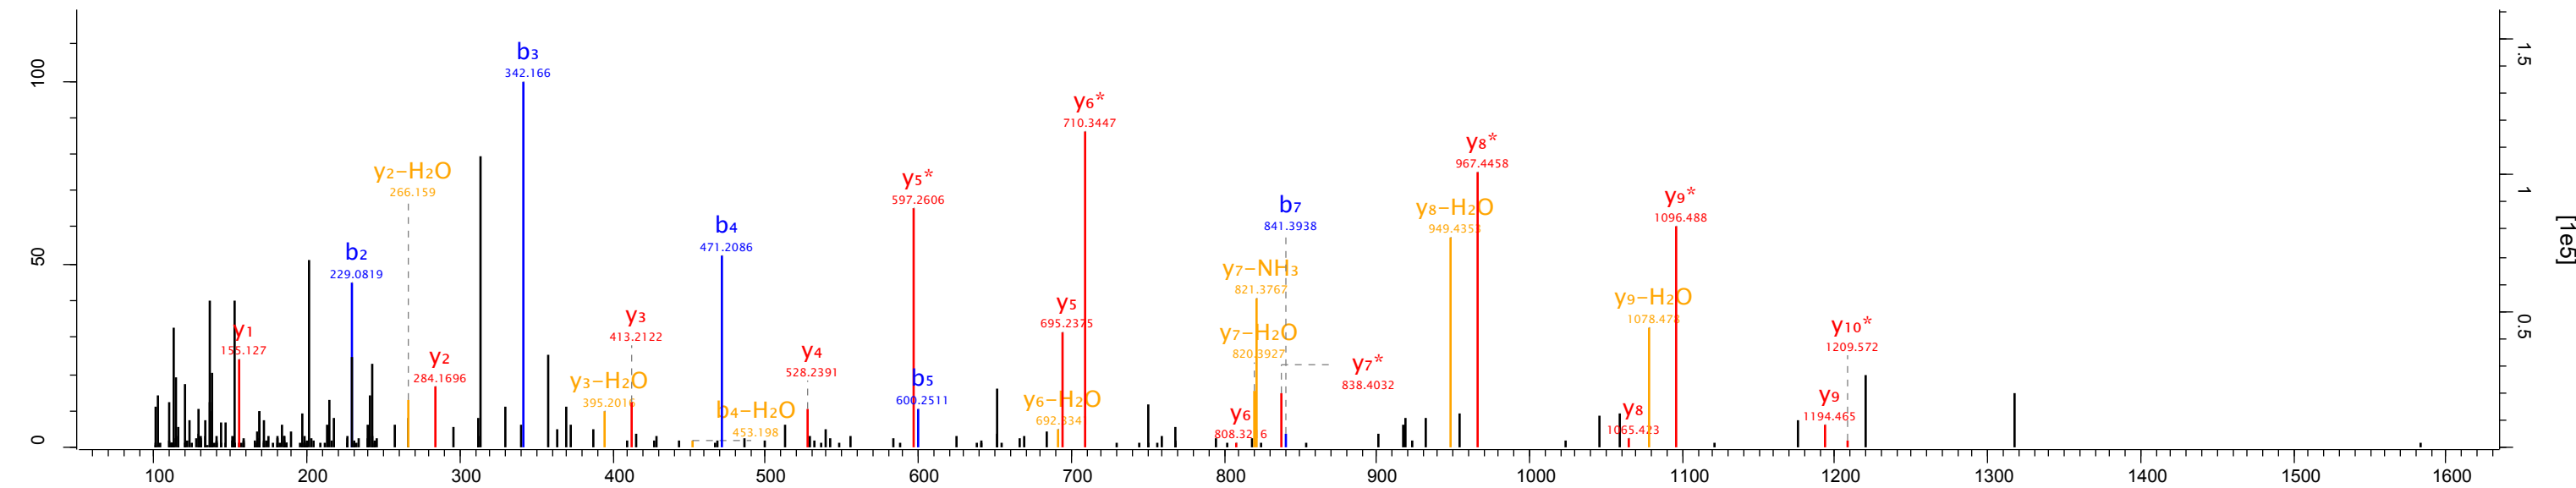

ac

-

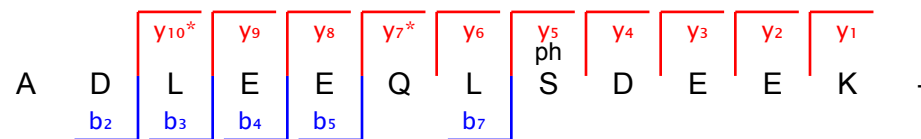

Raw file 20171215\_MaS\_33SR\_LMH\_phospho\_03 Scan 14283 Method FTMS; HCD Score 190.44 m/z 713.83 Gene names MACF1

20171215\_MaS\_33SR\_LMH\_phospho\_03

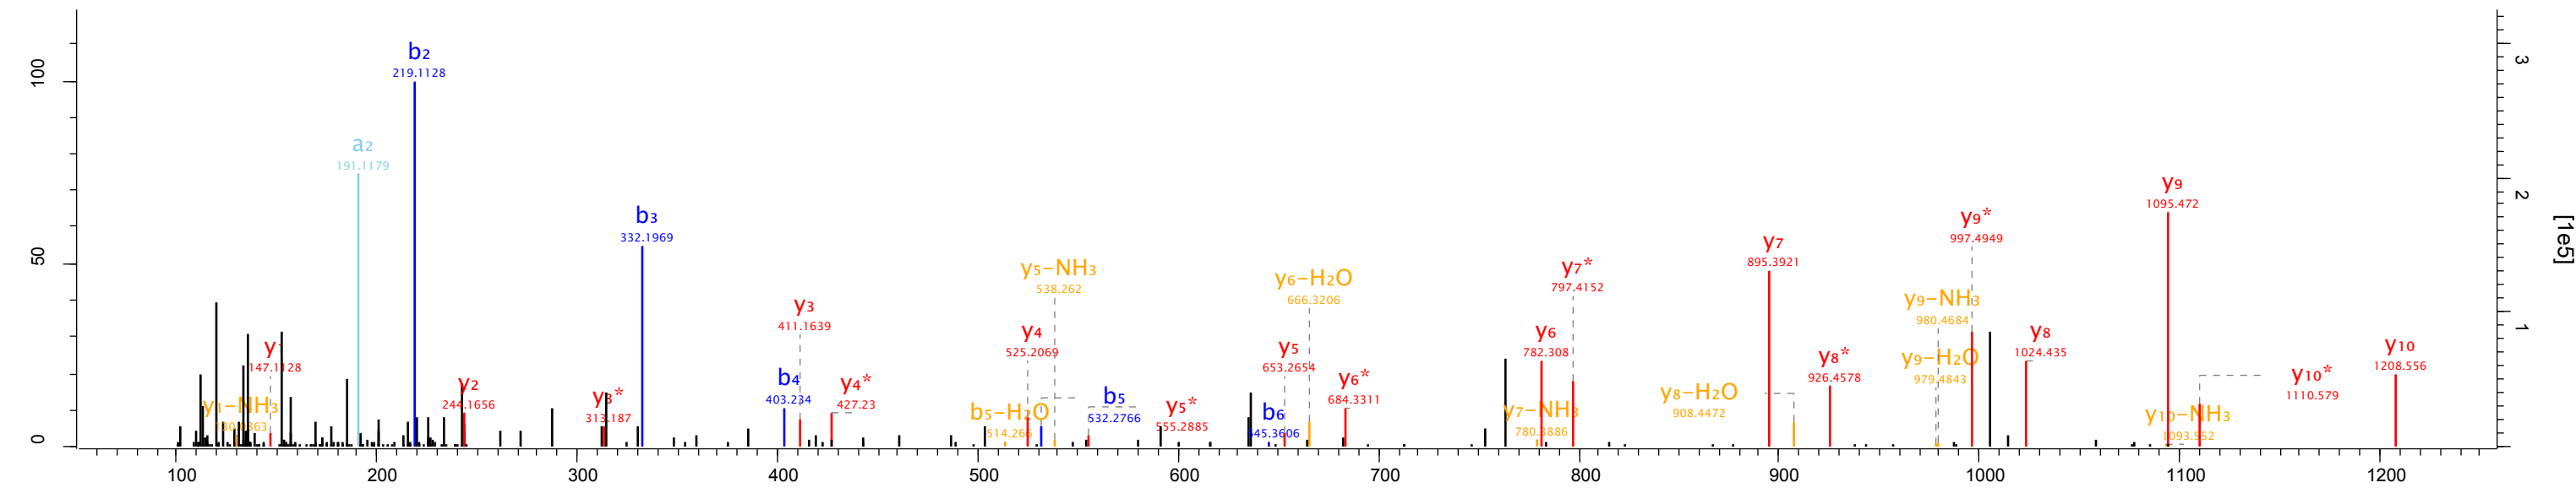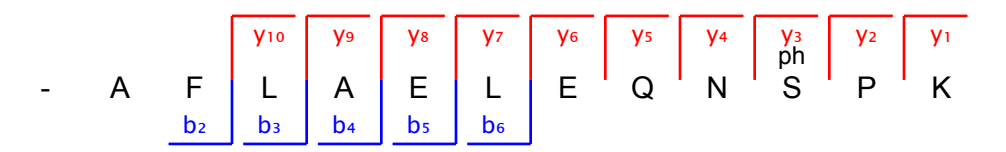

Raw file 20171215\_MaS\_33SR\_LMH\_phospho\_03 Scan 14633 Method FTMS; HCD Score 150.81 m/z 583.71 Gene names U2AF2

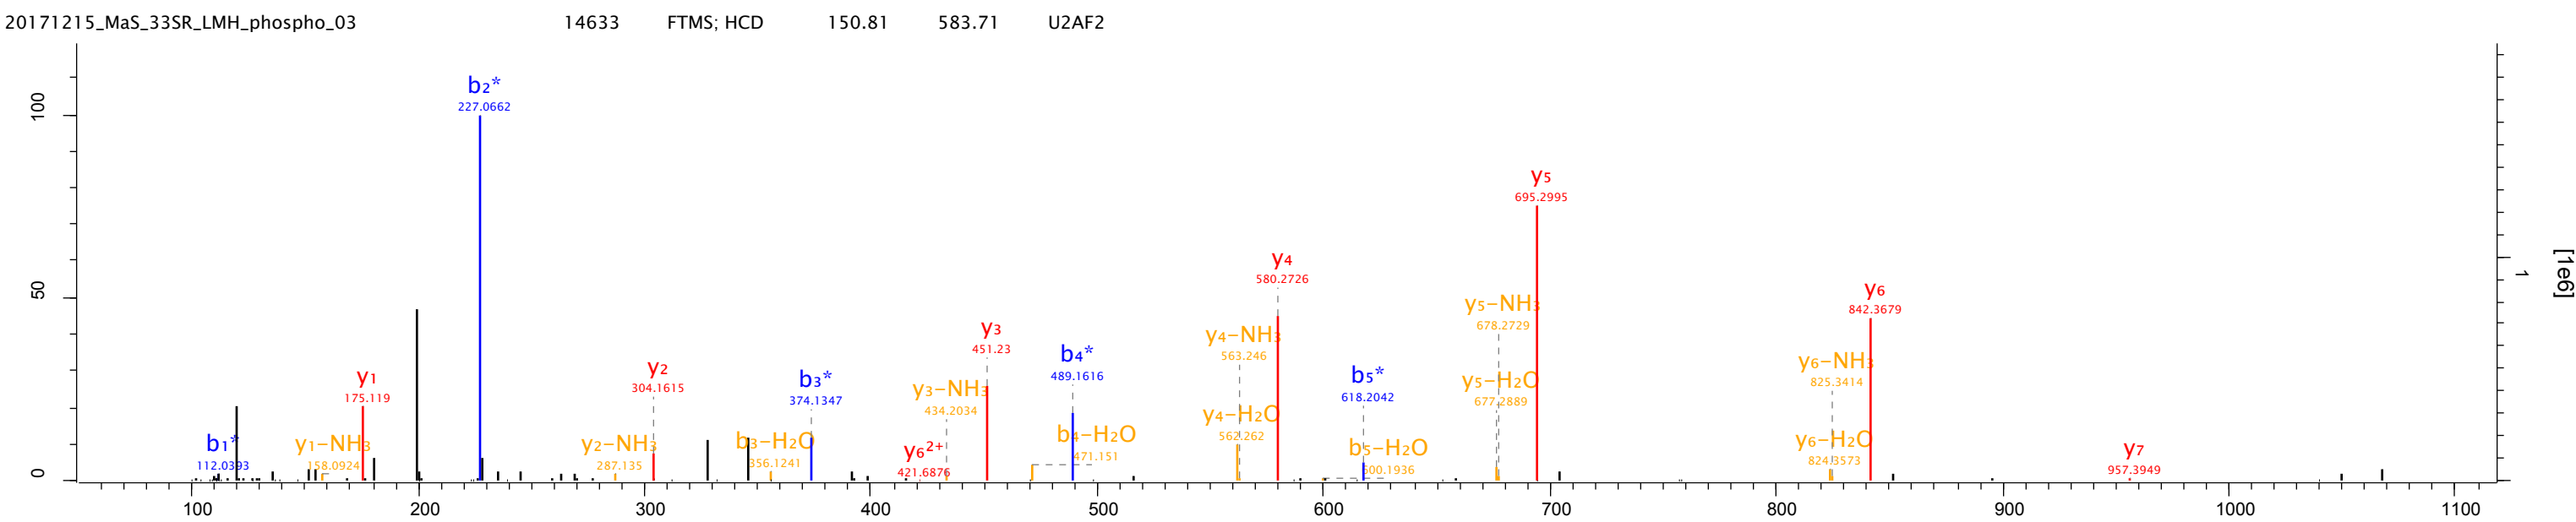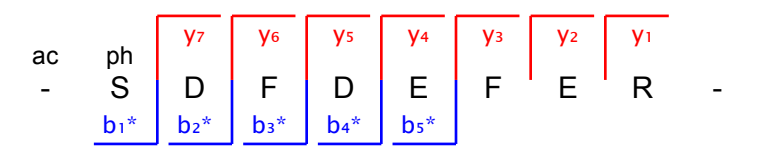

Raw file 20171215\_MaS\_33SR\_LMH\_phospho\_03 Scan 14793 Method FTMS; HCD Score 251.51 m/z 1110.94 Gene names PPP6R3

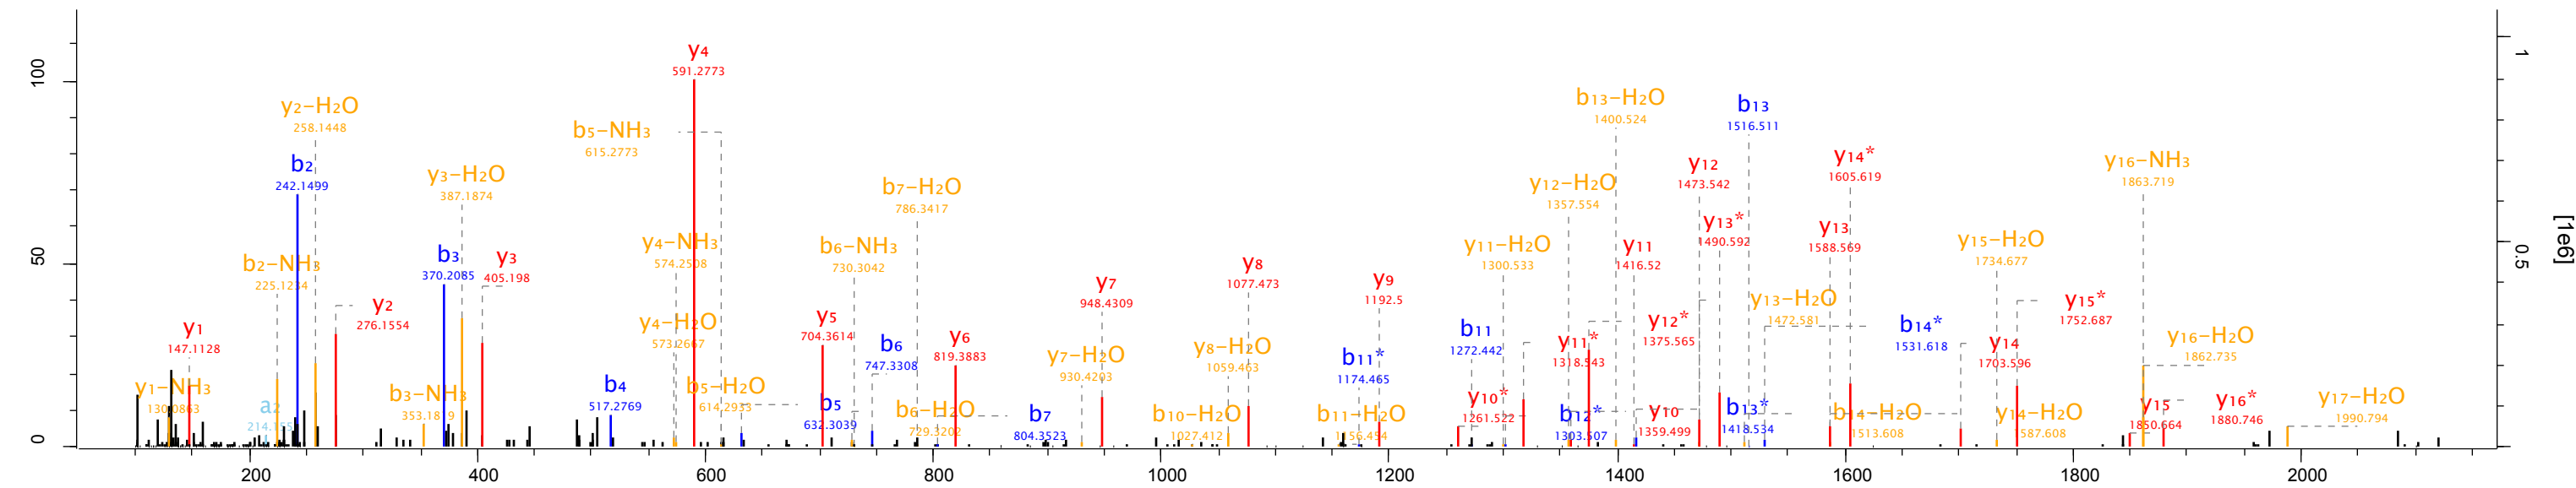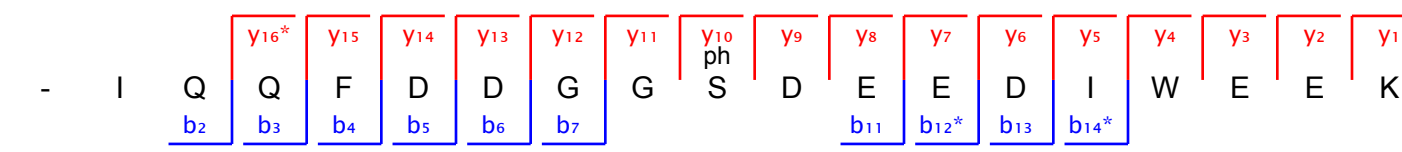

Raw file 20171215\_MaS\_33SR\_LMH\_phospho\_03 Scan 14853 Method FTMS; HCD Score 90.79 m/z 609.77 Gene names CD2AP

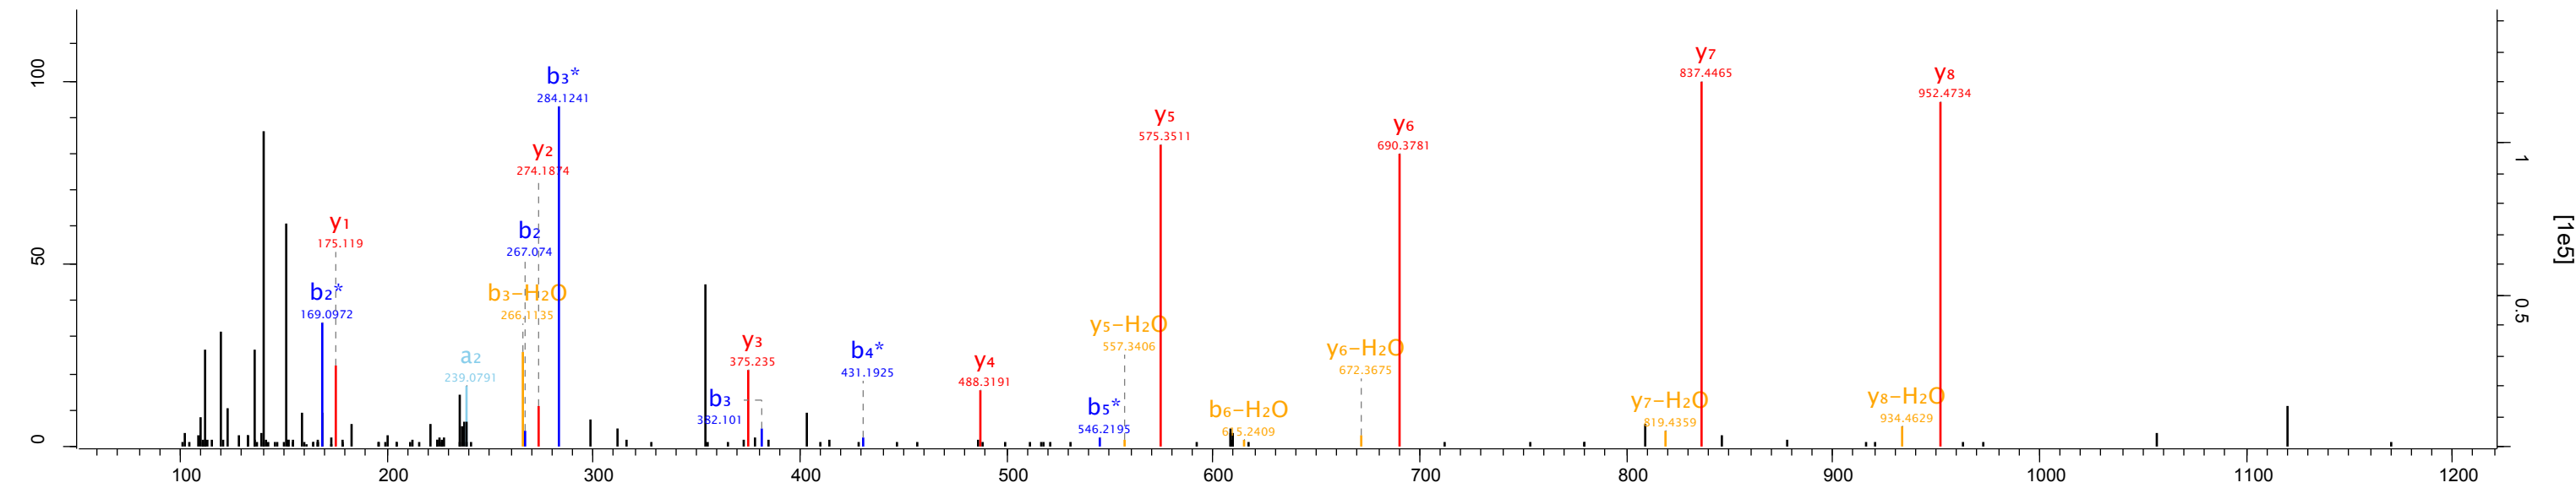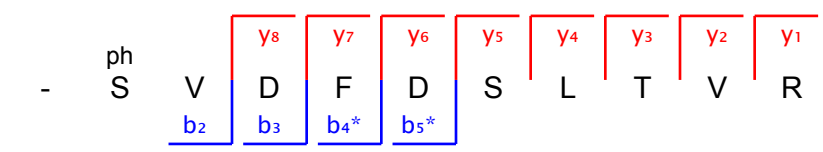

Raw file: 20171215\_MaS\_33SR\_LMH\_phospho\_03  
 Scan: 15103 Method: FTMS; HCD Score: 88.98 m/z: 1030.94 Gene names: TNKS1BP1

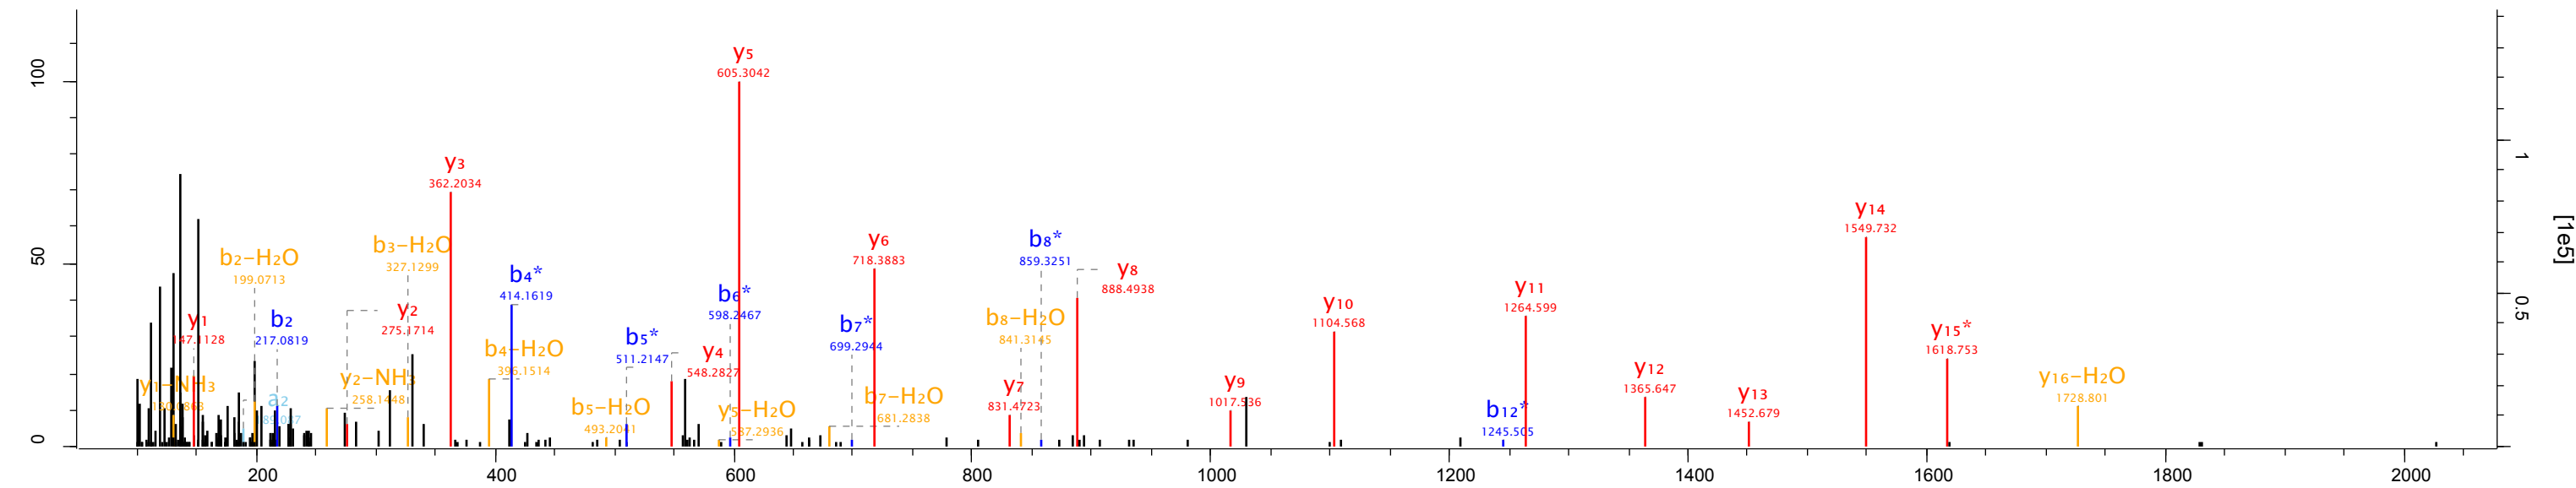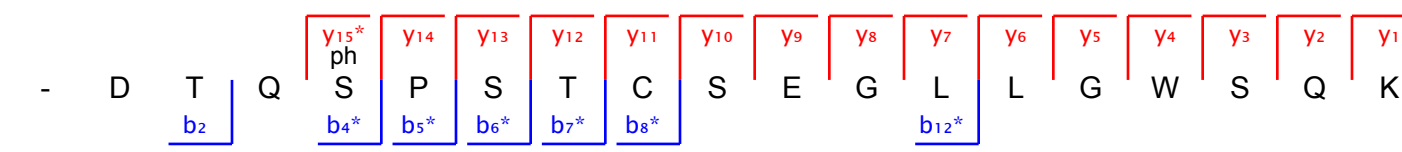



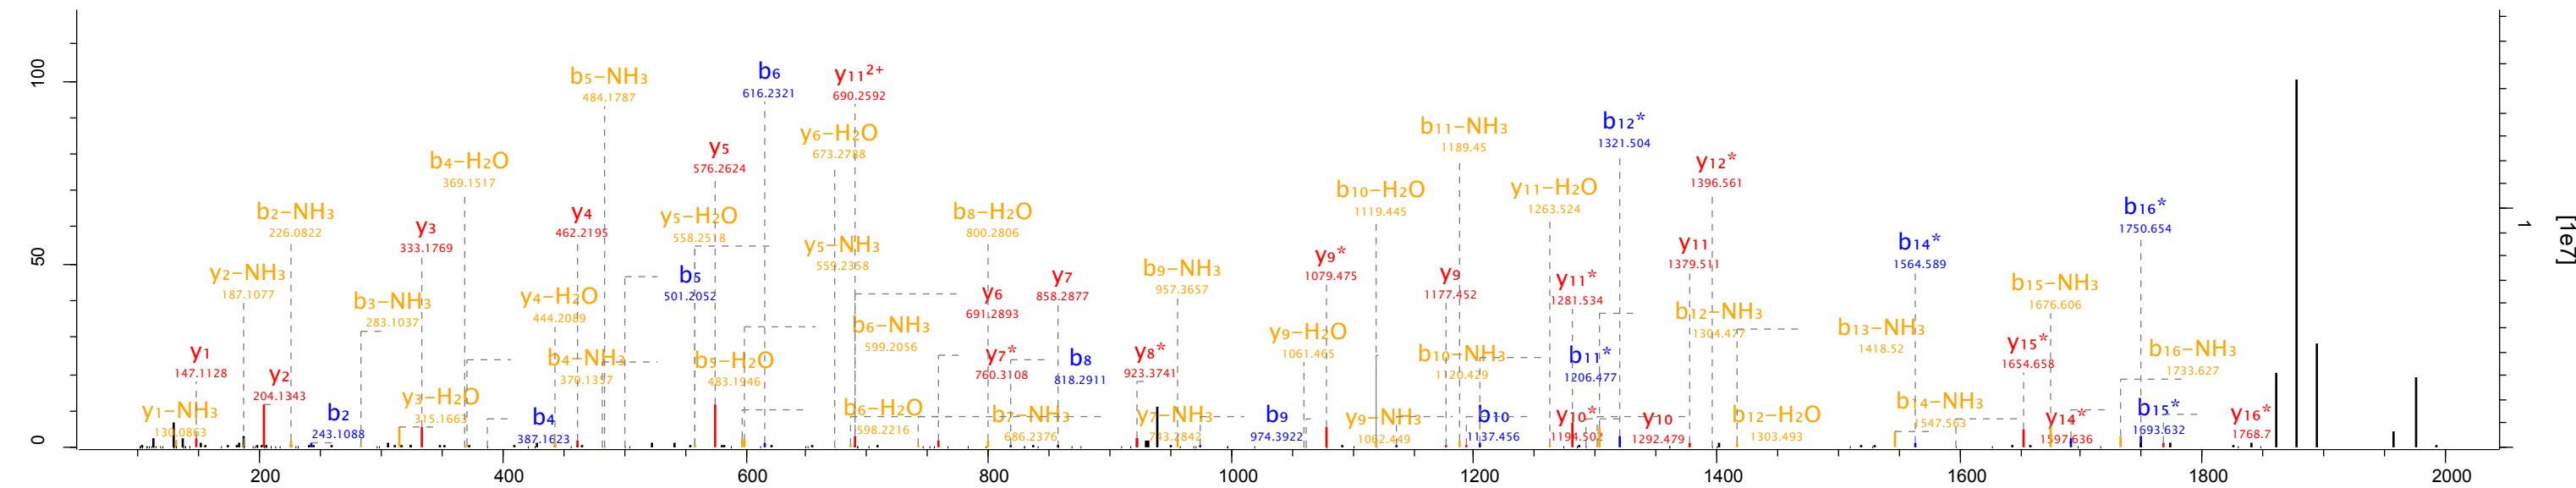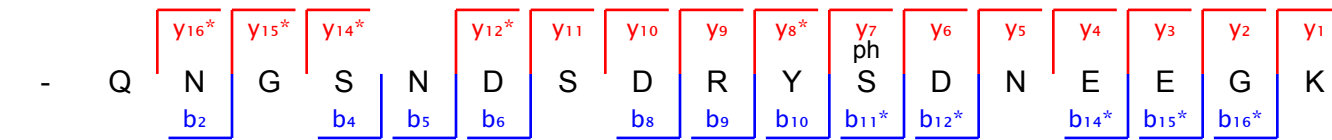

Raw file 20171215\_MaS\_33SR\_LMH\_phospho\_03 Scan 2183 Method FTMS; HCD Score 173.06 m/z 595.74 Gene names CWC22

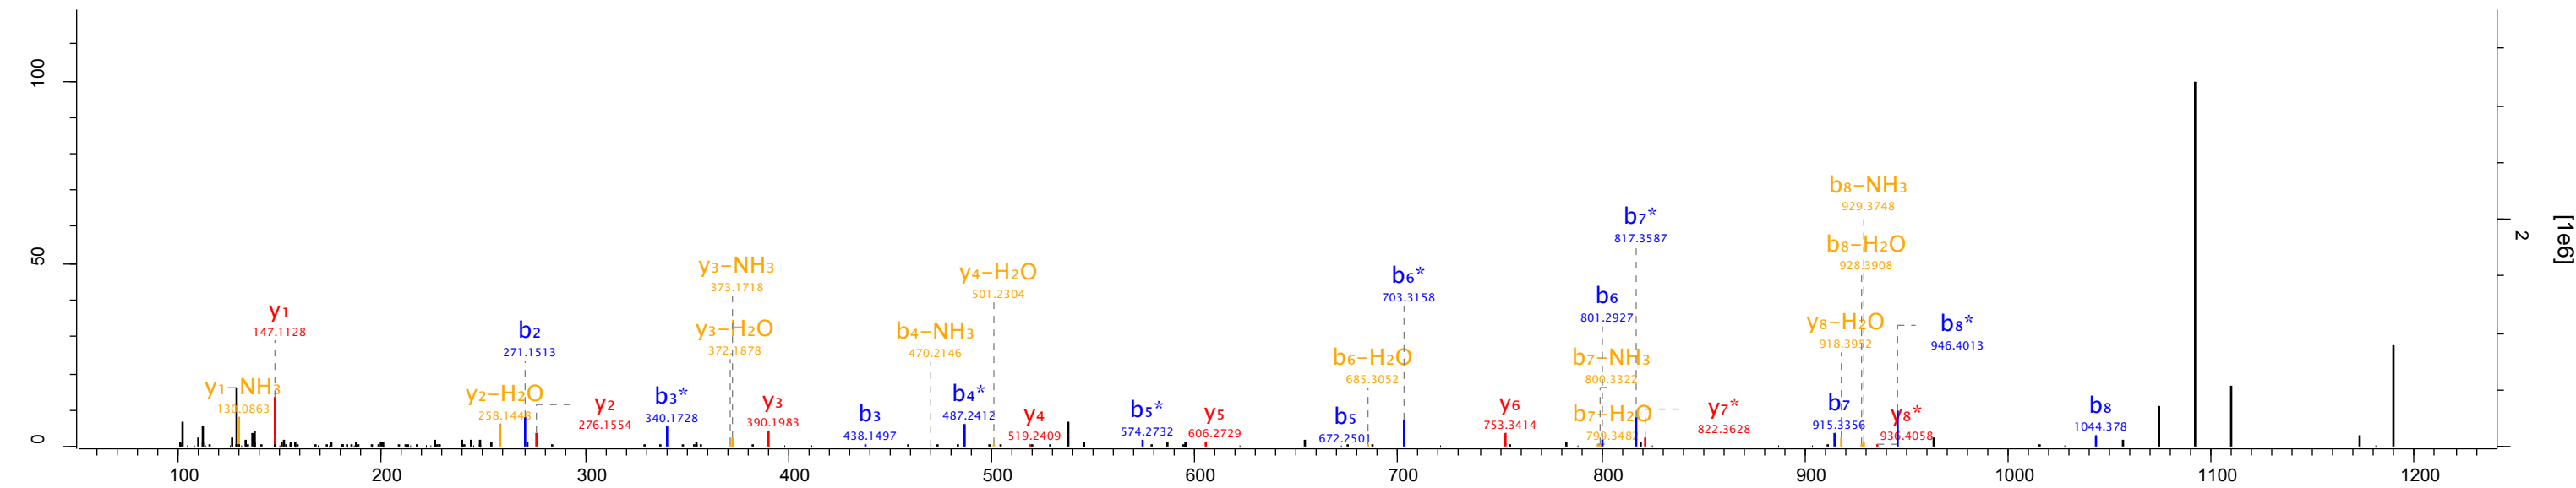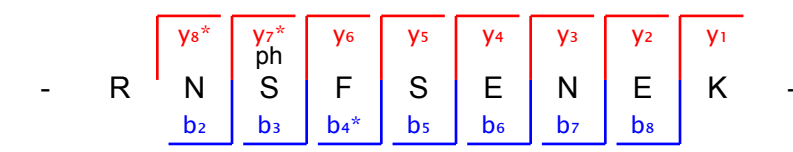

Raw file 20171215\_MaS\_33SR\_LMH\_phospho\_03 Scan 2193 Method FTMS; HCD Score 235.76 m/z 696.28 Gene names PLA2G4A

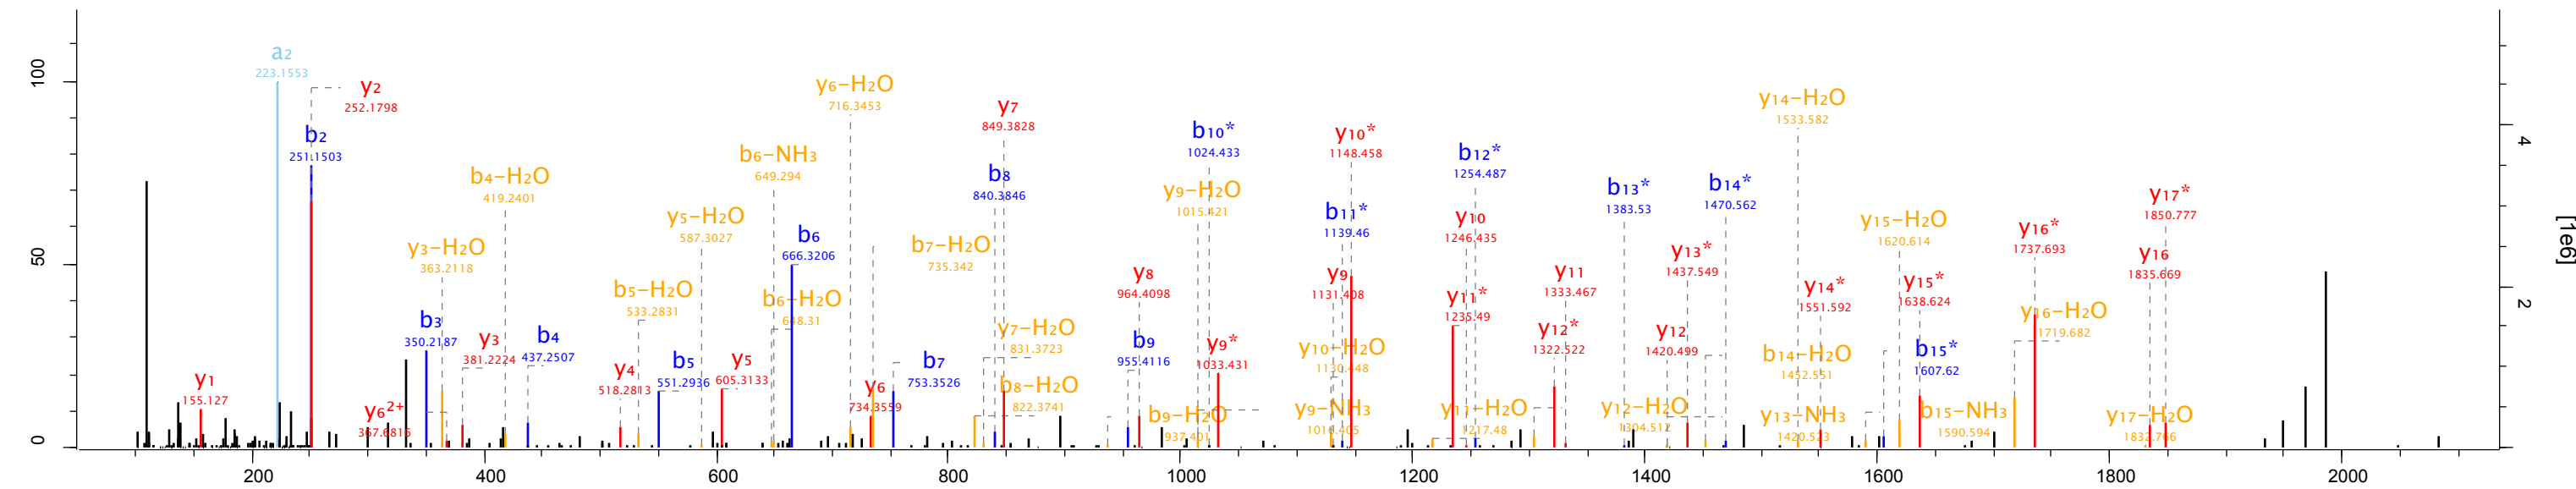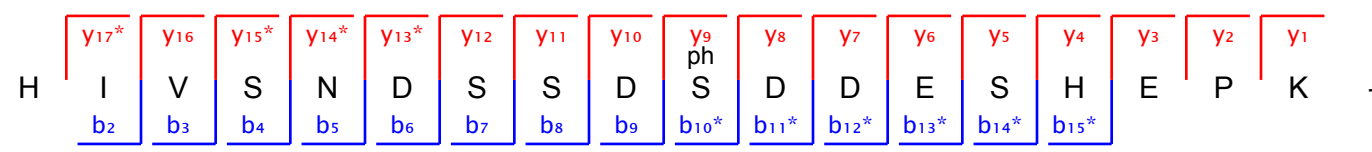

Raw file 20171215\_MaS\_33SR\_LMH\_phospho\_03 Scan 2223 Method FTMS; HCD Score 253.59 m/z 709.36 Gene names FOXH1;XRCC1

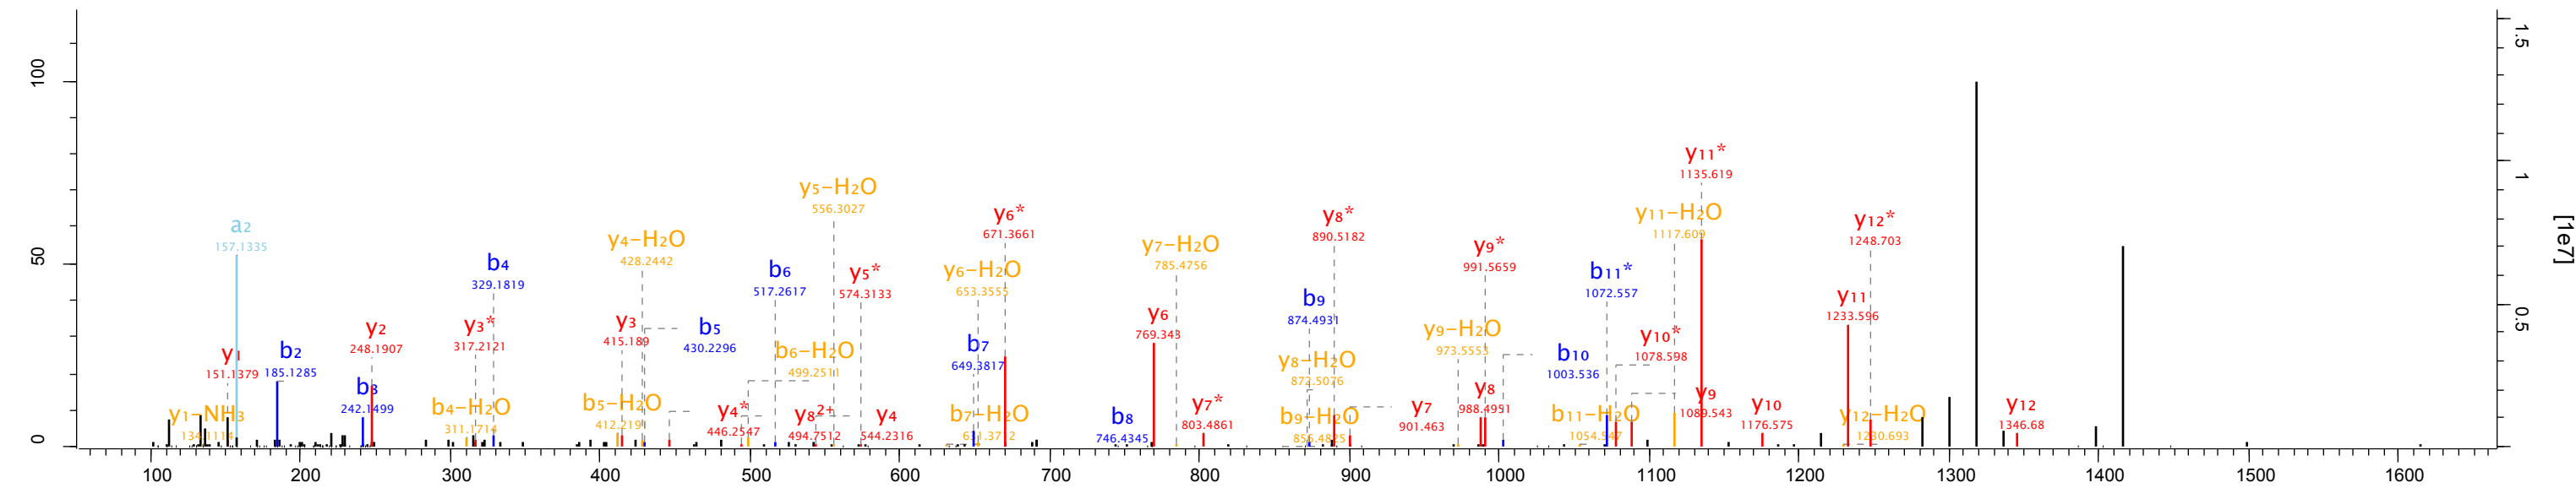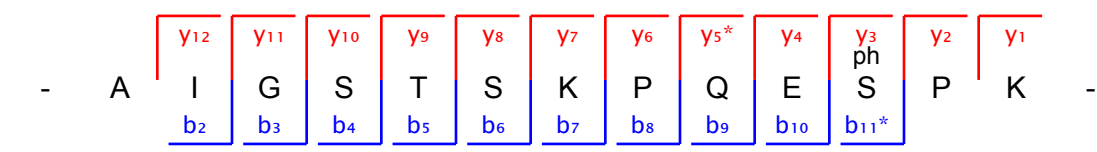

Raw file 20171215\_MaS\_33SR\_LMH\_phospho\_03 Scan 2433 Method FTMS; HCD Score 84.3 m/z 565.79 Gene names SET

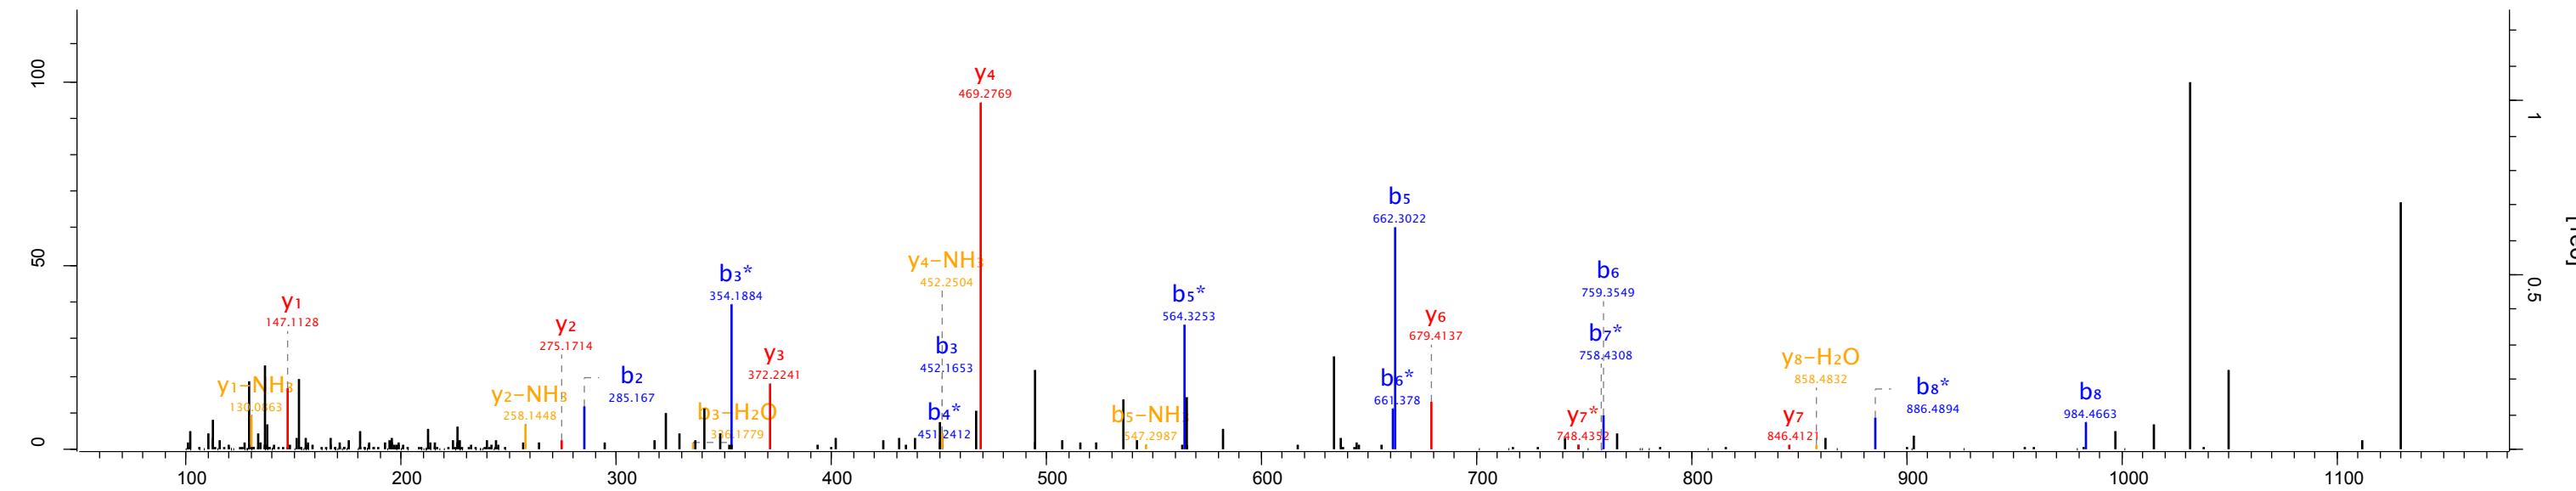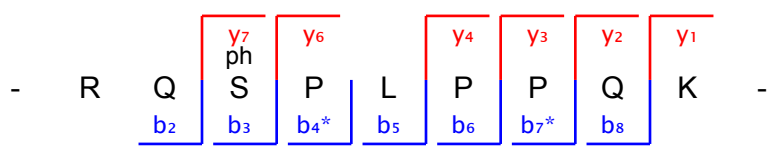

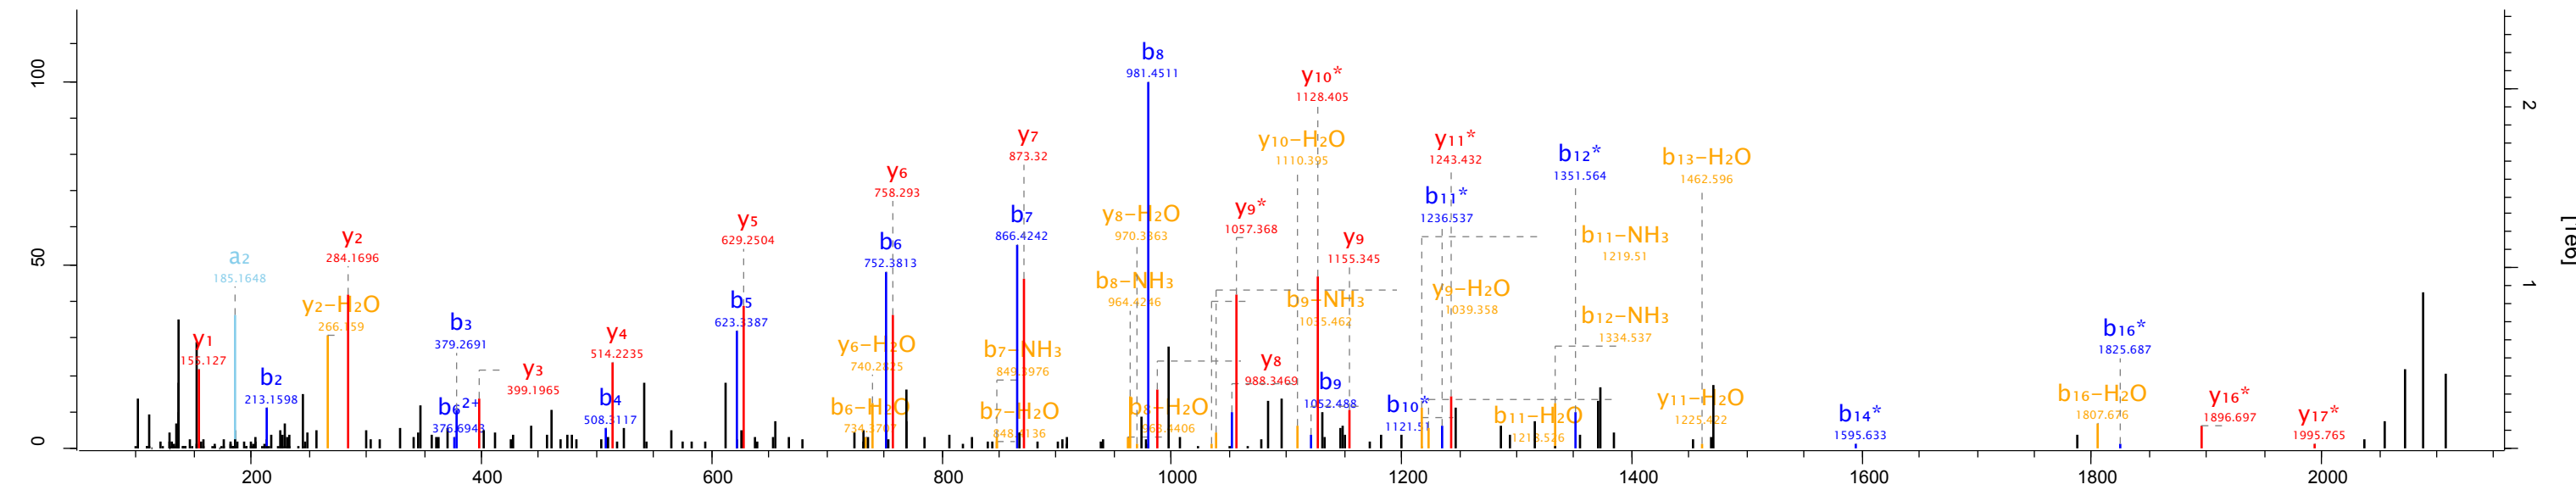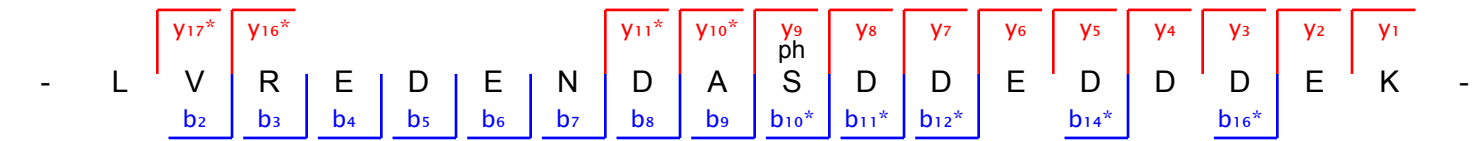

Raw file 20171215\_MaS\_33SR\_LMH\_phospho\_03 Scan 2893 Method FTMS; HCD Score 122.3 m/z 714.79 Gene names TRA2A;TRA2B

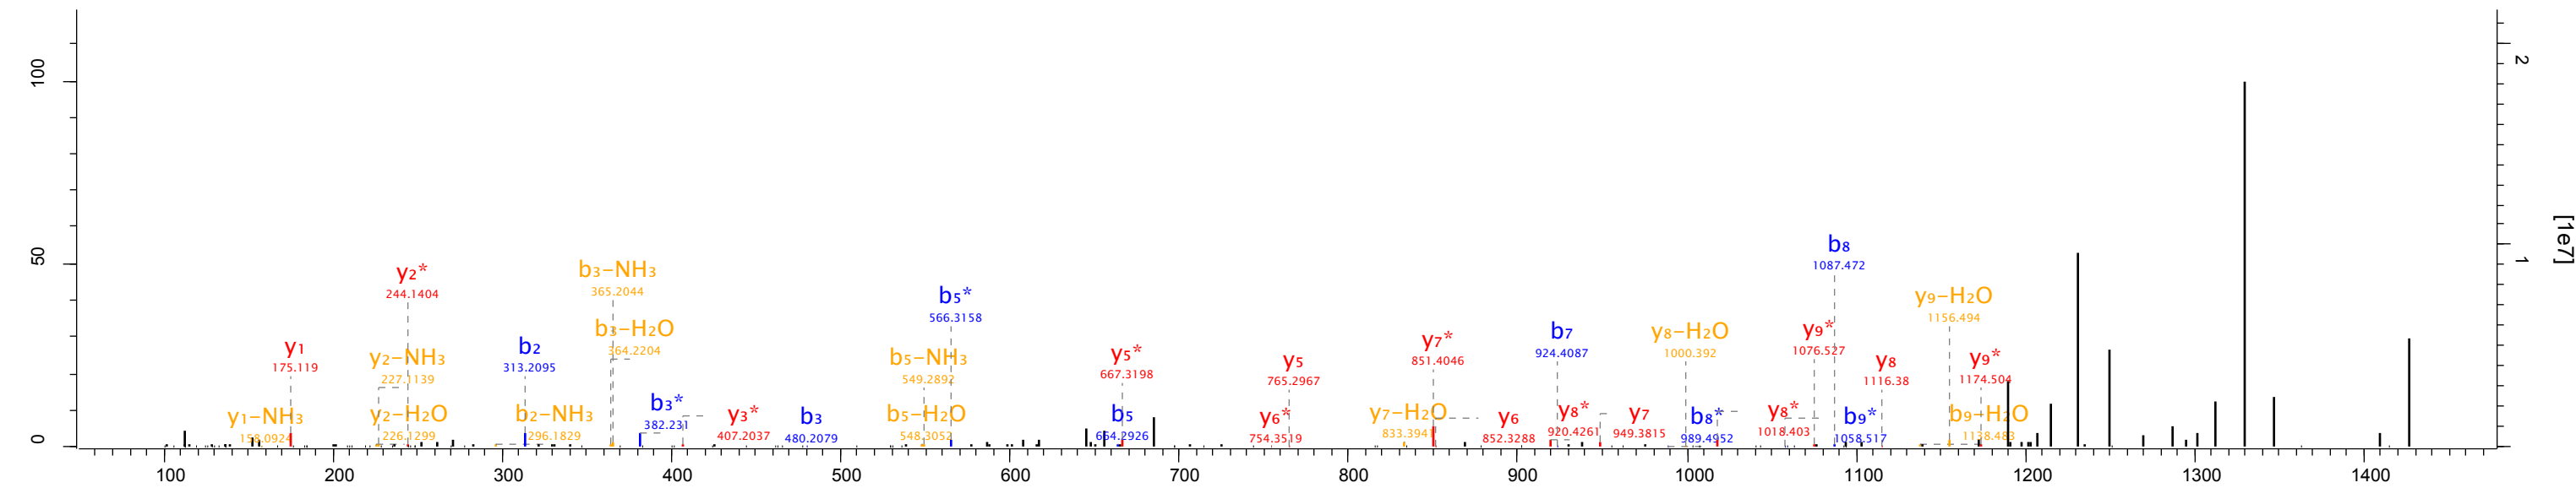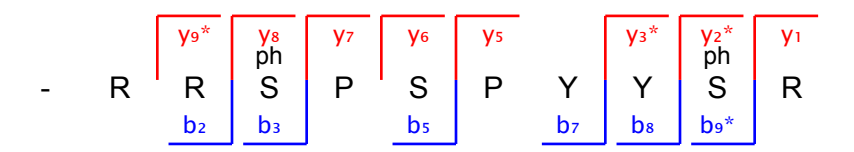

Raw file 20171215\_MaS\_33SR\_LMH\_phospho\_03 Scan 2953 Method FTMS; HCD Score 138.03 m/z 615.24 Gene names ZC3H15

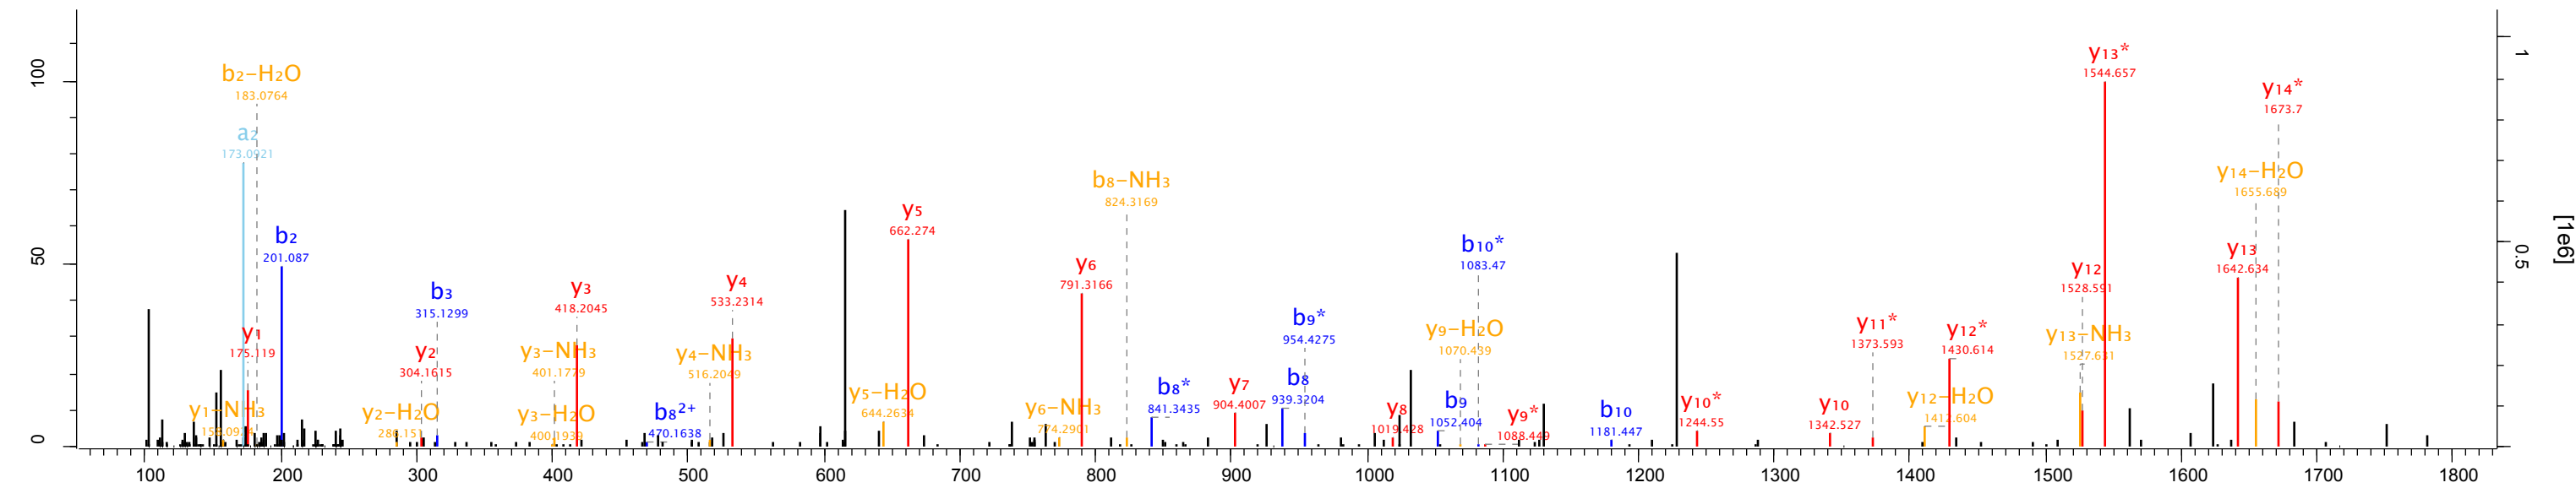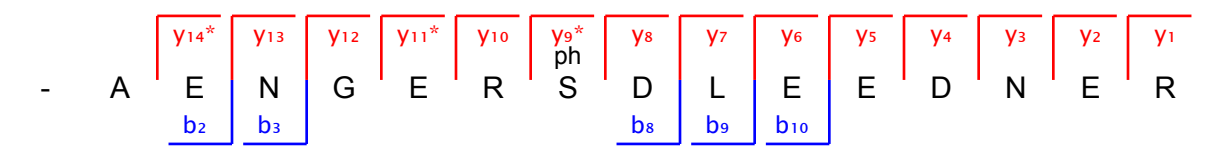



Raw file 20171215\_MaS\_33SR\_LMH\_phospho\_03 Scan 3073 Method FTMS; HCD Score 229.71 m/z 750.69 Gene names RCOR1

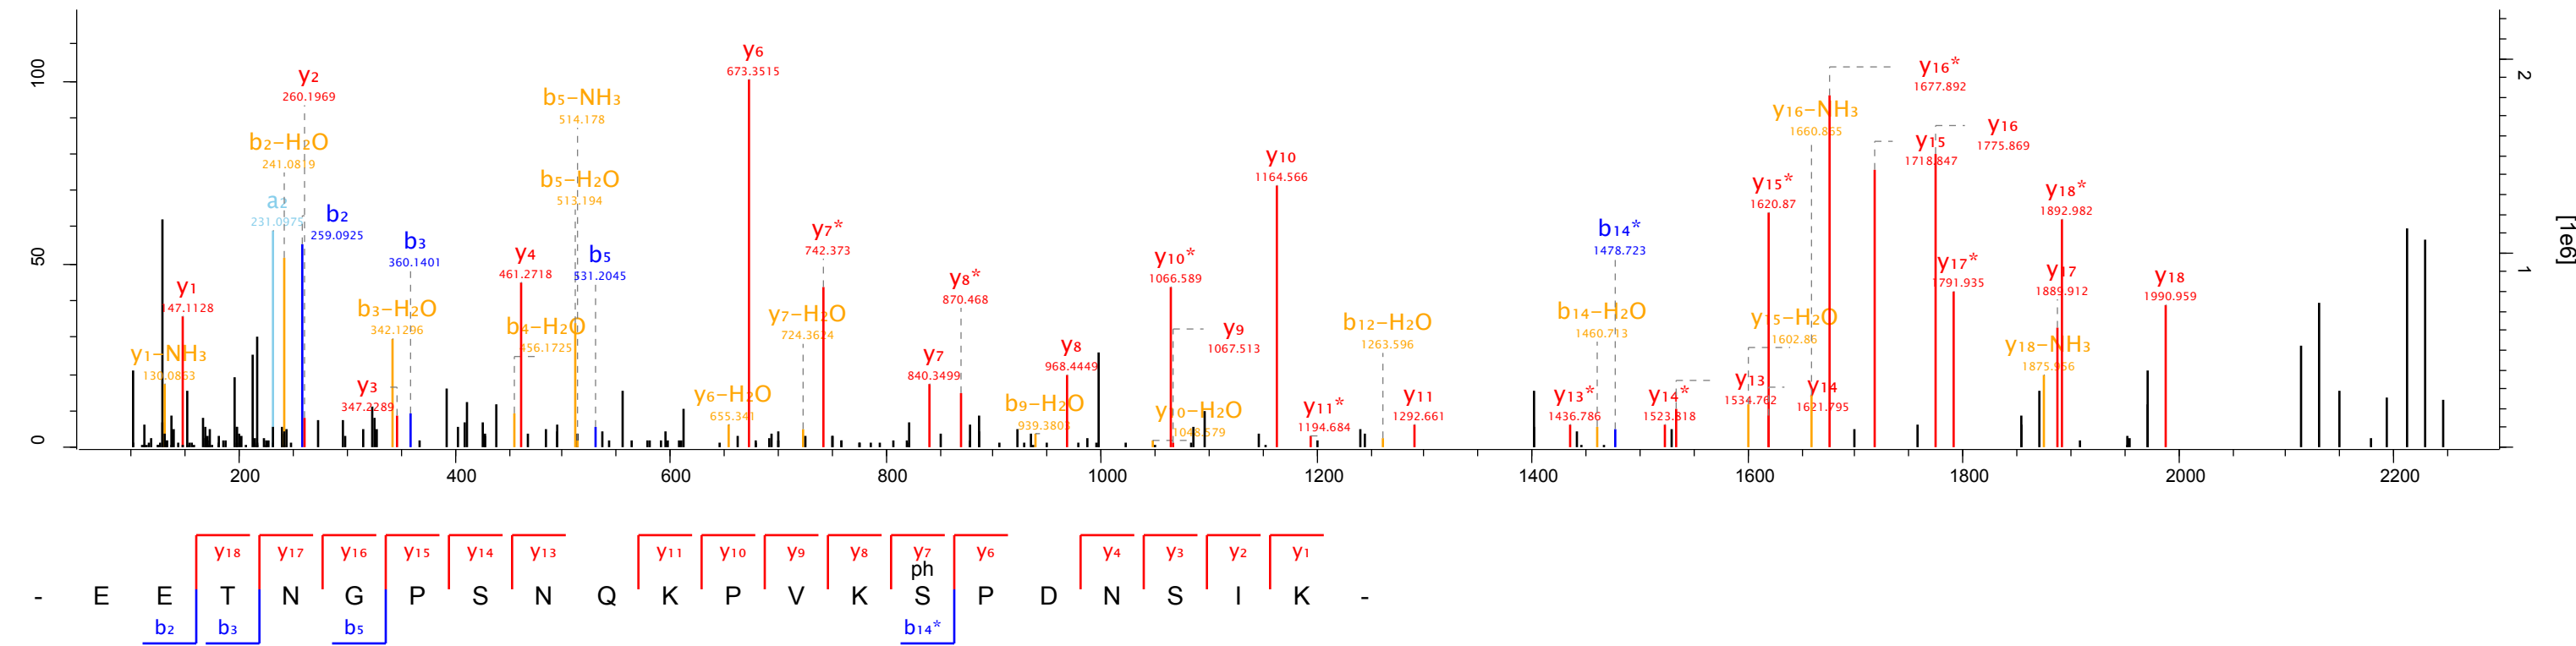

Raw file 20171215\_MaS\_33SR\_LMH\_phospho\_03 Scan 3193 Method FTMS; HCD Score 64.84 m/z 593.8 Gene names AFF4

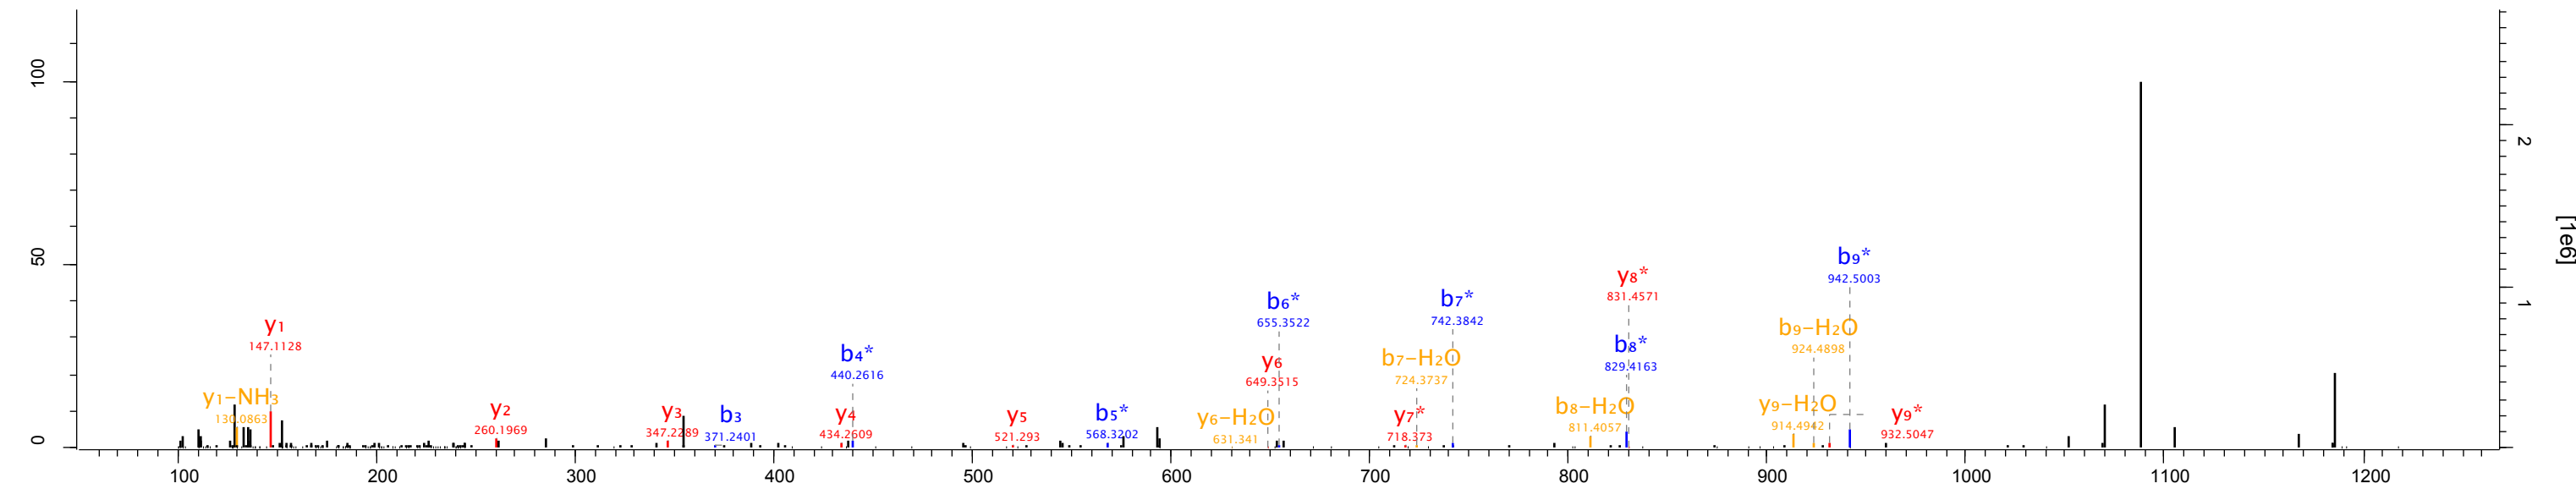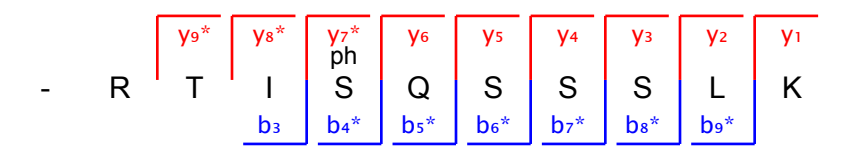

Raw file 20171215\_MaS\_33SR\_LMH\_phospho\_03 Scan 3323 Method FTMS; HCD Score 133.68 m/z 874.41 Gene names EPB41L2

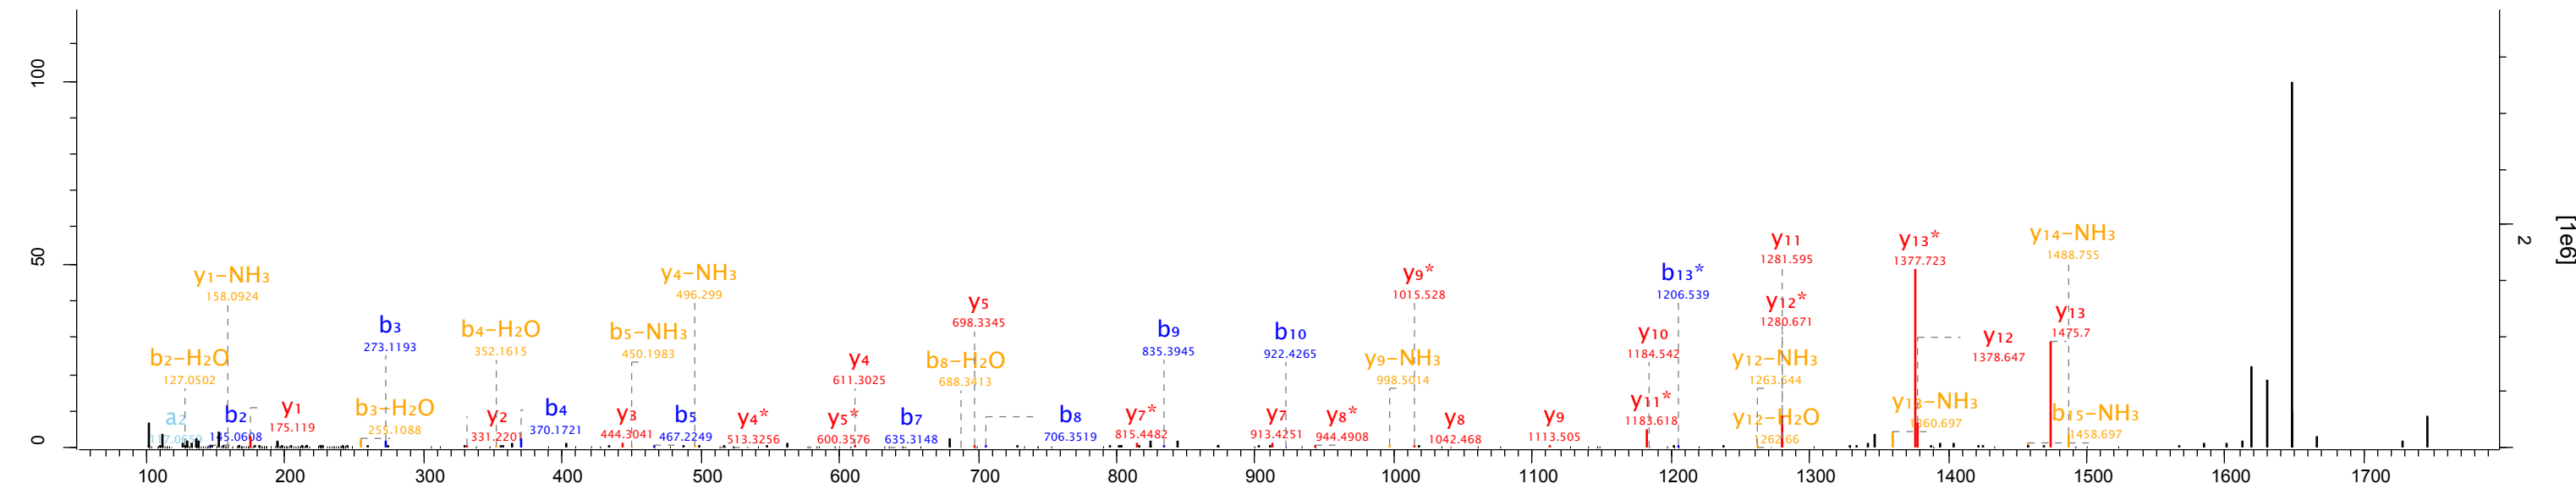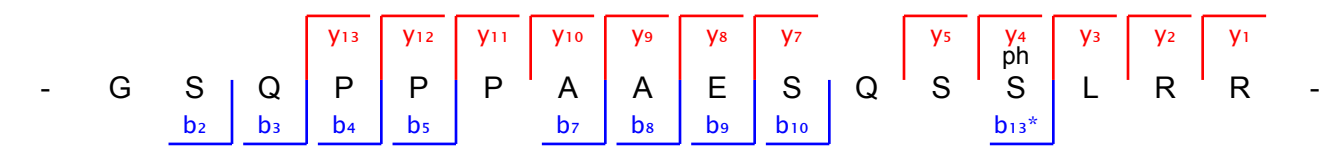

Raw file 20171215\_MaS\_33SR\_LMH\_phospho\_03 Scan 3503 Method FTMS; HCD Score 157.47 m/z 554.75 Gene names SLC38A1

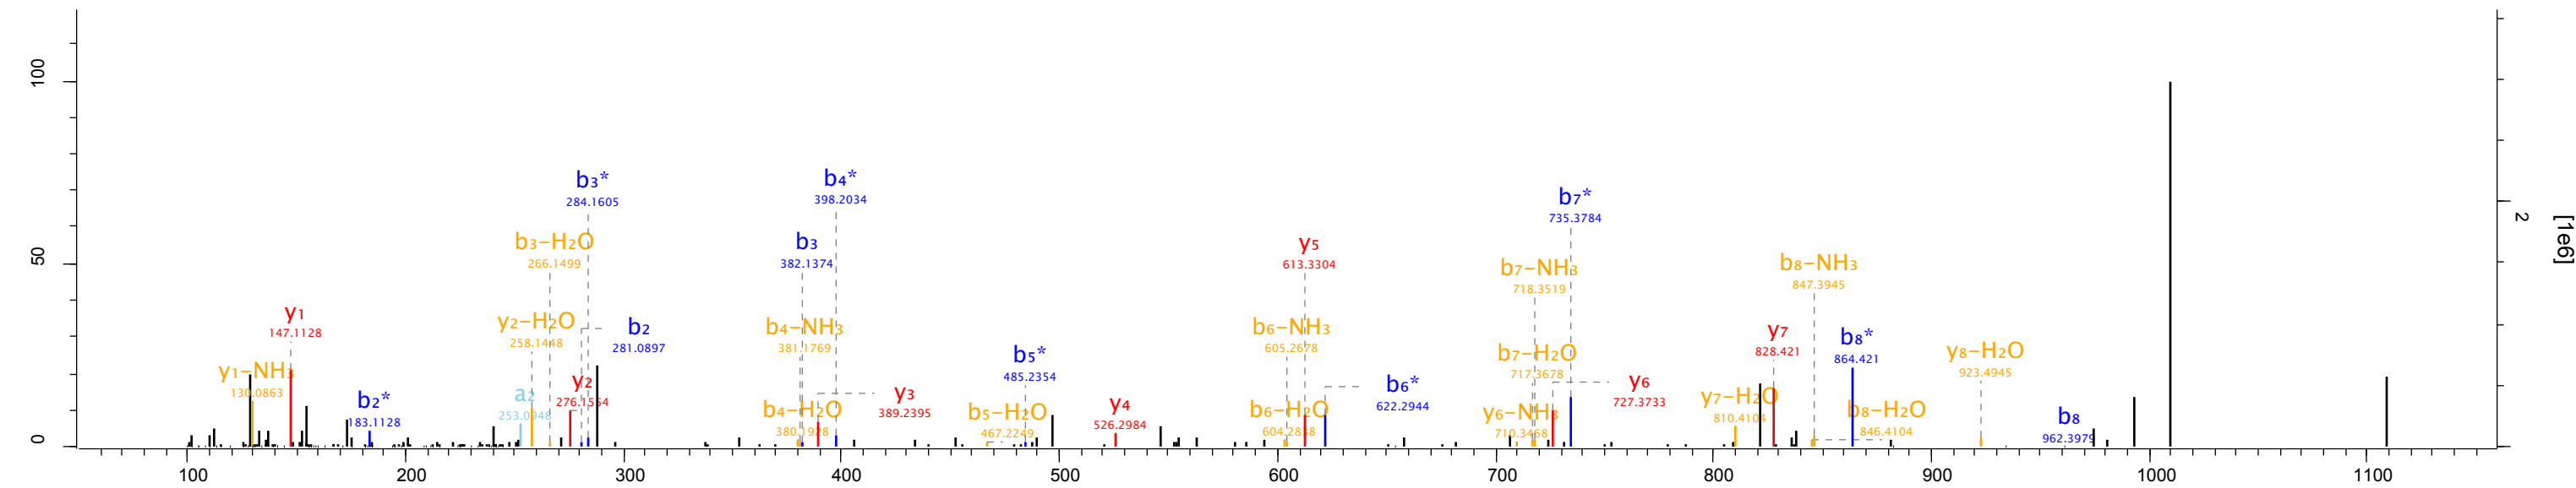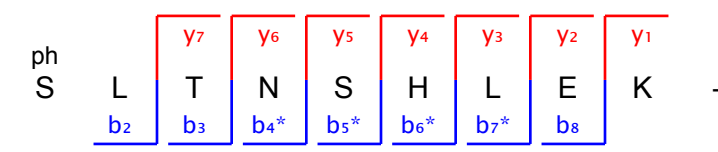

Raw file 20171215\_MaS\_33SR\_LMH\_phospho\_03 Scan 3653 Method FTMS; HCD Score 176.98 m/z 665.79 Gene names TJP2

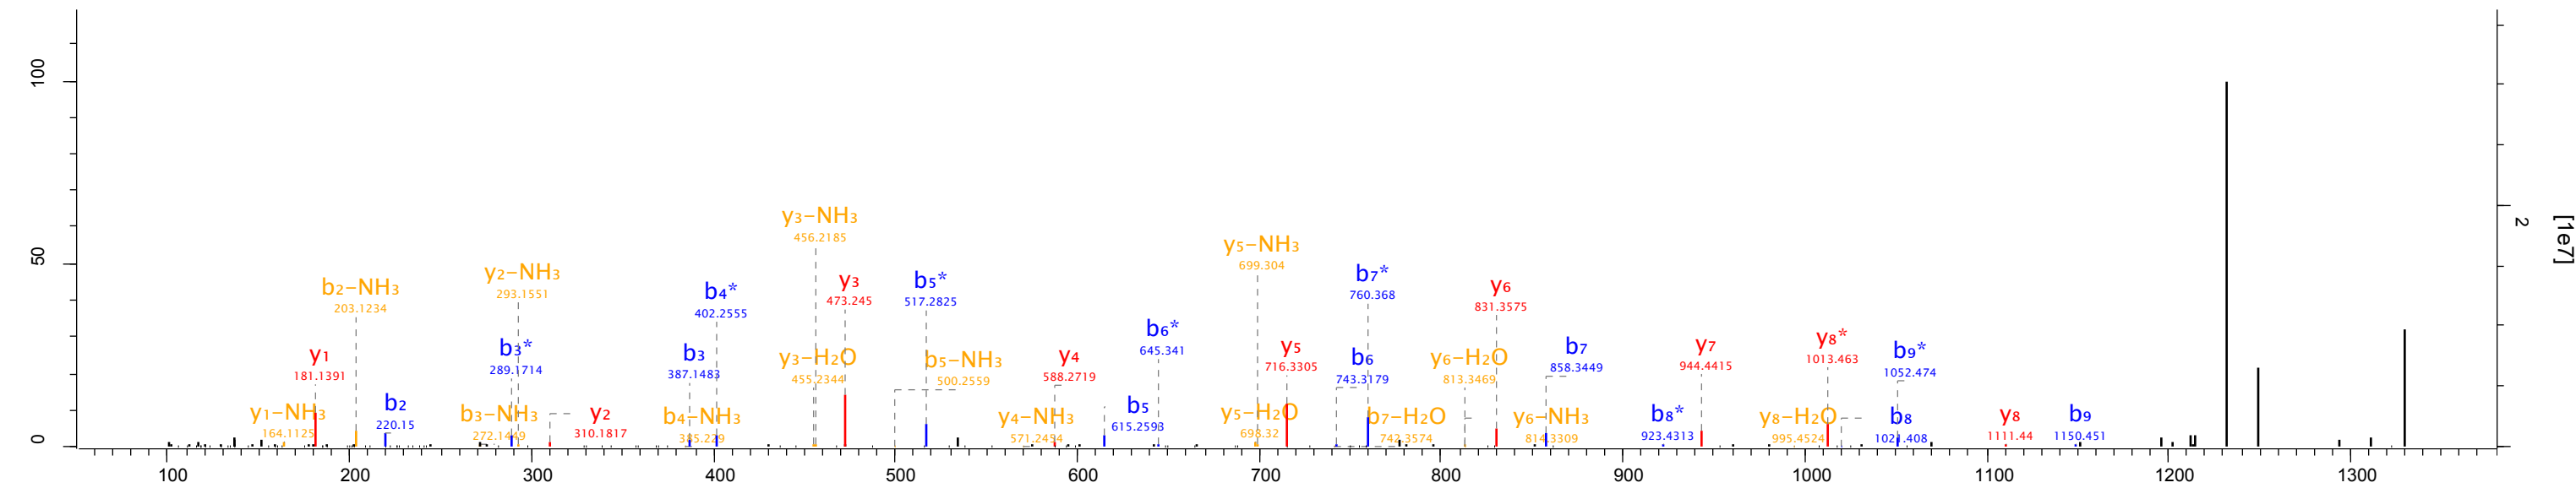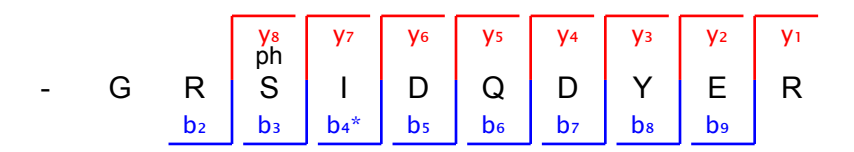

Raw file: 20171215\_MaS\_33SR\_LMH\_phospho\_03  
 Scan: 3743 Method: FTMS; HCD Score: 122.33 m/z: 503.19 Gene names: RBM8A

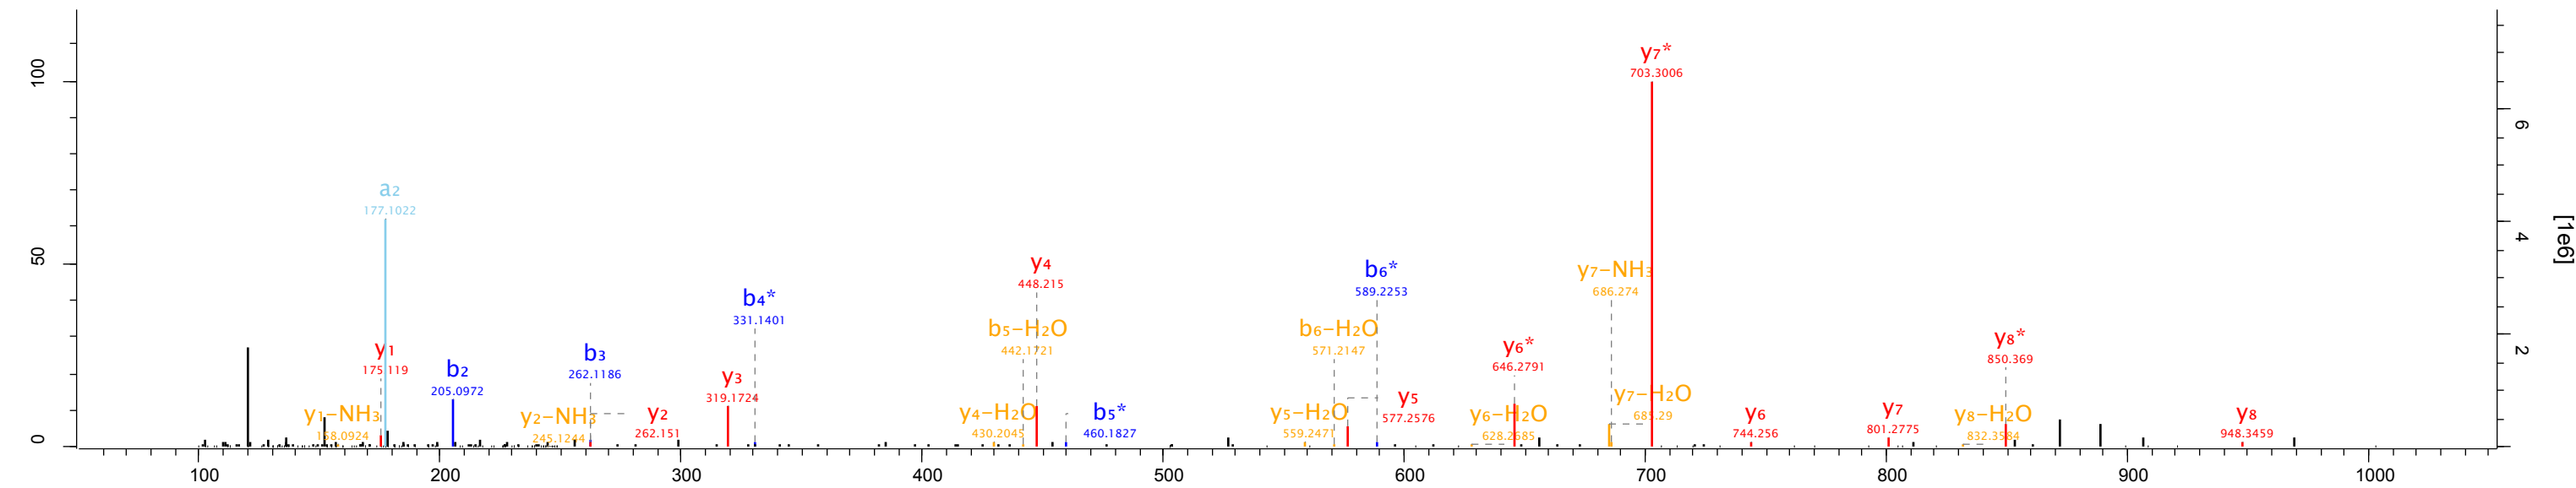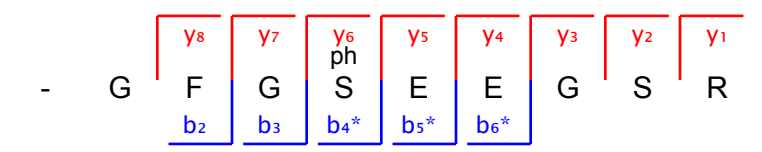

Raw file 20171215\_MaS\_33SR\_LMH\_phospho\_03 Scan 4033 Method FTMS; HCD Score 78.52 m/z 416.21 Gene names MLIP

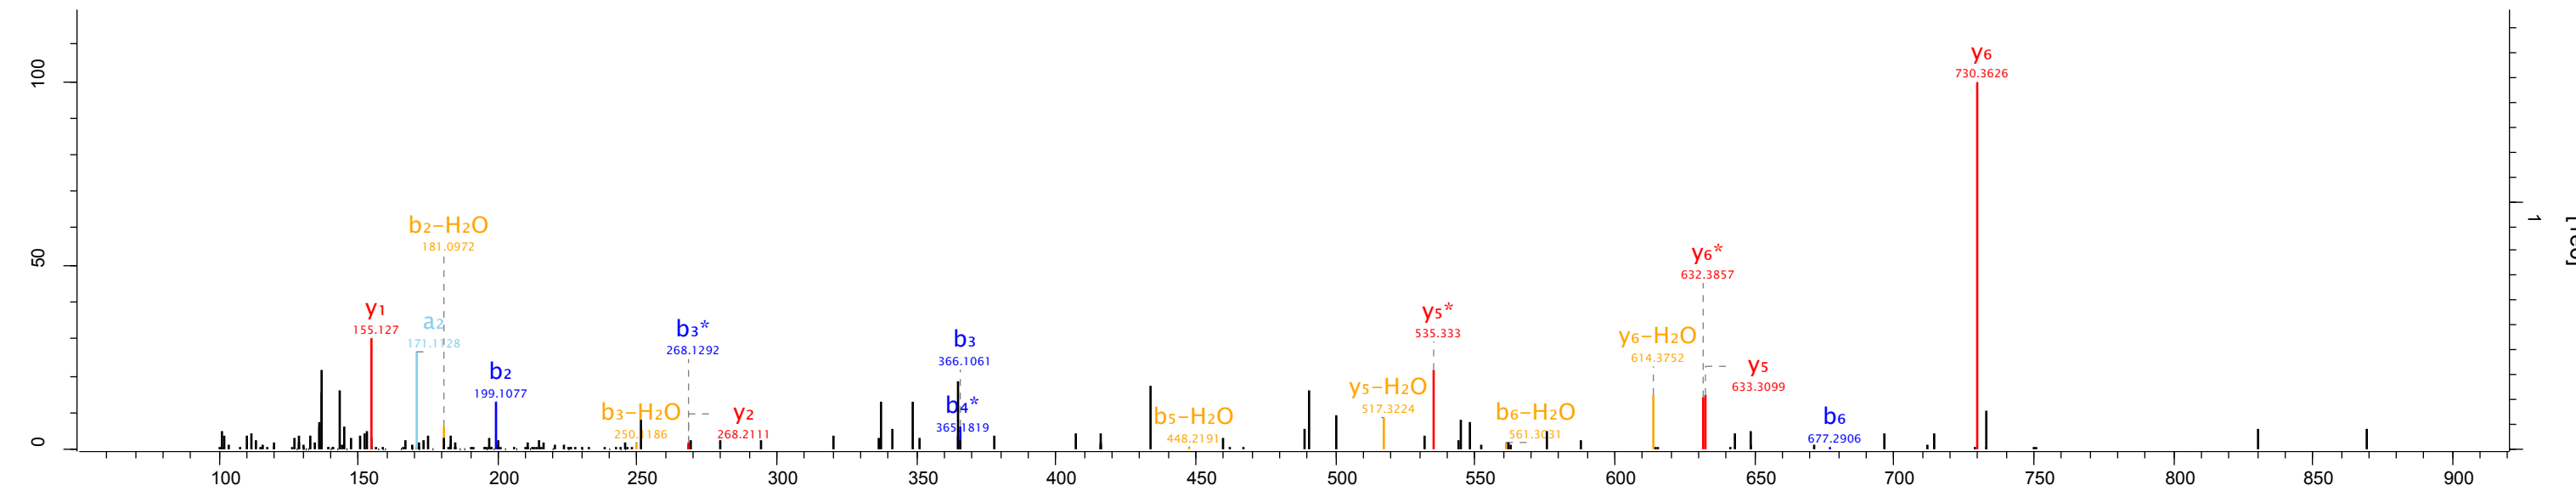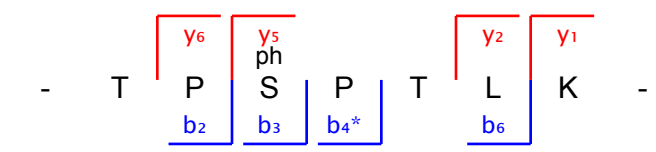

Raw file 20171215\_MaS\_33SR\_LMH\_phospho\_03 Scan 4443 Method FTMS; HCD Score 84.48 m/z 541.75 Gene names PLEKHA5

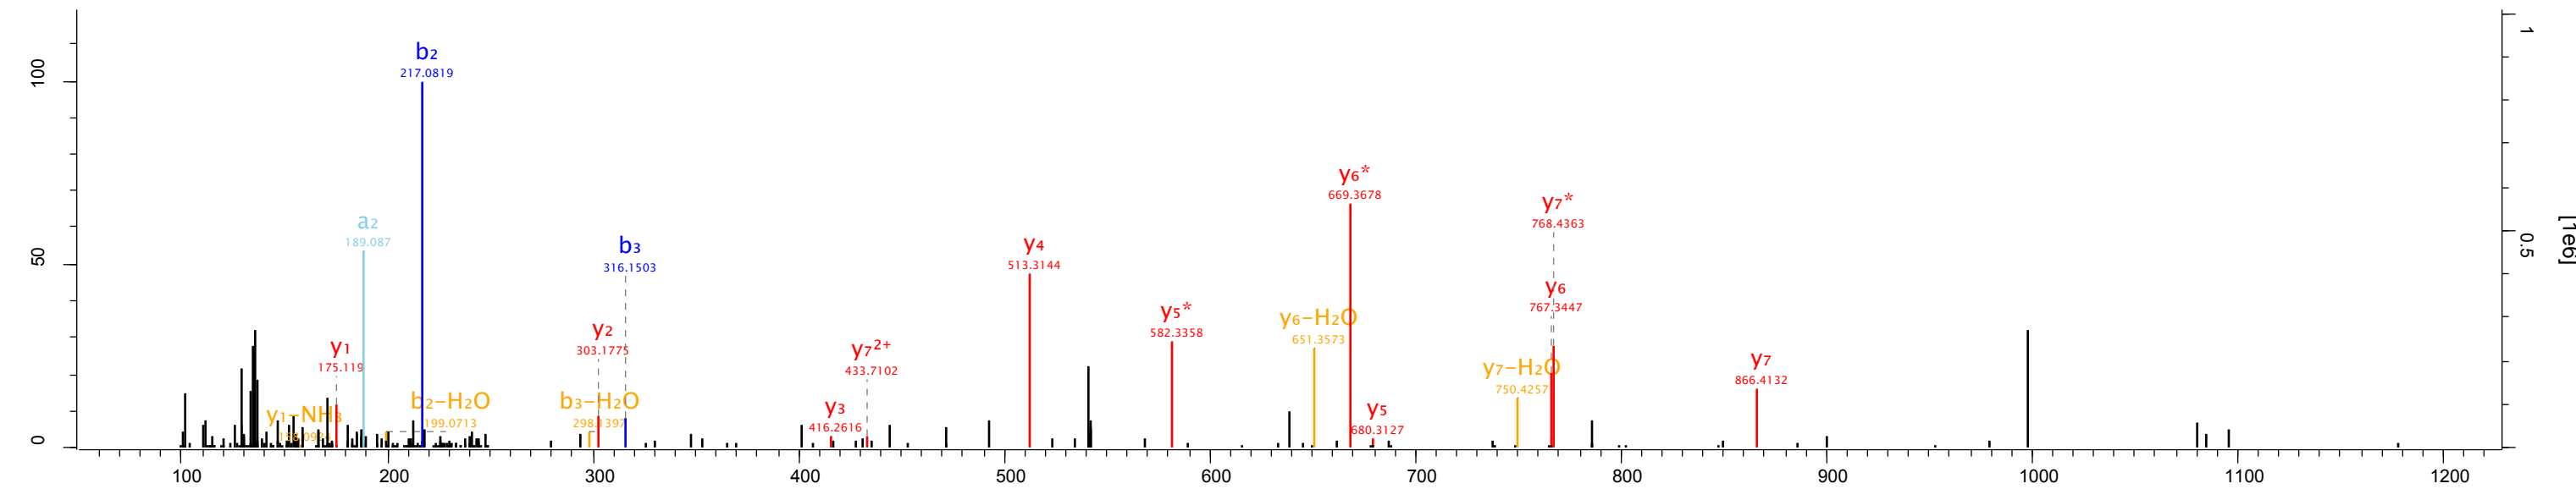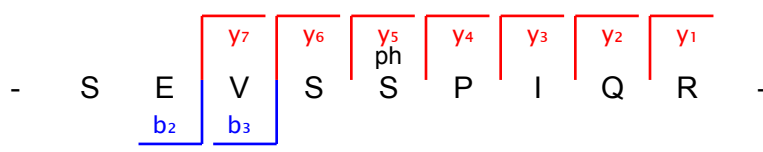



Raw file 20171215\_MaS\_33SR\_LMH\_phospho\_03 Scan 4653 Method FTMS; HCD Score 106.67 m/z 492.72 Gene names ENO1

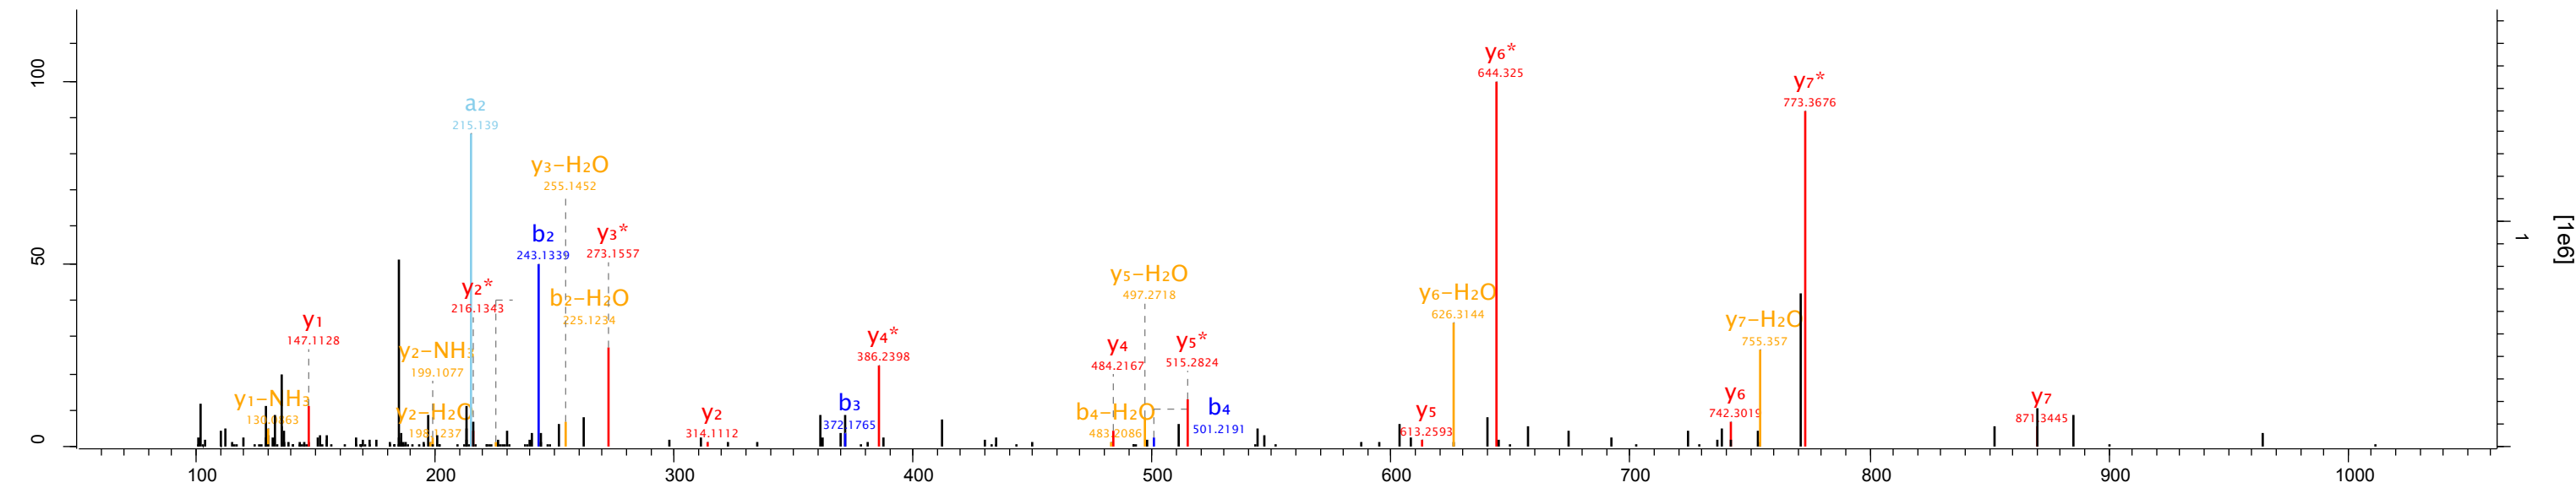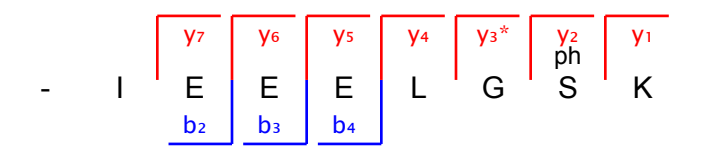

Raw file 20171215\_MaS\_33SR\_LMH\_phospho\_03 Scan 4743 Method FTMS; HCD Score 49.3 m/z 903.41 Gene names MPZL3

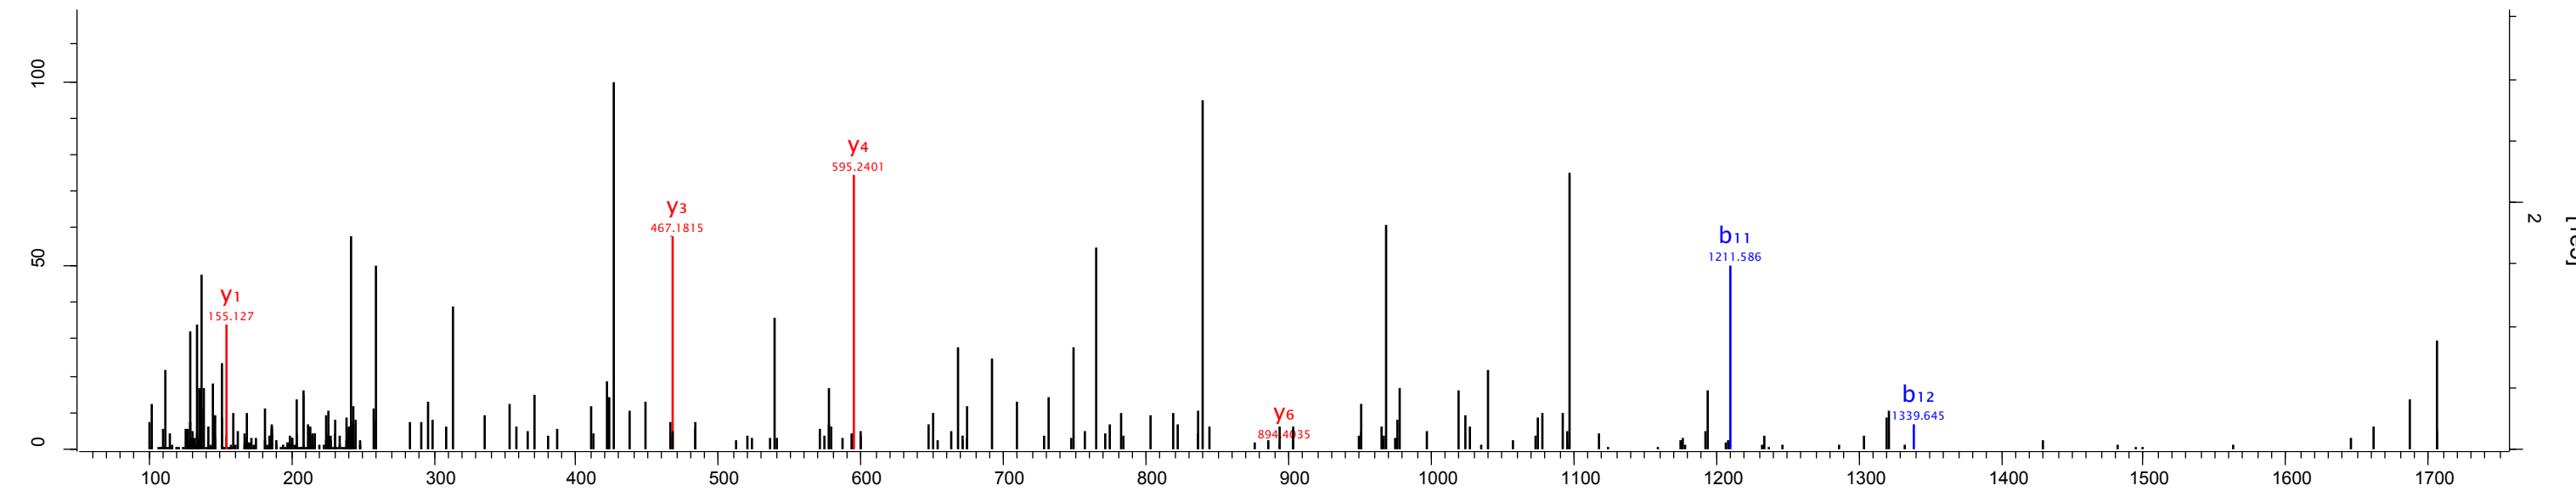

- G F V S V A L S A W I Q T M K -

ph

y6 y4 y3 y1

b11 b12

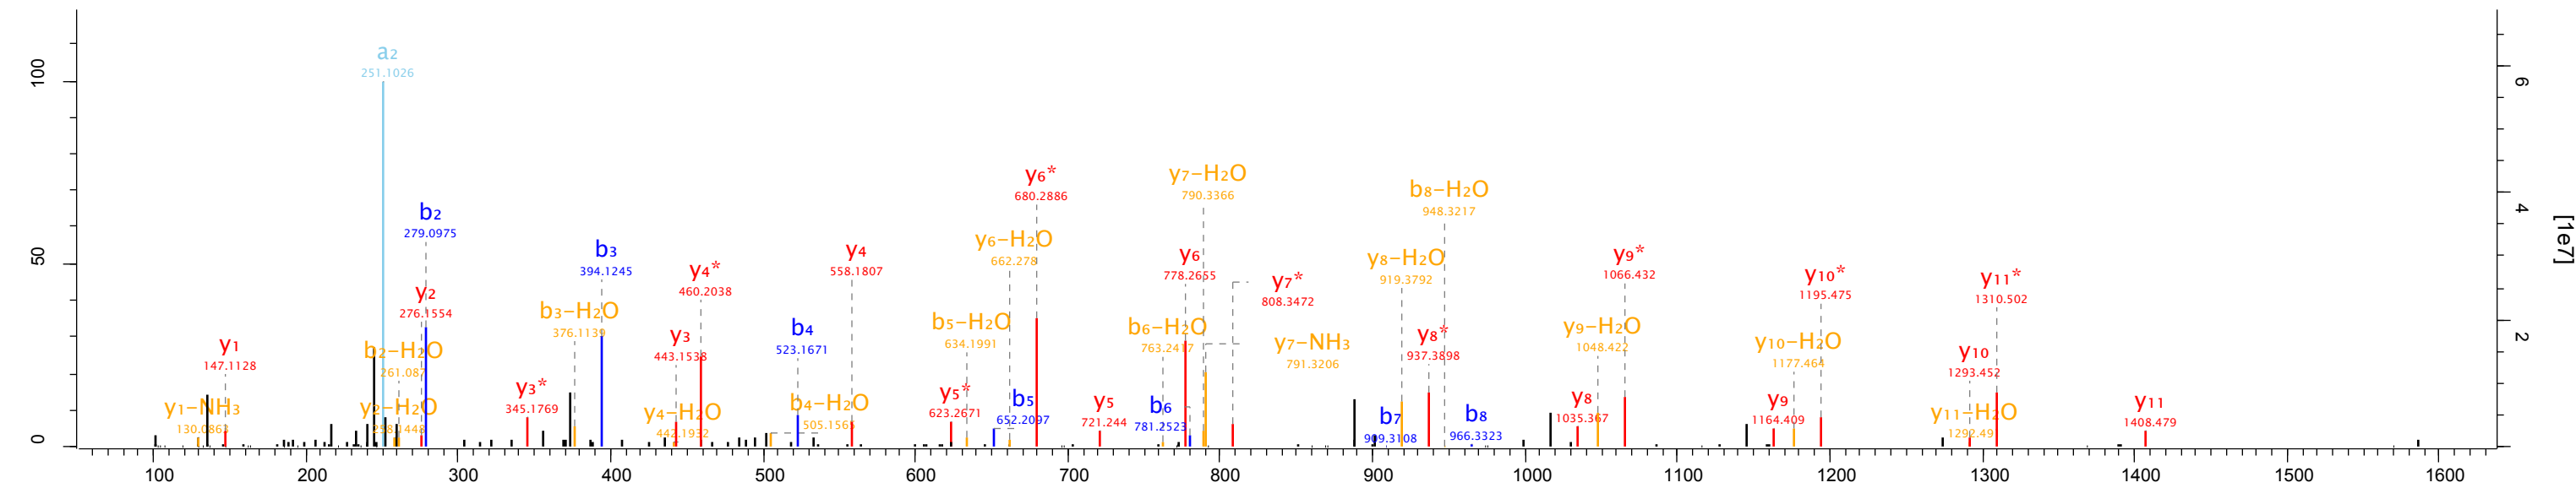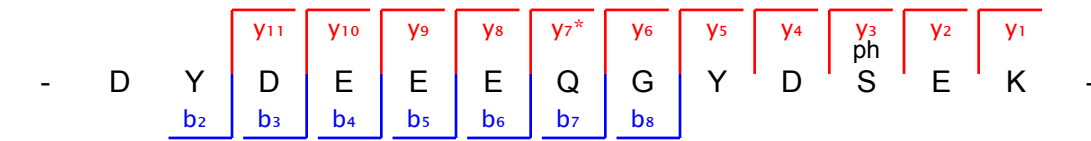

Raw file: 20171215\_MaS\_33SR\_LMH\_phospho\_03  
 Scan: 4923 Method: FTMS; HCD Score: 46.41 m/z: 651.28 Gene names: HSF1

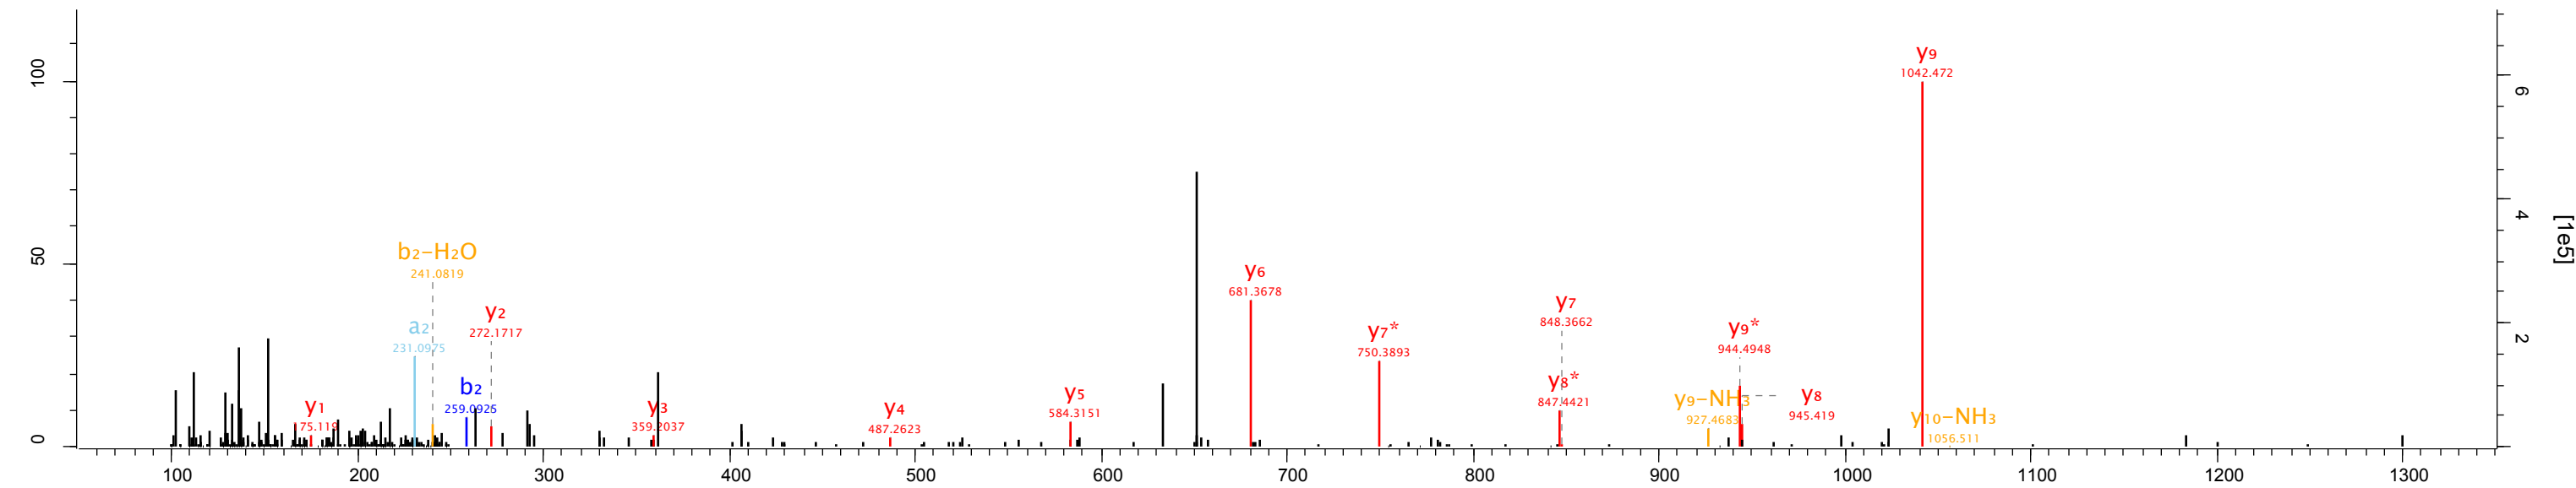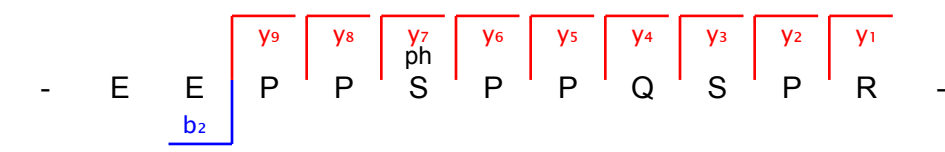

Raw file 20171215\_MaS\_33SR\_LMH\_phospho\_03 Scan 5053 Method FTMS; HCD Score 292.65 m/z 734.32 Gene names TCOF1

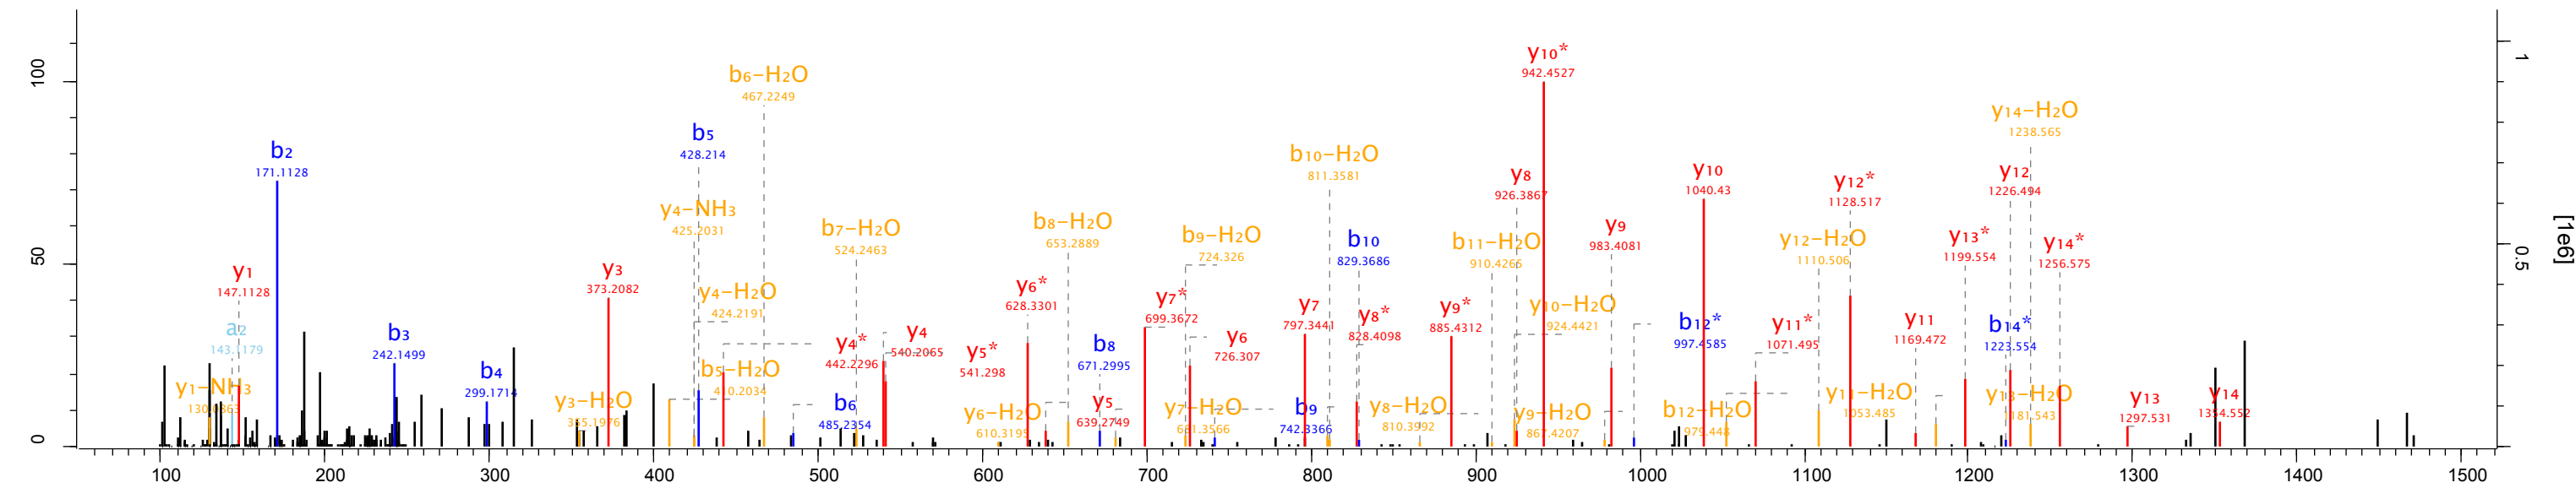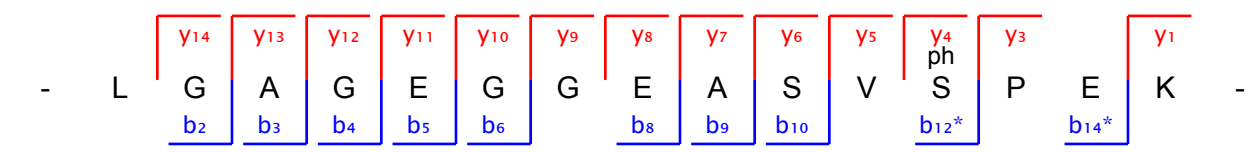

Raw file 20171215\_MaS\_33SR\_LMH\_phospho\_03 Scan 5103 Method FTMS; HCD Score 87.16 m/z 719.79 Gene names ZBTB38

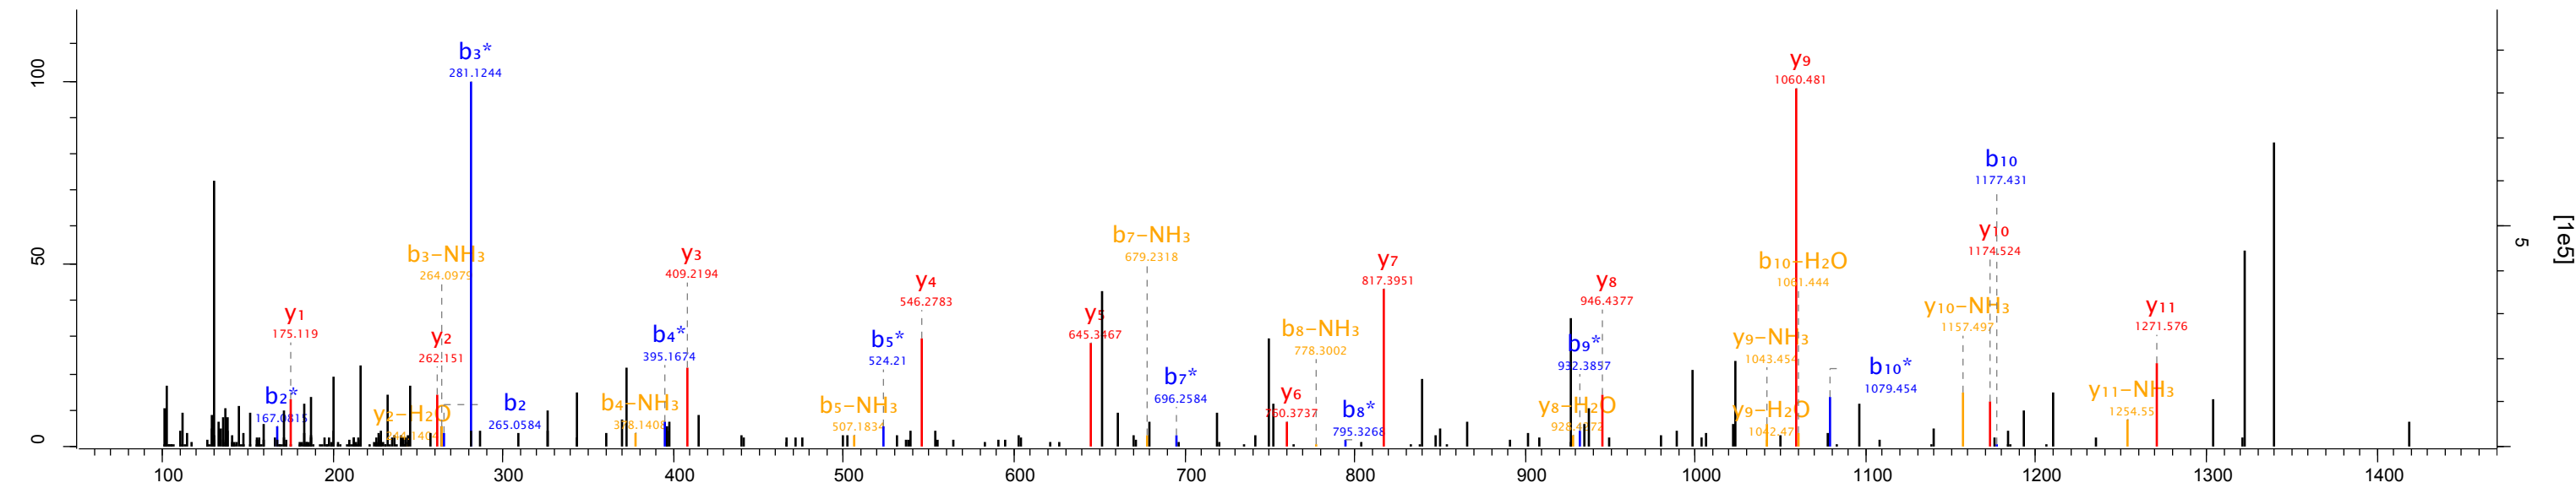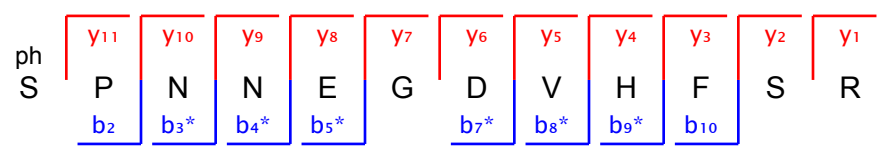

Raw file 20171215\_MaS\_33SR\_LMH\_phospho\_03 Scan 5263 Method FTMS; HCD Score 90.17 m/z 1070.45 Gene names UTP20

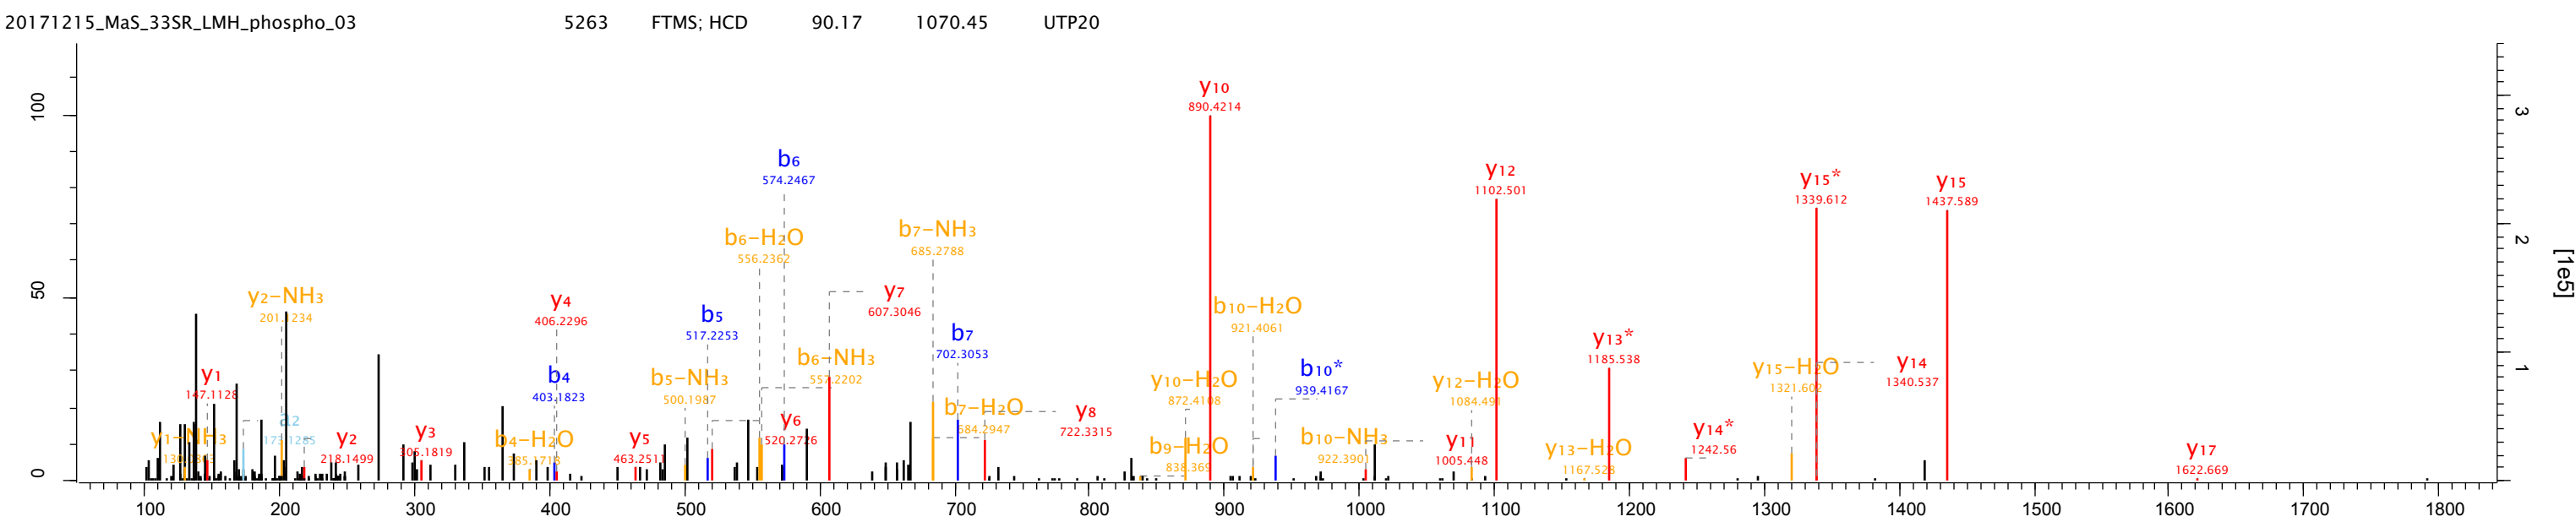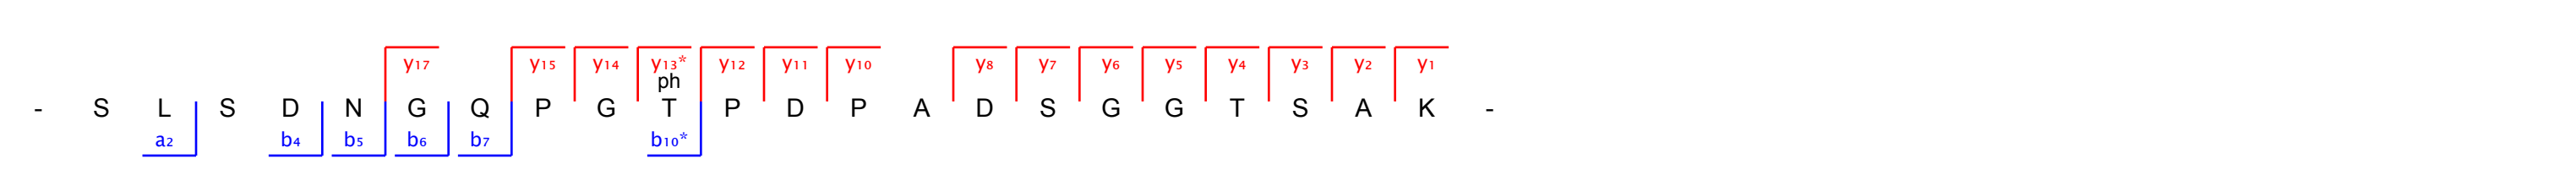

Raw file 20171215\_MaS\_33SR\_LMH\_phospho\_03 Scan 5303 Method FTMS; HCD Score 120.33 m/z 435.2 Gene names RANBP2;RGPD4;RGPD5;RGPD8

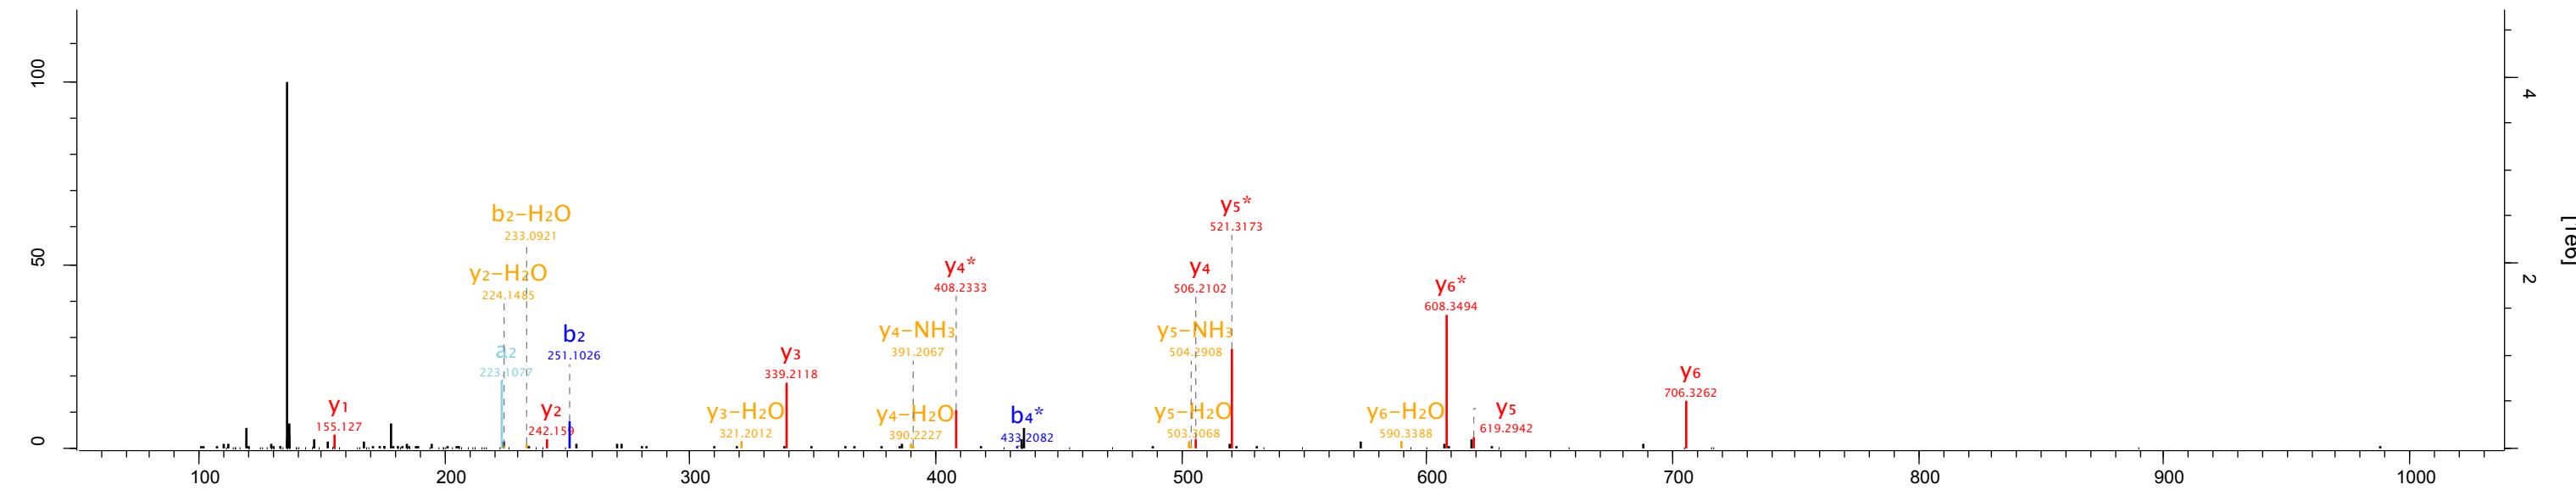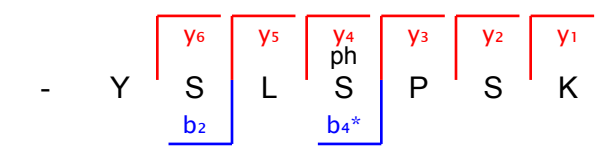



Raw file 20171215\_MaS\_33SR\_LMH\_phospho\_03 Scan 5323 Method FTMS; HCD Score 196.3 m/z 834.37 Gene names CLASP1

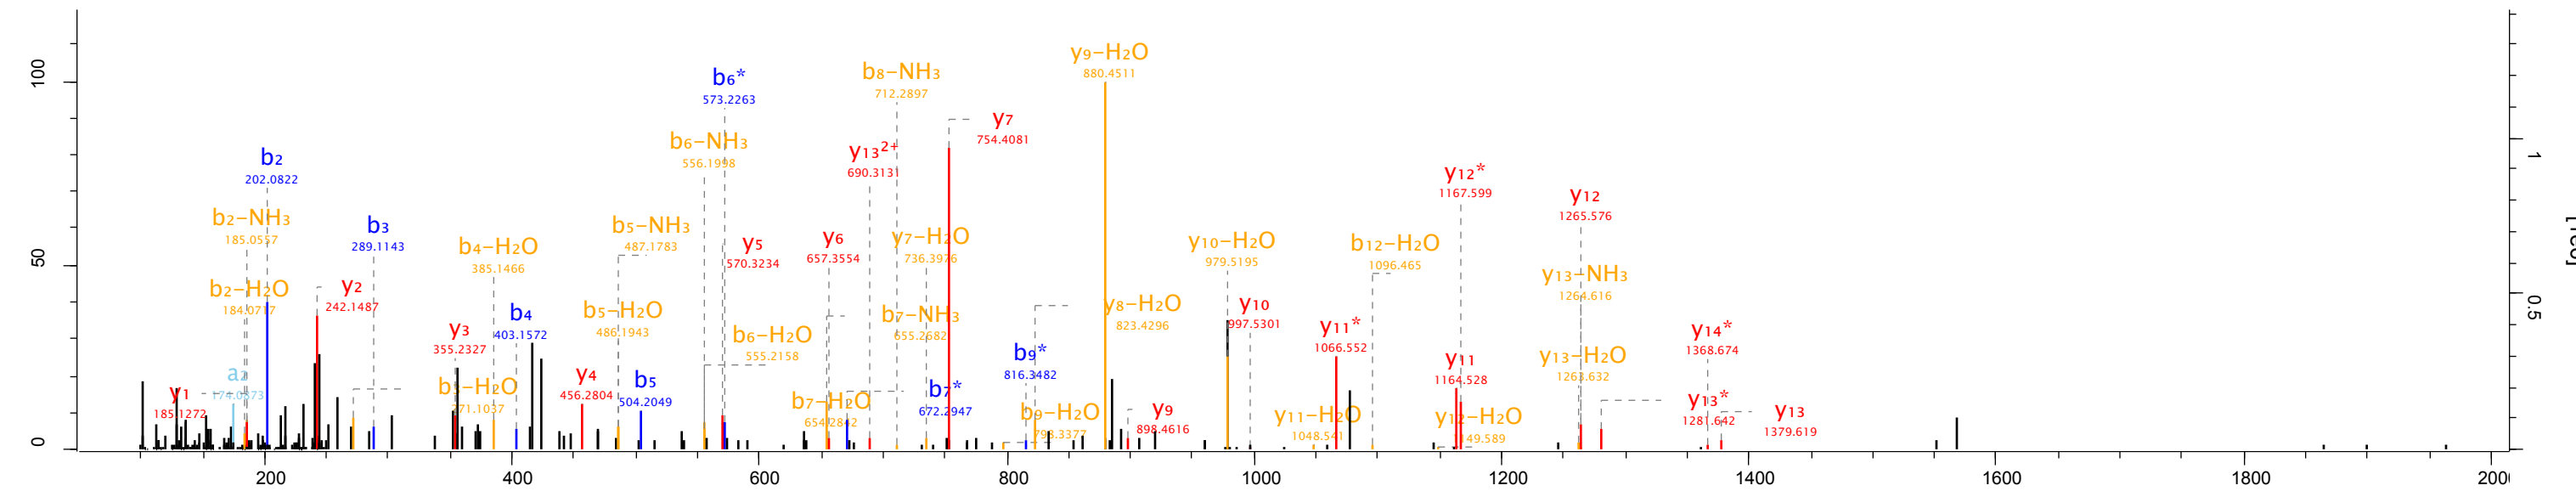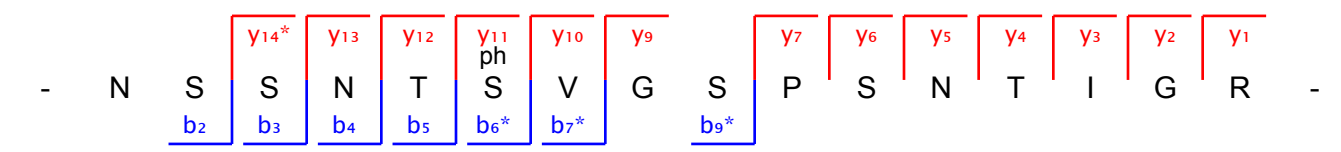

Raw file 20171215\_MaS\_33SR\_LMH\_phospho\_03 Scan 5333 Method FTMS; HCD Score 51.09 m/z 644.8 Gene names ABL2

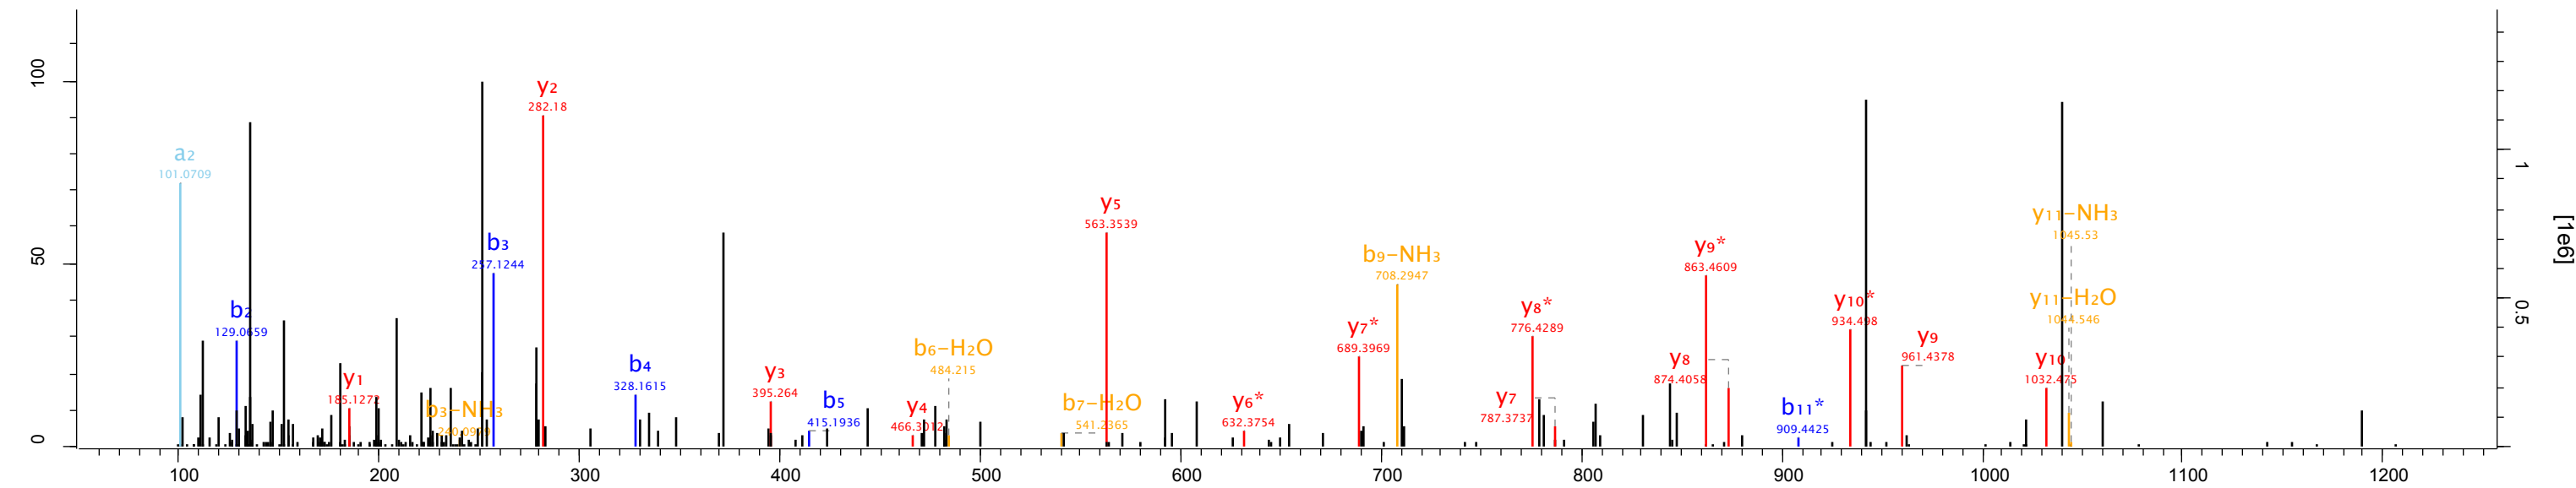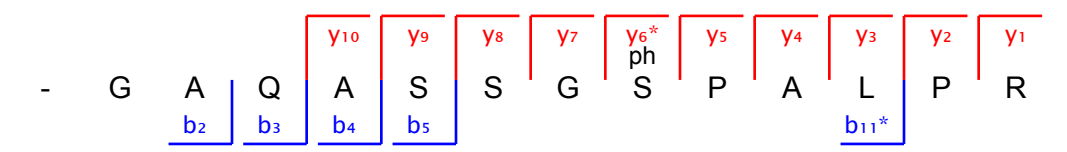

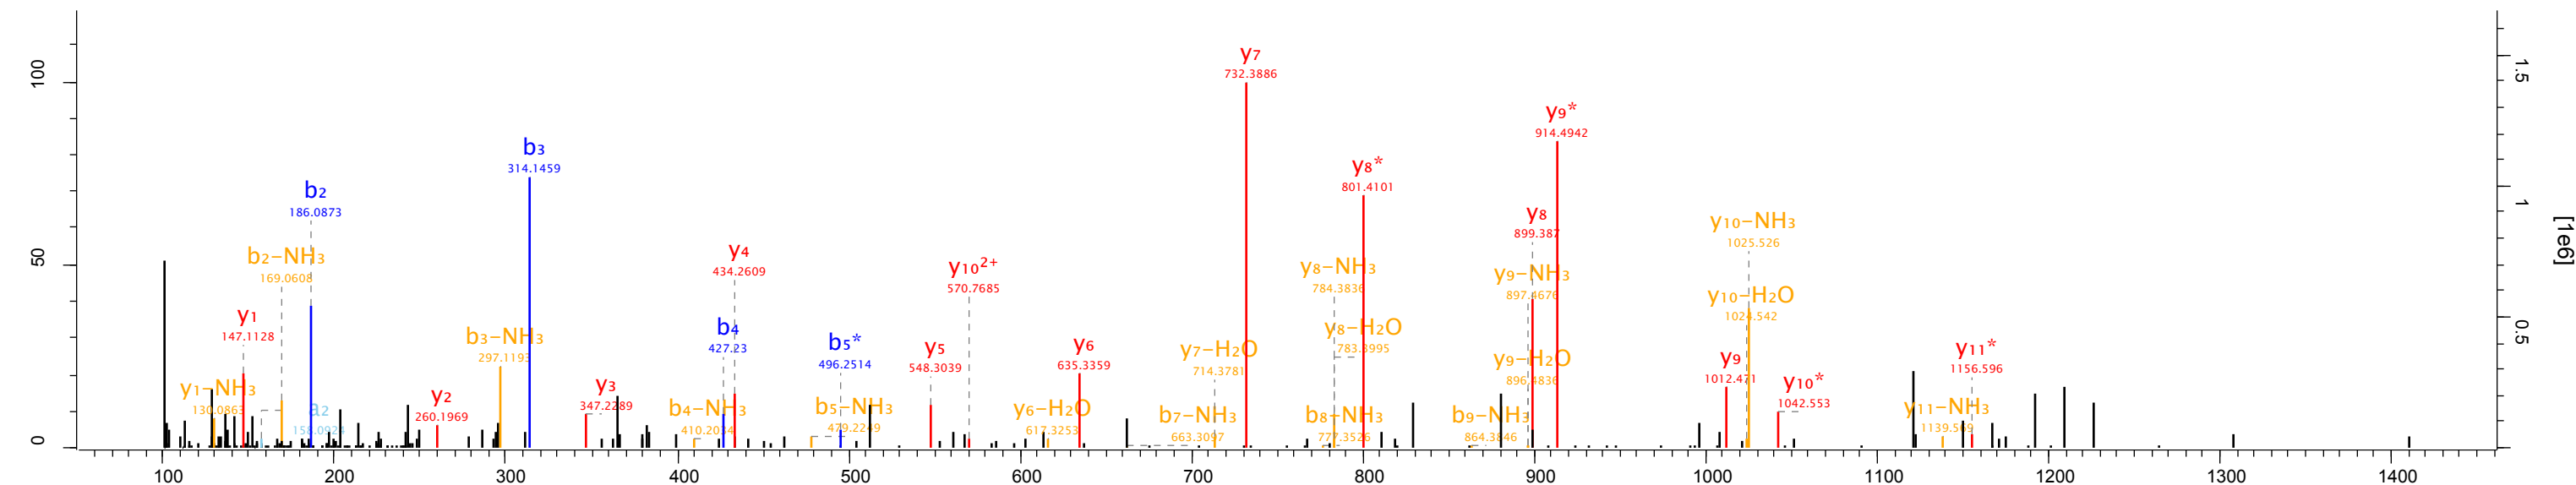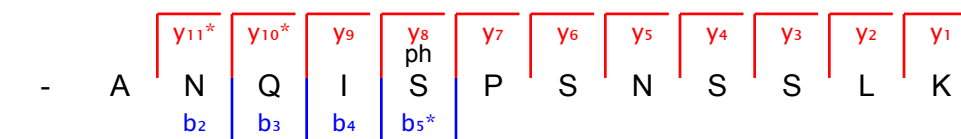

Raw file 20171215\_MaS\_33SR\_LMH\_phospho\_03 Scan 5483 Method FTMS; HCD Score 130.01 m/z 945.39 Gene names DHX16

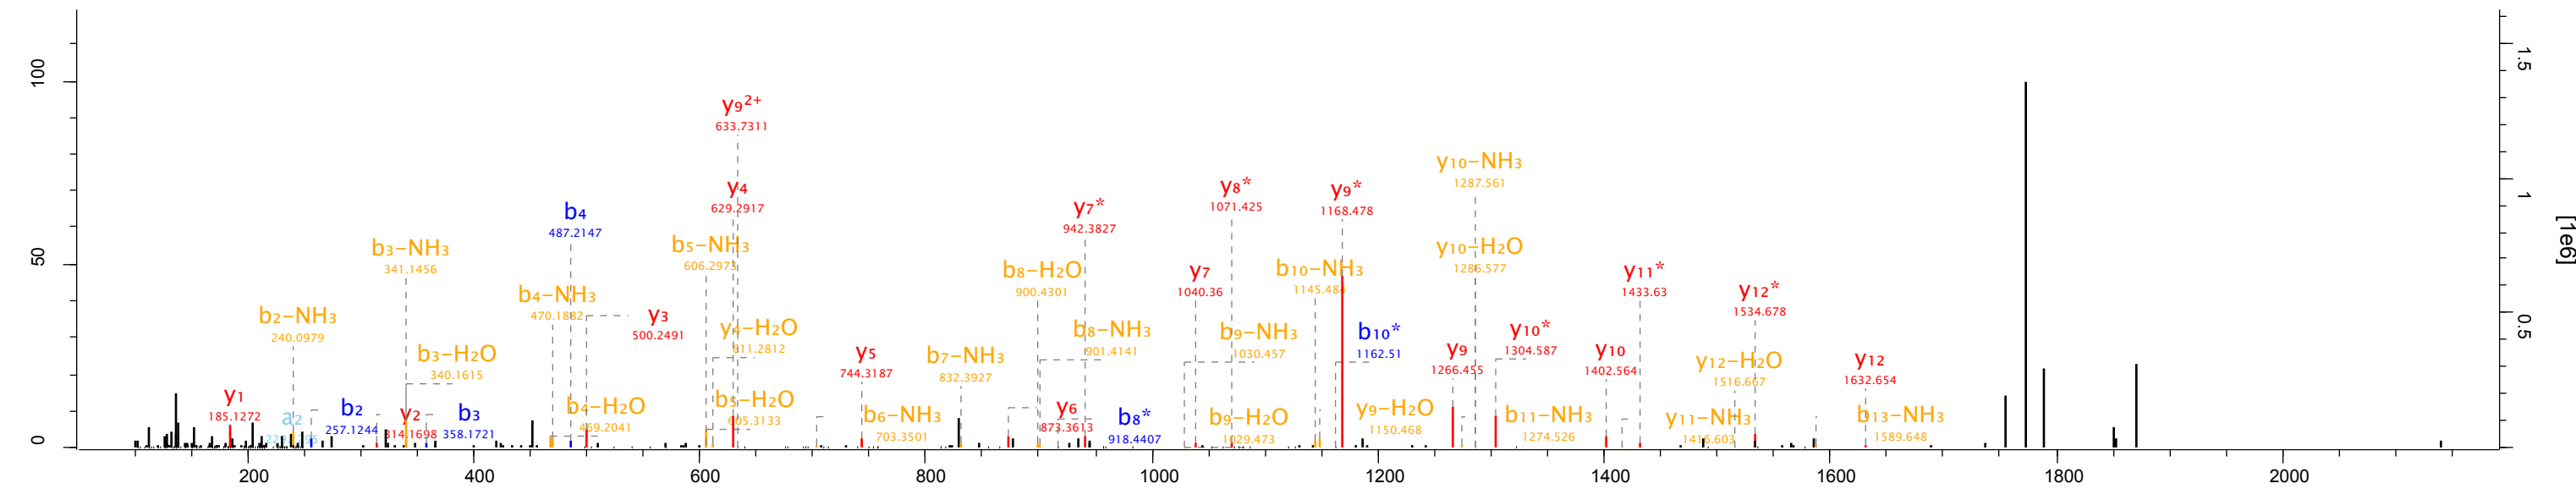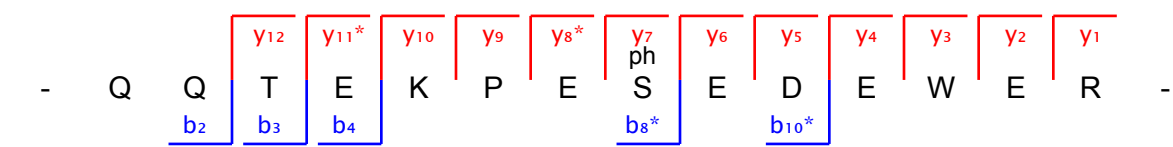

Raw file 20171215\_MaS\_33SR\_LMH\_phospho\_03 Scan 5833 Method FTMS; HCD Score 100.58 m/z 636.8 Gene names GAPVD1

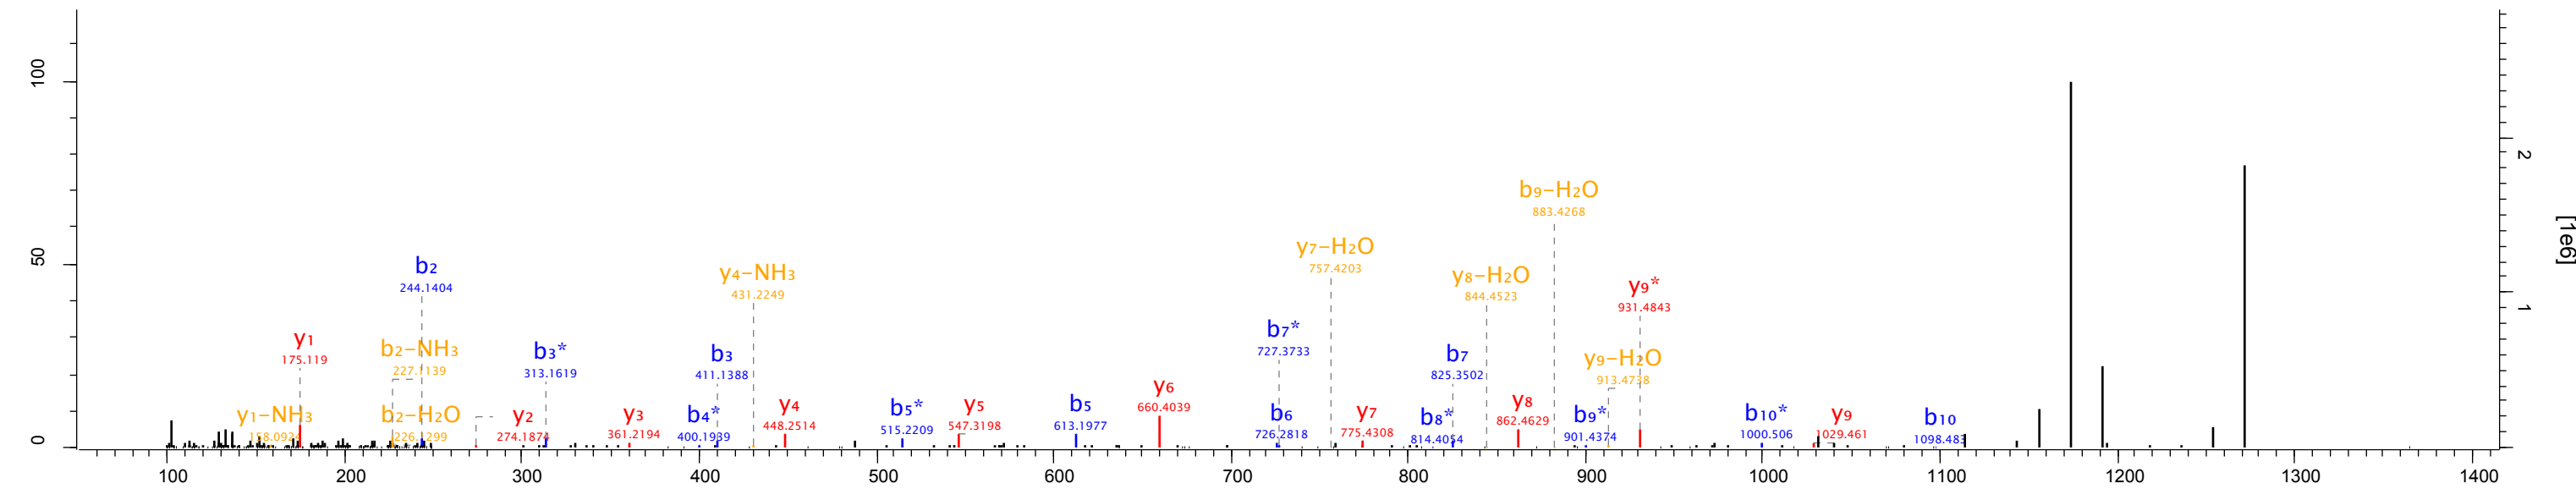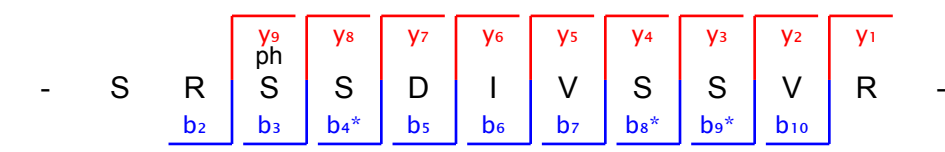

Raw file 20171215\_MaS\_33SR\_LMH\_phospho\_03 Scan 6053 Method FTMS; HCD Score 120.03 m/z 540.21 Gene names PDHA1

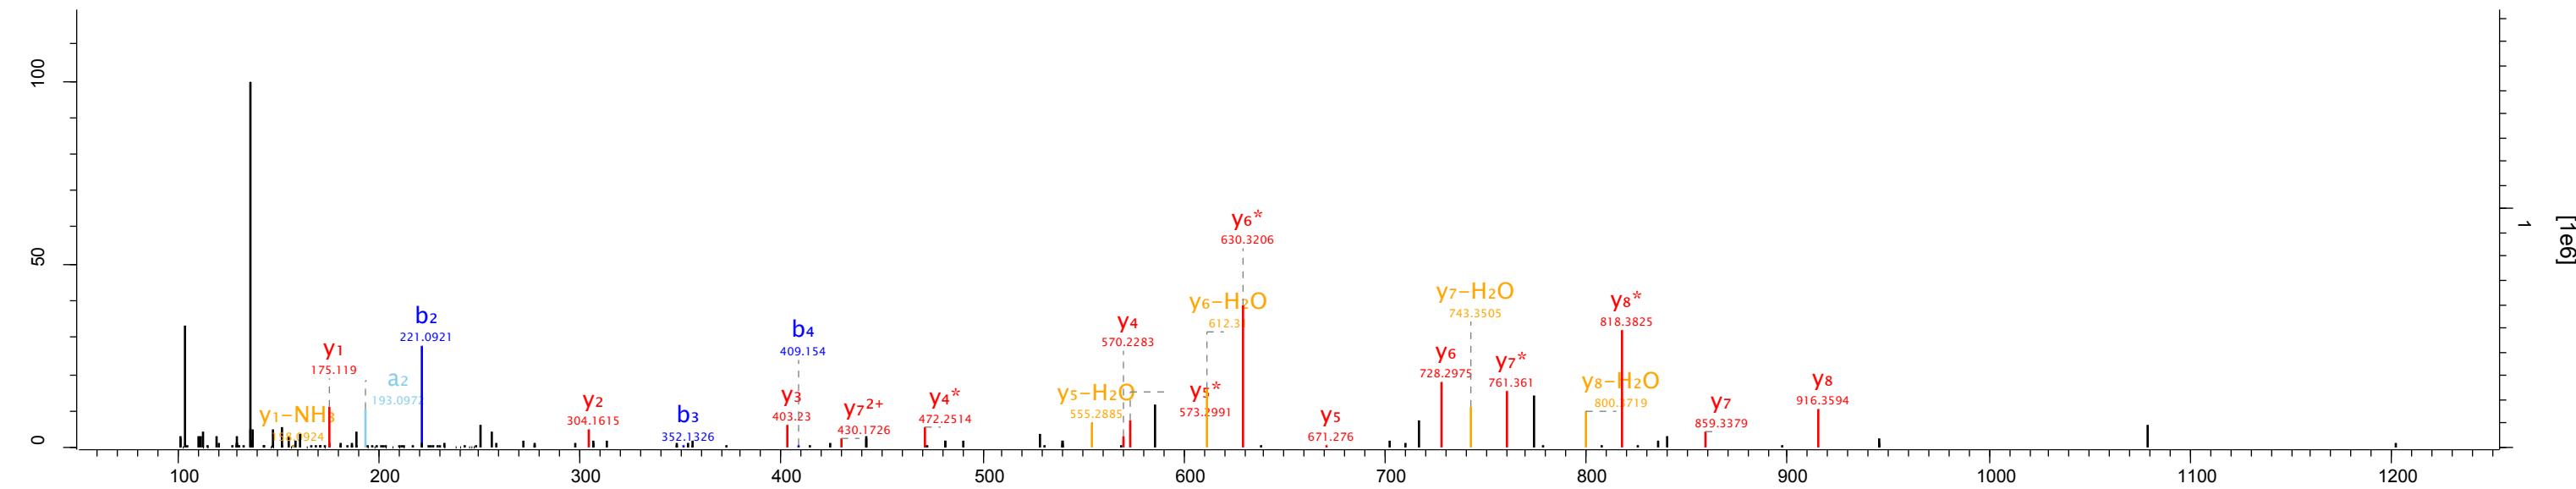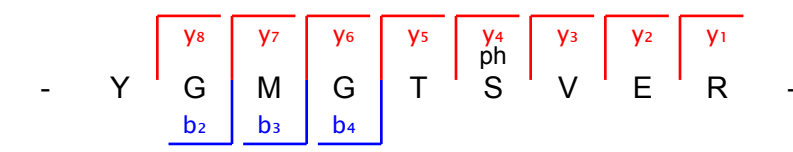

Raw file 20171215\_MaS\_33SR\_LMH\_phospho\_03 Scan 6393 Method FTMS; HCD Score 133.23 m/z 580.77 Gene names DYRK1A;DYRK1B

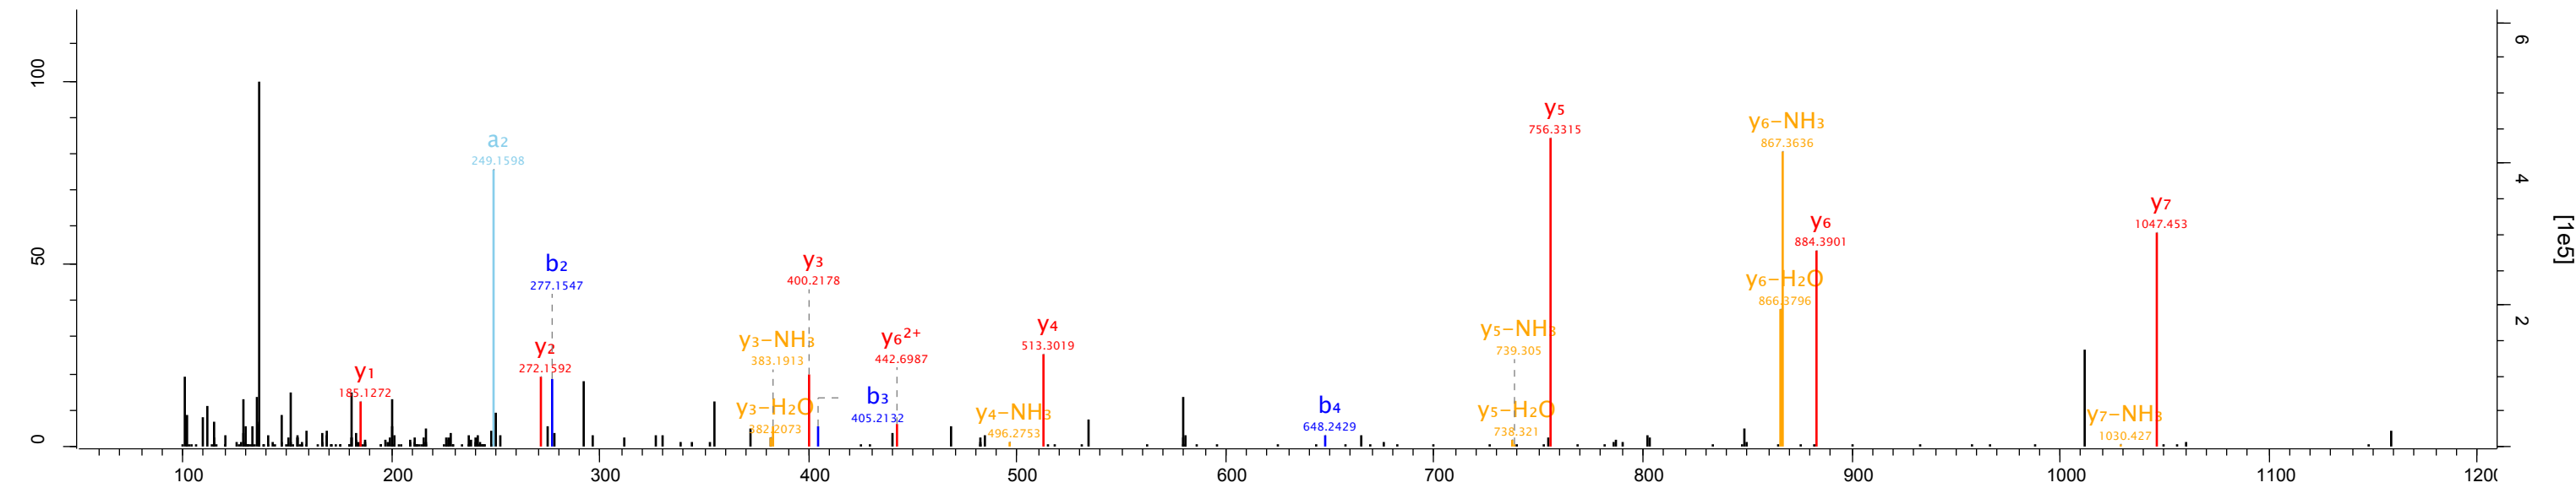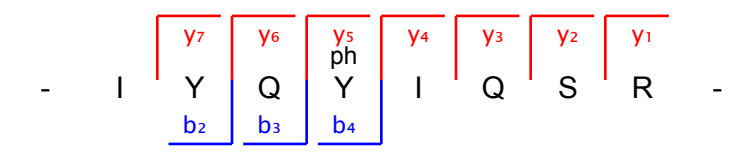

Raw file 20171215\_MaS\_33SR\_LMH\_phospho\_03 Scan 6413 Method FTMS; HCD Score 185.3 m/z 564.25 Gene names FCHO2

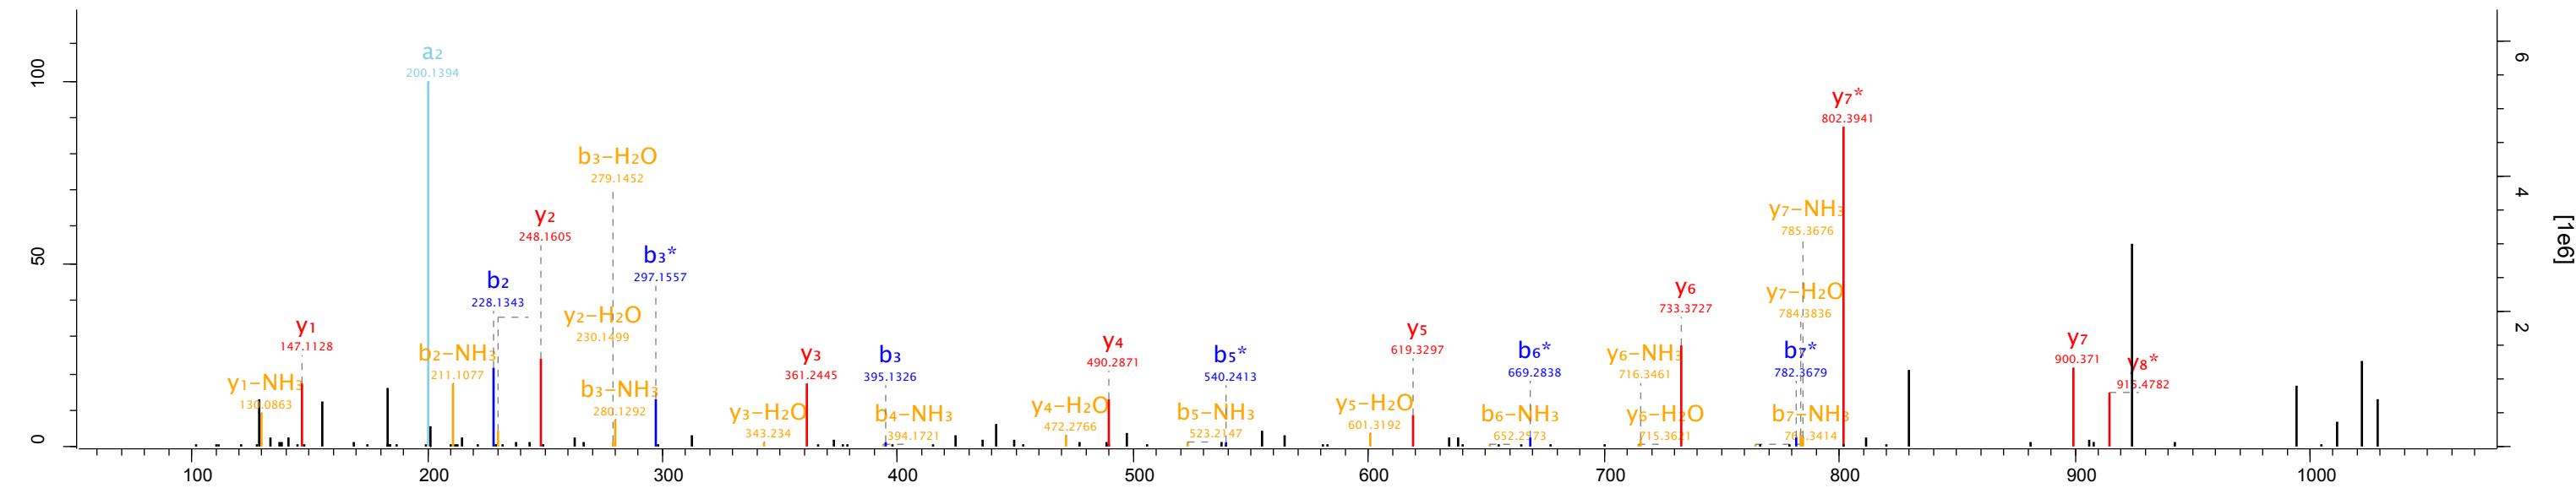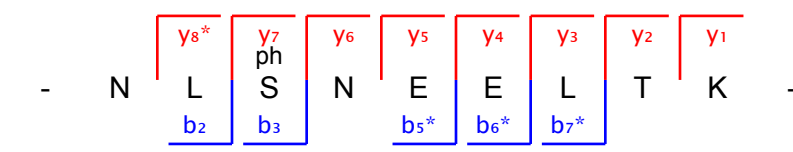



20171215\_MaS\_33SR\_LMH\_phospho\_03 6493 FTMS; HCD 250.7 1005.94 MECP2

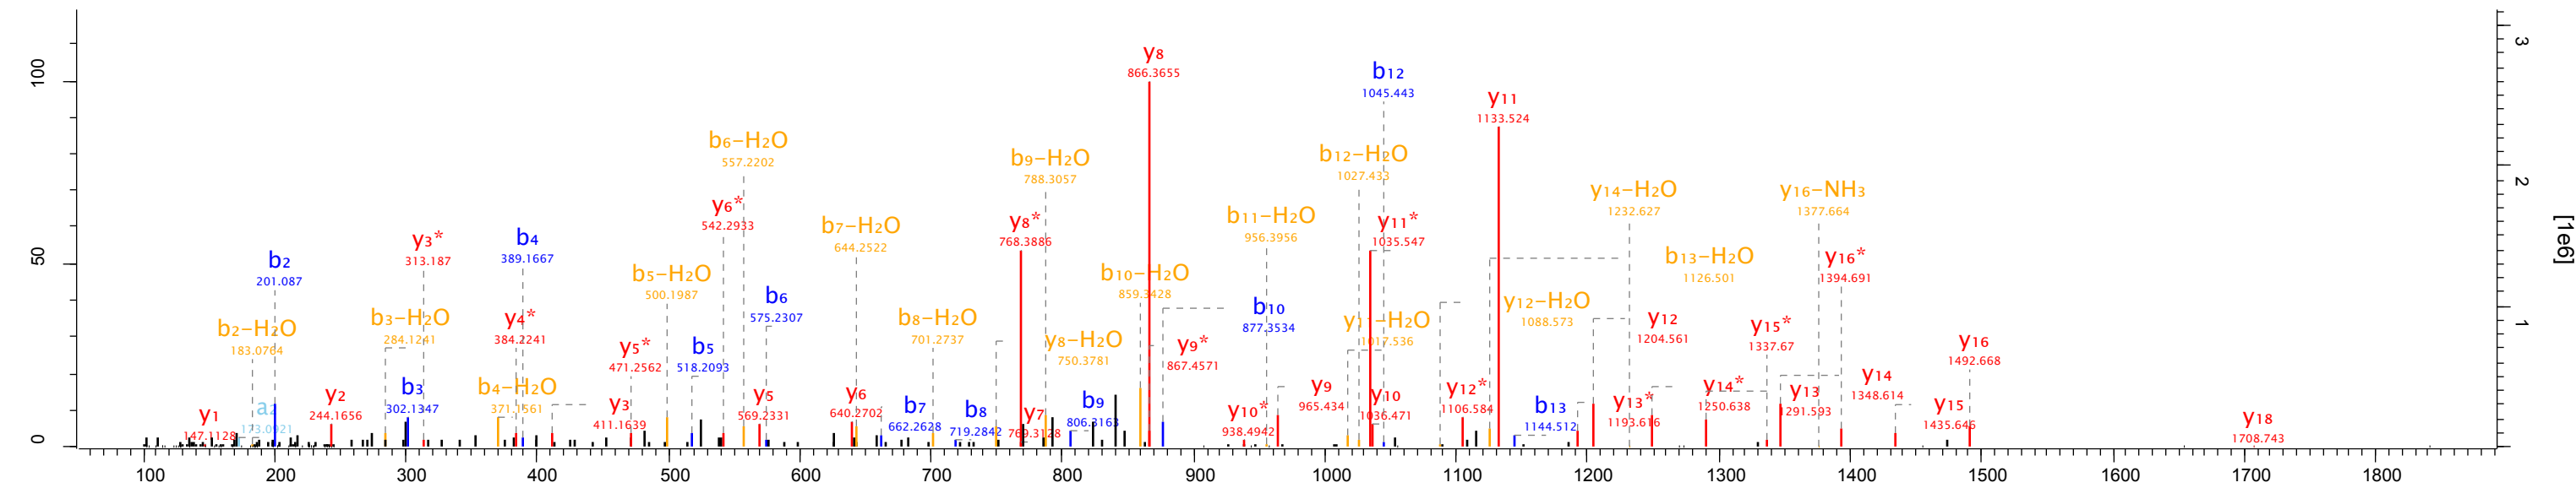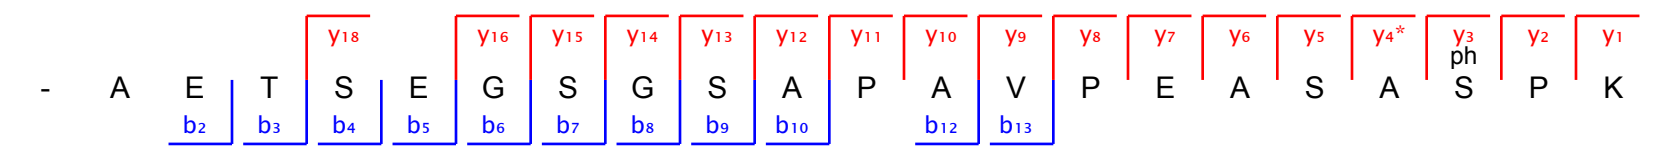

Raw file: 20171215\_MaS\_33SR\_LMH\_phospho\_03  
 Scan: 6503 Method: FTMS; HCD Score: 236.19 m/z: 1000.94 Gene names: KTN1

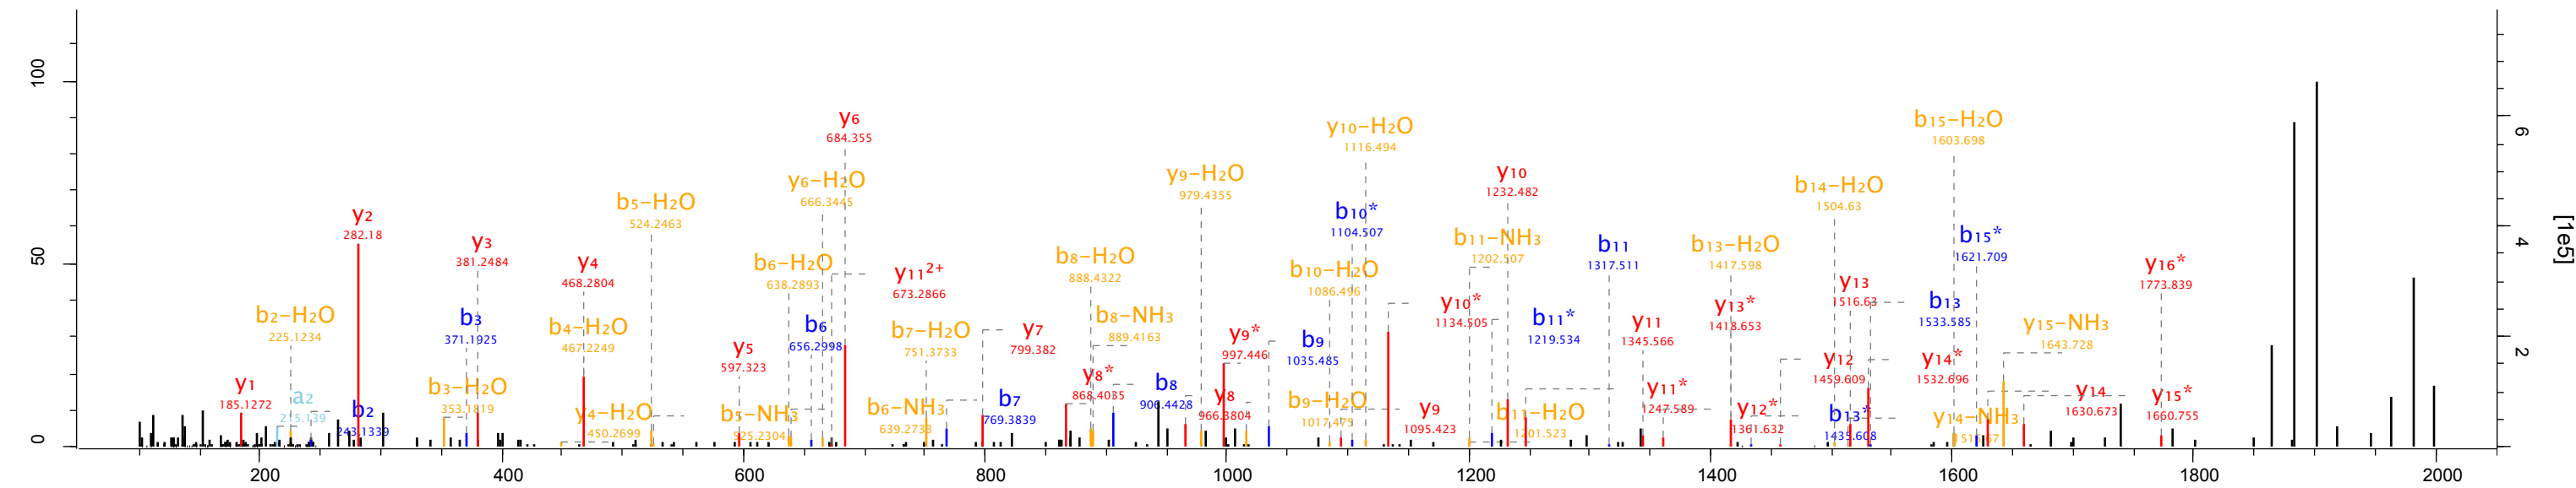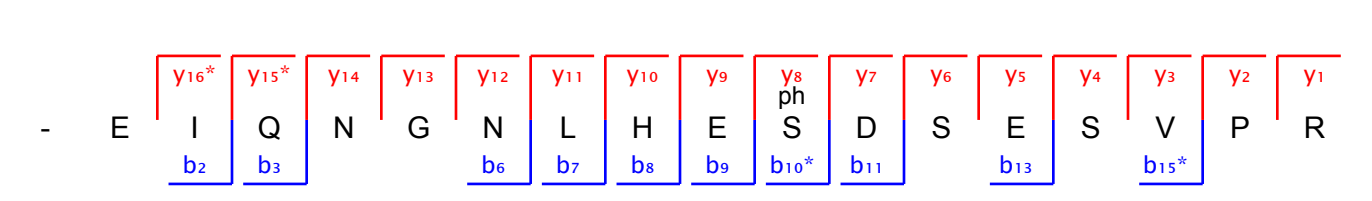

Raw file 20171215\_MaS\_33SR\_LMH\_phospho\_03 Scan 6513 Method FTMS; HCD Score 217.26 m/z 911.36 Gene names STARD13

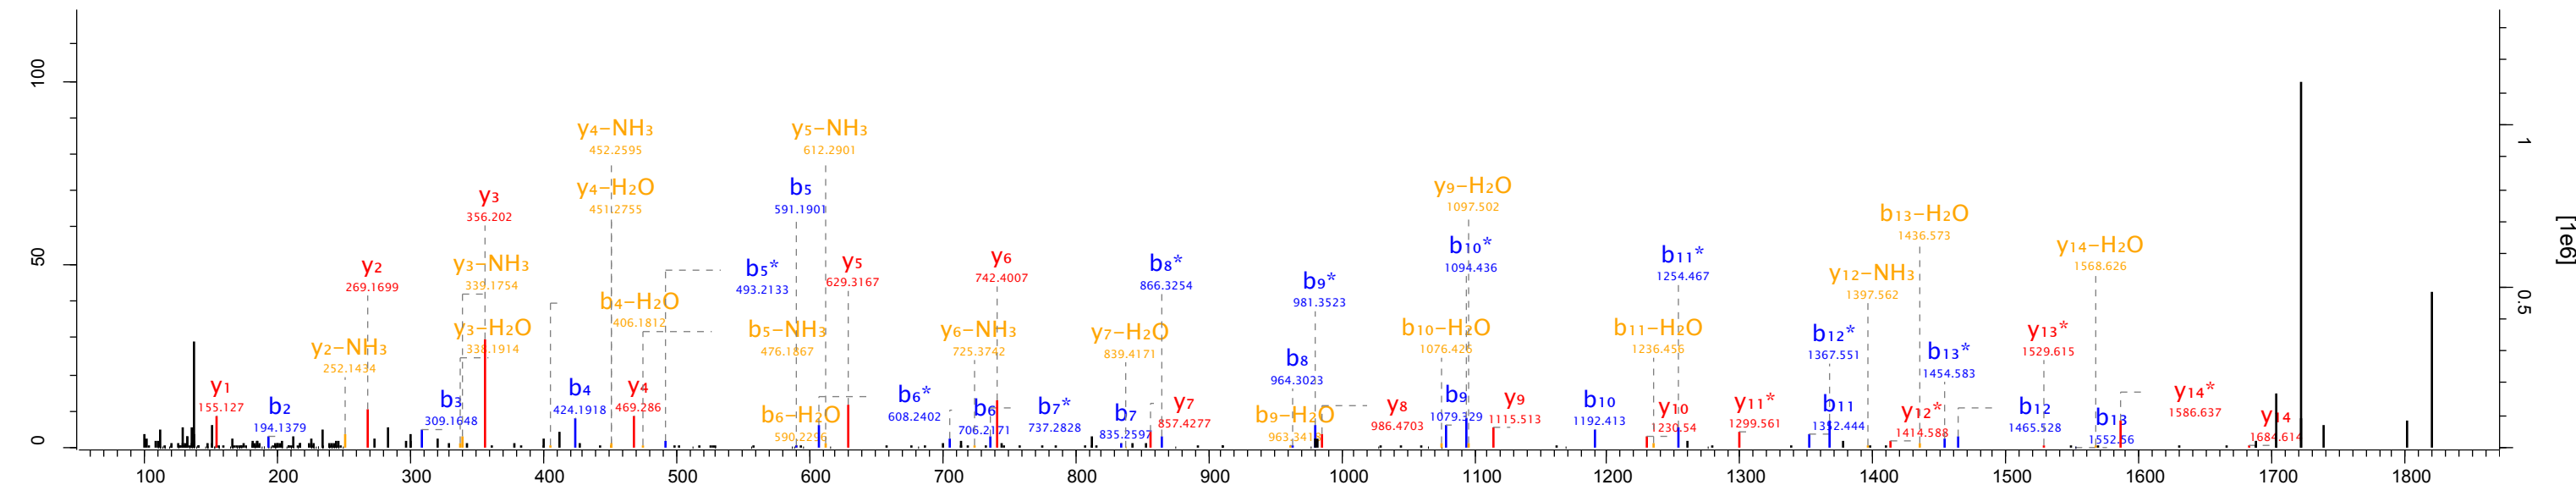

- K G D D S D E E D L C I S N K -

y14
y13\*
y12\*
y11\*  
ph
y10
y9
y8
y7
y6
y5
y4
y3
y2
y1

b2
b3
b4
b5
b6
b7
b8
b9
b10
b11
b12
b13

Raw file 20171215\_MaS\_33SR\_LMH\_phospho\_03 Scan 6813 Method FTMS; HCD Score 216.01 m/z 756.81 Gene names NELFE

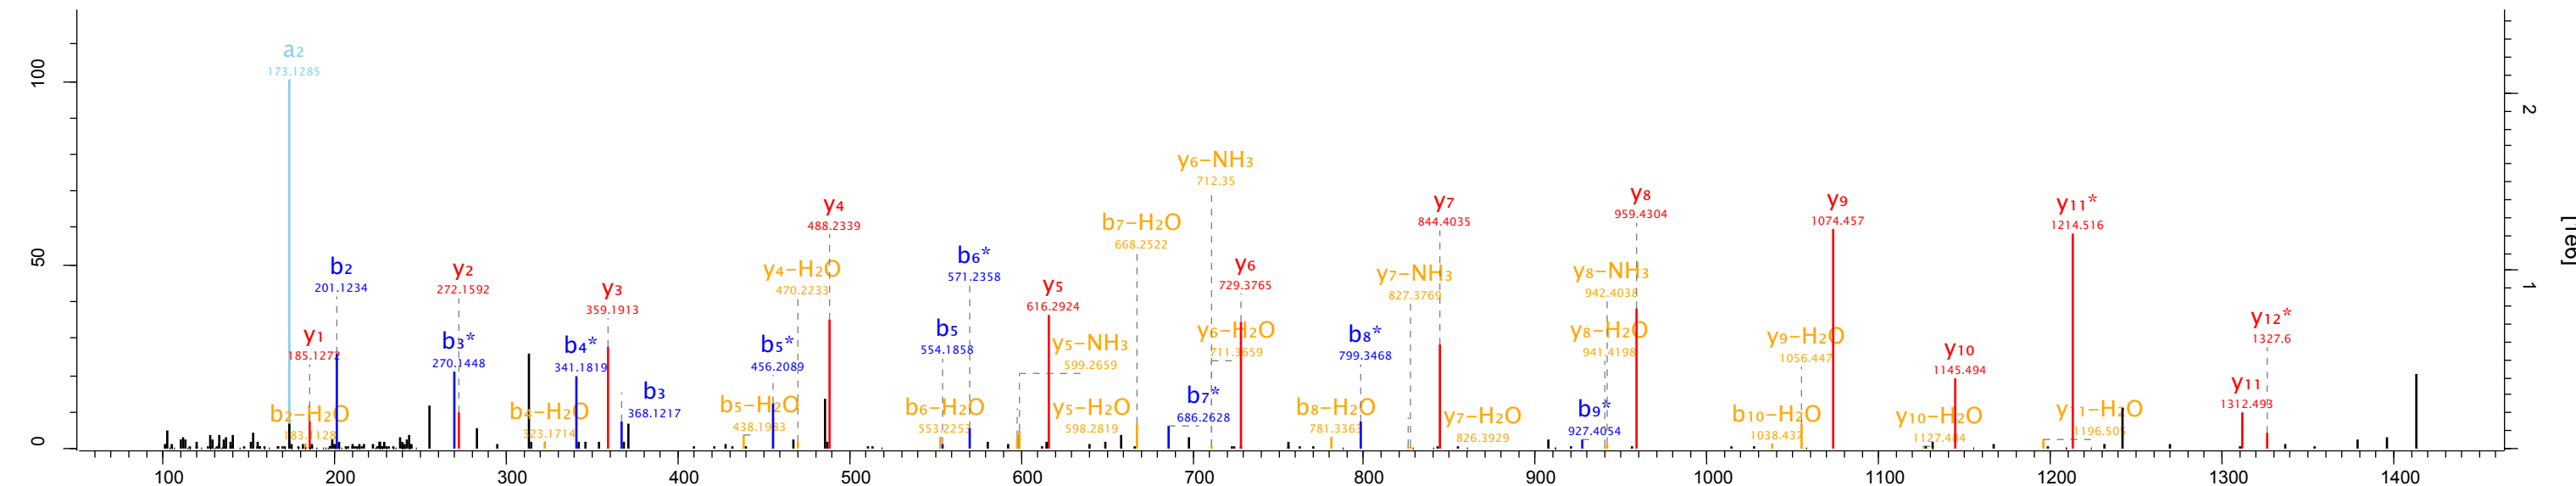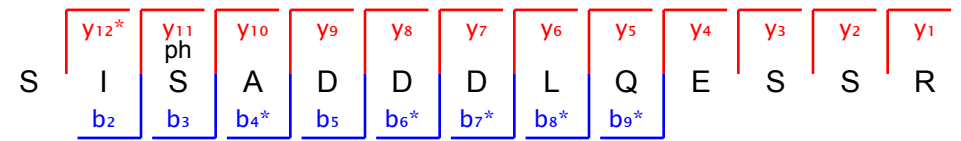

Raw file 20171215\_MaS\_33SR\_LMH\_phospho\_03 Scan 7133 Method FTMS; HCD Score 218.55 m/z 819.7 Gene names NDRG1

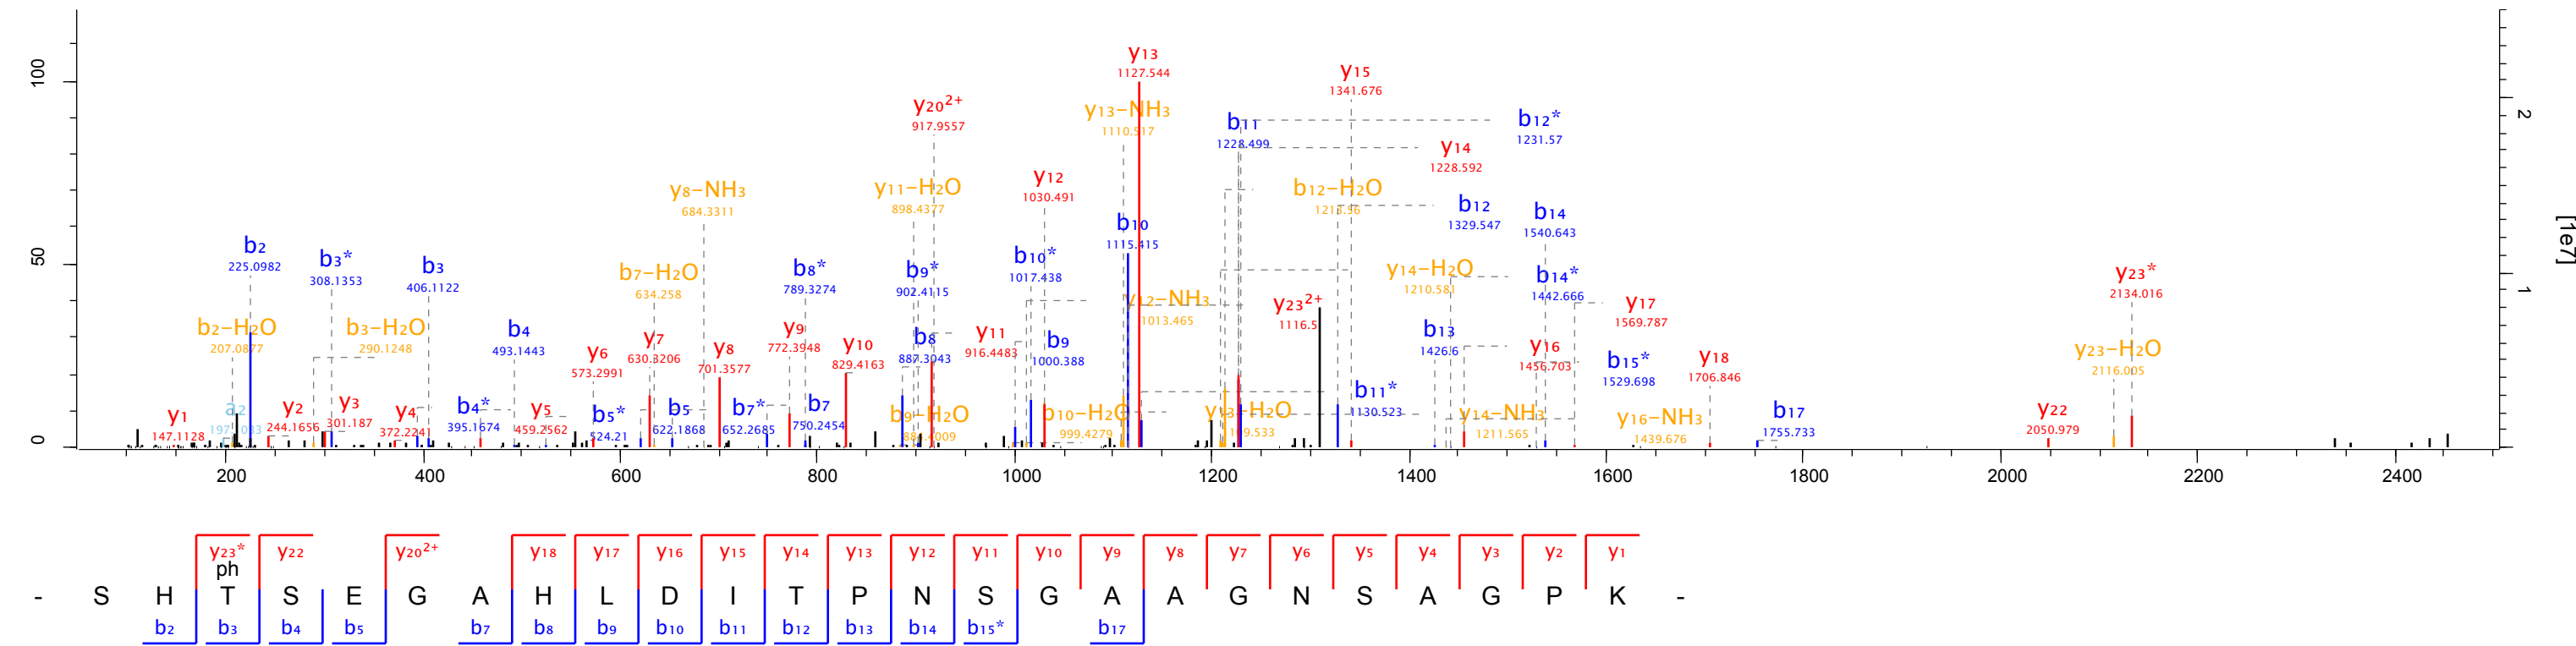

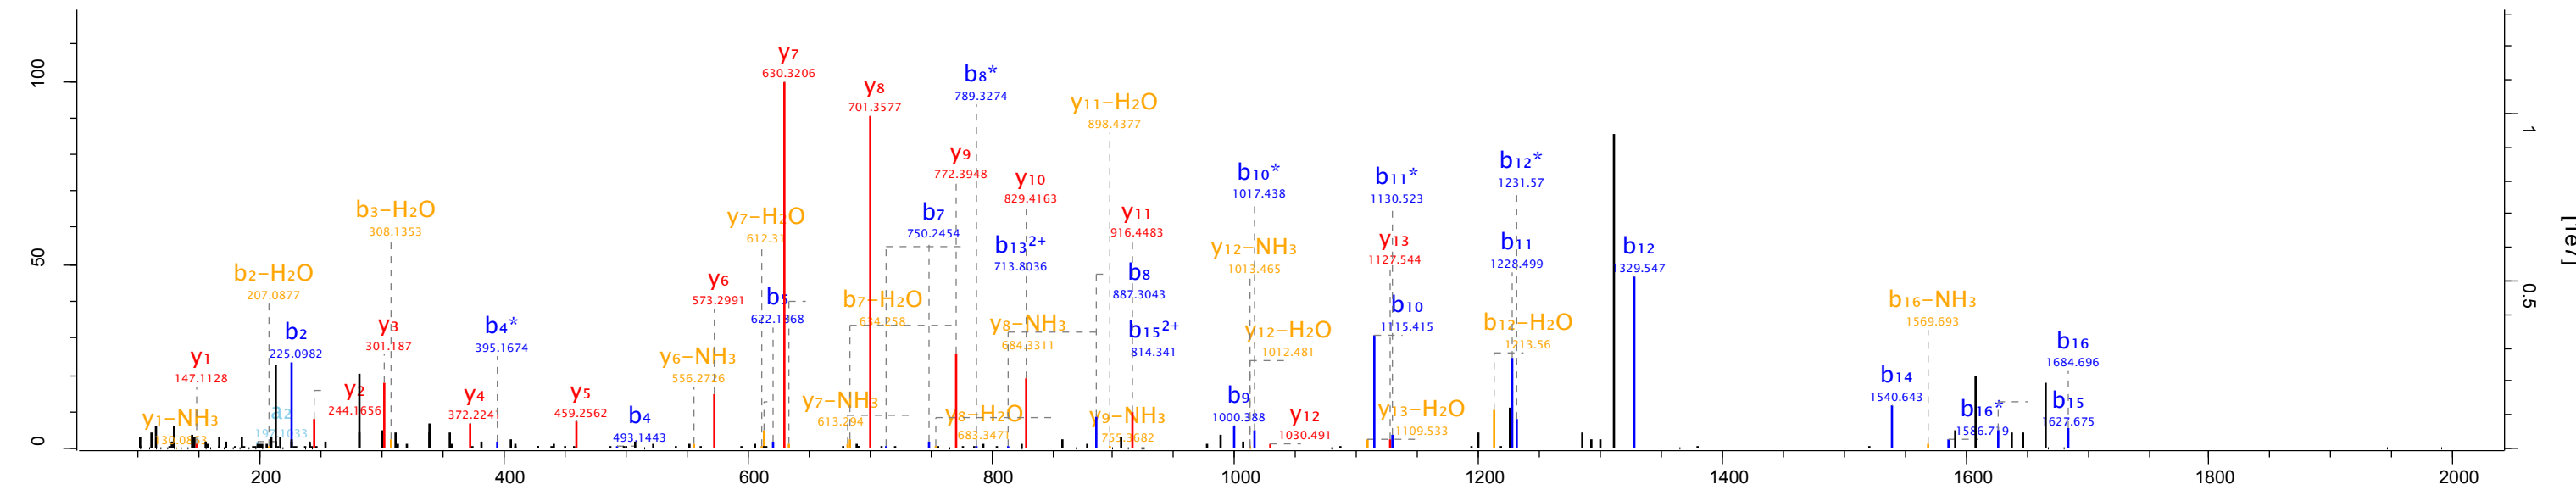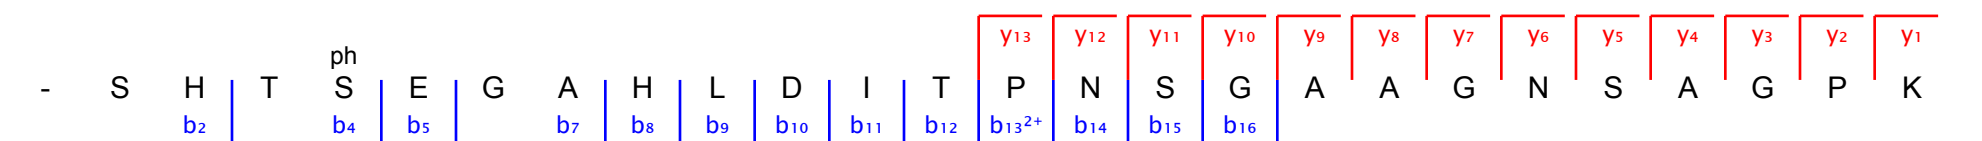

Raw file 20171215\_MaS\_33SR\_LMH\_phospho\_03 Scan 7493 Method FTMS; HCD Score 142.85 m/z 935.86 Gene names MAP3K4

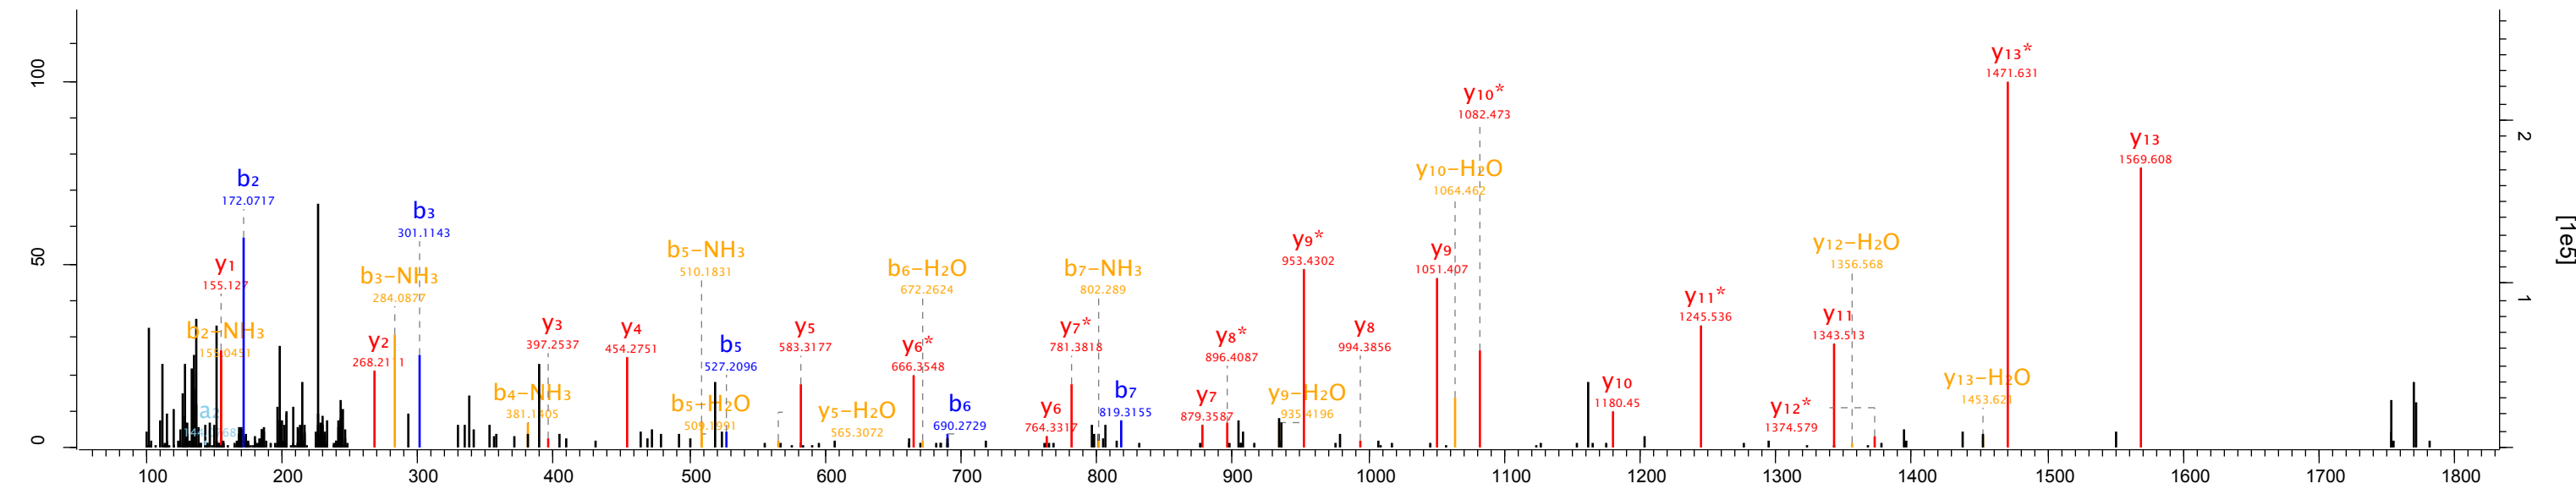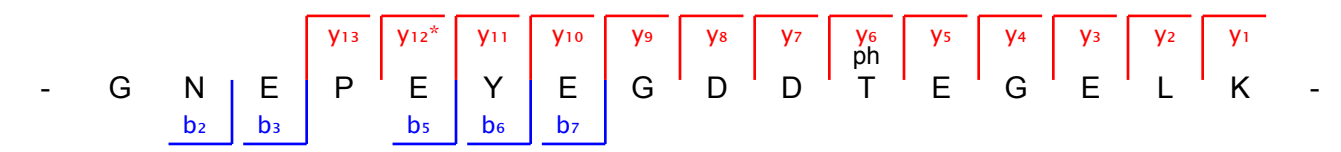

20171215\_MaS\_33SR\_LMH\_phospho\_03

7533 FTMS; HCD 169.6 748.31 NFIC

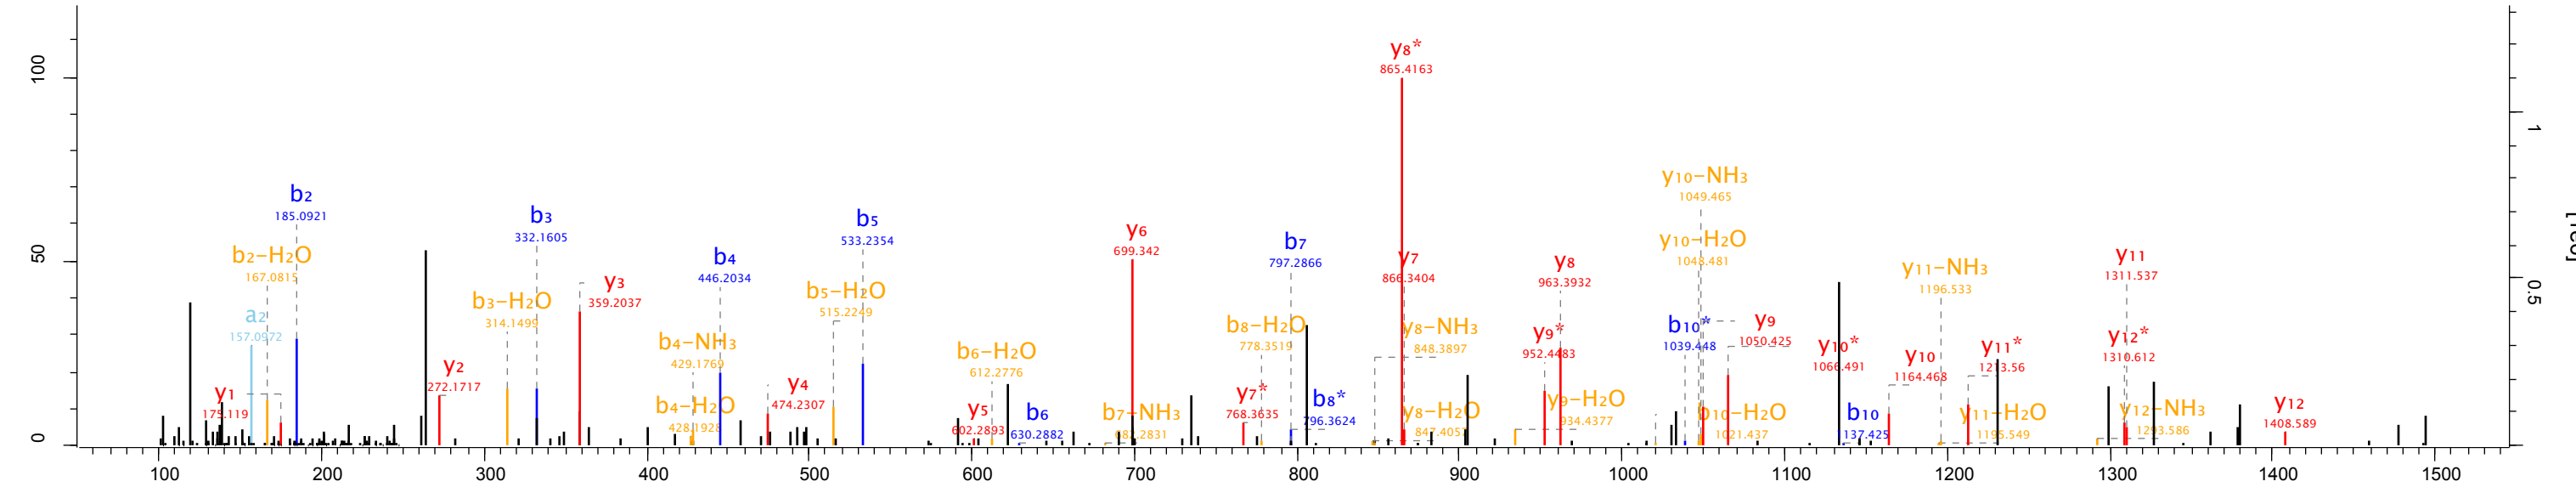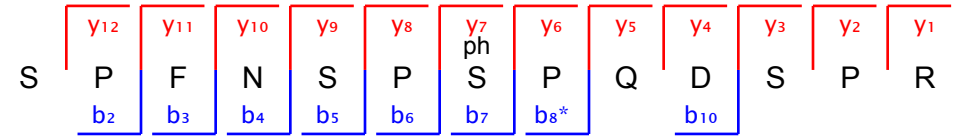



Raw file: 20171215\_MaS\_33SR\_LMH\_phospho\_03  
 Scan: 7623 Method: FTMS; HCD Score: 99.54 m/z: 556.22 Gene names: DOCK7

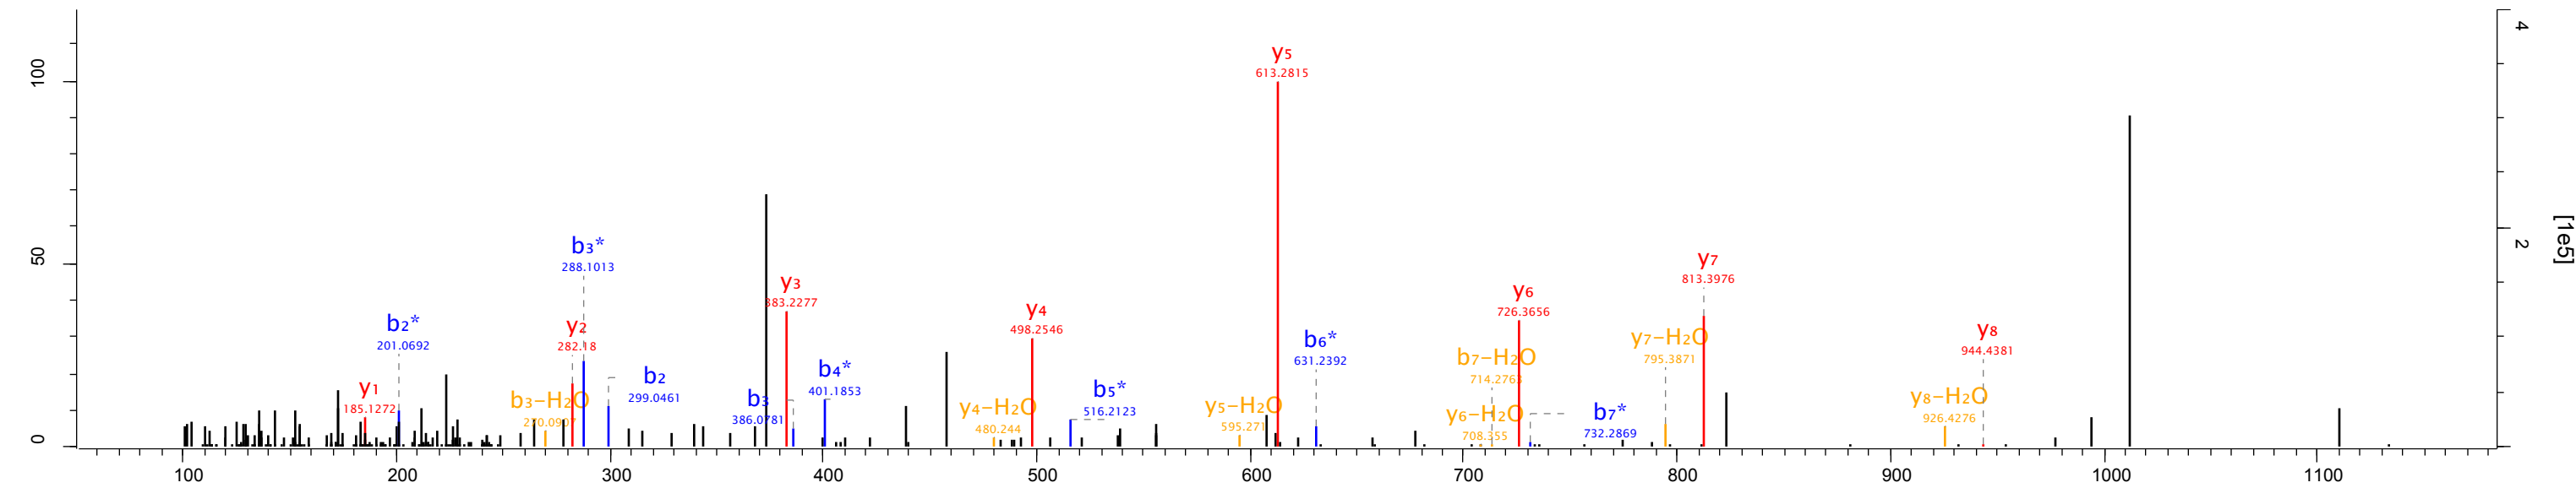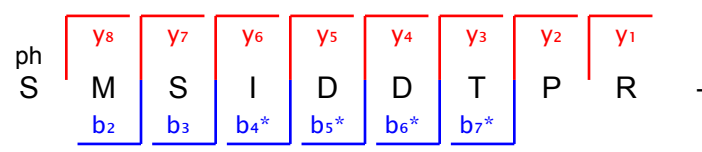

Raw file 20171215\_MaS\_33SR\_LMH\_phospho\_03 Scan 7663 Method FTMS; HCD Score 104.01 m/z 408.71 Gene names SLC7A11

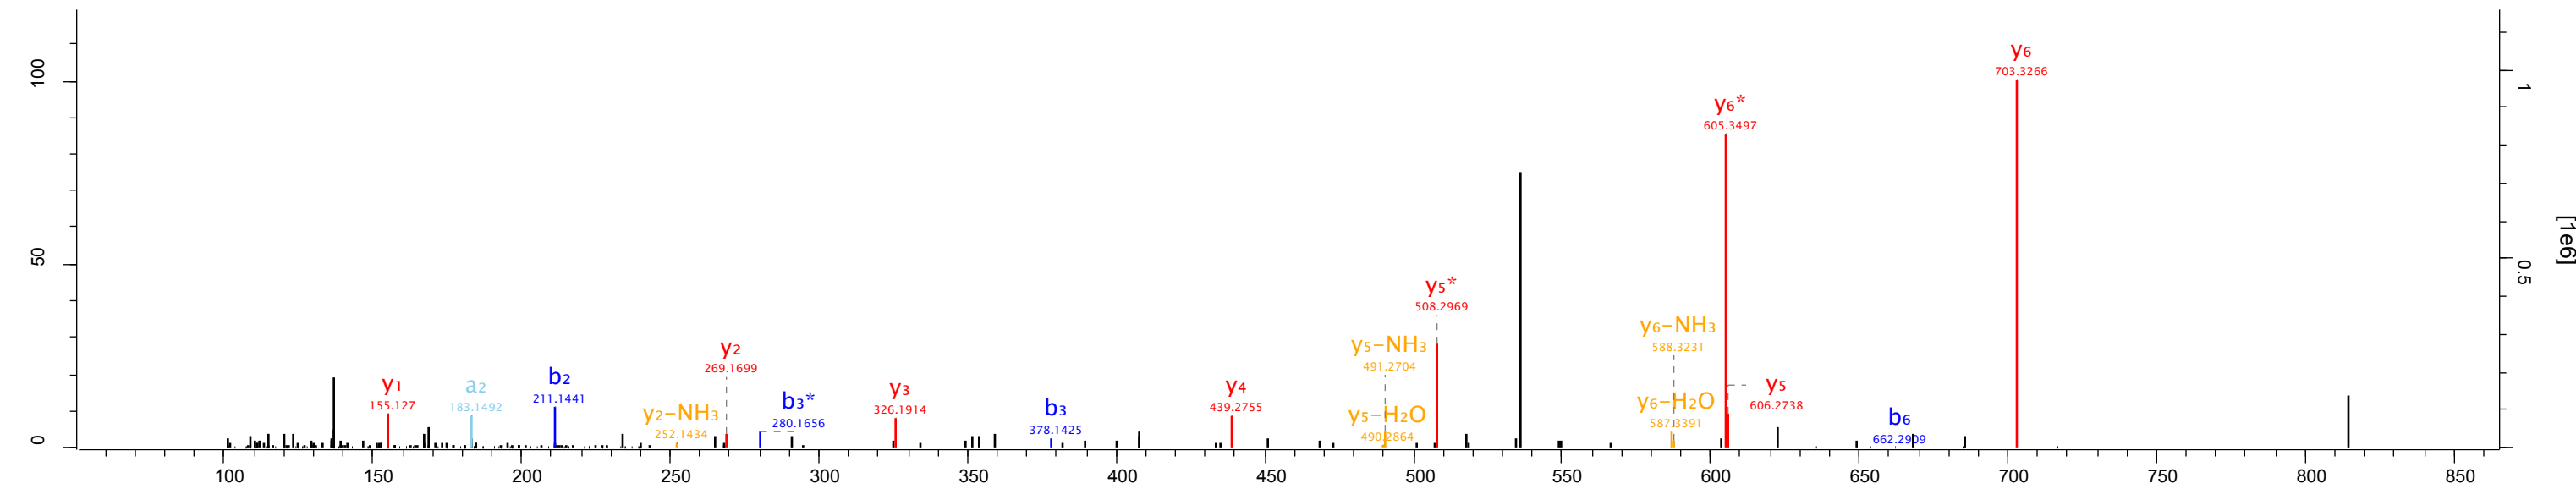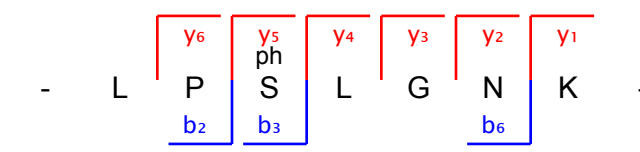

Raw file: 20171215\_MaS\_33SR\_LMH\_phospho\_03  
 Scan: 7873 Method: FTMS; HCD Score: 56.45 m/z: 877.71 Gene names: RAD23A

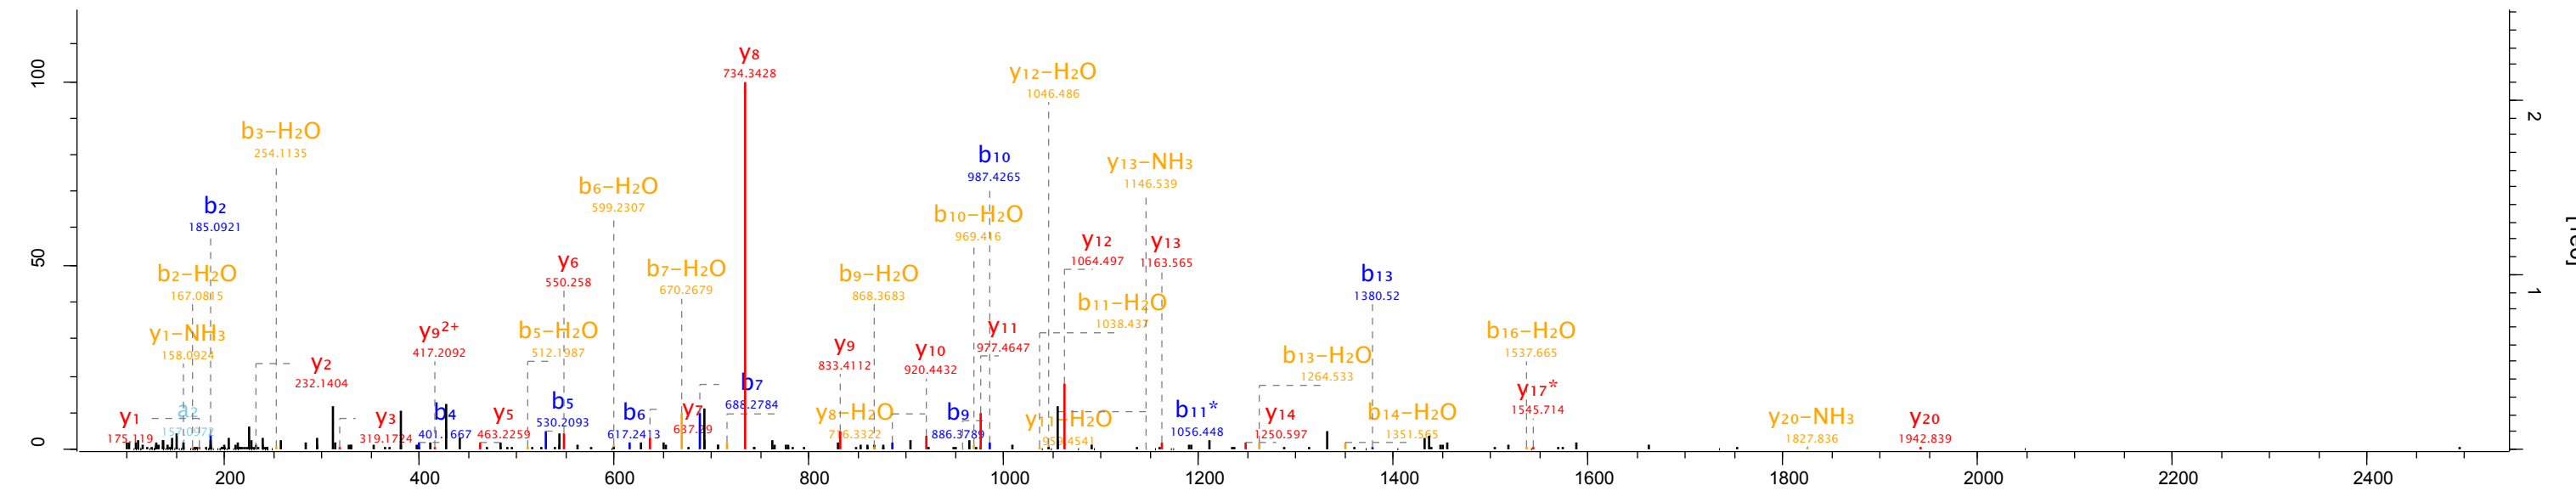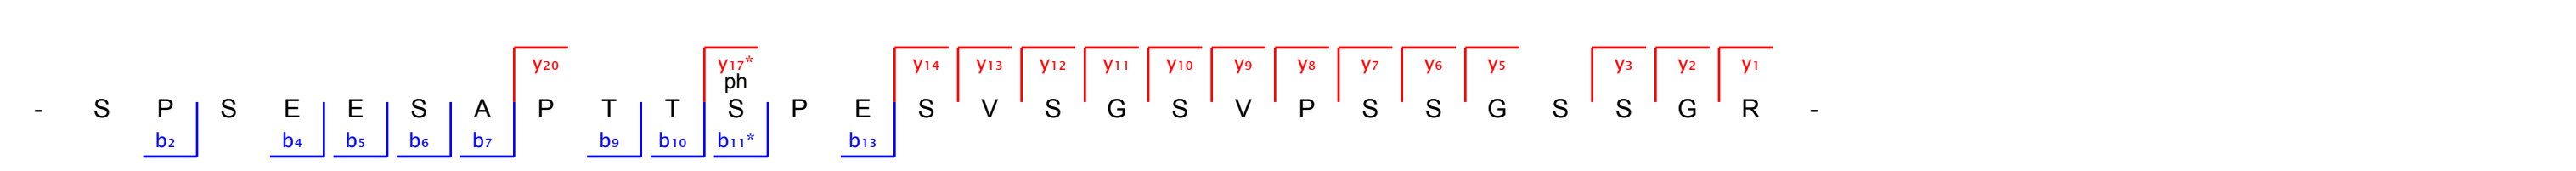

Raw file 20171215\_MaS\_33SR\_LMH\_phospho\_03 Scan 7953 Method FTMS; HCD Score 51.03 m/z 469.57 Gene names KIF11

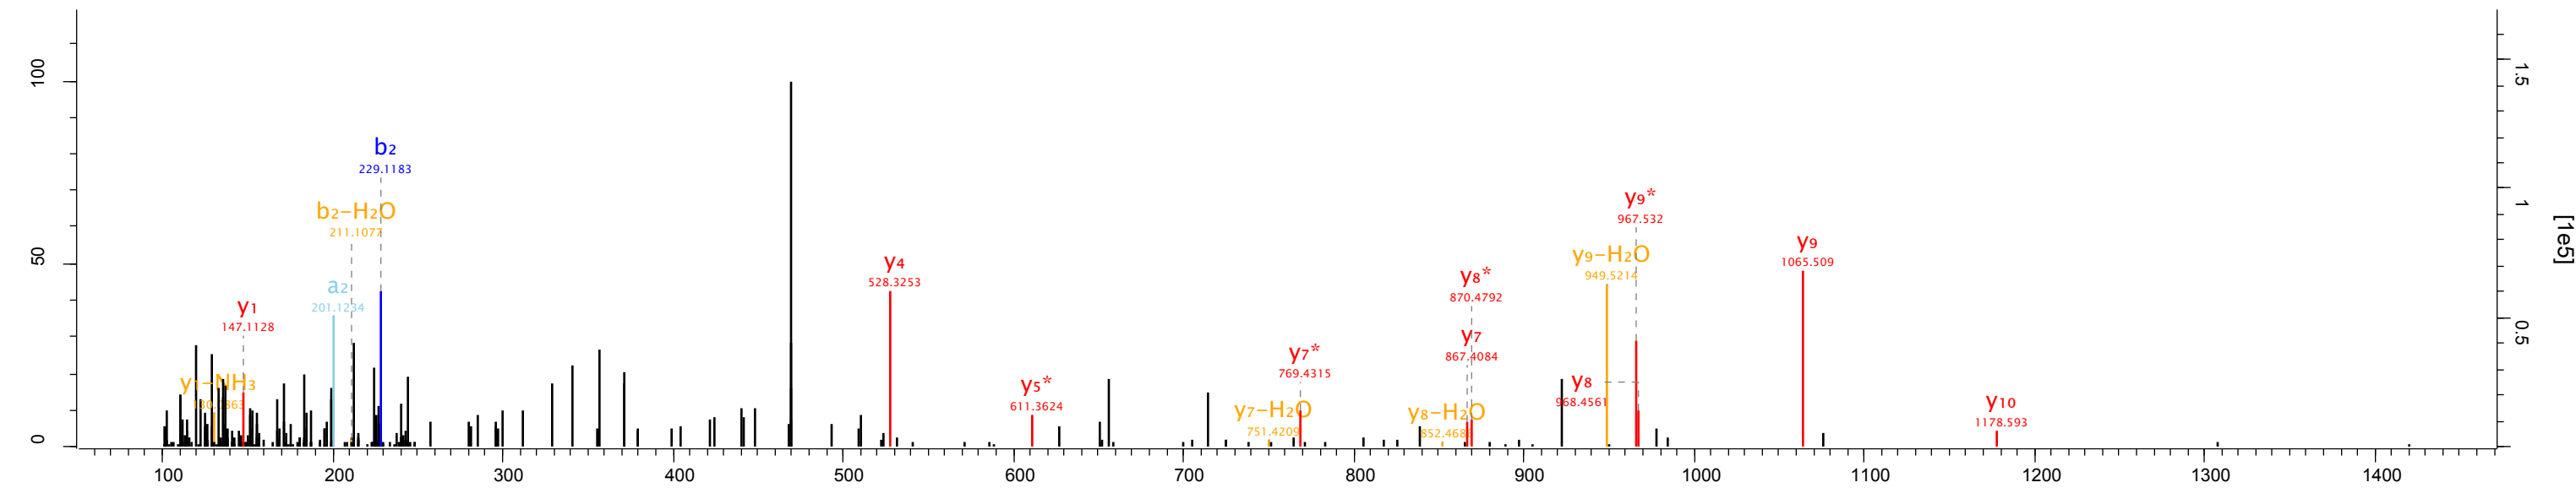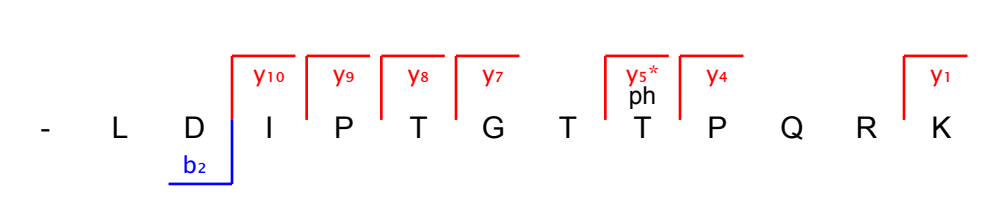

Raw file: 20171215\_MaS\_33SR\_LMH\_phospho\_03  
 Scan: 8203 Method: FTMS; HCD Score: 141.36 m/z: 1017.92 Gene names: TNKS1 BP1

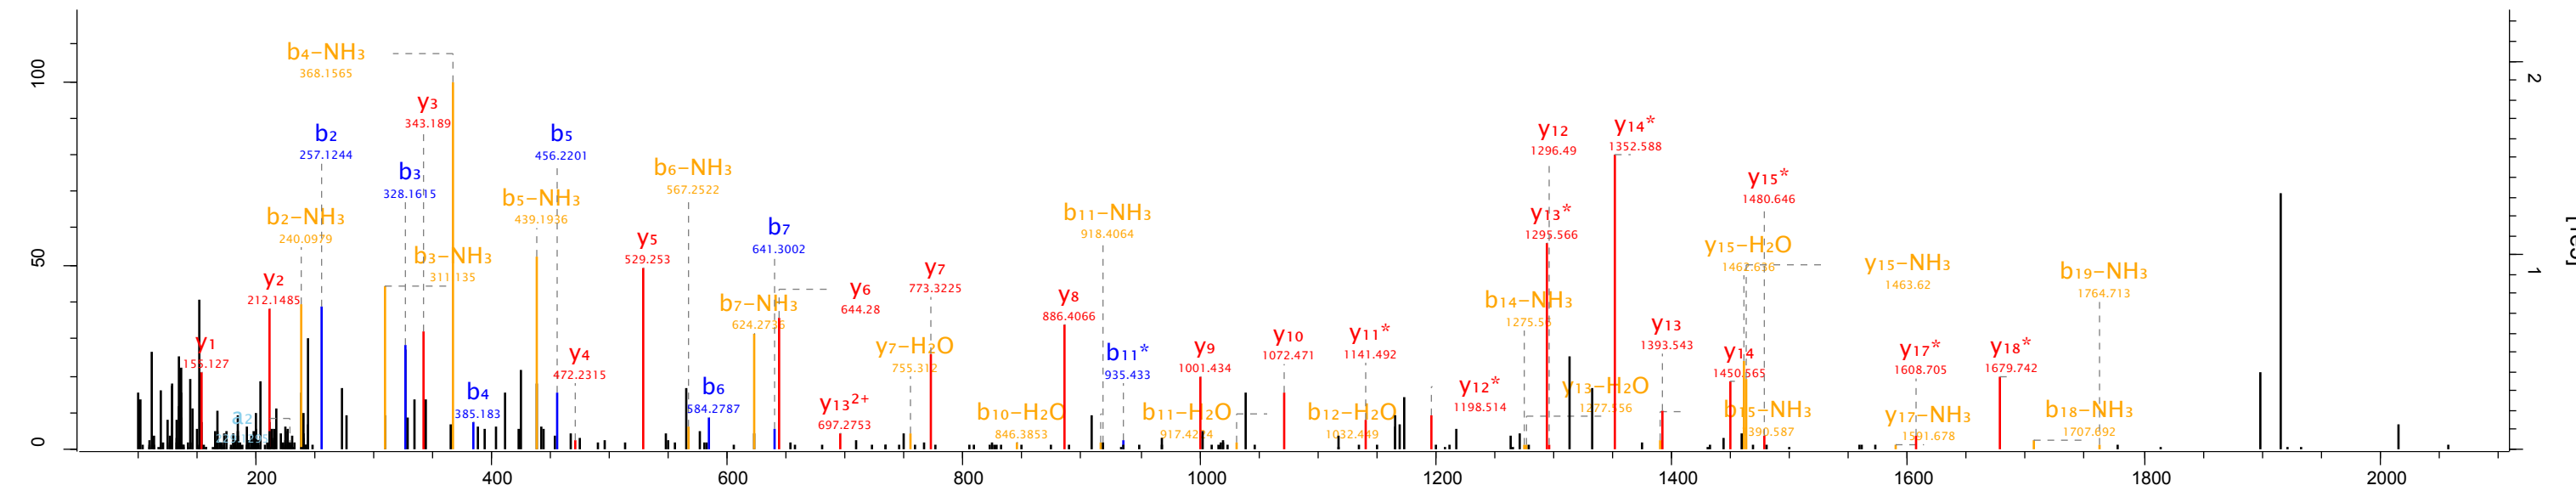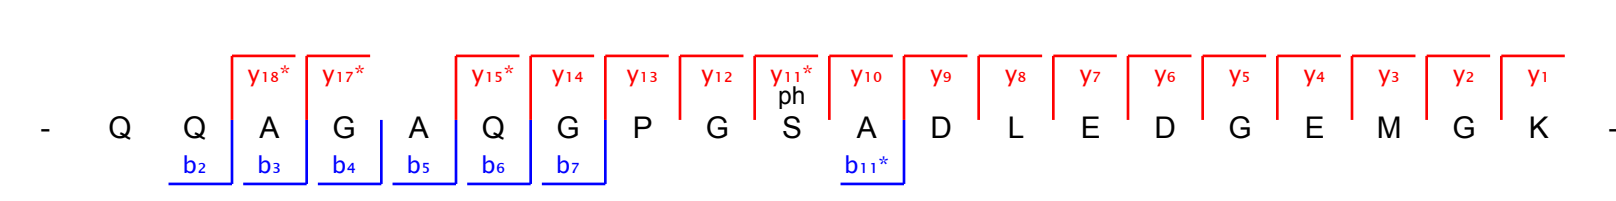

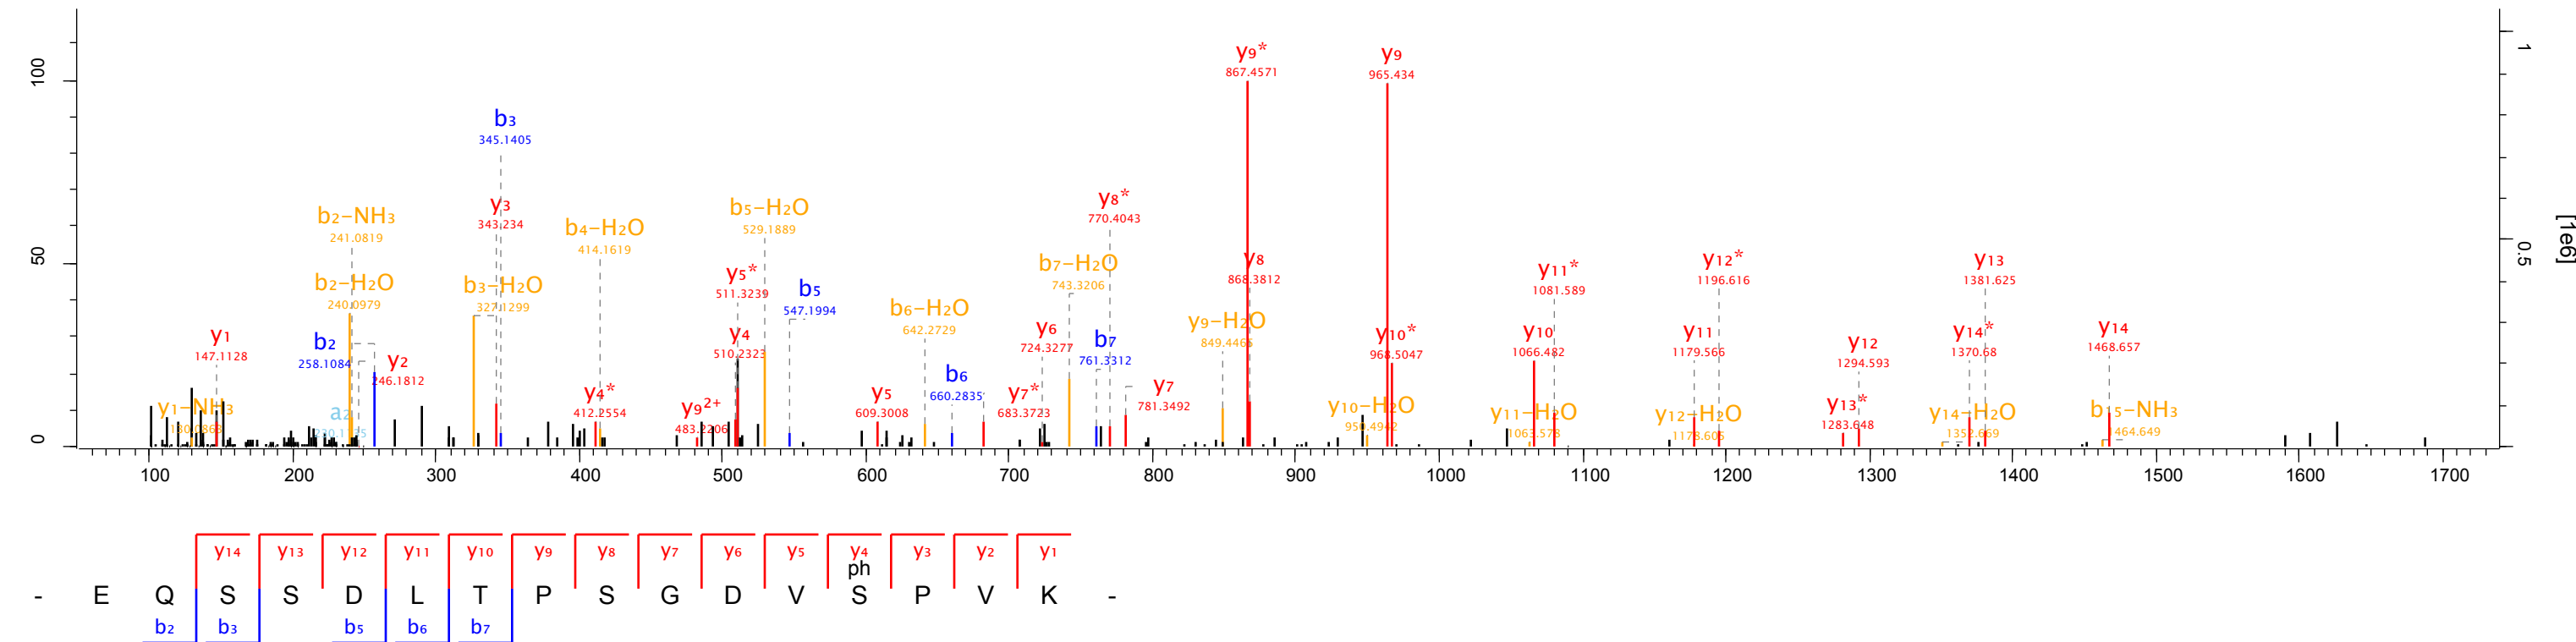

Raw file 20171215\_MaS\_33SR\_LMH\_phospho\_03 Scan 8243 Method FTMS; HCD Score 137.73 m/z 610.74 Gene names THRAP3

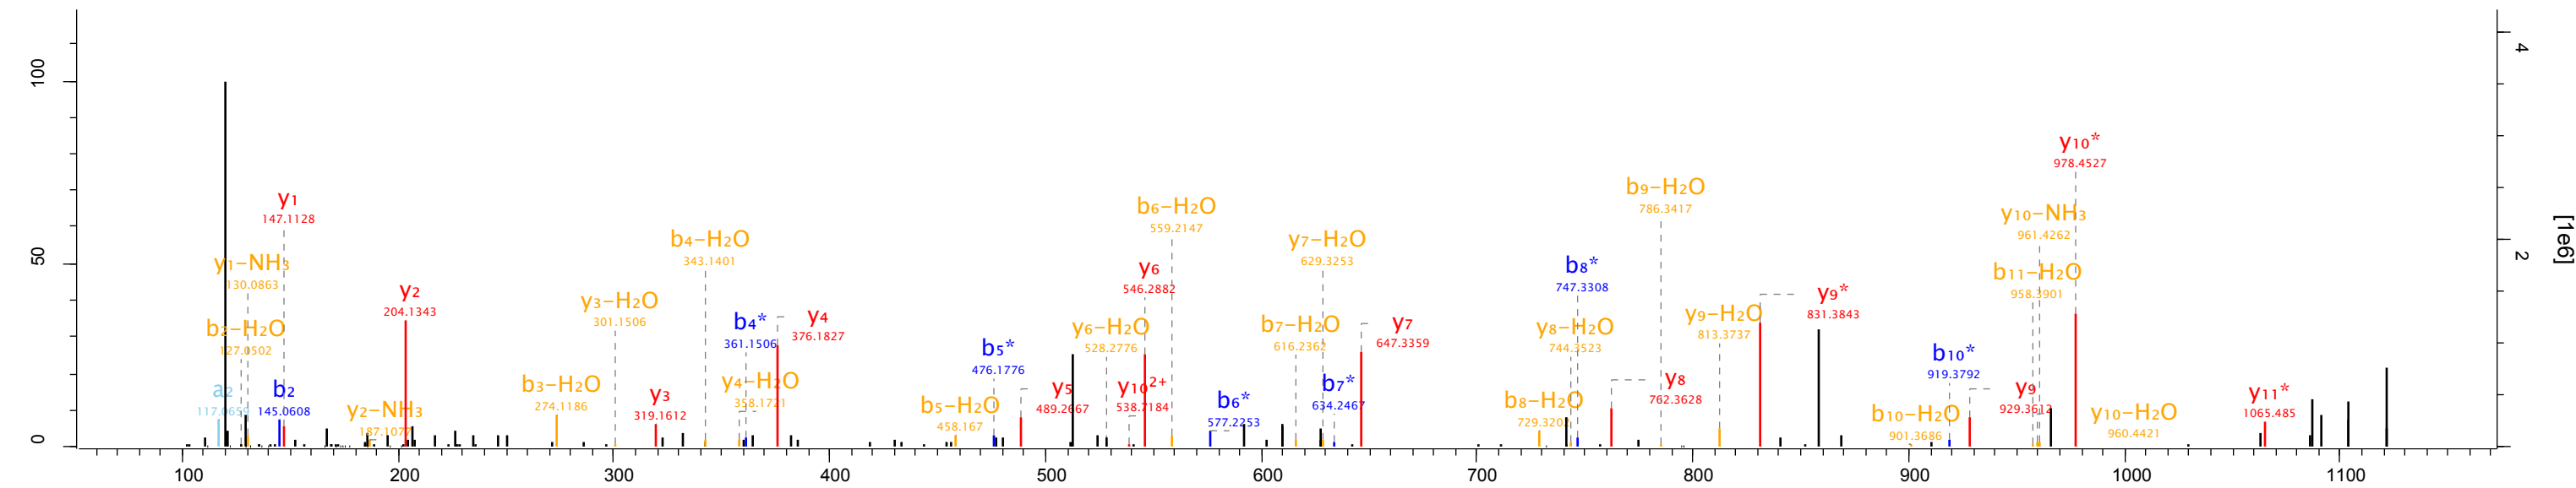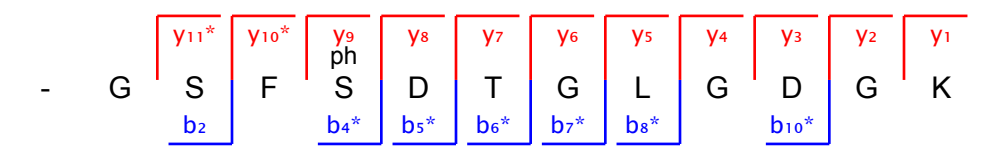

Raw file 20171215\_MaS\_33SR\_LMH\_phospho\_03 Scan 8273 Method FTMS; HCD Score 70.11 m/z 568.92 Gene names RB1

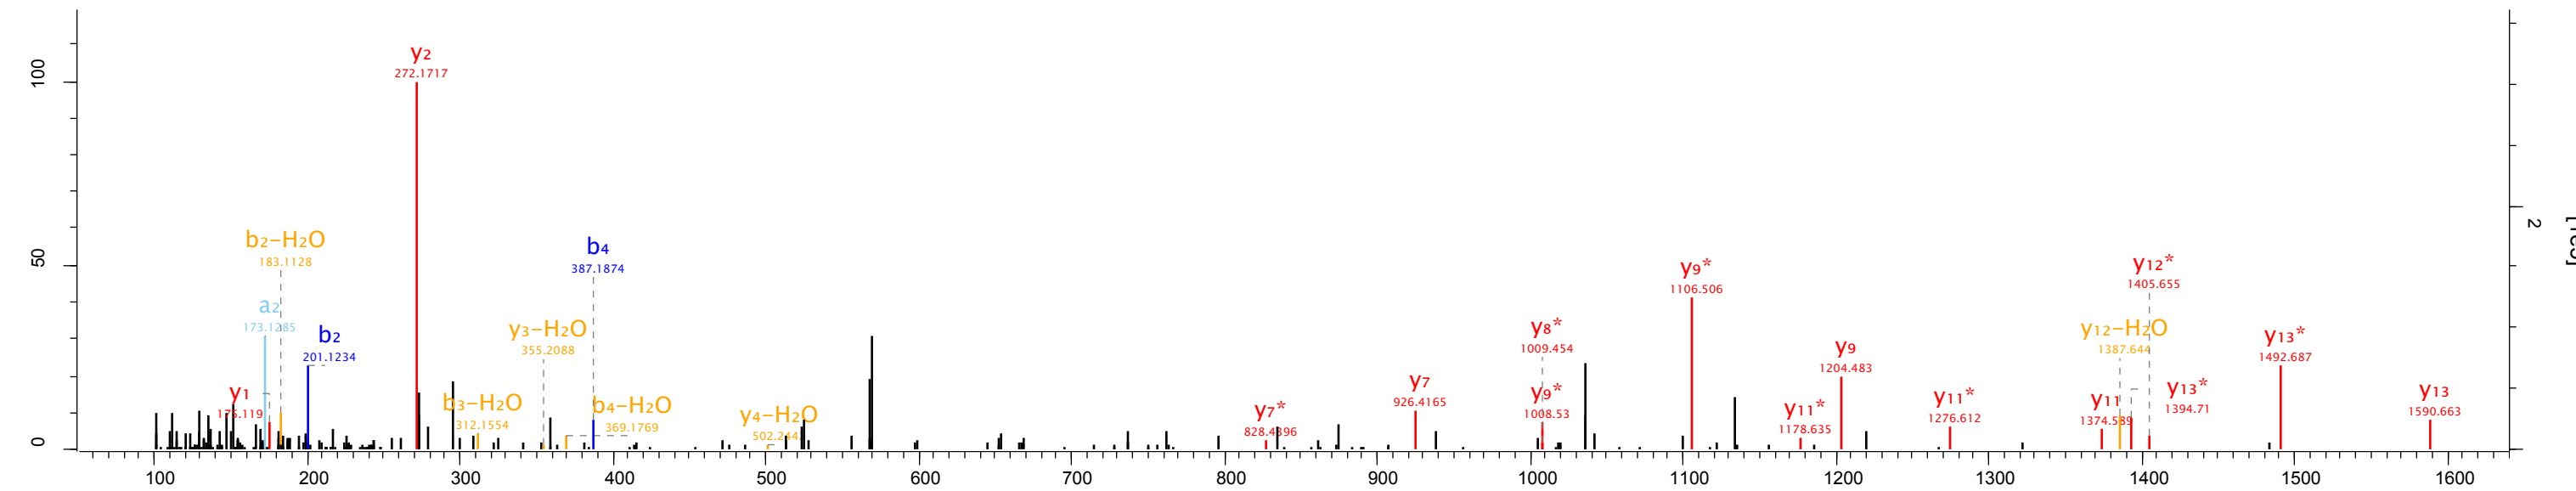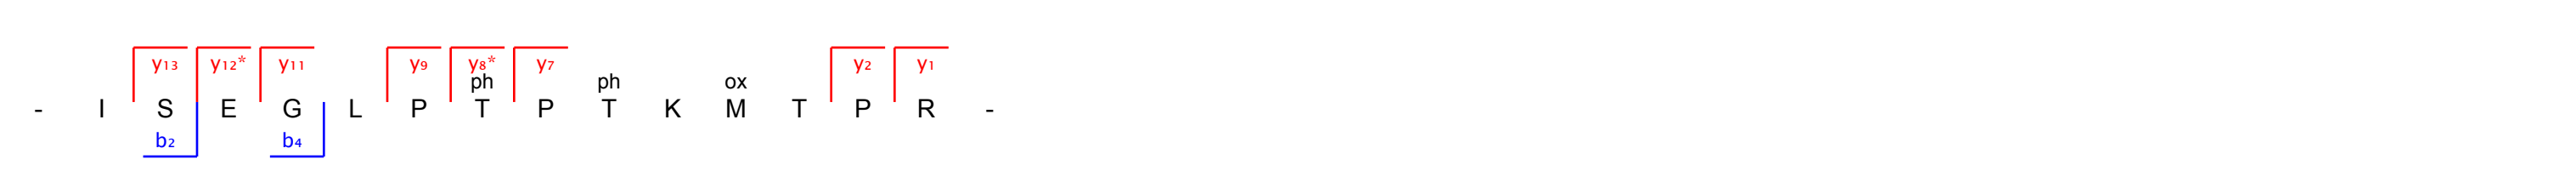



Raw file: 20171215\_MaS\_33SR\_LMH\_phospho\_03  
 Scan: 8363 Method: FTMS; HCD Score: 141.08 m/z: 902.88 Gene names: BAT3;BAG6

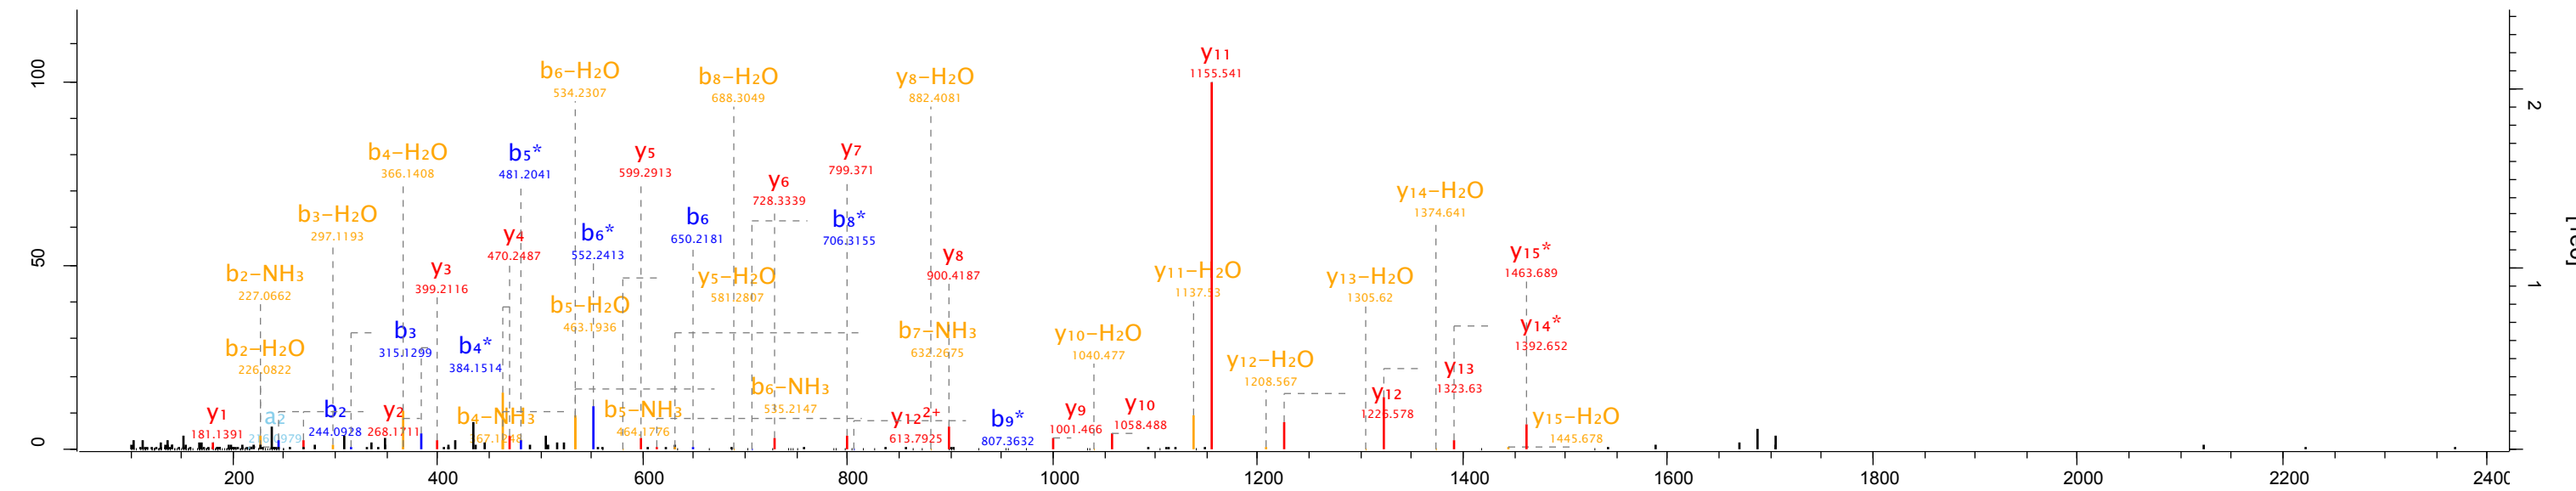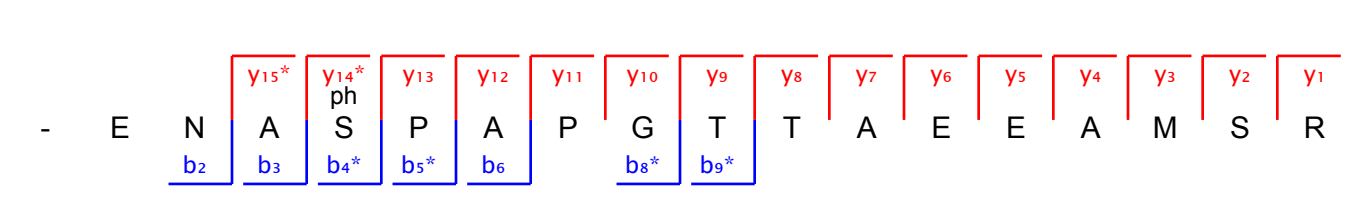

Raw file 20171215\_MaS\_33SR\_LMH\_phospho\_03 Scan 8393 Method FTMS; HCD Score 220.42 m/z 724.32 Gene names NCKAP5L

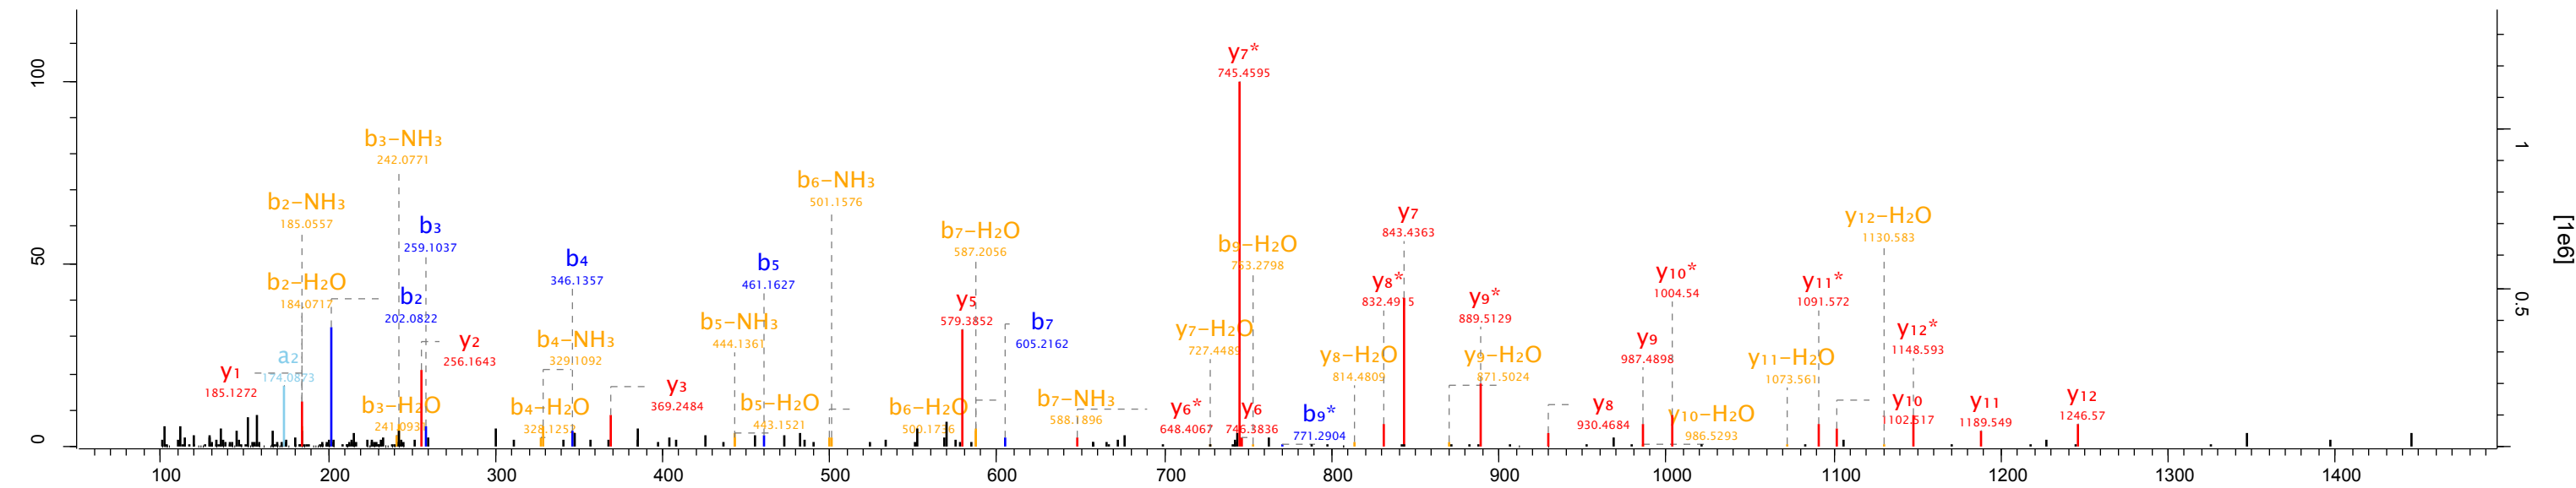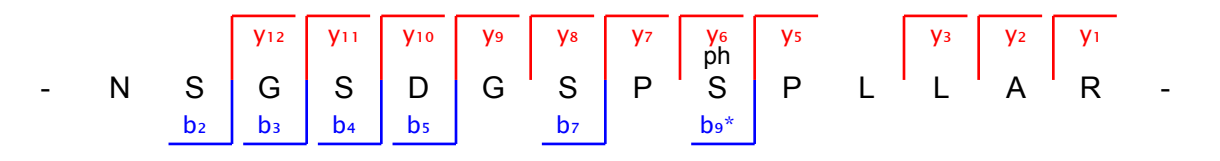

Raw file 20171215\_MaS\_33SR\_LMH\_phospho\_03 Scan 8473 Method FTMS; HCD Score 101.85 m/z 811.36 Gene names ATAD1

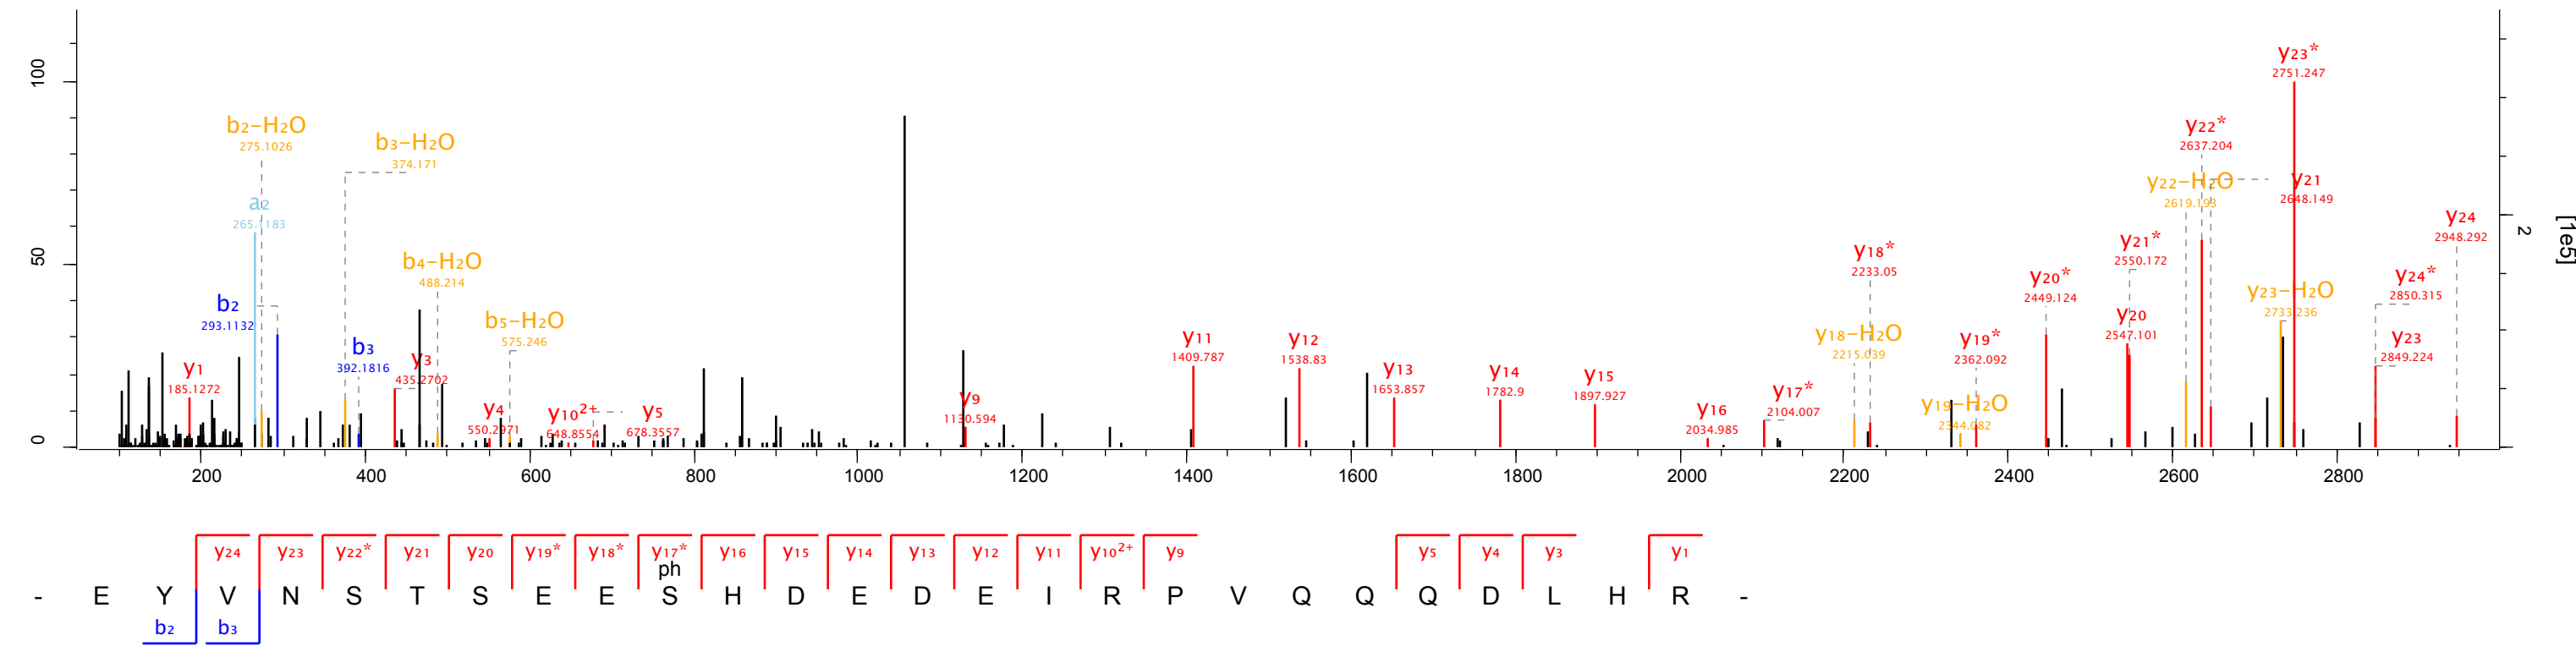

Raw file 20171215\_MaS\_33SR\_LMH\_phospho\_03 Scan 8483 Method FTMS; HCD Score 103.43 m/z 564.23 Gene names SPG21

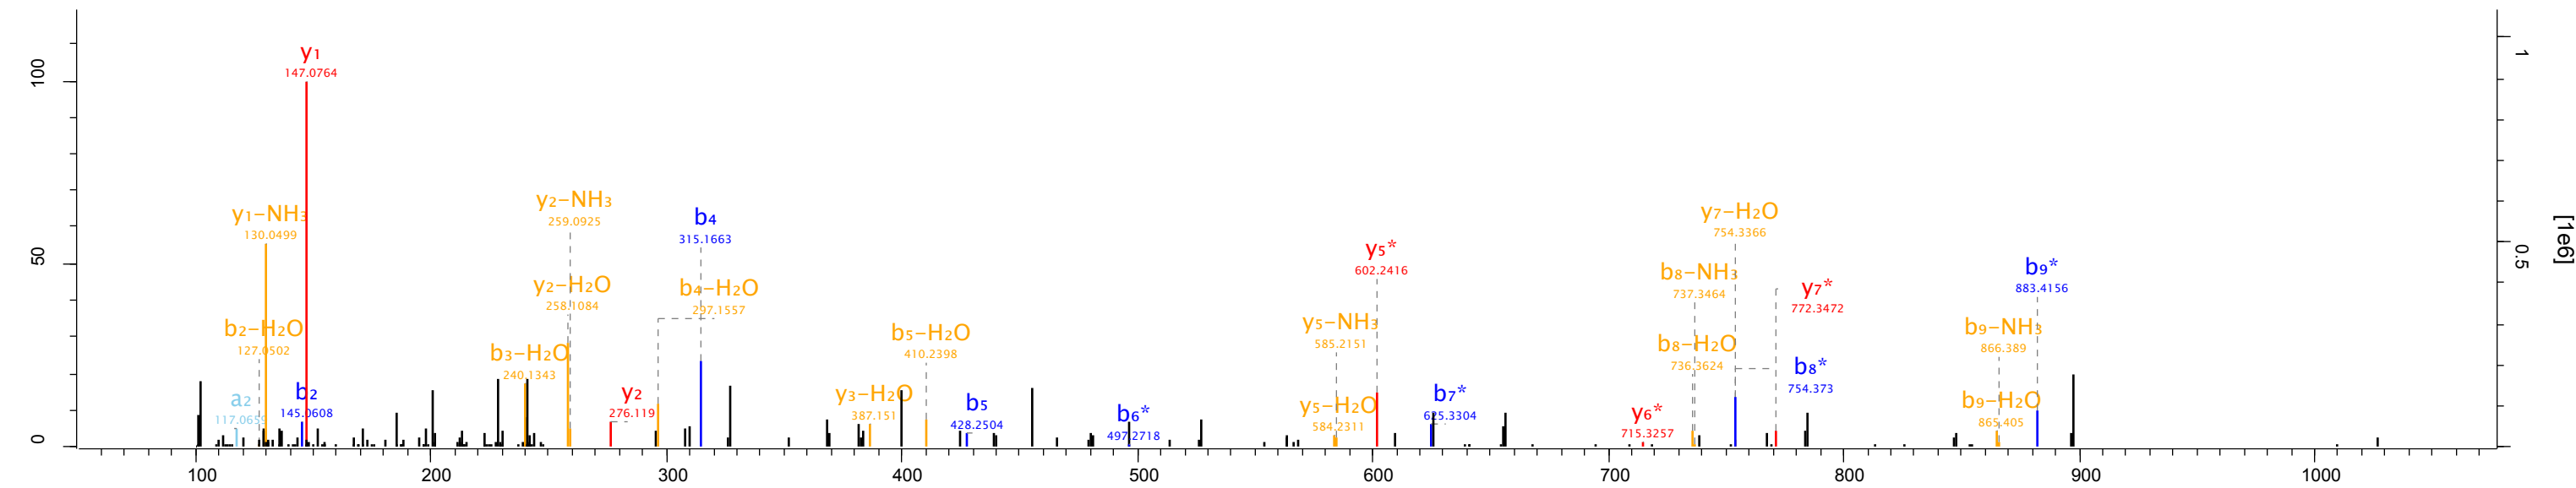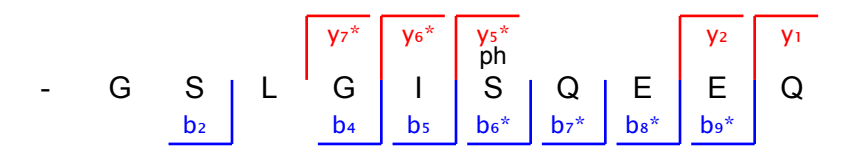

Raw file 20171215\_MaS\_33SR\_LMH\_phospho\_03 Scan 8743 Method FTMS; HCD Score 113.42 m/z 552.73 Gene names MAP4K5

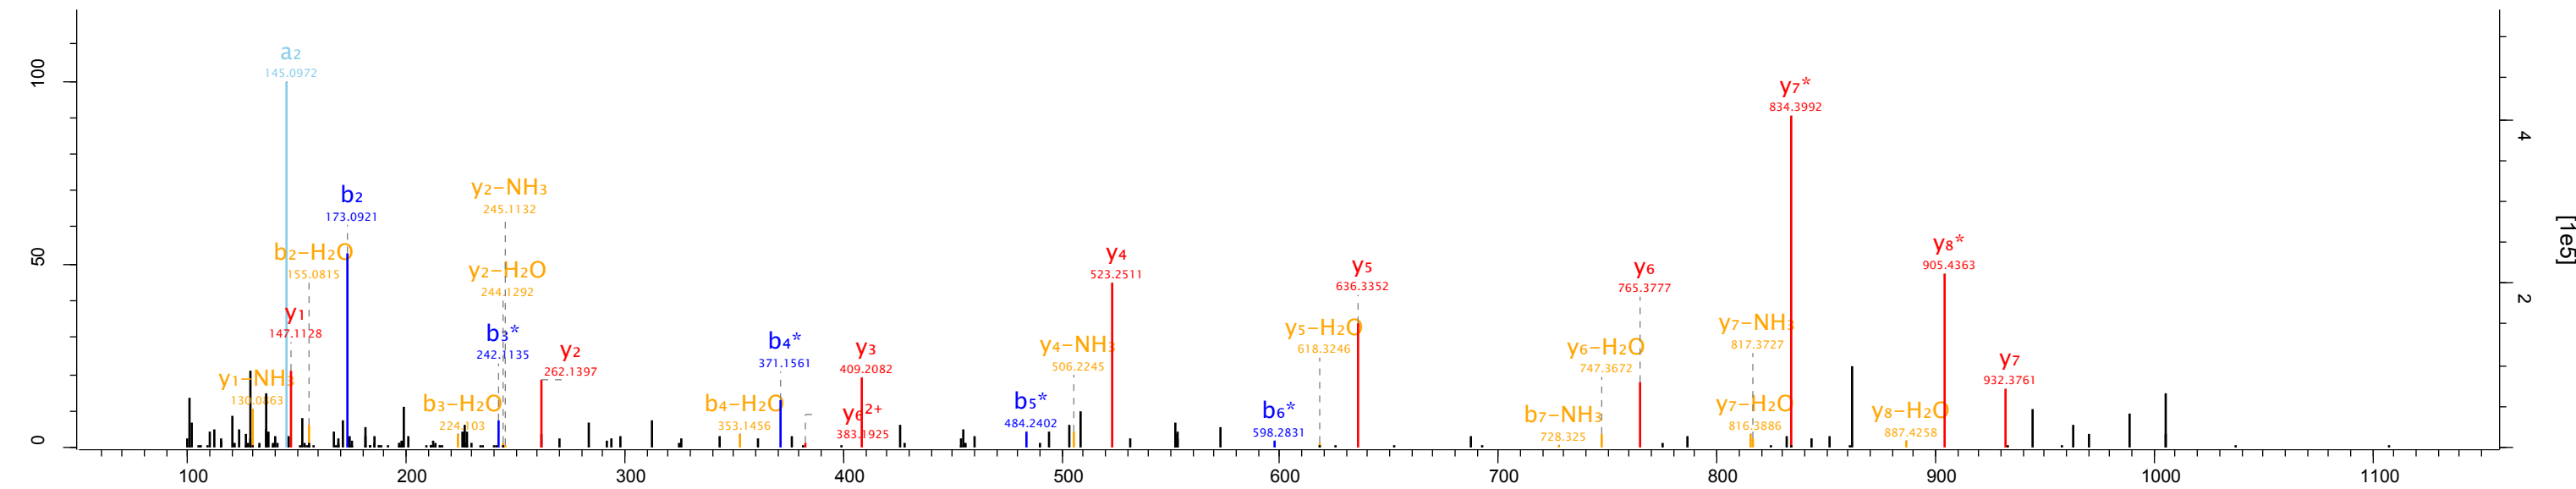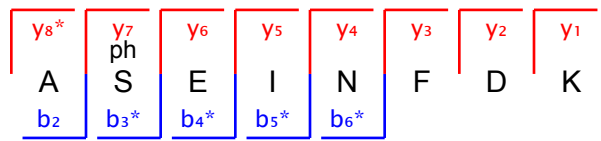

- T A S E I N F D K -

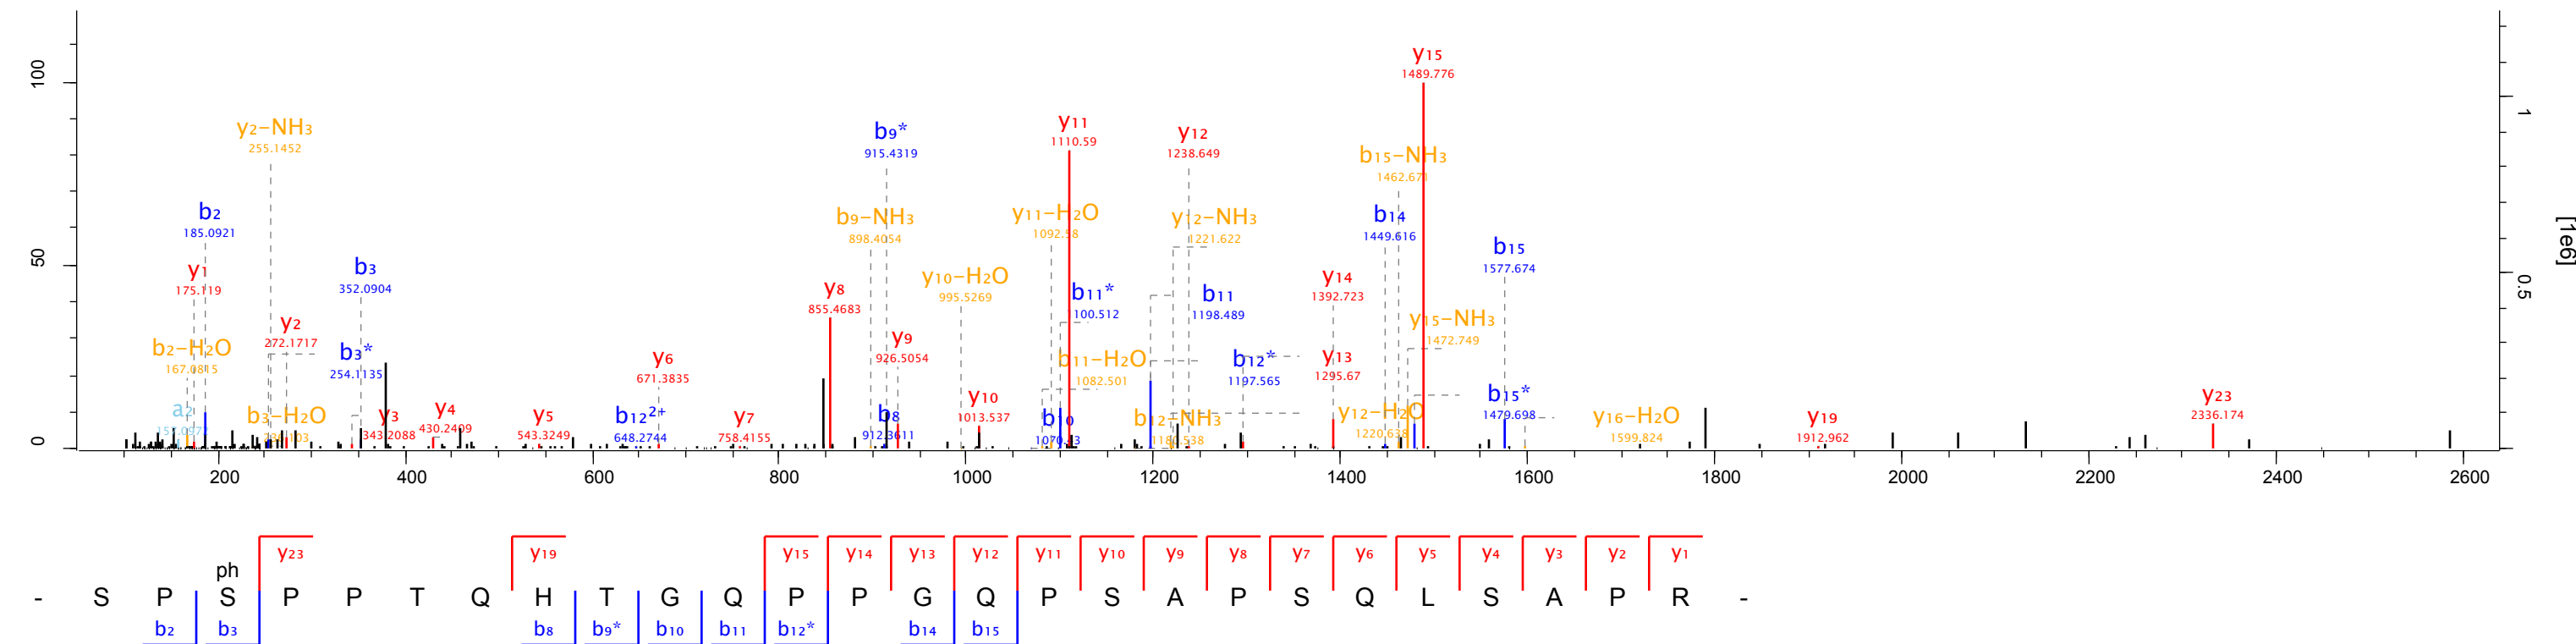

Raw file 20171215\_MaS\_33SR\_LMH\_phospho\_03 Scan 8943 Method FTMS; HCD Score 64.52 m/z 1128.44 Gene names KIAA0100

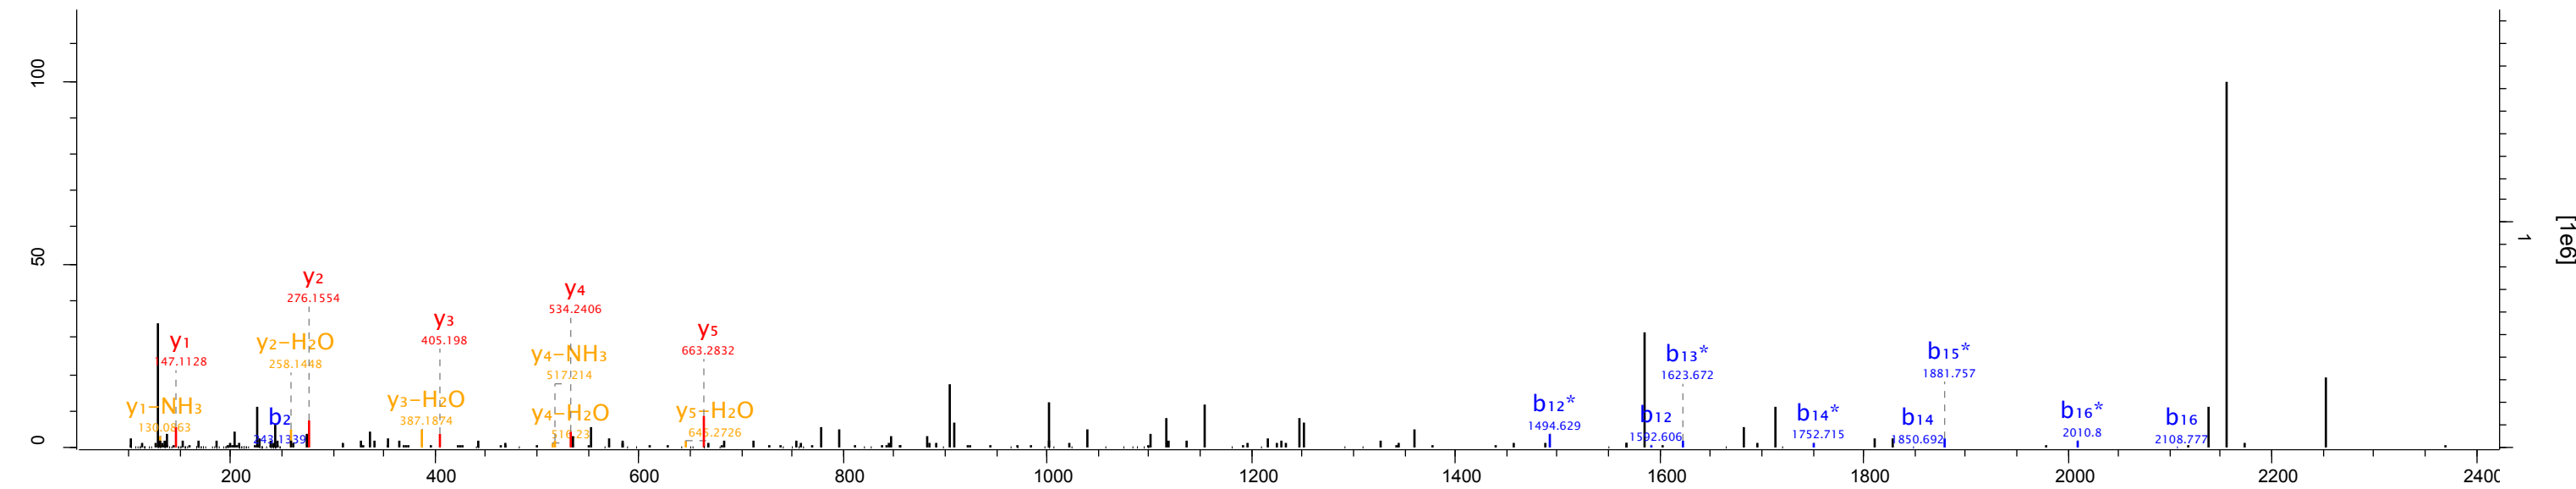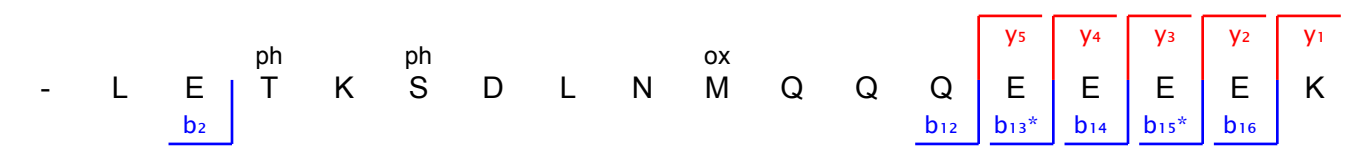

Raw file 20171215\_MaS\_33SR\_LMH\_phospho\_03 Scan 8963 Method FTMS; HCD Score 96.55 m/z 558.73 Gene names DHX8

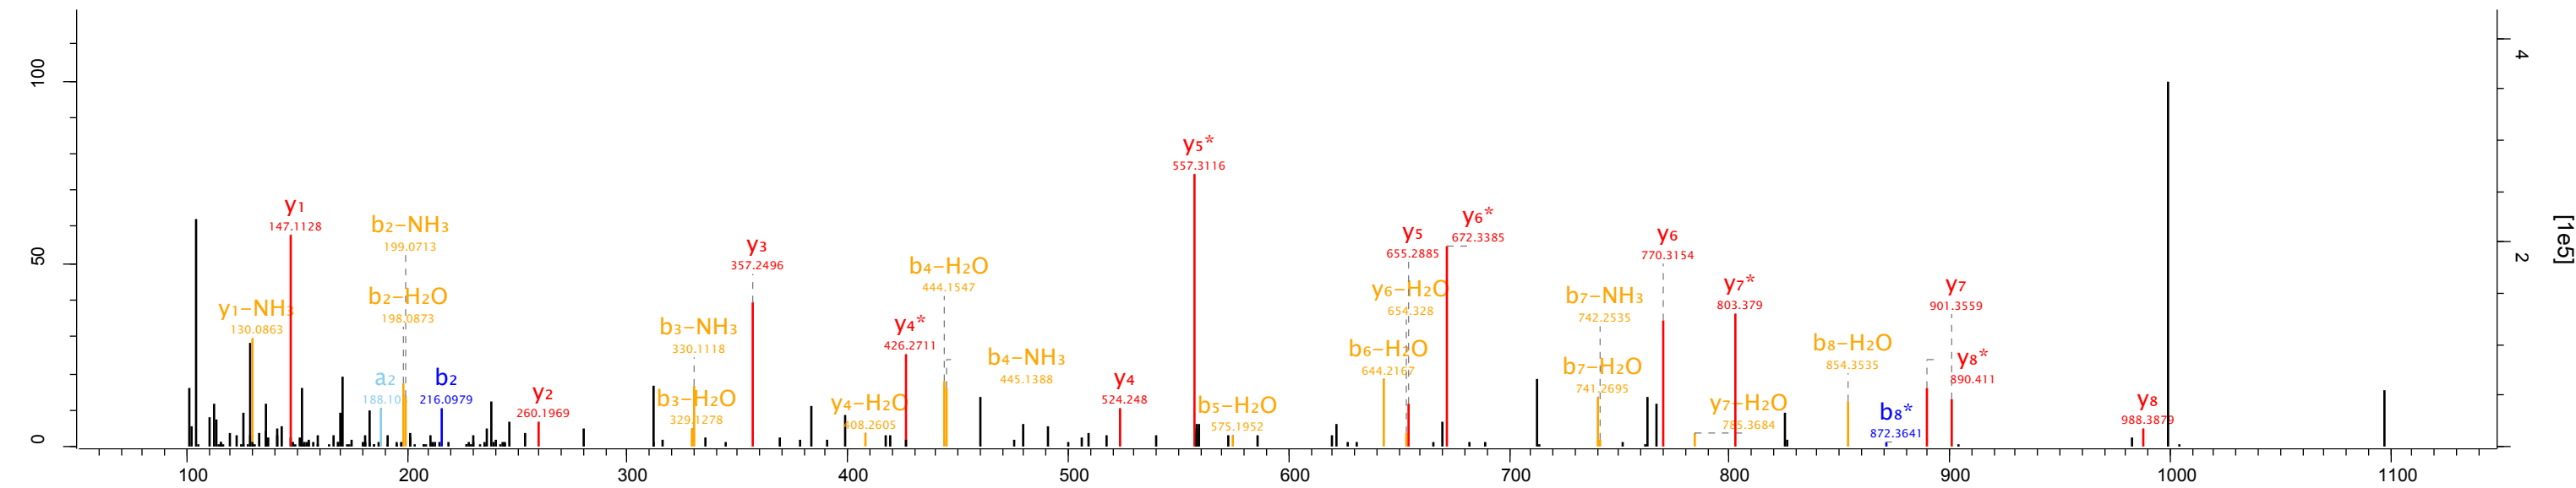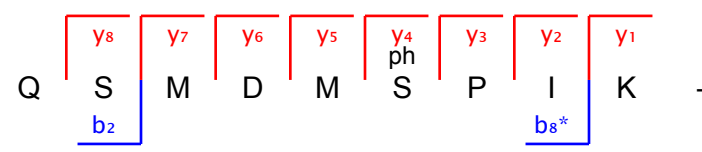



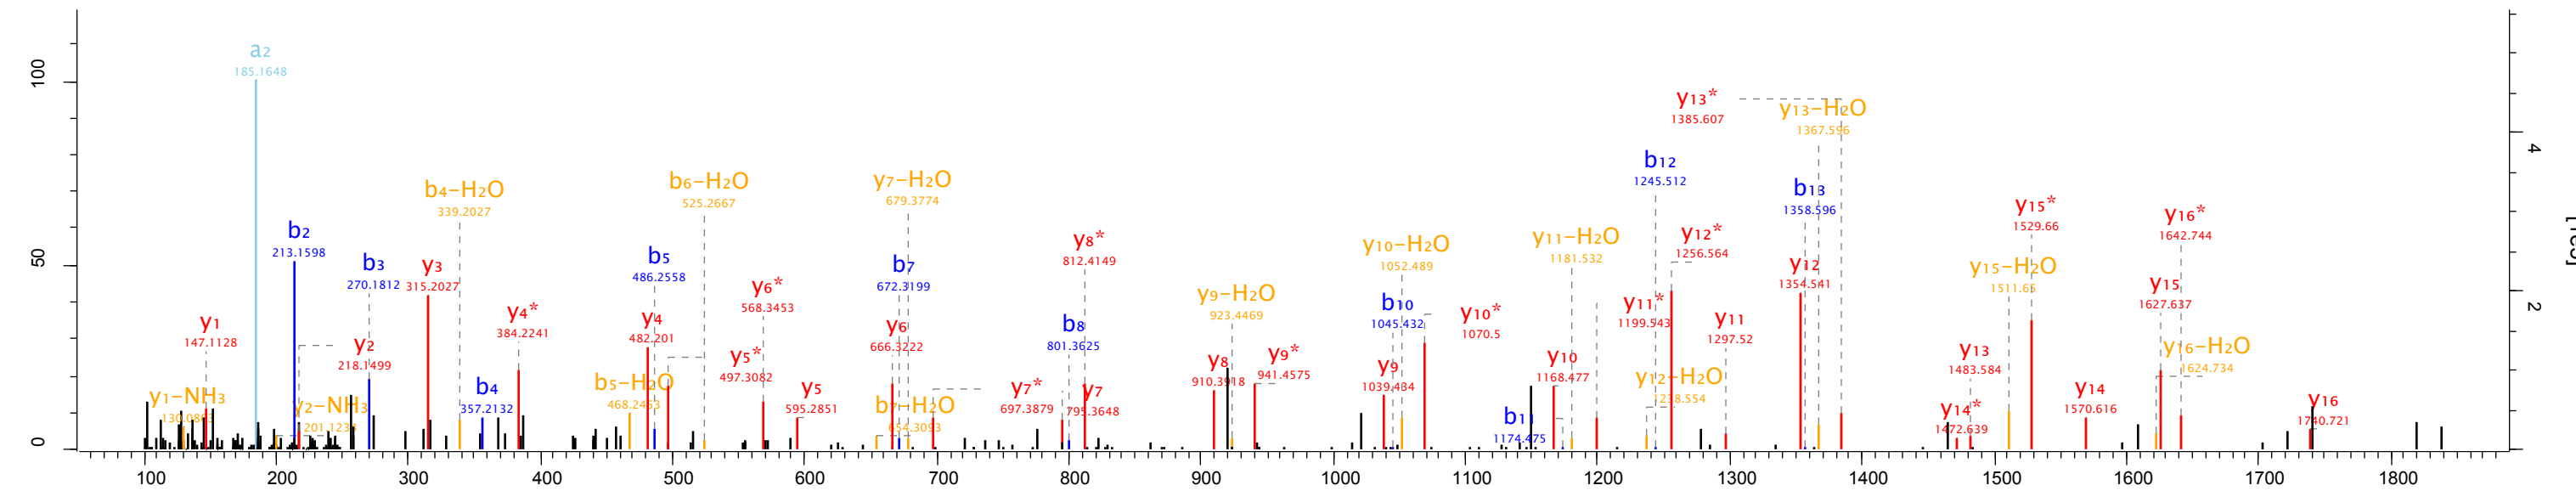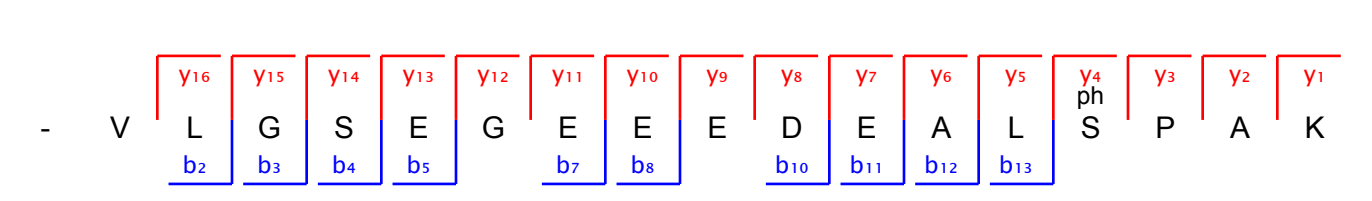

Raw file 20171215\_MaS\_33SR\_LMH\_phospho\_03 Scan 9263 Method FTMS; HCD Score 132.36 m/z 759 Gene names ARFGEF2

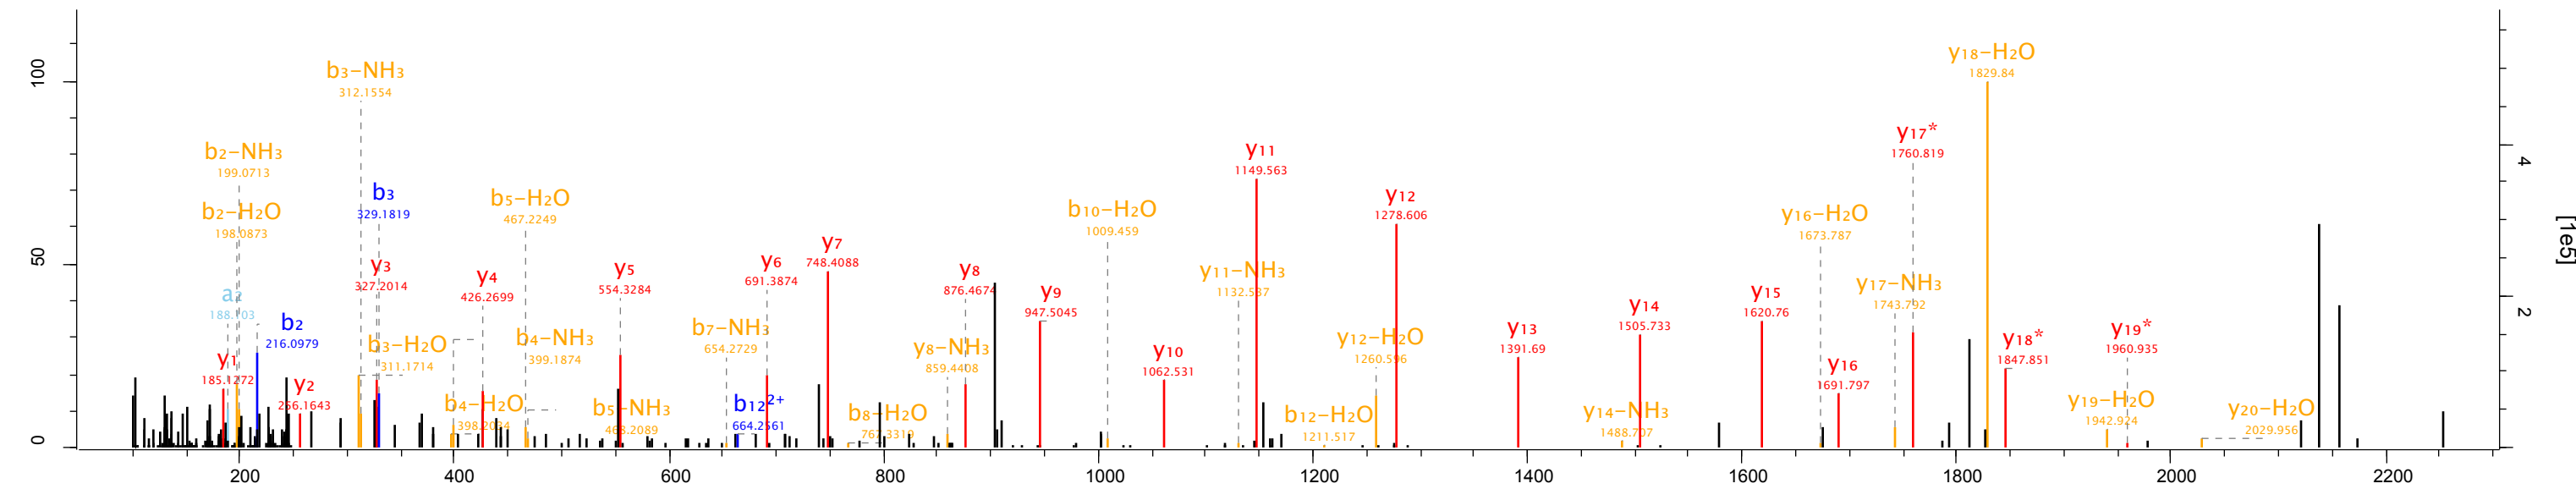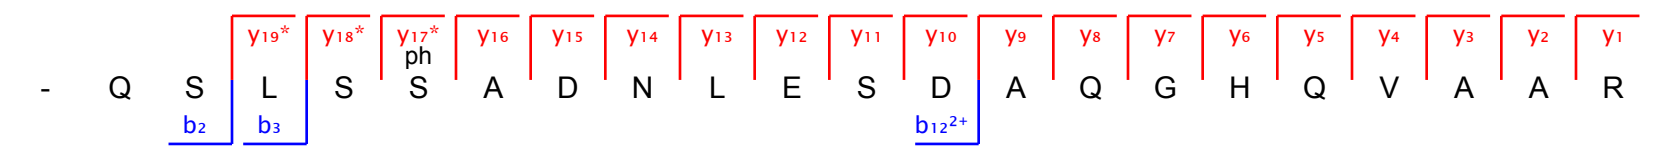

Raw file 20171215\_MaS\_33SR\_LMH\_phospho\_03 Scan 9473 Method FTMS; HCD Score 129.51 m/z 627.62 Gene names CTNNB1

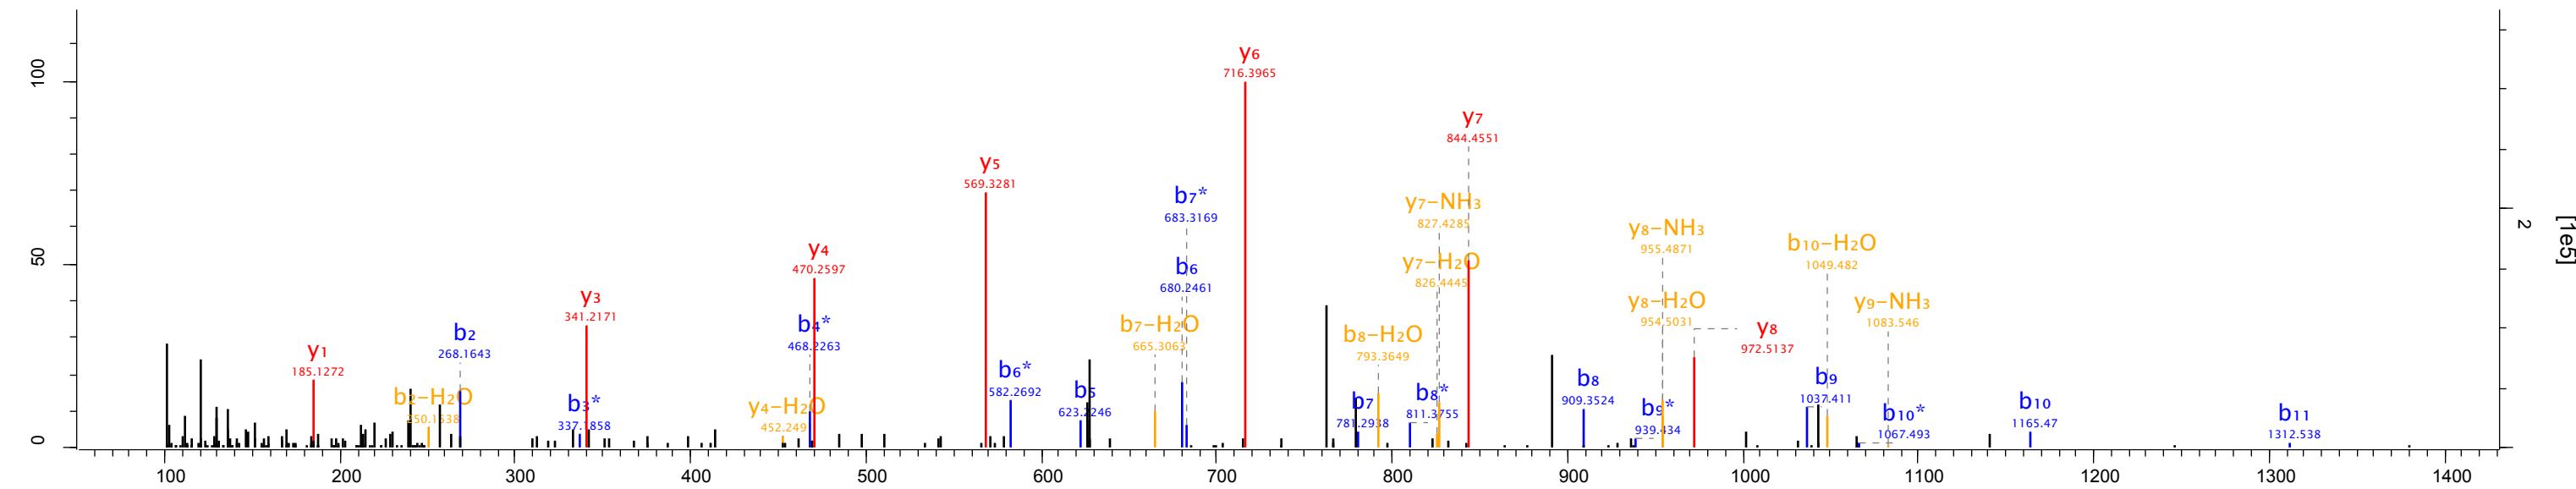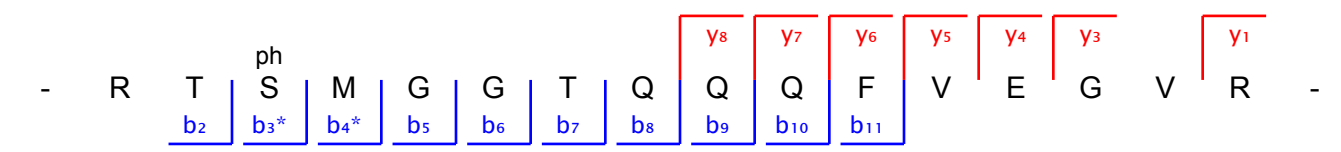

Raw file 20171215\_MaS\_33SR\_LMH\_phospho\_03 Scan 9663 Method FTMS; HCD Score 128.38 m/z 924.42 Gene names HUWE1

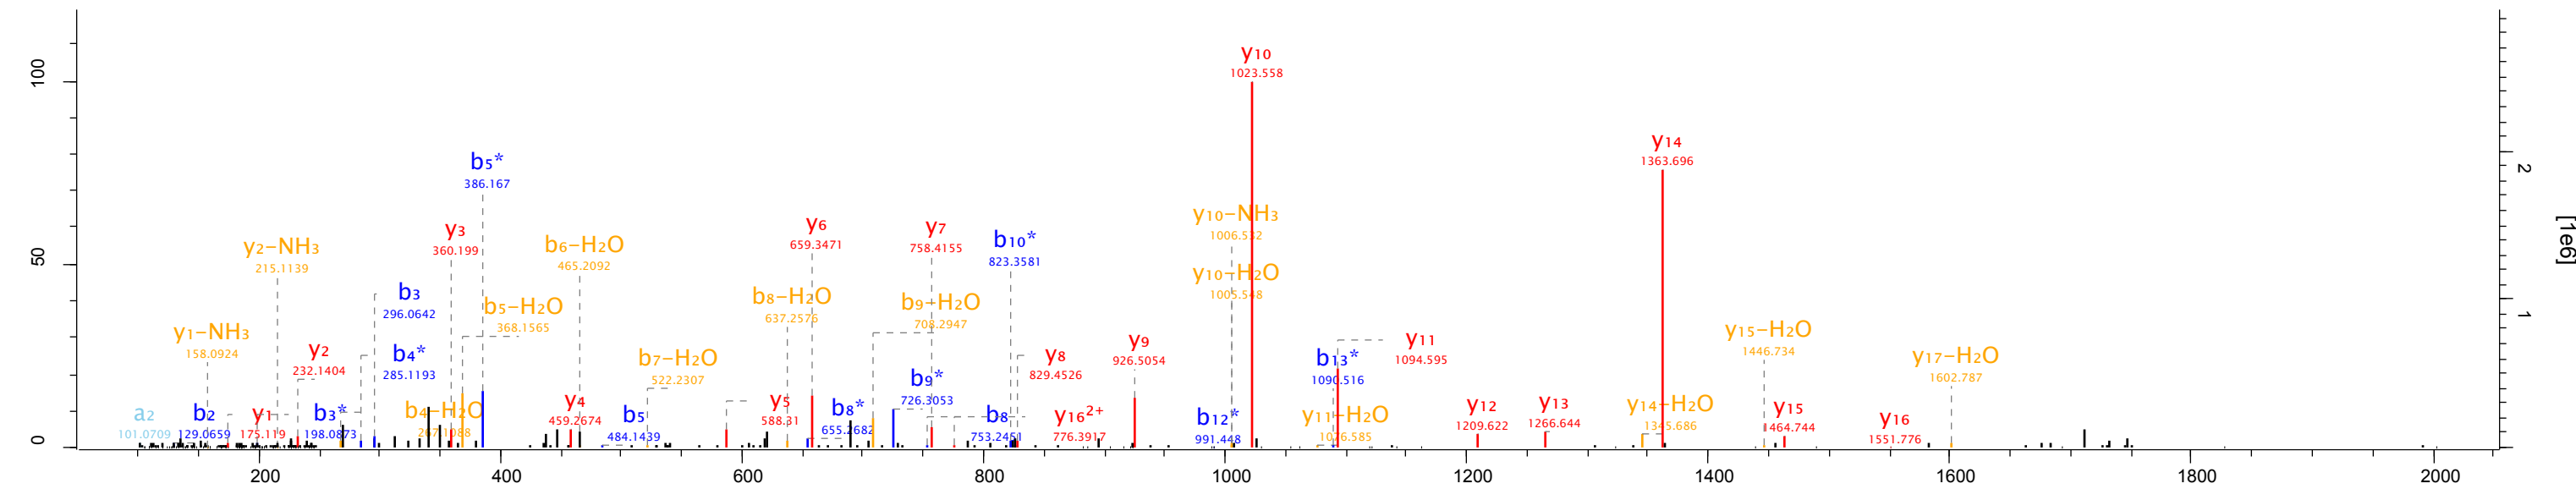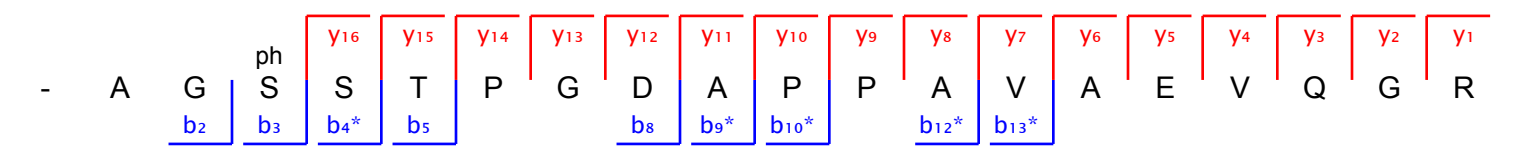

Raw file 20171215\_MaS\_33SR\_LMH\_phospho\_03 Scan 9683 Method FTMS; HCD Score 43.09 m/z 1048.47 Gene names AKAP12

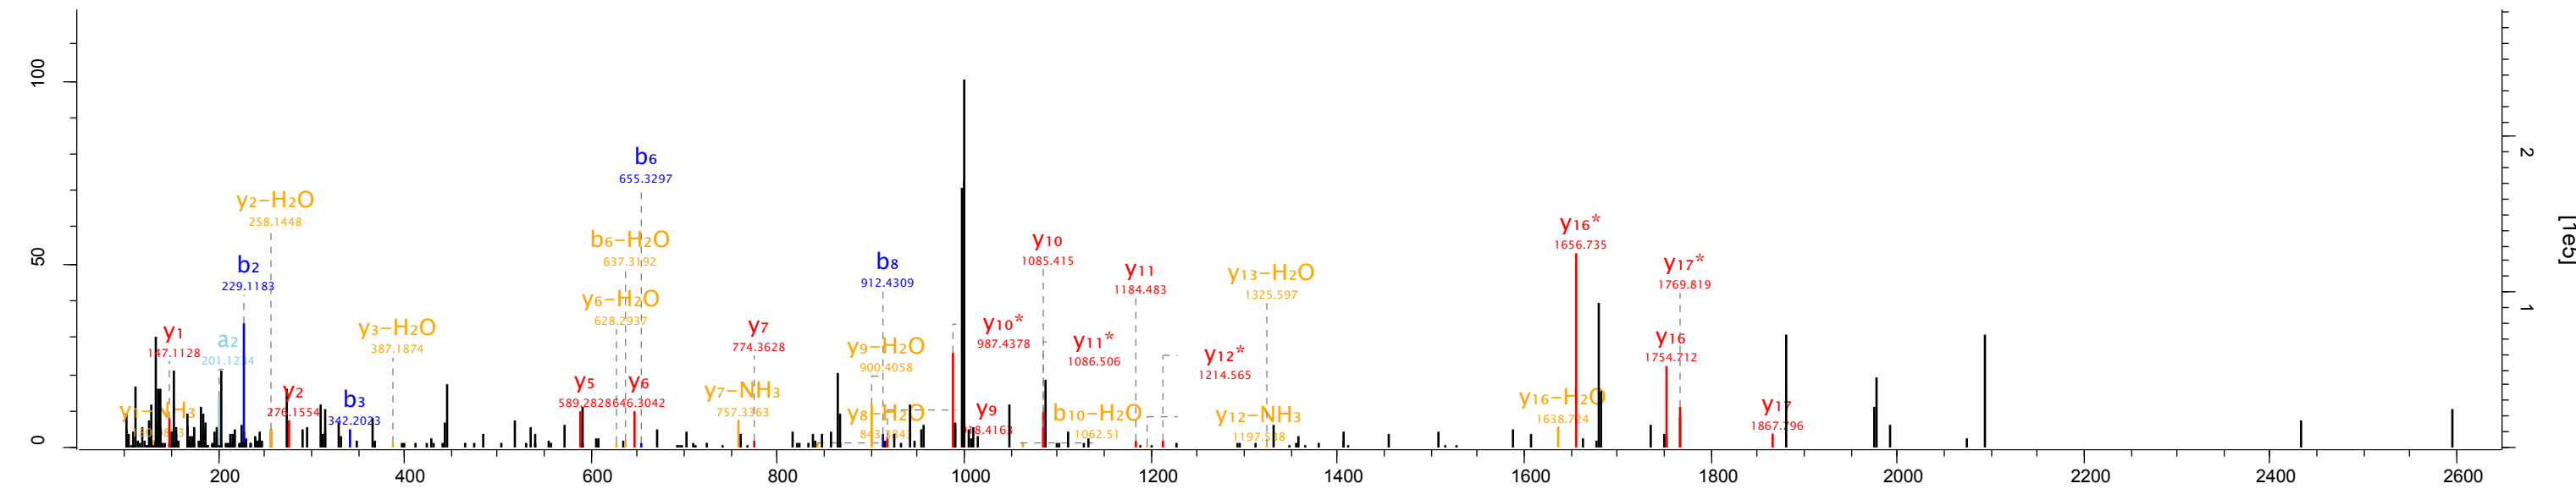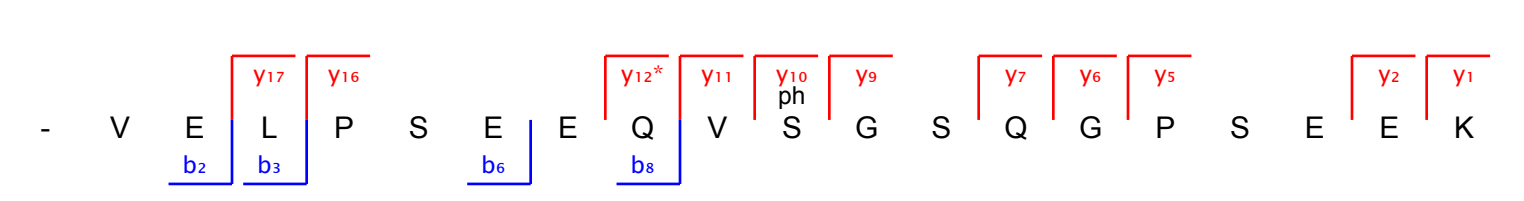

Raw file 20171215\_MaS\_33SR\_LMH\_phospho\_03 Scan 9703 Method FTMS; HCD Score 122.34 m/z 797.67 Gene names SLC6A15

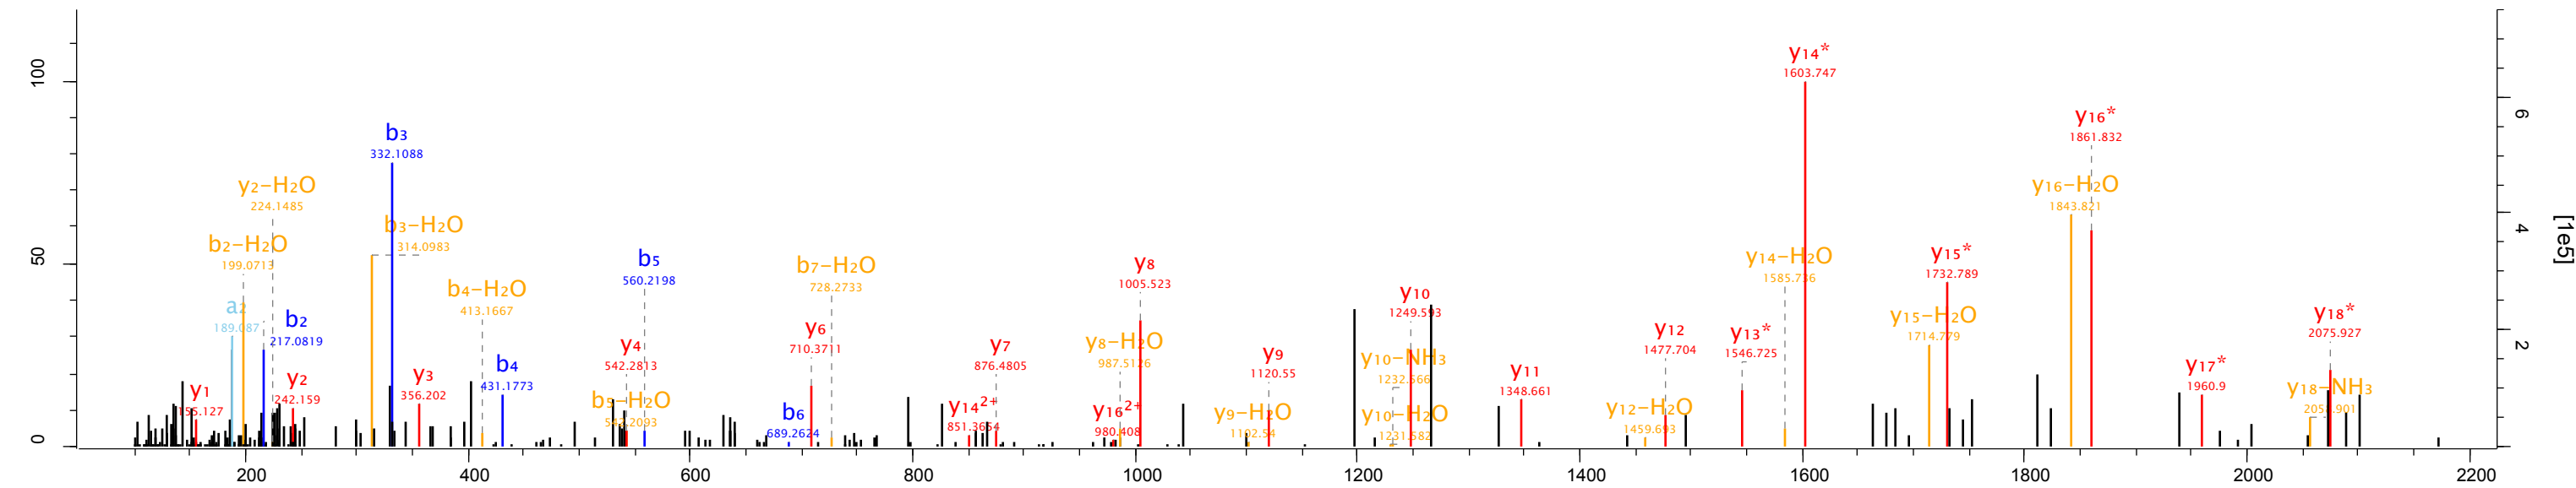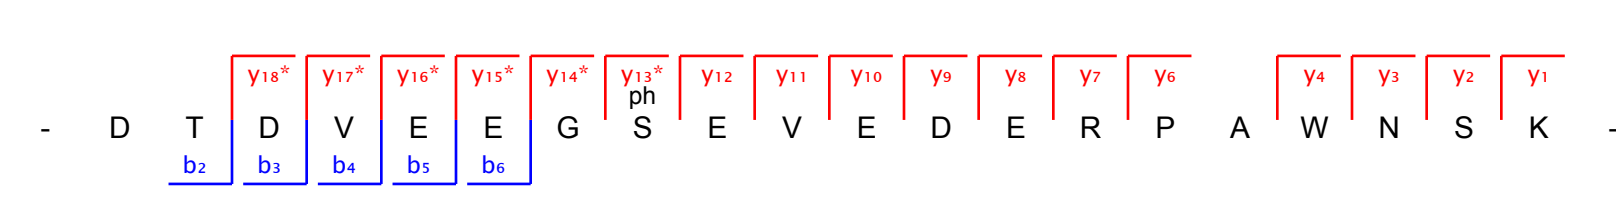

Raw file 20171215\_MaS\_33SR\_LMH\_phospho\_03 Scan 9723 Method FTMS; HCD Score 107.99 m/z 615.26 Gene names GLCCI1

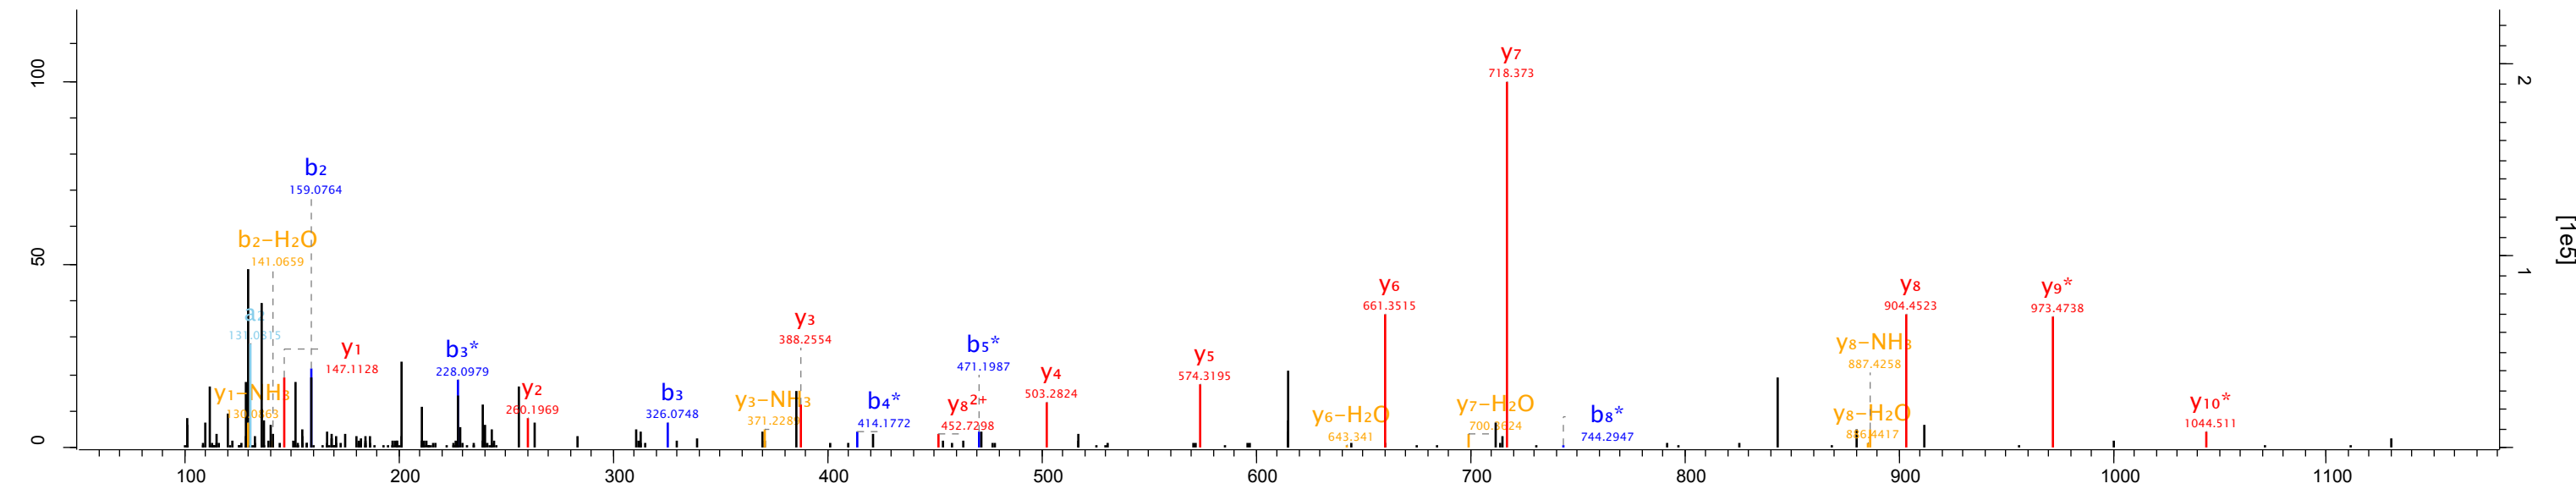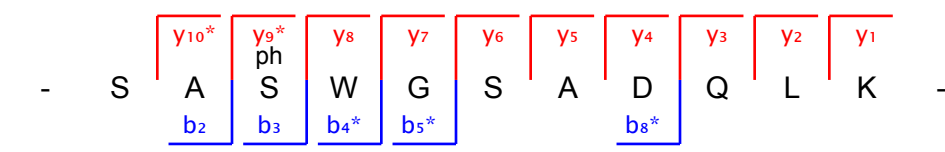

Raw file 20171215\_MaS\_33SR\_LMH\_phospho\_03 Scan 9843 Method FTMS; HCD Score 134.93 m/z 1029.77 Gene names CTAG1A

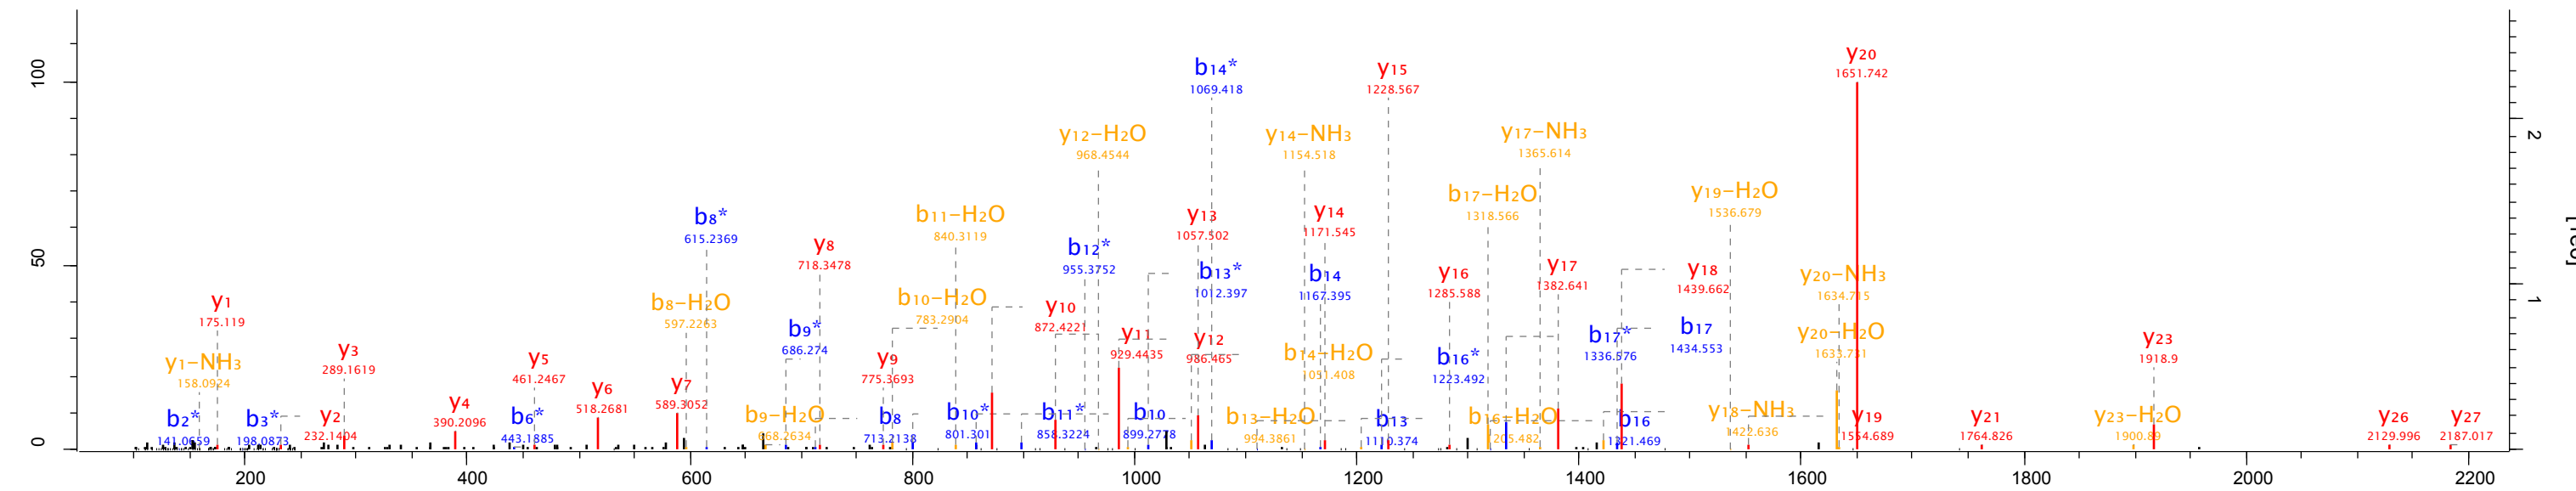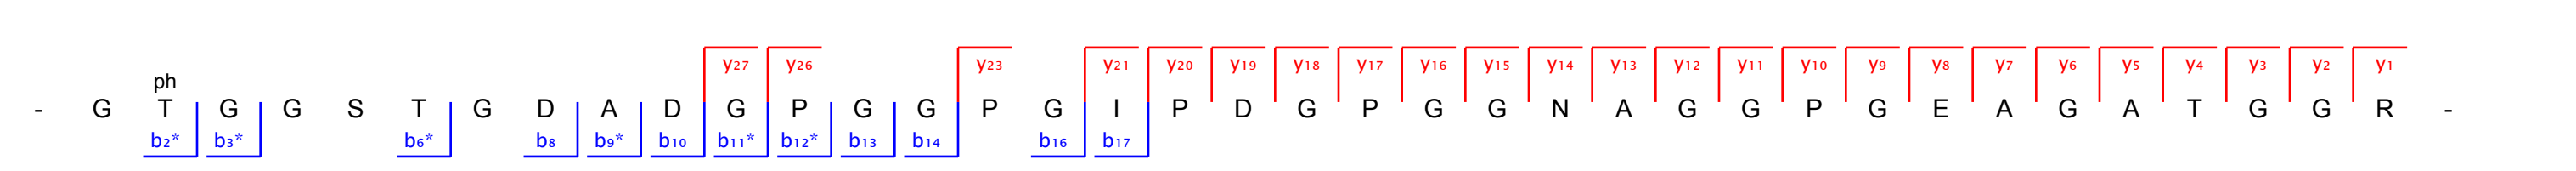



Raw file 20171215\_MaS\_33SR\_LMH\_phospho\_05 Scan 10083 Method FTMS; HCD Score 135.33 m/z 978.94 Gene names ABCC4

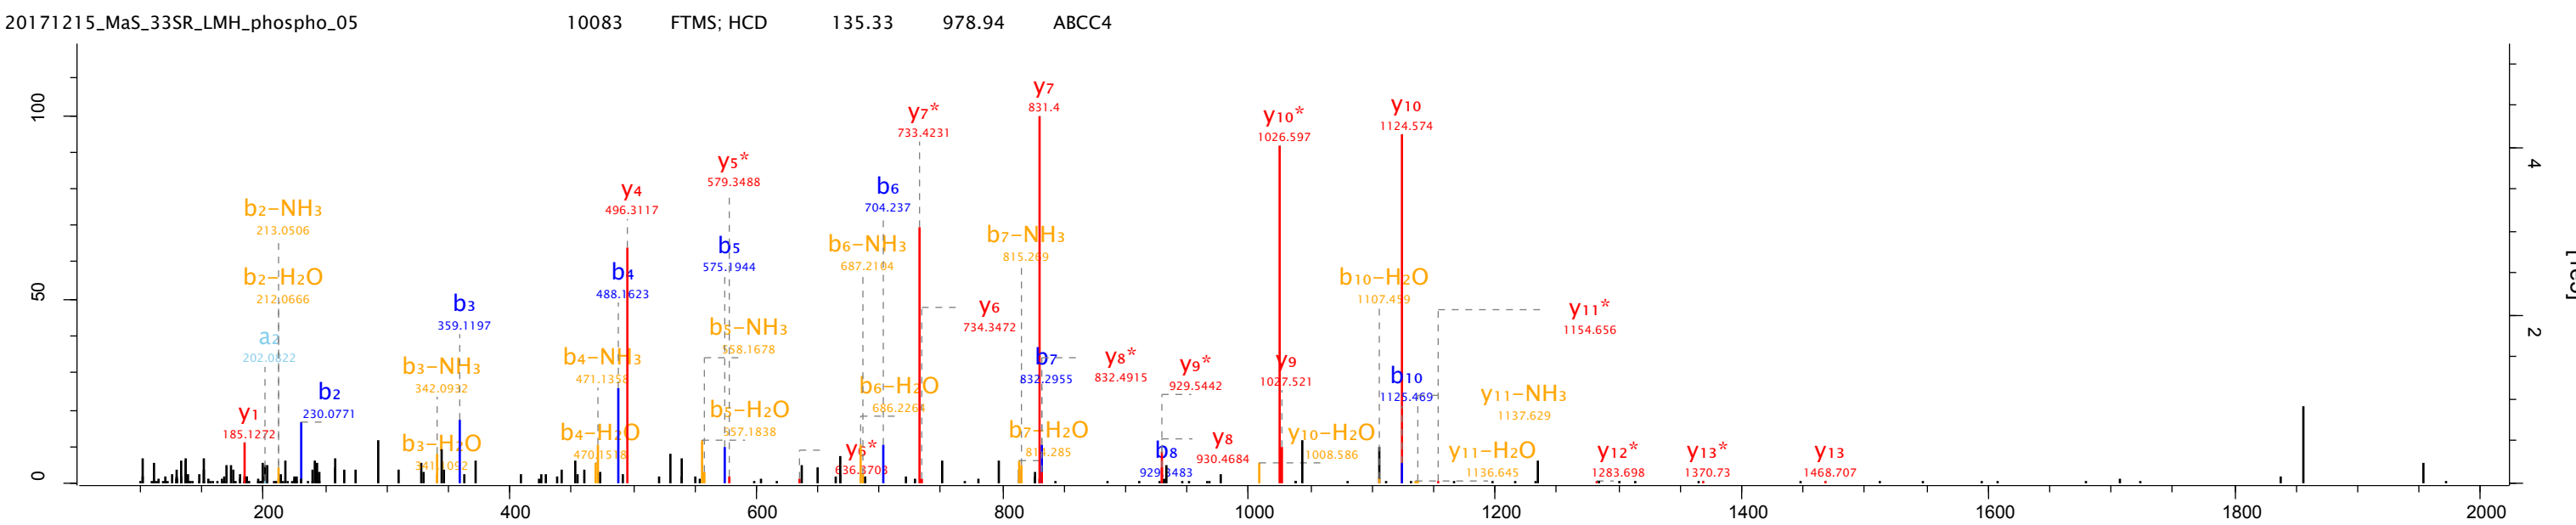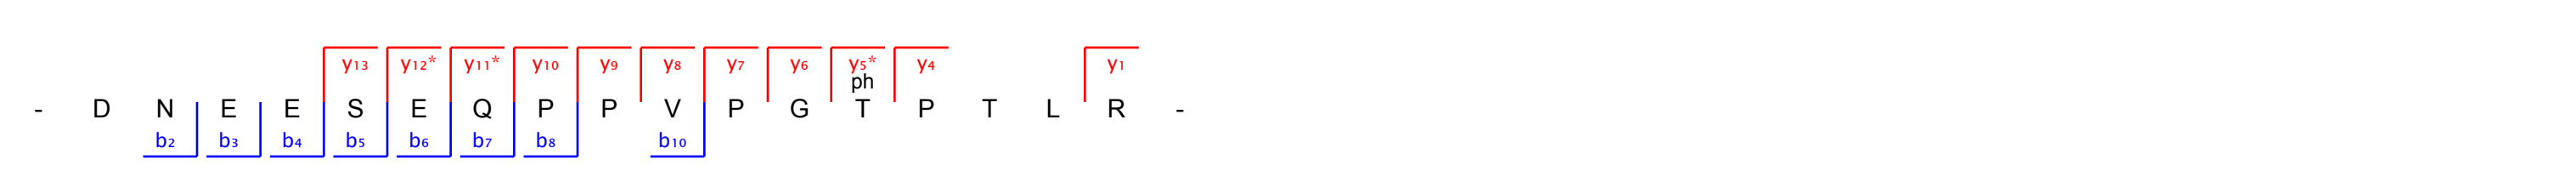

Raw file 20171215\_MaS\_33SR\_LMH\_phospho\_05 Scan 10093 Method FTMS; HCD Score 74.12 m/z 1159.01 Gene names HUWE1

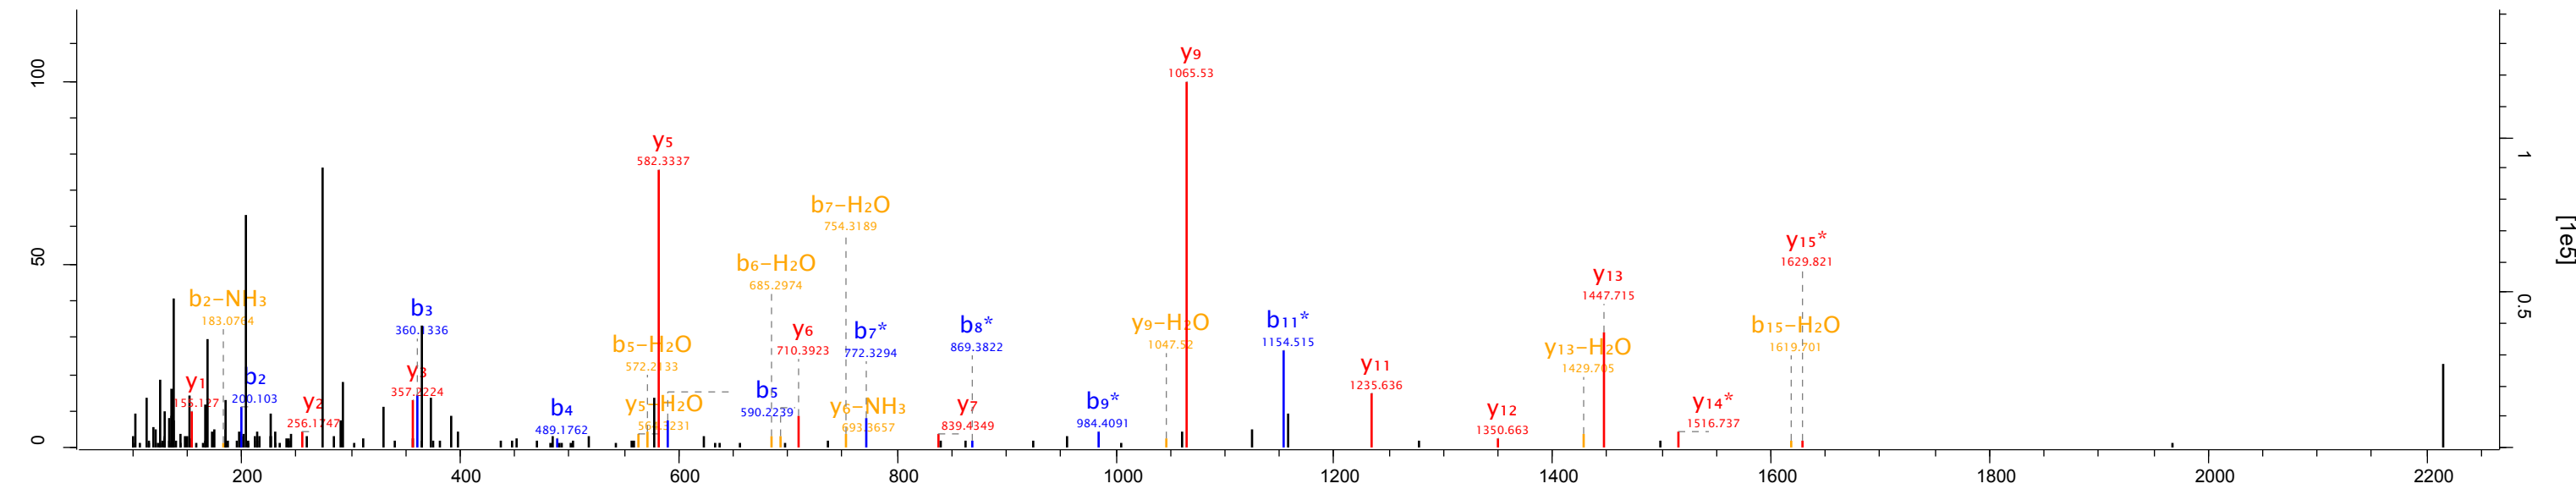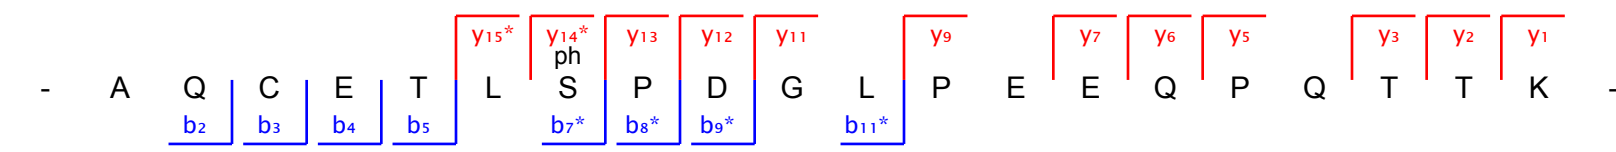

Raw file 20171215\_MaS\_33SR\_LMH\_phospho\_05 Scan 11783 Method FTMS; HCD Score 129.37 m/z 552.74 Gene names SORBS3

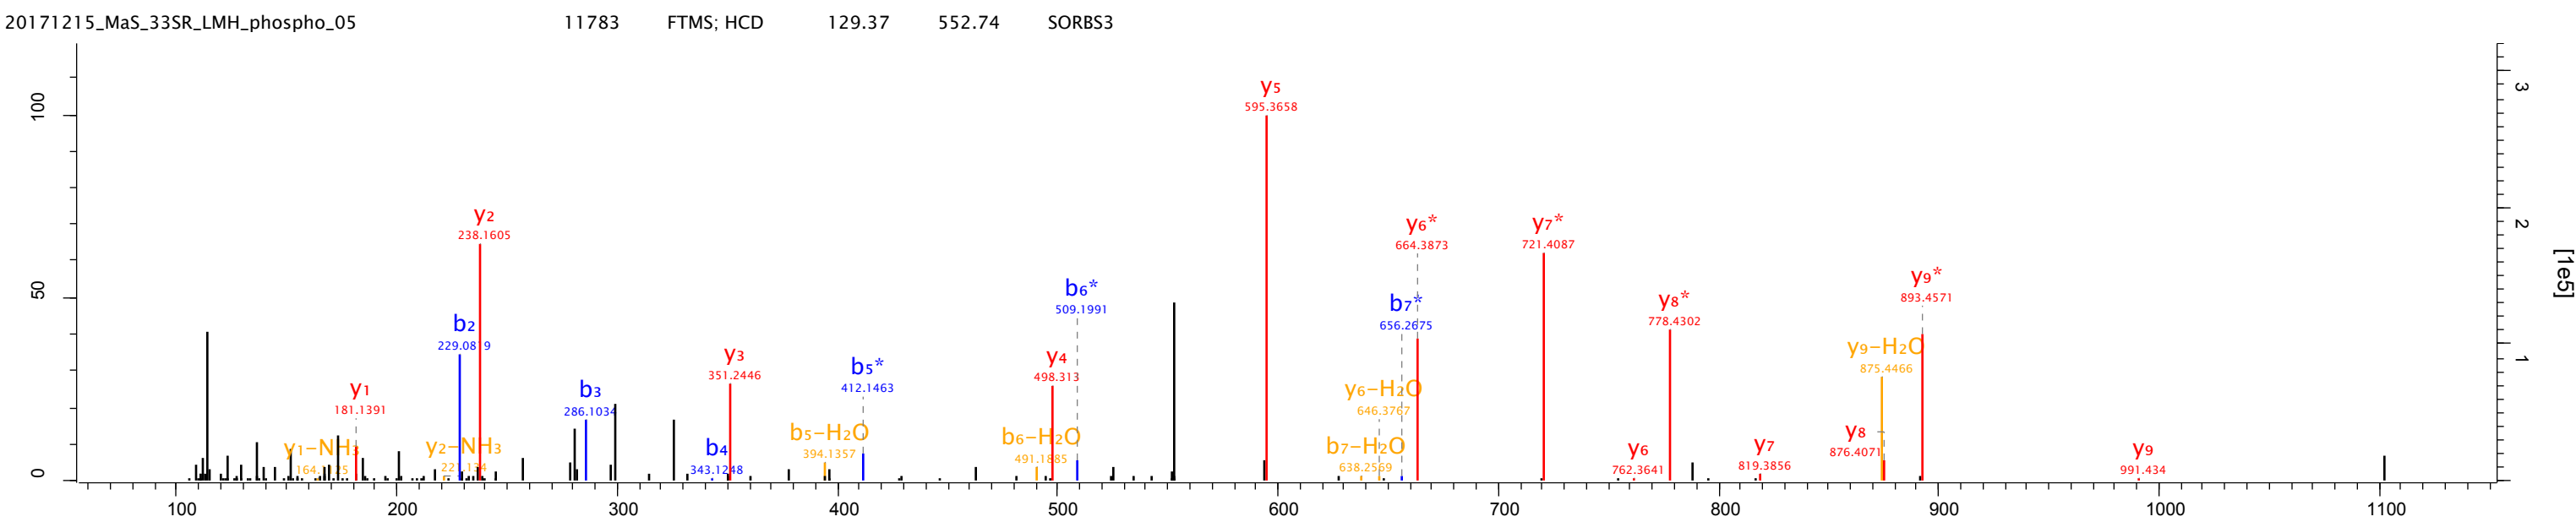

ac

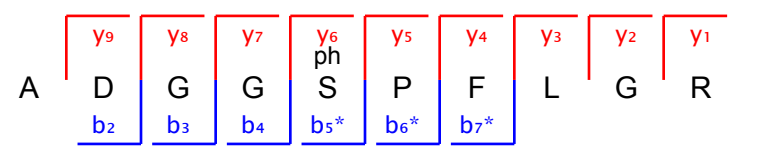

Raw file 20171215\_MaS\_33SR\_LMH\_phospho\_05 Scan 12283 Method FTMS; HCD Score 217.46 m/z 1228.61 Gene names CFL1

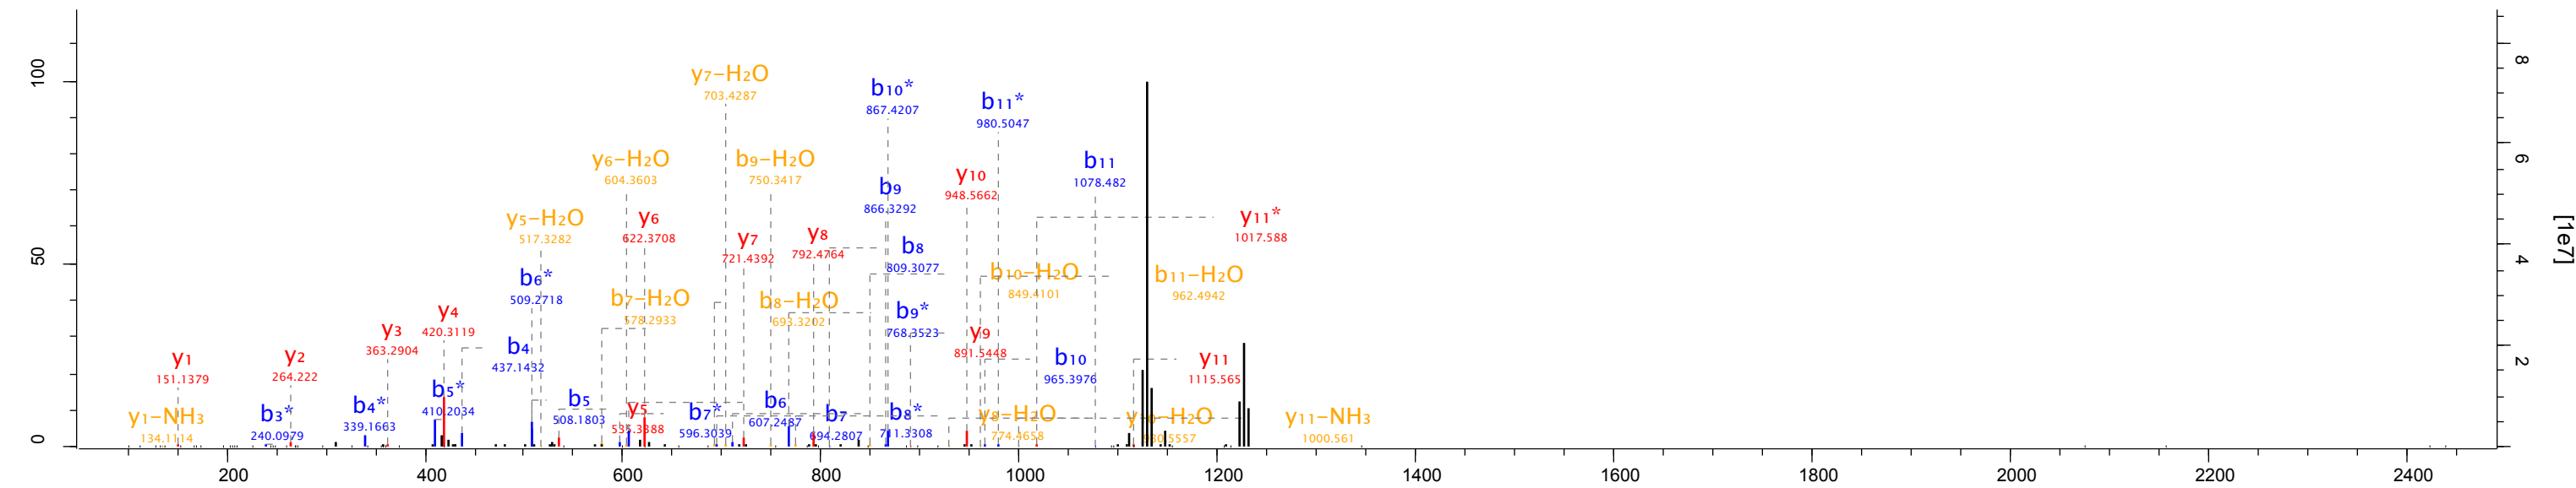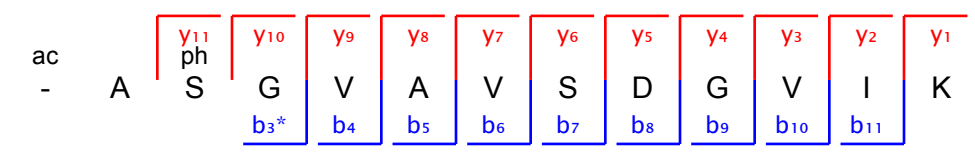

Raw file 20171215\_MaS\_33SR\_LMH\_phospho\_05 Scan 3153 Method FTMS; HCD Score 88.02 m/z 484.21 Gene names APIP

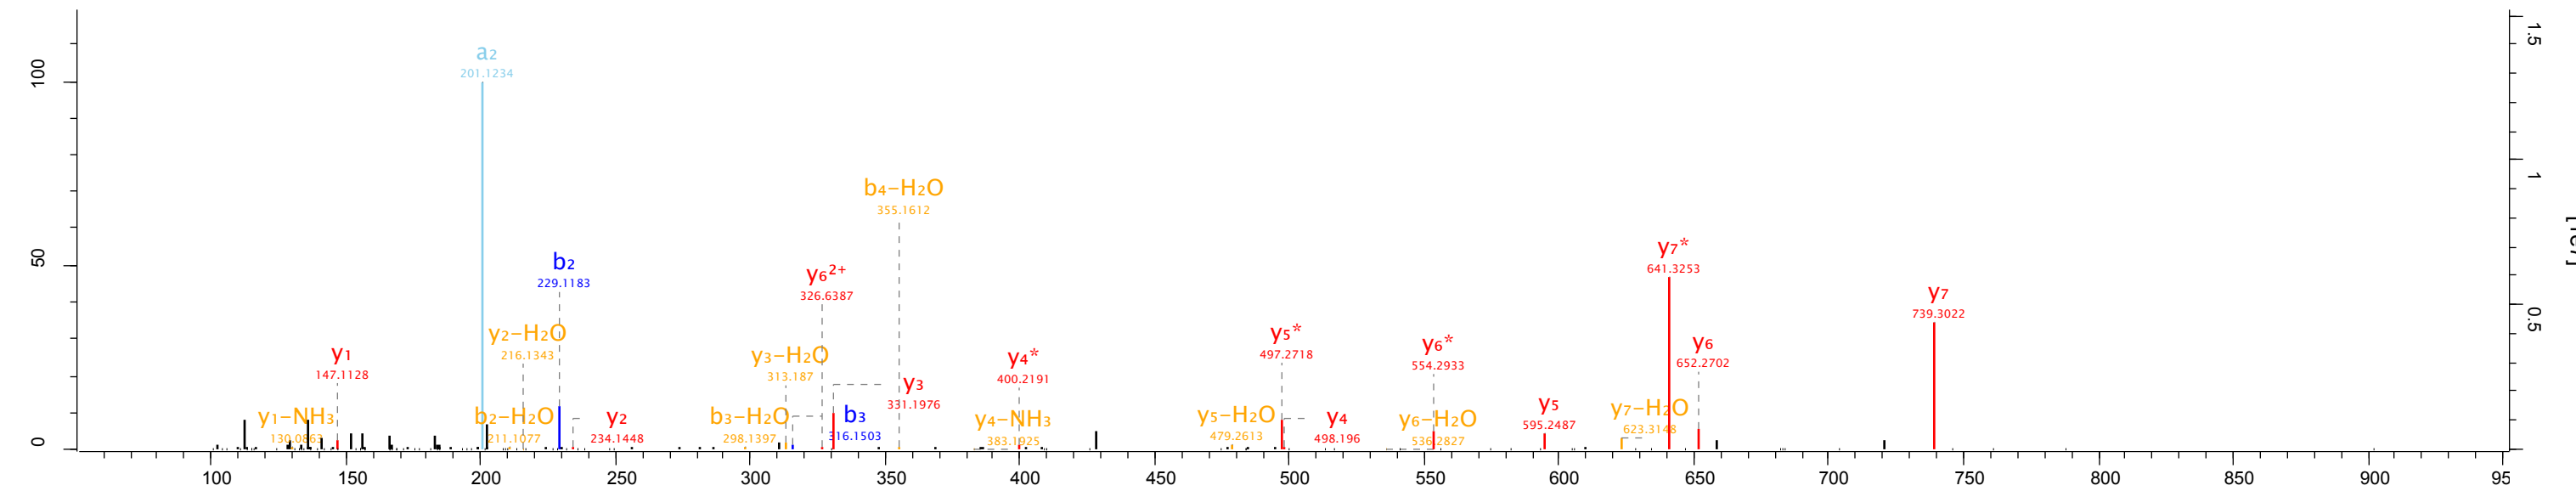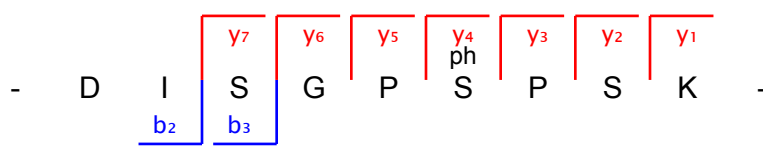

Raw file 20171215\_MaS\_33SR\_LMH\_phospho\_05 Scan 4173 Method FTMS; HCD Score 121.48 m/z 661.82 Gene names NUP98

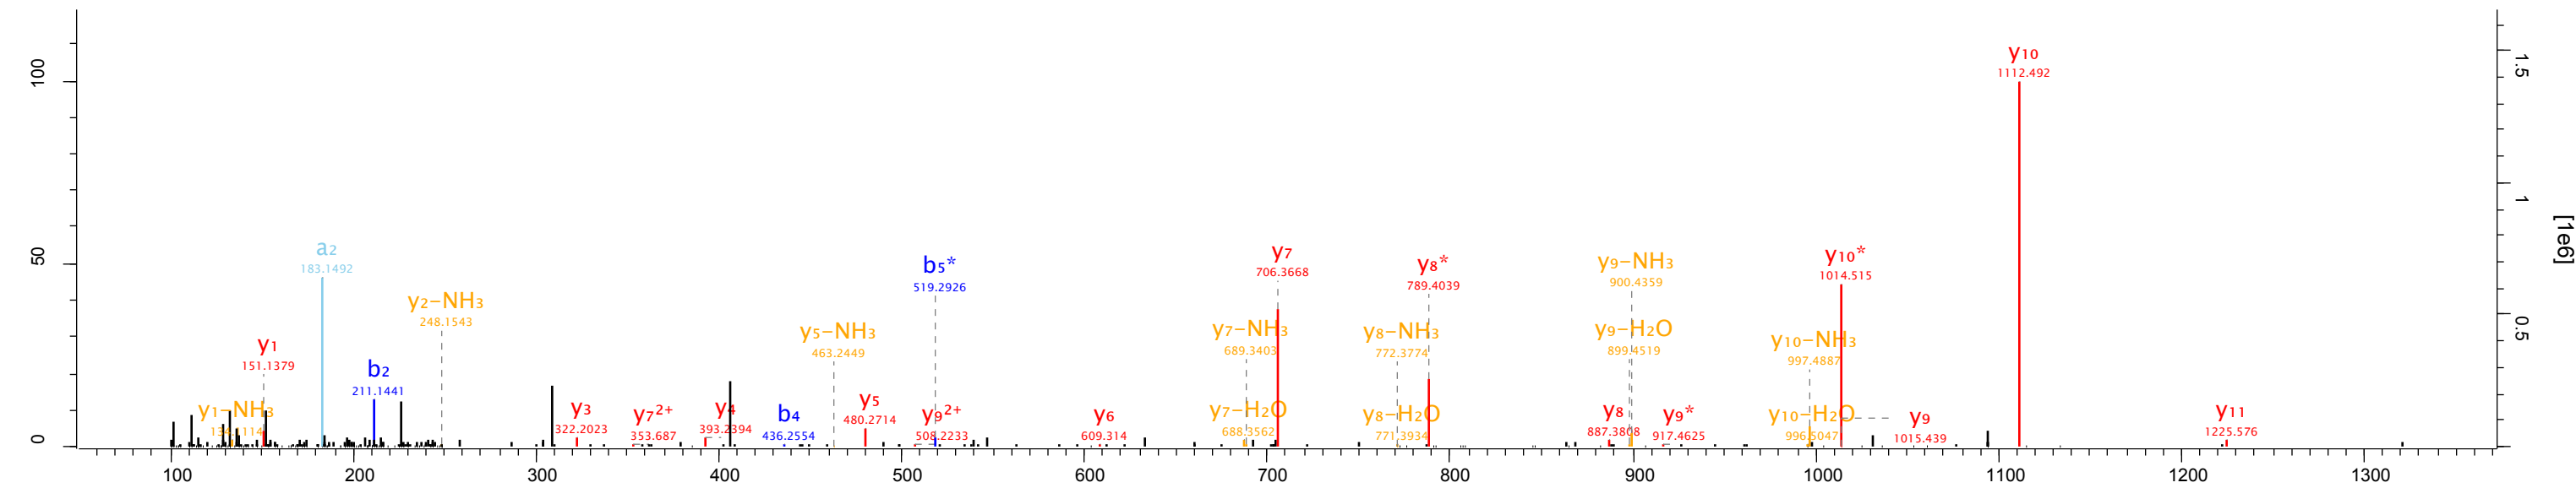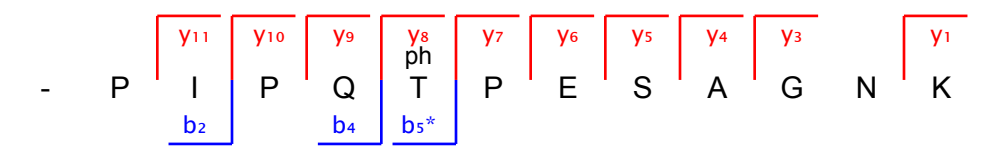

Raw file 20171215\_MaS\_33SR\_LMH\_phospho\_05 Scan 4253 Method FTMS; HCD Score 166.9 m/z 711.77 Gene names ADSL

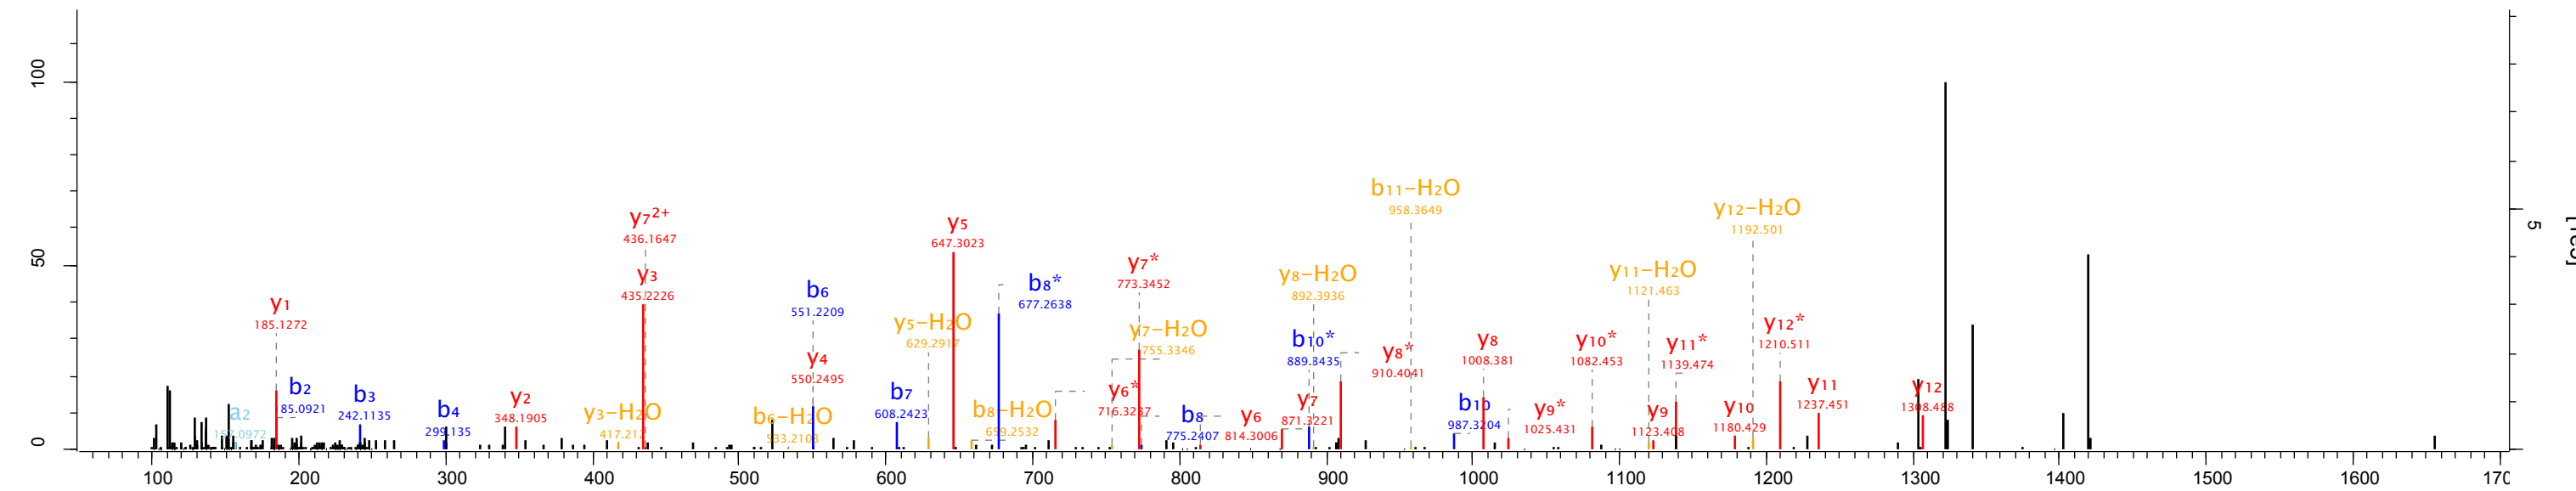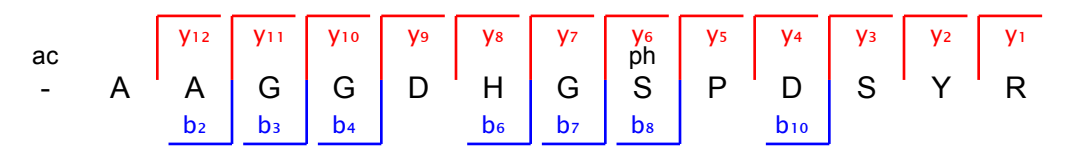

Raw file 20171215\_MaS\_33SR\_LMH\_phospho\_05 Scan 4423 Method FTMS; HCD Score 79.49 m/z 614.24 Gene names HUWE1

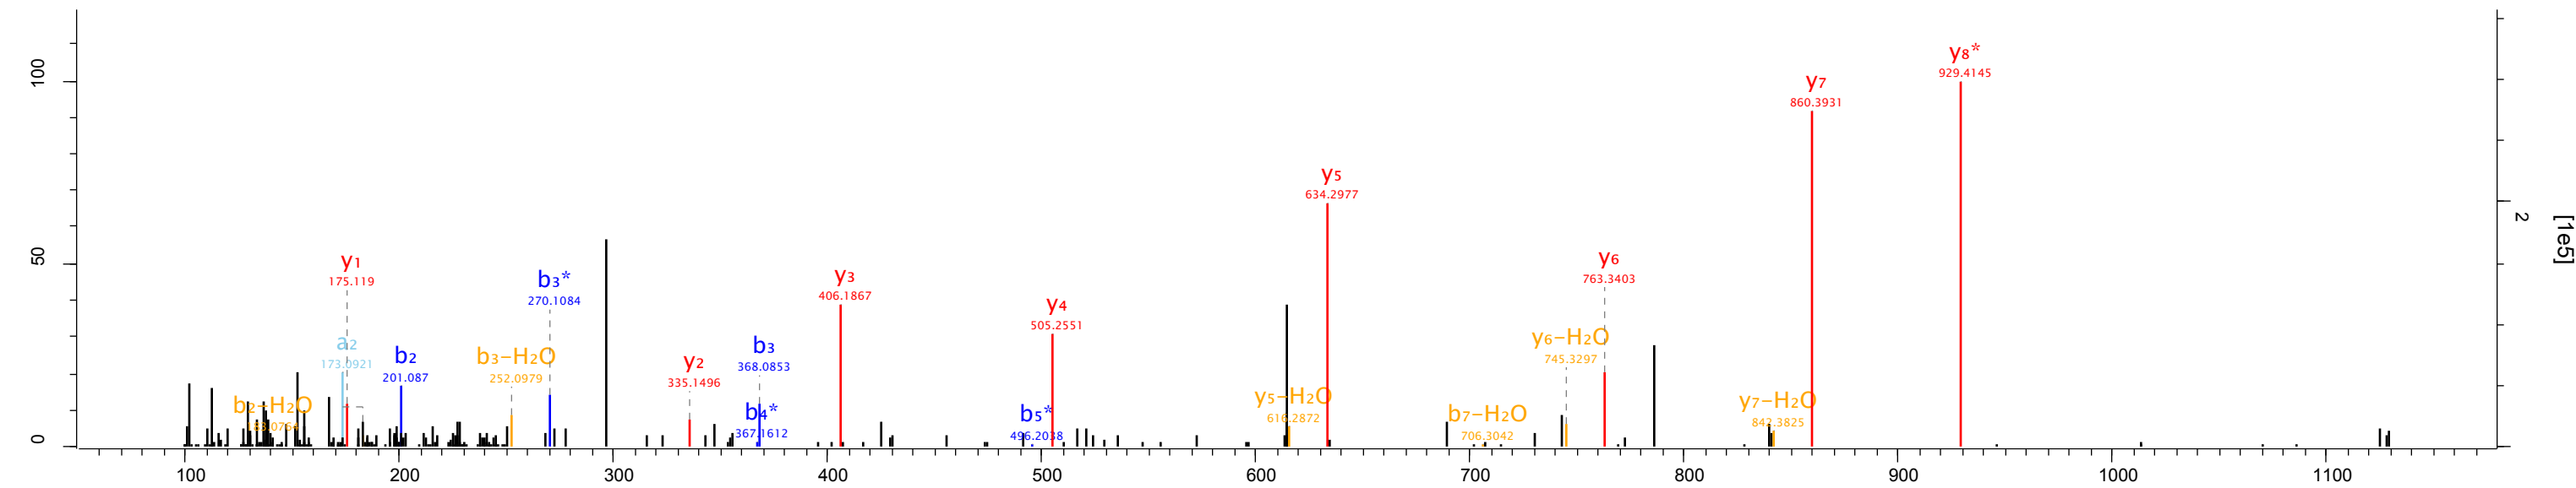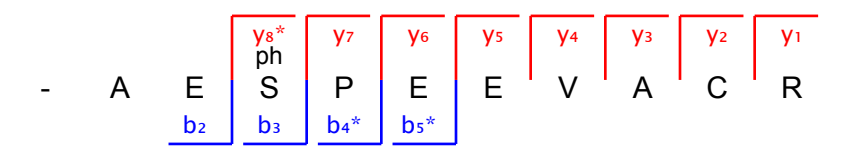



Raw file 20171215\_MaS\_33SR\_LMH\_phospho\_05 Scan 4793 Method FTMS; HCD Score 191.35 m/z 725.86 Gene names PPFIBP1

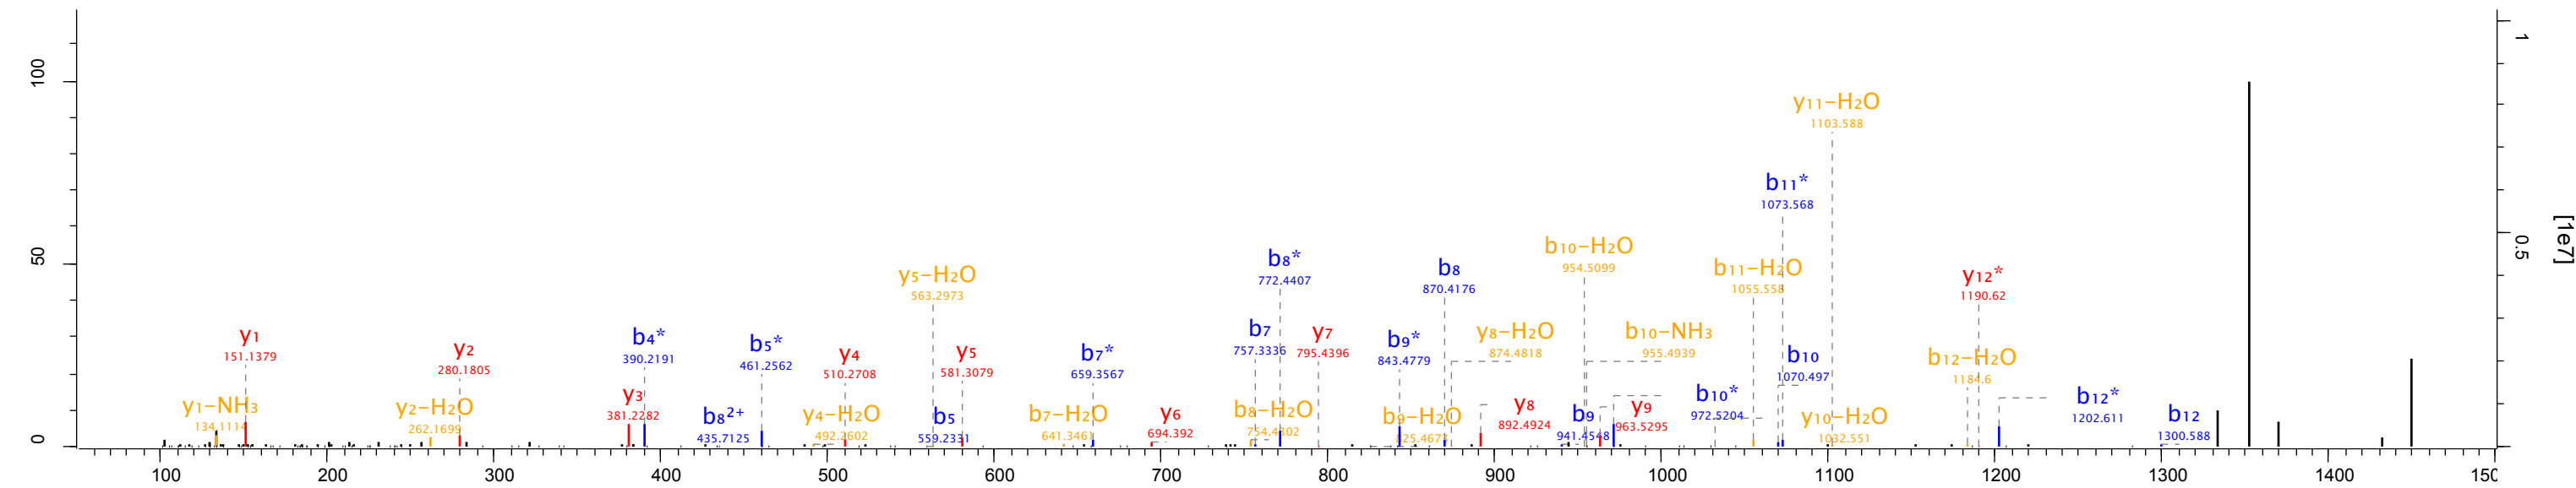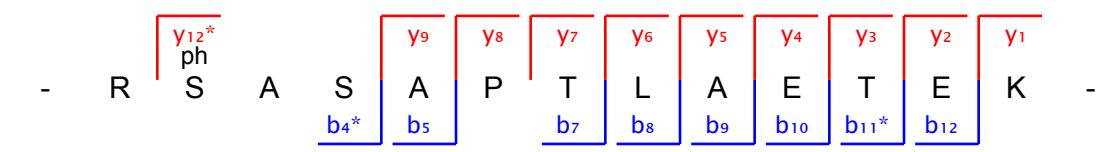

Raw file 20171215\_MaS\_33SR\_LMH\_phospho\_05 Scan 4883 Method FTMS; HCD Score 48.2 m/z 501.9 Gene names CLASP1

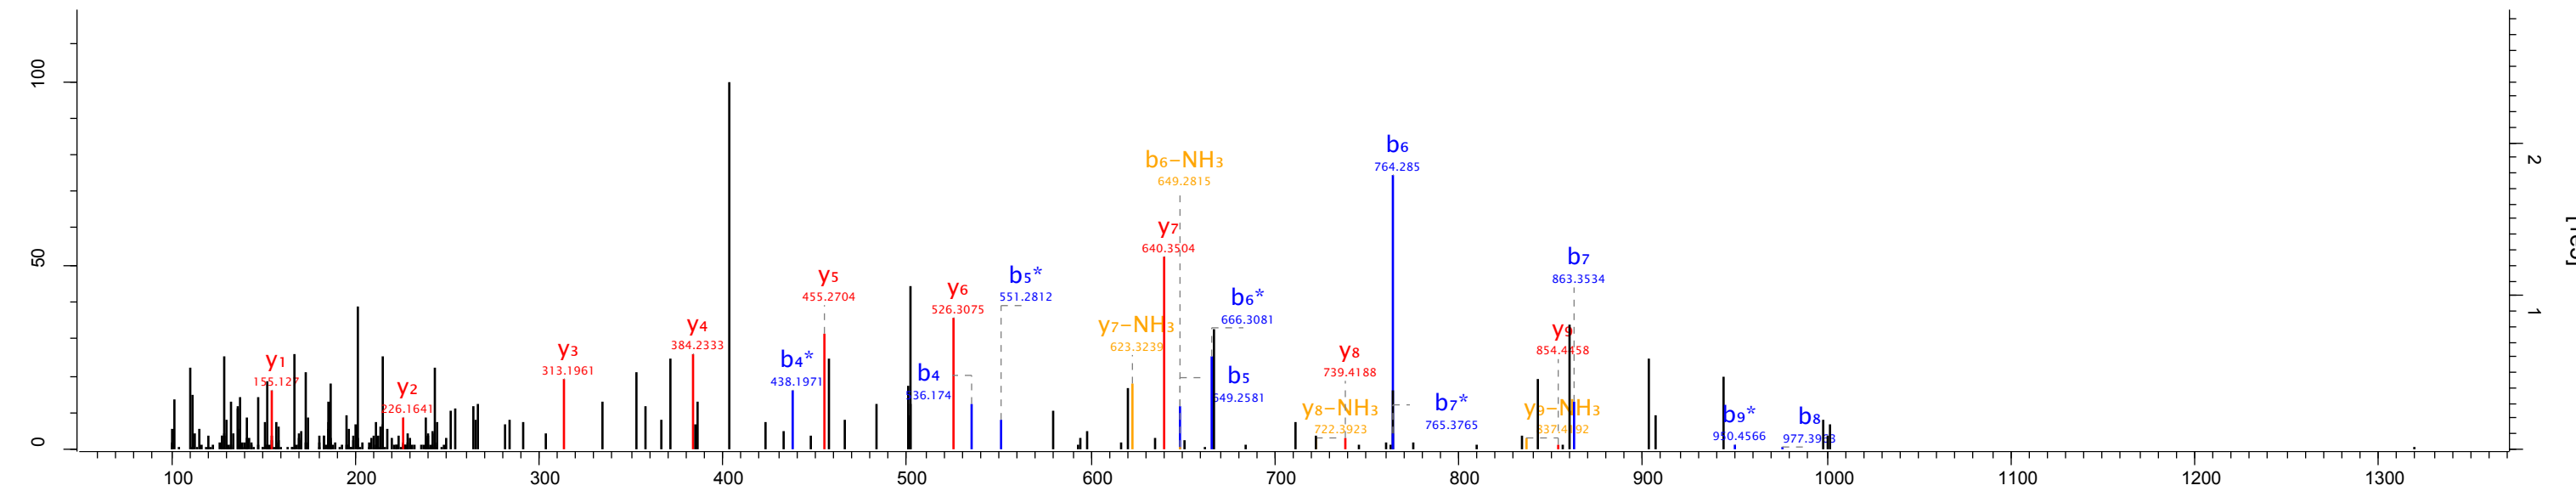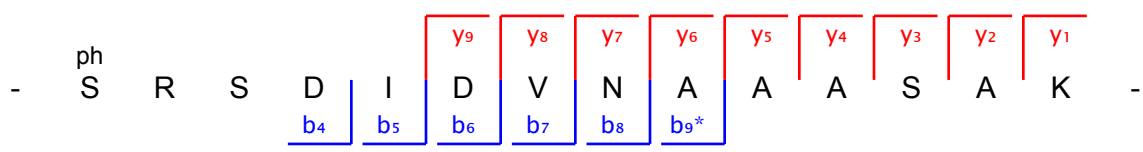

Raw file 20171215\_MaS\_33SR\_LMH\_phospho\_05 Scan 4953 Method FTMS; HCD Score 232.17 m/z 601.76 Gene names KLC1

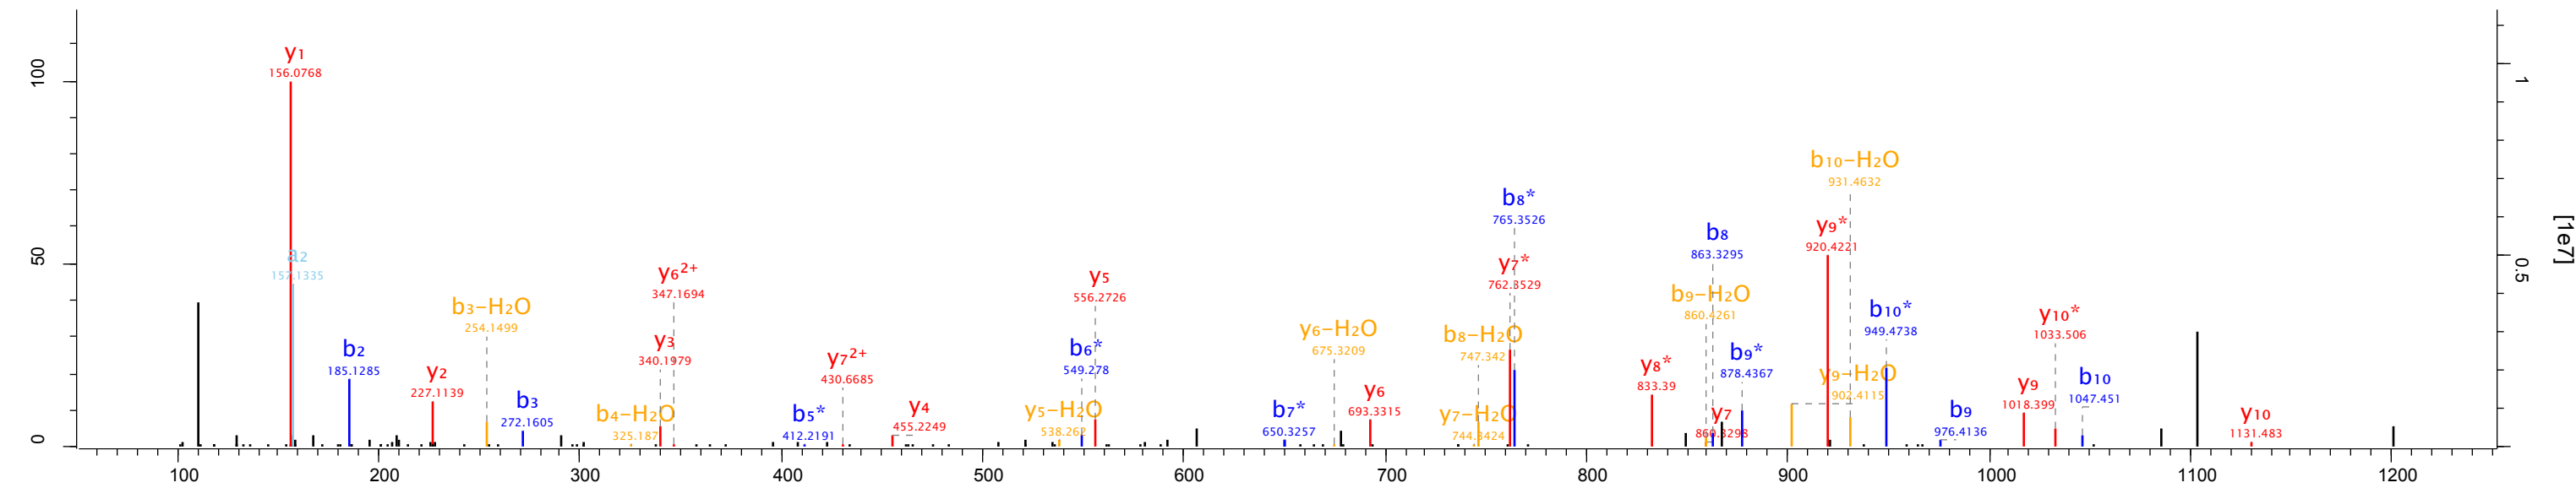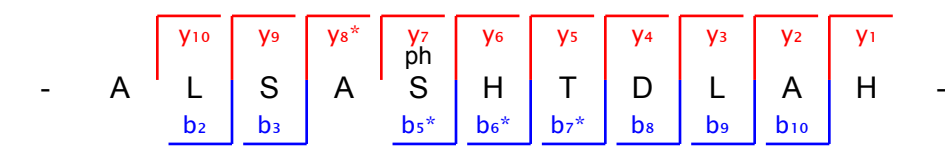

Raw file 20171215\_MaS\_33SR\_LMH\_phospho\_05 Scan 5493 Method FTMS; HCD Score 230.91 m/z 1008.44 Gene names DEK

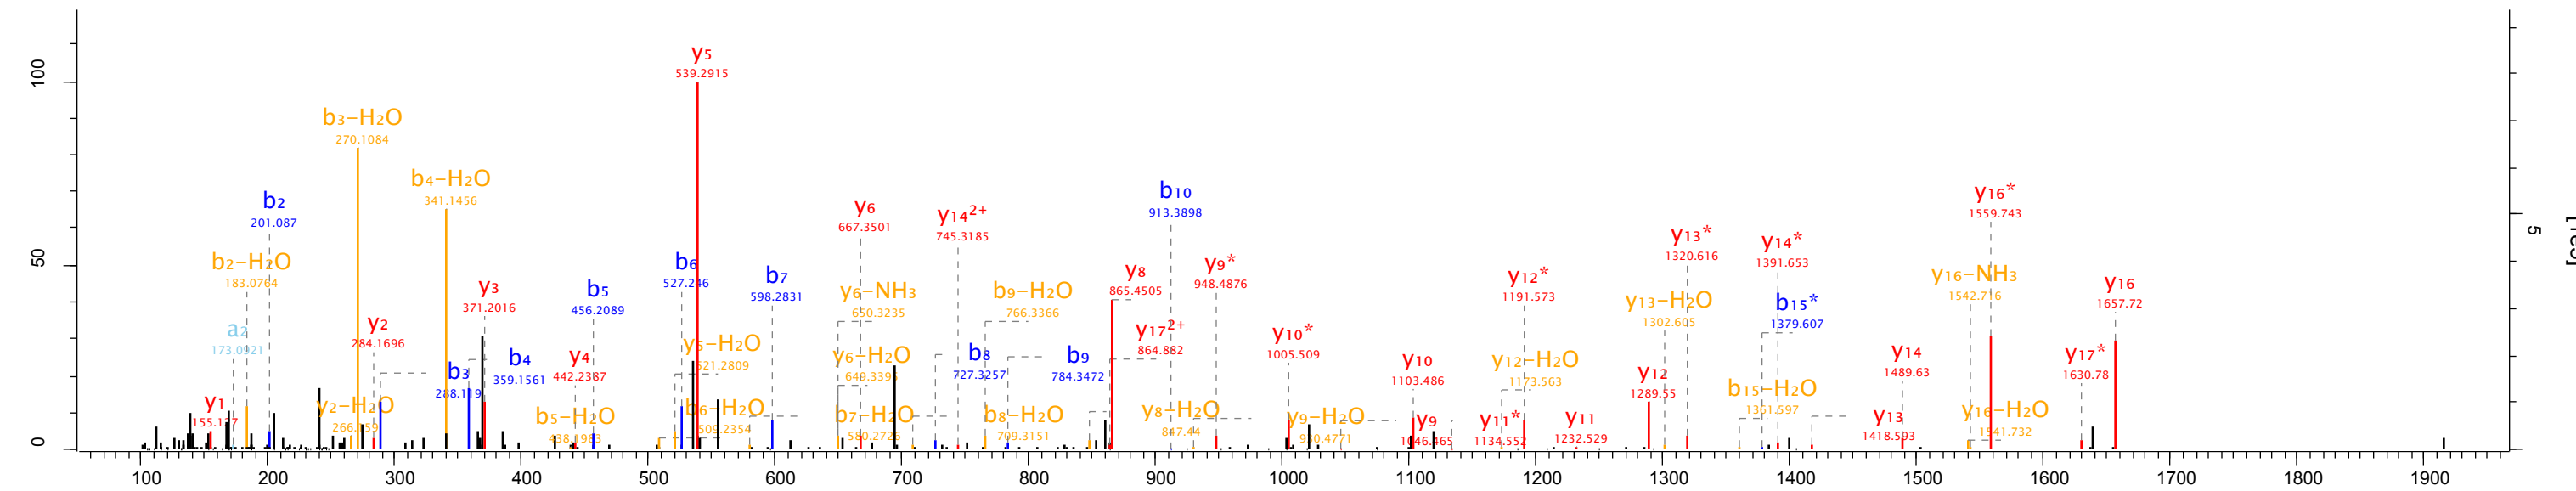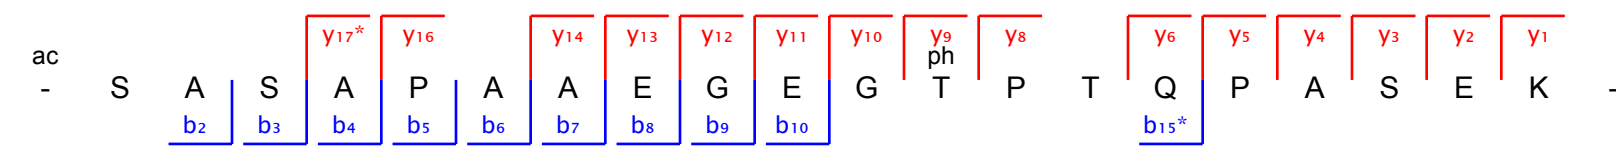

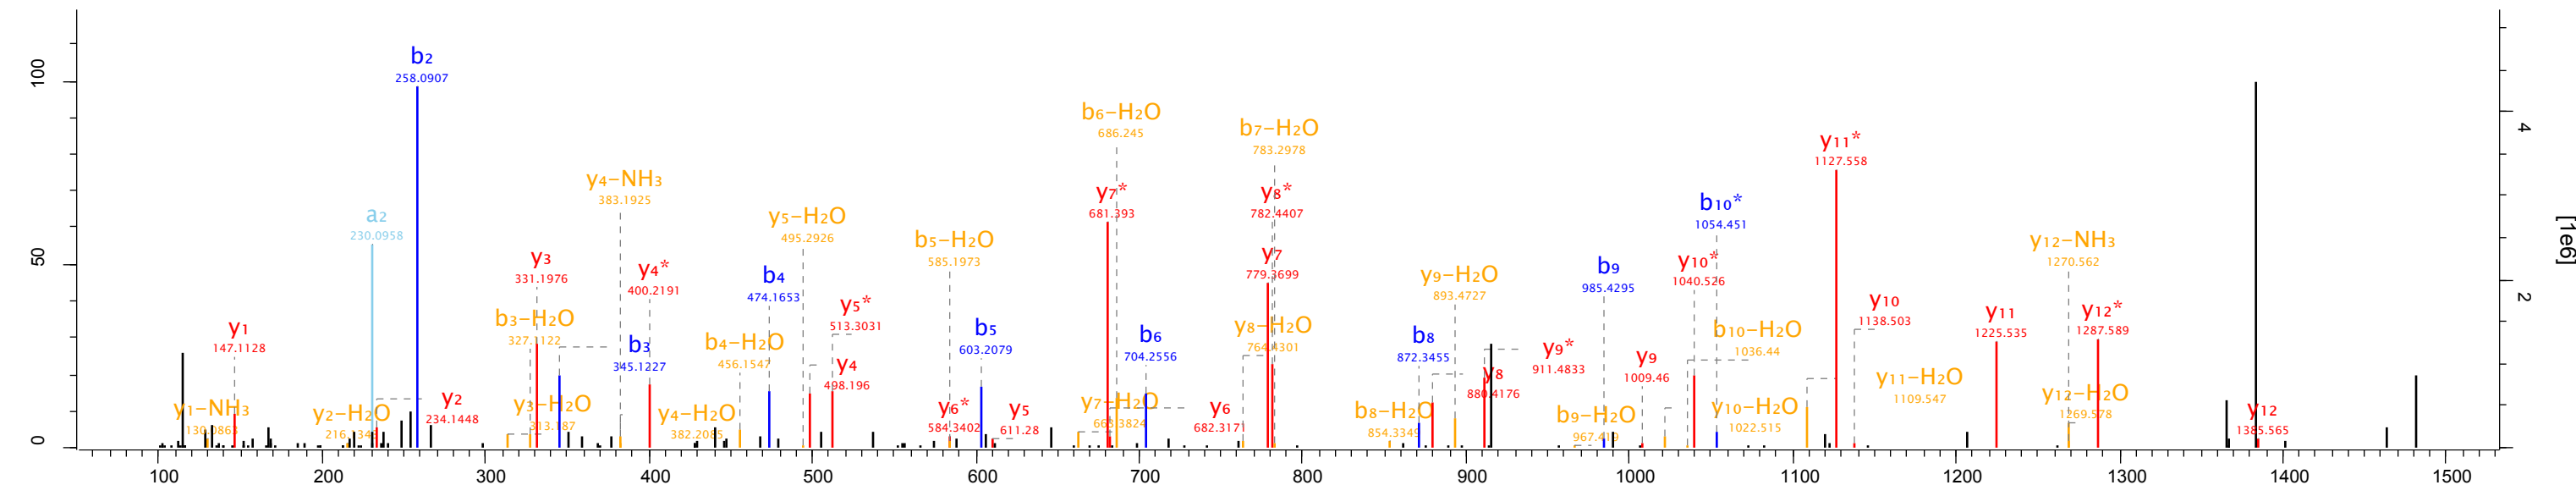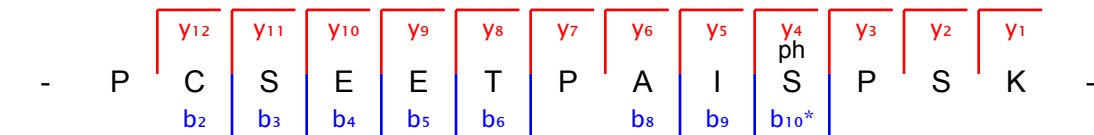

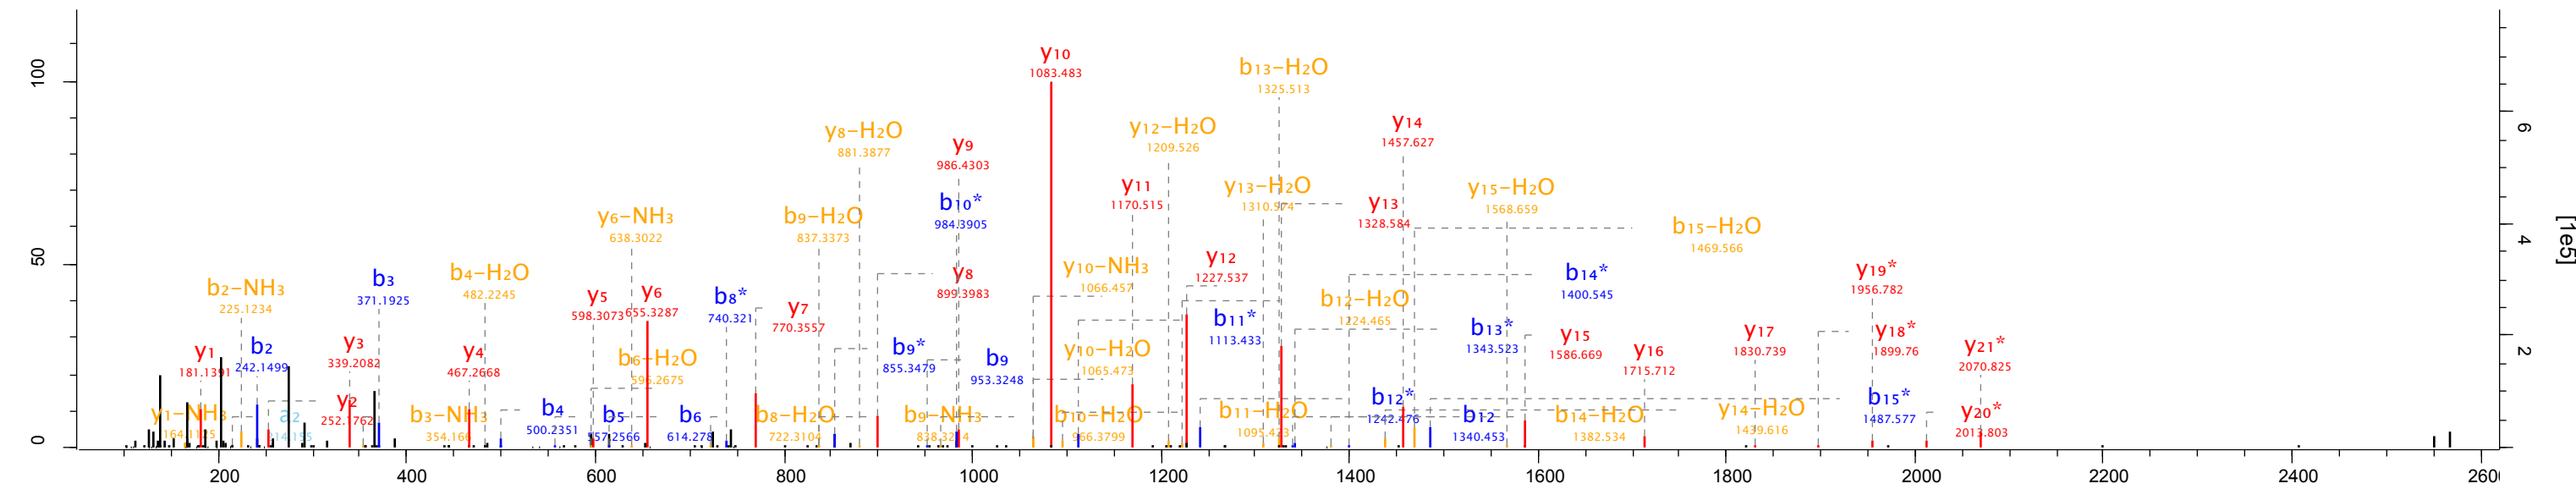

- L Q E E G G G S D E E E T G S P S E D G M Q S A R -

b<sub>2</sub>
b<sub>3</sub>
b<sub>4</sub>
y<sub>21</sub>\*
y<sub>20</sub>\*
y<sub>19</sub>\*
y<sub>18</sub>\*
ph
y<sub>17</sub>
y<sub>16</sub>
y<sub>15</sub>
y<sub>14</sub>
y<sub>13</sub>
y<sub>12</sub>
y<sub>11</sub>
y<sub>10</sub>
y<sub>9</sub>
y<sub>8</sub>
y<sub>7</sub>
y<sub>6</sub>
y<sub>5</sub>
y<sub>4</sub>
y<sub>3</sub>
y<sub>2</sub>
y<sub>1</sub>

b<sub>8</sub>\*
b<sub>9</sub>
b<sub>10</sub>\*
b<sub>11</sub>\*
b<sub>12</sub>
b<sub>13</sub>\*
b<sub>14</sub>\*
b<sub>15</sub>\*

Raw file 20171215\_MaS\_33SR\_LMH\_phospho\_05 Scan 7913 Method FTMS; HCD Score 85.84 m/z 560.78

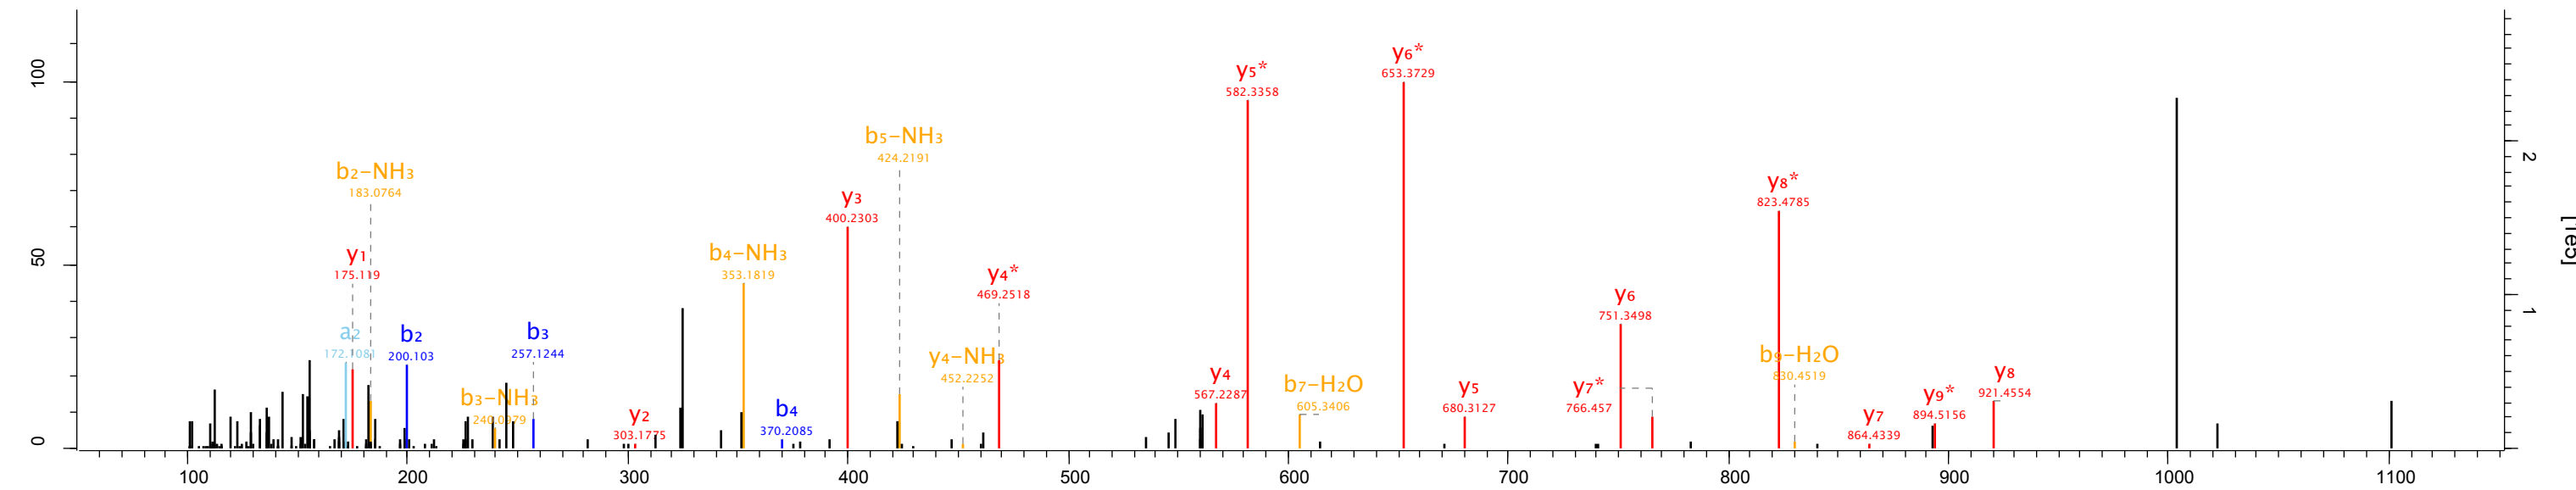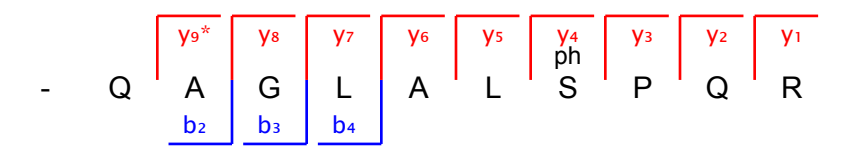

Raw file 20171215\_MaS\_33SR\_LMH\_phospho\_05 Scan 7983 Method FTMS; HCD Score 77.07 m/z 679.78 Gene names ATRX

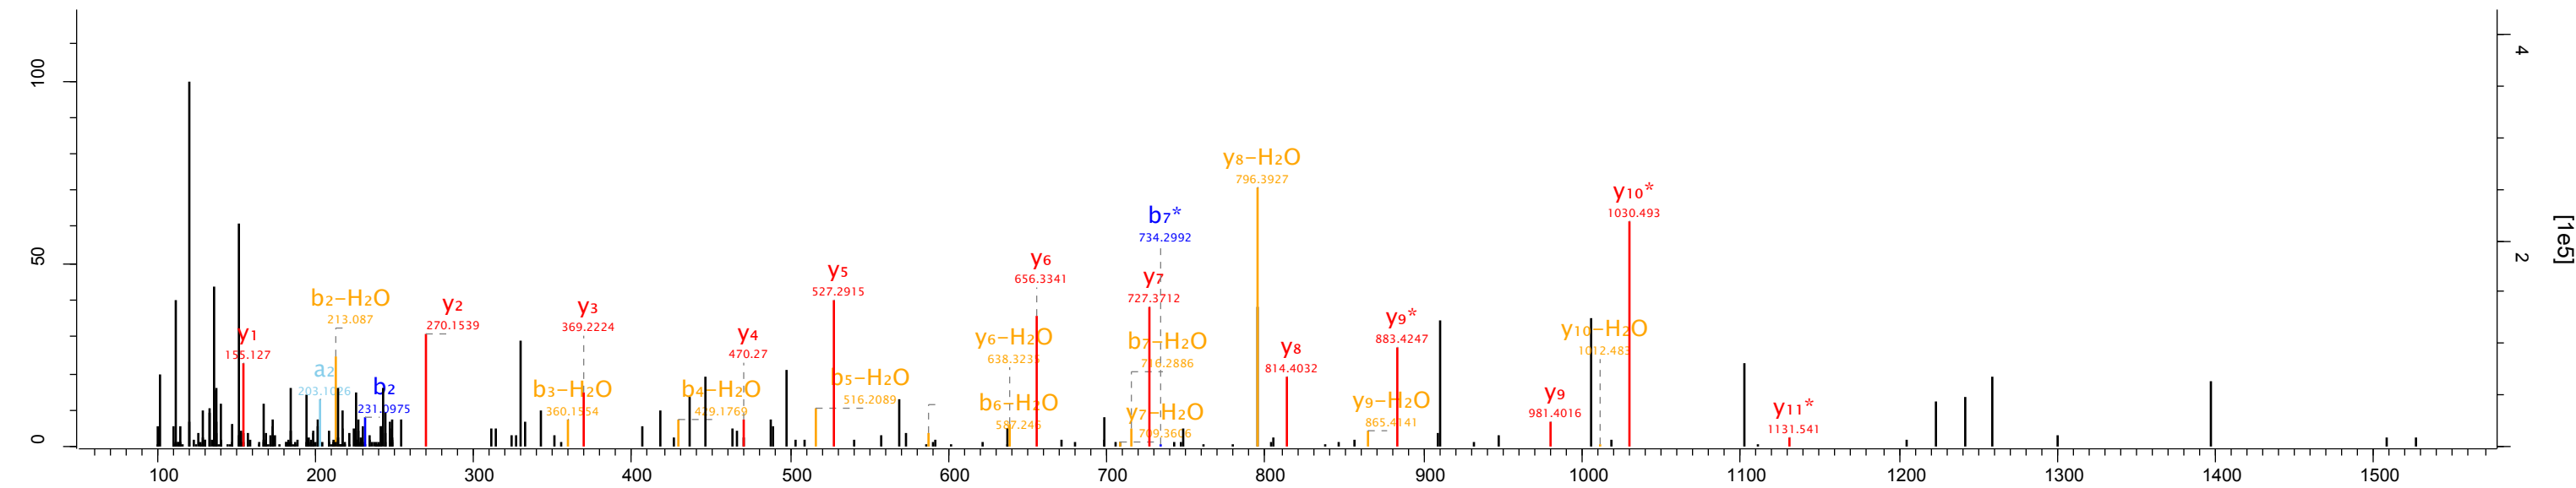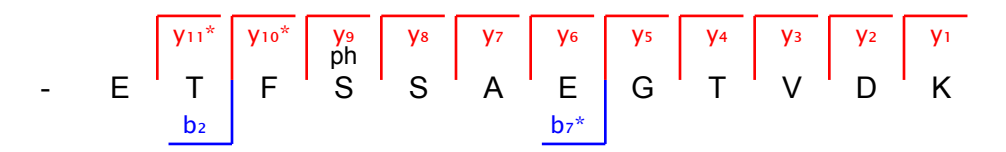



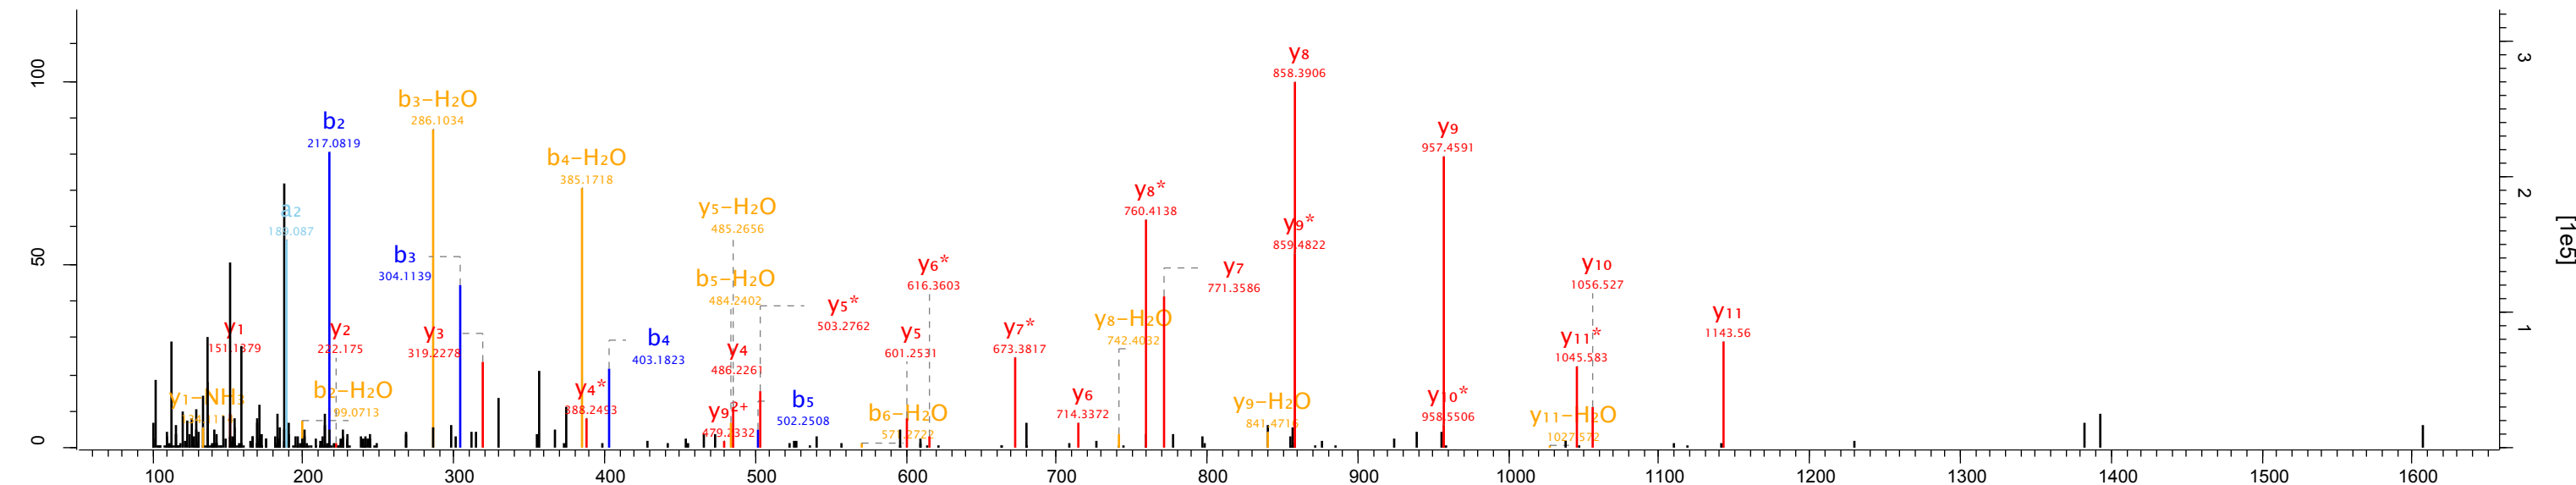

- S E S V V S G L D S P A K -

b<sub>2</sub> b<sub>3</sub> b<sub>4</sub> b<sub>5</sub>

y<sub>11</sub> y<sub>10</sub> y<sub>9</sub> y<sub>8</sub> y<sub>7</sub> y<sub>6</sub> y<sub>5</sub> y<sub>4</sub> y<sub>3</sub> y<sub>2</sub> y<sub>1</sub>

y<sub>11</sub>-H<sub>2</sub>O y<sub>10</sub>-H<sub>2</sub>O y<sub>9</sub>-H<sub>2</sub>O y<sub>8</sub>-H<sub>2</sub>O y<sub>7</sub>-H<sub>2</sub>O y<sub>6</sub>-H<sub>2</sub>O y<sub>5</sub>-H<sub>2</sub>O y<sub>4</sub>-H<sub>2</sub>O y<sub>3</sub>-H<sub>2</sub>O y<sub>2</sub>-H<sub>2</sub>O y<sub>1</sub>-H<sub>2</sub>O

b<sub>3</sub>-H<sub>2</sub>O b<sub>4</sub>-H<sub>2</sub>O b<sub>5</sub>-H<sub>2</sub>O

y<sub>1</sub>-NH<sub>3</sub>

Raw file

20171215\_MaS\_33SR\_LMH\_phospho\_05

Scan 9023 Method FTMS; HCD Score 53.45 m/z 642.77 Gene names RBM7

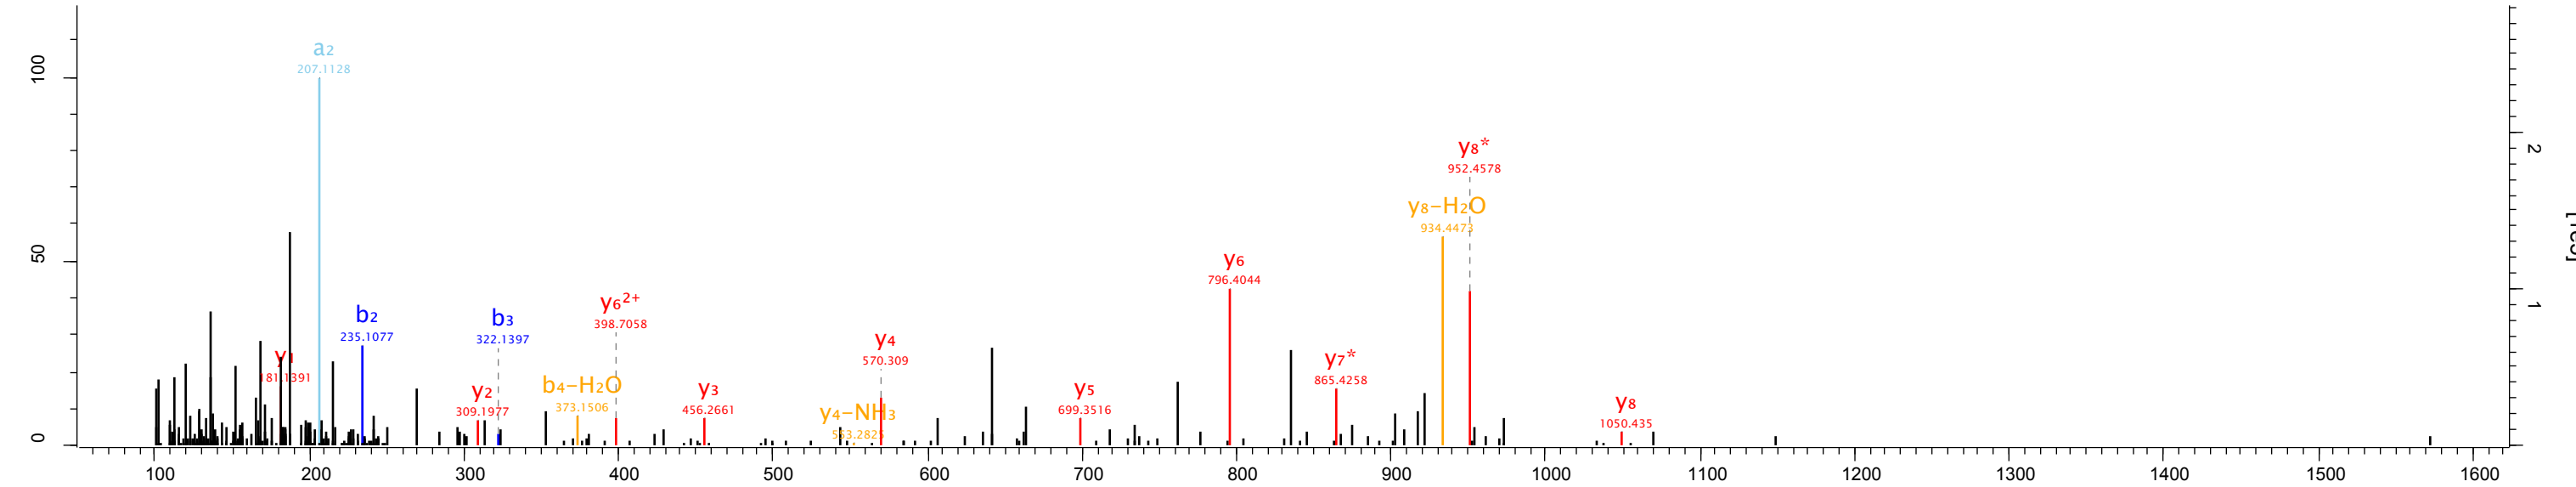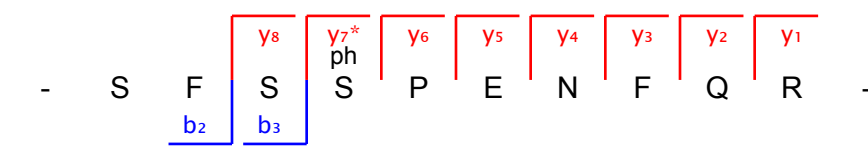

Raw file 20171215\_MaS\_33SR\_LMH\_phospho\_06 Scan 10073 Method FTMS; HCD Score 169.4 m/z 686.83 Gene names TRAFD1

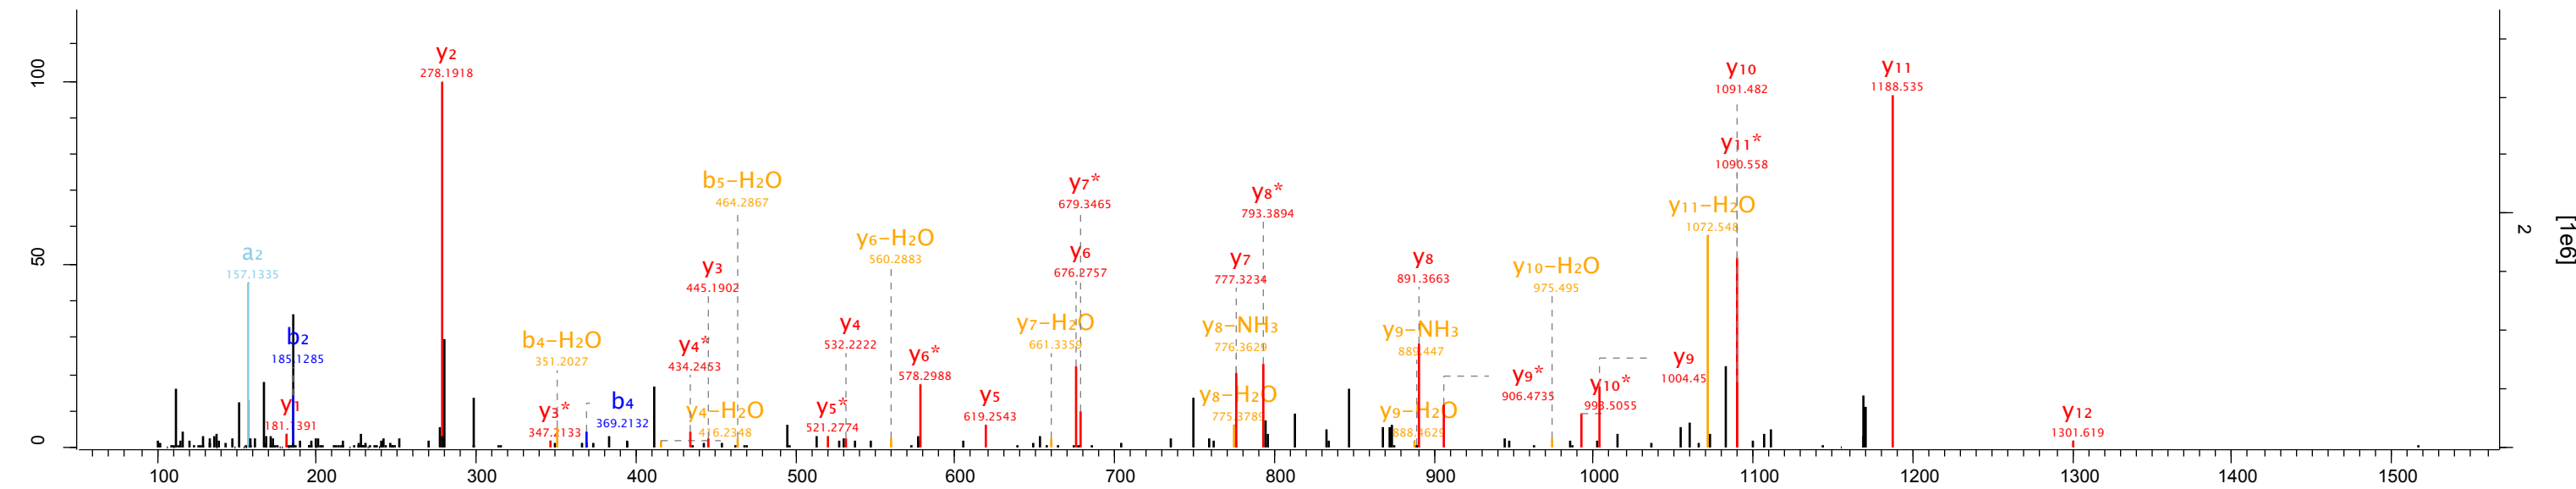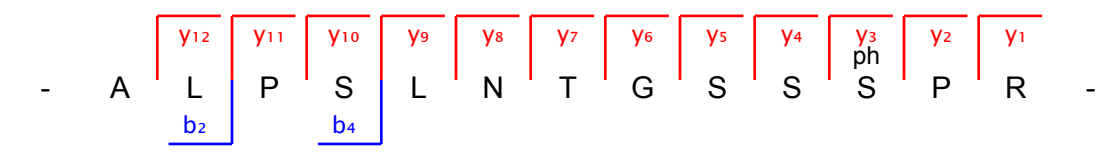

Raw file 20171215\_MaS\_33SR\_LMH\_phospho\_06 Scan 10503 Method FTMS; HCD Score 67.9 m/z 916.07 Gene names EIF4ENIF1

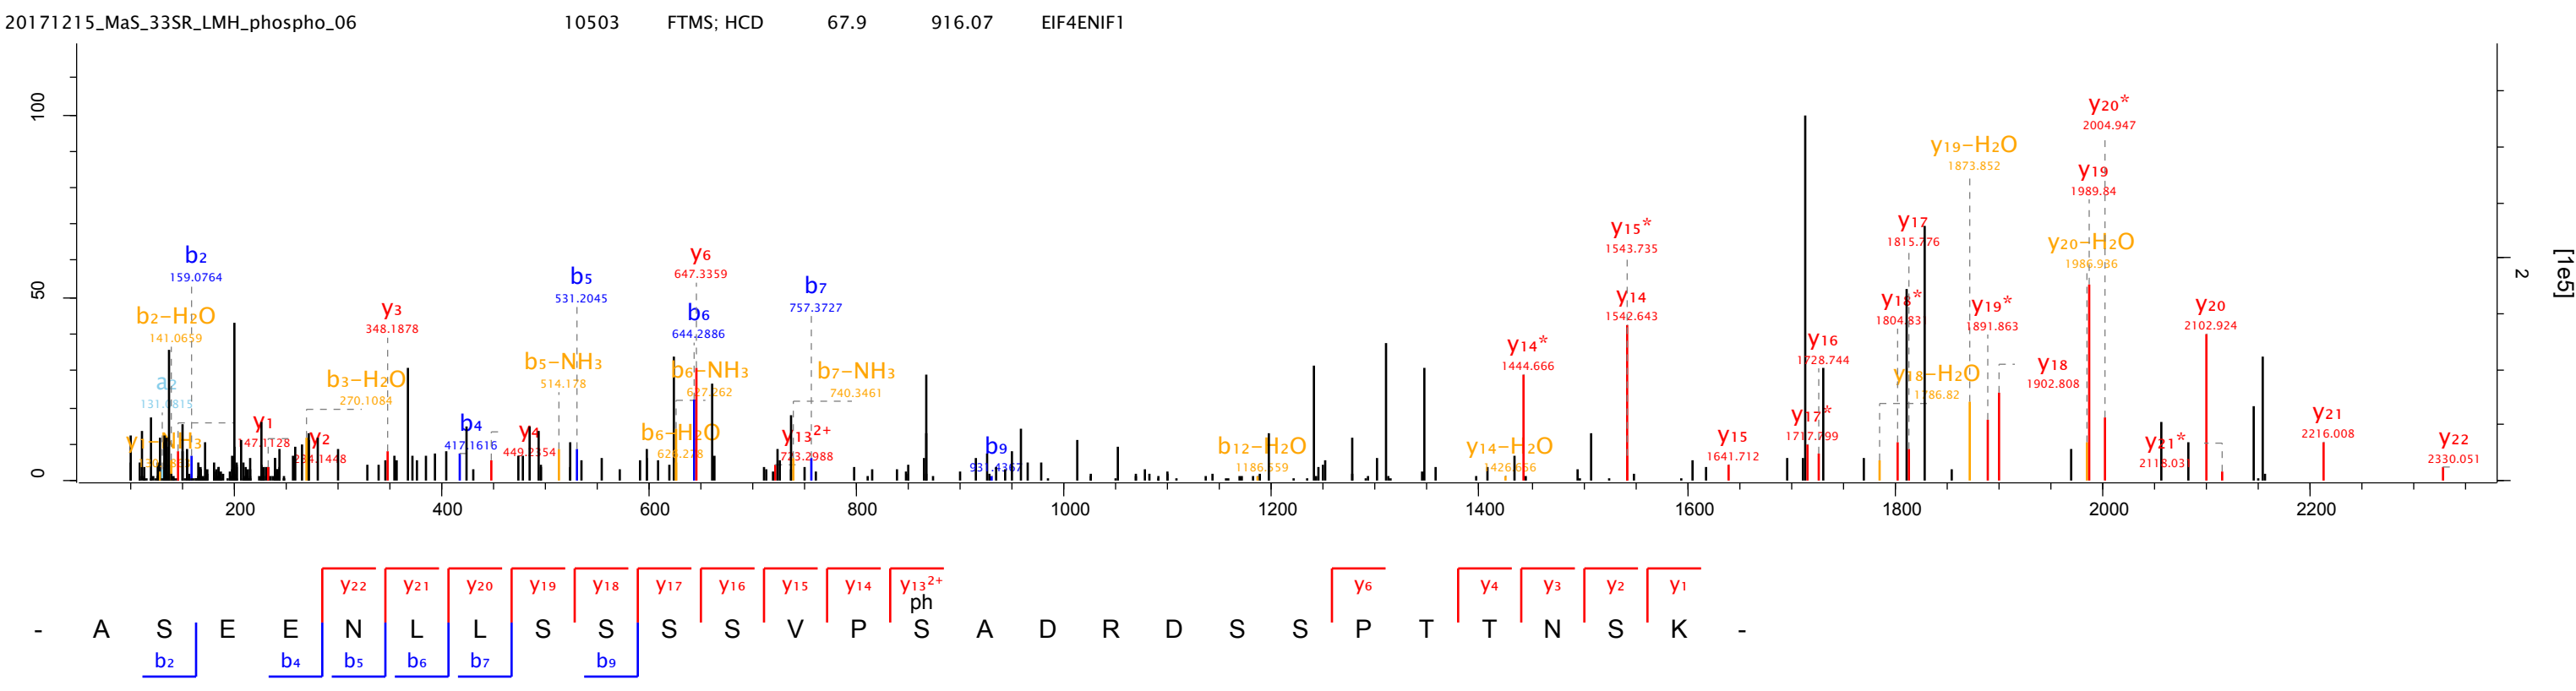

Raw file 20171215\_MaS\_33SR\_LMH\_phospho\_06 Scan 10563 Method FTMS; HCD Score 230.8 m/z 828.03 Gene names TNKS1BP1

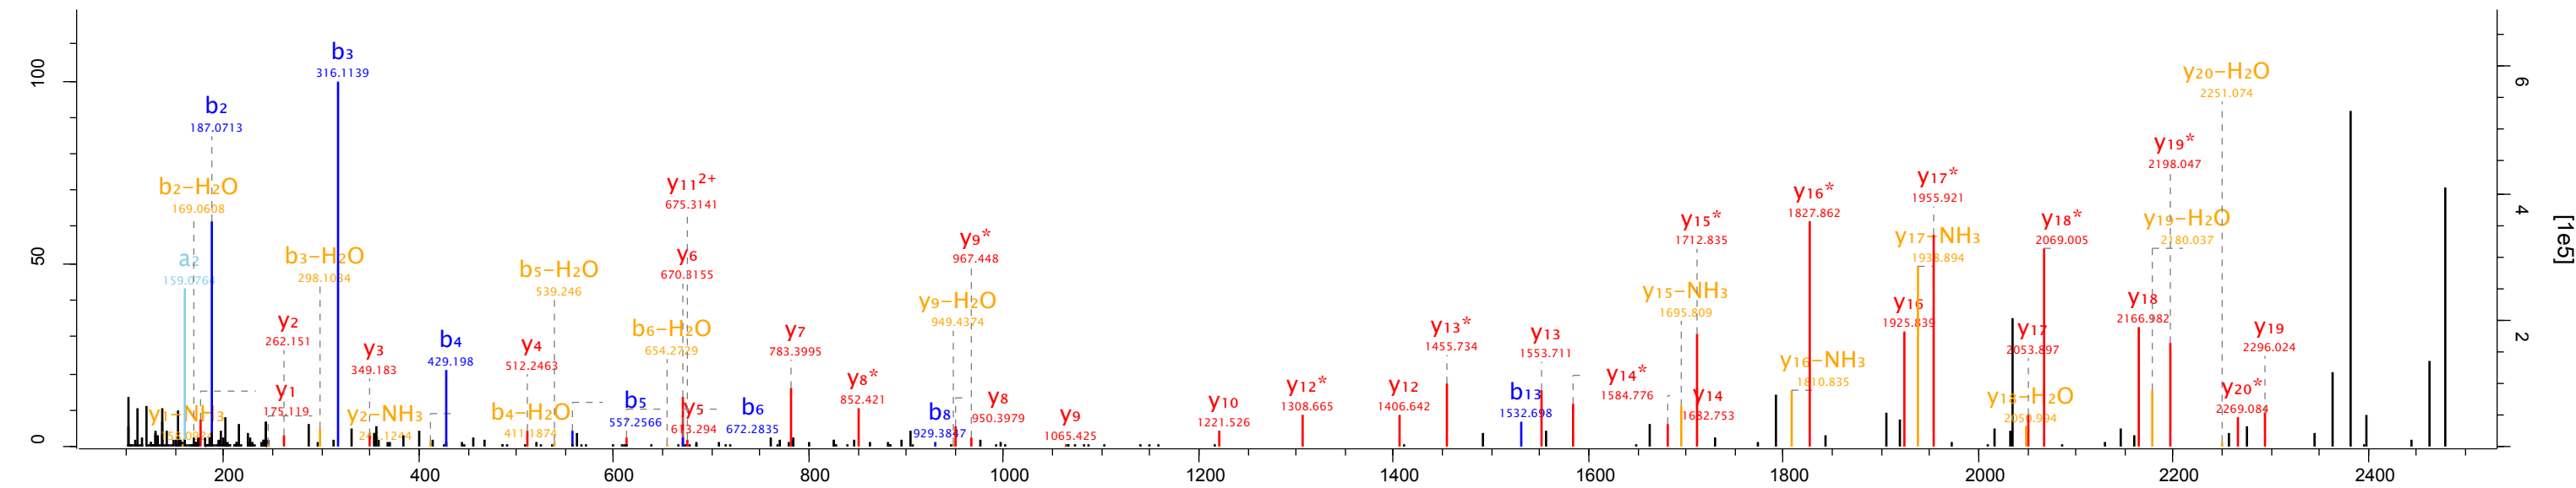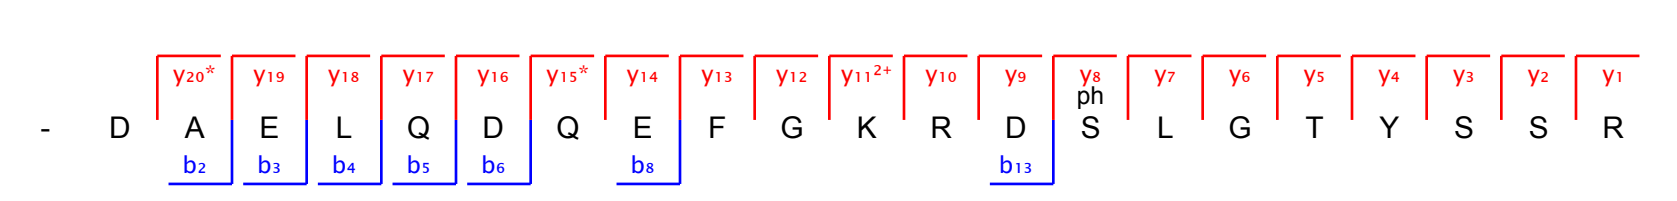

Raw file 20171215\_MaS\_33SR\_LMH\_phospho\_06 Scan 10763 Method FTMS; HCD Score 68.6 m/z 961.45 Gene names TXLNG

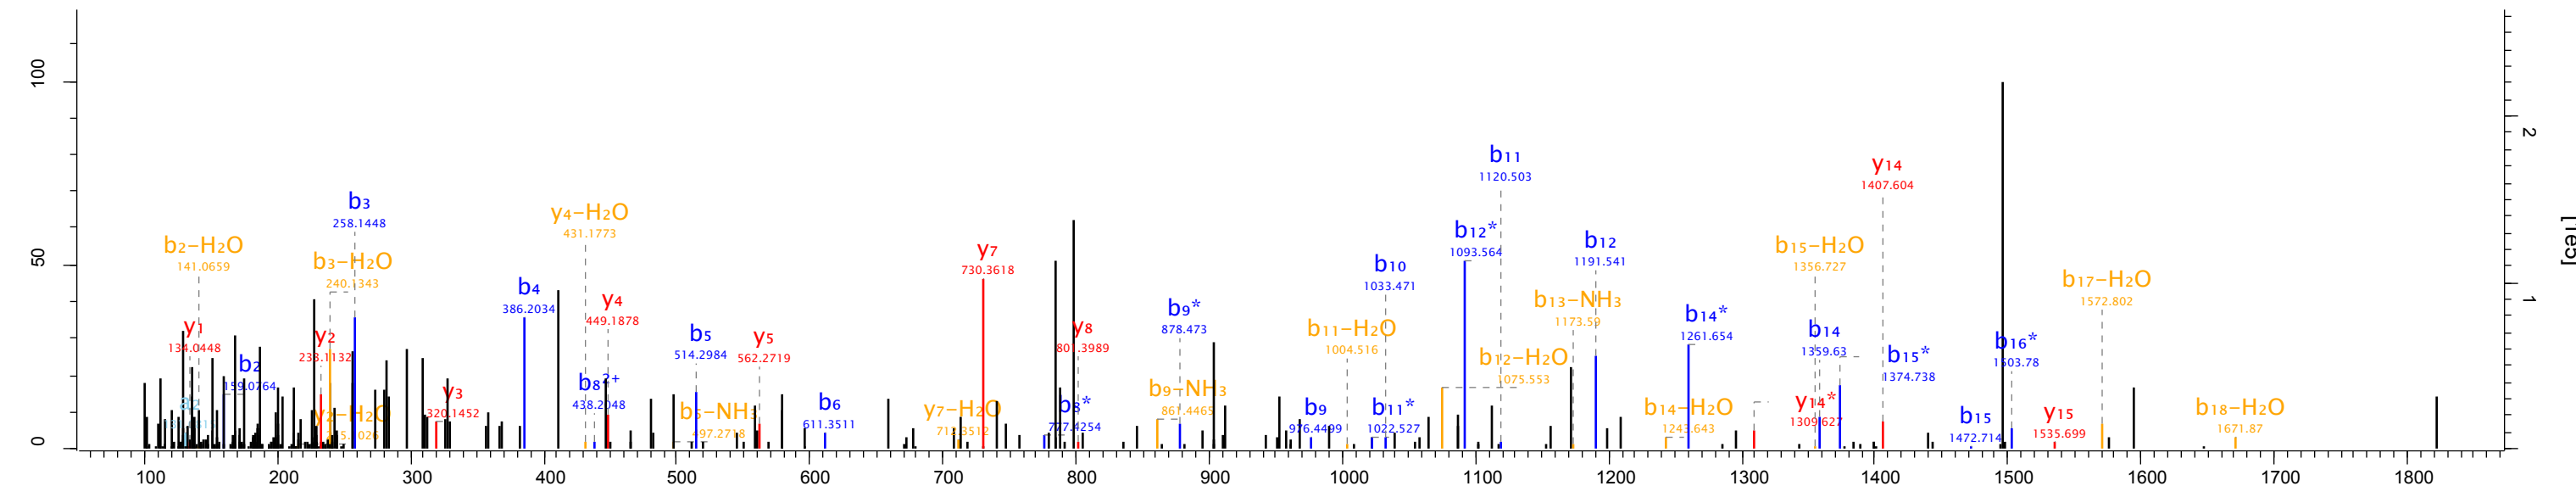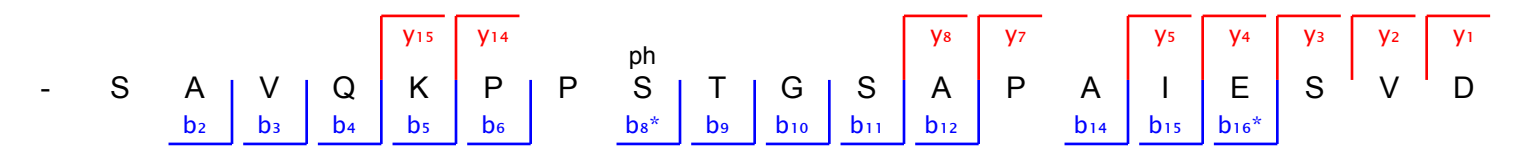

Raw file 20171215\_MaS\_33SR\_LMH\_phospho\_06 Scan 11053 Method FTMS; HCD Score 75.65 m/z 480.74 Gene names EPB41L2

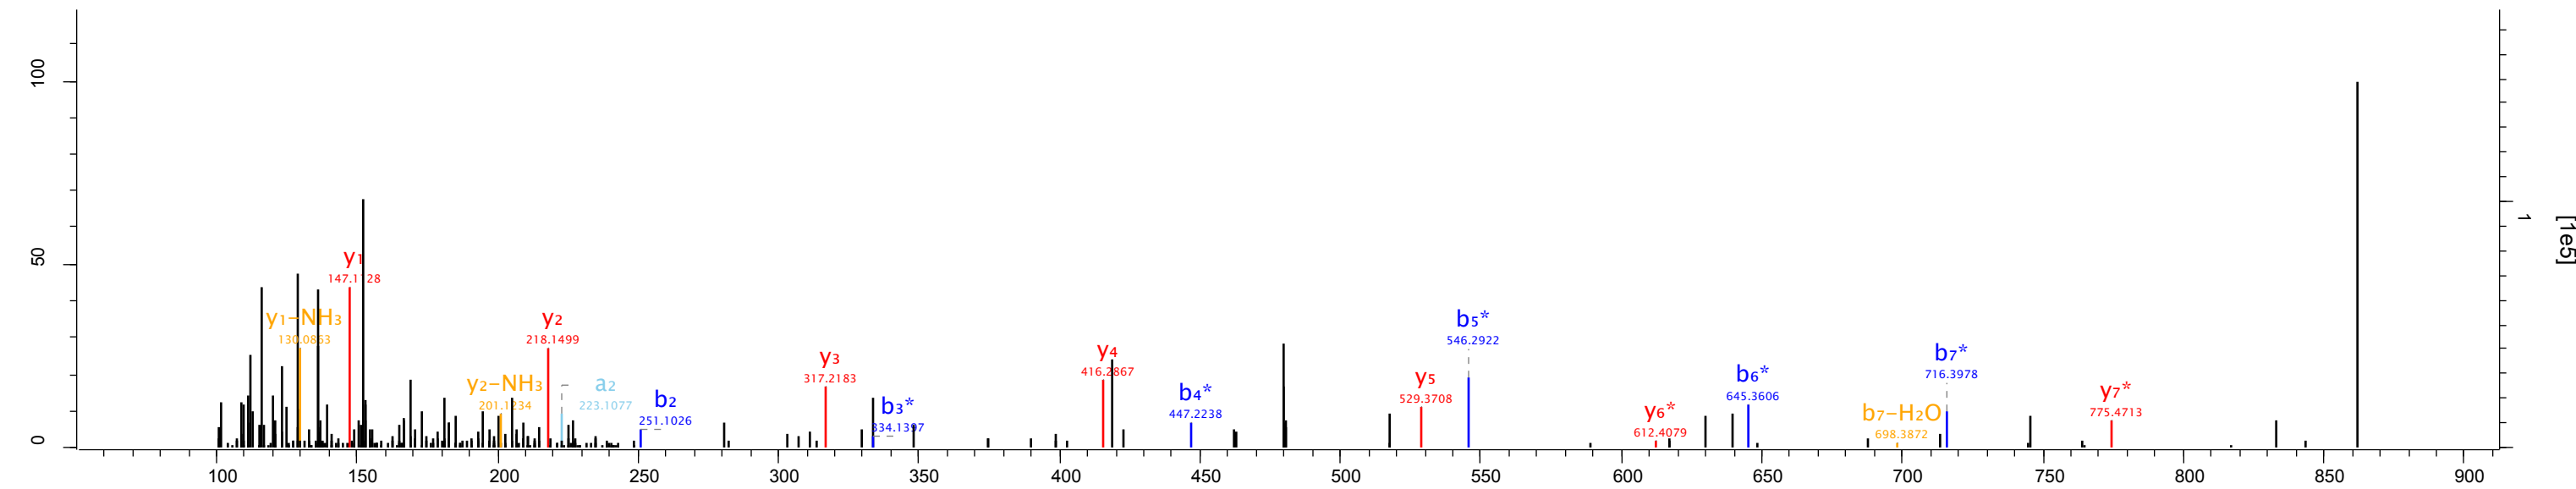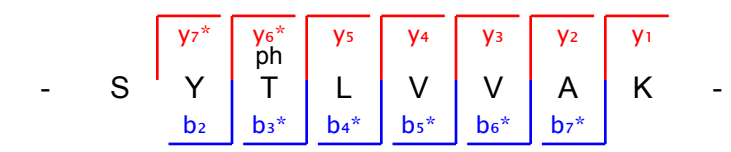

20171215\_MaS\_33SR\_LMH\_phospho\_06 11083 FTMS; HCD 298.75 1147.1 HNRNPC

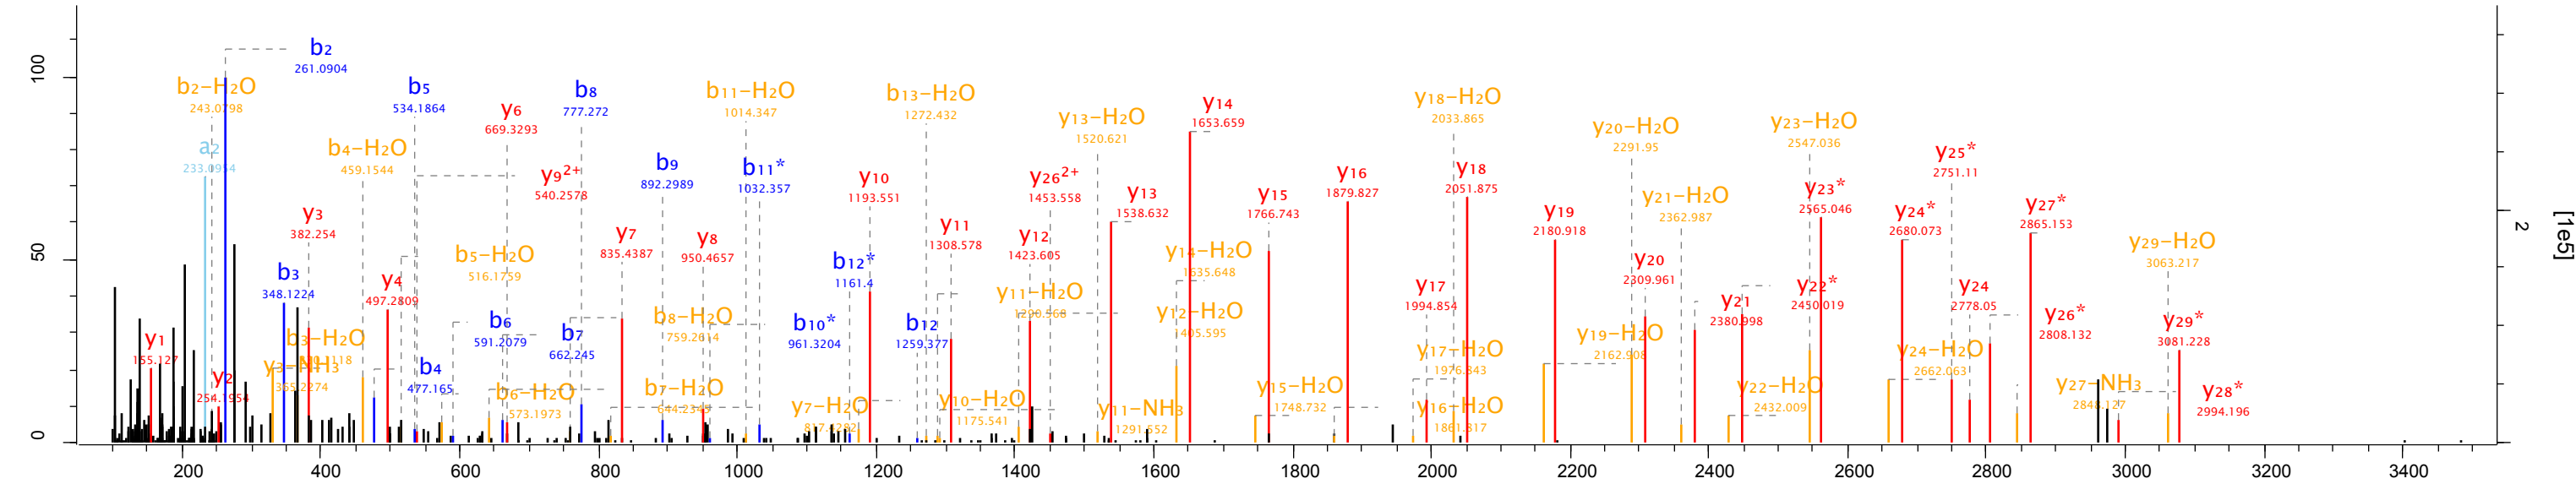

- M E S E G G A D D S A E E G D L L D D D N E D R G D D Q V K -

b<sub>2</sub>
b<sub>3</sub>
b<sub>4</sub>
b<sub>5</sub>
b<sub>6</sub>
b<sub>7</sub>
b<sub>8</sub>
b<sub>9</sub>
b<sub>10</sub><sup>\*</sup>
b<sub>11</sub><sup>\*</sup>
b<sub>12</sub>
y<sub>29</sub><sup>\*</sup>
y<sub>28</sub><sup>\*</sup>
y<sub>27</sub><sup>\*</sup>
y<sub>26</sub><sup>\*</sup>
y<sub>25</sub><sup>\*</sup>
y<sub>24</sub>
y<sub>23</sub><sup>\*</sup>
y<sub>22</sub><sup>\*</sup>
y<sub>21</sub>
y<sub>20</sub>
y<sub>19</sub>
y<sub>18</sub>
y<sub>17</sub>
y<sub>16</sub>
y<sub>15</sub>
y<sub>14</sub>
y<sub>13</sub>
y<sub>12</sub>
y<sub>11</sub>
y<sub>10</sub>
y<sub>9</sub><sup>2+</sup>
y<sub>8</sub>
y<sub>7</sub>
y<sub>6</sub>





Raw file 20171215\_MaS\_33SR\_LMH\_phospho\_06 Scan 11363 Method FTMS; HCD Score 123.75 m/z 470.72 Gene names CLSPN

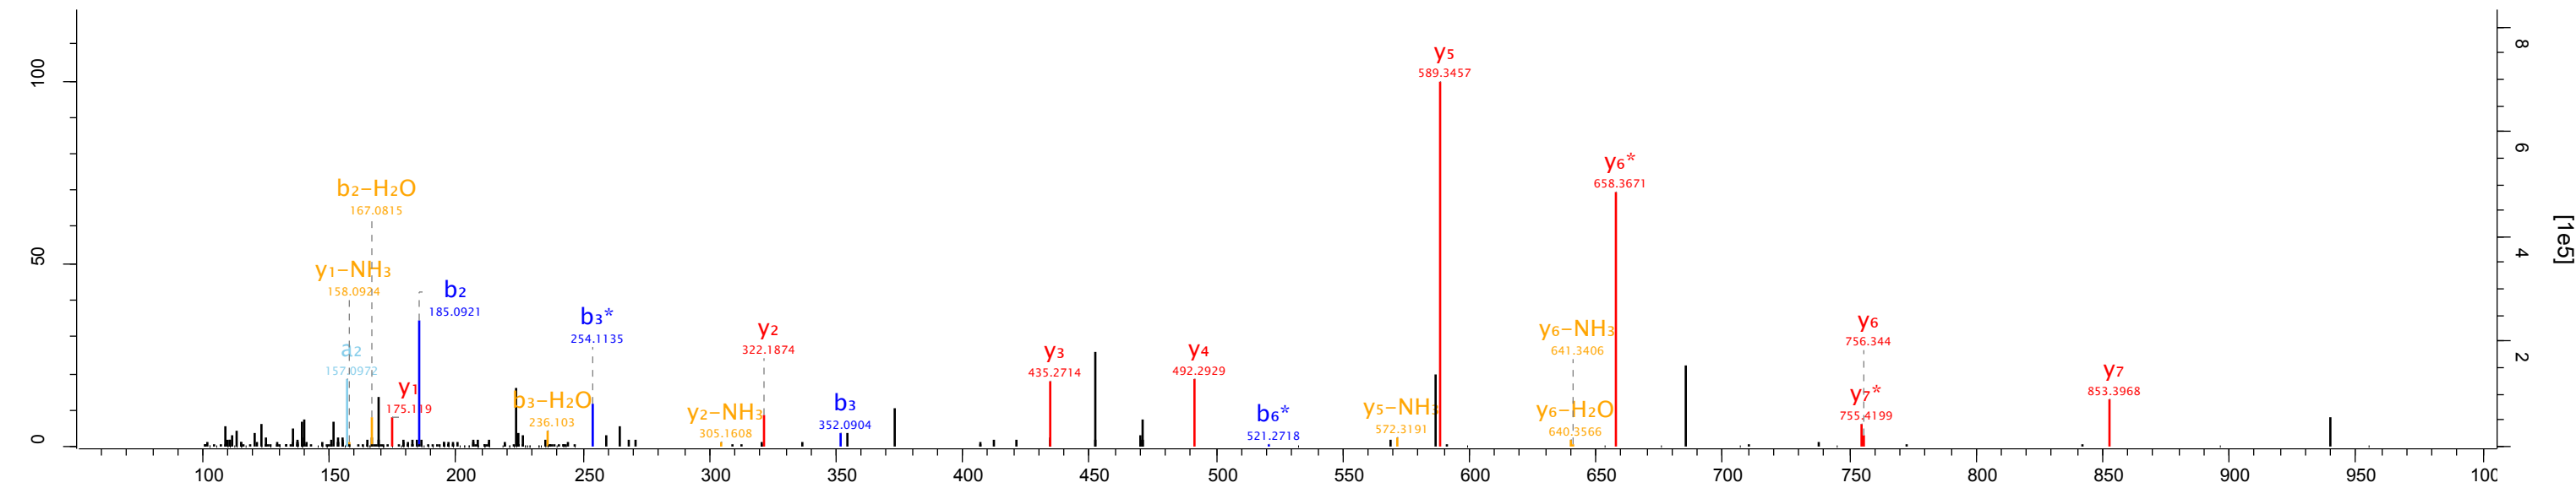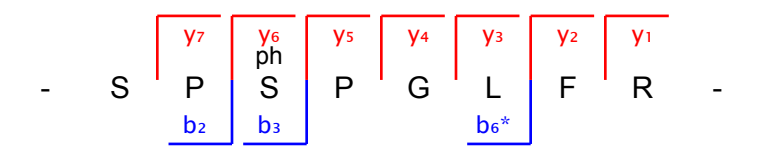

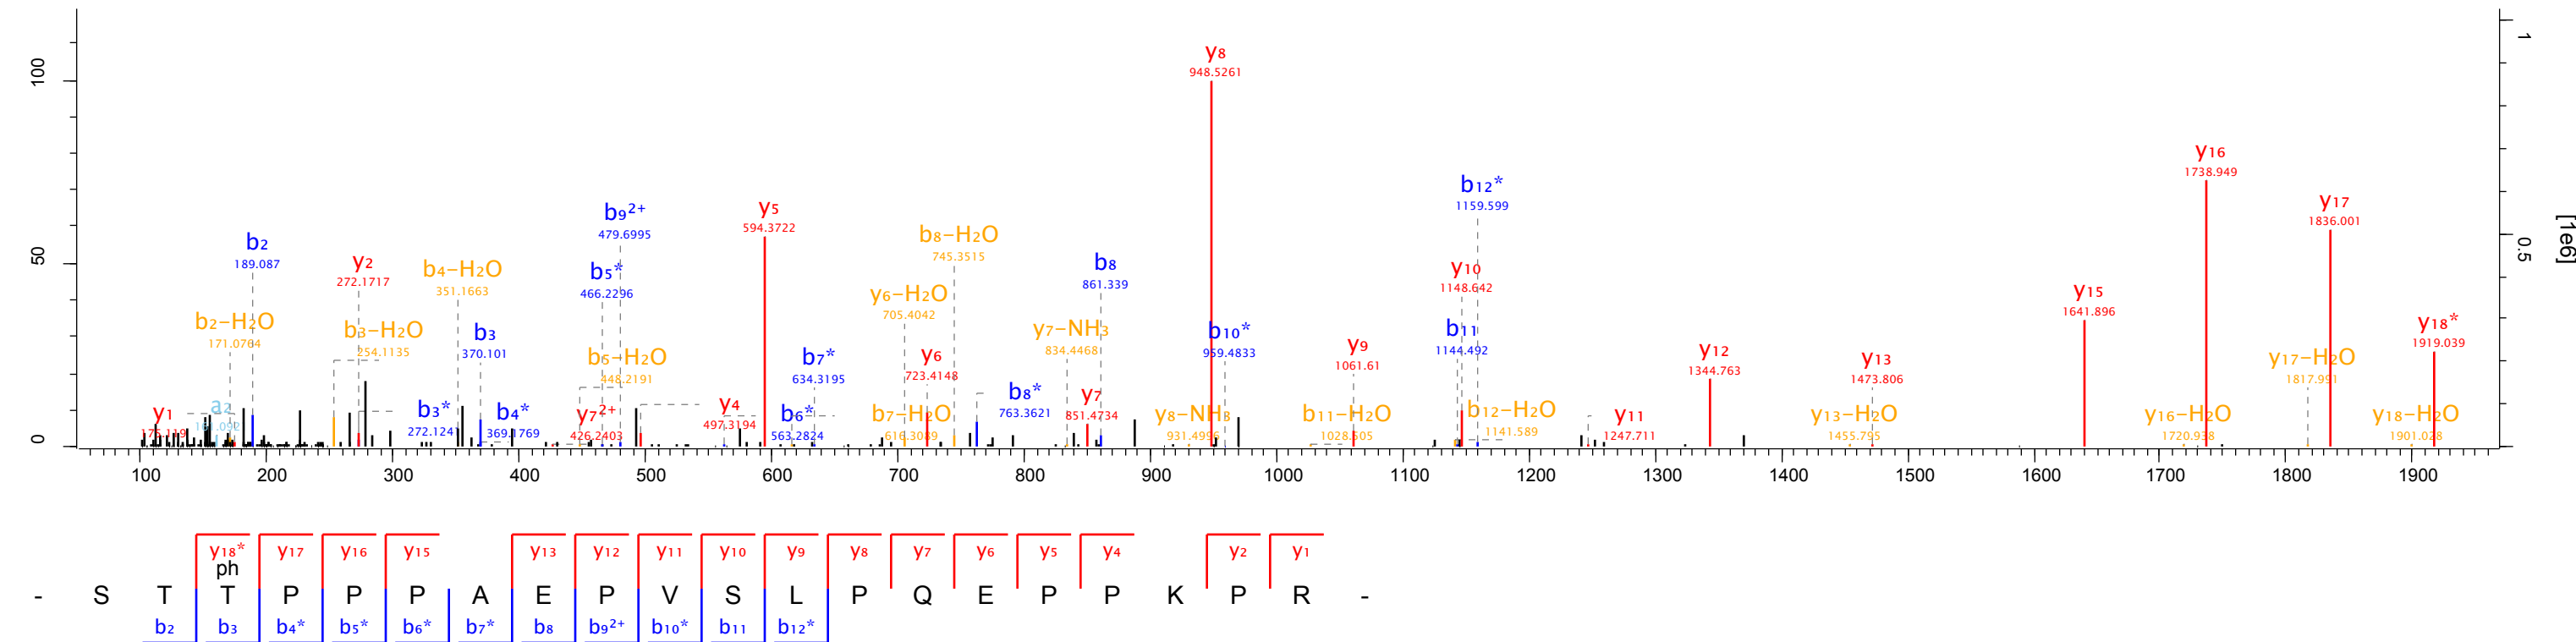

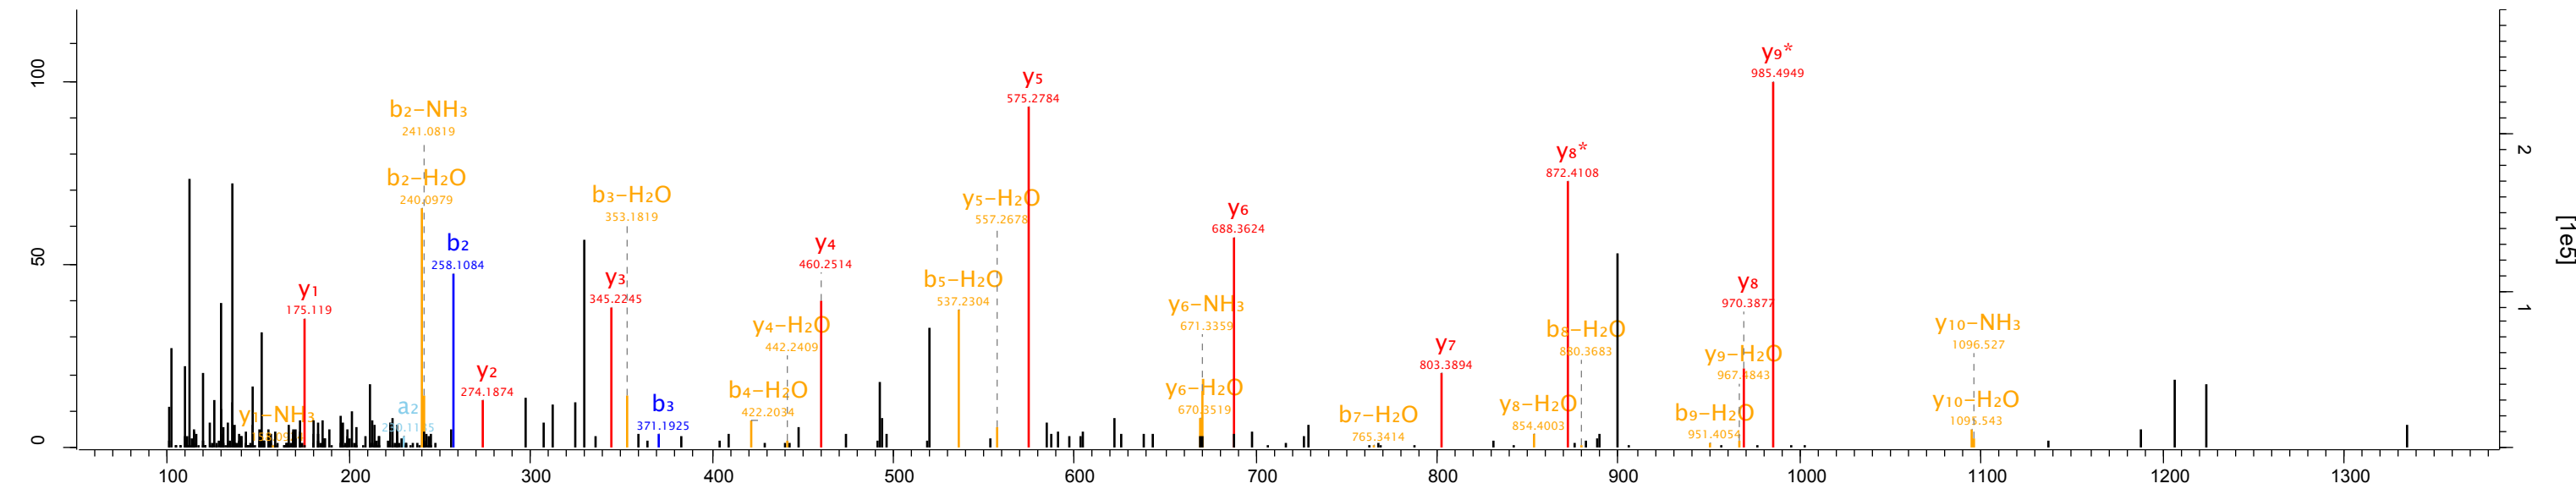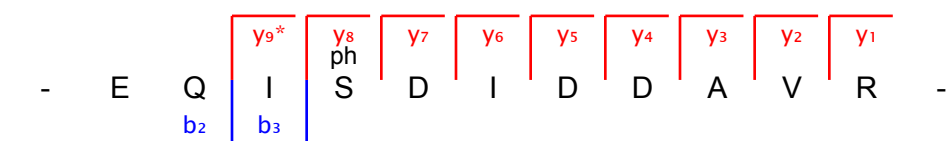

Raw file: 20171215\_MaS\_33SR\_LMH\_phospho\_06  
 Scan: 12293 Method: FTMS; HCD Score: 138.49 m/z: 887.92 Gene names: FRMD4A

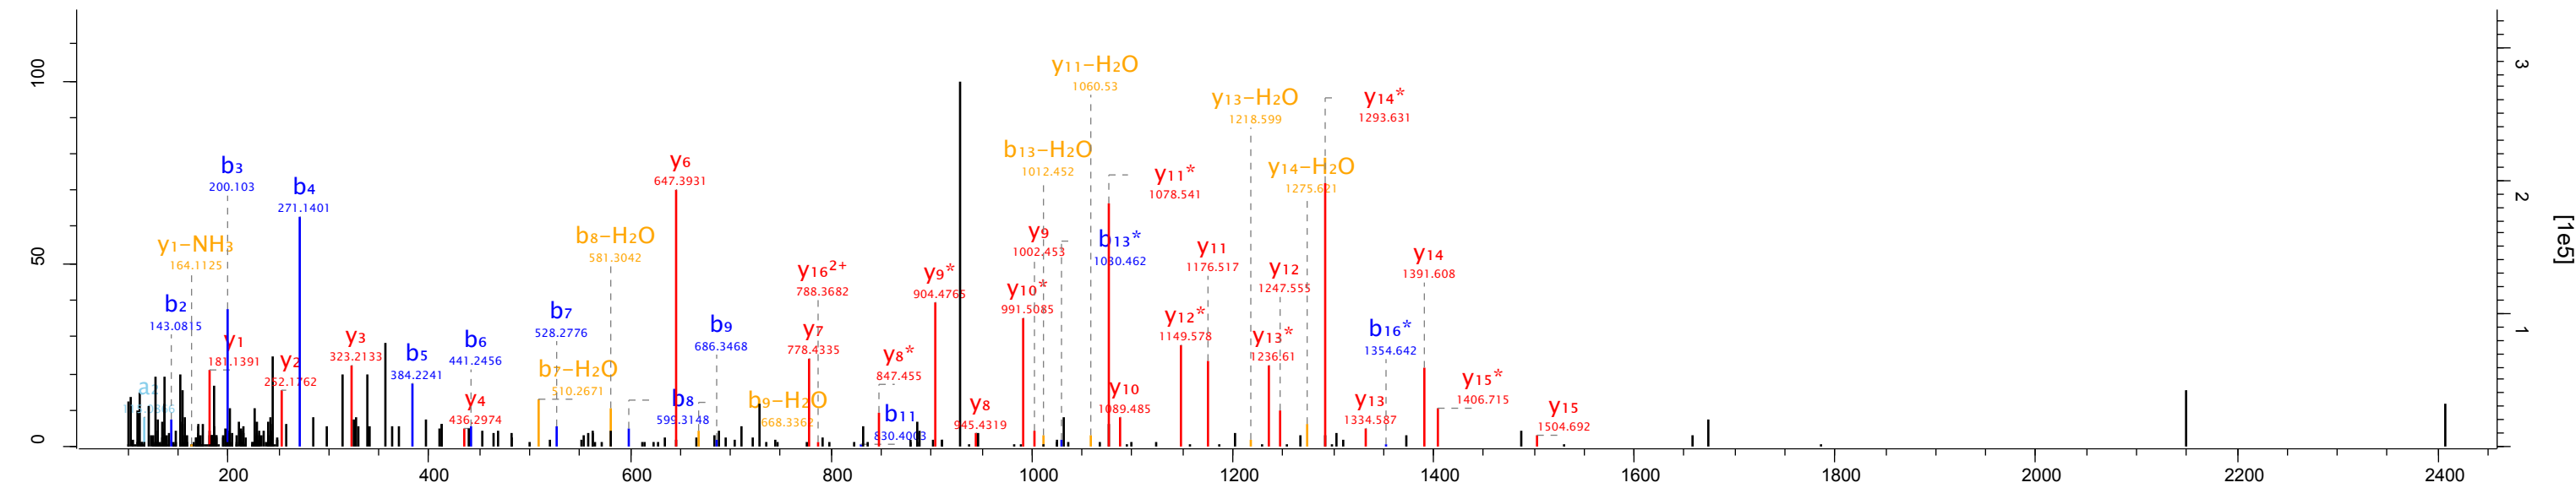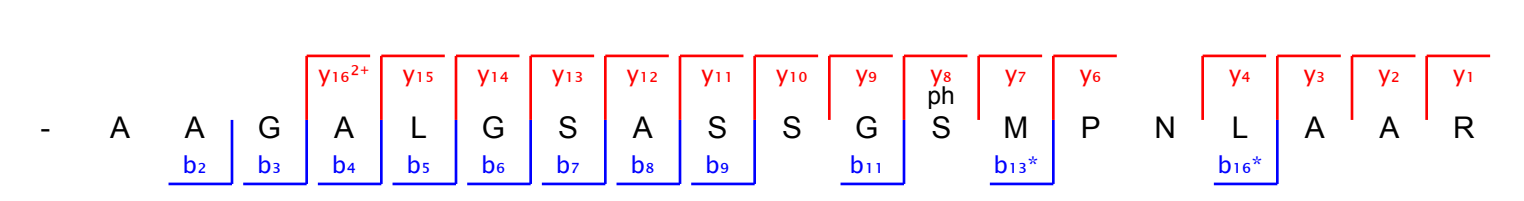

Raw file 20171215\_MaS\_33SR\_LMH\_phospho\_06 Scan 12363 Method FTMS; HCD Score 78.76 m/z 1114.02 Gene names USP1

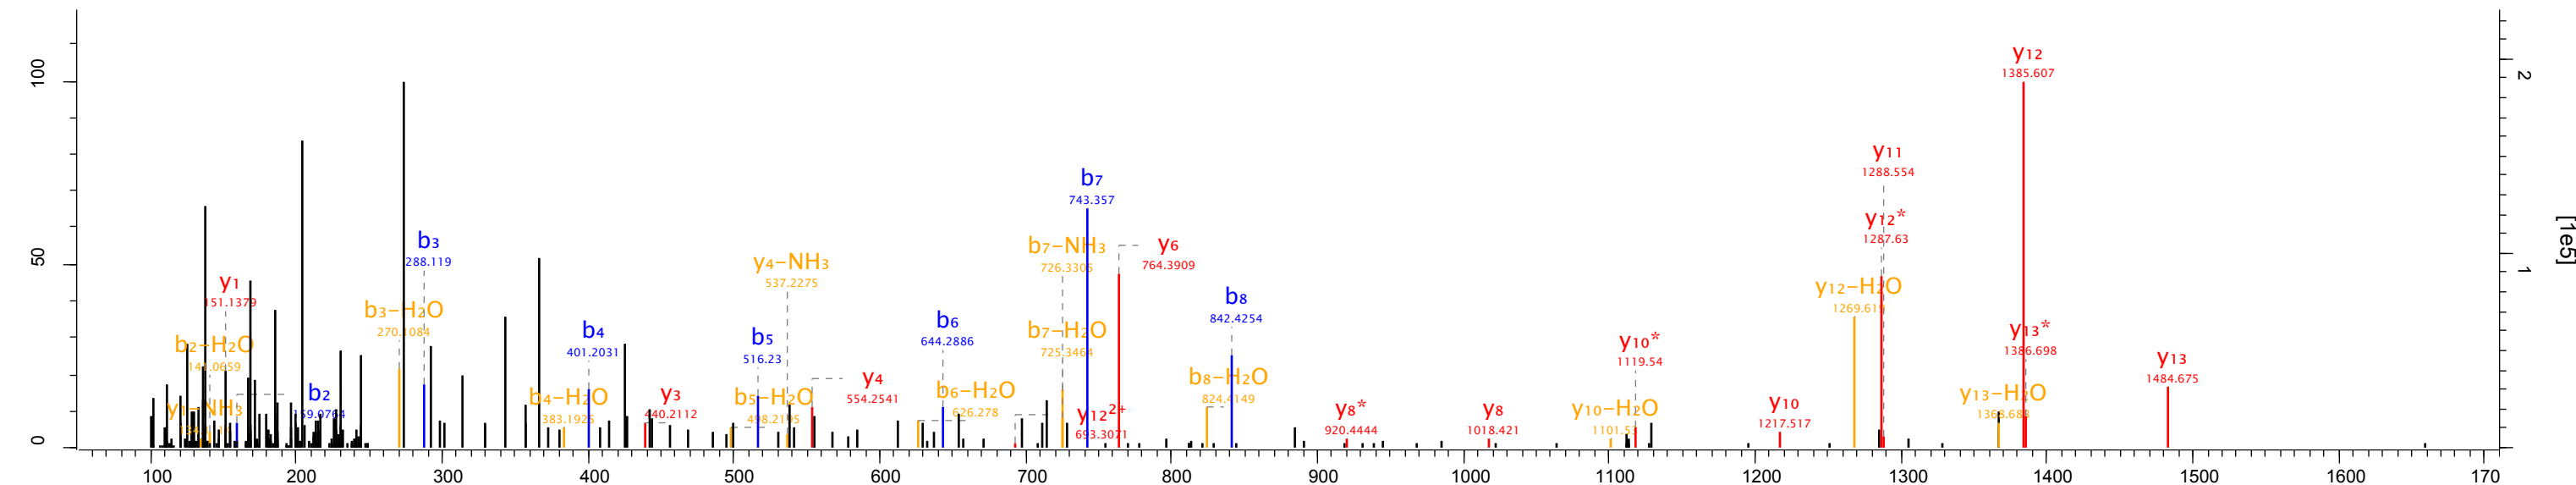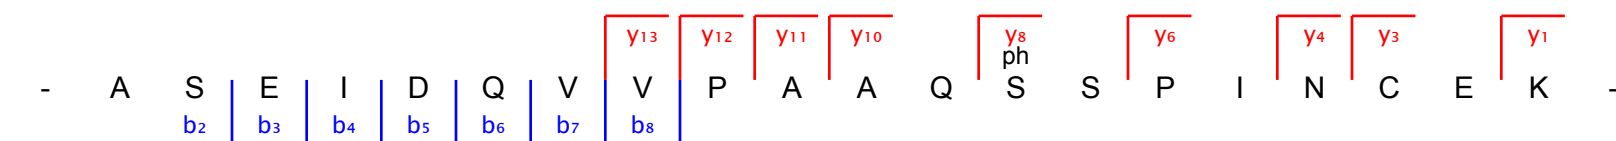

Raw file: 20171215\_MaS\_33SR\_LMH\_phospho\_06  
 Scan: 12413 Method: FTMS; HCD Score: 109.65 m/z: 999.8 Gene names: RRBP1

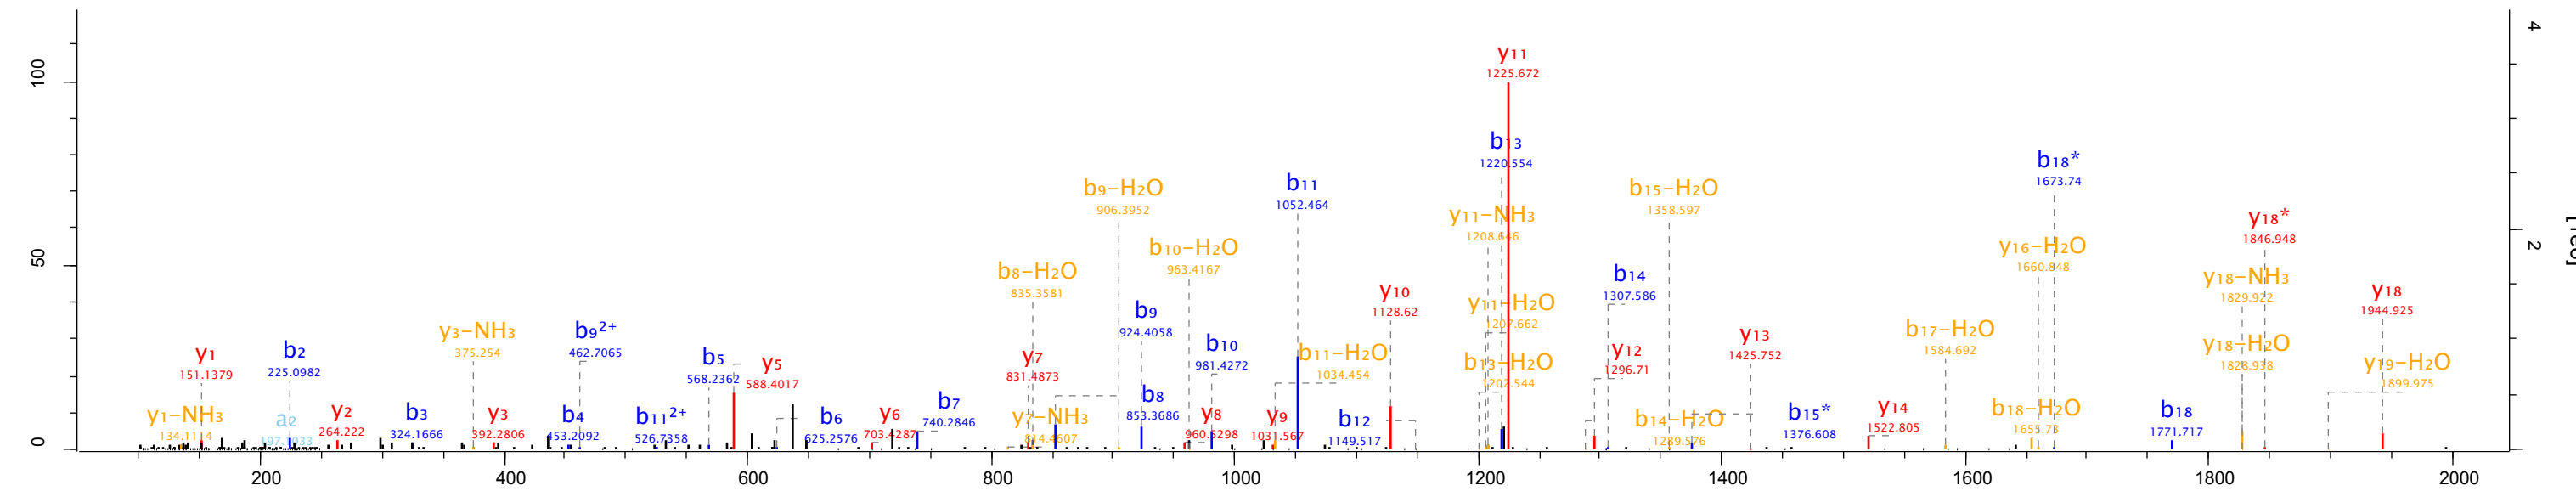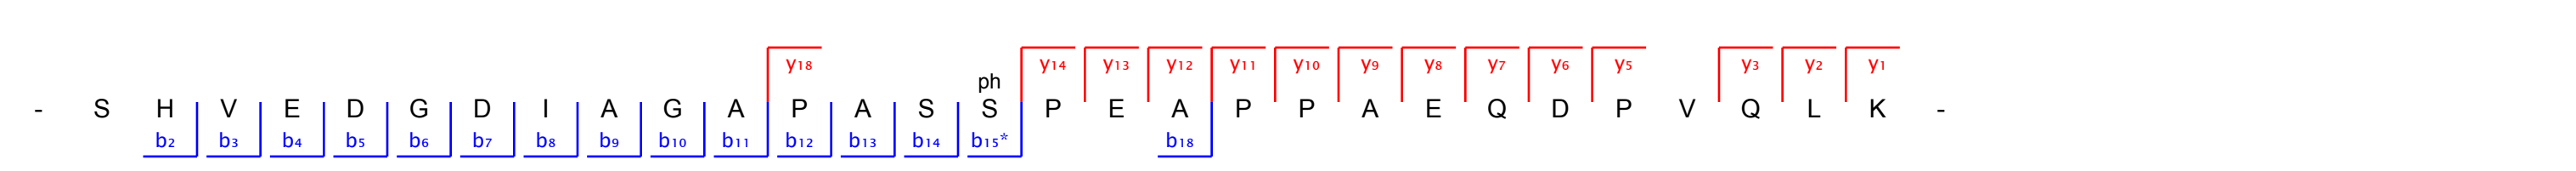

Raw file 20171215\_MaS\_33SR\_LMH\_phospho\_06 Scan 12473 Method FTMS; HCD Score 105.39 m/z 813.37 Gene names COIL

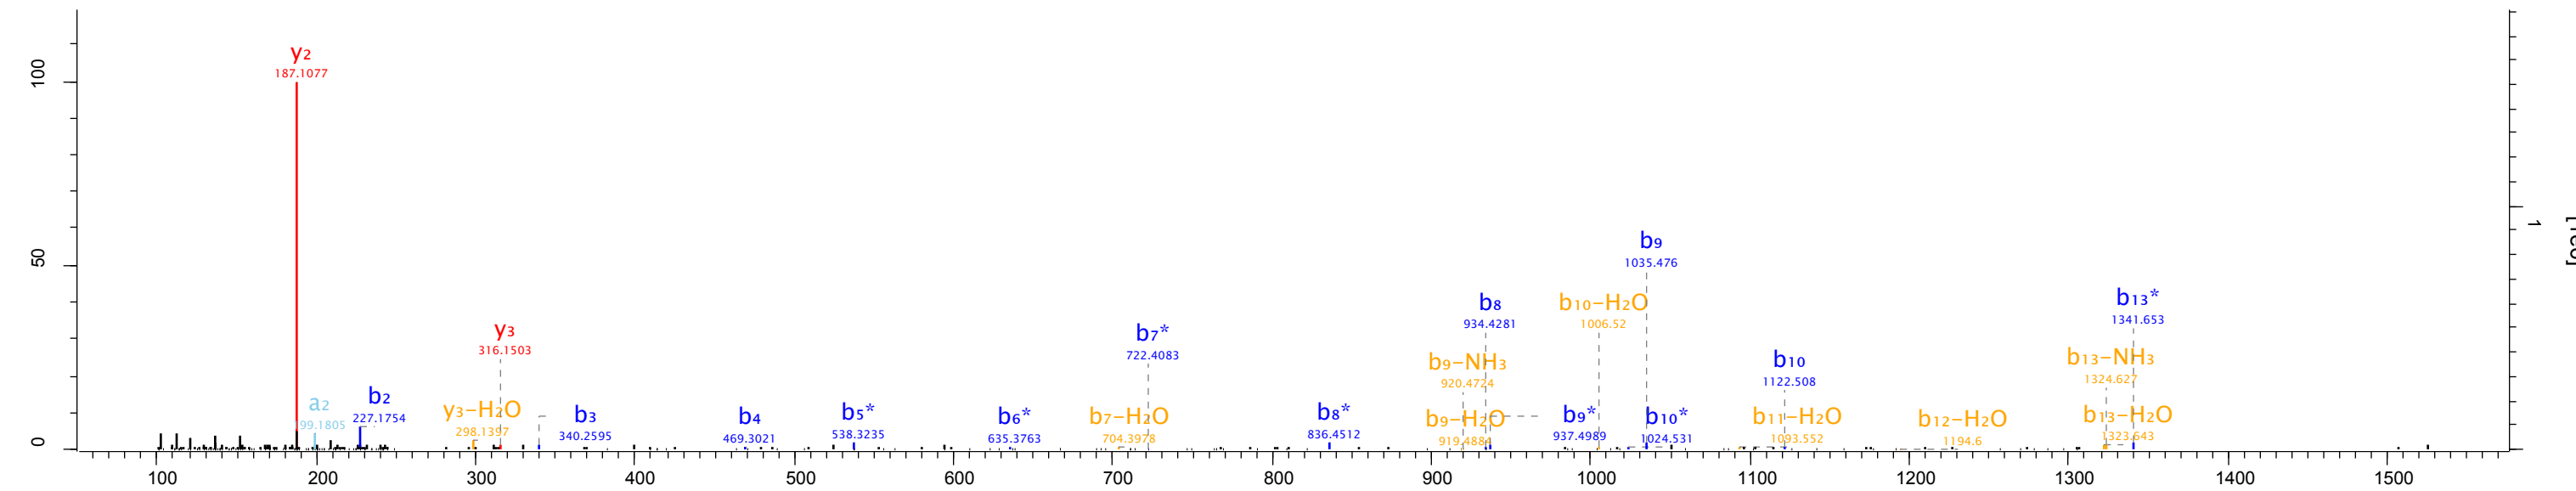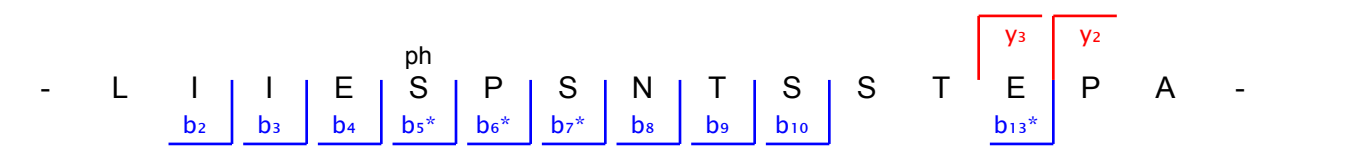



Raw file 20171215\_MaS\_33SR\_LMH\_phospho\_06 Scan 12923 Method FTMS; HCD Score 159.02 m/z 743.35 Gene names DLGAP4

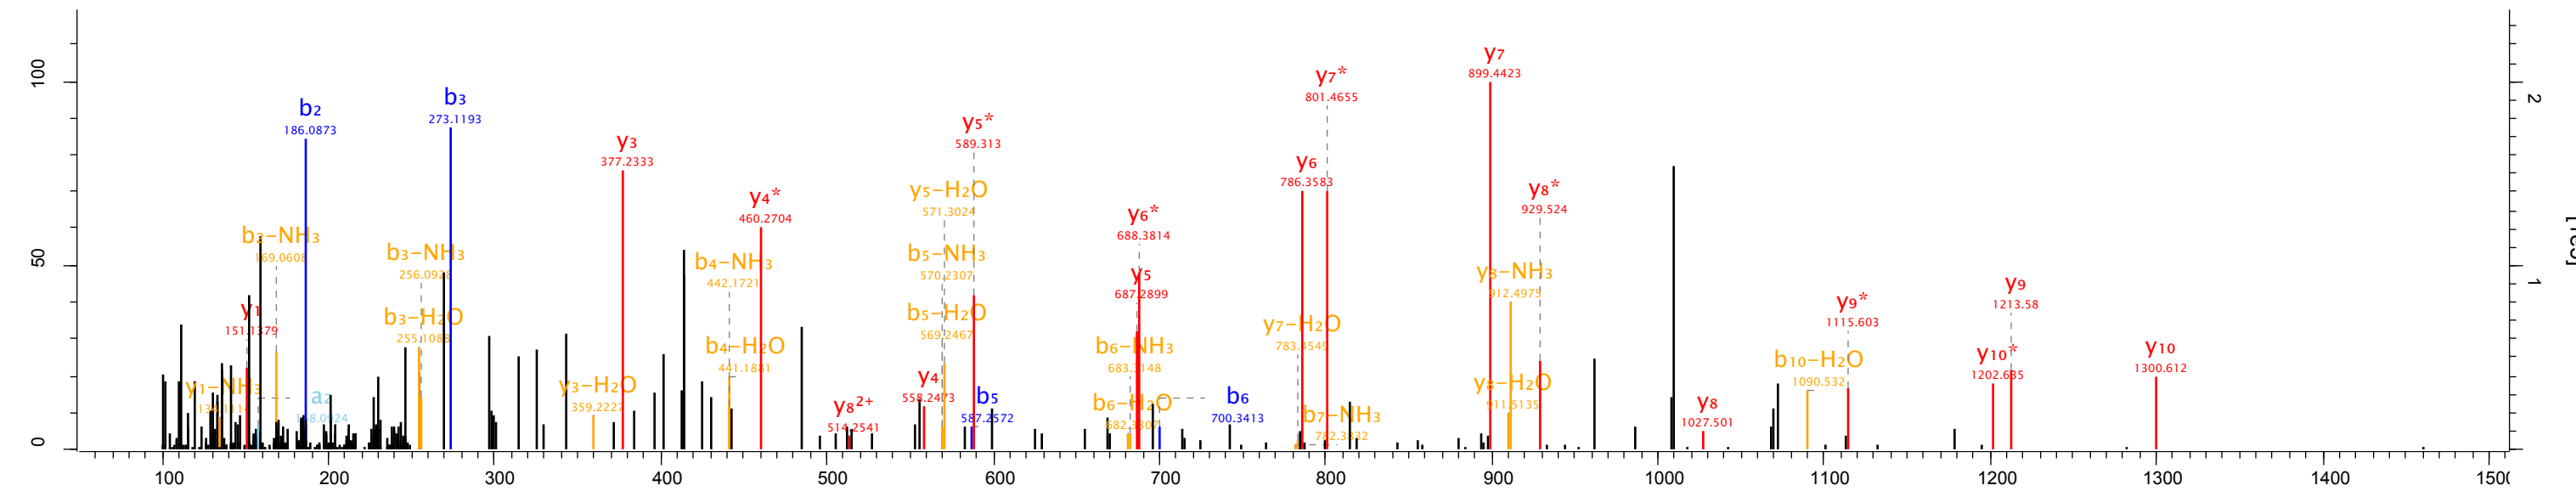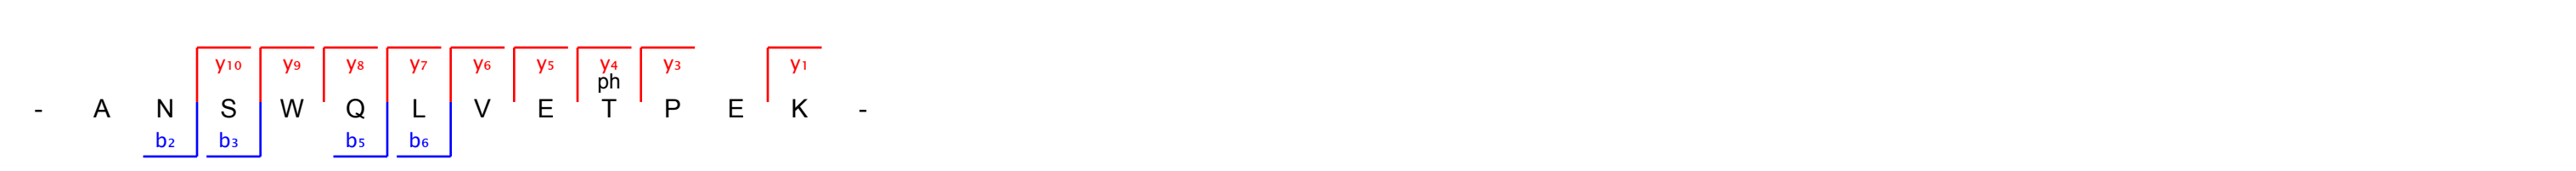

20171215\_MaS\_33SR\_LMH\_phospho\_06 13023 FTMS; HCD 200.52 879.41 CCDC86

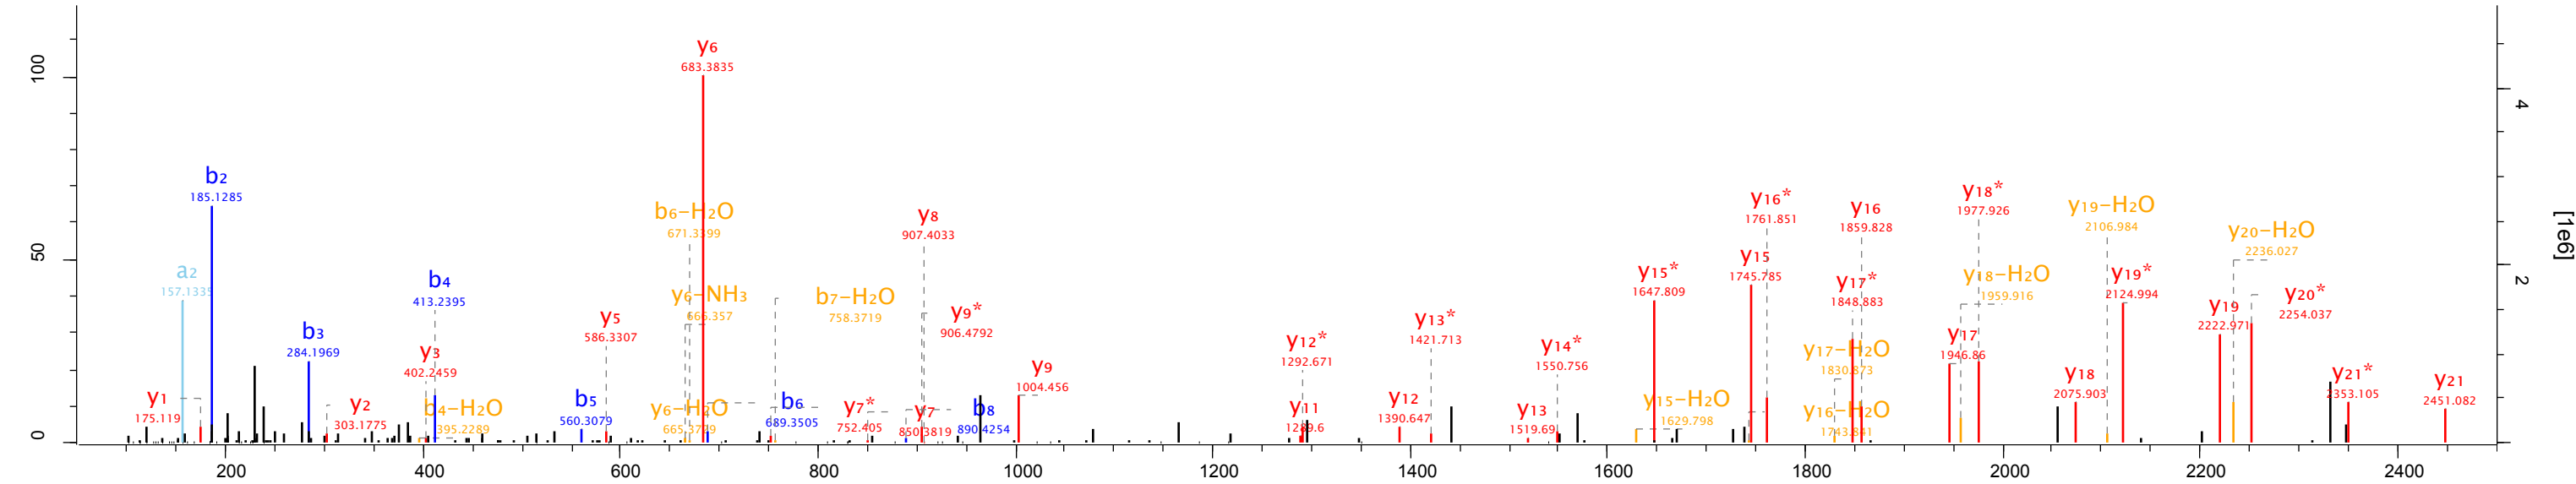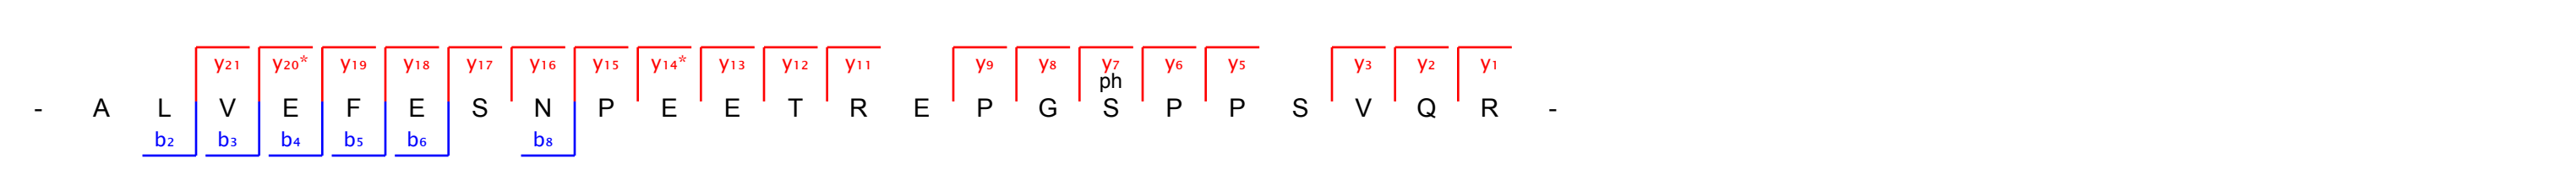

Raw file 20171215\_MaS\_33SR\_LMH\_phospho\_06 Scan 13143 Method FTMS; HCD Score 202.46 m/z 1044.99 Gene names CPEB4

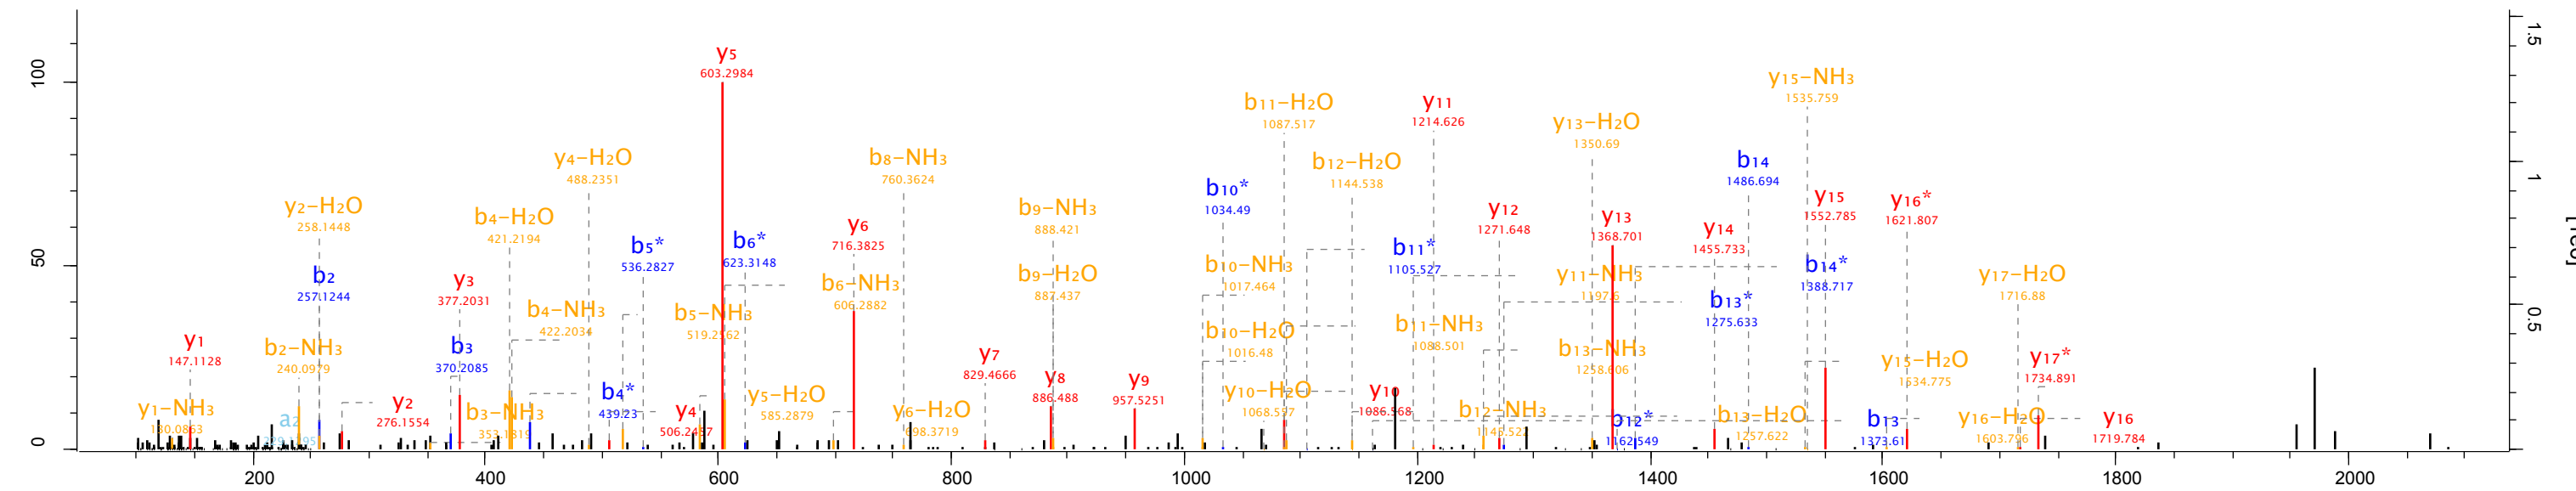

- Q Q L L ph S P S P G Q E A G I L P E T E K -

b<sub>2</sub> b<sub>3</sub> b<sub>4</sub><sup>\*</sup> b<sub>5</sub><sup>\*</sup> b<sub>6</sub><sup>\*</sup> b<sub>10</sub><sup>\*</sup> b<sub>11</sub><sup>\*</sup> b<sub>12</sub><sup>\*</sup> b<sub>13</sub> b<sub>14</sub>

y<sub>17</sub><sup>\*</sup> y<sub>16</sub> y<sub>15</sub> y<sub>14</sub> y<sub>13</sub> y<sub>12</sub> y<sub>11</sub> y<sub>10</sub> y<sub>9</sub> y<sub>8</sub> y<sub>7</sub> y<sub>6</sub> y<sub>5</sub> y<sub>4</sub> y<sub>3</sub> y<sub>2</sub> y<sub>1</sub>

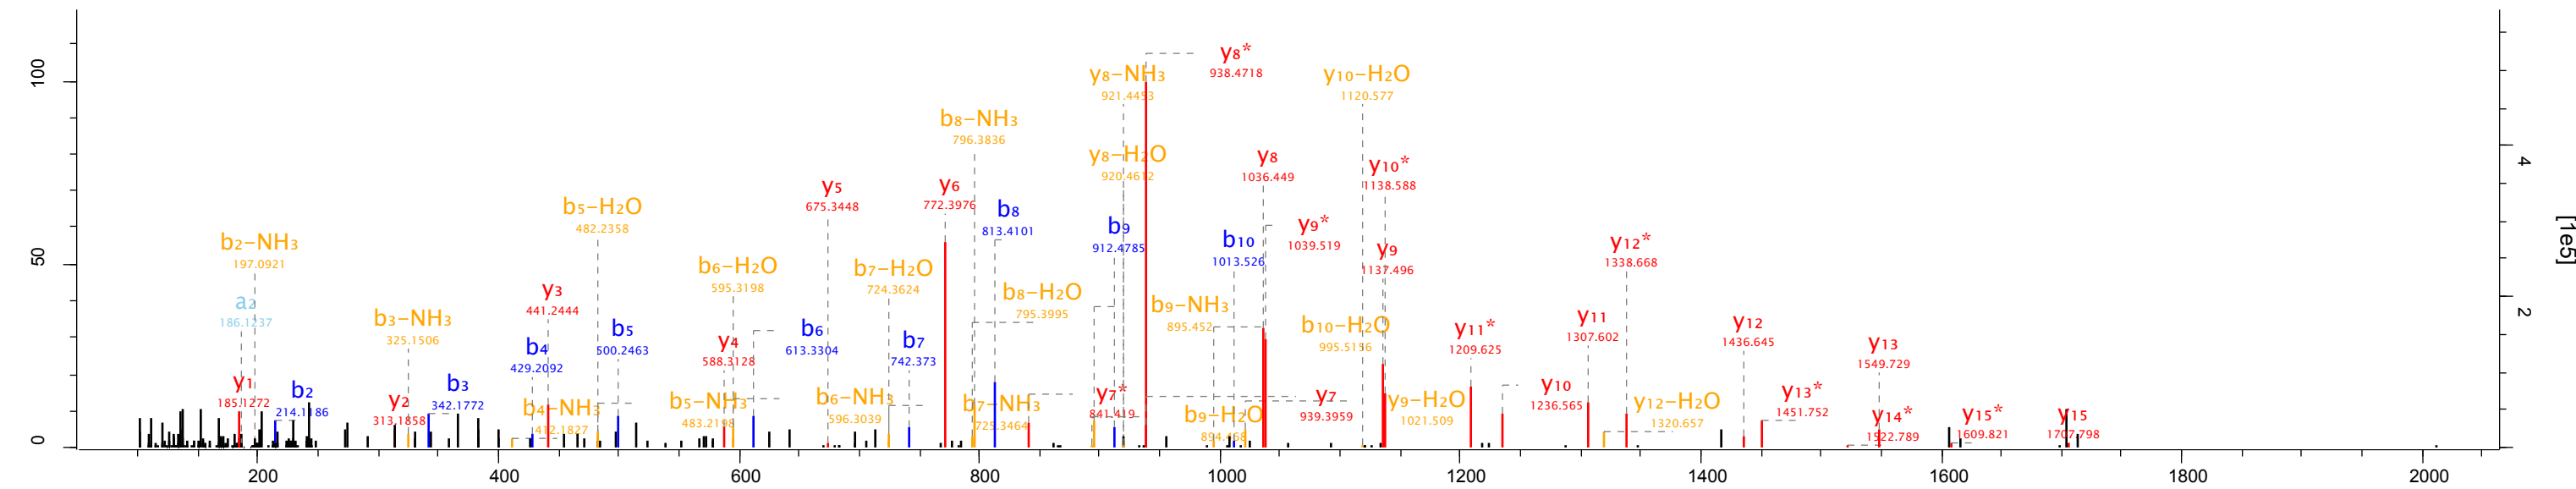

- V N Q S A L E A V T P S P S F Q Q R -

b2 b3 b4 b5 b6 b7 b8 b9 b10

y15 y14\* y13 y12 y11 y10 y9 y8 y7 y6 y5 y4 y3 y2 y1

ph

Raw file 20171215\_MaS\_33SR\_LMH\_phospho\_06 Scan 13653 Method FTMS; HCD Score 235.35 m/z 744.83 Gene names VDAC1

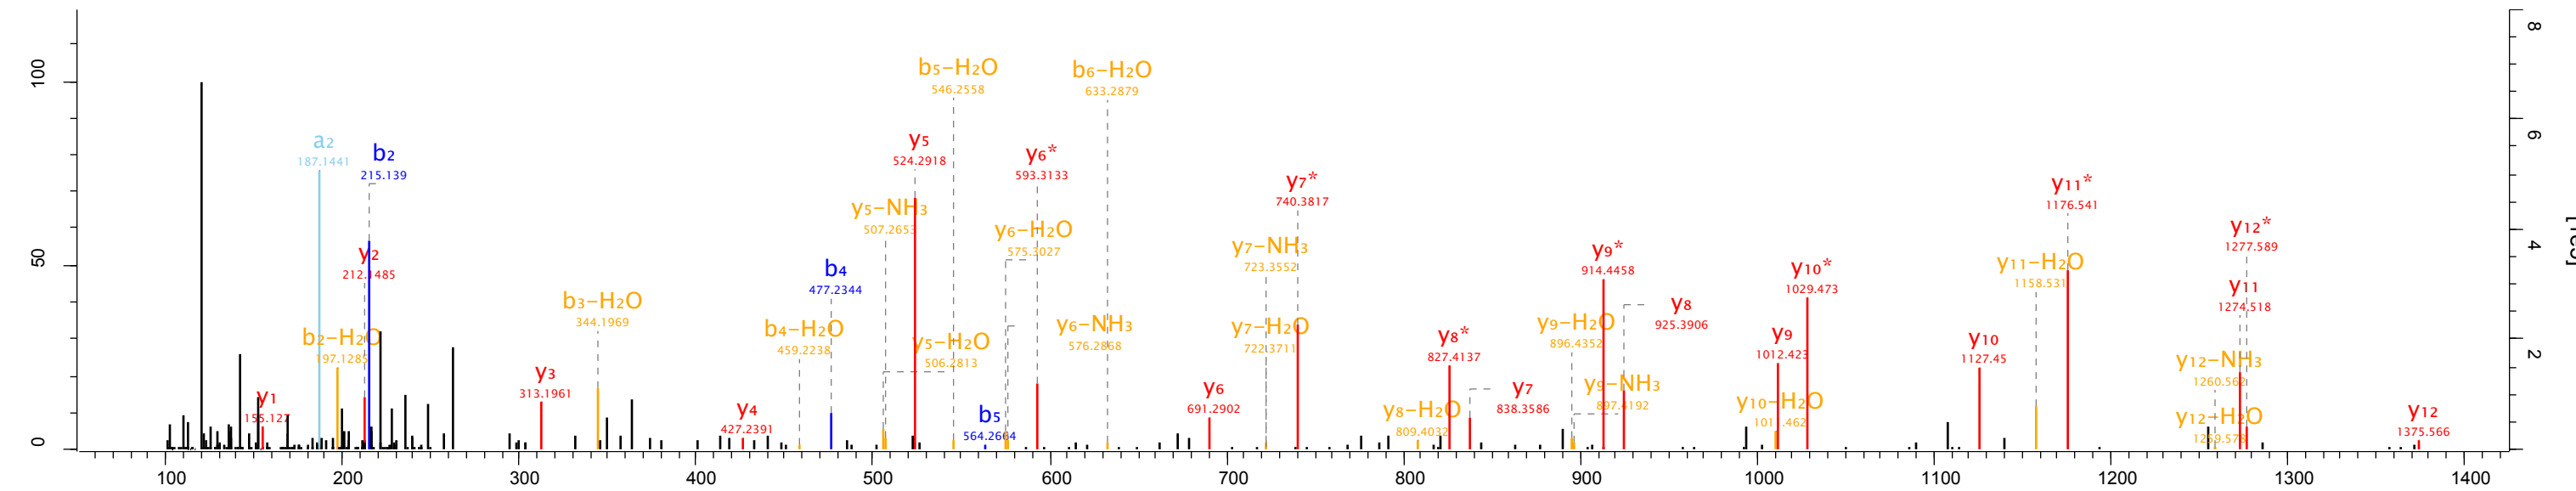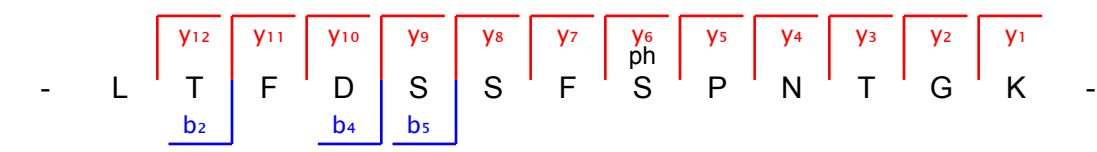

Raw file: 20171215\_MaS\_33SR\_LMH\_phospho\_06  
 Scan: 13873 Method: FTMS; HCD Score: 166.21 m/z: 965.91 Gene names: TNRC6C

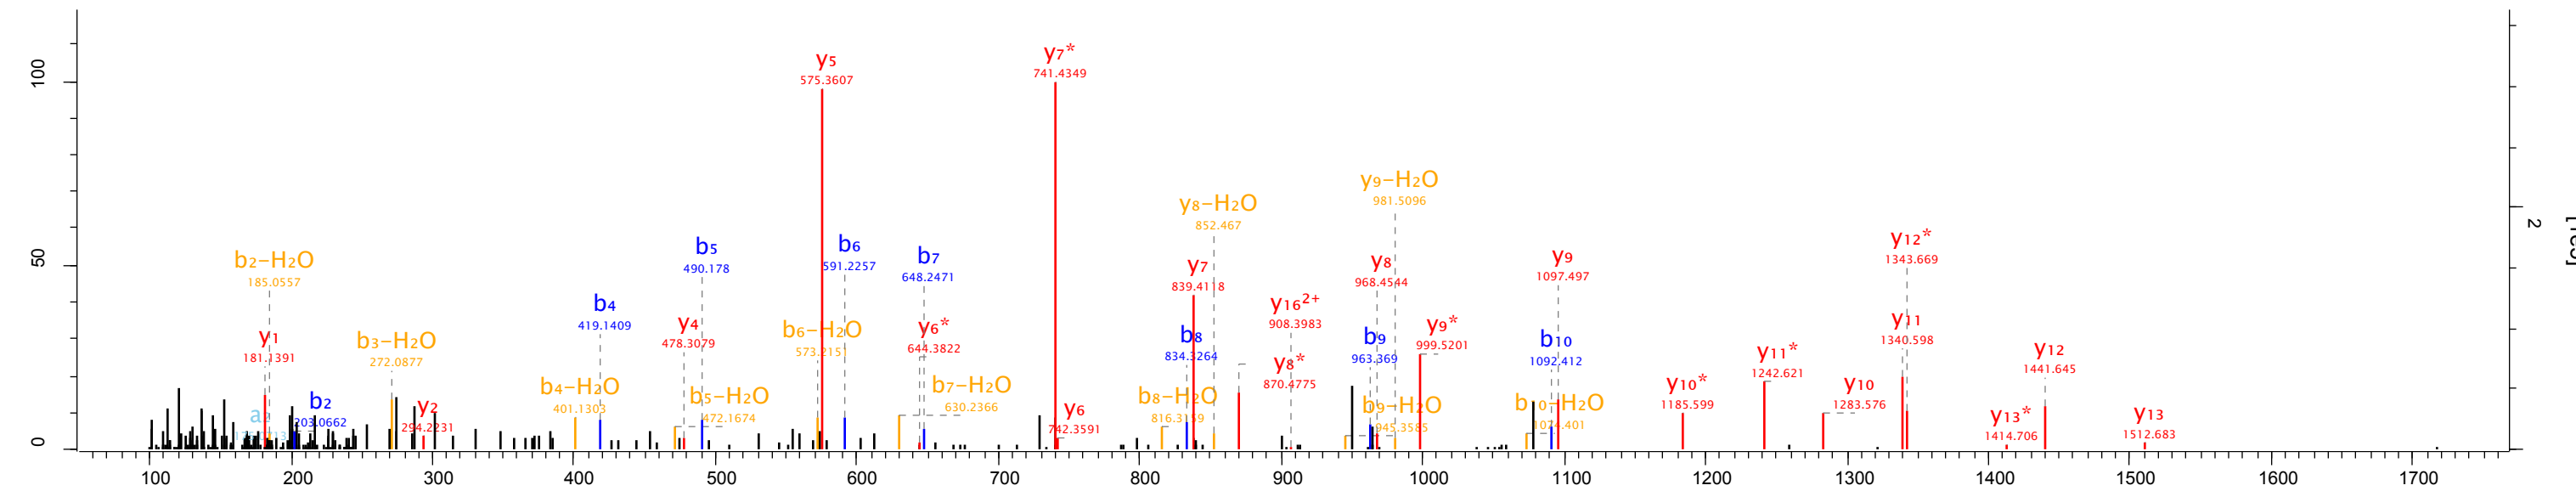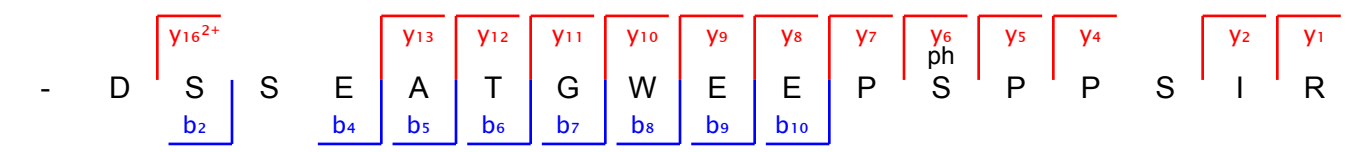

Raw file 20171215\_MaS\_33SR\_LMH\_phospho\_06 Scan 13883 Method FTMS; HCD Score 40.62 m/z 816.91 Gene names MEF2D

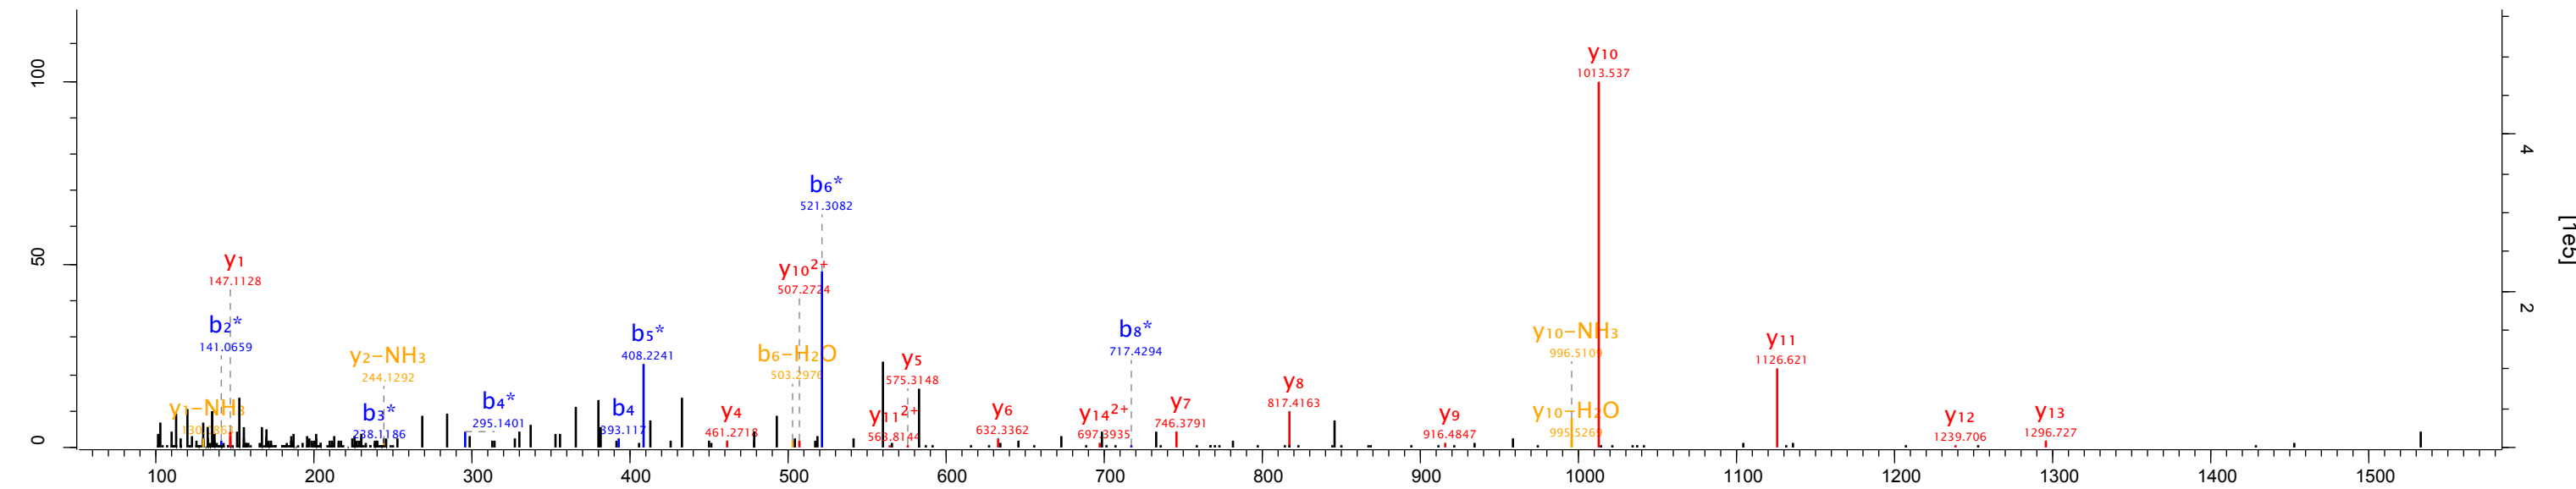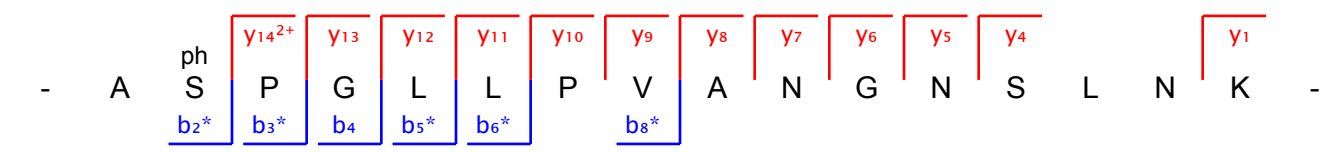

Raw file 20171215\_MaS\_33SR\_LMH\_phospho\_06 Scan 13893 Method FTMS; HCD Score 298.4 m/z 1316.26 Gene names NACA

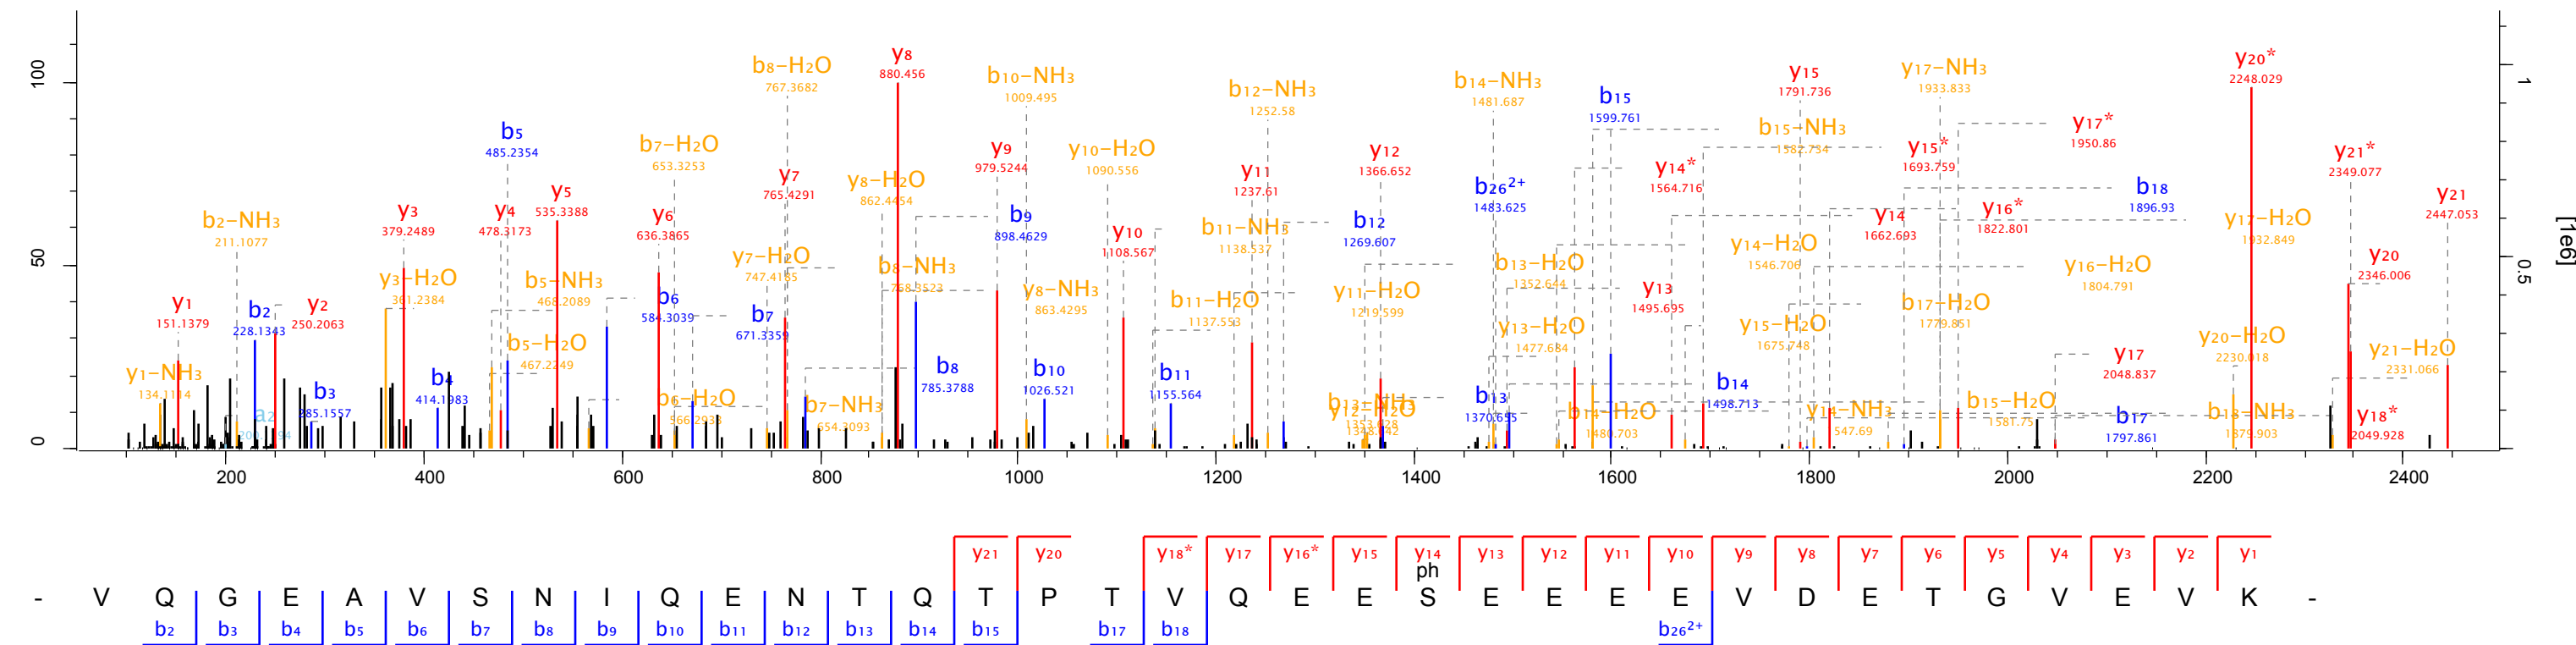



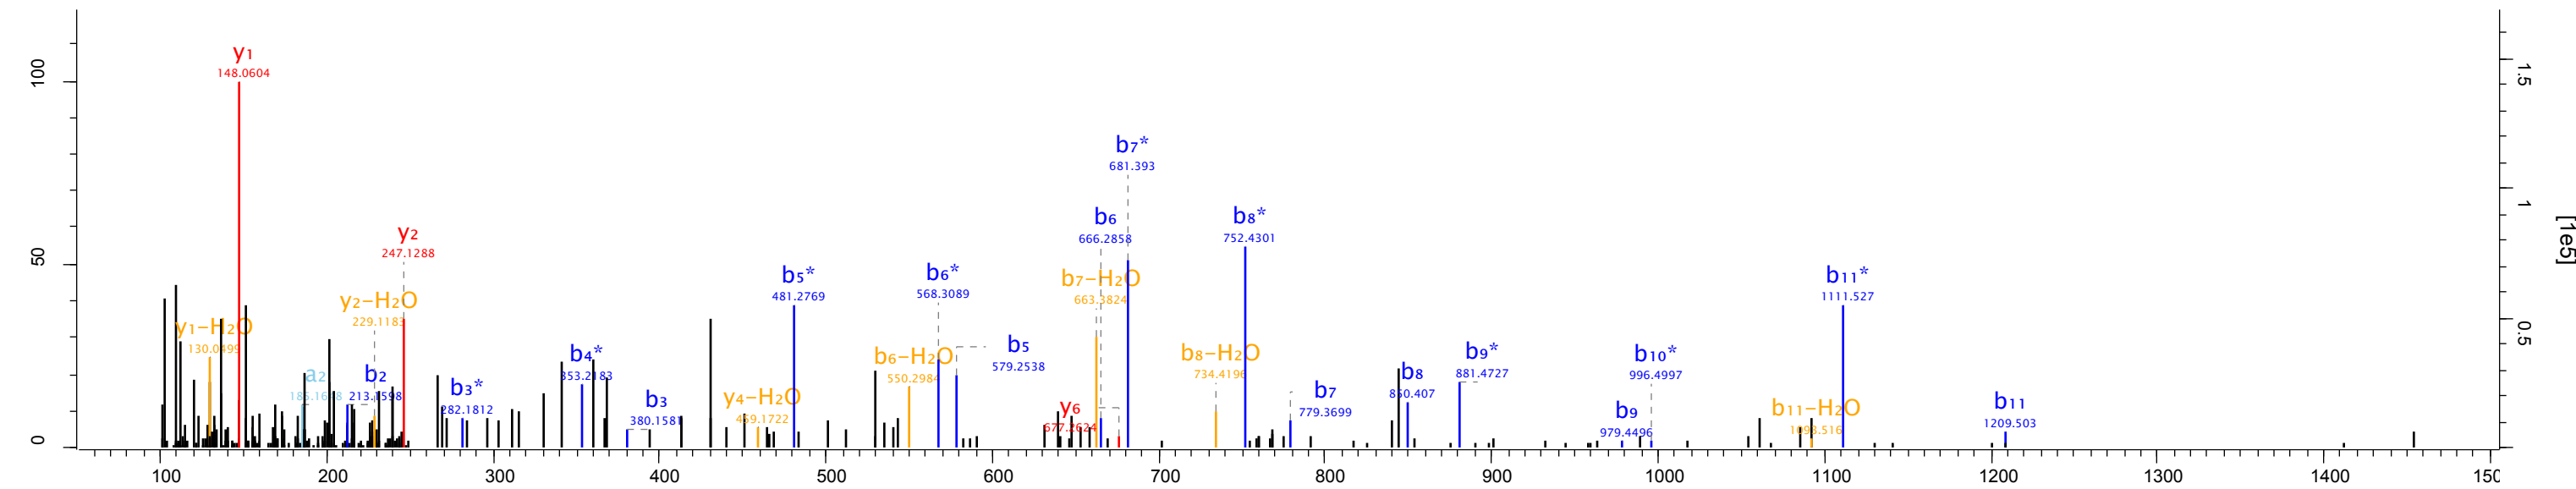

- I V S A Q S L A E D D V E -

ph  
y<sub>6</sub>  
y<sub>2</sub>  
y<sub>1</sub>

b<sub>2</sub> b<sub>3</sub> b<sub>4</sub>\* b<sub>5</sub> b<sub>6</sub> b<sub>7</sub> b<sub>8</sub> b<sub>9</sub> b<sub>10</sub>\* b<sub>11</sub>

Raw file 20171215\_MaS\_33SR\_LMH\_phospho\_06 Scan 13923 Method FTMS; HCD Score 88.39 m/z 725.34 Gene names PPP1R12C

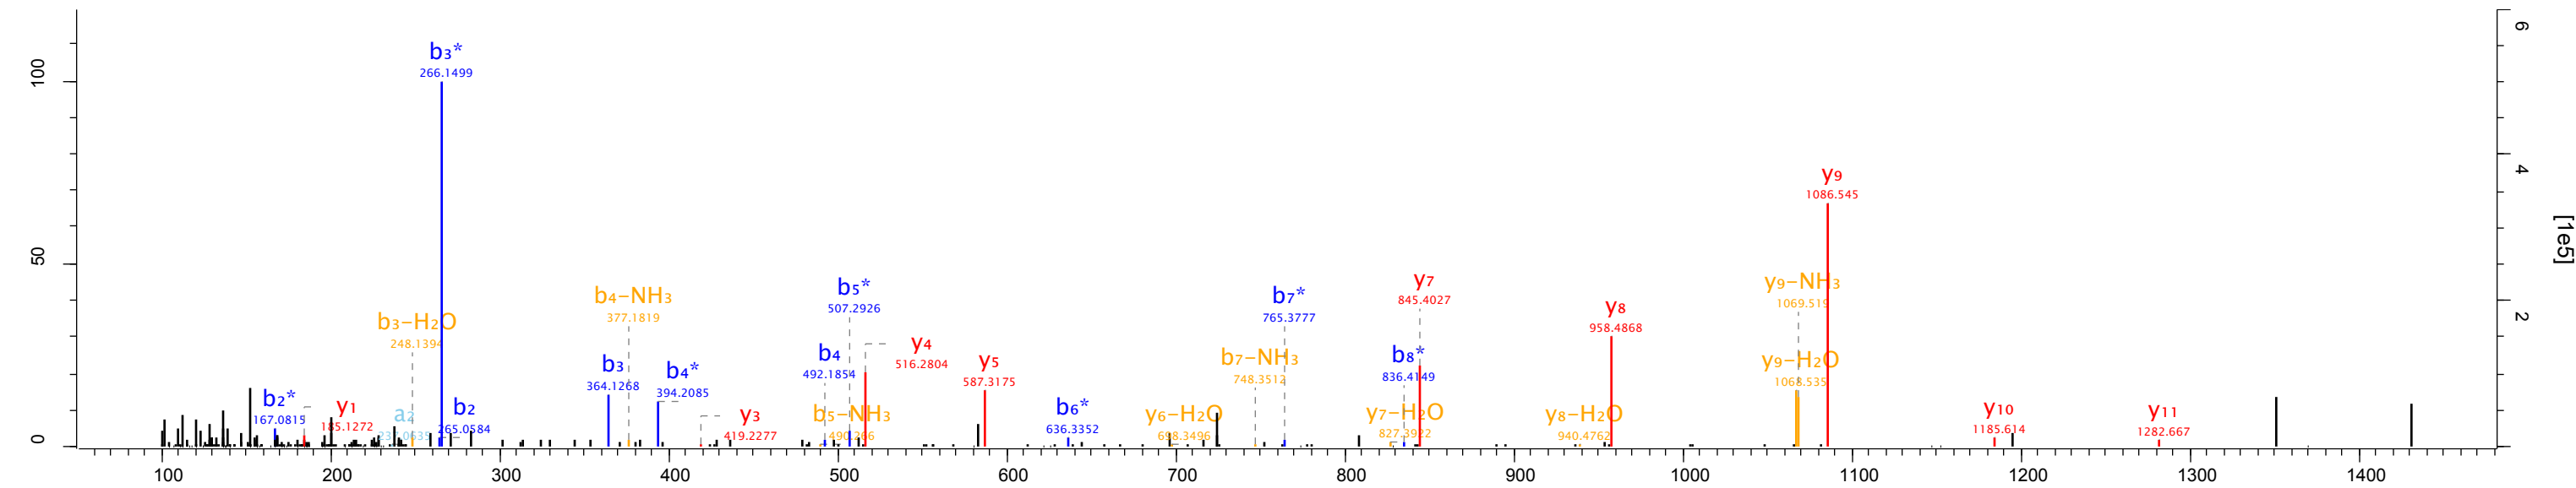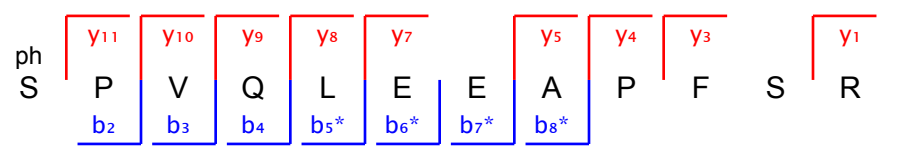

Raw file: 20171215\_MaS\_33SR\_LMH\_phospho\_06  
 Scan: 13943 Method: FTMS; HCD Score: 225.08 m/z: 864.42 Gene names: TPR

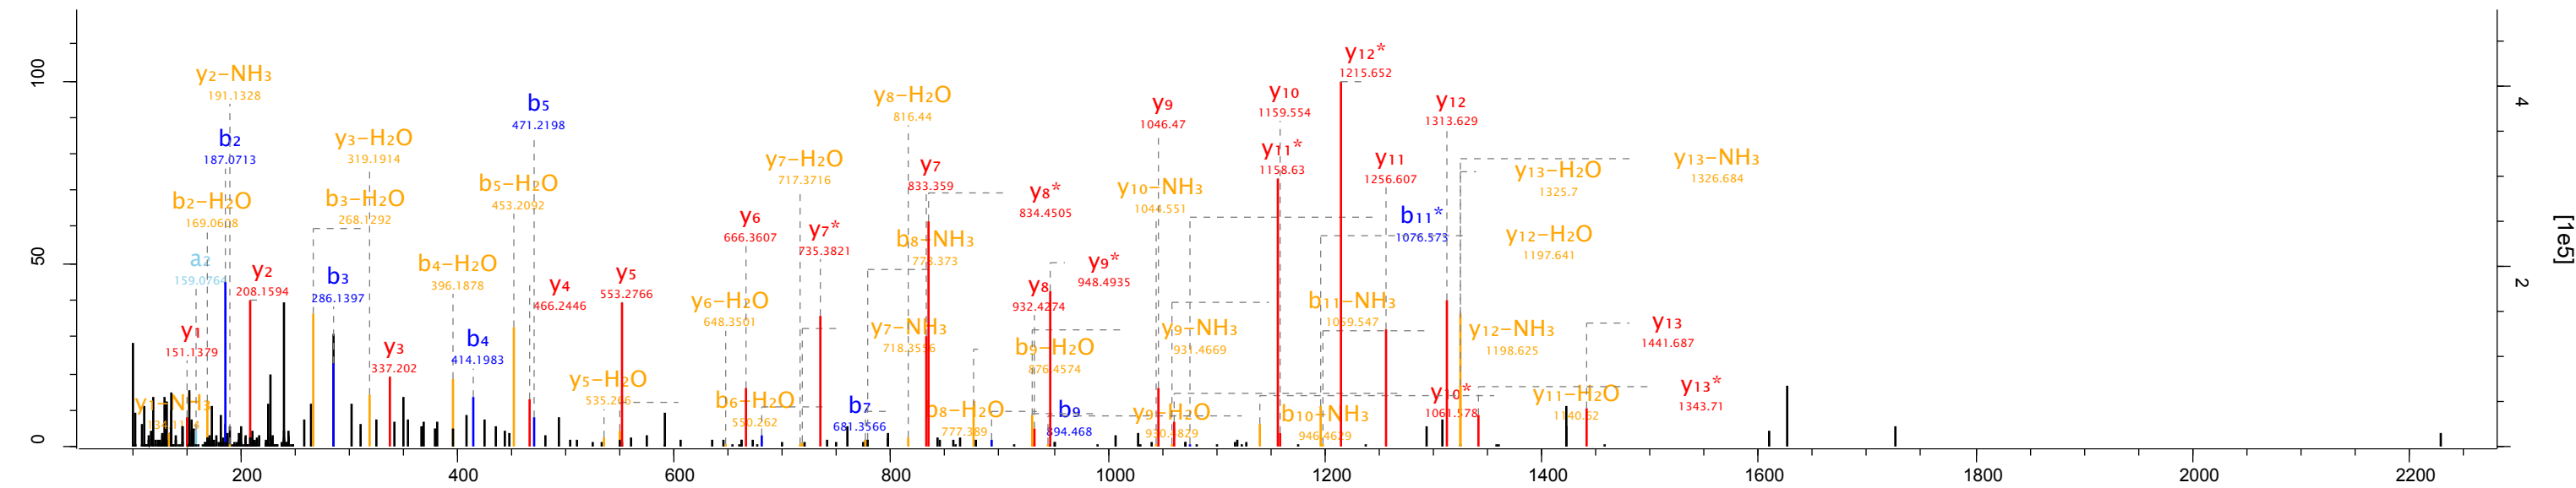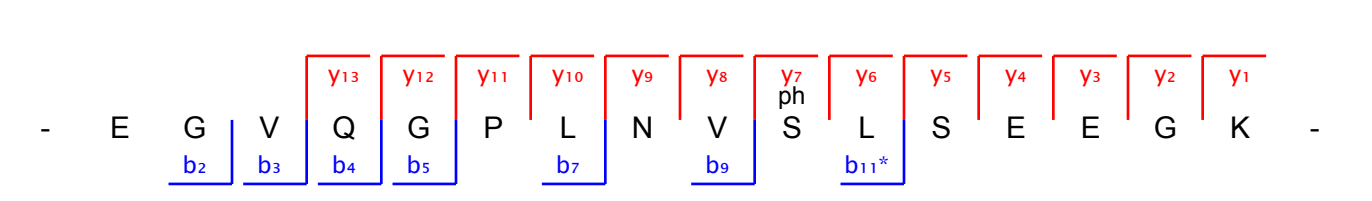

Raw file: 20171215\_MaS\_33SR\_LMH\_phospho\_06  
 Scan: 14103 Method: FTMS; HCD Score: 134.97 m/z: 1076.81 Gene names: HNRNPU

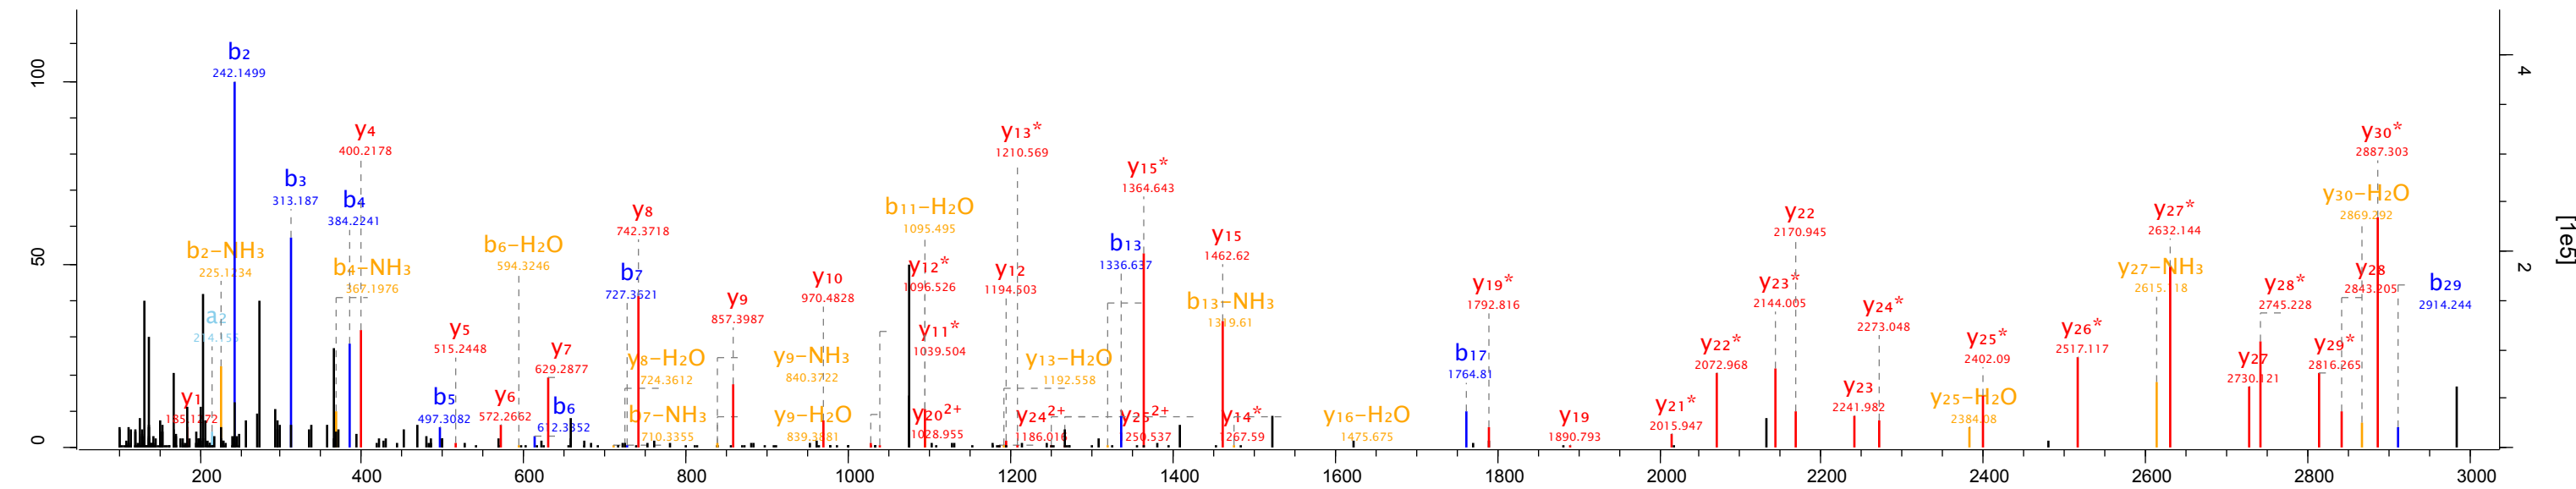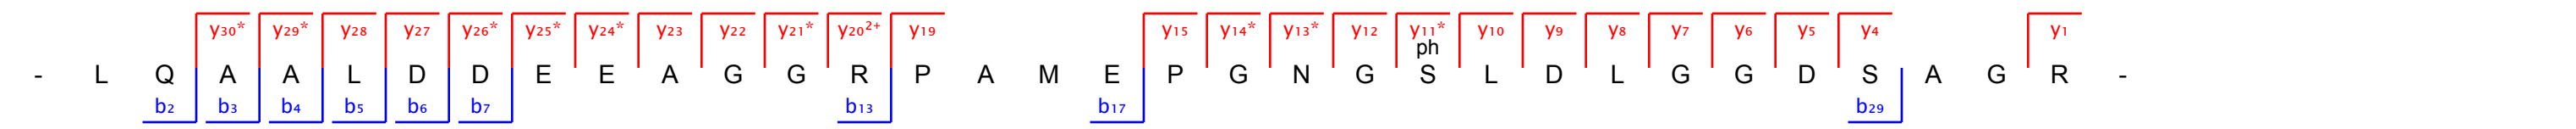

Raw file 20171215\_MaS\_33SR\_LMH\_phospho\_06 Scan 14203 Method FTMS; HCD Score 203.79 m/z 1040 Gene names SVIL

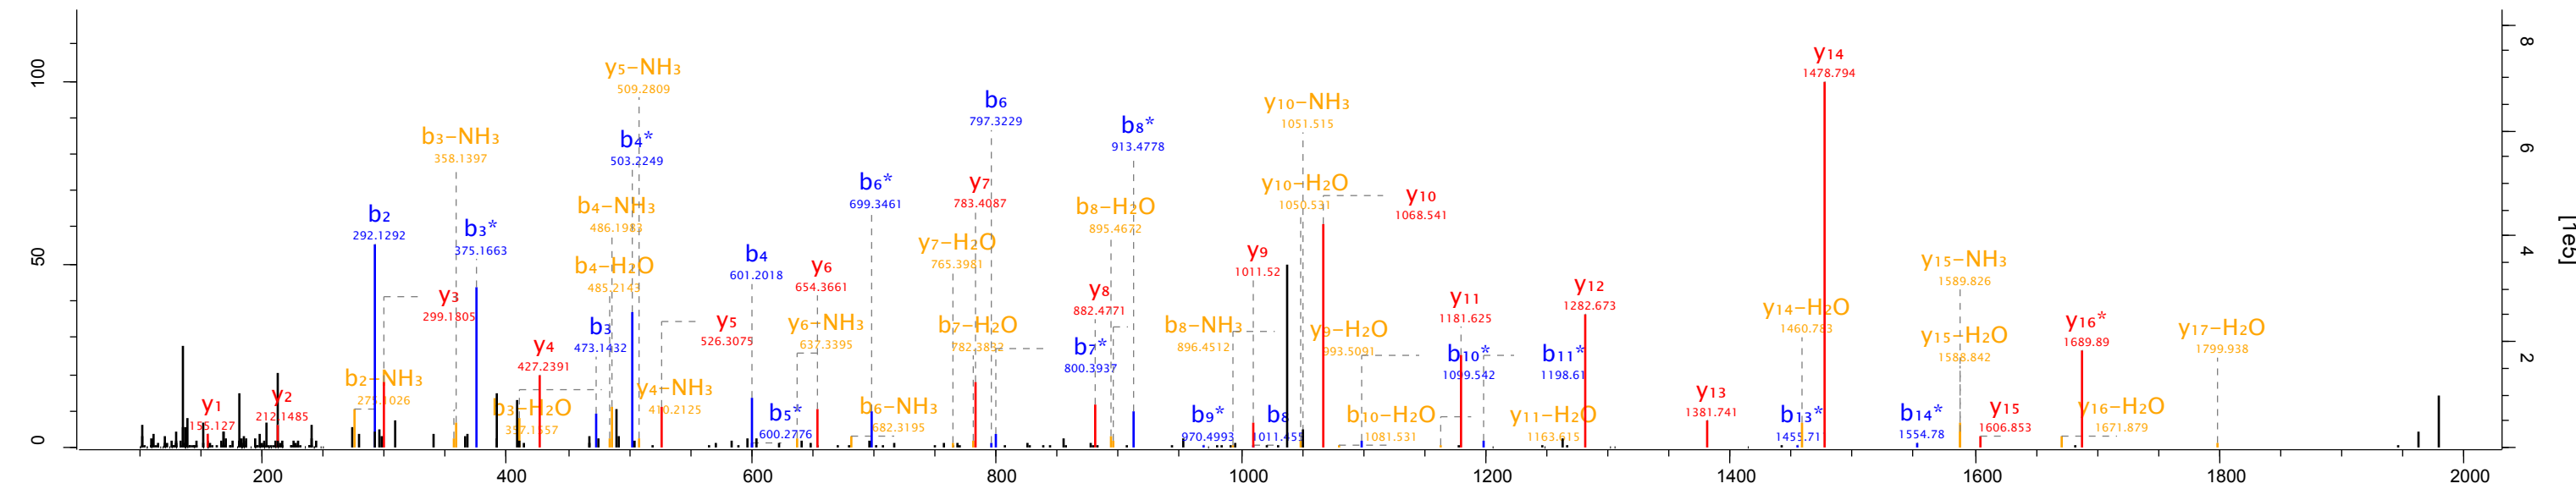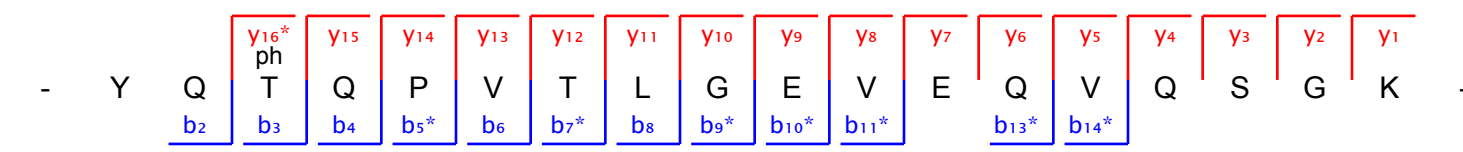

Raw file 20171215\_MaS\_33SR\_LMH\_phospho\_06 Scan 14643 Method FTMS; HCD Score 215.45 m/z 1084.01 Gene names TNKS1BP1

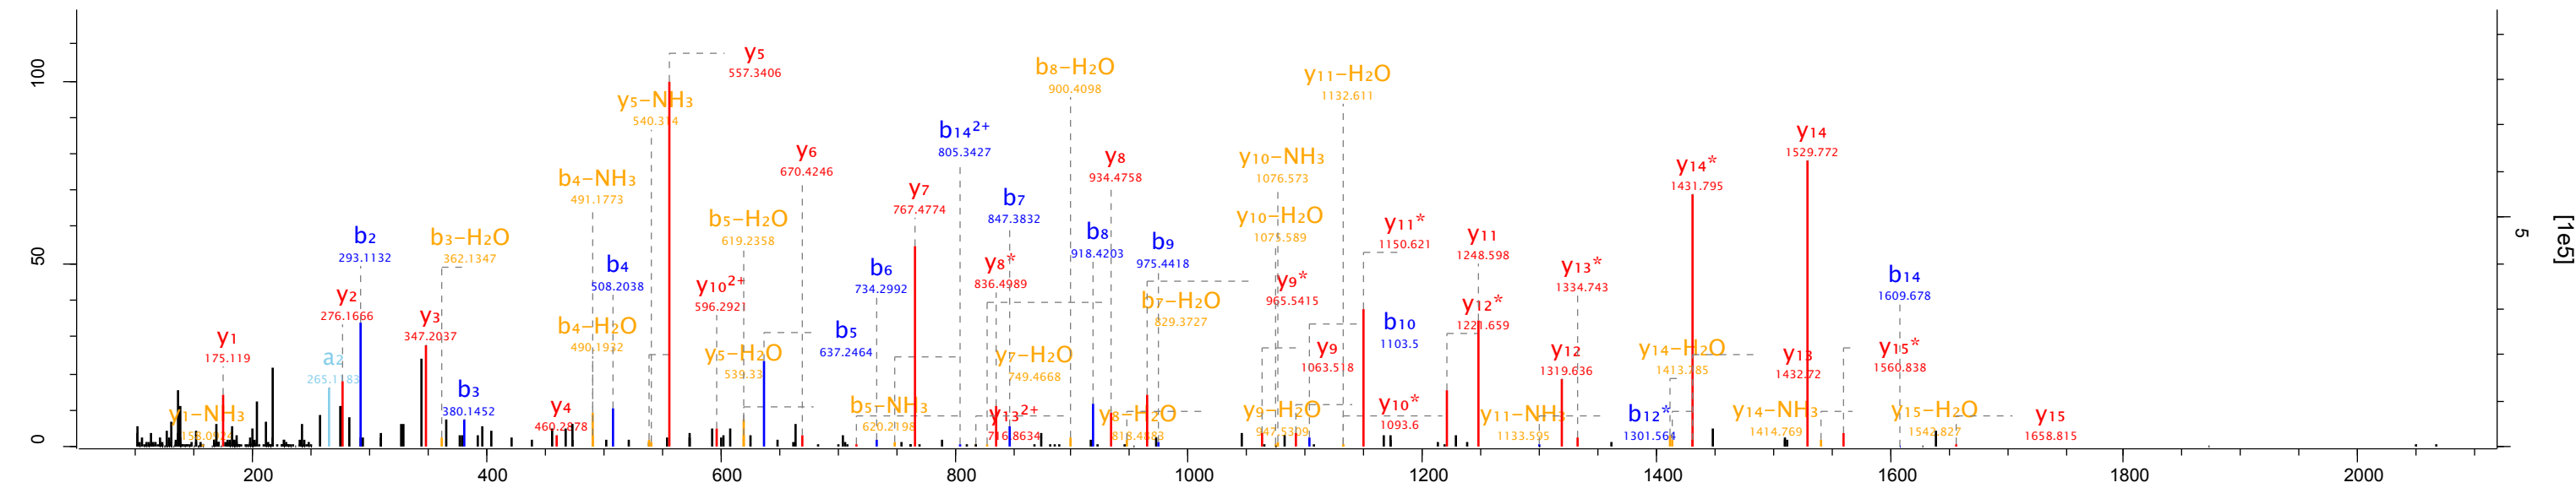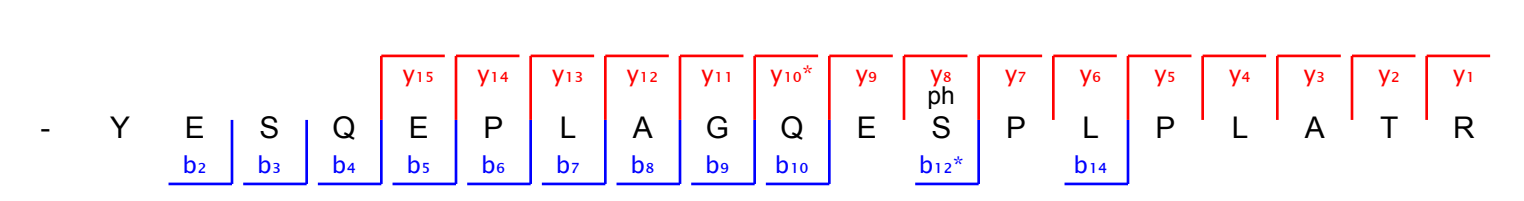

Raw file 20171215\_MaS\_33SR\_LMH\_phospho\_06 Scan 14683 Method FTMS; HCD Score 93.48 m/z 641.32 Gene names NKTR

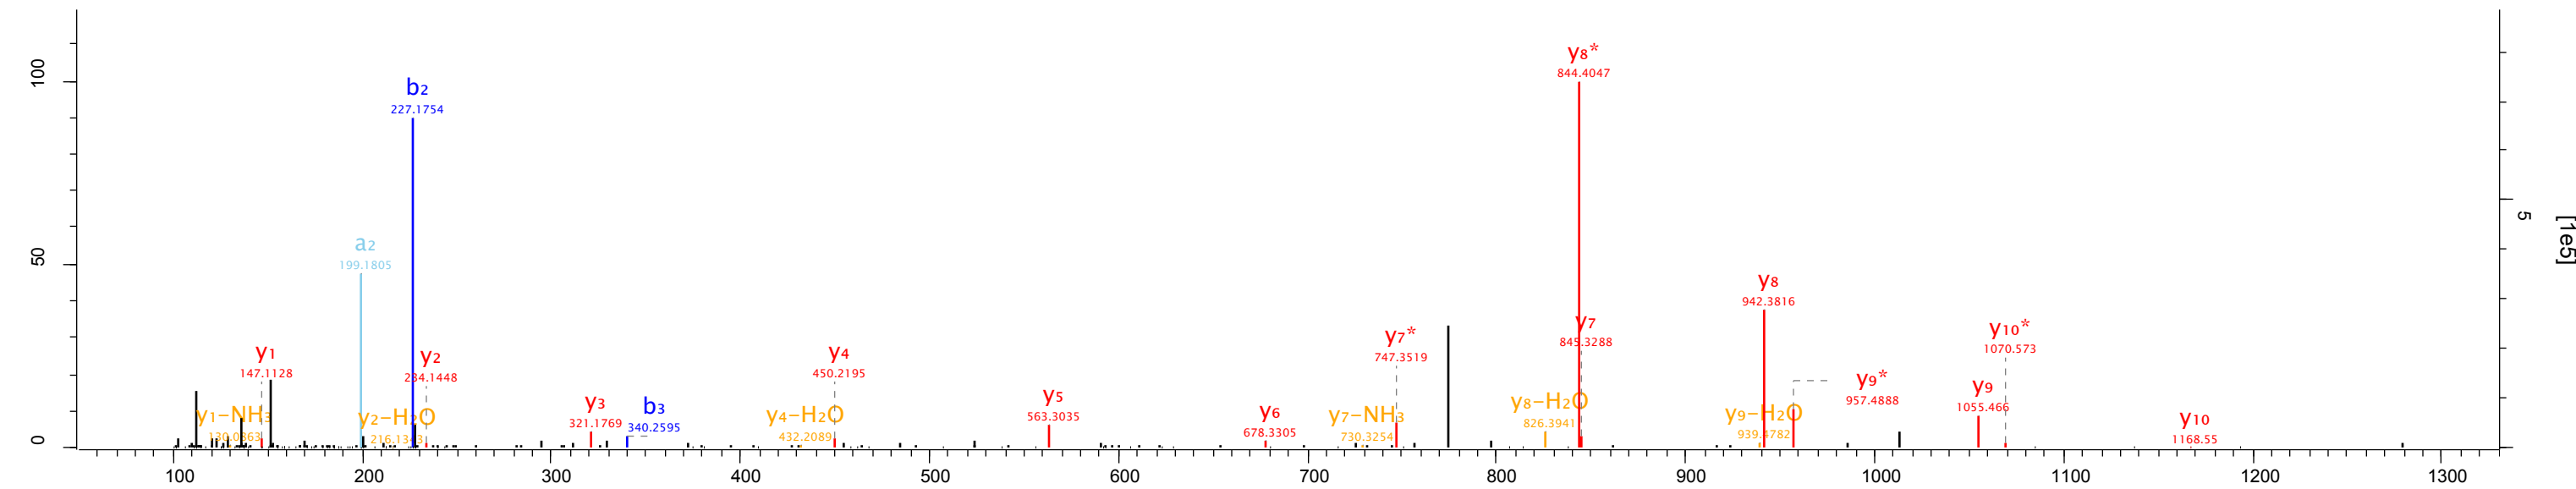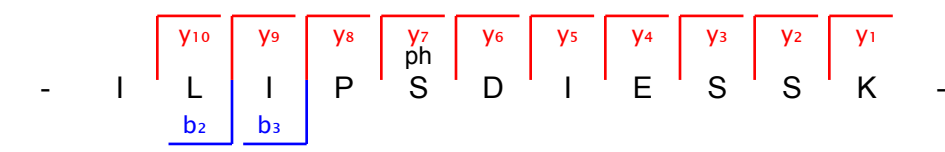

Raw file 20171215\_MaS\_33SR\_LMH\_phospho\_06 Scan 1483 Method FTMS; HCD Score 57.59 m/z 442.7

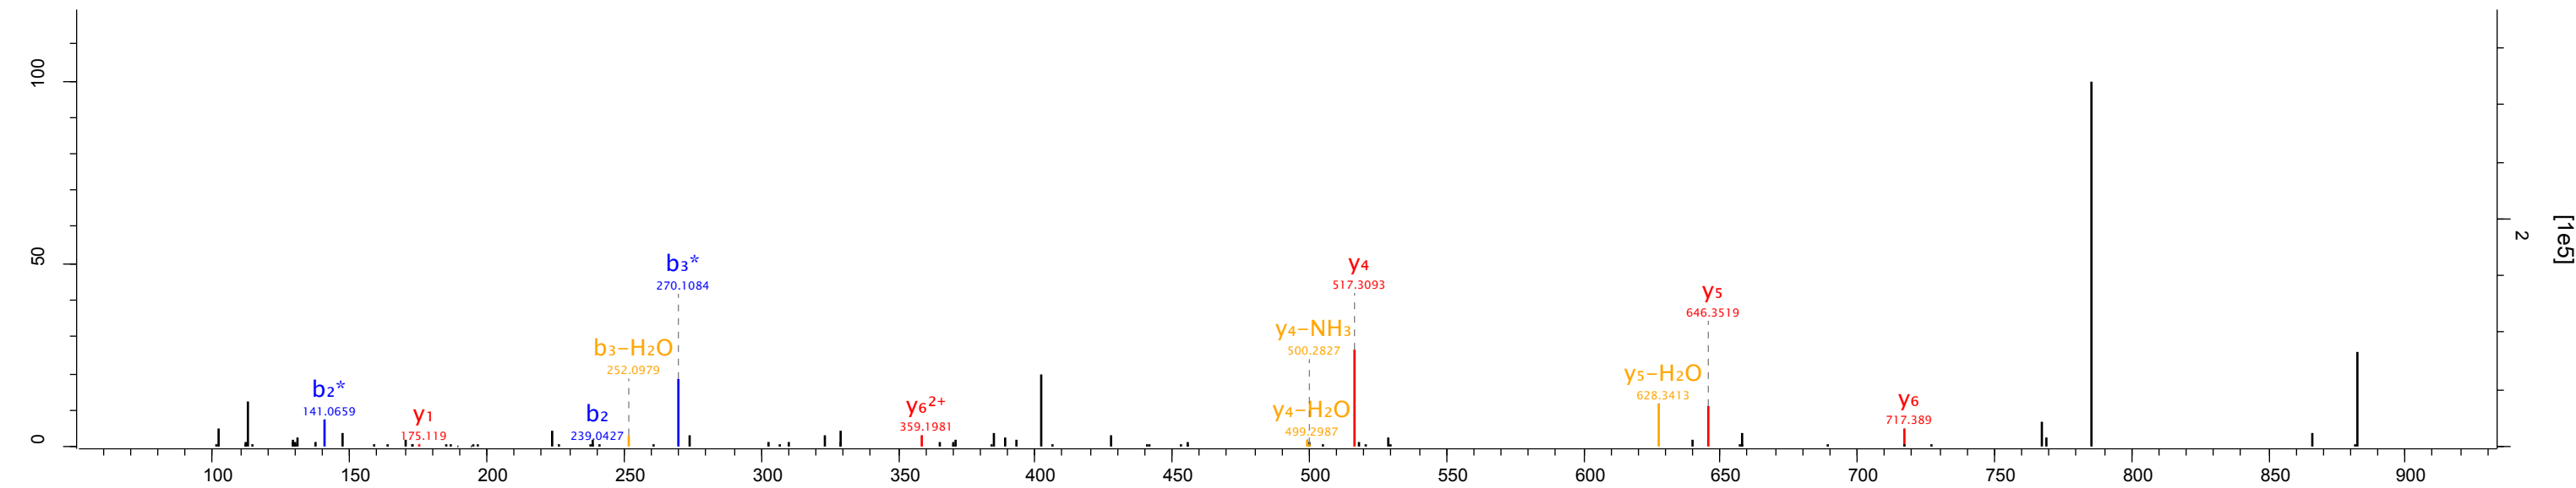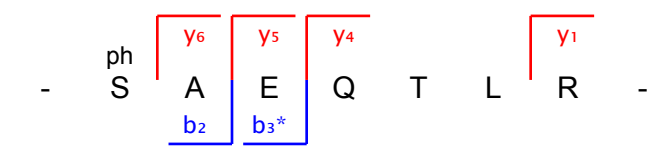



Raw file 20171215\_MaS\_33SR\_LMH\_phospho\_06 Scan 14893 Method FTMS; HCD Score 52.96 m/z 717.7 Gene names ZMYND8

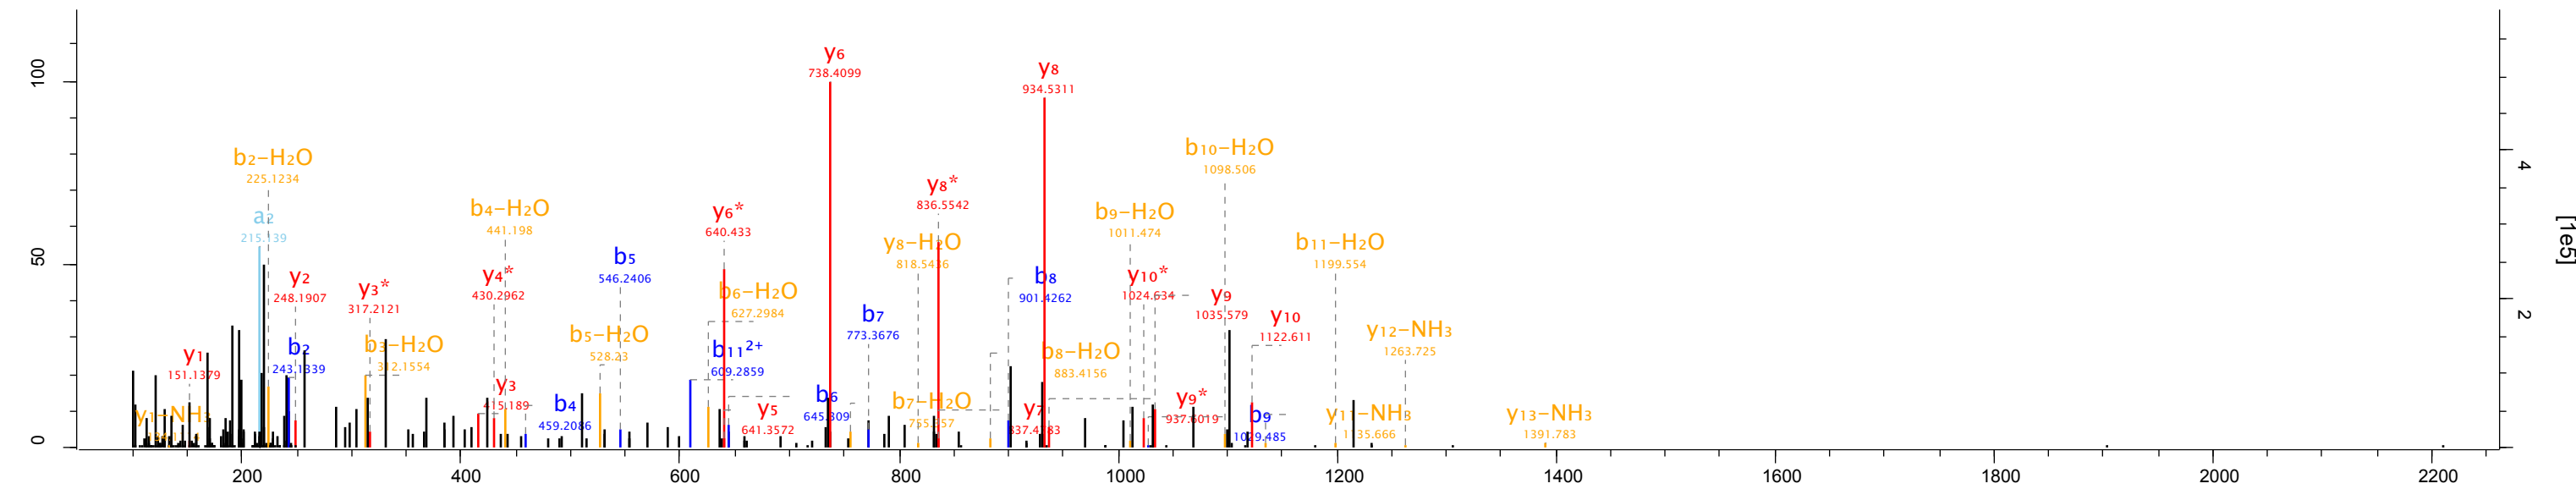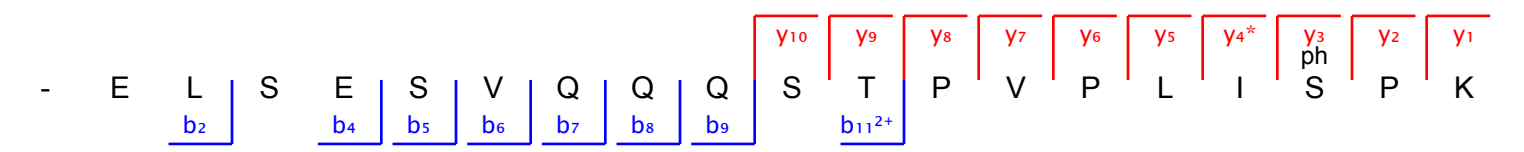

Raw file 20171215\_MaS\_33SR\_LMH\_phospho\_06 Scan 15293 Method FTMS; HCD Score 168.1 m/z 787.87 Gene names VIM

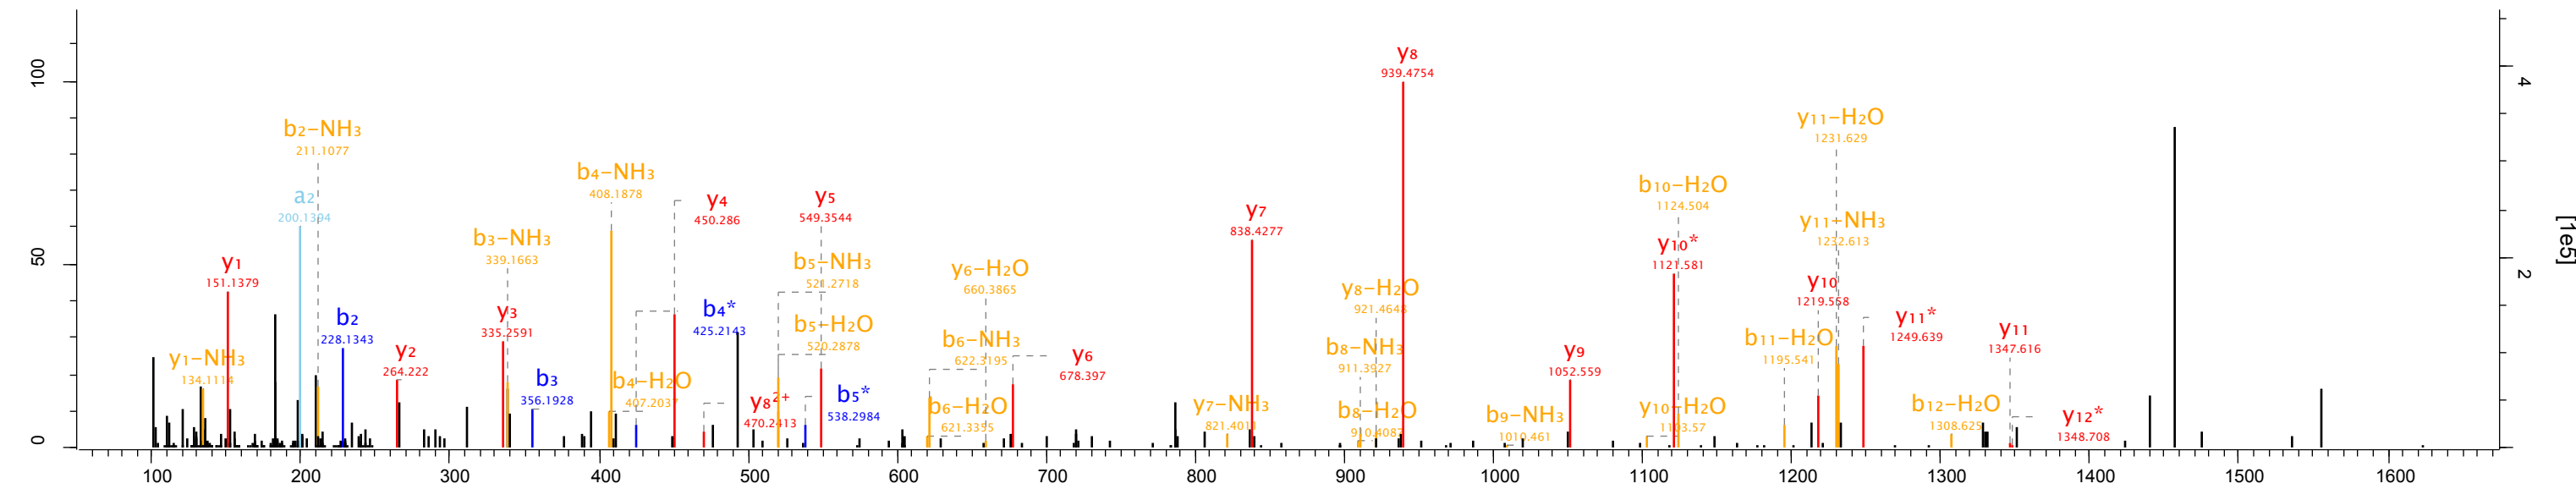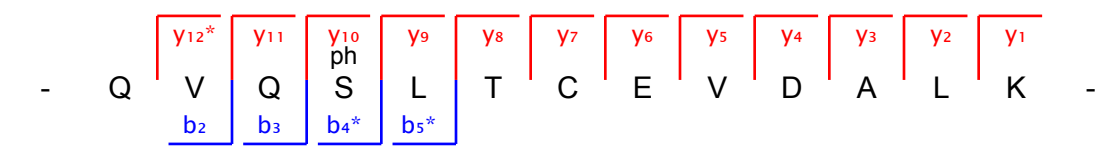

Raw file 20171215\_MaS\_33SR\_LMH\_phospho\_06 Scan 15363 Method FTMS; HCD Score 68.53 m/z 1194.54 Gene names CDYL

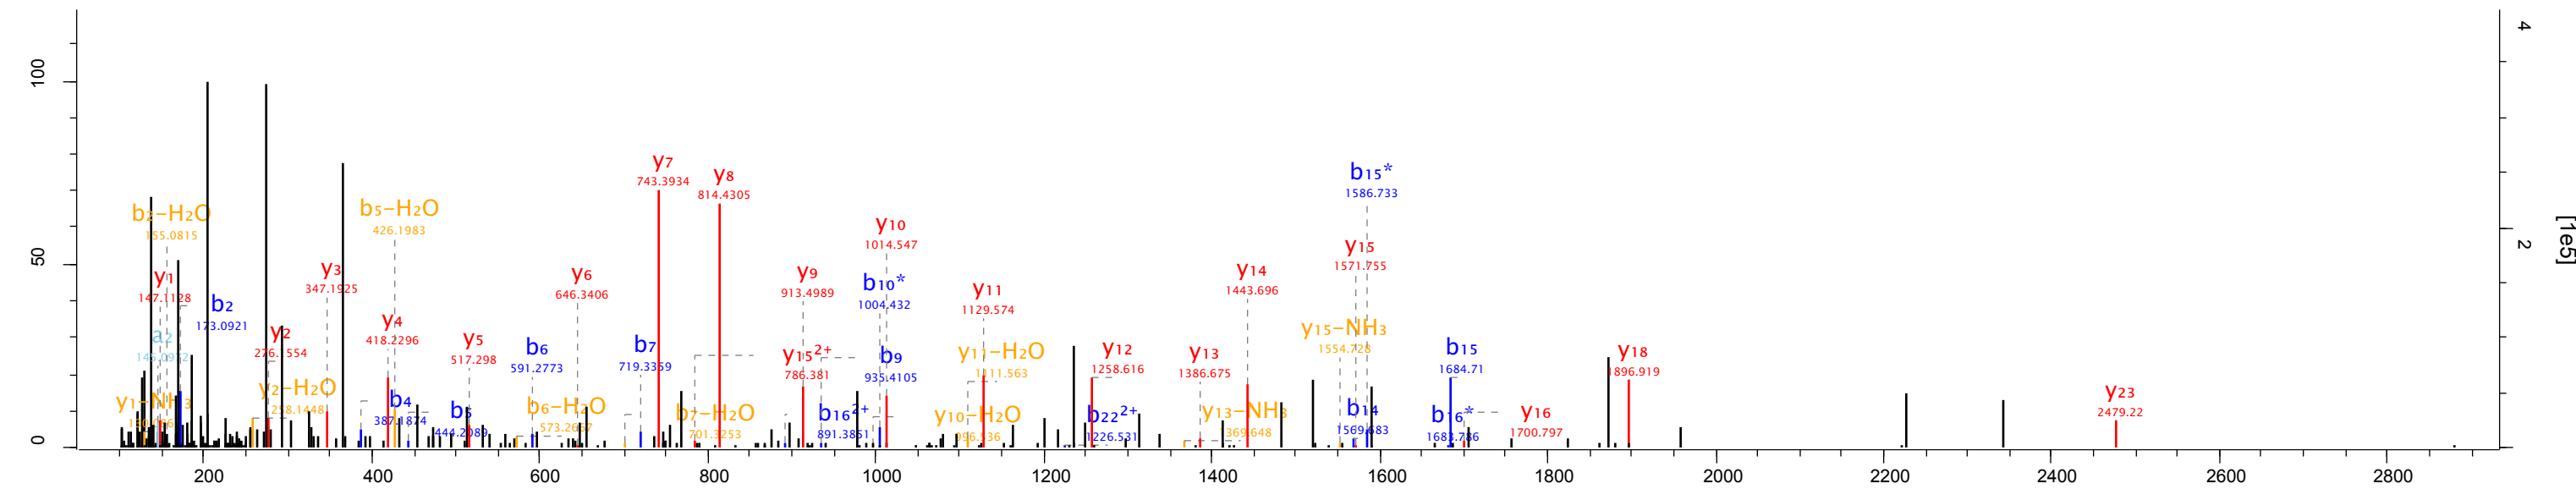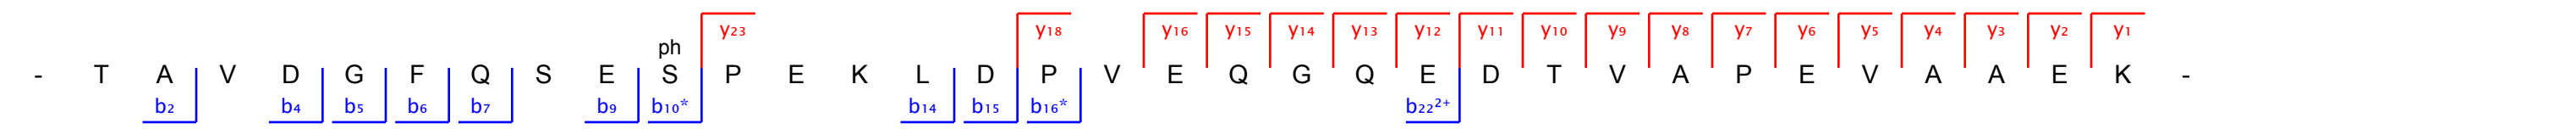

Raw file 20171215\_MaS\_33SR\_LMH\_phospho\_06 Scan 15433 Method FTMS; HCD Score 68.59 m/z 1197.56 Gene names CDYL

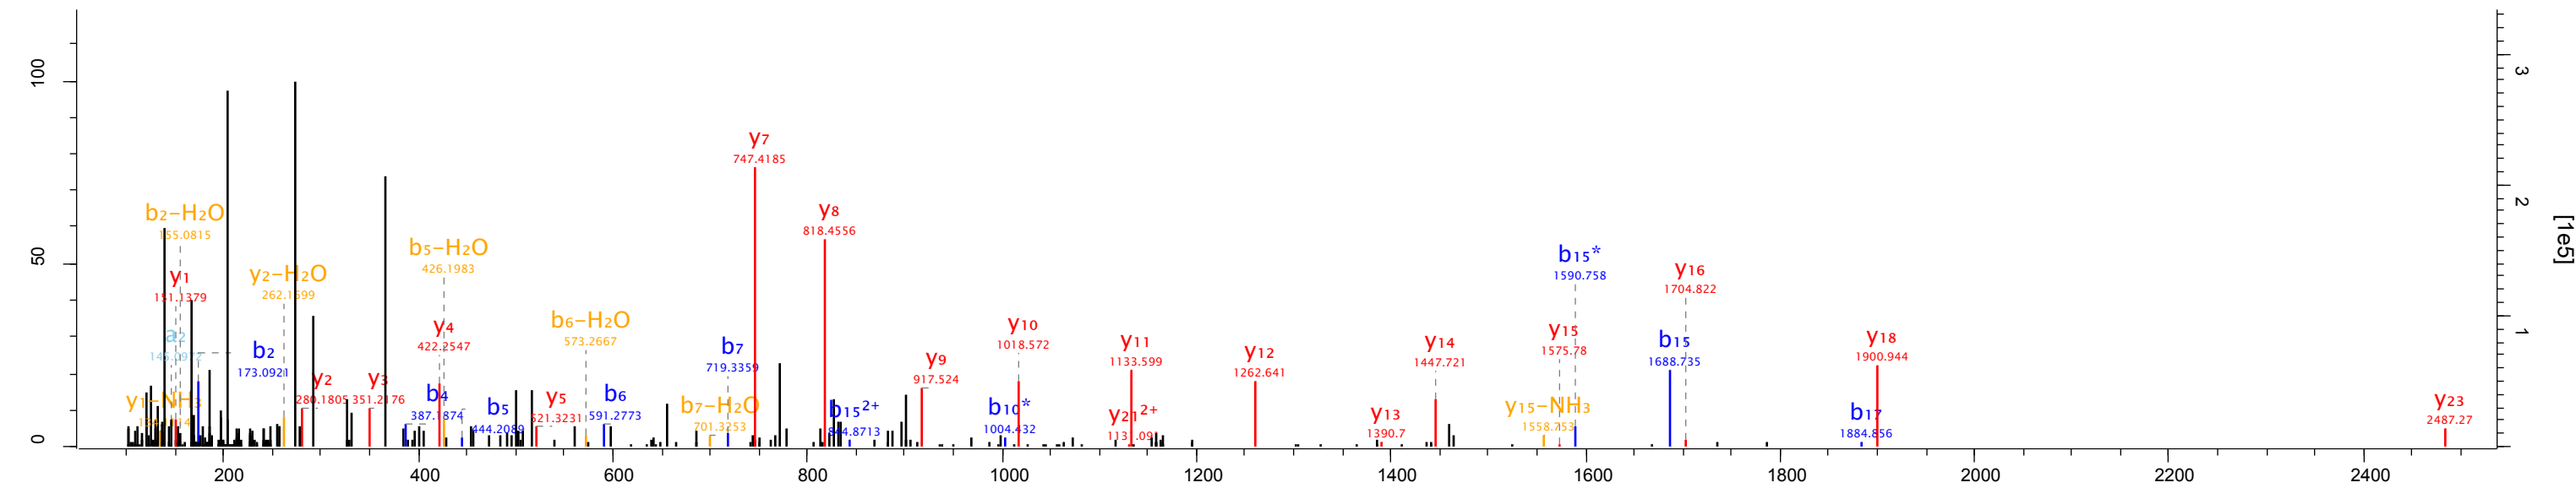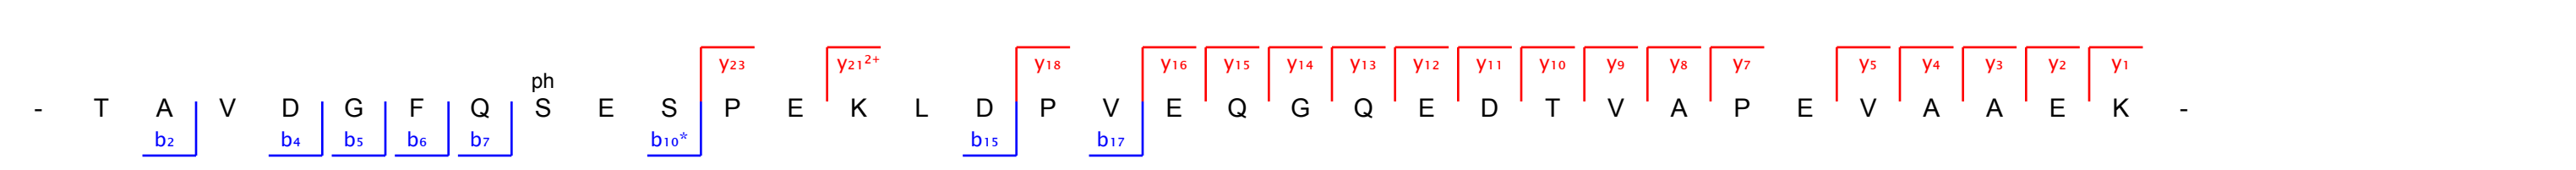

Fragmentation patterns shown in the diagram:

- Blue brackets (b ions): b<sub>2</sub> (A), b<sub>4</sub> (D), b<sub>5</sub> (G), b<sub>6</sub> (F), b<sub>7</sub> (Q), b<sub>10</sub><sup>\*</sup> (S), b<sub>15</sub> (D), b<sub>17</sub> (V).
- Red lines (y ions): y<sub>1</sub> (Q), y<sub>2</sub> (E), y<sub>3</sub> (A), y<sub>4</sub> (A), y<sub>5</sub> (V), y<sub>7</sub> (A), y<sub>8</sub> (V), y<sub>9</sub> (T), y<sub>10</sub> (D), y<sub>11</sub> (E), y<sub>12</sub> (Q), y<sub>13</sub> (G), y<sub>14</sub> (E), y<sub>15</sub> (Q), y<sub>16</sub> (V), y<sub>18</sub> (P), y<sub>21</sub><sup>2+</sup> (K), y<sub>23</sub> (P).

Raw file 20171215\_MaS\_33SR\_LMH\_phospho\_06 Scan 15593 Method FTMS; HCD Score 173.49 m/z 855.93 Gene names ASXL2

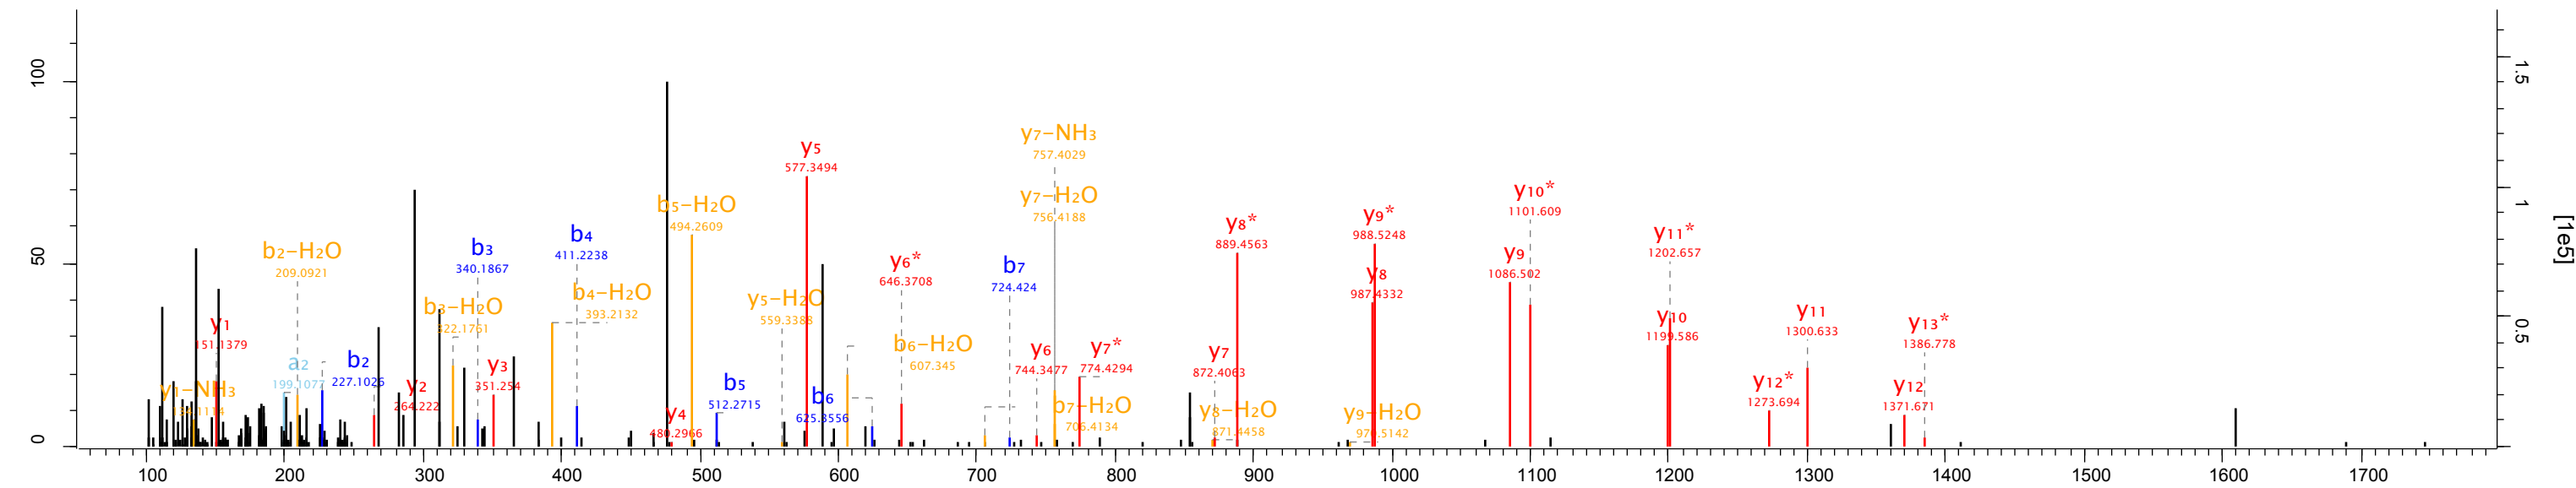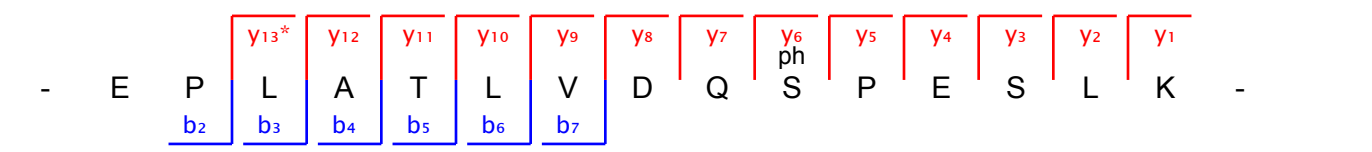

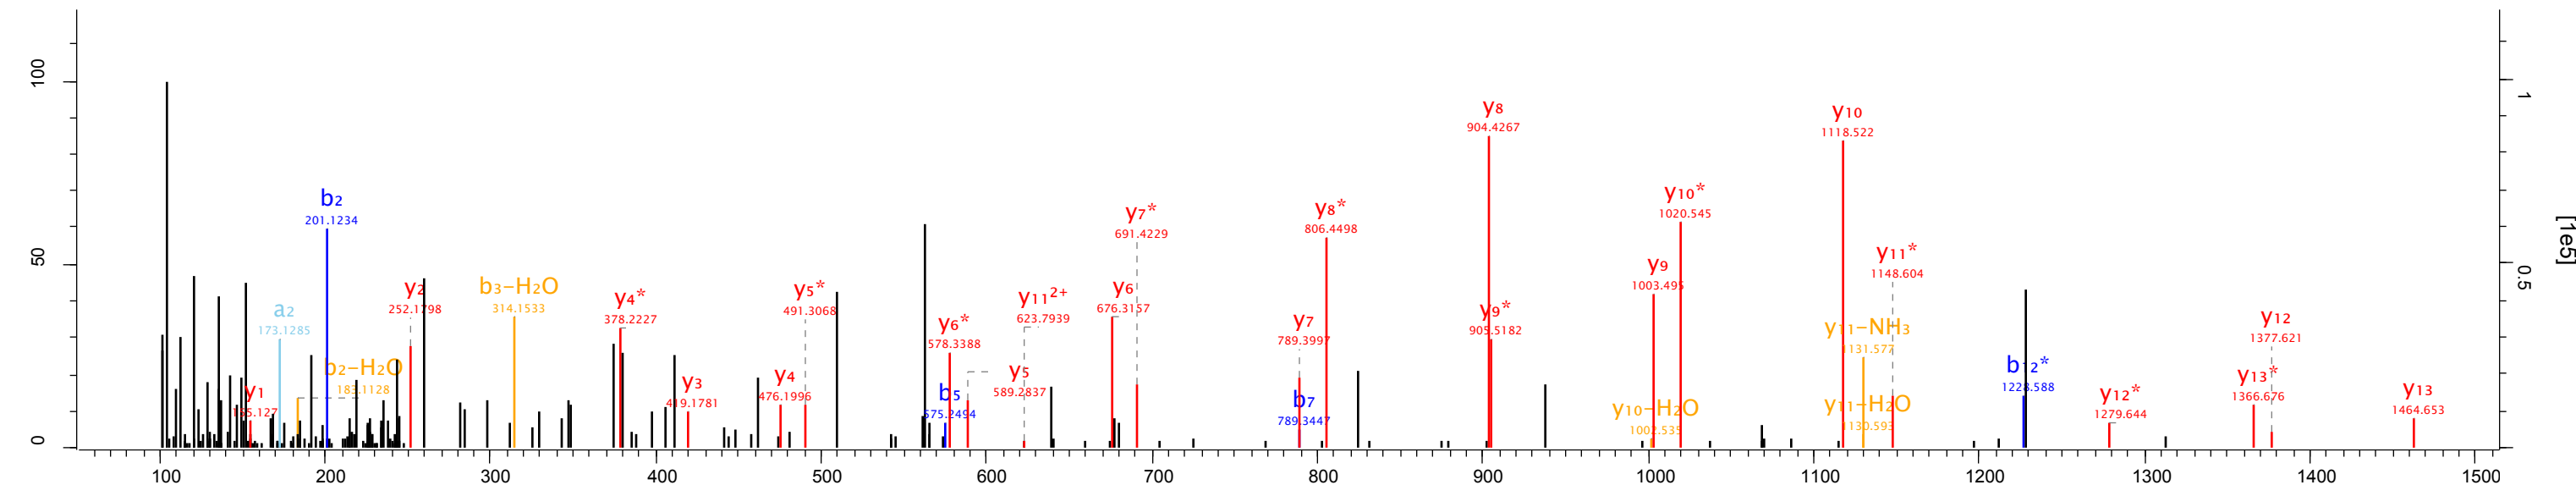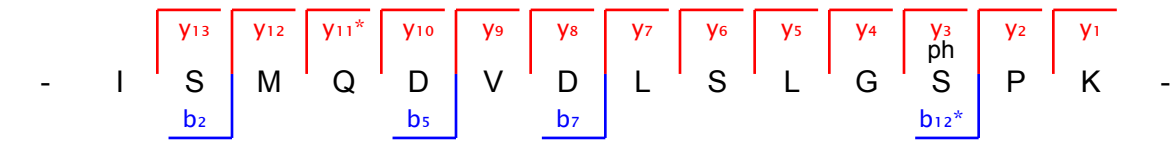

Raw file 20171215\_MaS\_33SR\_LMH\_phospho\_06 Scan 18893 Method FTMS; HCD Score 140.9 m/z 810.05 Gene names NUFIP2

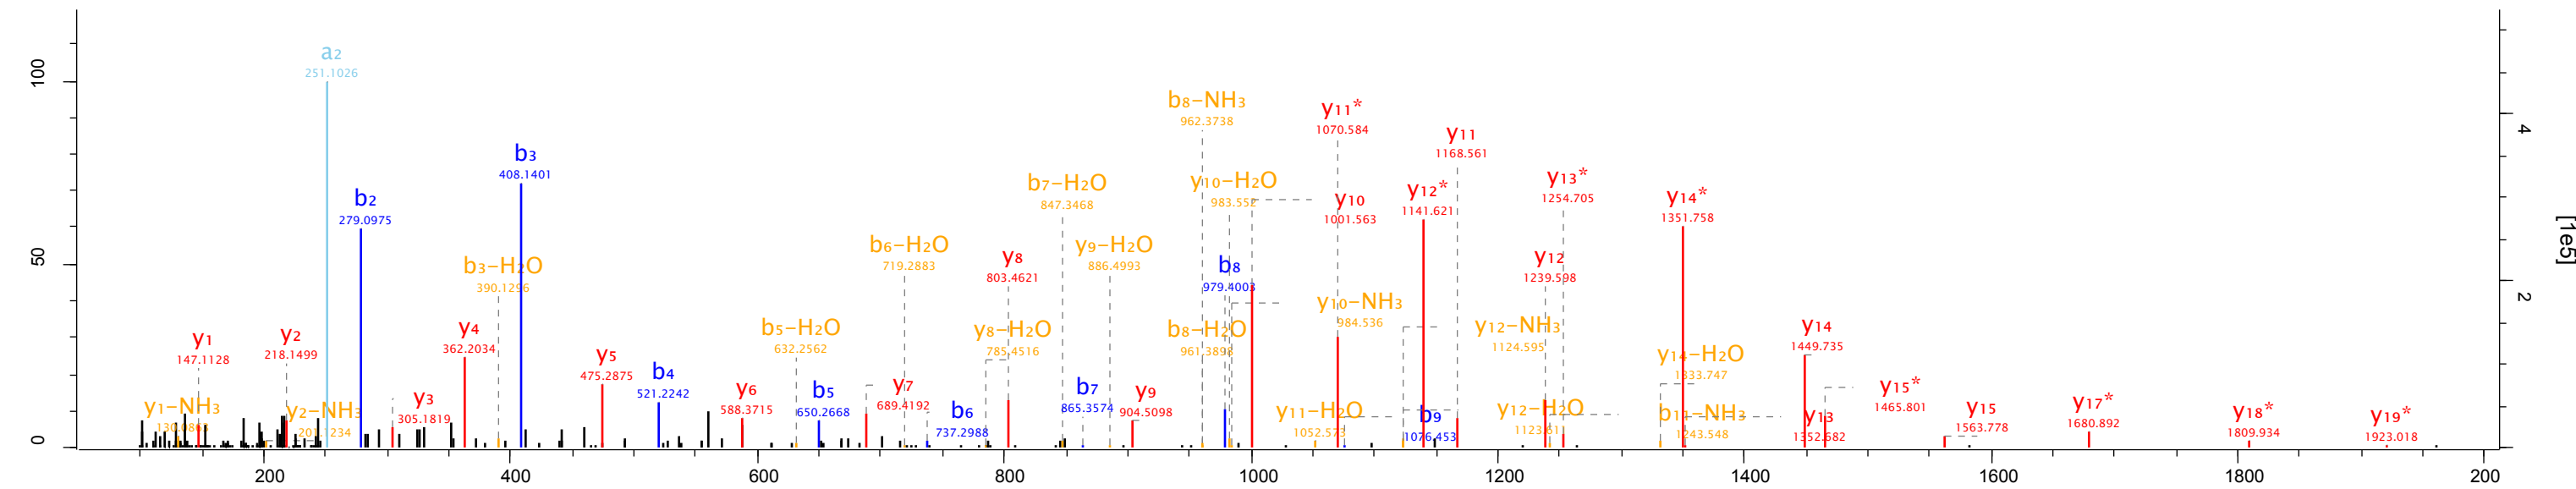

- D Y E I E S Q N P L A S P T N T L L G S A K -

b<sub>2</sub>
b<sub>3</sub>
b<sub>4</sub>
b<sub>5</sub>
b<sub>6</sub>
b<sub>7</sub>
b<sub>8</sub>
b<sub>9</sub>
y<sub>19</sub>\*
y<sub>18</sub>\*
y<sub>17</sub>\*
y<sub>15</sub>
y<sub>14</sub>
y<sub>13</sub>
y<sub>12</sub>
y<sub>11</sub>ph
y<sub>10</sub>
y<sub>9</sub>
y<sub>8</sub>
y<sub>7</sub>
y<sub>6</sub>
y<sub>5</sub>
y<sub>4</sub>
y<sub>3</sub>
y<sub>2</sub>
y<sub>1</sub>

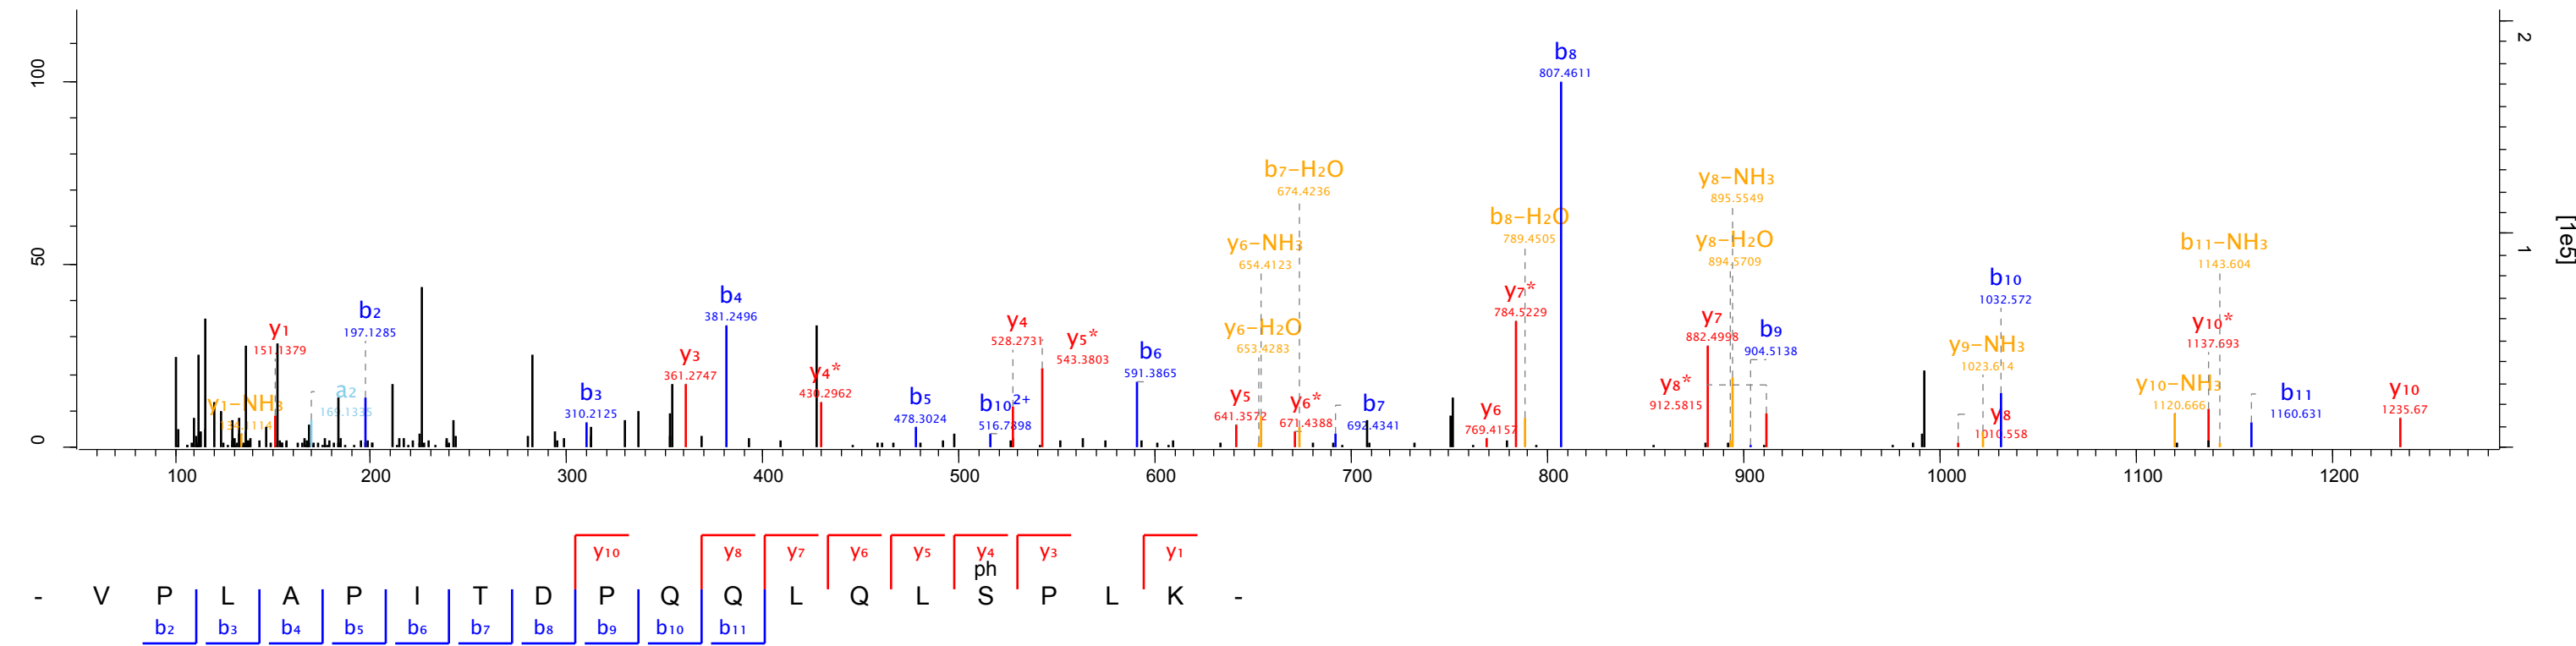



Raw file 20171215\_MaS\_33SR\_LMH\_phospho\_06 Scan 2613 Method FTMS; HCD Score 190.46 m/z 722.32

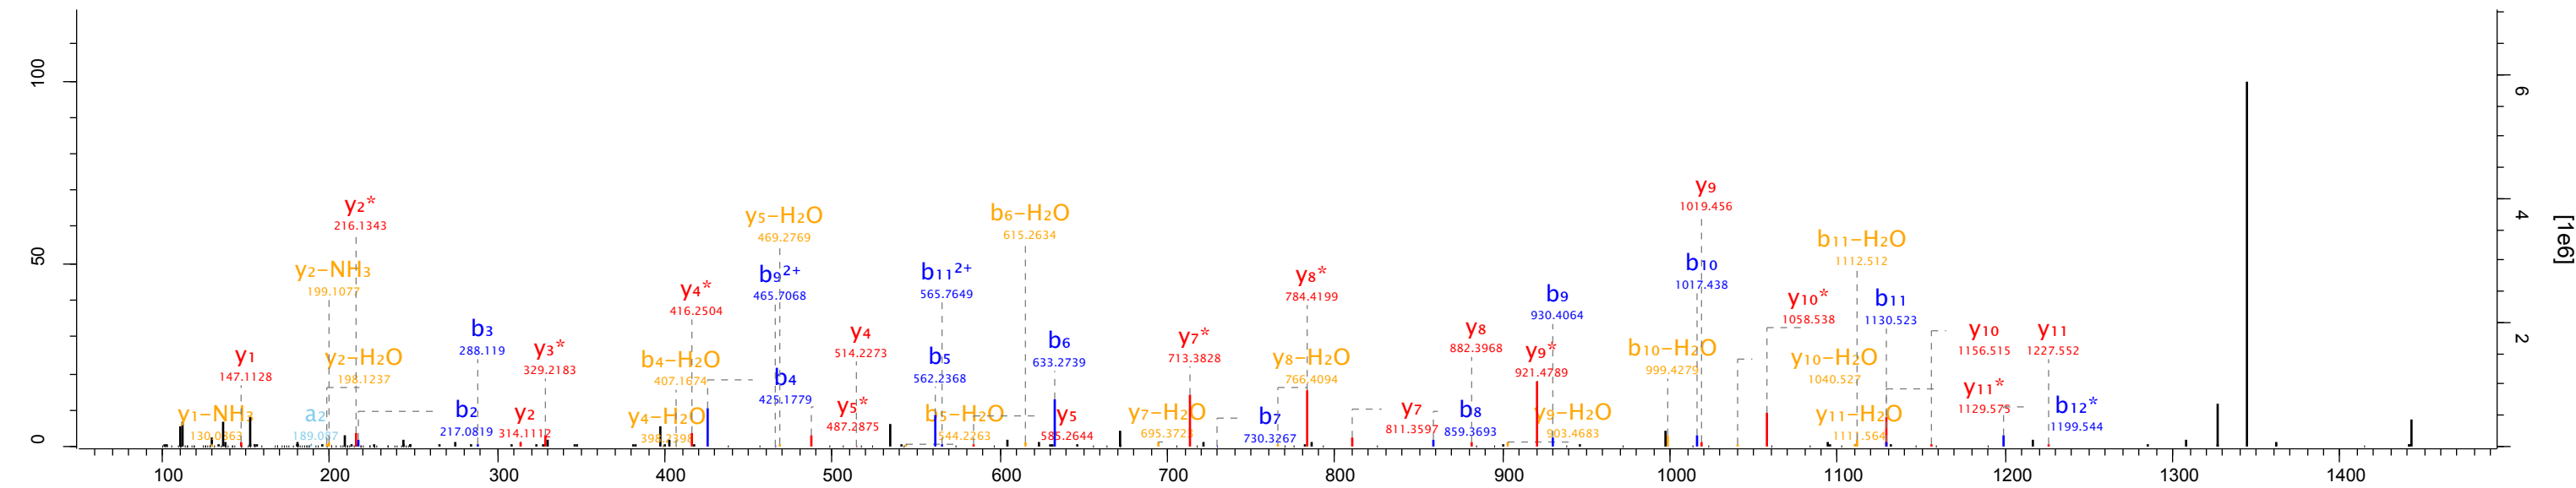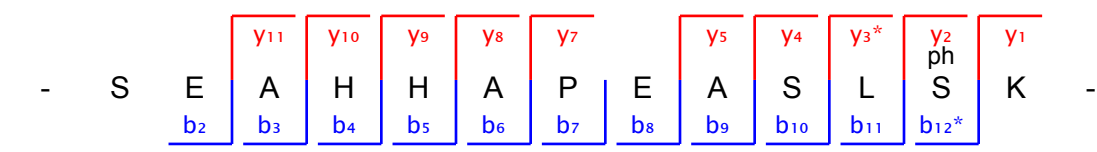

Raw file

20171215\_MaS\_33SR\_LMH\_phospho\_06

Scan 2703 Method FTMS; HCD Score 88.1 m/z 581.81 Gene names UBR5

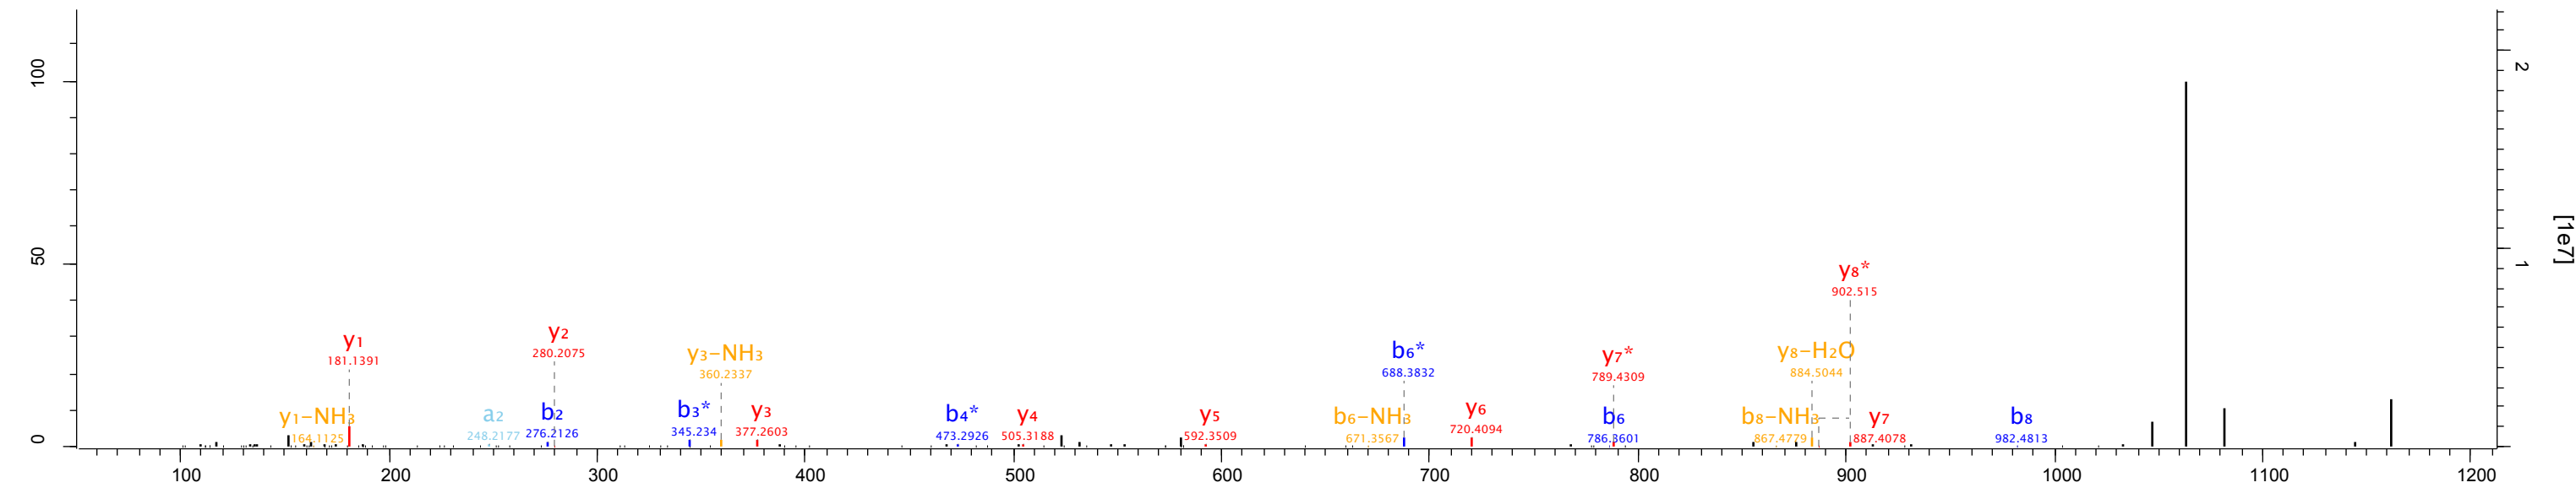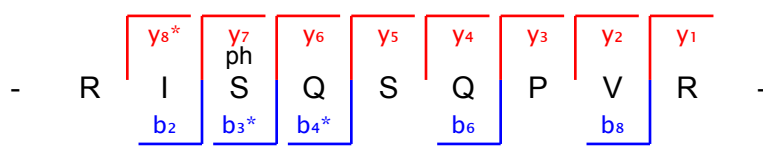

Raw file 20171215\_MaS\_33SR\_LMH\_phospho\_06 Scan 3093 Method FTMS; HCD Score 60.55 m/z 482.23 Gene names PRRC2C

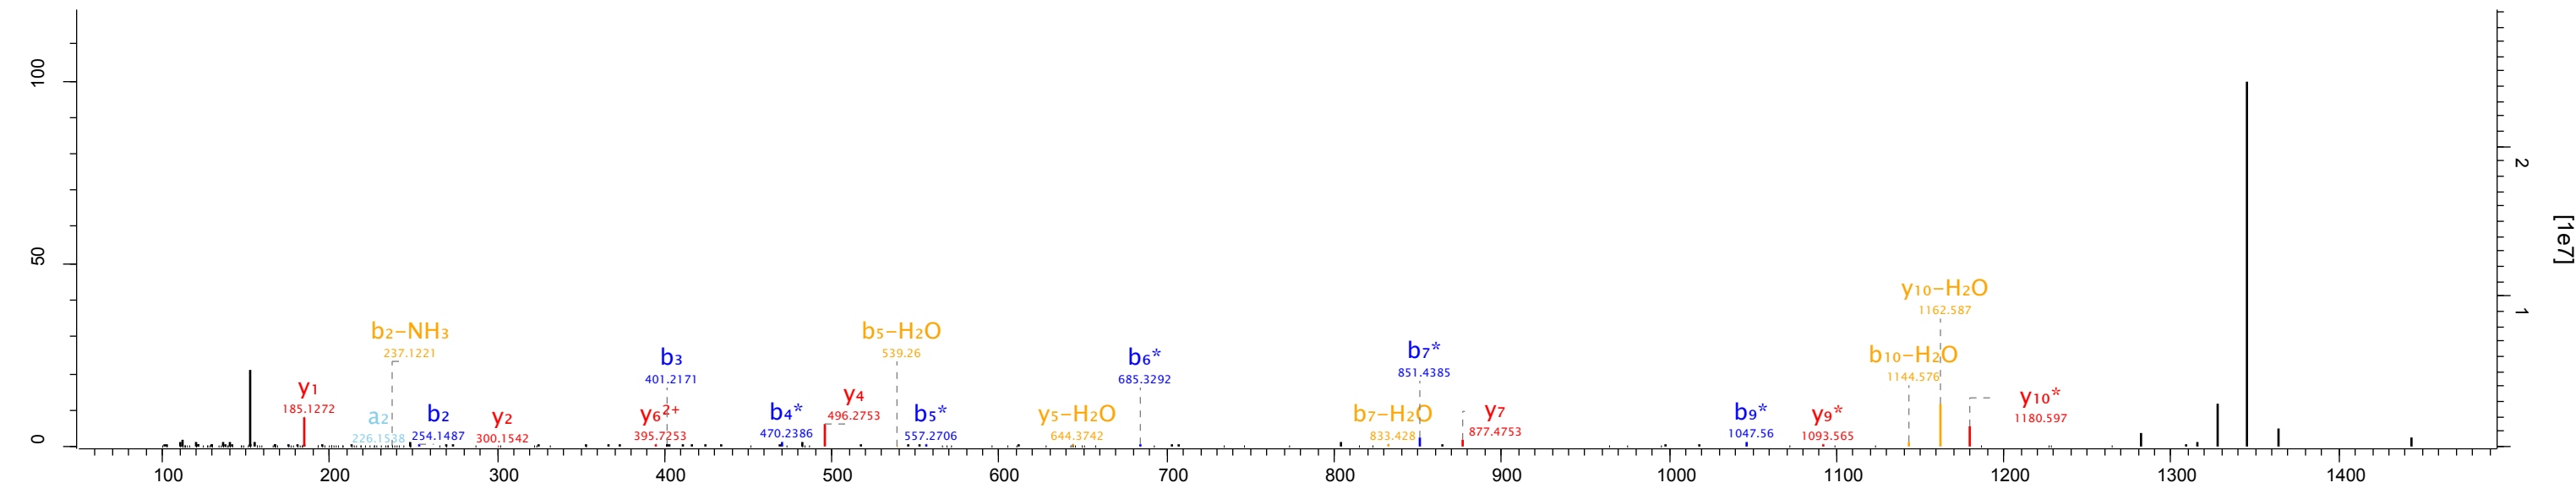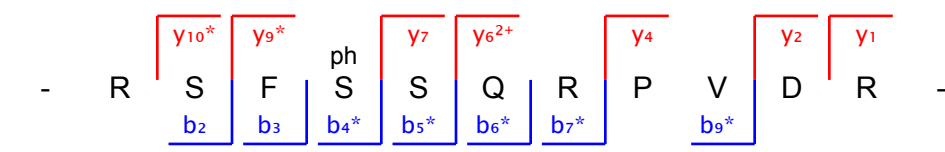

Raw file 20171215\_MaS\_33SR\_LMH\_phospho\_06 Scan 3133 Method FTMS; HCD Score 183.56 m/z 646.26 Gene names SORBS2

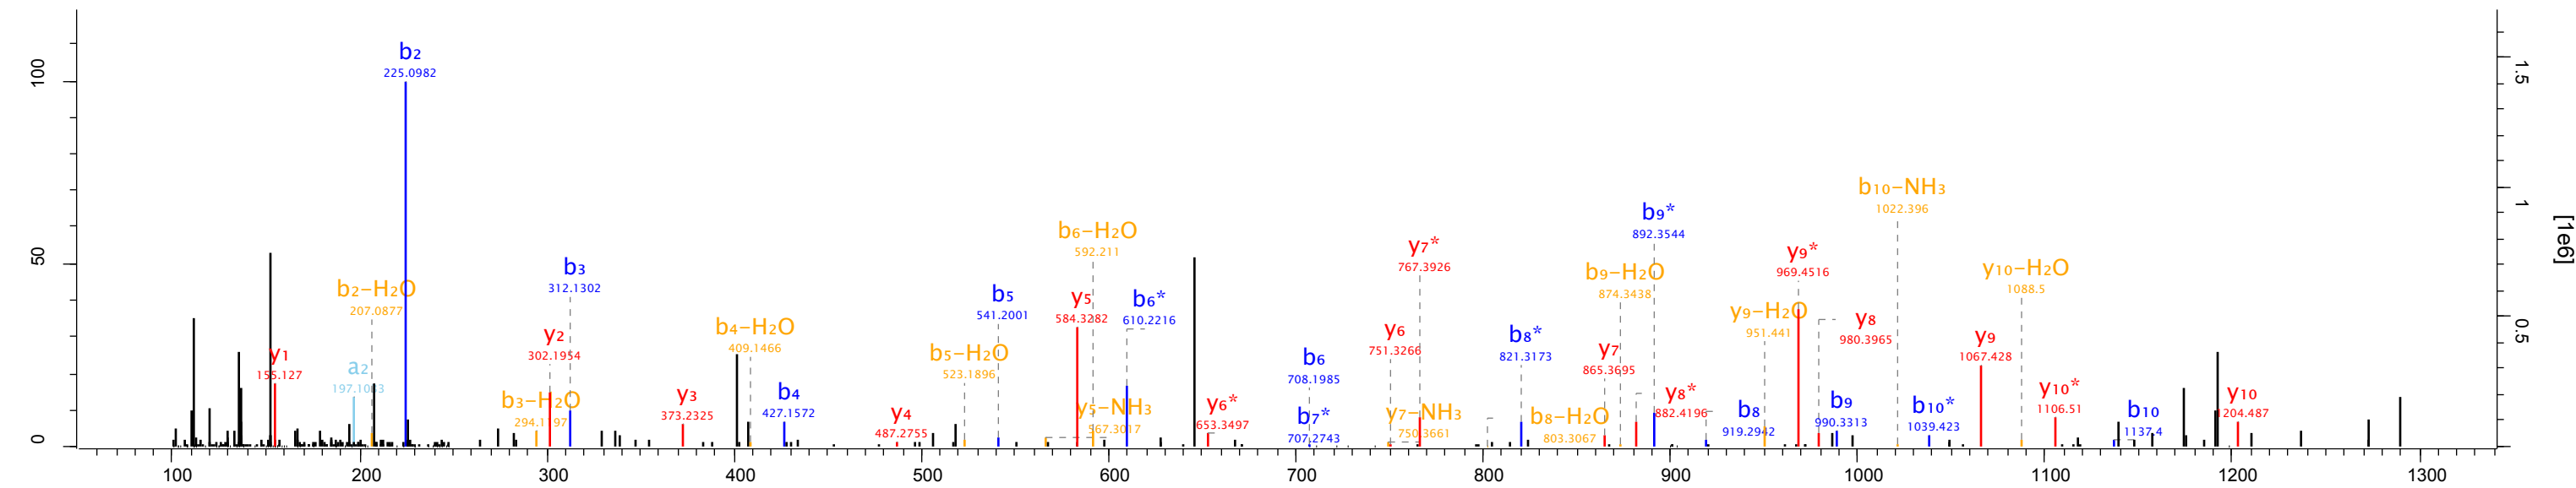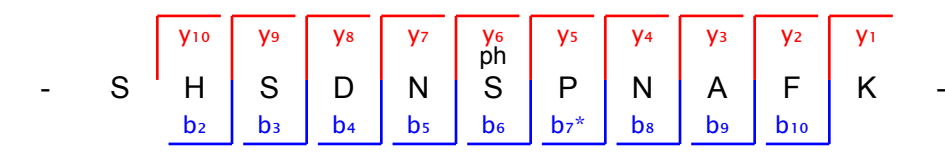

Raw file 20171215\_MaS\_33SR\_LMH\_phospho\_06 Scan 3373 Method FTMS; HCD Score 91.87 m/z 332.5 Gene names RNPS1

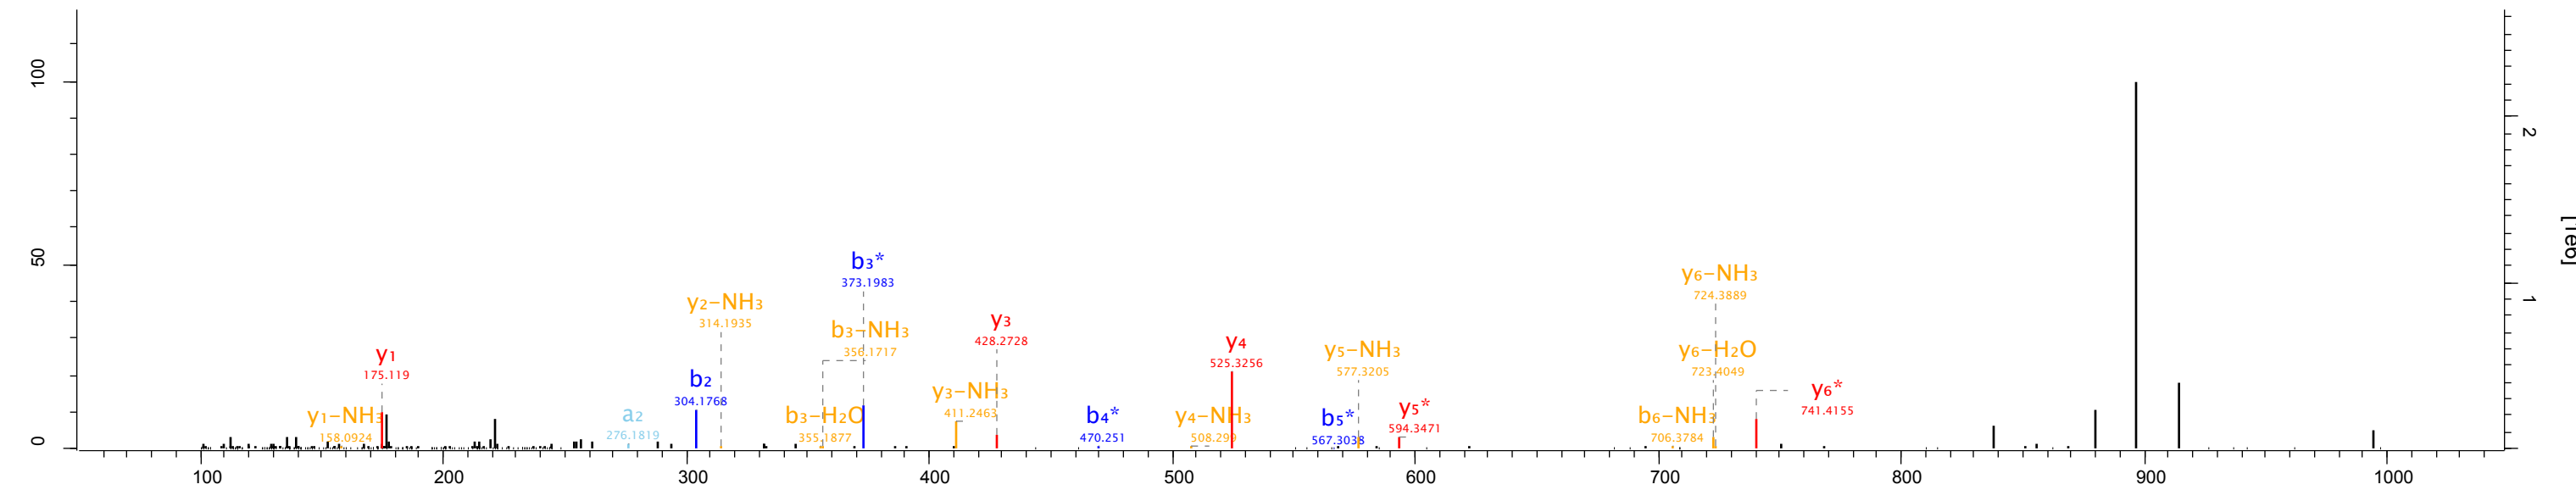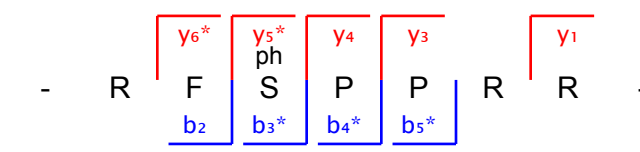

Raw file 20171215\_MaS\_33SR\_LMH\_phospho\_06 Scan 3783 Method FTMS; HCD Score 395.22 m/z 1171.98 Gene names HSP90AB1;HSP90AB3P

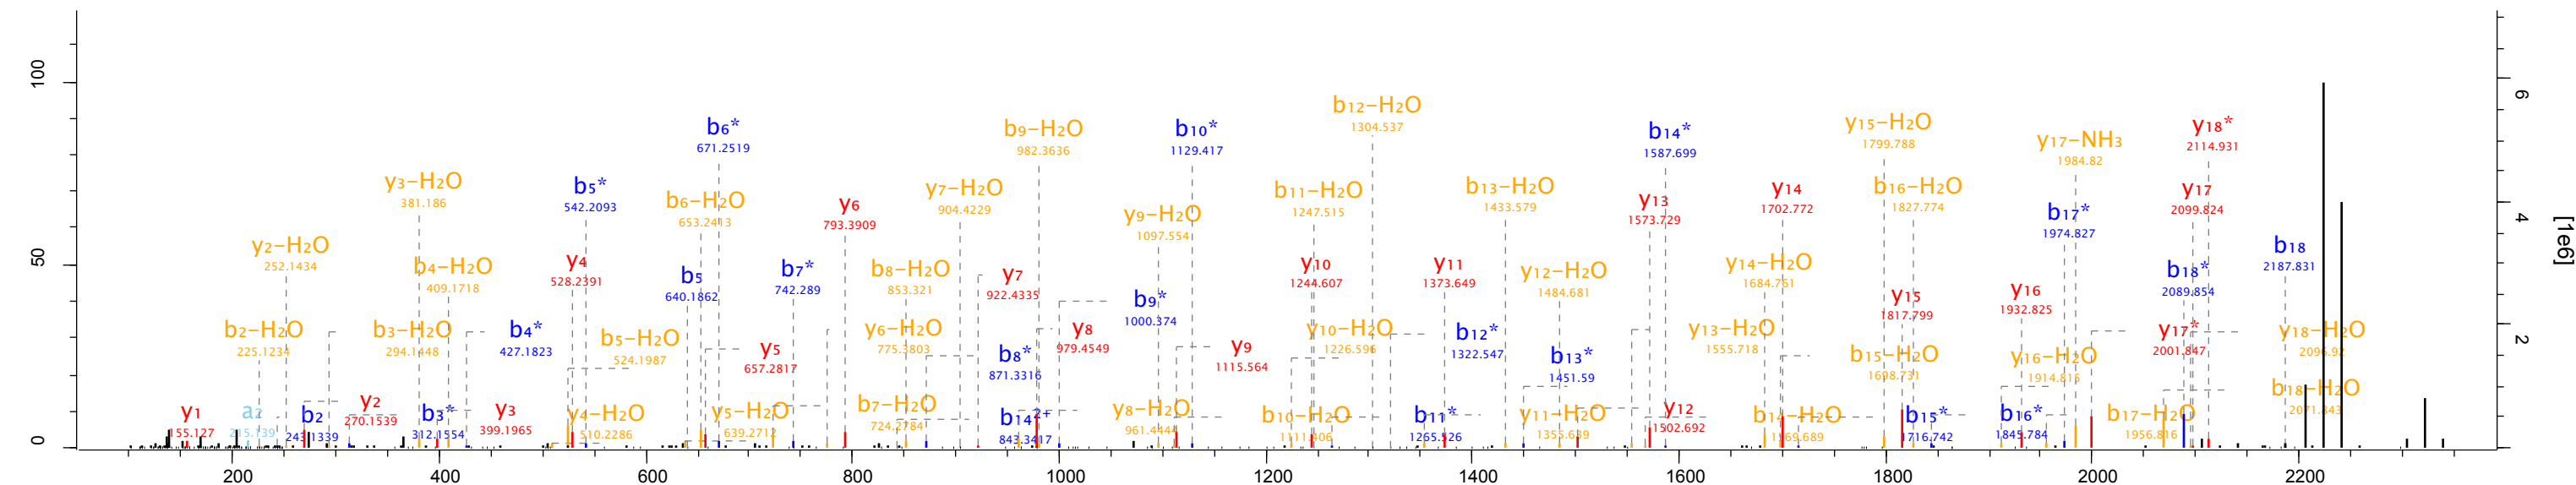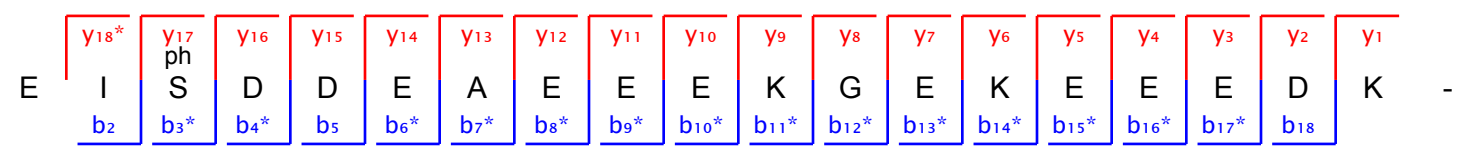

Raw file 20171215\_MaS\_33SR\_LMH\_phospho\_06 Scan 4153 Method FTMS; HCD Score 80.6 m/z 725.9 Gene names NUP214

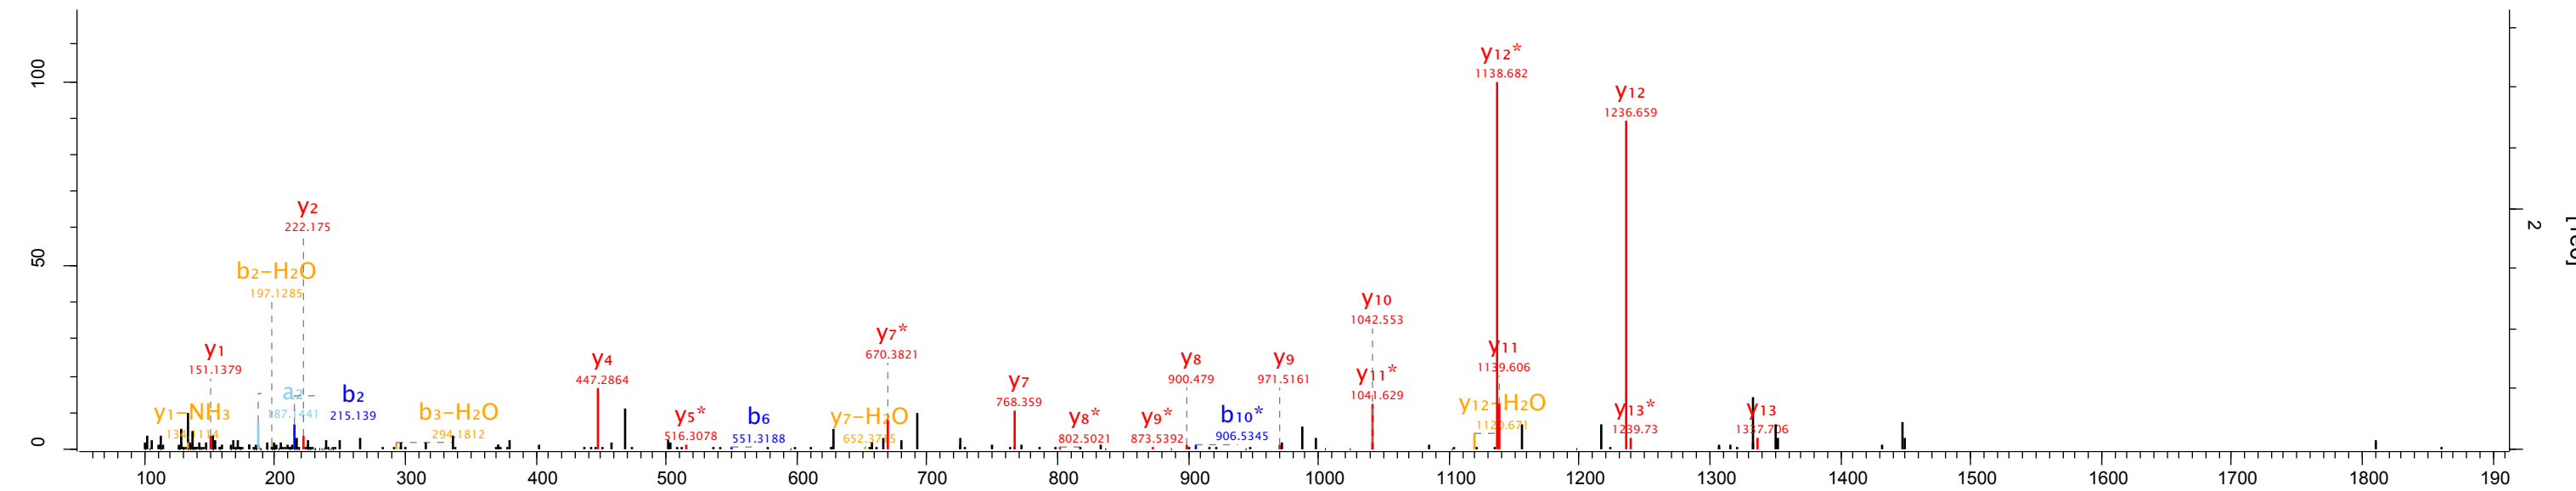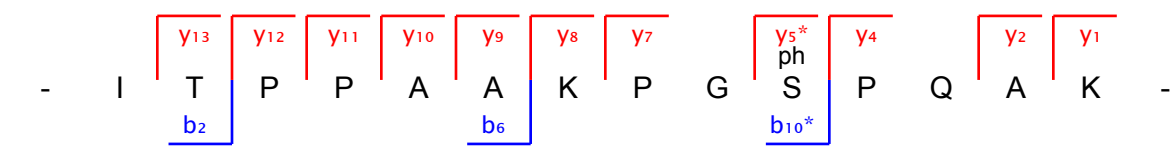

Raw file 20171215\_MaS\_33SR\_LMH\_phospho\_06 Scan 4573 Method FTMS; HCD Score 116.05 m/z 480.21 Gene names FMNL2

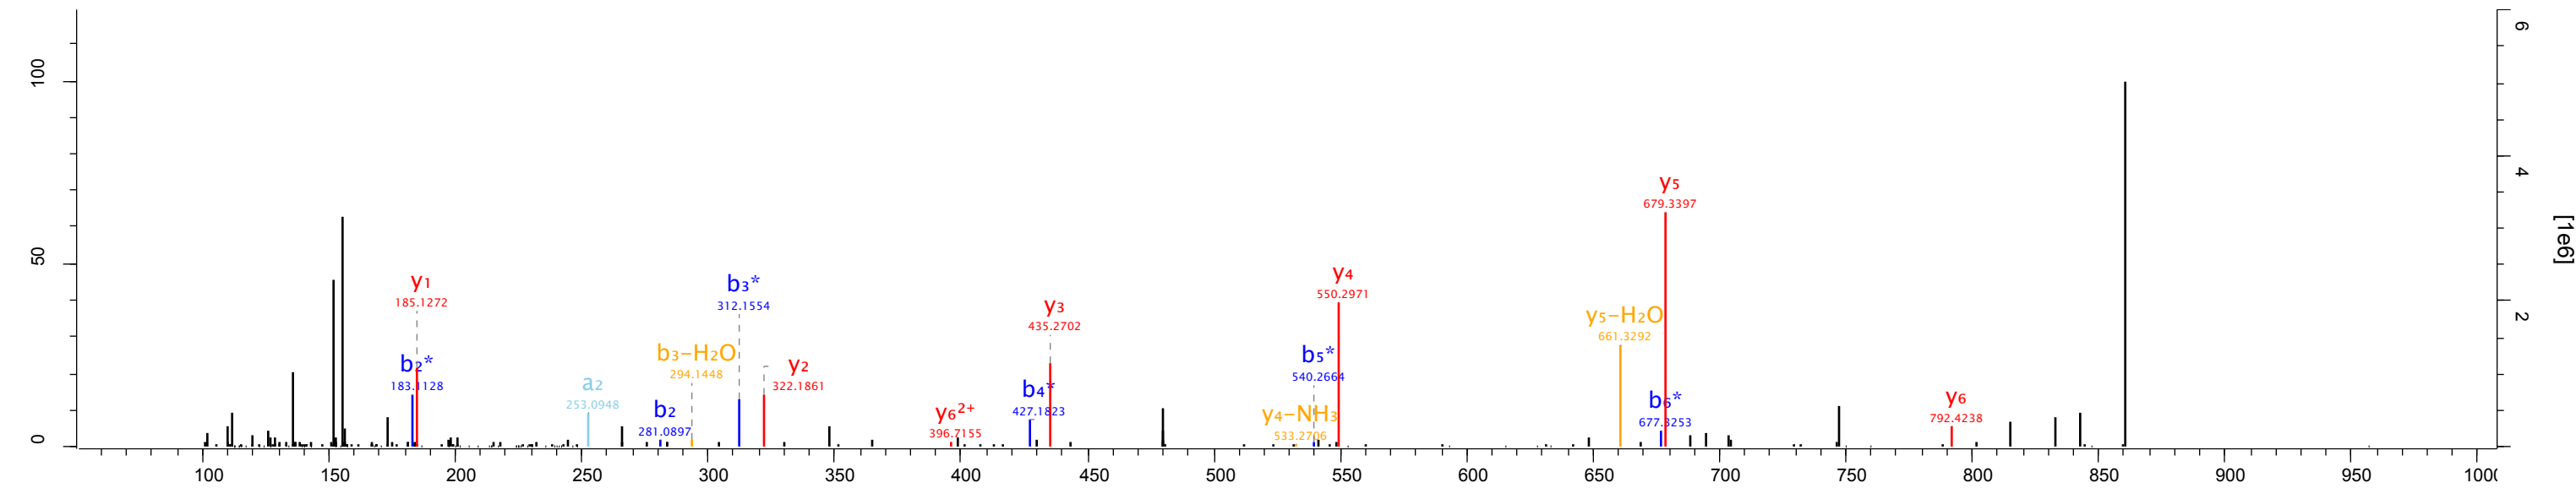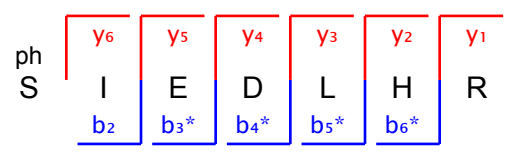



Raw file 20171215\_MaS\_33SR\_LMH\_phospho\_06 Scan 4613 Method FTMS; HCD Score 81.92 m/z 368.86 Gene names NFKB2

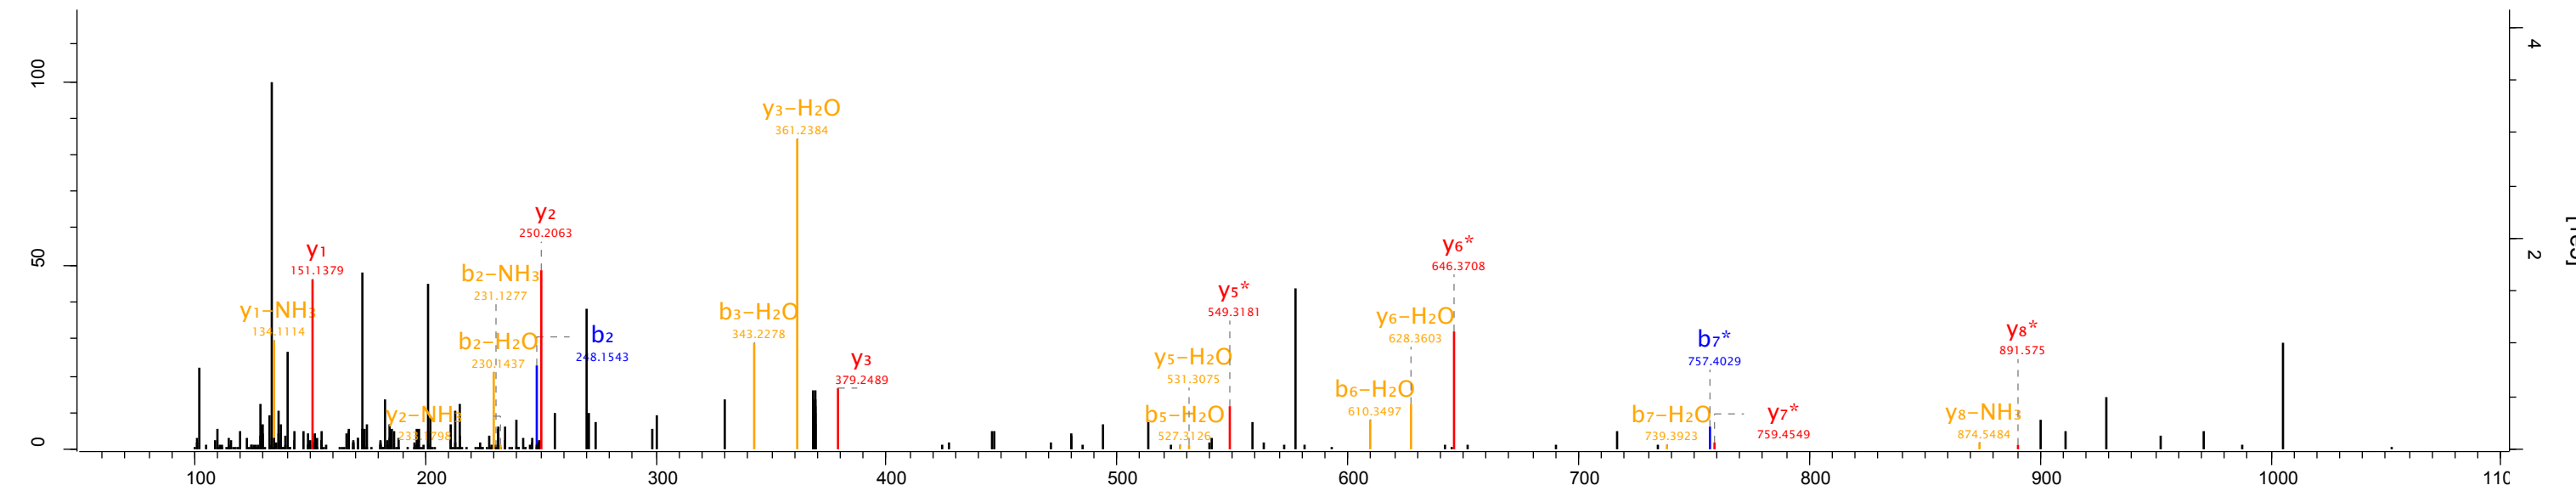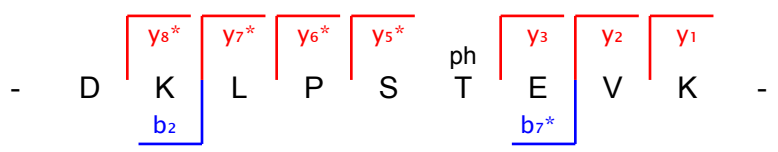

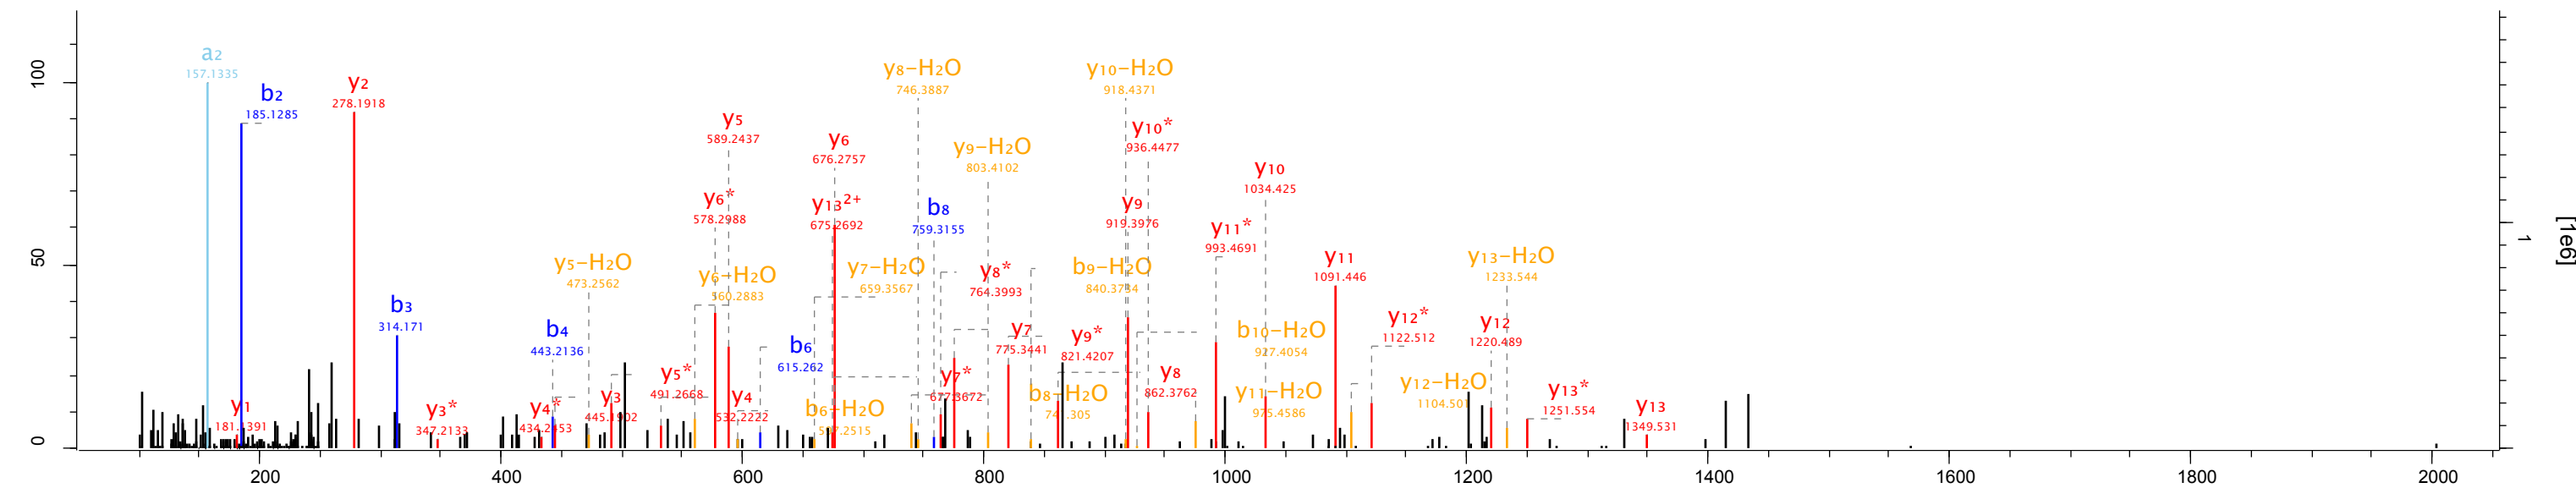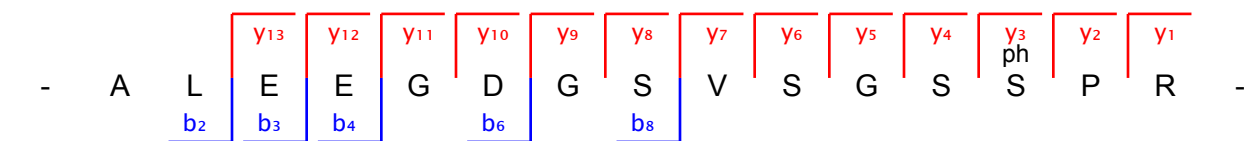

Raw file 20171215\_MaS\_33SR\_LMH\_phospho\_06 Scan 4783 Method FTMS; HCD Score 145.54 m/z 688.81 Gene names PHRF1

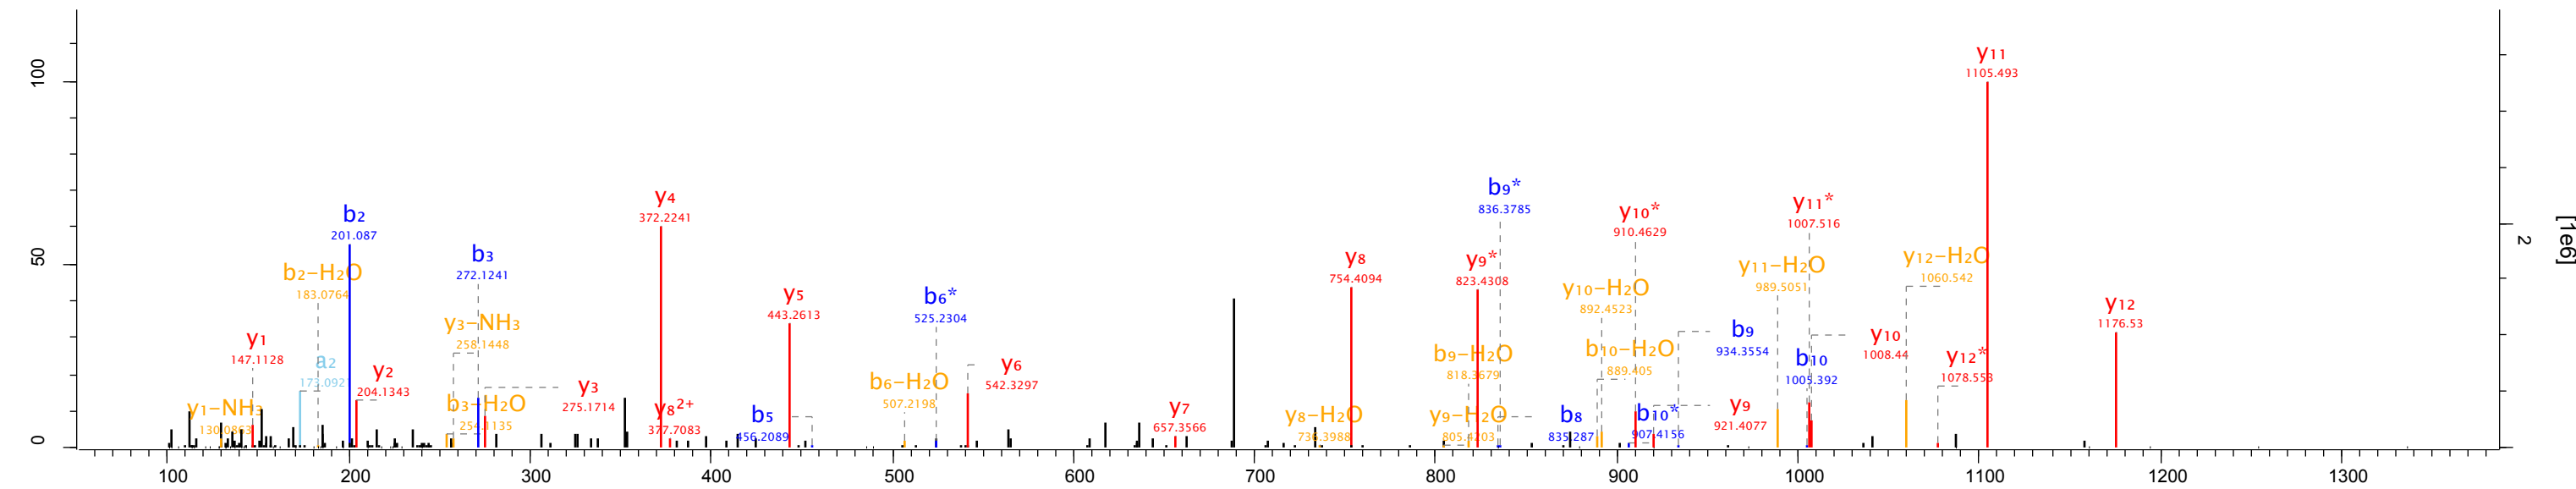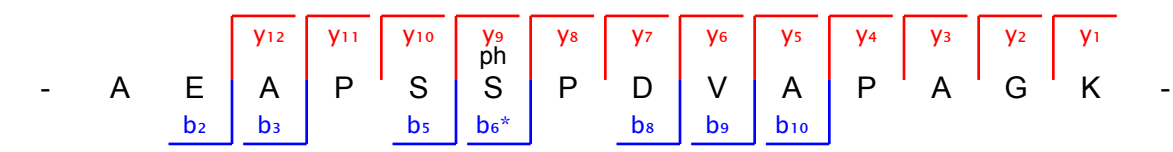

Raw file 20171215\_MaS\_33SR\_LMH\_phospho\_06 Scan 5073 Method FTMS; HCD Score 151.41 m/z 735.85 Gene names MCC

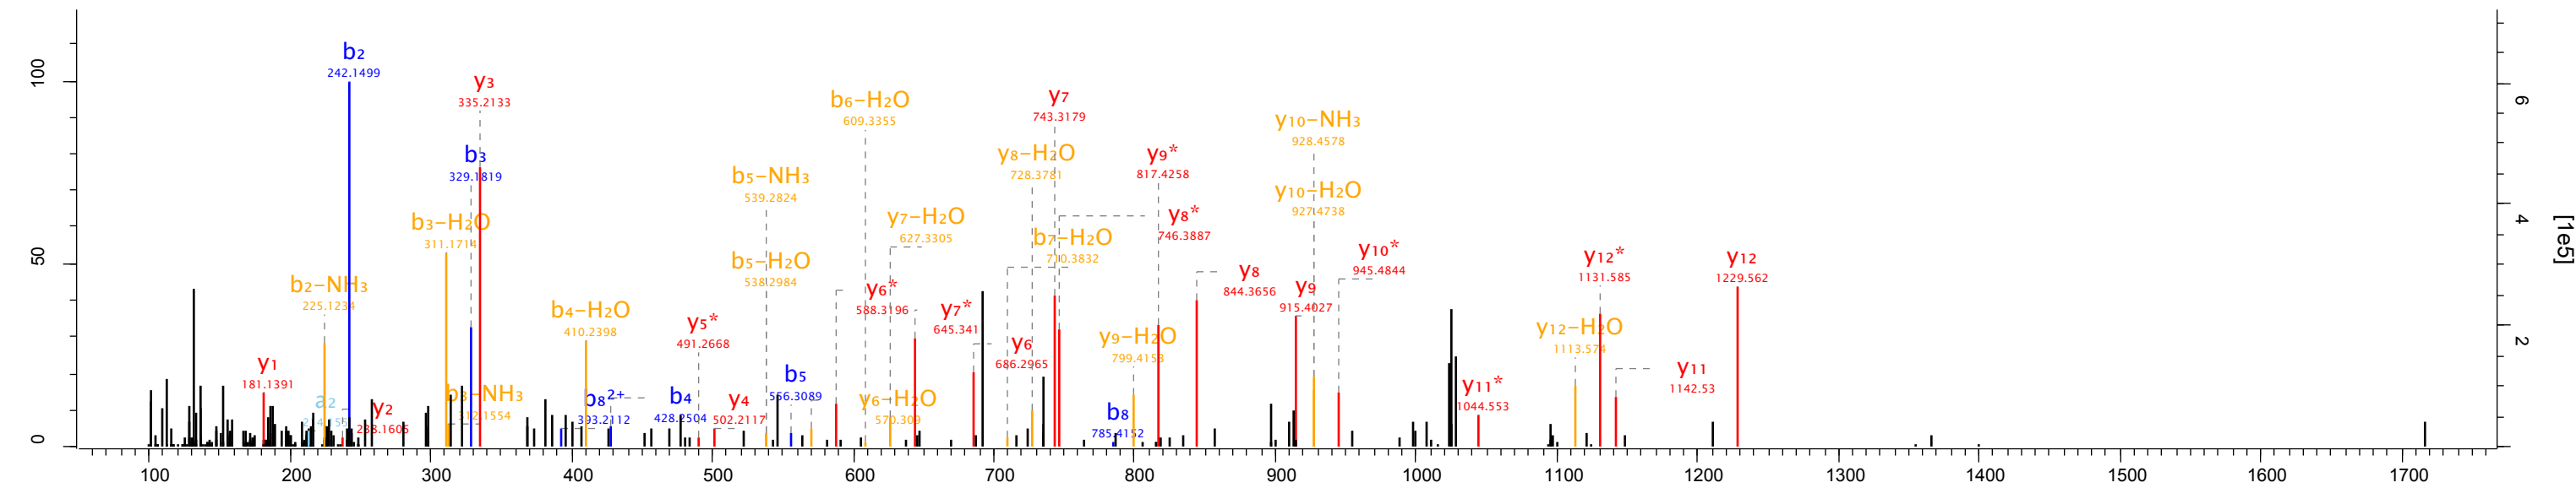

- L Q S V Q A T G P S S P G R -  
 b<sub>2</sub> b<sub>3</sub> b<sub>4</sub> b<sub>5</sub> b<sub>8</sub>  
 y<sub>12</sub> y<sub>11</sub> y<sub>10</sub>\* y<sub>9</sub> y<sub>8</sub> y<sub>7</sub> y<sub>6</sub> y<sub>5</sub>\* y<sub>4</sub> y<sub>3</sub> y<sub>2</sub> y<sub>1</sub>

Raw file 20171215\_MaS\_33SR\_LMH\_phospho\_06 Scan 5833 Method FTMS; HCD Score 136.3 m/z 629.79 Gene names NKTR

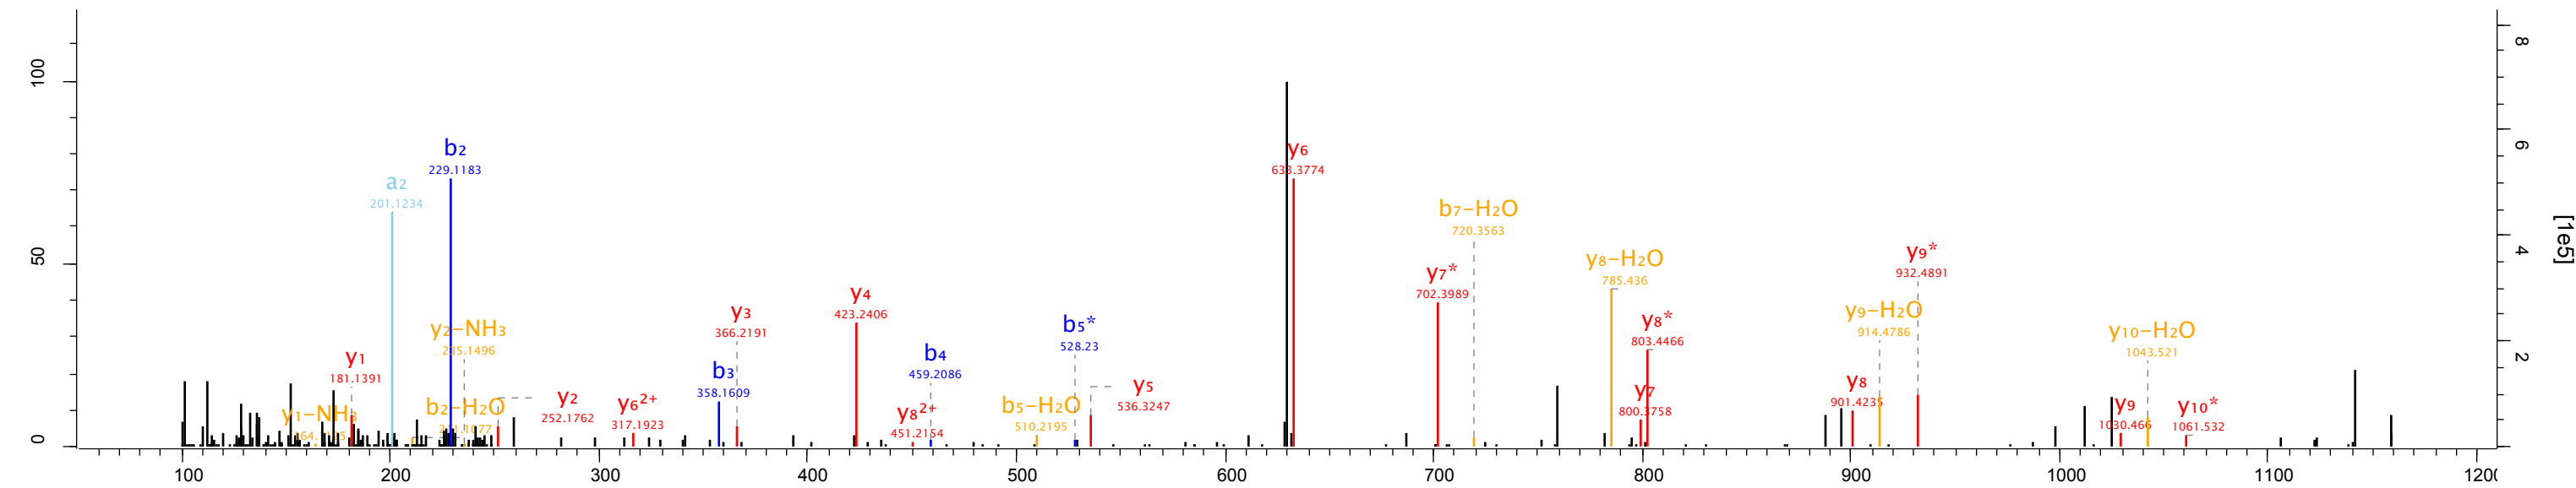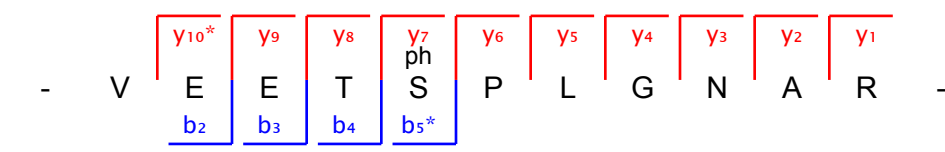

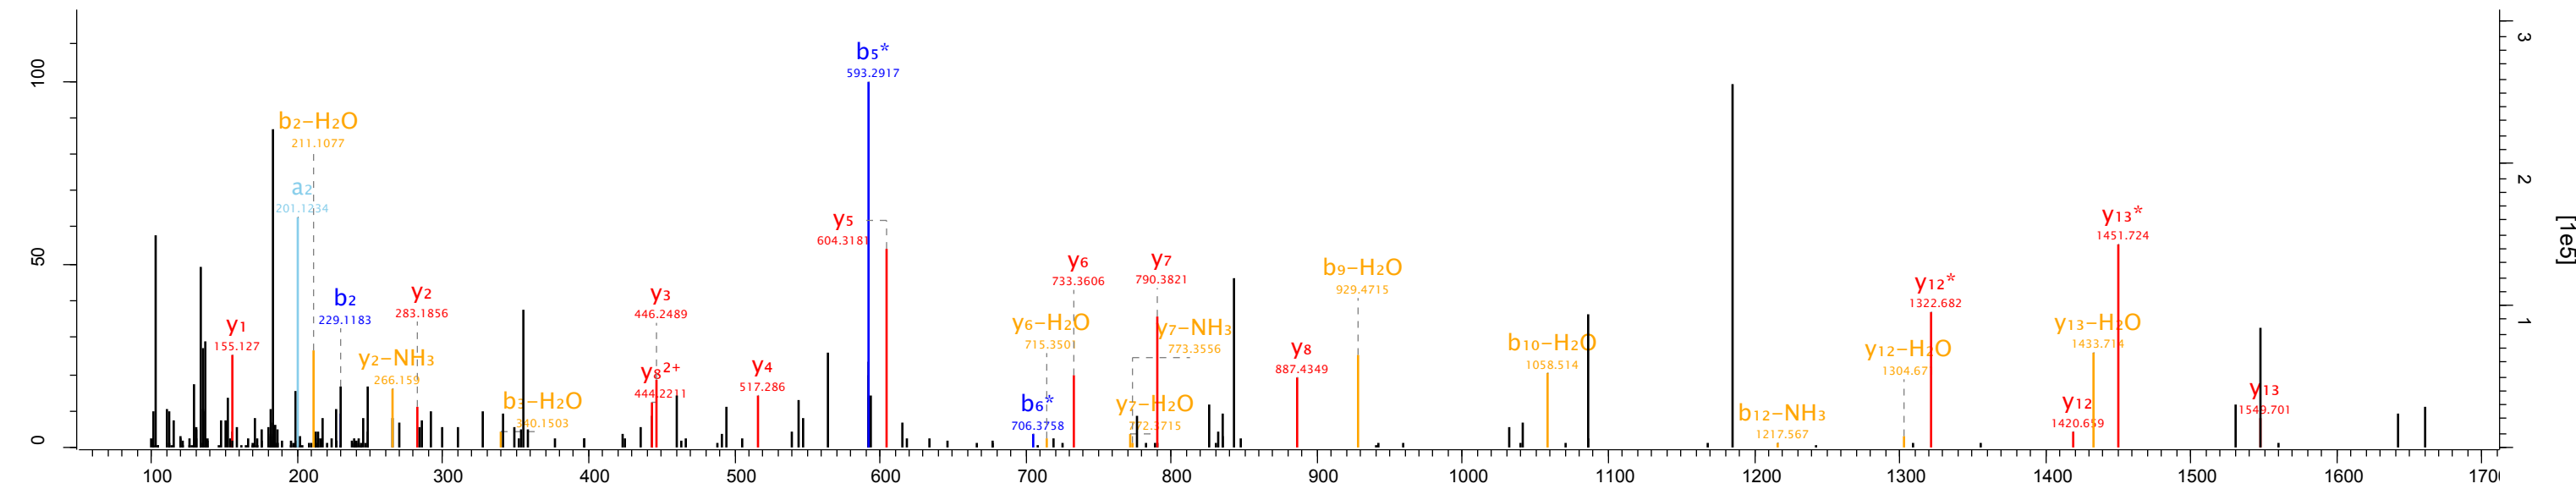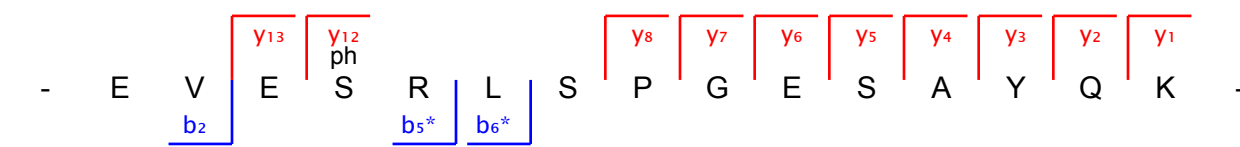

Raw file 20171215\_MaS\_33SR\_LMH\_phospho\_06 Scan 6193 Method FTMS; HCD Score 90.21 m/z 895.4 Gene names SOX5

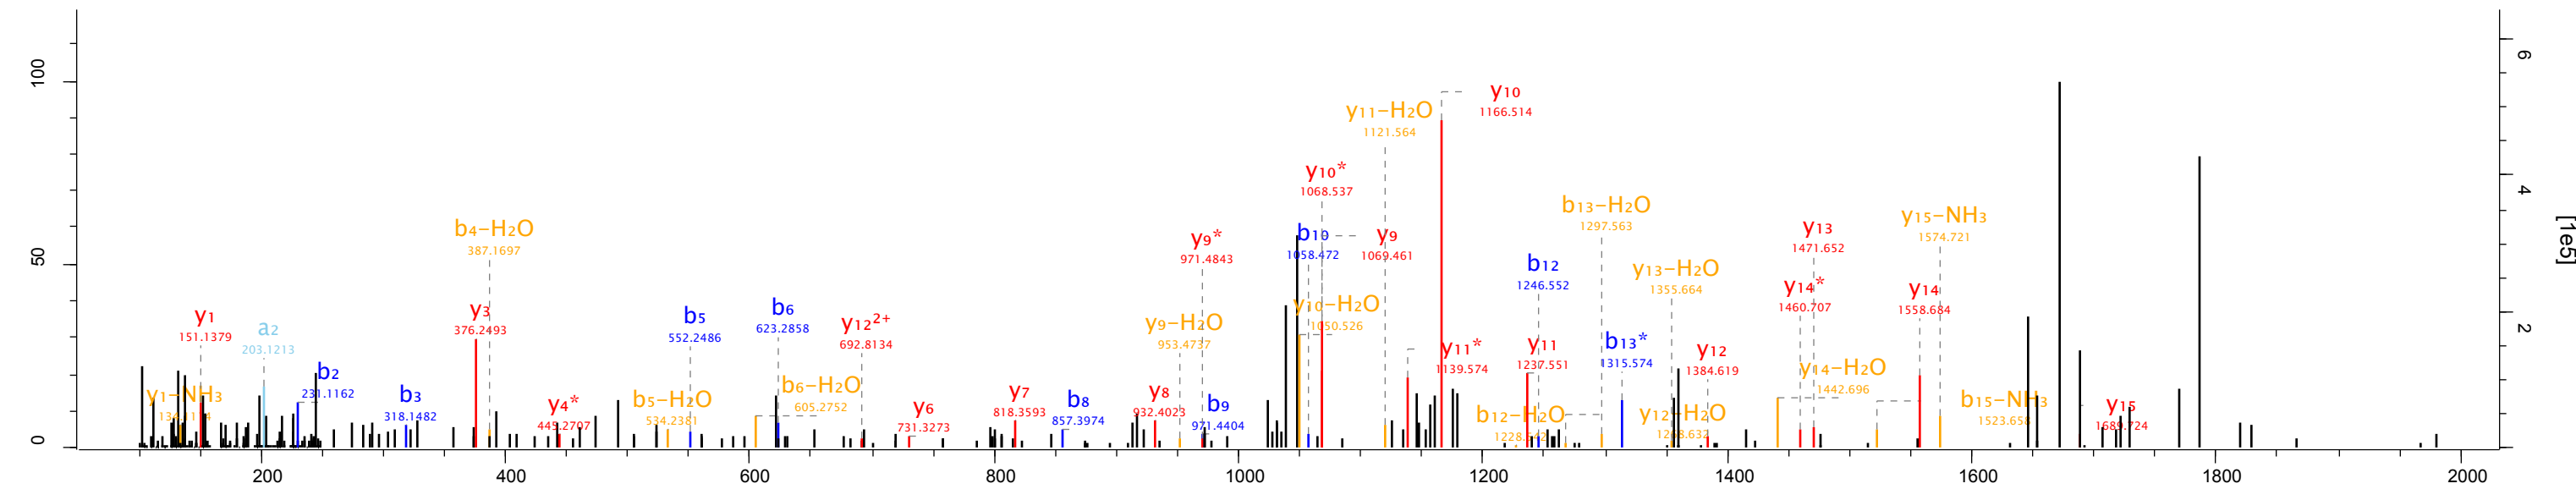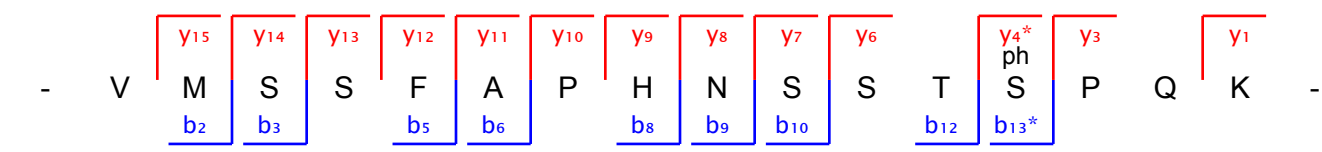

Raw file 20171215\_MaS\_33SR\_LMH\_phospho\_06 Scan 6273 Method FTMS; HCD Score 169.37 m/z 682.28 Gene names ZNF217

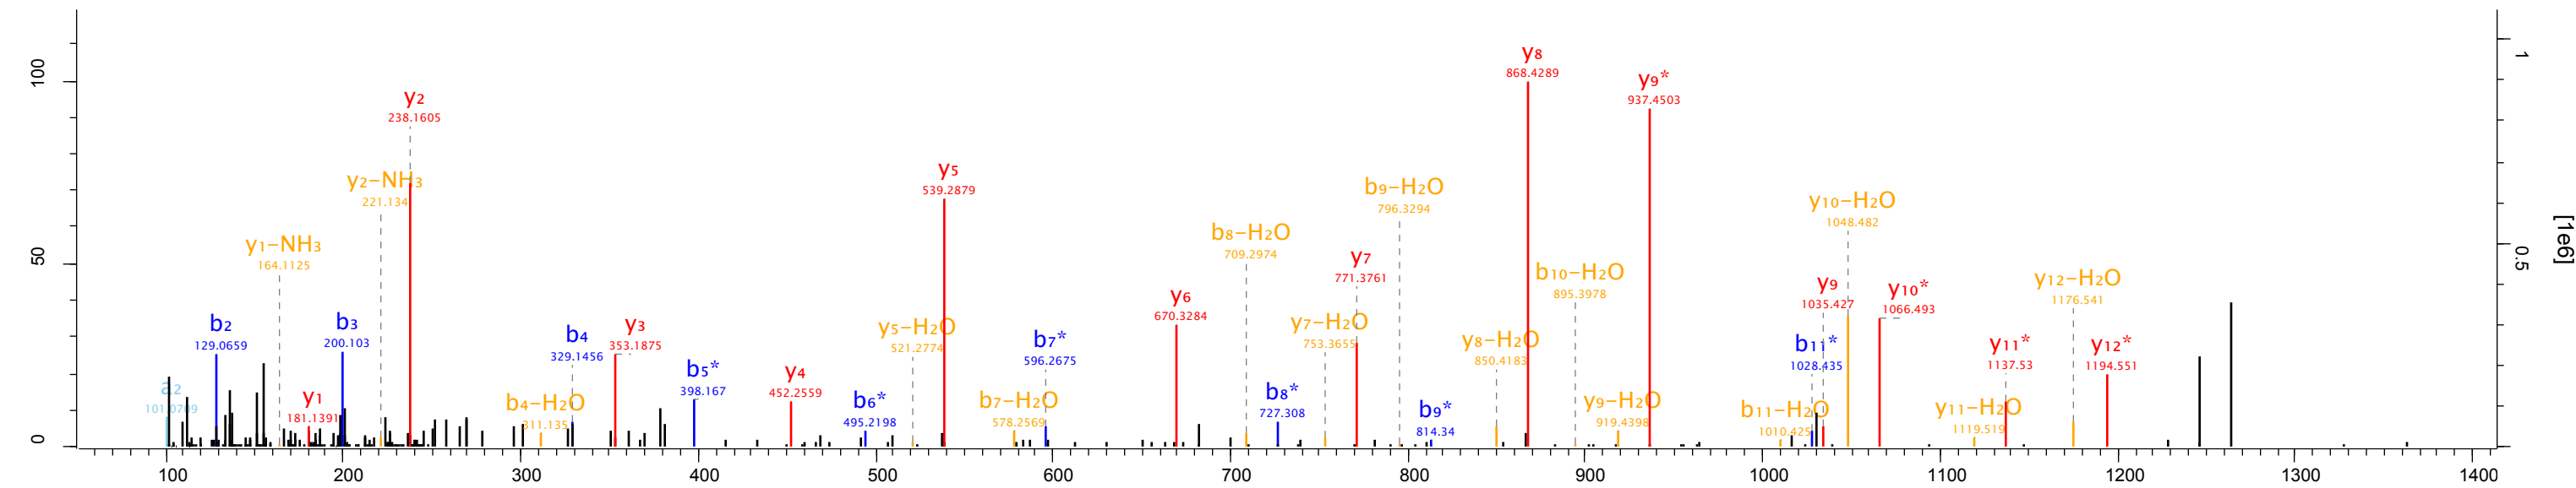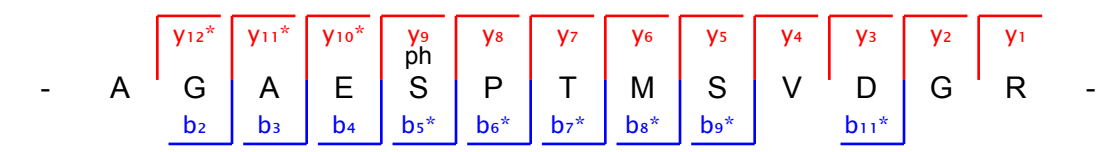



Raw file 20171215\_MaS\_33SR\_LMH\_phospho\_06 Scan 6653 Method FTMS; HCD Score 75.85 m/z 549.77 Gene names CLASRP

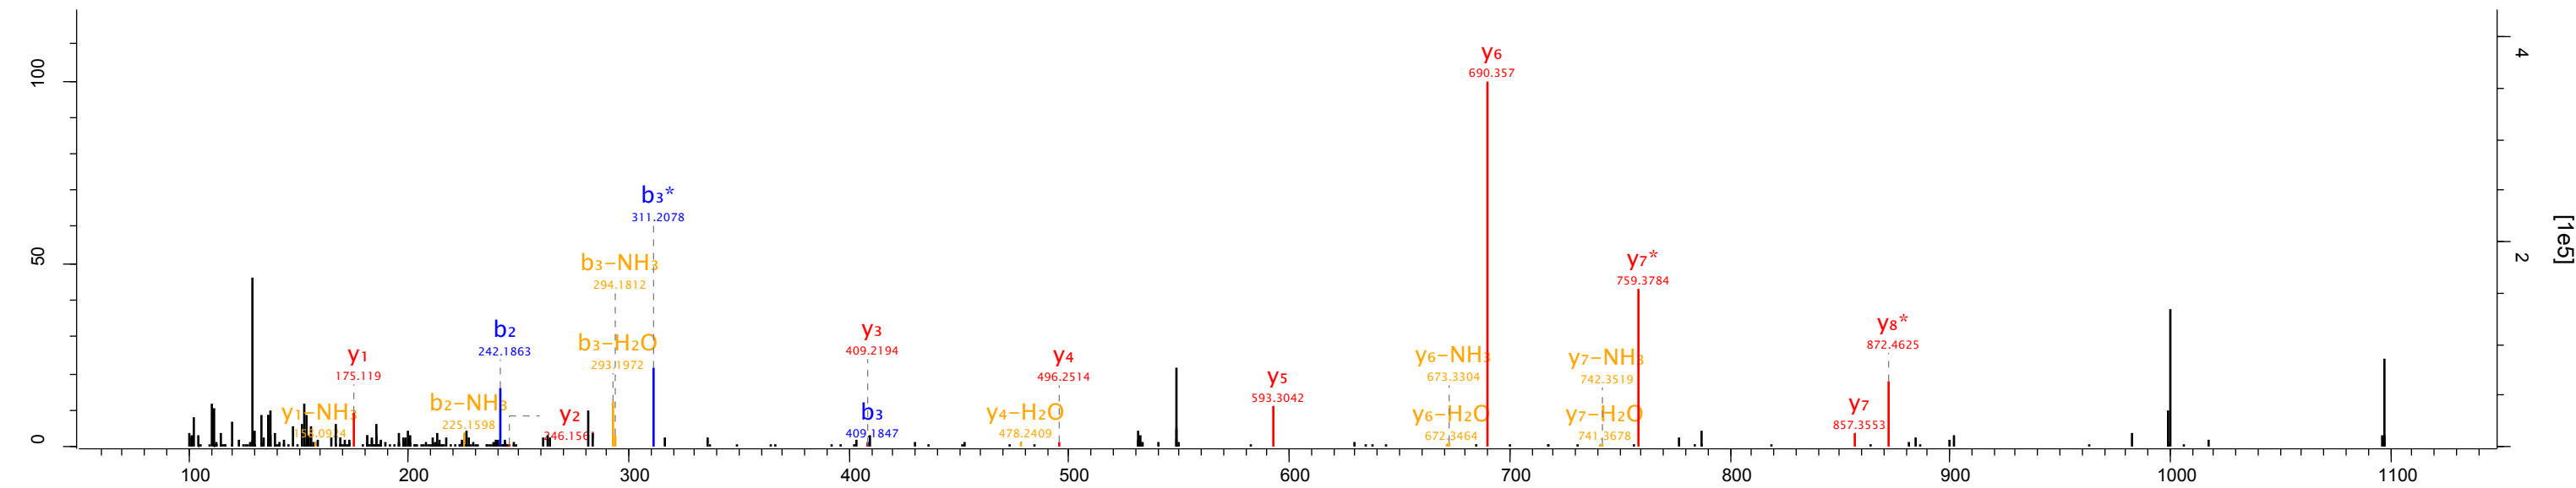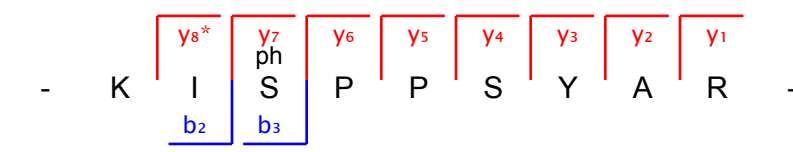

Raw file 20171215\_MaS\_33SR\_LMH\_phospho\_06 Scan 6853 Method FTMS; HCD Score 120.32 m/z 651.3 Gene names SPAG9

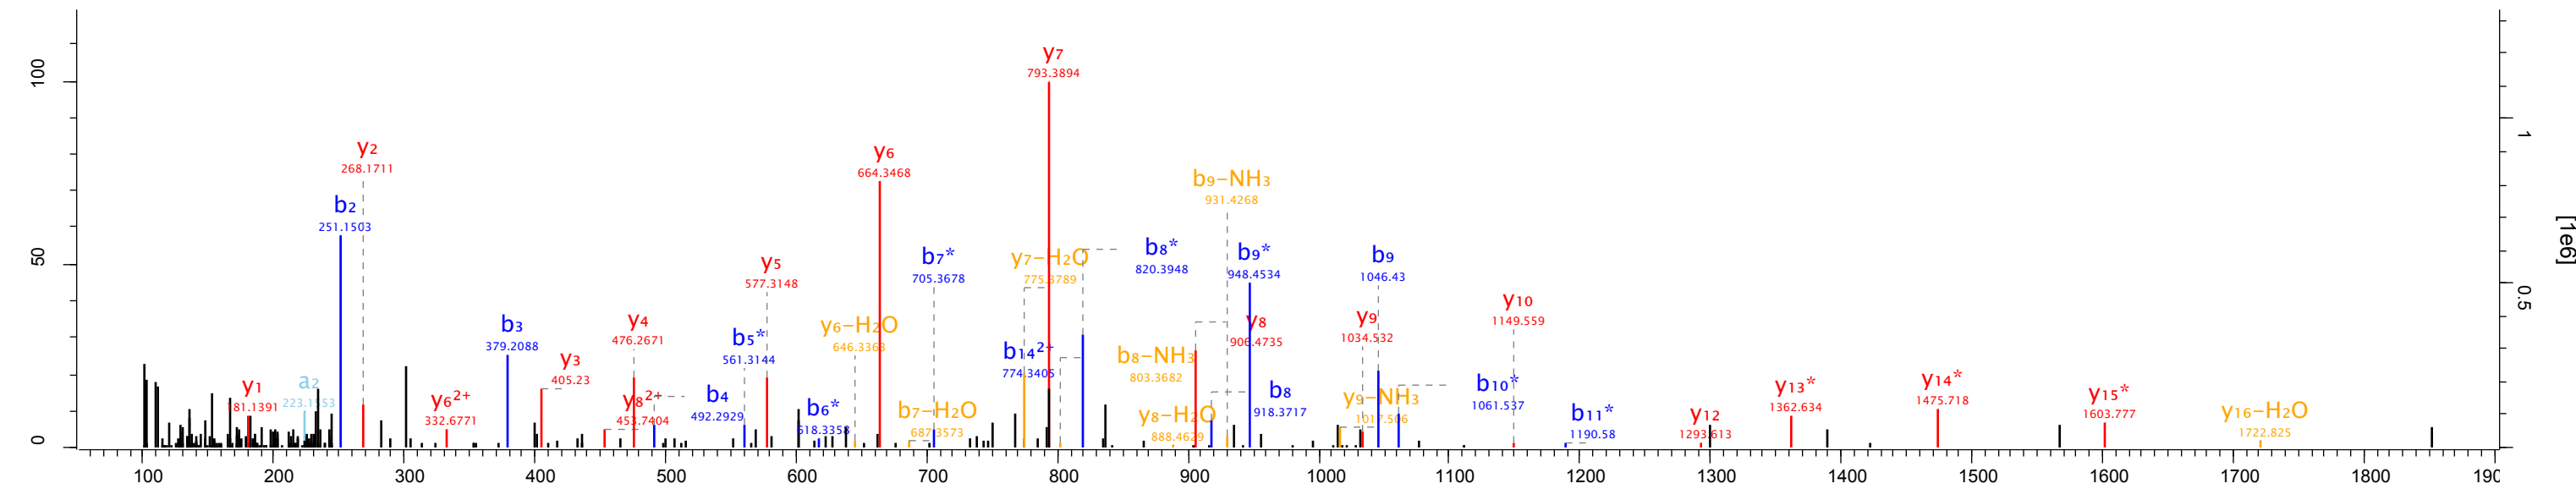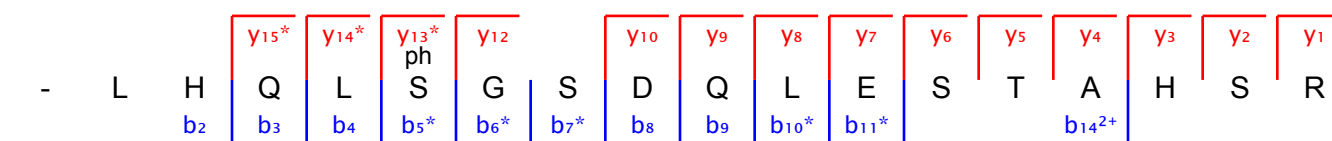

Raw file 20171215\_MaS\_33SR\_LMH\_phospho\_06 Scan 7313 Method FTMS; HCD Score 130.77 m/z 544.82 Gene names RPGR

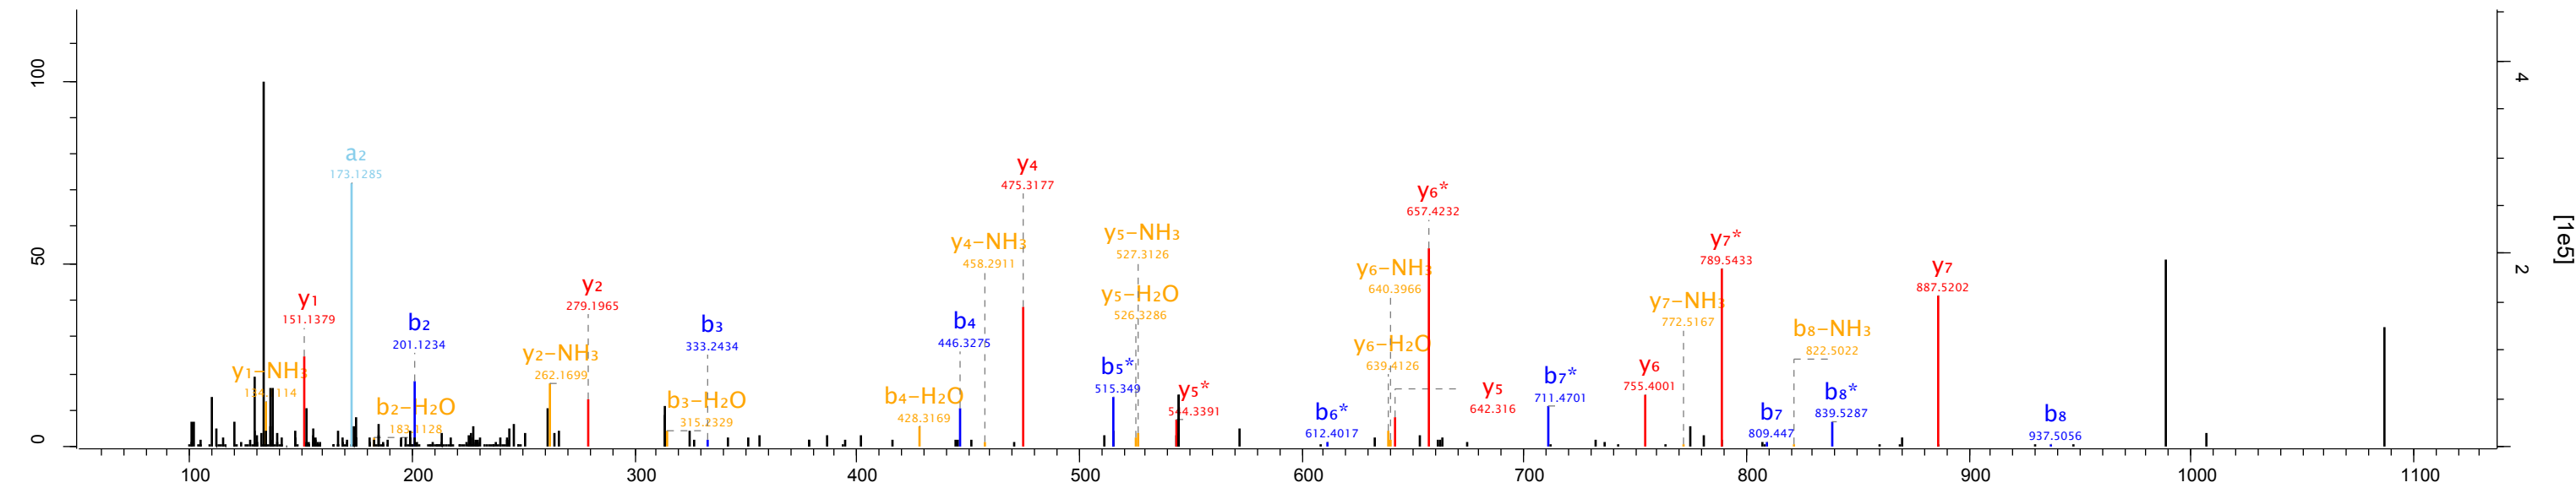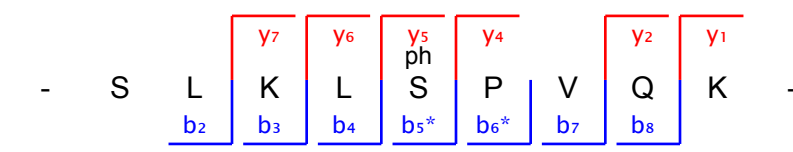

Raw file 20171215\_MaS\_33SR\_LMH\_phospho\_06 Scan 7693 Method FTMS; HCD Score 104.38 m/z 698.66 Gene names DSN1

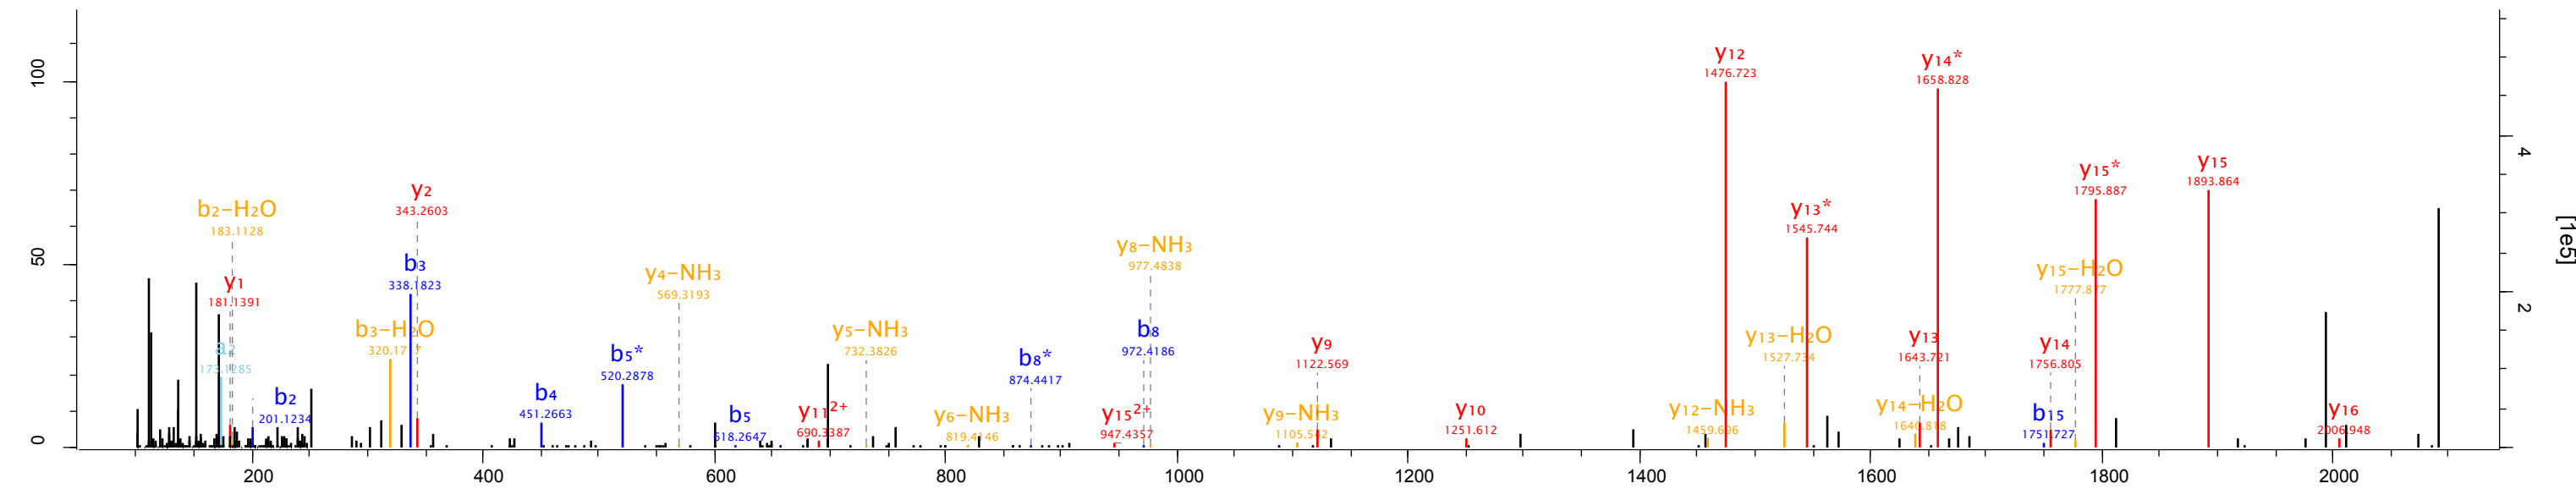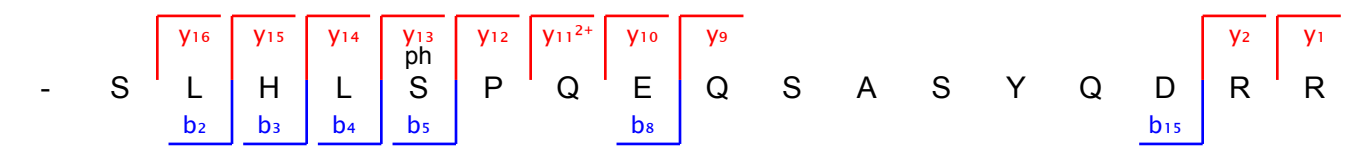

Raw file 20171215\_MaS\_33SR\_LMH\_phospho\_06 Scan 8663 Method FTMS; HCD Score 252.29 m/z 909.41 Gene names SRRM2

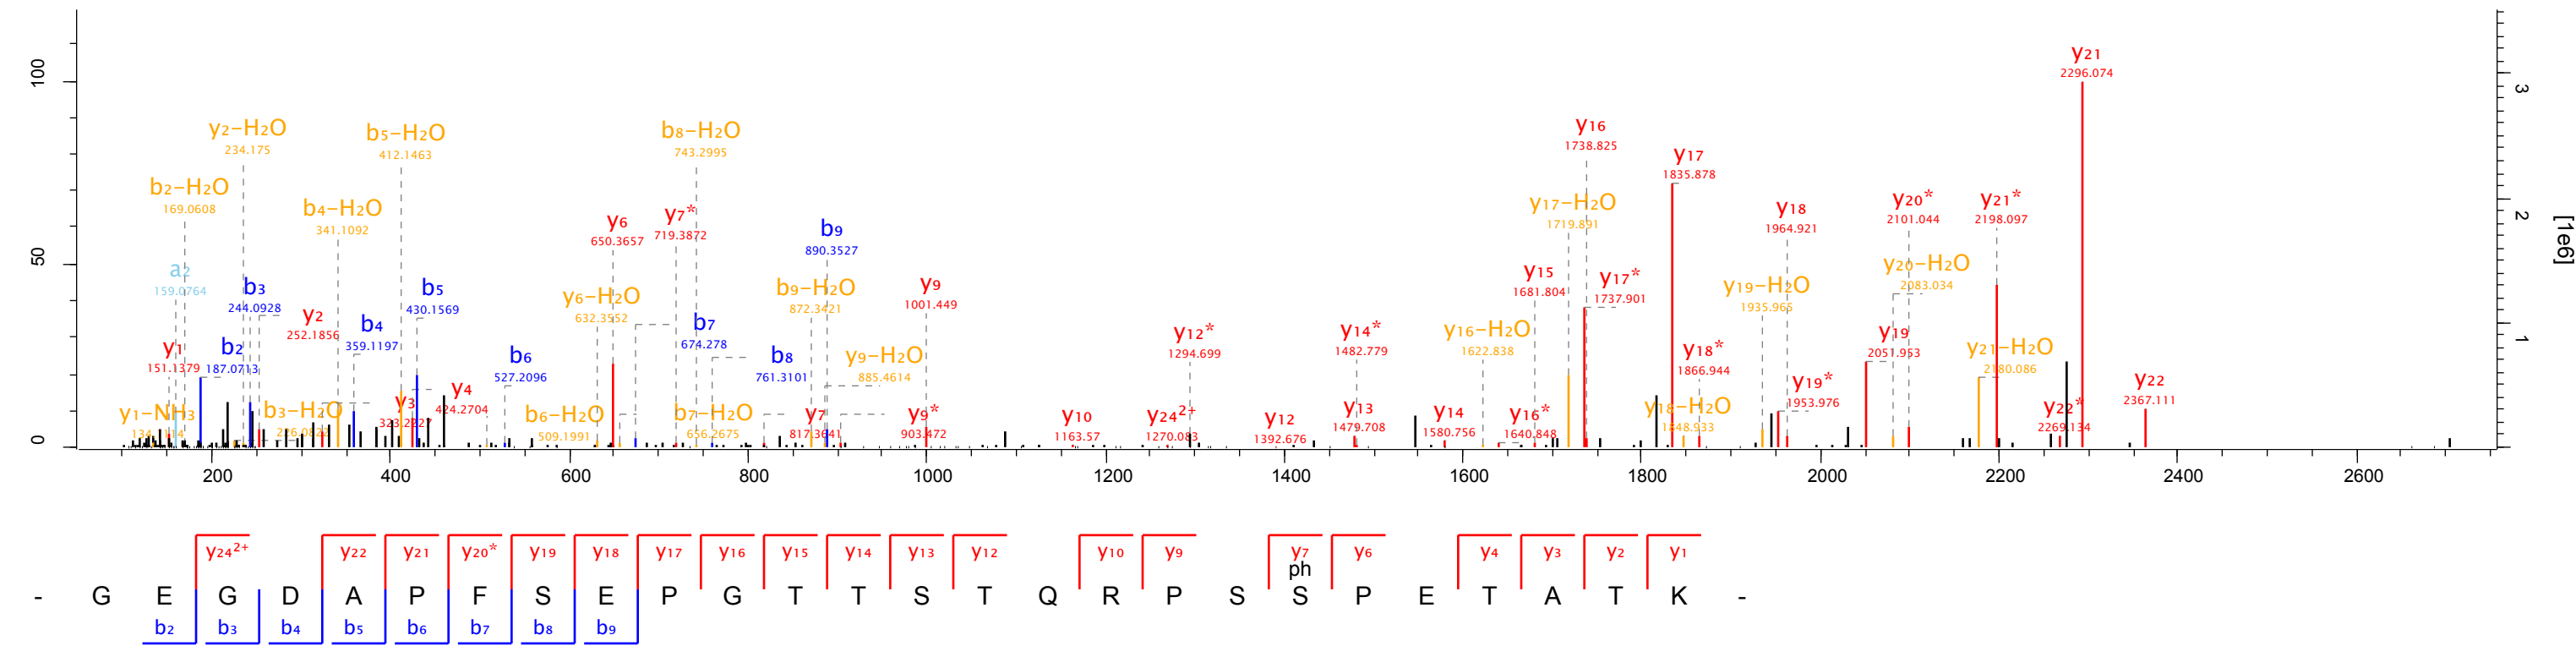

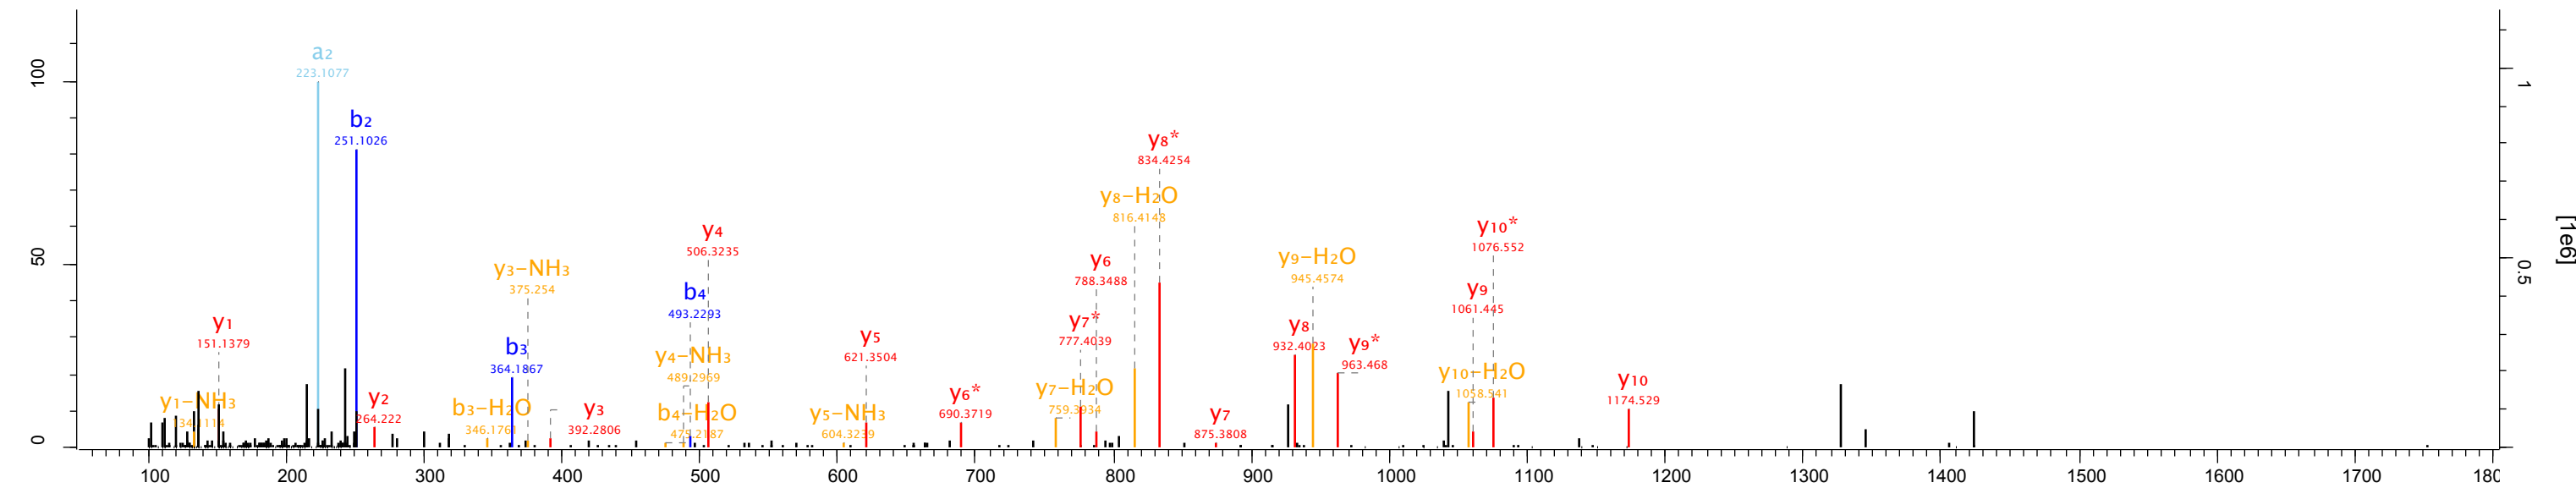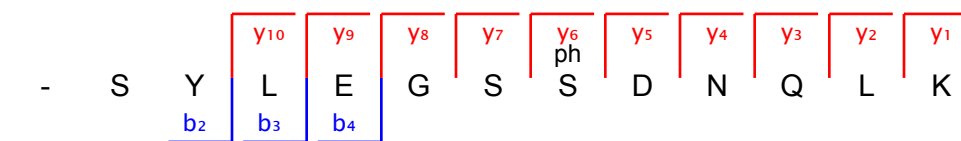

Raw file 20171215\_MaS\_33SR\_LMH\_phospho\_06 Scan 8793 Method FTMS; HCD Score 104.22 m/z 469.73 Gene names BOD1L1

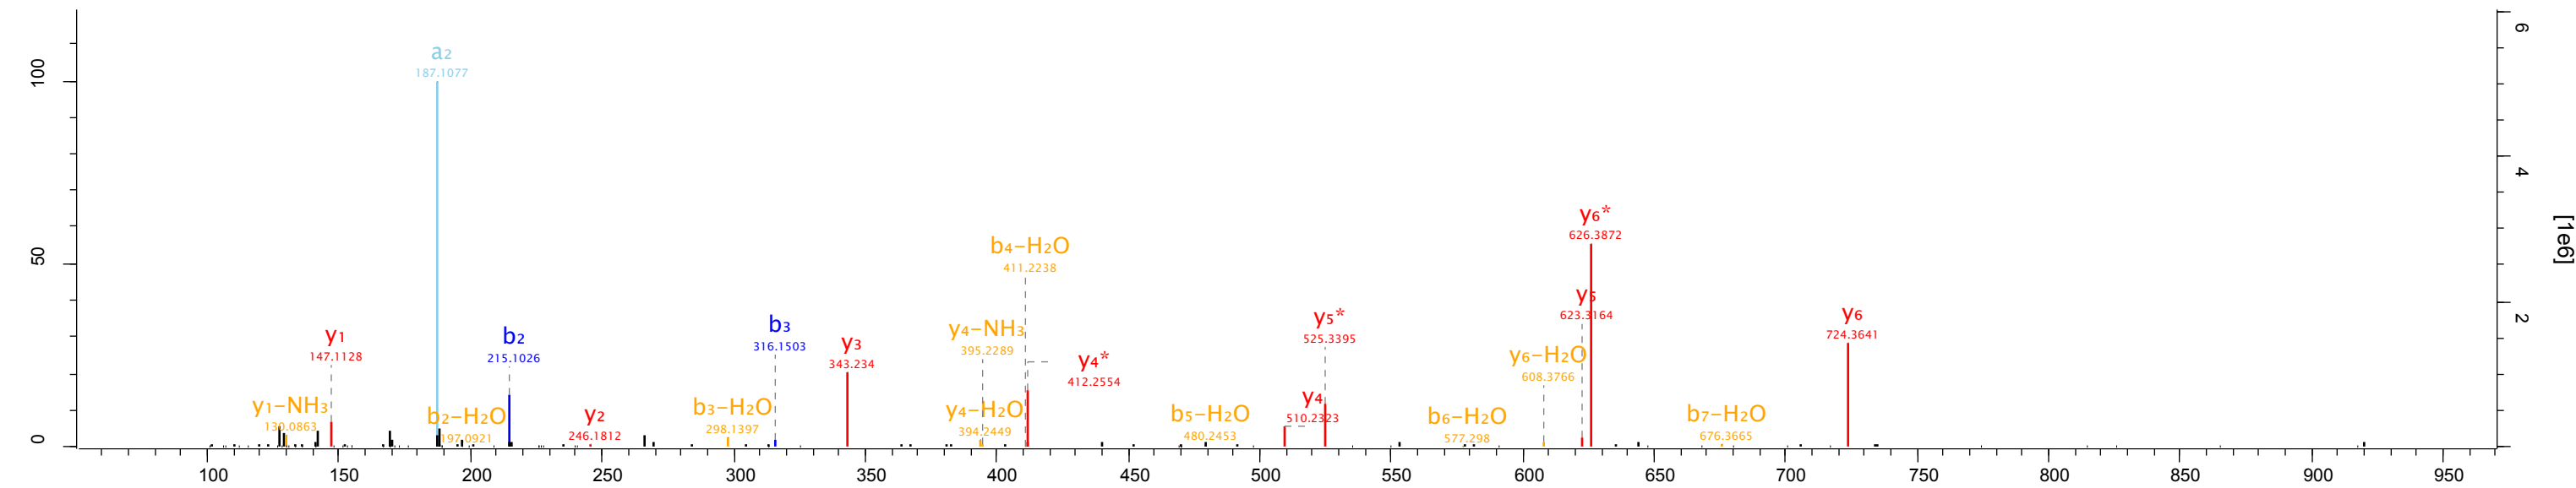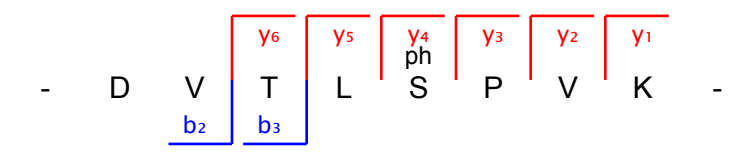

Raw file

20171215\_MaS\_33SR\_LMH\_phospho\_06

| Scan | Method    | Score  | m/z    | Gene names |
|------|-----------|--------|--------|------------|
| 8873 | FTMS; HCD | 135.94 | 526.81 | PTRF       |

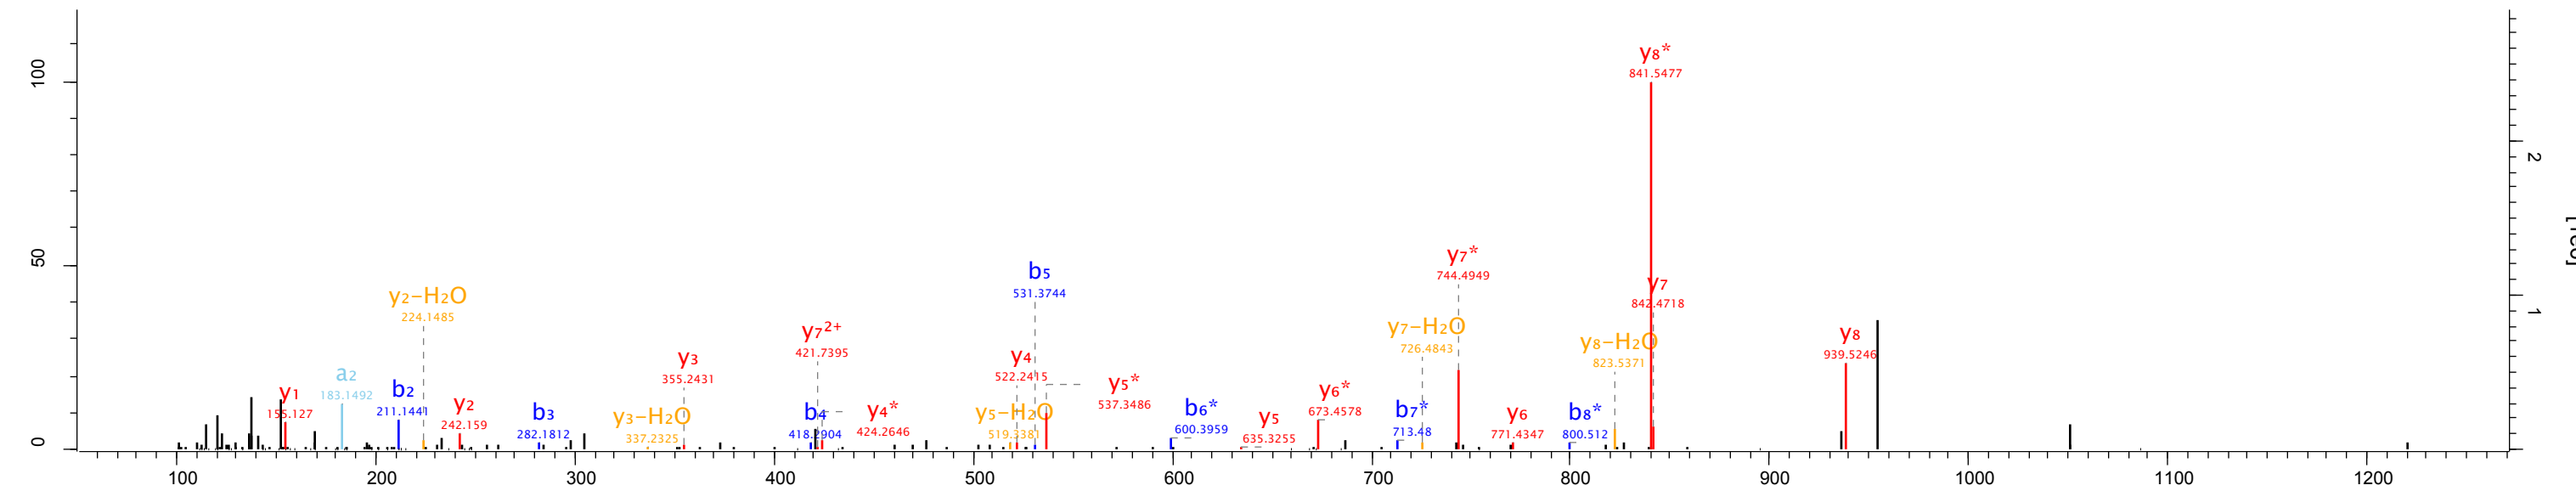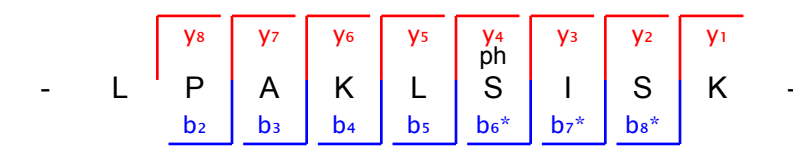



Raw file 20171215\_MaS\_33SR\_LMH\_phospho\_06 Scan 9113 Method FTMS; HCD Score 167.29 m/z 717.35 Gene names SRRM1

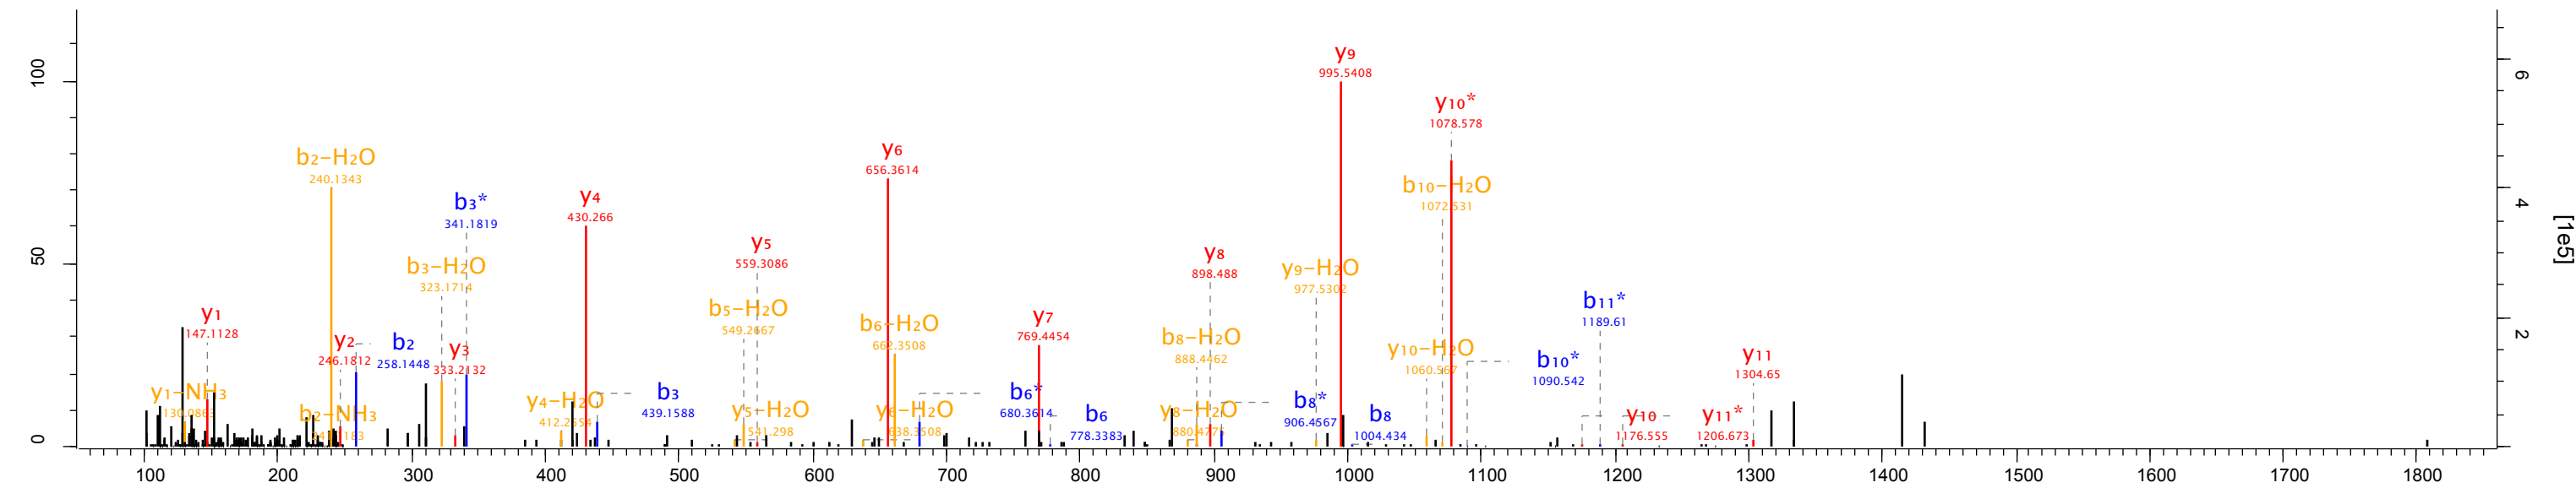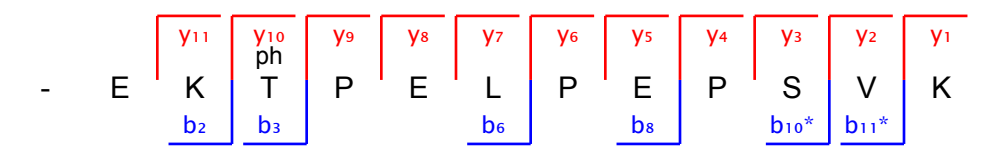

Raw file 20171215\_MaS\_33SR\_LMH\_phospho\_06 Scan 9293 Method FTMS; HCD Score 142.32 m/z 727.66 Gene names PGM3

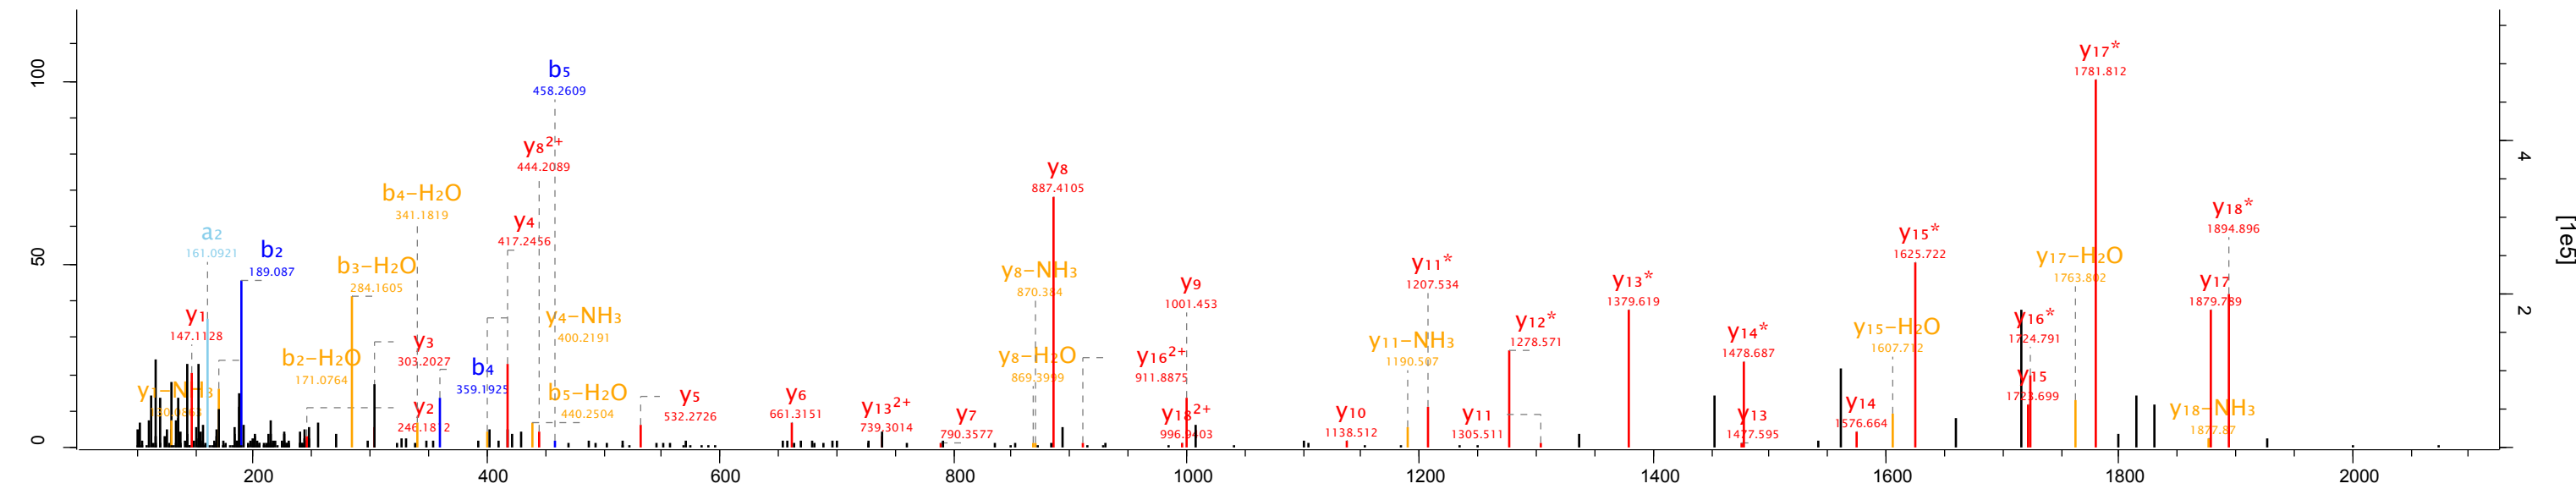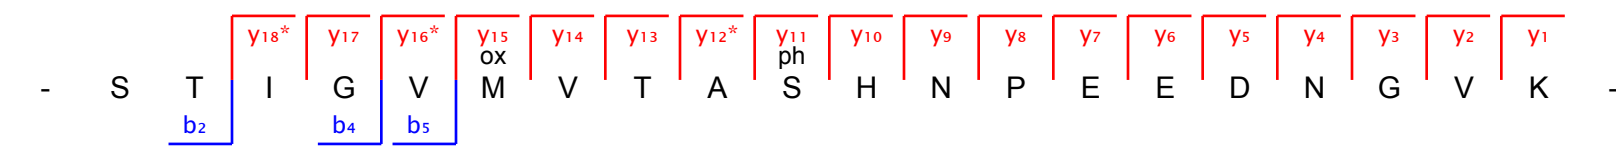

Raw file 20171215\_MaS\_33SR\_LMH\_phospho\_06 Scan 9313 Method FTMS; HCD Score 139.87 m/z 693.33 Gene names SVIL

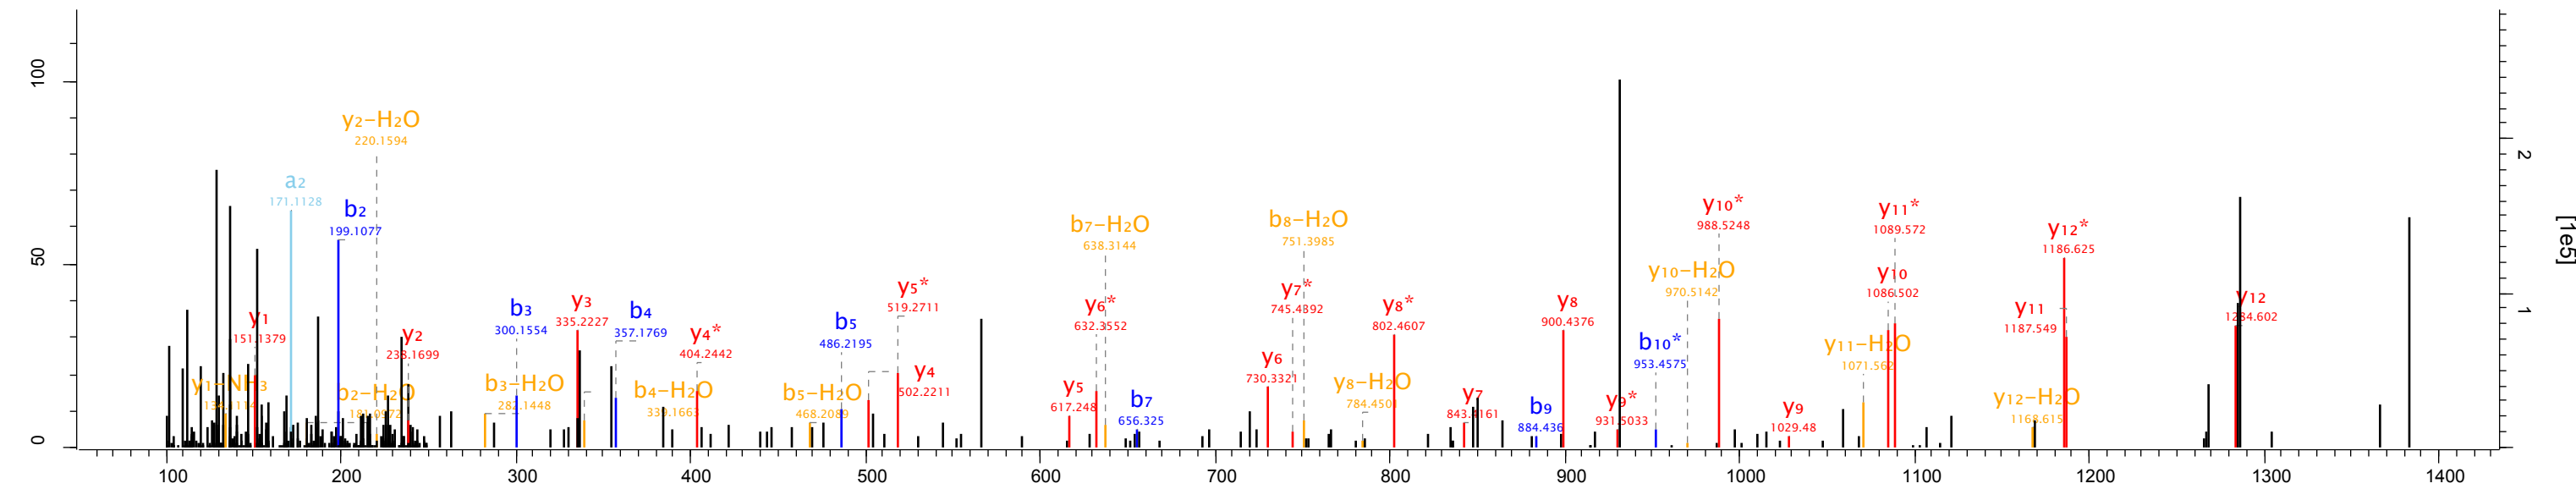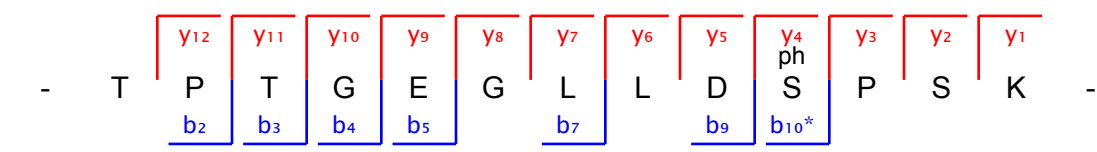

Raw file 20171215\_MaS\_33SR\_LMH\_phospho\_06 Scan 9713 Method FTMS; HCD Score 75.55 m/z 864.39

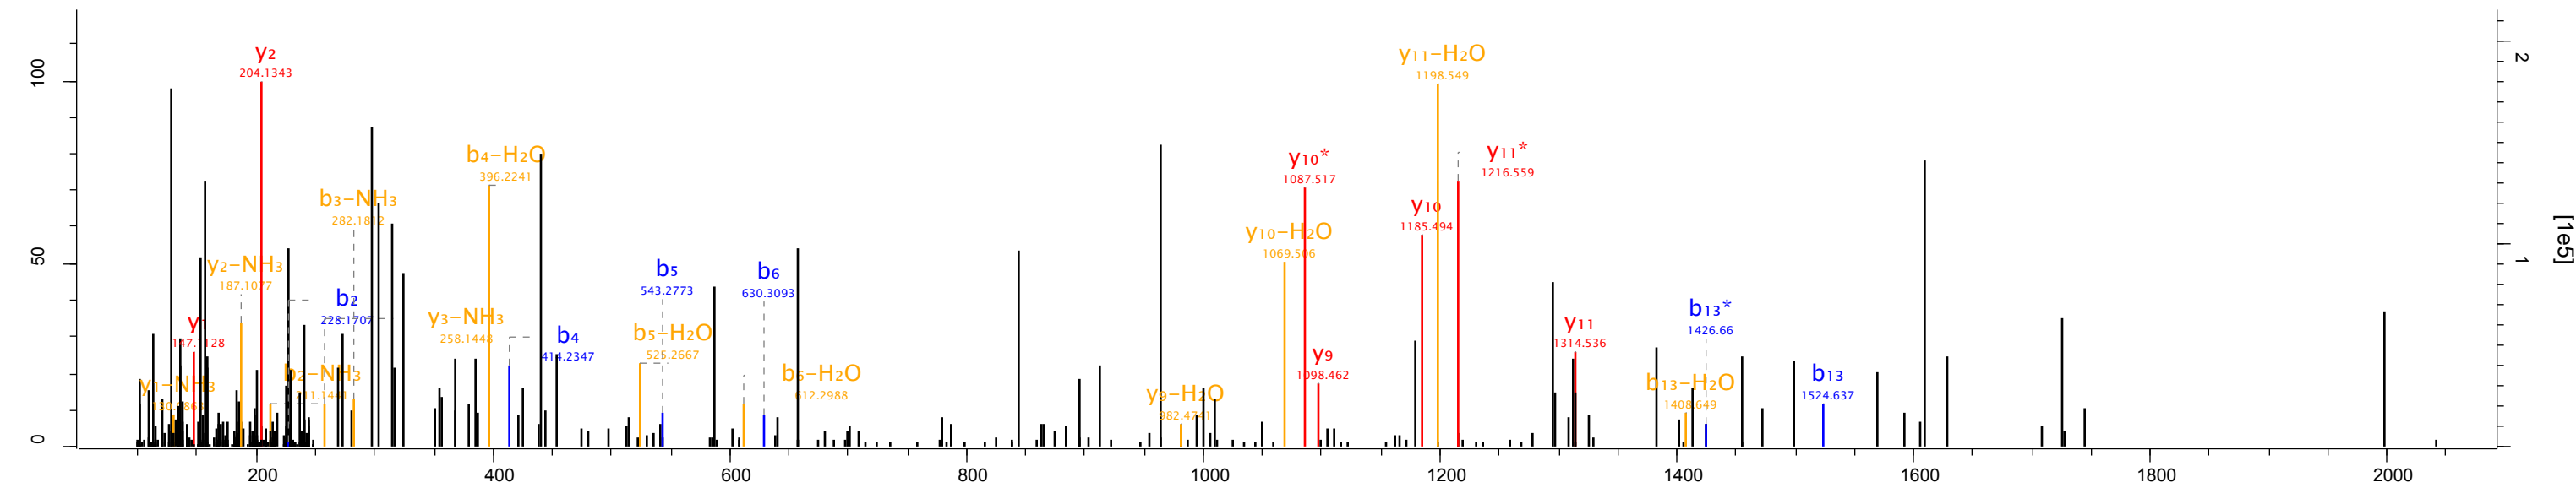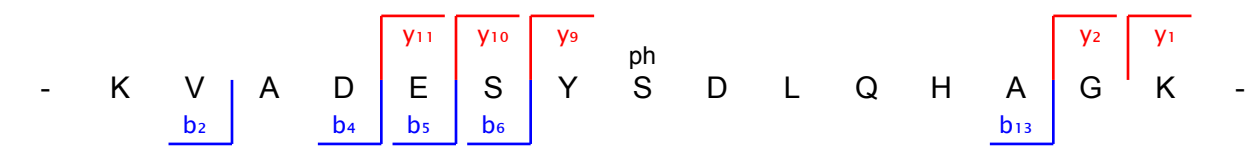

Raw file 20171215\_MaS\_33SR\_LMH\_phospho\_06 Scan 9723 Method FTMS; HCD Score 74.32 m/z 724.6 Gene names HELZ

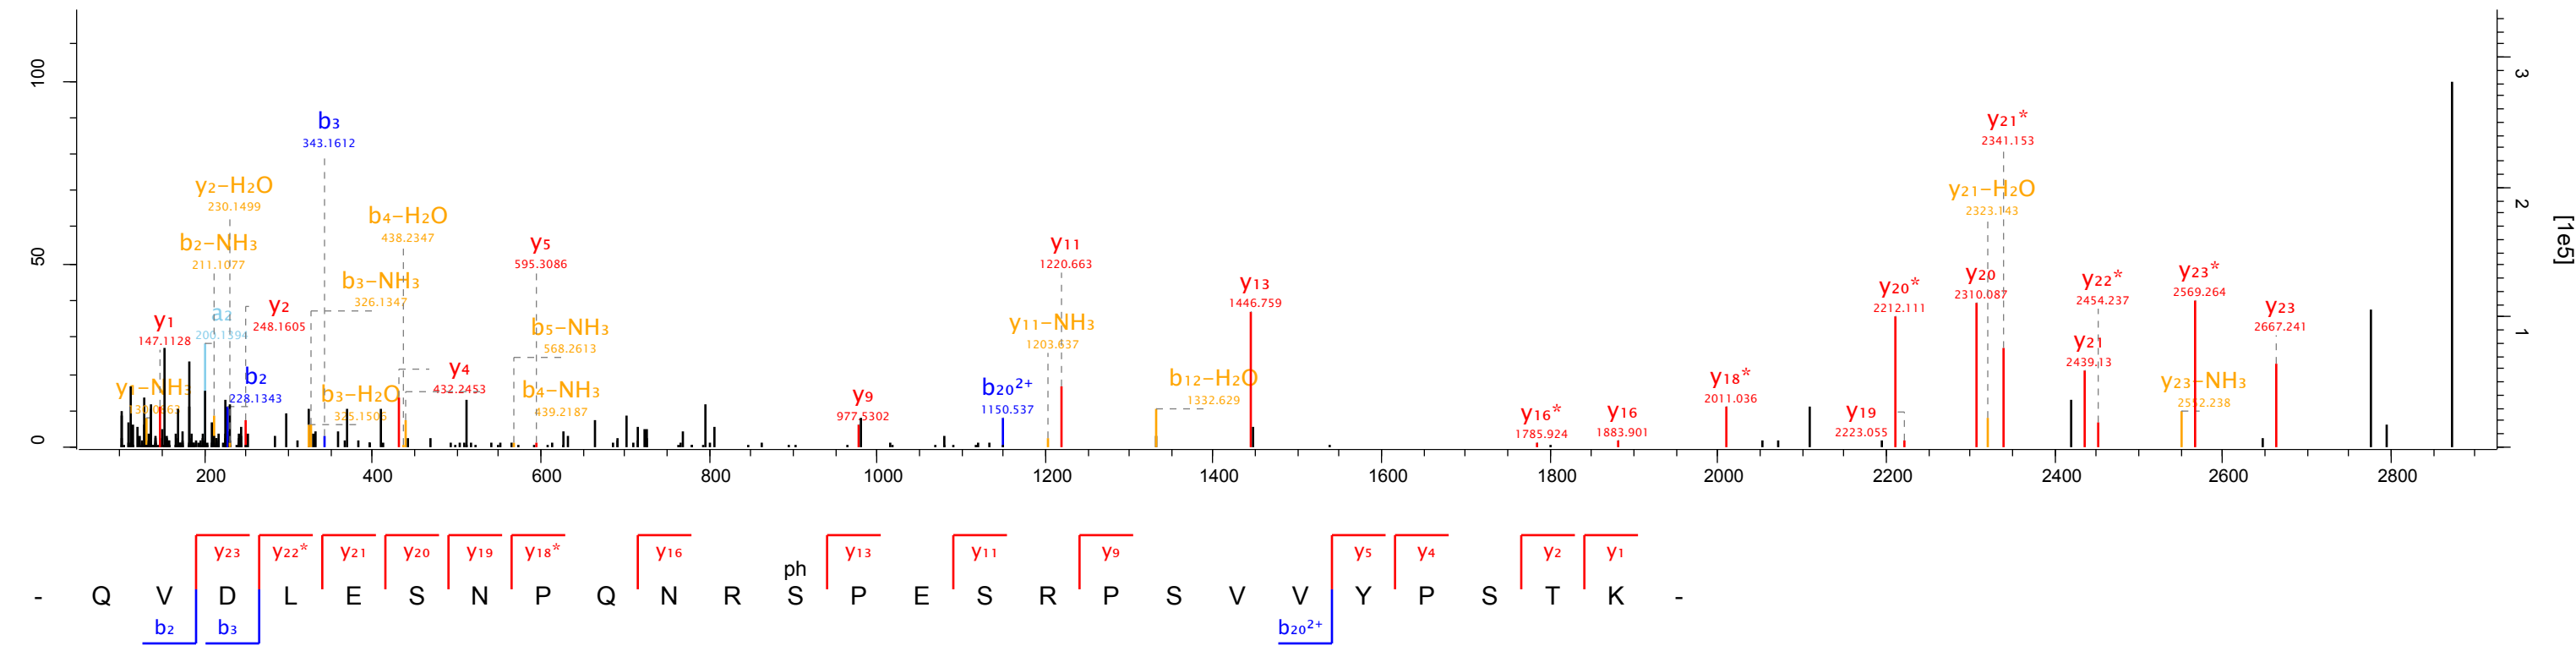

Raw file 20171215\_MaS\_33SR\_LMH\_phospho\_06 Scan 9843 Method FTMS; HCD Score 126.96 m/z 1029.49 Gene names PRKAR1A

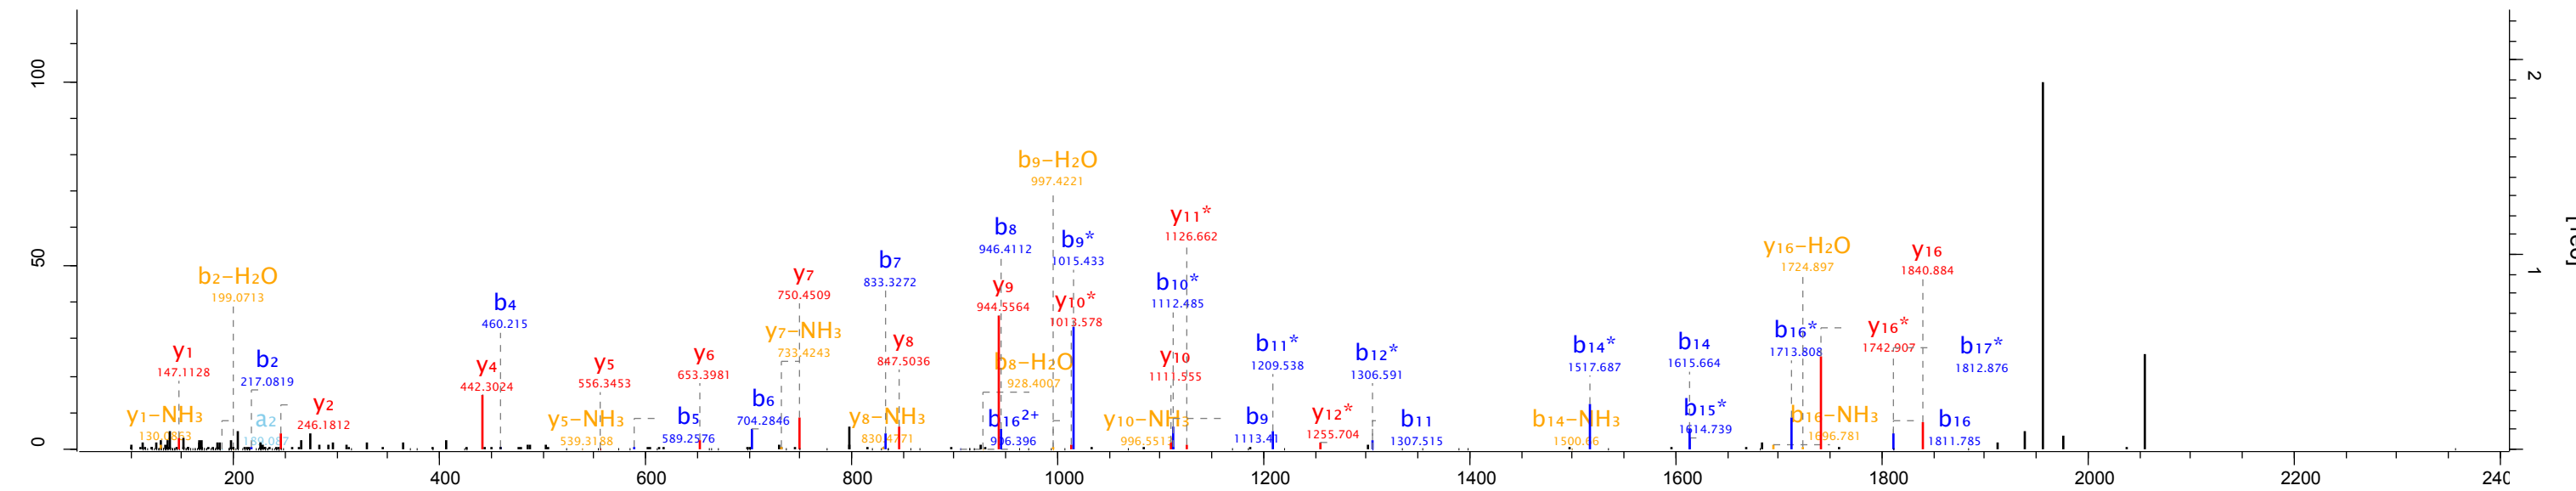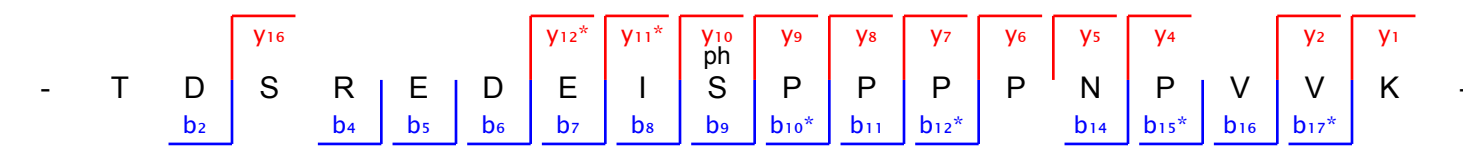

Raw file 20171215\_MaS\_33SR\_LMH\_phospho\_06 Scan 9893 Method FTMS; HCD Score 115.54 m/z 1040.5 Gene names HDAC7

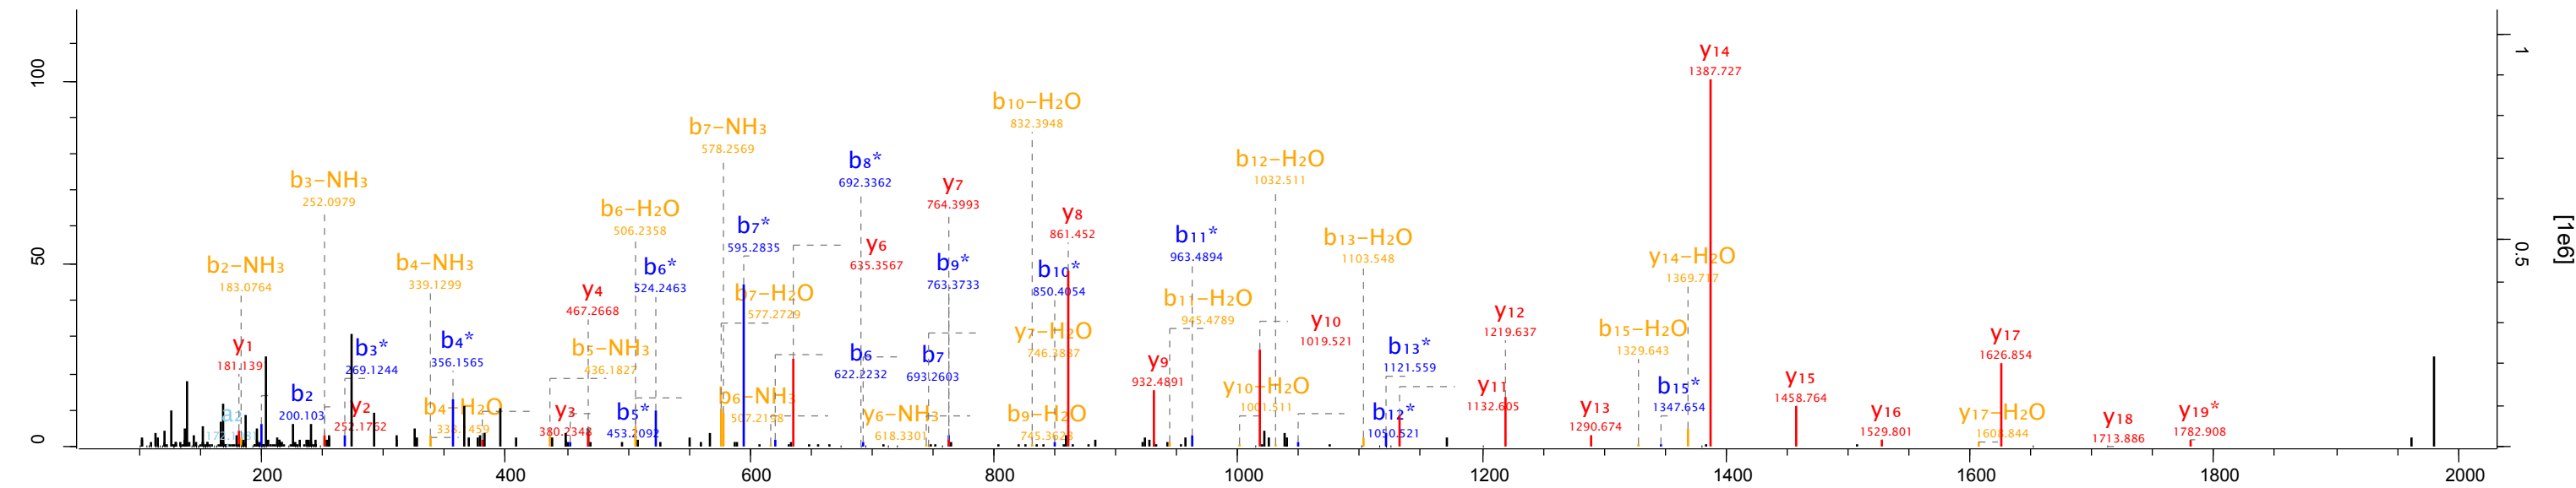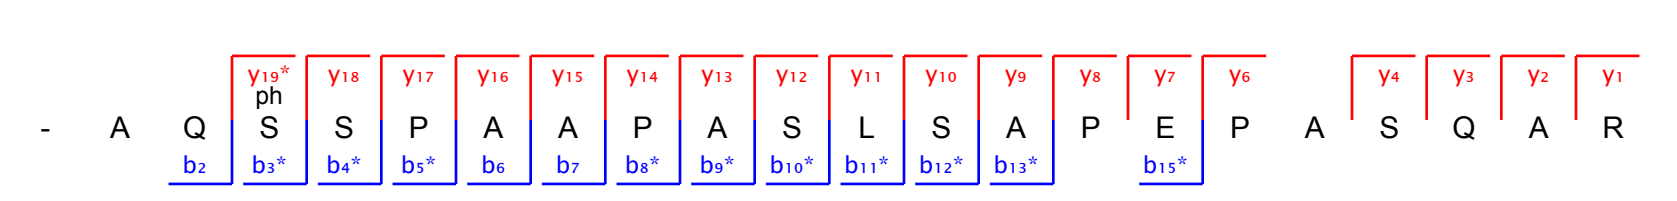

Raw file 20171215\_MaS\_33SR\_LMH\_phospho\_07 Scan 2093 Method FTMS; HCD Score 83.77 m/z 463.22 Gene names RSL1D1

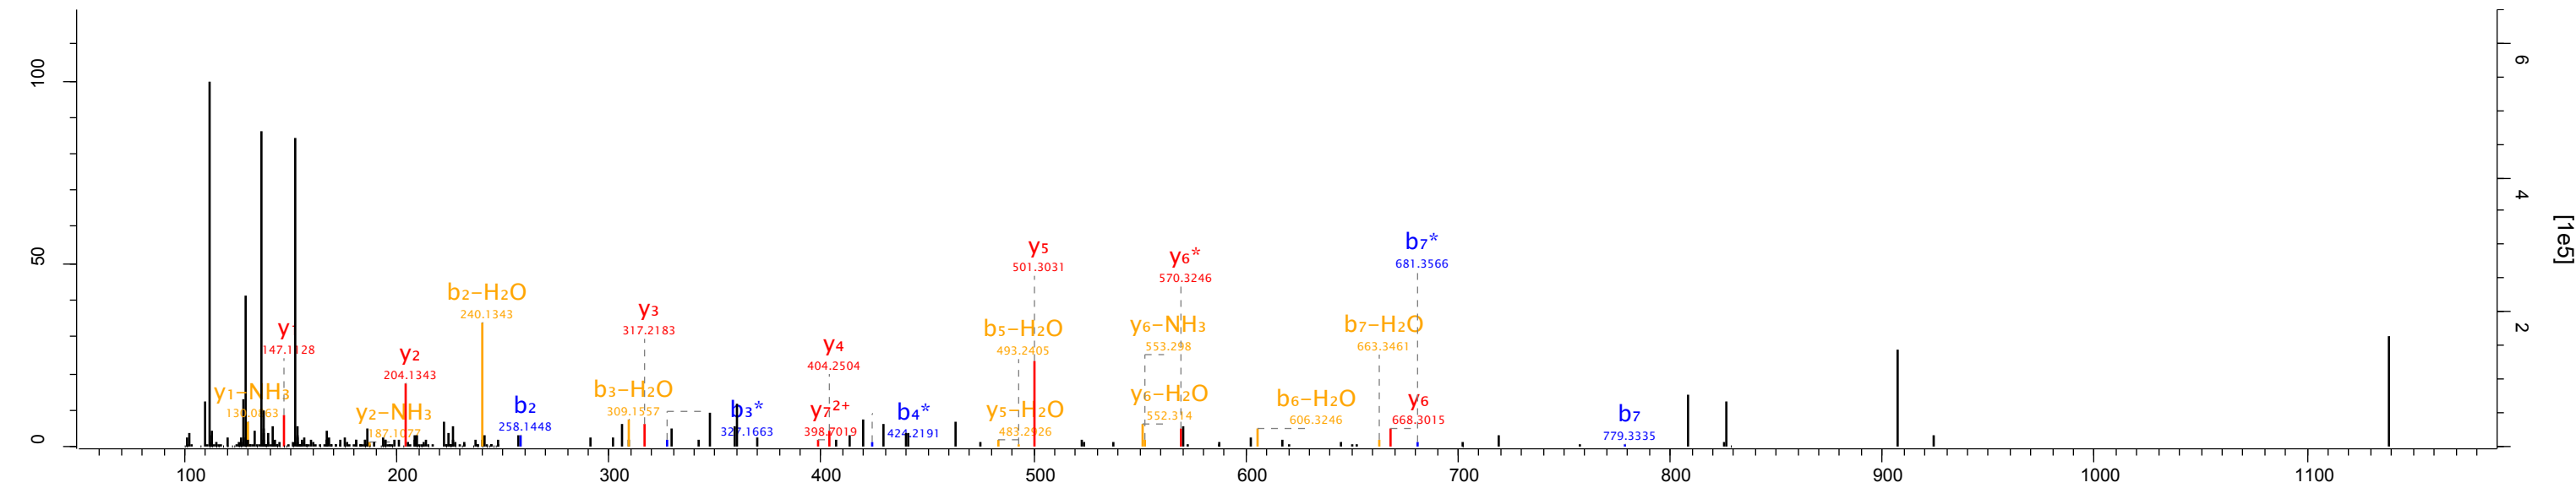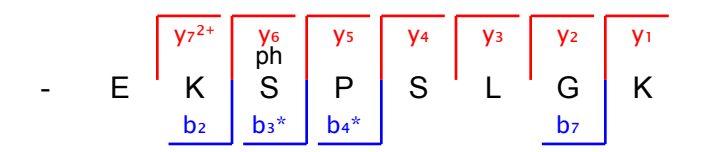



Raw file 20171215\_MaS\_33SR\_LMH\_phospho\_07 Scan 2143 Method FTMS; HCD Score 100.31 m/z 638.82 Gene names ARPP19

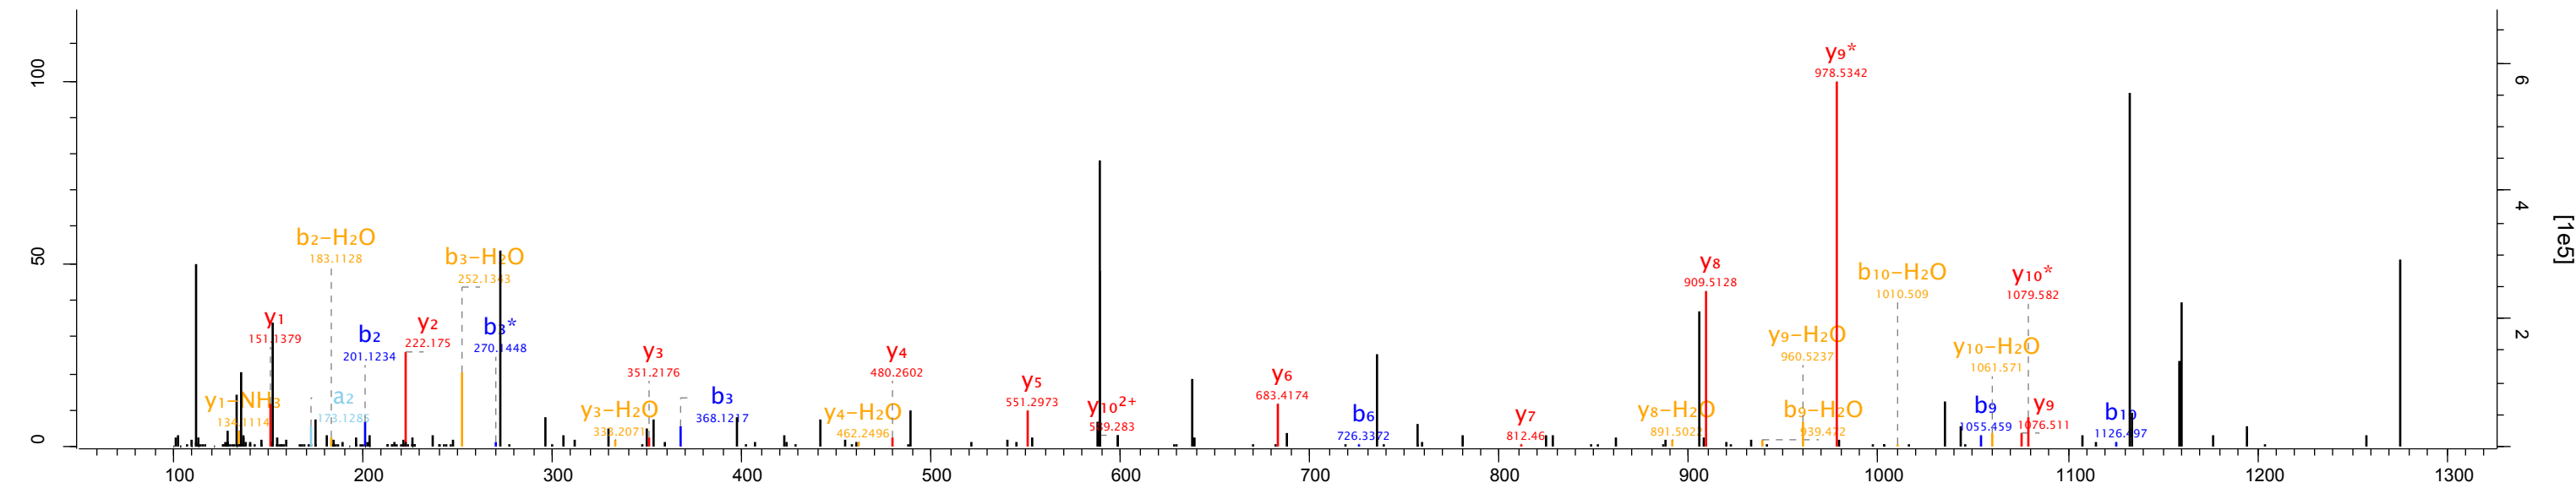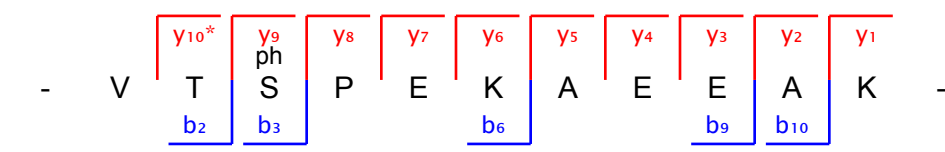

Raw file 20171215\_MaS\_33SR\_LMH\_phospho\_07 Scan 2173 Method FTMS; HCD Score 102.29 m/z 628.76 Gene names API5

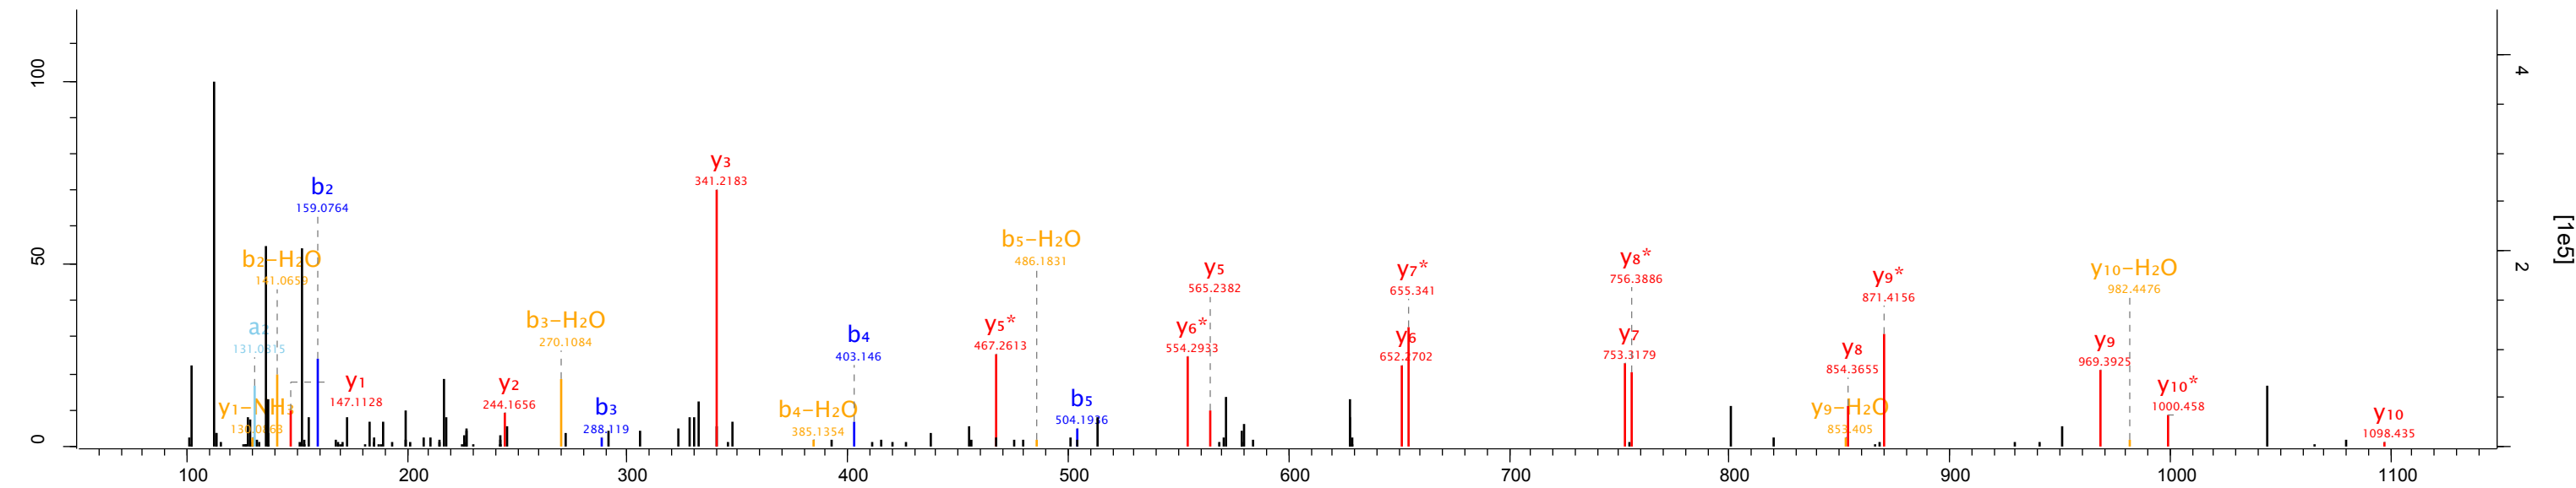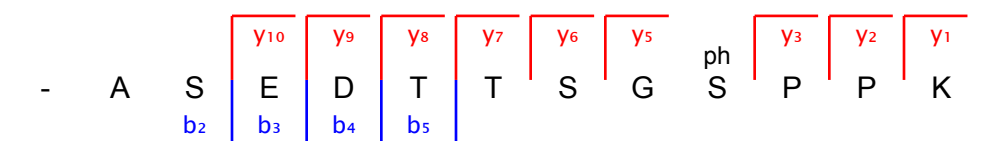

Raw file 20171215\_MaS\_33SR\_LMH\_phospho\_07 Scan 2313 Method FTMS; HCD Score 340.48 m/z 832.35

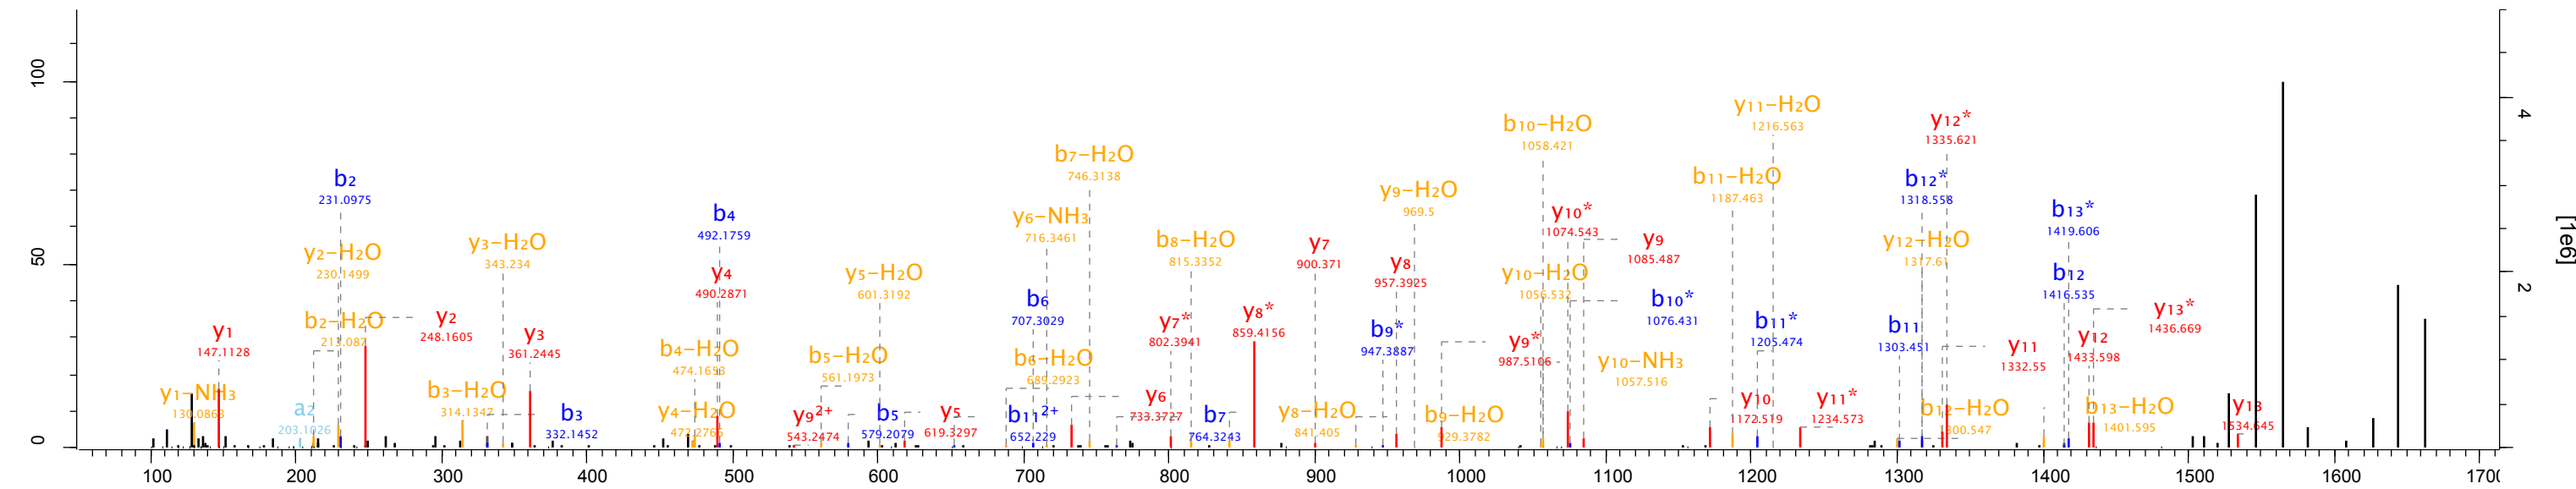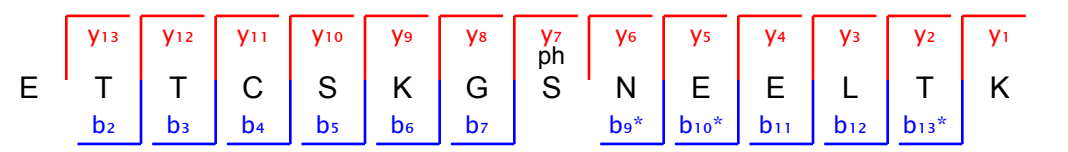

Raw file 20171215\_MaS\_33SR\_LMH\_phospho\_07 Scan 2413 Method FTMS; HCD Score 120.53 m/z 582.72 Gene names DDX5

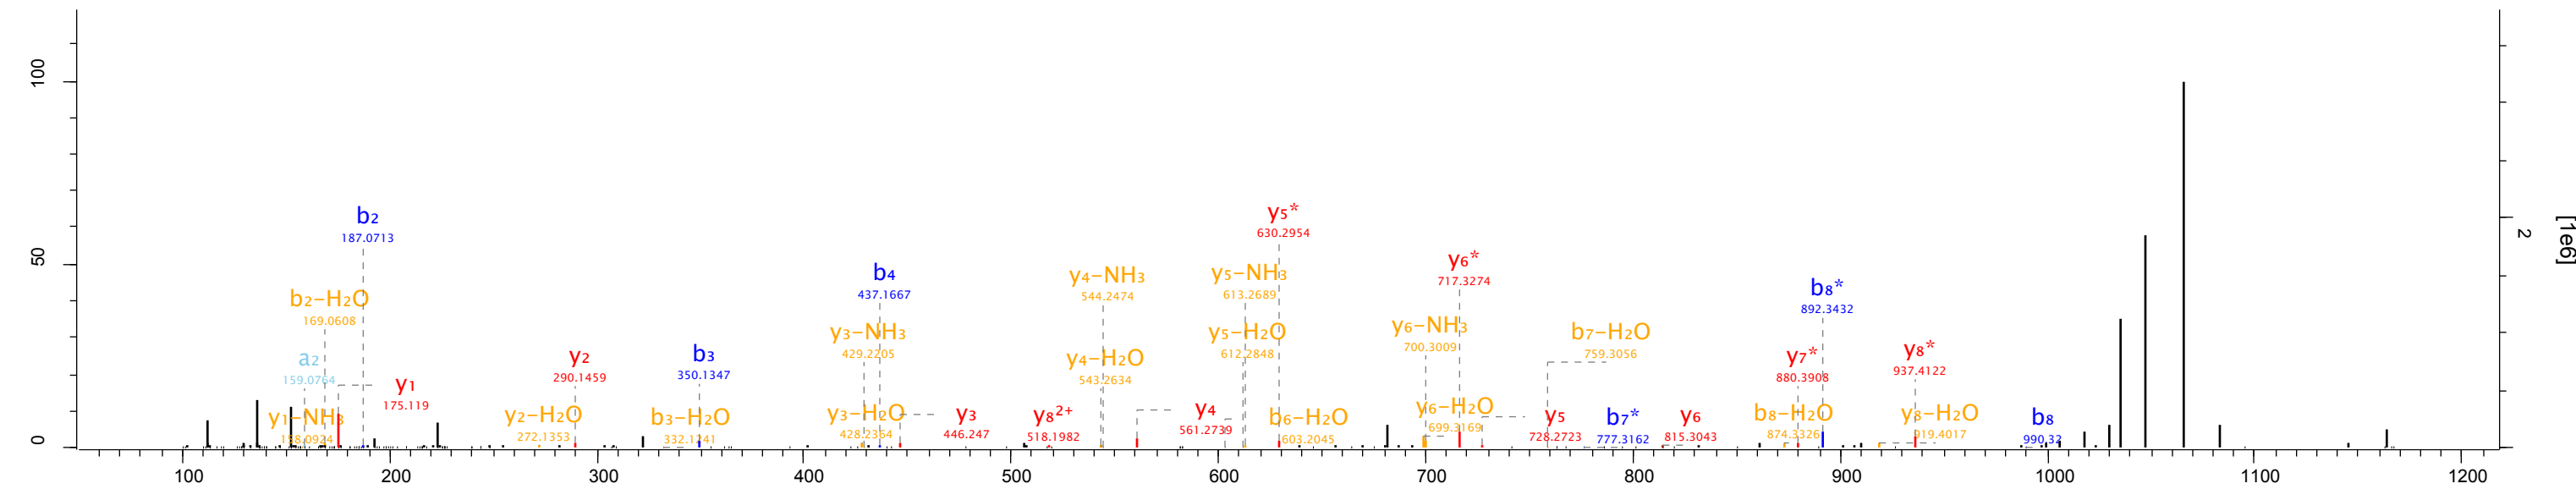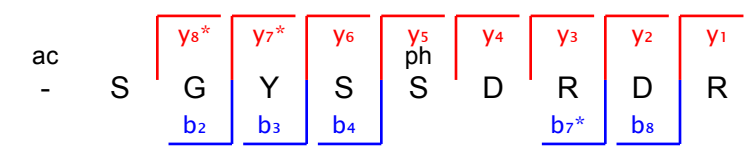

Raw file 20171215\_MaS\_33SR\_LMH\_phospho\_07 Scan 2533 Method FTMS; HCD Score 176.86 m/z 638.77 Gene names CD274

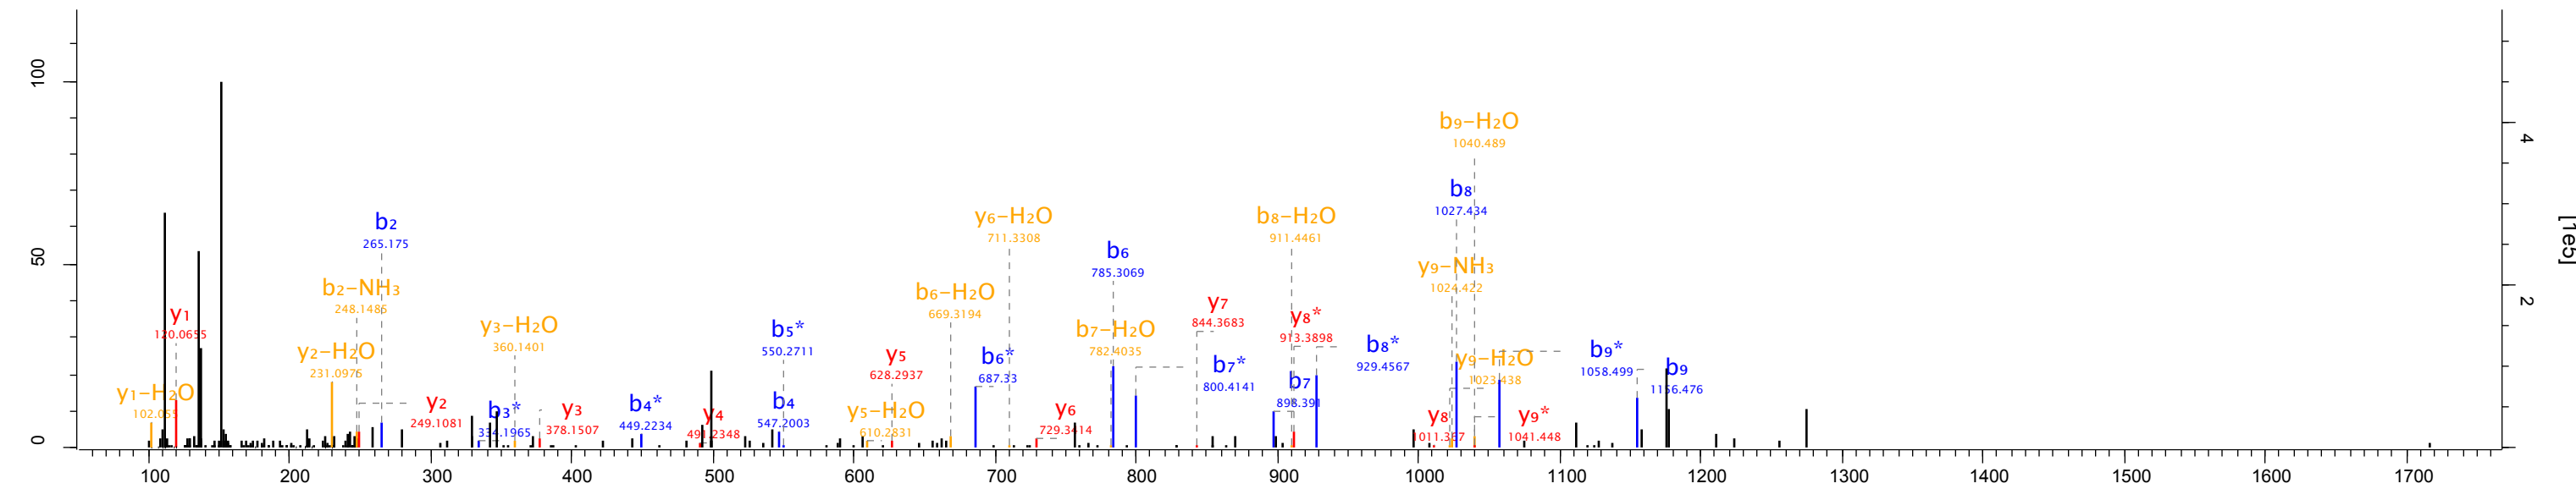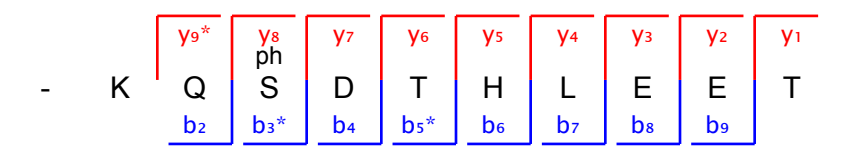

Raw file 20171215\_MaS\_33SR\_LMH\_phospho\_07 Scan 2593 Method FTMS; HCD Score 259.08 m/z 688.81 Gene names KAT7

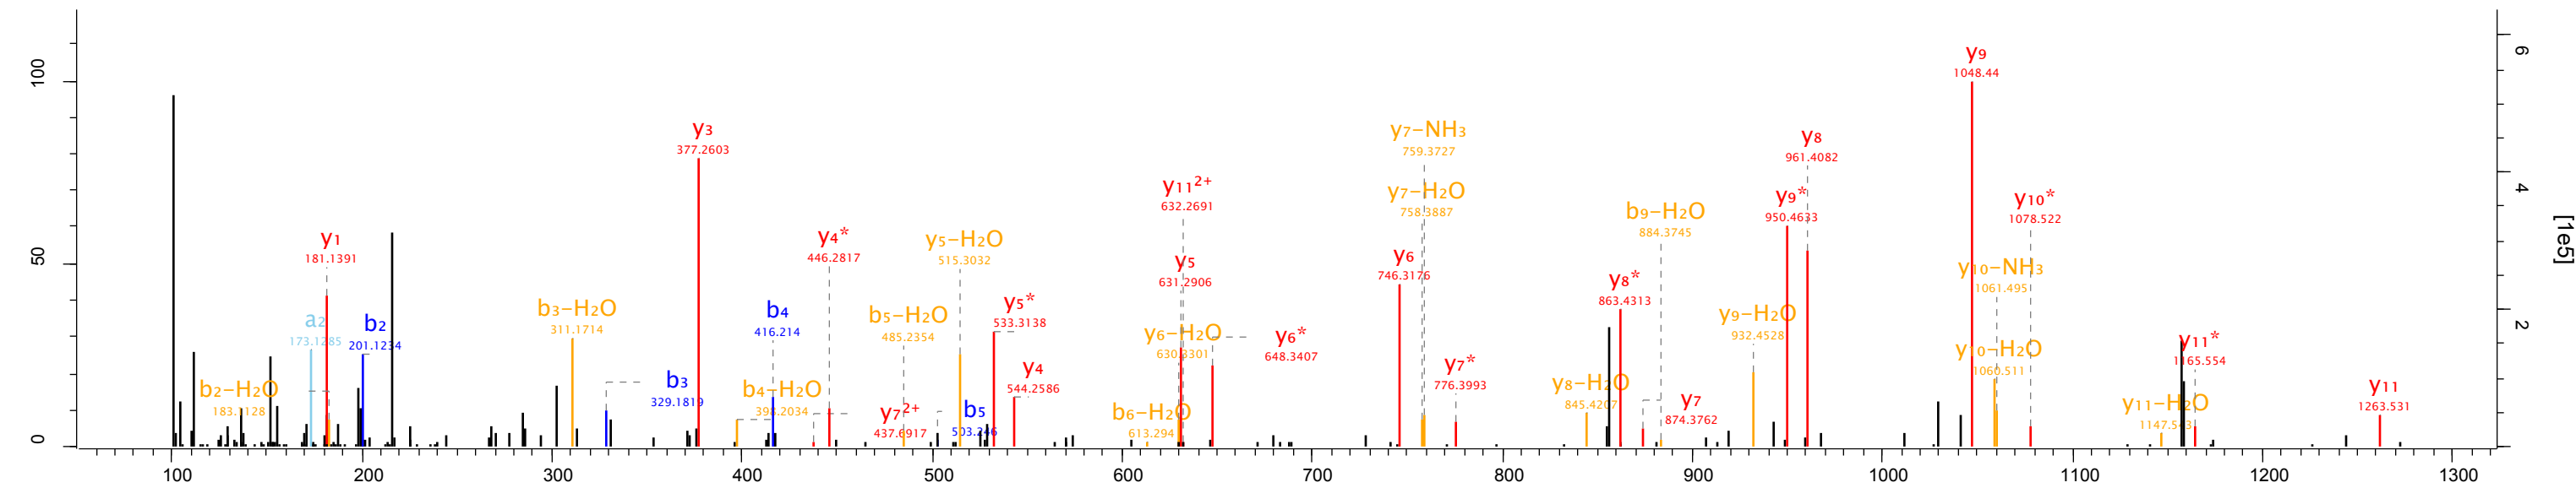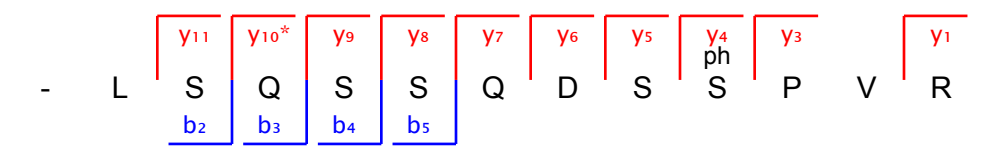

20171215\_MaS\_33SR\_LMH\_phospho\_07

2813 FTMS; HCD 113.1 582.78 ZYX

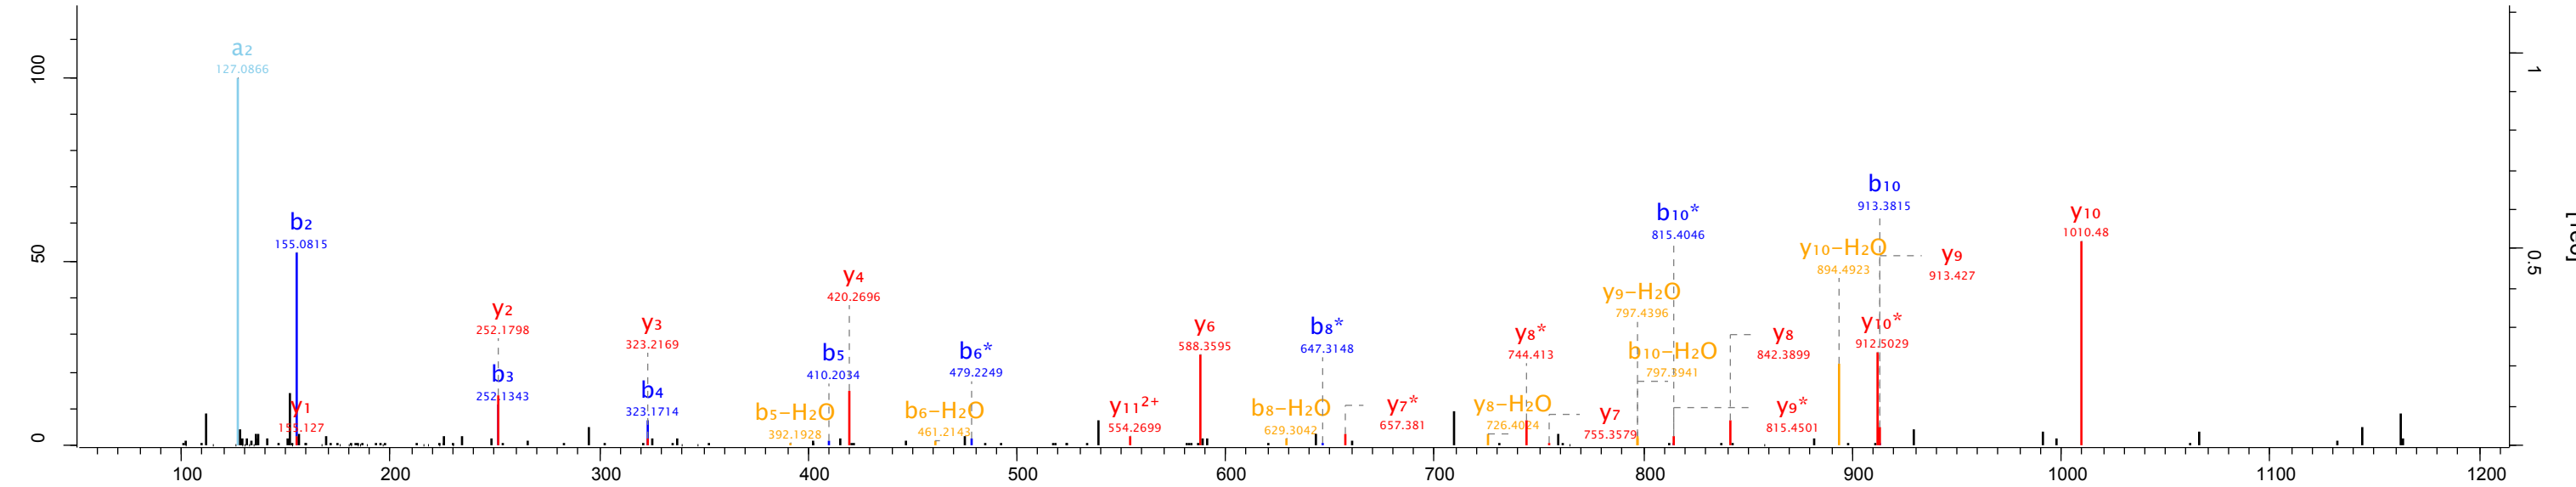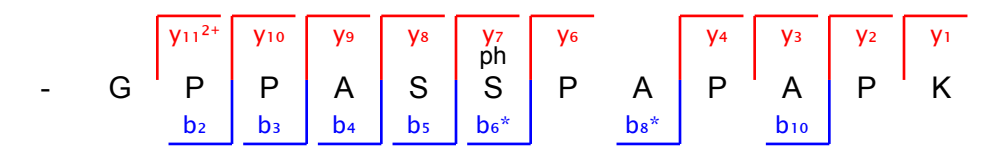

Raw file 20171215\_MaS\_33SR\_LMH\_phospho\_07 Scan 2973 Method FTMS; HCD Score 130.61 m/z 424.19 Gene names SRSF1

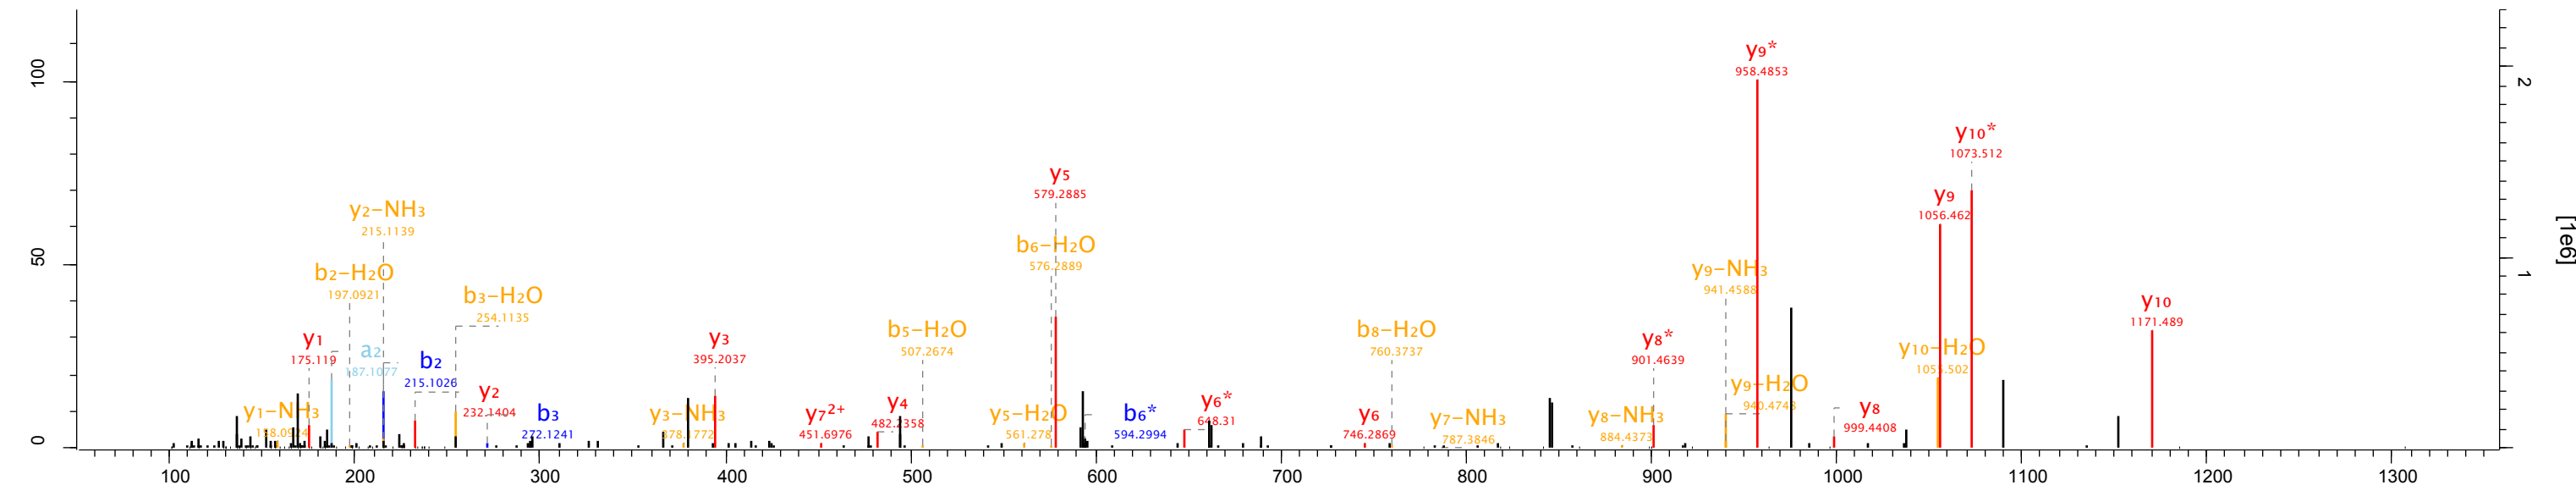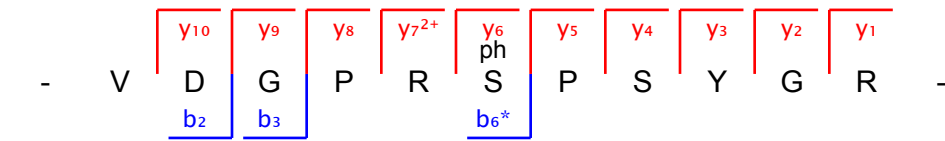



Raw file  
20171215\_MaS\_33SR\_LMH\_phospho\_07

Scan 3453 Method FTMS; HCD Score 138.25 m/z 625.63 Gene names MARCKS

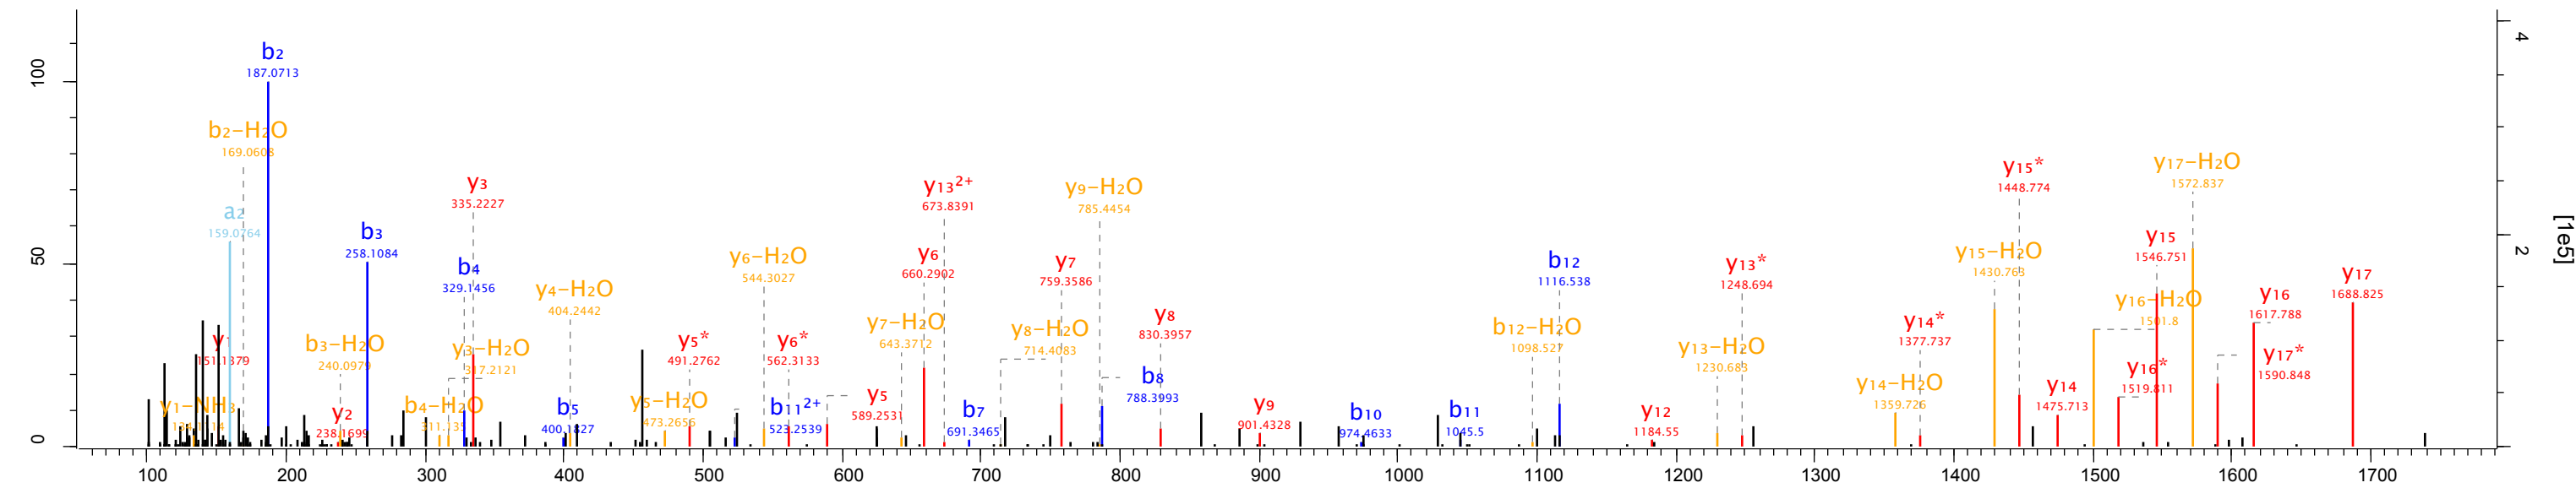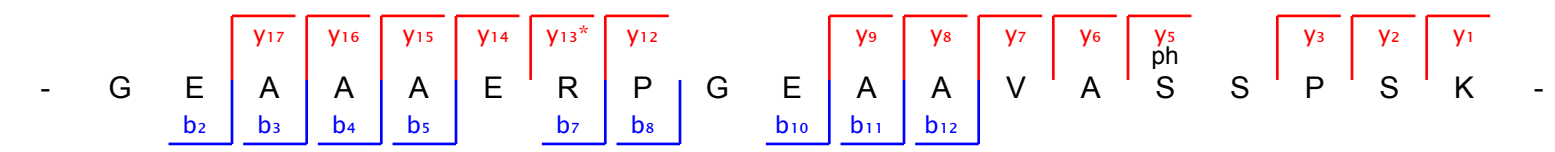

Raw file 20171215\_MaS\_33SR\_LMH\_phospho\_07 Scan 3913 Method FTMS; HCD Score 133.86 m/z 636.3 Gene names RNF219

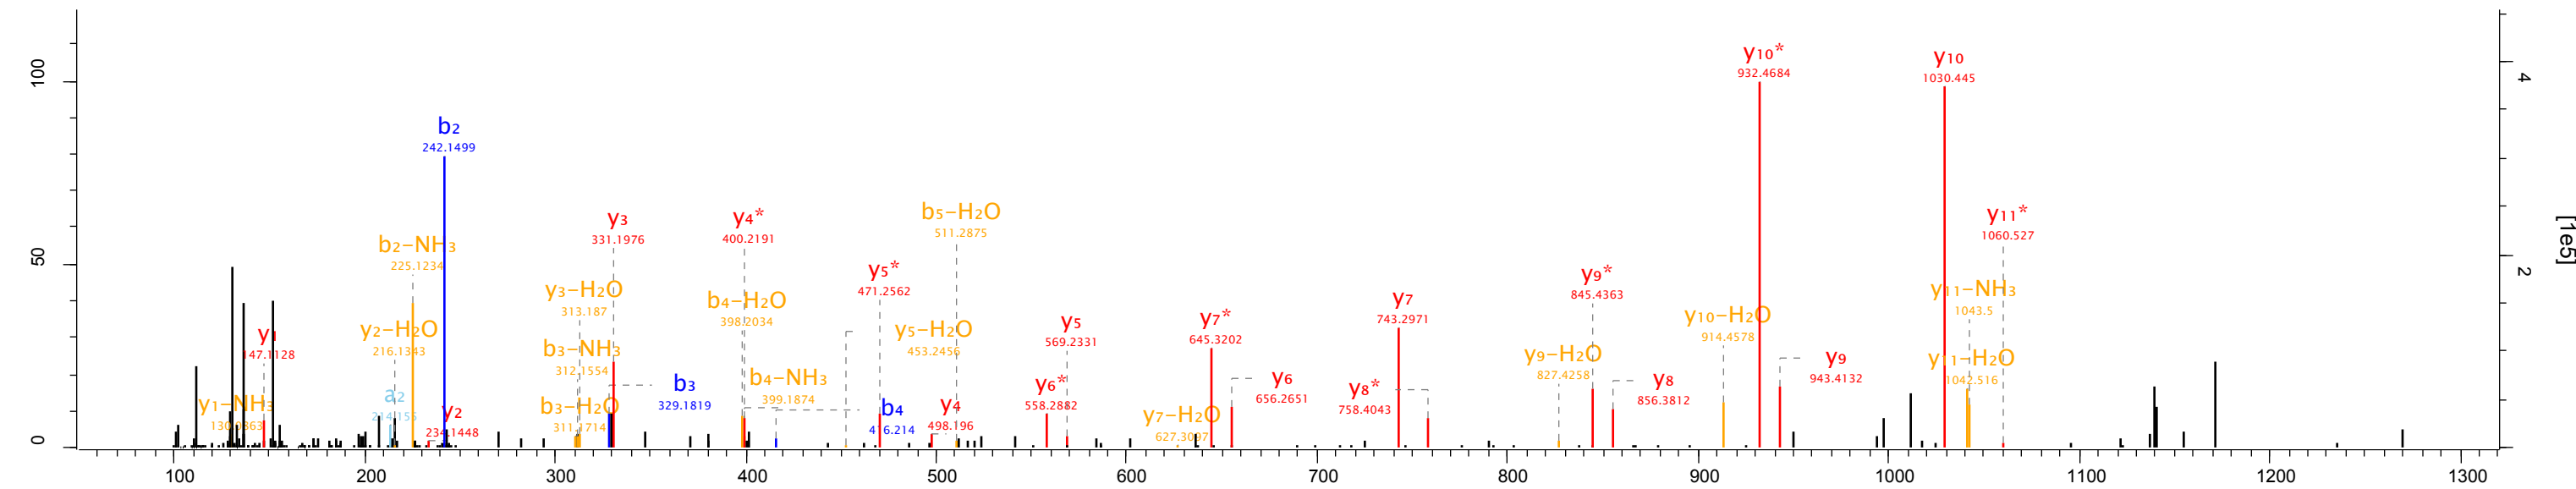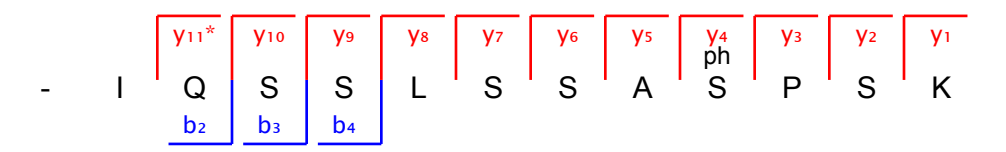

Raw file: 20171215\_MaS\_33SR\_LMH\_phospho\_07  
 Scan: 3923 Method: FTMS; HCD Score: 114.06 m/z: 684.3 Gene names: SRRM2

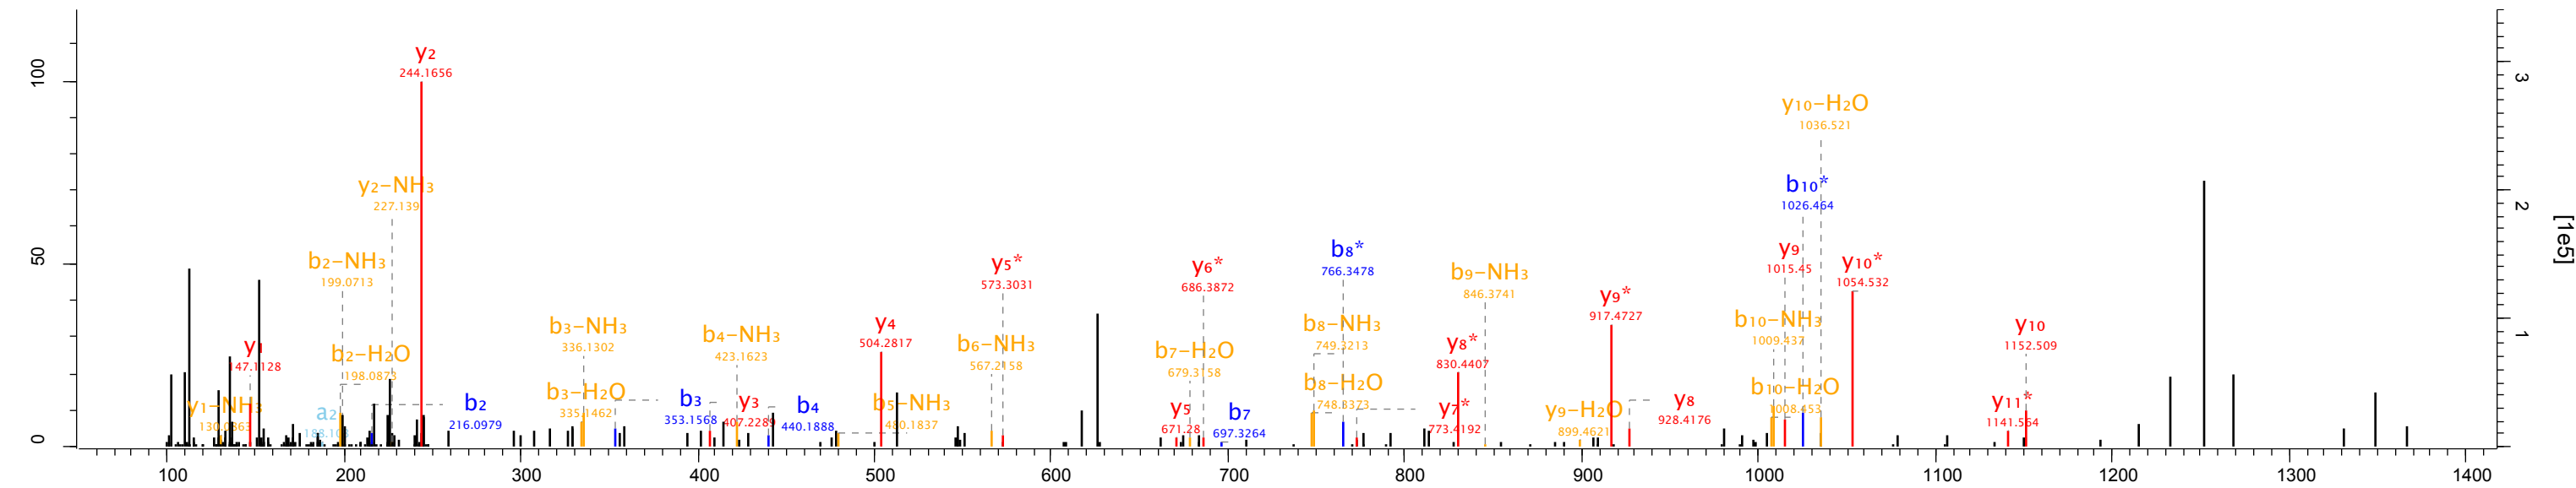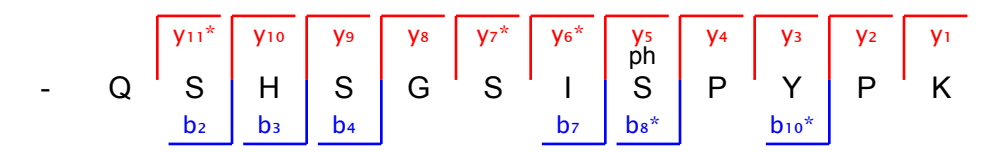

Raw file 20171215\_MaS\_33SR\_LMH\_phospho\_07 Scan 3933 Method FTMS; HCD Score 82.59 m/z 566.26 Gene names NHSL1

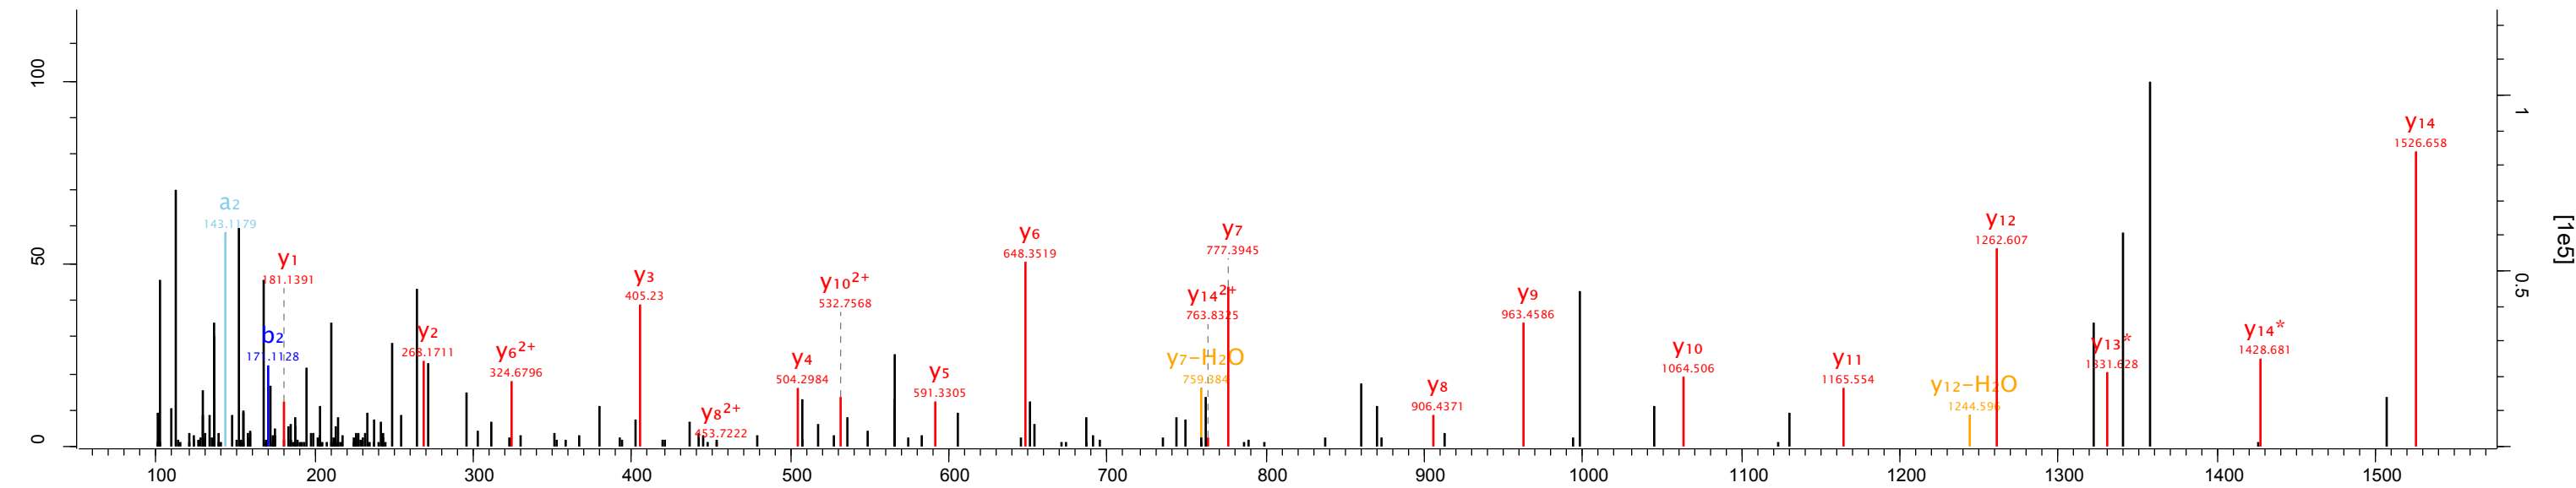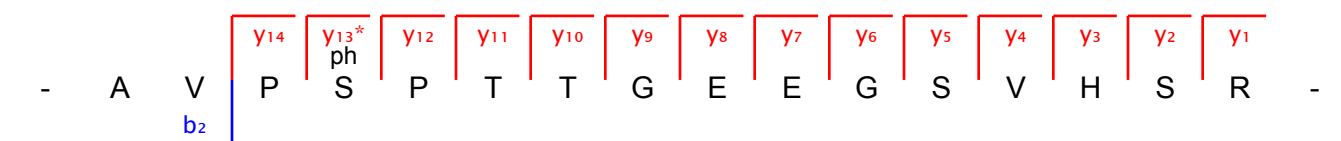

Raw file 20171215\_MaS\_33SR\_LMH\_phospho\_07 Scan 4153 Method FTMS; HCD Score 131.12 m/z 526.26 Gene names HSPH1

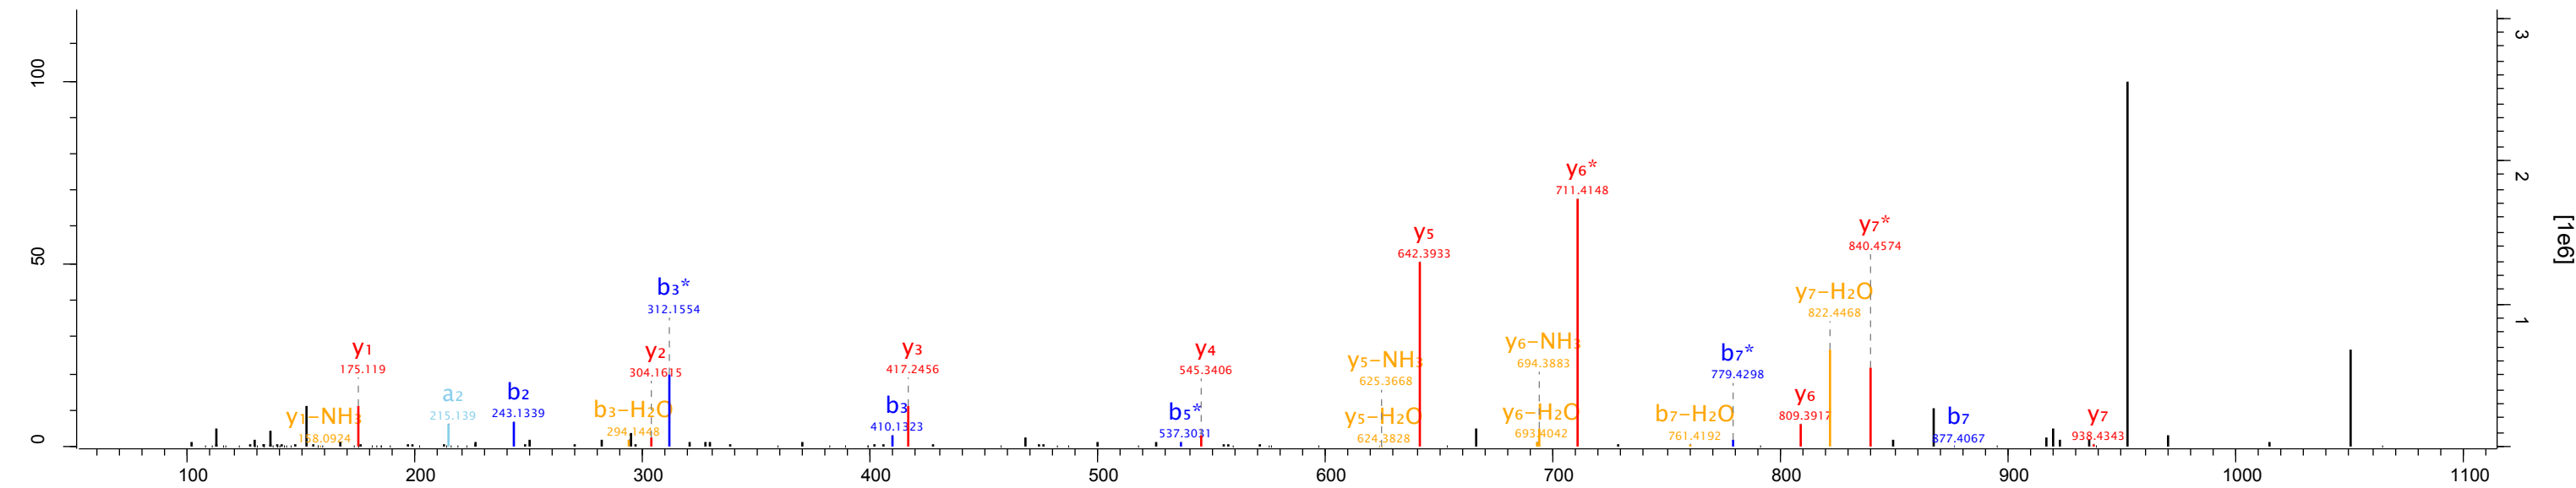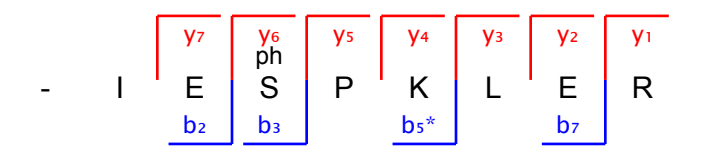

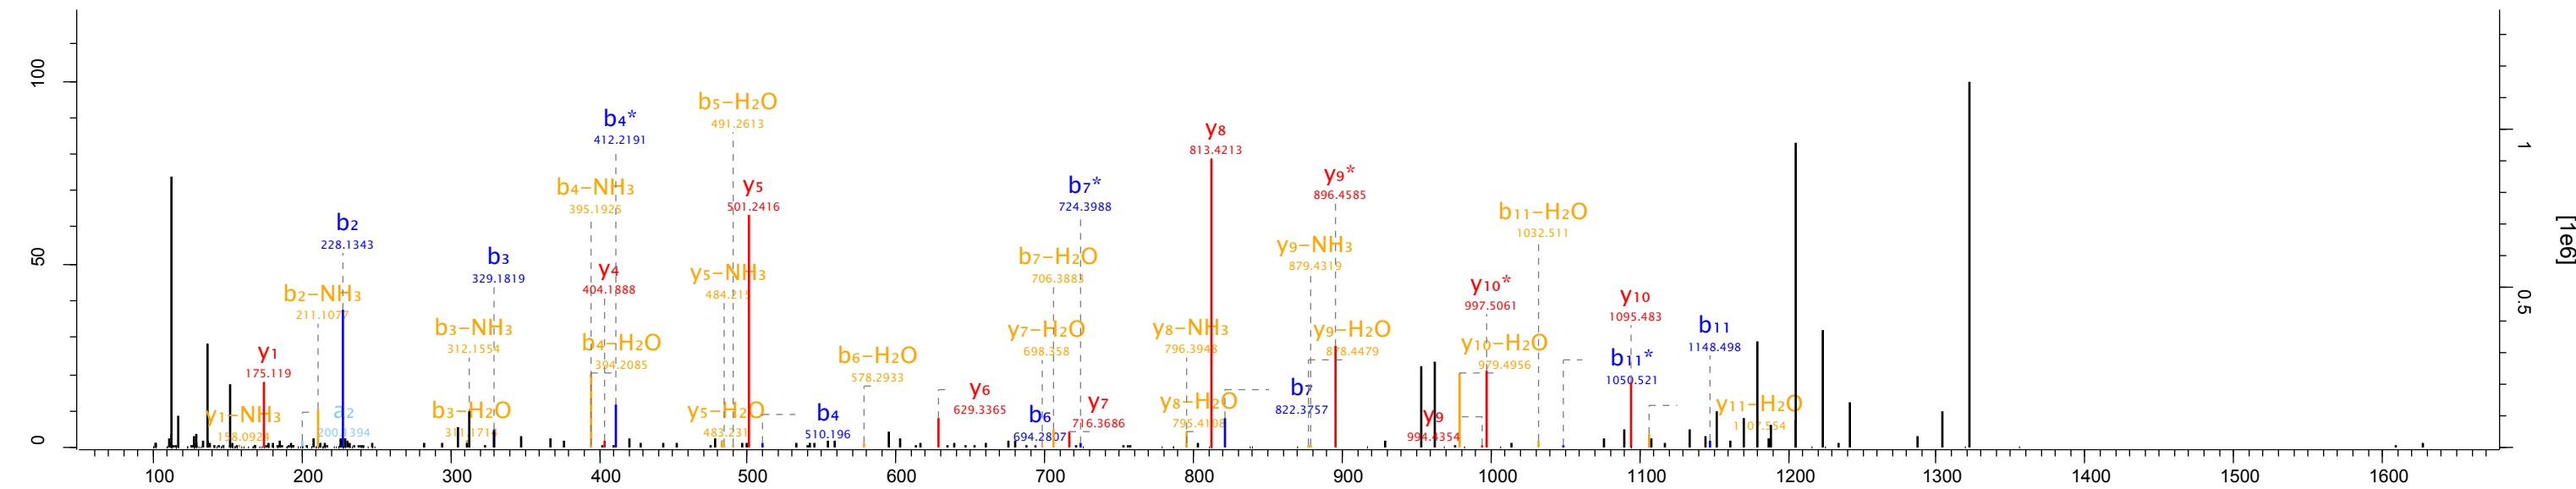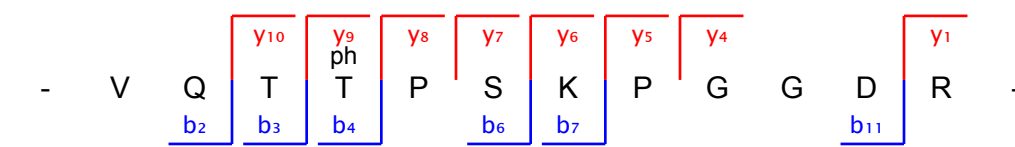

Raw file 20171215\_MaS\_33SR\_LMH\_phospho\_08 Scan 2603 Method FTMS; HCD Score 137.91 m/z 645.3 Gene names PBX2

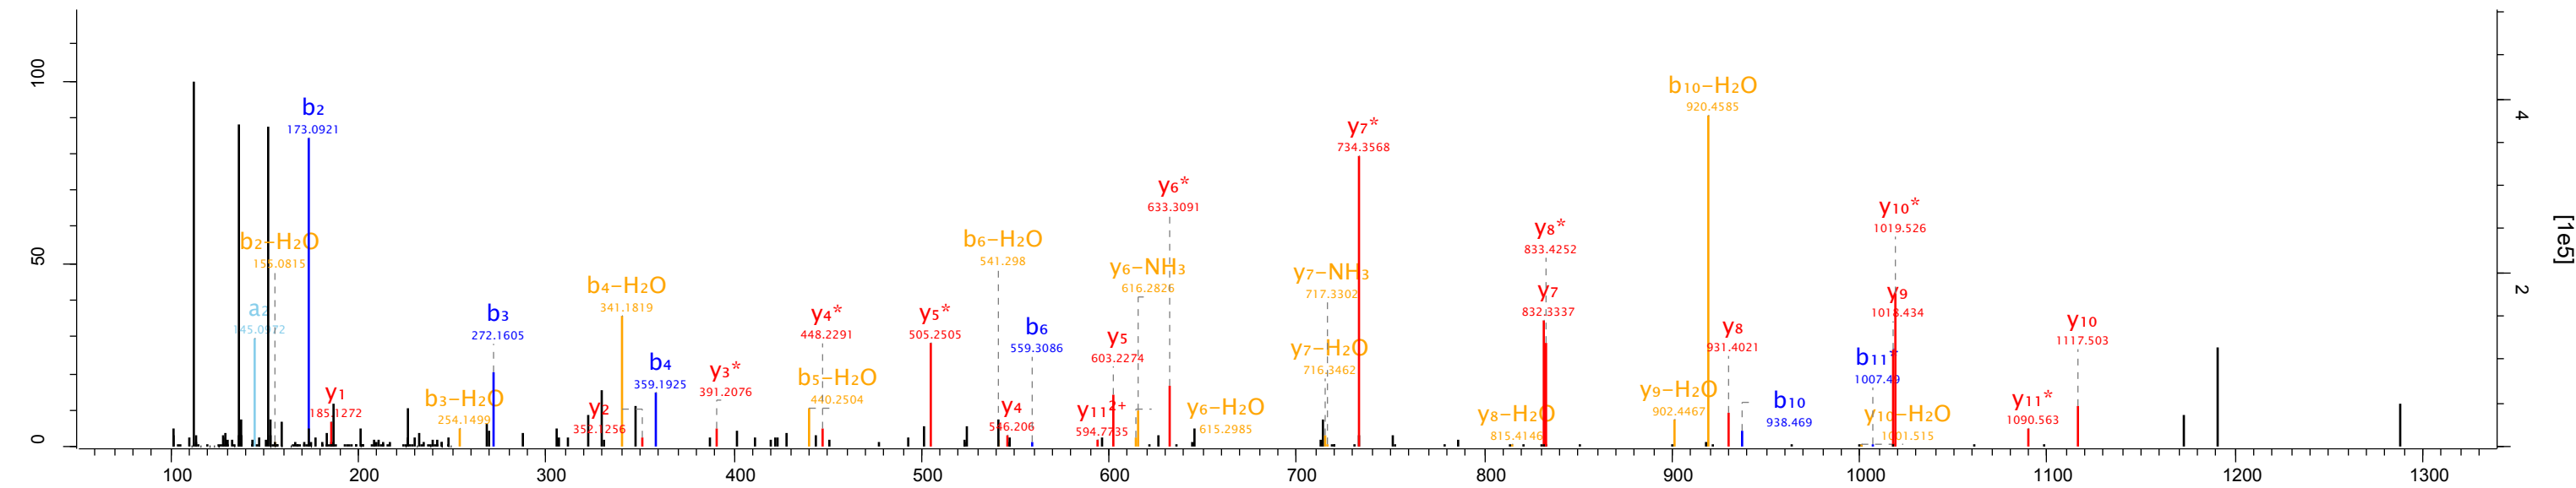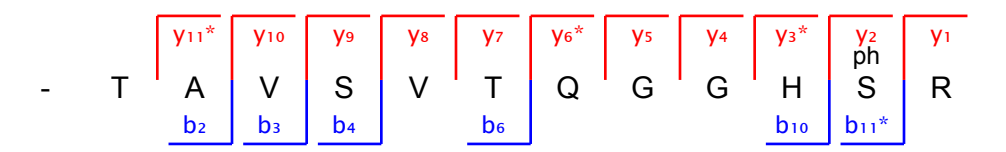

Raw file 20171215\_MaS\_33SR\_LMH\_phospho\_08 Scan 4333 Method FTMS; HCD Score 96.07 m/z 451.27 Gene names KMT2A;IREB2

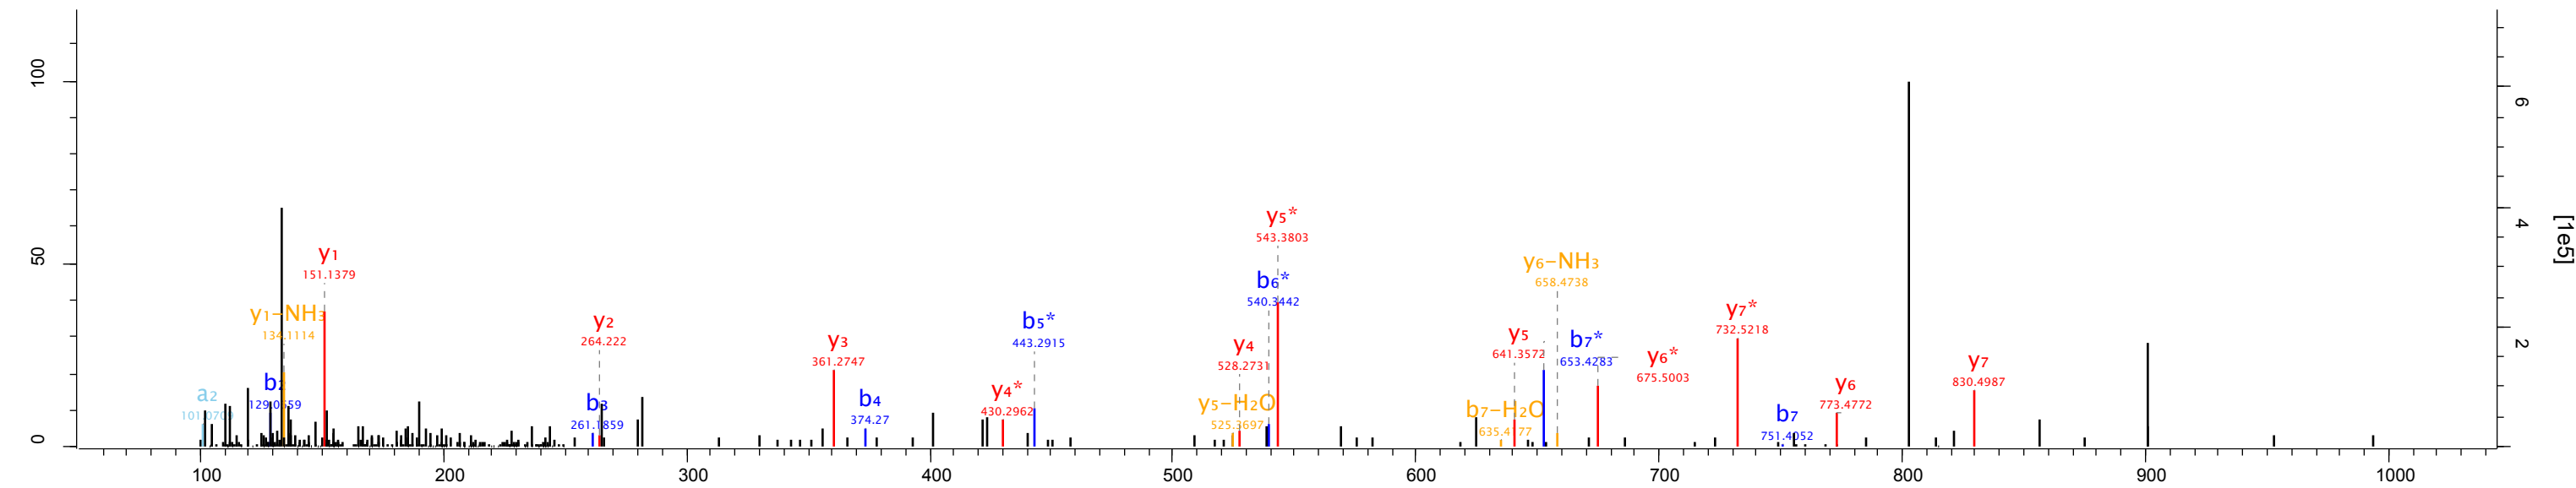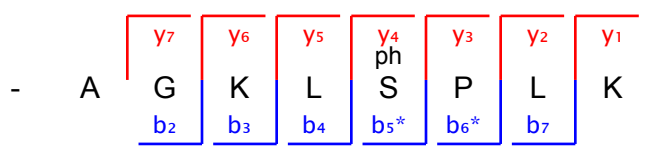



Raw file 20171215\_MaS\_33SR\_LMH\_phospho\_08 Scan 4573 Method FTMS; HCD Score 71.93 m/z 586.26 Gene names KIAA1522

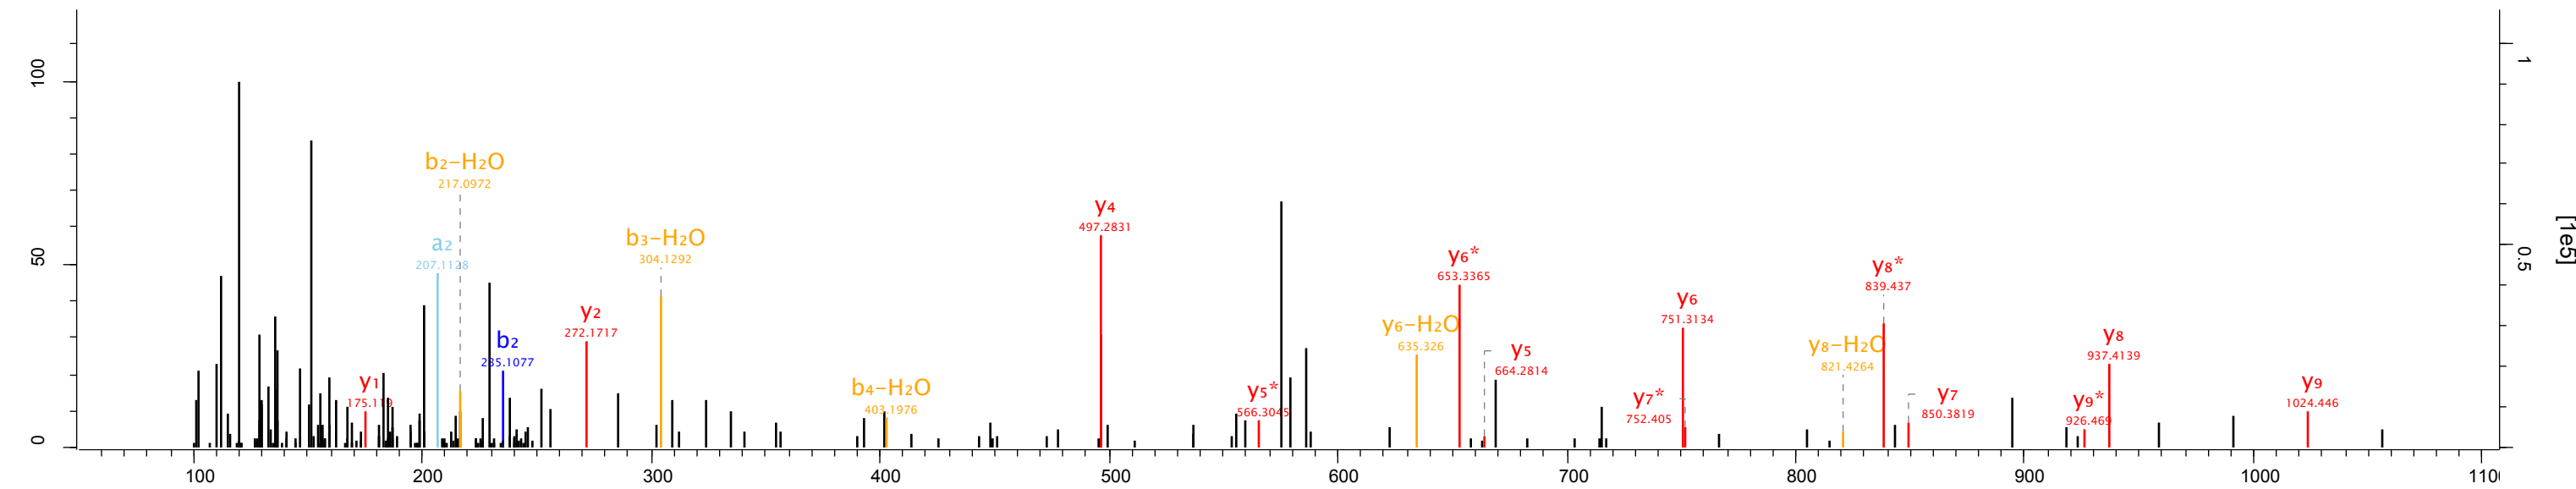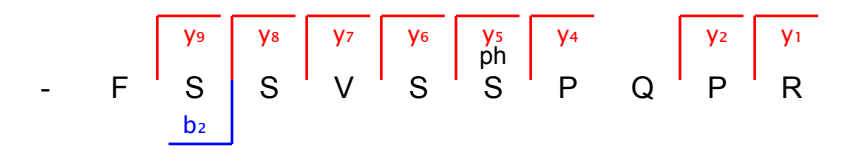

Raw file 20171215\_MaS\_33SR\_LMH\_phospho\_08 Scan 4923 Method FTMS; HCD Score 122.64 m/z 568.72 Gene names ATF7IP

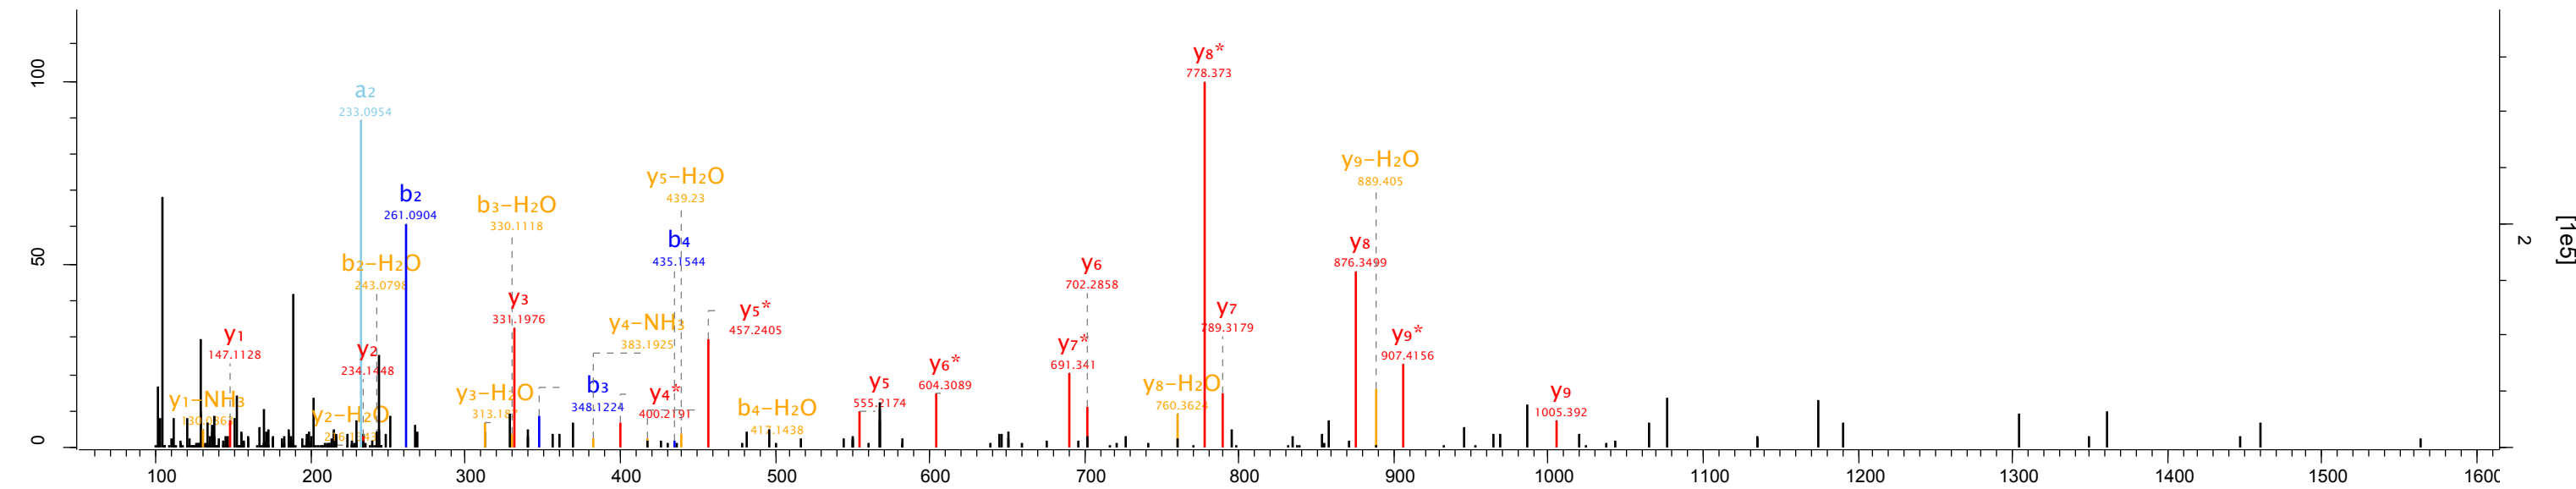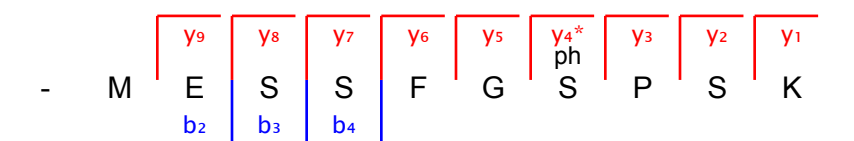

Raw file 20171215\_MaS\_33SR\_LMH\_phospho\_08 Scan 5473 Method FTMS; HCD Score 129.53 m/z 674.81 Gene names LARP4B

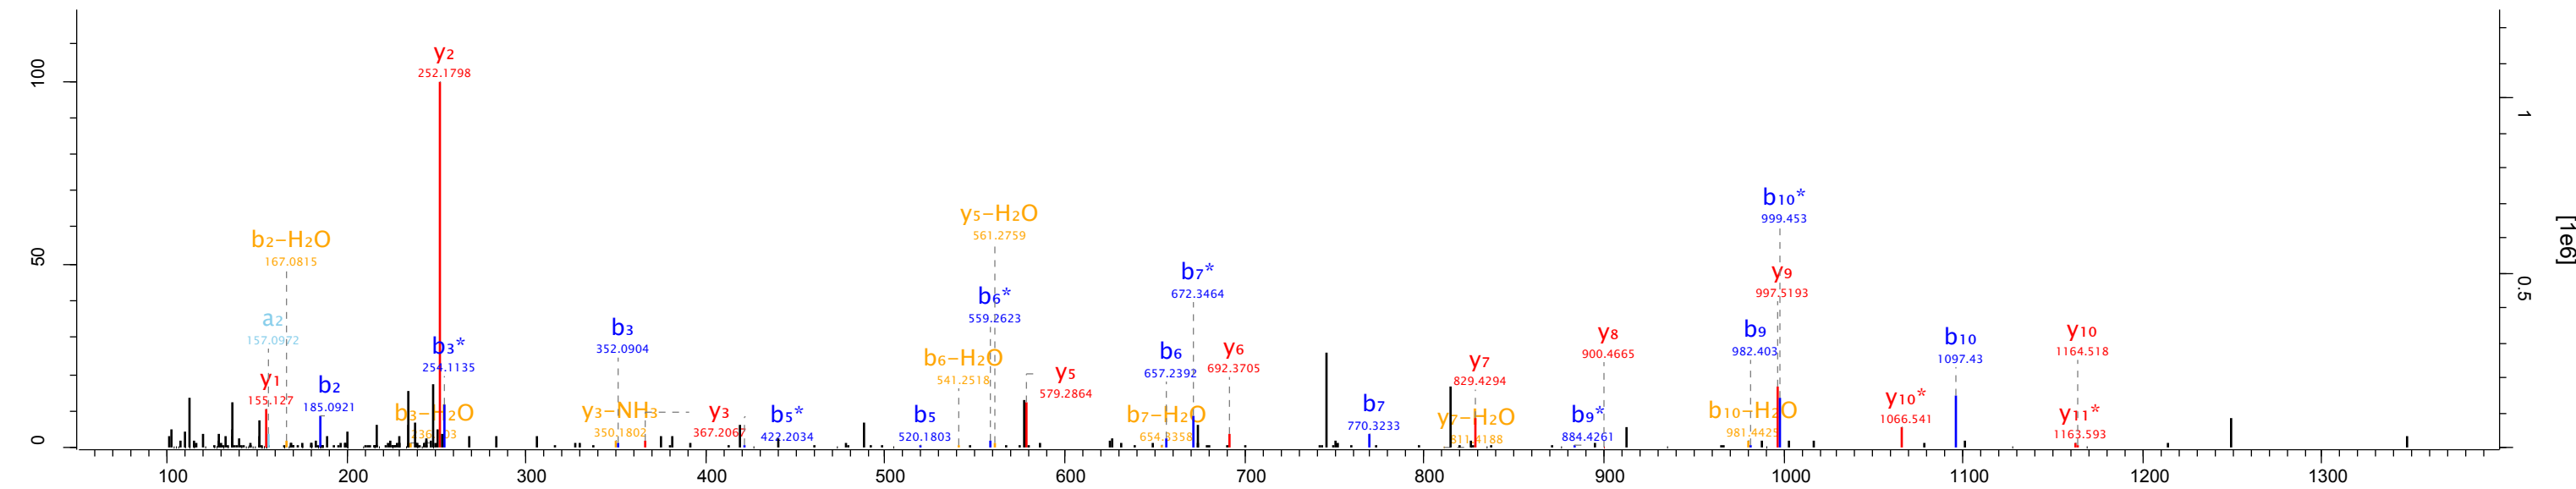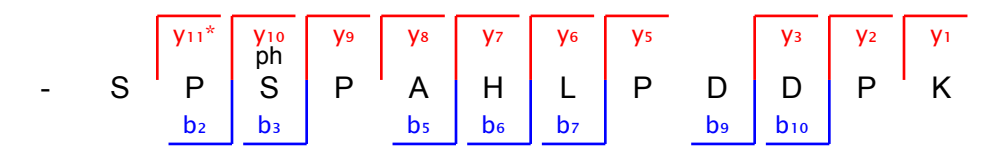

Raw file 20171215\_MaS\_33SR\_LMH\_phospho\_08 Scan 6393 Method FTMS; HCD Score 41.54 m/z 717.31 Gene names FLI1

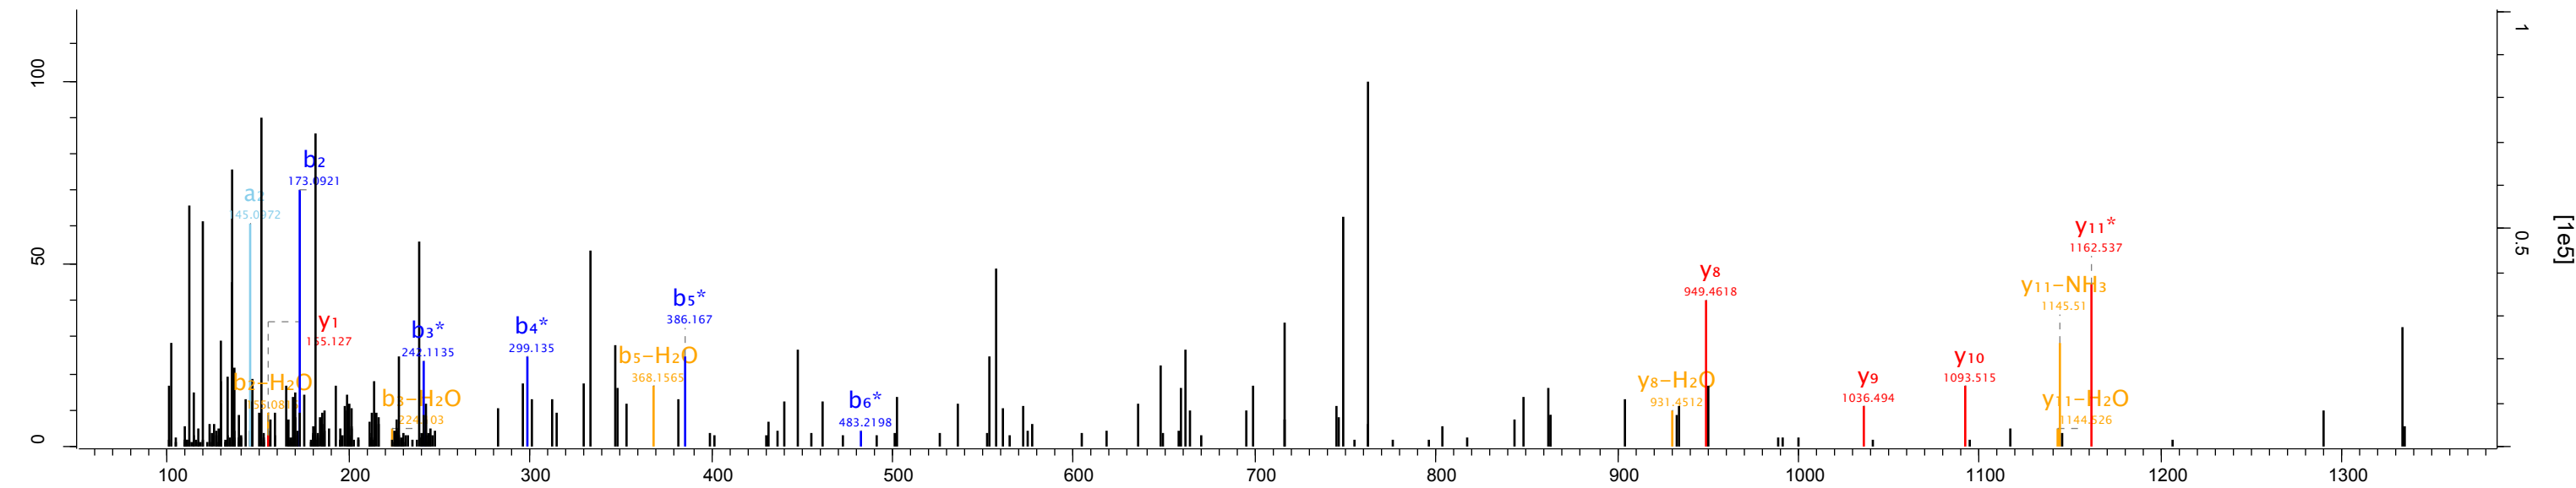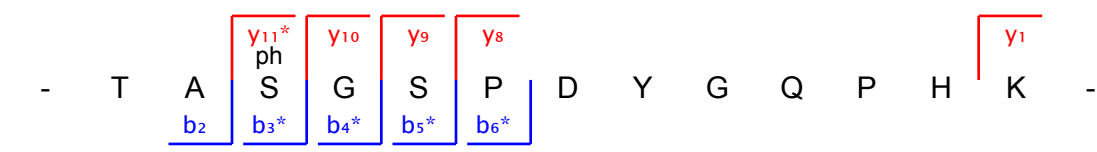

Raw file 20171215\_MaS\_33SR\_LMH\_phospho\_08 Scan 6683 Method FTMS; HCD Score 87.65 m/z 632.79 Gene names CDCA3

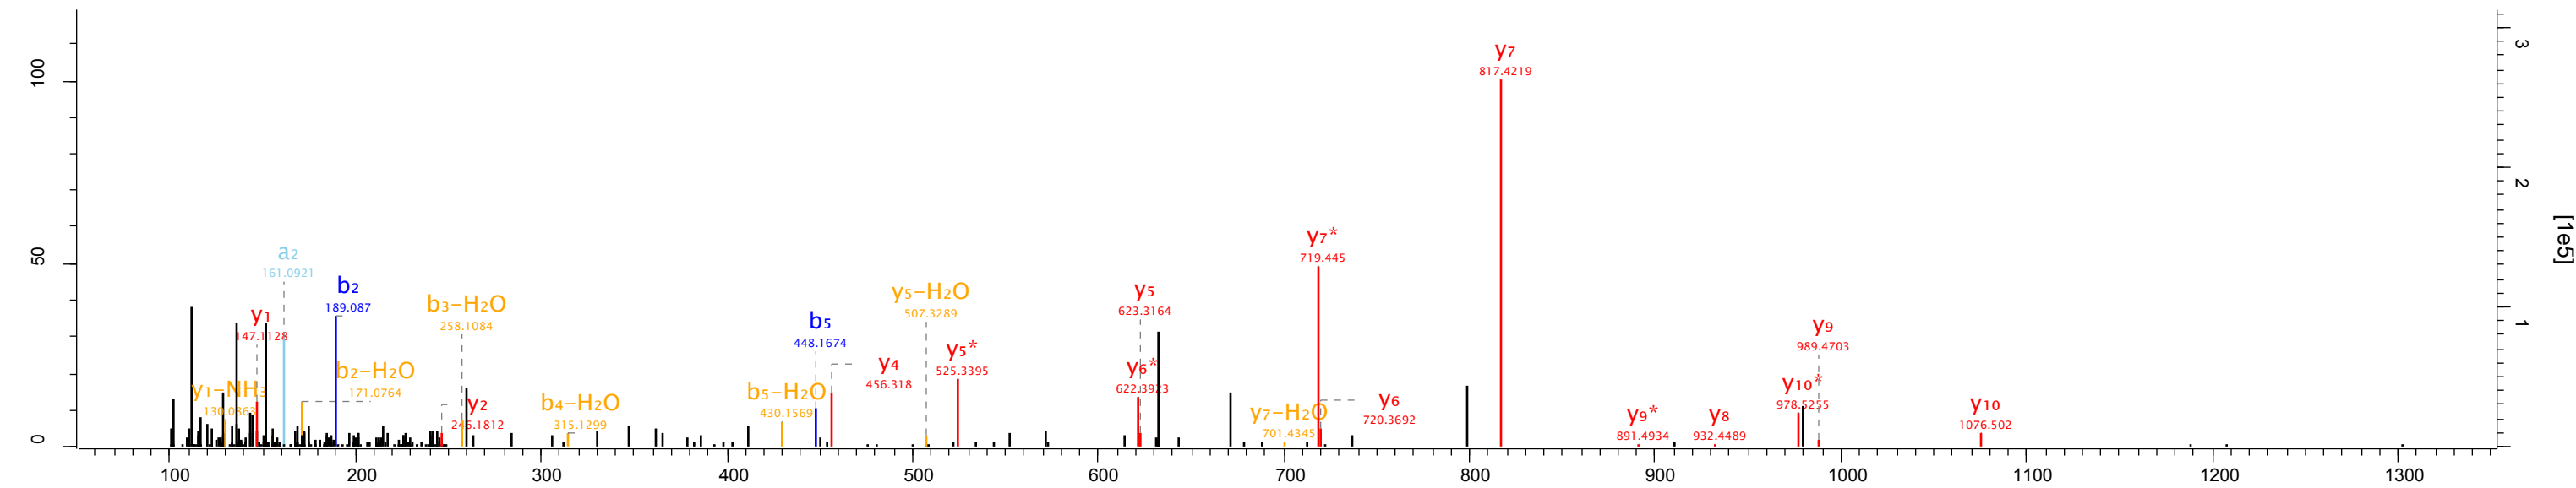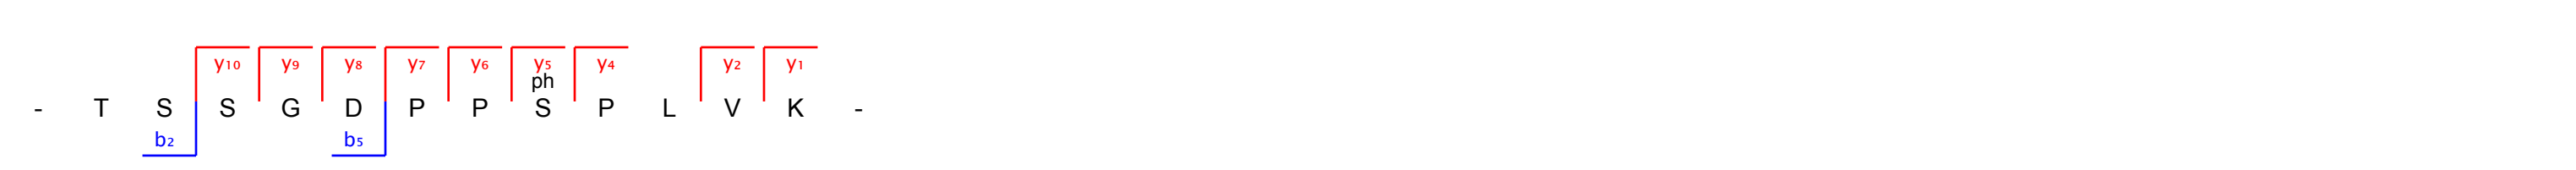

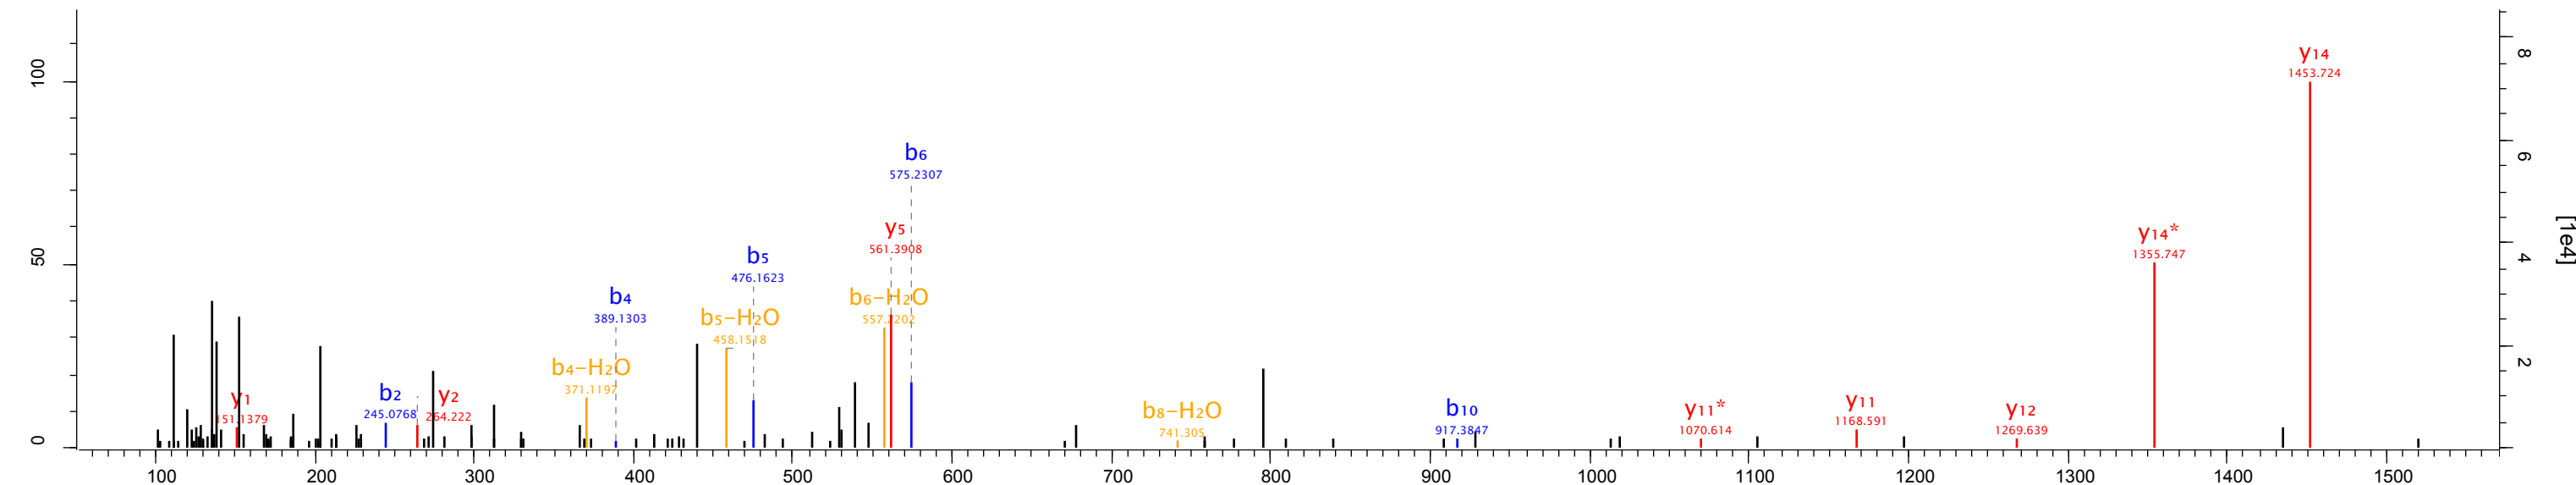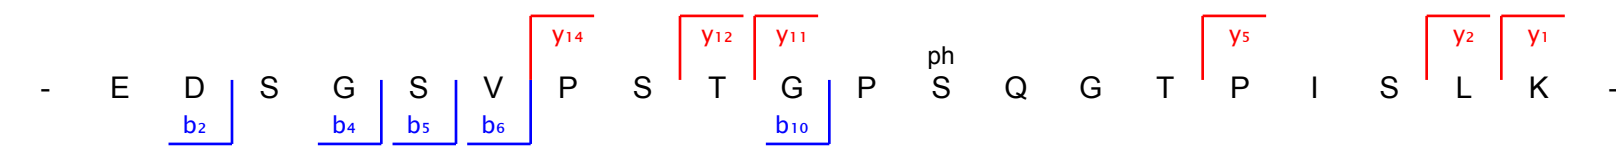

Raw file 20171215\_MaS\_33SR\_LMH\_phospho\_09 Scan 1893 Method FTMS; HCD Score 143.25 m/z 576.27 Gene names NUCKS1

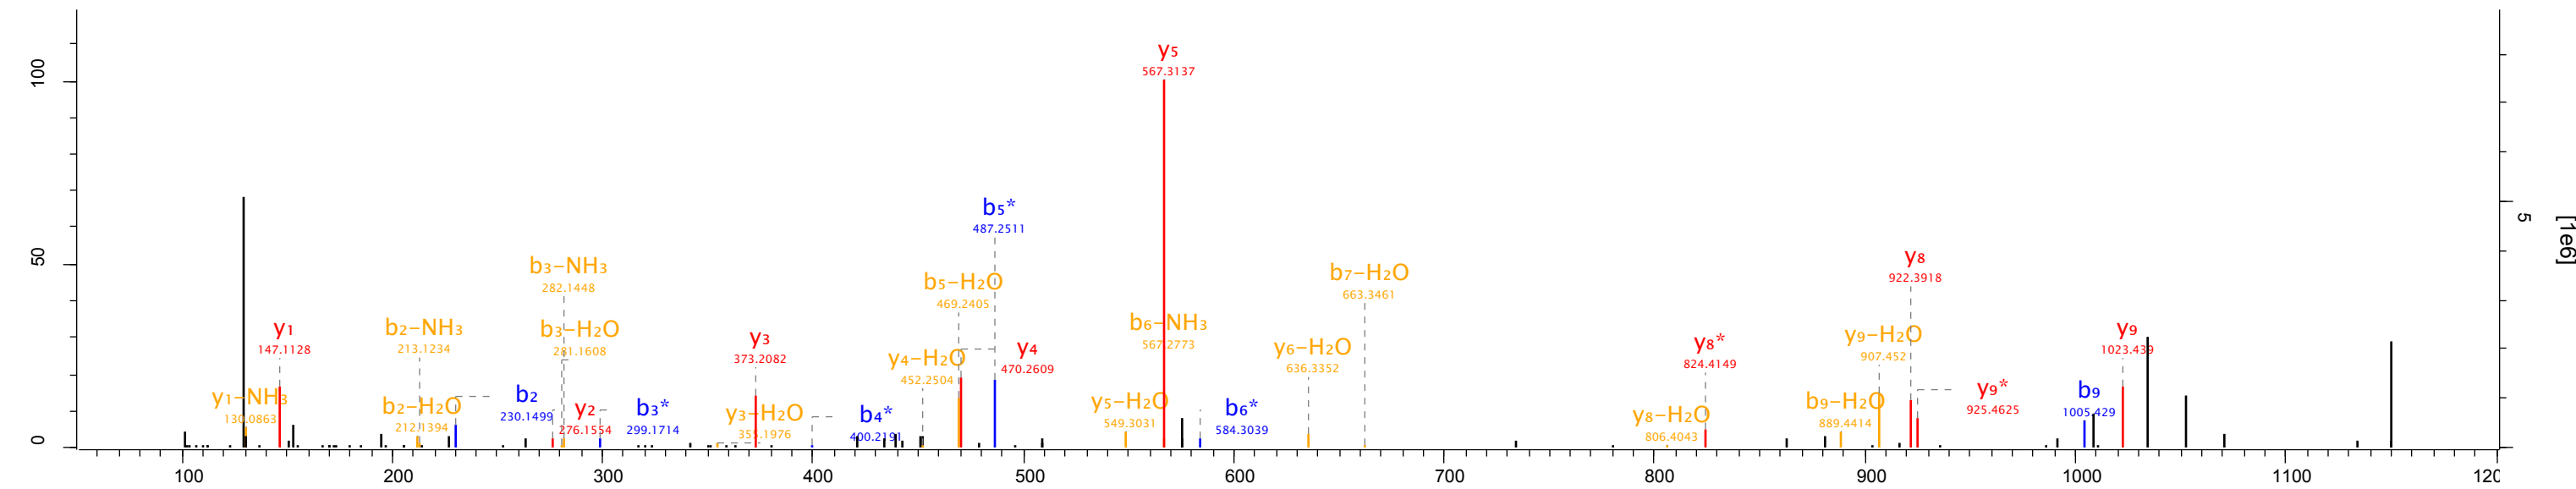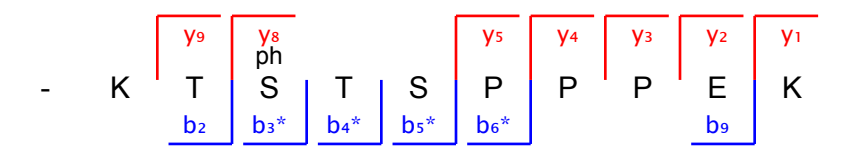

Raw file 20171215\_MaS\_33SR\_LMH\_phospho\_09 Scan 1983 Method FTMS; HCD Score 133.07 m/z 379.86 Gene names SKP1

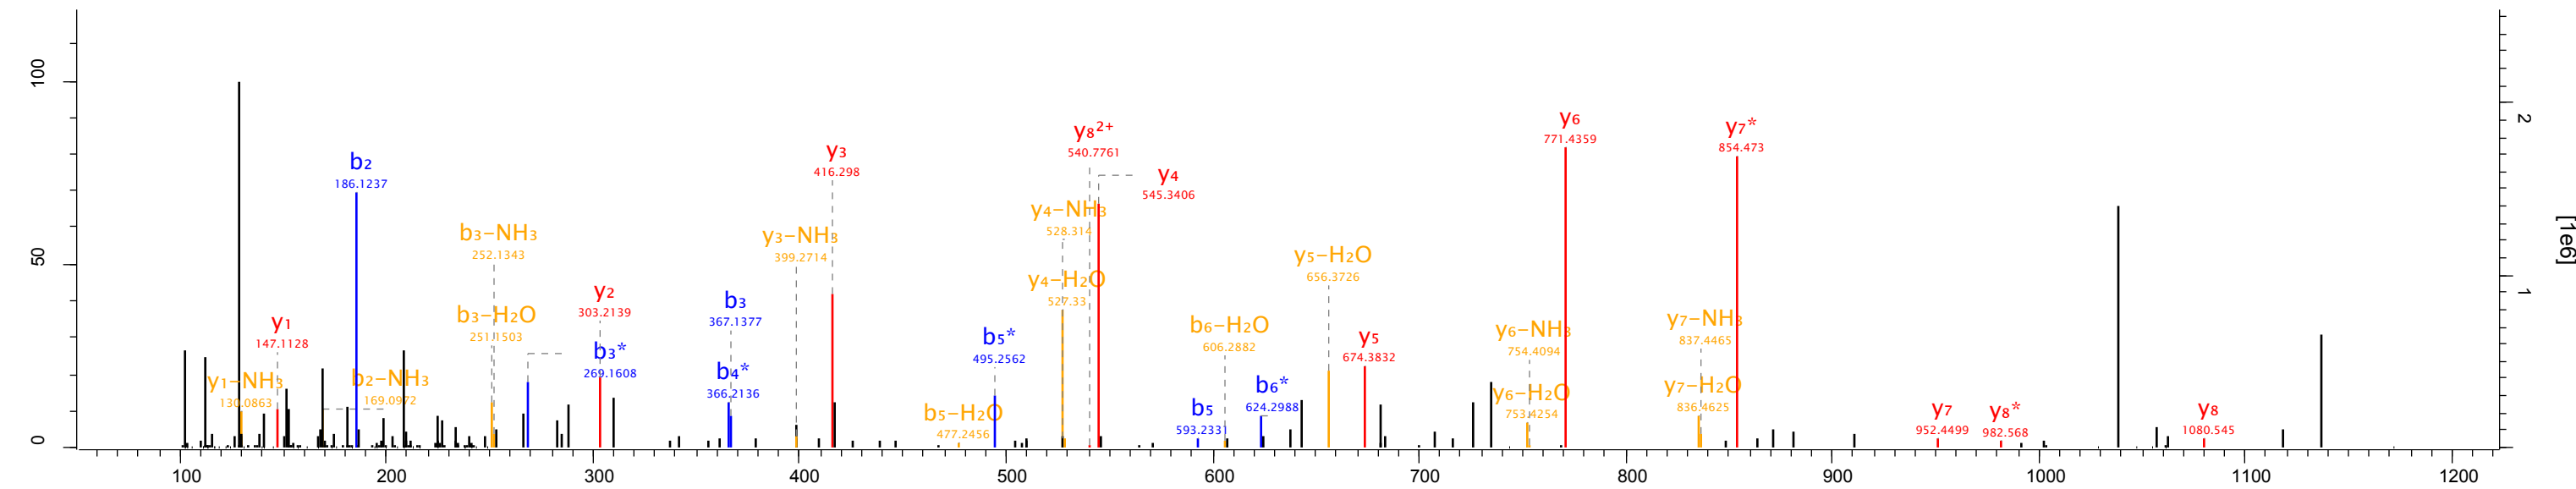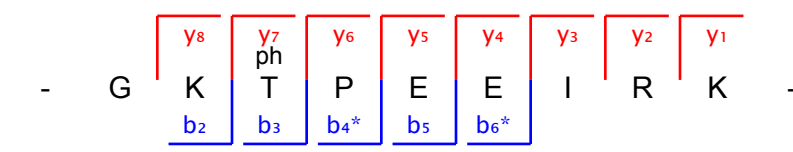



Raw file 20171215\_MaS\_33SR\_LMH\_phospho\_09 Scan 2783 Method FTMS; HCD Score 104.88 m/z 587.28 Gene names ZMYND8

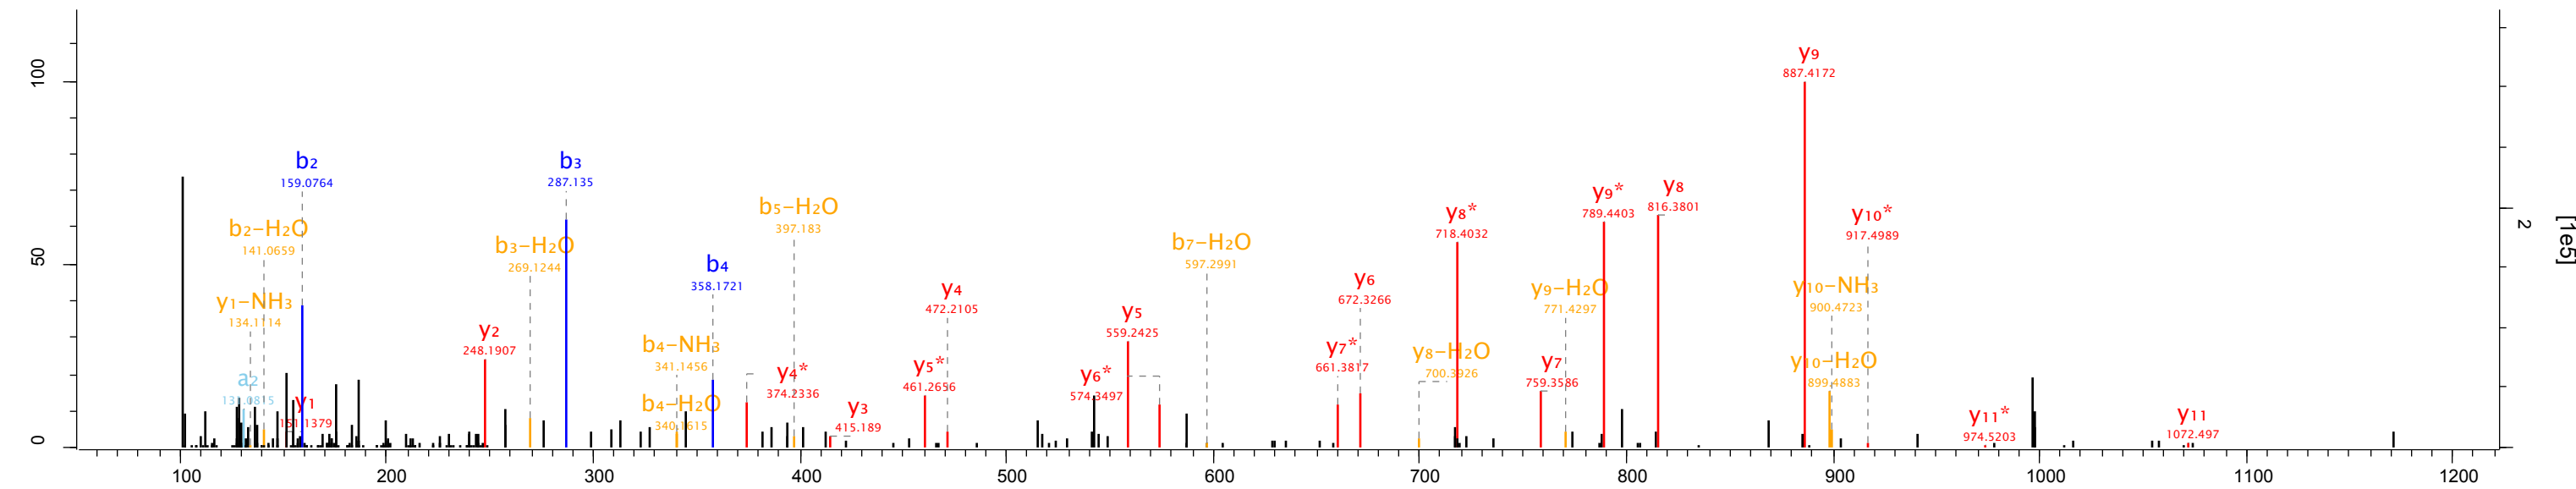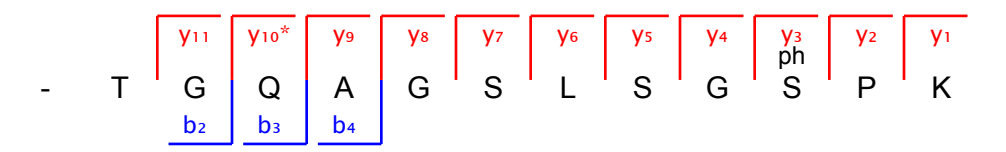

Raw file 20171215\_MaS\_33SR\_LMH\_phospho\_09 Scan 3213 Method FTMS; HCD Score 147.3 m/z 468.22 Gene names MAP4

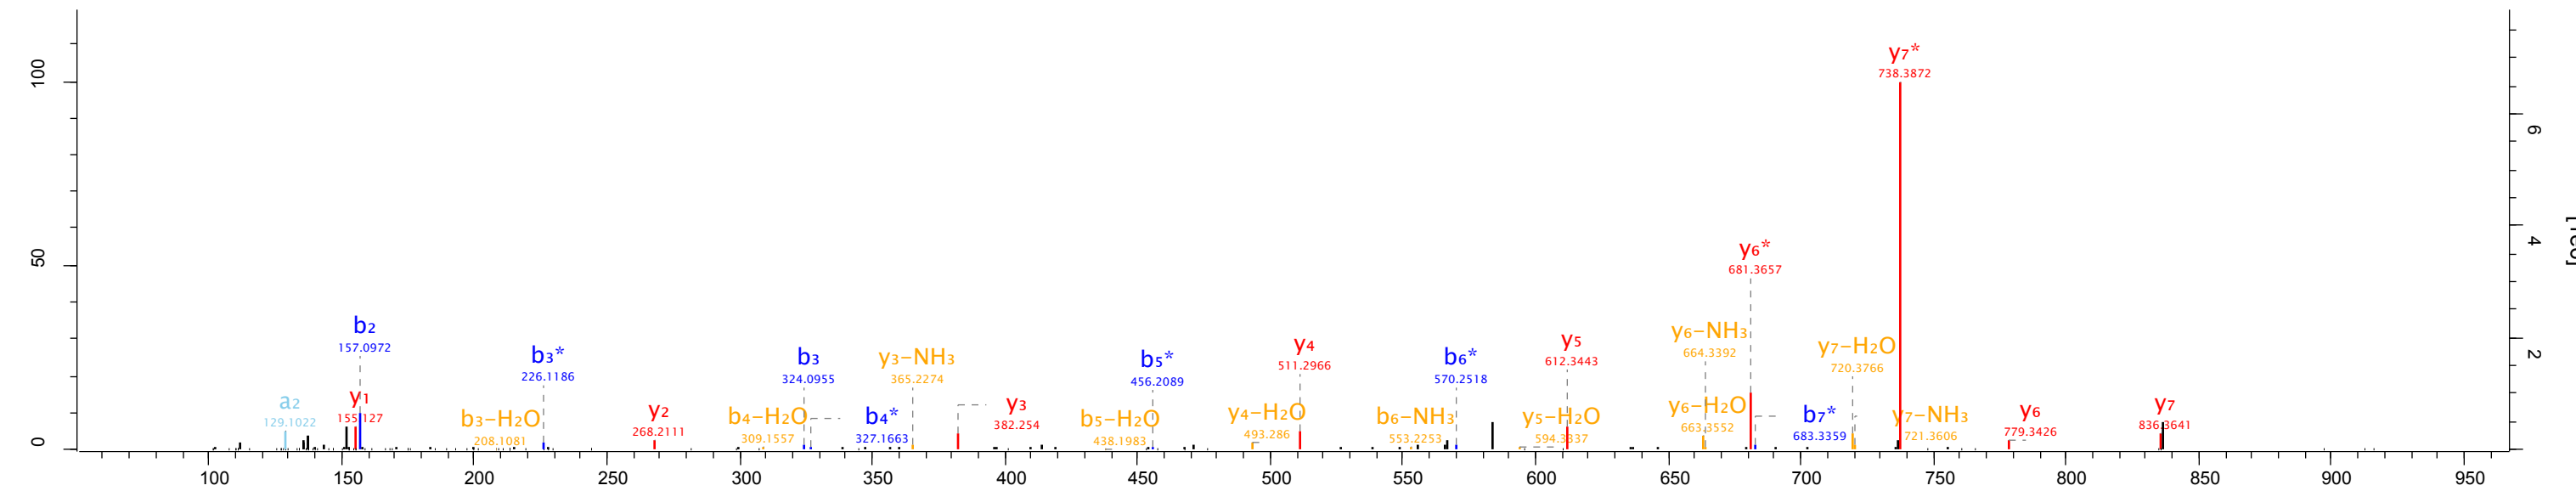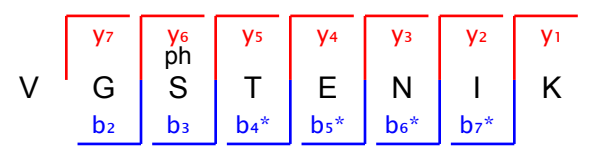

Raw file 20171215\_MaS\_33SR\_LMH\_phospho\_09 Scan 3223 Method FTMS; HCD Score 67.93 m/z 479.68 Gene names ZFP36L1

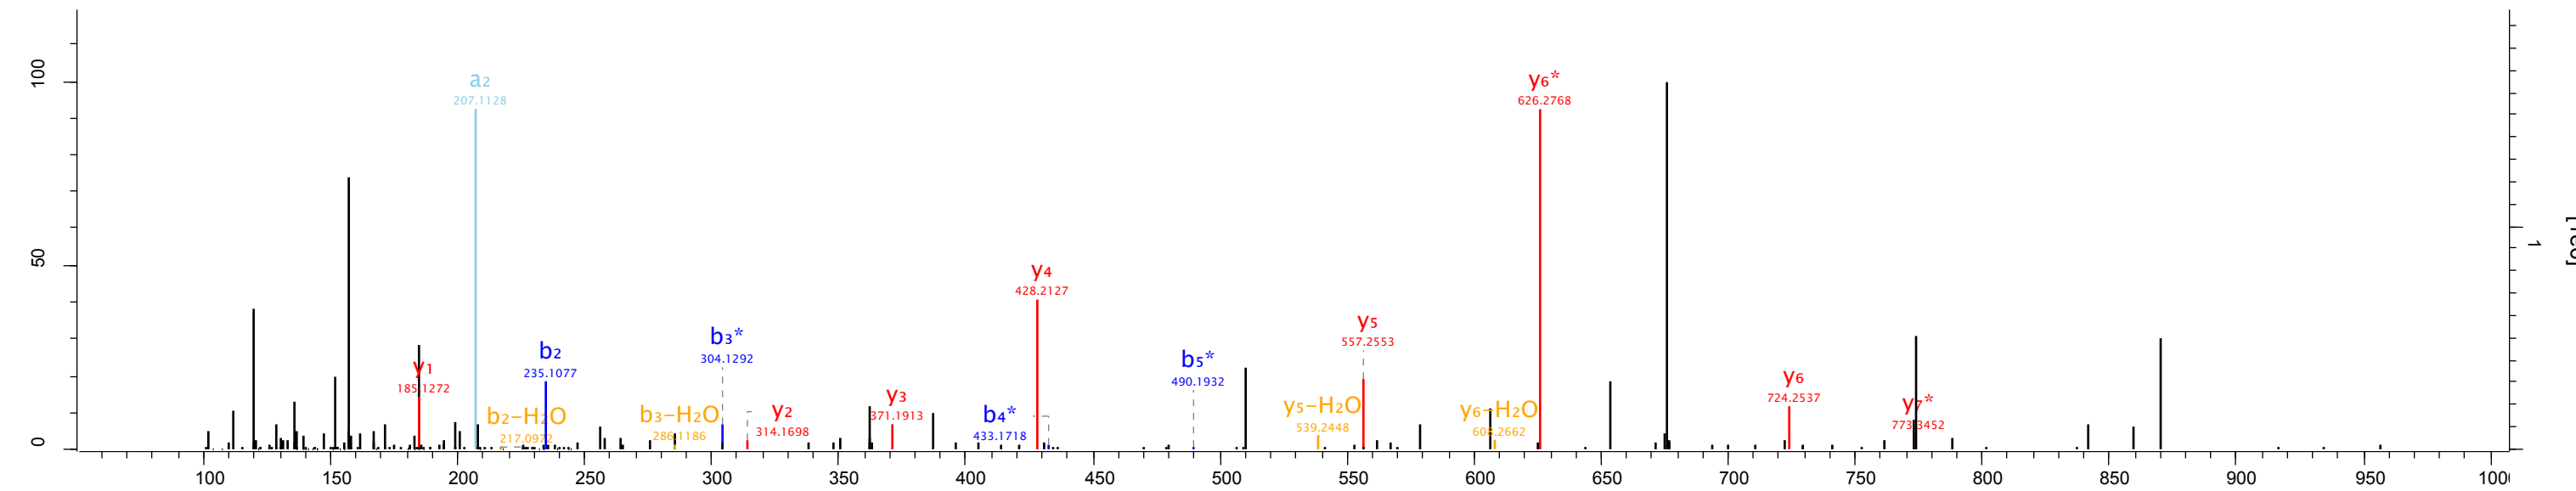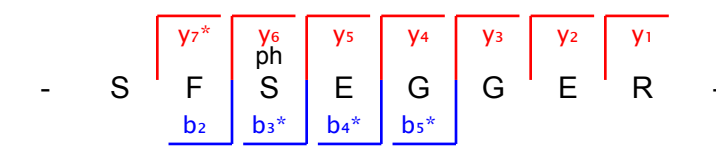

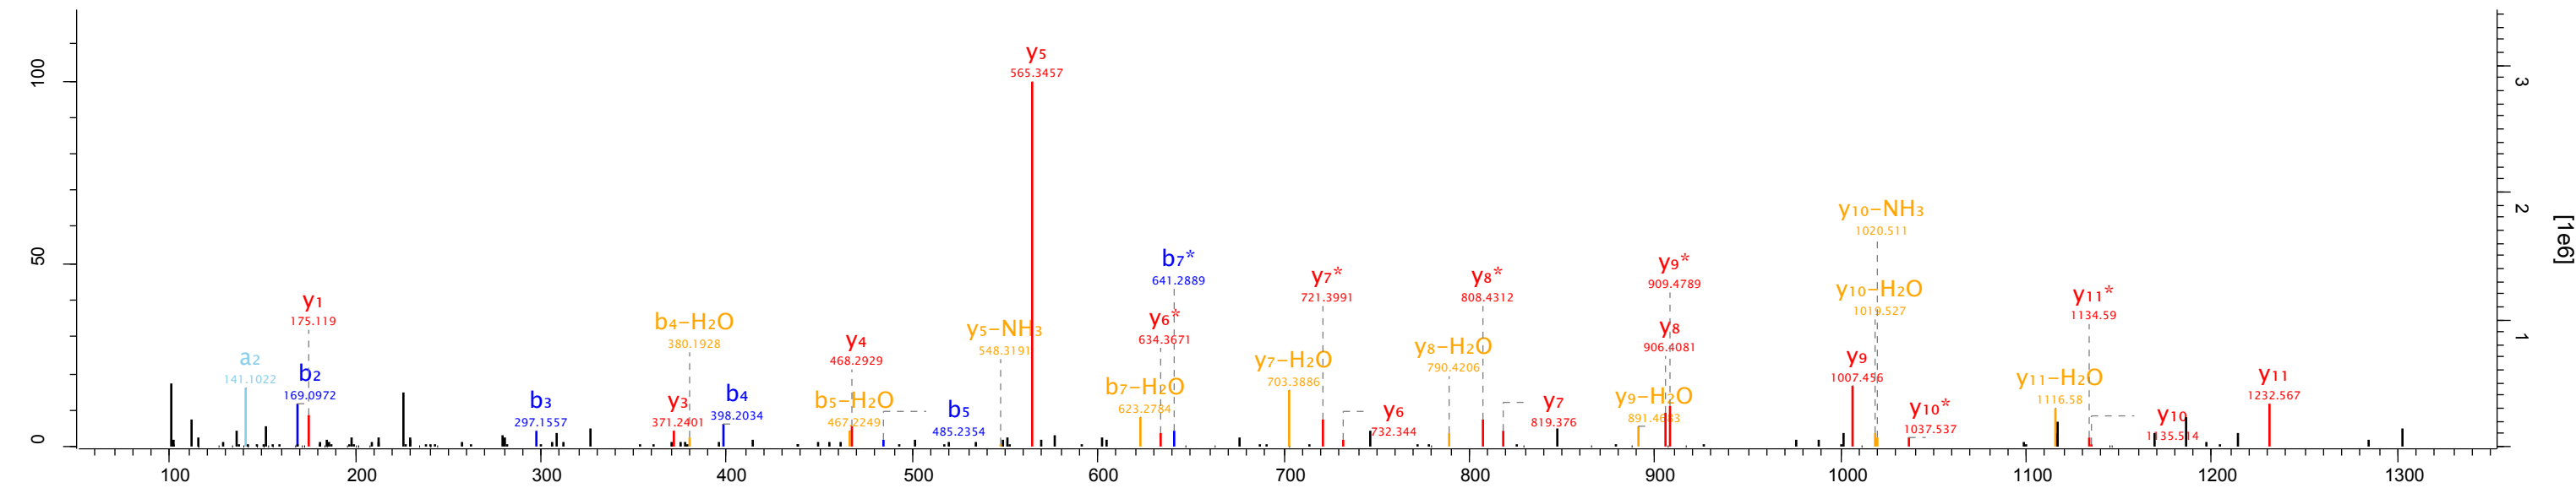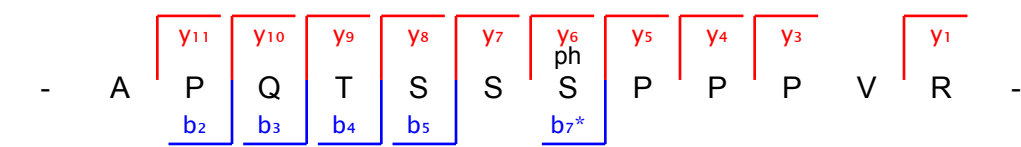

Raw file  
20171215\_MaS\_33SR\_LMH\_phospho\_09

Scan 3943 Method FTMS; HCD Score 115.26 m/z 684.3 Gene names SRRM2

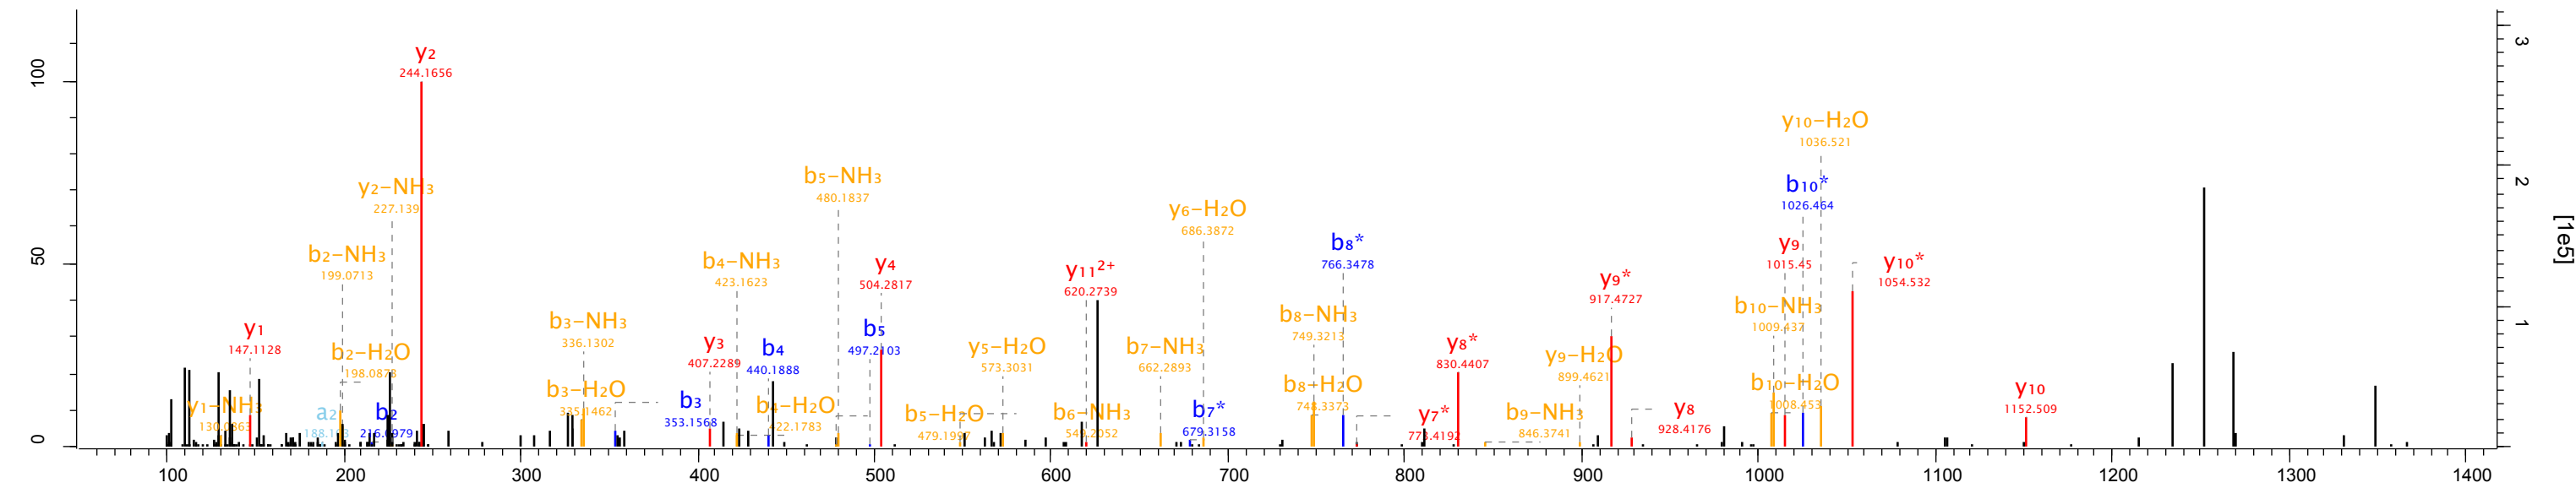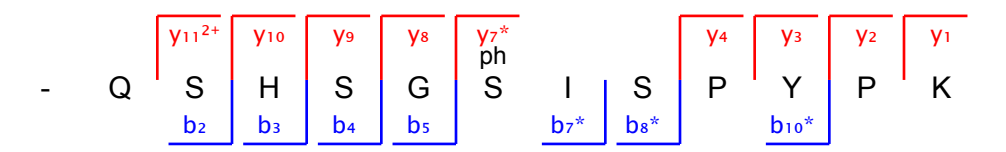

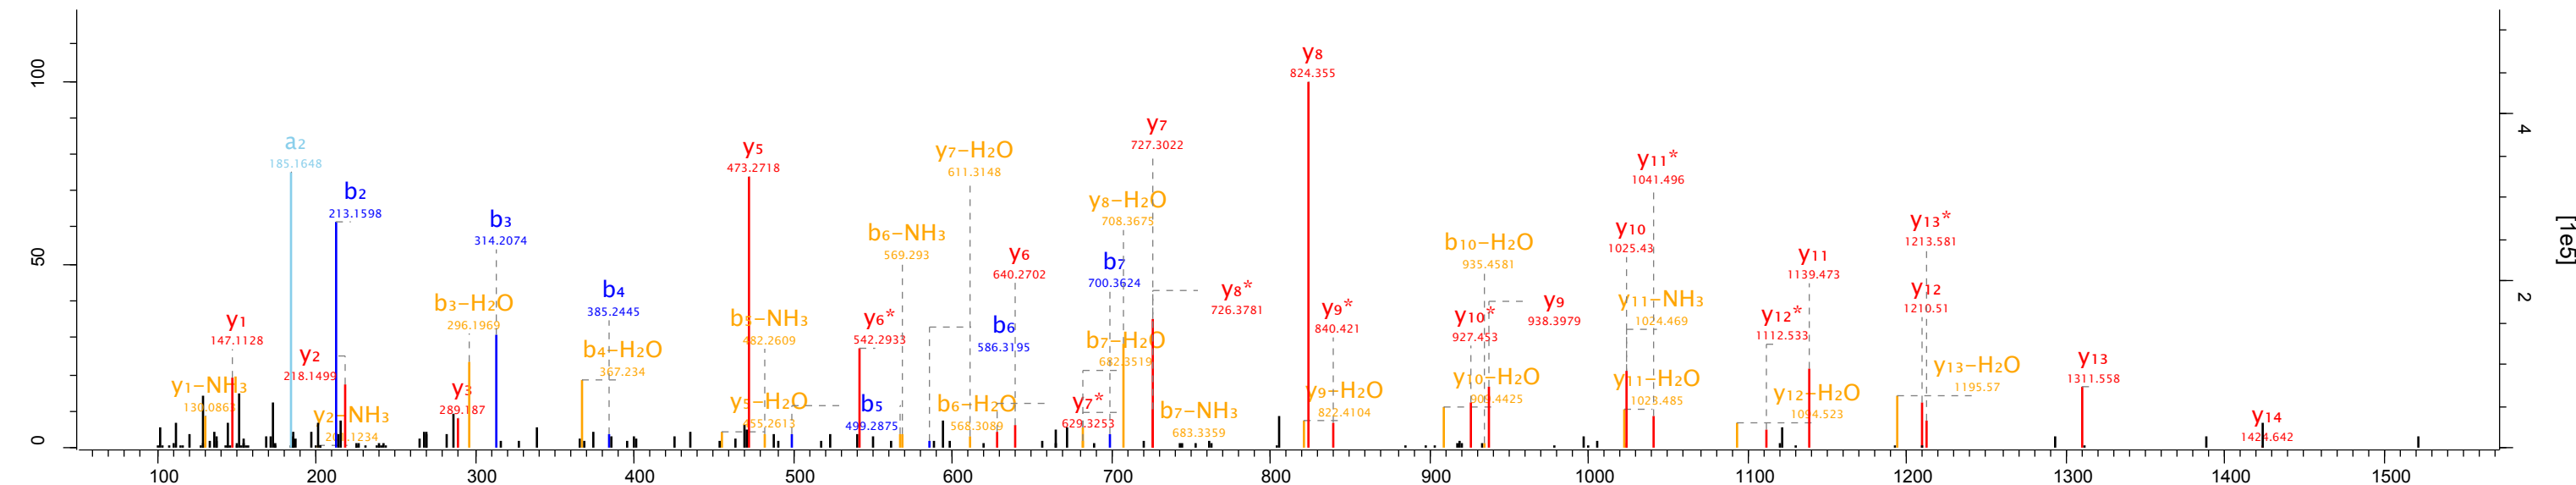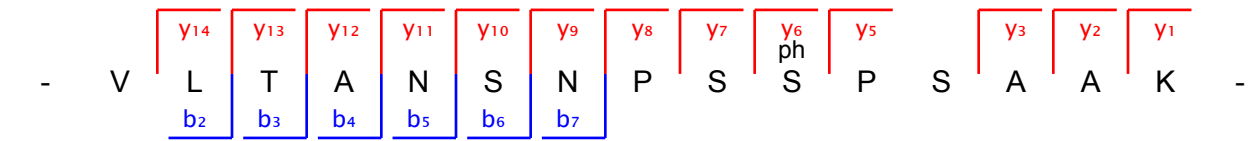

Raw file 20171215\_MaS\_33SR\_LMH\_phospho\_09 Scan 4573 Method FTMS; HCD Score 119.27 m/z 484.23 Gene names SETD2

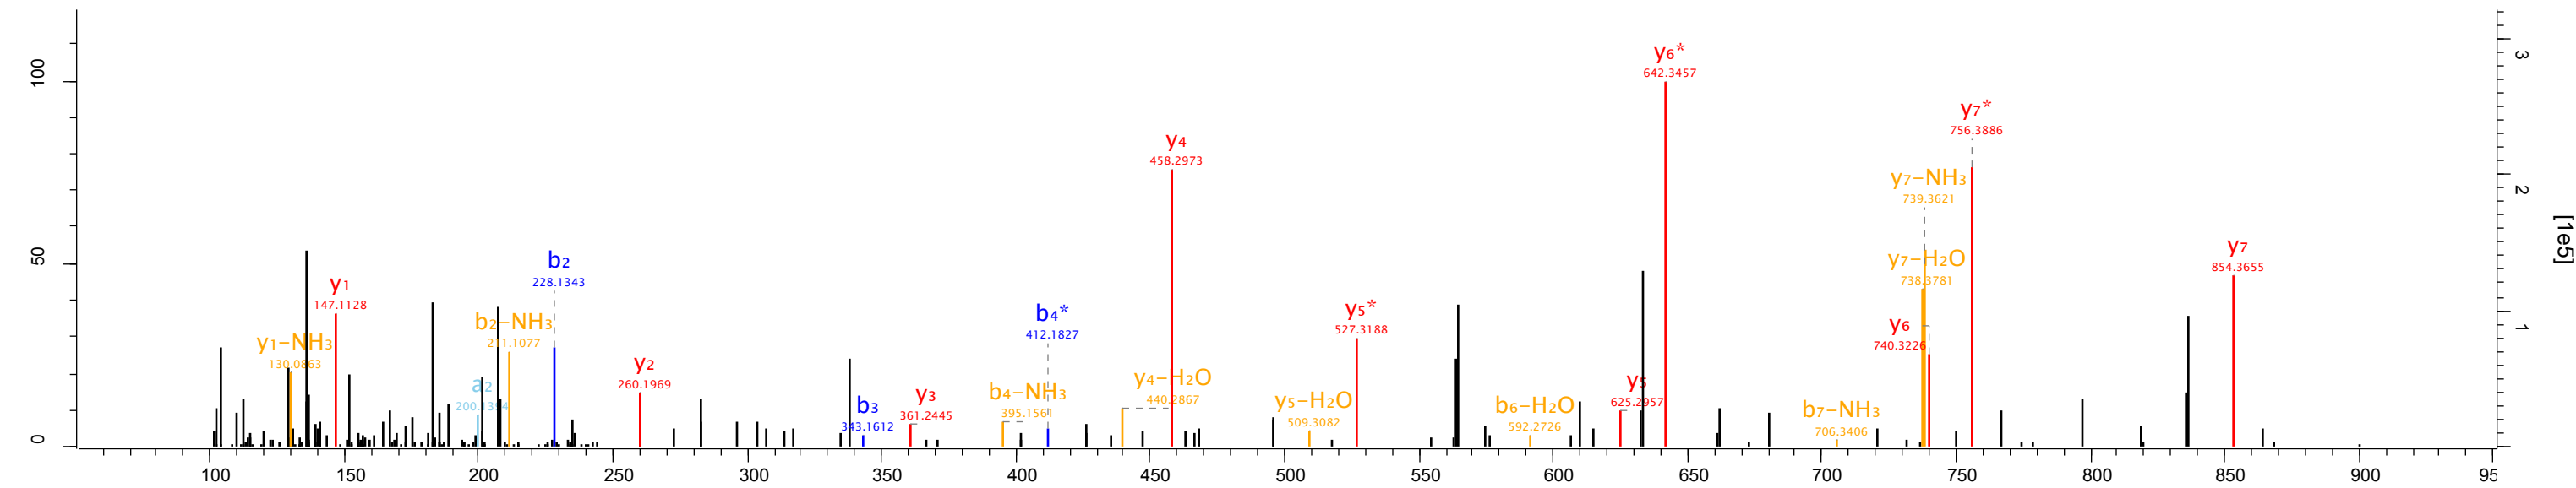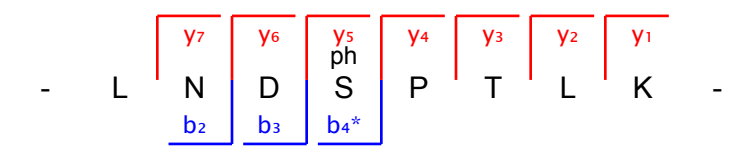

Raw file 20171215\_MaS\_33SR\_LMH\_phospho\_09 Scan 5153 Method FTMS; HCD Score 86.77 m/z 572.24 Gene names PRRC2B

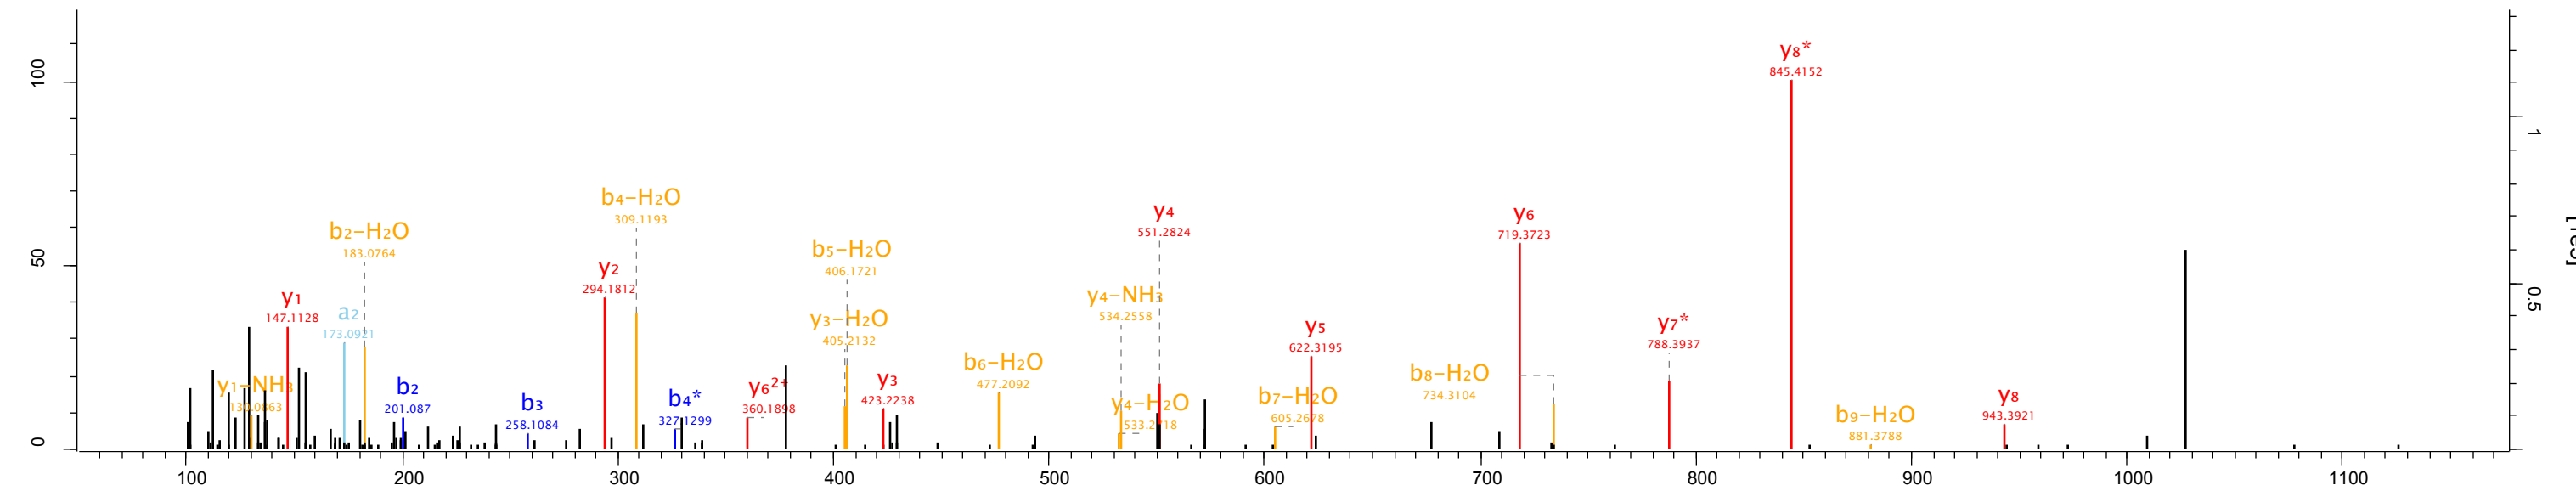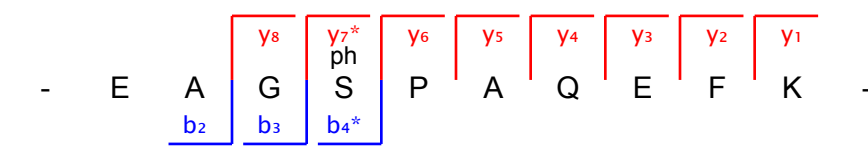



Raw file 20171215\_MaS\_33SR\_LMH\_phospho2\_01 Scan 11843 Method FTMS; HCD Score 62.19 m/z 723.37 Gene names SEC16A

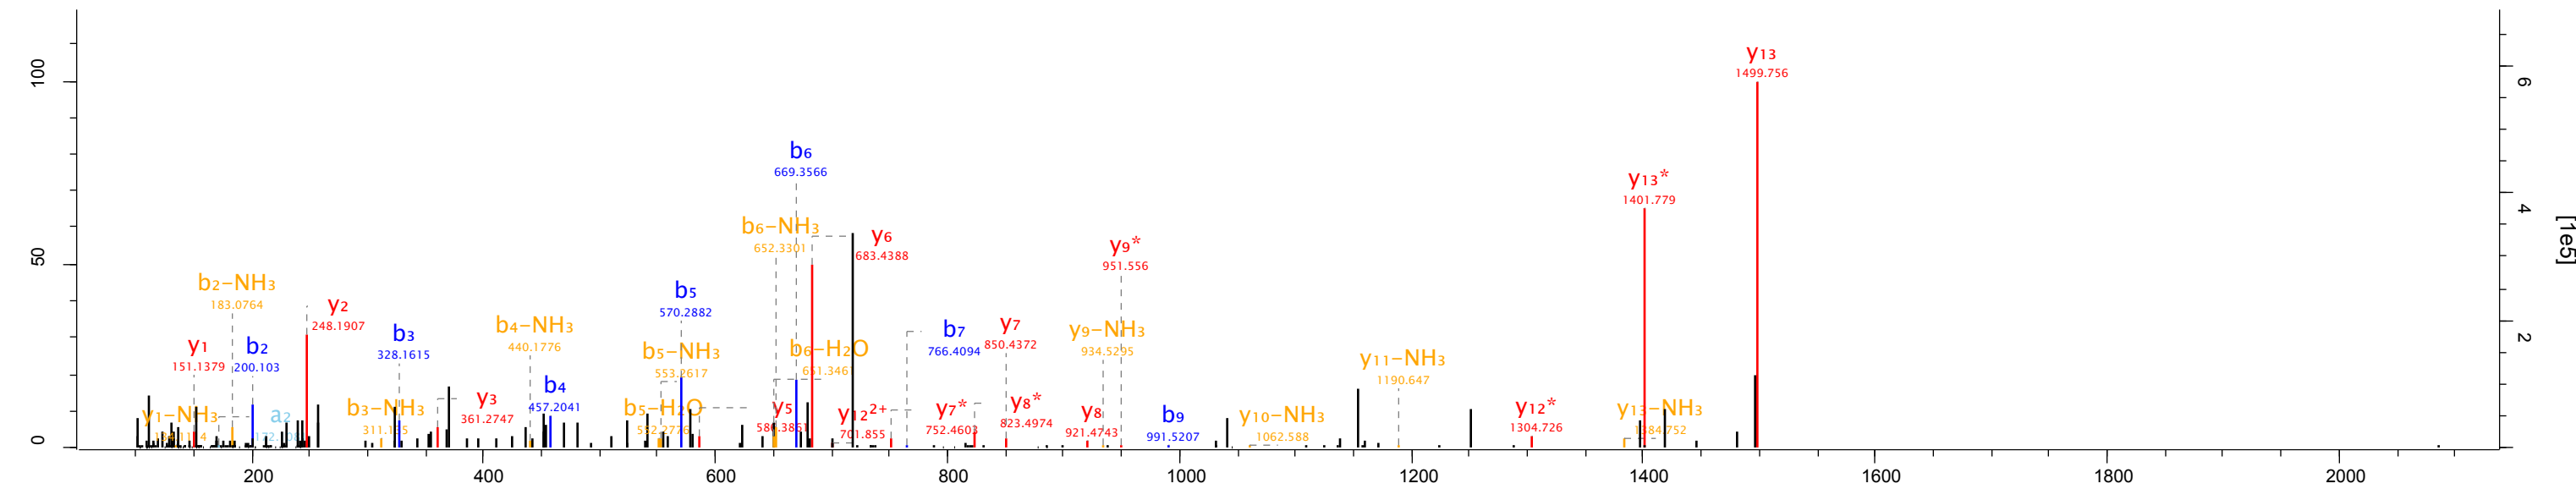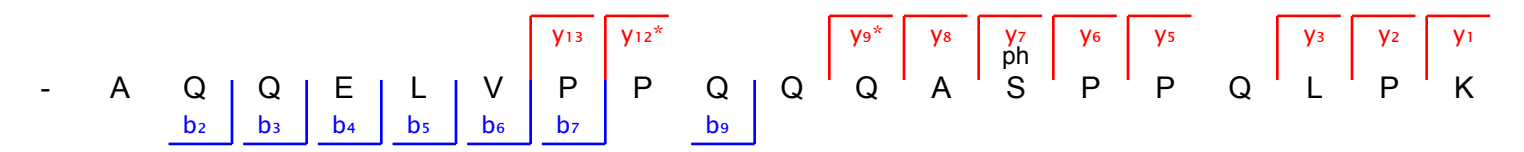

Raw file 20171215\_MaS\_33SR\_LMH\_phospho2\_01 Scan 12163 Method FTMS; HCD Score 97.82 m/z 838.37 Gene names TRIM28

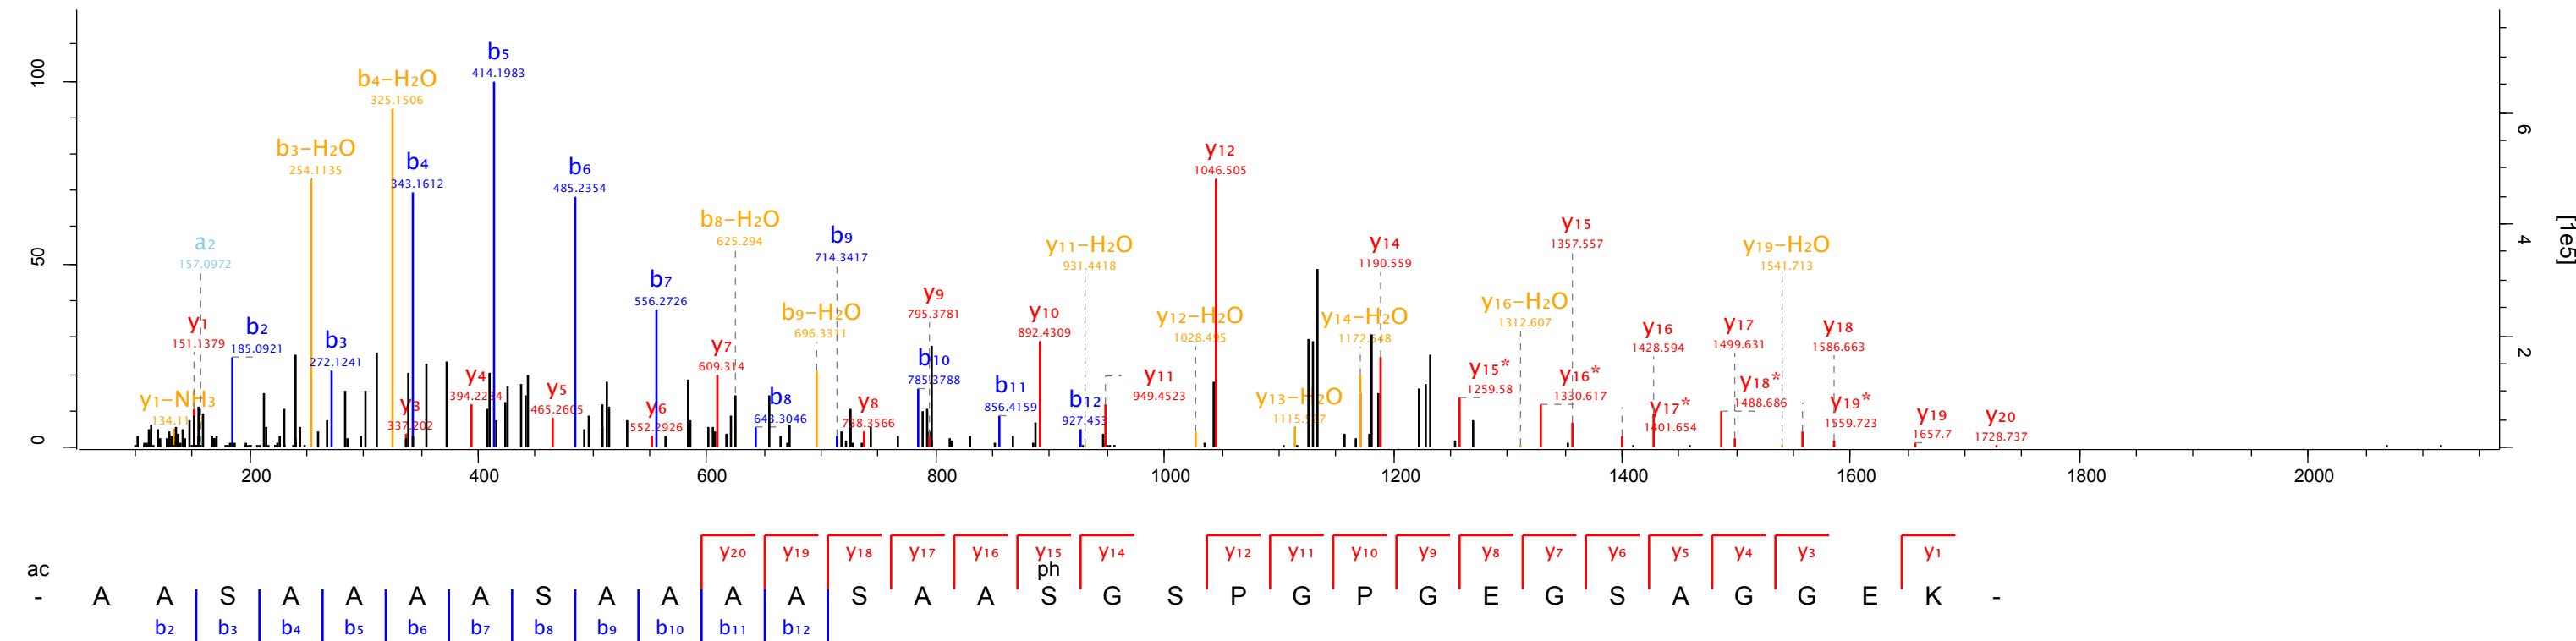

Raw file 20171215\_MaS\_33SR\_LMH\_phospho2\_01 Scan 3383 Method FTMS; HCD Score 109 m/z 548.26 Gene names EXOC1

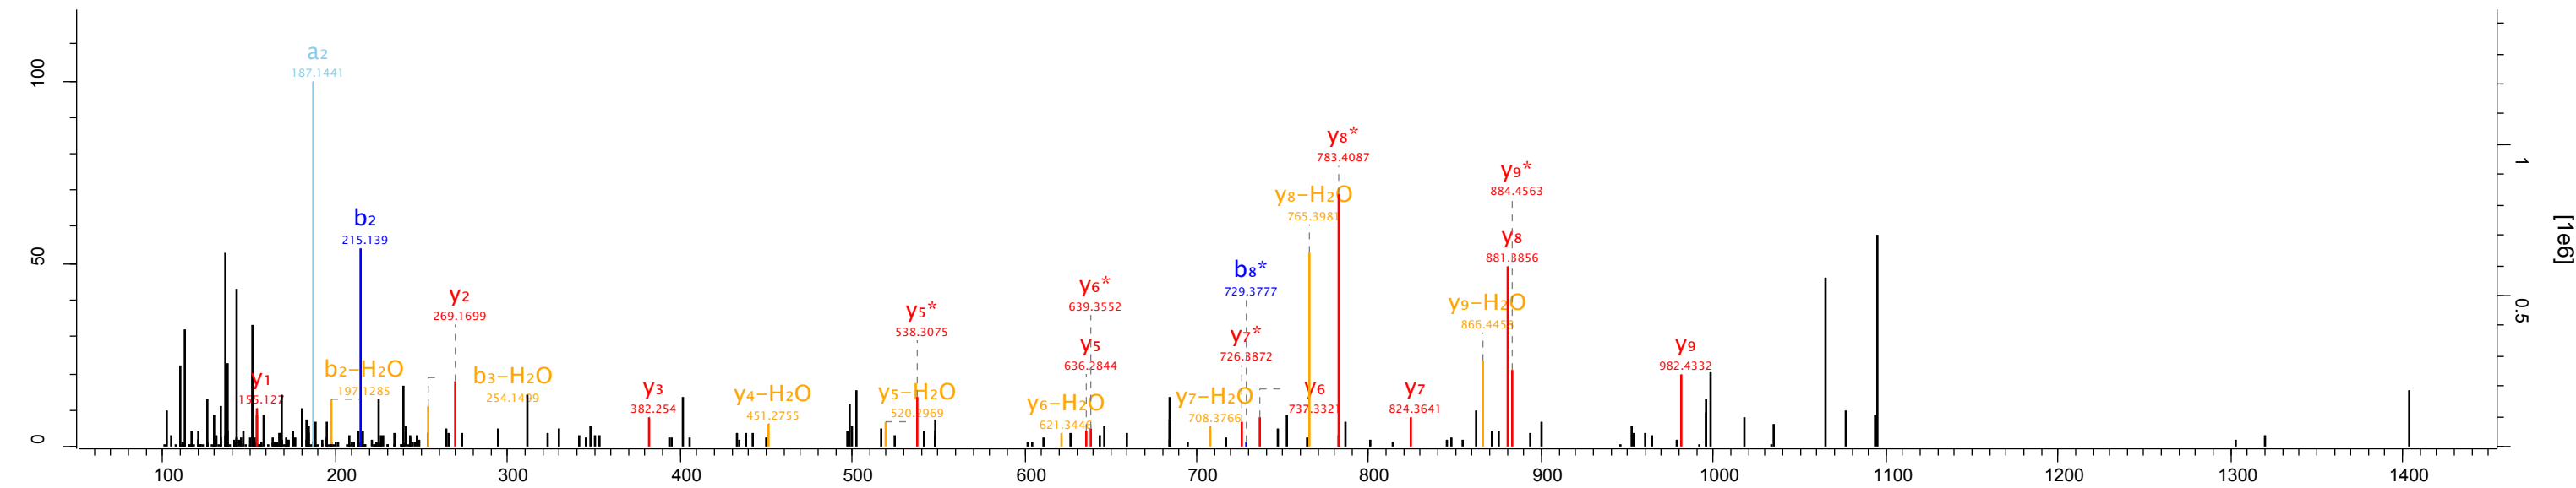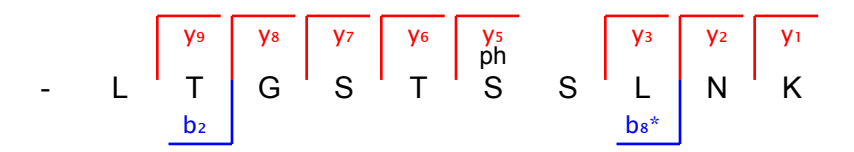

Raw file 20171215\_MaS\_33SR\_LMH\_phospho2\_01 Scan 3693 Method FTMS; HCD Score 82.63 m/z 782.33 Gene names AEBP2

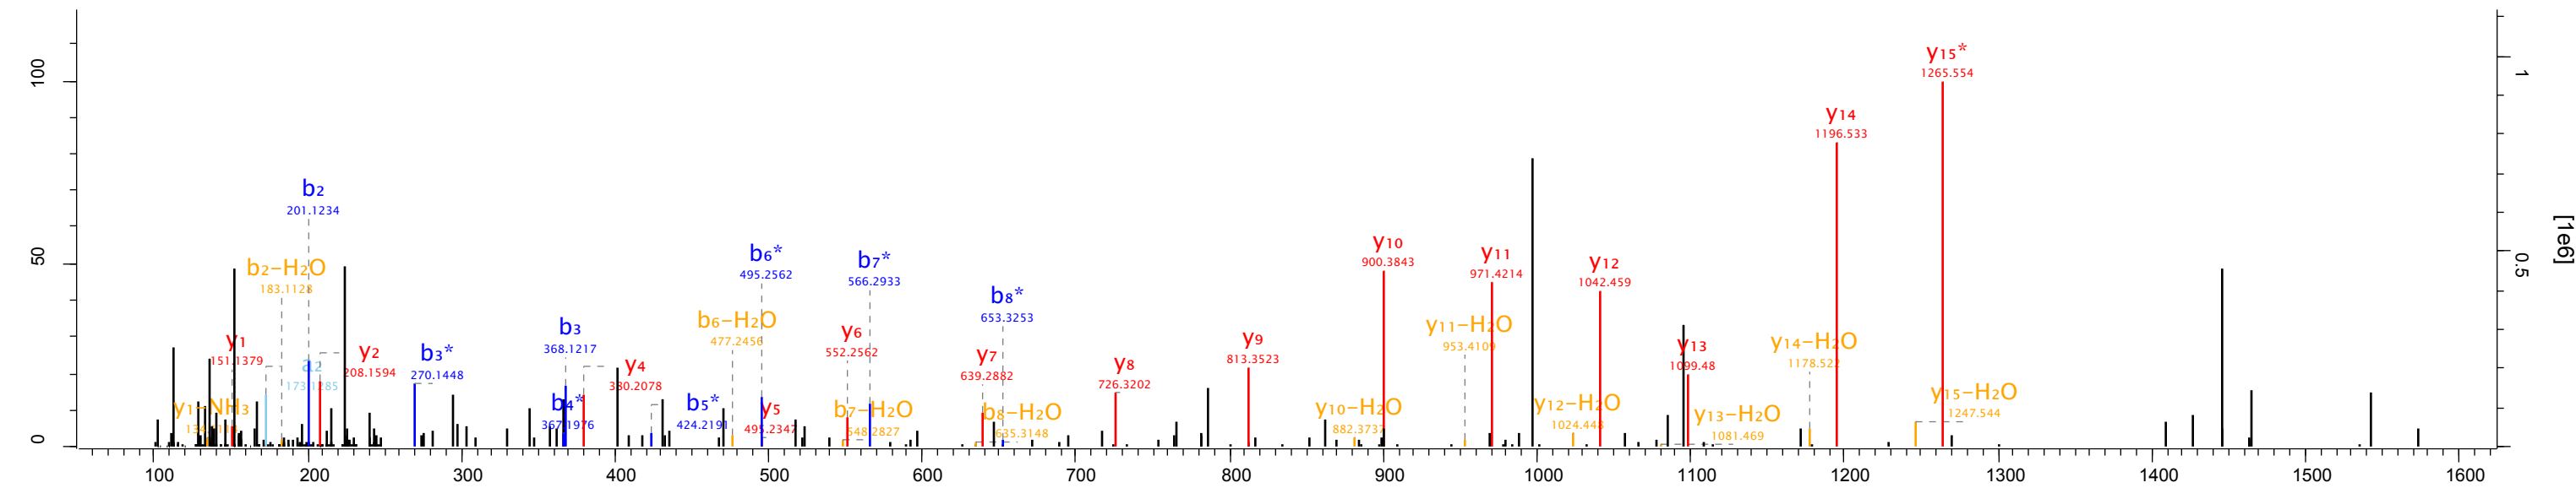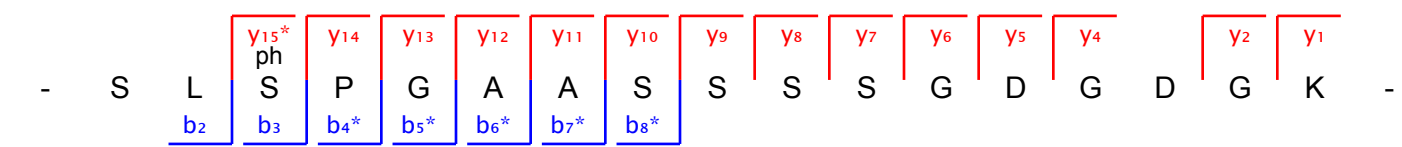

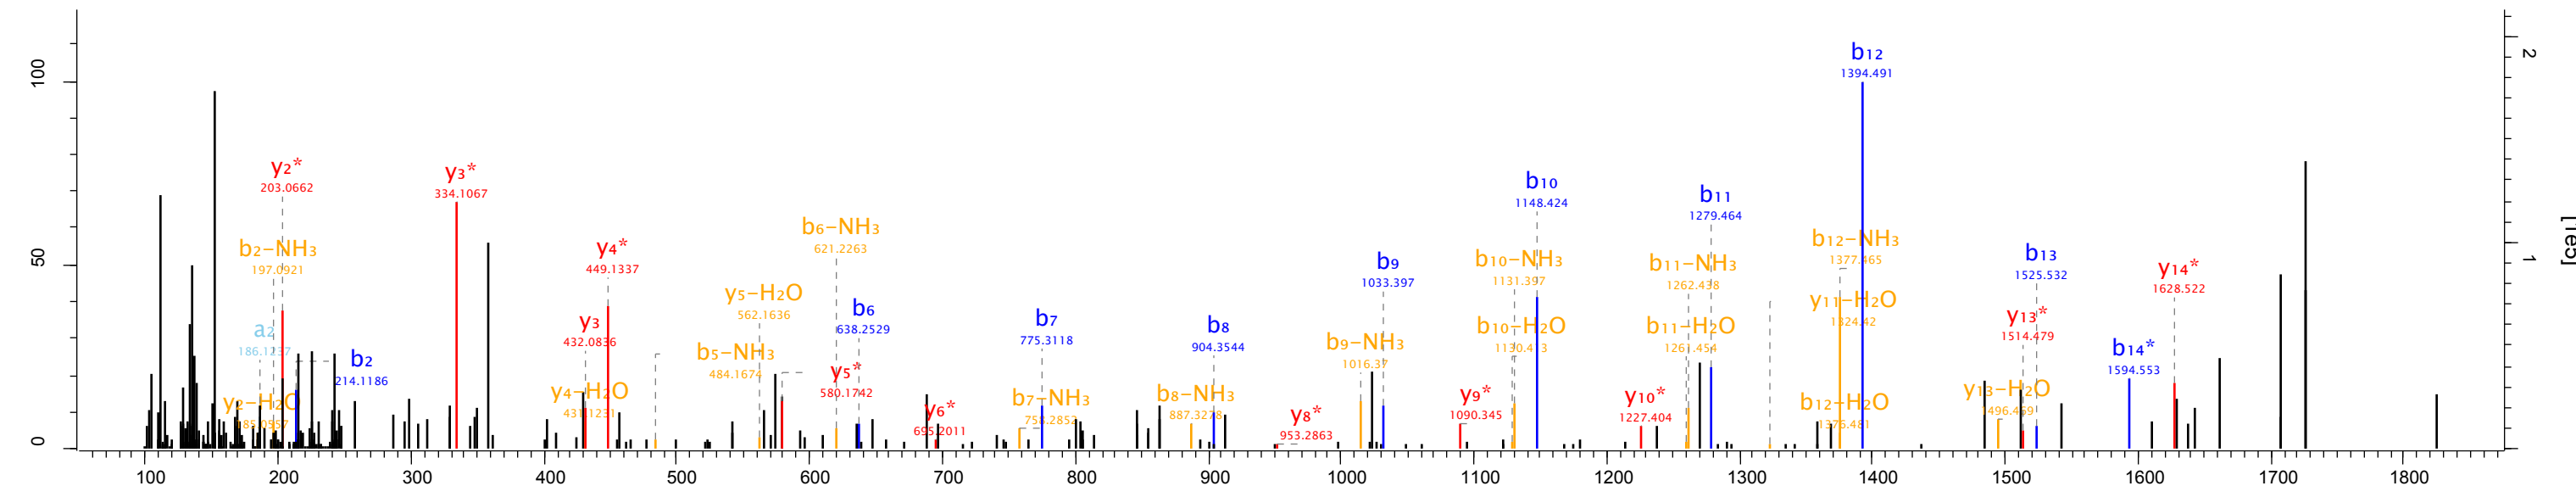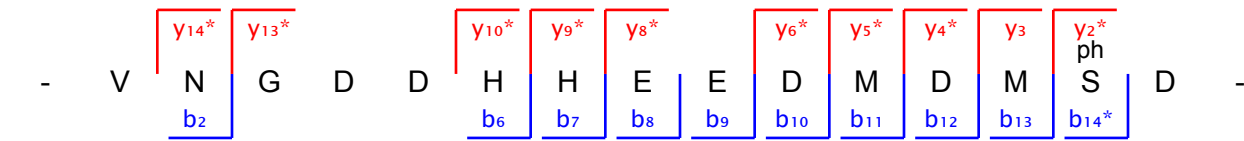

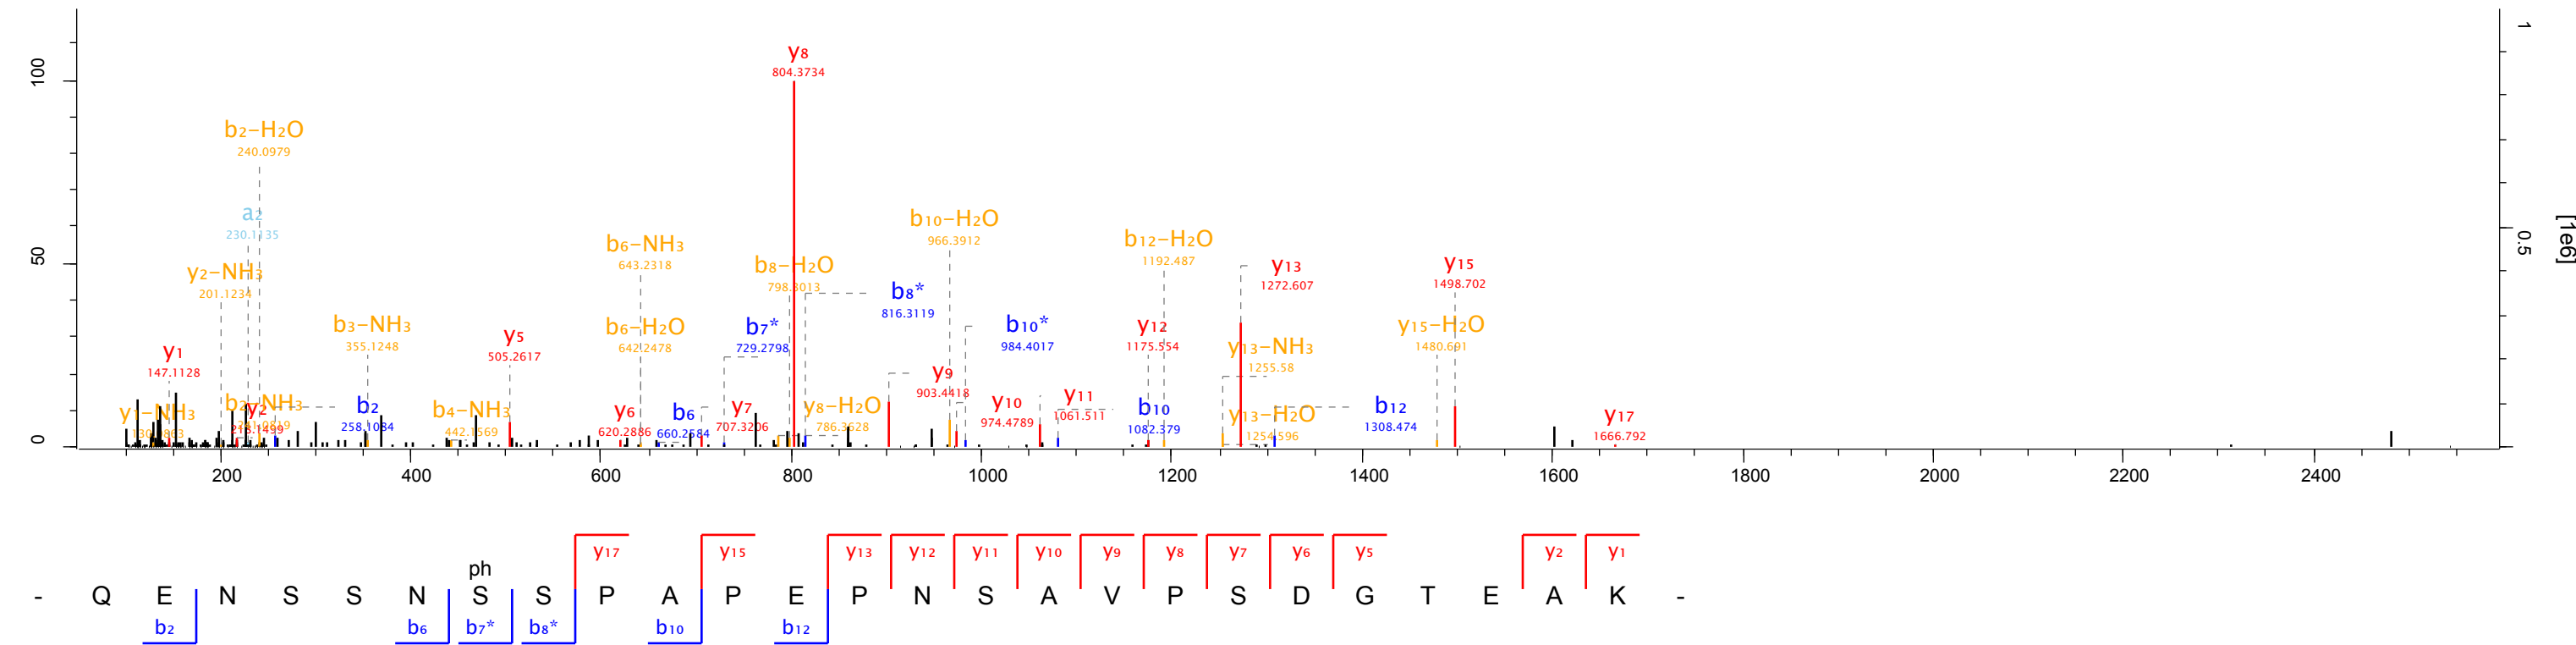

Raw file 20171215\_MaS\_33SR\_LMH\_phospho2\_01 Scan 5653 Method FTMS; HCD Score 68.42 m/z 639.63 Gene names RLF

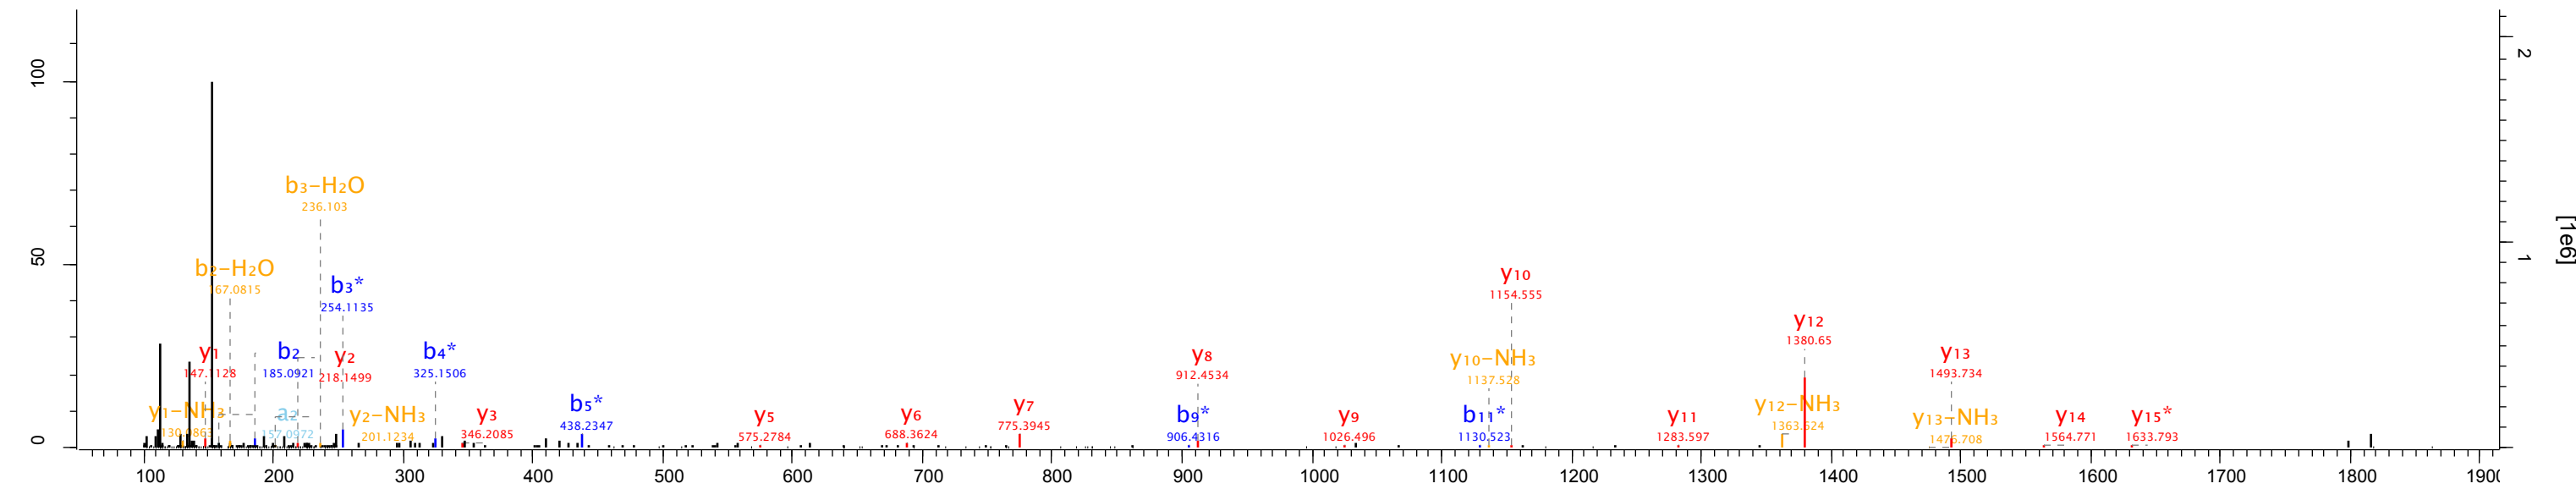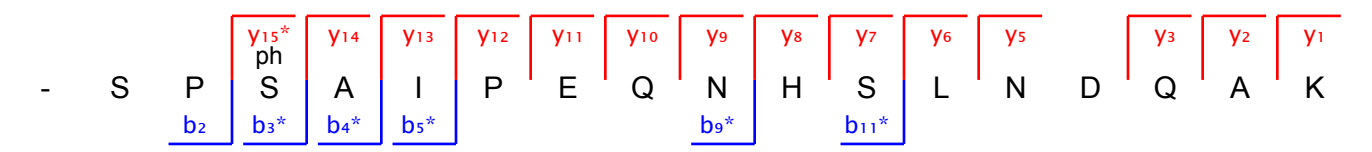

Raw file 20171215\_MaS\_33SR\_LMH\_phospho2\_01 Scan 5663 Method FTMS; HCD Score 280.85 m/z 1043.93 Gene names CRYBG3

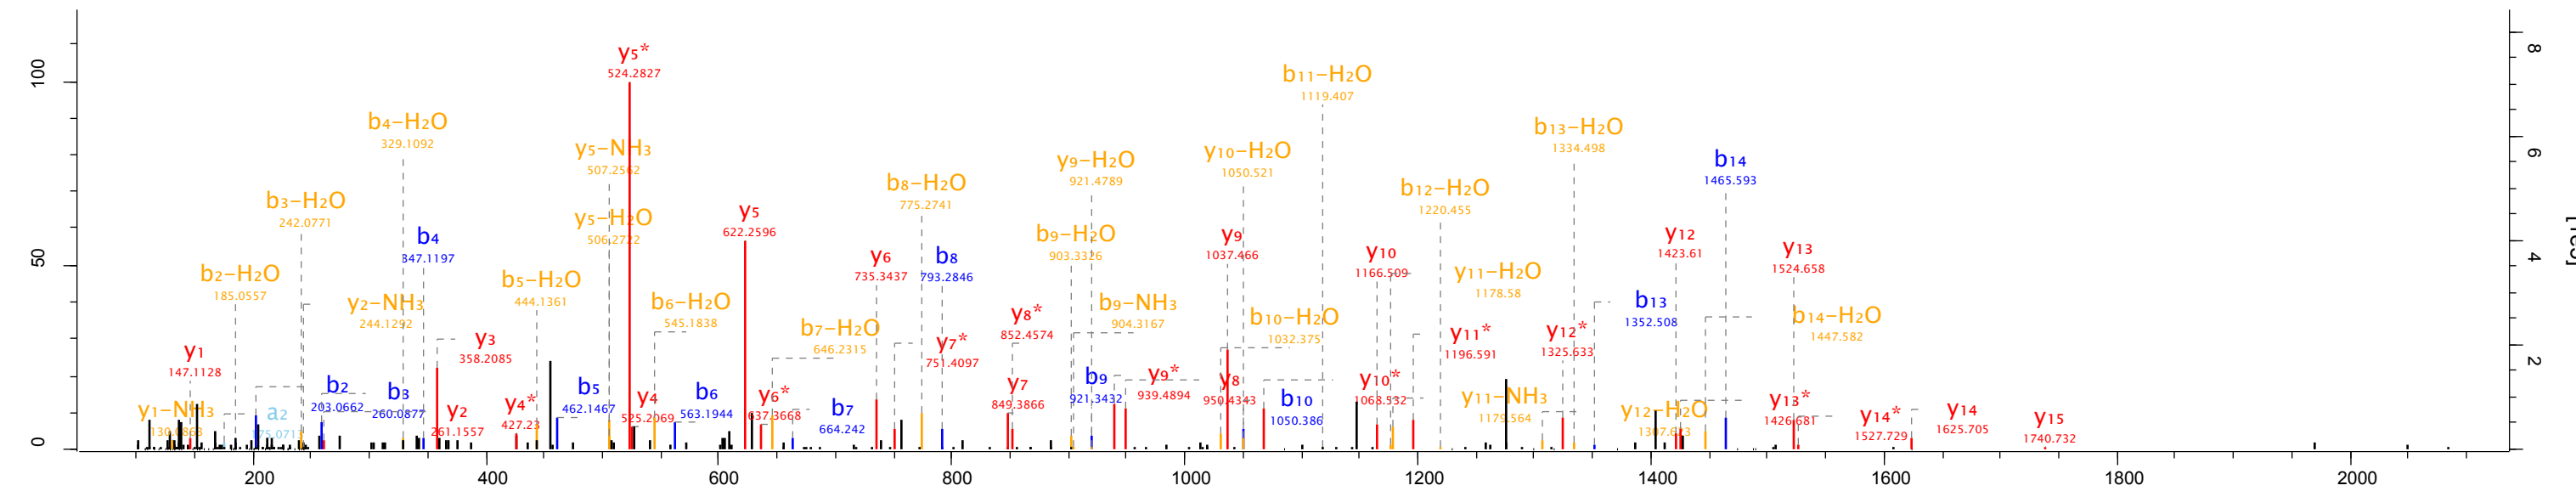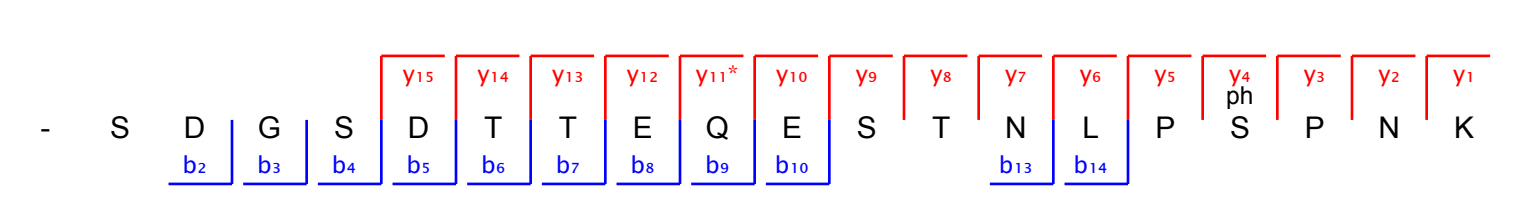



Raw file 20171215\_MaS\_33SR\_LMH\_phospho2\_01 Scan 5993 Method FTMS; HCD Score 135.16 m/z 1257.02 Gene names GSK3A

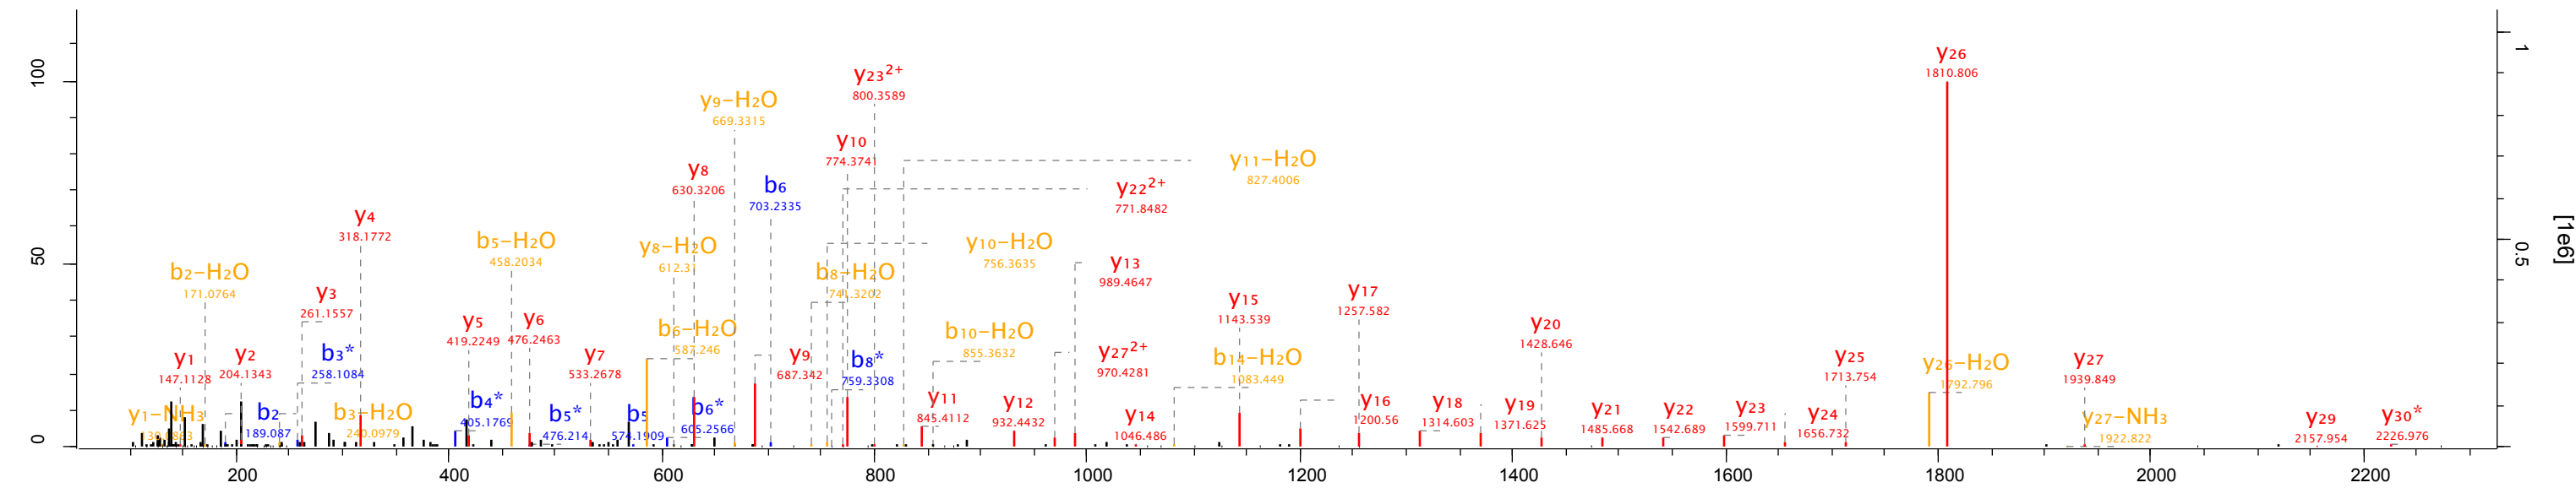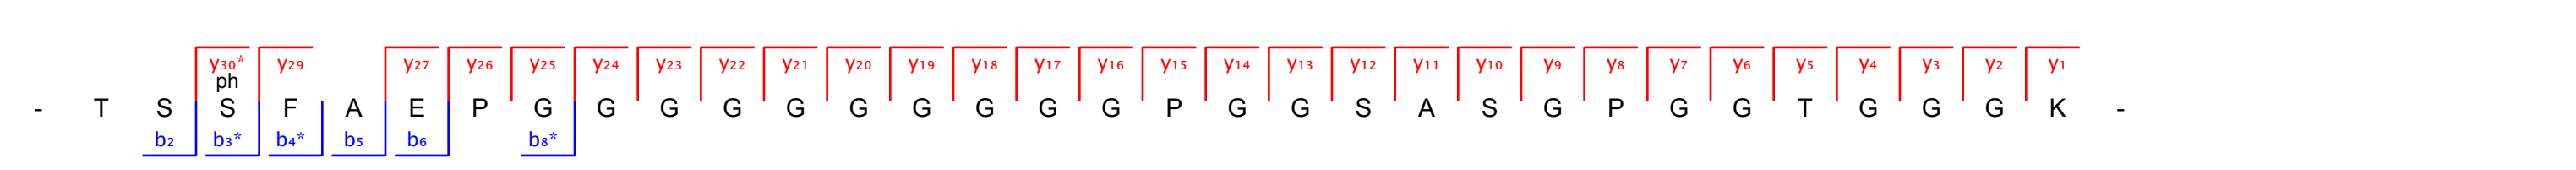



Raw file: 20171215\_MaS\_33SR\_LMH\_phospho2\_01  
 Scan: 9273 Method: FTMS; HCD Score: 149.47 m/z: 838.41 Gene names: MICALL1

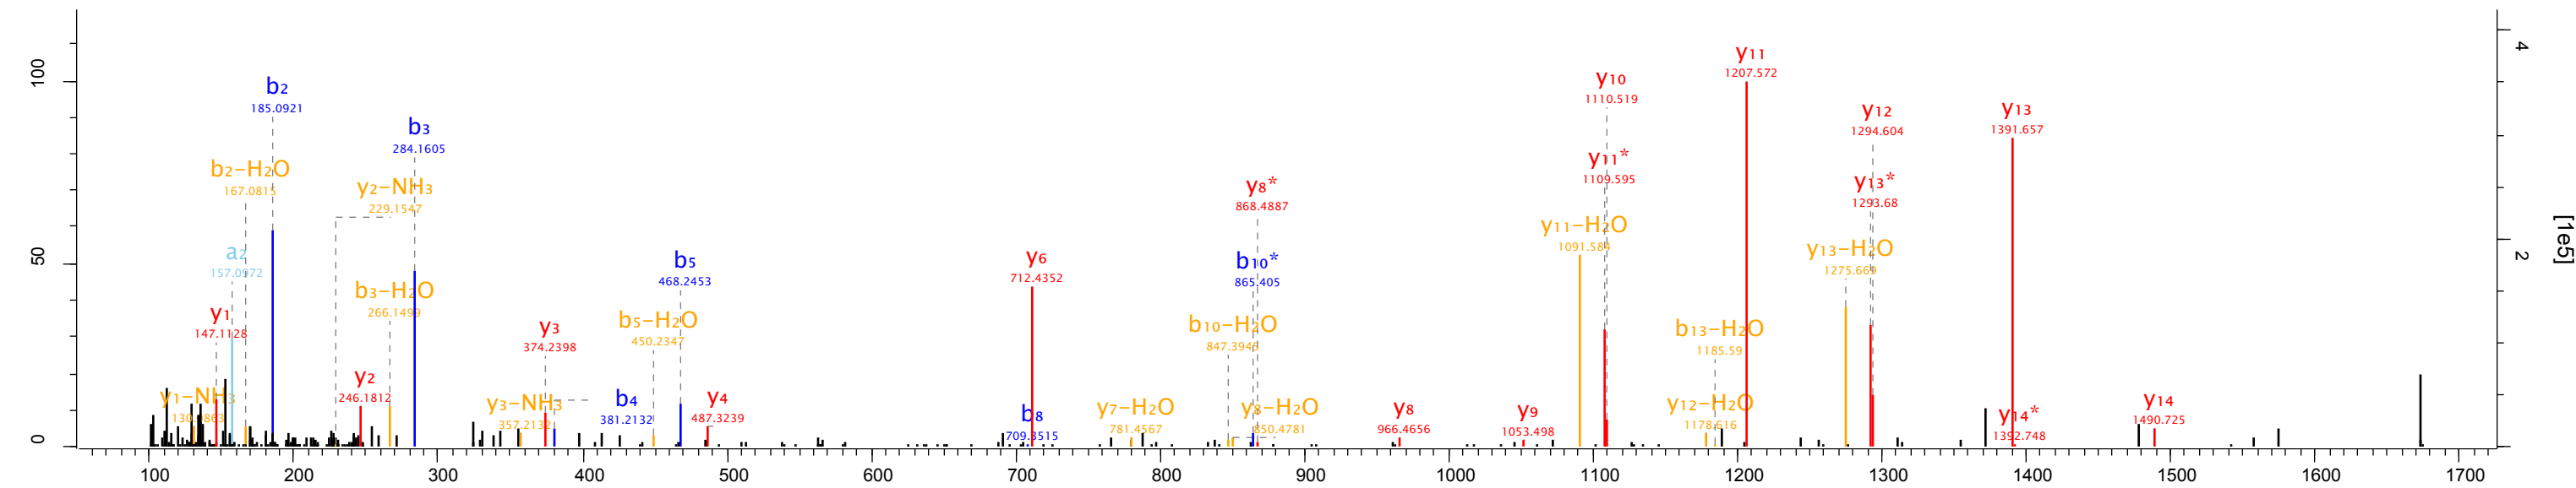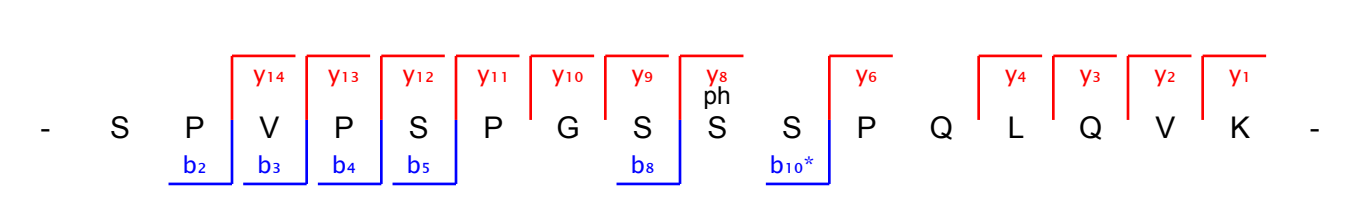

Raw file: 20171215\_MaS\_33SR\_LMH\_phospho2\_02  
 Scan: 10223 Method: FTMS; HCD Score: 99.32 m/z: 729.83 Gene names: BCLAF1

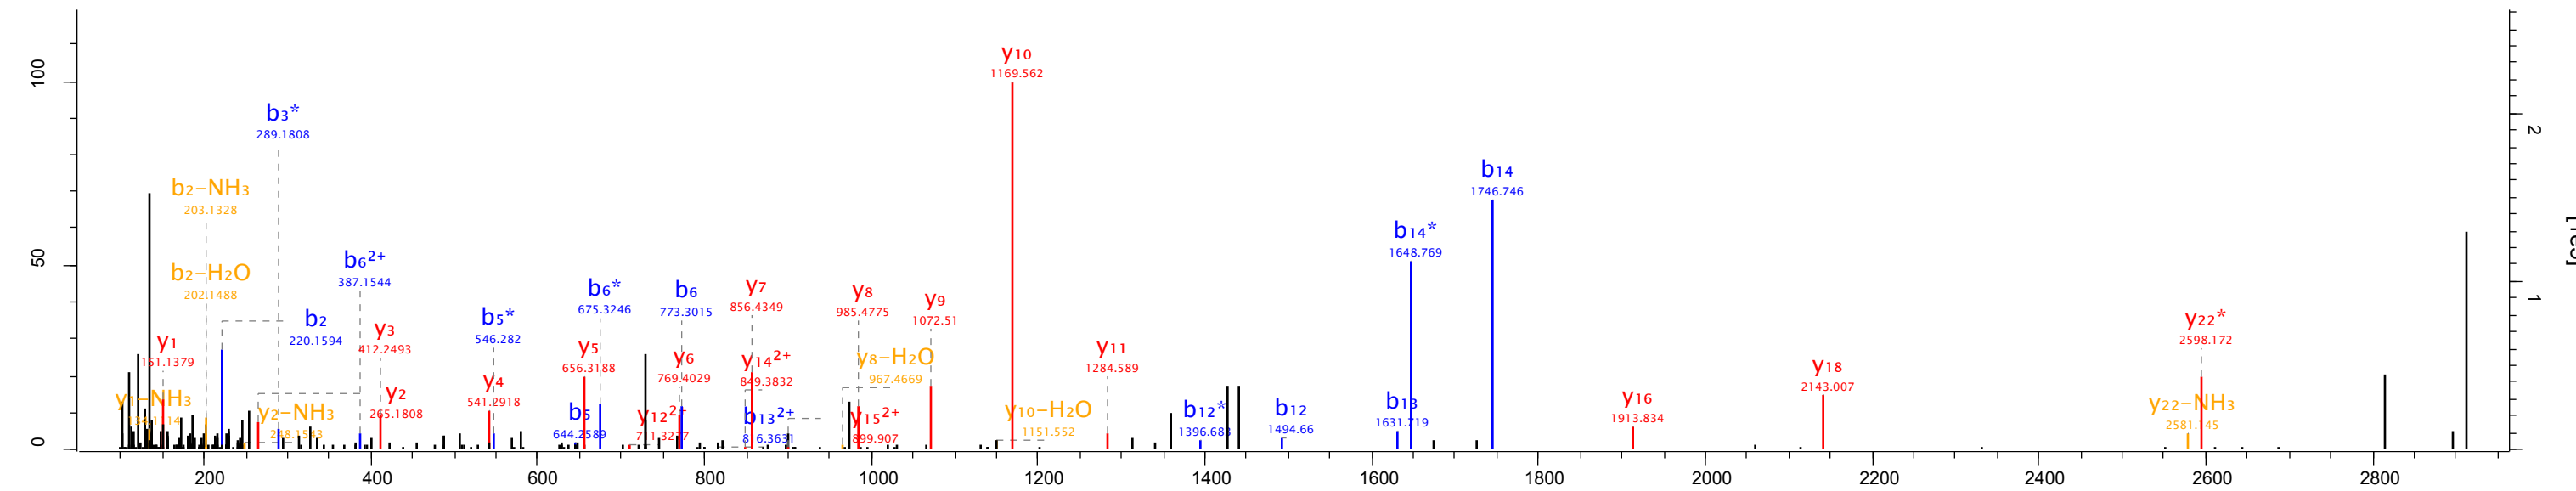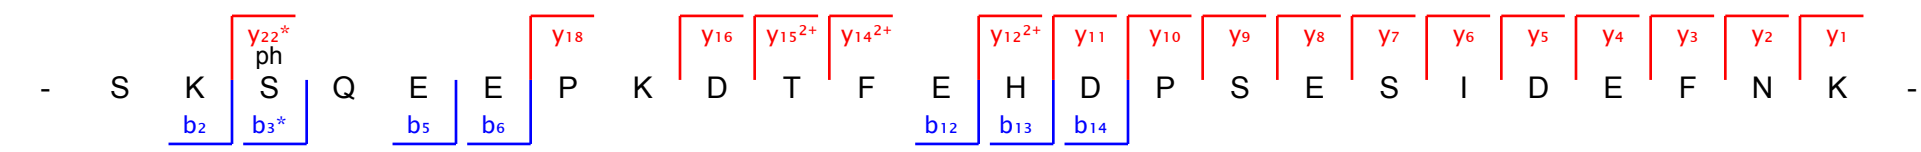

Raw file 20171215\_MaS\_33SR\_LMH\_phospho2\_02 Scan 10713 Method FTMS; HCD Score 60.13 m/z 1040.47 Gene names PIKFYVE

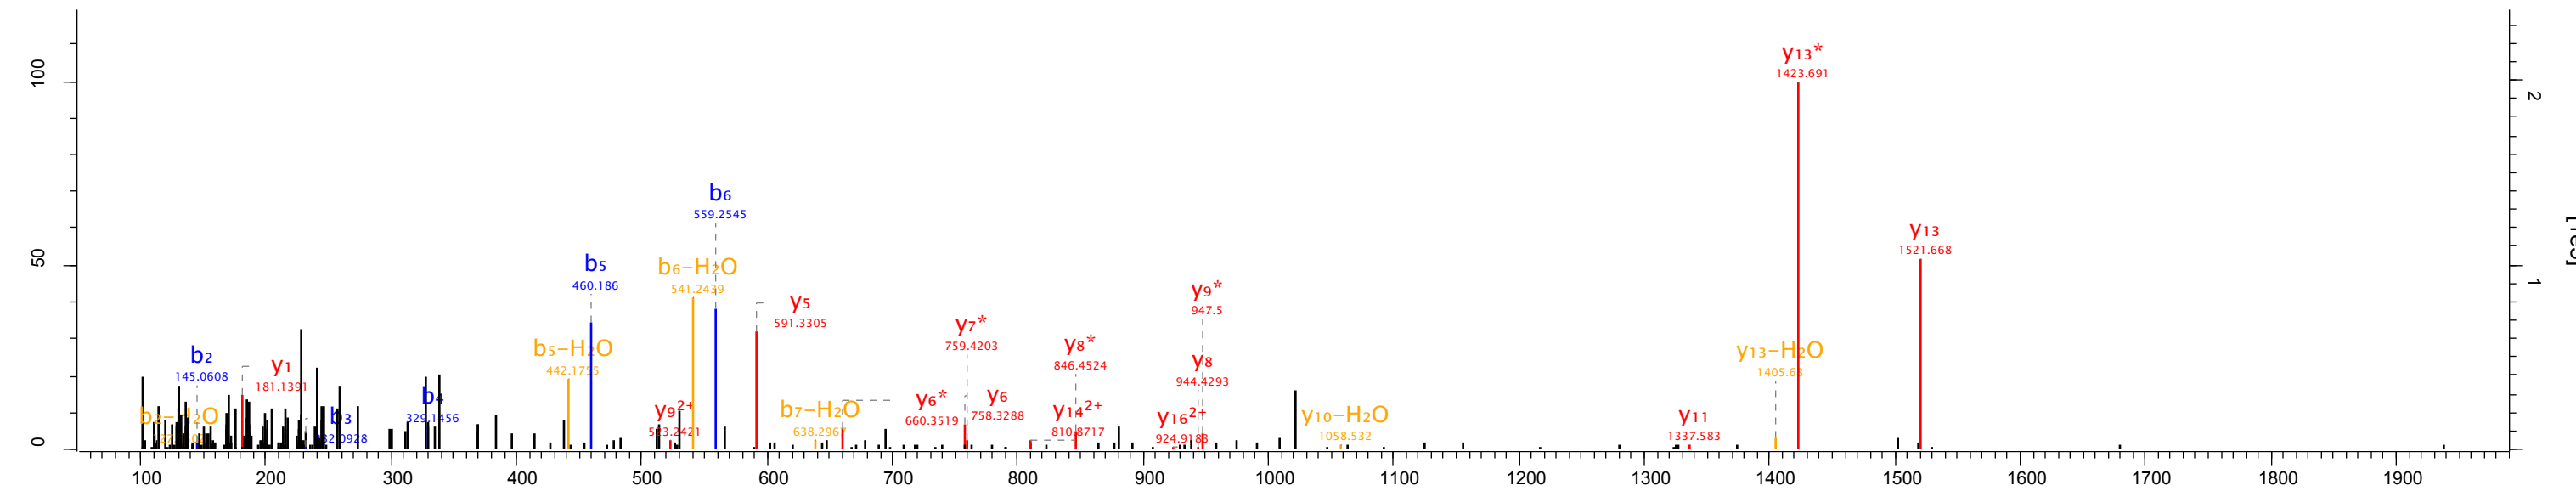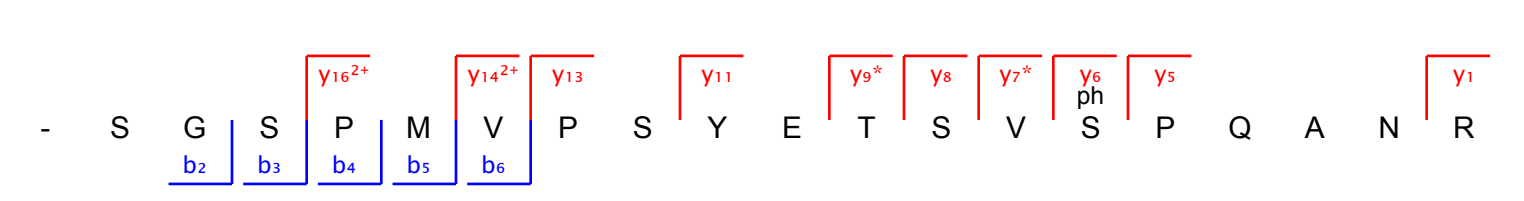

Raw file 20171215\_MaS\_33SR\_LMH\_phospho2\_02 Scan 10993 Method FTMS; HCD Score 140.95 m/z 959.4 Gene names TANC2

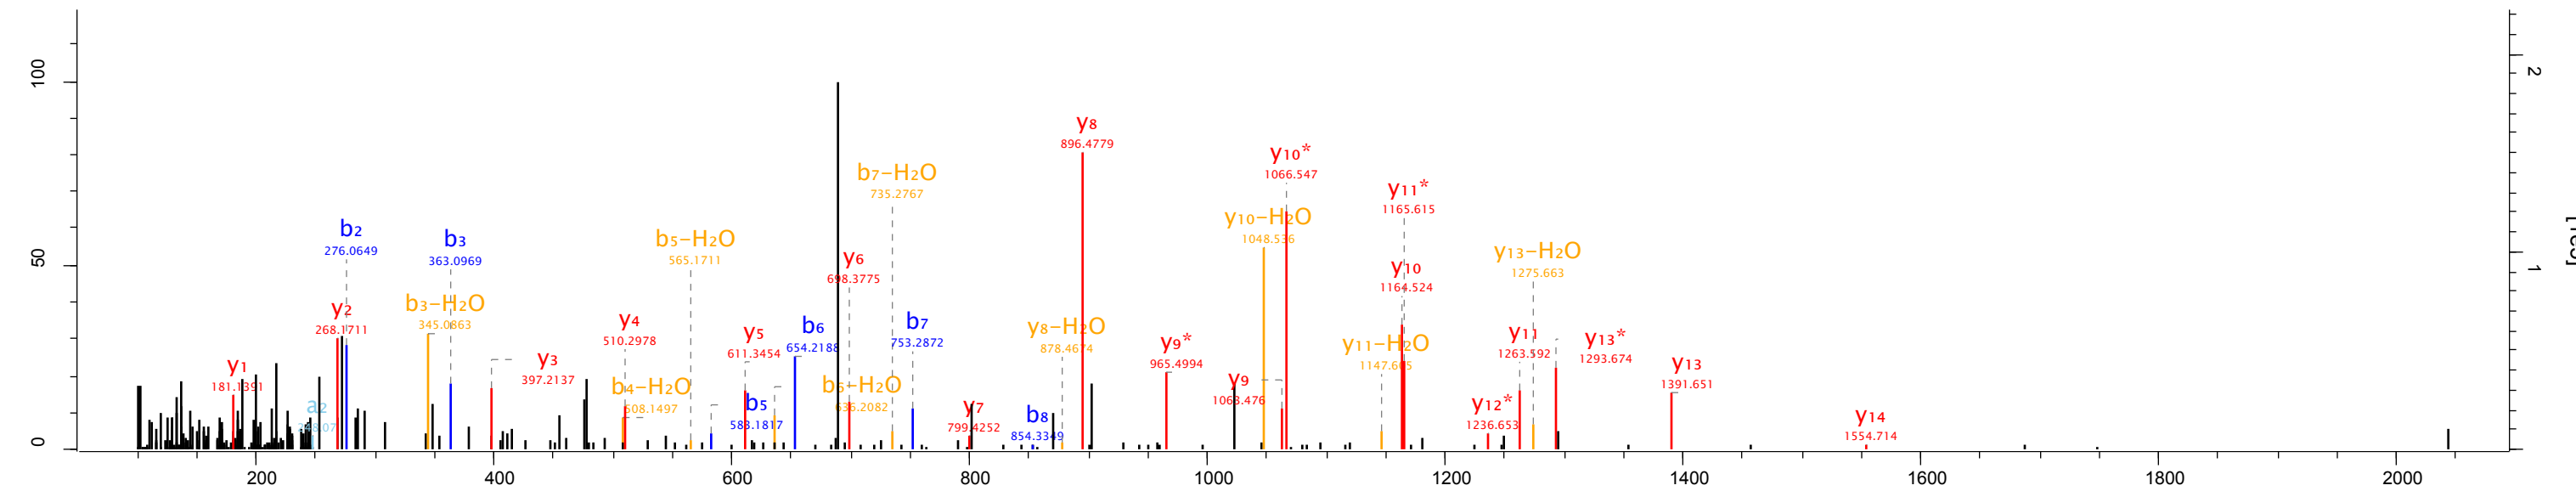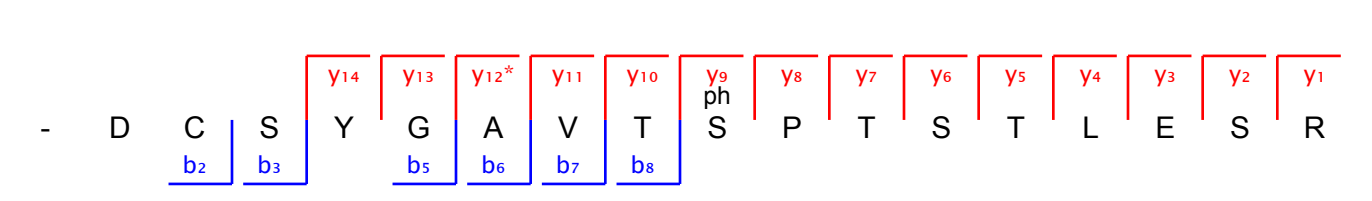

Raw file 20171215\_MaS\_33SR\_LMH\_phospho2\_02 Scan 11053 Method FTMS; HCD Score 83.42 m/z 662.97 Gene names PCM1

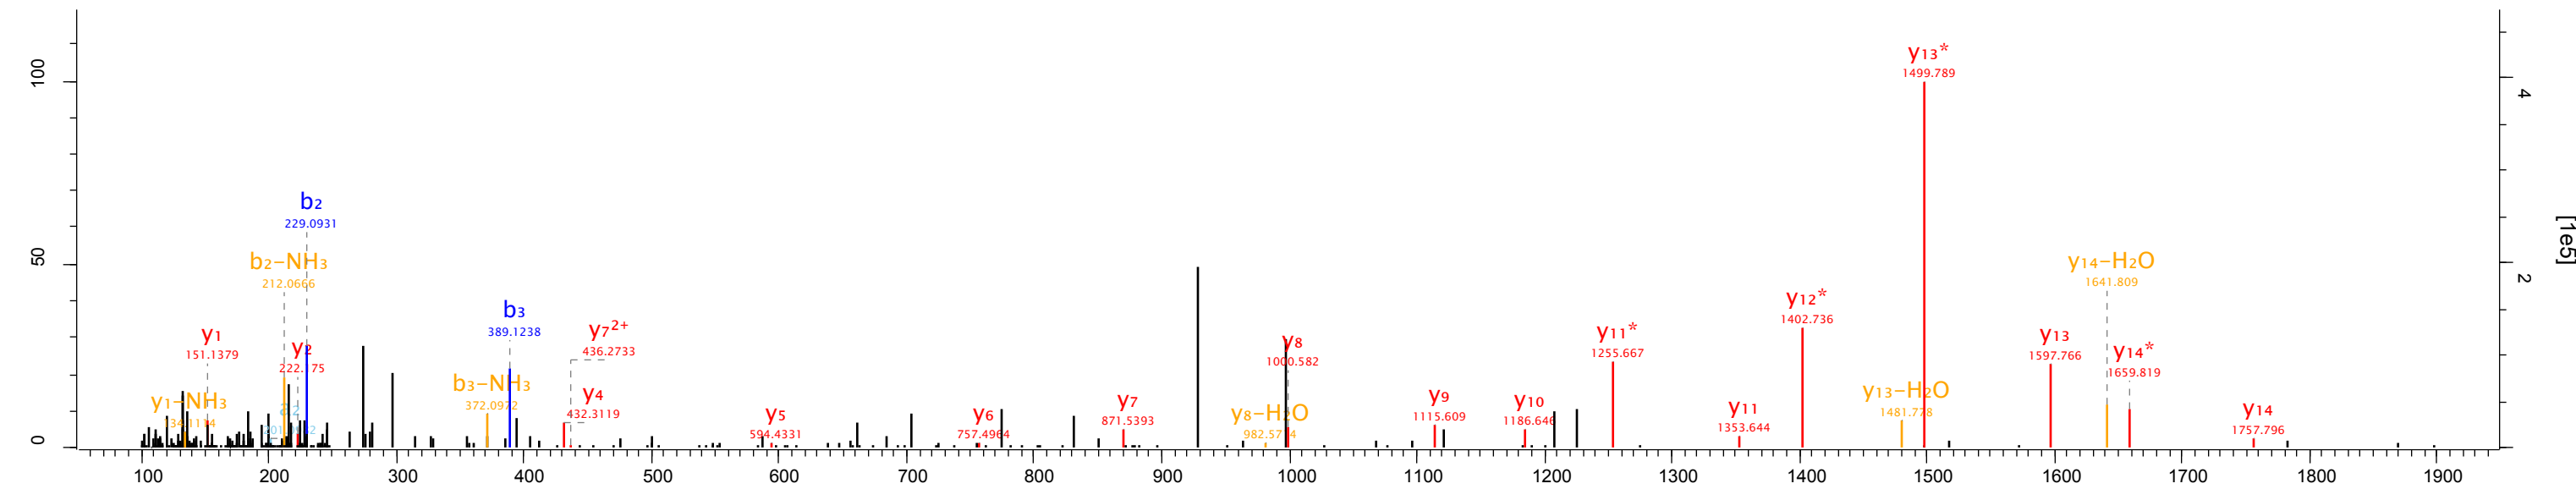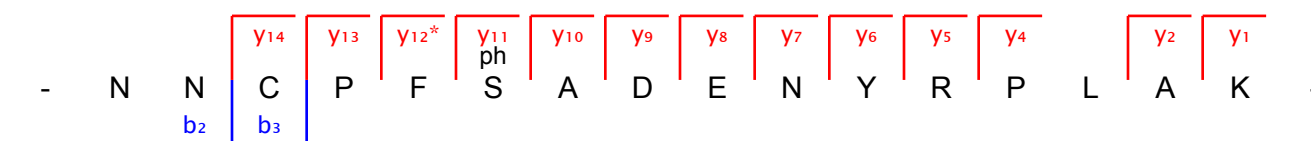

Raw file 20171215\_MaS\_33SR\_LMH\_phospho2\_02 Scan 11713 Method FTMS; HCD Score 190.57 m/z 1008.42 Gene names TNRC6B

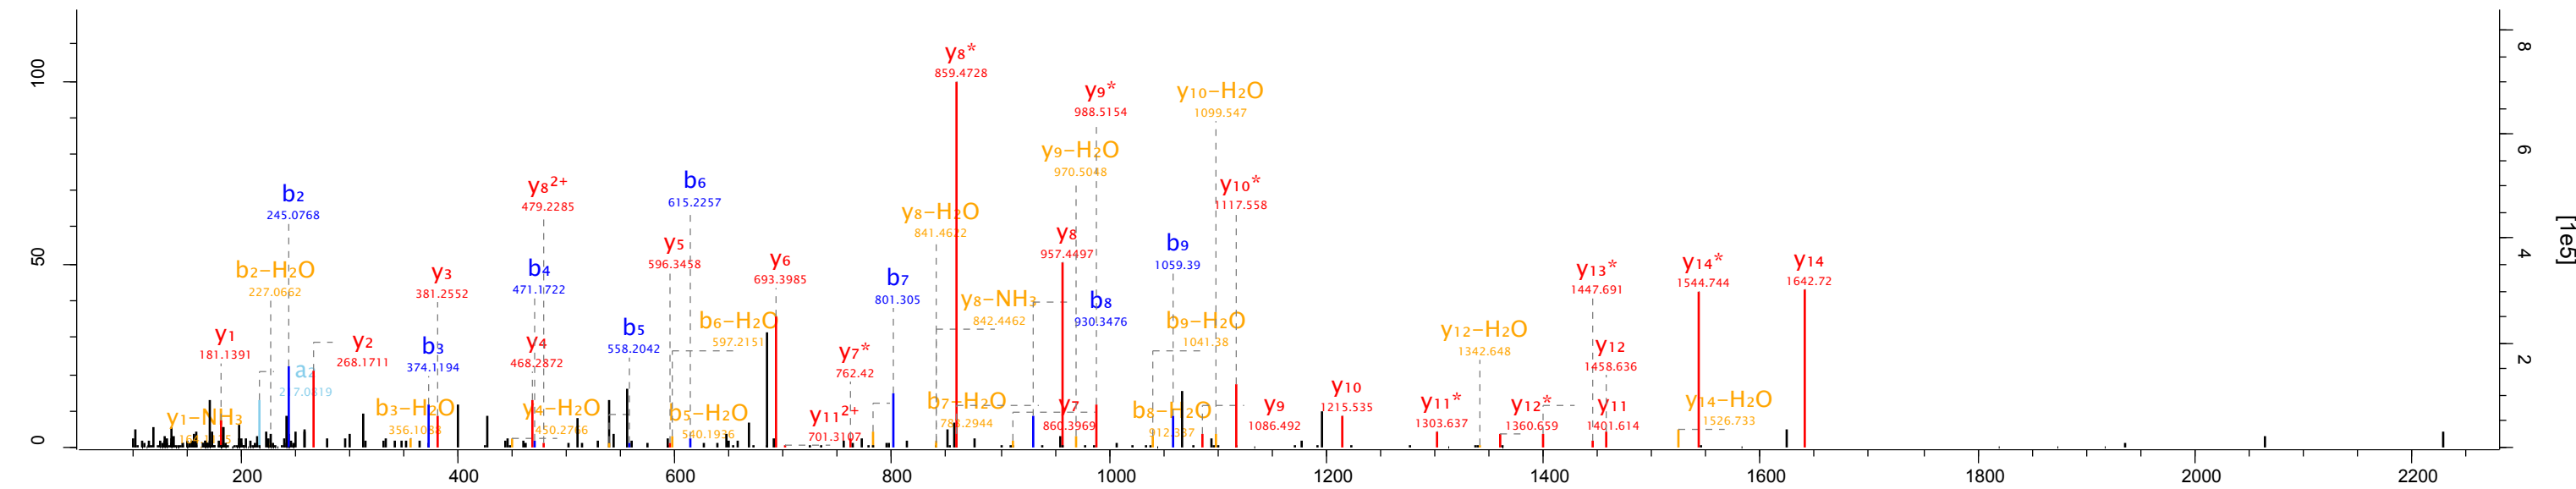

- D E E P S G W E E P S P Q S I S R -

Fragmentation mapping (b-ions in blue, y-ions in red):

- b2: E
- b3: E
- b4: P
- b5: S
- b6: G
- b7: W
- b8: E
- b9: E
- y1: R
- y2: S
- y3: I
- y4: S
- y5: Q
- y6: P
- y7: S
- y8: P
- y9: E
- y10: W
- y11: G
- y12: S
- y13: P
- y14: E



Raw file 20171215\_MaS\_33SR\_LMH\_phospho2\_02 Scan 12223 Method FTMS; HCD Score 156.87 m/z 1033.97 Gene names ITGA5

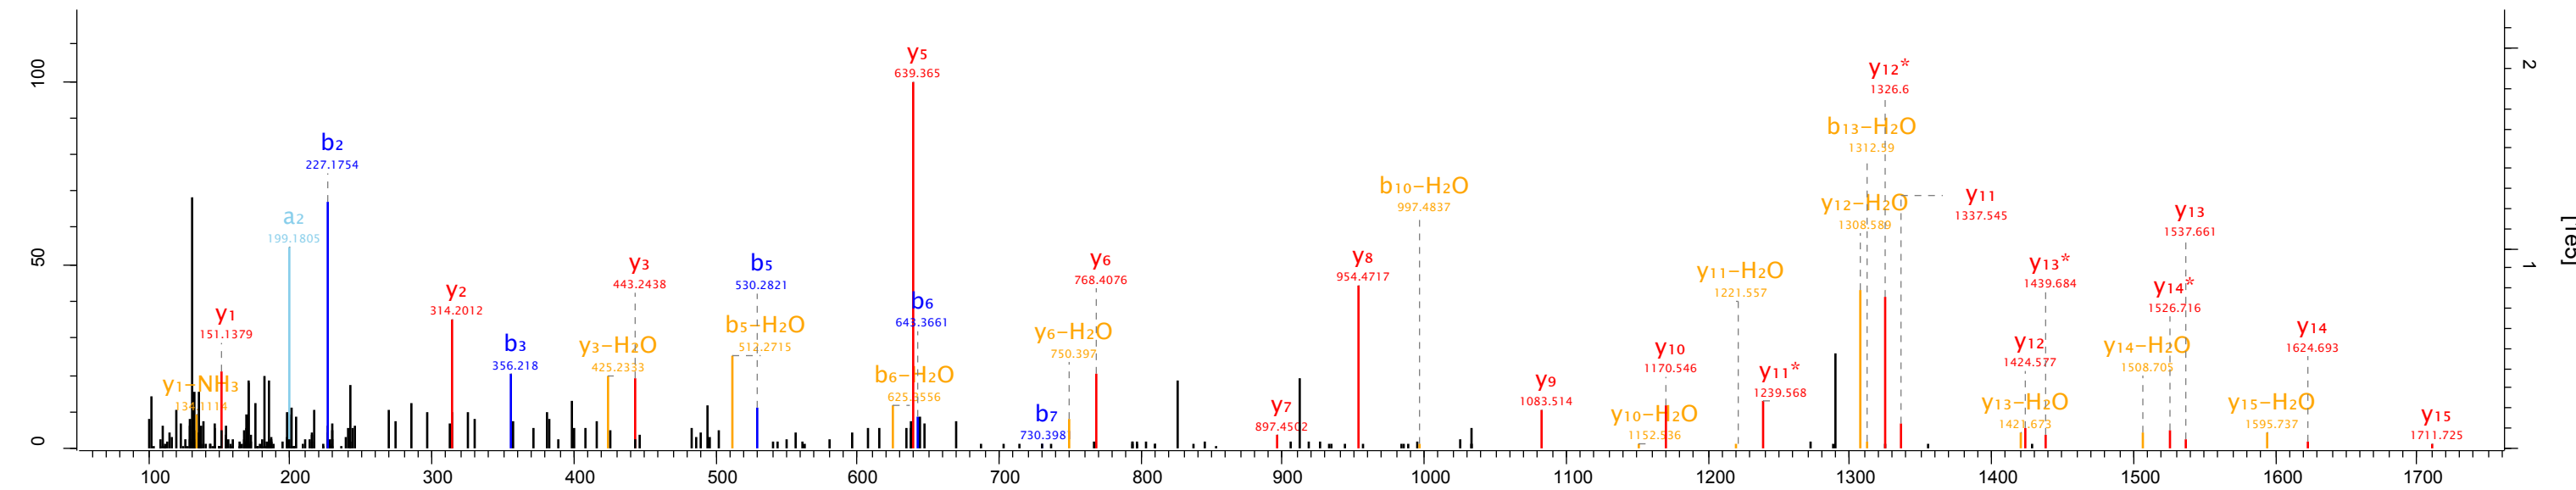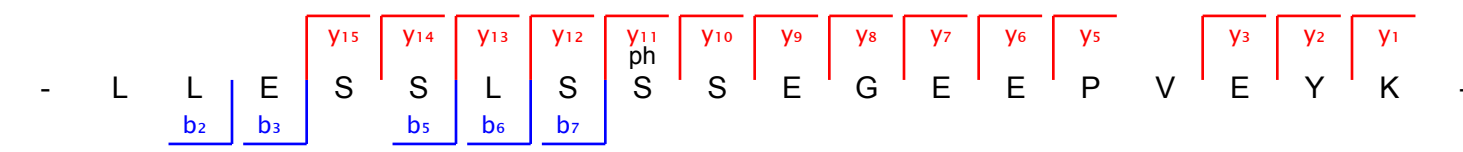

Raw file 20171215\_MaS\_33SR\_LMH\_phospho2\_02 Scan 12413 Method FTMS; HCD Score 187.51 m/z 1189.55 Gene names PAK1

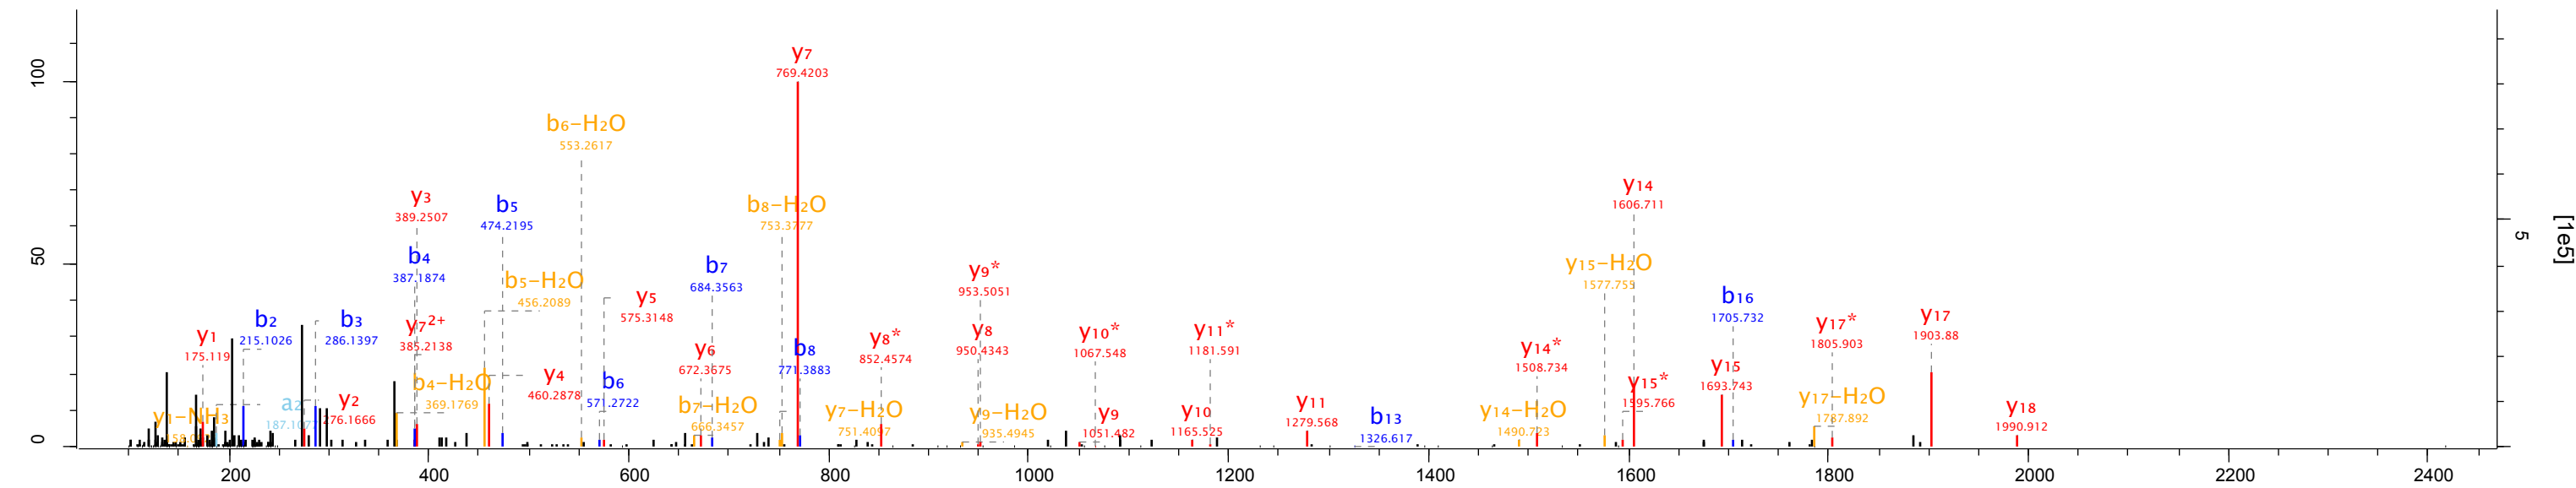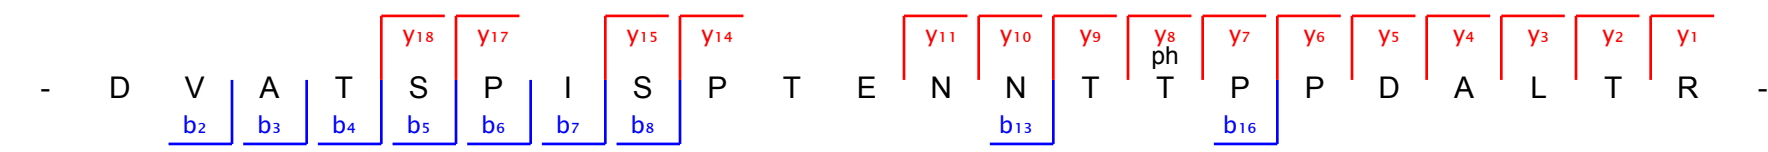

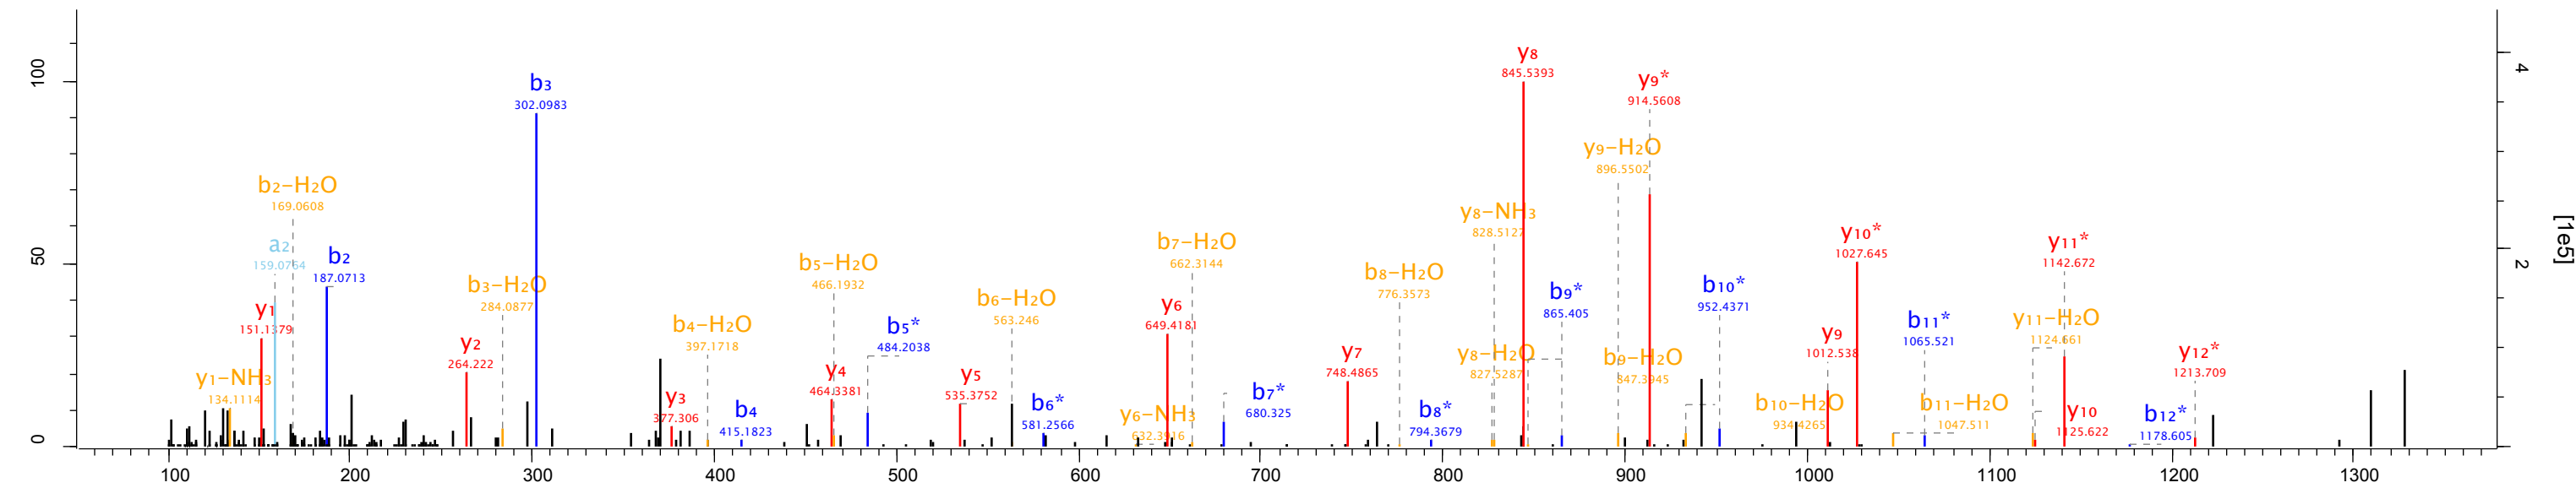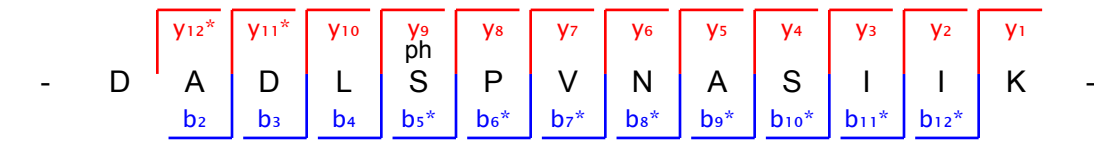

Raw file: 20171215\_MaS\_33SR\_LMH\_phospho2\_02  
 Scan: 13523 Method: FTMS; HCD Score: 80.04 m/z: 566.77 Gene names: RBM14

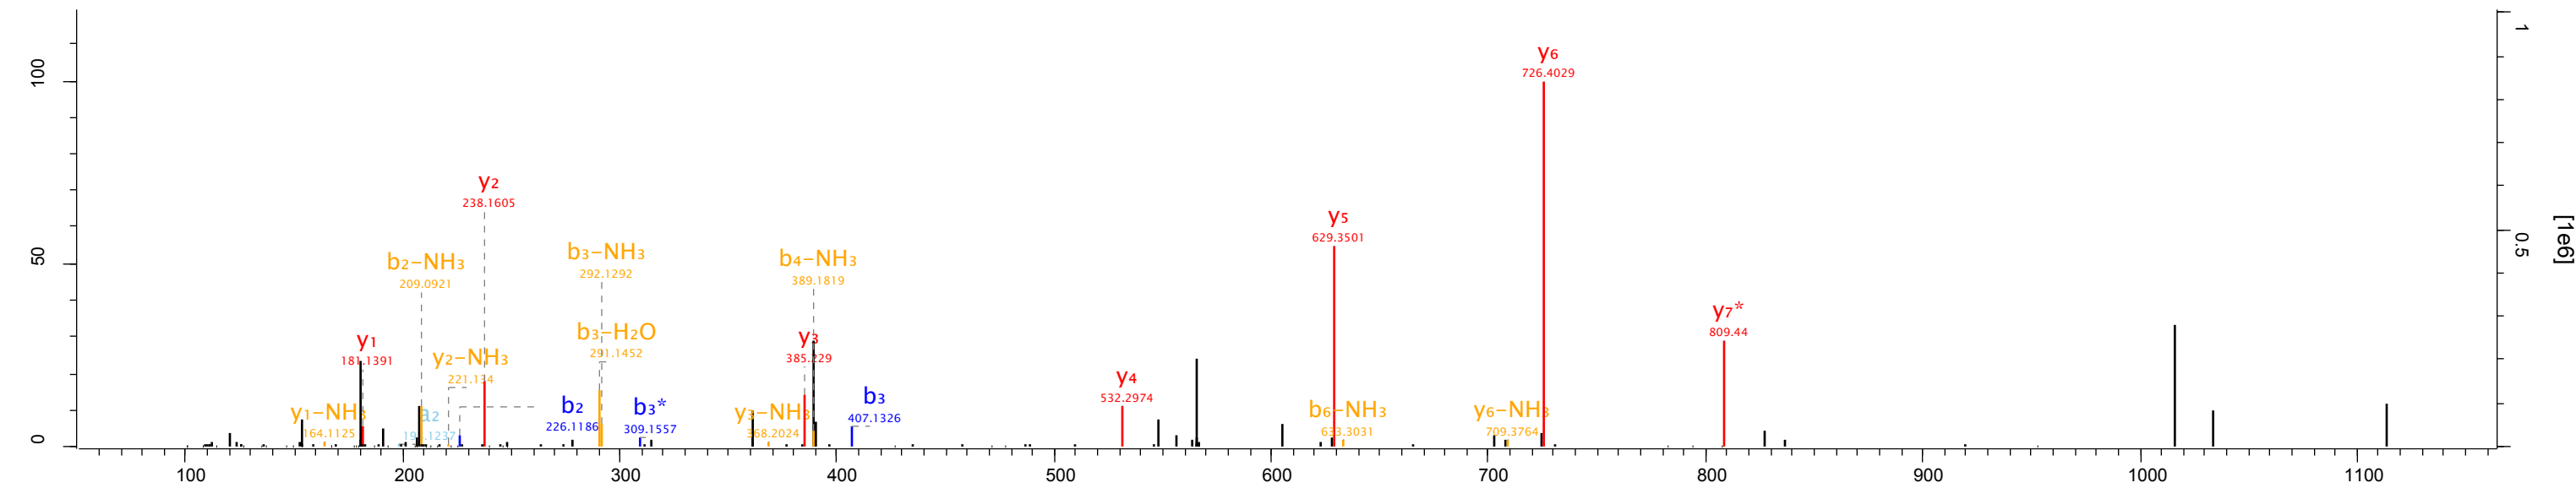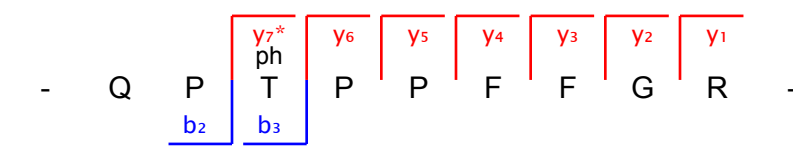

Raw file

20171215\_MaS\_33SR\_LMH\_phospho2\_02

| Scan  | Method    | Score | m/z    | Gene names |
|-------|-----------|-------|--------|------------|
| 14653 | FTMS; HCD | 91.6  | 910.41 | RPRD1A     |

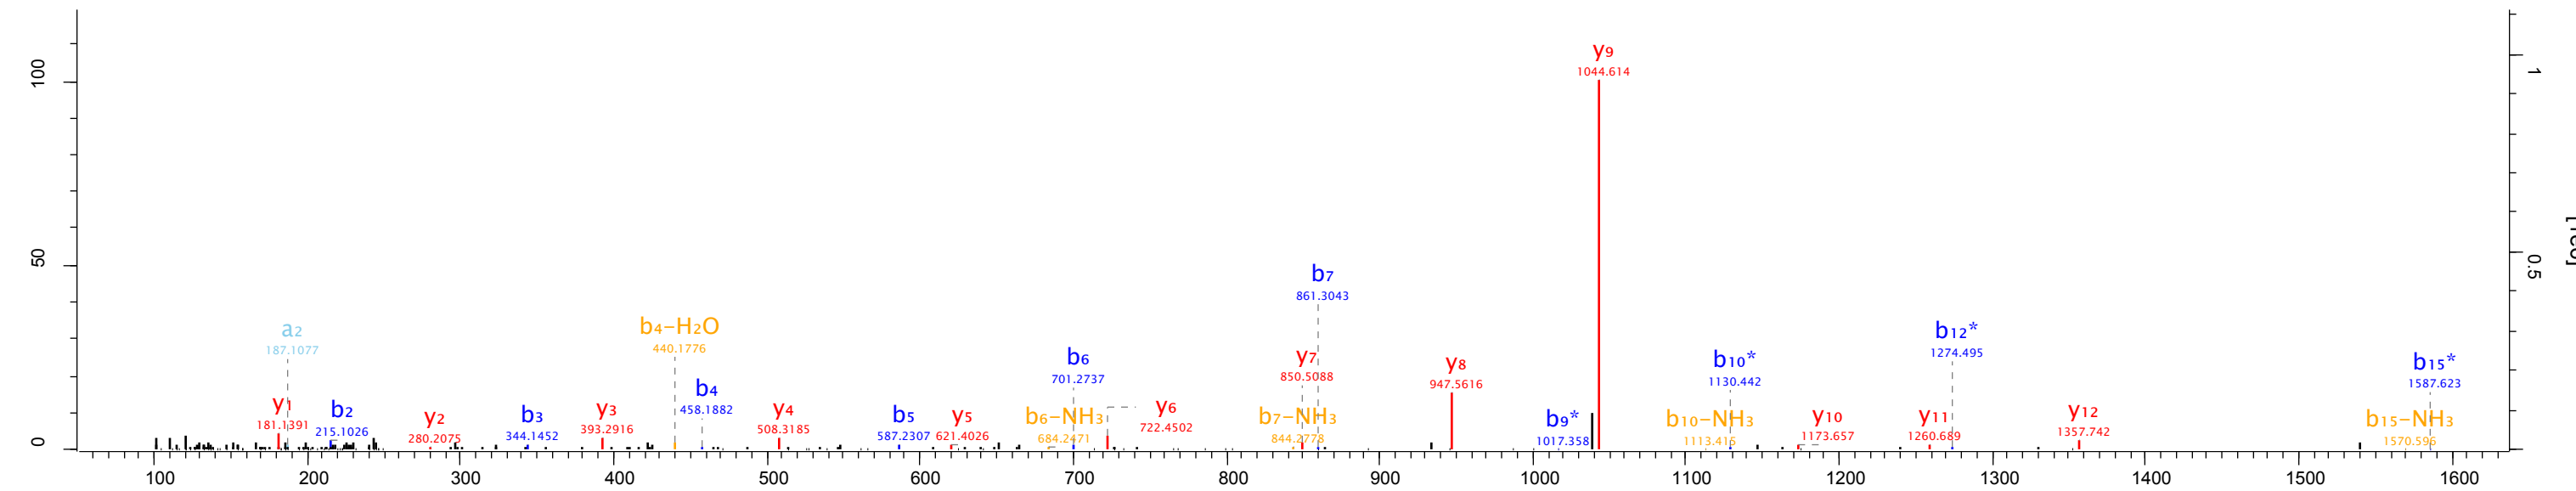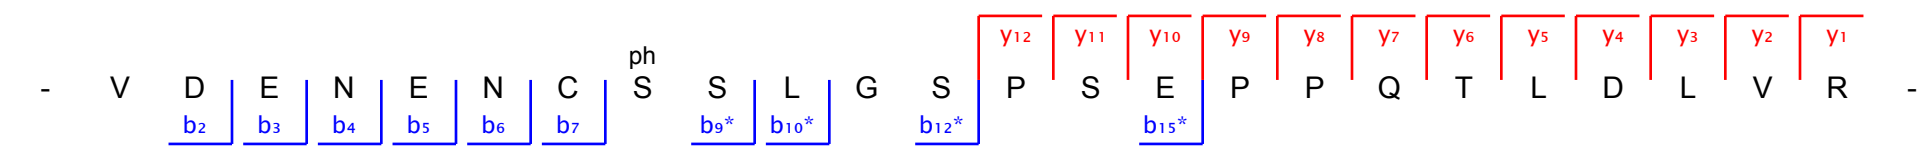

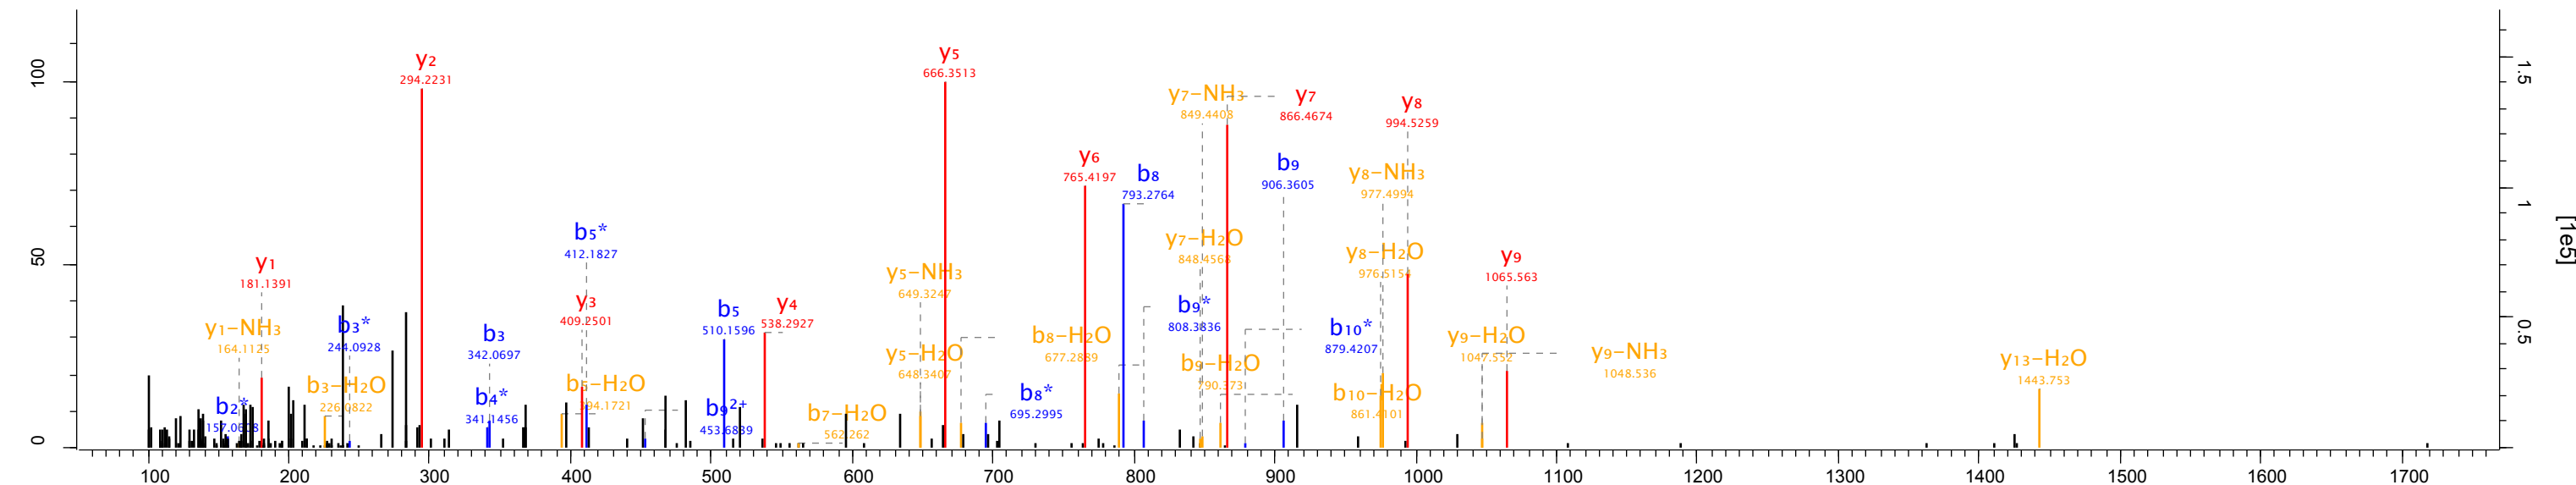

ph  
- S S S P A P A D I A Q T V Q E D L R -

b2\* b3 b4\* b5 b8 b9 b10\*

y9 y8 y7 y6 y5 y4 y3 y2 y1

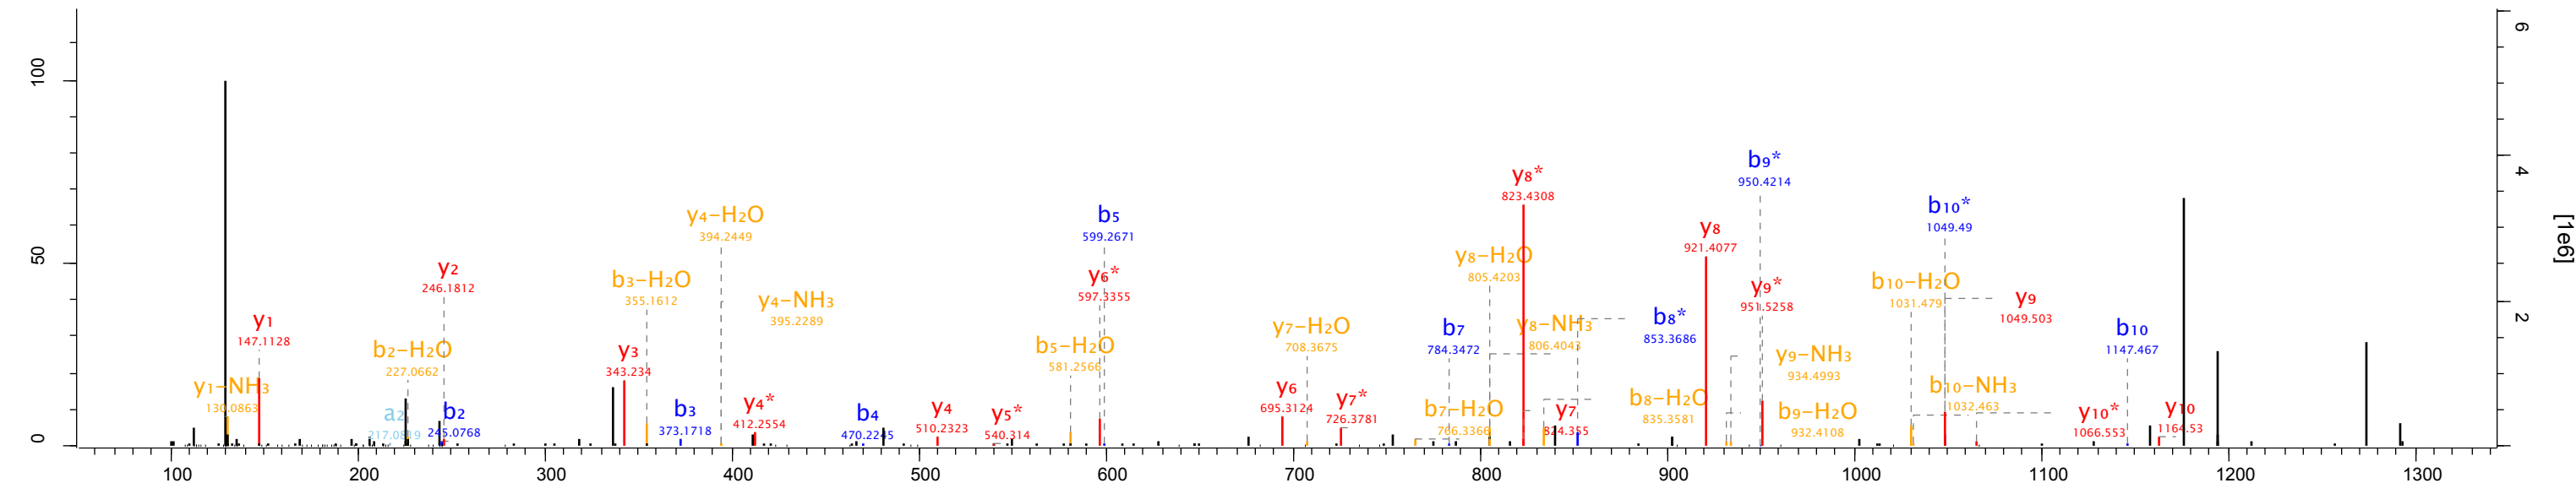

- E - D - K - P - E - G - Q - S - P - V - K -

y10 y9 y8 y7 y6 y5\* y4 y3 y2 y1  
b2 b3 b4 b5 b7 b8\* b9\* b10

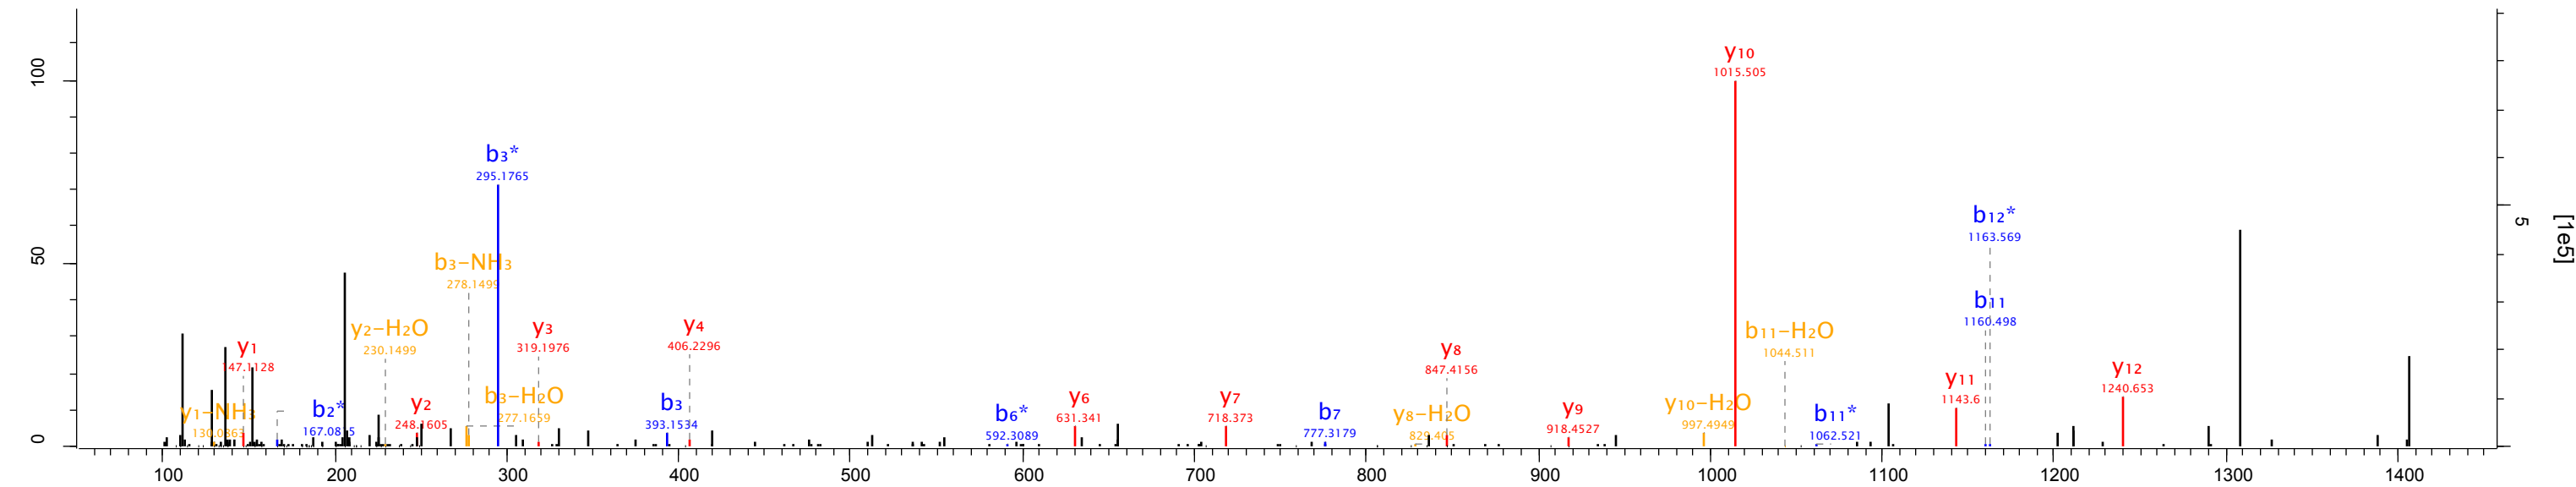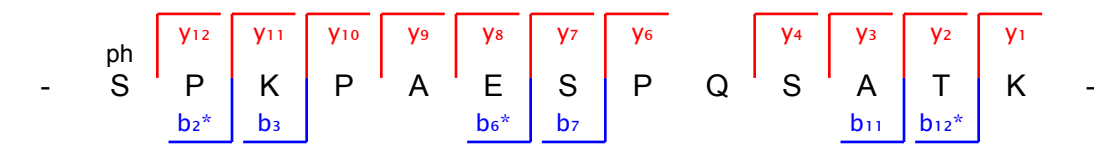



Raw file Scan Method Score m/z Gene names

20171215\_MaS\_33SR\_LMH\_phospho2\_02

2293 FTMS; HCD 123.1 624.8 SLIRP

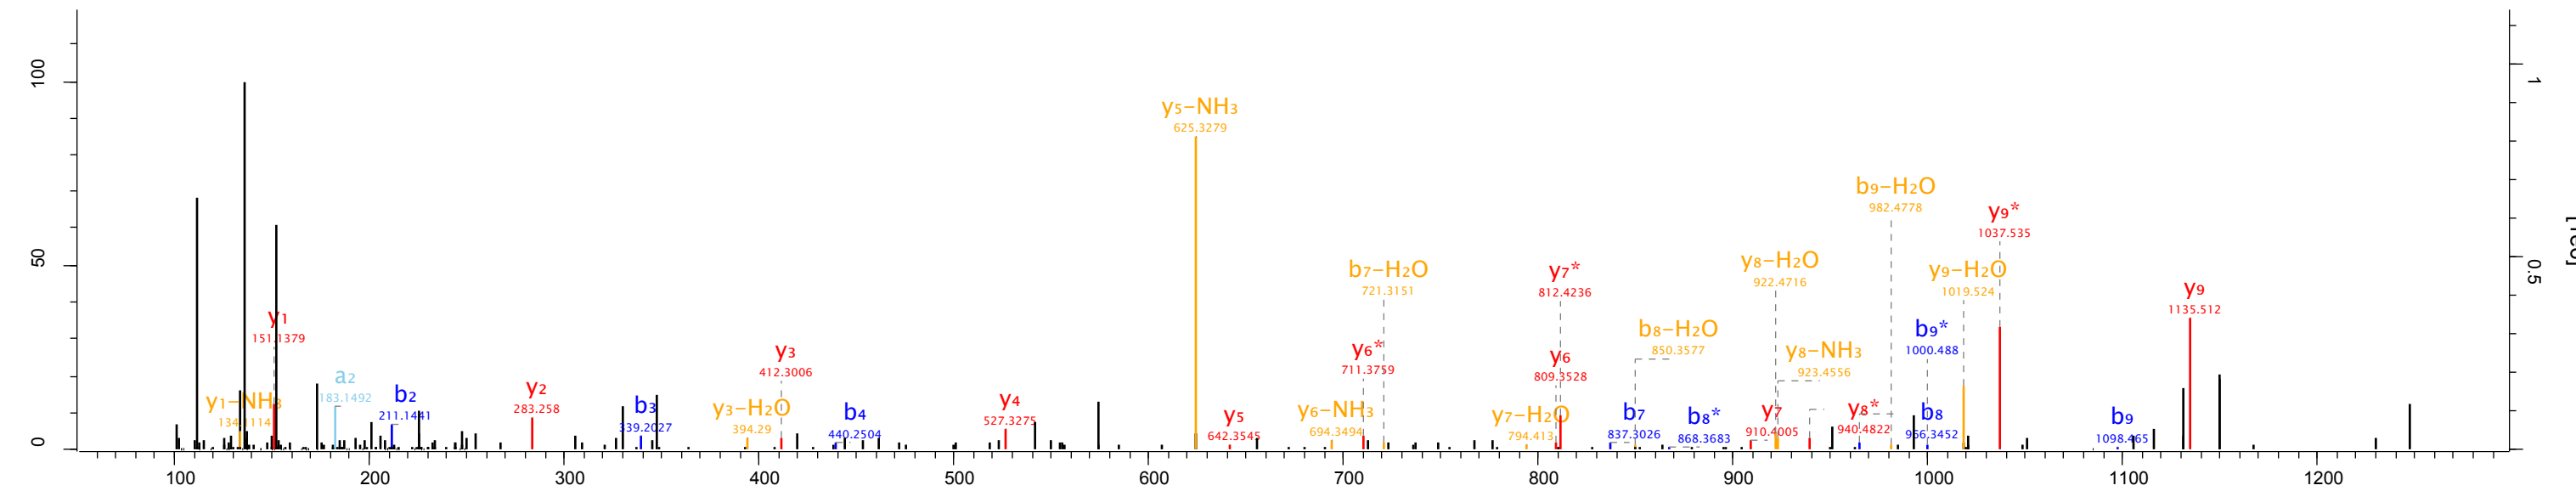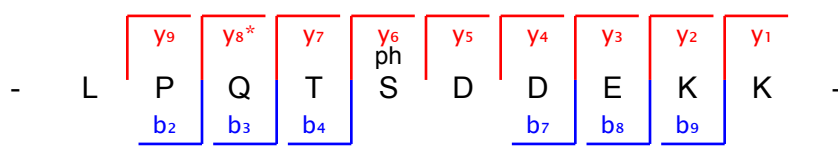

Raw file  
20171215\_MaS\_33SR\_LMH\_phospho2\_02

Scan 2753 Method FTMS; HCD Score 77.06 m/z 671.76 Gene names MICAL3

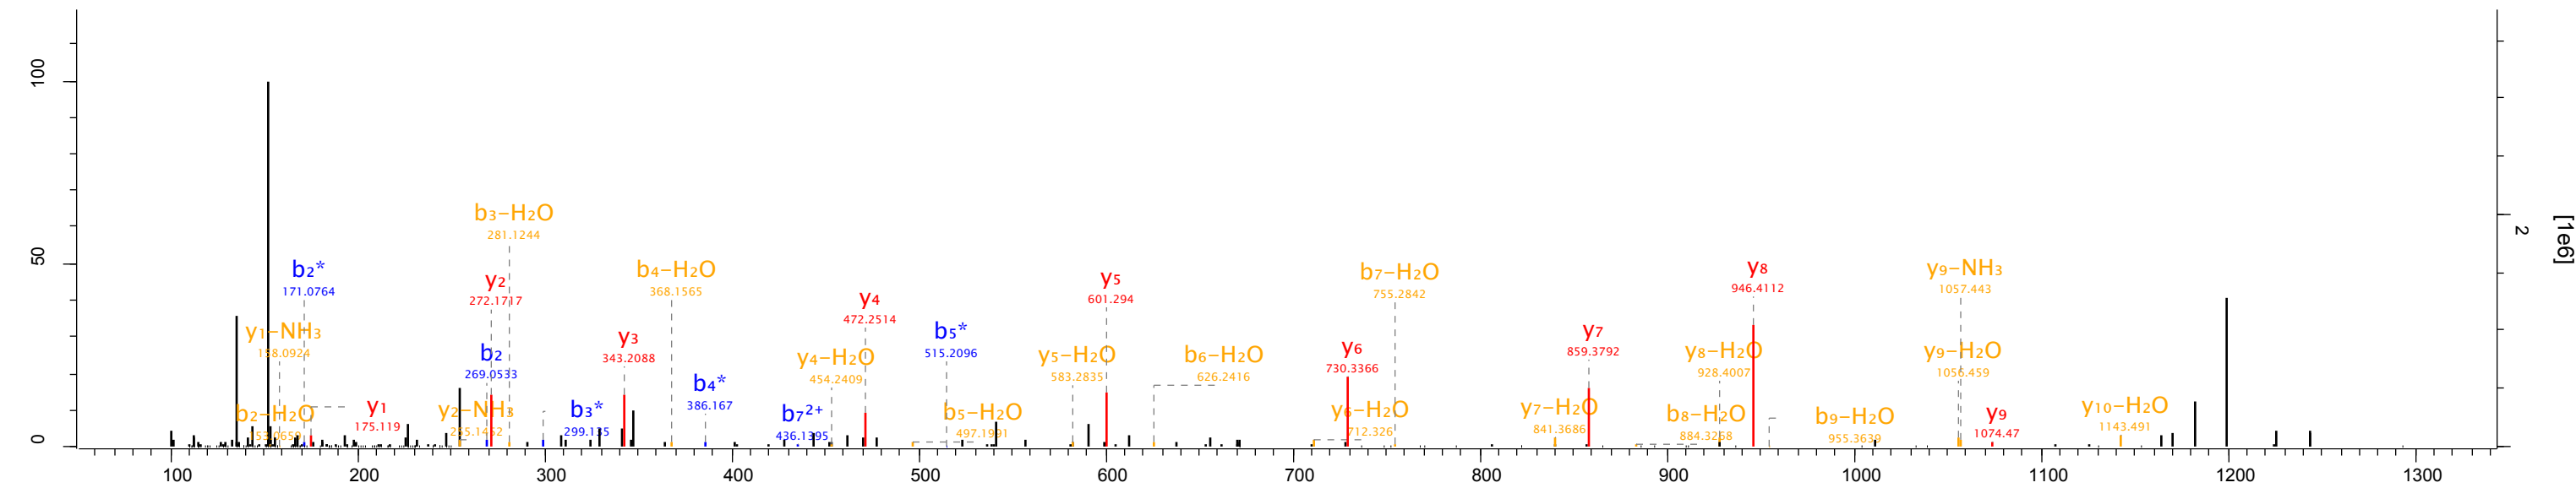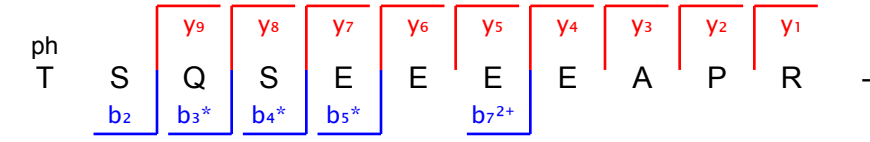

Raw file  
20171215\_MaS\_33SR\_LMH\_phospho2\_02

Scan 3293 Method FTMS; HCD Score 136.57 m/z 626.3 Gene names SMARCC2

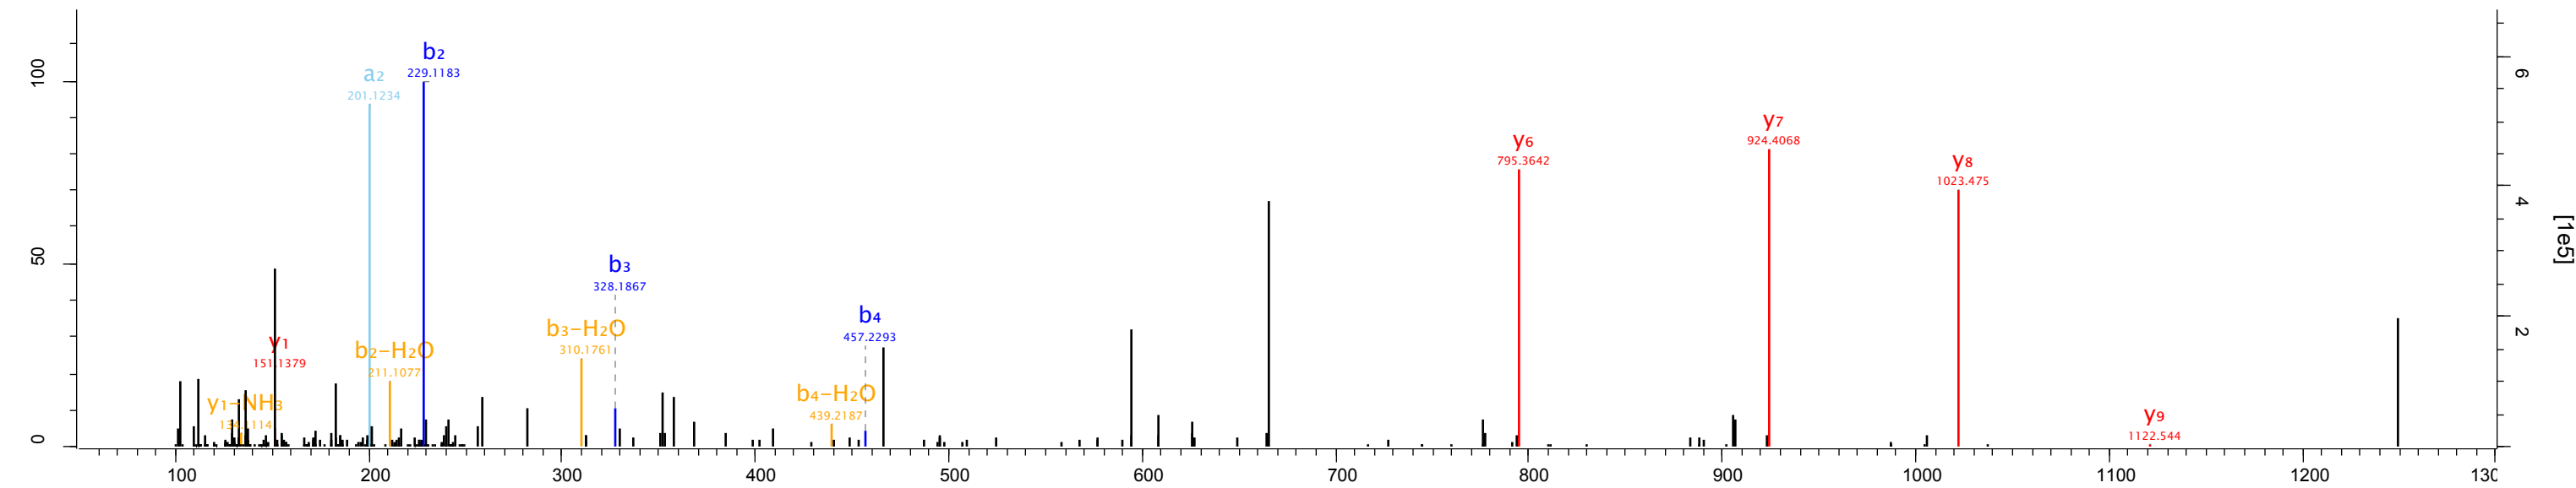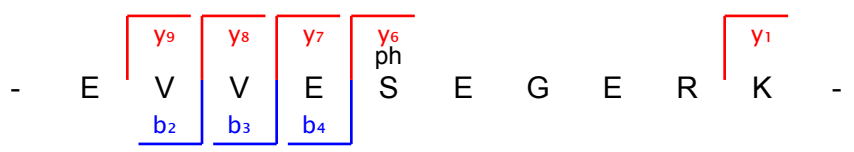

Raw file 20171215\_MaS\_33SR\_LMH\_phospho2\_02 Scan 3363 Method FTMS; HCD Score 74.08 m/z 526.72 Gene names RANBP2;RGPD4;RGPD5;RGPD8

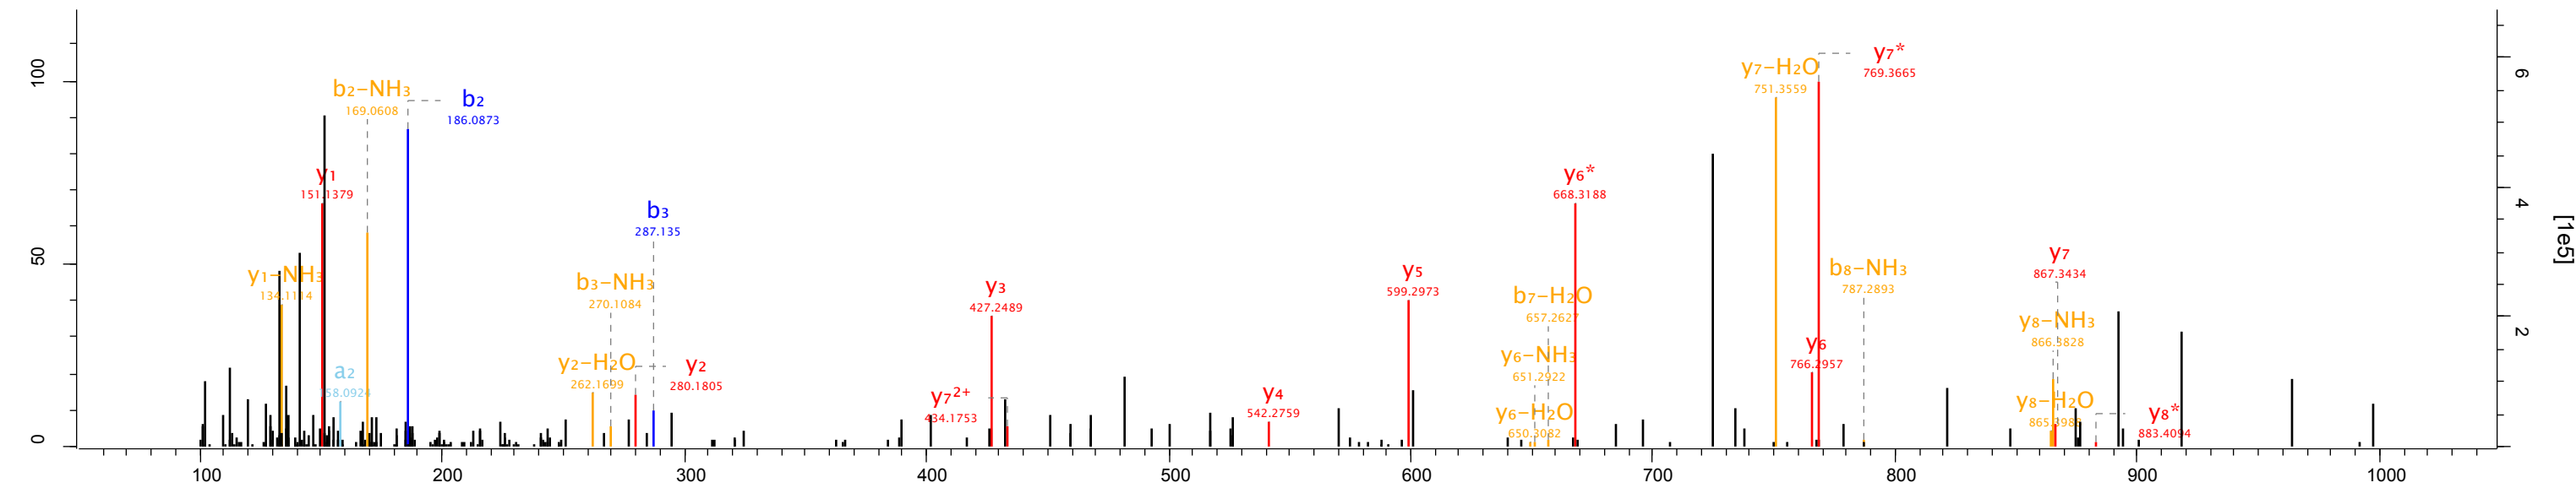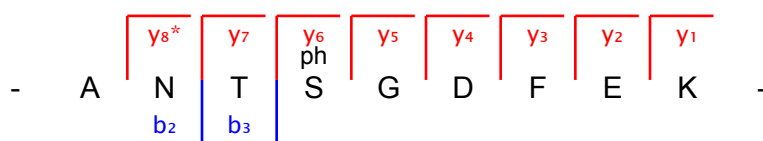

Raw file  
20171215\_MaS\_33SR\_LMH\_phospho2\_02

Scan 3403 Method FTMS; HCD Score 201.32 m/z 776.87 Gene names HMGA1;C2orf81

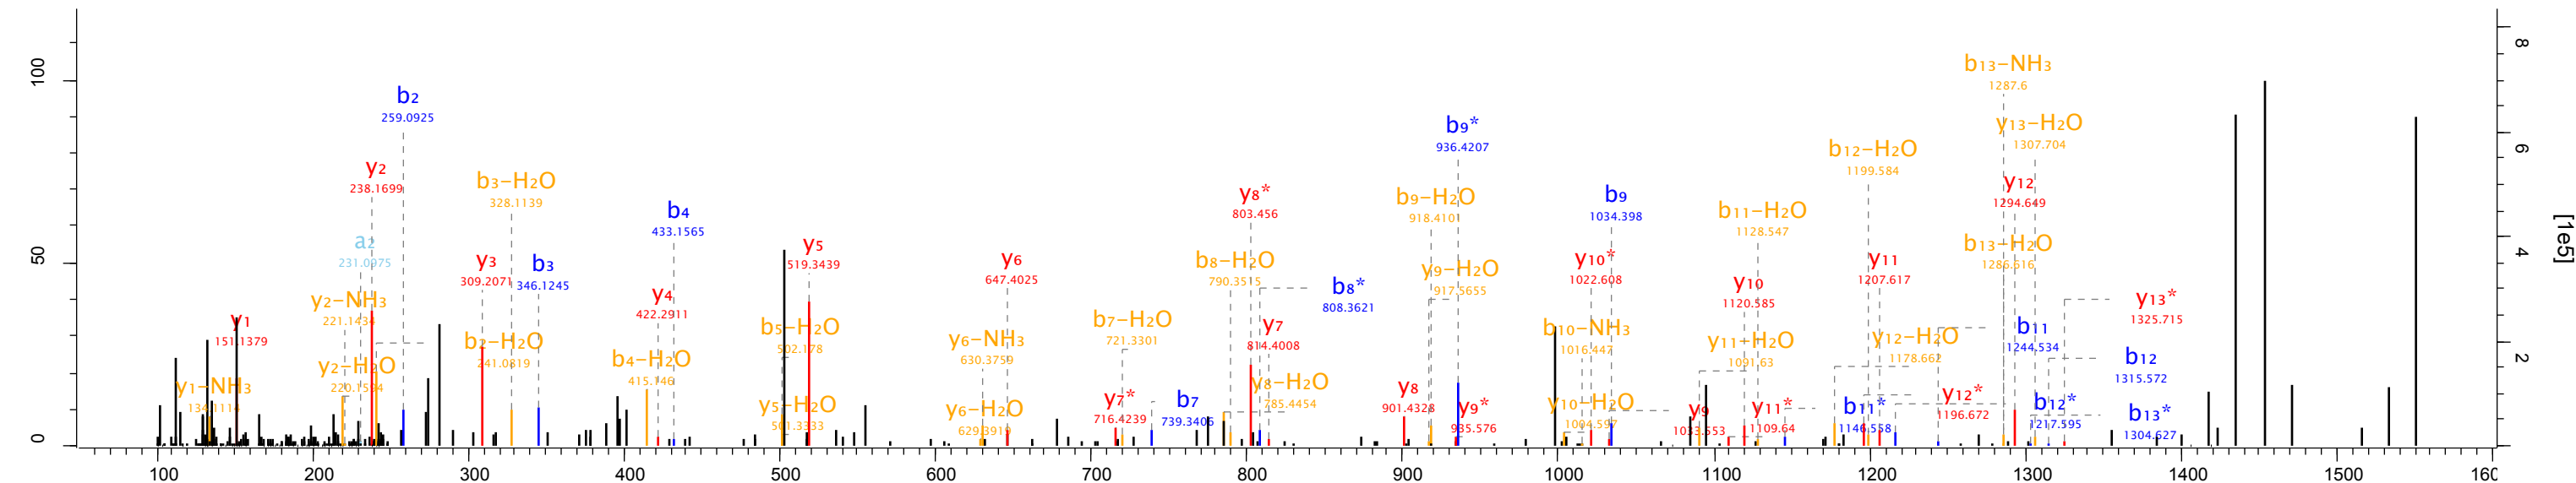

ac  
- S E S S S K S ph S Q P L A S K -

Fragmentation scheme diagram showing amino acid residues (E, S, S, S, K, S, ph, S, Q, P, L, A, S, K) and their corresponding b and y series labels (b2, b3, b4, b7, b8\*, b9, b11, b12, b13\*) connected by lines, indicating the fragmentation pattern.

Raw file  
20171215\_MaS\_33SR\_LMH\_phospho2\_02

Scan Method Score m/z Gene names  
3463 FTMS; HCD 124.25 832.31 STT3B

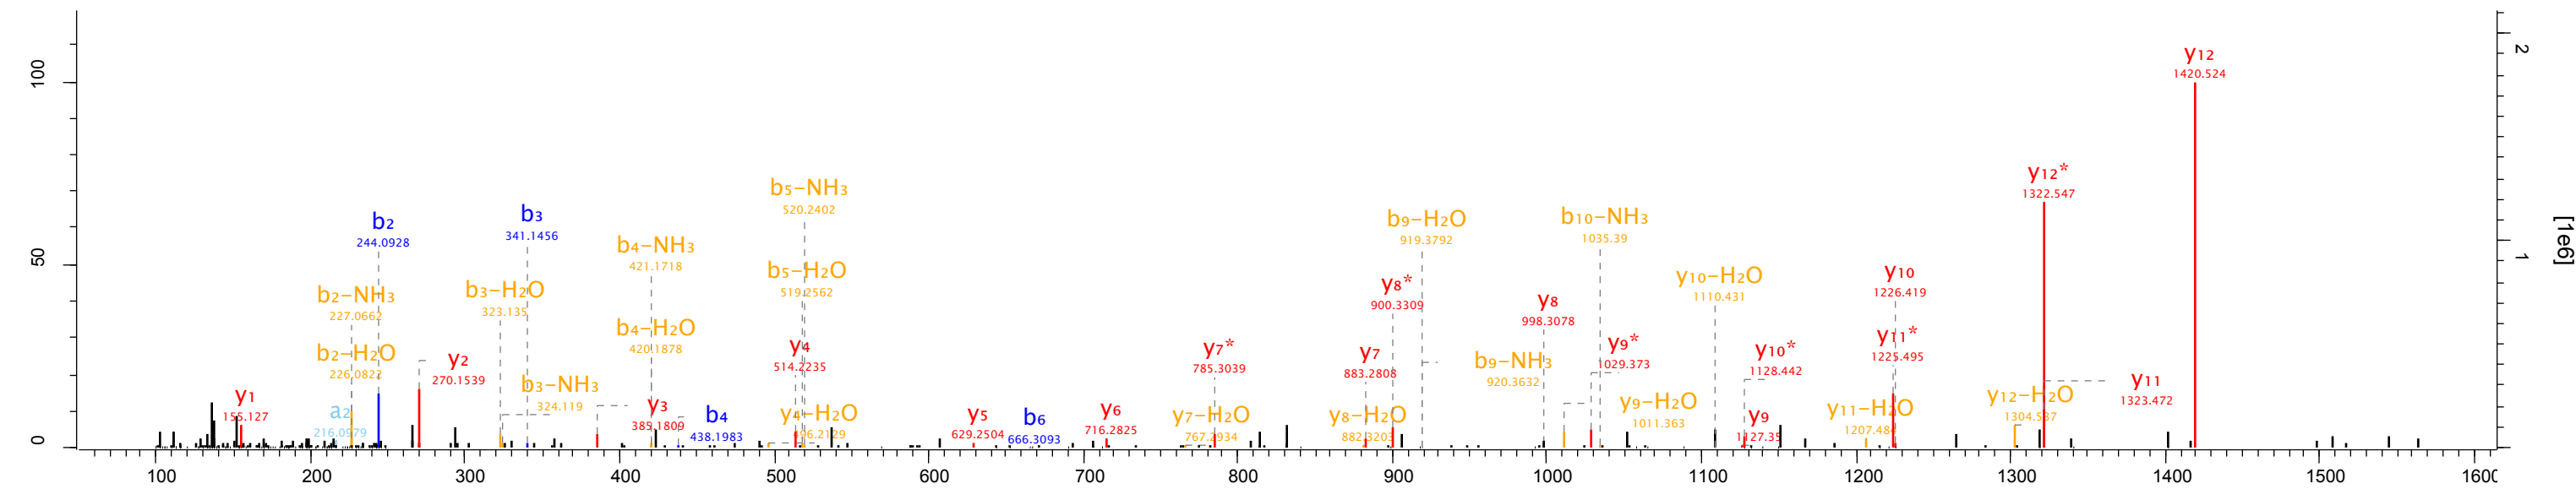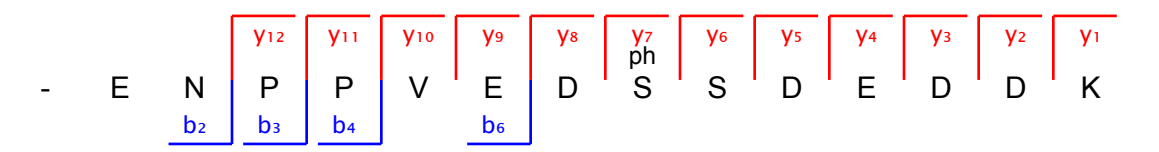

Raw file  
20171215\_MaS\_33SR\_LMH\_phospho2\_02

Scan 3733 Method FTMS; HCD Score 248.91 m/z 875.34 Gene names ITGAV

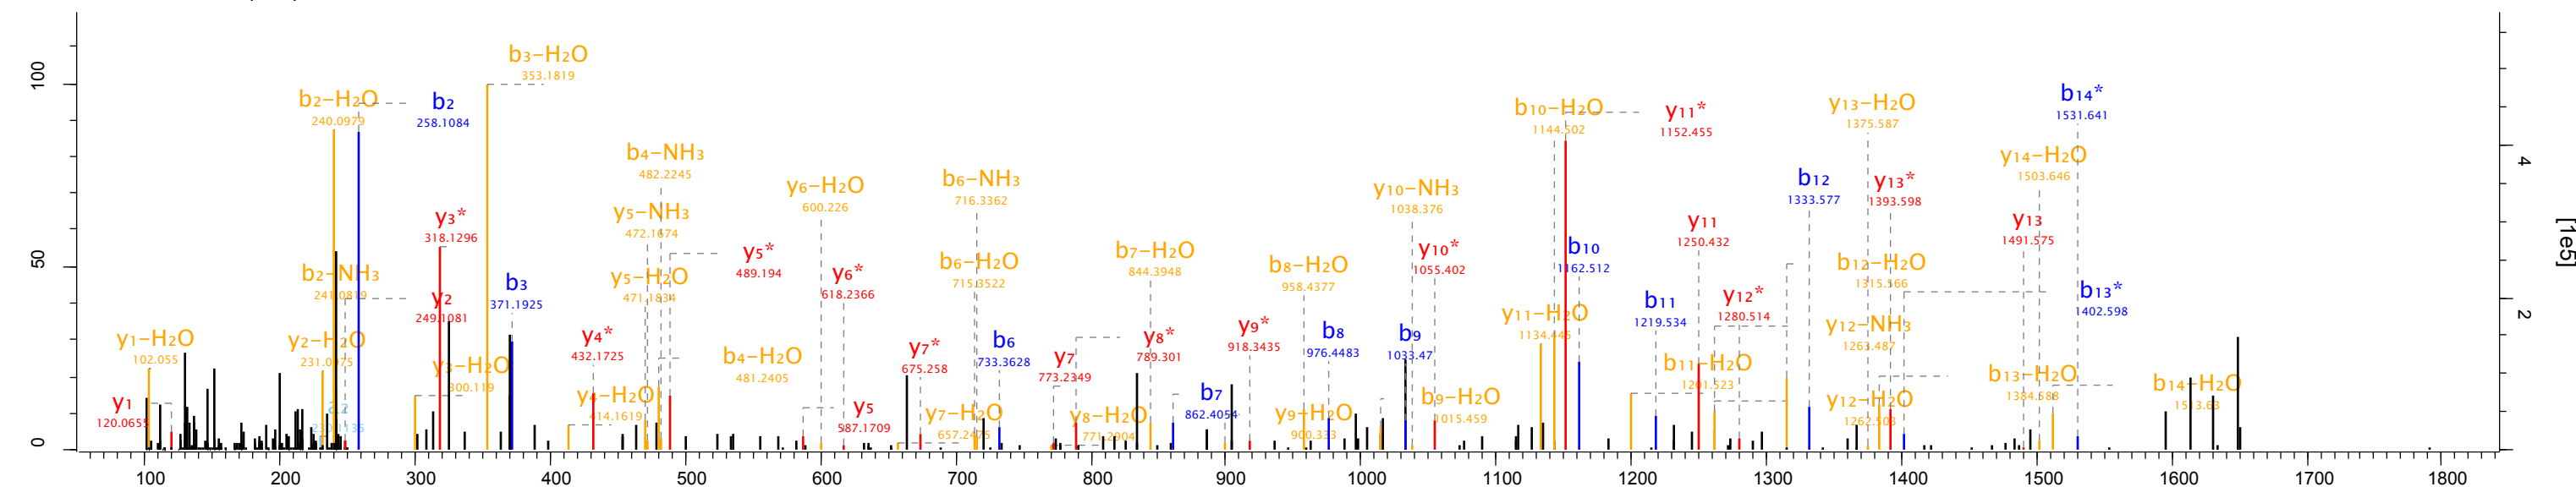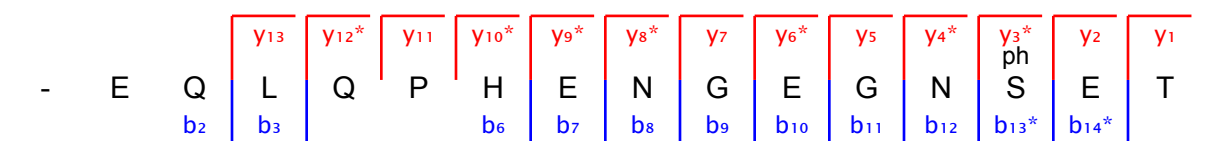

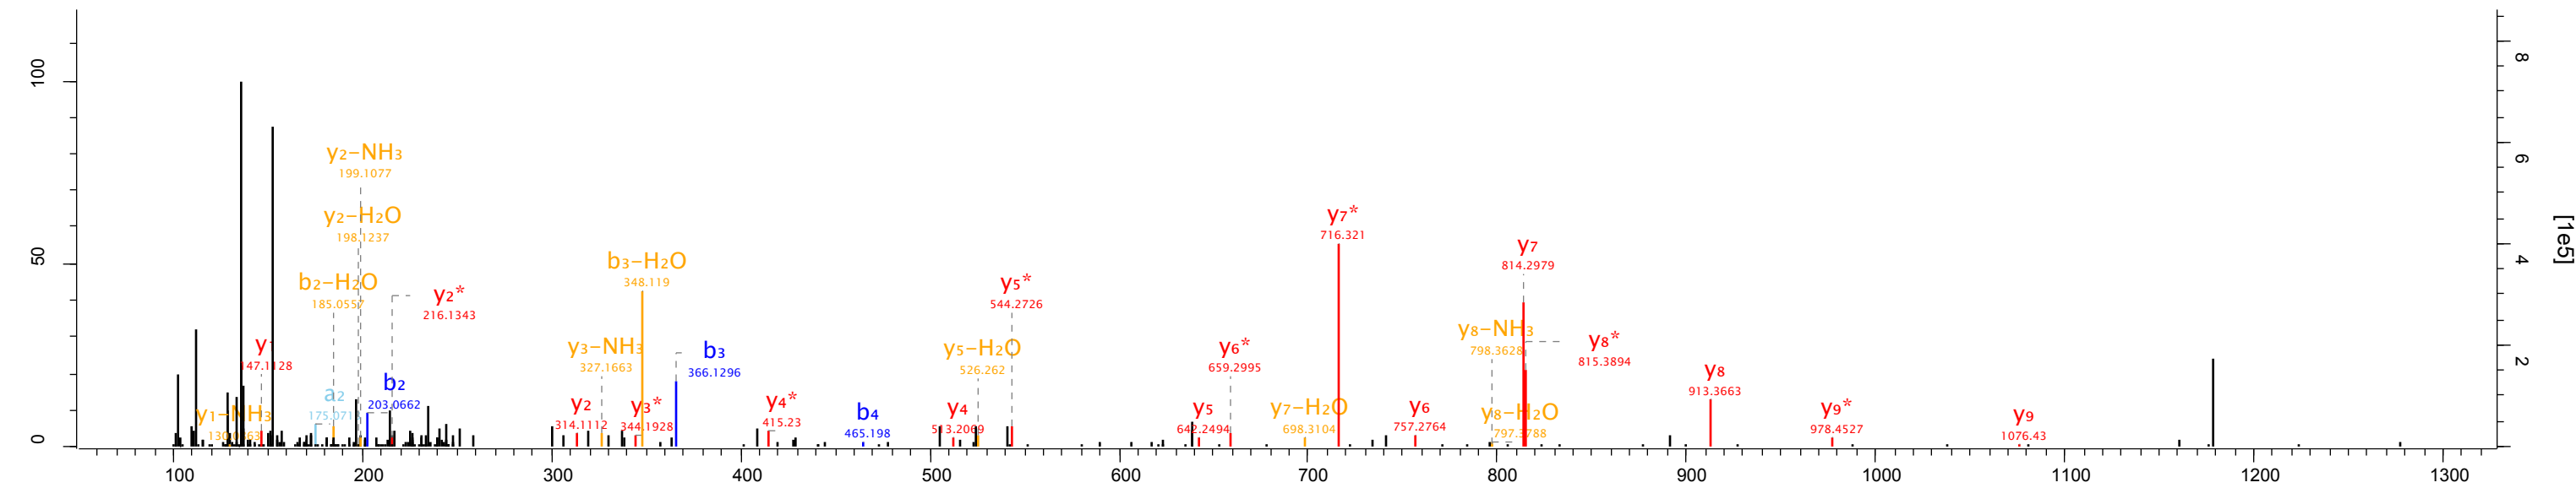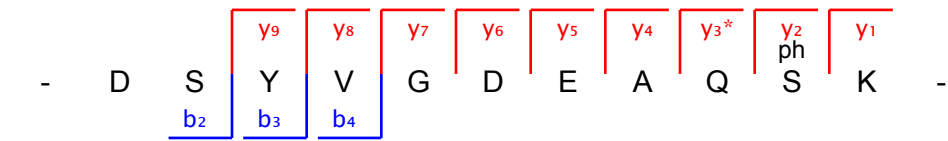



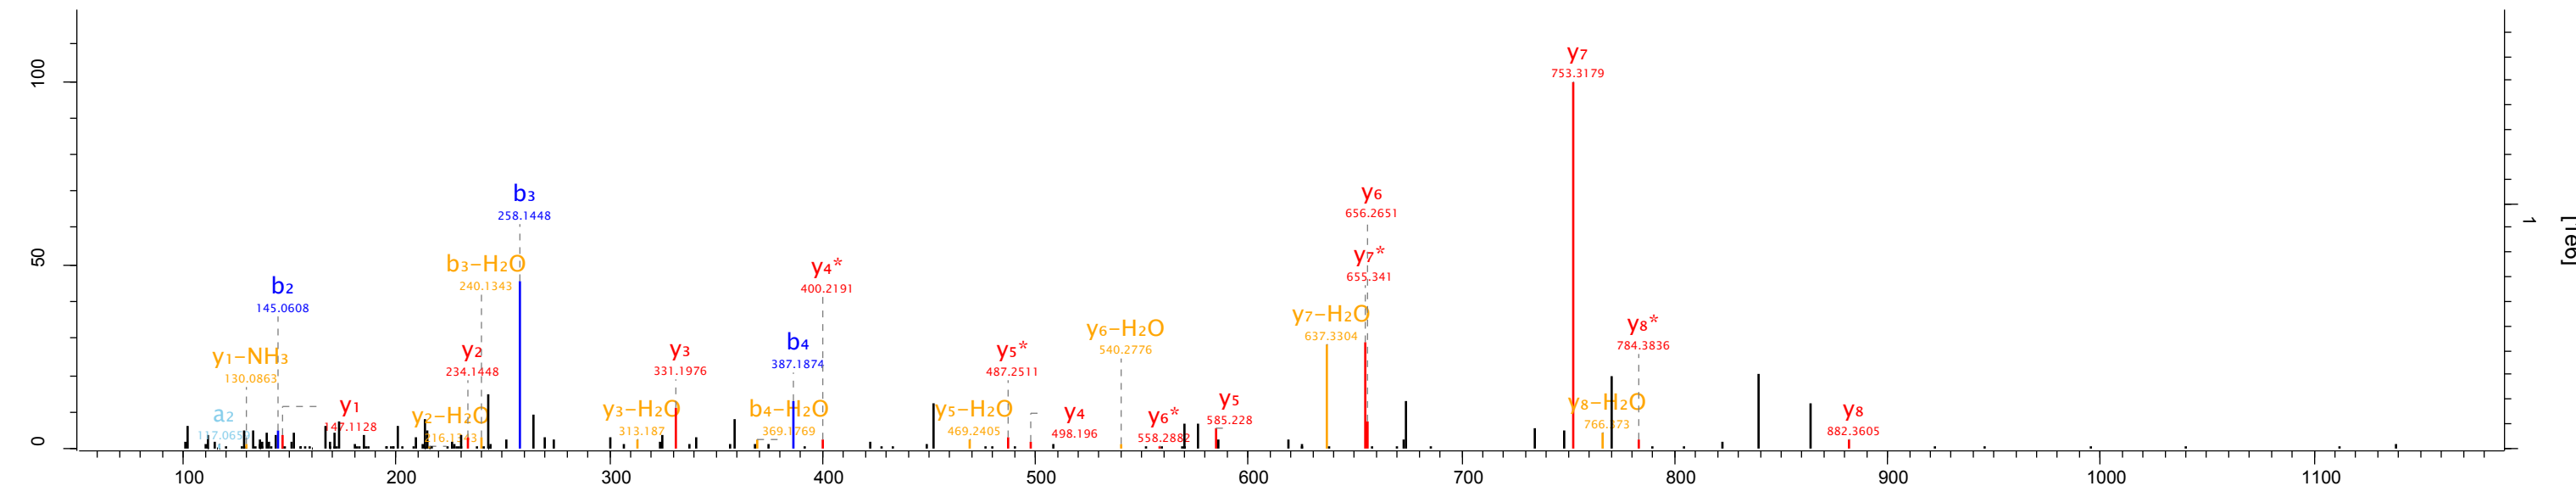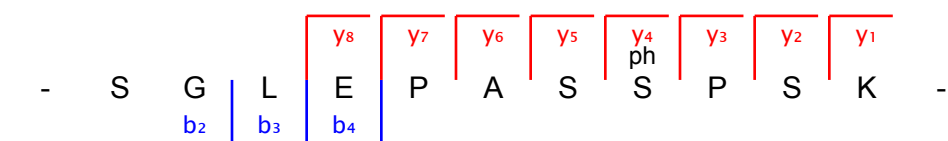

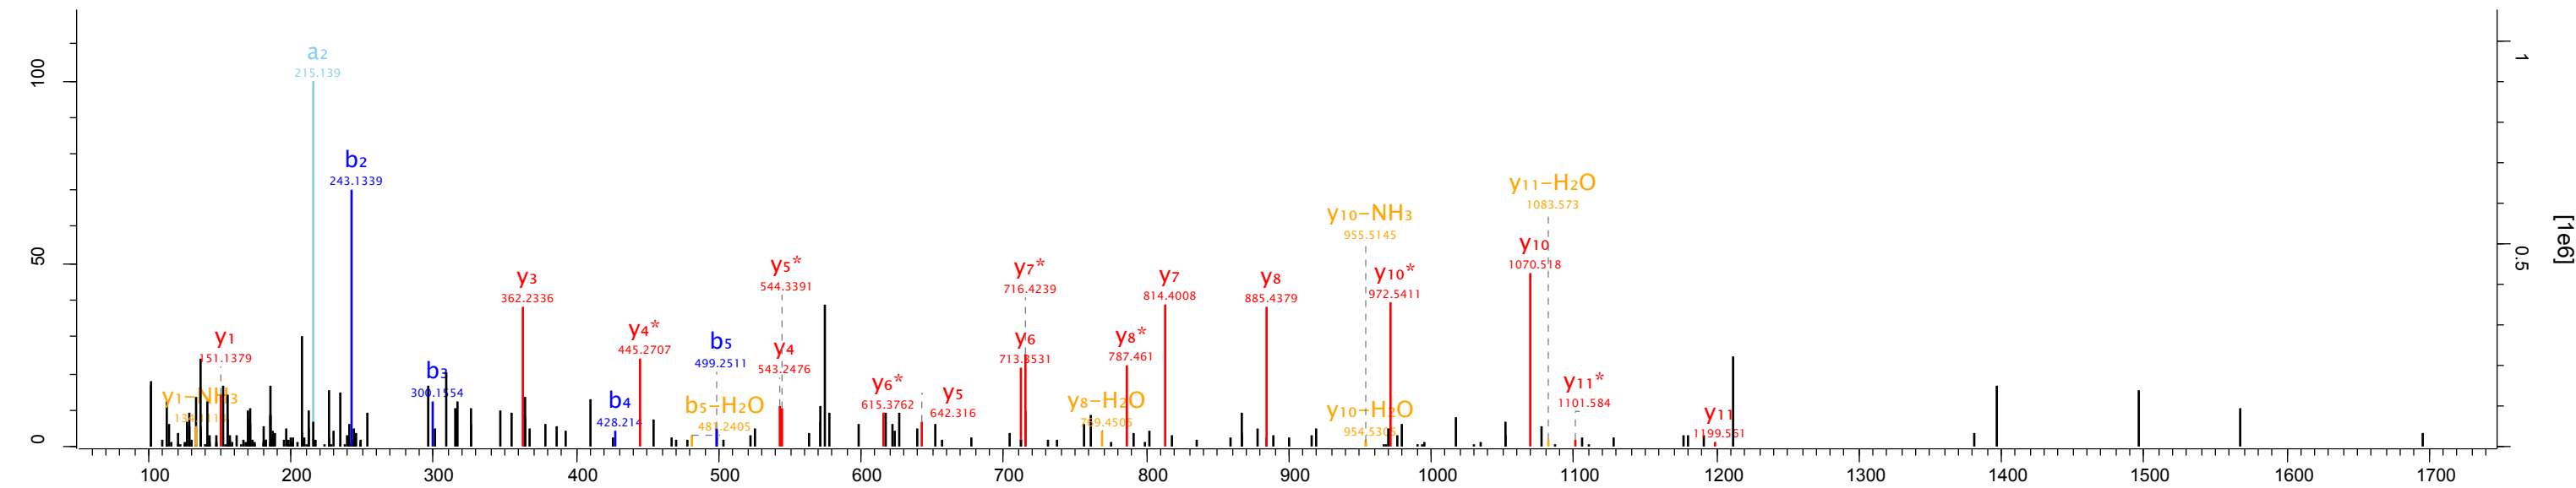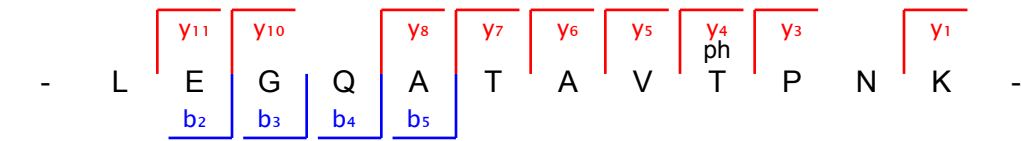

Raw file 20171215\_MaS\_33SR\_LMH\_phospho2\_02 Scan 4113 Method FTMS; HCD Score 105.95 m/z 507.74 Gene names SPEN

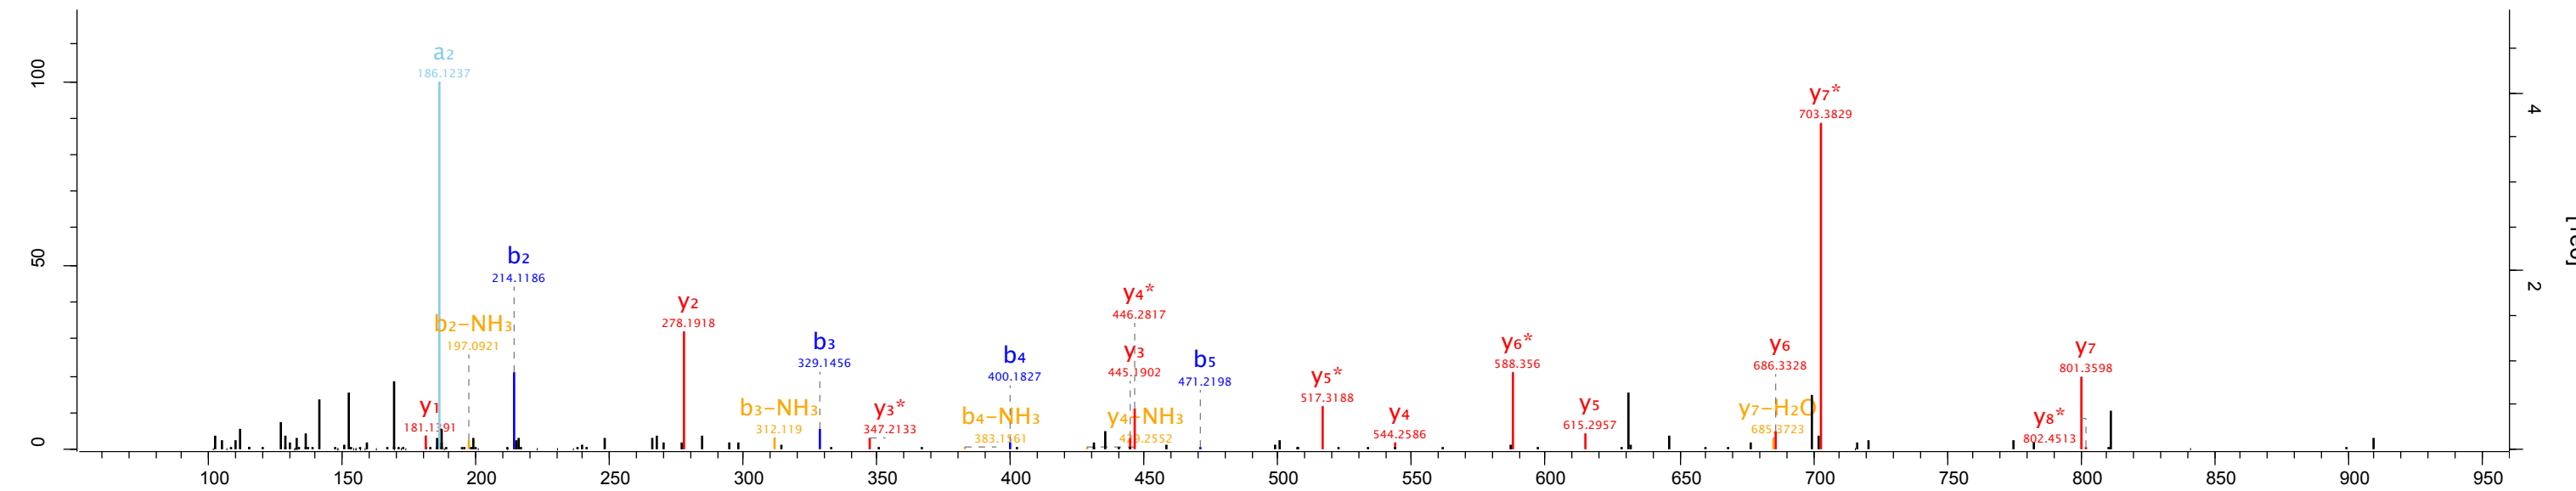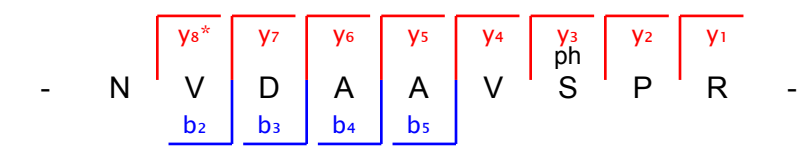

Raw file 20171215\_MaS\_33SR\_LMH\_phospho2\_02 Scan 4673 Method FTMS; HCD Score 133.91 m/z 468.2 Gene names ERCC6L

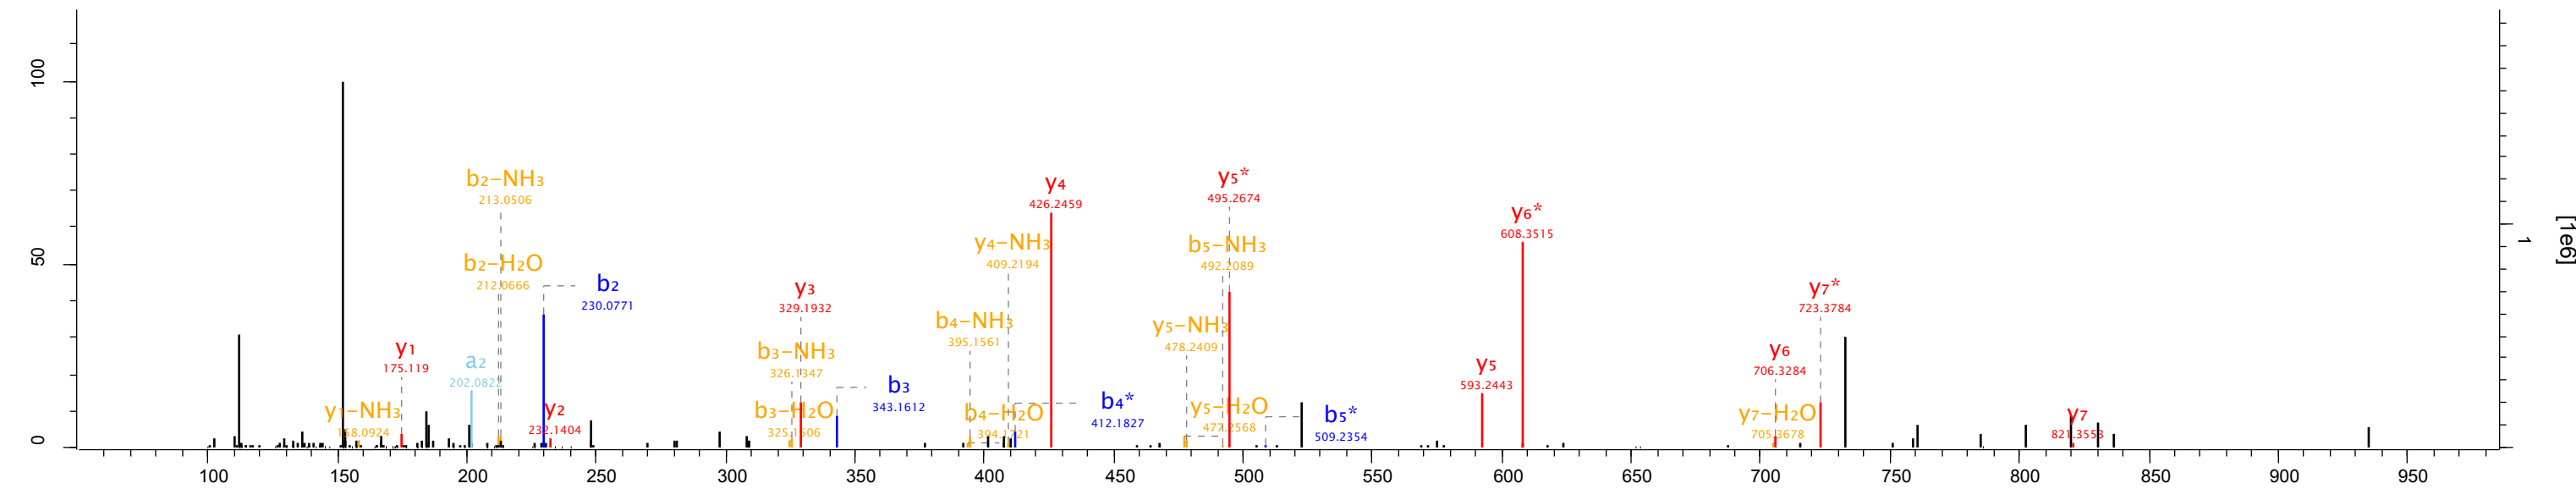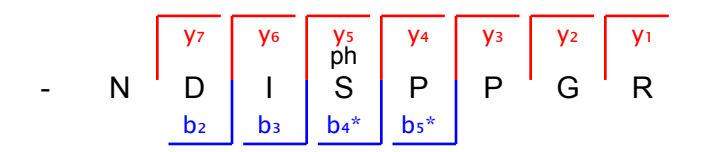

20171215\_MaS\_33SR\_LMH\_phospho2\_02 4683 FTMS; HCD 80.17 511.17 MISP

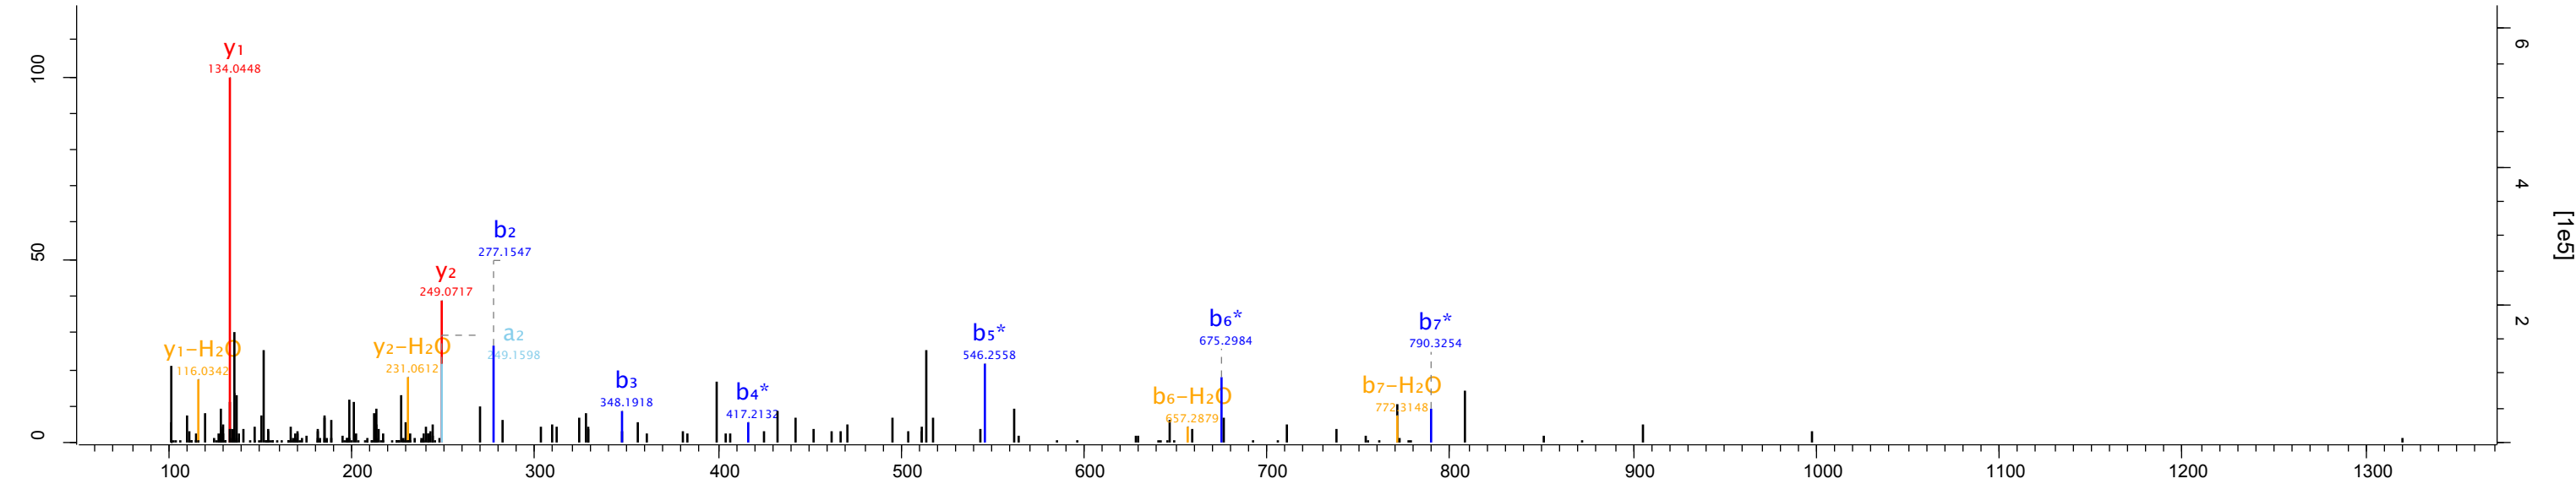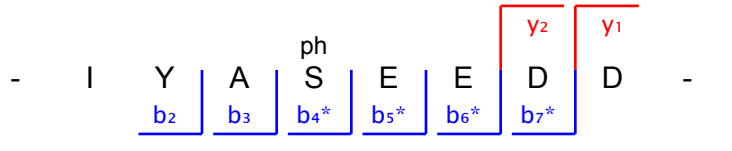

Raw file 20171215\_MaS\_33SR\_LMH\_phospho2\_02 Scan 5163 Method FTMS; HCD Score 80.39 m/z 730.33 Gene names CDON

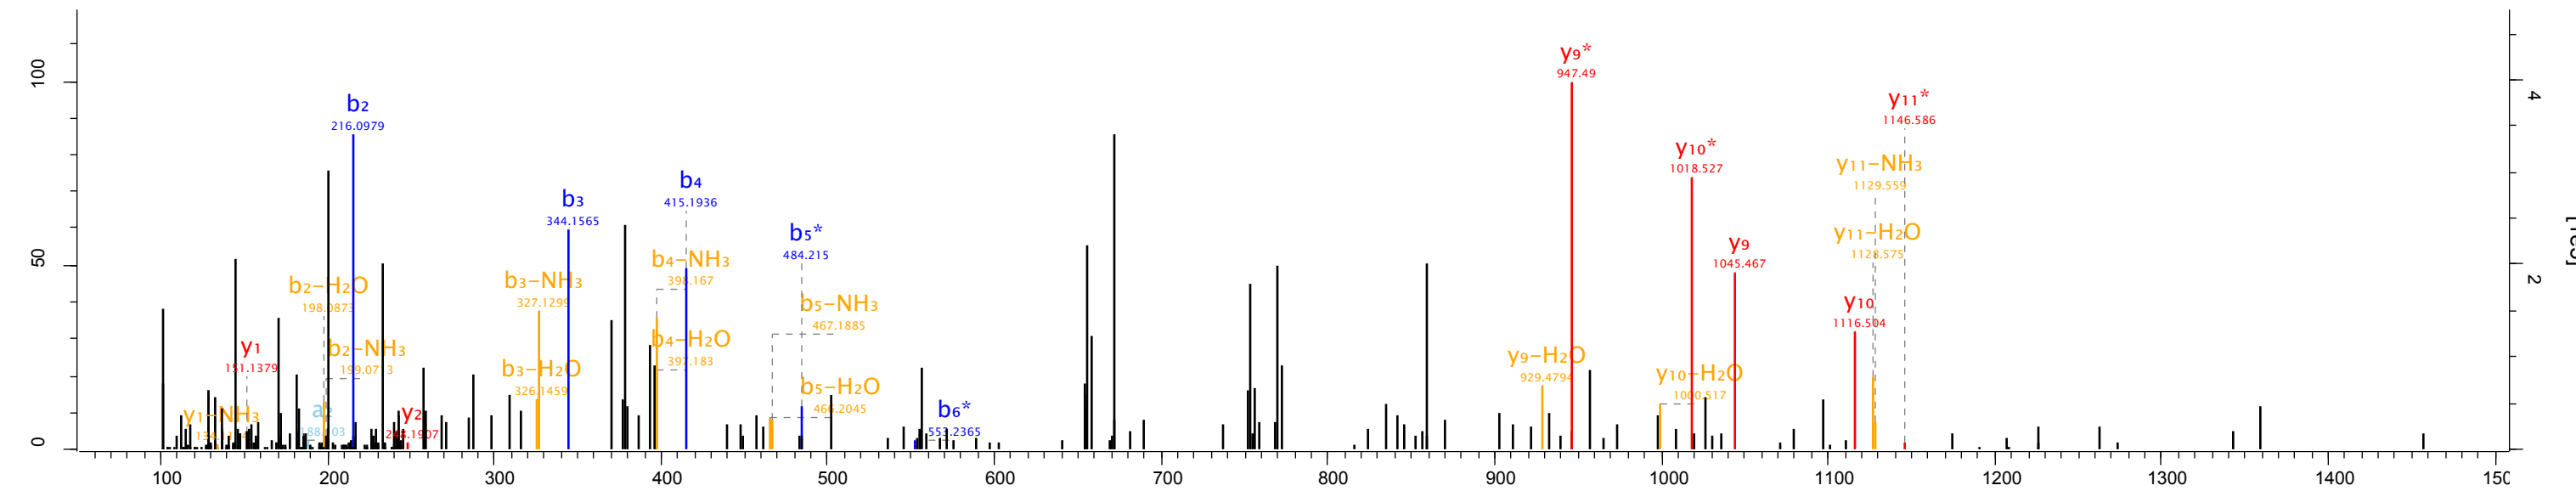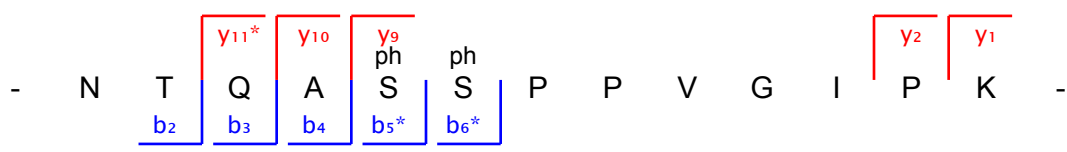

Raw file 20171215\_MaS\_33SR\_LMH\_phospho2\_02 Scan 5243 Method FTMS; HCD Score 154.05 m/z 539.68 Gene names HNRNPK

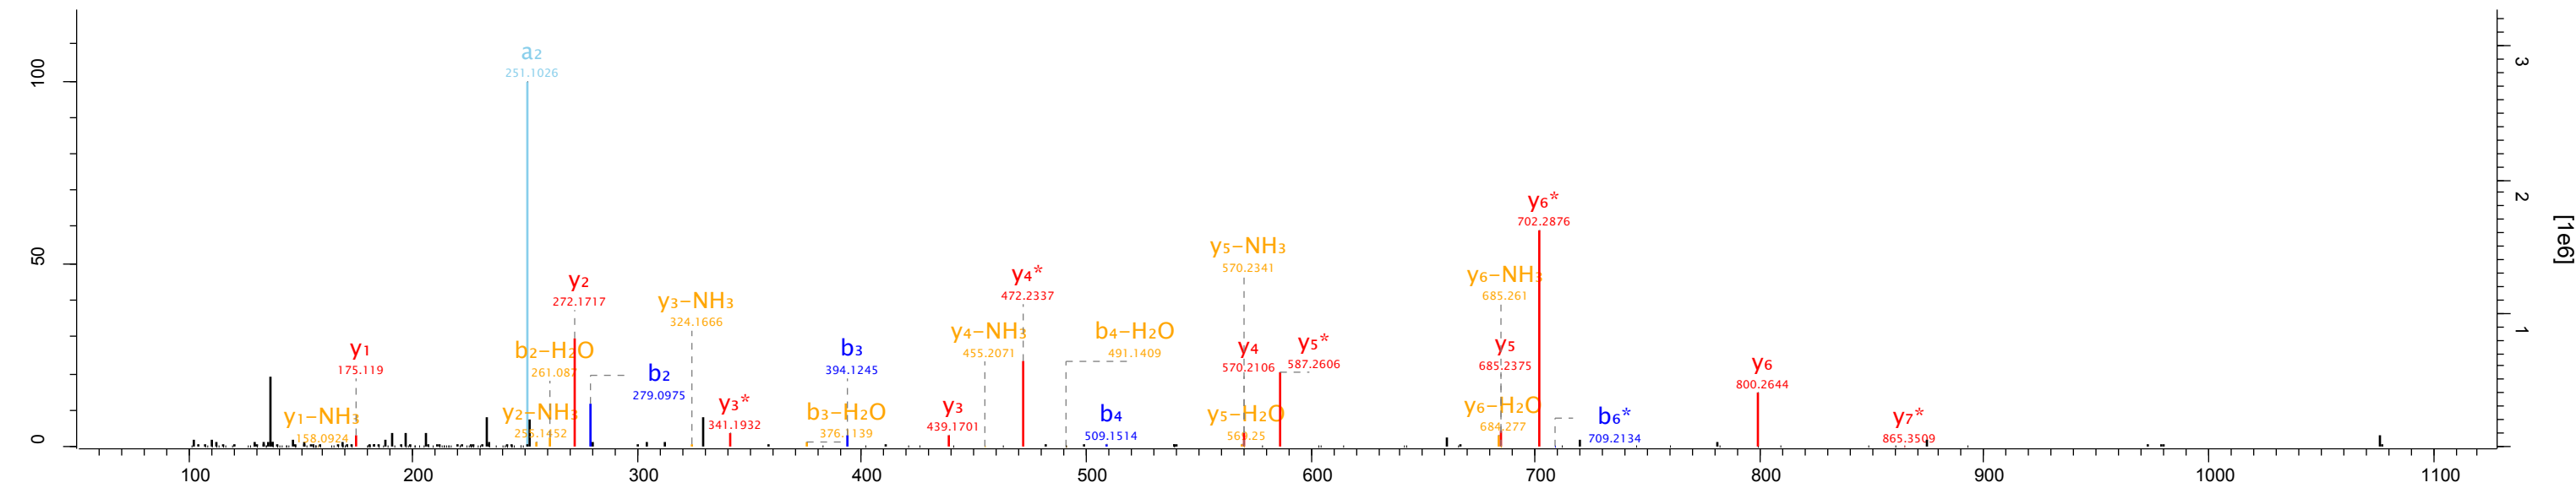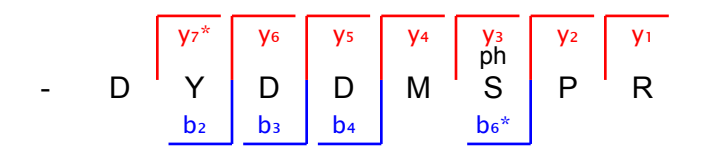

Raw file 20171215\_MaS\_33SR\_LMH\_phospho2\_02 Scan 5633 Method FTMS; HCD Score 347.24 m/z 1108.48 Gene names RAD23B

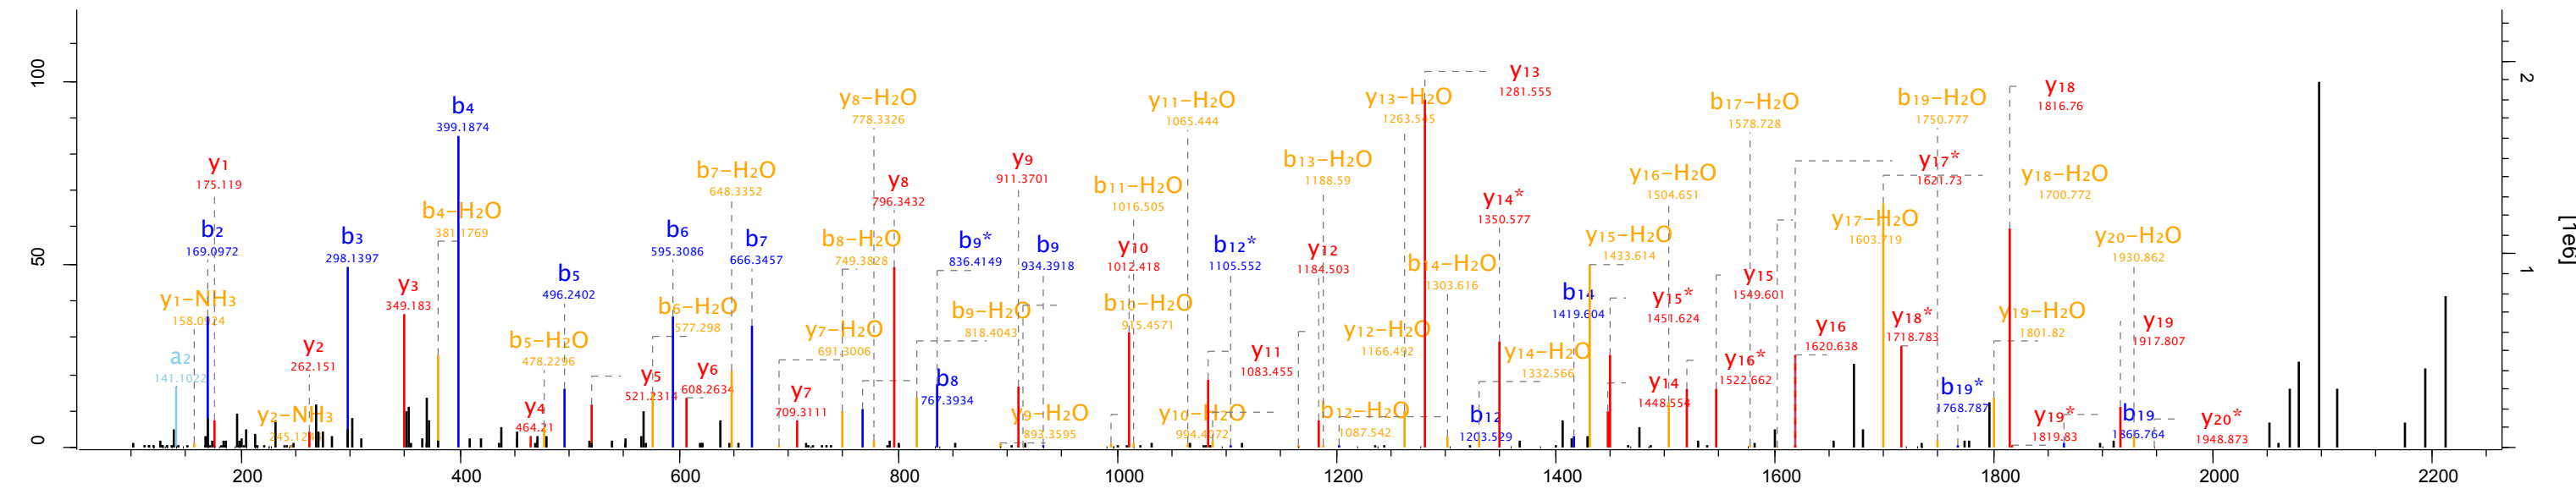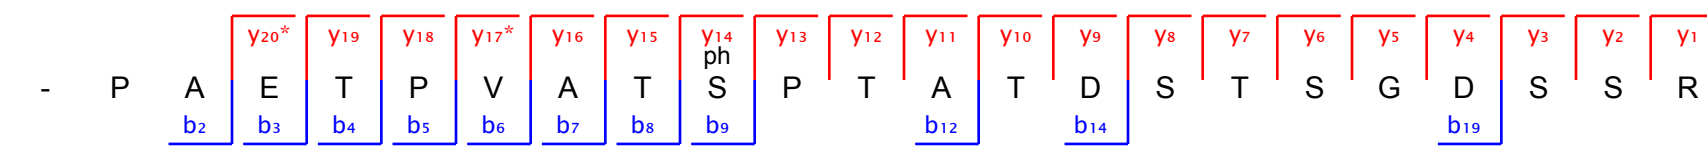



Raw file: 20171215\_MaS\_33SR\_LMH\_phospho2\_02  
 Scan: 5783 Method: FTMS; HCD Score: 99.97 m/z: 497.73 Gene names: ZC3H13

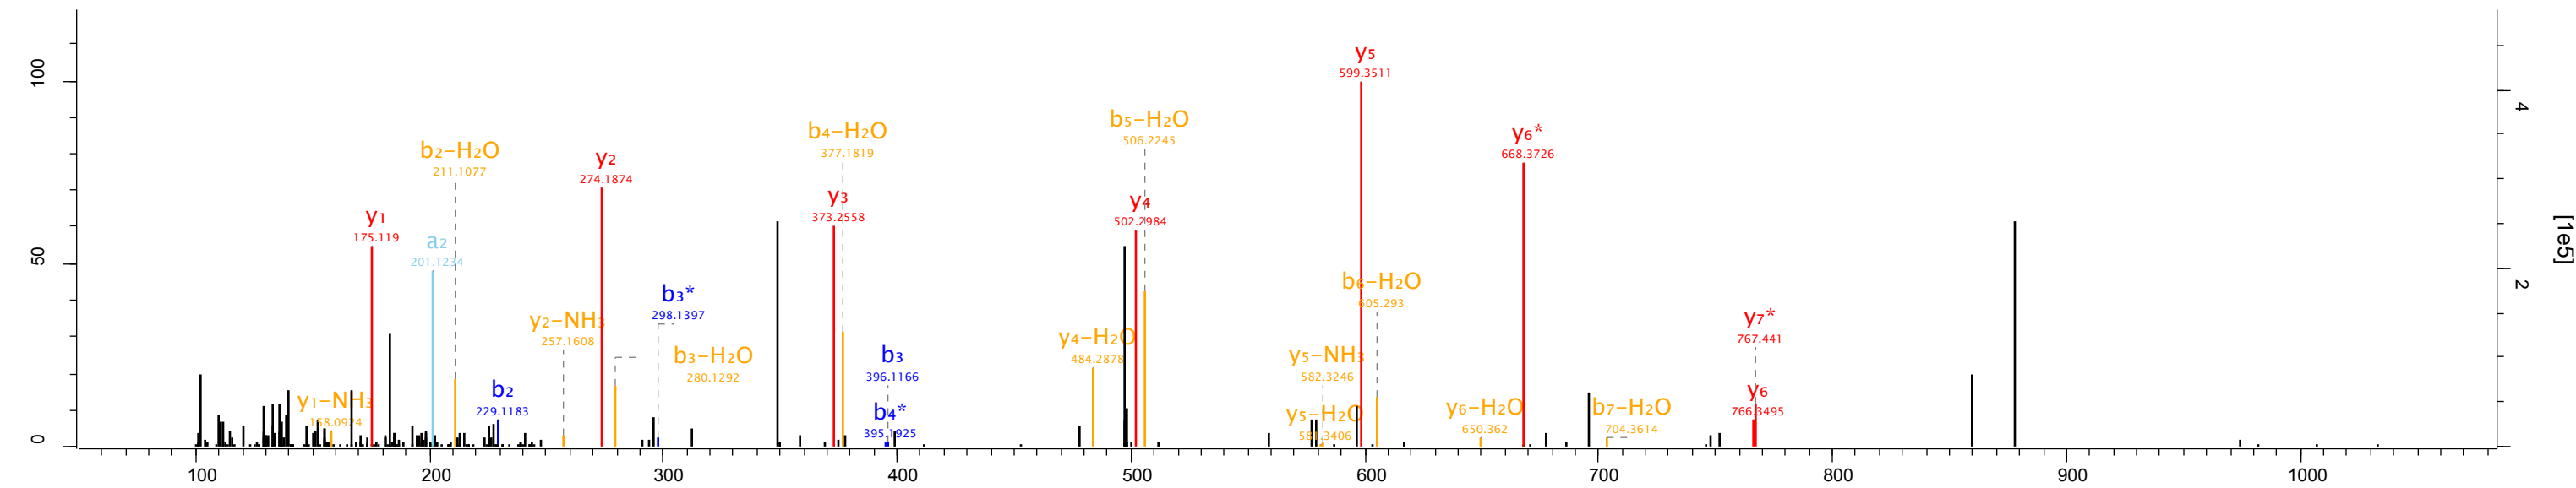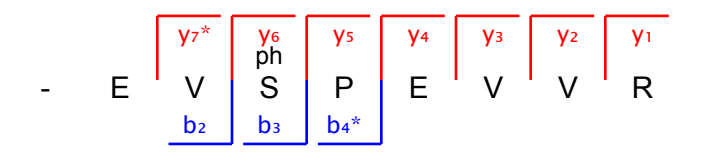

Raw file 20171215\_MaS\_33SR\_LMH\_phospho2\_02 Scan 6003 Method FTMS; HCD Score 129.85 m/z 913.4 Gene names TLE1

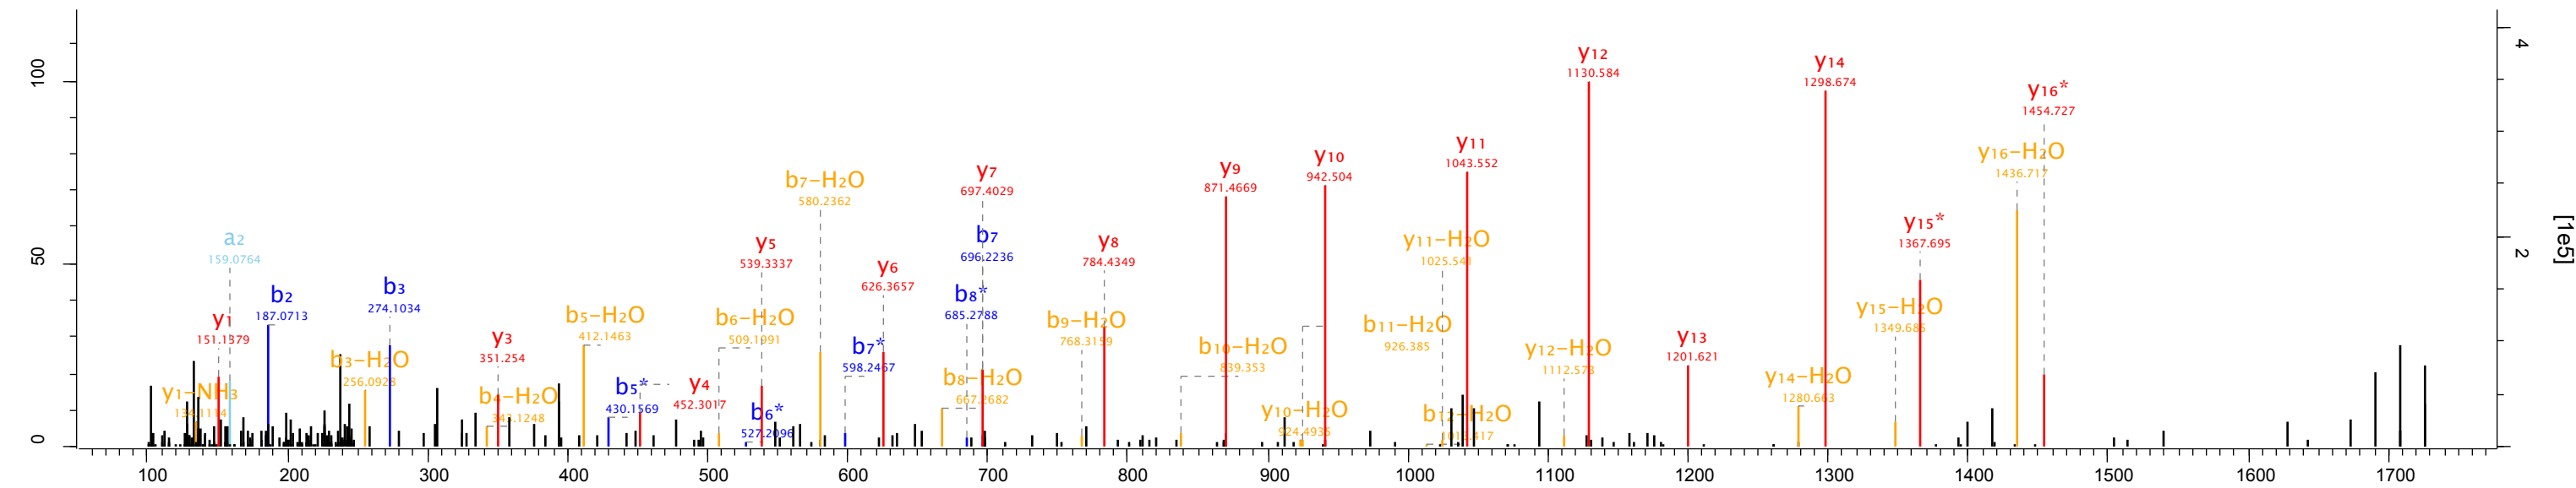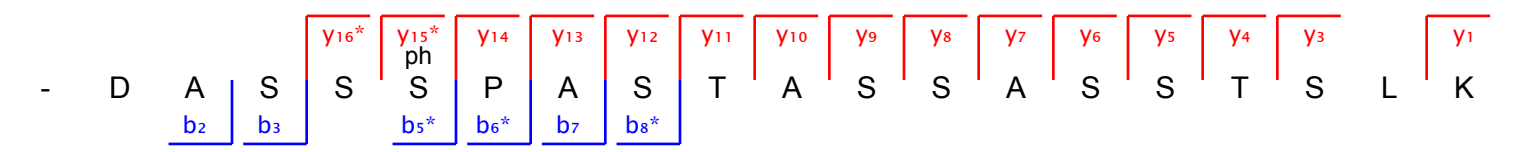

Raw file 20171215\_MaS\_33SR\_LMH\_phospho2\_02 Scan 6073 Method FTMS; HCD Score 54.2 m/z 527.27 Gene names SOX6

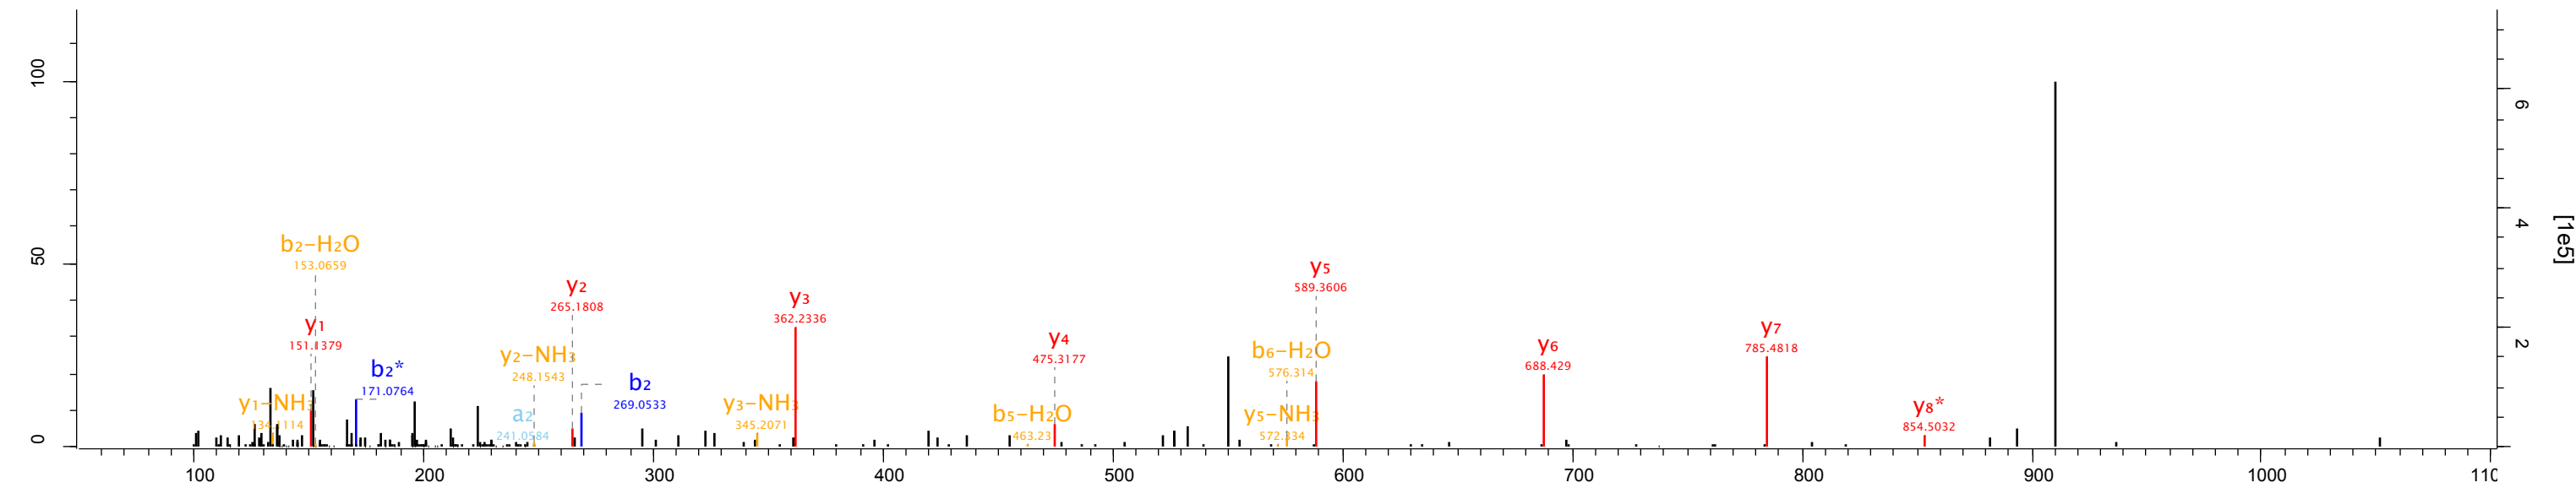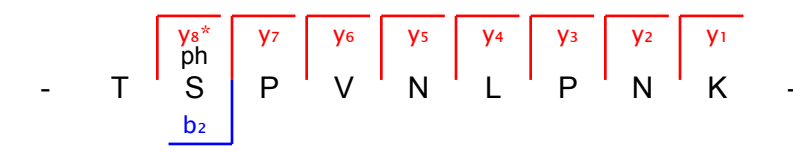

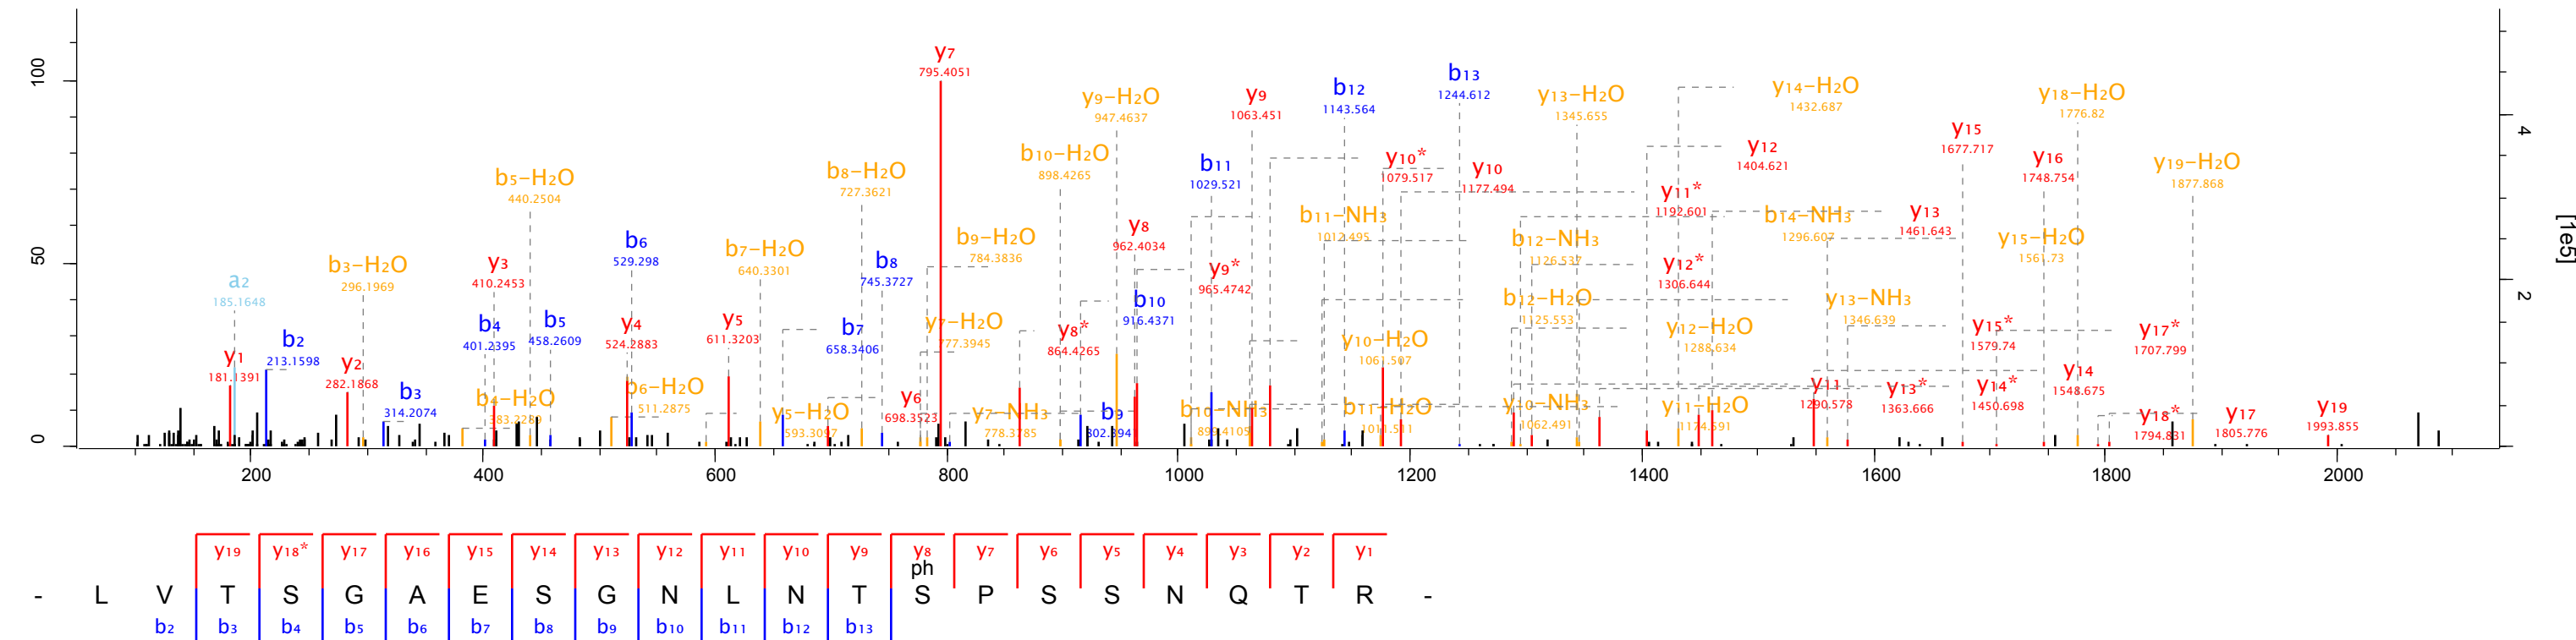

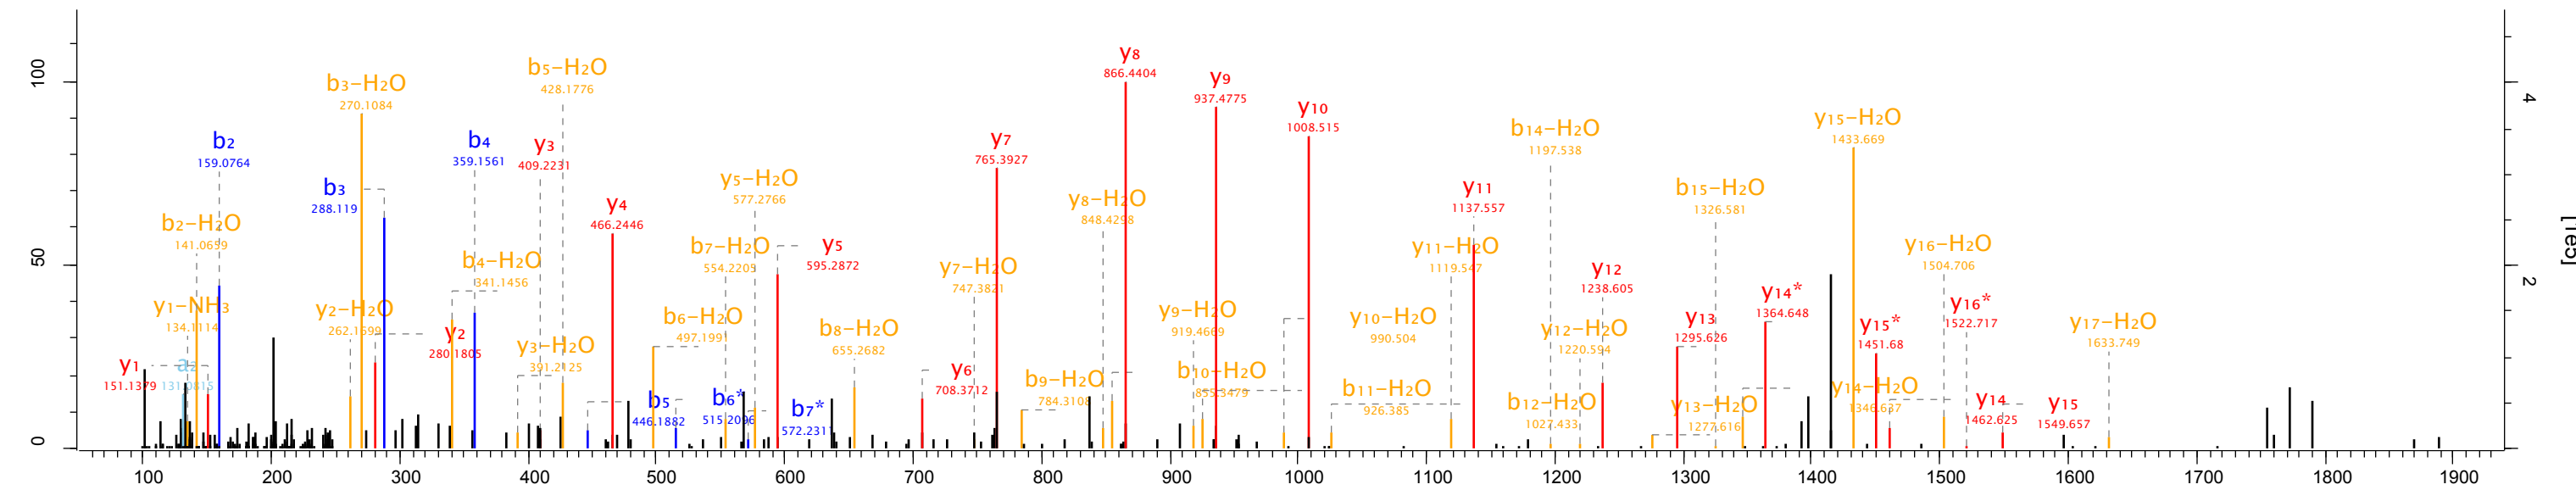

- G T E A S ph S G T E A A T G L E G E E K -

b<sub>2</sub>
b<sub>3</sub>
b<sub>4</sub>
b<sub>5</sub>
b<sub>6</sub>\*
b<sub>7</sub>\*
y<sub>16</sub>\*
y<sub>15</sub>
y<sub>14</sub>ph
y<sub>13</sub>
y<sub>12</sub>
y<sub>11</sub>
y<sub>10</sub>
y<sub>9</sub>
y<sub>8</sub>
y<sub>7</sub>
y<sub>6</sub>
y<sub>5</sub>
y<sub>4</sub>
y<sub>3</sub>
y<sub>2</sub>
y<sub>1</sub>

Raw file: 20171215\_MaS\_33SR\_LMH\_phospho2\_02  
 Scan: 6783 Method: FTMS; HCD Score: 115.37 m/z: 544.77 Gene names: DDX20

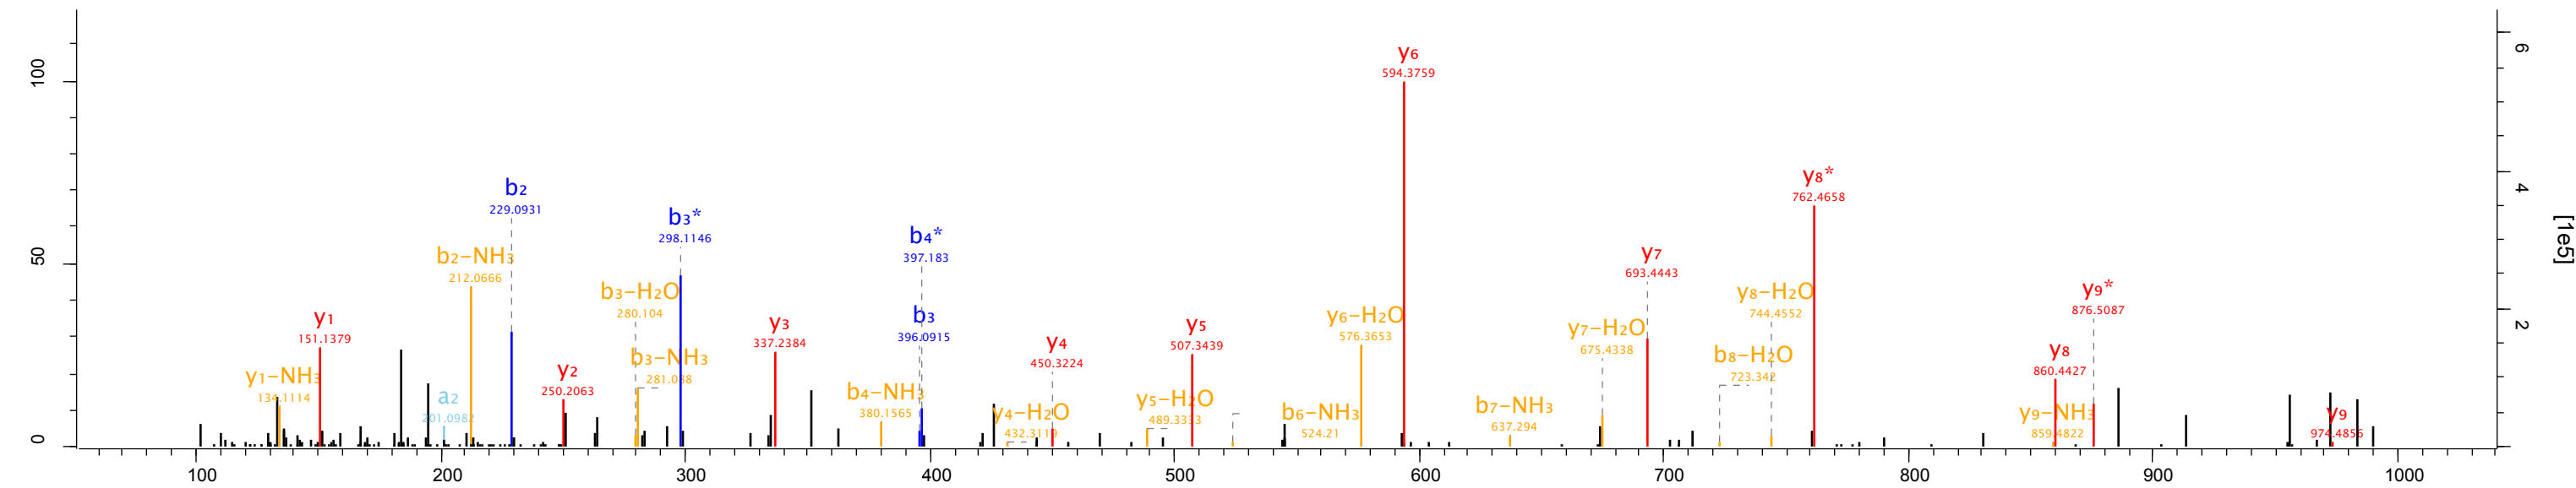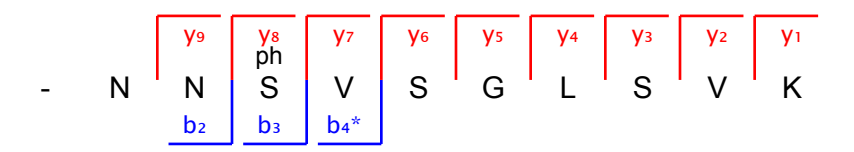

Raw file  
20171215\_MaS\_33SR\_LMH\_phospho2\_02

Scan 6873 Method FTMS; HCD Score 233.85 m/z 992.46 Gene names ANLN

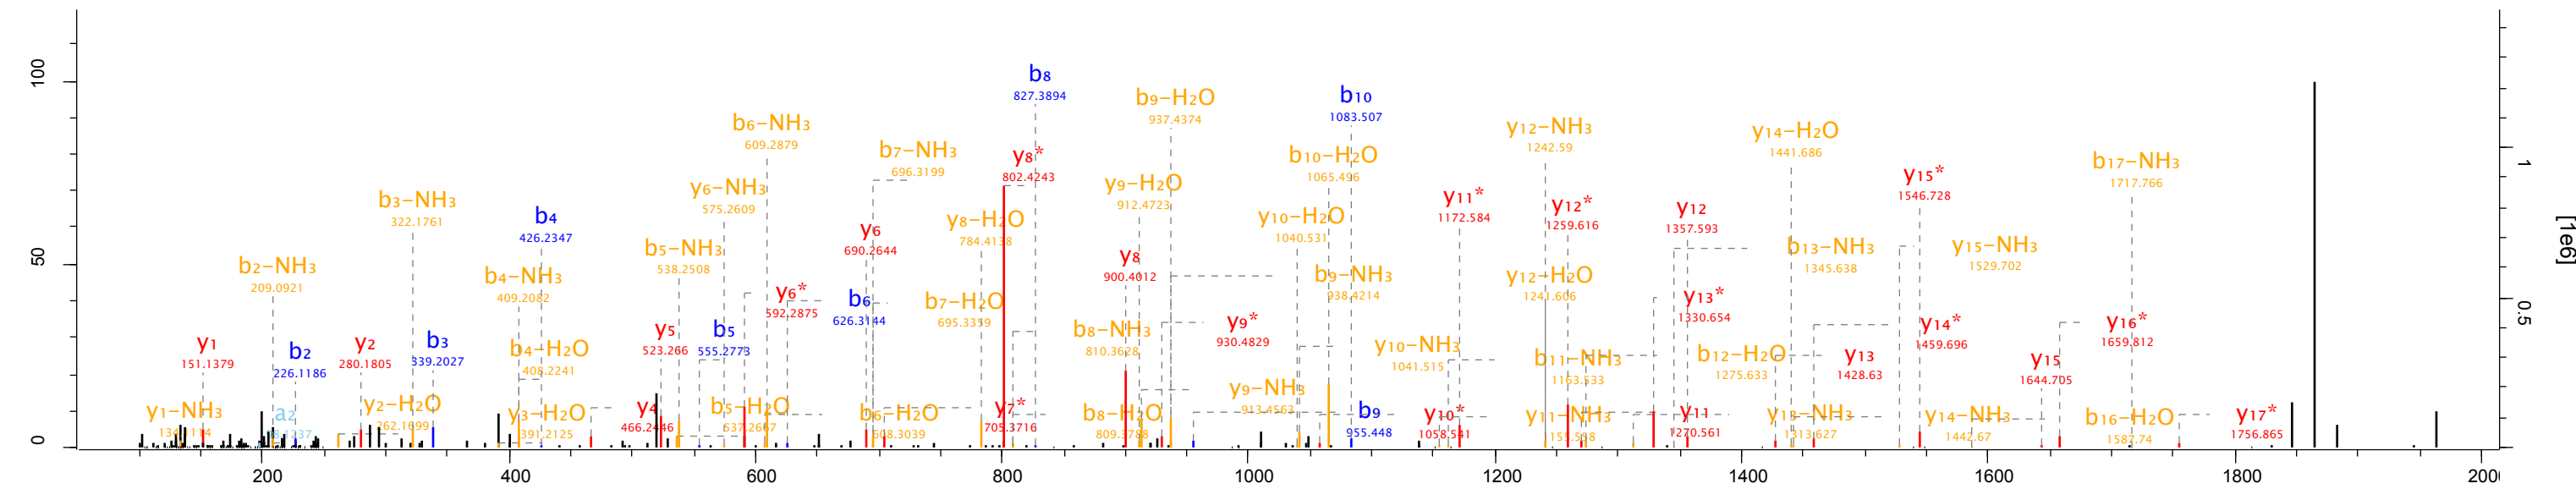

- Q P L S E A S N Q Q P L S G G E E K -

Fragmentation mapping:  
b2 (P), b3 (L), b4 (S), b5 (E), b6 (A), b8 (N), b9 (Q), b10 (Q)  
y1 (K), y2 (E), y4 (G), y5 (G), y6 (S), y7 (L), y8 (P), y9 (Q), y10 (Q), y11 (S), y12 (S), y13 (A), y14 (E), y15 (S), y16 (L), y17 (P)

Raw file  
20171215\_MaS\_33SR\_LMH\_phospho2\_02

Scan 7503 Method FTMS; HCD Score 134.88 m/z 792.32 Gene names PI4K2A

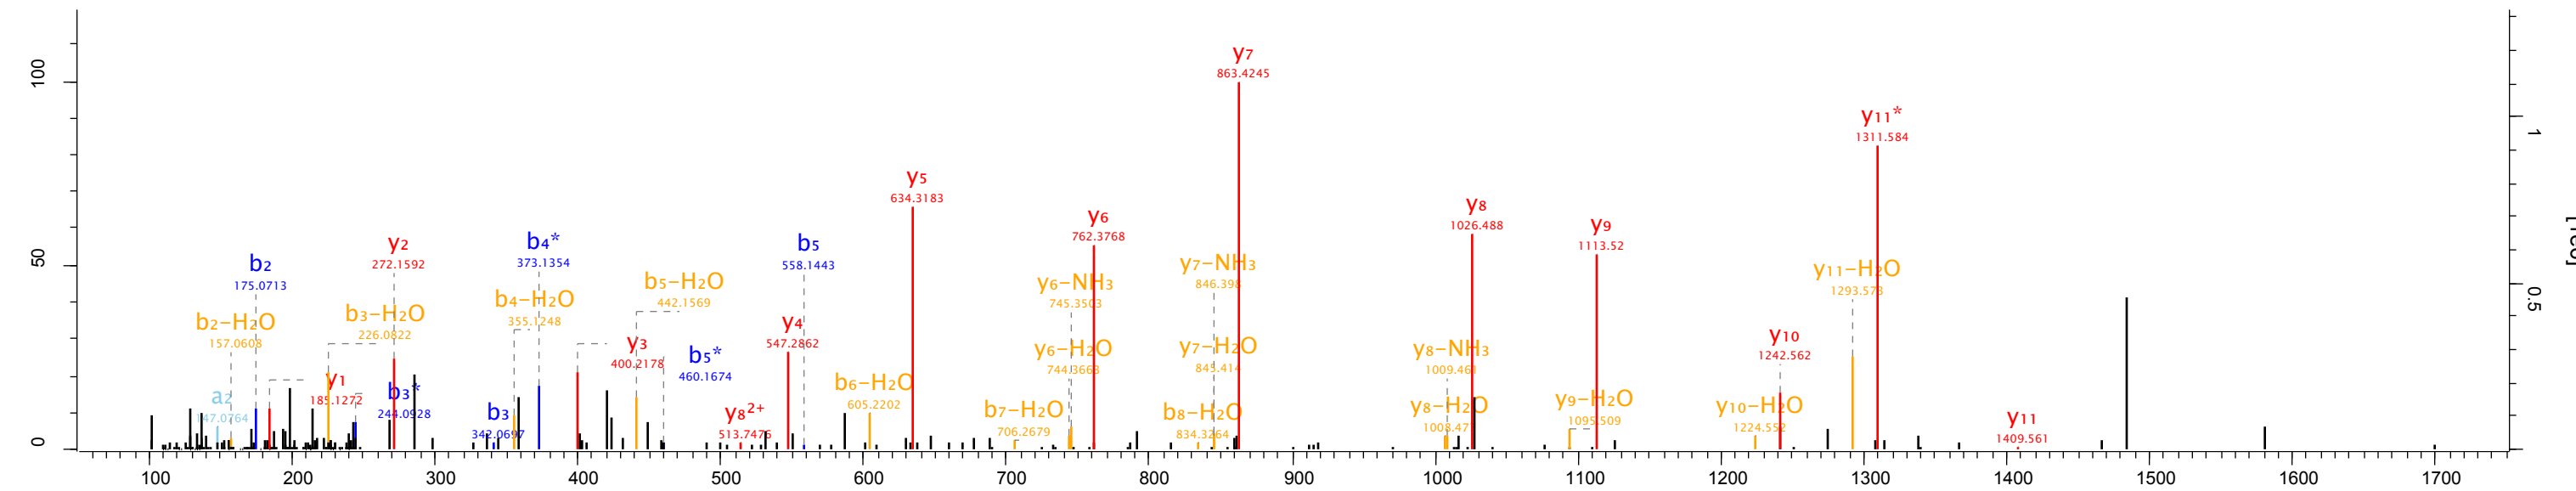

- S S S y11 ph S y10 E S y9 S y8 Y T Q y6 S y5 S F Q y4 Q y3 S y2 S R -

Below the sequence, blue boxes highlight the b ions corresponding to the peaks in the spectrum: b2 (under the first S), b3 (under the second S), b4\* (under the E), and b5 (under the third S).



Raw file: 20171215\_MaS\_33SR\_LMH\_phospho2\_02  
 Scan: 7593 Method: FTMS; HCD Score: 62.86 m/z: 1025.96 Gene names: SLK

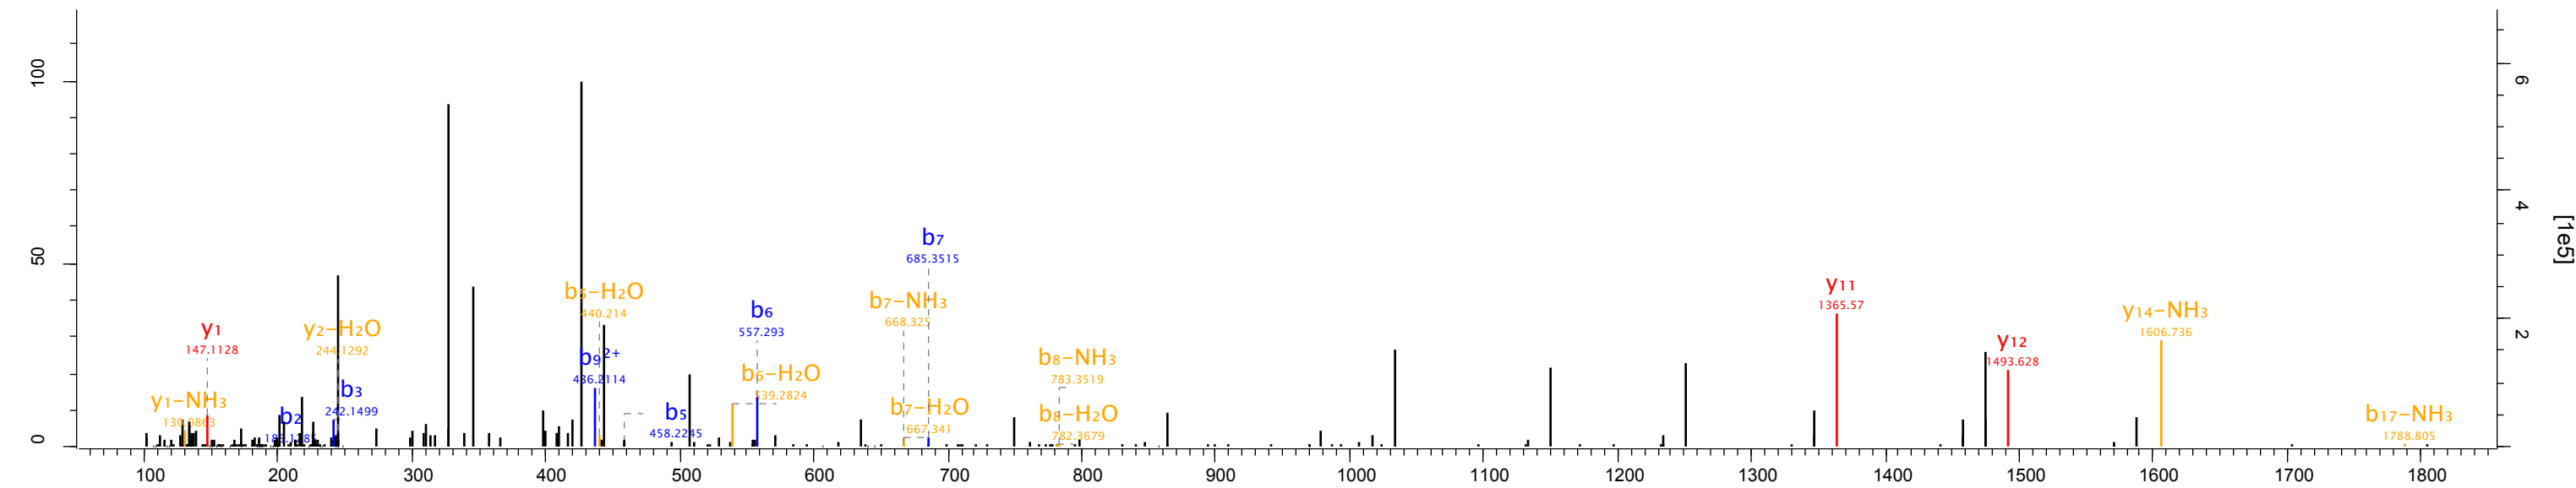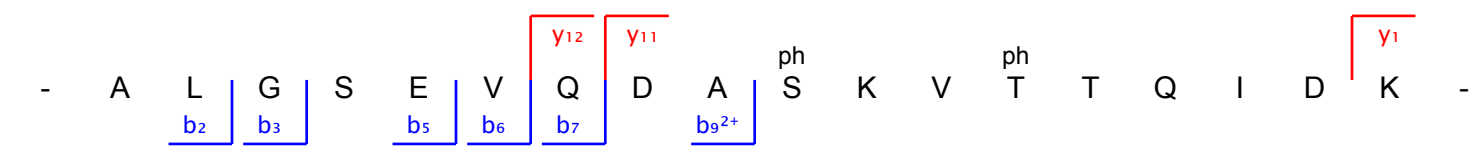

Raw file

20171215\_MaS\_33SR\_LMH\_phospho2\_02

| Scan | Method    | Score | m/z    | Gene names |
|------|-----------|-------|--------|------------|
| 8443 | FTMS; HCD | 76.76 | 628.81 | CRTC3      |

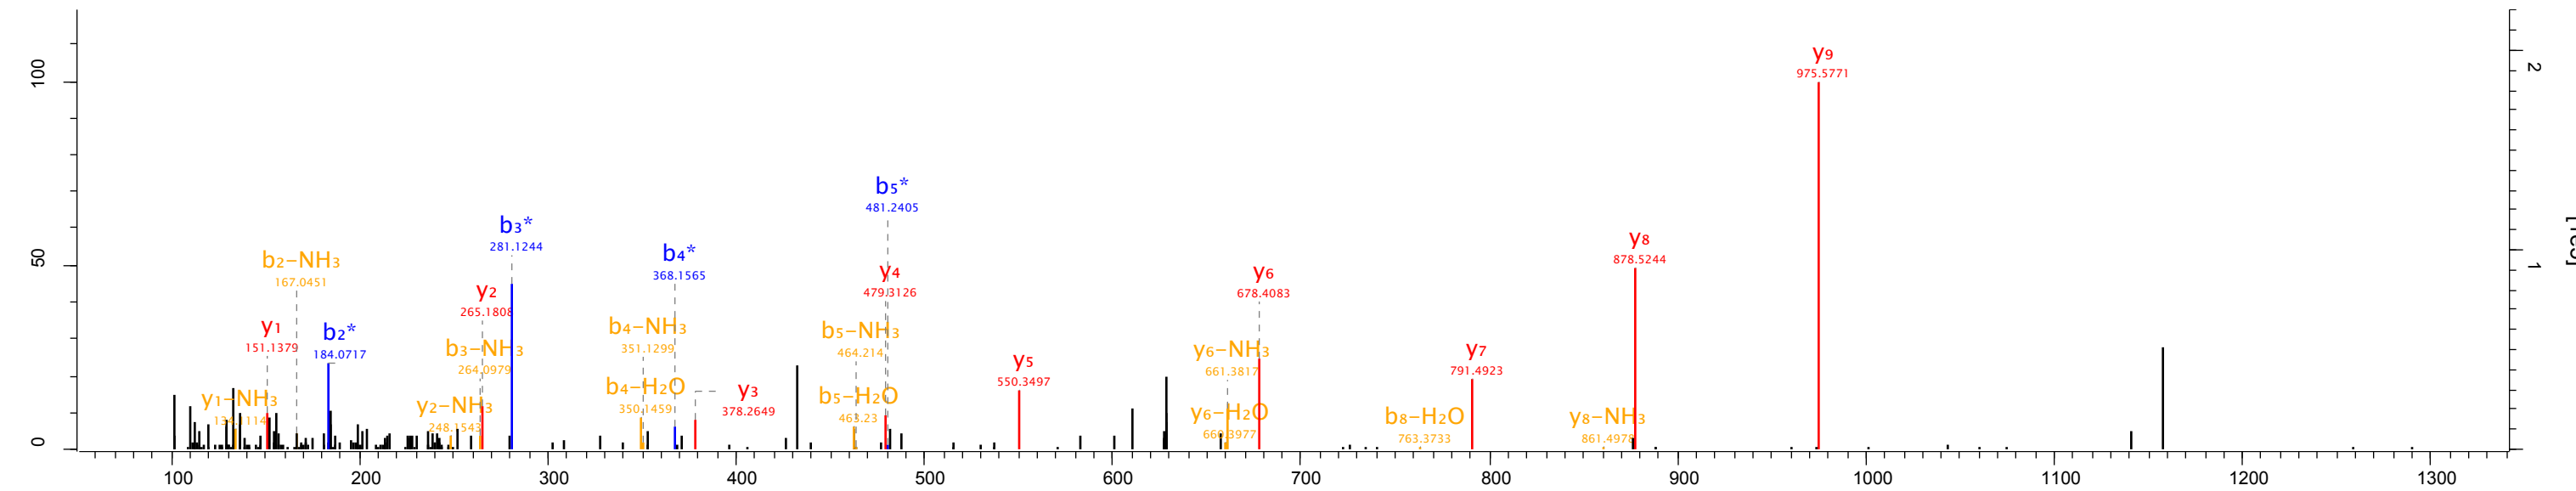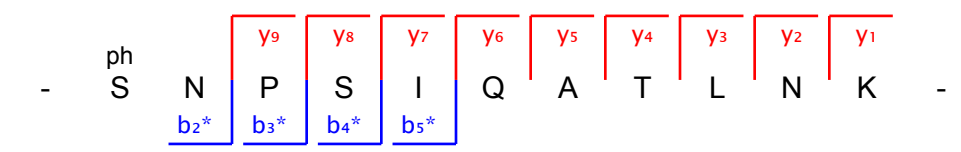

Raw file 20171215\_MaS\_33SR\_LMH\_phospho2\_02 Scan 8633 Method FTMS; HCD Score 115.87 m/z 739.82 Gene names KDM1A

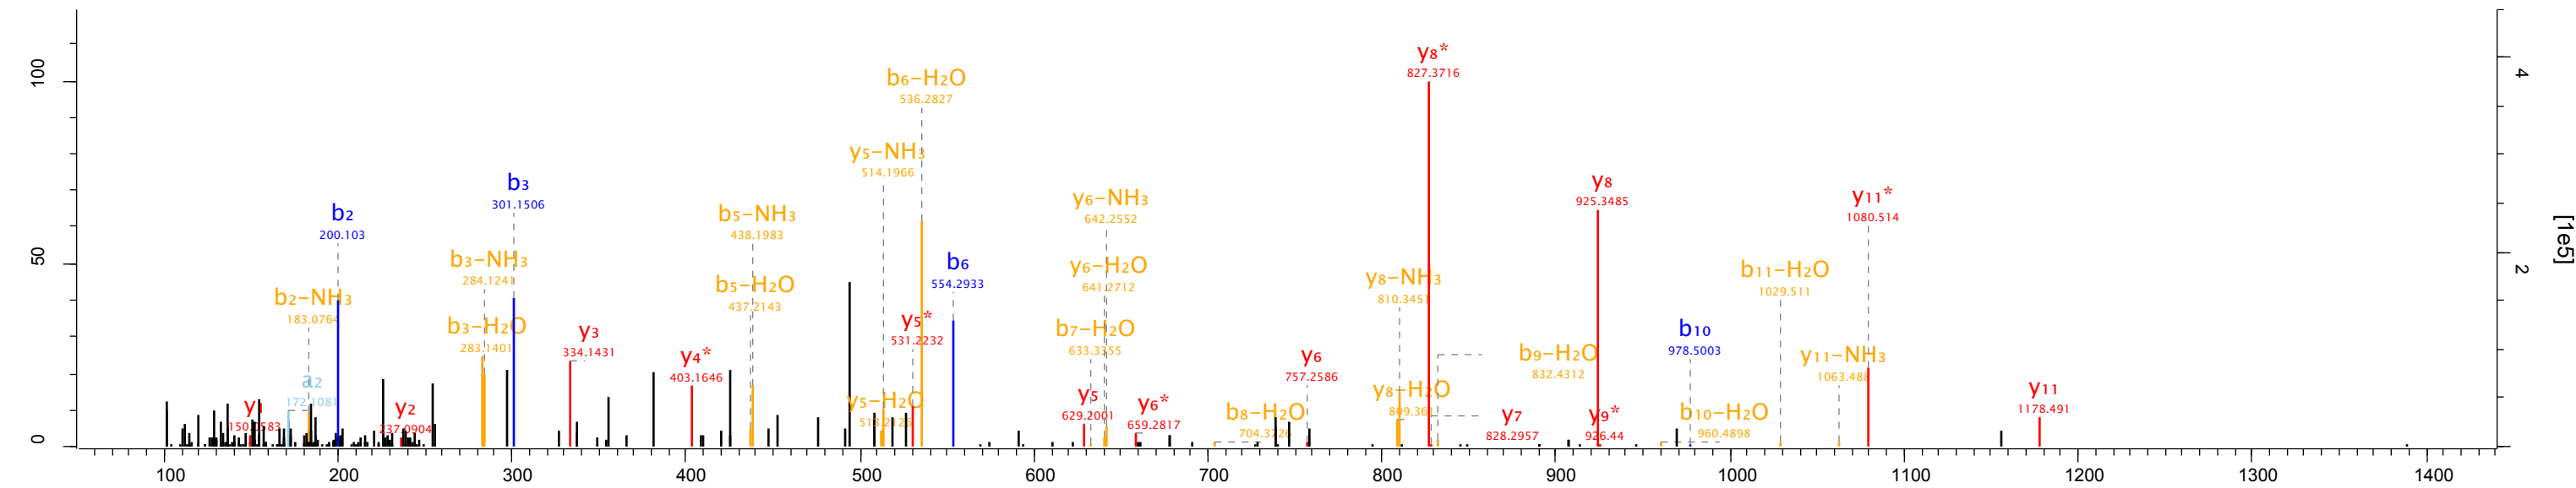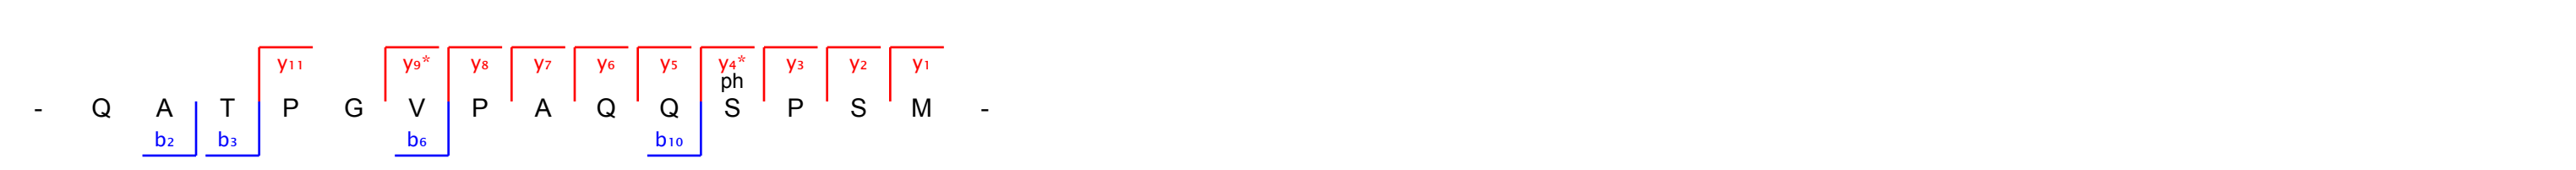



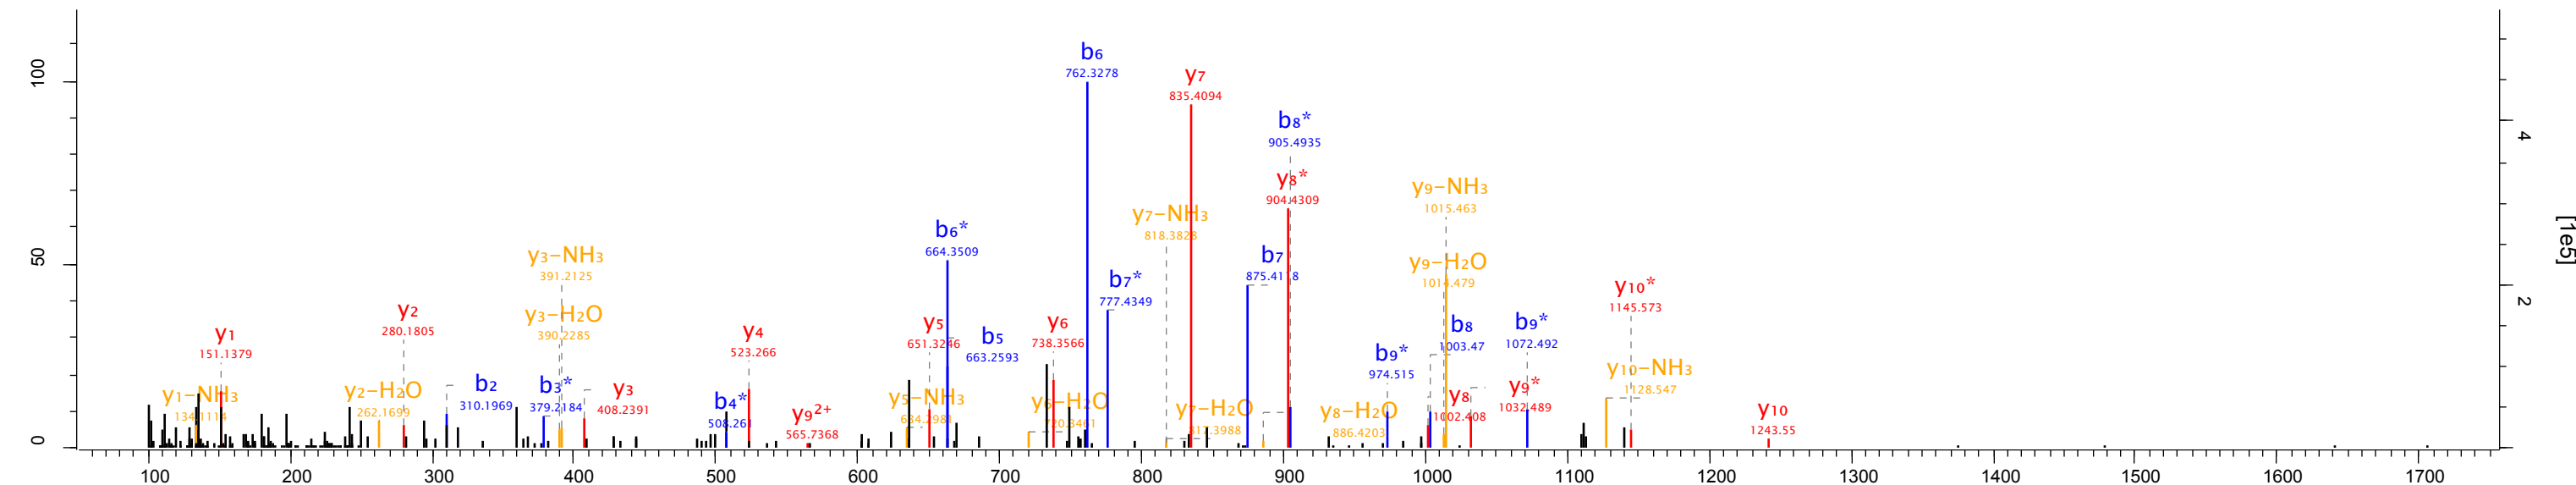

- R F S ph E G V L Q S ph S P S Q D Q E K -

b<sub>2</sub> b<sub>3</sub><sup>\*</sup> b<sub>4</sub><sup>\*</sup> b<sub>5</sub> b<sub>6</sub> b<sub>7</sub> b<sub>8</sub> b<sub>9</sub><sup>\*</sup>

y<sub>10</sub> y<sub>9</sub><sup>\*</sup> y<sub>8</sub> ph y<sub>7</sub> y<sub>6</sub> y<sub>5</sub> y<sub>4</sub> y<sub>3</sub> y<sub>2</sub> y<sub>1</sub>

Raw file Scan Method Score m/z Gene names

20171215\_MaS\_33SR\_LMH\_phospho2\_03 10123 FTMS; HCD 175.77 817.9 WIZ

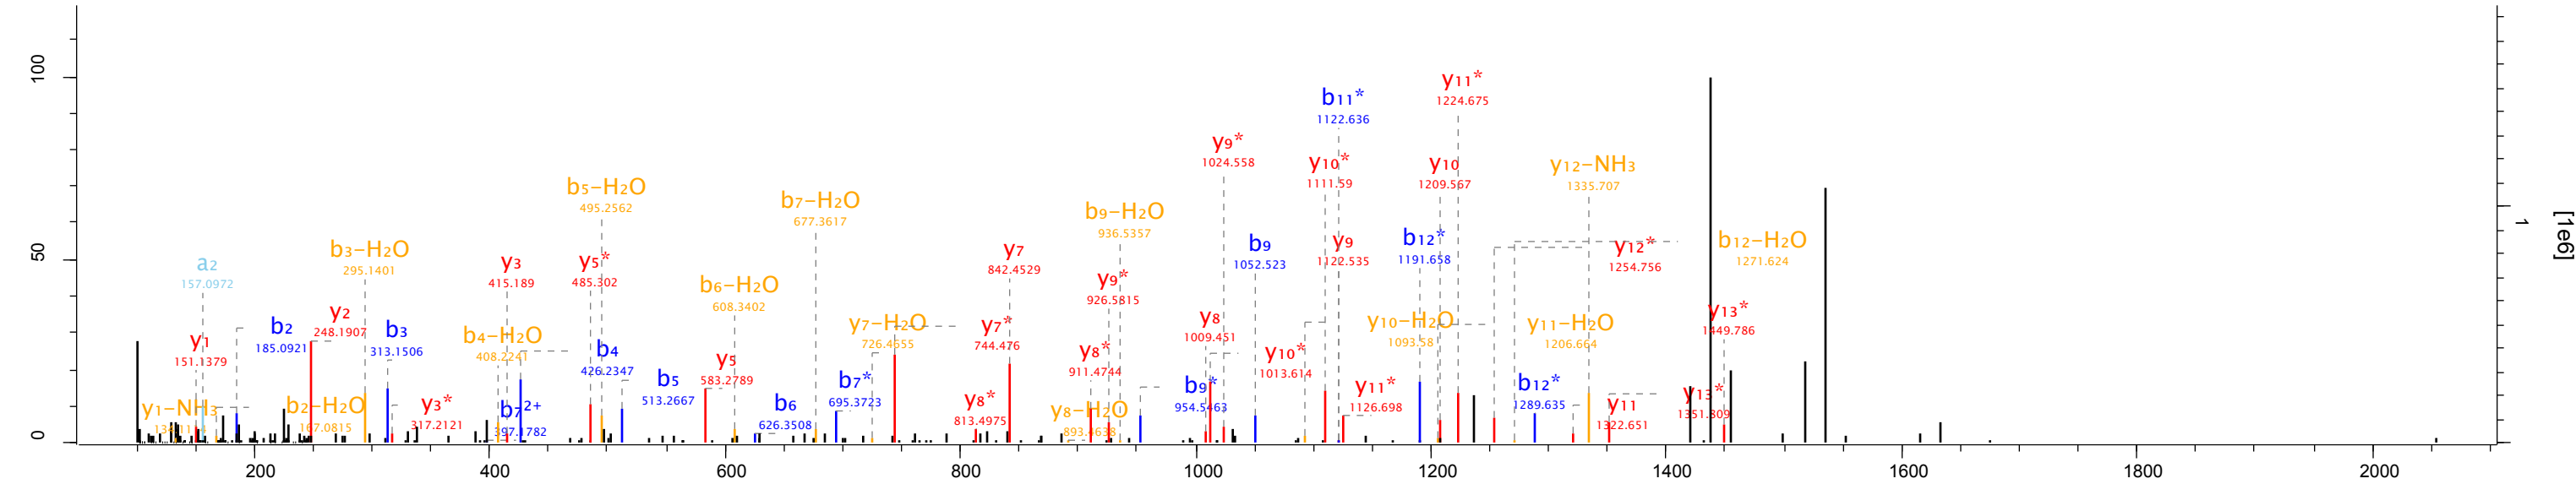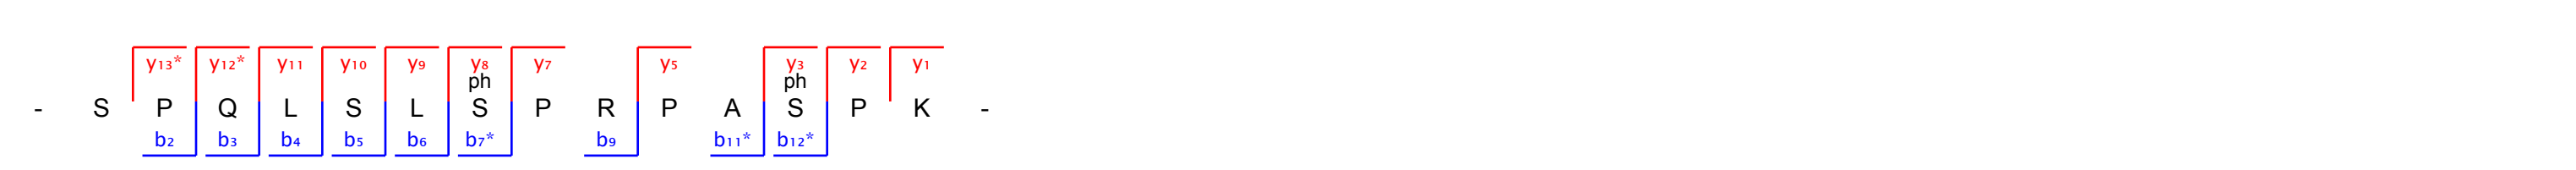

Raw file

20171215\_MaS\_33SR\_LMH\_phospho2\_03

Scan

10153

Method

FTMS; HCD

Score

128.74

m/z

643.27

Gene names

RANBP2;RGPD6;RGPD4;RGPD5;RGPD8

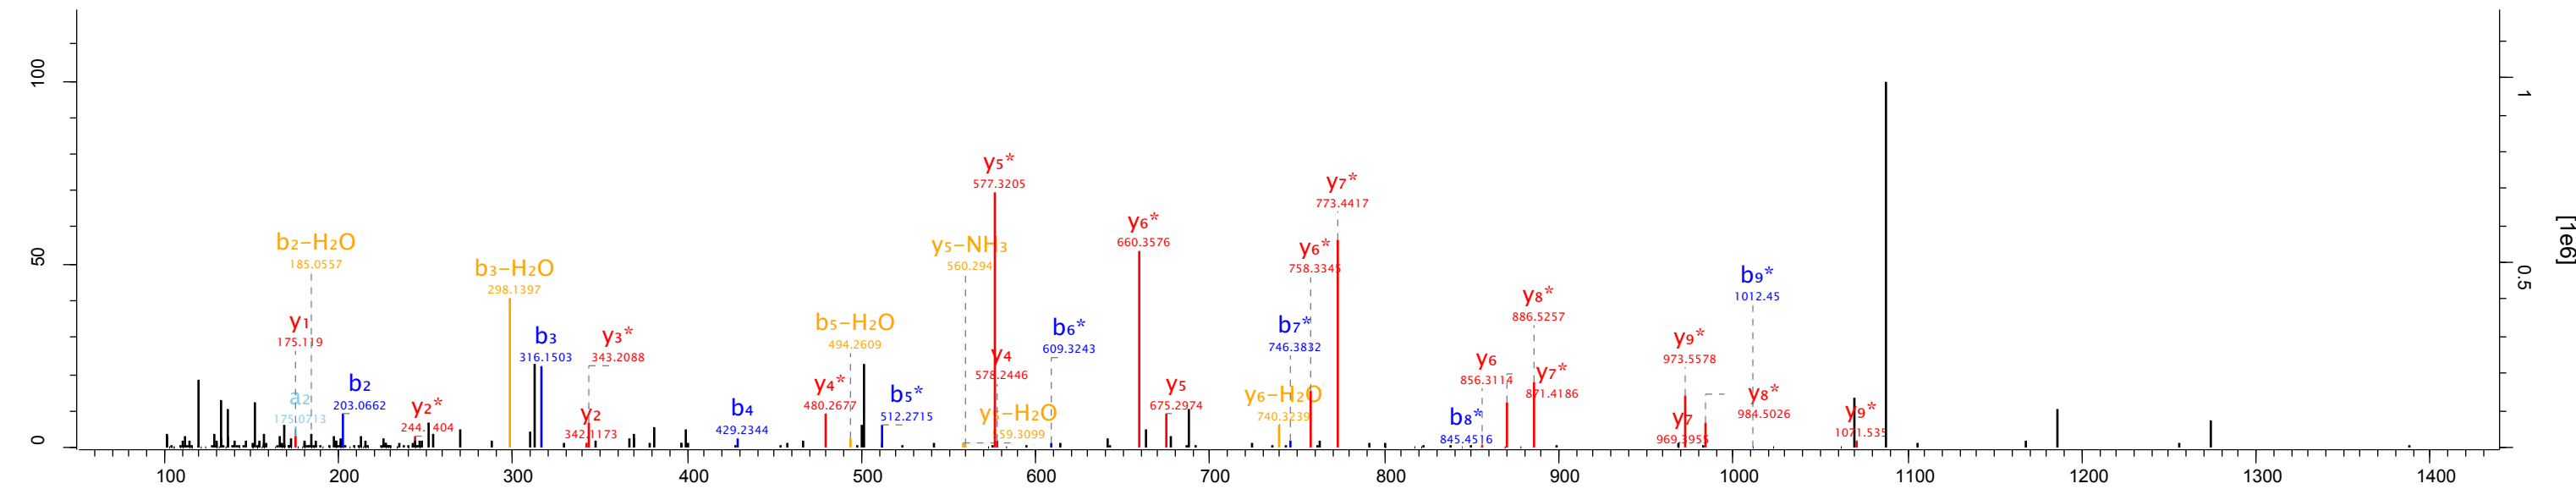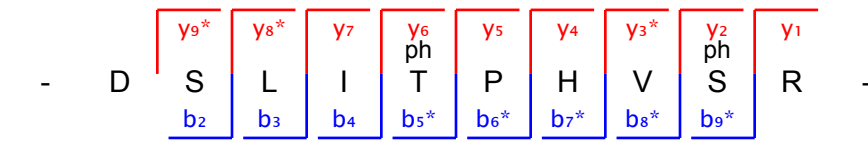

Raw file 20171215\_MaS\_33SR\_LMH\_phospho2\_03 Scan 10213 Method FTMS; HCD Score 127.3 m/z 752.8 Gene names DDX20

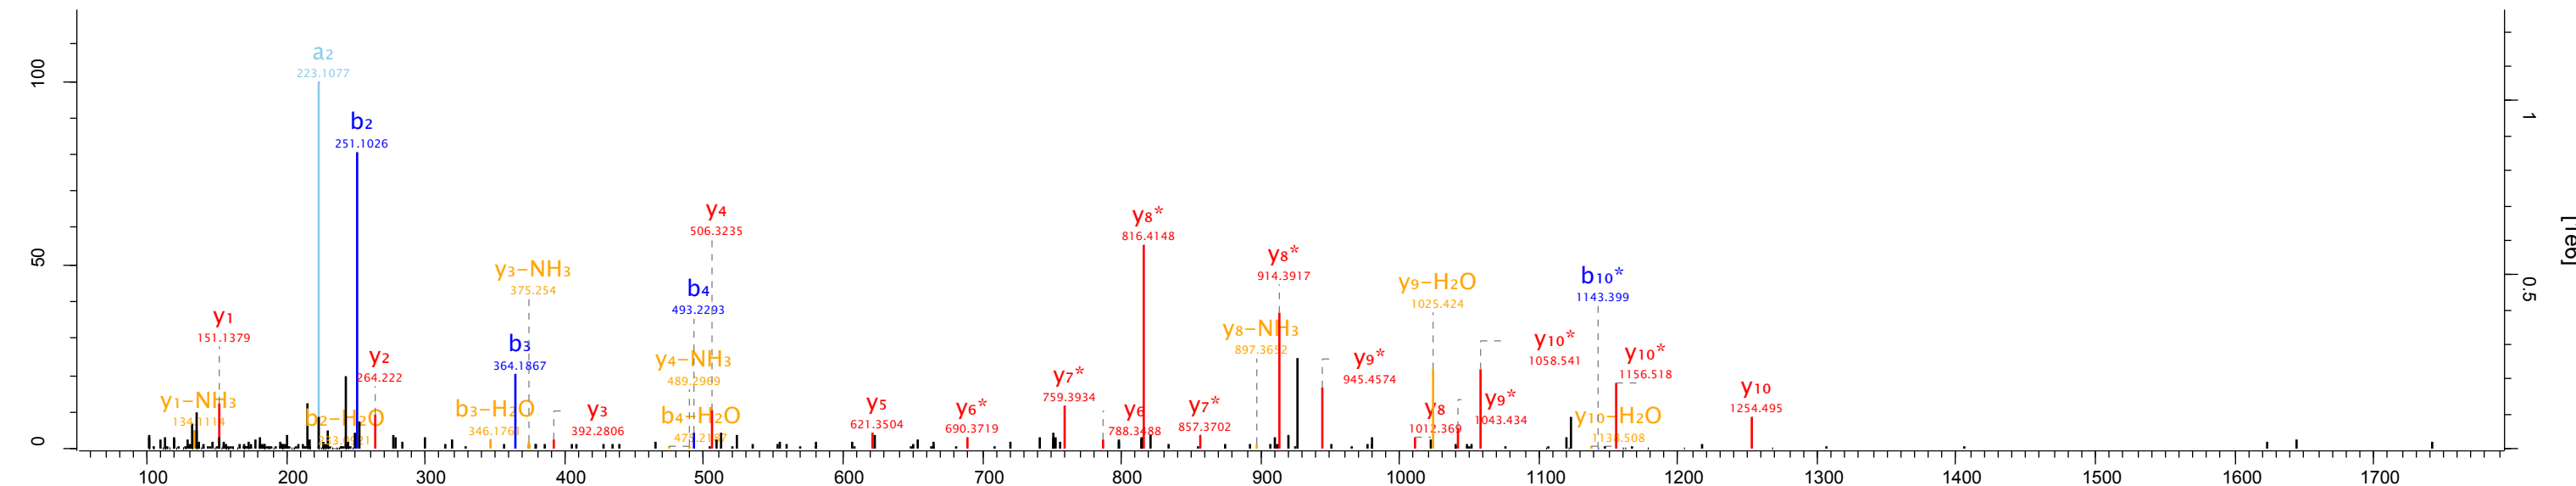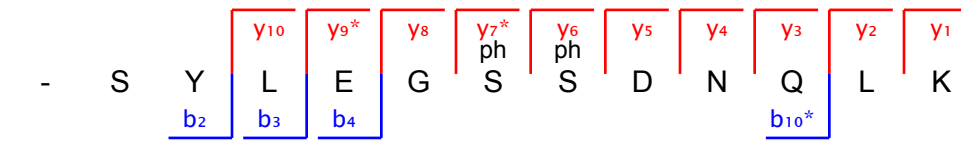



Raw file: 20171215\_MaS\_33SR\_LMH\_phospho2\_03  
 Scan: 10233 Method: FTMS; HCD Score: 53.49 m/z: 952.42 Gene names: IFI16

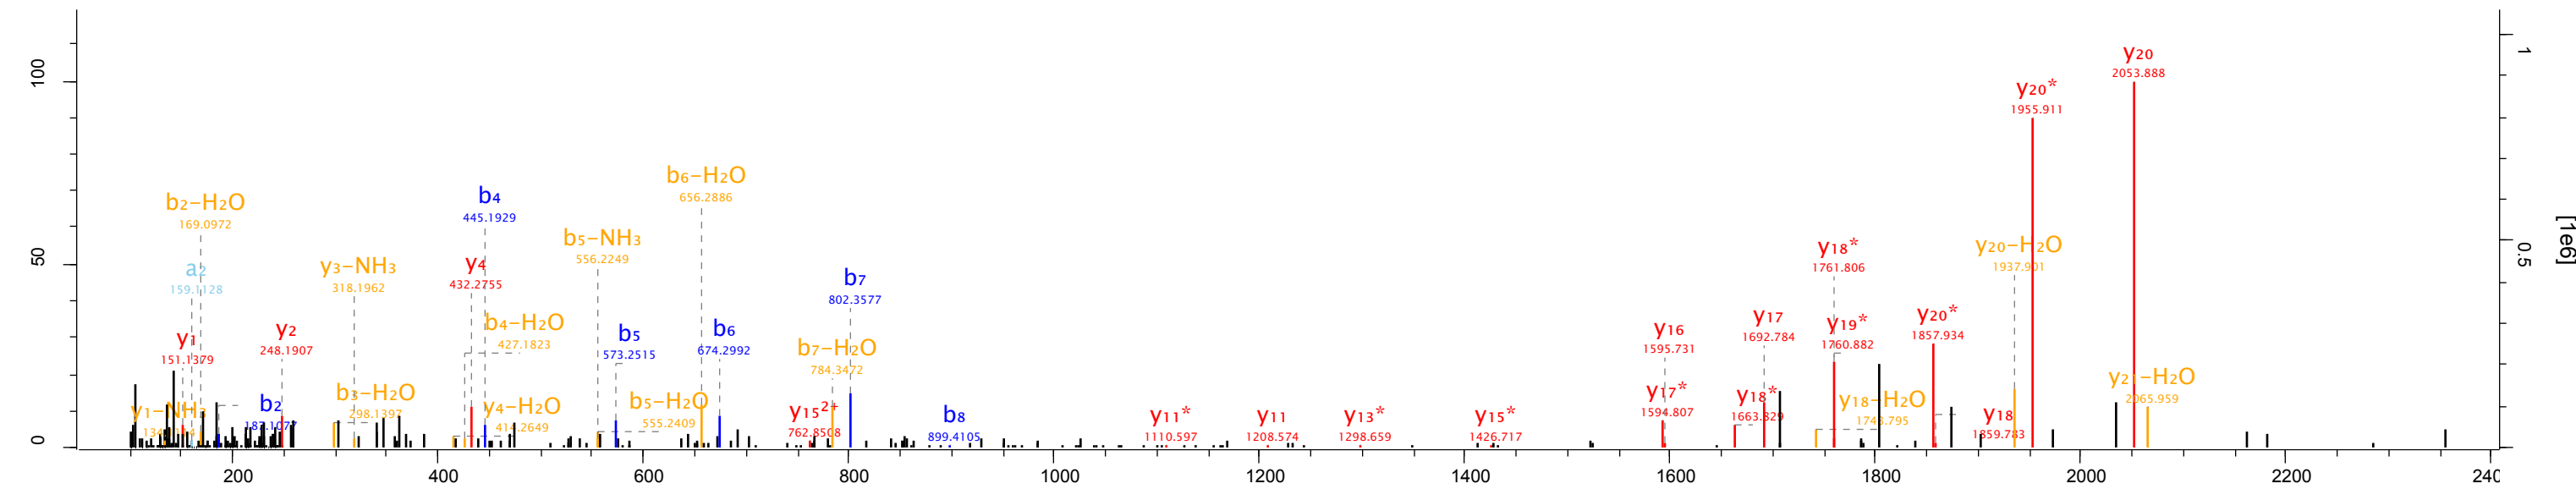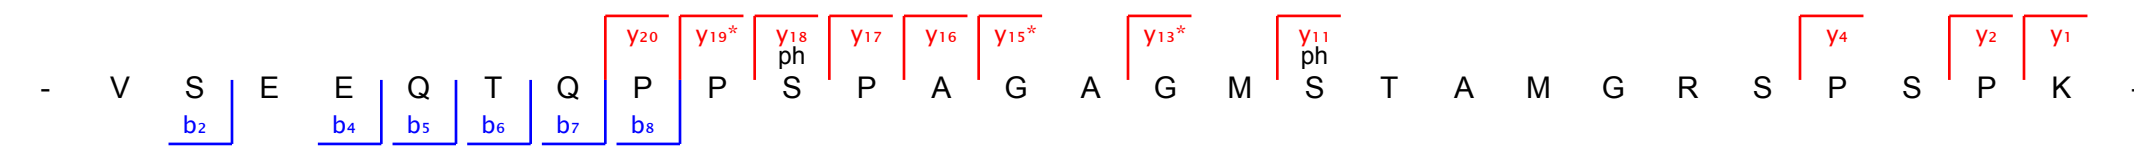

Raw file 20171215\_MaS\_33SR\_LMH\_phospho2\_03 Scan 10293 Method FTMS; HCD Score 183.82 m/z 668.35 Gene names LIN54

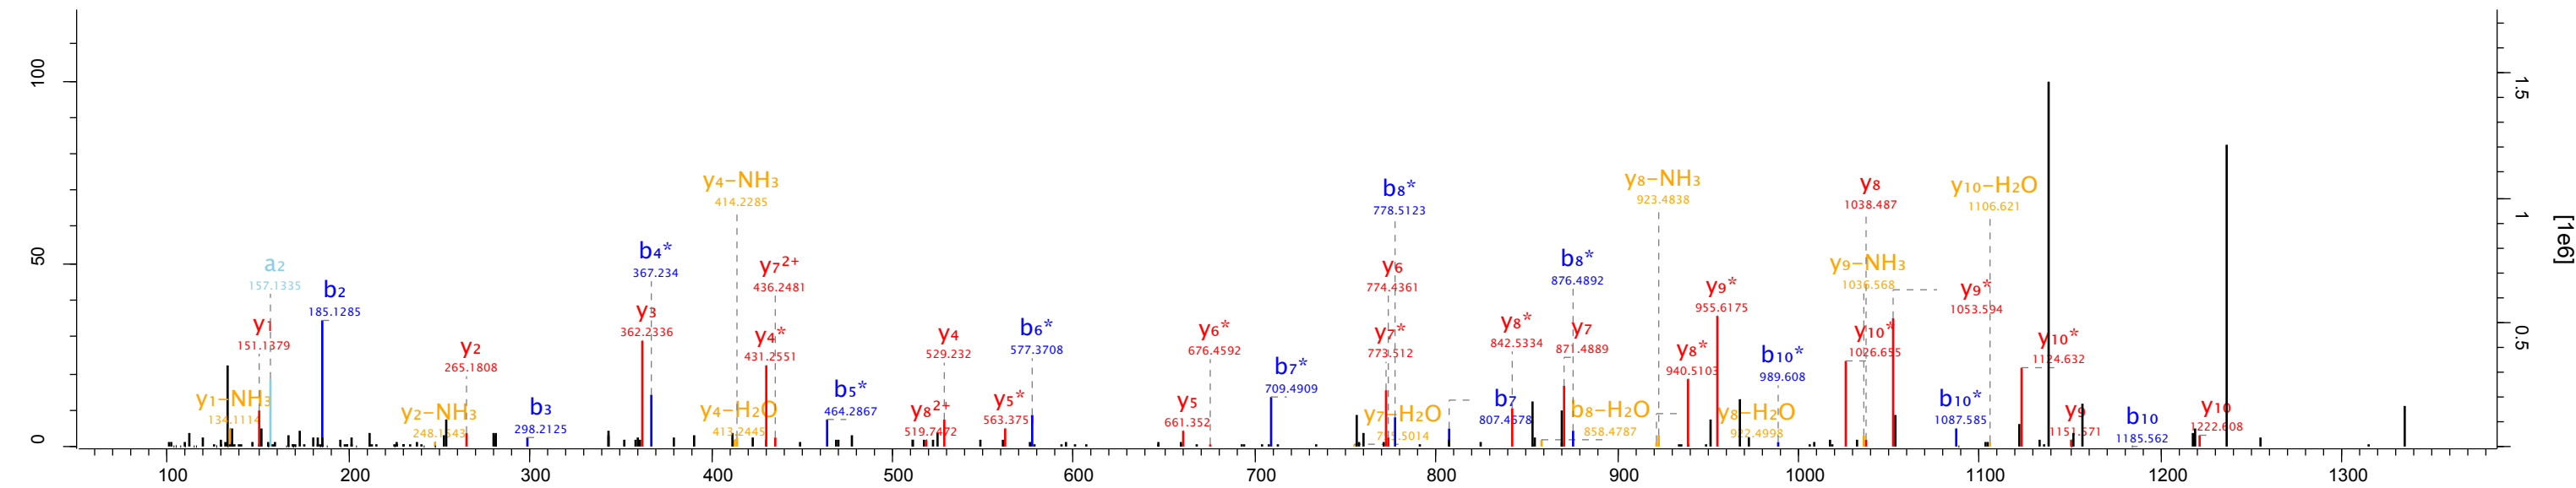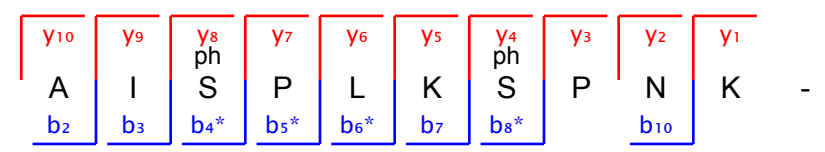

Raw file 20171215\_MaS\_33SR\_LMH\_phospho2\_03 Scan 10303 Method FTMS; HCD Score 183.8 m/z 1140.51 Gene names PAGE2

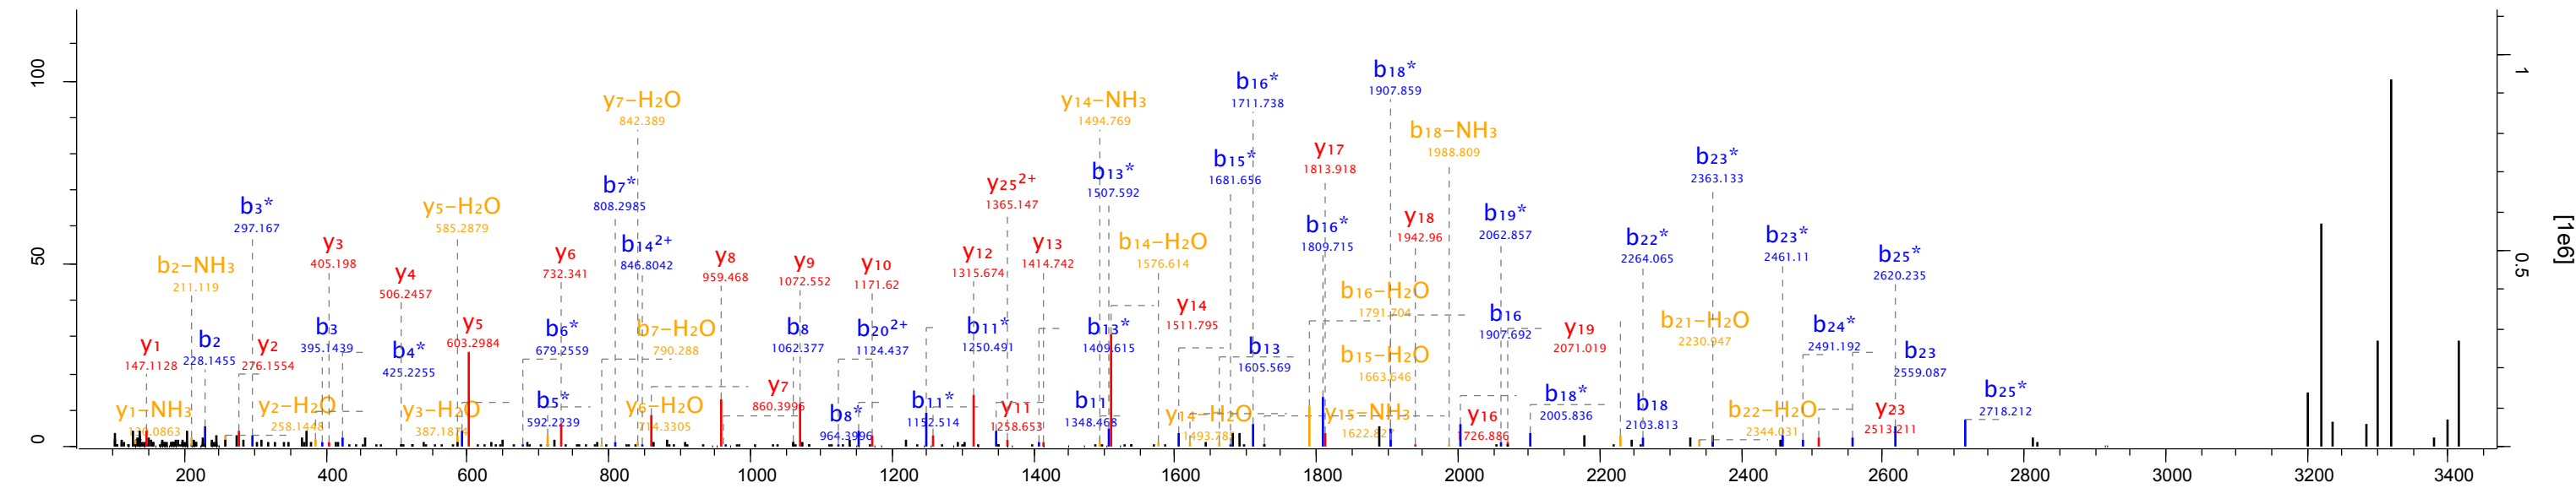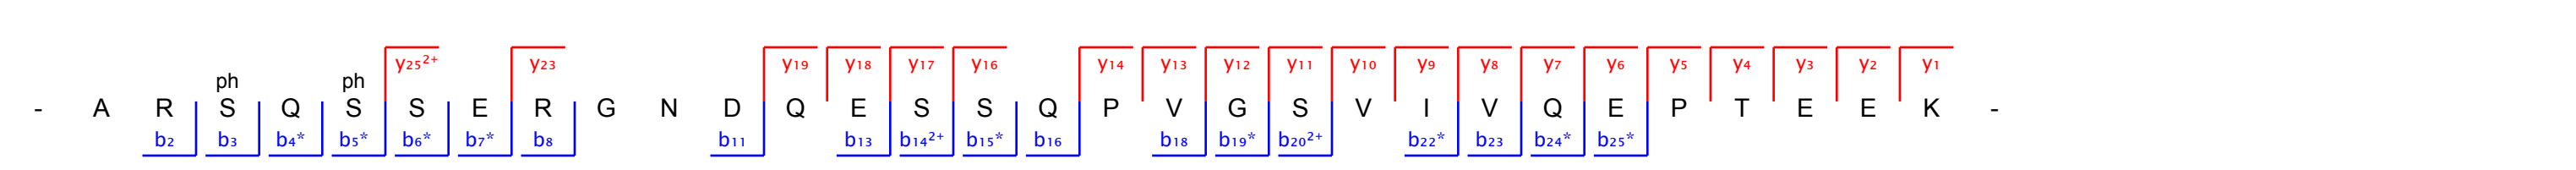

Raw file 20171215\_MaS\_33SR\_LMH\_phospho2\_03 Scan 10373 Method FTMS; HCD Score 127.35 m/z 951.08 Gene names HEXIM2

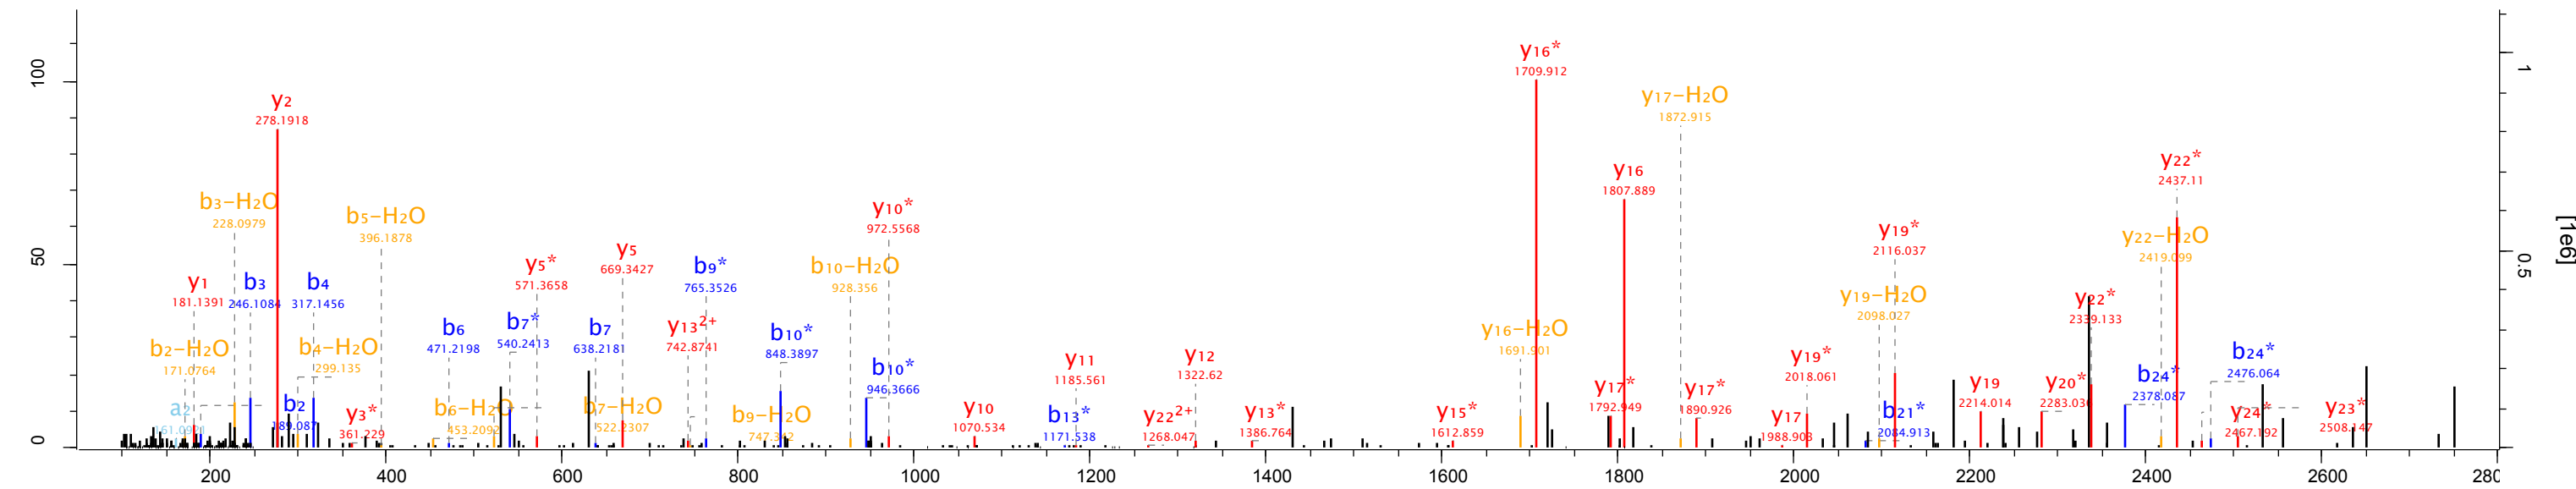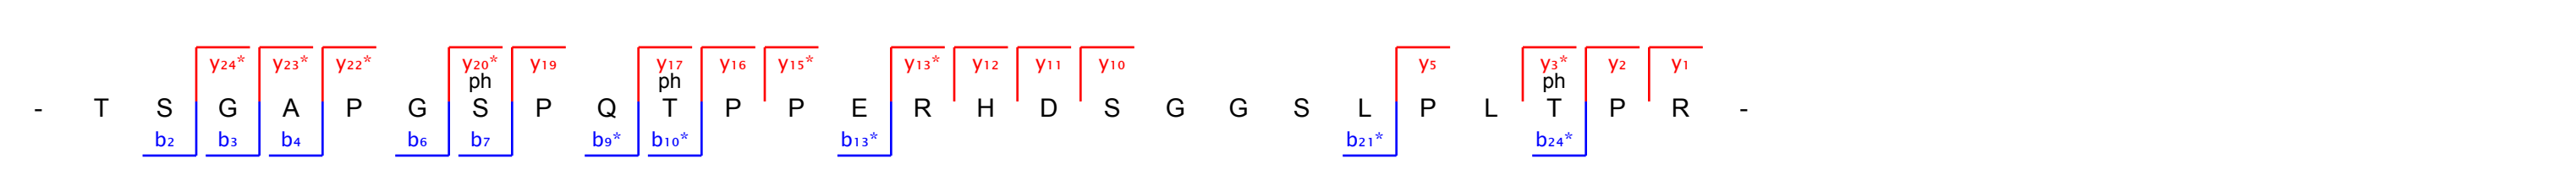

Raw file: 20171215\_MaS\_33SR\_LMH\_phospho2\_03  
 Scan: 10403 Method: FTMS; HCD Score: 105.56 m/z: 835.34 Gene names: HEXIM2

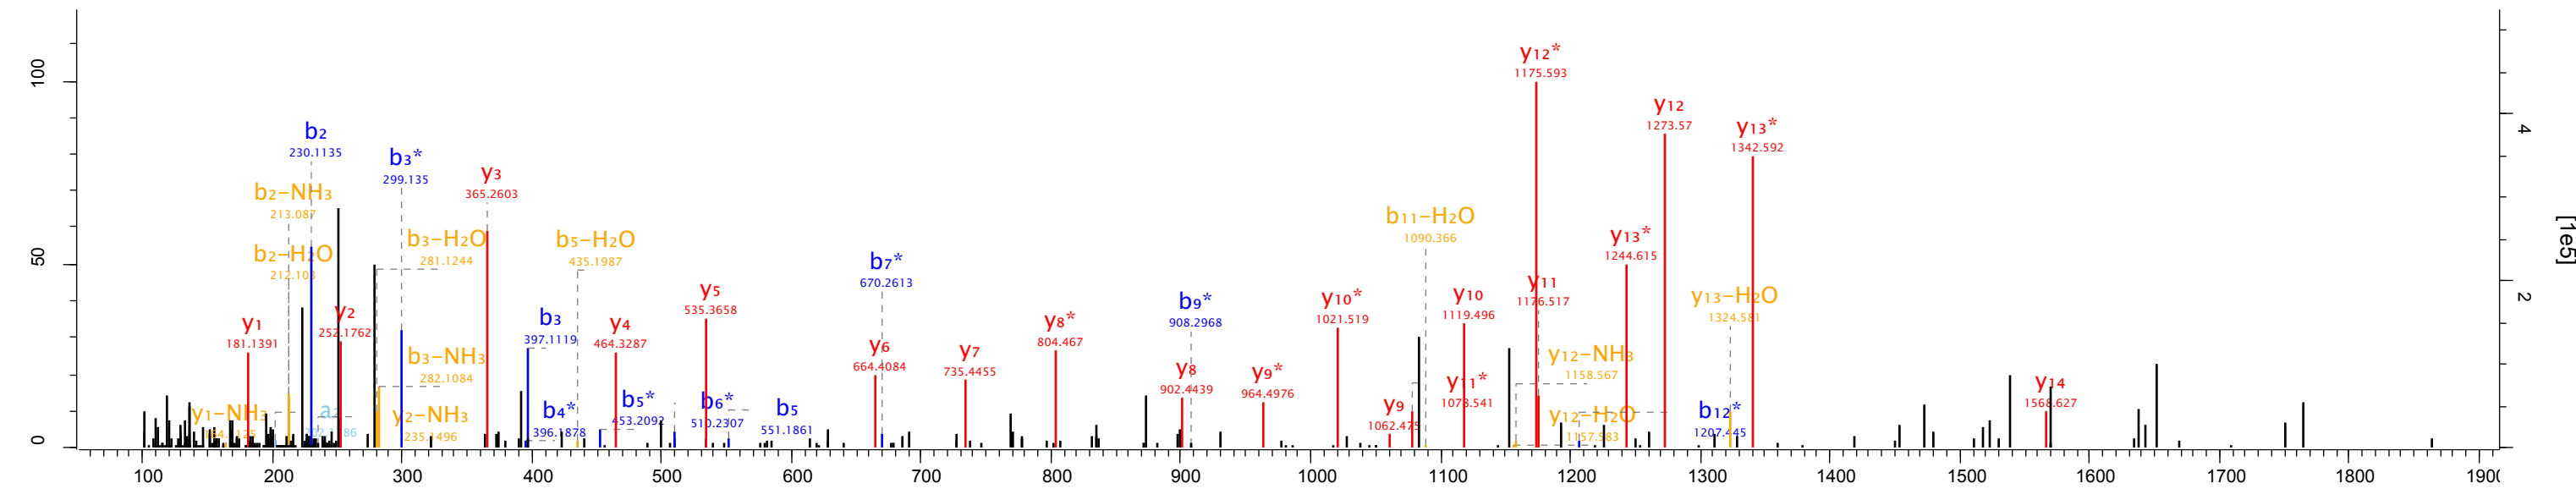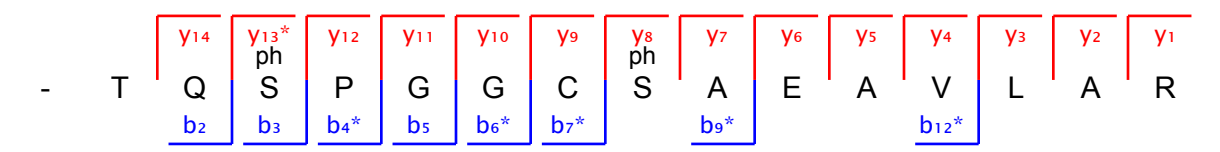

Raw file 20171215\_MaS\_33SR\_LMH\_phospho2\_03 Scan 10433 Method FTMS; HCD Score 205.8 m/z 974.88 Gene names PLEC

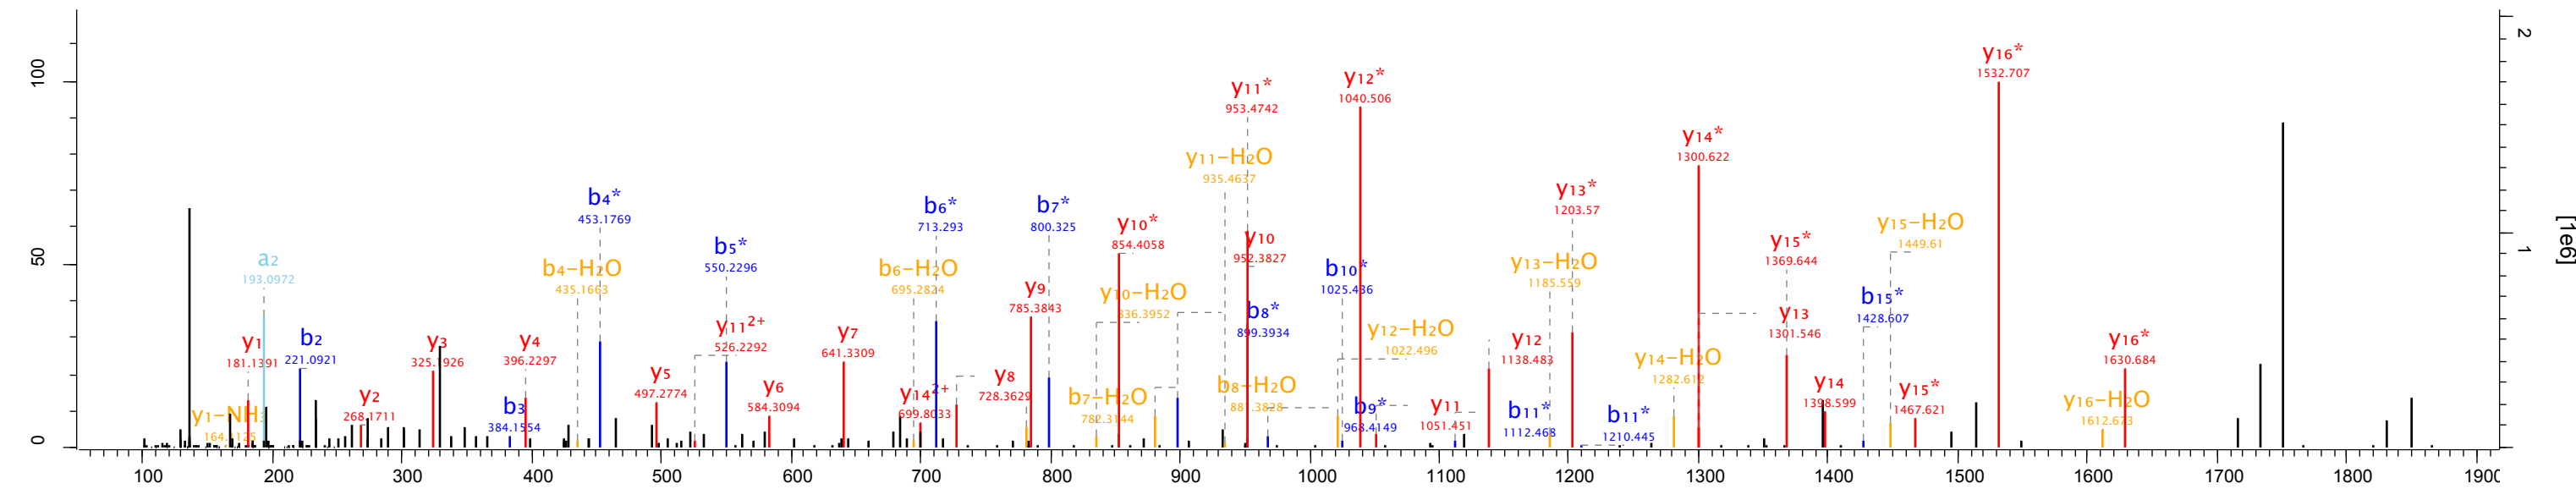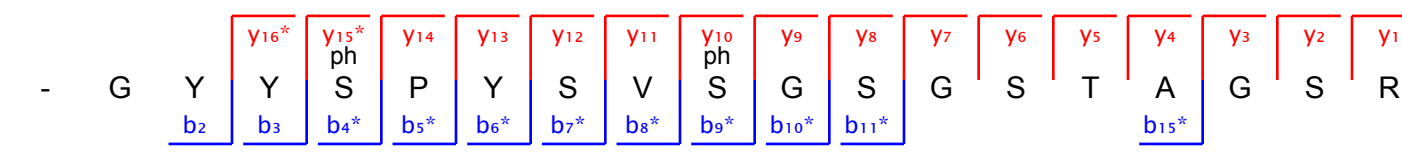

Raw file: 20171215\_MaS\_33SR\_LMH\_phospho2\_03  
 Scan: 10553 Method: FTMS; HCD Score: 141.19 m/z: 956.4 Gene names: SHROOM2

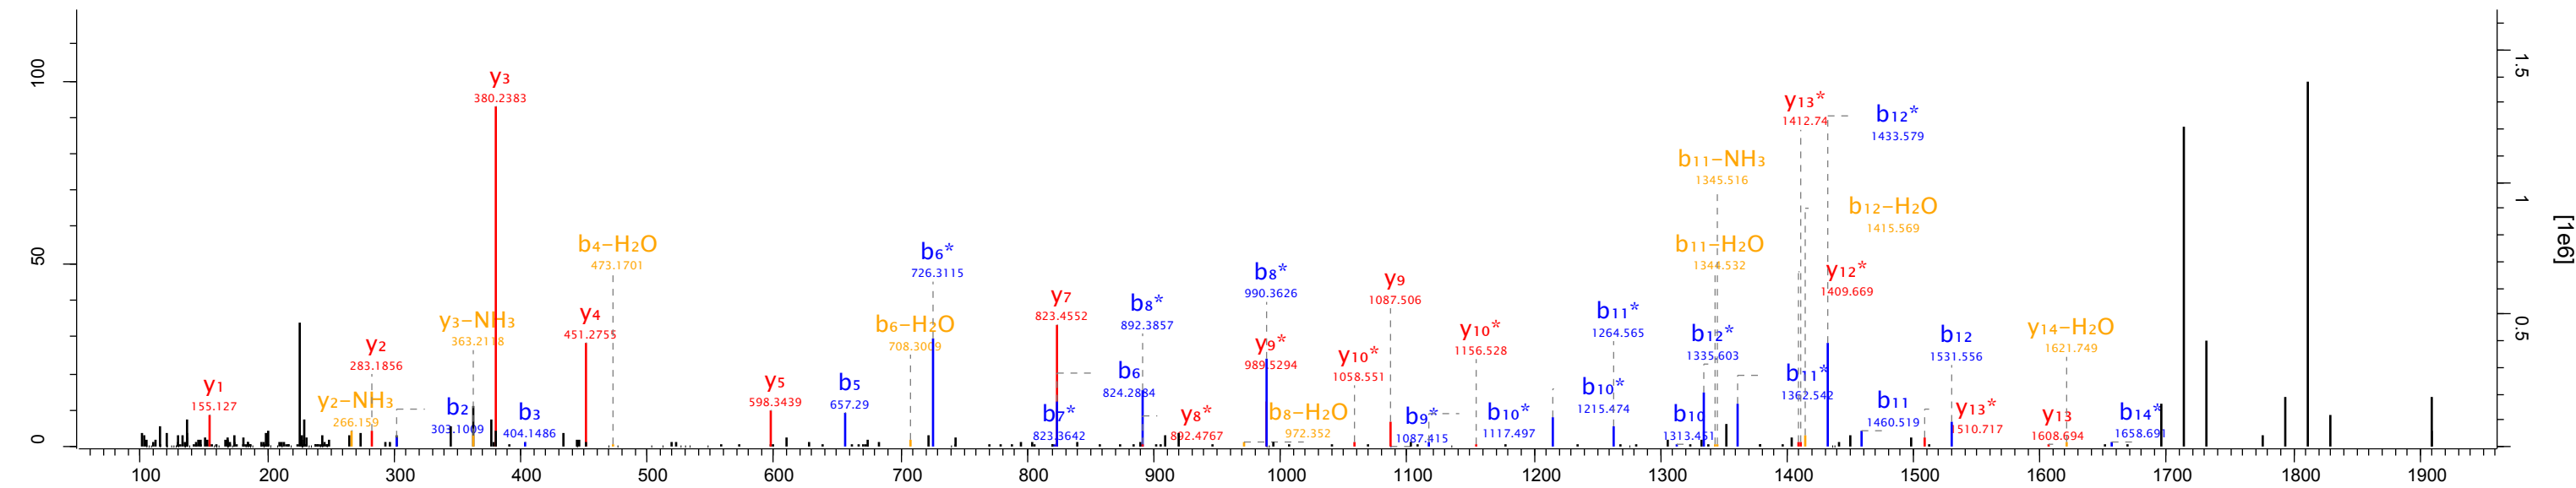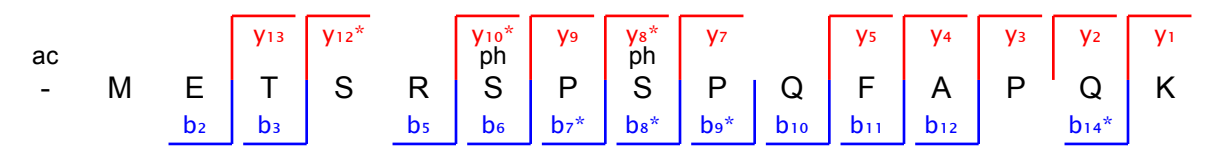

Raw file: 20171215\_MaS\_33SR\_LMH\_phospho2\_03  
 Scan: 10623 Method: FTMS; HCD Score: 115.38 m/z: 914.34 Gene names: ST13;ST13P4

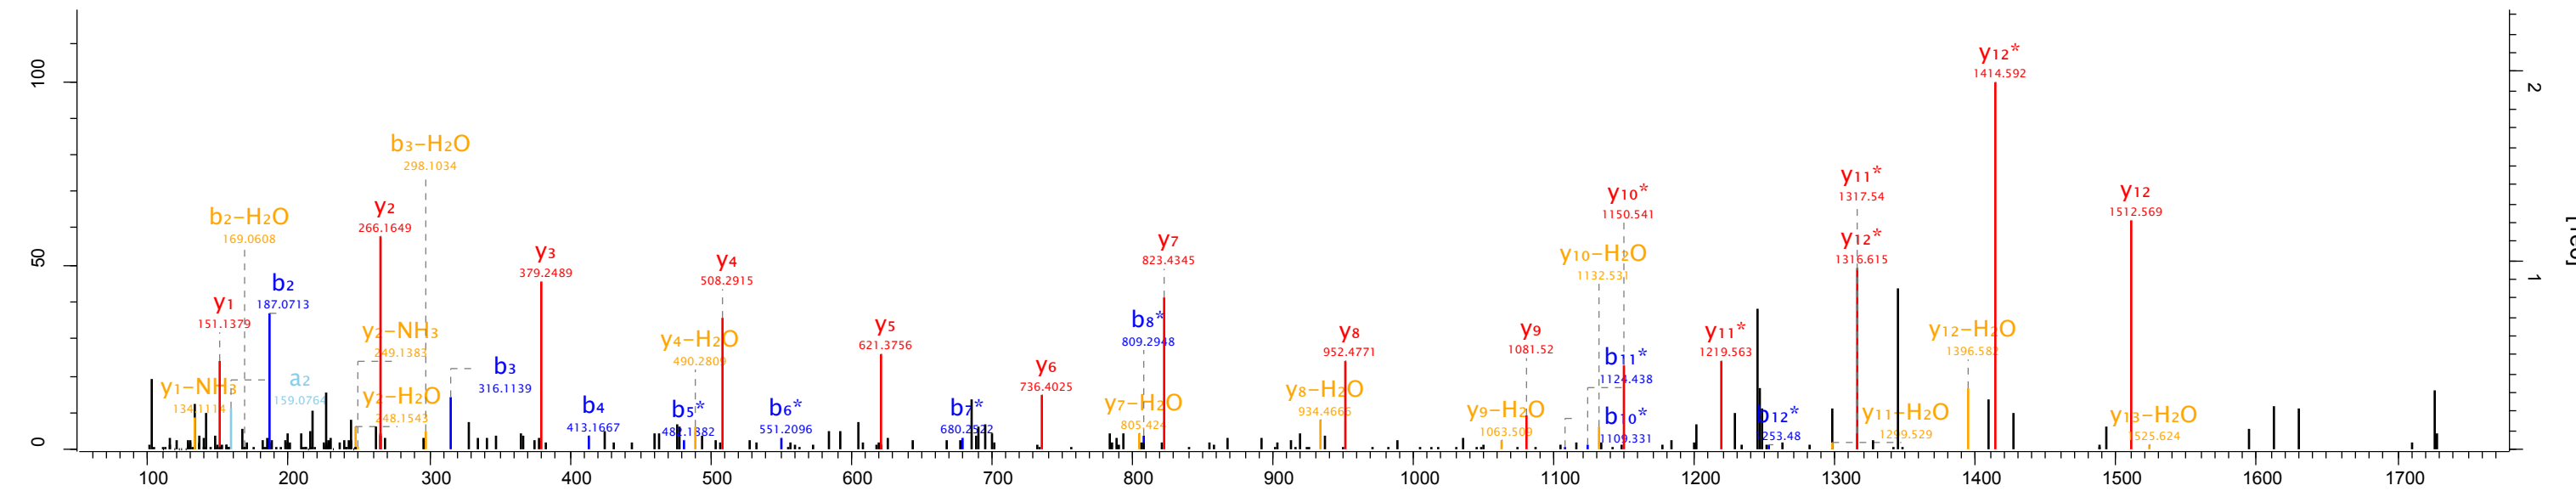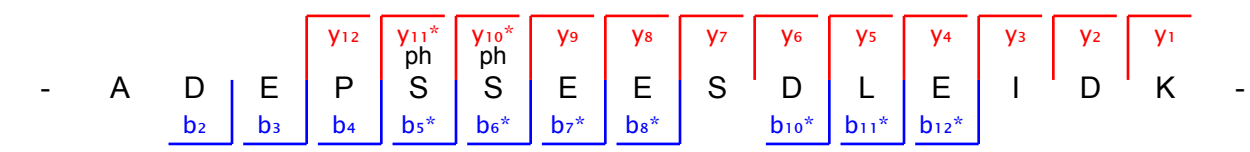



Raw file: 20171215\_MaS\_33SR\_LMH\_phospho2\_03  
 Scan: 10733 Method: FTMS; HCD Score: 101.38 m/z: 773.58 Gene names: TOMM70A

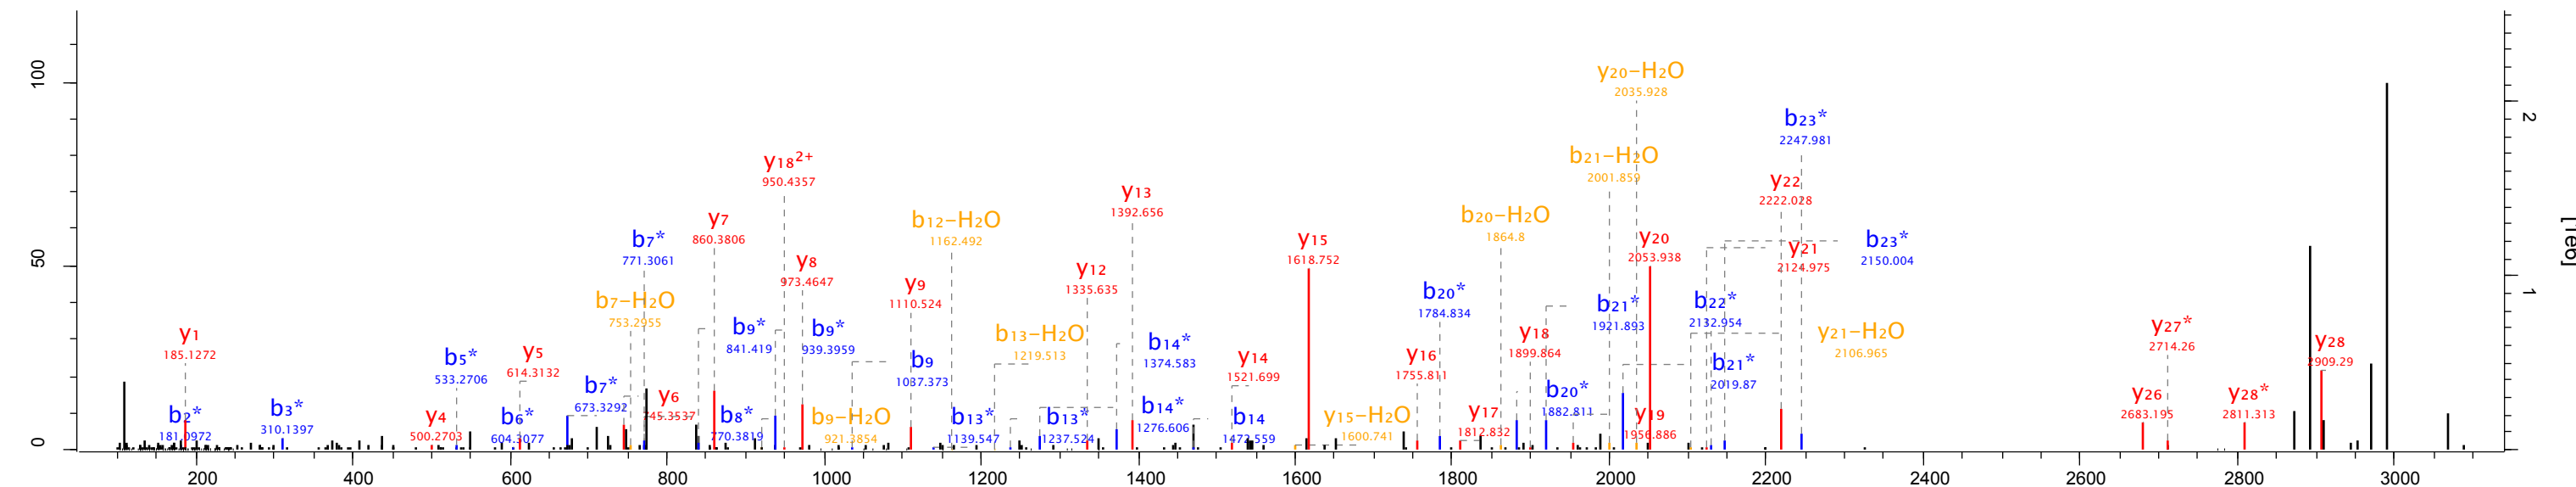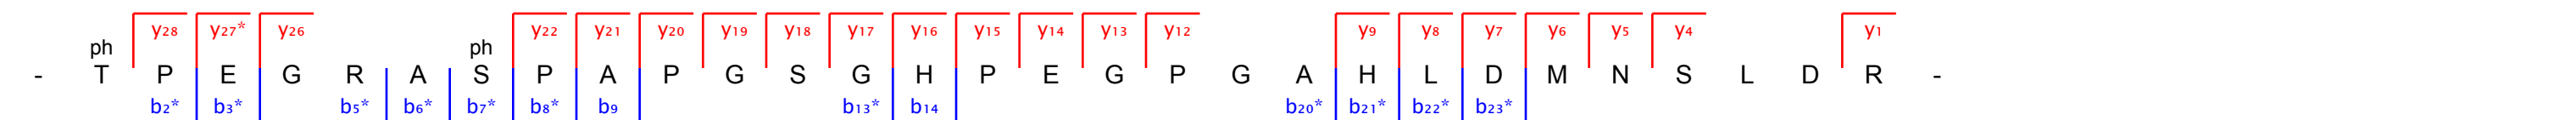

Raw file: 20171215\_MaS\_33SR\_LMH\_phospho2\_03  
 Scan: 10773 Method: FTMS; HCD Score: 74.36 m/z: 651.34 Gene names: RBM15B

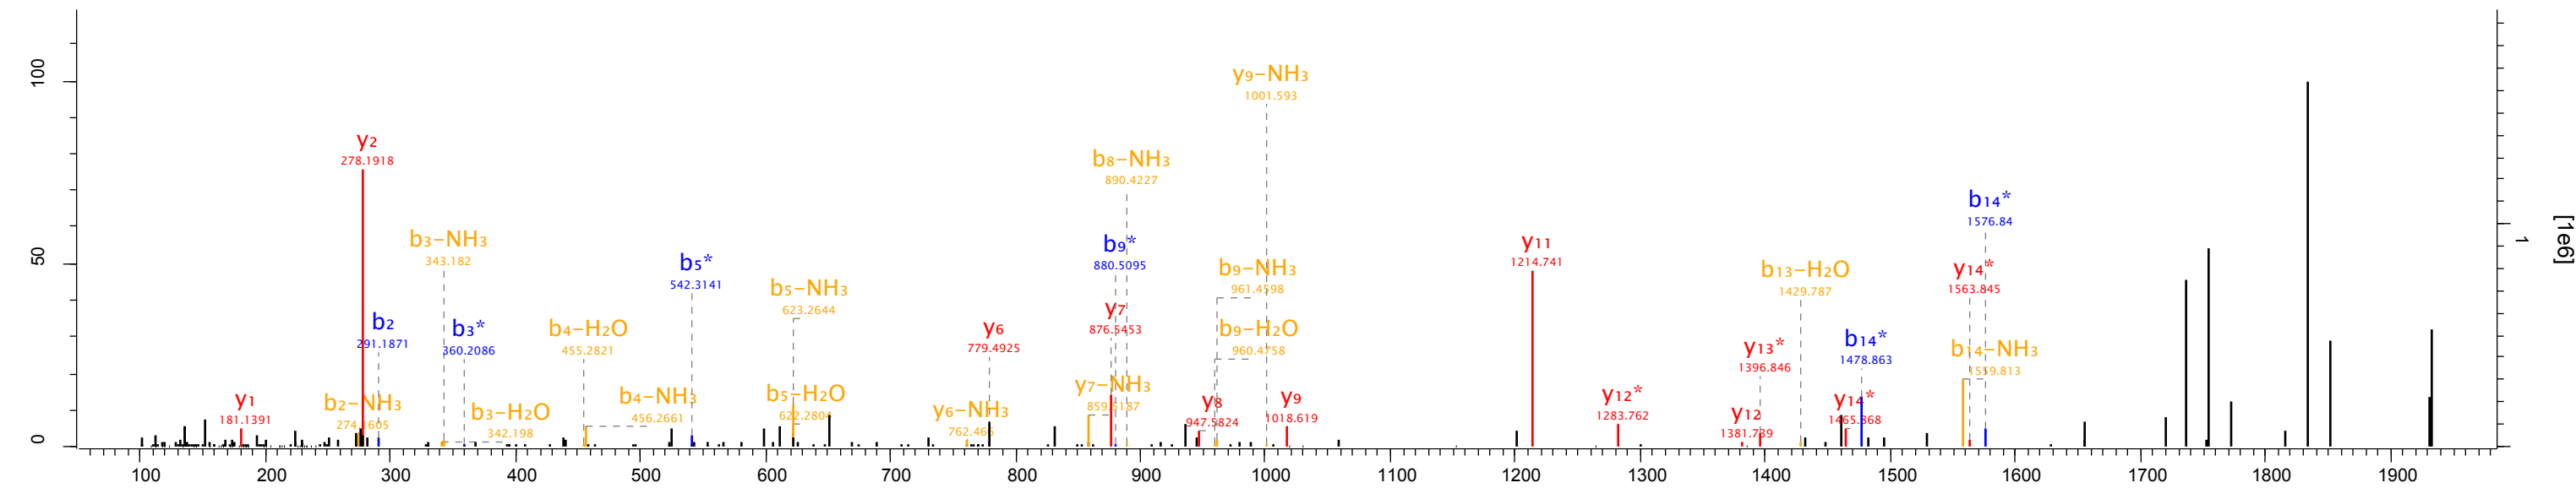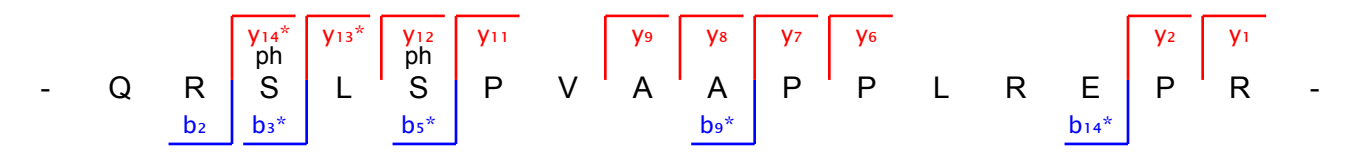



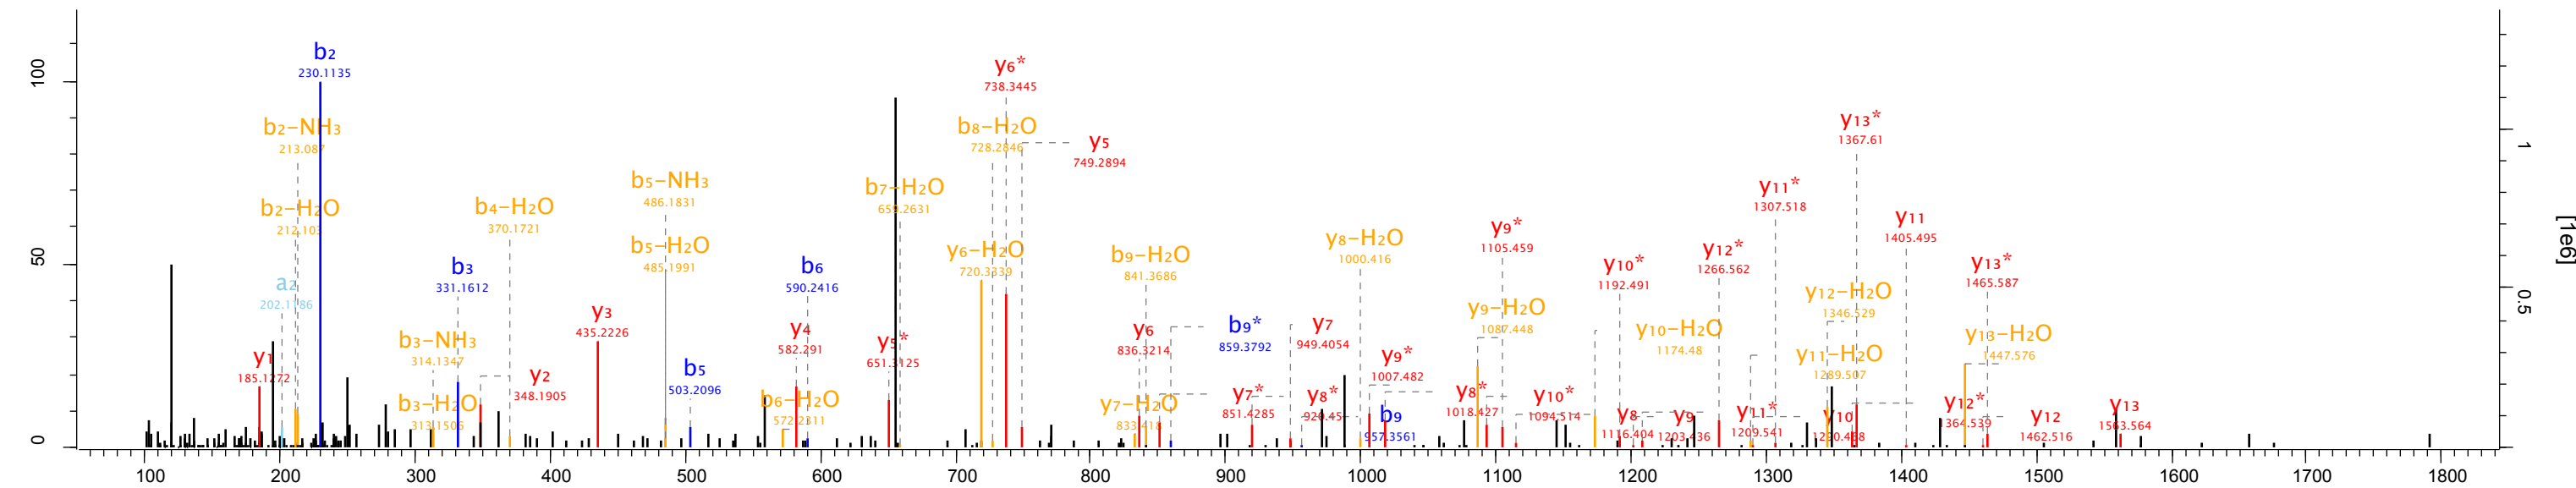

- T Q T G D S S S I S S F S Y R -

Fragmentation mapping (b and y ions):

- b2: T
- b3: T, G
- b5: D
- b6: S
- b9: I
- y1: R
- y2: Y
- y3: S
- y4: F
- y5: S
- y6: S
- y7: I
- y8: S
- y9: S
- y10: S
- y11: D
- y12: G
- y13: T

Raw file 20171215\_MaS\_33SR\_LMH\_phospho2\_03 Scan 10933 Method FTMS; HCD Score 163.78 m/z 868.35 Gene names NCOA7

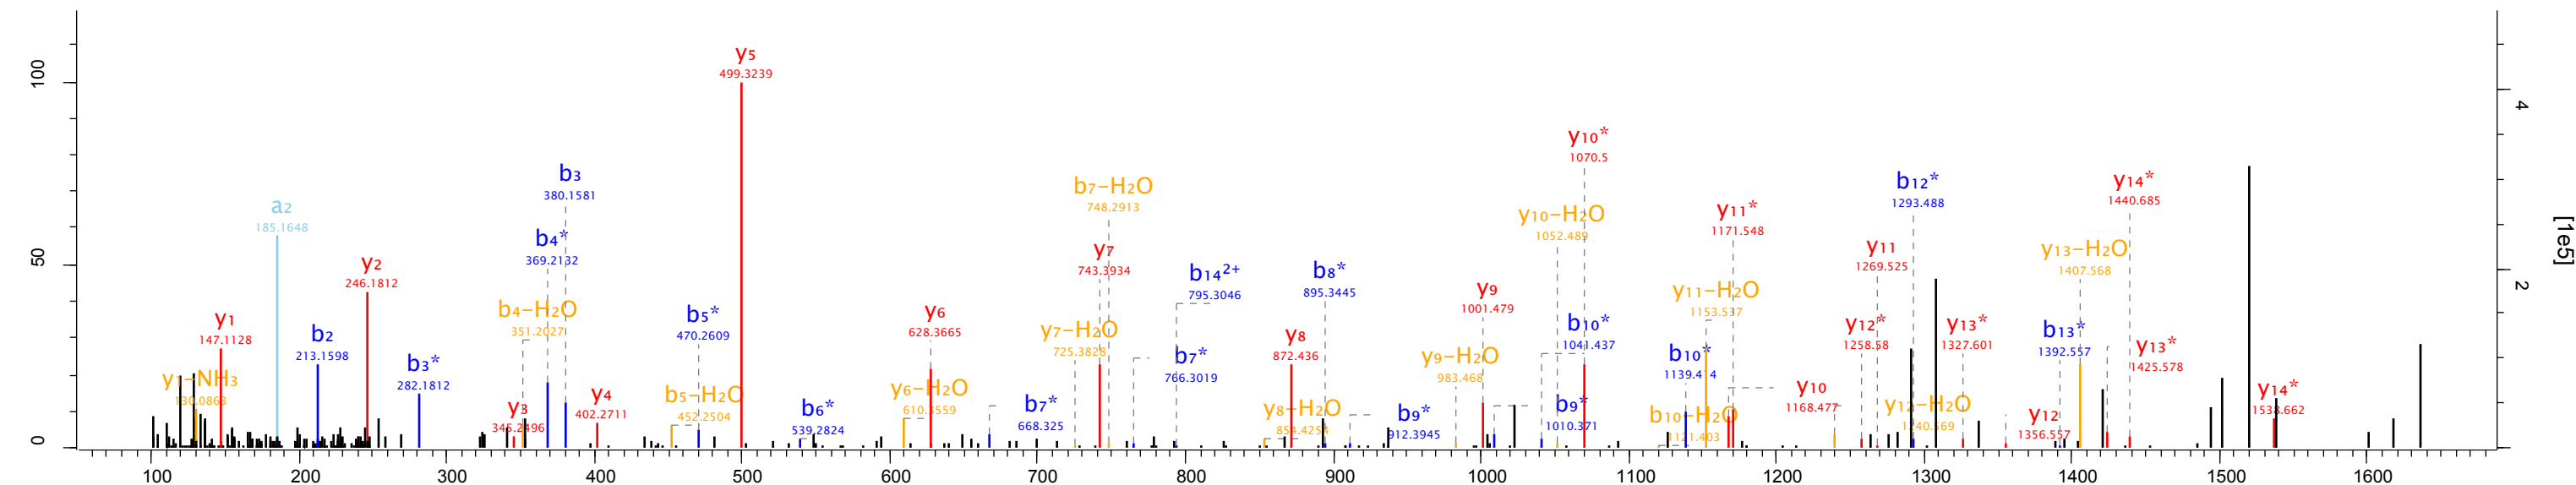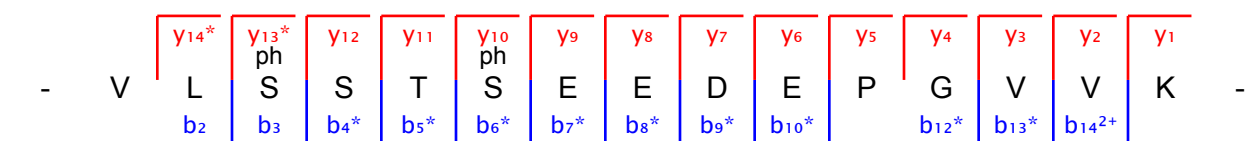

Raw file 20171215\_MaS\_33SR\_LMH\_phospho2\_03 Scan 11353 Method FTMS; HCD Score 138.44 m/z 677.95 Gene names SIPA1L2

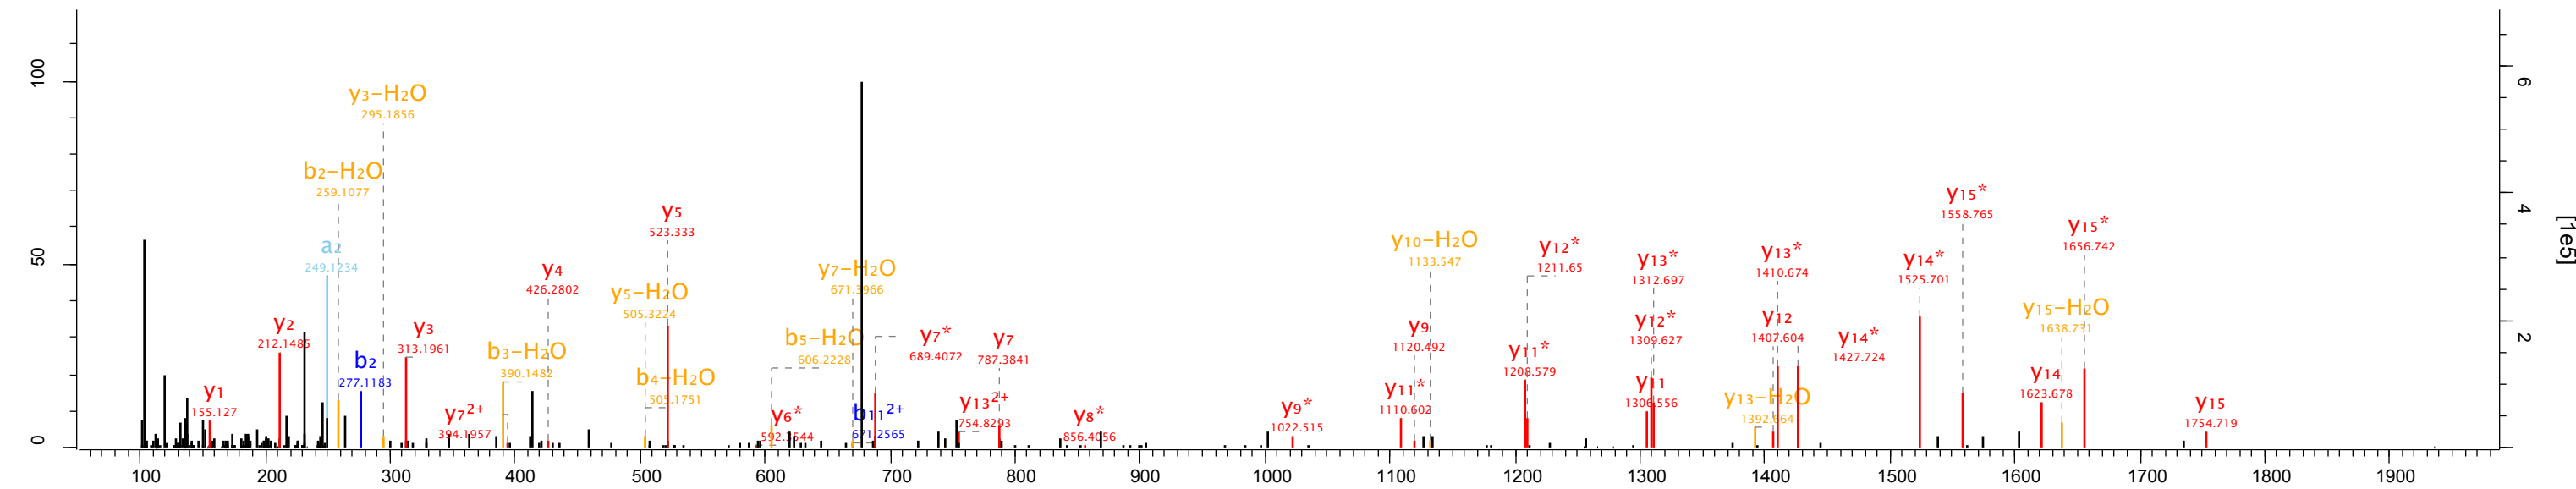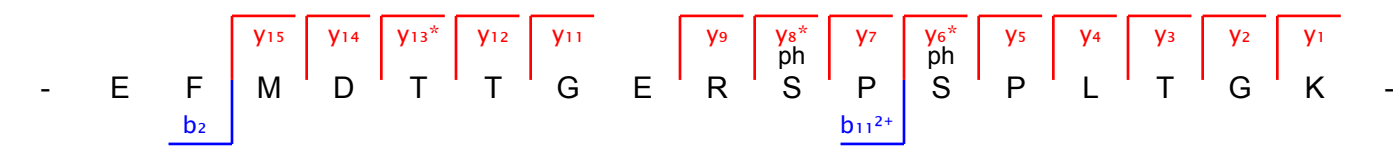

Raw file: 20171215\_MaS\_33SR\_LMH\_phospho2\_03  
 Scan: 11393 Method: FTMS; HCD Score: 156.6 m/z: 697.77 Gene names: ARPP19;ENSA

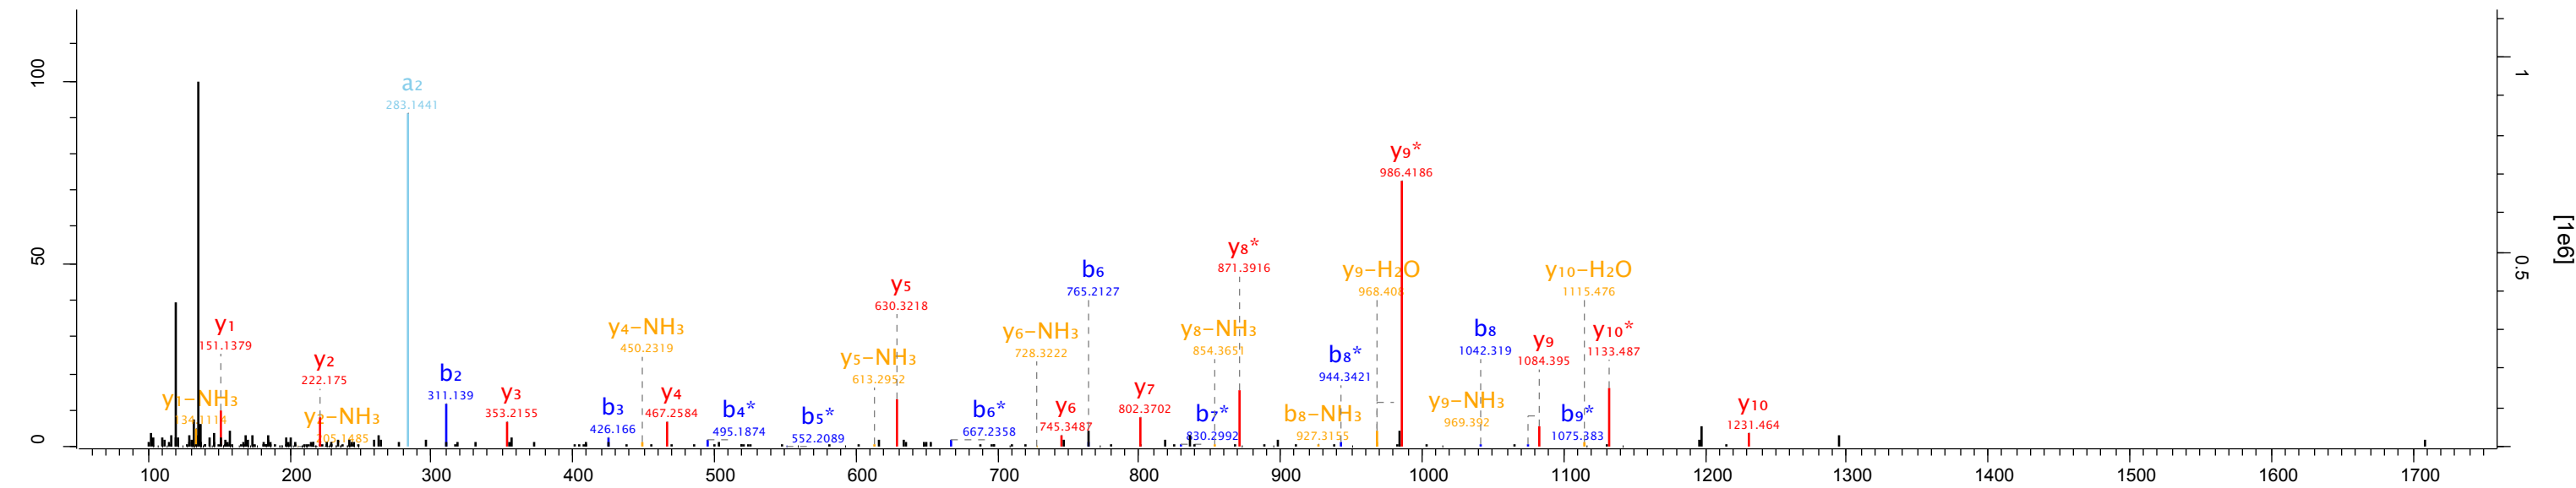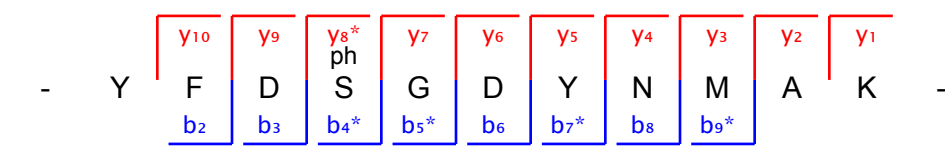

Raw file 20171215\_MaS\_33SR\_LMH\_phospho2\_03 Scan 11513 Method FTMS; HCD Score 63.3 m/z 934.06 Gene names RANBP2;RGPD4;RGPD5;RGPD8

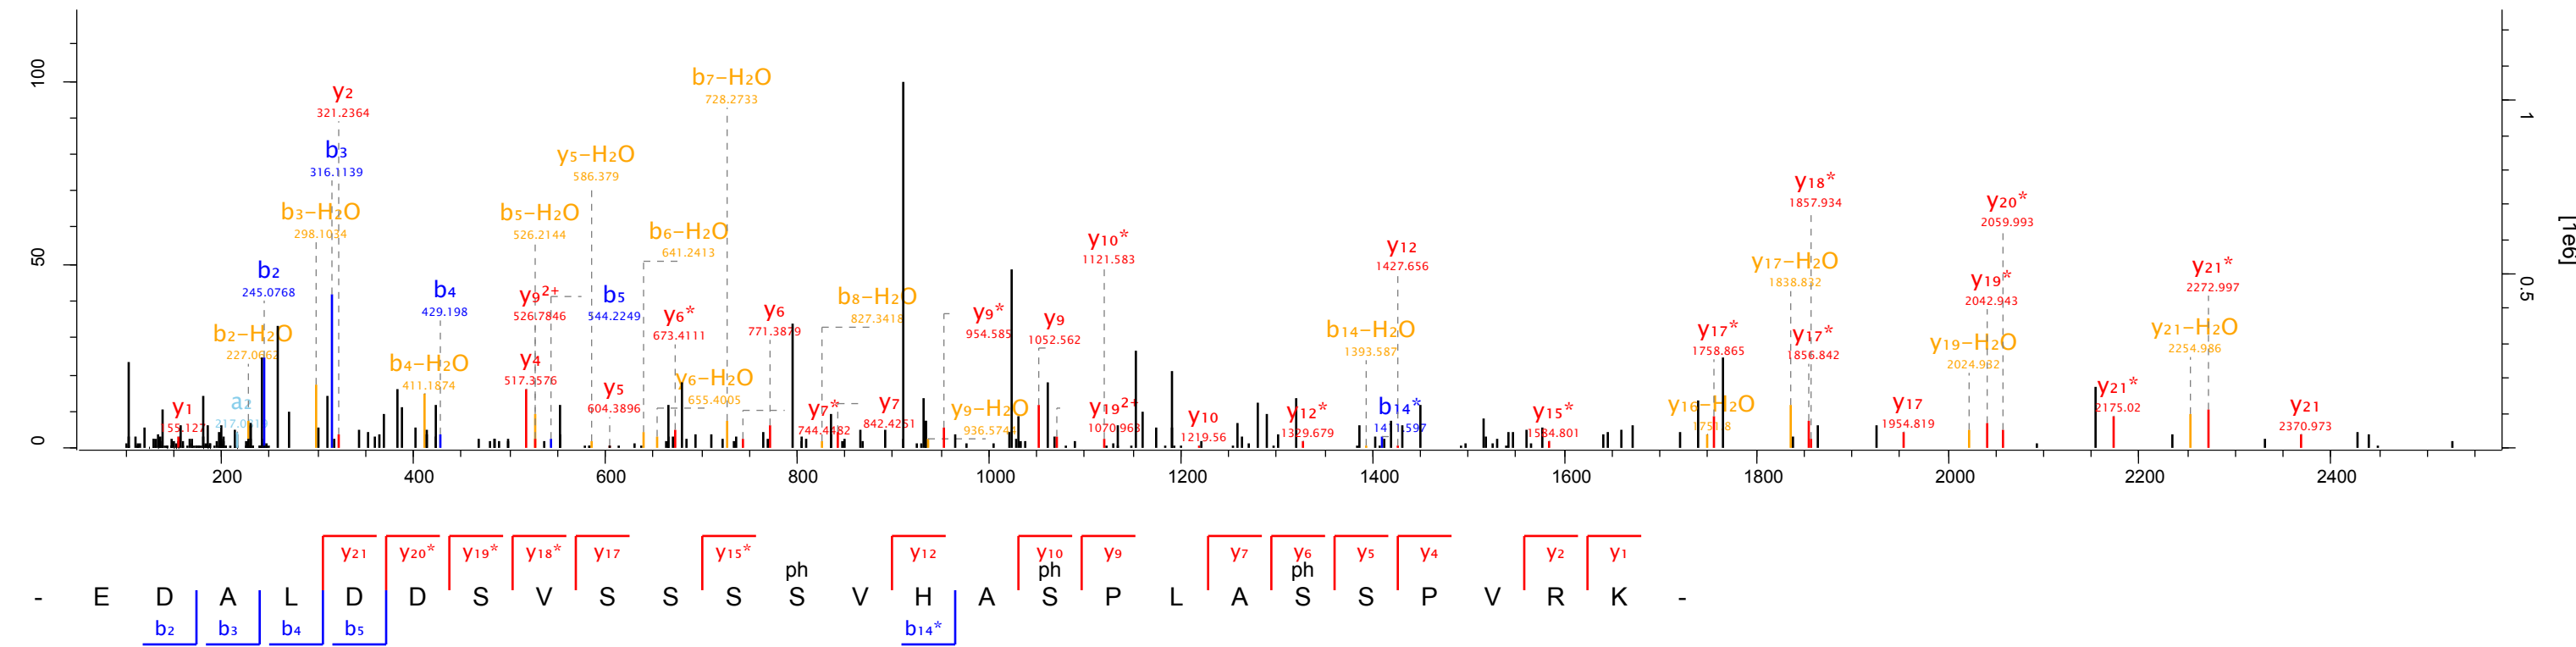



Raw file: 20171215\_MaS\_33SR\_LMH\_phospho2\_03  
 Scan: 11553 Method: FTMS; HCD Score: 149.95 m/z: 797.84 Gene names: VIM

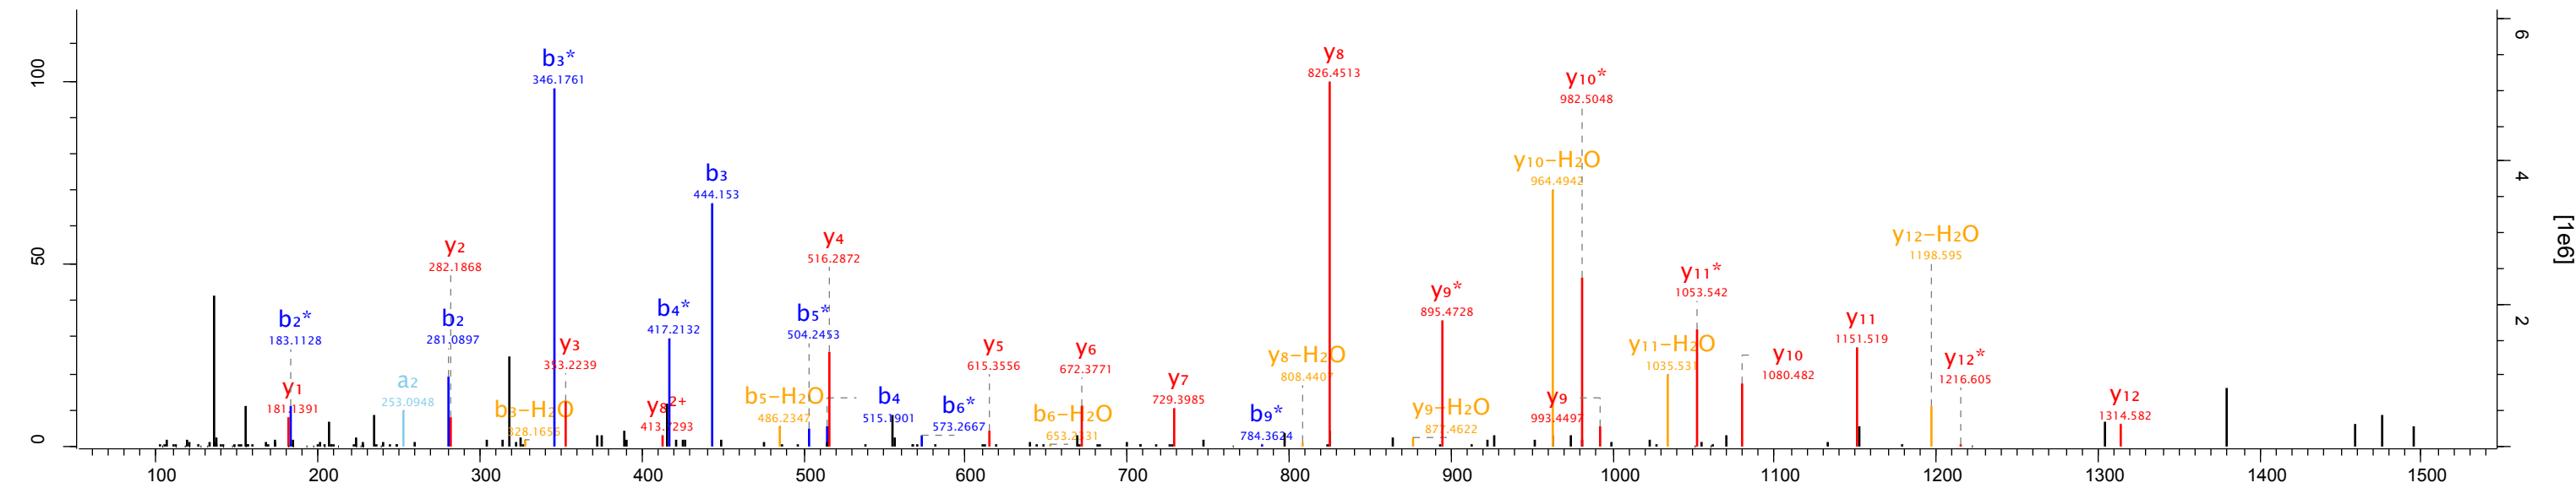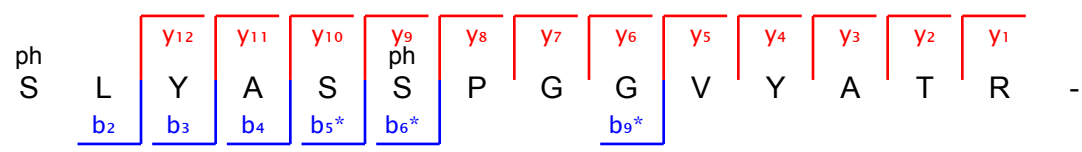

Raw file 20171215\_MaS\_33SR\_LMH\_phospho2\_03 Scan 11623 Method FTMS; HCD Score 166.65 m/z 897.39 Gene names DCP1A

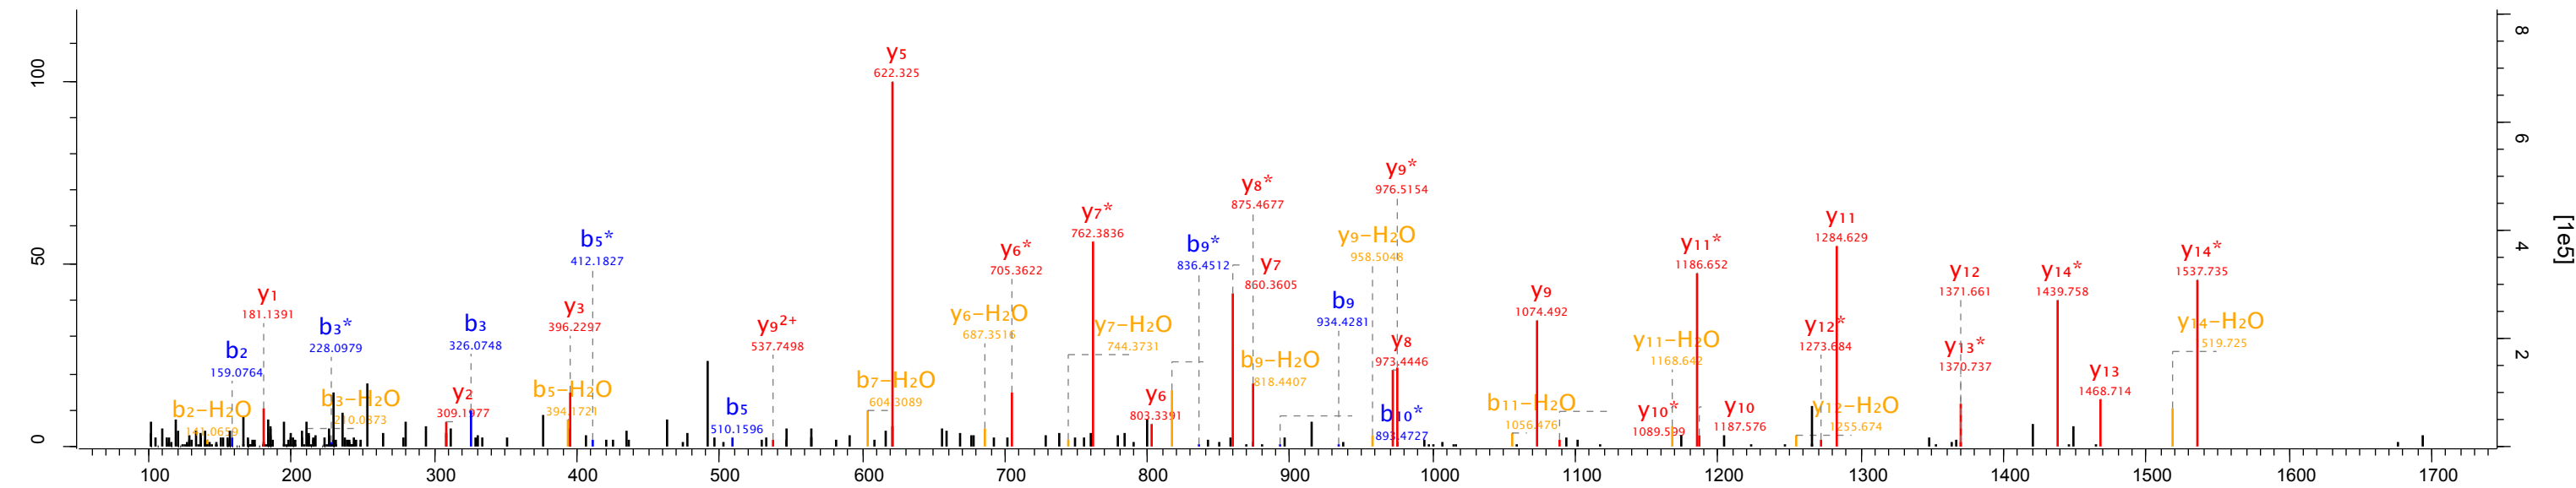

- A S S P S P L T I G T P E S Q R -

Fragmentation scheme showing b and y ions for the peptide sequence: A-S-S-P-S-P-L-T-I-G-T-P-E-S-Q-R. The b ions are labeled b2, b3, b5, b9, and b10\*. The y ions are labeled y1, y2, y3, y5, y6, y7, y8, y9, y10, y11, y12, y13, and y14\*.

Raw file: 20171215\_MaS\_33SR\_LMH\_phospho2\_03  
 Scan: 11653 Method: FTMS; HCD Score: 147.86 m/z: 840.83 Gene names: EEF2K

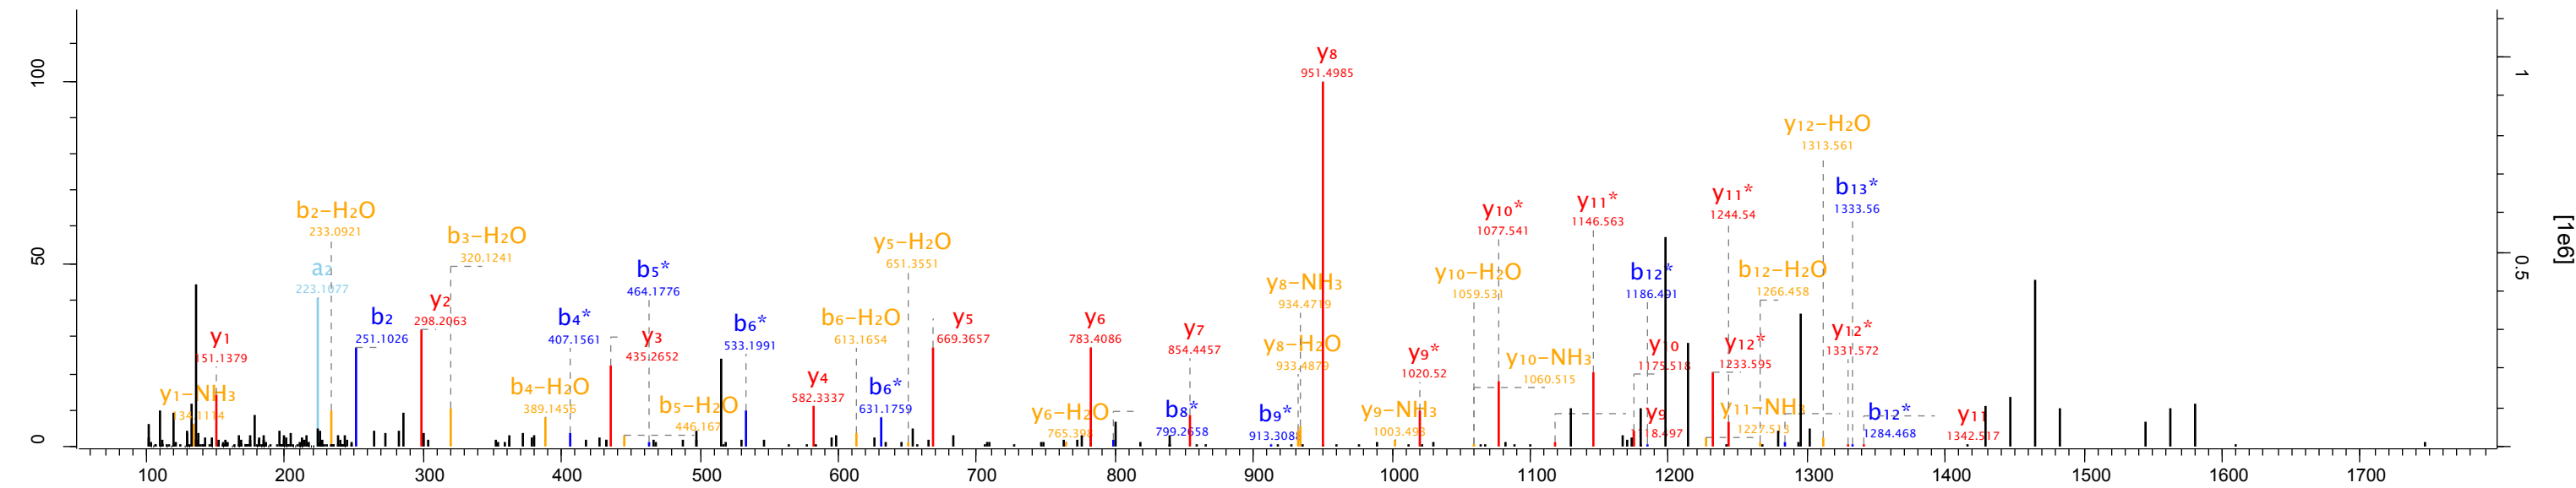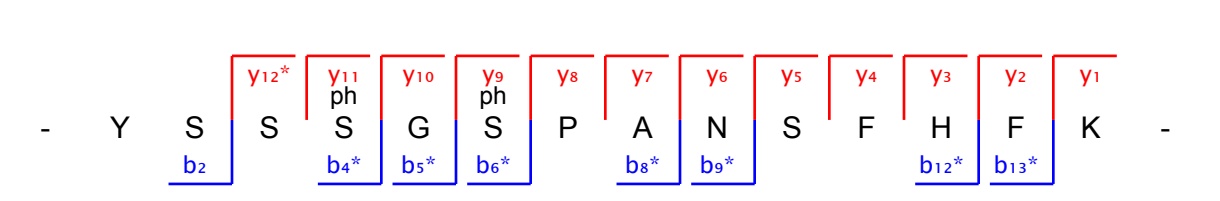

Raw file 20171215\_MaS\_33SR\_LMH\_phospho2\_03 Scan 11813 Method FTMS; HCD Score 151.05 m/z 979.39 Gene names ZFC3H1

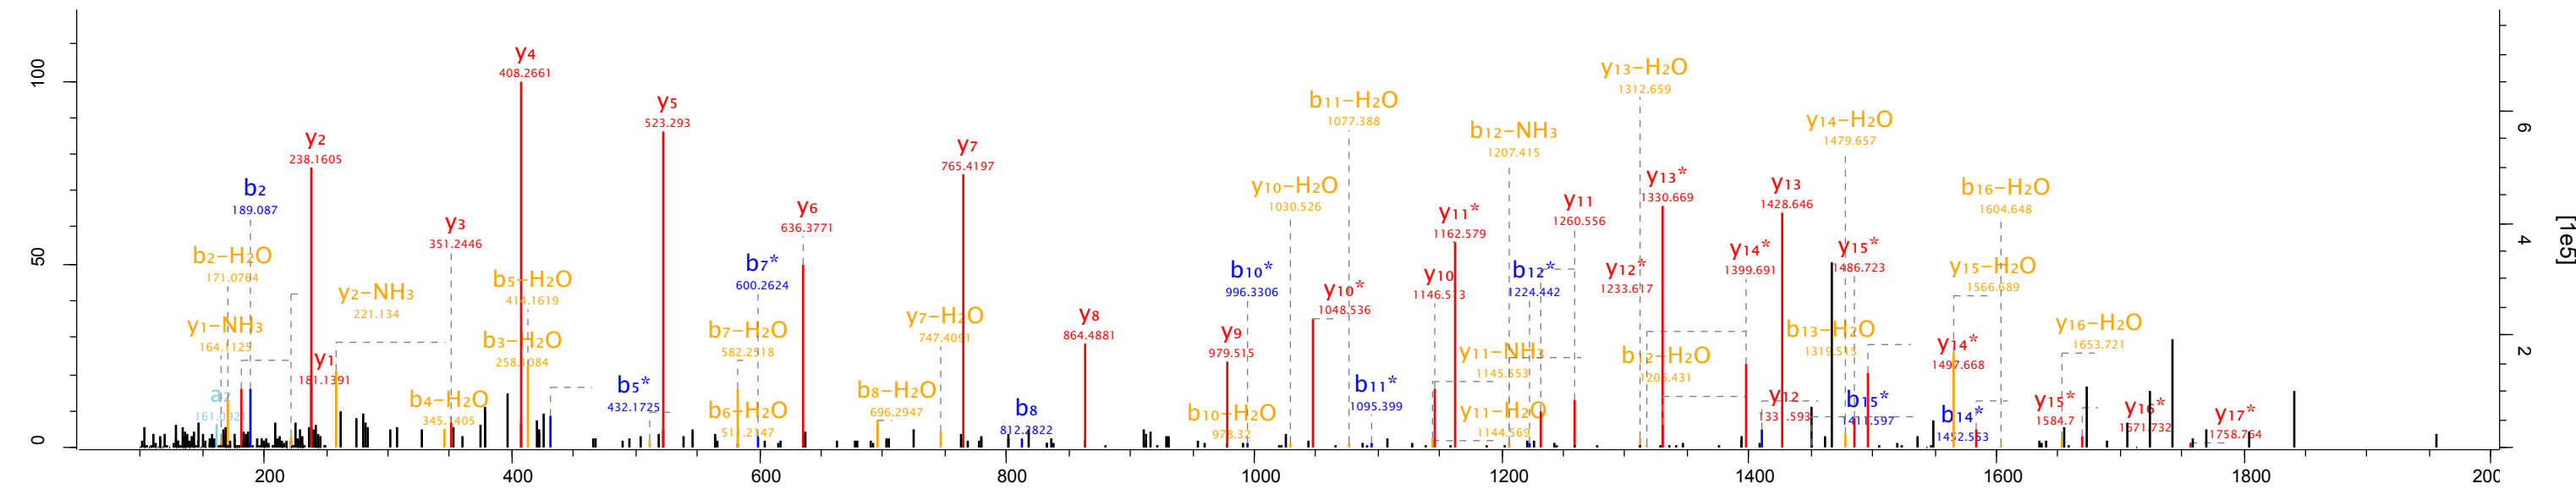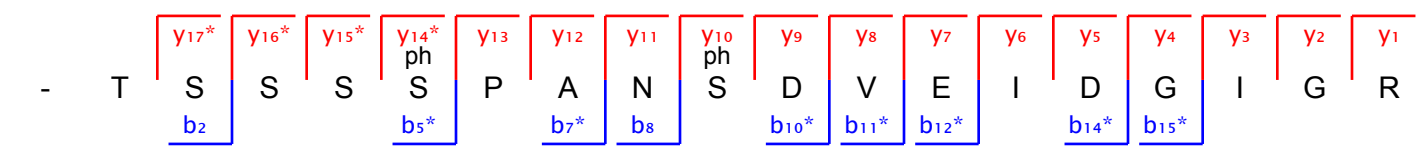

Raw file 20171215\_MaS\_33SR\_LMH\_phospho2\_03 Scan 11853 Method FTMS; HCD Score 152.63 m/z 1128.46 Gene names INF2

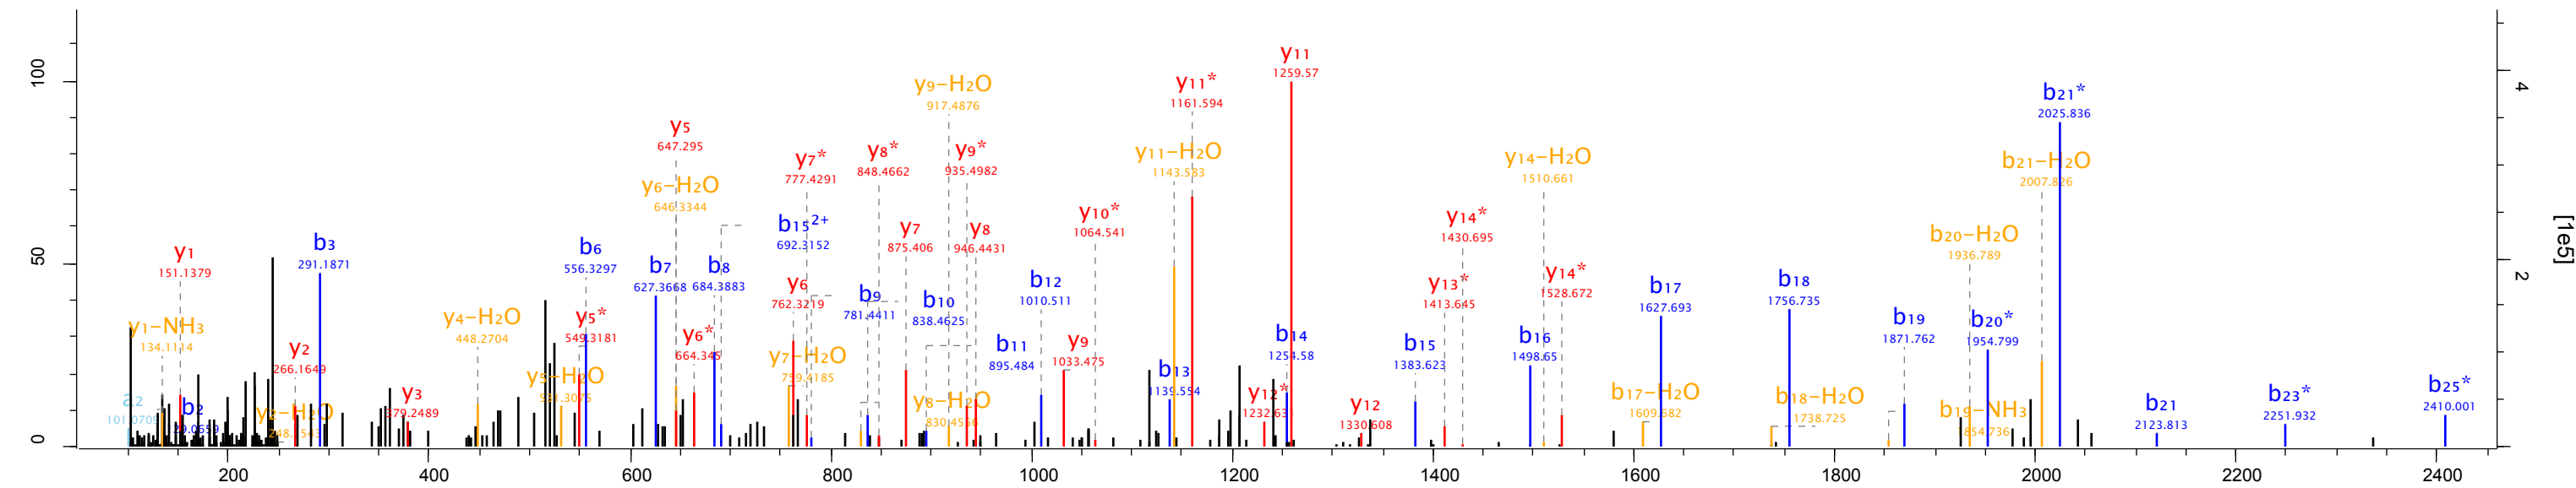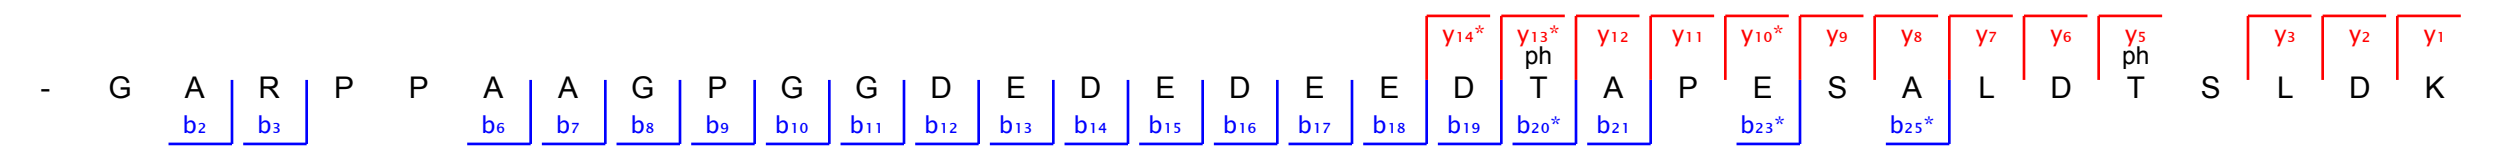

Raw file 20171215\_MaS\_33SR\_LMH\_phospho2\_03 Scan 11903 Method FTMS; HCD Score 220.46 m/z 1024.93 Gene names SF3B1

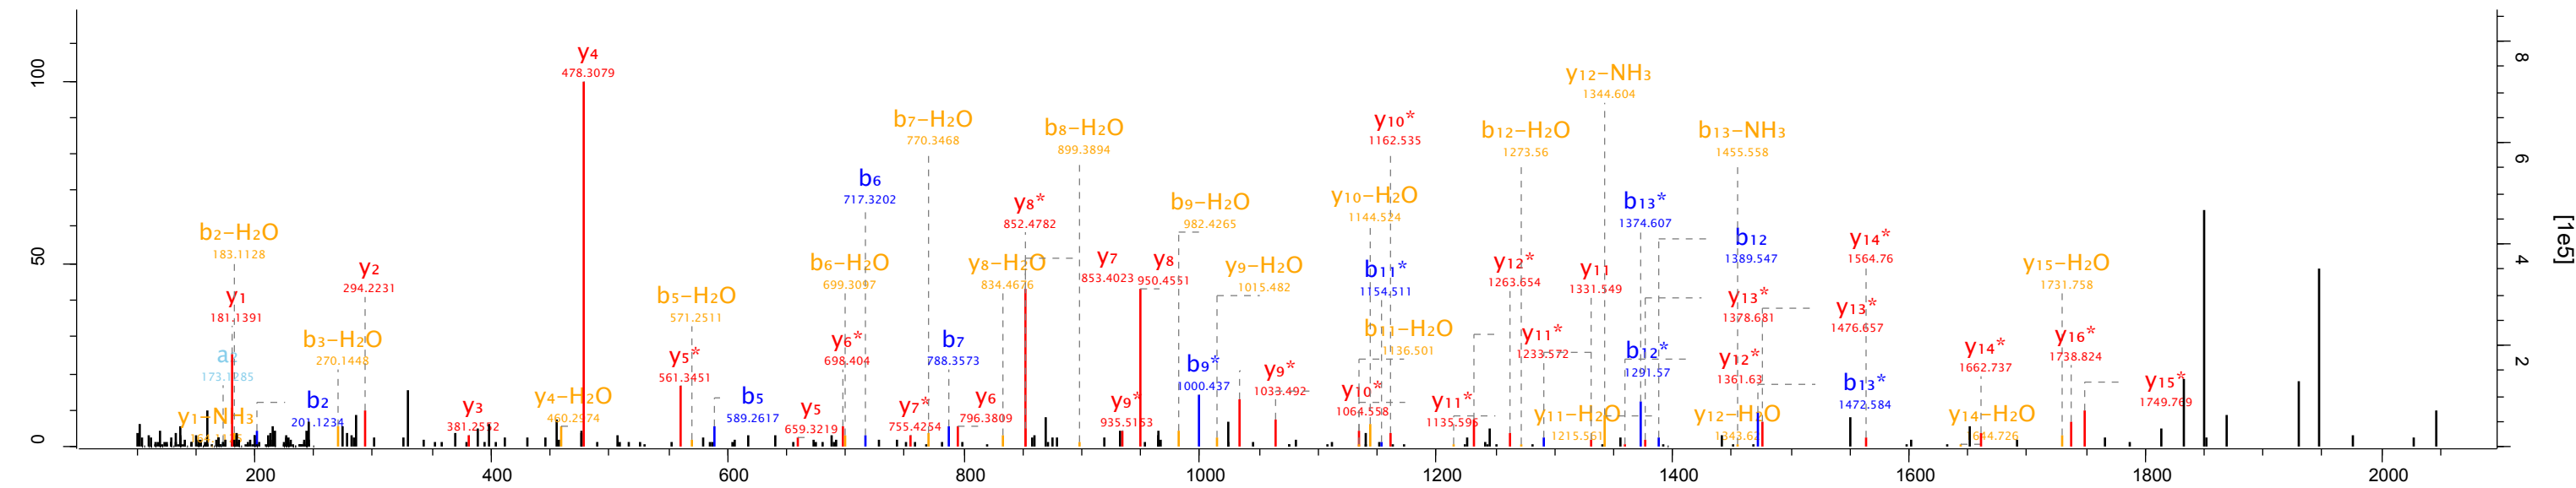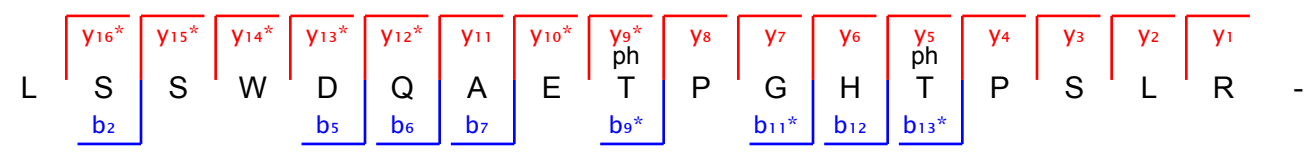

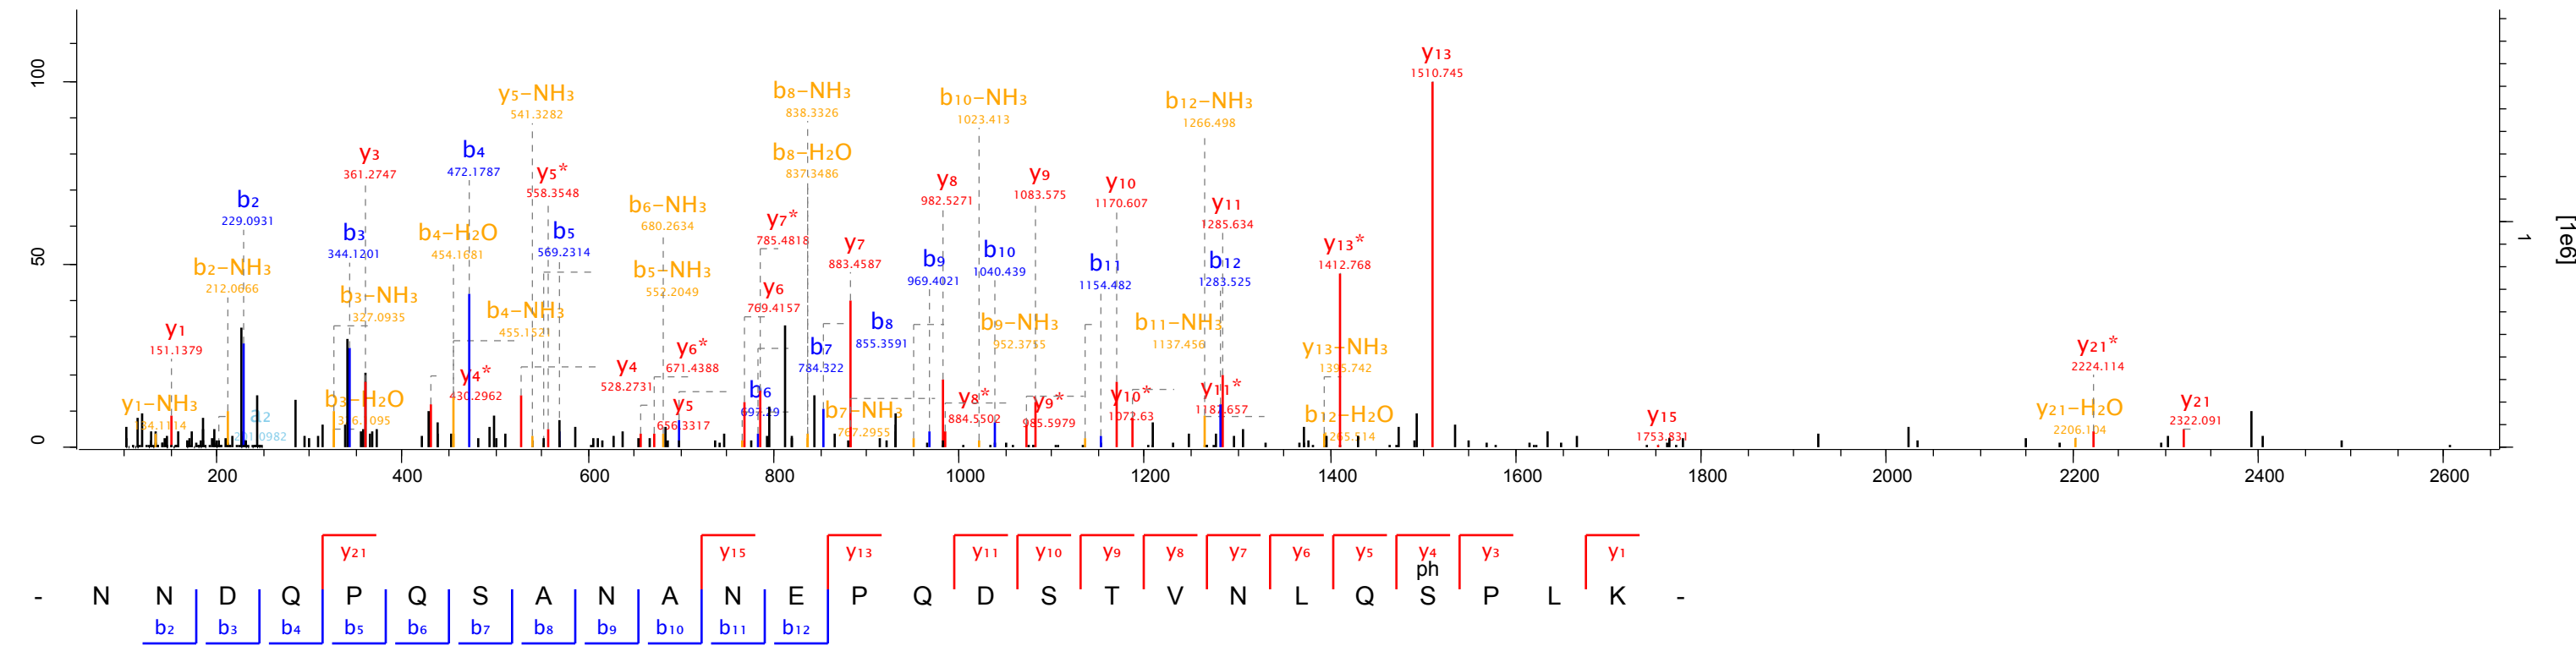





Raw file 20171215\_MaS\_33SR\_LMH\_phospho2\_03 Scan 12213 Method FTMS; HCD Score 217.54 m/z 1200.5 Gene names UBR4

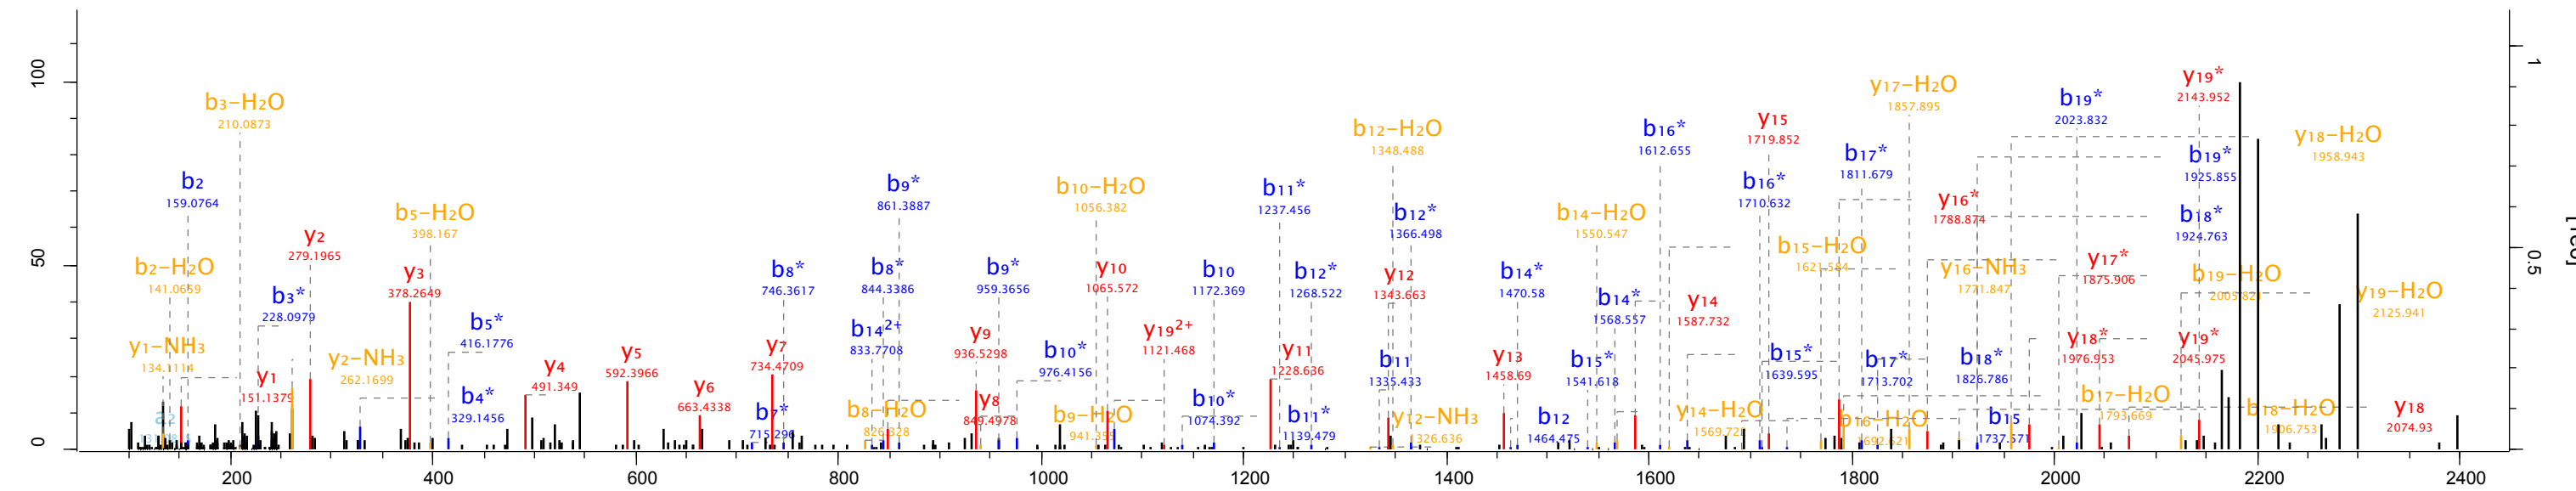

- T G Y<sub>19</sub>\*  
ph  
S Y<sub>18</sub> Y<sub>17</sub>\*  
S Y<sub>16</sub>\*  
ph  
S Y<sub>15</sub> Y<sub>14</sub> Y<sub>13</sub> Y<sub>12</sub> Y<sub>11</sub> Y<sub>10</sub> Y<sub>9</sub> Y<sub>8</sub> Y<sub>7</sub> Y<sub>6</sub> Y<sub>5</sub> Y<sub>4</sub> Y<sub>3</sub> Y<sub>2</sub> Y<sub>1</sub> -

b<sub>2</sub> b<sub>3</sub>\*  
b<sub>3</sub>\*-H<sub>2</sub>O b<sub>4</sub>\*  
b<sub>4</sub>\*-H<sub>2</sub>O b<sub>5</sub>\*  
b<sub>5</sub>\*-H<sub>2</sub>O b<sub>7</sub>\*  
b<sub>7</sub>\*-H<sub>2</sub>O b<sub>8</sub>\*  
b<sub>8</sub>\*-H<sub>2</sub>O b<sub>9</sub>\*  
b<sub>9</sub>\*-H<sub>2</sub>O b<sub>10</sub> b<sub>11</sub> b<sub>12</sub> b<sub>14</sub>\*  
b<sub>14</sub>\*-H<sub>2</sub>O b<sub>15</sub> b<sub>16</sub>\*  
b<sub>16</sub>\*-H<sub>2</sub>O b<sub>17</sub>\*  
b<sub>17</sub>\*-H<sub>2</sub>O b<sub>18</sub>\*  
b<sub>18</sub>\*-H<sub>2</sub>O b<sub>19</sub>\*  
b<sub>19</sub>\*-H<sub>2</sub>O Q K -

Raw file  
20171215\_MaS\_33SR\_LMH\_phospho2\_03

Scan Method Score m/z Gene names  
12293 FTMS; HCD 237.33 1166.52 MPRIP

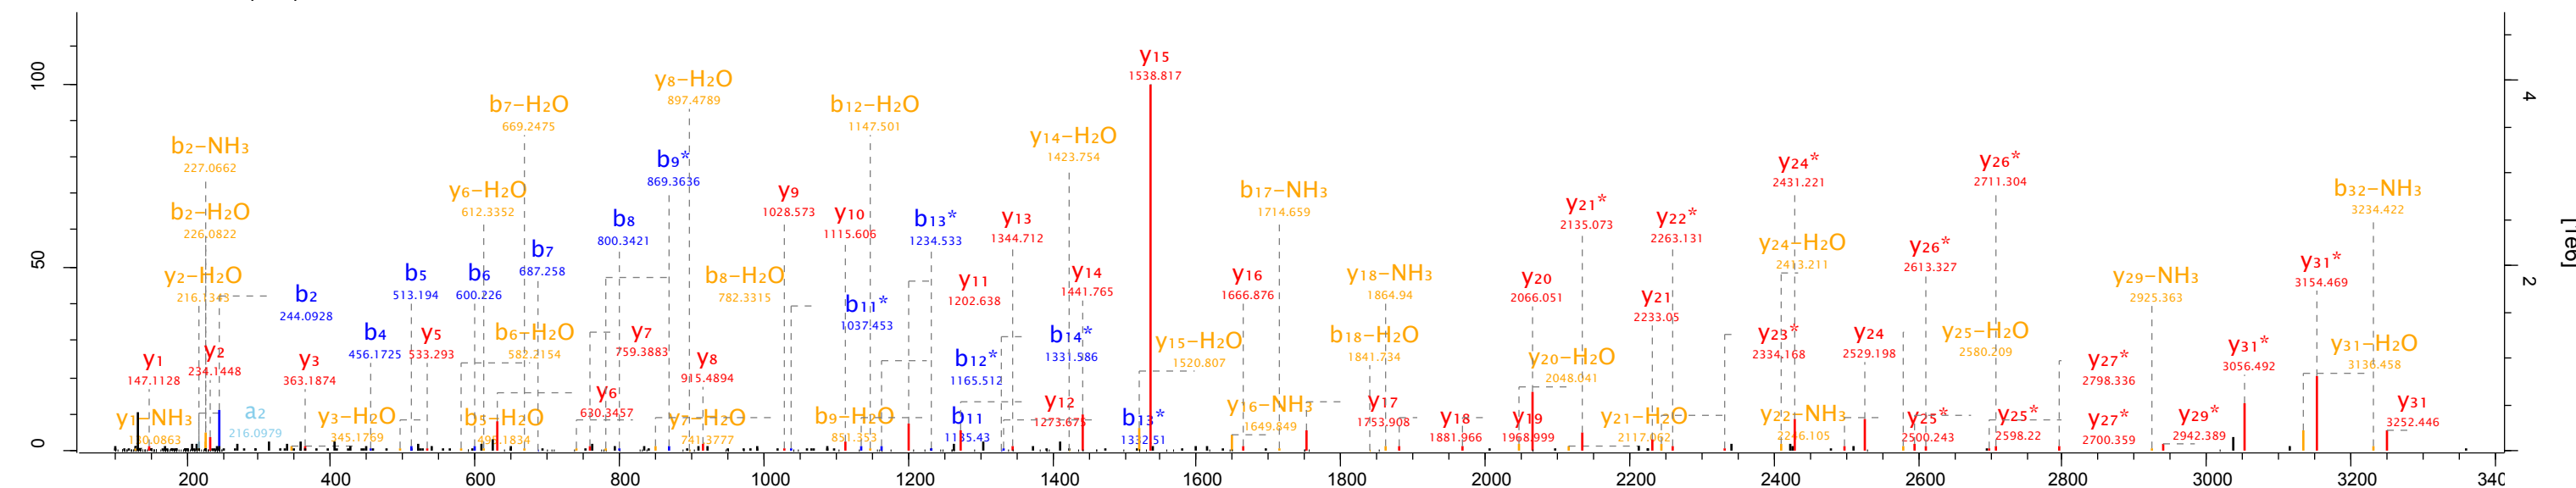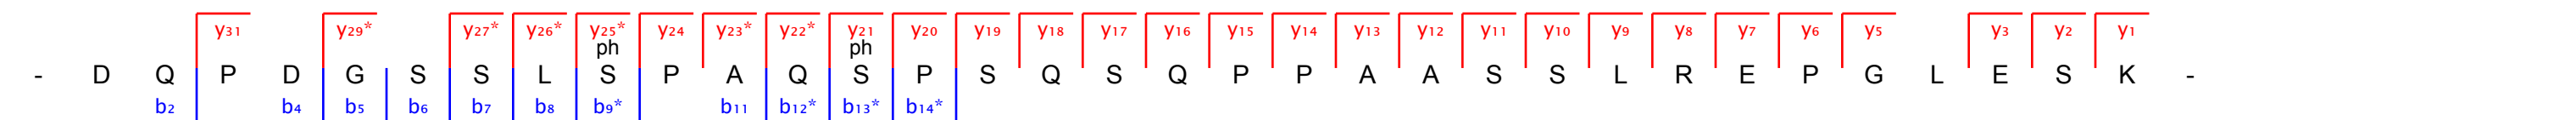

Raw file  
20171215\_MaS\_33SR\_LMH\_phospho2\_03

Scan 12393 Method FTMS; HCD Score 77.61 m/z 1096.98 Gene names NF1

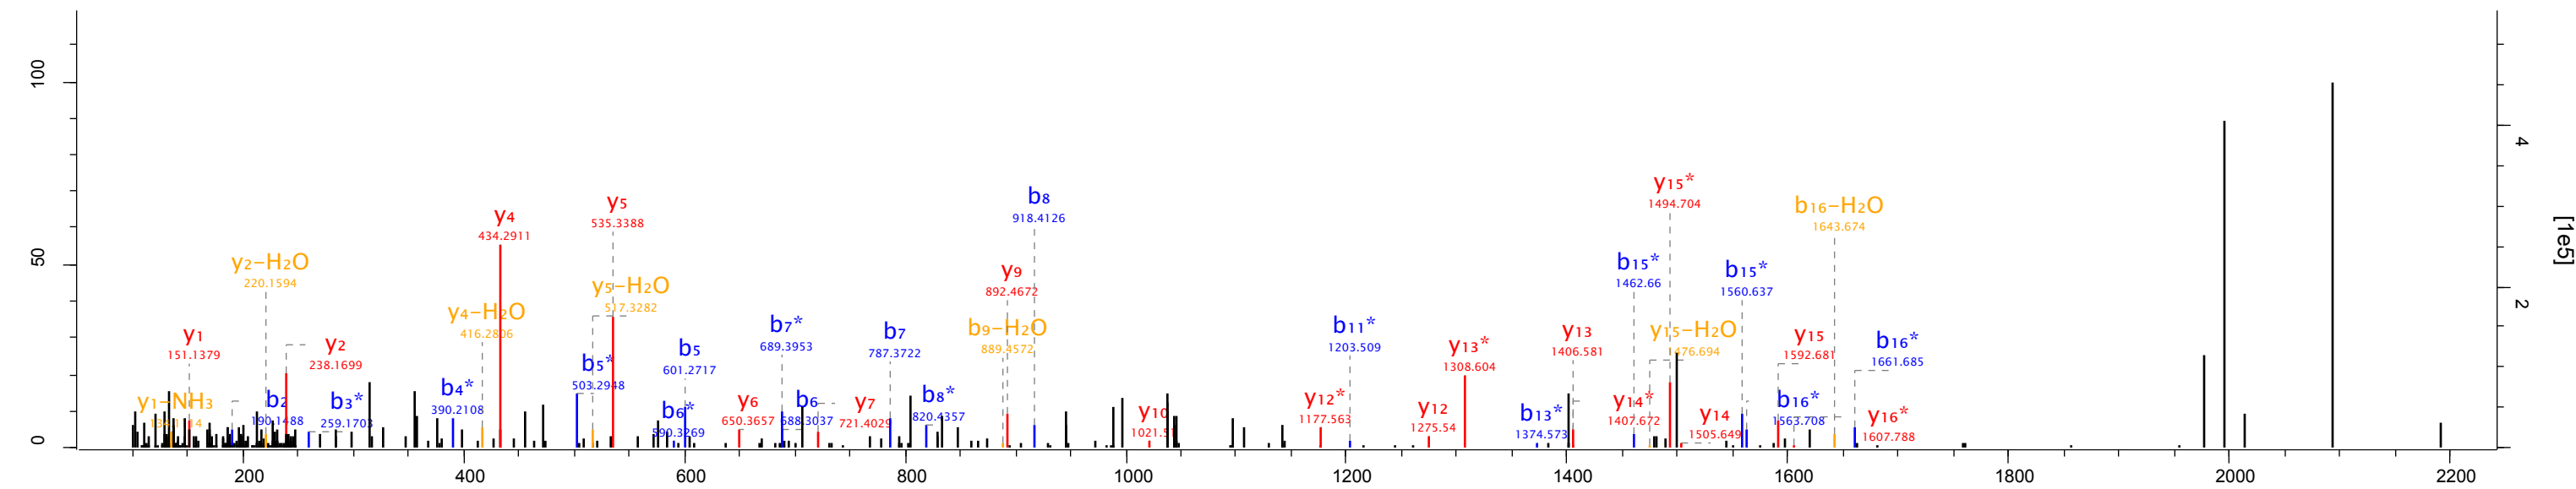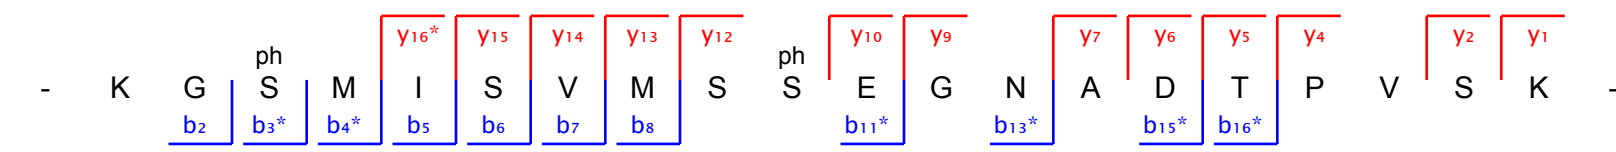

Raw file  
20171215\_MaS\_33SR\_LMH\_phospho2\_03  
Scan 12443 Method FTMS; HCD Score 43.76 m/z 743.34

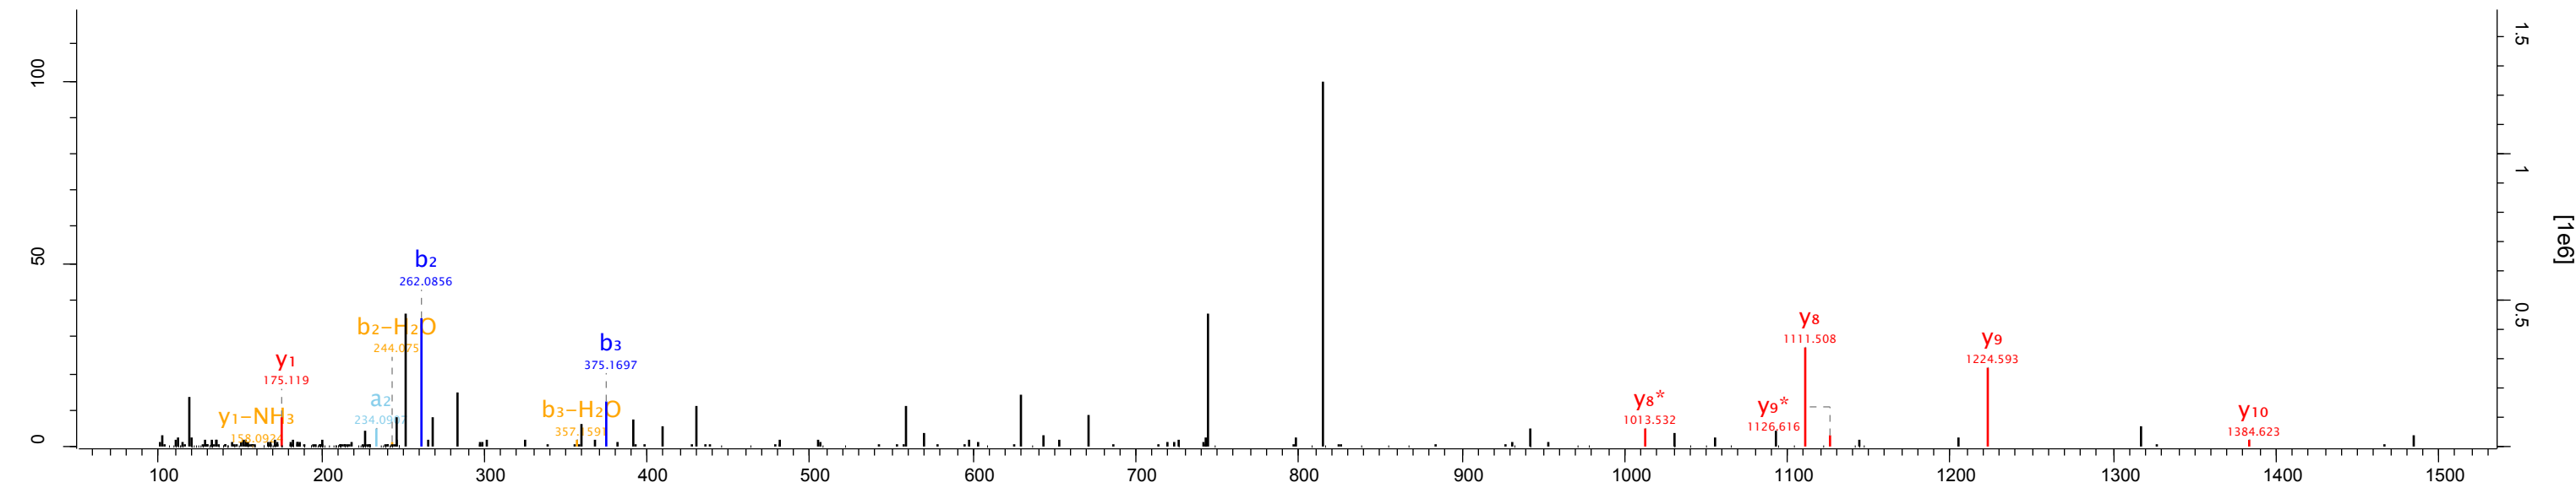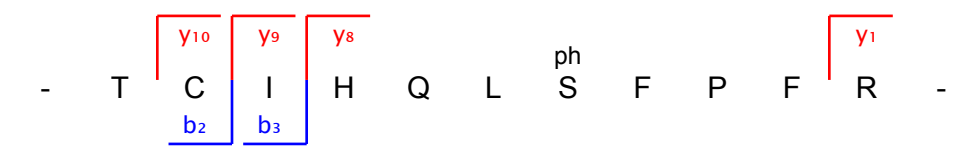

Raw file 20171215\_MaS\_33SR\_LMH\_phospho2\_03 Scan 12563 Method FTMS; HCD Score 147.46 m/z 656.27 Gene names PHF14

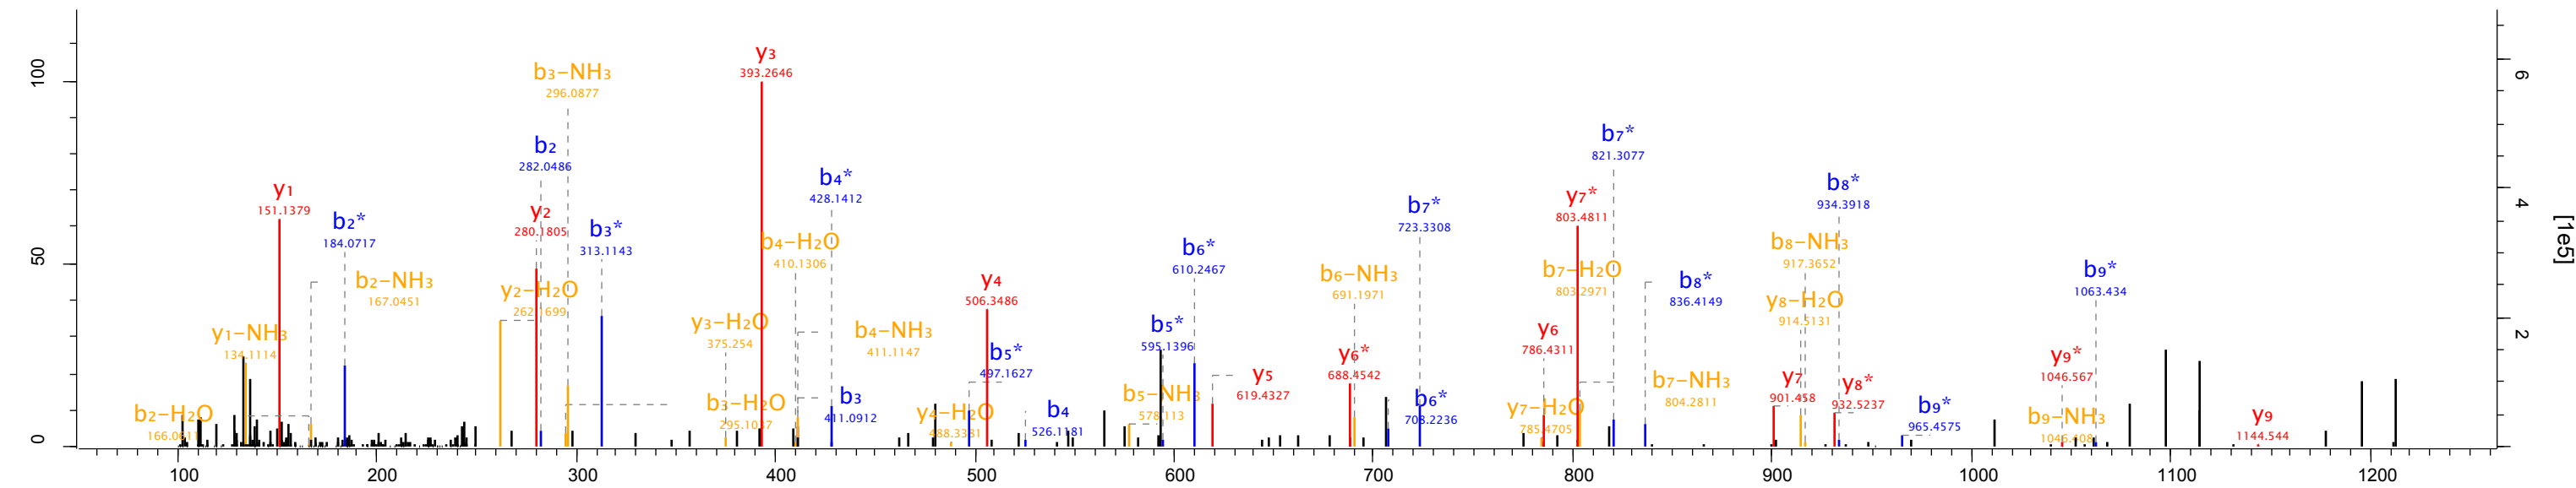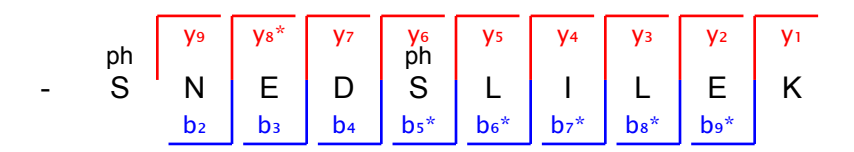

Raw file 20171215\_MaS\_33SR\_LMH\_phospho2\_03 Scan 12793 Method FTMS; HCD Score 130.72 m/z 820.33 Gene names AKAP8

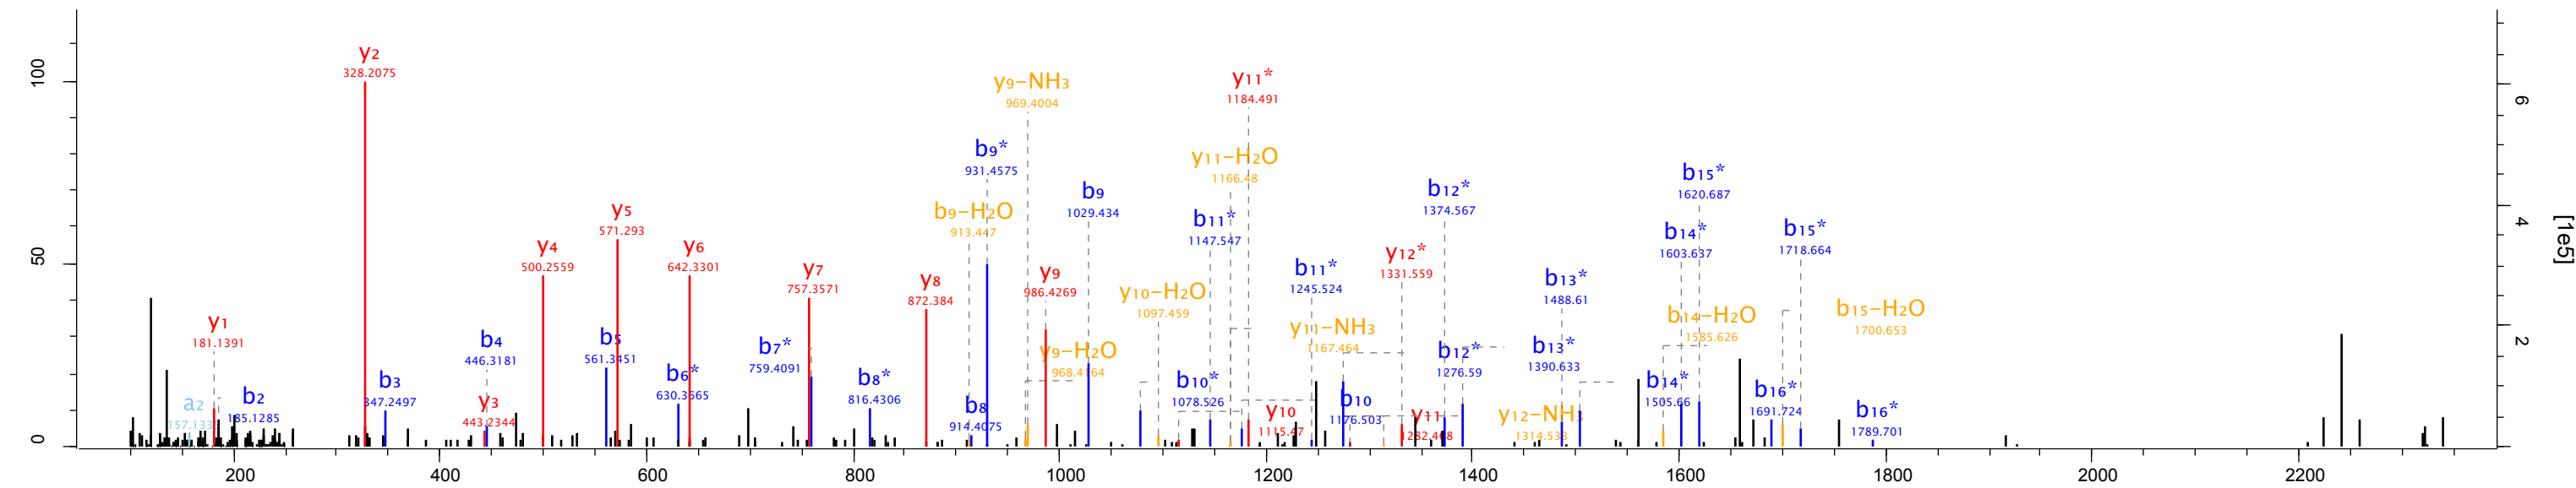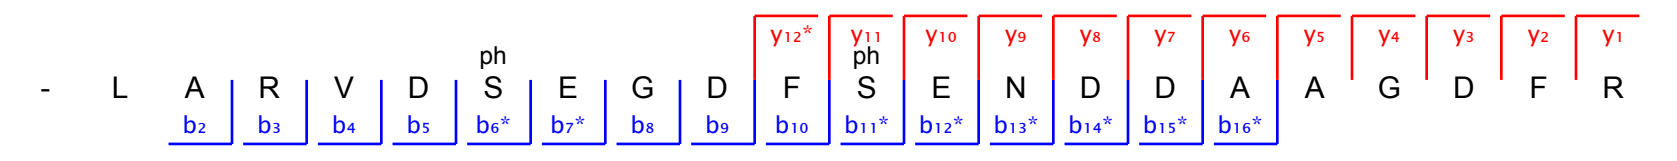

Raw file: 20171215\_MaS\_33SR\_LMH\_phospho2\_03  
 Scan: 12853 Method: FTMS; HCD Score: 228.64 m/z: 657.63 Gene names: CHAMP1

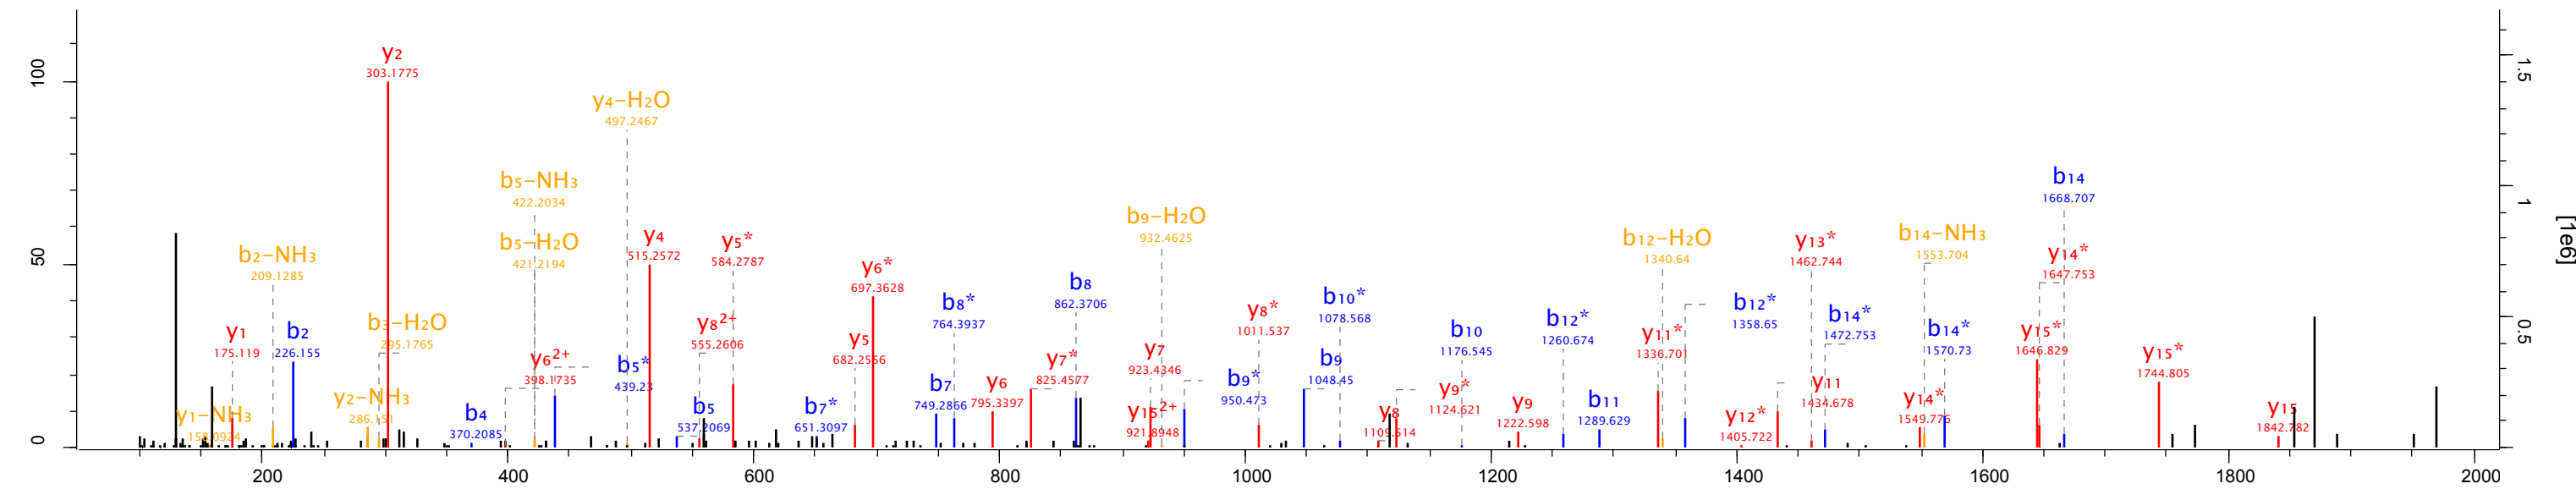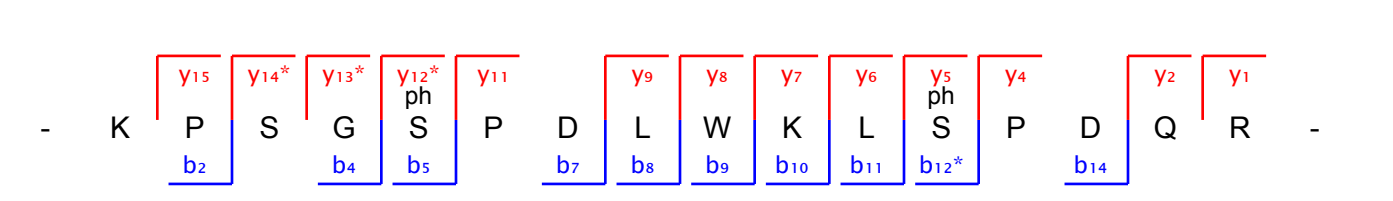

Raw file  
20171215\_MaS\_33SR\_LMH\_phospho2\_03

Scan 12923 Method FTMS; HCD Score 61.49 m/z 848.03 Gene names C2CD5

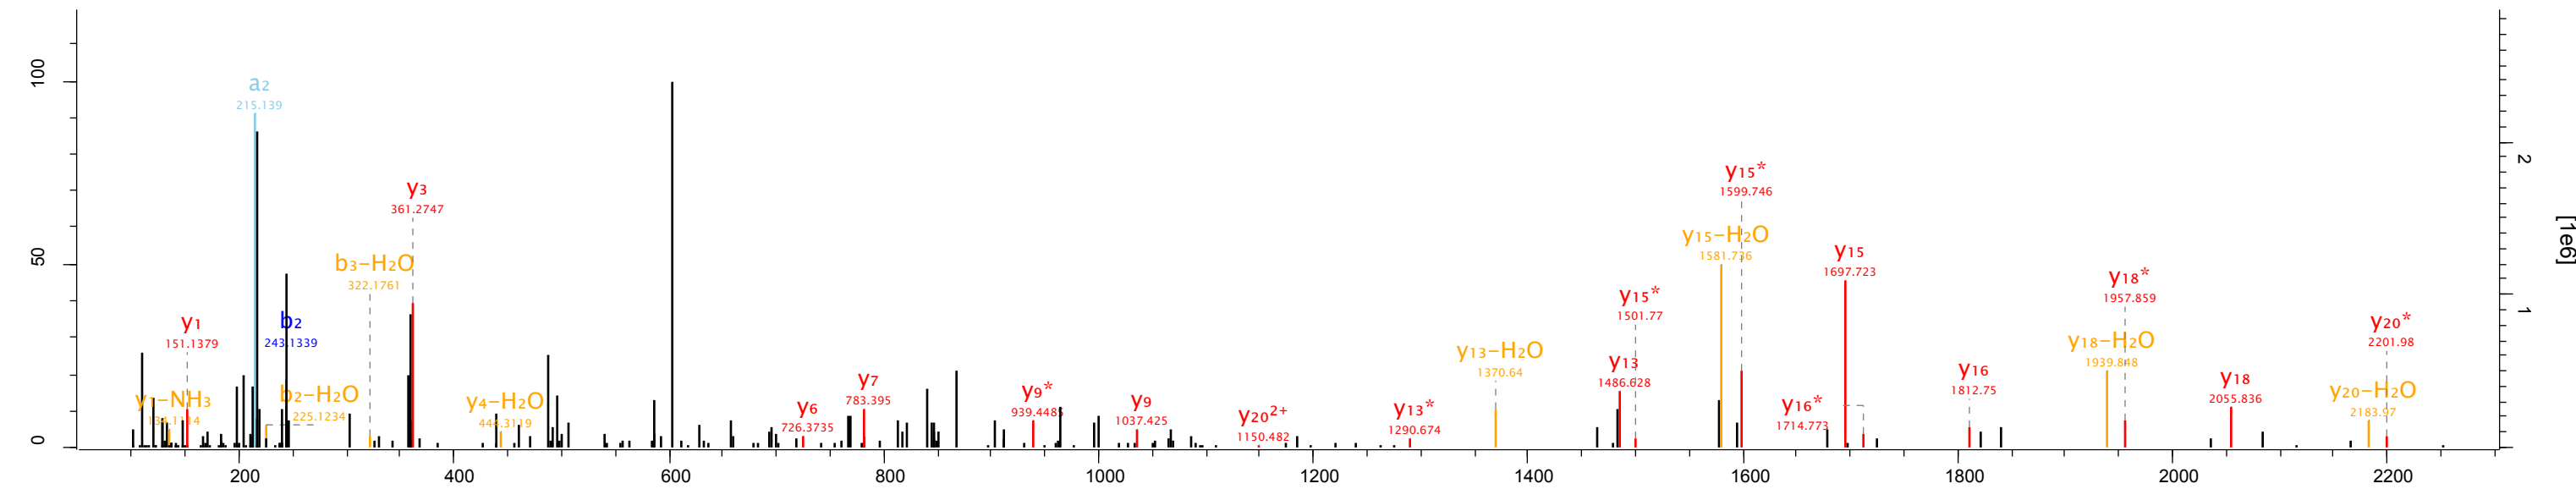

- E I P F N E D P N T P N T P L K -

Fragmentation diagram showing b2 (blue) and y1 through y20\* (red) ions. The b2 ion is at m/z 243.1339. The y ions are labeled with their m/z values: y20\* (1150.482), y18 (2055.836), y16 (1812.75), y15 (1697.723), y13 (1486.628), y9 (1037.425), y7 (783.395), y6 (726.3735), y3 (361.2747), and y1 (151.1379).



Raw file  
 20171215\_MaS\_33SR\_LMH\_phospho2\_03  
 Scan 12953 Method FTMS; HCD Score 163.19 m/z 1106.97 Gene names EPRS

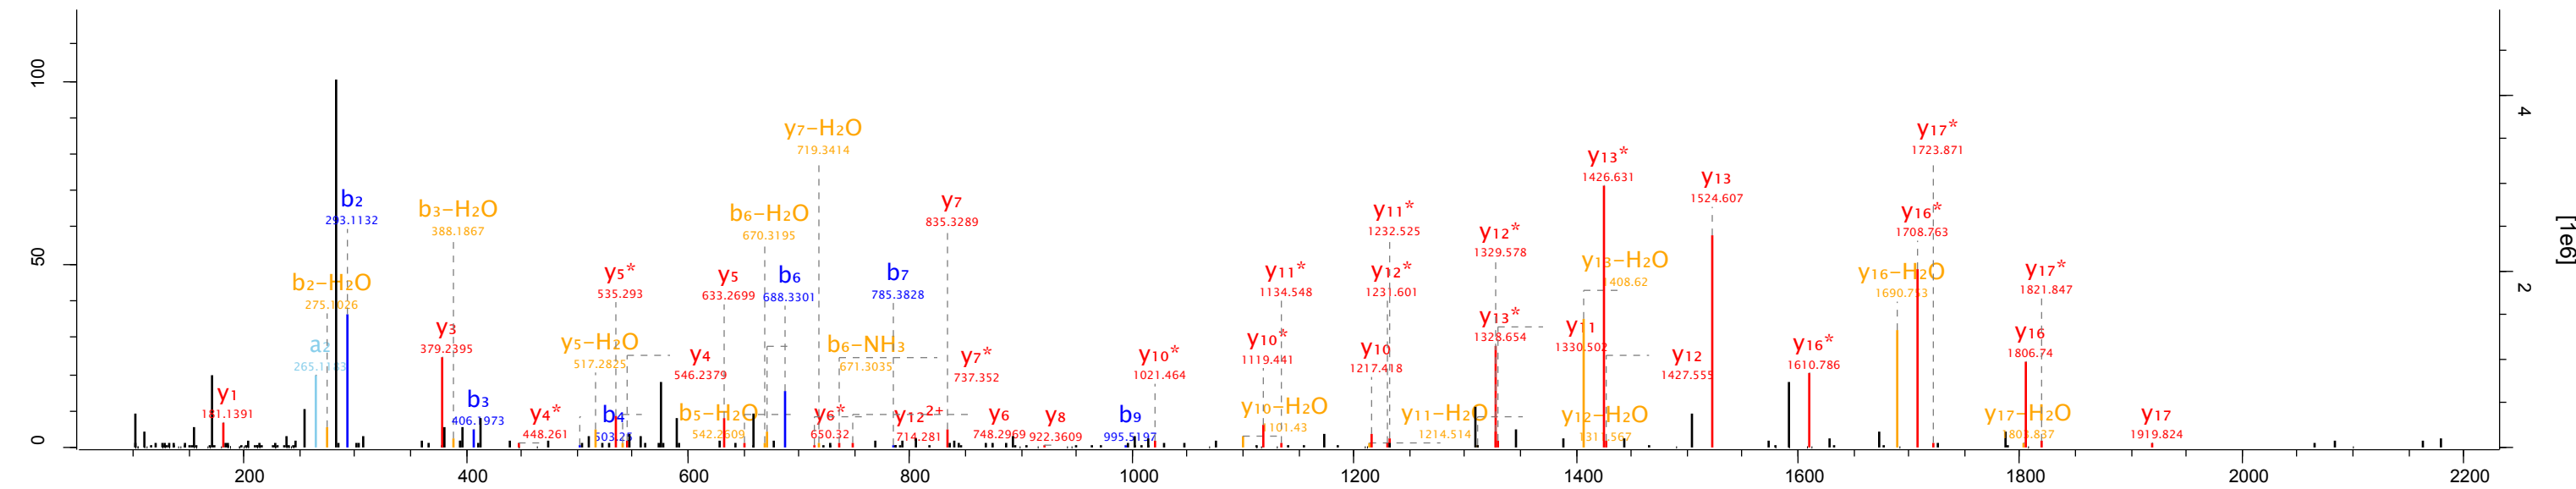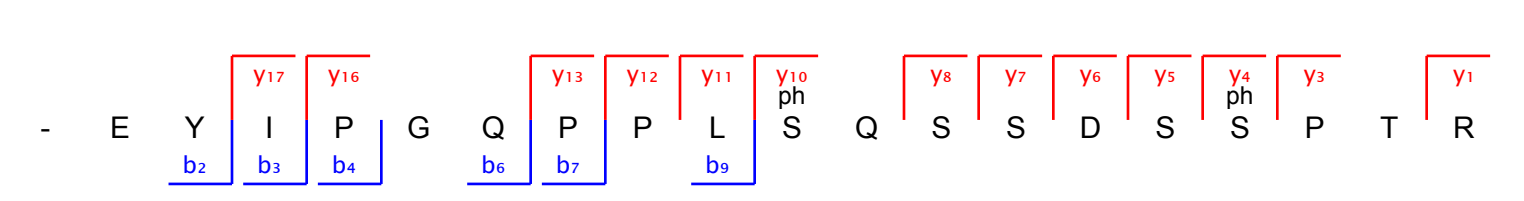

Raw file 20171215\_MaS\_33SR\_LMH\_phospho2\_03 Scan 13003 Method FTMS; HCD Score 136.53 m/z 841.34 Gene names ZNF106

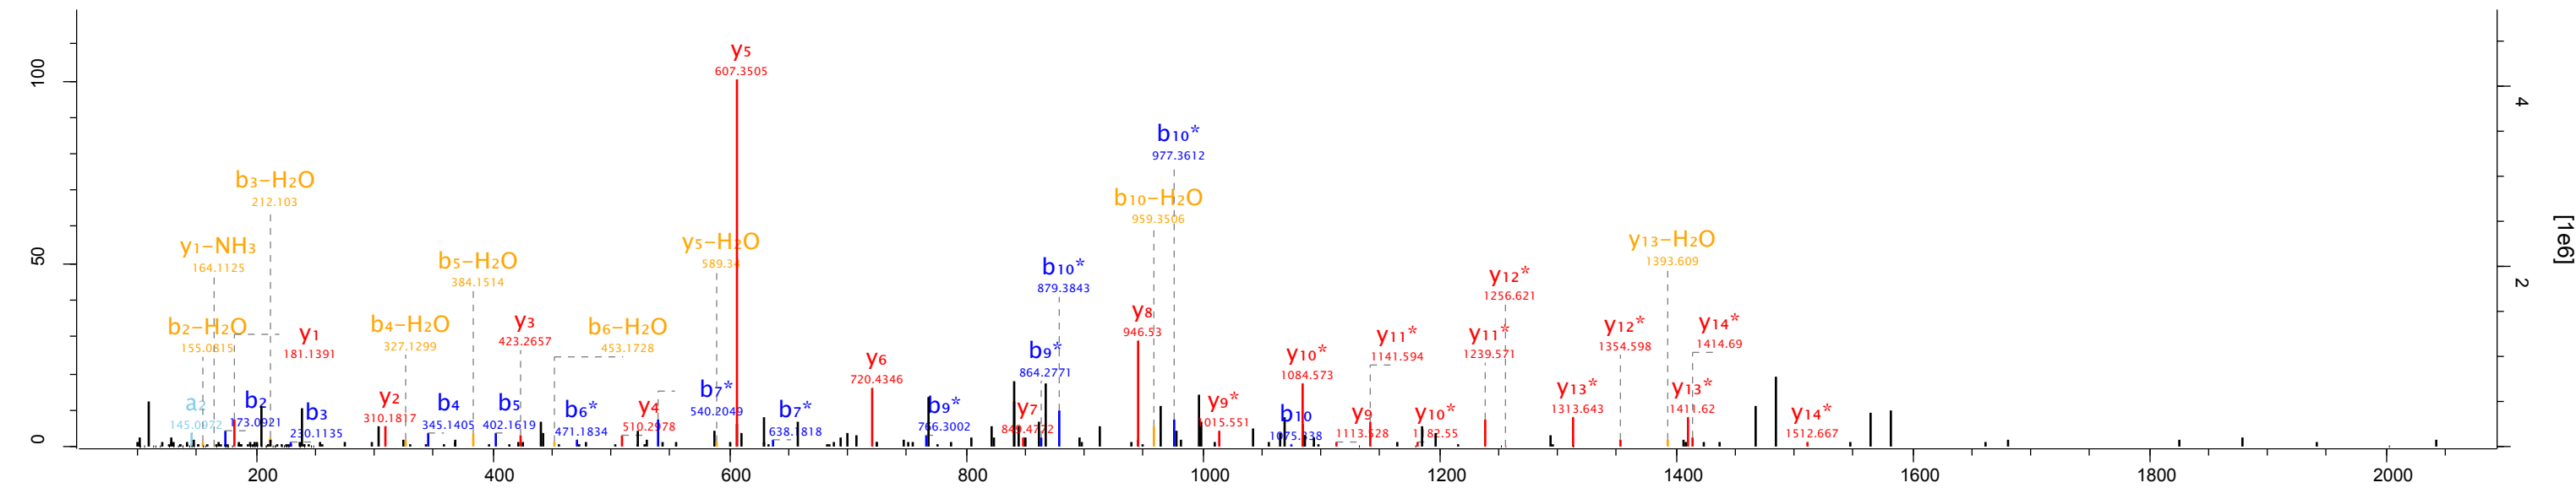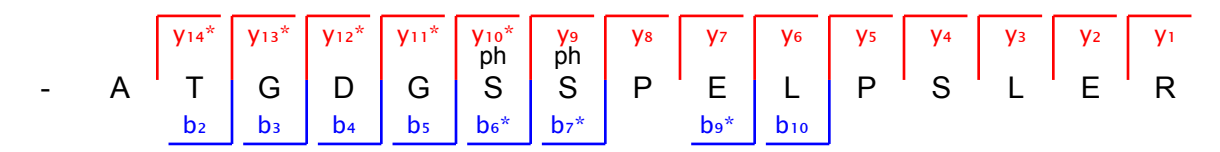

Raw file 20171215\_MaS\_33SR\_LMH\_phospho2\_03 Scan 13183 Method FTMS; HCD Score 162.02 m/z 1210.02 Gene names POLR2A

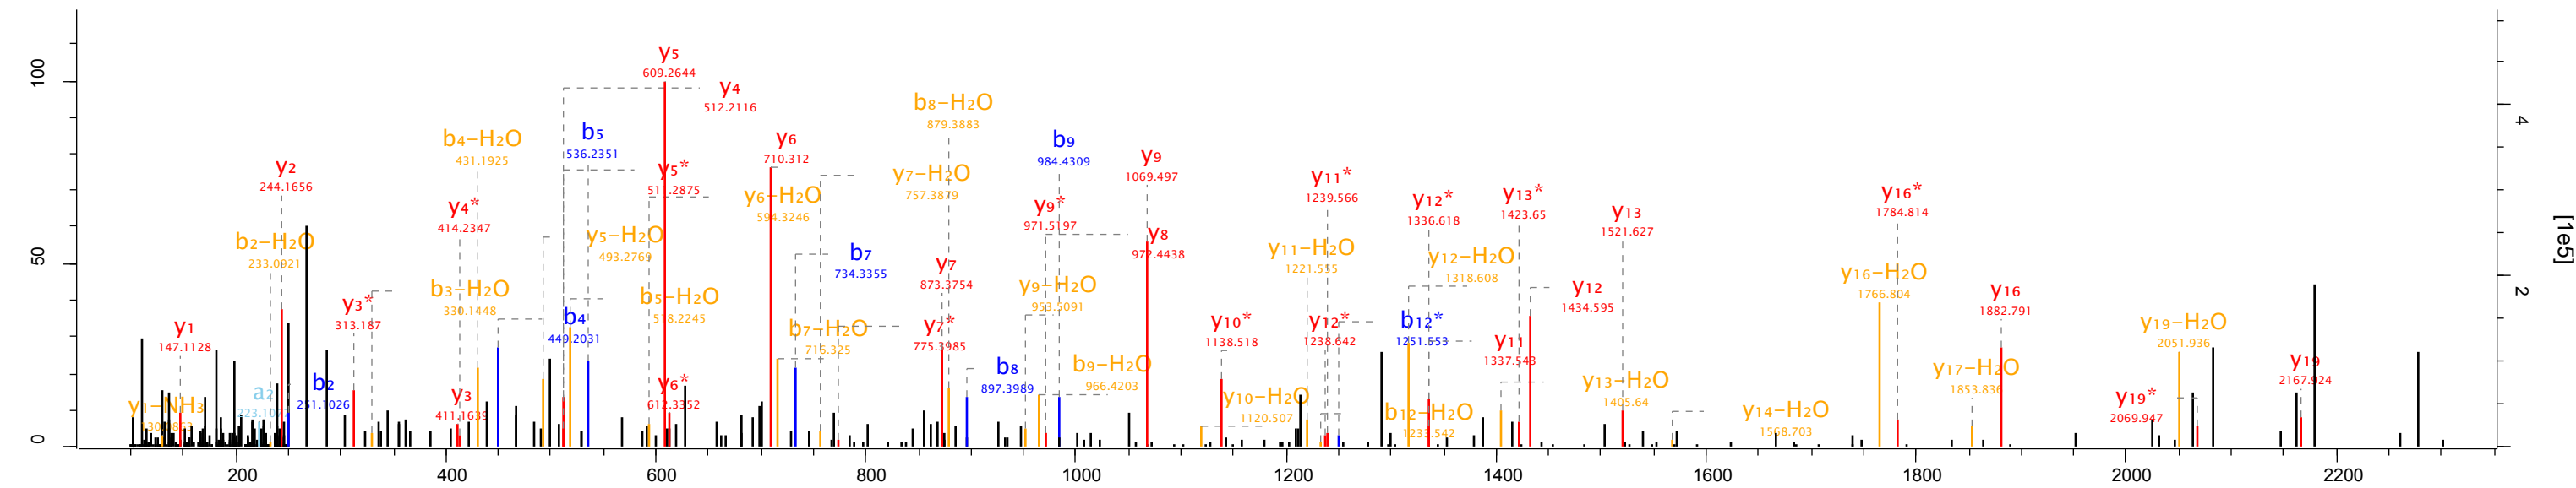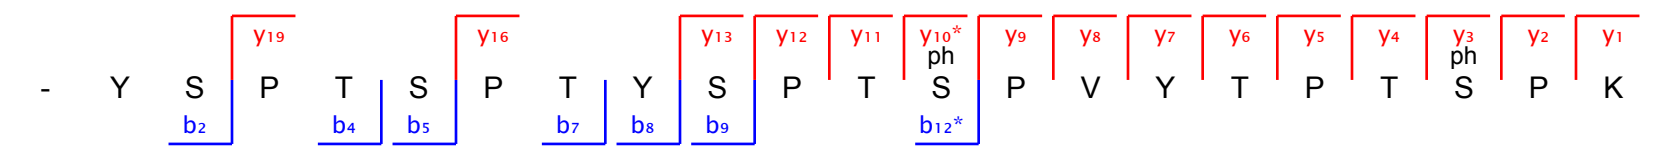

Raw file 20171215\_MaS\_33SR\_LMH\_phospho2\_03 Scan 13203 Method FTMS; HCD Score 204.55 m/z 1089.47 Gene names CDC5L

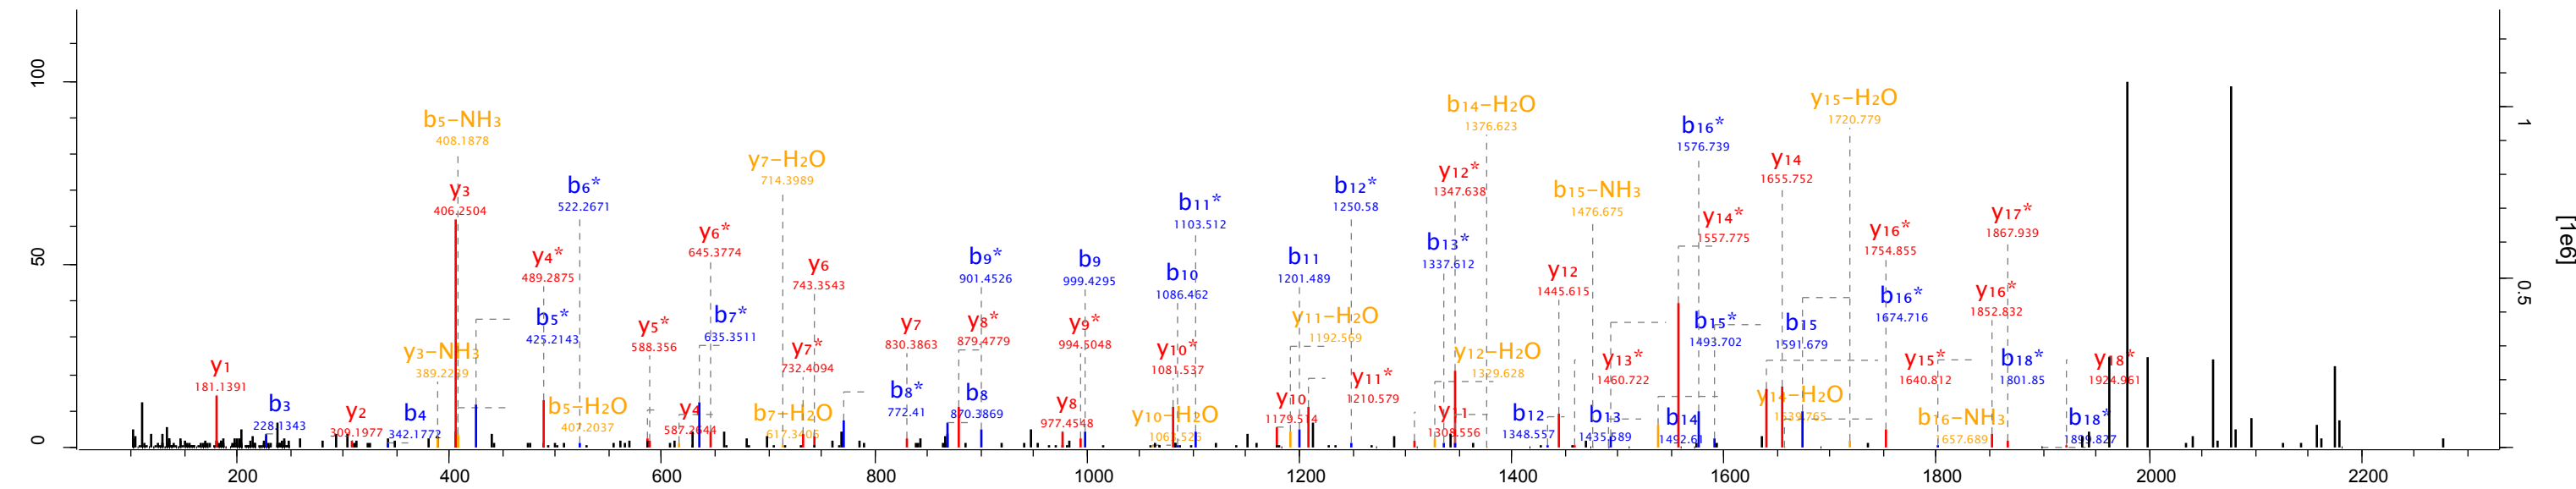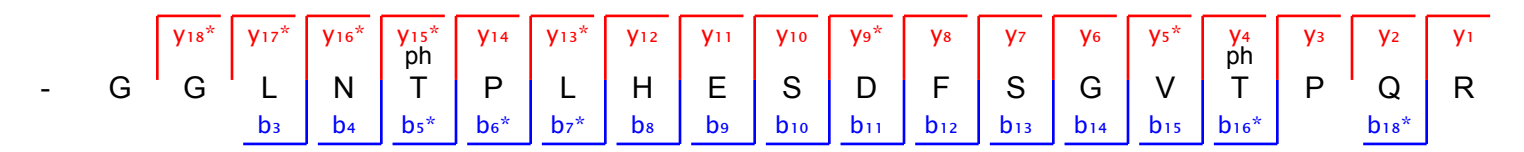

Raw file: 20171215\_MaS\_33SR\_LMH\_phospho2\_03  
 Scan: 13263 Method: FTMS; HCD Score: 247.34 m/z: 1108.42 Gene names: AKAP12

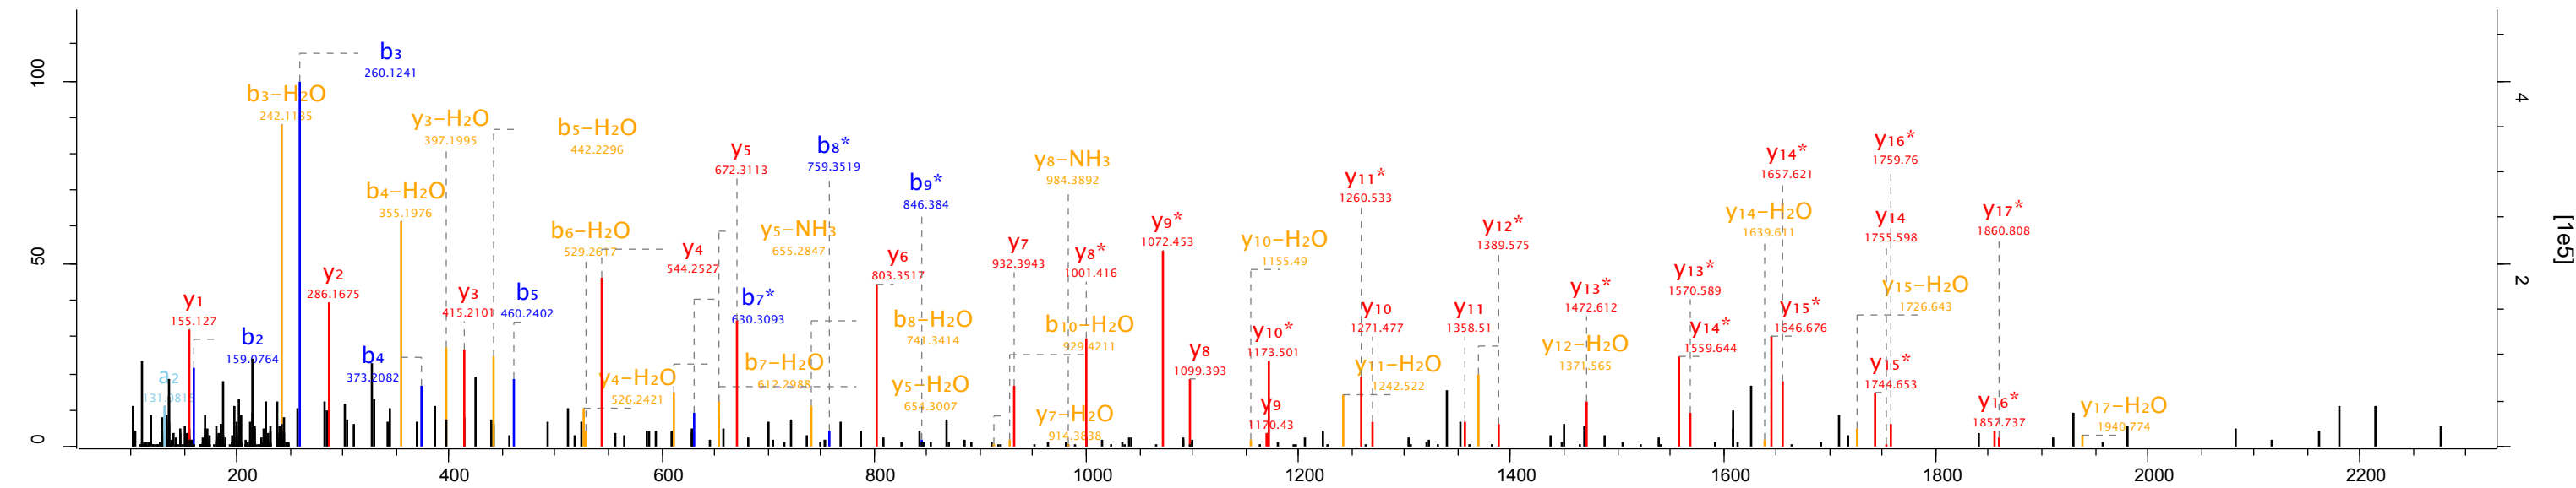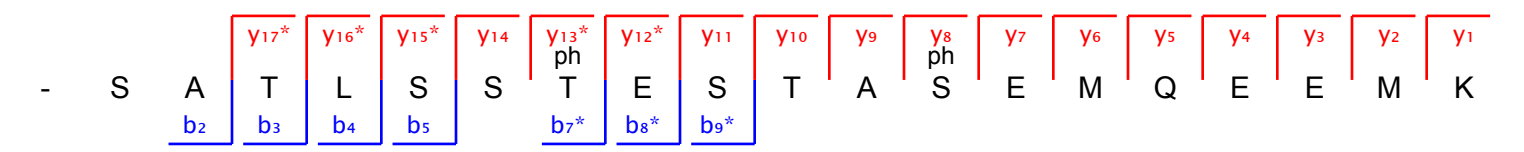

Raw file 20171215\_MaS\_33SR\_LMH\_phospho2\_03 Scan 13283 Method FTMS; HCD Score 320.96 m/z 1162.99 Gene names KRI1

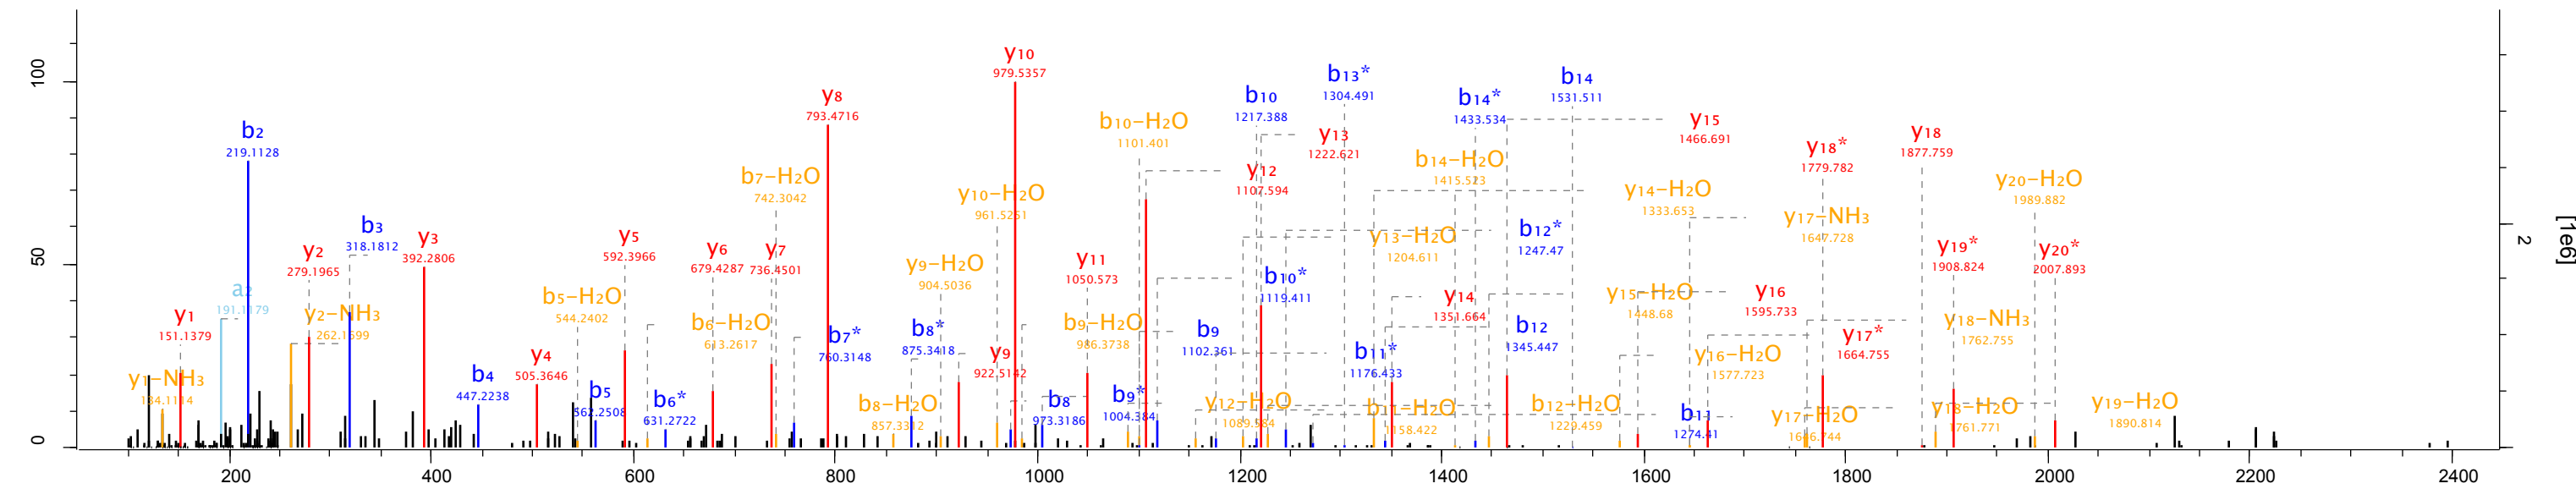

- A F V E D S E D E D G A G E G G S S L L Q K -

b<sub>2</sub>
b<sub>3</sub>
b<sub>4</sub>
b<sub>5</sub>
b<sub>6</sub><sup>\*</sup>
b<sub>7</sub><sup>\*</sup>
b<sub>8</sub>
b<sub>9</sub>
b<sub>10</sub>
b<sub>11</sub>
b<sub>12</sub>
b<sub>13</sub><sup>\*</sup>
b<sub>14</sub>

y<sub>20</sub><sup>\*</sup>
y<sub>19</sub><sup>\*</sup>
y<sub>18</sub>
y<sub>17</sub><sup>\*</sup>
ph
y<sub>16</sub>
y<sub>15</sub>
y<sub>14</sub>
y<sub>13</sub>
y<sub>12</sub>
y<sub>11</sub>
y<sub>10</sub>
y<sub>9</sub>
y<sub>8</sub>
y<sub>7</sub>
y<sub>6</sub>
y<sub>5</sub>
y<sub>4</sub>
y<sub>3</sub>
y<sub>2</sub>
y<sub>1</sub>

Raw file 20171215\_MaS\_33SR\_LMH\_phospho2\_03 Scan 13363 Method FTMS; HCD Score 181.45 m/z 1026.48 Gene names SRRM2

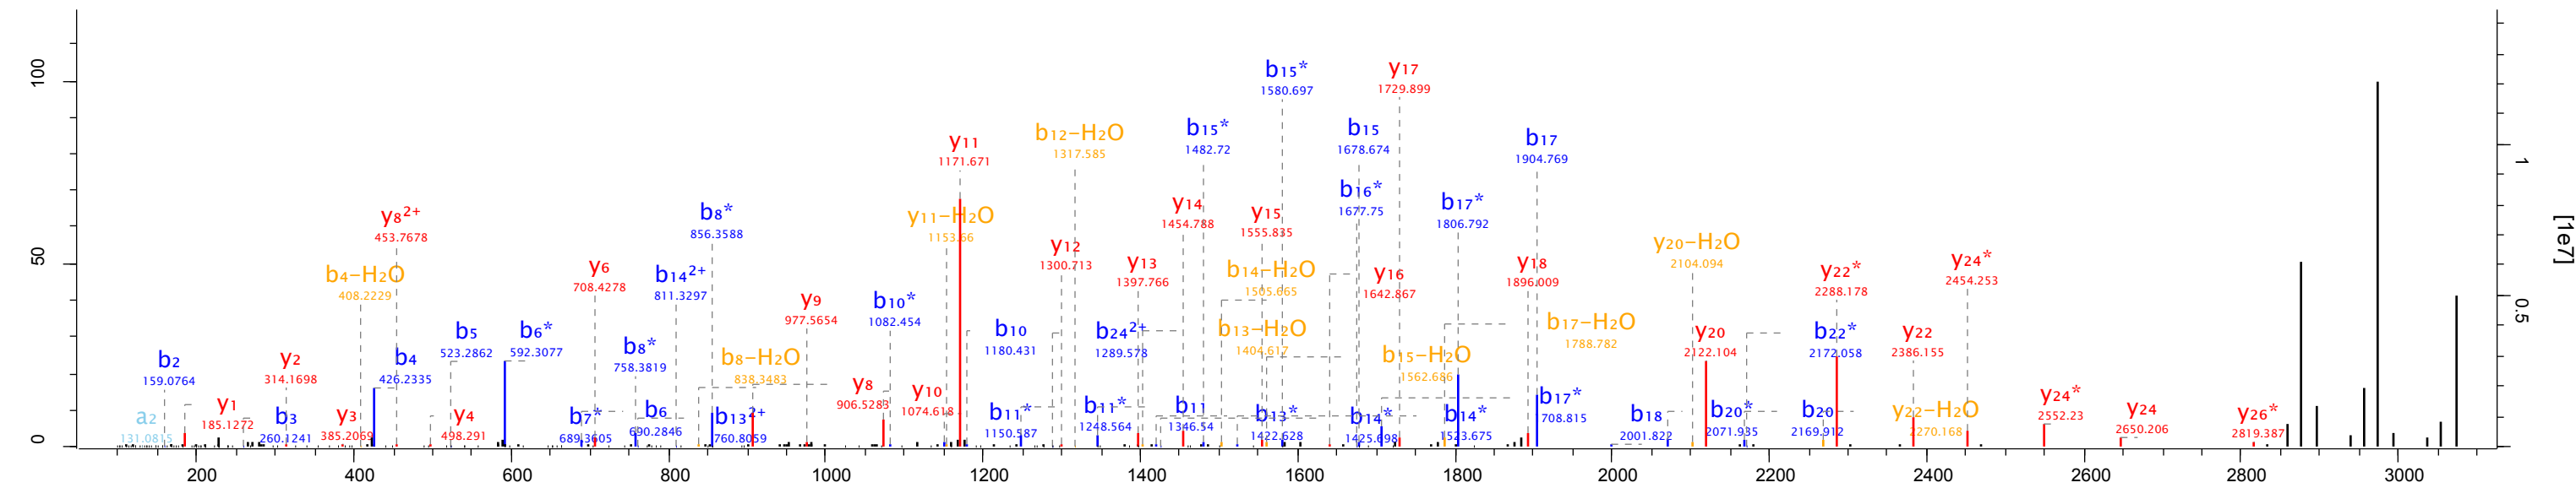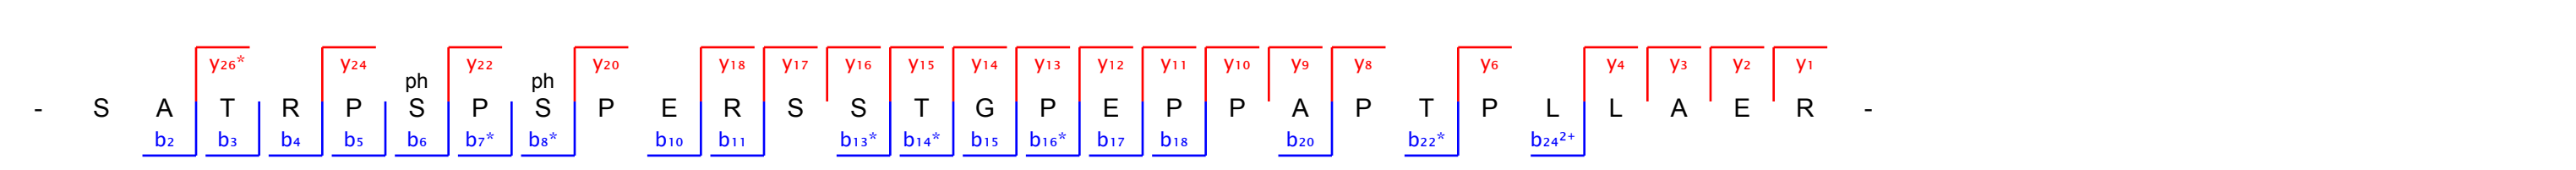

Raw file 20171215\_MaS\_33SR\_LMH\_phospho2\_03 Scan 13453 Method FTMS; HCD Score 192.63 m/z 868.88 Gene names FOXC2

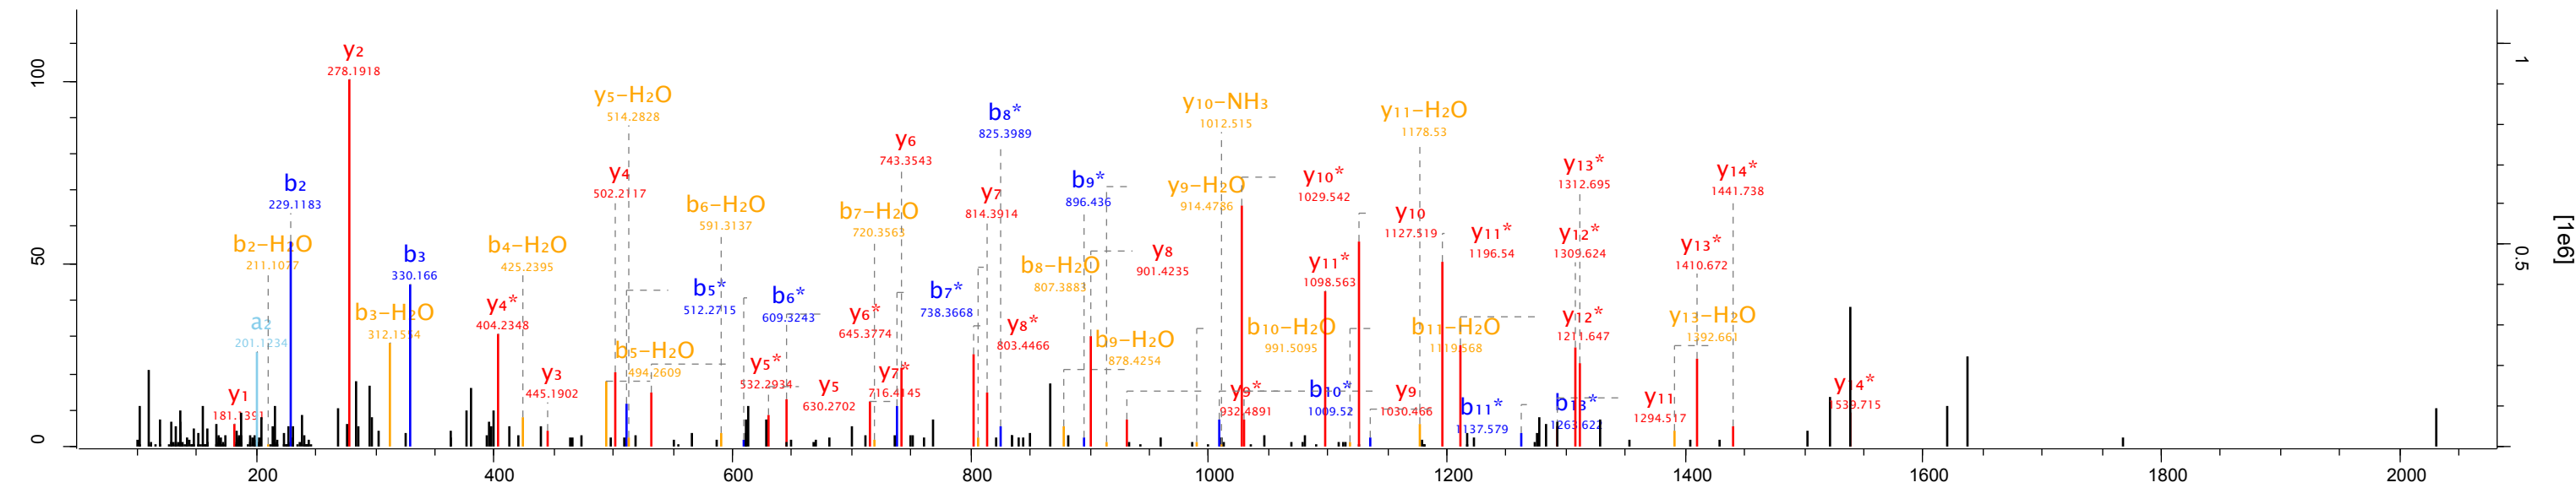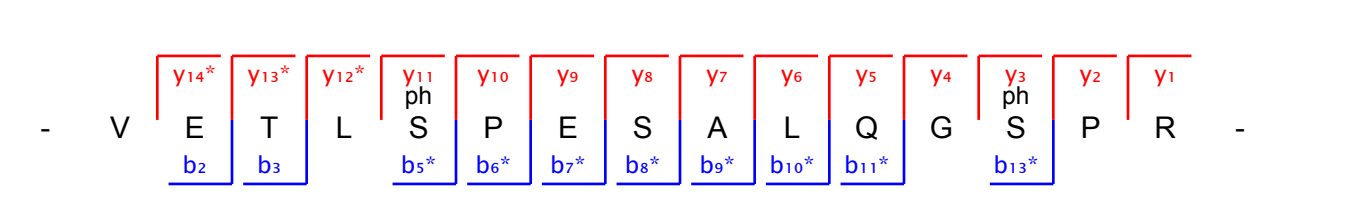



Raw file 20171215\_MaS\_33SR\_LMH\_phospho2\_03 Scan 13793 Method FTMS; HCD Score 148.31 m/z 1431.12 Gene names LARP1

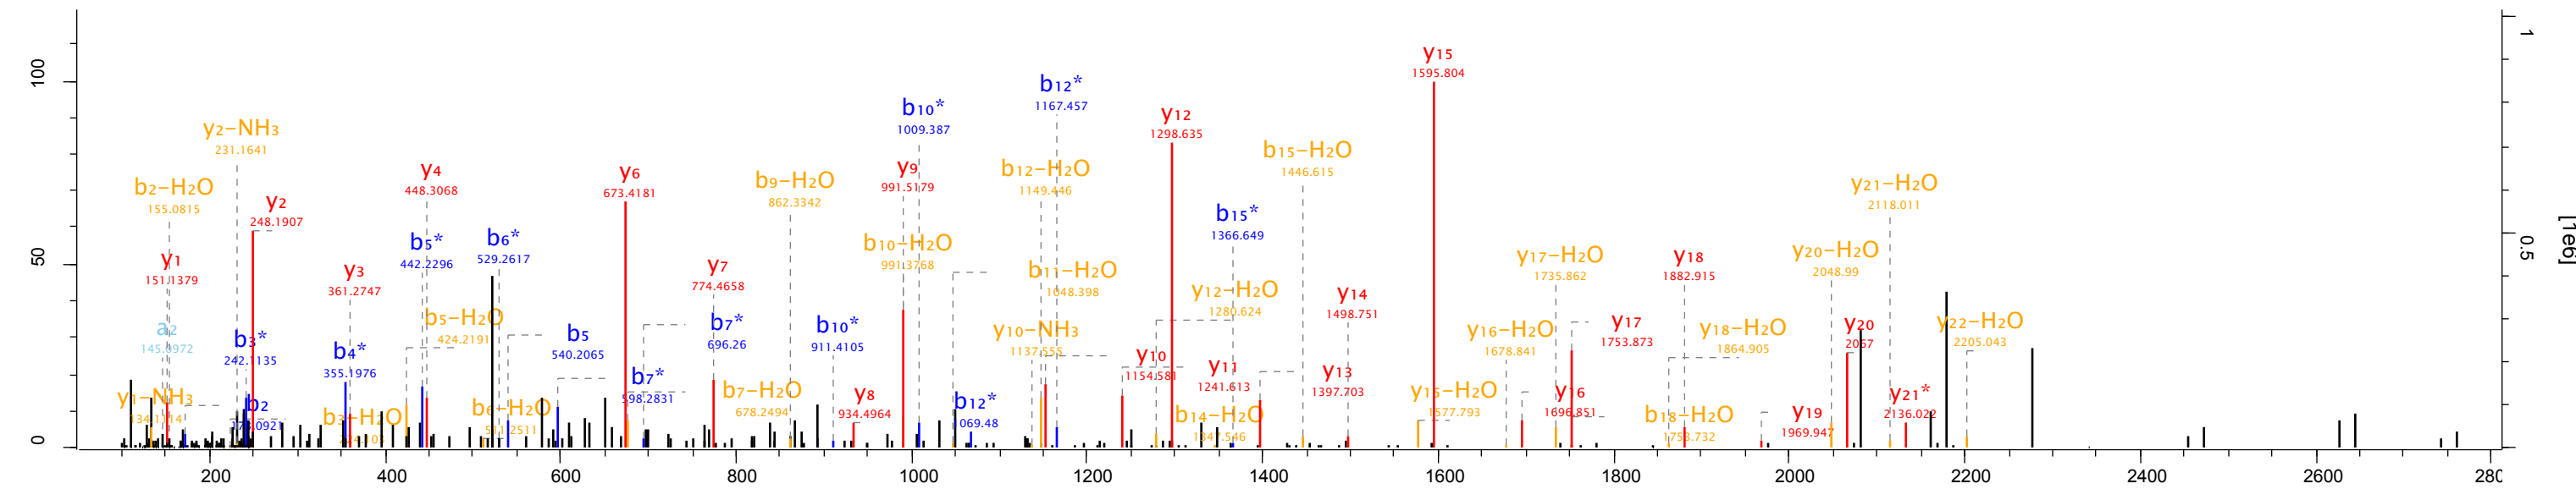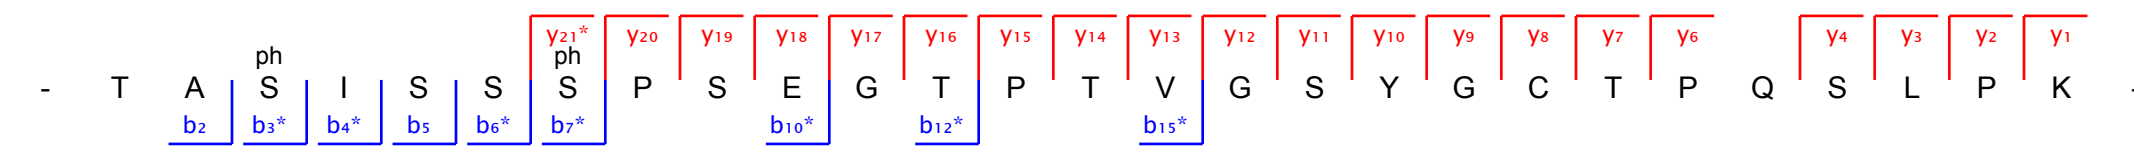

Raw file 20171215\_MaS\_33SR\_LMH\_phospho2\_03 Scan 14143 Method FTMS; HCD Score 103.05 m/z 800.71 Gene names ARHGEF11

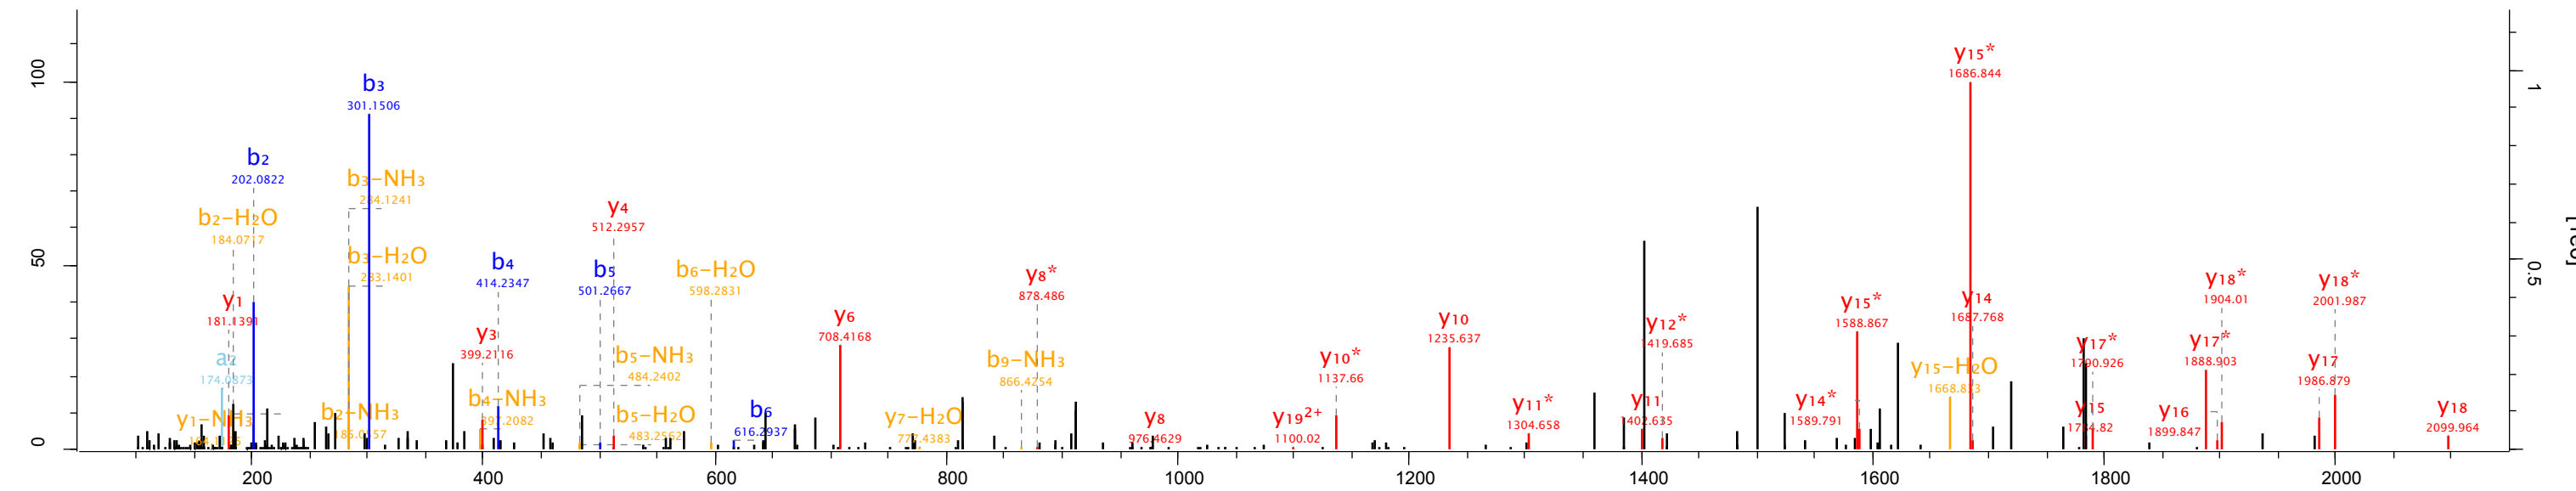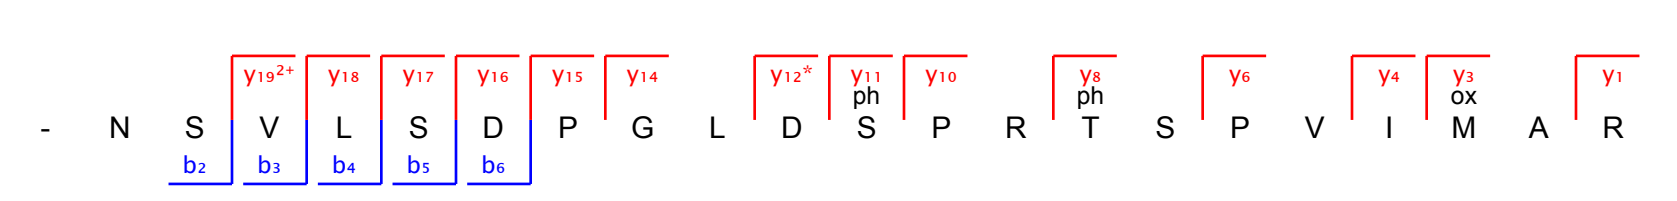

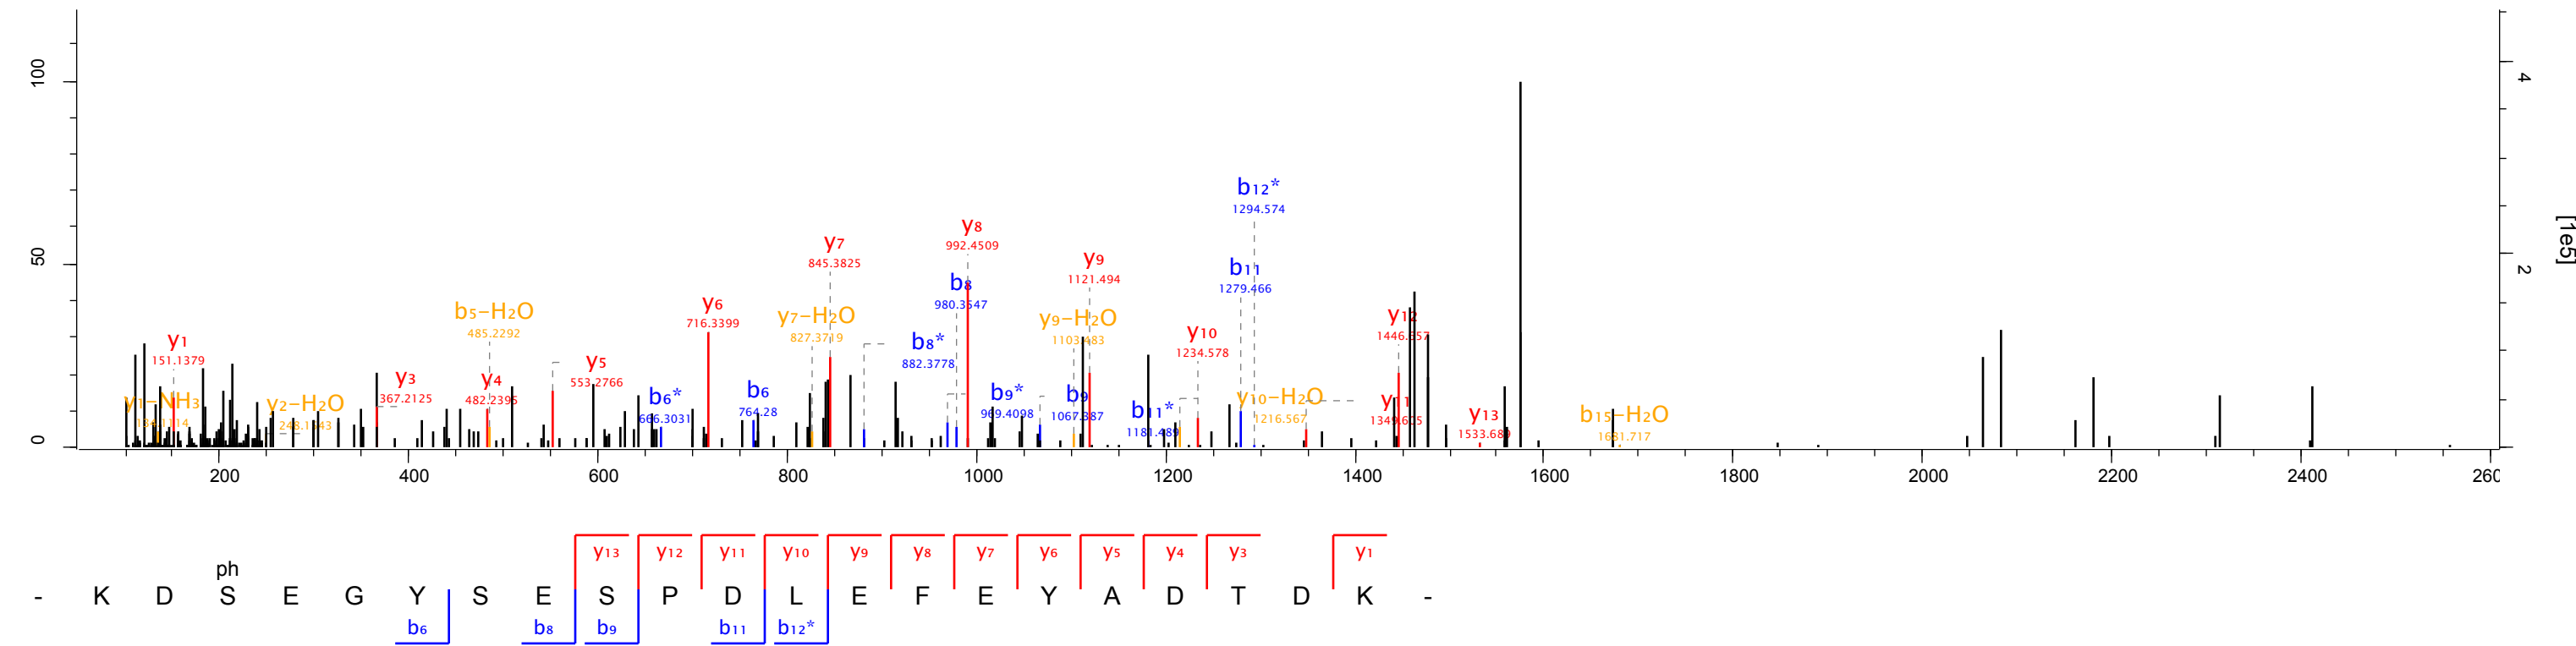

Raw file  
20171215\_MaS\_33SR\_LMH\_phospho2\_03

Scan 14573 Method FTMS; HCD Score 115.42 m/z 704.97 Gene names MAP1B

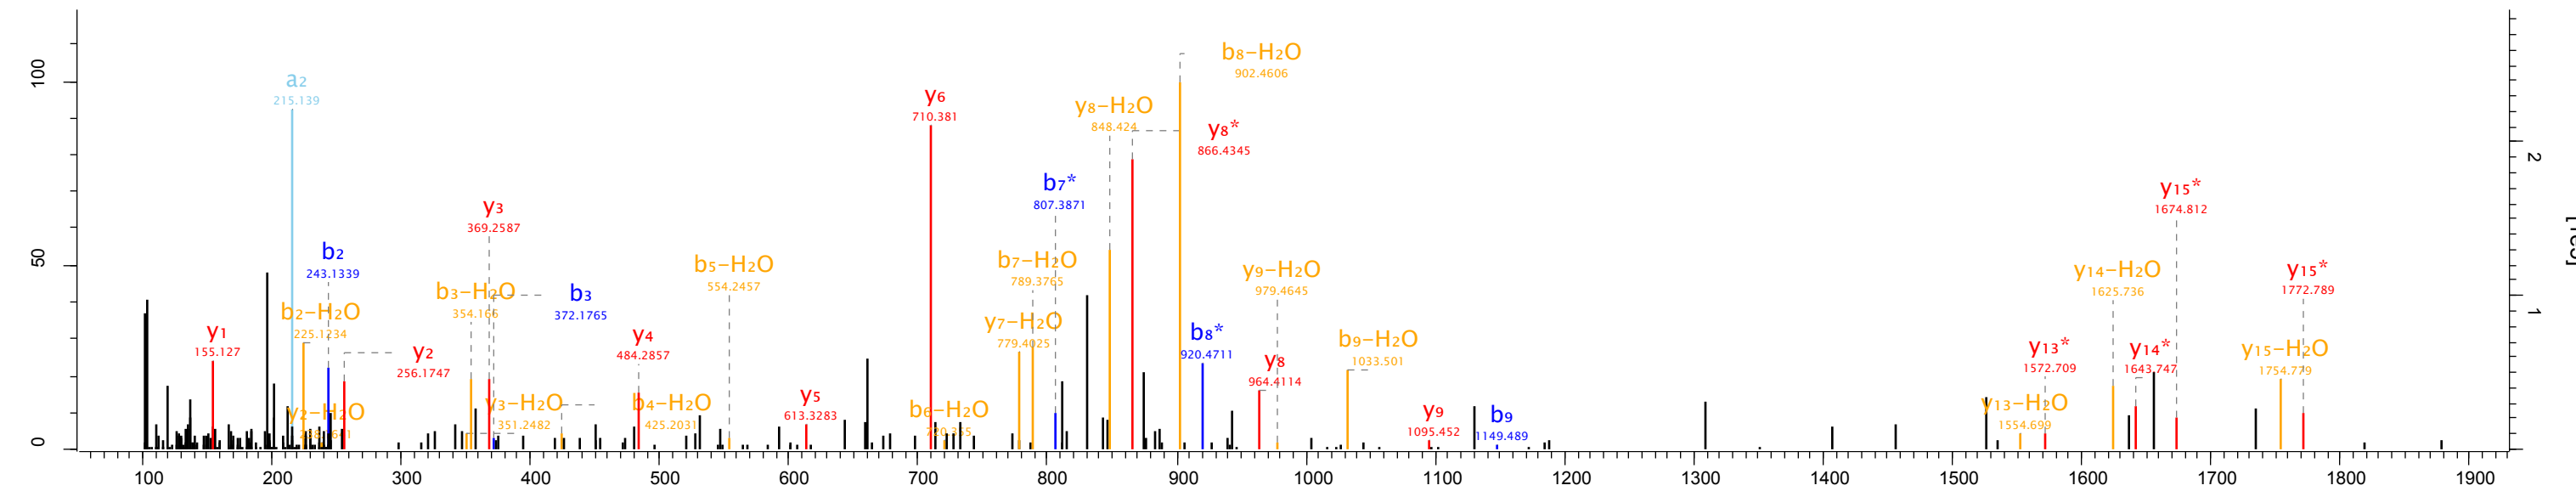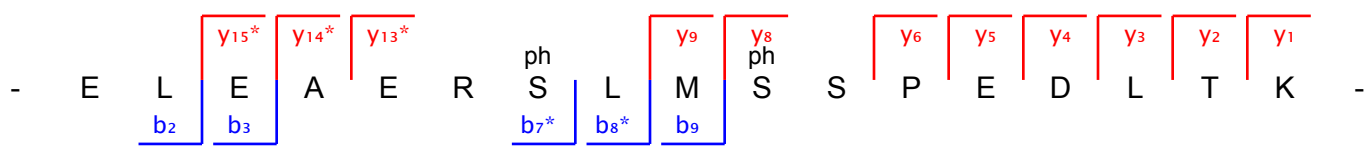

Raw file 20171215\_MaS\_33SR\_LMH\_phospho2\_03 Scan 14593 Method FTMS; HCD Score 92.54 m/z 908.39 Gene names GPR39

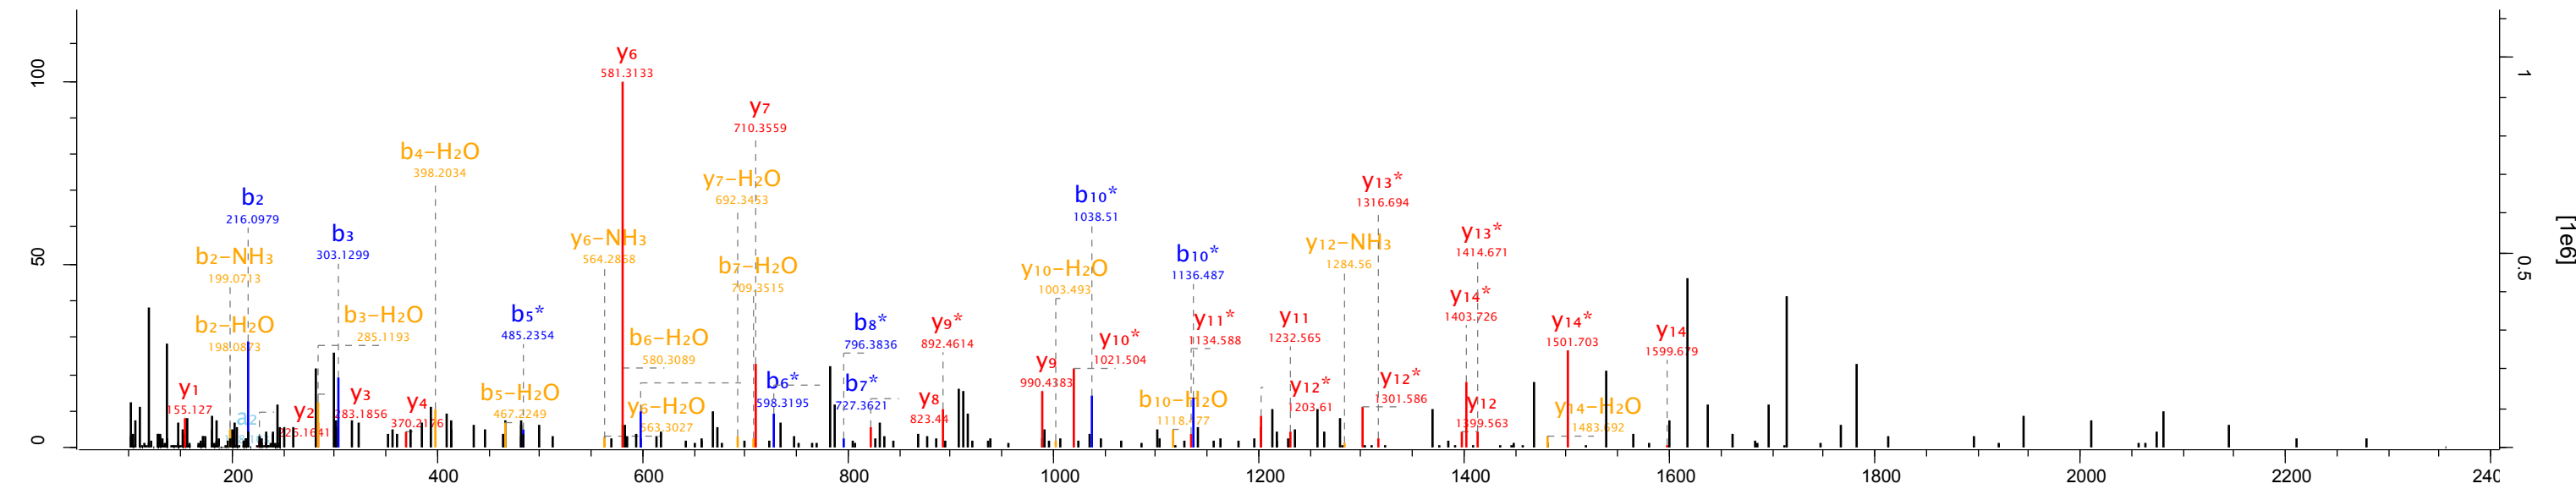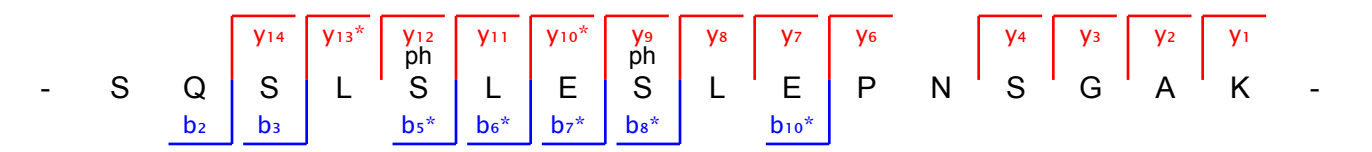

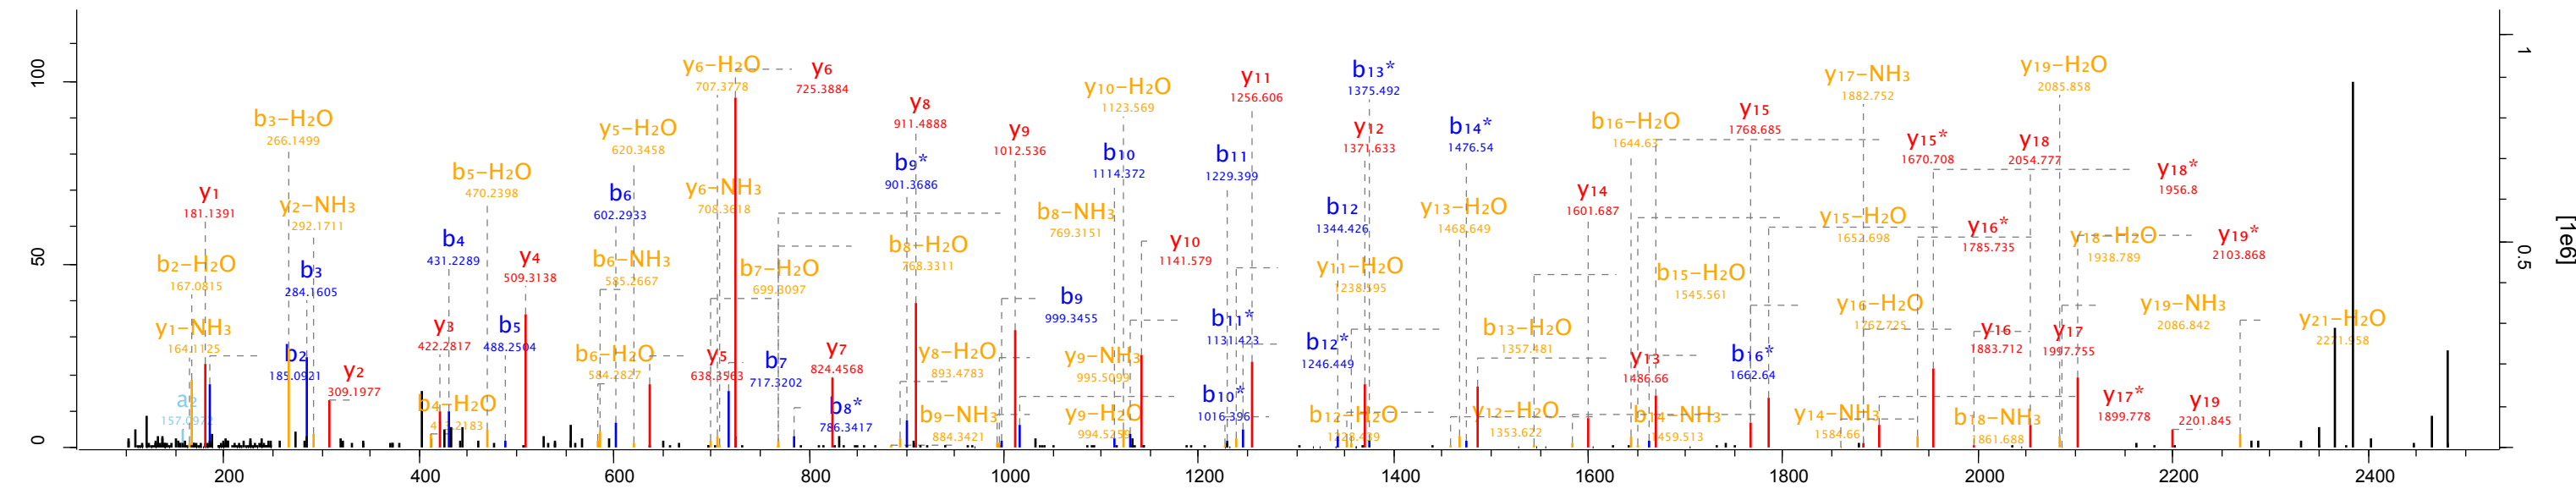

- P S V F G N D S D D D D E T S V S E S L Q R -

b<sub>2</sub> b<sub>3</sub> b<sub>4</sub> b<sub>5</sub> b<sub>6</sub> b<sub>7</sub> b<sub>8</sub><sup>\*</sup> b<sub>9</sub> b<sub>10</sub> b<sub>11</sub> b<sub>12</sub> b<sub>13</sub><sup>\*</sup> b<sub>14</sub><sup>\*</sup> b<sub>16</sub><sup>\*</sup>

y<sub>19</sub> y<sub>18</sub> y<sub>17</sub> y<sub>16</sub> y<sub>15</sub> ph y<sub>14</sub> y<sub>13</sub> y<sub>12</sub> y<sub>11</sub> y<sub>10</sub> y<sub>9</sub> y<sub>8</sub> y<sub>7</sub> y<sub>6</sub> y<sub>5</sub> y<sub>4</sub> y<sub>3</sub> y<sub>2</sub> y<sub>1</sub>

Raw file: 20171215\_MaS\_33SR\_LMH\_phospho2\_03  
 Scan: 14943 Method: FTMS; HCD Score: 126.68 m/z: 930.93 Gene names: RALGPS2

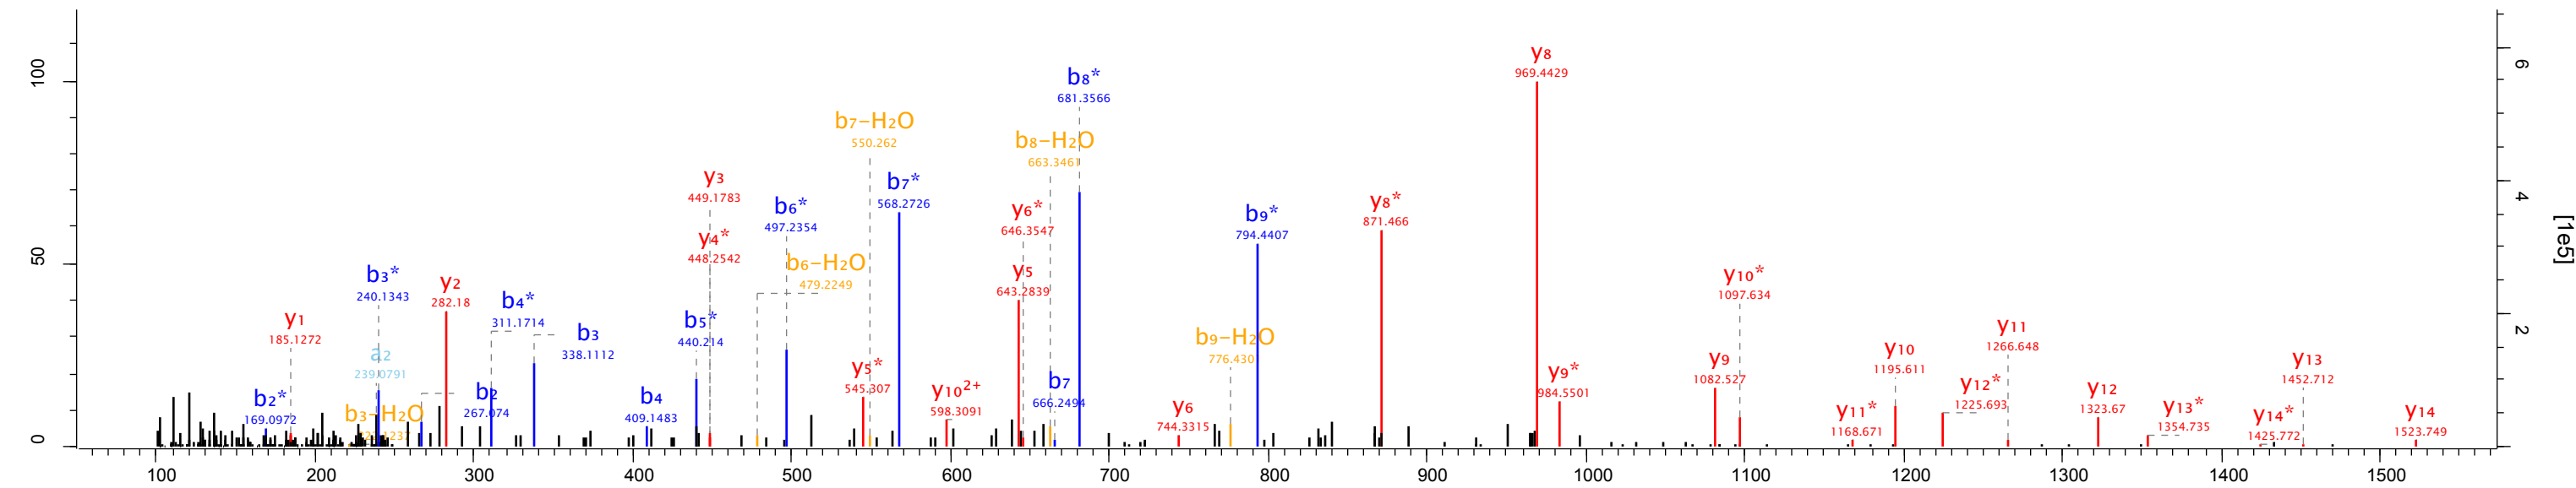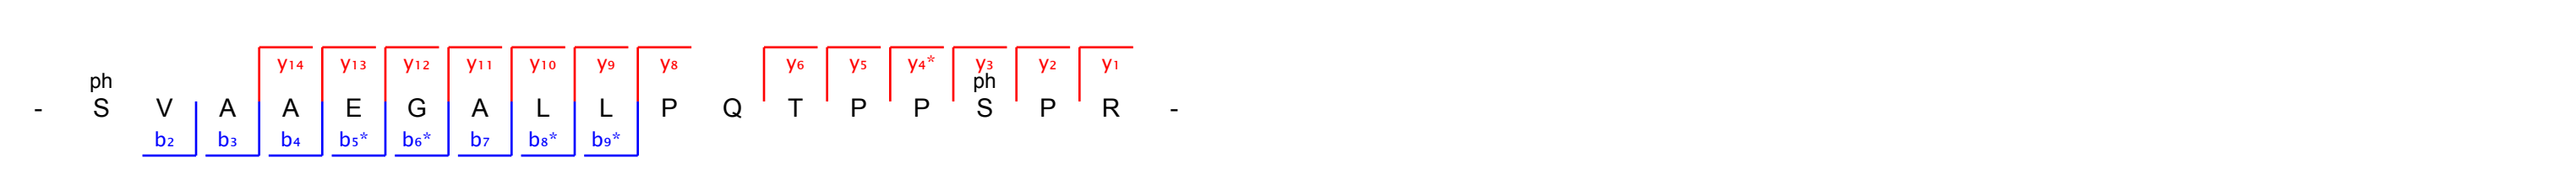

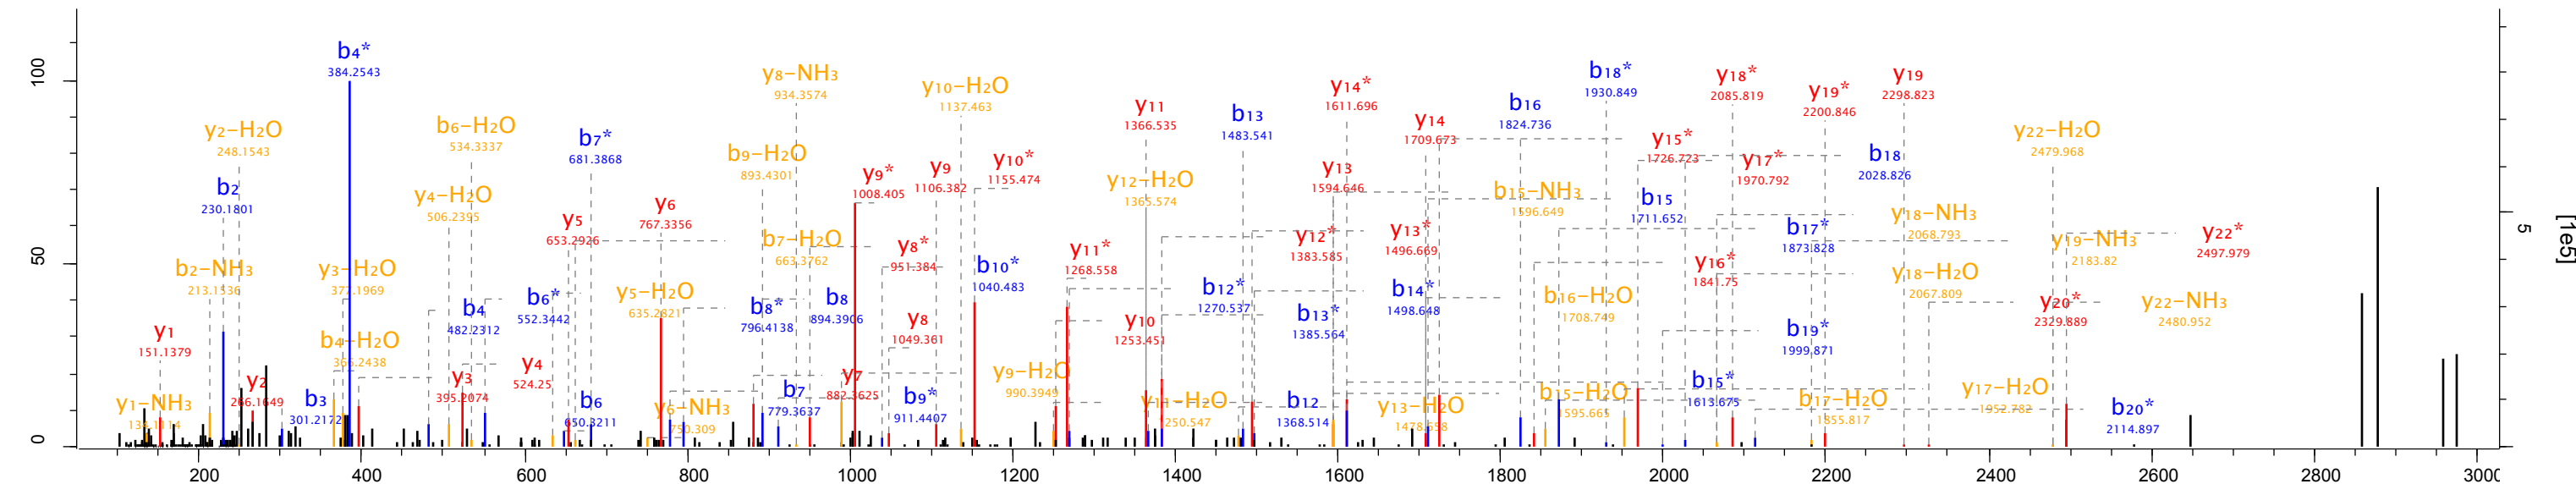

- K P A T P A E D D E D D D I D L F G S D N E E E D K -  
 b<sub>2</sub> b<sub>3</sub> b<sub>4</sub> y<sub>22</sub>\* b<sub>6</sub> b<sub>7</sub> b<sub>8</sub> b<sub>9</sub>\* b<sub>10</sub>\* b<sub>12</sub> b<sub>13</sub> b<sub>14</sub>\* b<sub>15</sub> b<sub>16</sub> b<sub>17</sub>\* b<sub>18</sub> b<sub>19</sub>\* b<sub>20</sub>\*



Raw file: 20171215\_MaS\_33SR\_LMH\_phospho2\_03  
 Scan: 15233 Method: FTMS; HCD Score: 111.98 m/z: 1063.48 Gene names: PCDH1

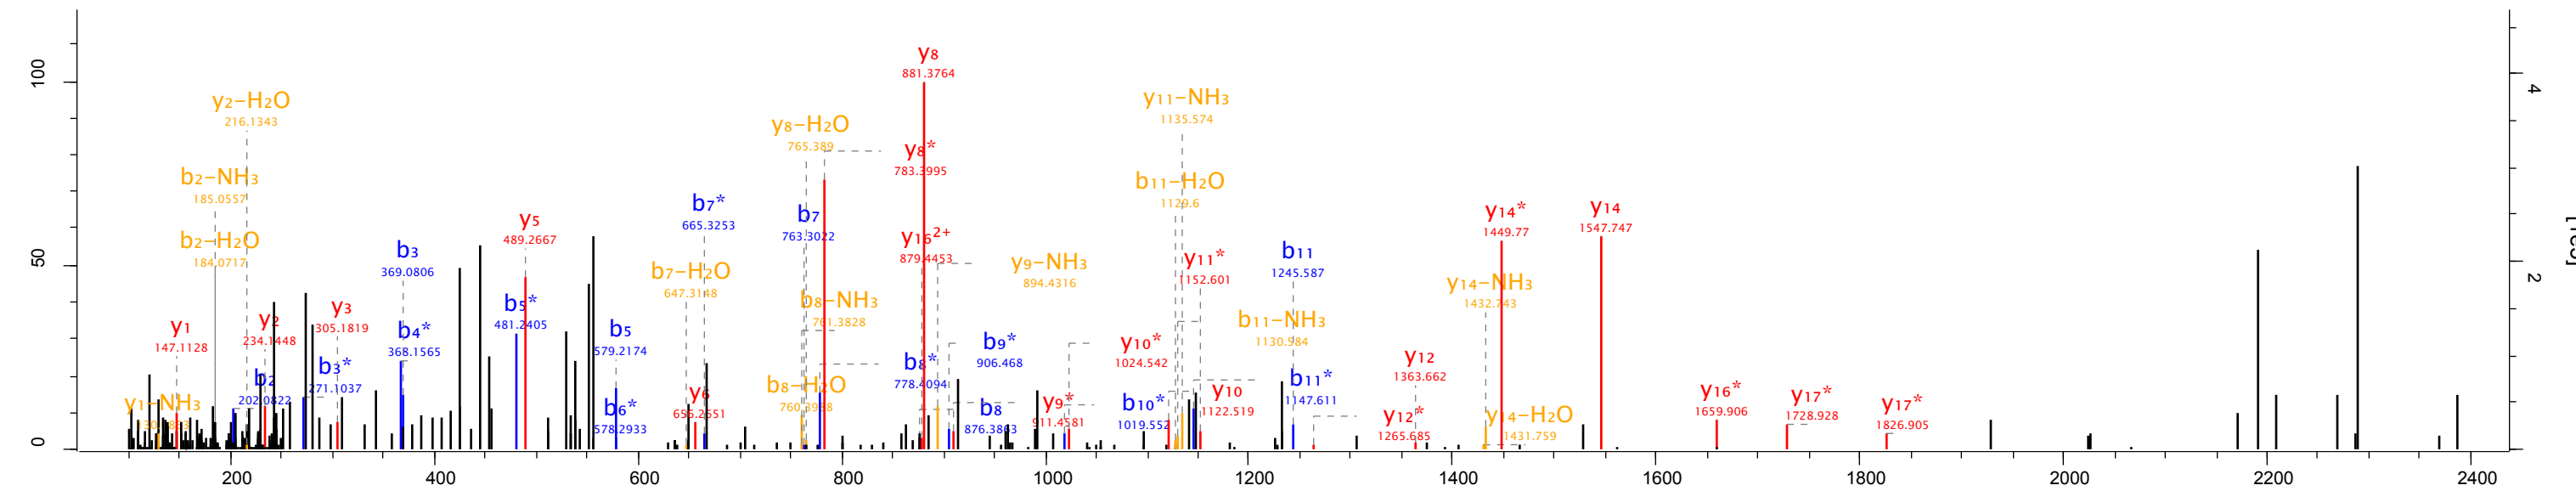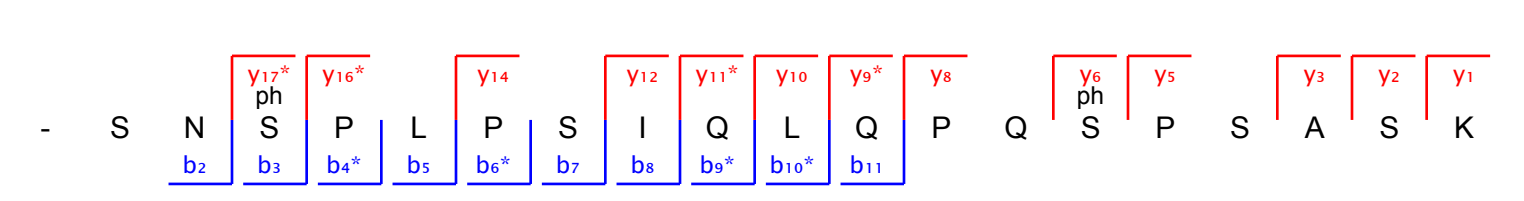

Raw file 20171215\_MaS\_33SR\_LMH\_phospho2\_03 Scan 15343 Method FTMS; HCD Score 160.77 m/z 1234.56 Gene names GEMIN5

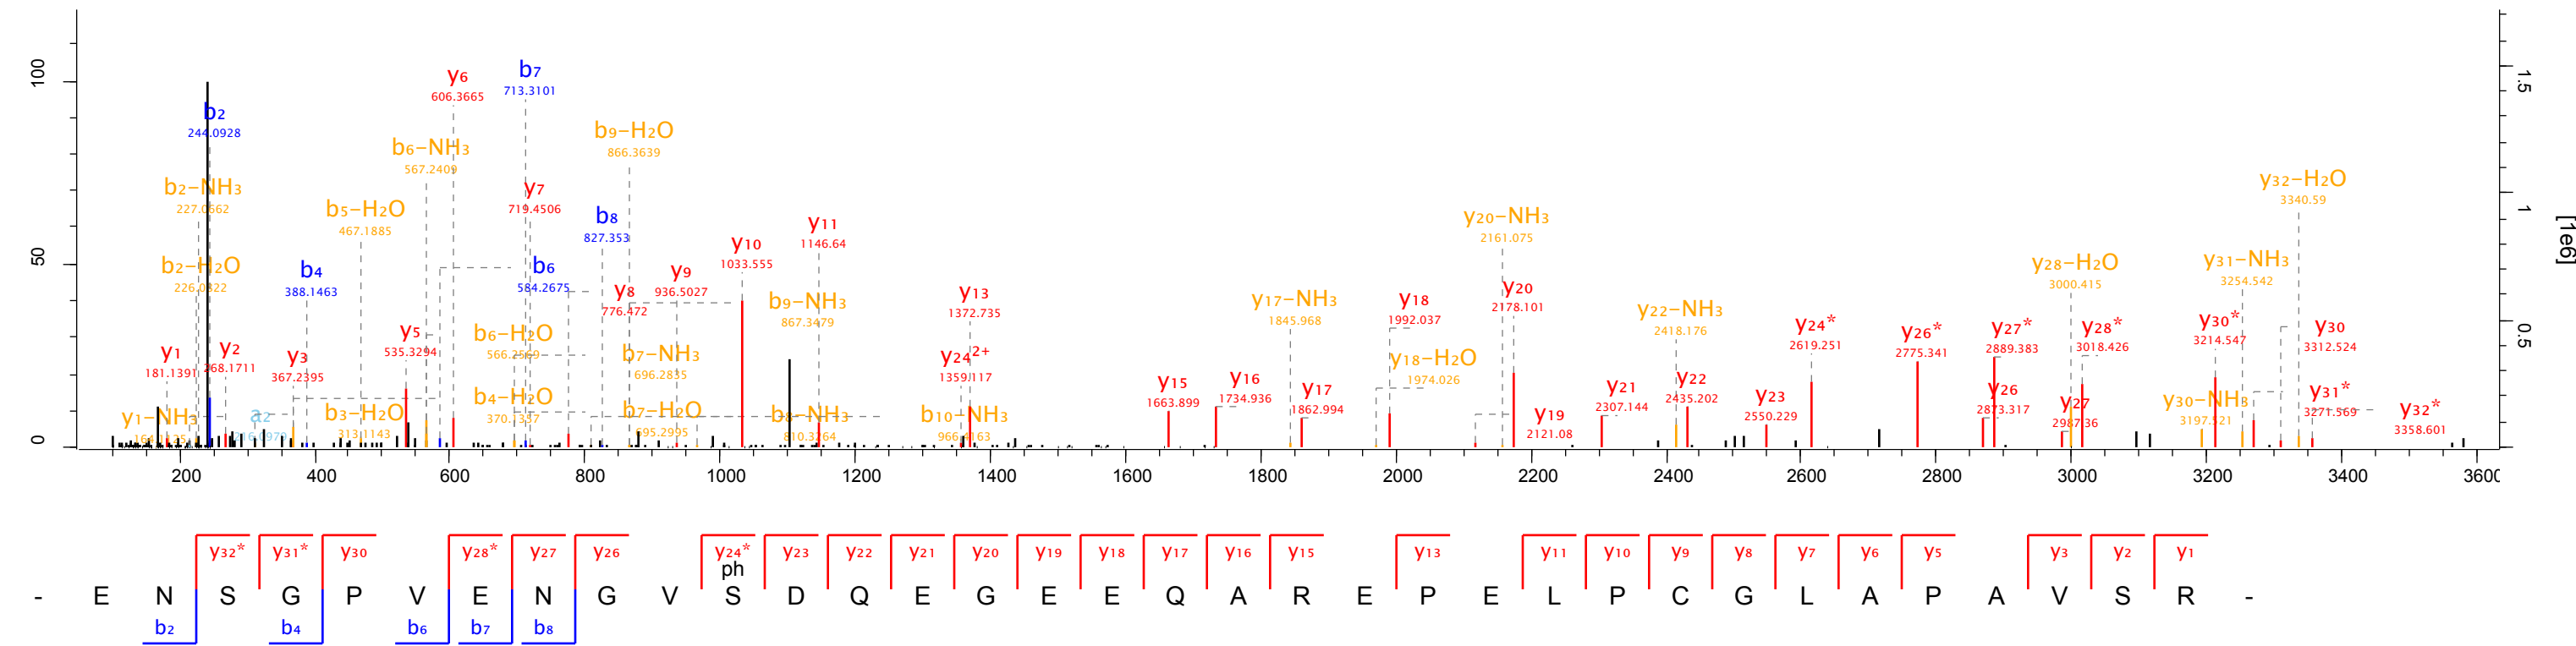

Raw file 20171215\_MaS\_33SR\_LMH\_phospho2\_03 Scan 15533 Method FTMS; HCD Score 102.72 m/z 1159.01 Gene names FXR2

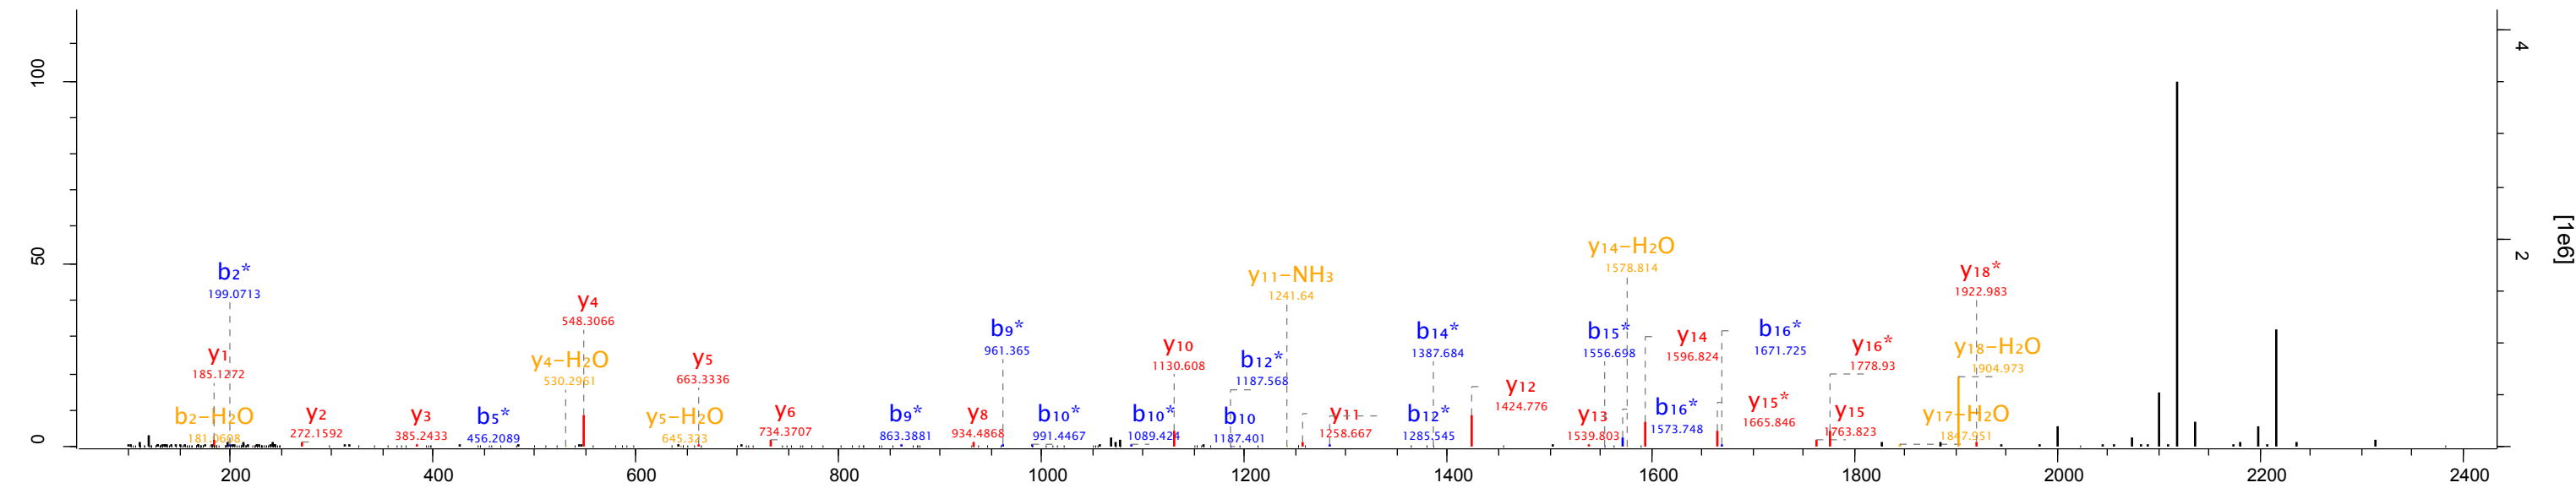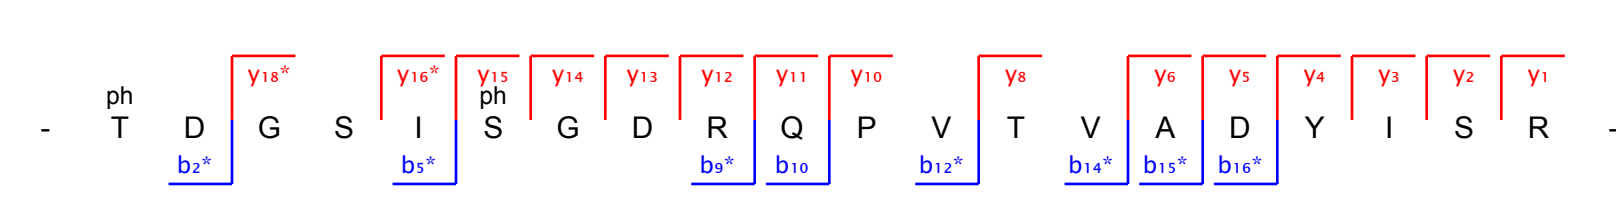

Raw file 20171215\_MaS\_33SR\_LMH\_phospho2\_03 Scan 15543 Method FTMS; HCD Score 59.67 m/z 903.05 Gene names PCNP

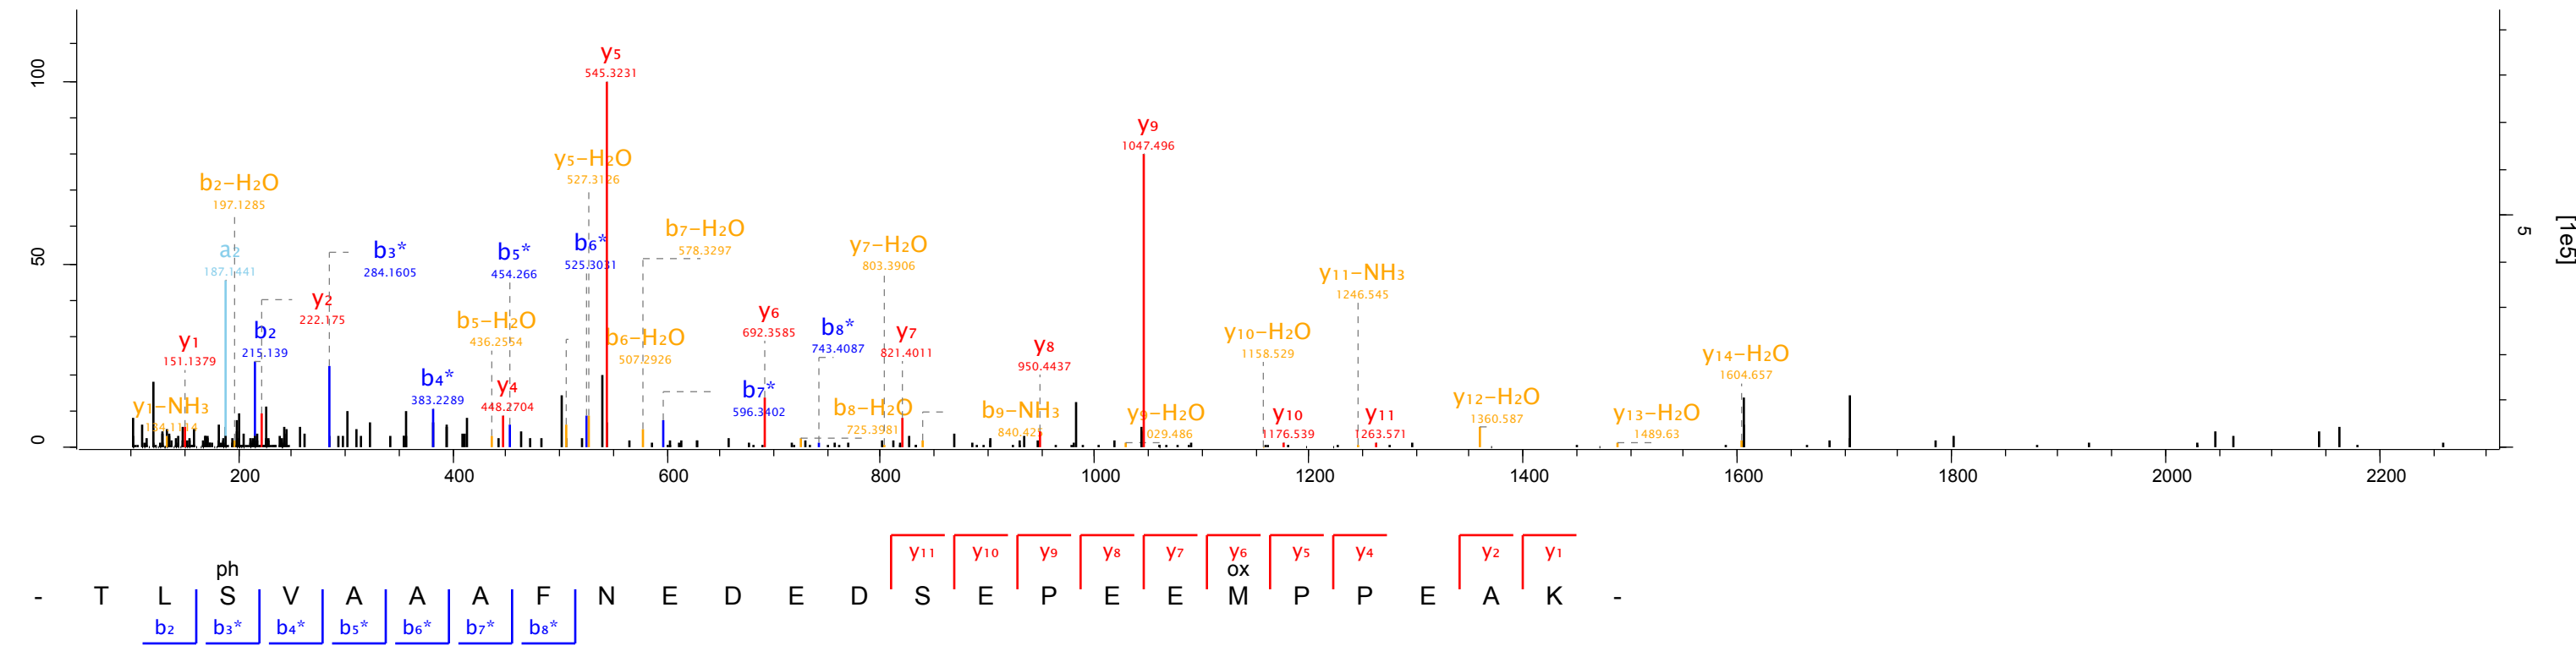

Raw file: 20171215\_MaS\_33SR\_LMH\_phospho2\_03  
 Scan: 15663 Method: FTMS; HCD Score: 139.22 m/z: 724.65 Gene names: NIFK

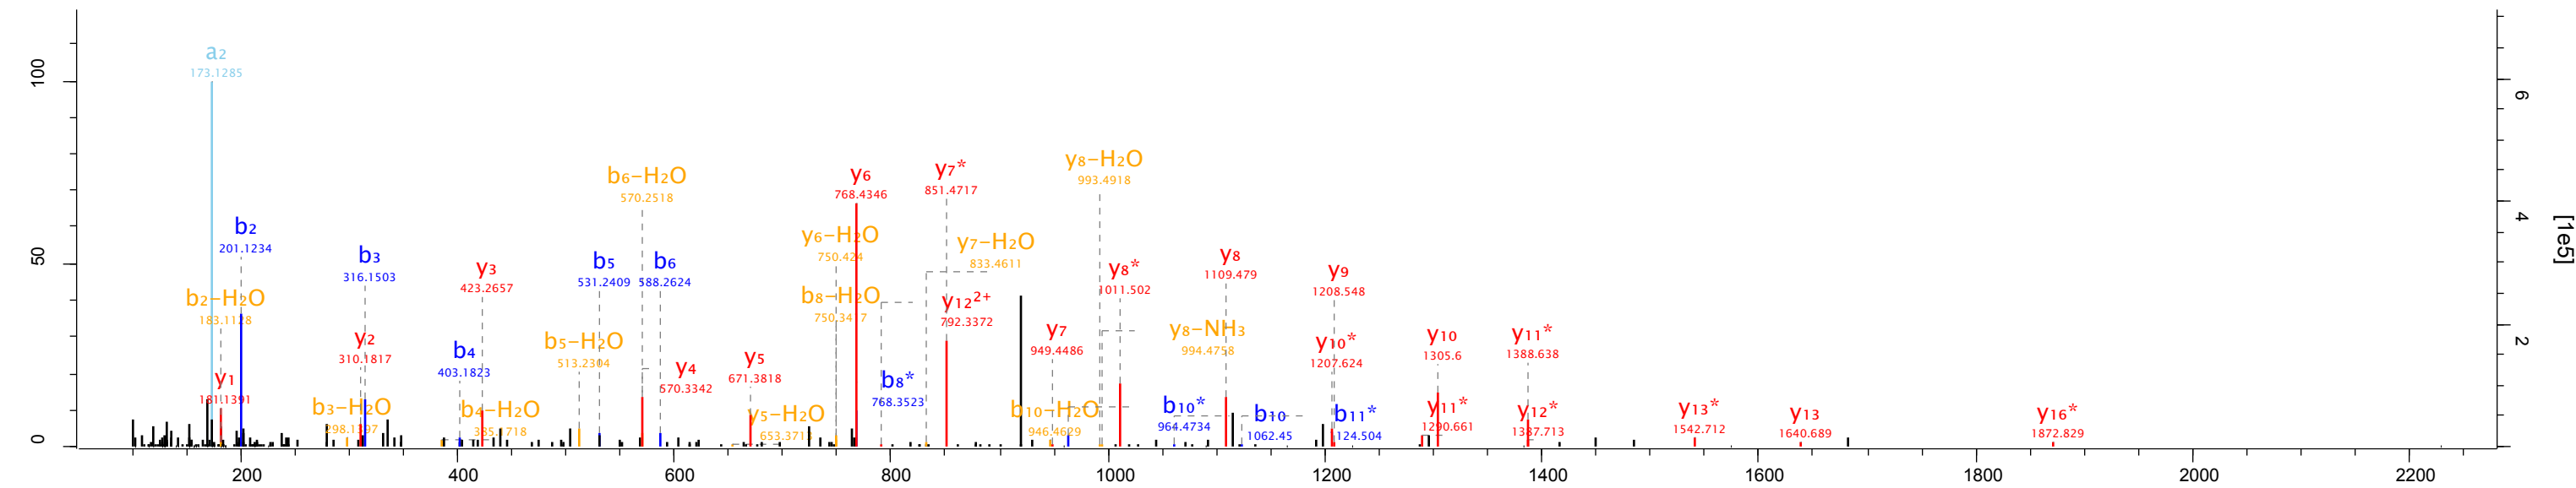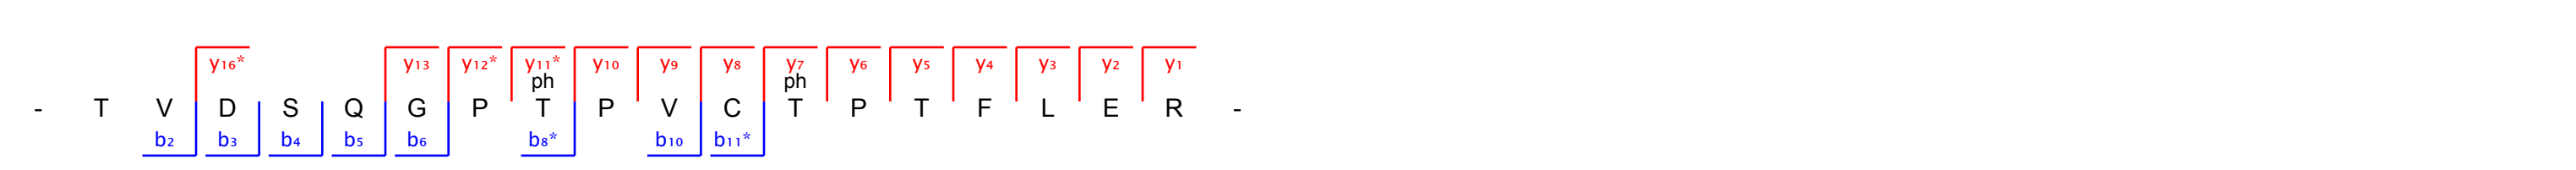

Raw file: 20171215\_MaS\_33SR\_LMH\_phospho2\_03  
 Scan: 15783 Method: FTMS; HCD Score: 129.35 m/z: 972.42 Gene names: SMEK2

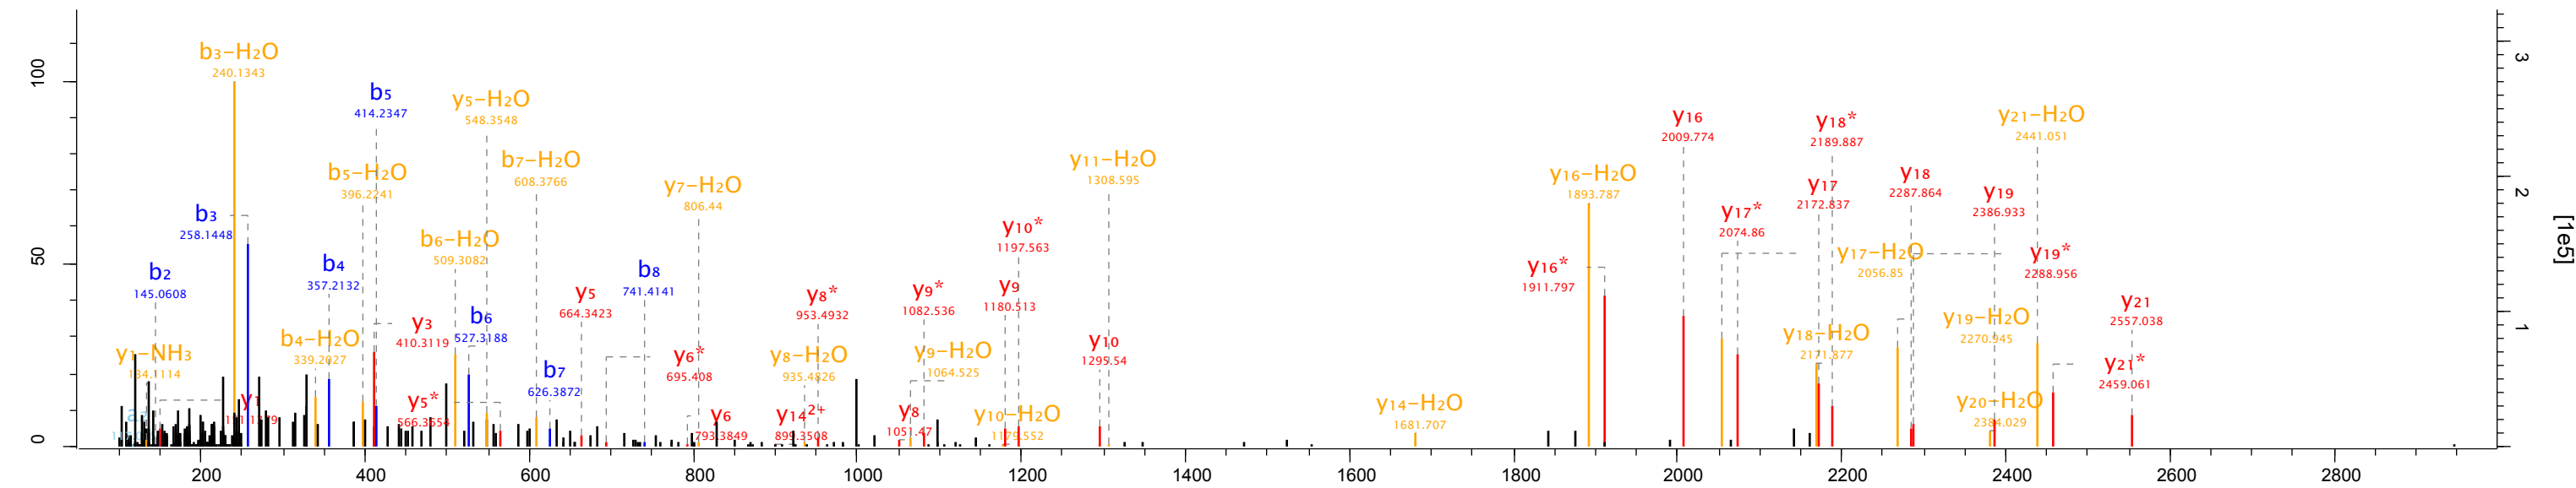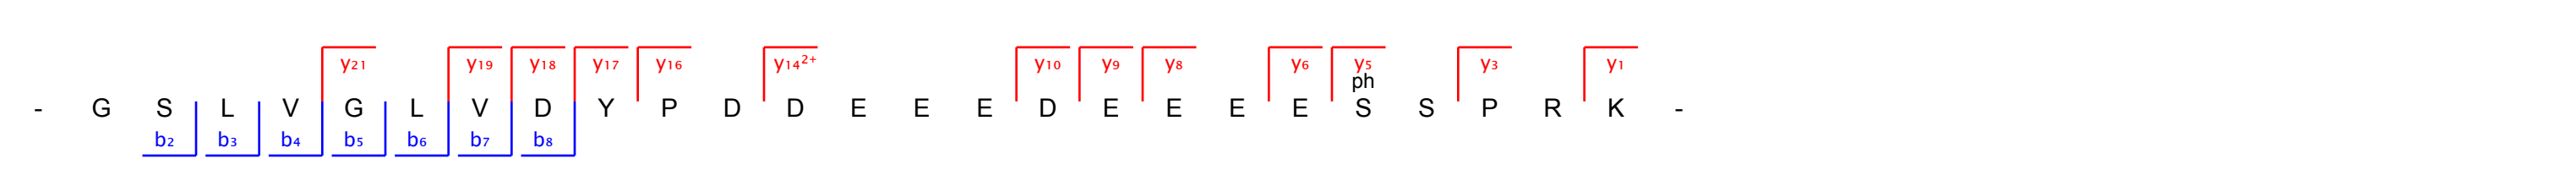

Raw file: 20171215\_MaS\_33SR\_LMH\_phospho2\_03  
 Scan: 15933 Method: FTMS; HCD Score: 87.51 m/z: 715.3 Gene names: MAP1B

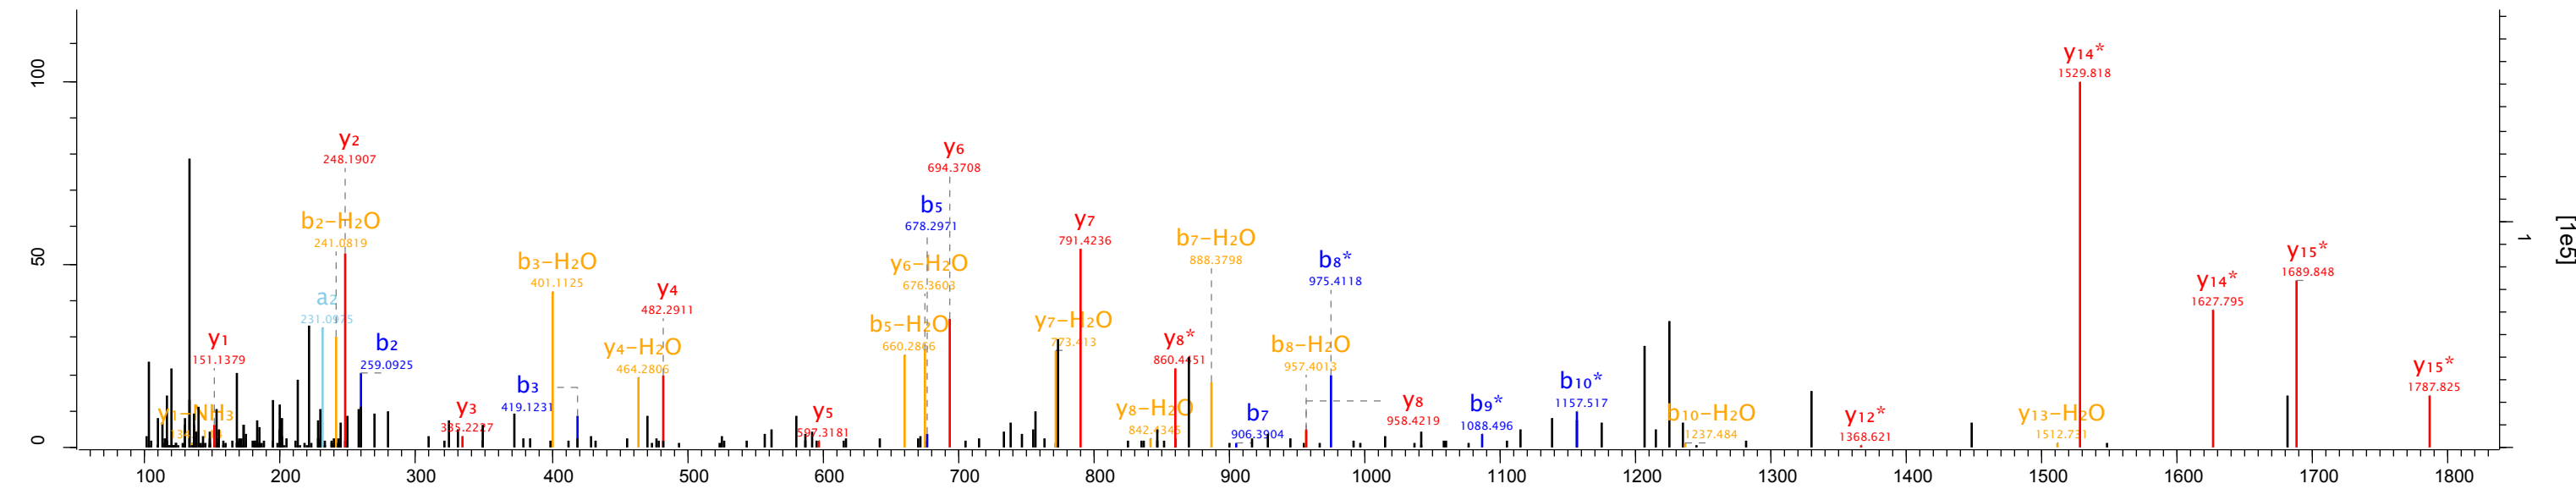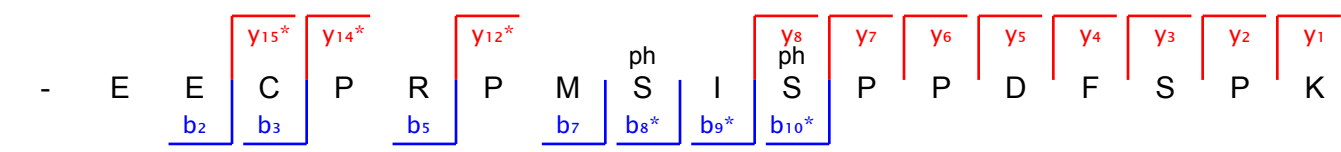

Raw file  
20171215\_MaS\_33SR\_LMH\_phospho2\_03

Scan 15953 Method FTMS; HCD Score 328.42 m/z 1323.52 Gene names CLNS1A

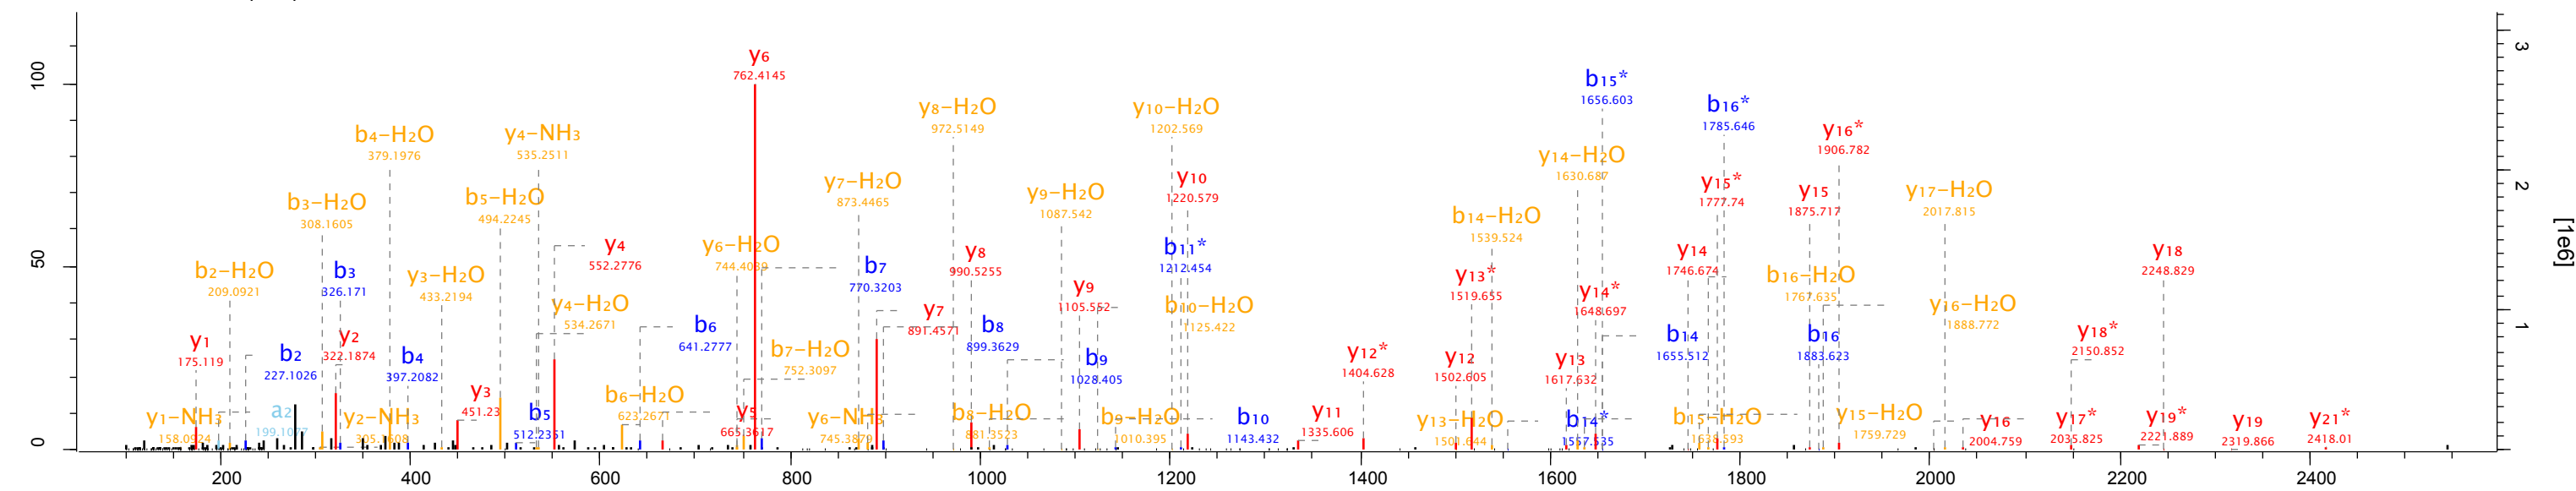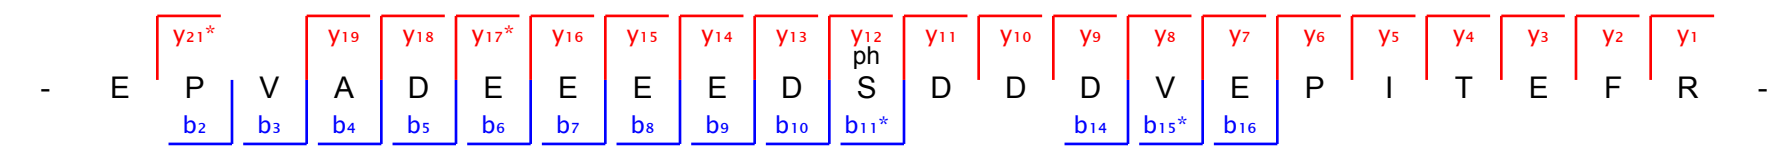



Raw file 20171215\_MaS\_33SR\_LMH\_phospho2\_03 Scan 16013 Method FTMS; HCD Score 169.94 m/z 1460.13 Gene names TCOF1

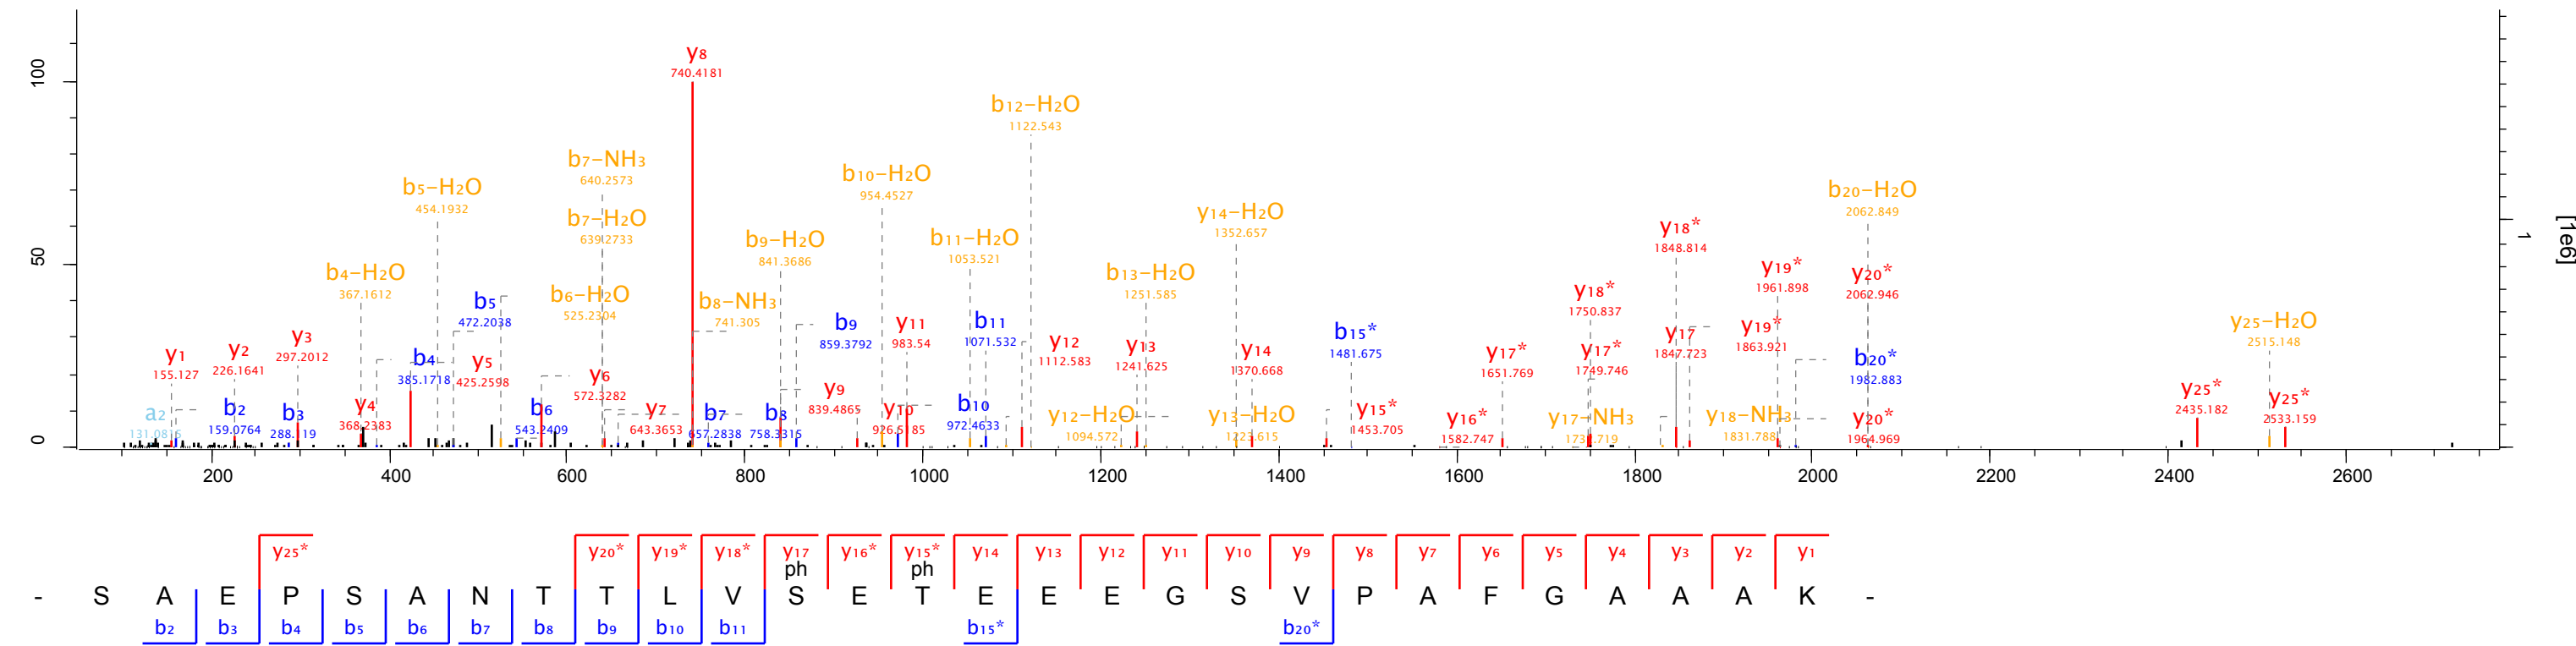

Raw file 20171215\_MaS\_33SR\_LMH\_phospho2\_03 Scan 16023 Method FTMS; HCD Score 79.51 m/z 847.32 Gene names KIAA1143

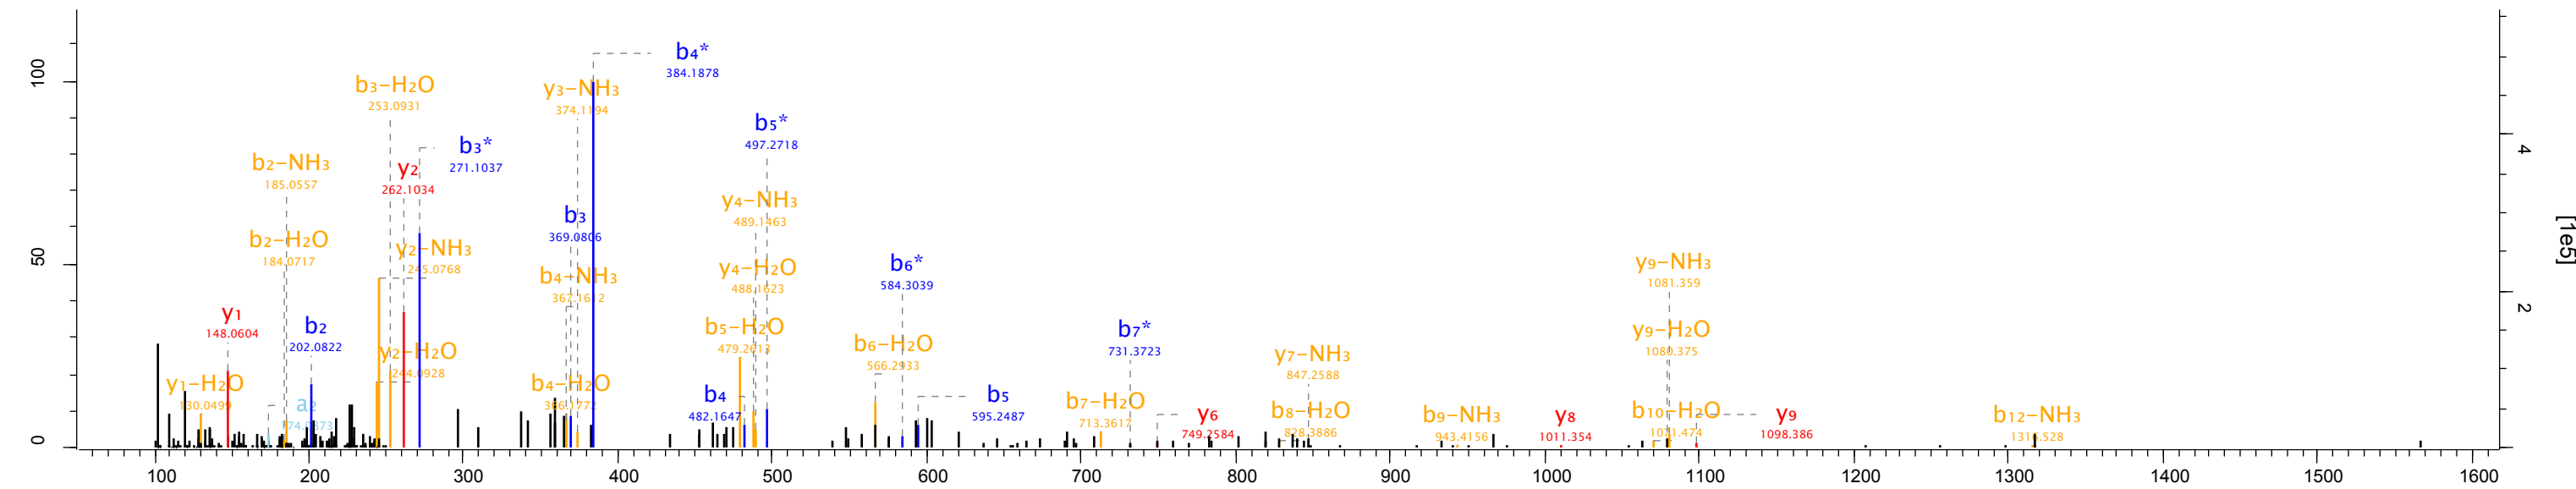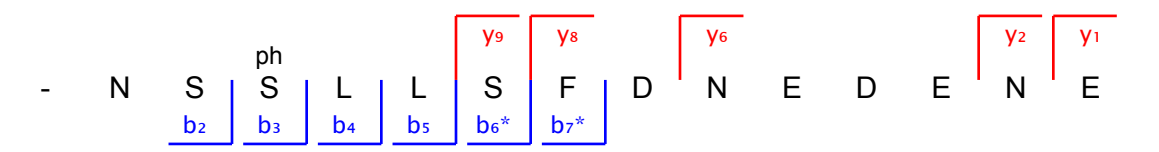

Raw file 20171215\_MaS\_33SR\_LMH\_phospho2\_03 Scan 16753 Method FTMS; HCD Score 143.17 m/z 968.44 Gene names AGGF1

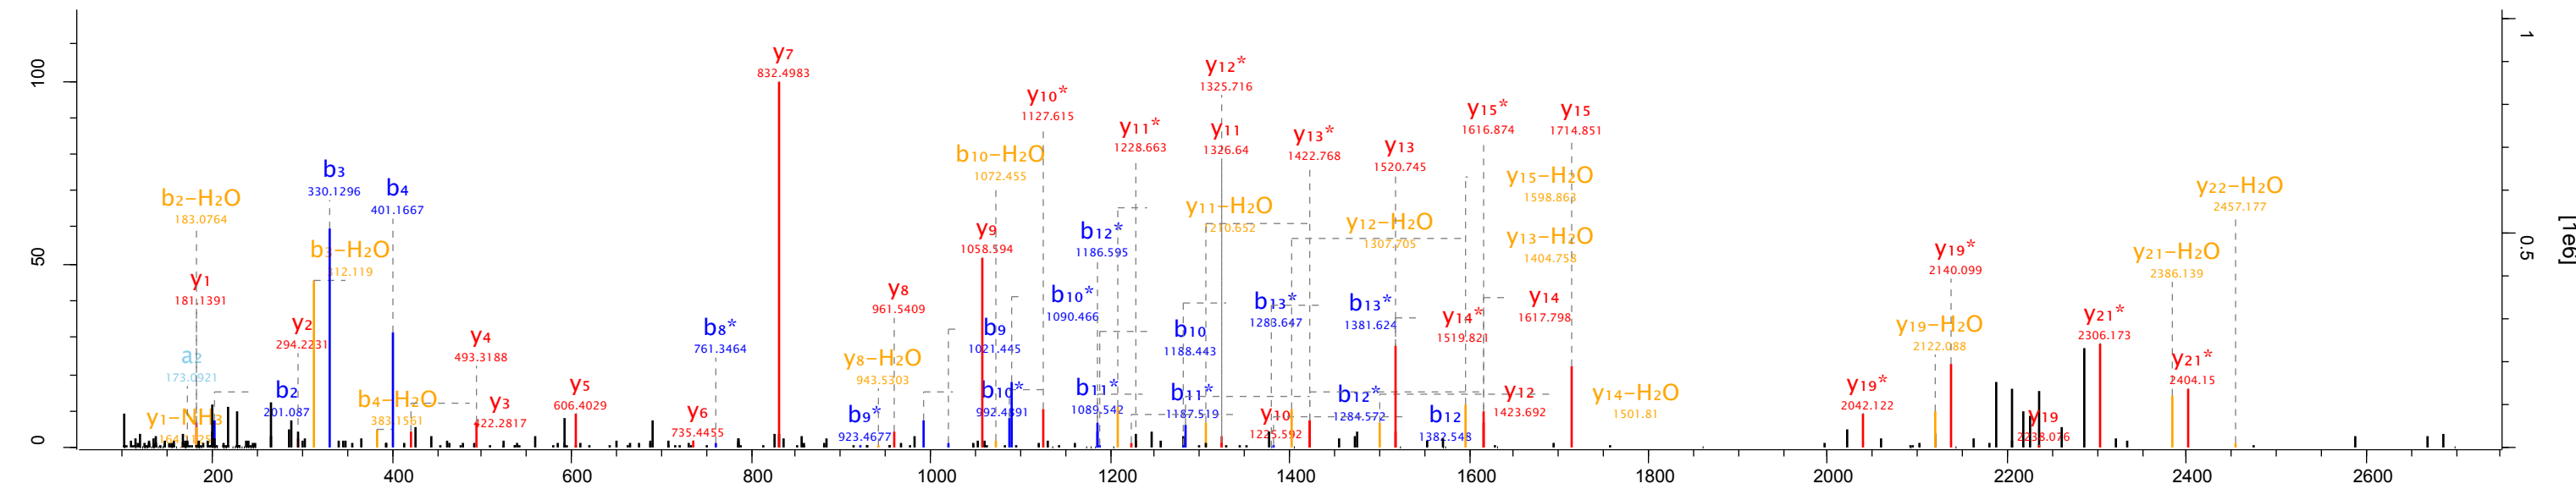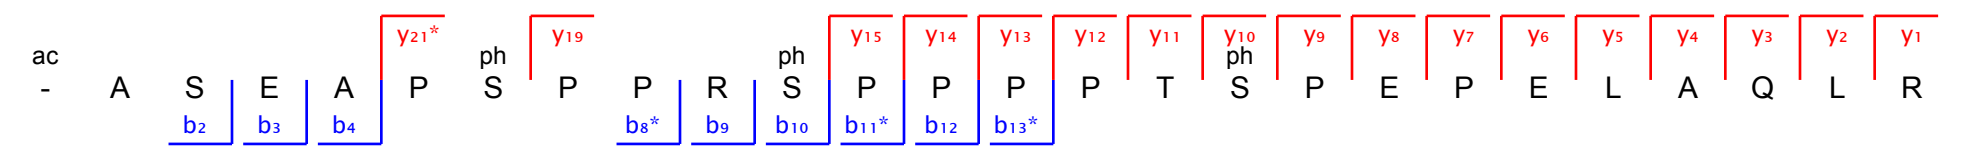

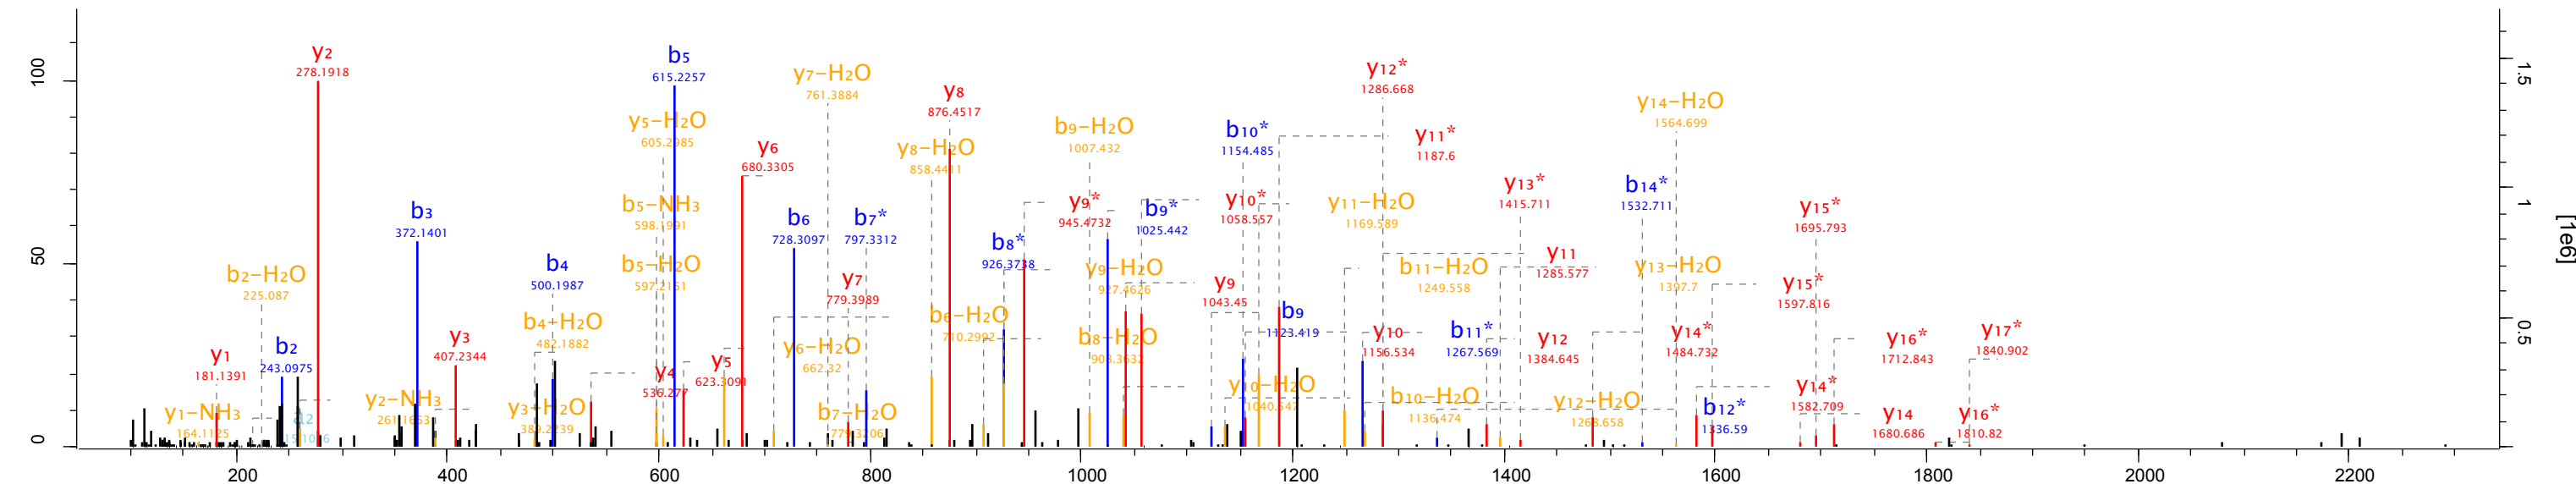

ac

- A E E Q D L S E V E L S P V G S E E P R -

Fragmentation sites are indicated by brackets below the sequence:

- b<sub>2</sub> (under E)
- b<sub>3</sub> (under E)
- b<sub>4</sub> (under Q)
- b<sub>5</sub> (under D)
- b<sub>6</sub> (under L)
- b<sub>7</sub><sup>\*</sup> (under S)
- b<sub>8</sub><sup>\*</sup> (under E)
- b<sub>9</sub> (under V)
- b<sub>10</sub><sup>\*</sup> (under E)
- b<sub>11</sub><sup>\*</sup> (under L)
- b<sub>12</sub><sup>\*</sup> (under S)
- b<sub>14</sub><sup>\*</sup> (under V)

Fragmentation sites are also indicated by brackets above the sequence:

- y<sub>17</sub><sup>\*</sup> (over Q)
- y<sub>16</sub><sup>\*</sup> (over D)
- y<sub>15</sub><sup>\*</sup> (over L)
- y<sub>14</sub> (over S)
- y<sub>13</sub><sup>\*</sup> (over E)
- y<sub>12</sub> (over V)
- y<sub>11</sub> (over E)
- y<sub>10</sub> (over L)
- y<sub>9</sub> (over S)
- y<sub>8</sub> (over P)
- y<sub>7</sub> (over V)
- y<sub>6</sub> (over G)
- y<sub>5</sub> (over S)
- y<sub>4</sub> (over E)
- y<sub>3</sub> (over E)
- y<sub>2</sub> (over P)
- y<sub>1</sub> (over R)

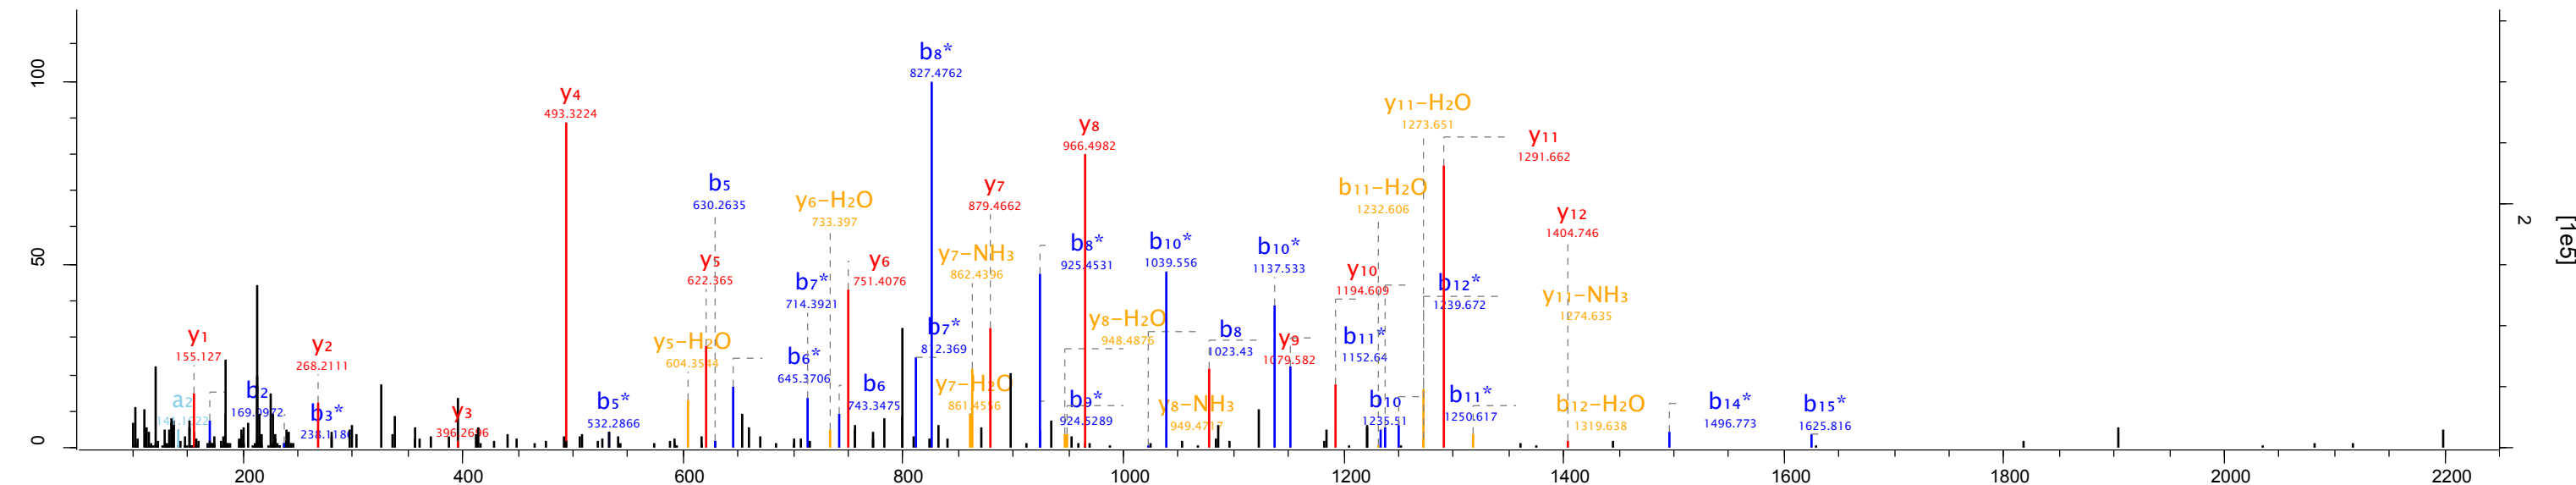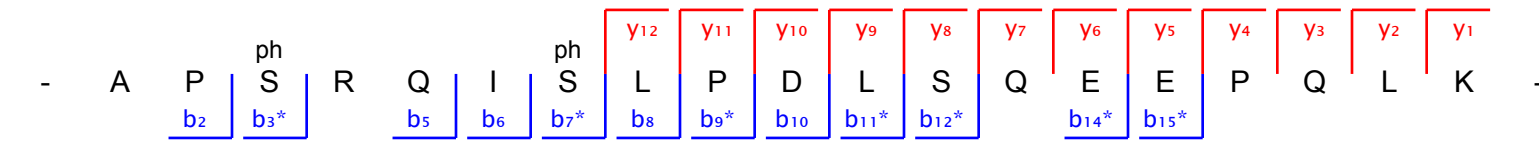

Raw file Scan Method Score m/z Gene names

20171215\_MaS\_33SR\_LMH\_phospho2\_03 17913 FTMS; HCD 102.51 856.38 DPYSL3

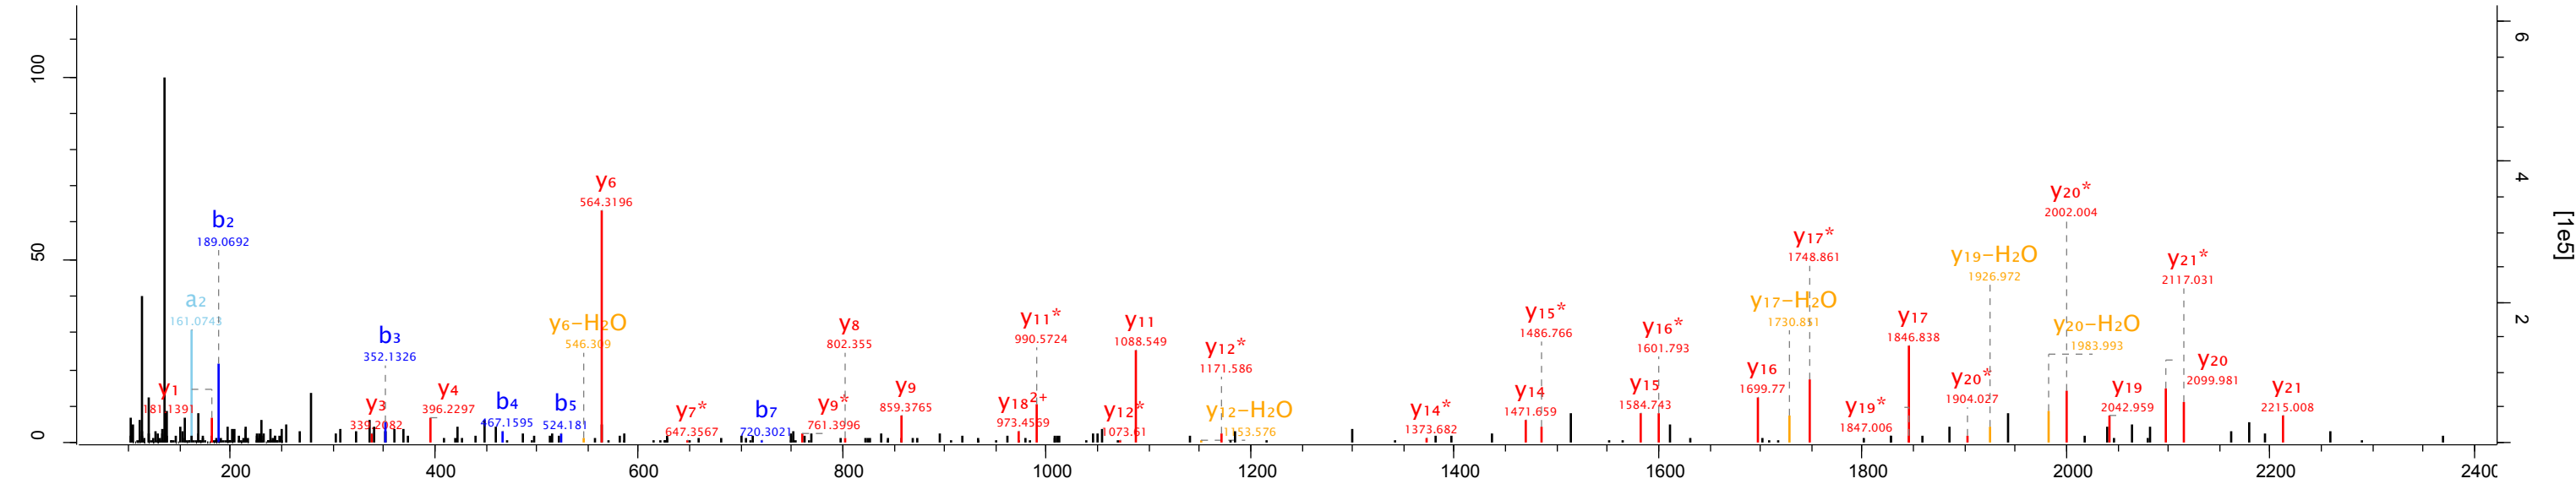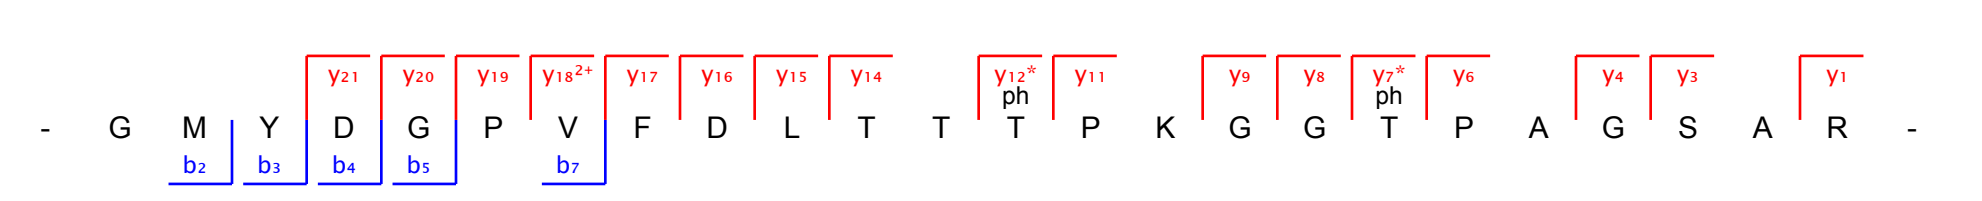

Raw file 20171215\_MaS\_33SR\_LMH\_phospho2\_03 Scan 17983 Method FTMS; HCD Score 109.98 m/z 1140.46 Gene names CCAR2

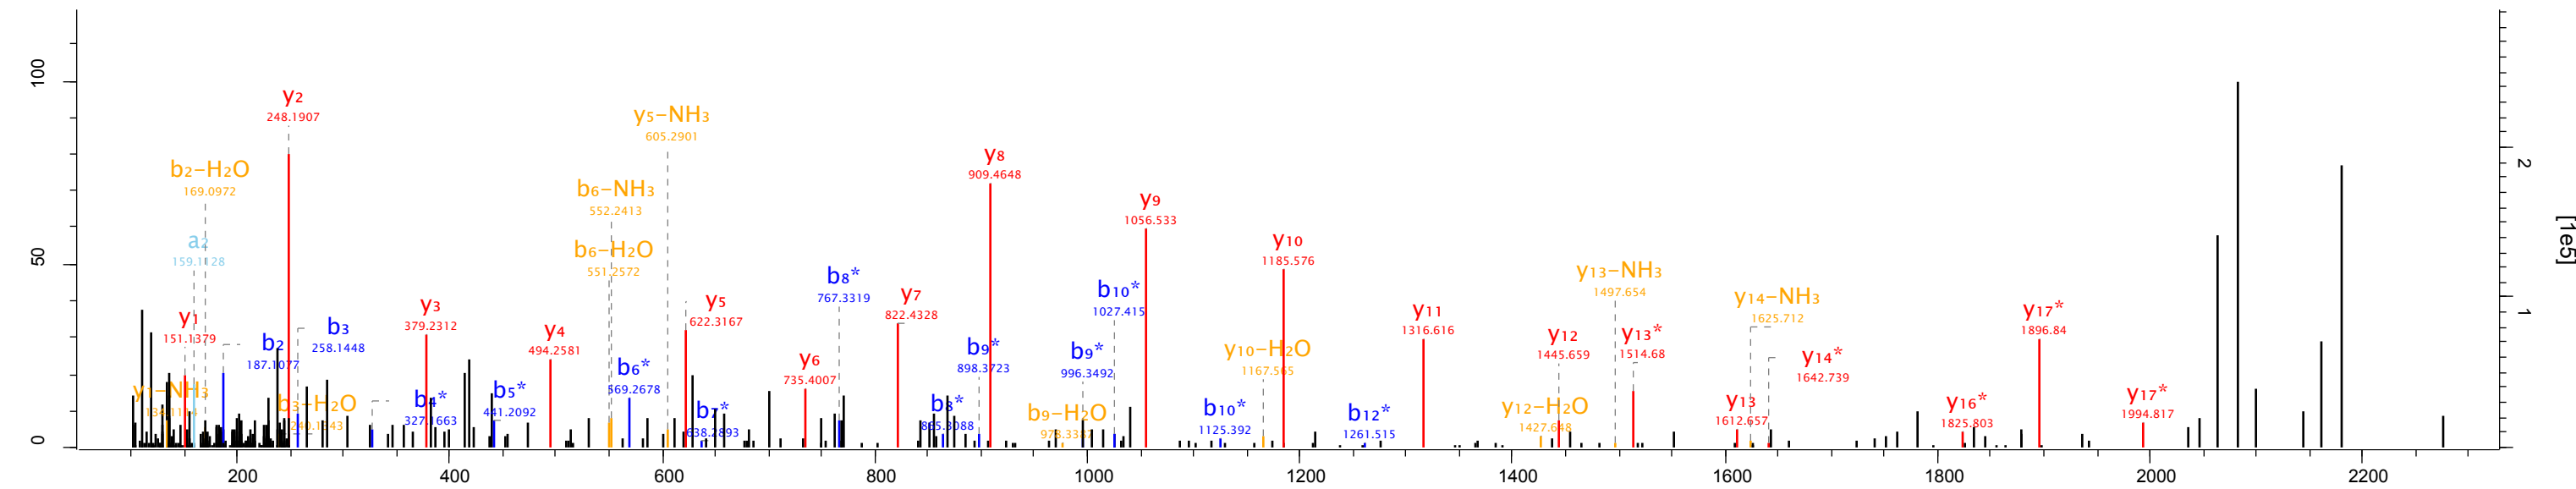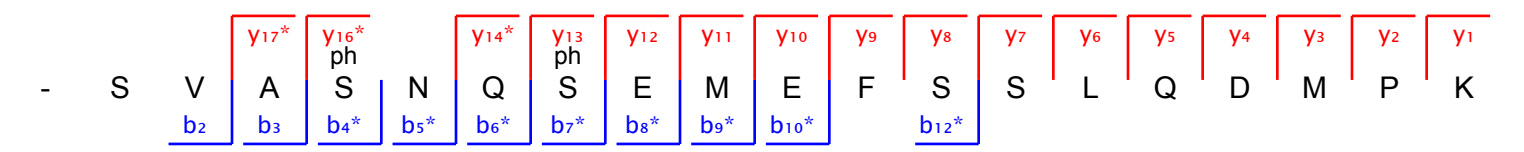

Raw file  
20171215\_MaS\_33SR\_LMH\_phospho2\_03

Scan Method Score m/z Gene names  
18203 FTMS; HCD 92.35 961.75 TOP2B

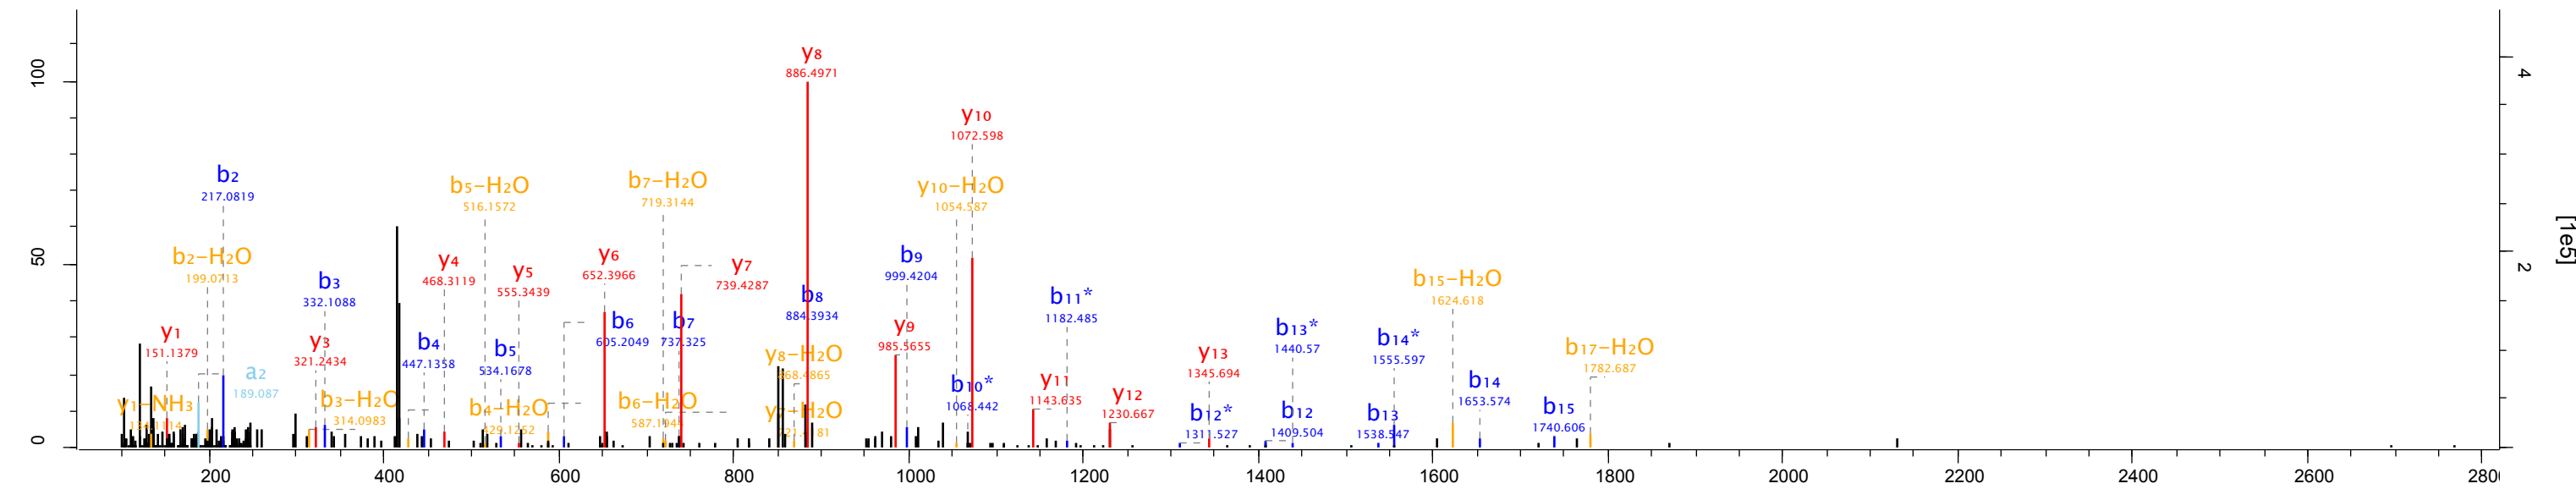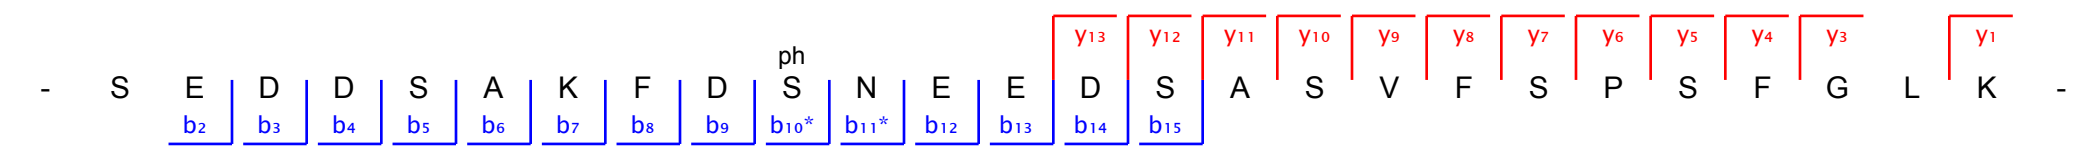



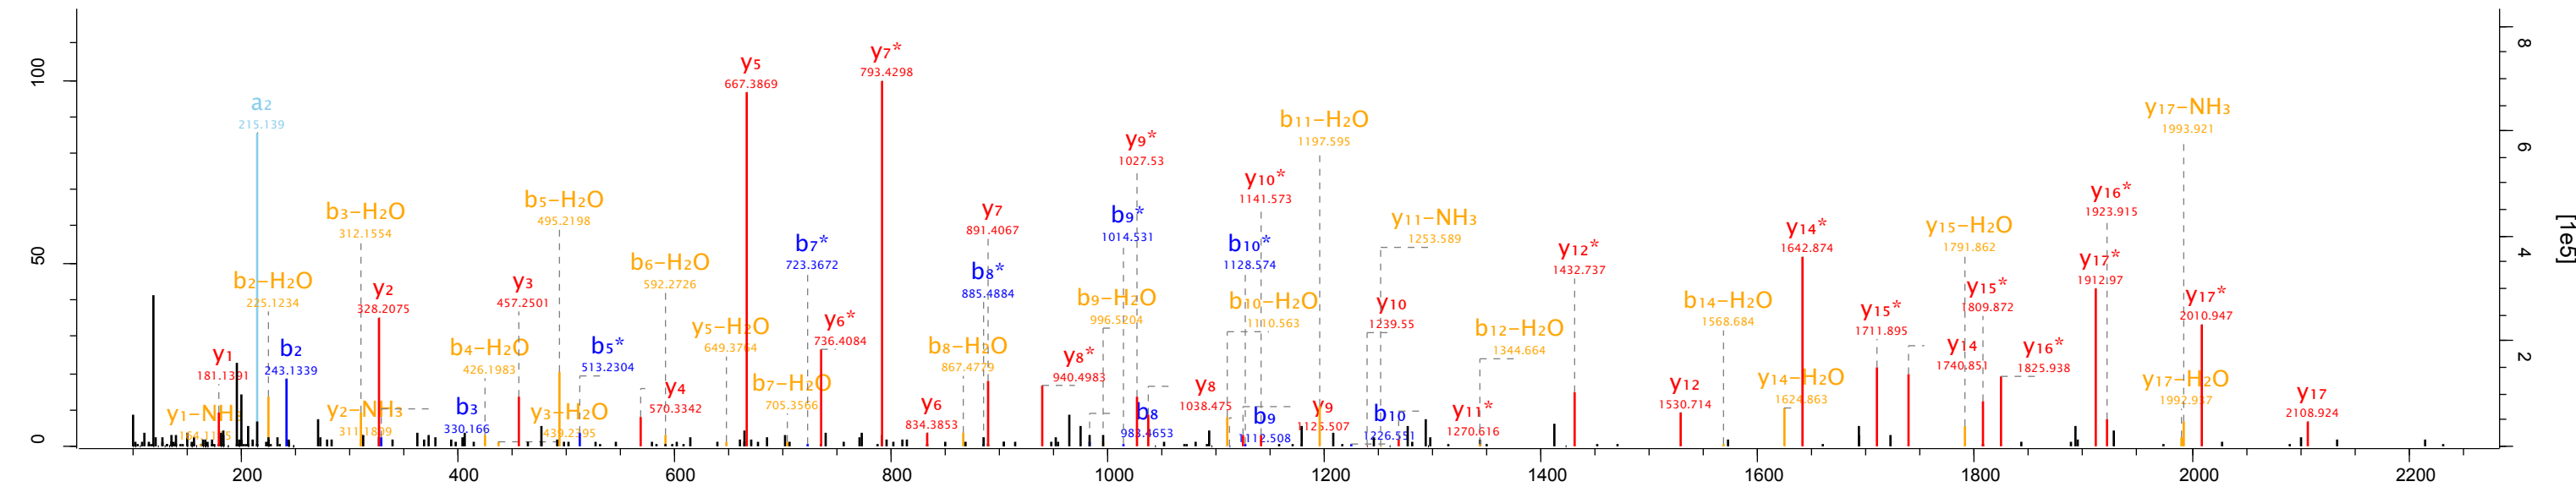

- E L S N P L R E N S F G S P L E F R -

Fragmentation mapping (b and y ions) is shown below the sequence:

- Blue boxes (b ions):** b<sub>2</sub> (L), b<sub>3</sub> (S), b<sub>5</sub>\* (N), b<sub>7</sub>\* (L), b<sub>8</sub> (R), b<sub>9</sub> (E), b<sub>10</sub> (N)
- Red boxes (y ions):** y<sub>17</sub> (S), y<sub>16</sub>\* (N), y<sub>15</sub>\* (ph), y<sub>14</sub> (S), y<sub>12</sub> (R), y<sub>11</sub>\* (E), y<sub>10</sub> (N), y<sub>9</sub> (S), y<sub>8</sub> (F), y<sub>7</sub> (G), y<sub>6</sub> (ph), y<sub>5</sub> (S), y<sub>4</sub> (L), y<sub>3</sub> (E), y<sub>2</sub> (F), y<sub>1</sub> (R)

Raw file 20171215\_MaS\_33SR\_LMH\_phospho2\_03 Scan 18433 Method FTMS; HCD Score 152.06 m/z 882.38 Gene names NUP153

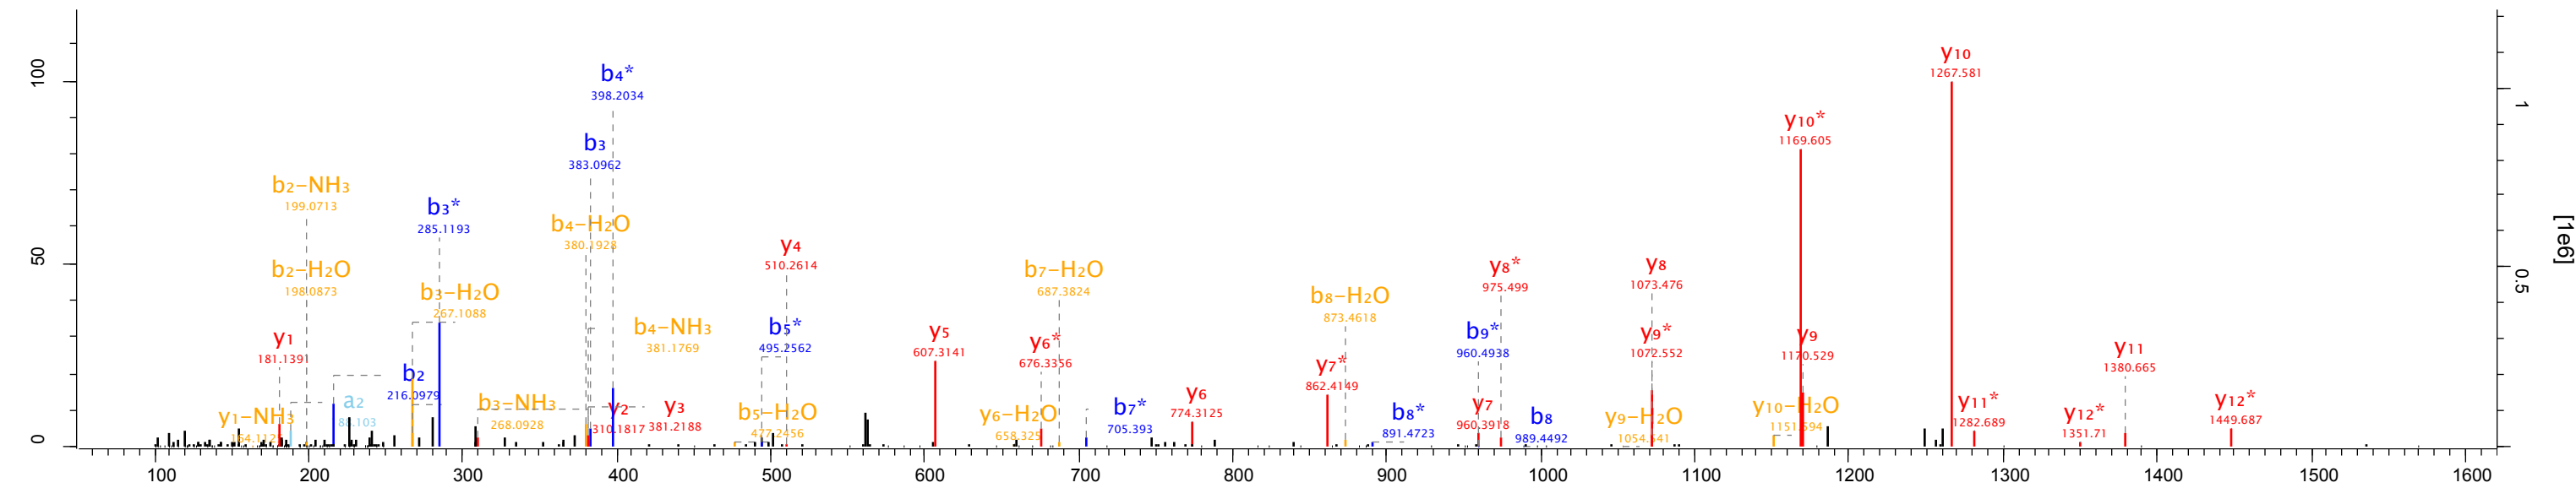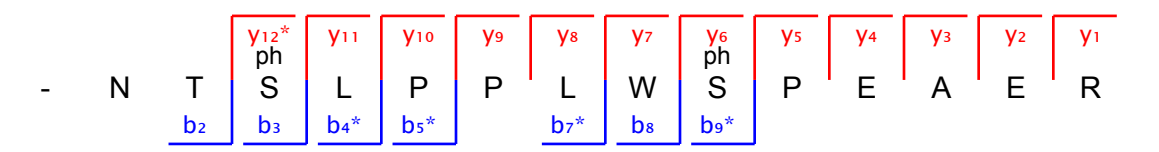

20171215\_MaS\_33SR\_LMH\_phospho2\_03 18443 FTMS; HCD 143.79 863.4 SF3B1

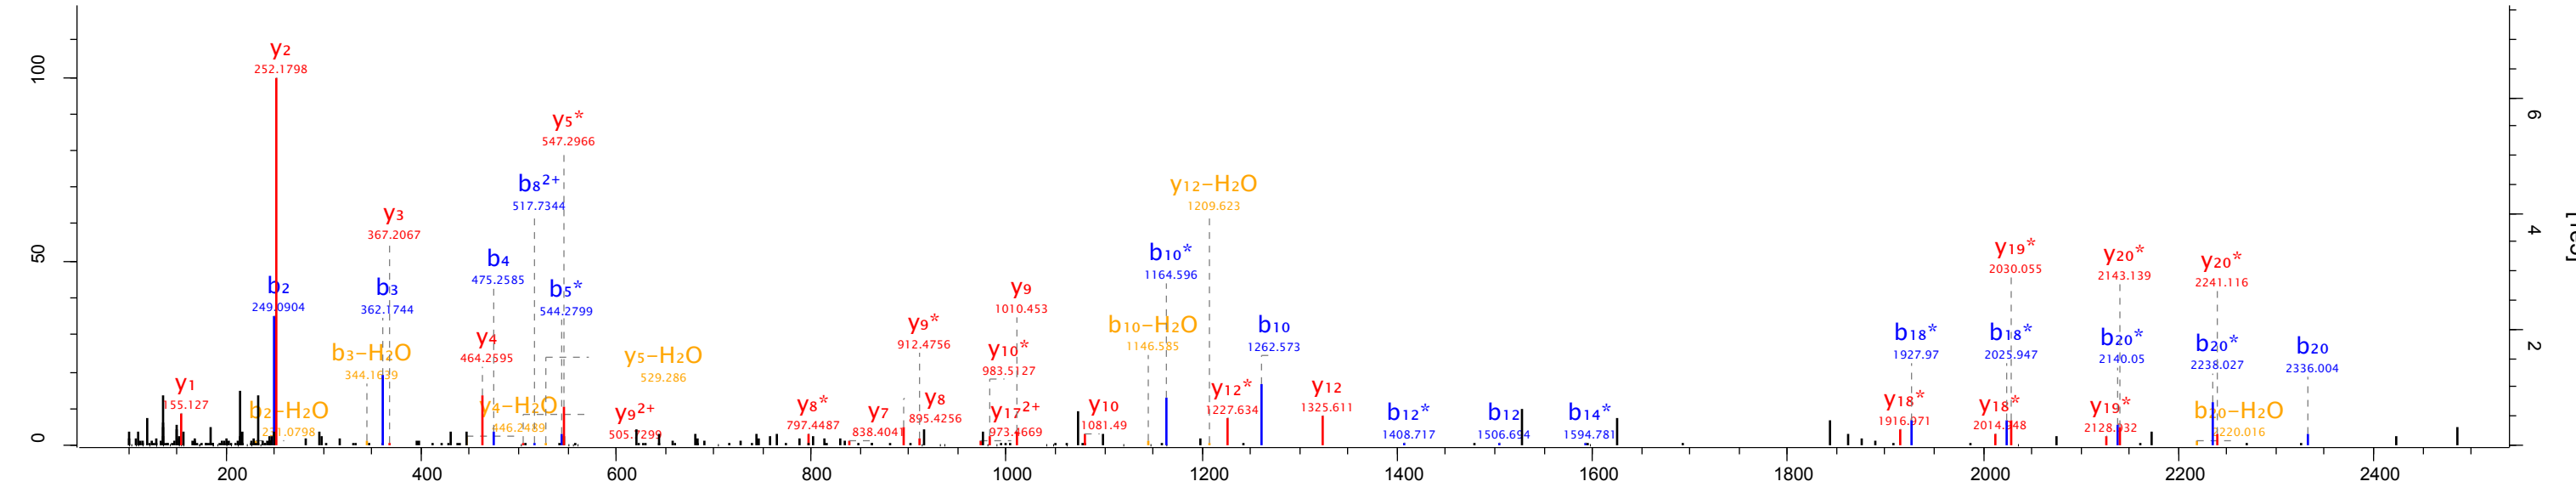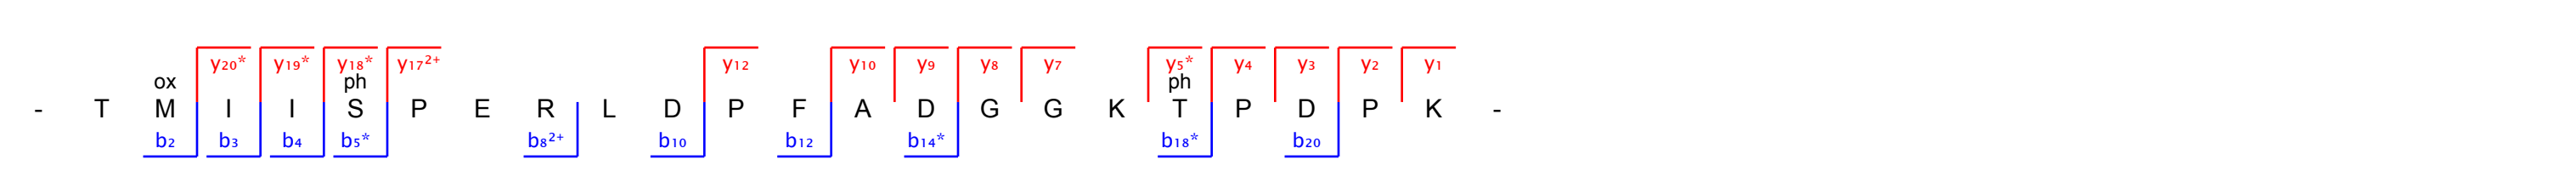

Raw file

20171215\_MaS\_33SR\_LMH\_phospho2\_03

| Scan  | Method    | Score | m/z    | Gene names |
|-------|-----------|-------|--------|------------|
| 18473 | FTMS; HCD | 40.32 | 987.44 | PELP1      |

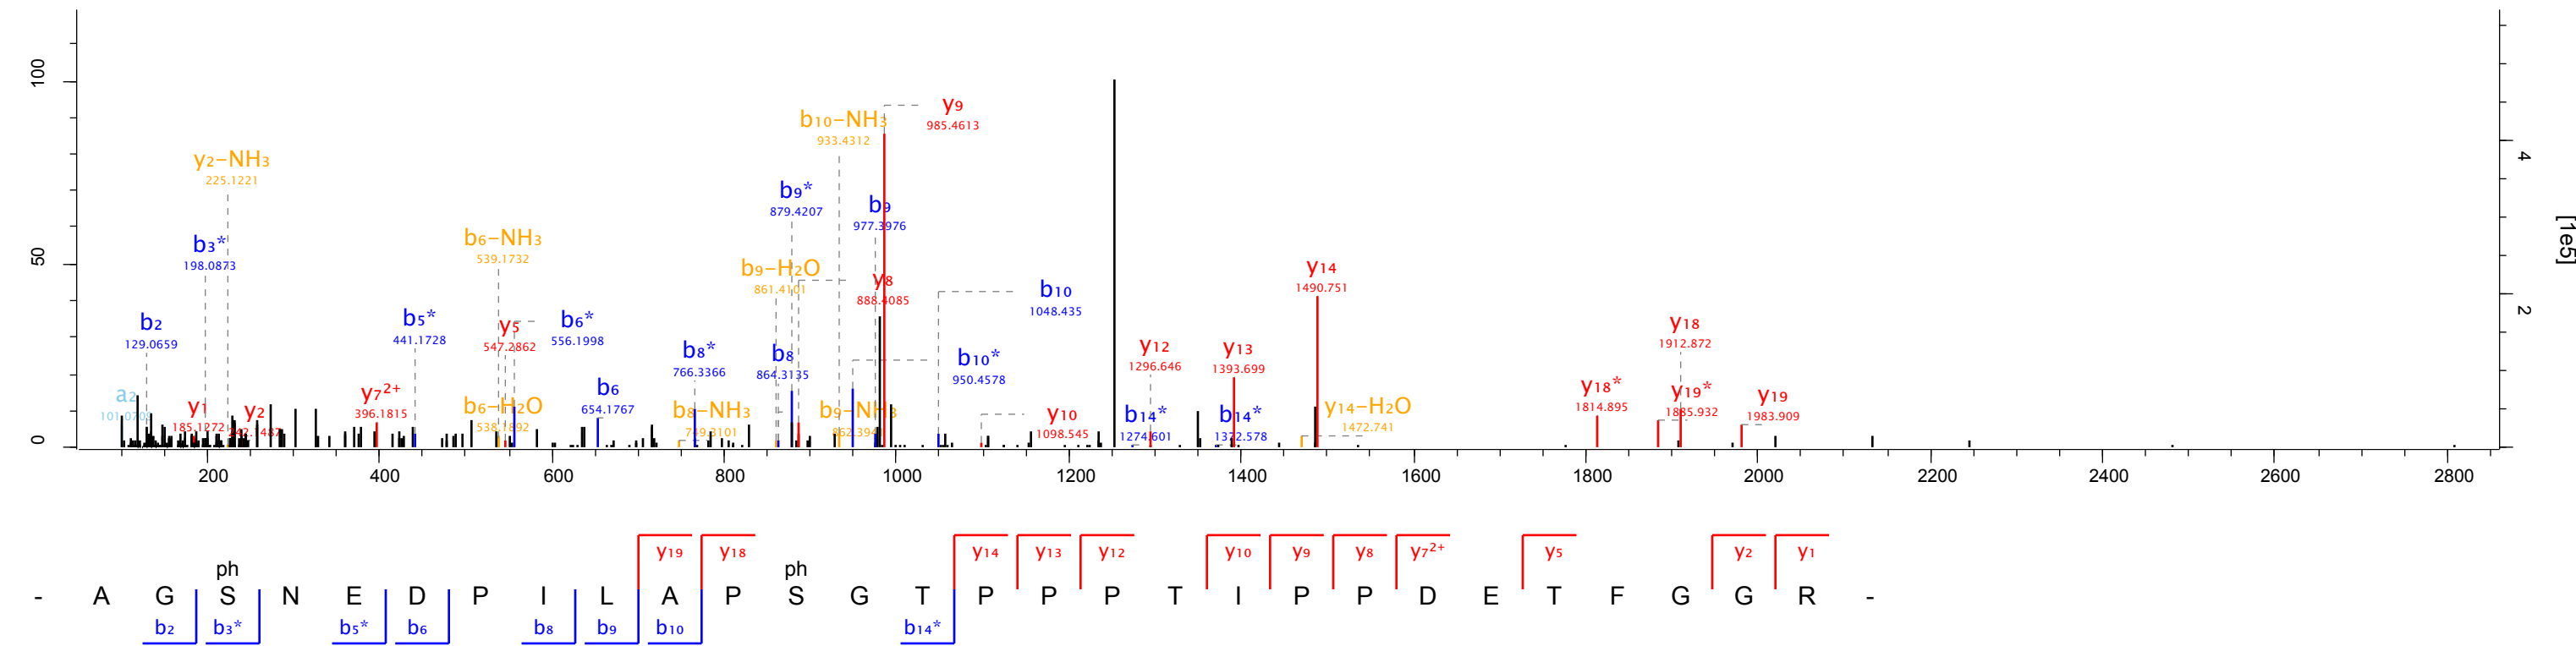

Raw file 20171215\_MaS\_33SR\_LMH\_phospho2\_03 Scan 18623 Method FTMS; HCD Score 158.13 m/z 855.07 Gene names NCOR2

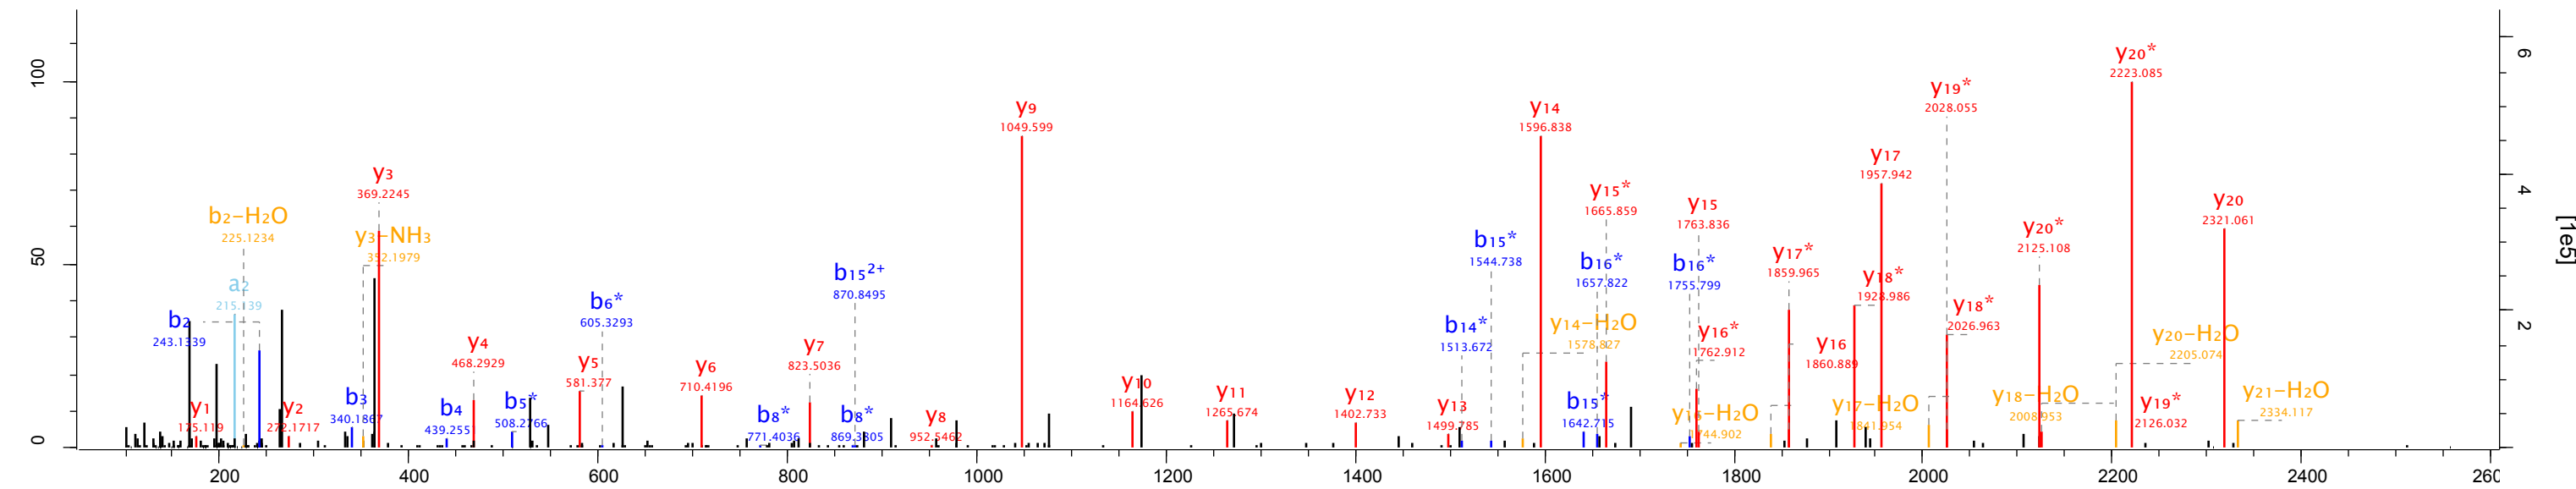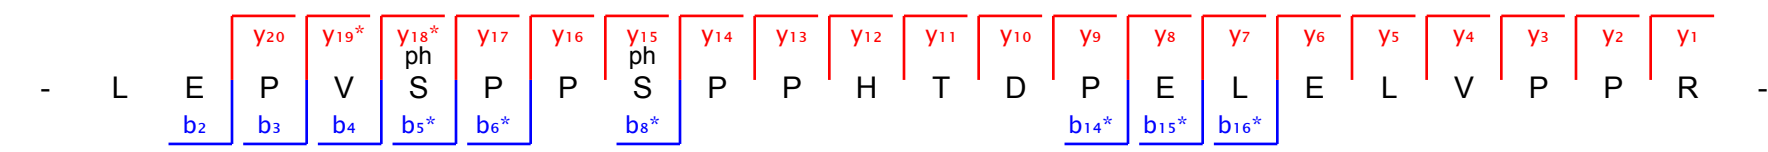

Raw file: 20171215\_MaS\_33SR\_LMH\_phospho2\_03  
 Scan: 18683 Method: FTMS; HCD Score: 47.72 m/z: 1311.52 Gene names: EIF5B

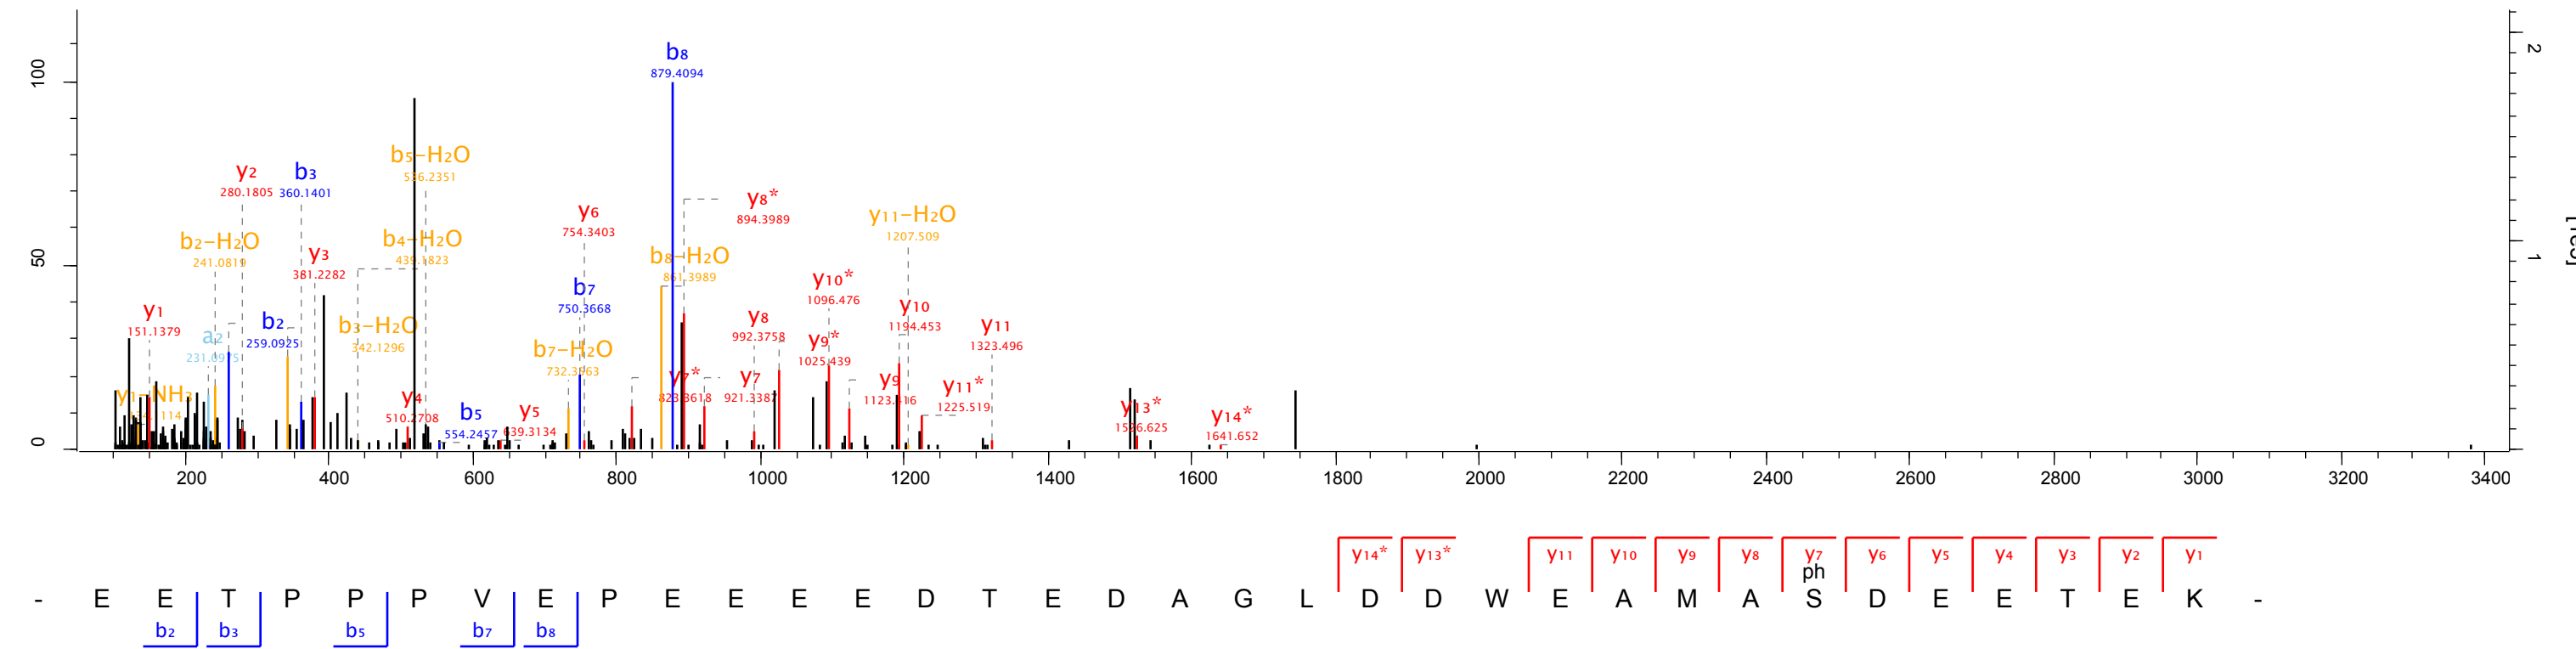

Raw file 20171215\_MaS\_33SR\_LMH\_phospho2\_03 Scan 18713 Method FTMS; HCD Score 133.86 m/z 796.85 Gene names MAP4

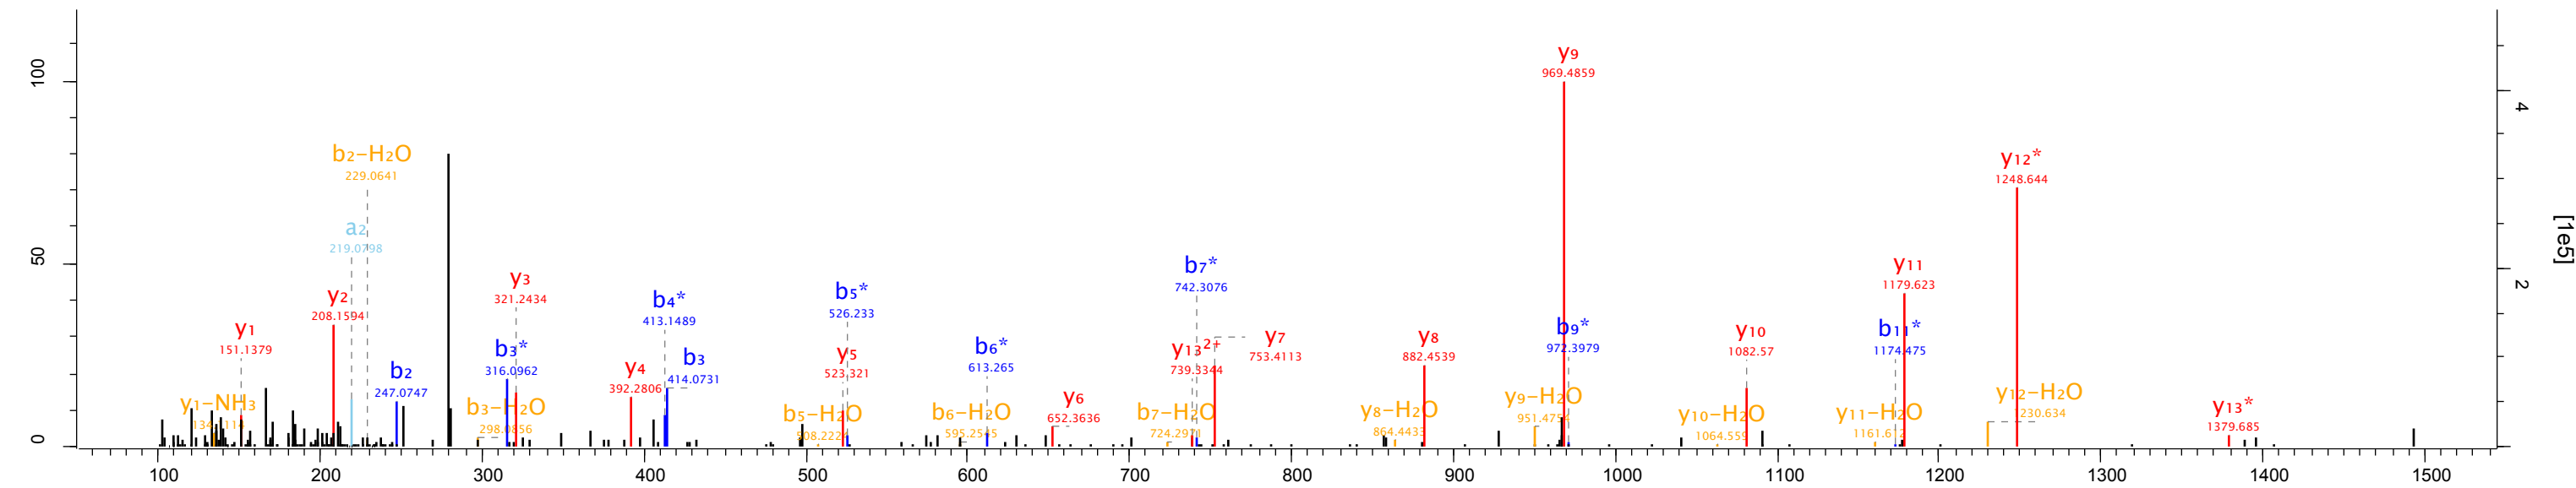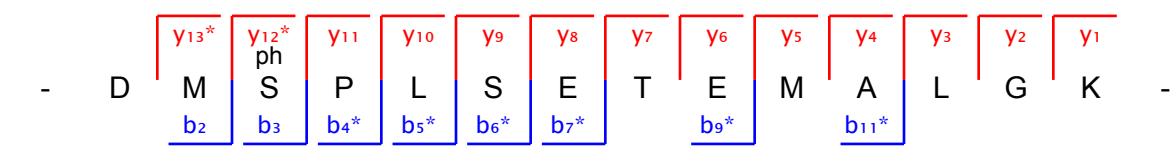

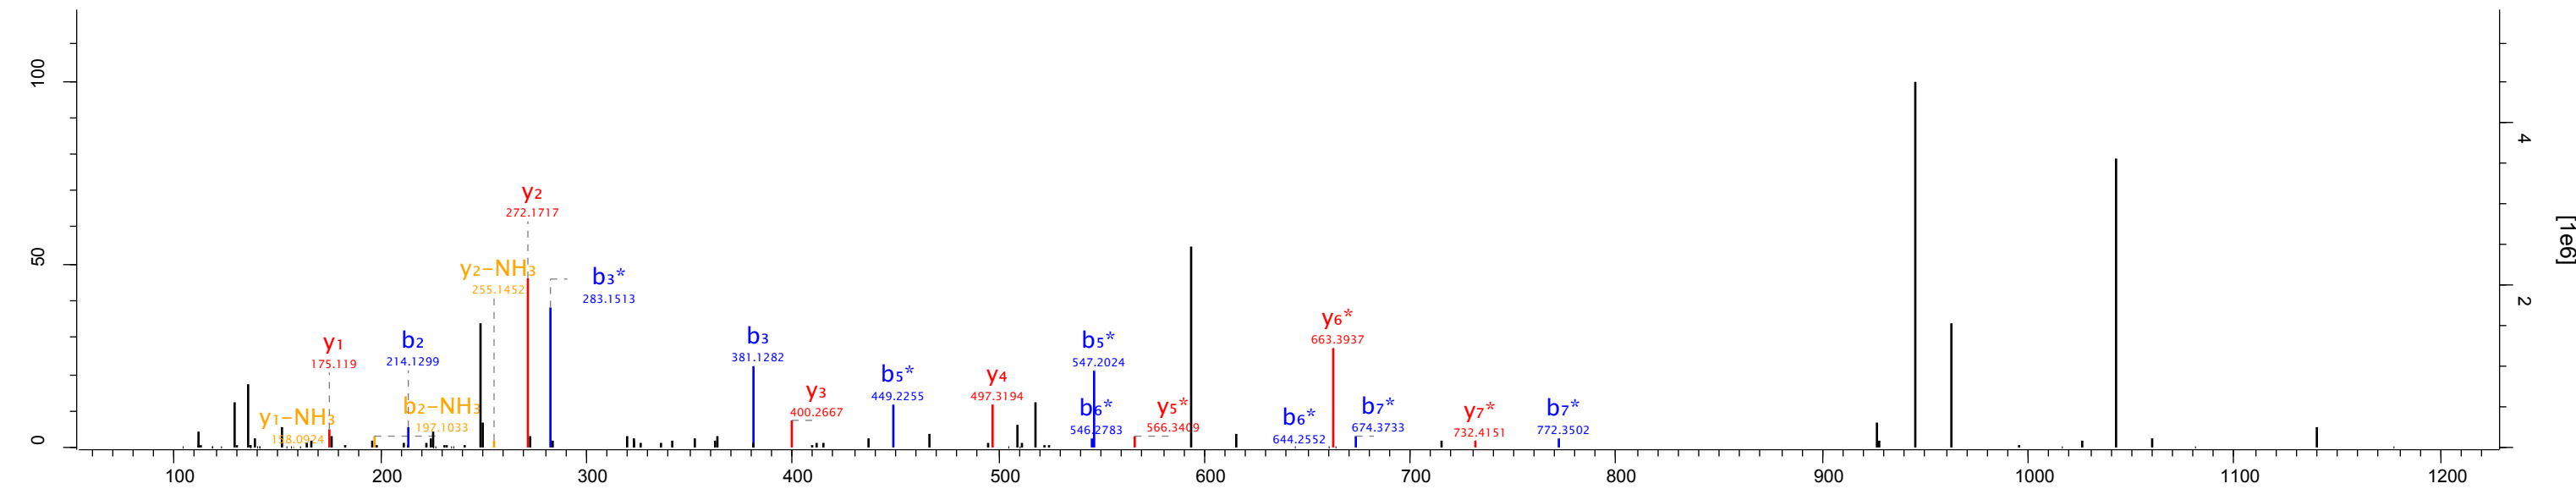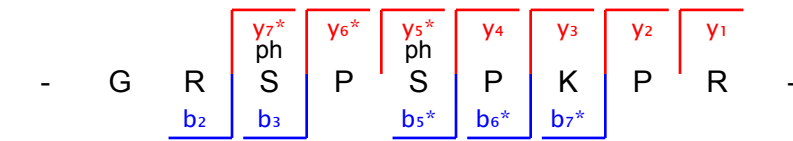



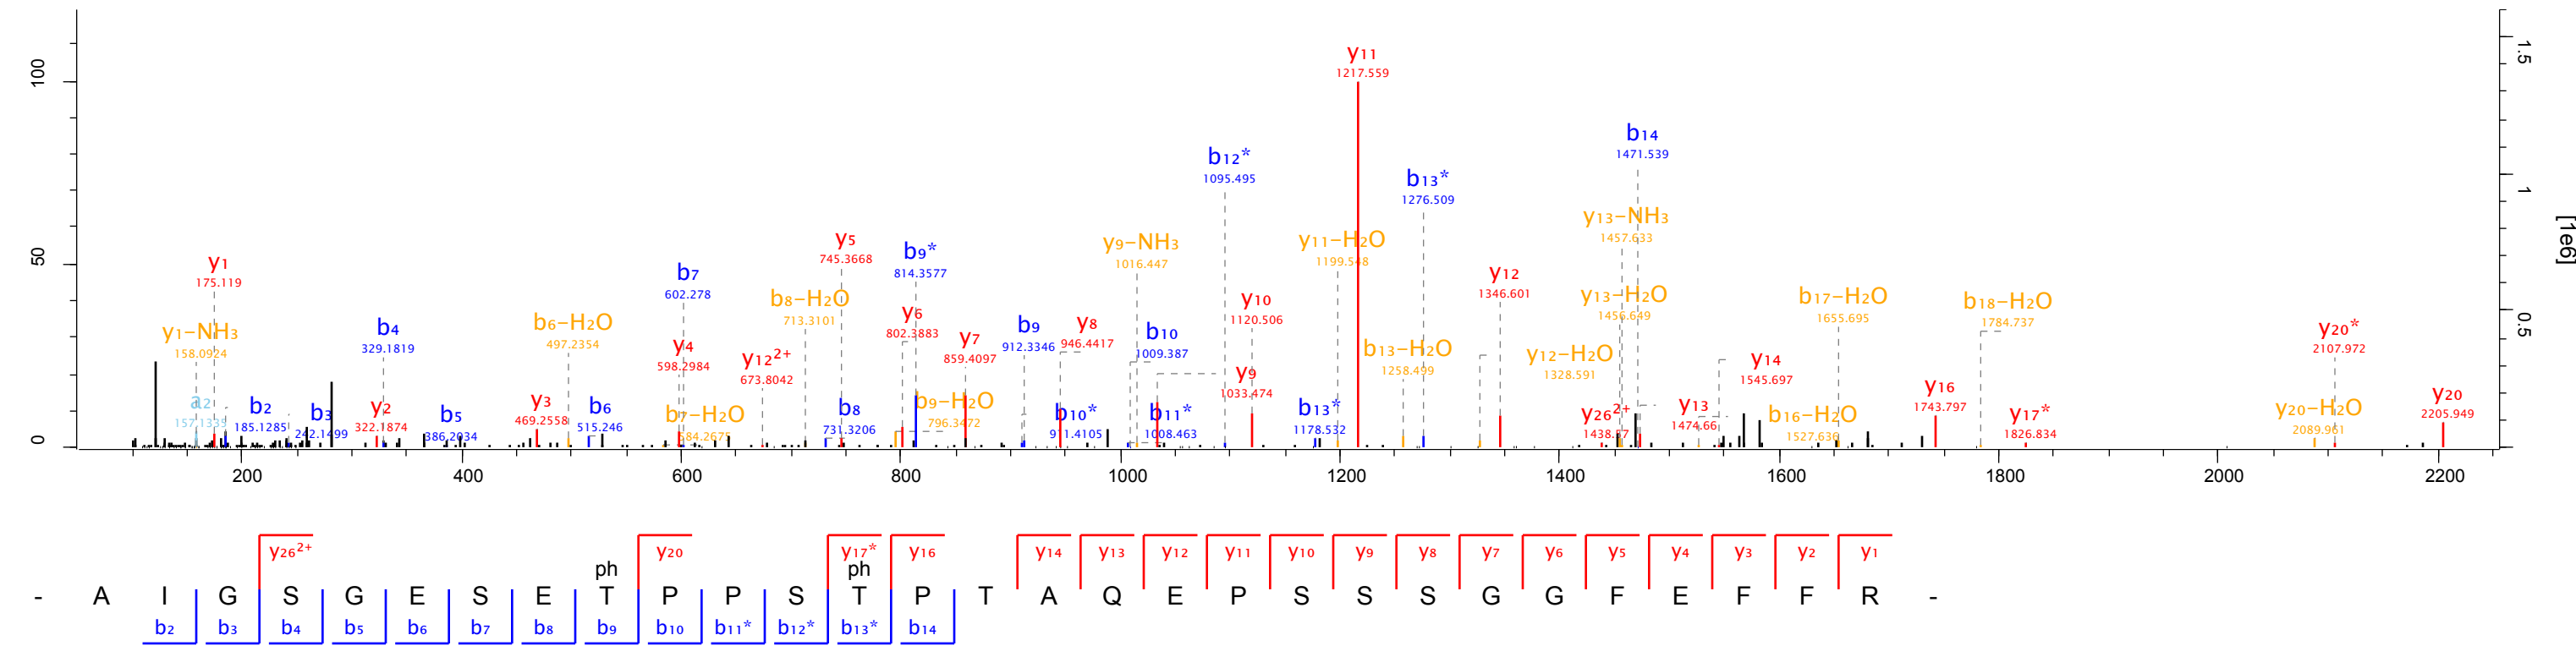

Raw file  
20171215\_MaS\_33SR\_LMH\_phospho2\_03

Scan 20023 Method FTMS; HCD Score 250.86 m/z 1006.95 Gene names TMOD3

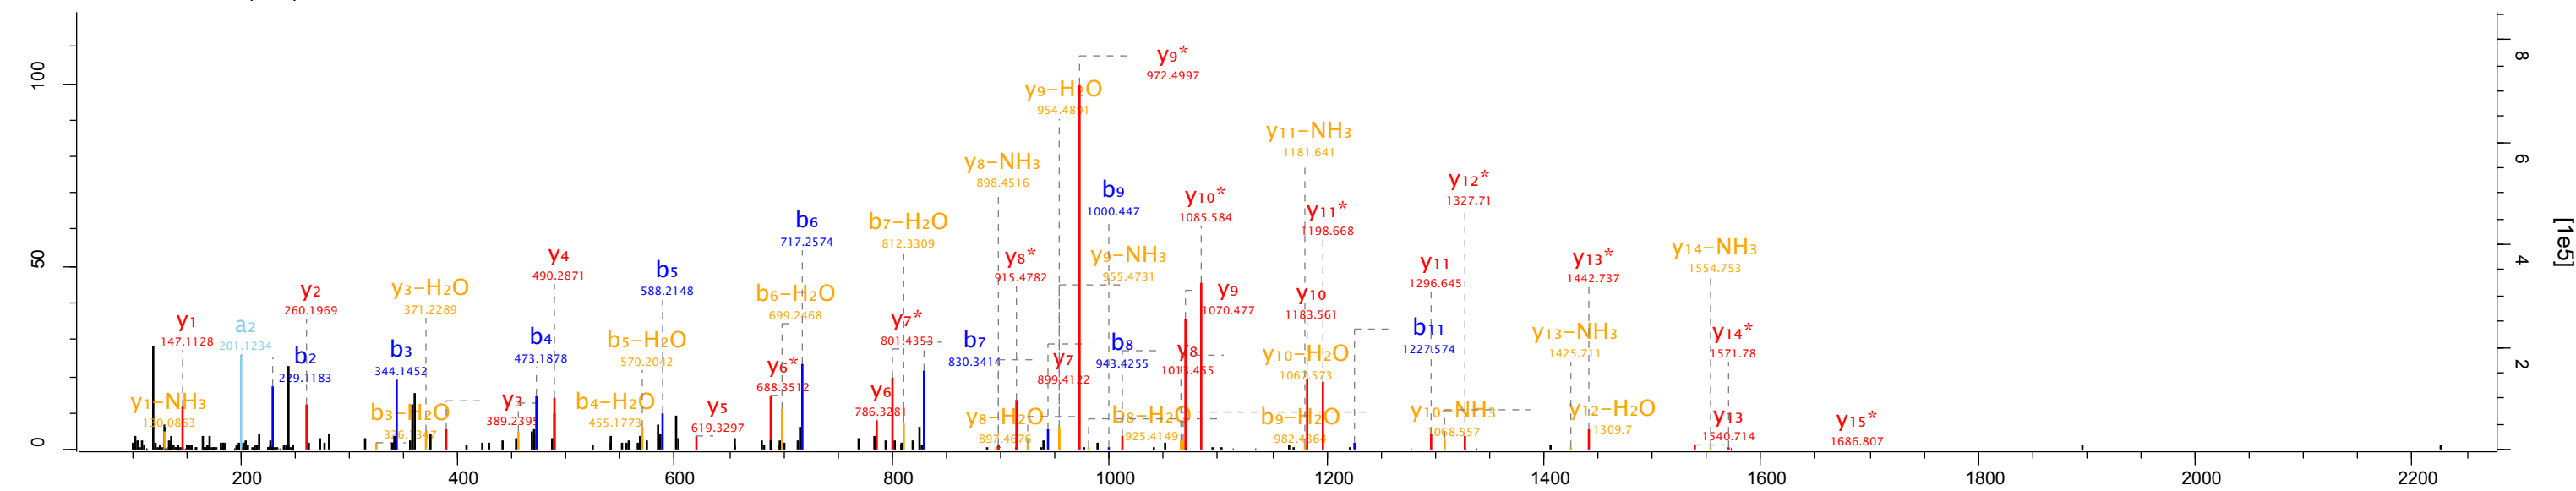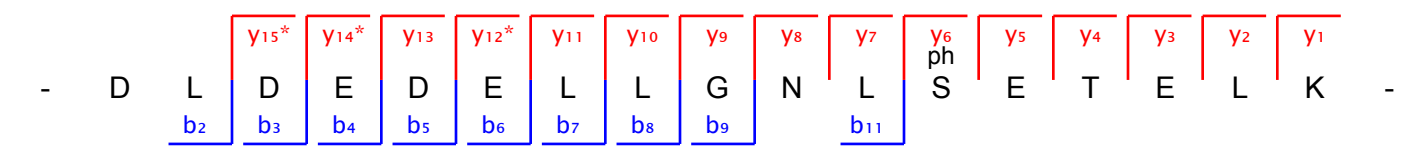



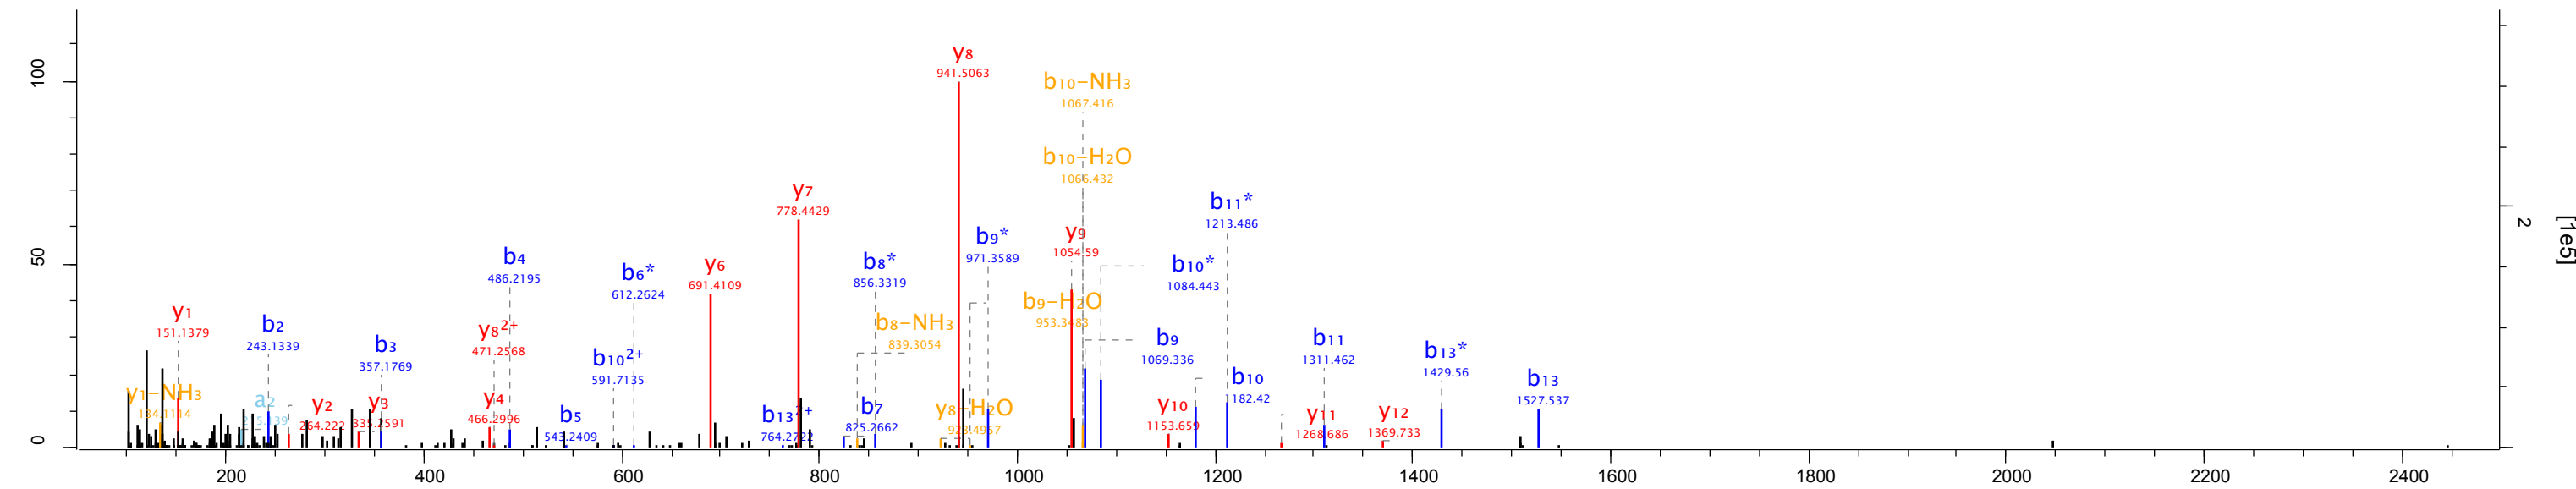

- L E N E G S D E D I E T D V L Y S P Q M A L K -  
 b<sub>2</sub> b<sub>3</sub> b<sub>4</sub> b<sub>5</sub> b<sub>6</sub><sup>\*</sup> b<sub>7</sub> b<sub>8</sub><sup>\*</sup> b<sub>9</sub> b<sub>10</sub> b<sub>11</sub> b<sub>13</sub> y<sub>12</sub> y<sub>11</sub> y<sub>10</sub> y<sub>9</sub> y<sub>8</sub> y<sub>7</sub> y<sub>6</sub> y<sub>4</sub> y<sub>3</sub> y<sub>2</sub> y<sub>1</sub>

20171215\_MaS\_33SR\_LMH\_phospho2\_03 2263 FTMS; HCD 60.66 440.87 SRRM1

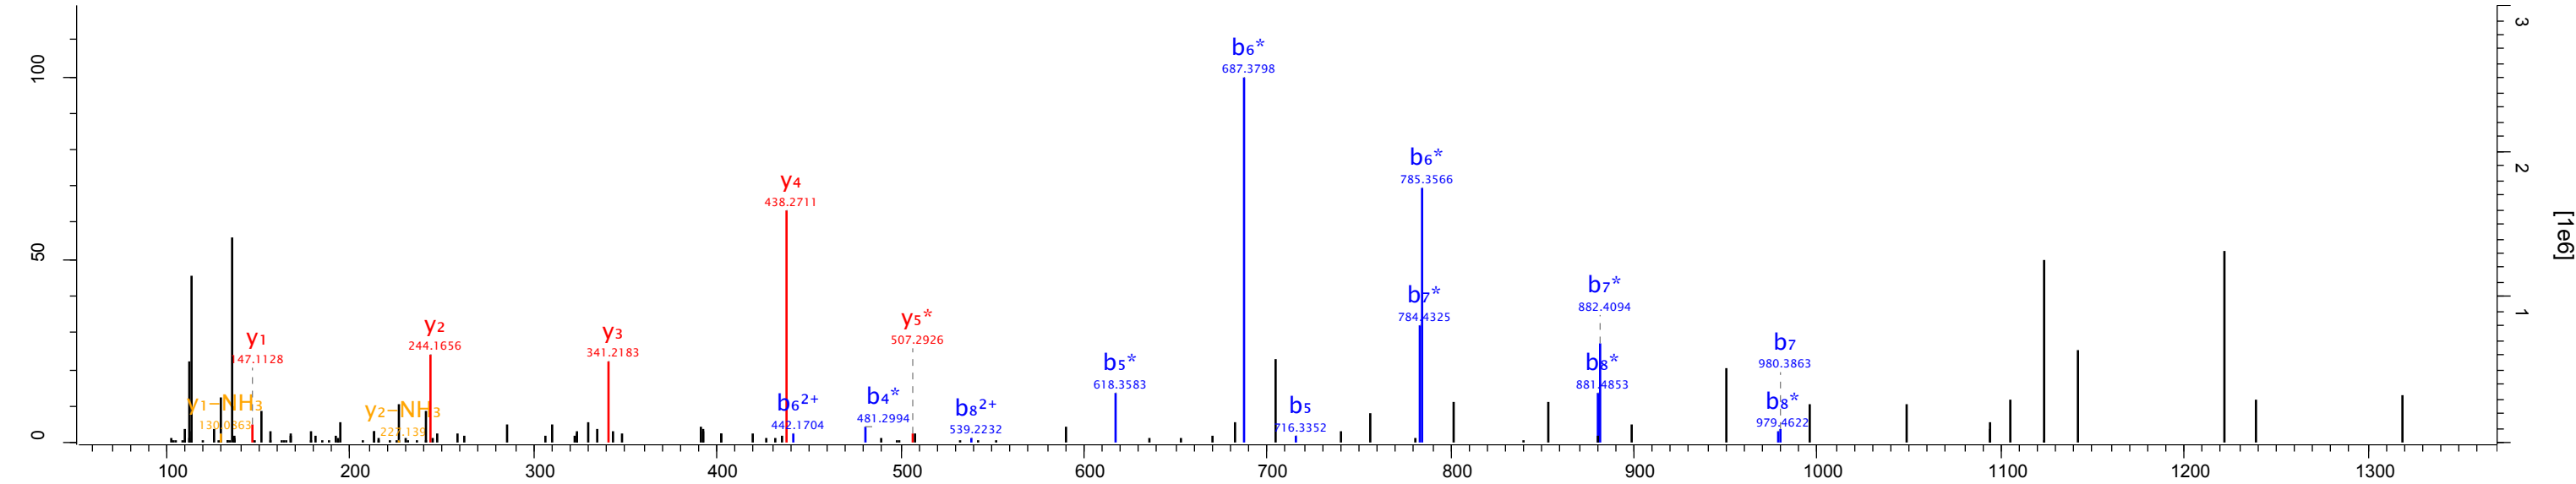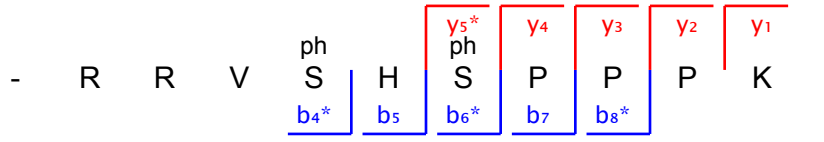

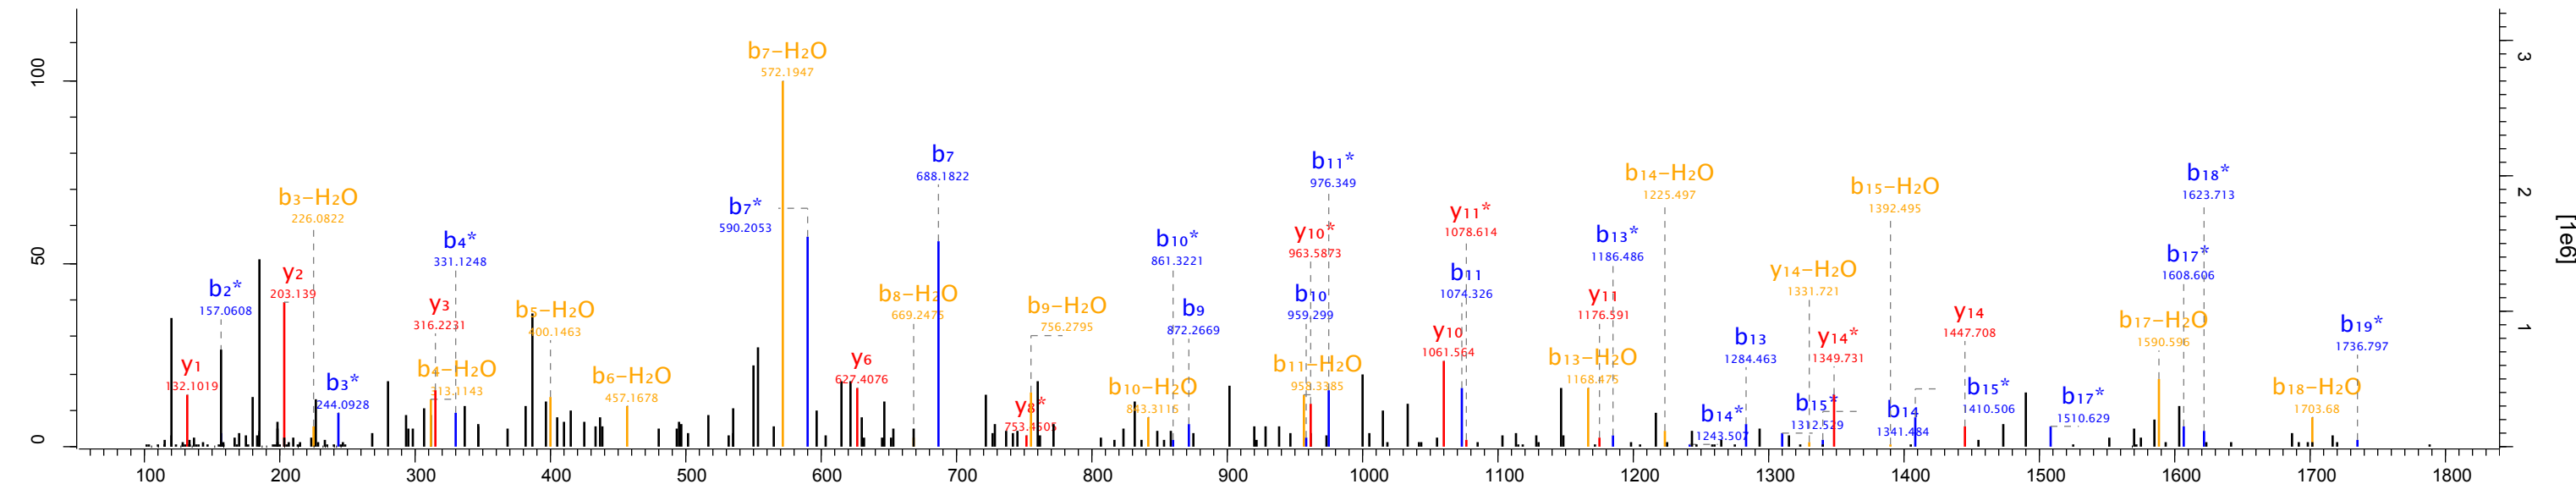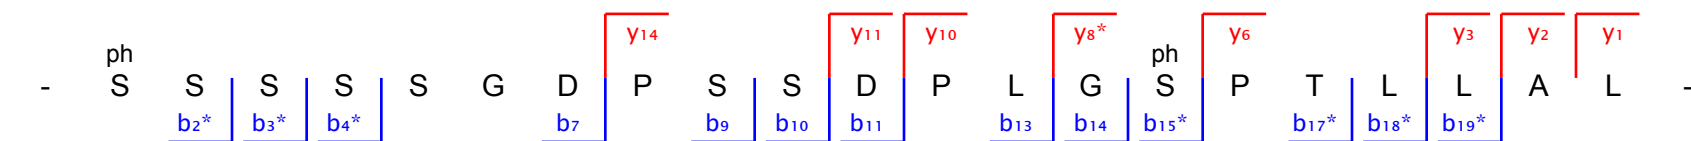

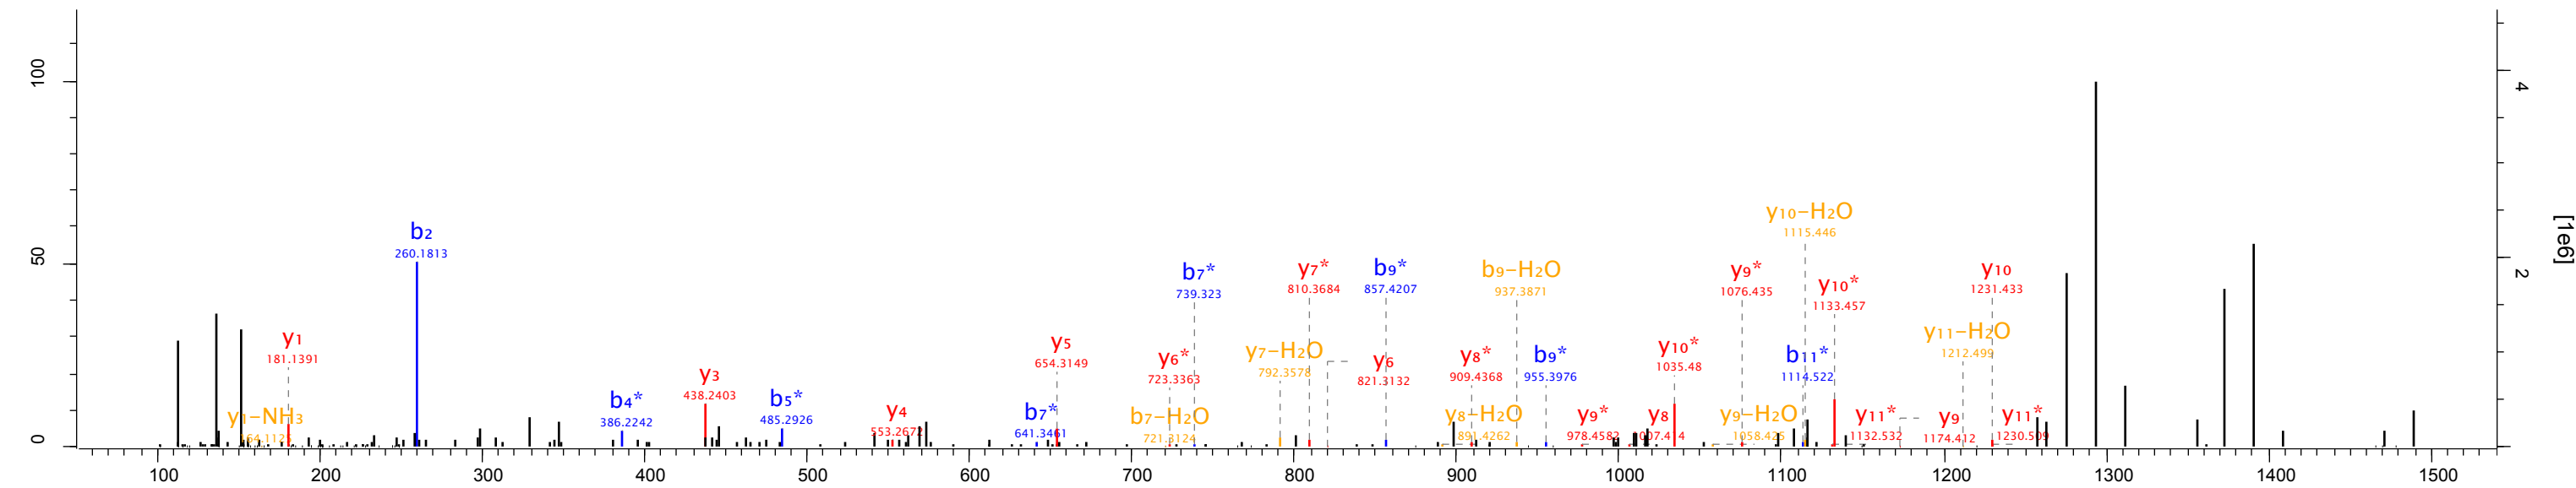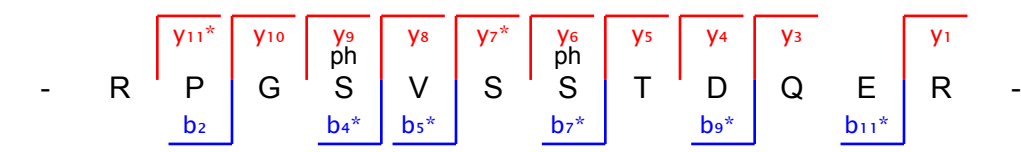

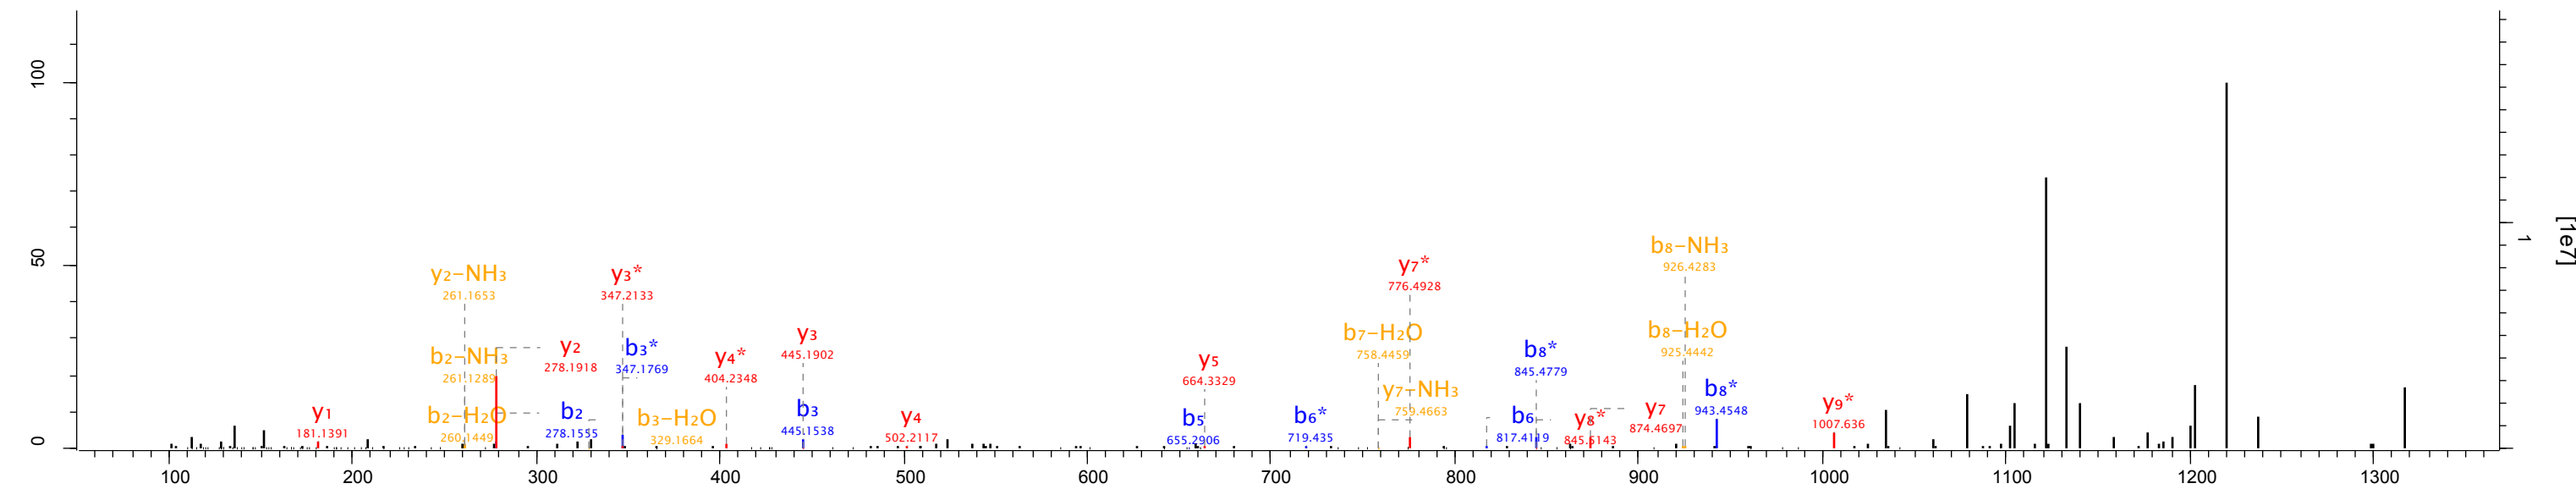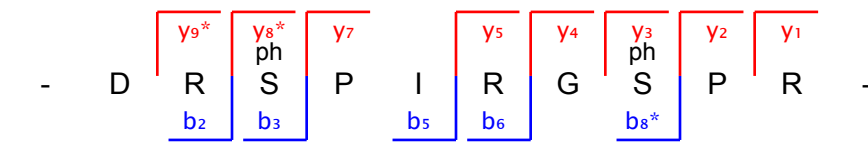



Raw file: 20171215\_MaS\_33SR\_LMH\_phospho2\_03  
 Scan: 3063 Method: FTMS; HCD Score: 198.83 m/z: 728.66 Gene names: HNRNPC

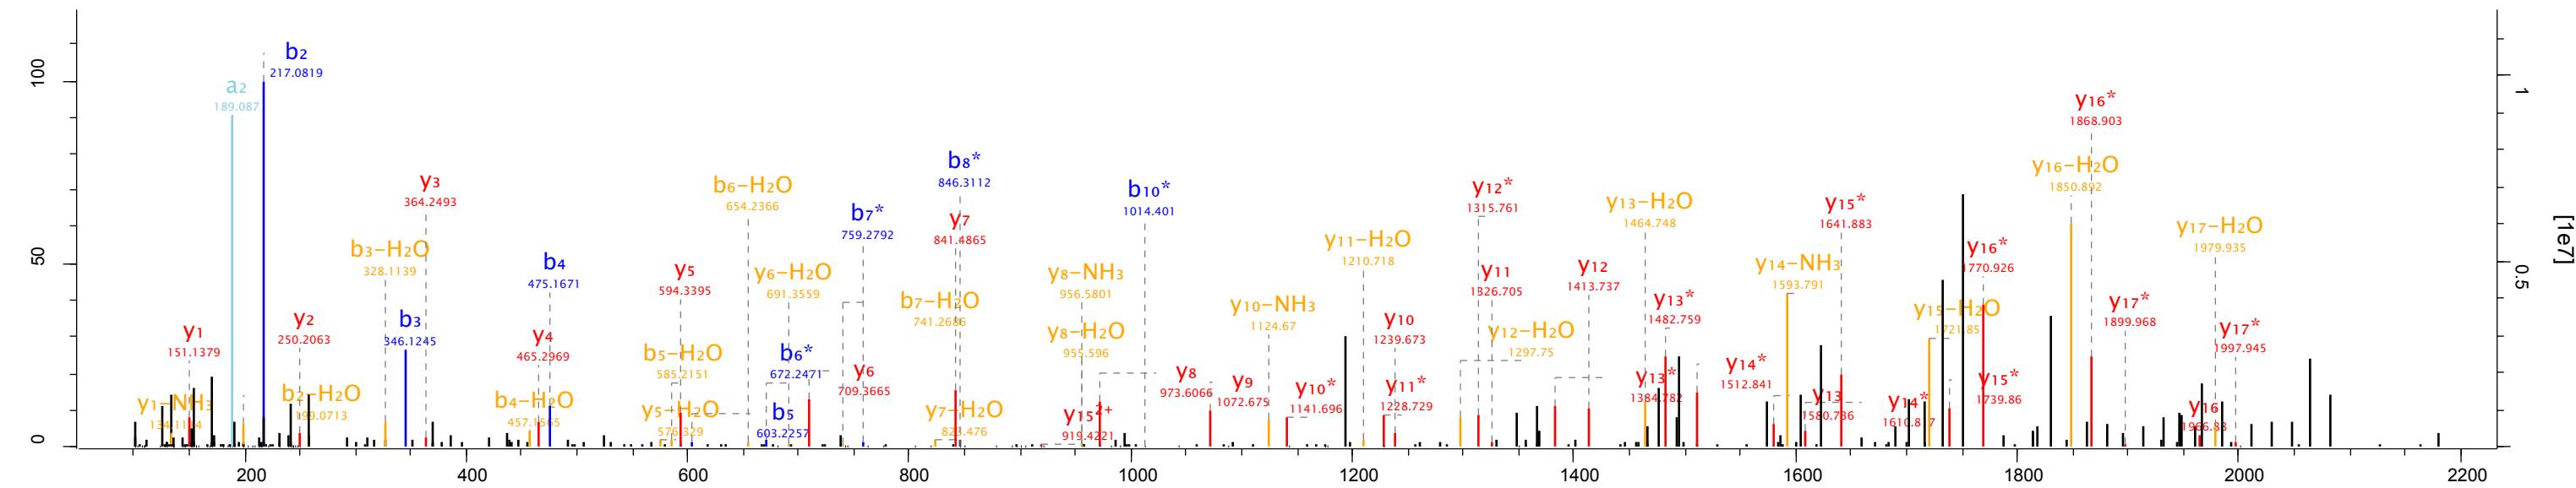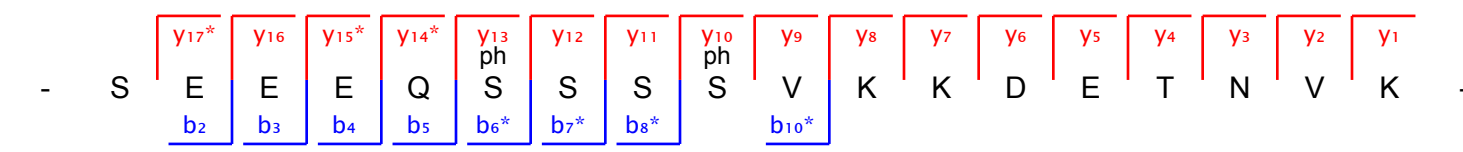

Raw file 20171215\_MaS\_33SR\_LMH\_phospho2\_03 Scan 3123 Method FTMS; HCD Score 61.44 m/z 492.9 Gene names EIF4G1

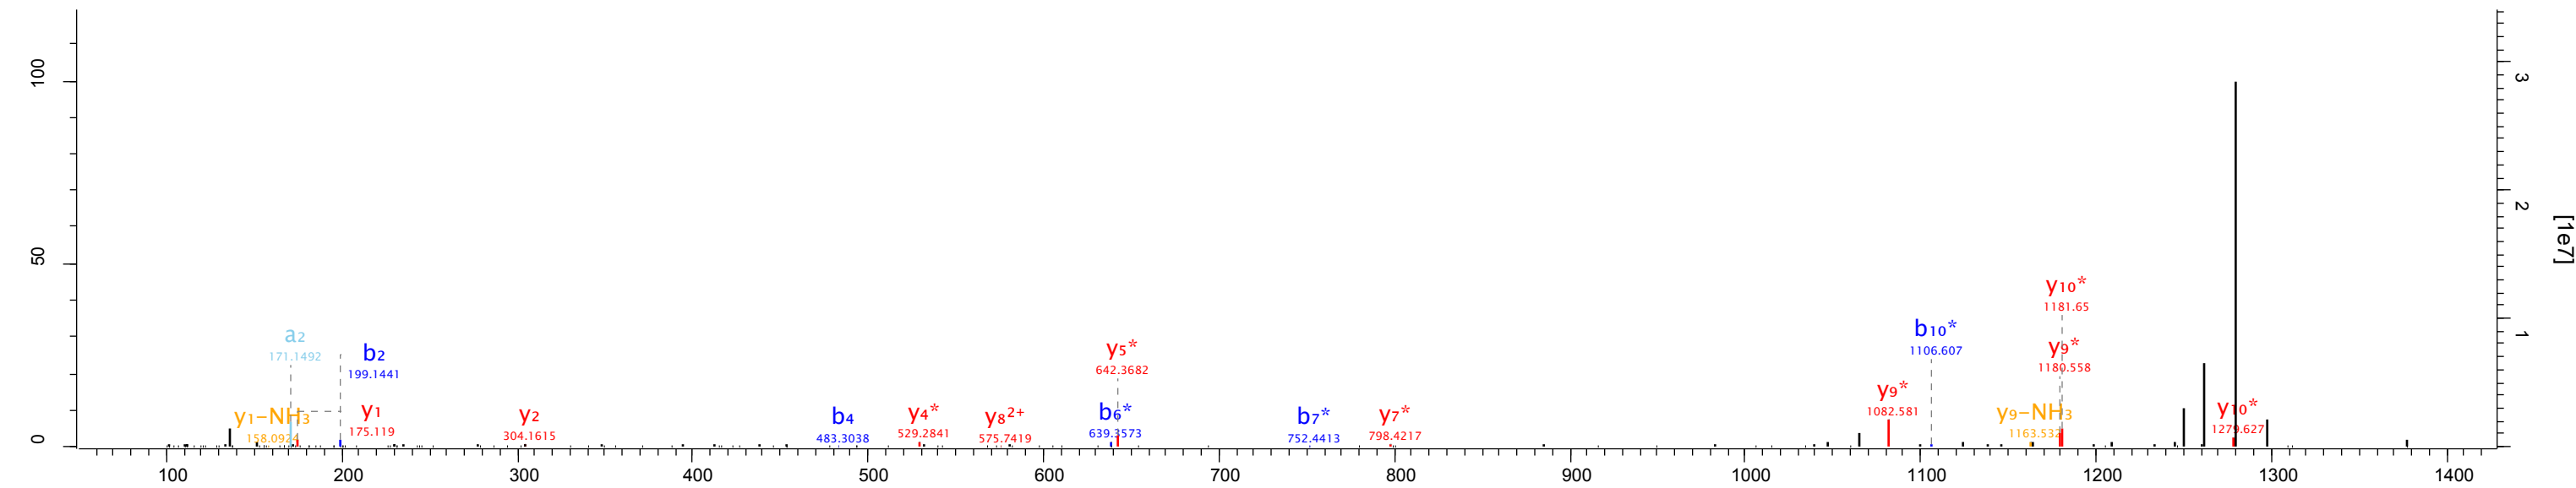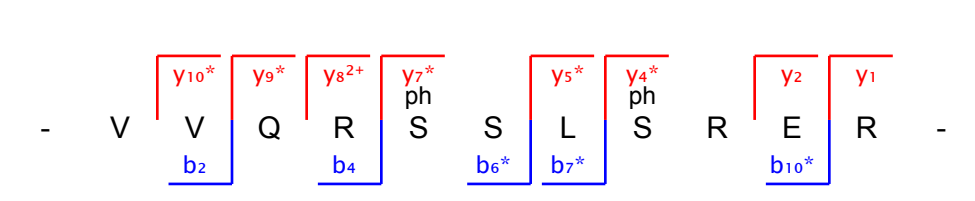

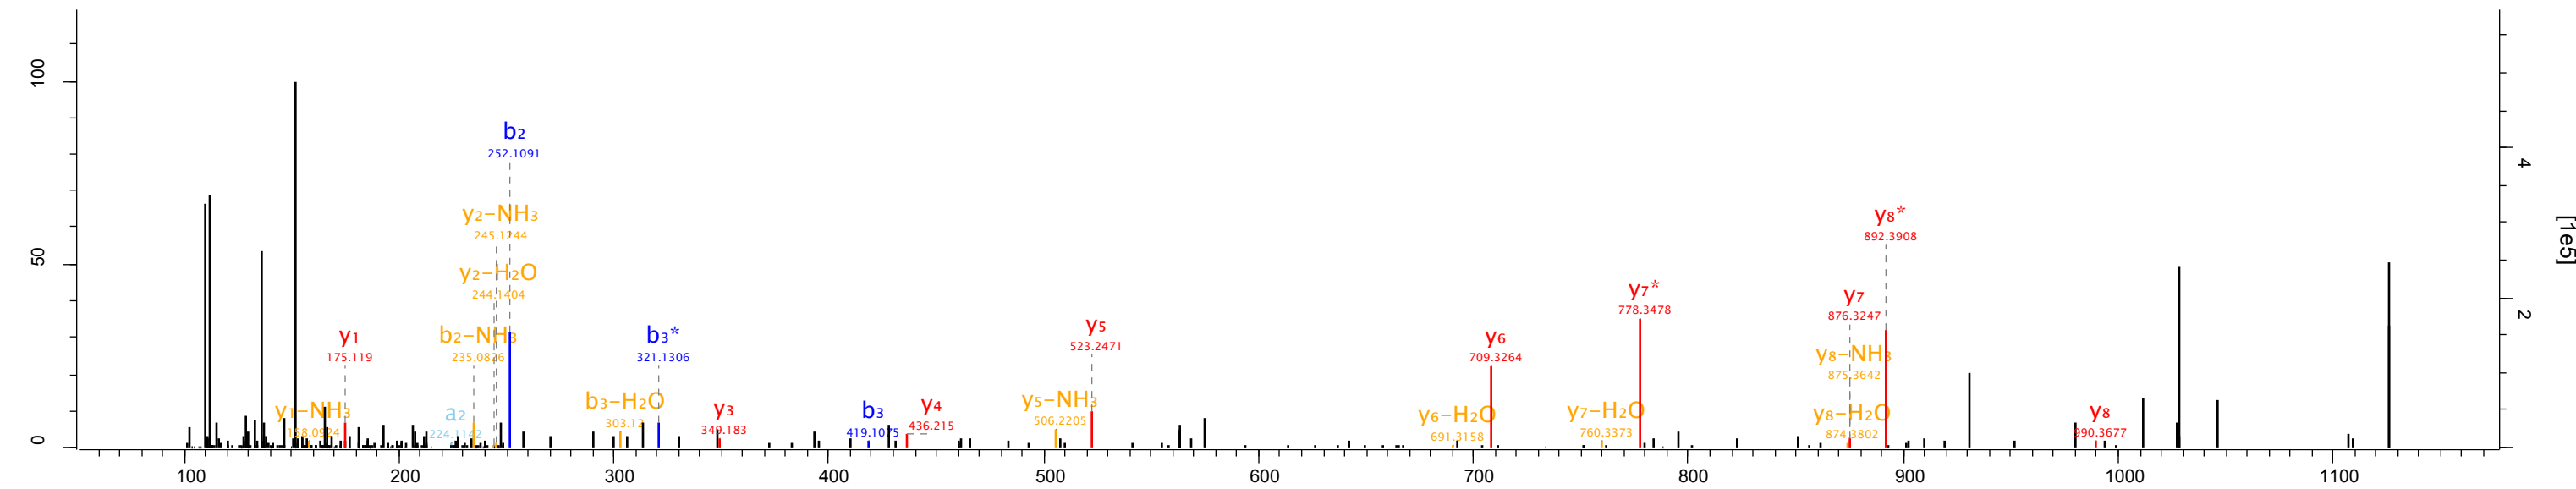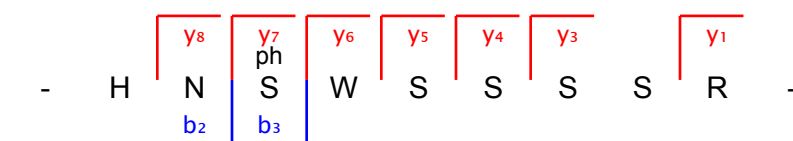

Raw file: 20171215\_MaS\_33SR\_LMH\_phospho2\_03  
 Scan: 3393 Method: FTMS; HCD Score: 62.74 m/z: 595.94 Gene names: SMARCC1

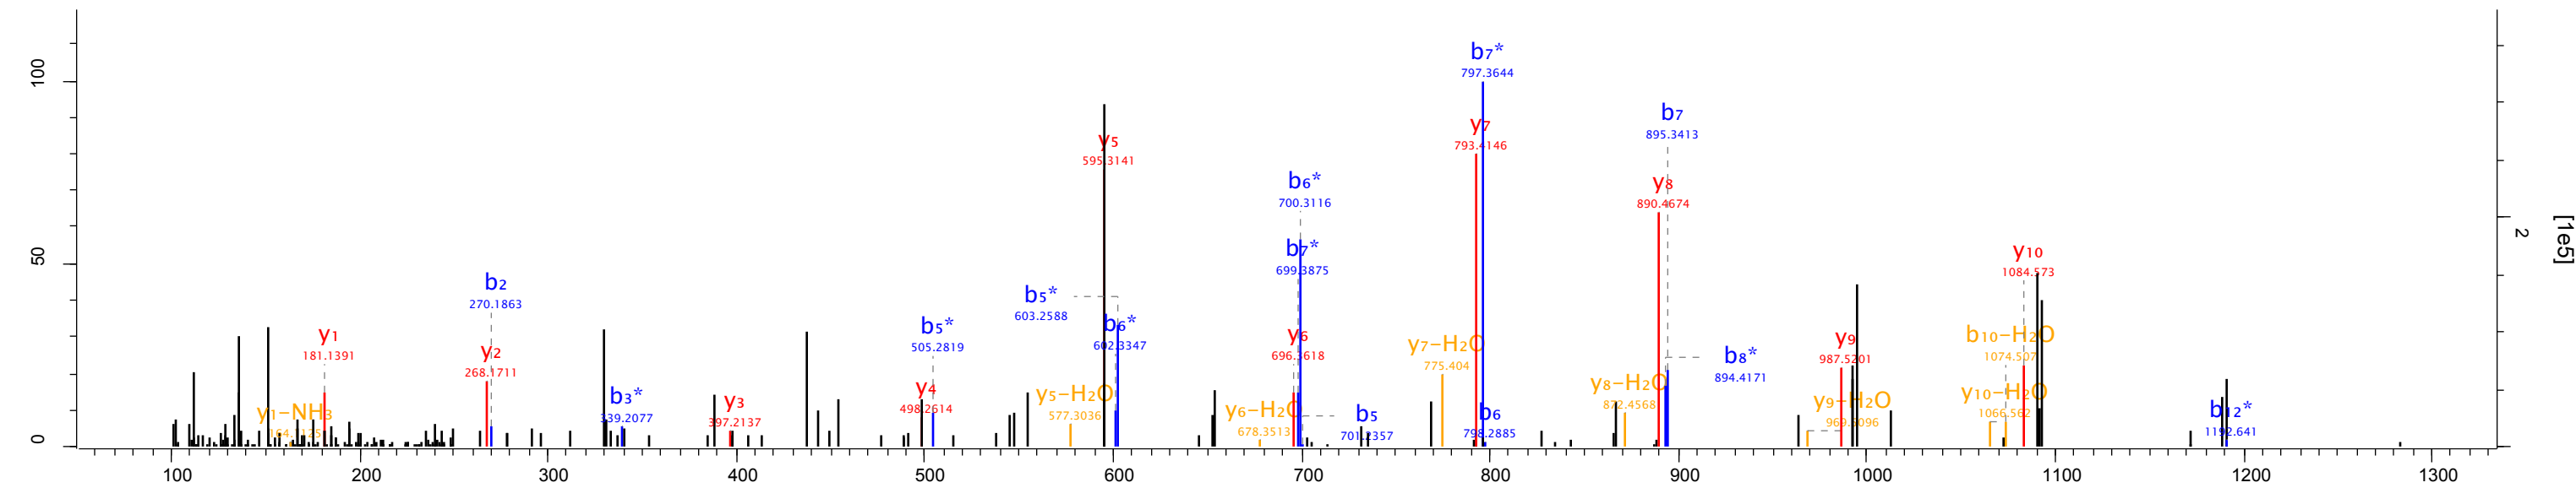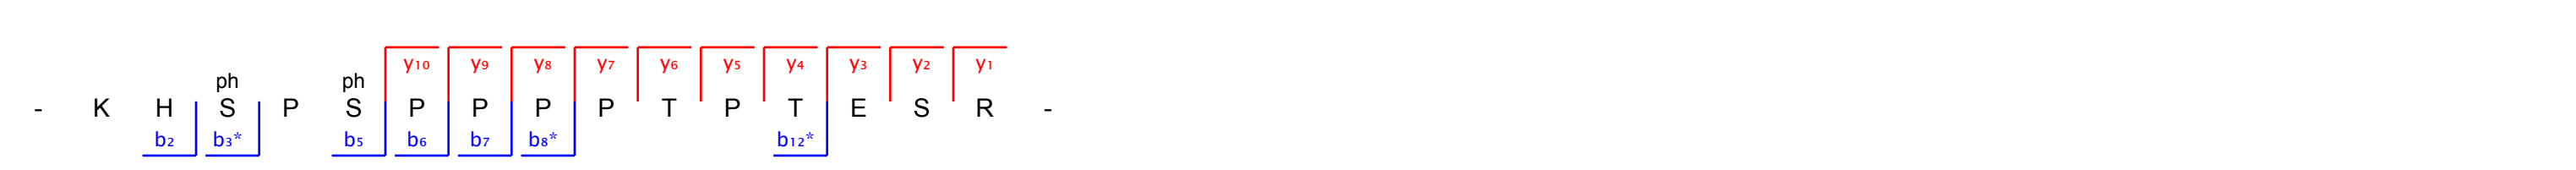

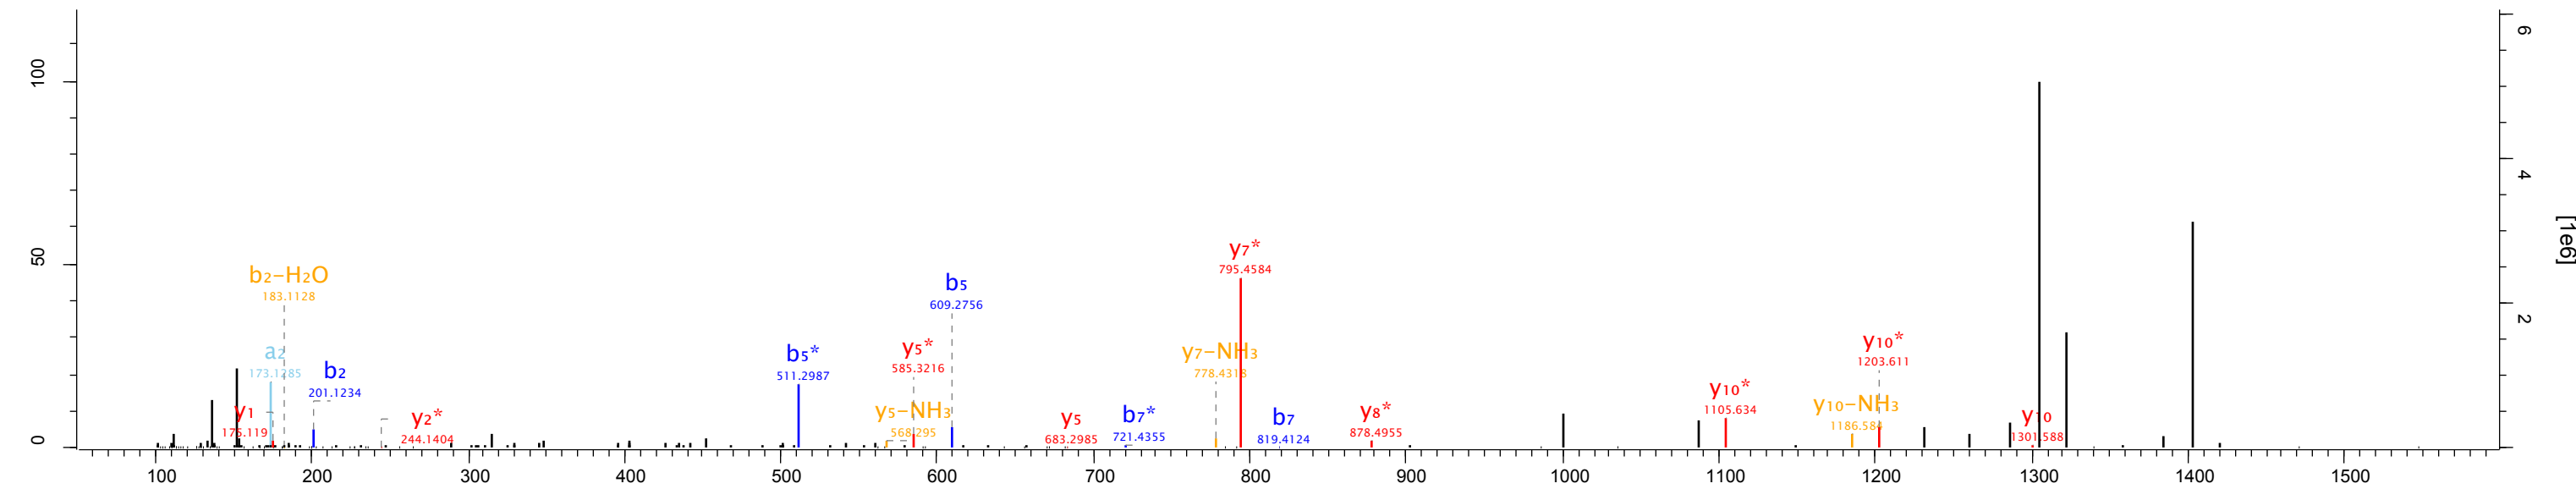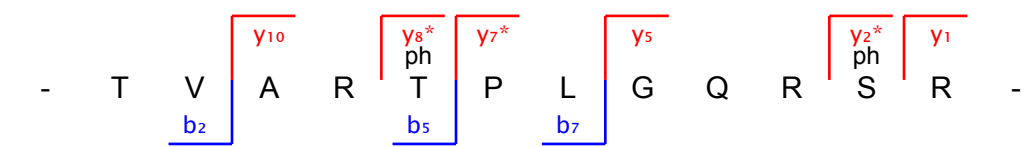

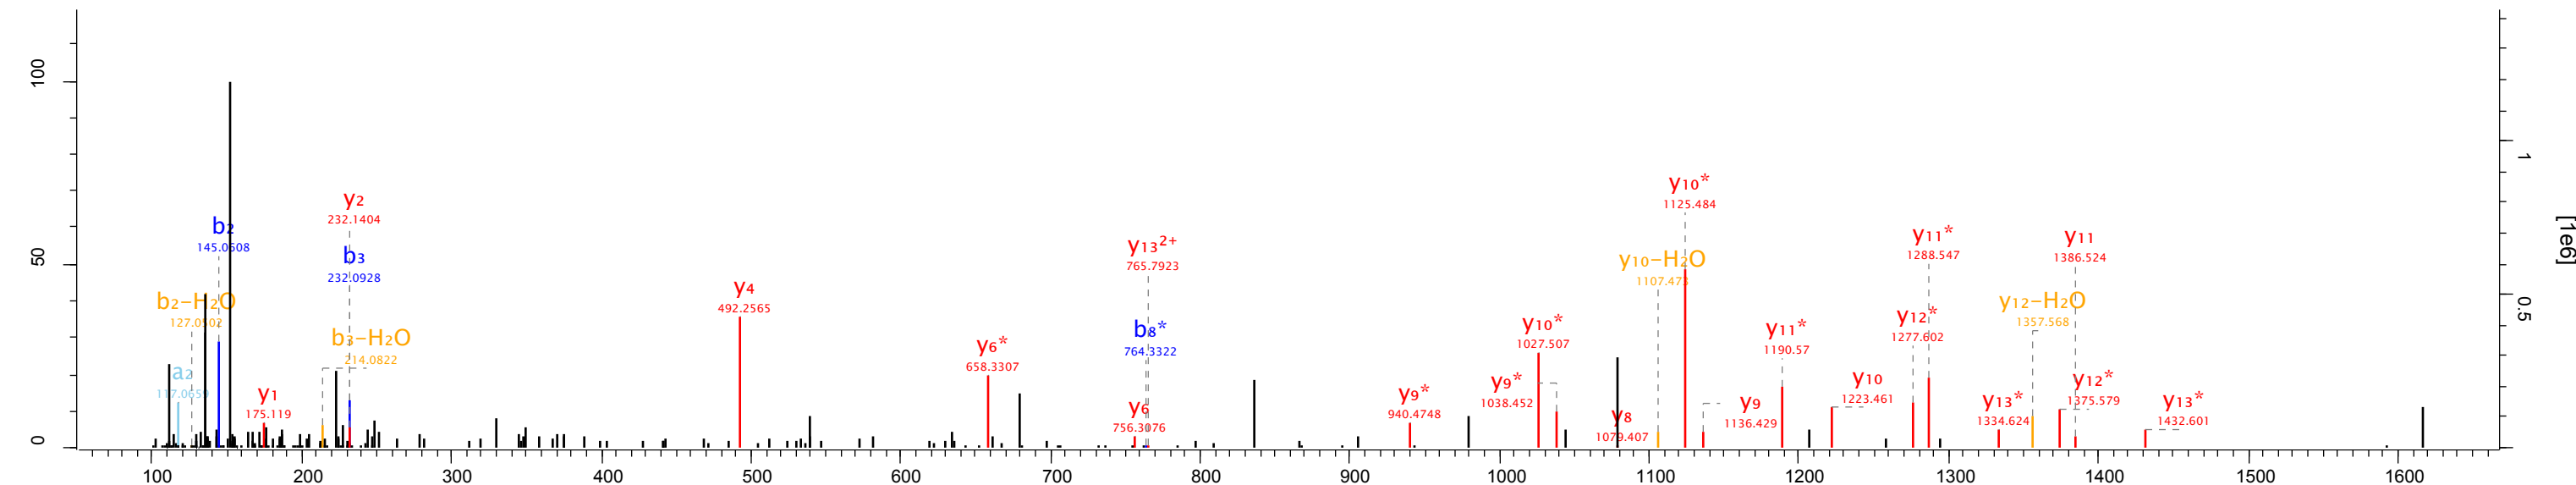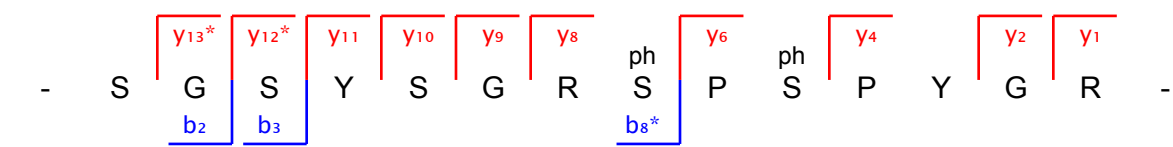

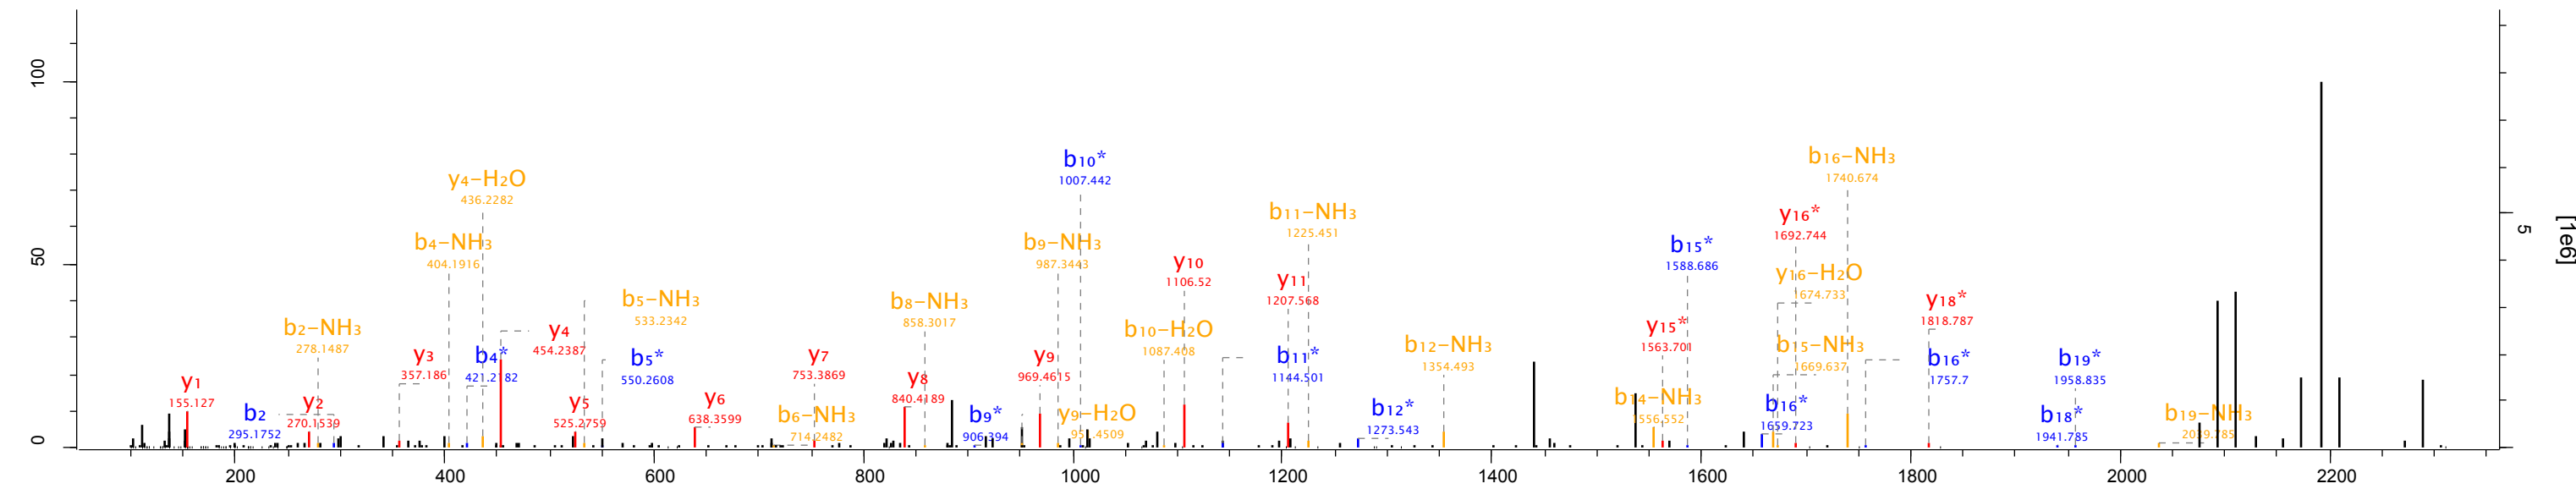

- Q R G S E T H E S D L A P S D K -

Fragmentation mapping:

- Red boxes: y18\* (G), y16\* (E), y15\* (ph), y11 (T), y10 (H), y9 (E), y8 (S), y7 (D), y6 (L), y5 (A), y4 (P), y3 (S), y2 (D), y1 (K)
- Blue boxes: b2 (R), b4\* (S), b5\* (E), b9\* (E), b10\* (T), b11\* (H), b12\* (E), b15\* (L), b16\* (A), b18\* (S), b19\* (D)

Raw file 20171215\_MaS\_33SR\_LMH\_phospho2\_03 Scan 4113 Method FTMS; HCD Score 156.48 m/z 934.79 Gene names TRIM44

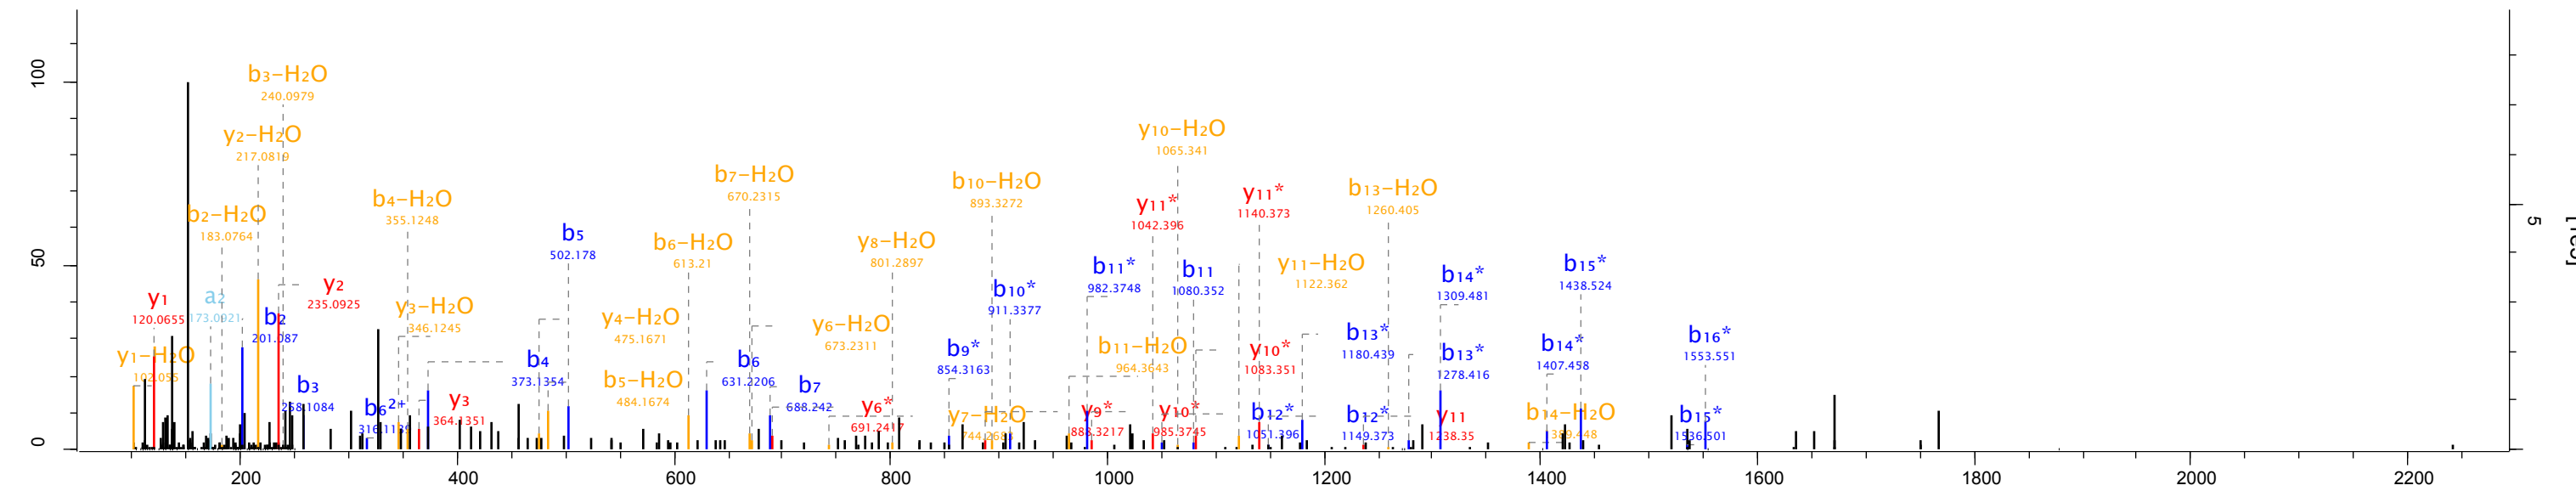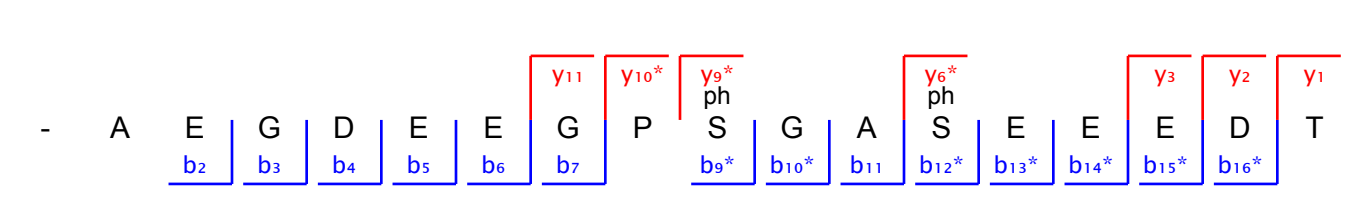



Raw file 20171215\_MaS\_33SR\_LMH\_phospho2\_03 Scan 4303 Method FTMS; HCD Score 321.31 m/z 1223.97 Gene names NUCKS1

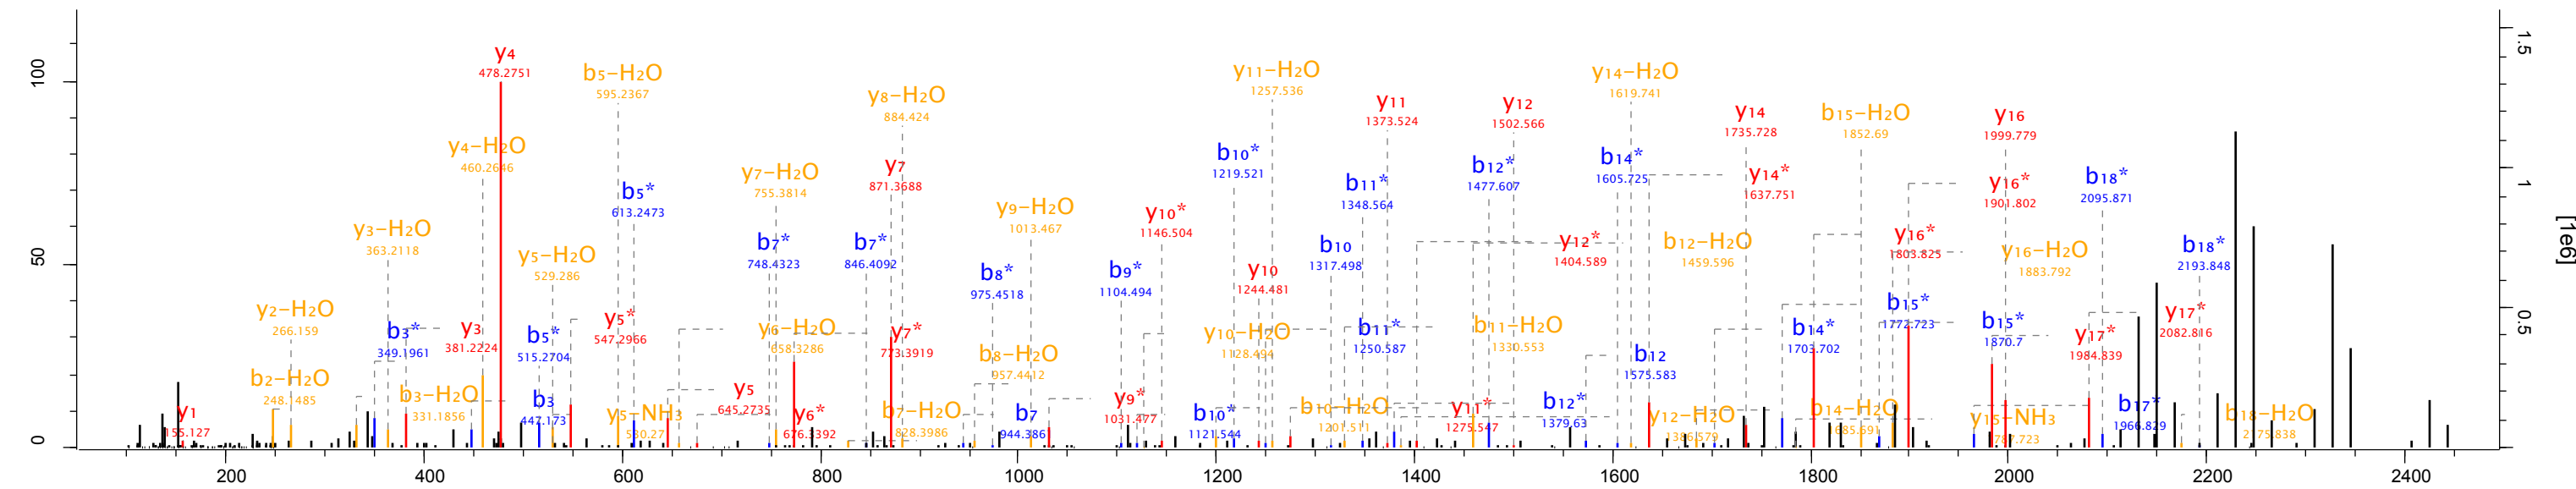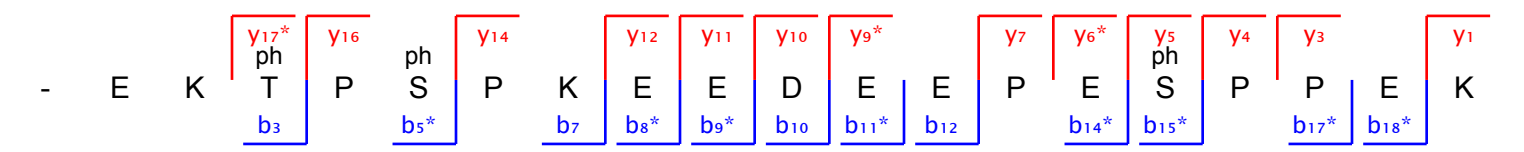

Raw file 20171215\_MaS\_33SR\_LMH\_phospho2\_03 Scan 4613 Method FTMS; HCD Score 320.44 m/z 1088.44 Gene names NCAPG

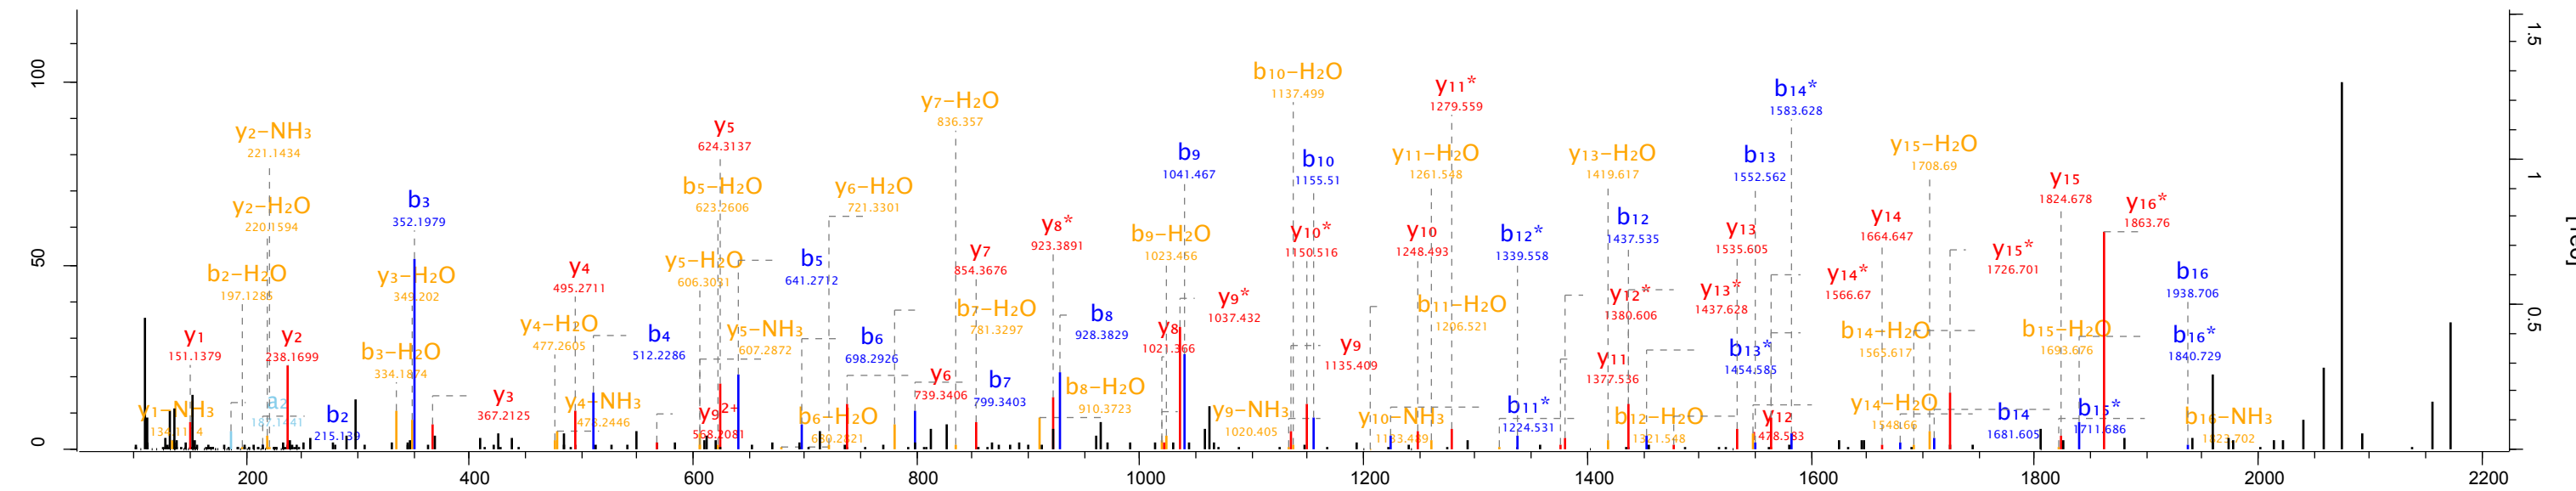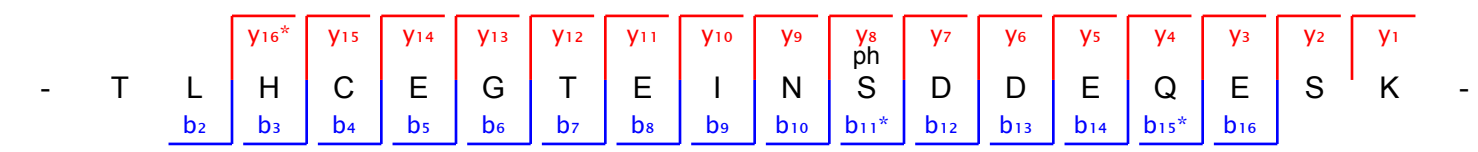

Raw file 20171215\_MaS\_33SR\_LMH\_phospho2\_03 Scan 4633 Method FTMS; HCD Score 105.5 m/z 785.84 Gene names SPTBN1

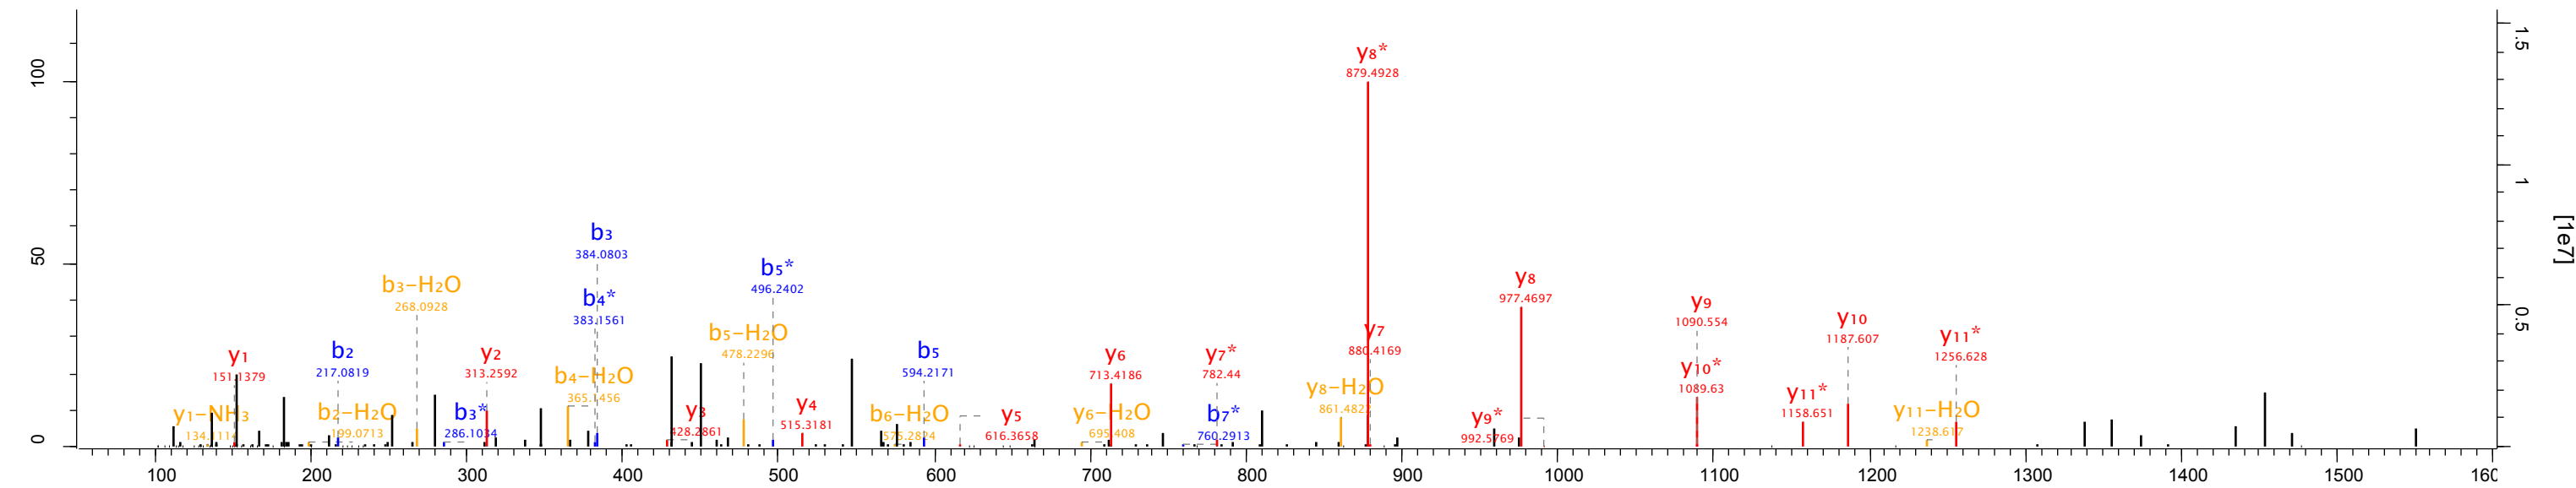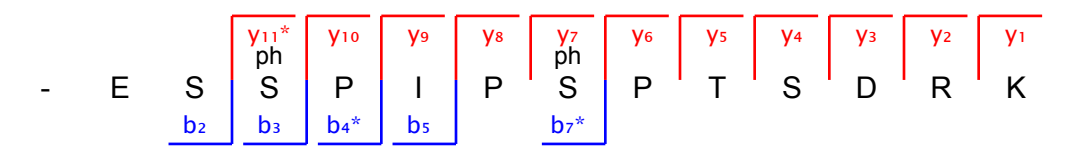

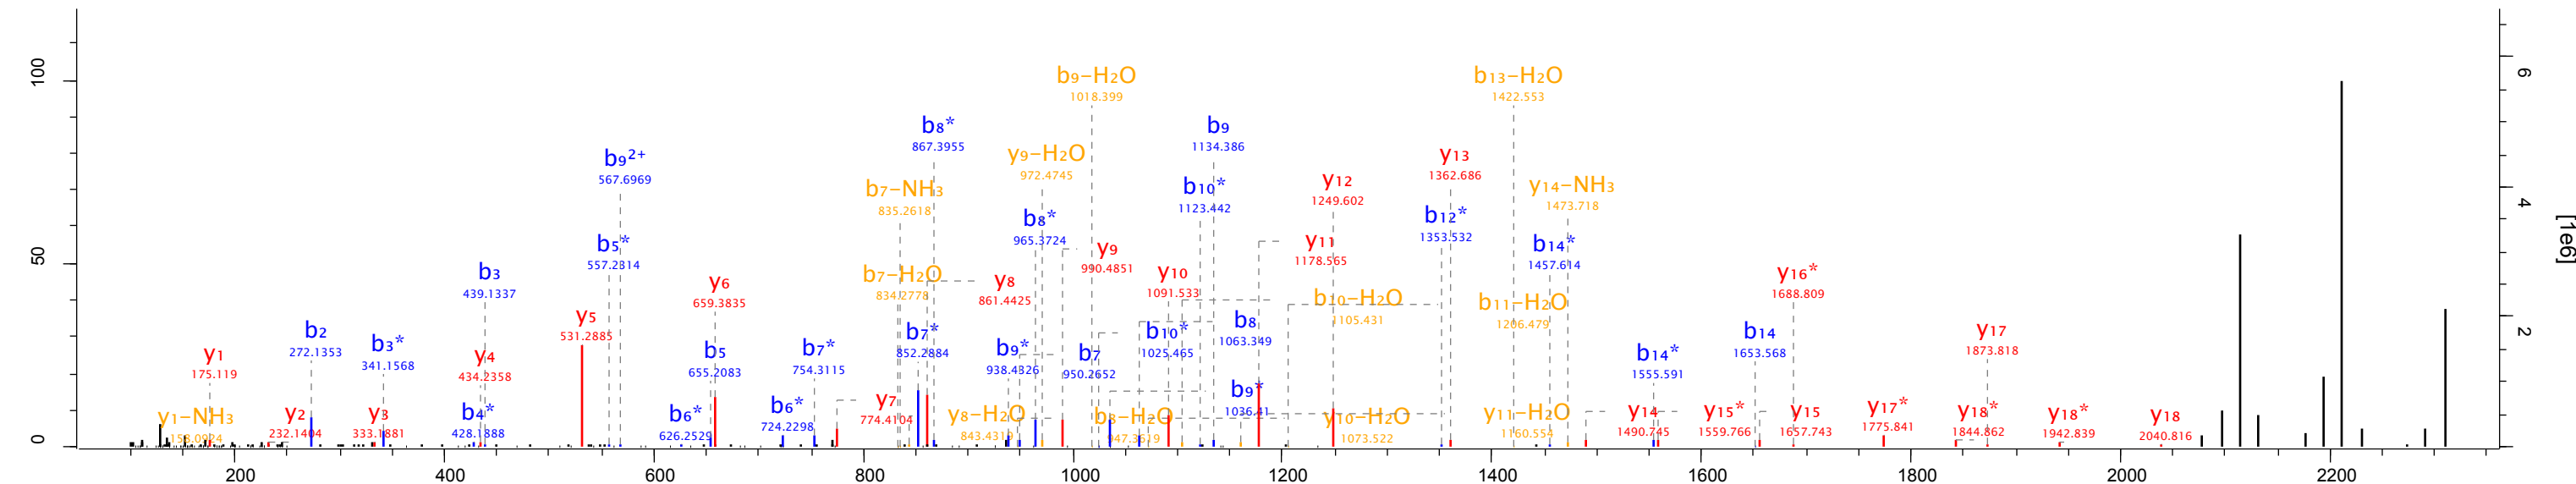

- R D S ph S E S ph S Q L A S T E S D K P T T G R -

b<sub>2</sub>
b<sub>3</sub>
b<sub>4</sub><sup>\*</sup>
b<sub>5</sub>
b<sub>6</sub><sup>\*</sup>
b<sub>7</sub>
b<sub>8</sub>
b<sub>9</sub>
b<sub>10</sub><sup>\*</sup>
b<sub>12</sub><sup>\*</sup>
b<sub>14</sub>

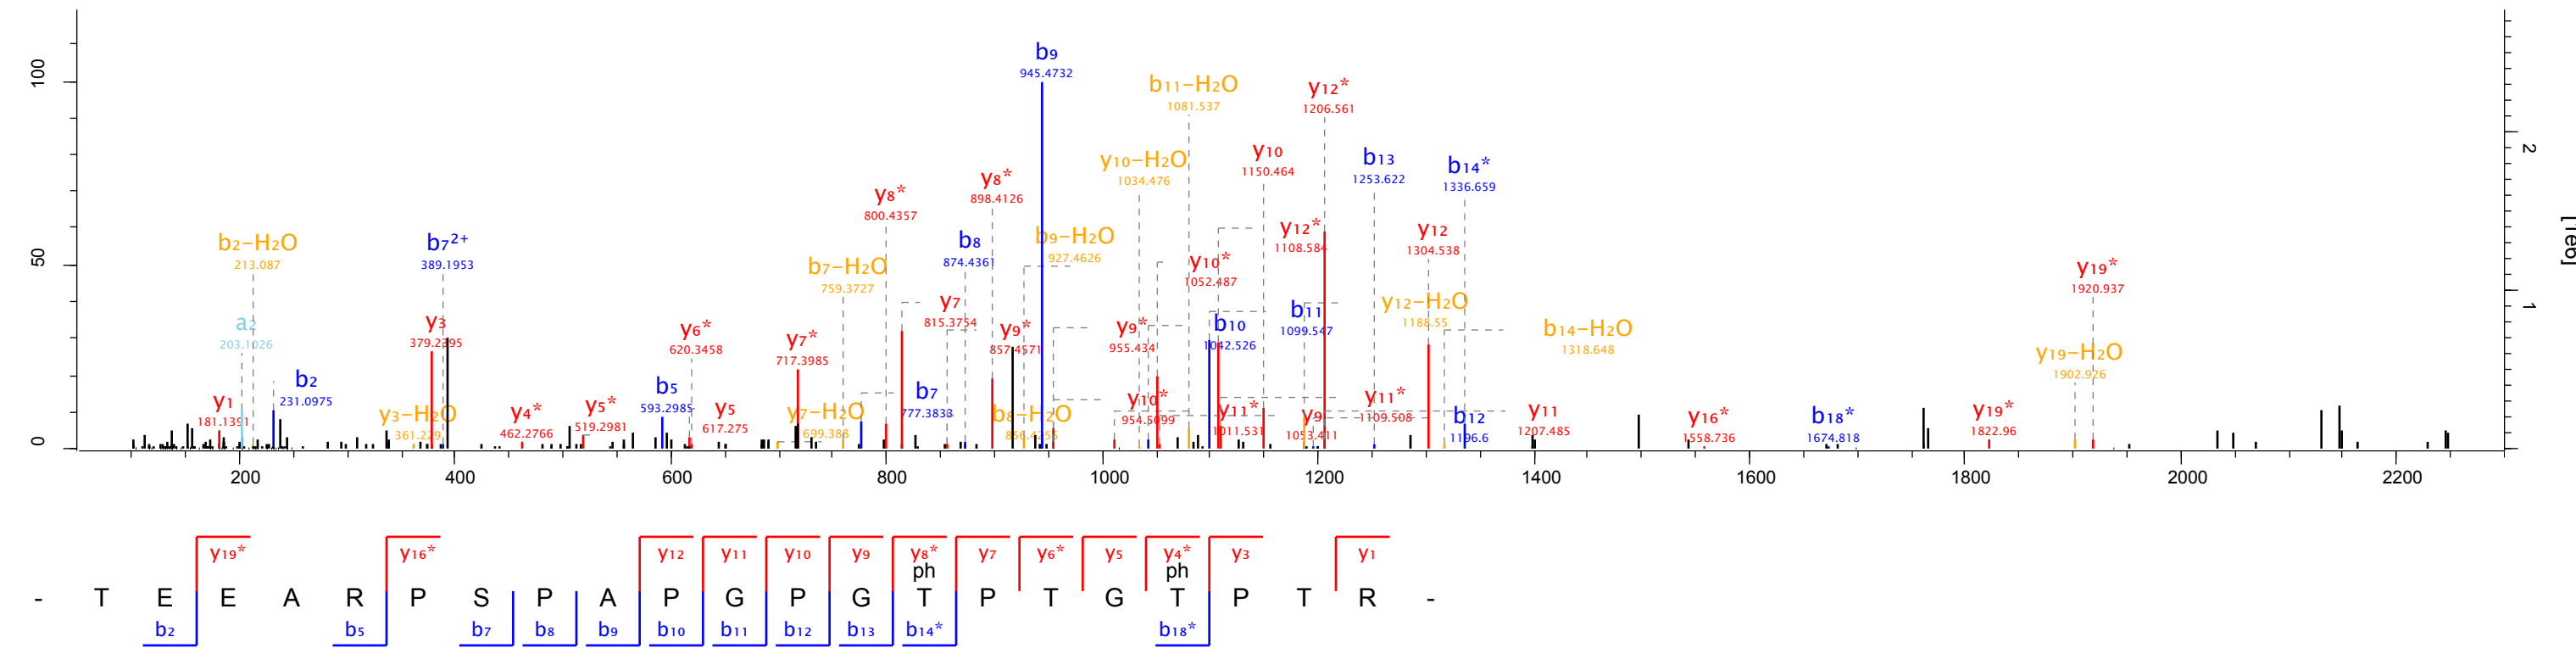

Raw file: 20171215\_MaS\_33SR\_LMH\_phospho2\_03  
 Scan: 5363 Method: FTMS; HCD Score: 111.96 m/z: 545.23 Gene names: PRPF4B

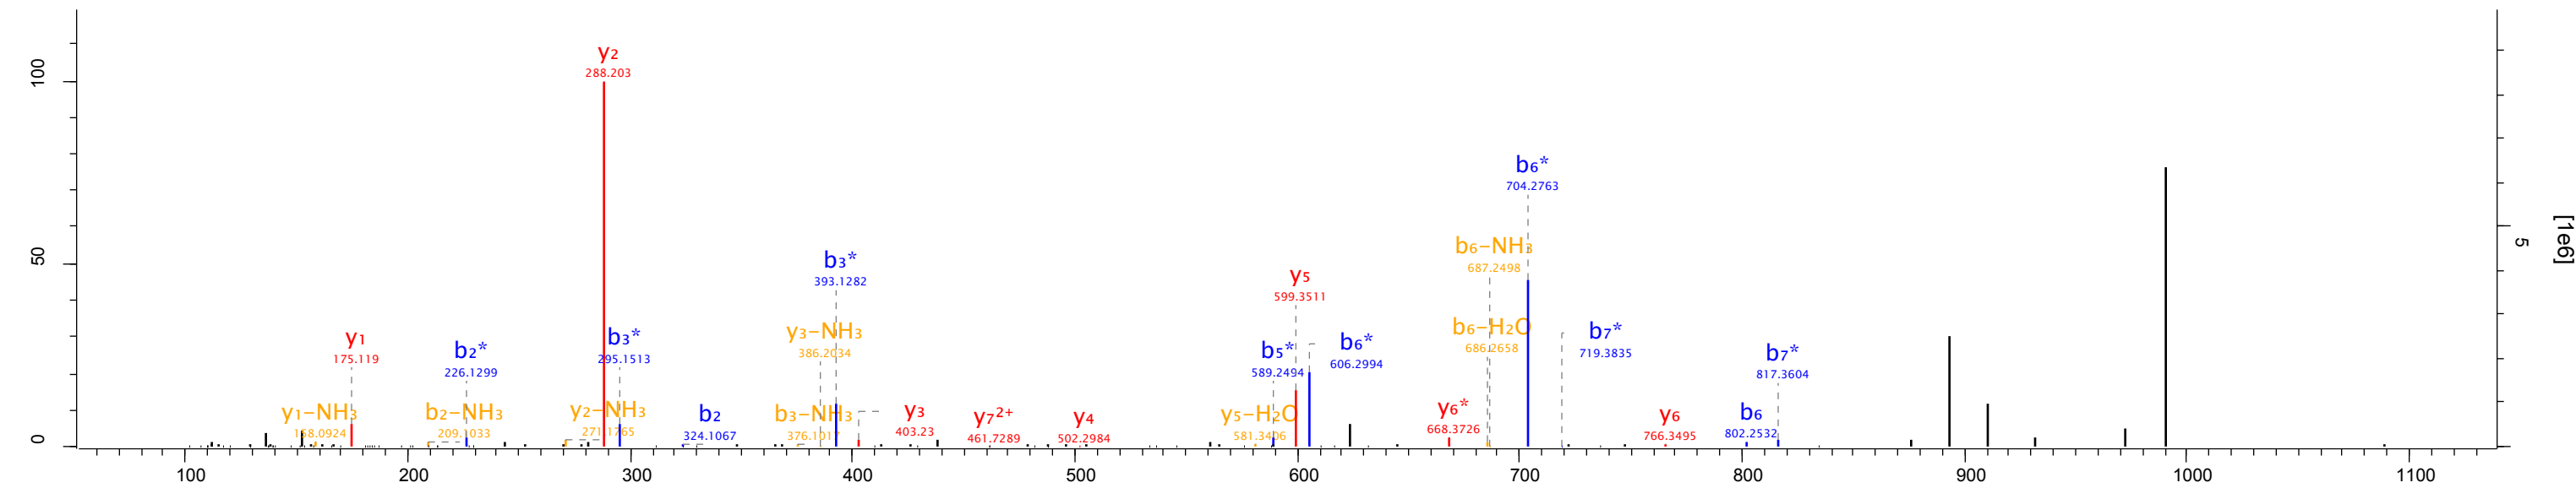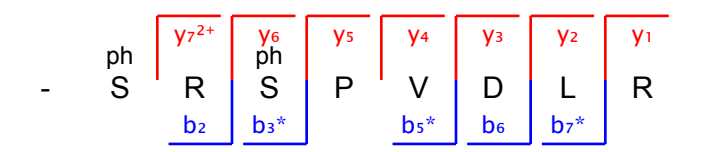

Raw file 20171215\_MaS\_33SR\_LMH\_phospho2\_03 Scan 5533 Method FTMS; HCD Score 53.35 m/z 605.95 Gene names NAV3

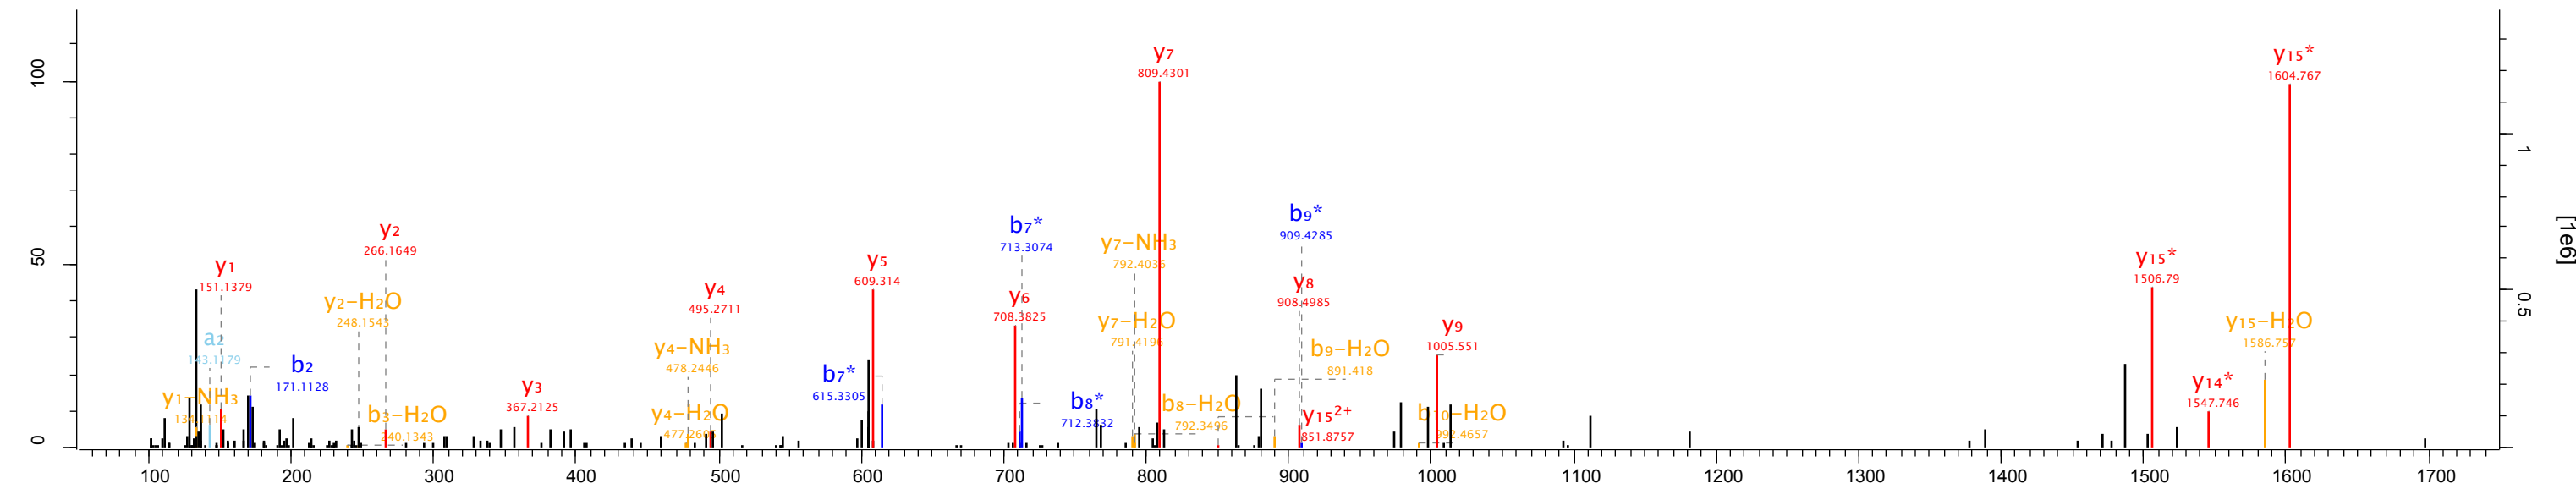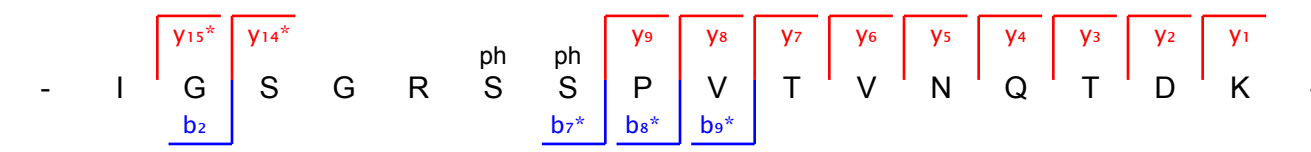

Raw file 20171215\_MaS\_33SR\_LMH\_phospho2\_03 Scan 5713 Method FTMS; HCD Score 78.67 m/z 543.91 Gene names ACIN1

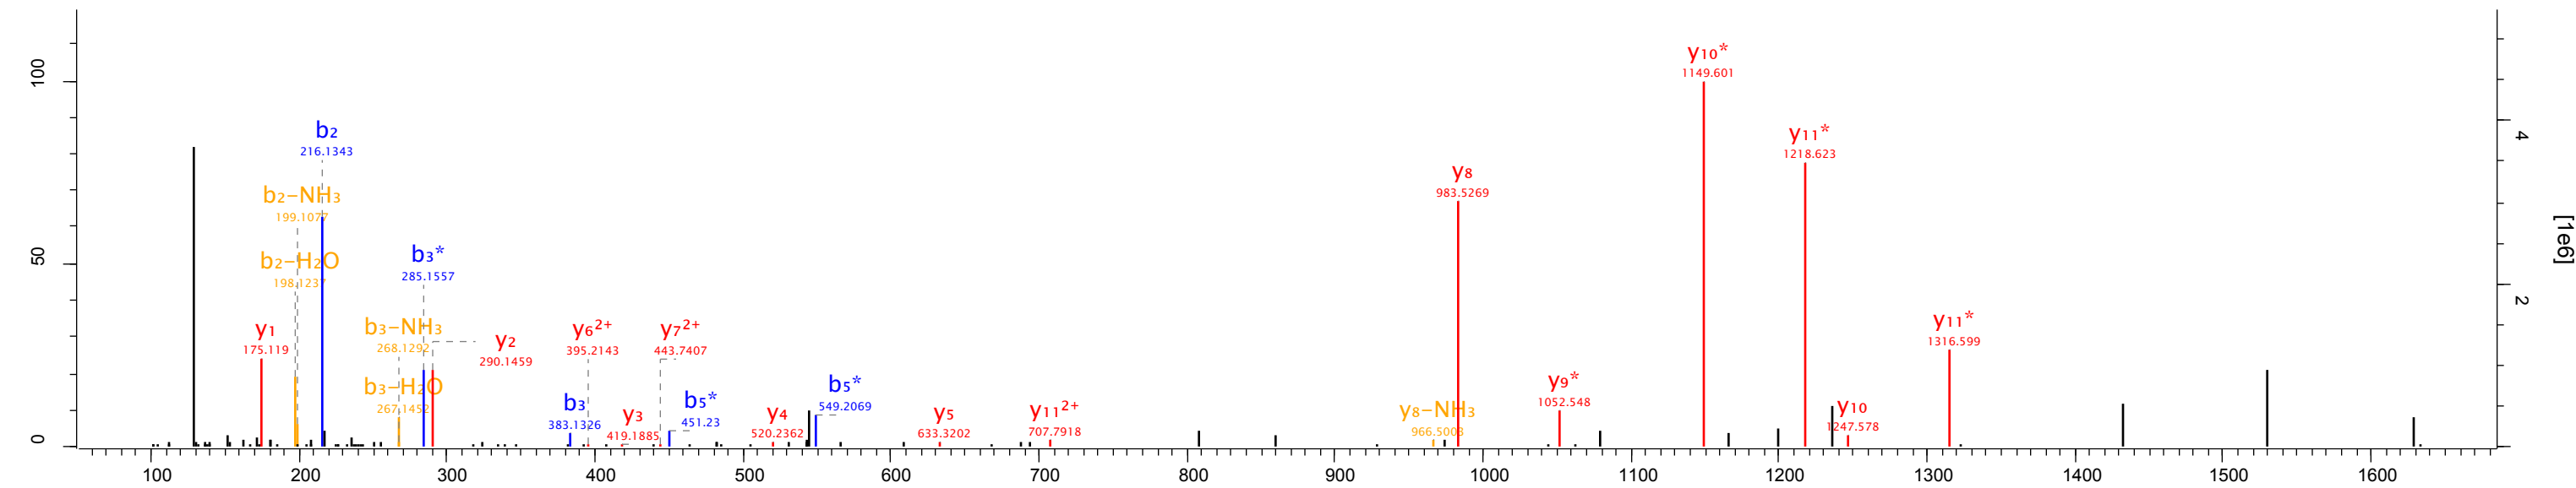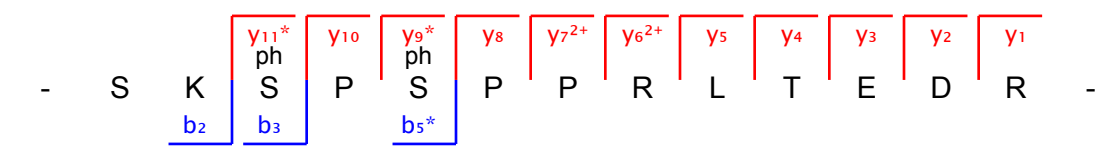



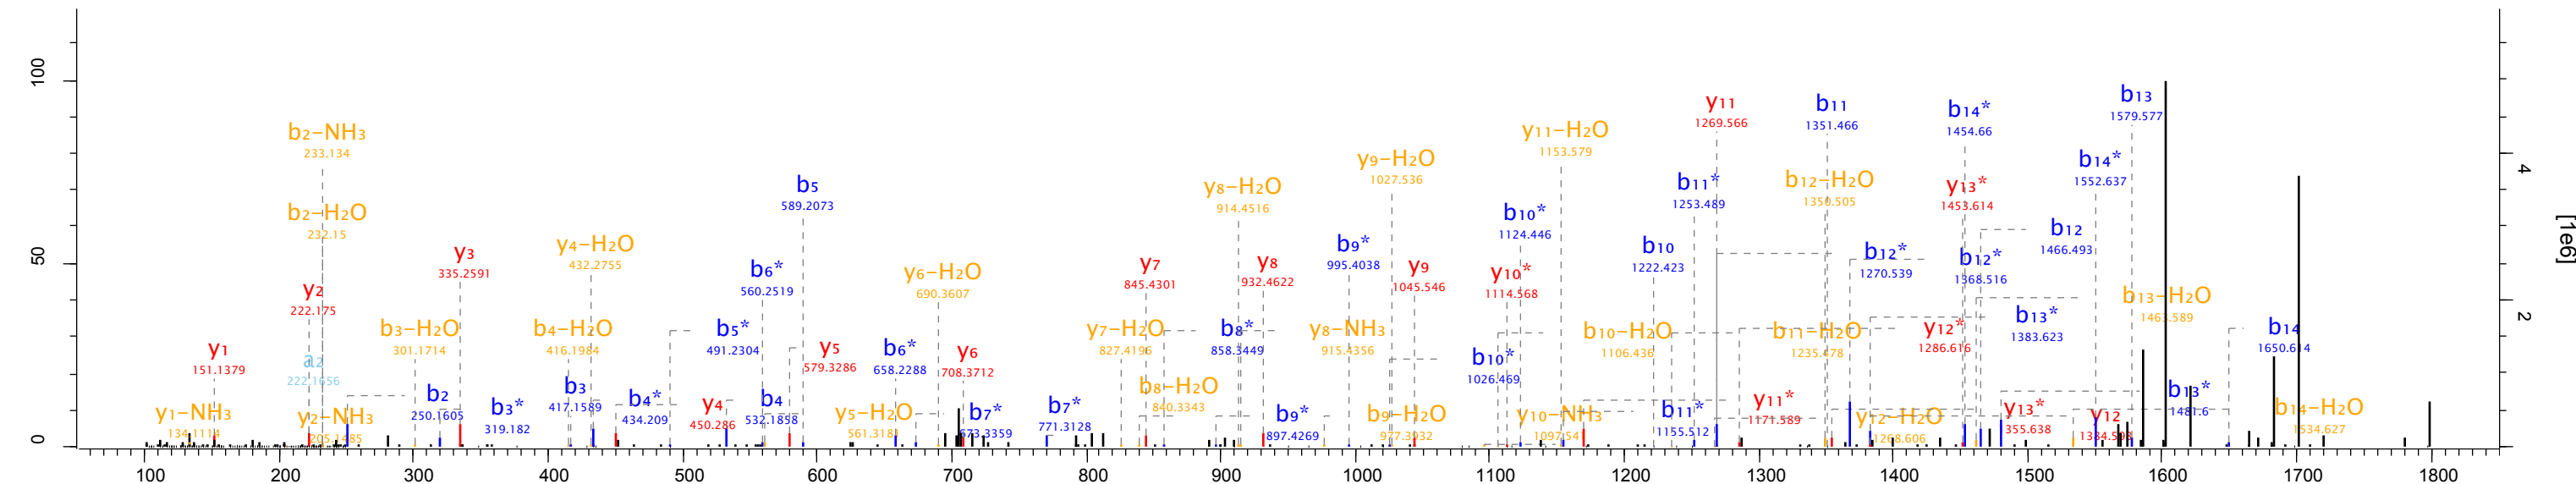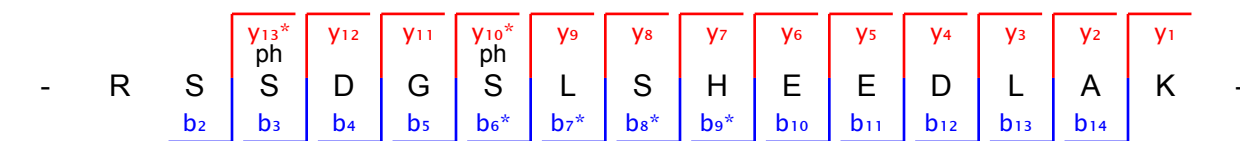

Raw file

20171215\_MaS\_33SR\_LMH\_phospho2\_03

| Scan | Method    | Score | m/z    | Gene names |
|------|-----------|-------|--------|------------|
| 6053 | FTMS; HCD | 74.11 | 844.87 | ZNF532     |

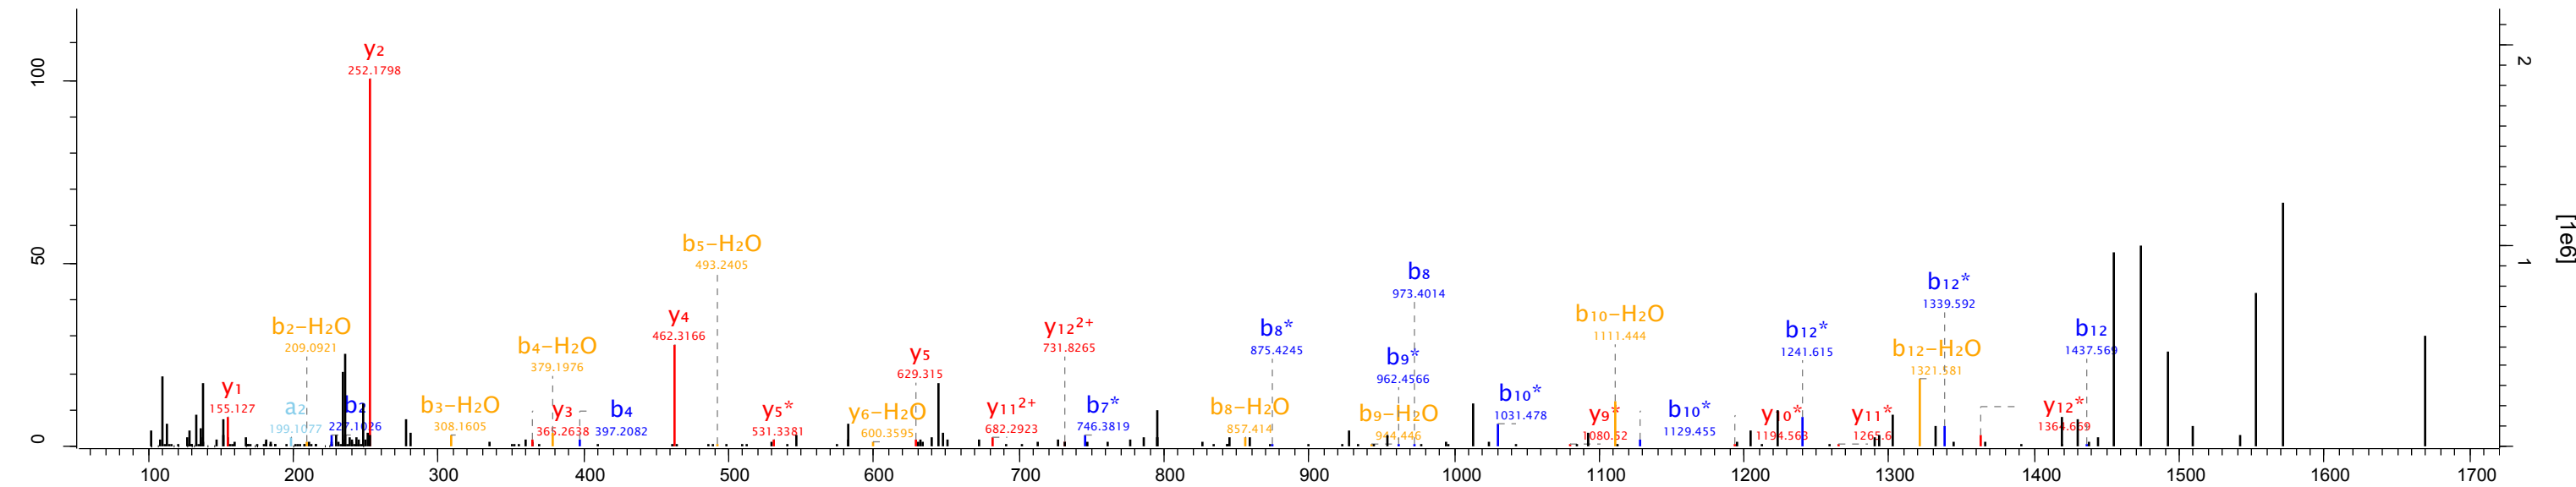

- E P V A N S R E S S P L P K -

b<sub>2</sub>
y<sub>12</sub><sup>\*</sup>
y<sub>11</sub><sup>\*</sup>
y<sub>10</sub><sup>\*</sup>
y<sub>9</sub><sup>ph</sup>
y<sub>4</sub>
y<sub>3</sub>
y<sub>2</sub>
y<sub>1</sub>

b<sub>4</sub>
b<sub>7</sub><sup>\*</sup>
b<sub>8</sub>
b<sub>9</sub><sup>\*</sup>
b<sub>10</sub><sup>\*</sup>
b<sub>12</sub>

Raw file

20171215\_MaS\_33SR\_LMH\_phospho2\_03

| Scan | Method    | Score | m/z    | Gene names |
|------|-----------|-------|--------|------------|
| 6233 | FTMS; HCD | 79.69 | 581.58 | NDRG1      |

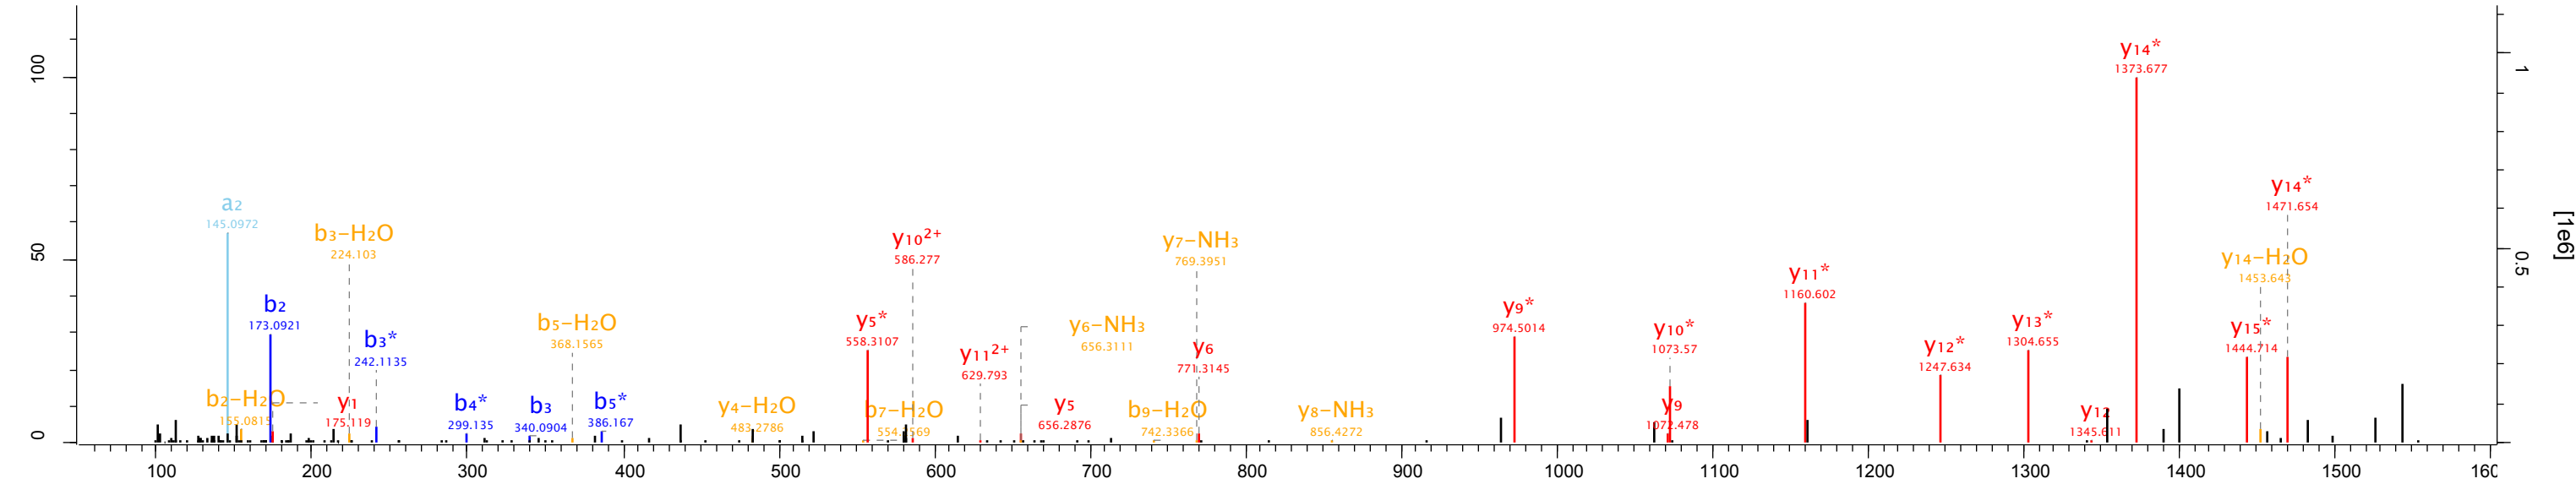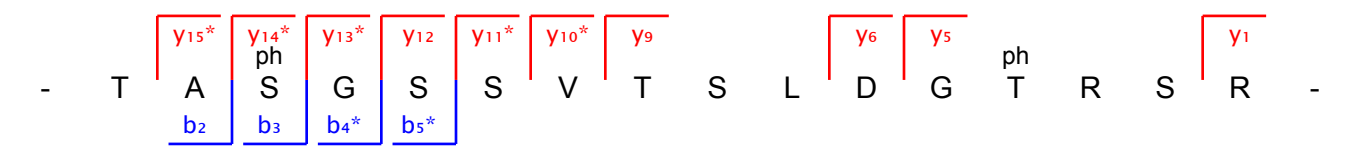

Raw file: 20171215\_MaS\_33SR\_LMH\_phospho2\_03  
 Scan: 6263 Method: FTMS; HCD Score: 68.58 m/z: 490.23 Gene names: DOT1L

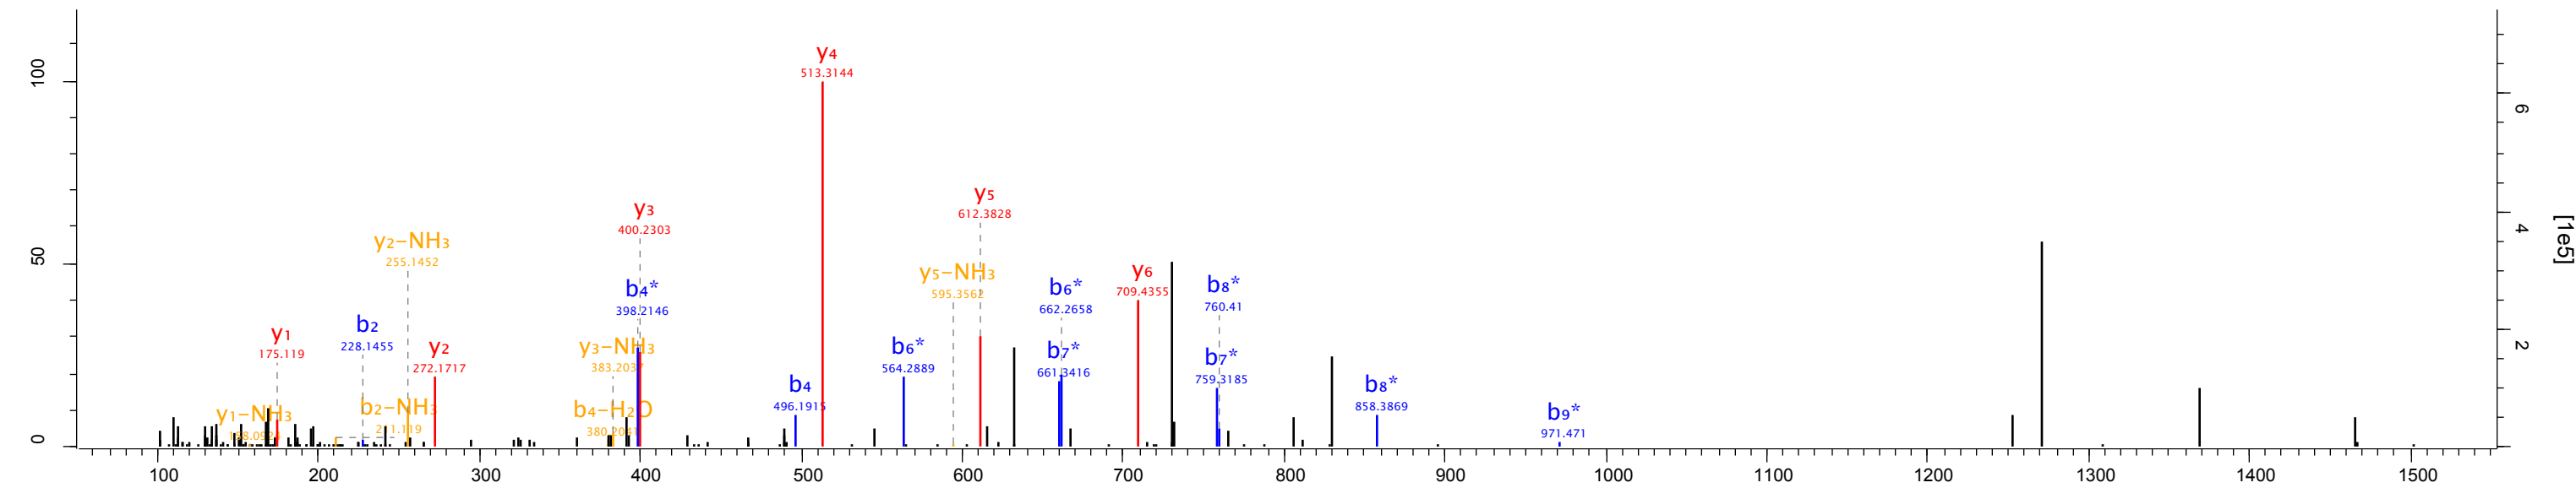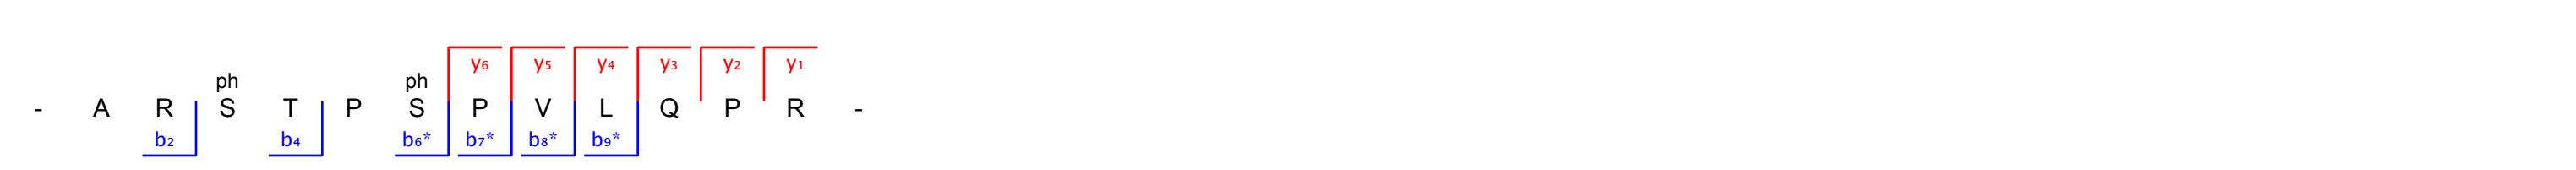

Raw file 20171215\_MaS\_33SR\_LMH\_phospho2\_03 Scan 6283 Method FTMS; HCD Score 78.4 m/z 536.76 Gene names TPX2

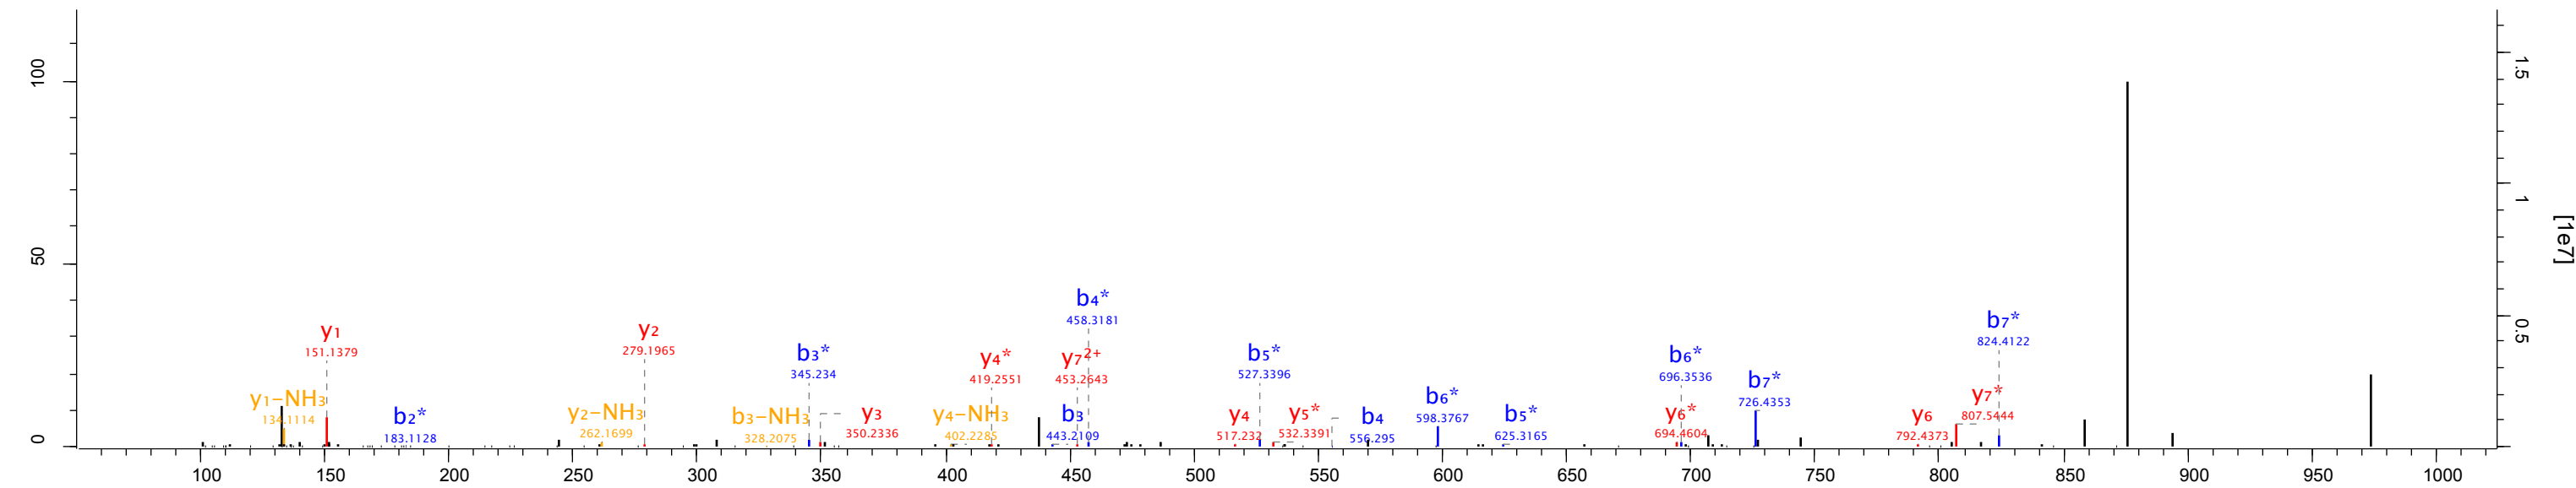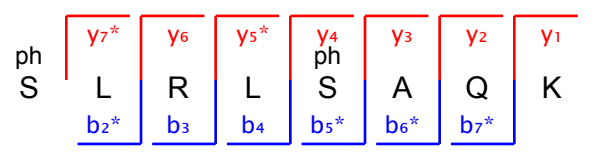

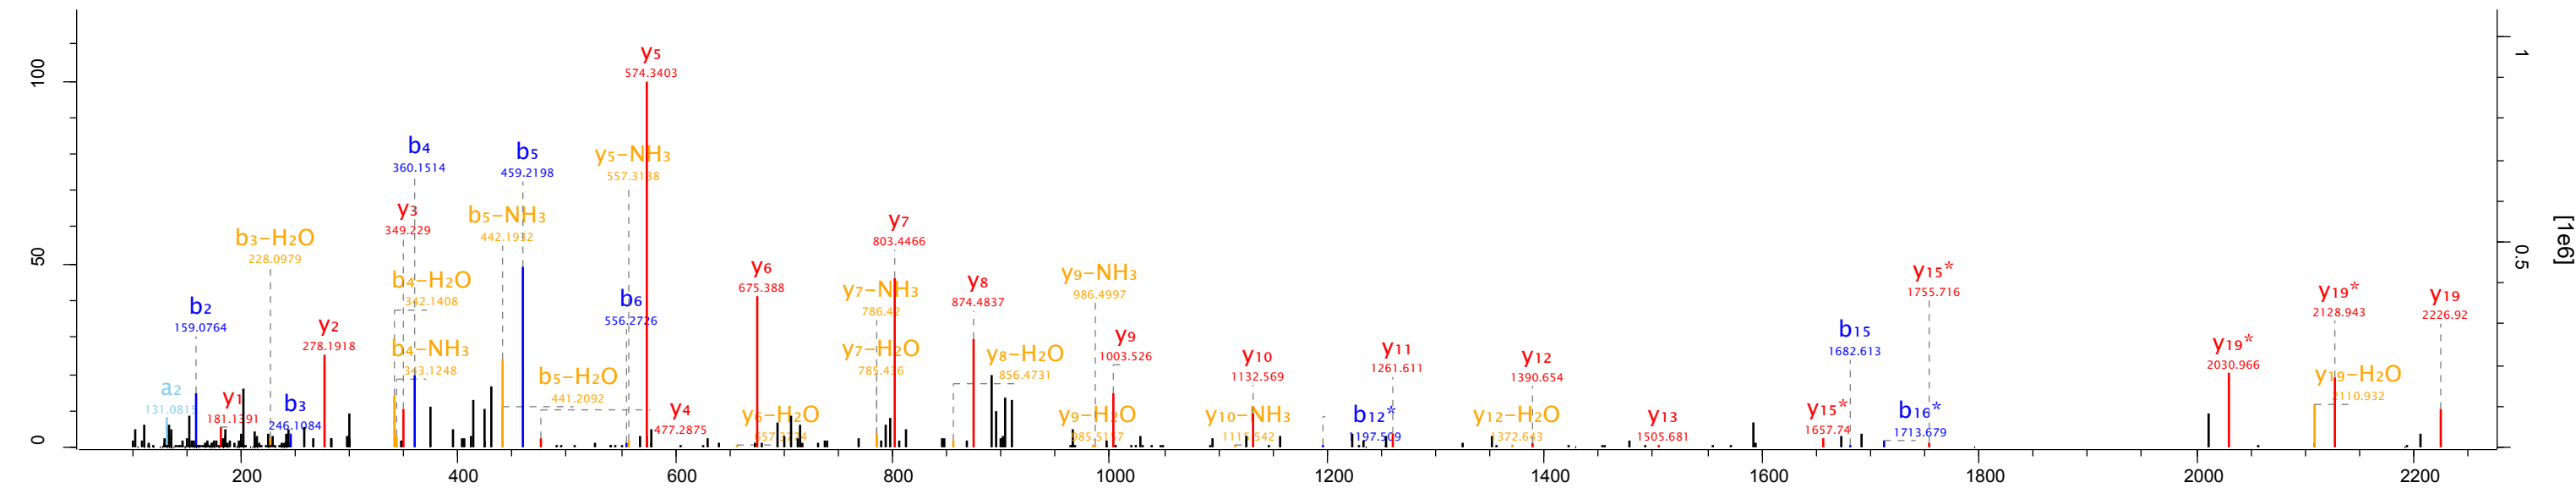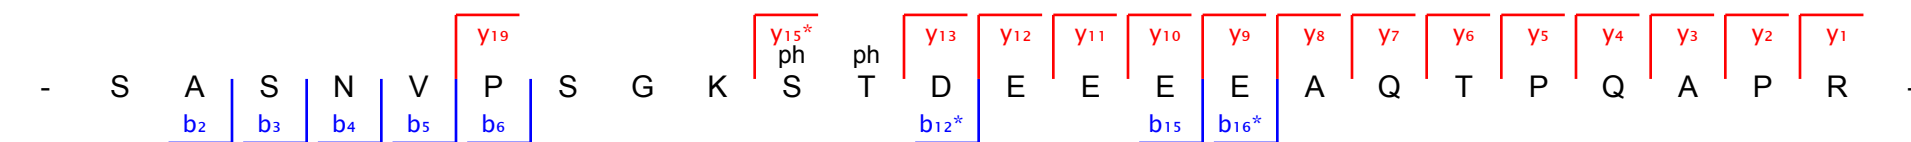

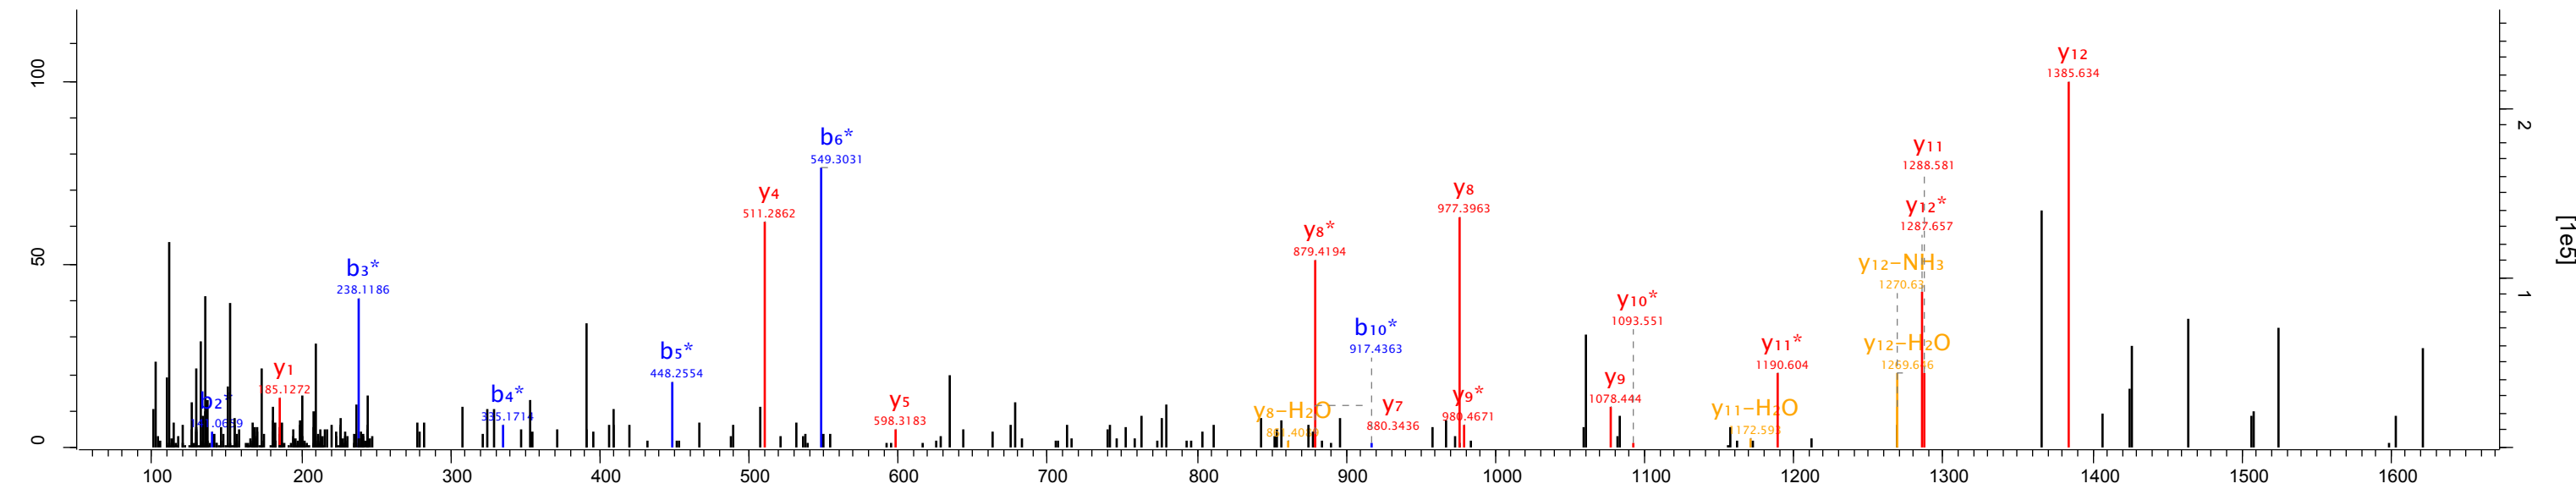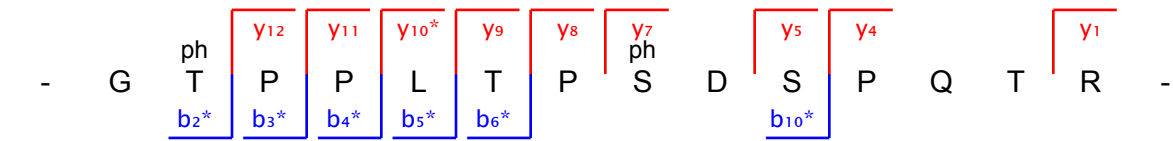

Raw file 20171215\_MaS\_33SR\_LMH\_phospho2\_03 Scan 7113 Method FTMS; HCD Score 109.04 m/z 637.27 Gene names BCL9L

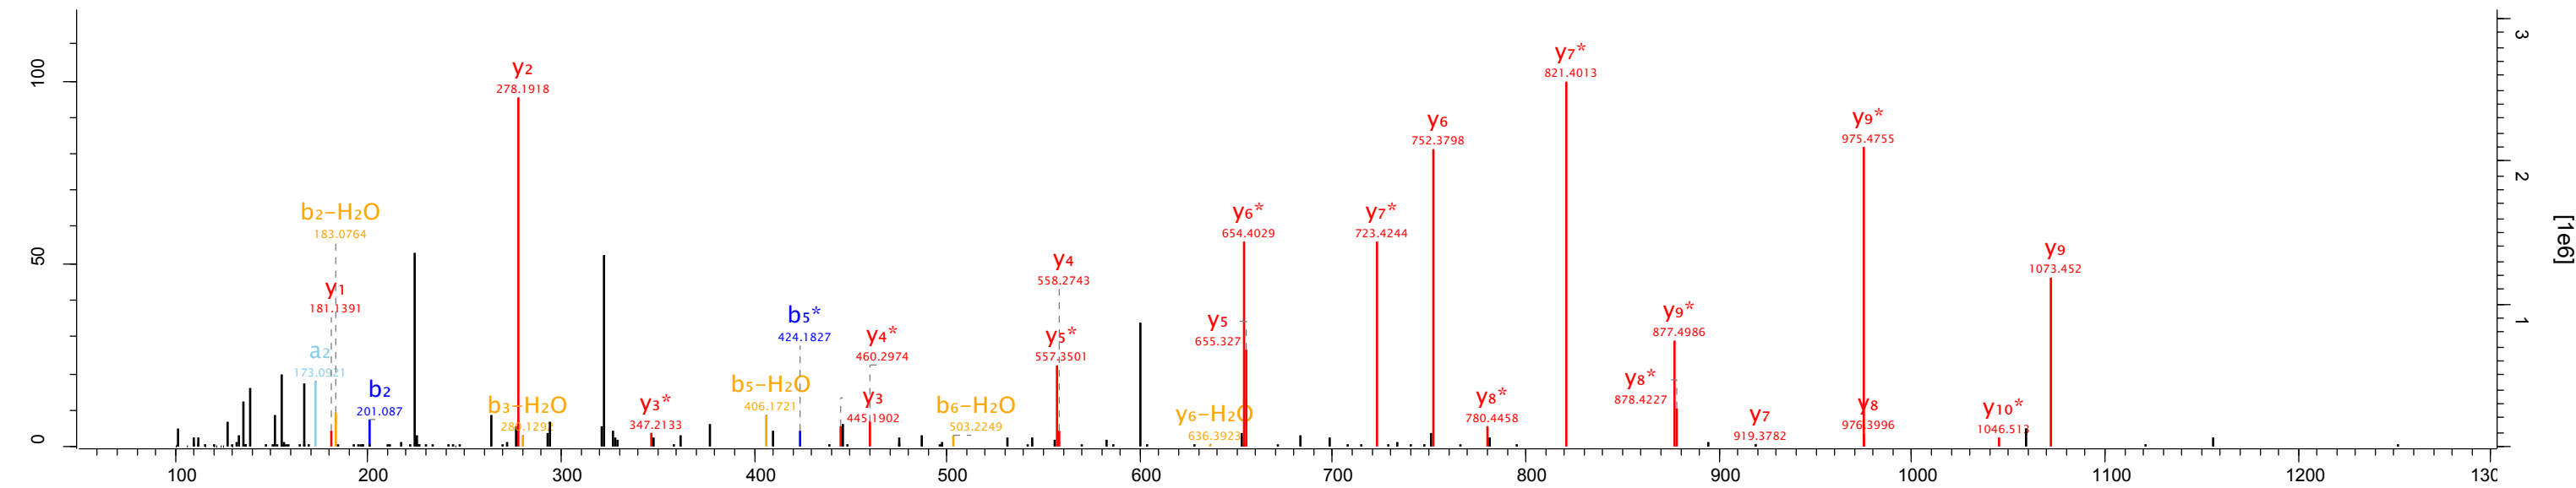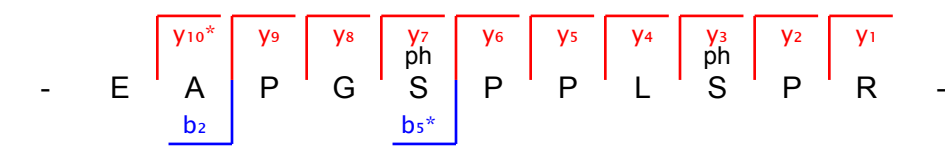



Raw file: 20171215\_MaS\_33SR\_LMH\_phospho2\_03  
 Scan: 7123 Method: FTMS; HCD Score: 135.16 m/z: 574.25 Gene names: SVIL

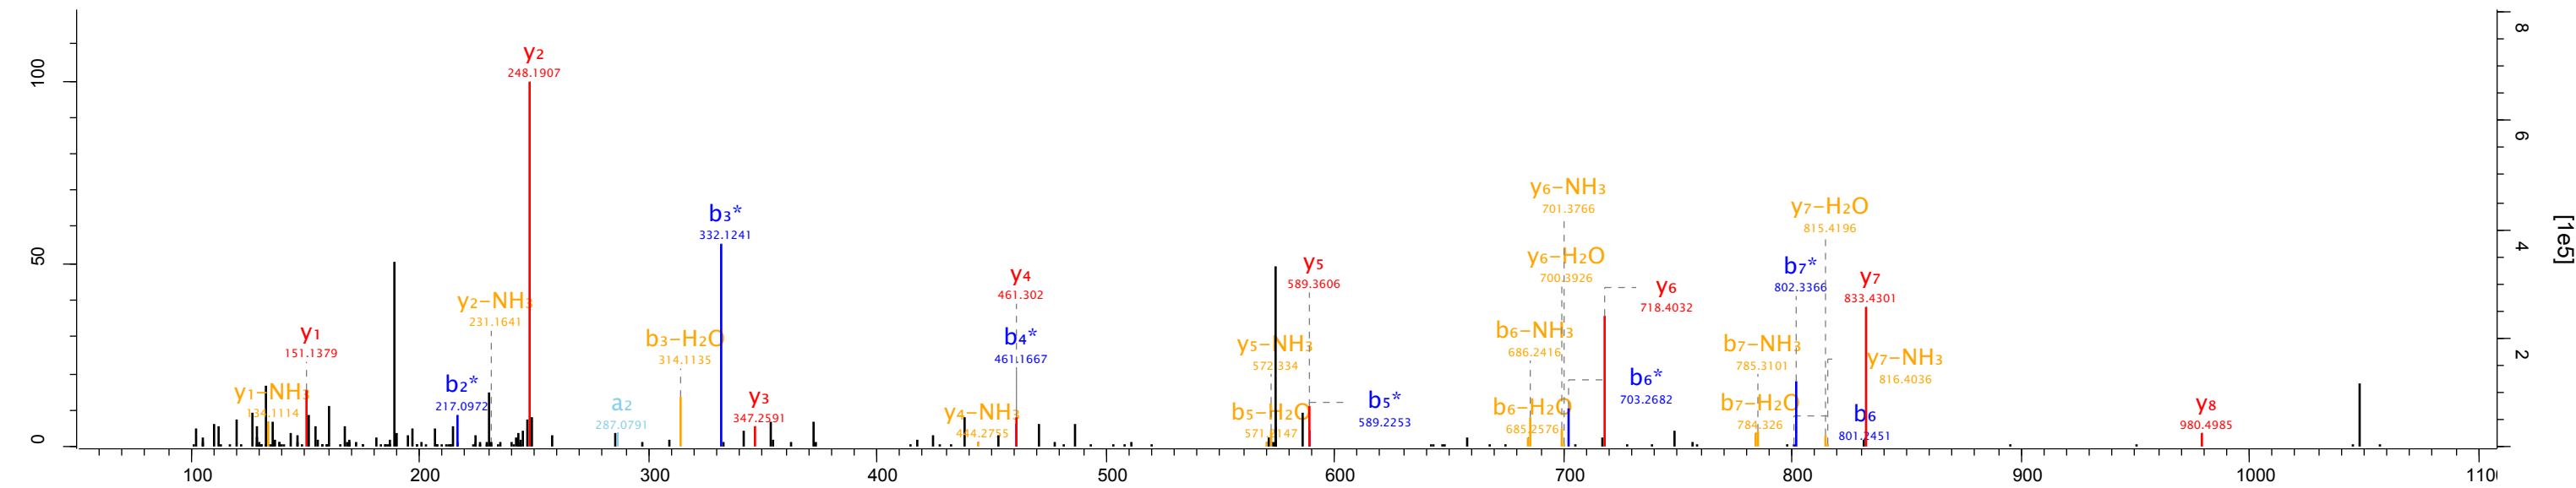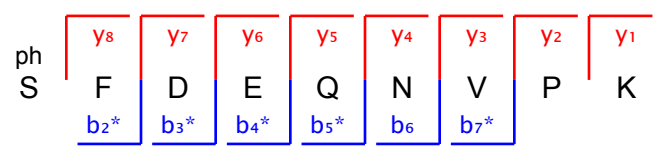

Raw file  
20171215\_MaS\_33SR\_LMH\_phospho2\_03

Scan 7753 Method FTMS; HCD Score 179.84 m/z 800.29 Gene names NSD1

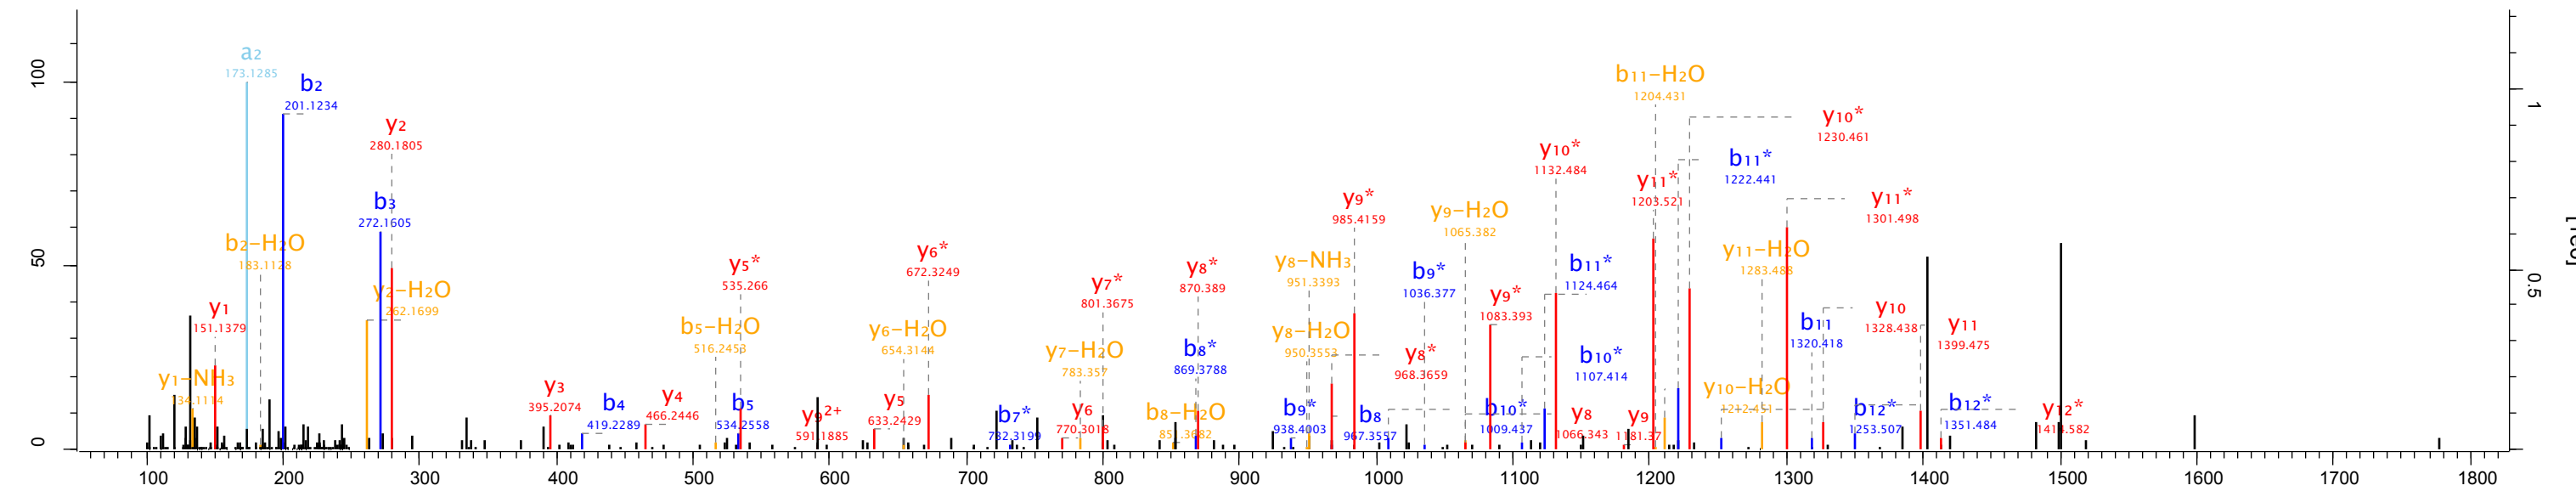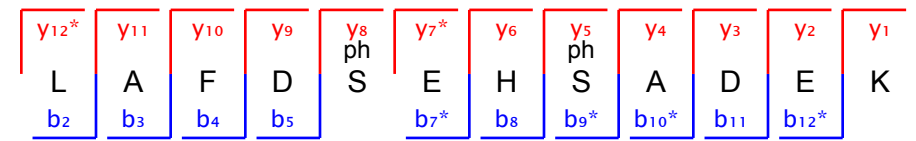

Raw file 20171215\_MaS\_33SR\_LMH\_phospho2\_03 Scan 7893 Method FTMS; HCD Score 142.45 m/z 923.91 Gene names MAP3K3

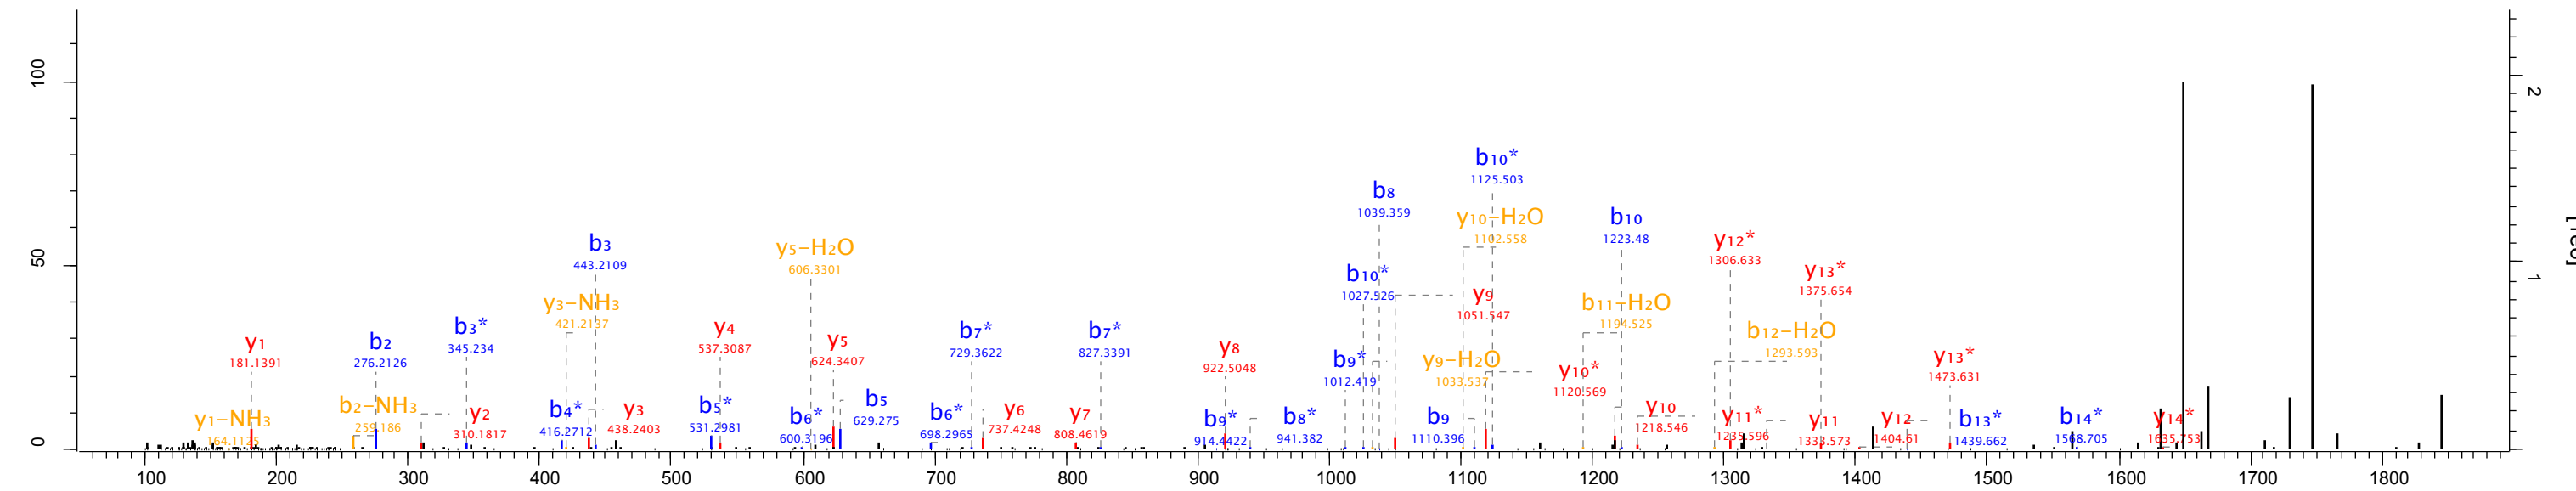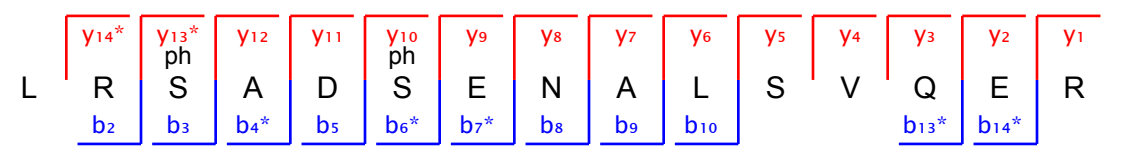

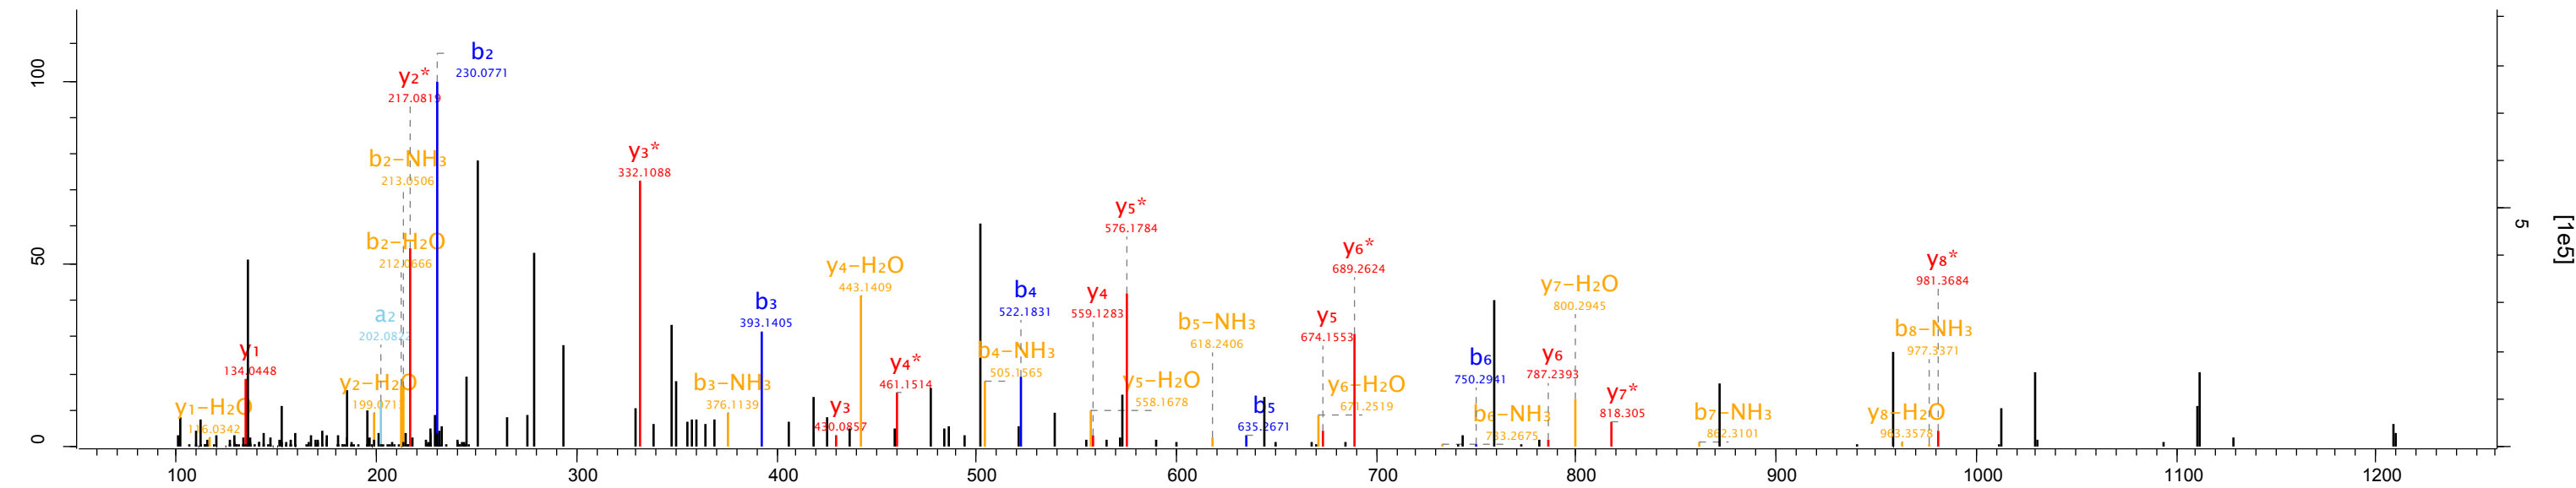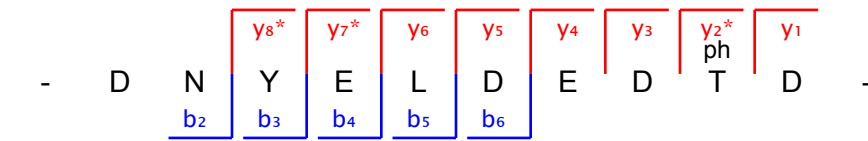

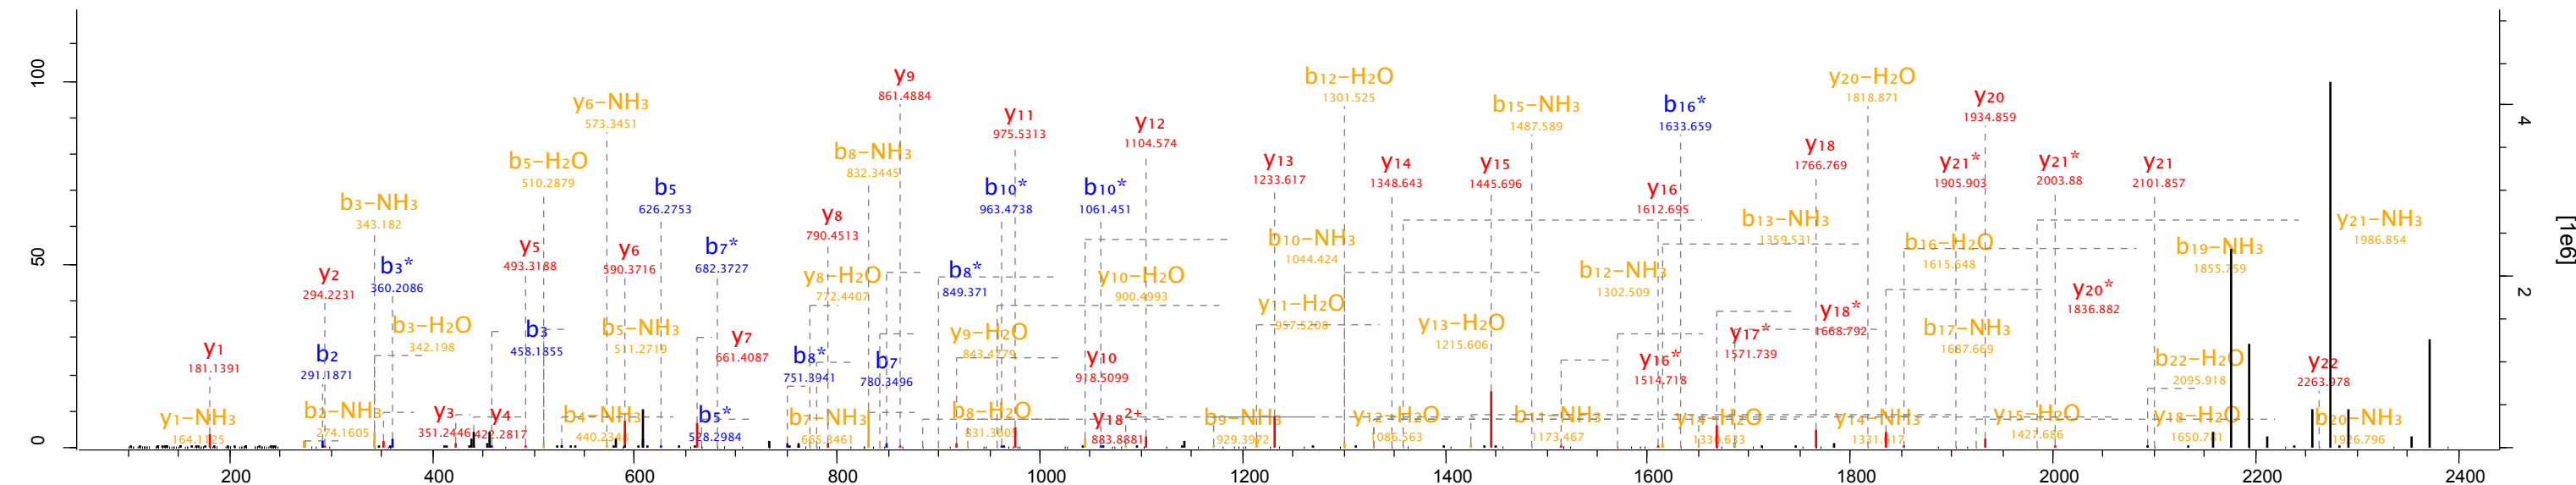

- Q R S P A P G S P D E E G G A E A P A A G I R -  
 y22 y21 ph y20 y18 y17\* y16 ph y15 y14 y13 y12 y11 y10 y9 y8 y7 y6 y5 y4 y3 y2 y1  
 b2 b3 b5 b7 b8\* b10\* b16\*

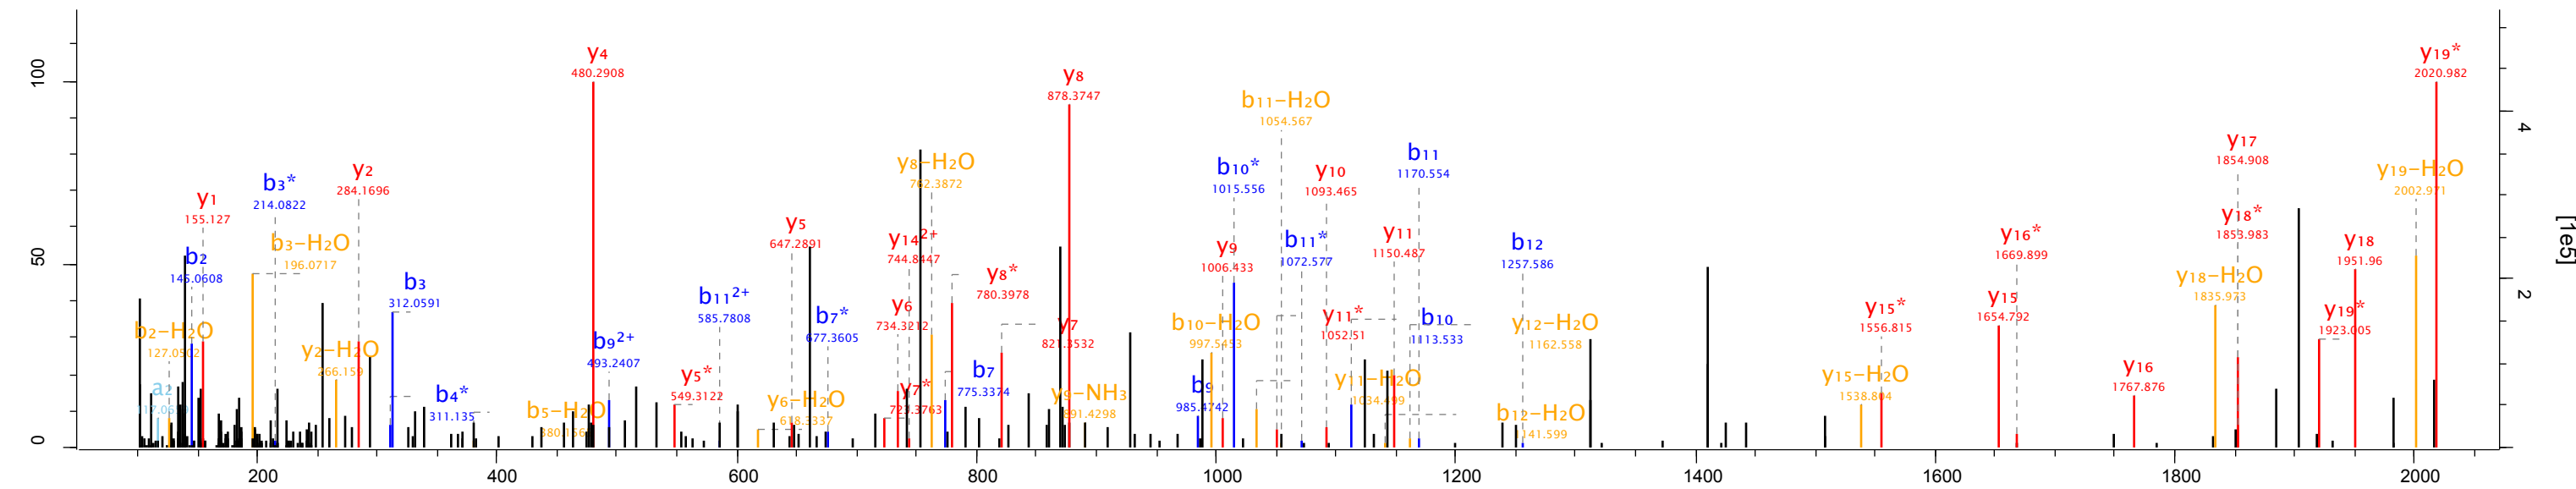

- G S S P S I R P I Q G S Q G S S S P V E K -

Labels below the sequence:

- b<sub>2</sub> (under S)
- b<sub>3</sub> (under S)
- b<sub>4</sub><sup>\*</sup> (under P)
- b<sub>7</sub> (under R)
- b<sub>9</sub> (under I)
- b<sub>10</sub> (under Q)
- b<sub>11</sub> (under G)
- b<sub>12</sub> (under S)

Labels above the sequence:

- y<sub>19</sub><sup>\*</sup> ph (above S)
- y<sub>18</sub> (above P)
- y<sub>17</sub> (above S)
- y<sub>16</sub> (above I)
- y<sub>15</sub> (above R)
- y<sub>14</sub><sup>2+</sup> (above P)
- y<sub>11</sub> (above G)
- y<sub>10</sub> (above S)
- y<sub>9</sub> (above Q)
- y<sub>8</sub> (above G)
- y<sub>7</sub> (above S)
- y<sub>6</sub> (above S)
- y<sub>5</sub> ph (above S)
- y<sub>4</sub> (above P)
- y<sub>2</sub> (above E)
- y<sub>1</sub> (above K)

Raw file 20171215\_MaS\_33SR\_LMH\_phospho2\_03 Scan 8493 Method FTMS; HCD Score 213.15 m/z 1040.44 Gene names PACSIN3

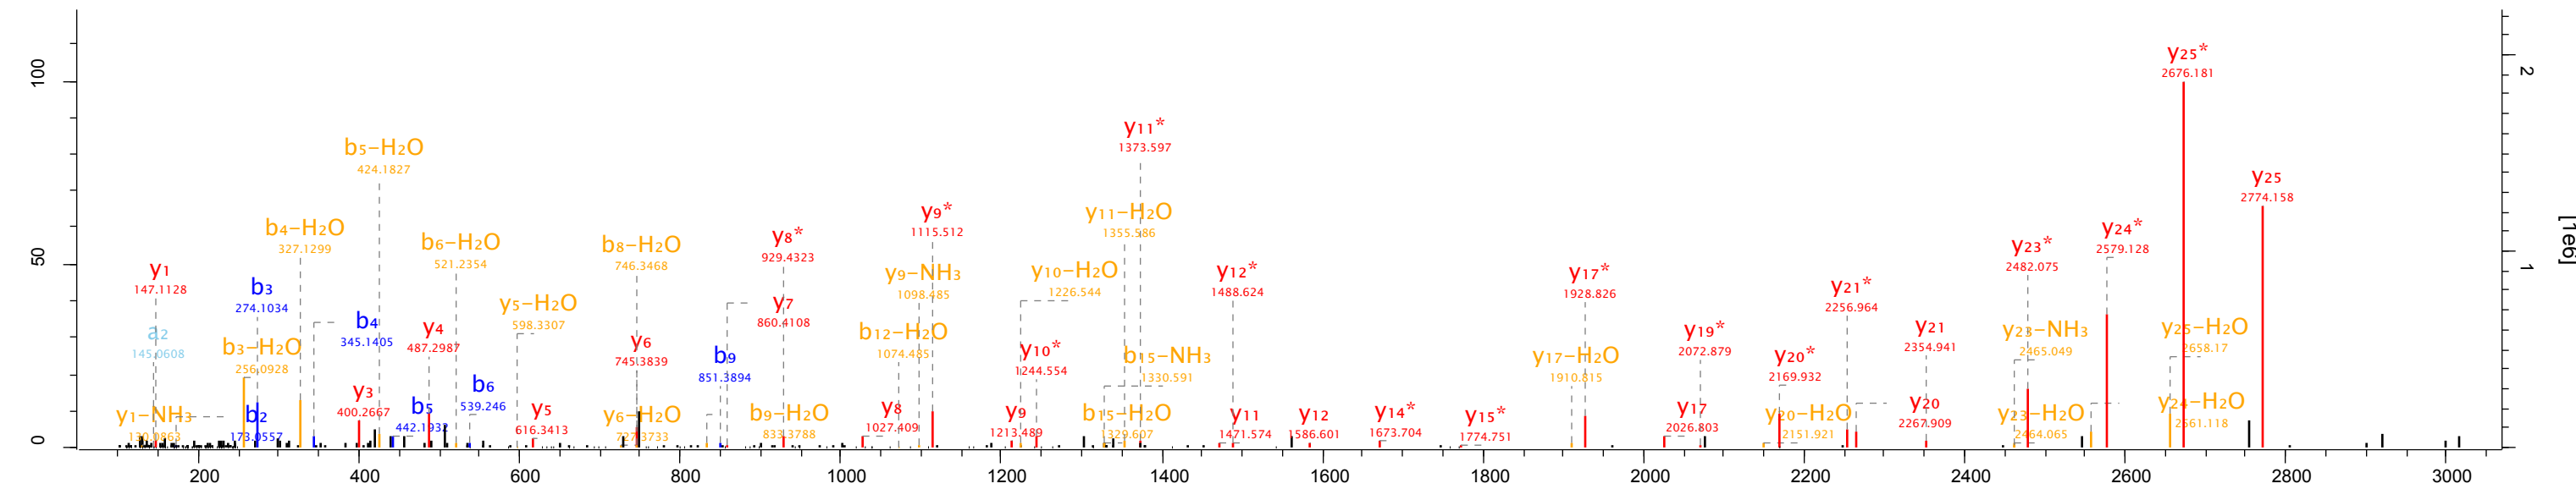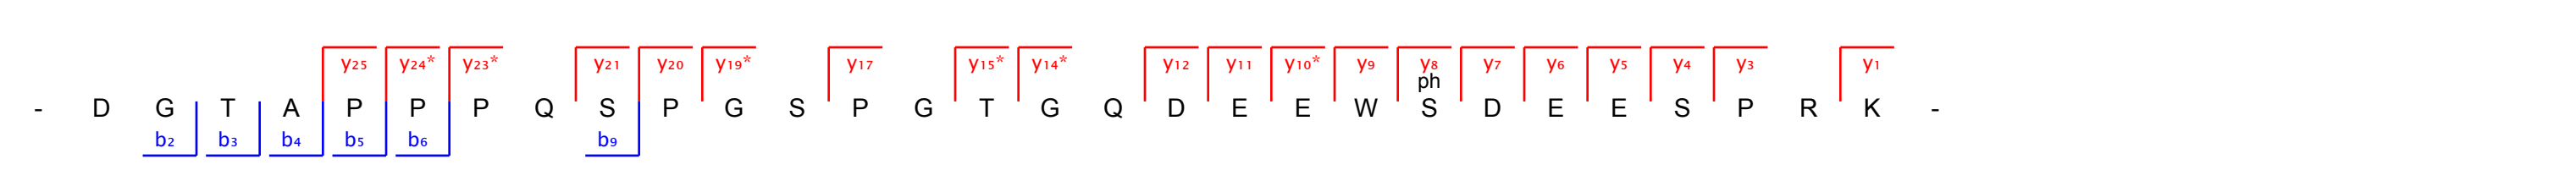

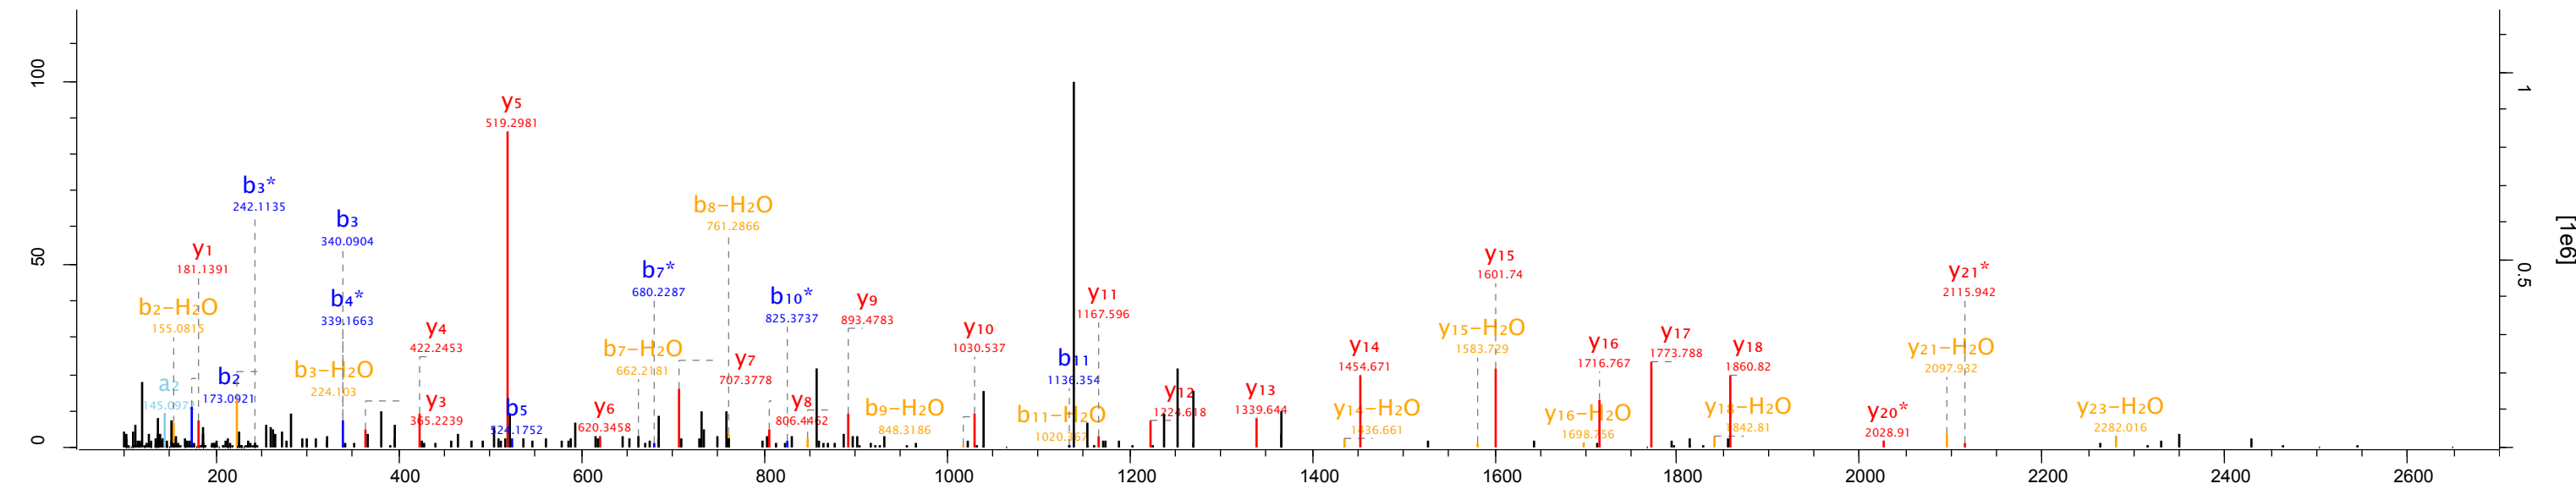

- A T S P S S S V S G D F D D G H H S V S T P G P S R -

ph ph

b<sub>2</sub> b<sub>3</sub> b<sub>4</sub>\* b<sub>5</sub> b<sub>7</sub>\*

y<sub>21</sub>\* y<sub>20</sub>\* y<sub>18</sub> y<sub>17</sub> y<sub>16</sub> y<sub>15</sub> y<sub>14</sub> y<sub>13</sub> y<sub>12</sub> y<sub>11</sub> y<sub>10</sub> y<sub>9</sub> y<sub>8</sub> y<sub>7</sub> y<sub>6</sub> y<sub>5</sub> y<sub>4</sub> y<sub>3</sub>

b<sub>10</sub>\* b<sub>11</sub>



Raw file 20171215\_MaS\_33SR\_LMH\_phospho2\_03 Scan 8693 Method FTMS; HCD Score 77.92 m/z 784.99 Gene names SENP3

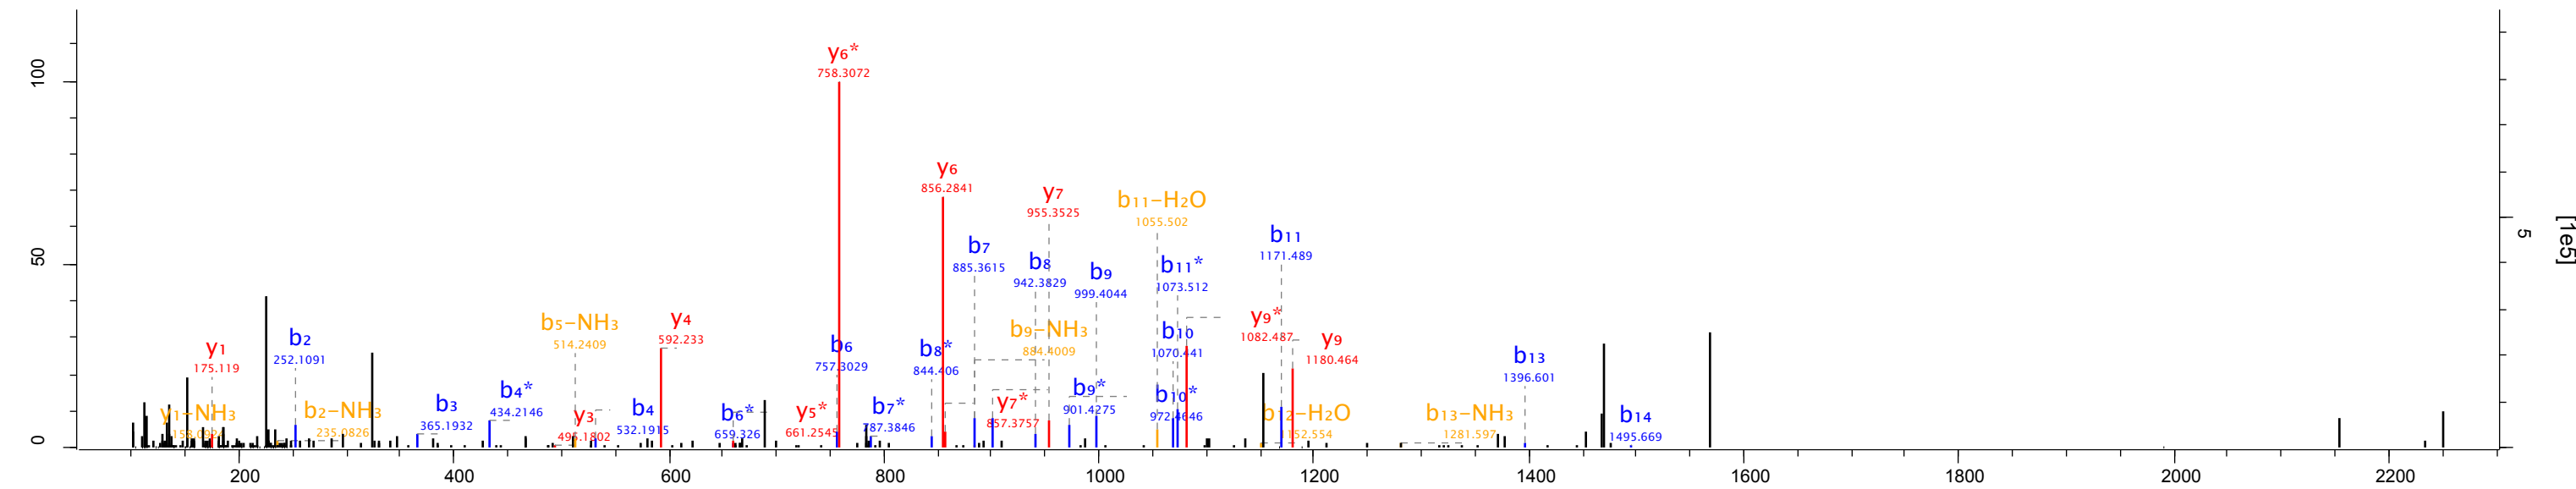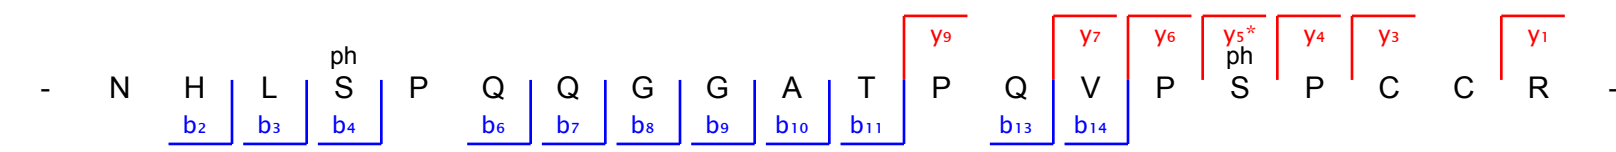

Raw file 20171215\_MaS\_33SR\_LMH\_phospho2\_03 Scan 8953 Method FTMS; HCD Score 105.66 m/z 882.7 Gene names BAT3;BAG6

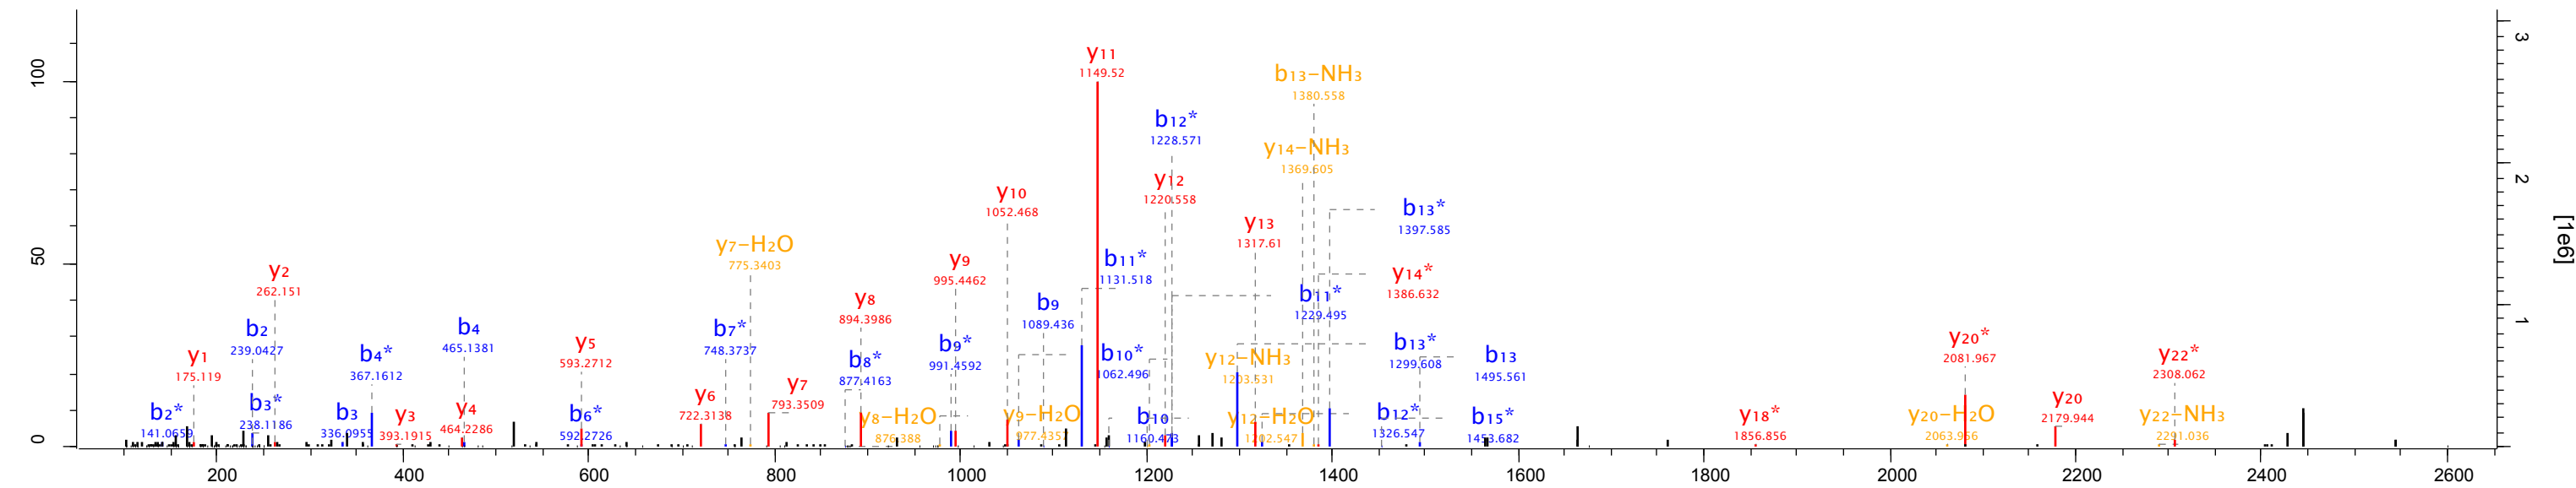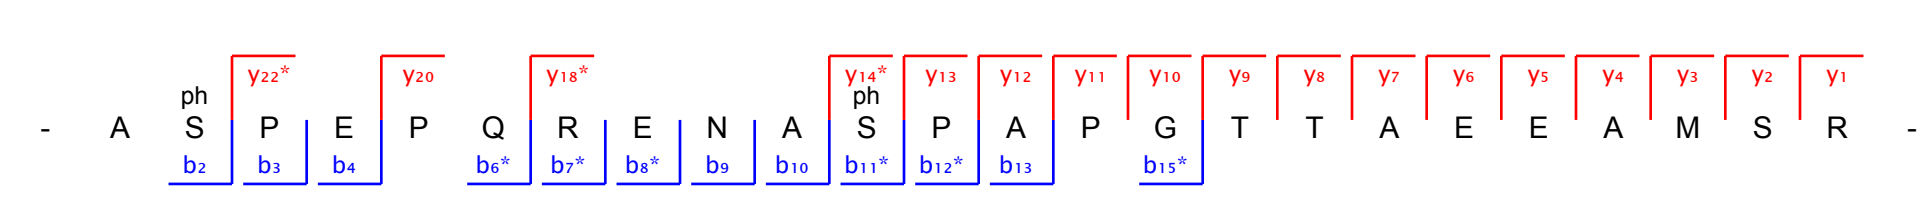

20171215\_MaS\_33SR\_LMH\_phospho2\_03 9113 FTMS; HCD 249.54 951.72 FARP1

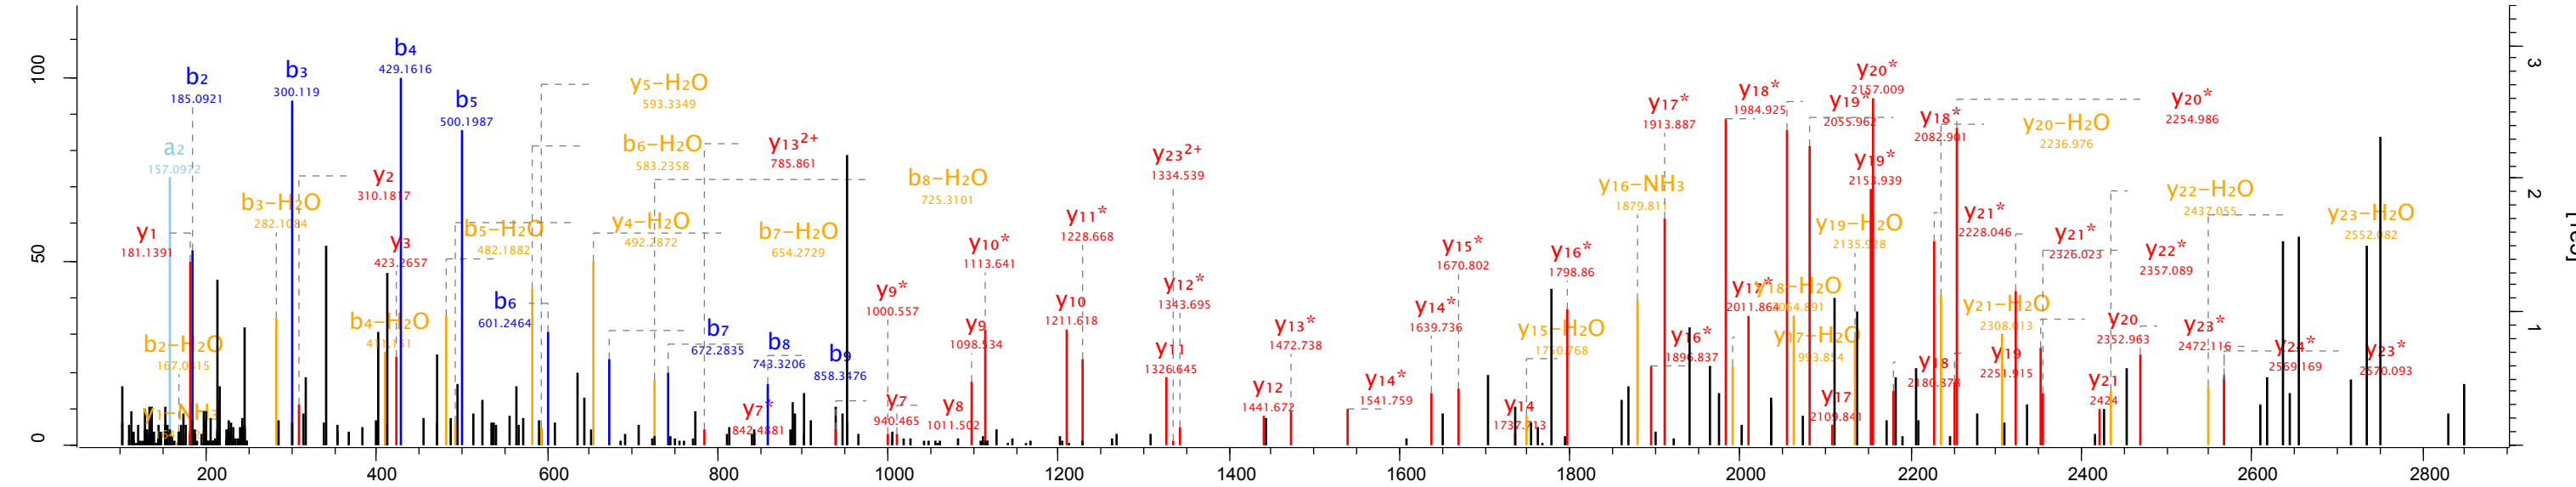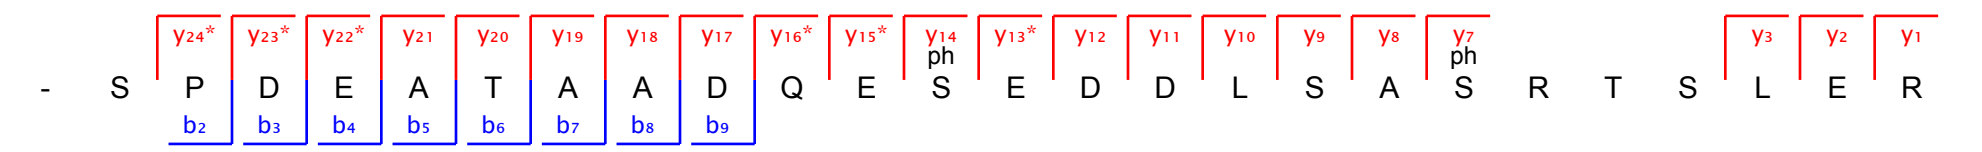

Raw file 20171215\_MaS\_33SR\_LMH\_phospho2\_03 Scan 9133 Method FTMS; HCD Score 187.19 m/z 947.38 Gene names FARP1

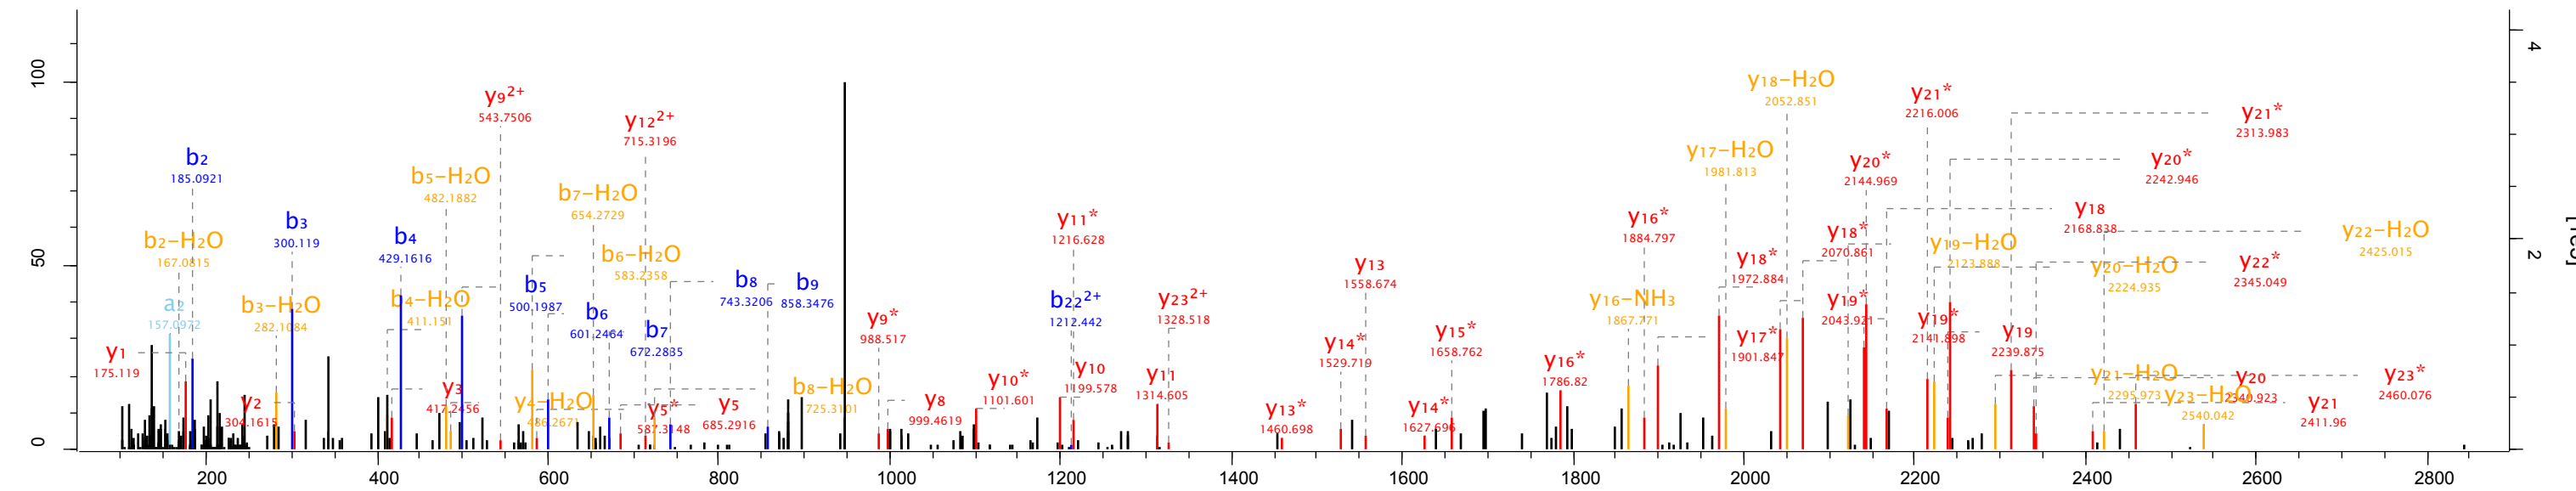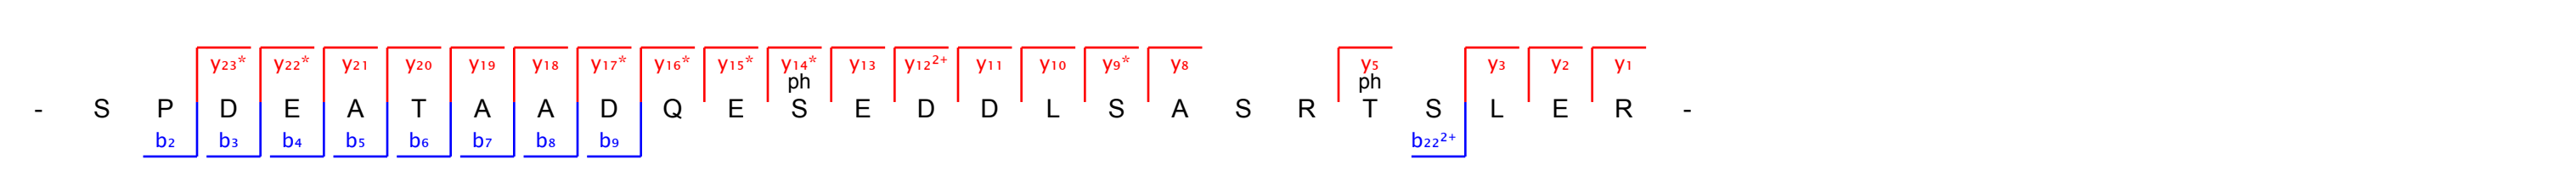

Raw file 20171215\_MaS\_33SR\_LMH\_phospho2\_03 Scan 9193 Method FTMS; HCD Score 70.45 m/z 619.29 Gene names PHLDB1

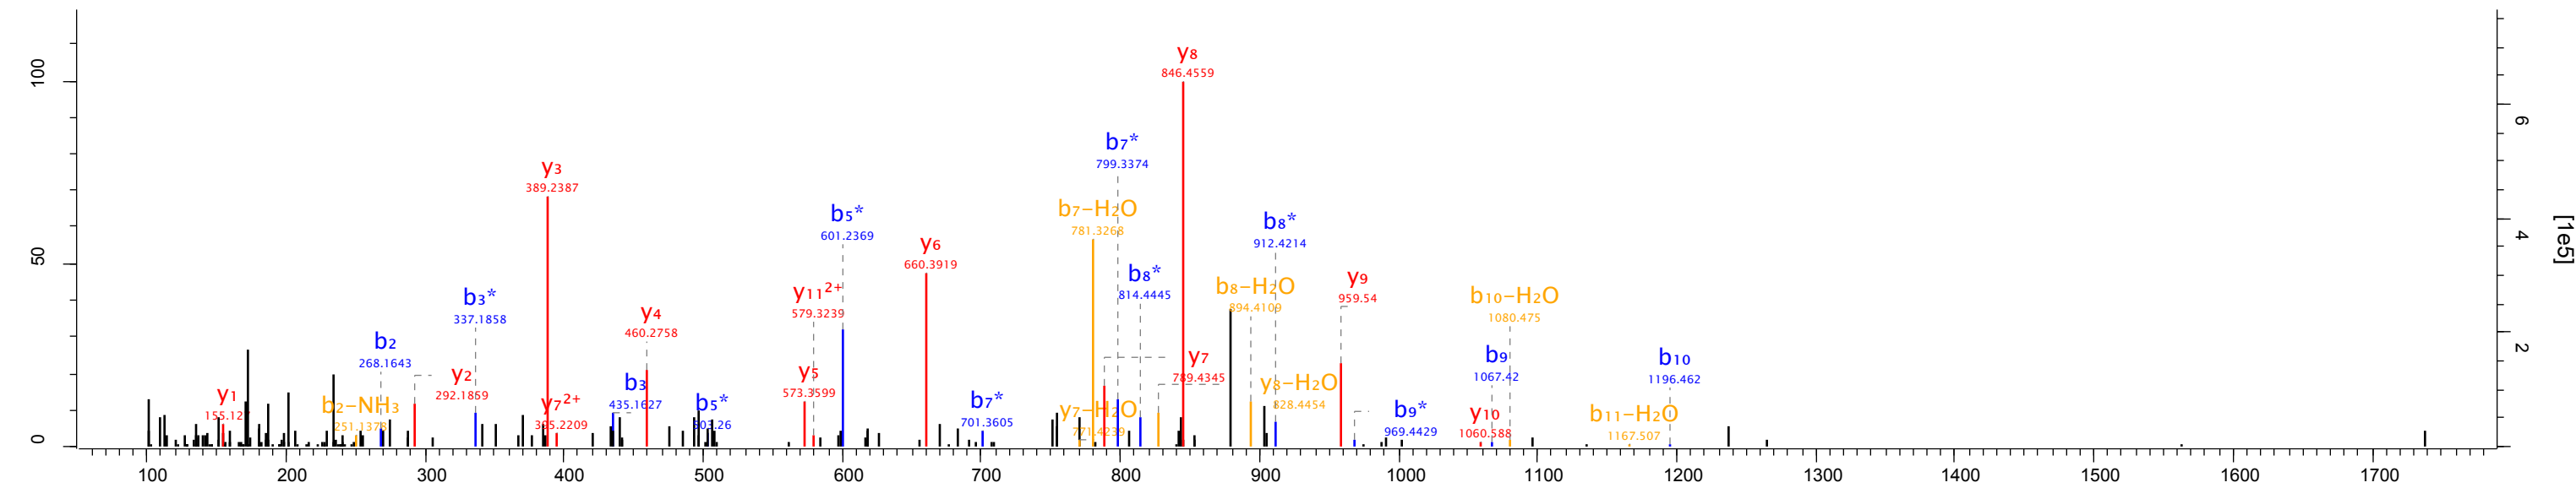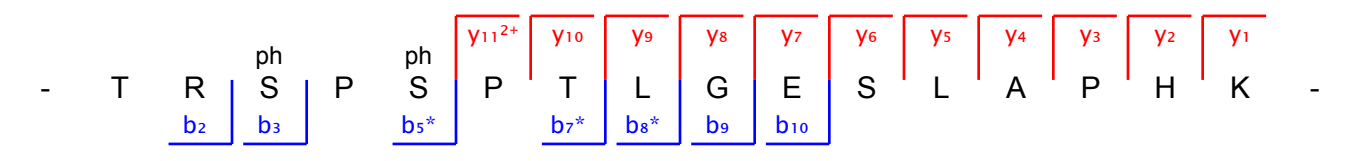

Raw file 20171215\_MaS\_33SR\_LMH\_phospho2\_03 Scan 9353 Method FTMS; HCD Score 98.64 m/z 837.68 Gene names PRKAR1B

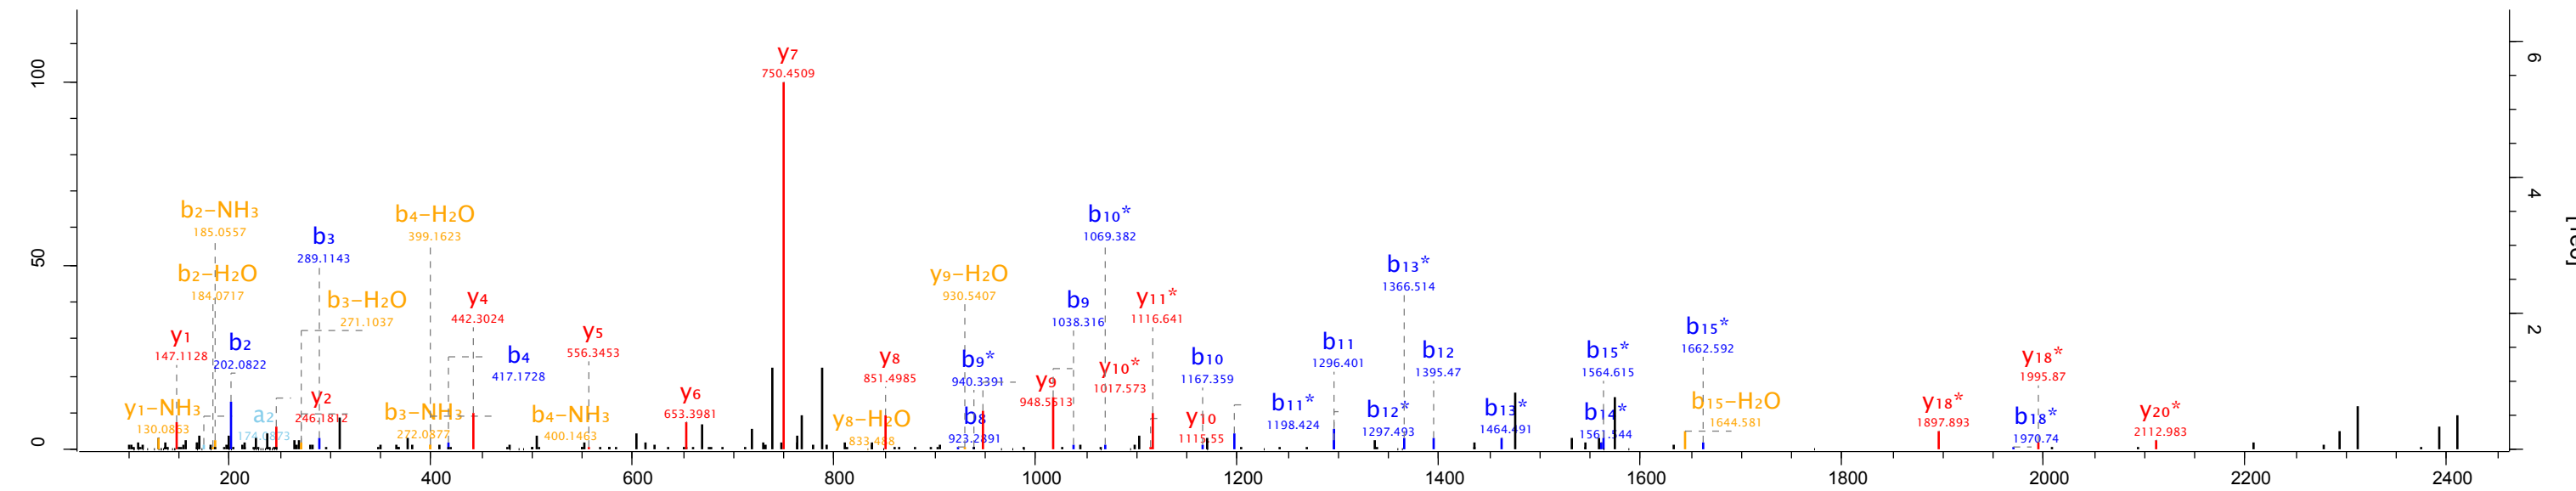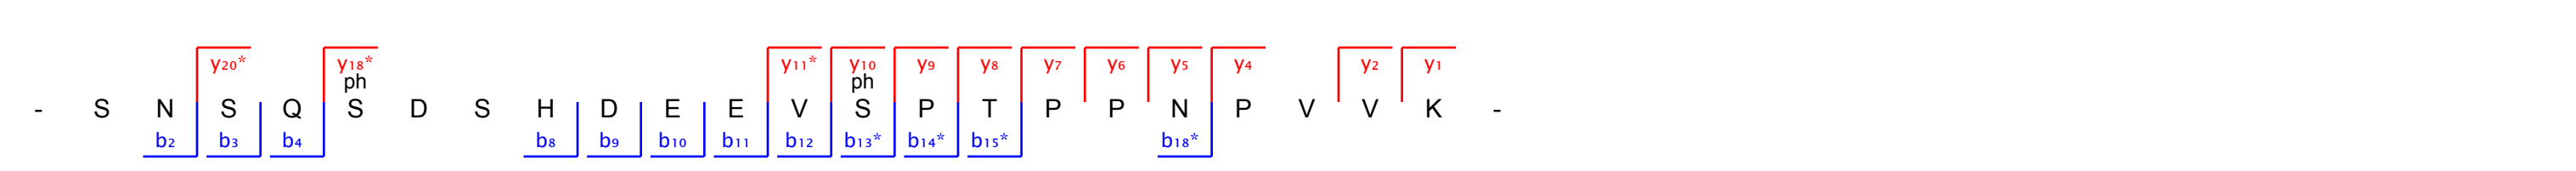

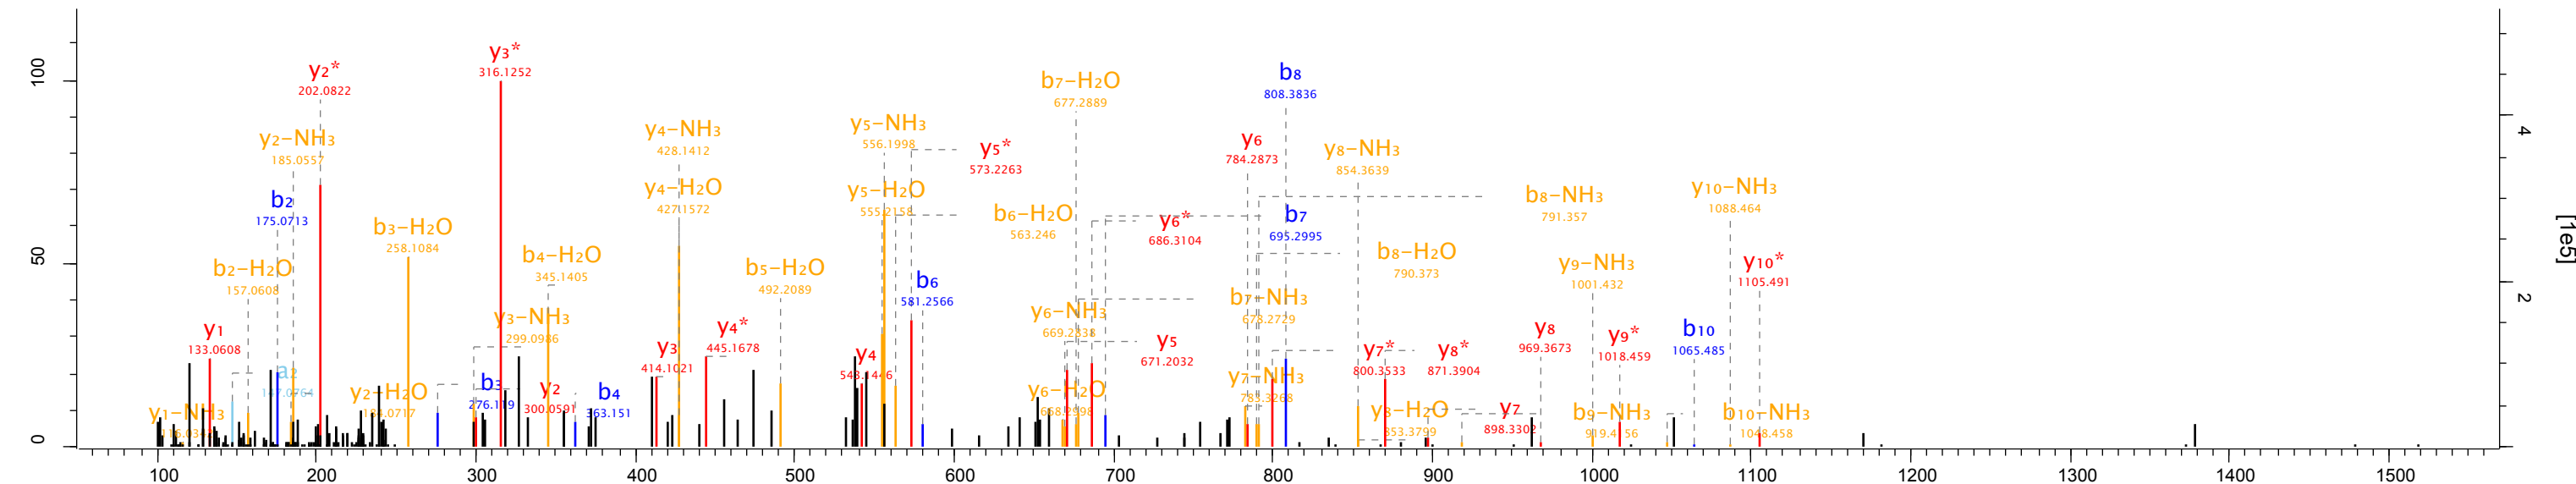

- S S T S F A N I Q E N S N -

b<sub>2</sub>
b<sub>3</sub>
b<sub>4</sub>
b<sub>6</sub>
b<sub>7</sub>
b<sub>8</sub>
b<sub>10</sub>
y<sub>10</sub><sup>\*</sup>
y<sub>9</sub><sup>\*</sup>
y<sub>8</sub>
y<sub>7</sub>
y<sub>6</sub>
y<sub>5</sub>
y<sub>4</sub>
y<sub>3</sub>
y<sub>2</sub><sub>ph</sub>
y<sub>1</sub>

Raw file 20171215\_MaS\_33SR\_LMH\_phospho2\_03 Scan 9983 Method FTMS; HCD Score 148.1 m/z 805.69 Gene names PRRC2C

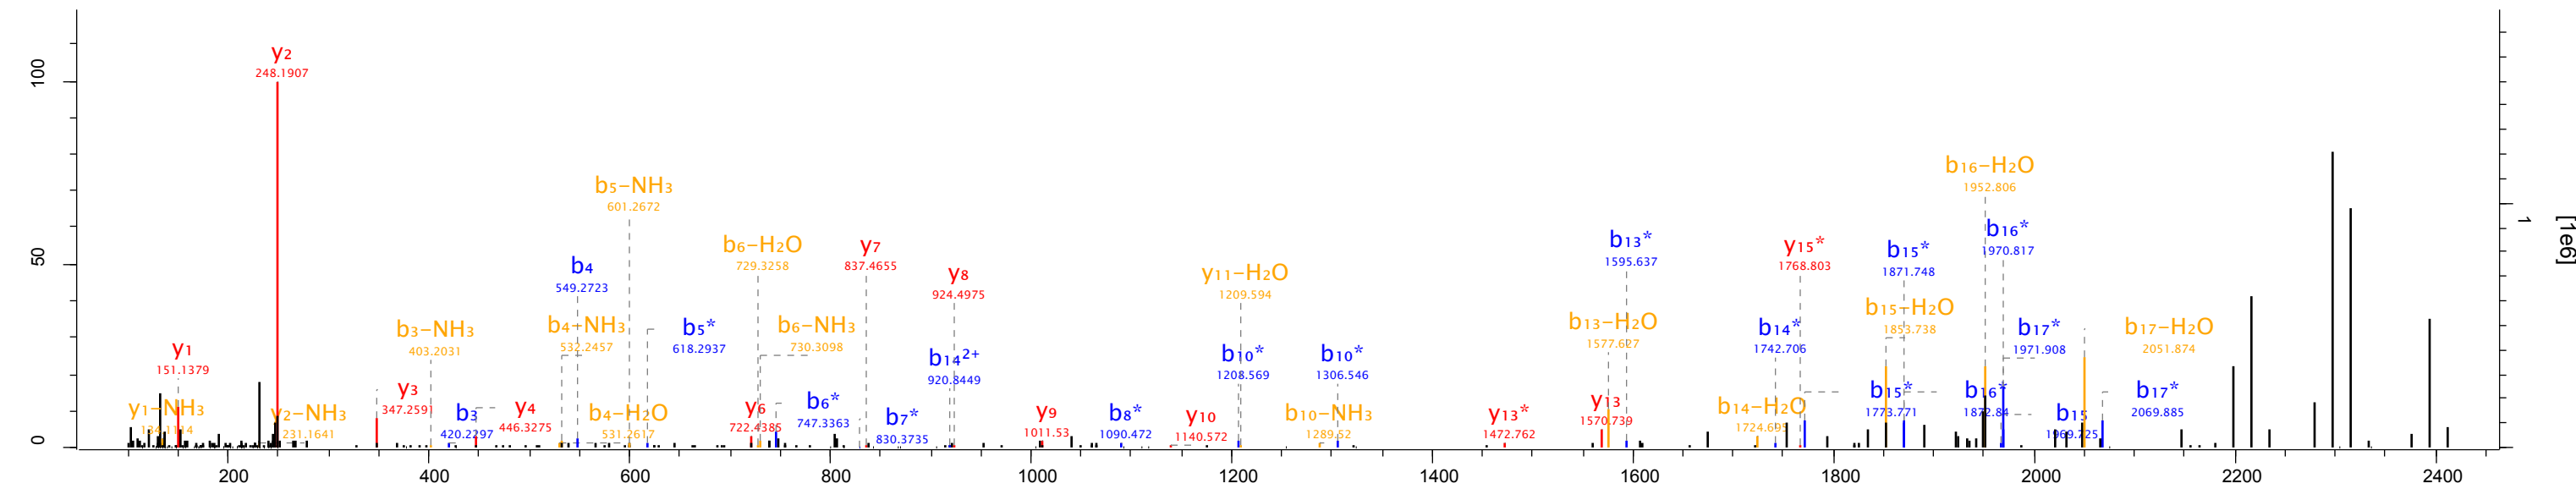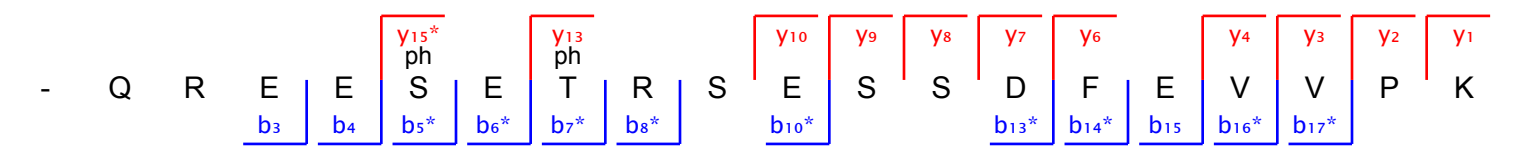



Raw file 20171215\_MaS\_33SR\_LMH\_phospho2\_04 Scan 10003 Method FTMS; HCD Score 176.85 m/z 731.32 Gene names GPR56

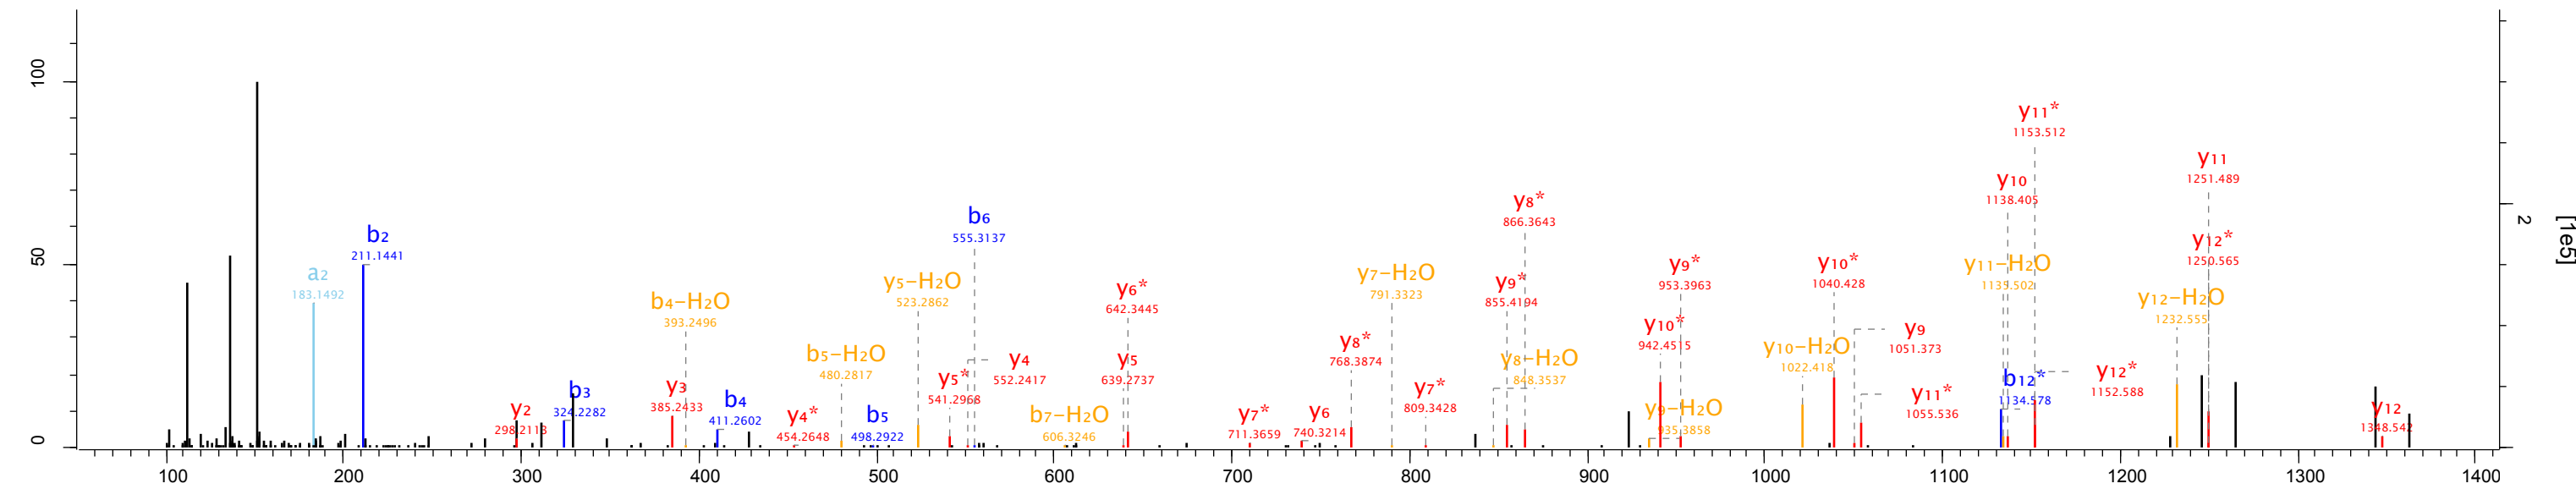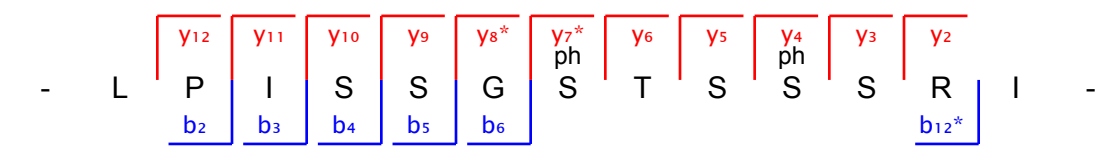

Raw file  
20171215\_MaS\_33SR\_LMH\_phospho2\_04

Scan 10403 Method FTMS; HCD Score 128.58 m/z 778.64 Gene names CTPS1

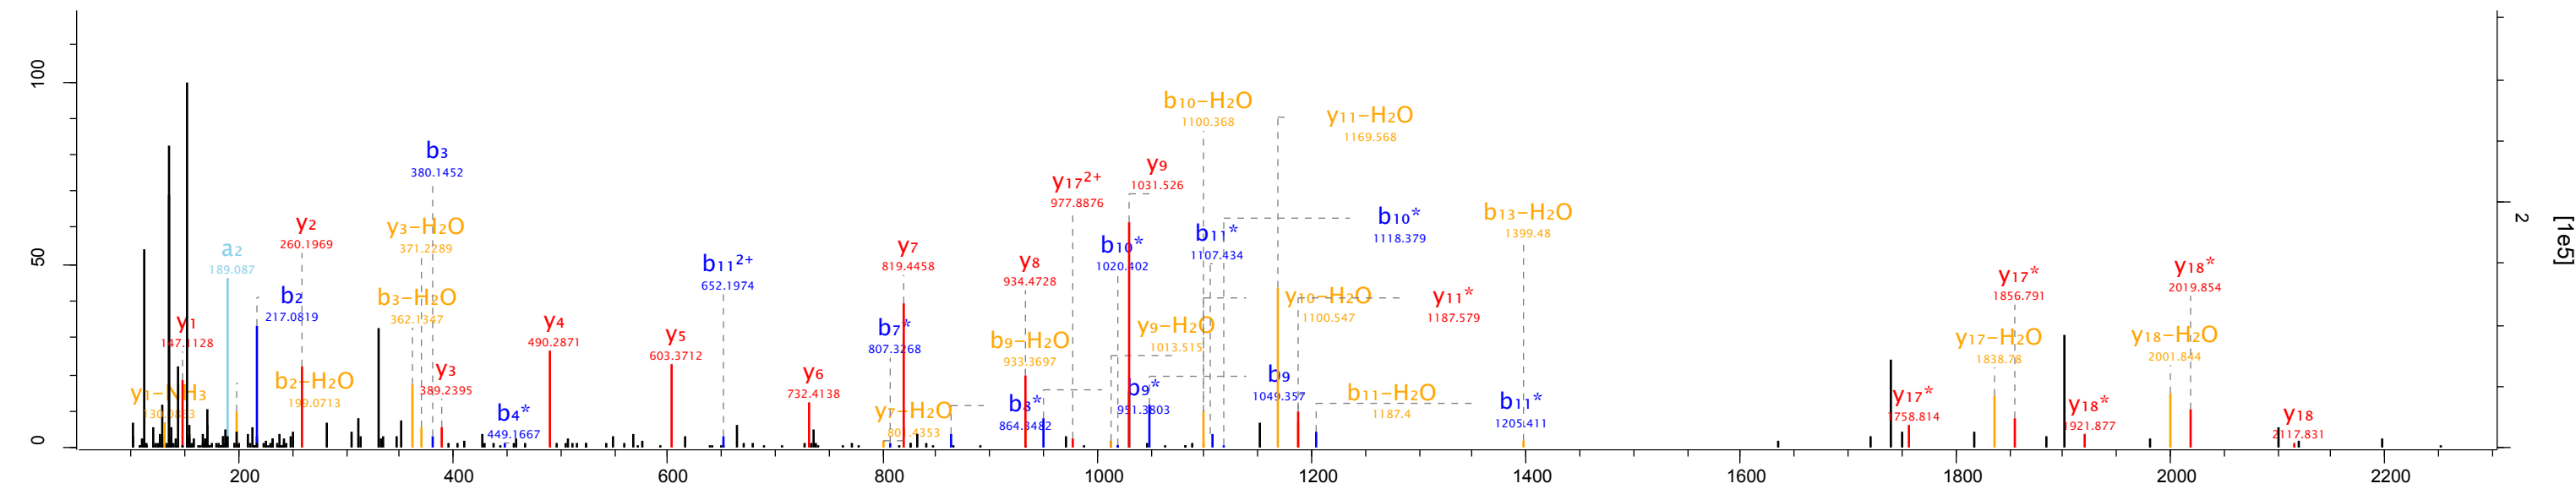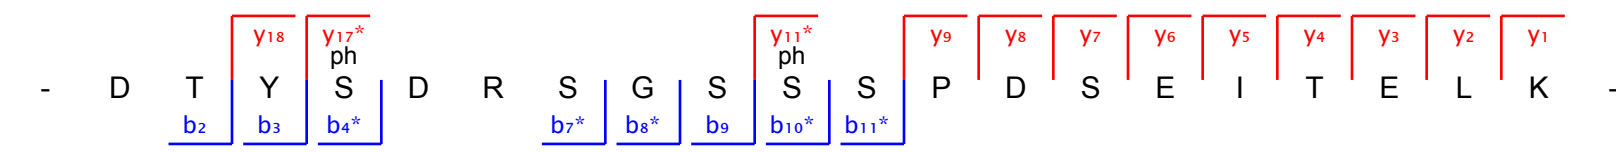

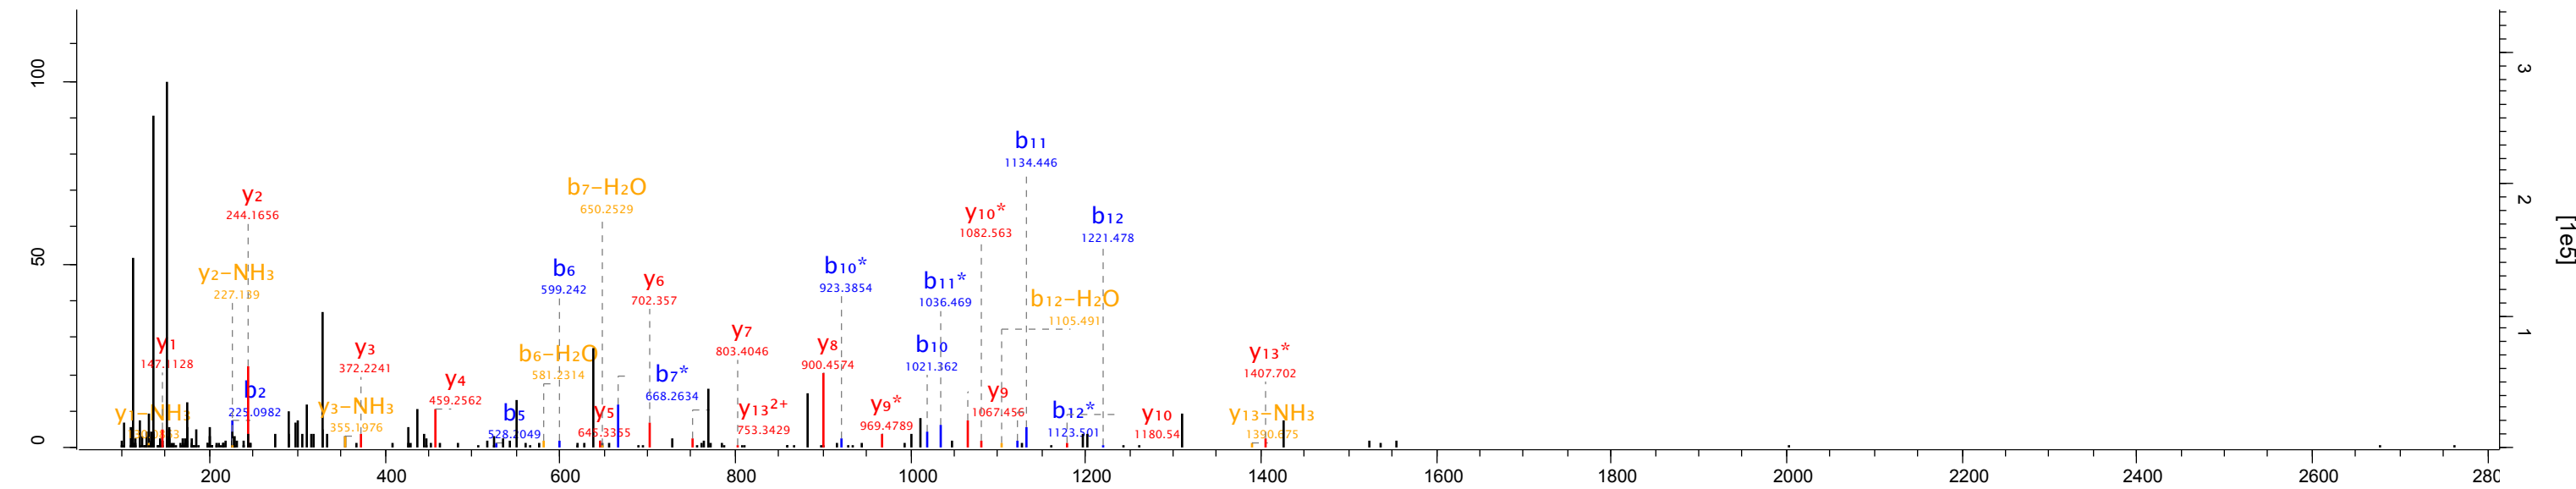

- S H S E S A S P S A L S S P N N L S P T G W S Q P K -

Annotations below the sequence:

- b2 (under H)
- b5 (under S), b6 (under A), b7\* (under S)
- b10 (under A), b11 (under L), b12 (under S)
- y13\* (under P)
- y10 (under L), y9 ph (under S), y8 (under P), y7 (under T), y6 (under G), y5 (under W), y4 (under S), y3 (under Q), y2 (under P), y1 (under K)

Raw file 20171215\_MaS\_33SR\_LMH\_phospho2\_04 Scan 14073 Method FTMS; HCD Score 42.32 m/z 810.31 Gene names FKBP15

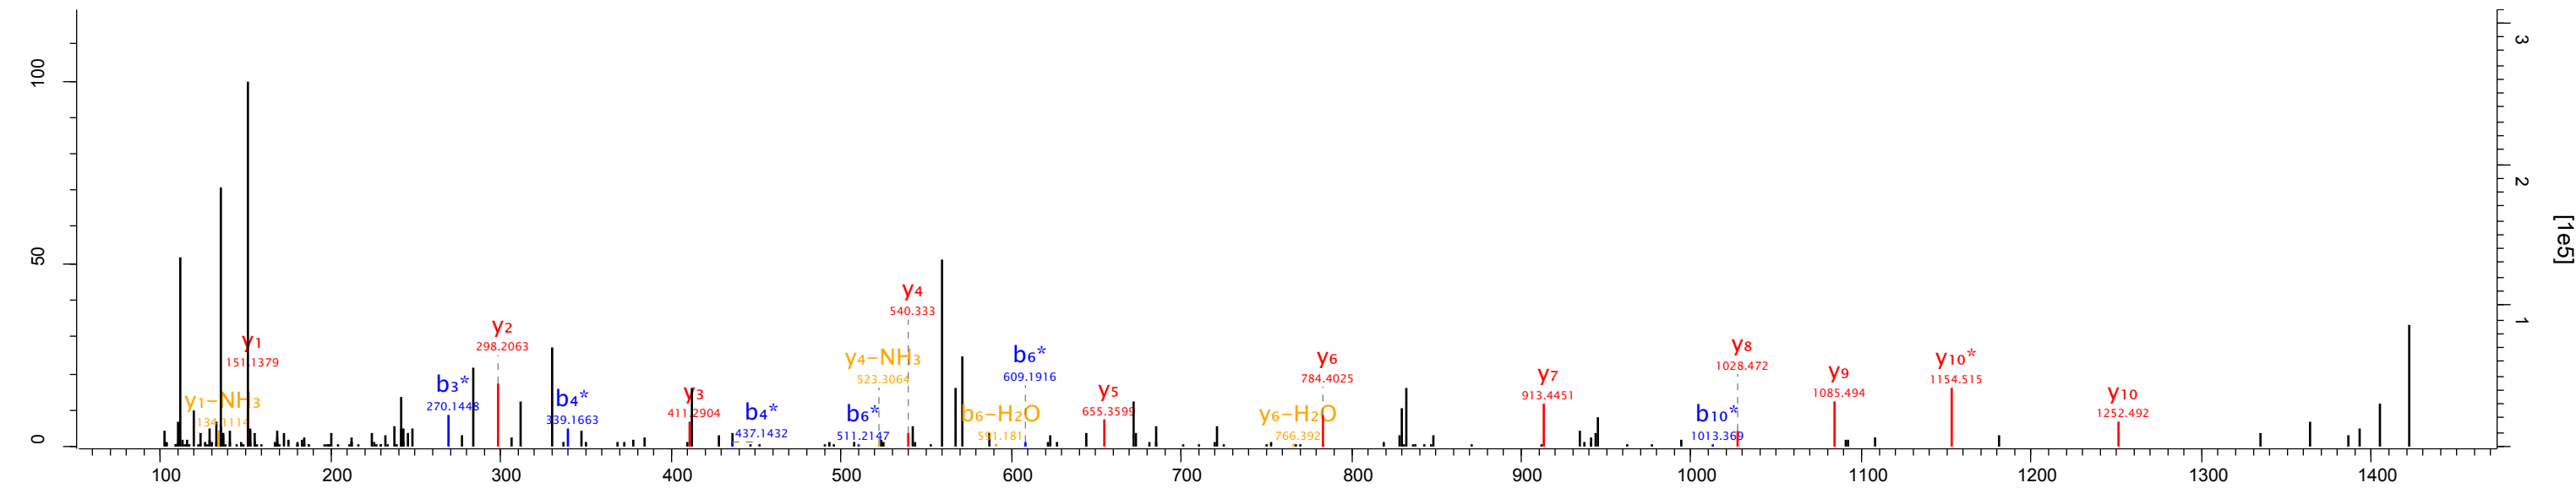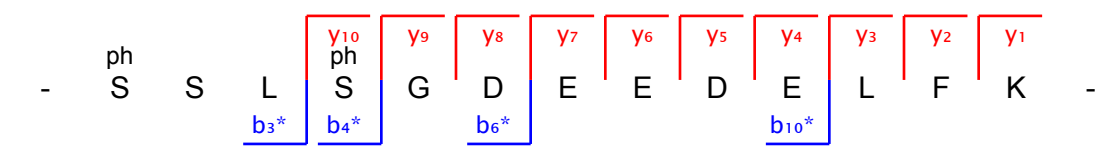

Raw file

20171215\_MaS\_33SR\_LMH\_phospho2\_04

| Scan  | Method    | Score | m/z     | Gene names |
|-------|-----------|-------|---------|------------|
| 15203 | FTMS; HCD | 49.54 | 1309.02 | PWP2       |

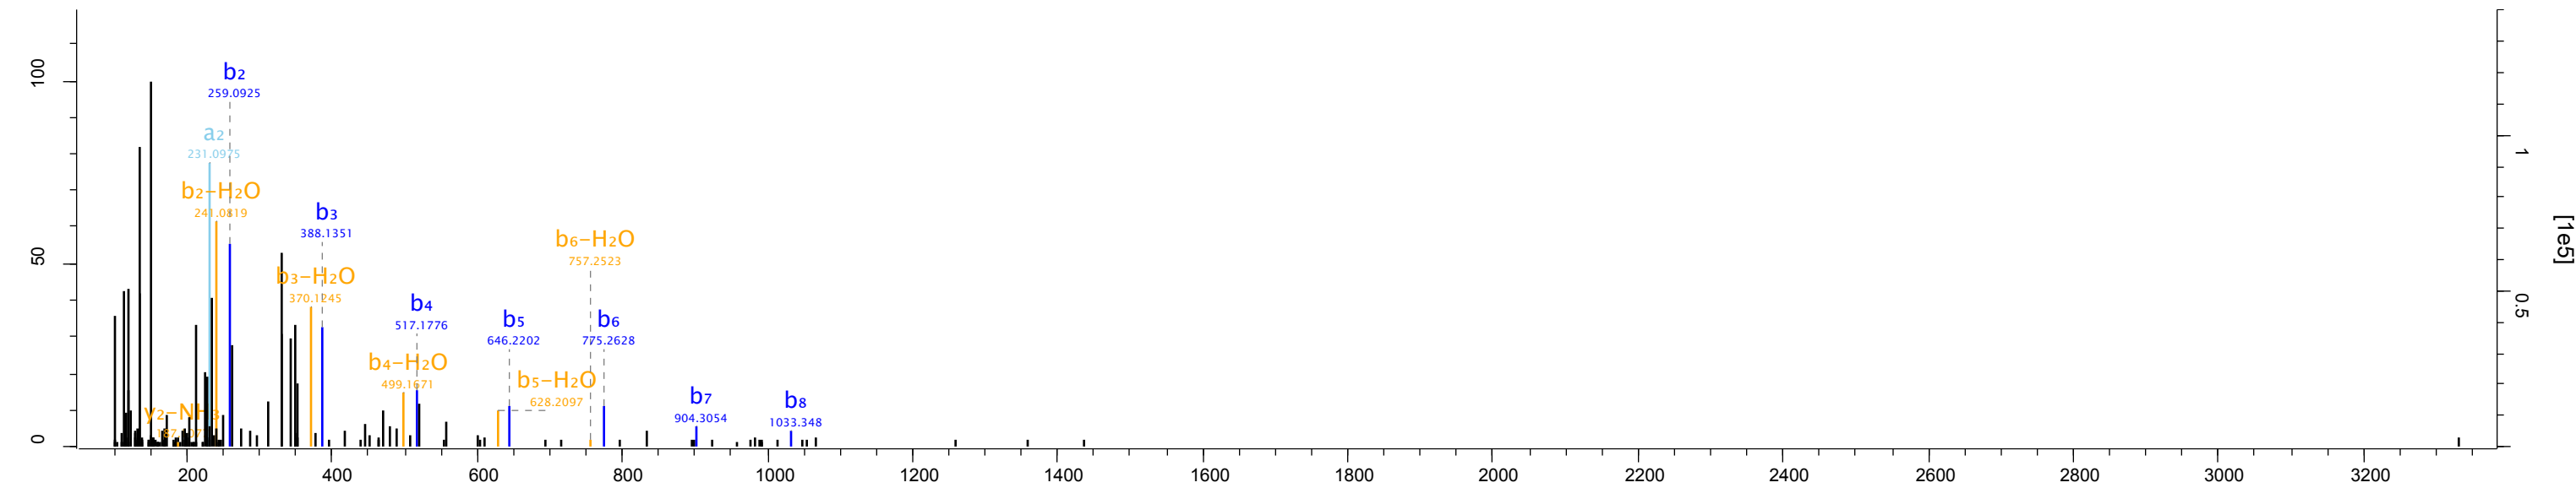

- E E E E E E E D Q E G D R E T T I R G K -

ph

b2 b3 b4 b5 b6 b7 b8

Raw file 20171215\_MaS\_33SR\_LMH\_phospho2\_04 Scan 2373 Method FTMS; HCD Score 67.52 m/z 546.19 Gene names MCM4

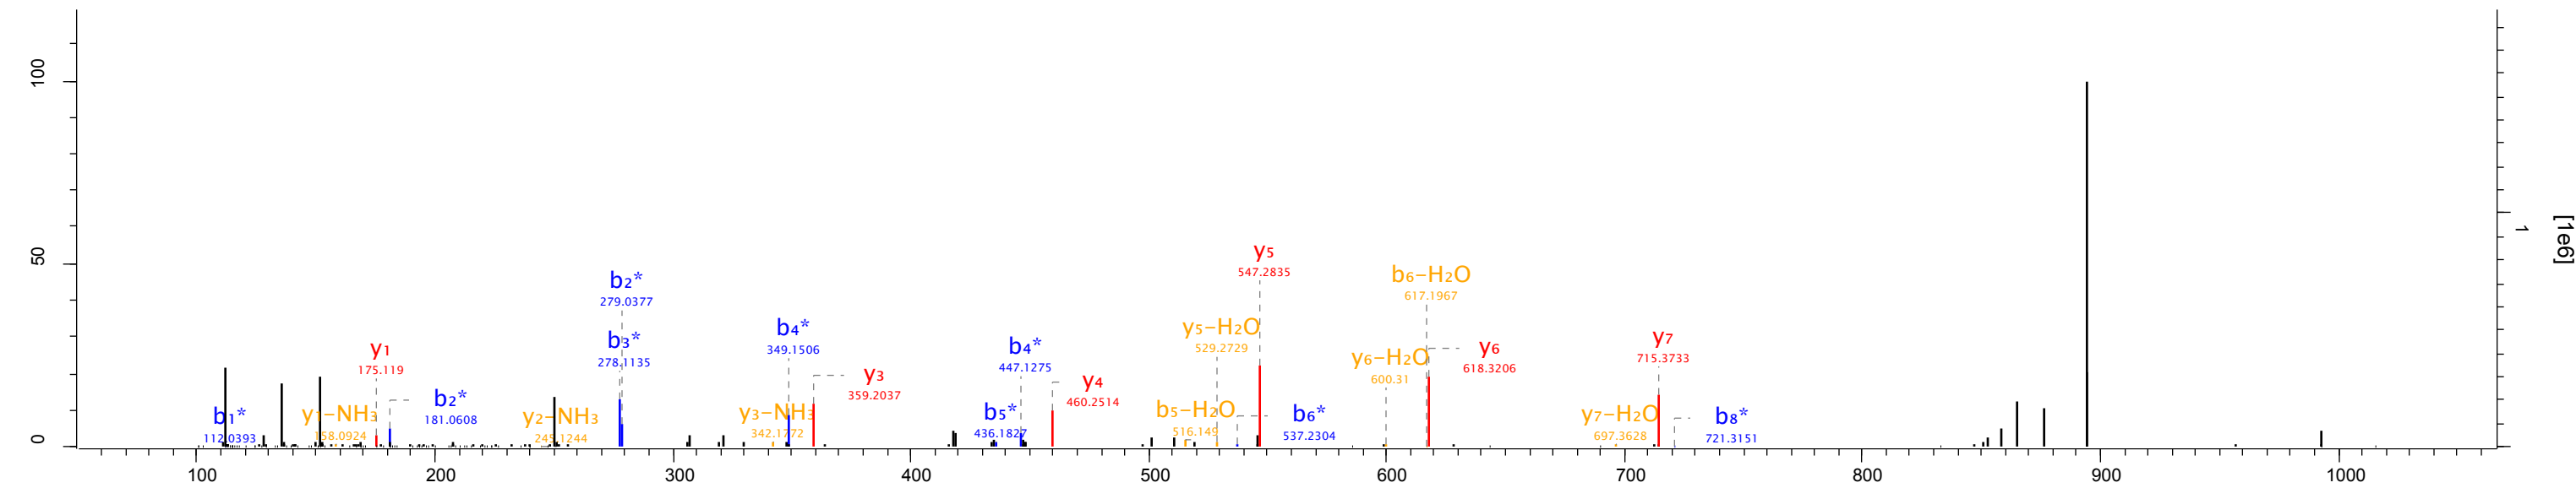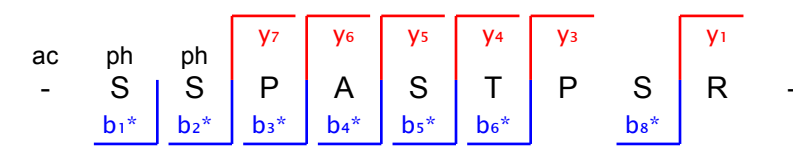

Raw file 20171215\_MaS\_33SR\_LMH\_phospho2\_04 Scan 2523 Method FTMS; HCD Score 67.88 m/z 494.21 Gene names SNIP1

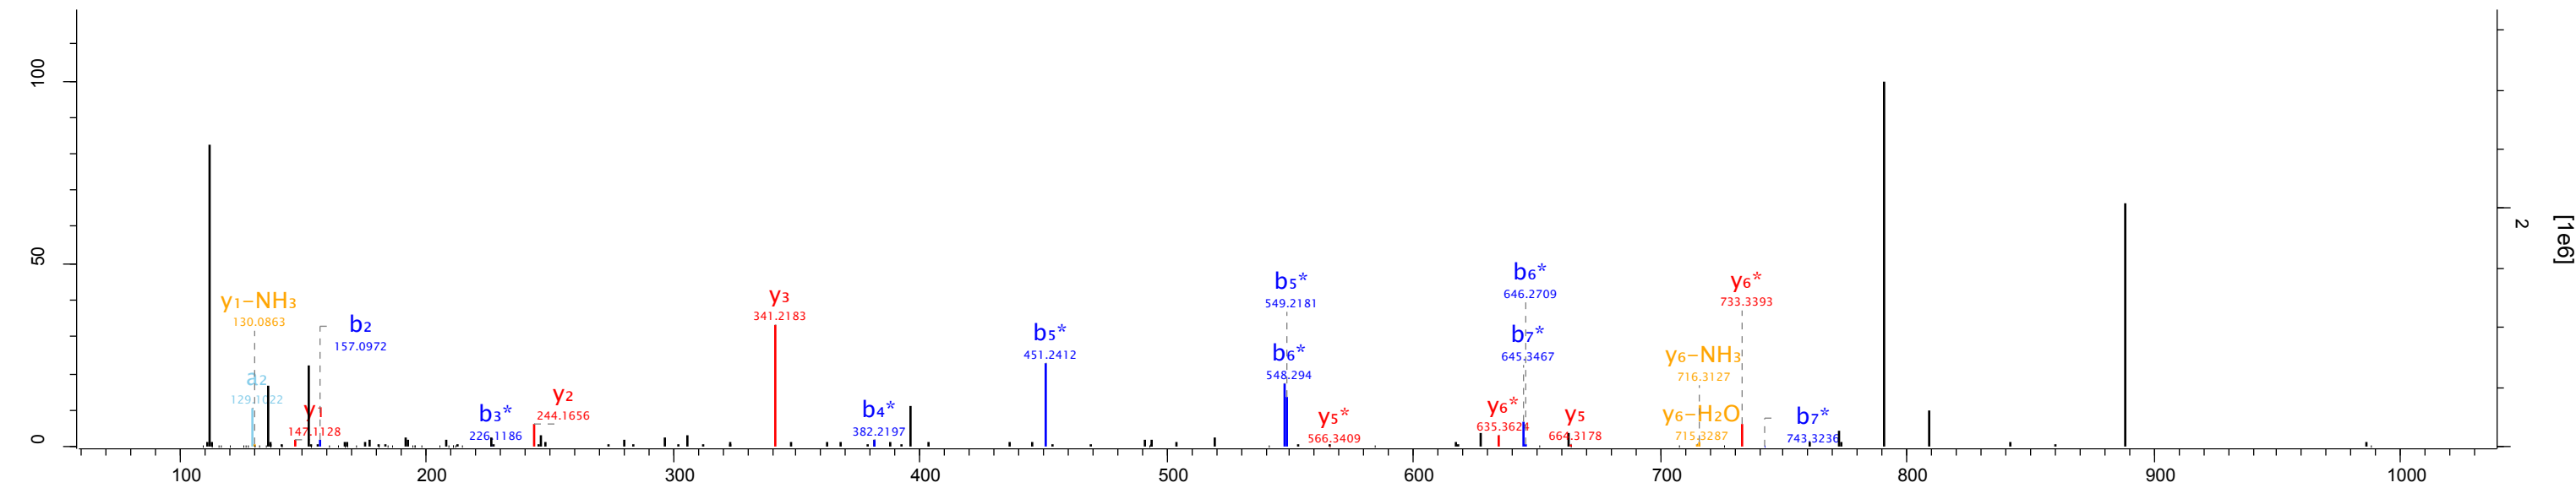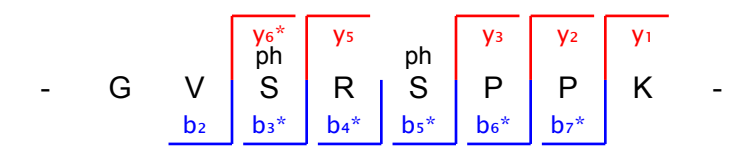

Raw file

20171215\_MaS\_33SR\_LMH\_phospho2\_04

| Scan | Method    | Score | m/z    | Gene names |
|------|-----------|-------|--------|------------|
| 3433 | FTMS; HCD | 45.75 | 812.95 | MAGED2     |

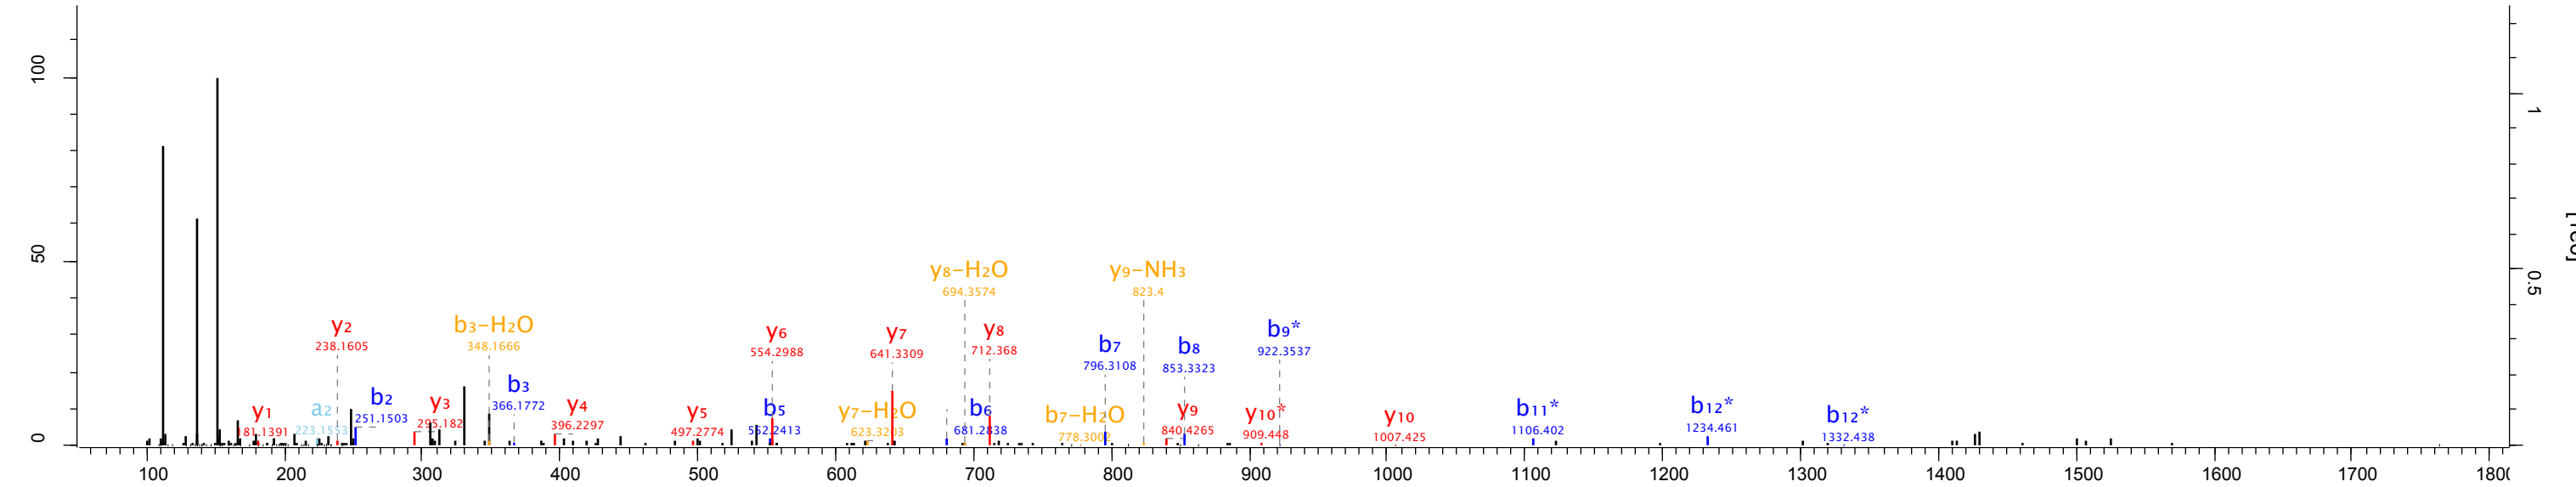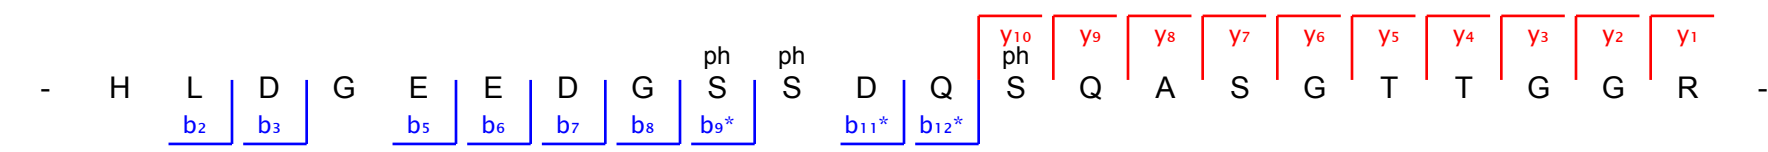



Raw file: 20171215\_MaS\_33SR\_LMH\_phospho2\_04  
 Scan: 3603 Method: FTMS; HCD Score: 244.68 m/z: 923.34 Gene names: GTF3C1

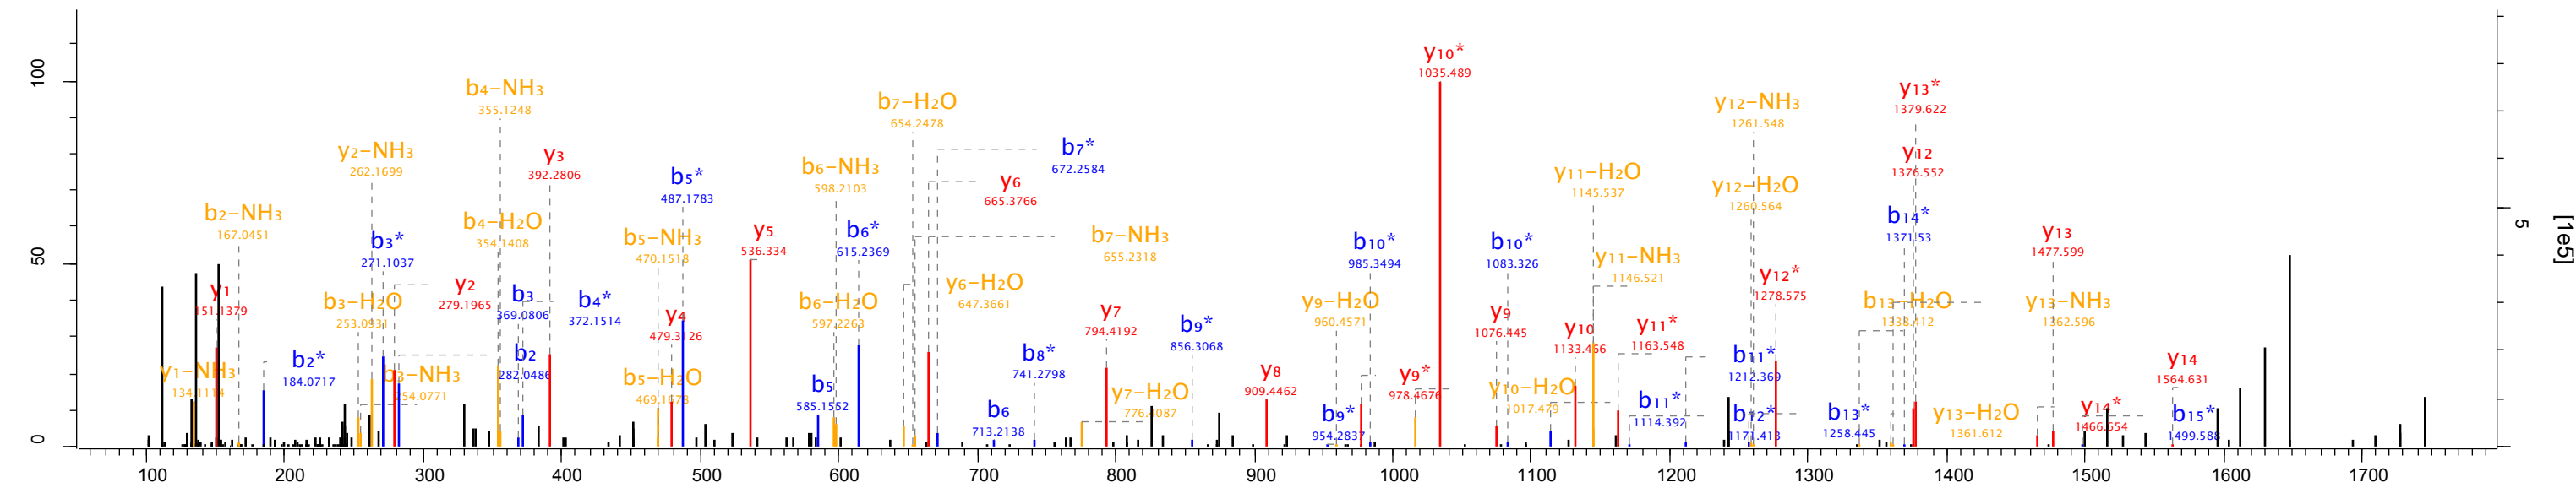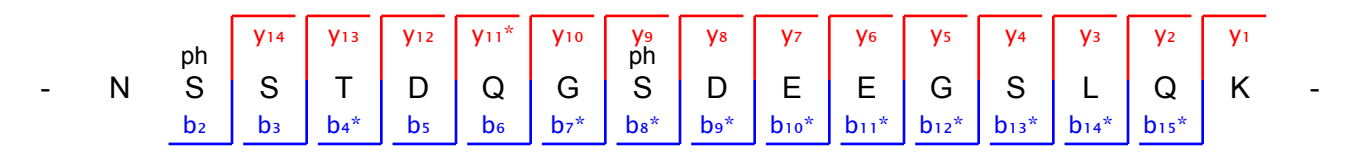

Raw file 20171215\_MaS\_33SR\_LMH\_phospho2\_04 Scan 3853 Method FTMS; HCD Score 84.86 m/z 816.85 Gene names HMGA1;C2orf81

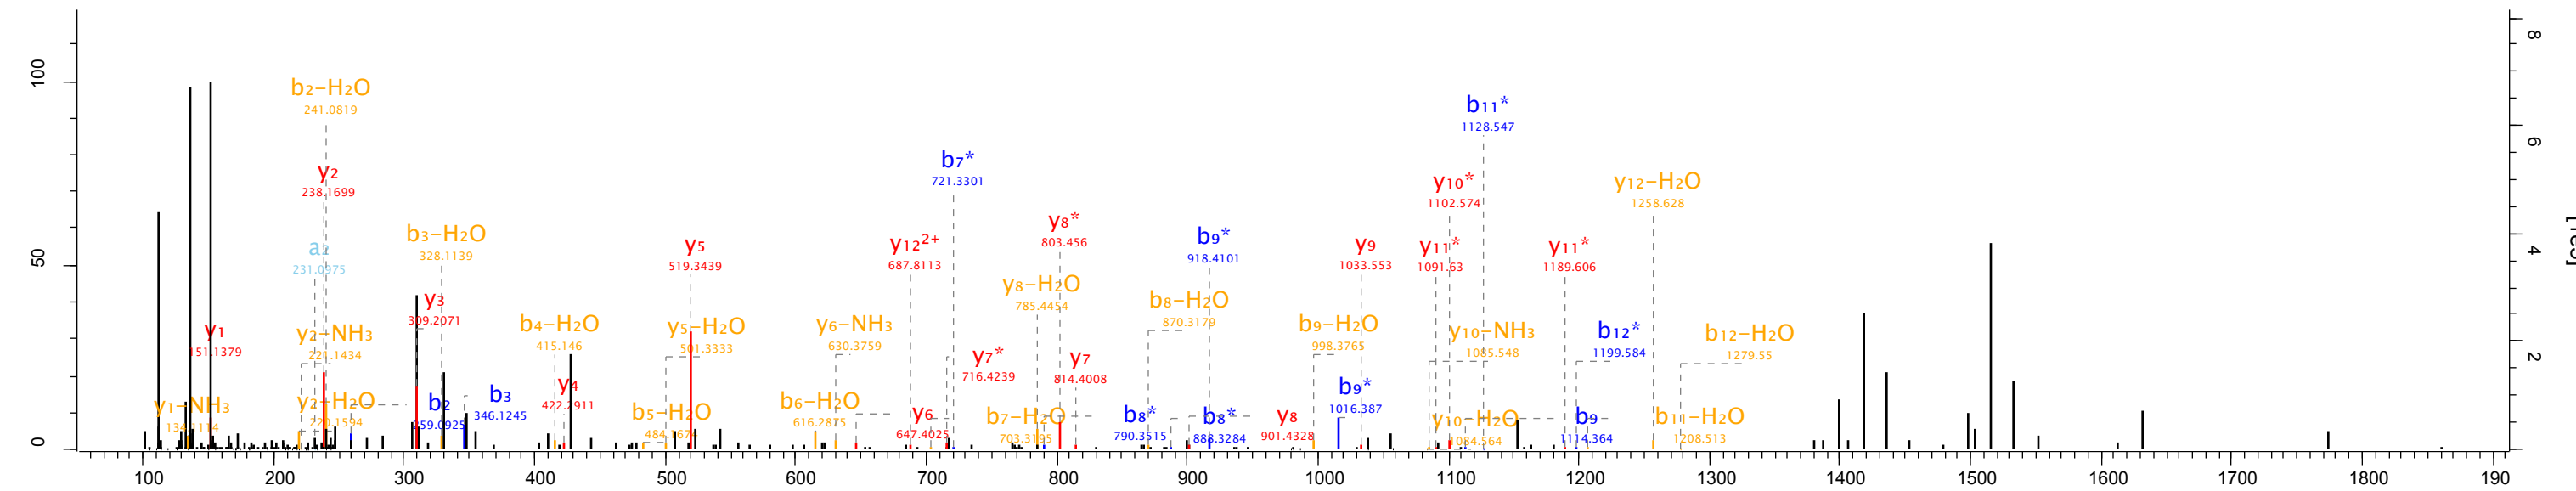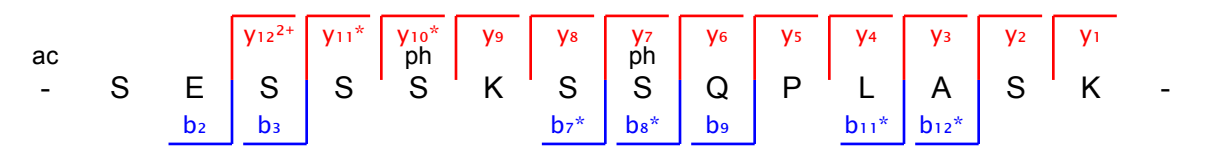

Raw file 20171215\_MaS\_33SR\_LMH\_phospho2\_04 Scan 3883 Method FTMS; HCD Score 261.71 m/z 760.33 Gene names RBM25

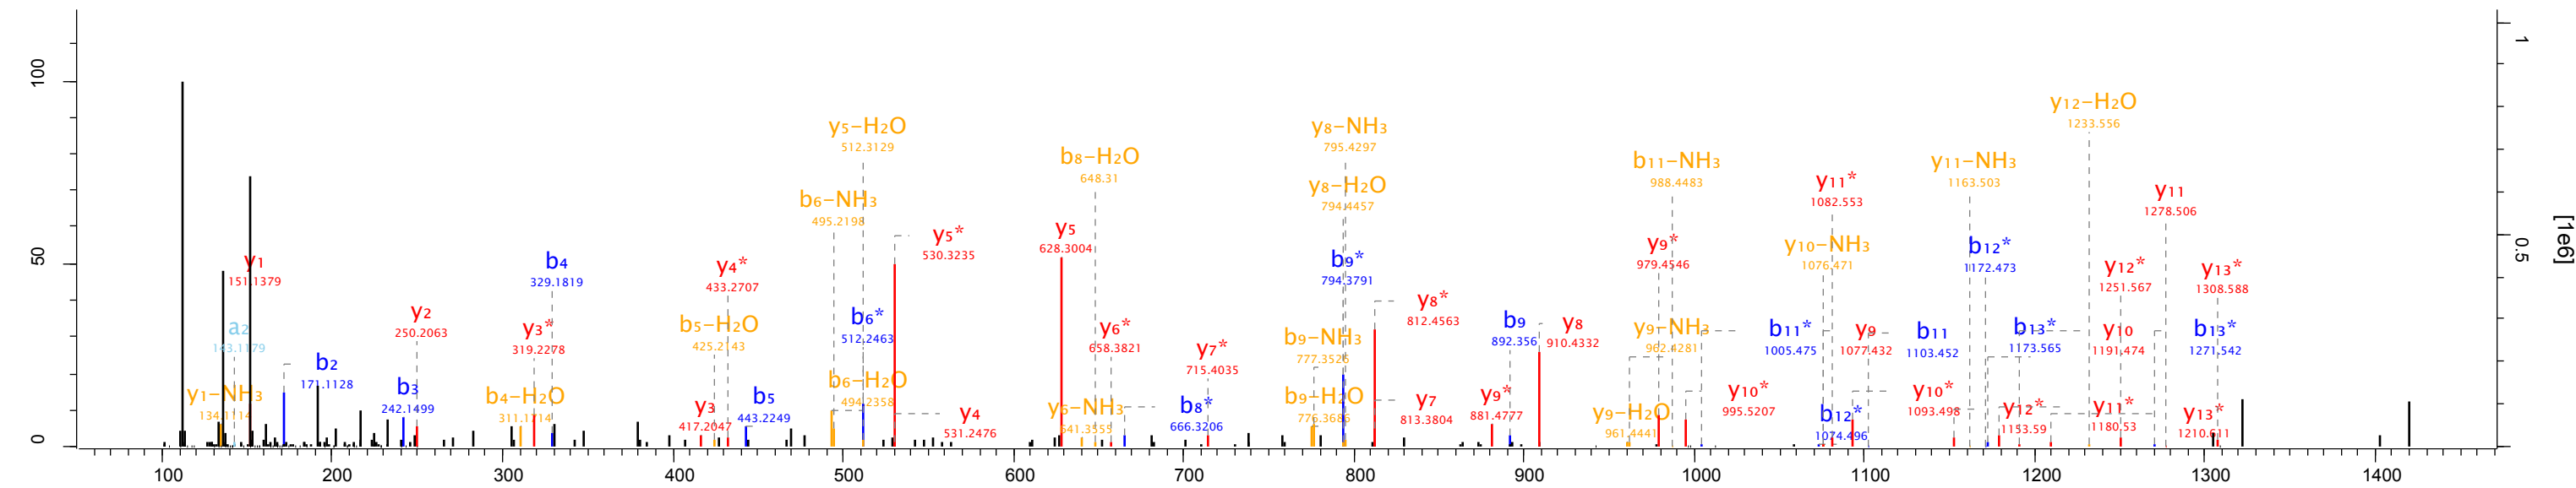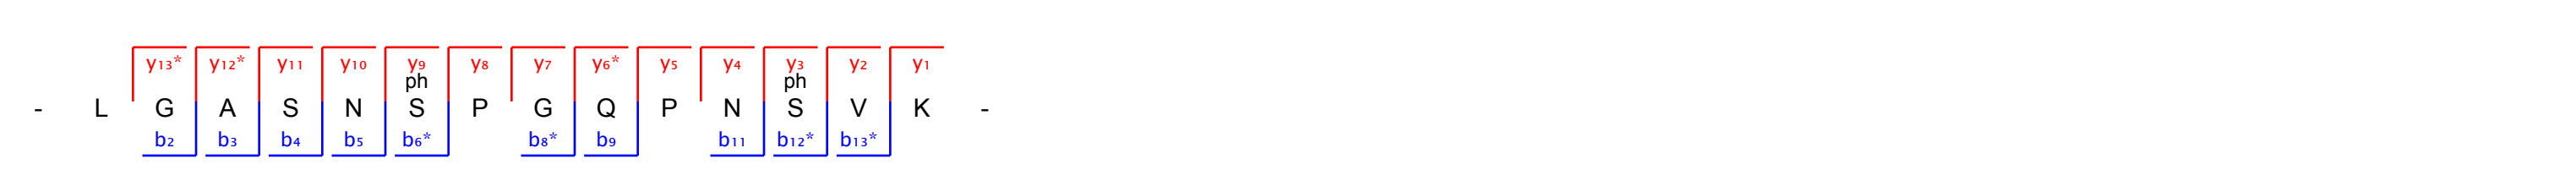

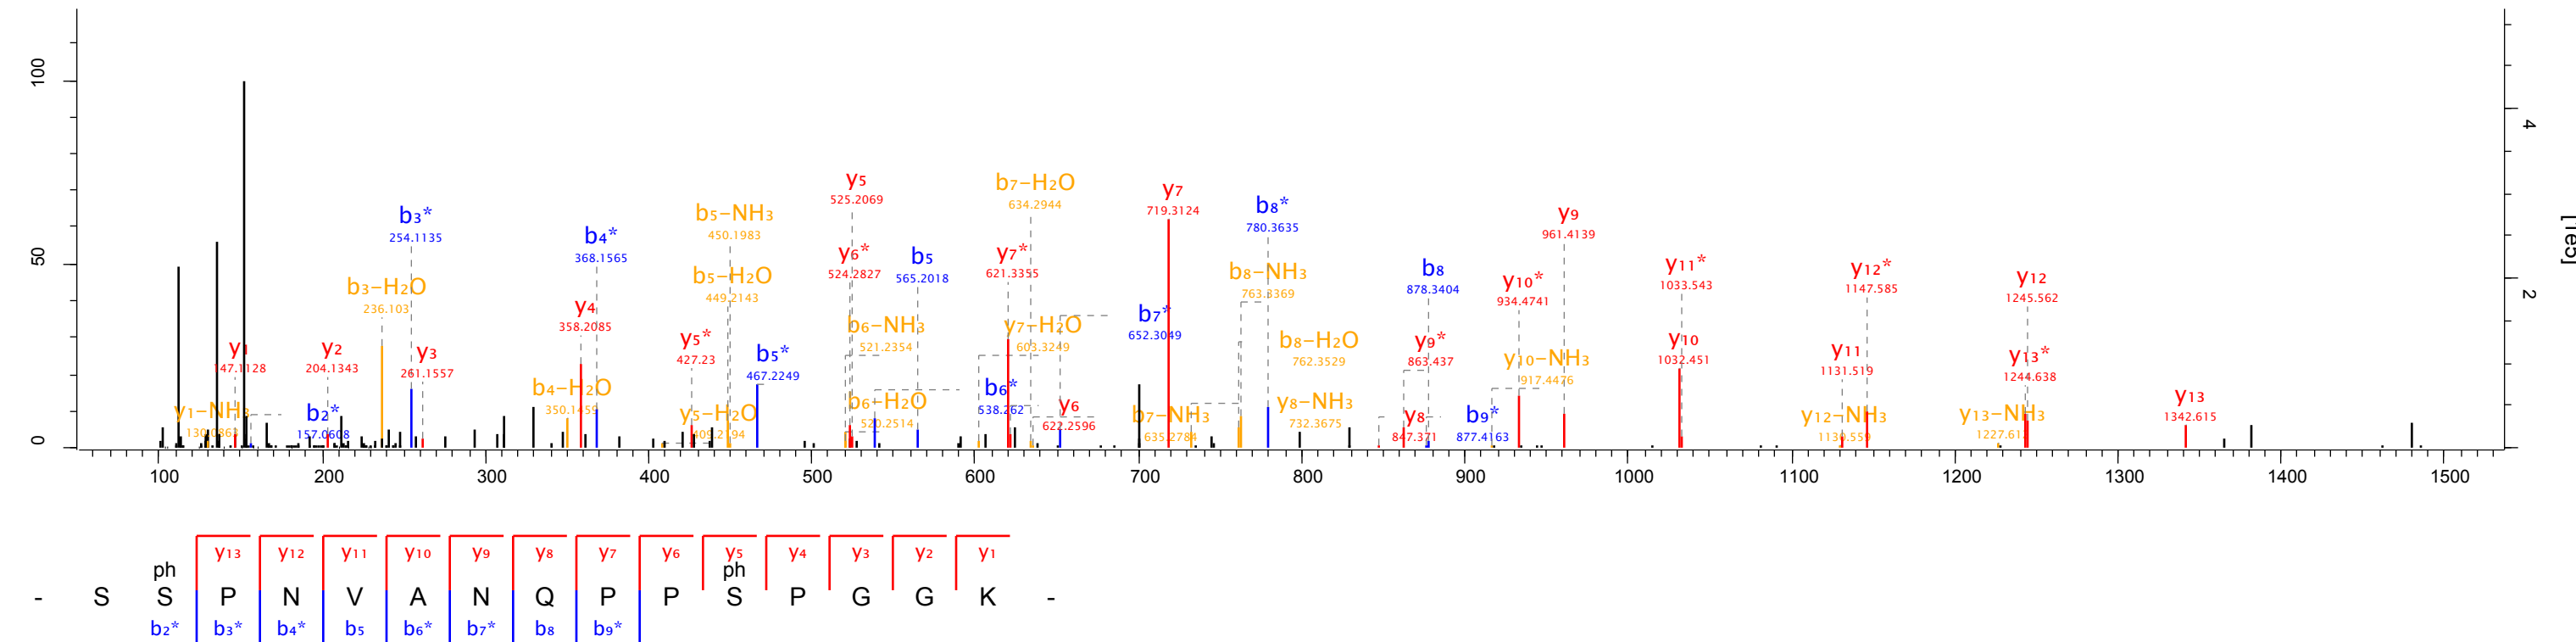

Raw file 20171215\_MaS\_33SR\_LMH\_phospho2\_04 Scan 5873 Method FTMS; HCD Score 52.36 m/z 726.79 Gene names PCYT1A

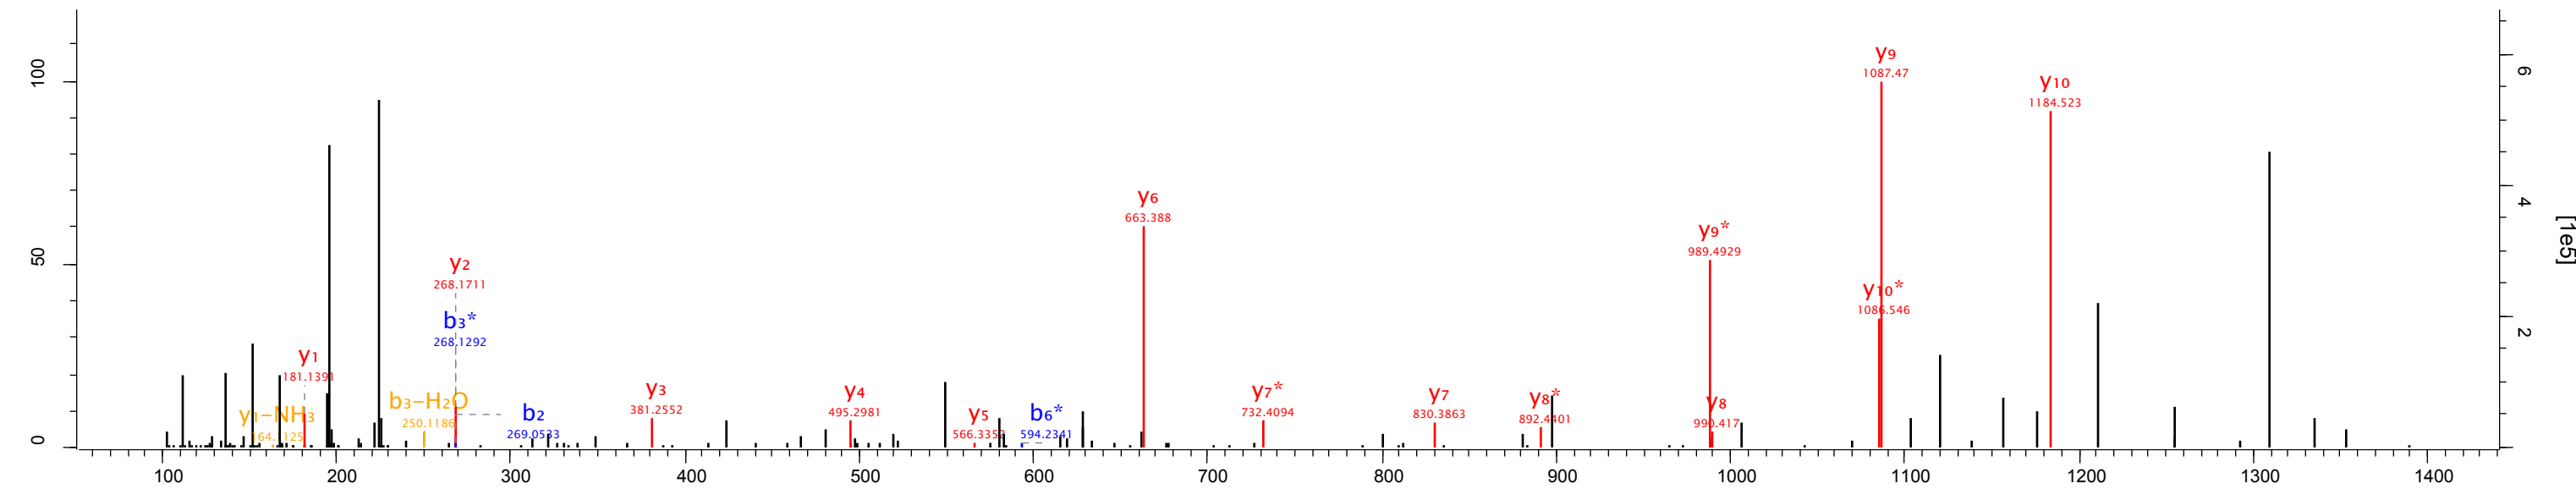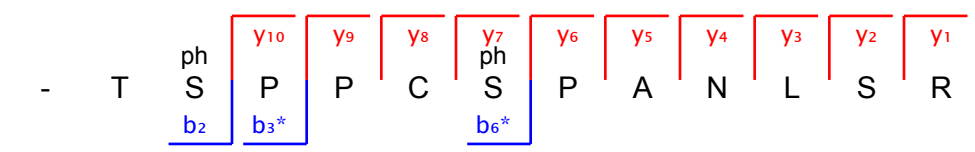

Raw file

20171215\_MaS\_33SR\_LMH\_phospho2\_04

| Scan | Method    | Score | m/z    | Gene names |
|------|-----------|-------|--------|------------|
| 6093 | FTMS; HCD | 45.11 | 600.27 | SRRM2      |

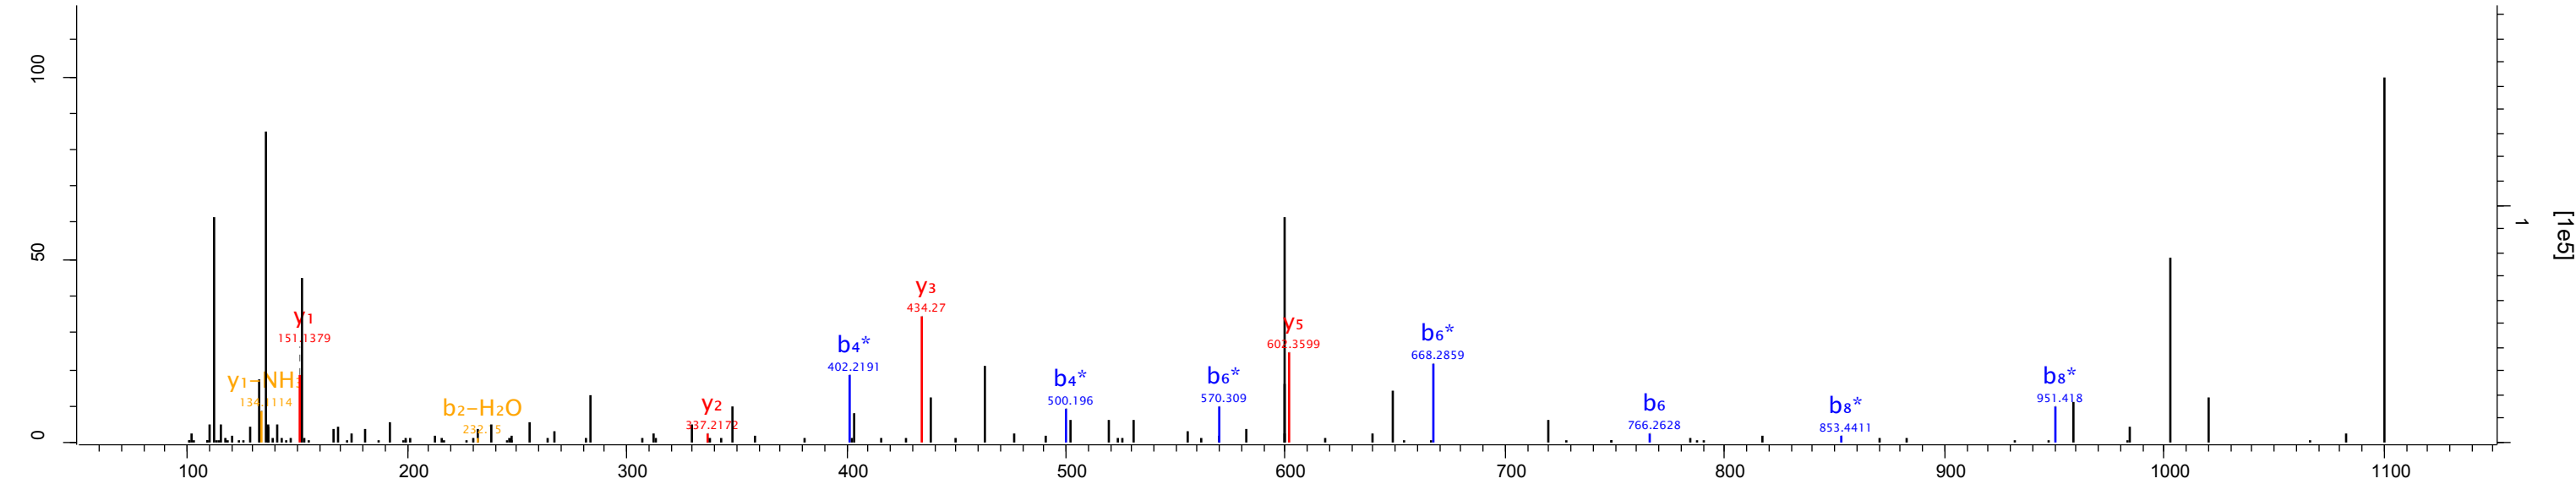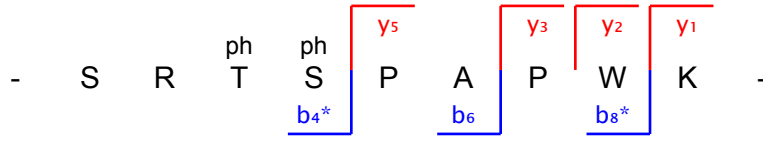

Raw file  
20171215\_MaS\_33SR\_LMH\_phospho2\_04

Scan 6273 Method FTMS; HCD Score 56.88 m/z 871.32 Gene names FRMD6

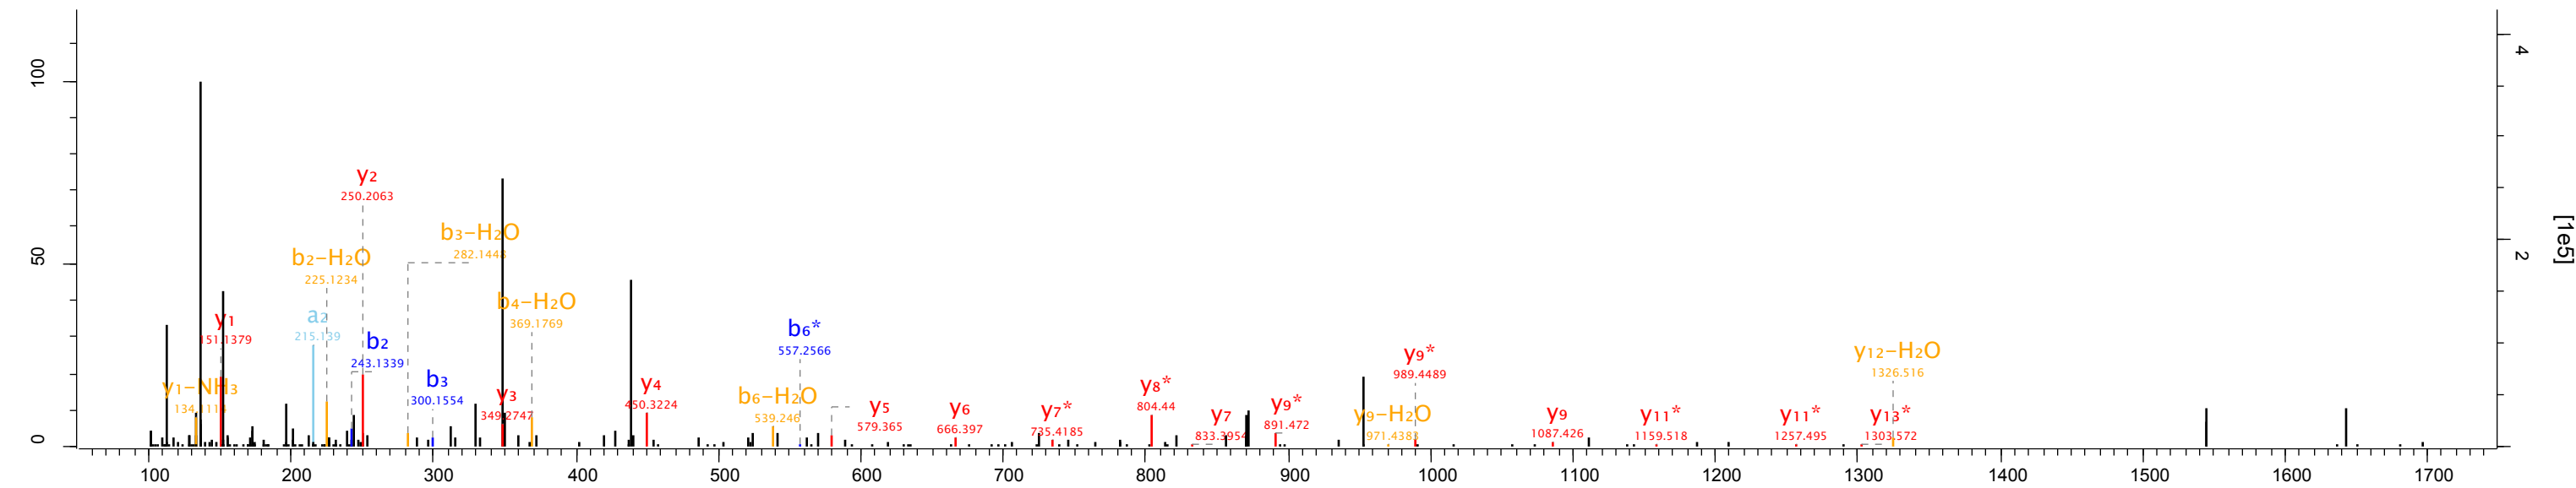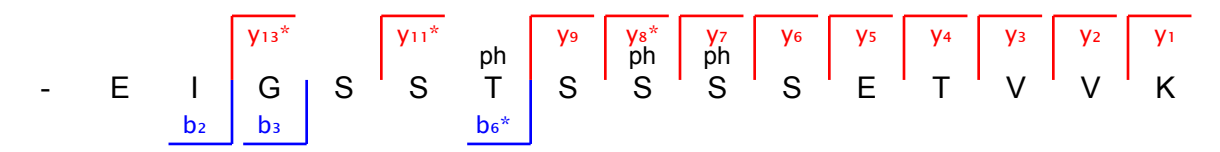

Raw file 20171215\_MaS\_33SR\_LMH\_phospho2\_04  
 Scan 6883 Method FTMS; HCD Score 123.51 m/z 823.03 Gene names KMT2A

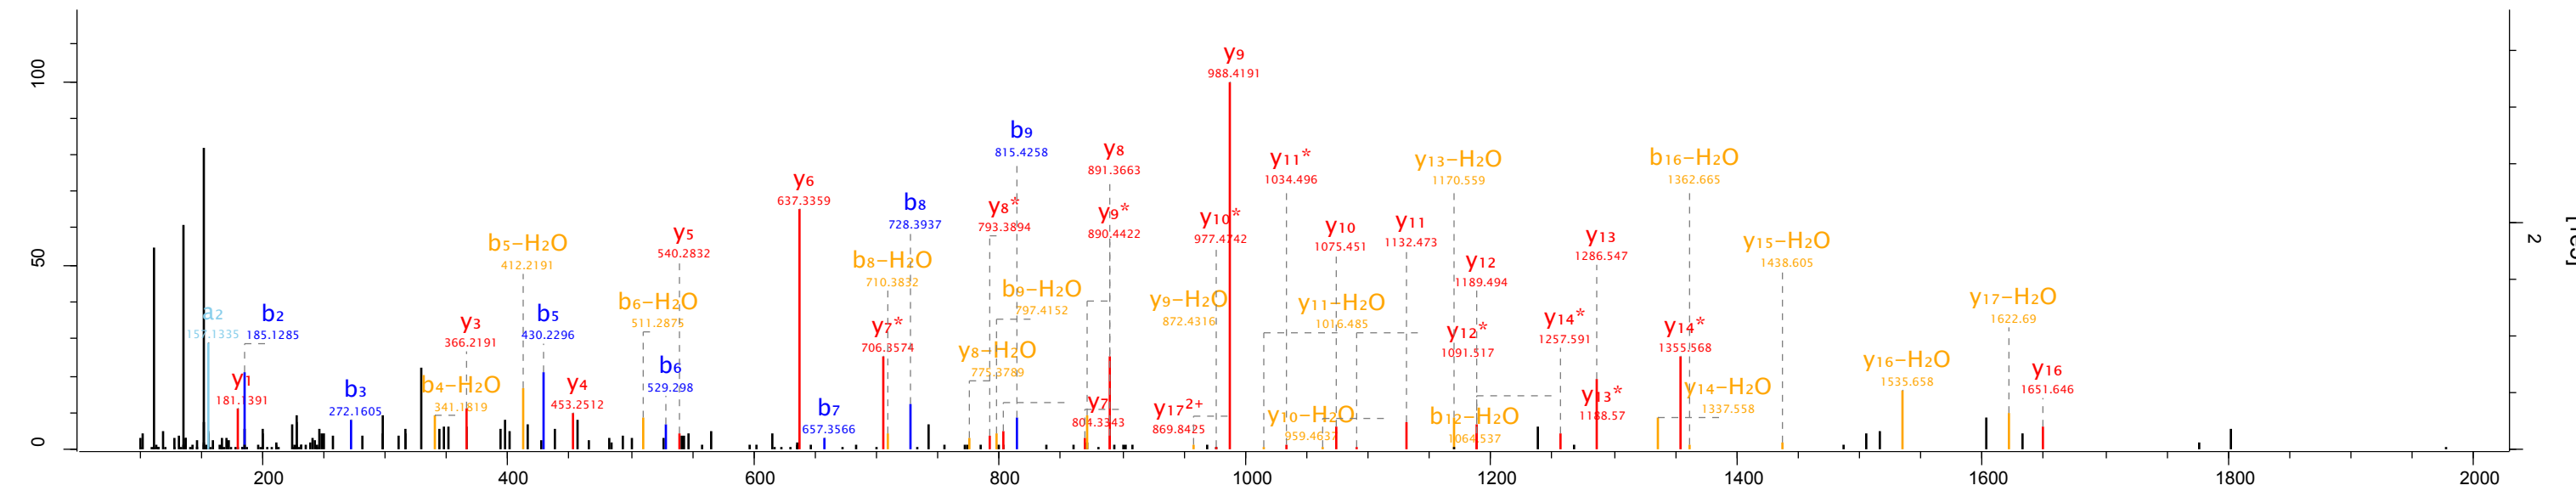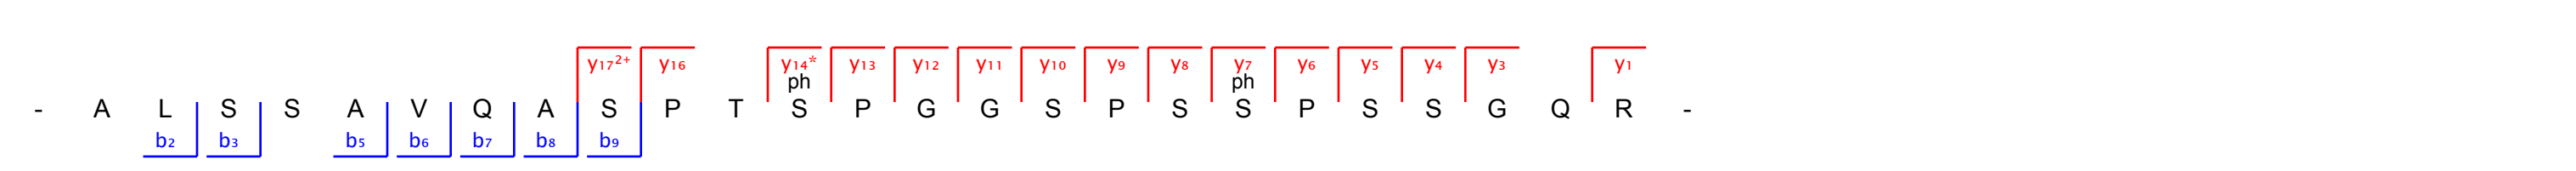



Raw file 20171215\_MaS\_33SR\_LMH\_phospho2\_05 Scan 13573 Method FTMS; HCD Score 62.05 m/z 1009.4 Gene names SFSWAP

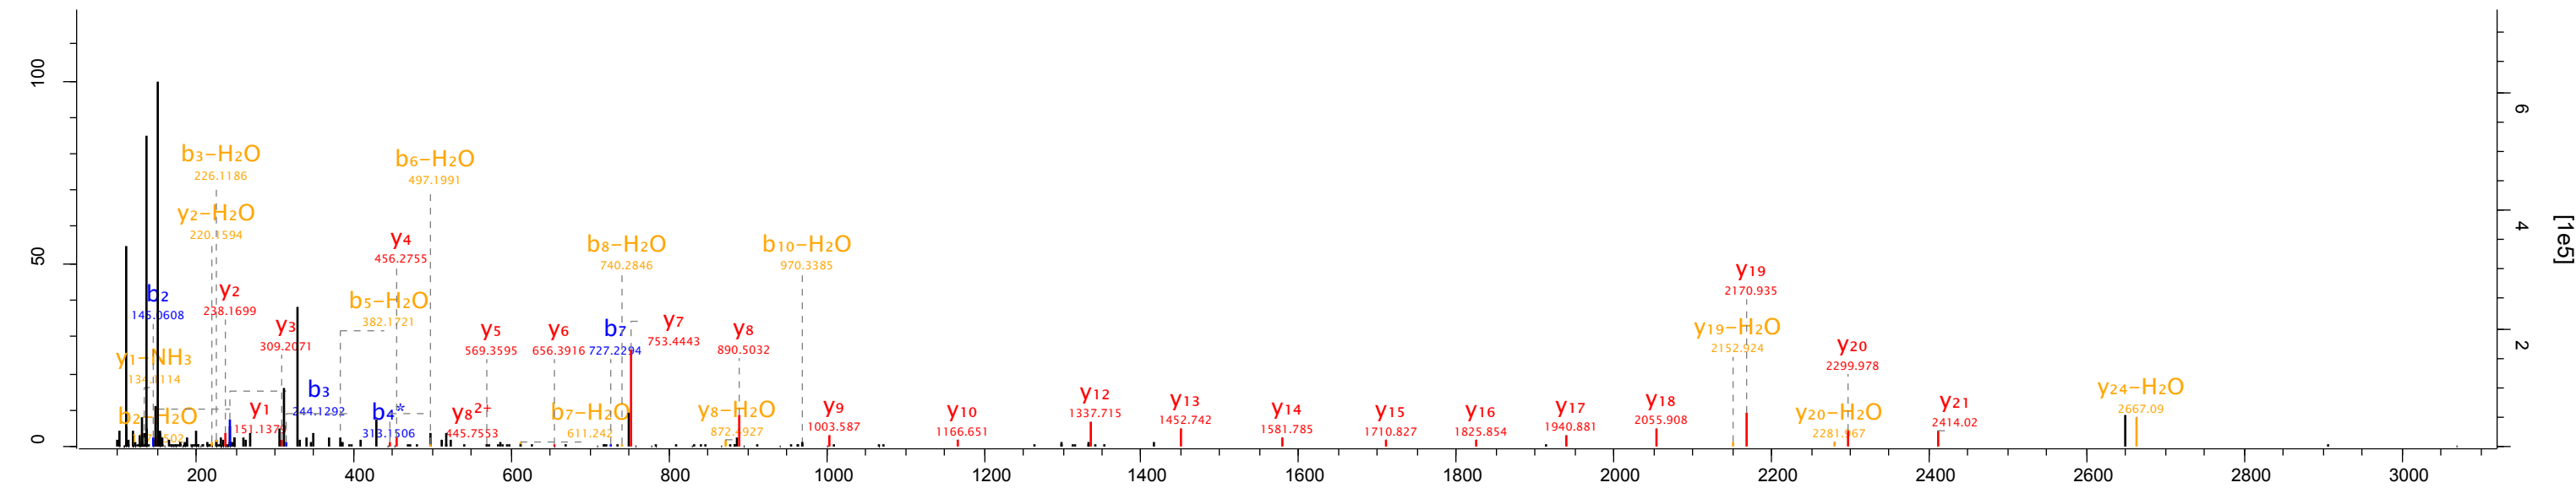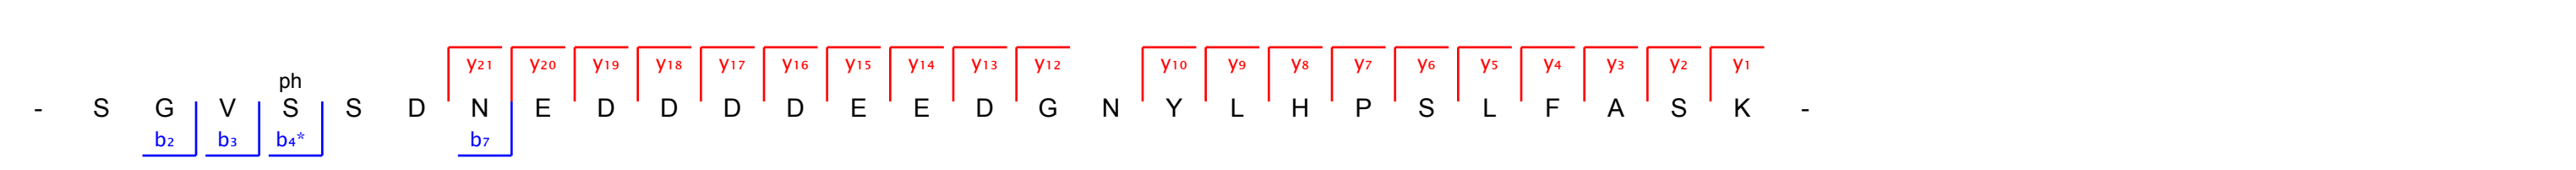

Raw file 20171215\_MaS\_33SR\_LMH\_phospho2\_05 Scan 2743 Method FTMS; HCD Score 53.36 m/z 571.22 Gene names SRRM2

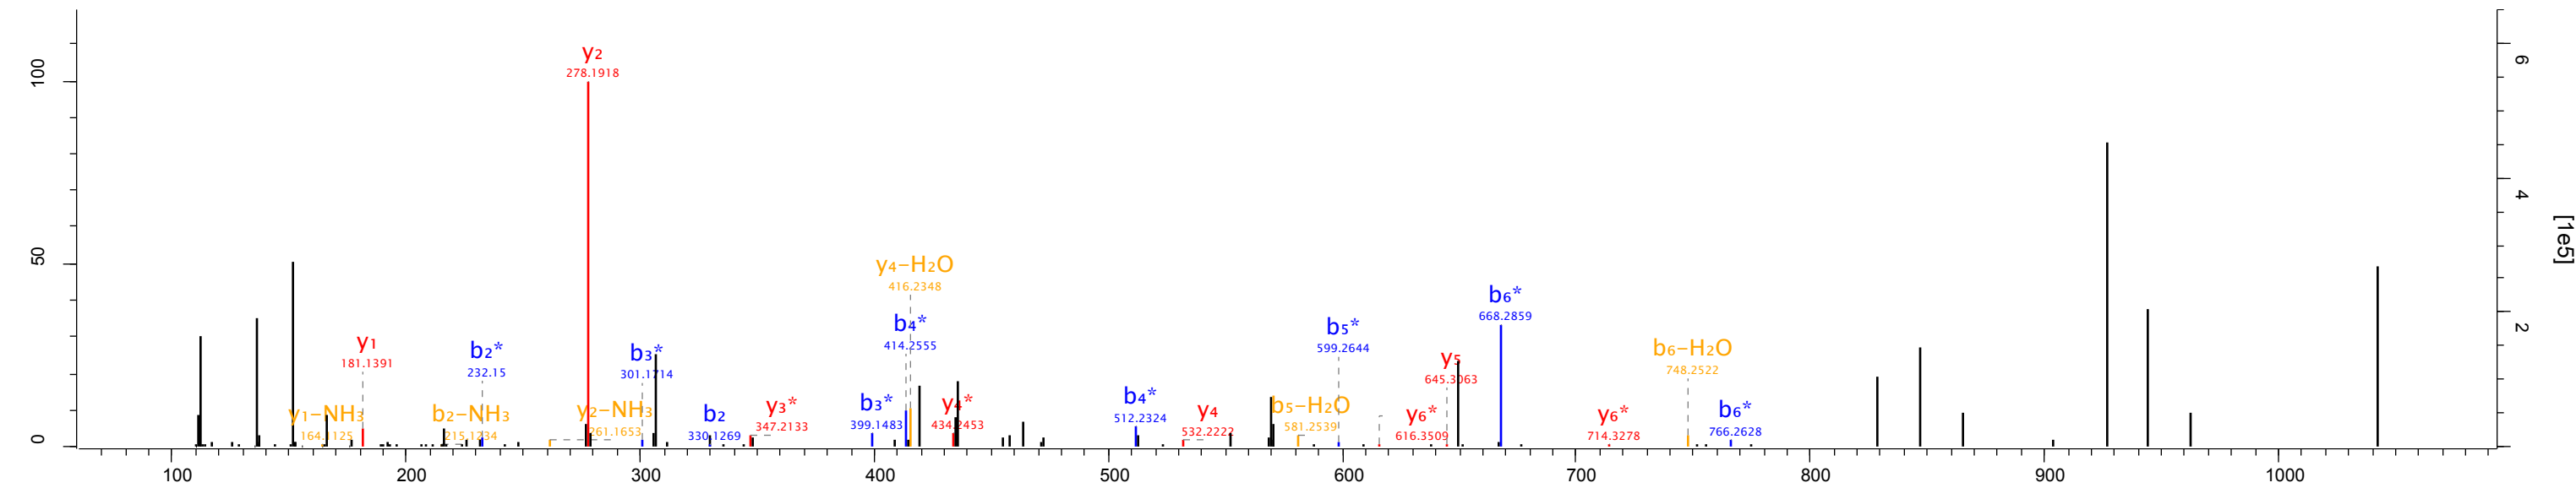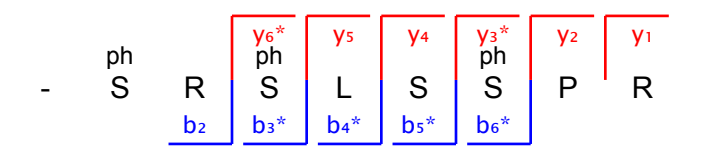

Raw file 20171215\_MaS\_33SR\_LMH\_phospho2\_05 Scan 3823 Method FTMS; HCD Score 49.09 m/z 879.66 Gene names DCAF6

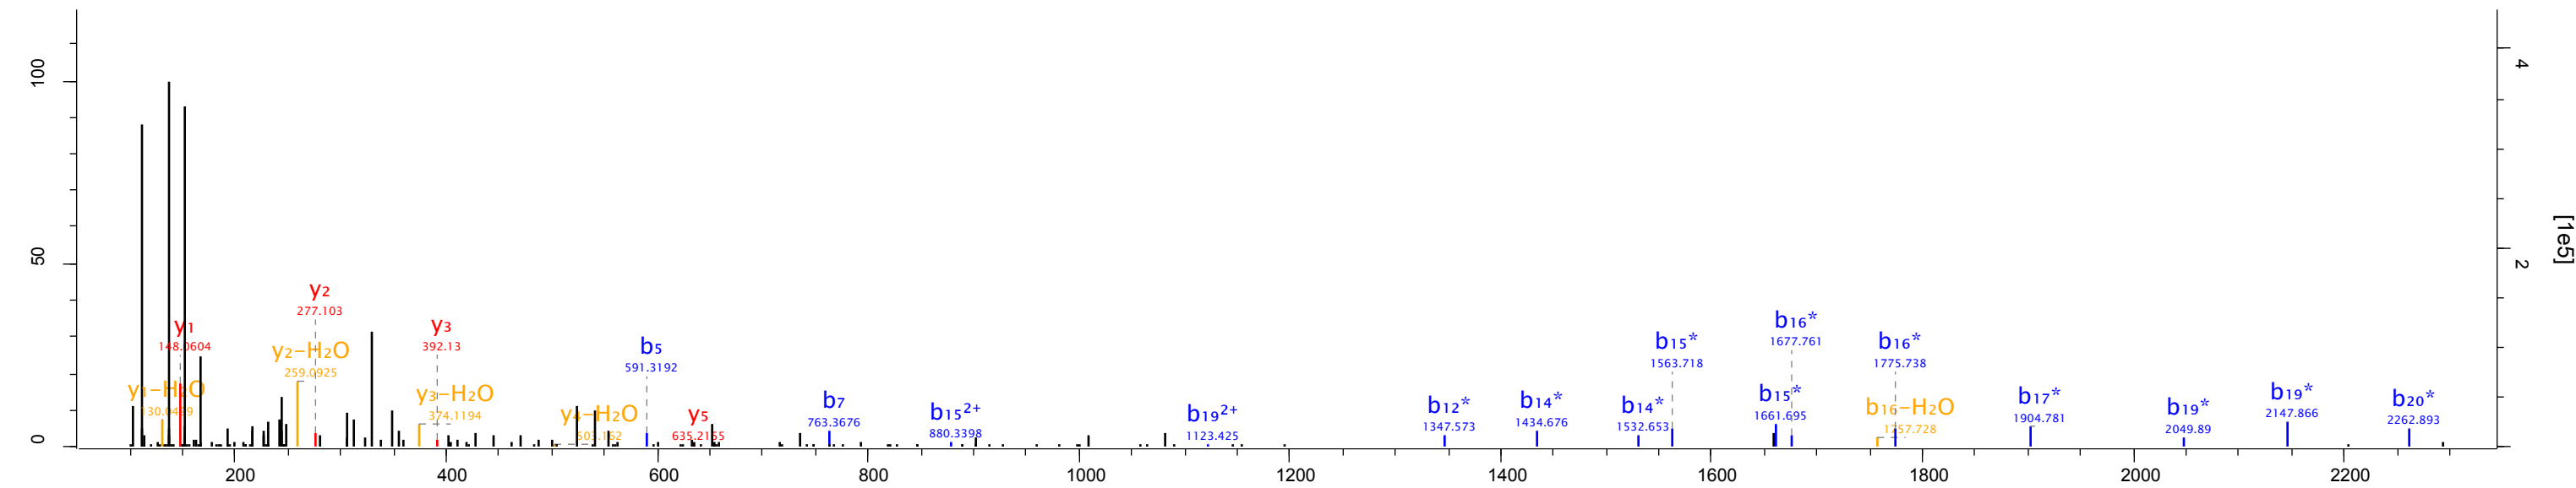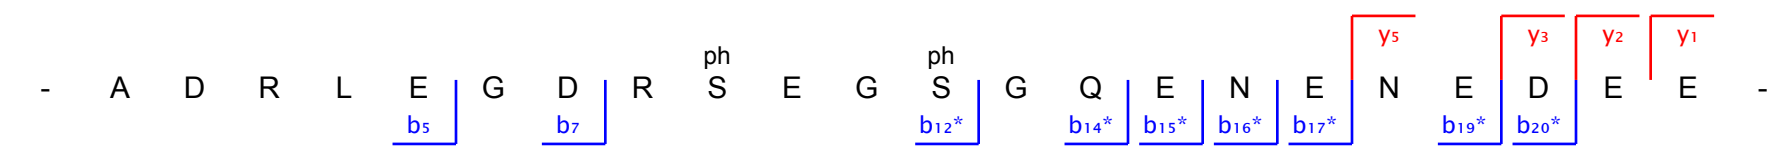

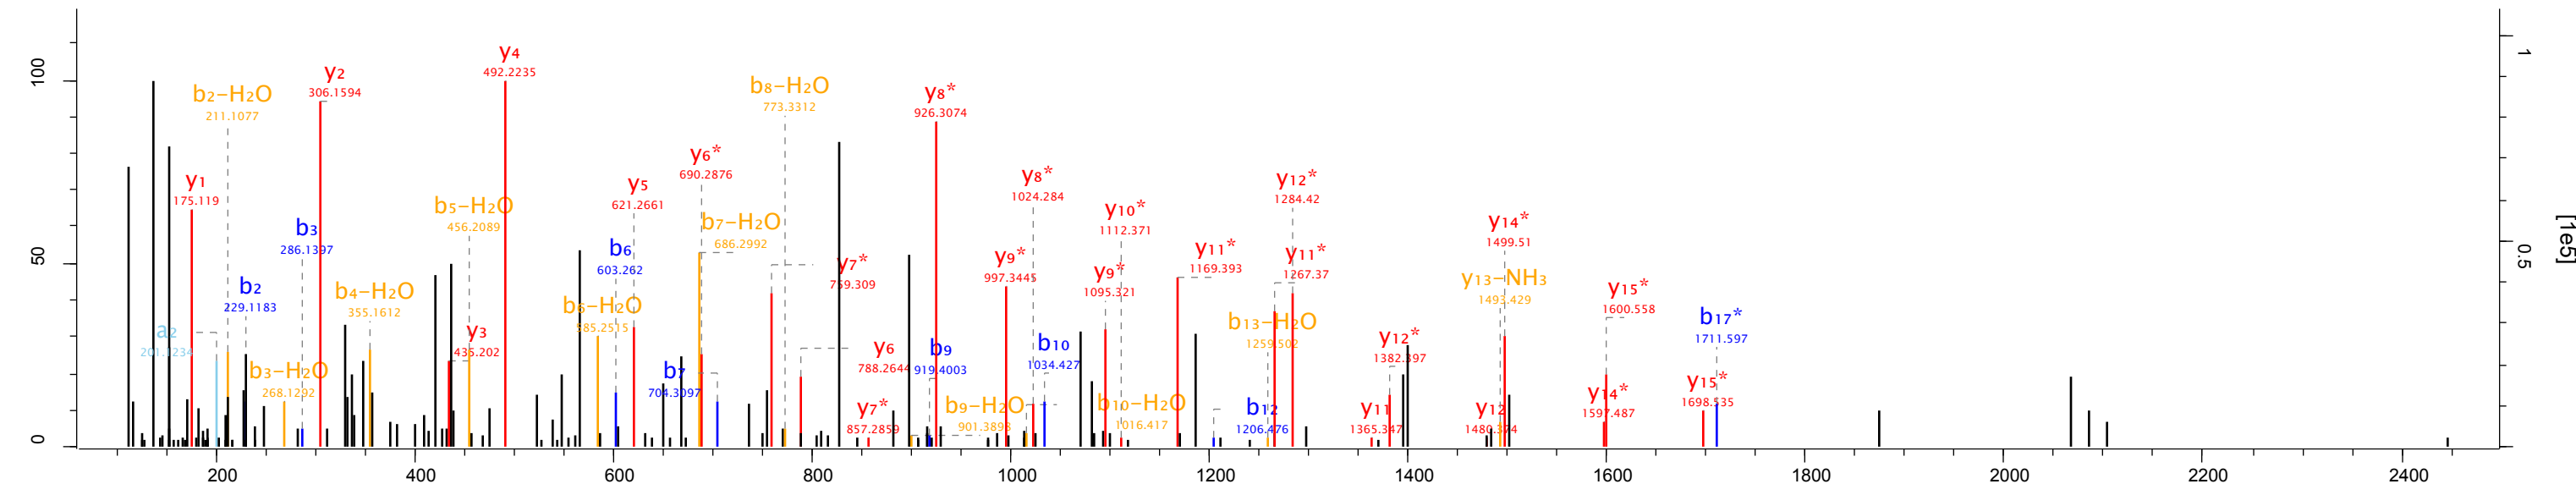

- E V G S T E T S Q D G D A S S S E G E M R -

b<sub>2</sub>
b<sub>3</sub>
b<sub>6</sub>
b<sub>7</sub>
b<sub>9</sub>
b<sub>10</sub>
b<sub>12</sub>
b<sub>17</sub>\*
y<sub>15</sub>\*
y<sub>14</sub>\*
y<sub>12</sub>
y<sub>11</sub>
y<sub>10</sub>\*
y<sub>9</sub>\*
y<sub>8</sub>\*
y<sub>7</sub>\*
y<sub>6</sub>
y<sub>5</sub>
y<sub>4</sub>
y<sub>3</sub>
y<sub>2</sub>
y<sub>1</sub>

20171215\_MaS\_33SR\_LMH\_phospho2\_05 4763 FTMS; HCD 136.62 771.74 ZMYM4

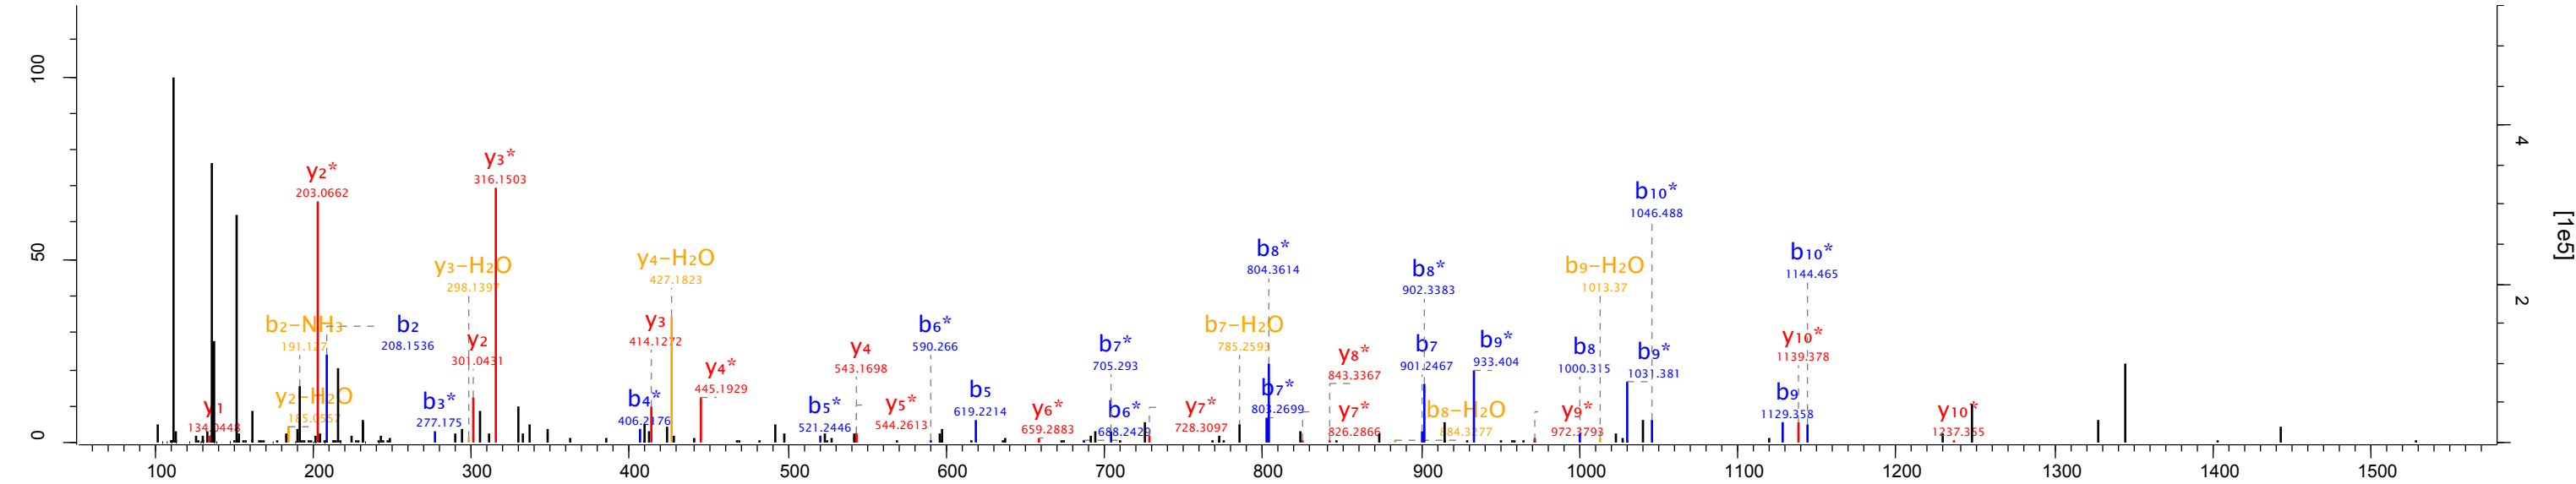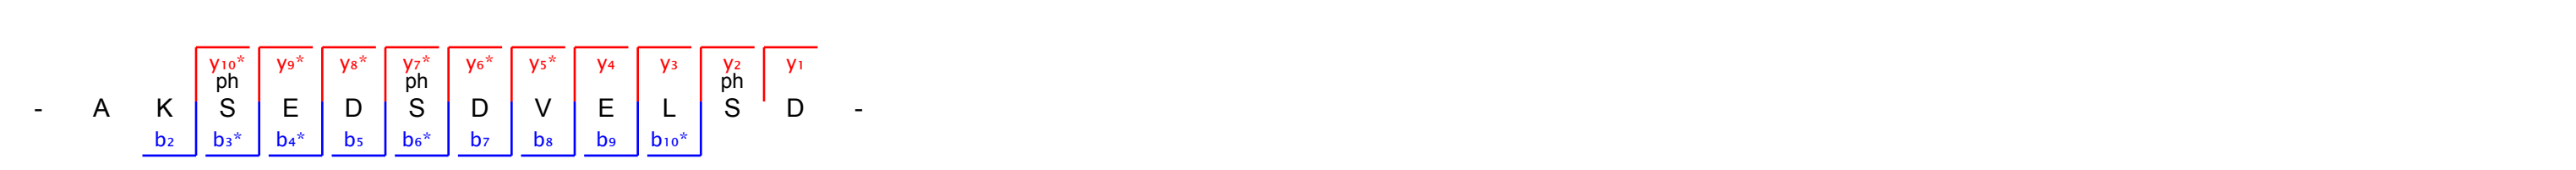

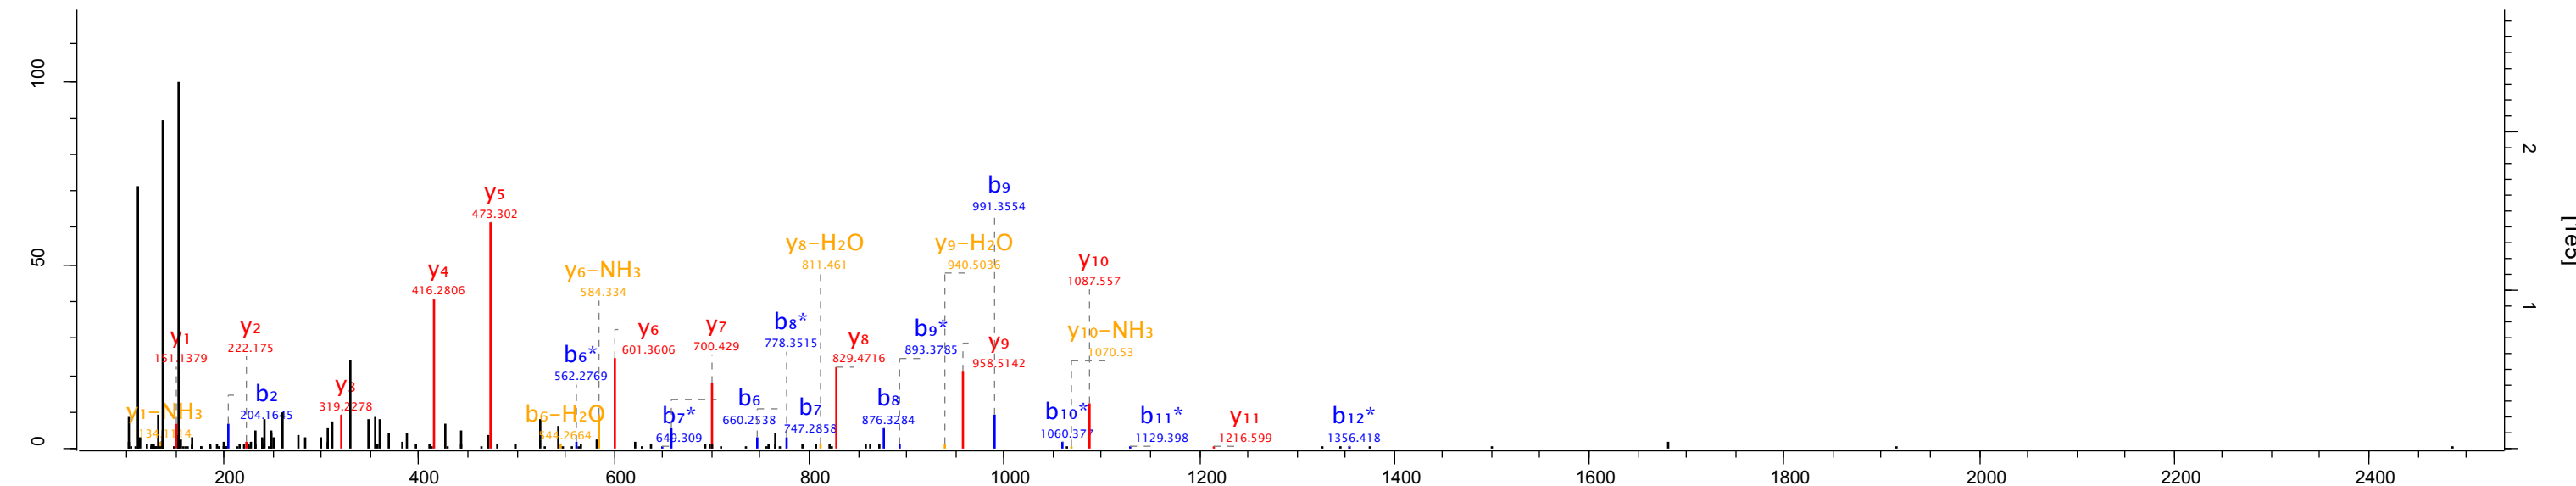

- K A S S ph S D S E D S ph S S E E E E V Q G P P A K -

b<sub>2</sub>
b<sub>6</sub>
b<sub>7</sub>
b<sub>8</sub>
b<sub>9</sub>
b<sub>10</sub>\*
b<sub>11</sub>\*
b<sub>12</sub>\*
y<sub>11</sub>
y<sub>10</sub>
y<sub>9</sub>
y<sub>8</sub>
y<sub>7</sub>
y<sub>6</sub>
y<sub>5</sub>
y<sub>4</sub>
y<sub>3</sub>
y<sub>2</sub>
y<sub>1</sub>

Raw file  
20171215\_MaS\_33SR\_LMH\_phospho2\_06

Scan 11143 Method FTMS; HCD Score 41.62 m/z 996.45 Gene names IGF2BP2

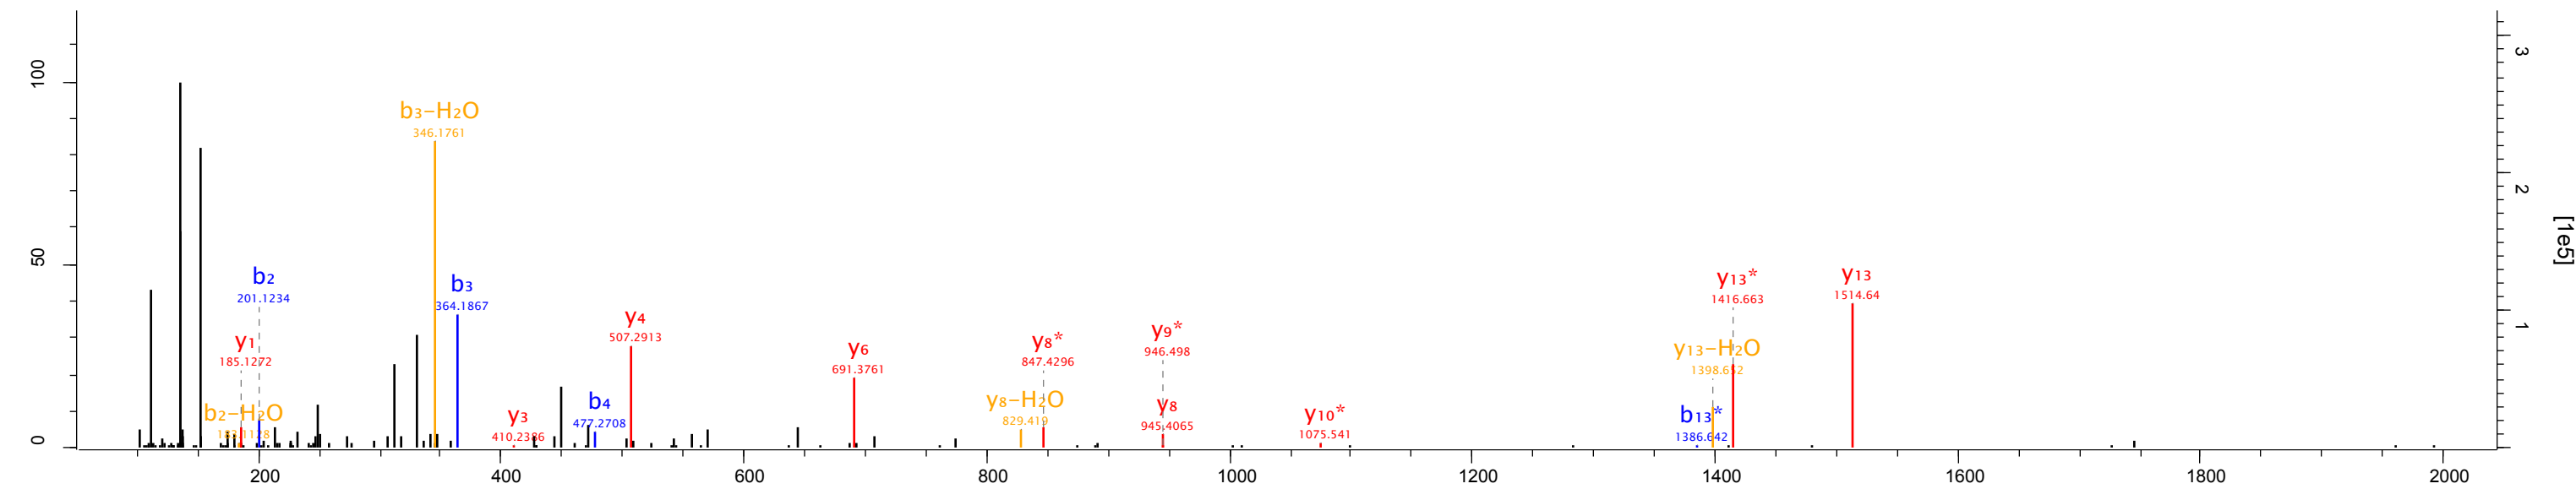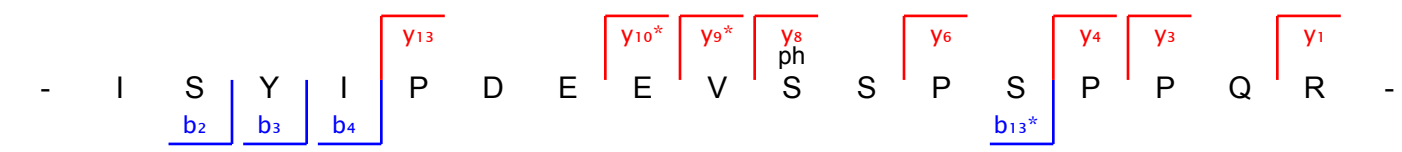

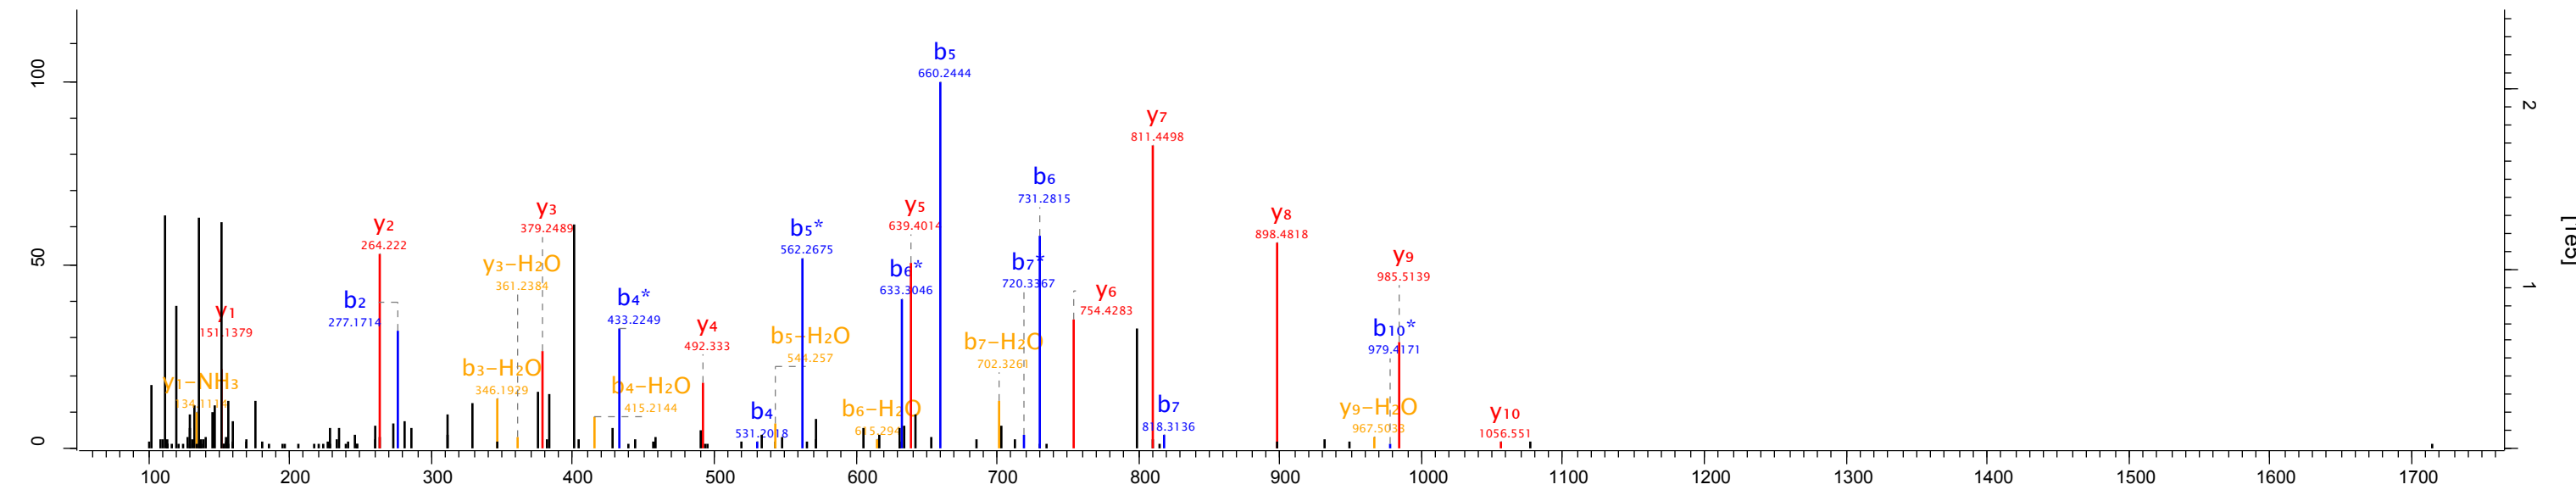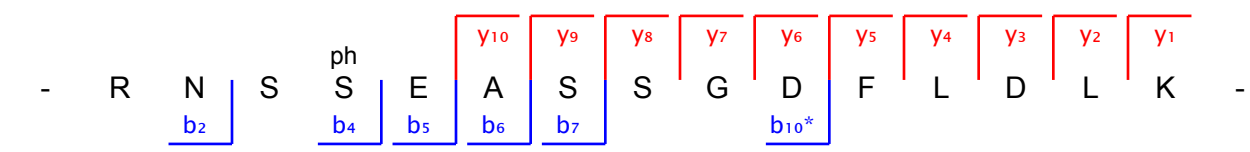



Raw file 20171215\_MaS\_33SR\_LMH\_phospho2\_06 Scan 2703 Method FTMS; HCD Score 99.09 m/z 749.86 Gene names TXLNA

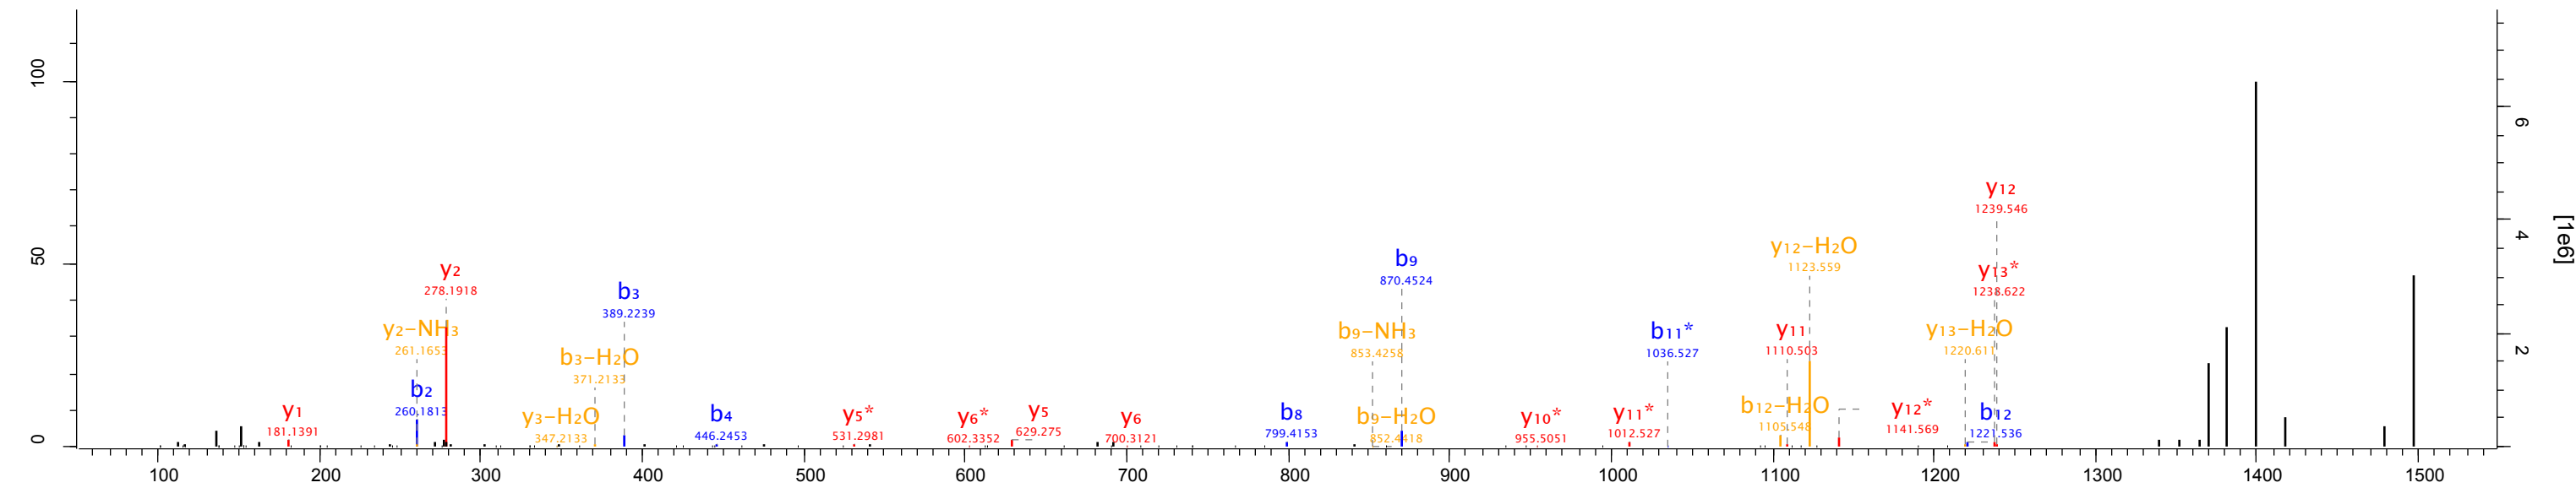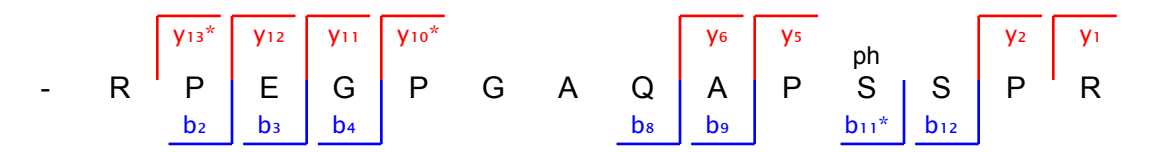

Raw file: 20171215\_MaS\_33SR\_LMH\_phospho2\_06  
 Scan: 3123 Method: FTMS; HCD Score: 147.08 m/z: 629.59 Gene names: EIF3B

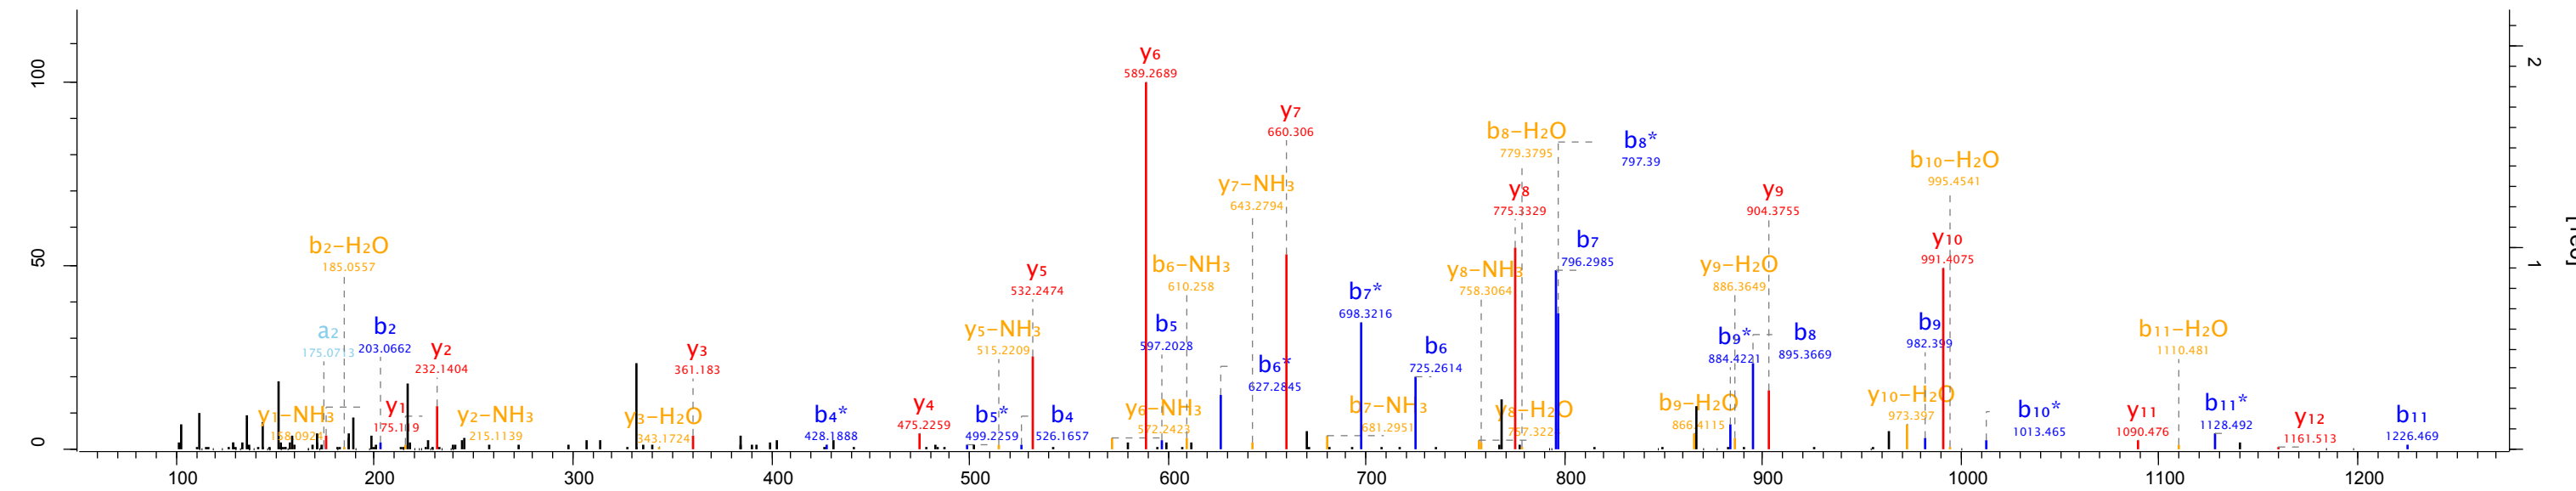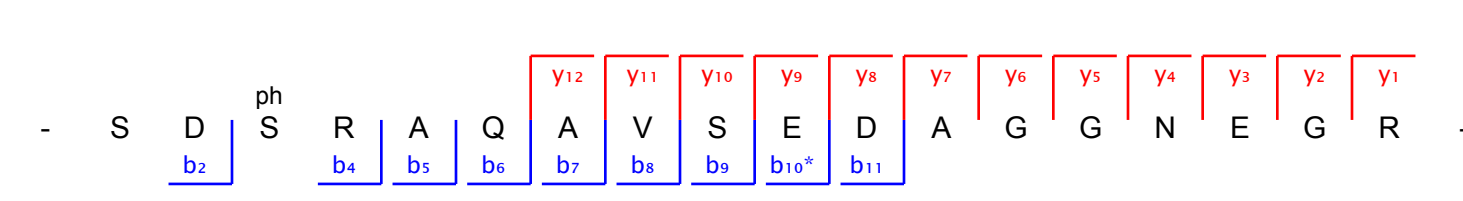

Raw file  
20171215\_MaS\_33SR\_LMH\_phospho2\_06

Scan 3443 Method FTMS; HCD Score 67.7 m/z 483.22 Gene names BRIP1

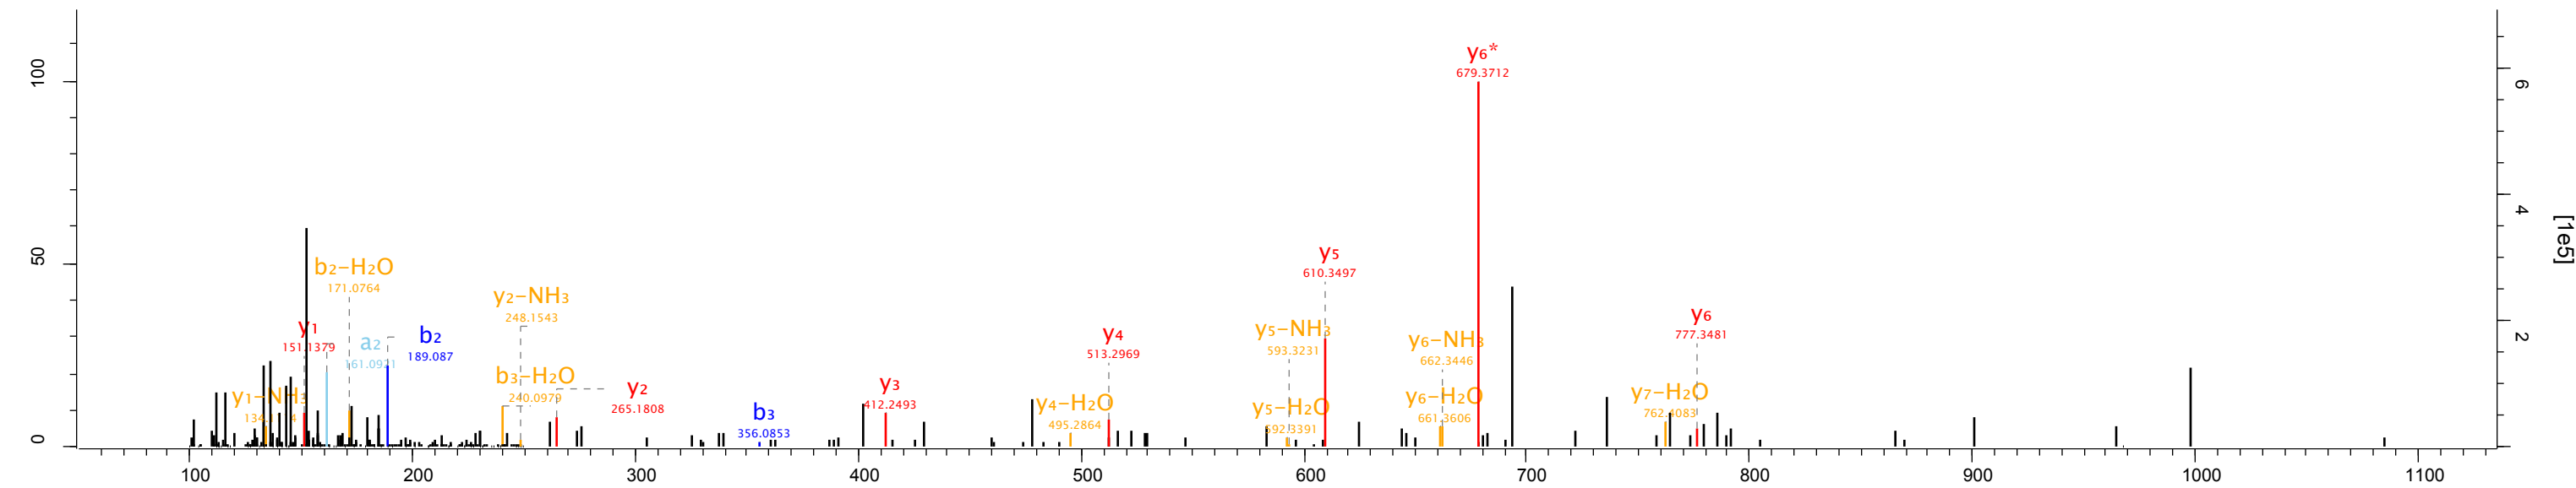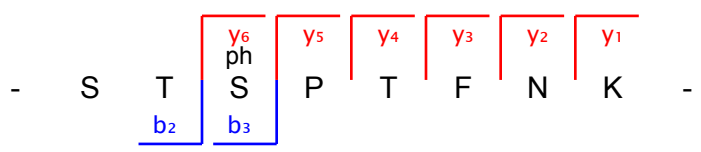

Raw file

20171215\_MaS\_33SR\_LMH\_phospho2\_06

| Scan | Method    | Score | m/z    | Gene names |
|------|-----------|-------|--------|------------|
| 3573 | FTMS; HCD | 40.28 | 639.32 | DPYSL3     |

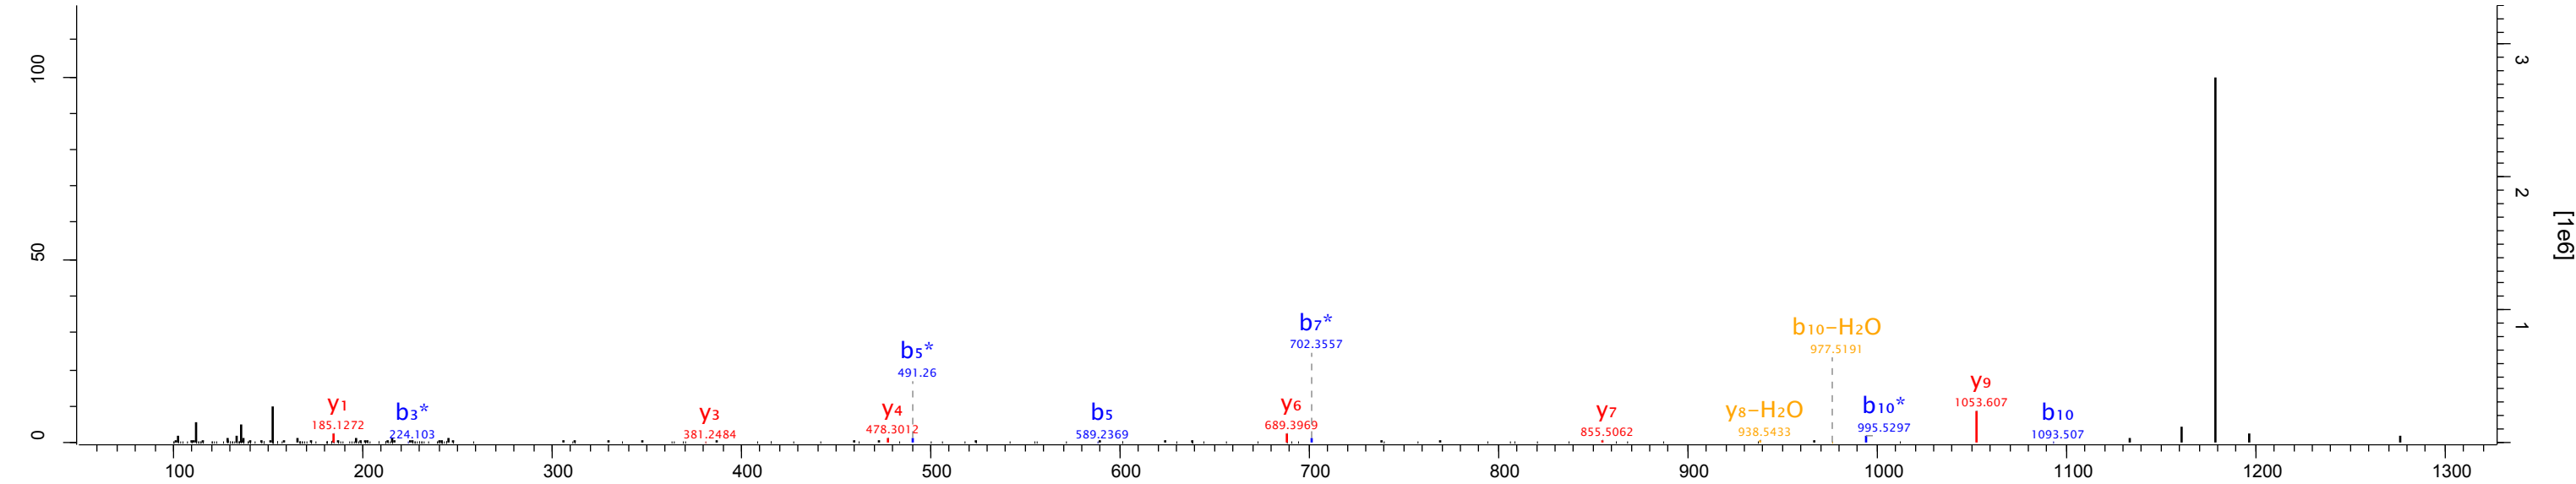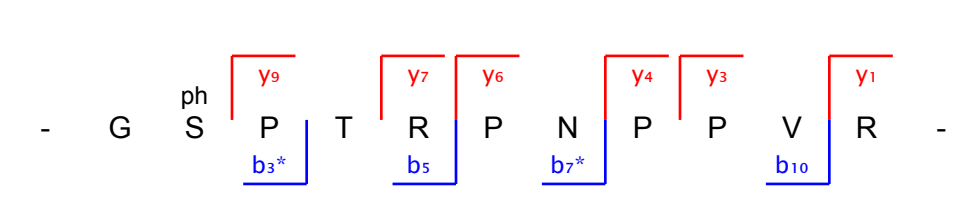

Raw file 20171215\_MaS\_33SR\_LMH\_phospho2\_06 Scan 3923 Method FTMS; HCD Score 47.43 m/z 566.76 Gene names KIF4A

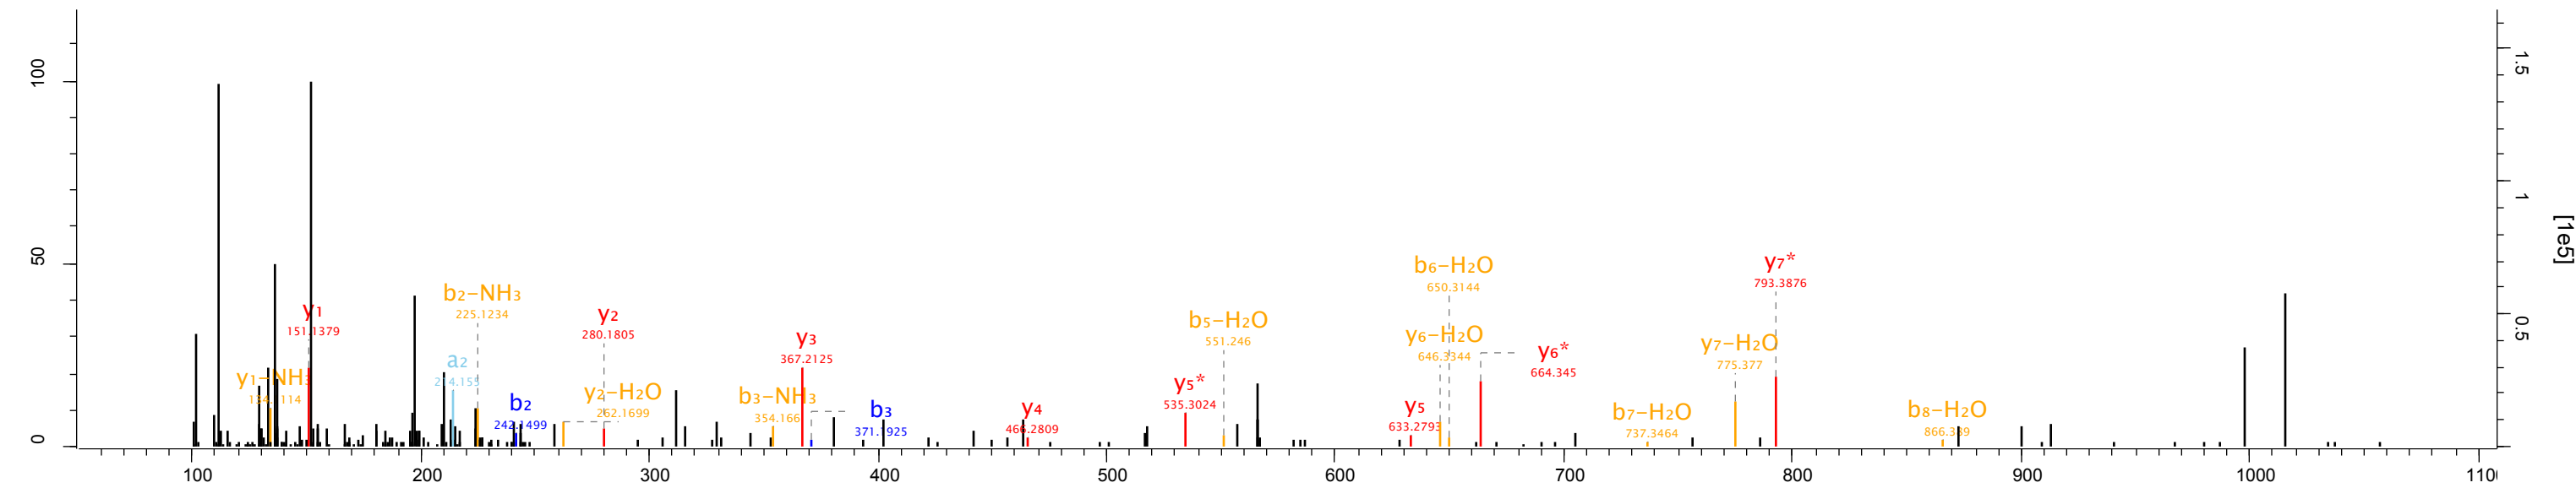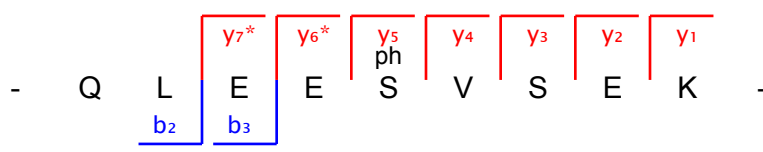

Raw file 20171215\_MaS\_33SR\_LMH\_phospho2\_06 Scan 4243 Method FTMS; HCD Score 132.59 m/z 599.26 Gene names RSRC2

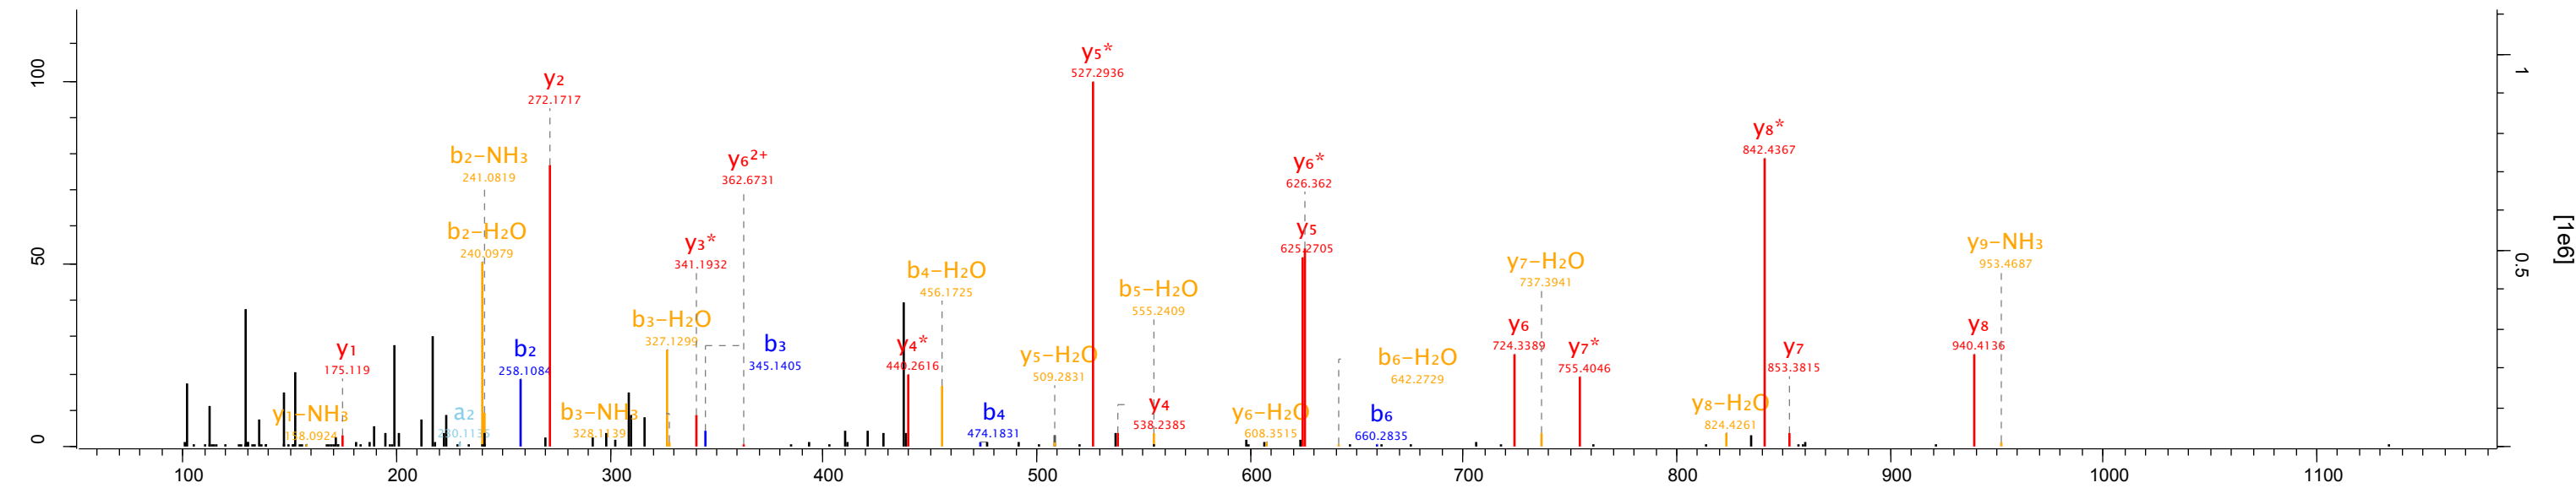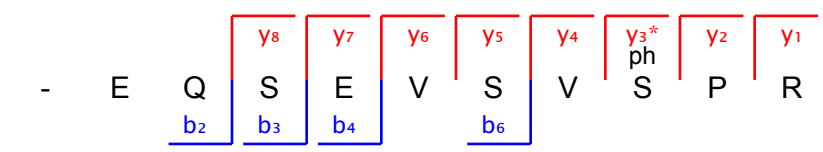

Raw file 20171215\_MaS\_33SR\_LMH\_phospho2\_06 Scan 4503 Method FTMS; HCD Score 61.11 m/z 600.75 Gene names SIPA1L2

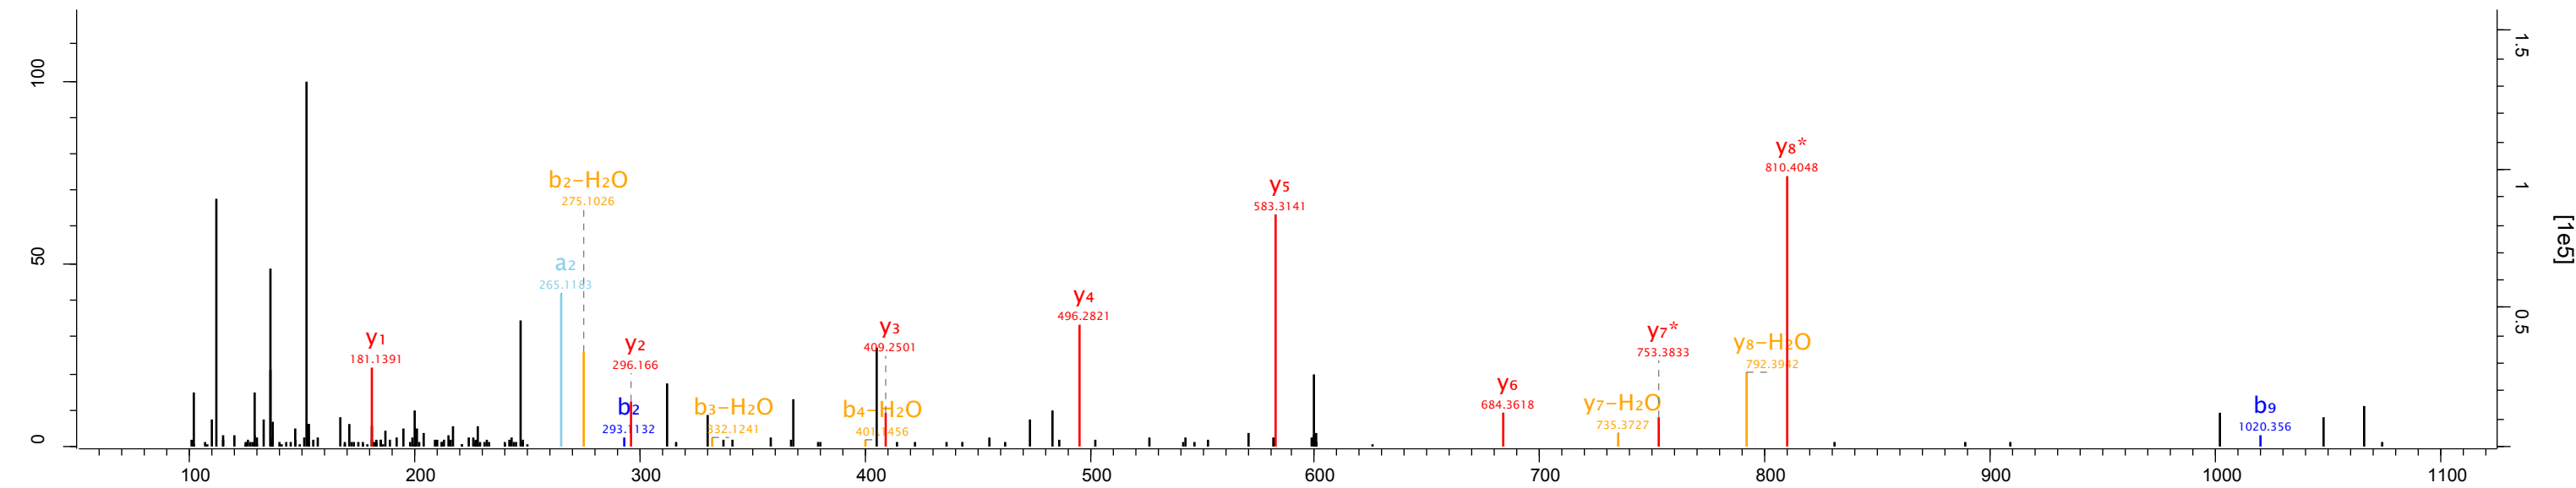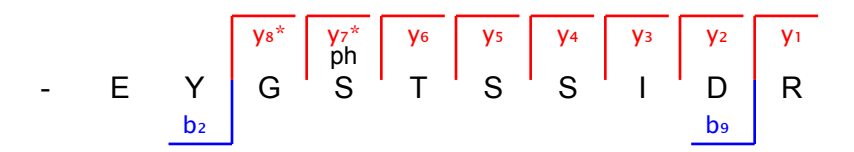

Raw file

20171215\_MaS\_33SR\_LMH\_phospho2\_06

| Scan | Method    | Score | m/z    | Gene names |
|------|-----------|-------|--------|------------|
| 7233 | FTMS; HCD | 40.28 | 723.33 | NES        |

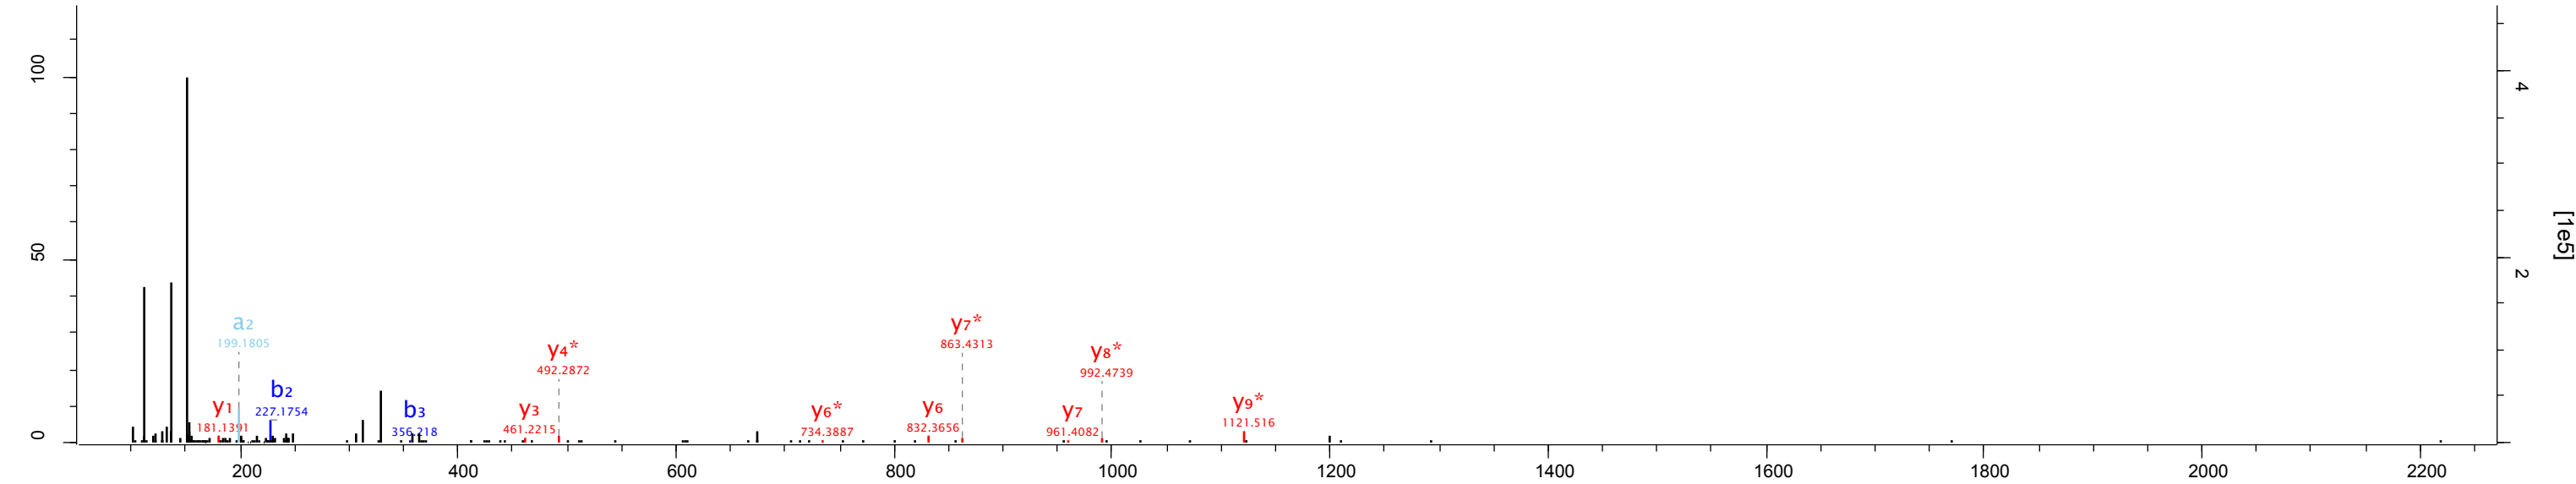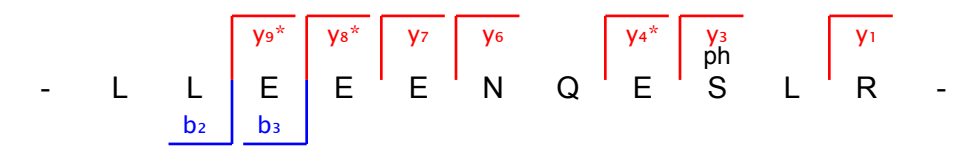



Raw file 20171215\_MaS\_33SR\_LMH\_phospho2\_06 Scan 8033 Method FTMS; HCD Score 46.57 m/z 951.95 Gene names NUP98

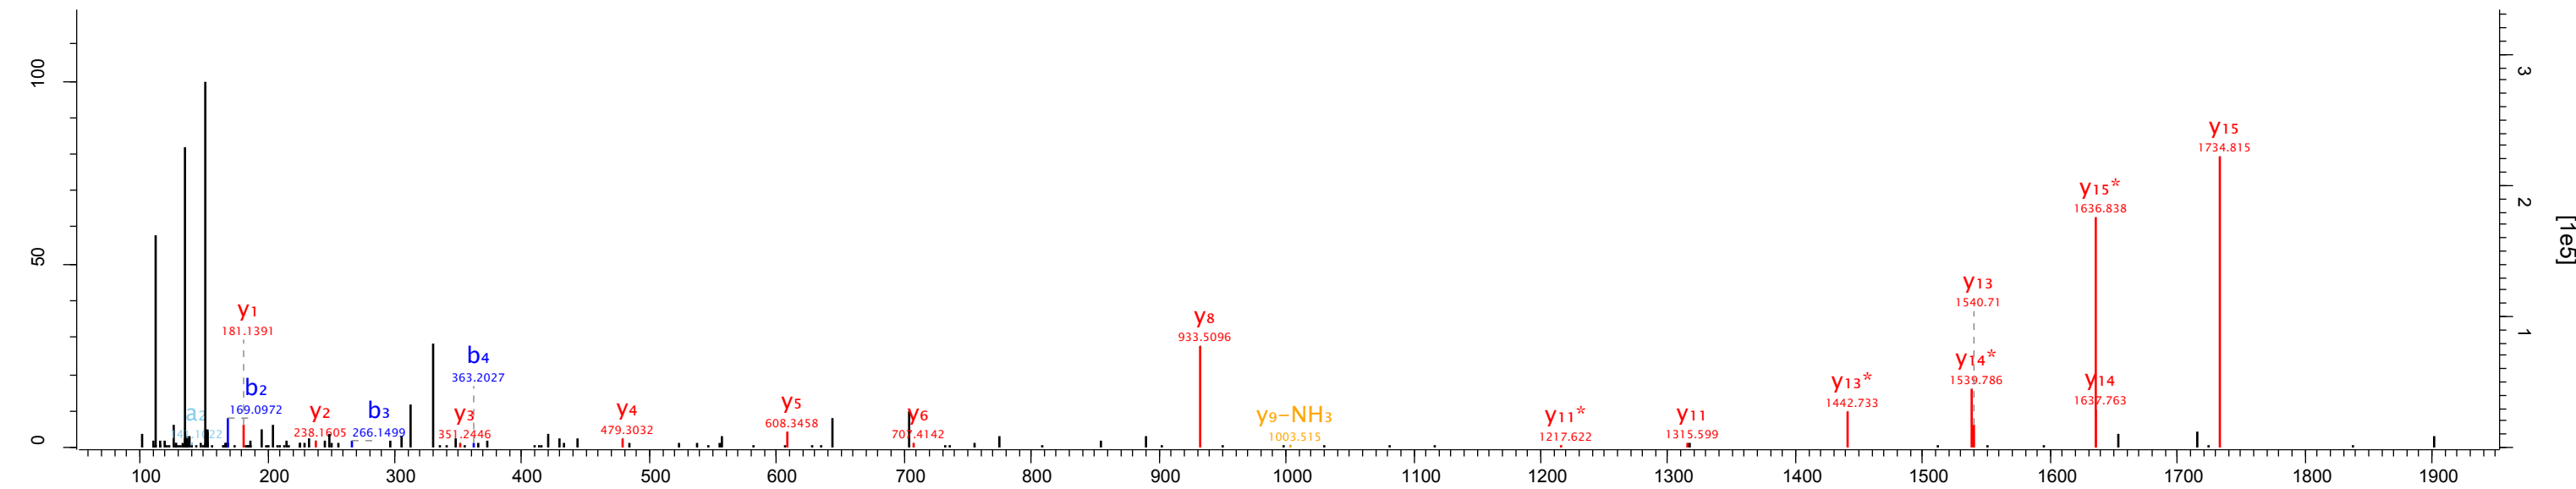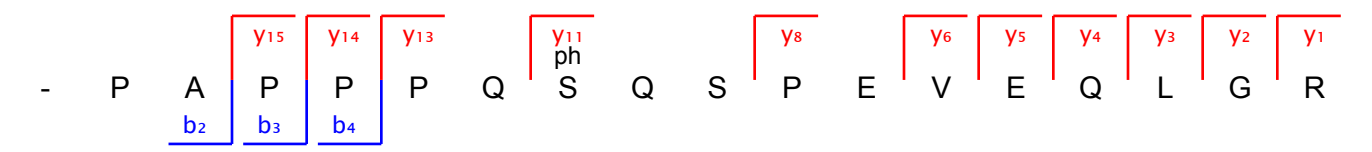

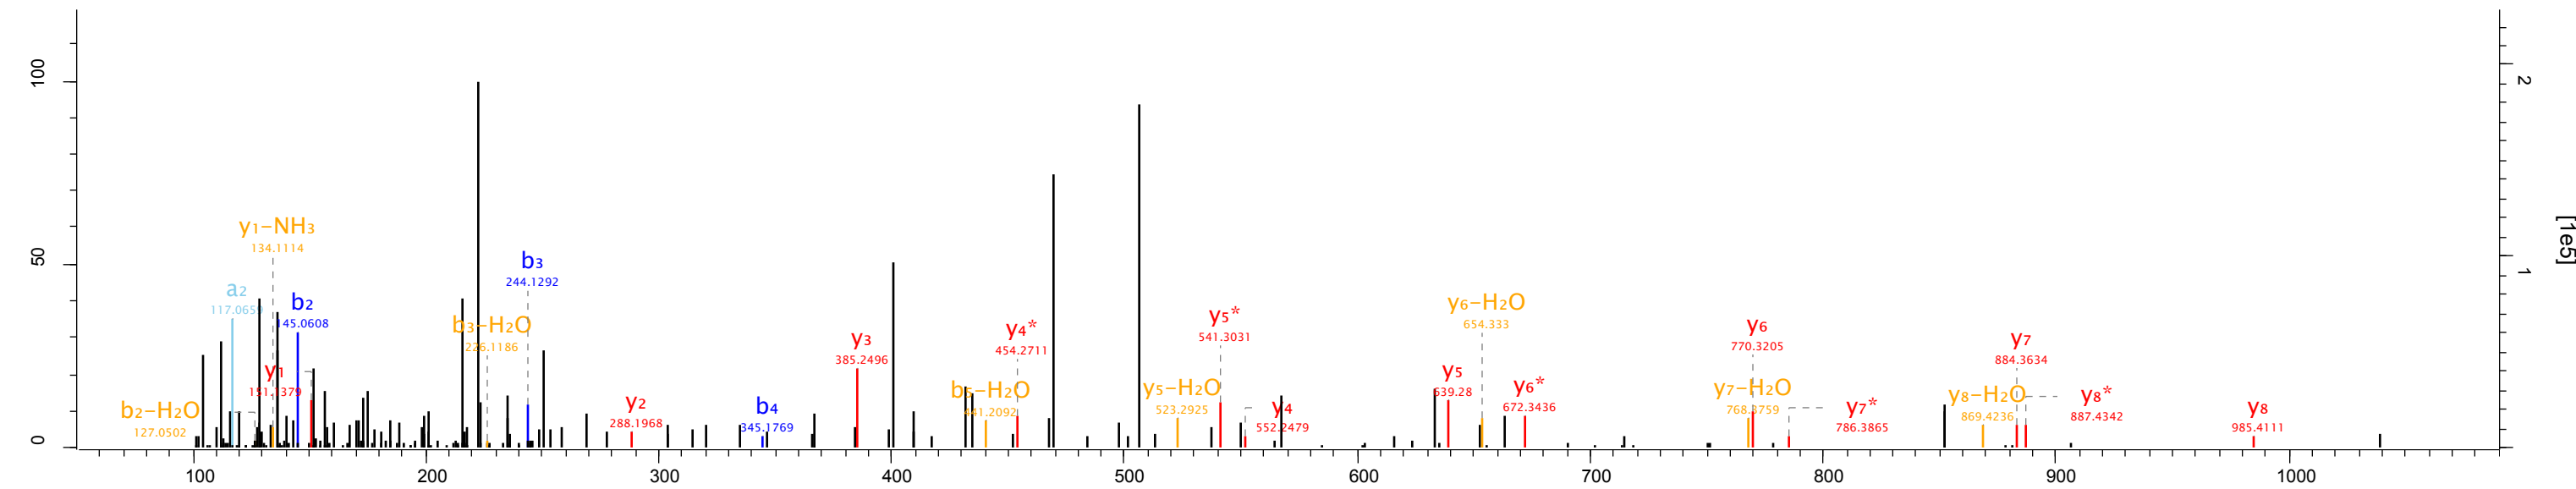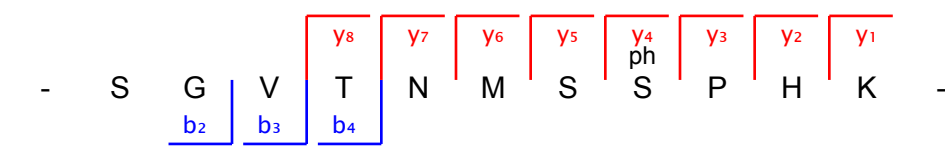

Raw file 20171215\_MaS\_33SR\_LMH\_phospho2\_08 Scan 2793 Method FTMS; HCD Score 90.05 m/z 436.7 Gene names PXN

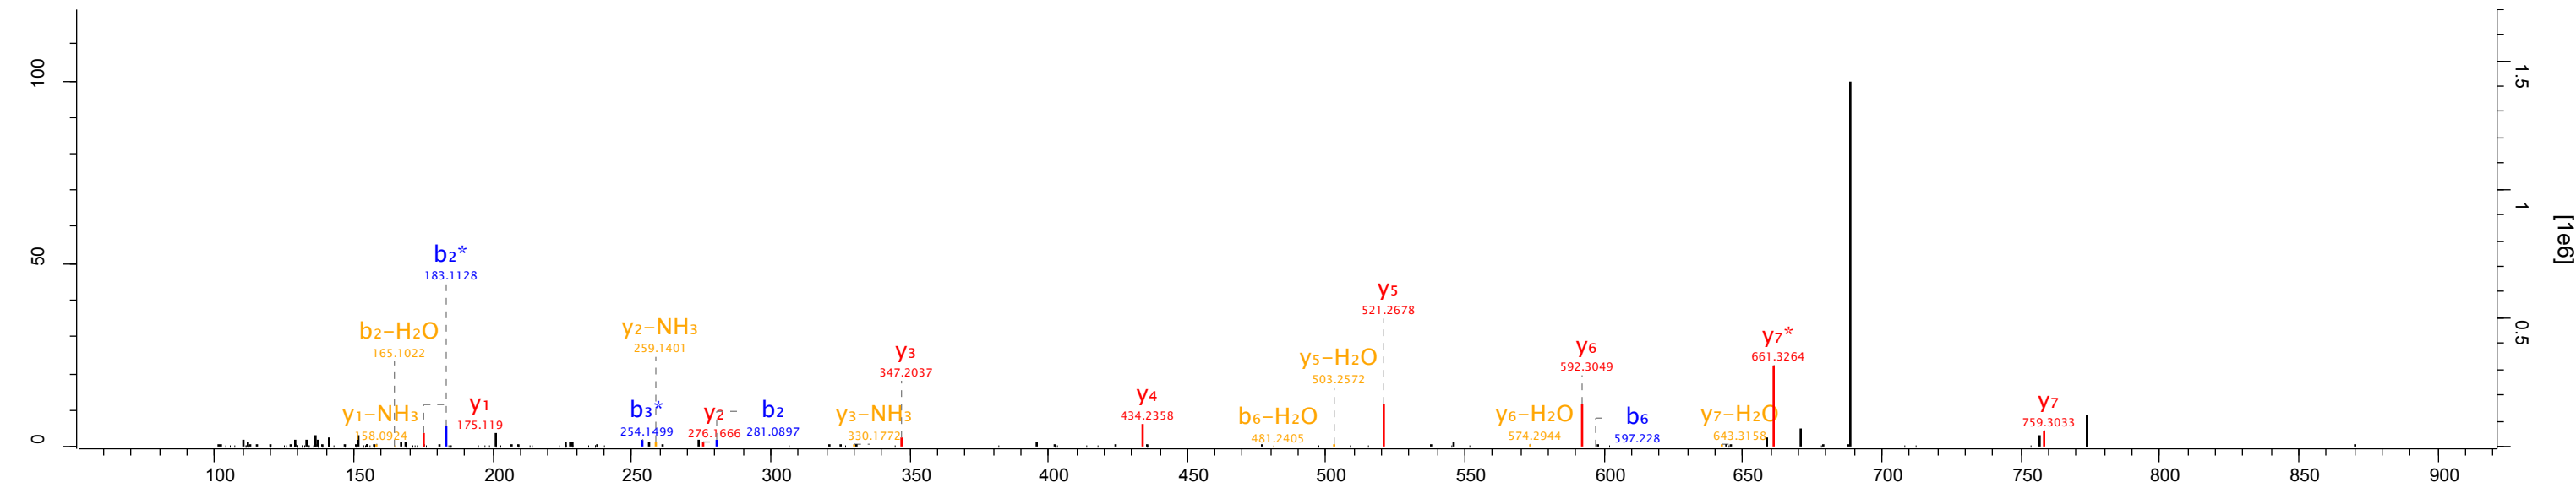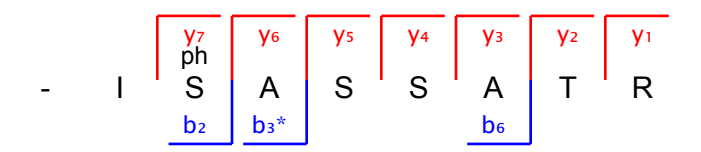

Raw file 20171215\_MaS\_33SR\_LMH\_phospho2\_08 Scan 3673 Method FTMS; HCD Score 94.09 m/z 644.77 Gene names IRS2

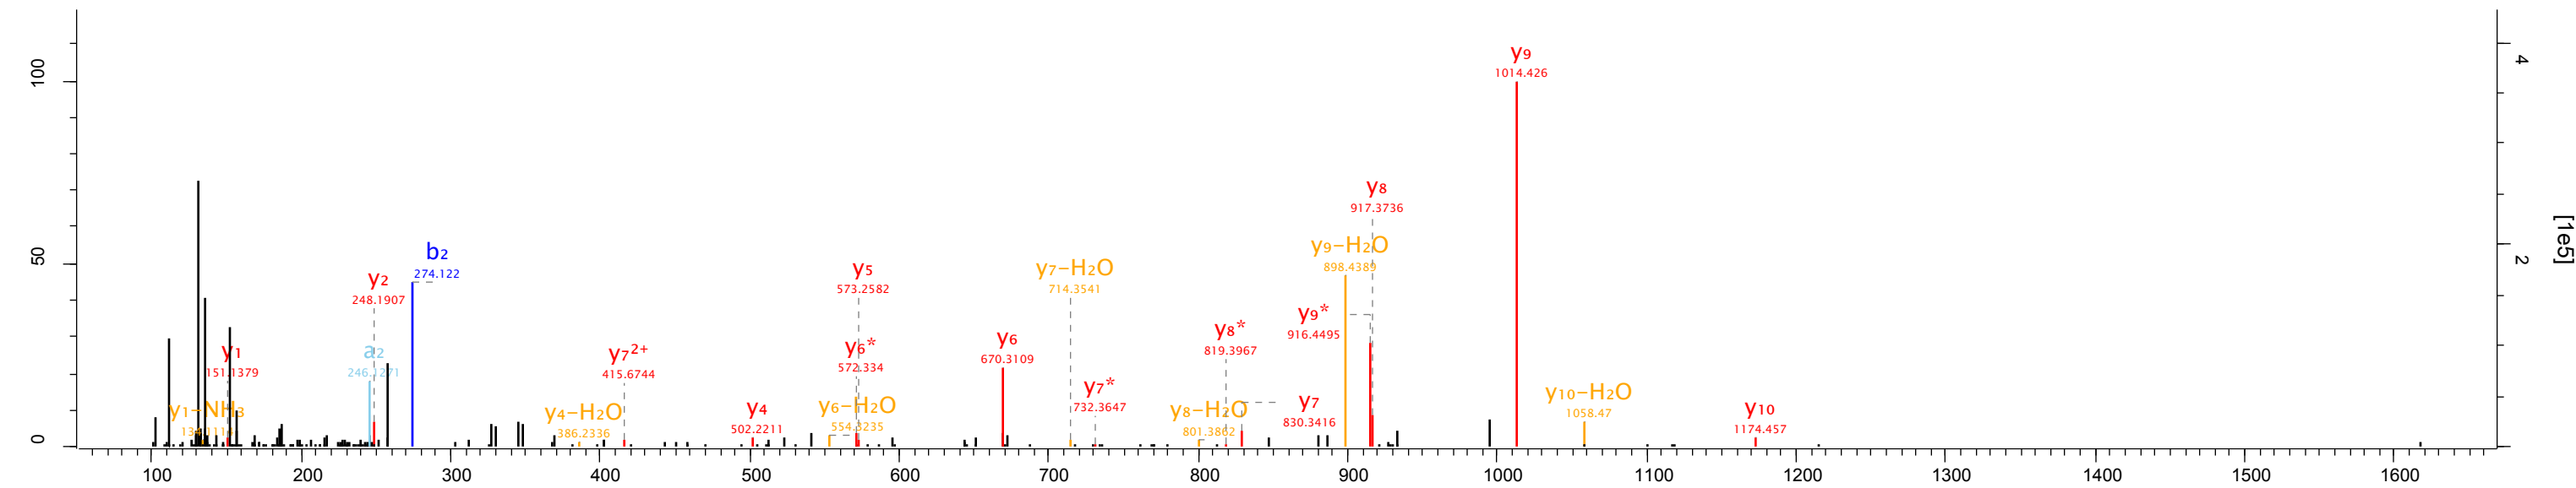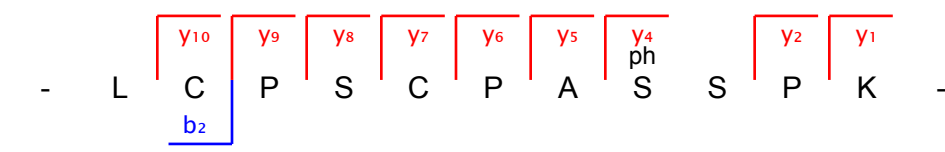

Raw file 20171215\_MaS\_33SR\_LMH\_phospho2\_09 Scan 1913 Method FTMS; HCD Score 68.28 m/z 561.28 Gene names RNPS1

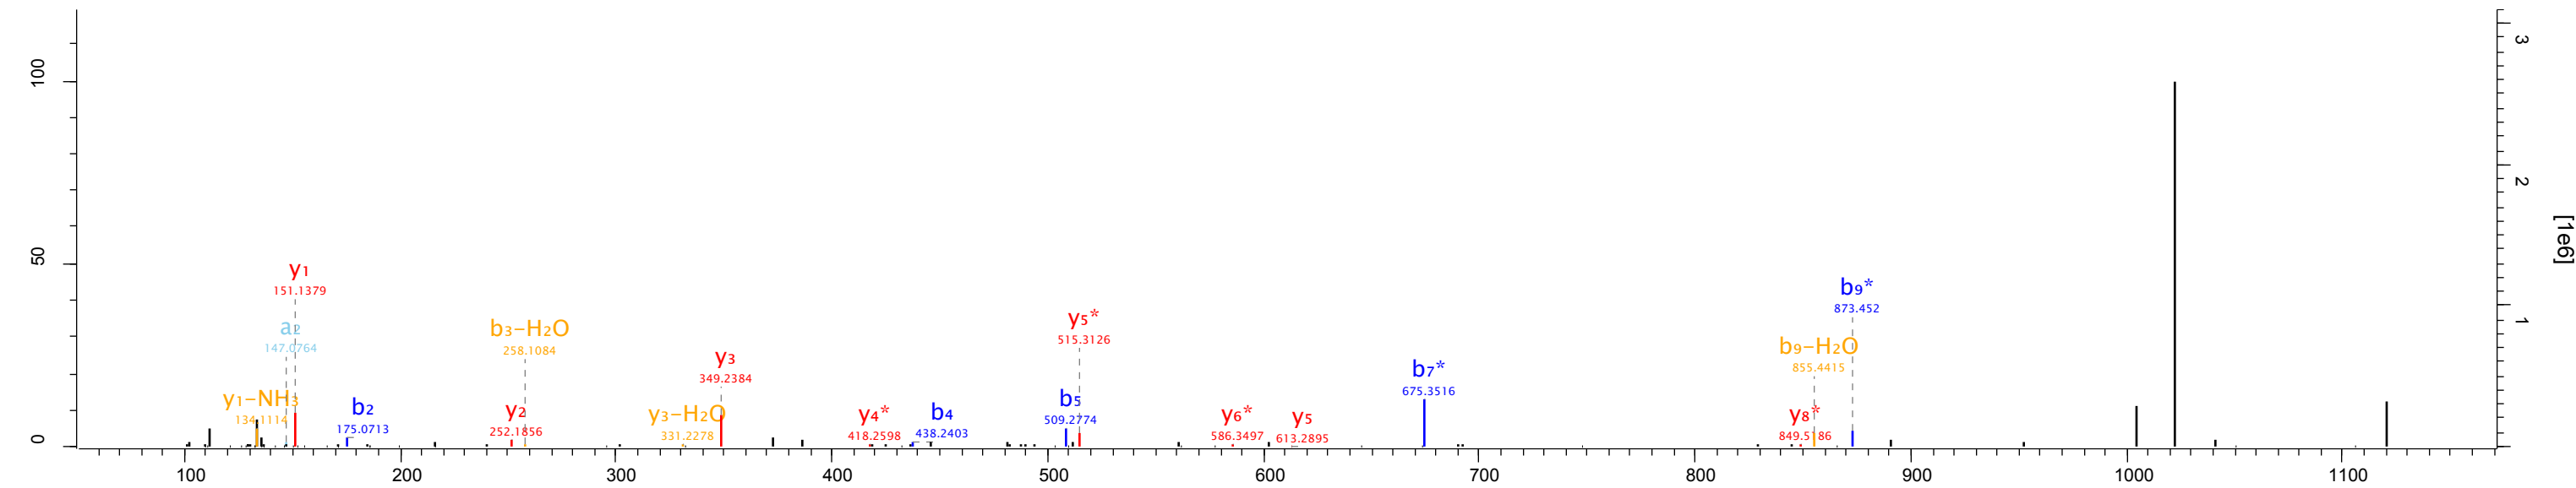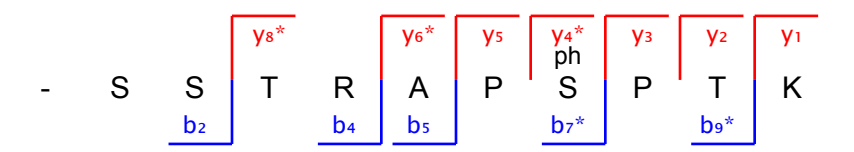

Raw file

20171215\_MaS\_33SR\_LMH\_phospho2\_09

| Scan | Method    | Score | m/z    | Gene names |
|------|-----------|-------|--------|------------|
| 1973 | FTMS; HCD | 71.08 | 382.87 | WDR43      |

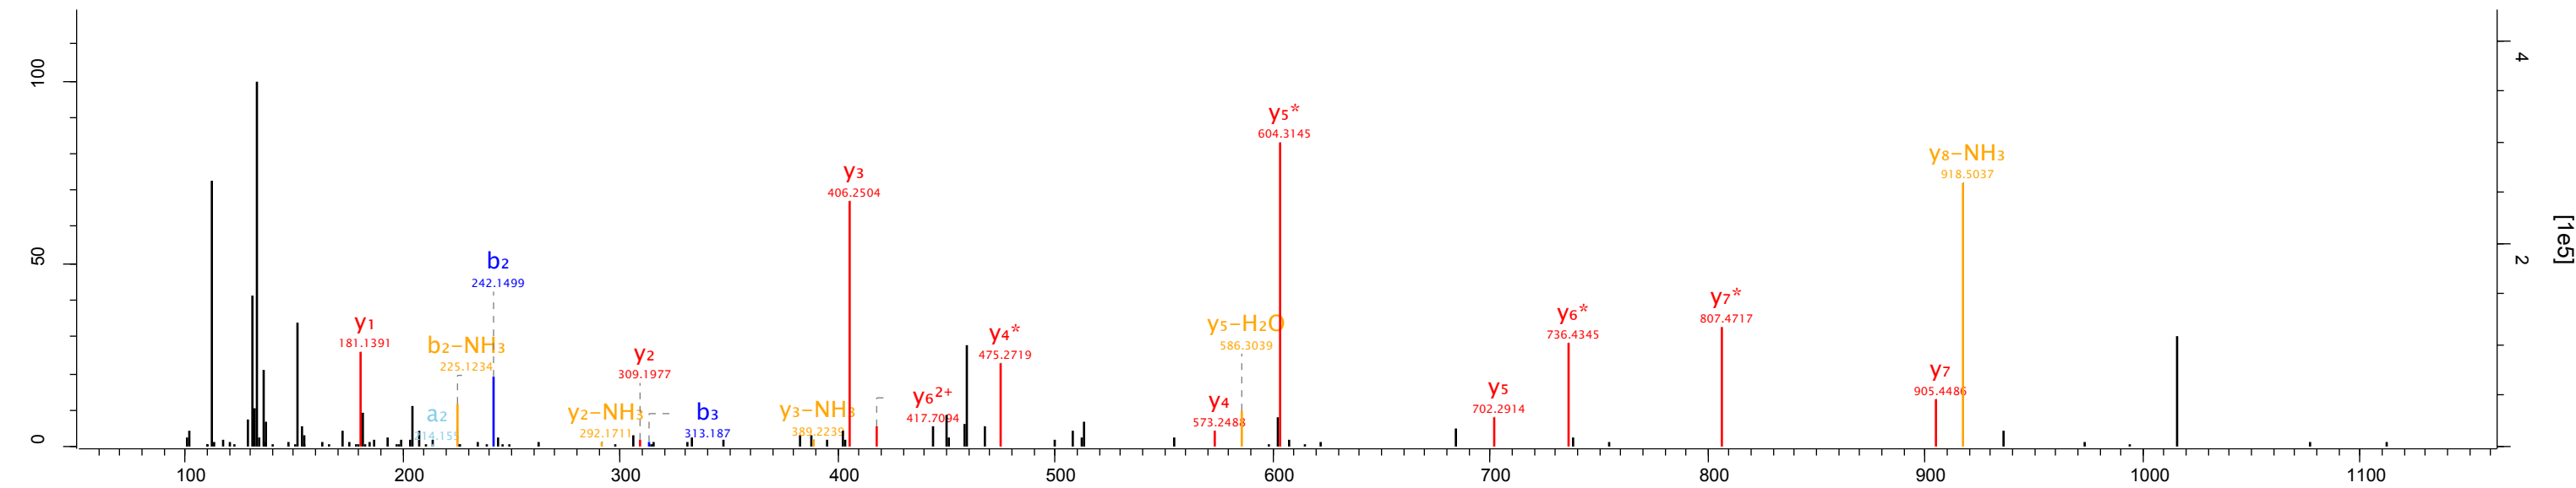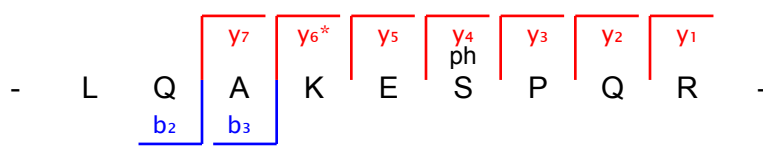

Raw file 20171215\_MaS\_33SR\_LMH\_phospho2\_09 Scan 3273 Method FTMS; HCD Score 74.85 m/z 626.79 Gene names PAN2

20171215\_MaS\_33SR\_LMH\_phospho2\_09

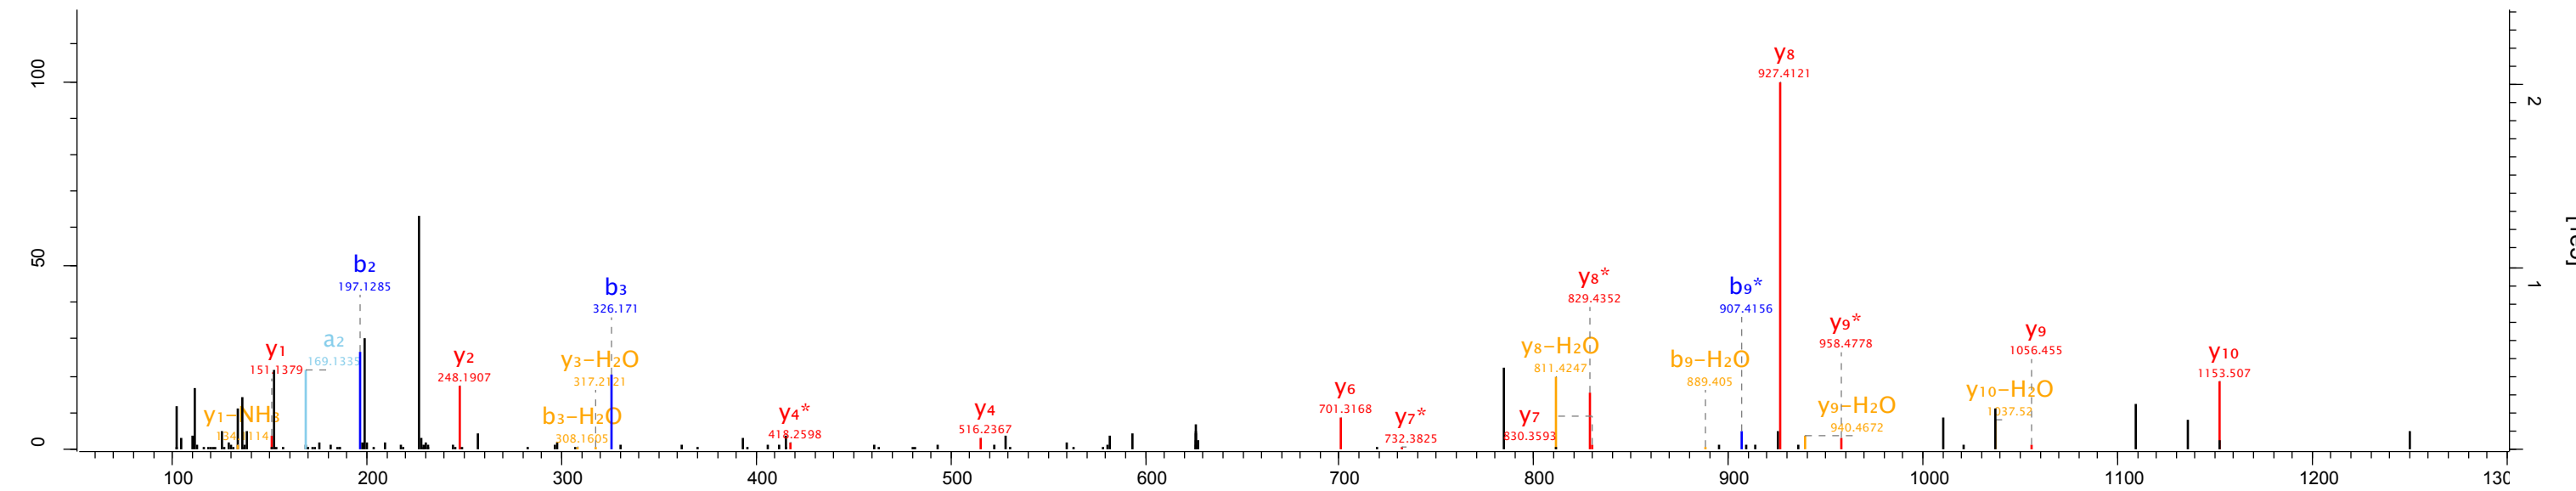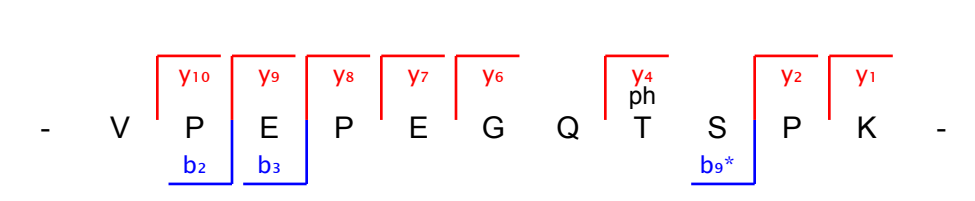

Raw file 20171215\_MaS\_33SR\_LMH\_phospho2\_09 Scan 3553 Method FTMS; HCD Score 95.09 m/z 489.77 Gene names RAPGEF6

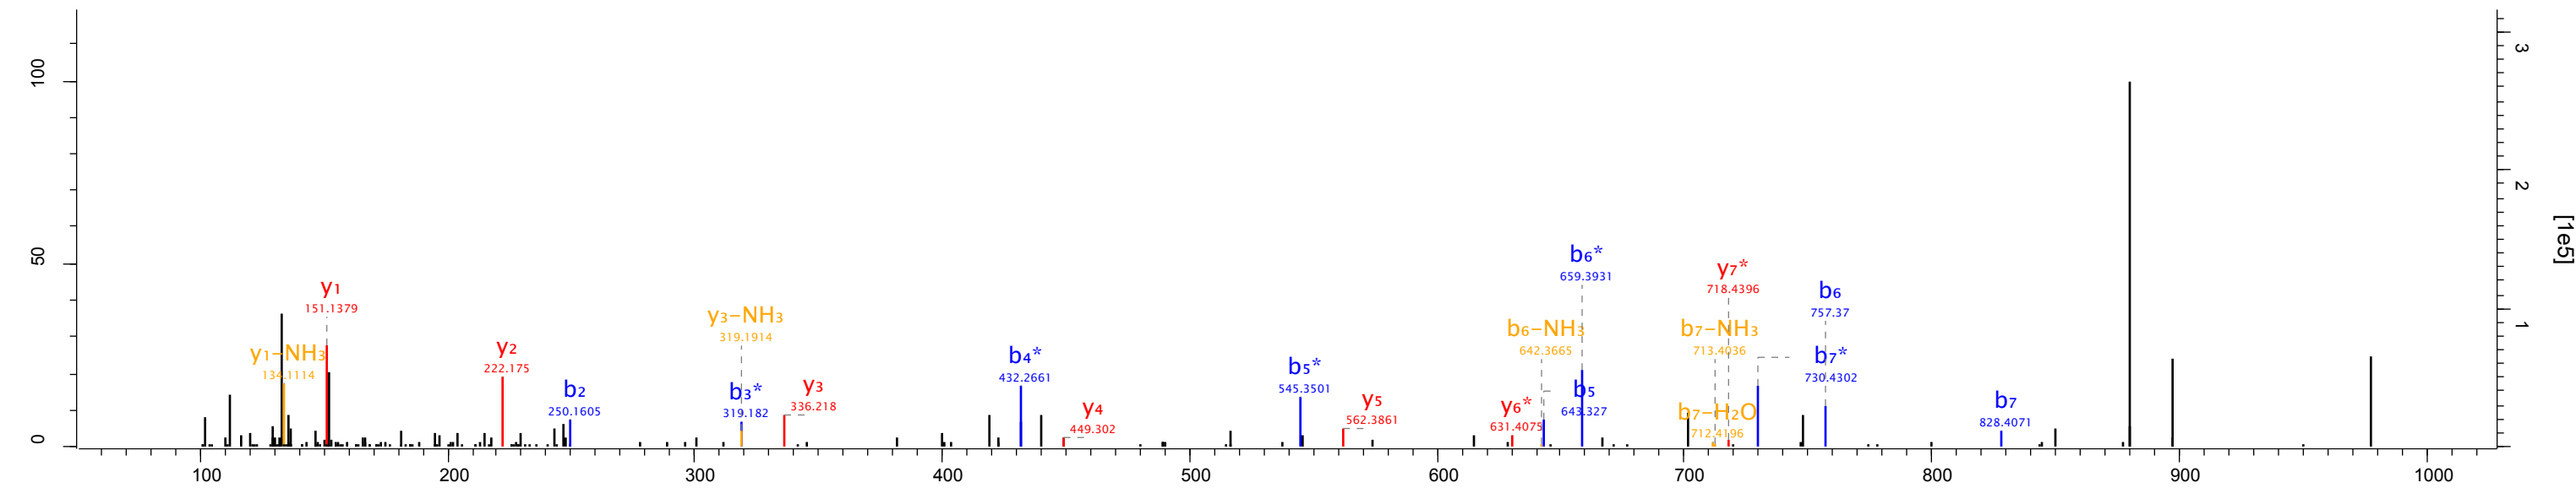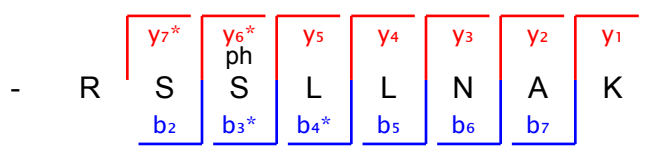



Raw file 20171215\_MaS\_33SR\_LMH\_phospho2\_09 Scan 4573 Method FTMS; HCD Score 90.91 m/z 407.2 Gene names KCTD3

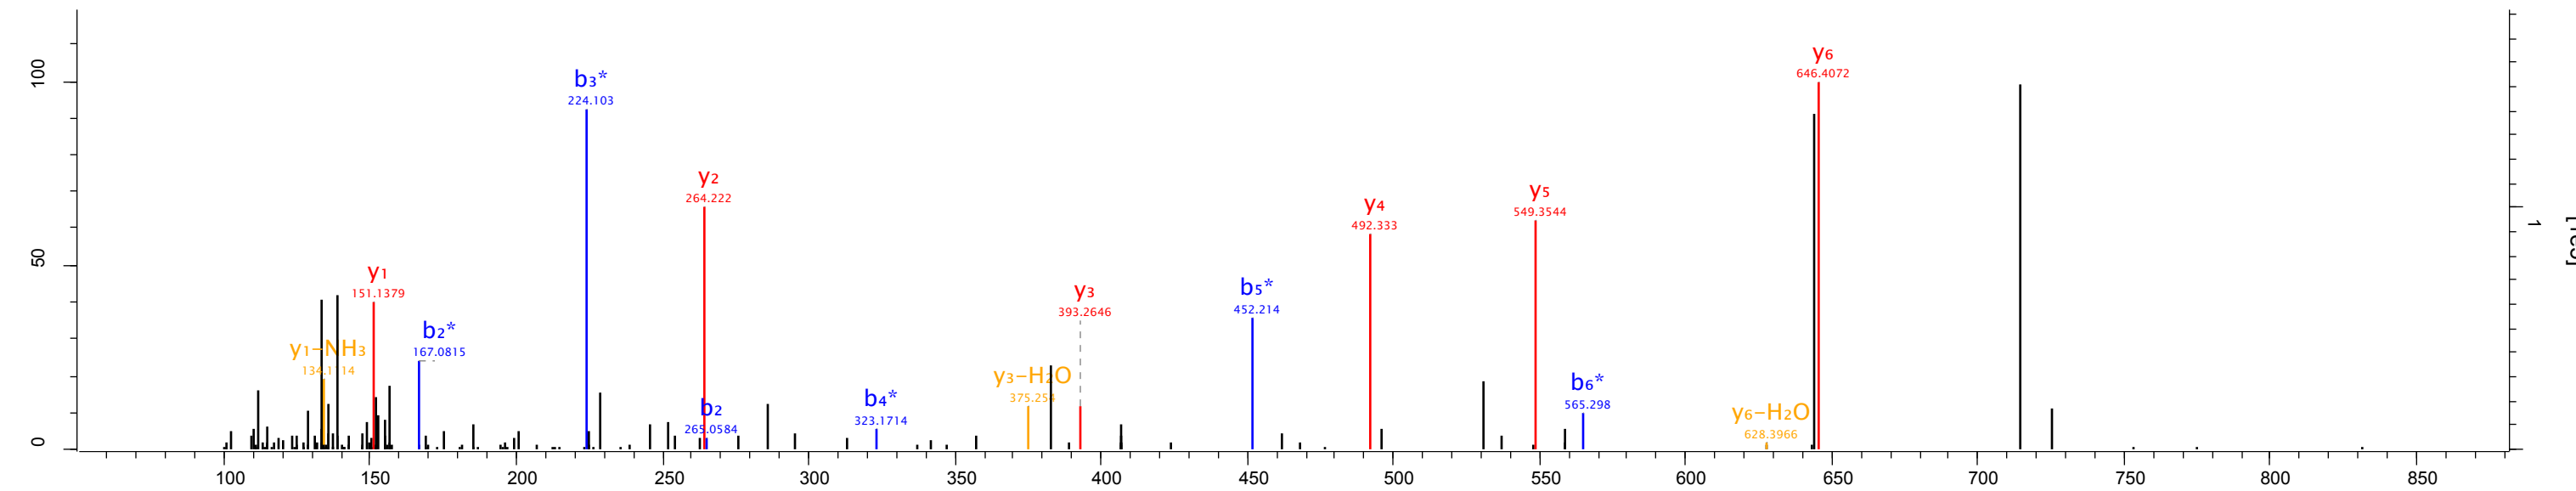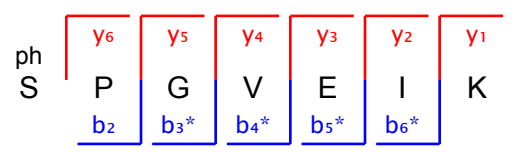

Raw file 20171215\_MaS\_33SR\_LMH\_phospho2\_09 Scan 4653 Method FTMS; HCD Score 53.08 m/z 458.73 Gene names EP400

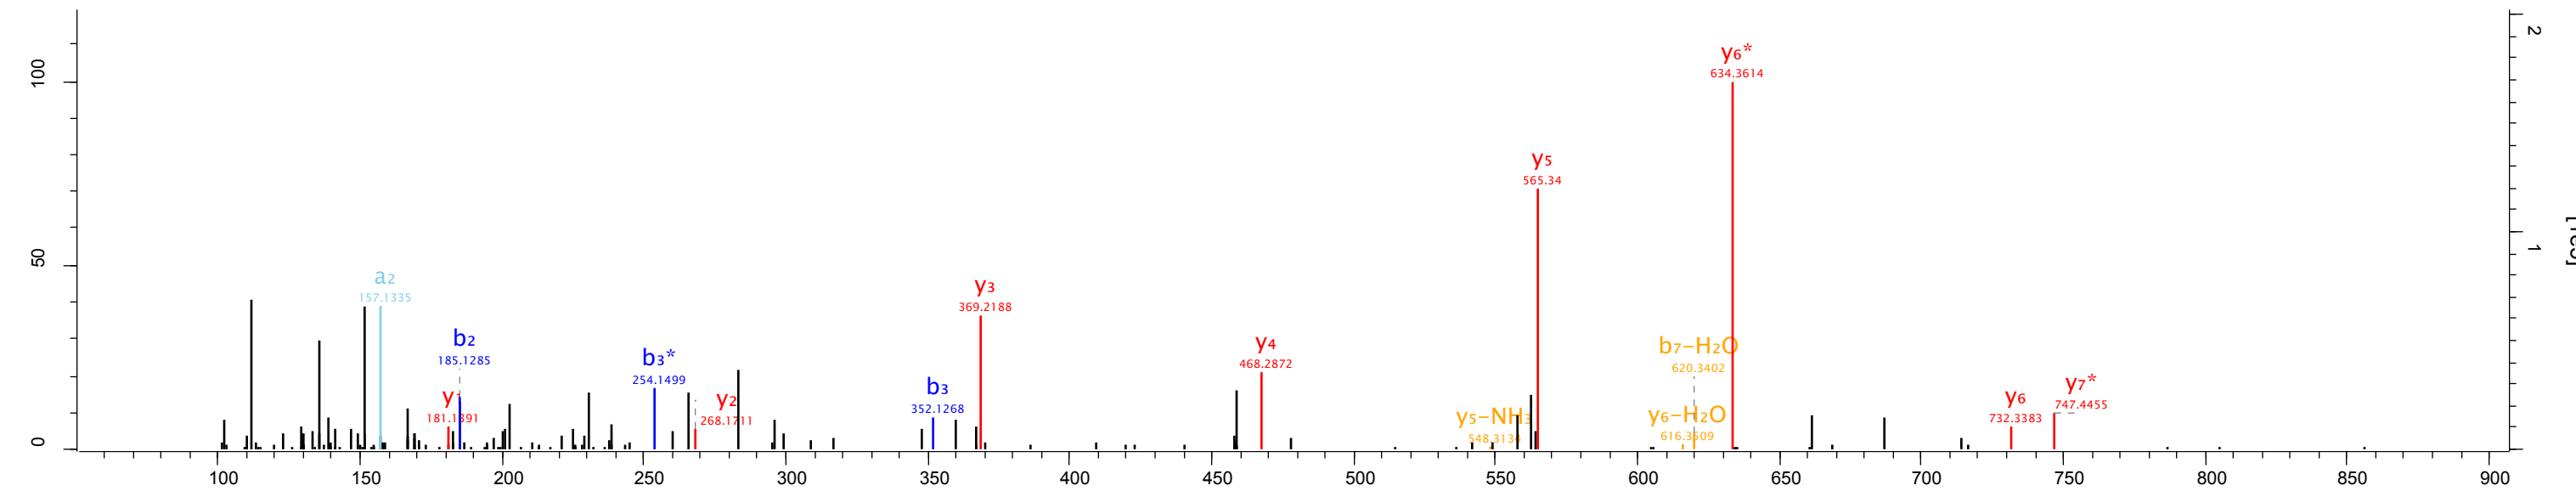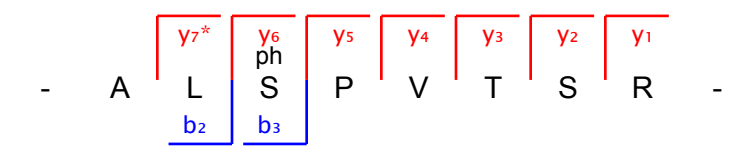

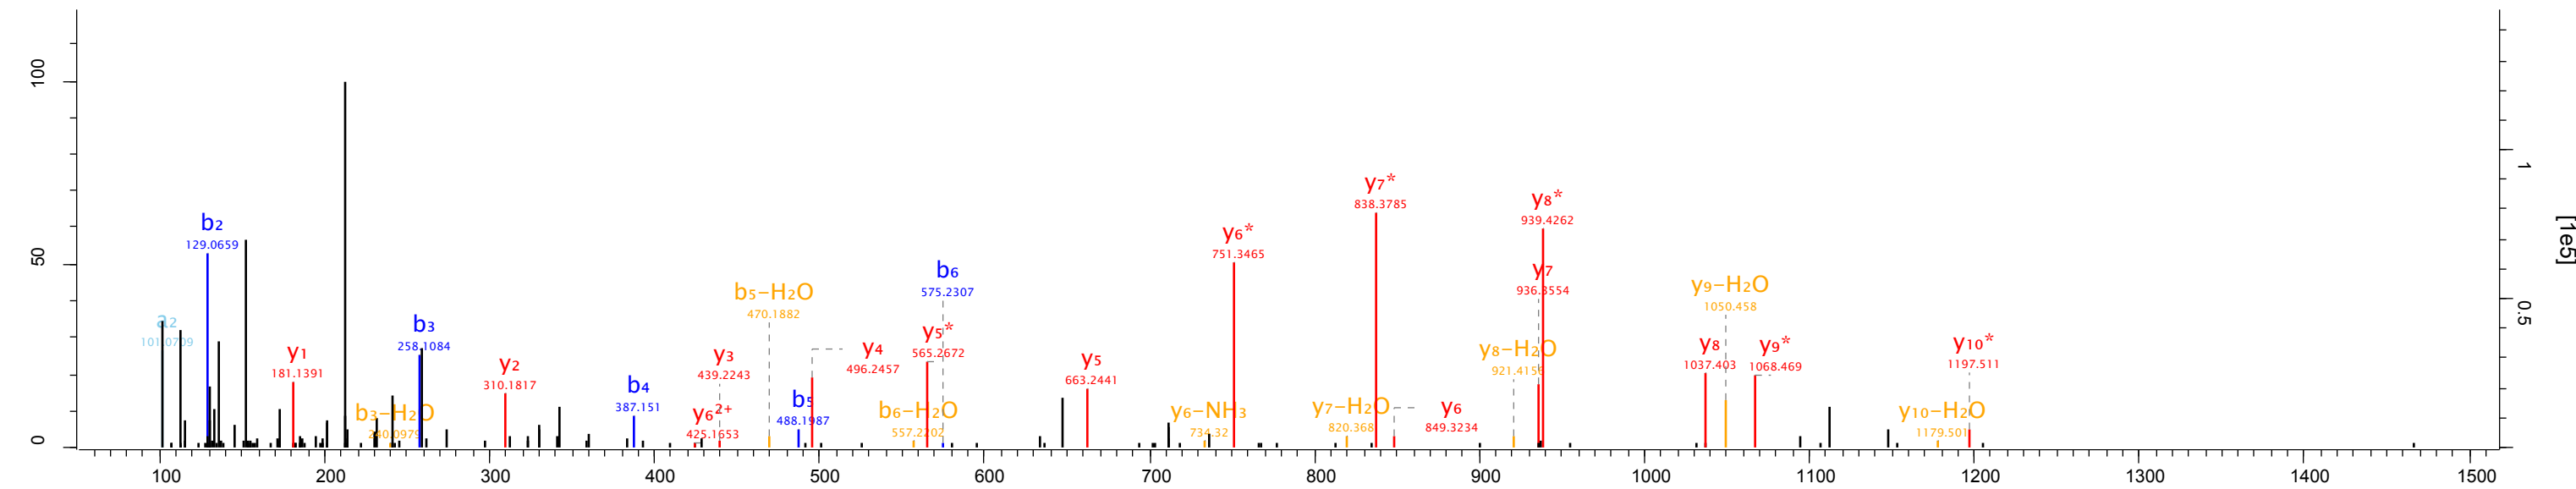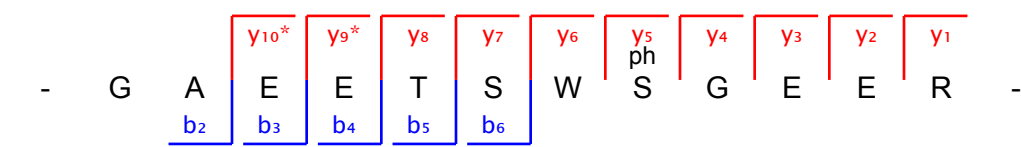

Raw file 20171215\_MaS\_33SR\_LMH\_proteome\_01 Scan 10533 Method FTMS; HCD Score 61.16 m/z 642.28 Gene names ARHGAP25

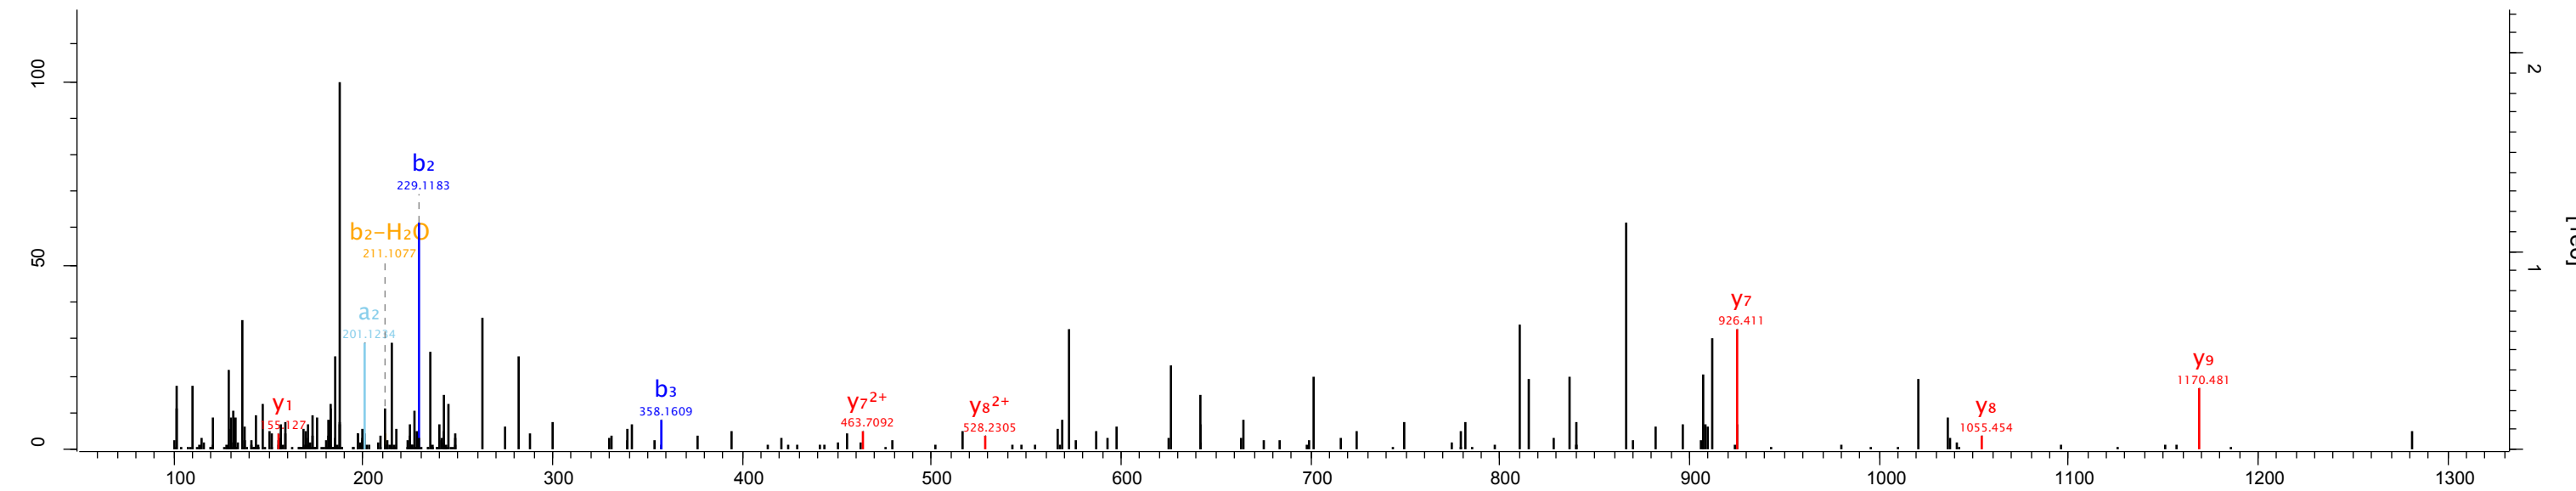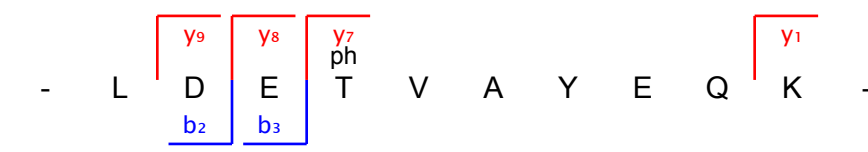

Raw file: 20171215\_MaS\_33SR\_LMH\_proteome\_01  
 Scan: 150733 Method: FTMS; HCD Score: 43.26 m/z: 1072.04 Gene names: TEX12

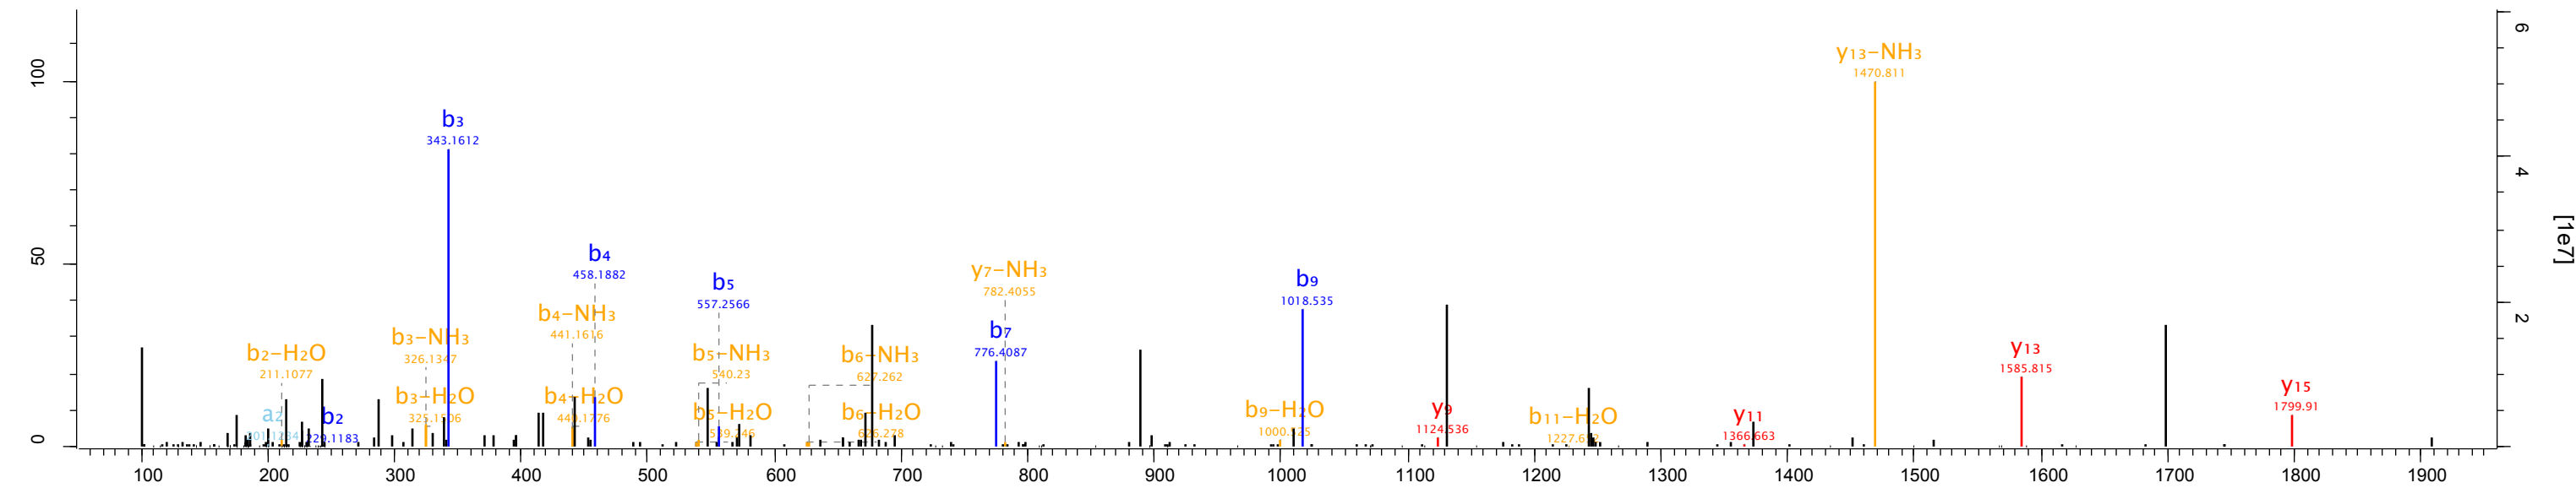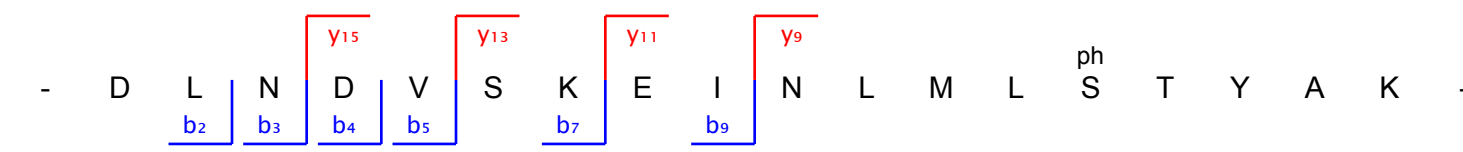

Raw file 20171215\_MaS\_33SR\_LMH\_proteome\_01 Scan 3613 Method FTMS; HCD Score 76.23 m/z 652.82 Gene names MTO1

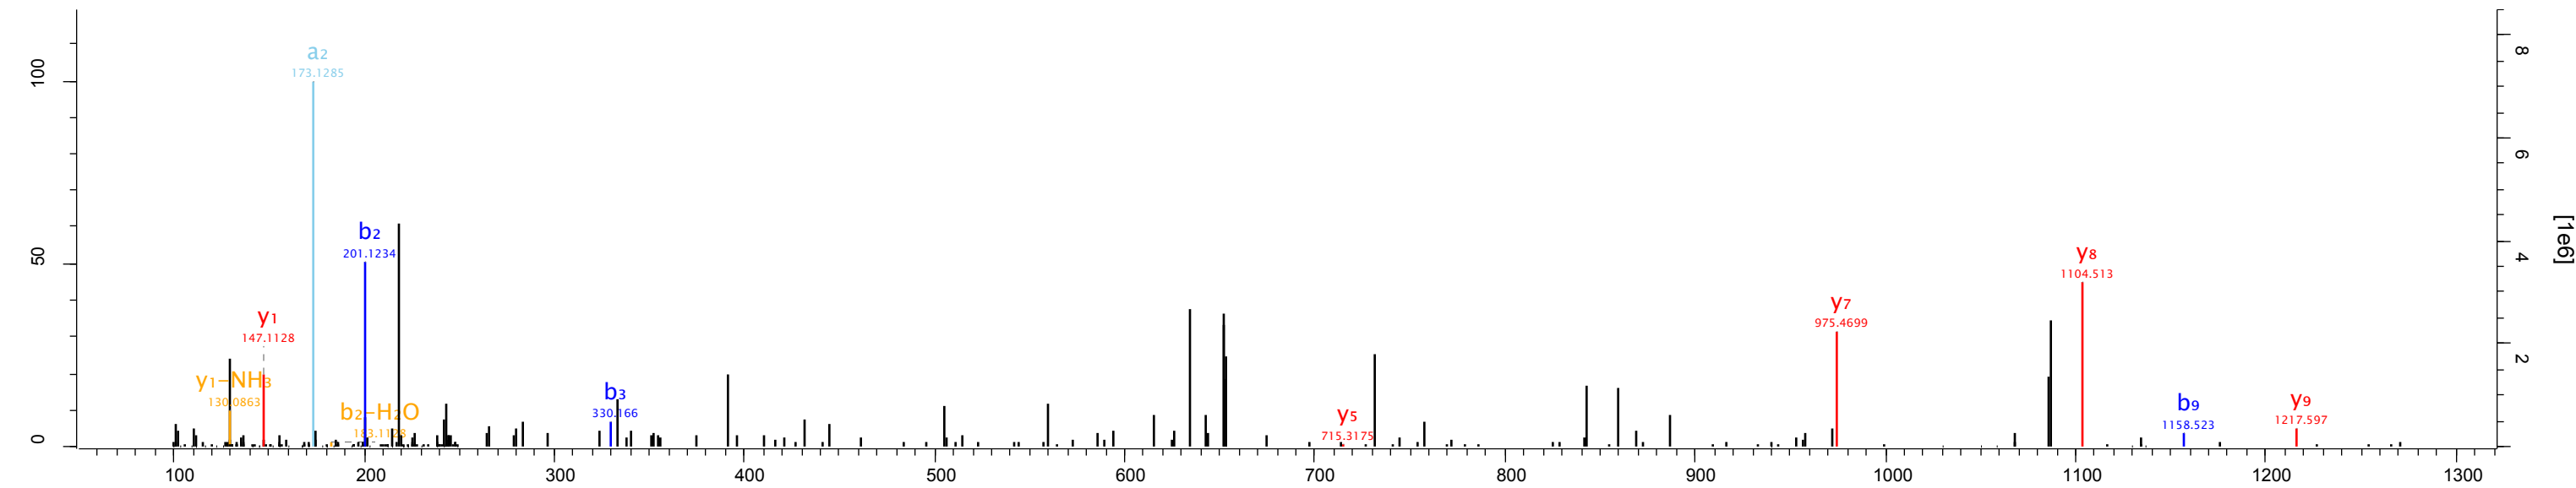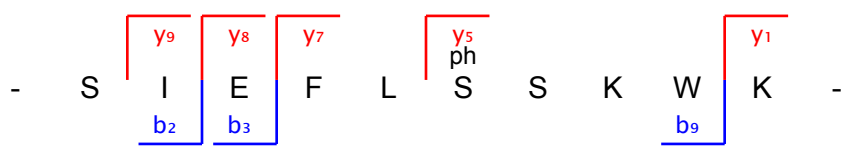

Raw file 20171215\_MaS\_33SR\_LMH\_proteome\_01 Scan 47553 Method FTMS; HCD Score 44.54 m/z 884.9 Gene names SURF4

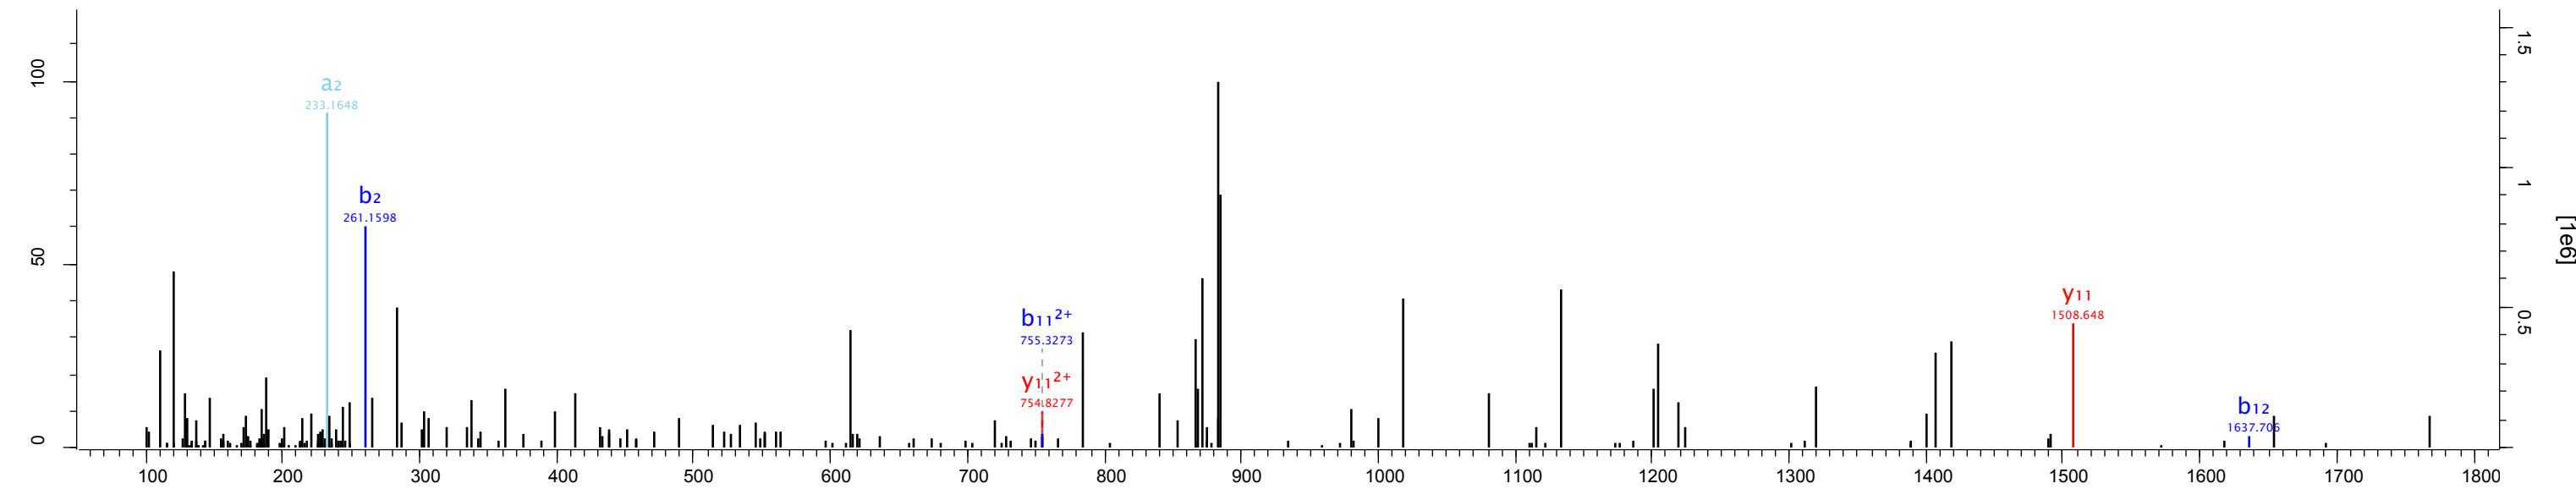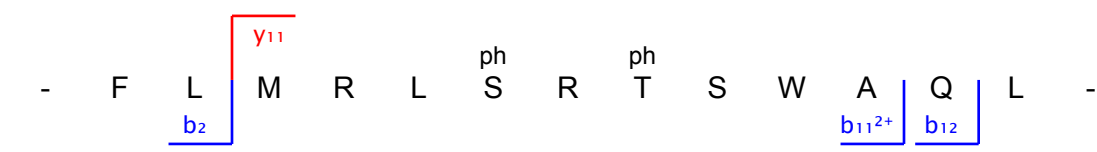

Raw file: 20171215\_MaS\_33SR\_LMH\_proteome\_01  
 Scan: 76603 Method: FTMS; HCD Score: 66.02 m/z: 735.68 Gene names: ARHGEF2

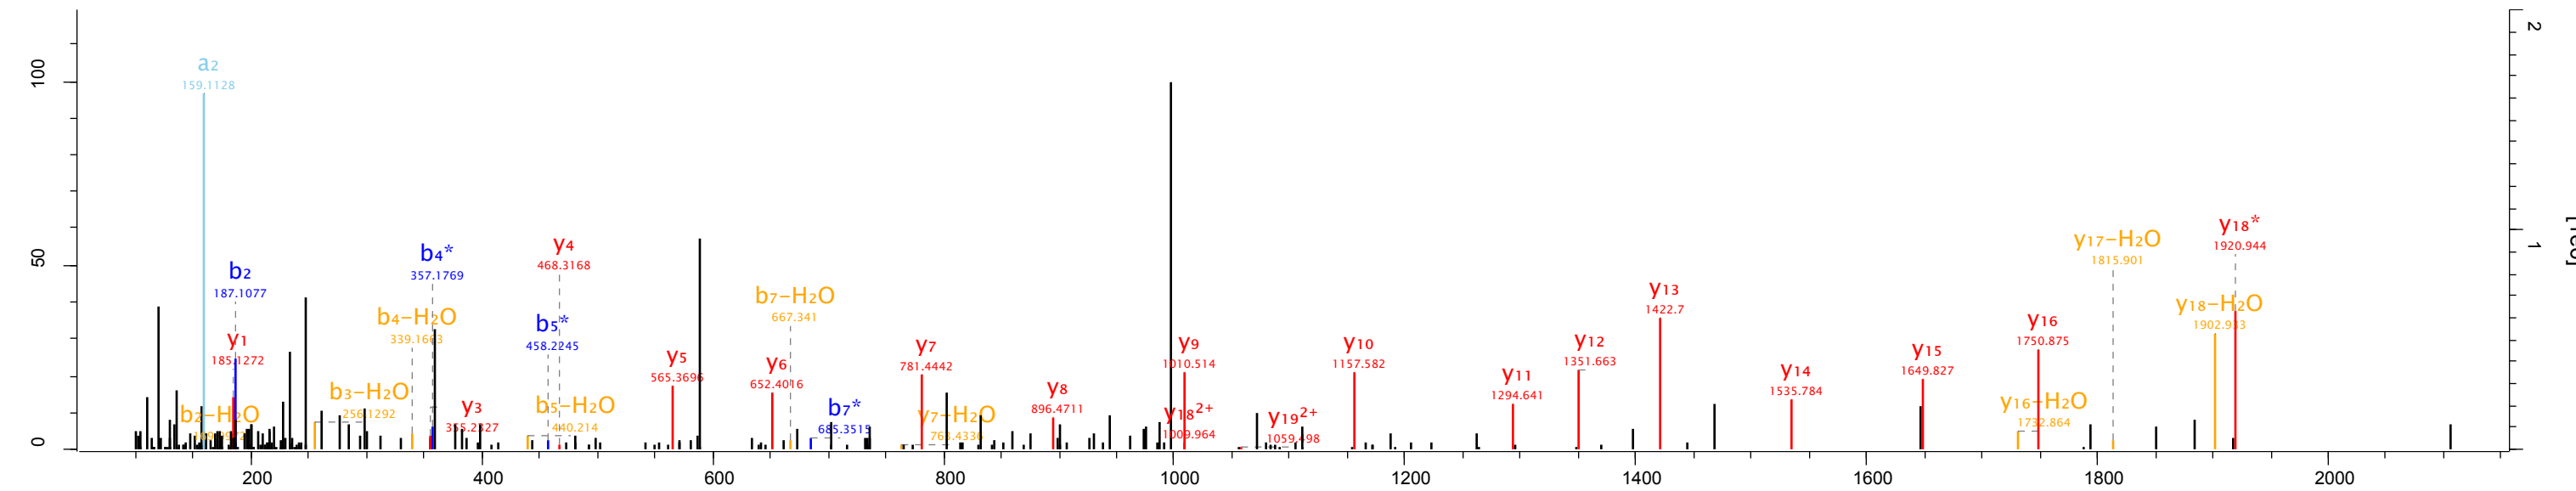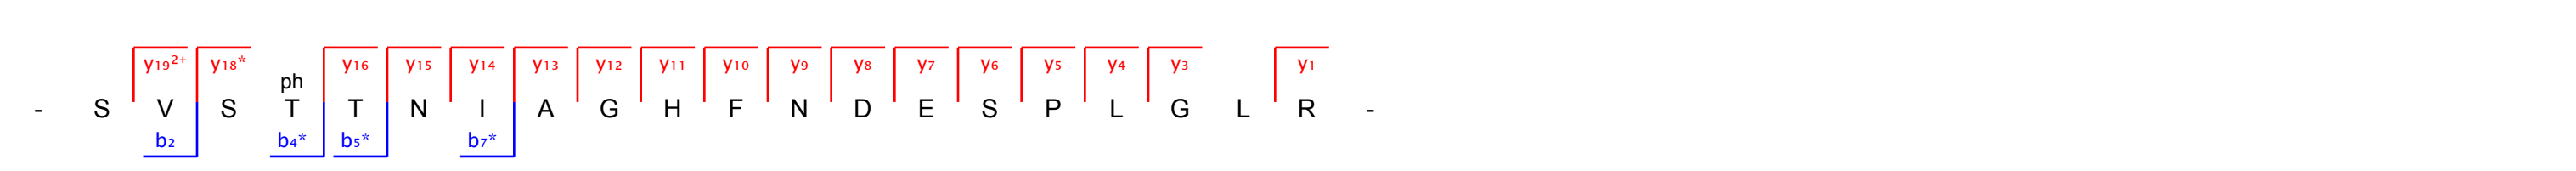



Raw file 20171215\_MaS\_33SR\_LMH\_proteome\_01 Scan 77353 Method FTMS; HCD Score 42.84 m/z 798.41

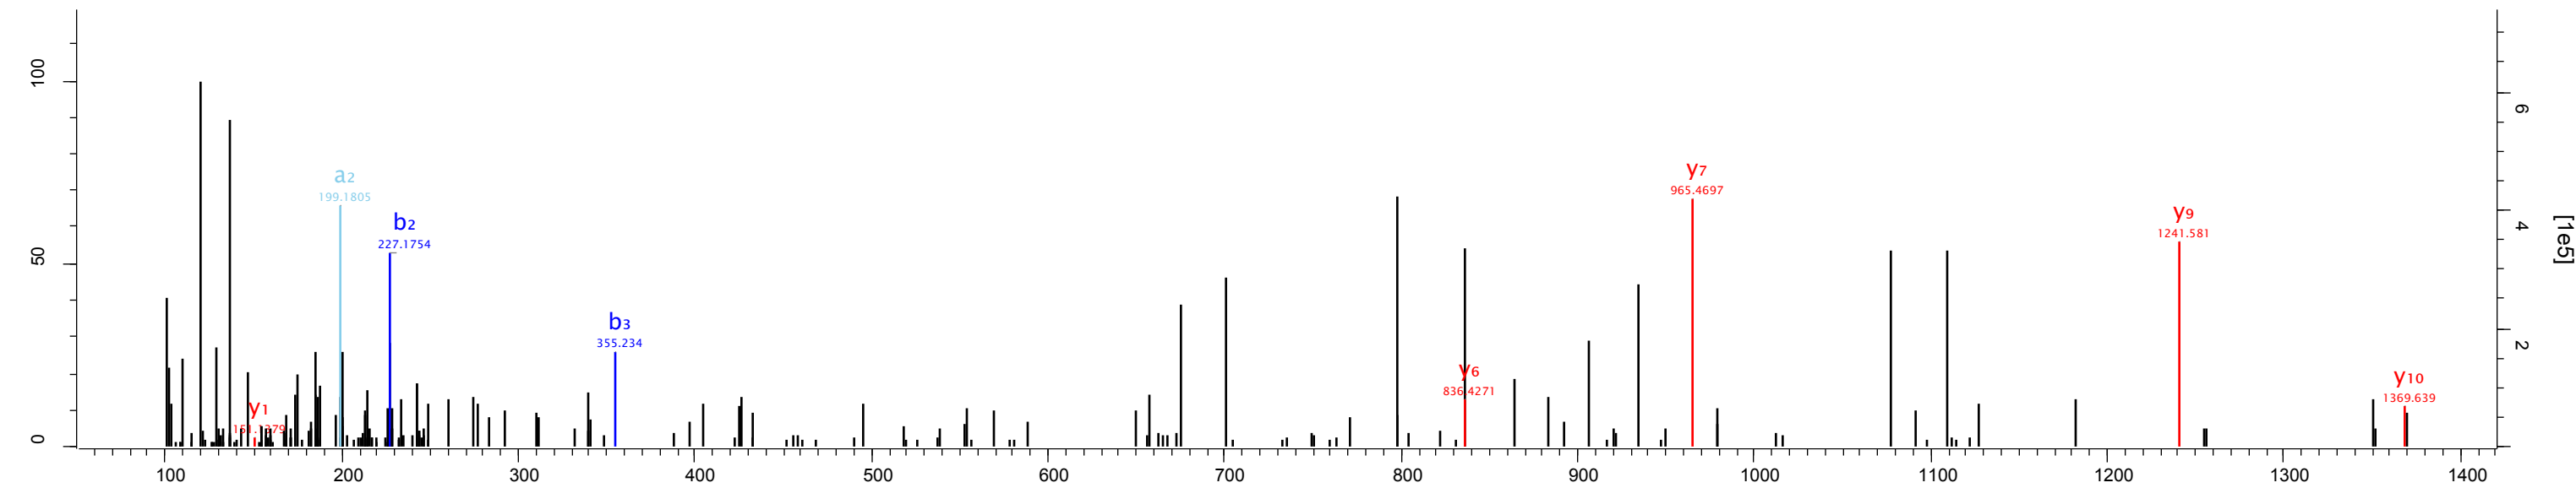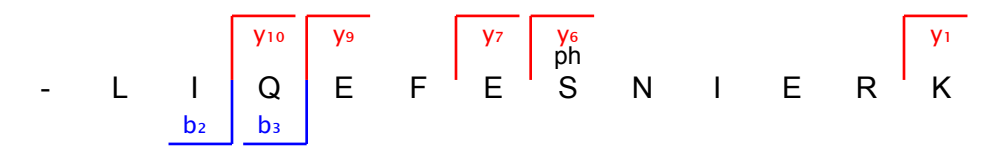

Raw file 20171215\_MaS\_33SR\_LMH\_proteome\_01 Scan 8423 Method FTMS; HCD Score 50.35 m/z 727.9 Gene names TRIM8

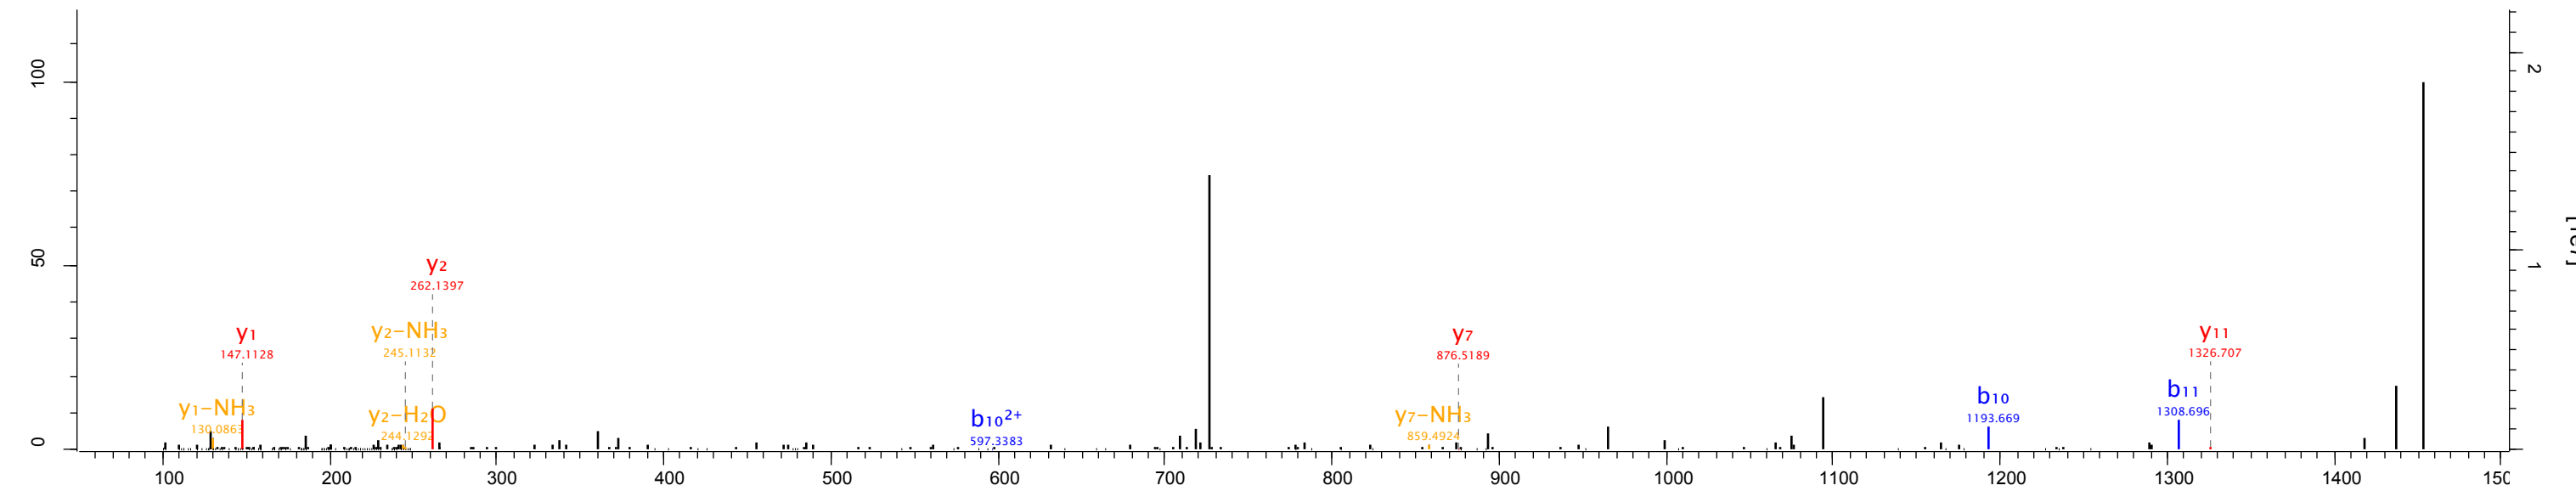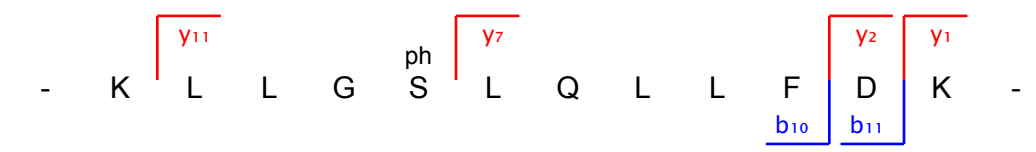

Raw file 20171215\_MaS\_33SR\_LMH\_proteome\_01 Scan 85153 Method FTMS; HCD Score 54.02 m/z 824.47

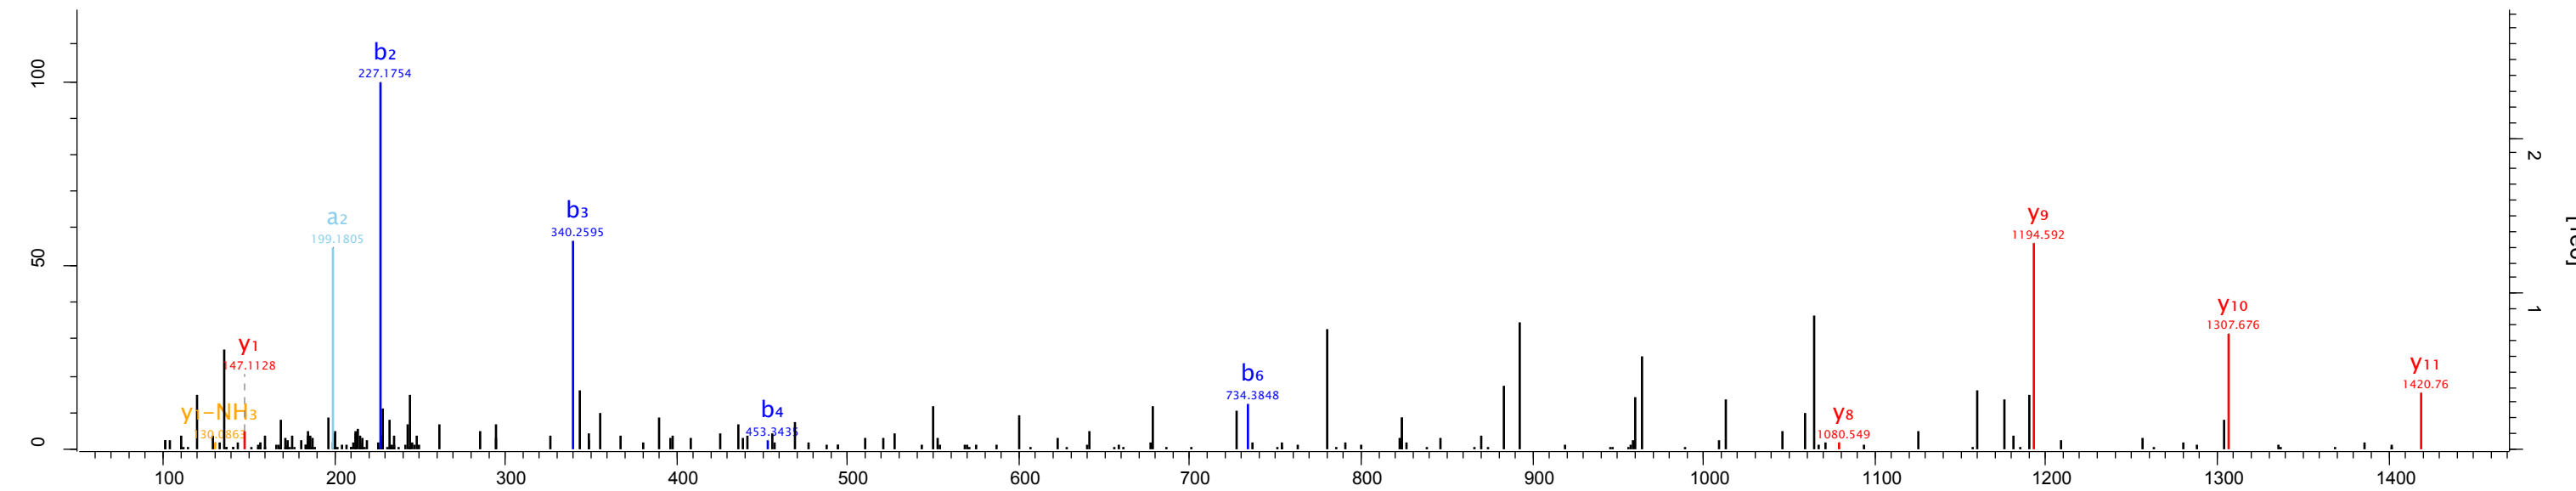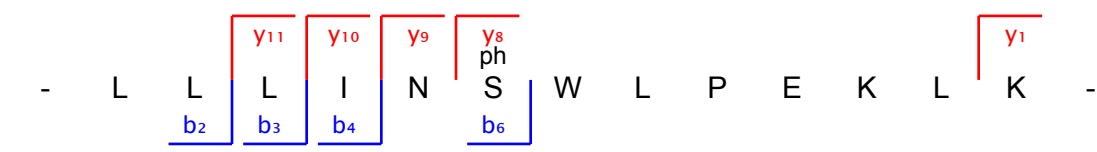

Raw file 20171215\_MaS\_33SR\_LMH\_proteome\_02 Scan 20243 Method FTMS; HCD Score 61.78 m/z 672.82

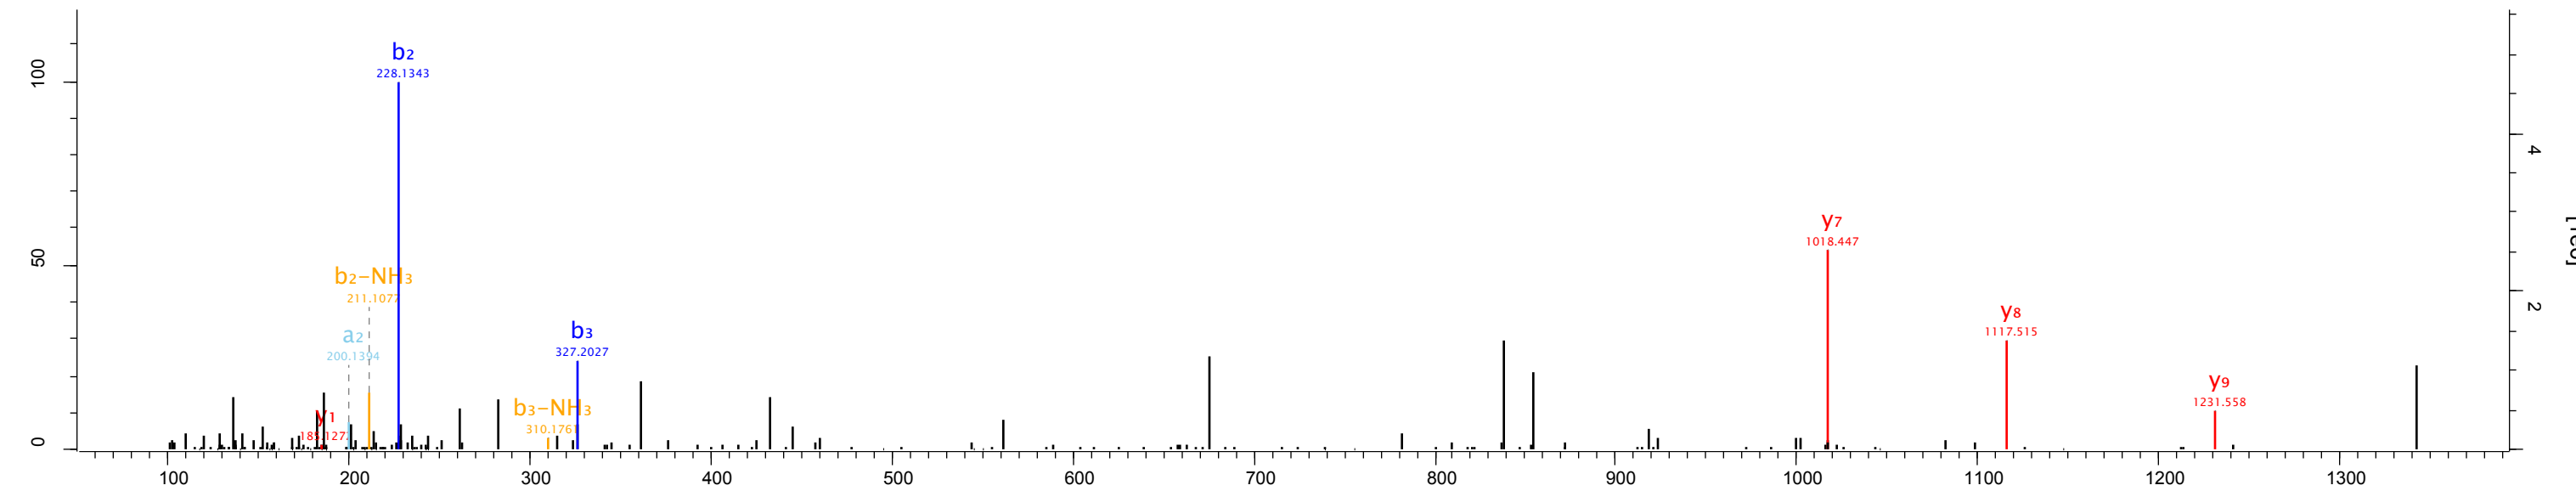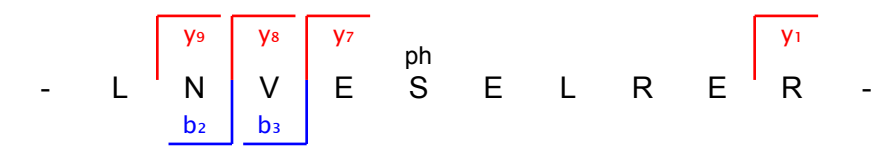

Raw file 20171215\_MaS\_33SR\_LMH\_proteome\_02 Scan 4103 Method FTMS; HCD Score 66.19 m/z 735.84 Gene names DCP1B

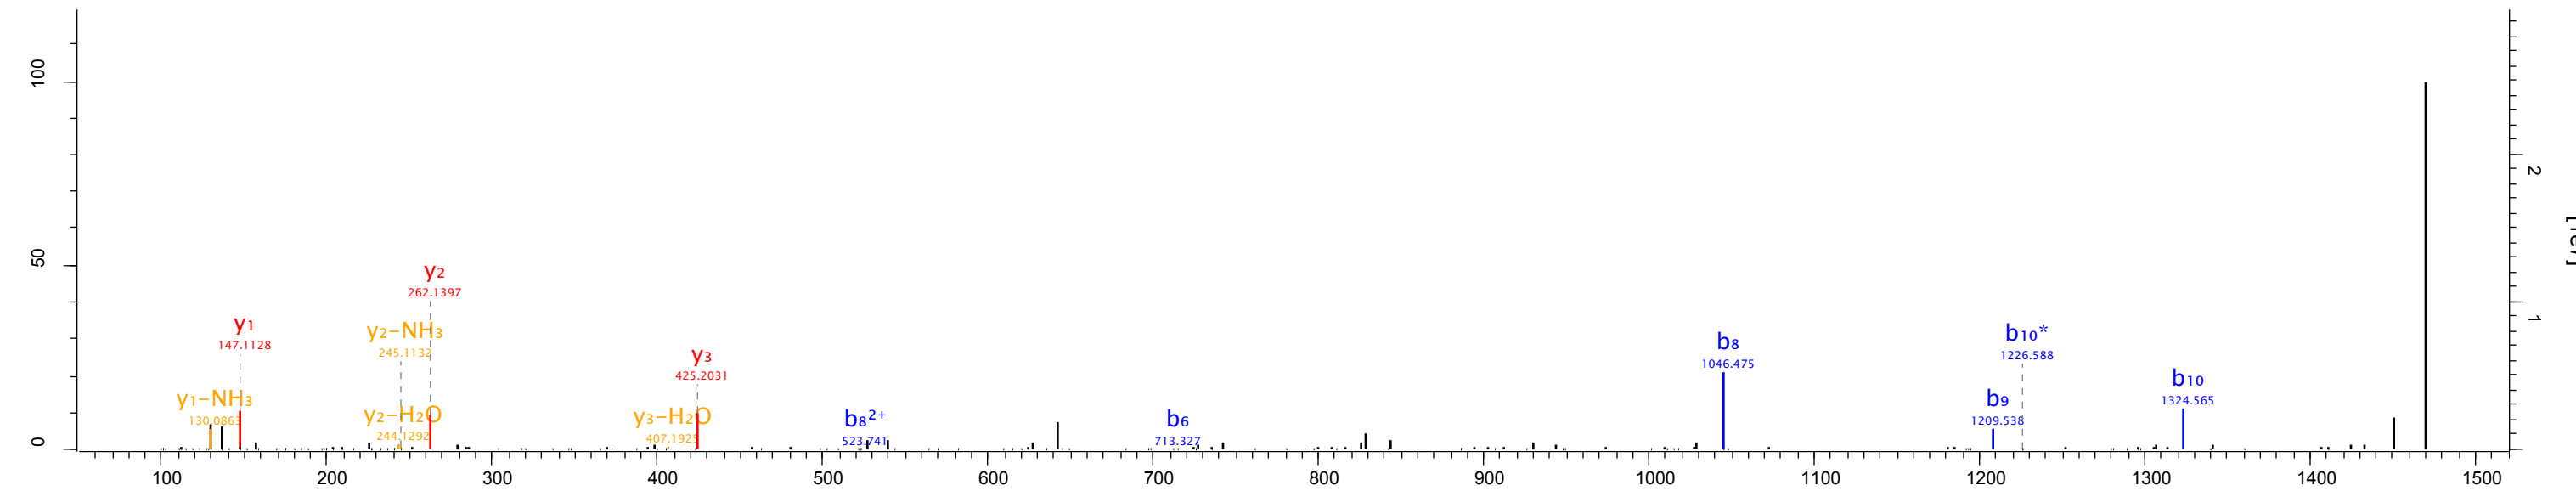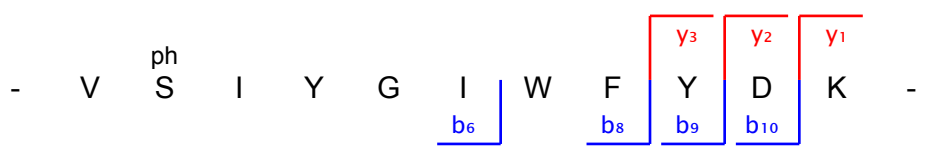

Raw file 20171215\_MaS\_33SR\_LMH\_proteome\_02 Scan 6253 Method FTMS; HCD Score 62.71 m/z 482.2

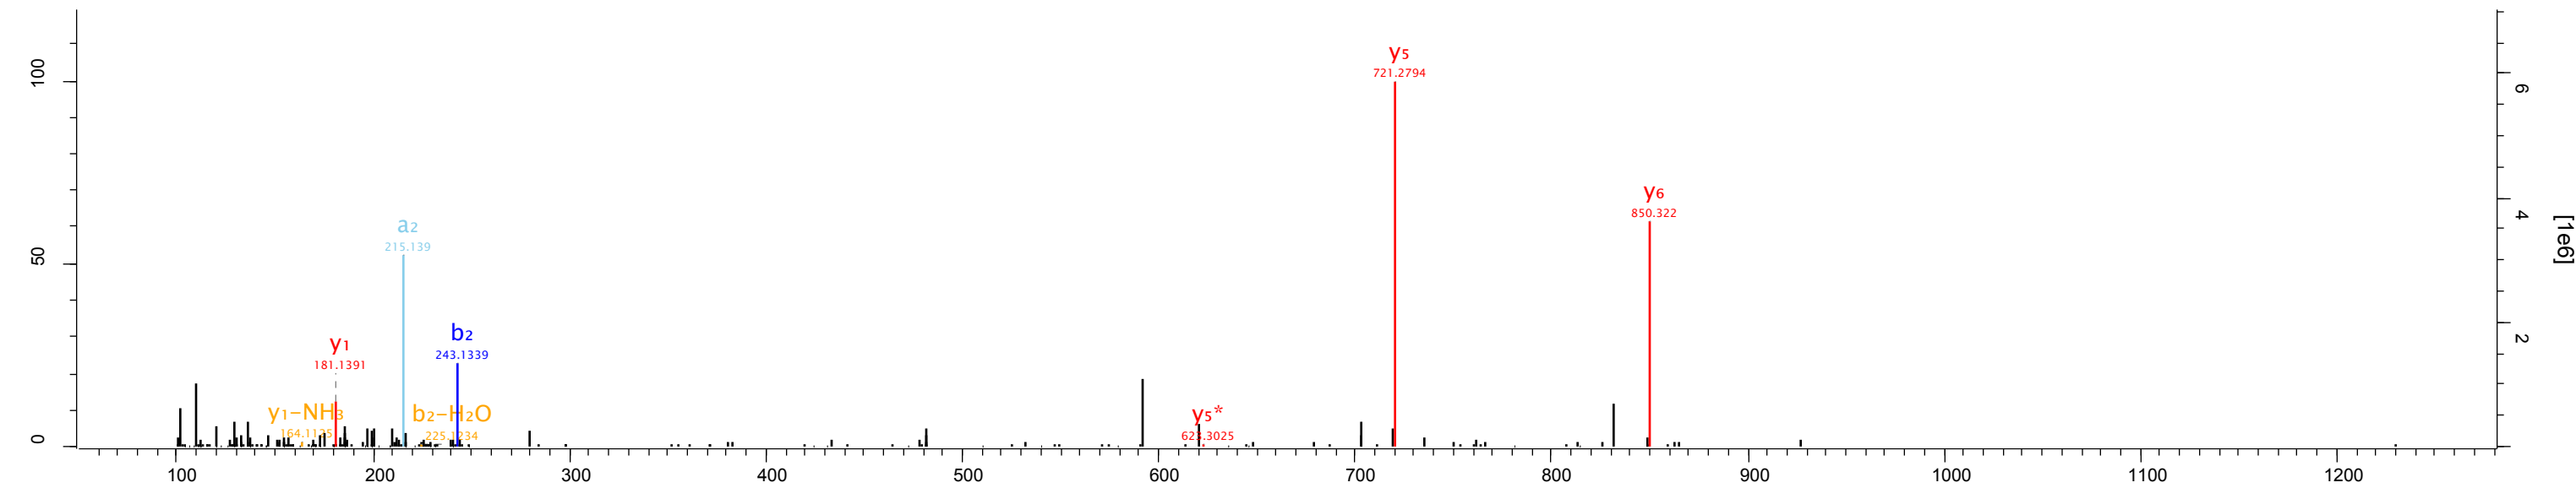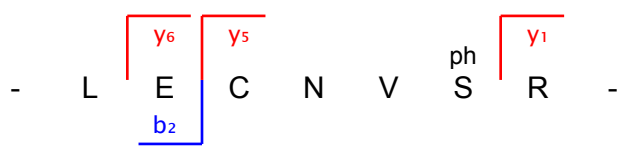

Raw file 20171215\_MaS\_33SR\_LMH\_phospho\_01 Scan 12544 Method FTMS; HCD Score 119.65 m/z 915.44 Gene names SRRM1

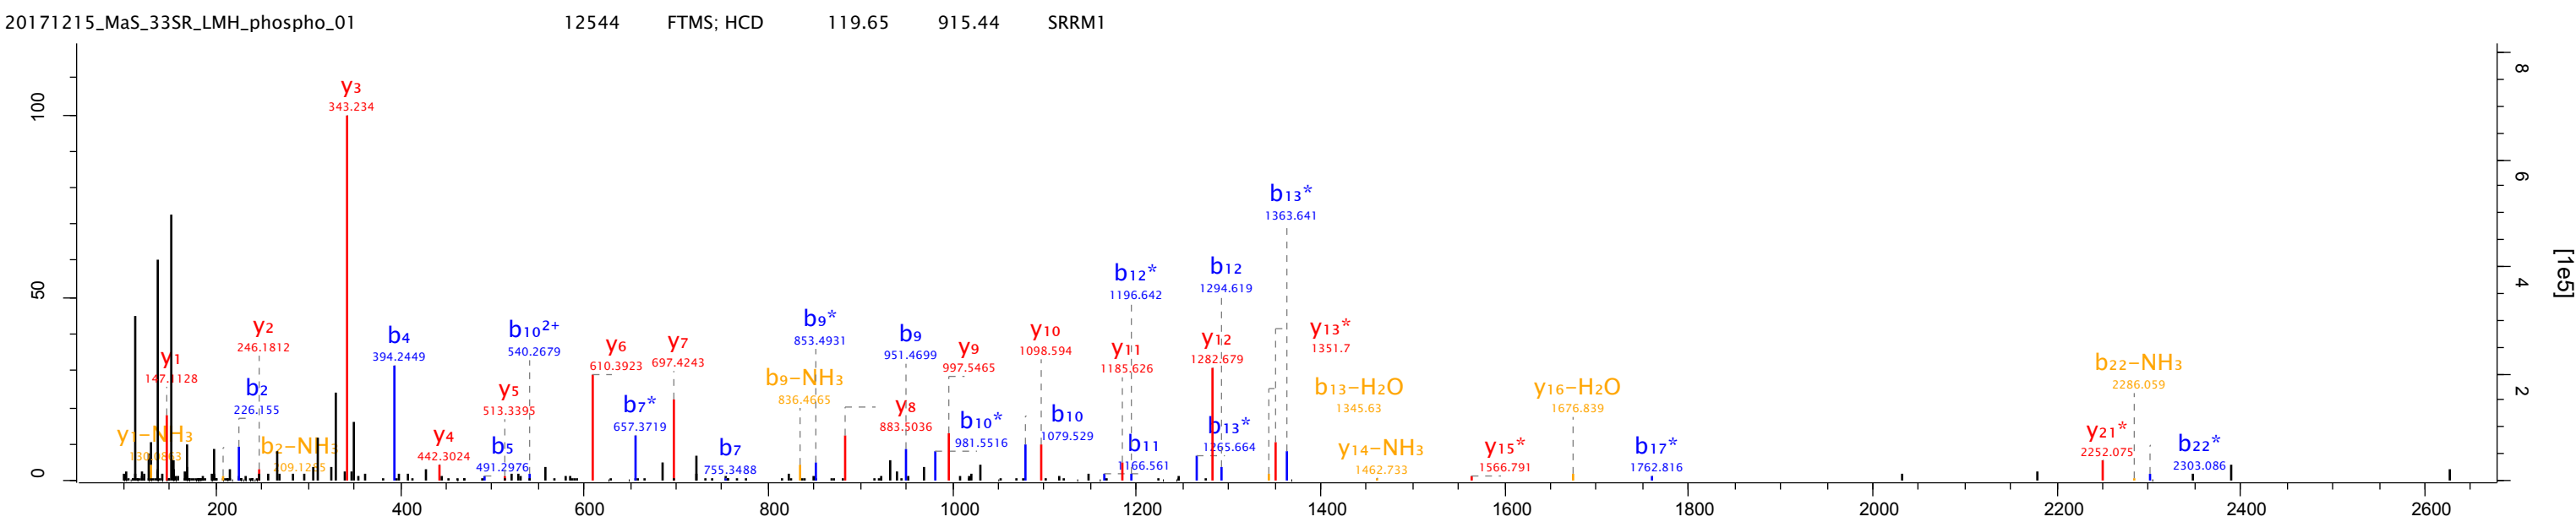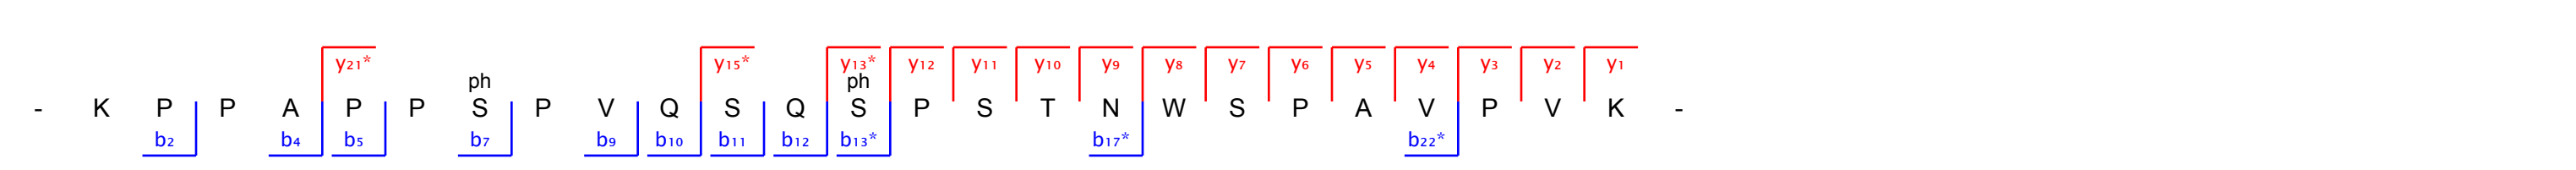

Raw file 20171215\_MaS\_33SR\_LMH\_phospho\_01 Scan 2384 Method FTMS; HCD Score 87.64 m/z 548.2 Gene names SRRM2

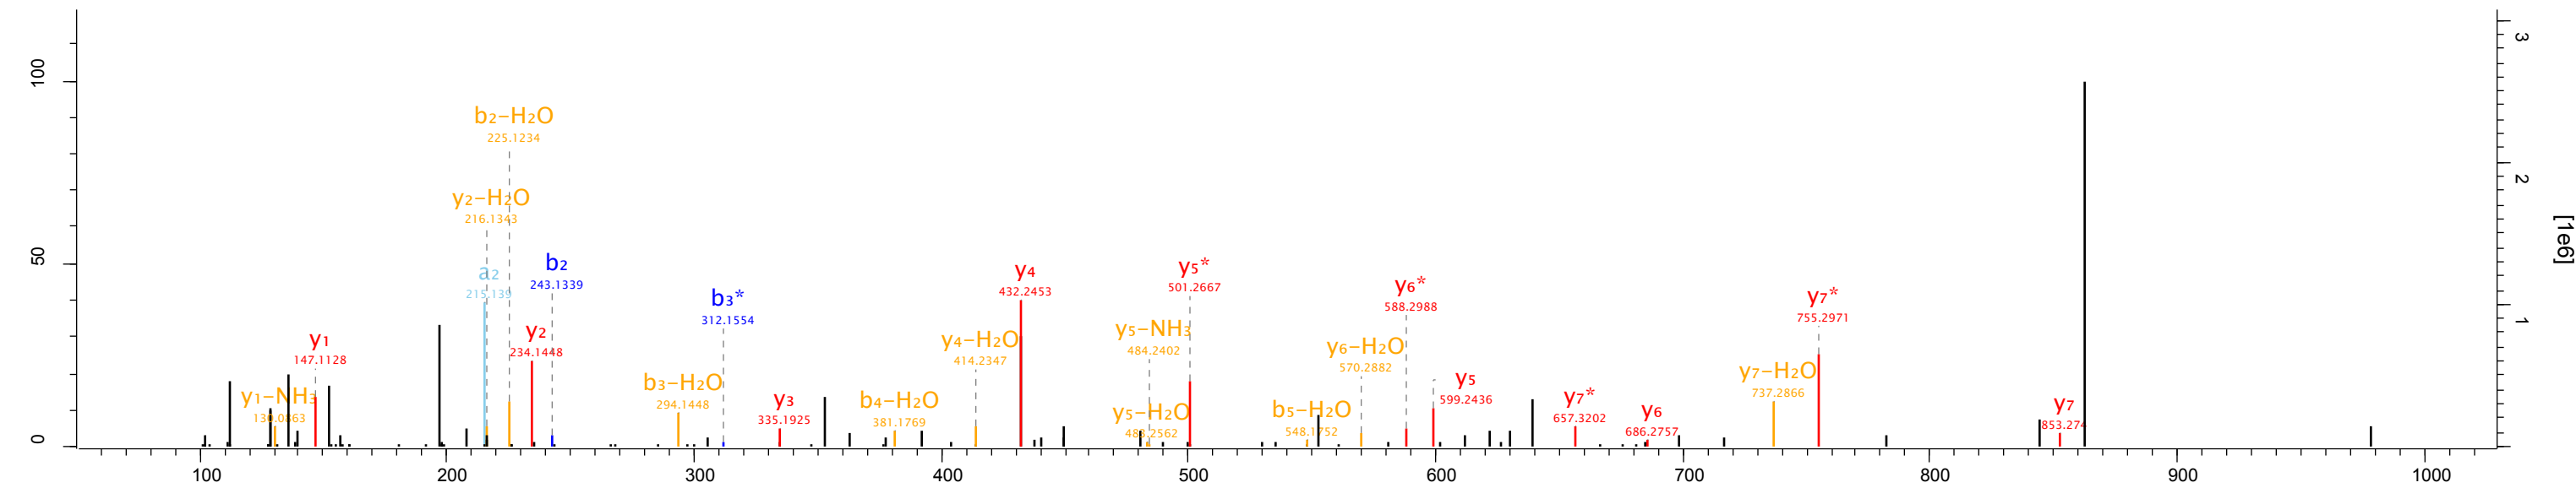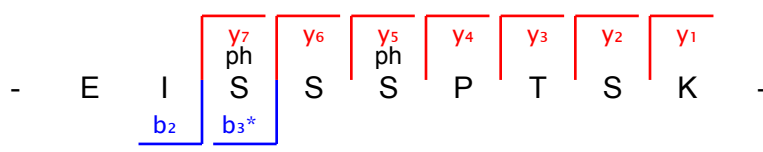



Raw file 20171215\_MaS\_33SR\_LMH\_phospho\_01 Scan 2524 Method FTMS; HCD Score 47.3 m/z 596.75 Gene names SPTBN5

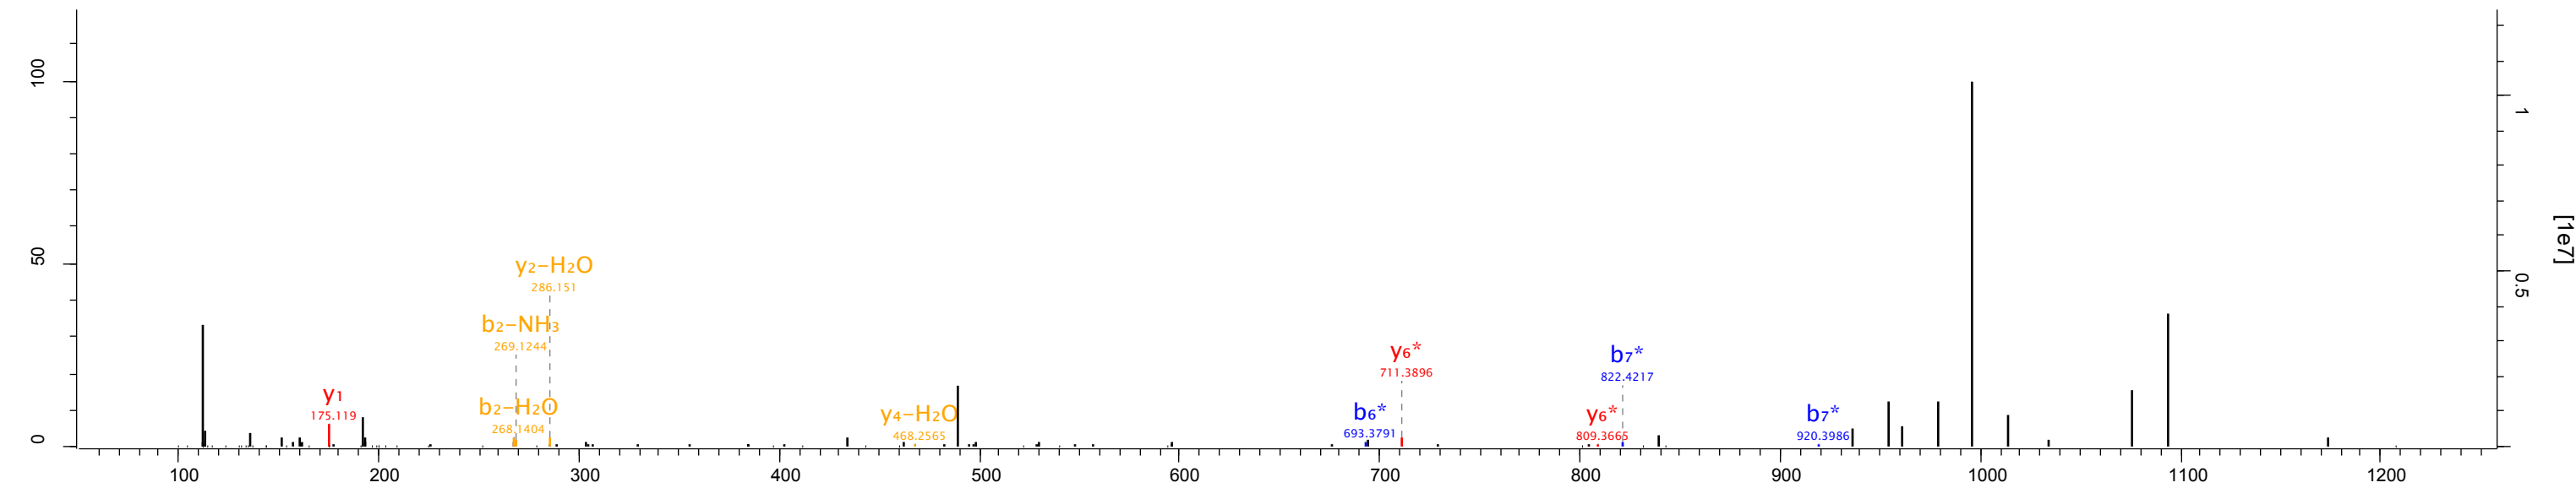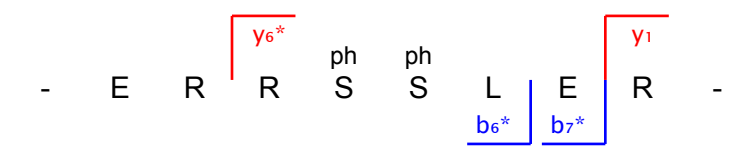

Raw file 20171215\_MaS\_33SR\_LMH\_phospho\_01 Scan 2604 Method FTMS; HCD Score 81.7 m/z 605.25 Gene names LMNB1

20171215\_MaS\_33SR\_LMH\_phospho\_01

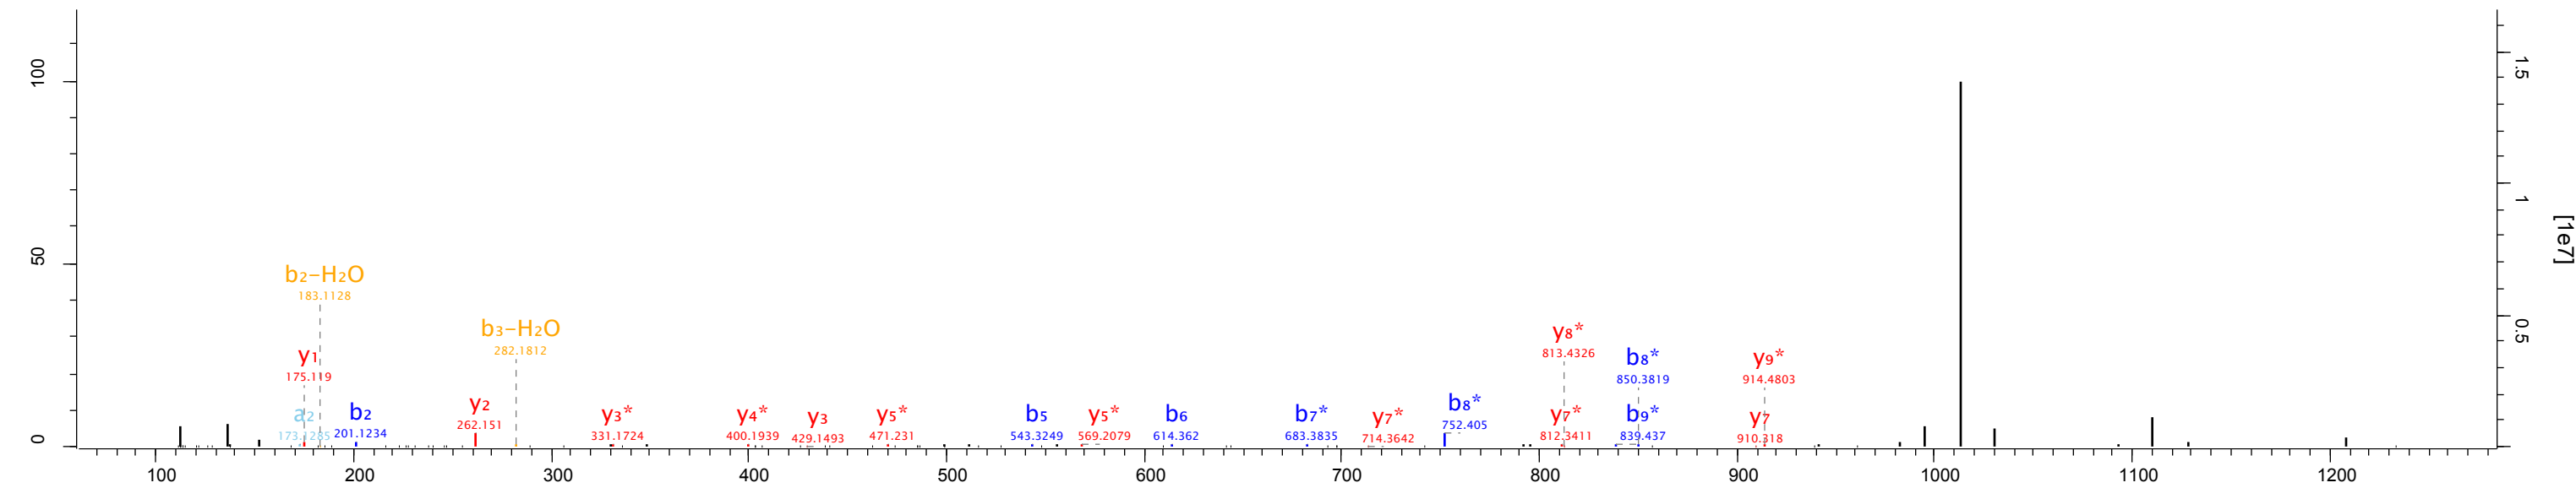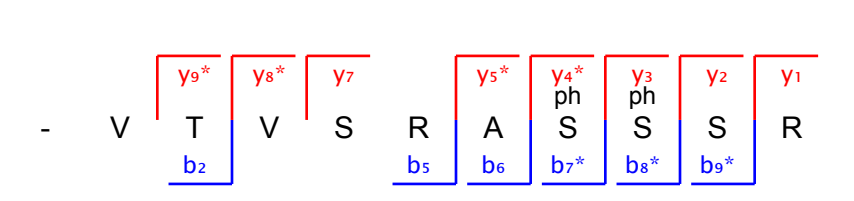

Raw file 20171215\_MaS\_33SR\_LMH\_phospho\_01 Scan 2714 Method FTMS; HCD Score 255.93 m/z 834.34 Gene names YBX1

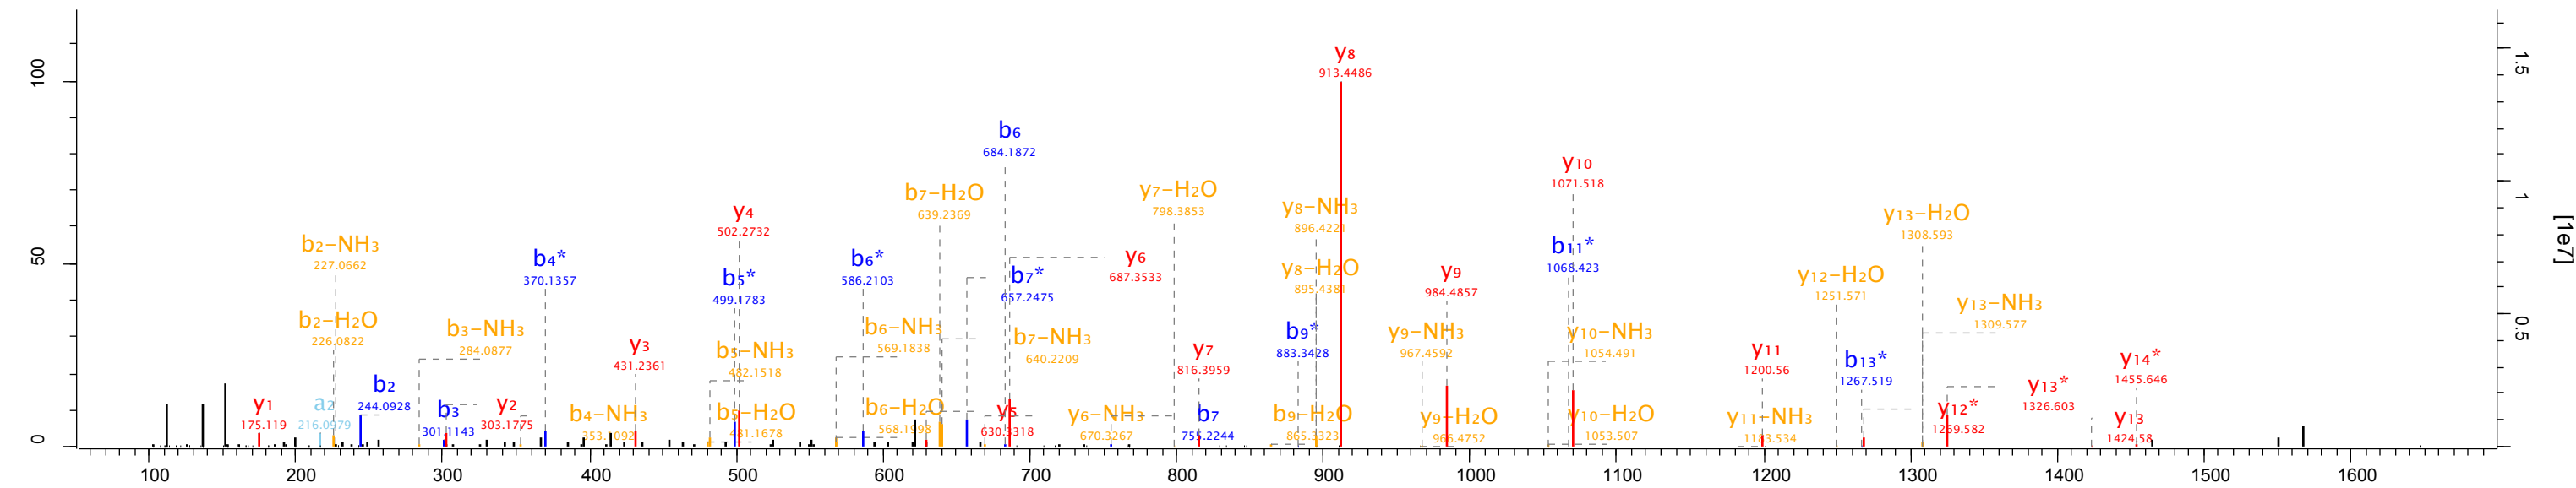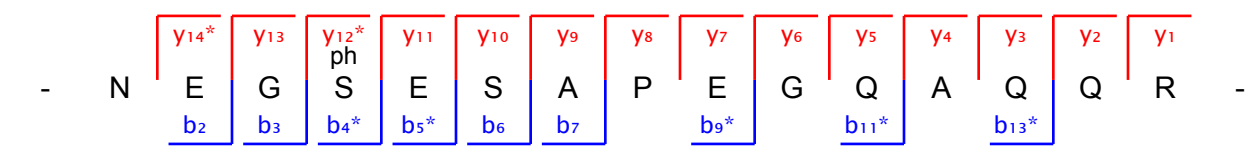

Raw file 20171215\_MaS\_33SR\_LMH\_phospho\_01 Scan 3384 Method FTMS; HCD Score 140.2 m/z 853.82 Gene names CLIP2

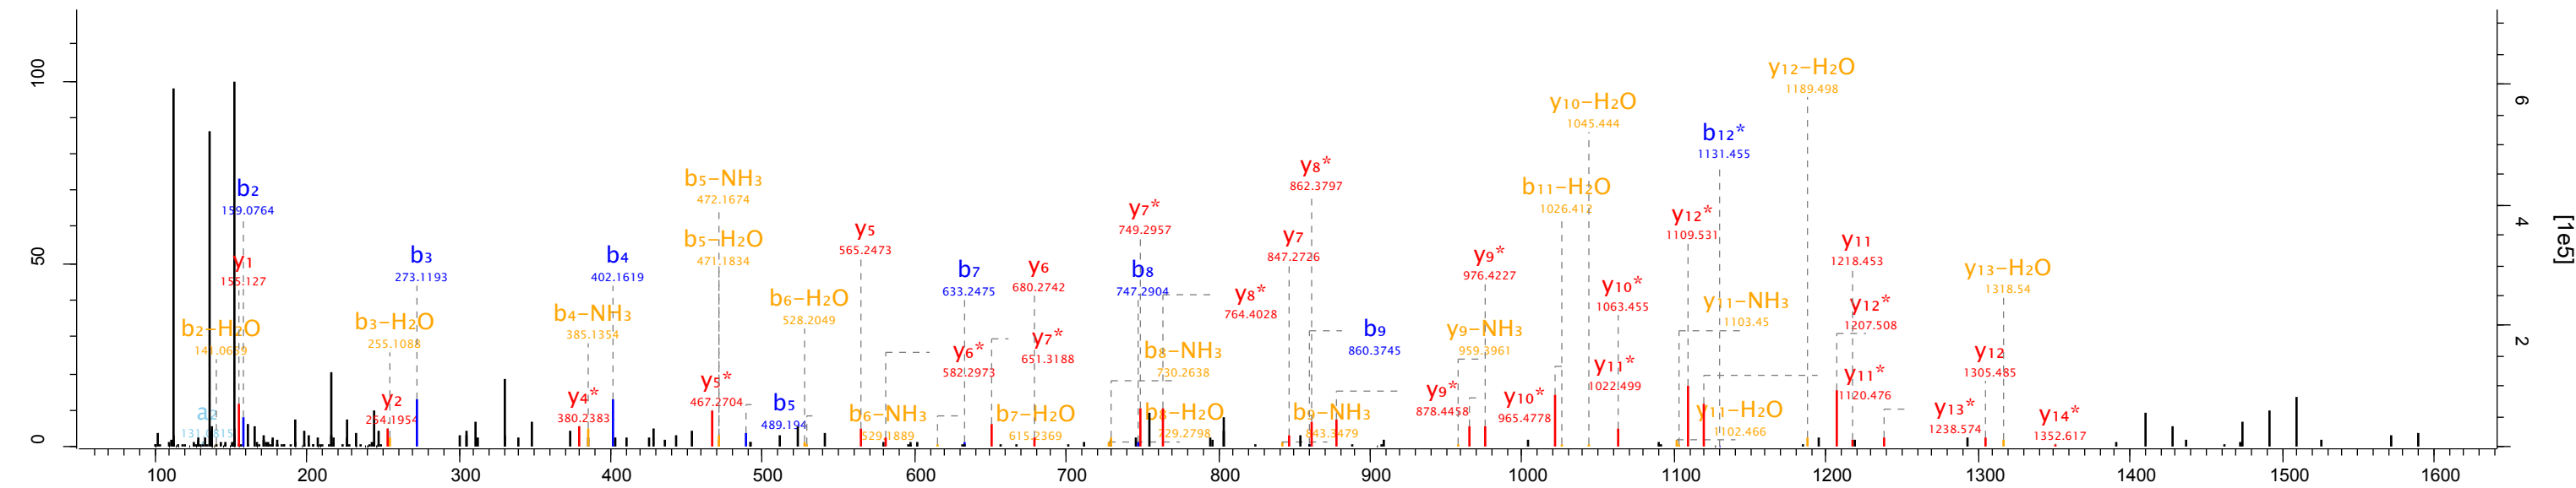

- T G N E S G S N L S G S V K -

Fragmentation mapping (b and y ions) is shown below the sequence:

- b<sub>2</sub> (under G)
- b<sub>3</sub> (under N)
- b<sub>4</sub> (under E)
- b<sub>5</sub> (under S)
- b<sub>7</sub> (under S)
- b<sub>8</sub> (under N)
- b<sub>9</sub> (under L)
- b<sub>12</sub>\* (under S)
- y<sub>14</sub>\* (over N)
- y<sub>13</sub>\* (over E)
- y<sub>12</sub> (over S)
- y<sub>11</sub> (over G)
- y<sub>10</sub>\* (over S)
- y<sub>9</sub>\* (over N)
- y<sub>8</sub>\* (over L)
- y<sub>7</sub> (over ph)
- y<sub>6</sub> (over D)
- y<sub>5</sub> (over S)
- y<sub>4</sub>\* (over G)
- y<sub>2</sub> (over V)
- y<sub>1</sub> (over K)

Raw file 20171215\_MaS\_33SR\_LMH\_phospho\_01 Scan 3744 Method FTMS; HCD Score 79.89 m/z 552.2 Gene names PCF11

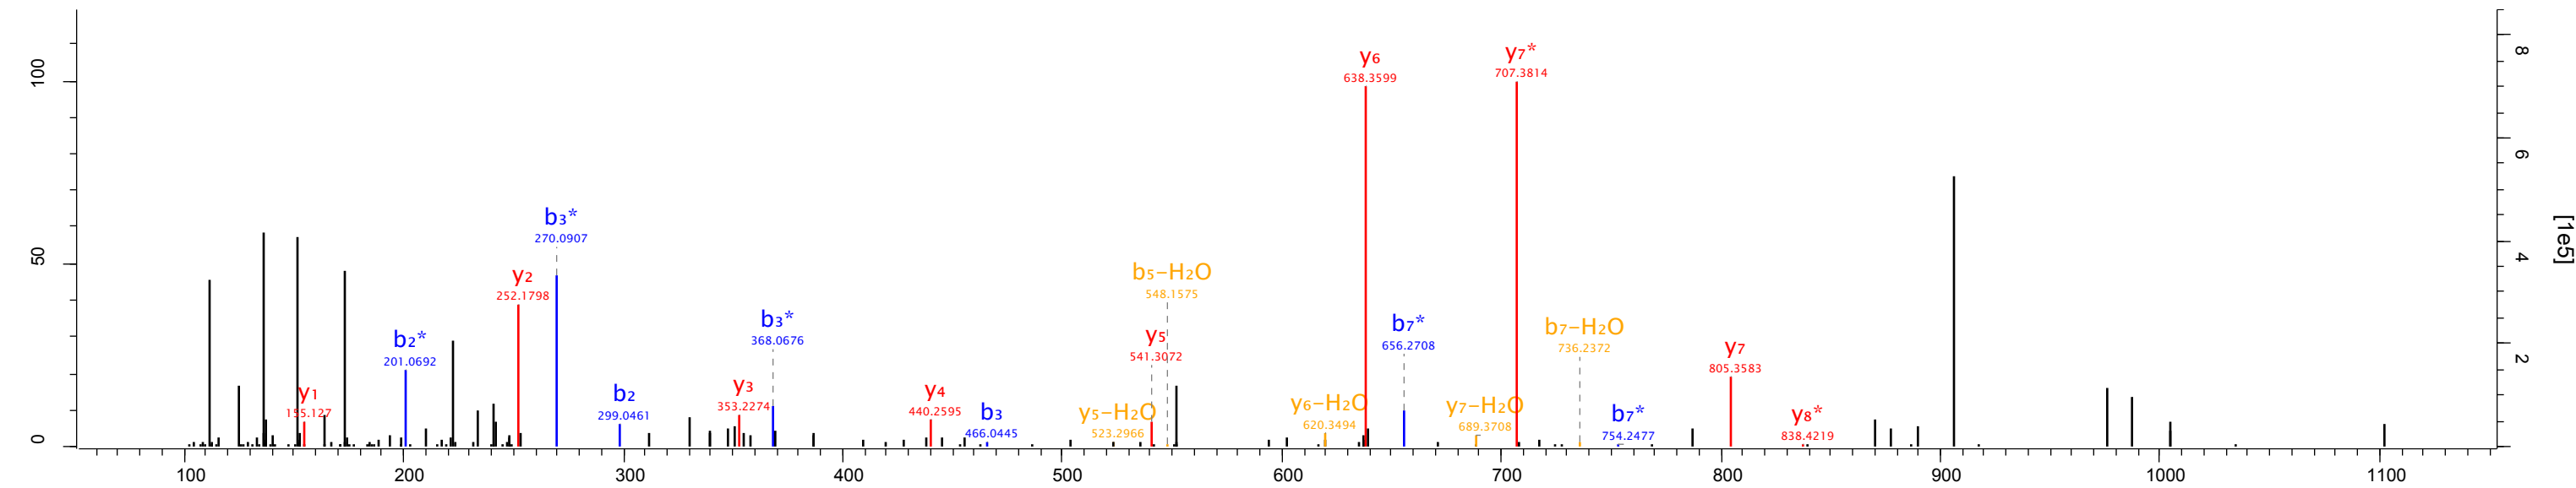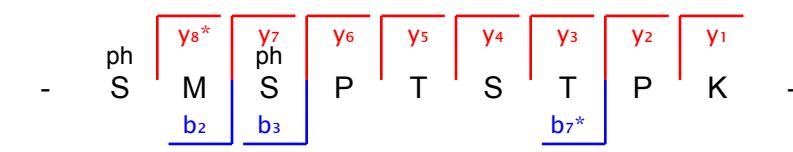

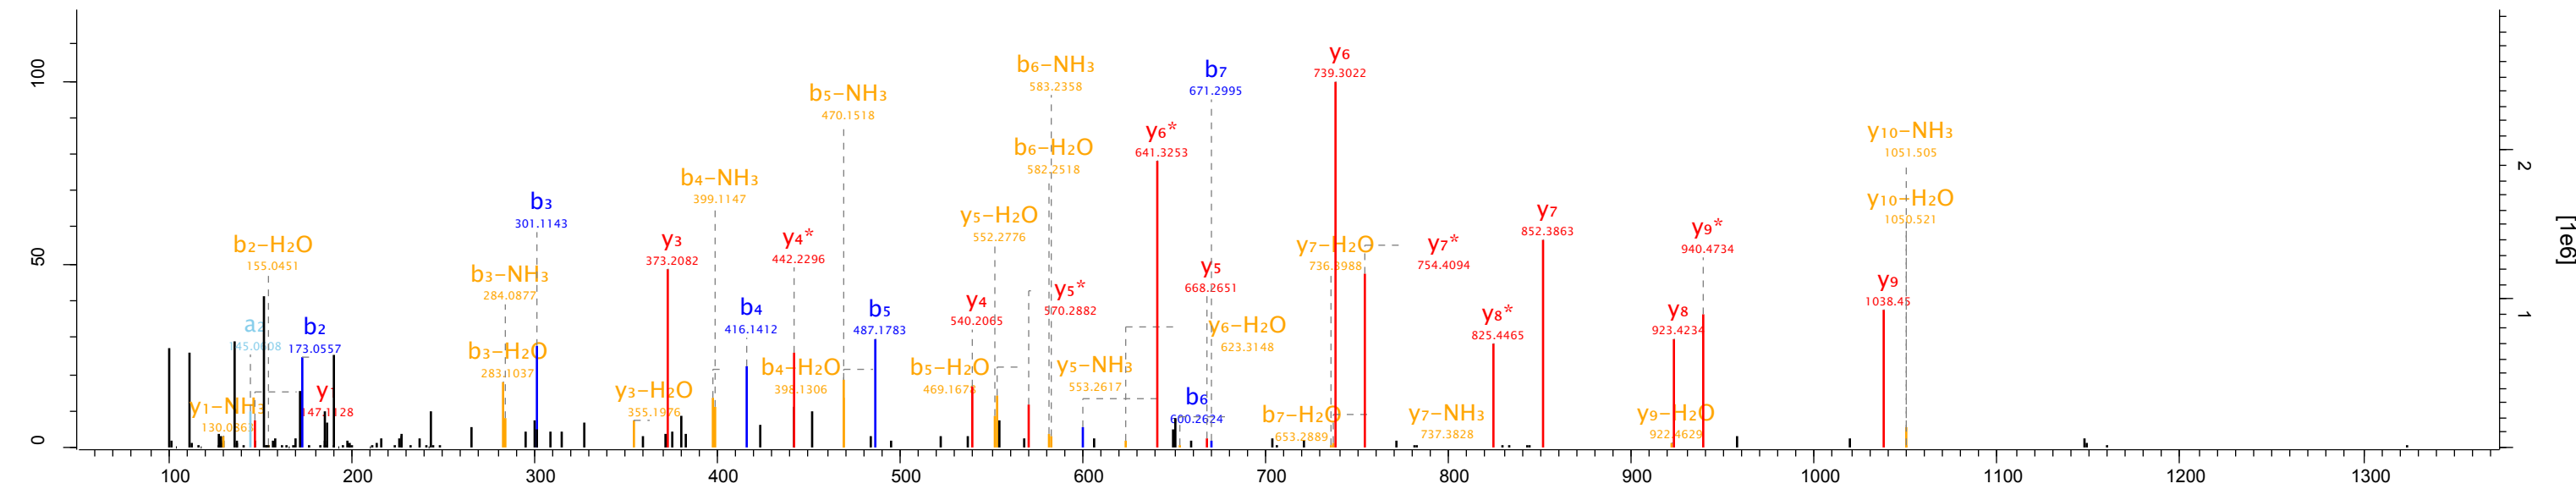

- D G Q D A I A Q S P E K -

b<sub>2</sub>
b<sub>3</sub>
b<sub>4</sub>
b<sub>5</sub>
b<sub>6</sub>
b<sub>7</sub>
y<sub>9</sub>
y<sub>8</sub>
y<sub>7</sub>
y<sub>6</sub>
y<sub>5</sub>
y<sub>4</sub>  
ph
y<sub>3</sub>
y<sub>1</sub>

Raw file 20171215\_MaS\_33SR\_LMH\_phospho\_01 Scan 4044 Method FTMS; HCD Score 259.44 m/z 1017.85 Gene names ZC3H13

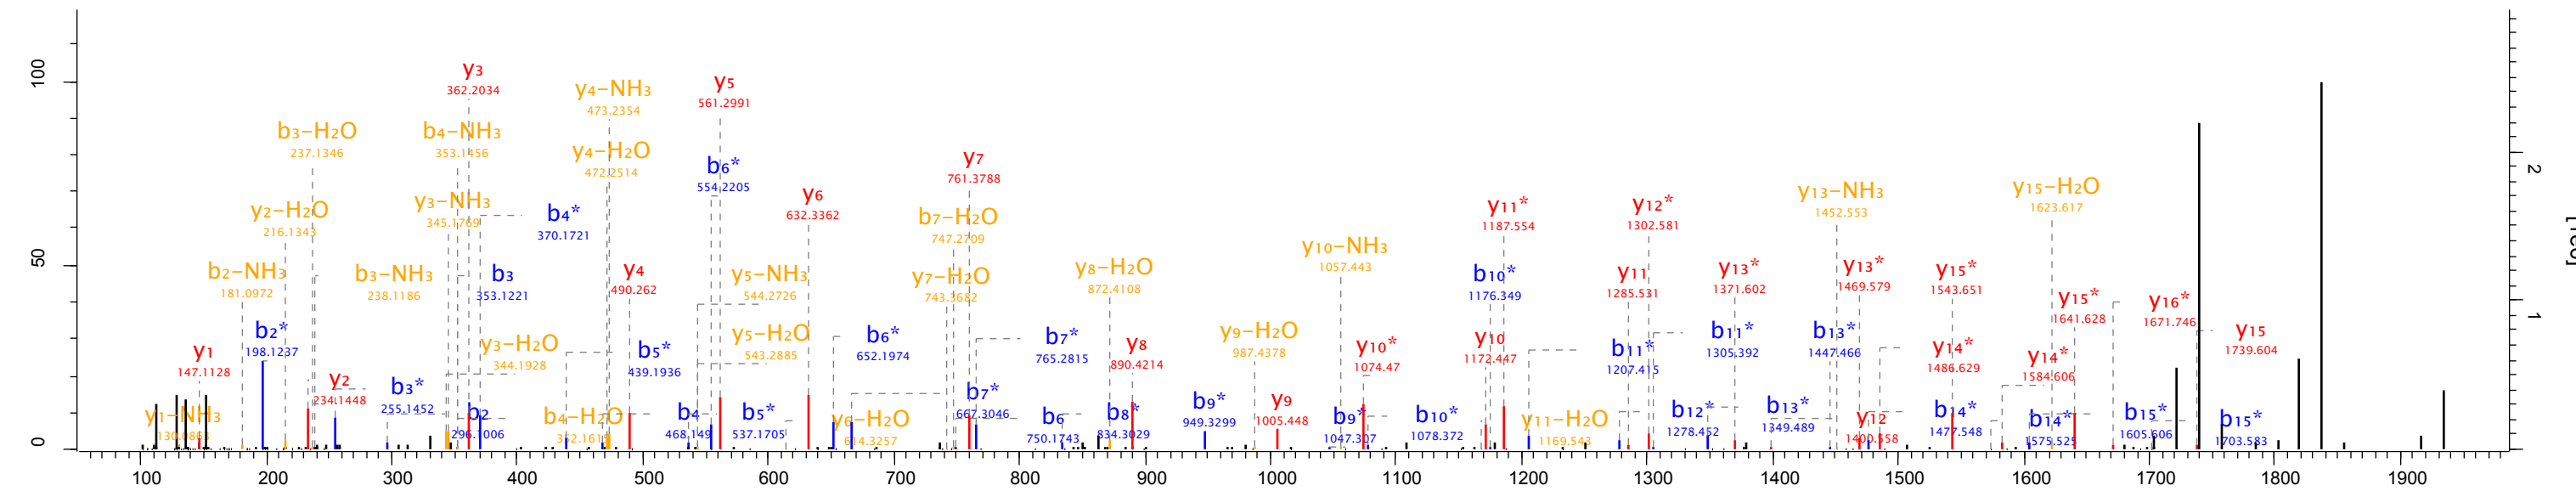

ph S  
 - S  
 K G D D I S D E E A A Q Q S K  
 b<sub>2</sub> b<sub>3</sub> b<sub>4</sub> b<sub>5</sub>\* b<sub>6</sub> b<sub>7</sub>\* b<sub>8</sub>\* b<sub>9</sub>\* b<sub>10</sub>\* b<sub>11</sub>\* b<sub>12</sub>\* b<sub>13</sub>\* b<sub>14</sub>\* b<sub>15</sub>\*  
 y<sub>16</sub>\* y<sub>15</sub> y<sub>14</sub>\* y<sub>13</sub>\* ph y<sub>12</sub> y<sub>11</sub> y<sub>10</sub> ph y<sub>9</sub> y<sub>8</sub> y<sub>7</sub> y<sub>6</sub> y<sub>5</sub> y<sub>4</sub> y<sub>3</sub> y<sub>2</sub> y<sub>1</sub>

Raw file 20171215\_MaS\_33SR\_LMH\_phospho\_01 Scan 4454 Method FTMS; HCD Score 214.67 m/z 1347.03 Gene names UBAP2L

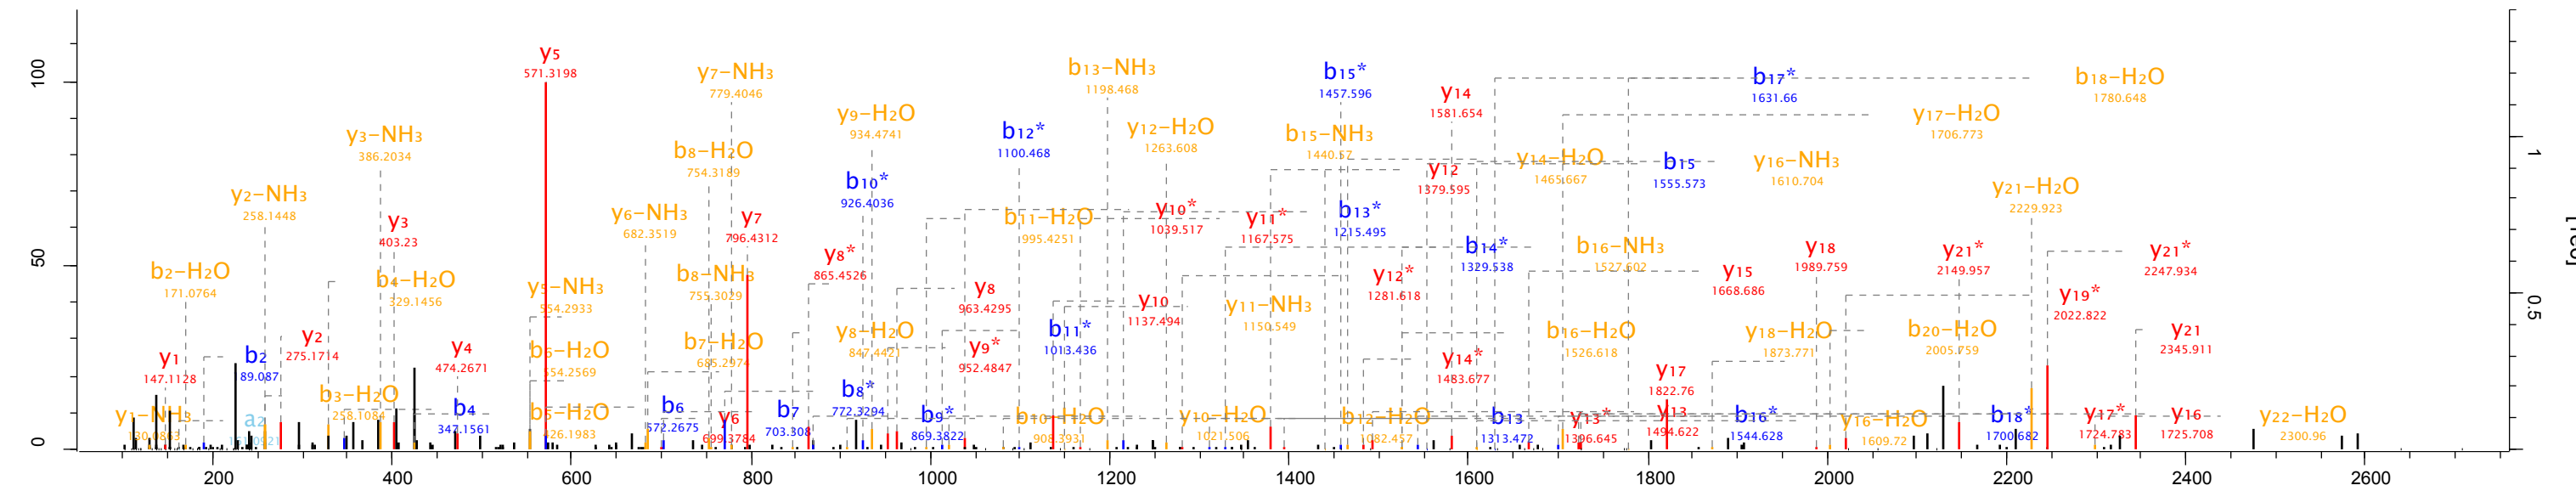

- S T S A P Q M S P G S S D N Q S S P Q P A Q Q K -

b<sub>2</sub>
b<sub>4</sub>
b<sub>6</sub>
b<sub>7</sub>
b<sub>8</sub><sup>\*</sup>
b<sub>9</sub><sup>\*</sup>
b<sub>10</sub><sup>\*</sup>
b<sub>11</sub><sup>\*</sup>
b<sub>12</sub><sup>\*</sup>
b<sub>13</sub>
b<sub>14</sub><sup>\*</sup>
b<sub>15</sub>
b<sub>16</sub><sup>\*</sup>
b<sub>17</sub><sup>\*</sup>
b<sub>18</sub><sup>\*</sup>

y<sub>21</sub>
y<sub>19</sub><sup>\*</sup>
y<sub>18</sub><sup>ph</sup>
y<sub>17</sub>
y<sub>16</sub>
y<sub>15</sub>
y<sub>14</sub>
y<sub>13</sub>
y<sub>12</sub>
y<sub>11</sub><sup>\*</sup>
y<sub>10</sub>
y<sub>9</sub><sup>\*</sup>
y<sub>8</sub><sup>ph</sup>
y<sub>7</sub>
y<sub>6</sub>
y<sub>5</sub>
y<sub>4</sub>
y<sub>3</sub>
y<sub>2</sub>
y<sub>1</sub>



Raw file 20171215\_MaS\_33SR\_LMH\_phospho\_01 Scan 4594 Method FTMS; HCD Score 124.5 m/z 654.25 Gene names SRRM1

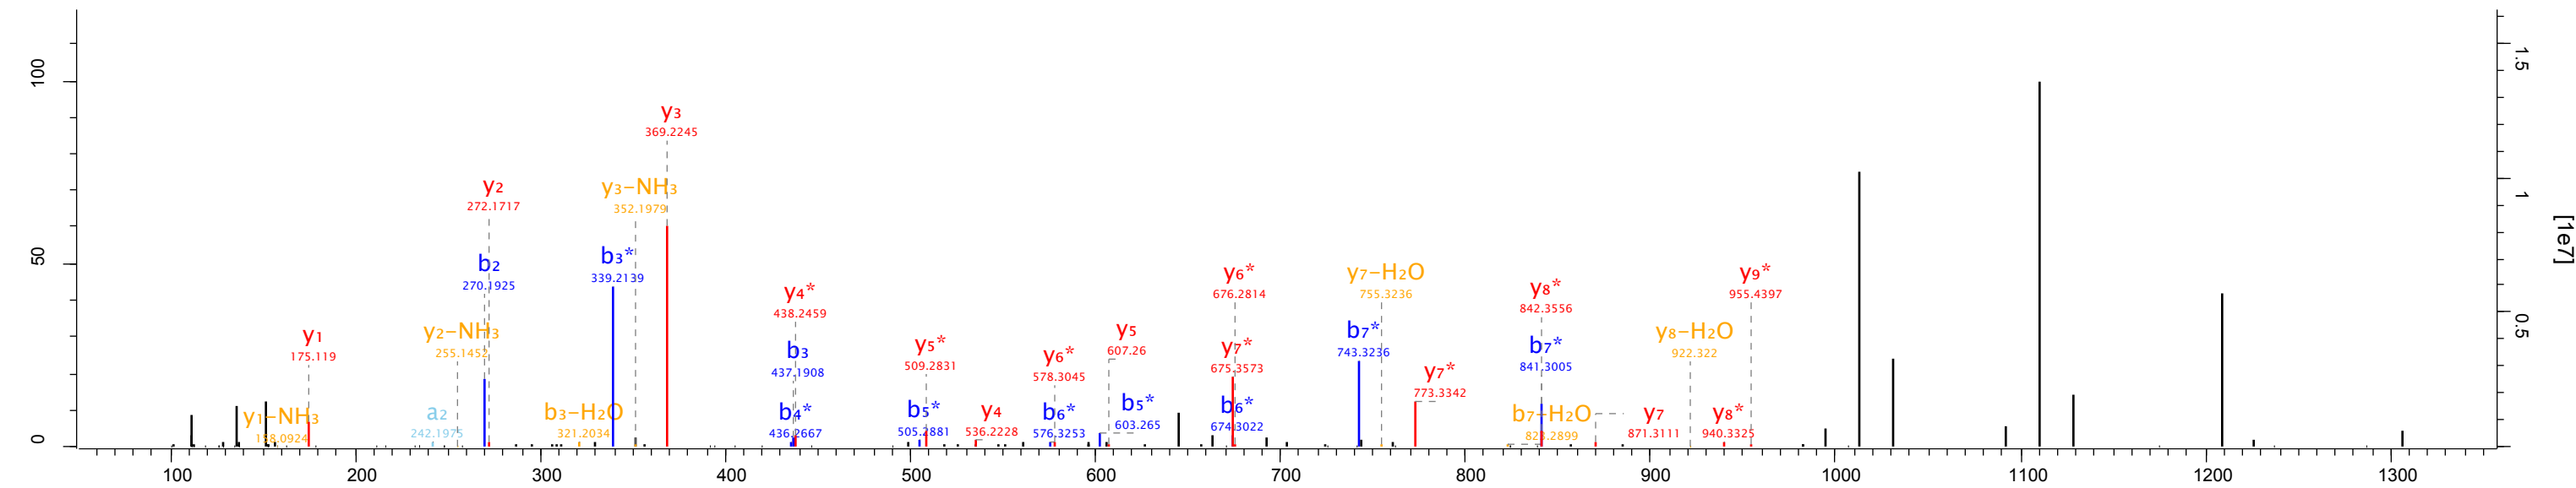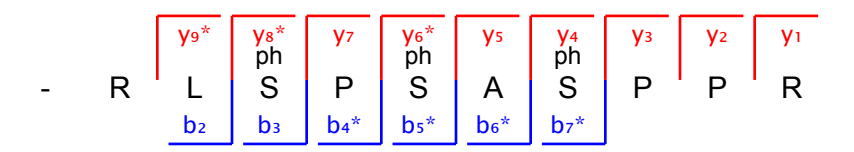

Raw file Scan Method Score m/z Gene names

20171215\_MaS\_33SR\_LMH\_phospho\_01 4934 FTMS; HCD 115.1 583.75 MIEF1

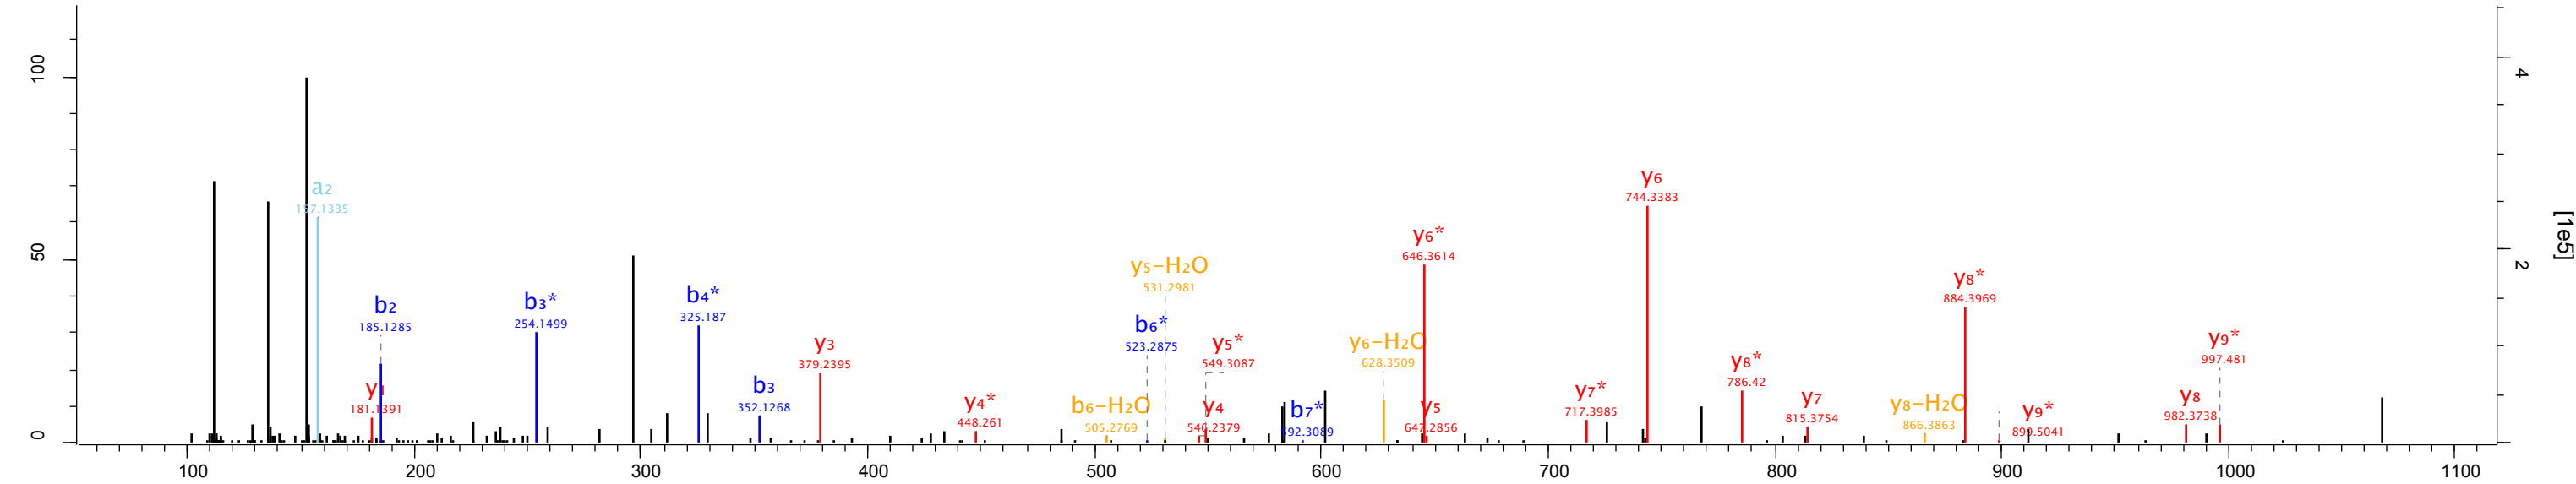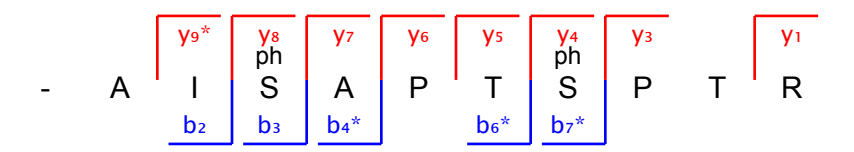

Raw file Scan Method Score m/z Gene names  
 20171215\_MaS\_33SR\_LMH\_phospho\_01 5314 FTMS; HCD 47.88 976.05 C11orf84

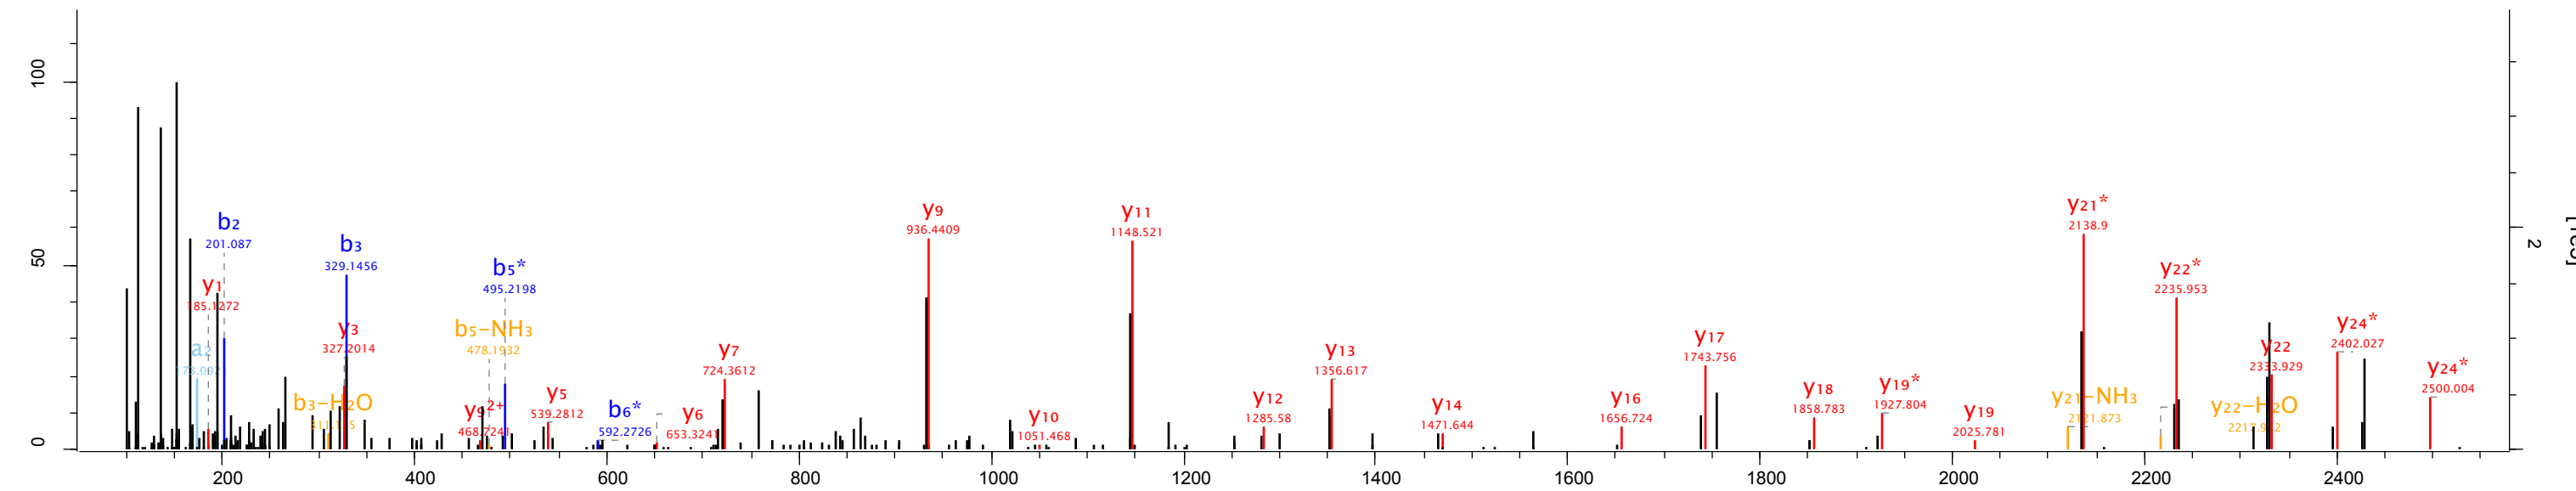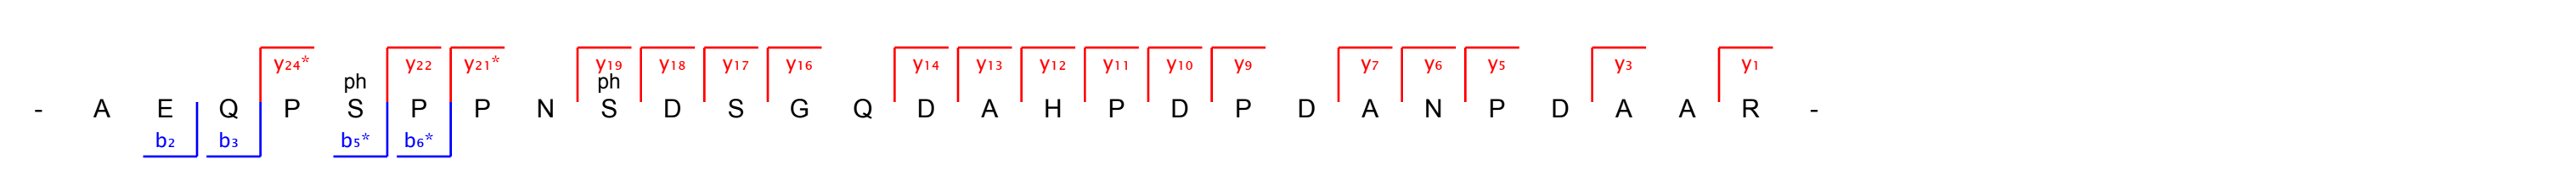

Raw file: 20171215\_MaS\_33SR\_LMH\_phospho\_01  
 Scan: 7314 Method: FTMS; HCD Score: 153.27 m/z: 1076.86 Gene names: ZNF609

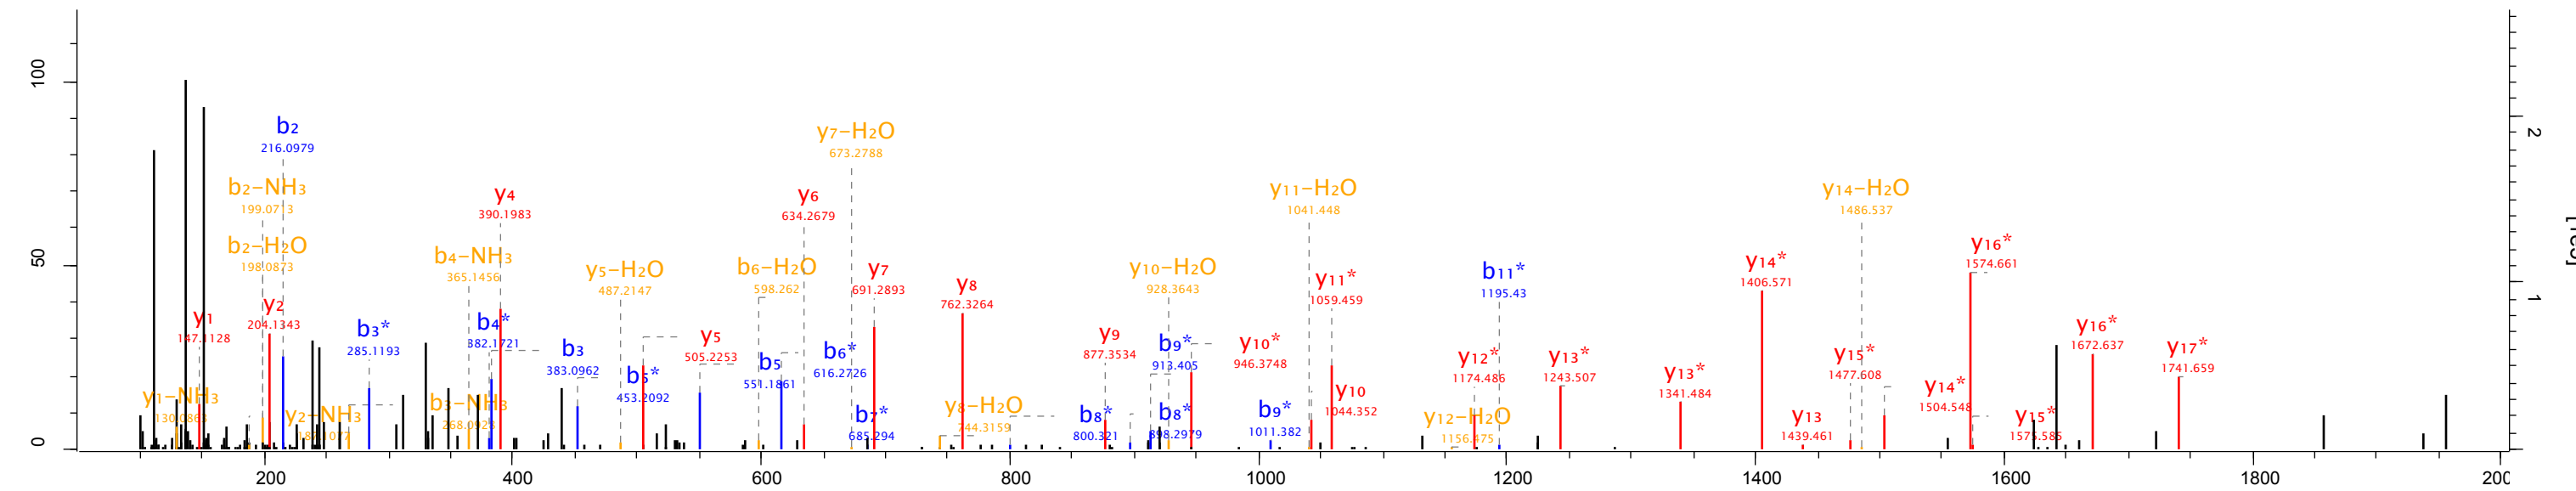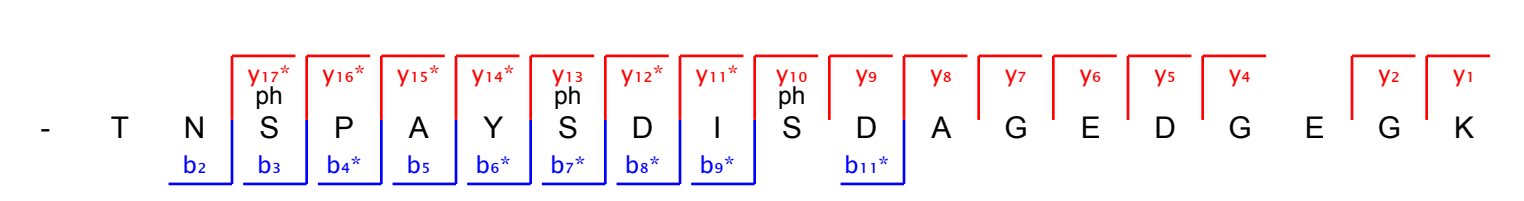

Raw file 20171215\_MaS\_33SR\_LMH\_phospho\_01 Scan 7624 Method FTMS; HCD Score 207.92 m/z 775.84 Gene names PTMA

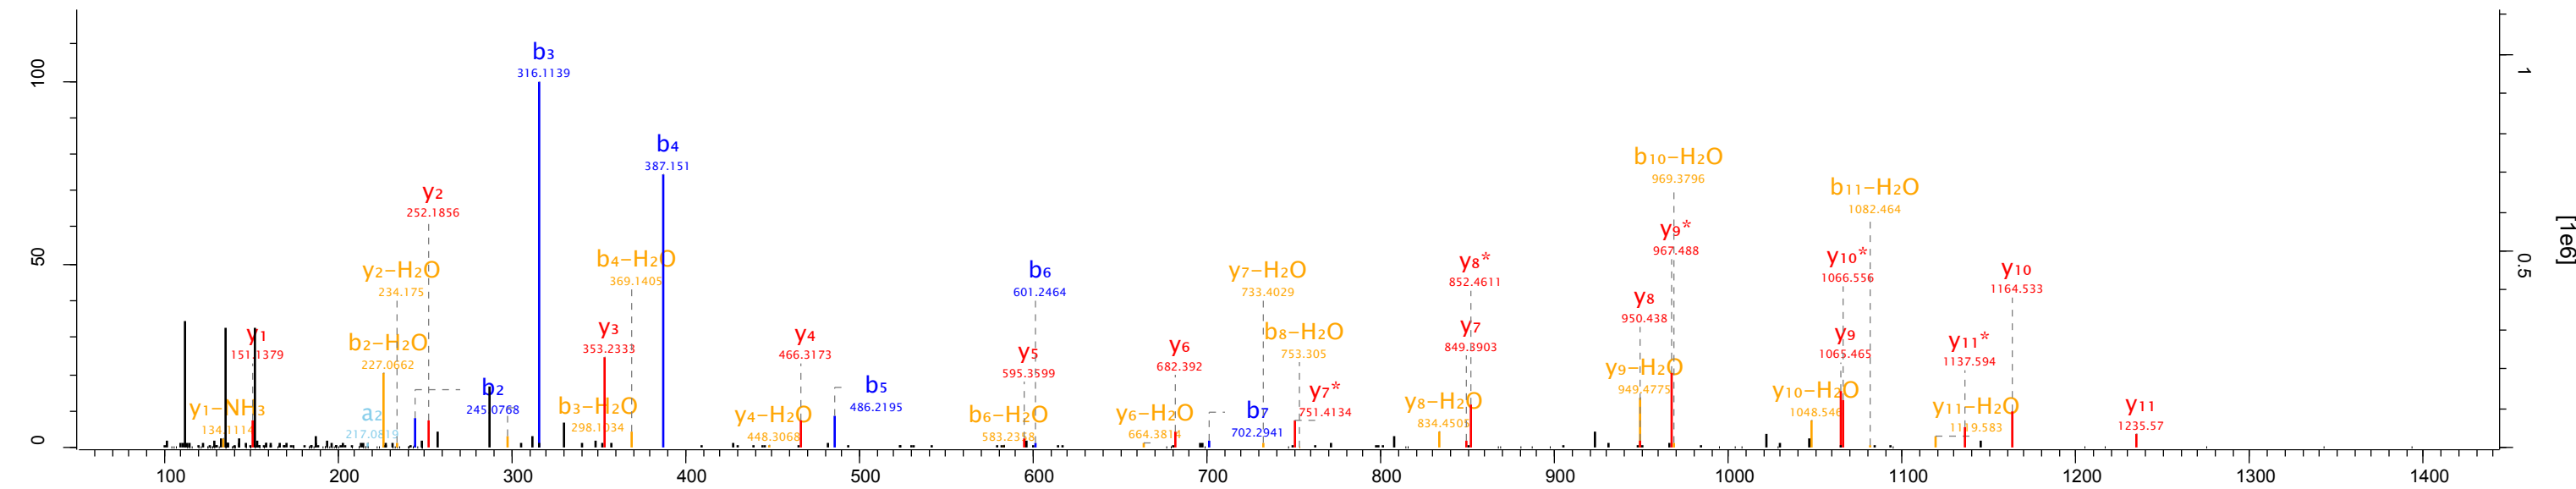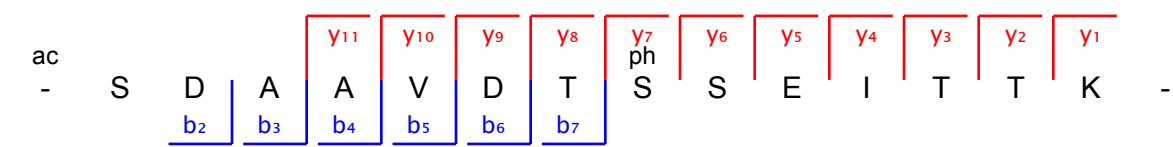

Raw file 20171215\_MaS\_33SR\_LMH\_phospho\_01 Scan 8084 Method FTMS; HCD Score 97.71 m/z 822.32 Gene names TMF1

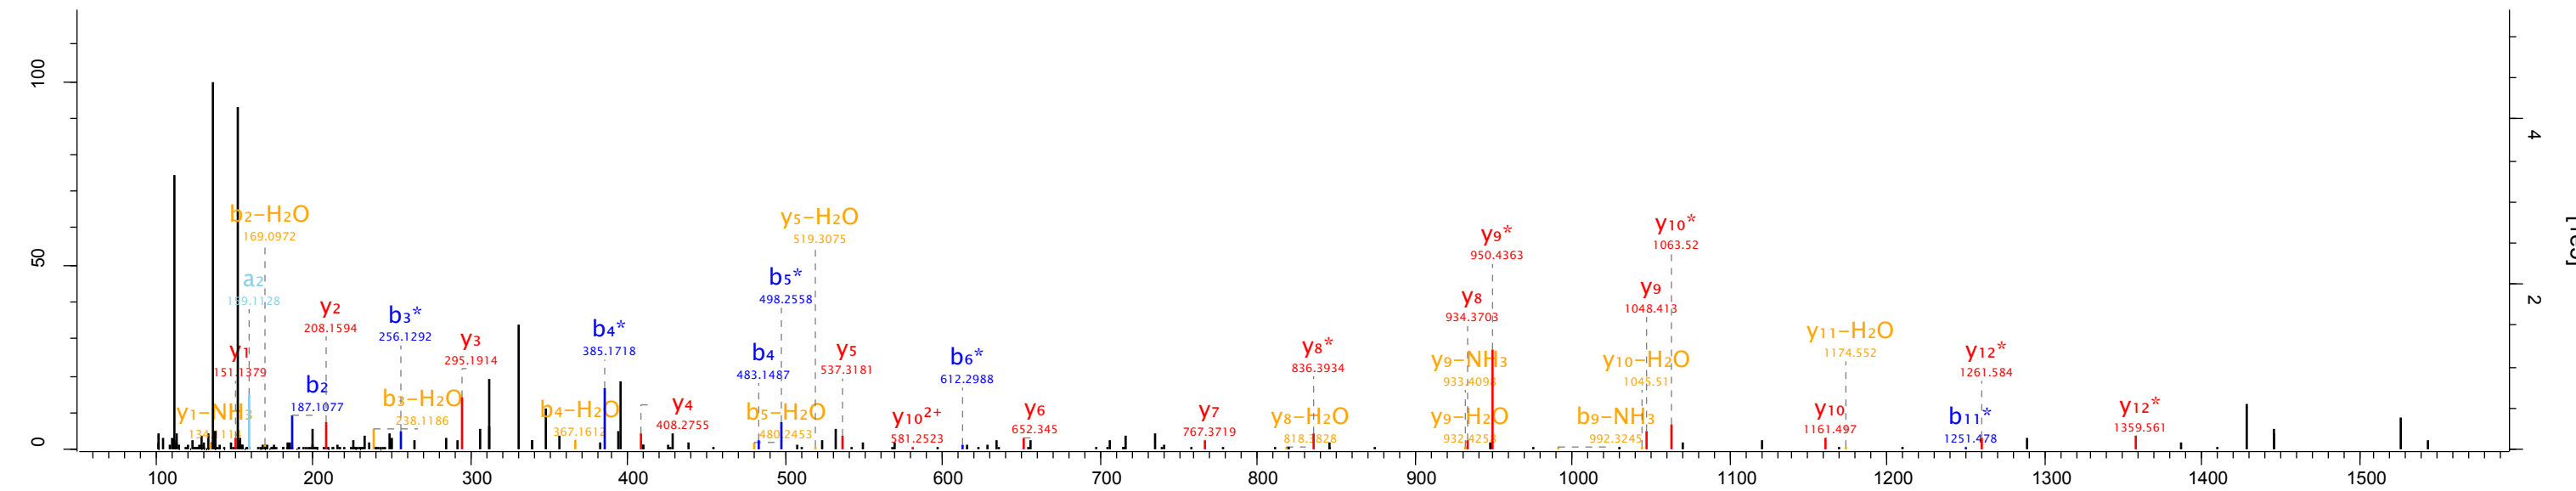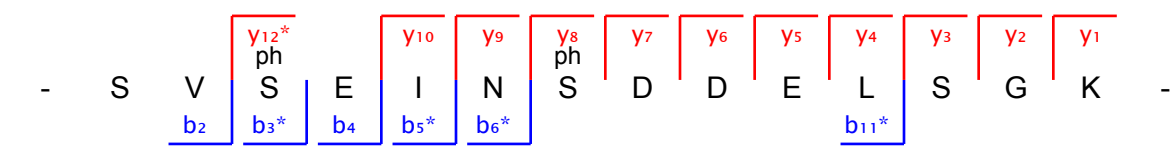

Raw file 20171215\_MaS\_33SR\_LMH\_phospho\_01 Scan 8354 Method FTMS; HCD Score 130.07 m/z 789.82 Gene names ZNF609

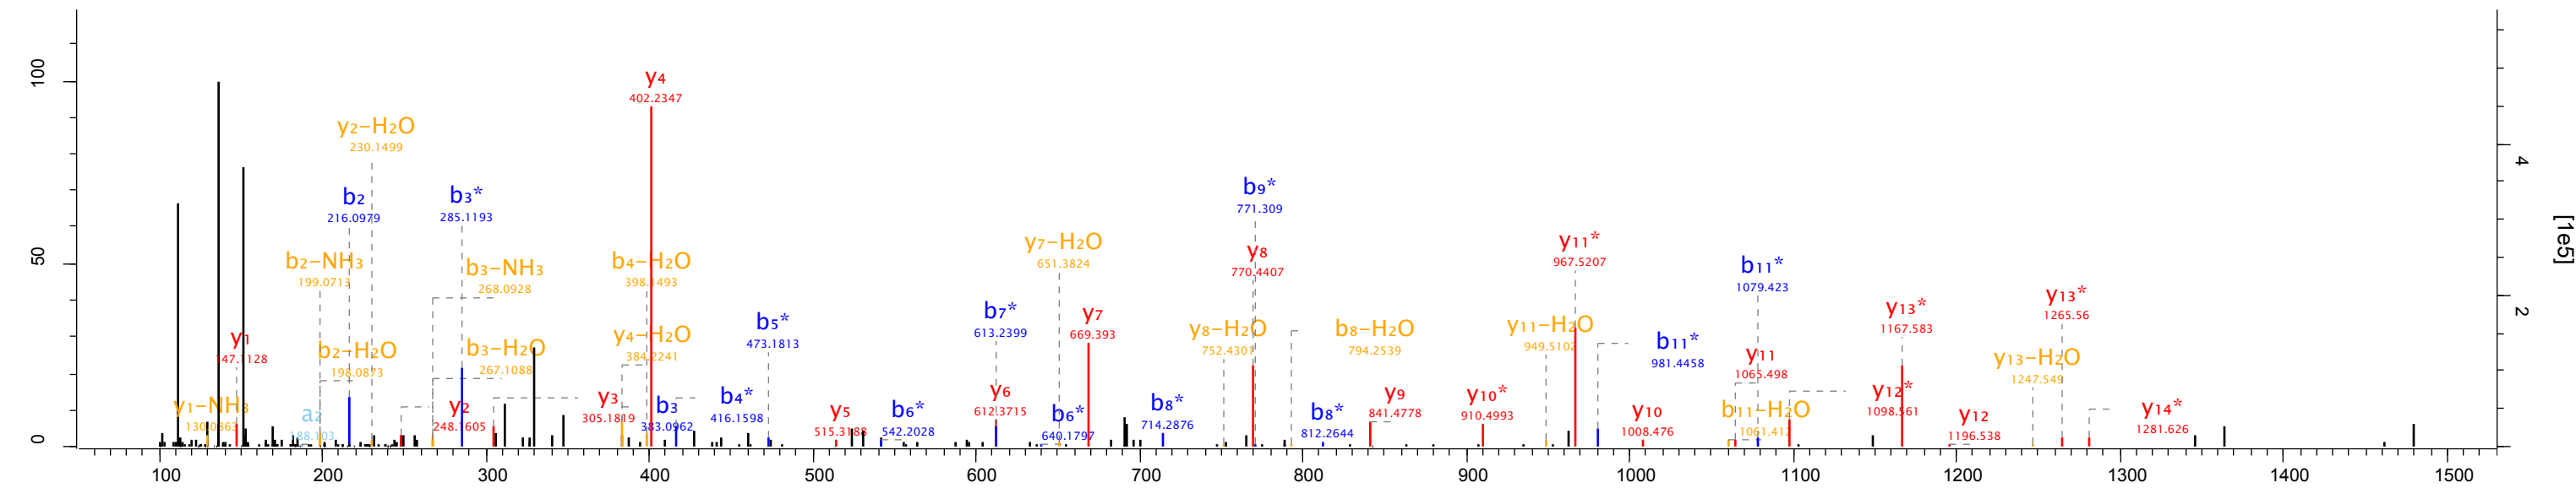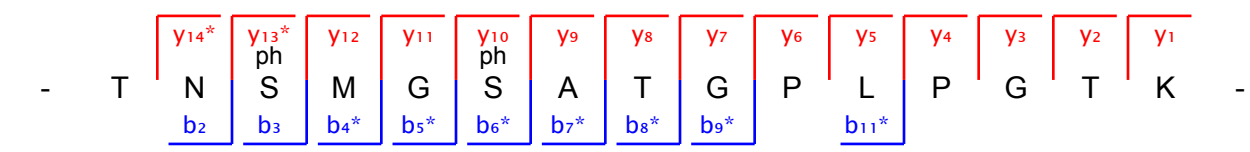

Raw file 20171215\_MaS\_33SR\_LMH\_phospho\_01 Scan 8804 Method FTMS; HCD Score 94.34 m/z 683.82 Gene names TRAFD1

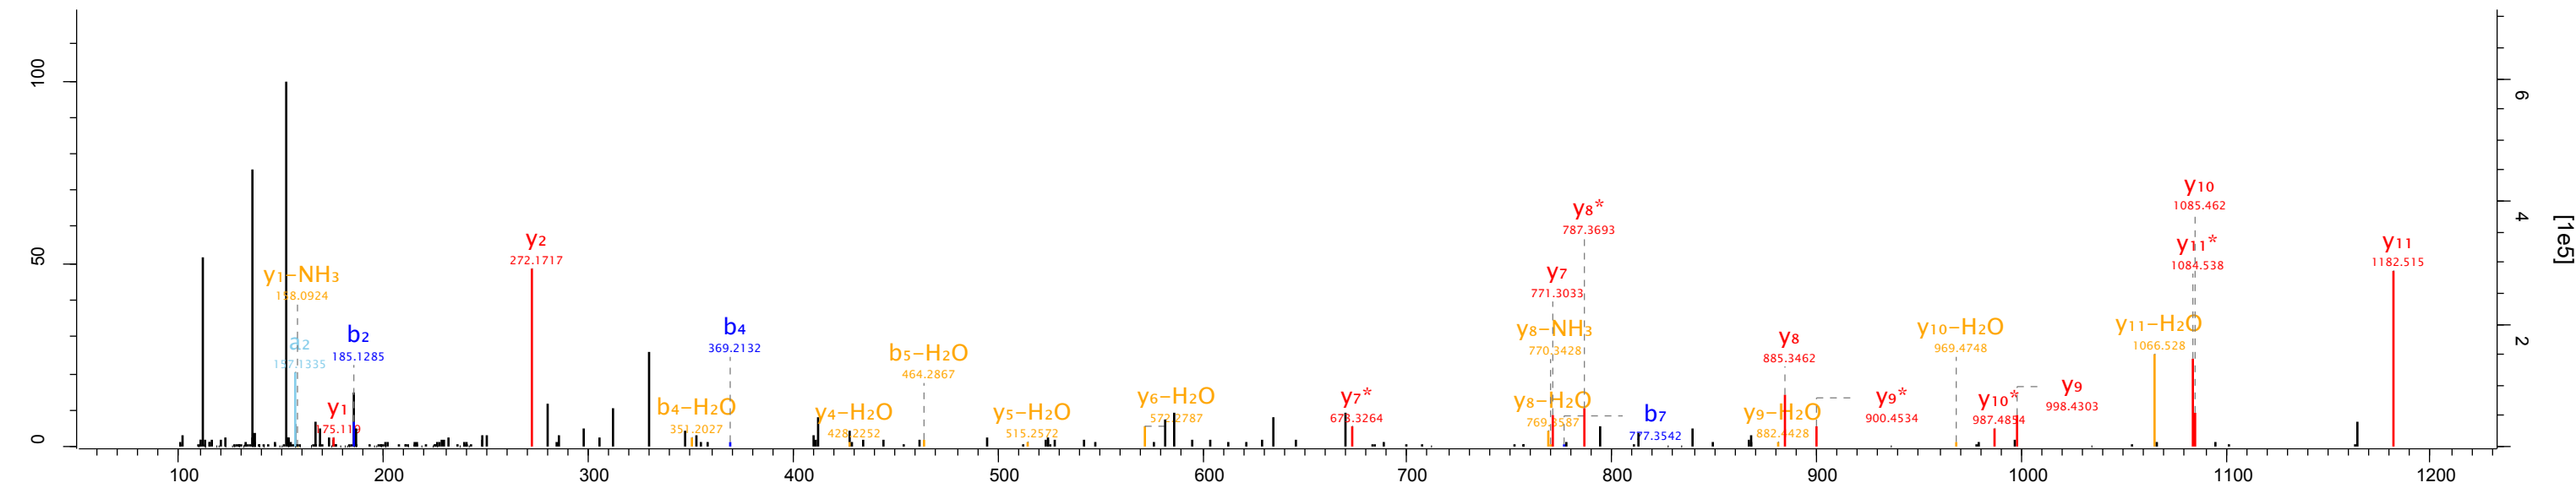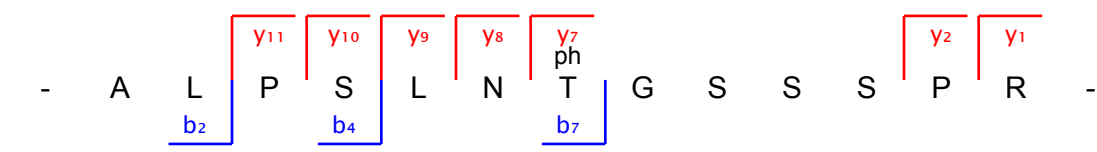



Raw file 20171215\_MaS\_33SR\_LMH\_phospho\_02 Scan 10004 Method FTMS; HCD Score 96.12 m/z 755.65 Gene names ARHGEF11

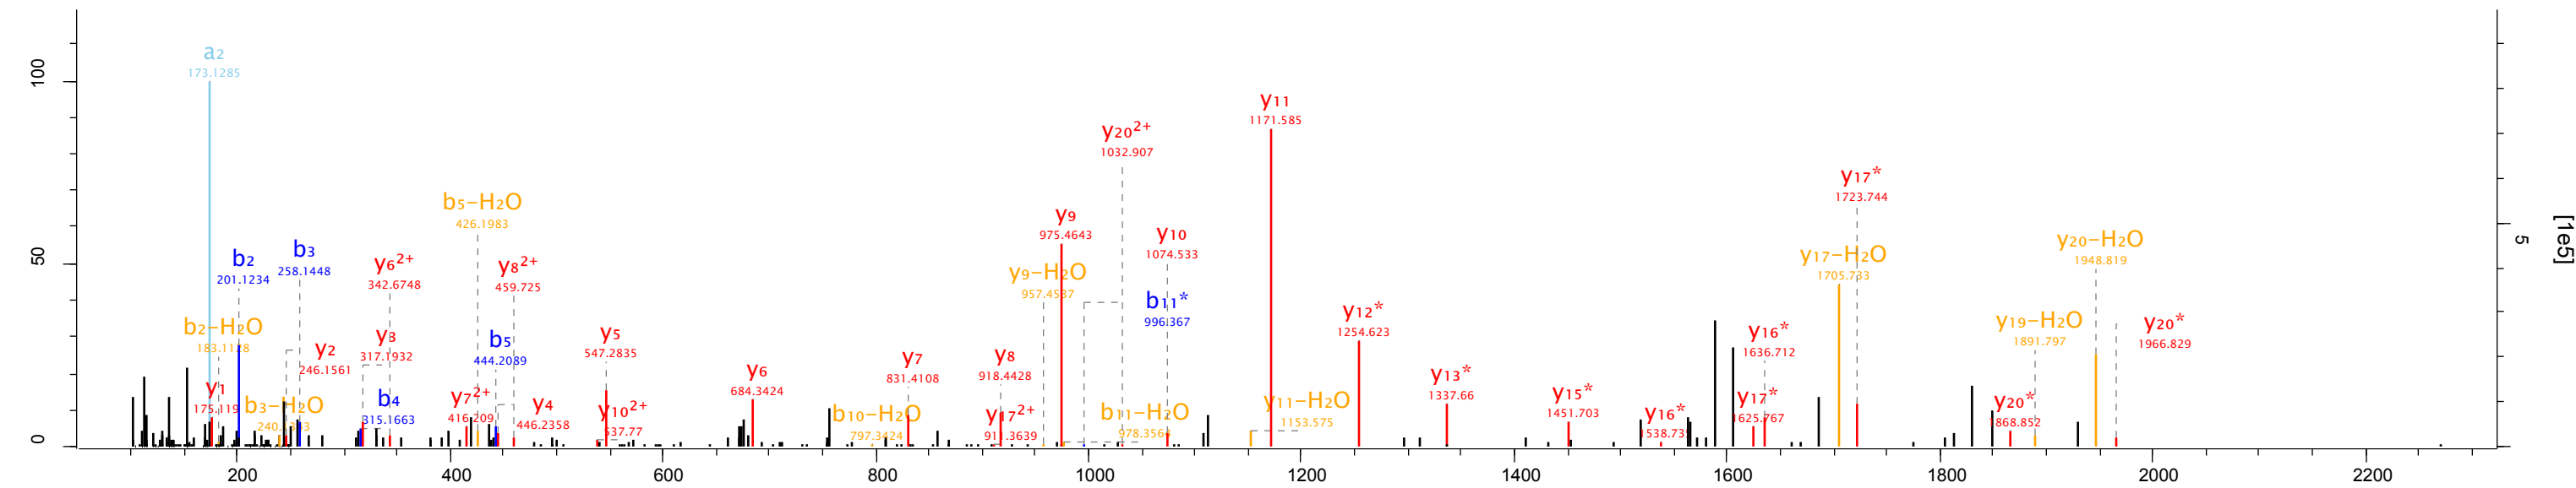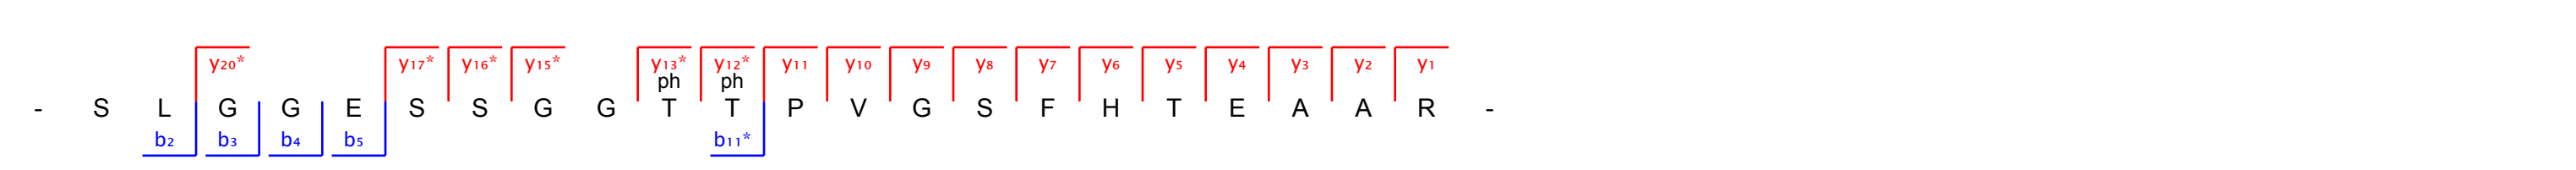

20171215\_MaS\_33SR\_LMH\_phospho\_02 10174 FTMS; HCD 127.54 768.85 RUNX1

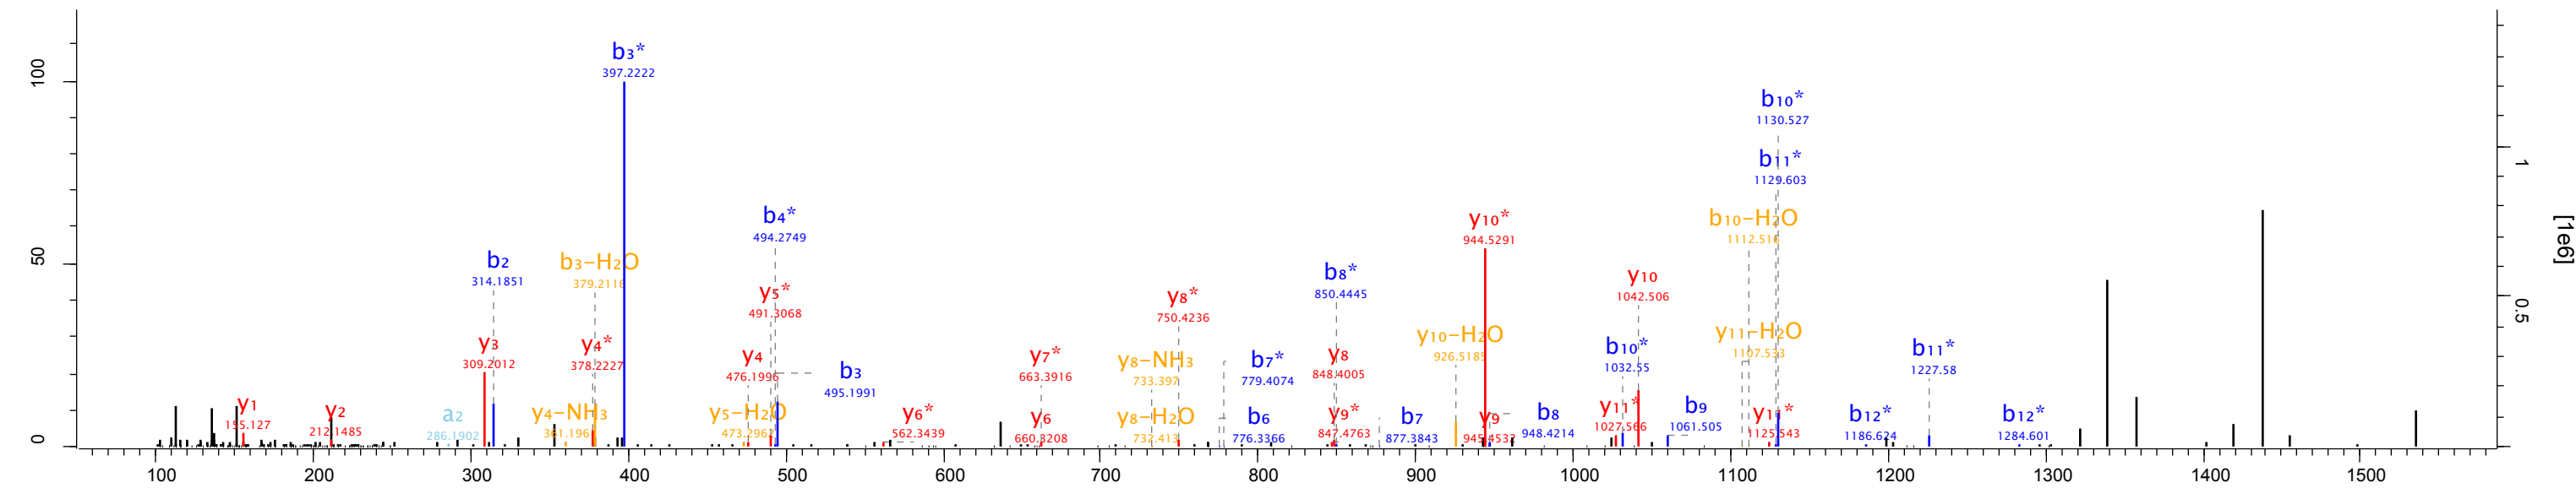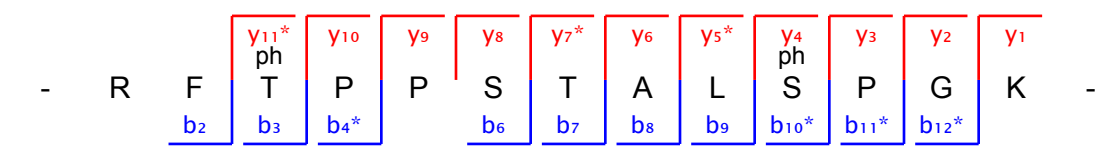

Raw file 20171215\_MaS\_33SR\_LMH\_phospho\_02 Scan 10214 Method FTMS; HCD Score 98.15 m/z 771.67 Gene names UBR4

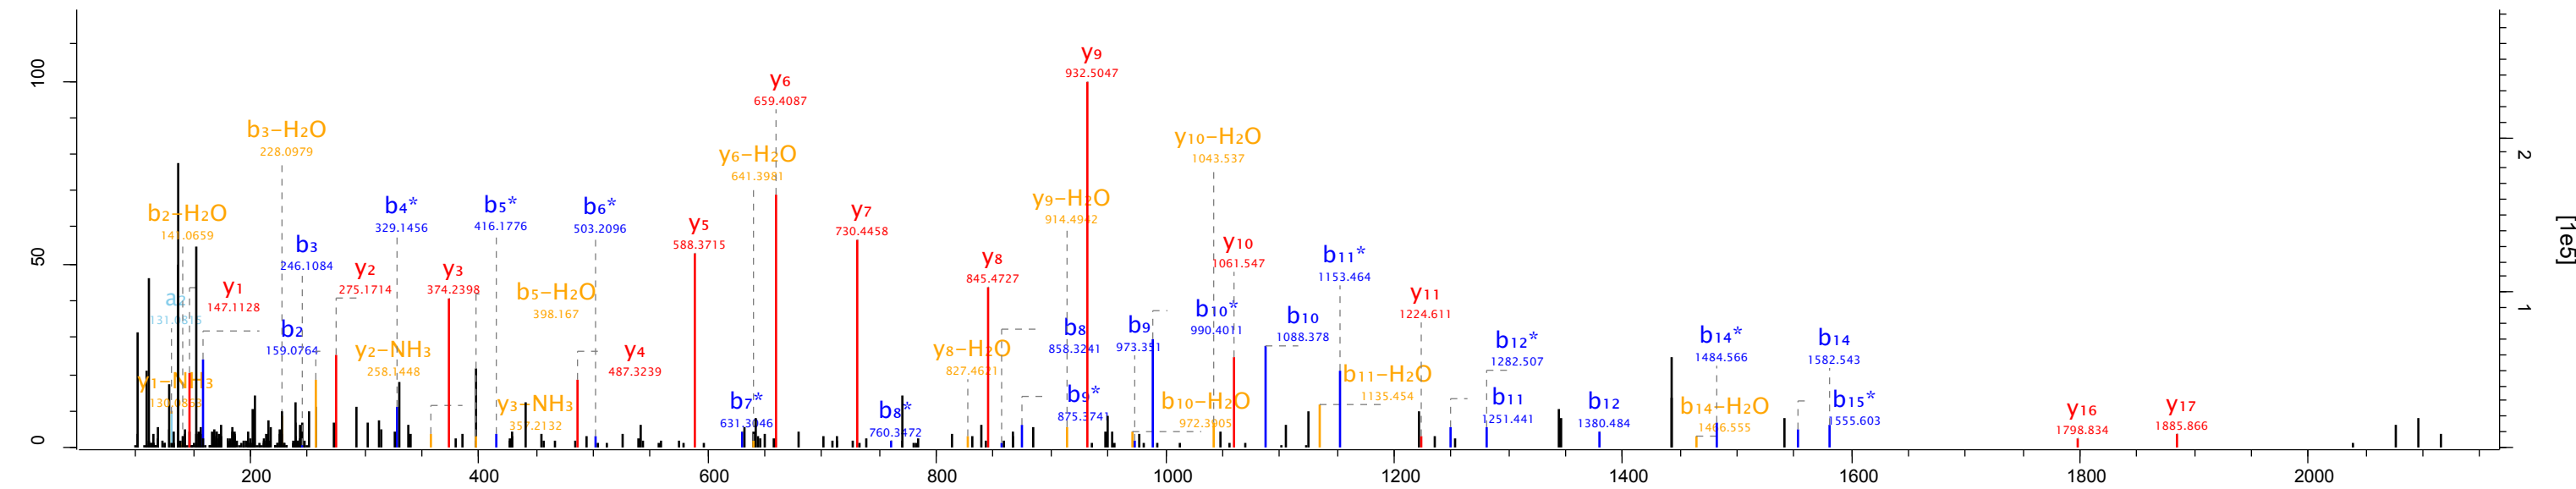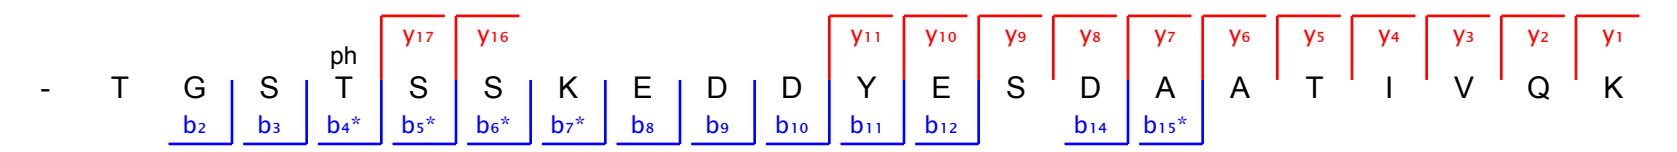

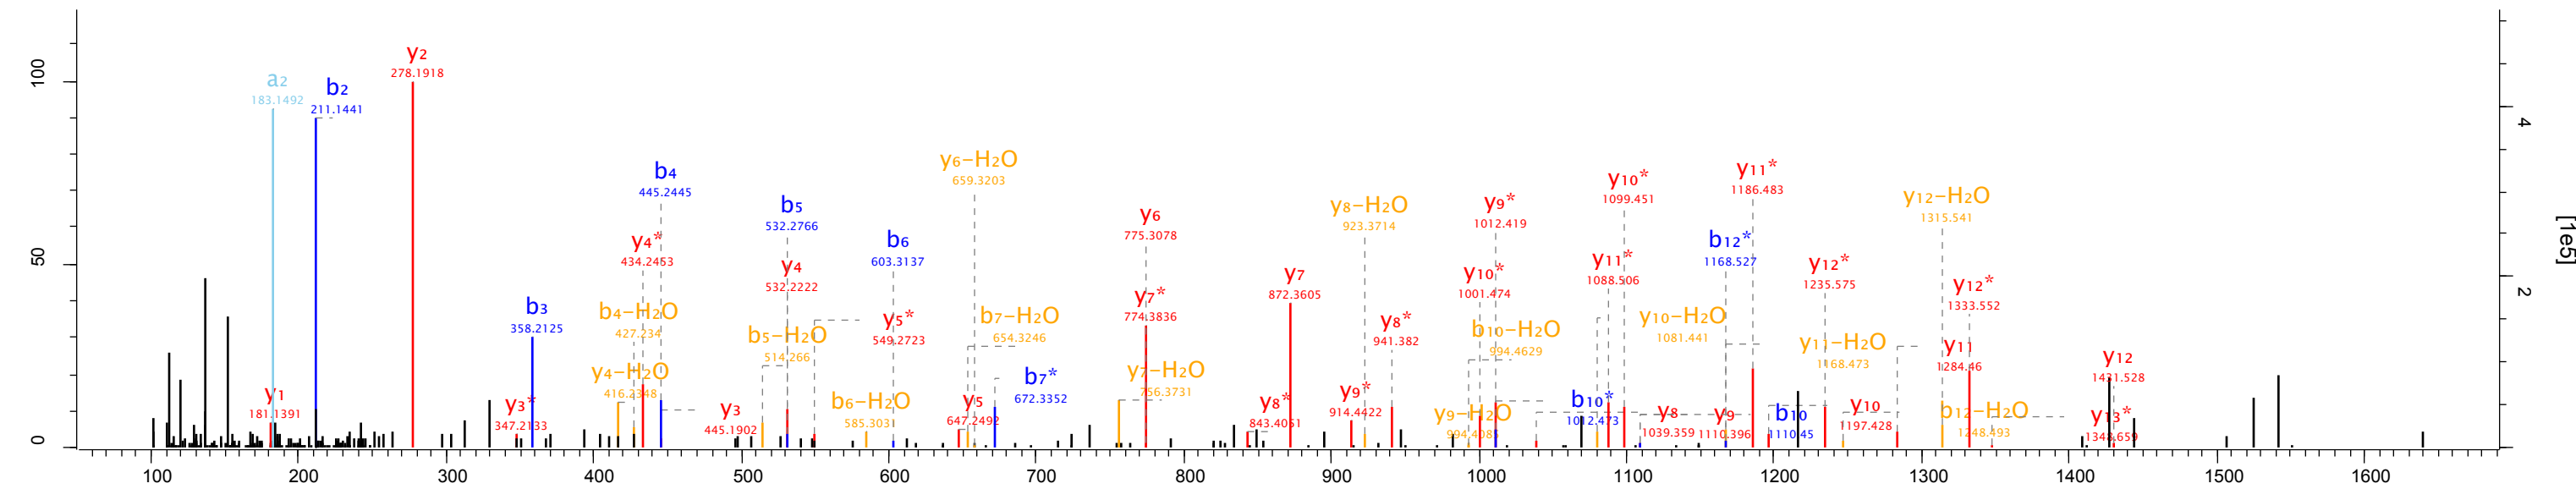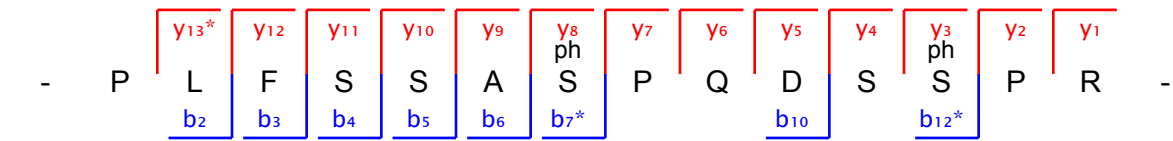

Raw file: 20171215\_MaS\_33SR\_LMH\_phospho\_02  
 Scan: 11194 Method: FTMS; HCD Score: 219.21 m/z: 936.44 Gene names: SLC4A7

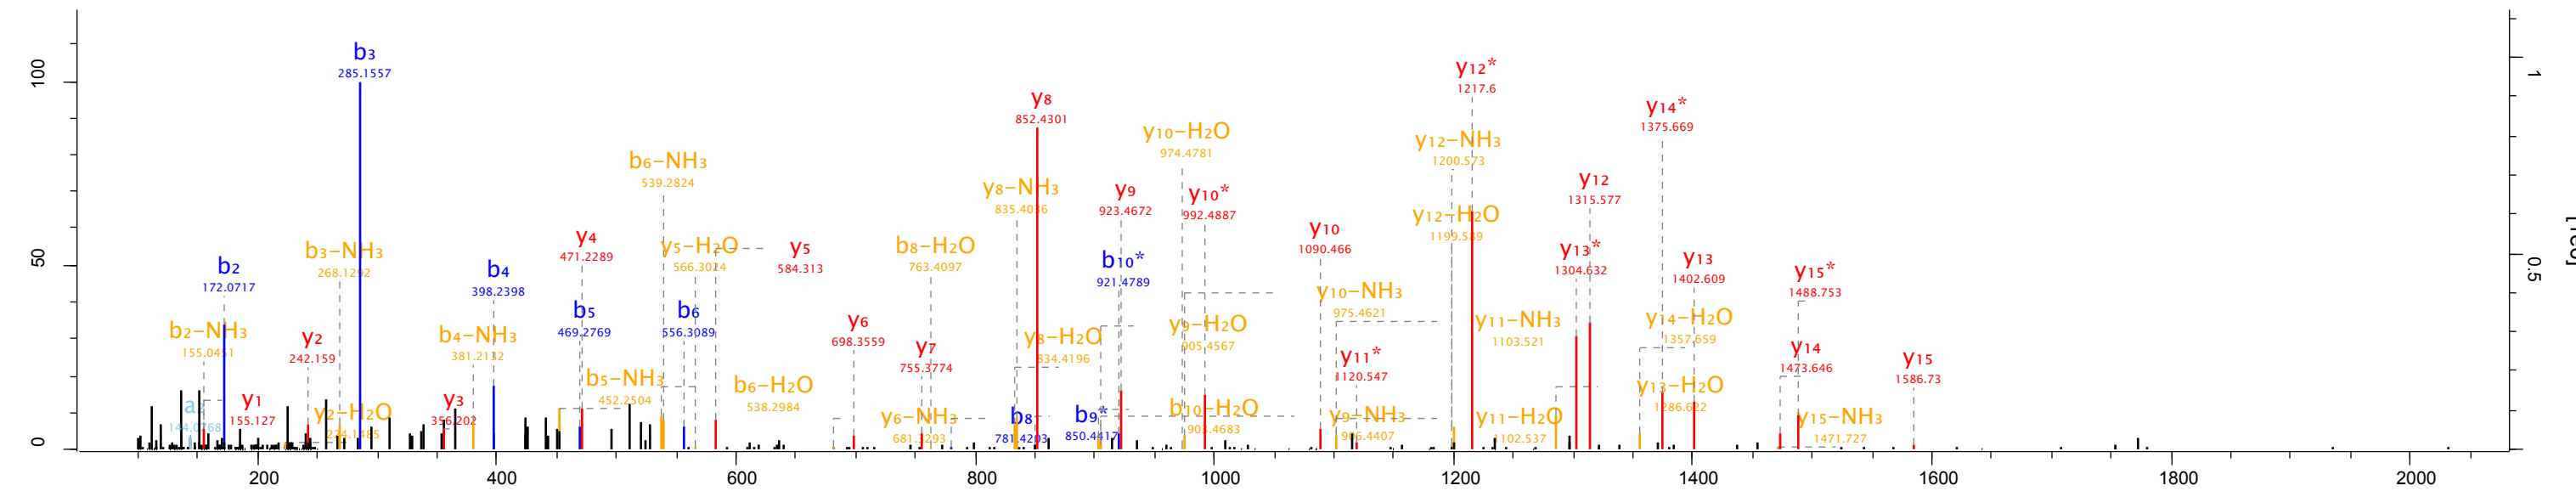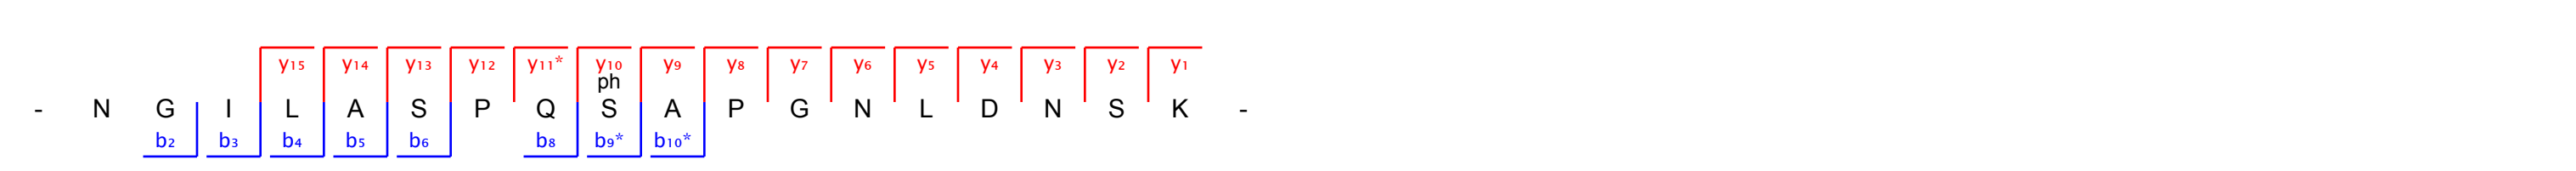

Raw file: 20171215\_MaS\_33SR\_LMH\_phospho\_02  
 Scan: 11334 Method: FTMS; HCD Score: 169.51 m/z: 800.86 Gene names: SORBS3

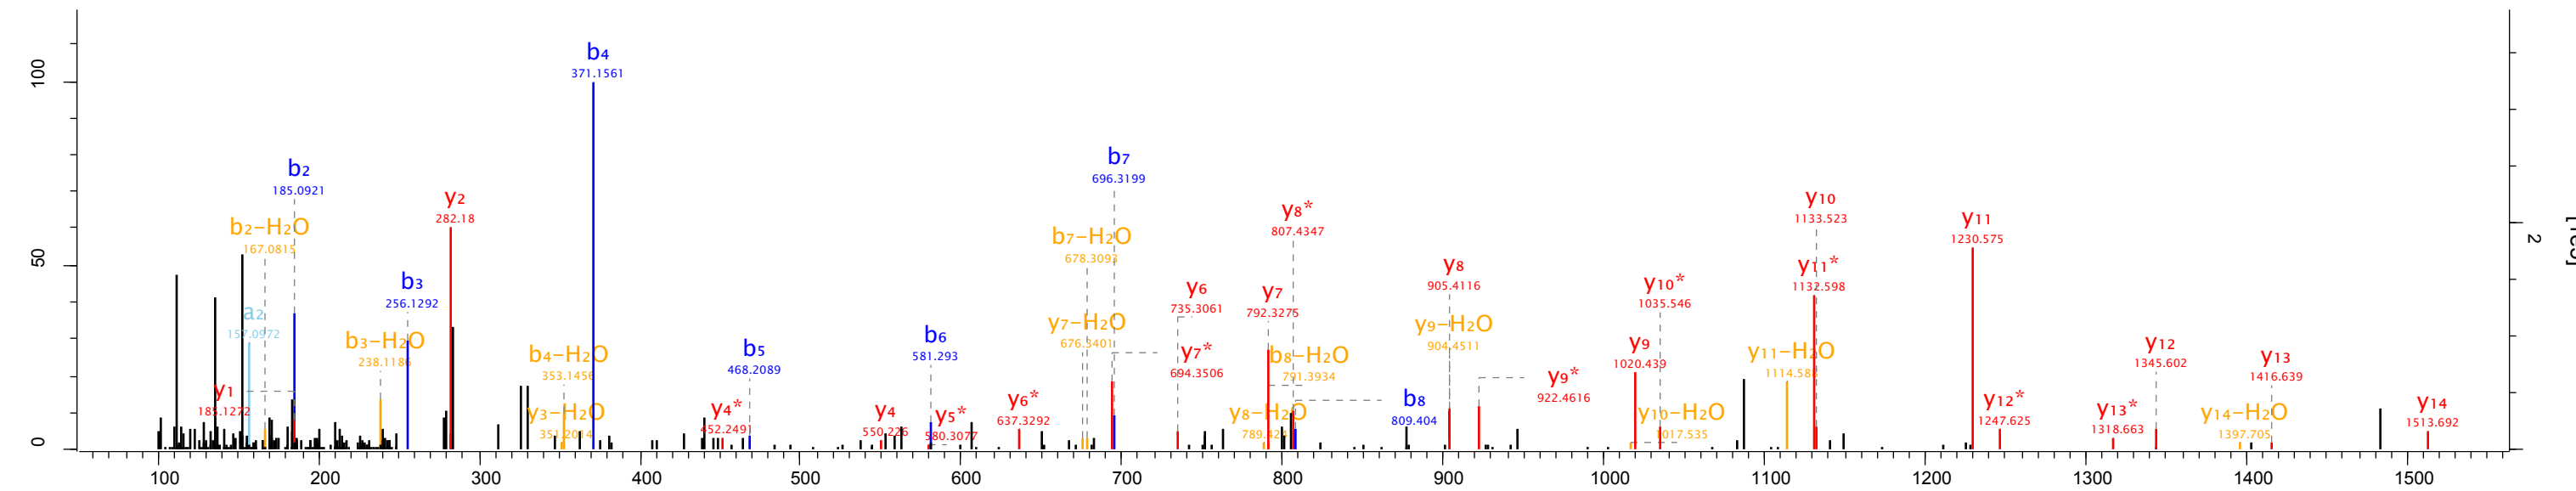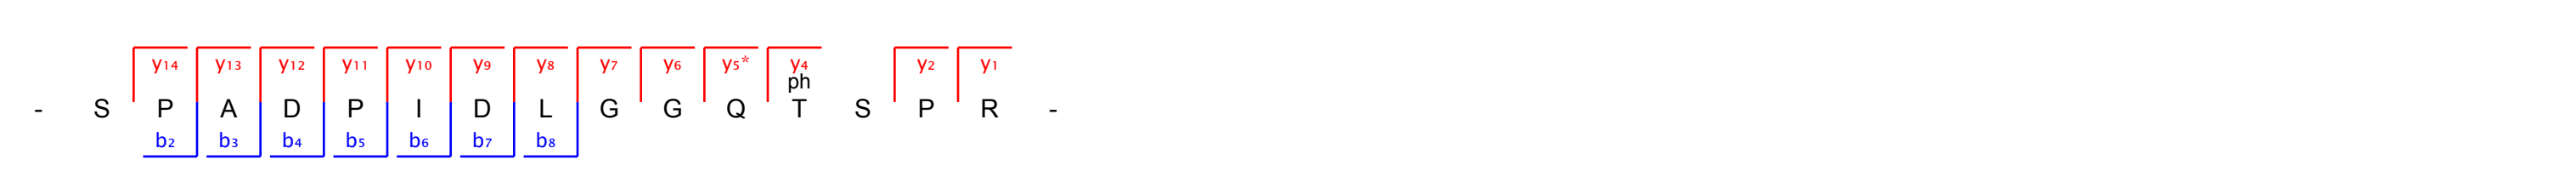

Raw file 20171215\_MaS\_33SR\_LMH\_phospho\_02 Scan 11744 Method FTMS; HCD Score 130.14 m/z 1184.48 Gene names CCDC88A

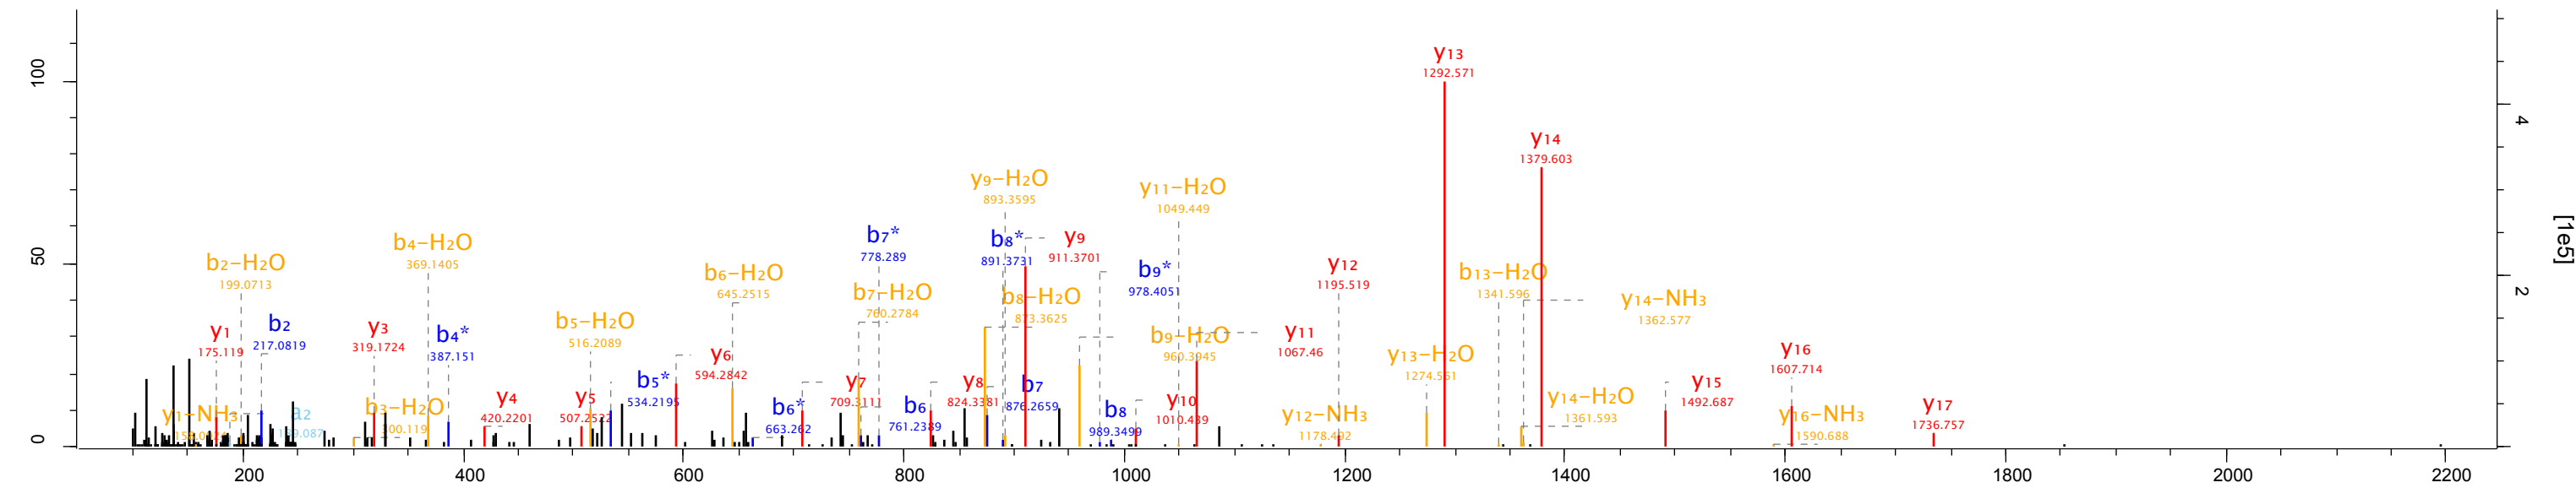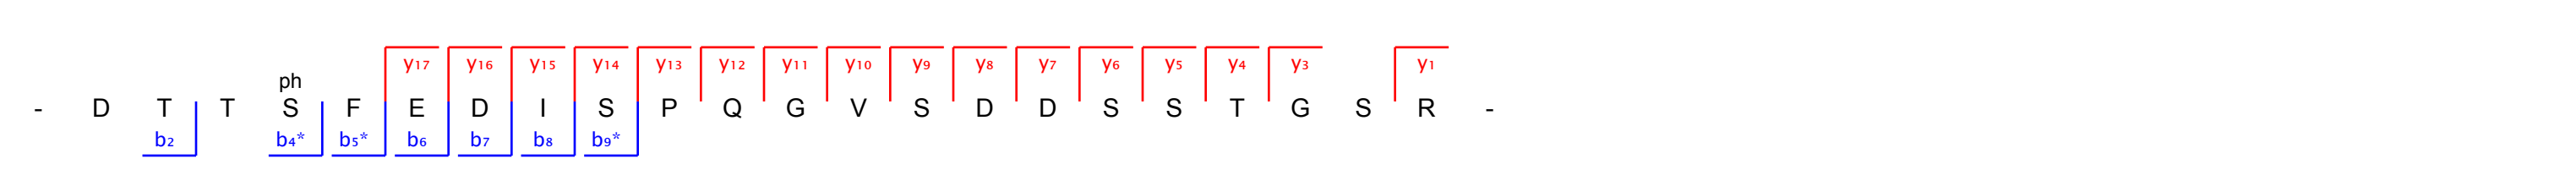

Raw file 20171215\_MaS\_33SR\_LMH\_phospho\_02 Scan 12904 Method FTMS; HCD Score 98.09 m/z 1044.13 Gene names MAP1B

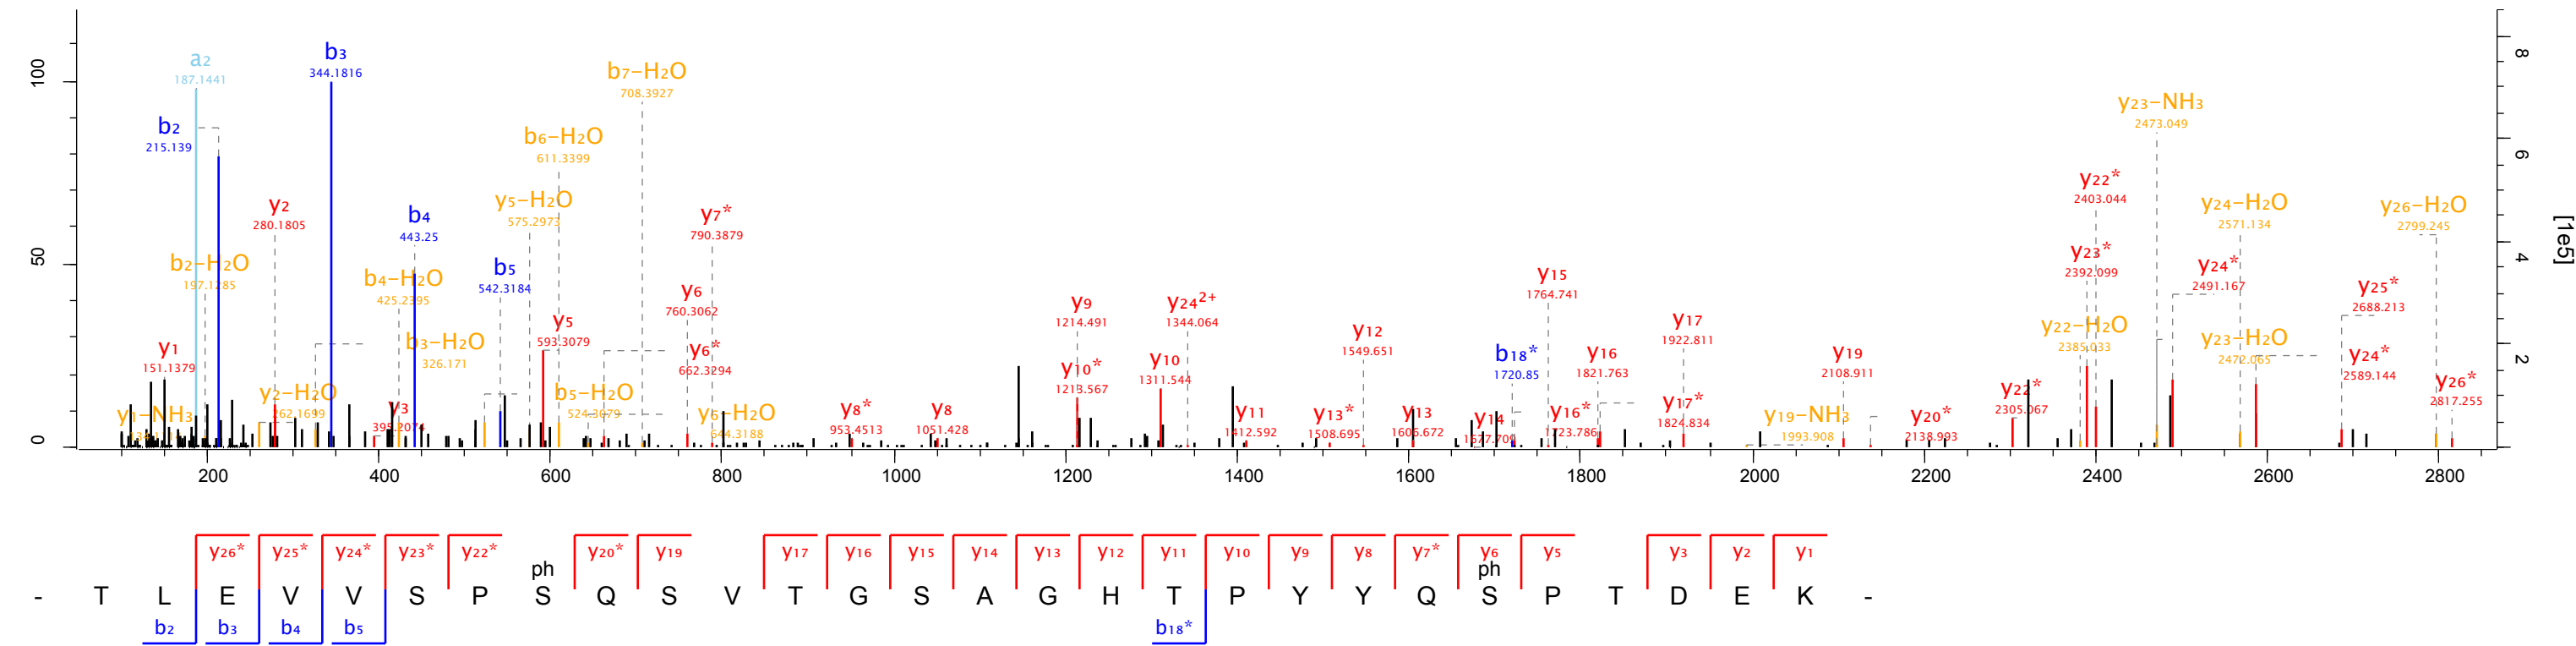



Raw file: 20171215\_MaS\_33SR\_LMH\_phospho\_02  
 Scan: 13524 Method: FTMS; HCD Score: 190.21 m/z: 1373.06 Gene names: MAGEA4

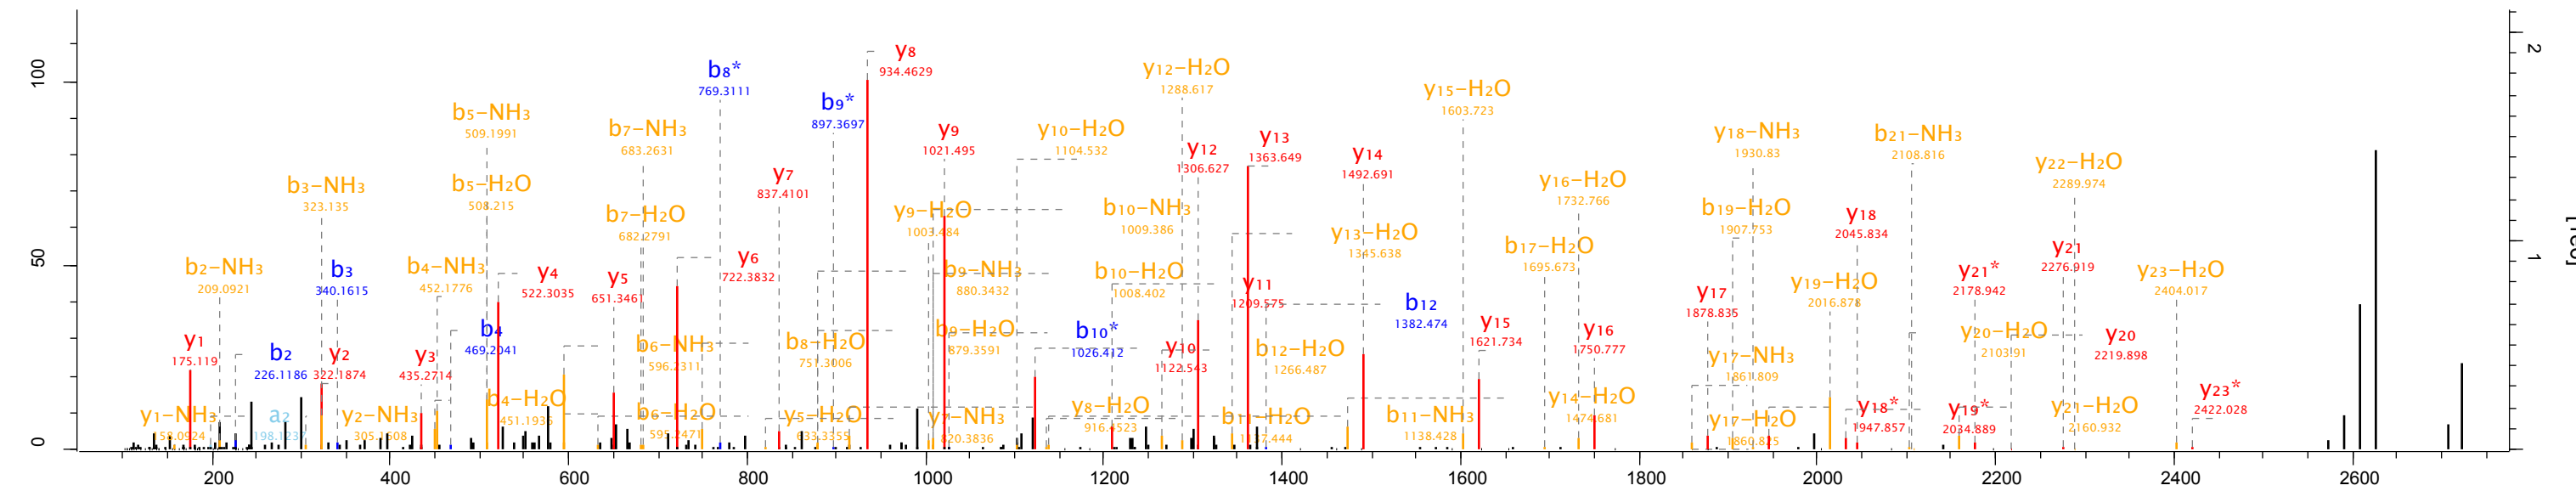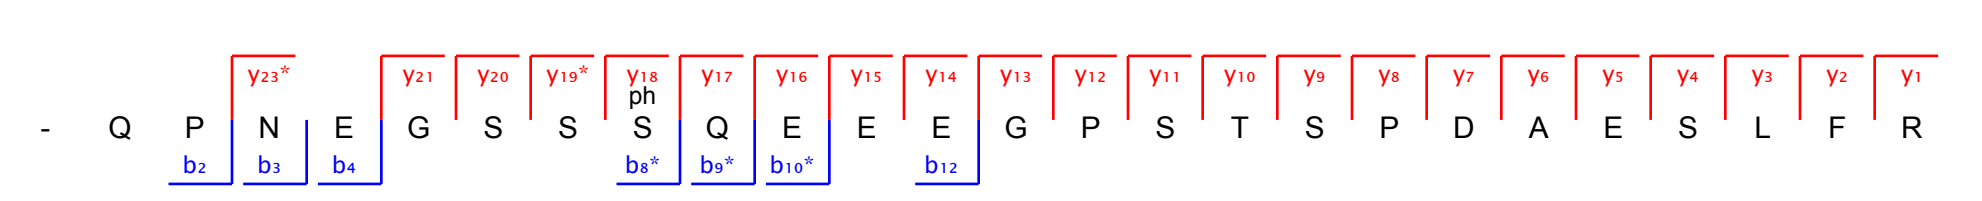

Raw file 20171215\_MaS\_33SR\_LMH\_phospho\_02 Scan 15764 Method FTMS; HCD Score 254.86 m/z 1156.84 Gene names CTTN

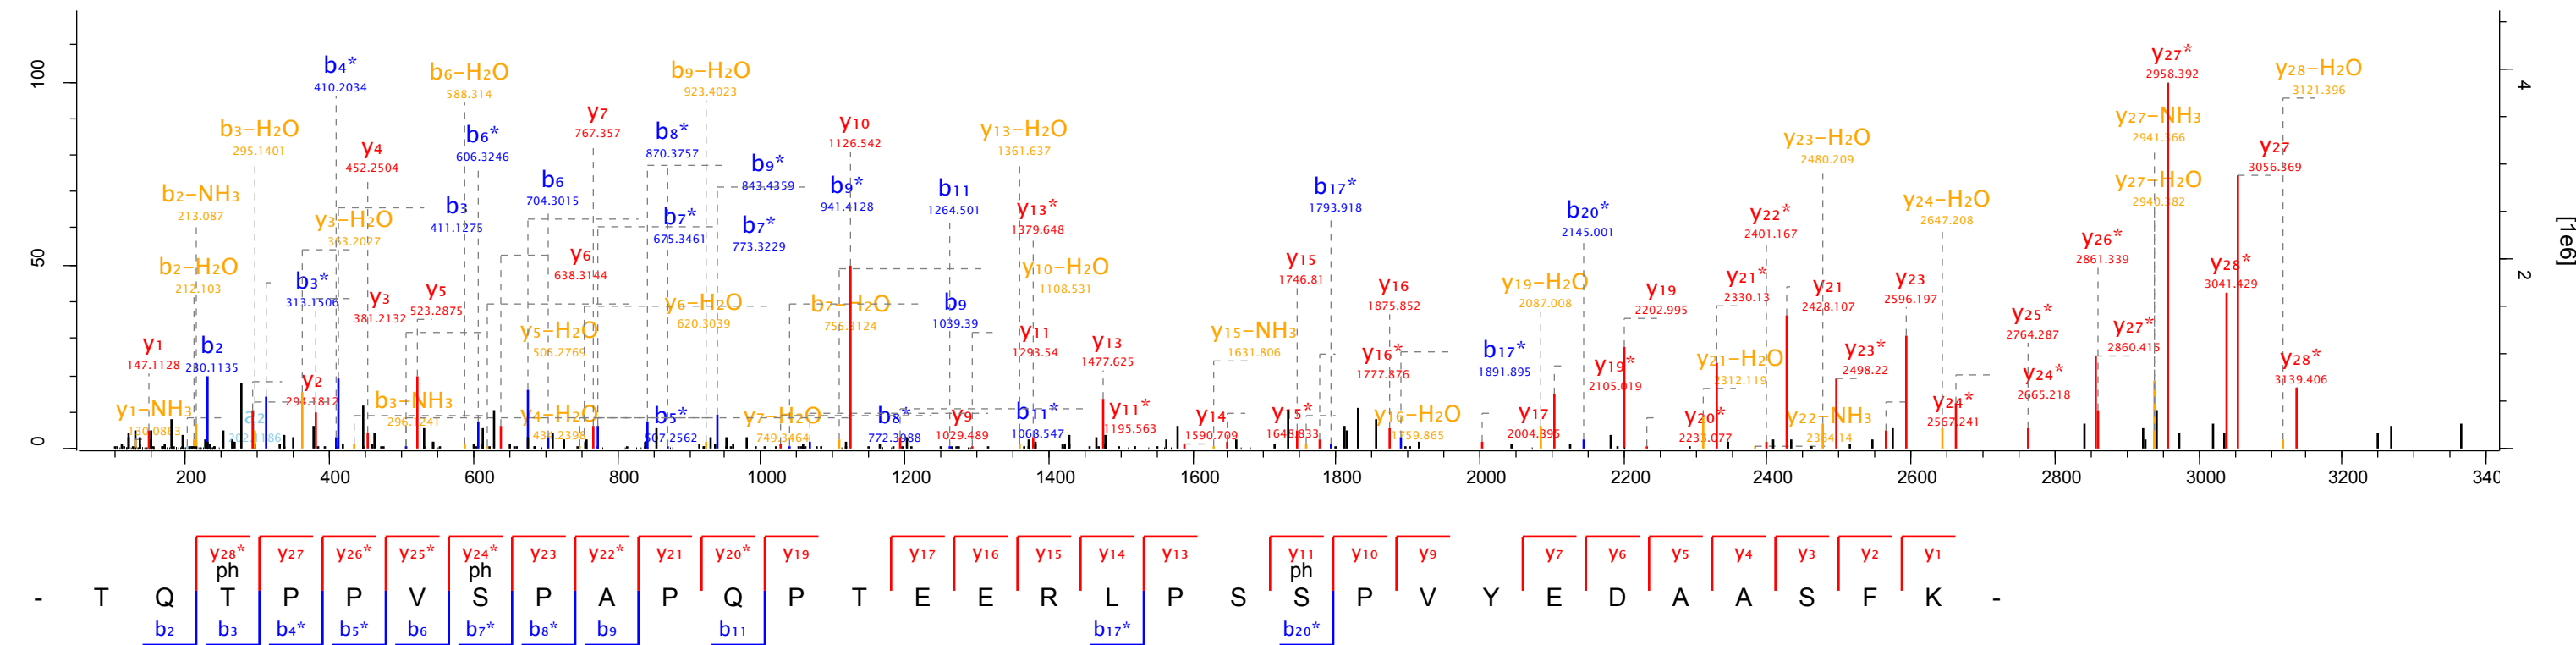

Raw file 20171215\_MaS\_33SR\_LMH\_phospho\_02 Scan 16014 Method FTMS; HCD Score 62.02 m/z 989.37 Gene names MCM3

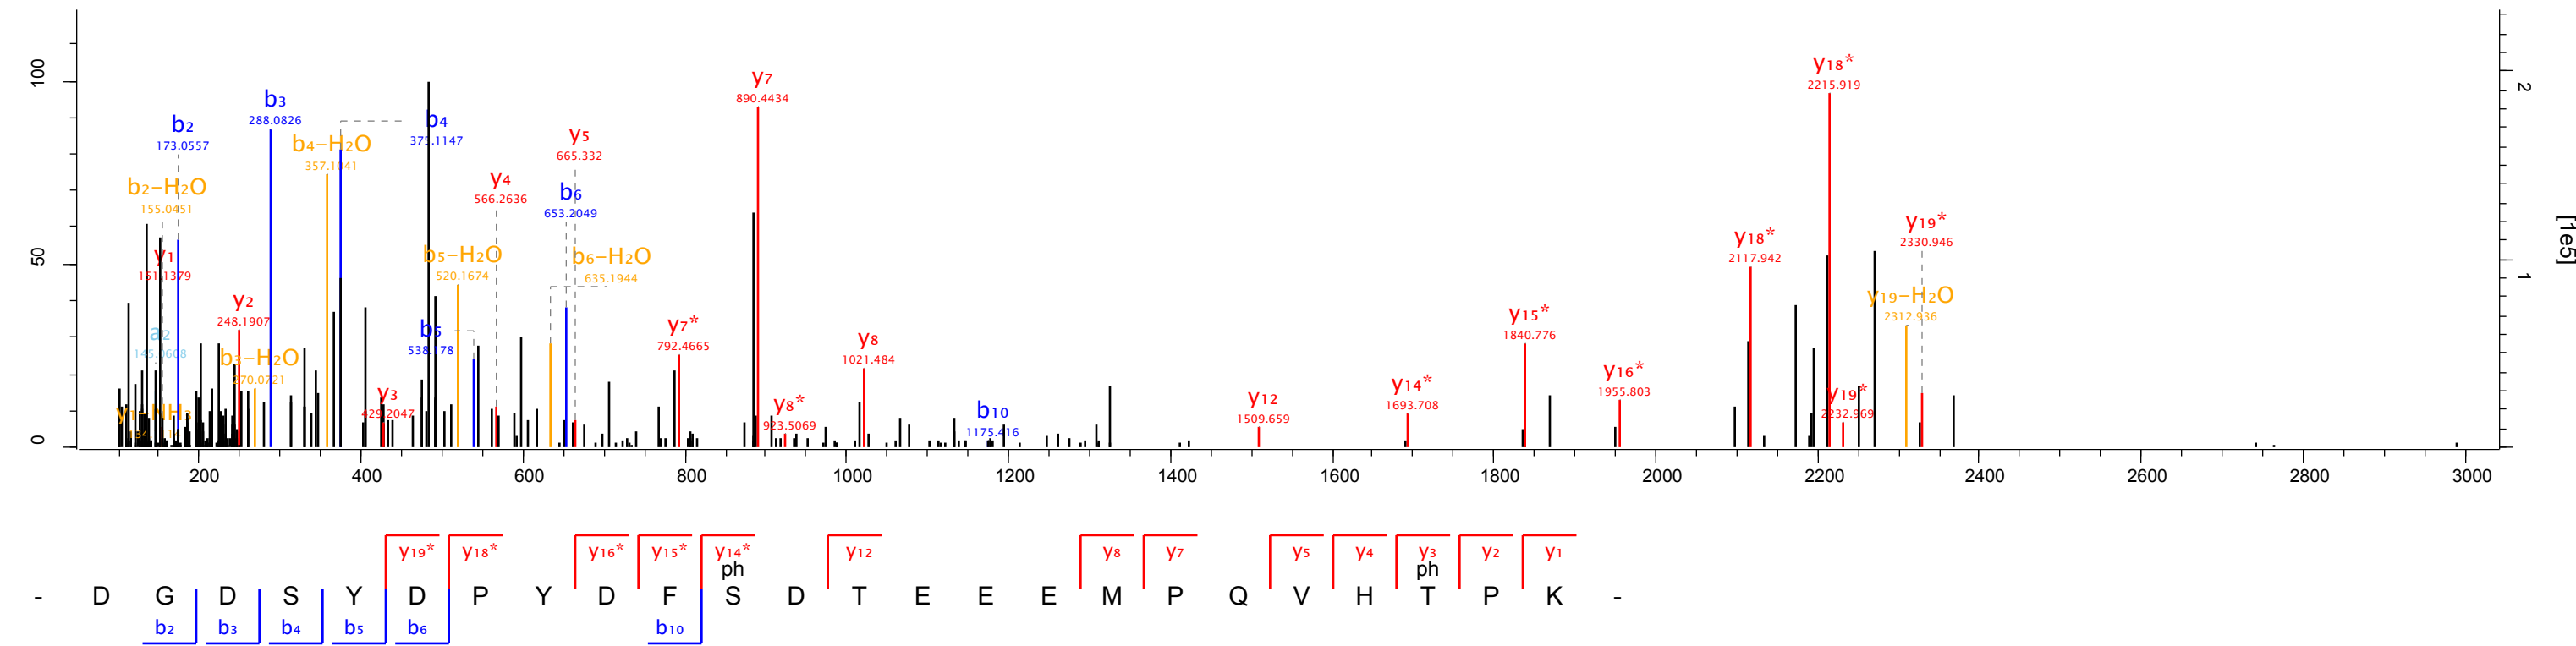

Raw file 20171215\_MaS\_33SR\_LMH\_phospho\_02 Scan 17614 Method FTMS; HCD Score 74.02 m/z 1281.23 Gene names PELP1

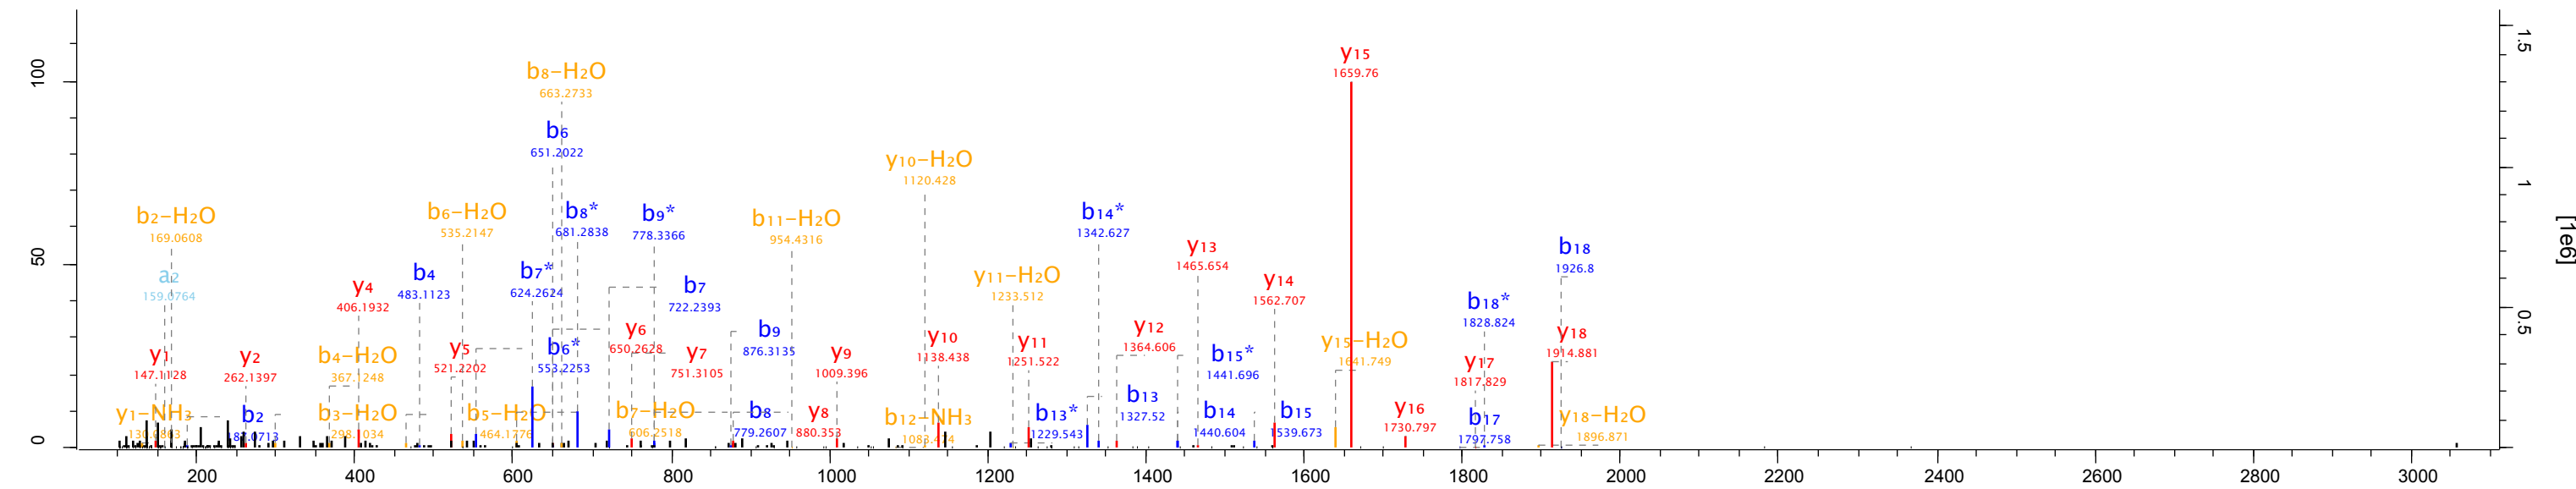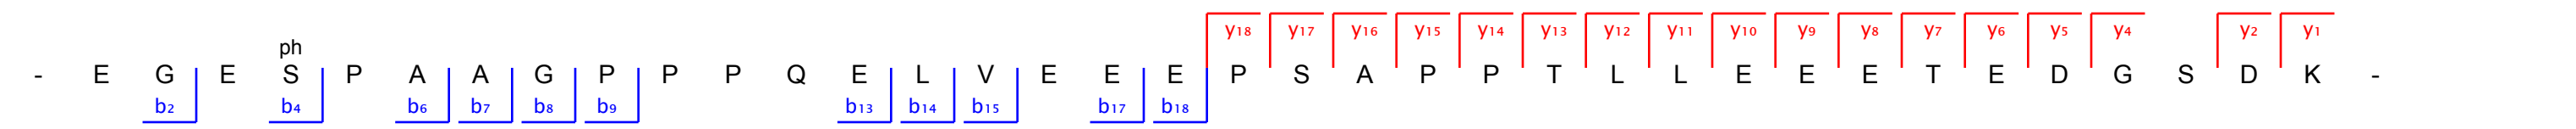

Raw file 20171215\_MaS\_33SR\_LMH\_phospho\_02 Scan 20614 Method FTMS; HCD Score 67.88 m/z 1023.95 Gene names FOSL2

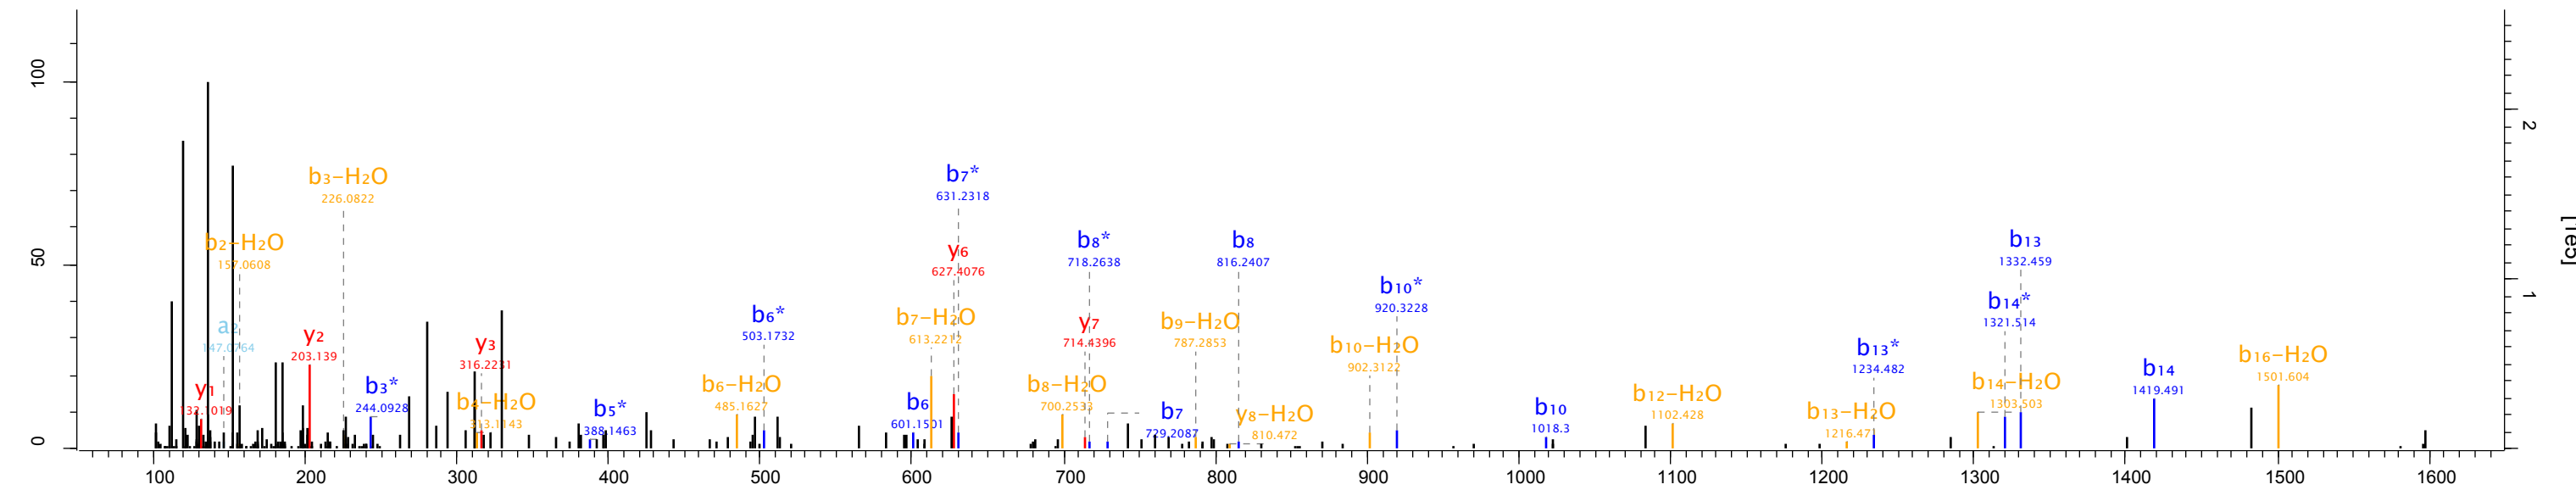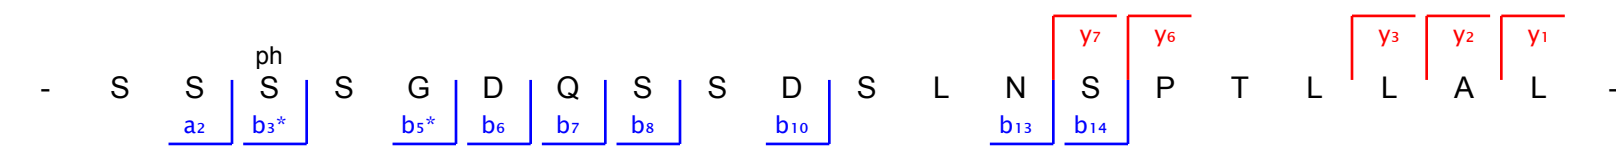

Raw file 20171215\_MaS\_33SR\_LMH\_phospho\_02 Scan 2114 Method FTMS; HCD Score 91.78 m/z 525.21 Gene names SRRM2

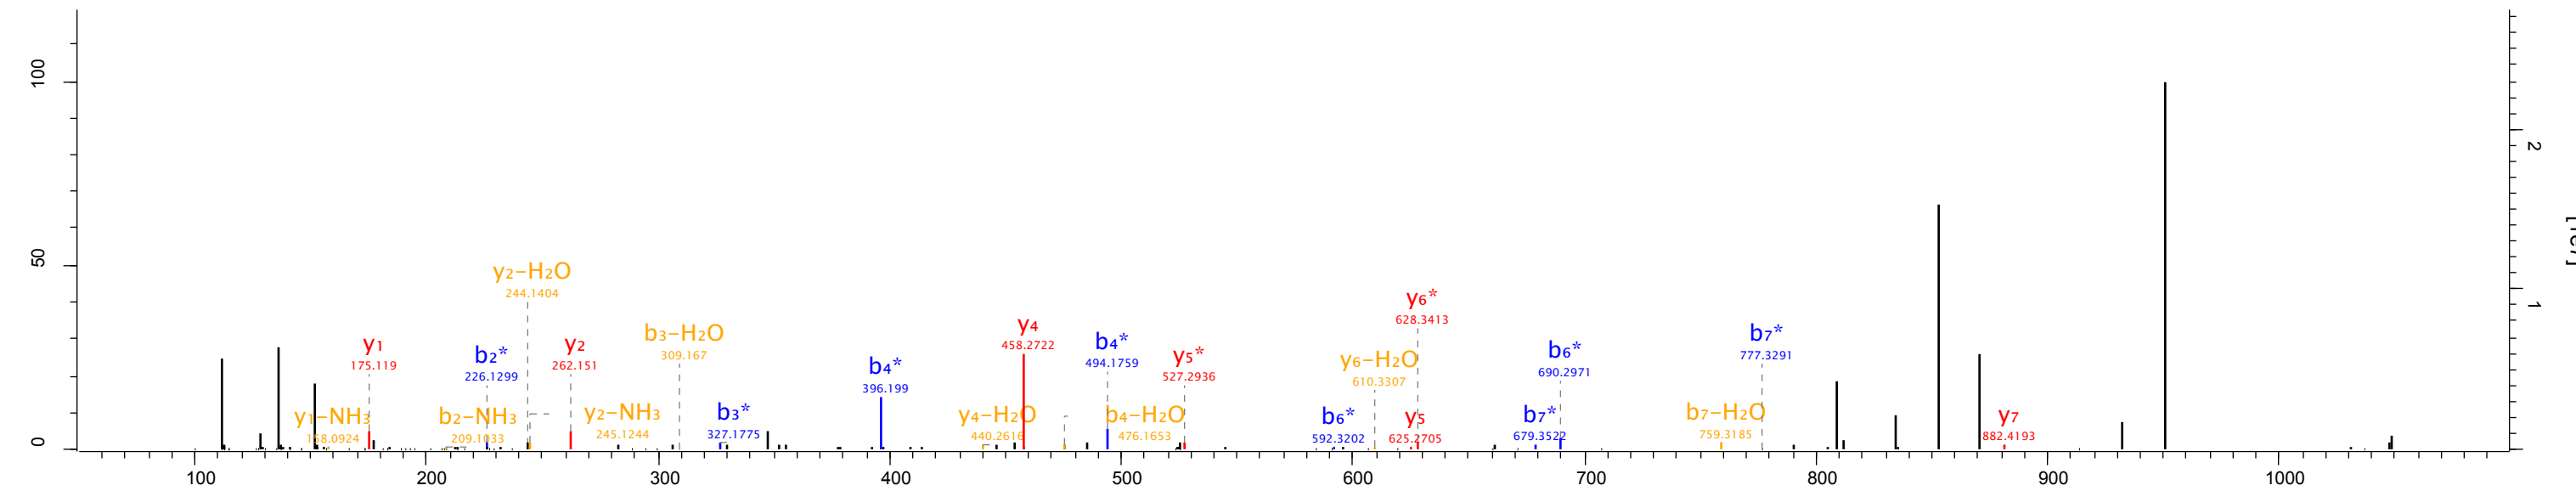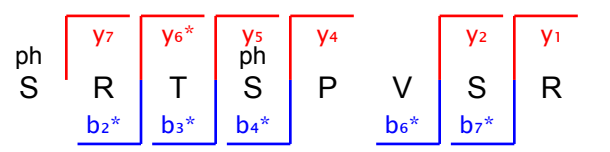

Raw file 20171215\_MaS\_33SR\_LMH\_phospho\_02 Scan 2164 Method FTMS; HCD Score 73.36 m/z 410.52 Gene names SRRM1

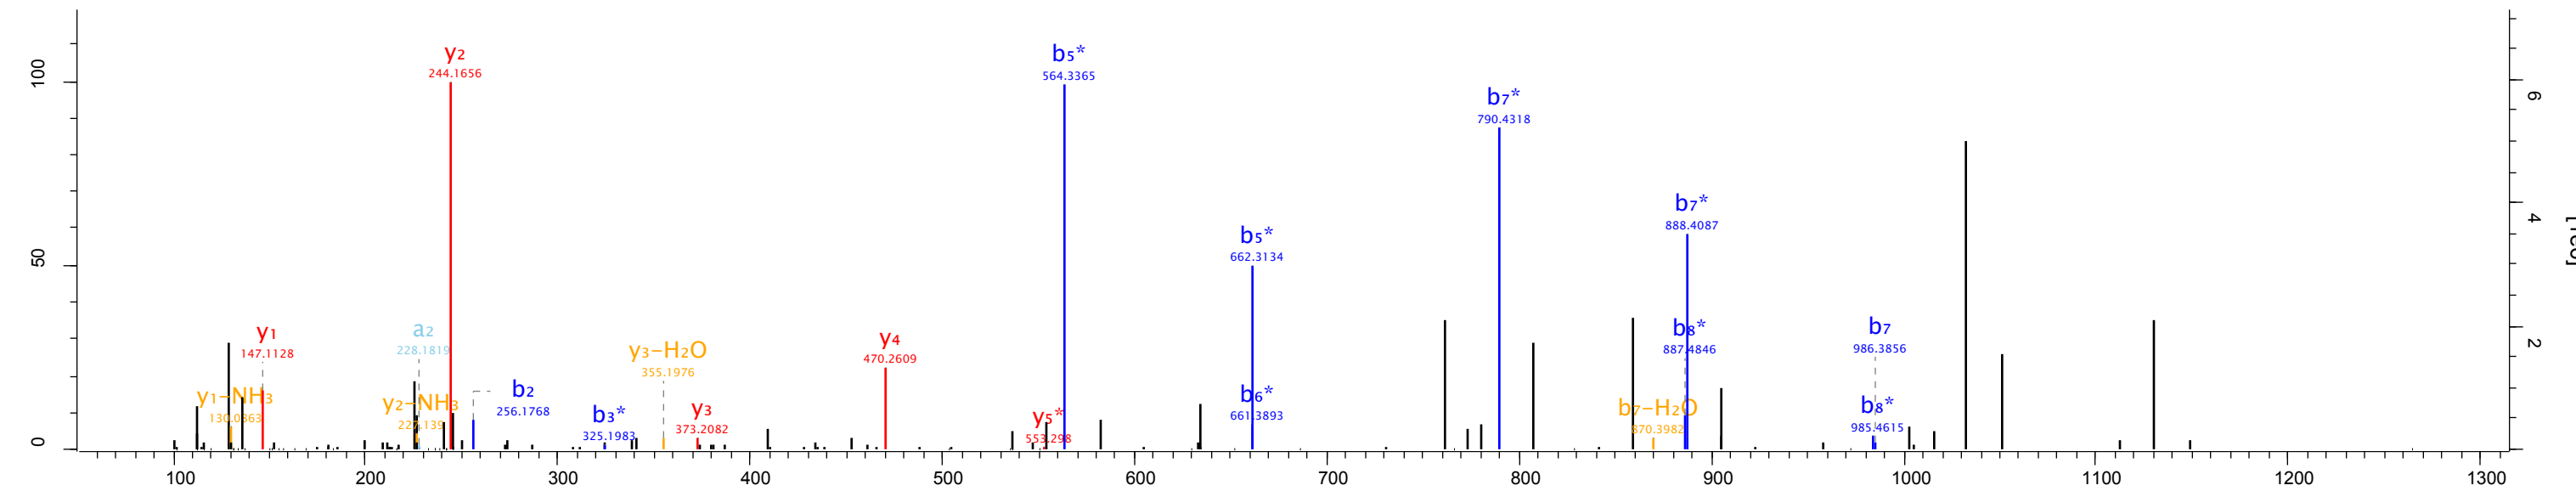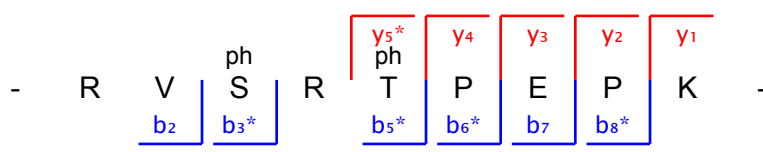

Raw file  
 20171215\_MaS\_33SR\_LMH\_phospho\_02  
 Scan 2654 Method FTMS; HCD Score 224.12 m/z 1021.41 Gene names EPB41L2

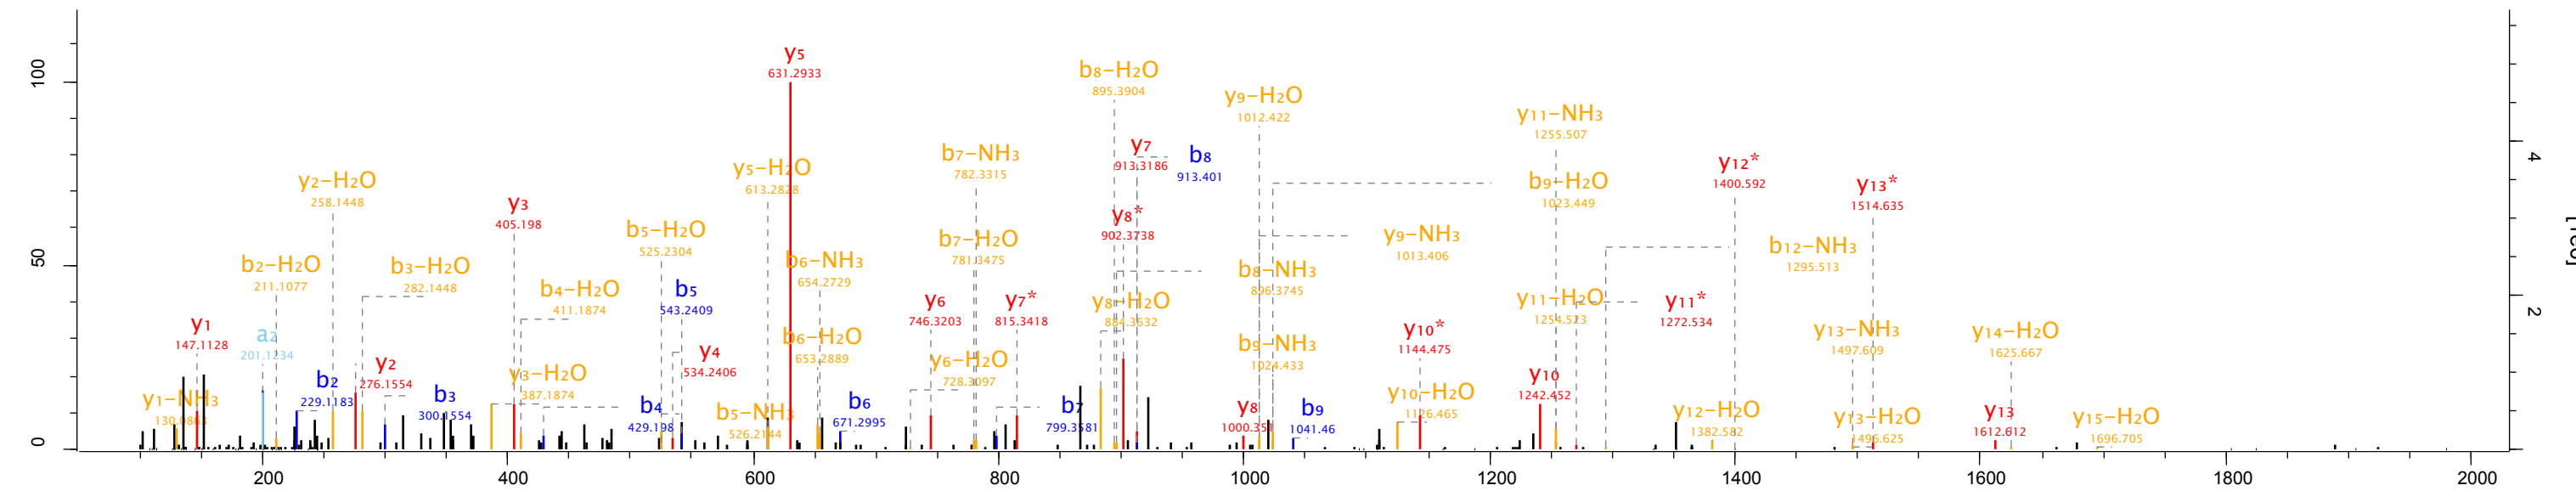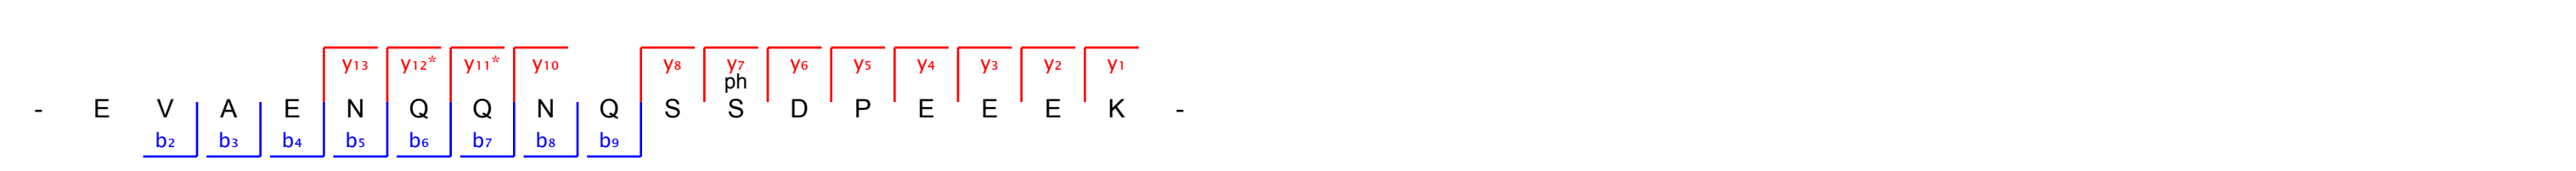



Raw file: 20171215\_MaS\_33SR\_LMH\_phospho\_02  
 Scan: 2864 Method: FTMS; HCD Score: 95.48 m/z: 474.7 Gene names: PRPF4B

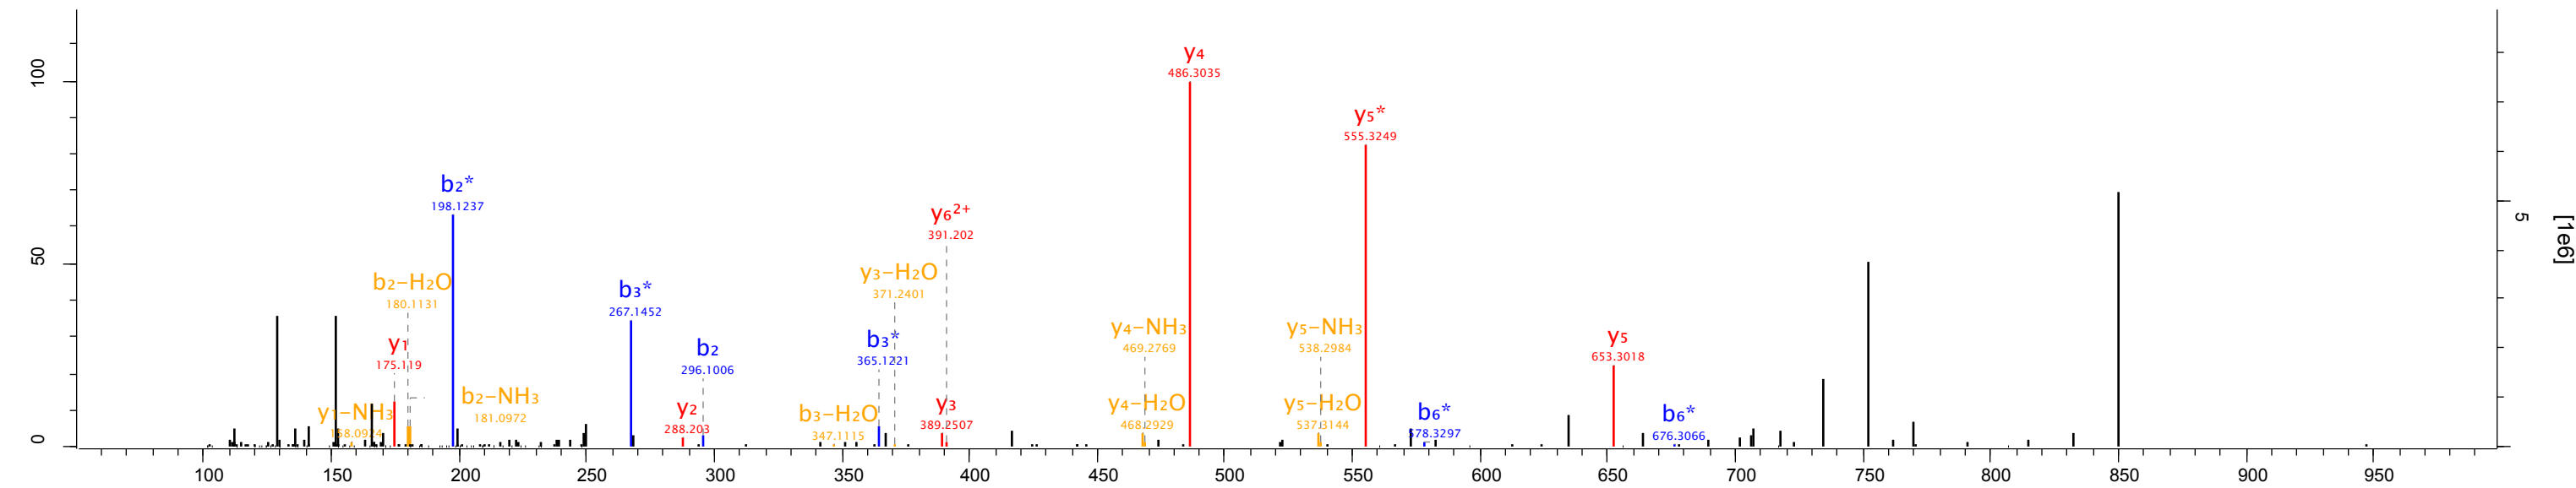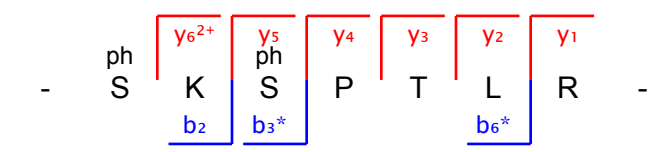

Raw file 20171215\_MaS\_33SR\_LMH\_phospho\_02 Scan 3004 Method FTMS; HCD Score 61.41 m/z 428.2 Gene names ZNF318

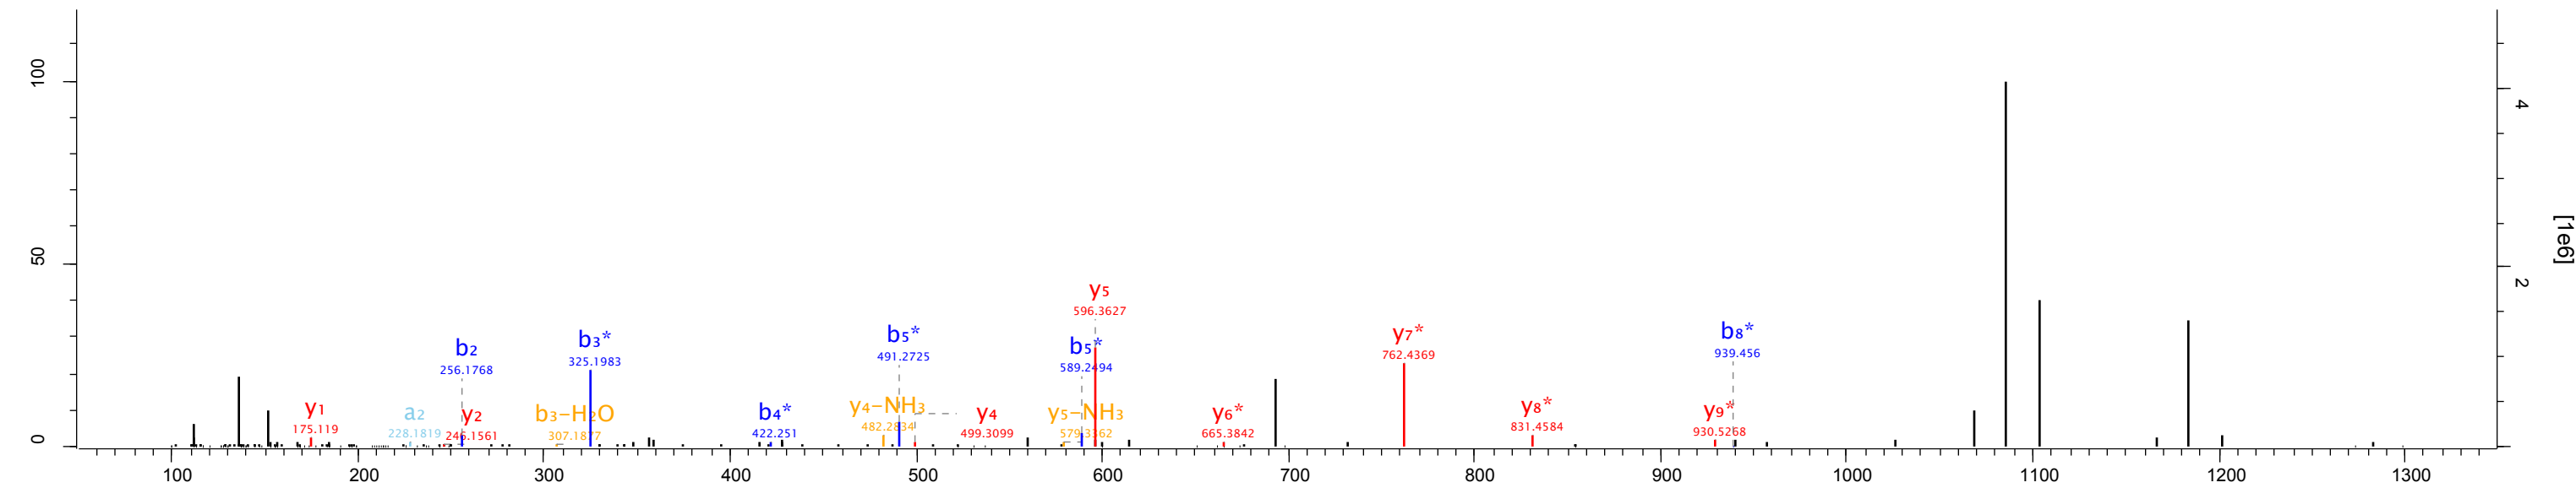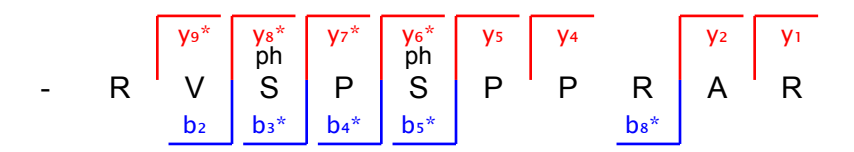

Raw file 20171215\_MaS\_33SR\_LMH\_phospho\_02 Scan 3044 Method FTMS; HCD Score 129.88 m/z 449.19 Gene names MARCKSL1

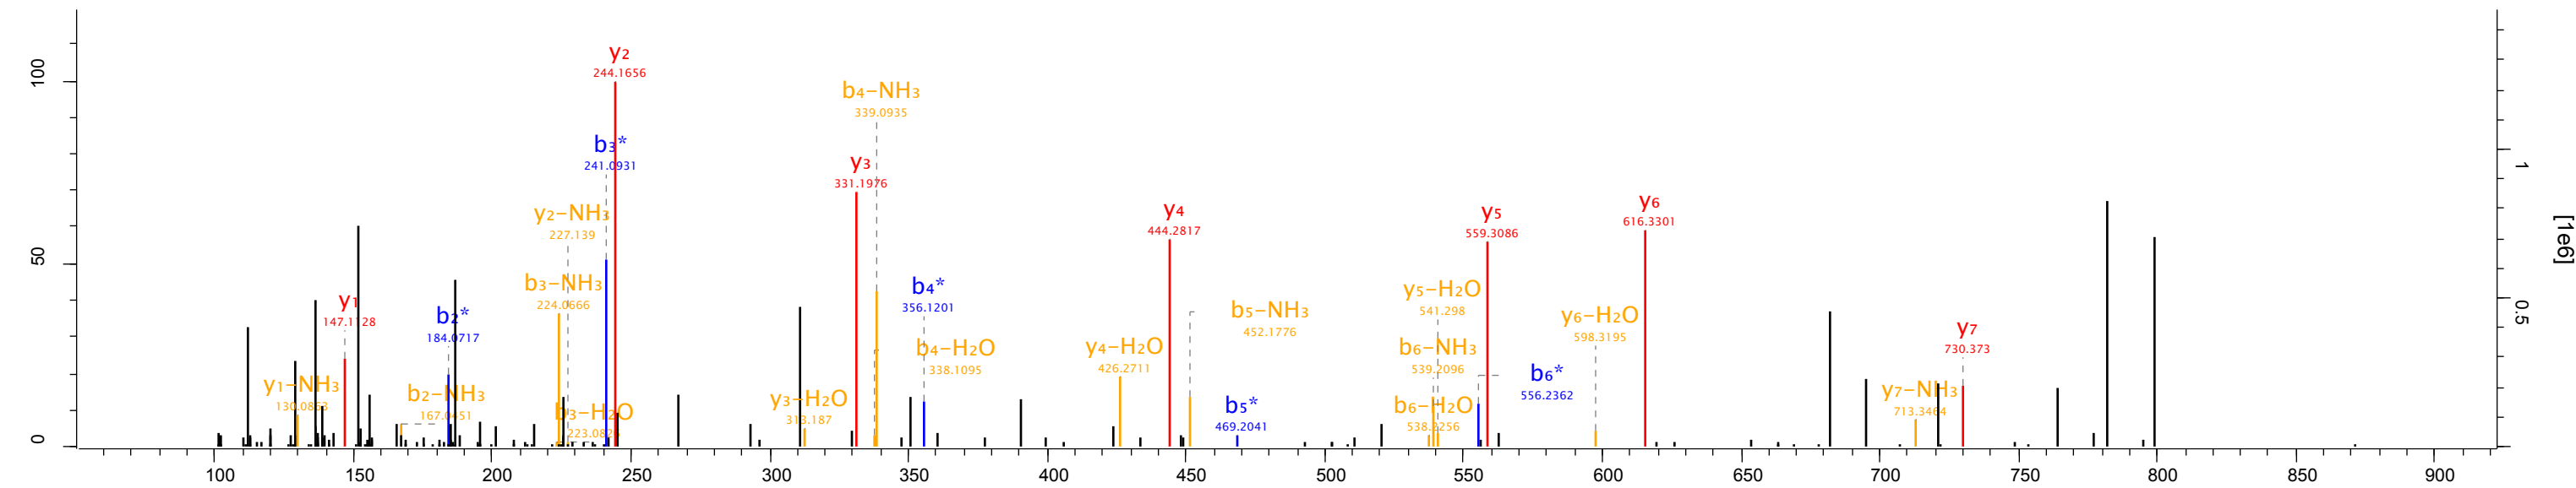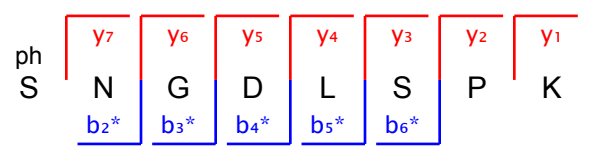

Raw file 20171215\_MaS\_33SR\_LMH\_phospho\_02 Scan 3114 Method FTMS; HCD Score 91.38 m/z 771.35 Gene names SRRM1

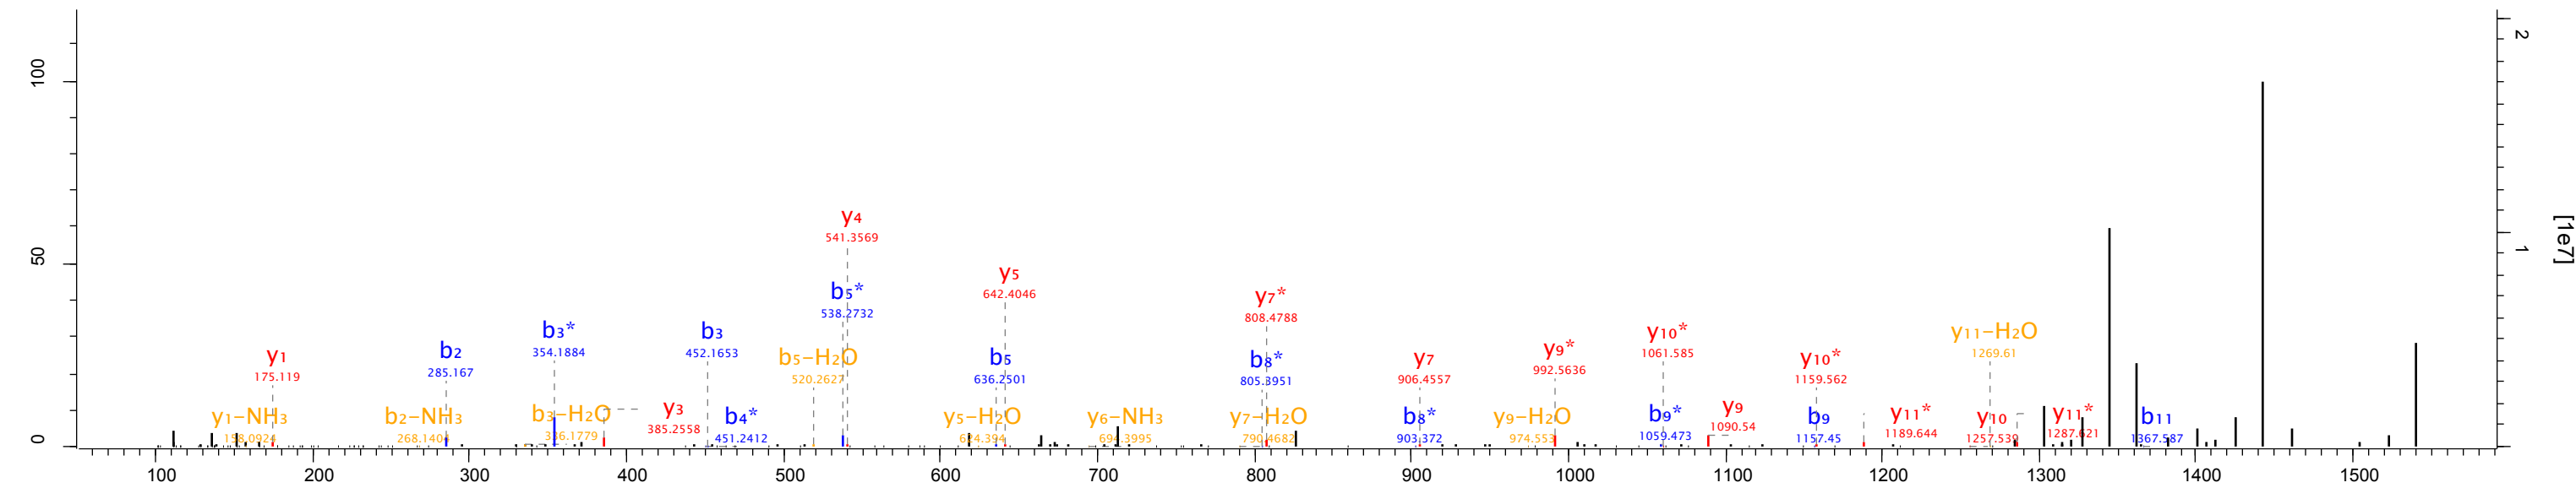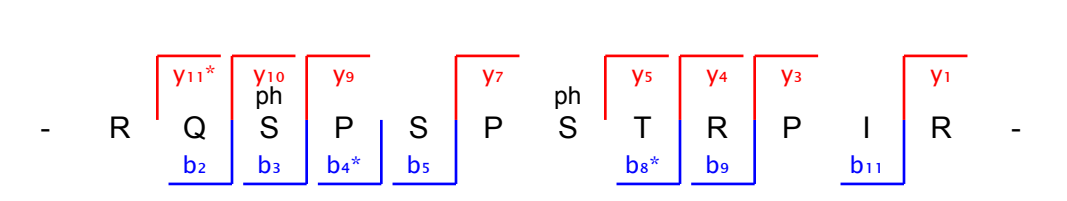

Raw file 20171215\_MaS\_33SR\_LMH\_phospho\_02 Scan 3194 Method FTMS; HCD Score 153.54 m/z 551.23 Gene names CARHSP1

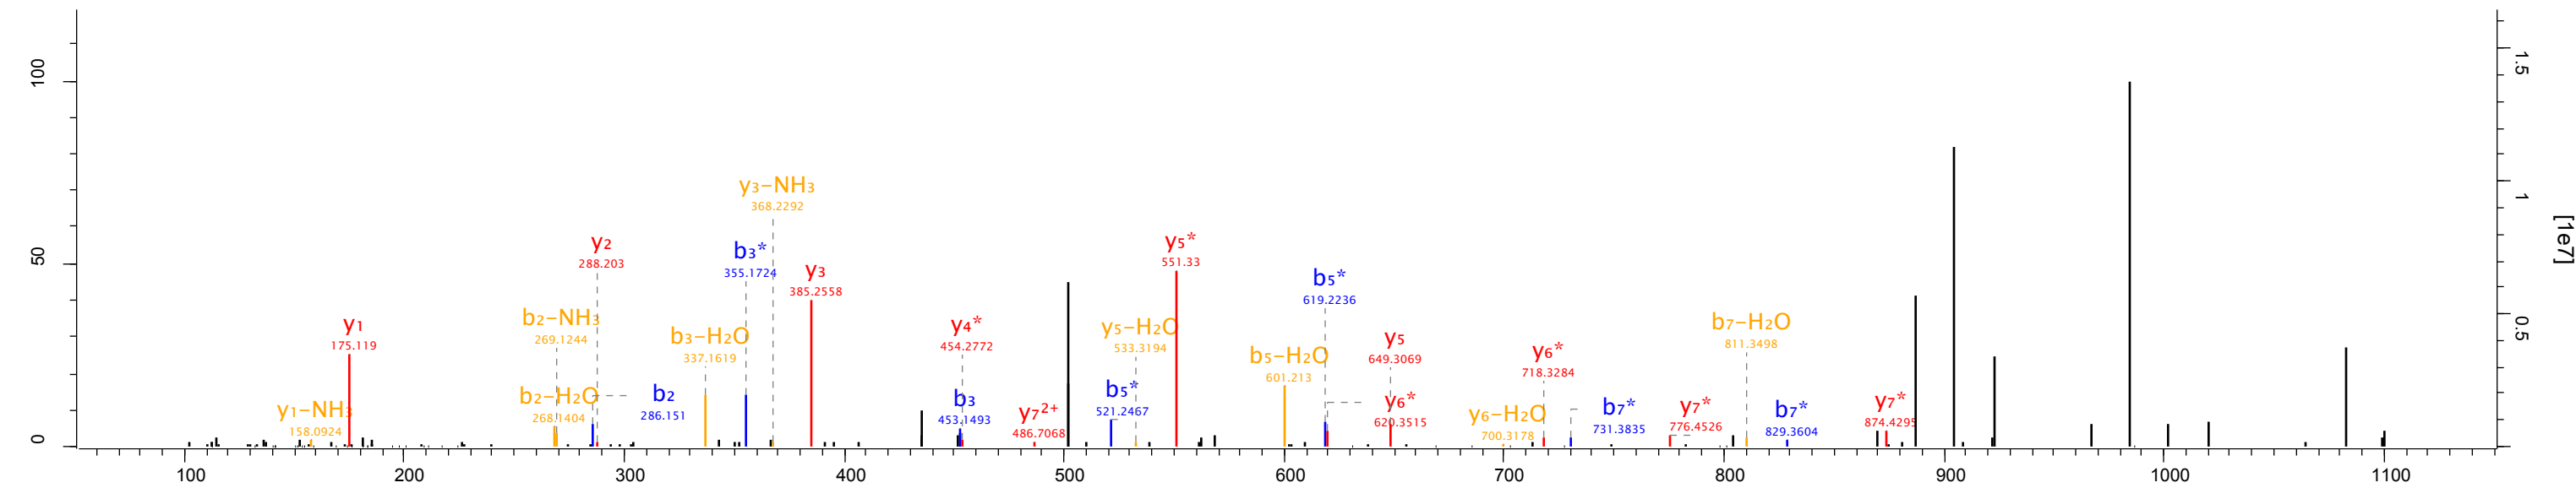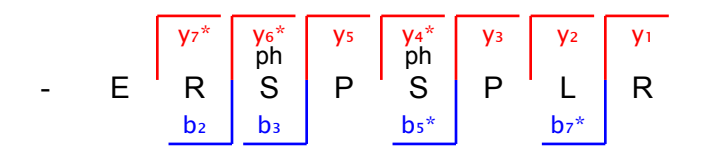

Raw file: 20171215\_MaS\_33SR\_LMH\_phospho\_02  
 Scan: 3274 Method: FTMS; HCD Score: 242.94 m/z: 854.33 Gene names: AKAP12

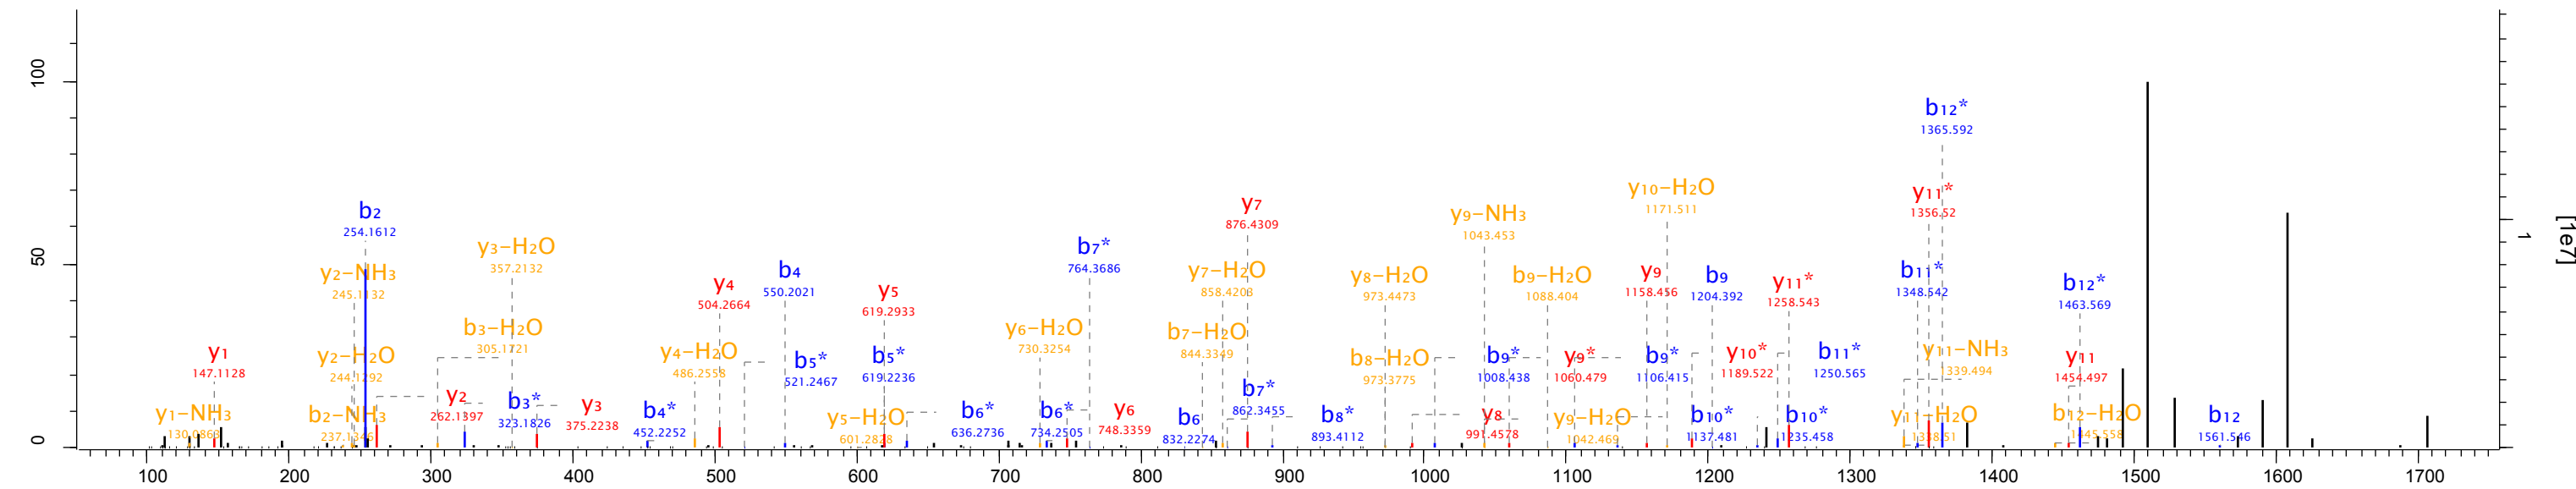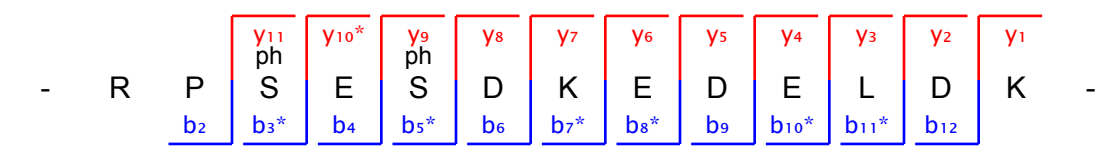

Raw file 20171215\_MaS\_33SR\_LMH\_phospho\_02 Scan 3424 Method FTMS; HCD Score 105.19 m/z 594.75 Gene names SRRM1

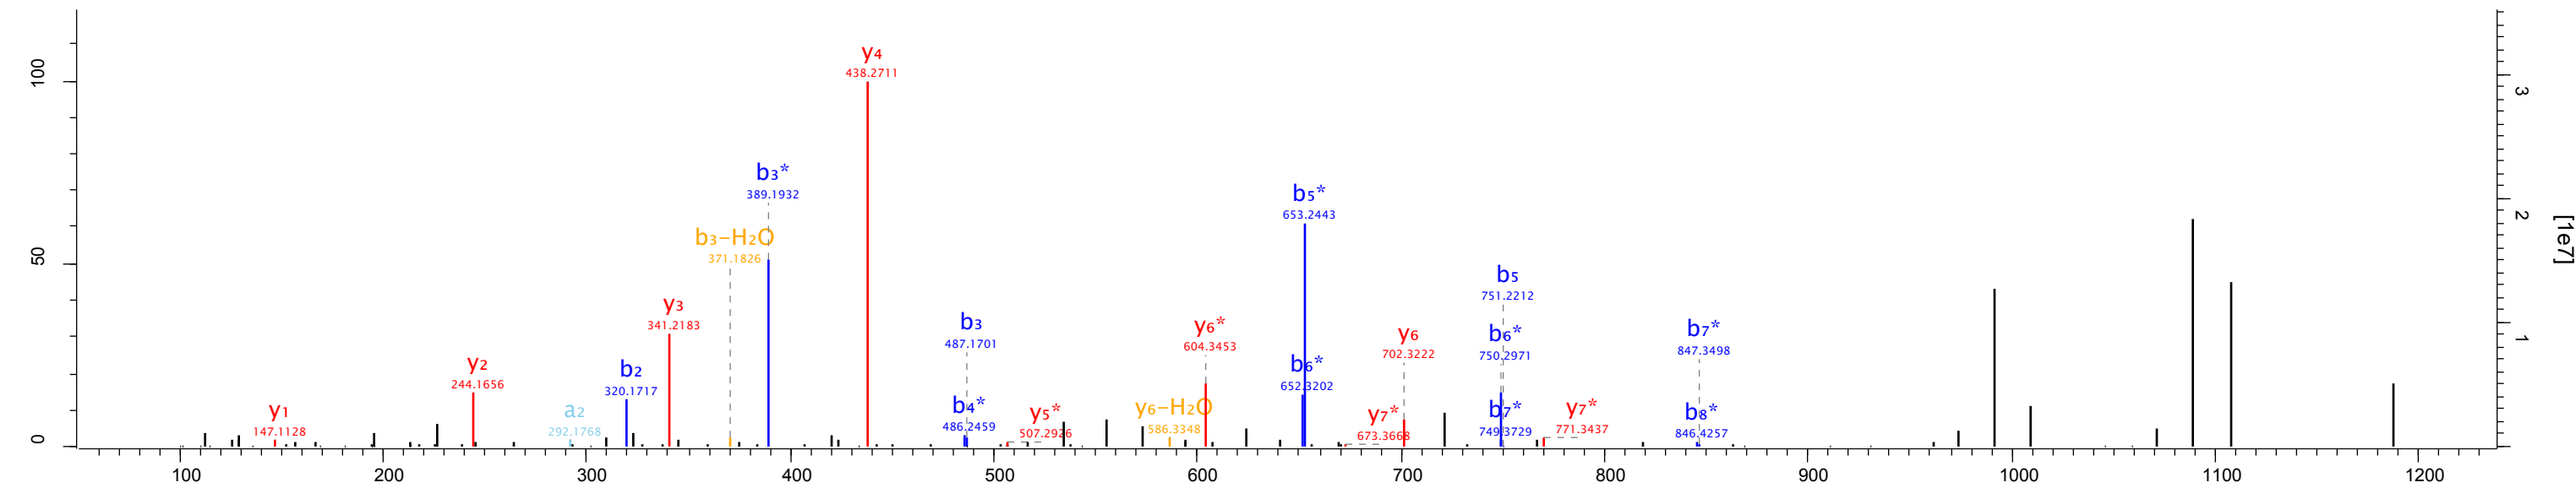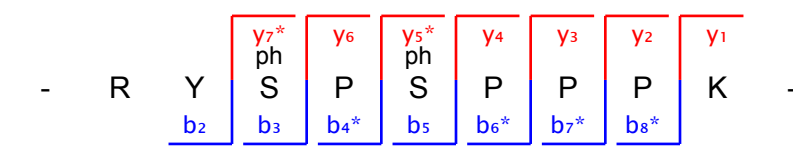

Raw file 20171215\_MaS\_33SR\_LMH\_phospho\_02 Scan 3694 Method FTMS; HCD Score 83.23 m/z 797.3 Gene names ELF1

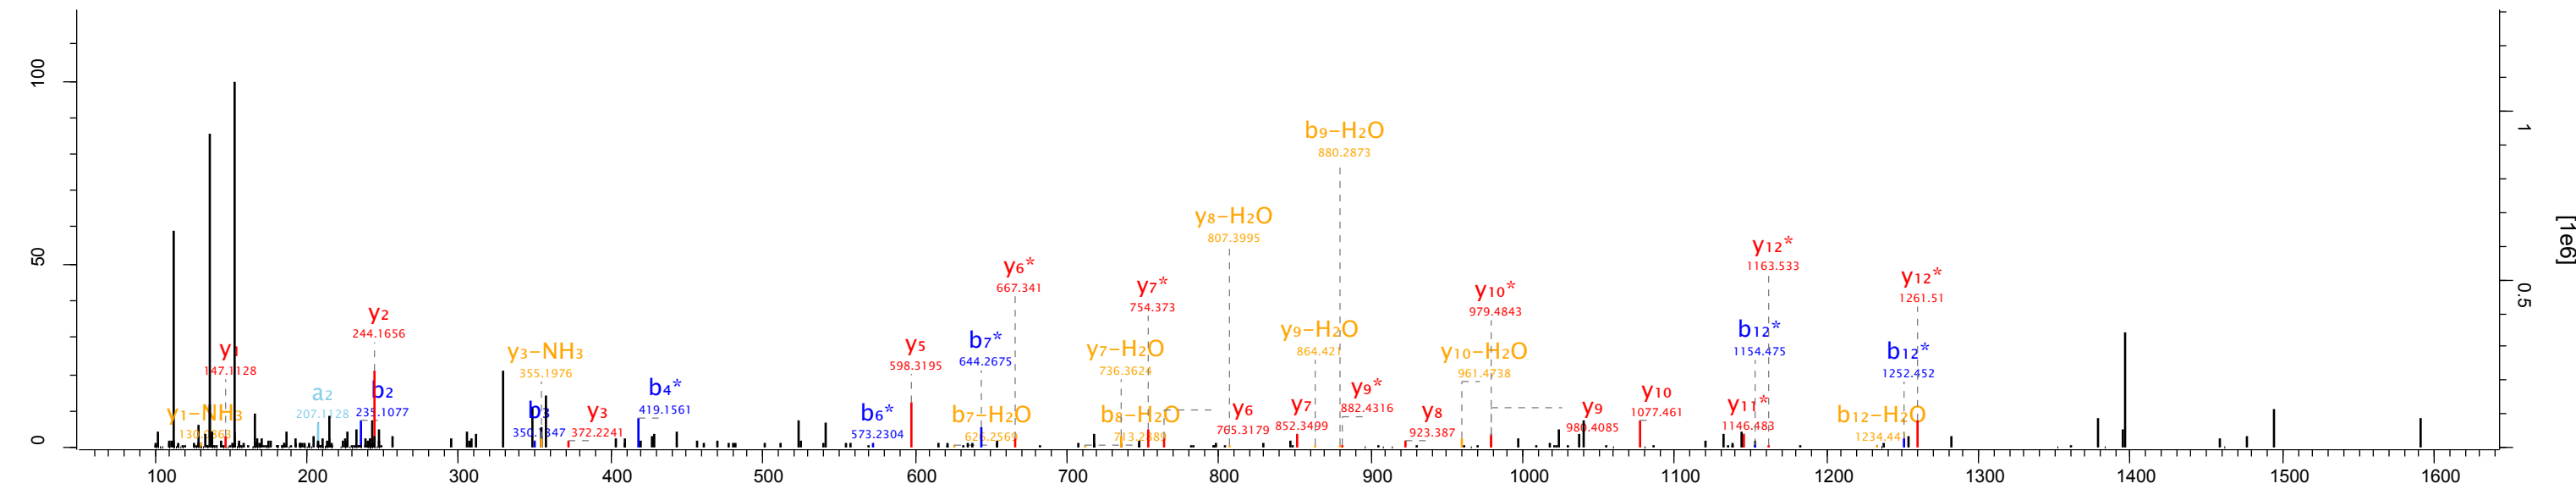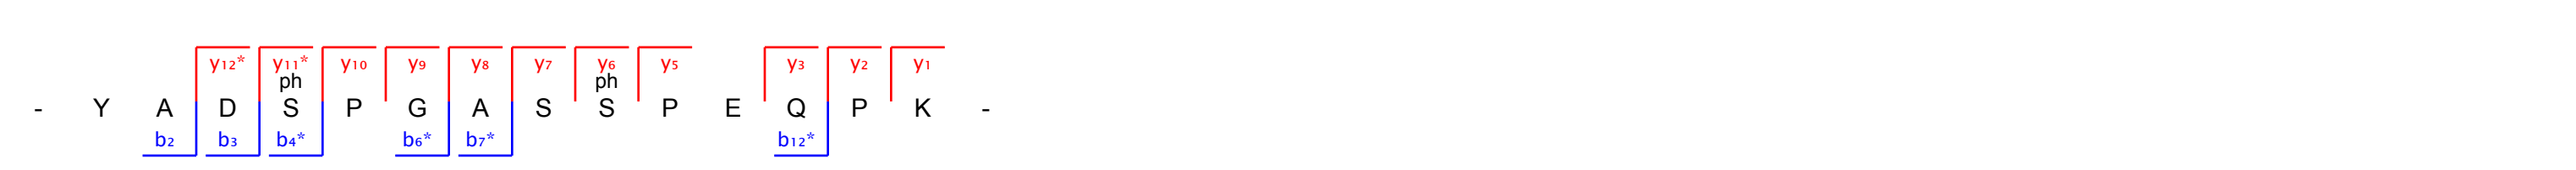



Raw file 20171215\_MaS\_33SR\_LMH\_phospho\_02 Scan 3954 Method FTMS; HCD Score 99.22 m/z 784.97 Gene names NKAP

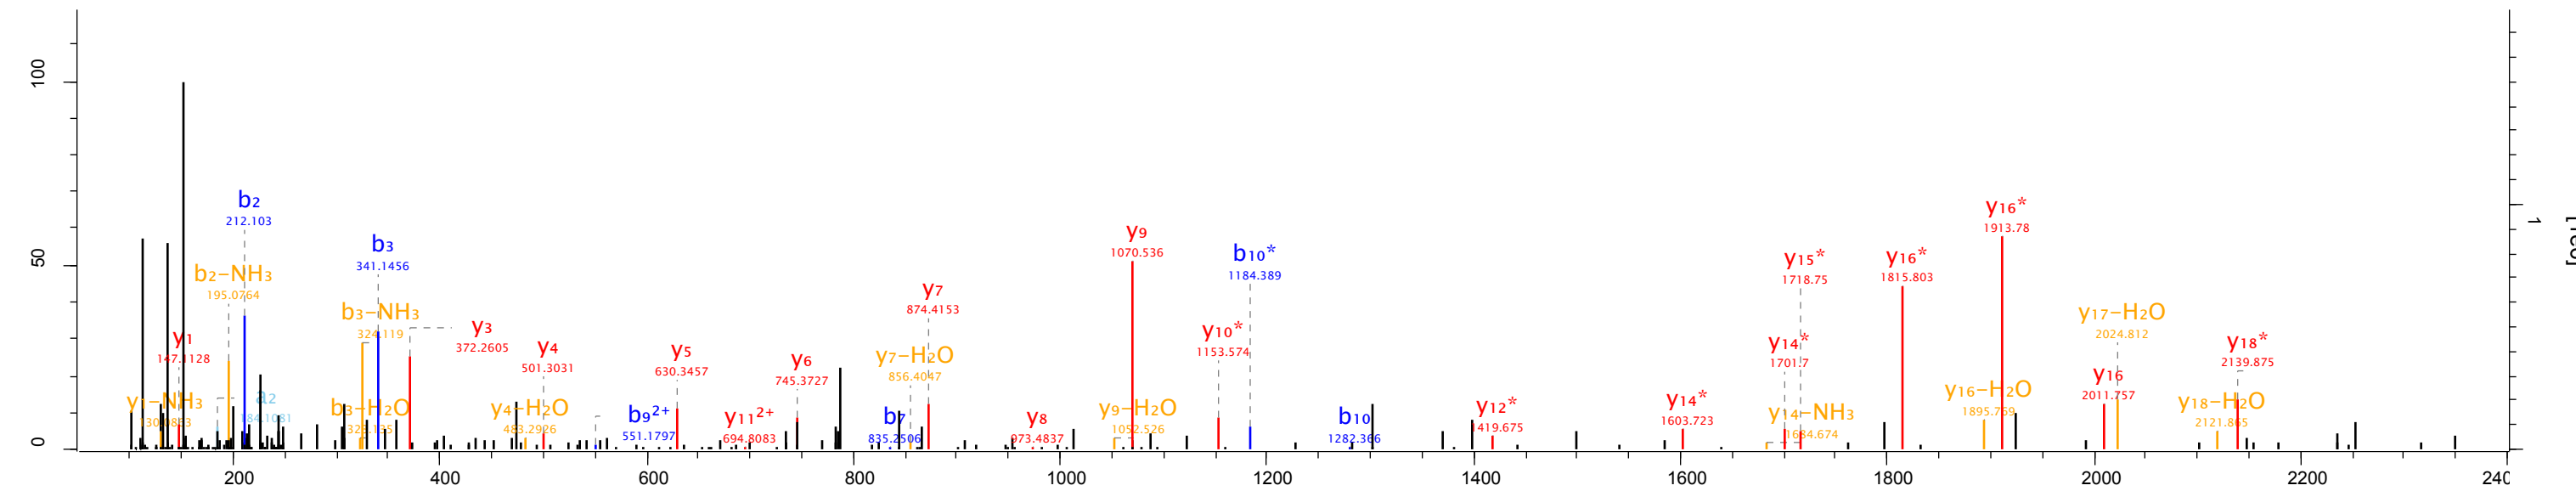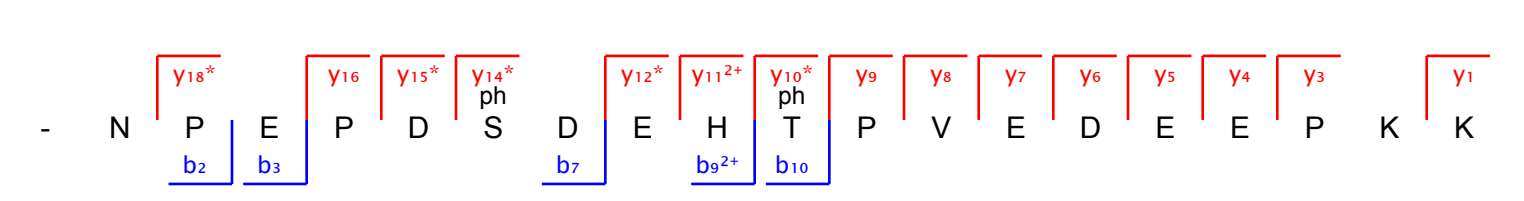

Raw file 20171215\_MaS\_33SR\_LMH\_phospho\_02 Scan 4284 Method FTMS; HCD Score 121.54 m/z 674.3 Gene names CEP170

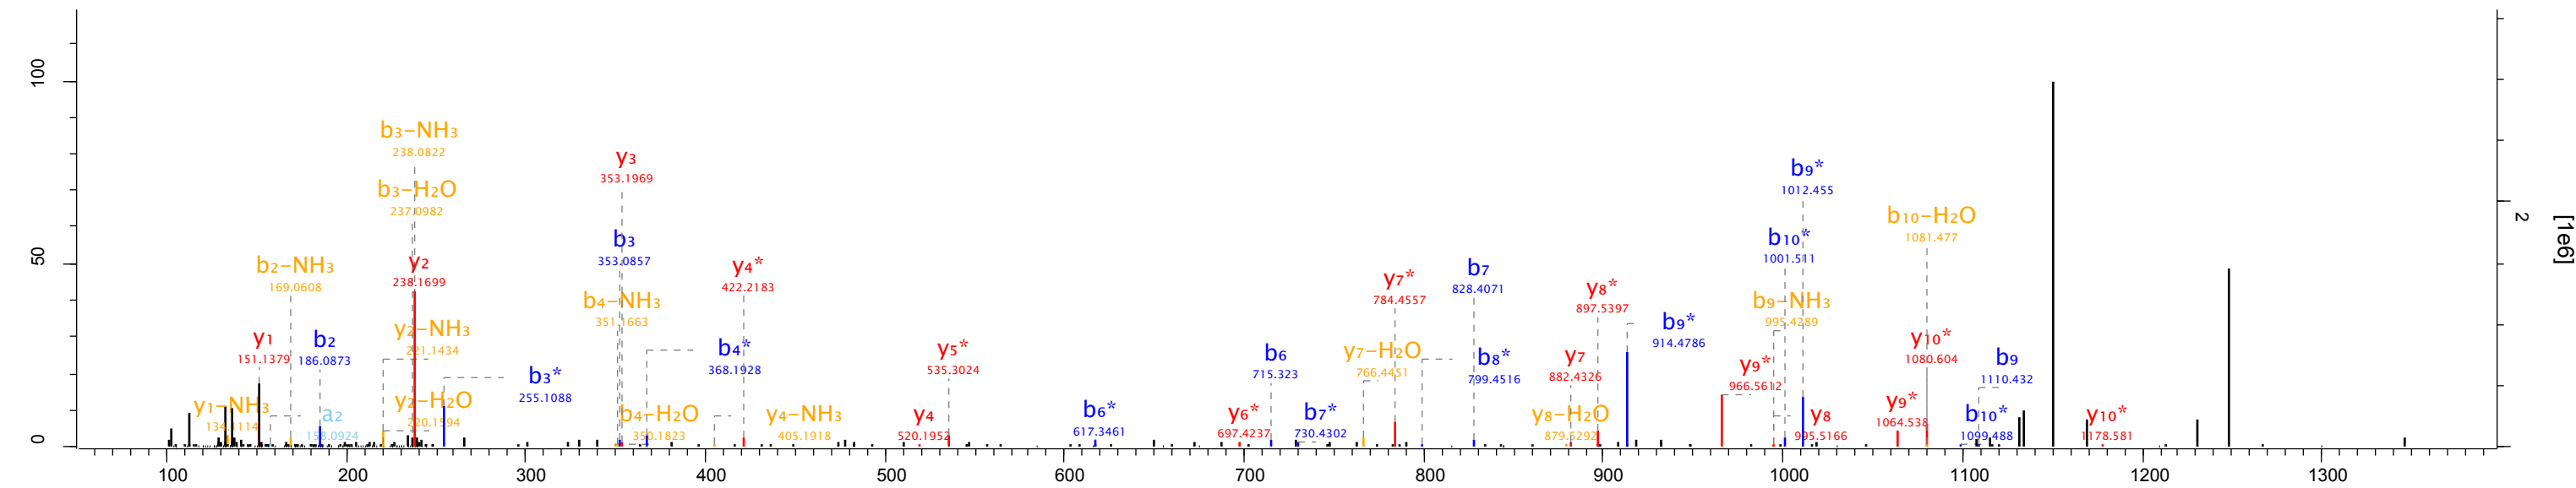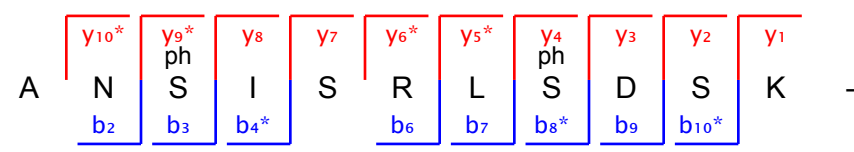

Raw file

20171215\_MaS\_33SR\_LMH\_phospho\_02

| Scan | Method    | Score  | m/z    | Gene names |
|------|-----------|--------|--------|------------|
| 4844 | FTMS; HCD | 229.05 | 804.35 | MRGBP      |

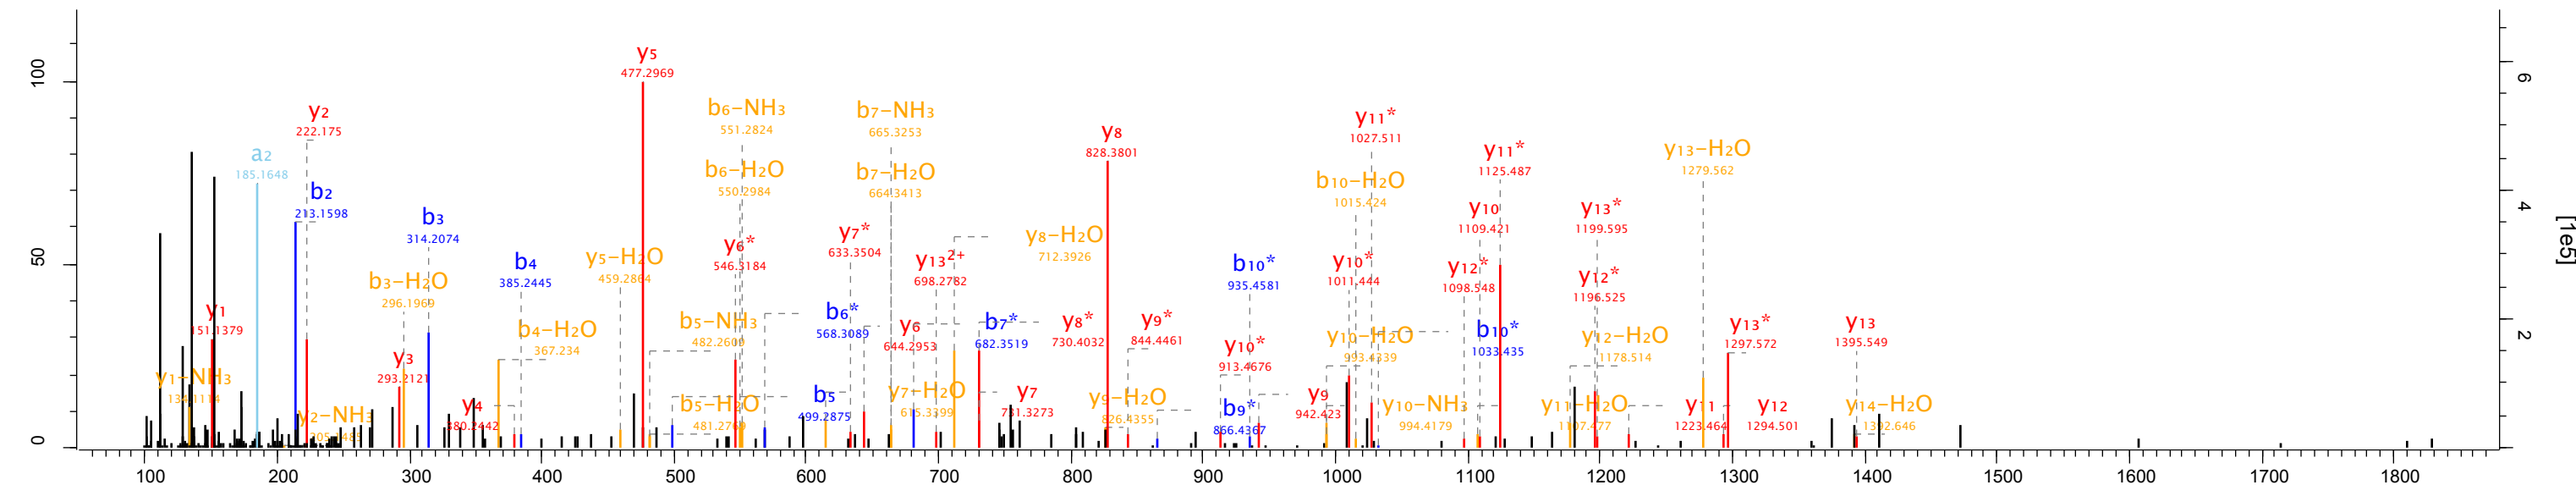

- V L T A N S N P S P S A A K -

Fragmentation mapping (b and y ions) is shown below the sequence:

- b2: L
- b3: T
- b4: A
- b5: N
- b6\*: S
- b7\*: N
- b9\*: S
- b10\*: S

Fragmentation mapping (y ions) is shown above the sequence:

- y1: K
- y2: A
- y3: A
- y4: P
- y5: P
- y6: S
- y7: S
- y8: P
- y9: N
- y10: S
- y11: N
- y12: A
- y13: T
- y14: L

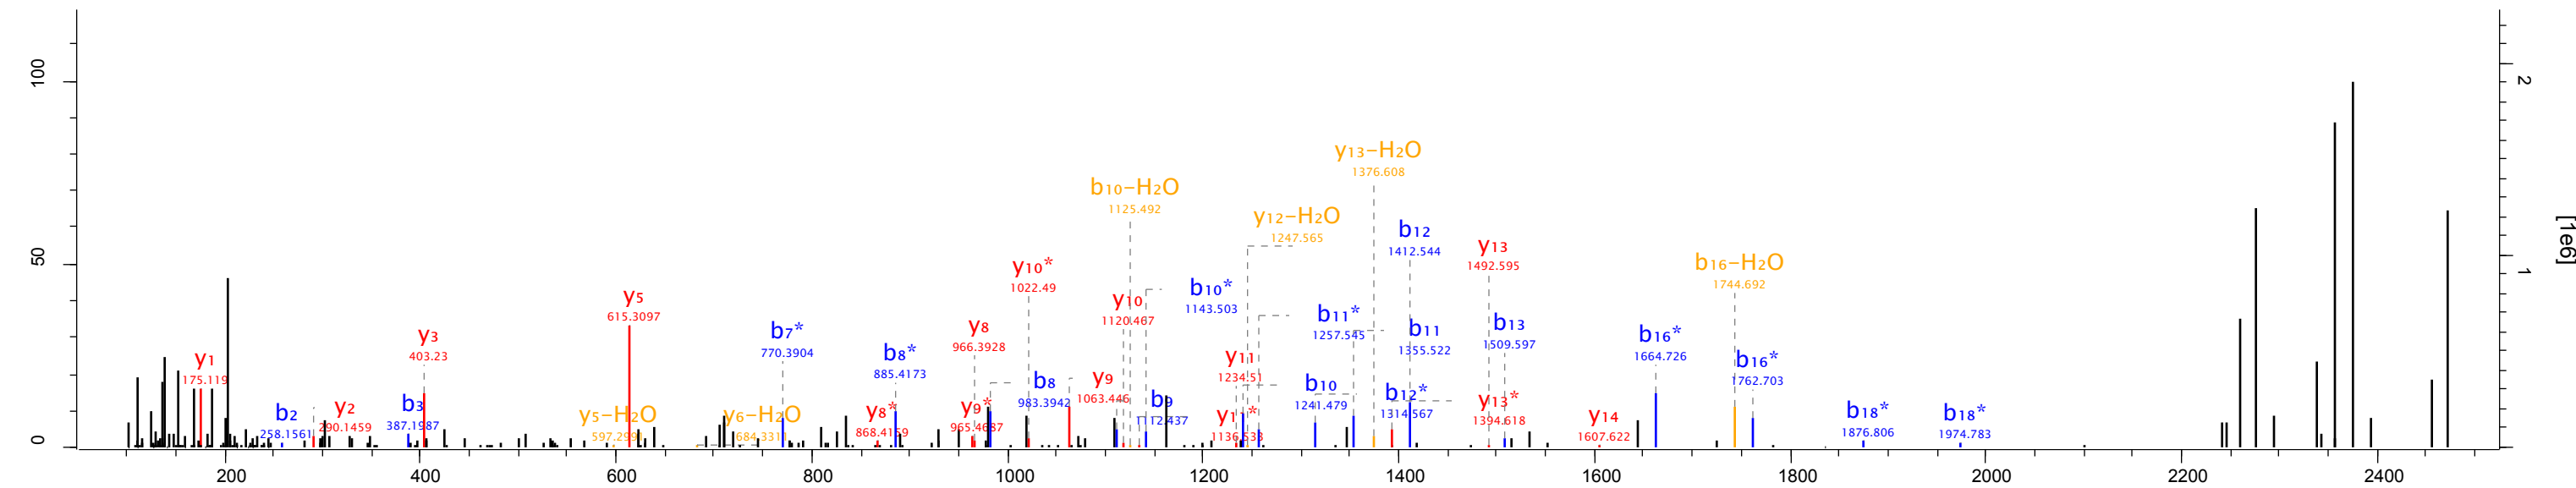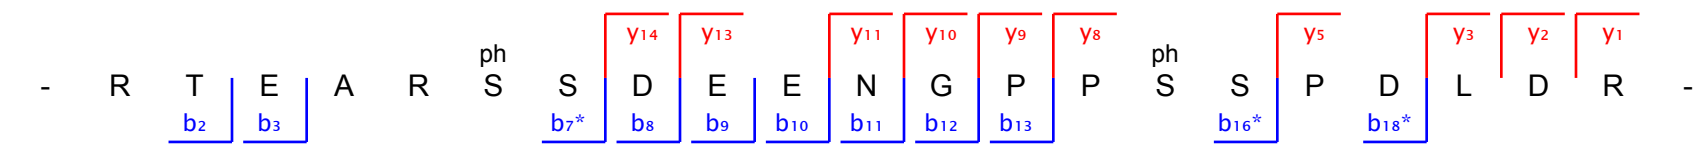

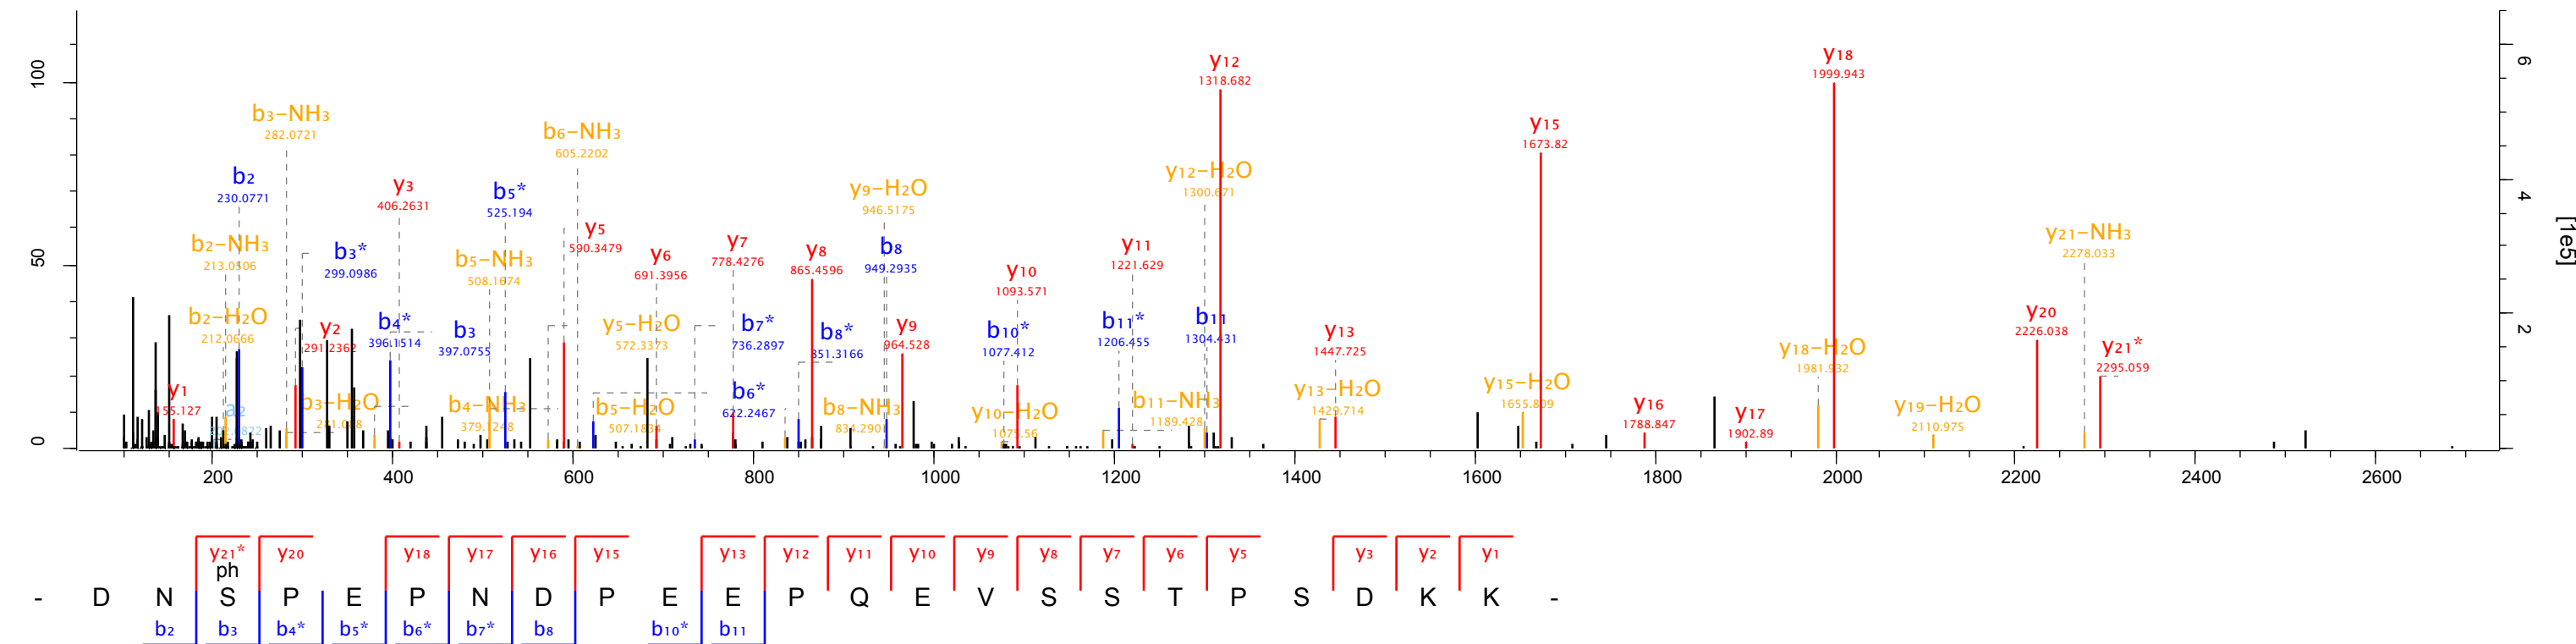

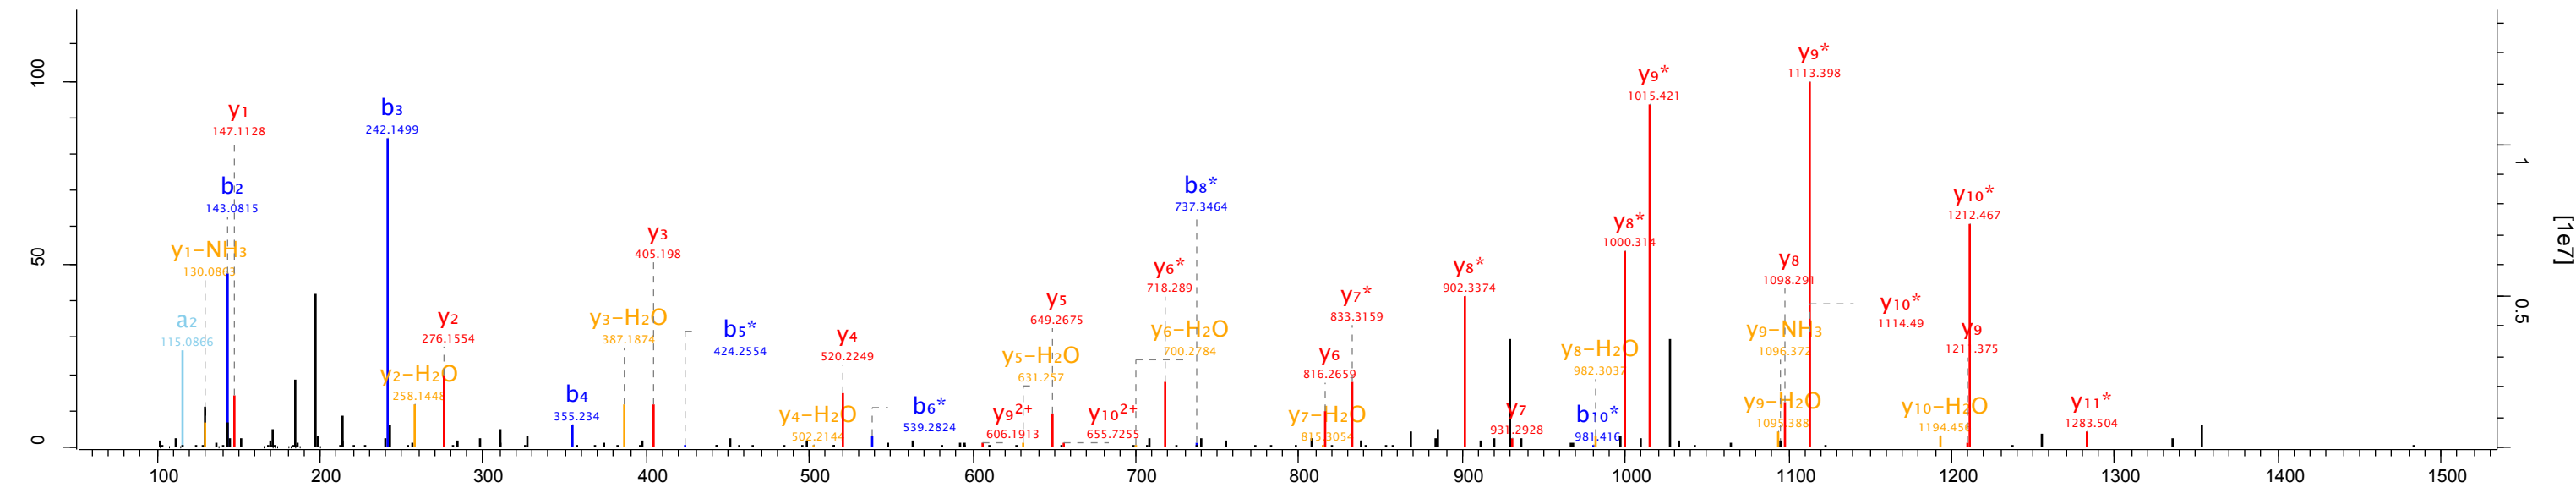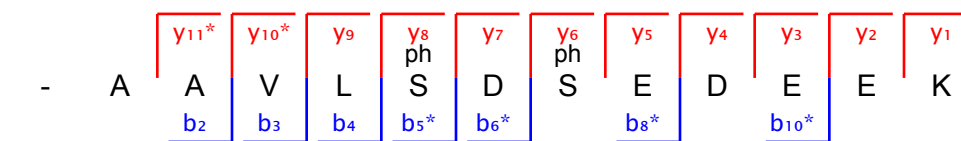

Raw file: 20171215\_MaS\_33SR\_LMH\_phospho\_02  
 Scan: 5634 Method: FTMS; HCD Score: 108.23 m/z: 690.23 Gene names: HERC1

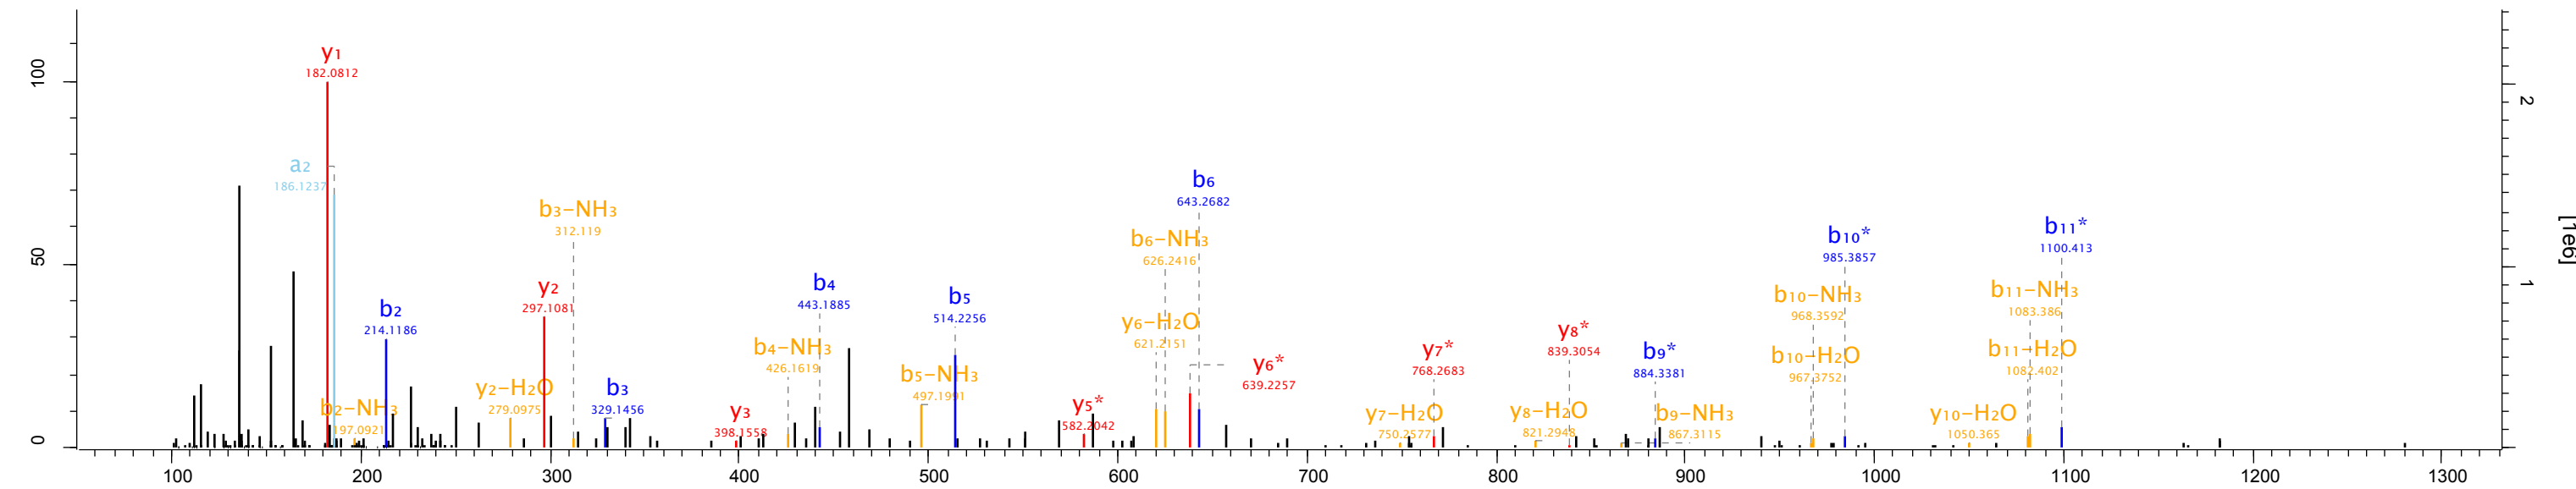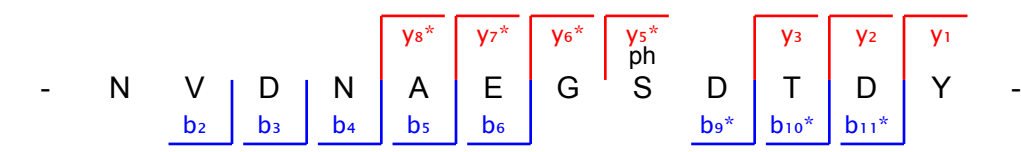

Raw file 20171215\_MaS\_33SR\_LMH\_phospho\_02 Scan 5794 Method FTMS; HCD Score 170.27 m/z 933.84 Gene names DKC1

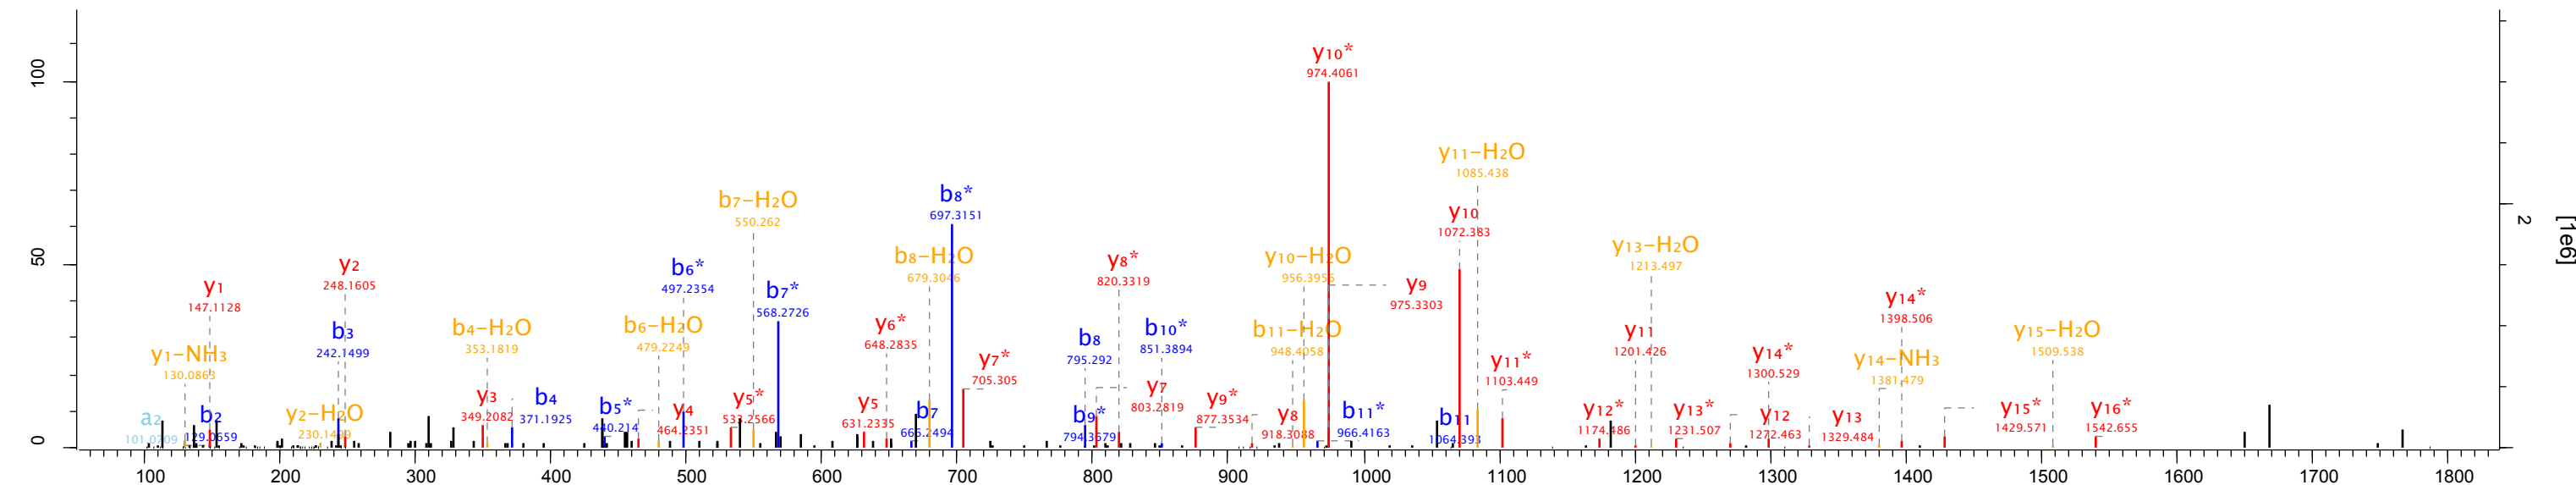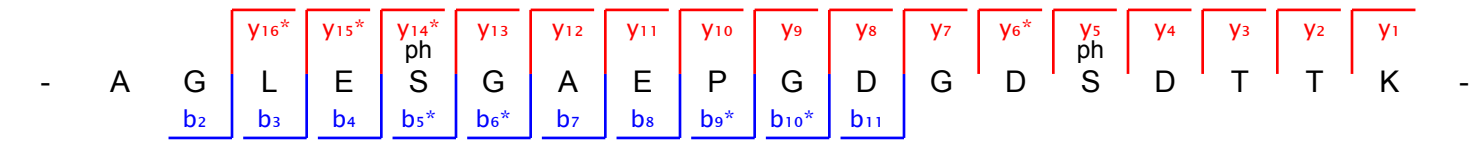



Raw file 20171215\_MaS\_33SR\_LMH\_phospho\_02 Scan 6304 Method FTMS; HCD Score 49.45 m/z 543.22 Gene names SRRM2

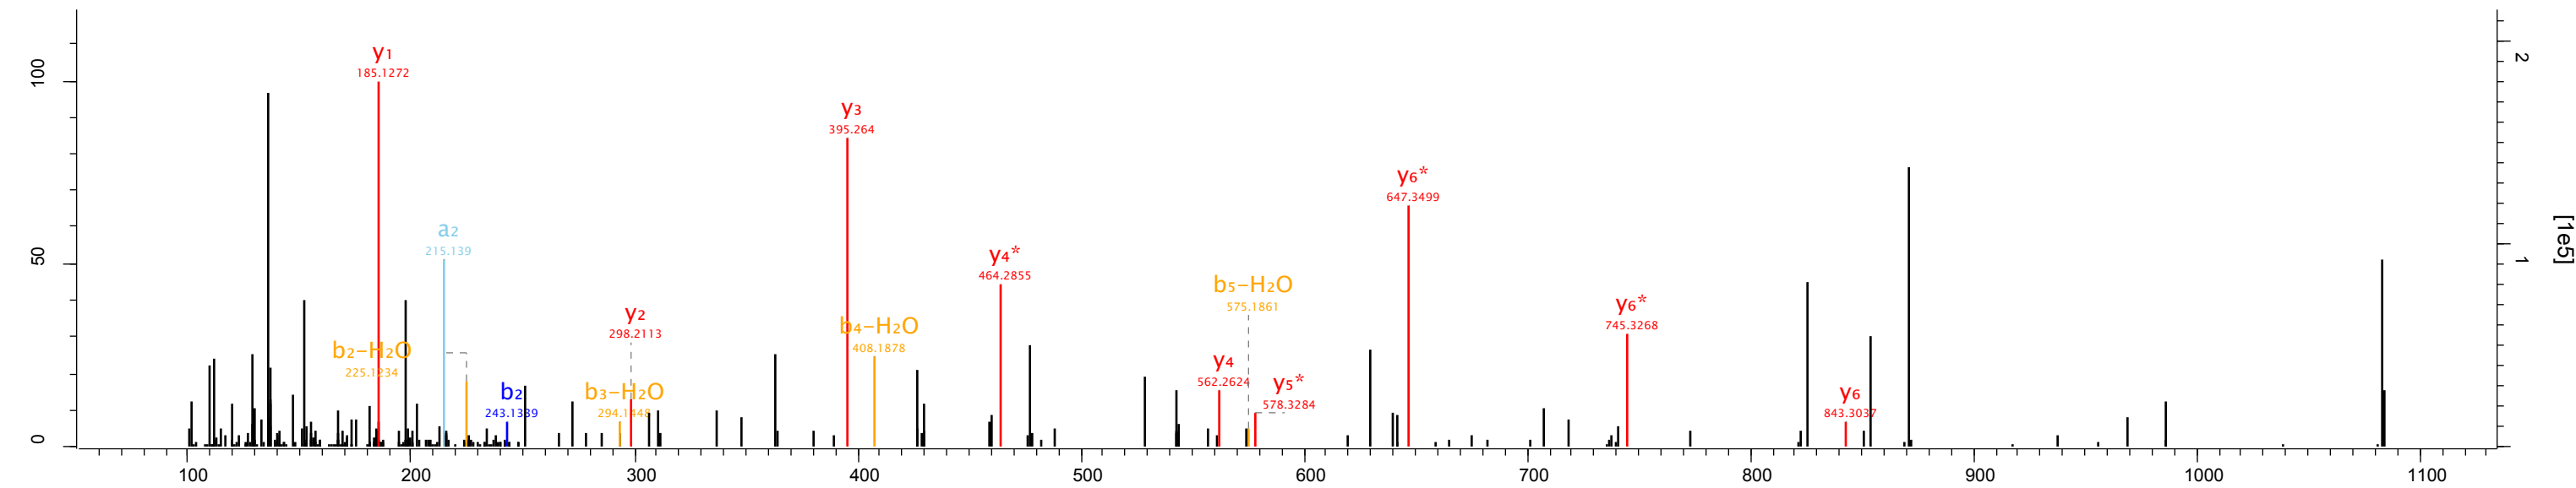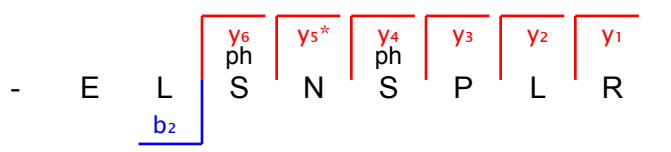

Raw file 20171215\_MaS\_33SR\_LMH\_phospho\_02 Scan 6364 Method FTMS; HCD Score 120.23 m/z 925.87 Gene names EPHA2

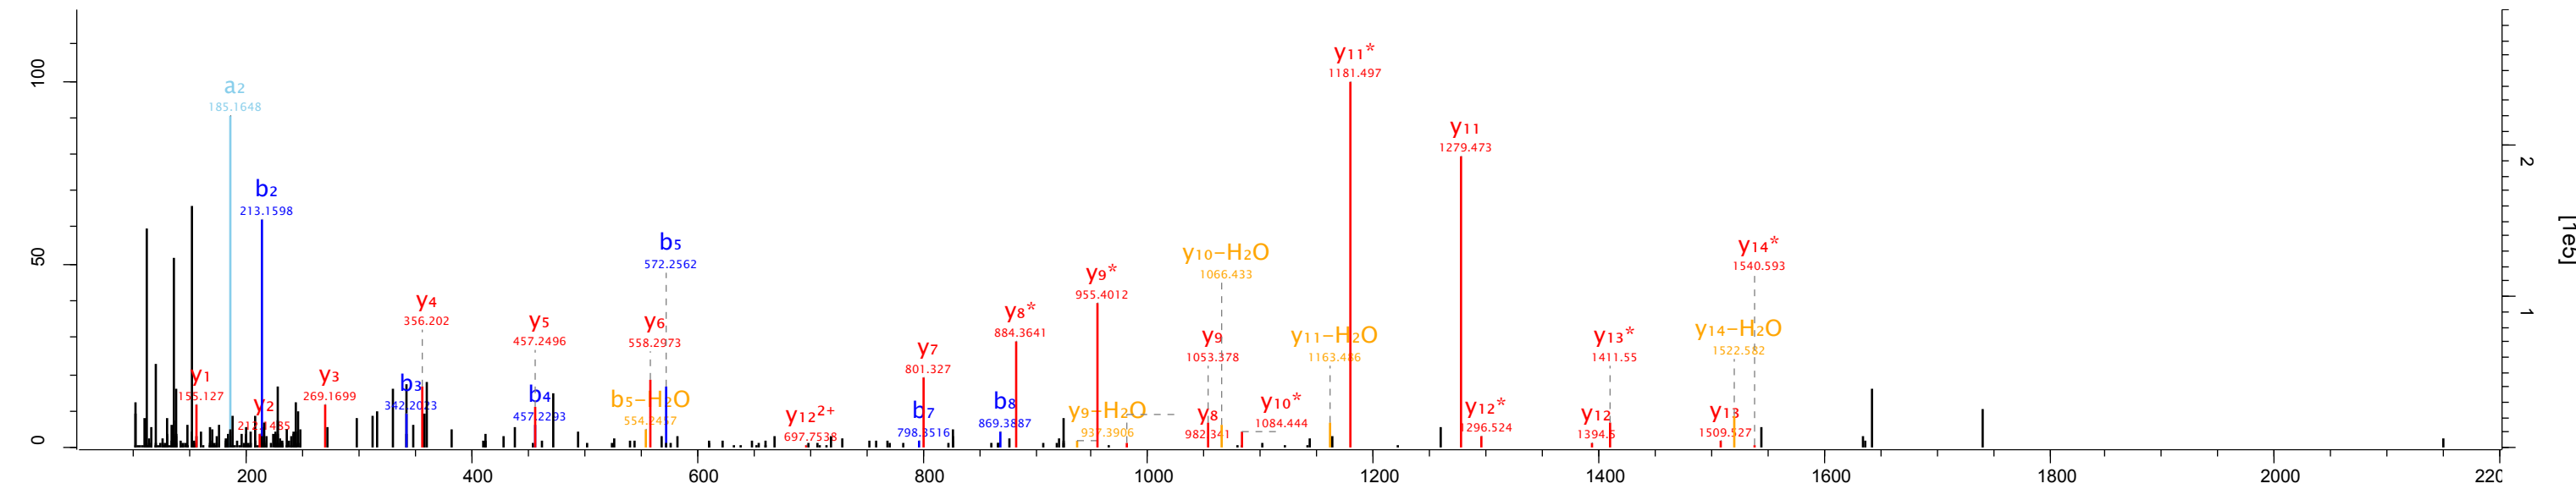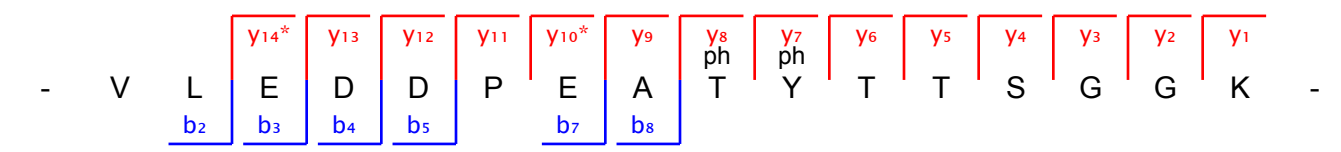

Raw file: 20171215\_MaS\_33SR\_LMH\_phospho\_02  
 Scan: 6444 Method: FTMS; HCD Score: 80.02 m/z: 724.33 Gene names: RERE

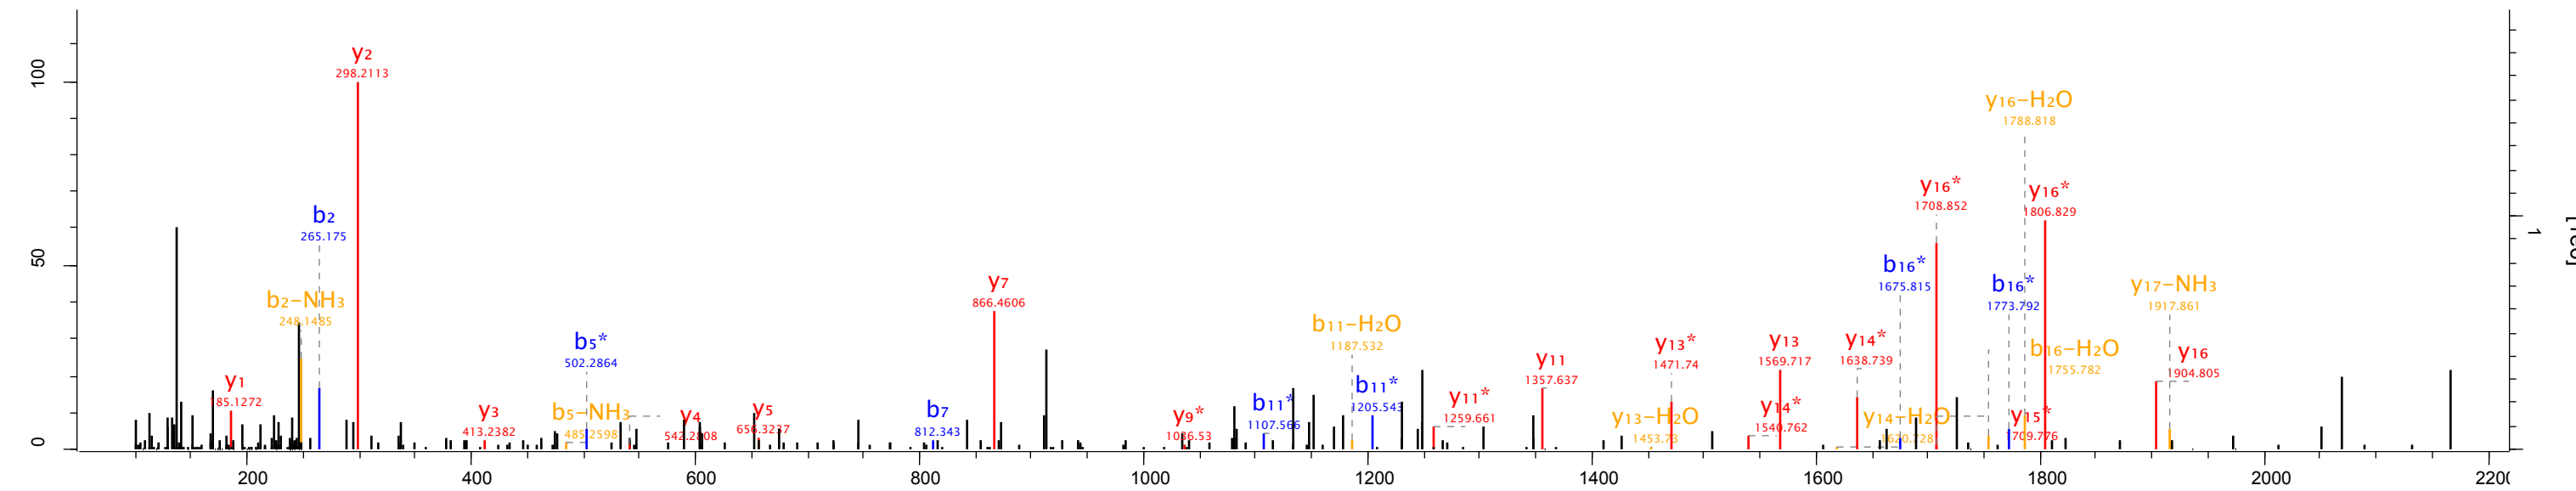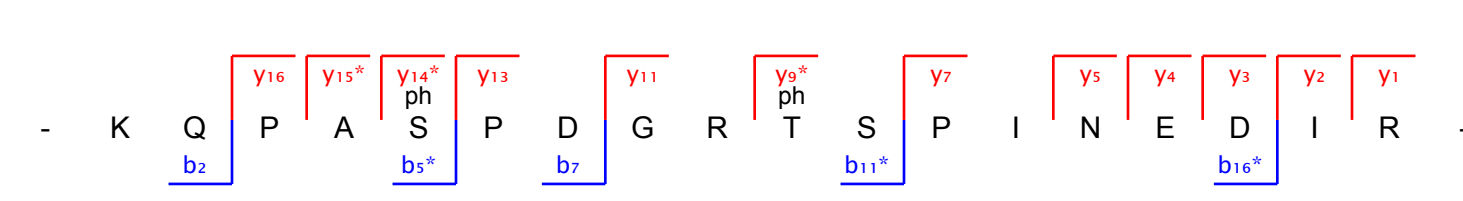

Raw file 20171215\_MaS\_33SR\_LMH\_phospho\_02 Scan 7894 Method FTMS; HCD Score 208.59 m/z 750.81 Gene names CEP170

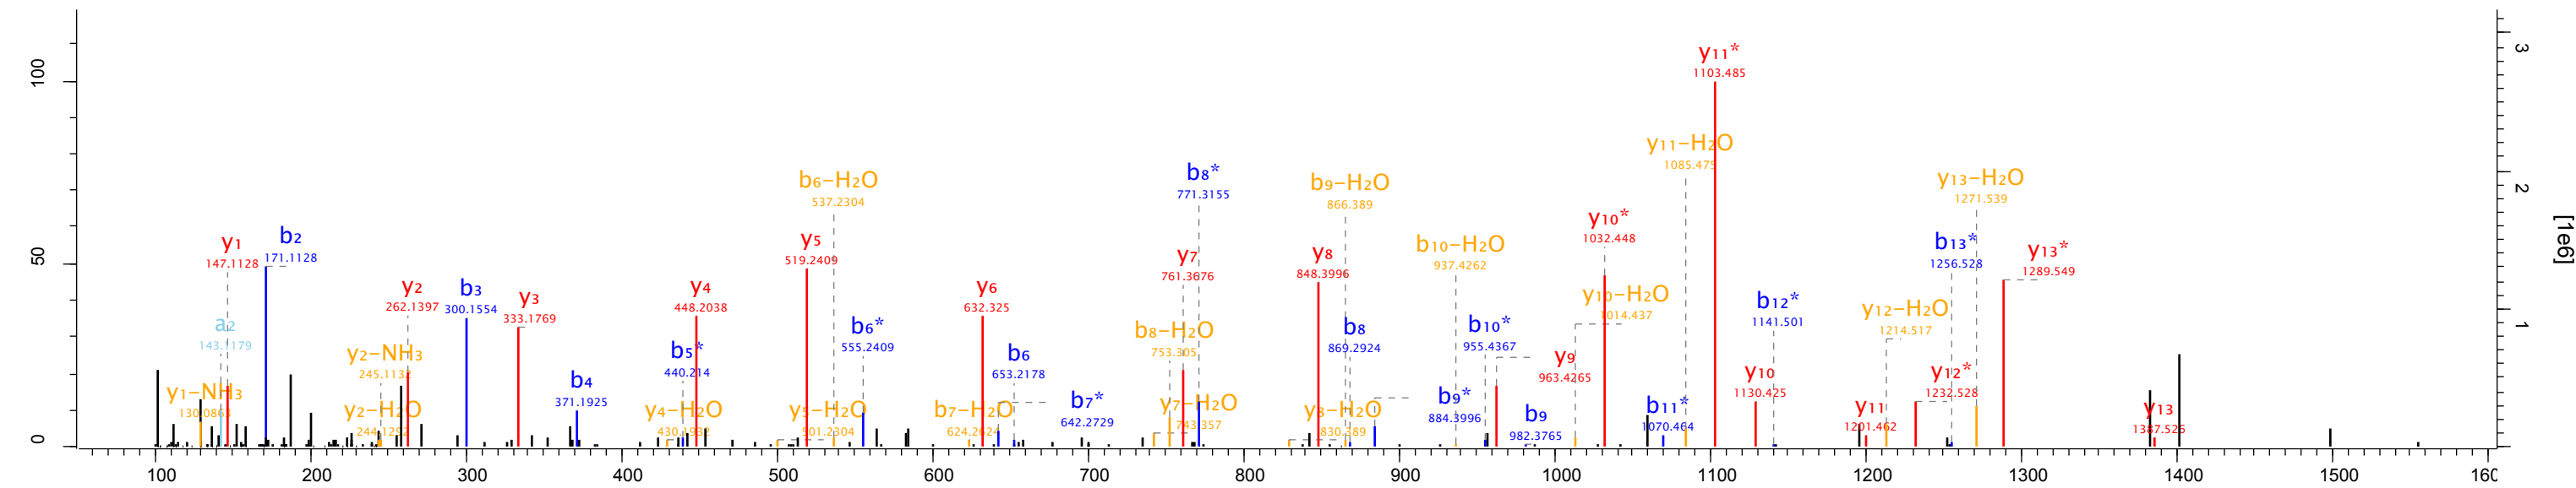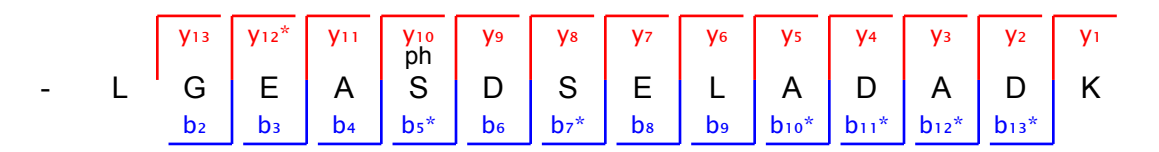

Raw file 20171215\_MaS\_33SR\_LMH\_phospho\_02 Scan 7954 FTMS; HCD Score 87.08 m/z 1149.82 Gene names HSPA4

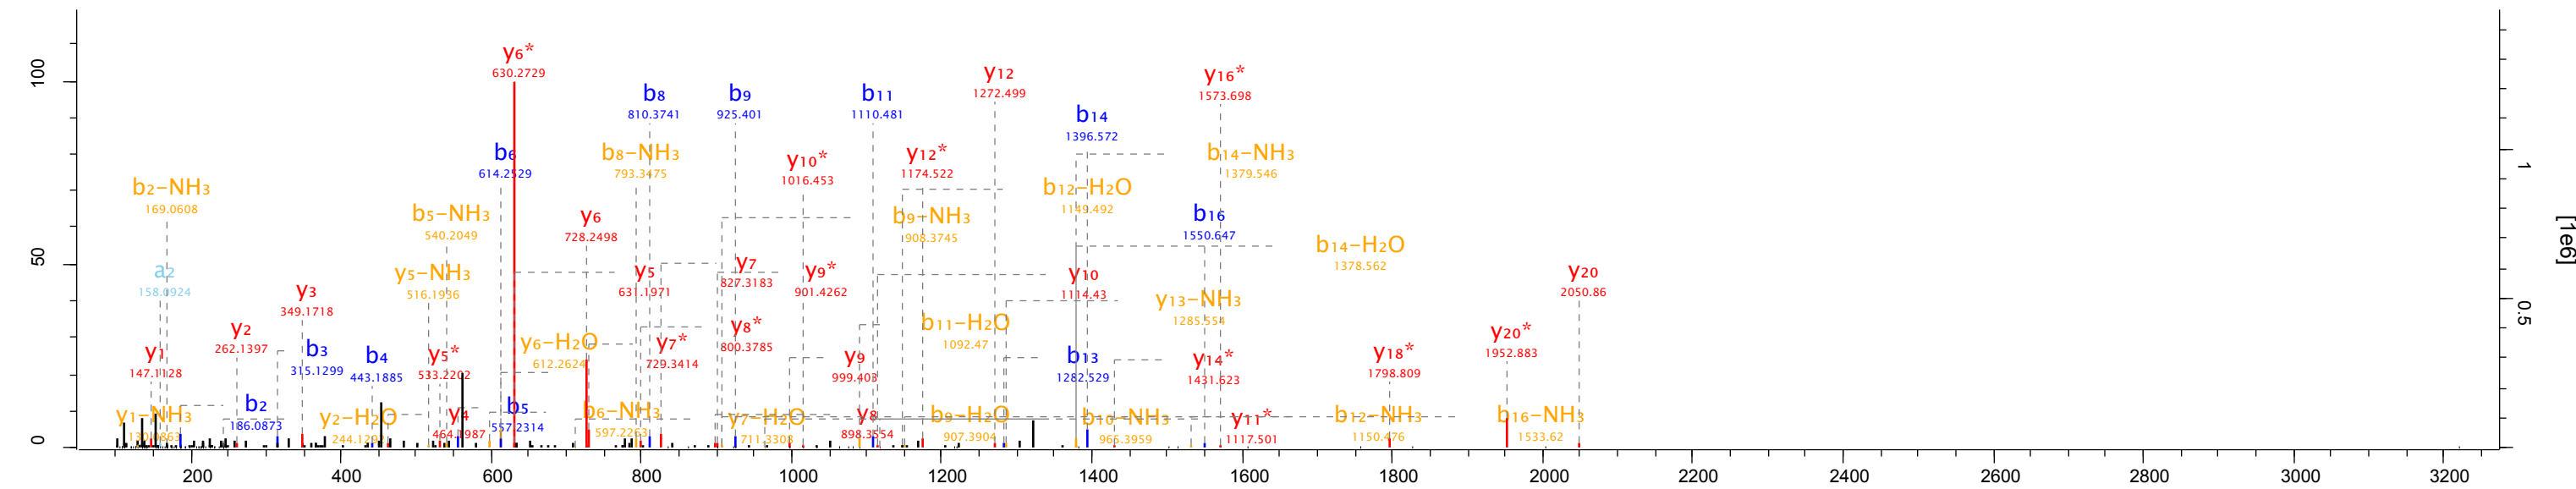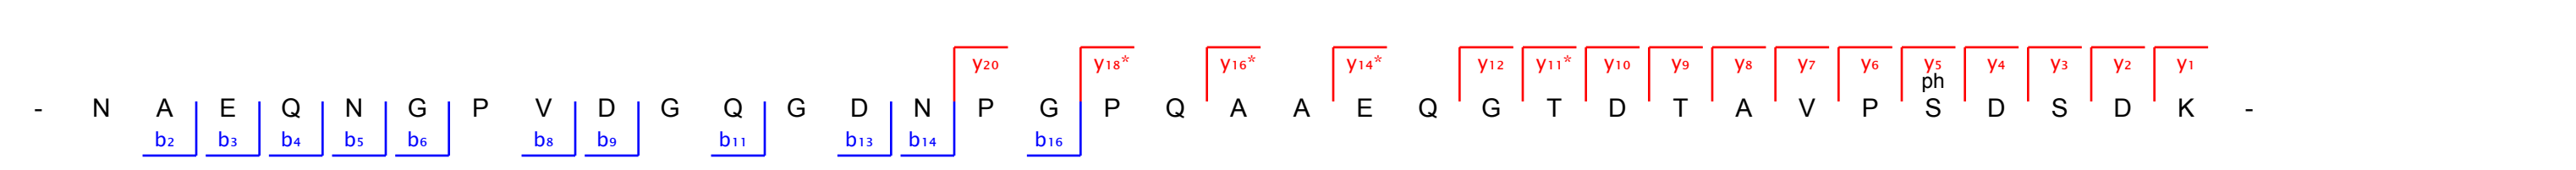

Raw file 20171215\_MaS\_33SR\_LMH\_phospho\_02 Scan 8404 Method FTMS; HCD Score 117.8 m/z 735.29 Gene names UBE2V1

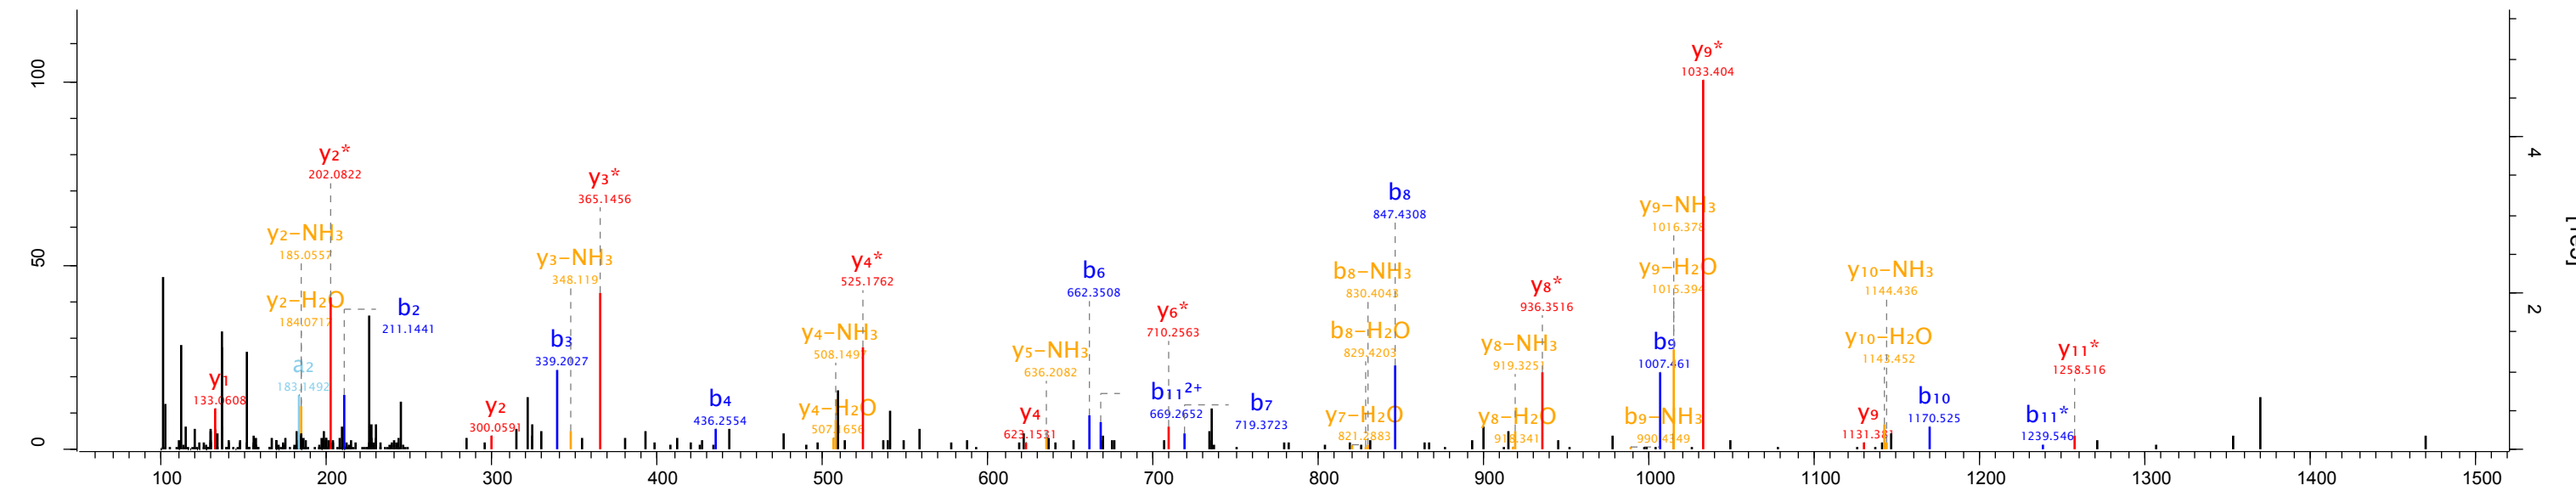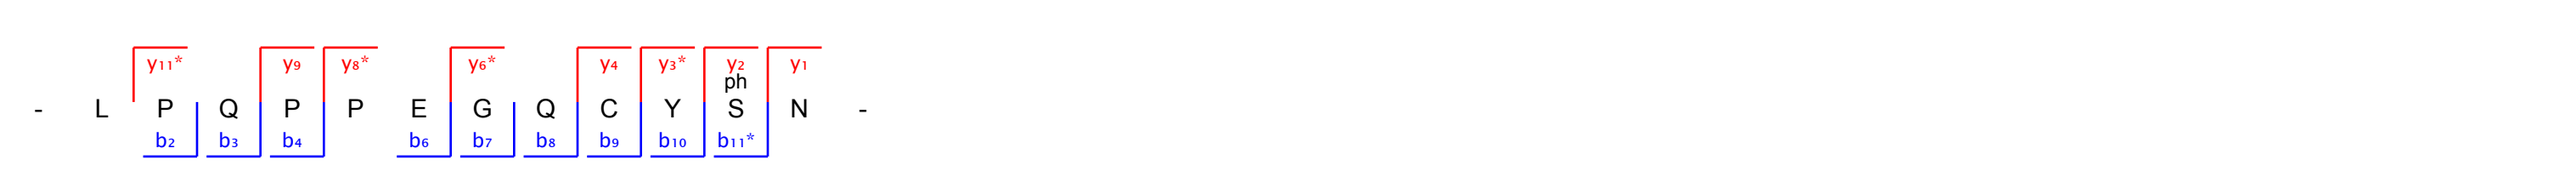

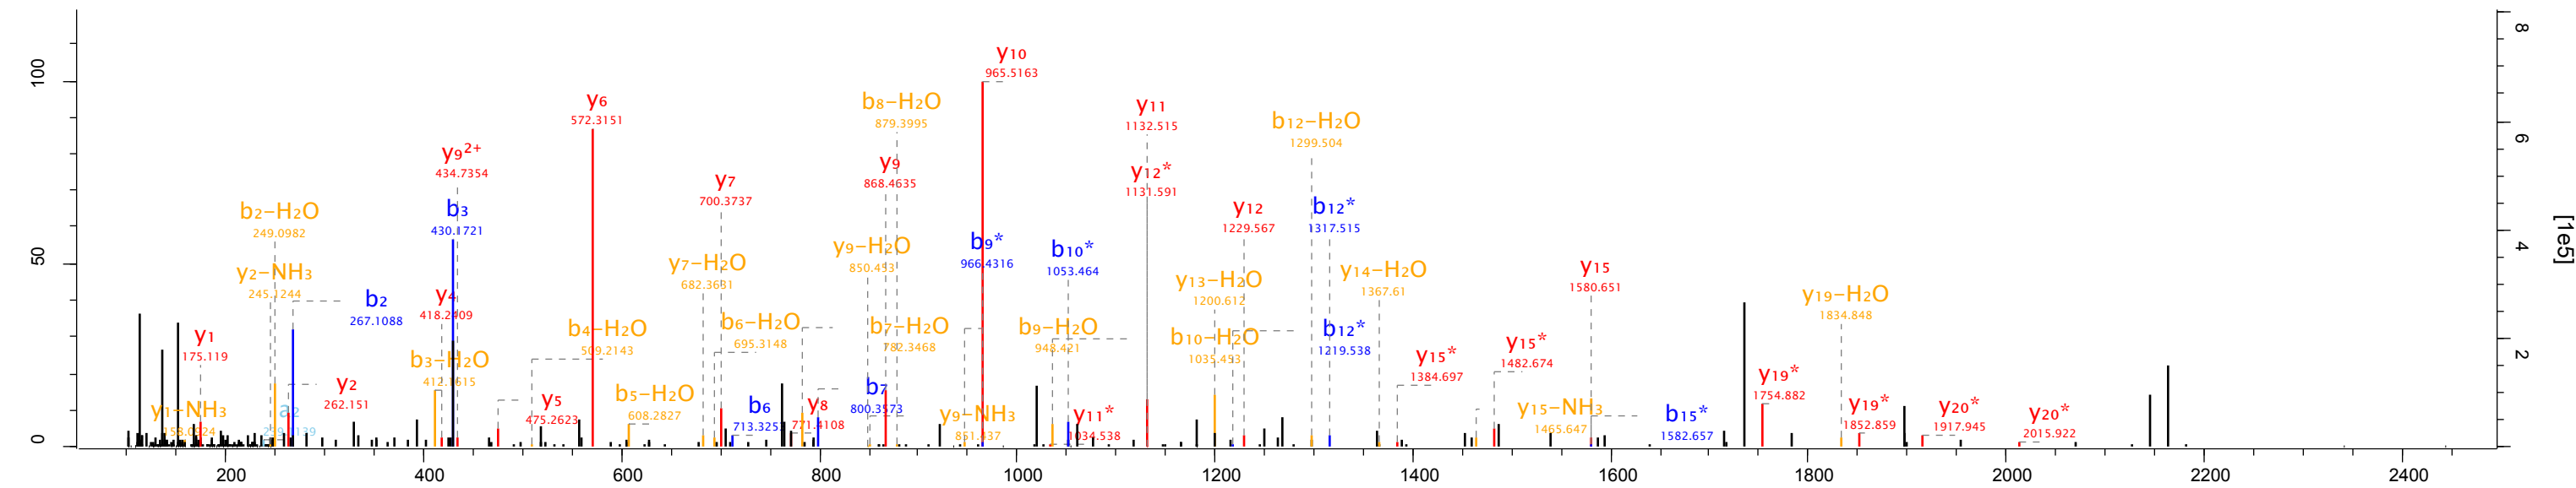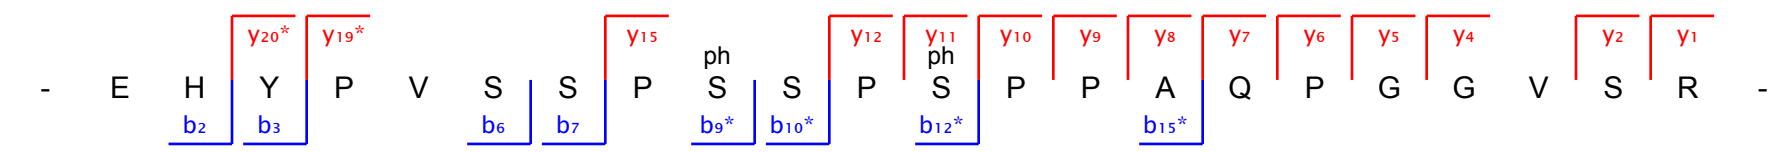

Raw file 20171215\_MaS\_33SR\_LMH\_phospho\_02 Scan 8944 Method FTMS; HCD Score 69.03 m/z 539.22 Gene names KPNA6

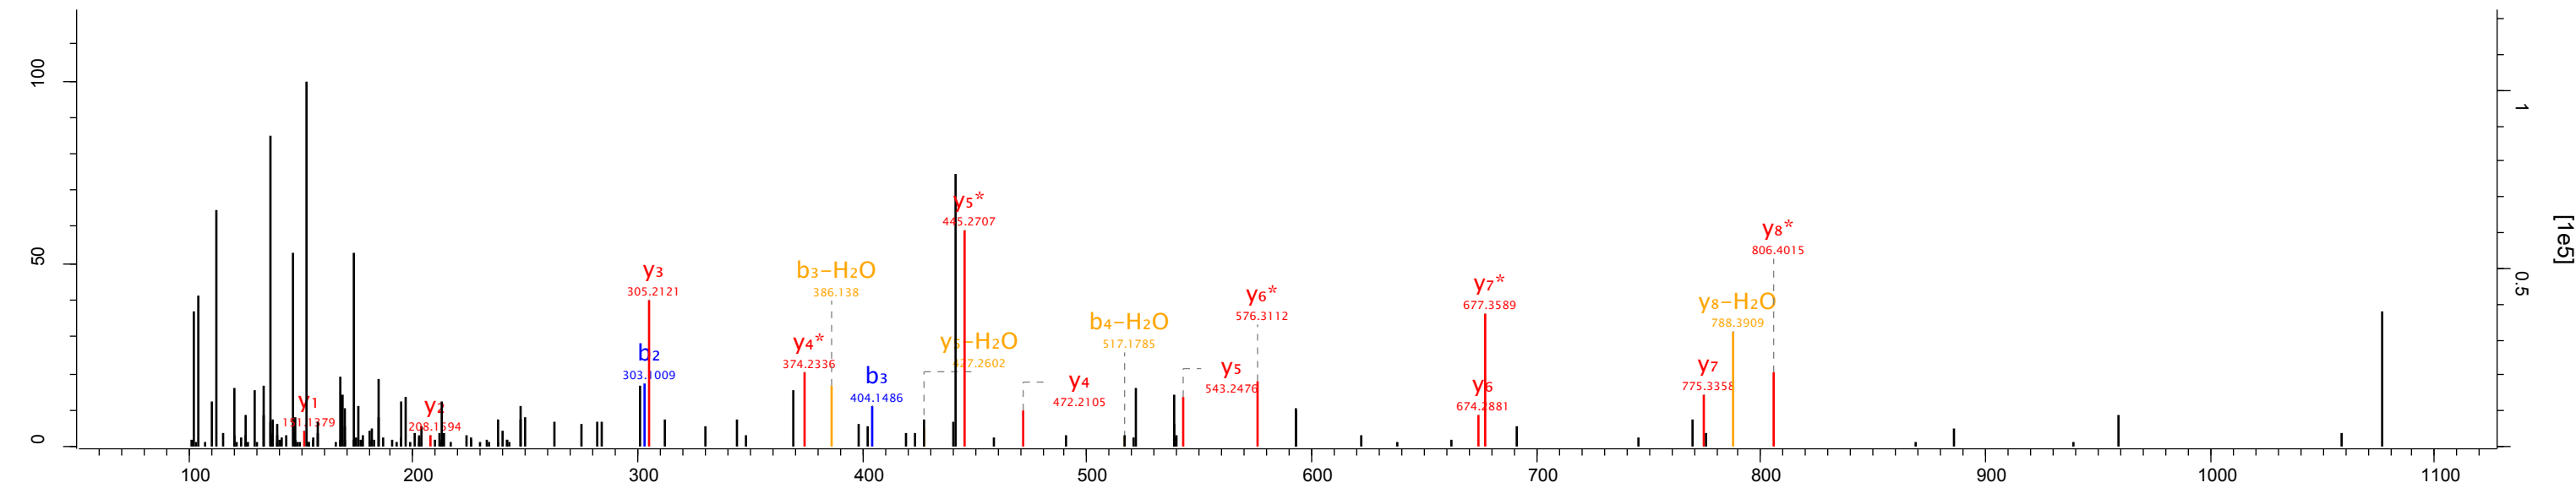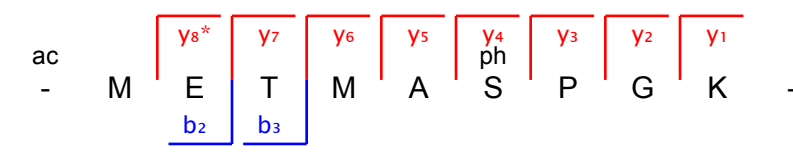



Raw file 20171215\_MaS\_33SR\_LMH\_phospho\_02 Scan 8964 Method FTMS; HCD Score 71.65 m/z 880.86 Gene names DLG1

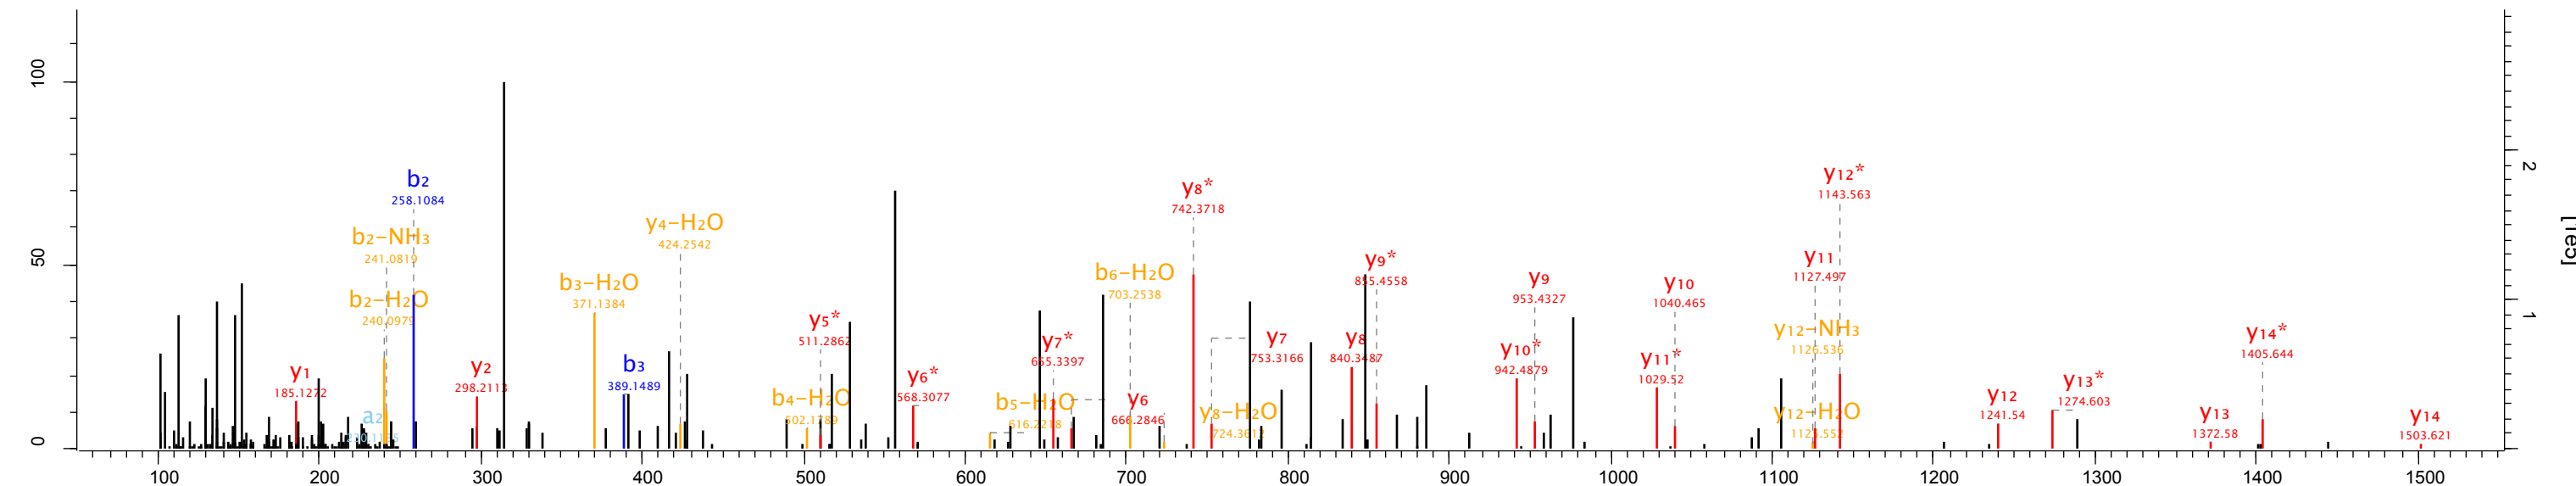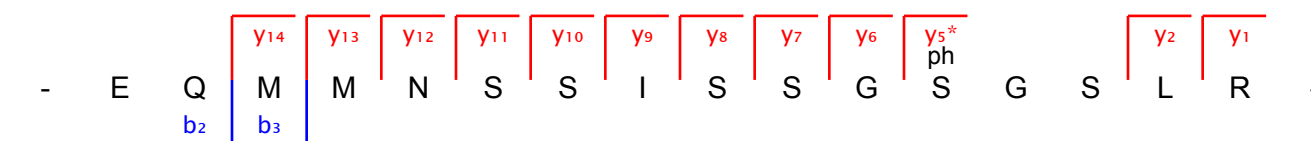

Raw file 20171215\_MaS\_33SR\_LMH\_phospho\_02 Scan 9414 Method FTMS; HCD Score 106.67 m/z 990.44 Gene names RPTOR

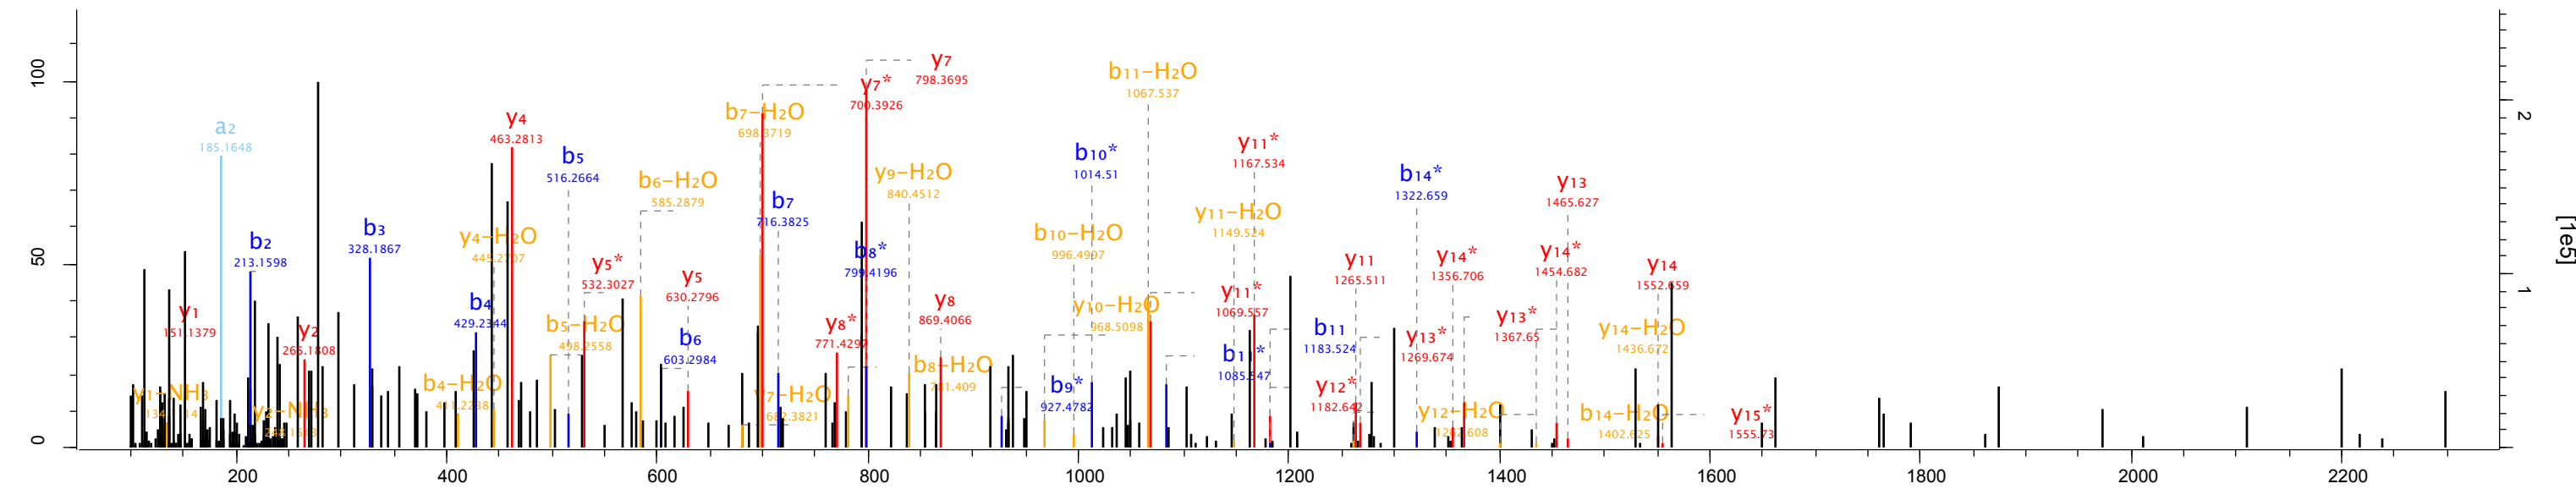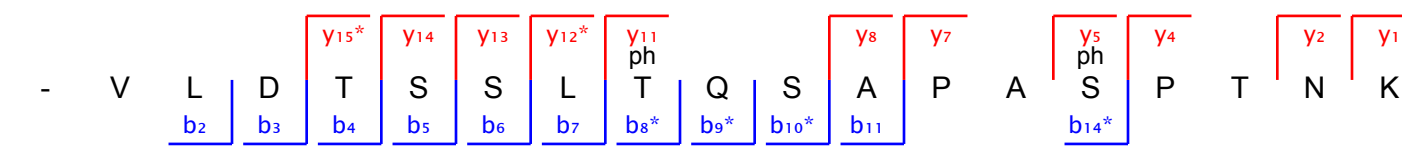

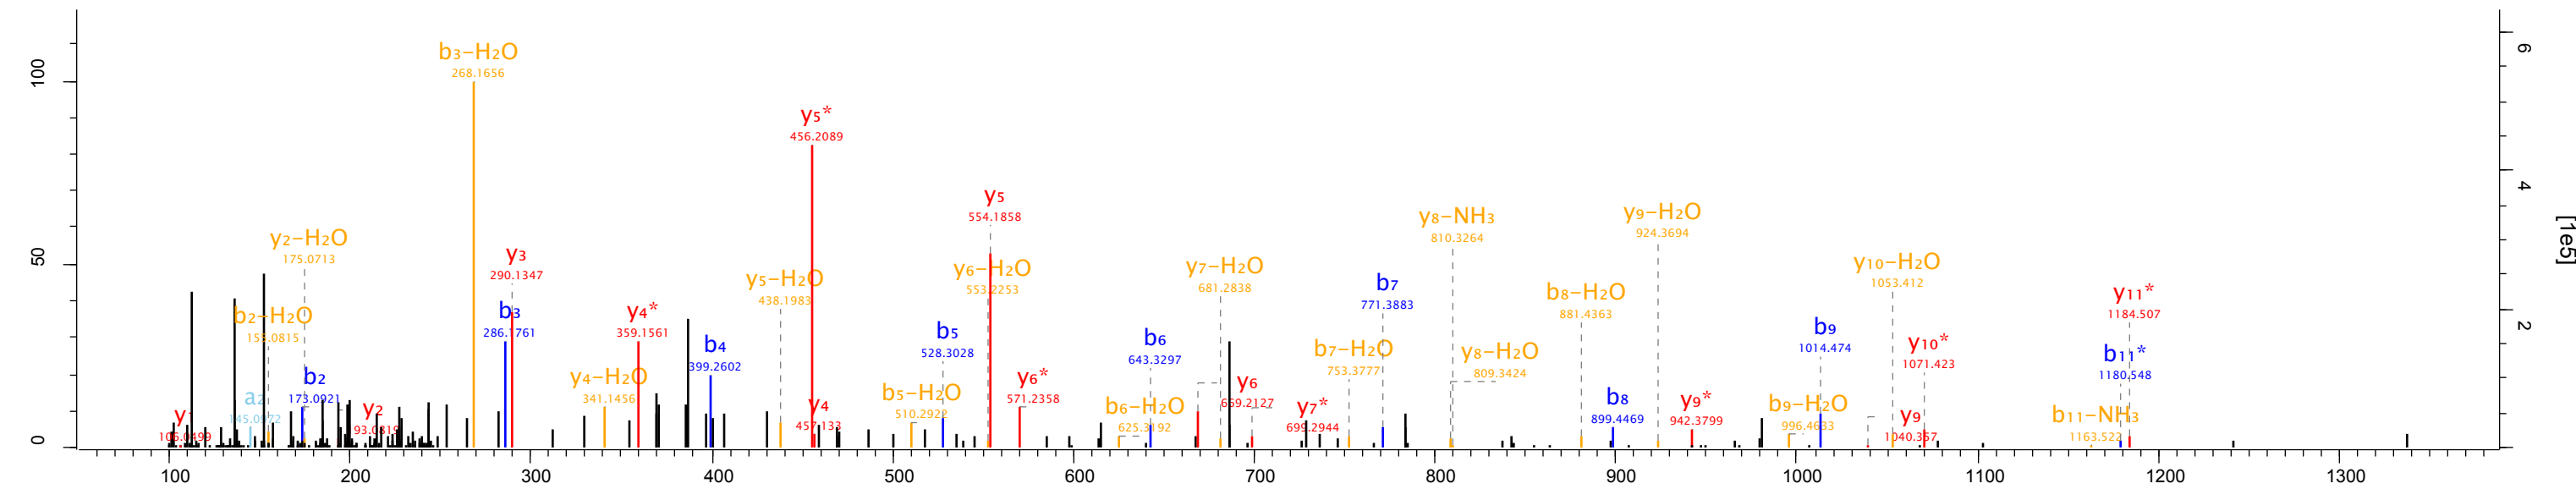

- A T L L E D Q Q D P S P S -

Fragmentation mapping (b and y ions) is shown below the sequence:

- b<sub>2</sub> (under T)
- b<sub>3</sub> (under L)
- b<sub>4</sub> (under L)
- b<sub>5</sub> (under E)
- b<sub>6</sub> (under D)
- b<sub>7</sub> (under Q)
- b<sub>8</sub> (under Q)
- b<sub>9</sub> (under D)
- b<sub>11</sub>\* (under S)
- y<sub>11</sub>\* (above L)
- y<sub>10</sub>\* (above E)
- y<sub>9</sub> (above D)
- y<sub>7</sub>\* (above Q)
- y<sub>6</sub> (above D)
- y<sub>5</sub> (above P)
- y<sub>4</sub> (above S)
- y<sub>3</sub> (above P)
- y<sub>2</sub> (above S)
- y<sub>1</sub> (above S)

Raw file 20171215\_MaS\_33SR\_LMH\_phospho\_02 Scan 9554 Method FTMS; HCD Score 154.67 m/z 855.88 Gene names NUP188

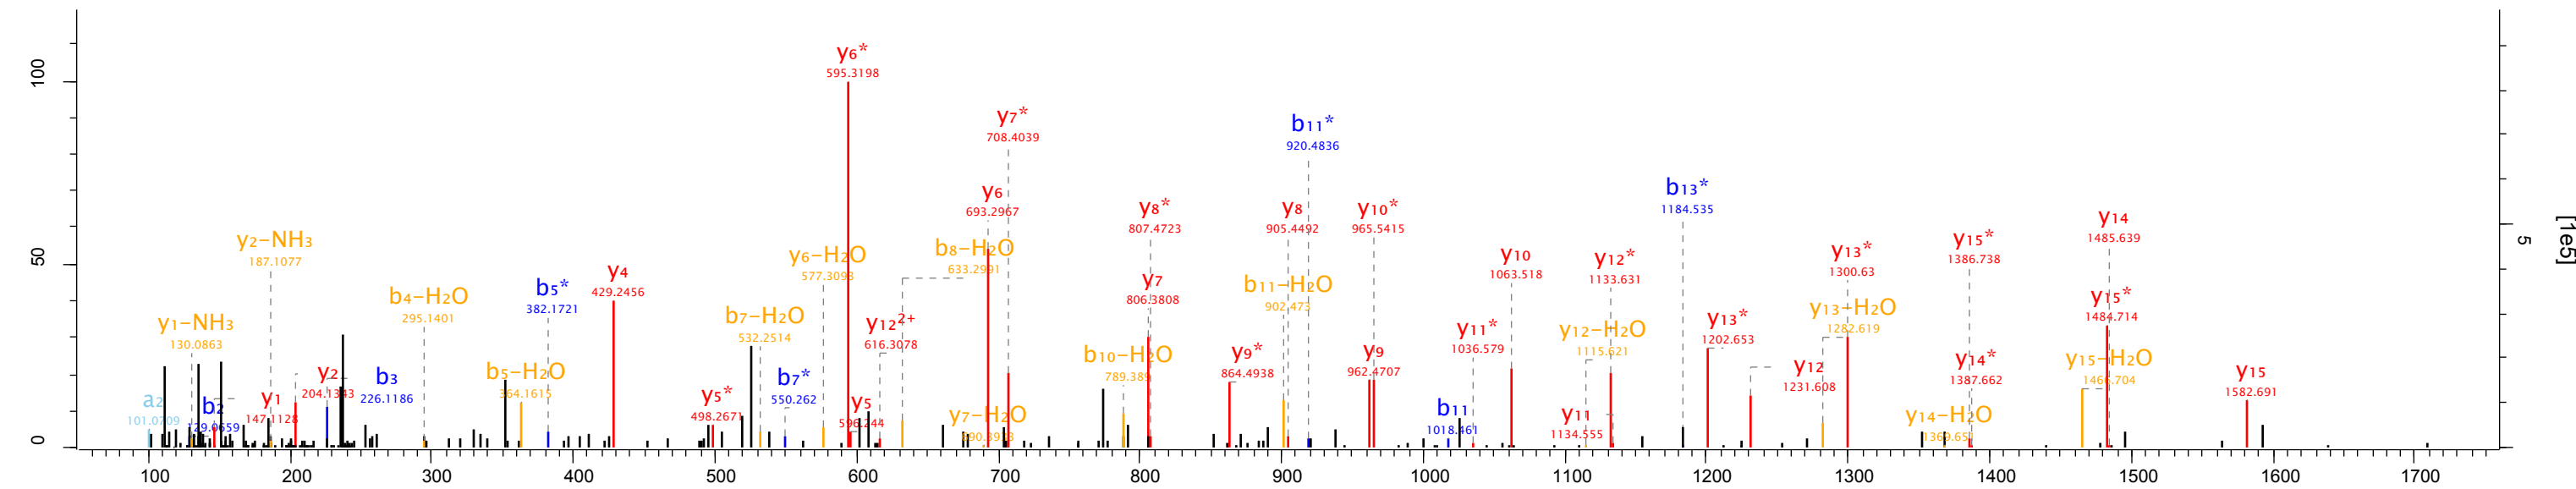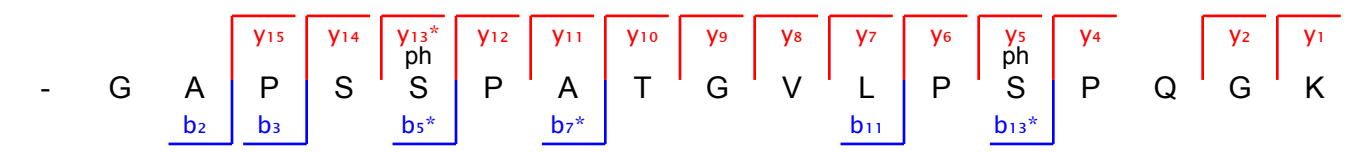

Raw file 20171215\_MaS\_33SR\_LMH\_phospho\_03 Scan 10334 Method FTMS; HCD Score 41.7 m/z 739.27 Gene names FBXO32

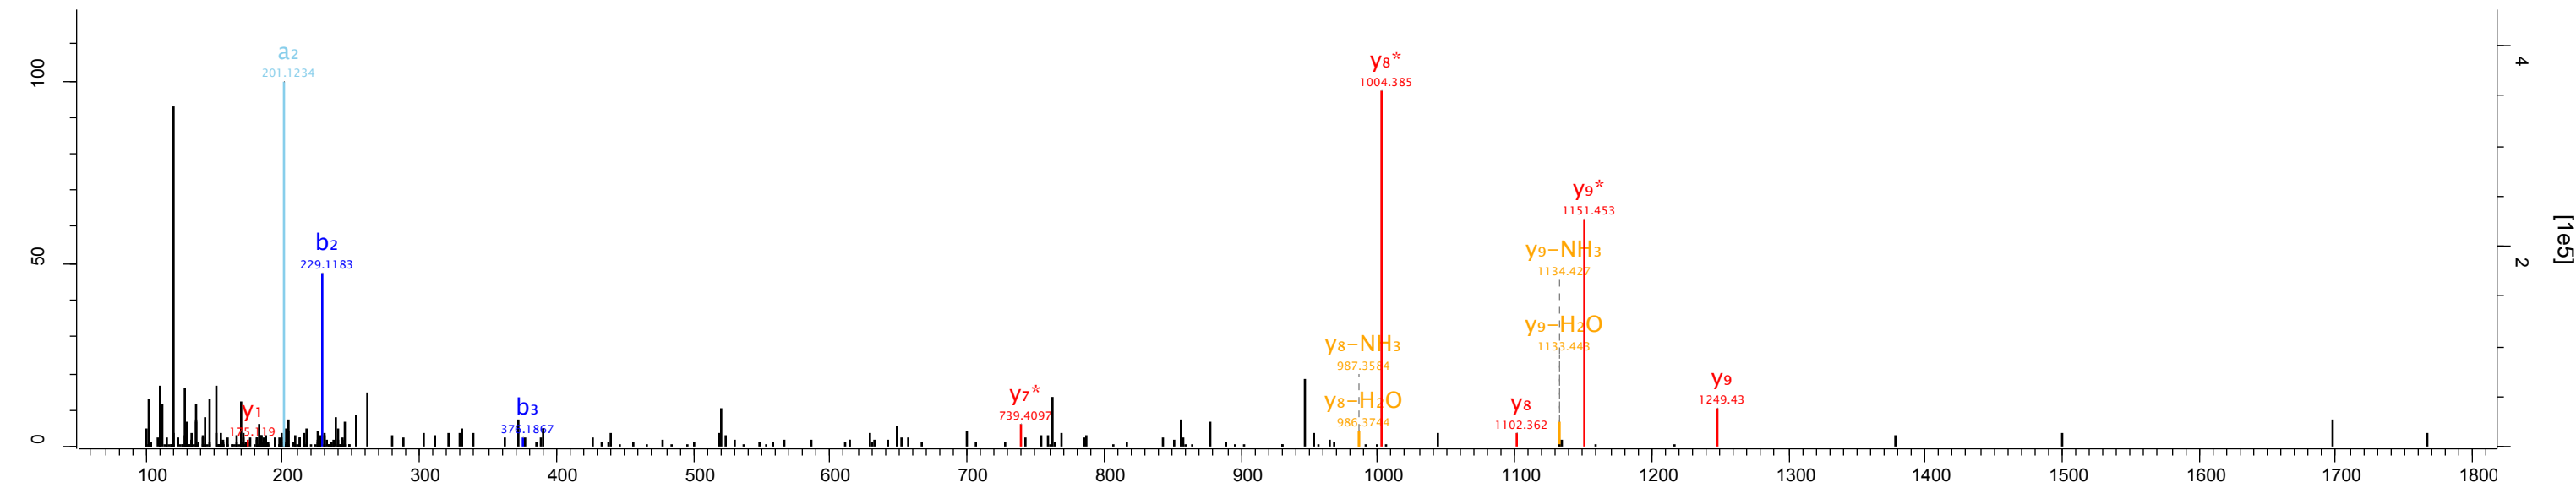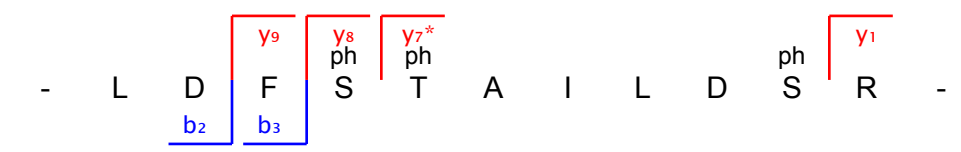

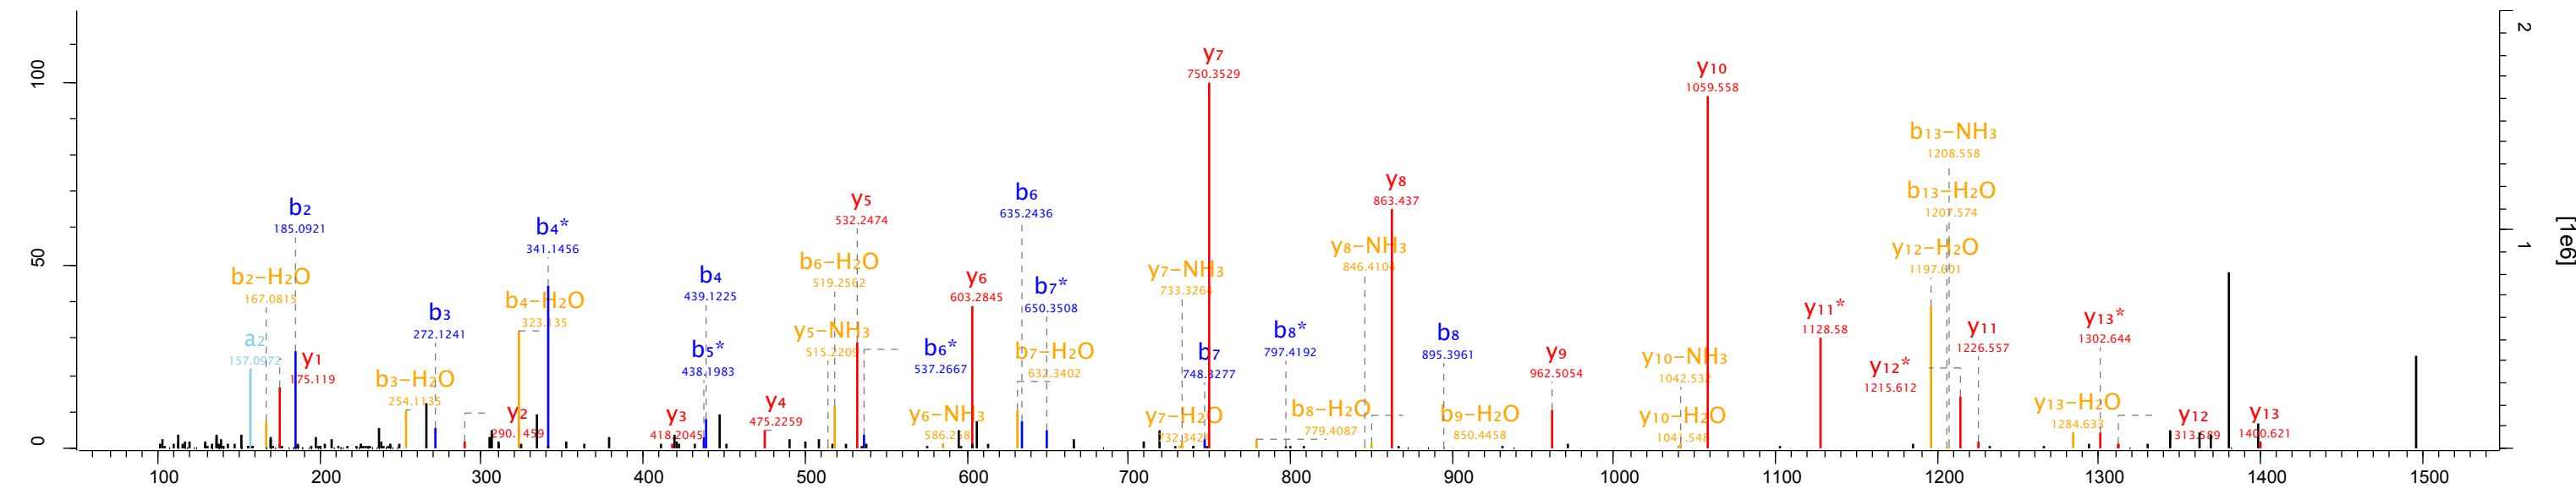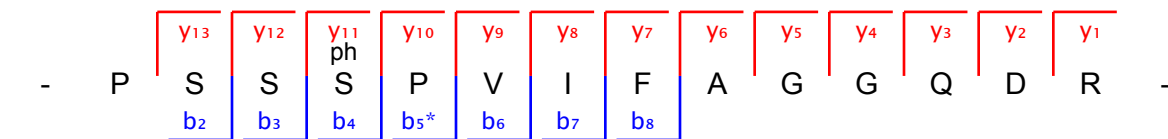

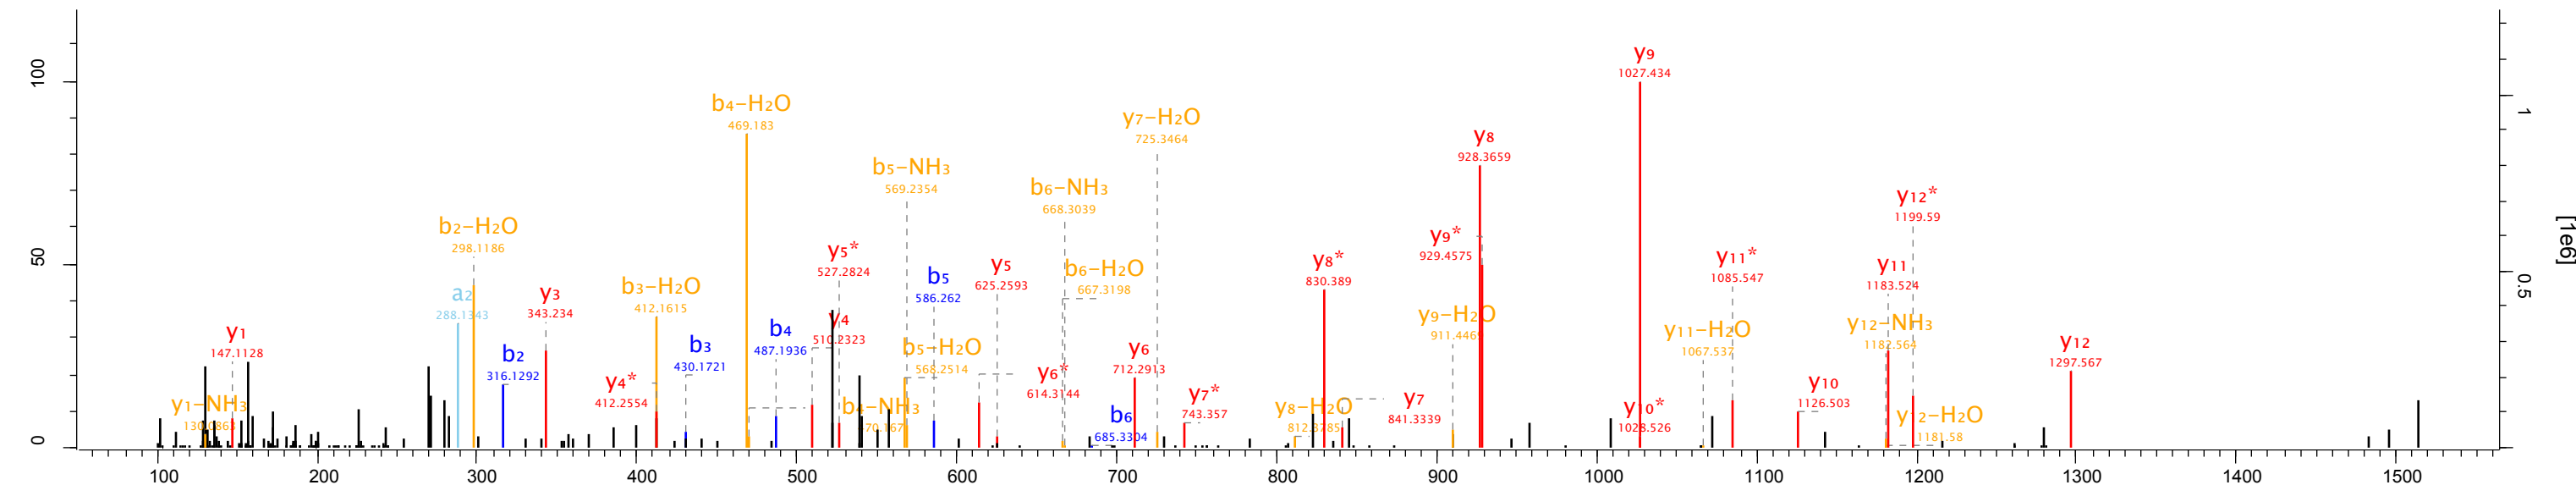

- E W N G V V S E S D S P V K -

Fragmentation mapping (b and y ions):

- b<sub>2</sub> (under W)
- b<sub>3</sub> (under N)
- b<sub>4</sub> (under G)
- b<sub>5</sub> (under V)
- b<sub>6</sub> (under V)
- y<sub>1</sub> (under K)
- y<sub>3</sub> (under P)
- y<sub>4</sub> (under S)
- y<sub>5</sub> (under D)
- y<sub>6</sub> (under S)
- y<sub>7</sub> (under E)
- y<sub>8</sub> (under S)
- y<sub>9</sub> (under V)
- y<sub>10</sub> (under V)
- y<sub>11</sub> (under G)
- y<sub>12</sub> (under N)

Raw file 20171215\_MaS\_33SR\_LMH\_phospho\_03 Scan 10574 Method FTMS; HCD Score 104.24 m/z 947.11 Gene names NCOR2

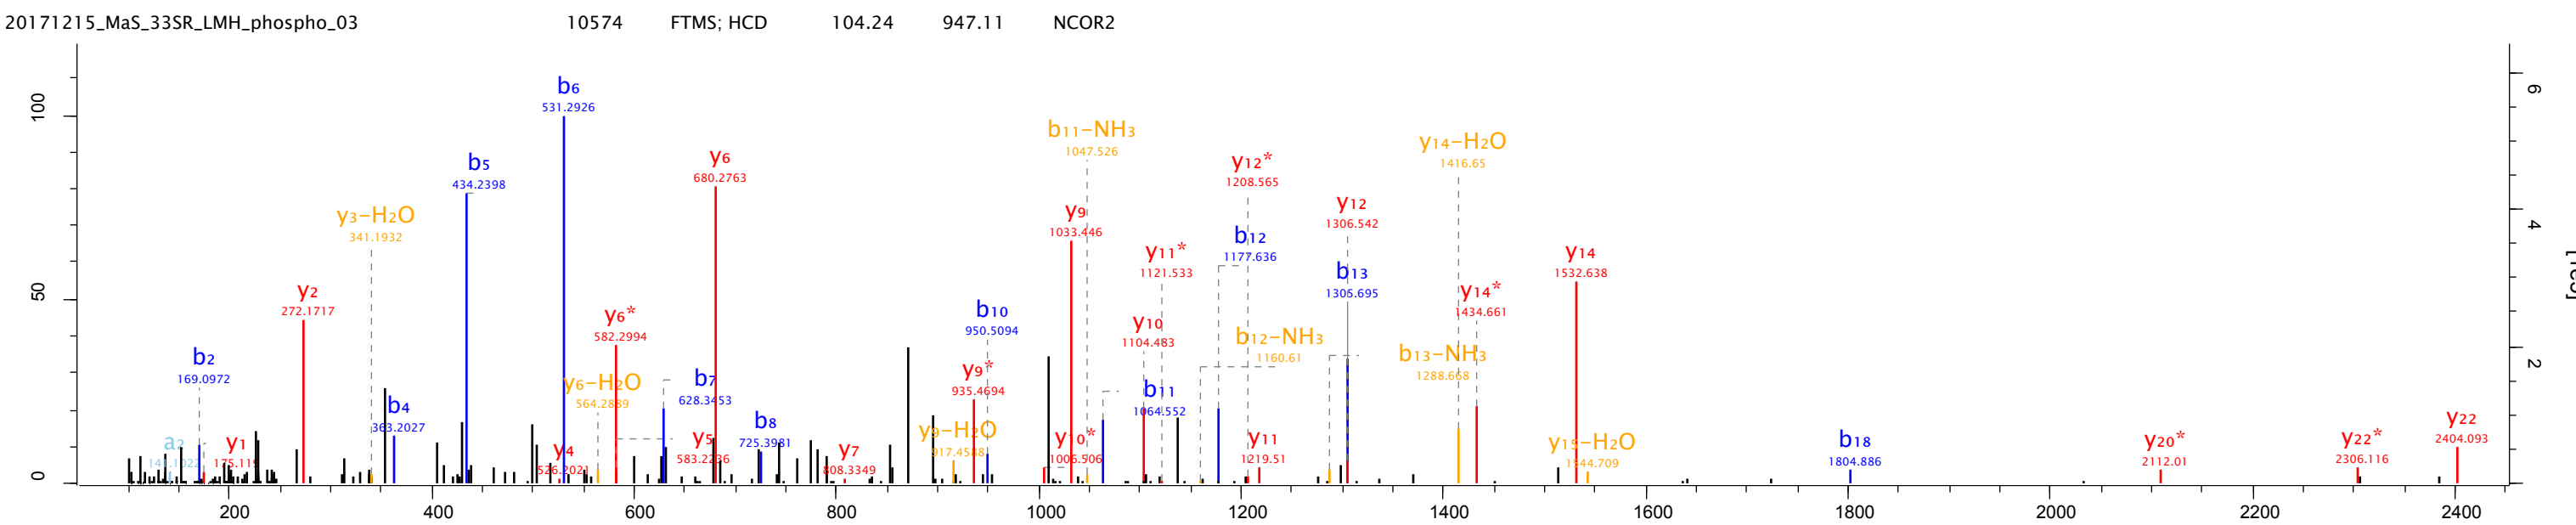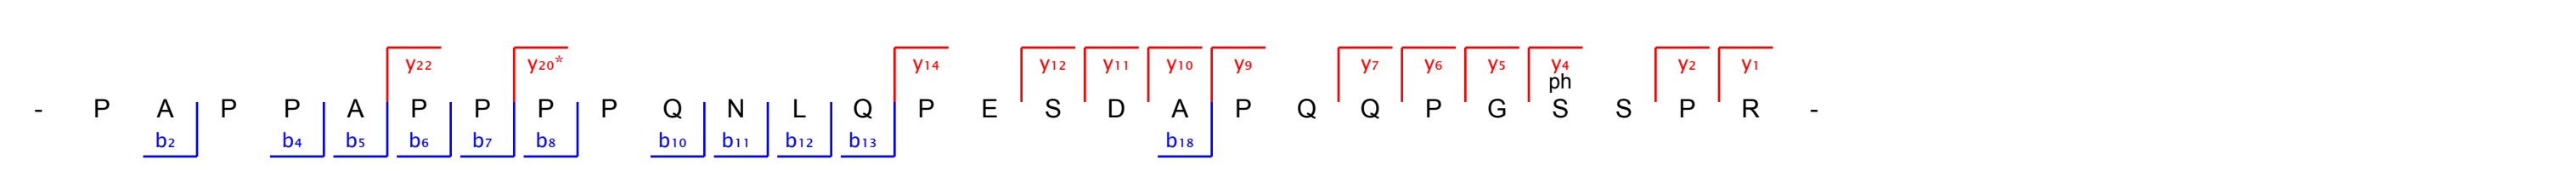



Raw file 20171215\_MaS\_33SR\_LMH\_phospho\_03 Scan 11274 Method FTMS; HCD Score 144.92 m/z 1006.13 Gene names ARHGAP17

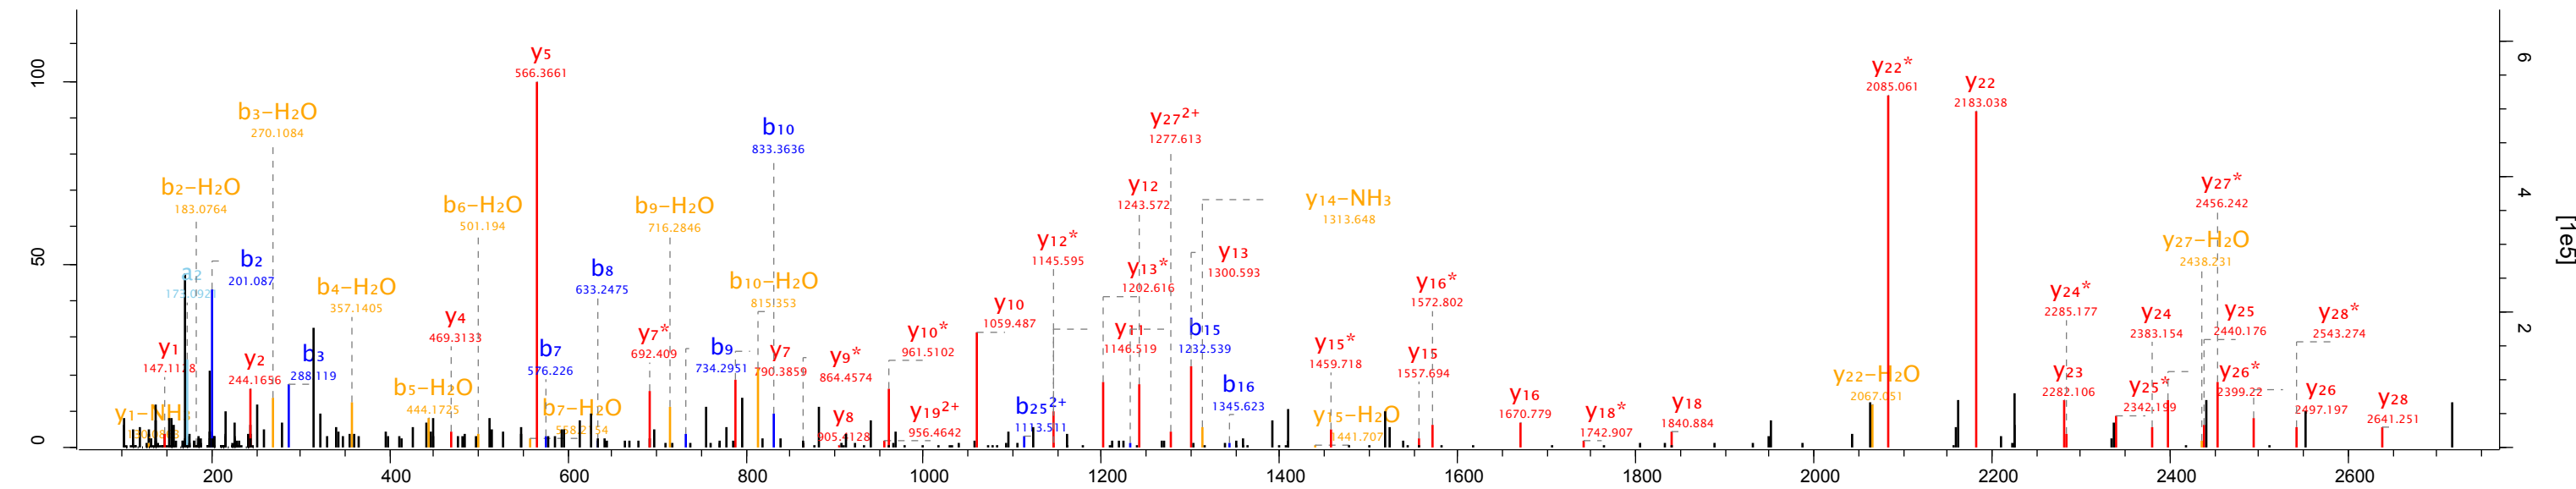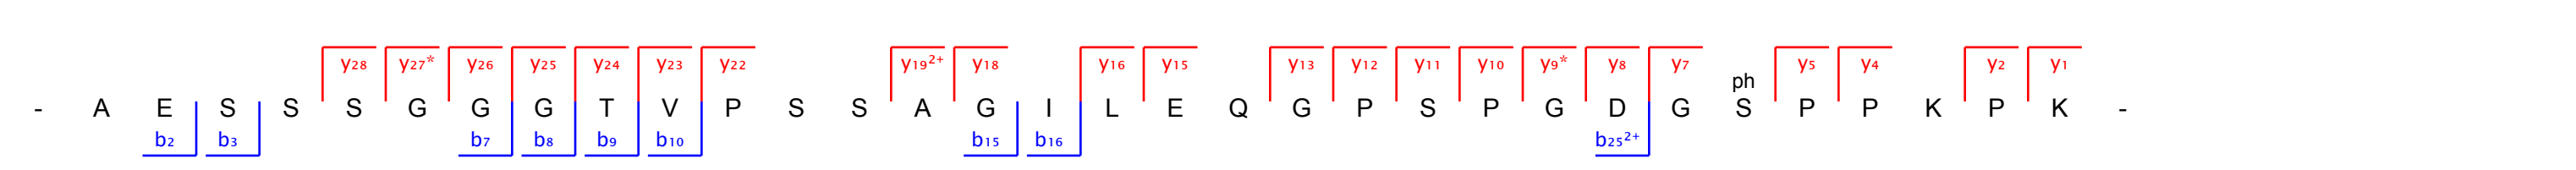

Raw file: 20171215\_MaS\_33SR\_LMH\_phospho\_03  
 Scan: 11534 Method: FTMS; HCD Score: 182.62 m/z: 1008.45 Gene names: RAB11FIP5

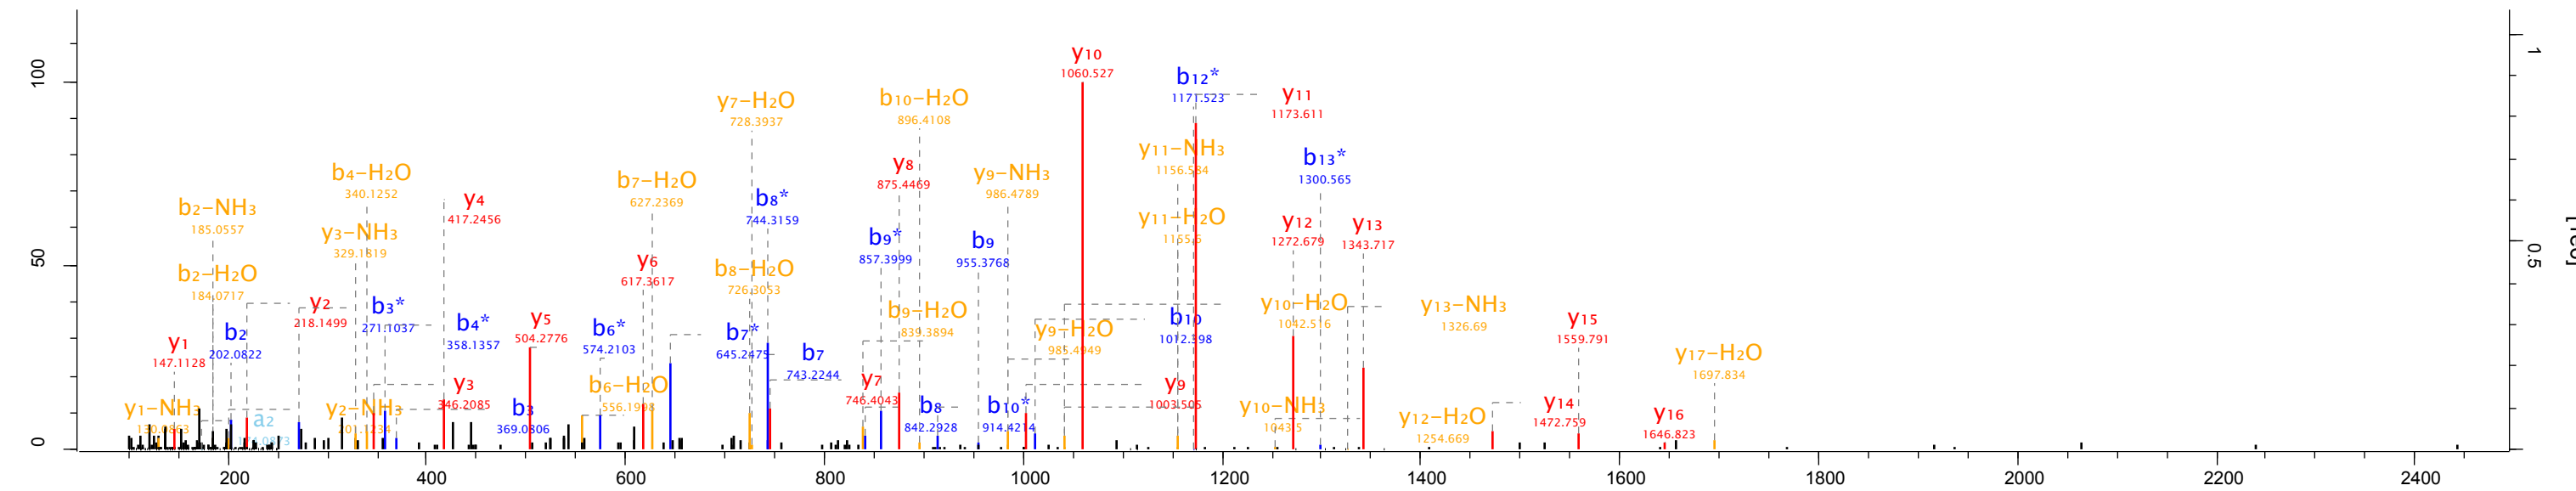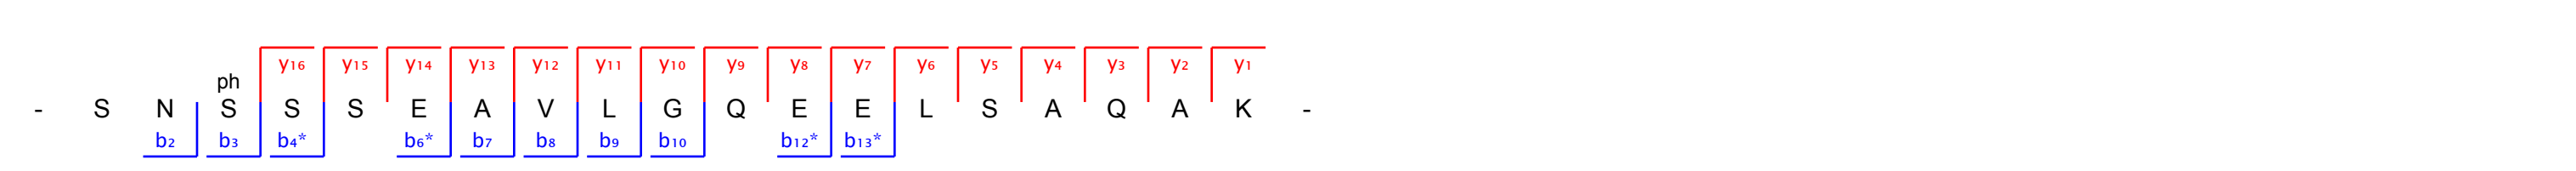

Raw file: 20171215\_MaS\_33SR\_LMH\_phospho\_03  
 Scan: 11824 Method: FTMS; HCD Score: 164.63 m/z: 712.33 Gene names: EPHA2

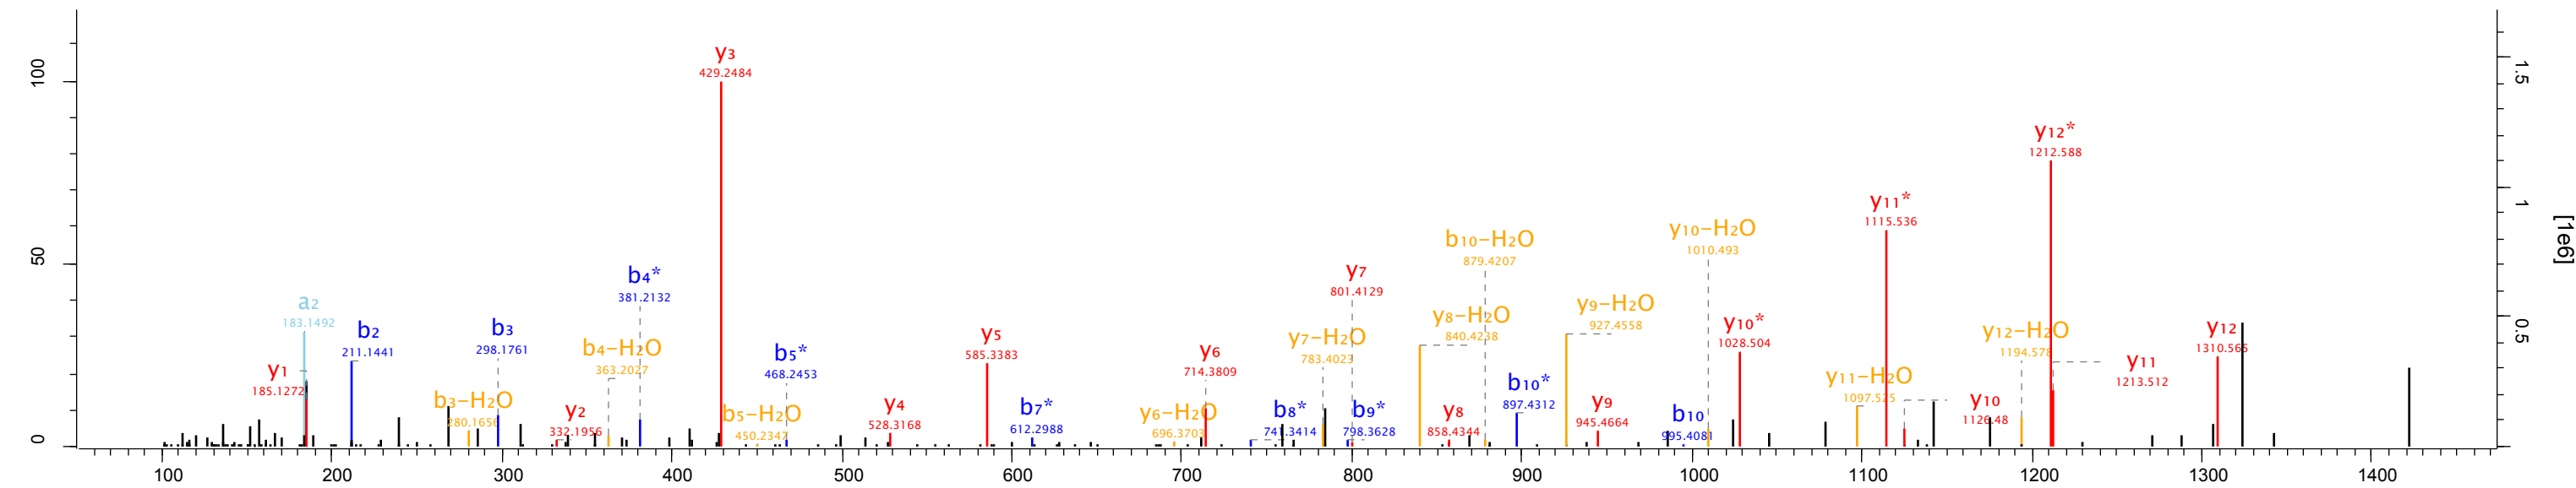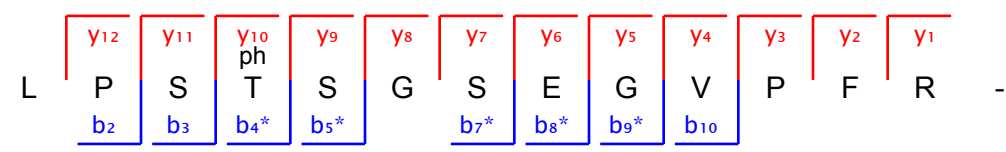

Raw file 20171215\_MaS\_33SR\_LMH\_phospho\_03 Scan 12014 Method FTMS; HCD Score 151.06 m/z 1106 Gene names MPDZ

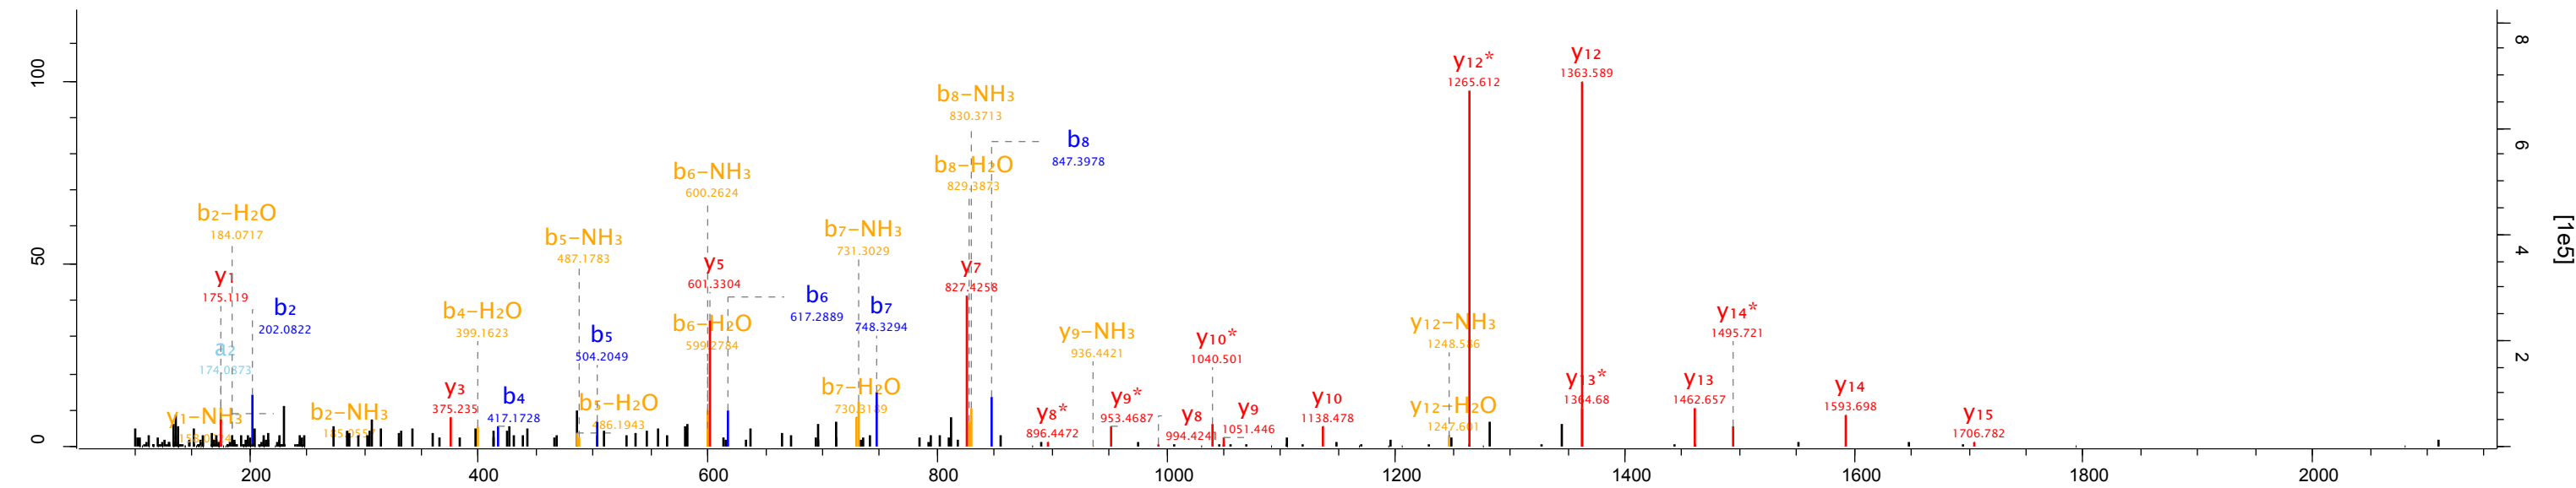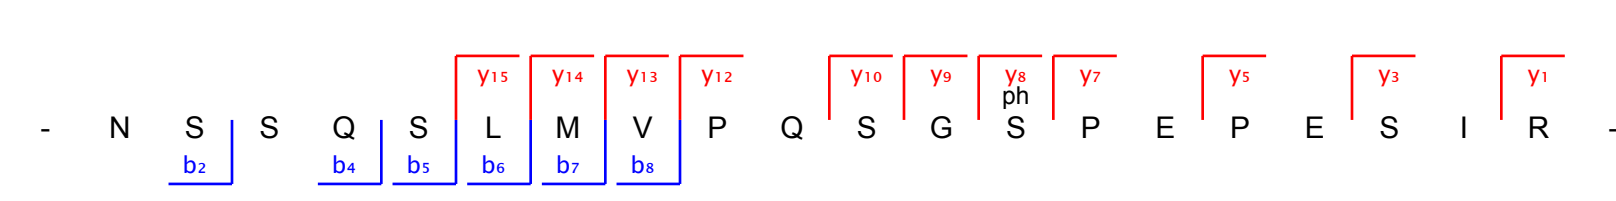

20171215\_MaS\_33SR\_LMH\_phospho\_03 12744 FTMS; HCD 109.14 754.34 CNPY2

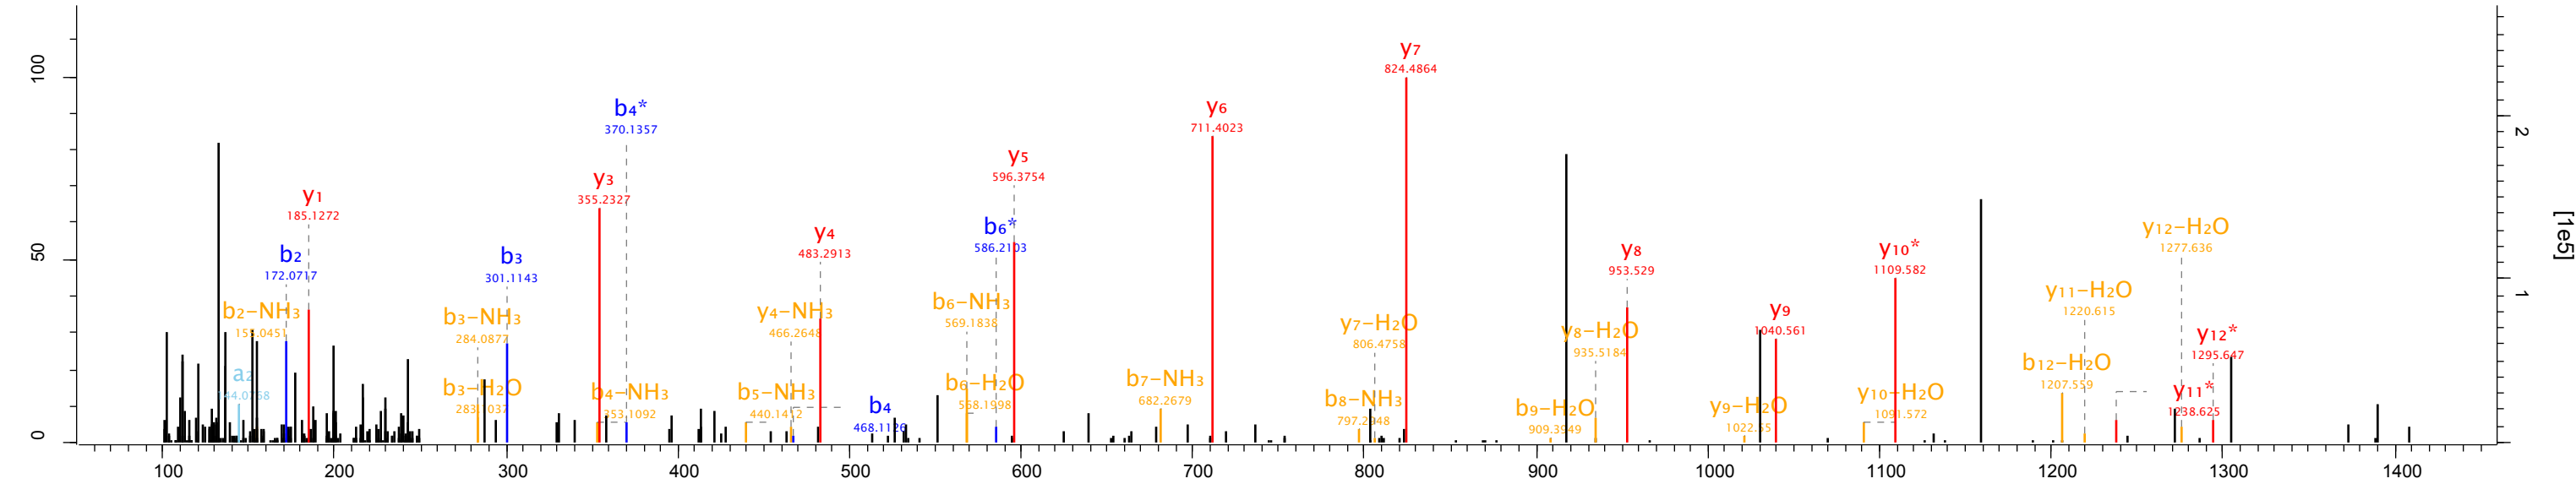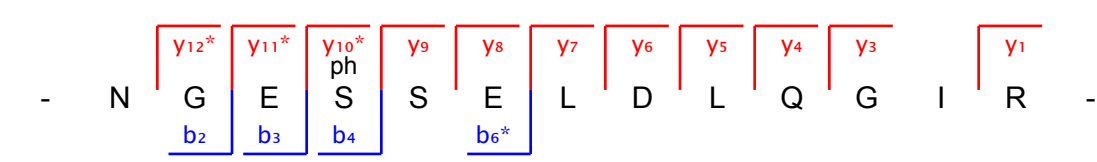

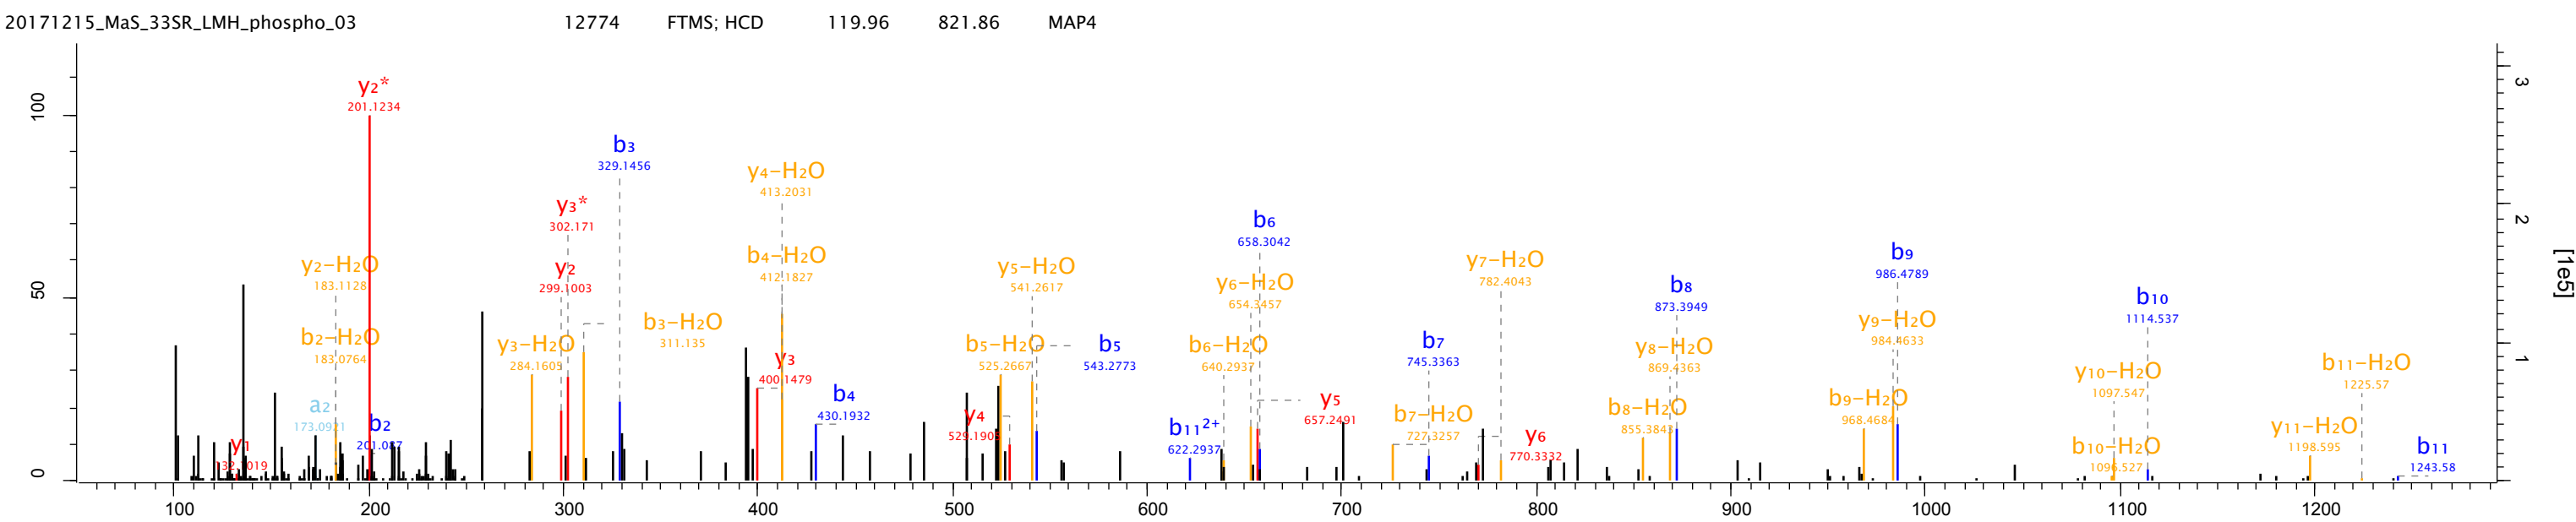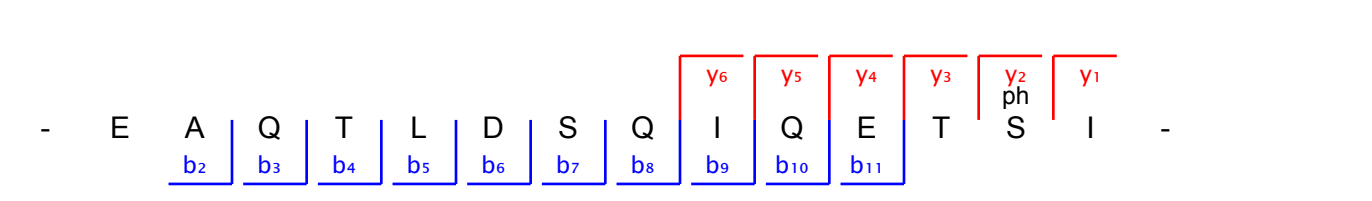

Raw file 20171215\_MaS\_33SR\_LMH\_phospho\_03 Scan 12954 Method FTMS; HCD Score 172.56 m/z 878.85 Gene names MTMR9

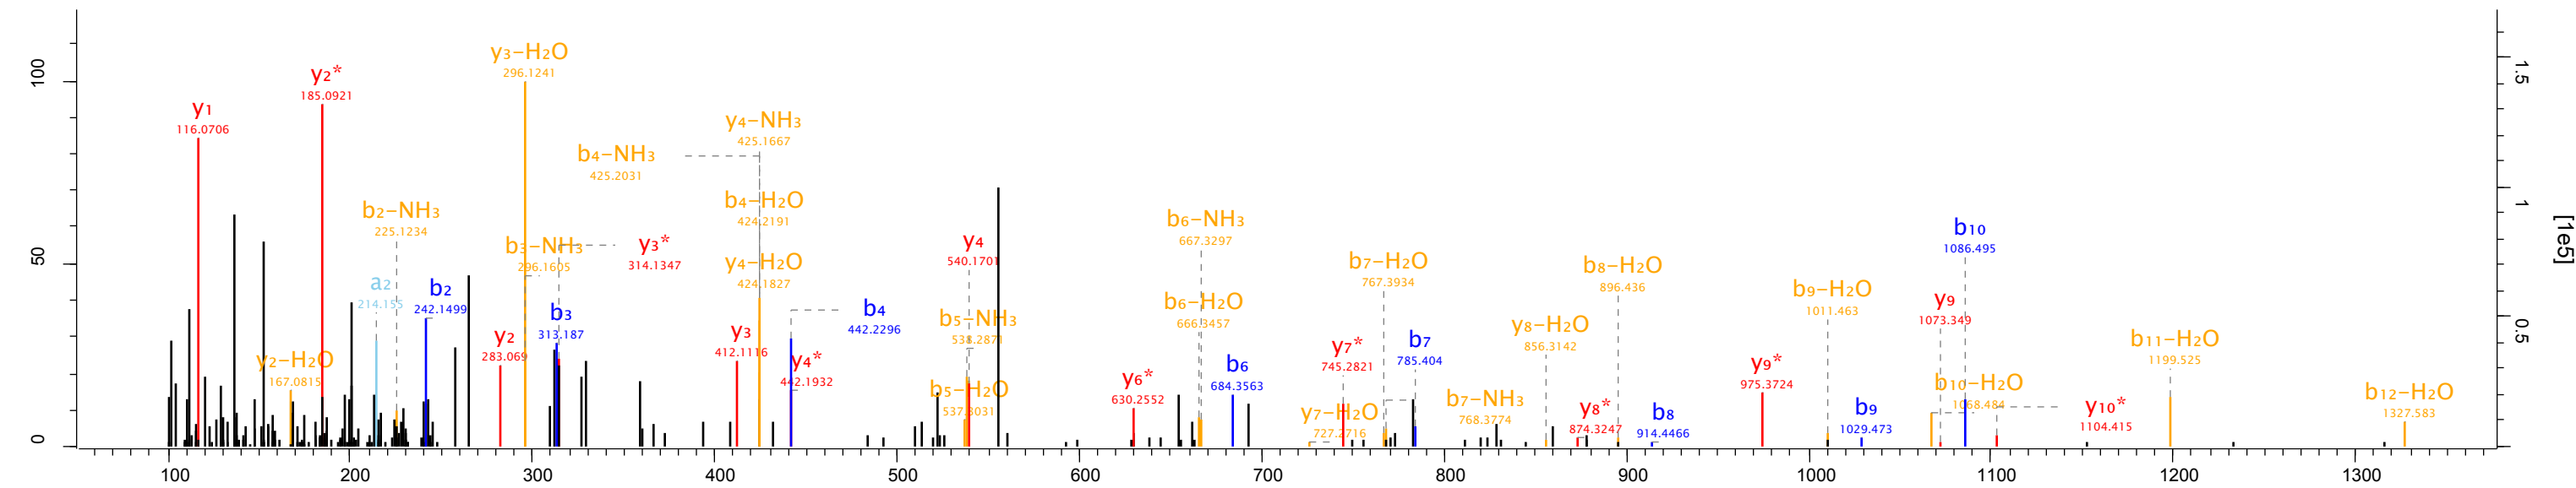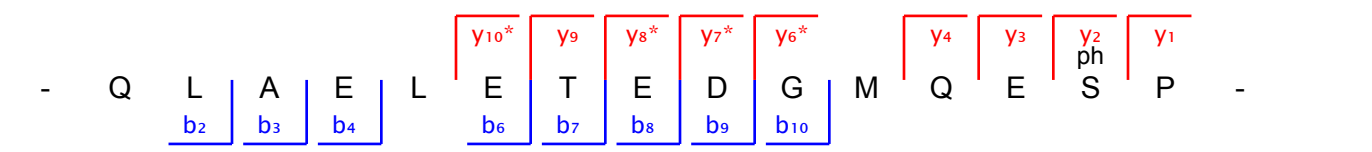

Raw file 20171215\_MaS\_33SR\_LMH\_phospho\_03 Scan 13194 Method FTMS; HCD Score 191.97 m/z 1198.53 Gene names USP34

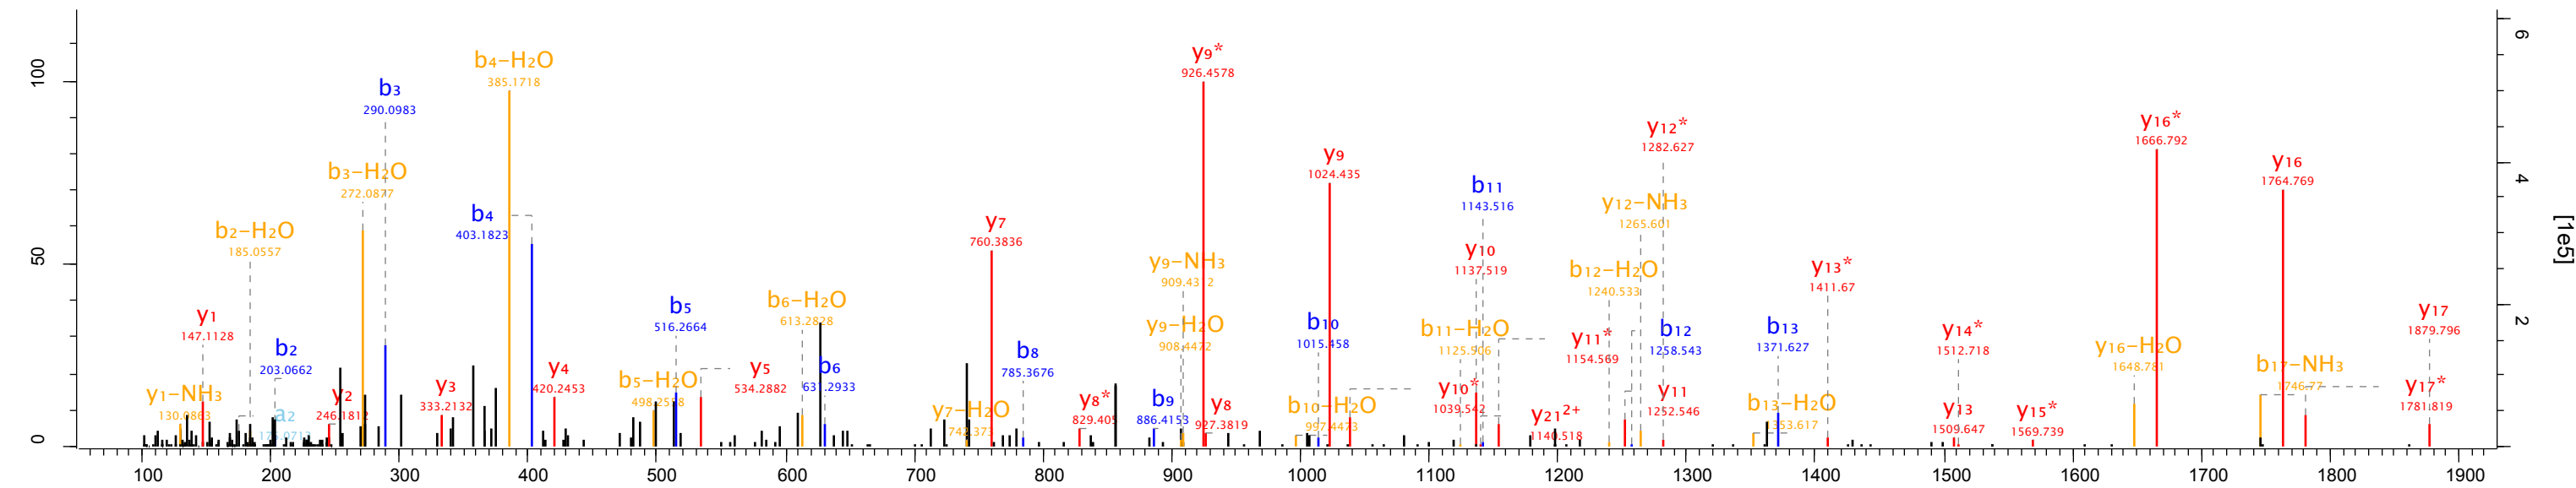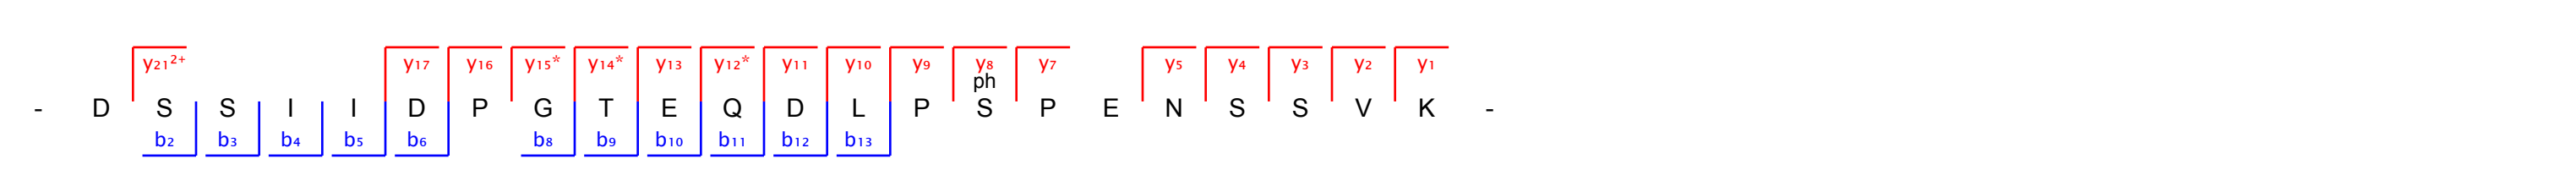



Raw file 20171215\_MaS\_33SR\_LMH\_phospho\_03 Scan 13494 Method FTMS; HCD Score 165.77 m/z 819.72 Gene names LARP4

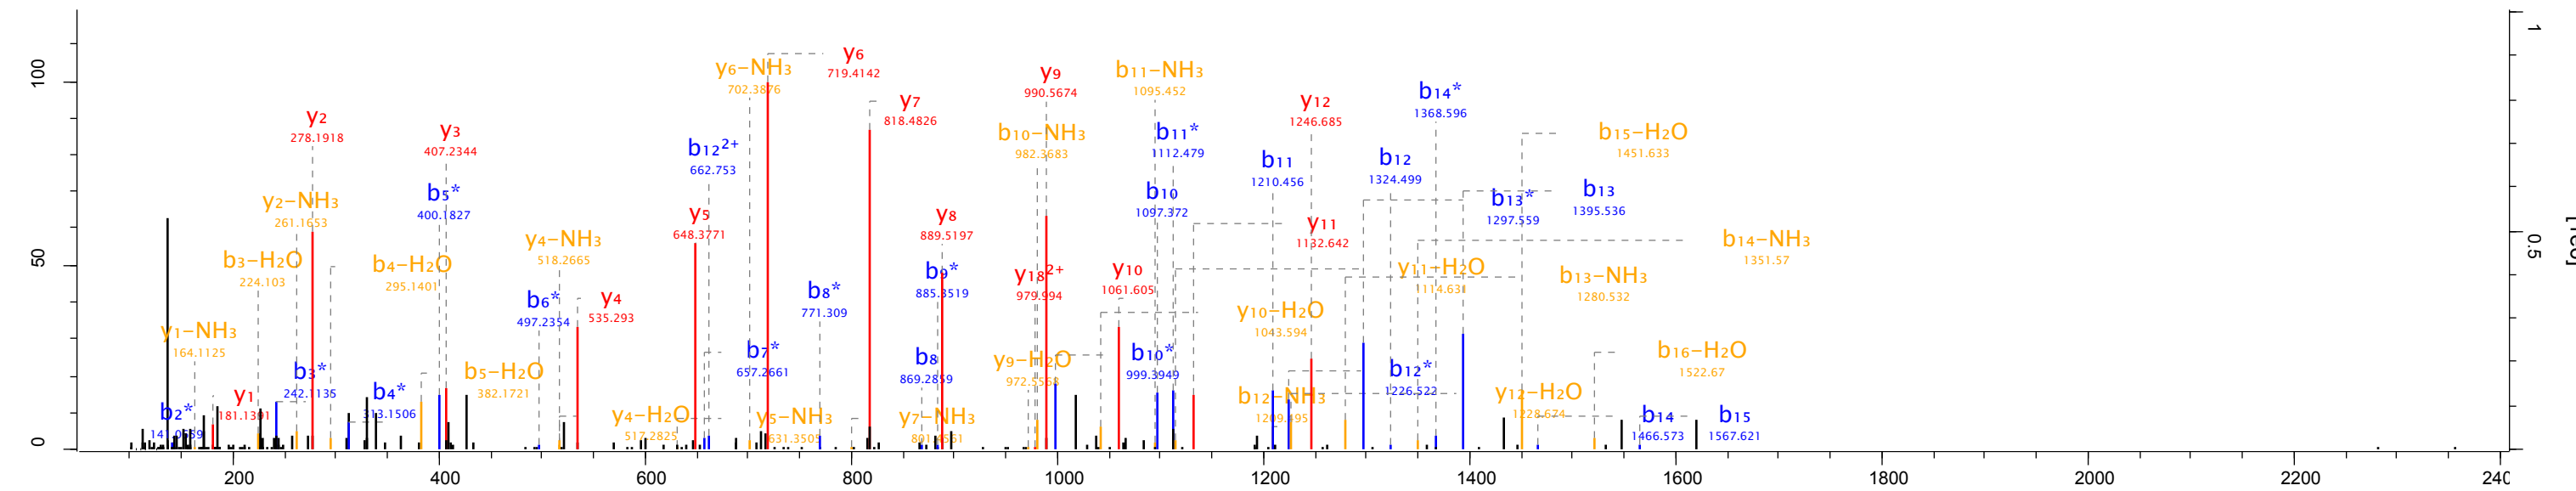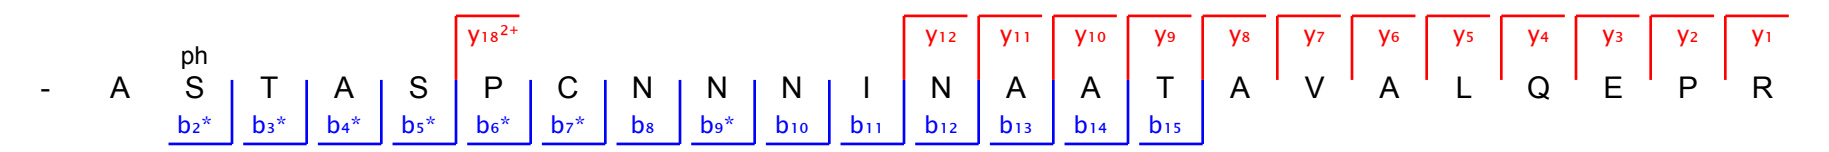

Raw file 20171215\_MaS\_33SR\_LMH\_phospho\_03 Scan 13564 Method FTMS; HCD Score 211.49 m/z 789.87 Gene names NUP98

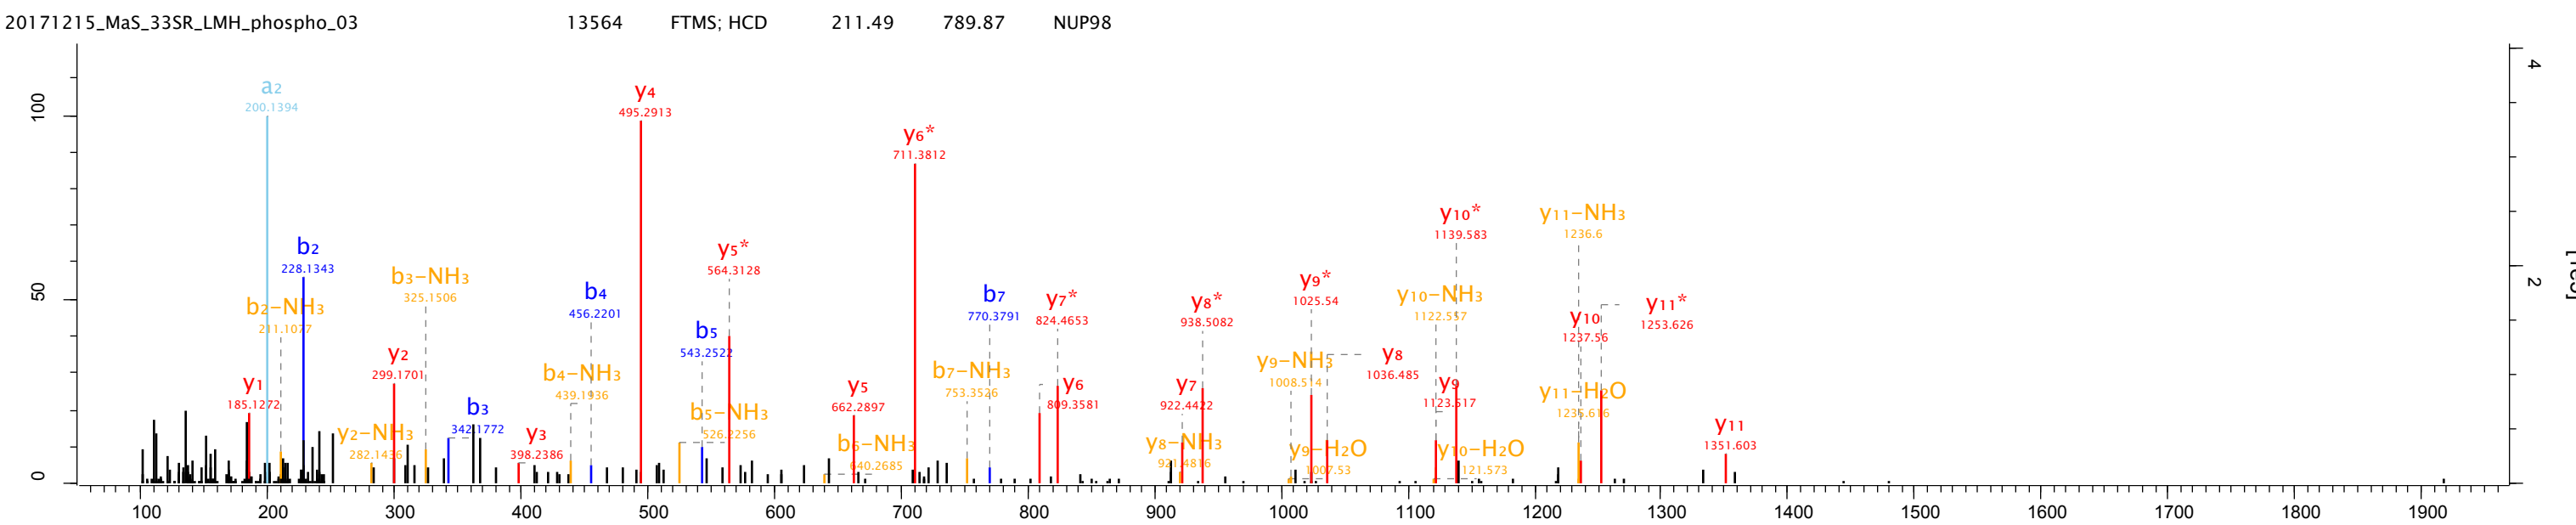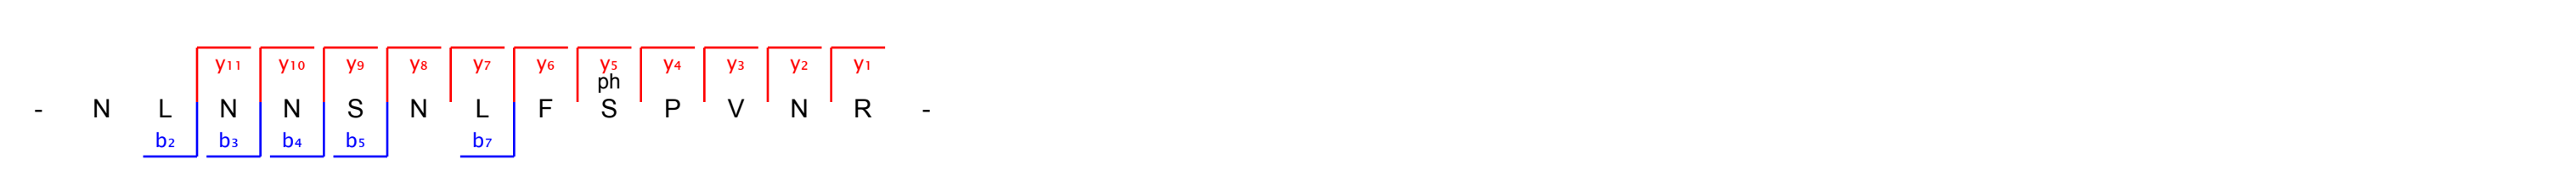

Raw file 20171215\_MaS\_33SR\_LMH\_phospho\_03 Scan 13654 Method FTMS; HCD Score 157.9 m/z 1042.98 Gene names AKAP2

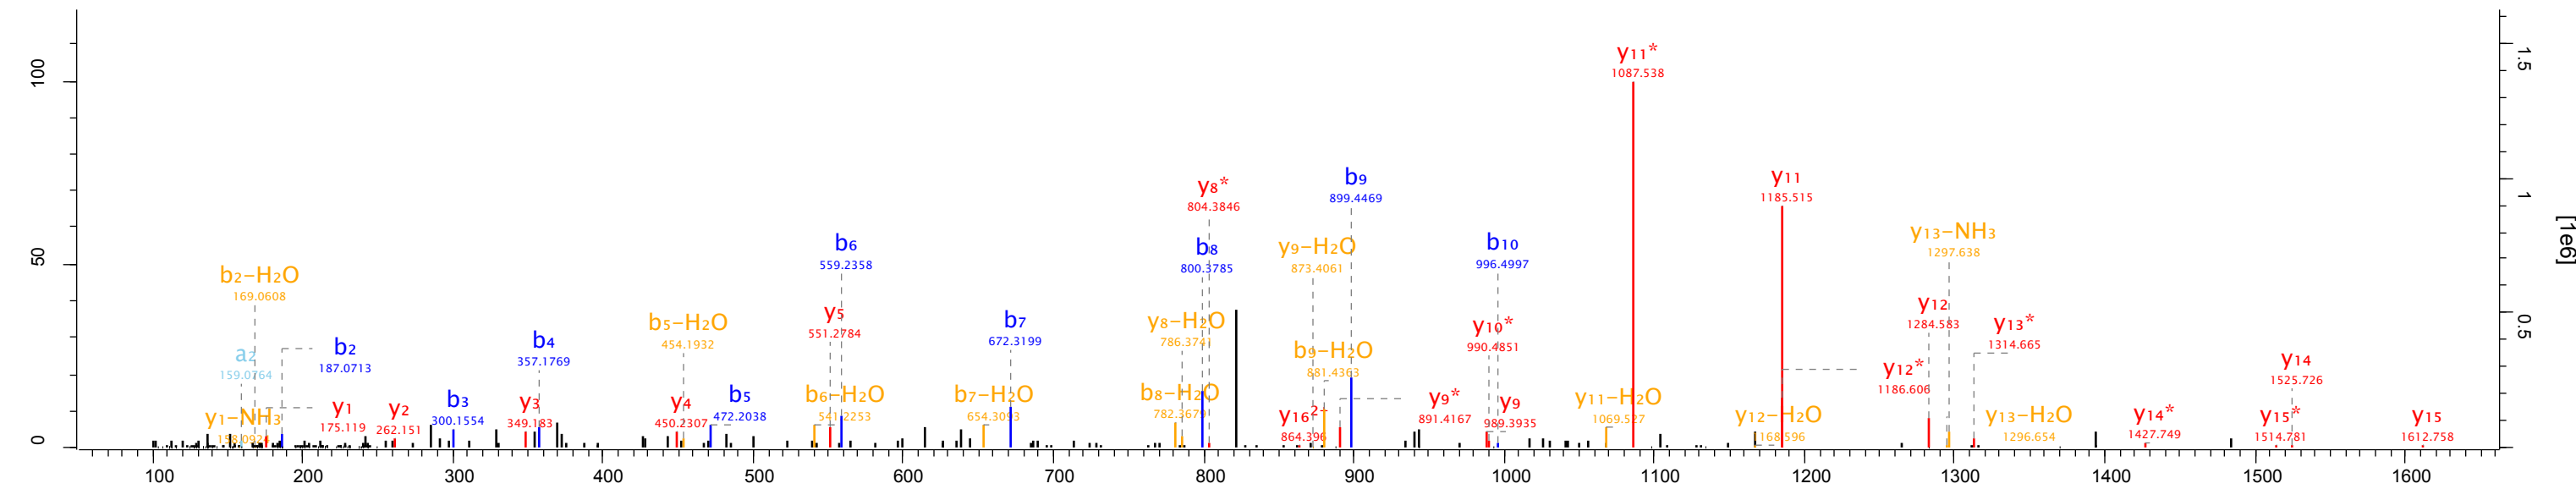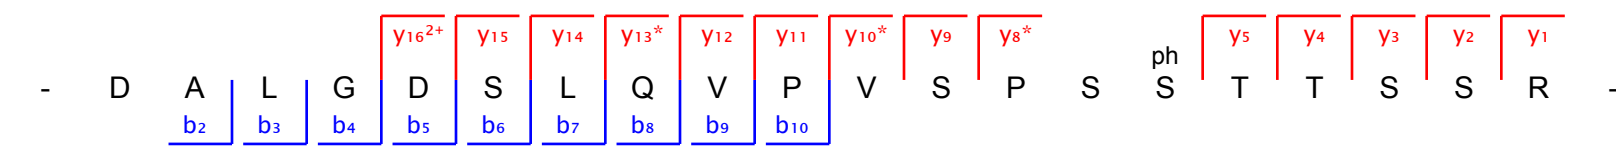

Raw file 20171215\_MaS\_33SR\_LMH\_phospho\_03 Scan 14164 Method FTMS; HCD Score 197.51 m/z 899.39 Gene names C9orf16

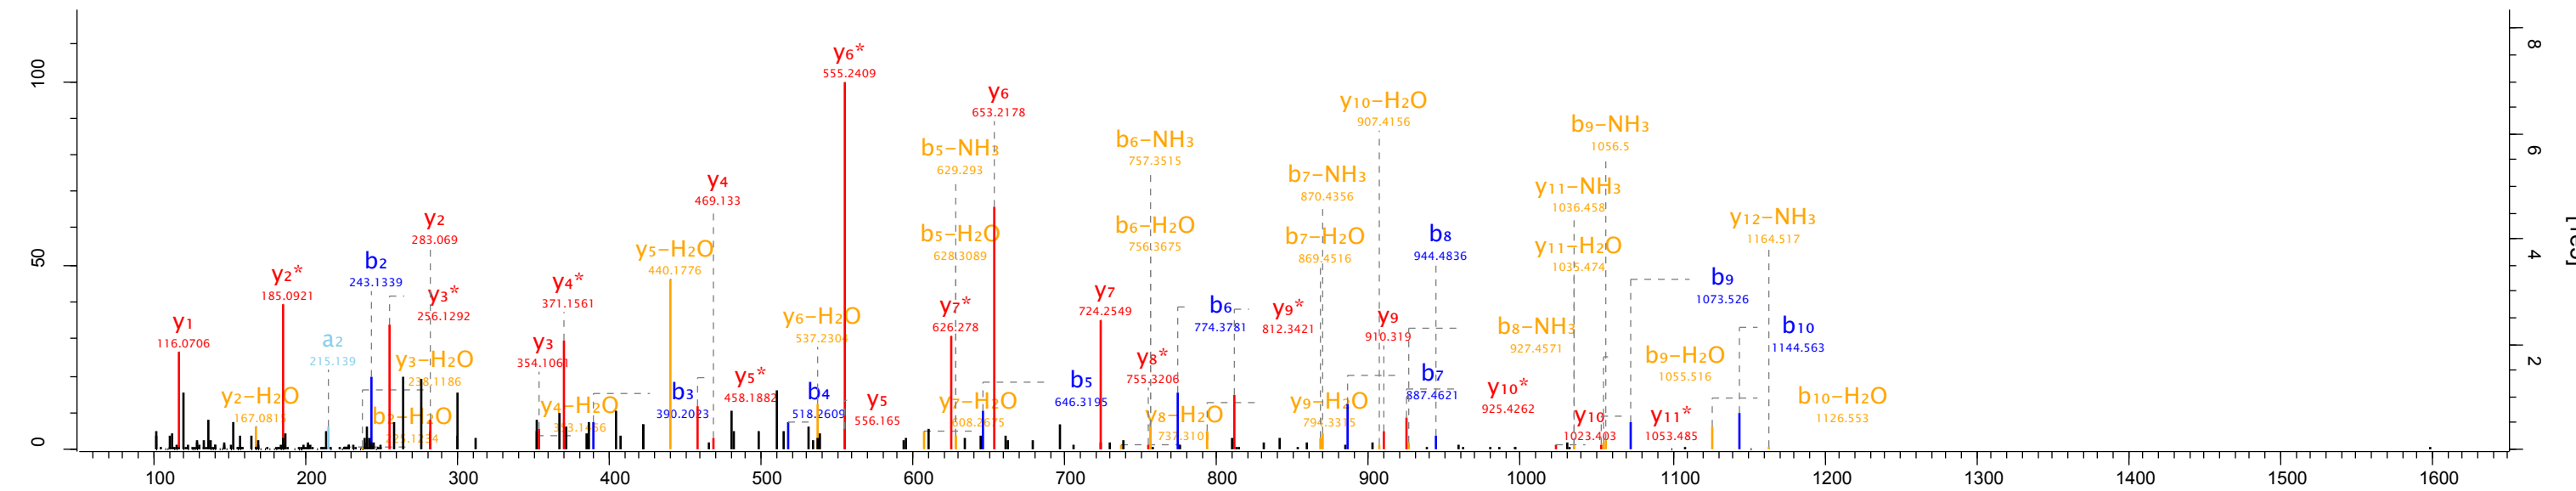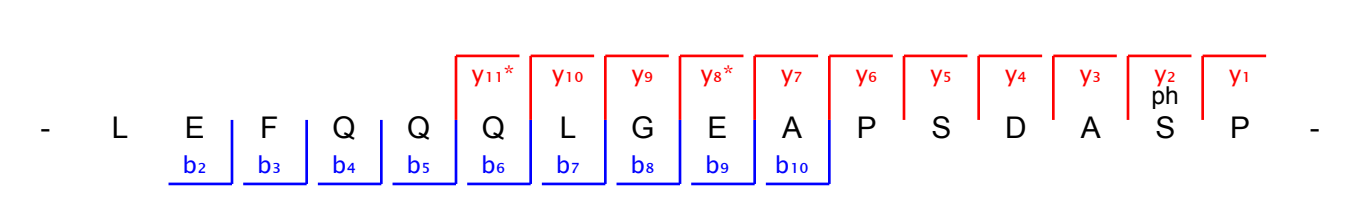

Raw file 20171215\_MaS\_33SR\_LMH\_phospho\_03 Scan 14174 Method FTMS; HCD Score 65.04 m/z 687.34 Gene names DOCK5

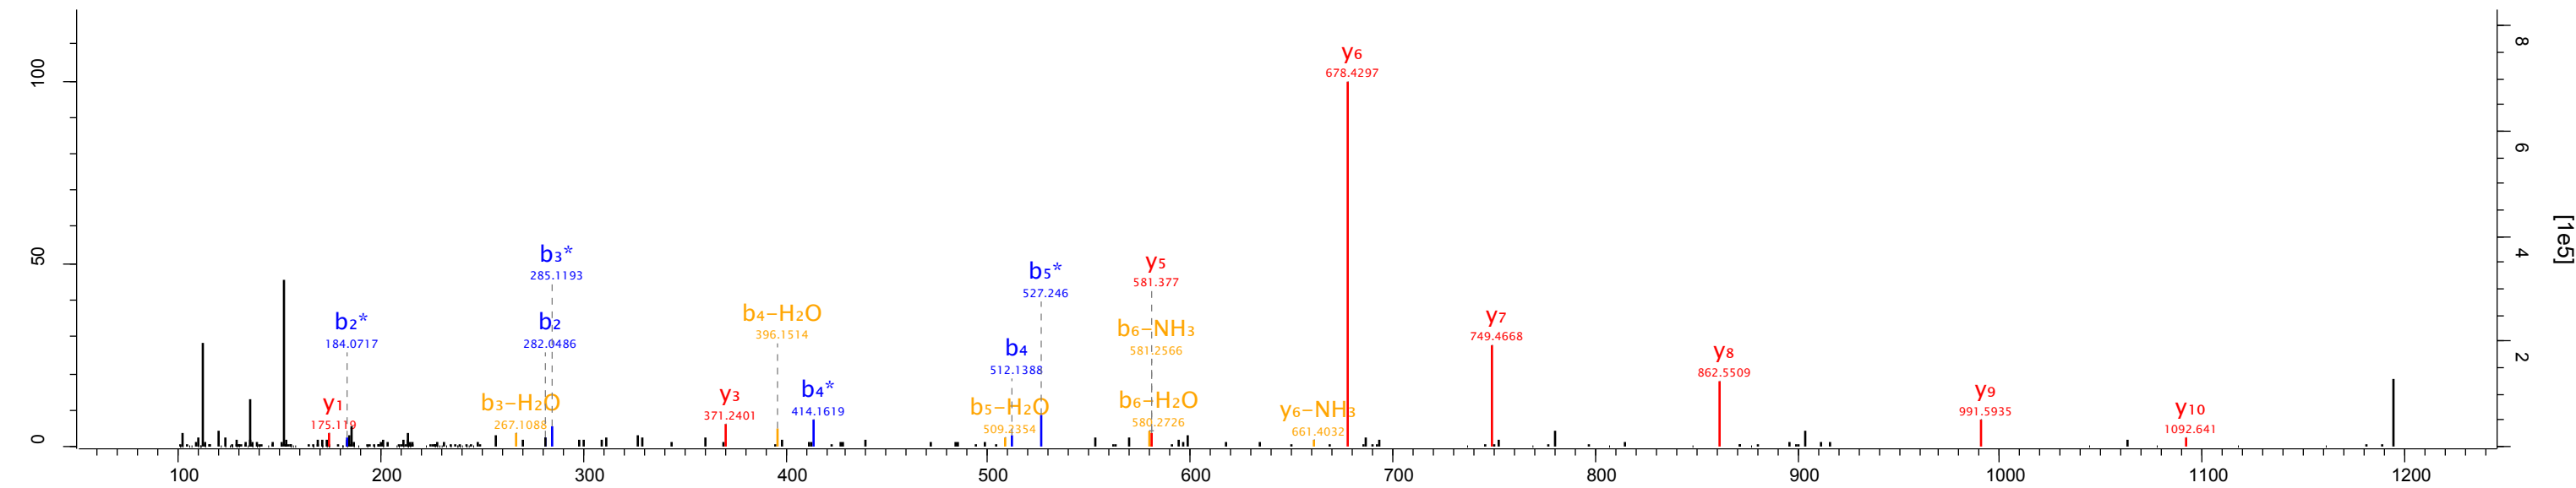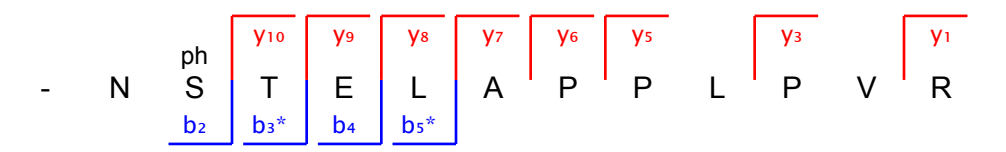

20171215\_MaS\_33SR\_LMH\_phospho\_03 14404 FTMS; HCD 218.64 857.91 FAM76B

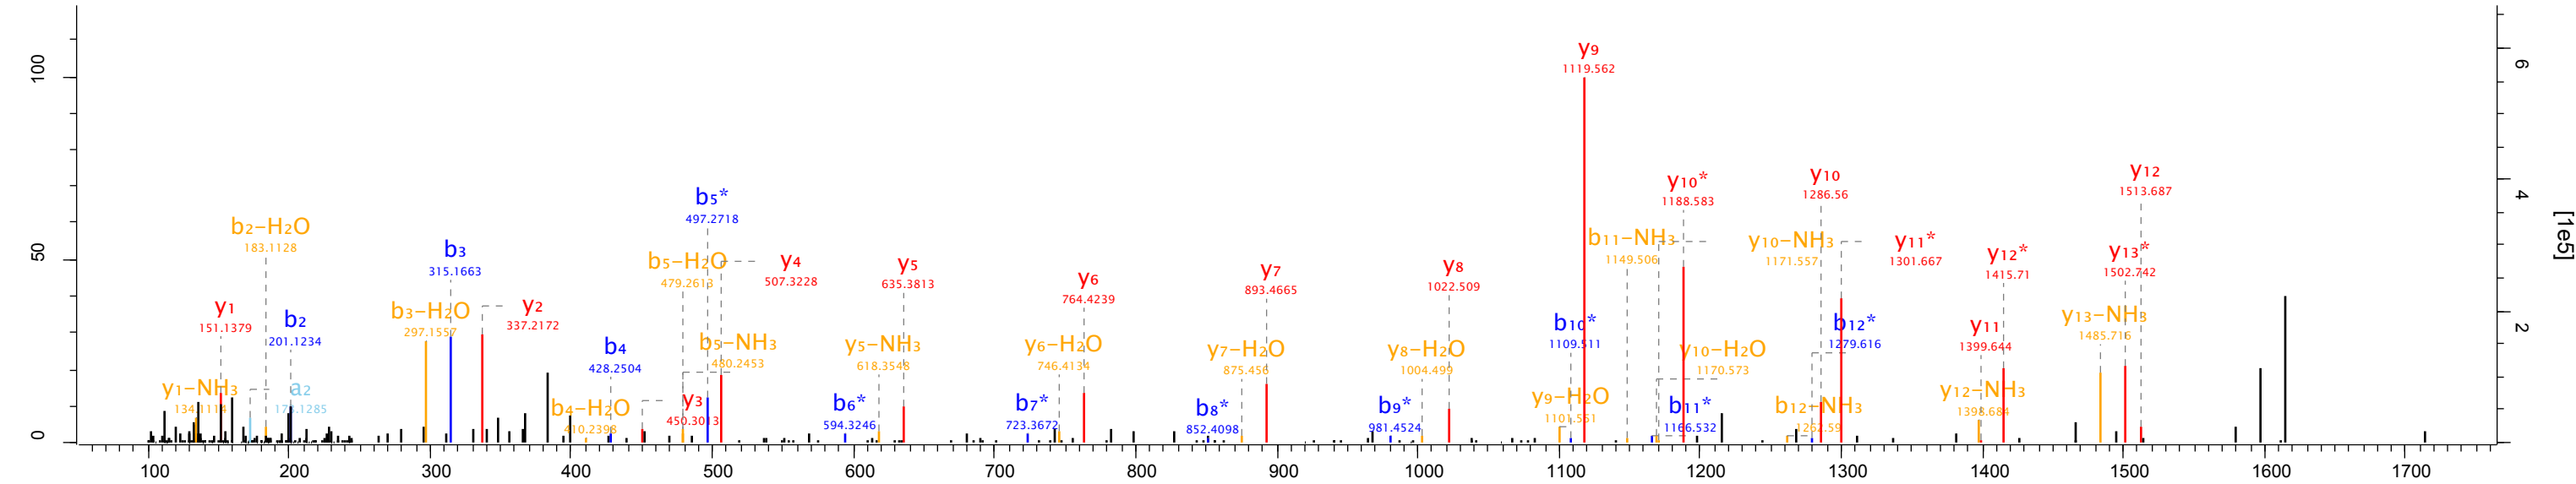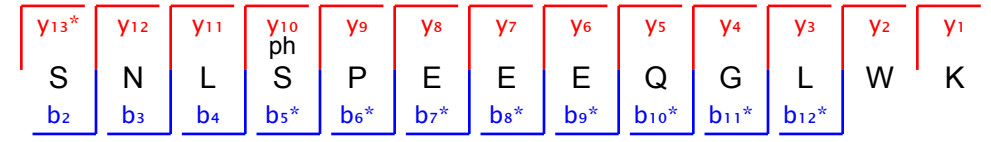

20171215\_MaS\_33SR\_LMH\_phospho\_03 14794 FTMS; HCD 232.78 891.32 OSTF1

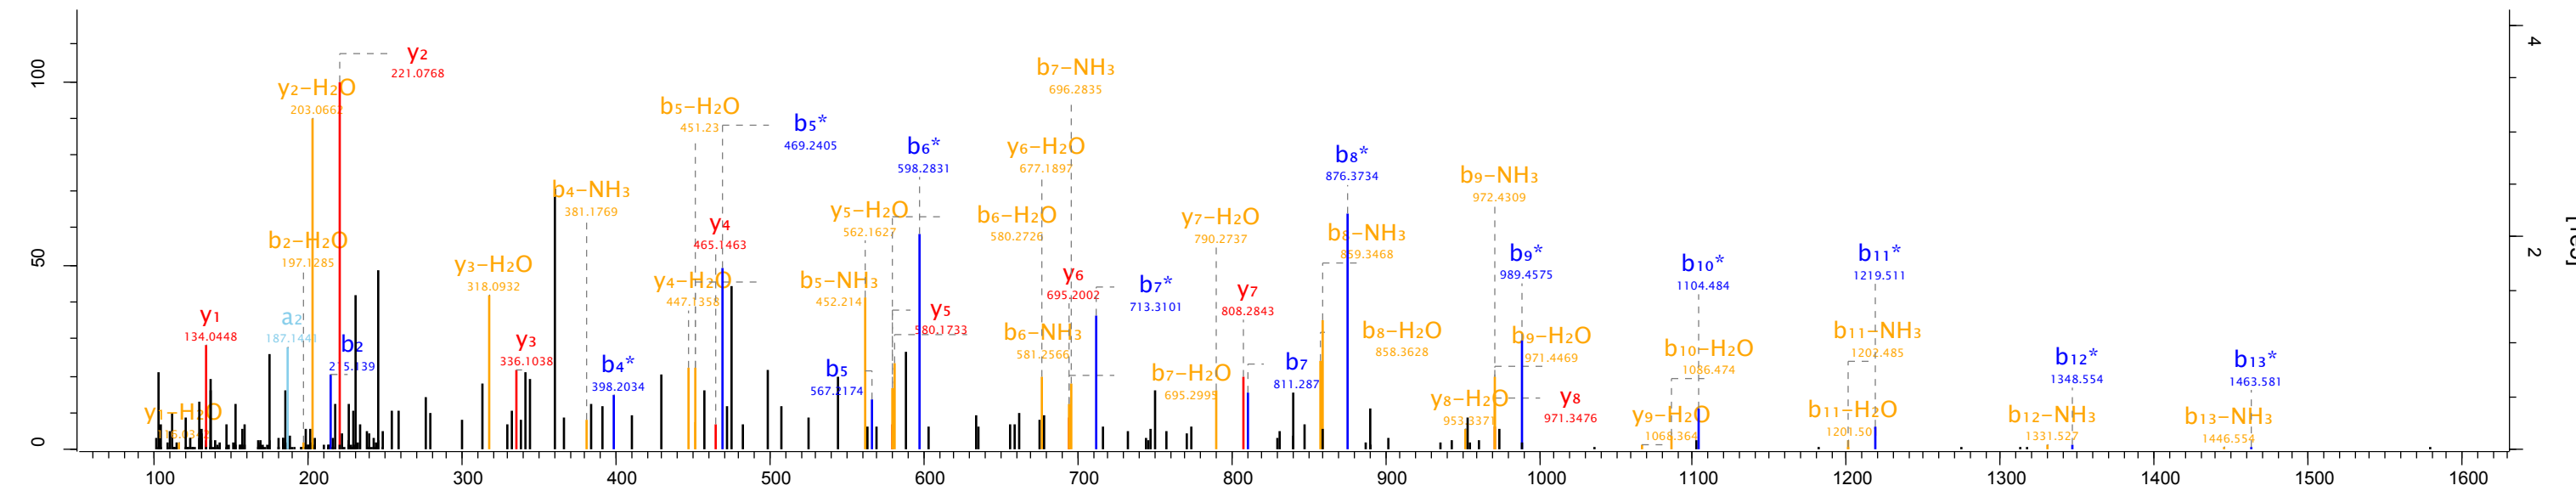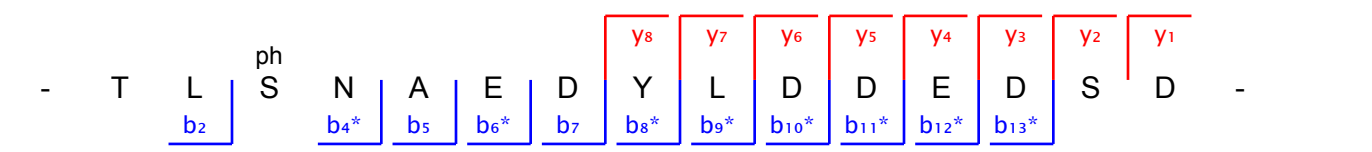

[1e5]

Raw file 20171215\_MaS\_33SR\_LMH\_phospho\_03 Scan 15534 Method FTMS; HCD Score 66.83 m/z 963.05 Gene names MCM3

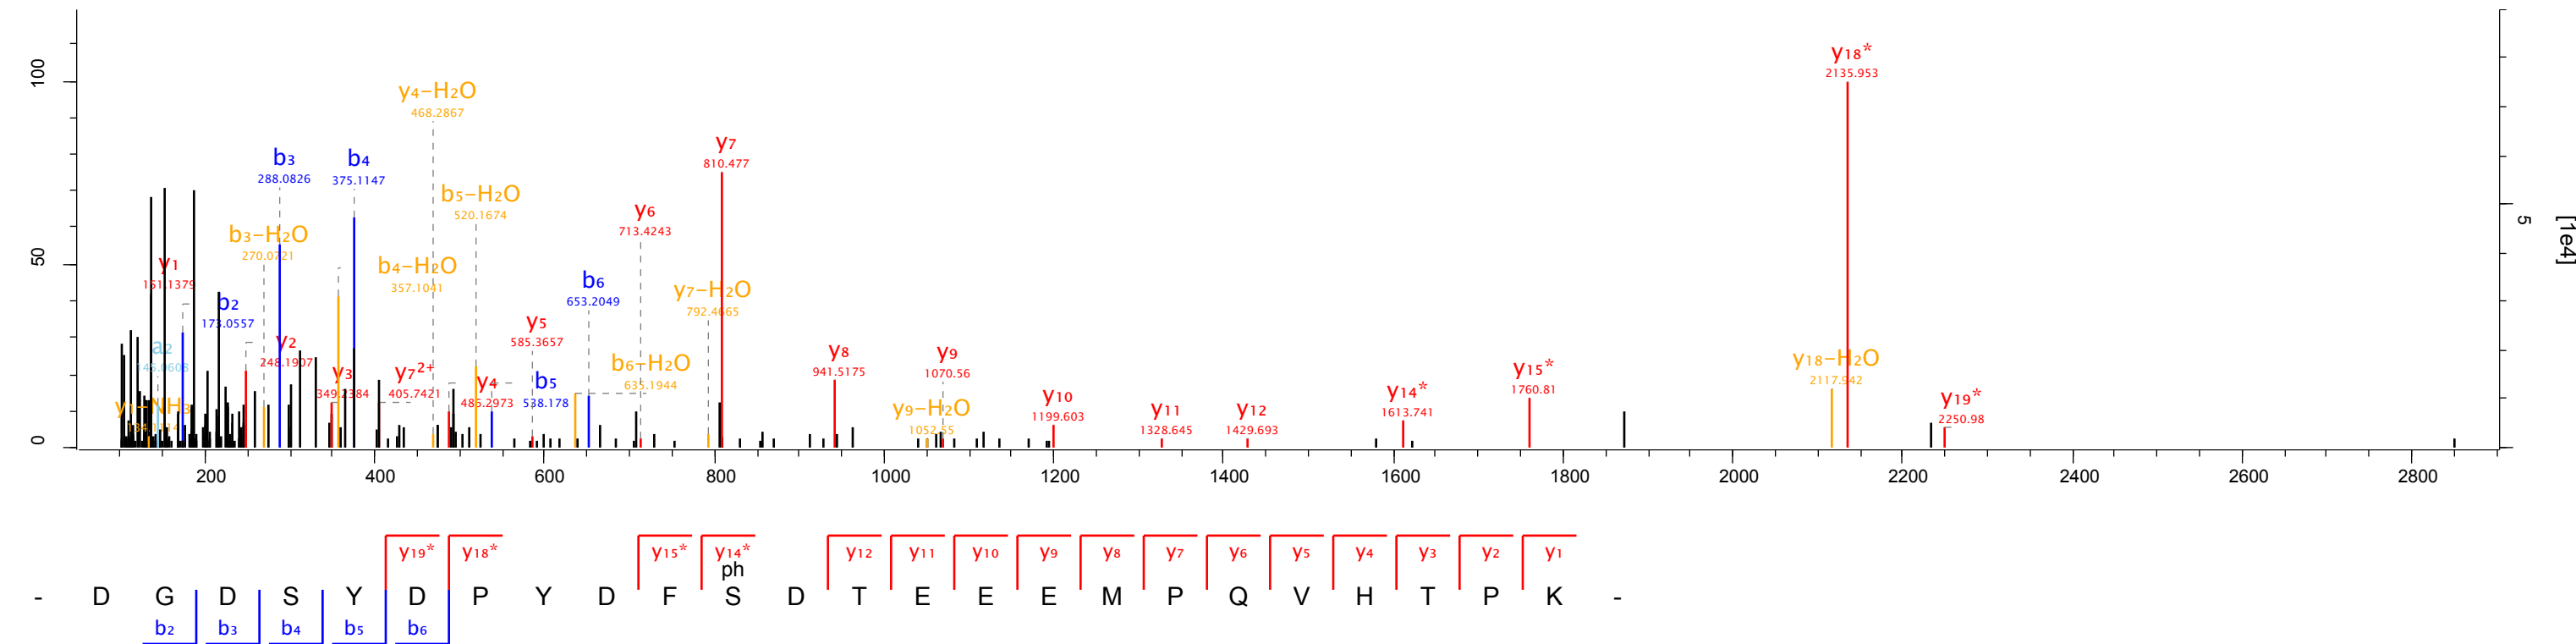



Raw file: 20171215\_MaS\_33SR\_LMH\_phospho\_03  
 Scan: 17174 Method: FTMS; HCD Score: 174.68 m/z: 726.85 Gene names: SON

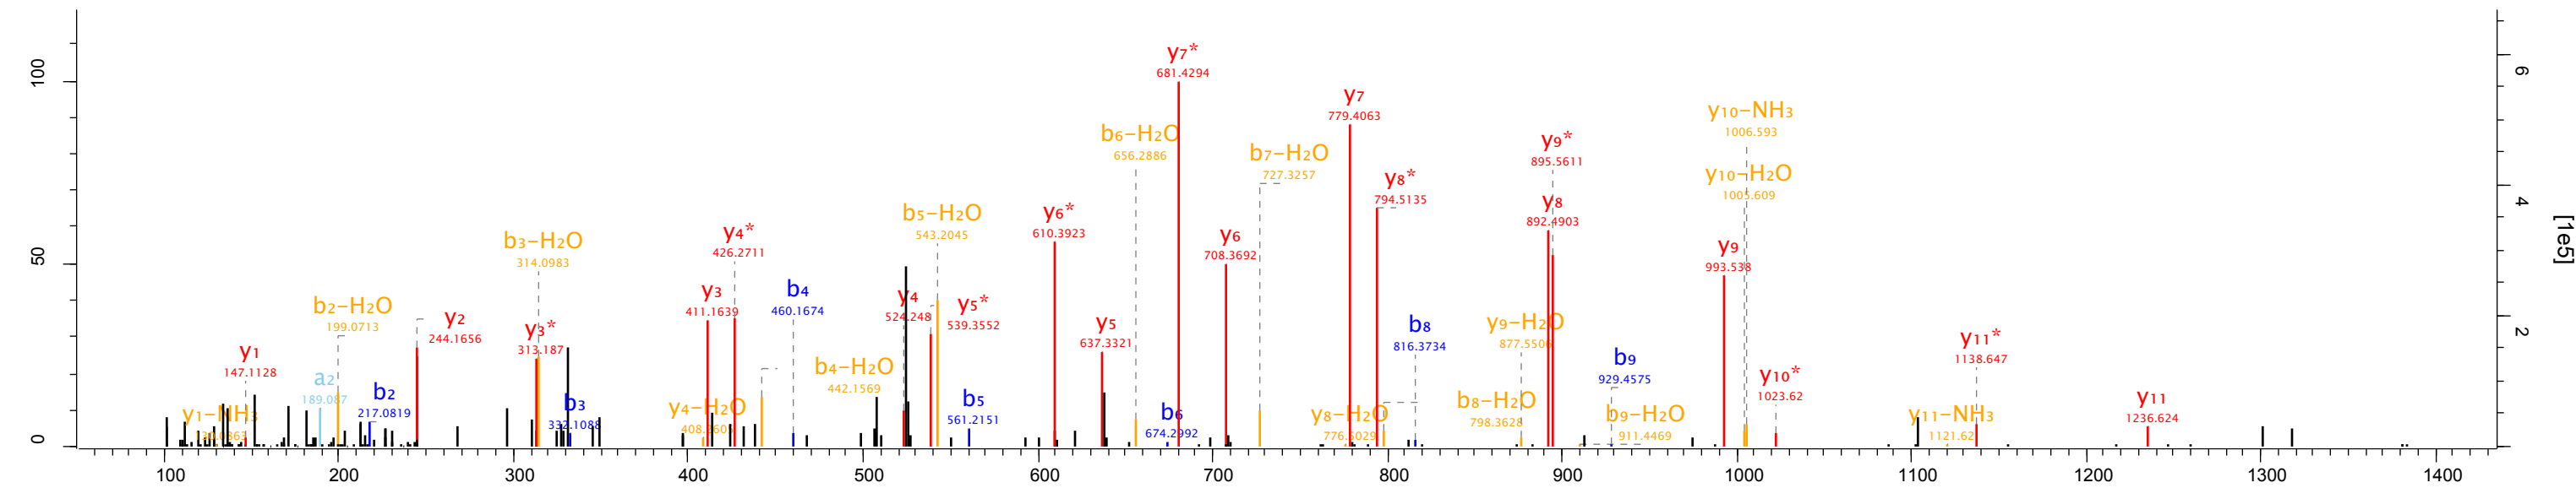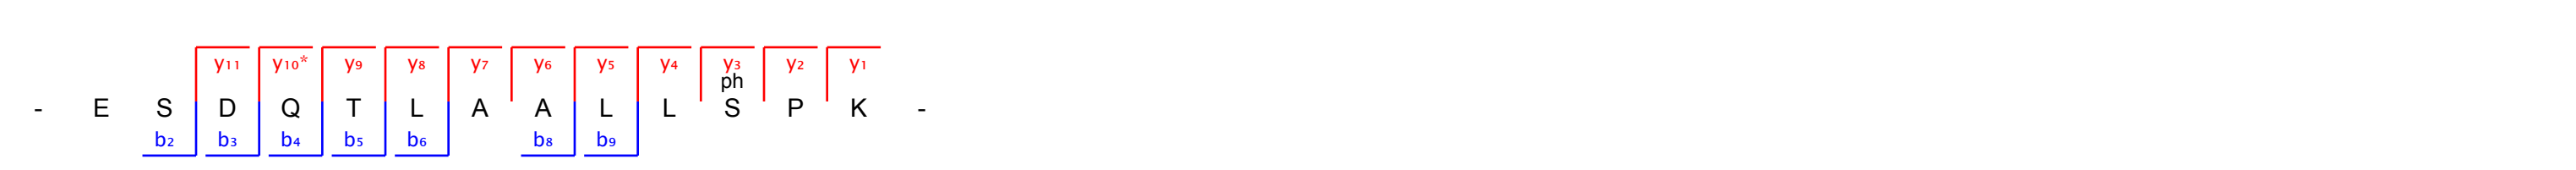

Raw file 20171215\_MaS\_33SR\_LMH\_phospho\_03 Scan 1934 Method FTMS; HCD Score 123.29 m/z 514.97 Gene names WDR33

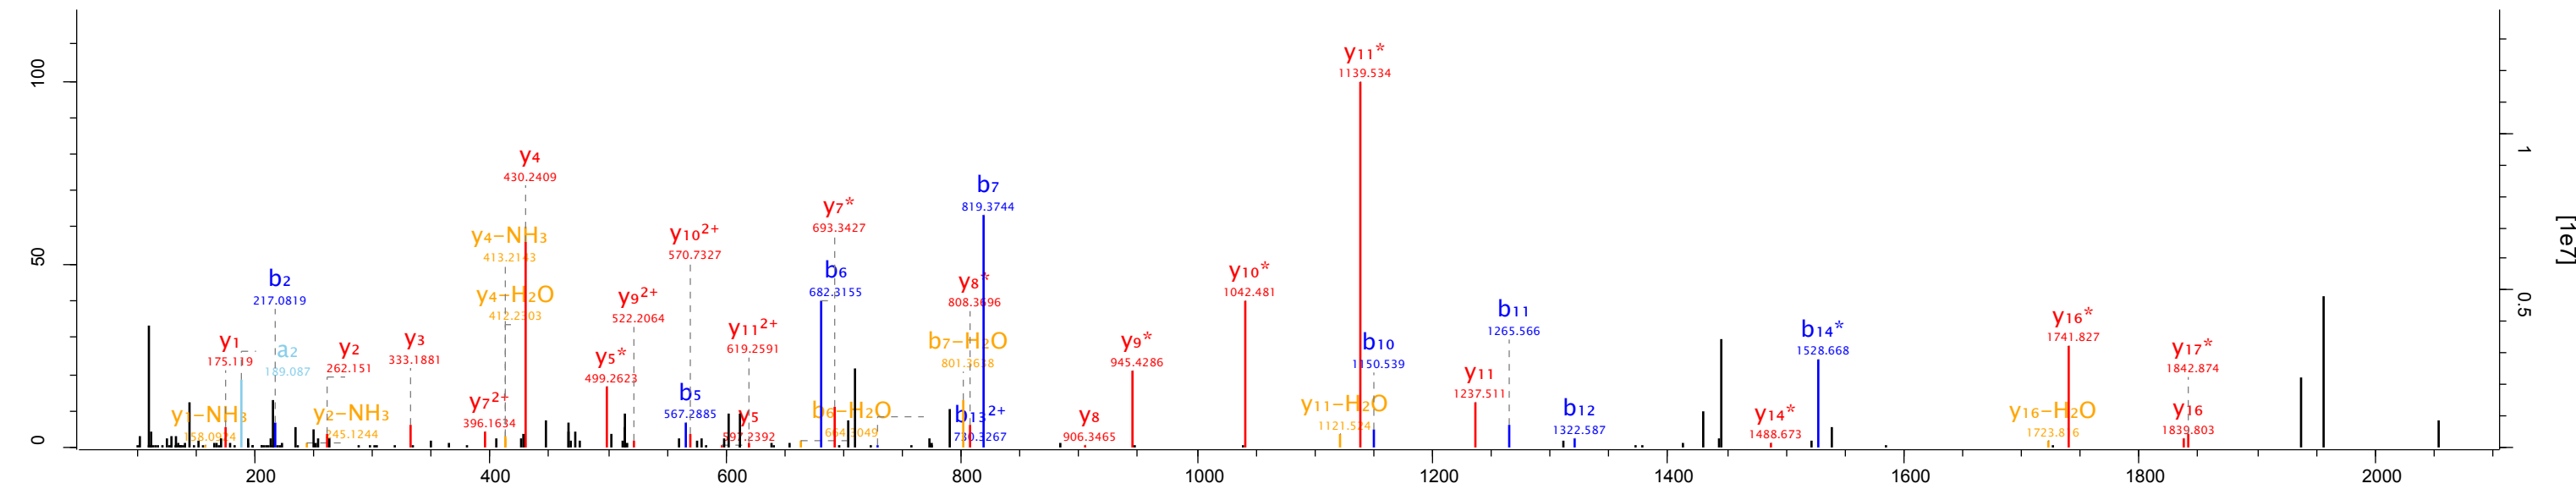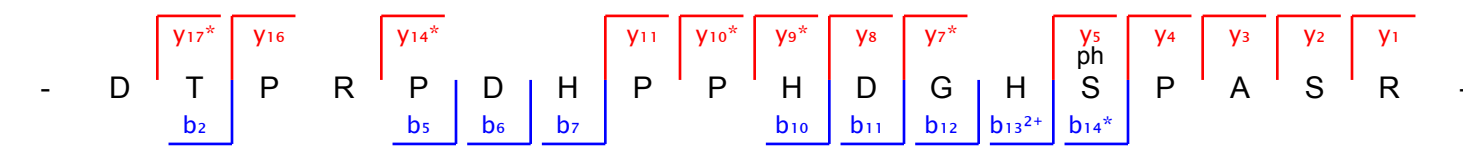

Raw file 20171215\_MaS\_33SR\_LMH\_phospho\_03 Scan 1974 Method FTMS; HCD Score 71.59 m/z 524.58

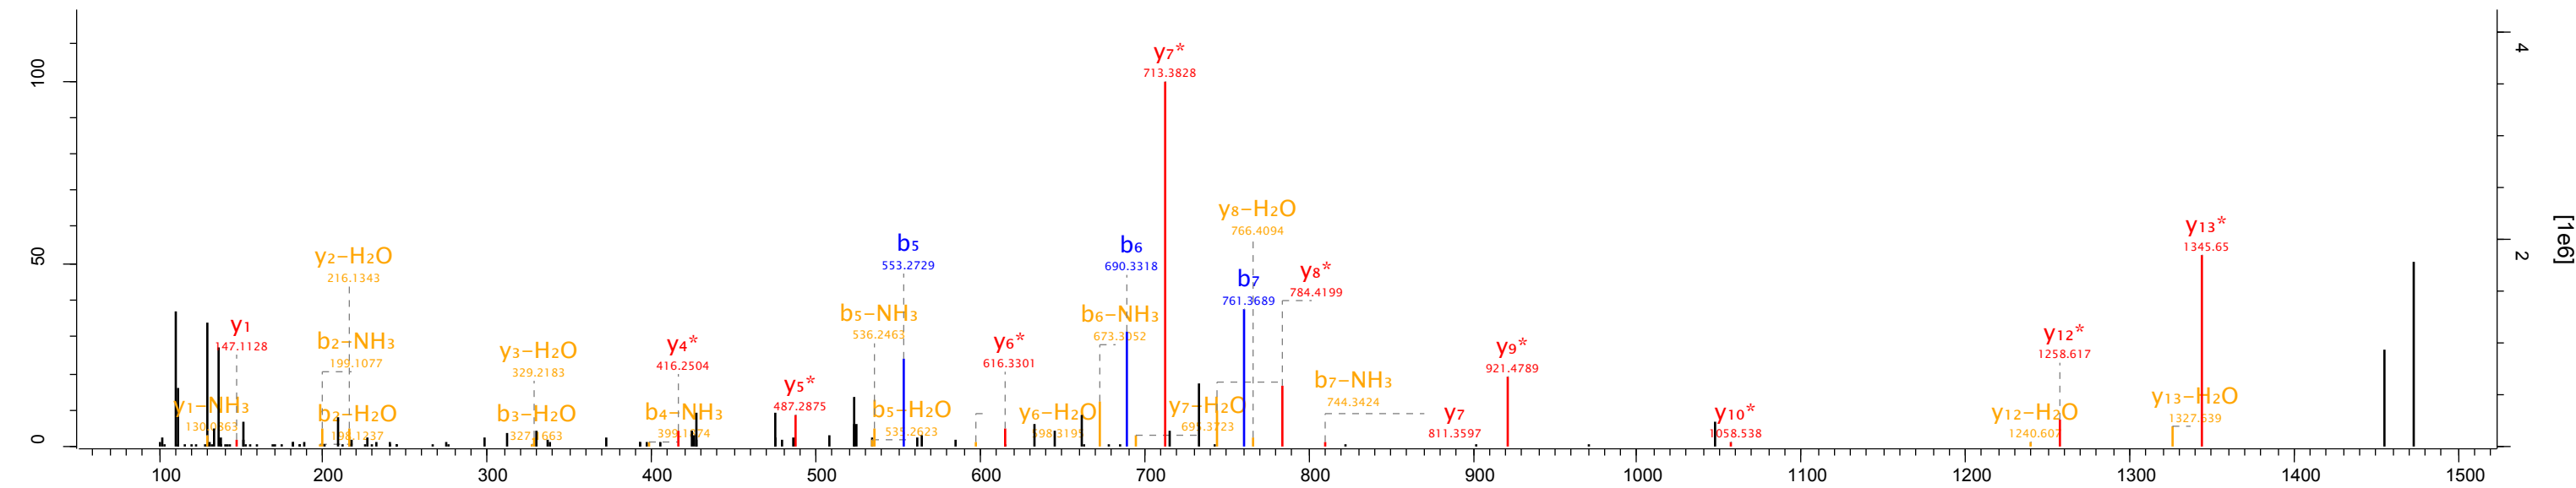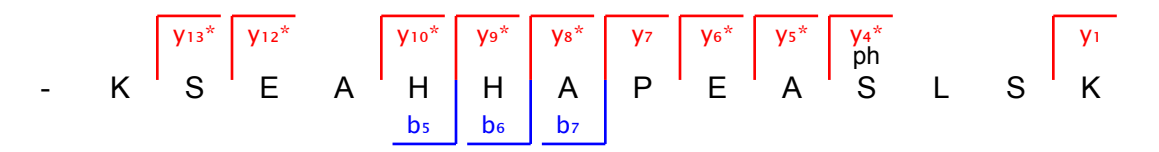

Raw file: 20171215\_MaS\_33SR\_LMH\_phospho\_03  
 Scan: 2004 Method: FTMS; HCD Score: 105.91 m/z: 638.27 Gene names: RNPC3

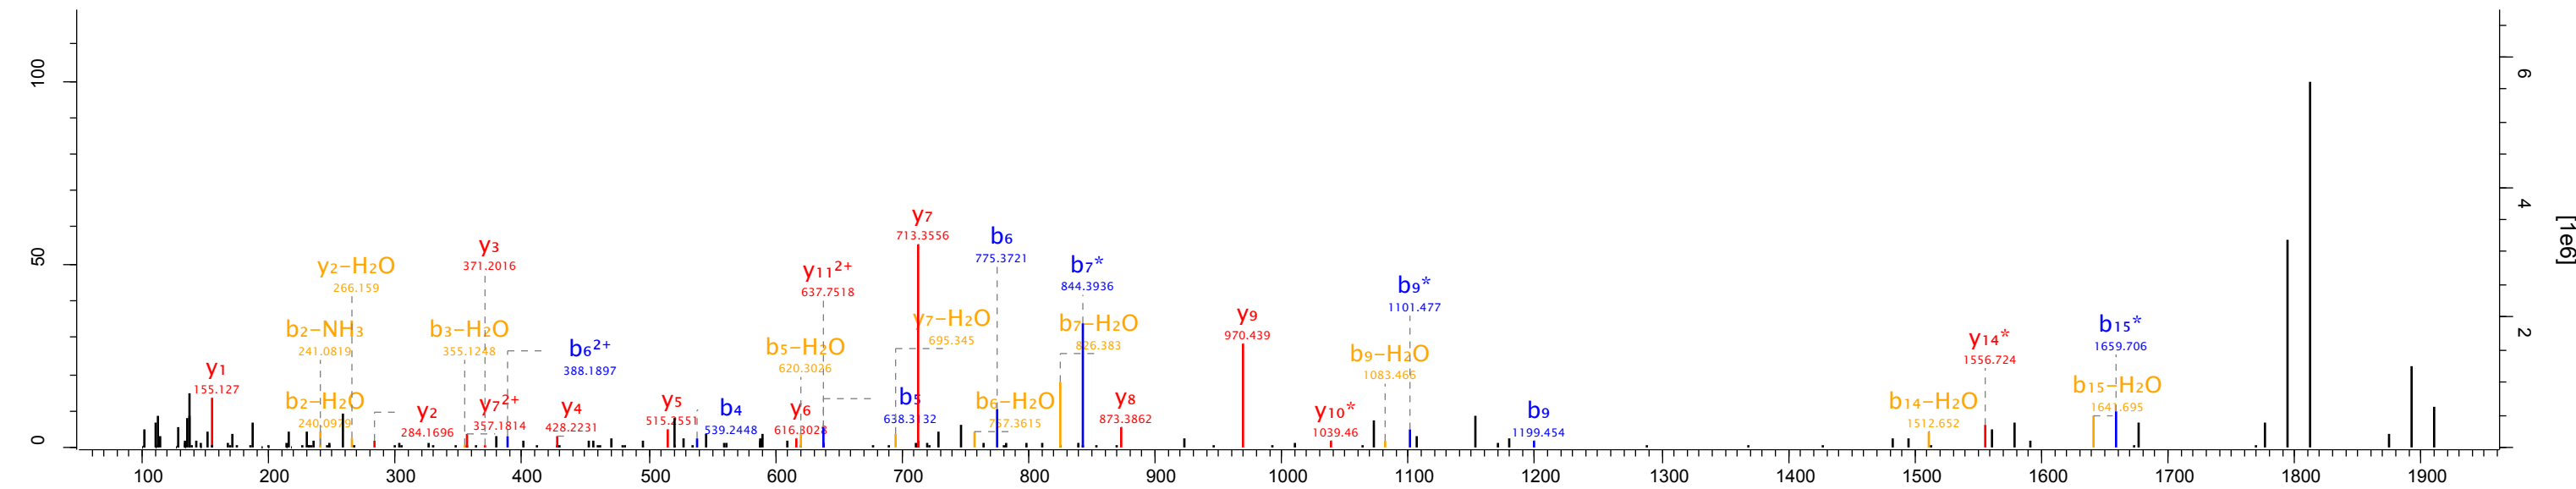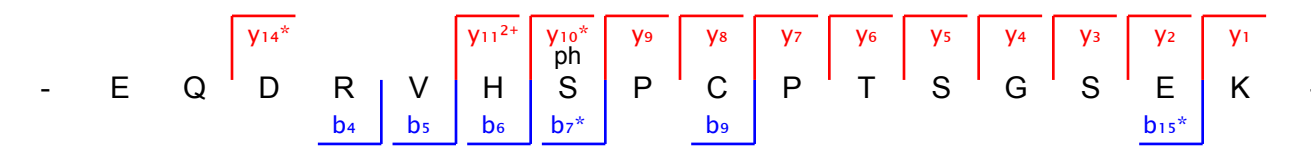

Raw file 20171215\_MaS\_33SR\_LMH\_phospho\_03 Scan 2024 Method FTMS; HCD Score 114.76 m/z 847.37 Gene names WNK4

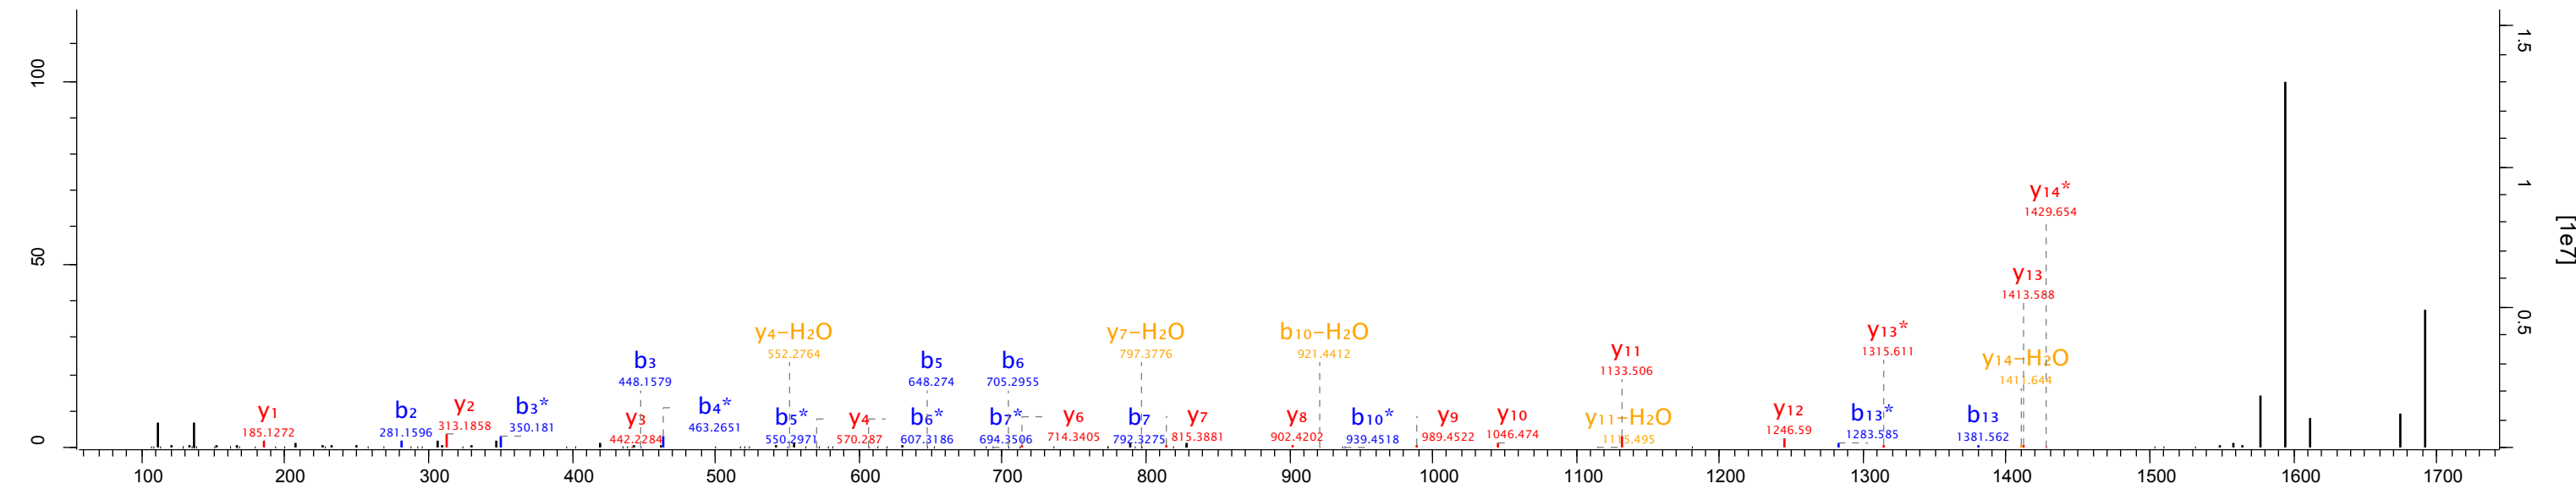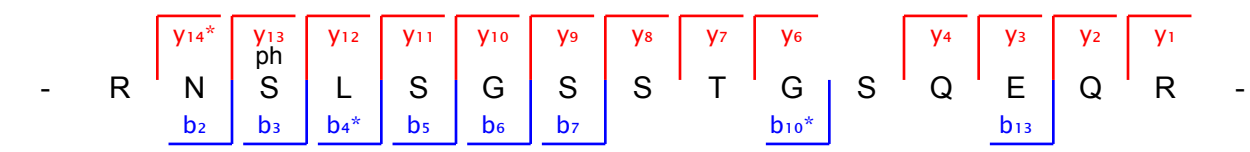

Raw file 20171215\_MaS\_33SR\_LMH\_phospho\_03 Scan 2064 Method FTMS; HCD Score 159.03 m/z 528.58 Gene names LRWD1

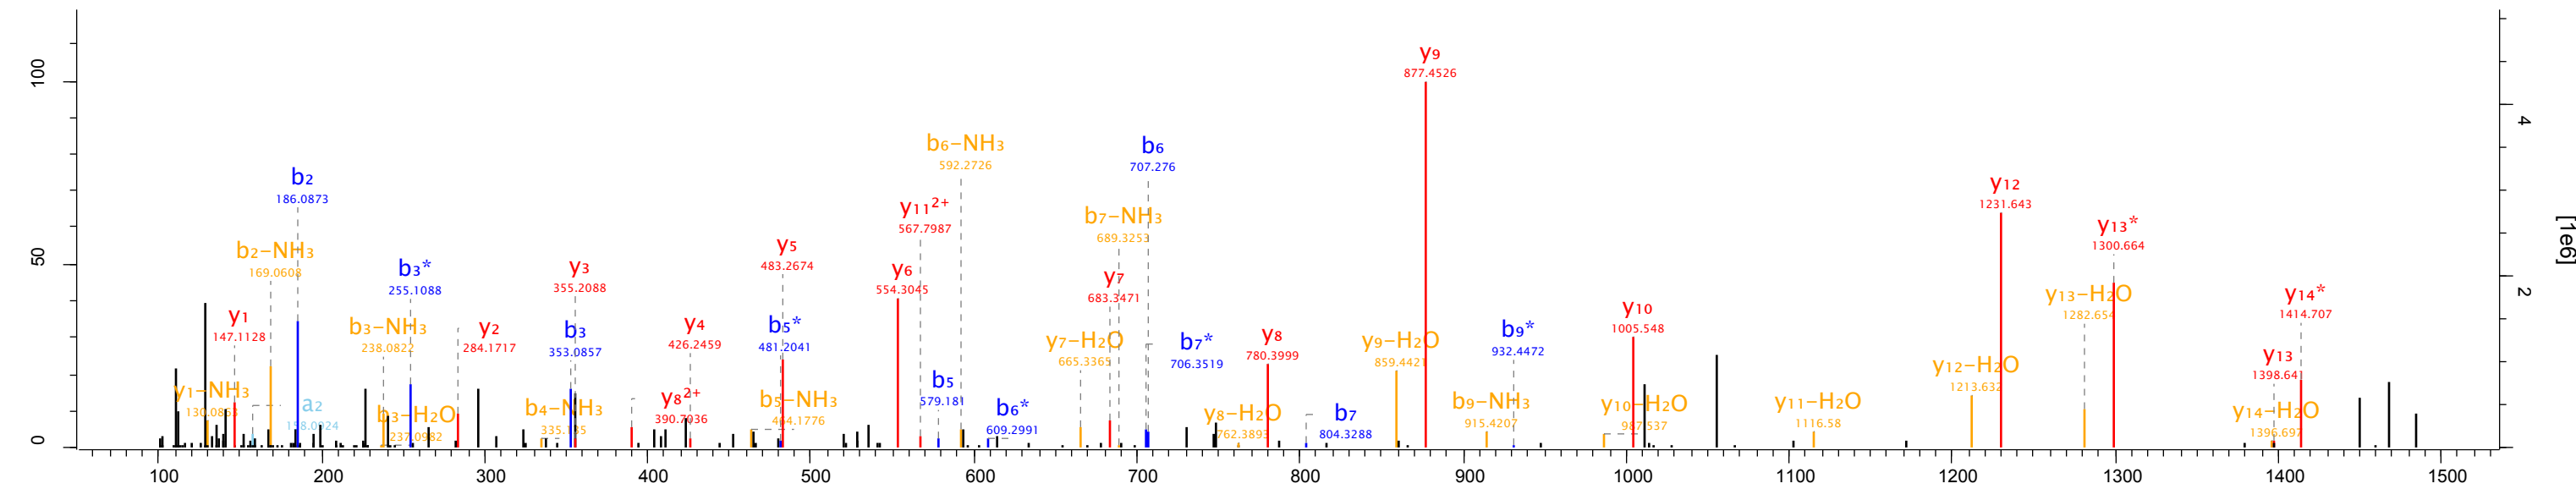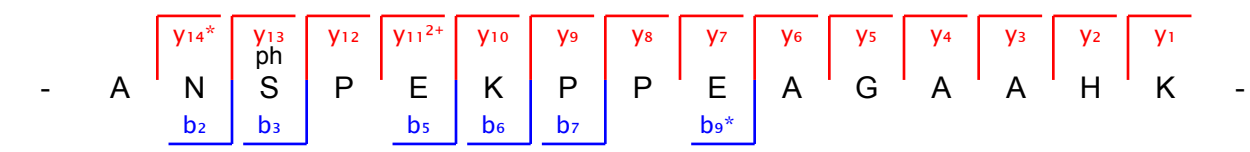

Raw file 20171215\_MaS\_33SR\_LMH\_phospho\_03 Scan 2104 Method FTMS; HCD Score 103.76 m/z 482.24 Gene names ZC3H18

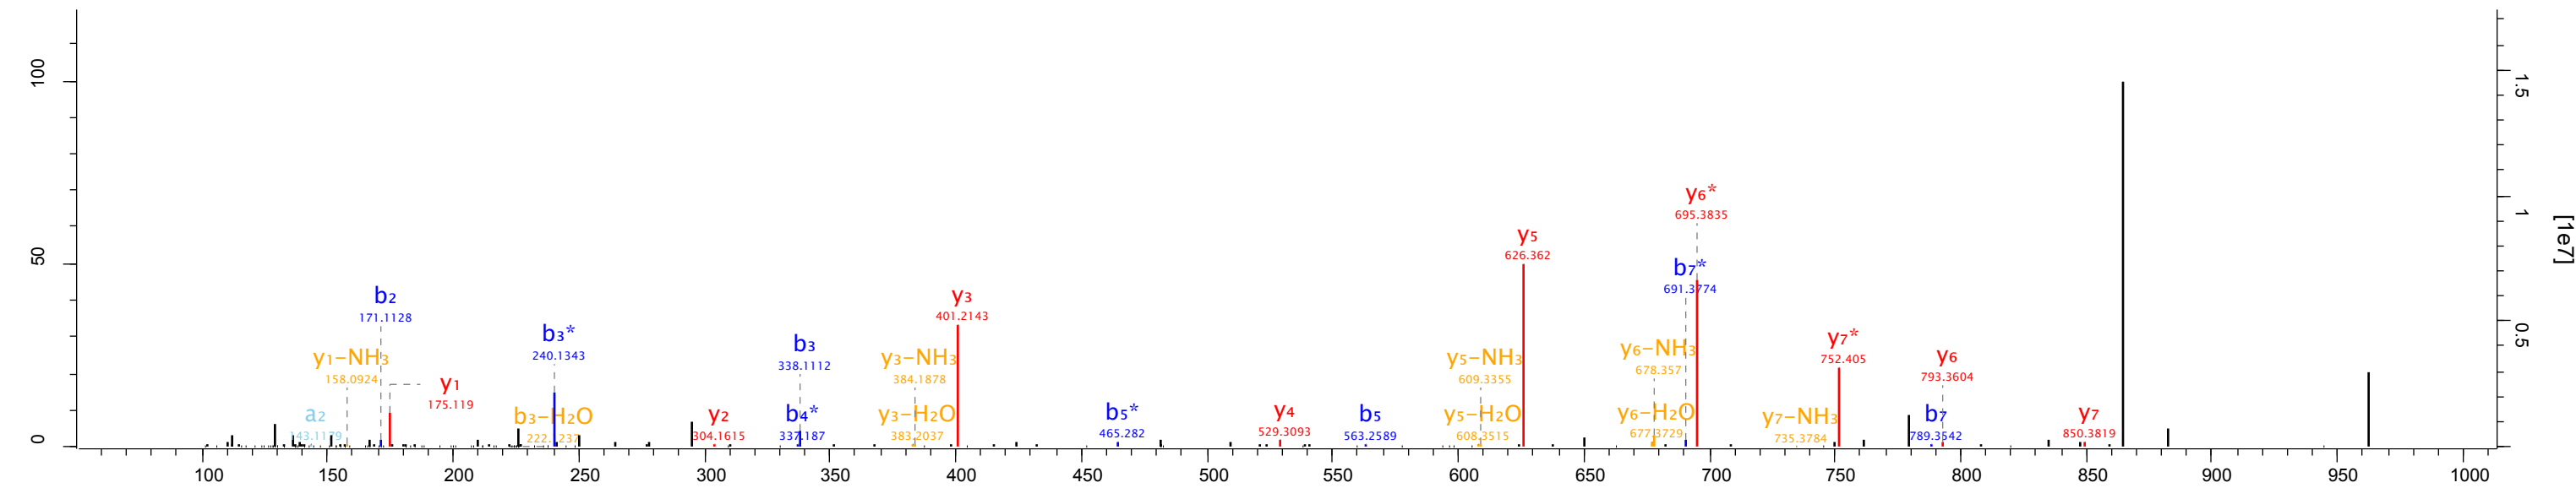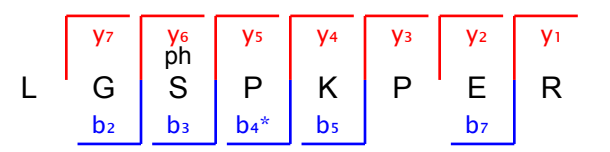

Raw file 20171215\_MaS\_33SR\_LMH\_phospho\_03 Scan 2124 Method FTMS; HCD Score 231.51 m/z 882.93 Gene names TCOF1

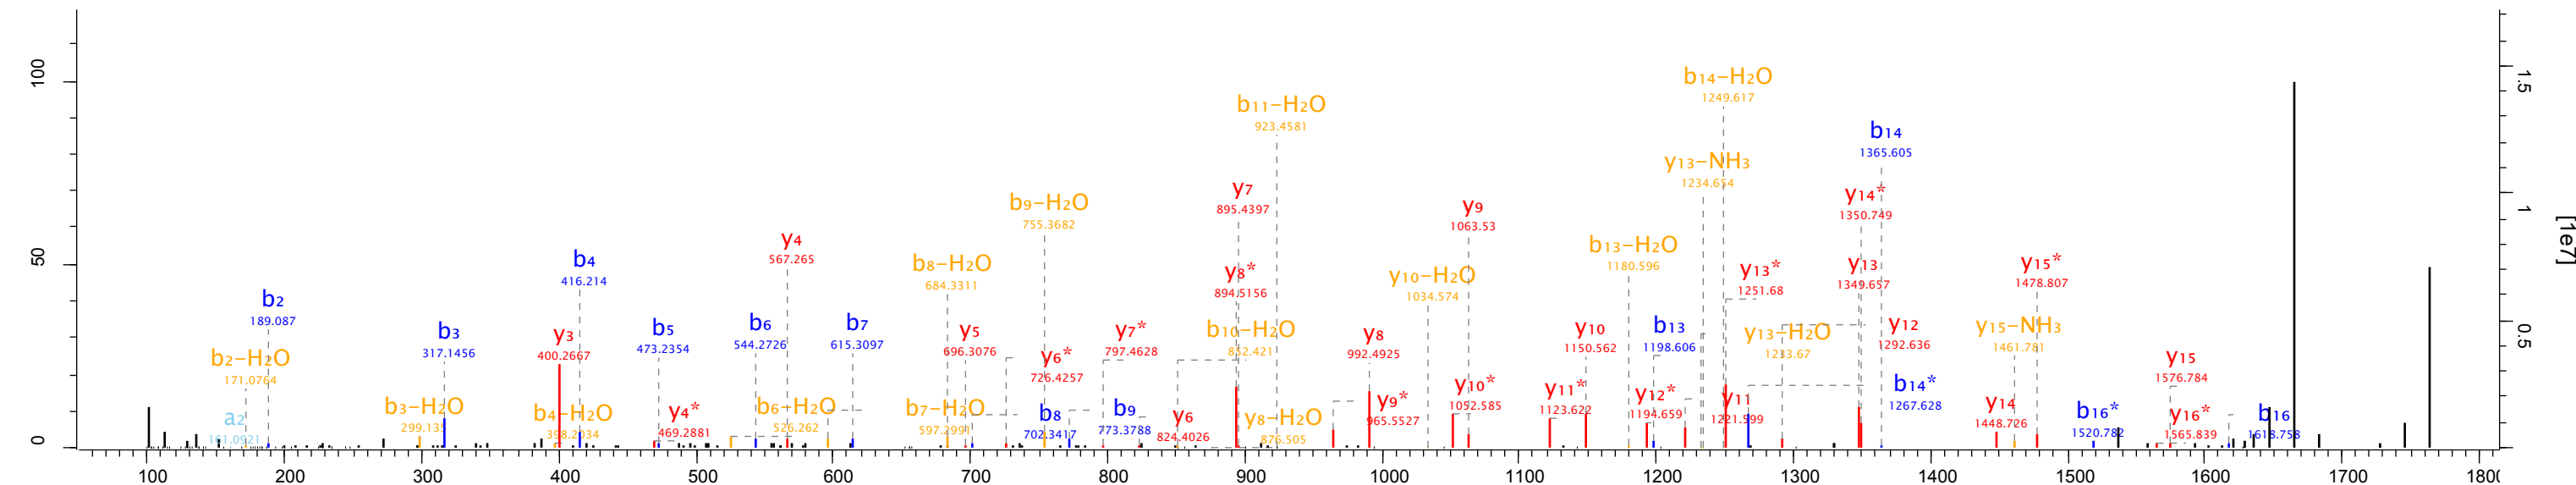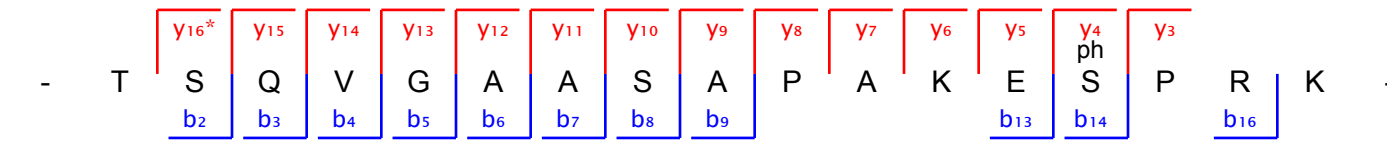



Raw file 20171215\_MaS\_33SR\_LMH\_phospho\_03 Scan 2264 Method FTMS; HCD Score 131.64 m/z 712.34 Gene names KDM5B

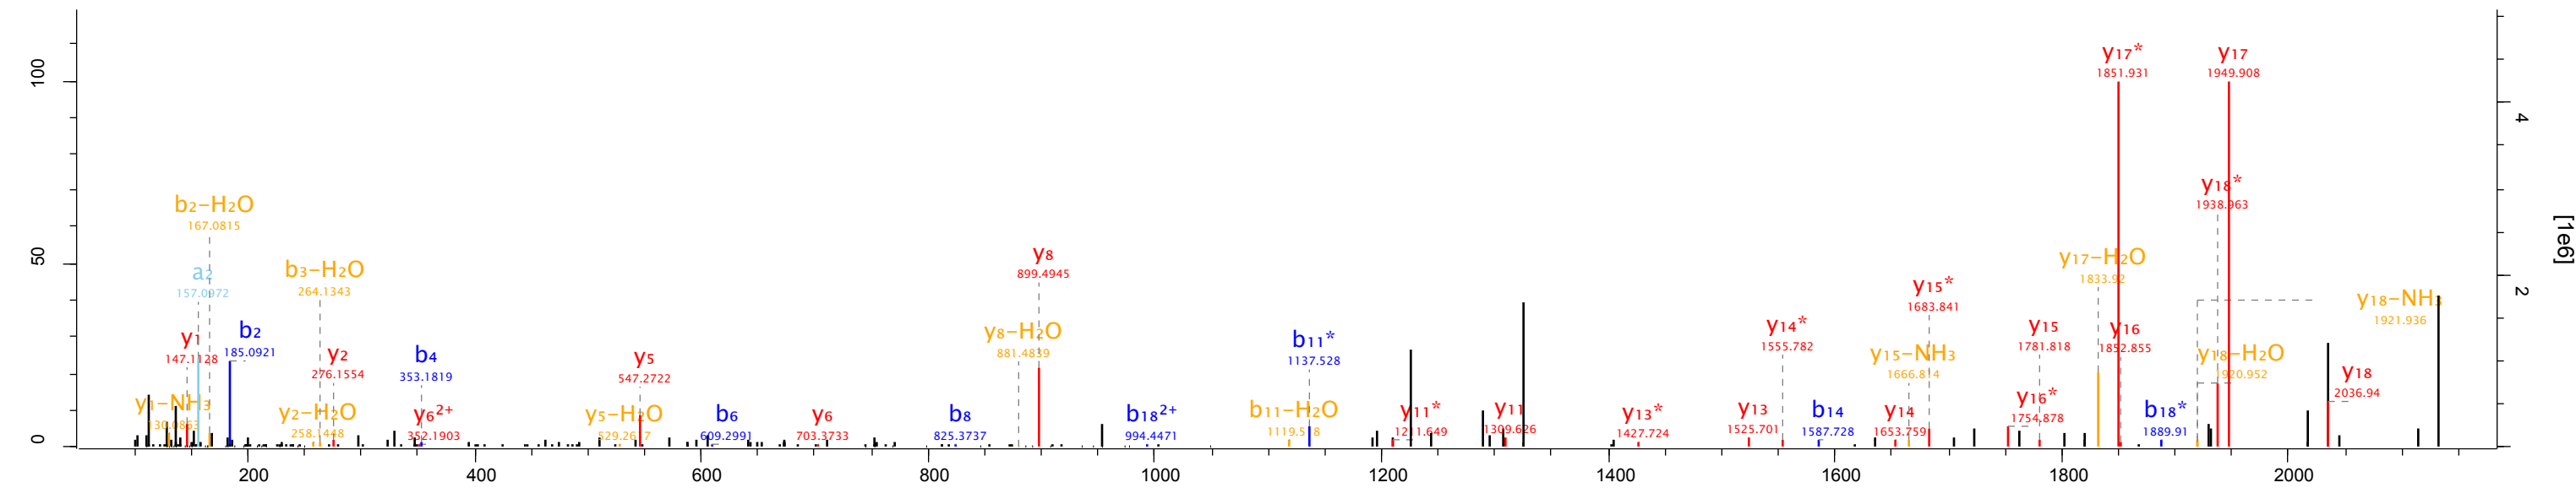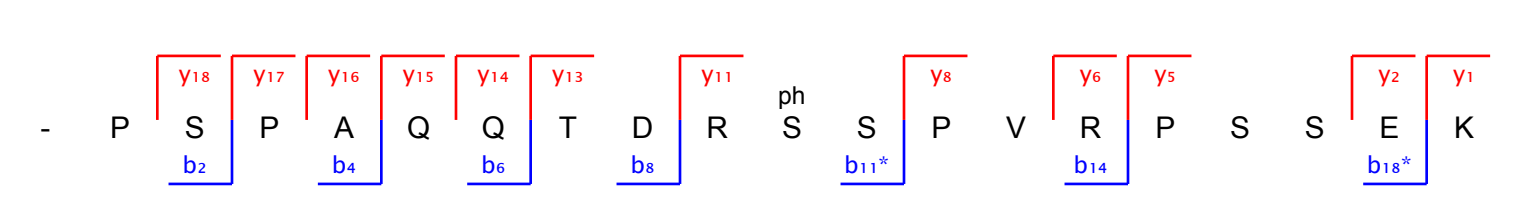

Raw file 20171215\_MaS\_33SR\_LMH\_phospho\_03 Scan 2374 Method FTMS; HCD Score 316.33 m/z 823.31 Gene names PRPF3

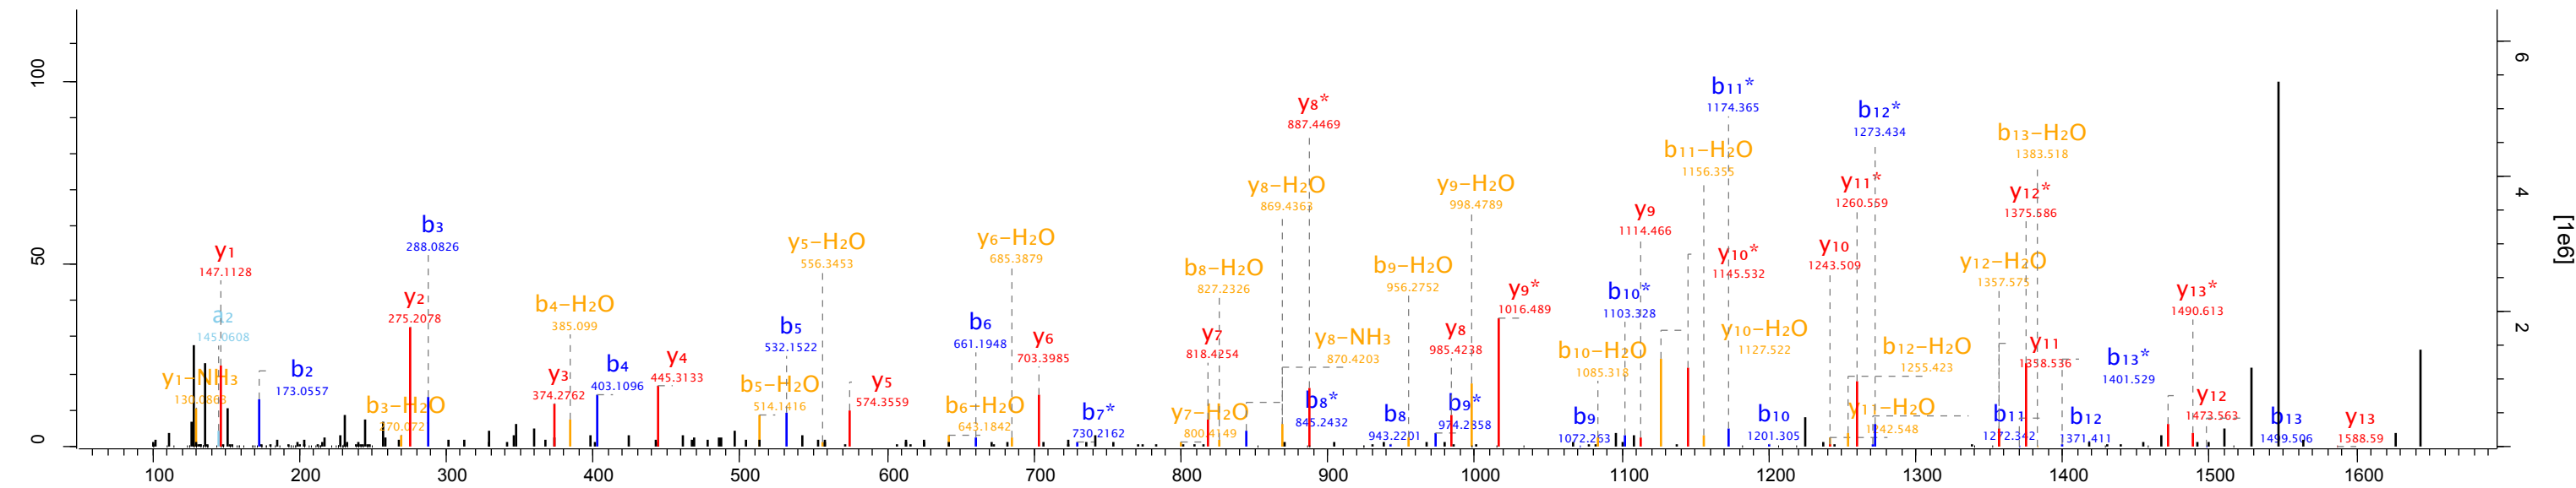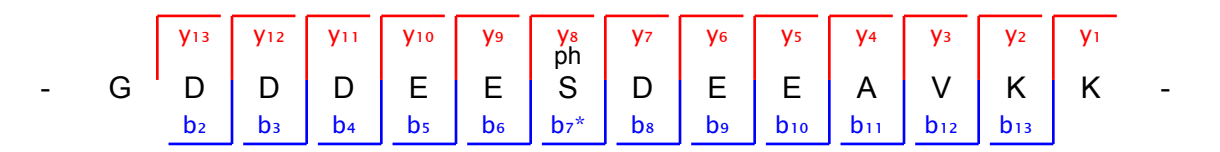

Raw file: 20171215\_MaS\_33SR\_LMH\_phospho\_03  
 Scan: 2624 Method: FTMS; HCD Score: 128.57 m/z: 683.29 Gene names: S100A16

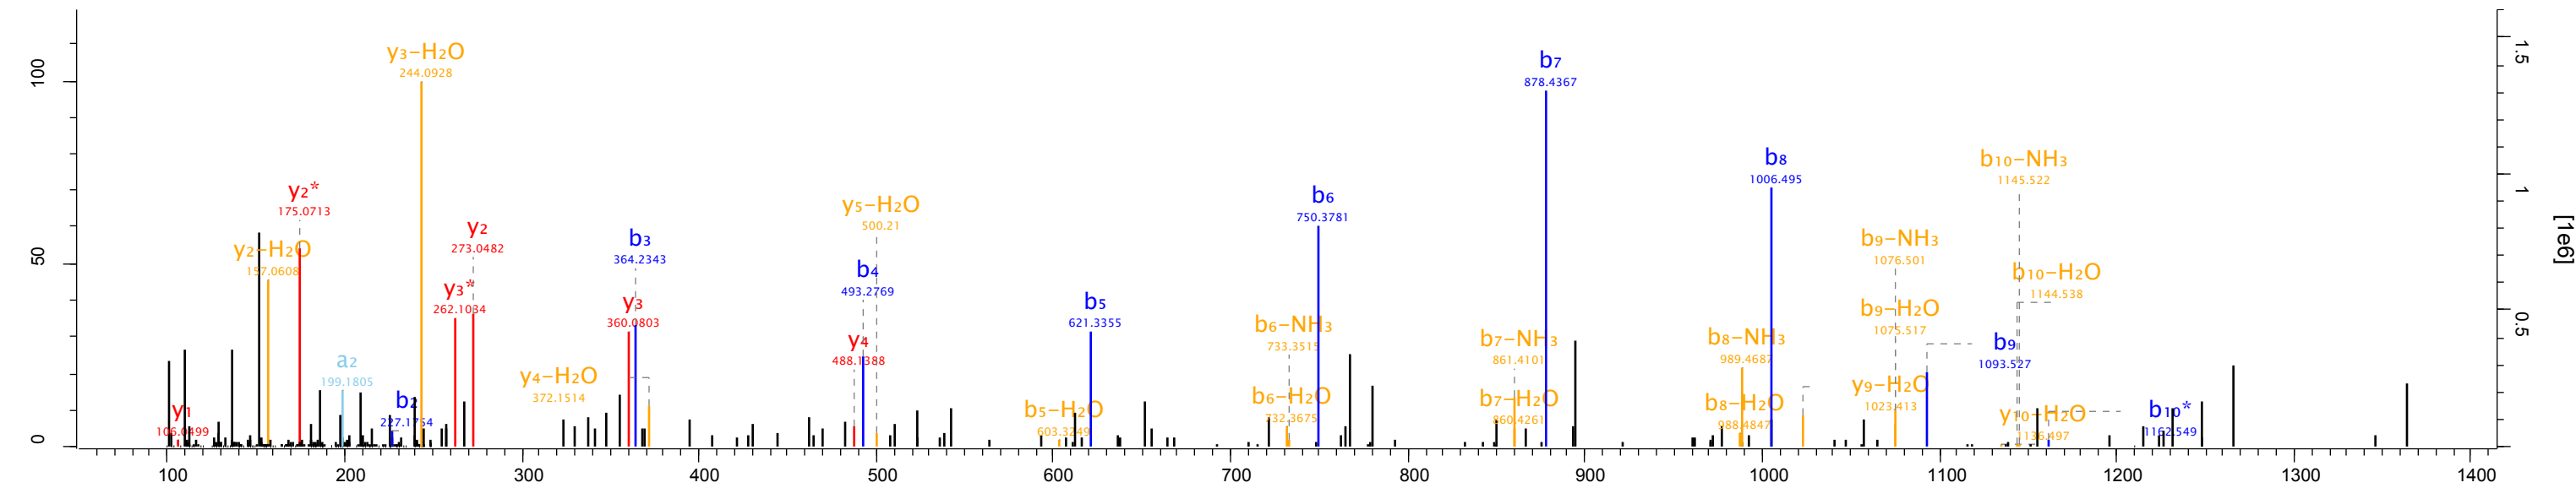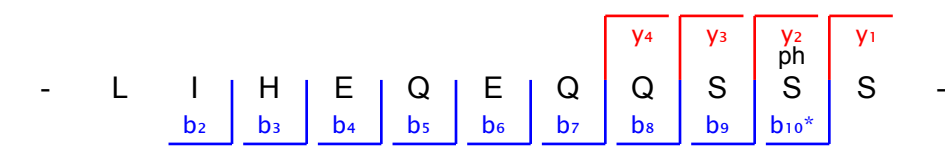

Raw file 20171215\_MaS\_33SR\_LMH\_phospho\_03 Scan 2744 Method FTMS; HCD Score 89.47 m/z 574.56 Gene names RBMX;RBMXL1

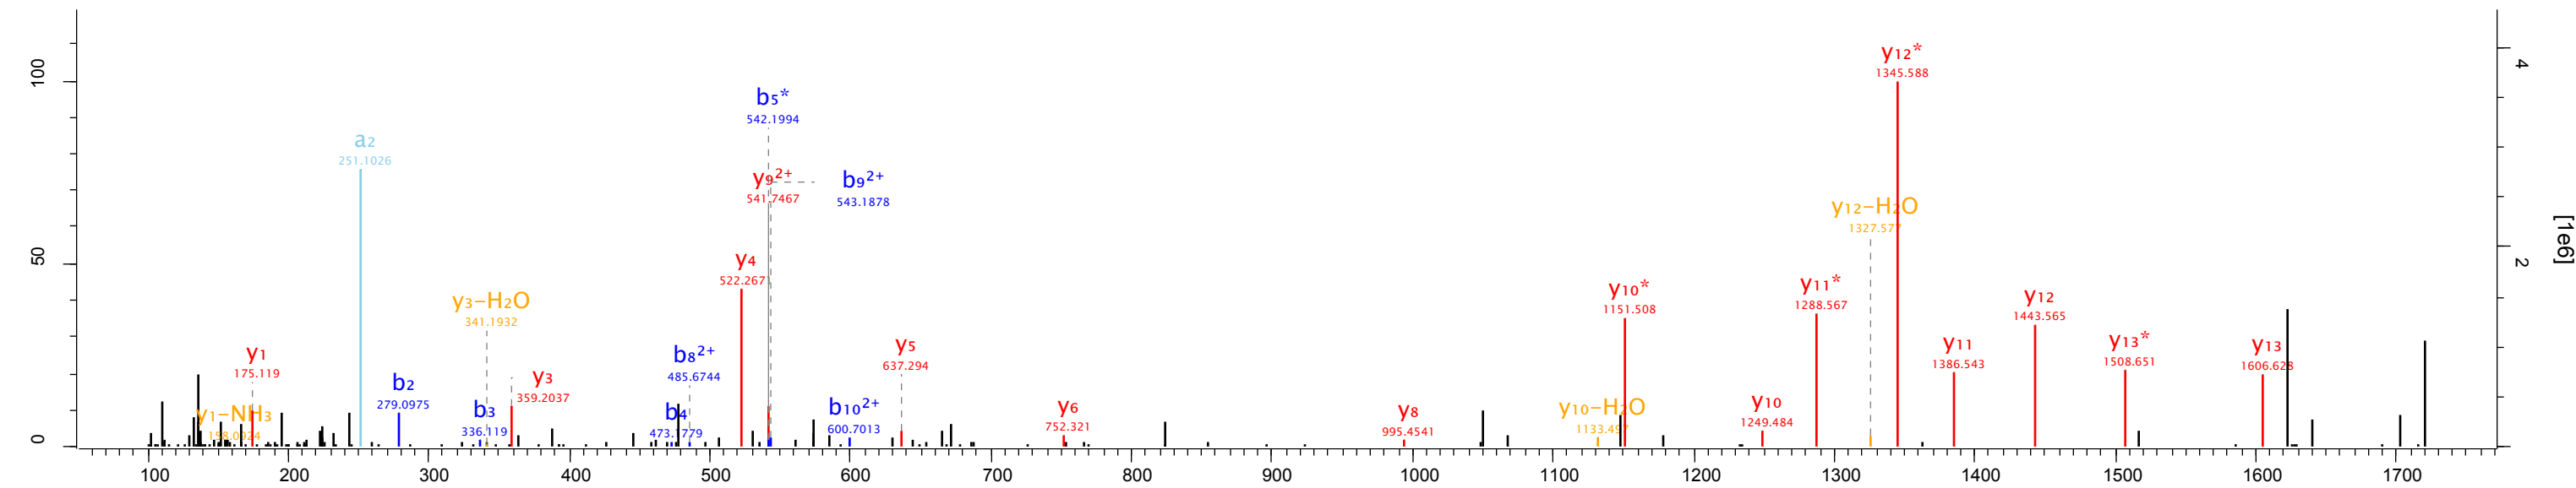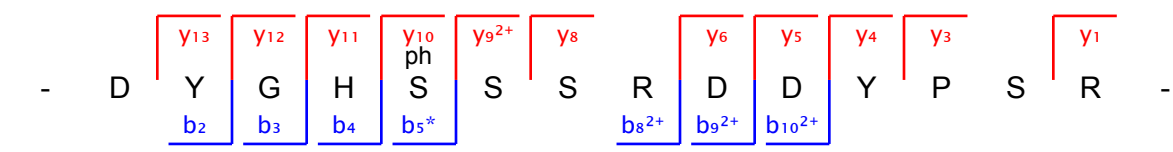

Raw file 20171215\_MaS\_33SR\_LMH\_phospho\_03 Scan 2824 Method FTMS; HCD Score 325.84 m/z 1067.47

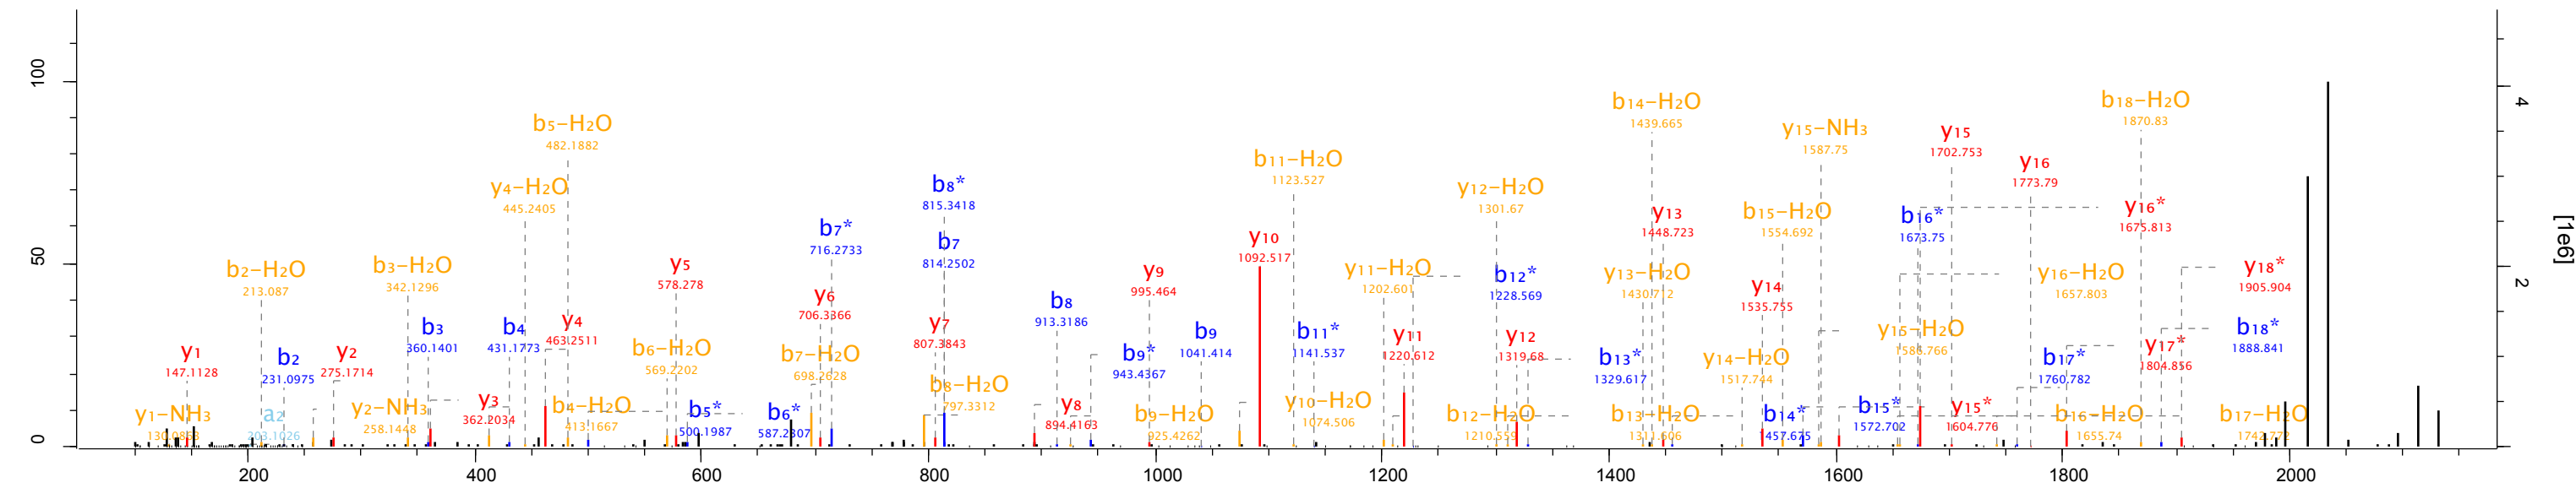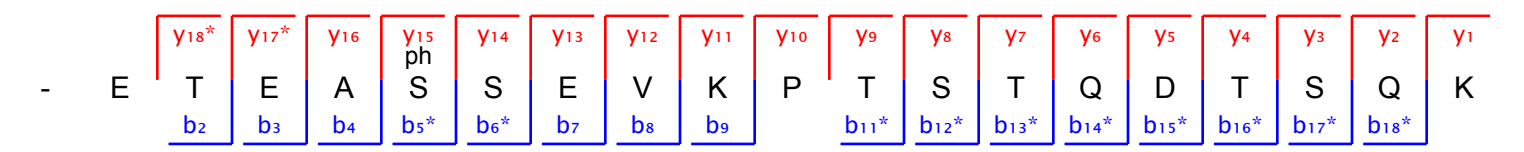

Raw file 20171215\_MaS\_33SR\_LMH\_phospho\_03 Scan 2974 Method FTMS; HCD Score 137.8 m/z 673.8 Gene names ARHGEF2

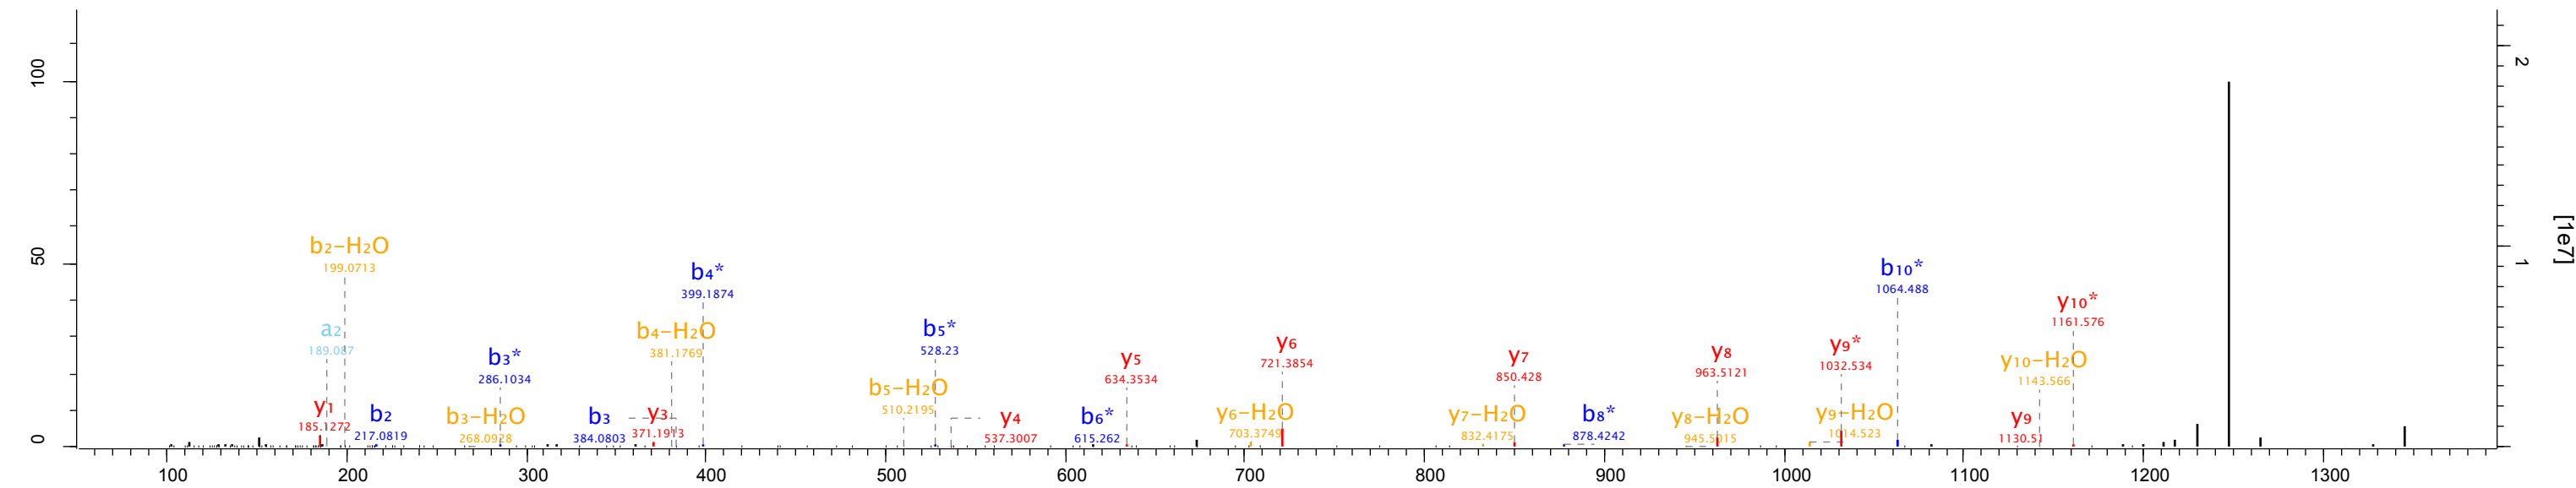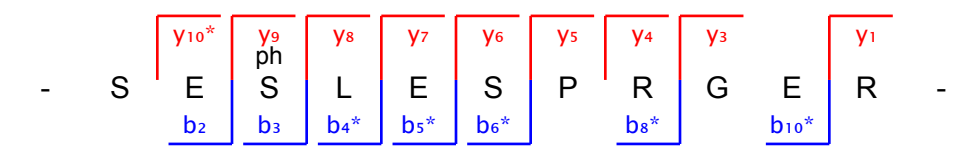

Raw file 20171215\_MaS\_33SR\_LMH\_phospho\_03 Scan 3044 Method FTMS; HCD Score 292.31 m/z 771.66 Gene names CANX

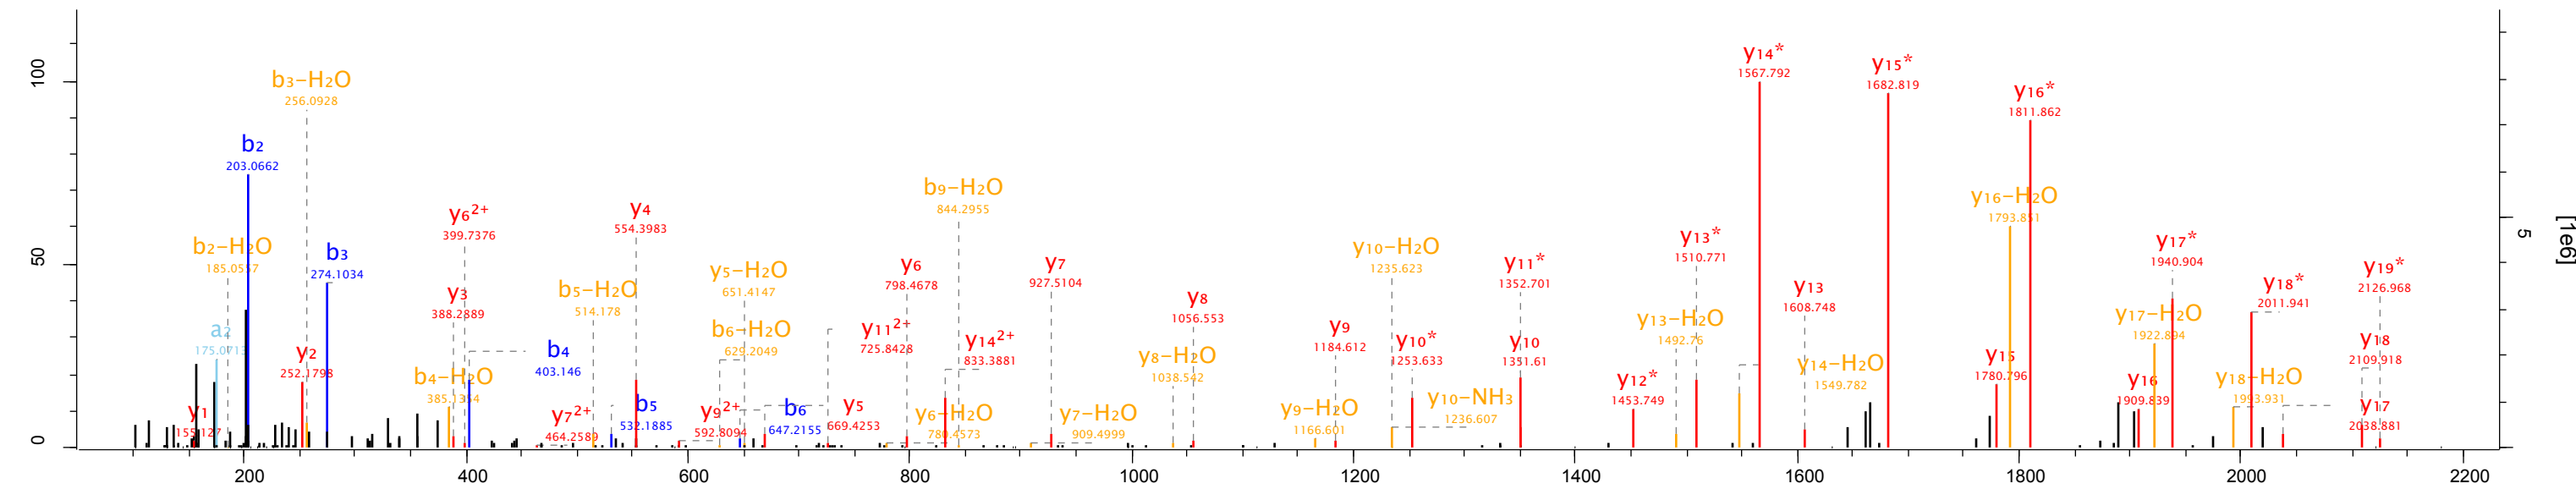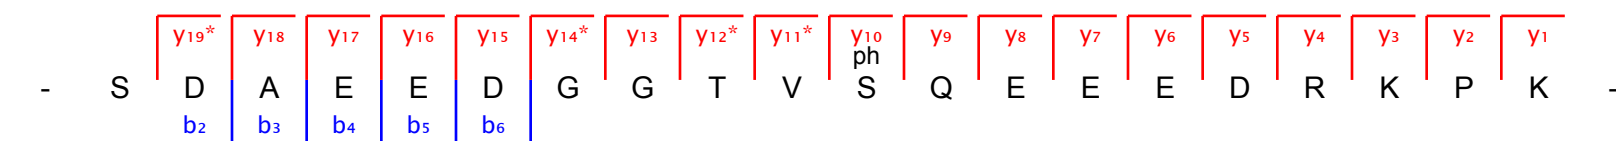

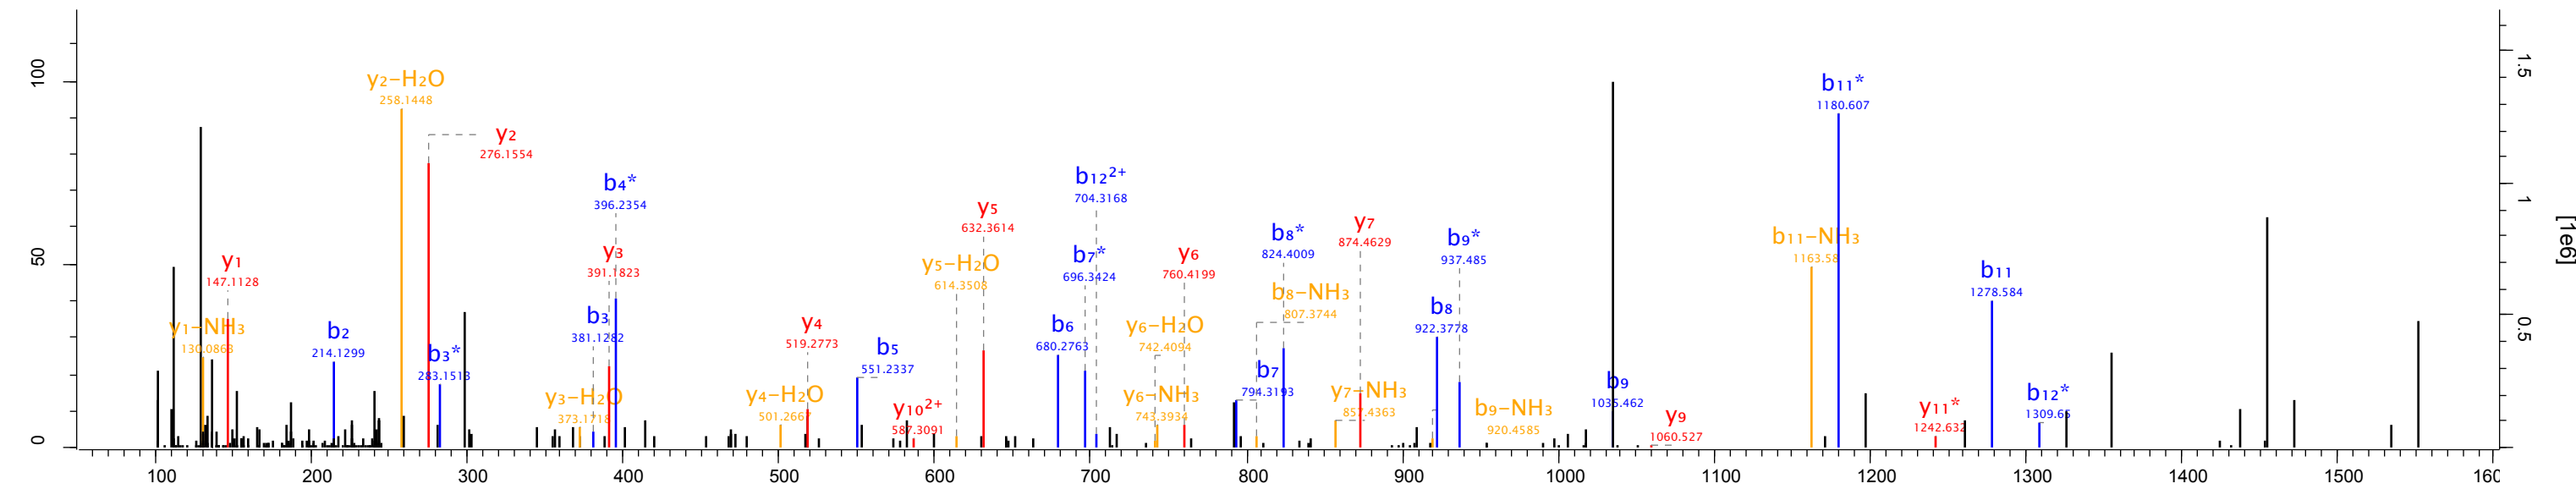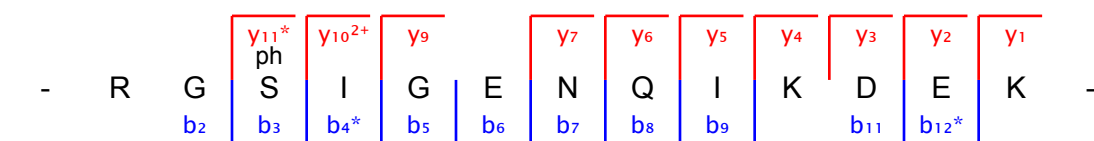



Raw file 20171215\_MaS\_33SR\_LMH\_phospho\_03 Scan 3144 Method FTMS; HCD Score 99.28 m/z 534.26 Gene names HNRNPU

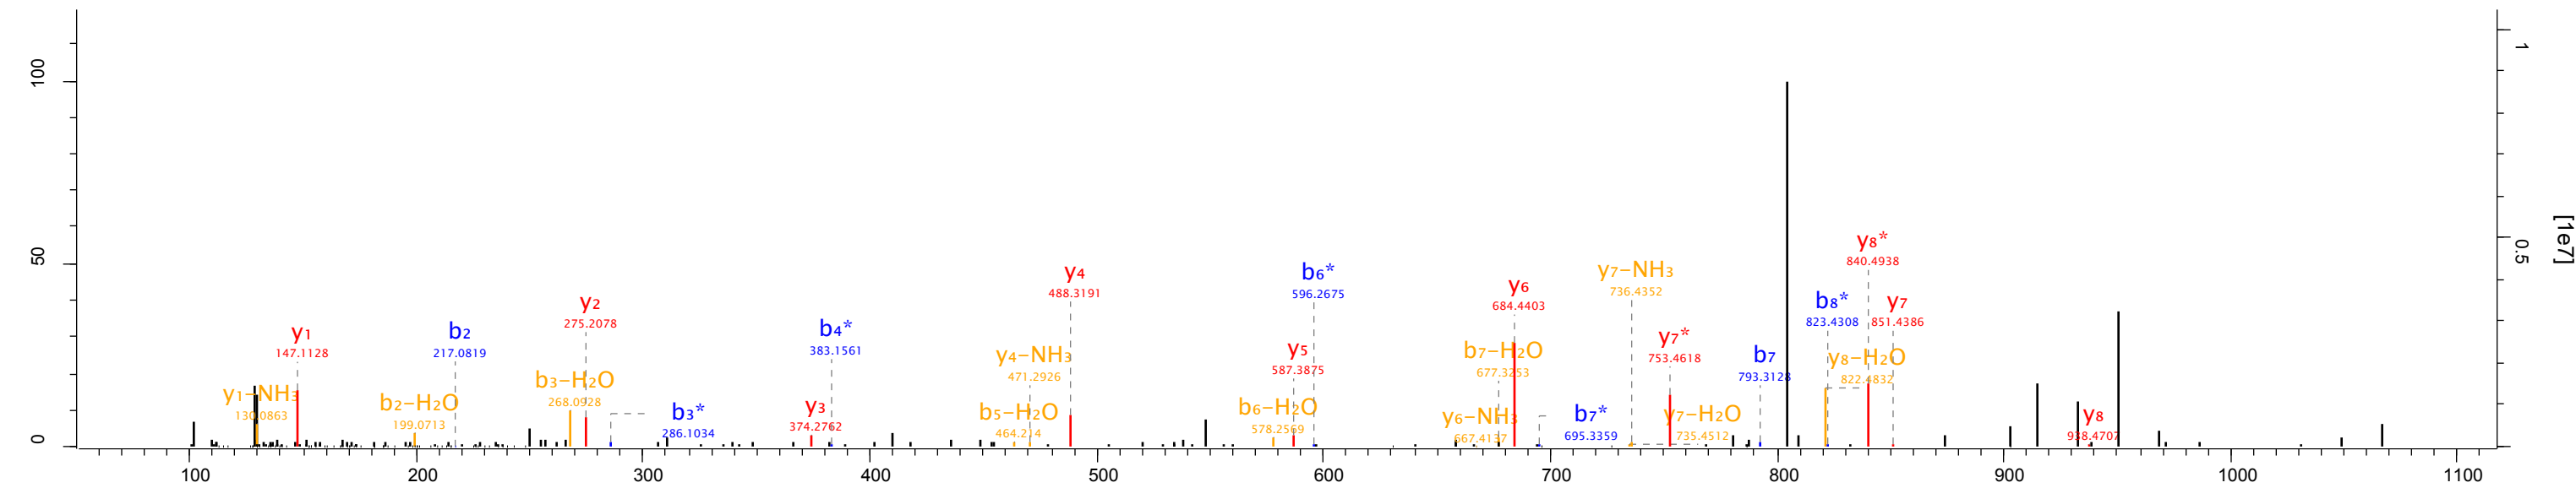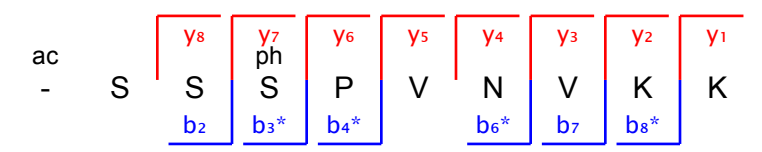

Raw file 20171215\_MaS\_33SR\_LMH\_phospho\_03 Scan 3854 Method FTMS; HCD Score 271.25 m/z 1150.04 Gene names PSMD2

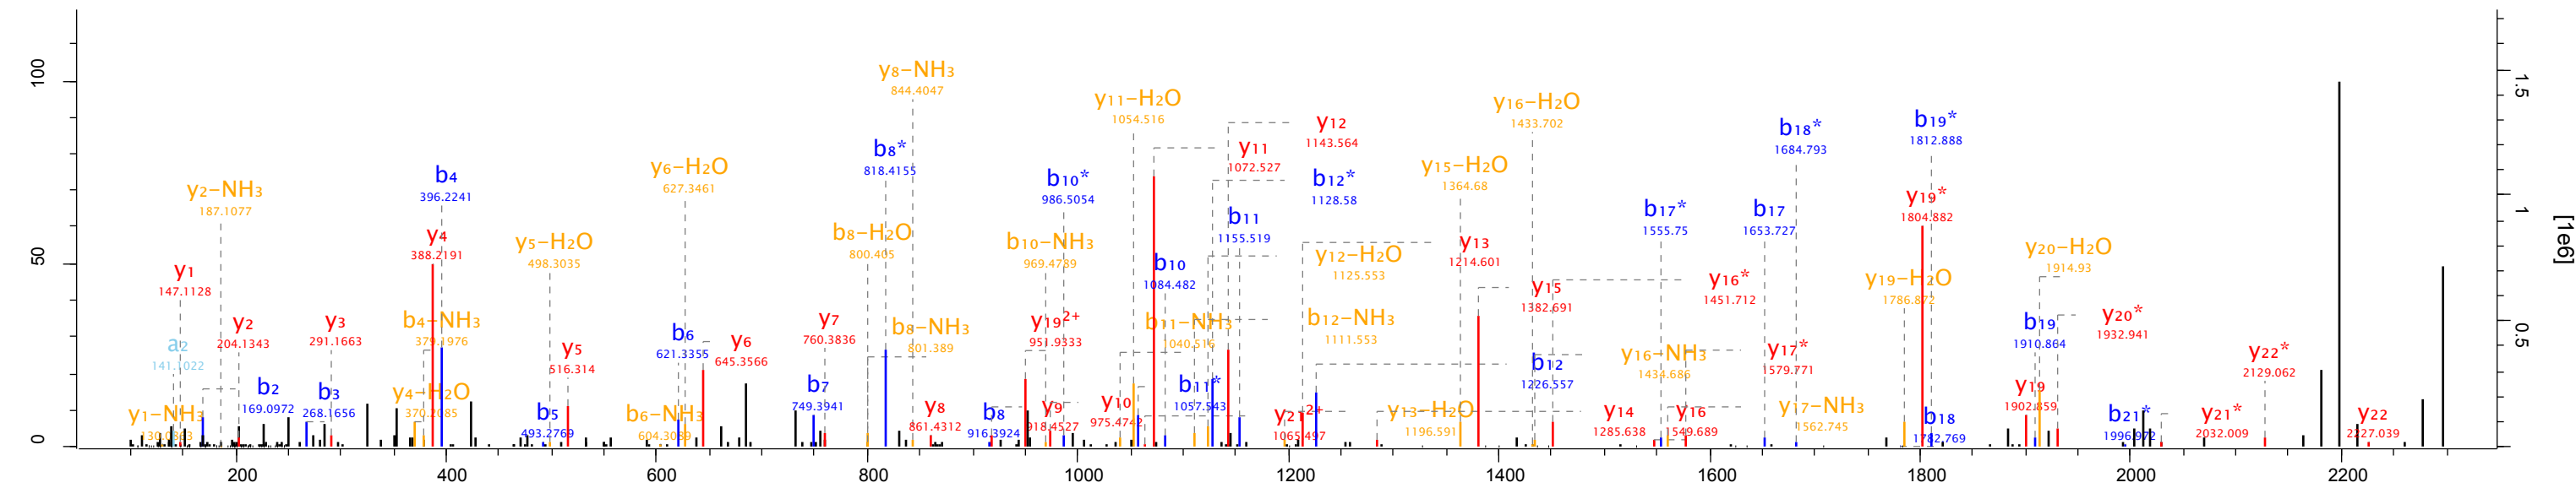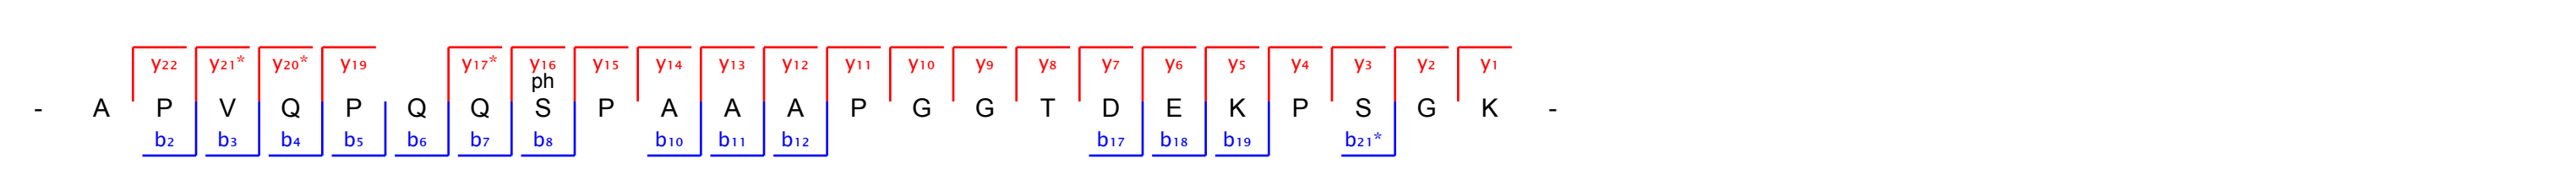

Raw file 20171215\_MaS\_33SR\_LMH\_phospho\_03 Scan 3894 Method FTMS; HCD Score 81.9 m/z 570.25 Gene names NCOR2

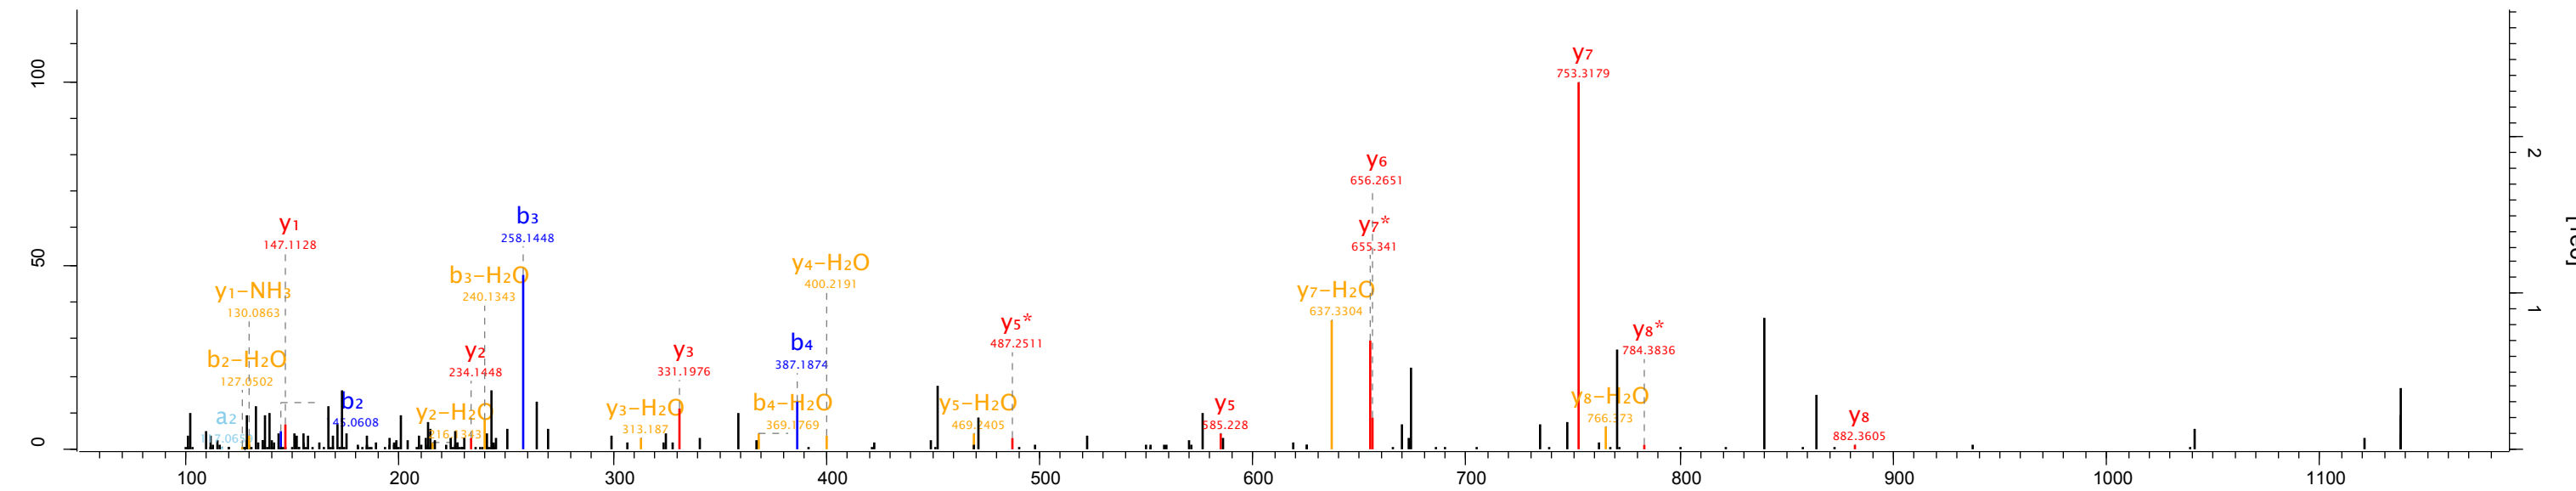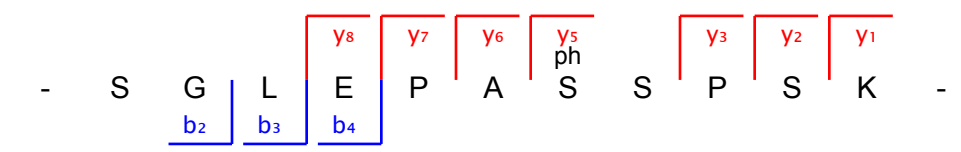

Raw file 20171215\_MaS\_33SR\_LMH\_phospho\_03 Scan 4064 Method FTMS; HCD Score 202.79 m/z 732.8 Gene names KHDRBS1

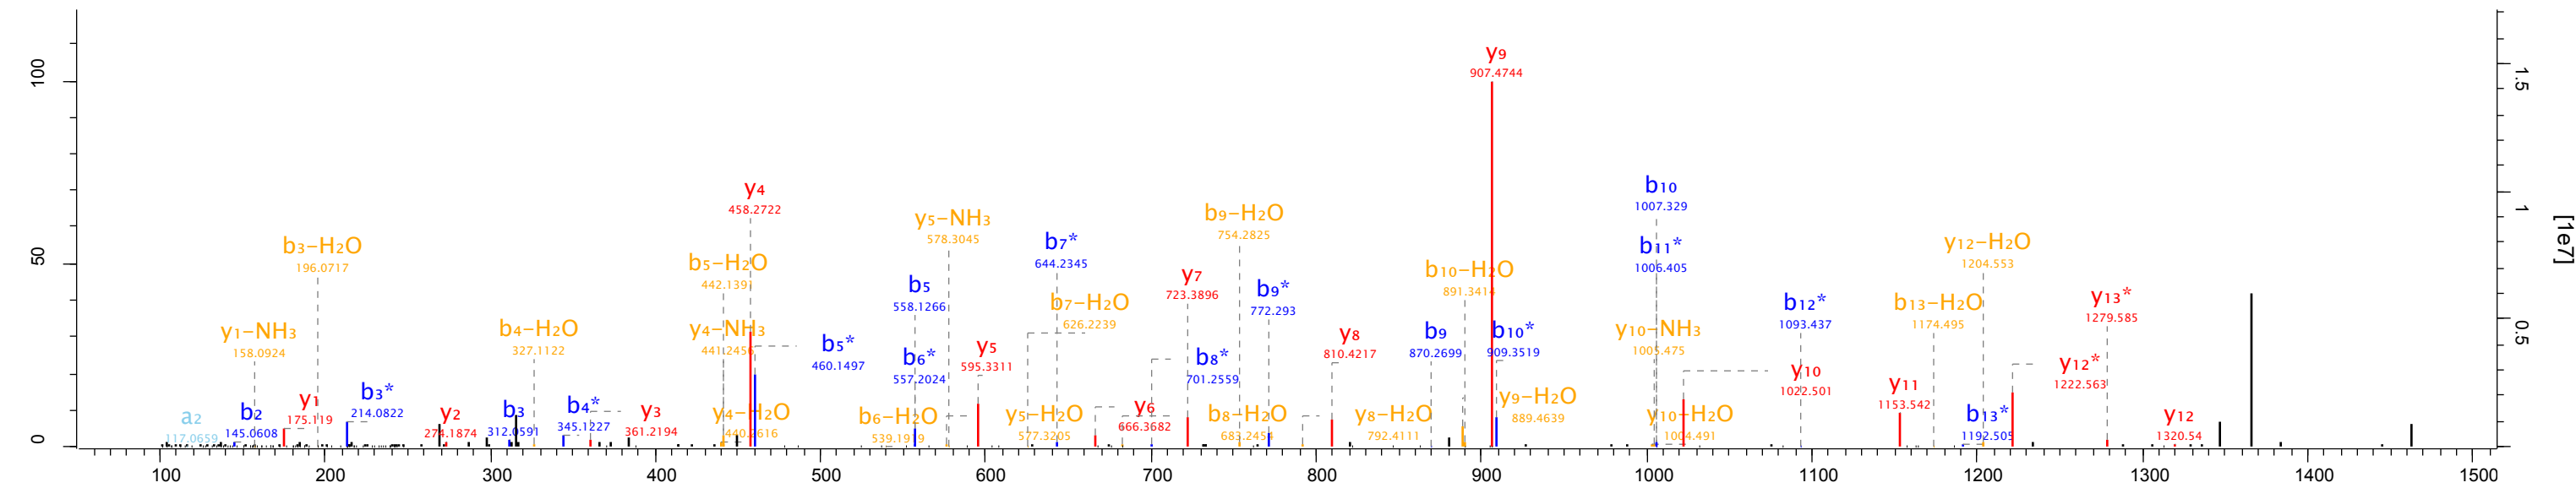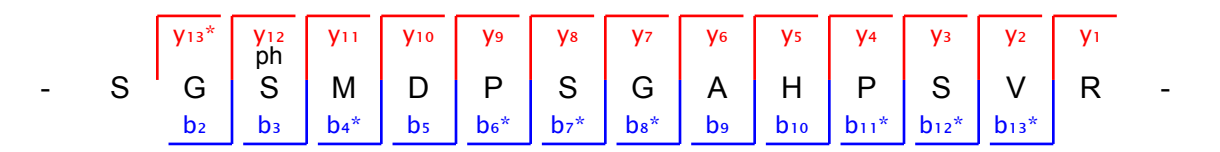

Raw file 20171215\_MaS\_33SR\_LMH\_phospho\_03 Scan 4084 Method FTMS; HCD Score 82.59 m/z 477.23 Gene names ATRX

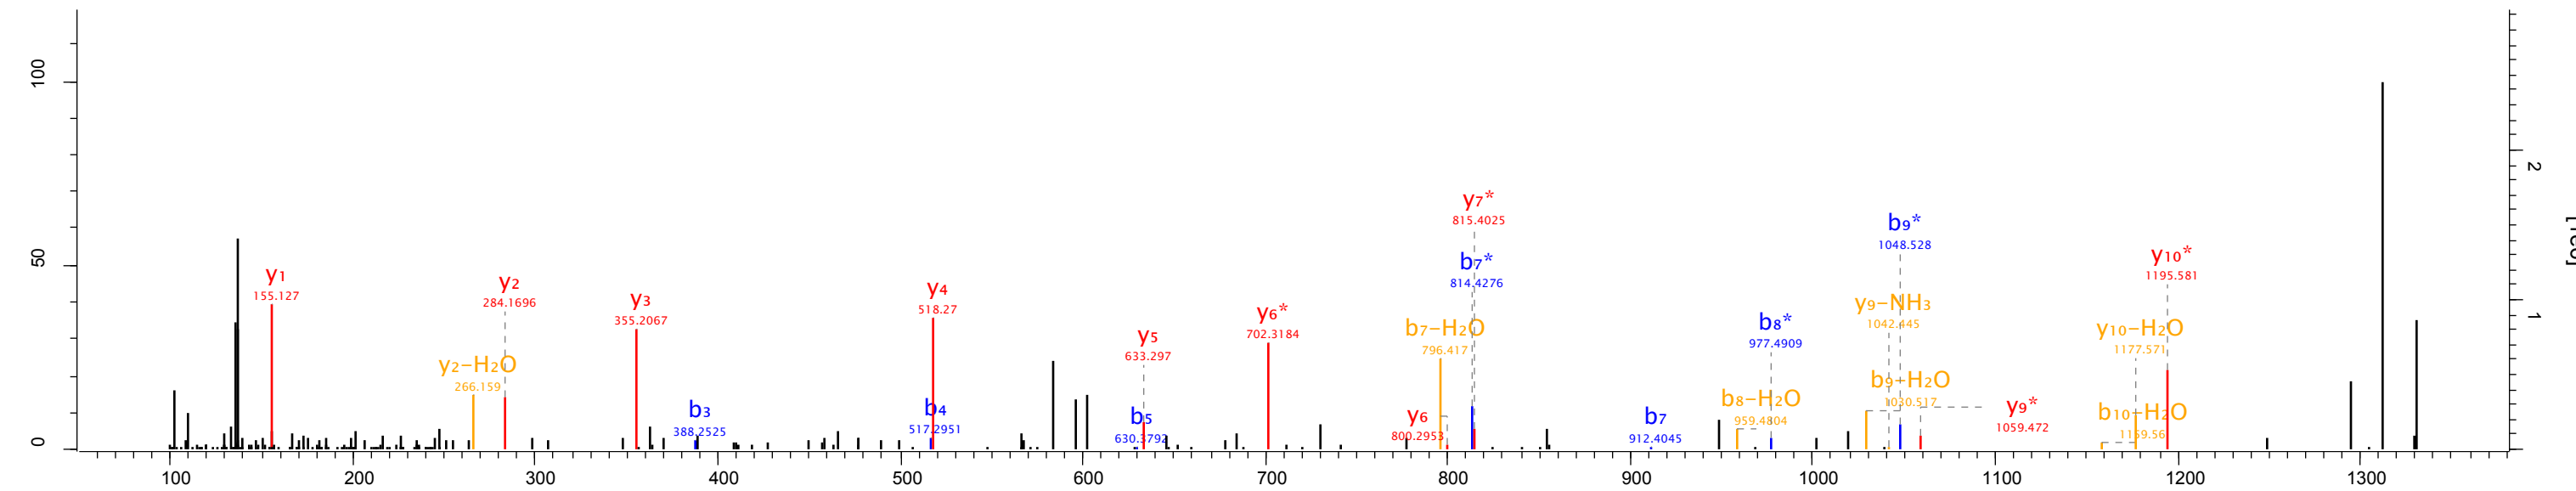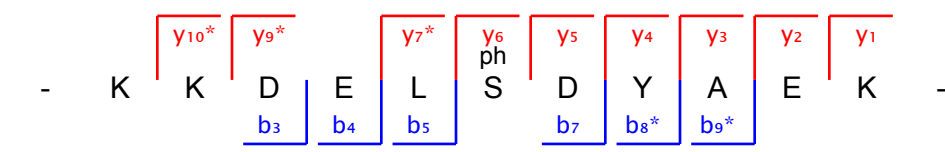



Raw file 20171215\_MaS\_33SR\_LMH\_phospho\_03 Scan 4344 Method FTMS; HCD Score 122.29 m/z 551.59 Gene names CETN2

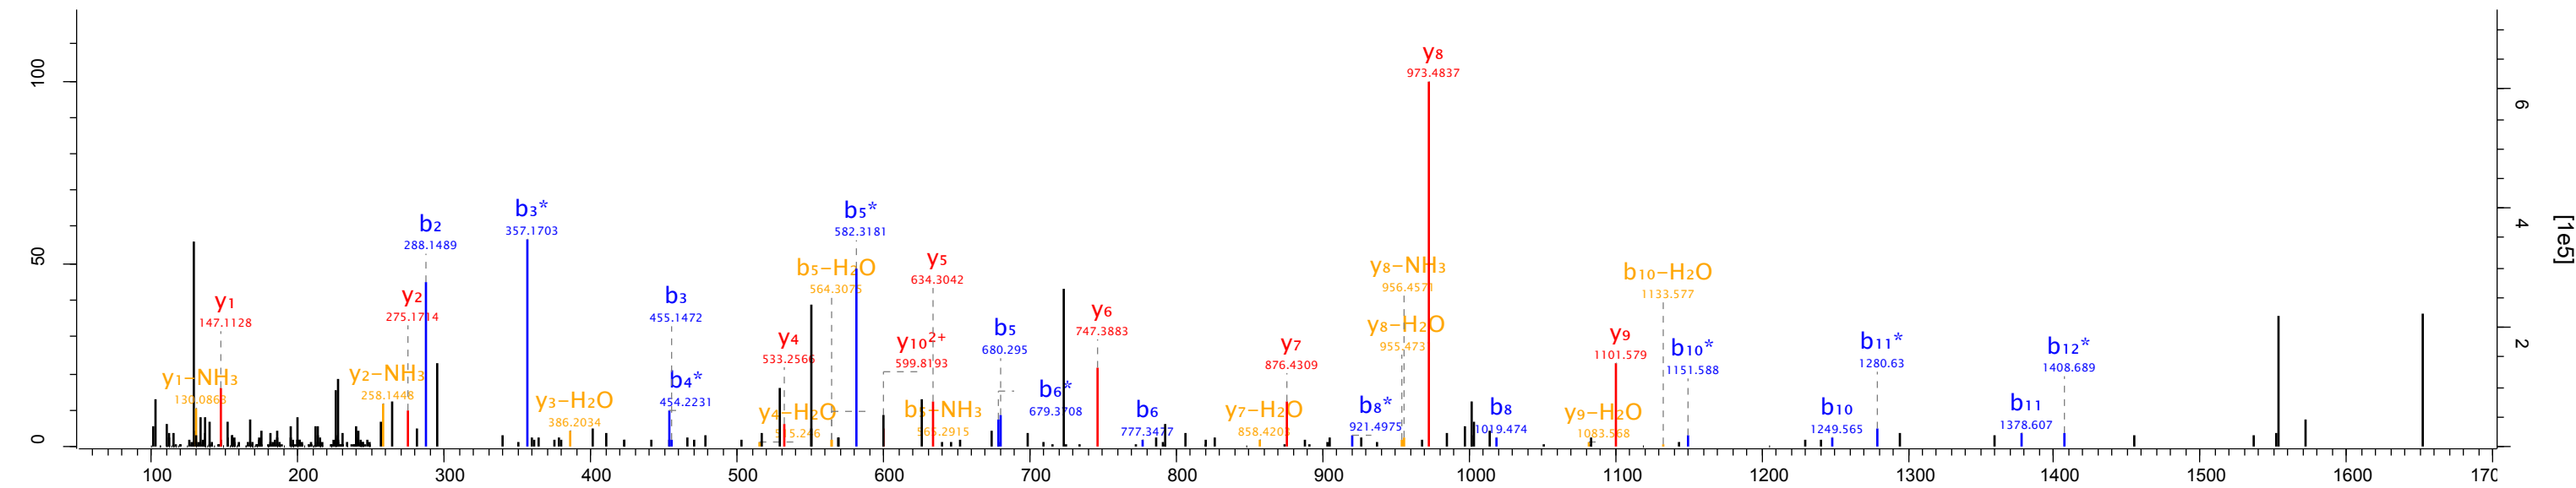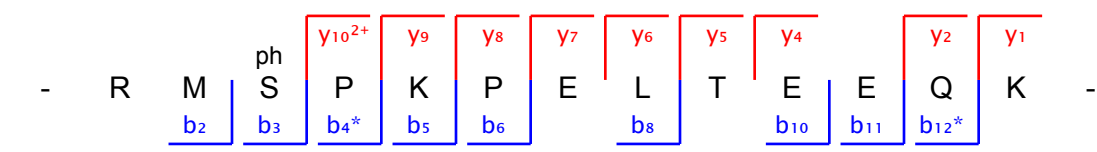

Raw file 20171215\_MaS\_33SR\_LMH\_phospho\_03 Scan 4684 Method FTMS; HCD Score 155.76 m/z 801.91 Gene names GPATCH8

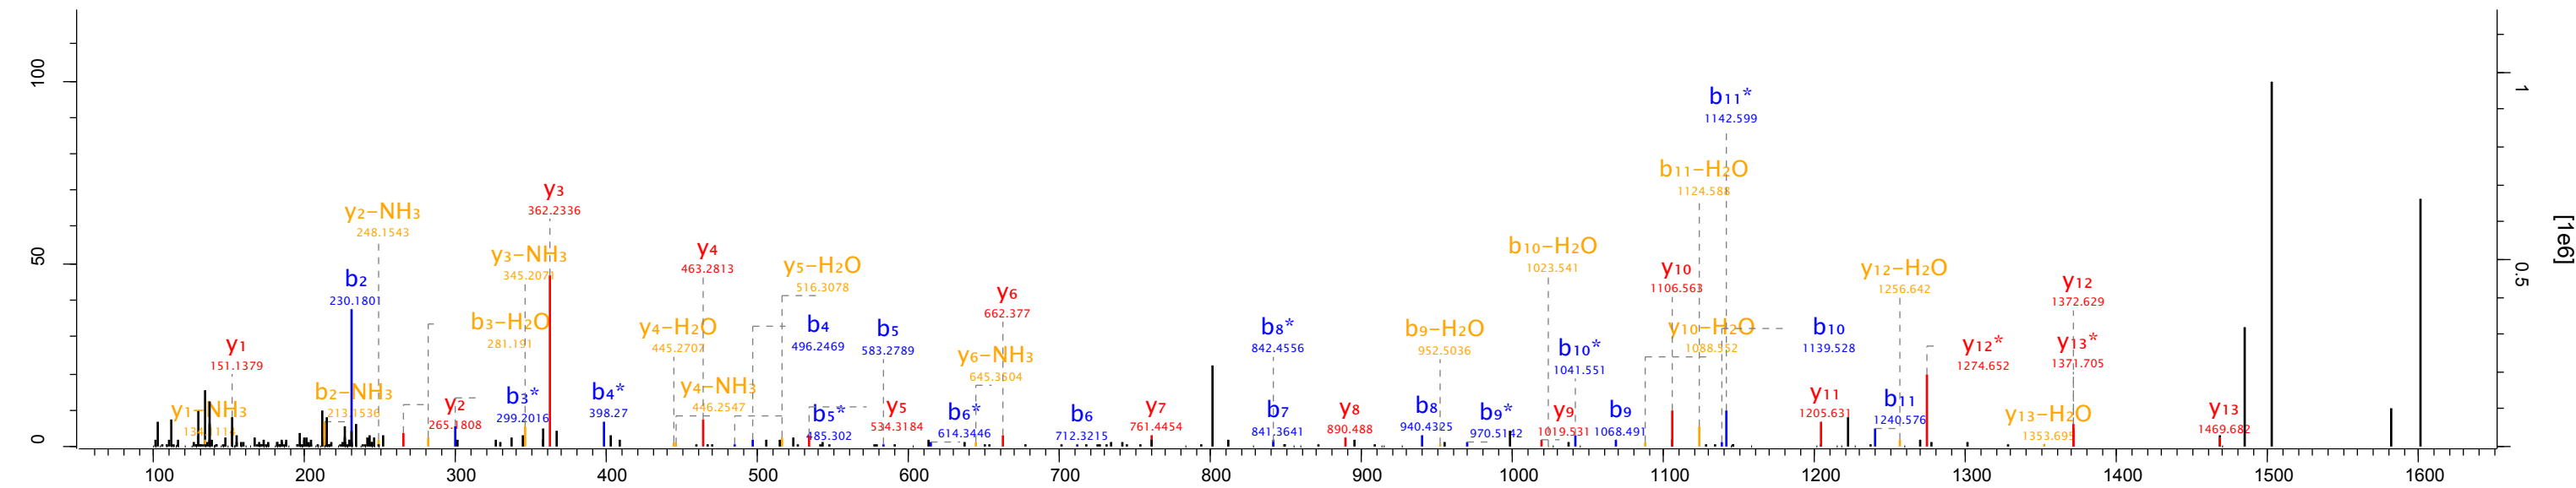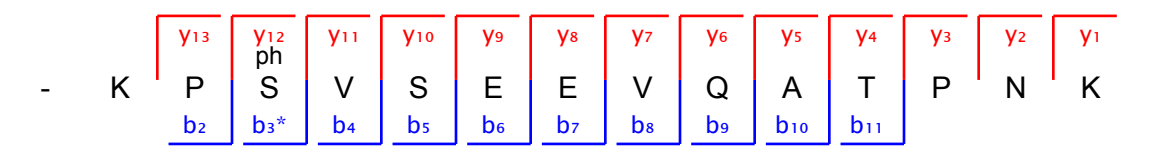



Raw file 20171215\_MaS\_33SR\_LMH\_phospho\_03 Scan 4734 Method FTMS; HCD Score 137.73 m/z 485.56 Gene names CLASP2

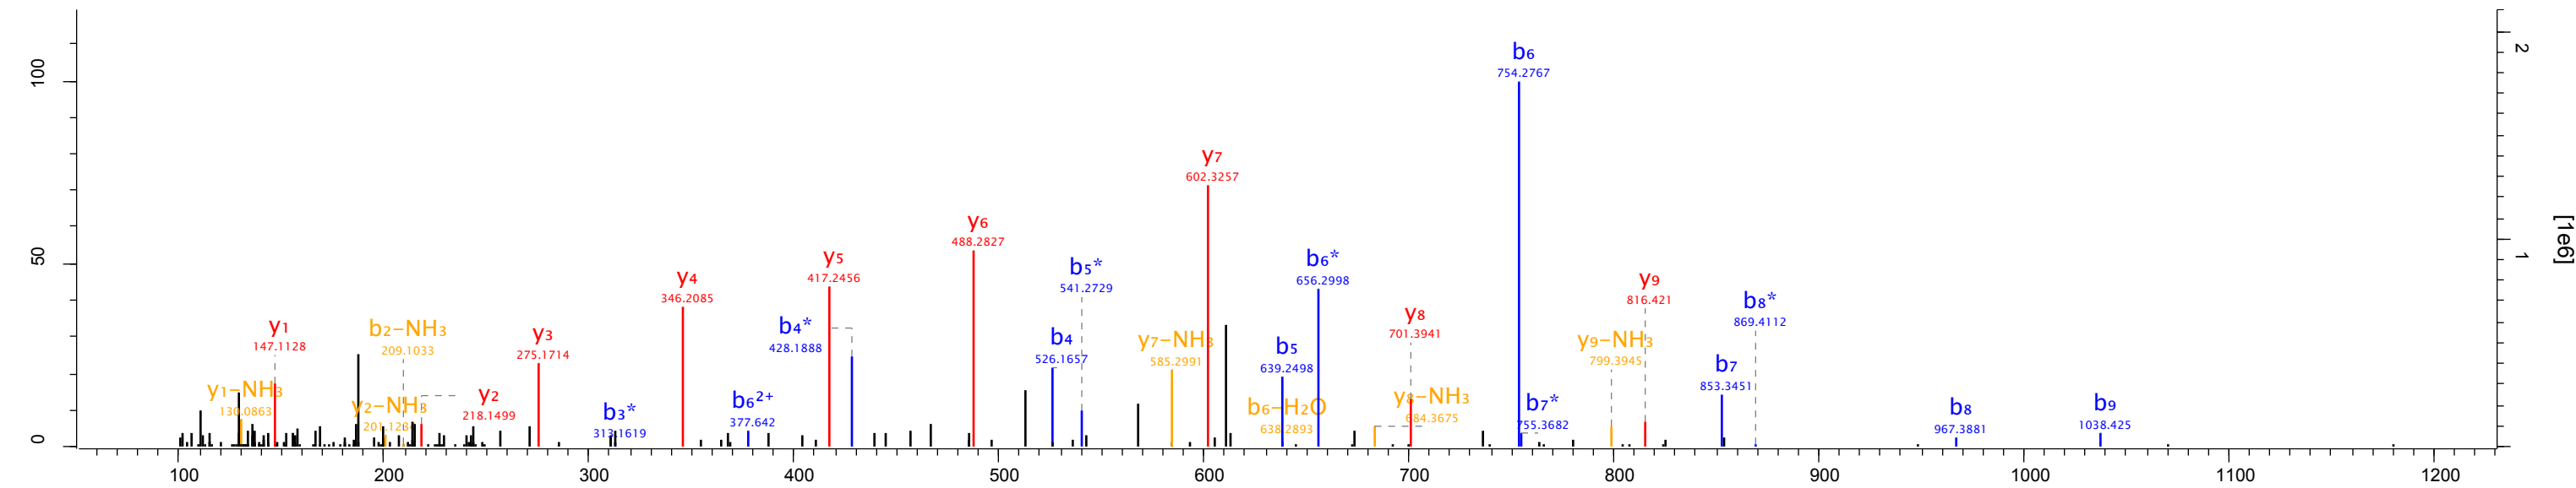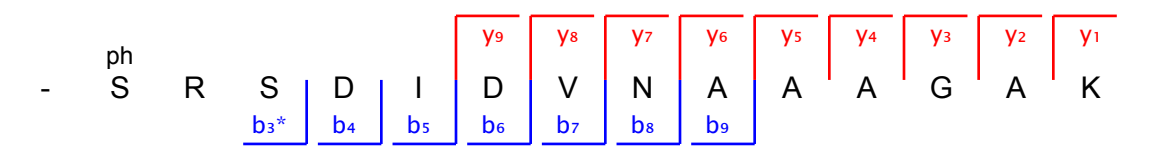

Raw file 20171215\_MaS\_33SR\_LMH\_phospho\_03 Scan 4884 Method FTMS; HCD Score 76.73 m/z 557.25 Gene names CWC25

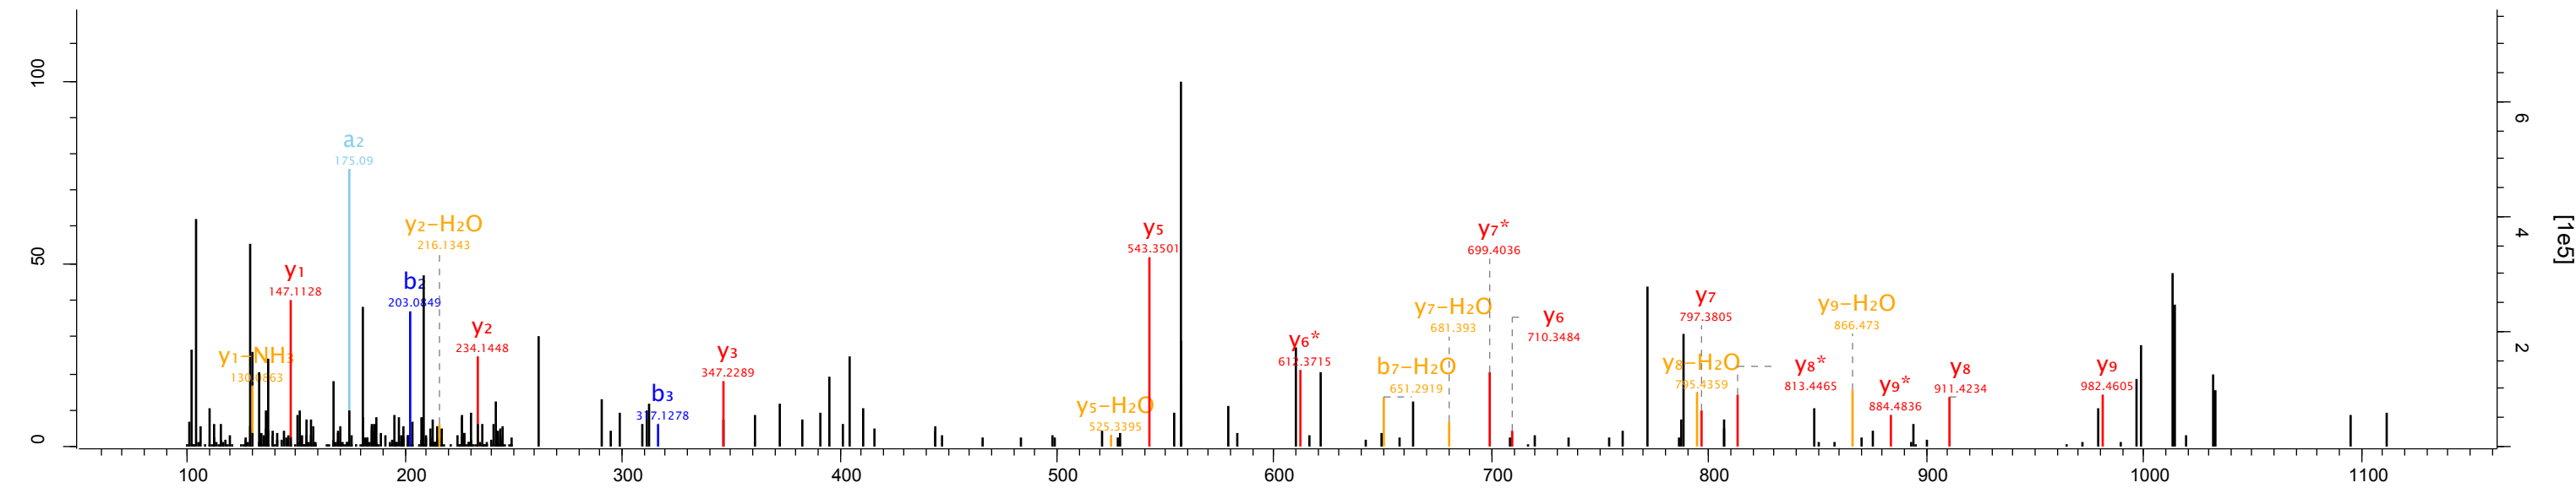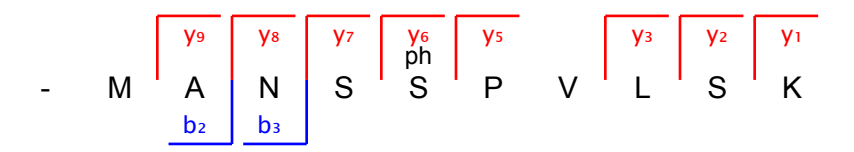

Raw file 20171215\_MaS\_33SR\_LMH\_phospho\_03 Scan 4904 Method FTMS; HCD Score 101.71 m/z 548.77 Gene names SRRM1

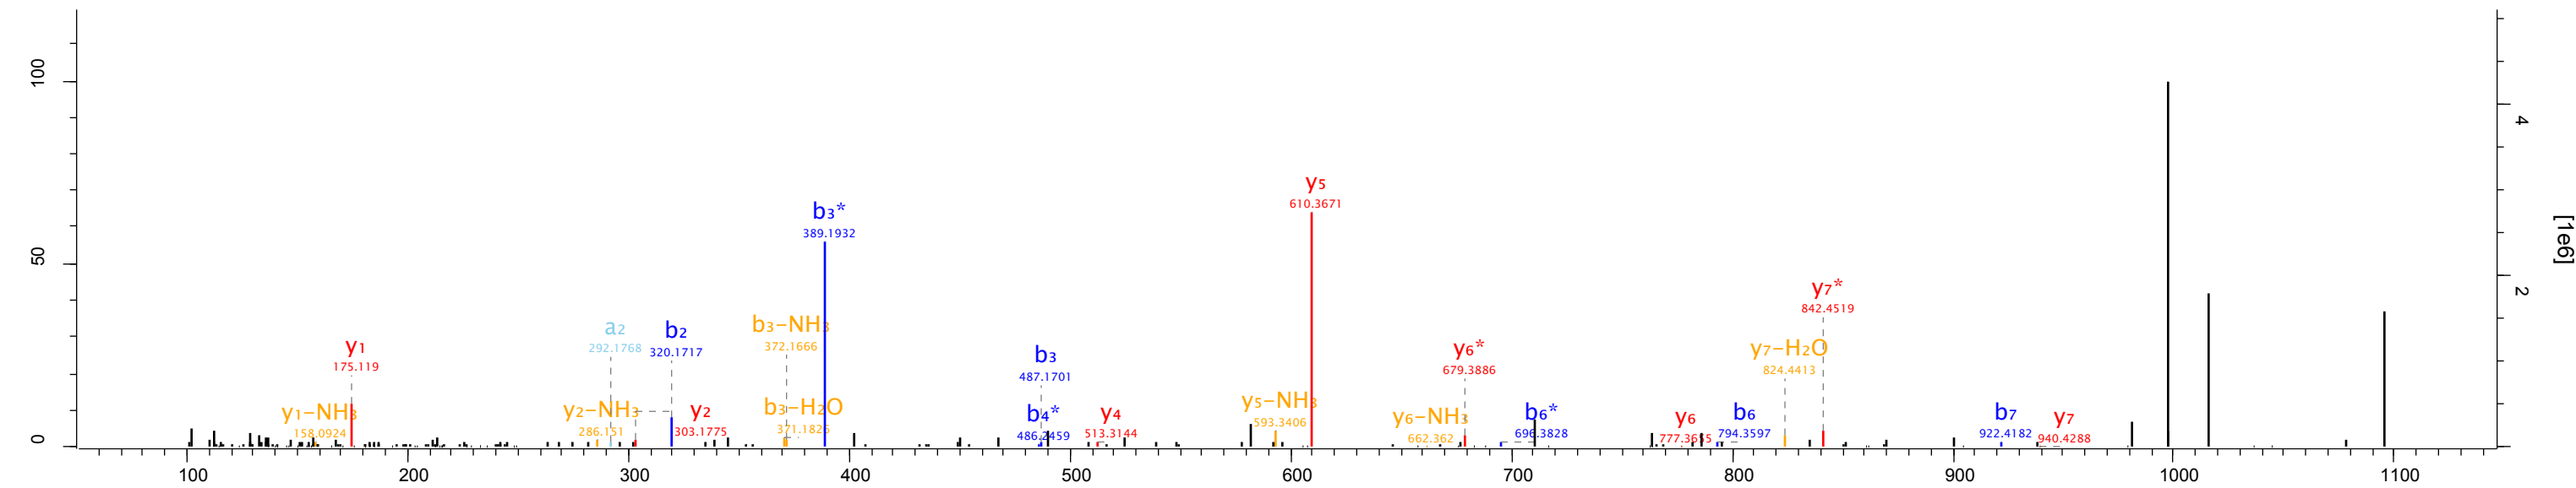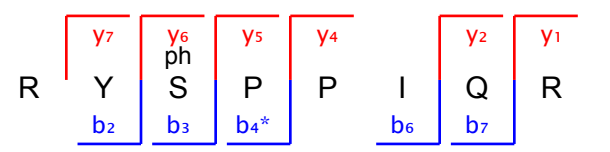

Raw file 20171215\_MaS\_33SR\_LMH\_phospho\_03 Scan 5054 Method FTMS; HCD Score 67.4 m/z 589.92 Gene names CCNK

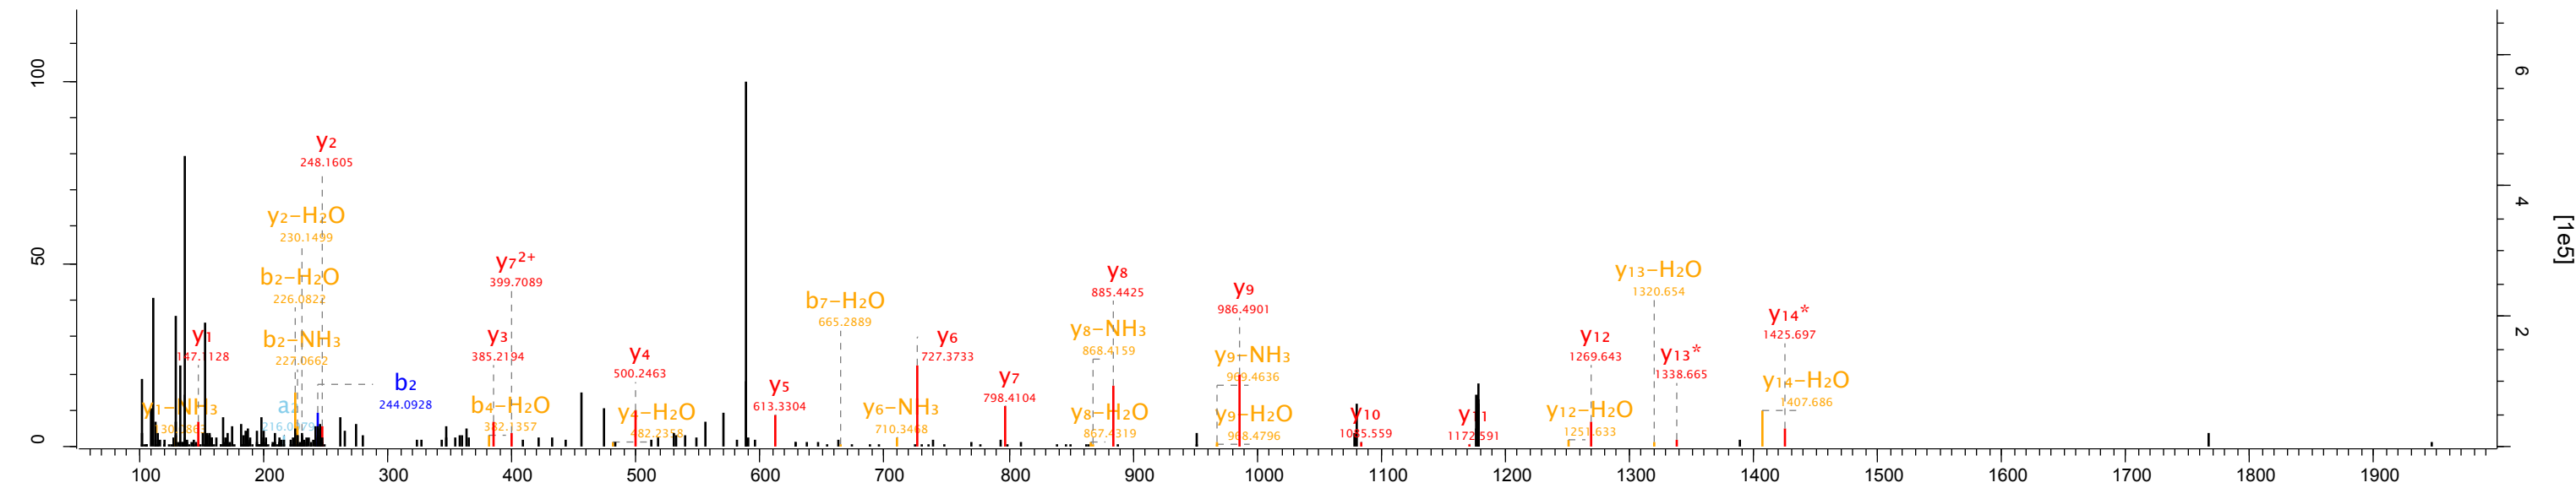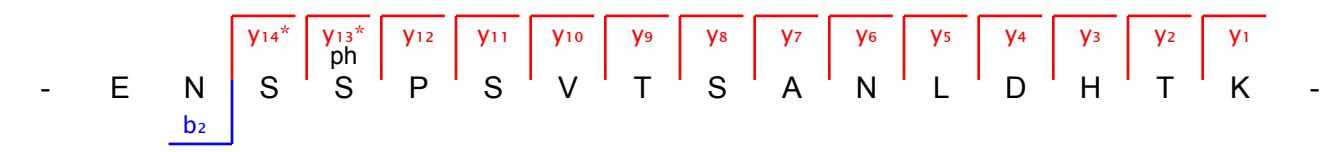

Raw file 20171215\_MaS\_33SR\_LMH\_phospho\_03 Scan 5614 Method FTMS; HCD Score 112.82 m/z 581.32 Gene names LMNB1;LMNB2

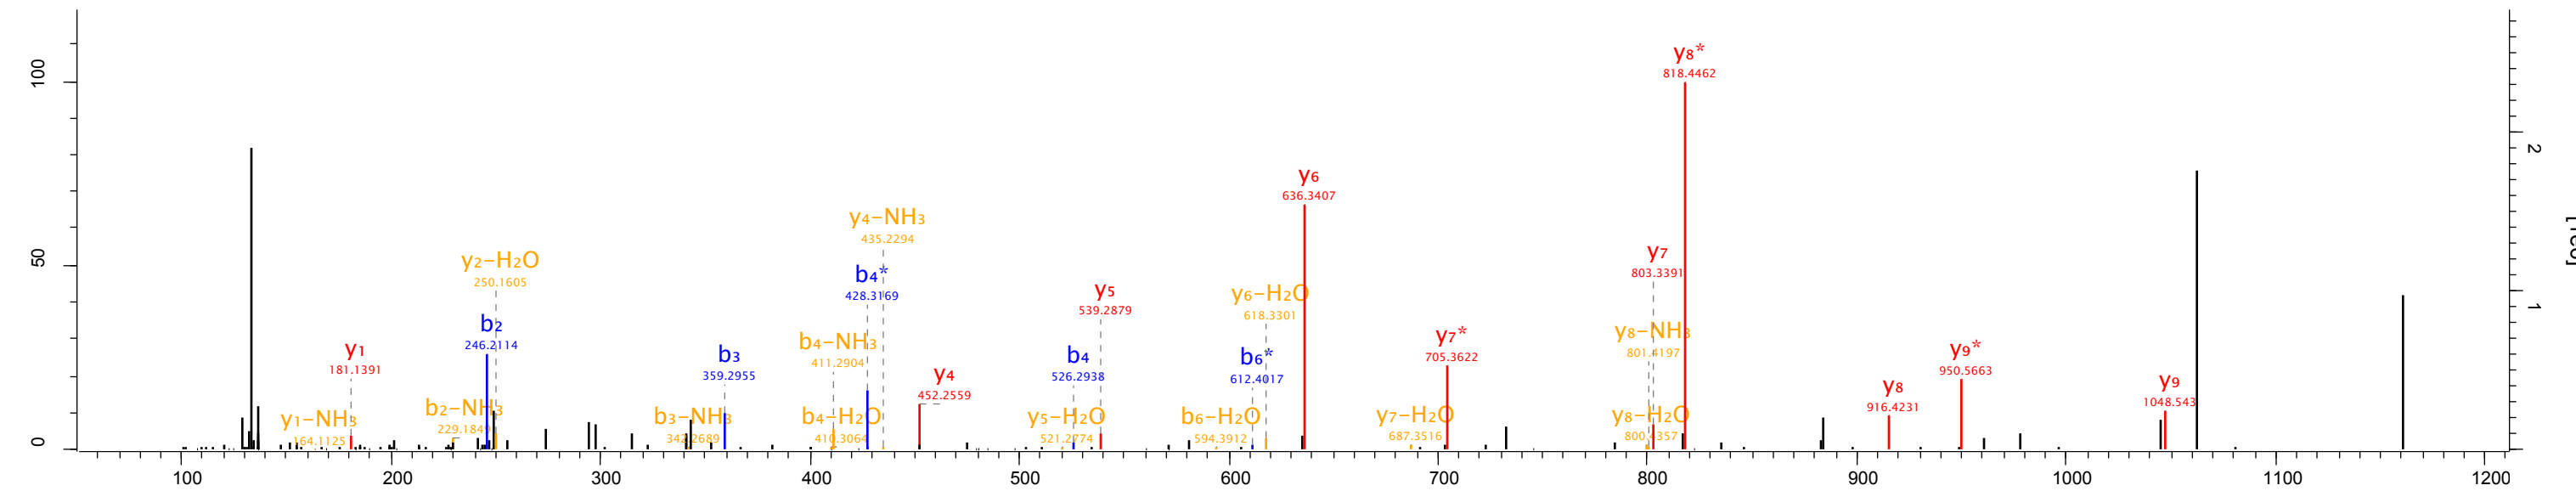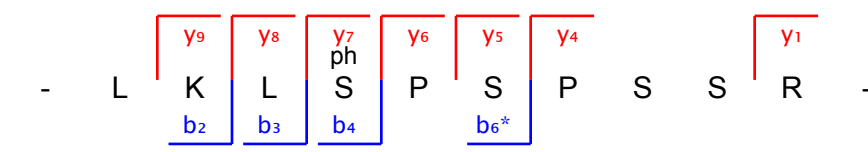

Raw file 20171215\_MaS\_33SR\_LMH\_phospho\_03 Scan 5664 Method FTMS; HCD Score 71.6 m/z 568.92 Gene names KIAA1429

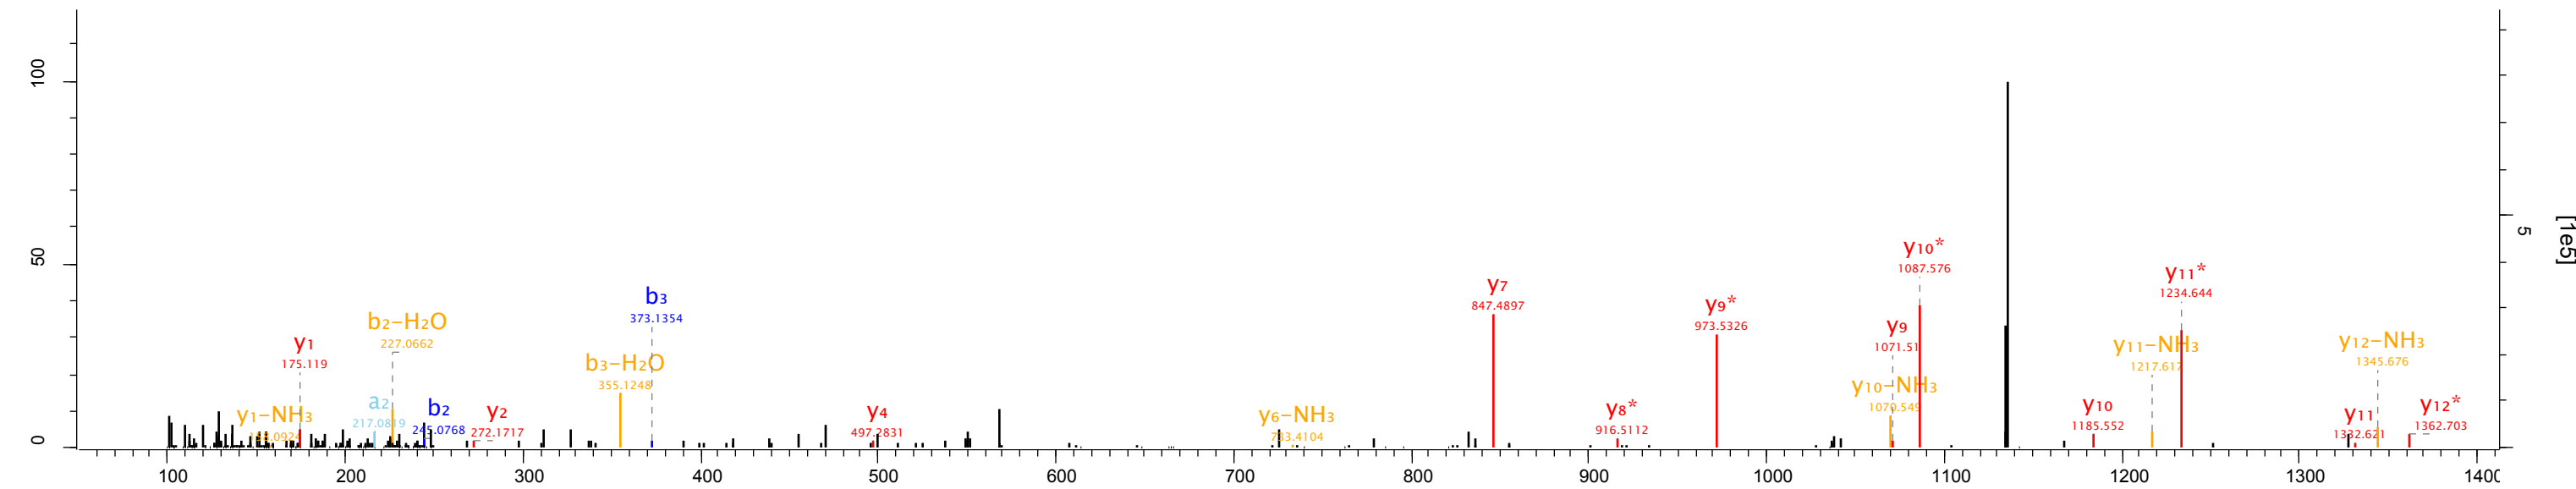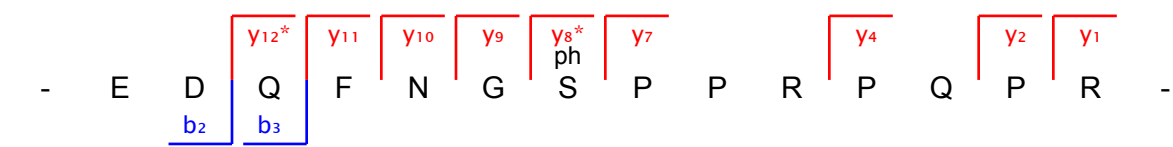

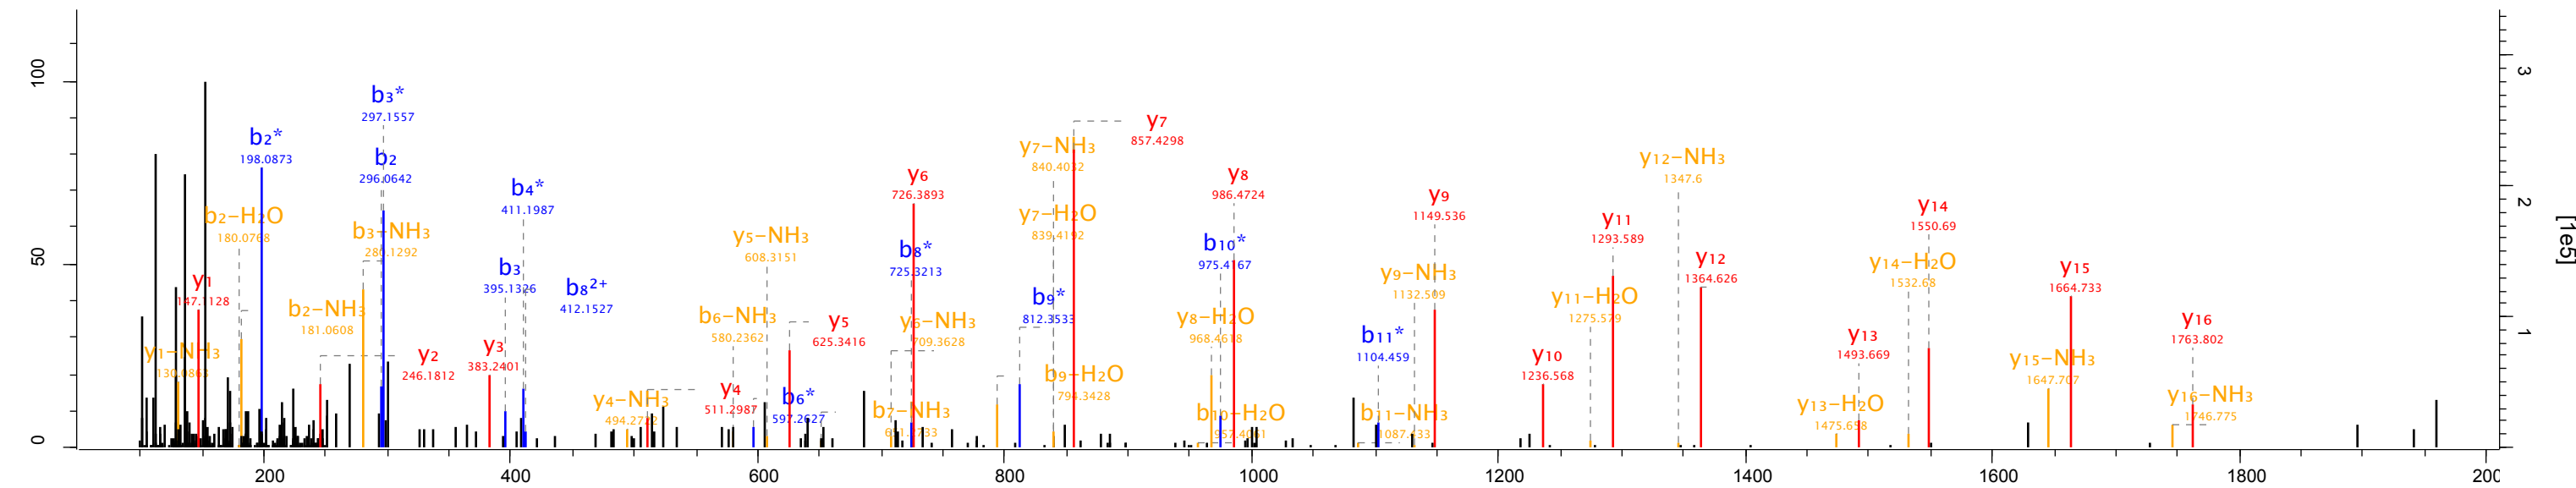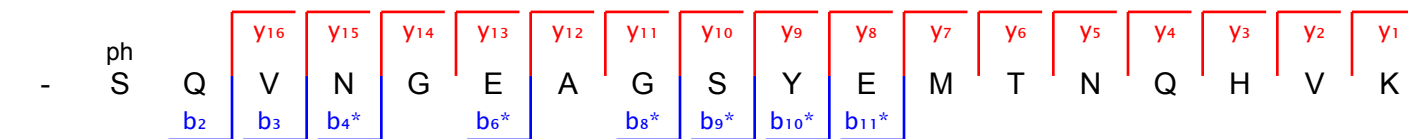

Raw file 20171215\_MaS\_33SR\_LMH\_phospho\_03 Scan 6534 Method FTMS; HCD Score 85.82 m/z 530.72 Gene names DCP1B

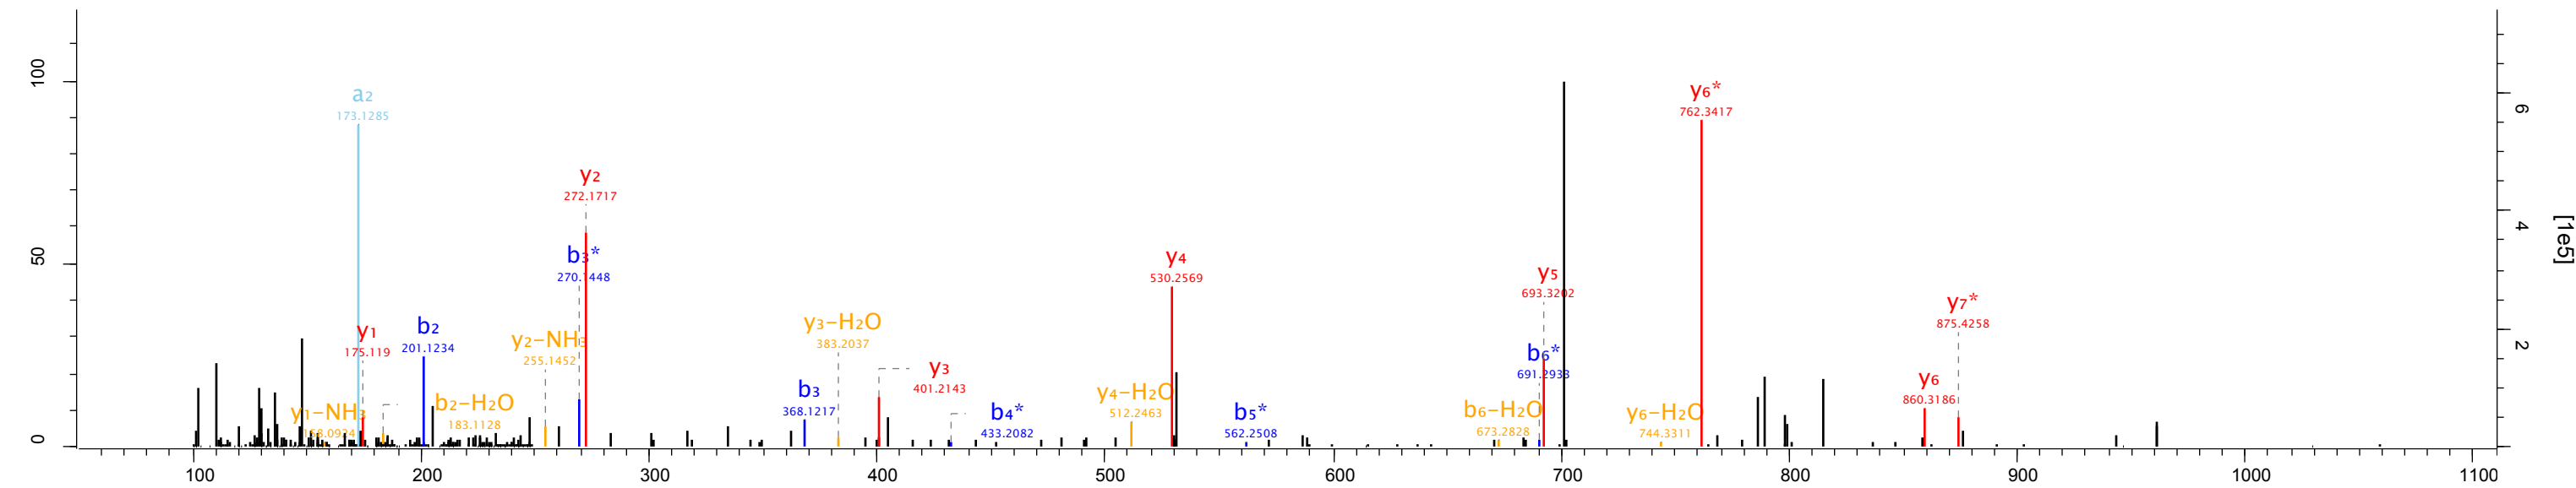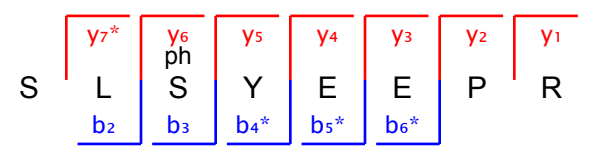



Raw file: 20171215\_MaS\_33SR\_LMH\_phospho\_03  
 Scan: 6764 Method: FTMS; HCD Score: 75.05 m/z: 1005.9 Gene names: FIP1L1

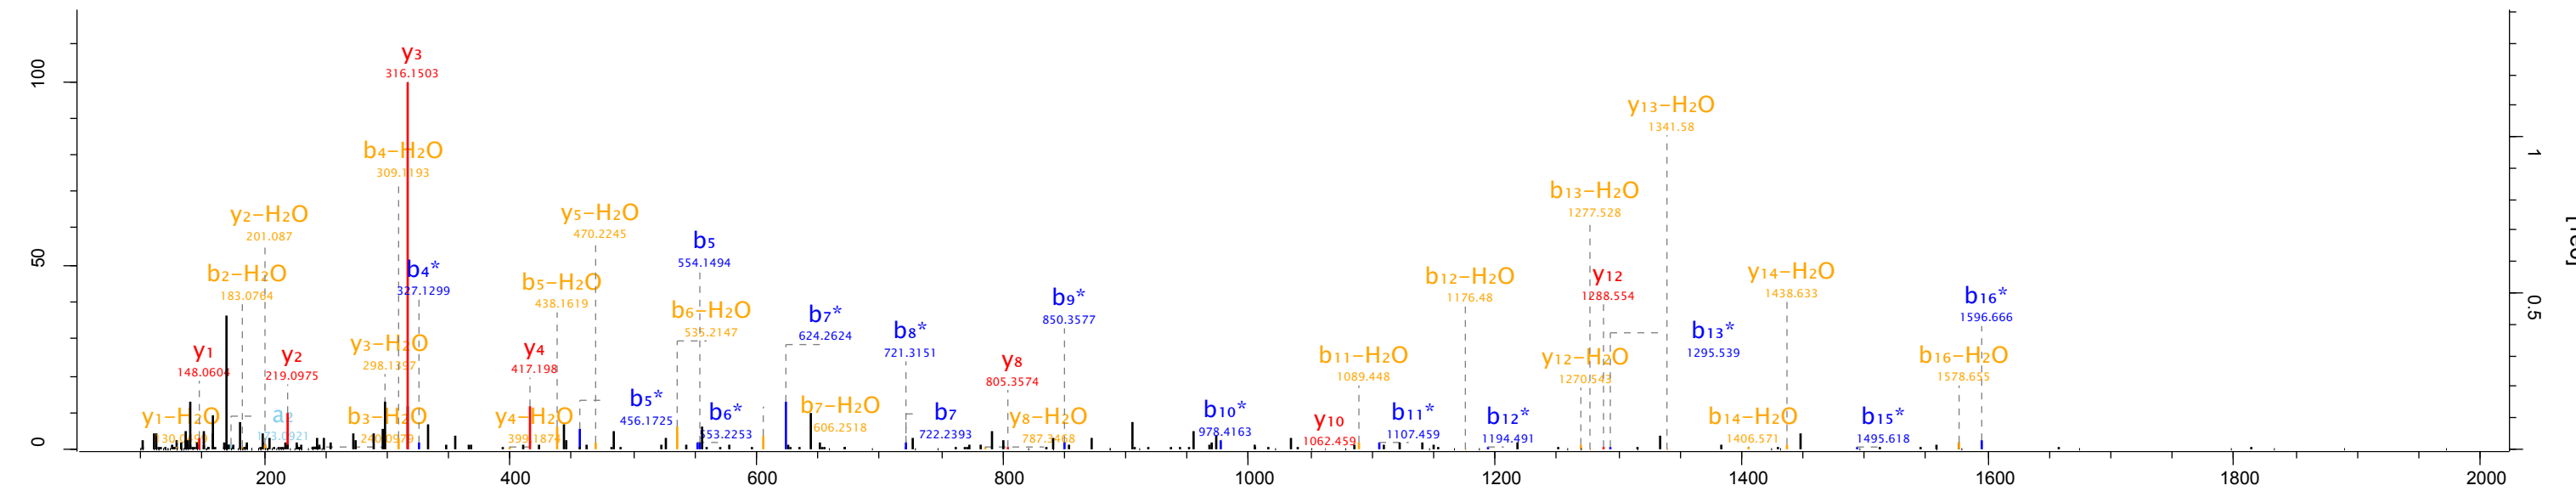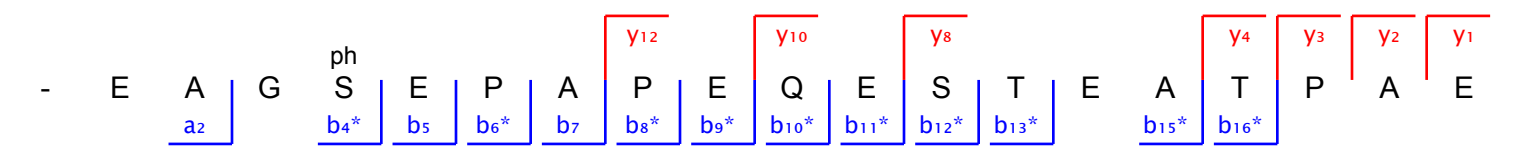

Raw file 20171215\_MaS\_33SR\_LMH\_phospho\_03 Scan 7174 Method FTMS; HCD Score 200.45 m/z 826.82 Gene names TCP1

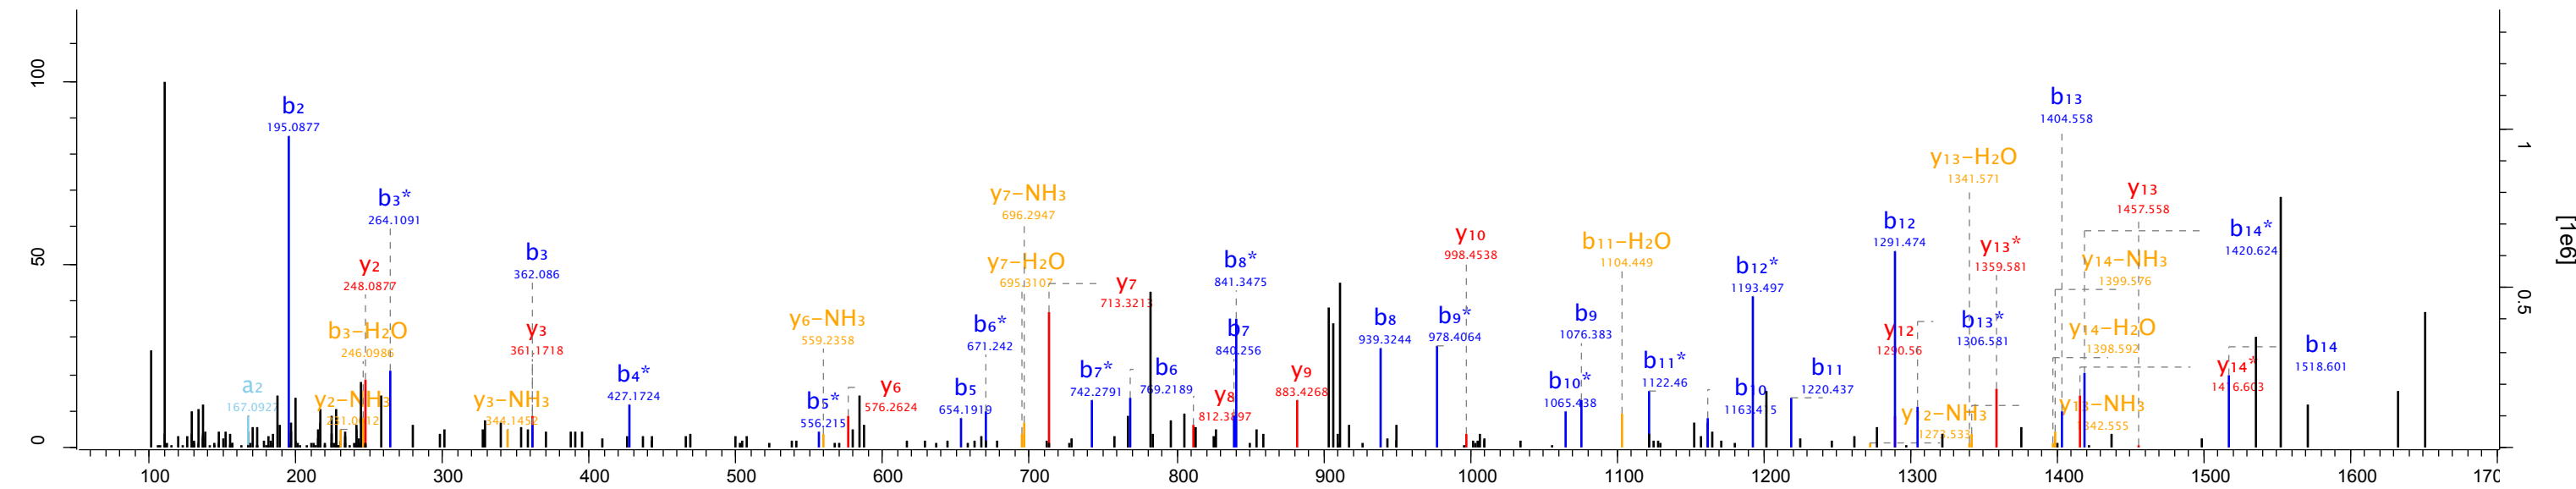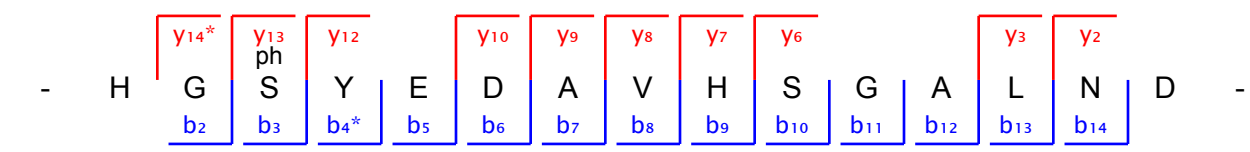

Raw file 20171215\_MaS\_33SR\_LMH\_phospho\_03 Scan 7504 Method FTMS; HCD Score 68.66 m/z 426.2 Gene names AIFM1

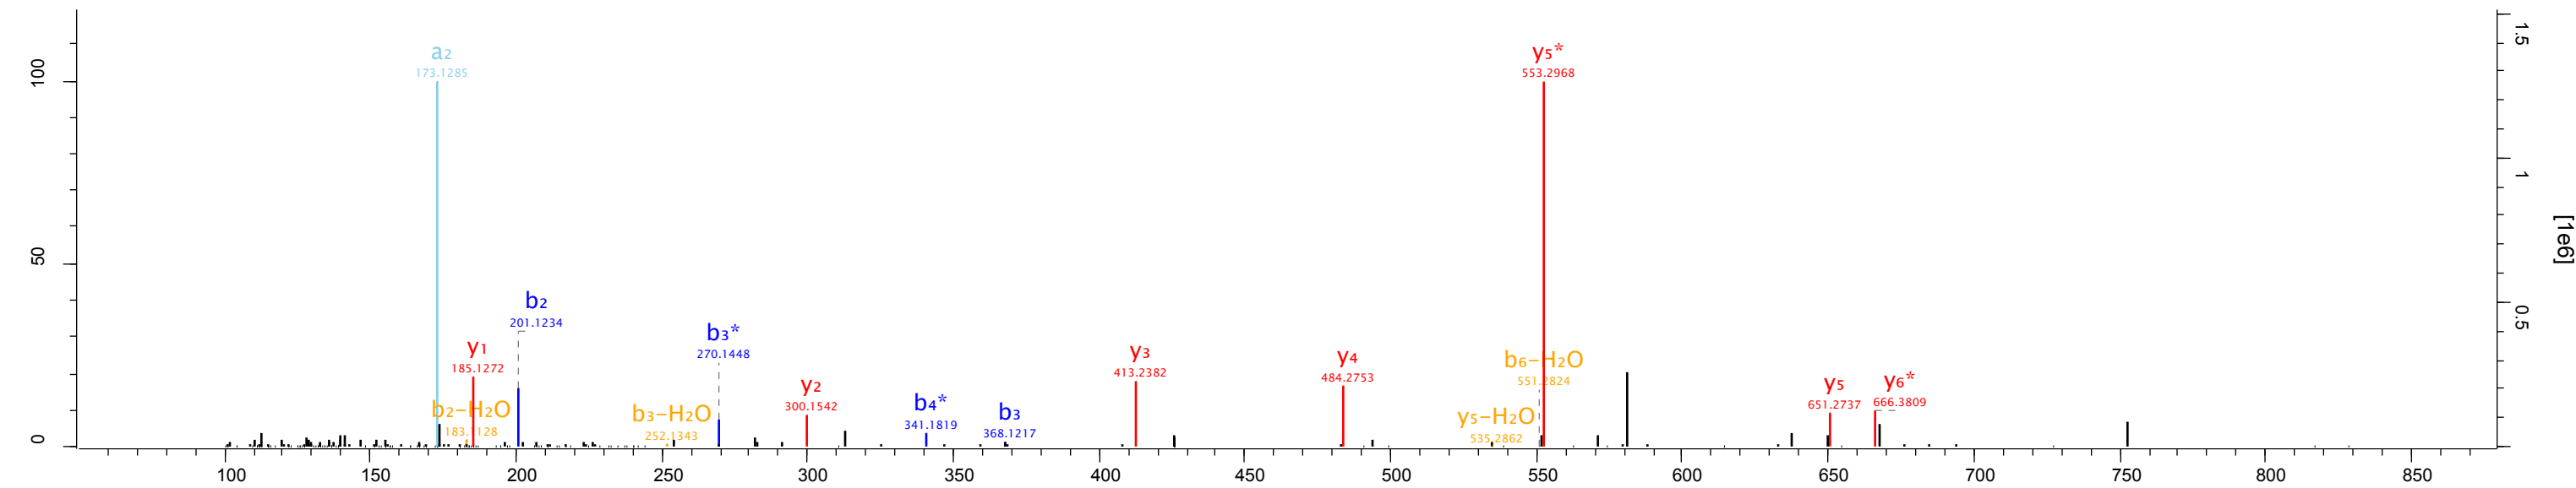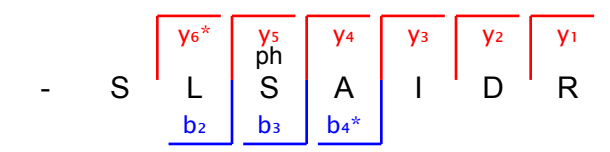

Raw file 20171215\_MaS\_33SR\_LMH\_phospho\_03 Scan 7734 Method FTMS; HCD Score 191.47 m/z 777.34 Gene names ITCH

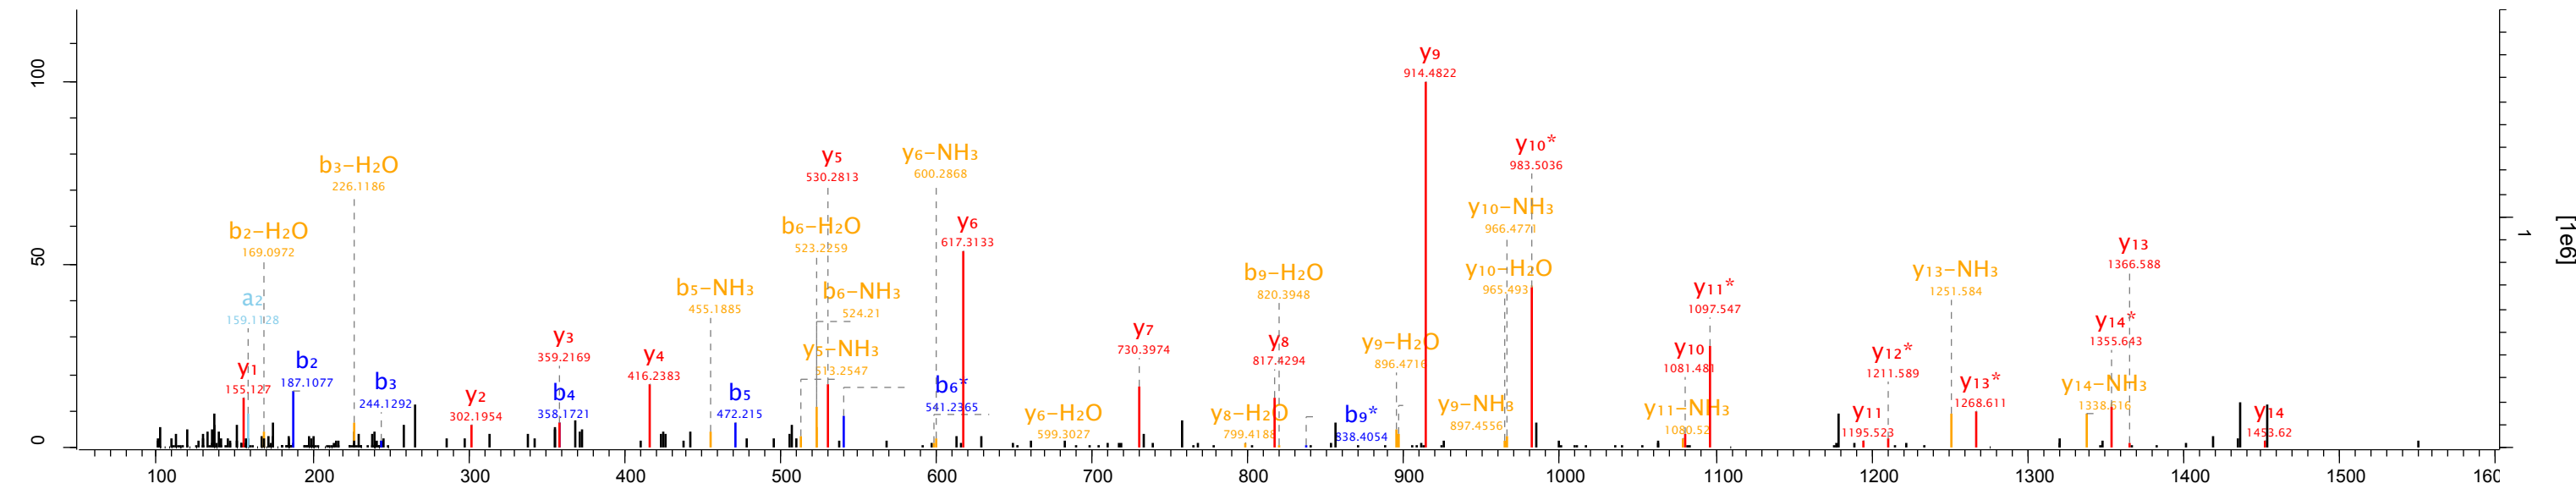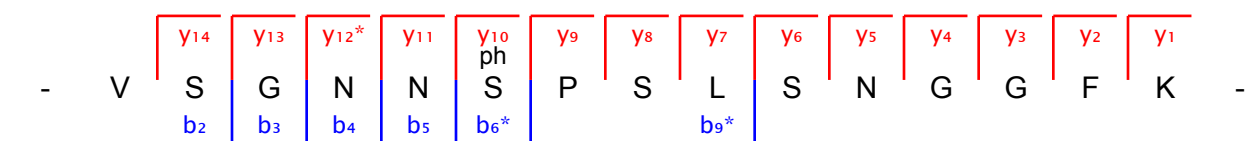

Raw file 20171215\_MaS\_33SR\_LMH\_phospho\_03 Scan 7824 Method FTMS; HCD Score 178.05 m/z 814.37 Gene names KIF7

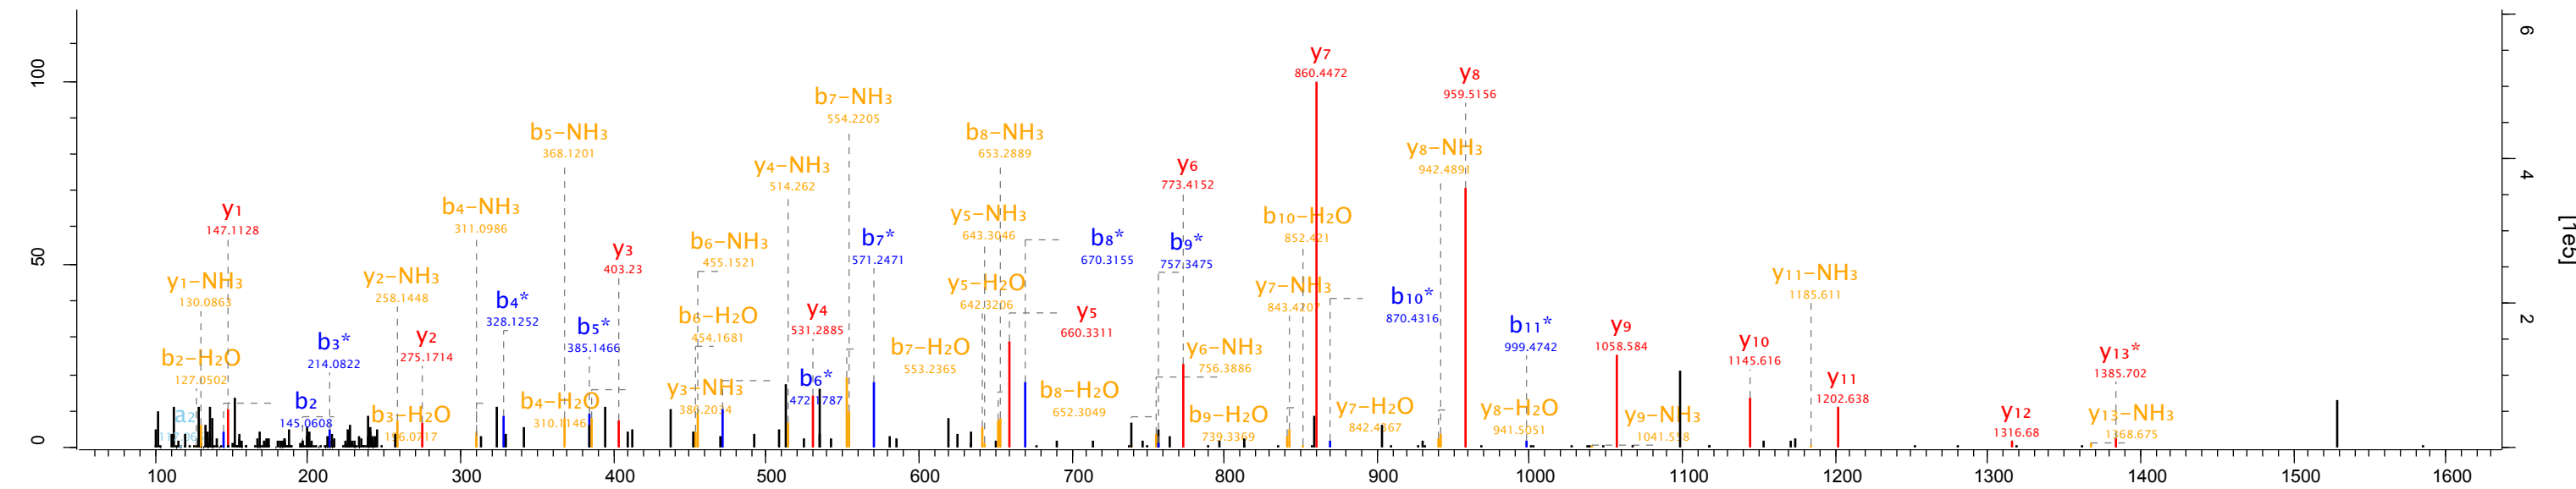

- S G S ph S N G S V V S L E Q Q Q K -

b<sub>2</sub> b<sub>3</sub>\* b<sub>4</sub>\* b<sub>5</sub>\* b<sub>6</sub>\* b<sub>7</sub>\* b<sub>8</sub>\* b<sub>9</sub>\* b<sub>10</sub>\* b<sub>11</sub>\*

Raw file 20171215\_MaS\_33SR\_LMH\_phospho\_03 Scan 7974 Method FTMS; HCD Score 142.93 m/z 896.39 Gene names SLC7A5

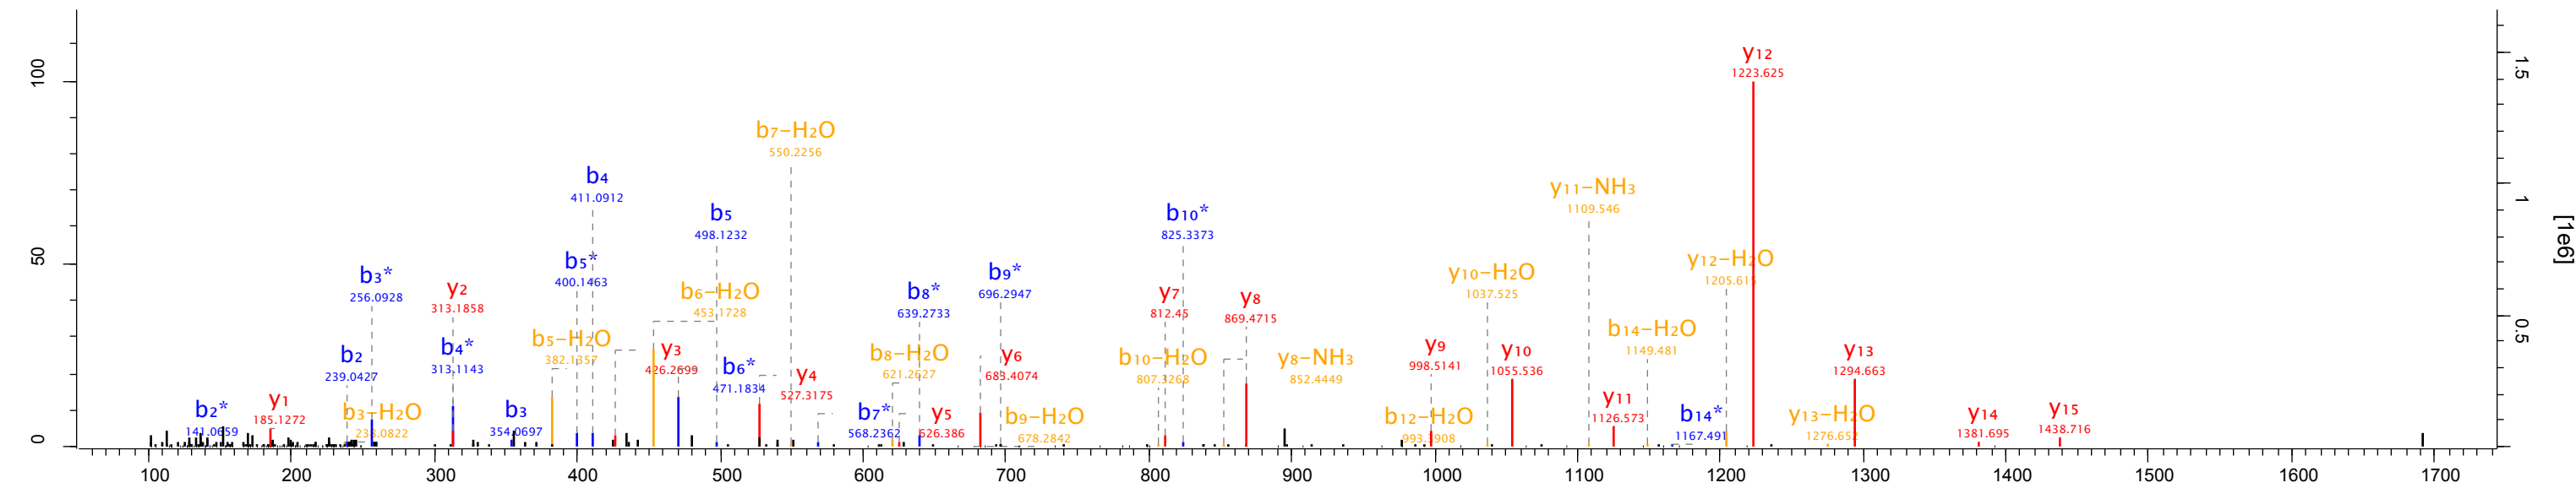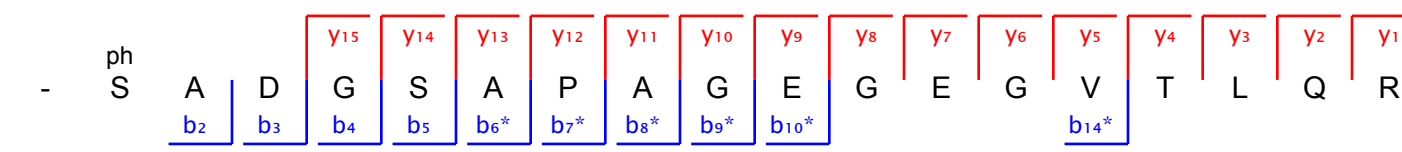

Raw file 20171215\_MaS\_33SR\_LMH\_phospho\_03 Scan 8274 Method FTMS; HCD Score 213.72 m/z 1105.91 Gene names FBXW9

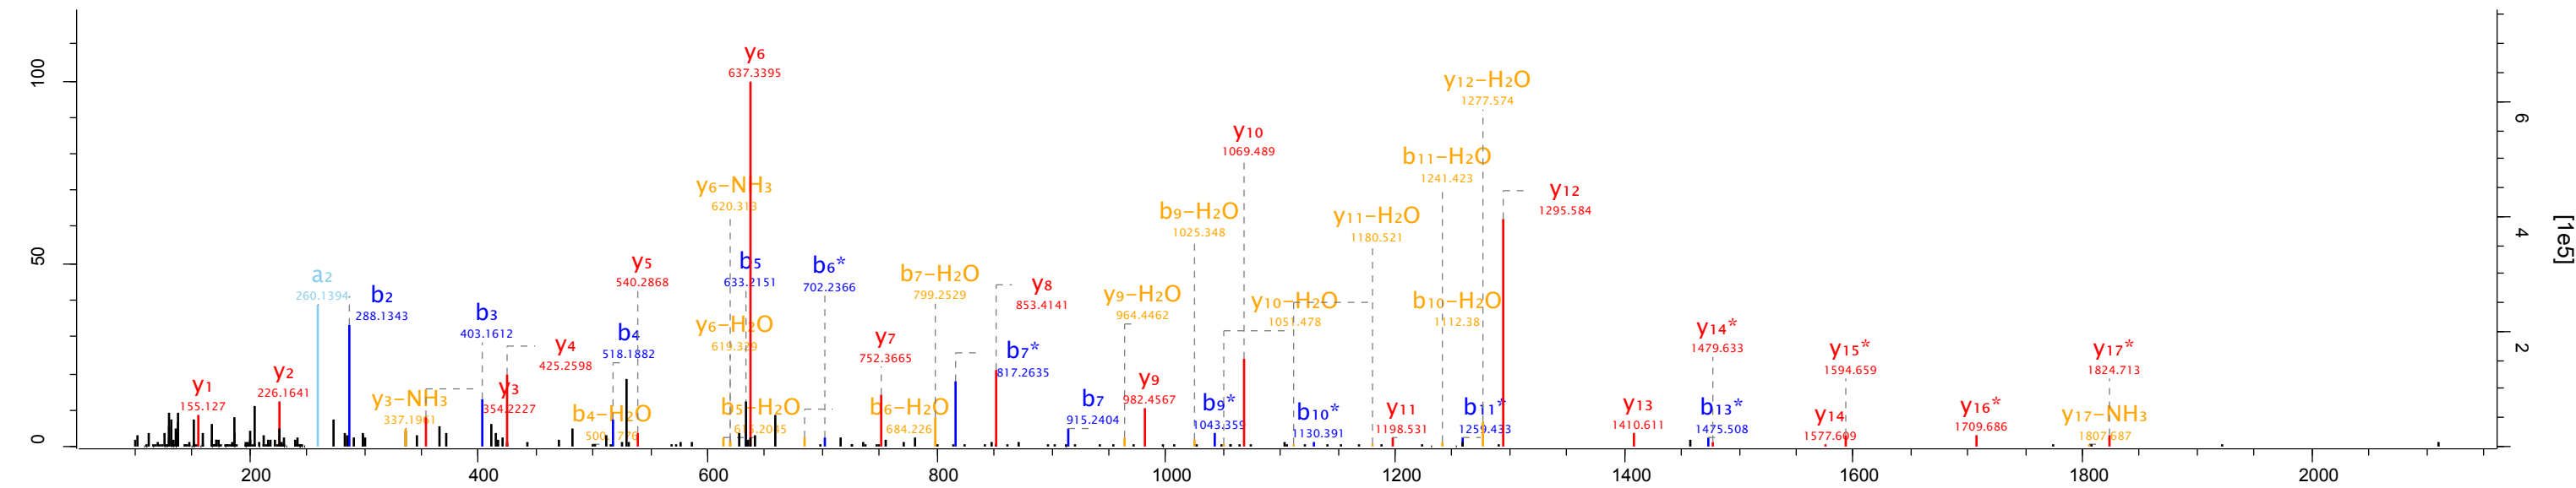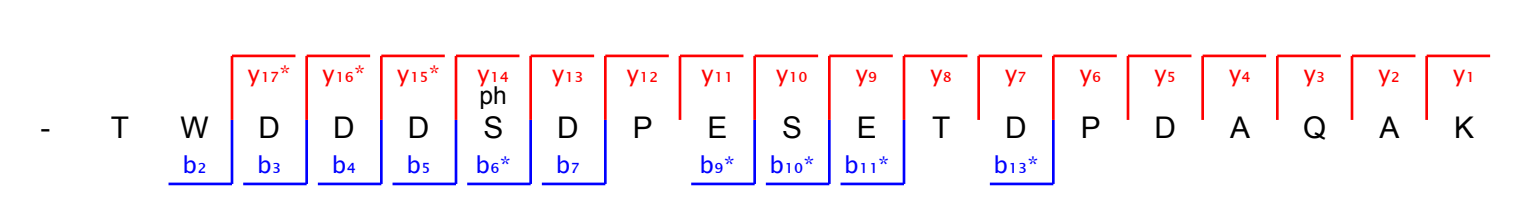

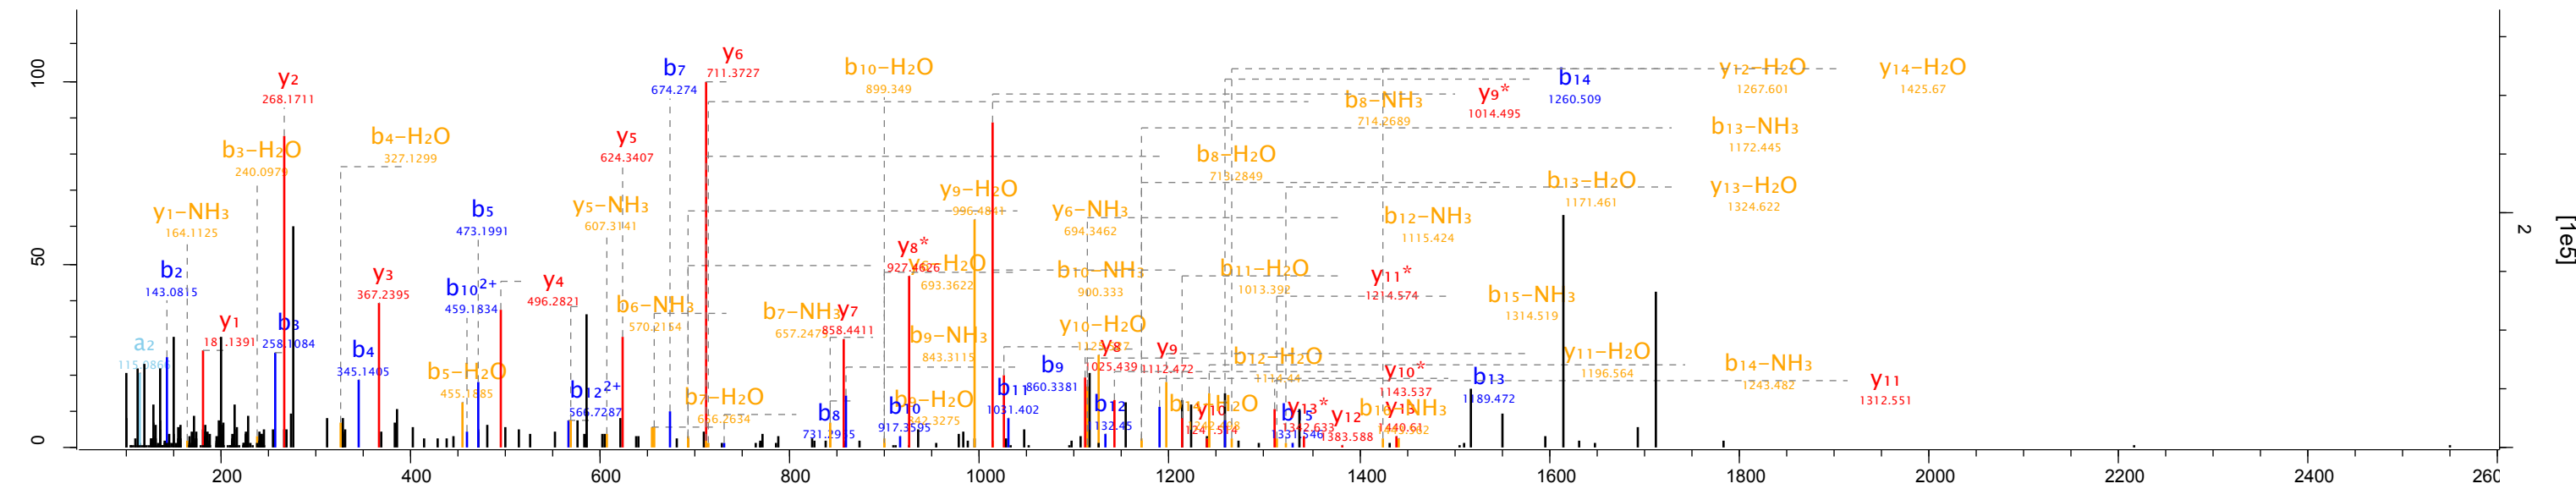



Raw file 20171215\_MaS\_33SR\_LMH\_phospho\_03 Scan 8444 Method FTMS; HCD Score 122.1 m/z 829.4 Gene names YEATS2

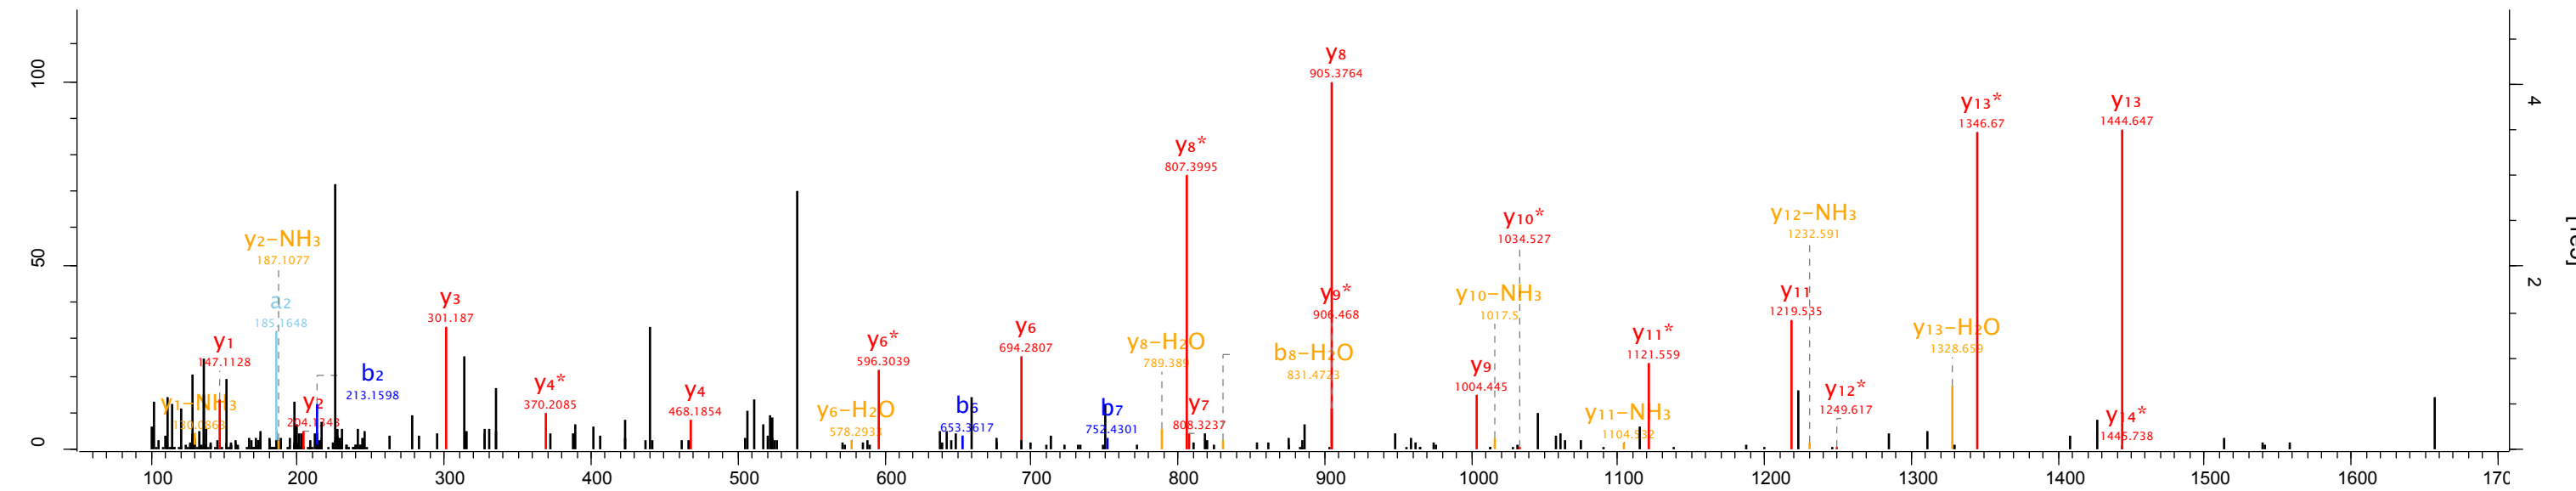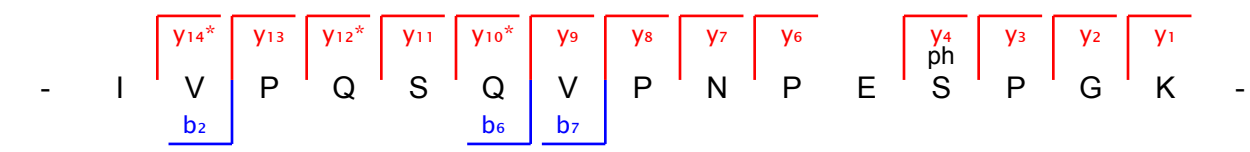

Raw file 20171215\_MaS\_33SR\_LMH\_phospho\_03 Scan 8474 Method FTMS; HCD Score 54.67 m/z 913.34 Gene names YTHDC2

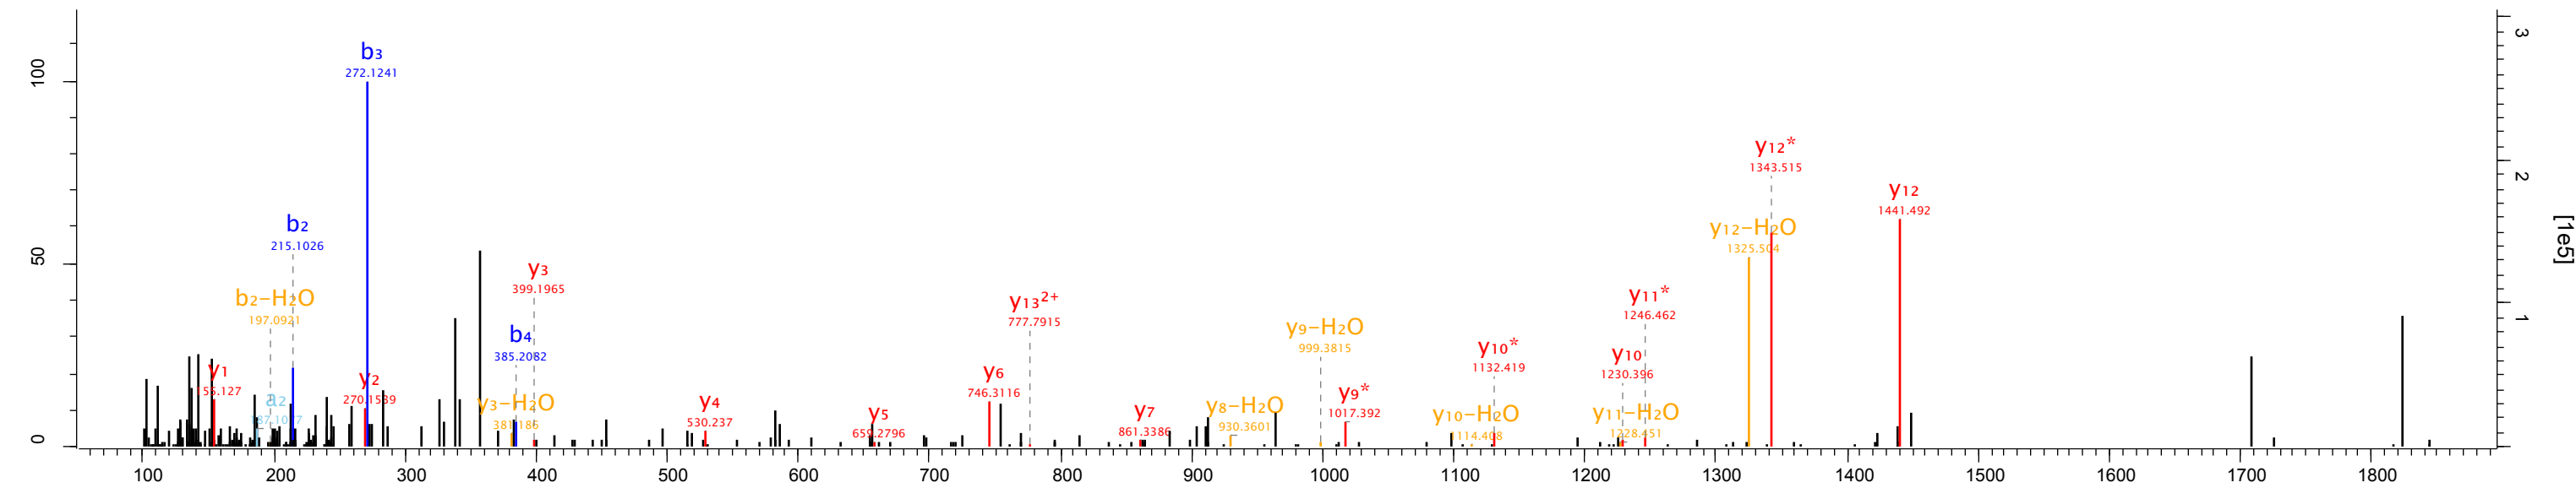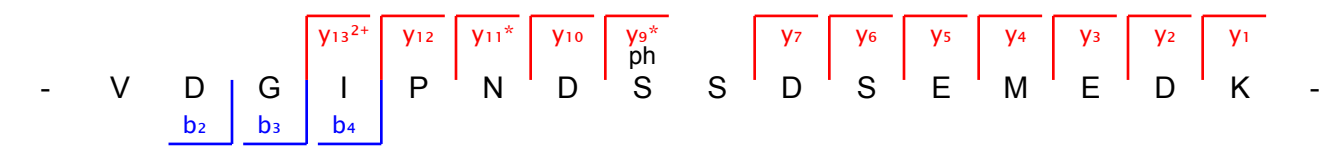

Raw file 20171215\_MaS\_33SR\_LMH\_phospho\_03 Scan 8564 Method FTMS; HCD Score 143.56 m/z 638.31 Gene names RPS6KA3

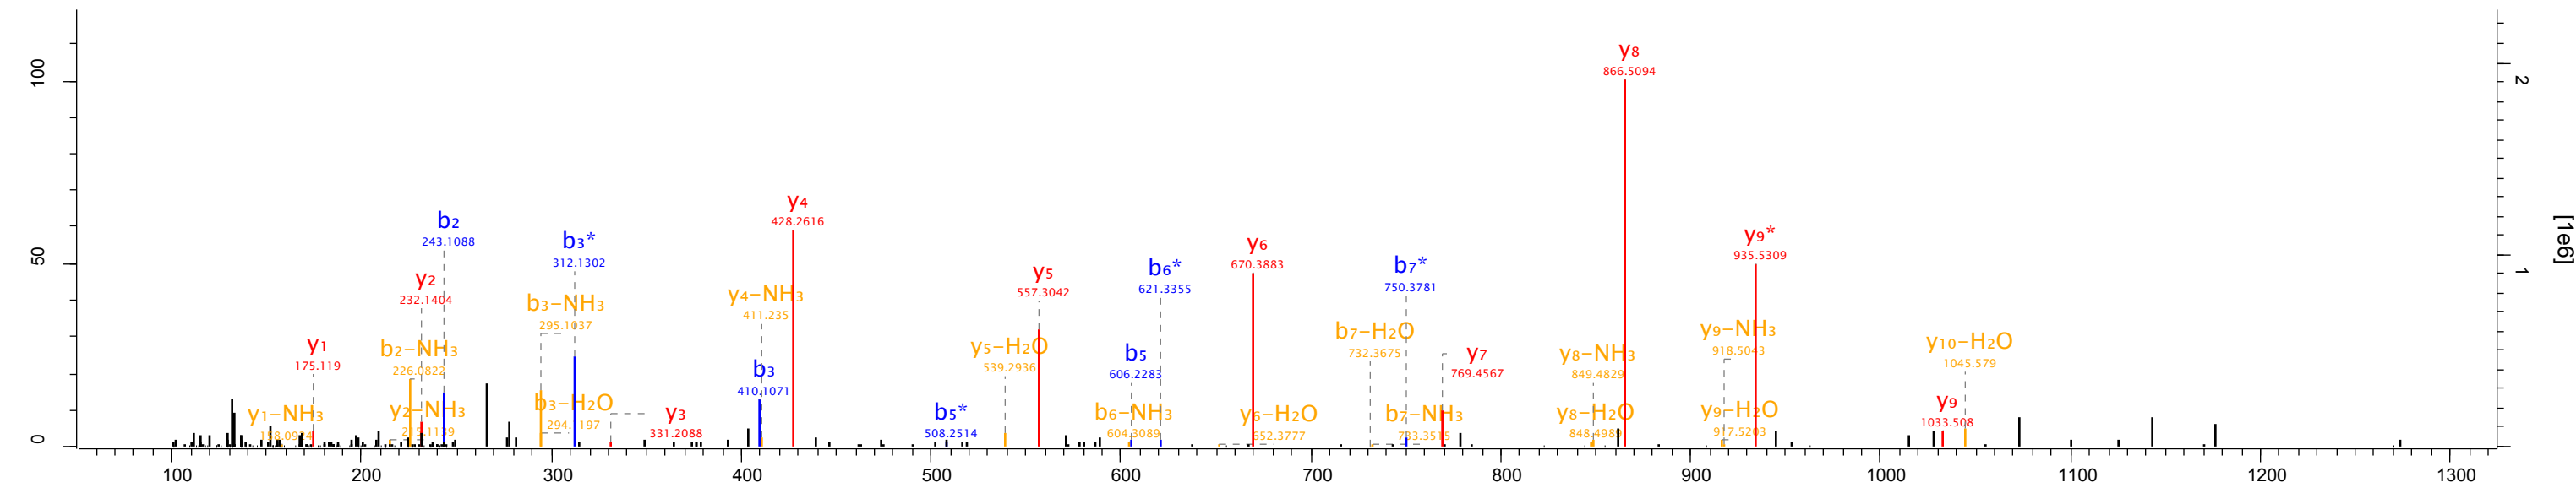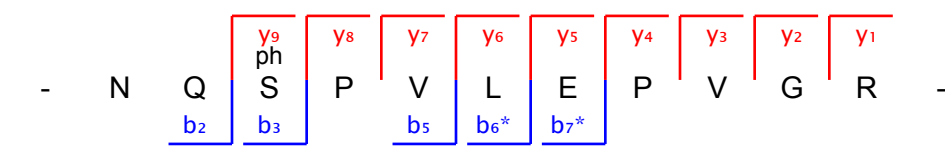

Raw file 20171215\_MaS\_33SR\_LMH\_phospho\_03 Scan 8714 Method FTMS; HCD Score 150.91 m/z 927.37 Gene names NMD3

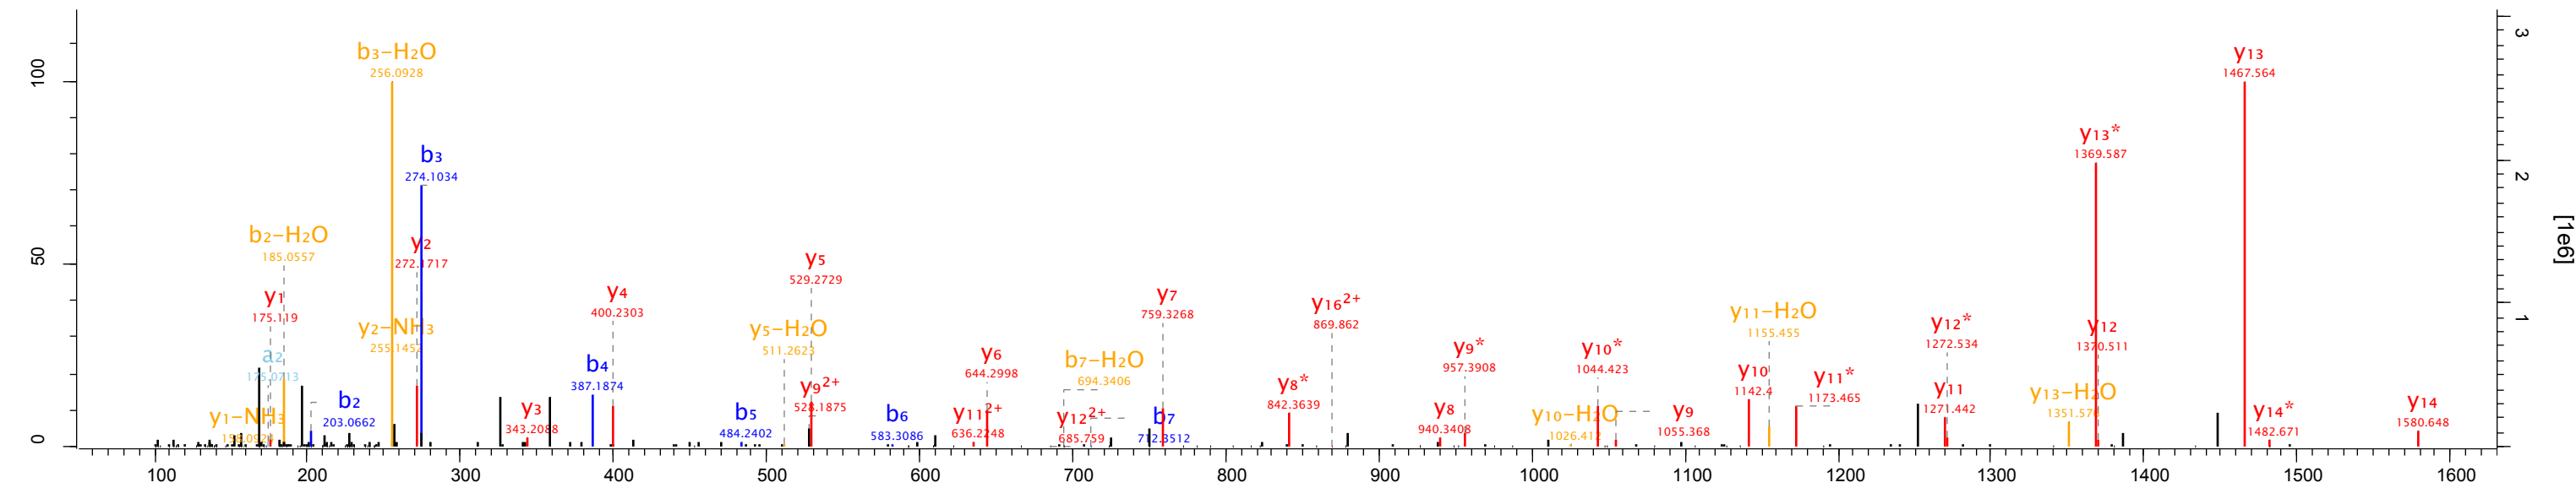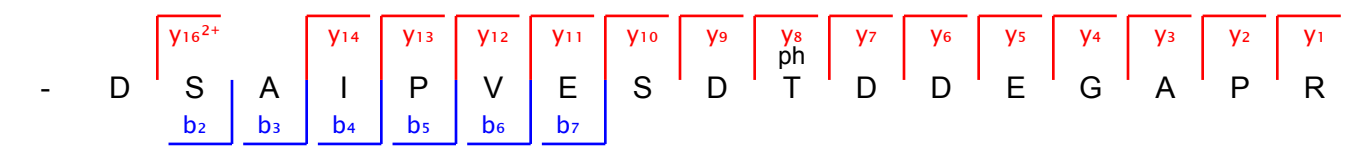

Raw file 20171215\_MaS\_33SR\_LMH\_phospho\_03 Scan 8844 Method FTMS; HCD Score 197.37 m/z 843.02 Gene names TJP2

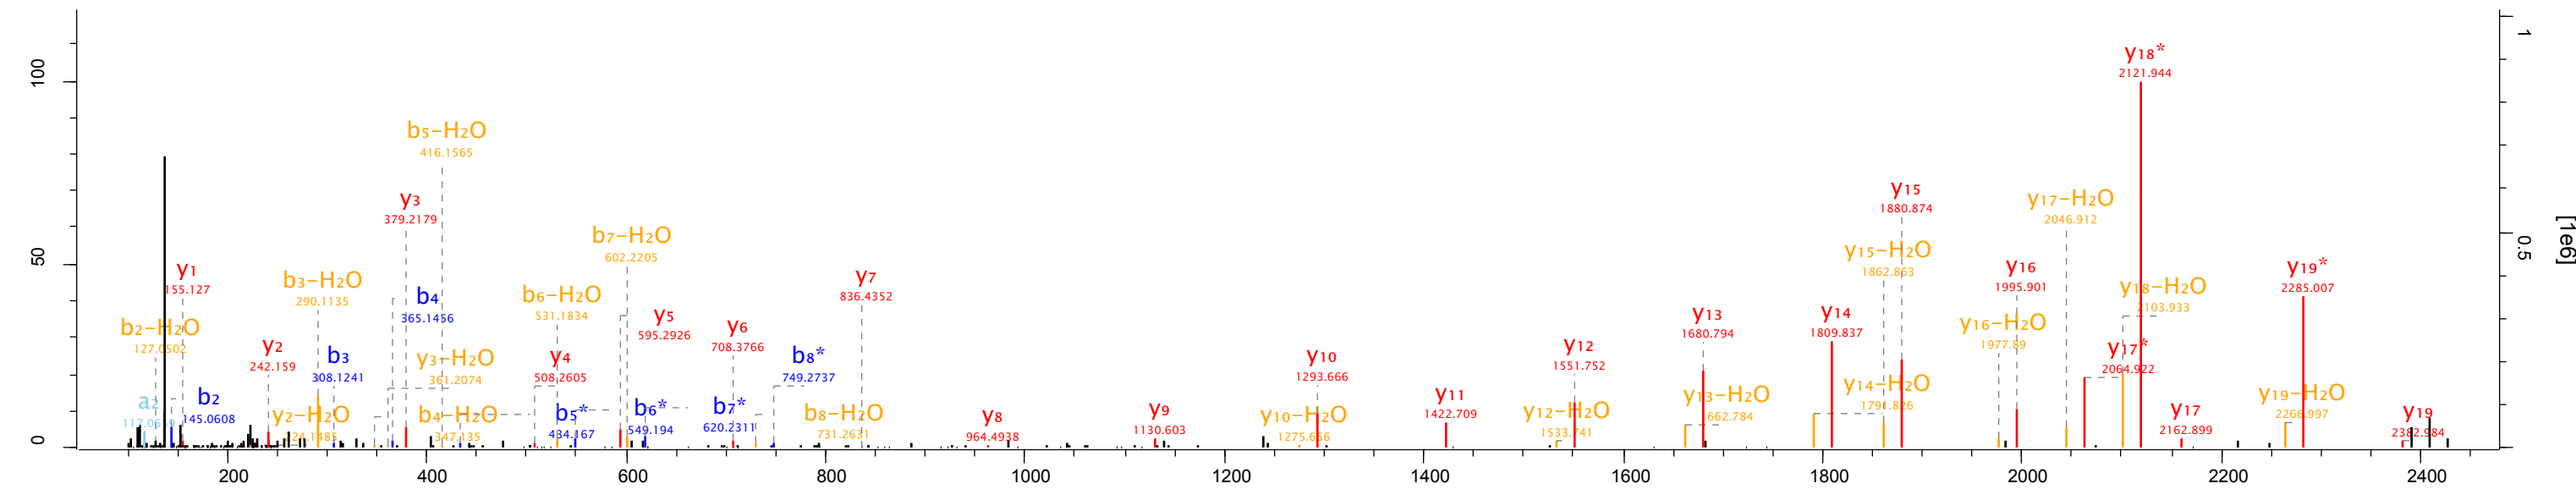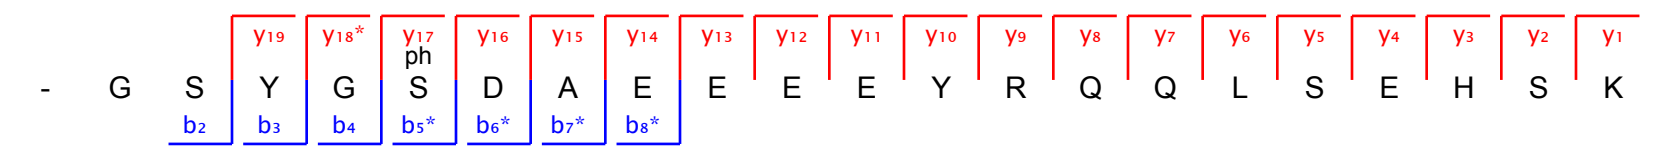



Raw file 20171215\_MaS\_33SR\_LMH\_phospho\_03 Scan 8934 Method FTMS; HCD Score 101.53 m/z 696.82 Gene names TMSB4X

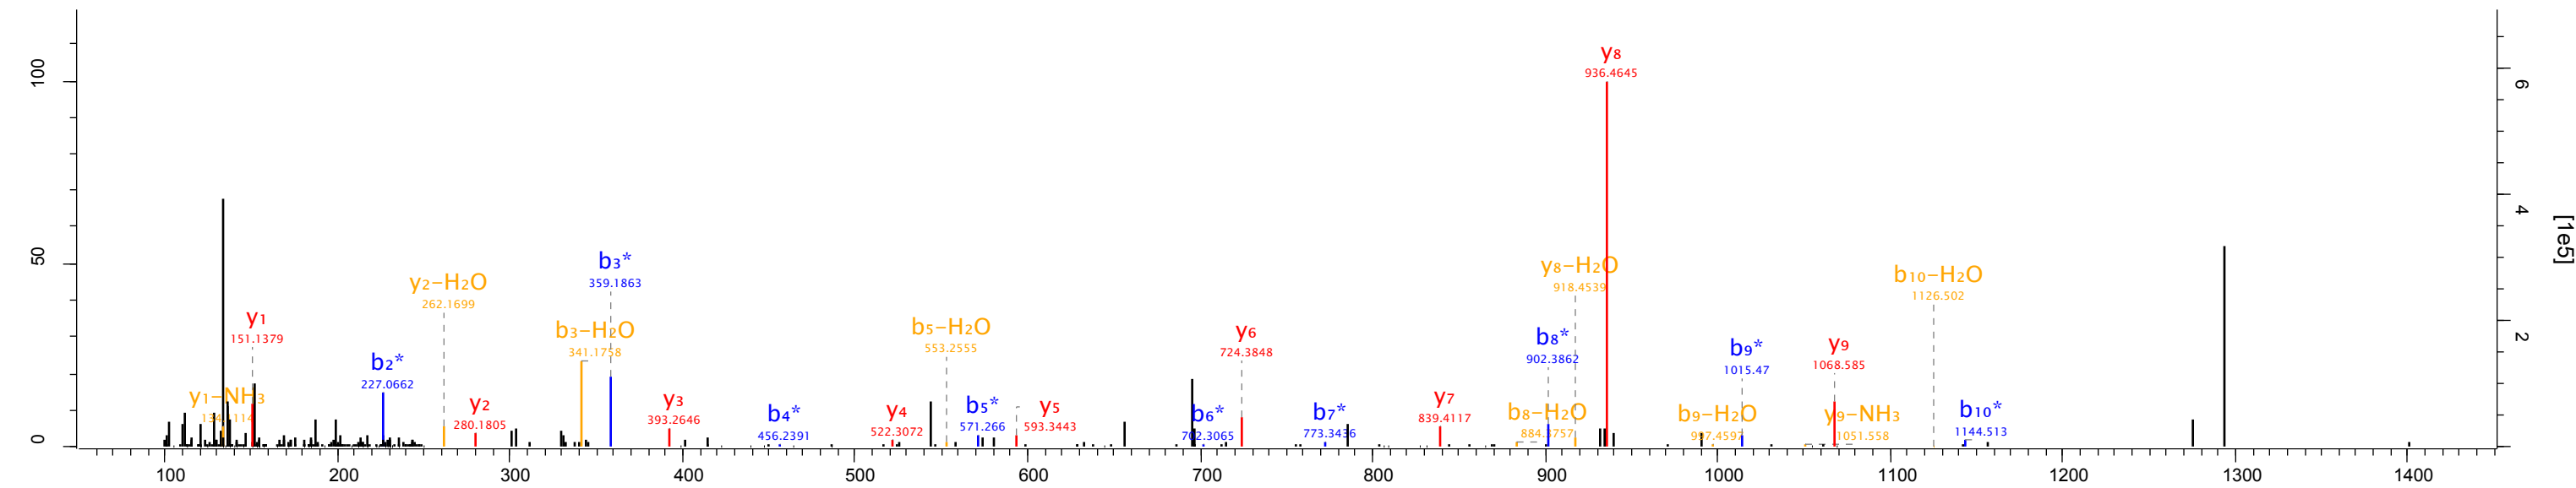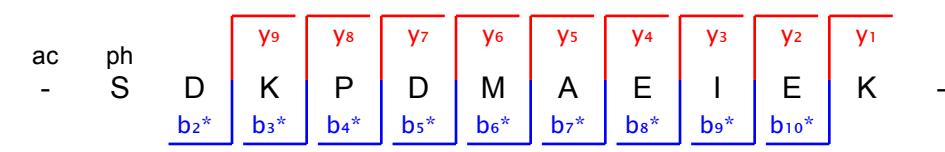

Raw file 20171215\_MaS\_33SR\_LMH\_phospho\_03 Scan 9084 Method FTMS; HCD Score 119.96 m/z 644.78 Gene names TRIP12

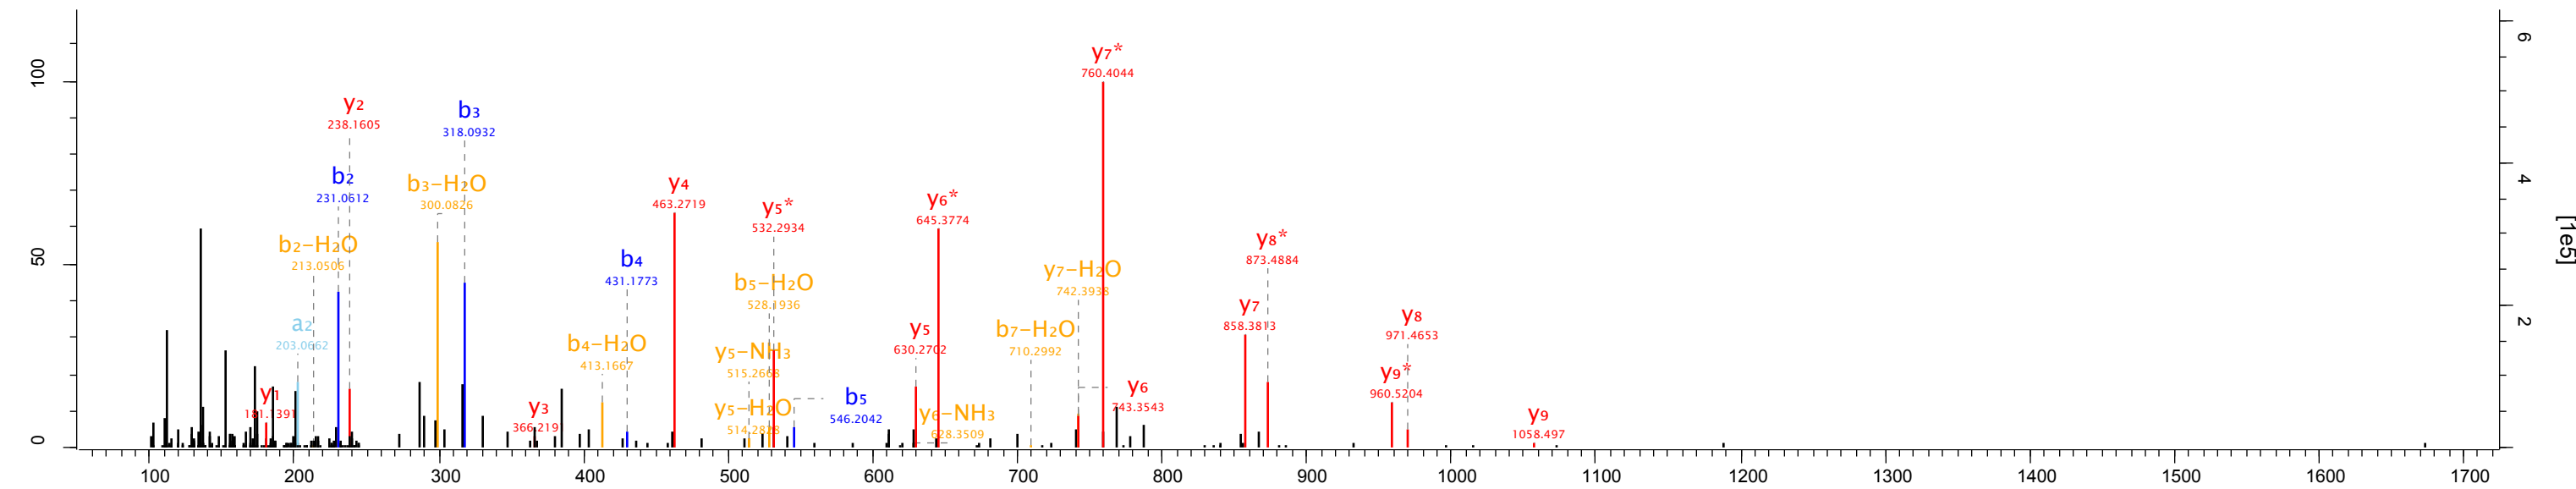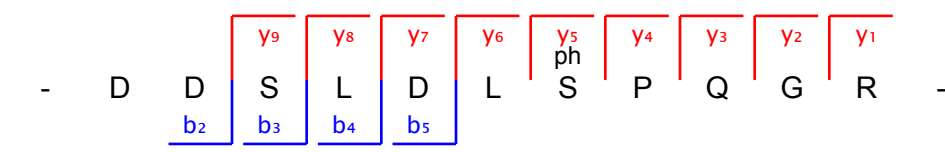



Raw file 20171215\_MaS\_33SR\_LMH\_phospho\_03 Scan 9114 Method FTMS; HCD Score 197.6 m/z 877.4 Gene names RAD51AP1

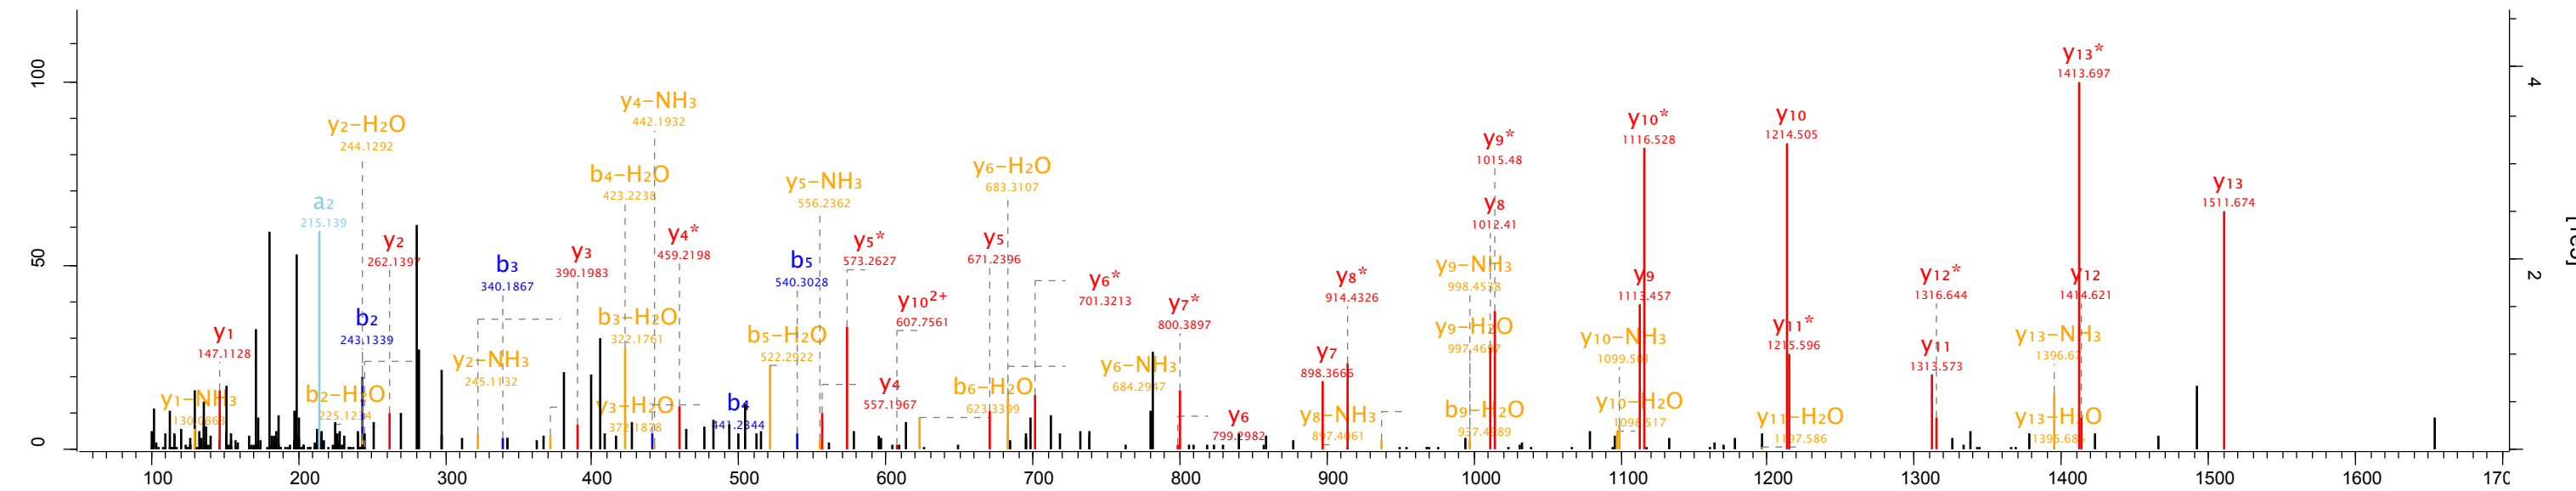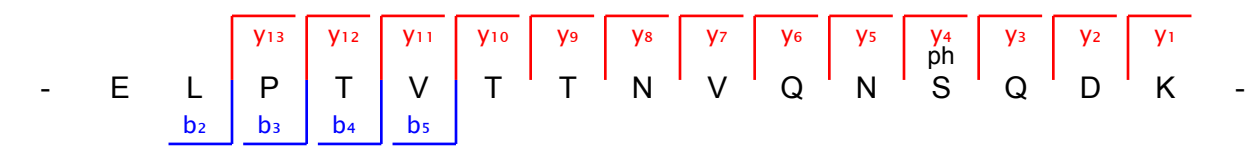

Raw file 20171215\_MaS\_33SR\_LMH\_phospho\_03 Scan 9134 Method FTMS; HCD Score 299.06 m/z 894.92 Gene names CAMSAP2

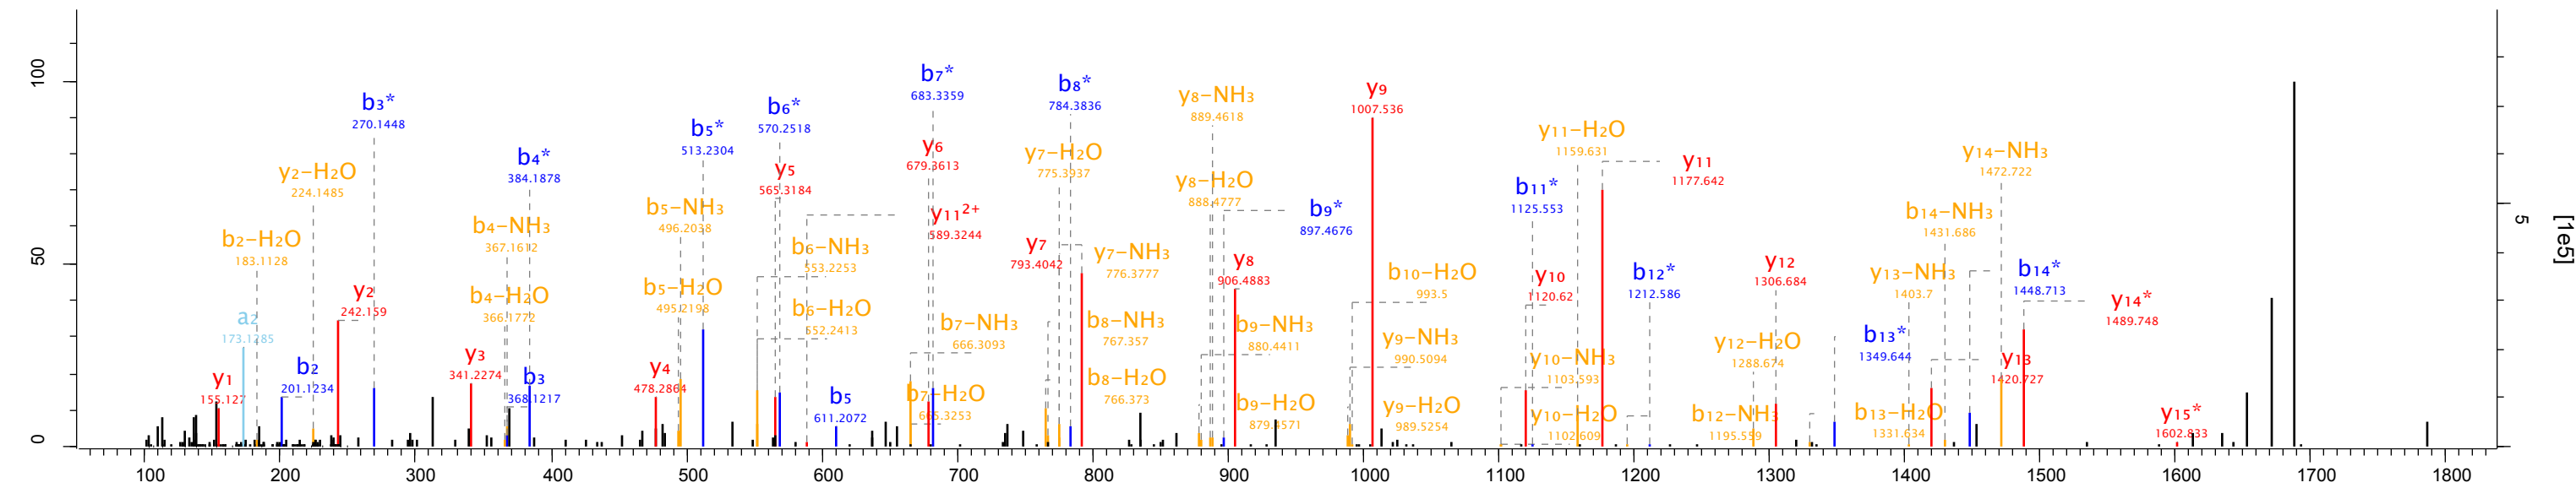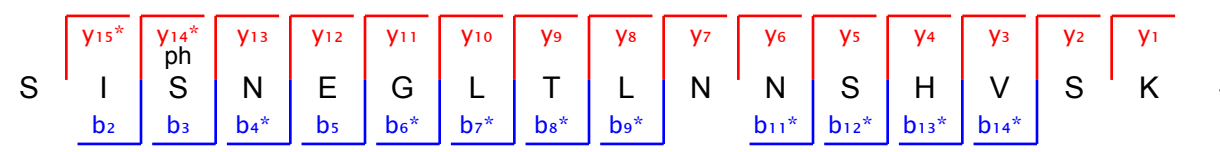

Raw file 20171215\_MaS\_33SR\_LMH\_phospho\_03 Scan 9204 Method FTMS; HCD Score 101.39 m/z 581.26 Gene names RPS27A;UBB;UBC;UBA52

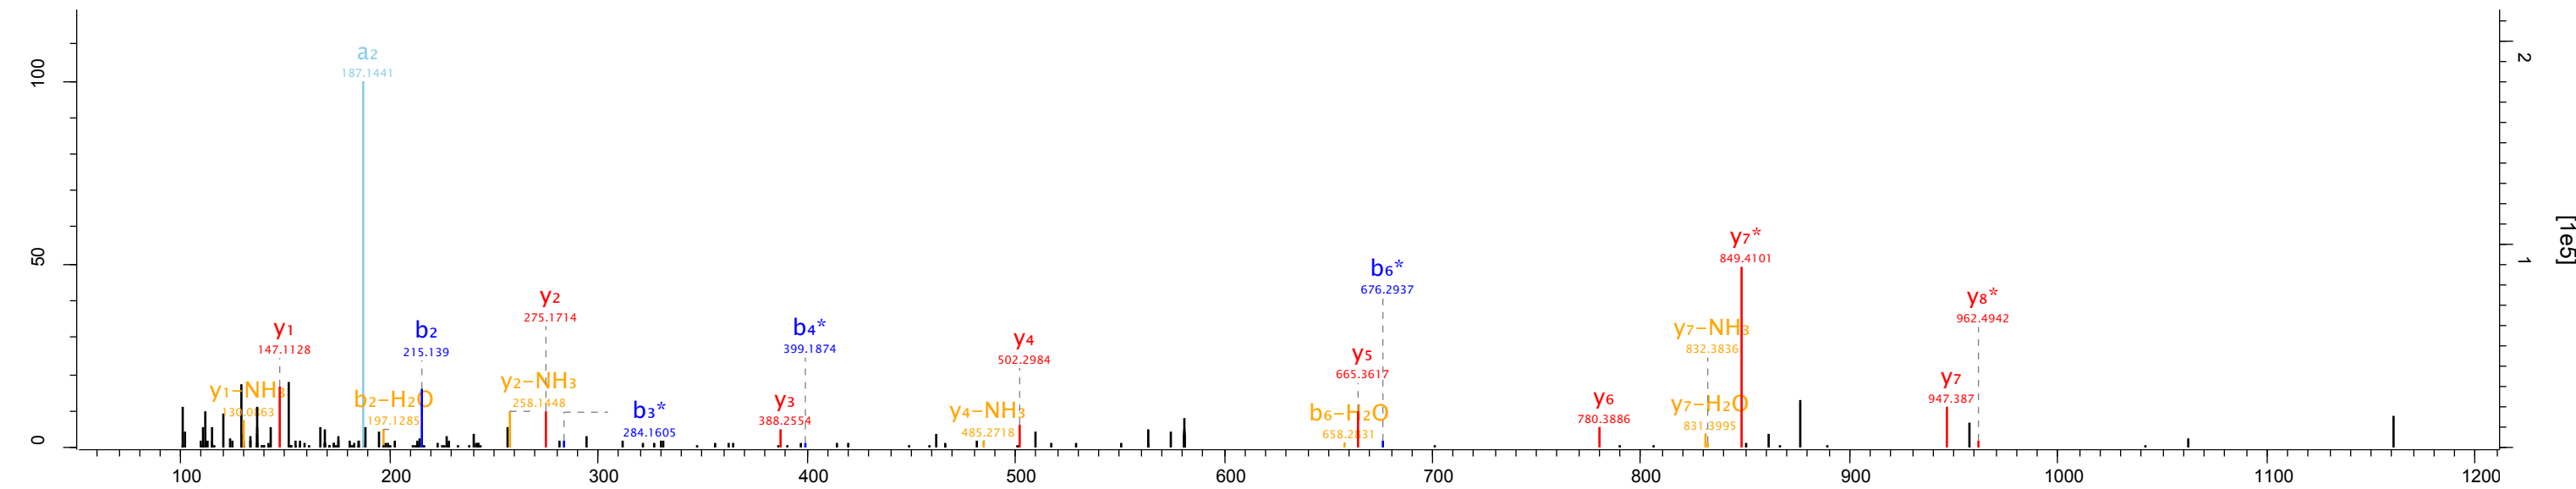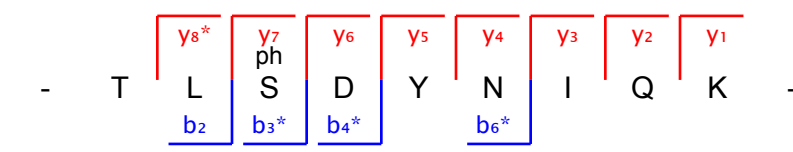

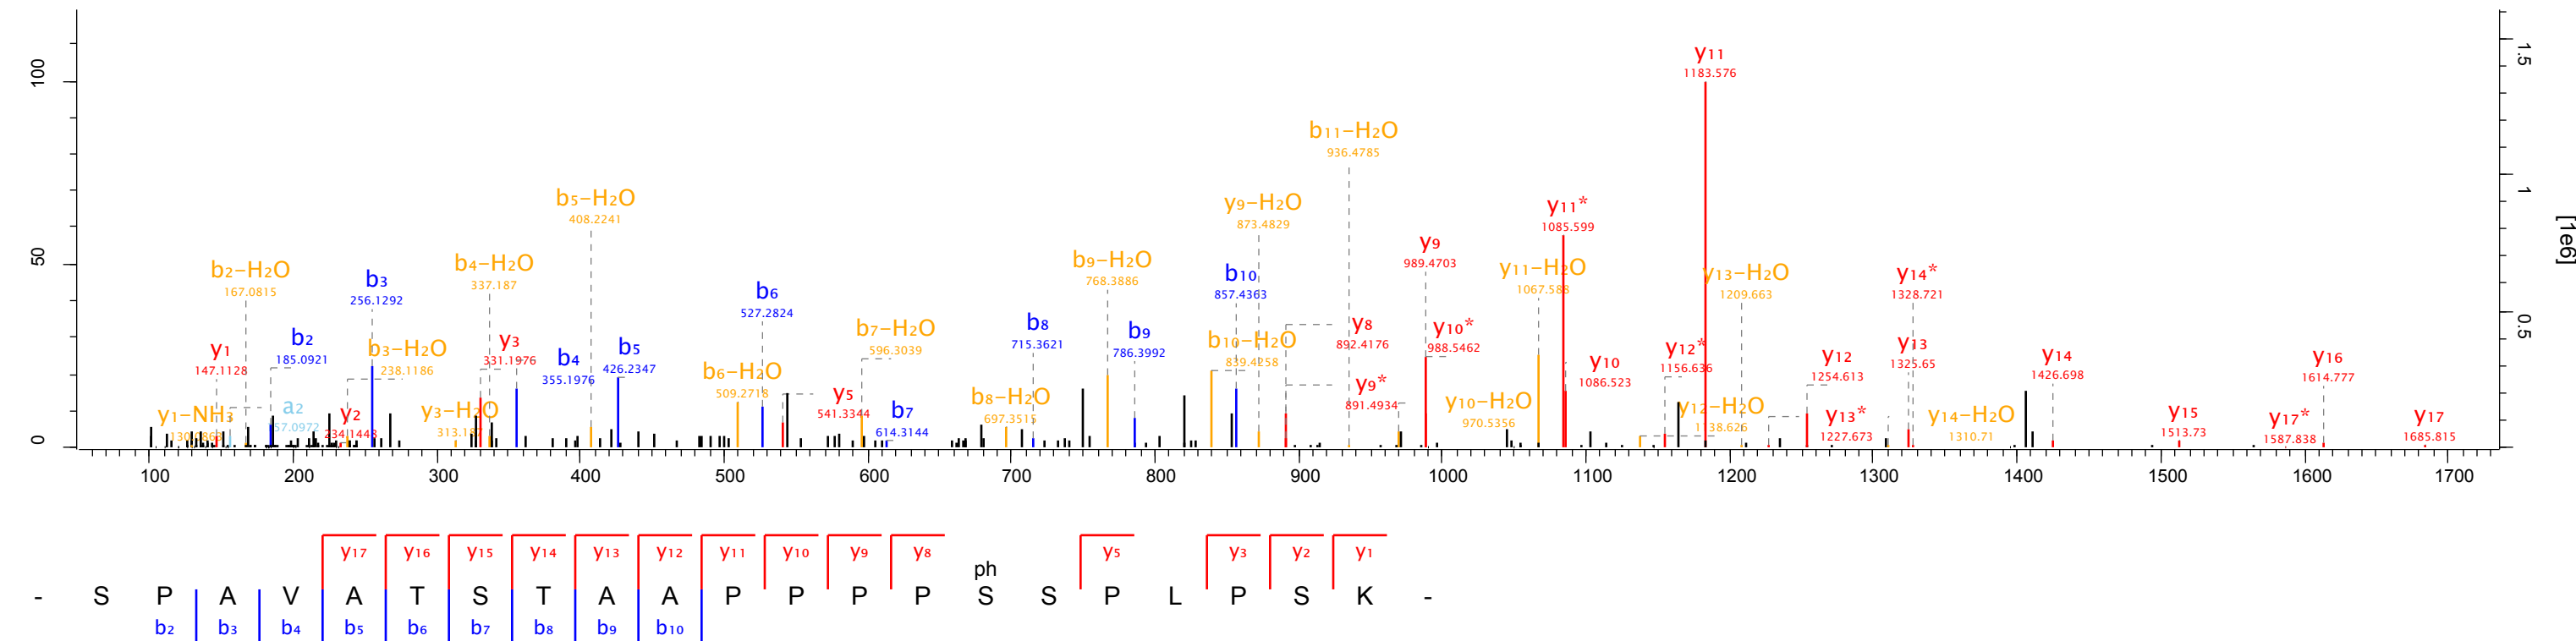

Raw file 20171215\_MaS\_33SR\_LMH\_phospho\_03 Scan 9364 Method FTMS; HCD Score 155.17 m/z 901.92 Gene names SSBP3

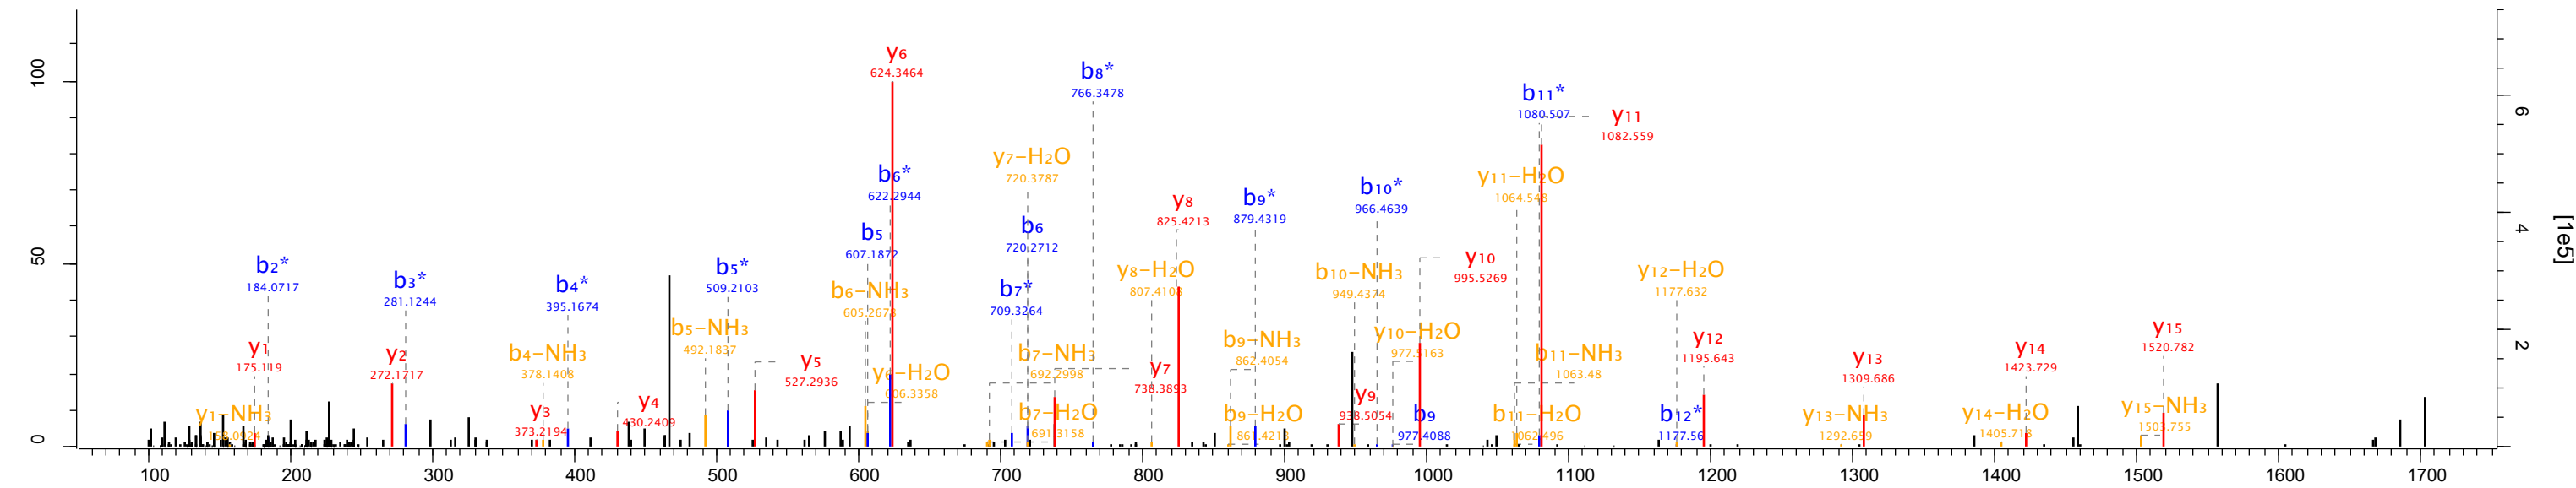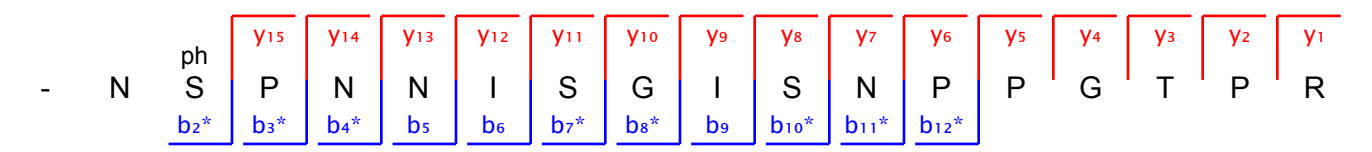

20171215\_MaS\_33SR\_LMH\_phospho\_03 9684 FTMS; HCD 110.32 1094.14 OGFR

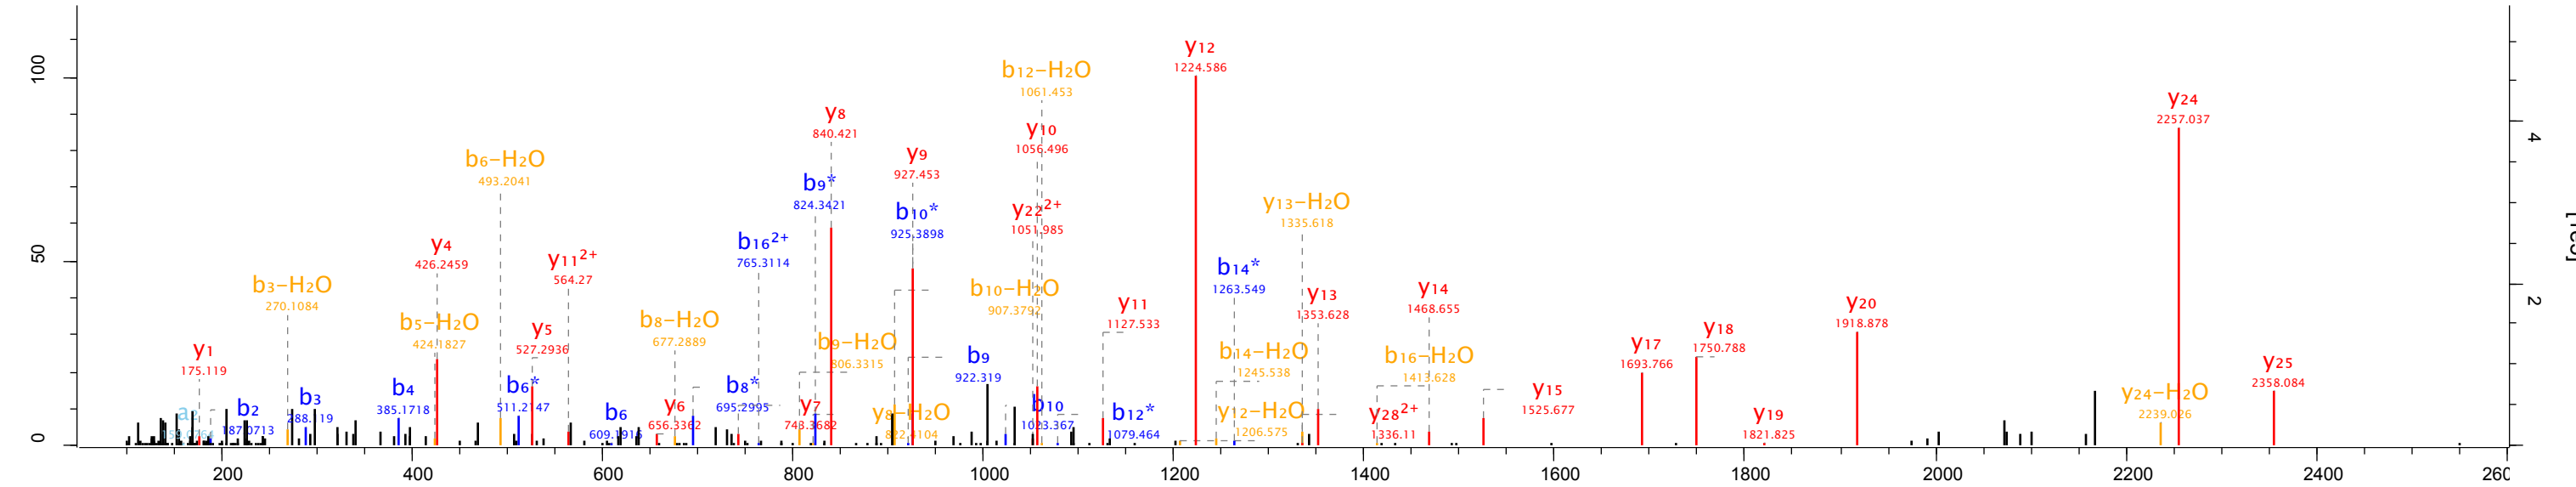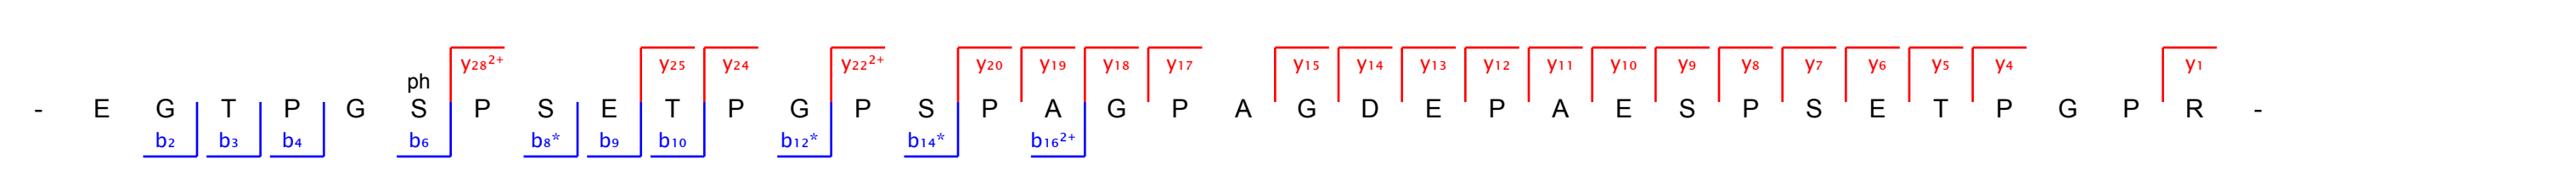

Raw file 20171215\_MaS\_33SR\_LMH\_phospho\_03 Scan 9874 Method FTMS; HCD Score 77.96 m/z 786.87 Gene names TBC1D5

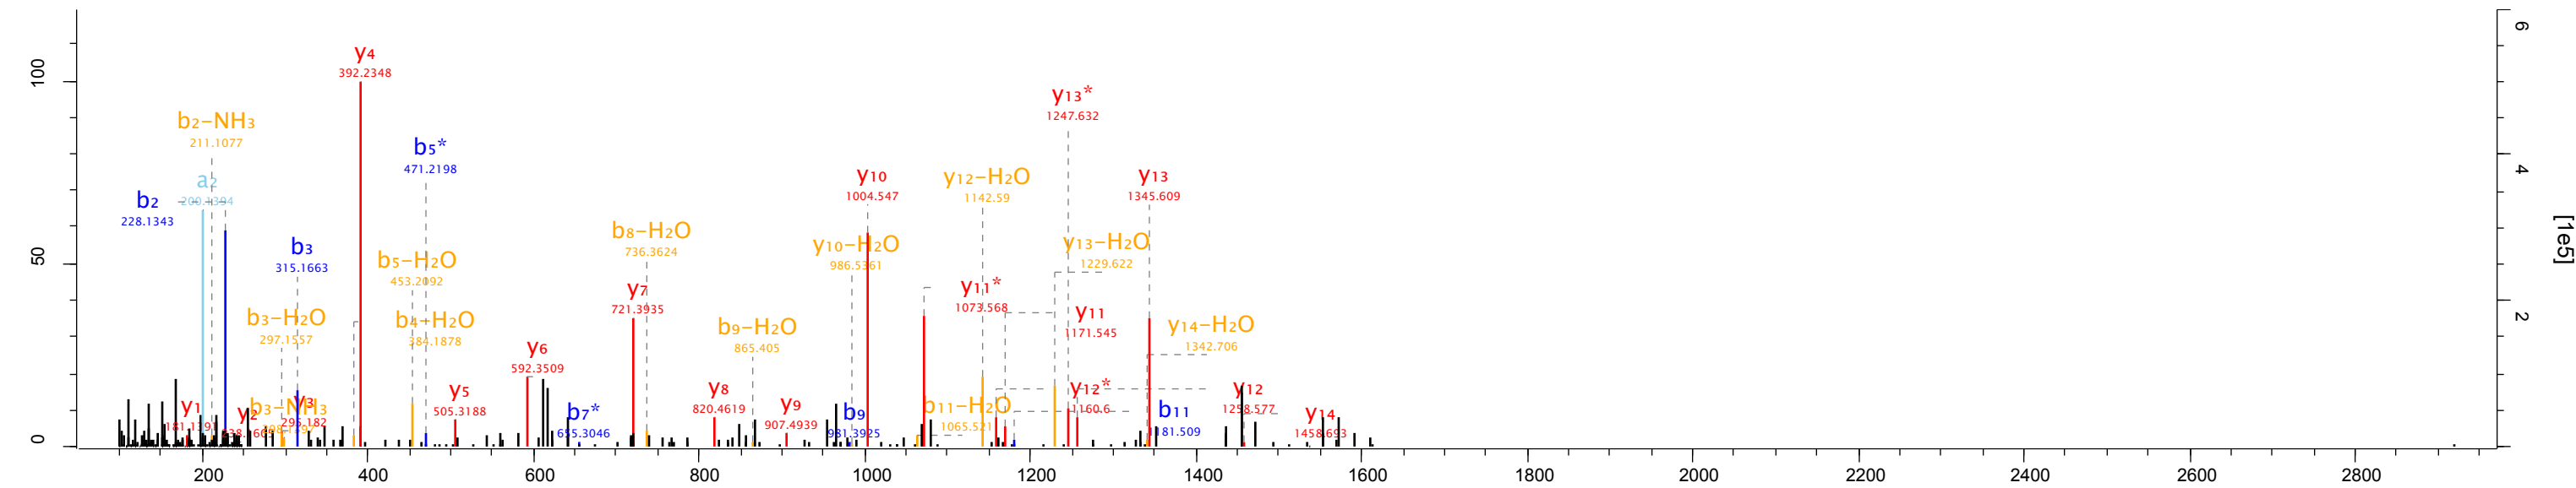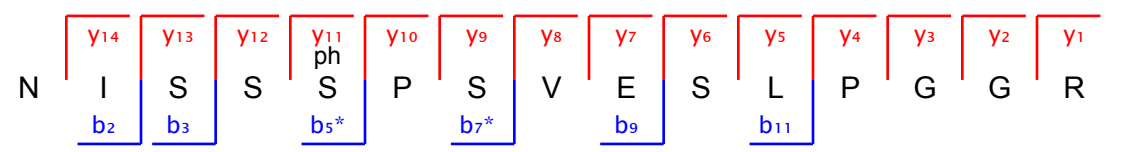

Raw file: 20171215\_MaS\_33SR\_LMH\_phospho\_03  
 Scan: 9904 Method: FTMS; HCD Score: 239.75 m/z: 729.86 Gene names: FLII

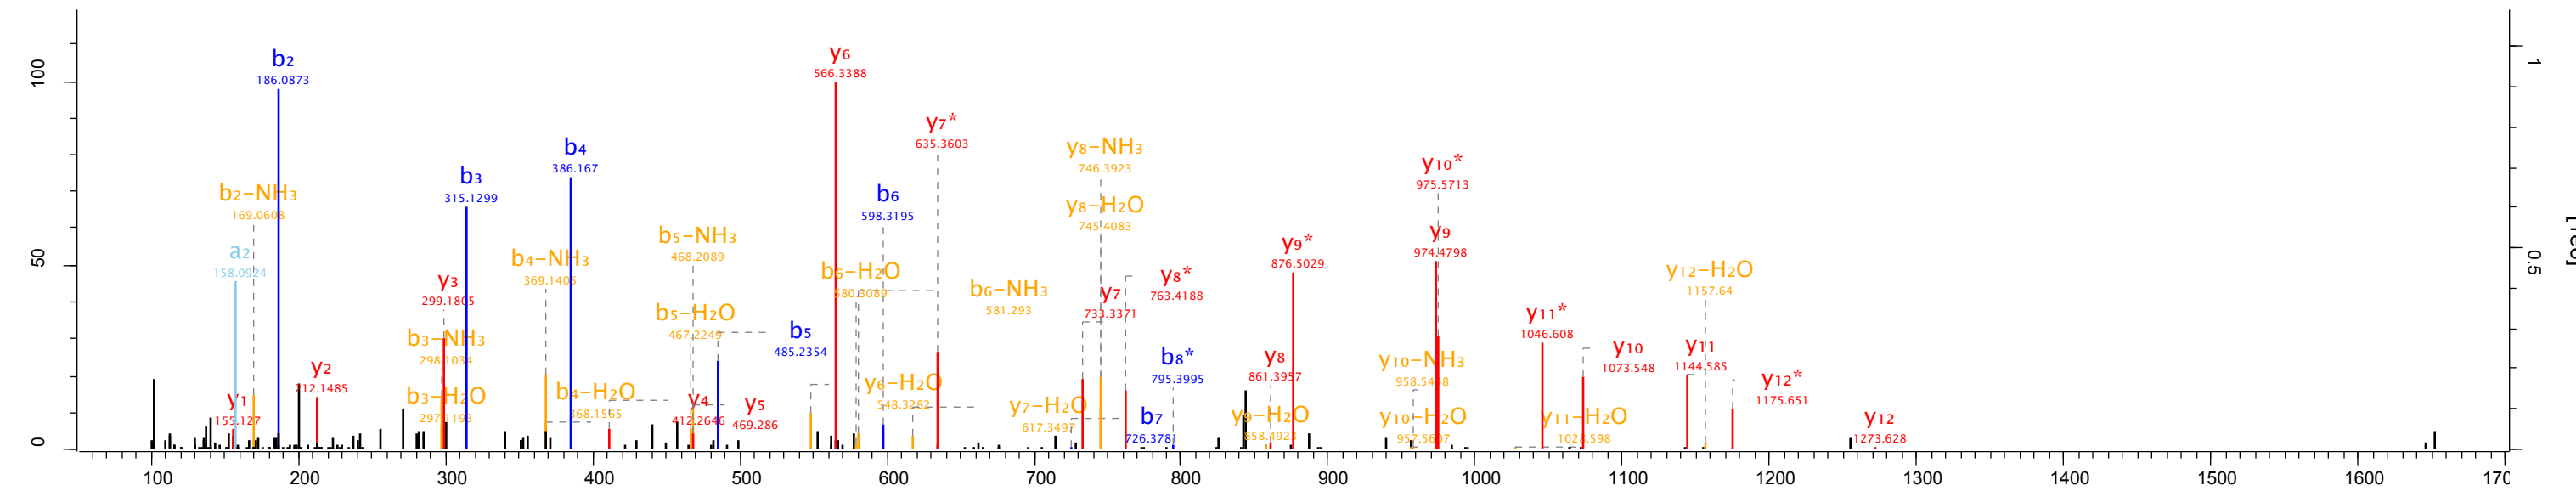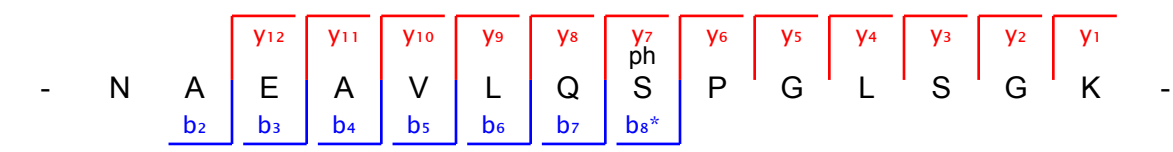



Raw file 20171215\_MaS\_33SR\_LMH\_phospho\_05 Scan 10764 Method FTMS; HCD Score 196.18 m/z 705.33 Gene names SH2D4A

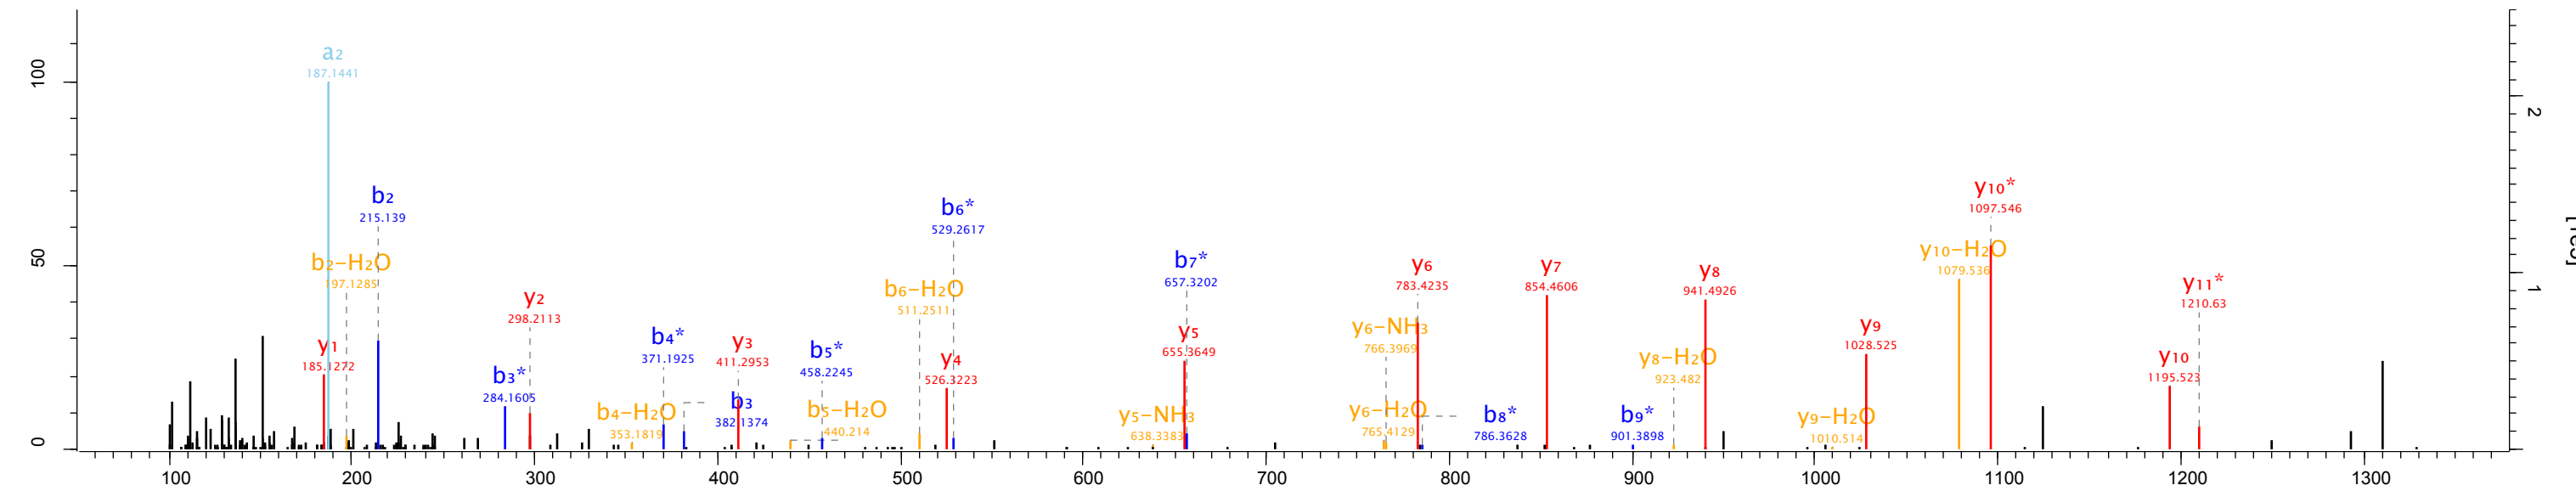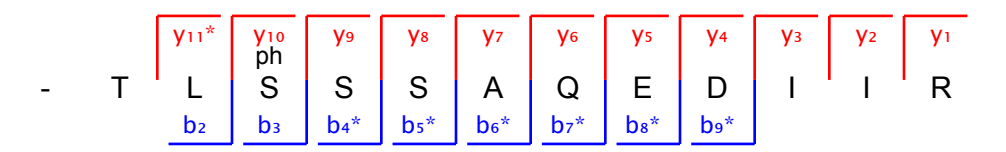

Raw file 20171215\_MaS\_33SR\_LMH\_phospho\_05 Scan 11104 Method FTMS; HCD Score 127.83 m/z 787.34 Gene names PKN2

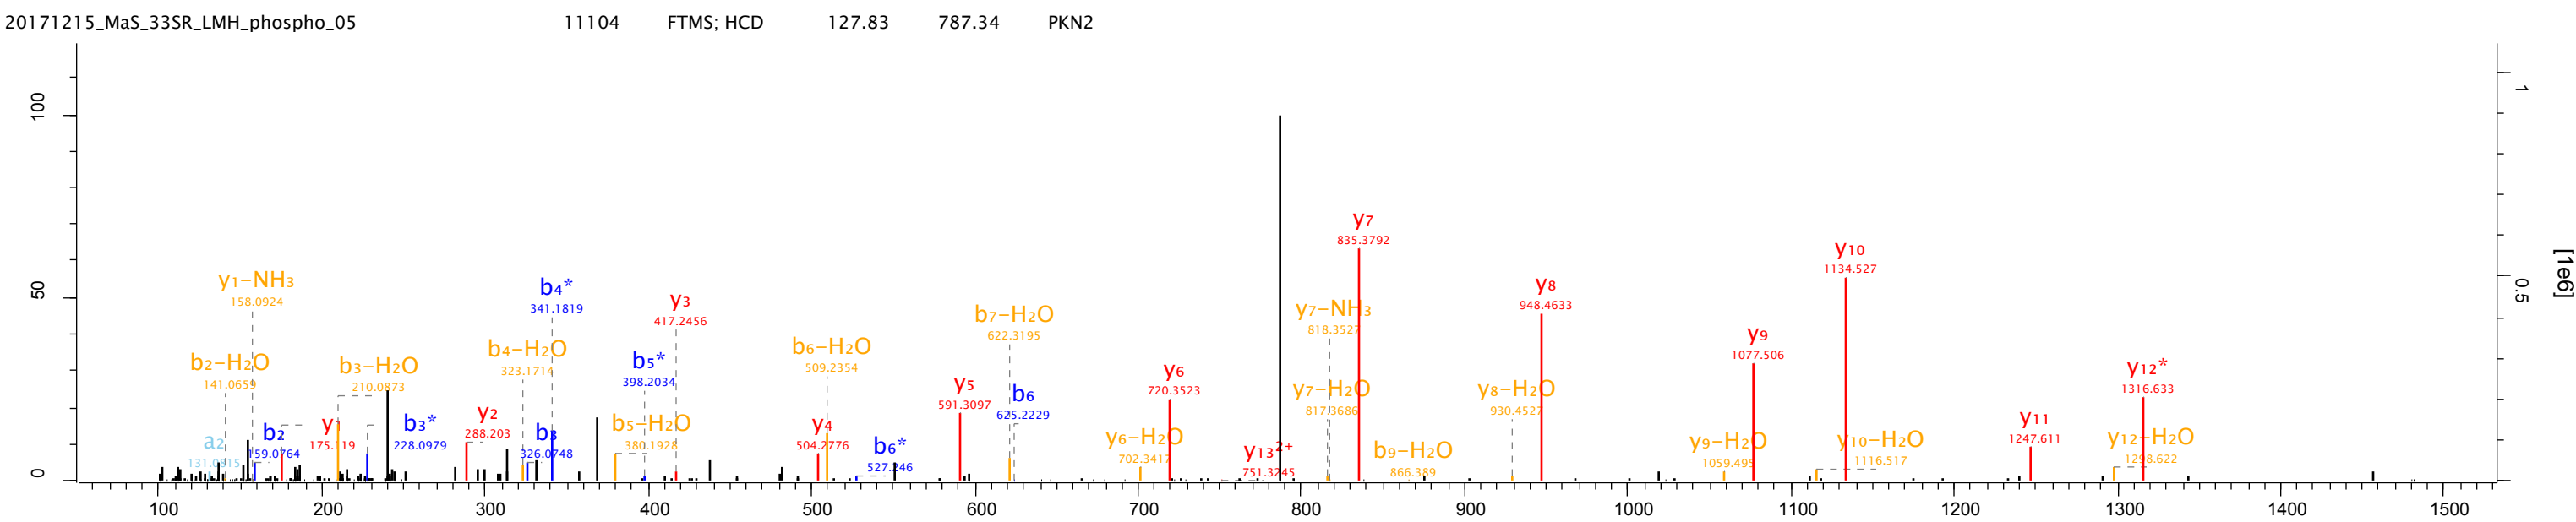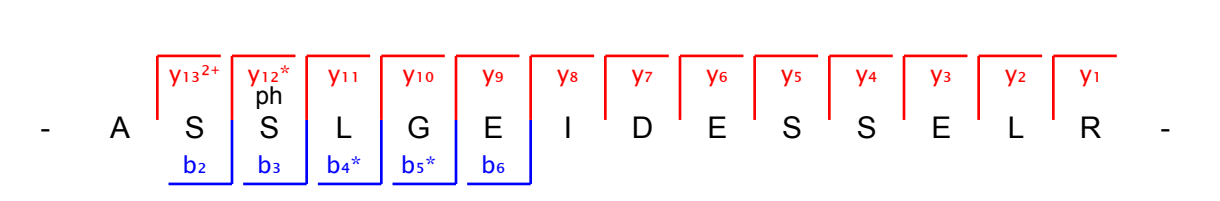

Raw file: 20171215\_MaS\_33SR\_LMH\_phospho\_05  
 Scan: 1994 Method: FTMS; HCD Score: 55.84 m/z: 662.53 Gene names: WDR52;CFAP44

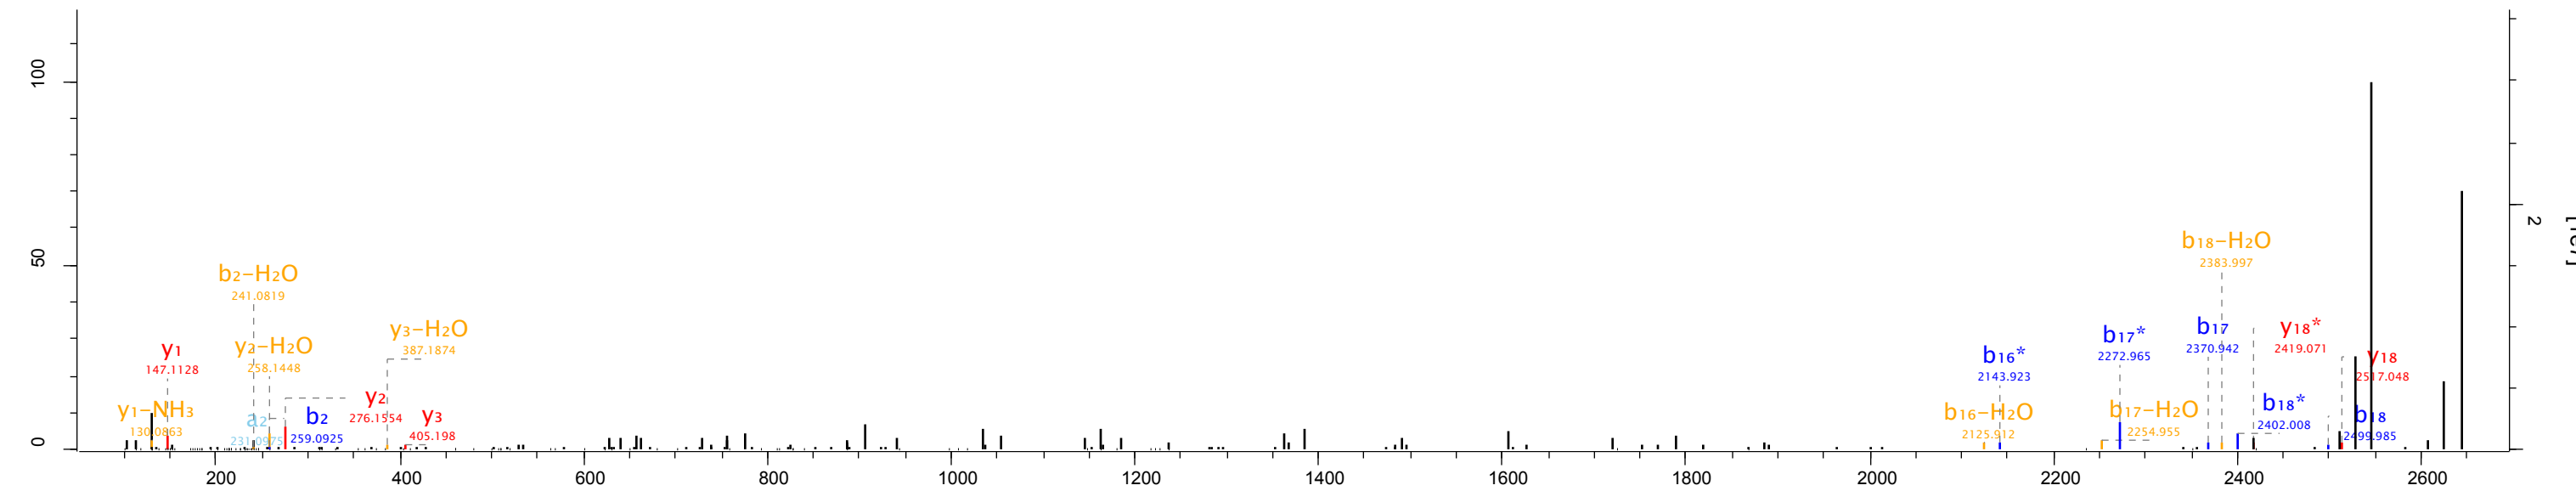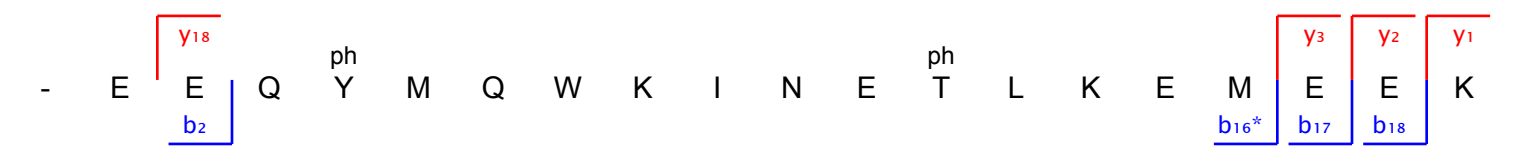

Raw file: 20171215\_MaS\_33SR\_LMH\_phospho\_05  
 Scan: 3194 Method: FTMS; HCD Score: 145.28 m/z: 528.22 Gene names: CEP170

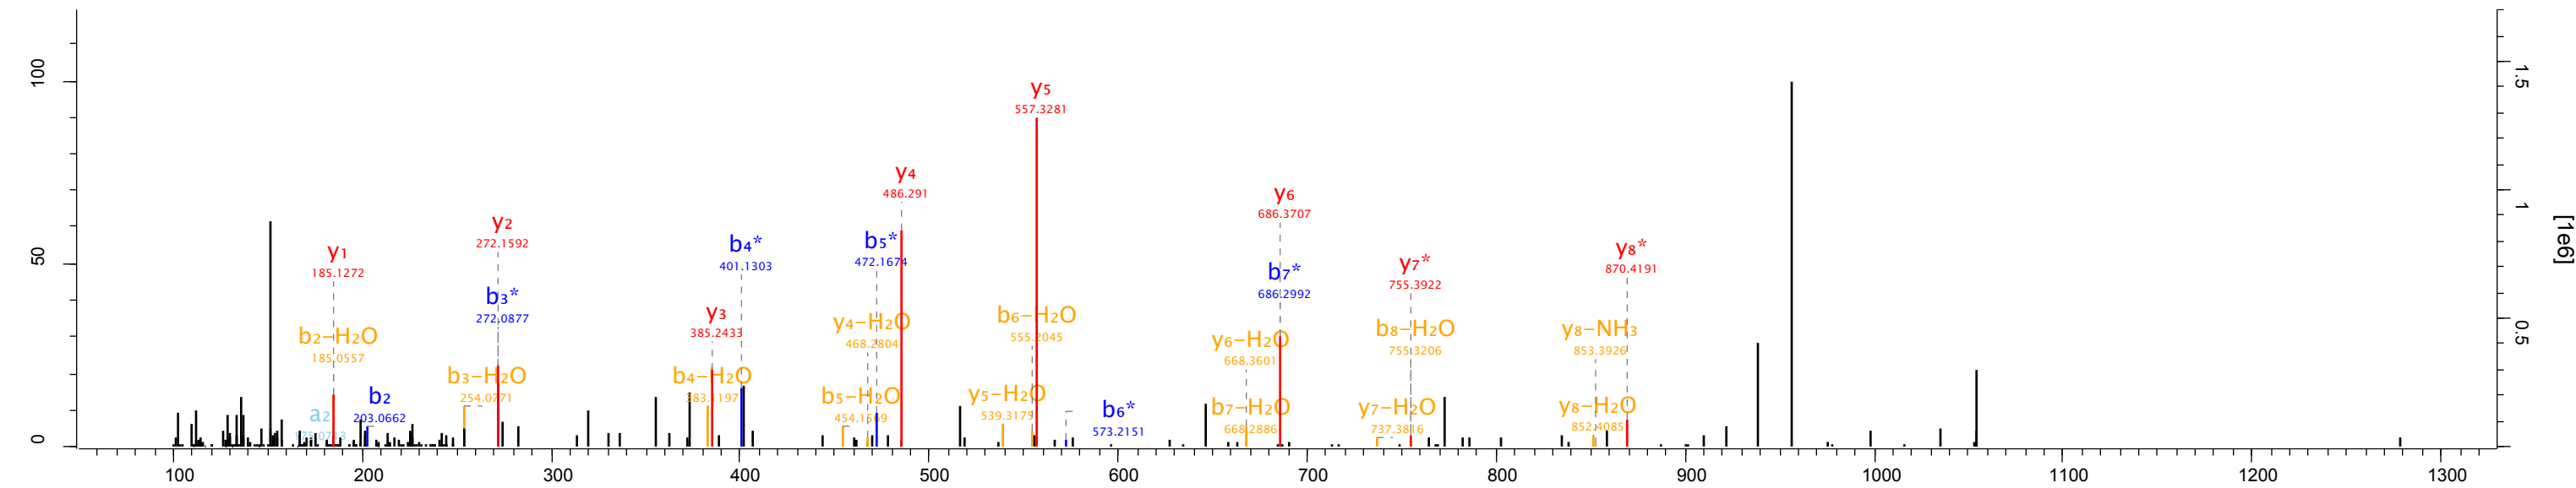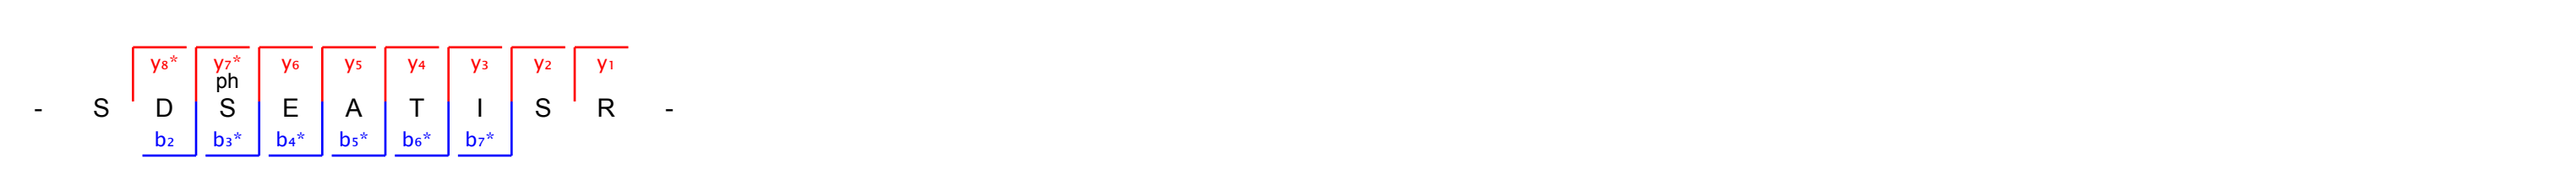

Raw file  
 20171215\_MaS\_33SR\_LMH\_phospho\_05  
 Scan 3844 Method FTMS; HCD Score 47.81 m/z 730.97 Gene names NEFL

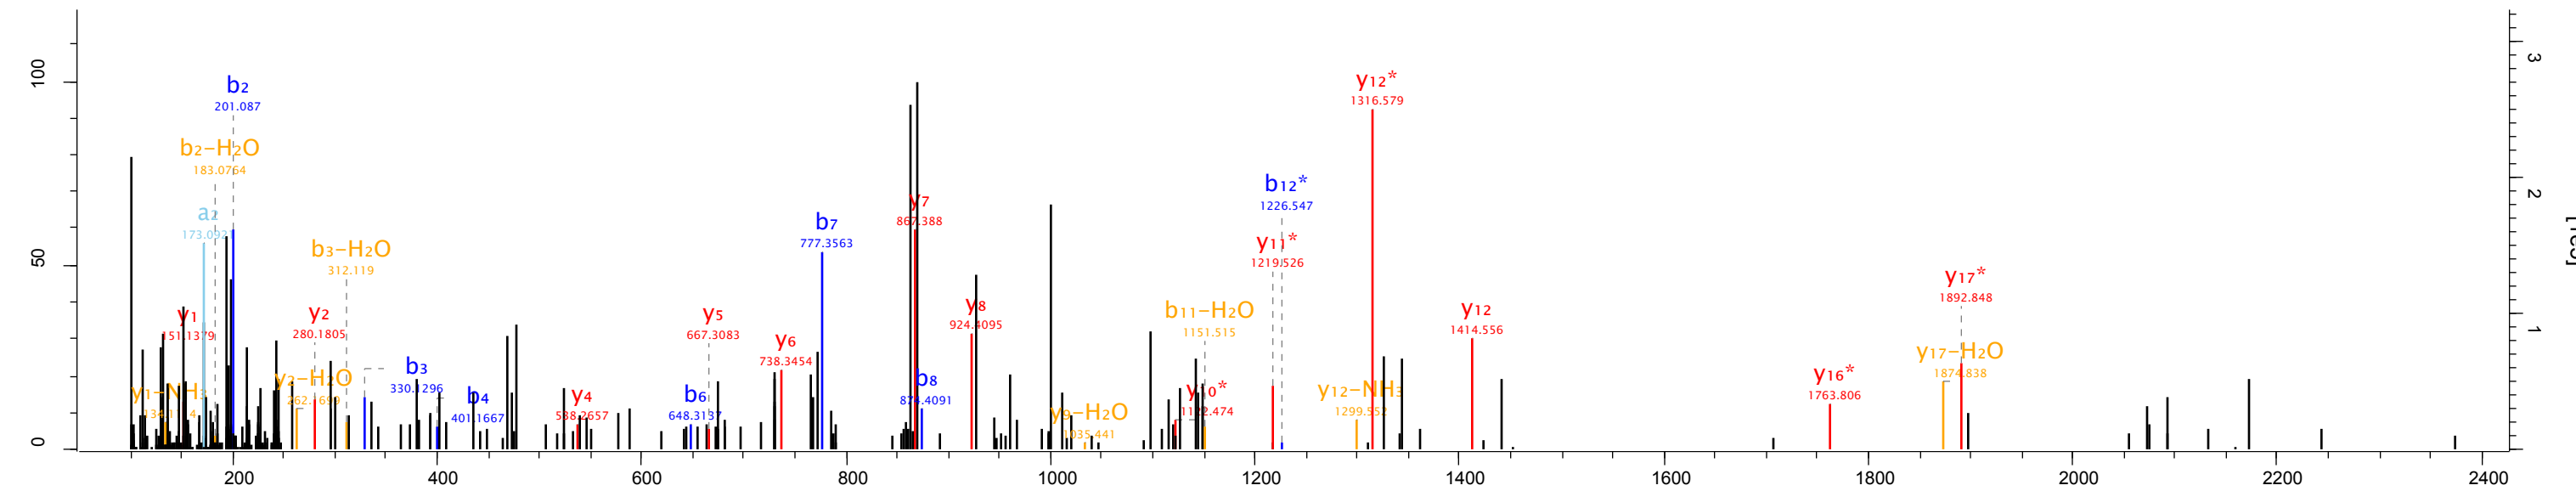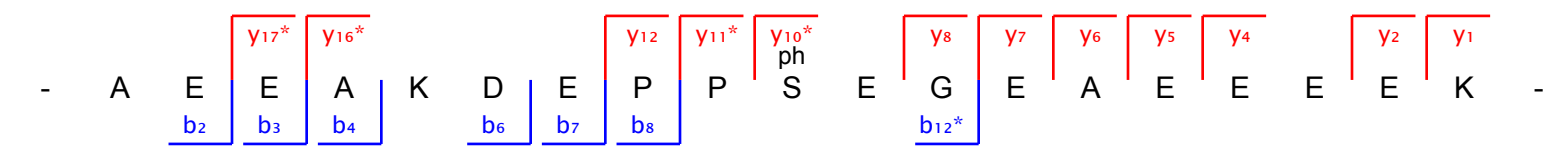

Raw file 20171215\_MaS\_33SR\_LMH\_phospho\_05 Scan 4464 Method FTMS; HCD Score 89.51 m/z 662.32 Gene names TLN1

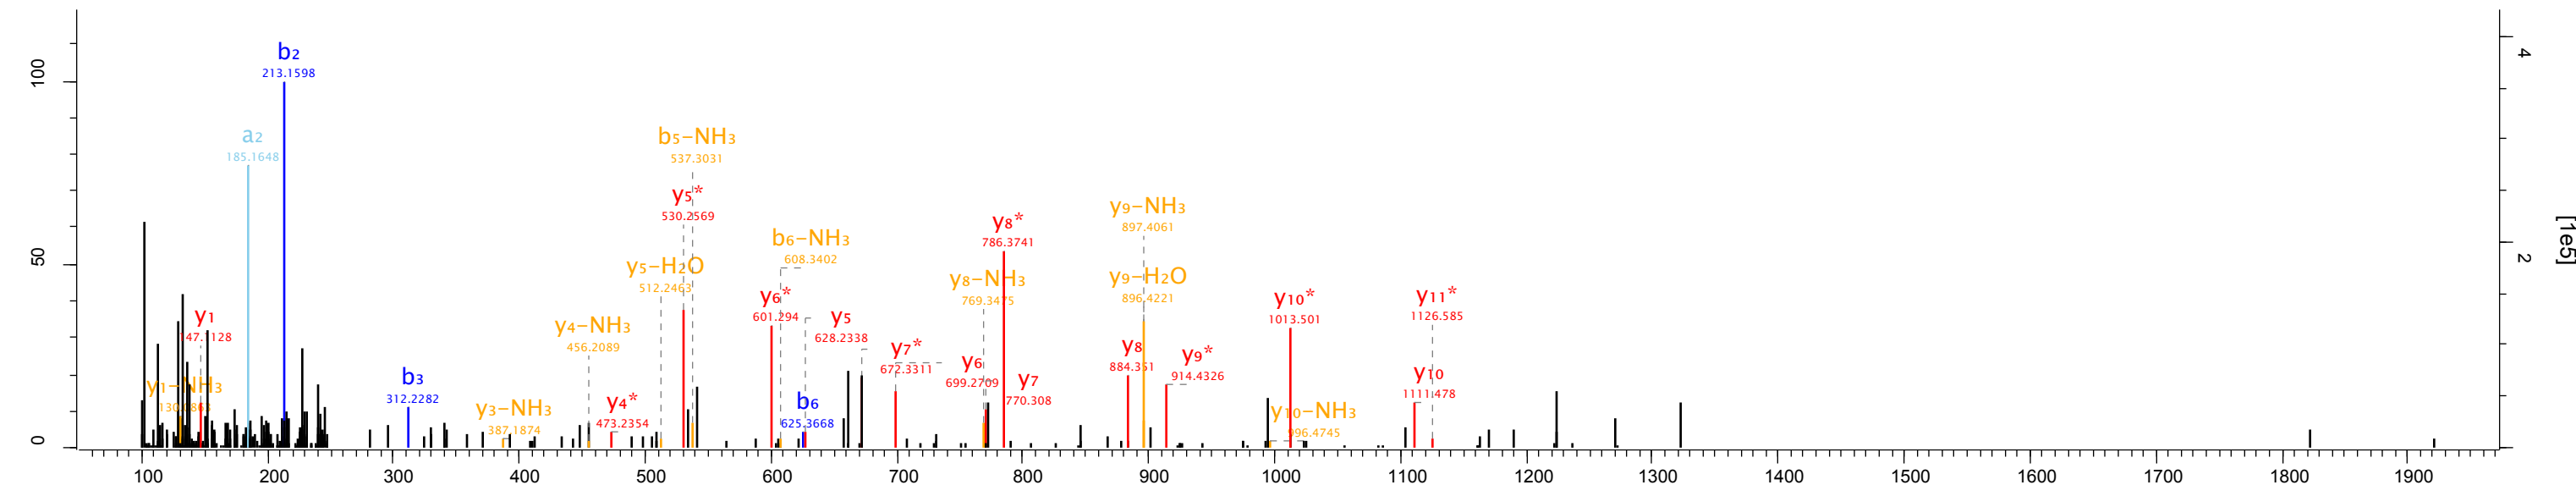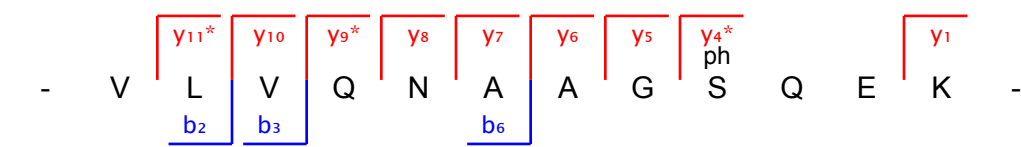

Raw file 20171215\_MaS\_33SR\_LMH\_phospho\_05 Scan 4484 Method FTMS; HCD Score 80.87 m/z 478.23 Gene names SYNRG

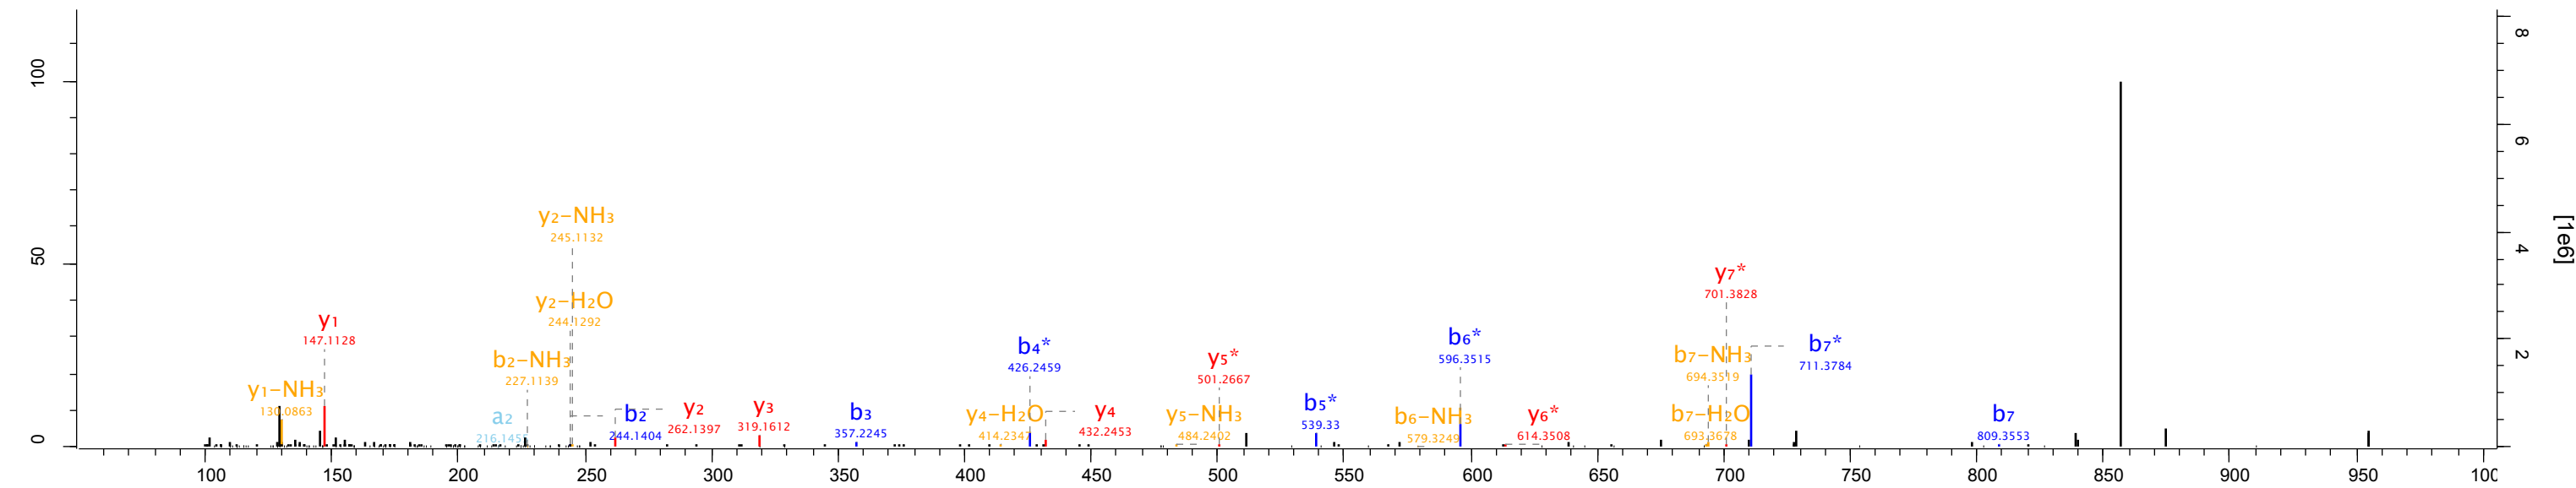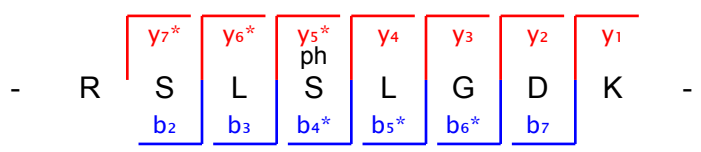

Raw file 20171215\_MaS\_33SR\_LMH\_phospho\_05 Scan 4924 Method FTMS; HCD Score 169.58 m/z 734.34 Gene names PPF1BP1

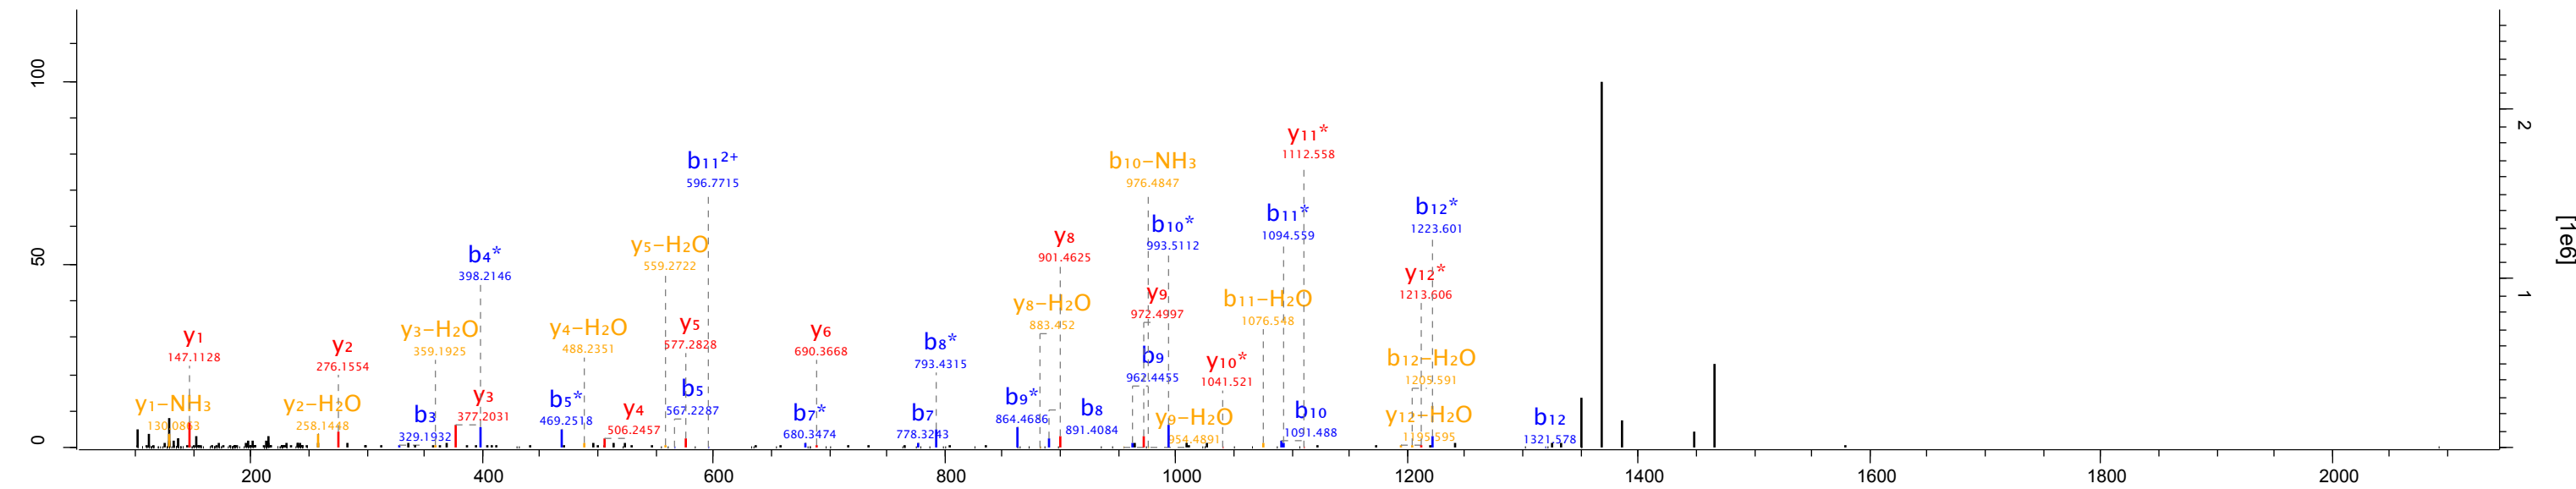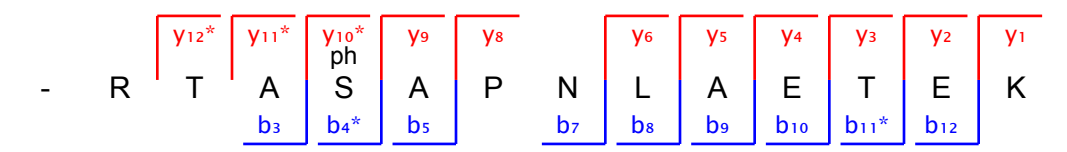



Raw file 20171215\_MaS\_33SR\_LMH\_phospho\_05 Scan 4994 Method FTMS; HCD Score 91.55 m/z 440.73 Gene names ZNF638

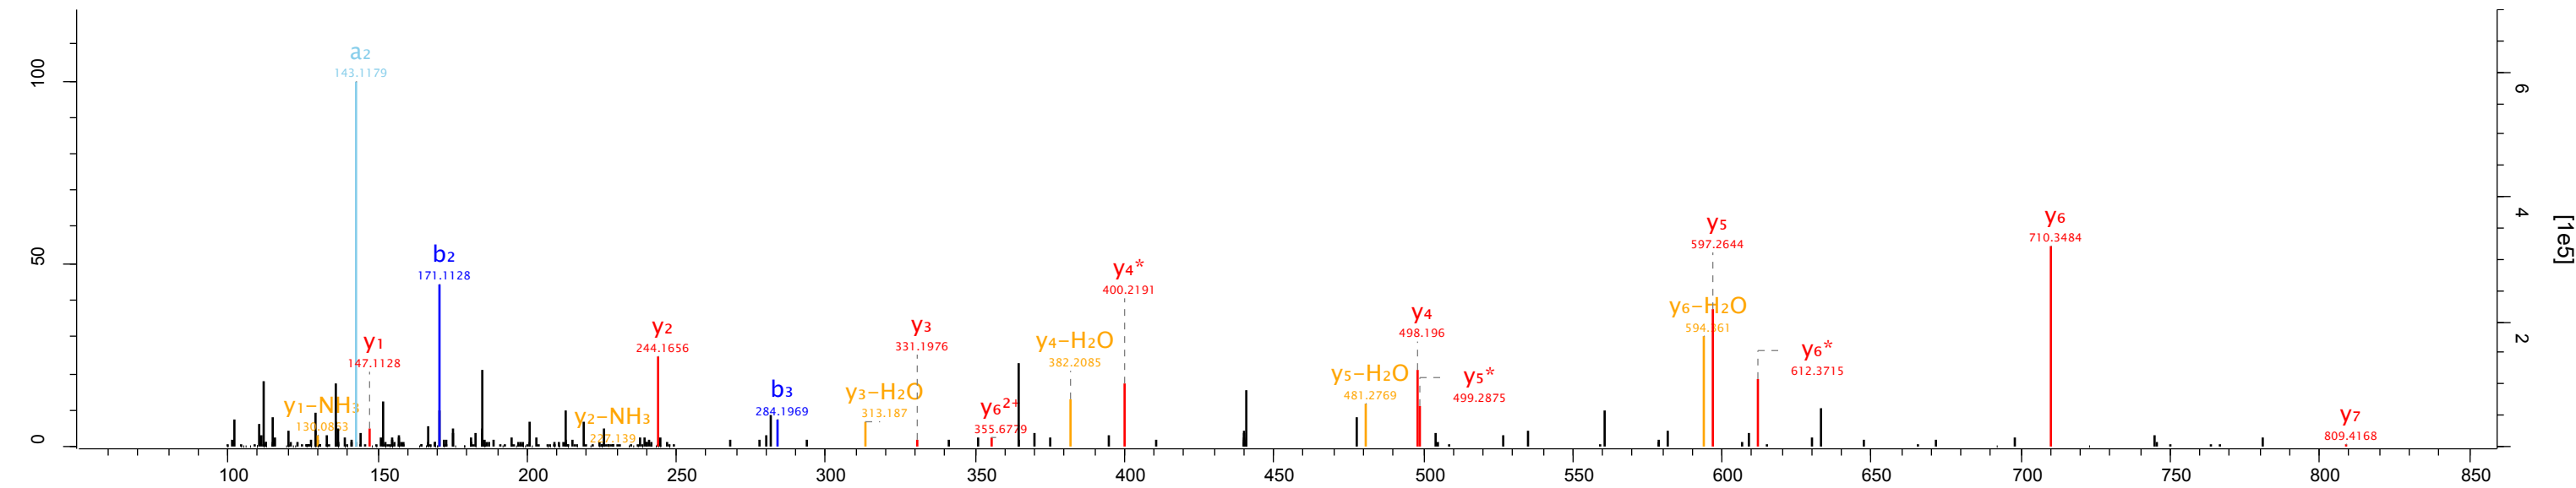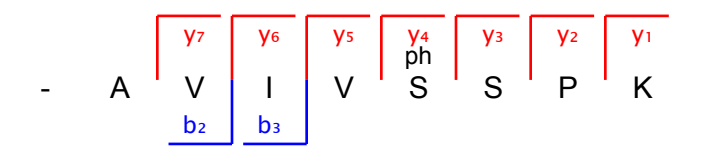

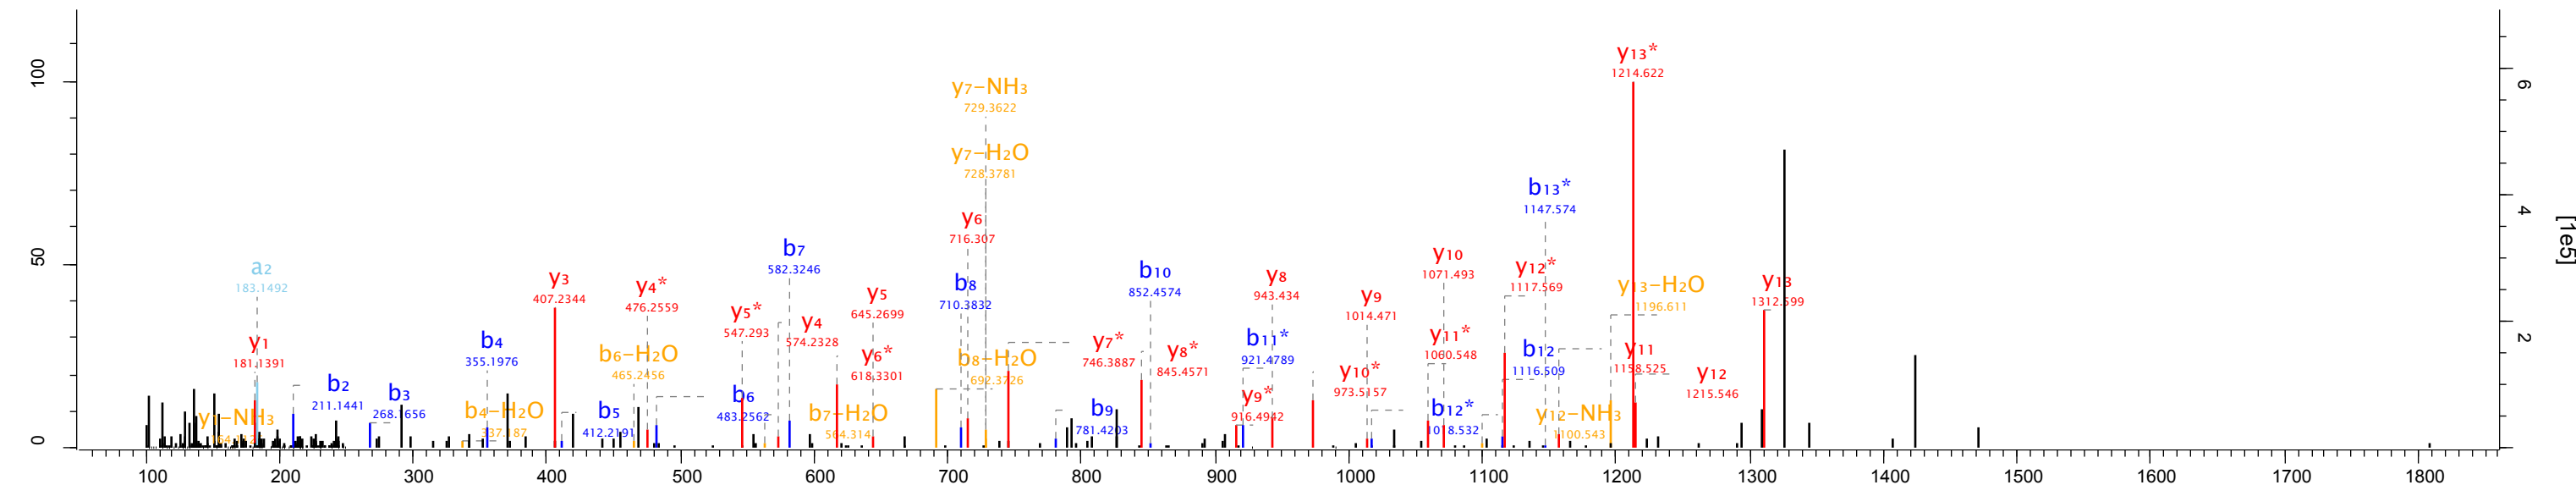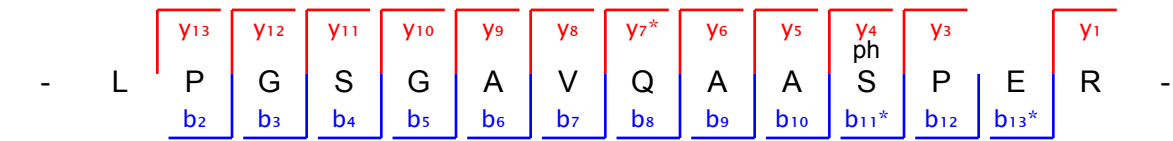

L

y13

y12

y11

y10

y9

y8

y7\*

y6

y5

y4

y3

y1

-

b2

b3

b4

b5

b6

b7

b8

b9

b10

b11\*

b12

b13\*

-

L

y13

y12

y11

y10

y9

y8

y7\*

y6

y5

y4

y3

y1

-

b2

b3

b4

b5

b6

b7

b8

b9

b10

b11\*

b12

b13\*

-

Raw file  
 20171215\_MaS\_33SR\_LMH\_phospho\_05  
 Scan 8384 Method FTMS; HCD Score 217.91 m/z 895.92 Gene names NES

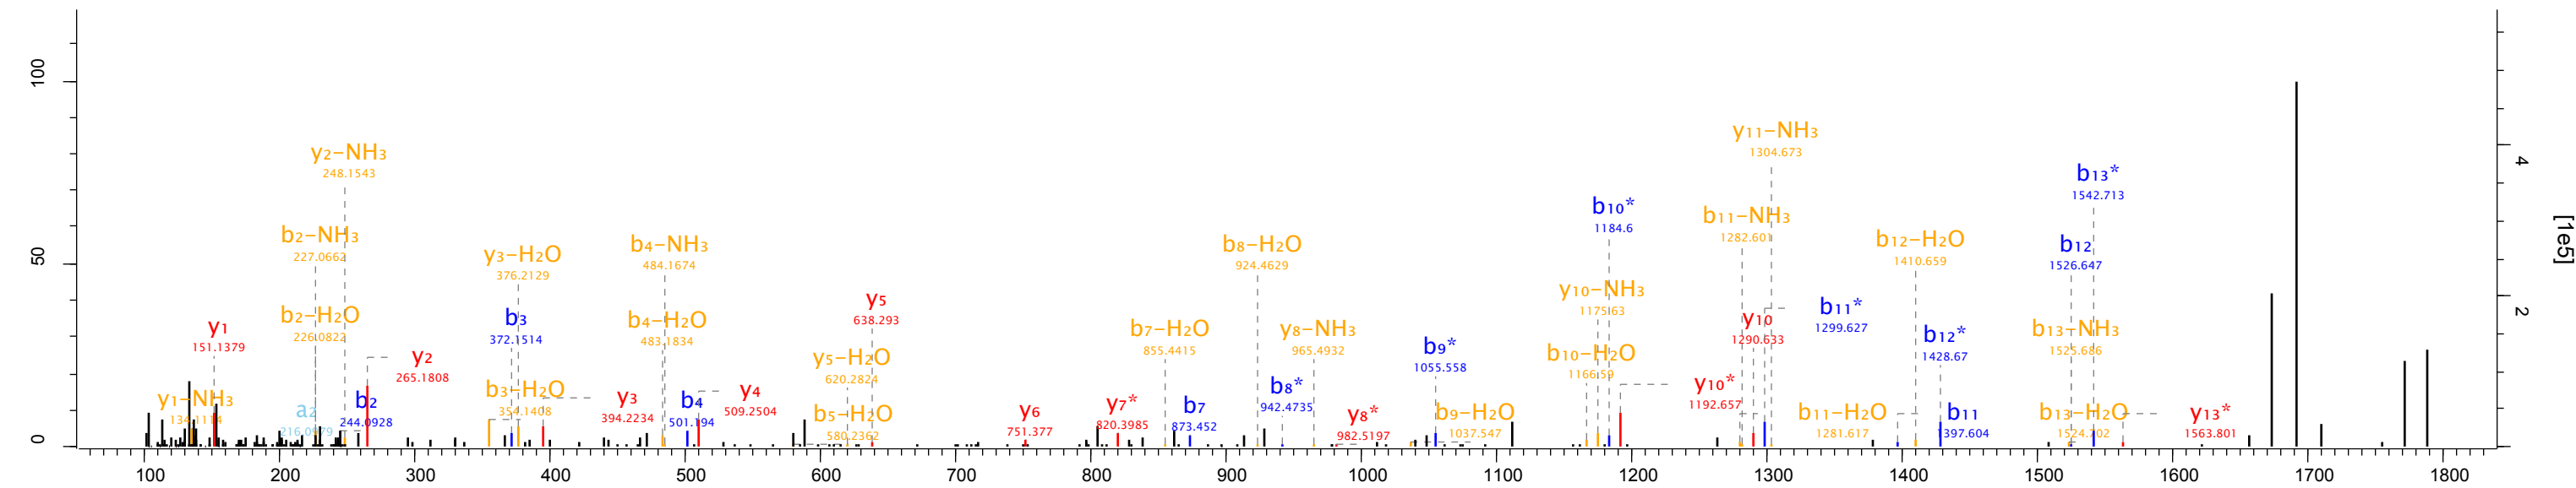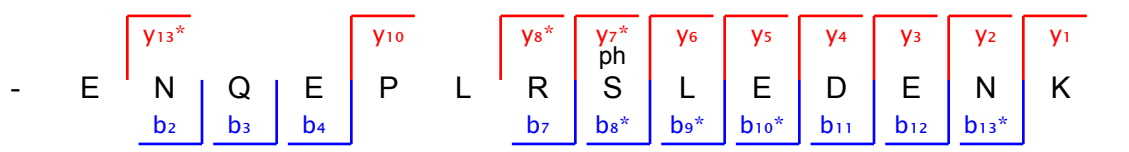

Raw file 20171215\_MaS\_33SR\_LMH\_phospho\_05 Scan 8704 Method FTMS; HCD Score 132.64 m/z 721.84 Gene names TCOF1

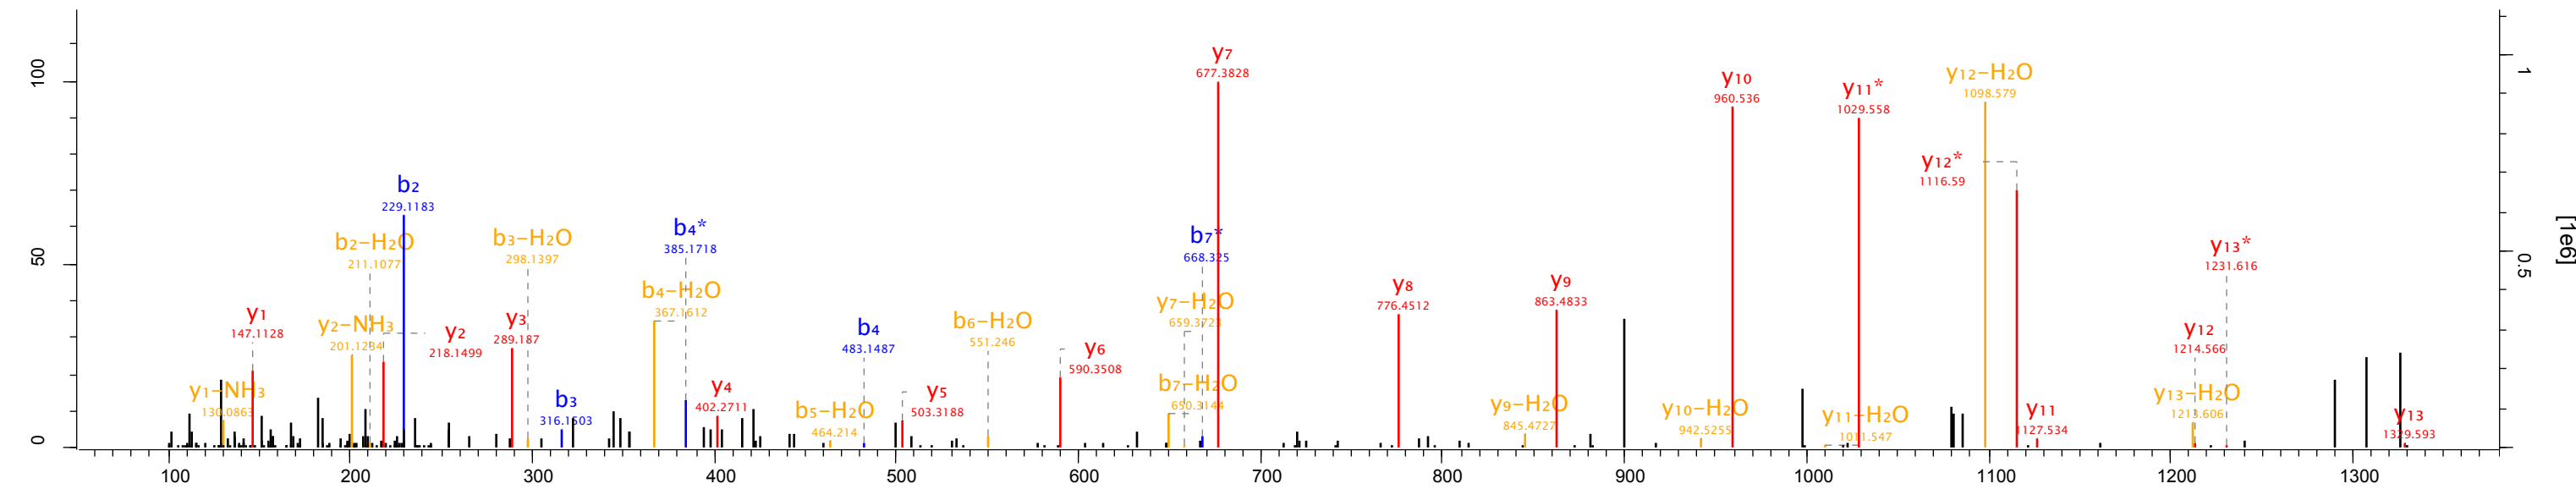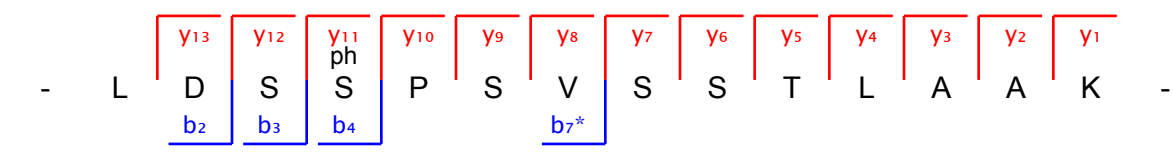

Raw file 20171215\_MaS\_33SR\_LMH\_phospho\_05 Scan 9744 Method FTMS; HCD Score 44.93 m/z 923.42 Gene names MMP16

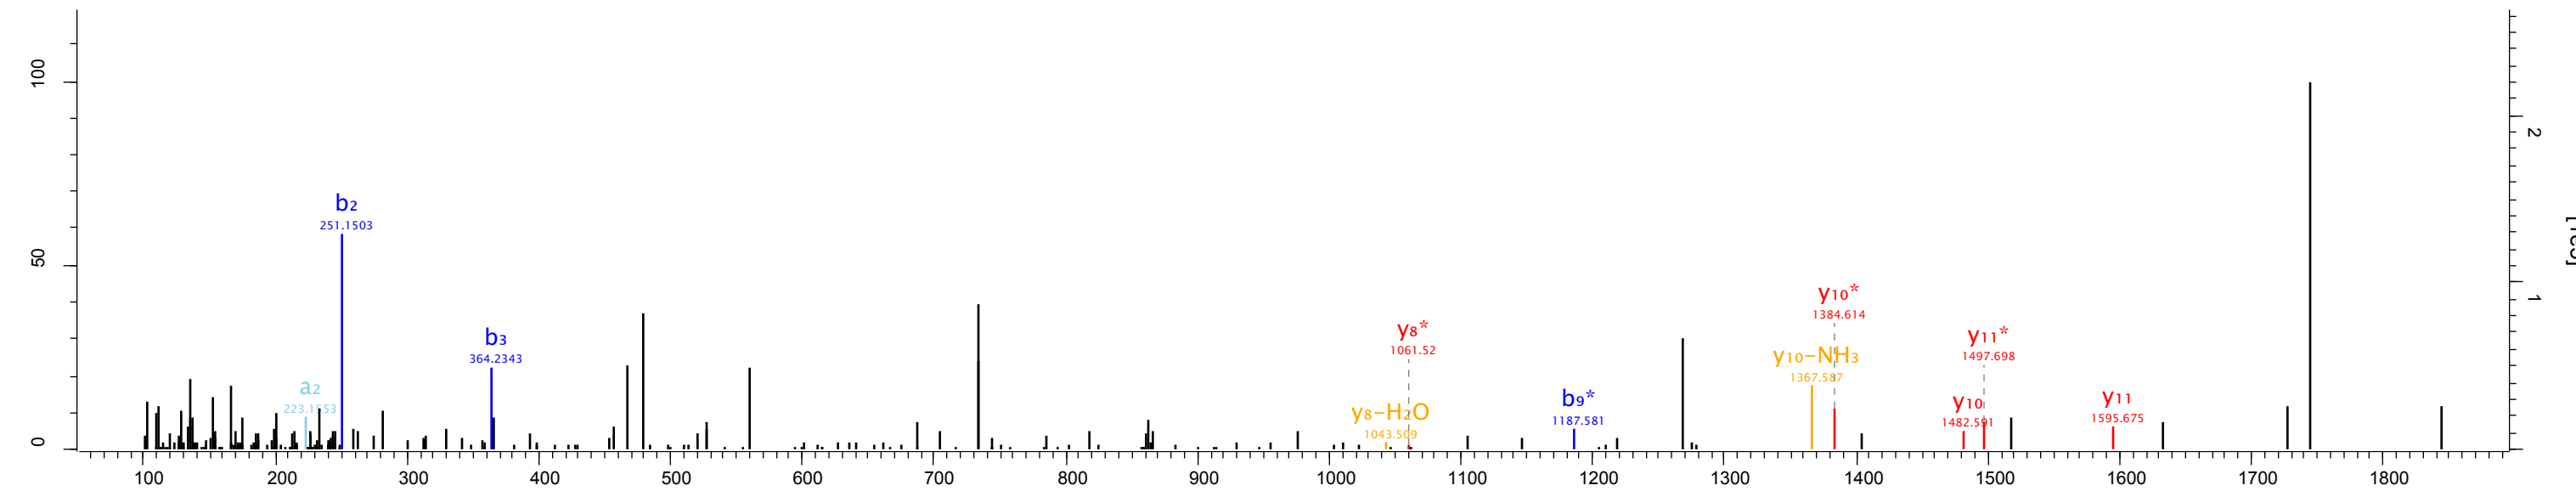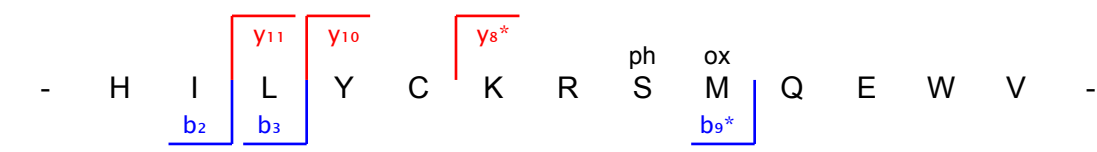

Raw file: 20171215\_MaS\_33SR\_LMH\_phospho\_06  
 Scan: 10004 Method: FTMS; HCD Score: 129.05 m/z: 800.84 Gene names: C7orf50

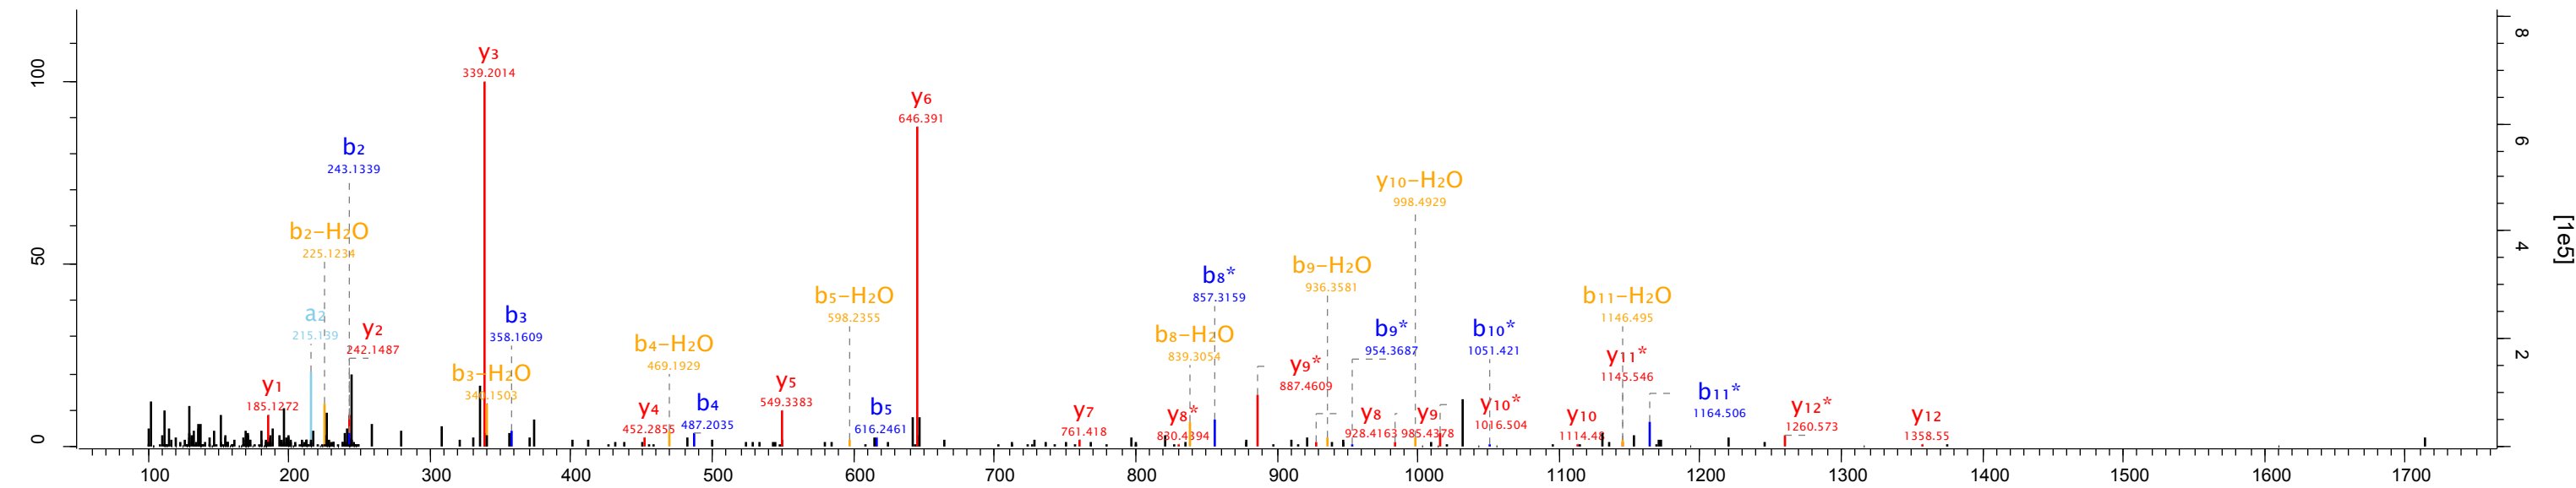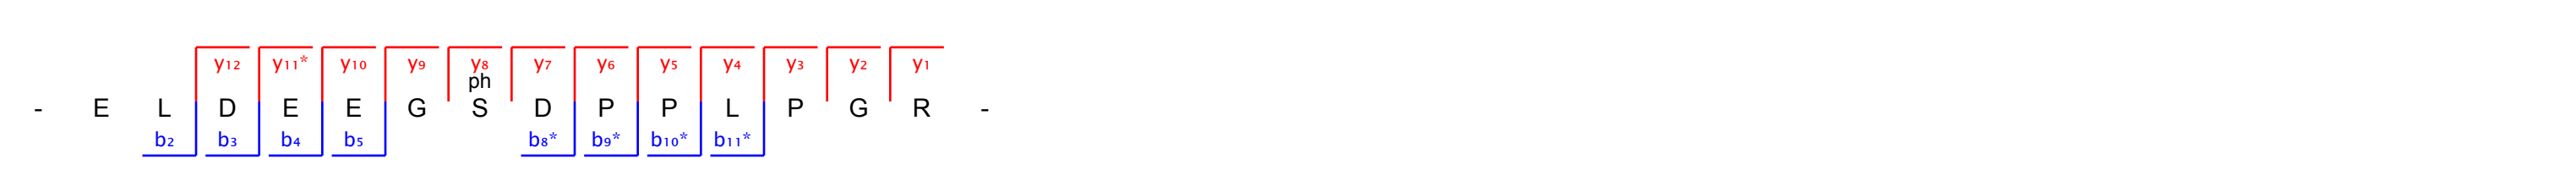

Raw file 20171215\_MaS\_33SR\_LMH\_phospho\_06 Scan 10394 Method FTMS; HCD Score 94.96 m/z 813.37 Gene names NCK1

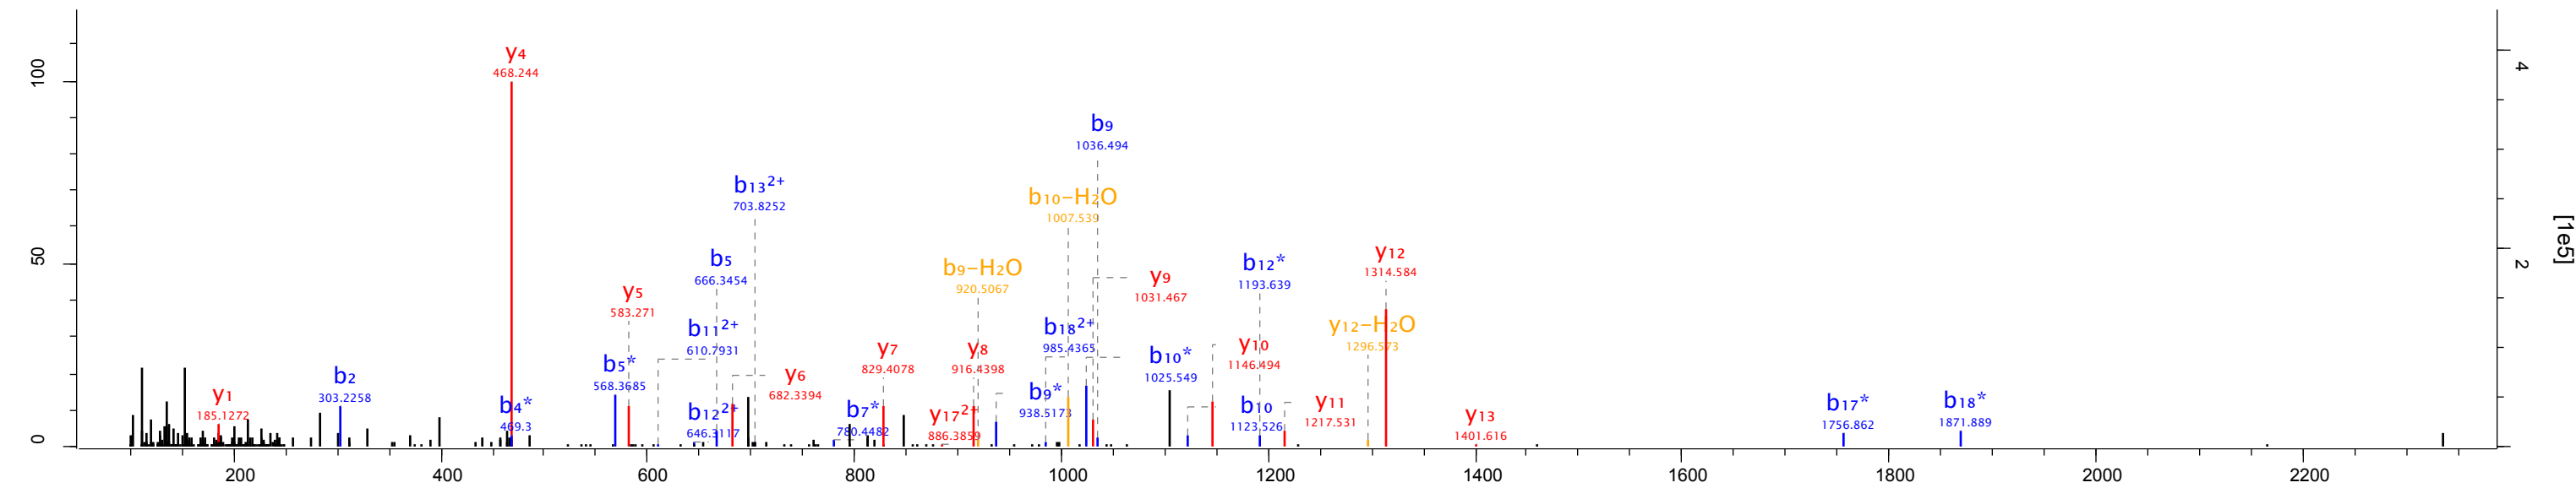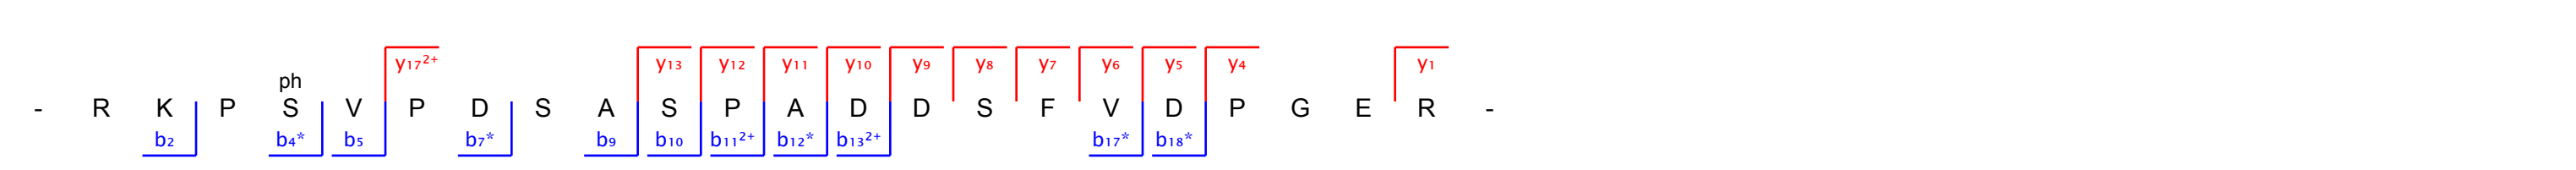

Raw file 20171215\_MaS\_33SR\_LMH\_phospho\_06 Scan 10414 Method FTMS; HCD Score 78.1 m/z 492.73

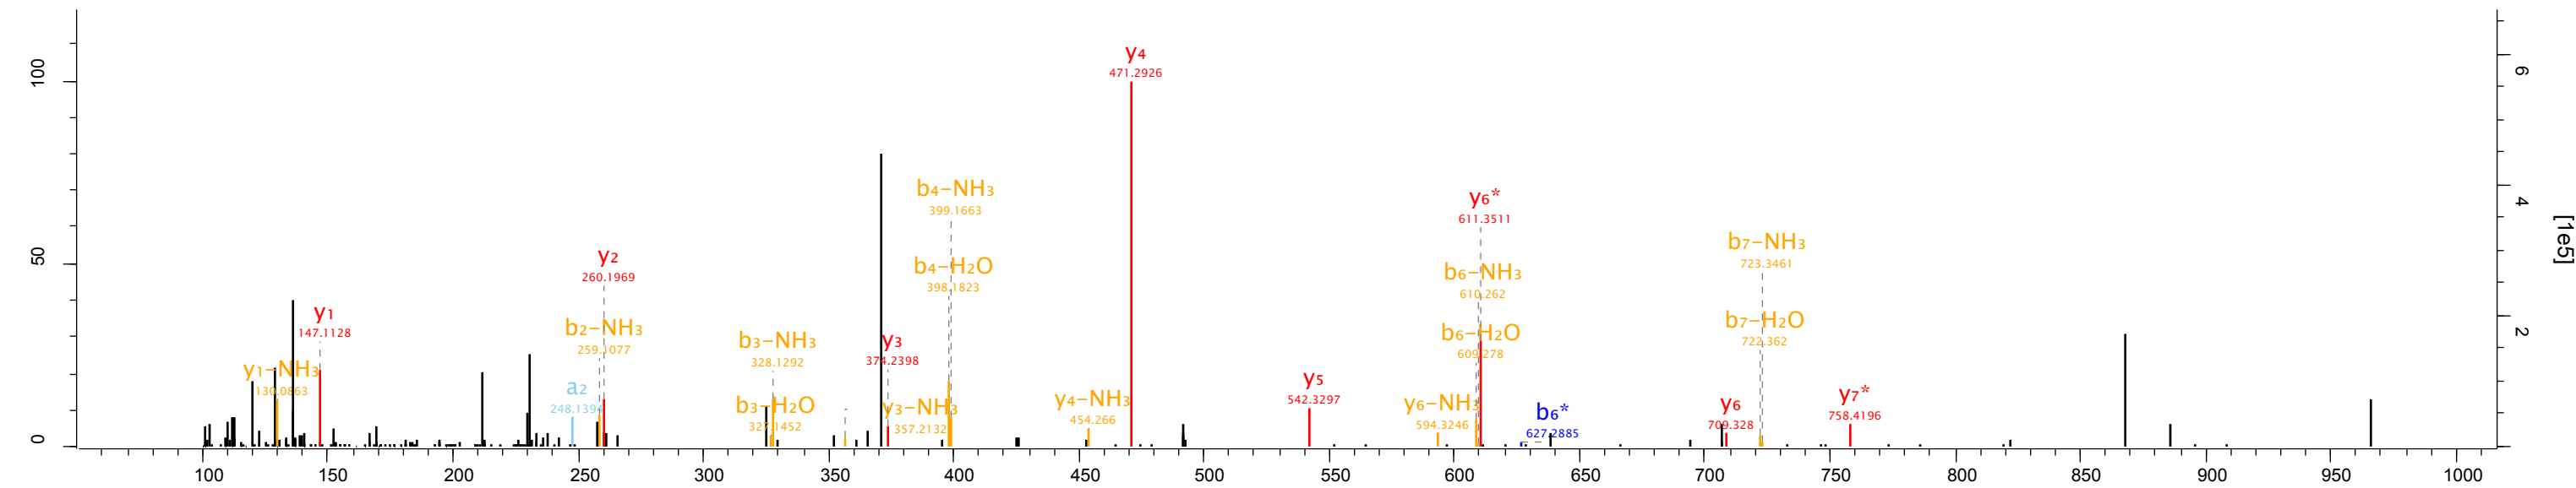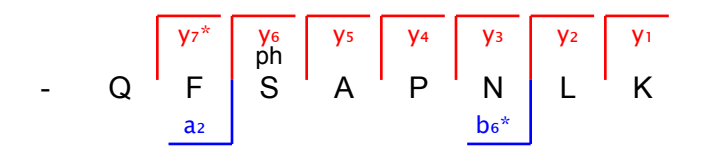



Raw file 20171215\_MaS\_33SR\_LMH\_phospho\_06 Scan 10824 Method FTMS; HCD Score 145.81 m/z 599.78 Gene names PFKP

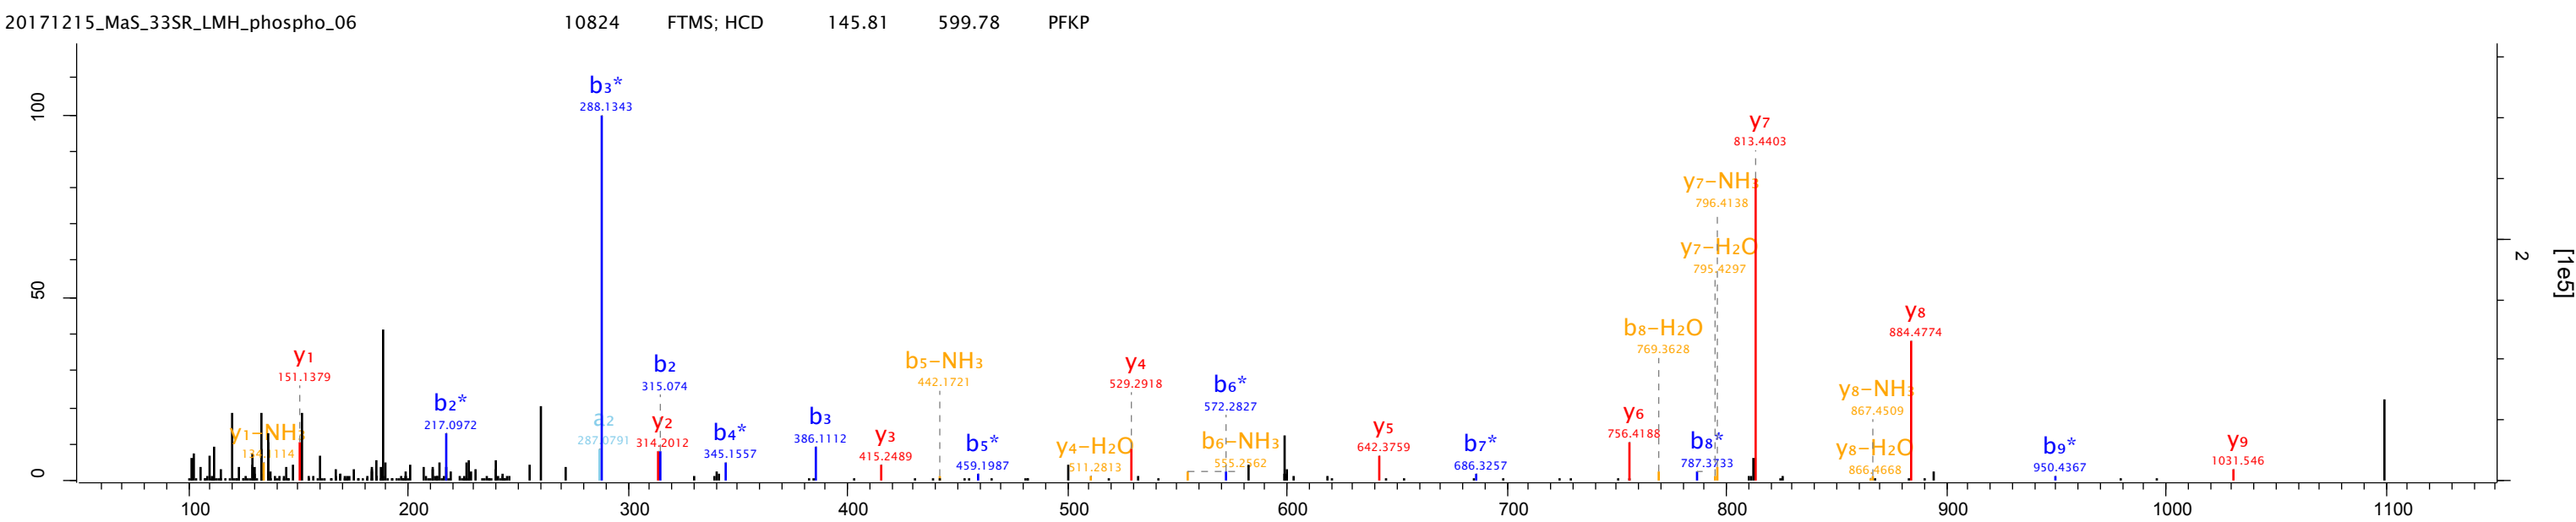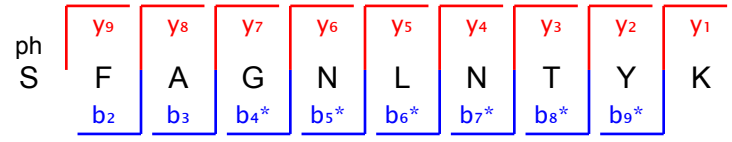

Raw file: 20171215\_MaS\_33SR\_LMH\_phospho\_06  
 Scan: 10884 Method: FTMS; HCD Score: 129.11 m/z: 824.83 Gene names: CDK13

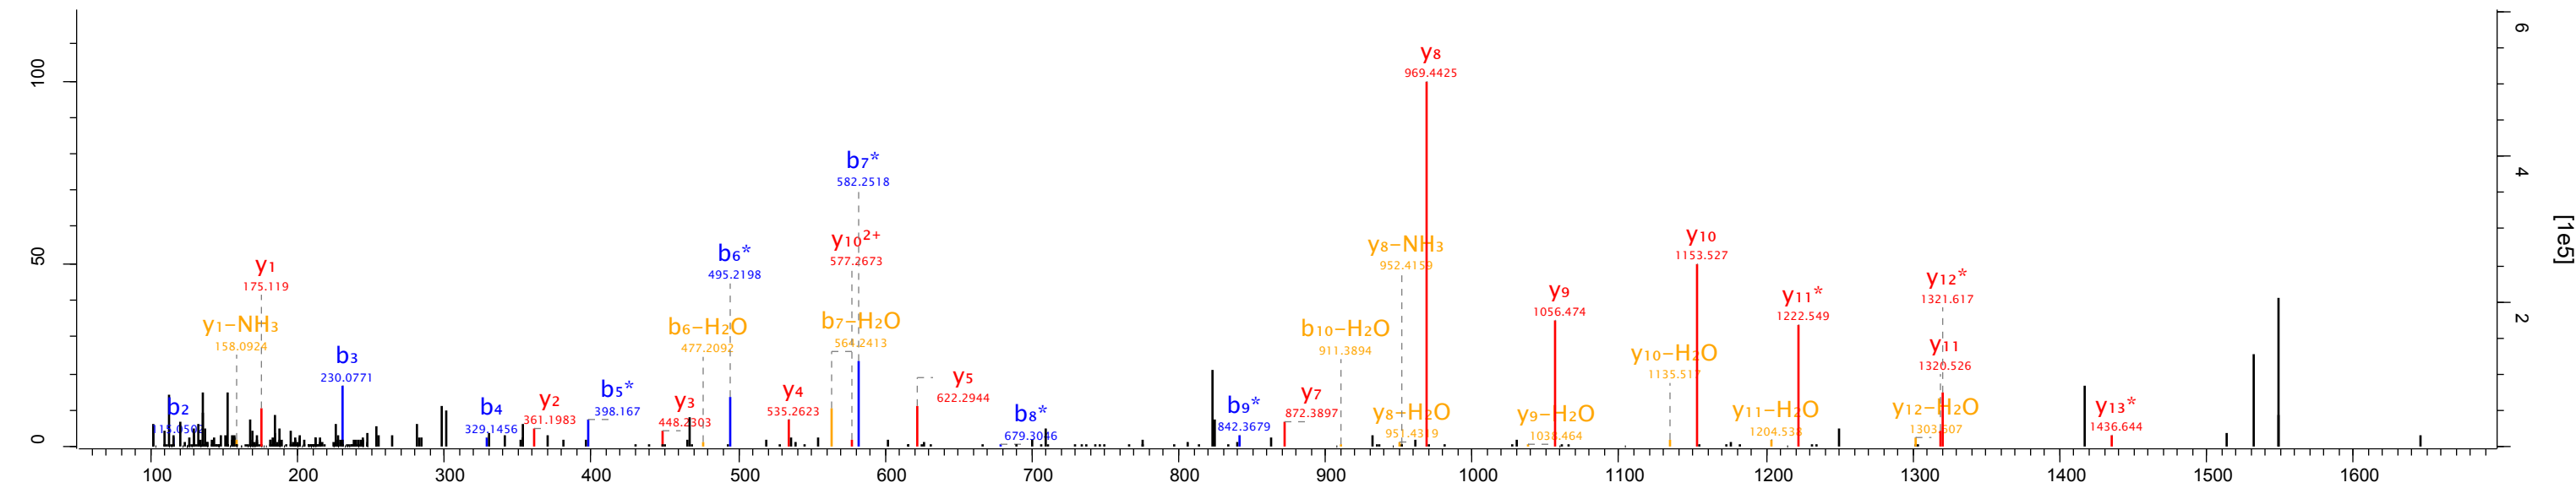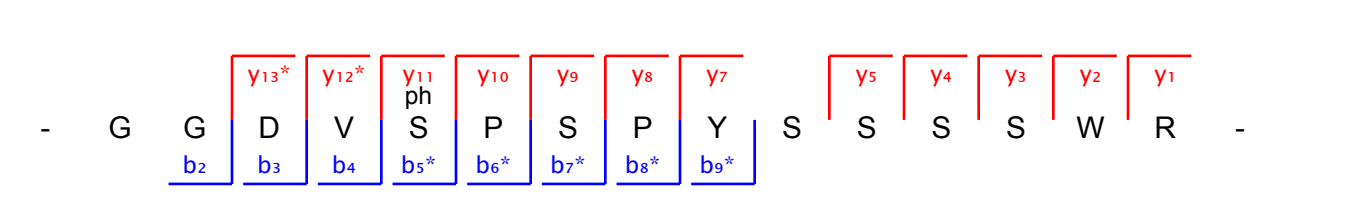

Raw file: 20171215\_MaS\_33SR\_LMH\_phospho\_06  
 Scan: 11004 Method: FTMS; HCD Score: 111.07 m/z: 634.29 Gene names: TIAM1

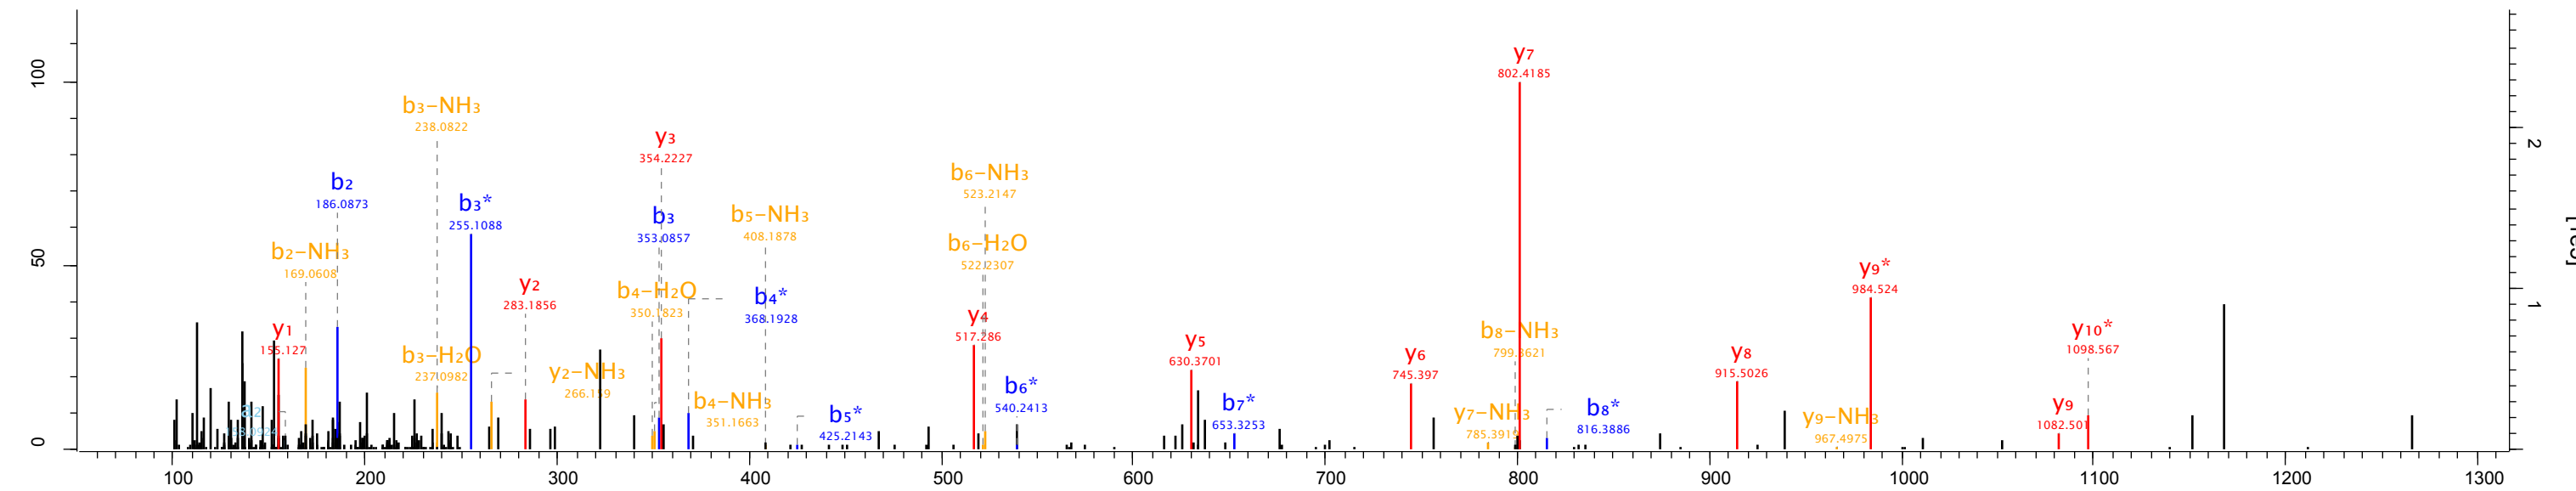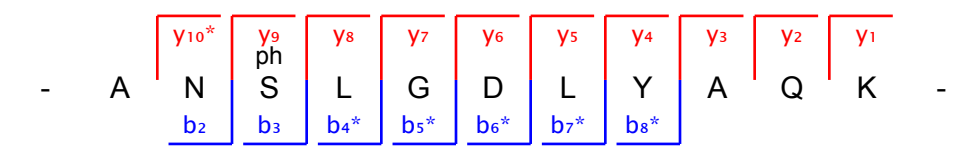

Raw file 20171215\_MaS\_33SR\_LMH\_phospho\_06 Scan 11044 Method FTMS; HCD Score 124.2 m/z 654.28 Gene names FLNA

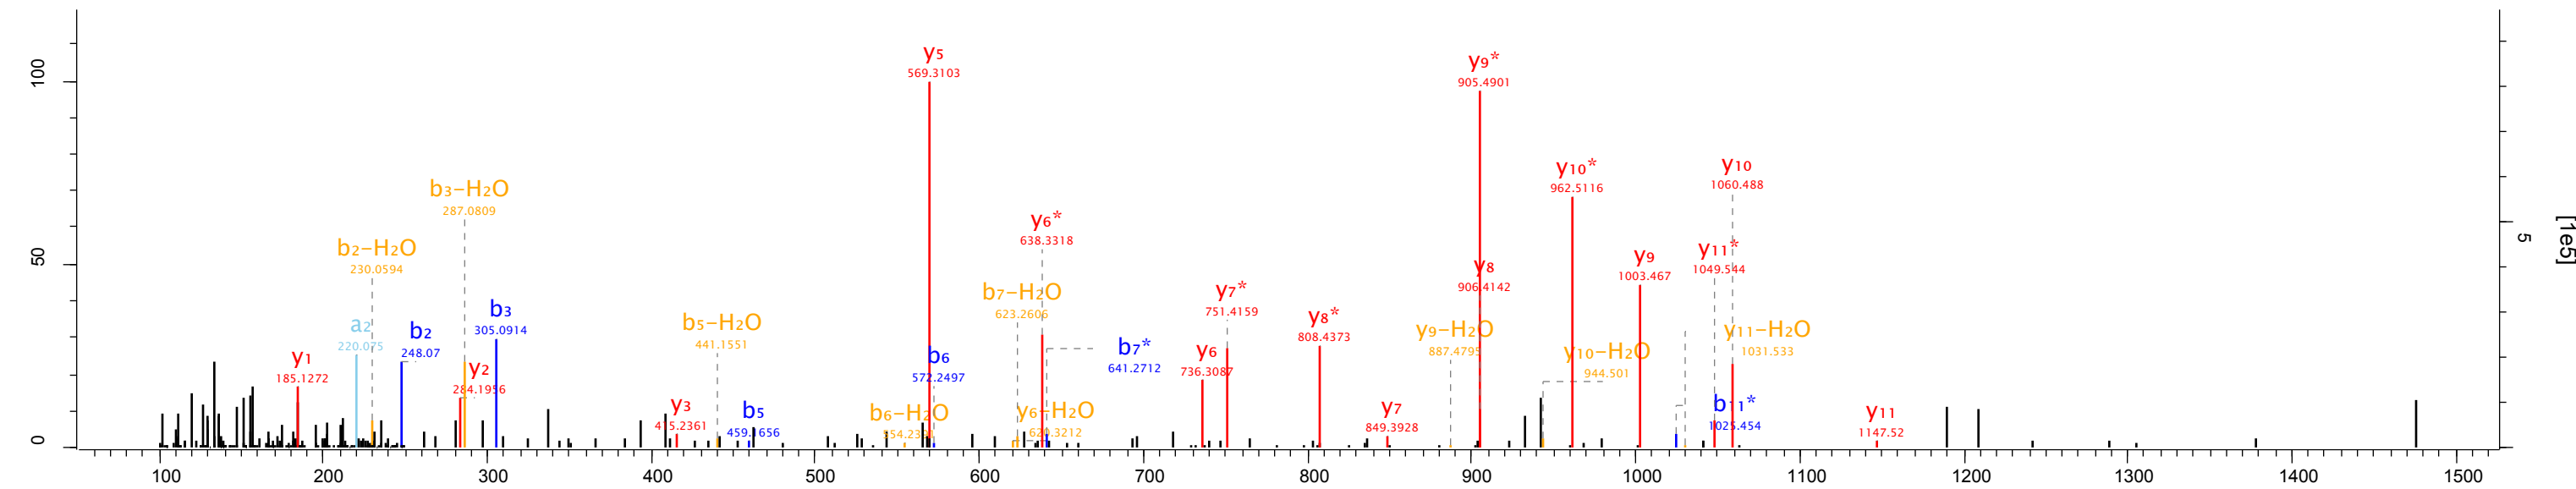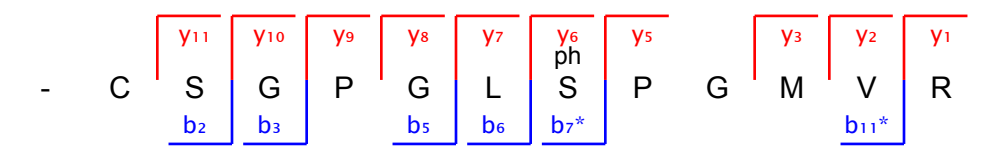

Raw file 20171215\_MaS\_33SR\_LMH\_phospho\_06 Scan 11074 Method FTMS; HCD Score 69.25 m/z 595.3 Gene names UBR4

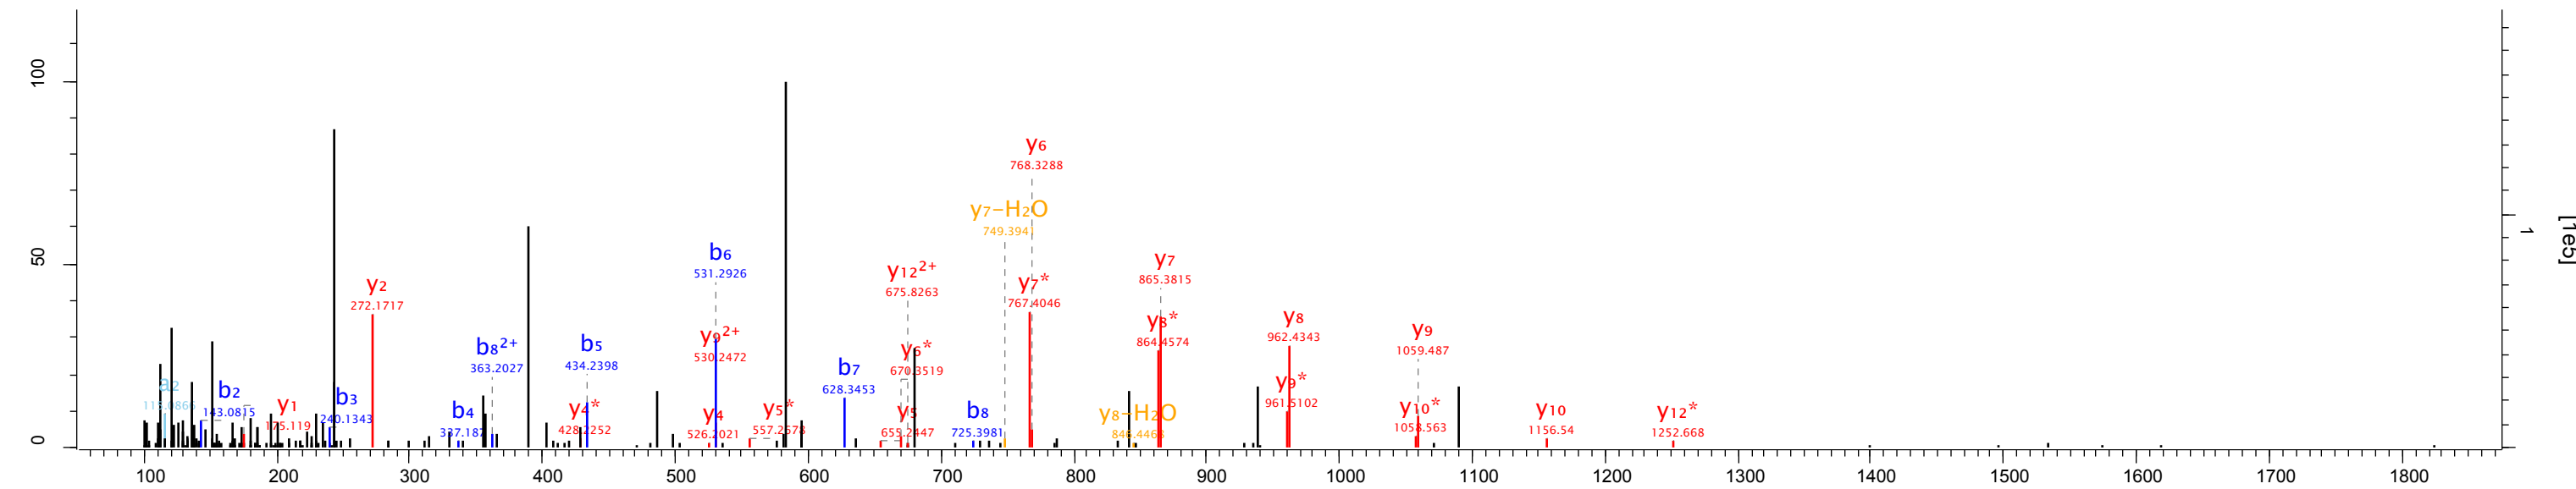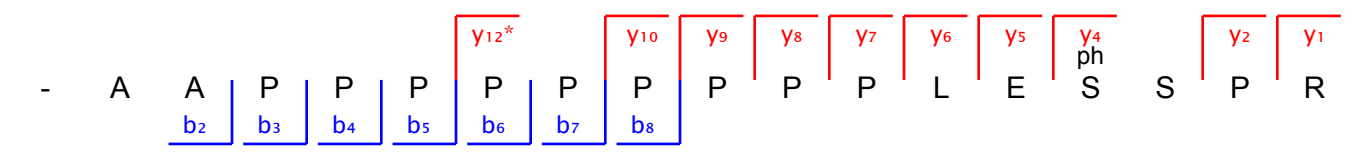

Raw file 20171215\_MaS\_33SR\_LMH\_phospho\_06 Scan 11084 Method FTMS; HCD Score 101.6 m/z 920.93 Gene names PLEC

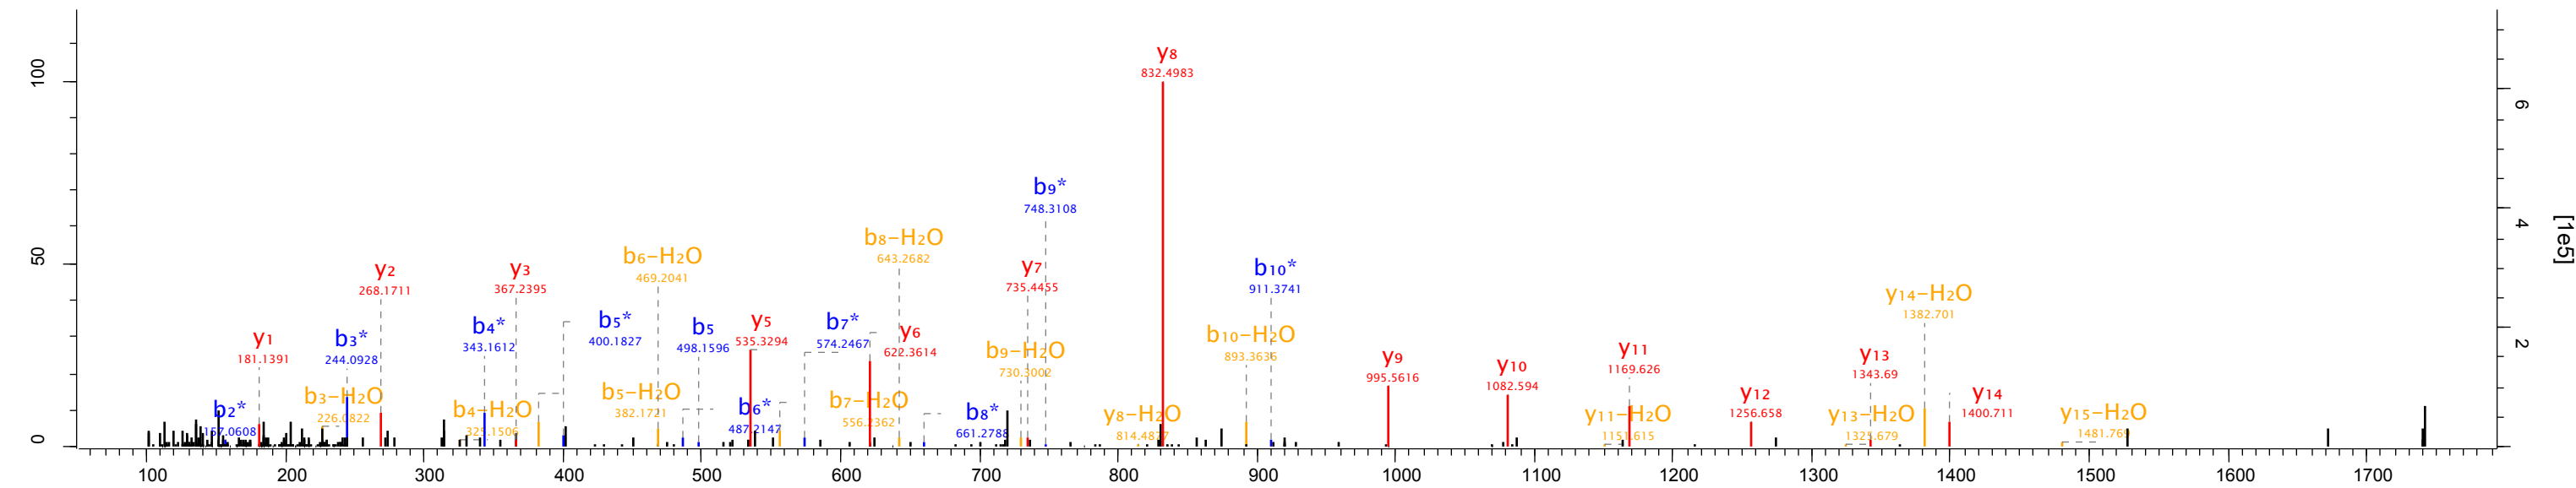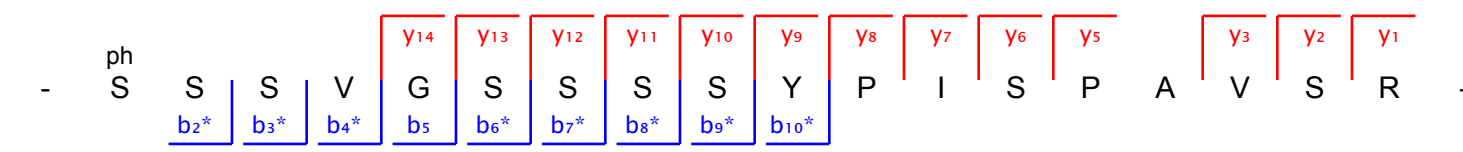

Raw file 20171215\_MaS\_33SR\_LMH\_phospho\_06 Scan 11374 Method FTMS; HCD Score 211.98 m/z 970.9 Gene names NAP1L4

20171215\_MaS\_33SR\_LMH\_phospho\_06

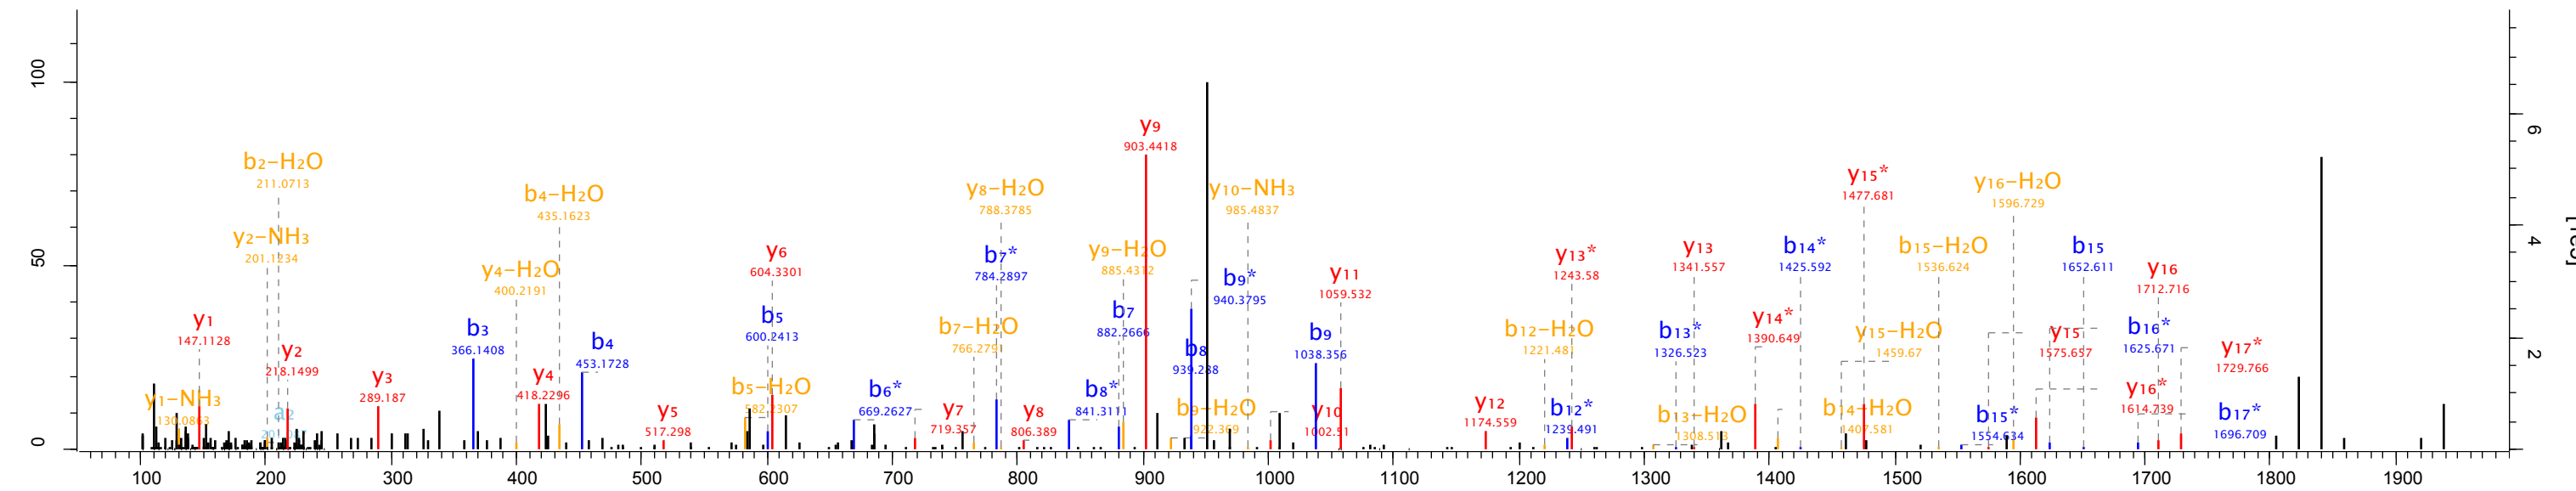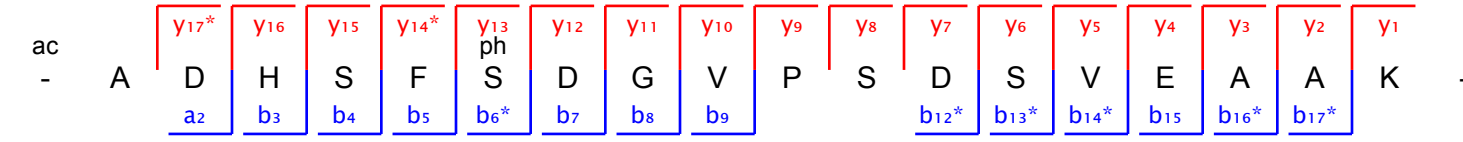

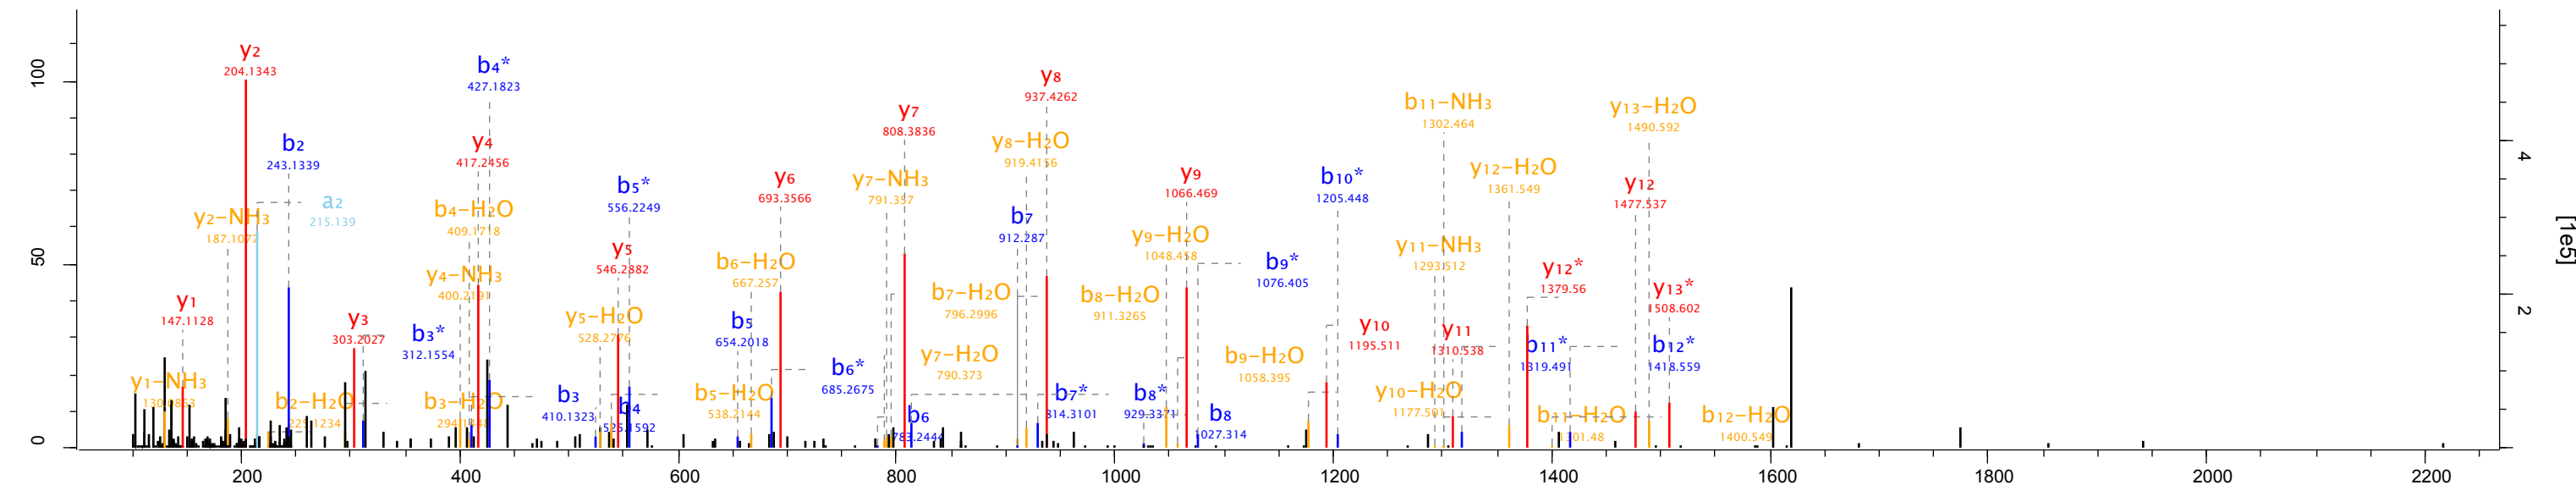

y13\*
y12  
ph
y11
y10
y9
y8
y7
y6
y5
y4
y3
y2
y1

b2
b3
b4
b5
b6
b7
b8
b9\*
b10\*
b11\*
b12\*

- I E S D E E D F E N V G K -



Raw file 20171215\_MaS\_33SR\_LMH\_phospho\_06 Scan 11714 Method FTMS; HCD Score 53.36 m/z 1017.97 Gene names KIAA1598

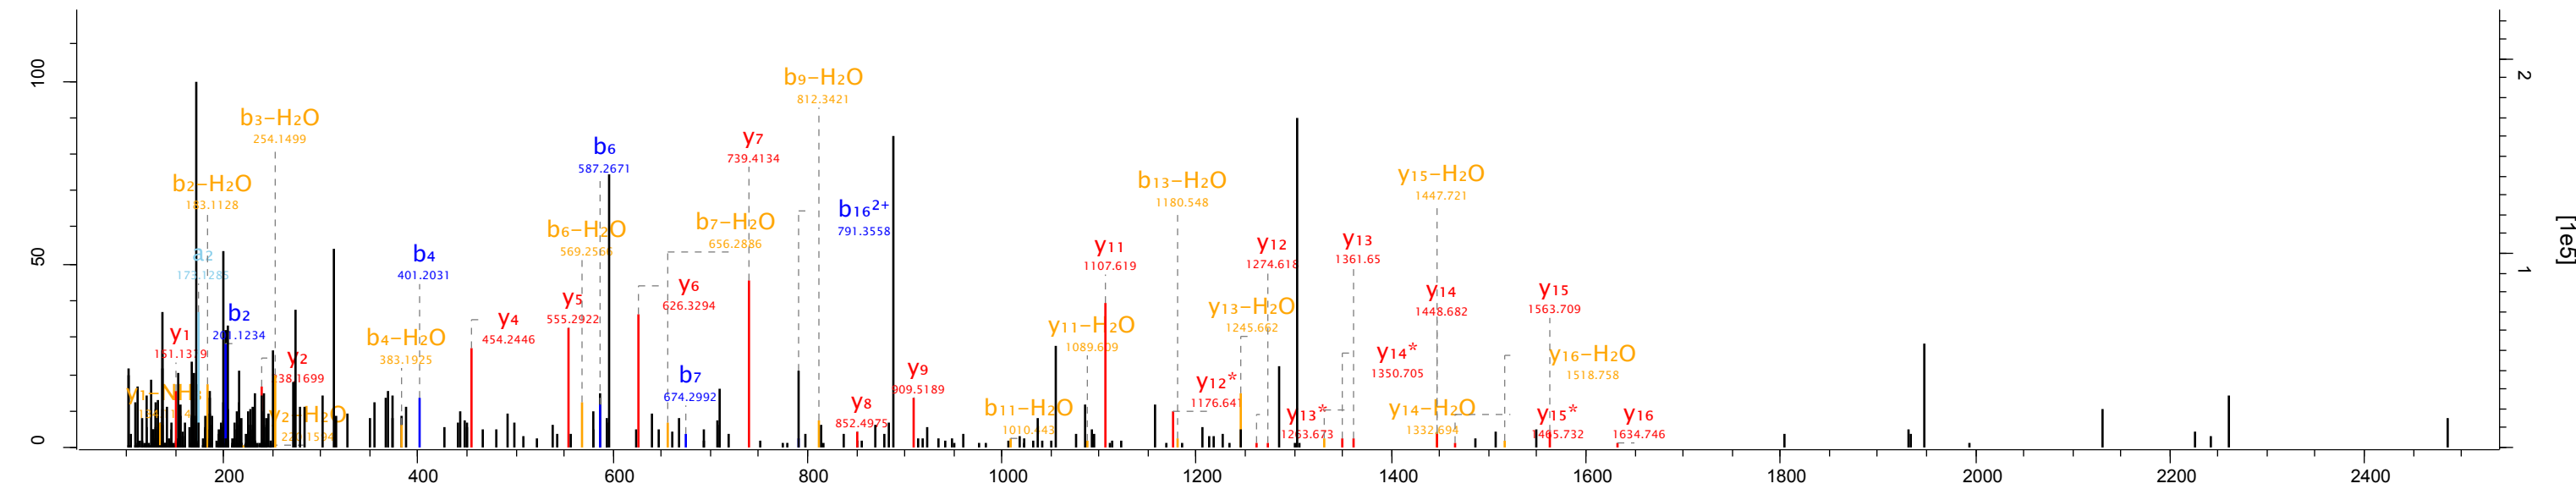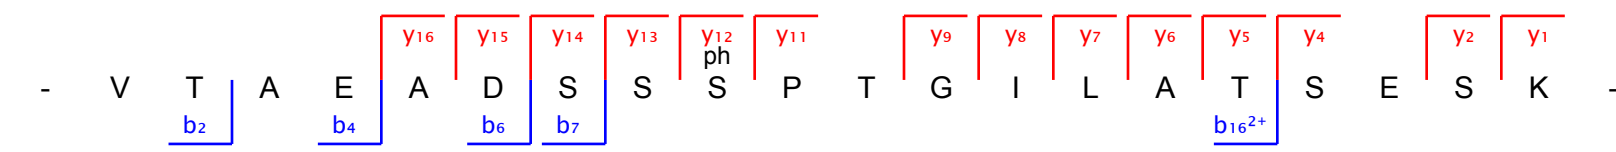

Raw file: 20171215\_MaS\_33SR\_LMH\_phospho\_06  
 Scan: 11734 Method: FTMS; HCD Score: 143.04 m/z: 491.23 Gene names: ERRFI1

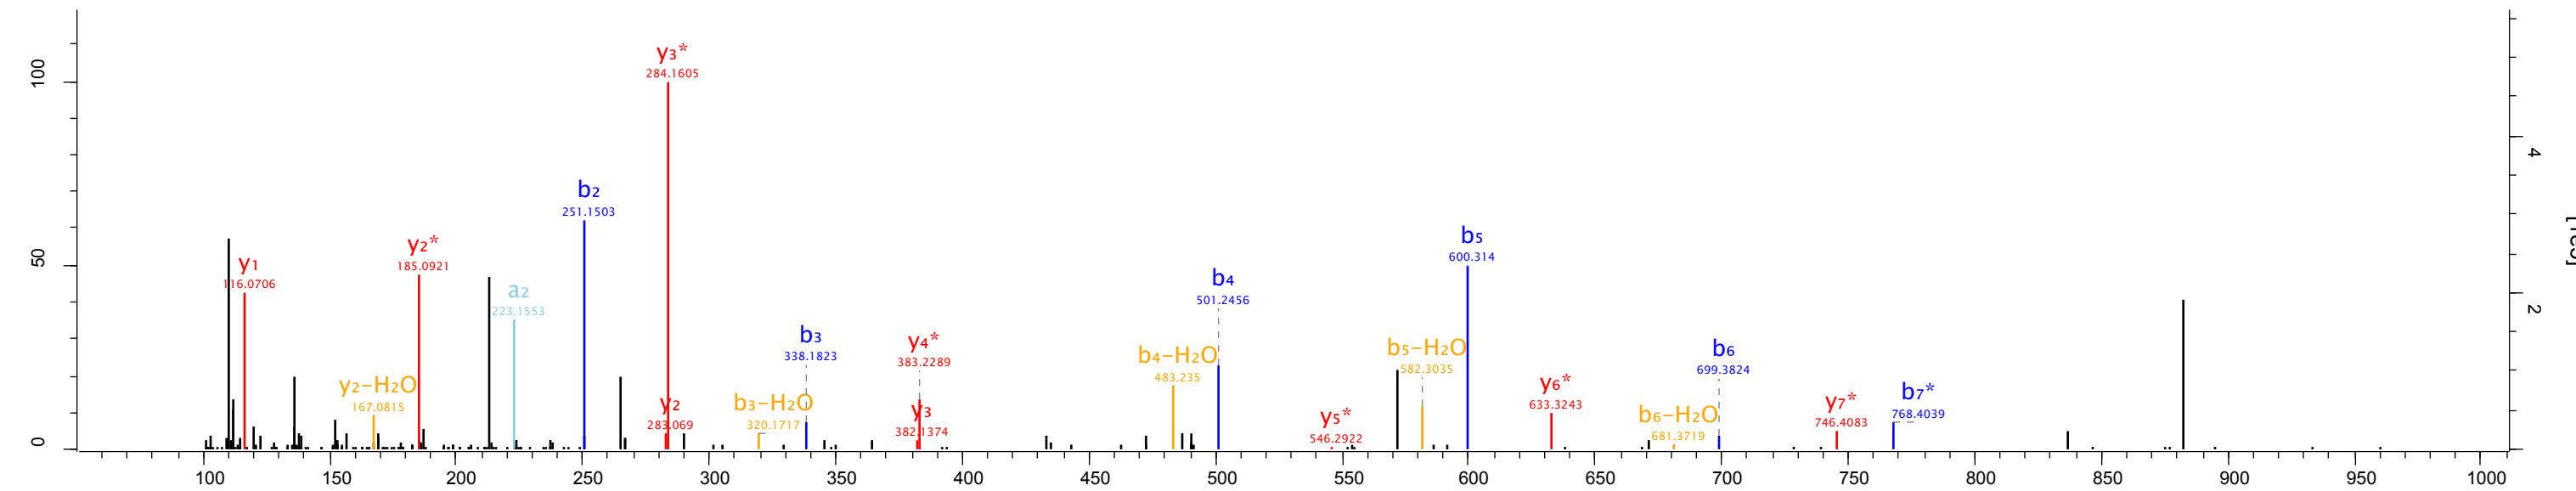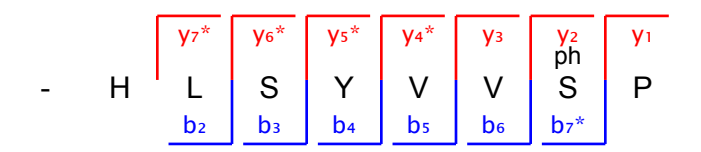

Raw file 20171215\_MaS\_33SR\_LMH\_phospho\_06 Scan 11794 Method FTMS; HCD Score 144.46 m/z 782.83 Gene names TNKS1BP1

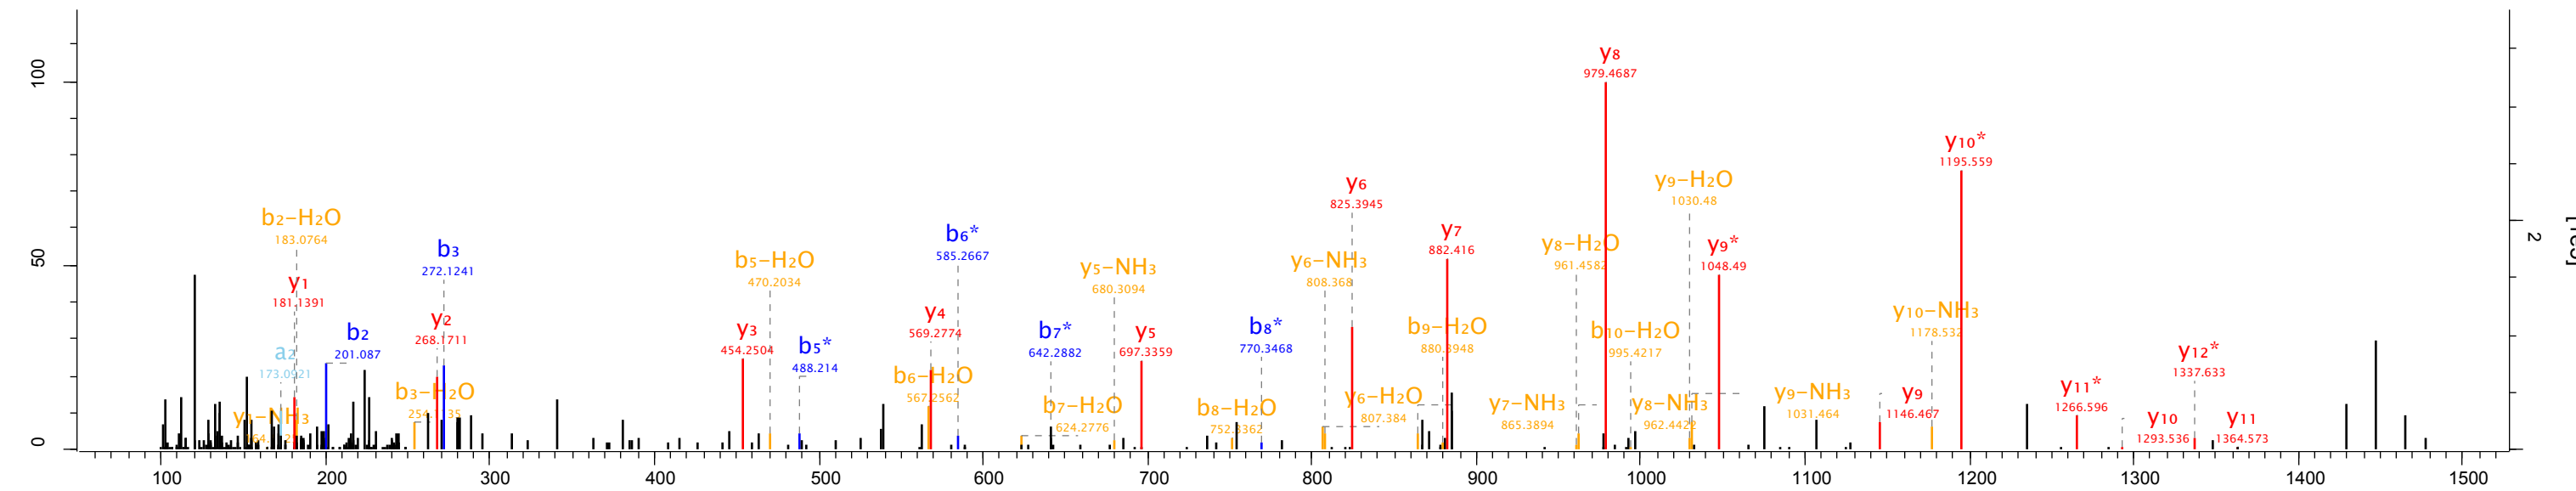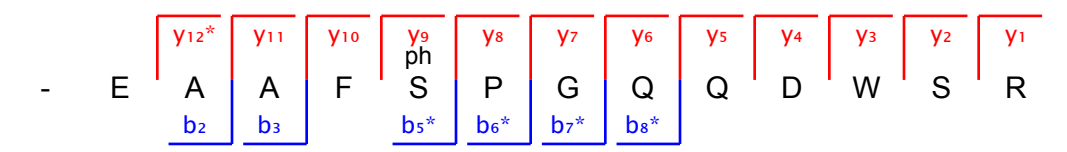

Raw file 20171215\_MaS\_33SR\_LMH\_phospho\_06 Scan 11834 Method FTMS; HCD Score 97.71 m/z 599.29 Gene names NES

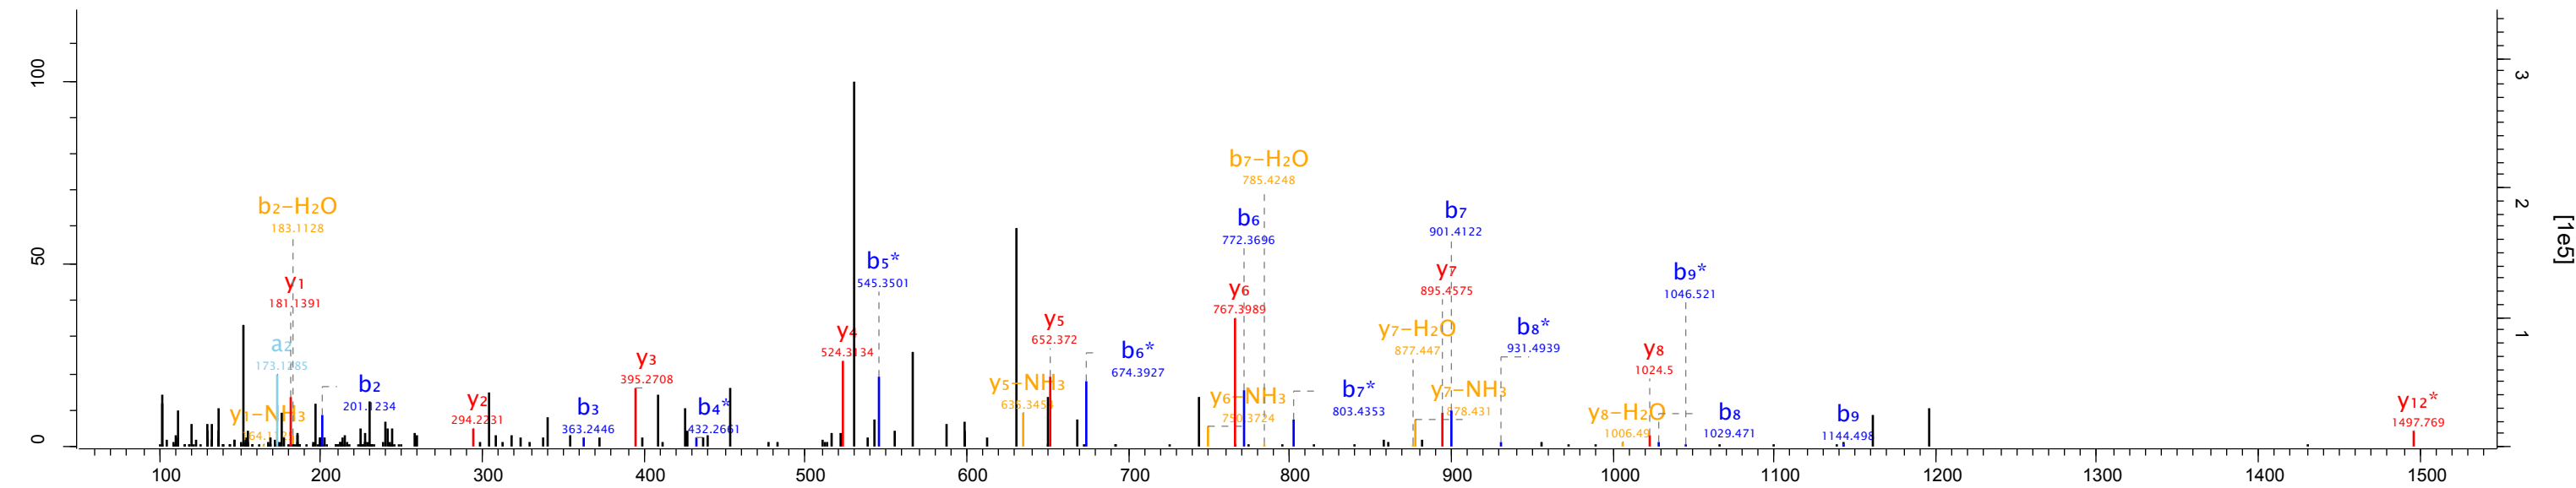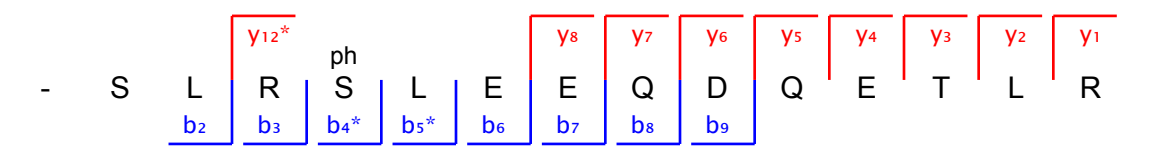

Raw file 20171215\_MaS\_33SR\_LMH\_phospho\_06 Scan 12194 Method FTMS; HCD Score 209.85 m/z 905.92 Gene names ZNF316

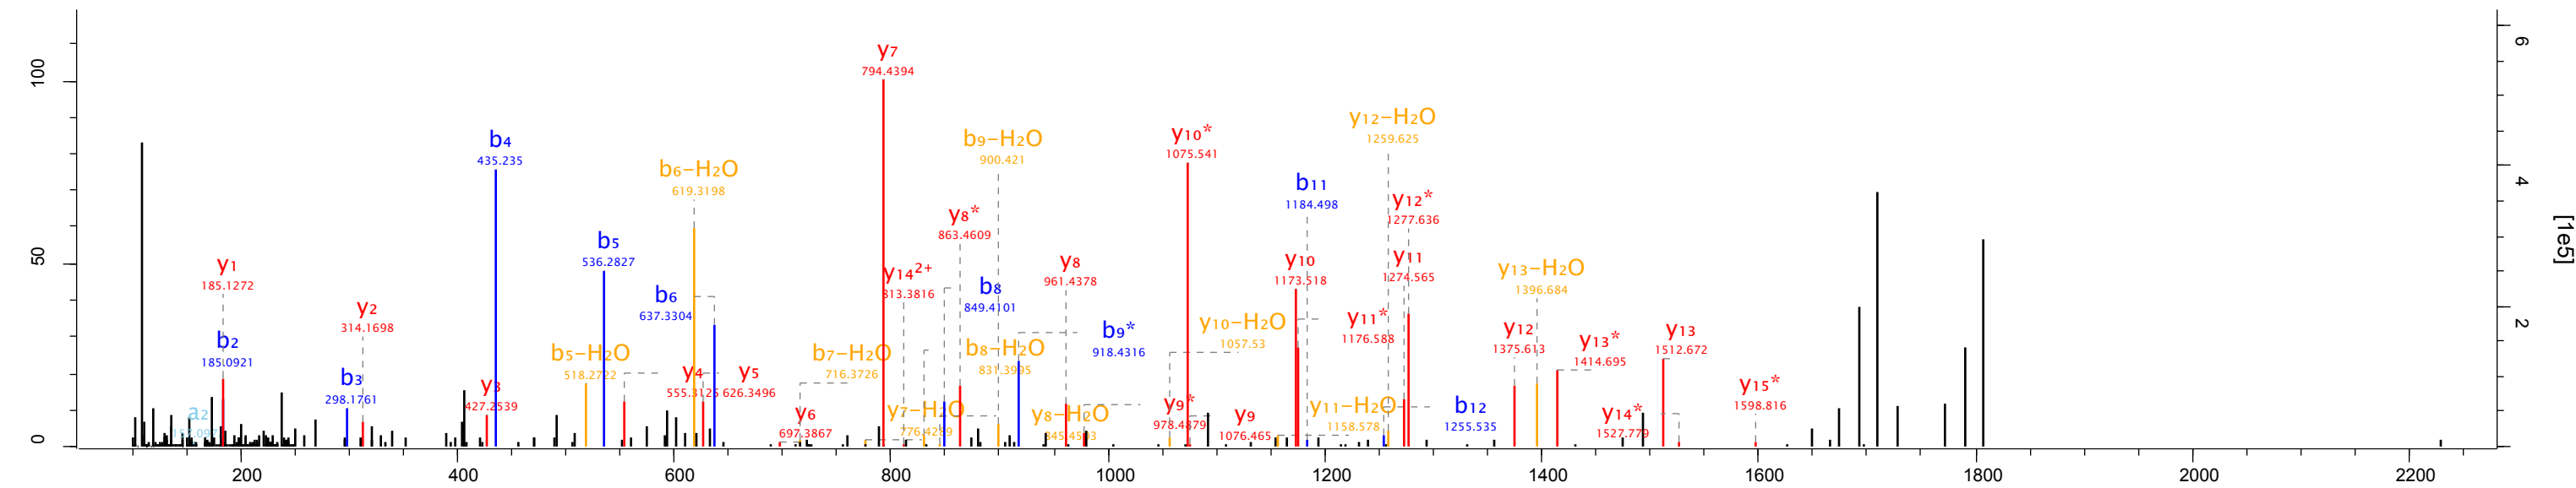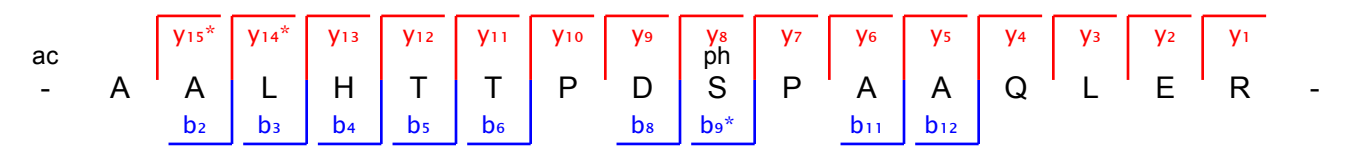

Raw file: 20171215\_MaS\_33SR\_LMH\_phospho\_06  
 Scan: 12374 Method: FTMS; HCD Score: 133.36 m/z: 1035.45 Gene names: CT45A3;CT45A1

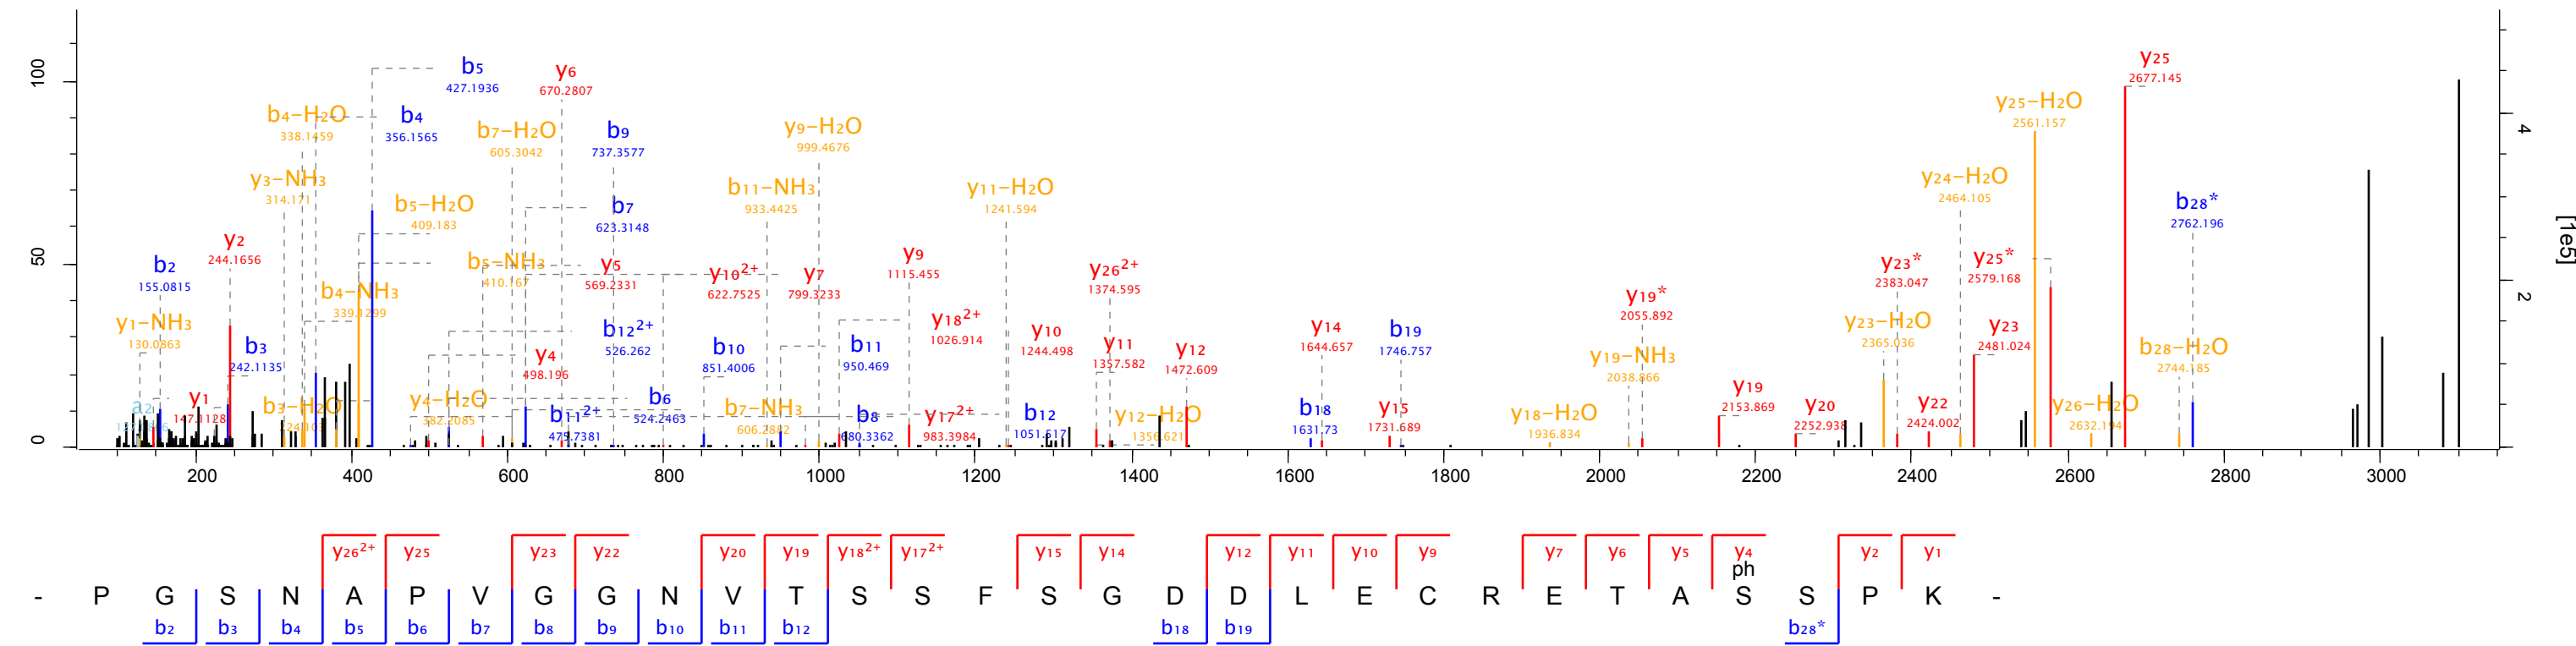

Raw file 20171215\_MaS\_33SR\_LMH\_phospho\_06 Scan 1244 Method FTMS; HCD Score 104.43 m/z 500.75 Gene names SRRM1

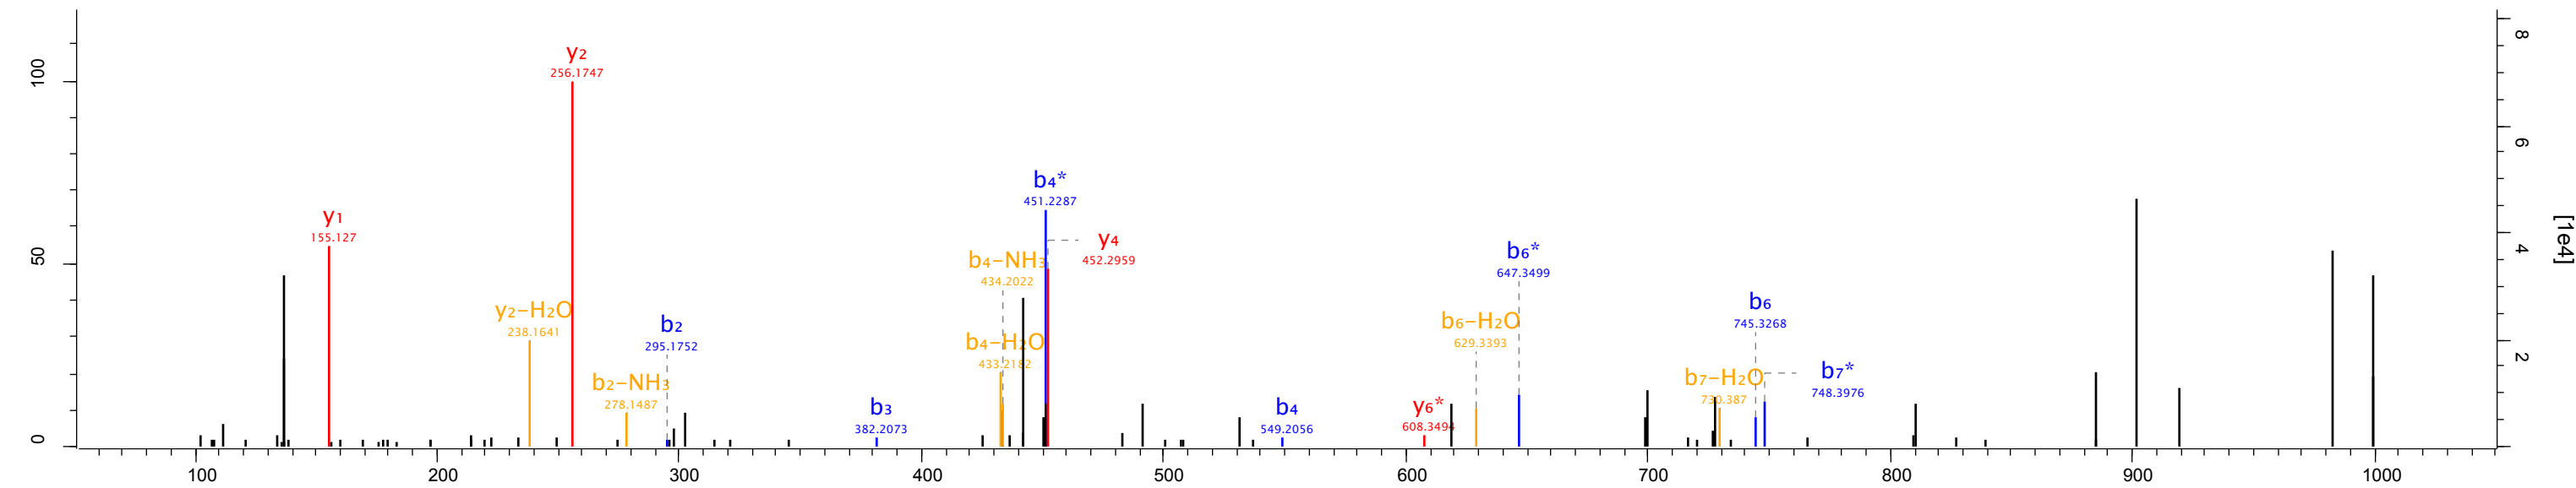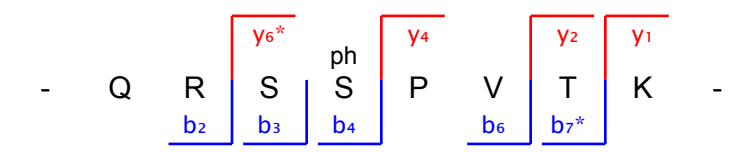

Raw file 20171215\_MaS\_33SR\_LMH\_phospho\_06 Scan 12454 Method FTMS; HCD Score 68.05 m/z 1289.21 Gene names SERBP1

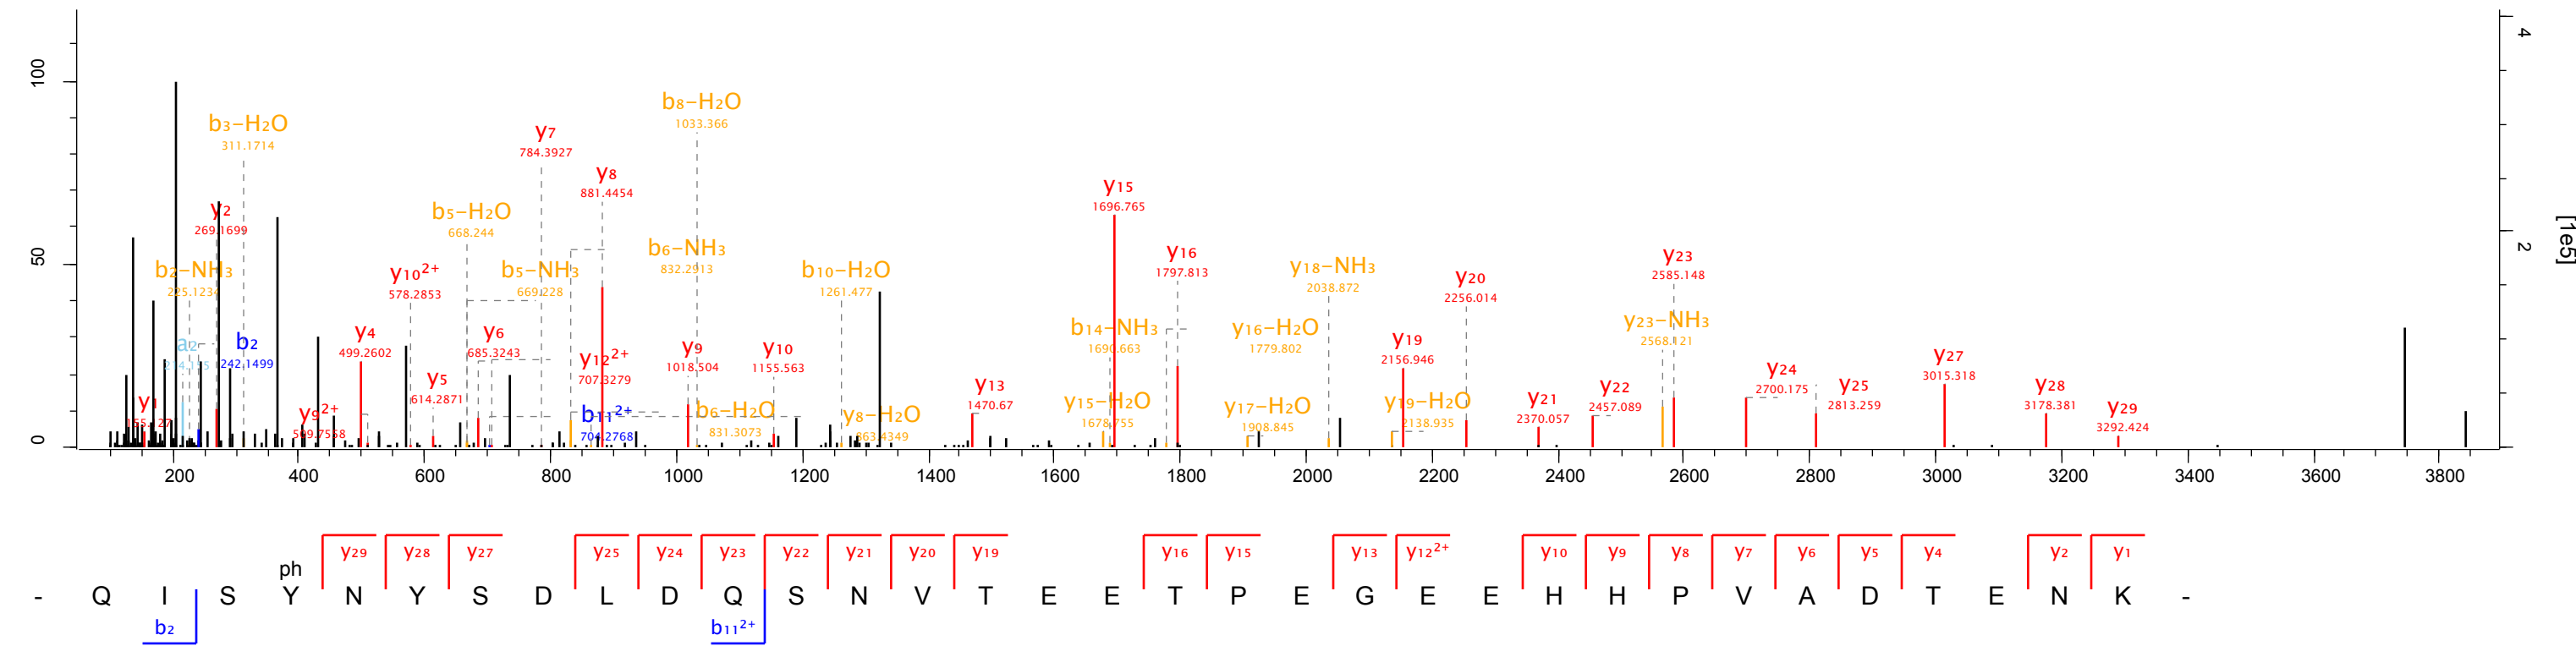



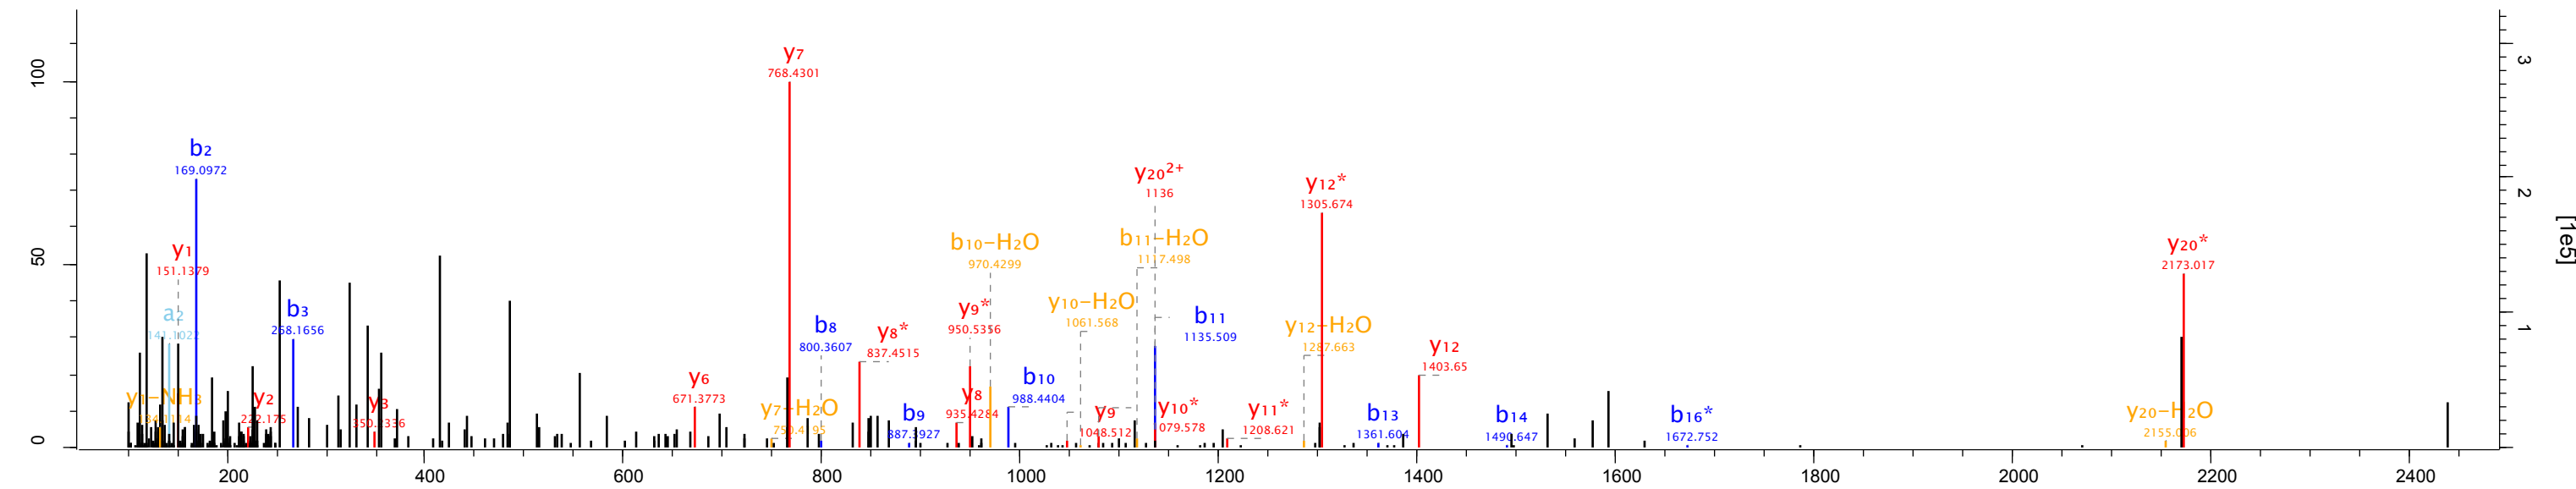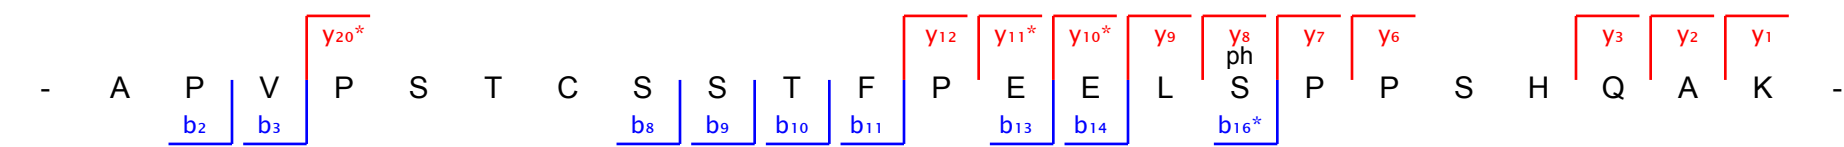

Raw file: 20171215\_MaS\_33SR\_LMH\_phospho\_06  
 Scan: 12684 Method: FTMS; HCD Score: 135.64 m/z: 918.44 Gene names: LARP4

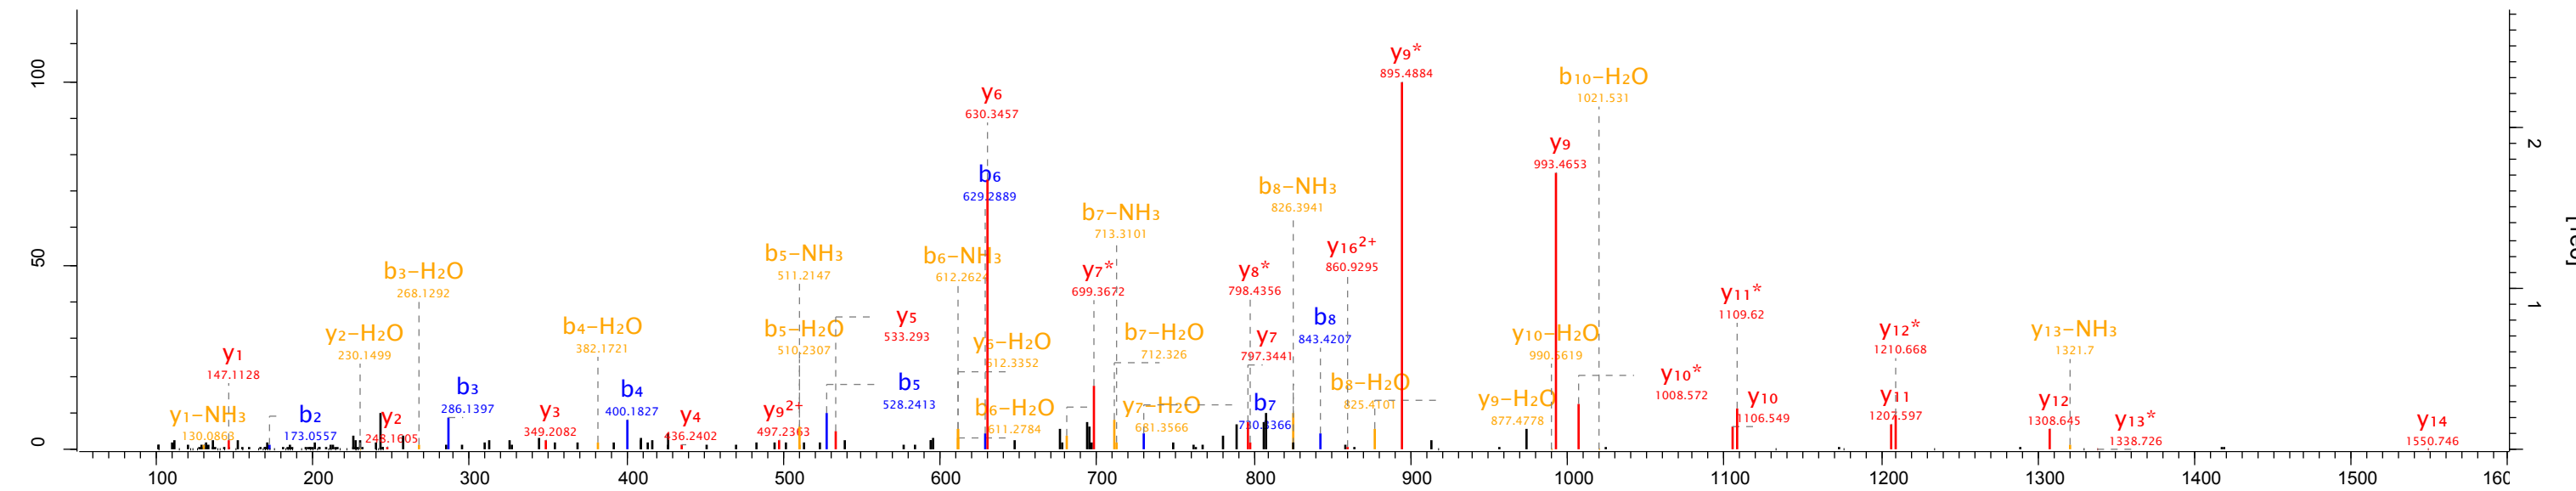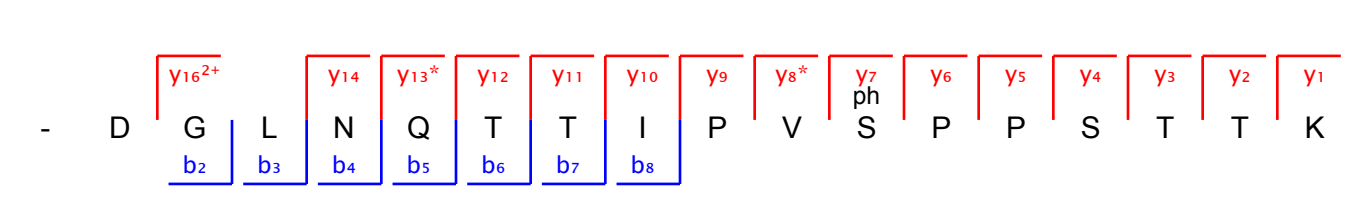

Raw file 20171215\_MaS\_33SR\_LMH\_phospho\_06 Scan 12714 Method FTMS; HCD Score 143.69 m/z 878.4 Gene names TP53BP1

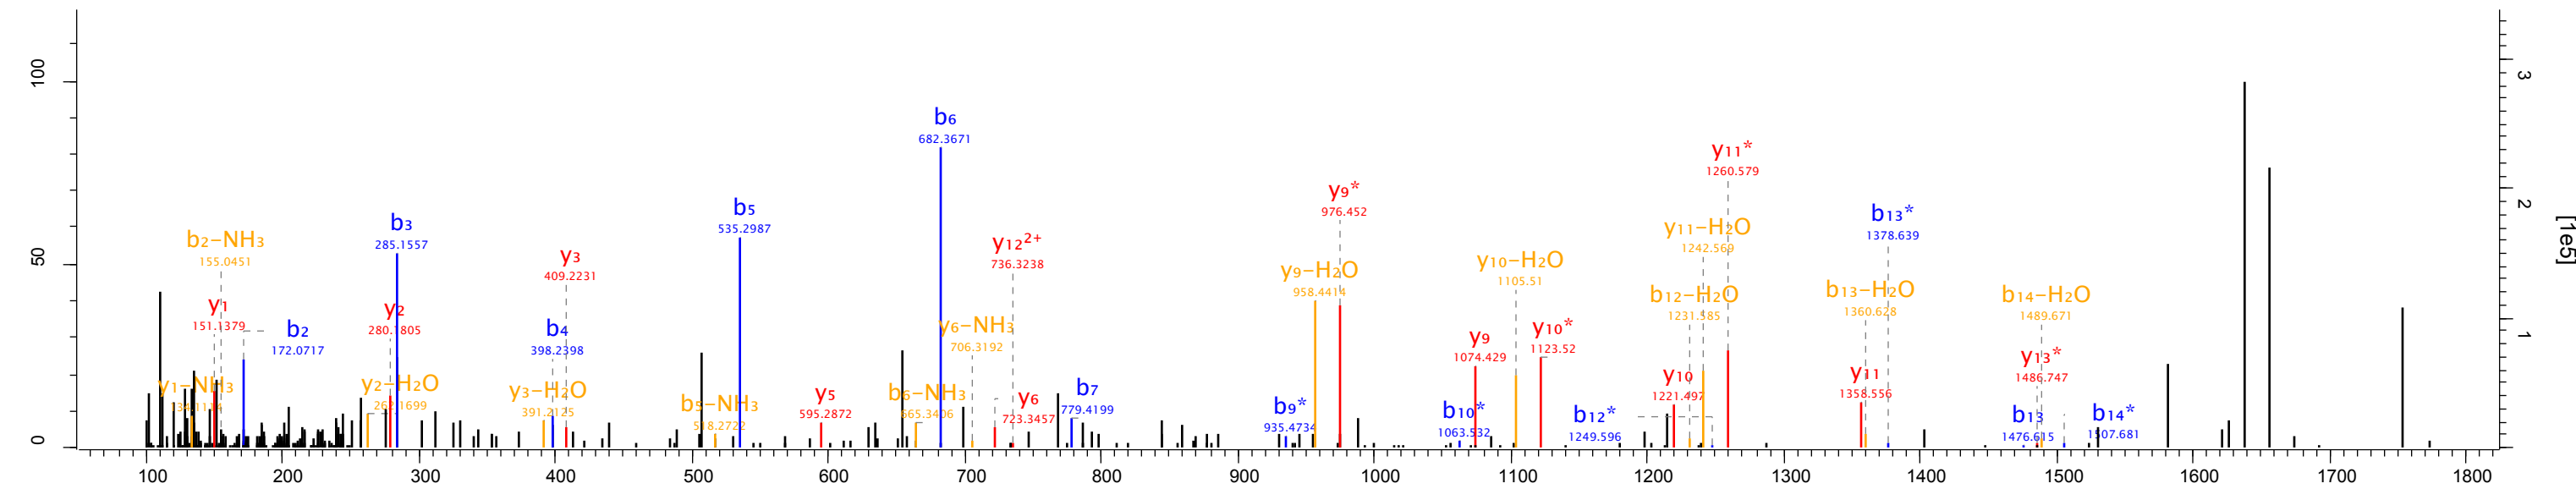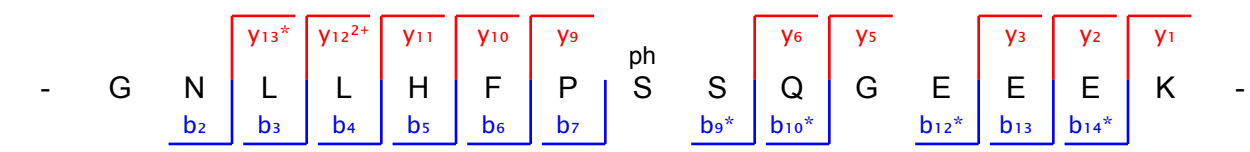

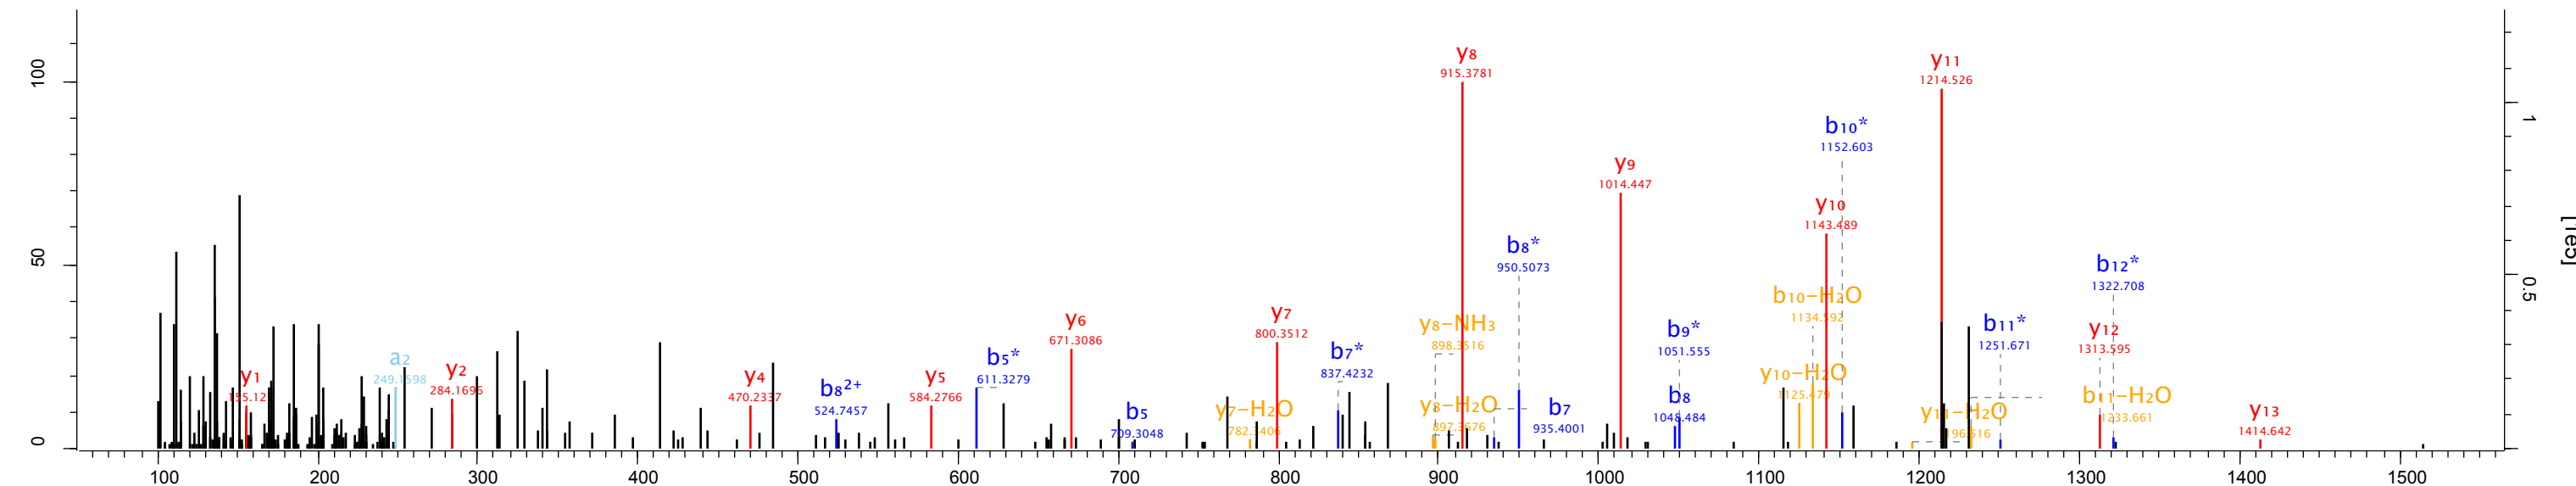

- L Y K ph S E P E L T T V A E V D E S N G E E K -  
 a2 b5 b7 b8 b9\* b10\* b11\* b12\* y13 y12 y11 y10 y9 y8 y7 y6 y5 y4 y2 y1

Raw file 20171215\_MaS\_33SR\_LMH\_phospho\_06 Scan 13094 Method FTMS; HCD Score 195.53 m/z 687.64 Gene names USP8

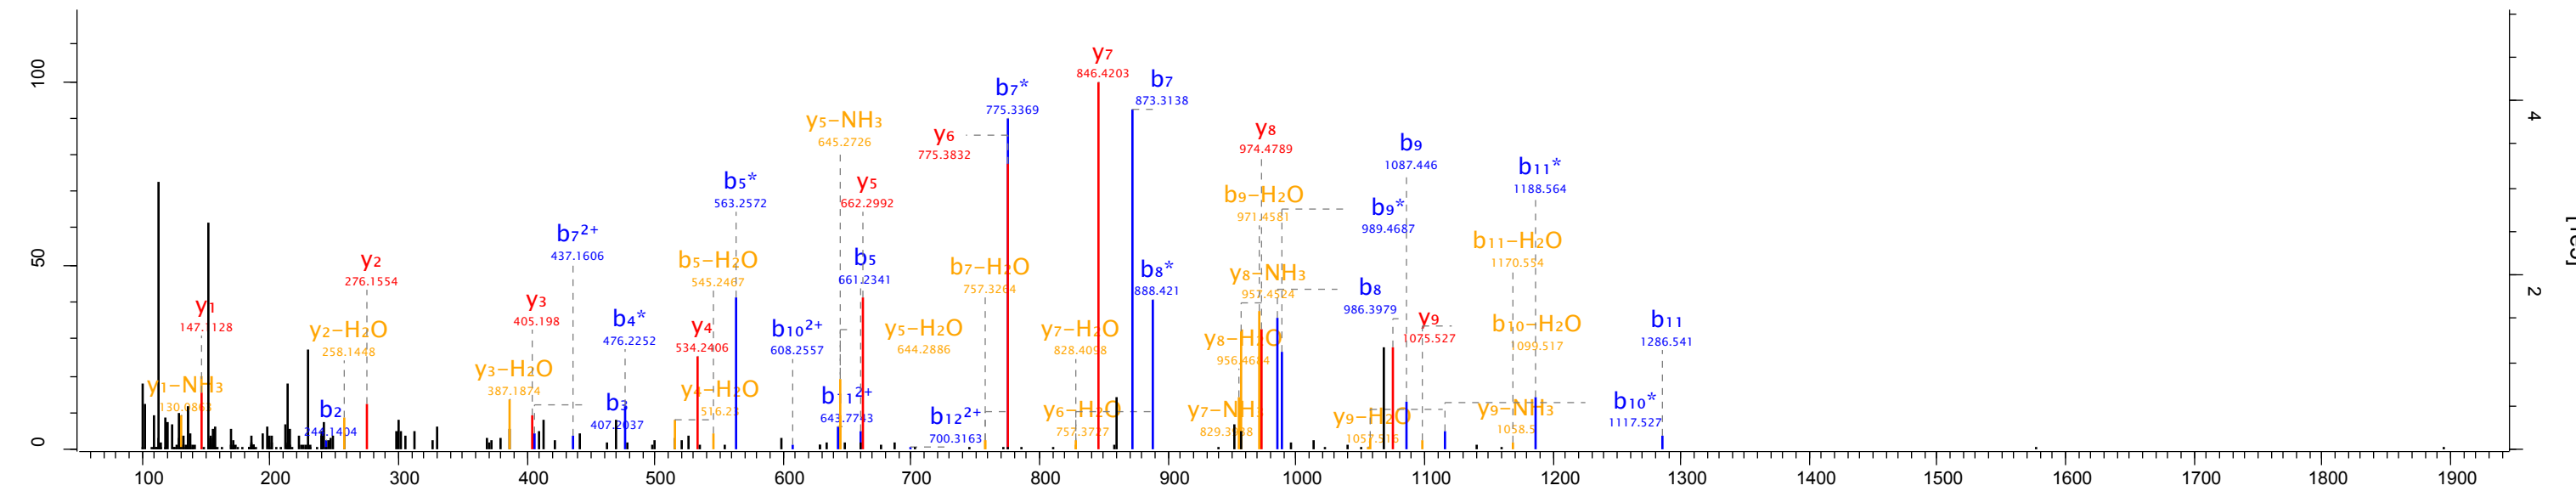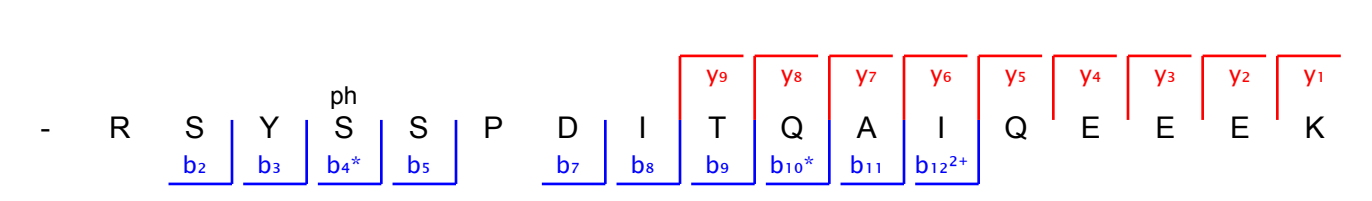

Raw file 20171215\_MaS\_33SR\_LMH\_phospho\_06 Scan 1384 Method FTMS; HCD Score 96.34 m/z 491.74 Gene names SRRM1

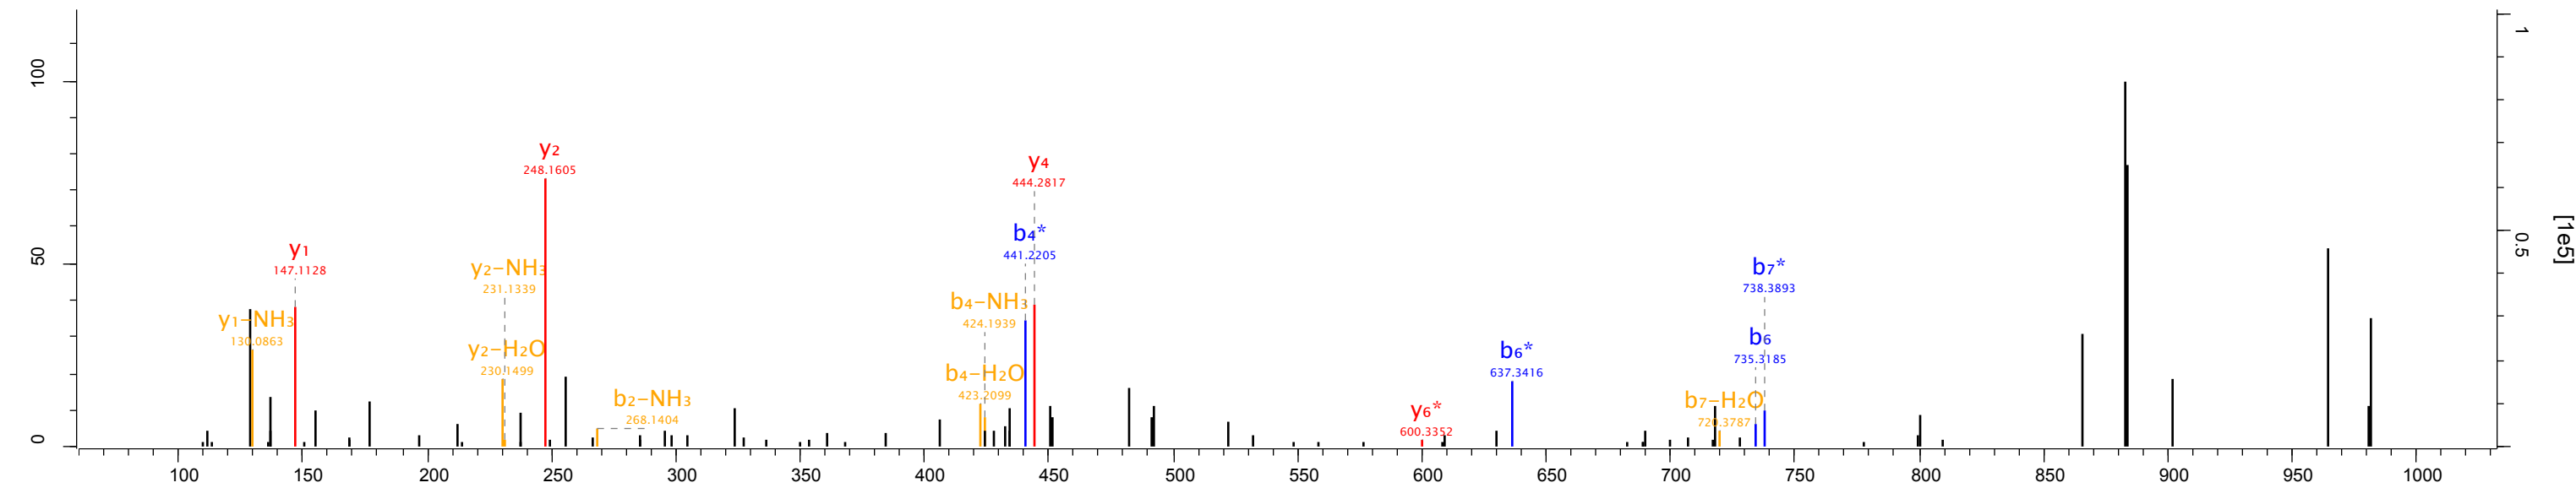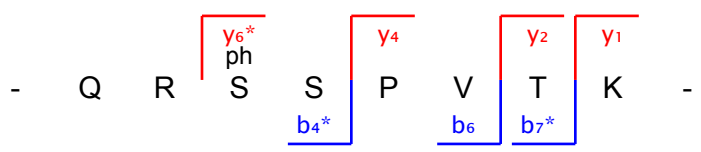

Raw file: 20171215\_MaS\_33SR\_LMH\_phospho\_06  
 Scan: 14074 Method: FTMS; HCD Score: 61.67 m/z: 1234.88 Gene names: RTN3

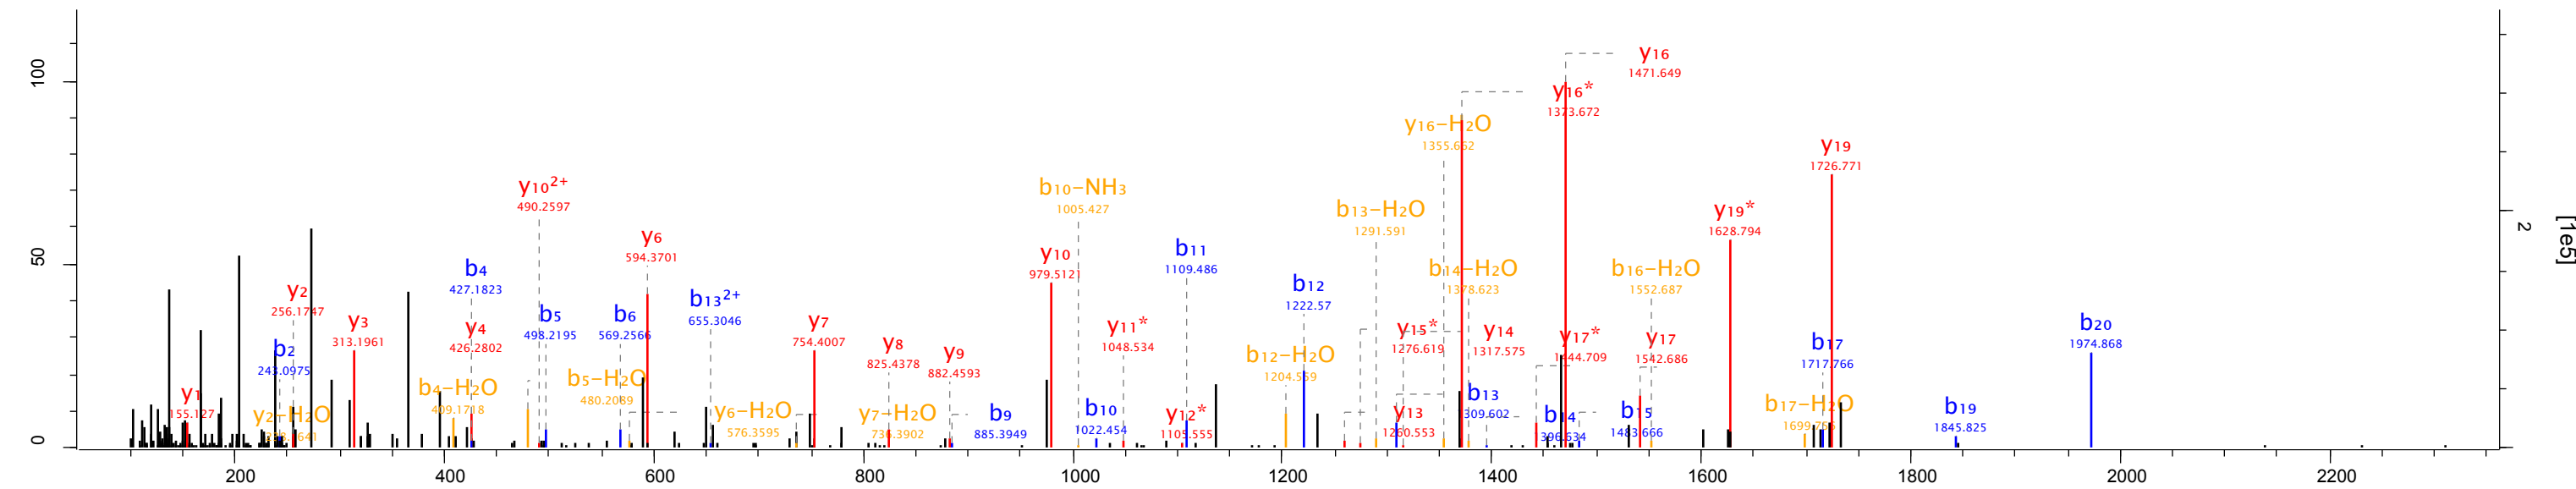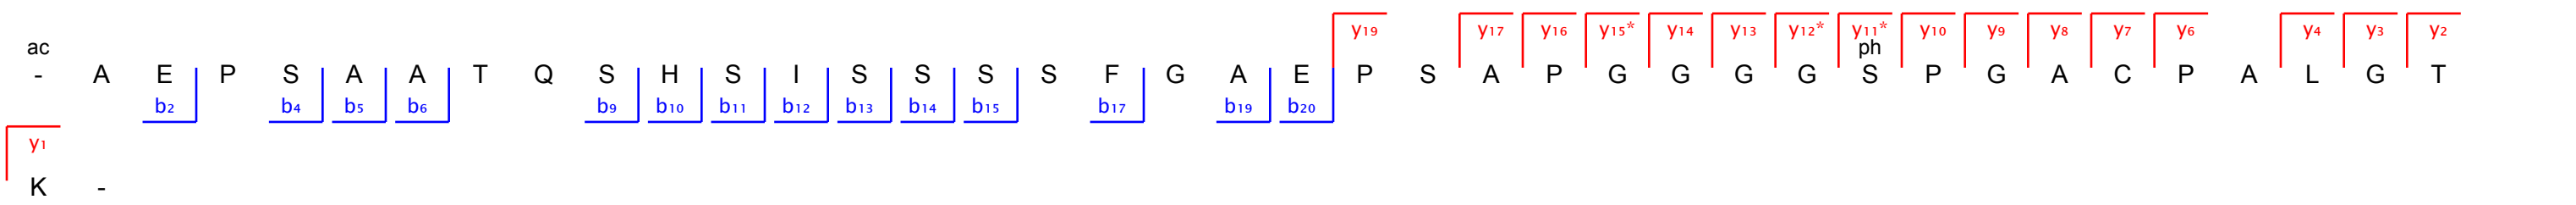

Raw file 20171215\_MaS\_33SR\_LMH\_phospho\_06 Scan 14164 Method FTMS; HCD Score 120.11 m/z 830.4 Gene names SUGP1

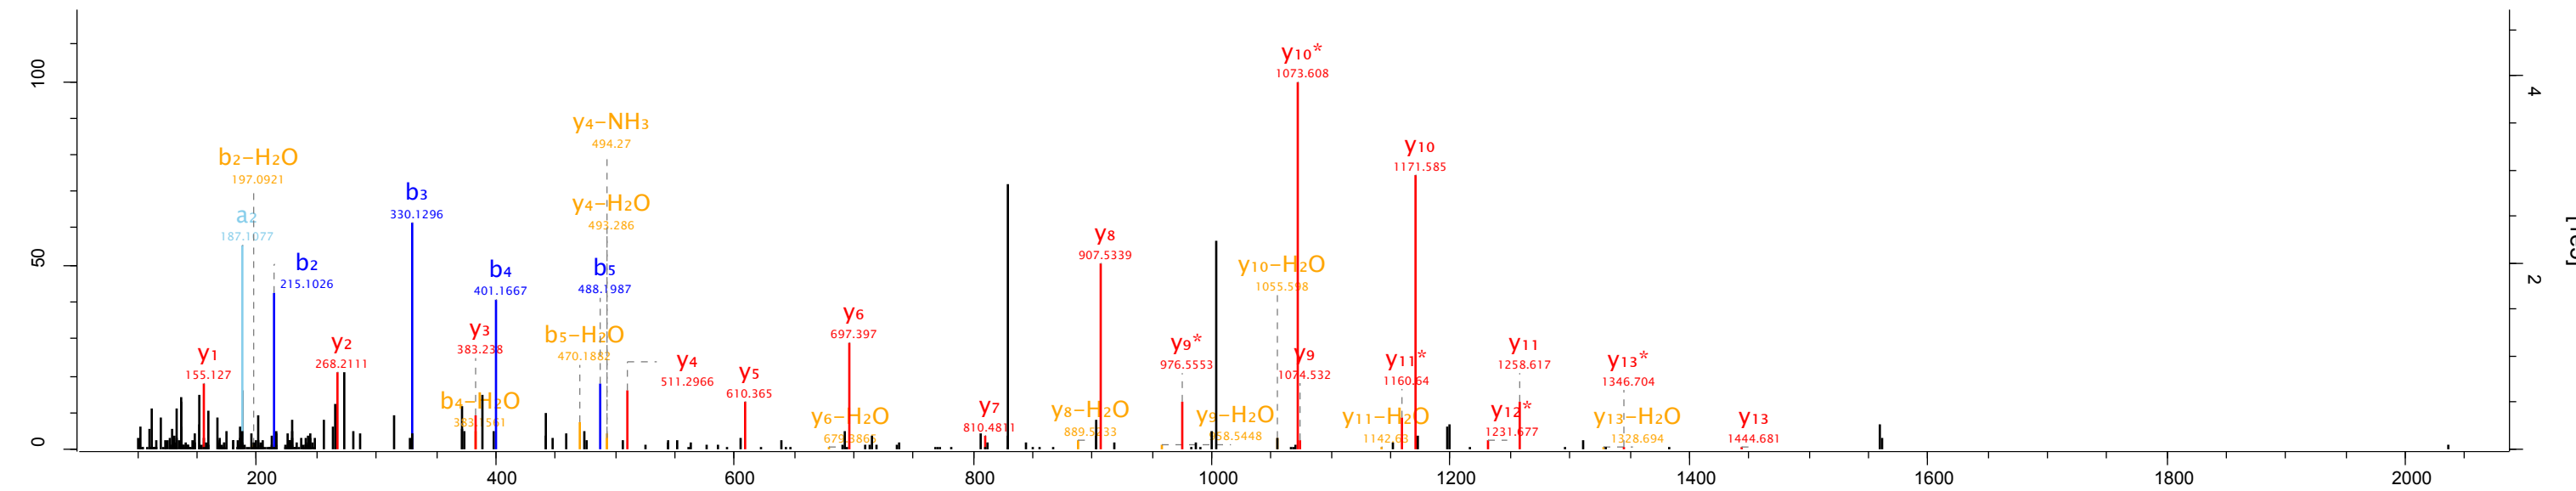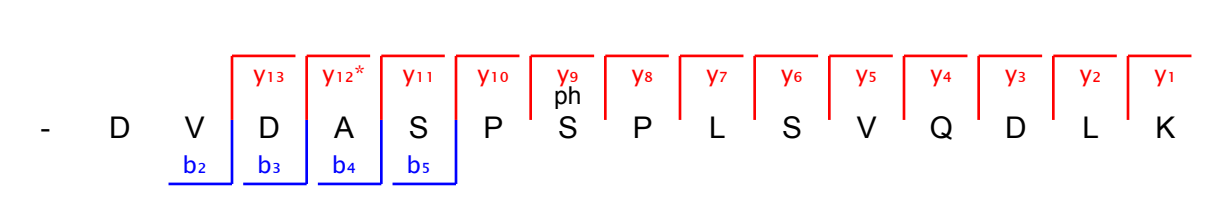



Raw file 20171215\_MaS\_33SR\_LMH\_phospho\_06 Scan 14514 Method FTMS; HCD Score 169.67 m/z 827.9 Gene names SUGP1

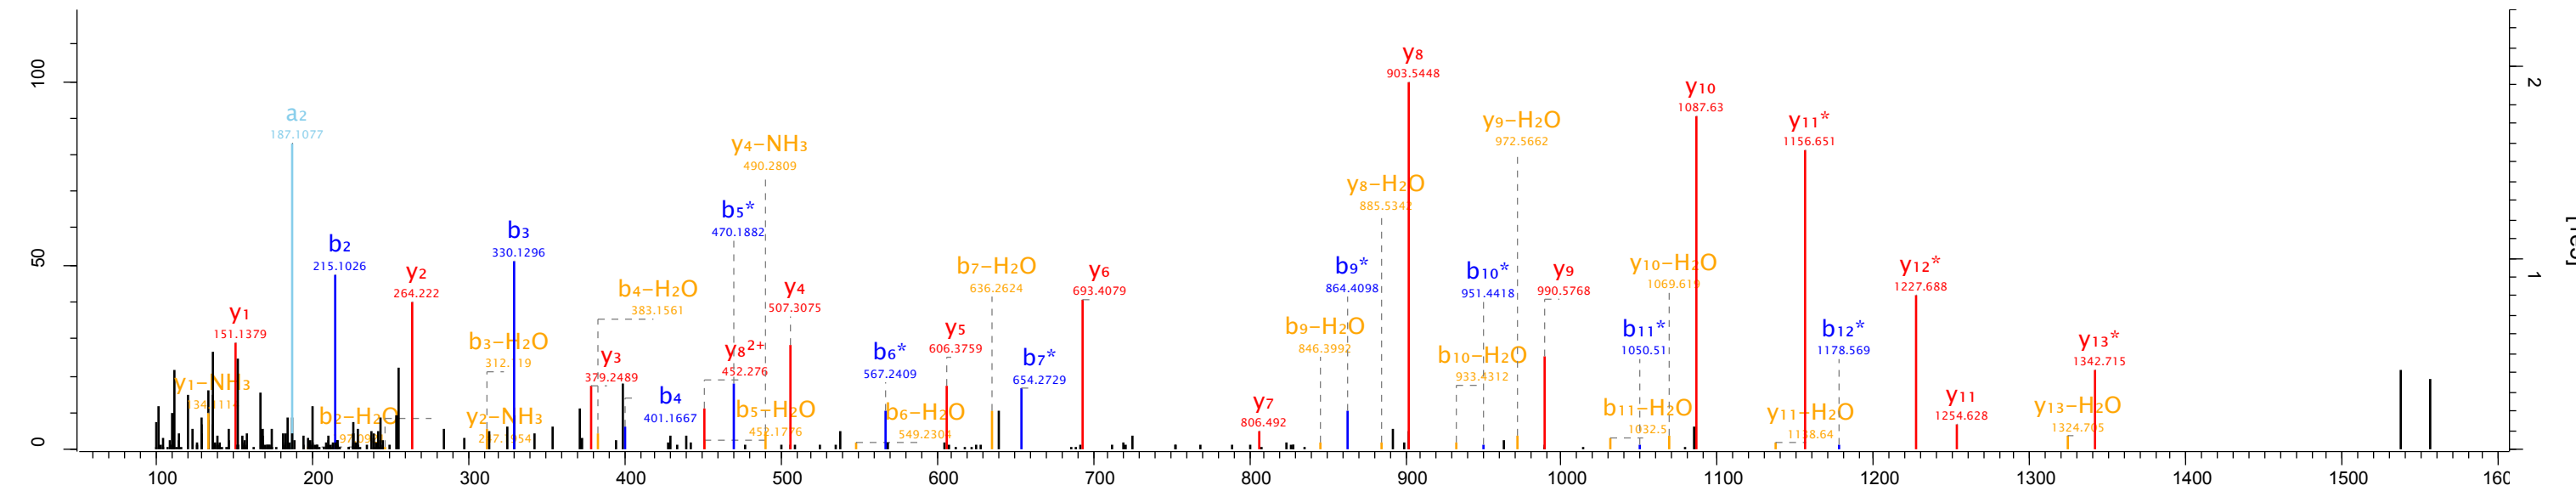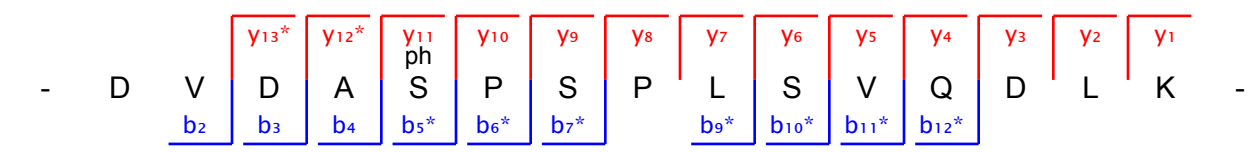

Raw file 20171215\_MaS\_33SR\_LMH\_phospho\_06 Scan 14744 Method FTMS; HCD Score 137.52 m/z 994.49 Gene names SPTBN1

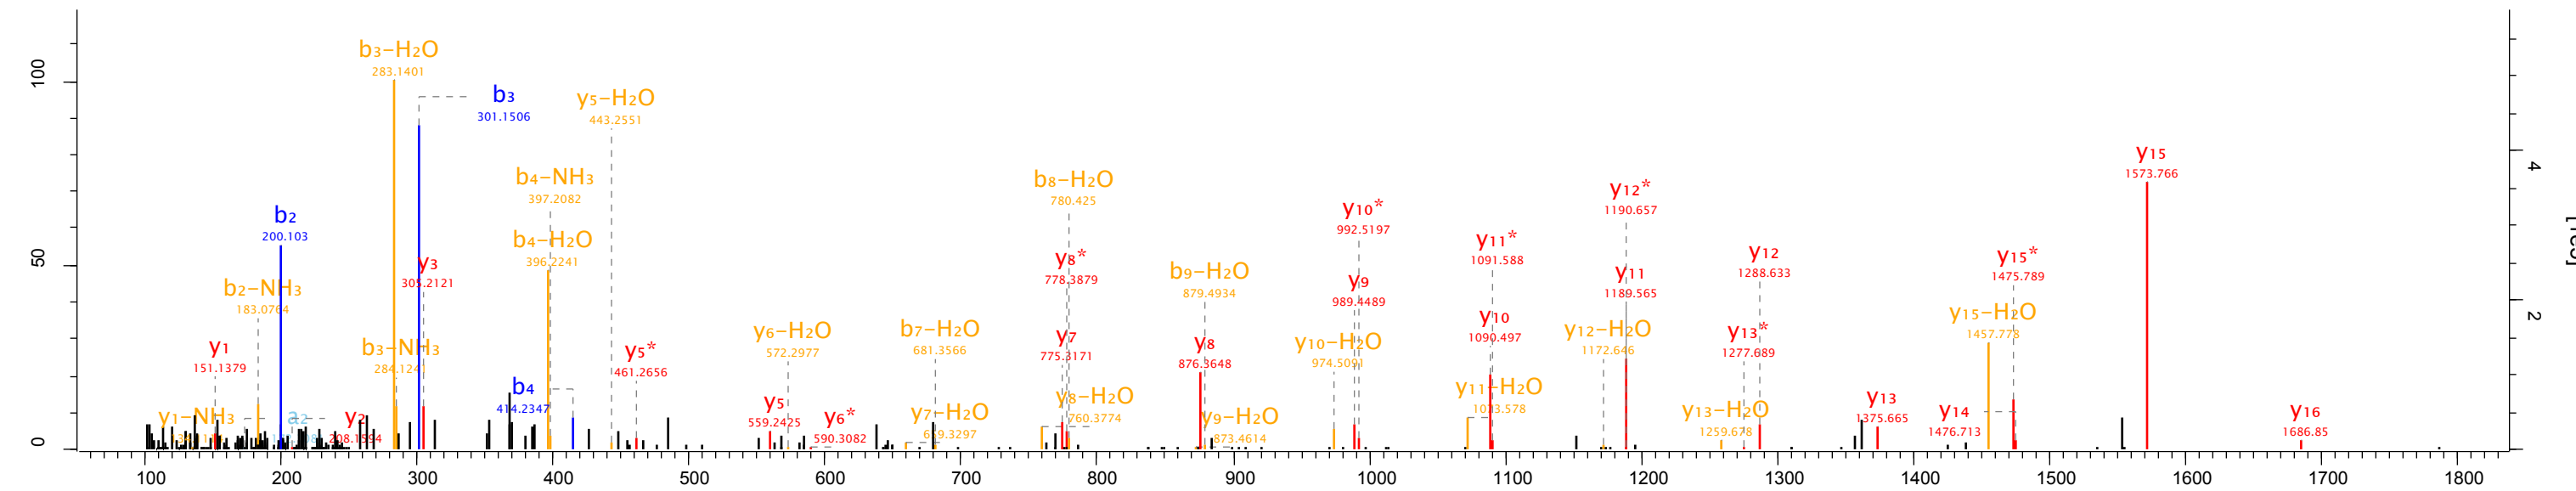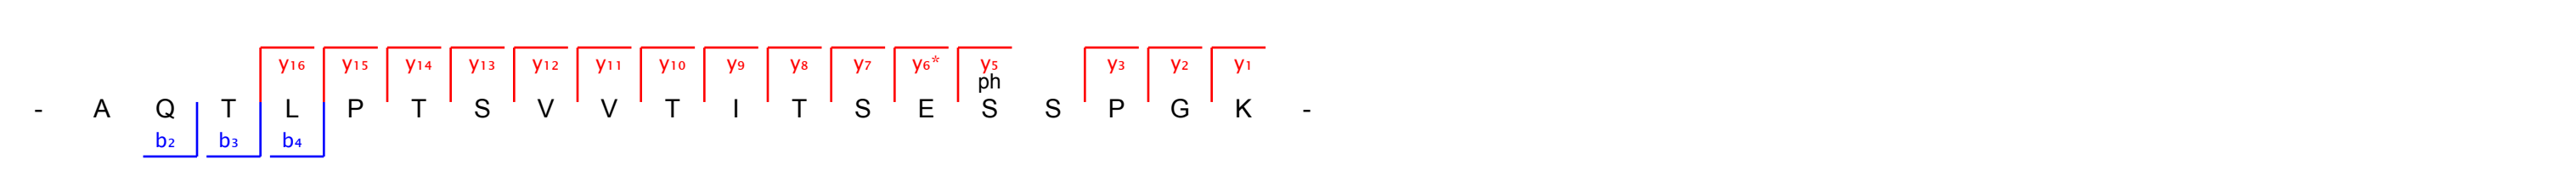

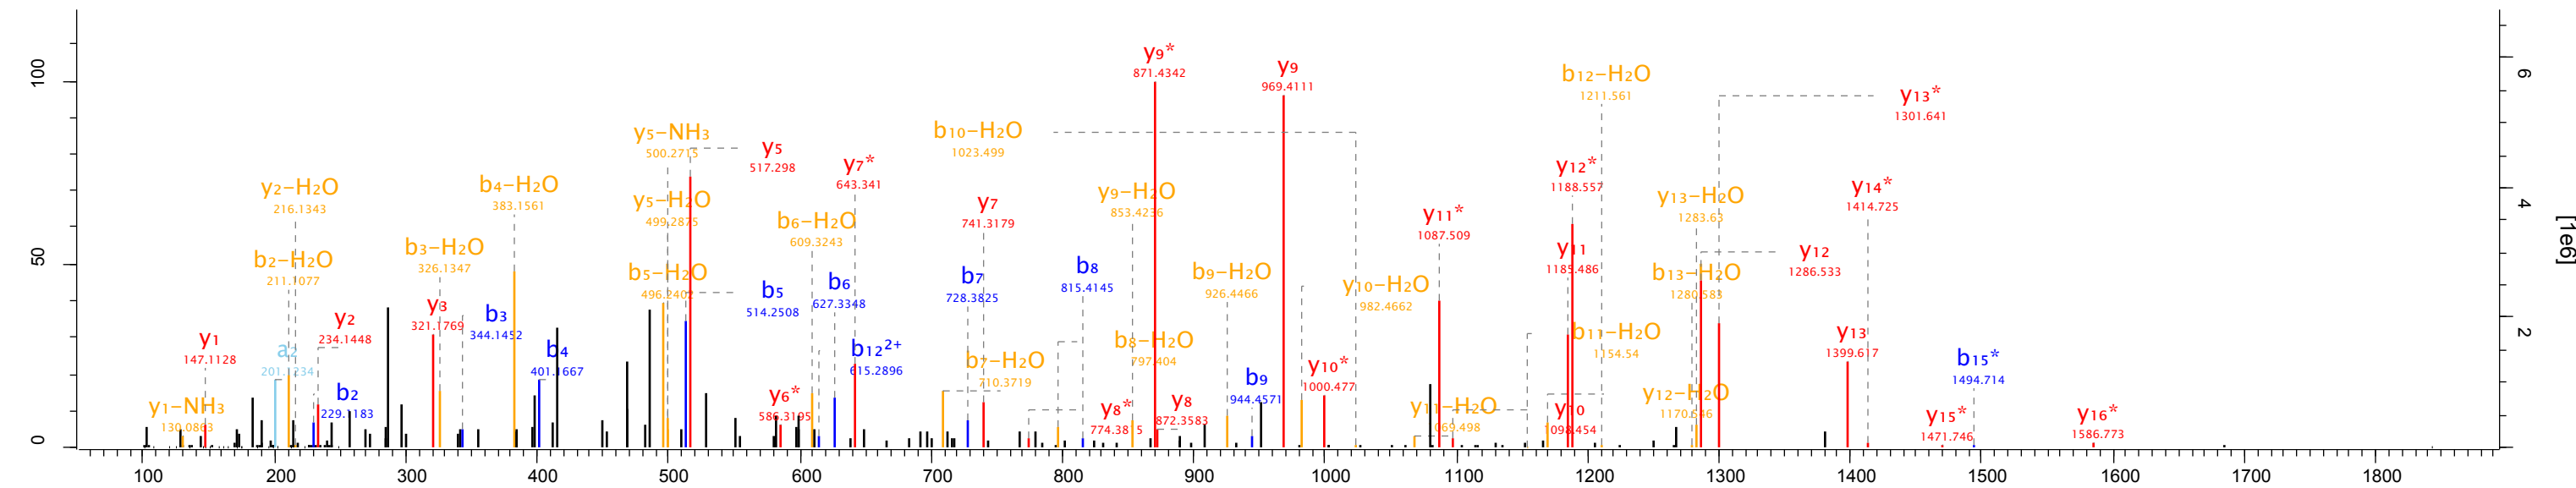

- E V D G L L T S E P M G S P V S S K -

Fragmentation labels (b and y ions) are shown below the corresponding amino acids:

- b<sub>2</sub> (under V)
- b<sub>3</sub> (under D)
- b<sub>4</sub> (under G)
- b<sub>5</sub> (under L)
- b<sub>6</sub> (under L)
- b<sub>7</sub> (under T)
- b<sub>8</sub> (under S)
- b<sub>9</sub> (under E)
- b<sub>12</sub><sup>2+</sup> (under G)
- b<sub>15</sub><sup>\*</sup> (under V)
- y<sub>16</sub><sup>\*</sup> (above D)
- y<sub>15</sub><sup>\*</sup> (above G)
- y<sub>14</sub><sup>\*</sup> (above L)
- y<sub>13</sub> (above L)
- y<sub>12</sub> (above T)
- y<sub>11</sub> (above S)
- y<sub>10</sub> (above E)
- y<sub>9</sub> (above P)
- y<sub>8</sub> (above M)
- y<sub>7</sub> (above G)
- y<sub>6</sub><sup>\*</sup> (above S)
- y<sub>5</sub> (above P)
- y<sub>3</sub> (above V)
- y<sub>2</sub> (above S)
- y<sub>1</sub> (above K)

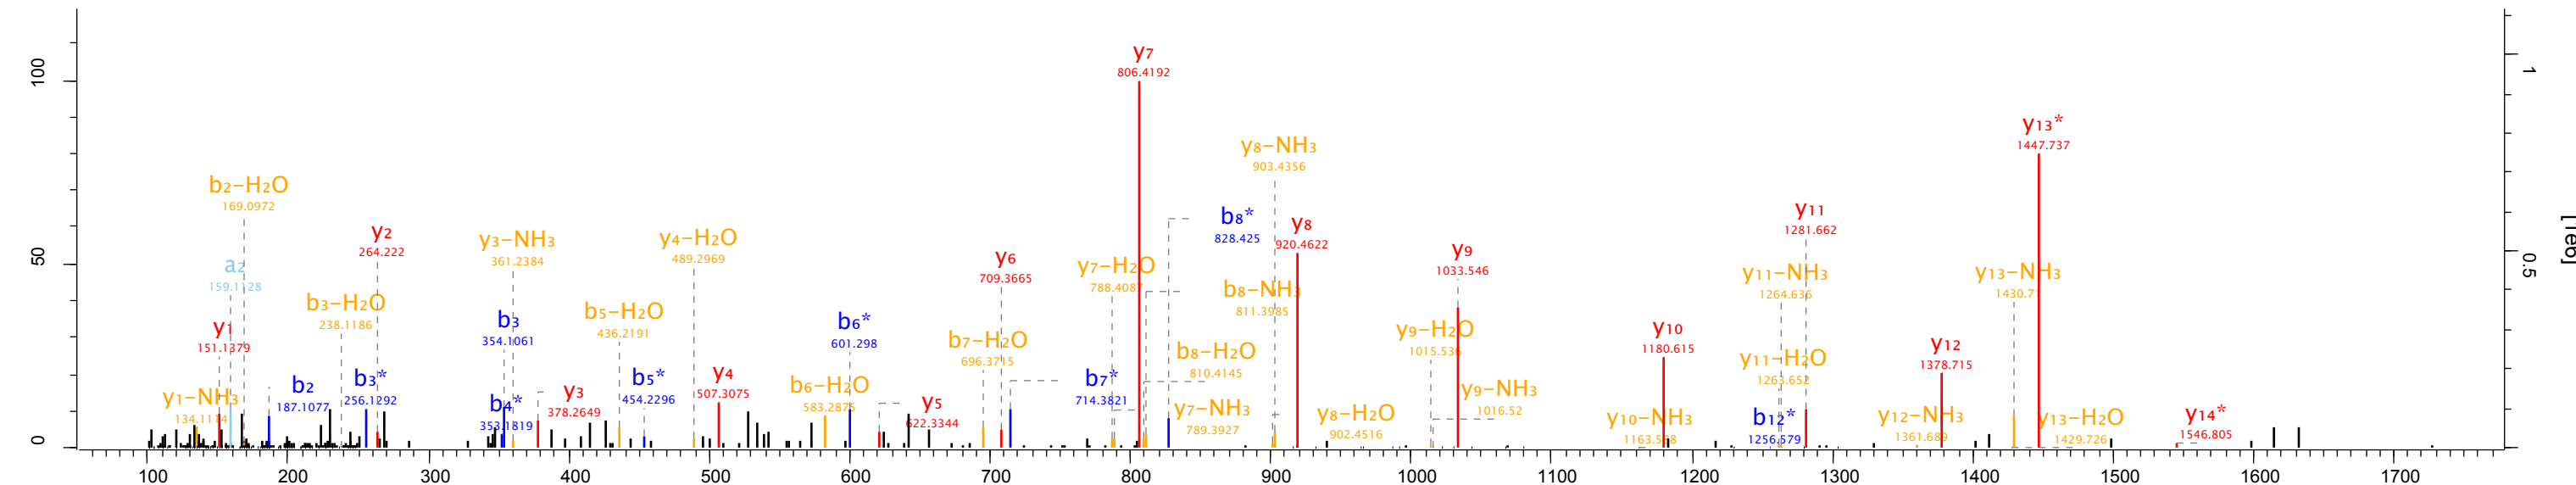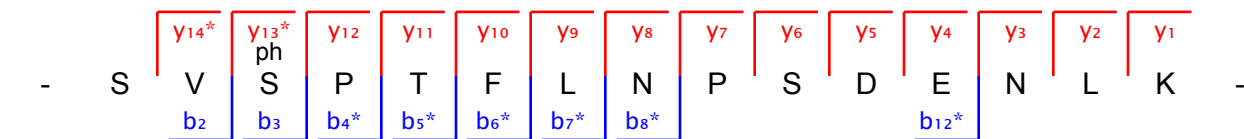

Raw file 20171215\_MaS\_33SR\_LMH\_phospho\_06 Scan 15234 Method FTMS; HCD Score 75.06 m/z 858.05 Gene names TP53BP1

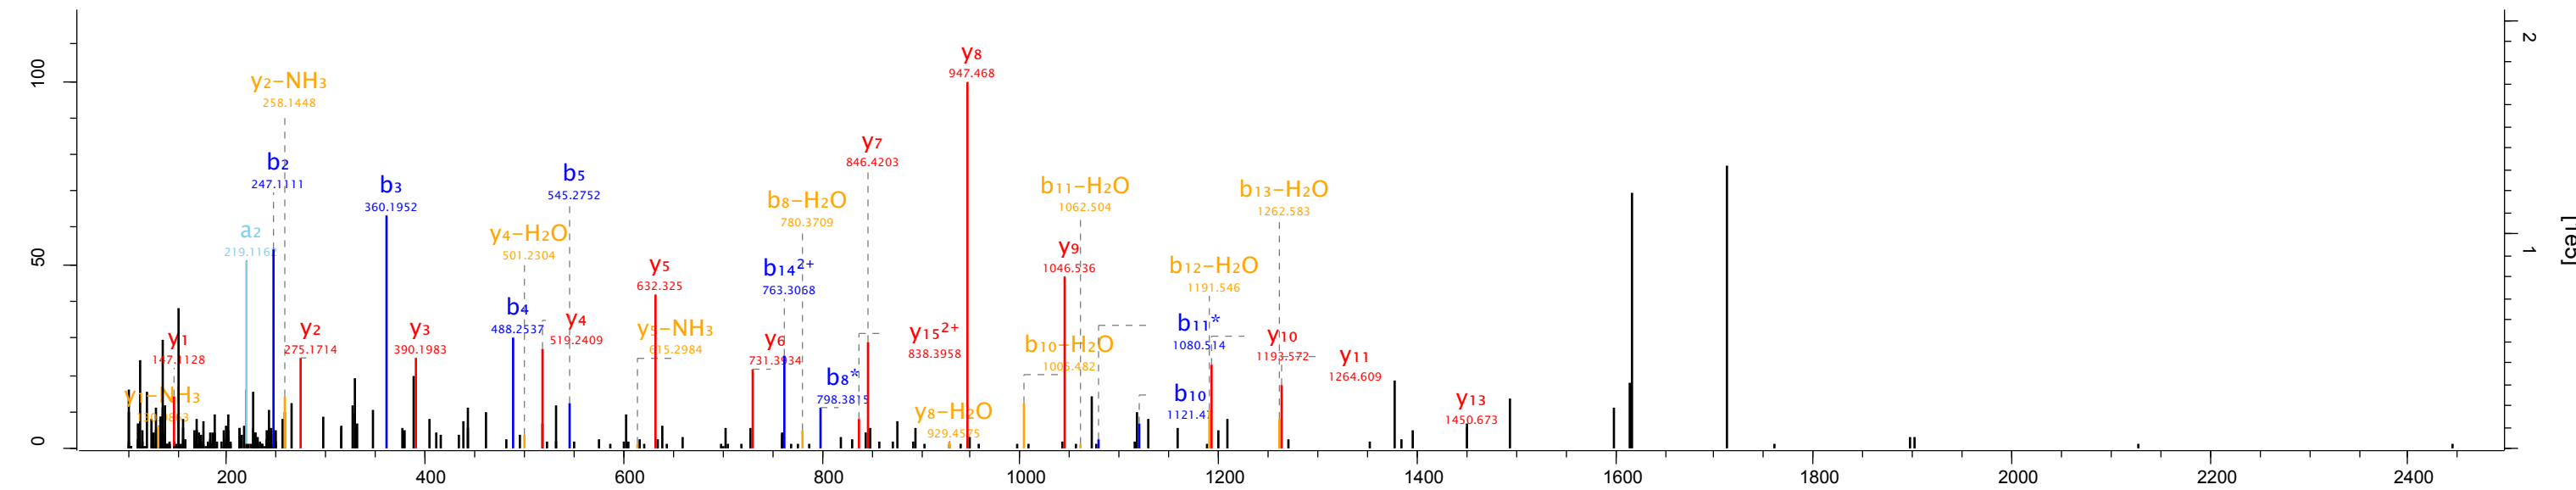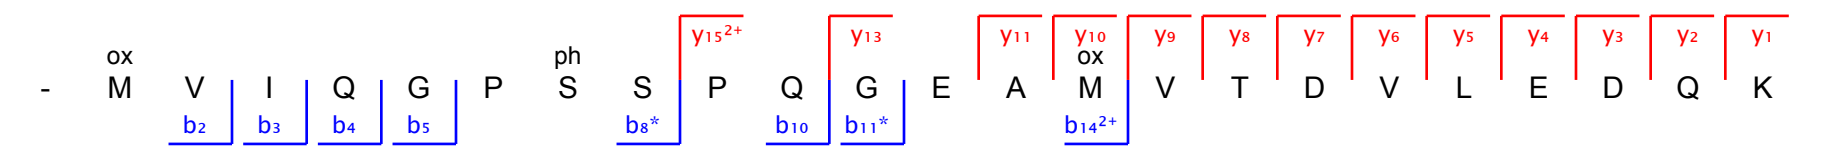

20171215\_MaS\_33SR\_LMH\_phospho\_06 15254 FTMS; HCD 230.86 802.85 GFPT1

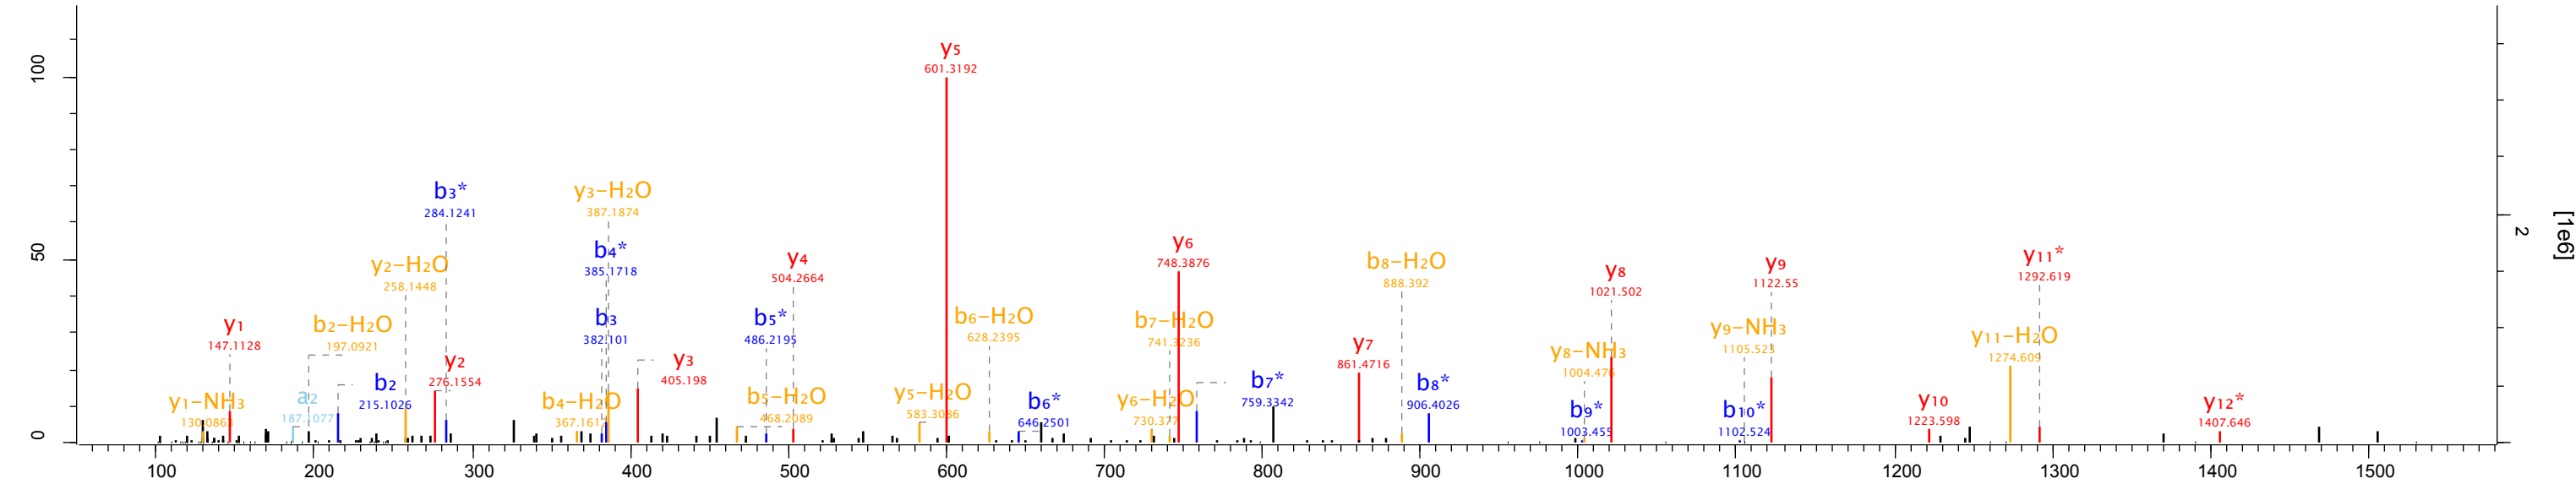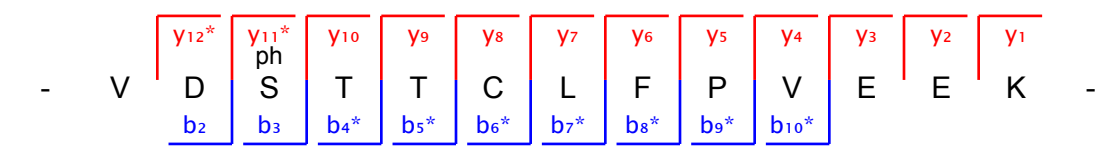

20171215\_MaS\_33SR\_LMH\_phospho\_06 15404 FTMS; HCD 123.68 673.32 INO80B

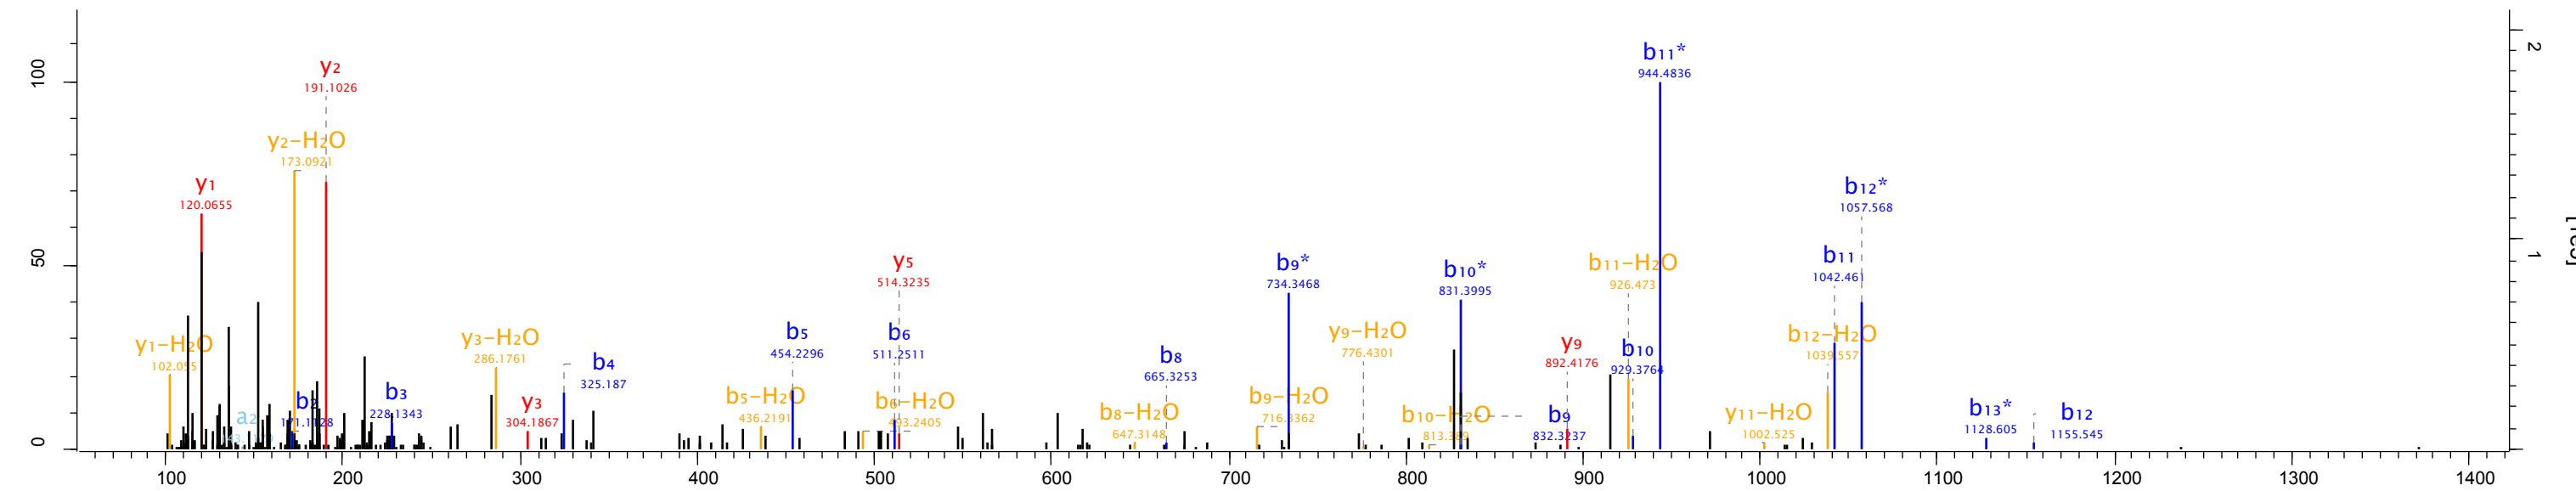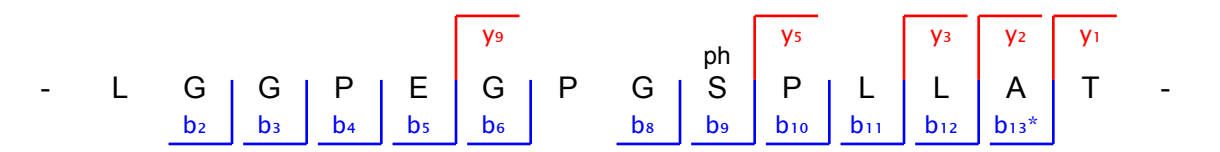

Raw file 20171215\_MaS\_33SR\_LMH\_phospho\_06 Scan 16654 Method FTMS; HCD Score 160.58 m/z 1029.15 Gene names MAP1B

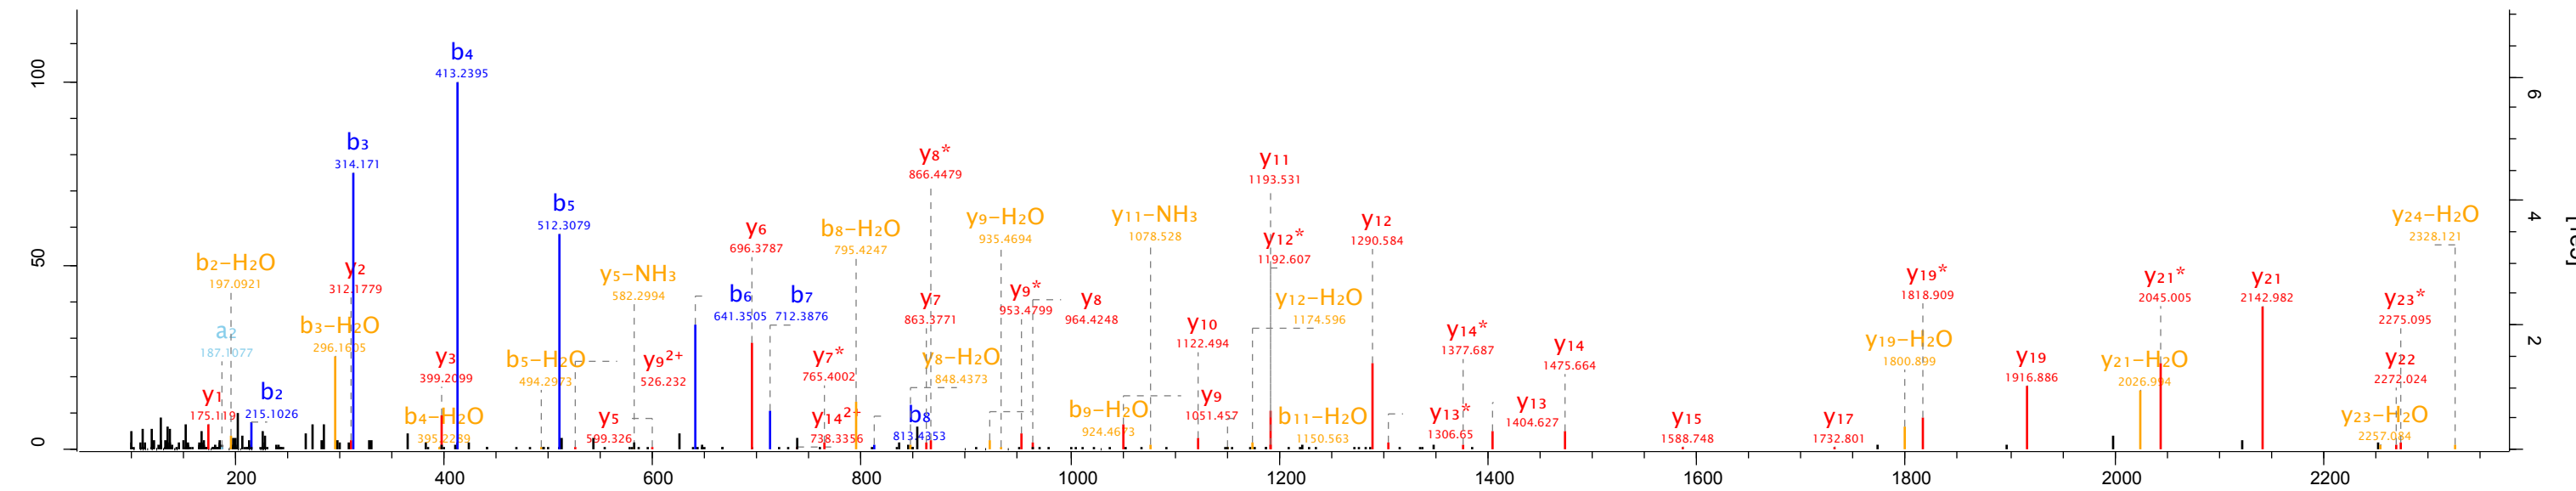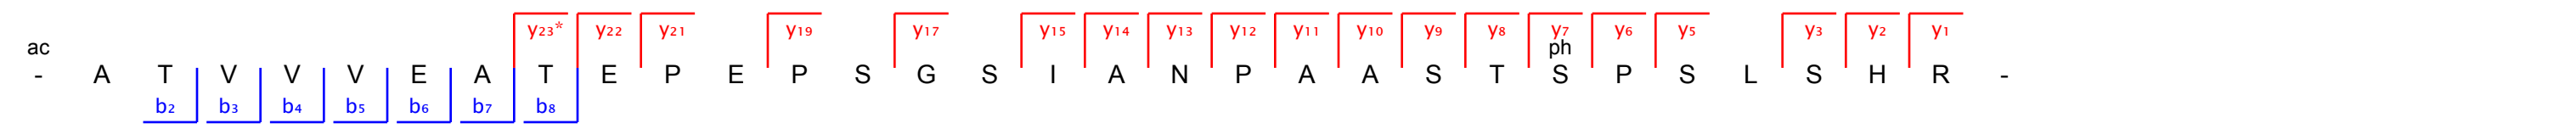



Raw file: 20171215\_MaS\_33SR\_LMH\_phospho\_06  
 Scan: 18174 Method: FTMS; HCD Score: 44.31 m/z: 894.74 Gene names: GOLGB1

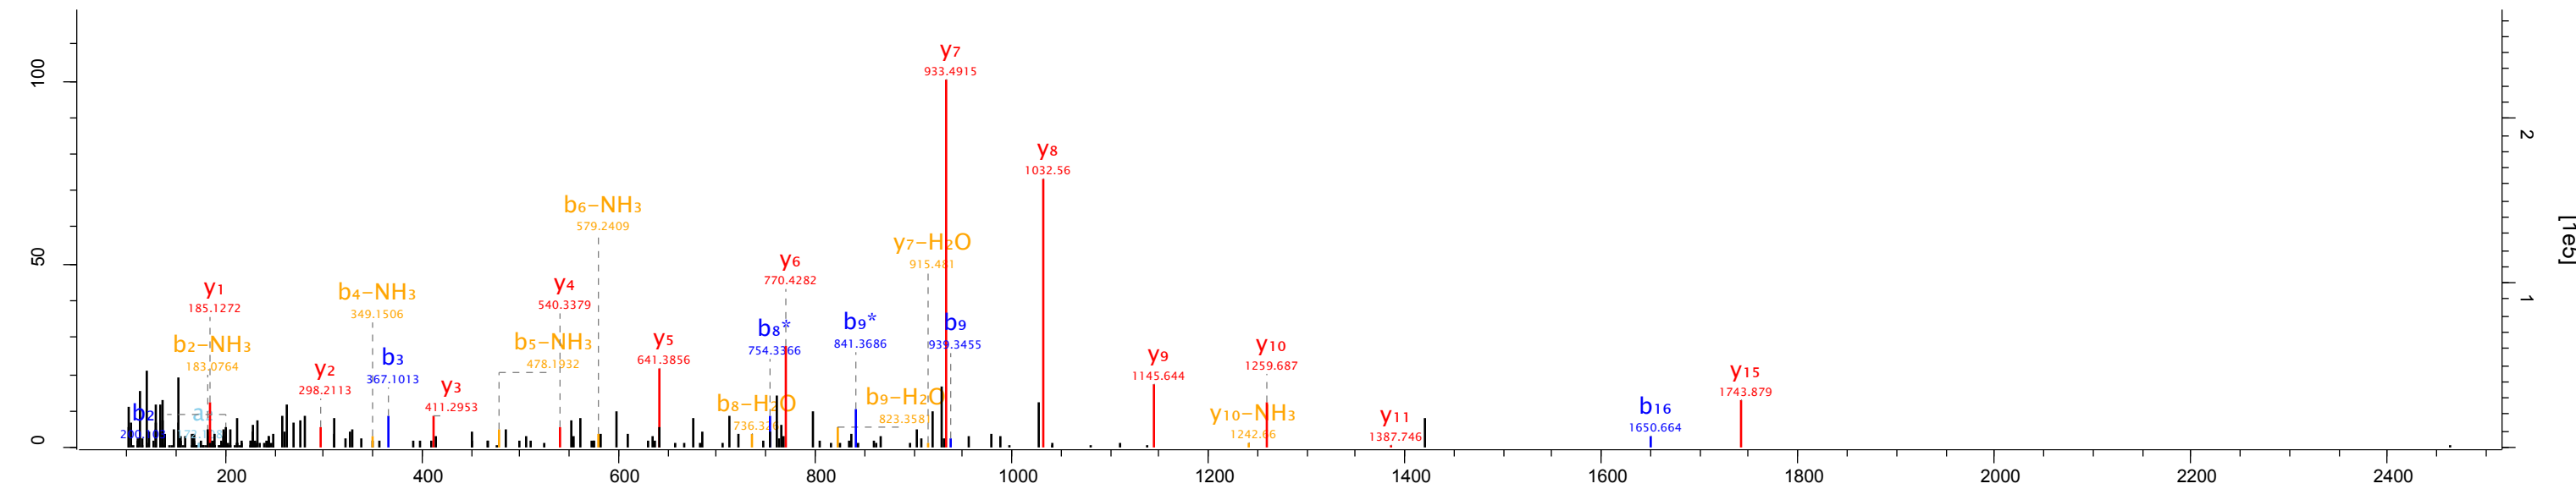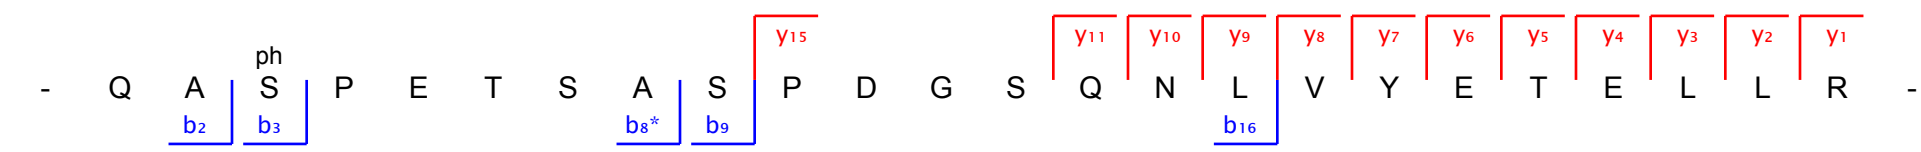

Raw file 20171215\_MaS\_33SR\_LMH\_phospho\_06 Scan 1974 Method FTMS; HCD Score 110.46 m/z 327.17 Gene names RBM14;RBM4;RBM4B

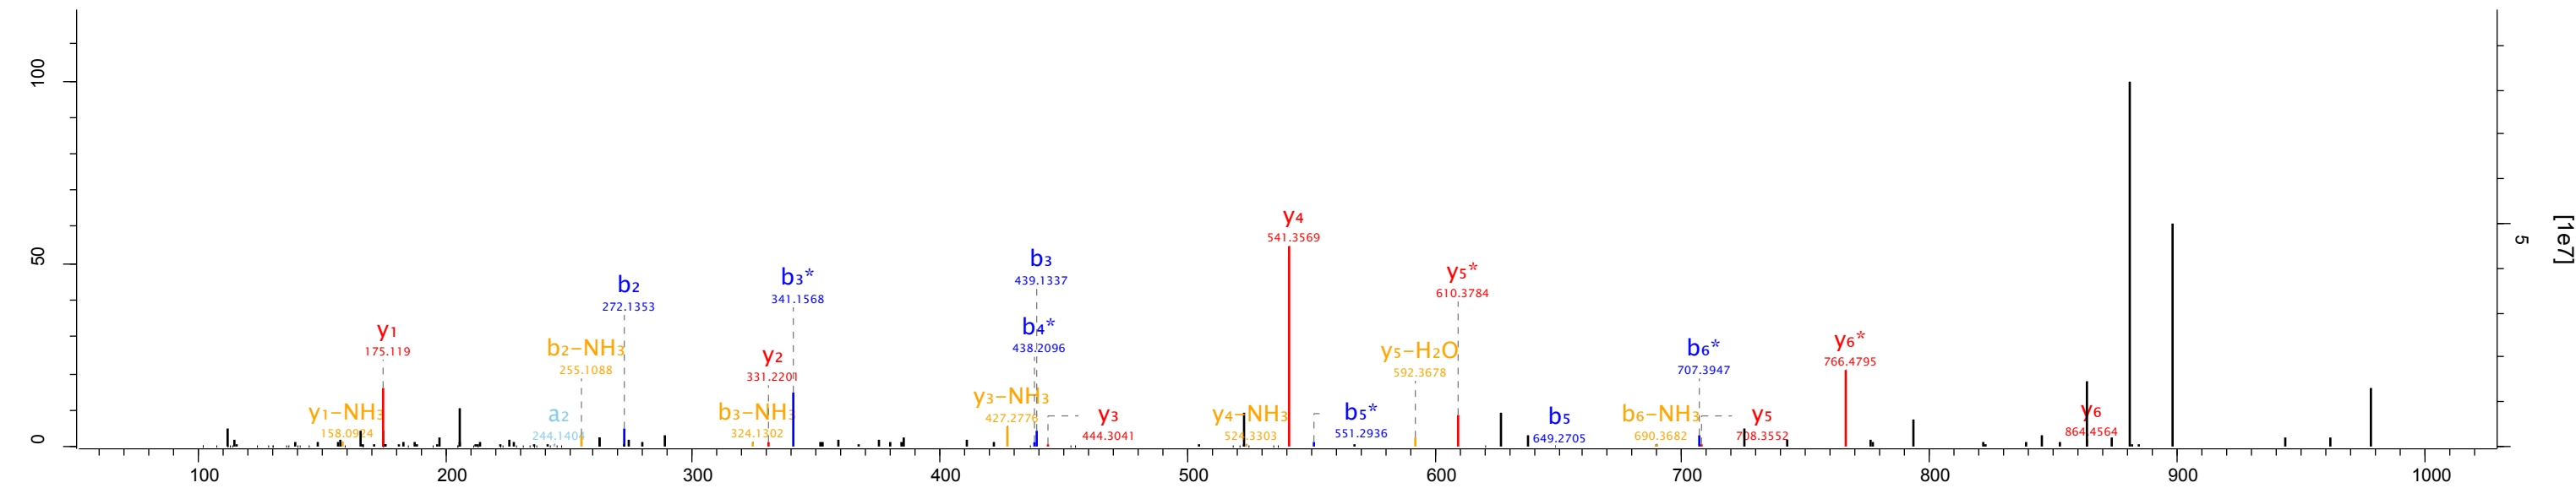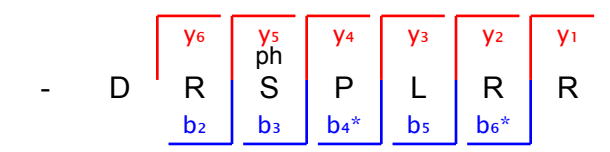

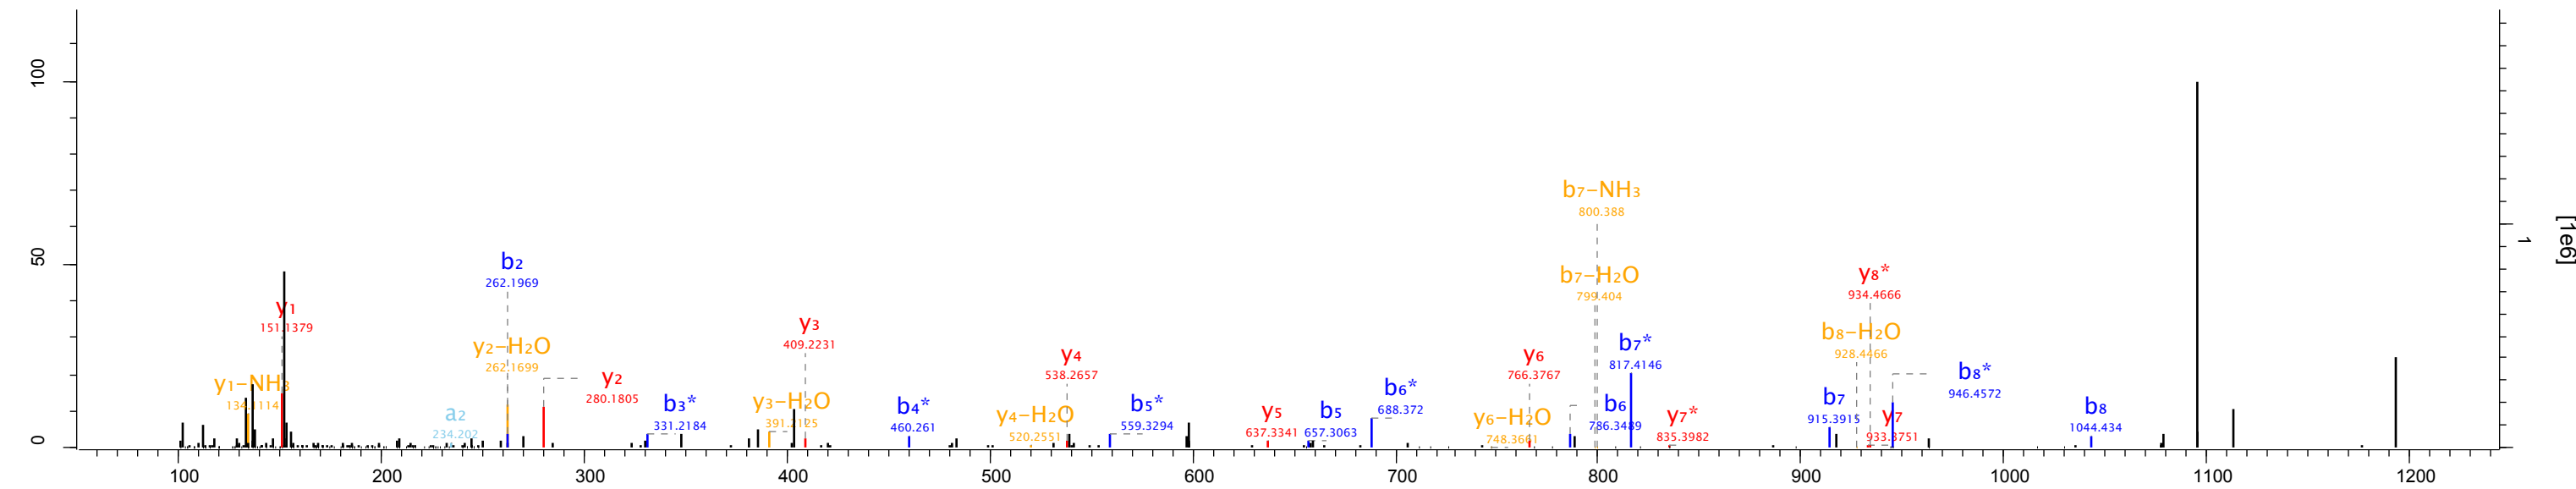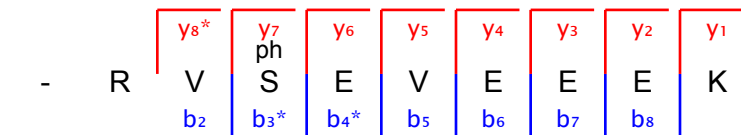

Raw file 20171215\_MaS\_33SR\_LMH\_phospho\_06 Scan 3324 Method FTMS; HCD Score 111.84 m/z 617.28 Gene names SEC61B

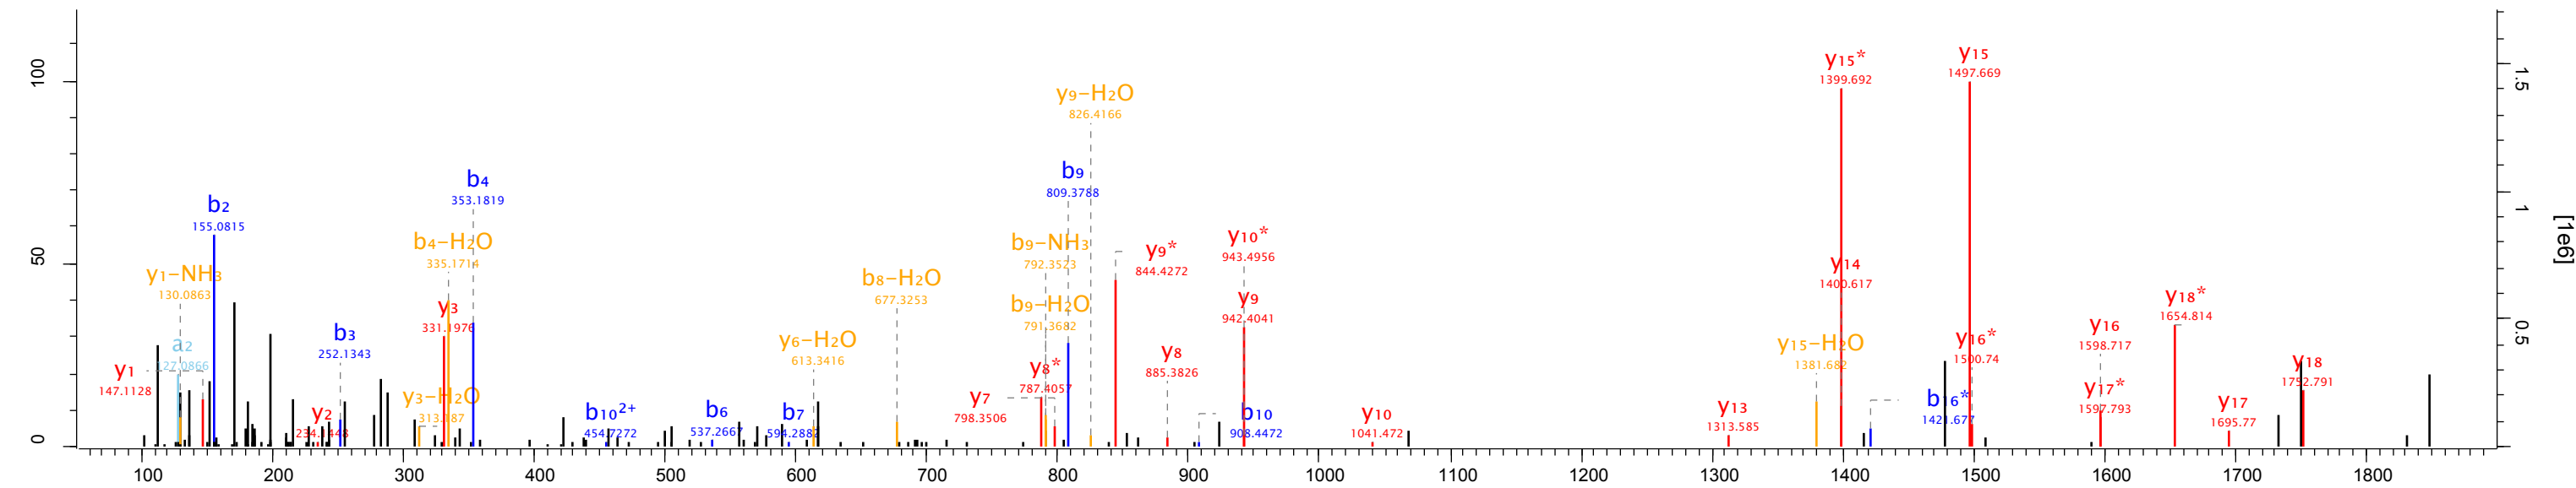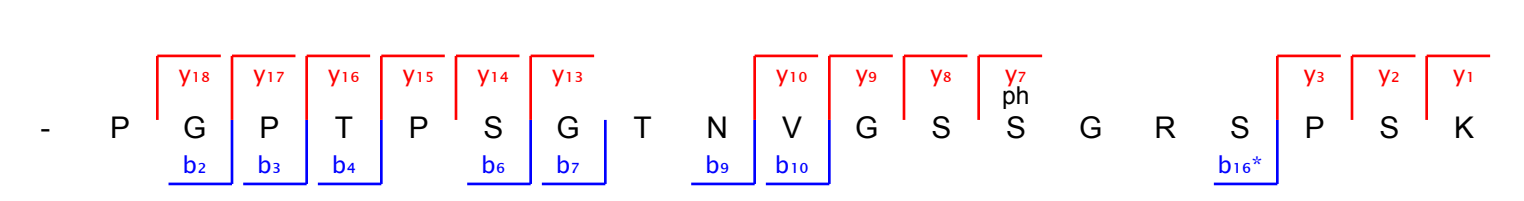

Raw file 20171215\_MaS\_33SR\_LMH\_phospho\_06 Scan 3404 Method FTMS; HCD Score 91.09 m/z 639.79 Gene names SSH2

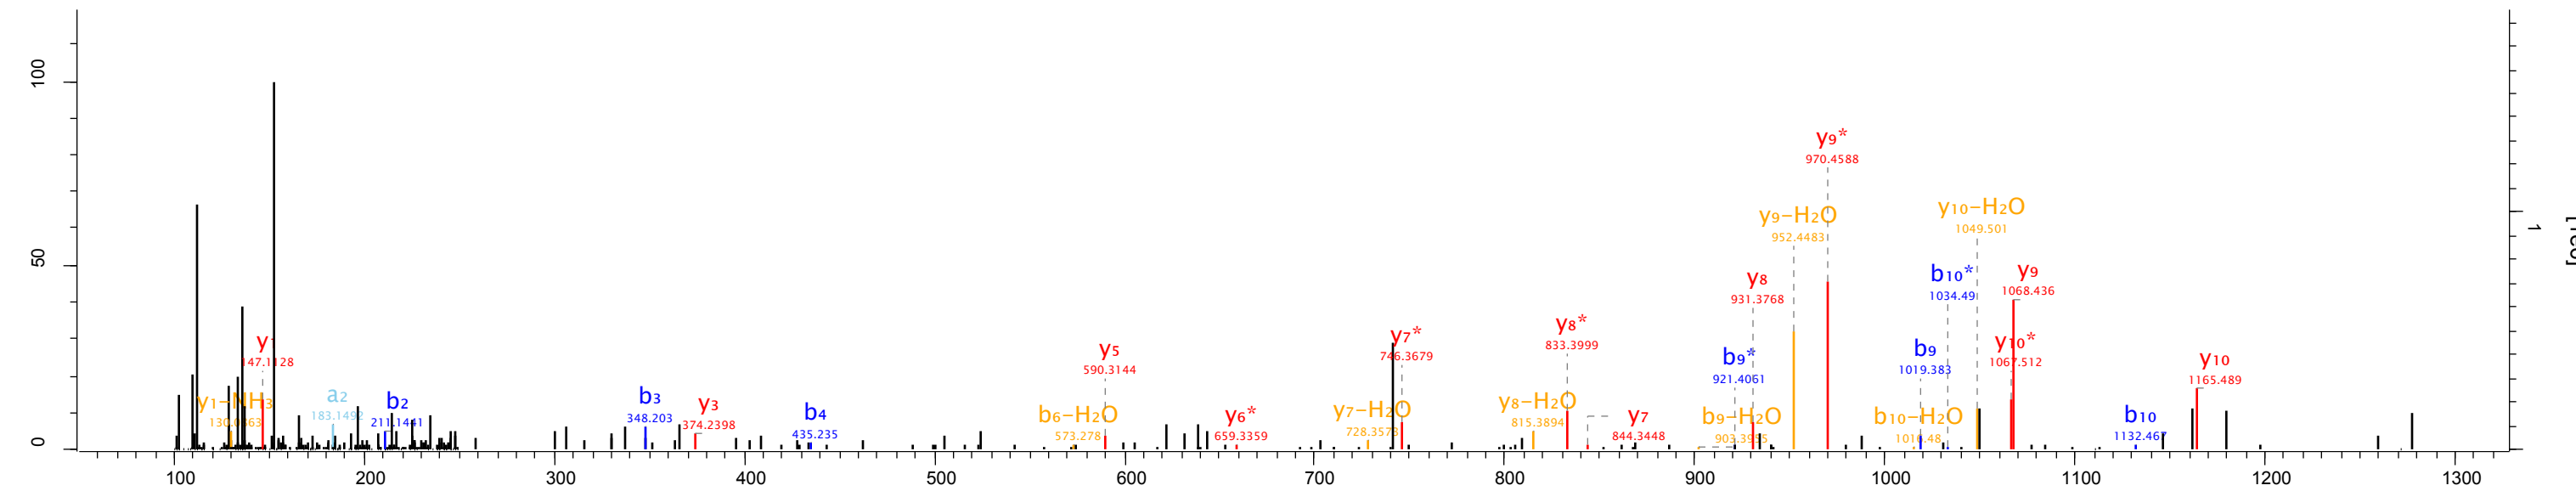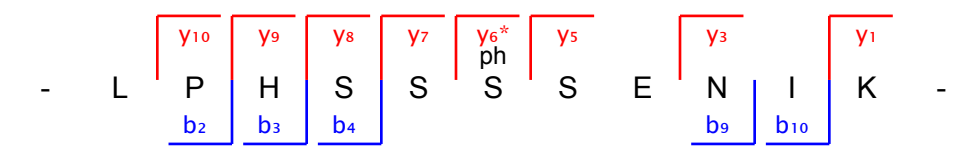

Raw file 20171215\_MaS\_33SR\_LMH\_phospho\_06 Scan 3464 Method FTMS; HCD Score 94.47 m/z 515.25 Gene names PRKCD

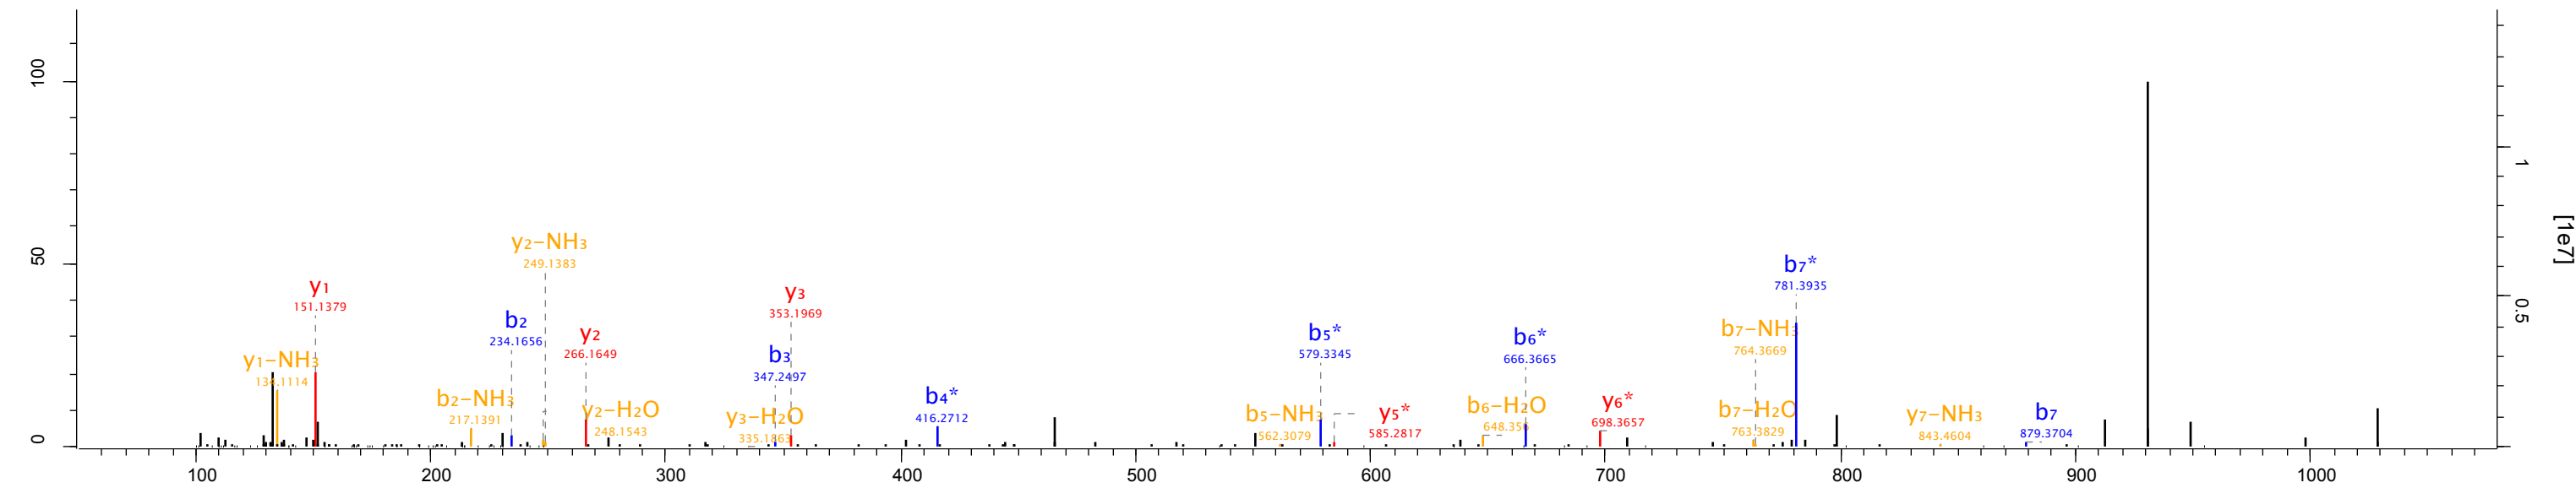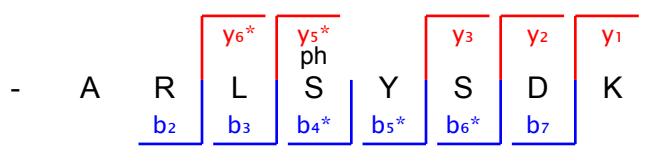

Raw file 20171215\_MaS\_33SR\_LMH\_phospho\_06 Scan 4104 Method FTMS; HCD Score 124.04 m/z 525.73 Gene names NOLC1

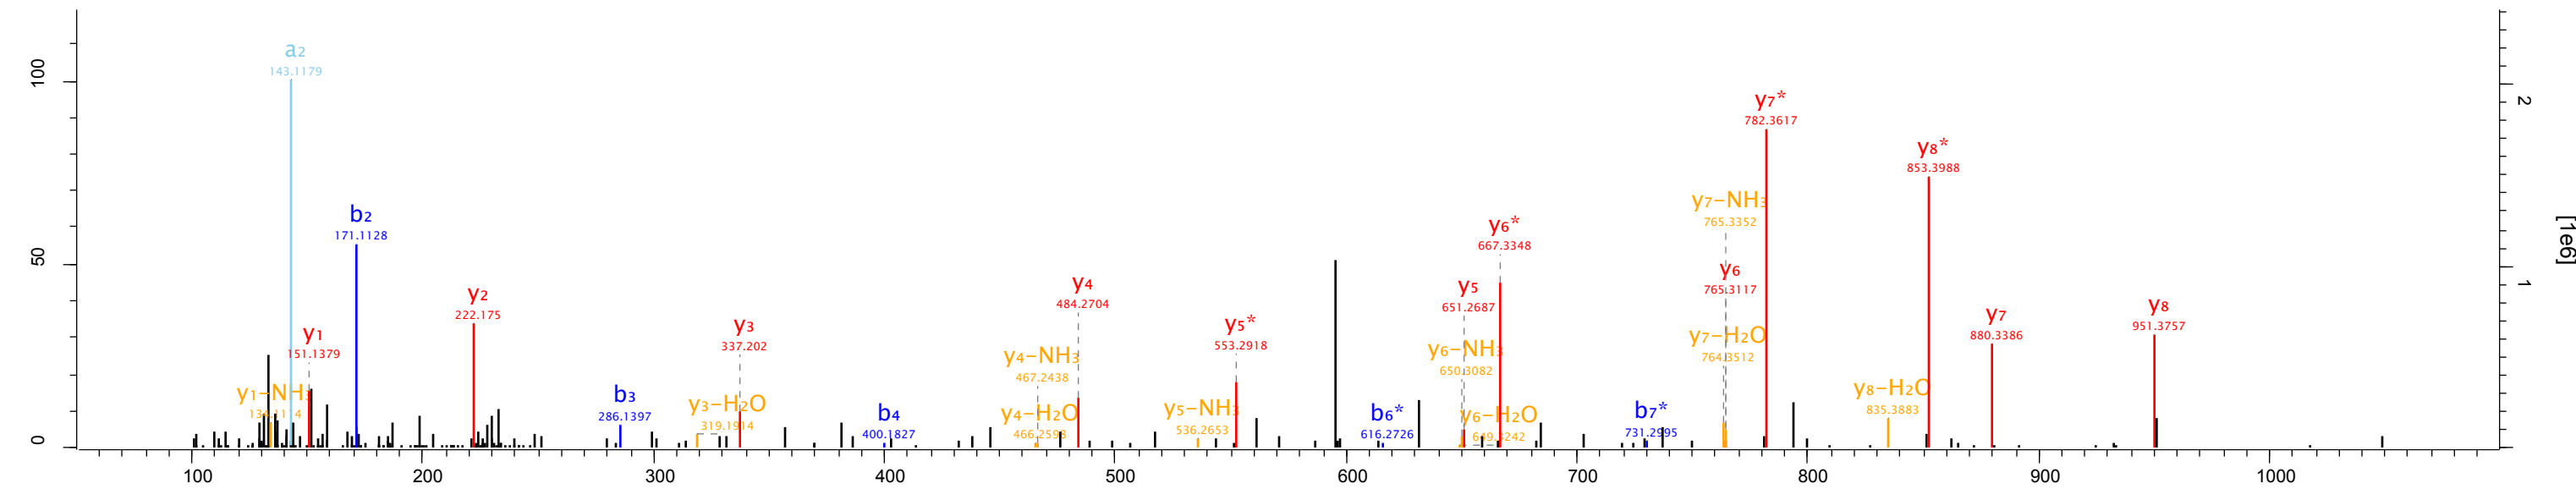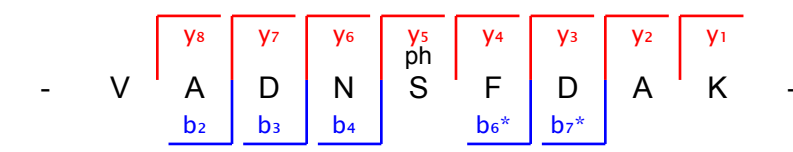

Raw file 20171215\_MaS\_33SR\_LMH\_phospho\_06 Scan 4344 Method FTMS; HCD Score 106.42 m/z 579.28 Gene names NME1-NME2;NME2;NME2P1

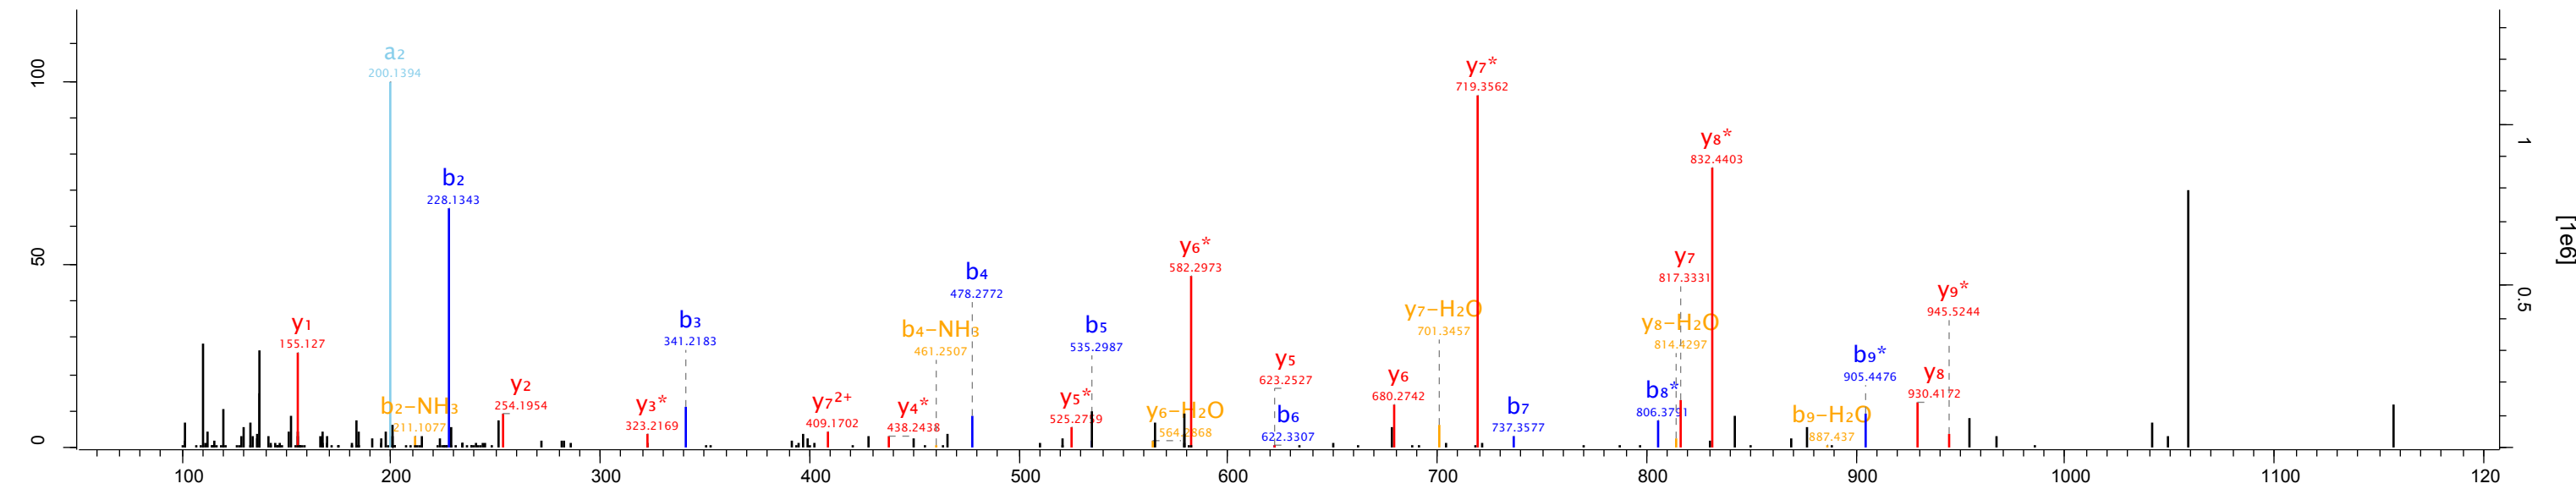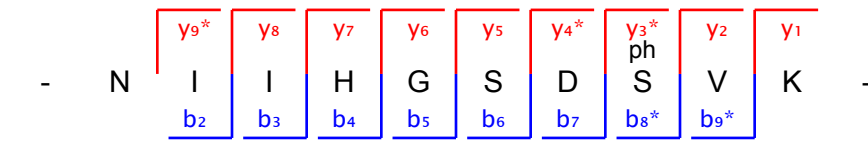



Raw file: 20171215\_MaS\_33SR\_LMH\_phospho\_06  
 Scan: 4554 Method: FTMS; HCD Score: 53.37 m/z: 538.25 Gene names: TRIM24

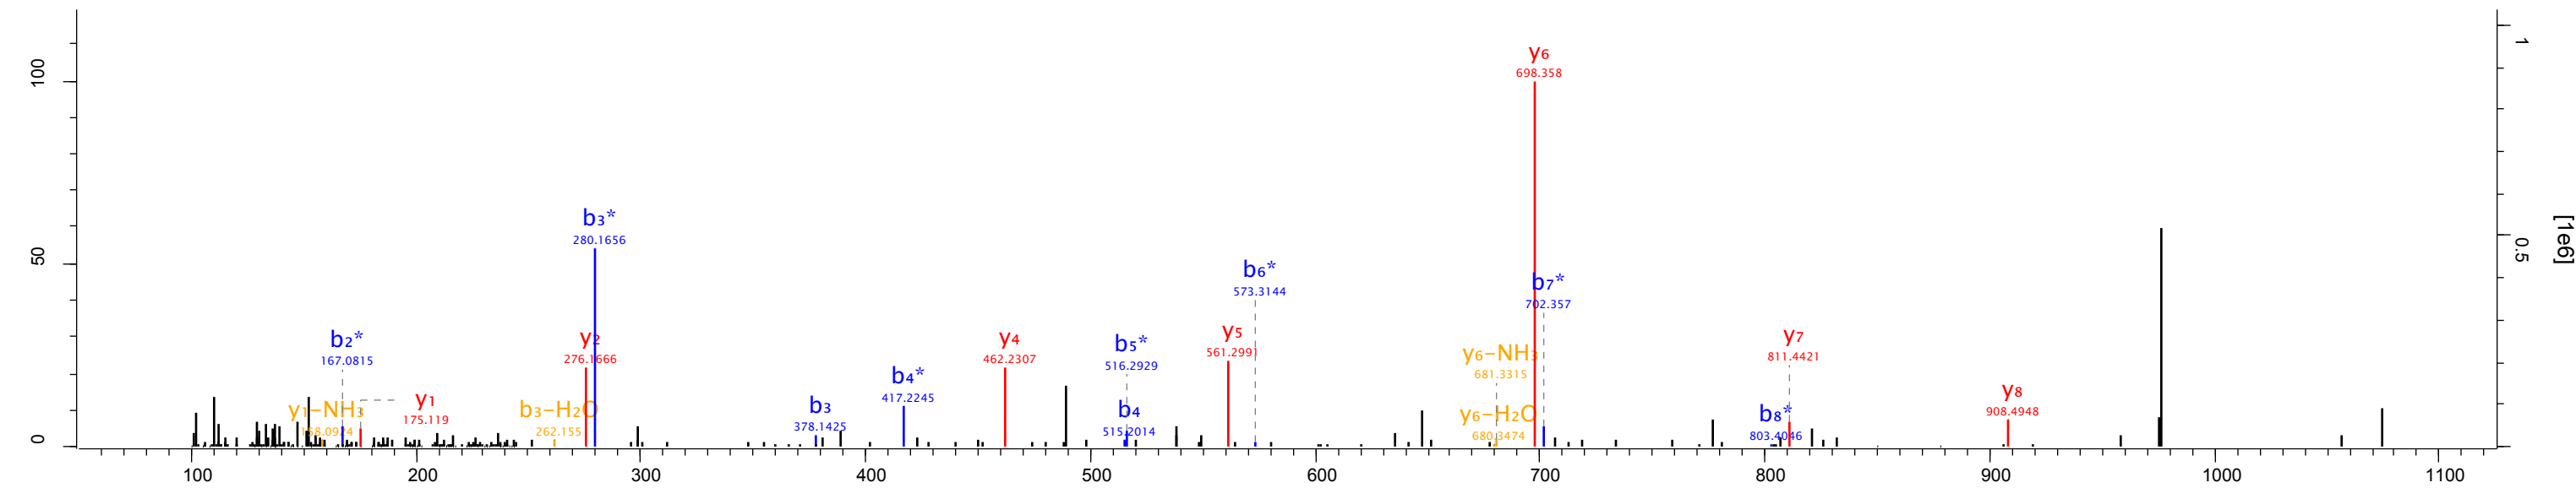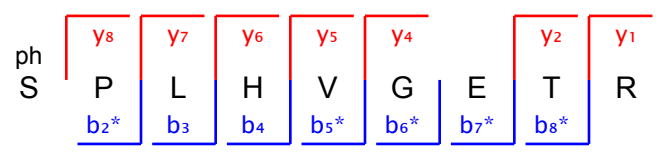

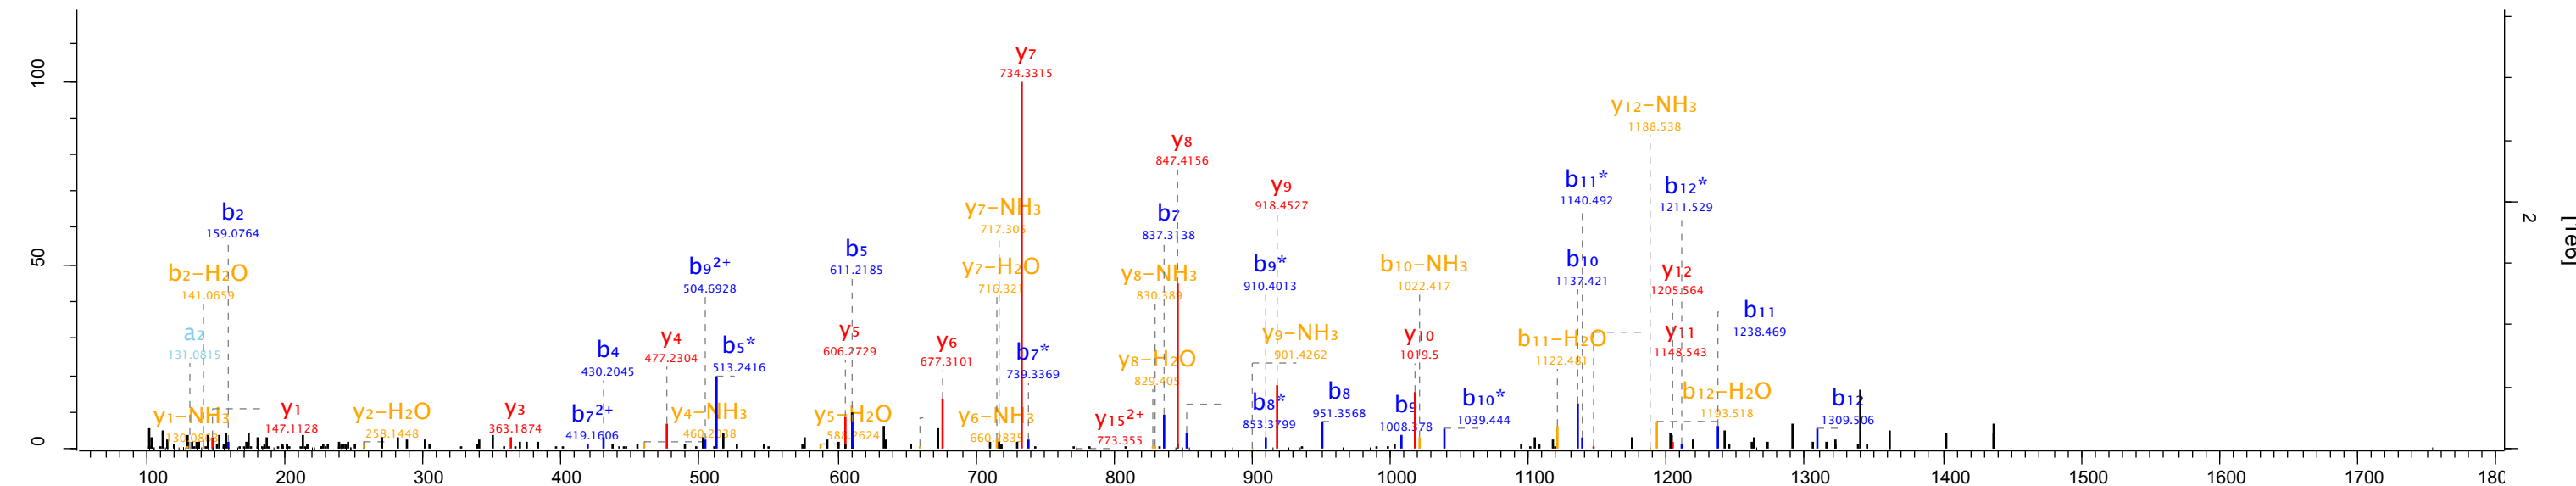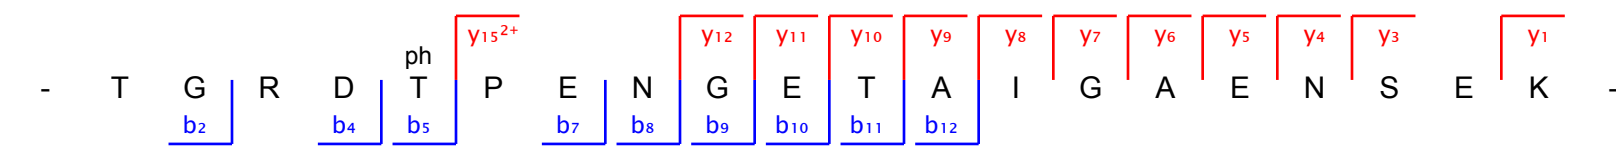

Raw file 20171215\_MaS\_33SR\_LMH\_phospho\_06 Scan 4874 Method FTMS; HCD Score 44.58 m/z 861.91 Gene names FAM117B

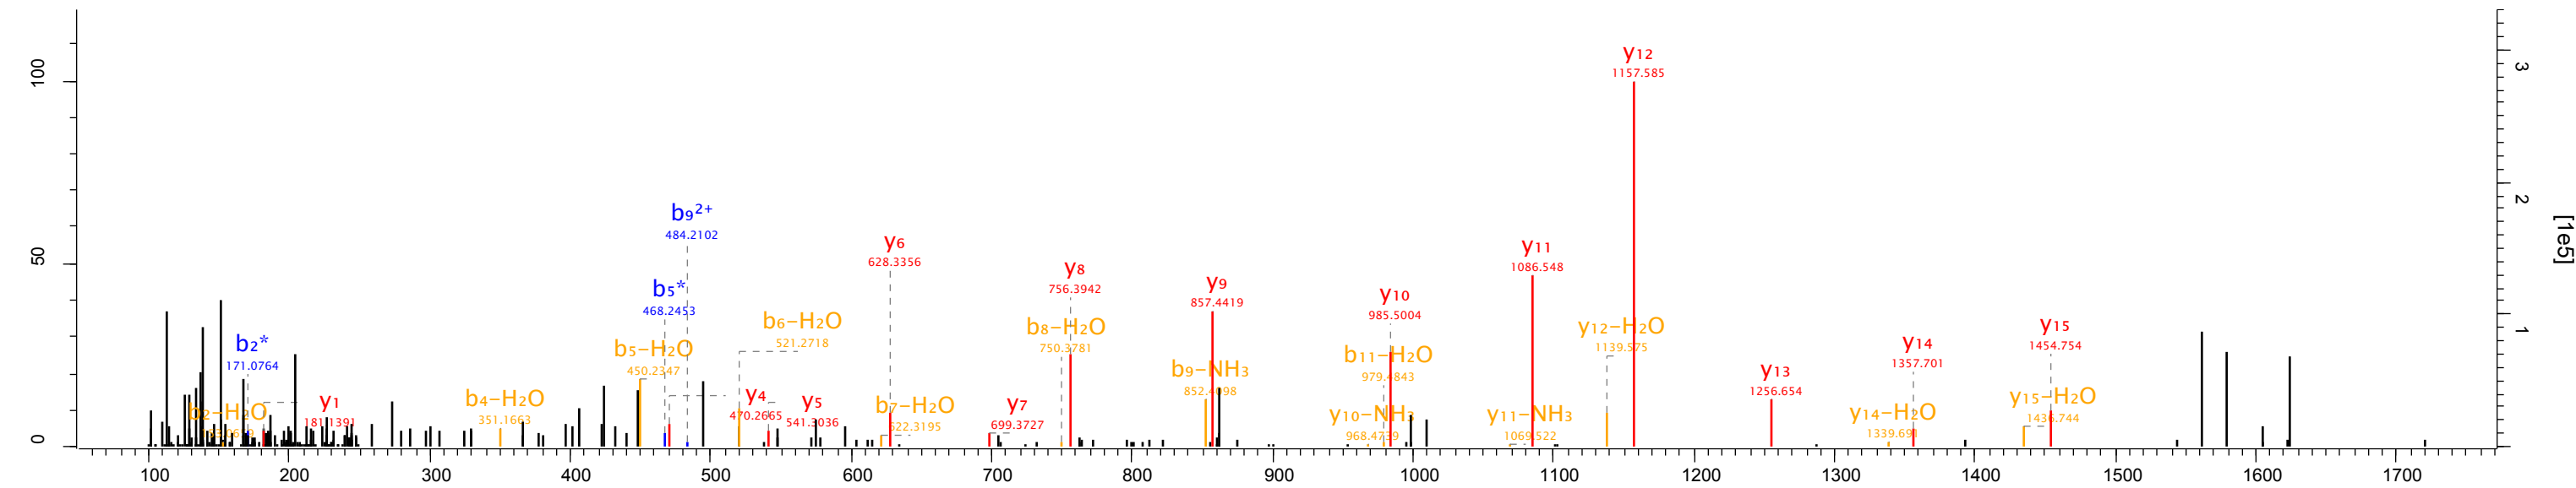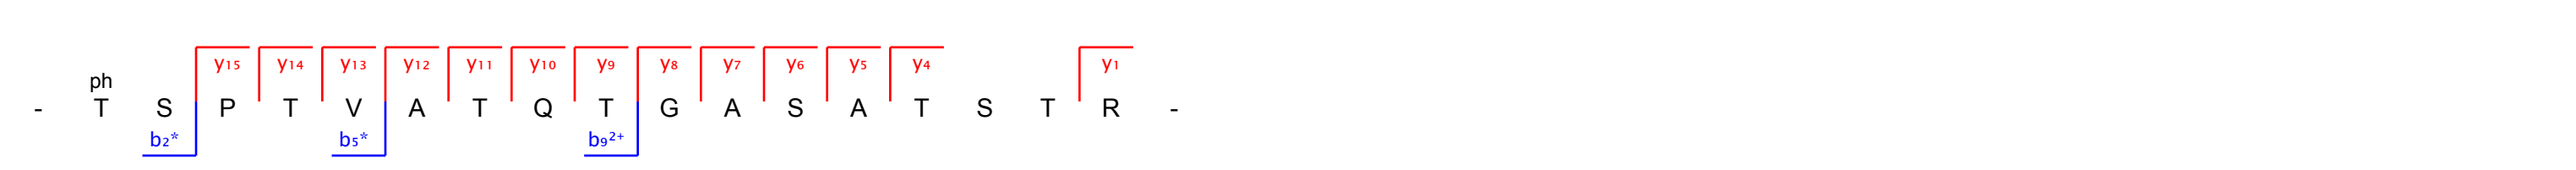

Raw file  
20171215\_MaS\_33SR\_LMH\_phospho\_06

Scan 4884 Method FTMS; HCD Score 163.41 m/z 793.81 Gene names SSRP1

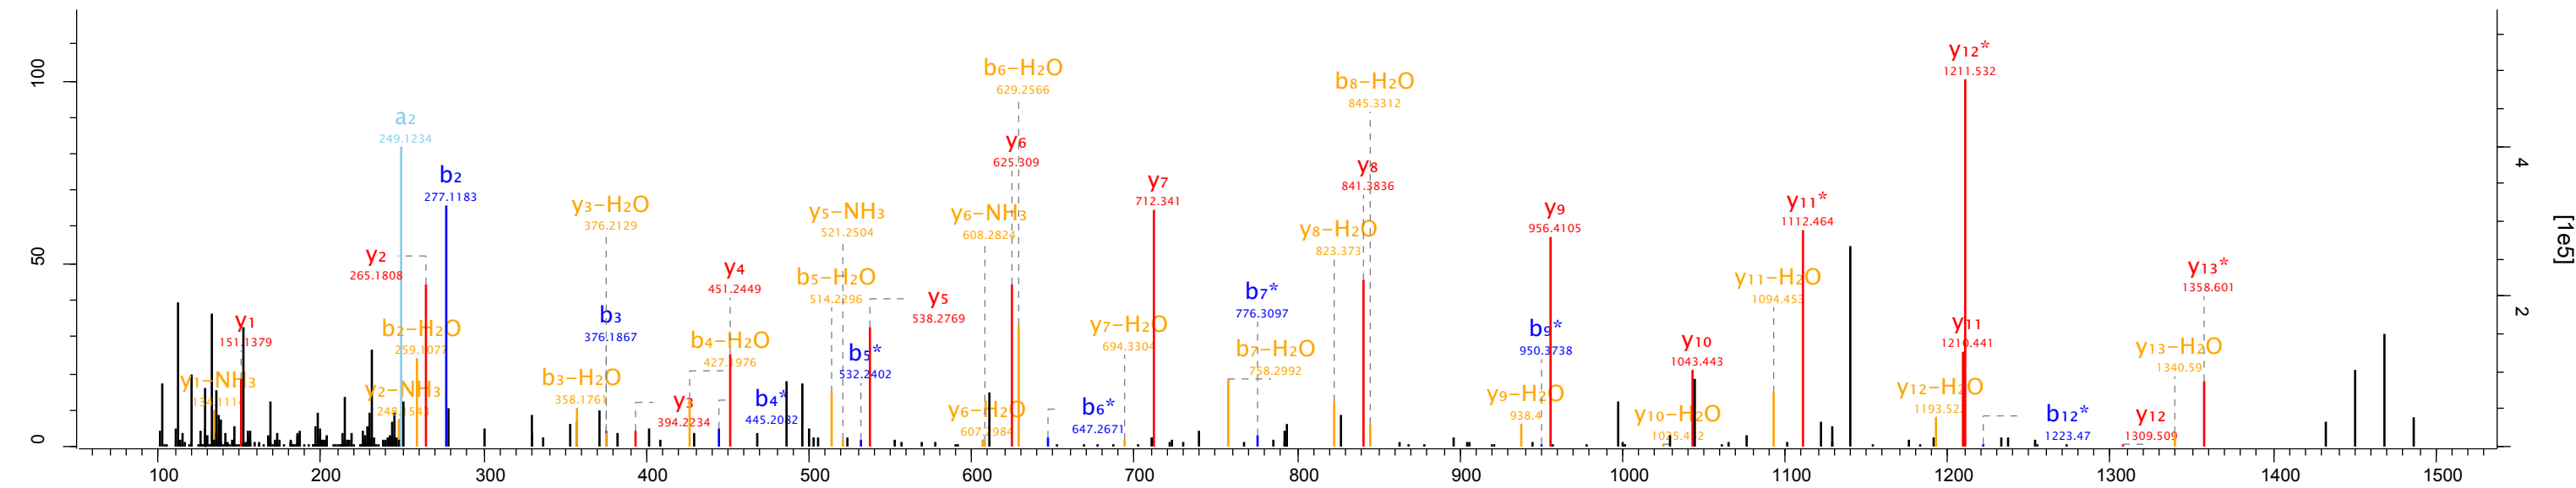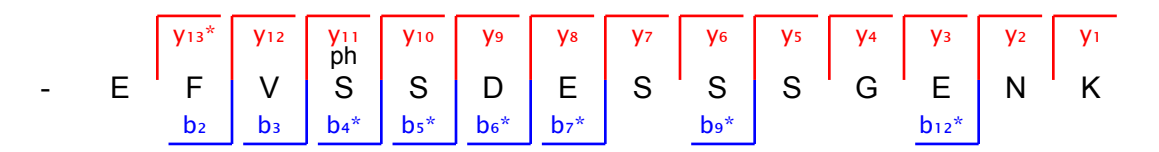

Raw file 20171215\_MaS\_33SR\_LMH\_phospho\_06 Scan 4914 Method FTMS; HCD Score 111.83 m/z 475.56 Gene names PPIA1

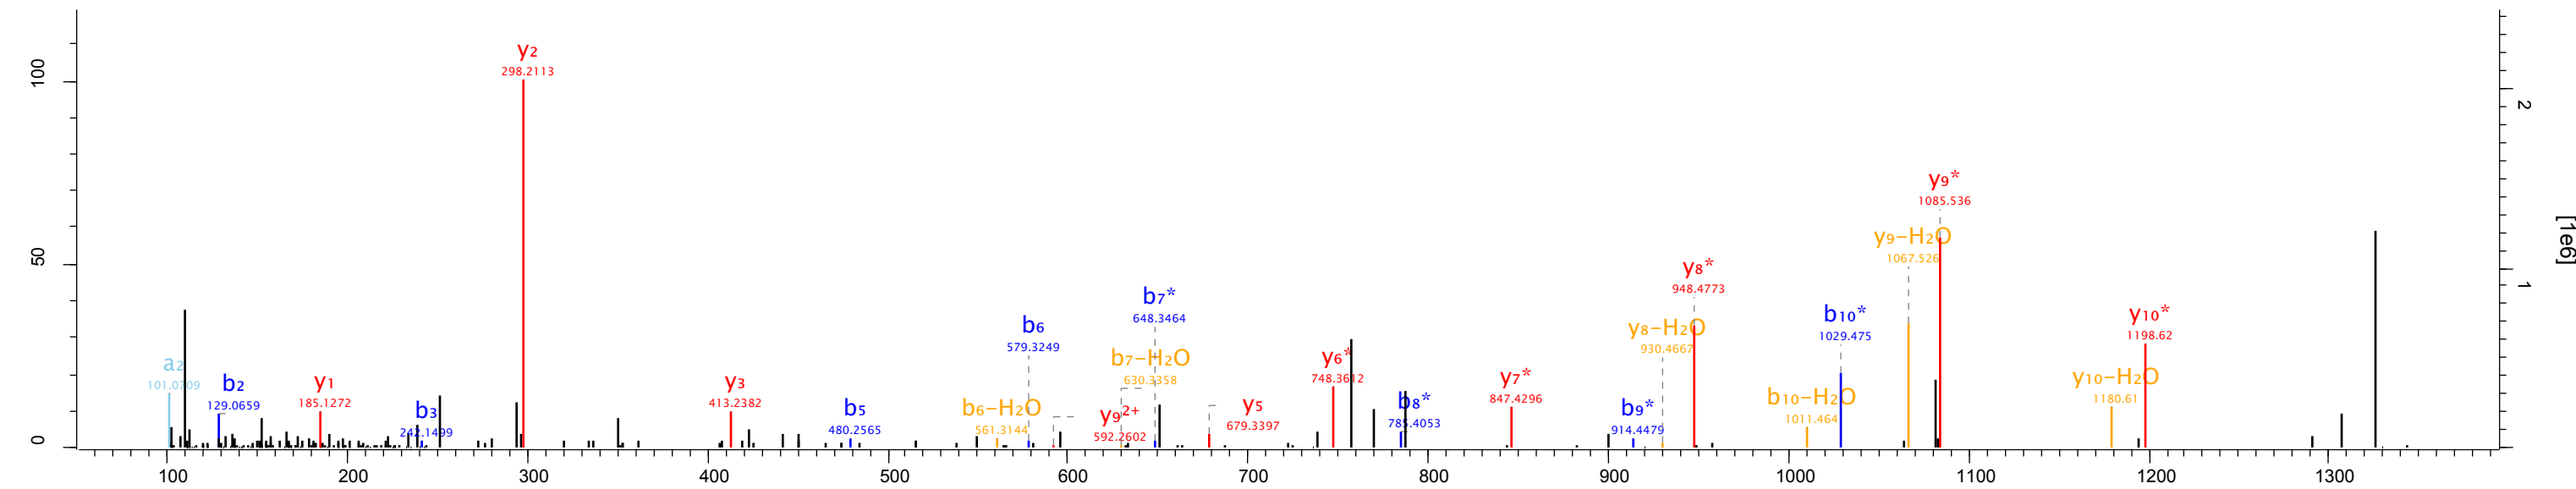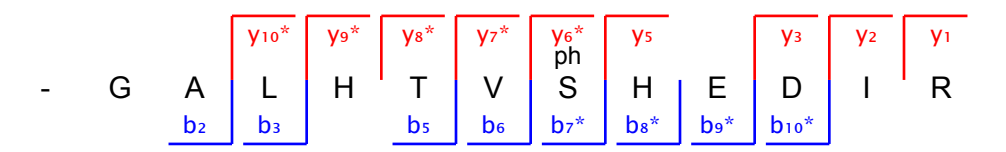

Raw file 20171215\_MaS\_33SR\_LMH\_phospho\_06 Scan 4944 Method FTMS; HCD Score 59.86 m/z 570.92 Gene names PPFIA1

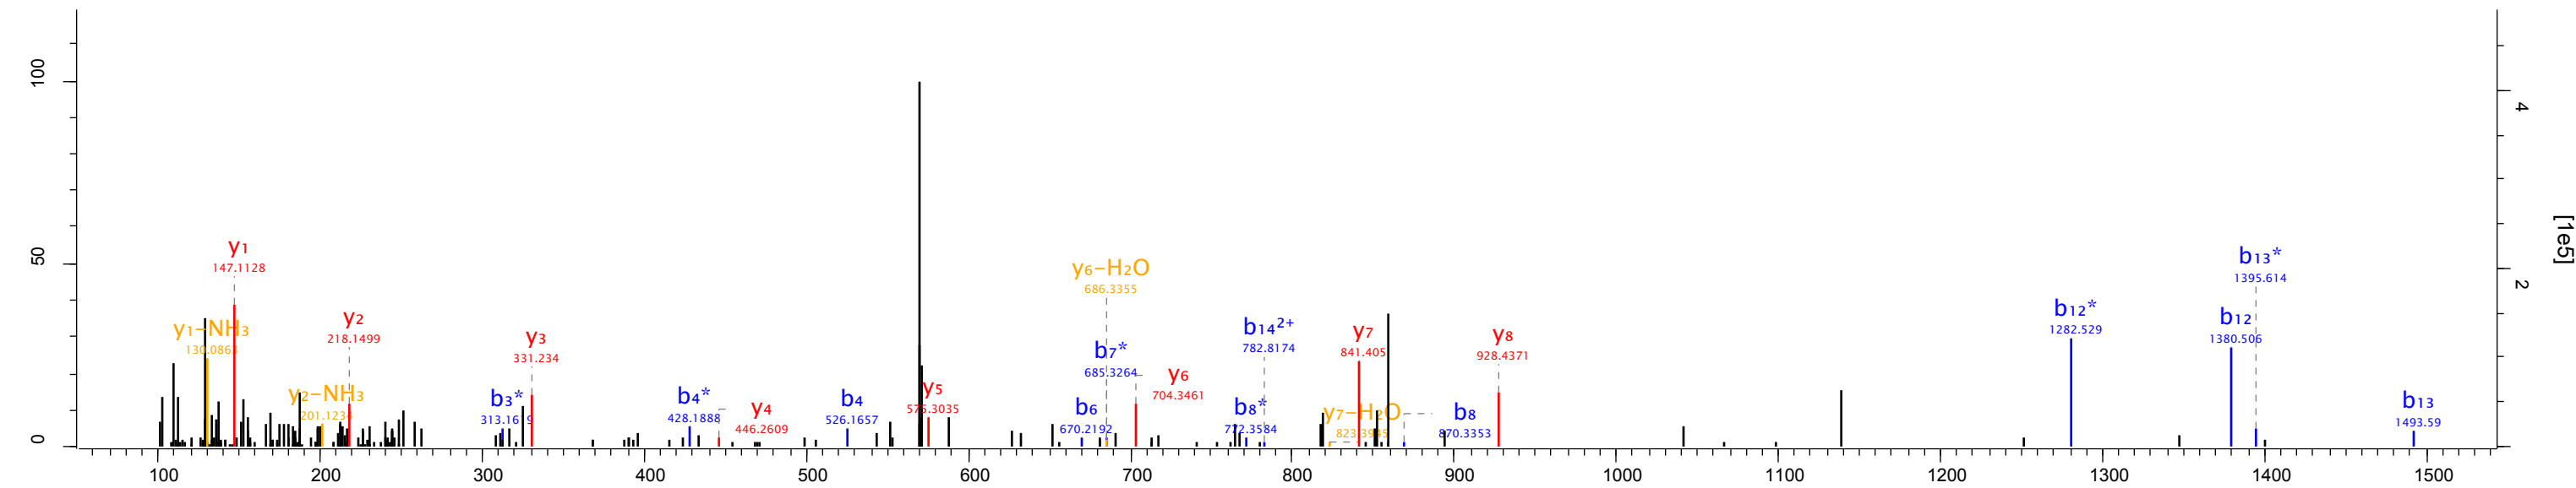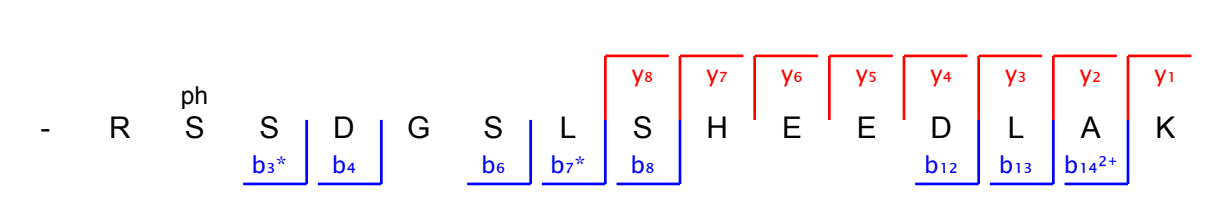

Raw file 20171215\_MaS\_33SR\_LMH\_phospho\_06 Scan 5074 Method FTMS; HCD Score 48.53 m/z 652.8 Gene names EXPH5

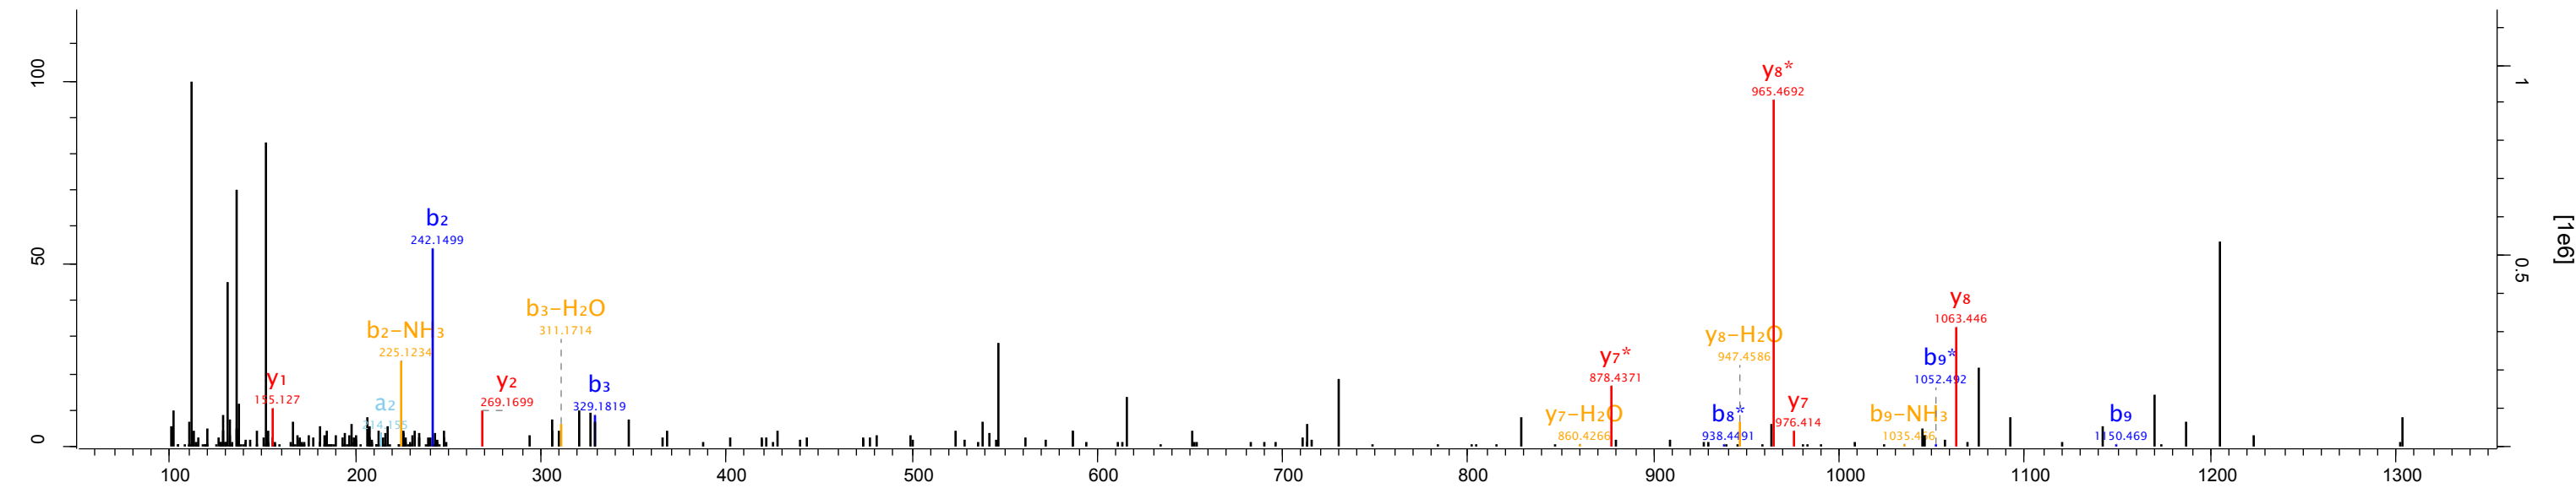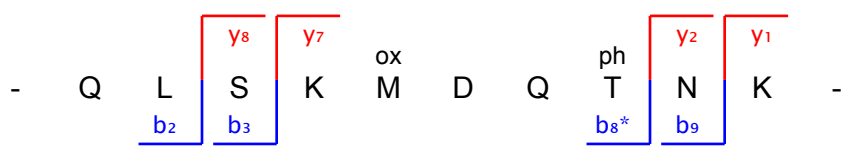

Raw file 20171215\_MaS\_33SR\_LMH\_phospho\_06 Scan 5424 Method FTMS; HCD Score 75.54 m/z 656.31 Gene names DCAF15

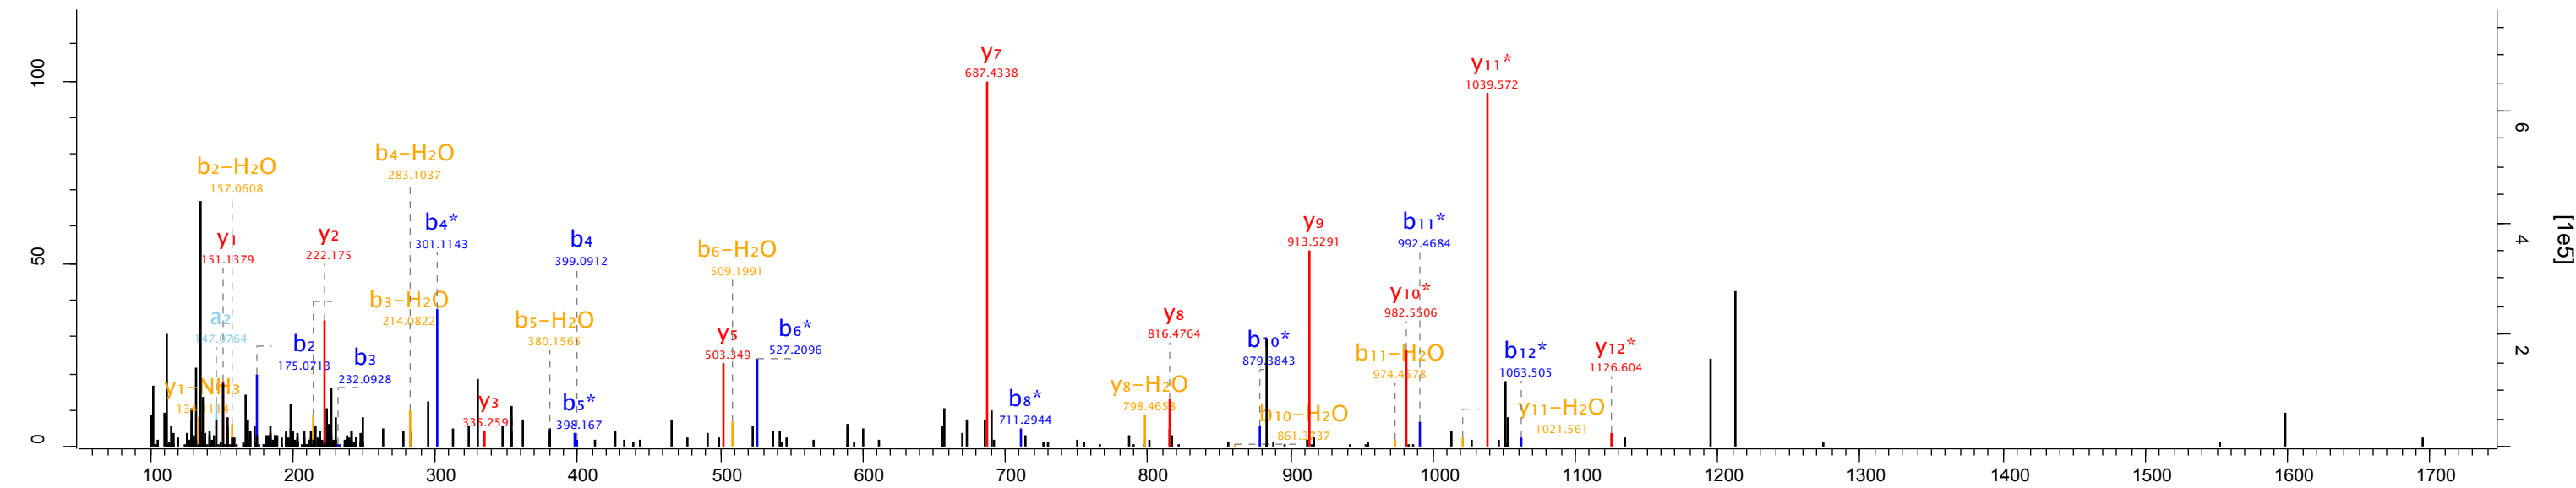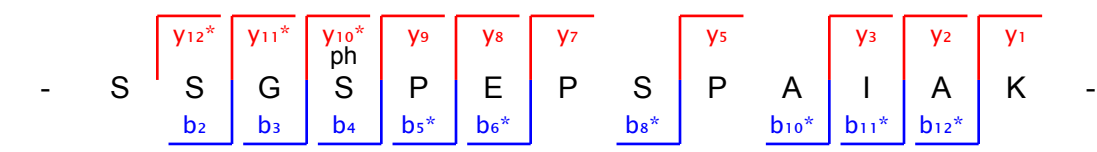



Raw file 20171215\_MaS\_33SR\_LMH\_phospho\_06 Scan 5464 Method FTMS; HCD Score 194.19 m/z 852.86 Gene names SART3

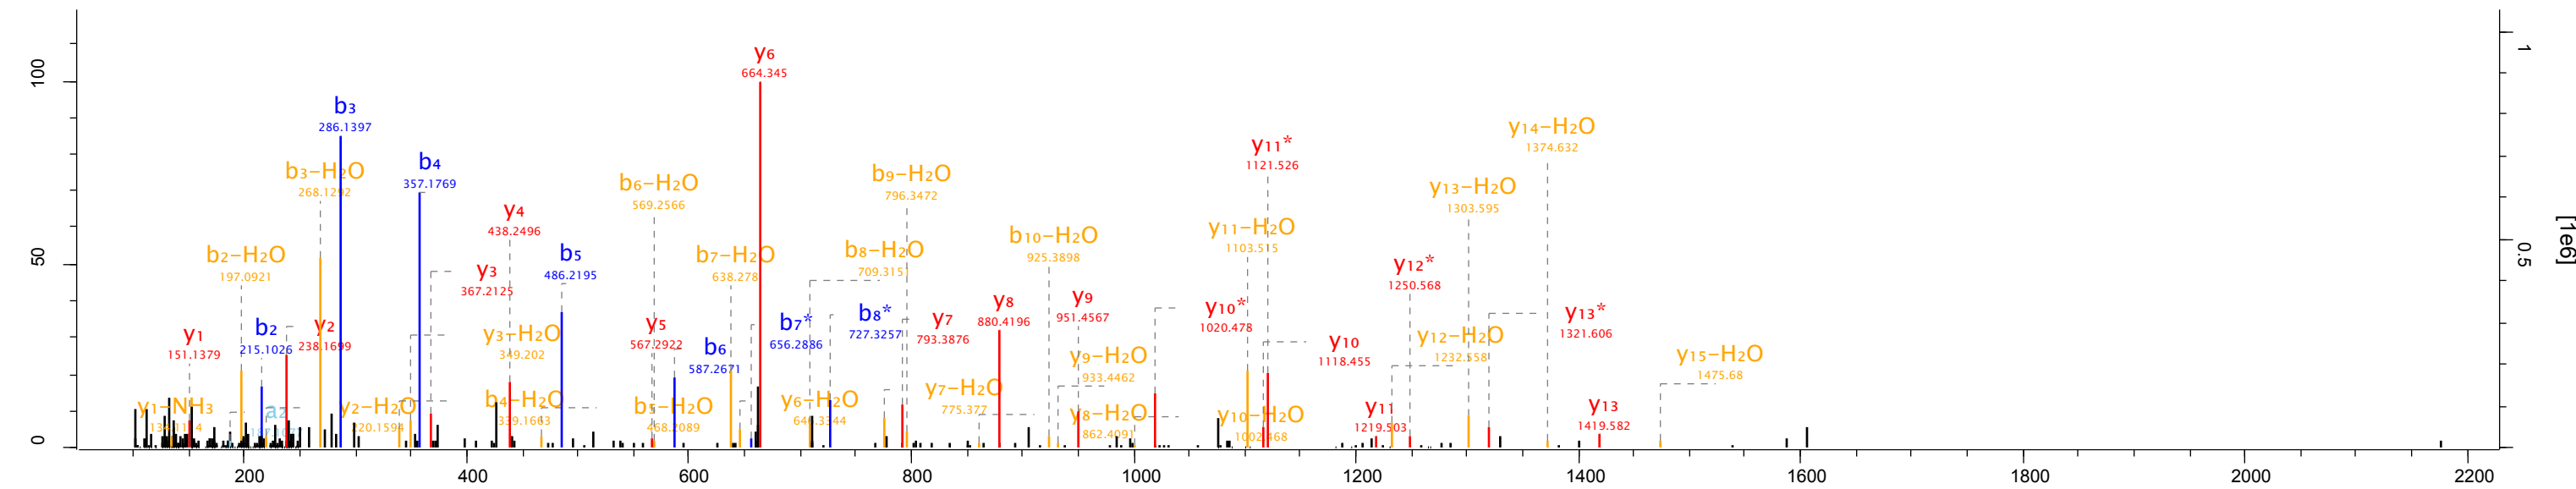

ac  
 - A T A A E T S A S E P E A E S K -  
 b2 b3 b4 b5 b6 b7\* b8\*

Raw file 20171215\_MaS\_33SR\_LMH\_phospho\_06 Scan 5734 Method FTMS; HCD Score 308.77 m/z 986.38 Gene names NUP98

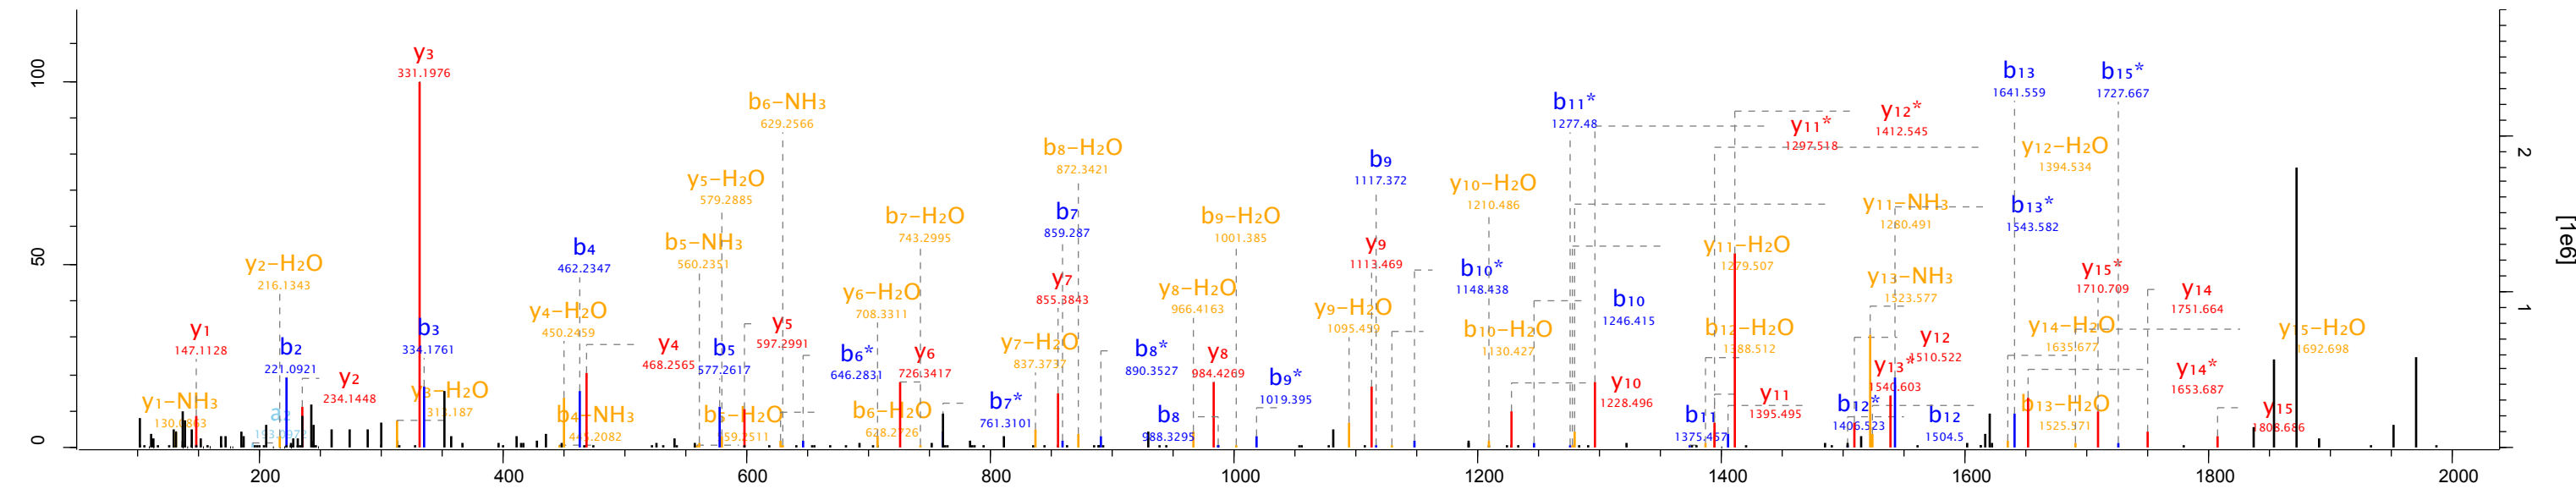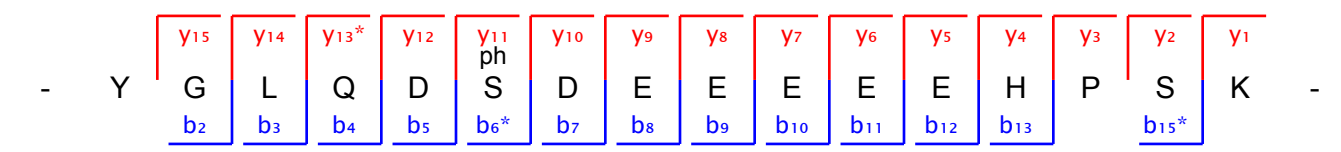

Raw file 20171215\_MaS\_33SR\_LMH\_phospho\_06 Scan 5884 Method FTMS; HCD Score 184.58 m/z 566.26 Gene names EIF4B

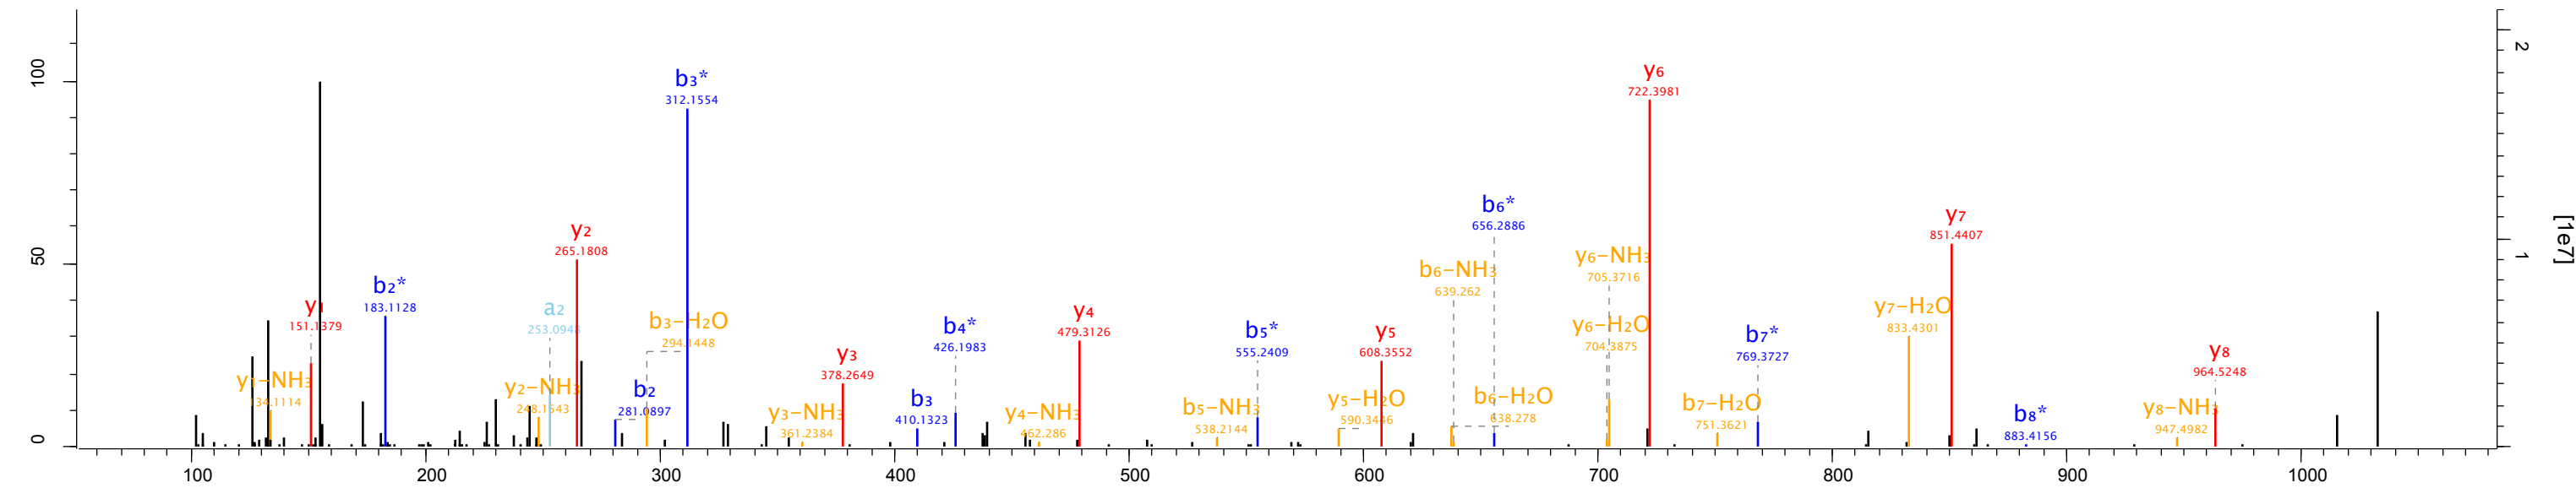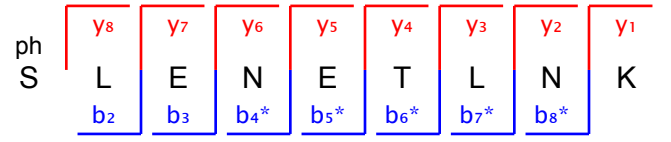

Raw file 20171215\_MaS\_33SR\_LMH\_phospho\_06 Scan 6234 Method FTMS; HCD Score 90.97 m/z 640.28 Gene names MAP3K1

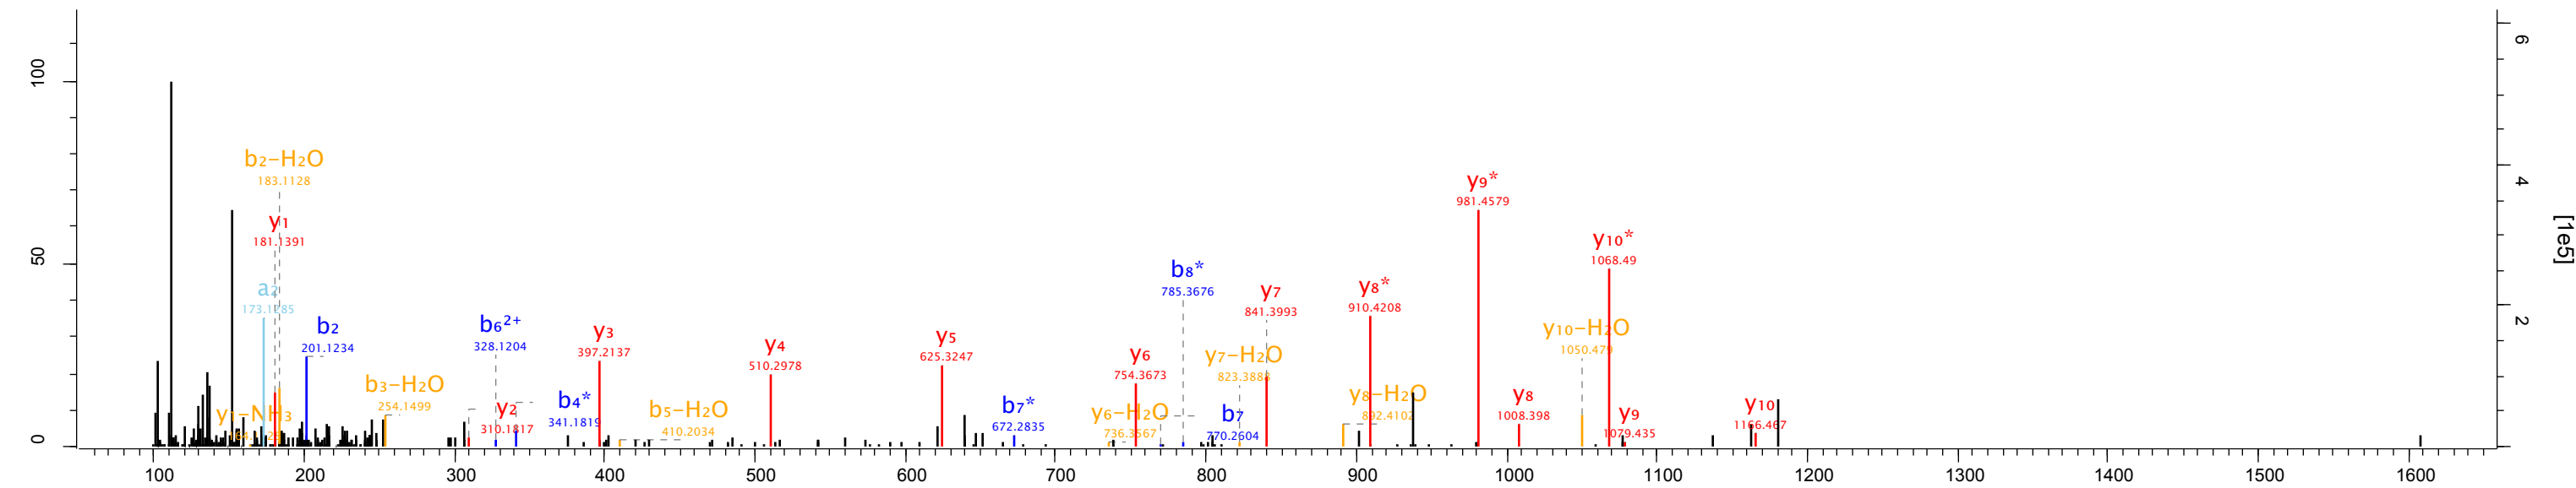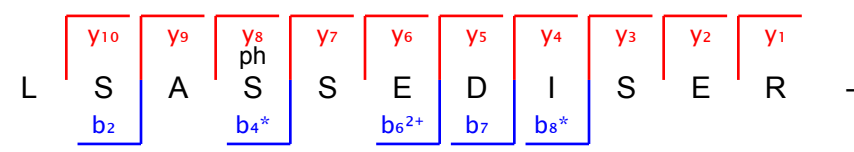

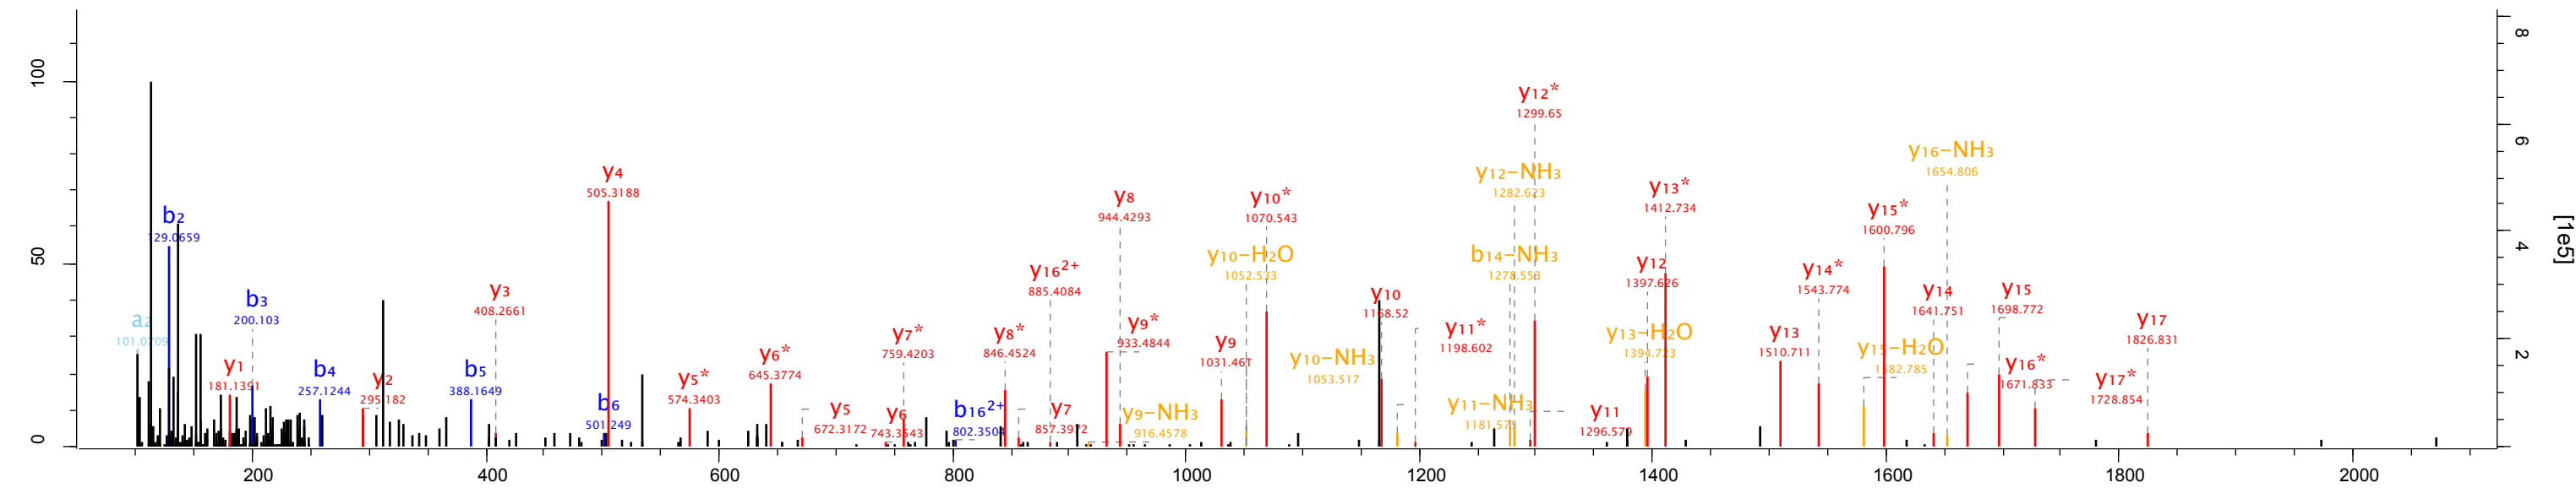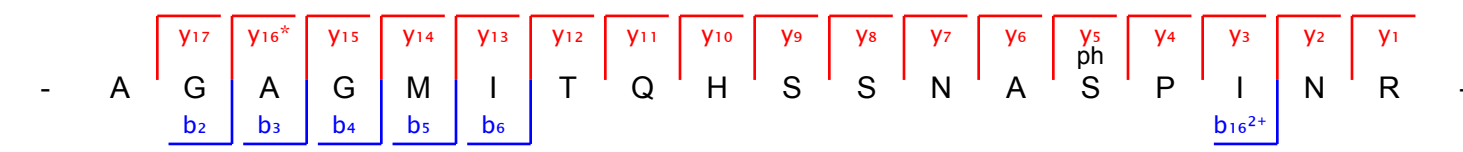

Raw file 20171215\_MaS\_33SR\_LMH\_phospho\_06 Scan 6604 Method FTMS; HCD Score 188.71 m/z 836.37 Gene names BIVM-ERCC5;ERCC5

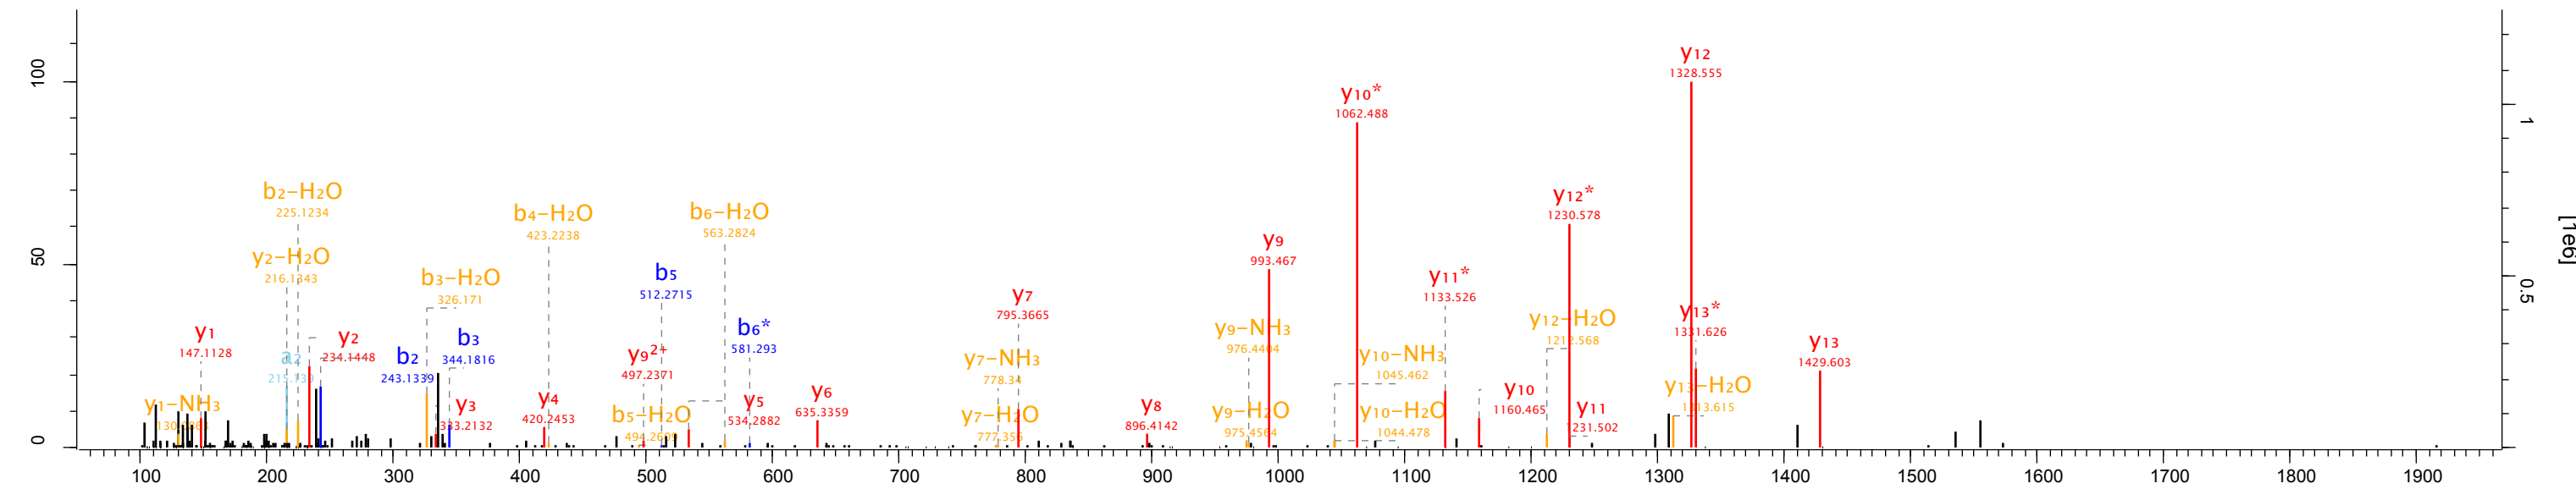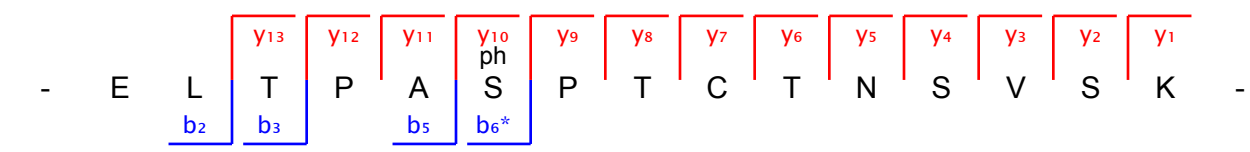

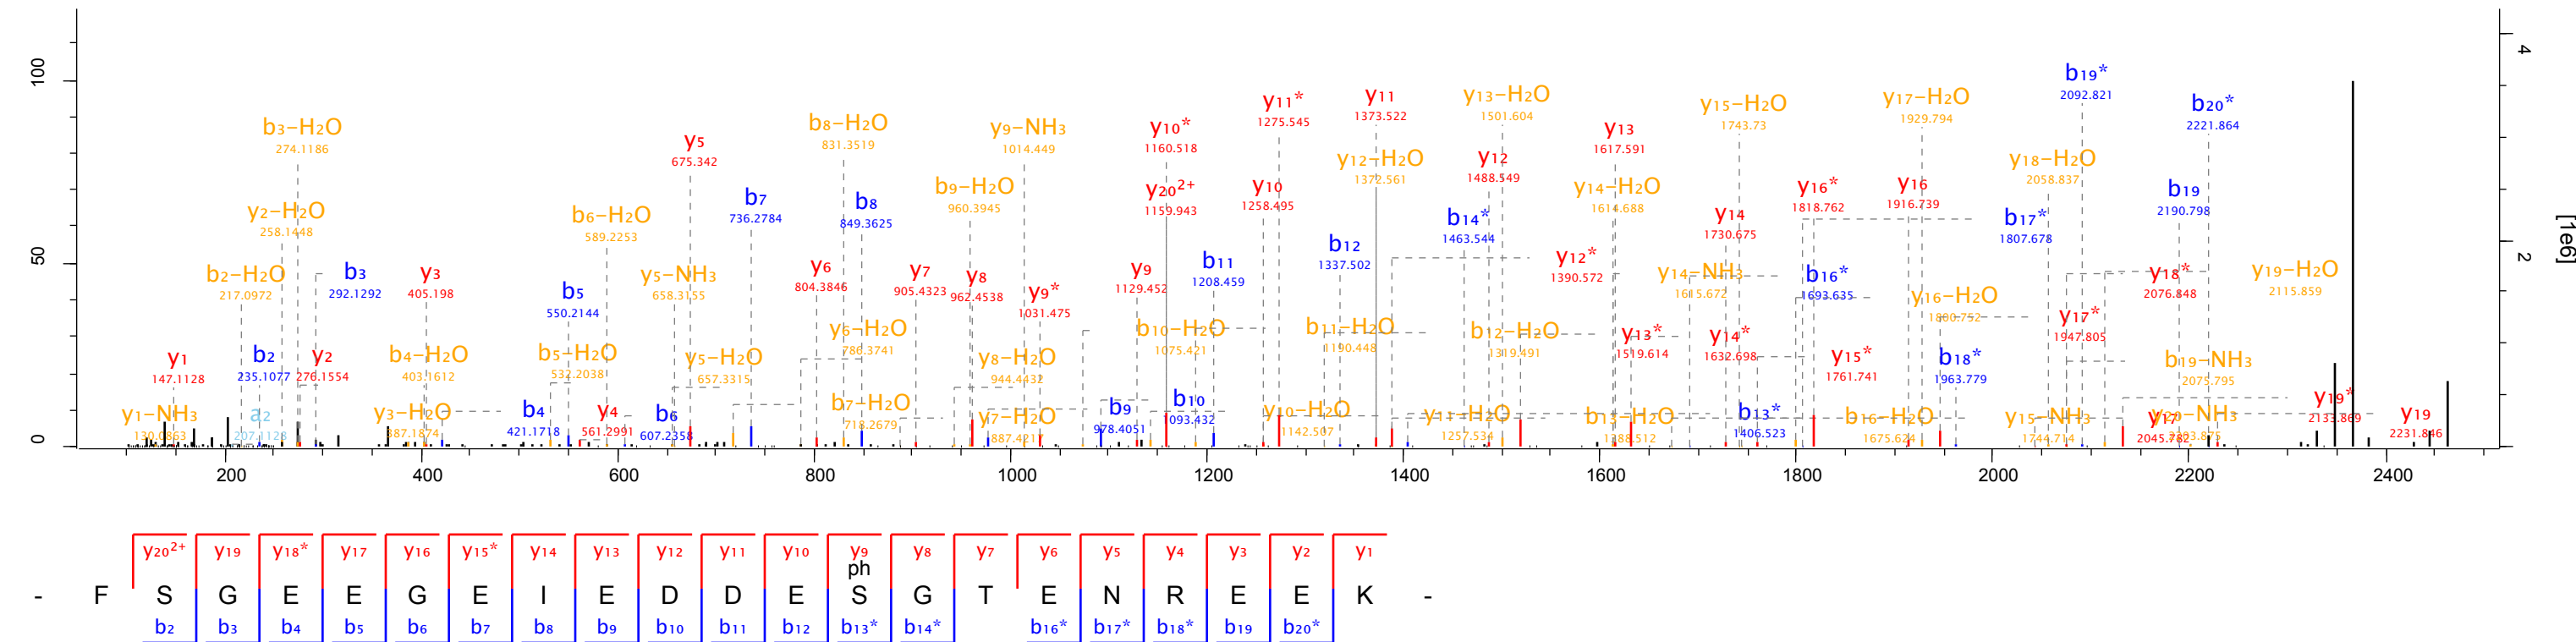

Raw file 20171215\_MaS\_33SR\_LMH\_phospho\_06 Scan 6744 Method FTMS; HCD Score 81.81 m/z 899.43 Gene names CTNND1

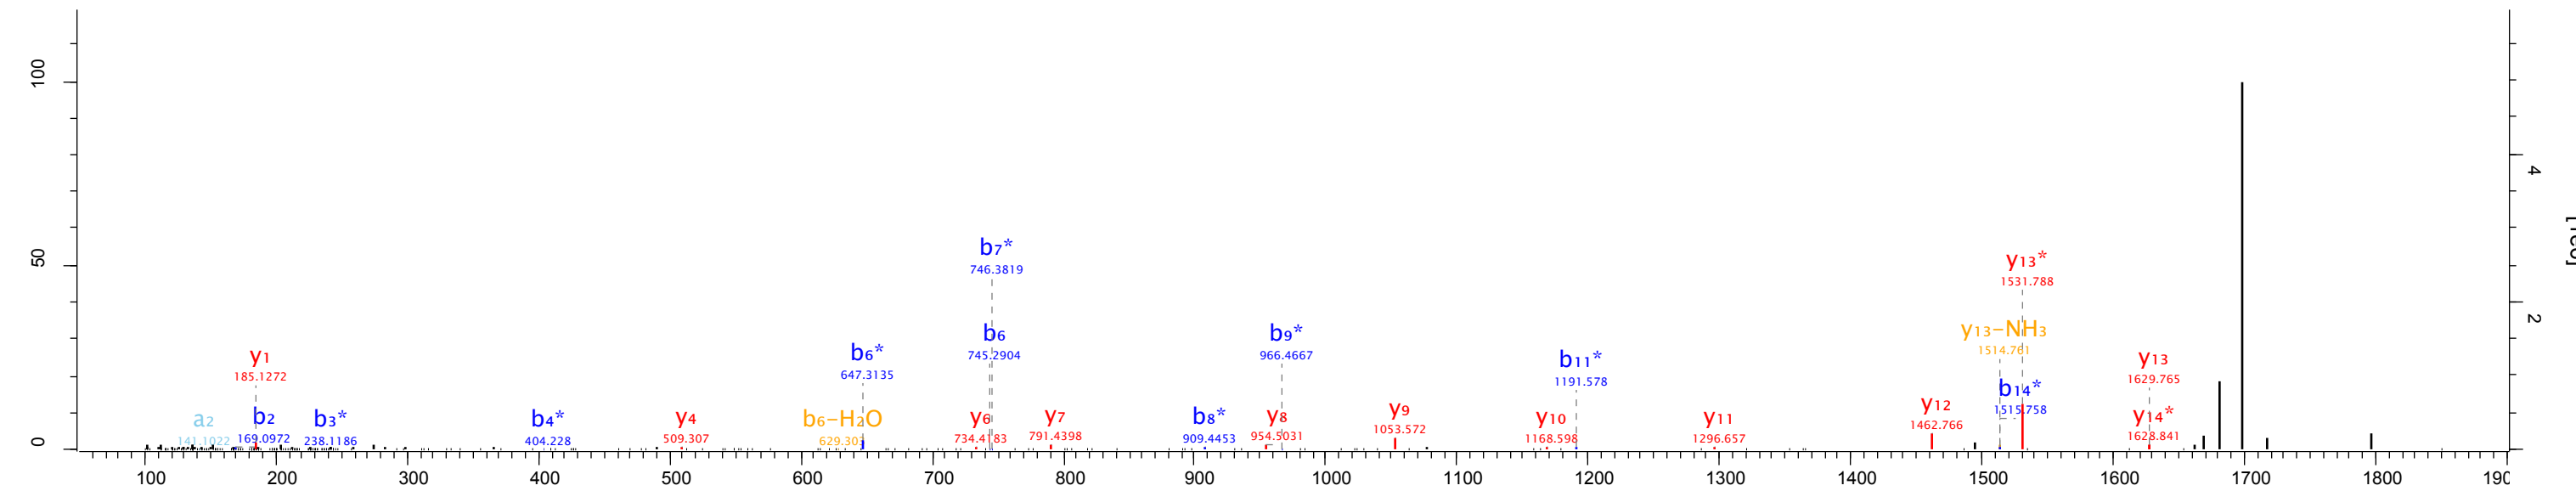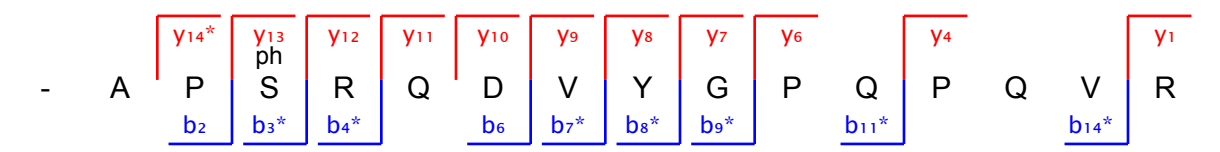



Raw file 20171215\_MaS\_33SR\_LMH\_phospho\_06 Scan 6824 Method FTMS; HCD Score 130.36 m/z 537.26 Gene names PARN

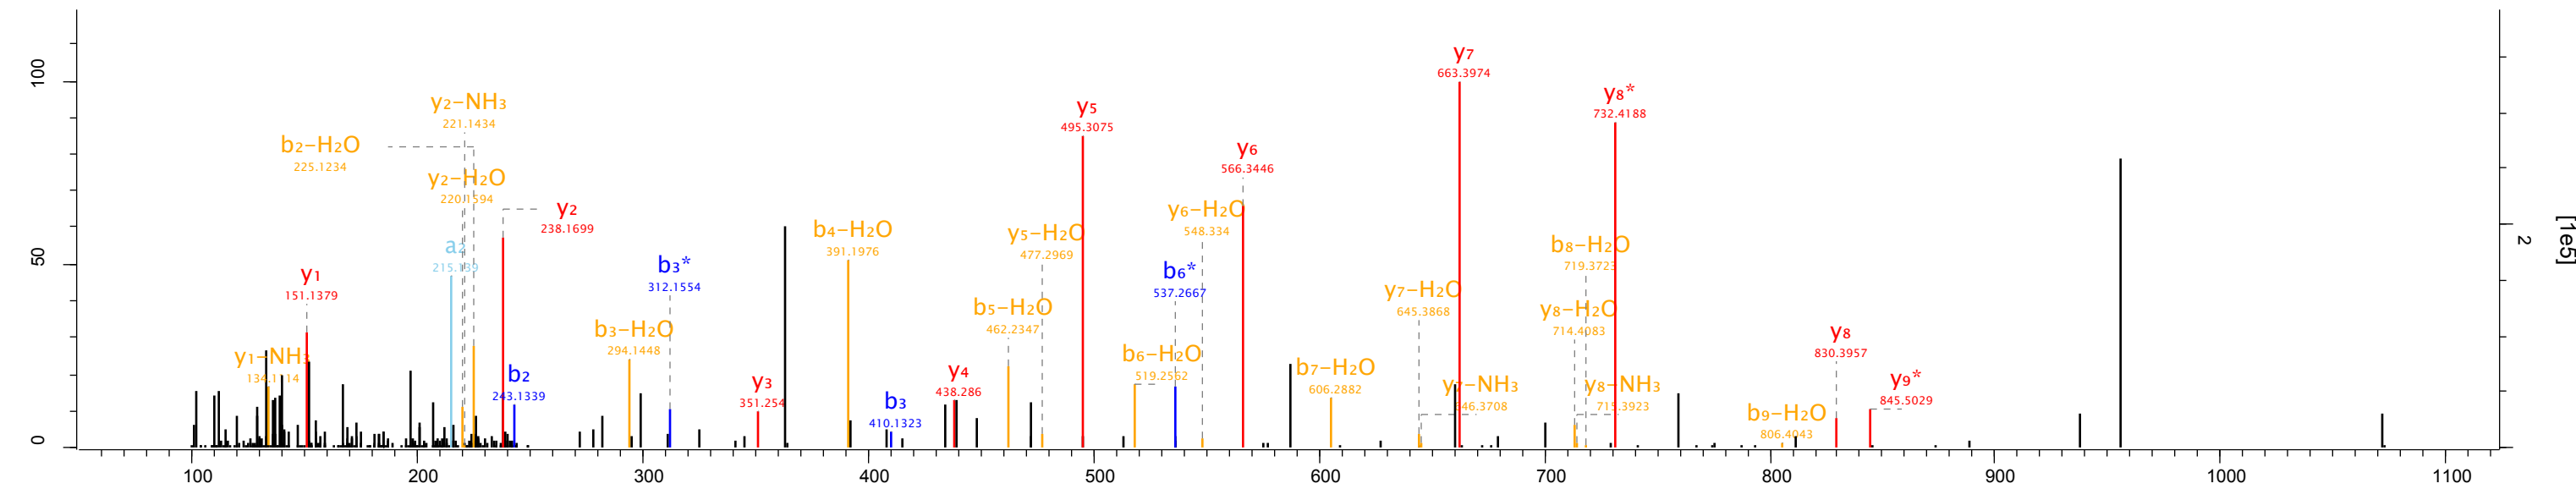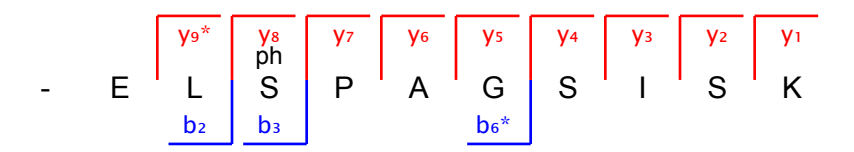

Raw file 20171215\_MaS\_33SR\_LMH\_phospho\_06 Scan 6904 Method FTMS; HCD Score 56.33 m/z 522.25 Gene names CASP8AP2

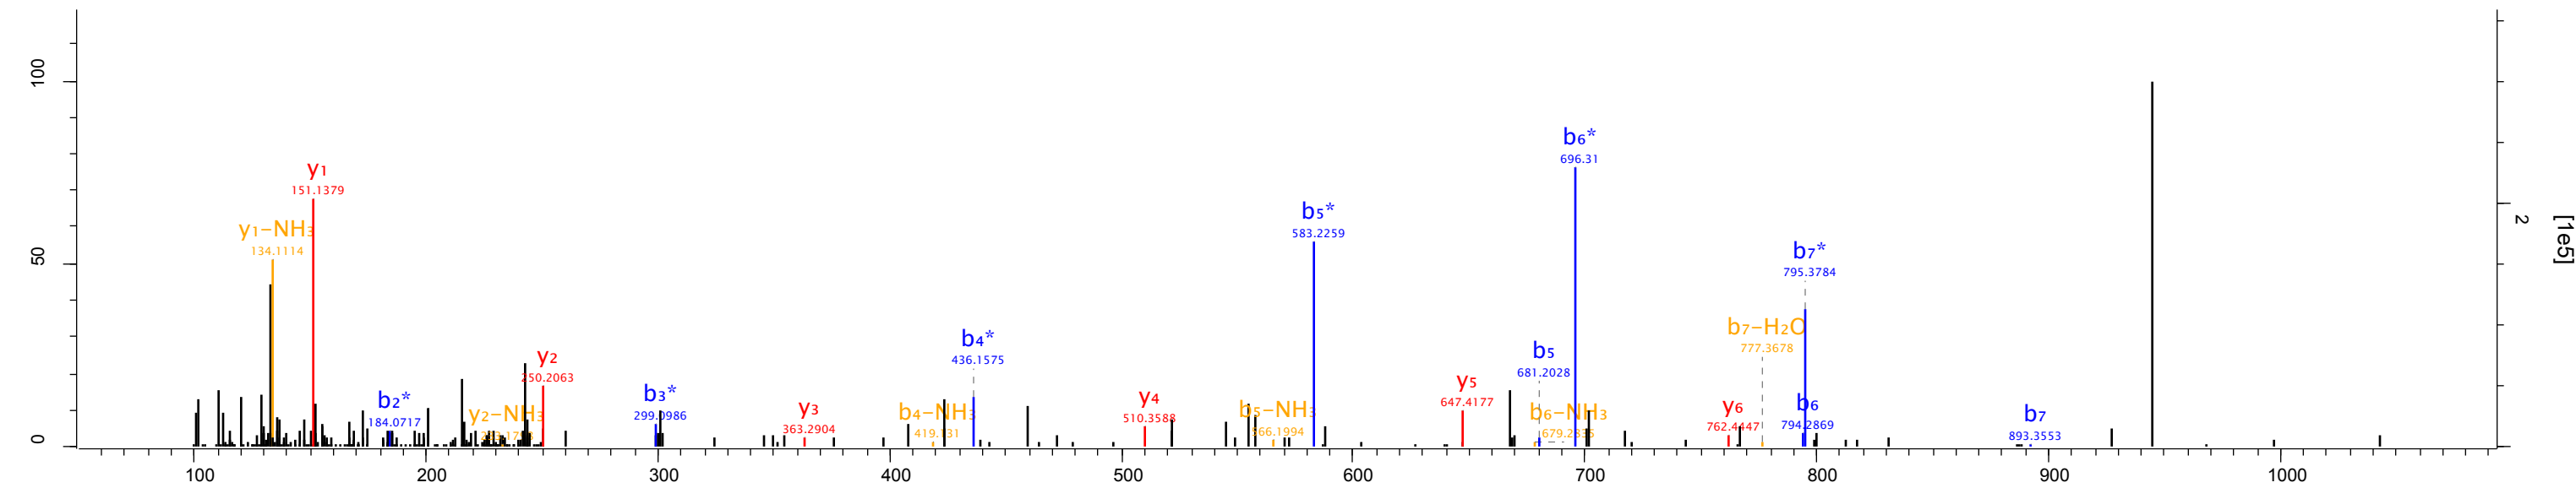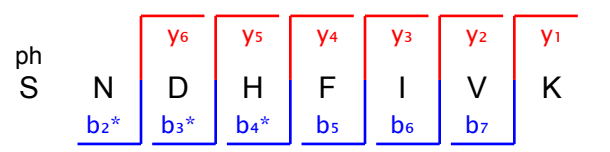

Raw file 20171215\_MaS\_33SR\_LMH\_phospho\_06 Scan 6924 Method FTMS; HCD Score 89.31 m/z 685.37 Gene names NCOR2

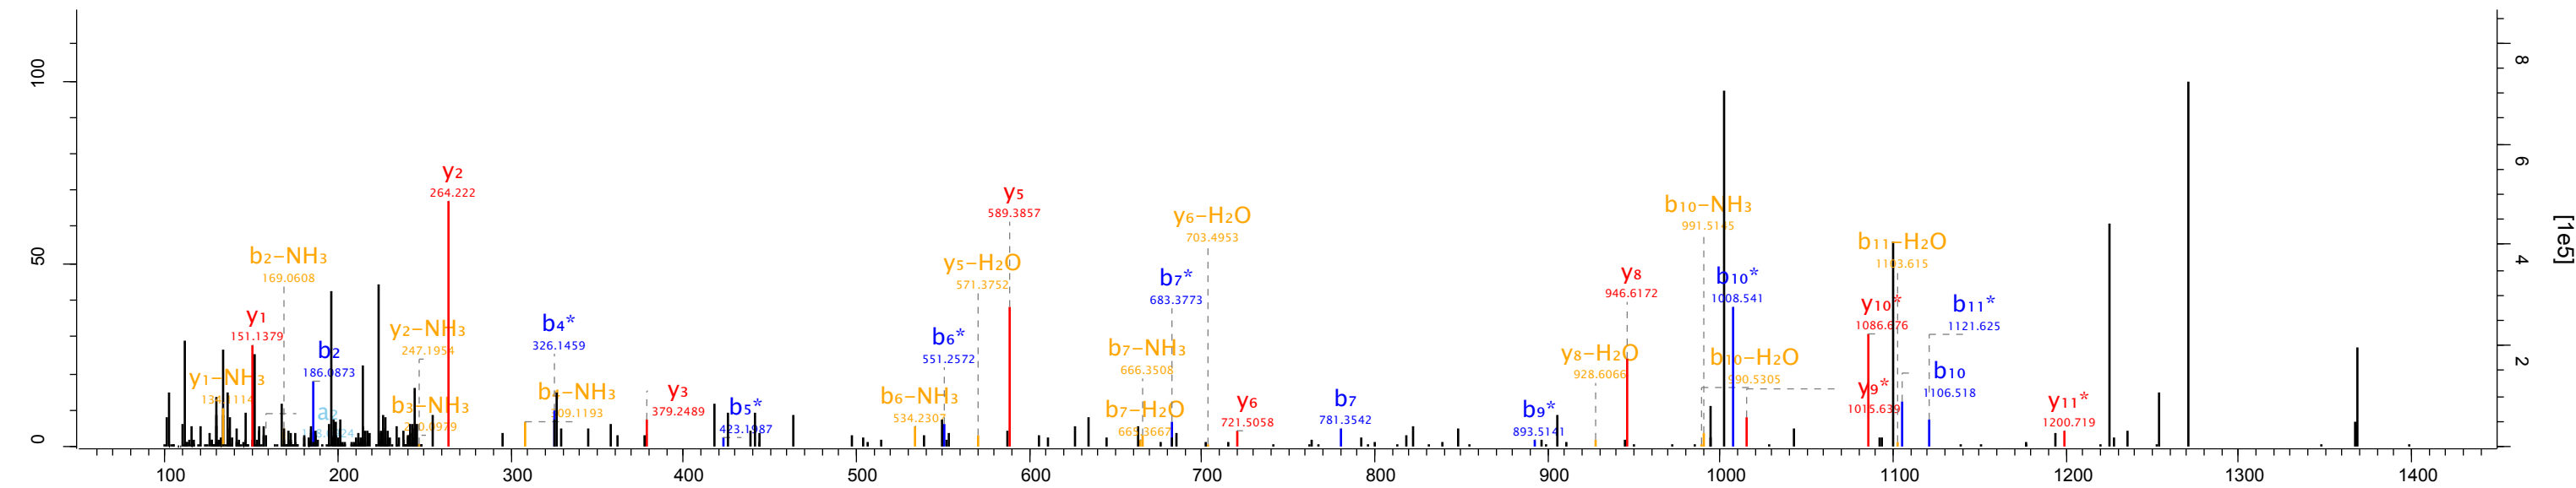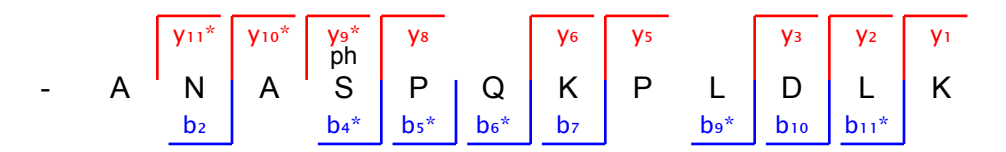

Raw file 20171215\_MaS\_33SR\_LMH\_phospho\_06 Scan 6934 Method FTMS; HCD Score 134.52 m/z 796.37 Gene names RSRC2

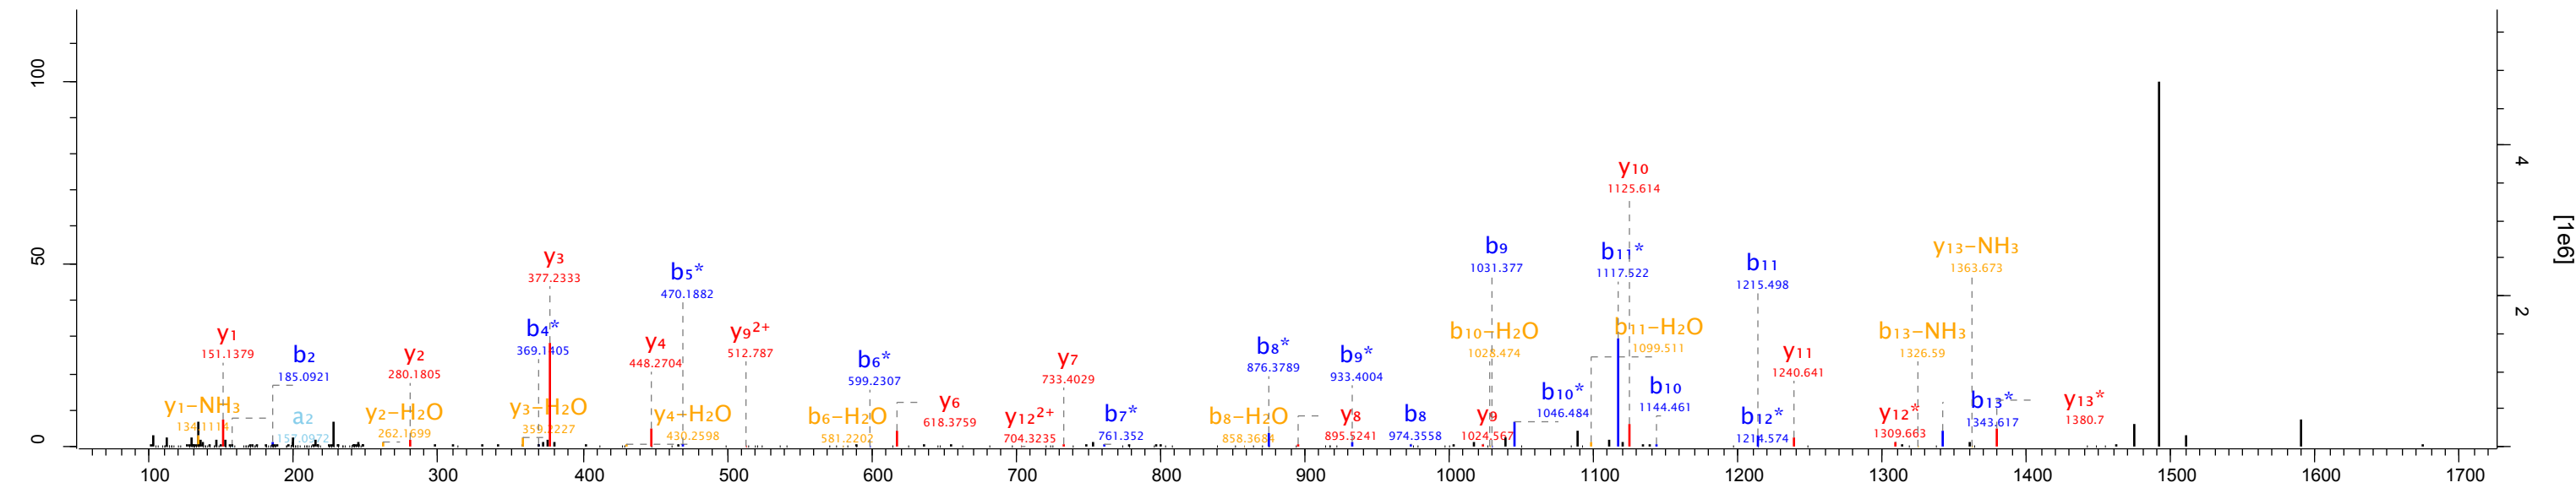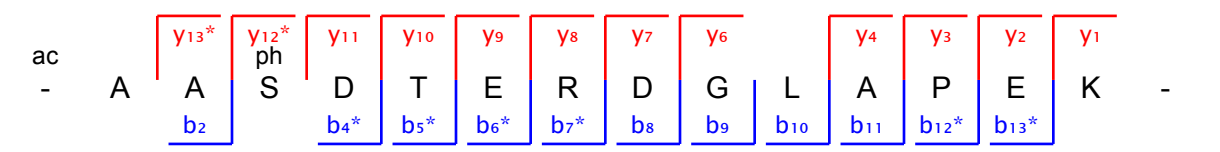

Raw file 20171215\_MaS\_33SR\_LMH\_phospho\_06 Scan 6954 Method FTMS; HCD Score 149.04 m/z 784.67 Gene names TNKS1BP1

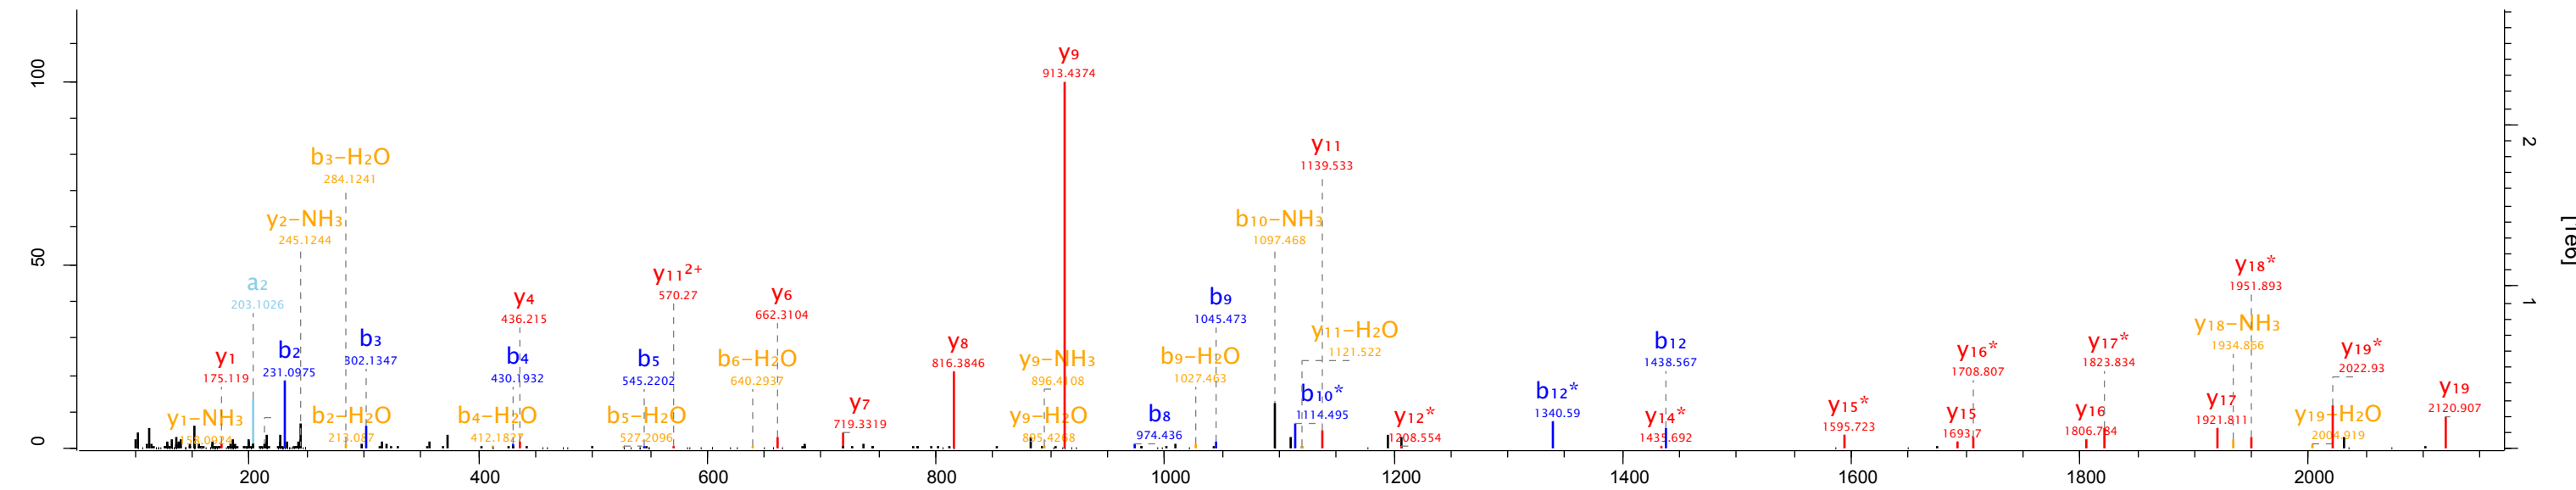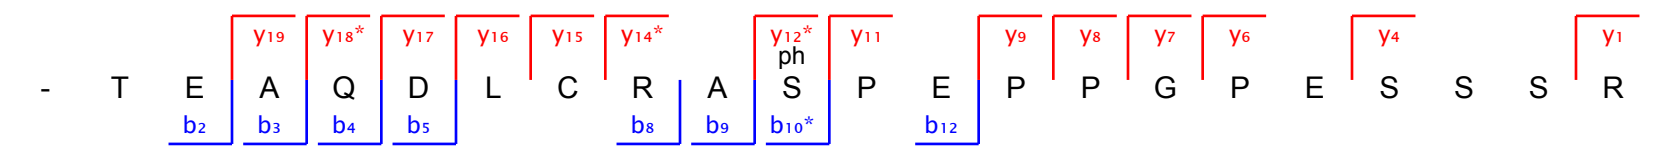

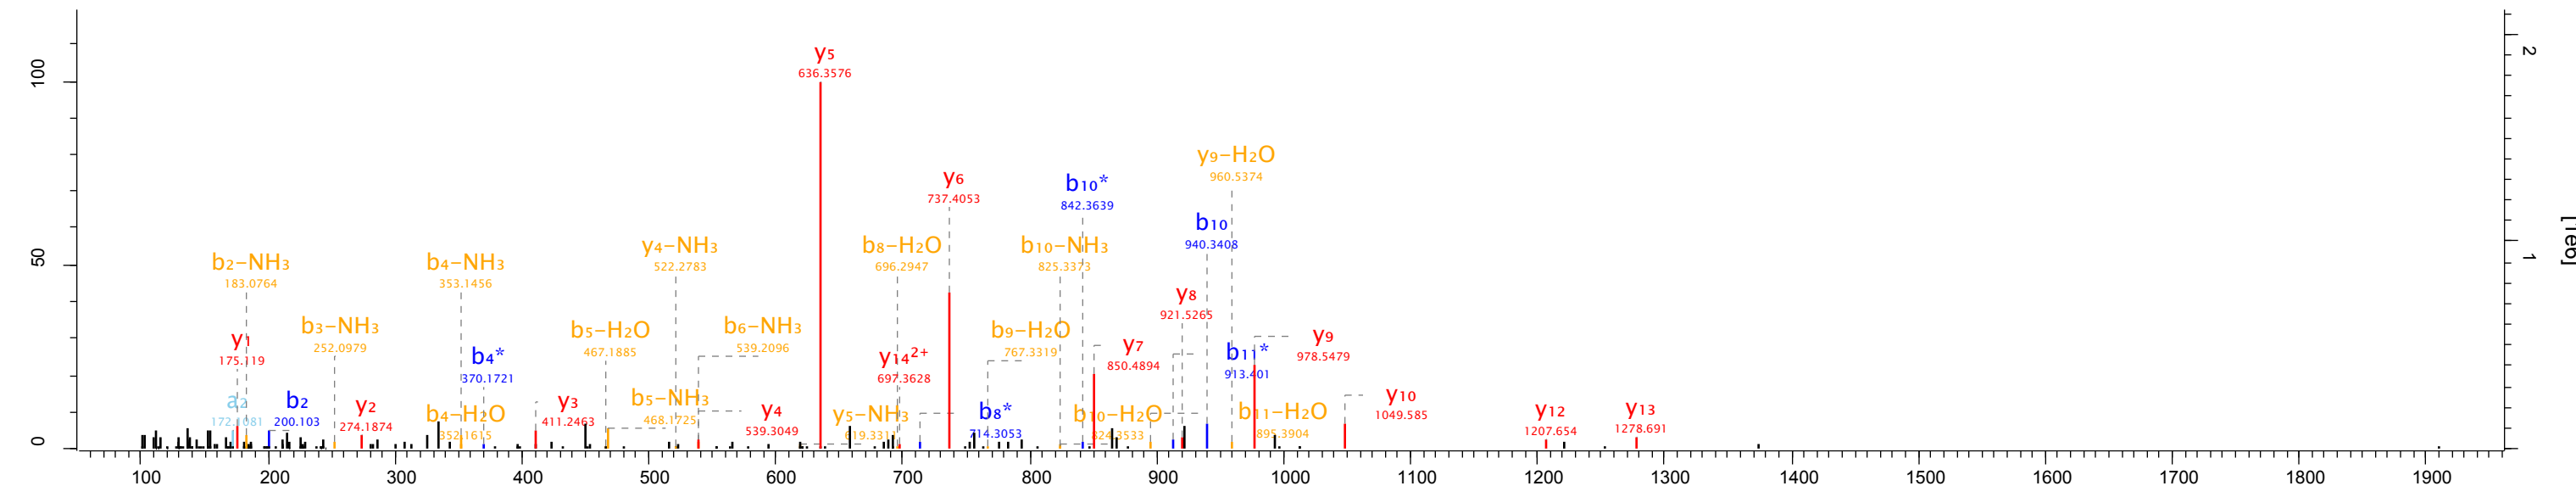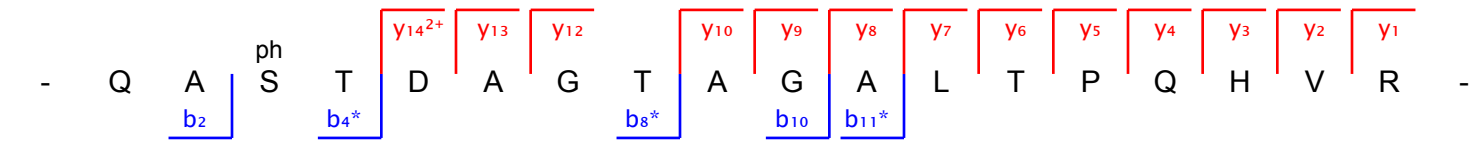

Raw file 20171215\_MaS\_33SR\_LMH\_phospho\_06 Scan 7264 Method FTMS; HCD Score 82.18 m/z 612.3 Gene names MINK1

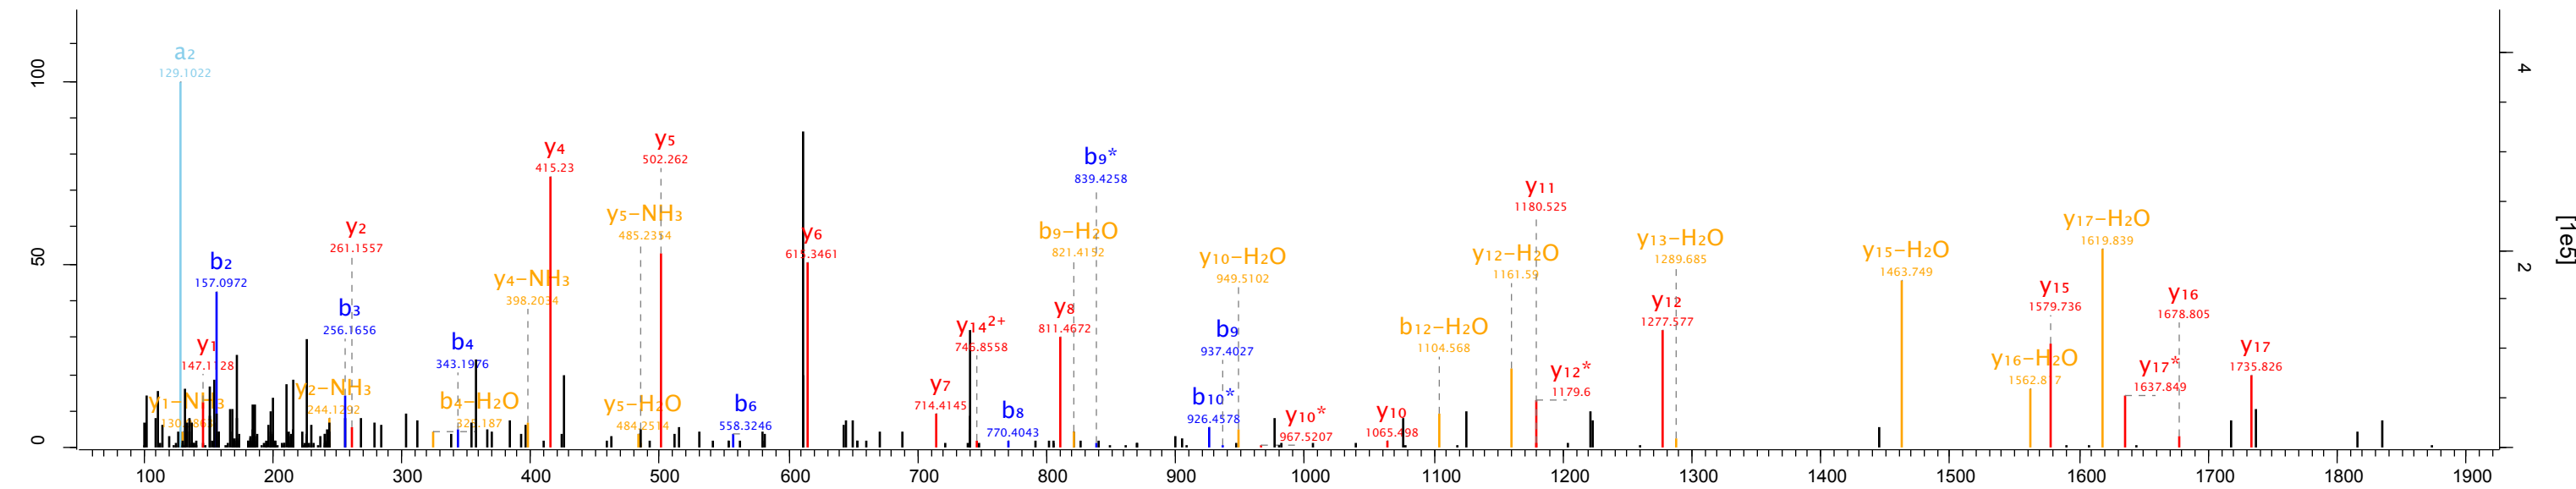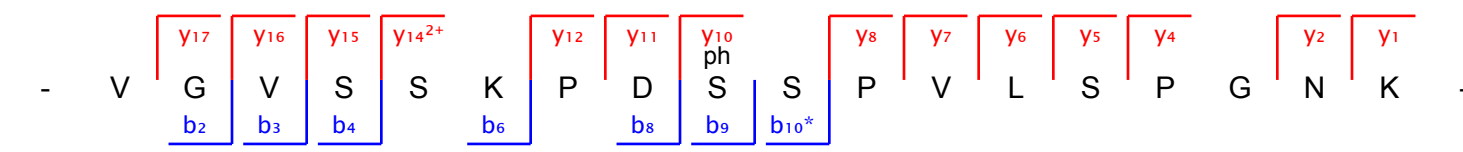

Raw file 20171215\_MaS\_33SR\_LMH\_phospho\_06 Scan 7664 Method FTMS; HCD Score 93.84 m/z 497.23 Gene names CD97

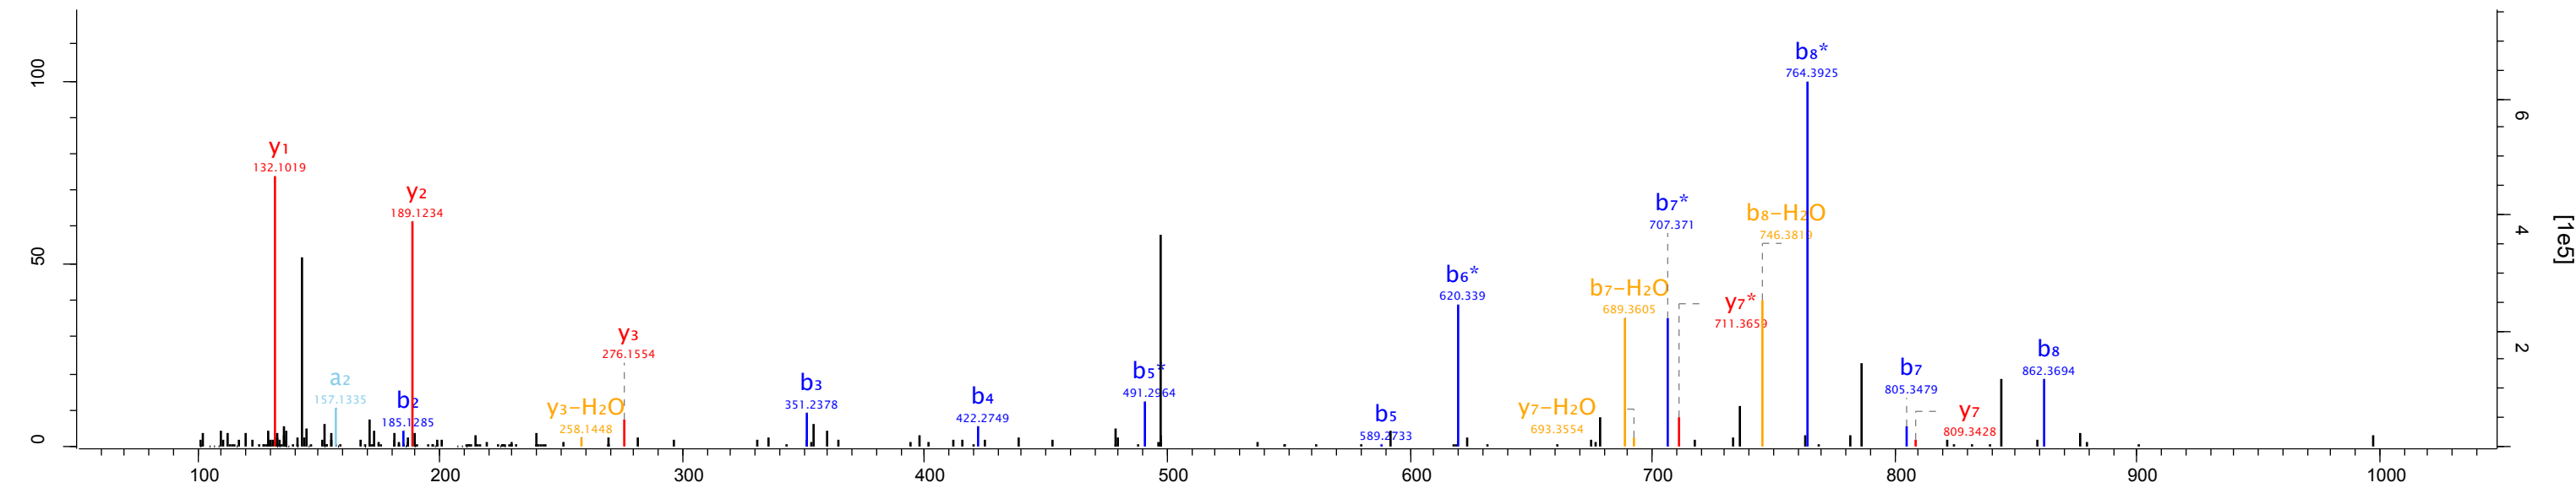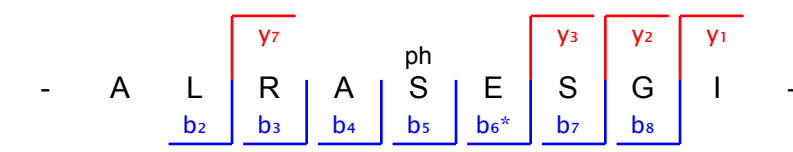



Raw file 20171215\_MaS\_33SR\_LMH\_phospho\_06 Scan 7734 Method FTMS; HCD Score 90.35 m/z 508.91 Gene names RBM4

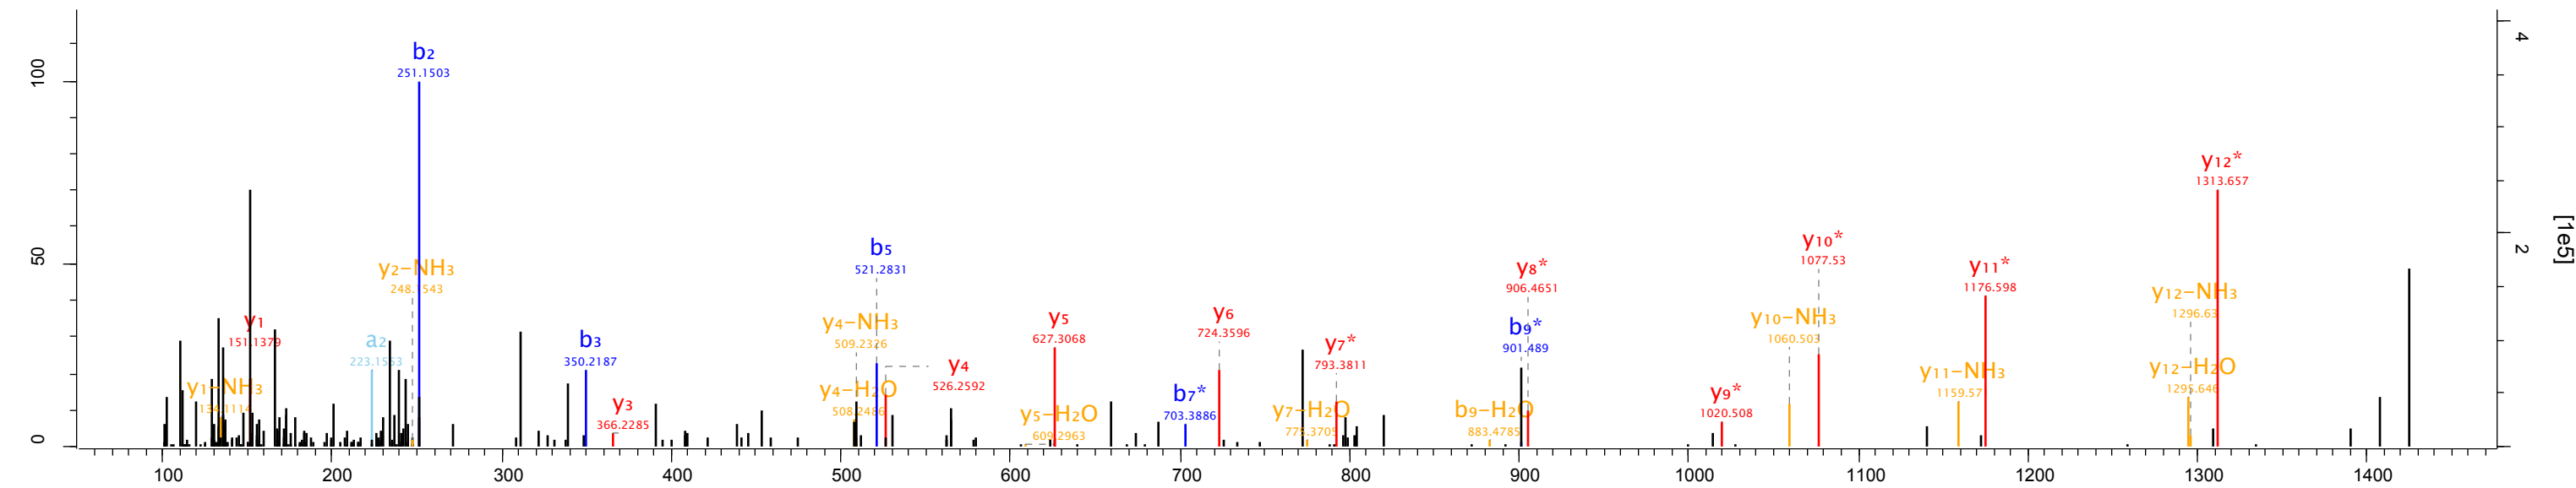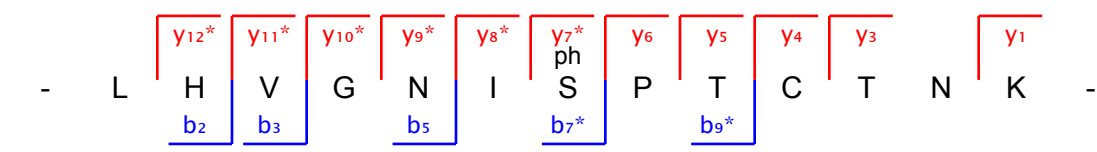

Raw file 20171215\_MaS\_33SR\_LMH\_phospho\_06 Scan 7744 Method FTMS; HCD Score 131.38 m/z 991.44 Gene names IRS2

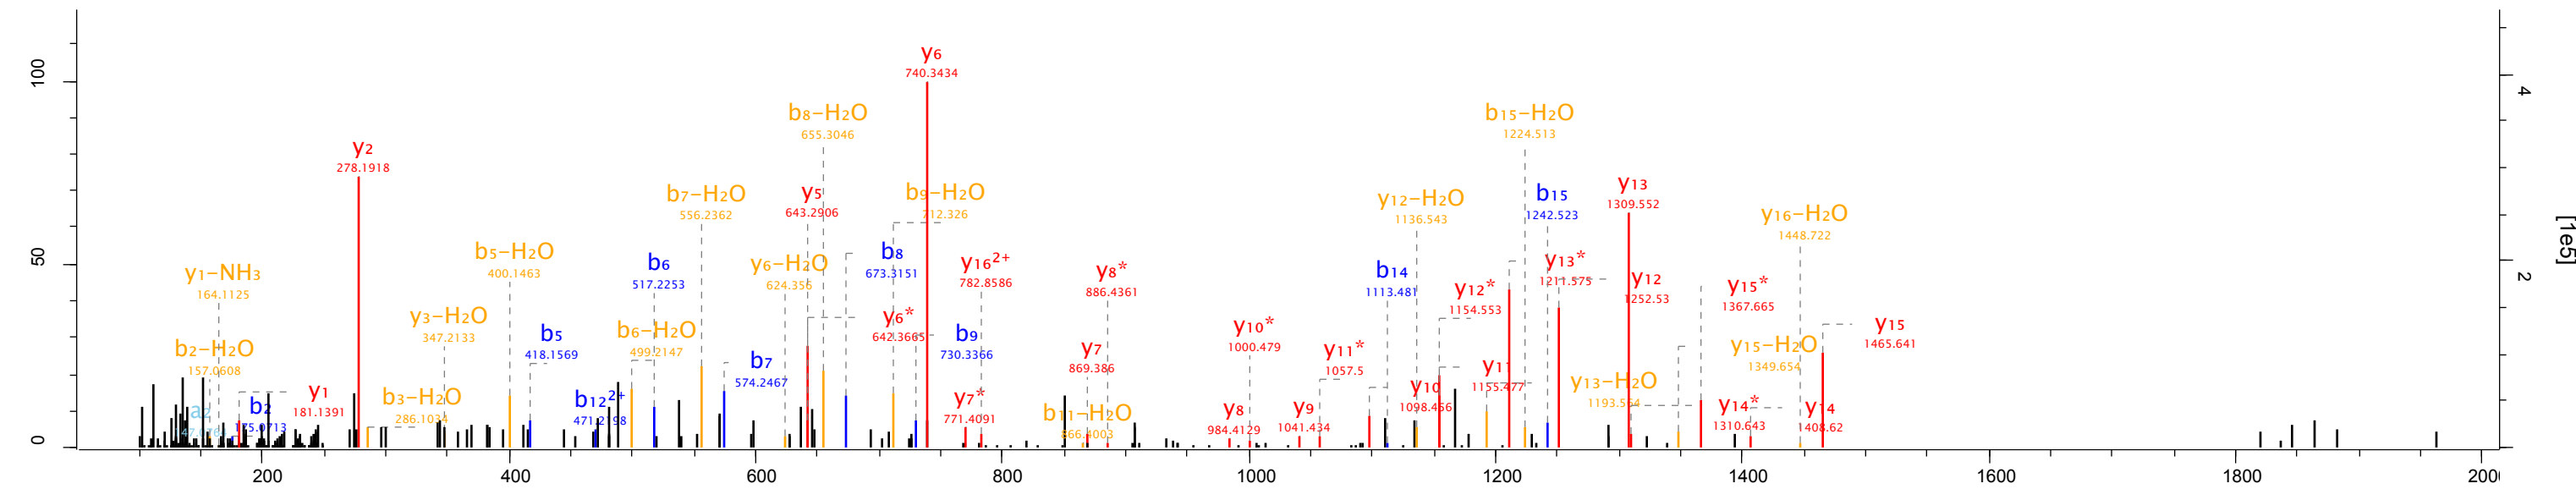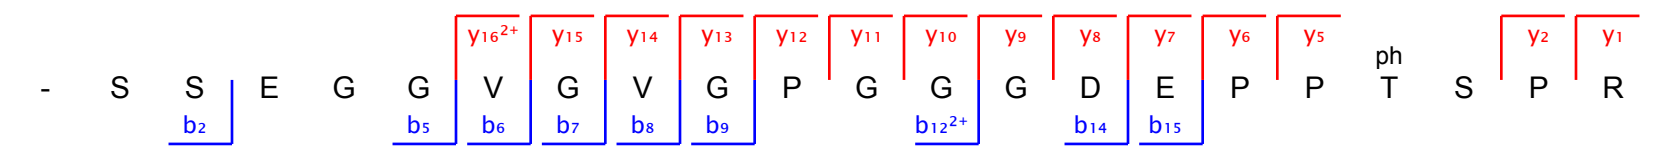

Raw file 20171215\_MaS\_33SR\_LMH\_phospho\_06 Scan 7924 Method FTMS; HCD Score 76.38 m/z 727.33 Gene names IRF2BPL

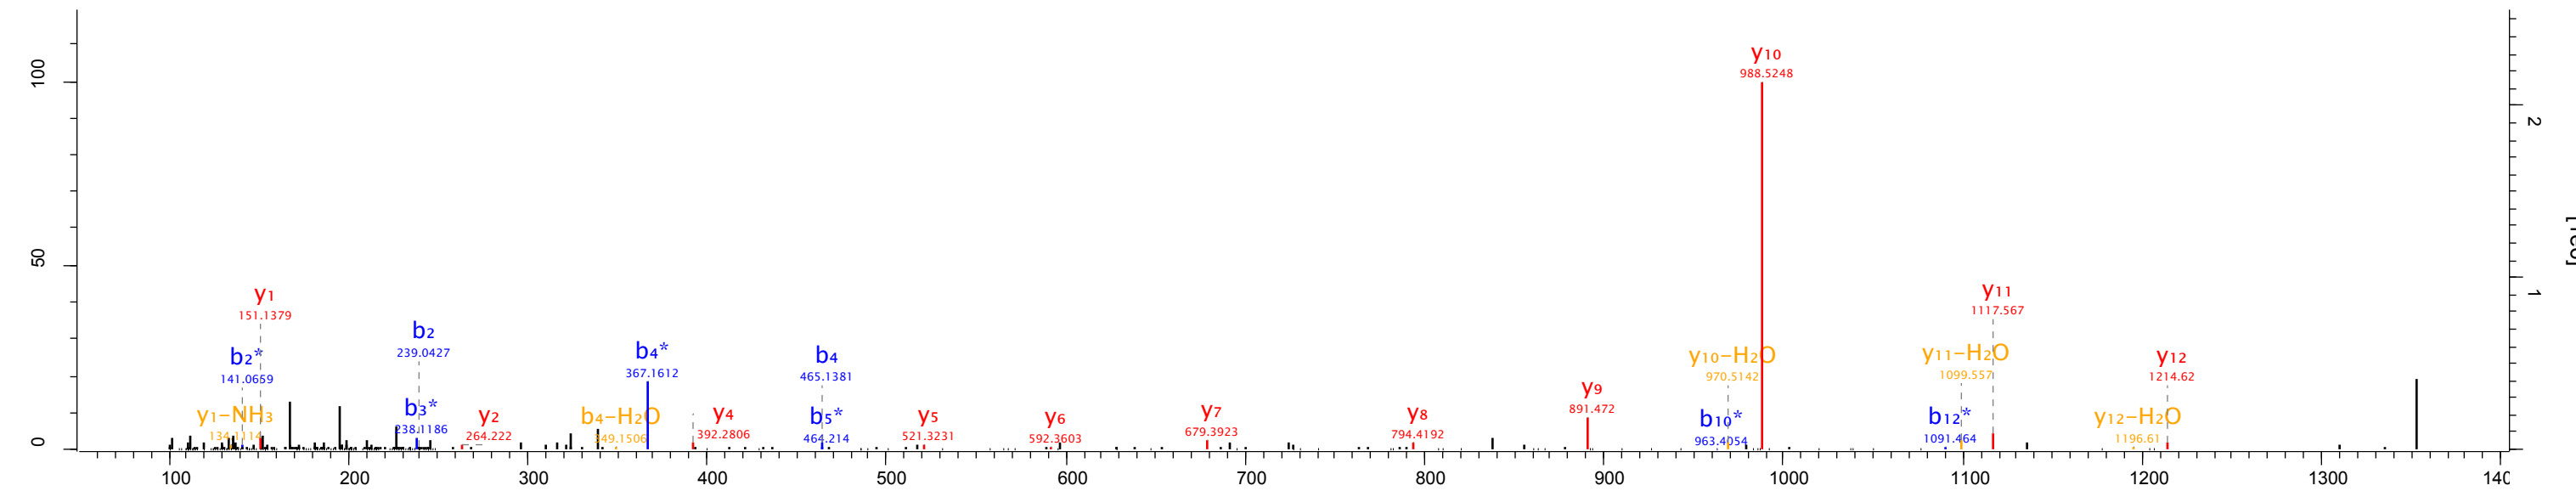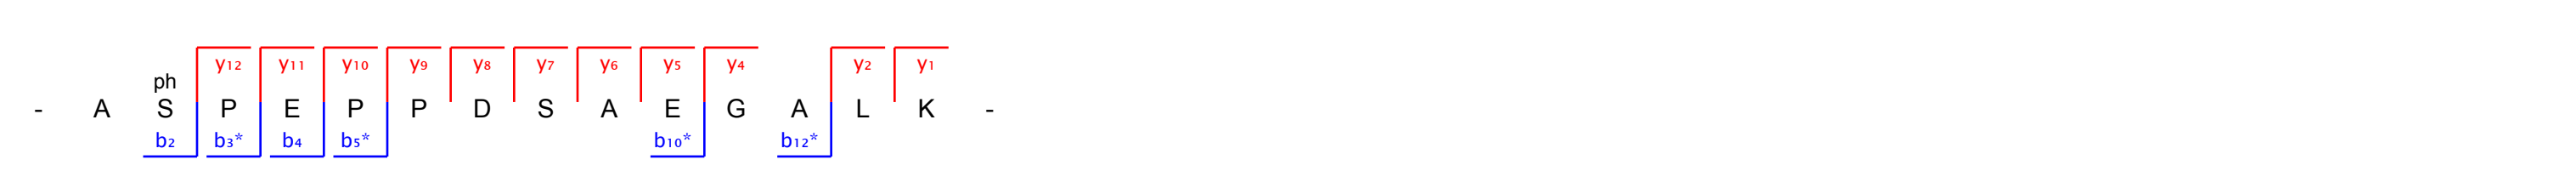

Raw file 20171215\_MaS\_33SR\_LMH\_phospho\_06 Scan 8034 Method FTMS; HCD Score 42.96 m/z 644.82 Gene names KLC2

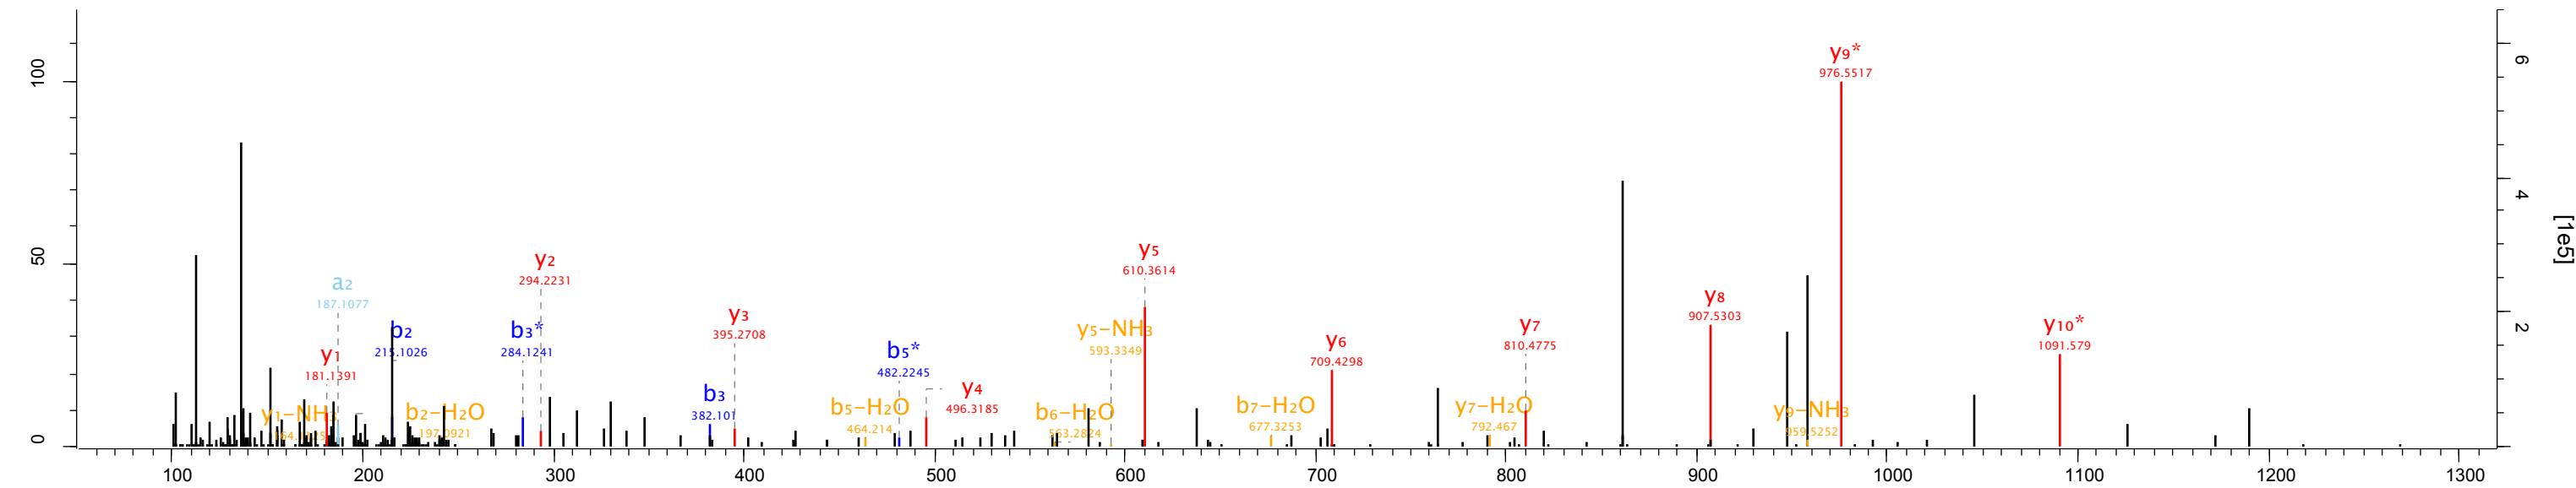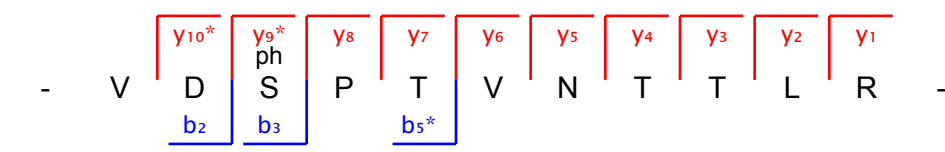

Raw file 20171215\_MaS\_33SR\_LMH\_phospho\_06 Scan 8064 Method FTMS; HCD Score 80.92 m/z 533.22 Gene names MYO1C

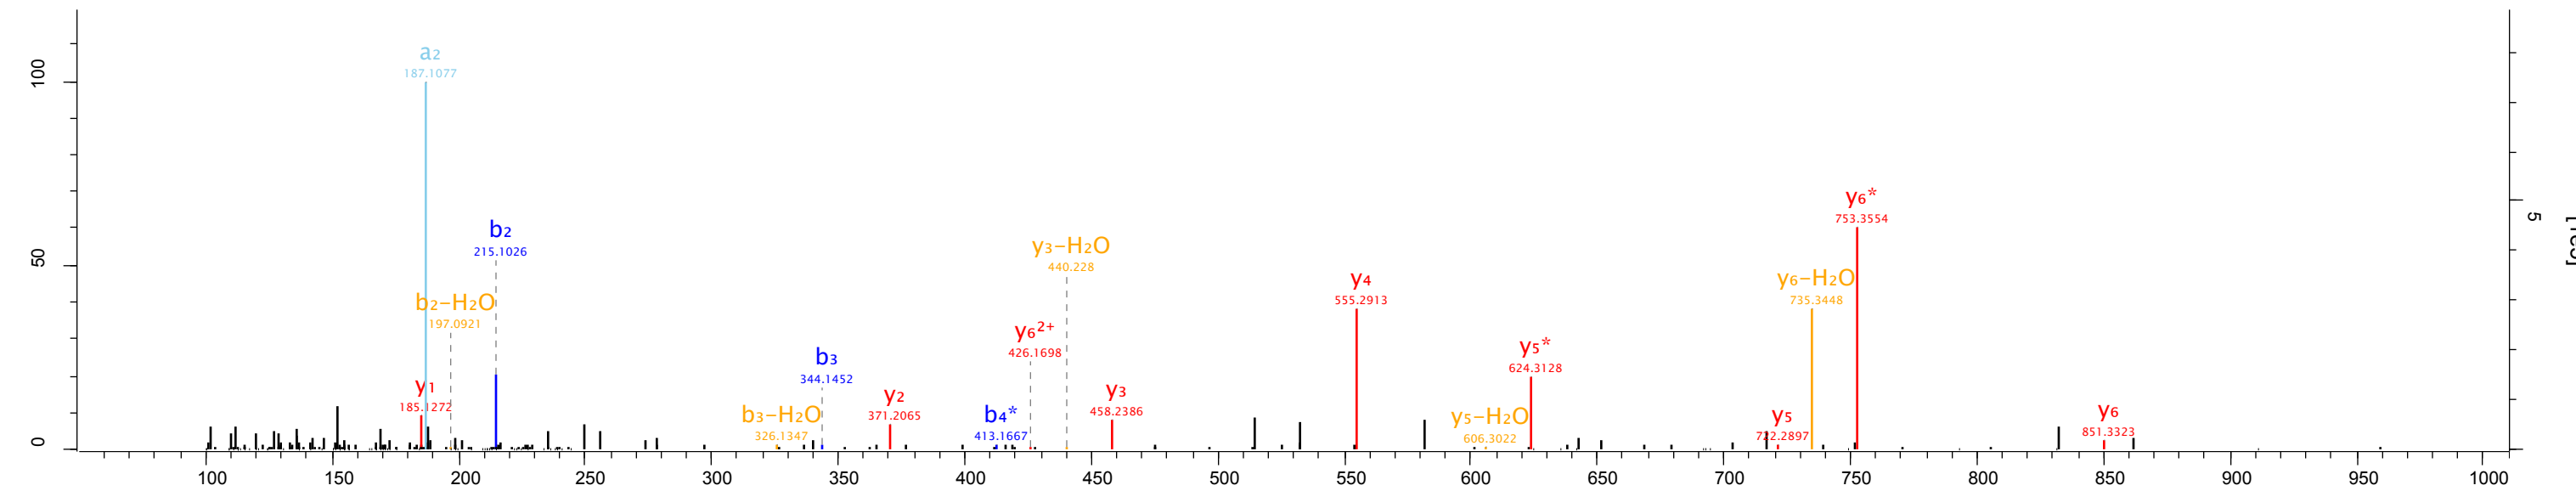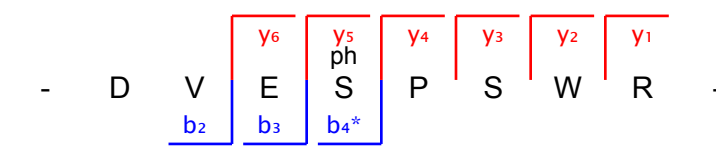

Raw file 20171215\_MaS\_33SR\_LMH\_phospho\_06 Scan 8134 Method FTMS; HCD Score 129 m/z 495.22 Gene names CEP170

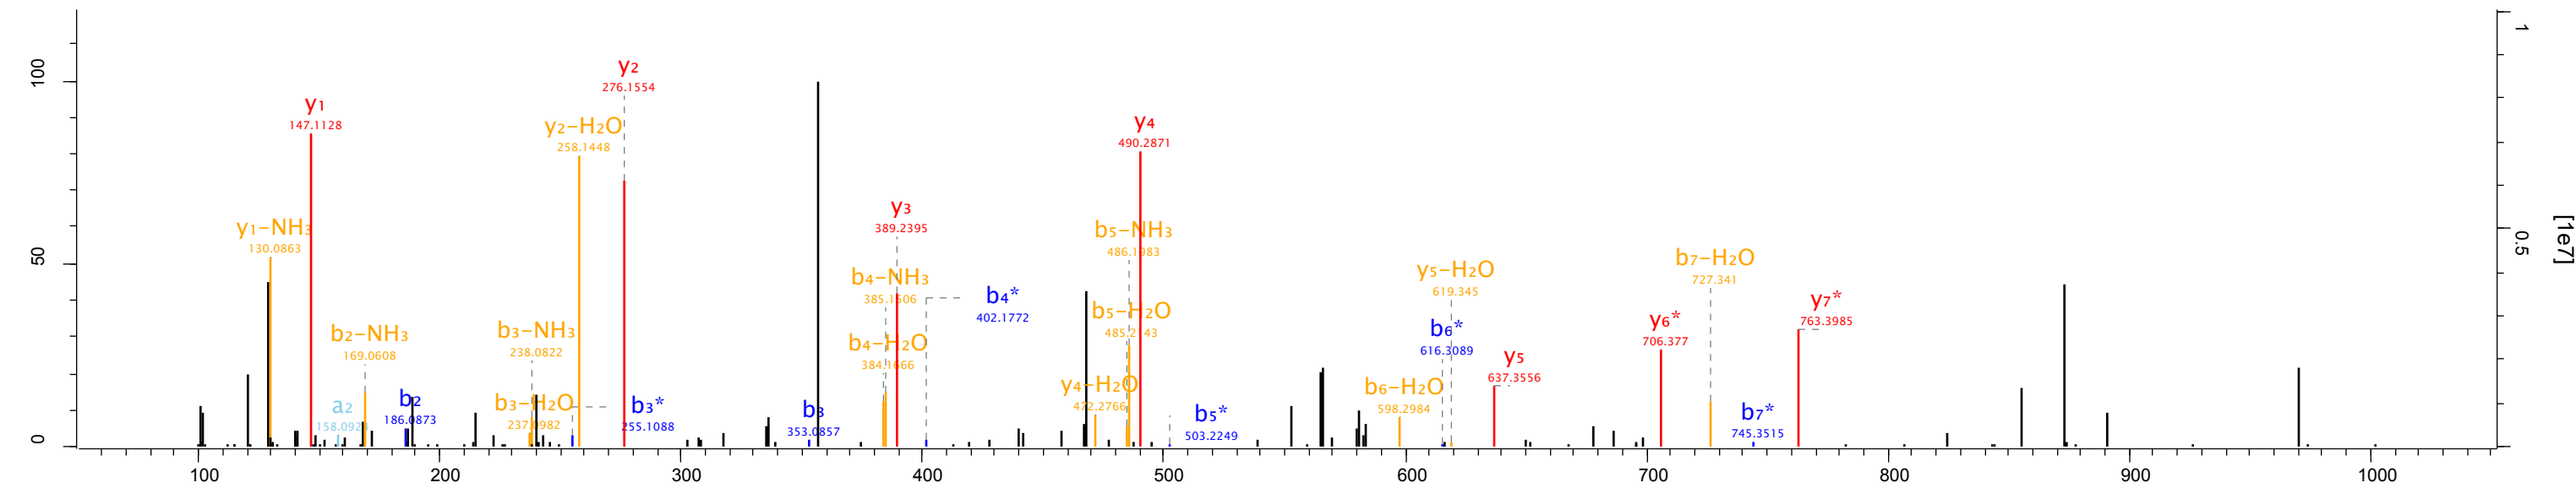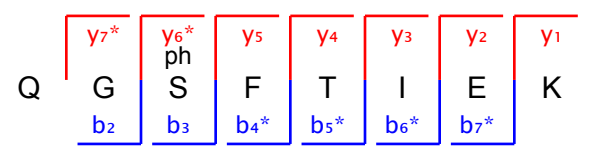

Raw file: 20171215\_MaS\_33SR\_LMH\_phospho\_06  
 Scan: 8674 Method: FTMS; HCD Score: 99.06 m/z: 689.31 Gene names: OGFR

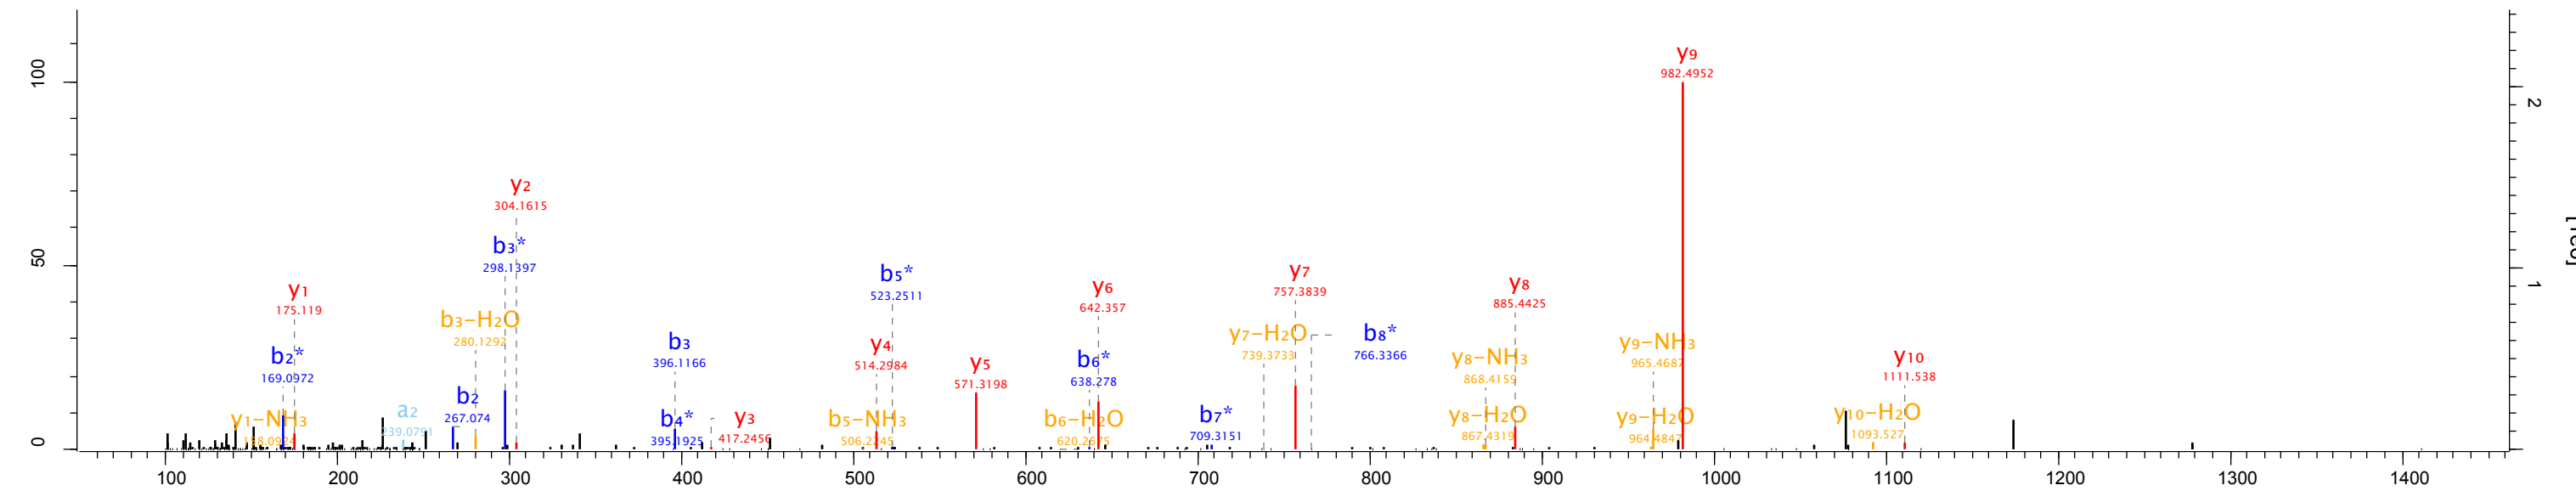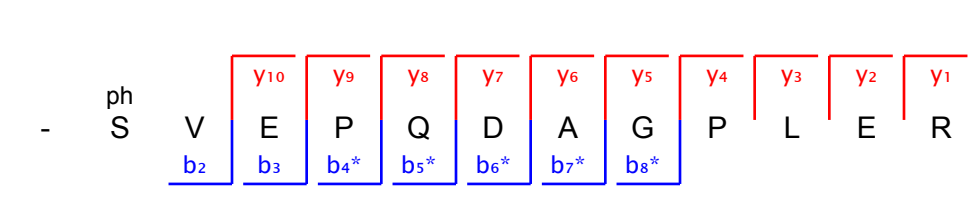

Raw file 20171215\_MaS\_33SR\_LMH\_phospho\_06 Scan 8704 Method FTMS; HCD Score 77.4 m/z 719.01 Gene names CTNNA1;CTNNA2

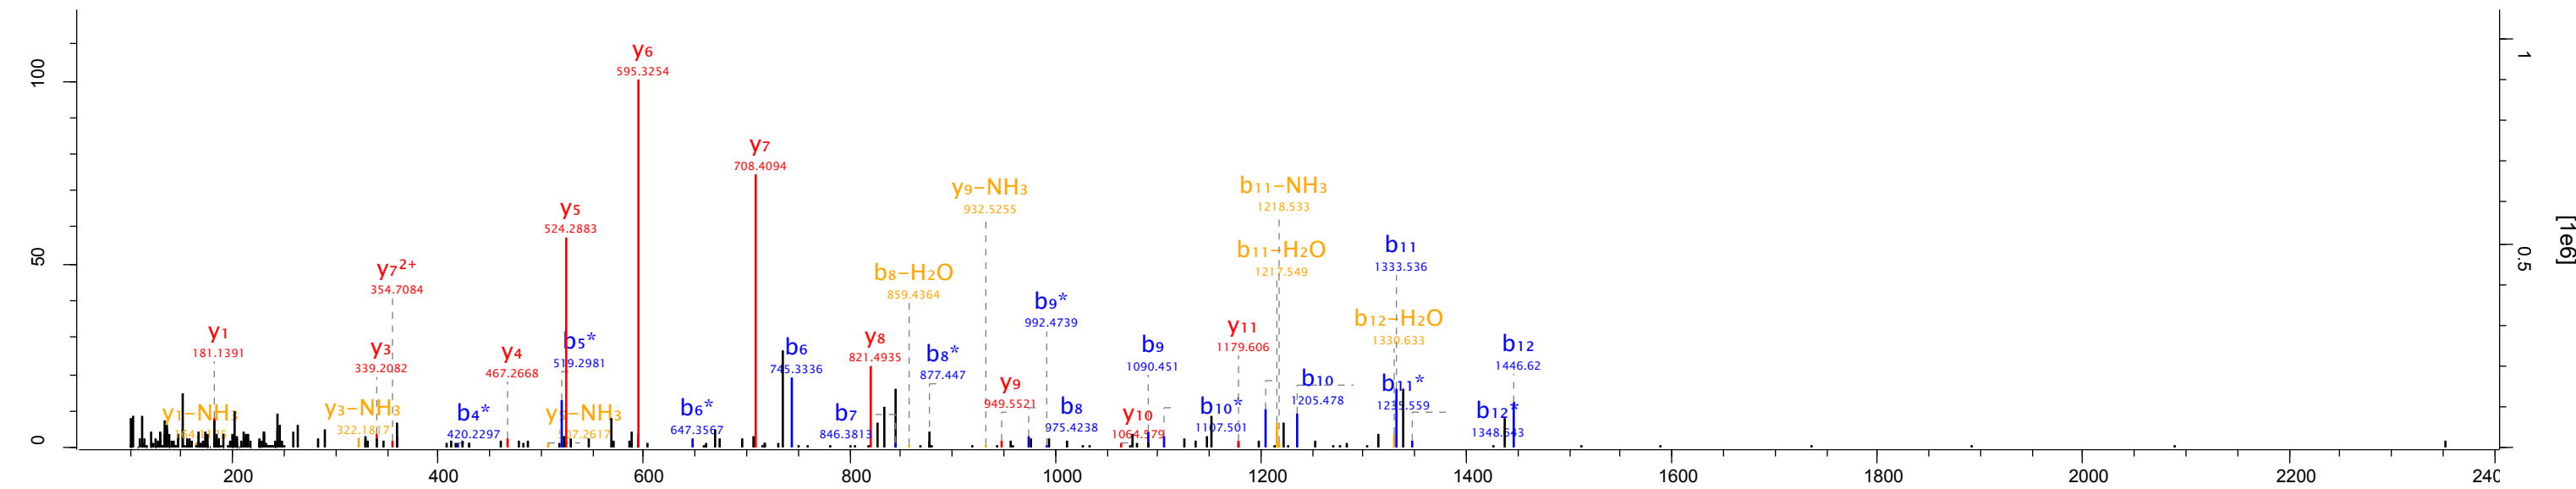

ph  
 - S R T S V Q T E D D Q L I A G Q S A R -  
 b4\* b5\* b6 b7 b8 b9 b10 b11 b12 y11 y10 y9 y8 y7 y6 y5 y4 y3 y1



Raw file 20171215\_MaS\_33SR\_LMH\_phospho\_06 Scan 8874 Method FTMS; HCD Score 132.42 m/z 812.37 Gene names SCAF1

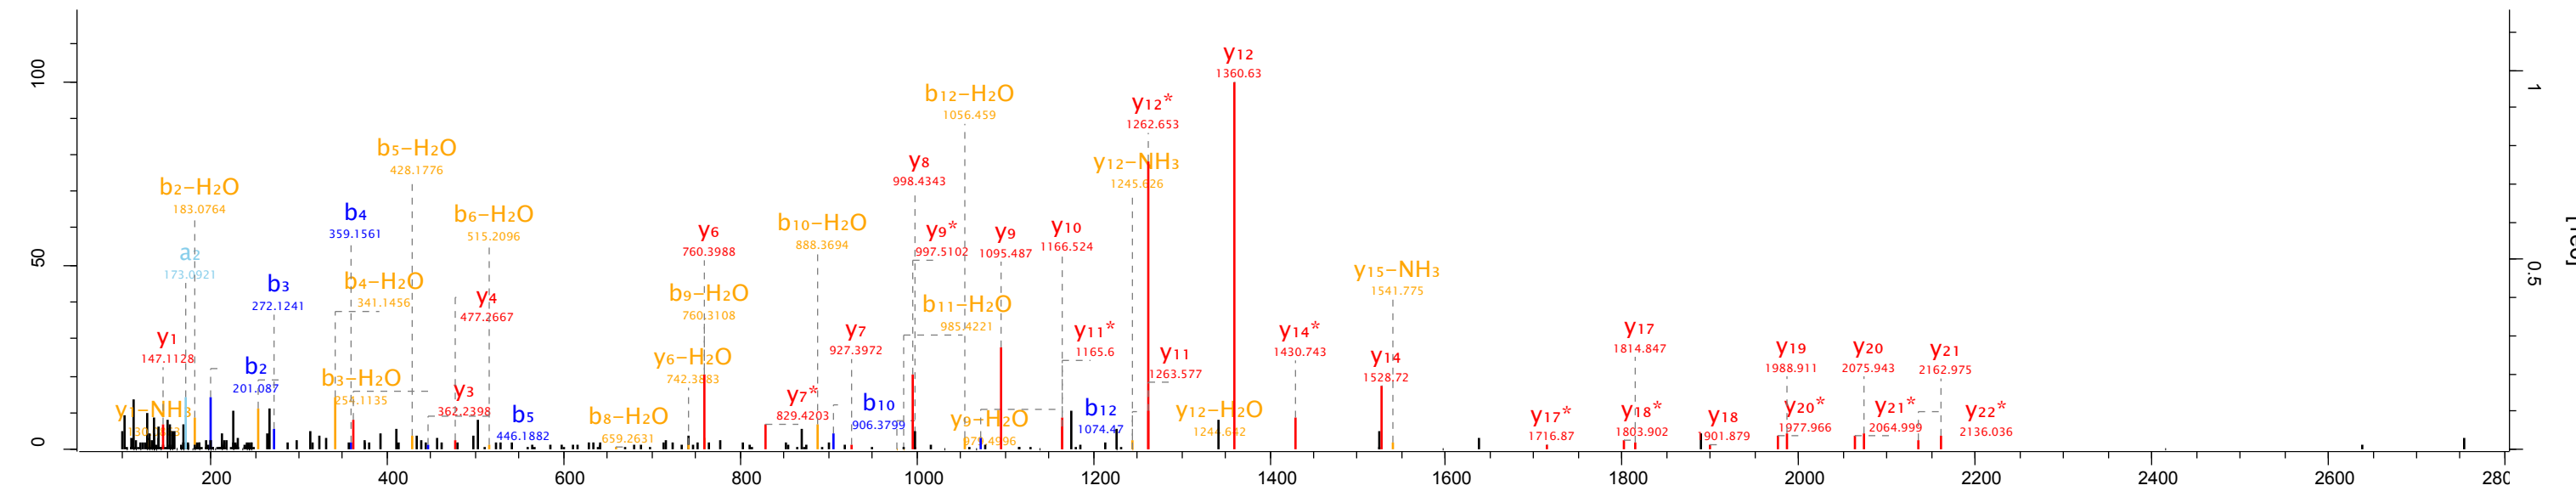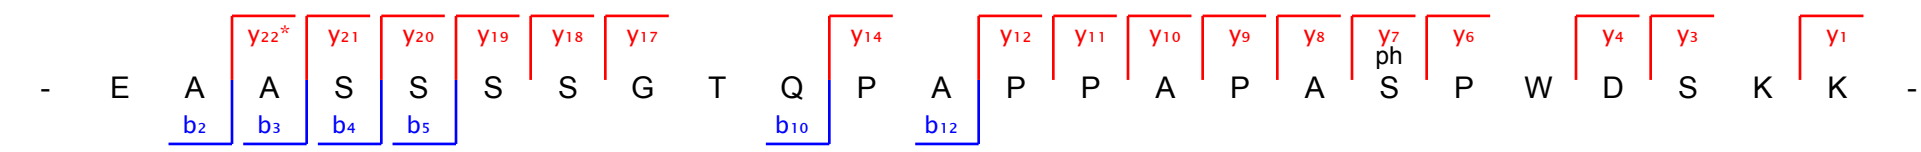

Raw file 20171215\_MaS\_33SR\_LMH\_phospho\_06 Scan 9344 Method FTMS; HCD Score 111.55 m/z 877.72 Gene names HDAC4

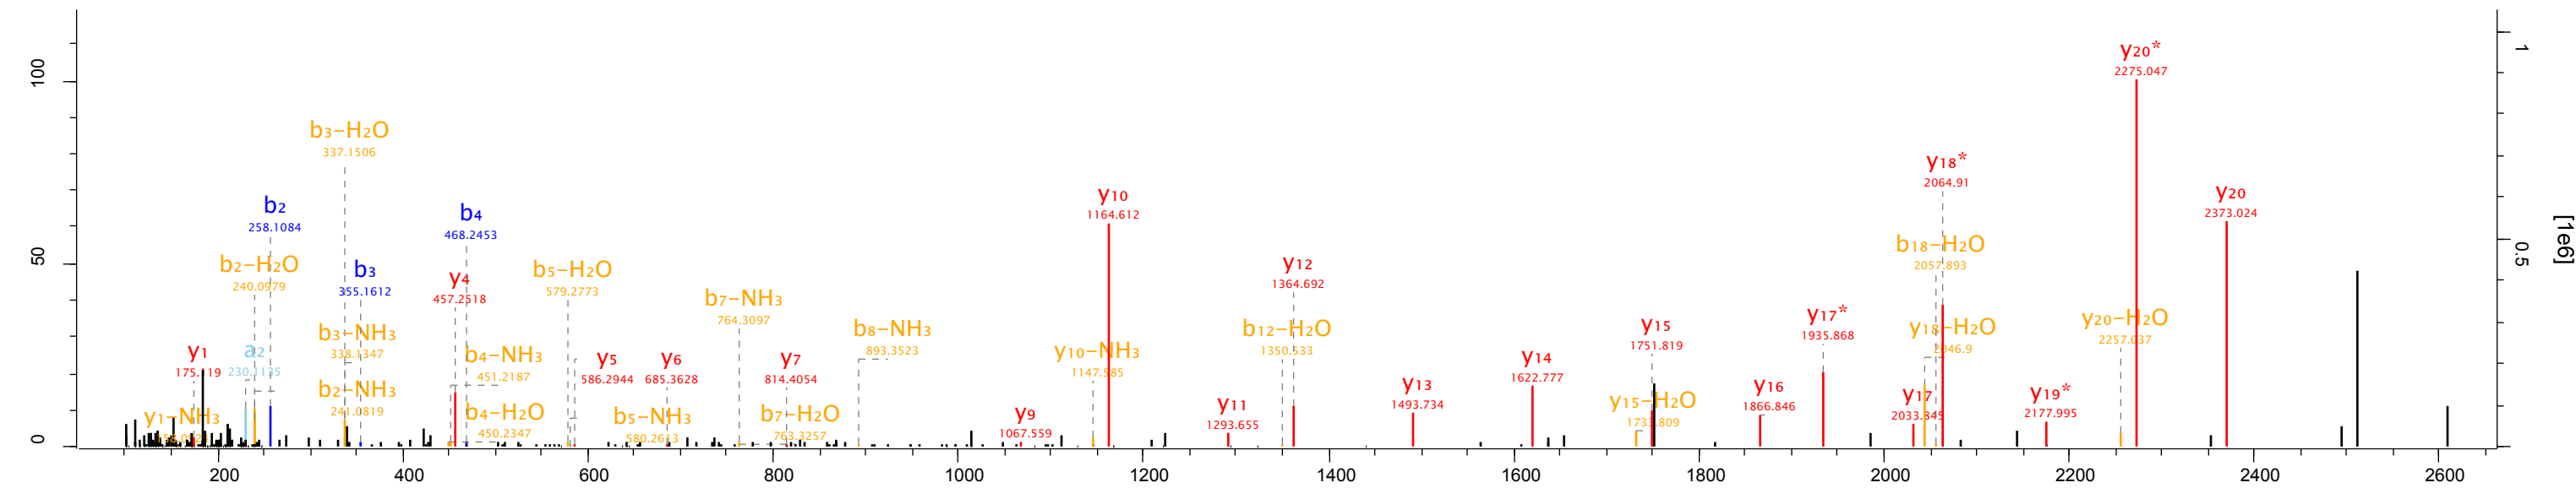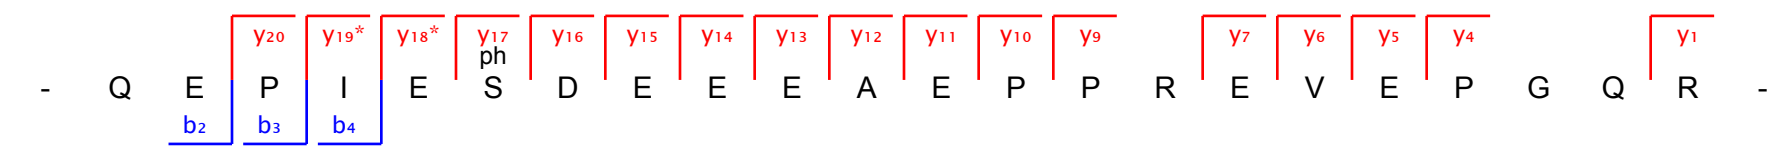

Raw file: 20171215\_MaS\_33SR\_LMH\_phospho\_06  
 Scan: 9564 Method: FTMS; HCD Score: 76.59 m/z: 807.34 Gene names: IRS1

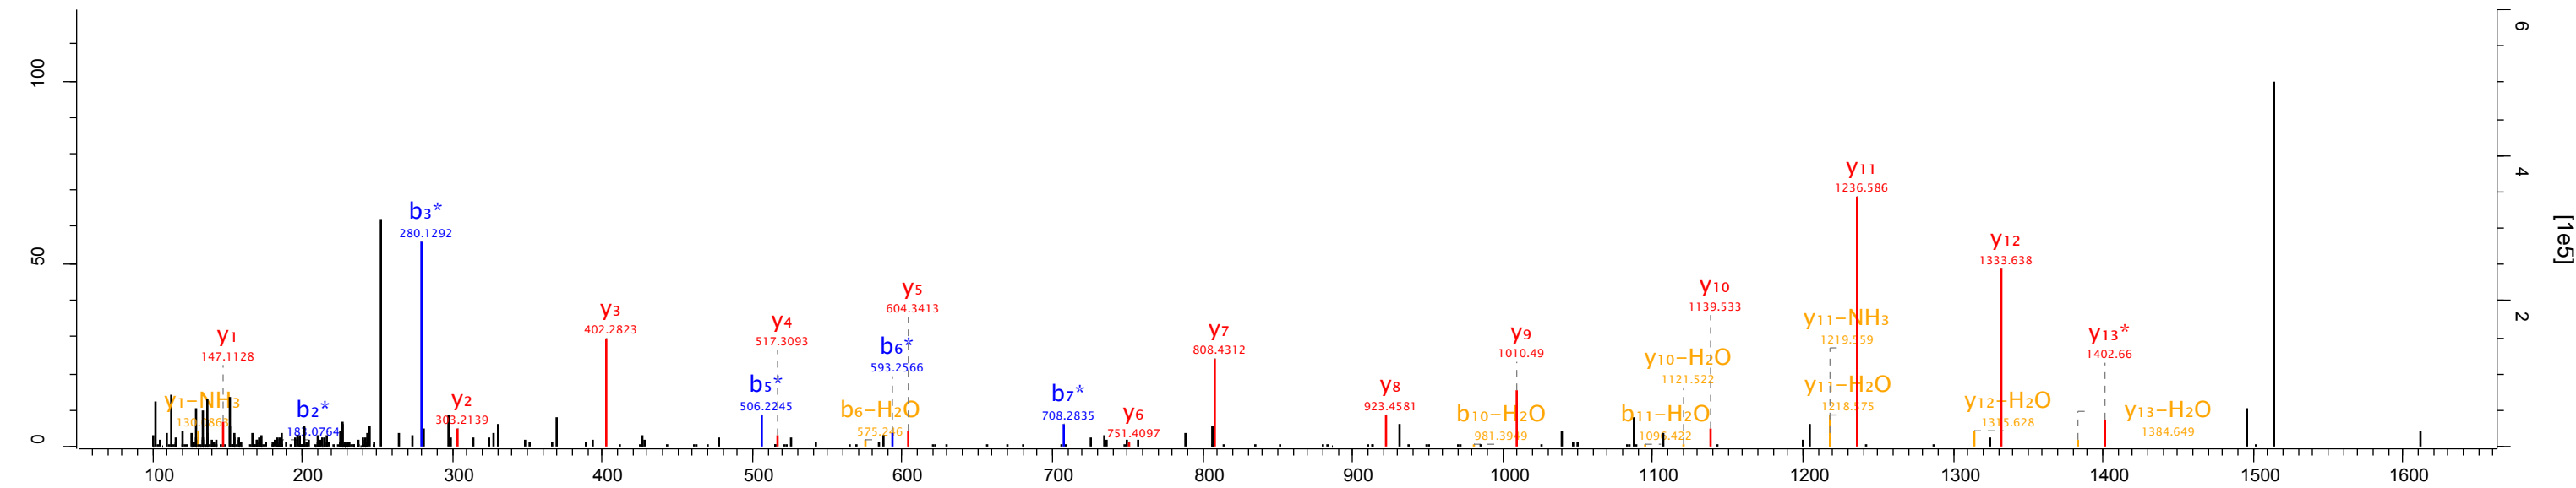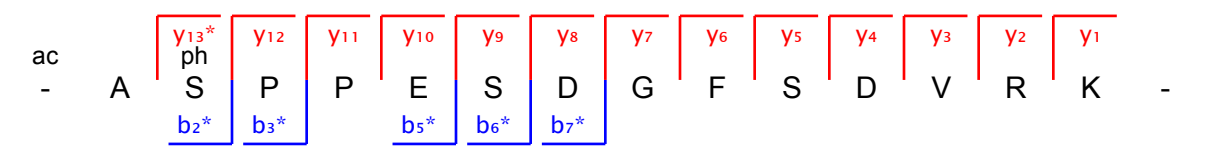

Raw file 20171215\_MaS\_33SR\_LMH\_phospho\_06 Scan 9724 Method FTMS; HCD Score 76.76 m/z 604.27 Gene names RSF1

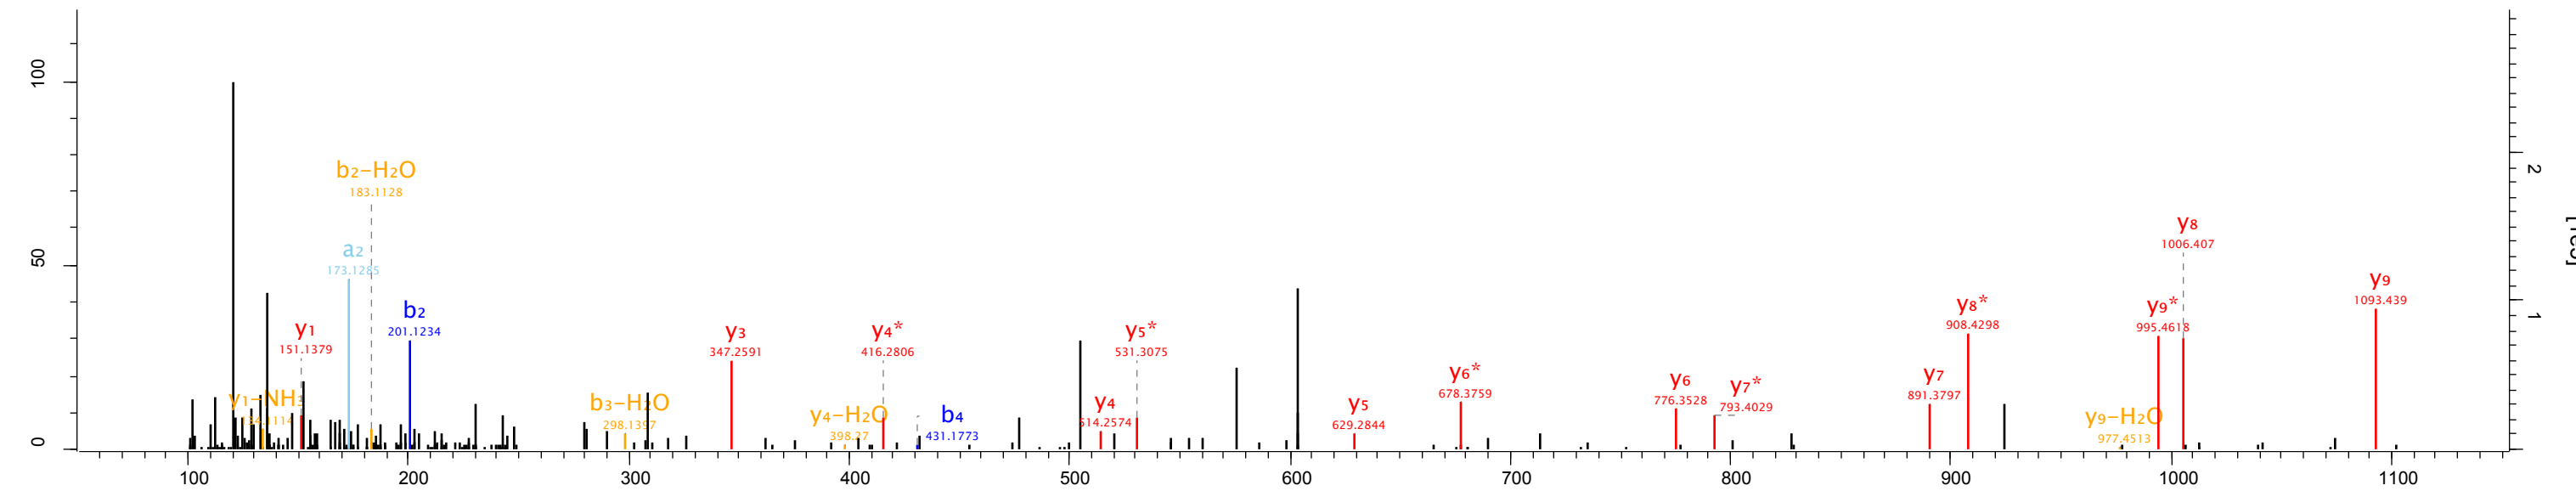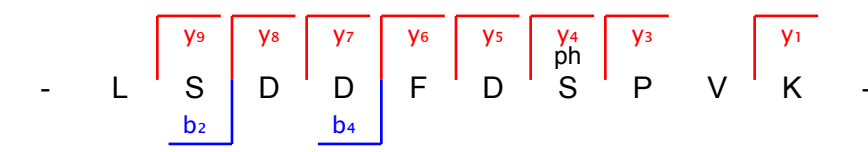

Raw file 20171215\_MaS\_33SR\_LMH\_phospho\_07 Scan 2044 Method FTMS; HCD Score 115.53 m/z 705.82 Gene names IRF2BPL

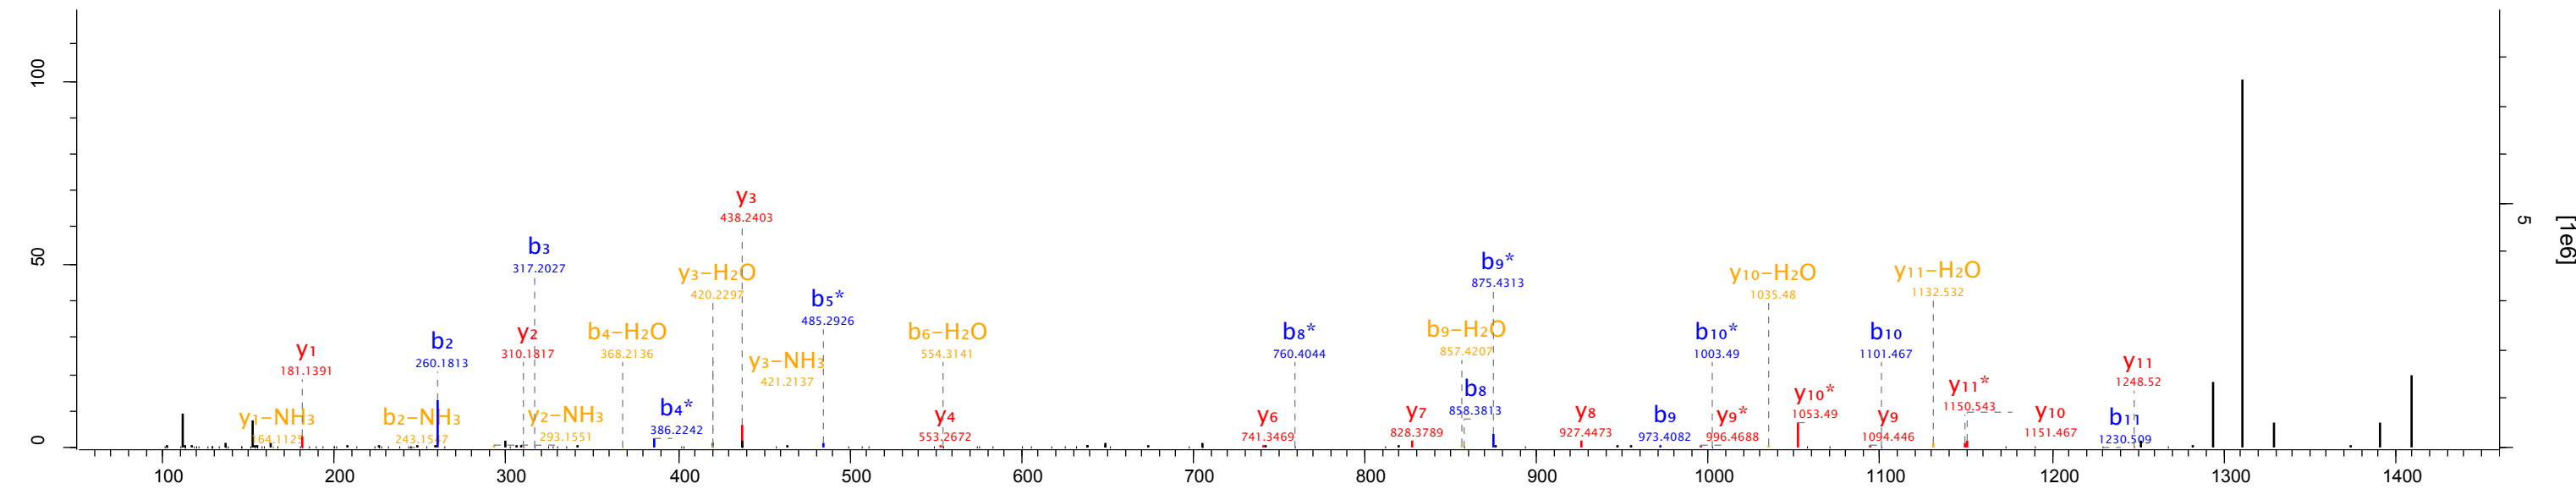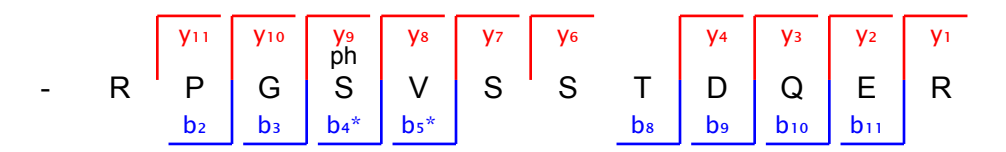

Raw file 20171215\_MaS\_33SR\_LMH\_phospho\_07 Scan 2344 Method FTMS; HCD Score 61.28 m/z 578.61 Gene names SMTN

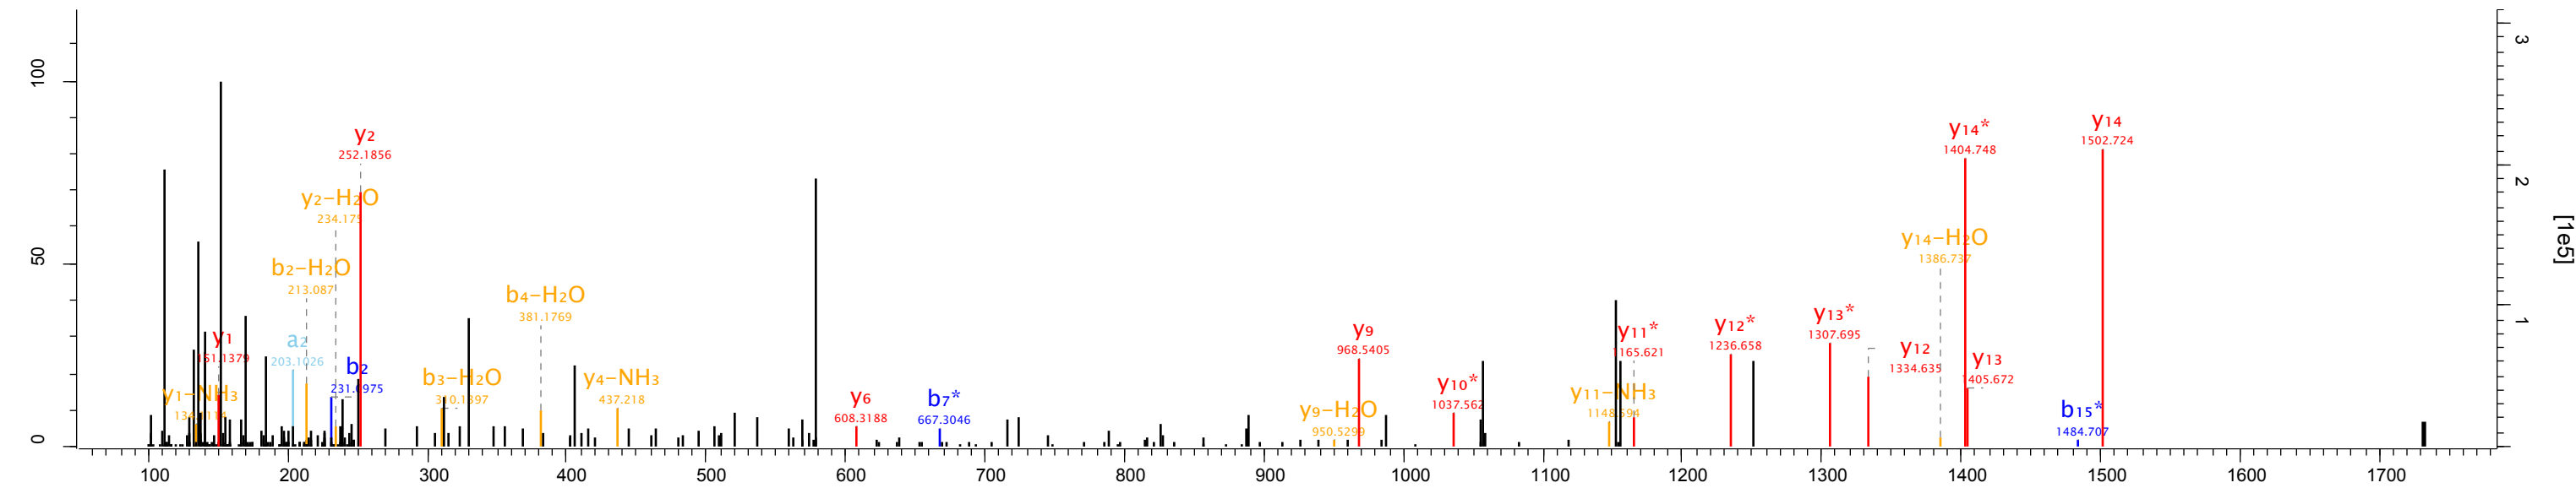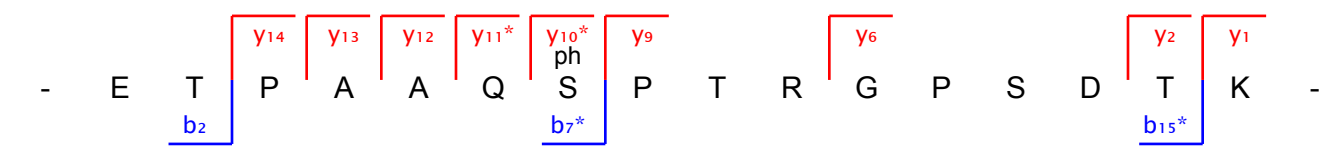

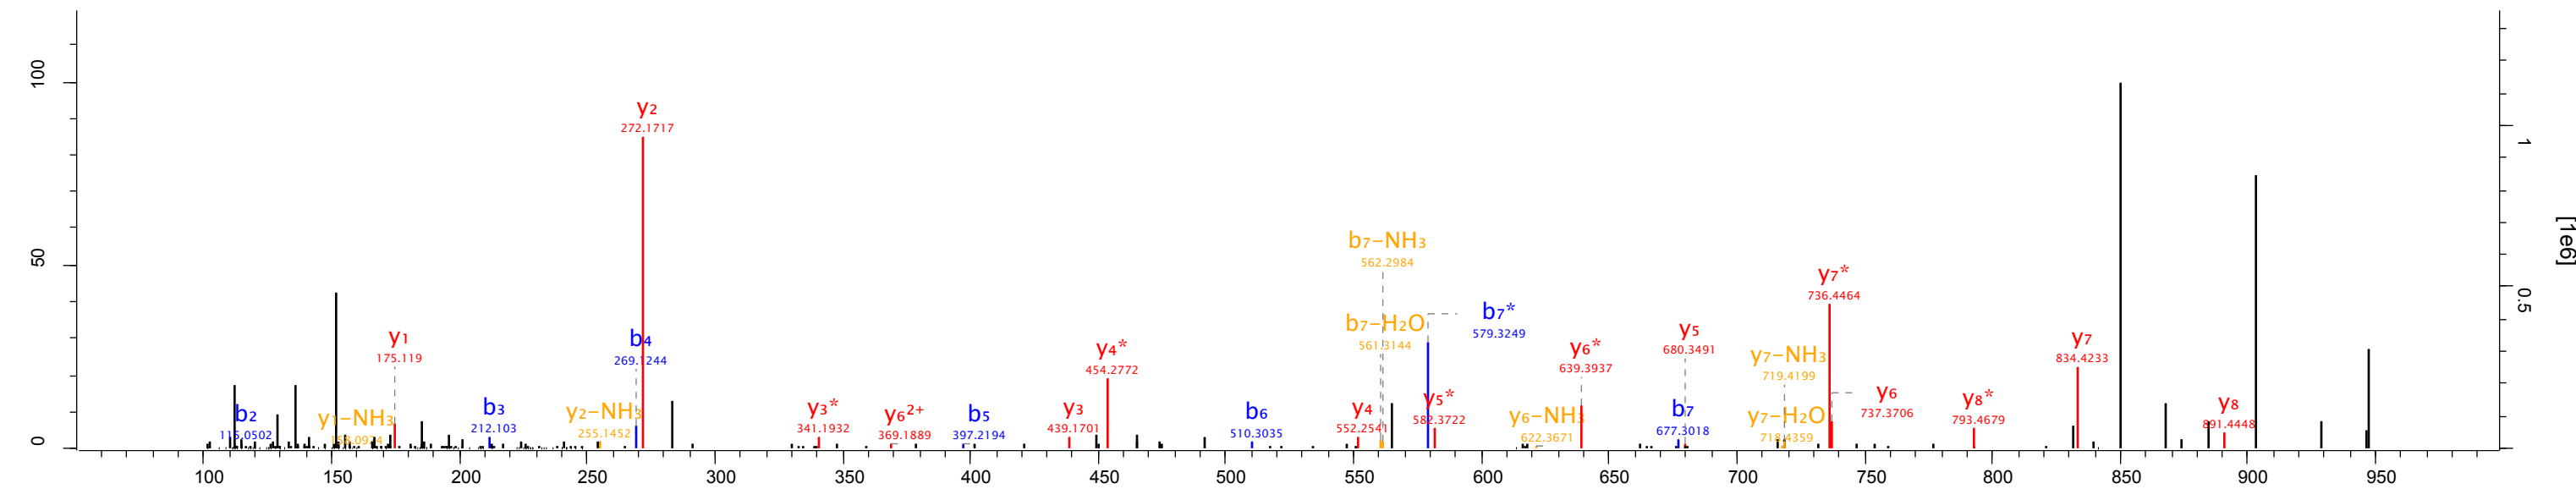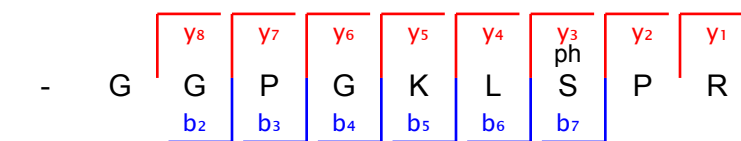

Raw file 20171215\_MaS\_33SR\_LMH\_phospho\_07 Scan 2804 Method FTMS; HCD Score 140.22 m/z 595.76 Gene names SLC1A5

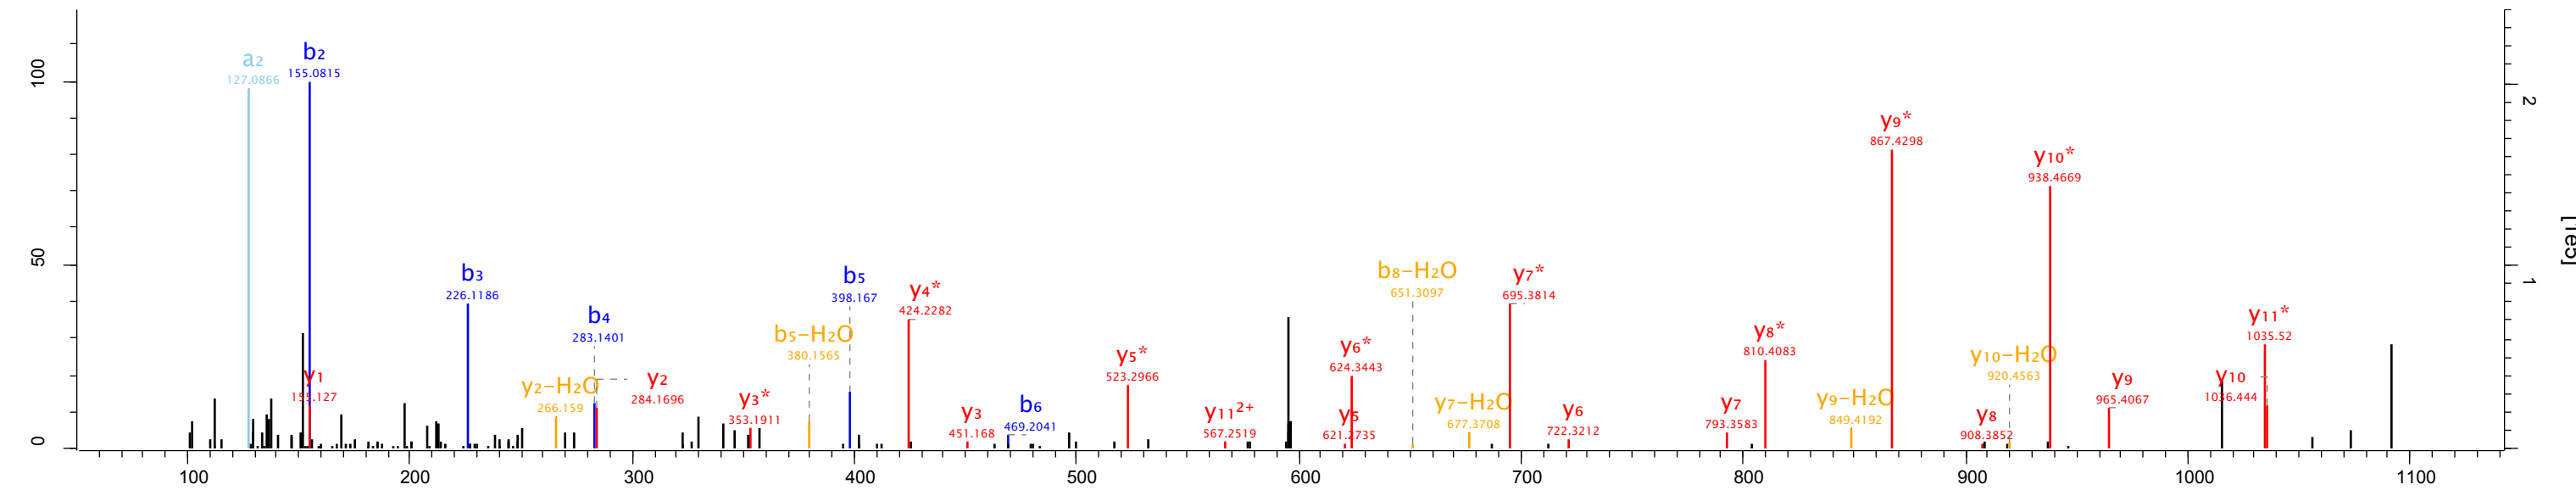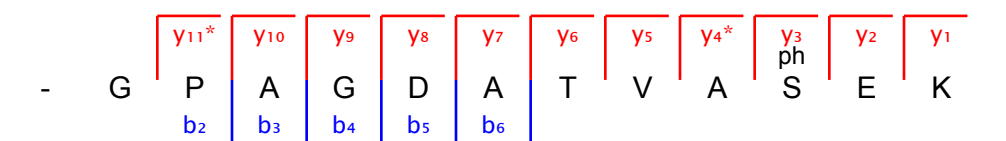



Raw file 20171215\_MaS\_33SR\_LMH\_phospho\_07 Scan 3794 Method FTMS; HCD Score 52.89 m/z 588.27 Gene names CHAMP1

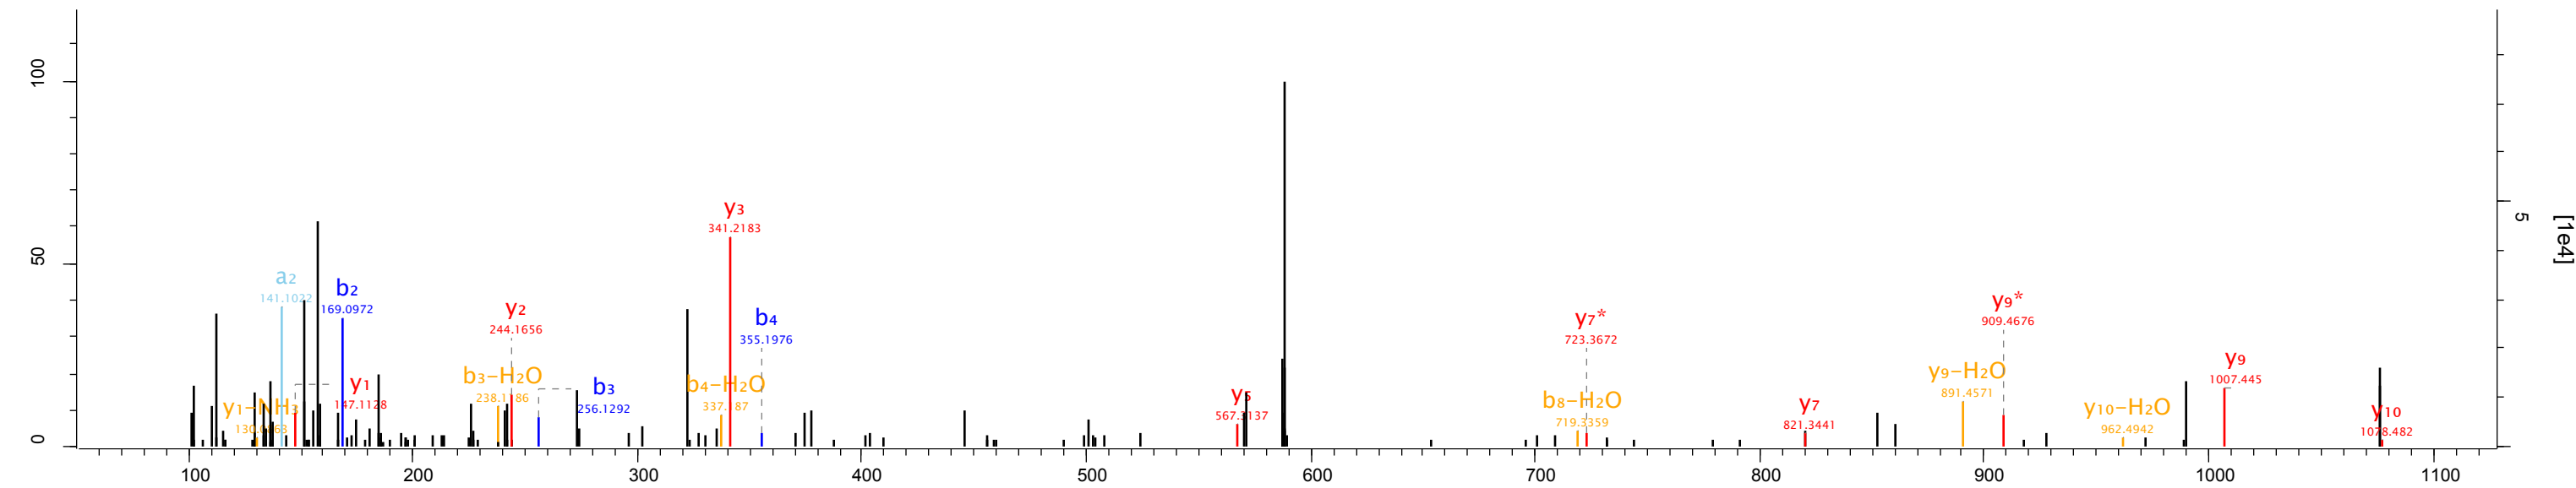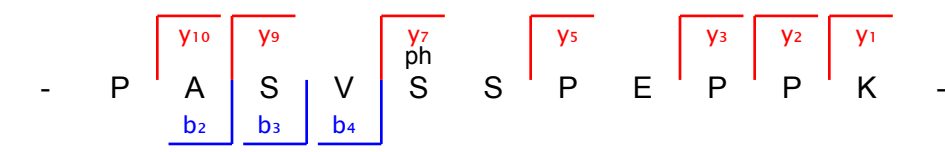

Raw file 20171215\_MaS\_33SR\_LMH\_phospho\_07 Scan 5254 Method FTMS; HCD Score 46.07 m/z 553.75 Gene names BNC1

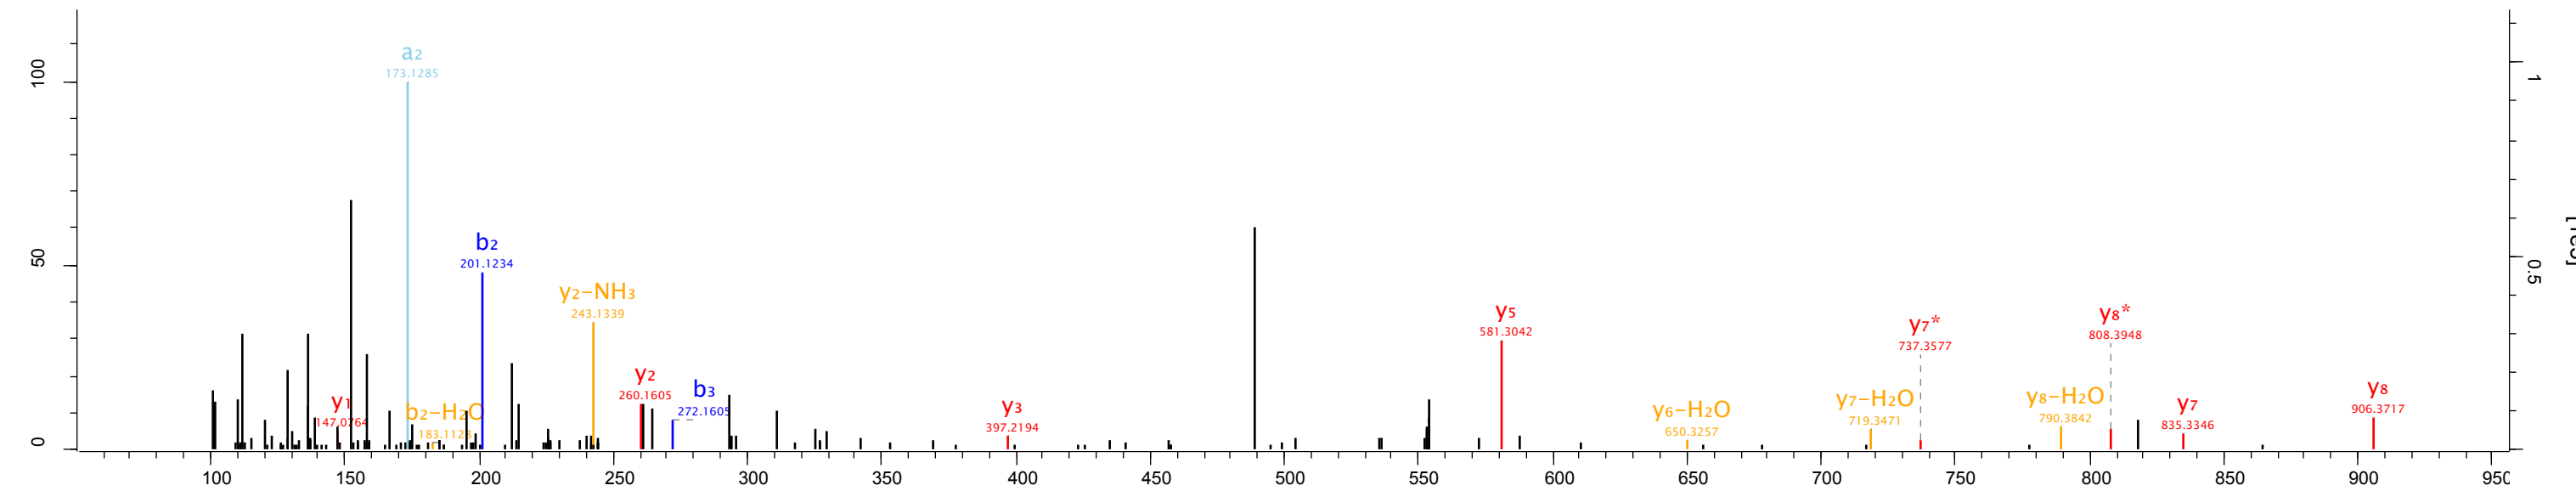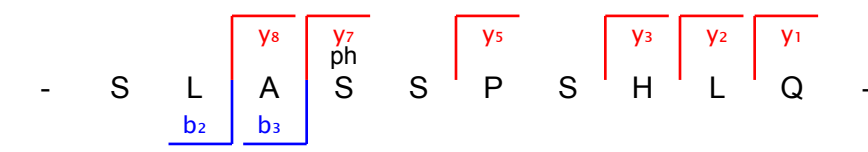

Raw file

20171215\_MaS\_33SR\_LMH\_phospho\_08

| Scan | Method    | Score | m/z    | Gene names |
|------|-----------|-------|--------|------------|
| 1924 | FTMS; HCD | 40.94 | 437.85 | BABAM1     |

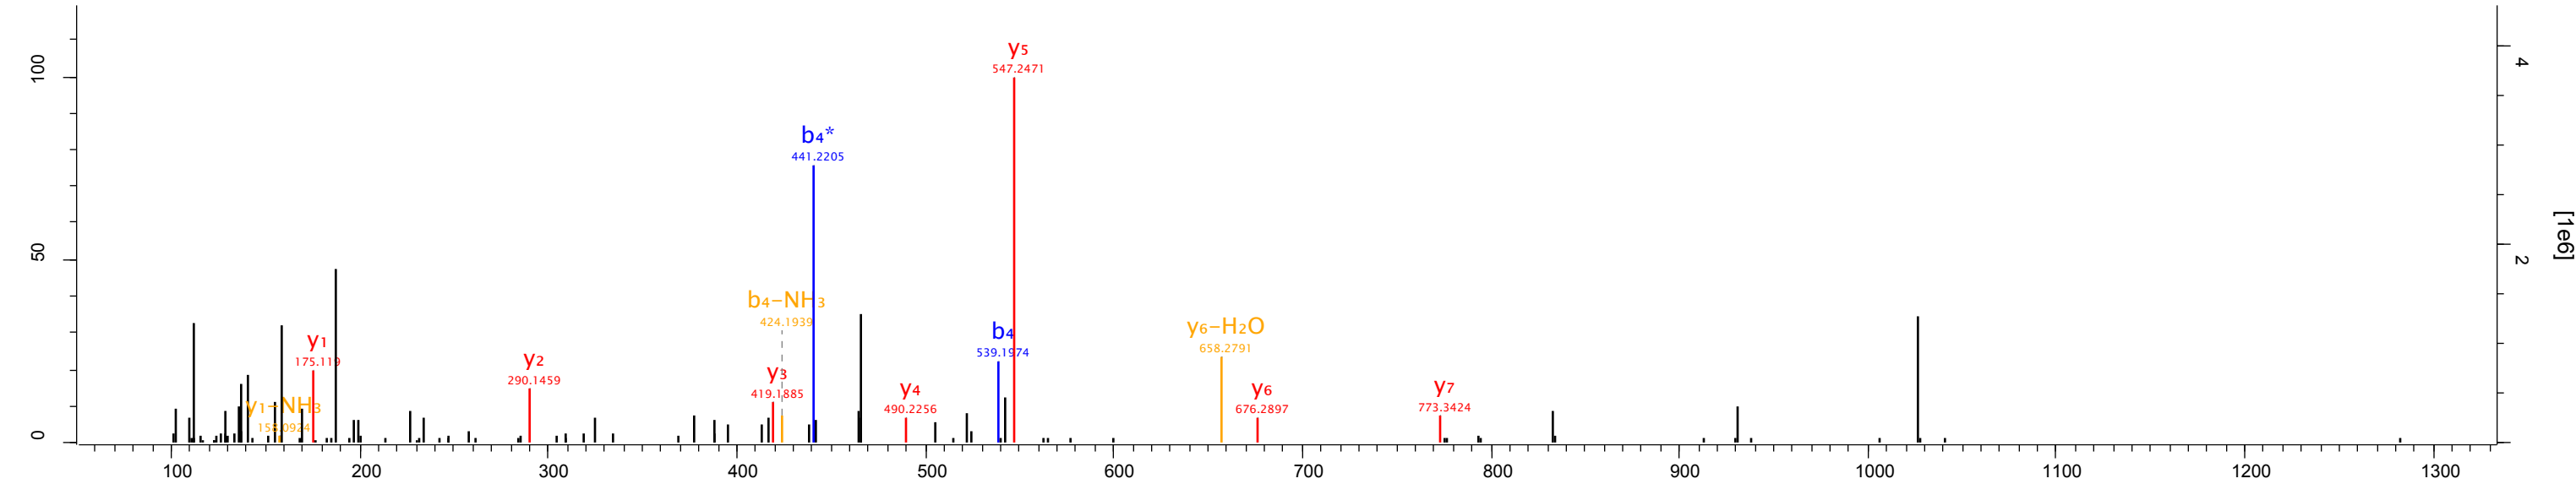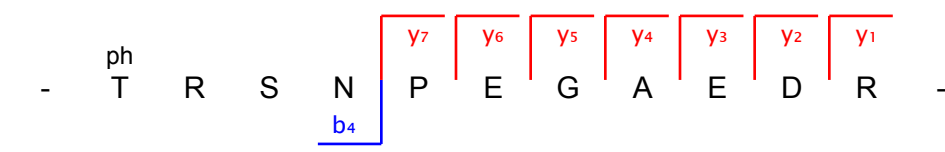

Raw file

20171215\_MaS\_33SR\_LMH\_phospho\_08

| Scan | Method    | Score | m/z    | Gene names |
|------|-----------|-------|--------|------------|
| 2004 | FTMS; HCD | 77.9  | 555.25 | PHACTR4    |

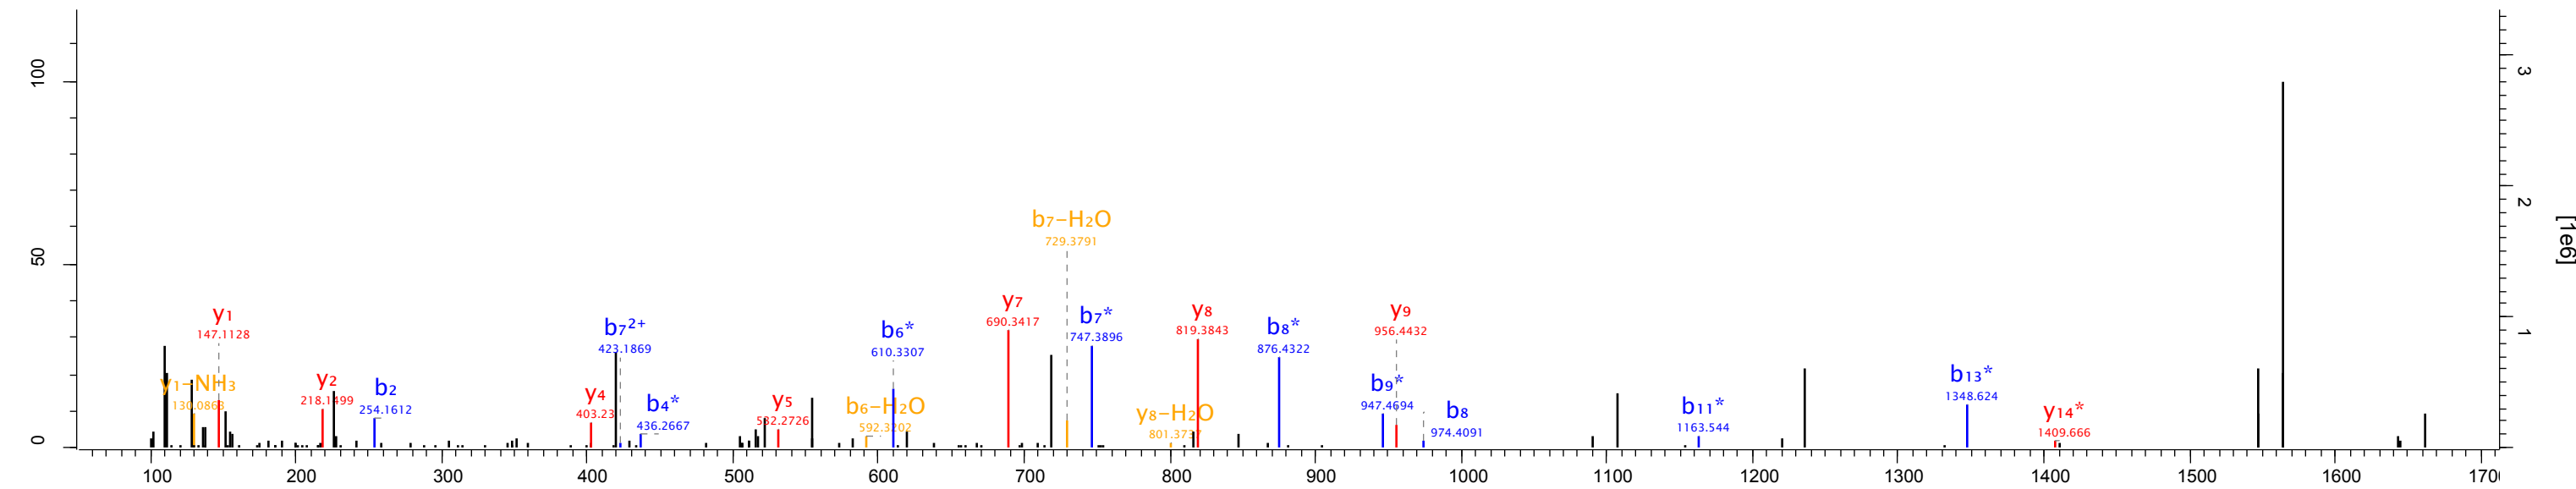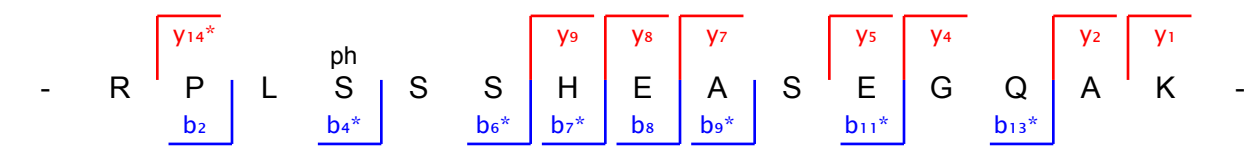

Raw file 20171215\_MaS\_33SR\_LMH\_phospho\_08 Scan 3514 Method FTMS; HCD Score 100.11 m/z 647.82 Gene names KAT7

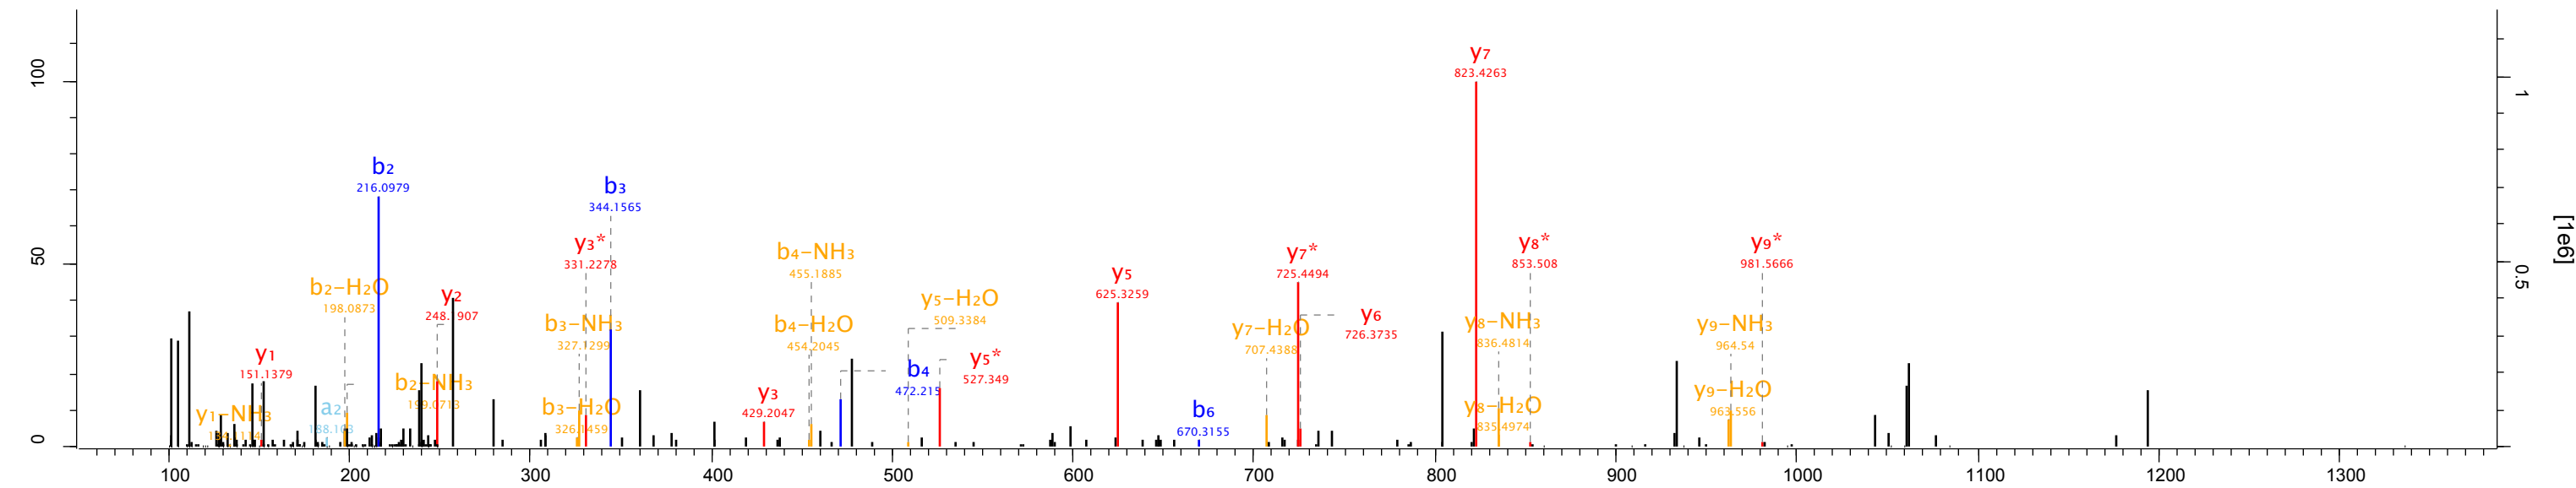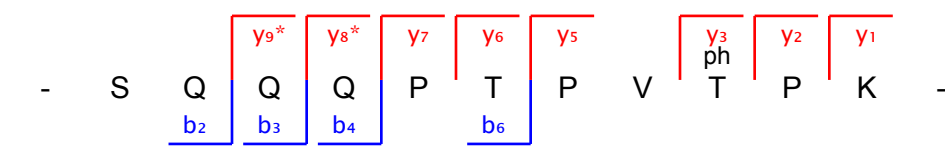



Raw file 20171215\_MaS\_33SR\_LMH\_phospho\_08 Scan 4224 Method FTMS; HCD Score 127.27 m/z 535.77 Gene names WRNIP1

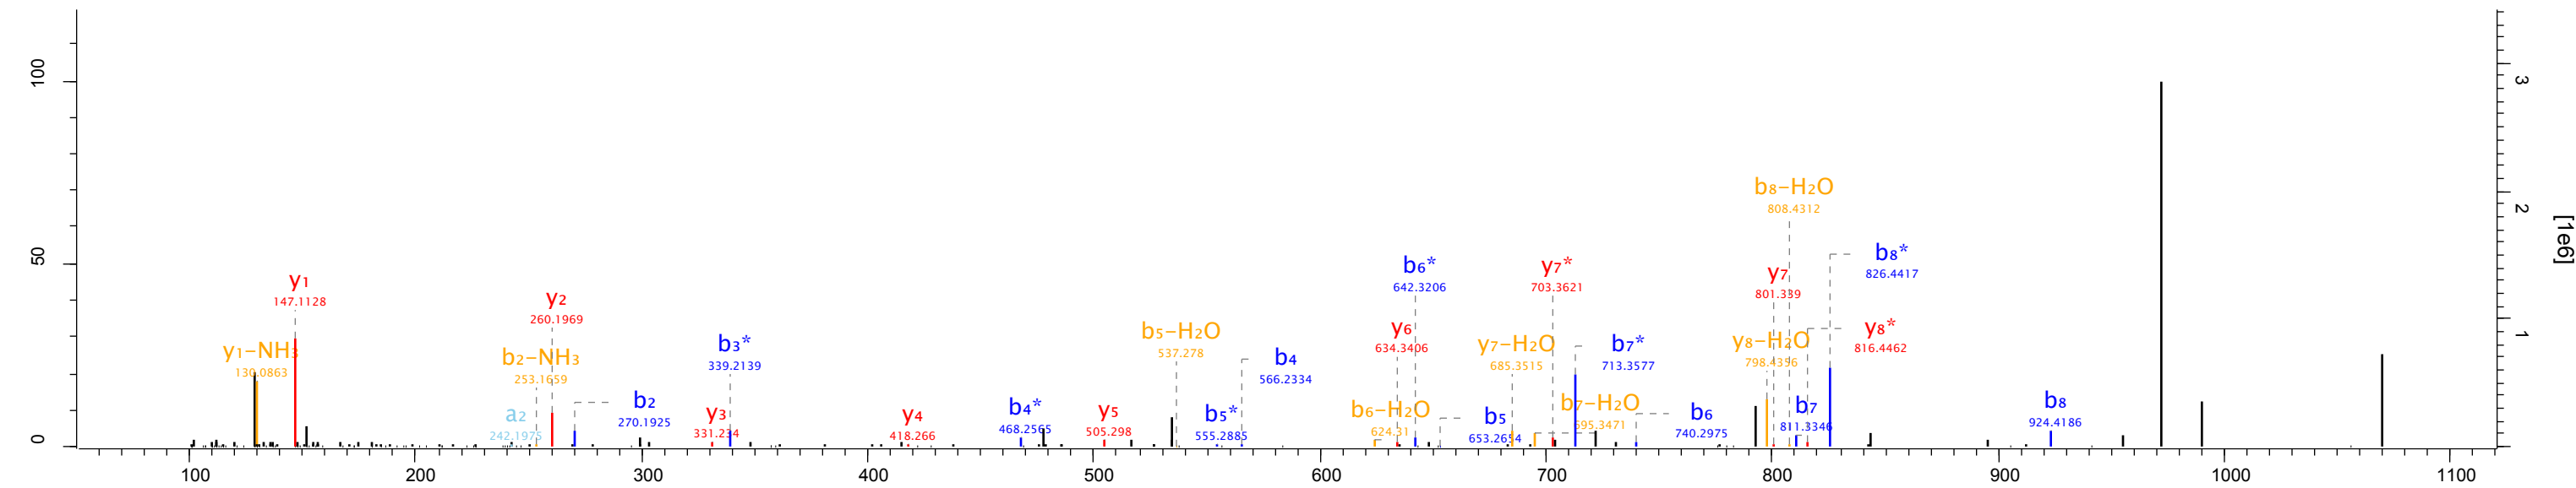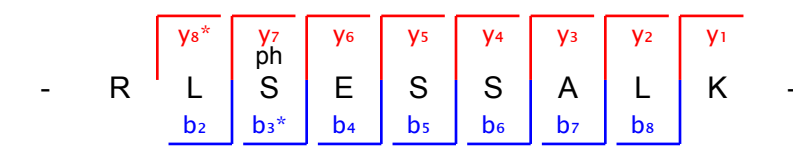

Raw file 20171215\_MaS\_33SR\_LMH\_phospho\_08 Scan 4364 Method FTMS; HCD Score 91.66 m/z 737.8 Gene names PAWR

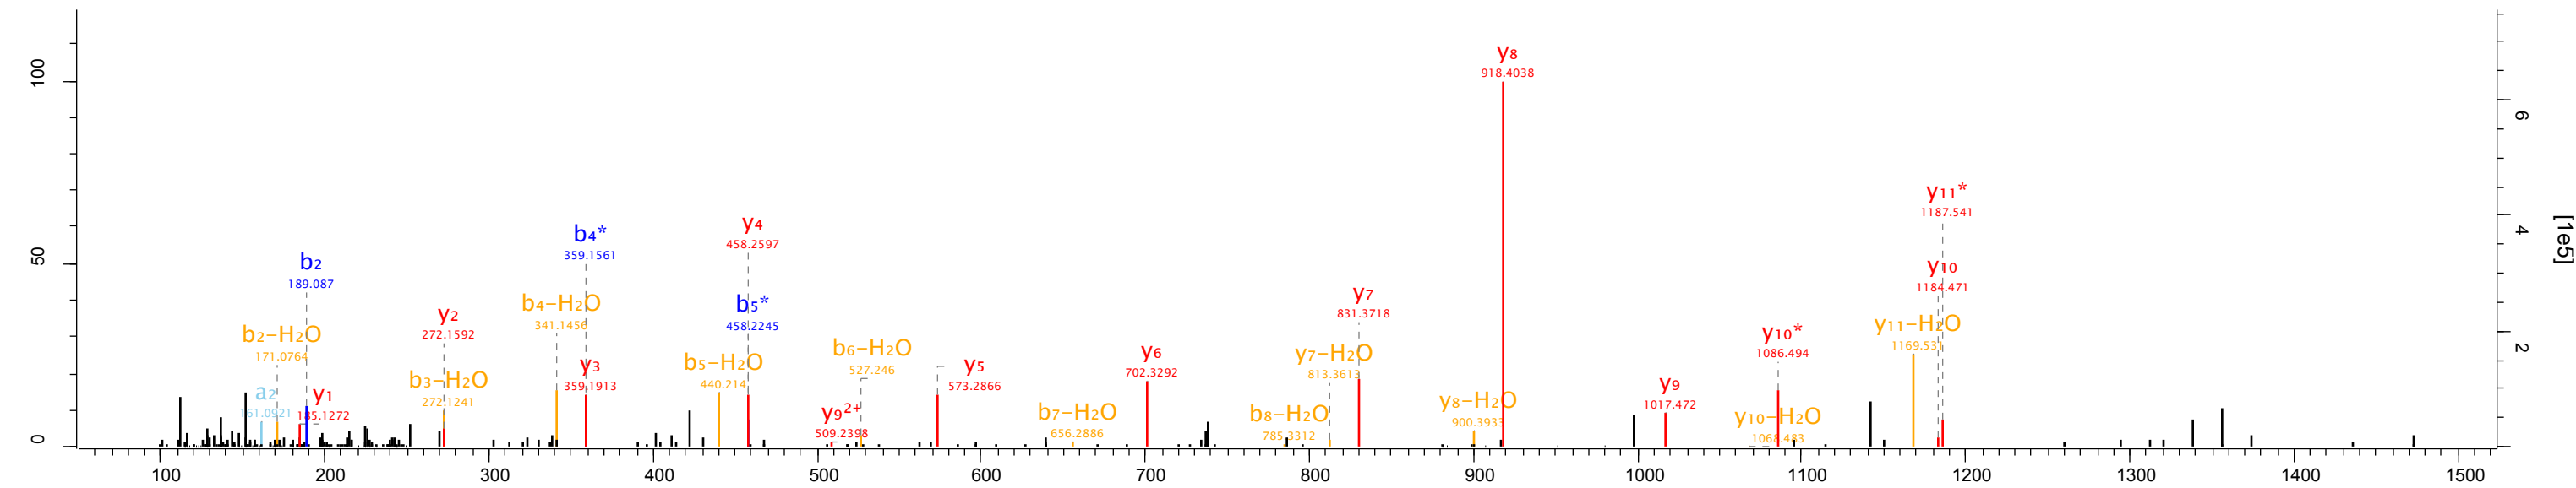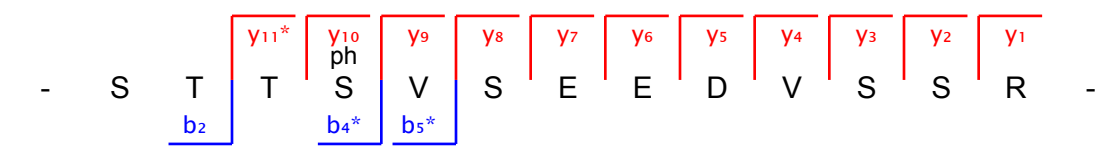



Raw file 20171215\_MaS\_33SR\_LMH\_phospho\_08 Scan 4454 Method FTMS; HCD Score 61.53 m/z 469.73 Gene names LZTS2

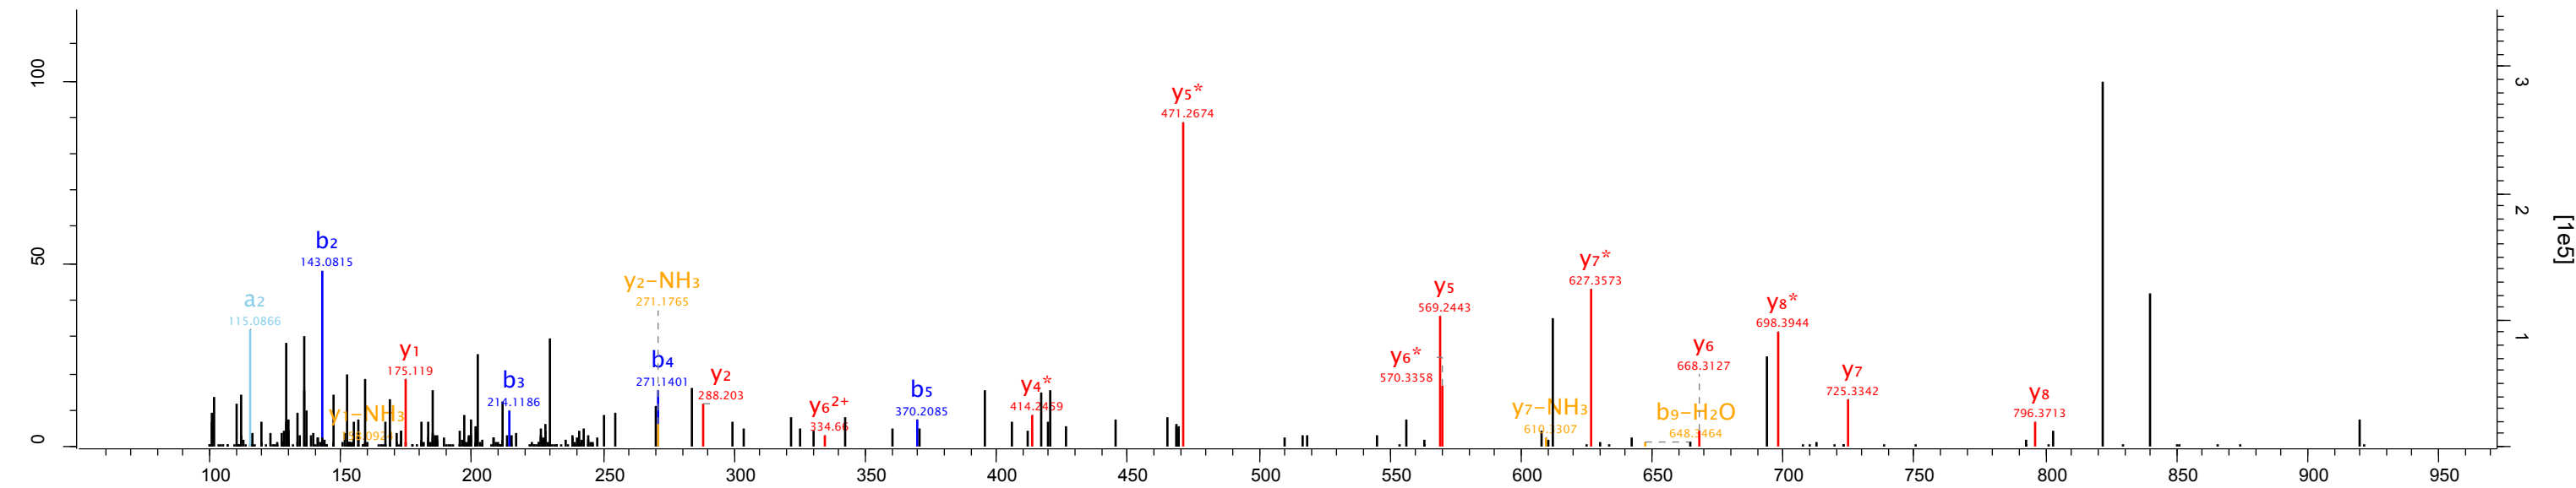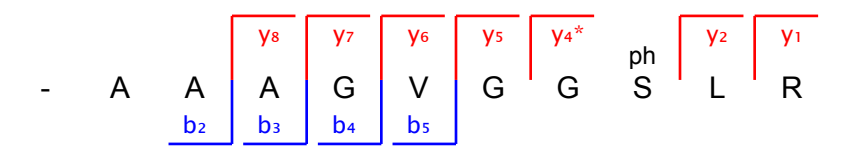

Raw file 20171215\_MaS\_33SR\_LMH\_phospho\_08 Scan 4804 Method FTMS; HCD Score 89.17 m/z 440.73 Gene names ZNF638

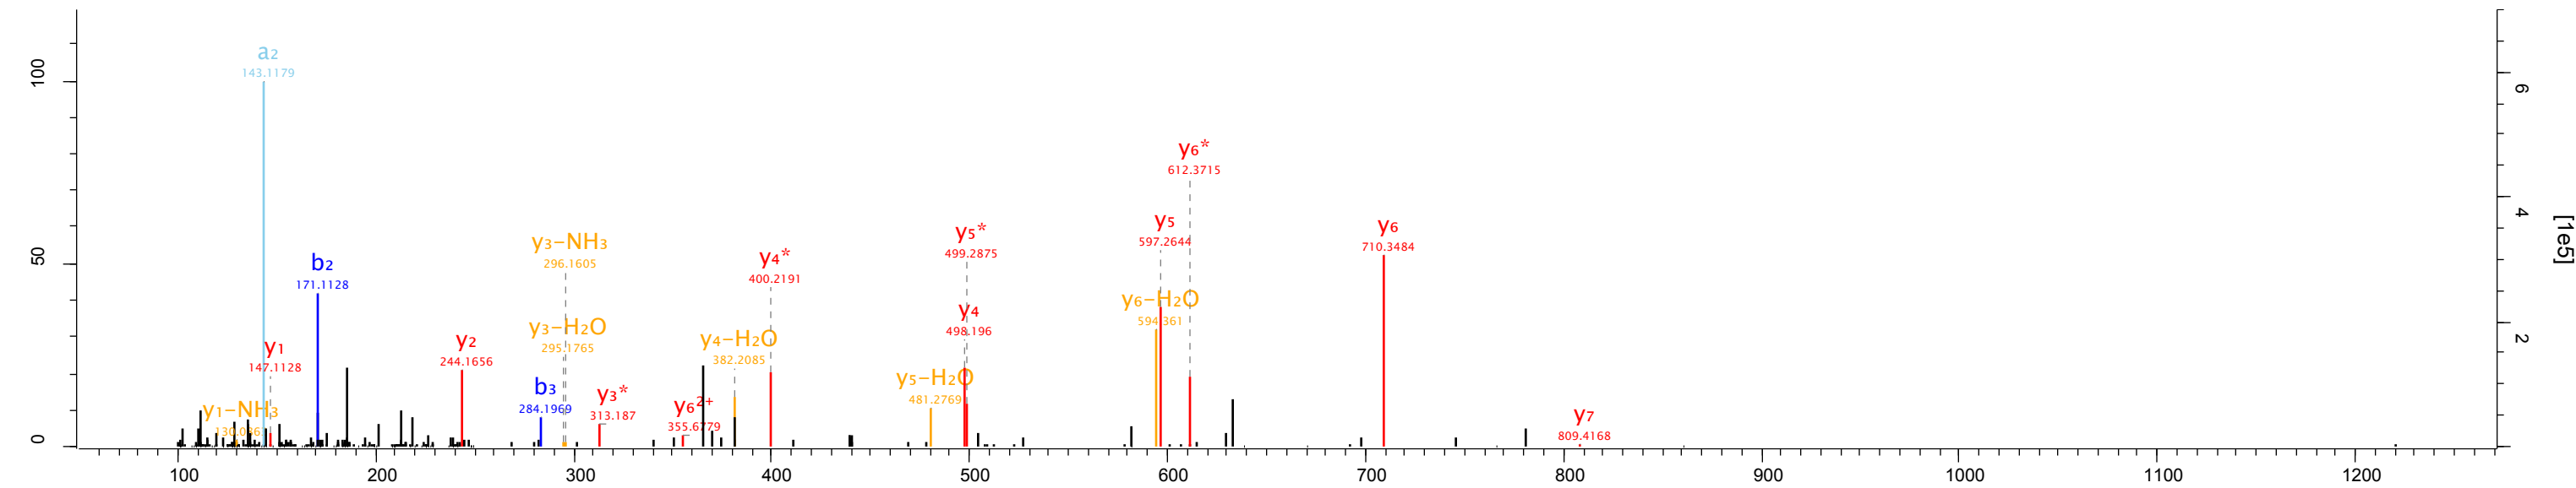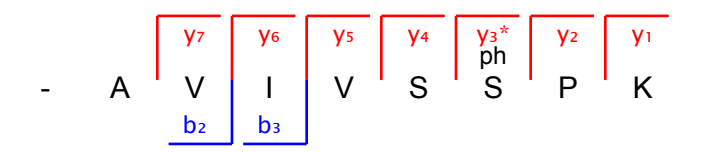

Raw file 20171215\_MaS\_33SR\_LMH\_phospho\_08 Scan 4894 Method FTMS; HCD Score 140.78 m/z 695.85 Gene names ZC3H14

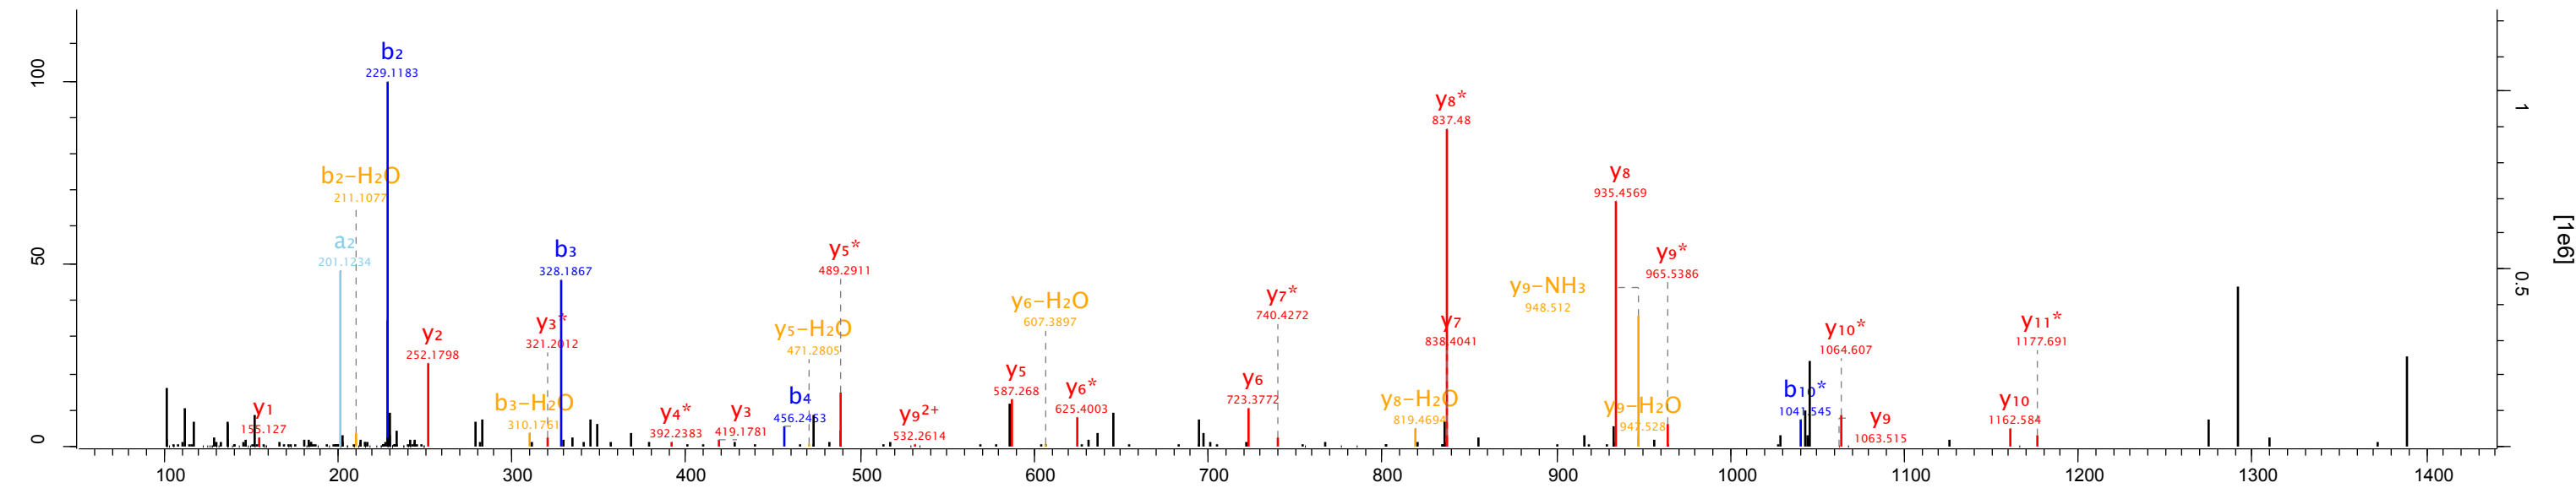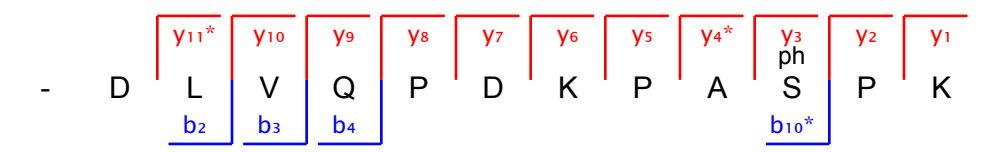

Raw file 20171215\_MaS\_33SR\_LMH\_phospho\_08 Scan 5264 Method FTMS; HCD Score 62.09 m/z 552.76 Gene names PHLDB1

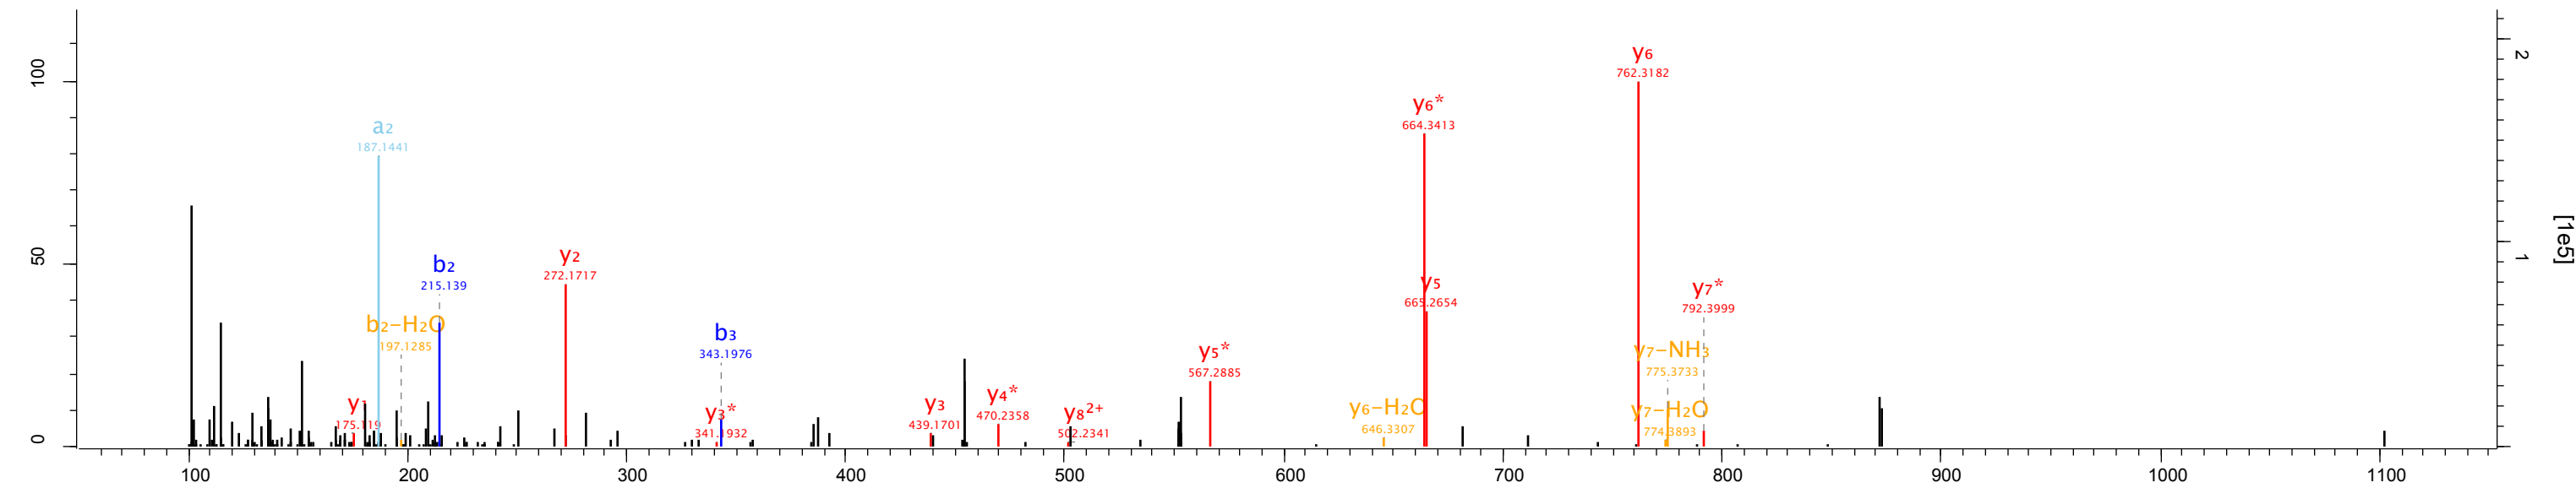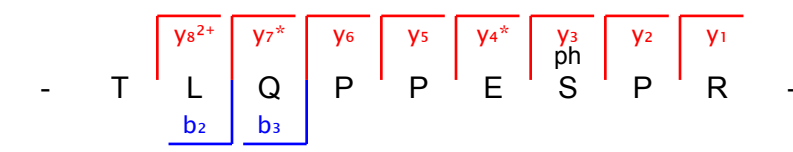

Raw file 20171215\_MaS\_33SR\_LMH\_phospho\_08 Scan 5554 Method FTMS; HCD Score 71.18 m/z 470.23 Gene names PHRF1

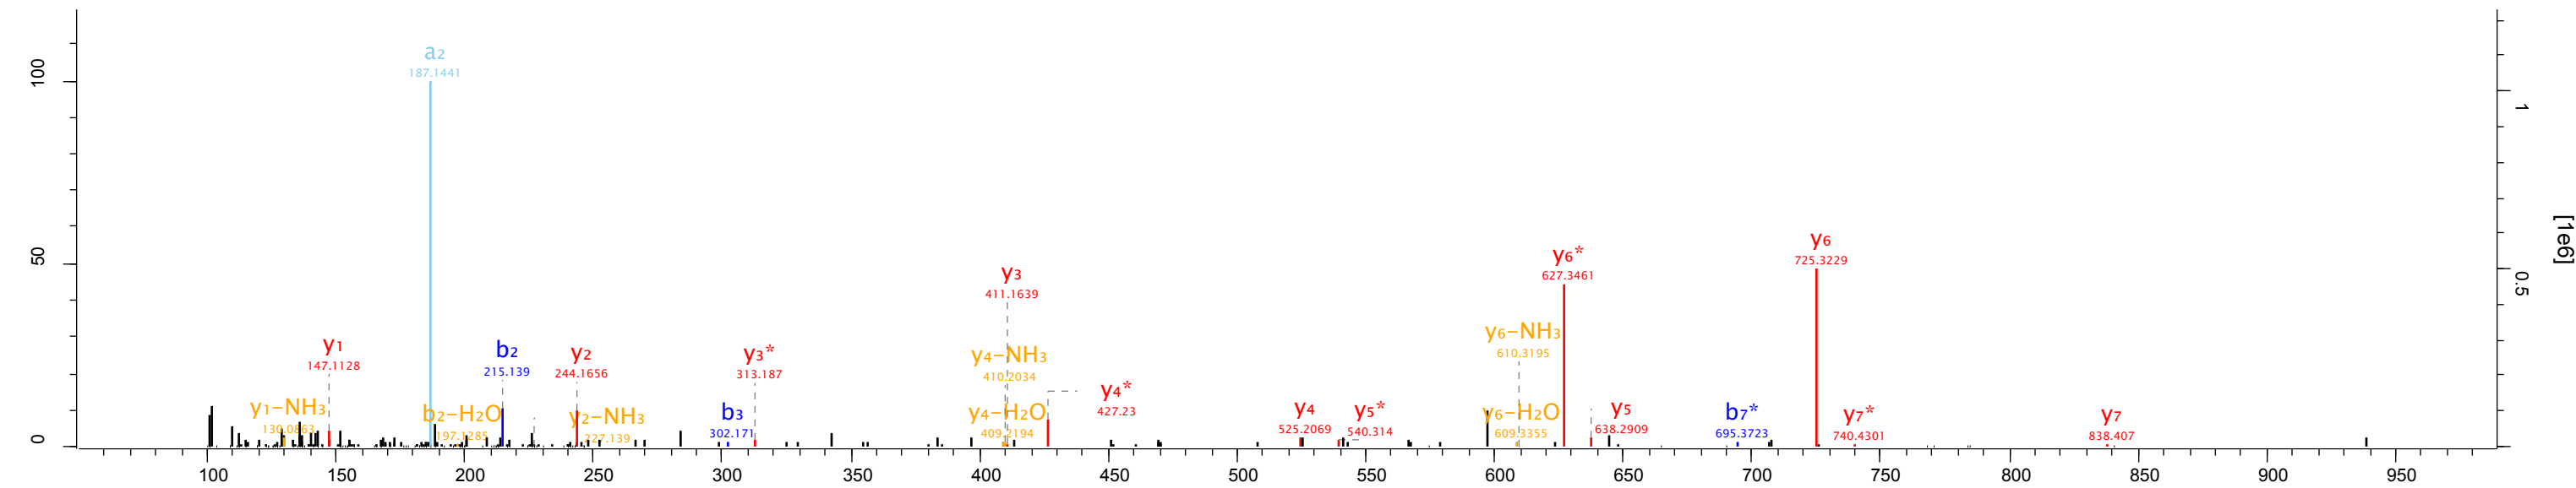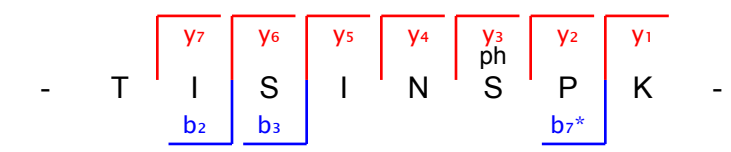

Raw file 20171215\_MaS\_33SR\_LMH\_phospho\_08 Scan 5714 Method FTMS; HCD Score 127.88 m/z 659.3 Gene names TNKS1BP1

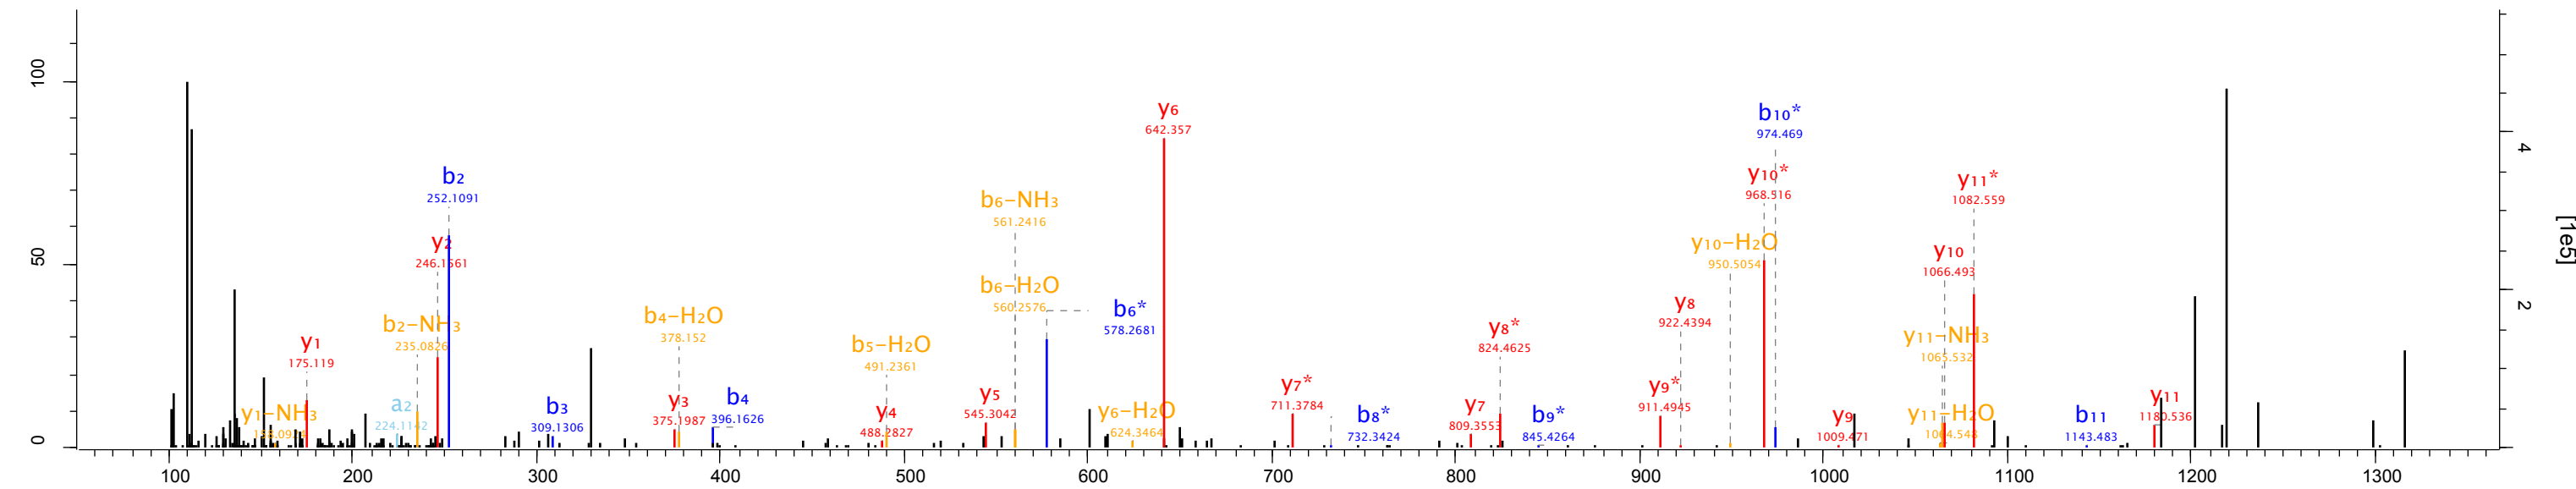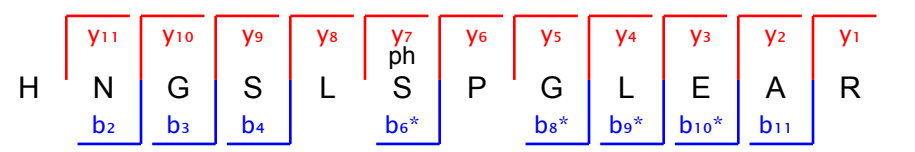

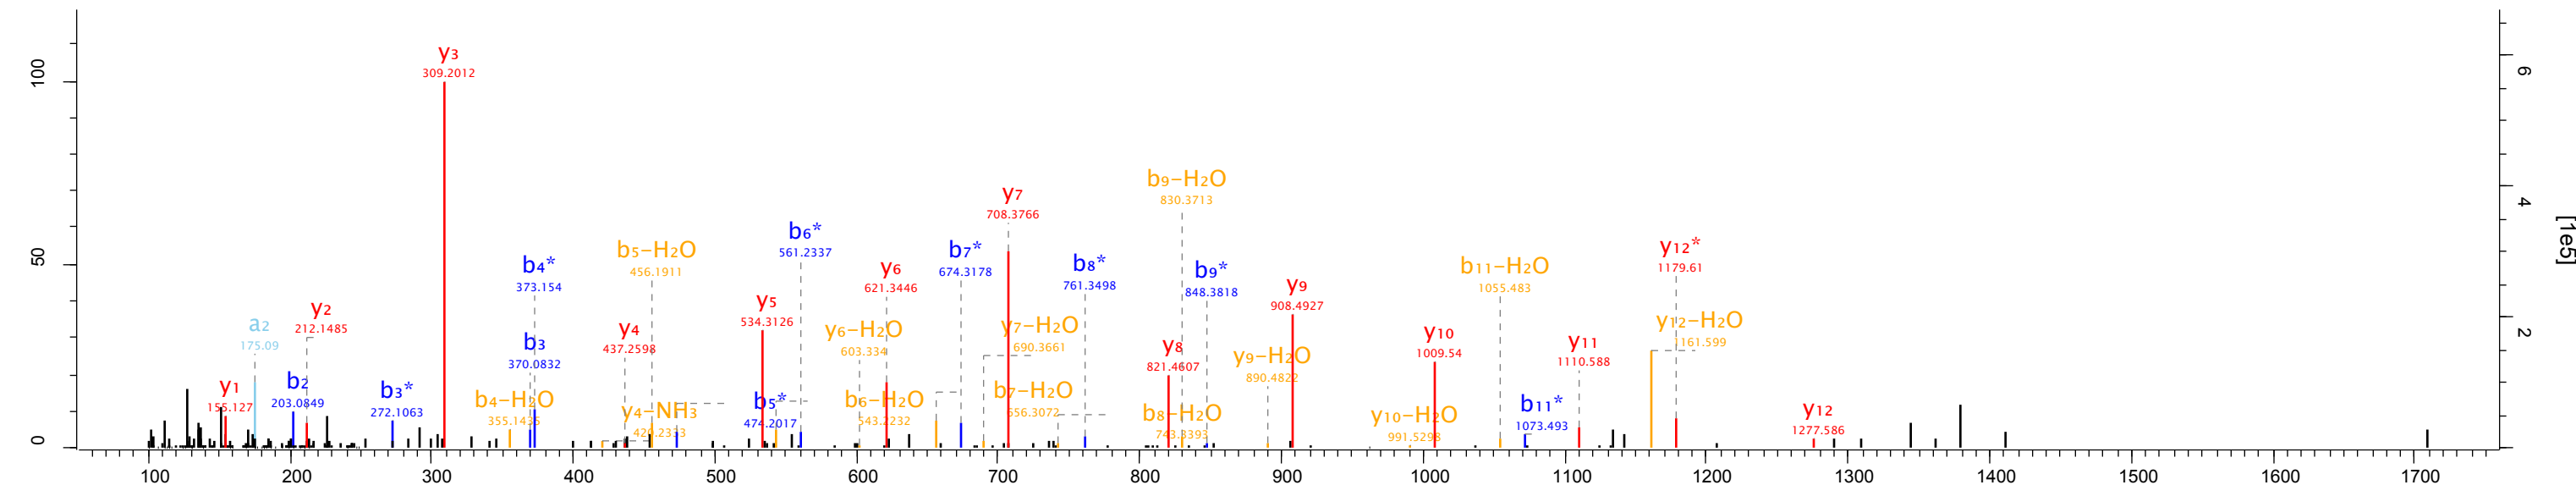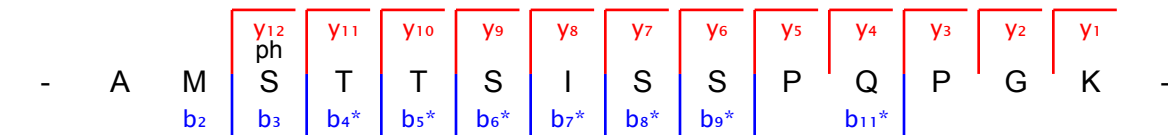

Raw file 20171215\_MaS\_33SR\_LMH\_phospho\_08 Scan 7094 Method FTMS; HCD Score 145.33 m/z 713.86 Gene names RRP1B

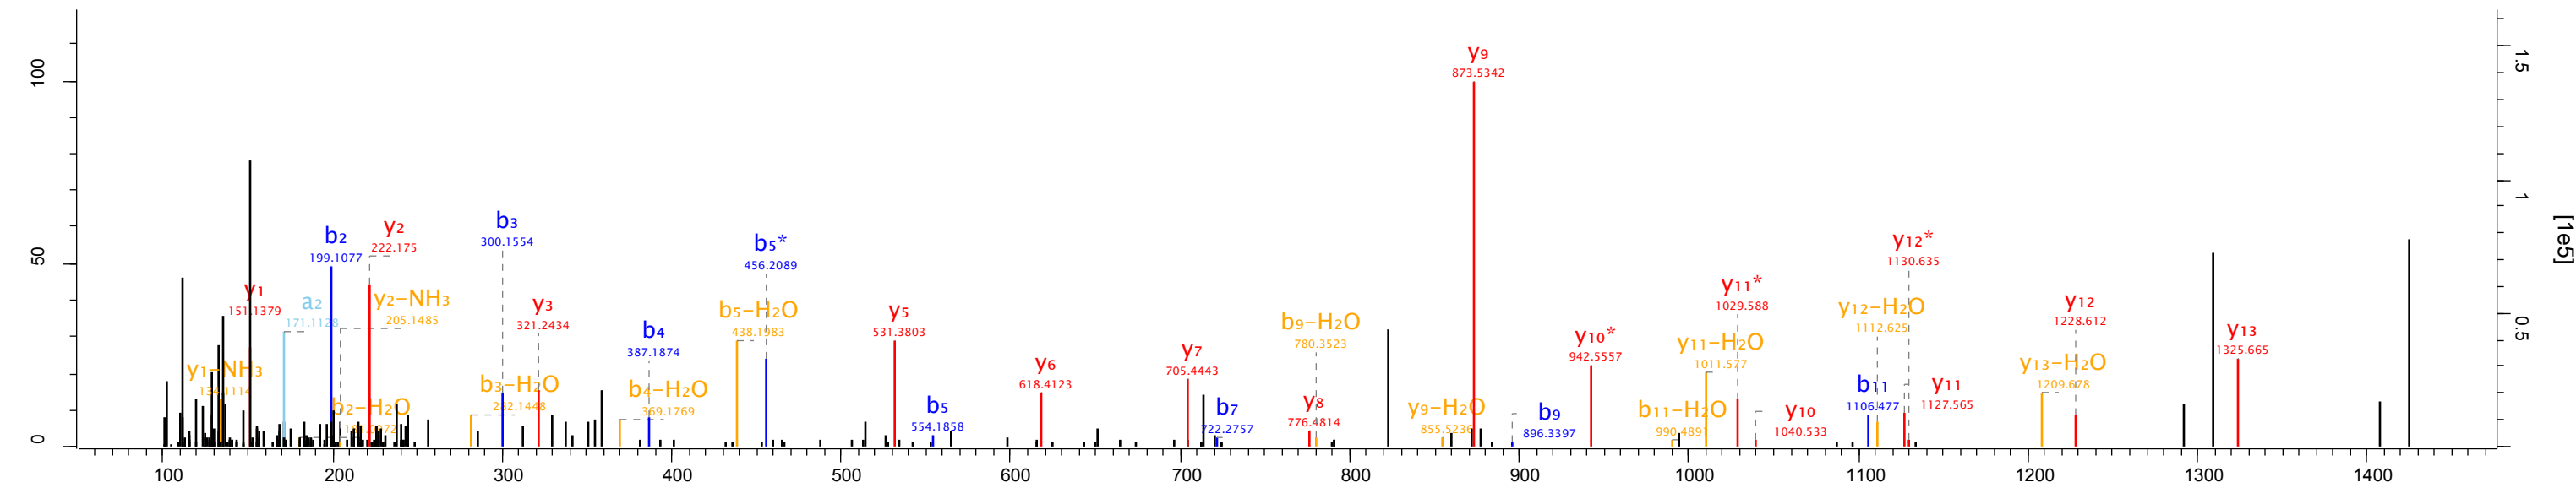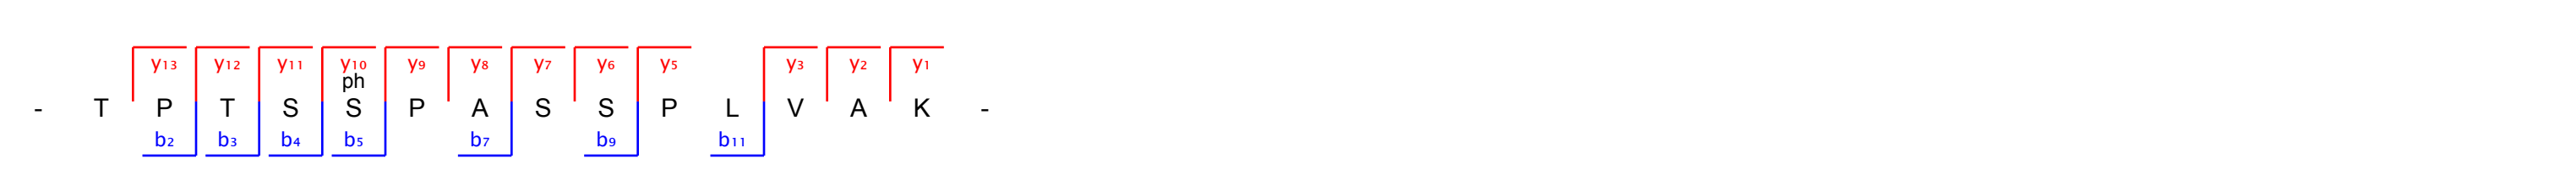



Raw file 20171215\_MaS\_33SR\_LMH\_phospho\_08 Scan 7354 Method FTMS; HCD Score 129.05 m/z 678.31 Gene names MLF2

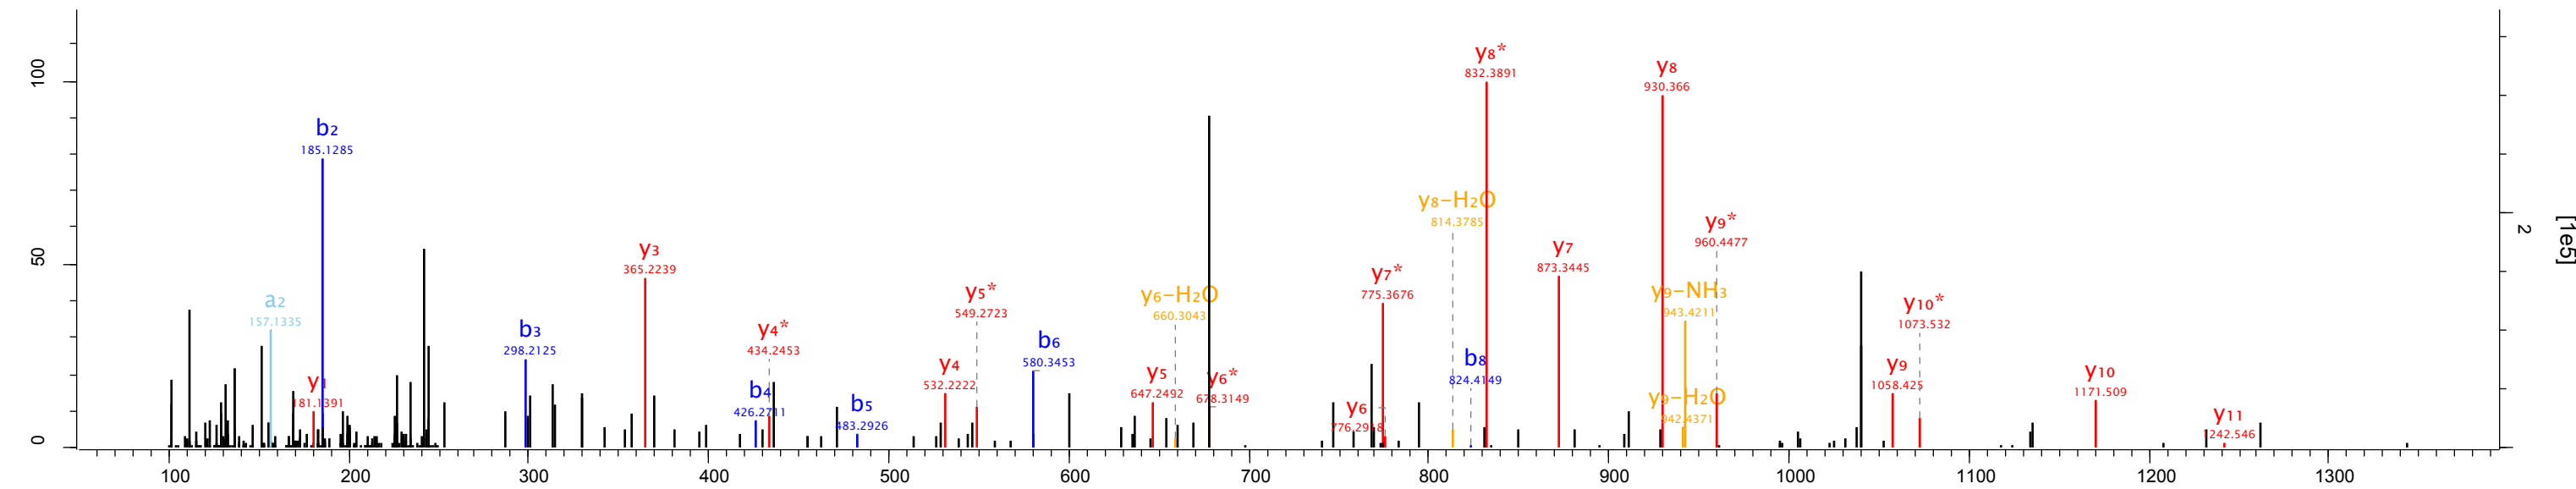

- L A I Q G P E D S P S R -

b<sub>2</sub>
b<sub>3</sub>
b<sub>4</sub>
b<sub>5</sub>
b<sub>6</sub>
b<sub>8</sub>
y<sub>11</sub>
y<sub>10</sub>
y<sub>9</sub>
y<sub>8</sub>
y<sub>7</sub>
y<sub>6</sub>
y<sub>5</sub>
y<sub>4</sub>  
ph
y<sub>3</sub>
y<sub>1</sub>

Raw file: 20171215\_MaS\_33SR\_LMH\_phospho\_08  
 Scan: 7824 Method: FTMS; HCD Score: 96.77 m/z: 699.31 Gene names: SON

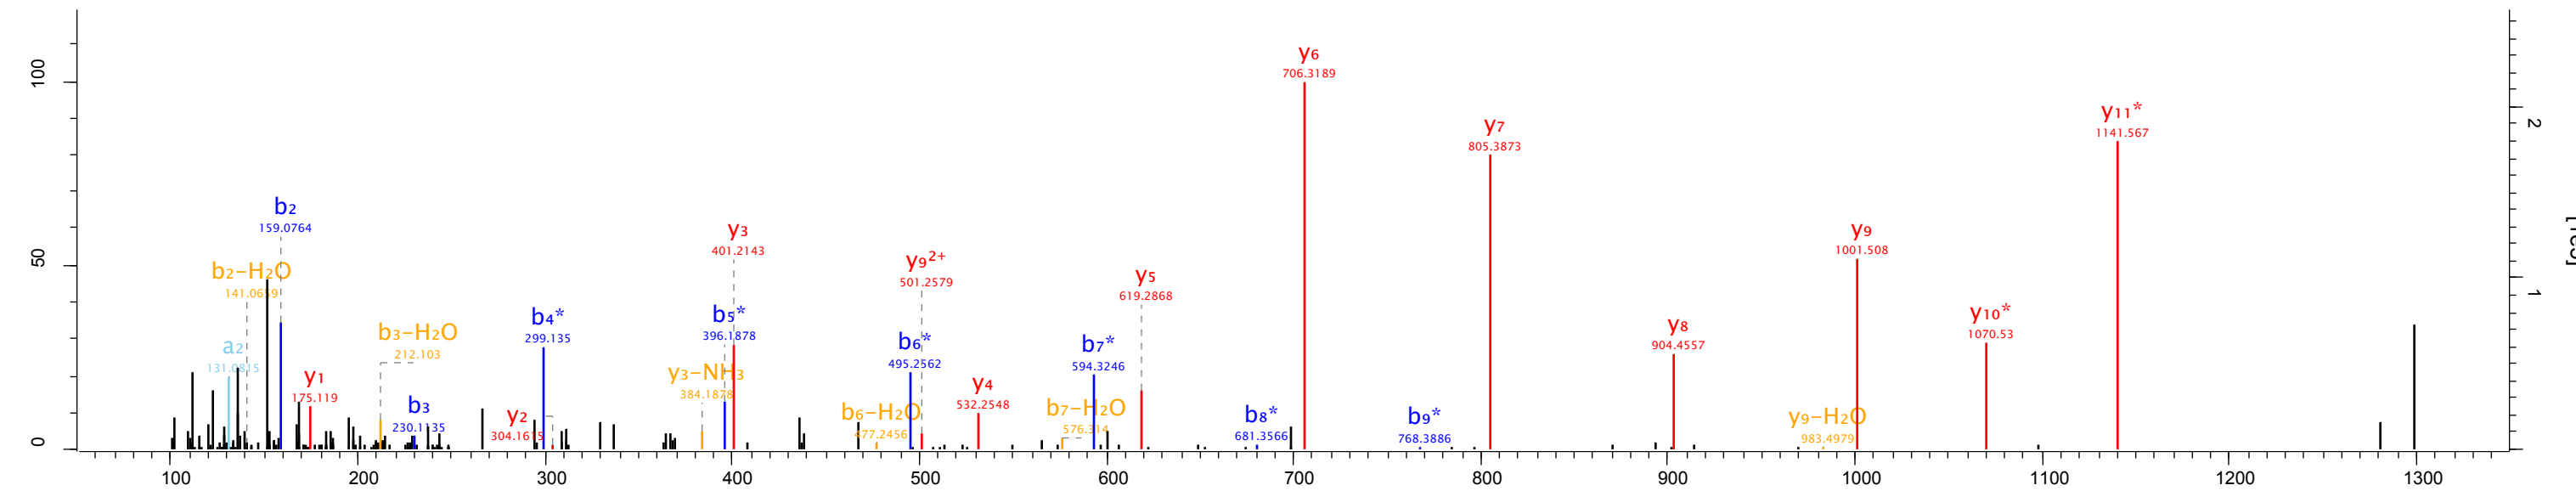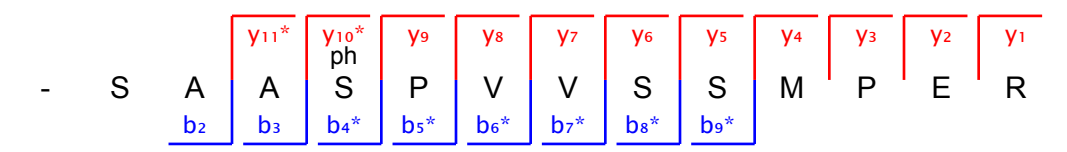



Raw file 20171215\_MaS\_33SR\_LMH\_phospho\_08 Scan 9454 Method FTMS; HCD Score 42.79 m/z 733.35 Gene names NSUN2

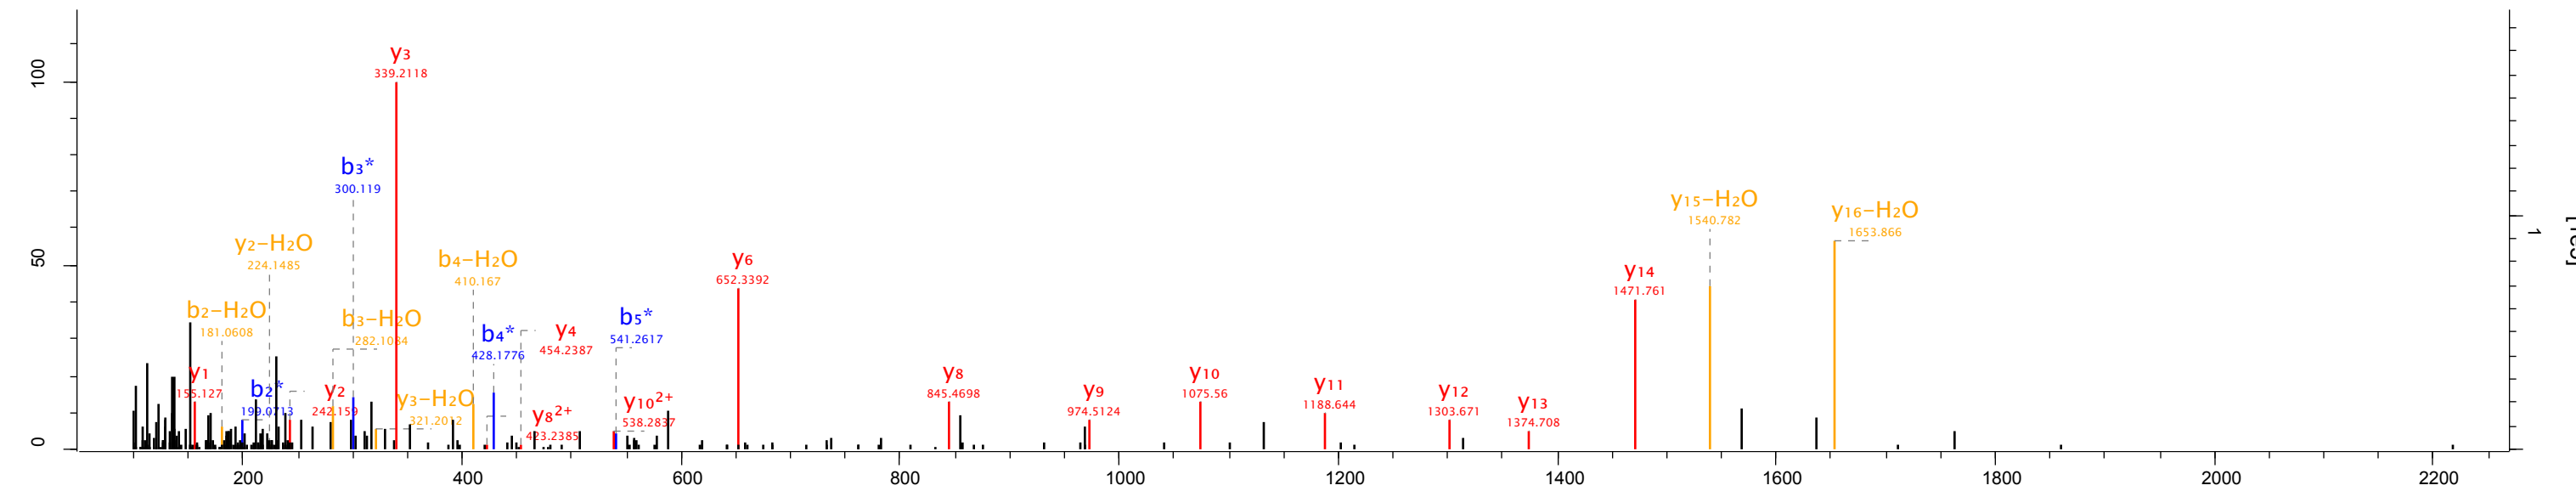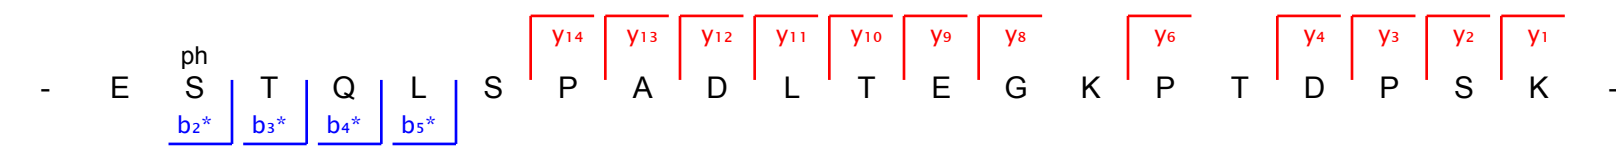

Raw file 20171215\_MaS\_33SR\_LMH\_phospho\_09 Scan 2094 Method FTMS; HCD Score 141.27 m/z 434.73 Gene names AHNAK

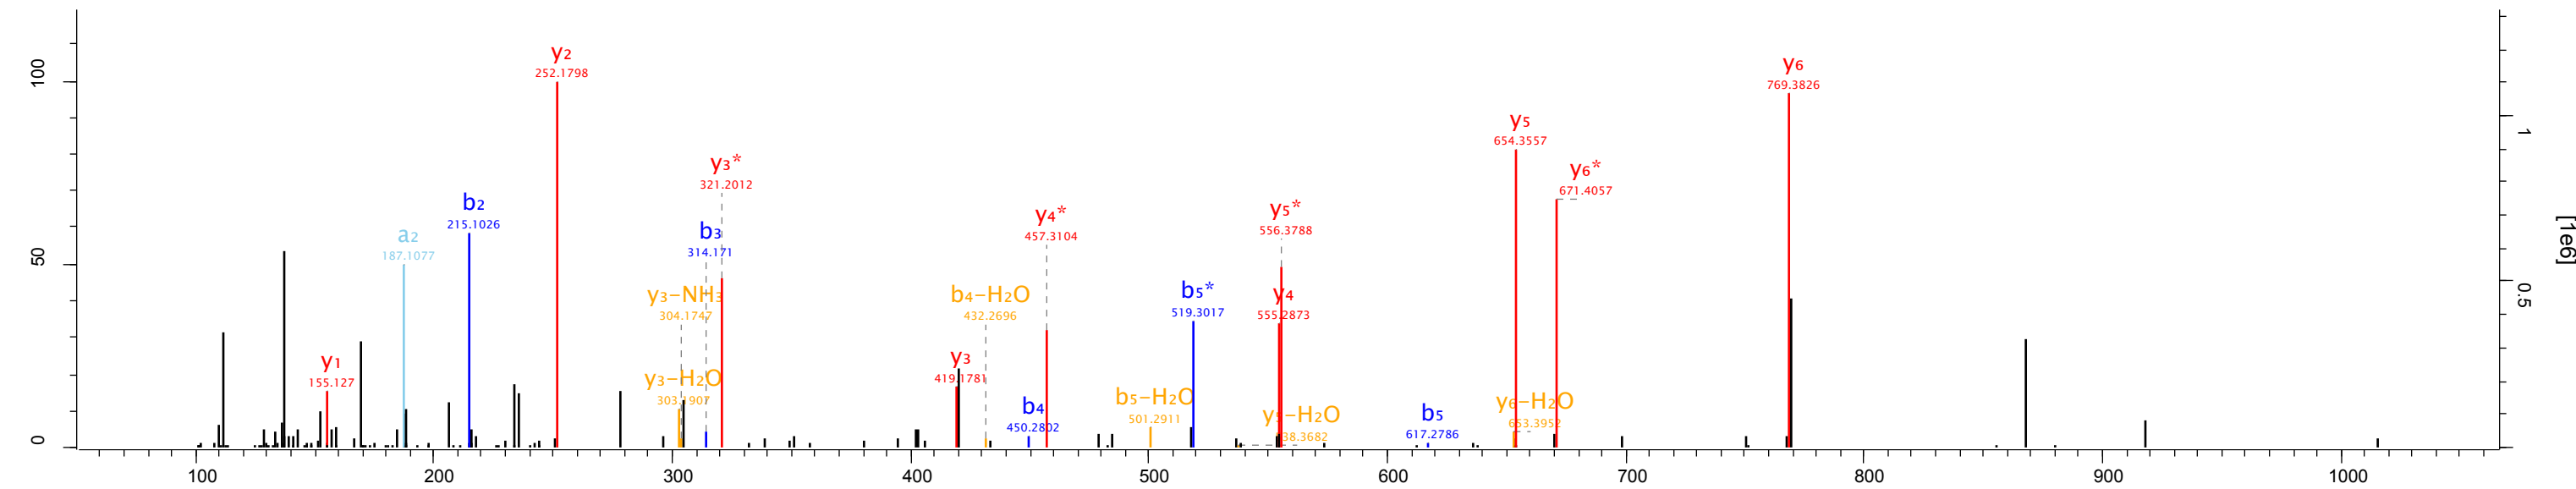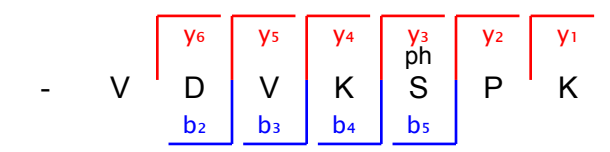

Raw file 20171215\_MaS\_33SR\_LMH\_phospho\_09 Scan 2374 Method FTMS; HCD Score 100.02 m/z 474.72 Gene names CCDC137

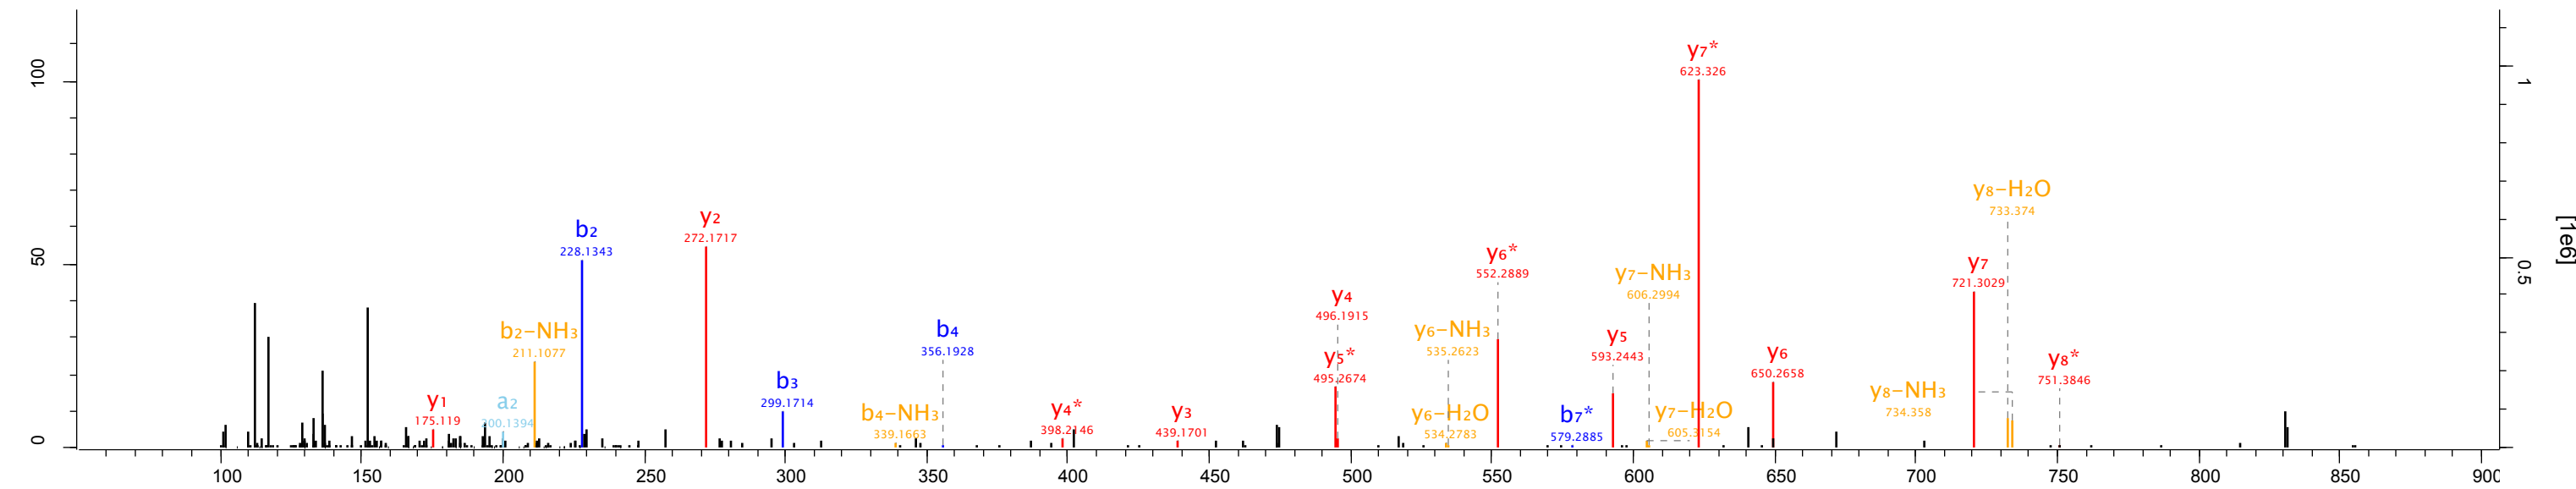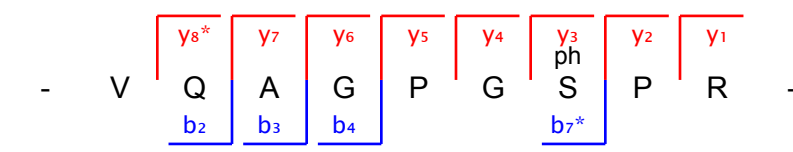

Raw file 20171215\_MaS\_33SR\_LMH\_phospho\_09 Scan 3364 Method FTMS; HCD Score 49.84 m/z 520.23 Gene names VCIPI1

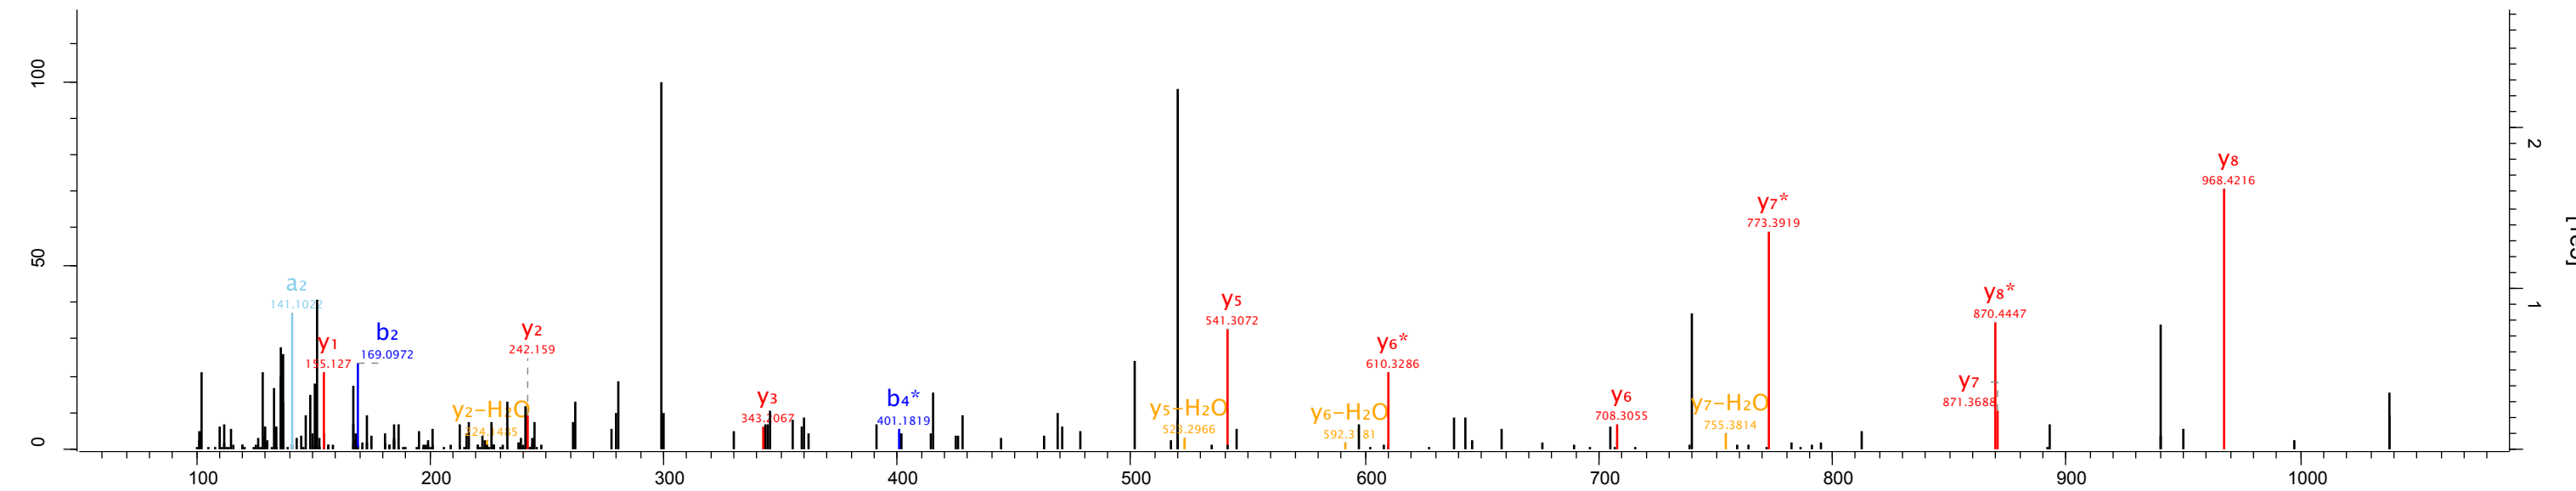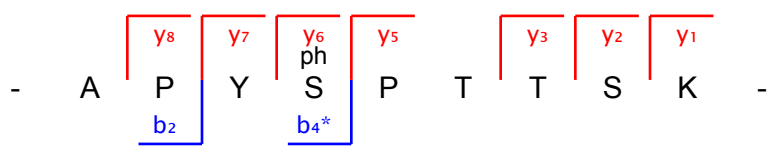

Raw file 20171215\_MaS\_33SR\_LMH\_phospho\_09 Scan 3824 Method FTMS; HCD Score 61.16 m/z 629.82 Gene names FAM83G

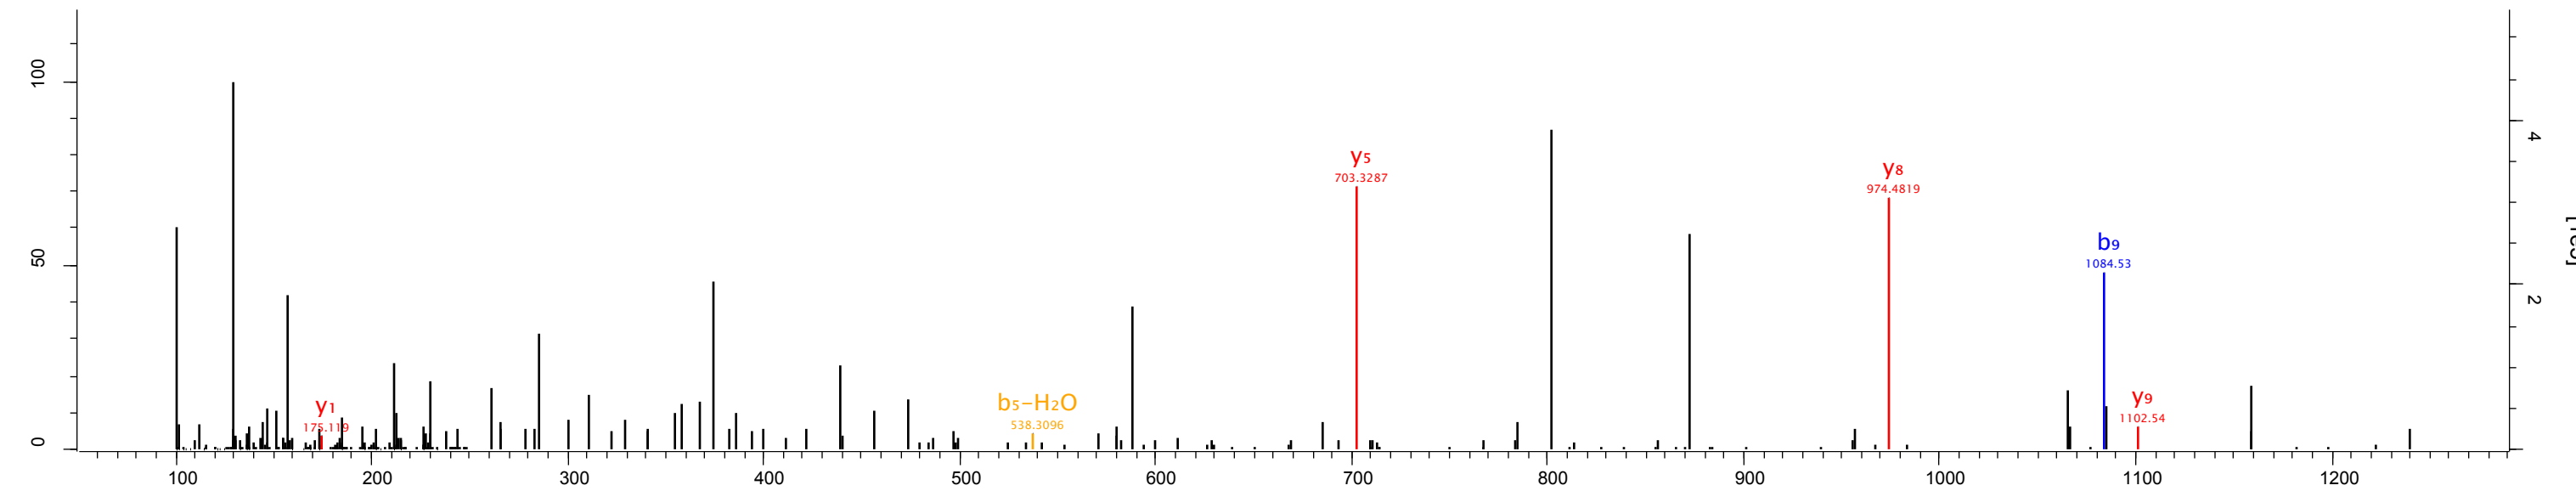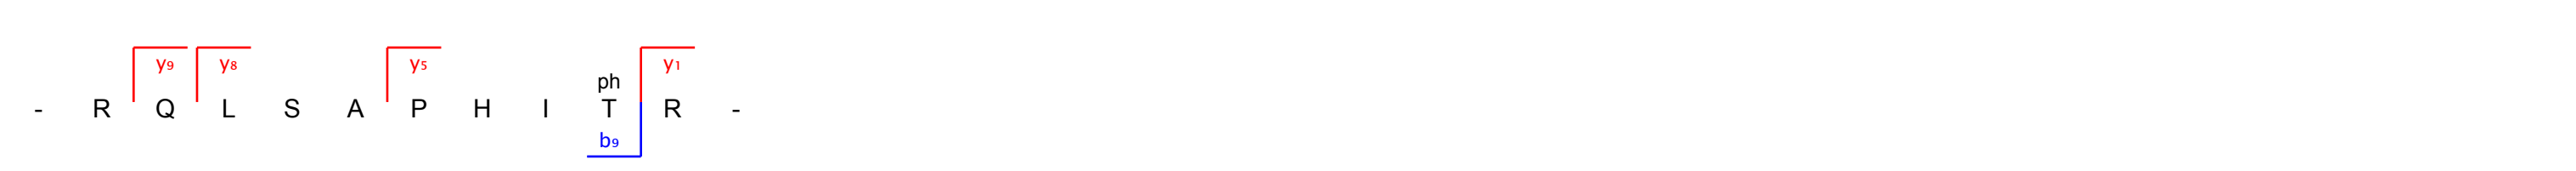



Raw file 20171215\_MaS\_33SR\_LMH\_phospho\_09 Scan 4084 Method FTMS; HCD Score 62.09 m/z 552.26 Gene names PLEKHA4

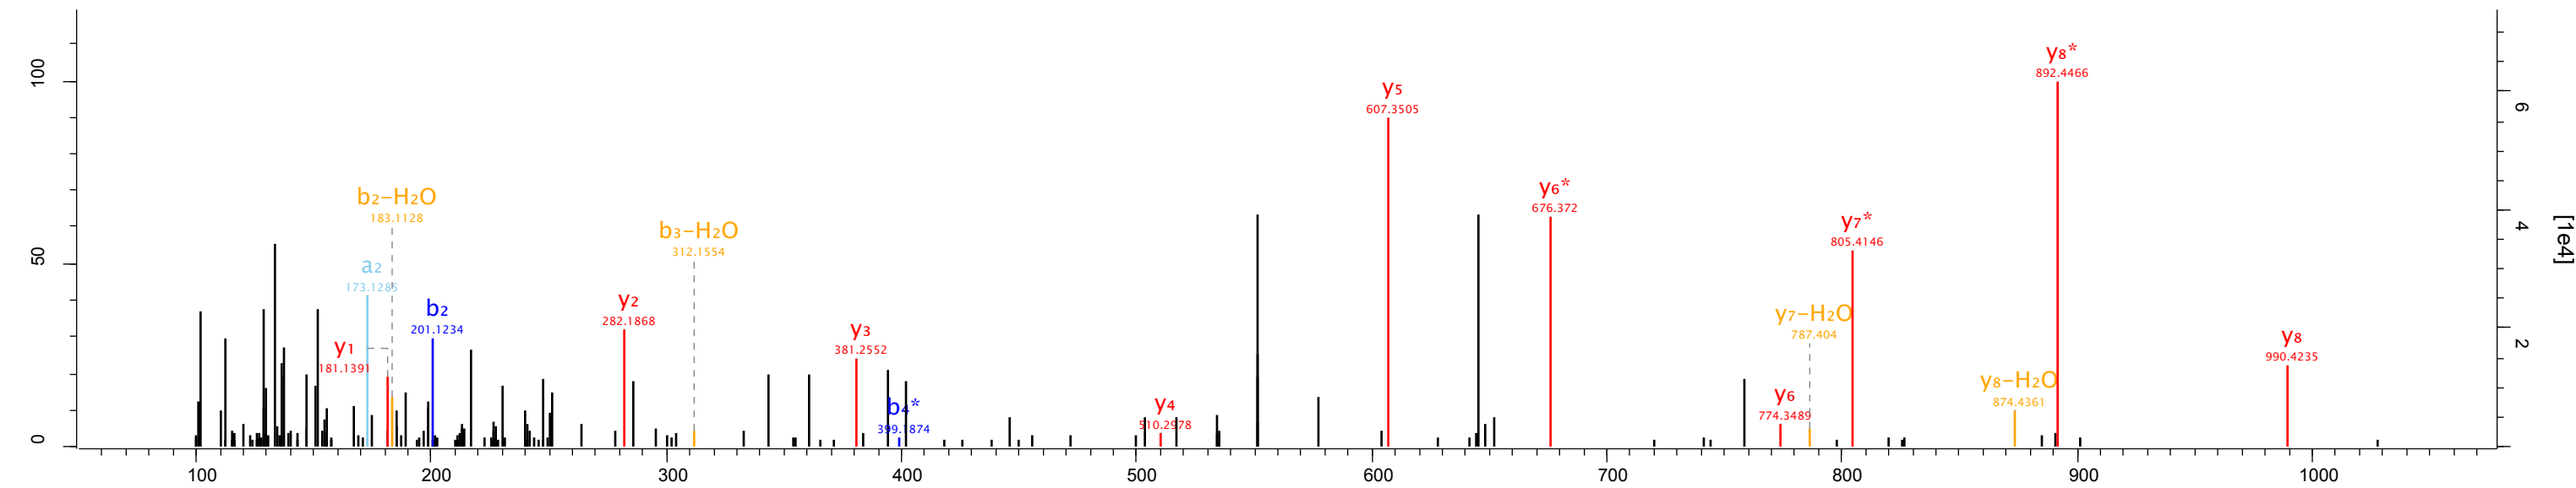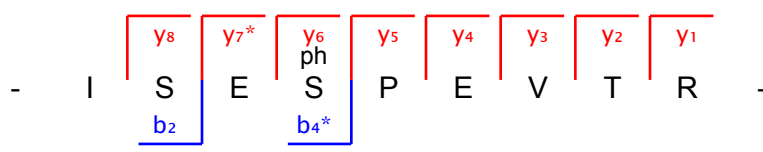

Raw file 20171215\_MaS\_33SR\_LMH\_phospho\_09 Scan 8364 Method FTMS; HCD Score 122.96 m/z 683.82 Gene names TRAFD1

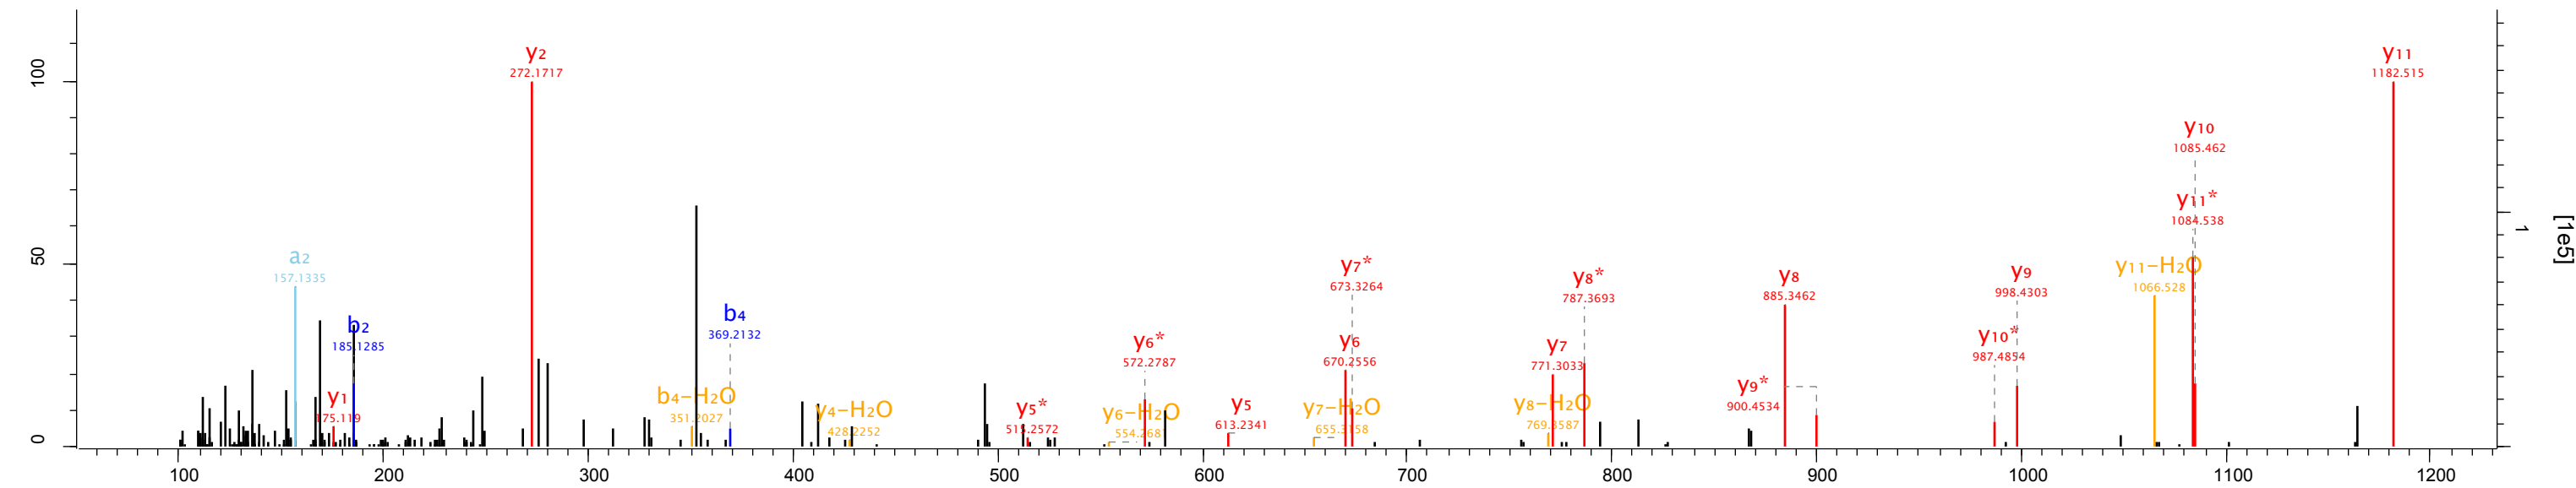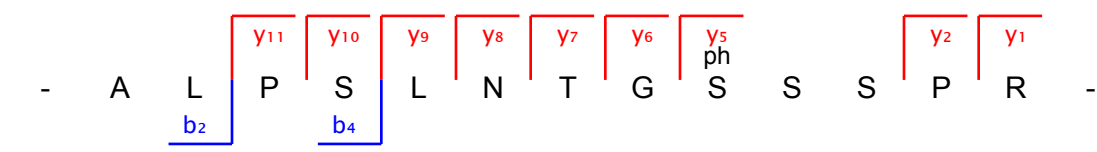

Raw file 20171215\_MaS\_33SR\_LMH\_phospho\_09 Scan 8474 Method FTMS; HCD Score 91.66 m/z 687.83 Gene names MYOF

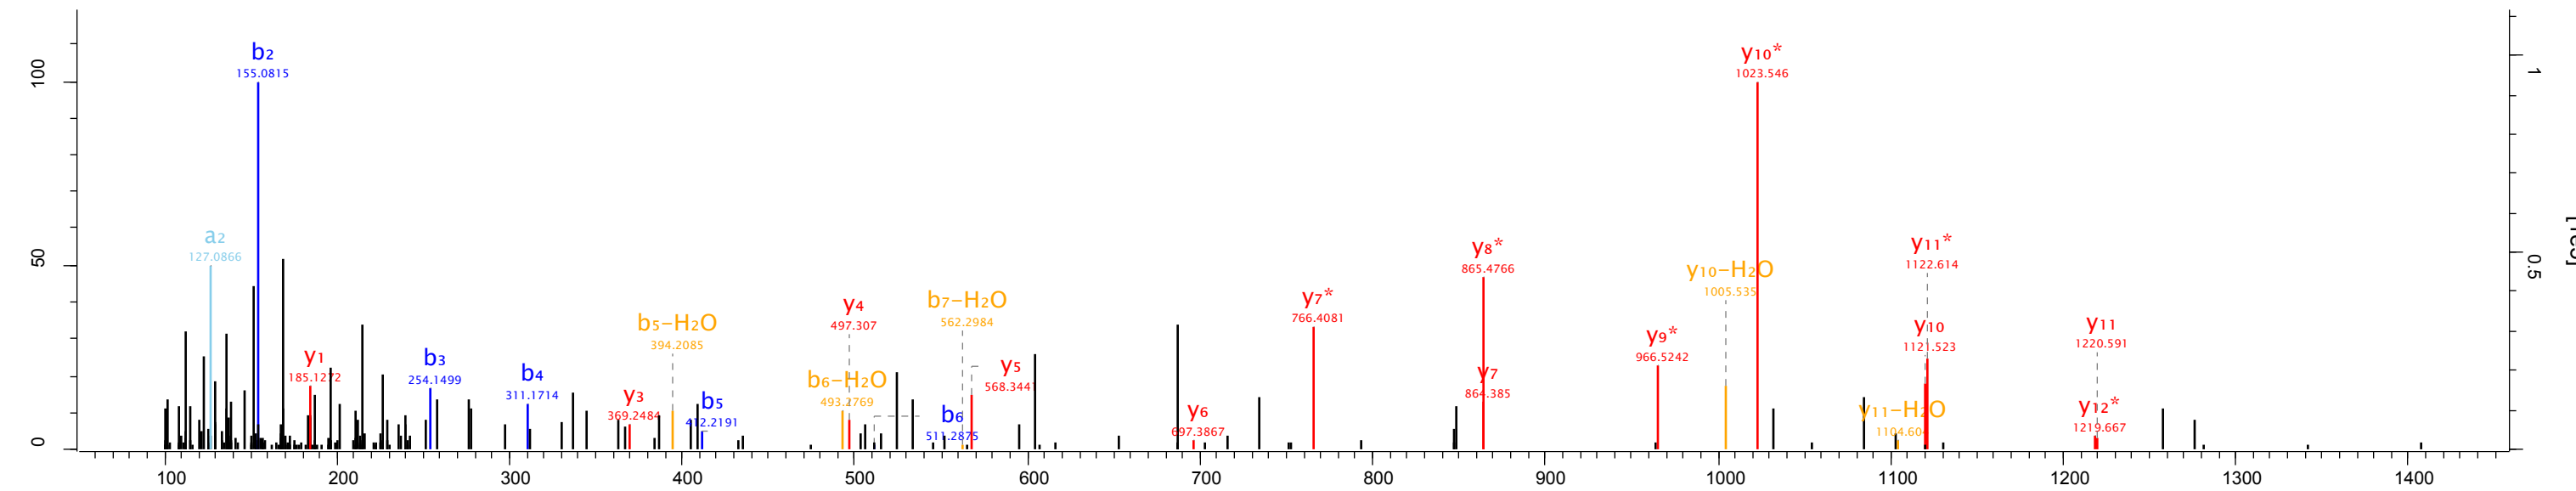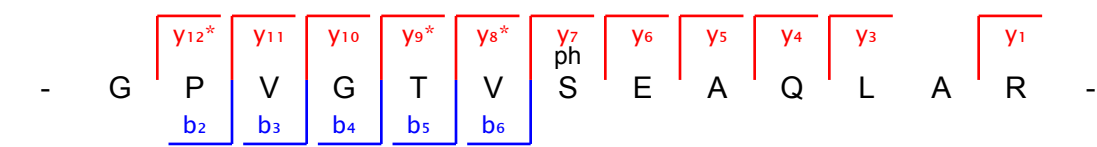

Raw file: 20171215\_MaS\_33SR\_LMH\_phospho2\_01  
 Scan: 10284 Method: FTMS; HCD Score: 189.98 m/z: 844.38 Gene names: RB1

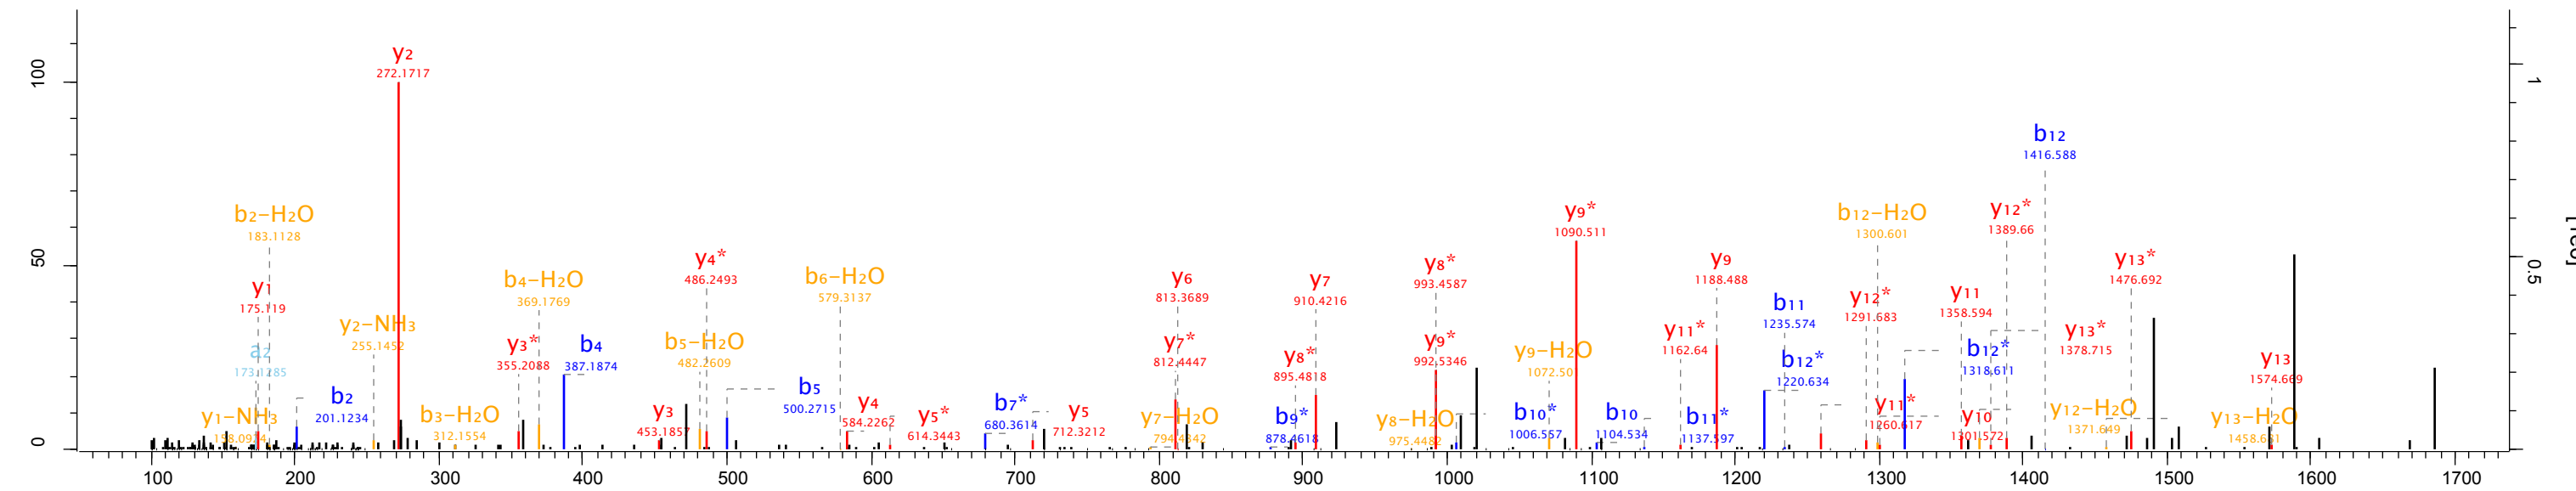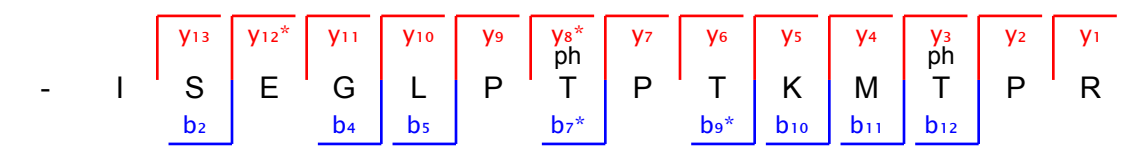

Raw file: 20171215\_MaS\_33SR\_LMH\_phospho2\_01  
 Scan: 1974 Method: FTMS; HCD Score: 84.89 m/z: 778.33 Gene names: PCM1

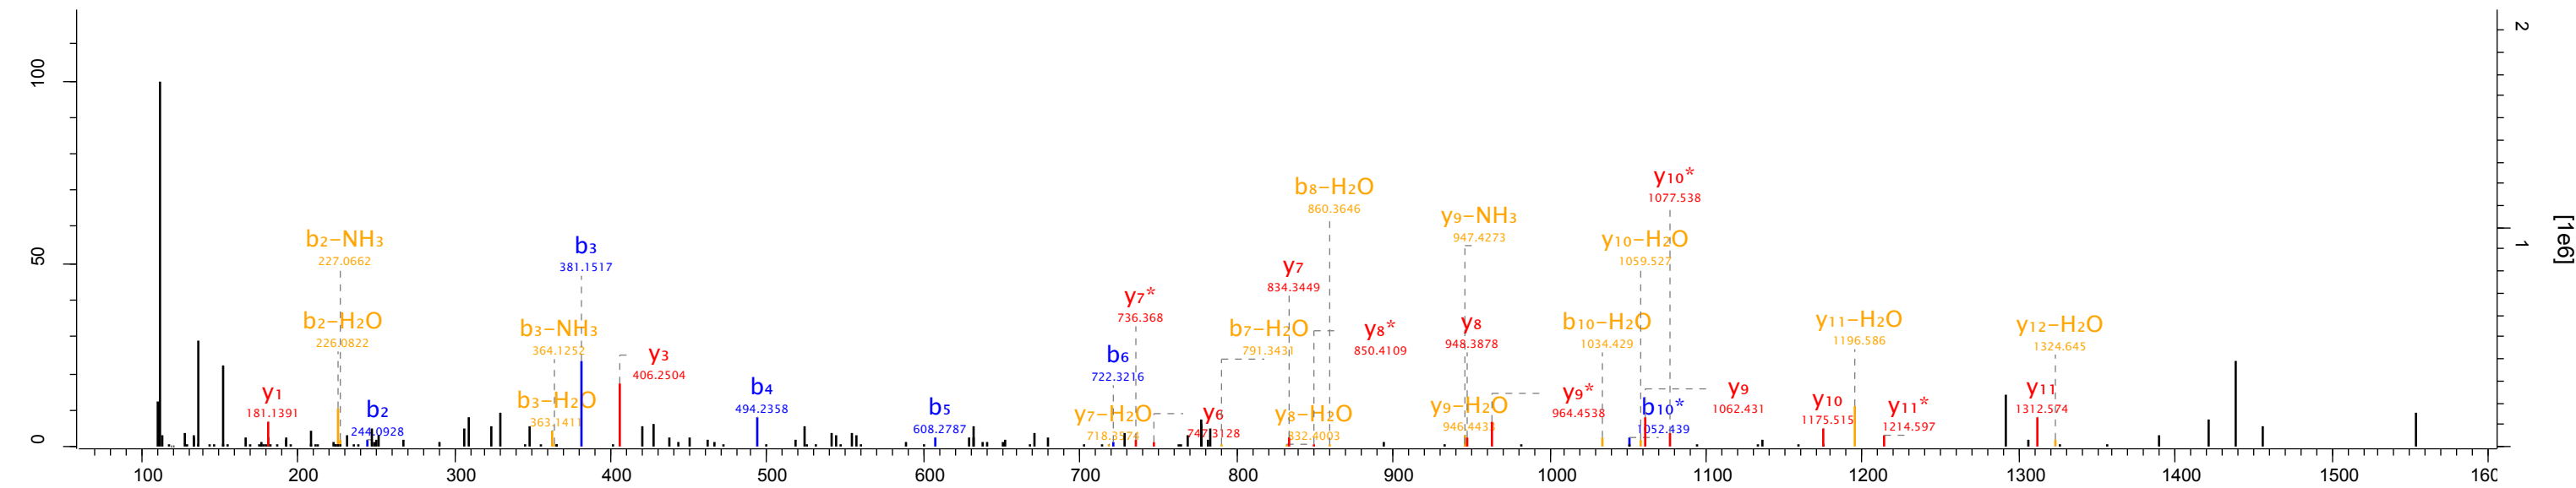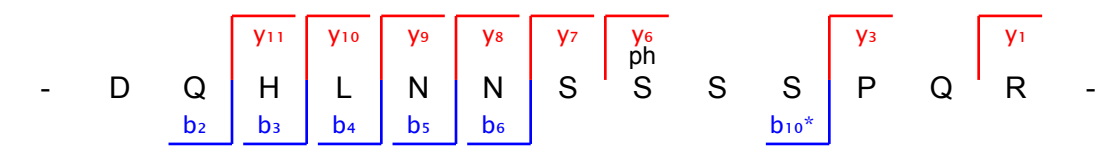

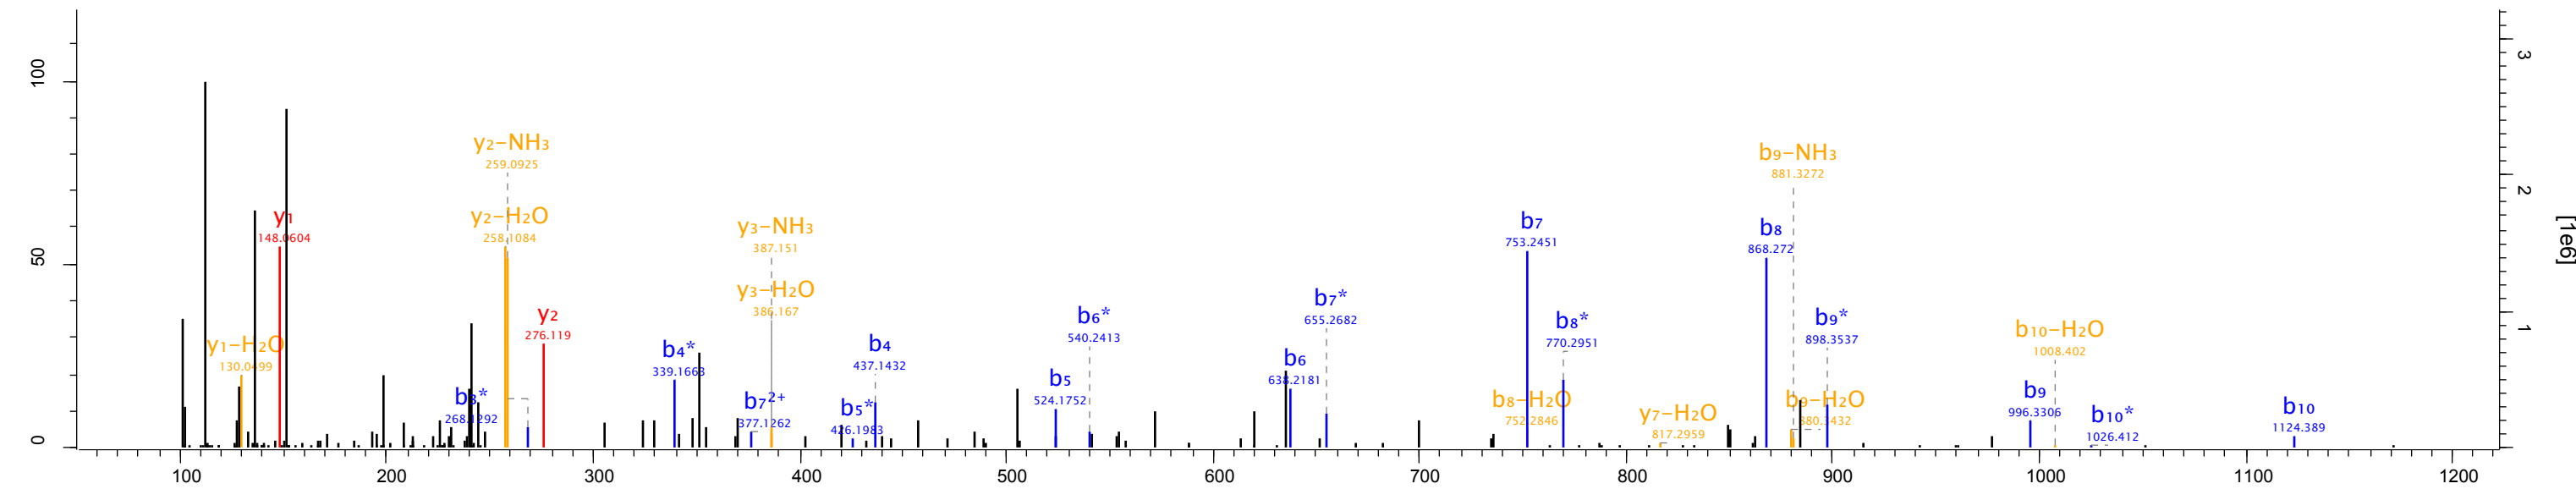

ph  
T P S A S N D D Q Q E -  
b3\* b4 b5 b6 b7 b8 b9 b10

Red boxes highlight the sequence **Q Q E** and the label **y1** above the second **Q**. Blue boxes highlight the labels **b3\*** through **b10** below the amino acid sequence.

Raw file 20171215\_MaS\_33SR\_LMH\_phospho2\_01 Scan 3244 Method FTMS; HCD Score 58.09 m/z 787.39 Gene names KATNA1

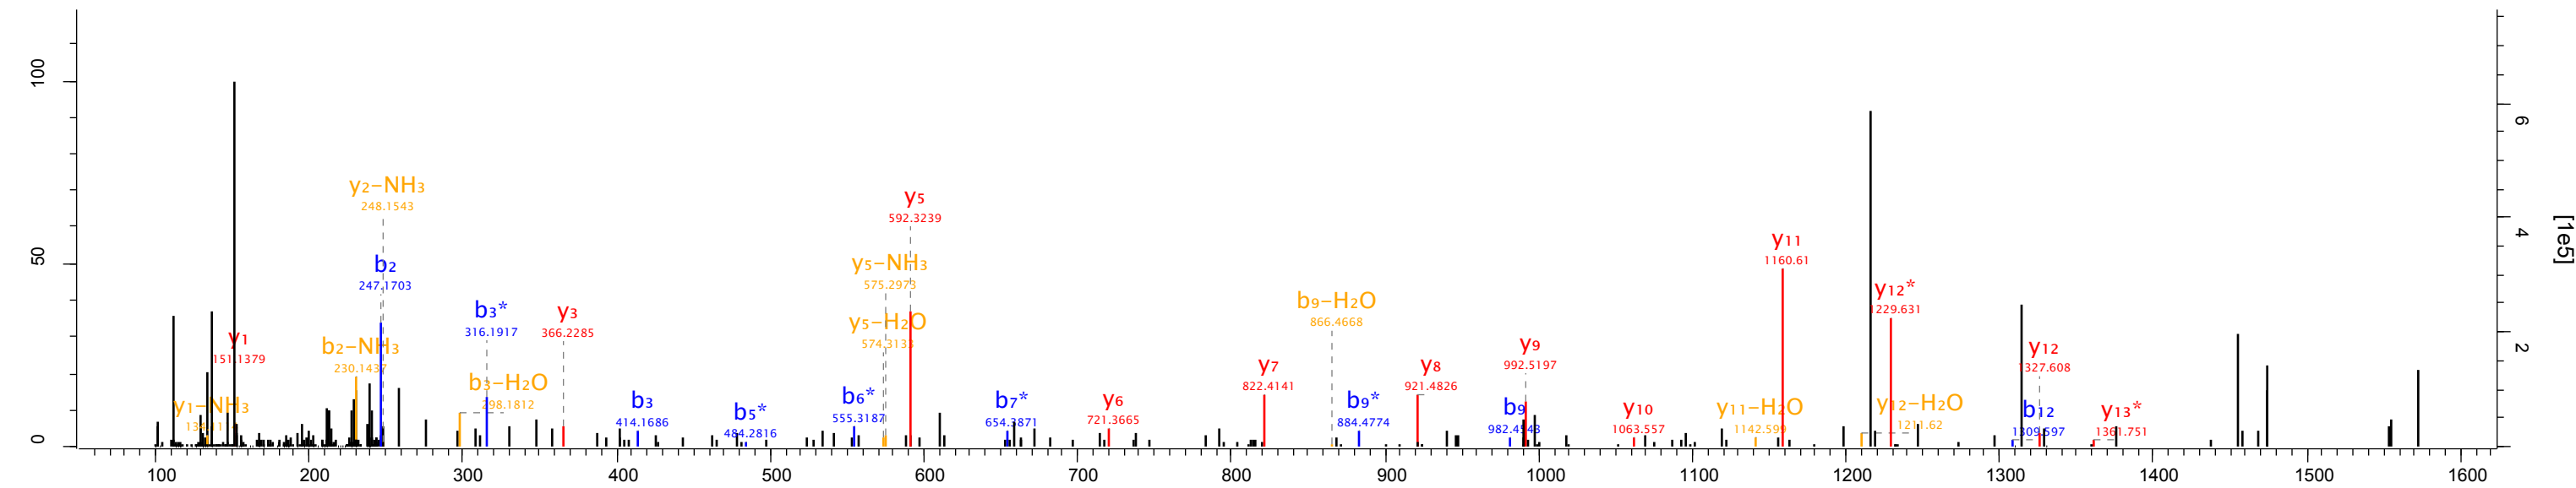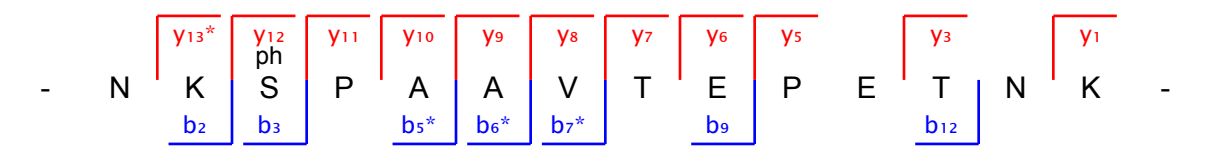

Raw file 20171215\_MaS\_33SR\_LMH\_phospho2\_01 Scan 3434 Method FTMS; HCD Score 40.99 m/z 565.6 Gene names ADD1

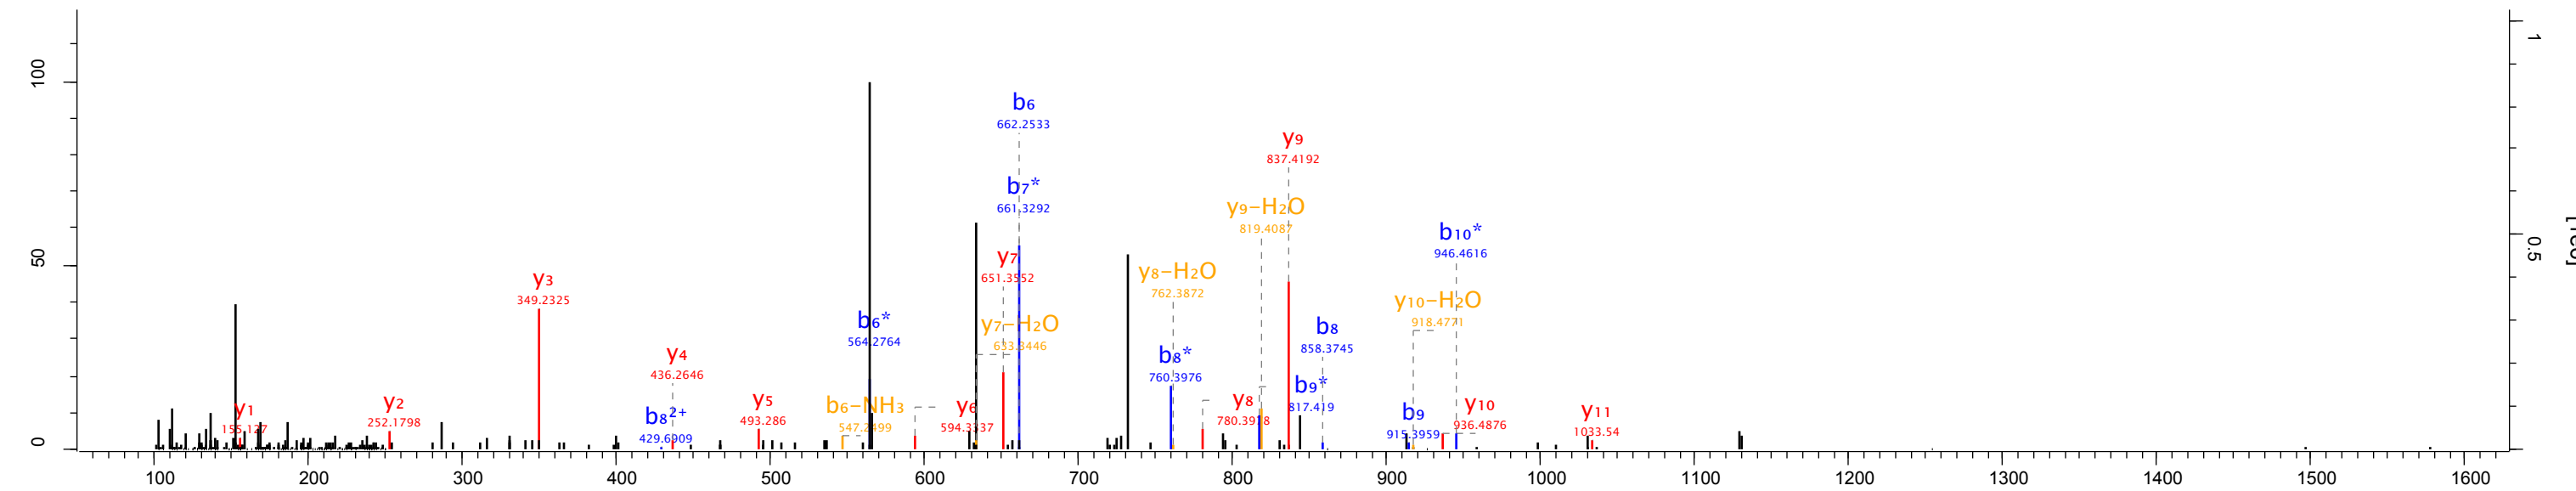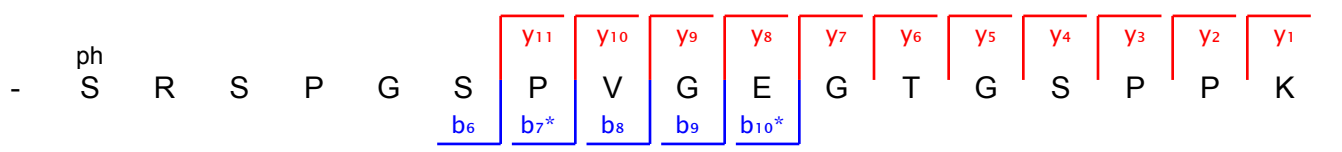



Raw file 20171215\_MaS\_33SR\_LMH\_phospho2\_01 Scan 3534 Method FTMS; HCD Score 121.82 m/z 728.32 Gene names BRCA1

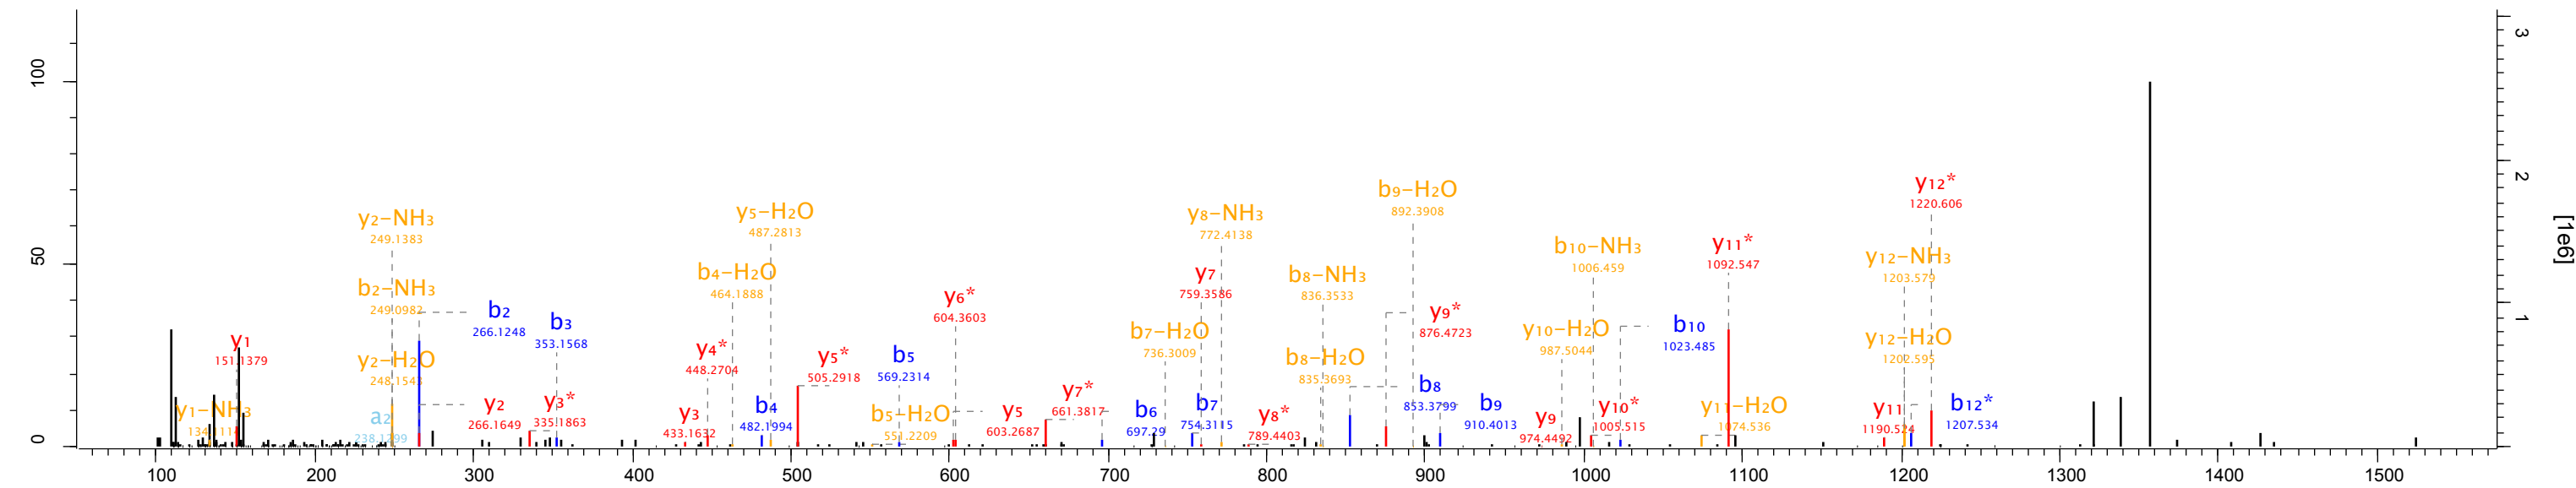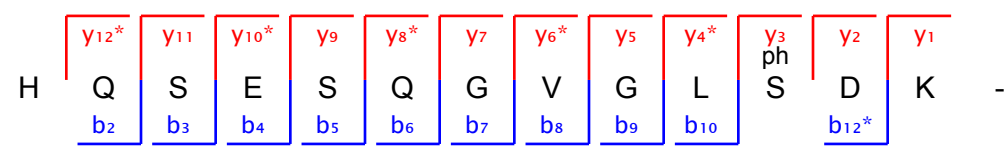

Raw file 20171215\_MaS\_33SR\_LMH\_phospho2\_01 Scan 3844 Method FTMS; HCD Score 52.5 m/z 539.74 Gene names ZNF335

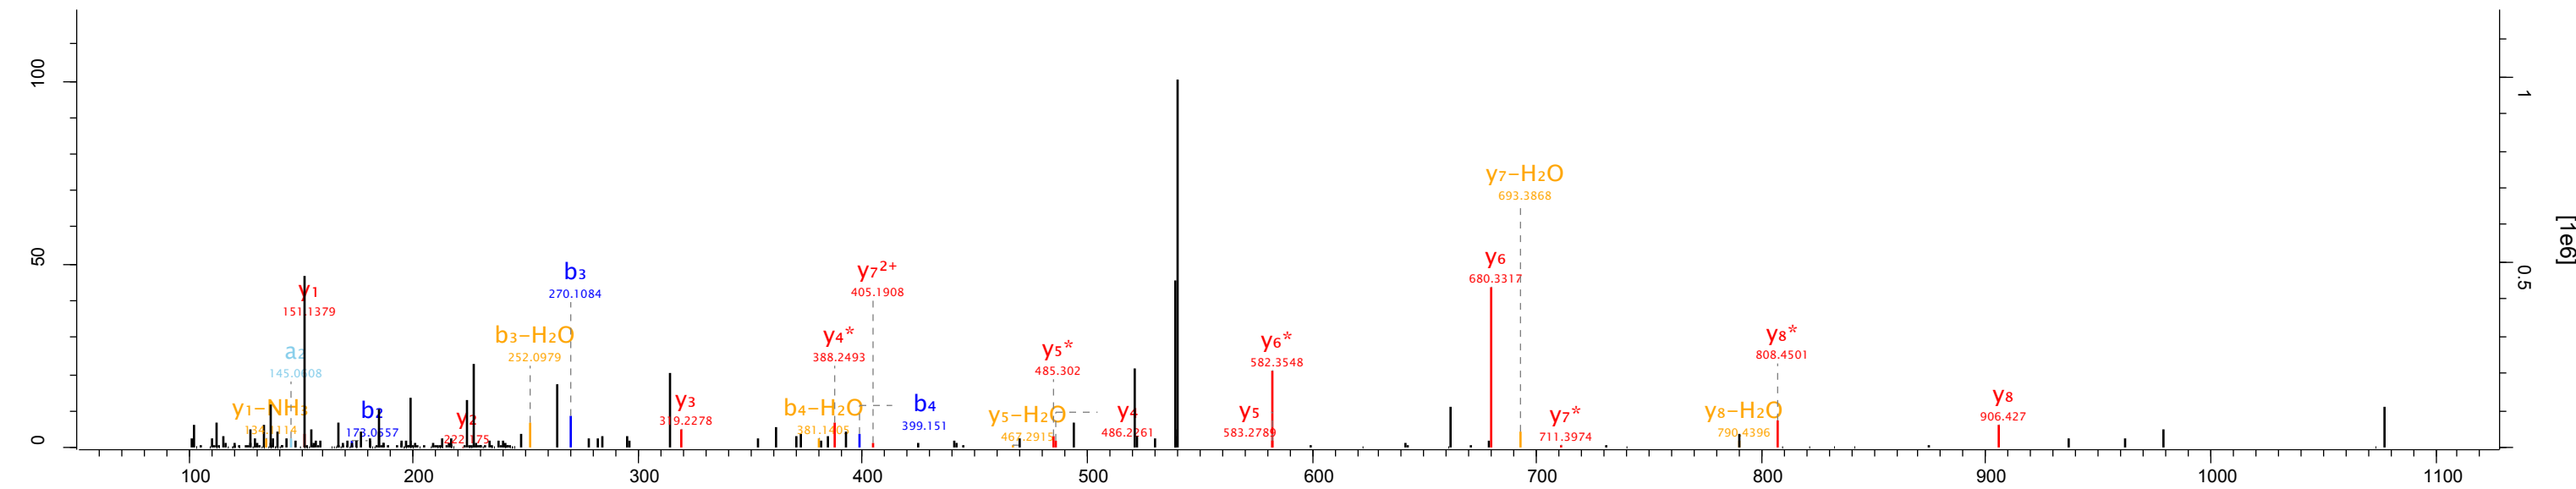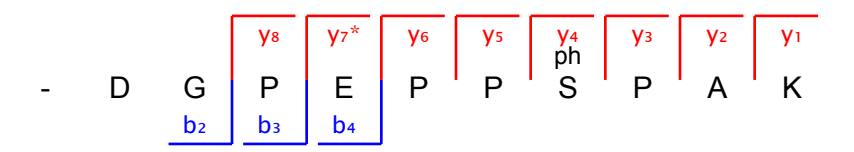

Raw file 20171215\_MaS\_33SR\_LMH\_phospho2\_01 Scan 4494 Method FTMS; HCD Score 158.06 m/z 490.25 Gene names NUCKS1

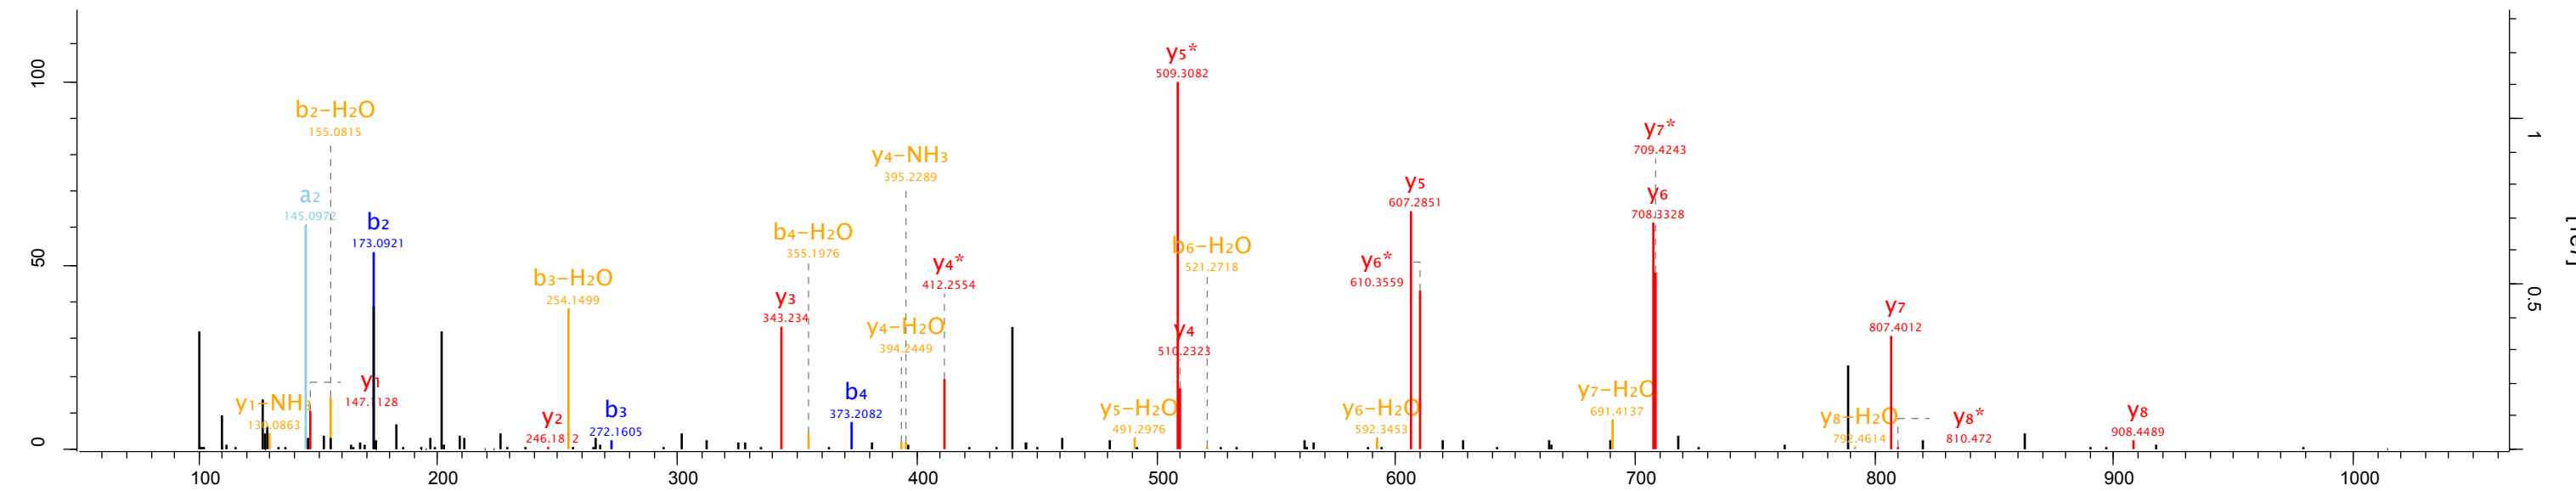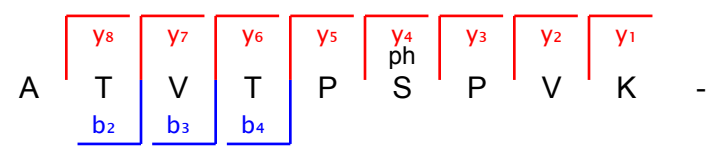

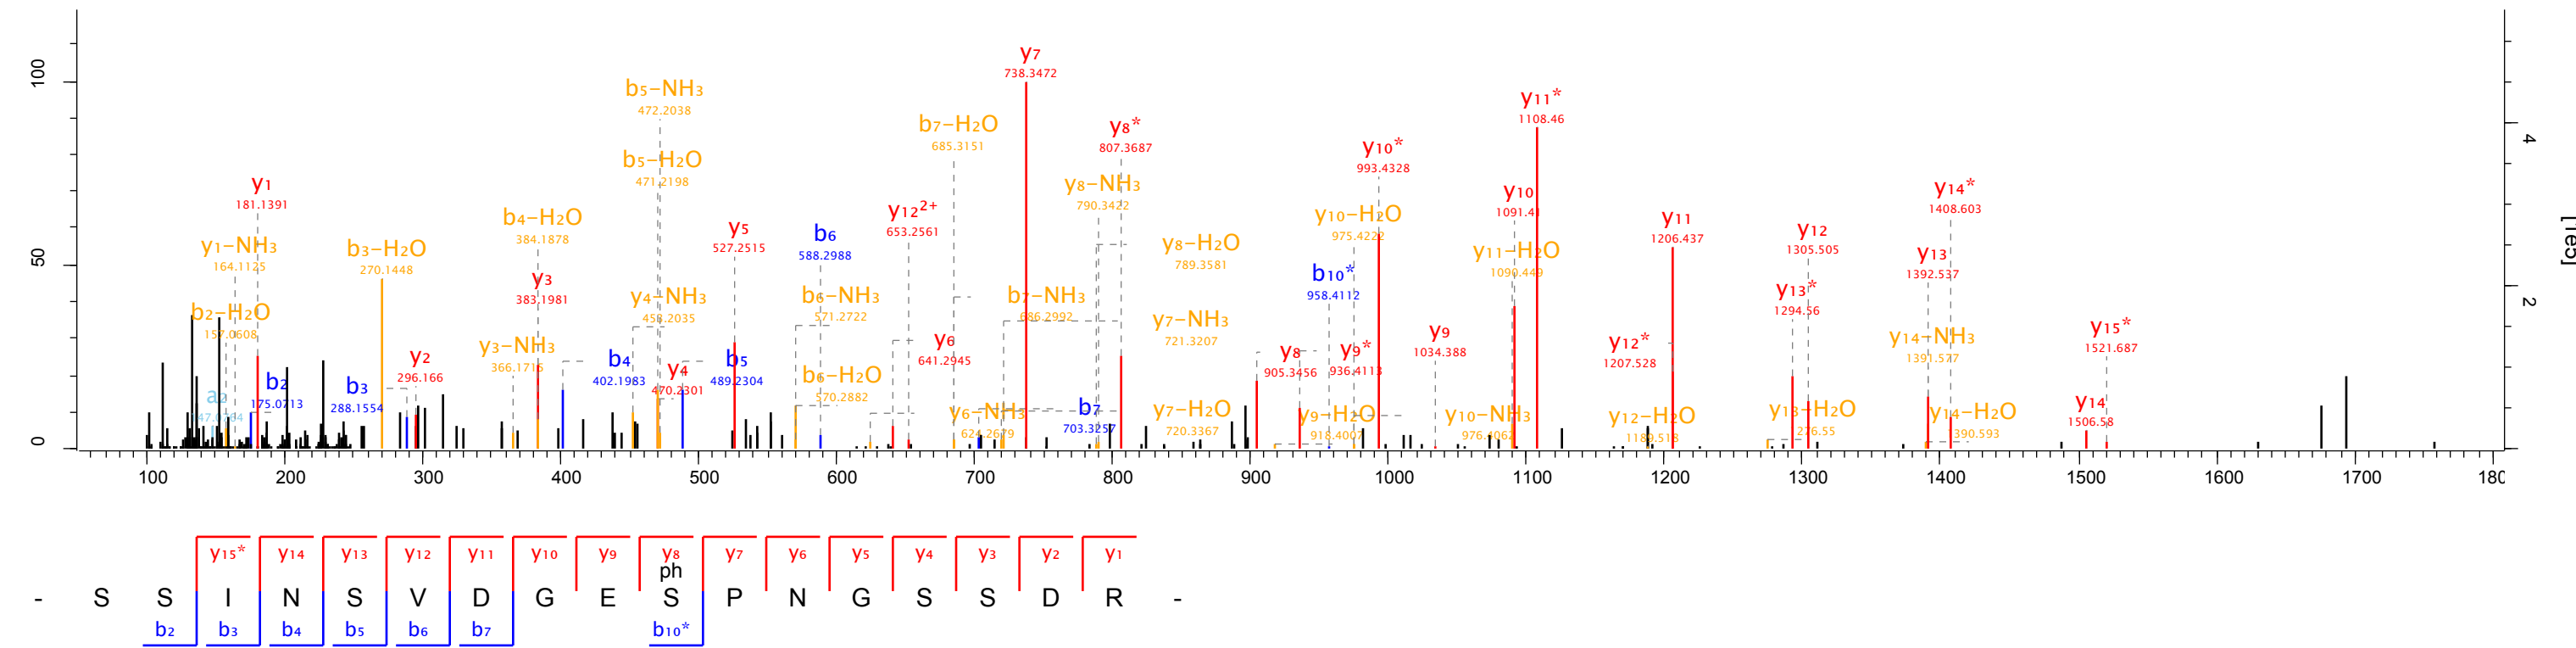

Raw file 20171215\_MaS\_33SR\_LMH\_phospho2\_01 Scan 4884 Method FTMS; HCD Score 132.6 m/z 776.85 Gene names SMG9

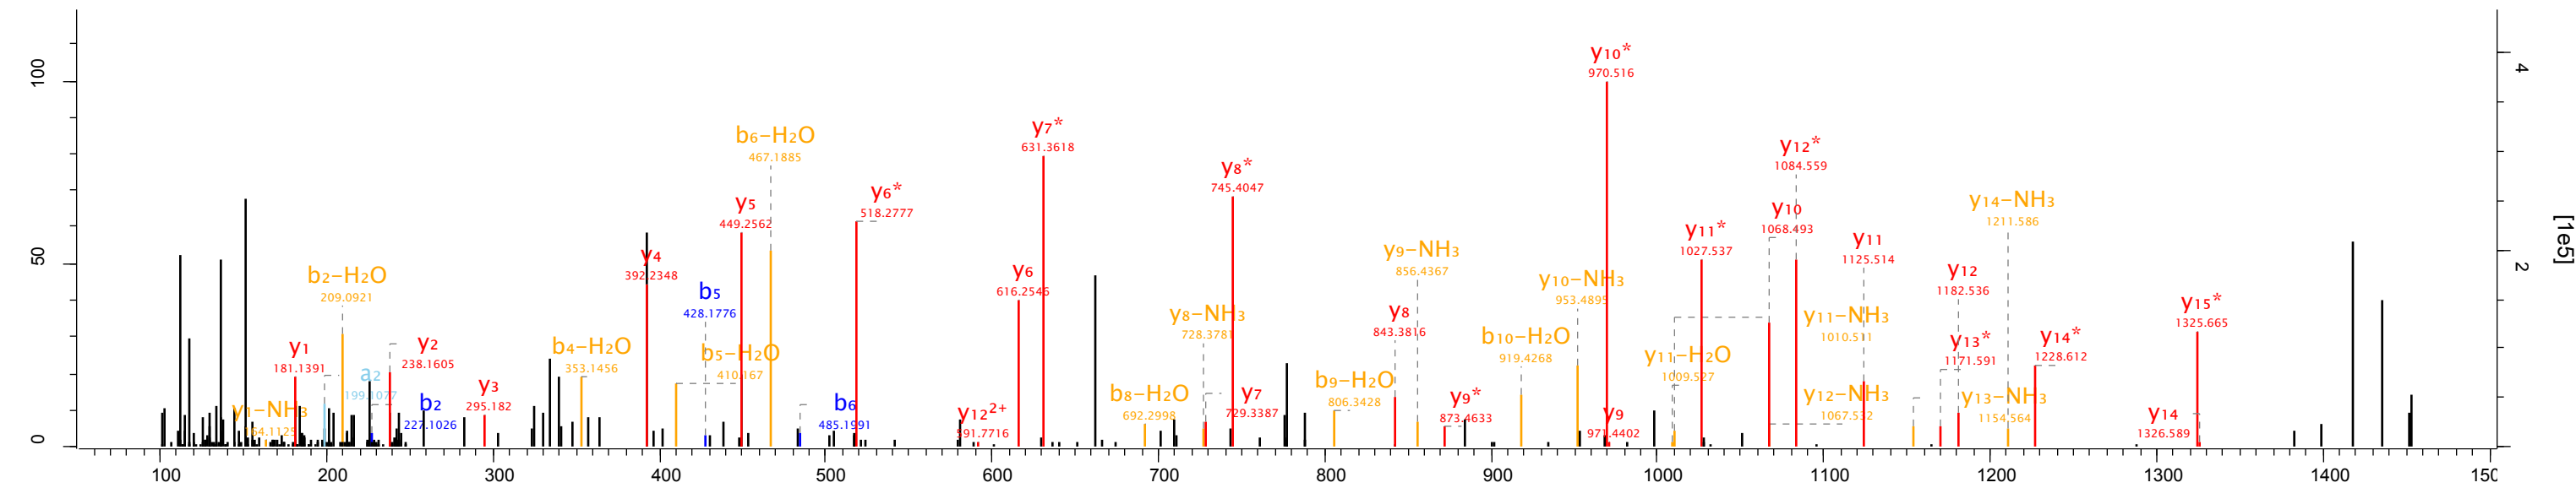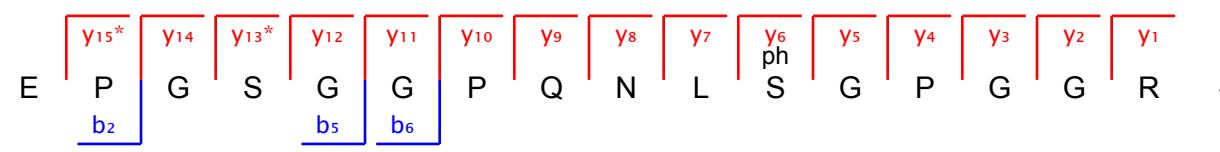

Raw file: 20171215\_MaS\_33SR\_LMH\_phospho2\_01  
 Scan: 5004 Method: FTMS; HCD Score: 173.83 m/z: 767.89 Gene names: LSM14A

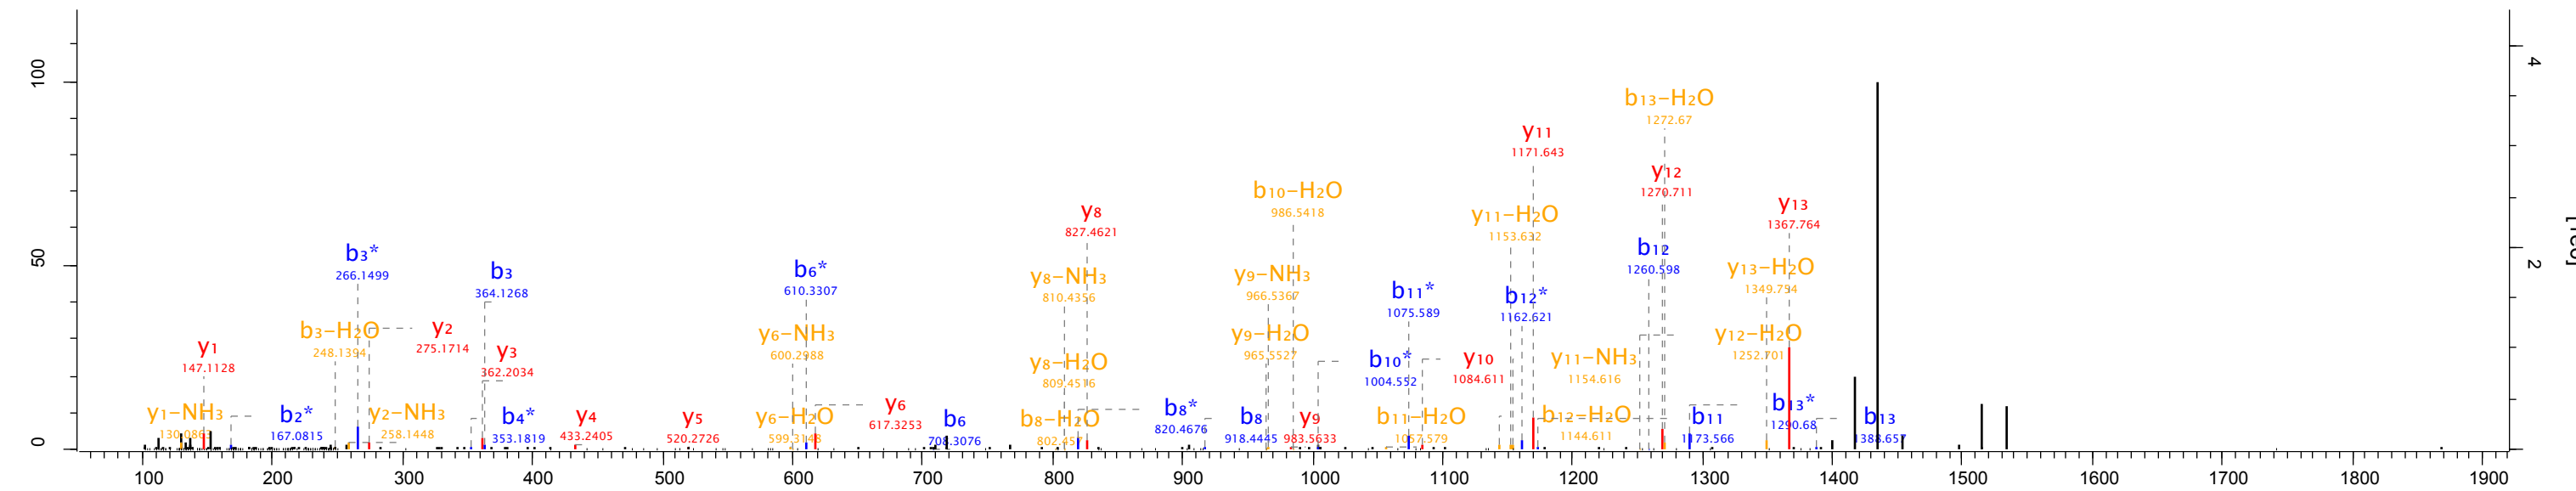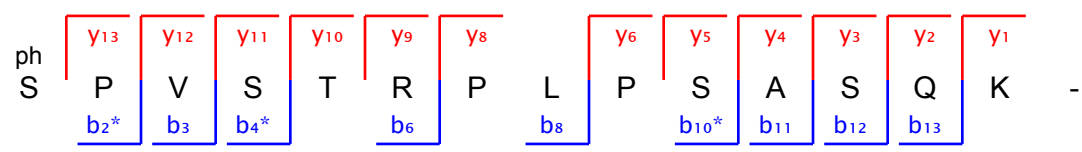

Raw file: 20171215\_MaS\_33SR\_LMH\_phospho2\_01  
 Scan: 5274 Method: FTMS; HCD Score: 160.65 m/z: 590.75 Gene names: MCM2

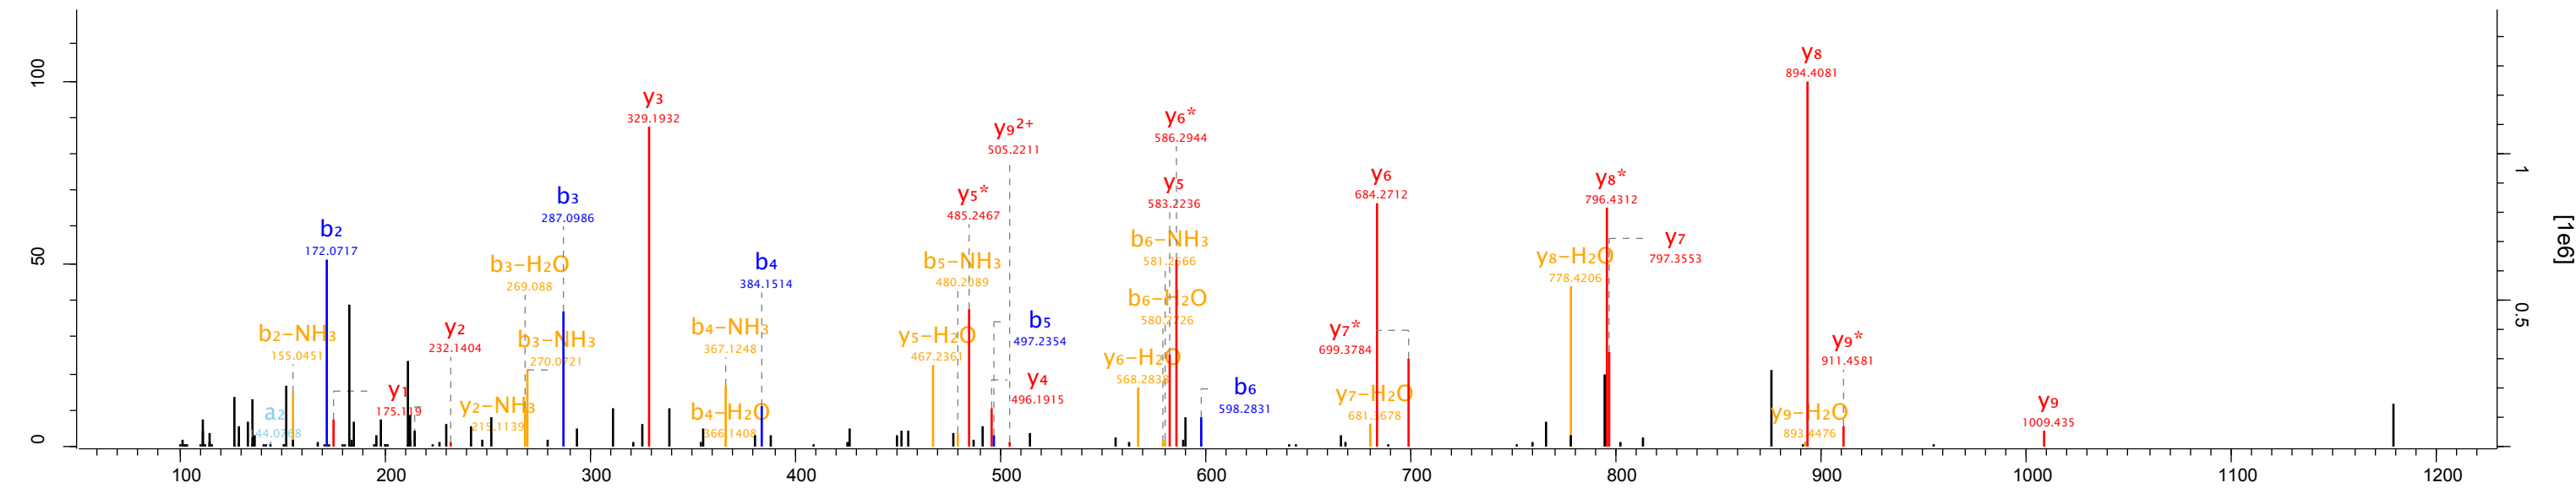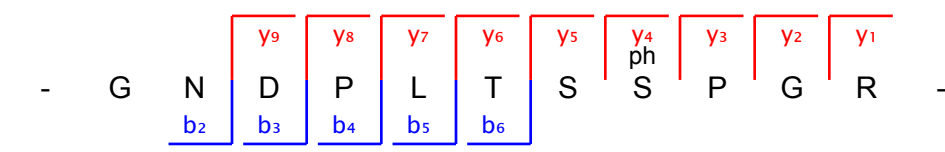

Raw file: 20171215\_MaS\_33SR\_LMH\_phospho2\_01  
 Scan: 5694 Method: FTMS; HCD Score: 92.64 m/z: 620.8 Gene names: PIKFYVE

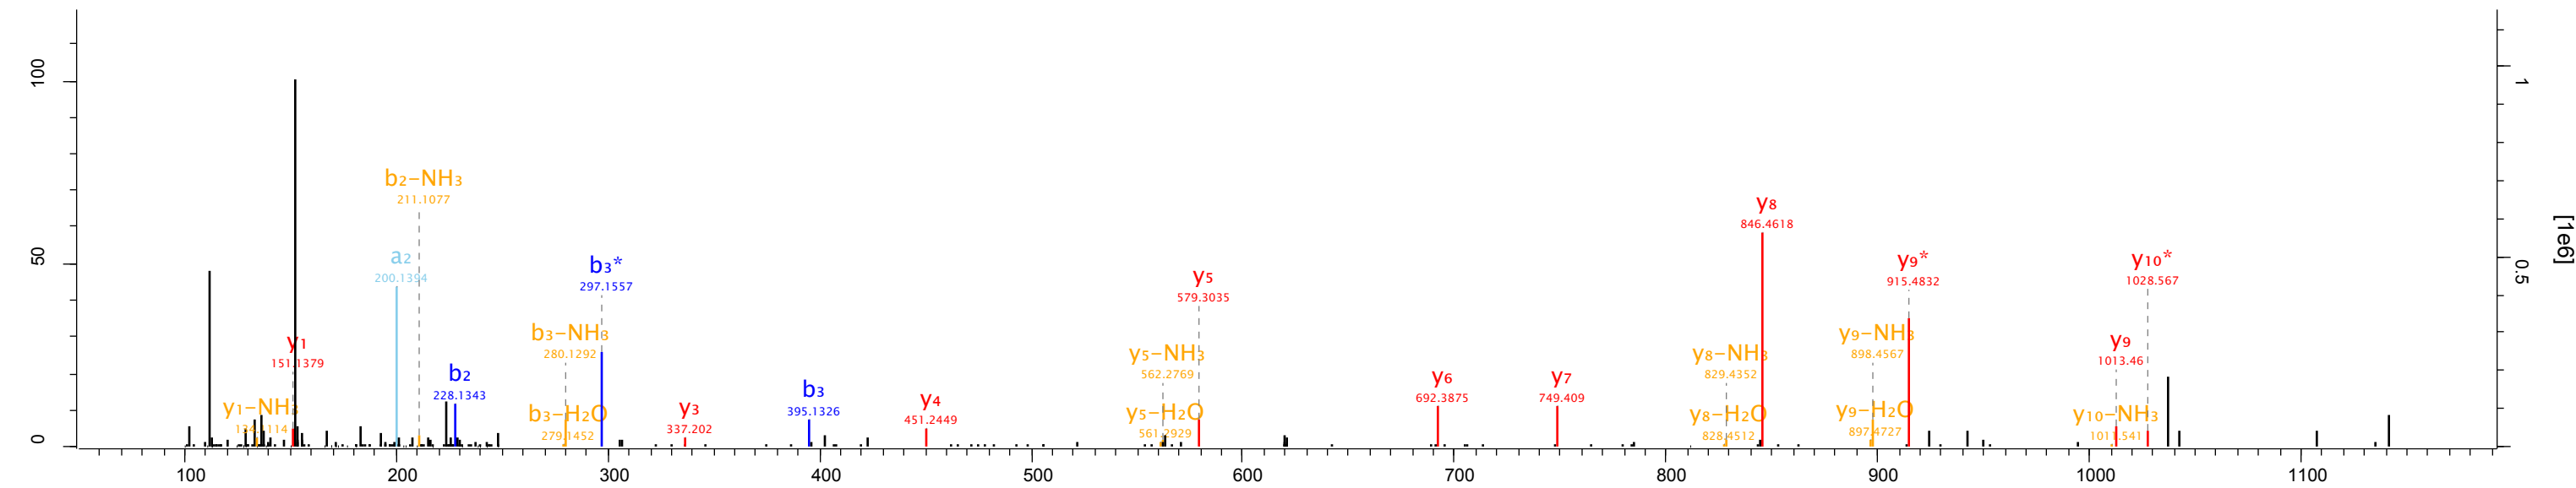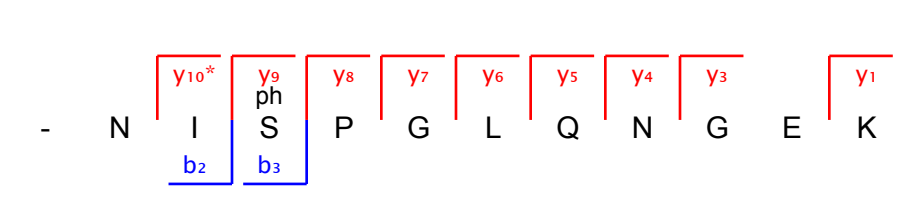



Raw file 20171215\_MaS\_33SR\_LMH\_phospho2\_01 Scan 6324 Method FTMS; HCD Score 114.62 m/z 754.34 Gene names CTTNBP2NL

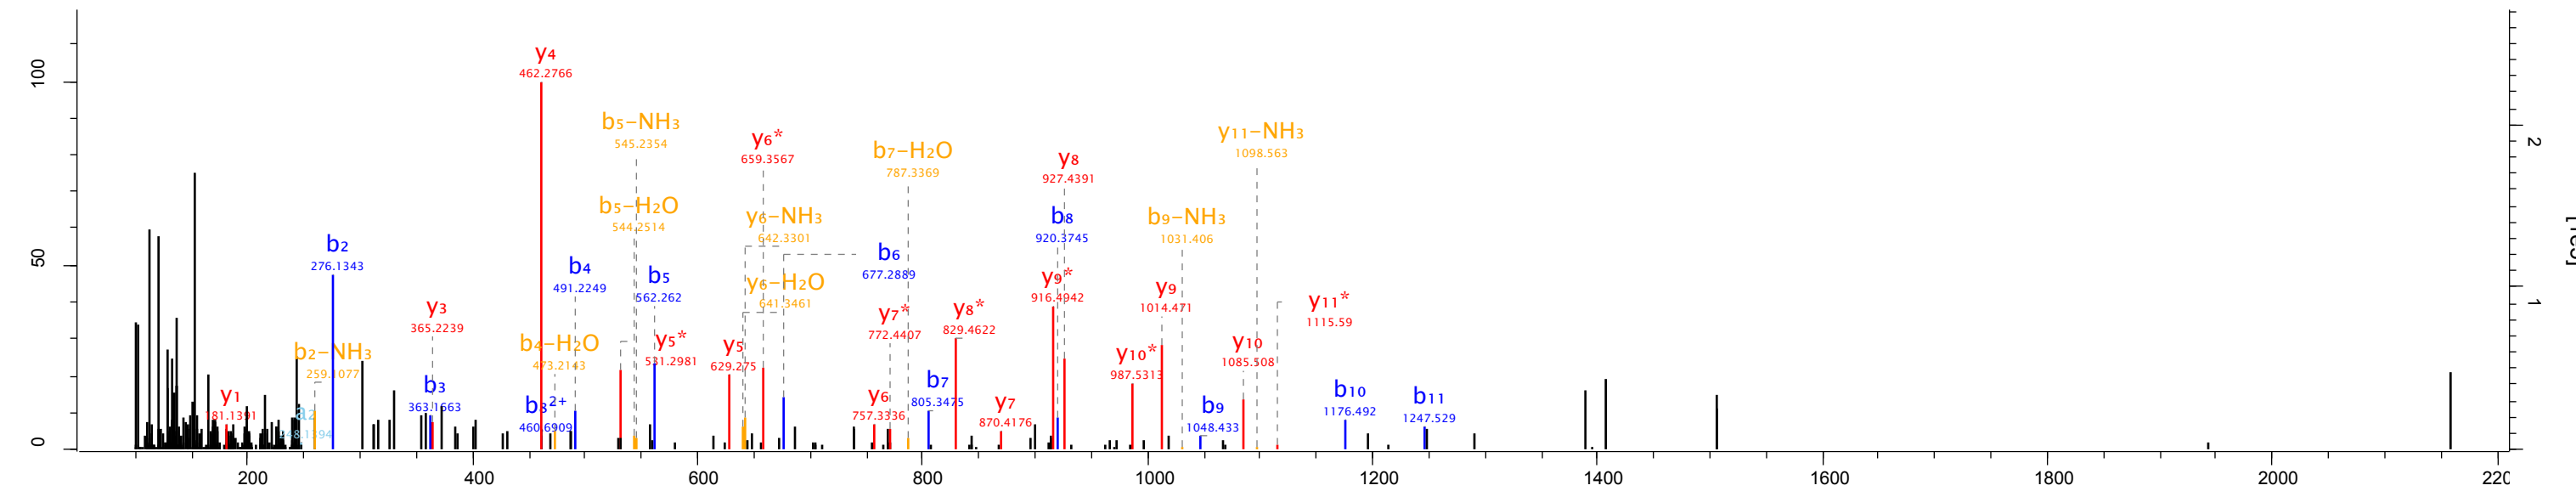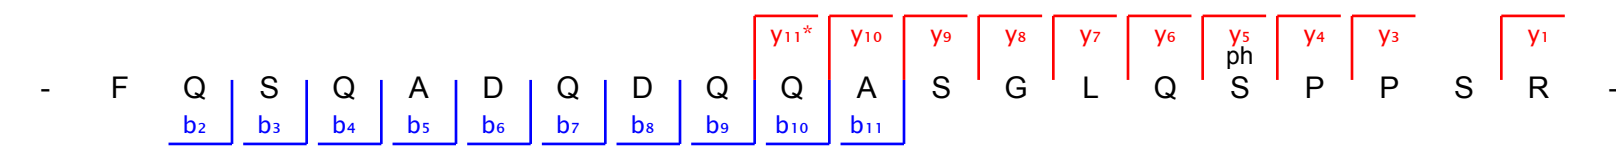

Raw file 20171215\_MaS\_33SR\_LMH\_phospho2\_01 Scan 6854 Method FTMS; HCD Score 141.64 m/z 874.39 Gene names ZC3HC1

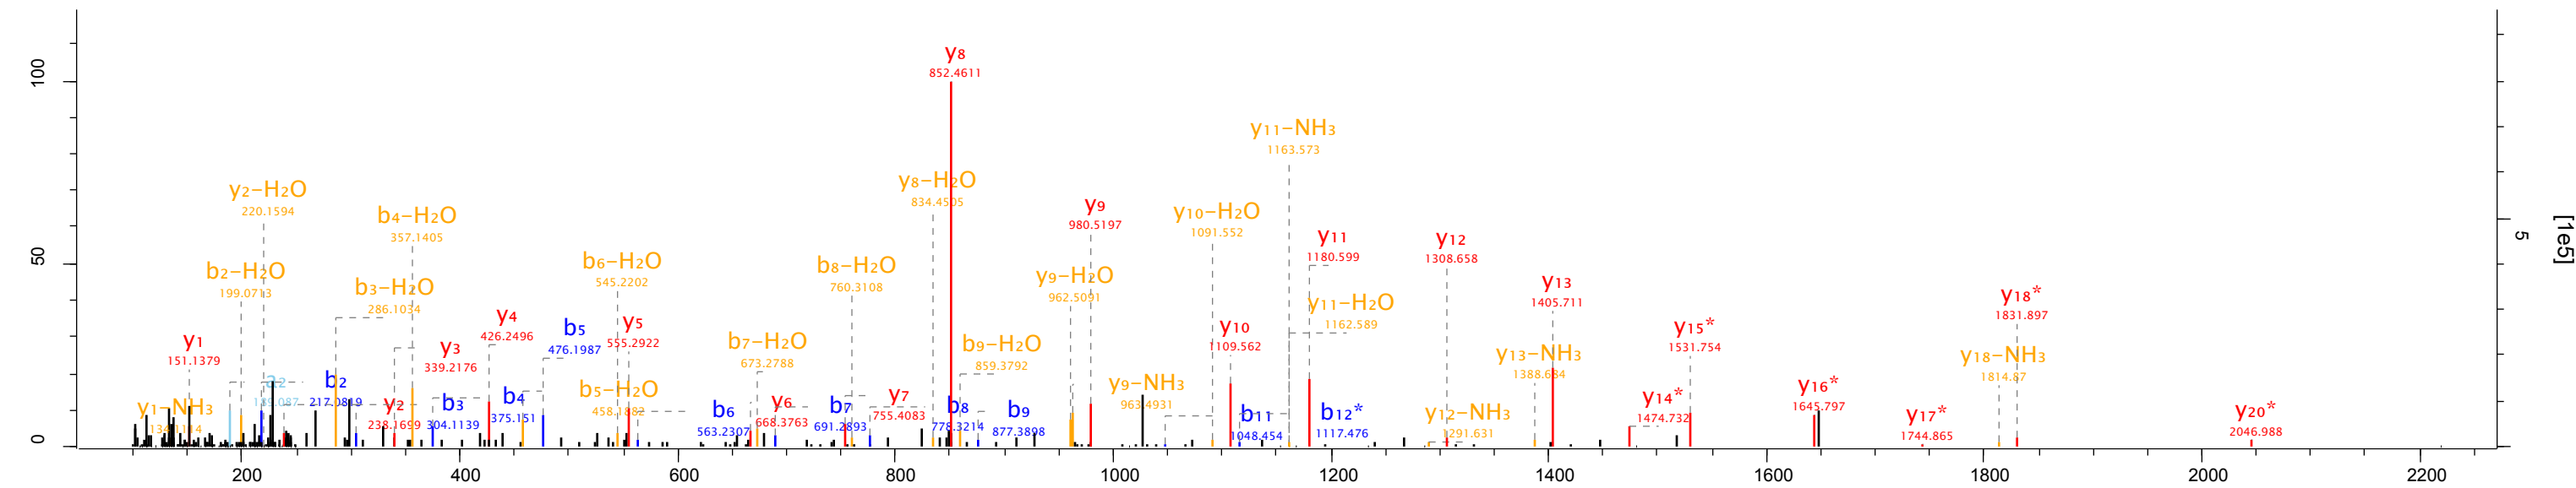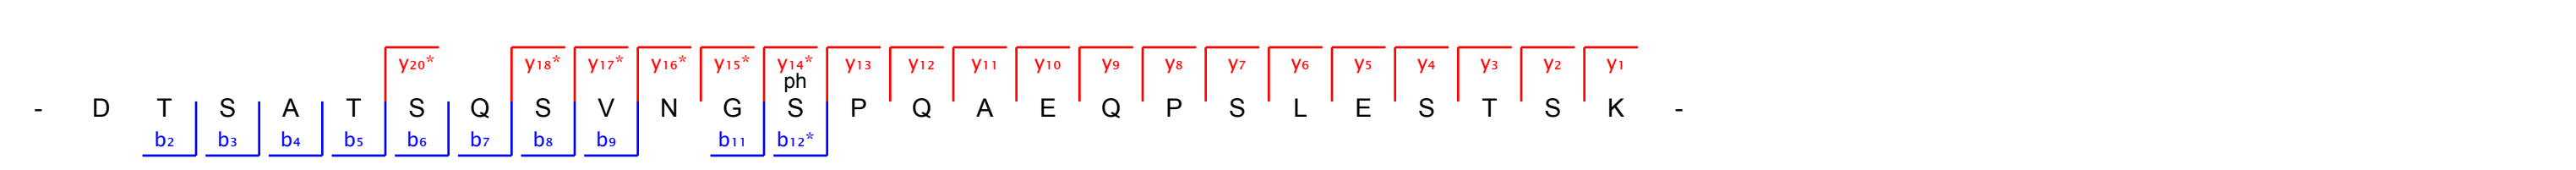

Raw file  
20171215\_MaS\_33SR\_LMH\_phospho2\_01

Scan 8474 Method FTMS; HCD Score 47.24 m/z 776.02 Gene names DLGAP5

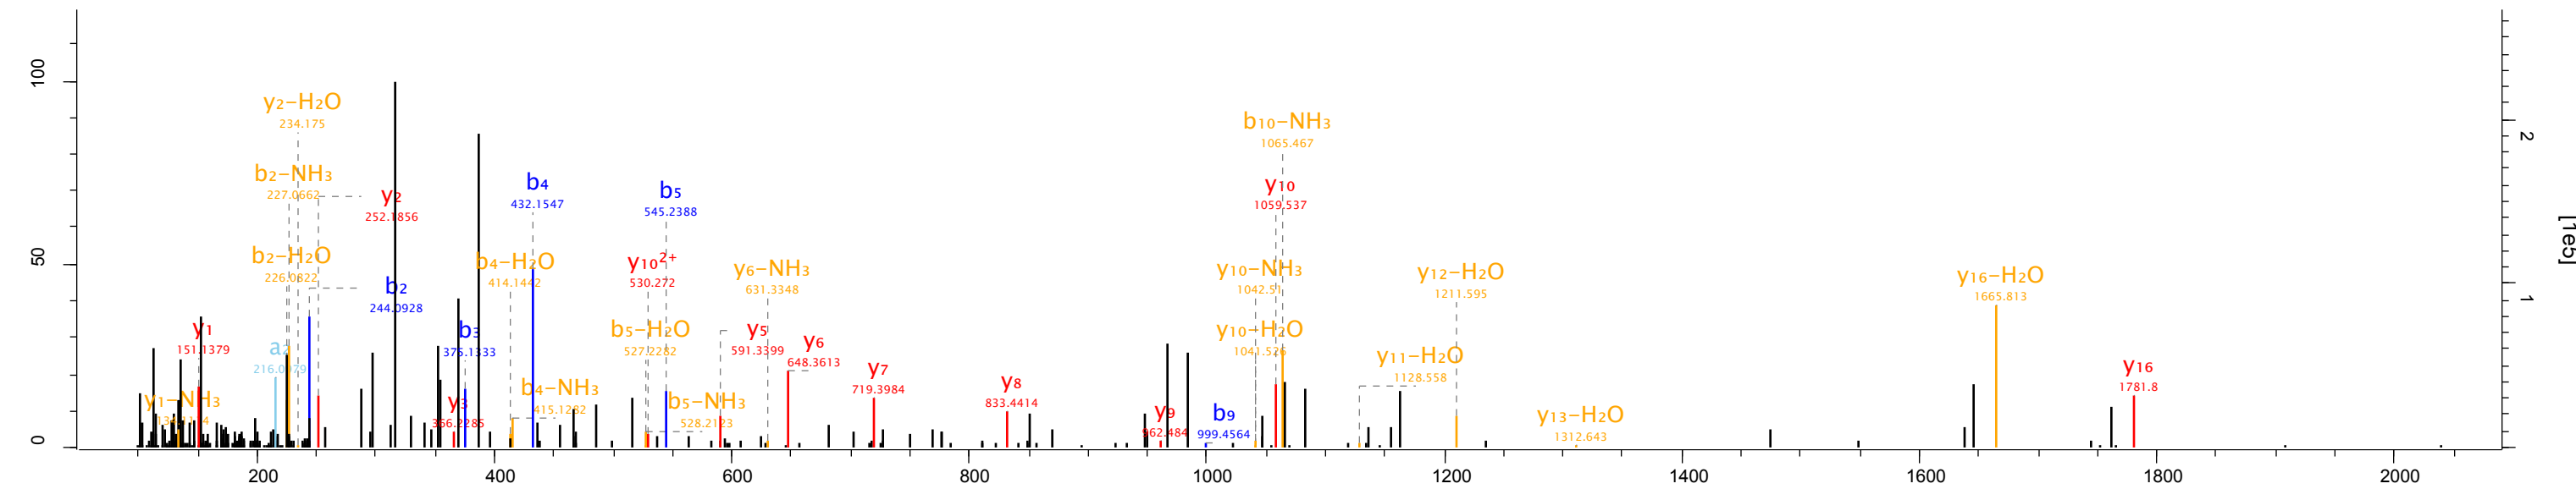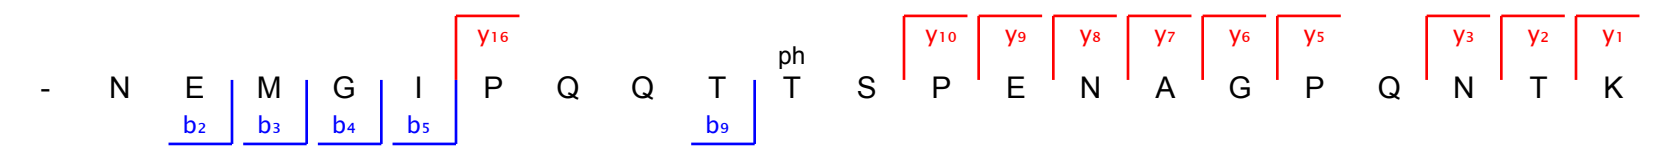

Raw file: 20171215\_MaS\_33SR\_LMH\_phospho2\_02  
 Scan: 10654 Method: FTMS; HCD Score: 152.2 m/z: 1049.44 Gene names: BABAM1

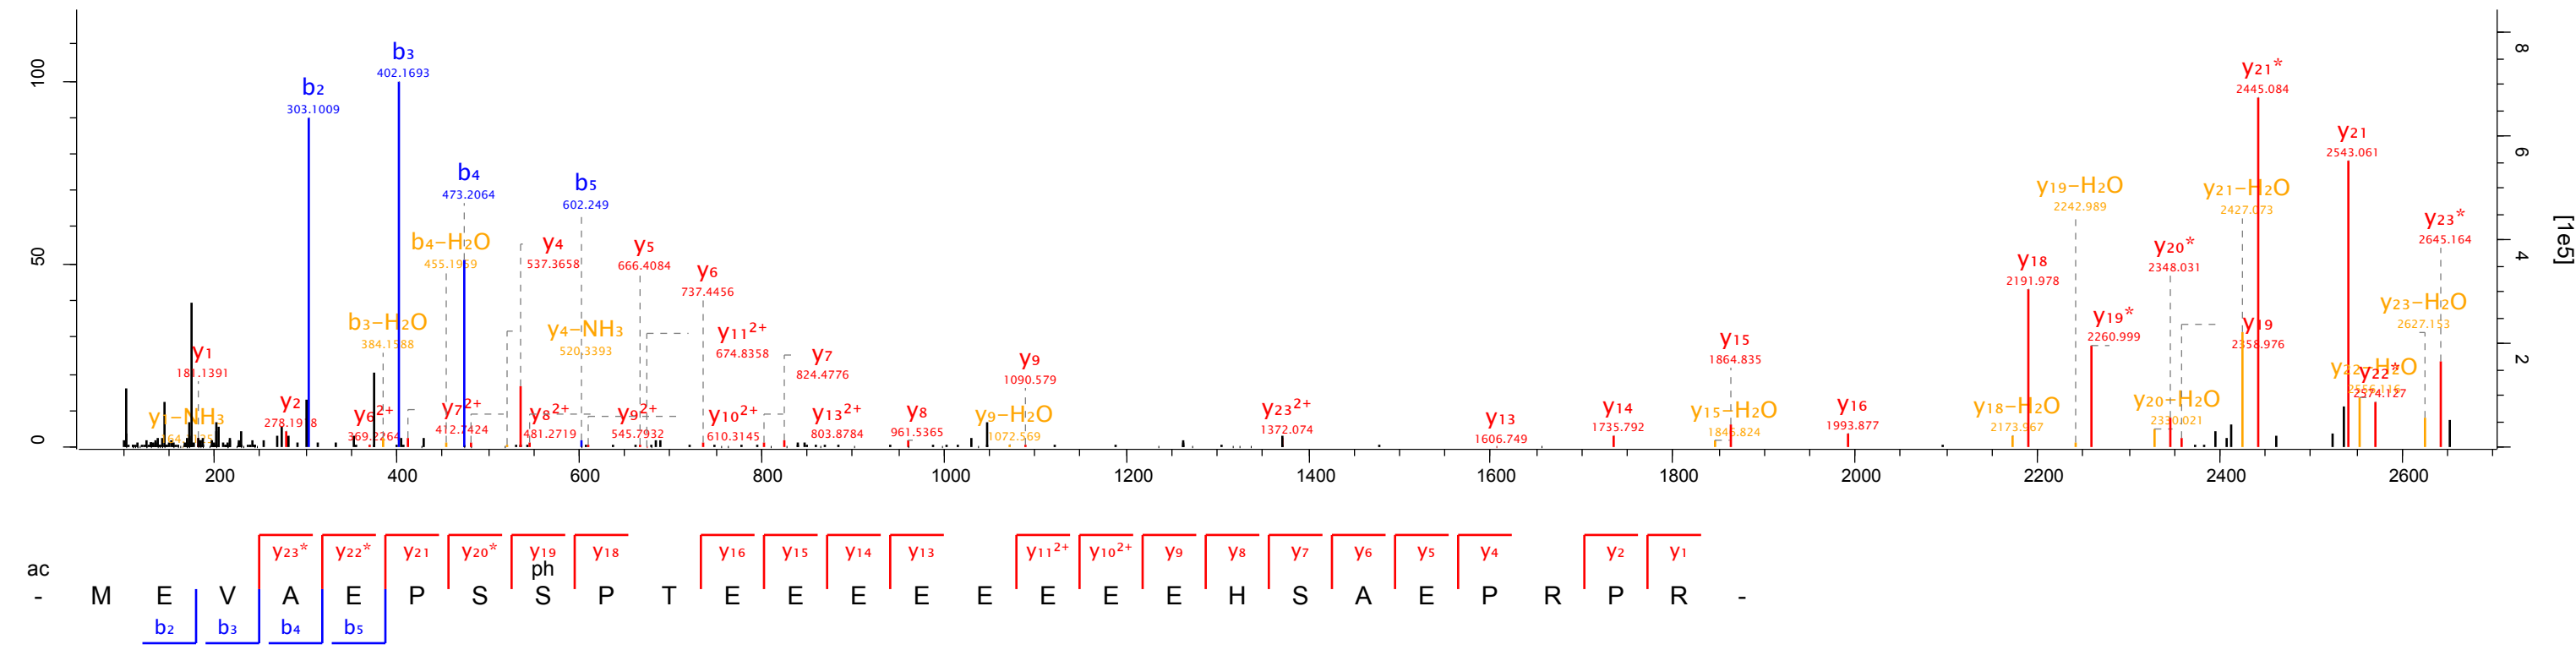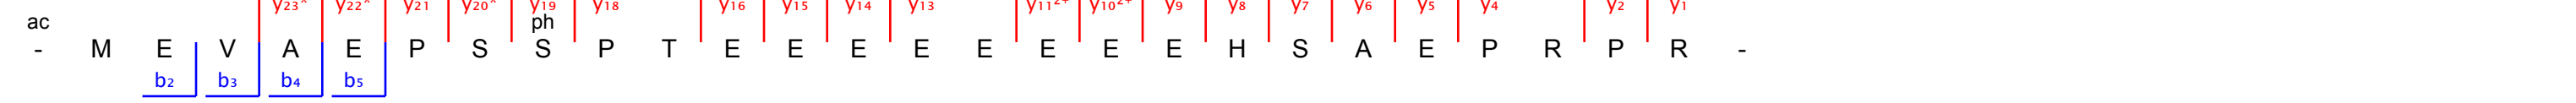

Raw file 20171215\_MaS\_33SR\_LMH\_phospho2\_02 Scan 10874 Method FTMS; HCD Score 151.96 m/z 1102.47 Gene names INF2

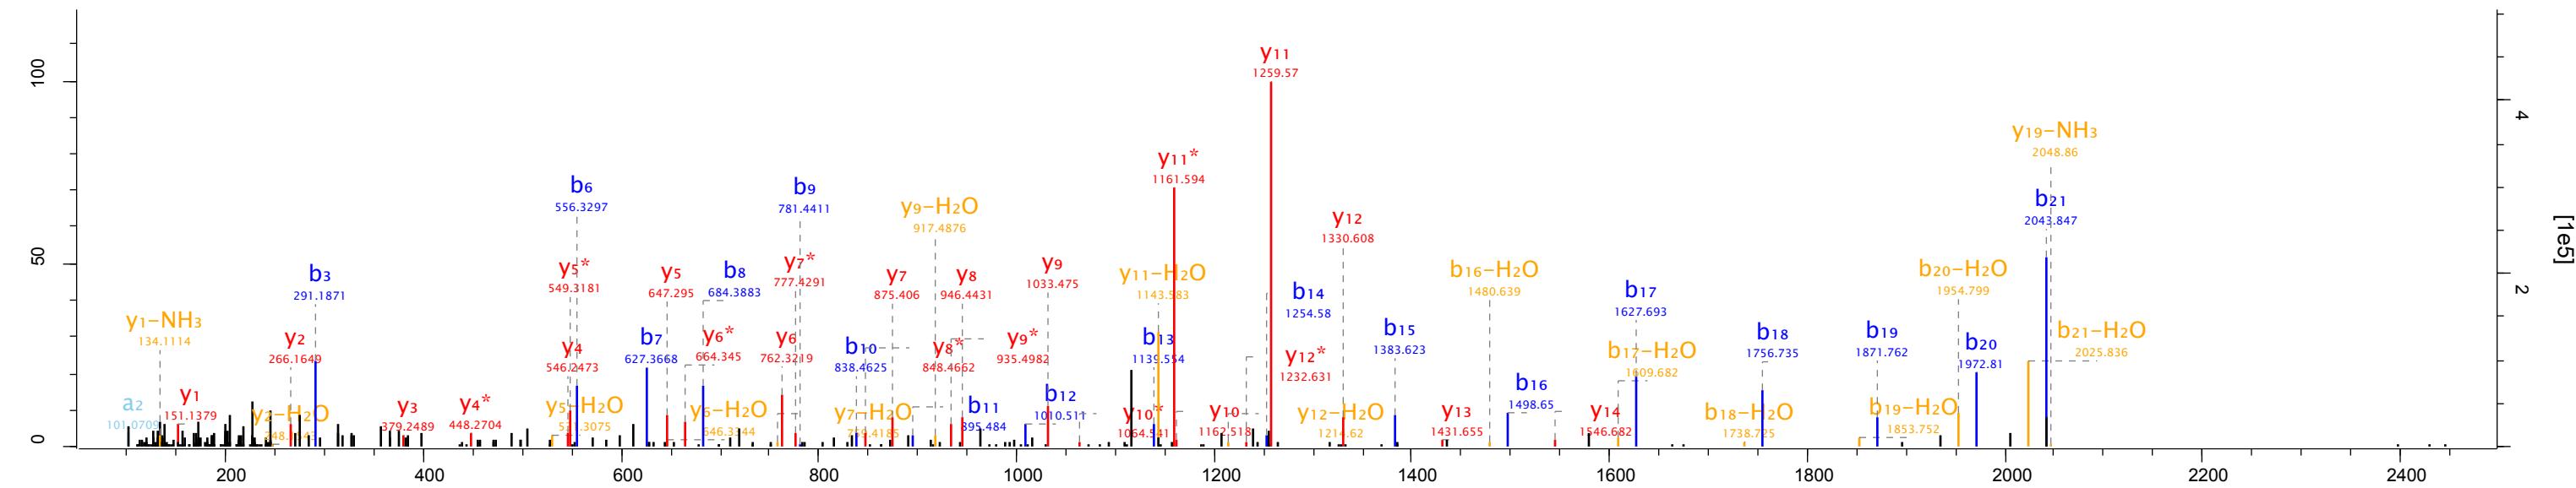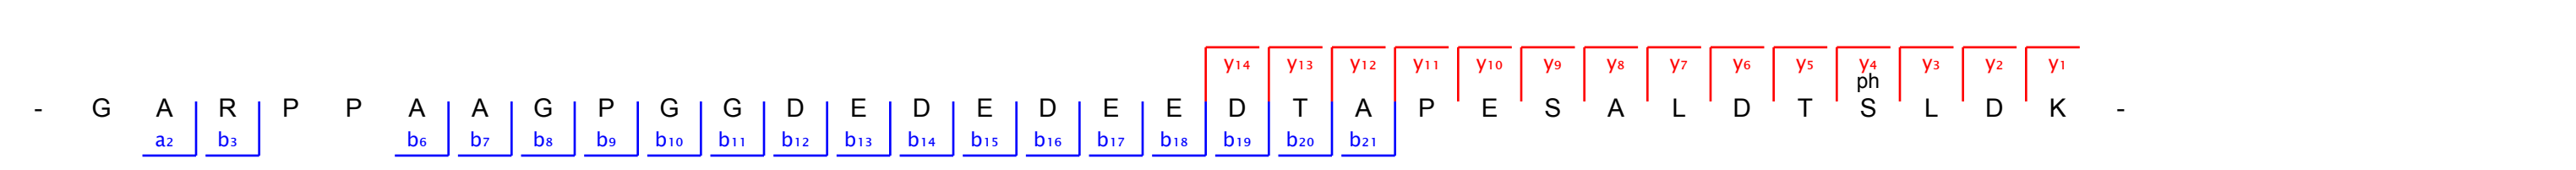

Raw file 20171215\_MaS\_33SR\_LMH\_phospho2\_02 Scan 11334 Method FTMS; HCD Score 128.95 m/z 652.32 Gene names TFDP2

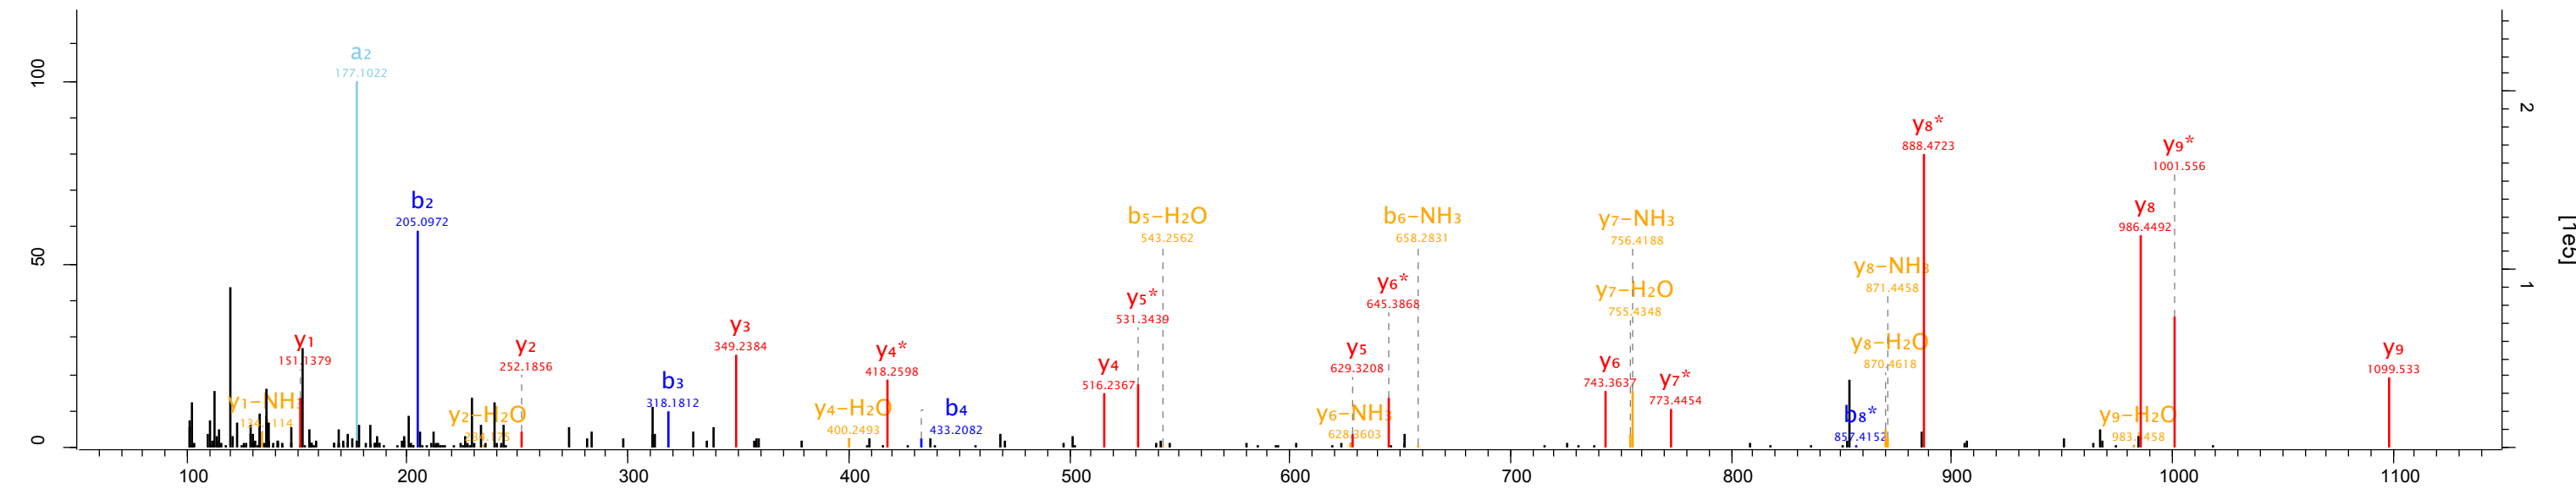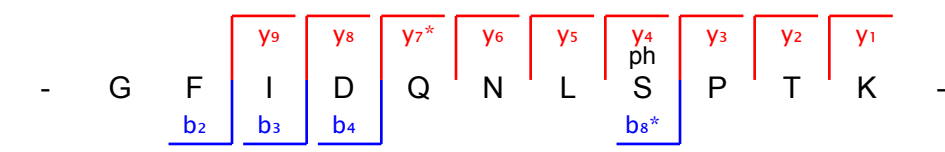

Raw file 20171215\_MaS\_33SR\_LMH\_phospho2\_02 Scan 11384 Method FTMS; HCD Score 155.2 m/z 782.83 Gene names OBSL1

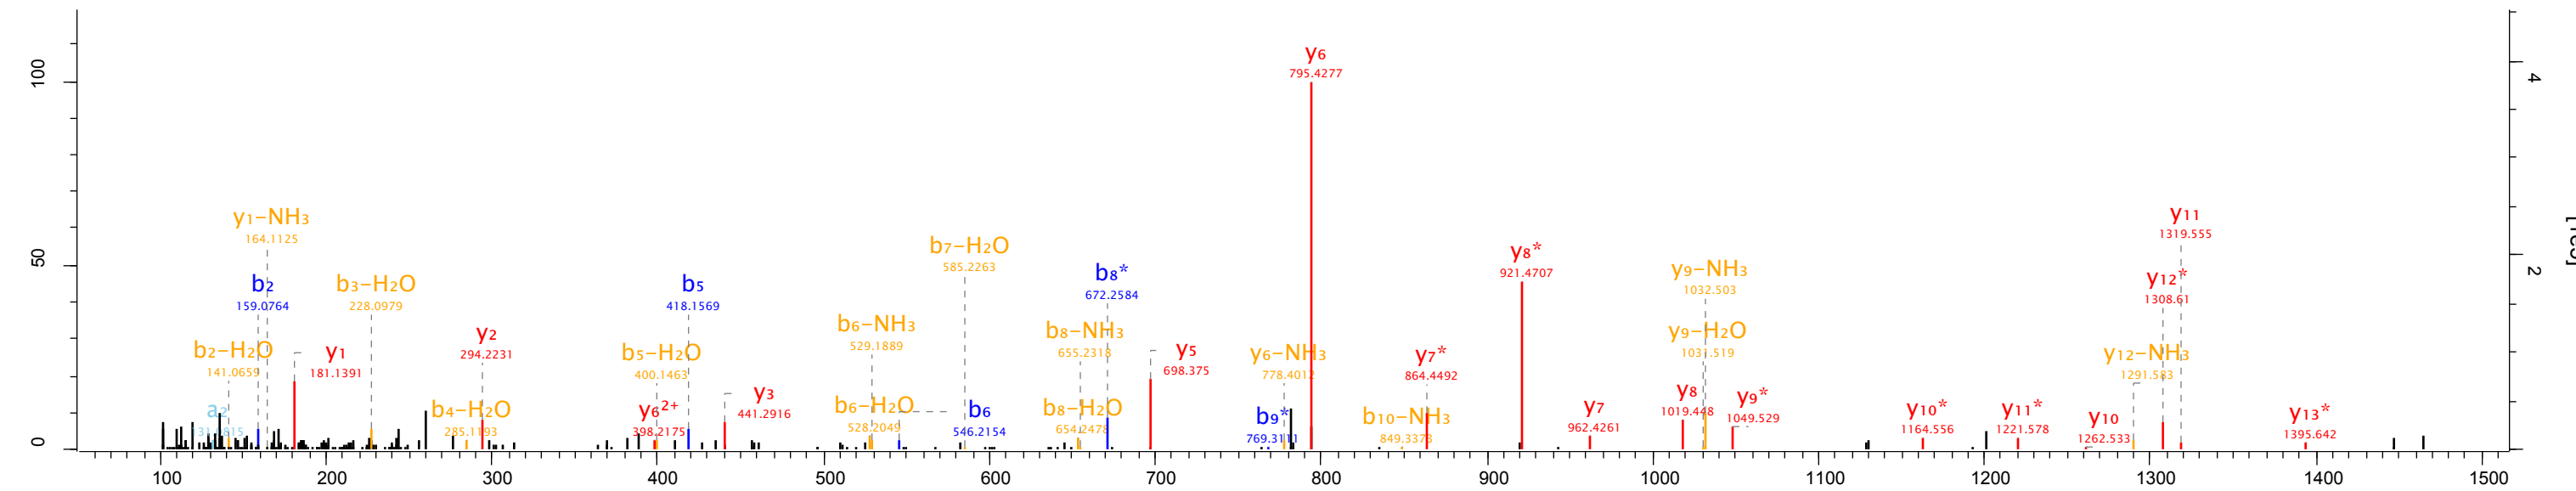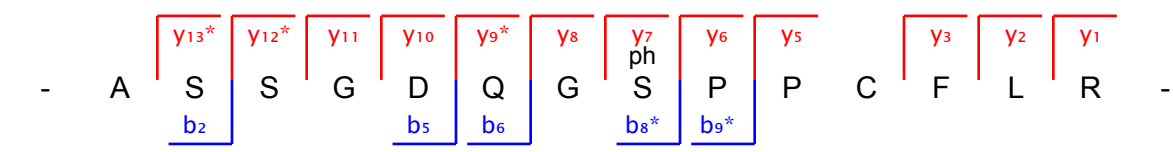

Raw file 20171215\_MaS\_33SR\_LMH\_phospho2\_02 Scan 11864 Method FTMS; HCD Score 108.25 m/z 758.36 Gene names FANCE

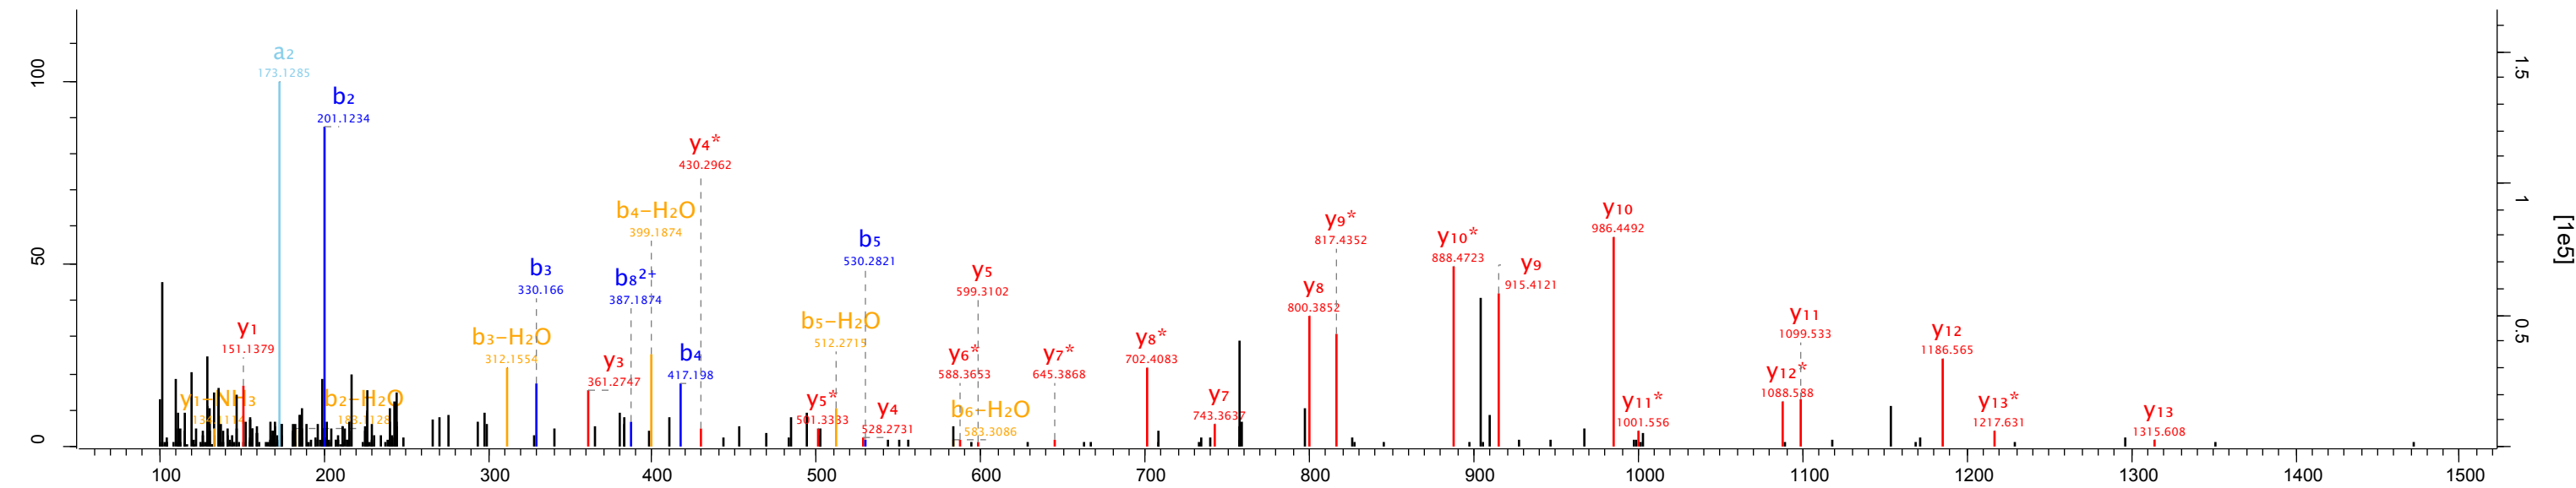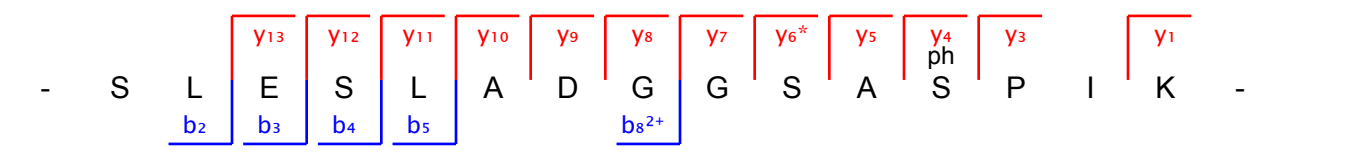



Raw file 20171215\_MaS\_33SR\_LMH\_phospho2\_02 Scan 11964 Method FTMS; HCD Score 59.54 m/z 1079.94 Gene names AKAP12

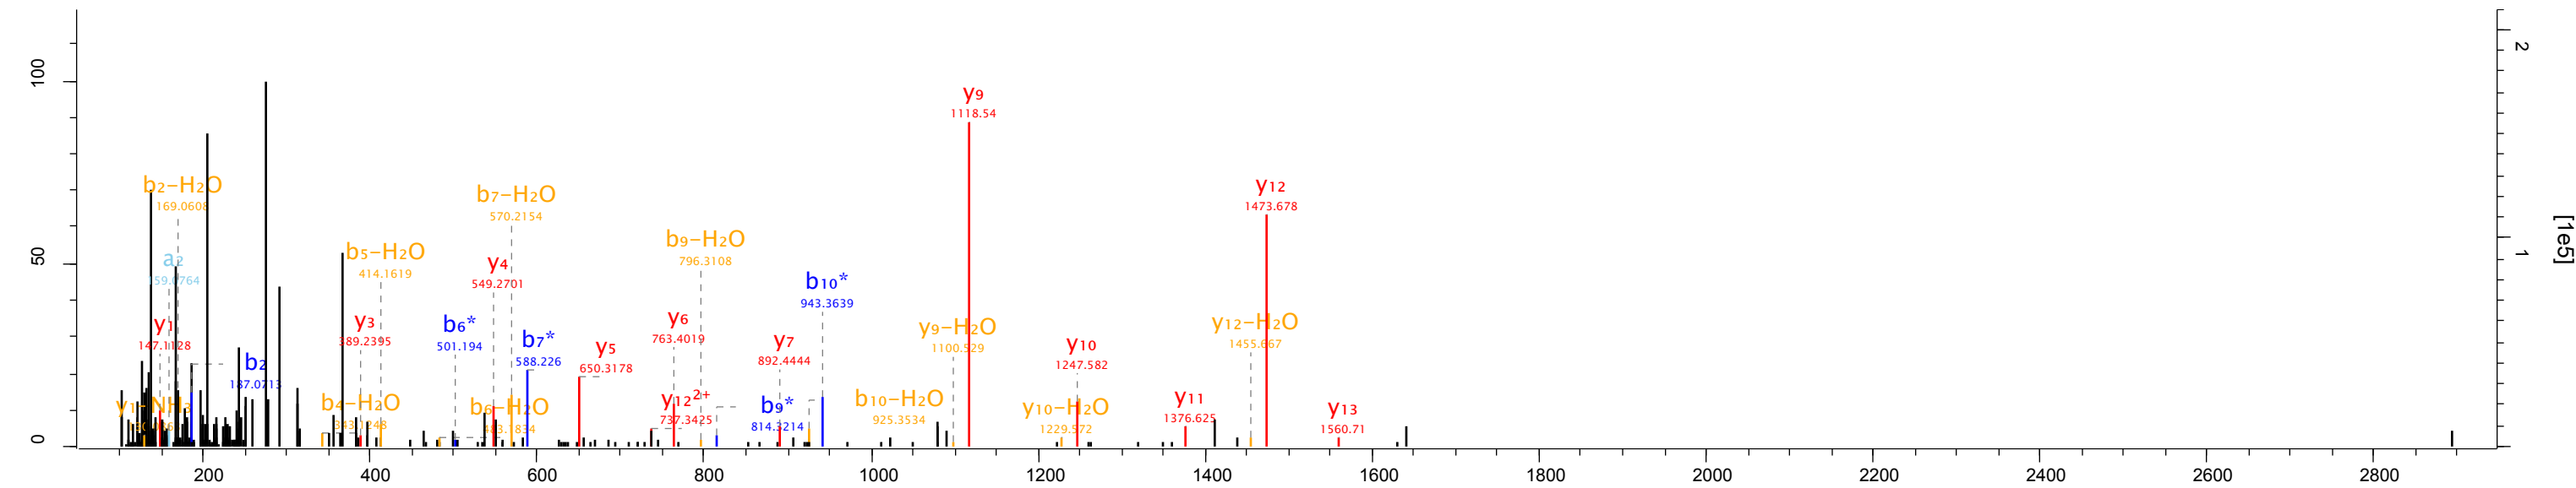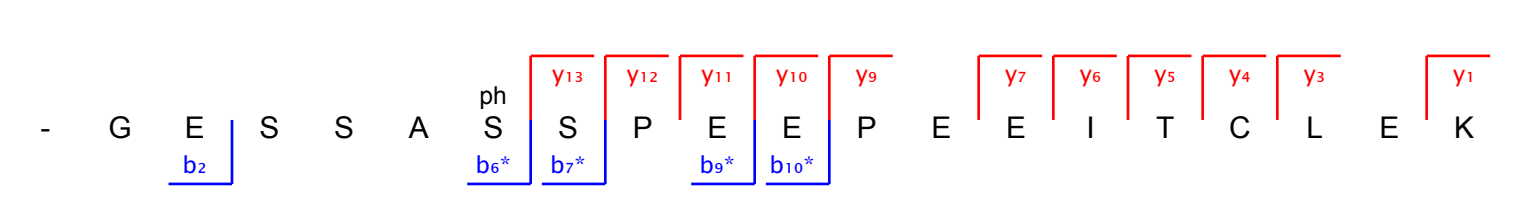

Raw file: 20171215\_MaS\_33SR\_LMH\_phospho2\_02  
 Scan: 12354 Method: FTMS; HCD Score: 92.51 m/z: 1138.52 Gene names: EIF3B

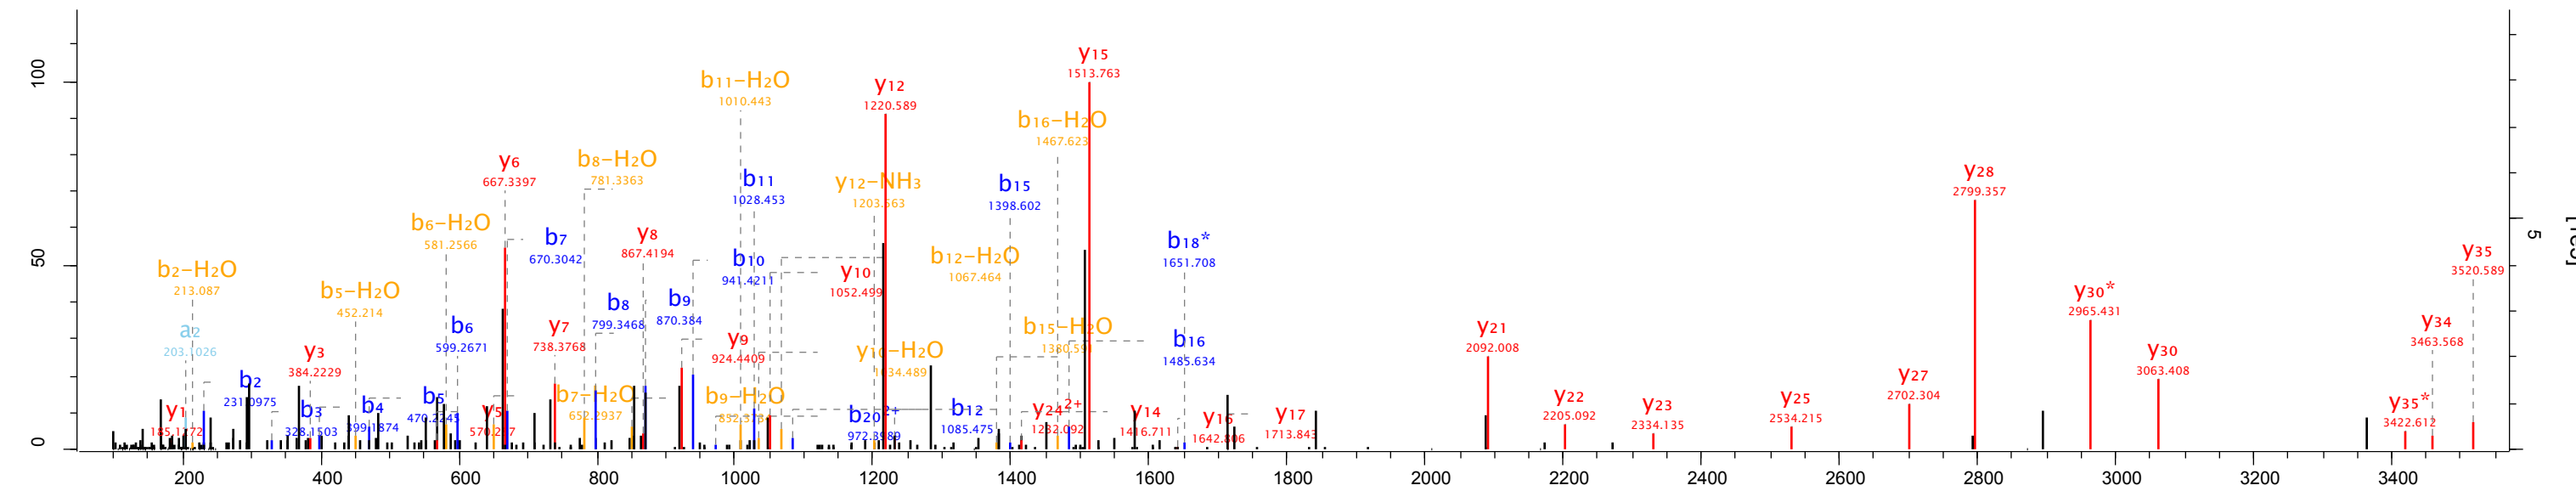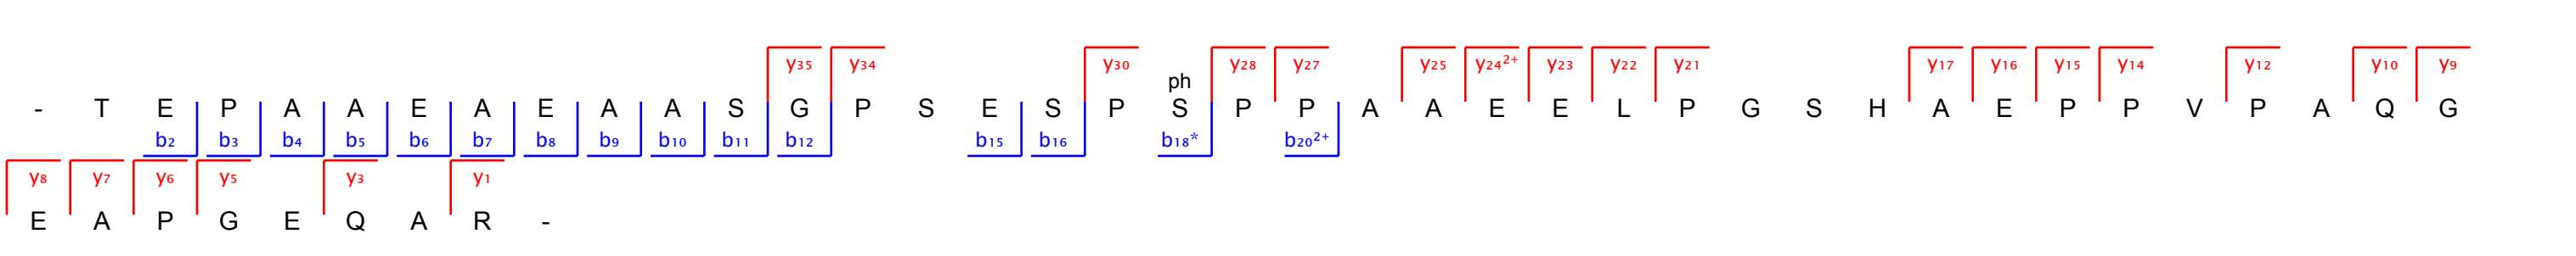

Raw file 20171215\_MaS\_33SR\_LMH\_phospho2\_02 Scan 12444 Method FTMS; HCD Score 218.56 m/z 657.83 Gene names TBC1D25

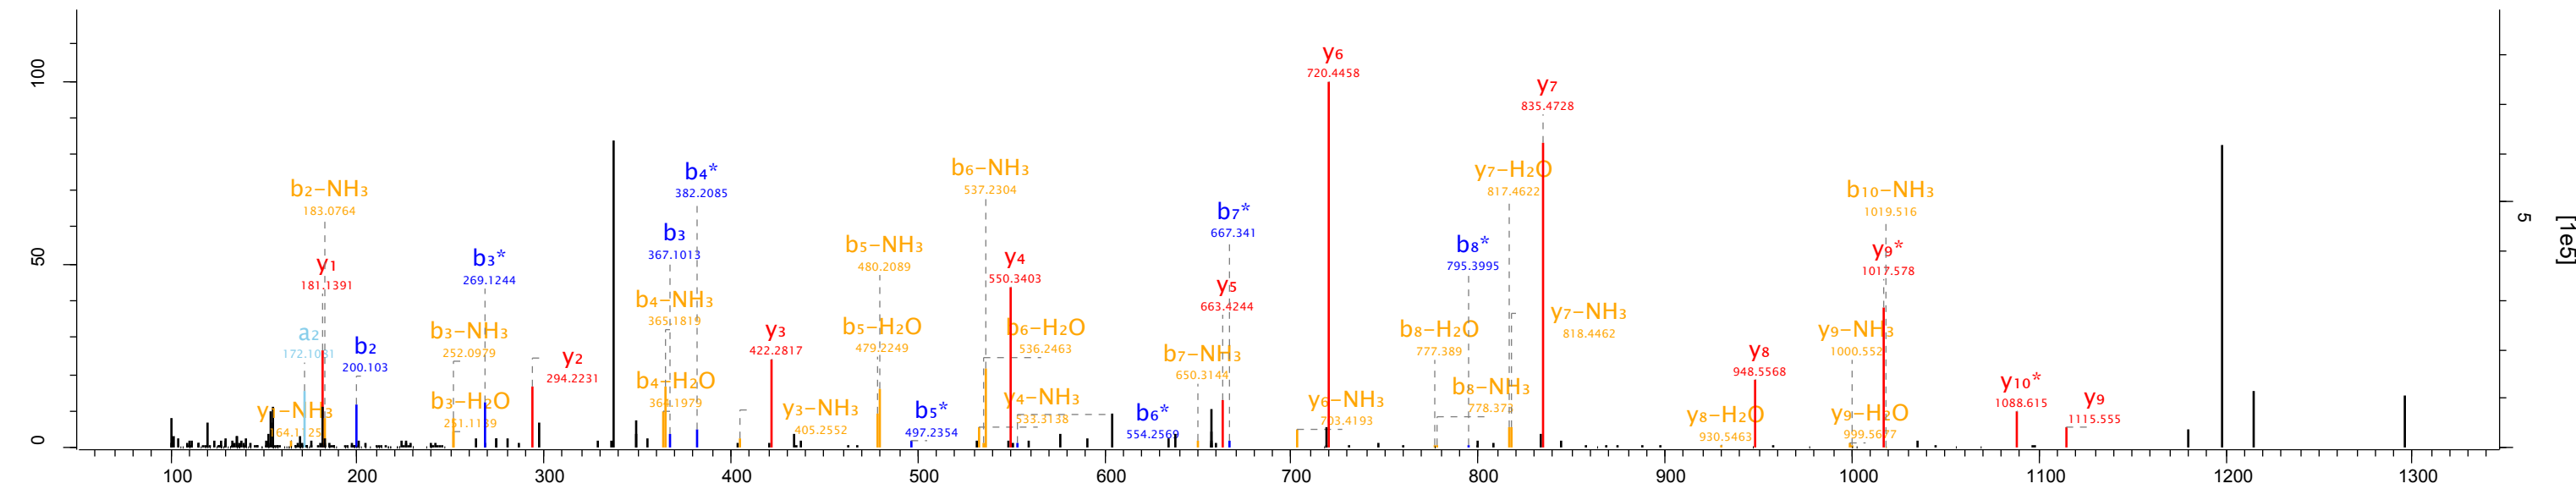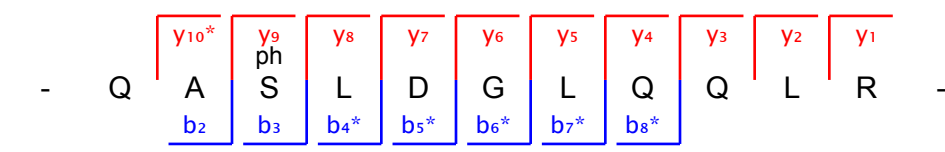

Raw file: 20171215\_MaS\_33SR\_LMH\_phospho2\_02  
 Scan: 15734 Method: FTMS; HCD Score: 92.82 m/z: 1232.57 Gene names: ARHGDI4

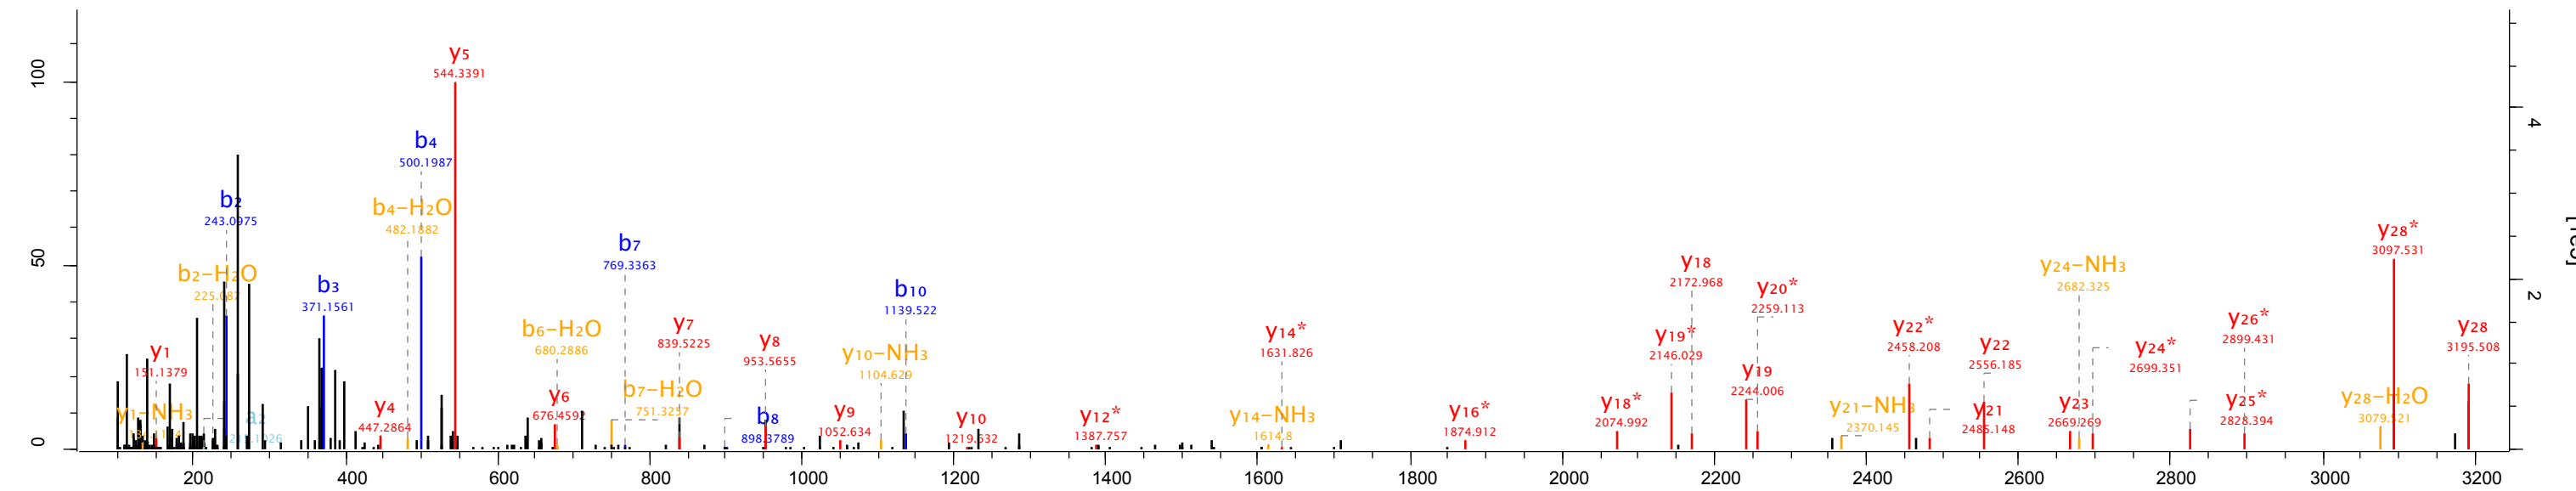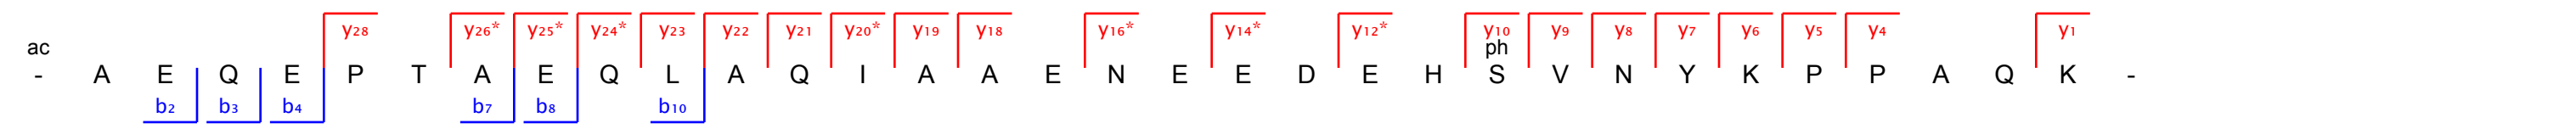

Raw file: 20171215\_MaS\_33SR\_LMH\_phospho2\_02  
 Scan: 2304 Method: FTMS; HCD Score: 79.61 m/z: 595.23 Gene names: POLR3C

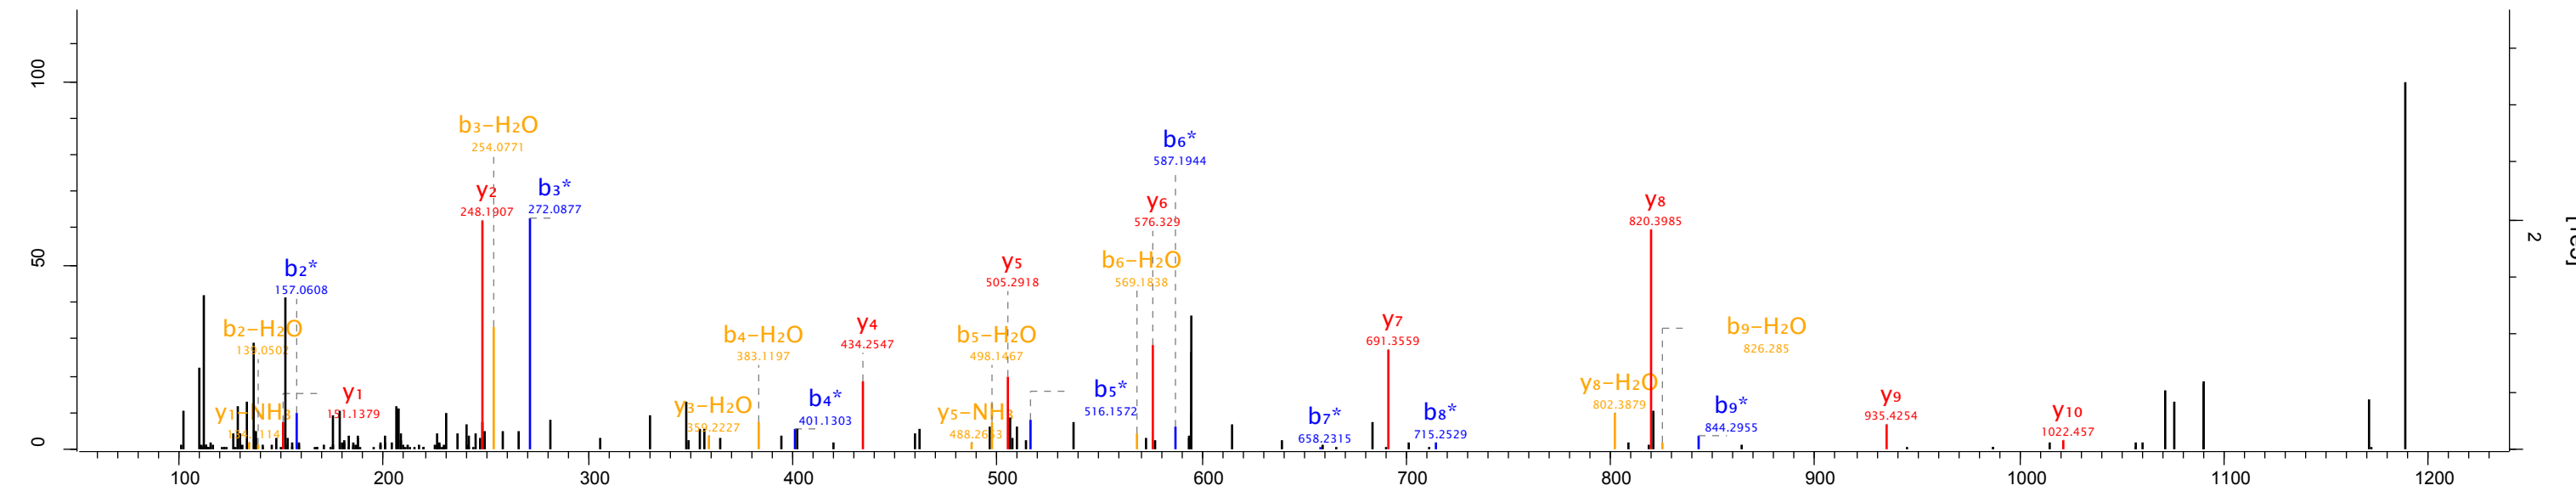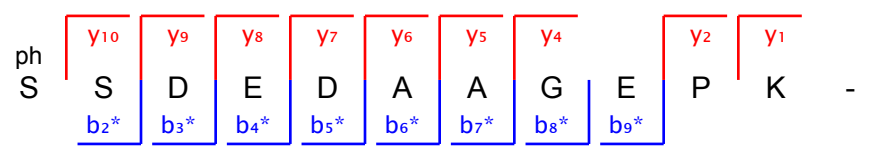

Raw file 20171215\_MaS\_33SR\_LMH\_phospho2\_02 Scan 2474 Method FTMS; HCD Score 124.96 m/z 679.81 Gene names WWP2

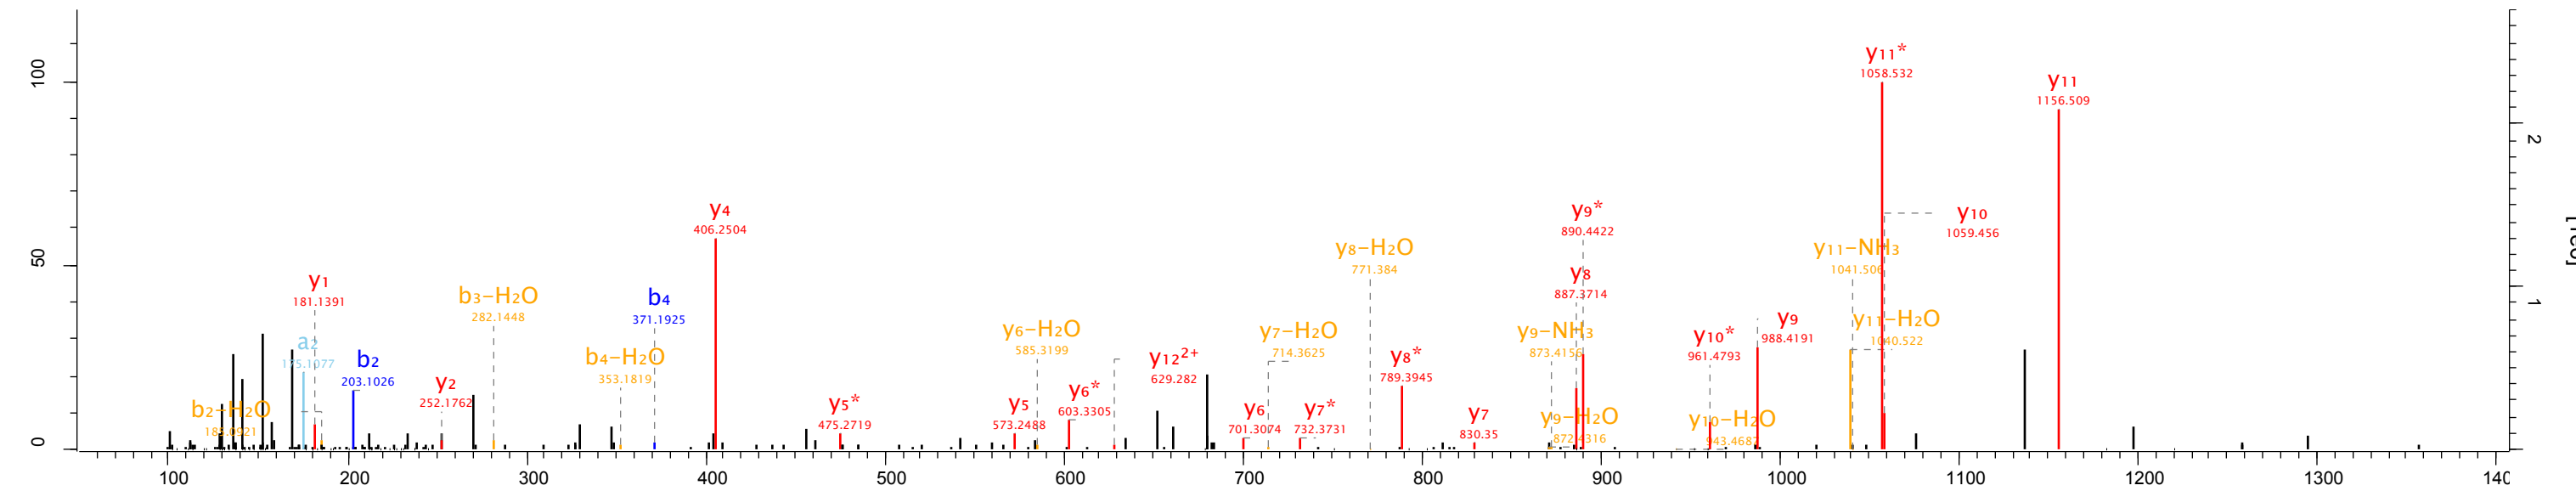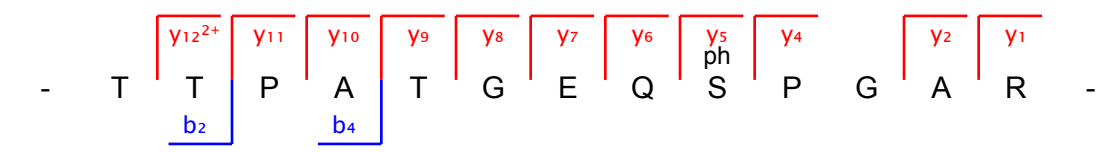

Raw file 20171215\_MaS\_33SR\_LMH\_phospho2\_02 Scan 2964 Method FTMS; HCD Score 83.95 m/z 421.7 Gene names INPP5F

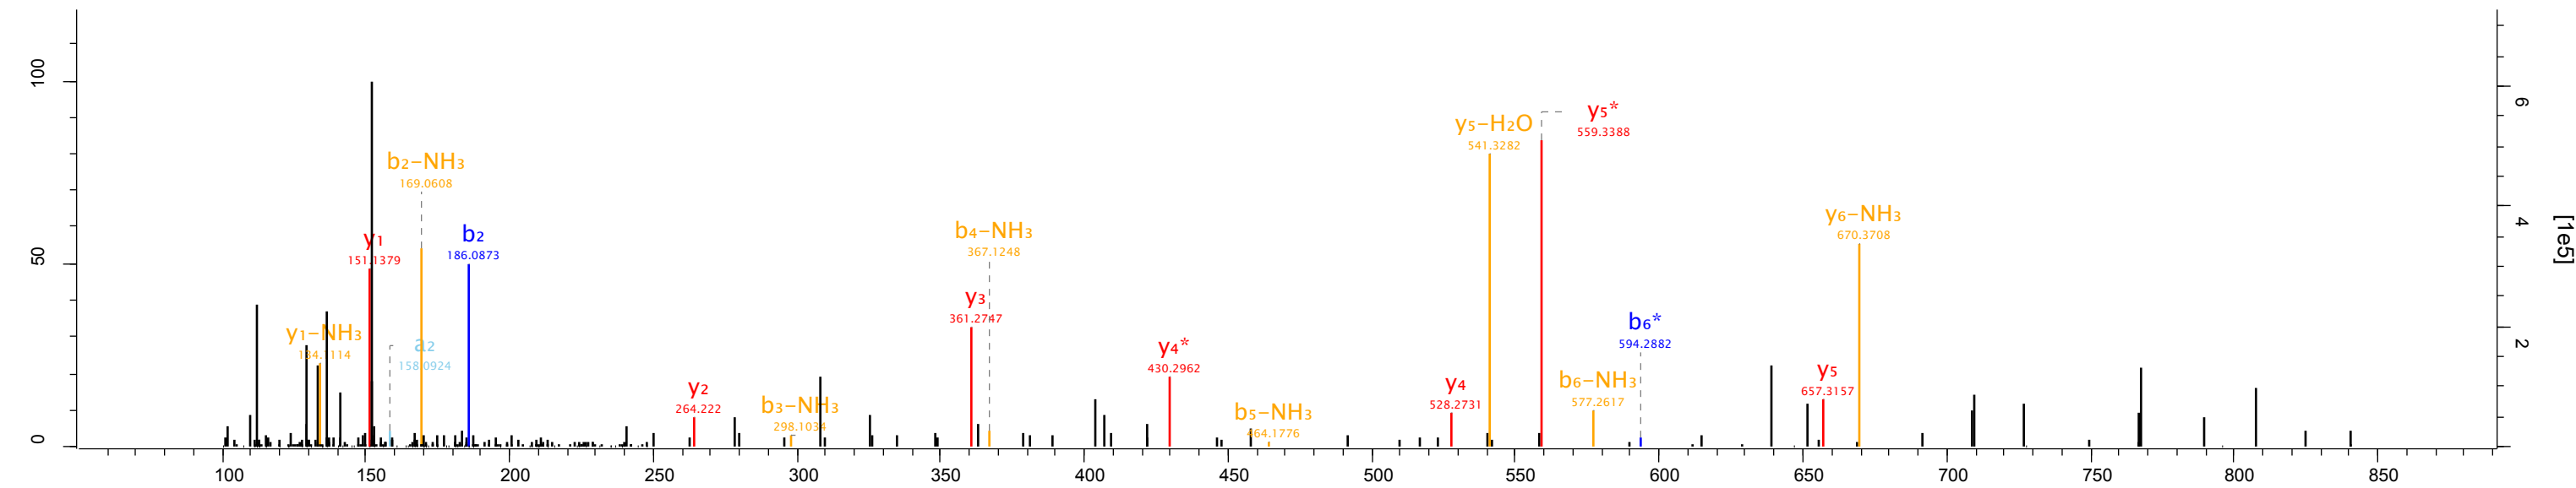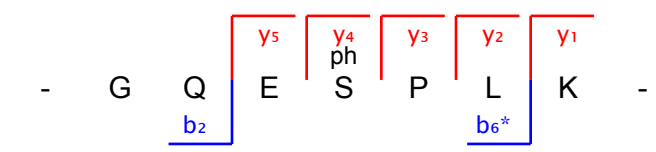

Raw file

20171215\_MaS\_33SR\_LMH\_phospho2\_02

| Scan | Method    | Score | m/z    | Gene names |
|------|-----------|-------|--------|------------|
| 2984 | FTMS; HCD | 58.25 | 406.71 | AKAP12     |

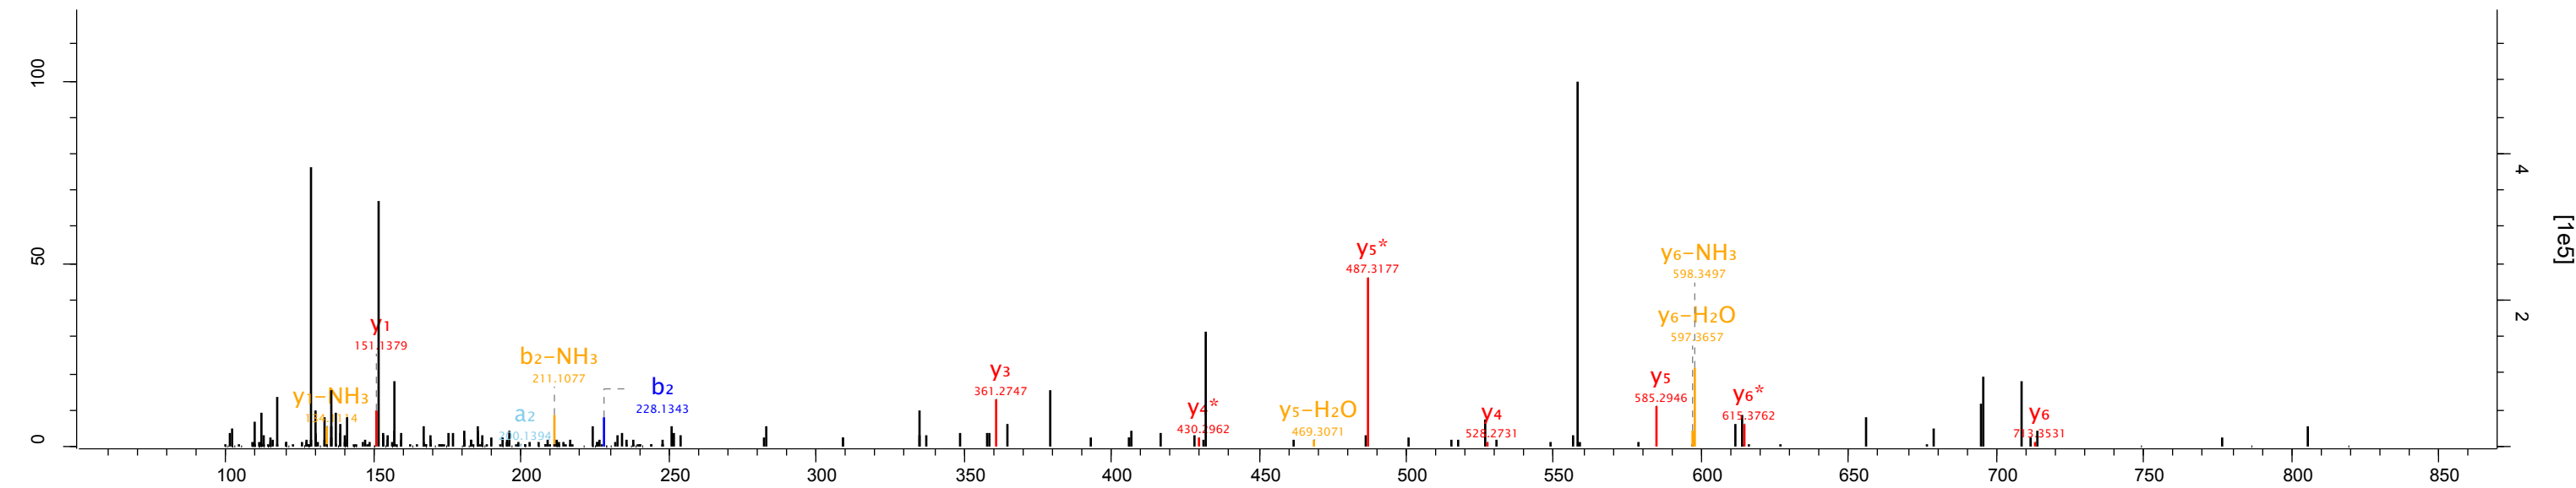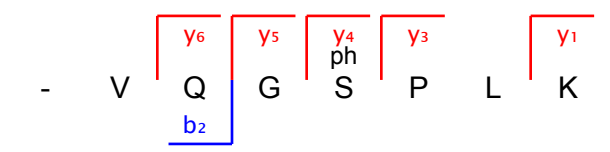



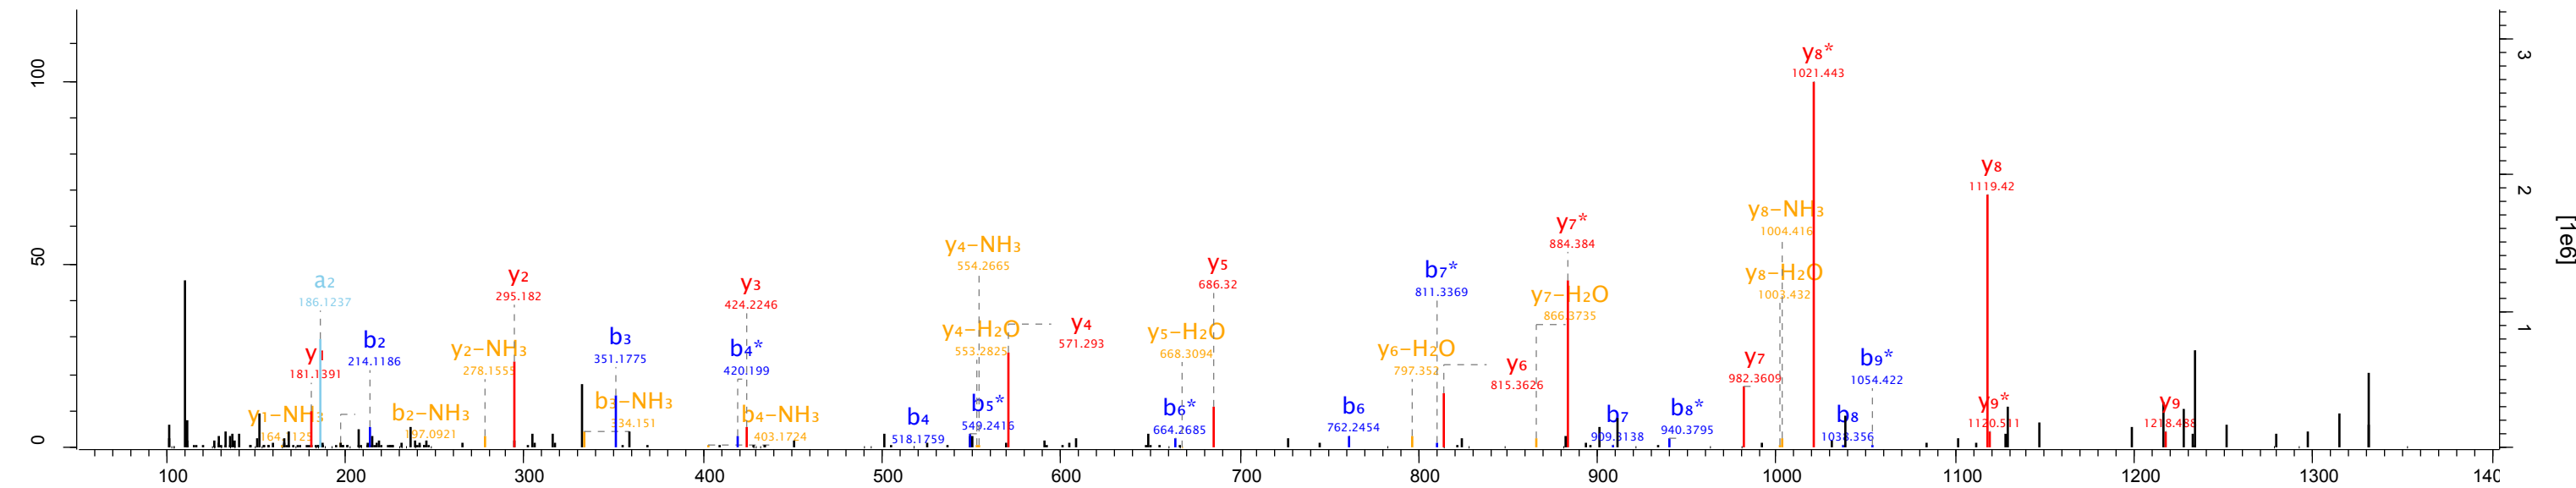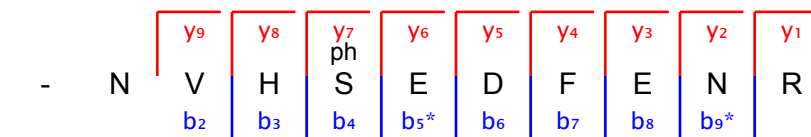

Raw file  
20171215\_MaS\_33SR\_LMH\_phospho2\_02

Scan 3994 Method FTMS; HCD Score 101.82 m/z 489.18 Gene names H2AFX

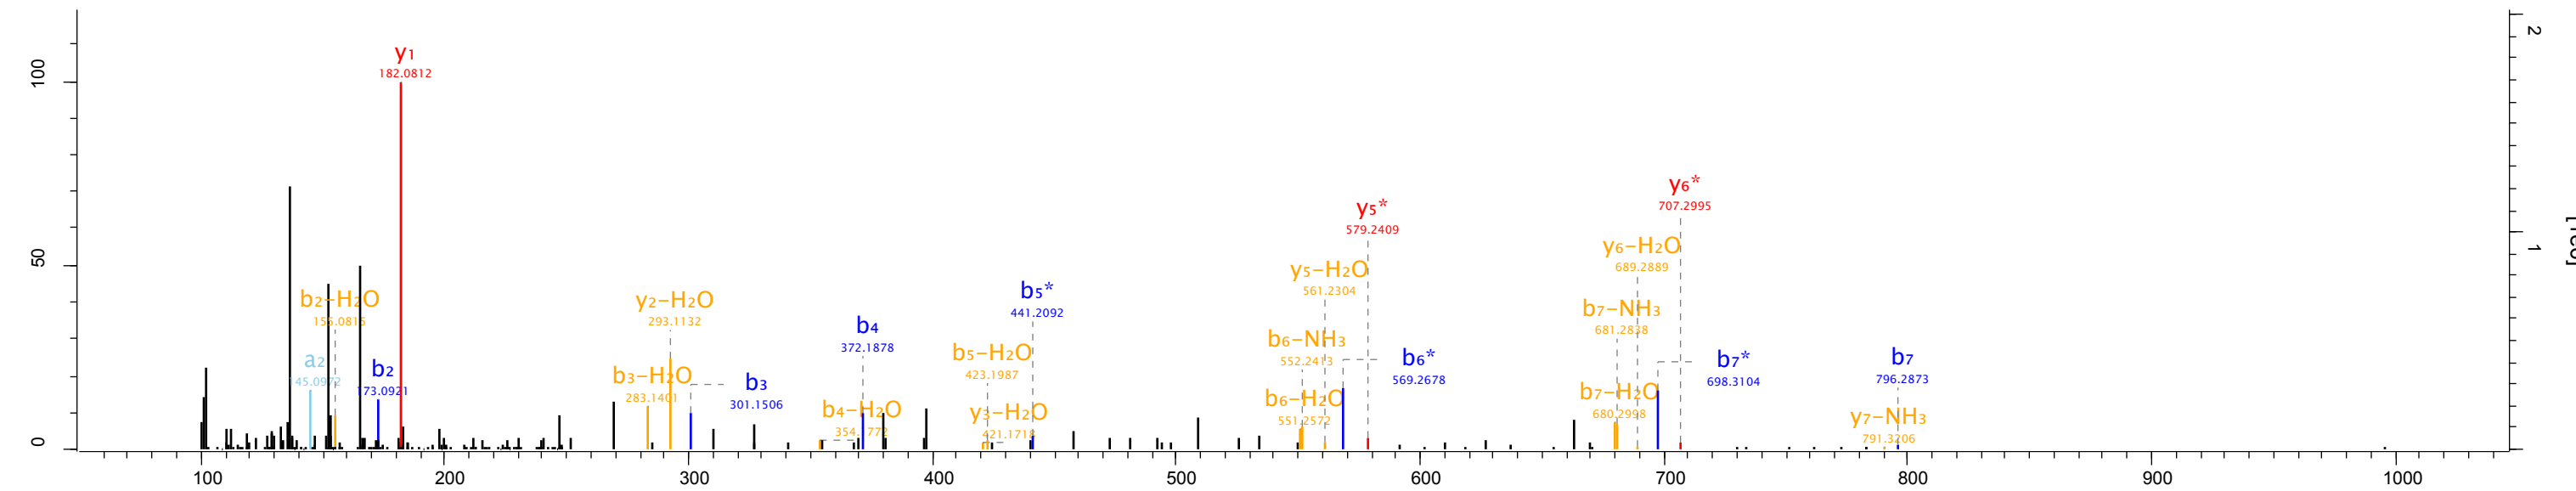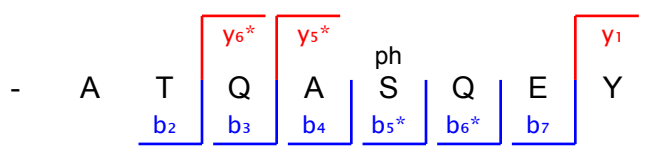

Raw file  
 20171215\_MaS\_33SR\_LMH\_phospho2\_02  
 Scan 4084 Method FTMS; HCD Score 55.72 m/z 661.78

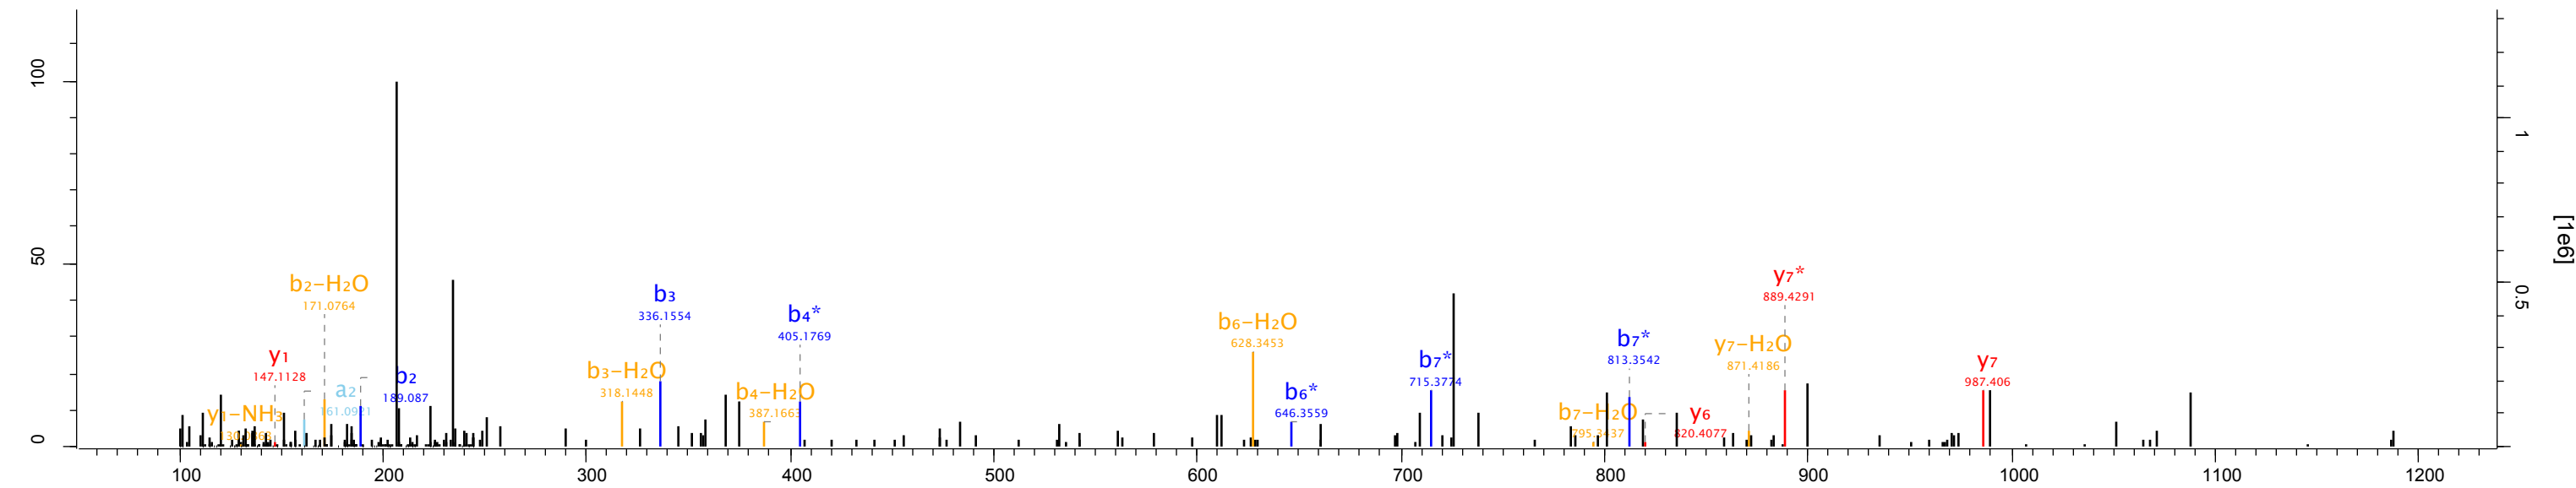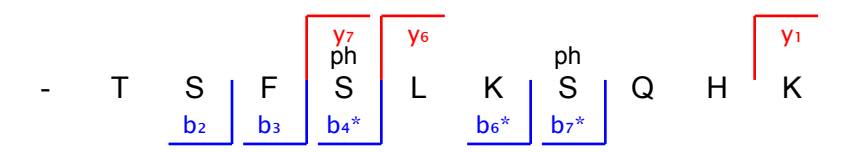

Raw file: 20171215\_MaS\_33SR\_LMH\_phospho2\_02  
 Scan: 4104 Method: FTMS; HCD Score: 105.13 m/z: 523.73 Gene names: BRAF

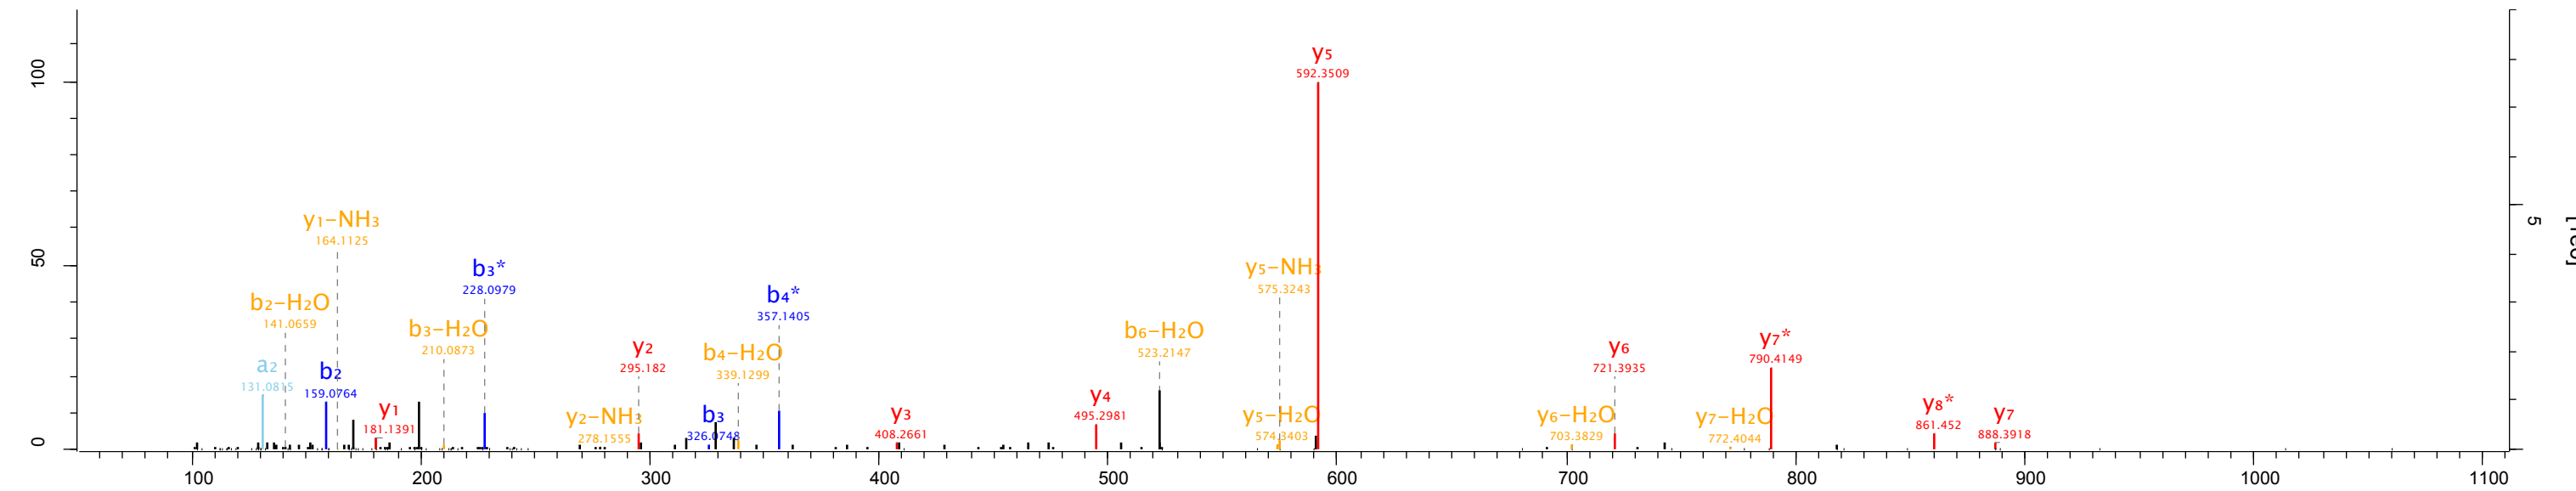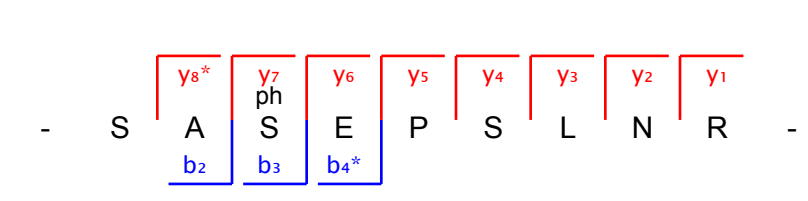

20171215\_MaS\_33SR\_LMH\_phospho2\_02

4144 FTMS; HCD 250.79 825.83 DTD1

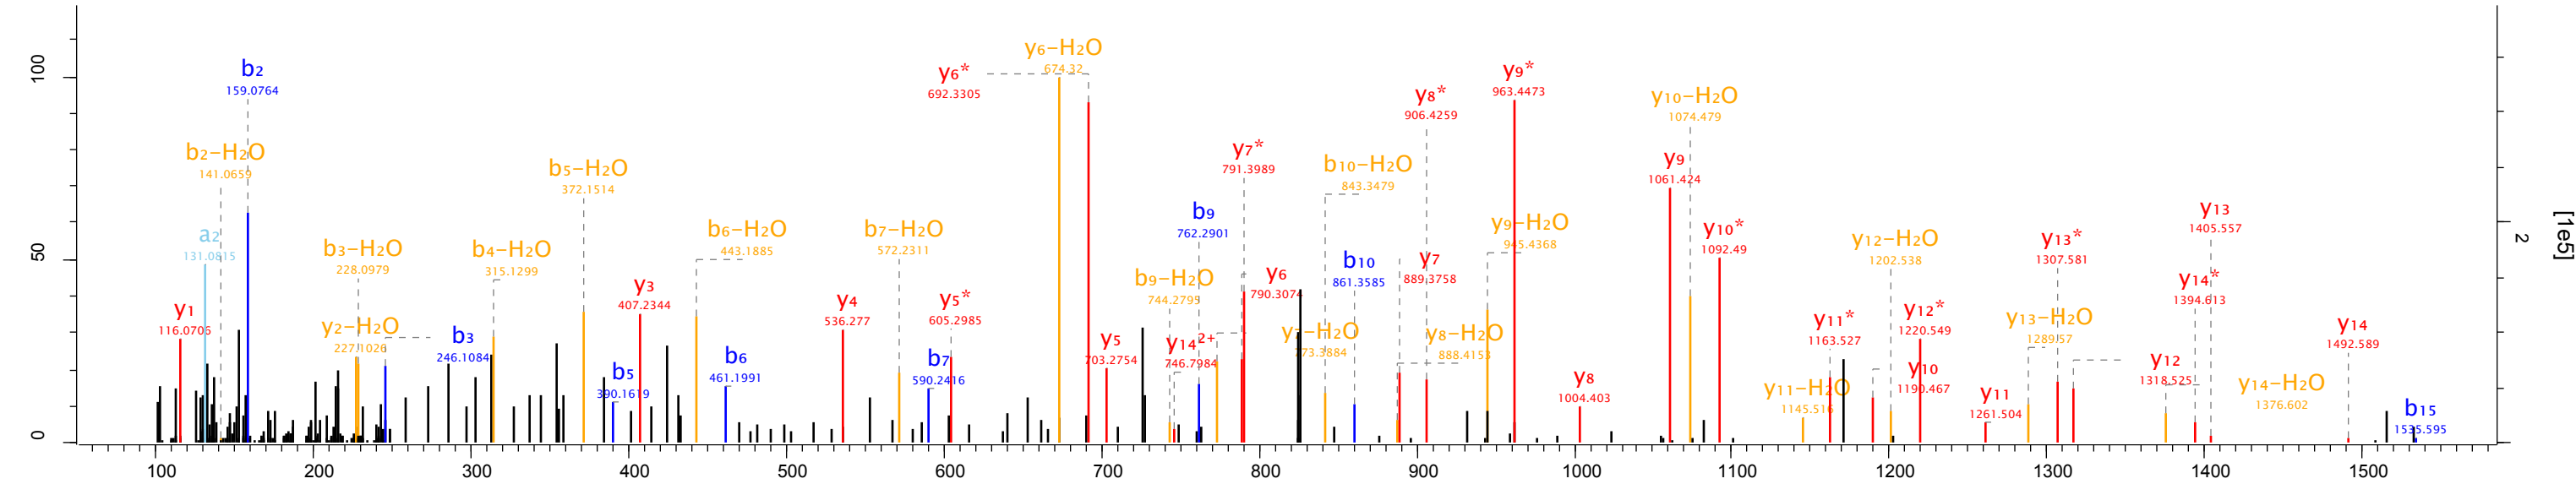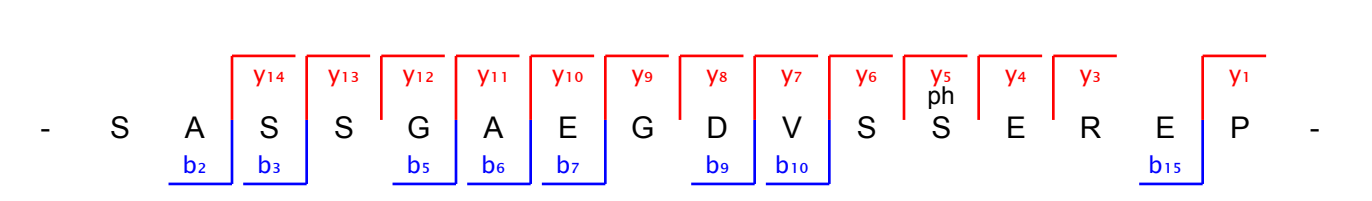

[1e5]

Raw file 20171215\_MaS\_33SR\_LMH\_phospho2\_02 Scan 4724 Method FTMS; HCD Score 77.54 m/z 530.23 Gene names BOD1L1

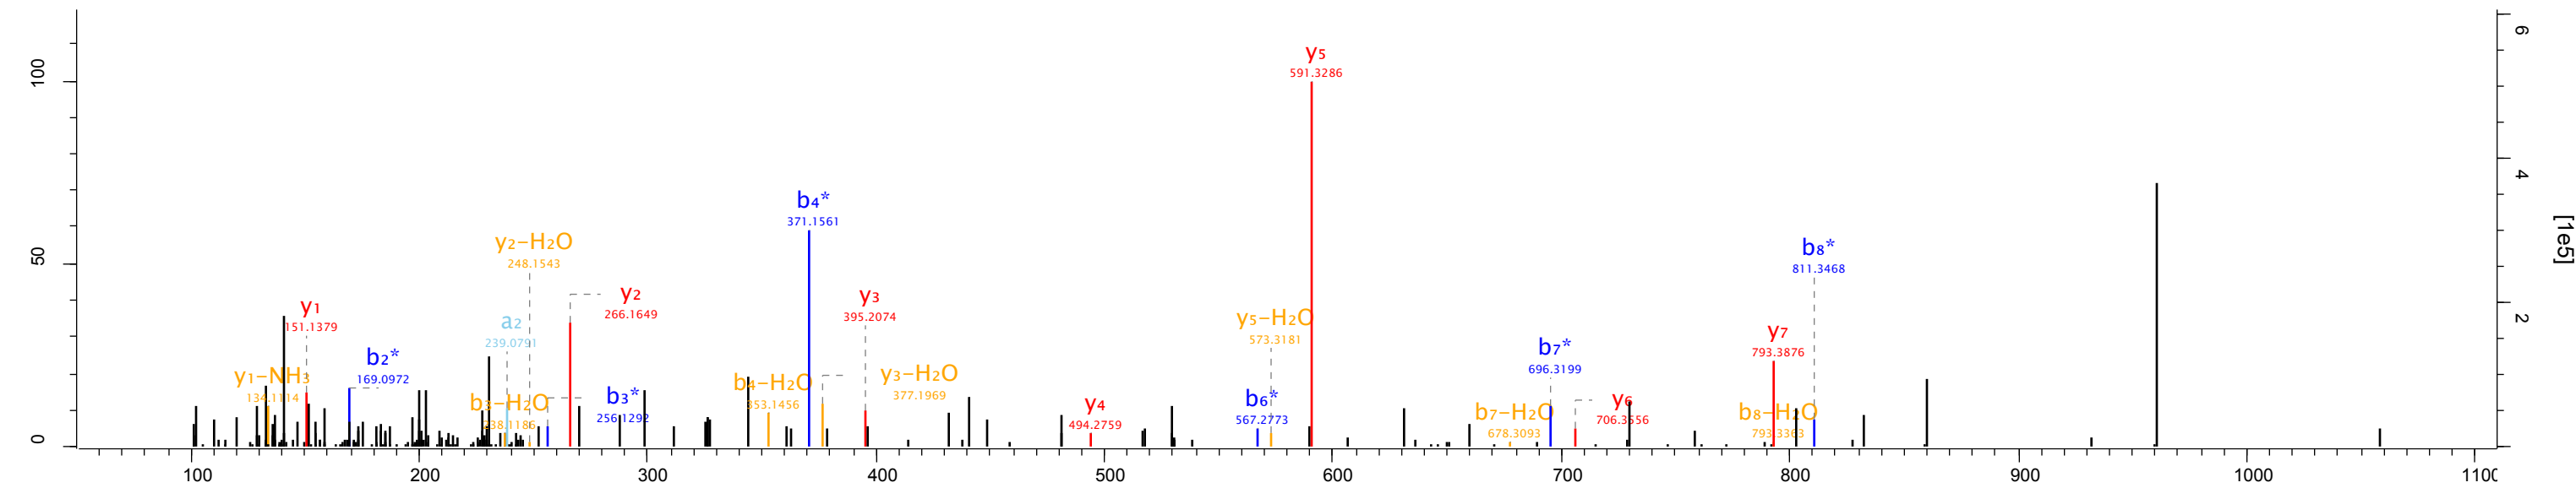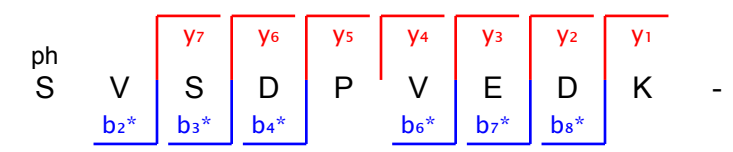

Raw file  
20171215\_MaS\_33SR\_LMH\_phospho2\_02

Scan Method Score m/z Gene names  
4864 FTMS; HCD 508.58 1214.98 ZRANB2

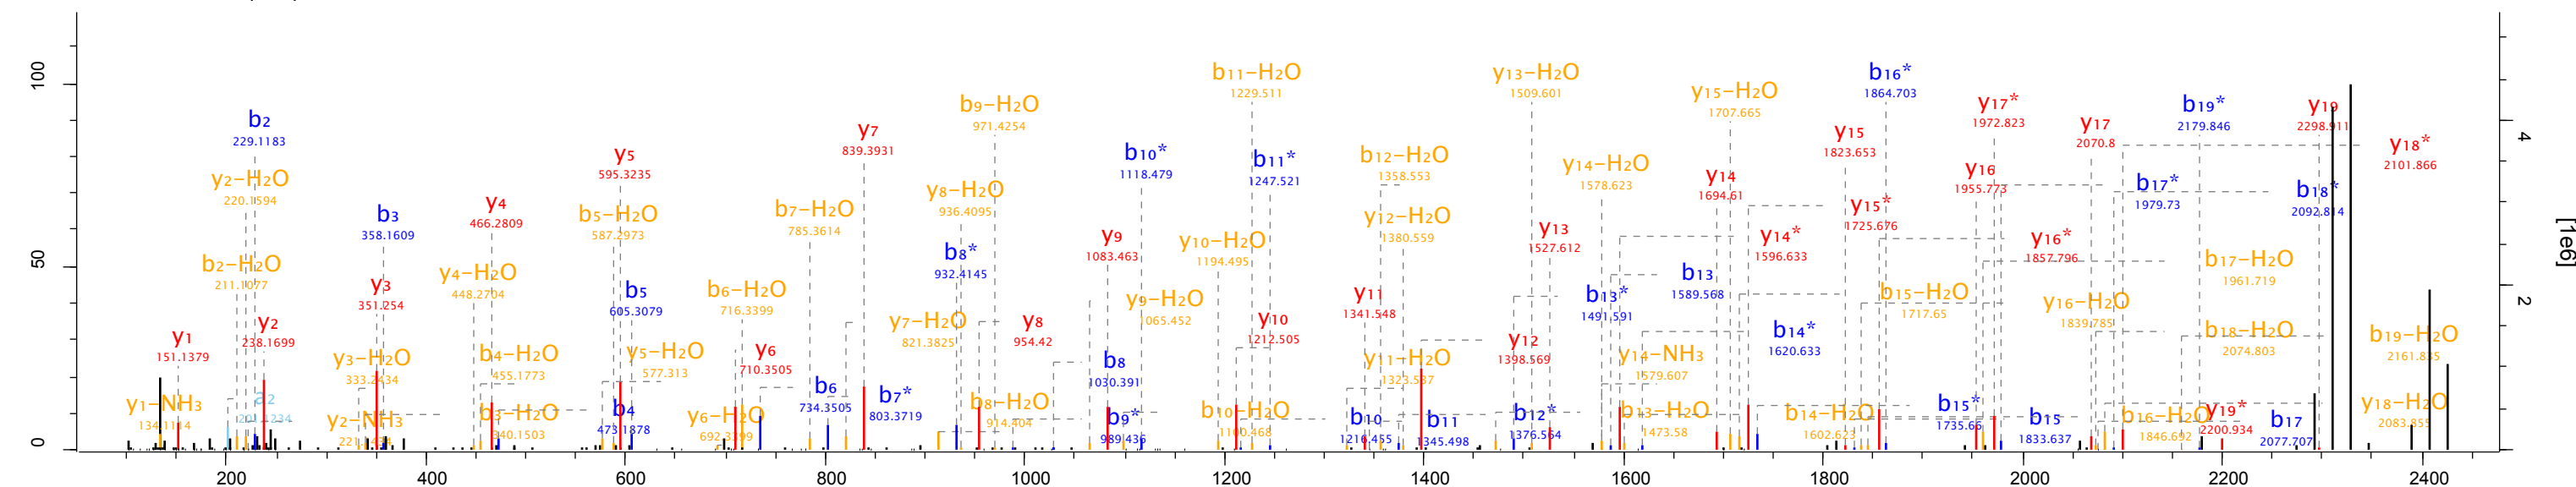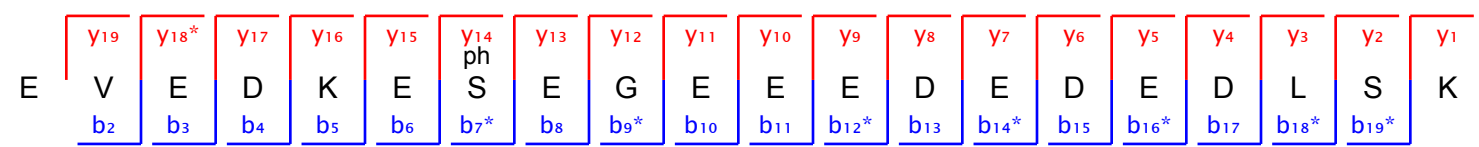

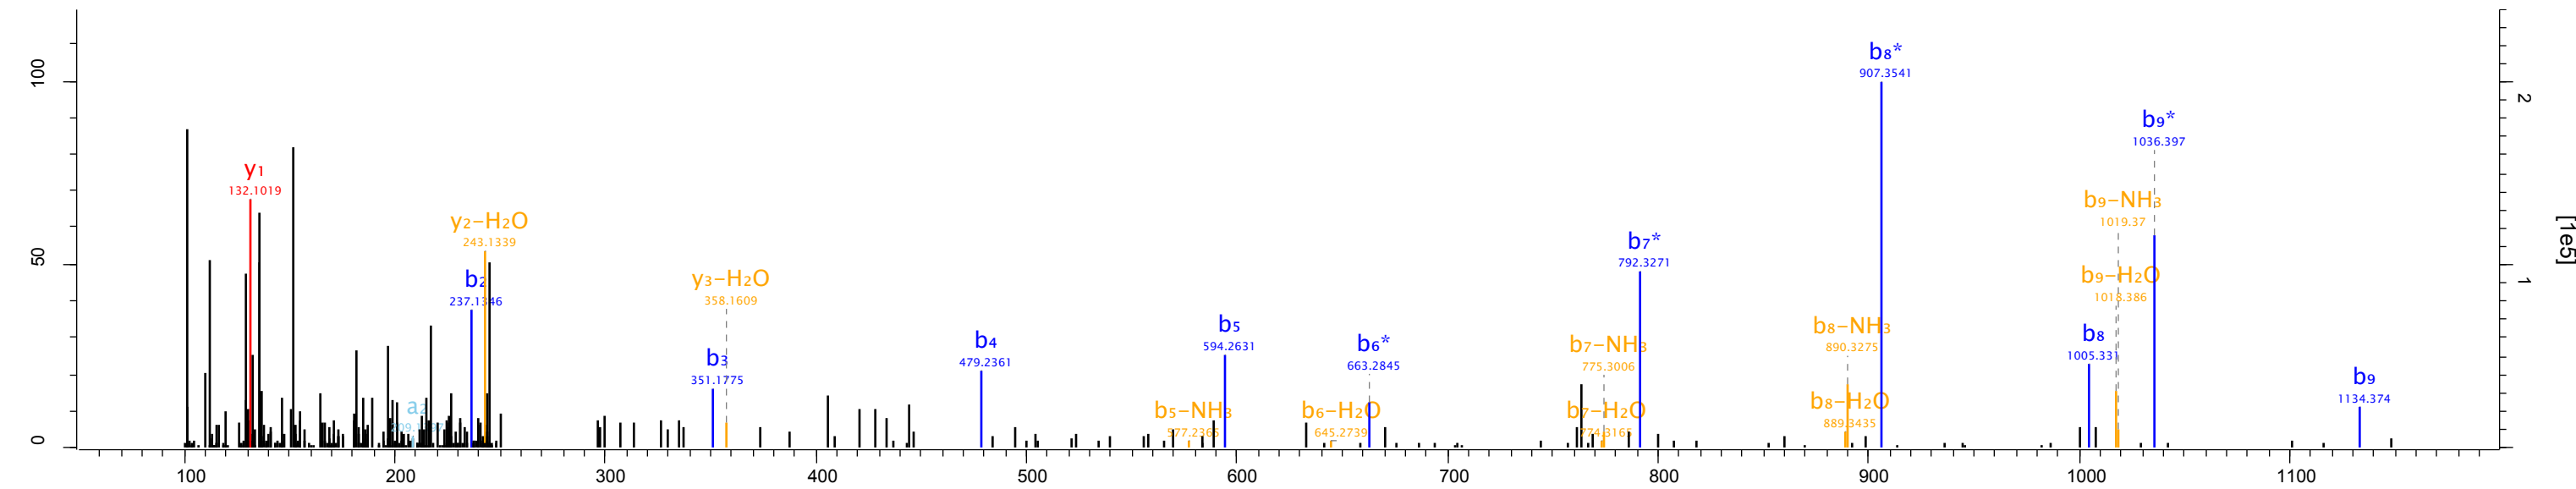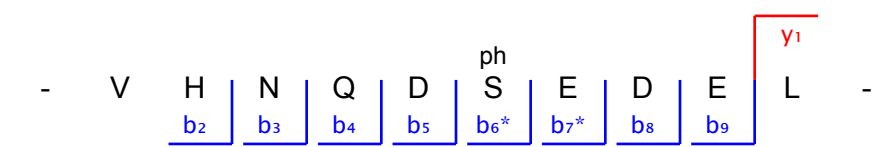



Raw file  
20171215\_MaS\_33SR\_LMH\_phospho2\_02

Scan 5424 Method FTMS; HCD Score 115.82 m/z 474.69 Gene names ITGB4

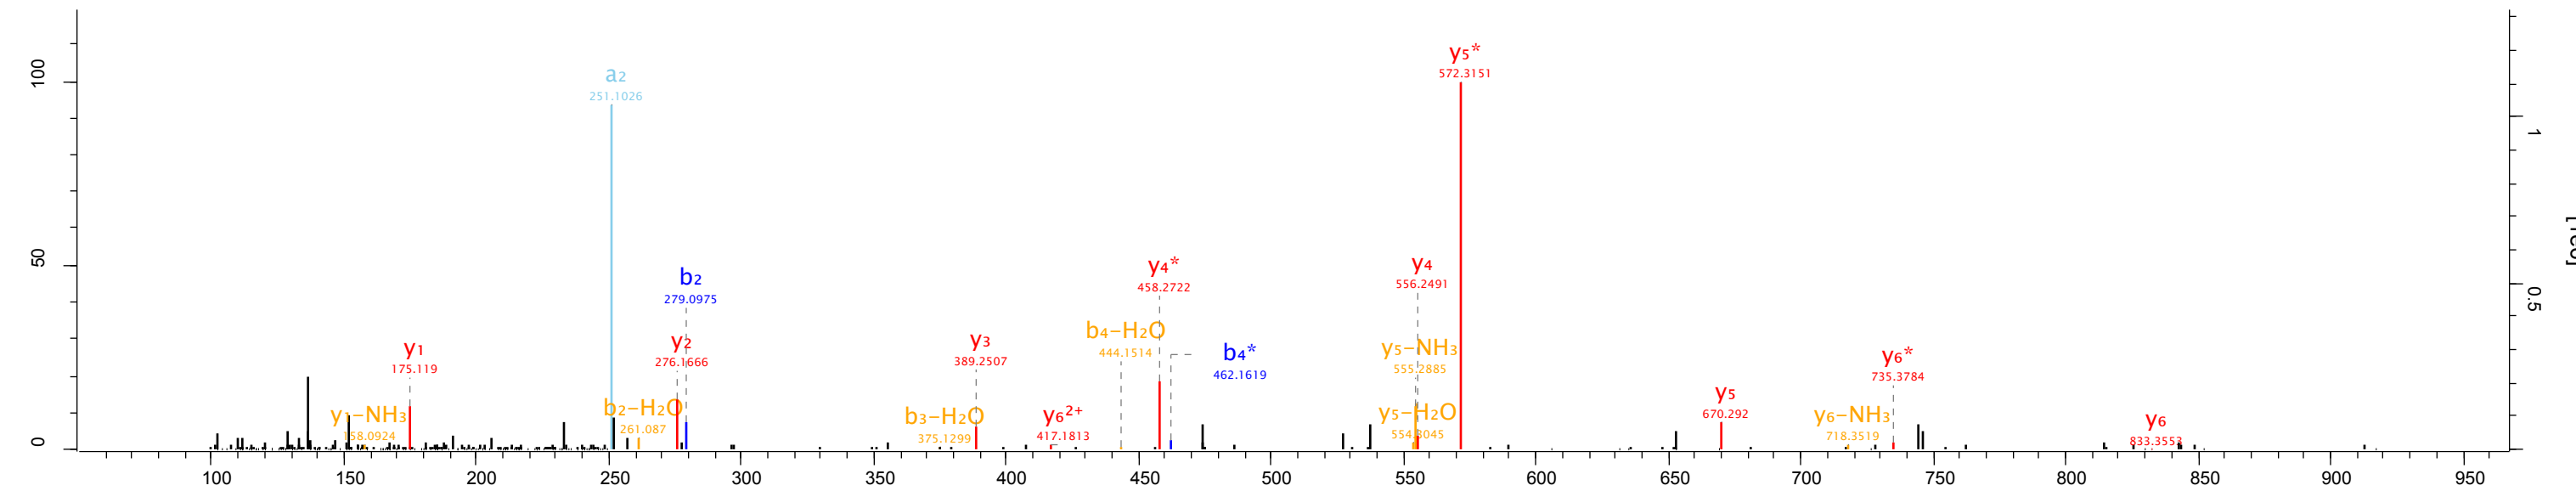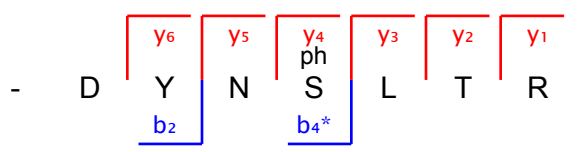

20171215\_MaS\_33SR\_LMH\_phospho2\_02 5594 FTMS; HCD 45.28 604.77 LUZP1

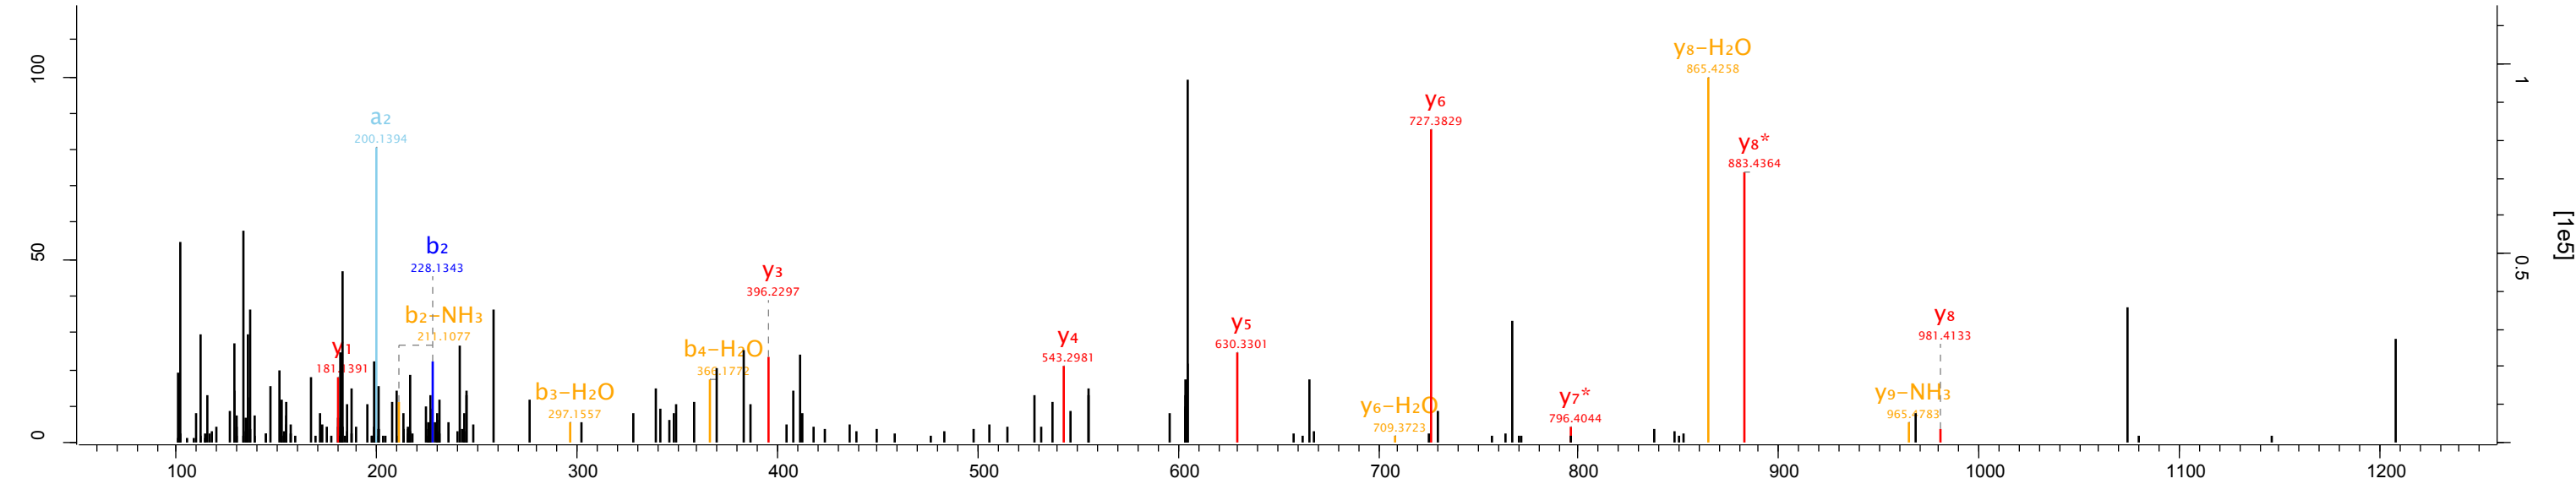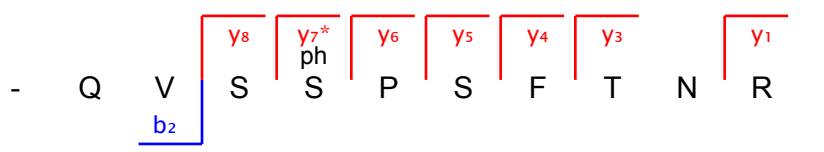

Raw file 20171215\_MaS\_33SR\_LMH\_phospho2\_02 Scan 5744 Method FTMS; HCD Score 227 m/z 723.81 Gene names PPAN

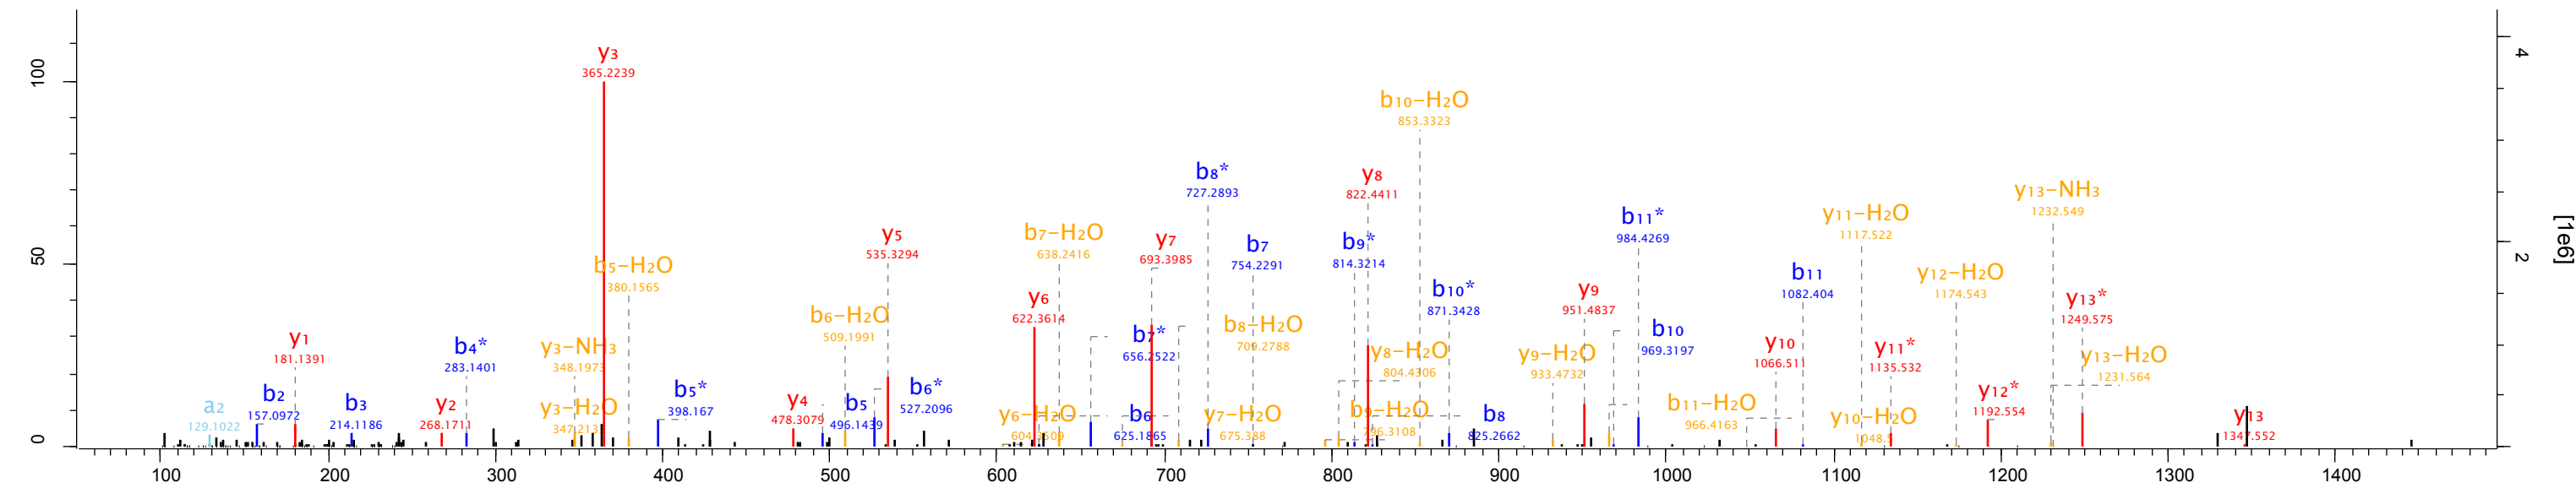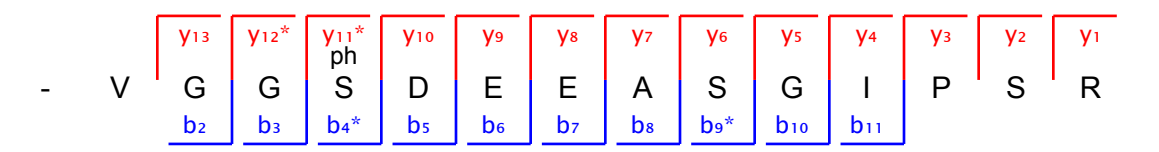

Raw file 20171215\_MaS\_33SR\_LMH\_phospho2\_02 Scan 5754 Method FTMS; HCD Score 67.65 m/z 593.79 Gene names GTF2F1

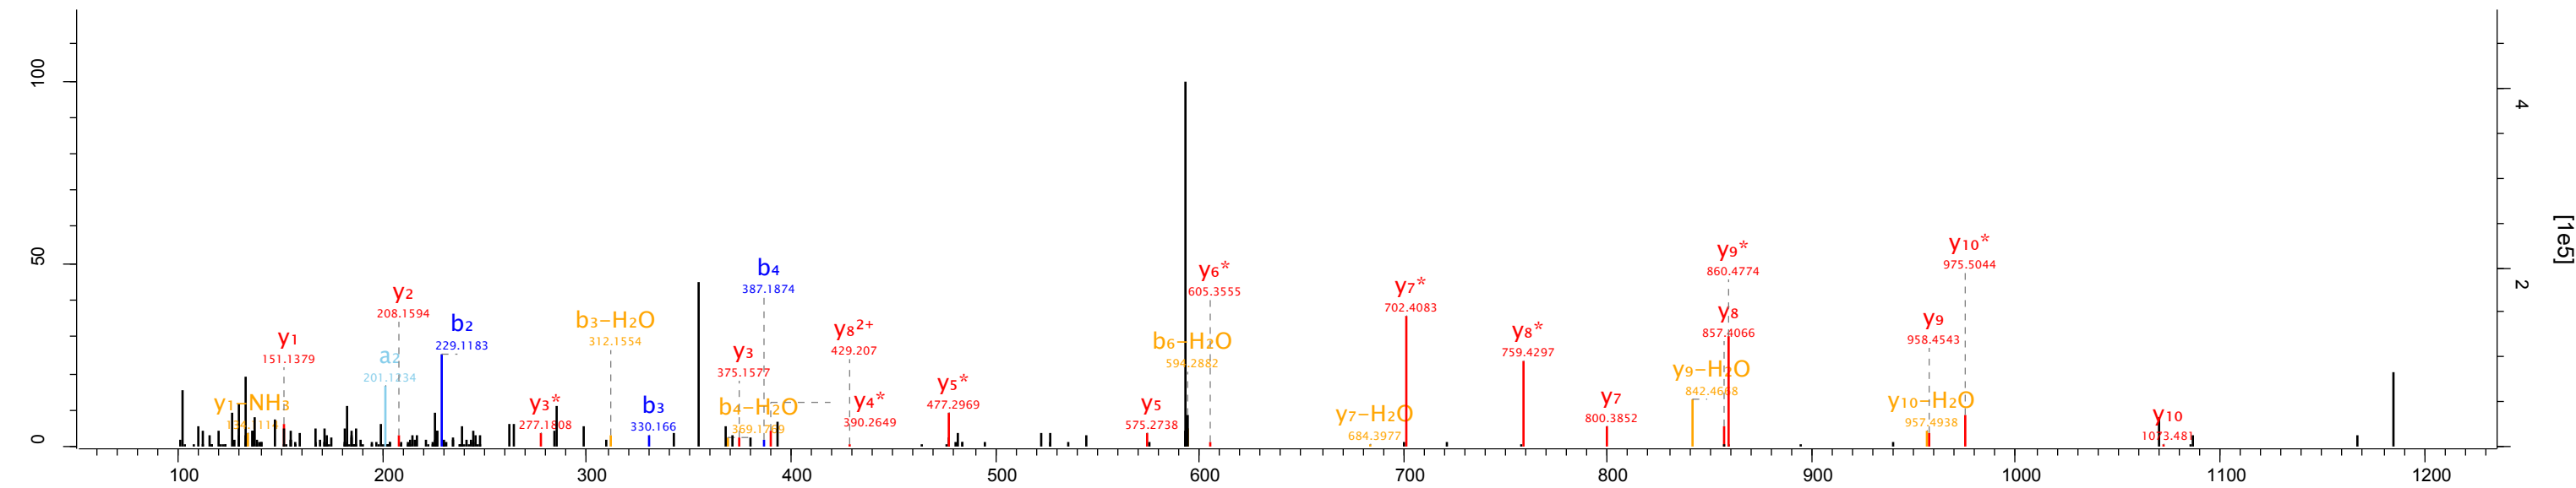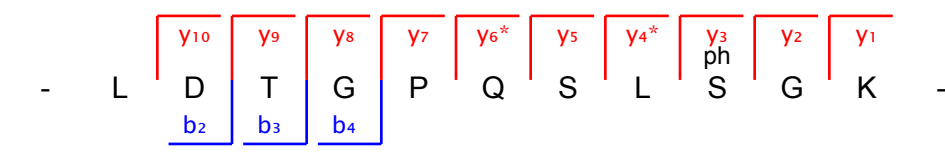

Raw file

20171215\_MaS\_33SR\_LMH\_phospho2\_02

| Scan | Method    | Score | m/z    | Gene names |
|------|-----------|-------|--------|------------|
| 5964 | FTMS; HCD | 147.6 | 827.35 | LITAF;TLE3 |

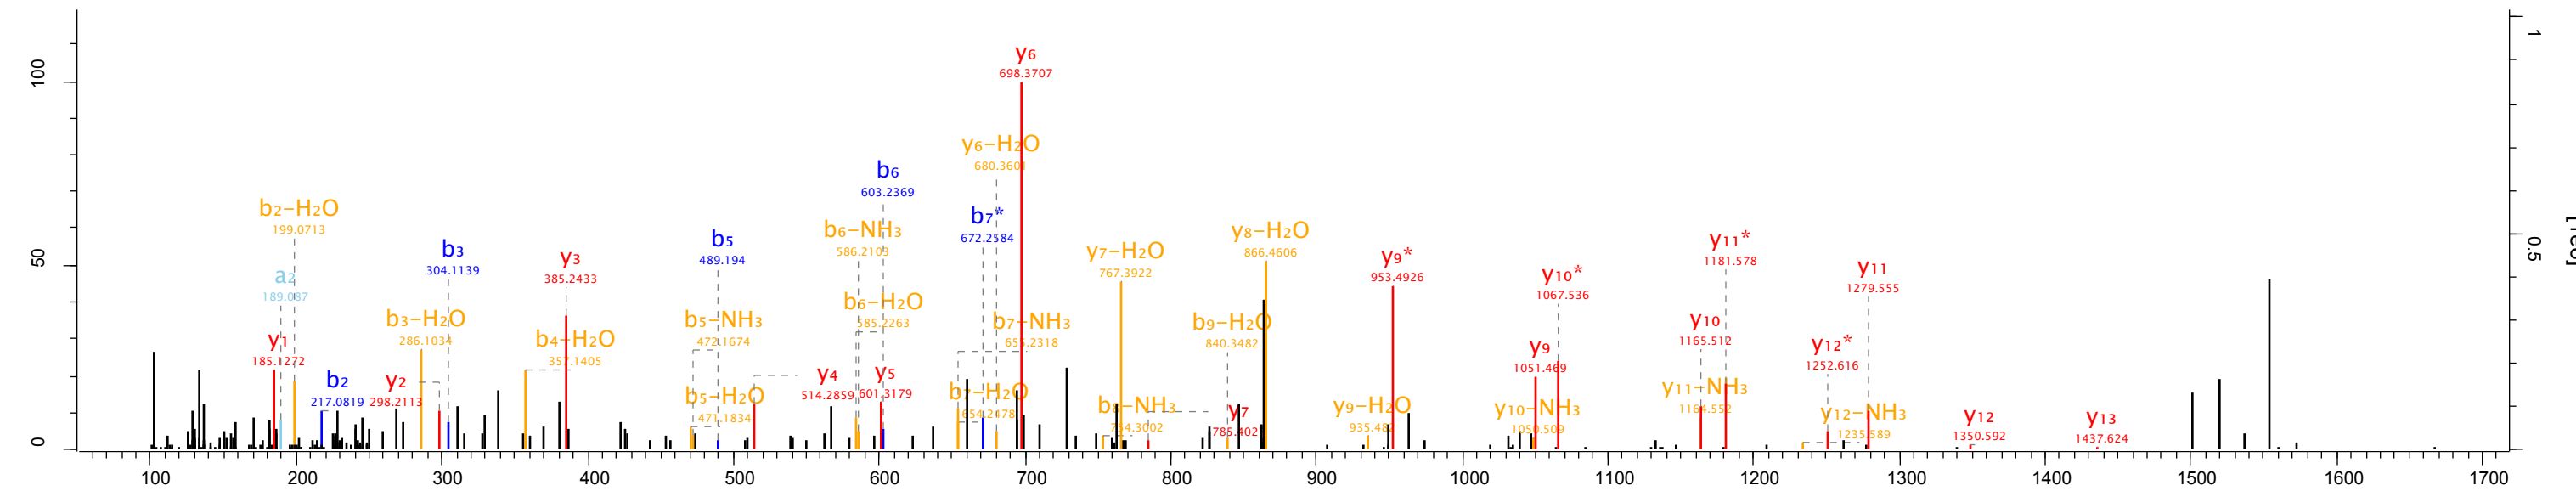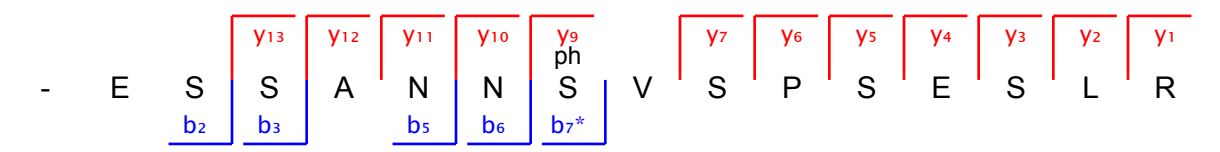

Raw file 20171215\_MaS\_33SR\_LMH\_phospho2\_02 Scan 6544 Method FTMS; HCD Score 83.18 m/z 584.78 Gene names CAMSAP2

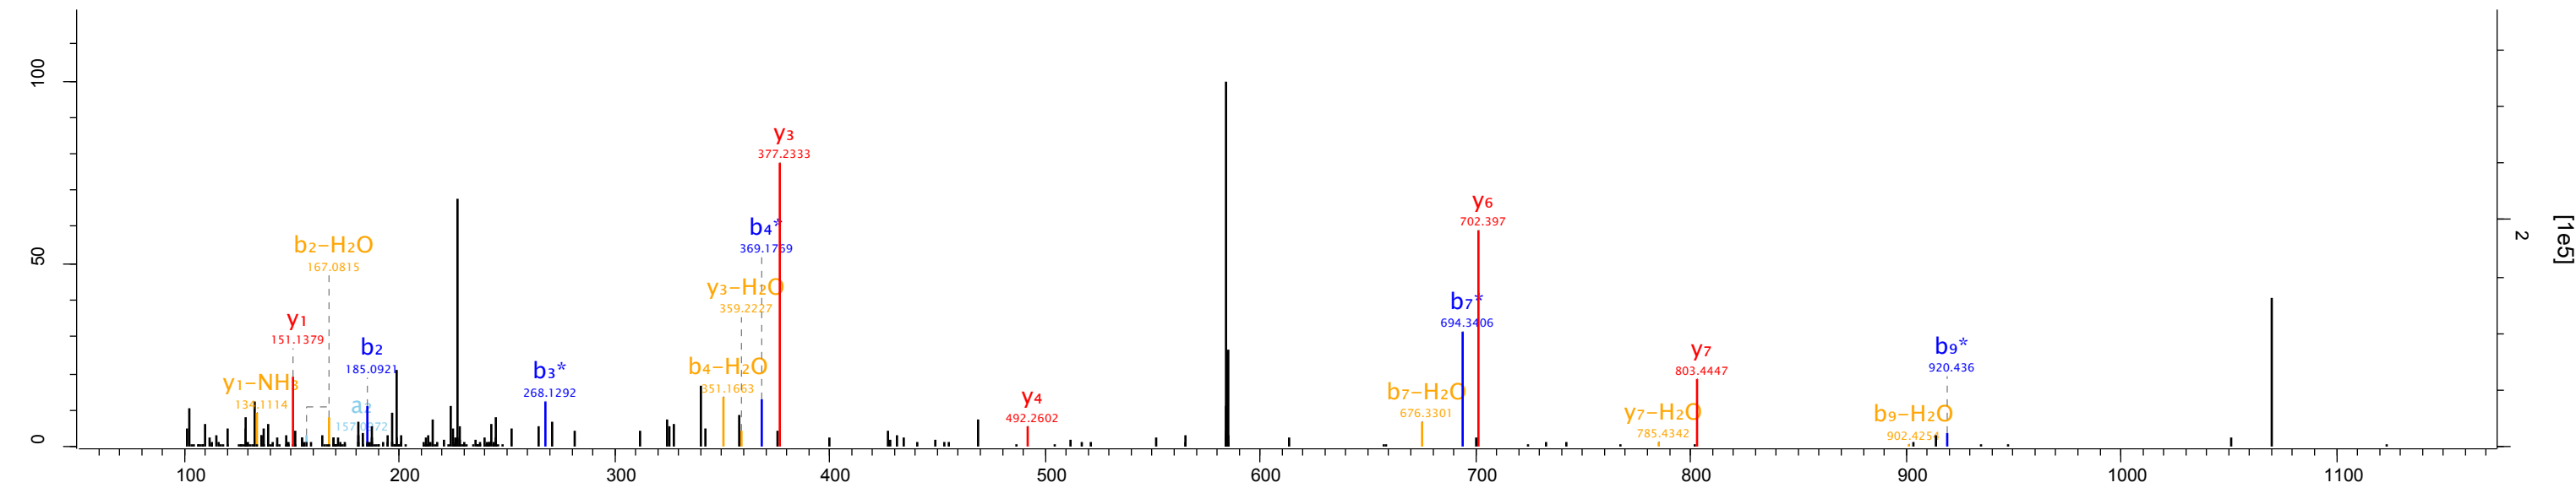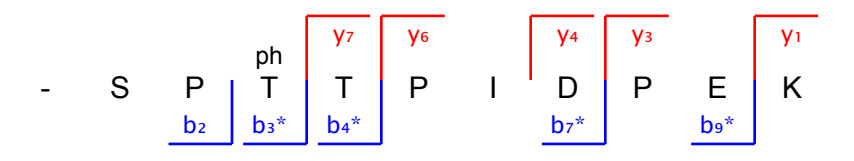

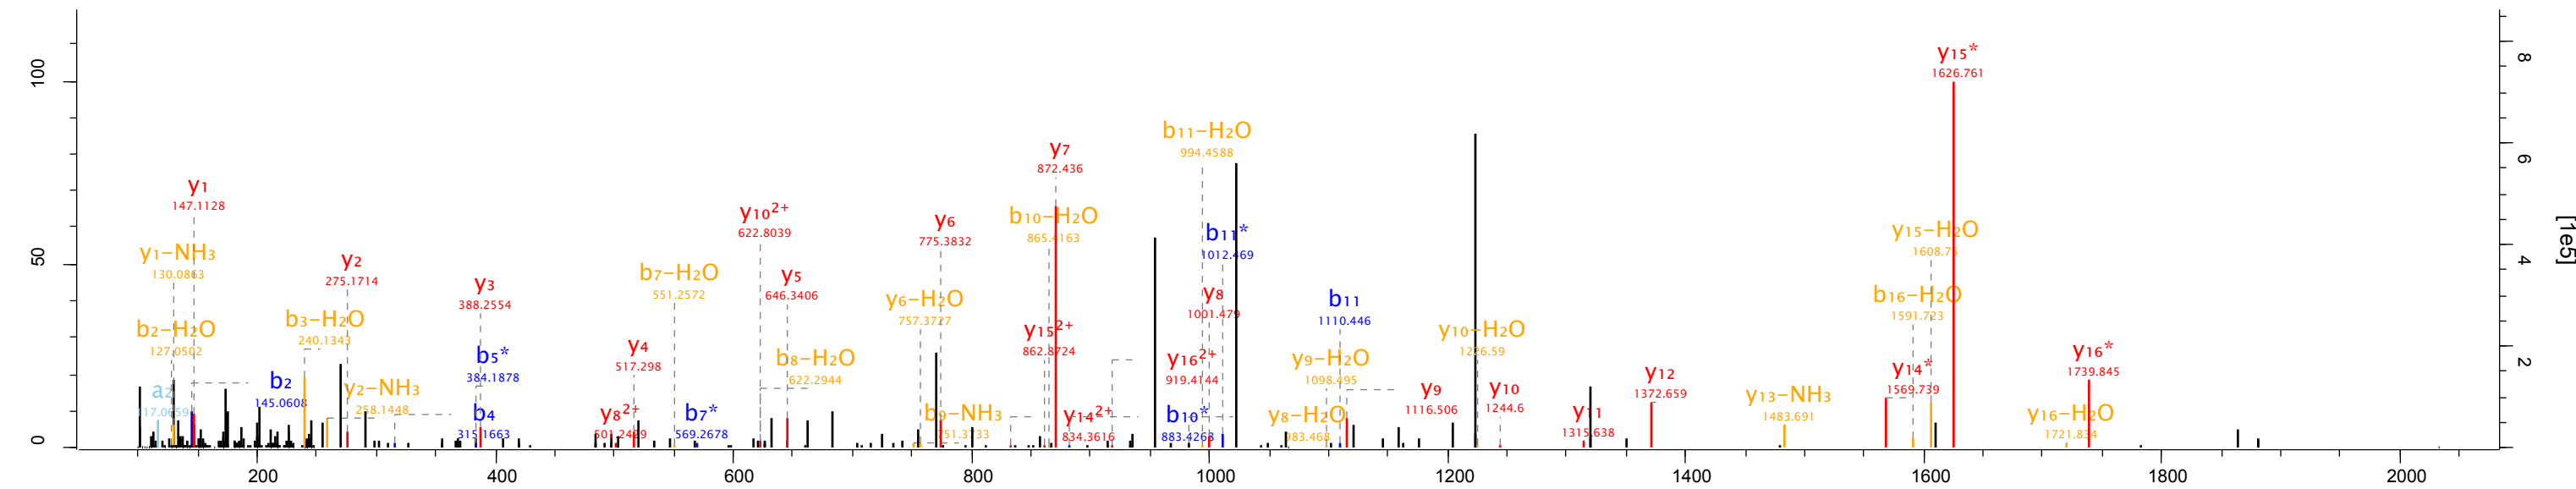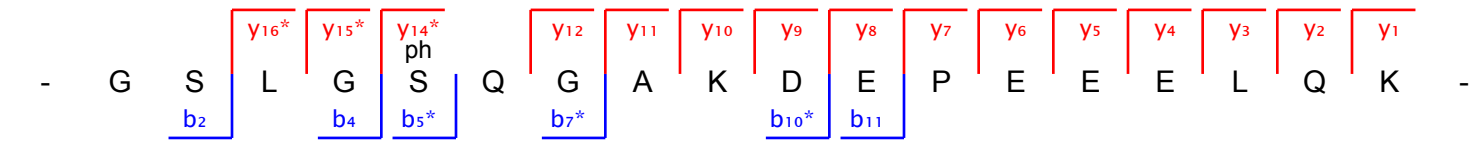

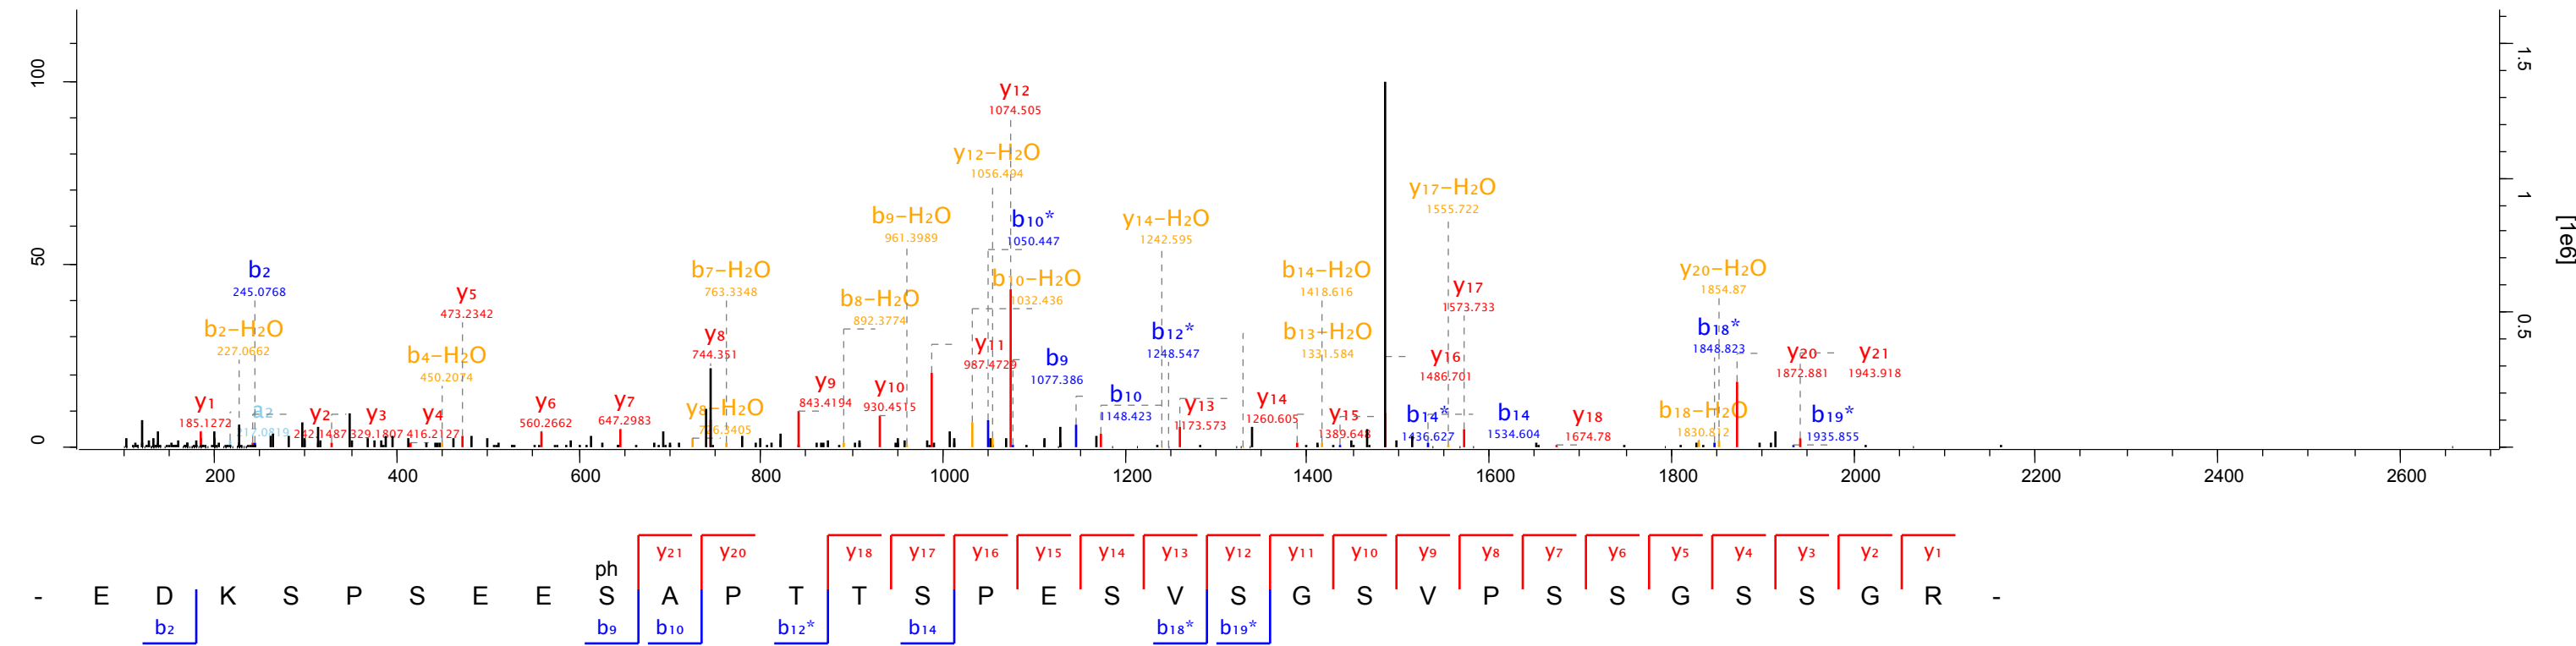



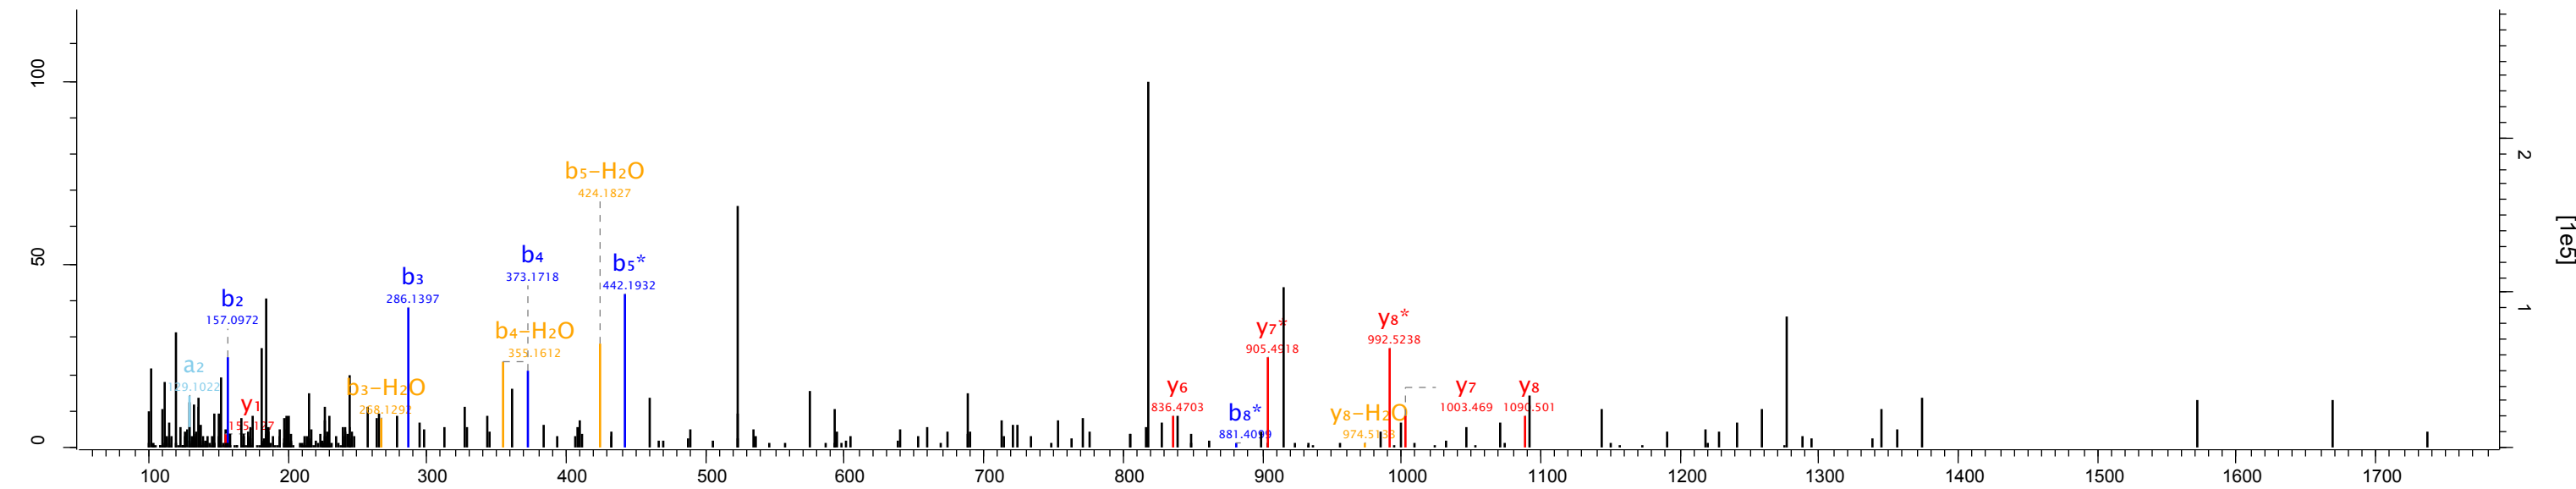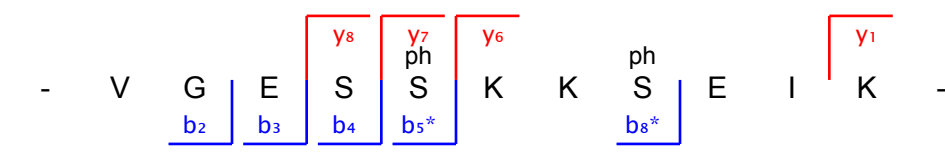

Raw file 20171215\_MaS\_33SR\_LMH\_phospho2\_02 Scan 8424 Method FTMS; HCD Score 122.86 m/z 684.29 Gene names GSK3B;GSK3A

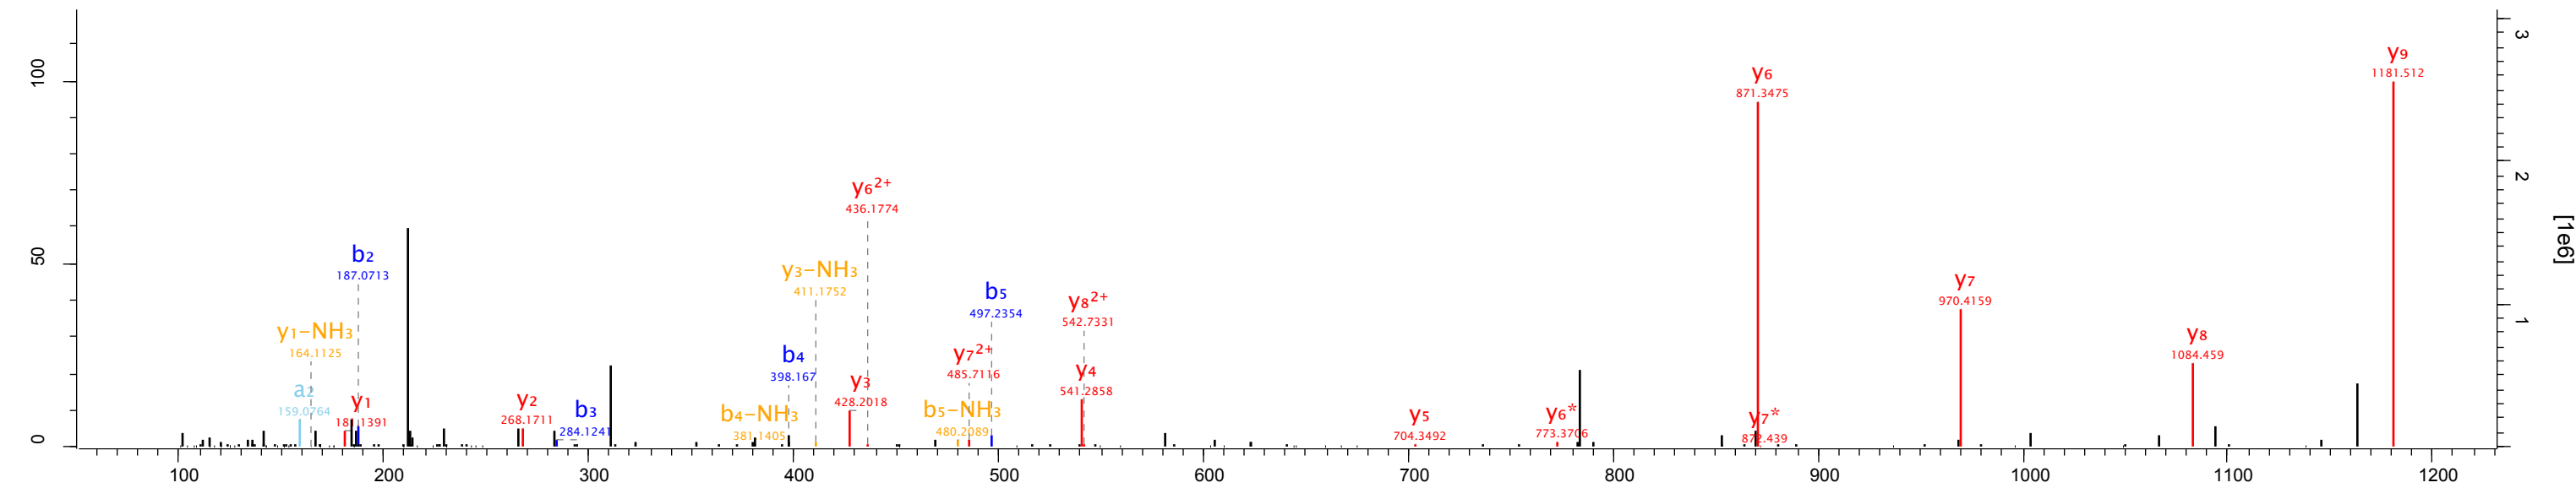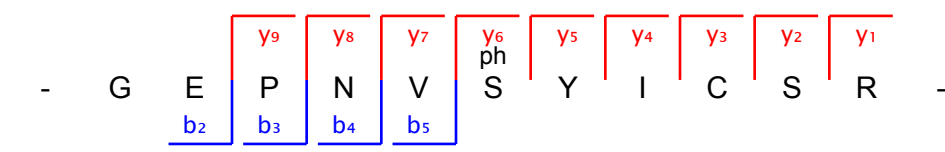

Raw file: 20171215\_MaS\_33SR\_LMH\_phospho2\_02  
 Scan: 8574 Method: FTMS; HCD Score: 135.09 m/z: 857.41 Gene names: EAF1

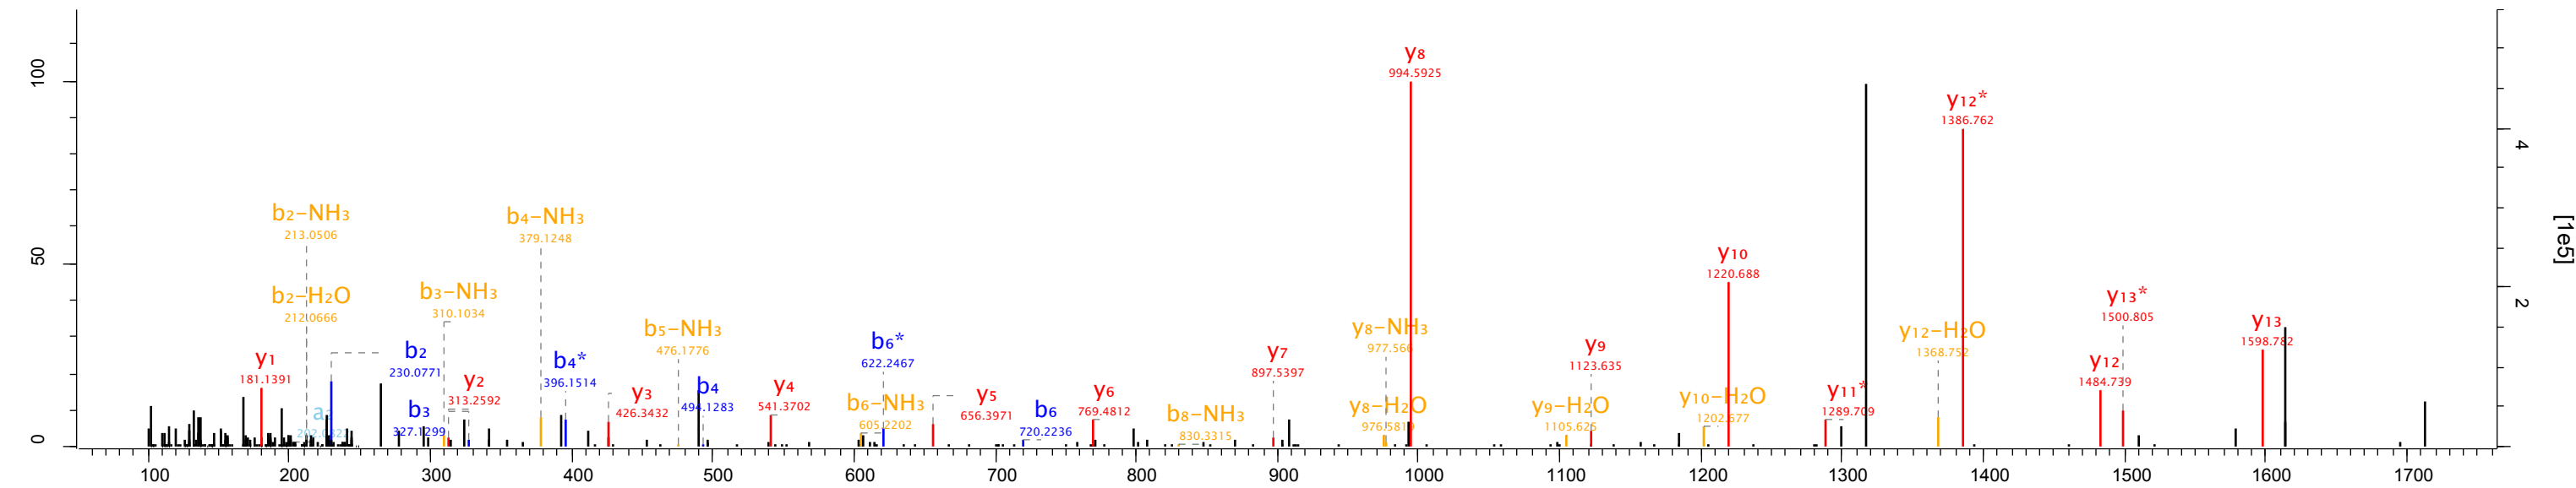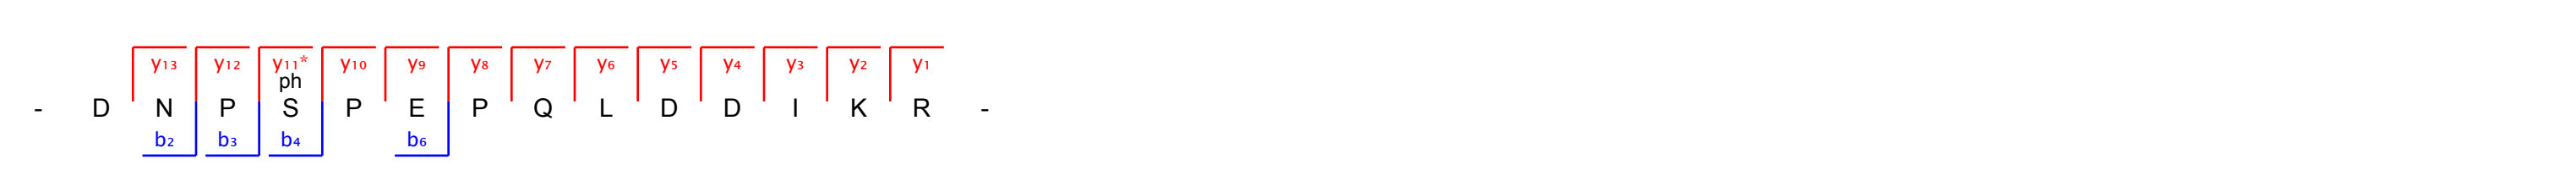

Raw file  
20171215\_MaS\_33SR\_LMH\_phospho2\_02

Scan 9014 Method FTMS; HCD Score 166.48 m/z 775.84 Gene names PTMA

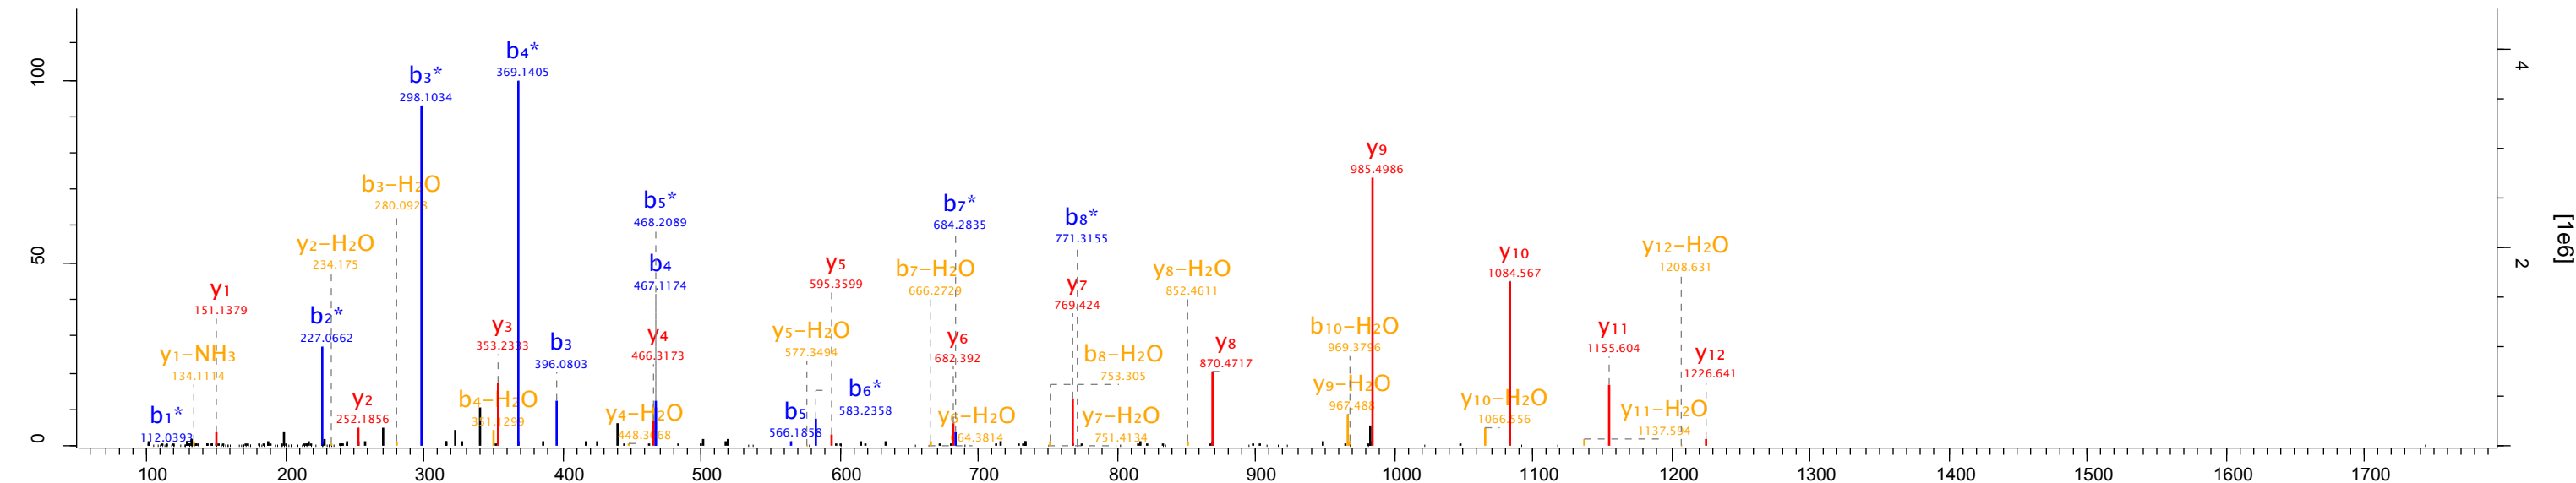

ac - ph S D A A V D T S S E I T T K -  
b1\* b2\* b3 b4 b5 b6\* b7\* b8\*



Raw file 20171215\_MaS\_33SR\_LMH\_phospho2\_03 Scan 10004 Method FTMS; HCD Score 81.15 m/z 964.35 Gene names SMARCA4

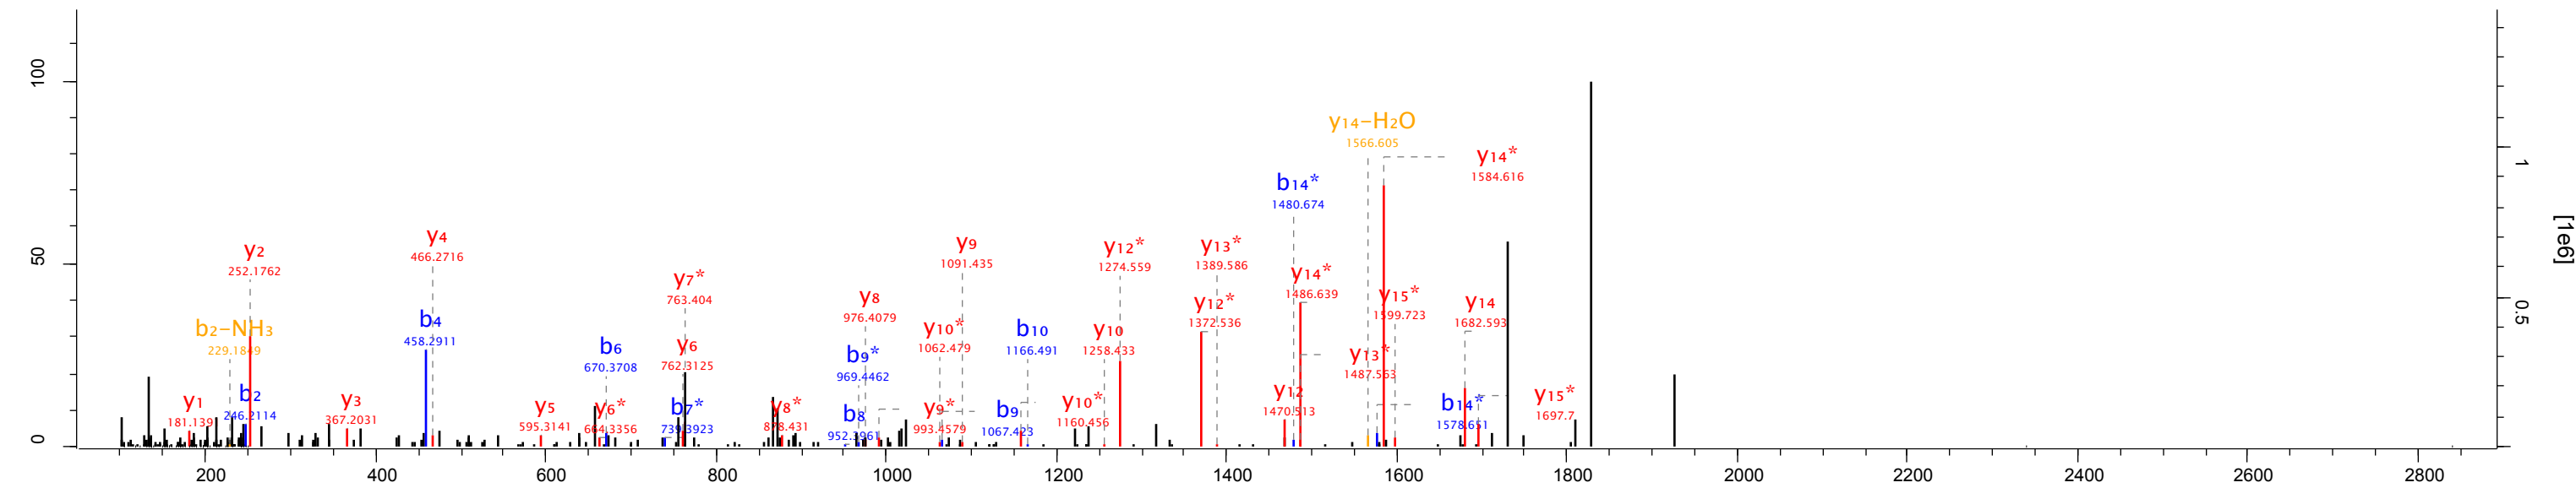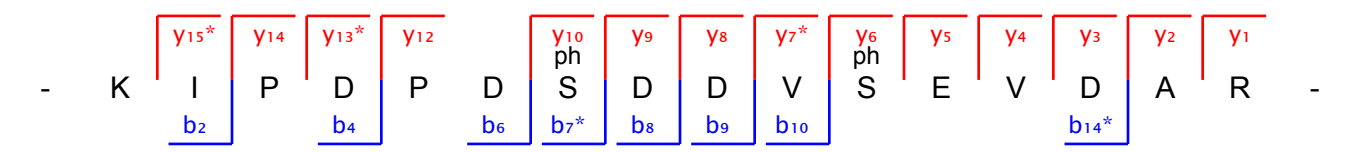

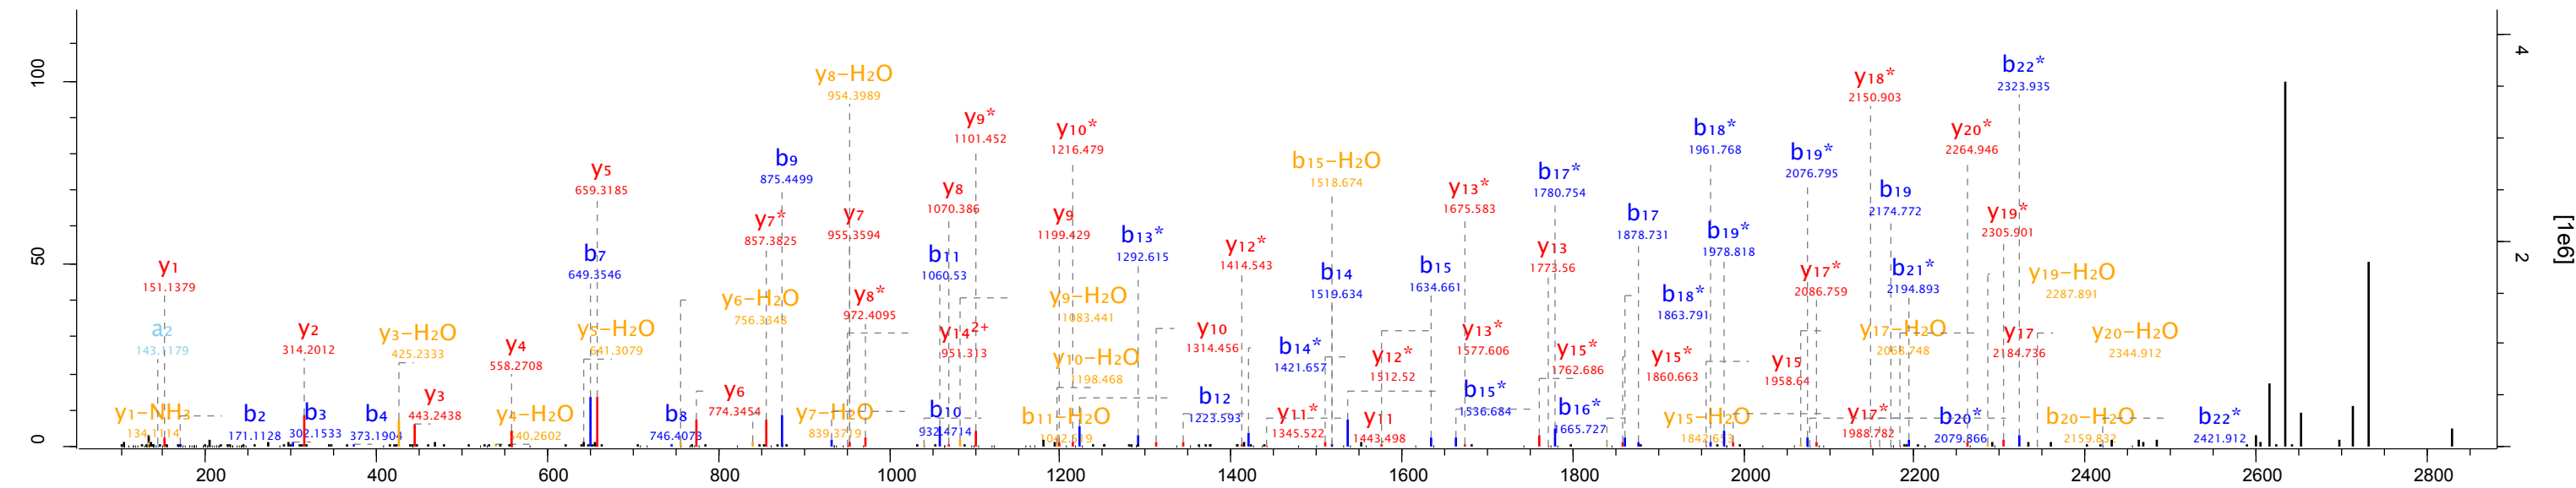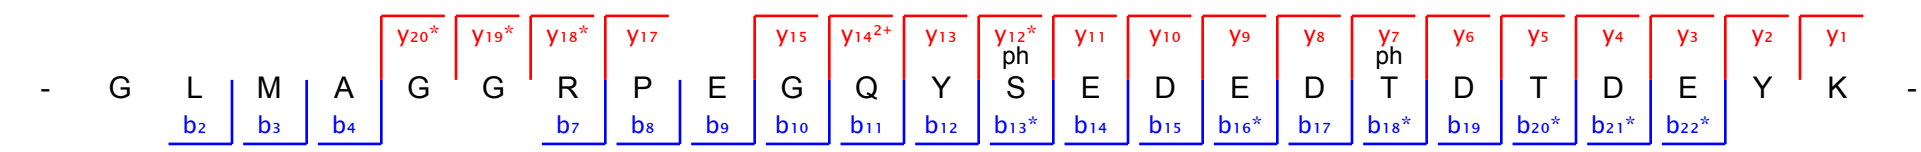

Raw file 20171215\_MaS\_33SR\_LMH\_phospho2\_03 Scan 10184 Method FTMS; HCD Score 153.21 m/z 828.33 Gene names TP53BP1

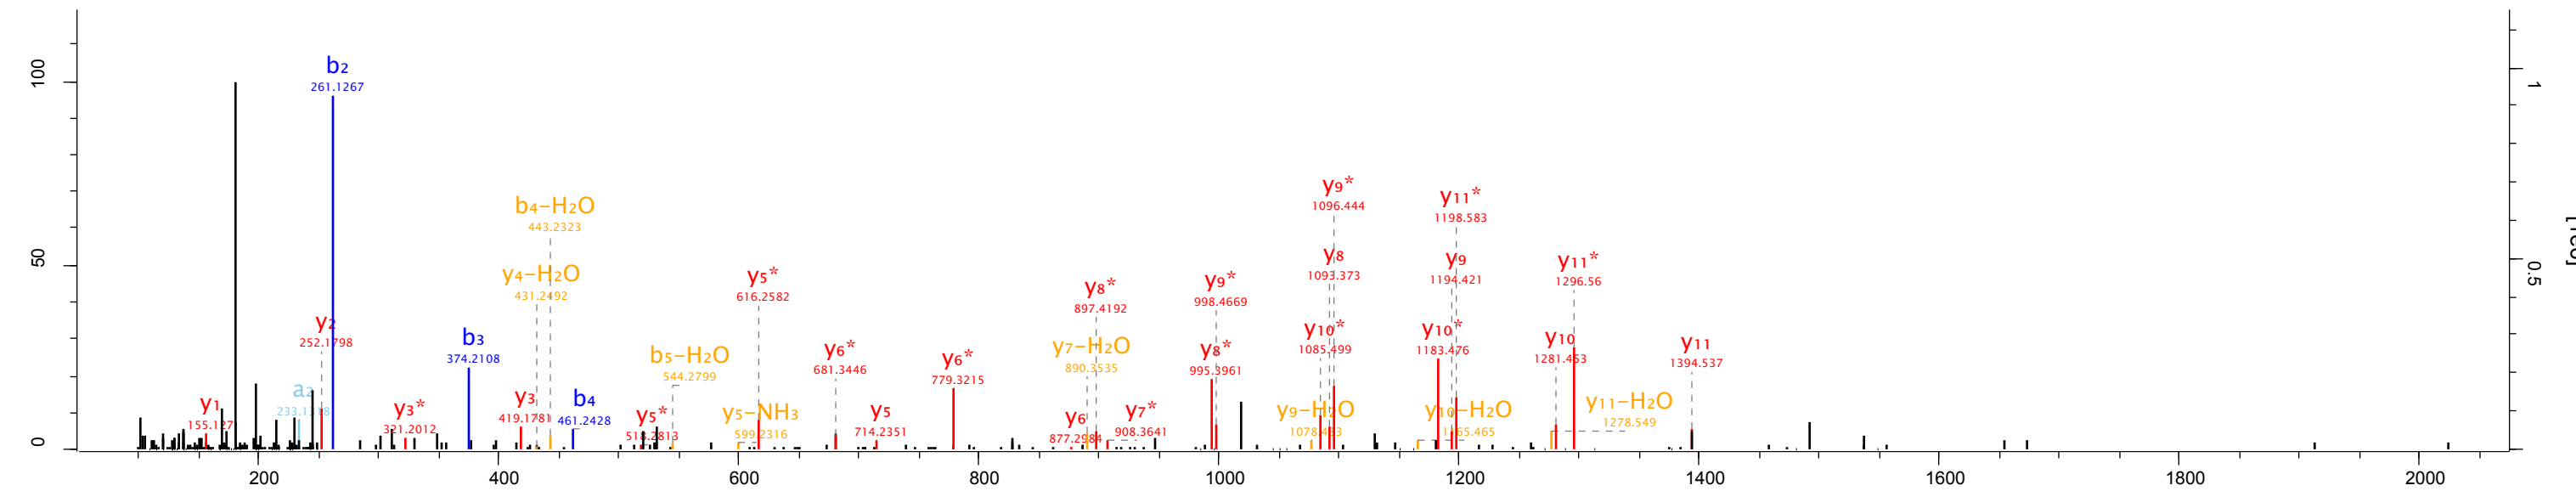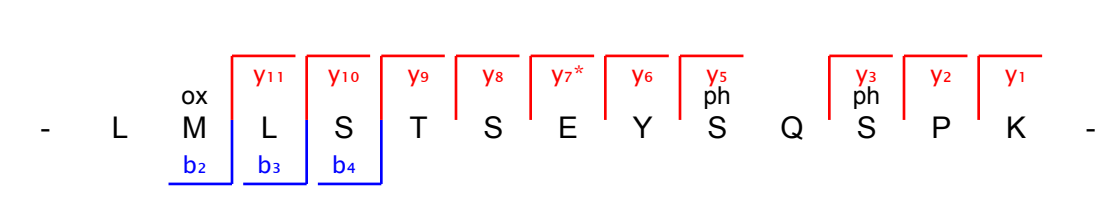



Raw file  
20171215\_MaS\_33SR\_LMH\_phospho2\_03

Scan 10344 Method FTMS; HCD Score 136.49 m/z 934.99 Gene names MFAP1

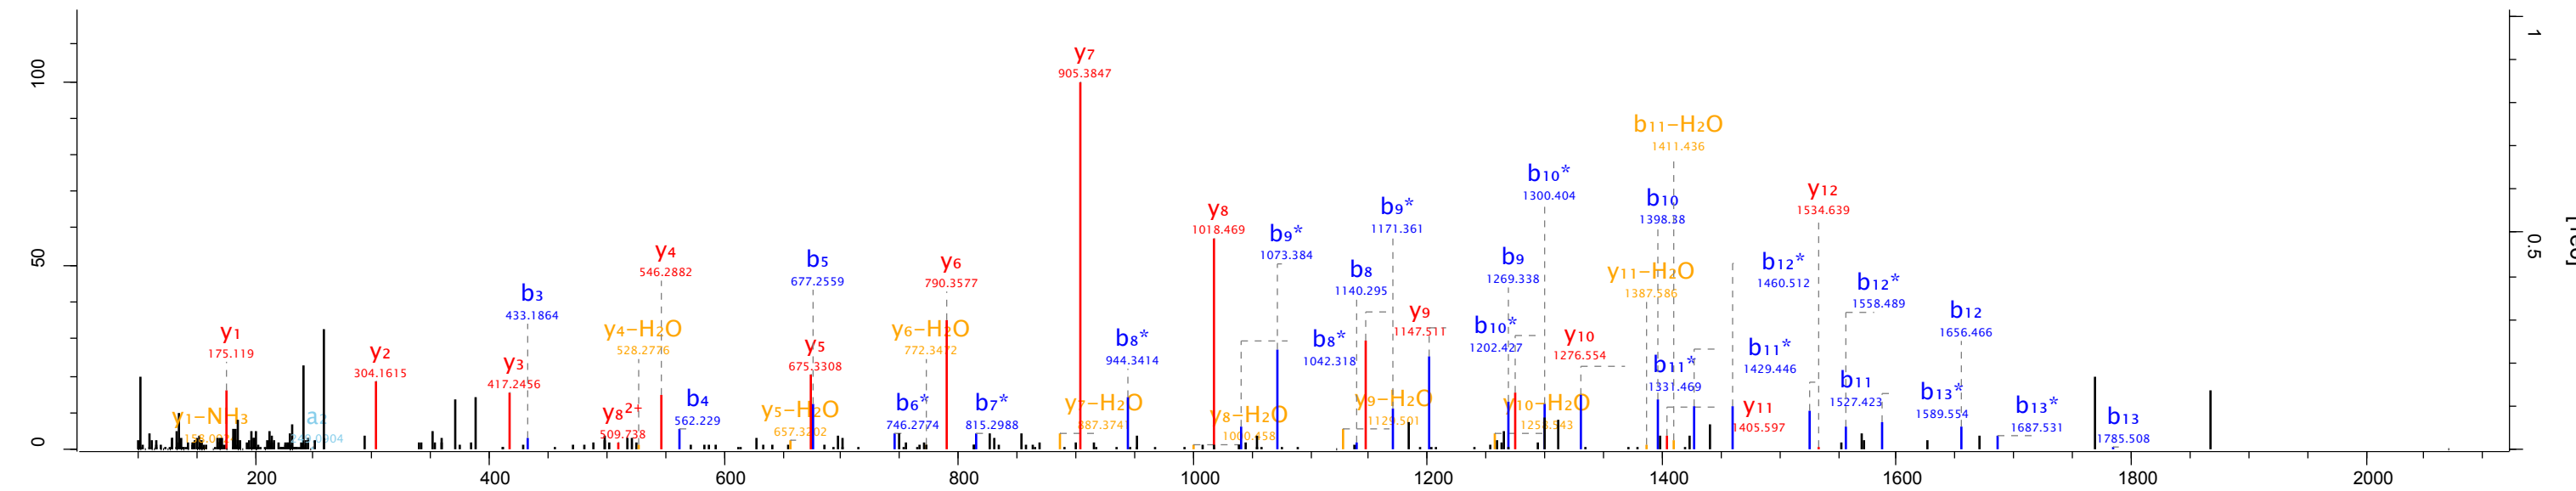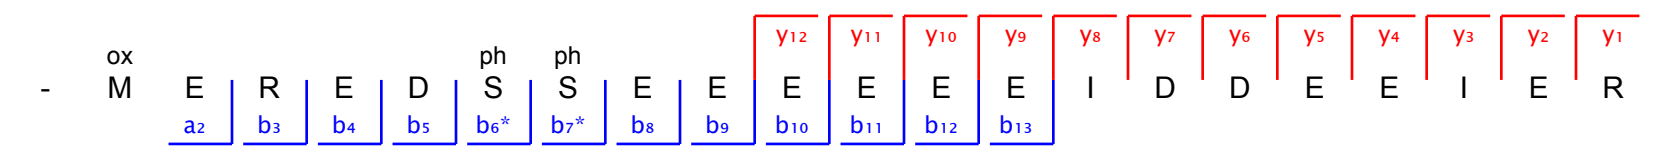

Raw file  
20171215\_MaS\_33SR\_LMH\_phospho2\_03

Scan 10354 Method FTMS; HCD Score 181.94 m/z 880.88 Gene names TBC1D15

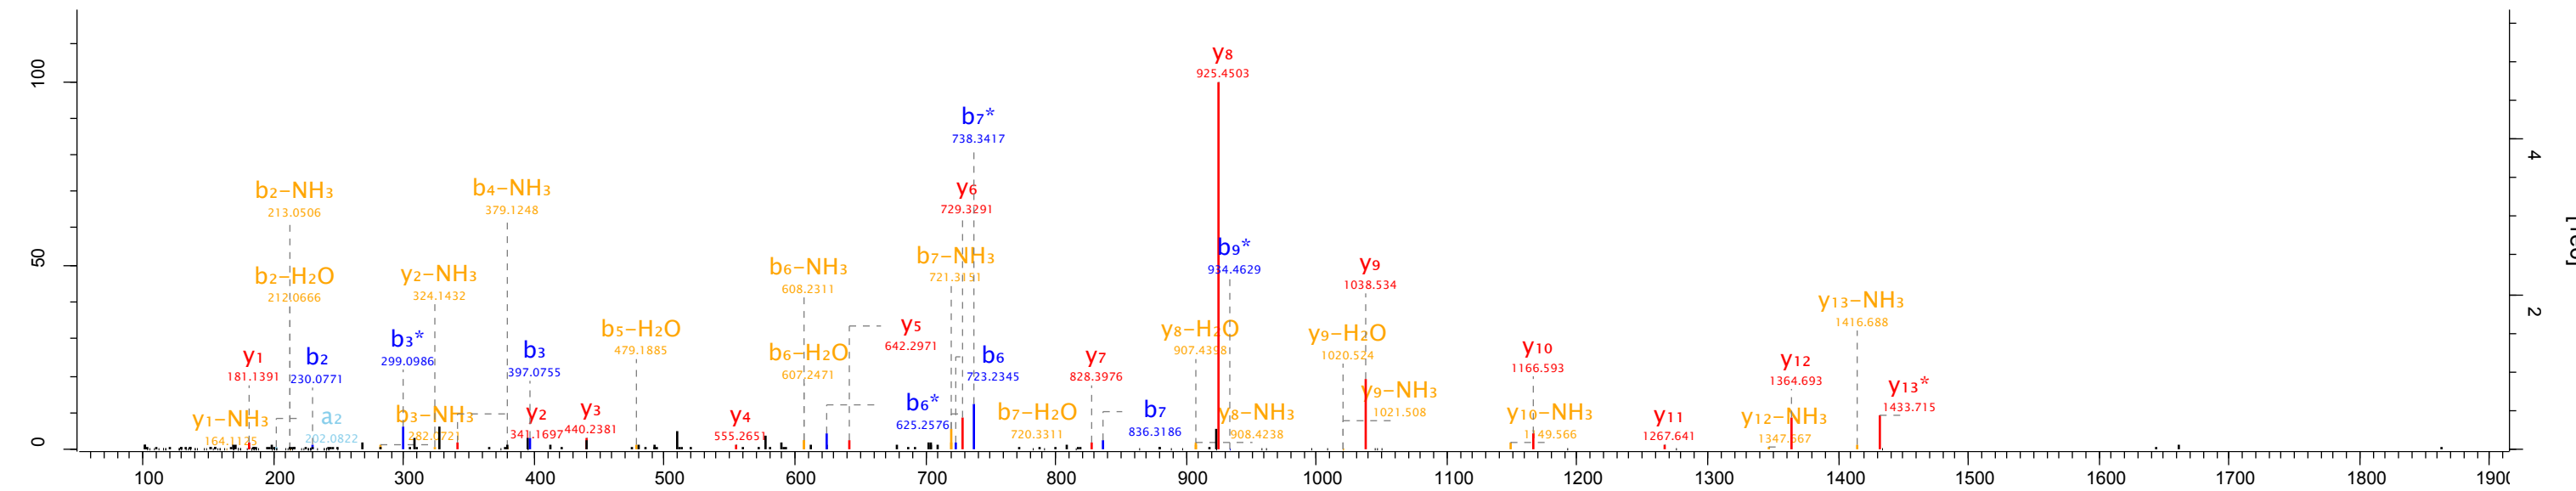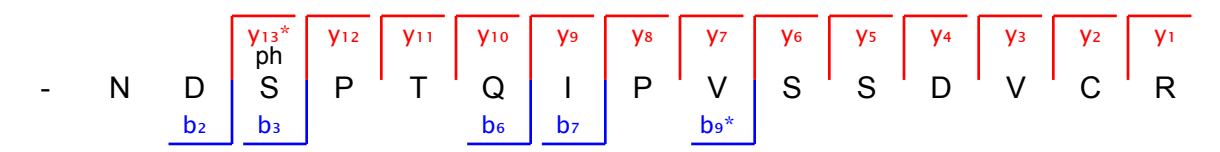

Raw file 20171215\_MaS\_33SR\_LMH\_phospho2\_03 Scan 10404 Method FTMS; HCD Score 105.66 m/z 799.39 Gene names KIAA1143

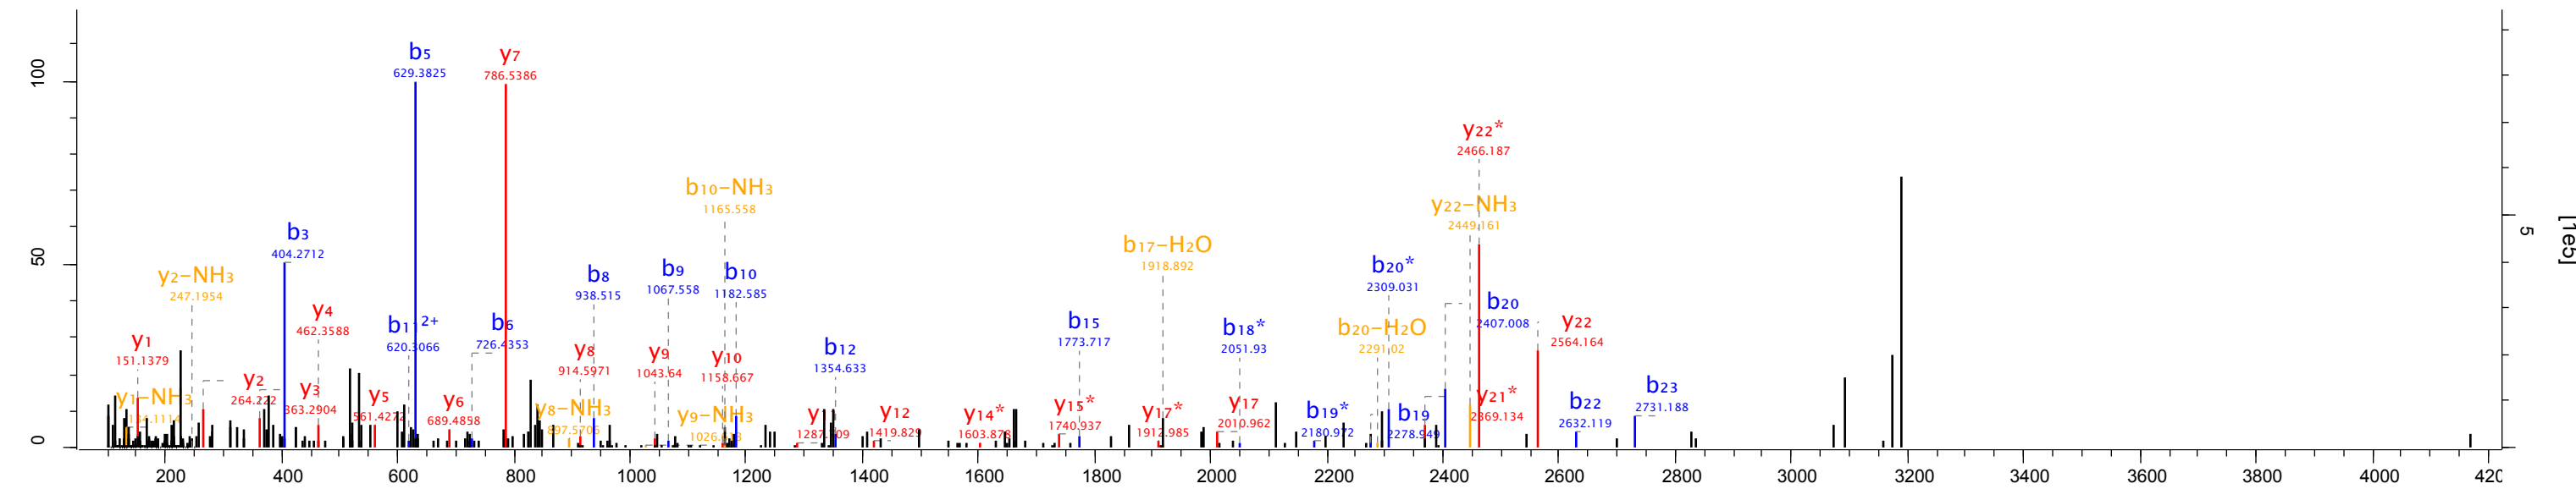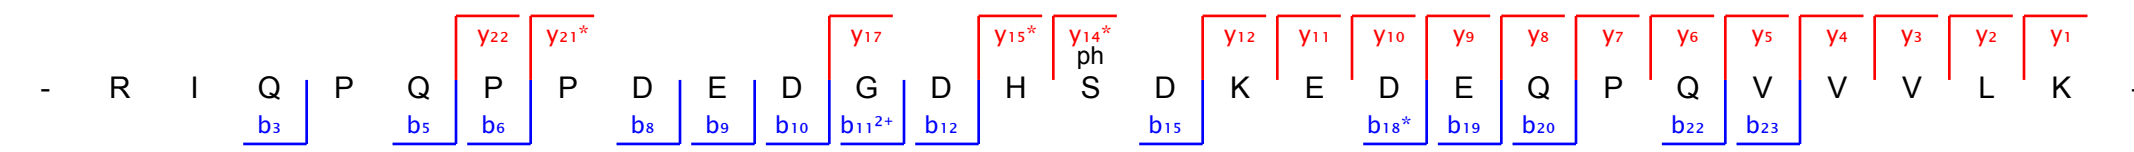

Raw file 20171215\_MaS\_33SR\_LMH\_phospho2\_03 Scan 10704 Method FTMS; HCD Score 67.93 m/z 763.81 Gene names MOCOS

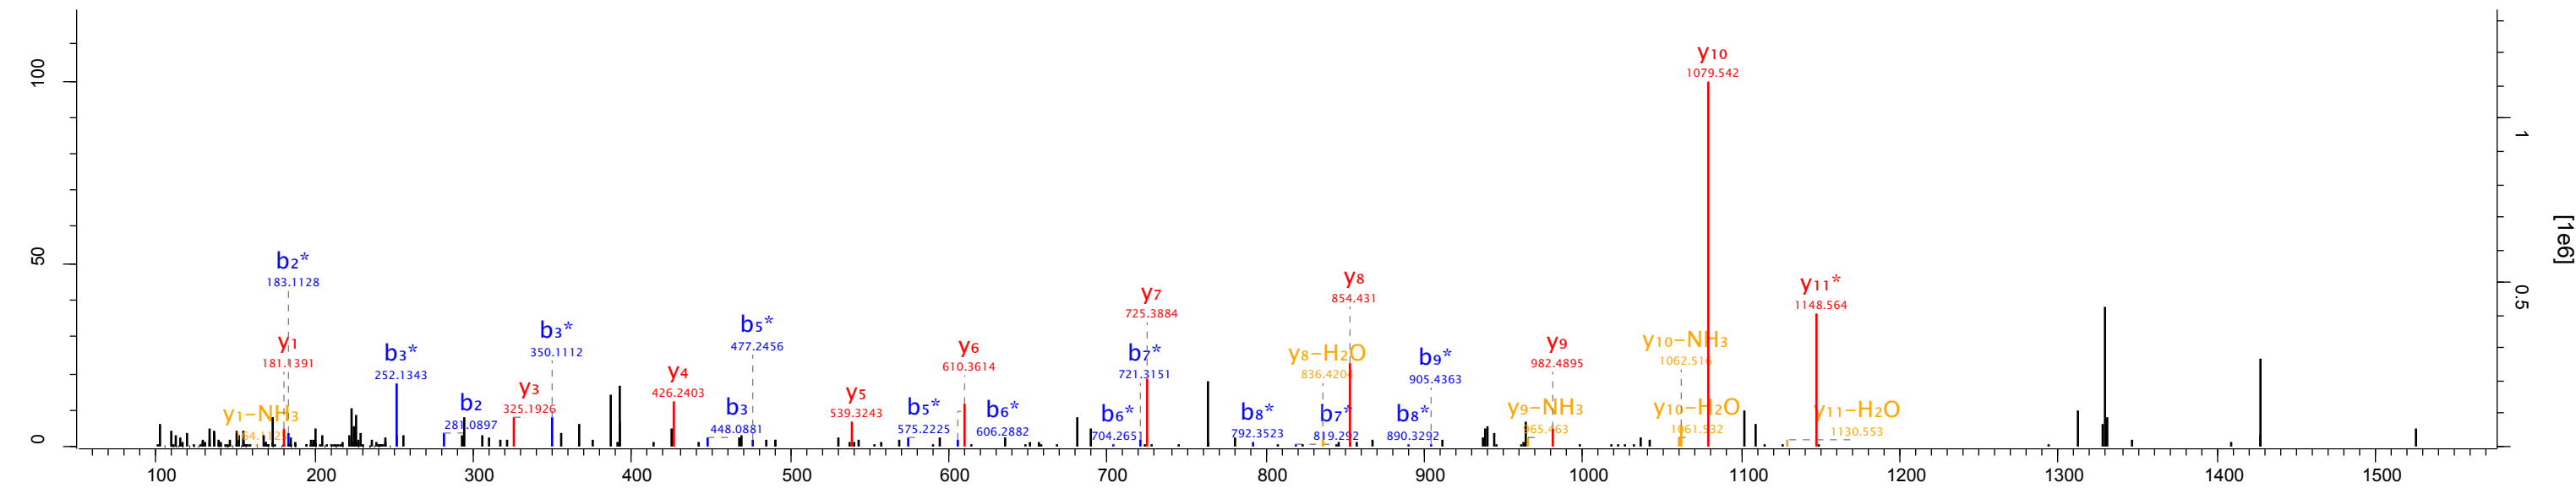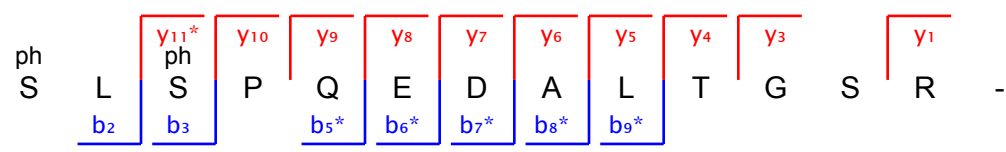

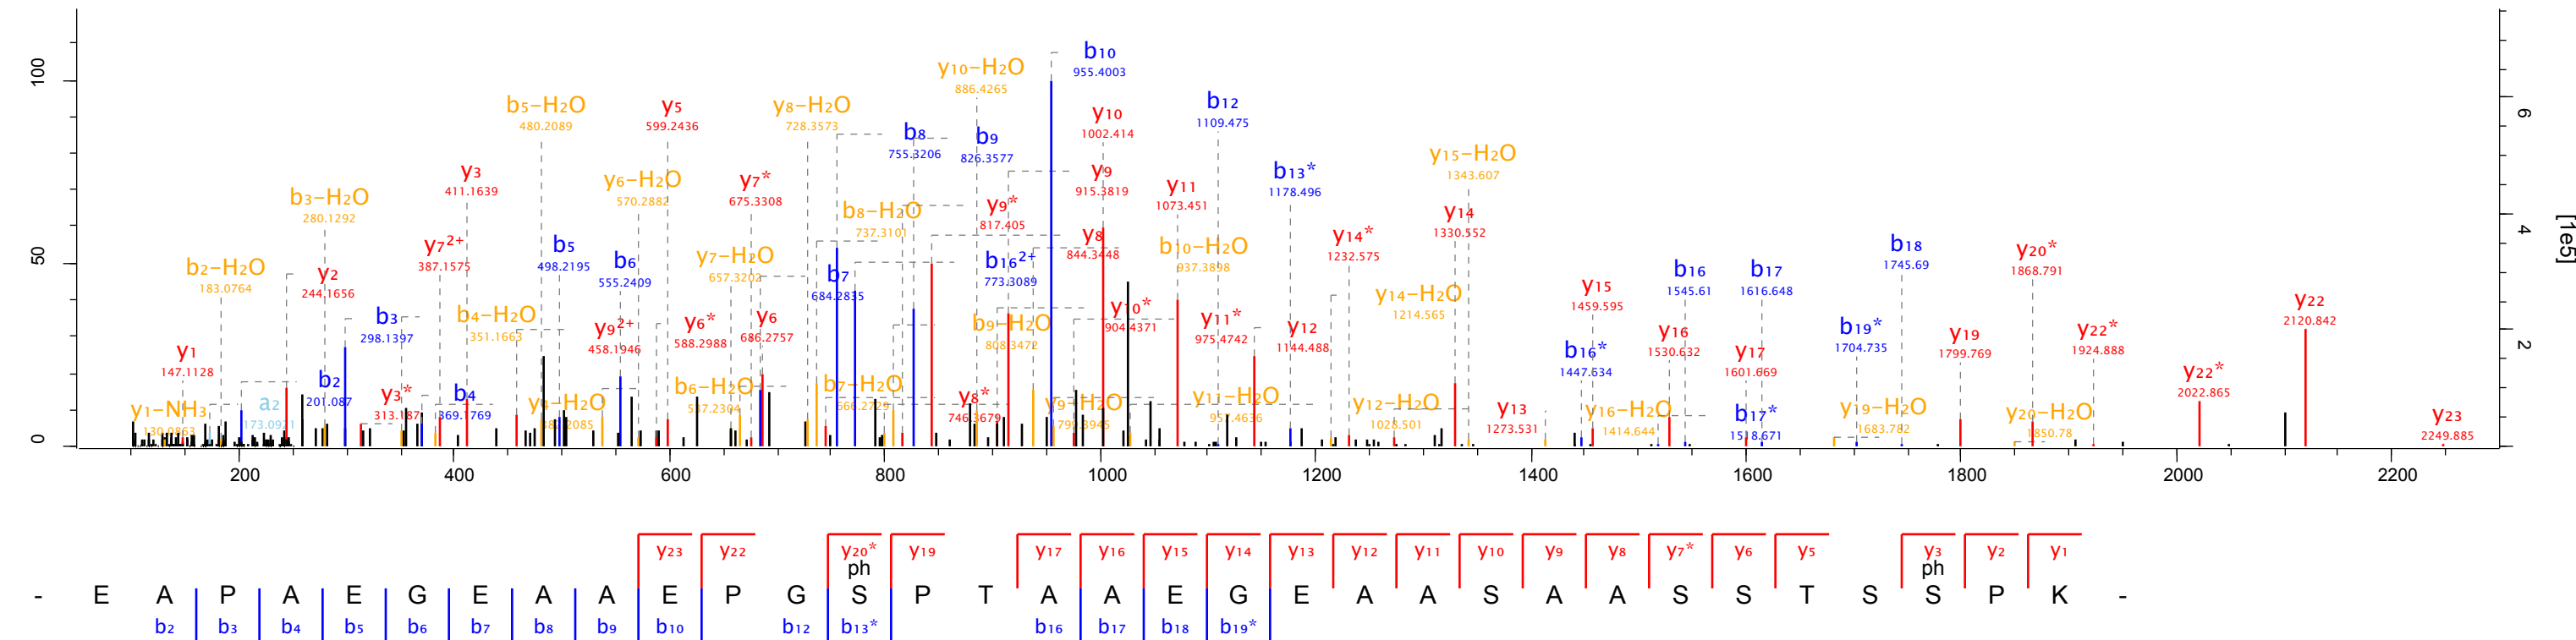

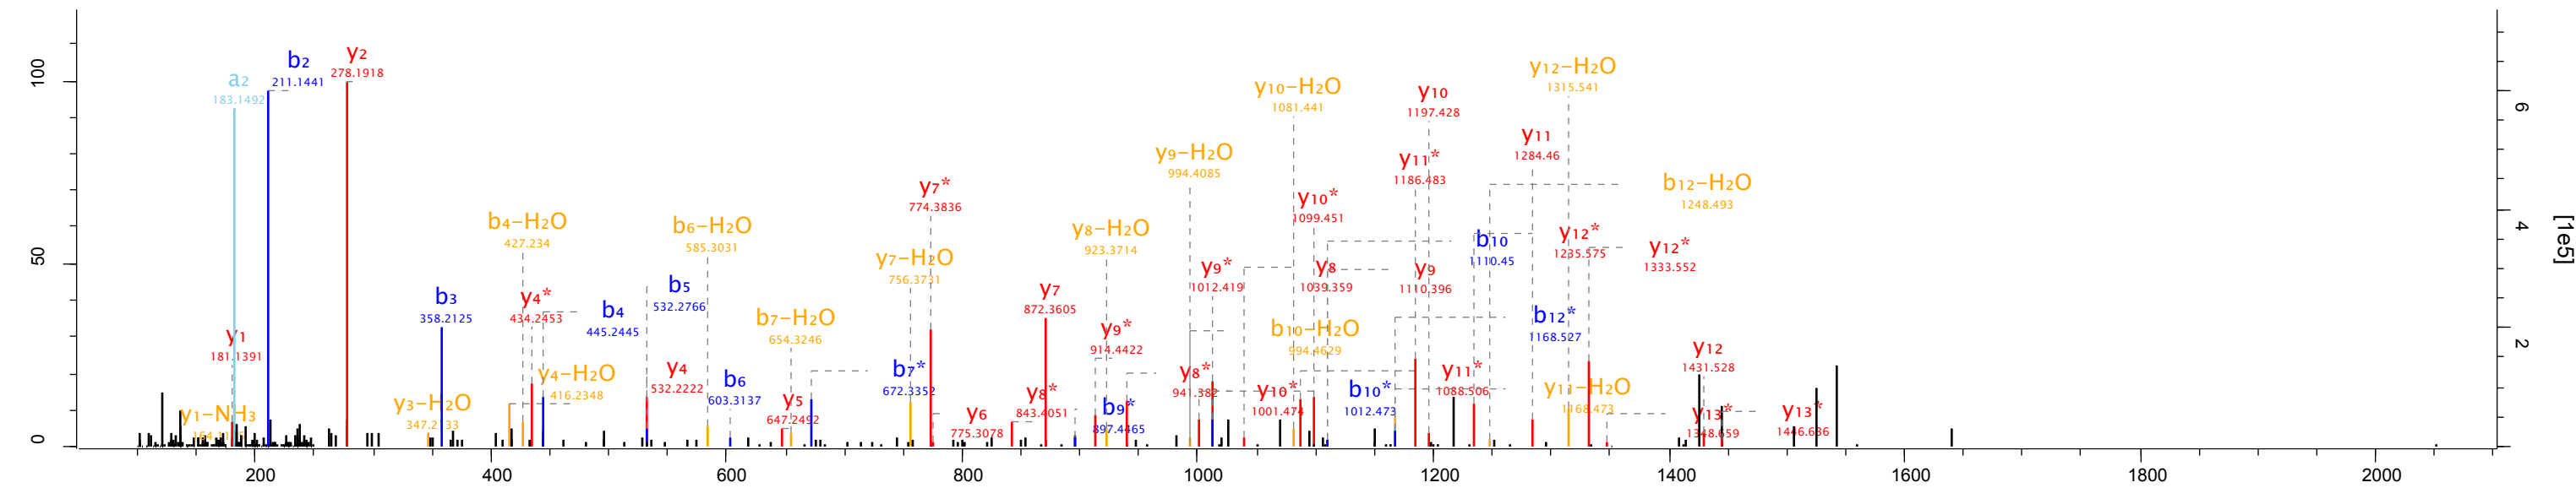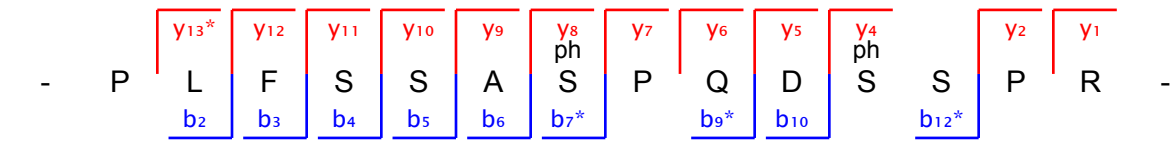

Raw file 20171215\_MaS\_33SR\_LMH\_phospho2\_03 Scan 11324 Method FTMS; HCD Score 137.91 m/z 1063.12 Gene names RSF1

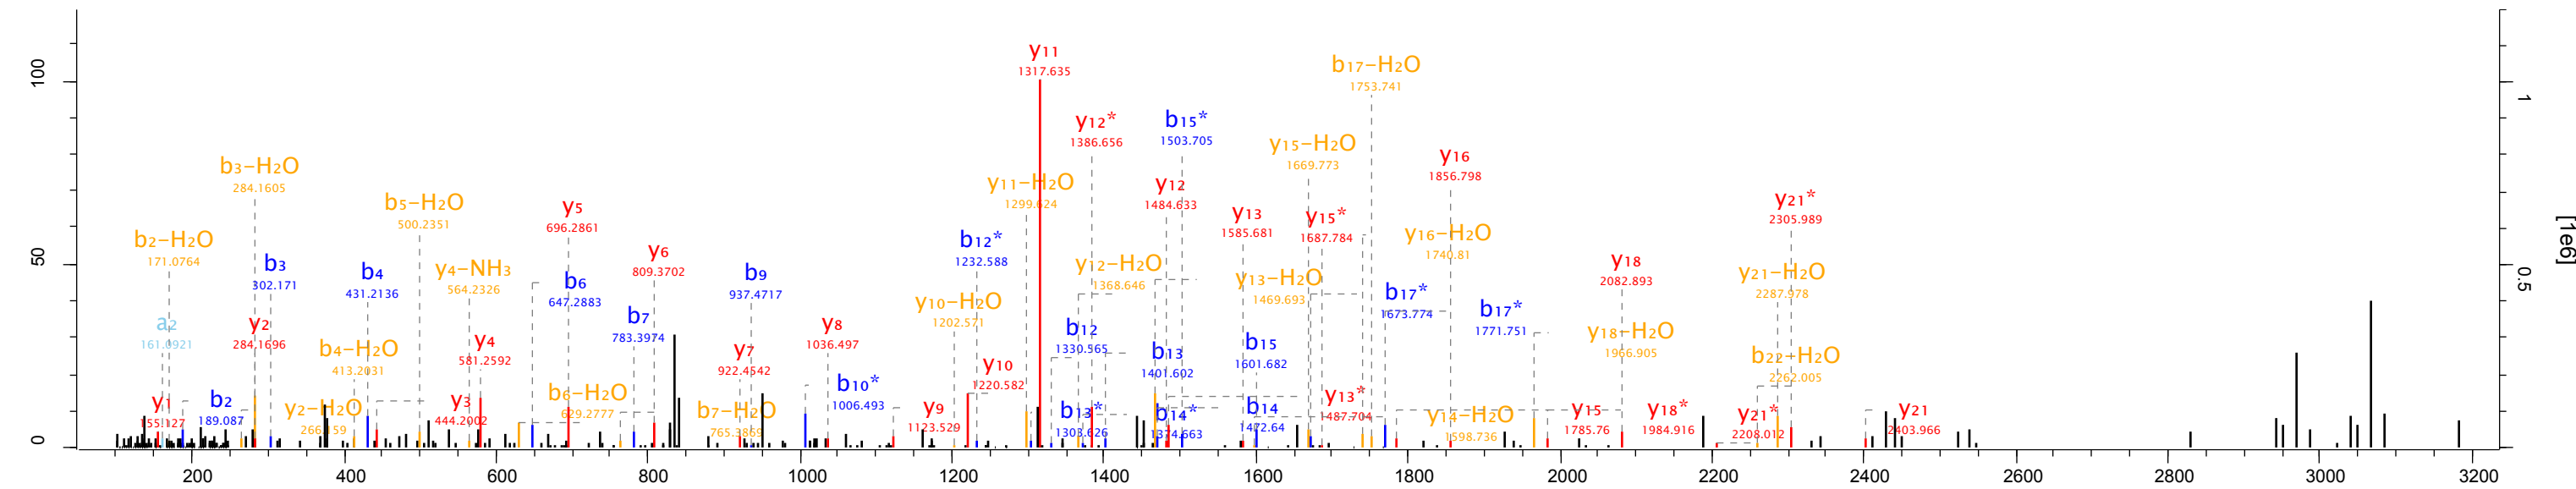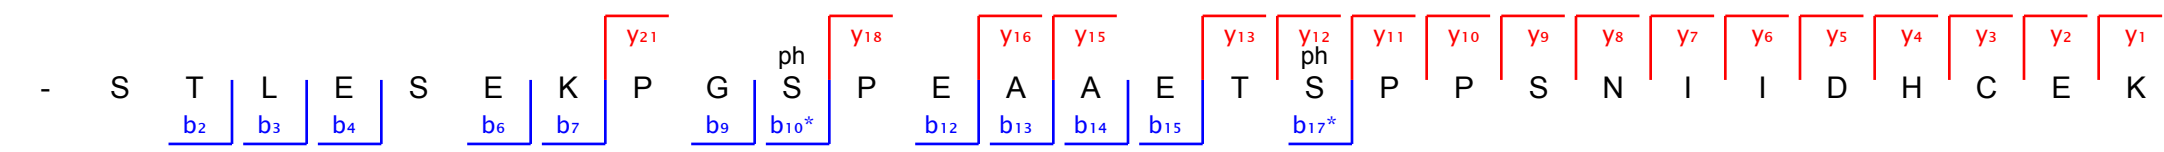

Raw file 20171215\_MaS\_33SR\_LMH\_phospho2\_03 Scan 11554 Method FTMS; HCD Score 117.8 m/z 831.36 Gene names TOX4

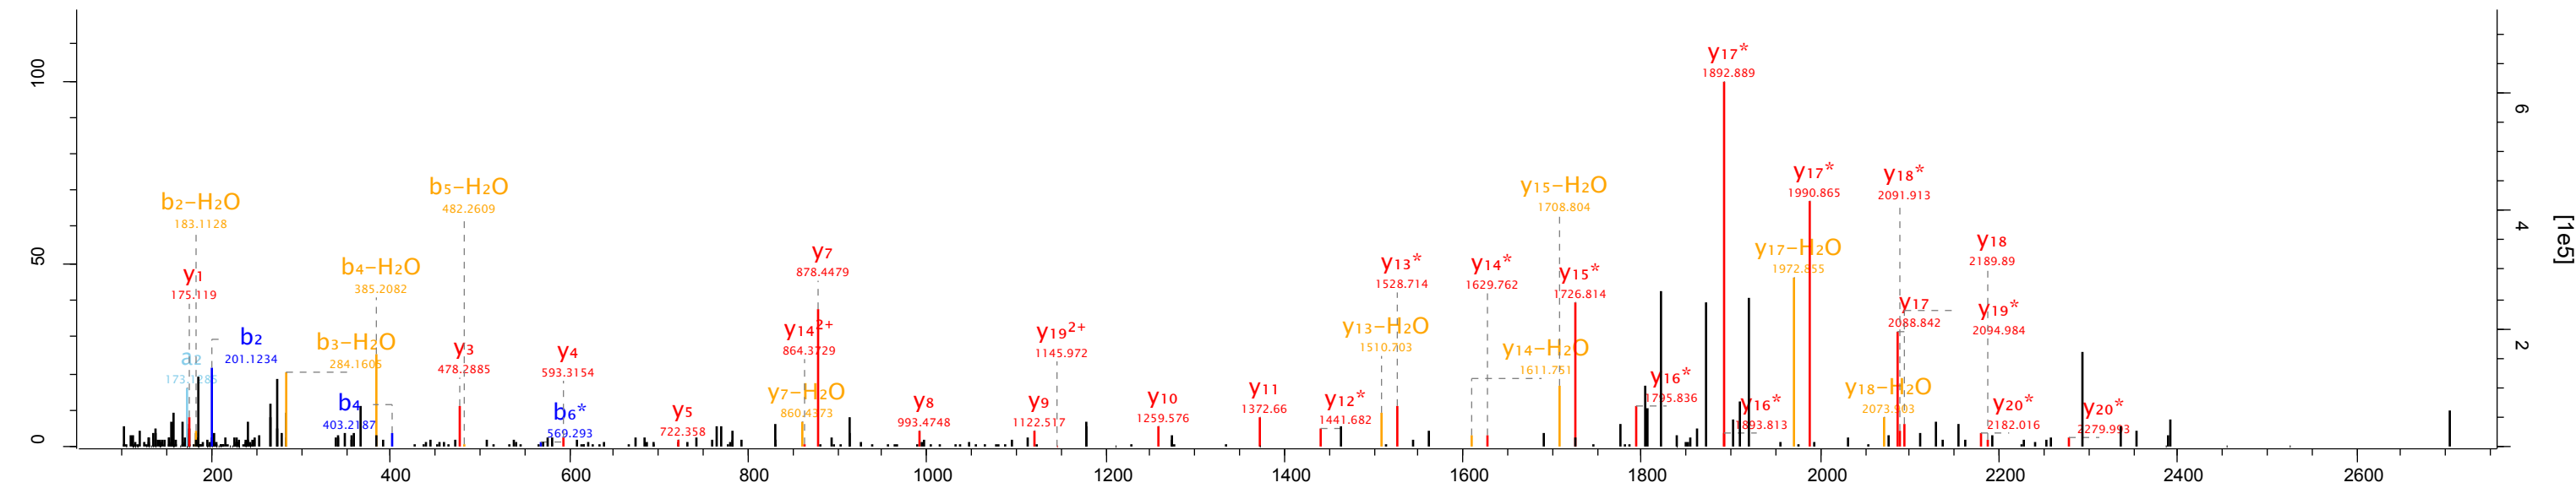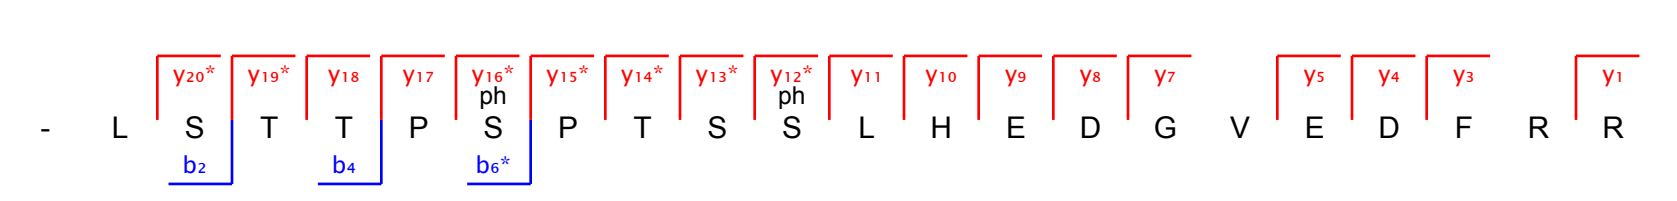



Raw file 20171215\_MaS\_33SR\_LMH\_phospho2\_03 Scan 11744 Method FTMS; HCD Score 146.6 m/z 974.87 Gene names MLLT1

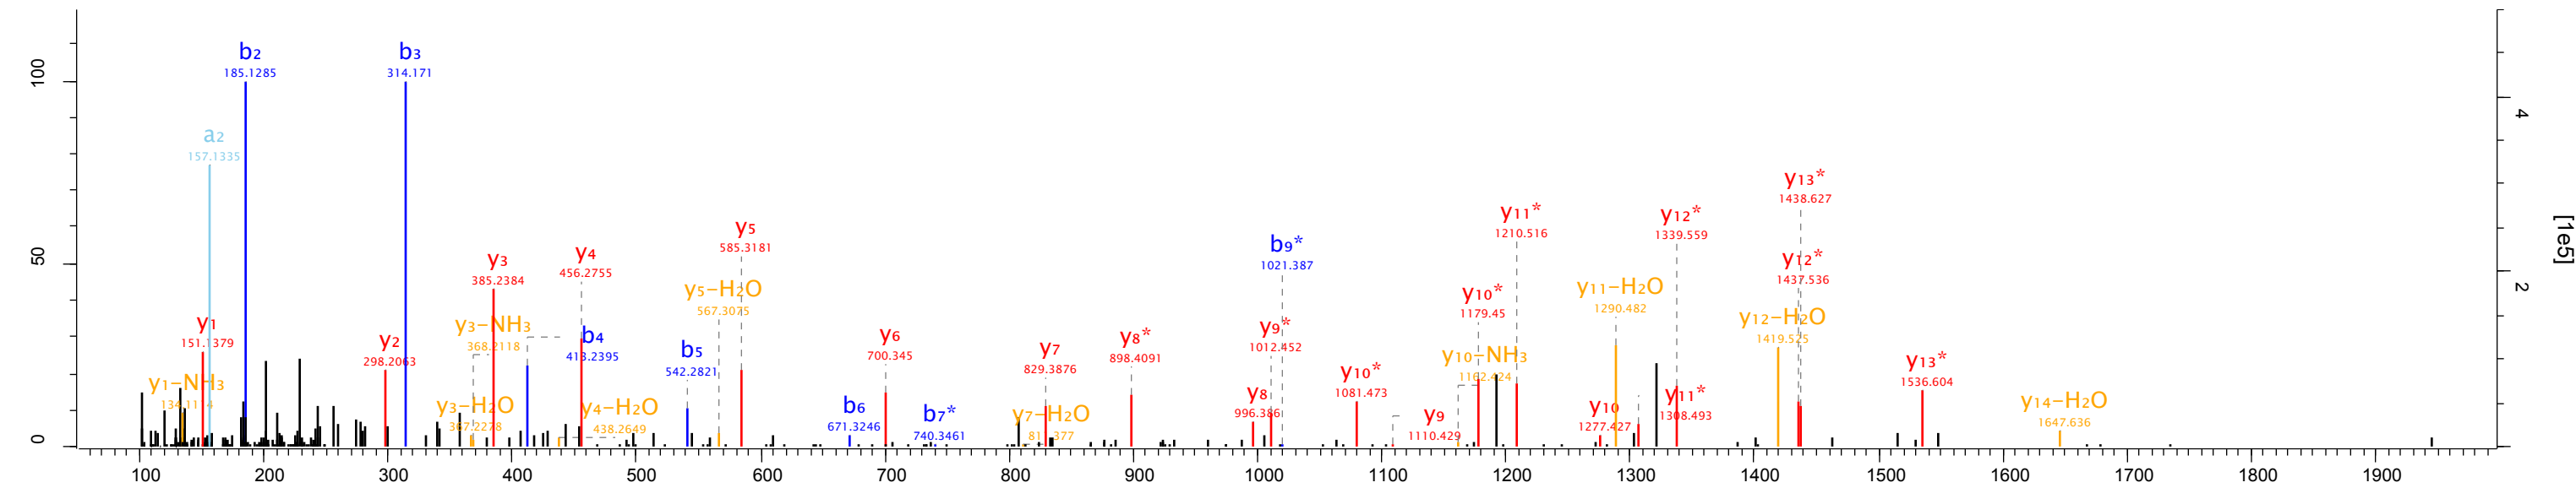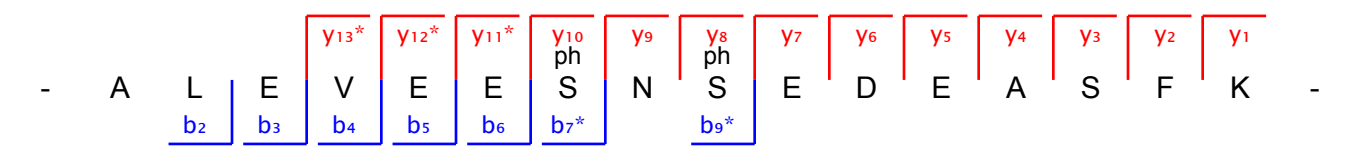

Raw file 20171215\_MaS\_33SR\_LMH\_phospho2\_03 Scan 12134 Method FTMS; HCD Score 152.74 m/z 1012.48 Gene names RAVER1

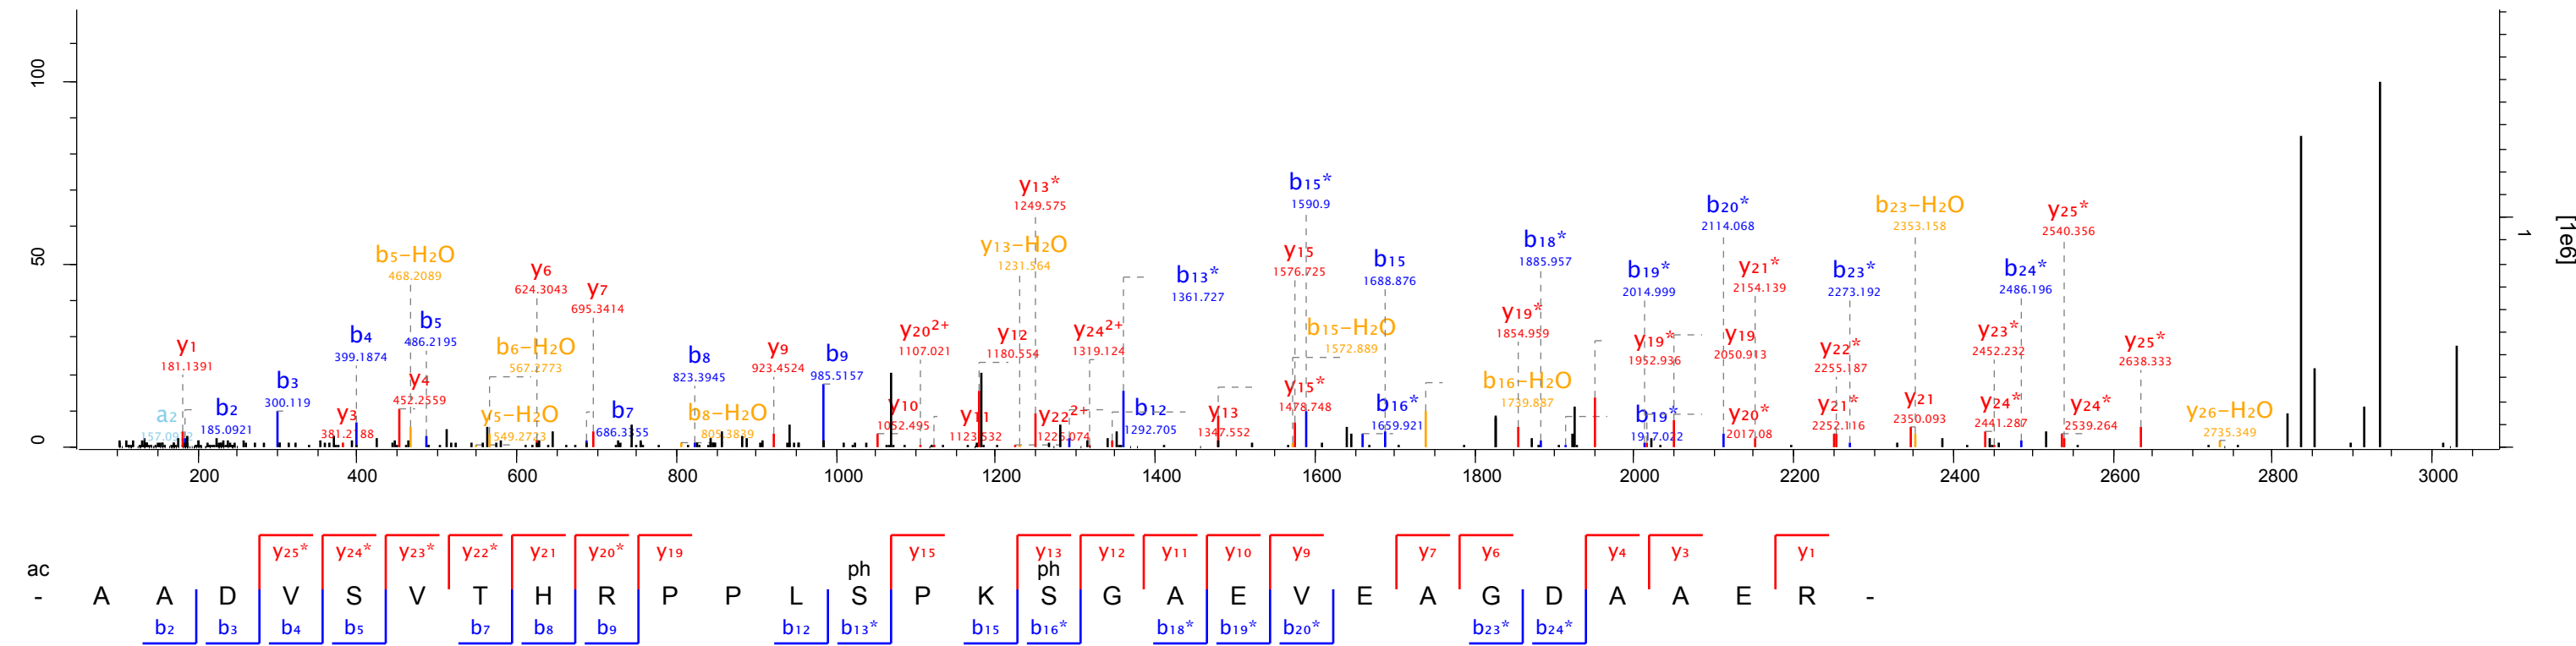

Raw file 20171215\_MaS\_33SR\_LMH\_phospho2\_03 Scan 12204 Method FTMS; HCD Score 354.35 m/z 1285.49 Gene names SURF2

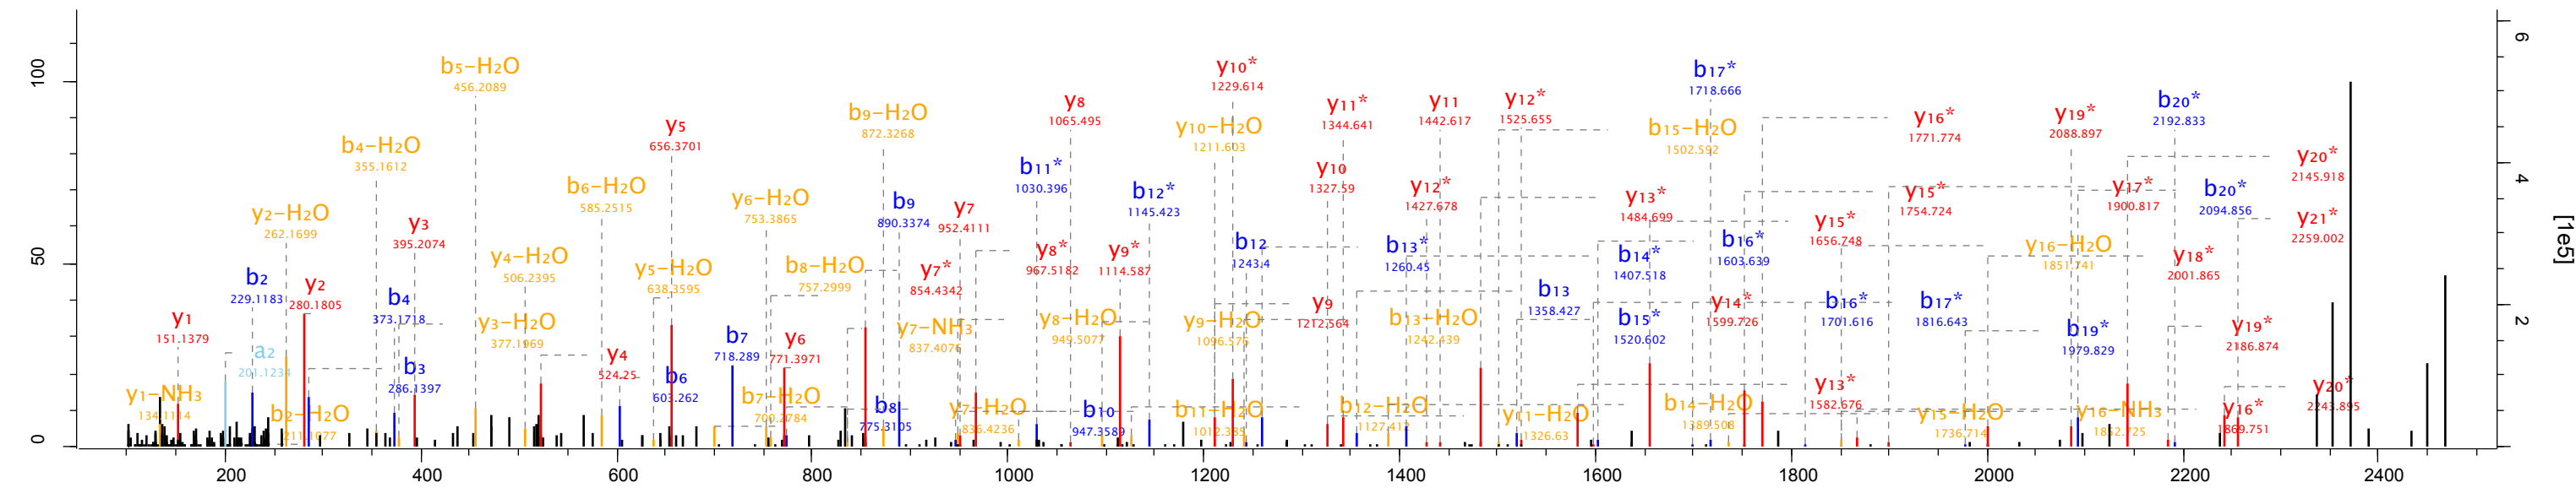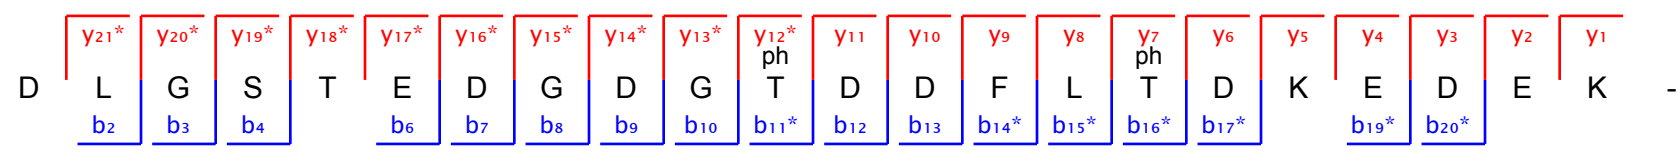

Raw file 20171215\_MaS\_33SR\_LMH\_phospho2\_03 Scan 12434 Method FTMS; HCD Score 48.23 m/z 806.35 Gene names KIZ

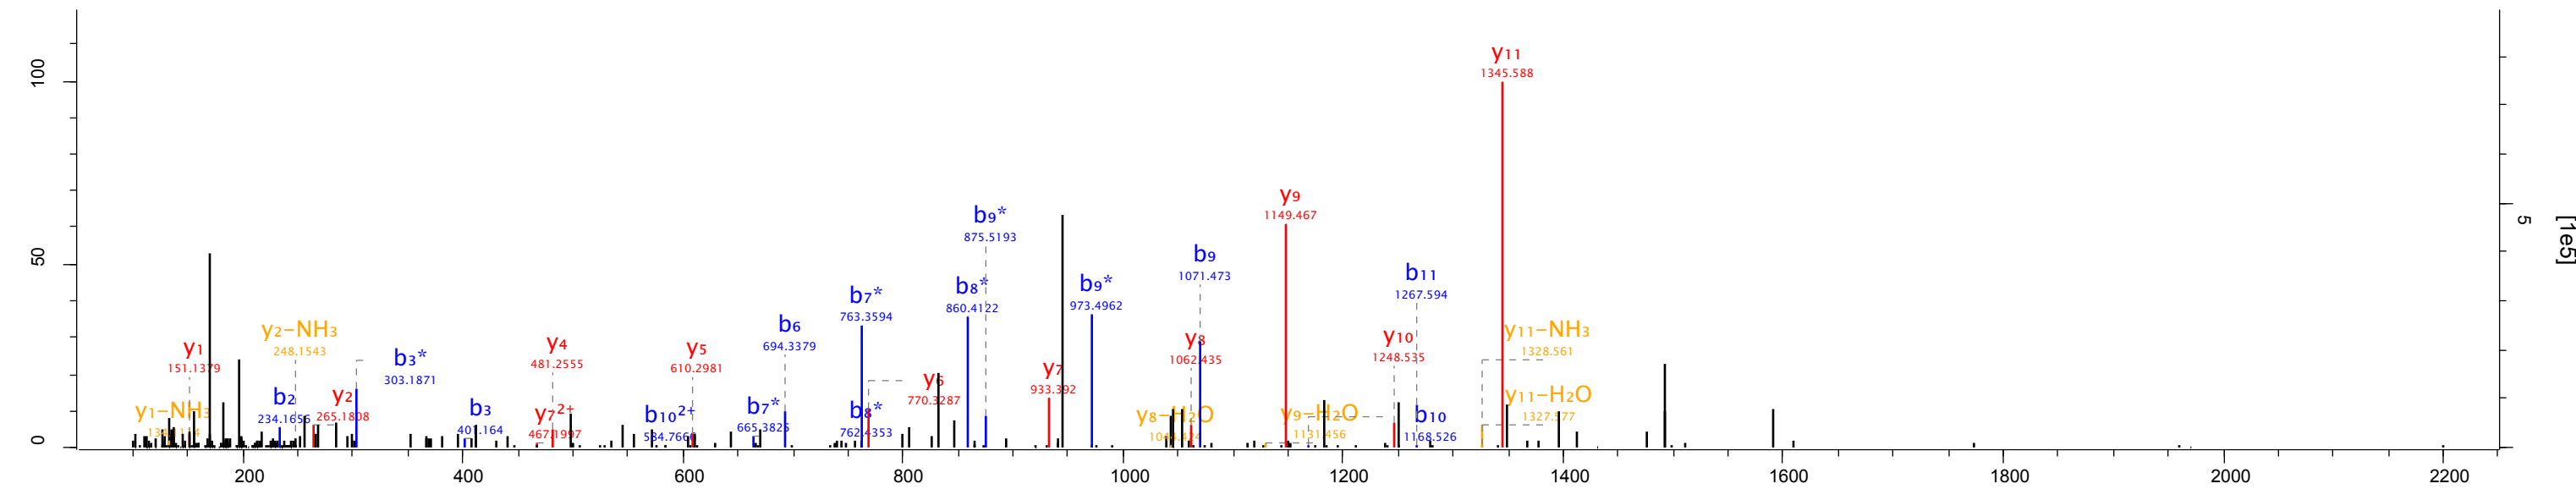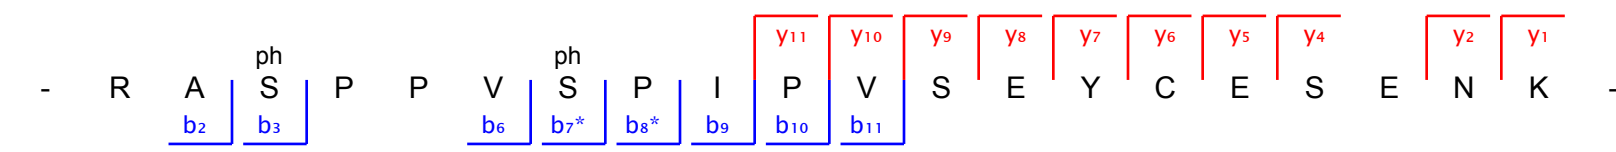

Raw file 20171215\_MaS\_33SR\_LMH\_phospho2\_03 Scan 12534 Method FTMS; HCD Score 109.42 m/z 987.37 Gene names CTDPI

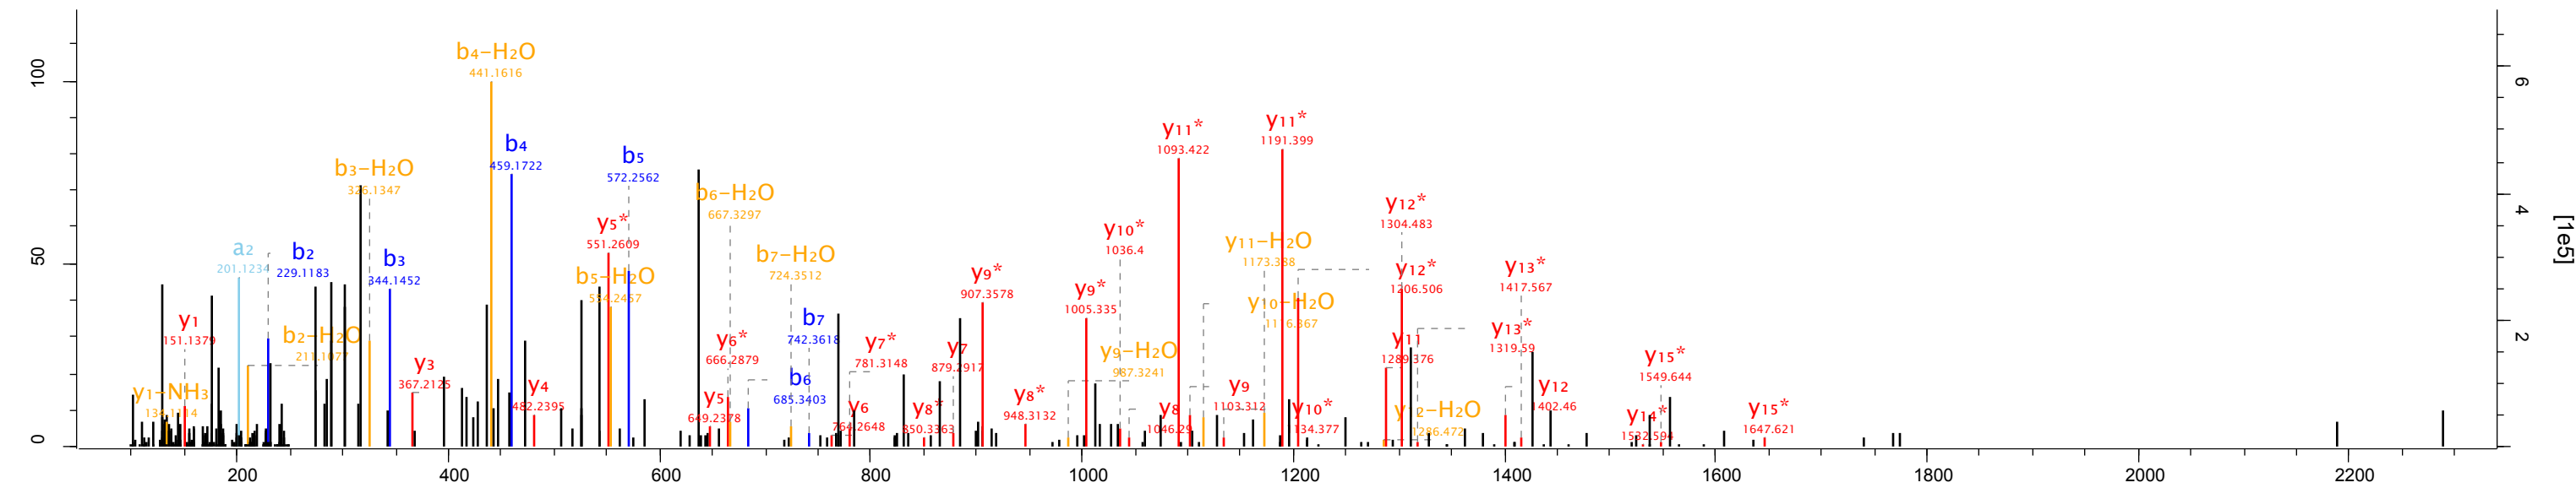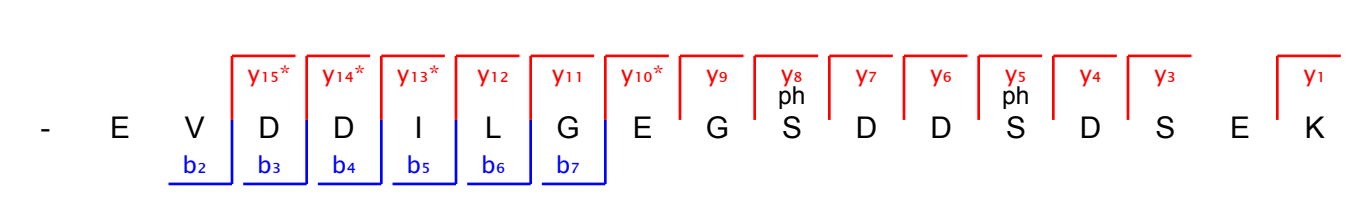

Raw file Scan Method Score m/z Gene names  
 20171215\_MaS\_33SR\_LMH\_phospho2\_03 12574 FTMS; HCD 158.94 1134.13 DHX34

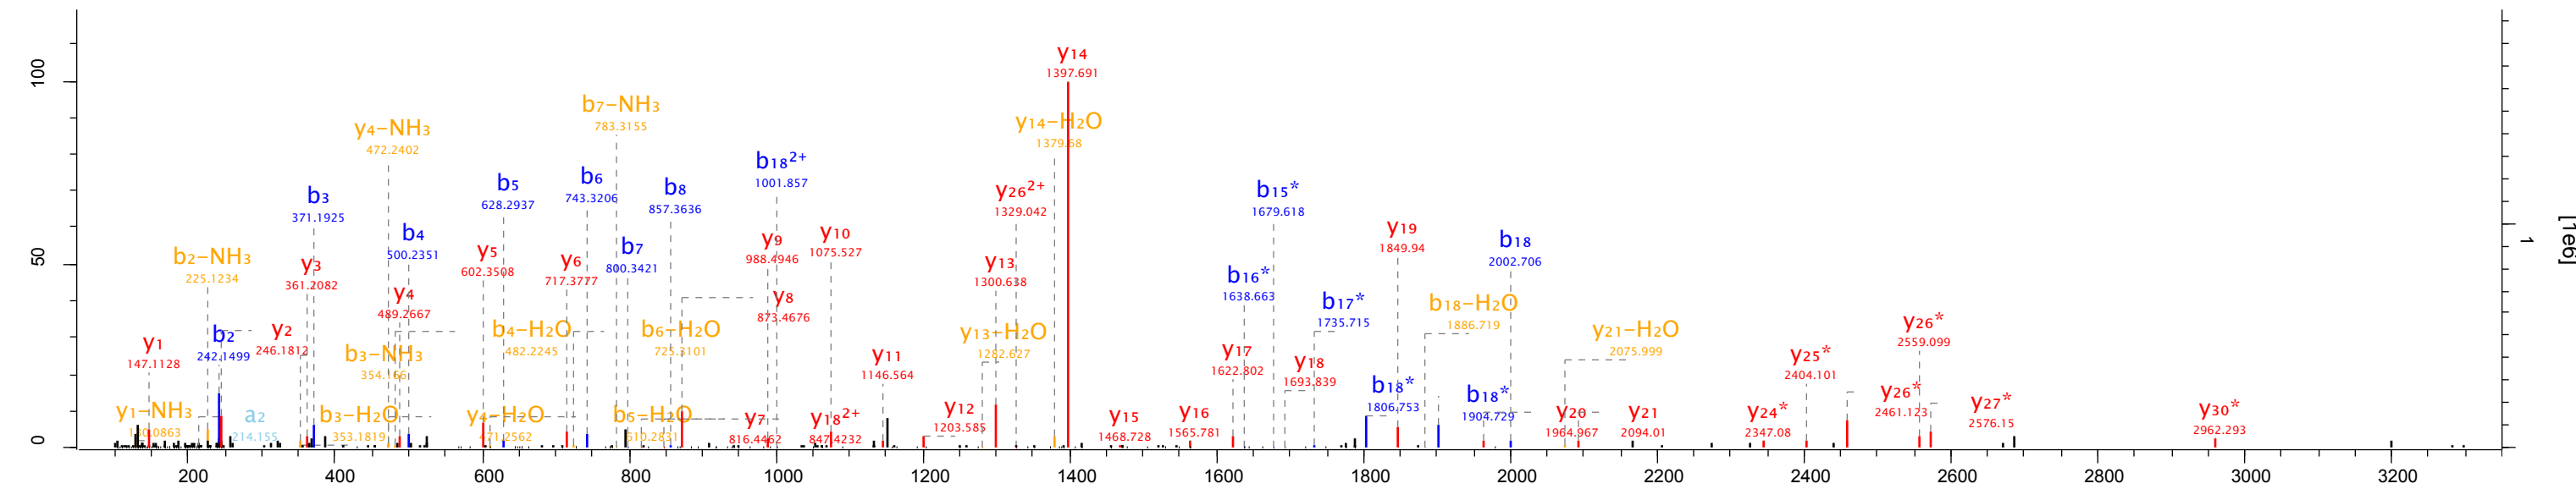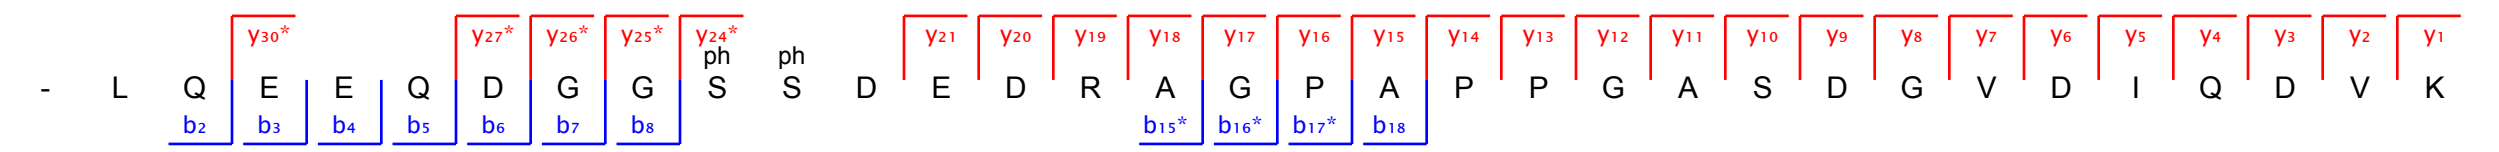

Raw file 20171215\_MaS\_33SR\_LMH\_phospho2\_03 Scan 12684 Method FTMS; HCD Score 134.21 m/z 918.05 Gene names FAM169A

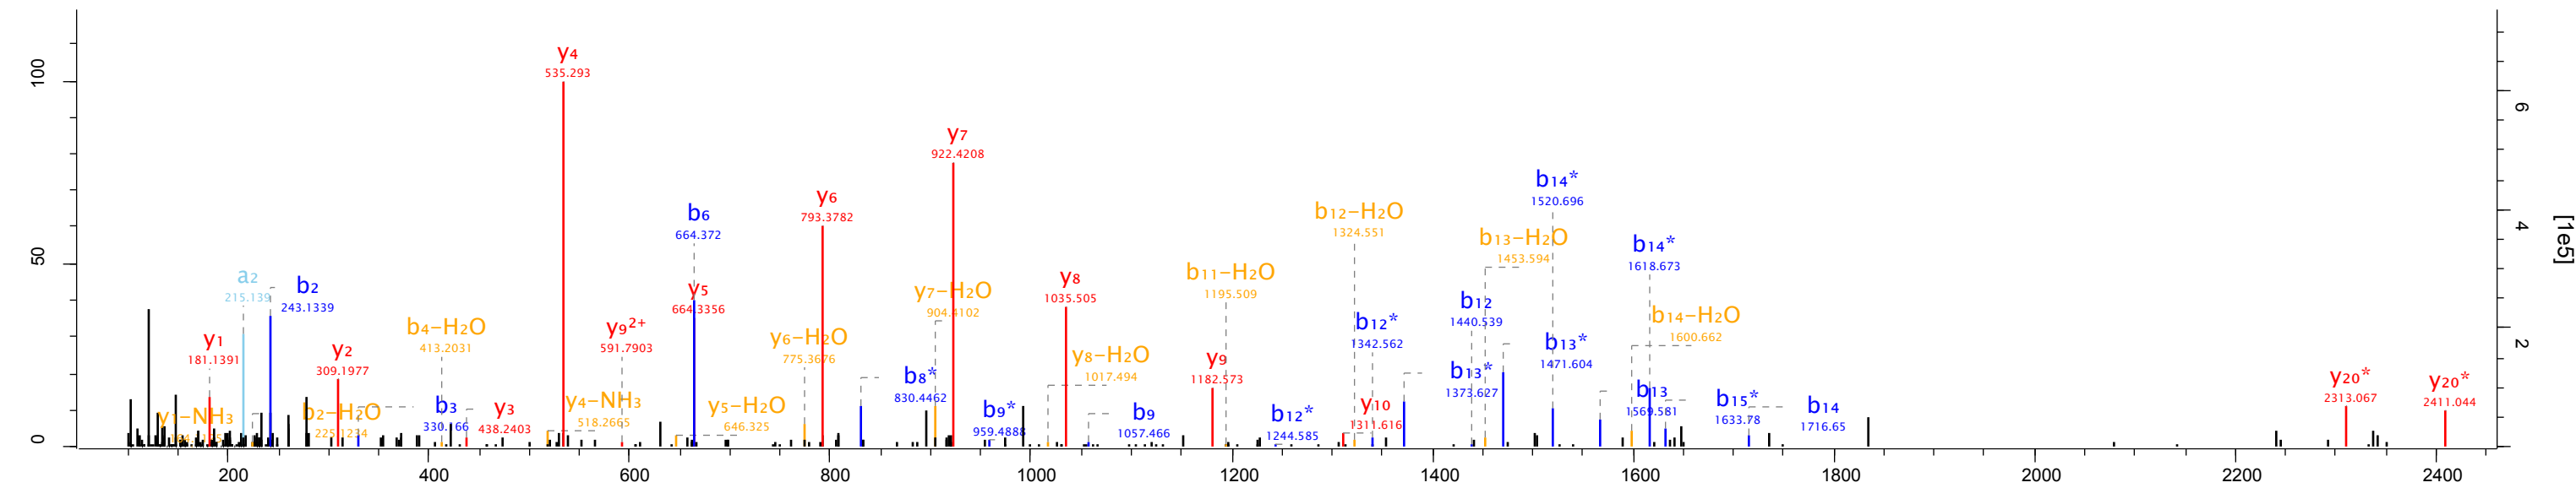

- L E S T A R P S E S S E E F L E E E P E Q R -

Fragmentation sites (b-ions in blue, y-ions in red):

- b<sub>2</sub> (L-E)
- b<sub>3</sub> (L-E-S)
- b<sub>6</sub> (A-R)
- b<sub>8</sub>\* (S-E)
- b<sub>9</sub> (S-E-S)
- b<sub>12</sub> (S-E-E)
- b<sub>13</sub> (S-E-E-F)
- b<sub>14</sub> (S-E-E-F-L)
- b<sub>15</sub>\* (S-E-E-F-L-E)
- y<sub>1</sub> (R)
- y<sub>2</sub> (R-E)
- y<sub>3</sub> (R-E-E)
- y<sub>4</sub> (R-E-E-P)
- y<sub>5</sub> (R-E-E-P-E)
- y<sub>6</sub> (R-E-E-P-E-E)
- y<sub>7</sub> (R-E-E-P-E-E-E)
- y<sub>8</sub> (R-E-E-P-E-E-E-F)
- y<sub>9</sub> (R-E-E-P-E-E-E-F-L)
- y<sub>10</sub> (R-E-E-P-E-E-E-F-L-E)
- y<sub>20</sub>\* (R-E-E-P-E-E-E-F-L-E-E)
- y<sub>20</sub>\* (R-E-E-P-E-E-E-F-L-E-E-Q)

Raw file: 20171215\_MaS\_33SR\_LMH\_phospho2\_03  
 Scan: 12804 Method: FTMS; HCD Score: 125.73 m/z: 804.81 Gene names: BIVM-ERCC5;ERCC5

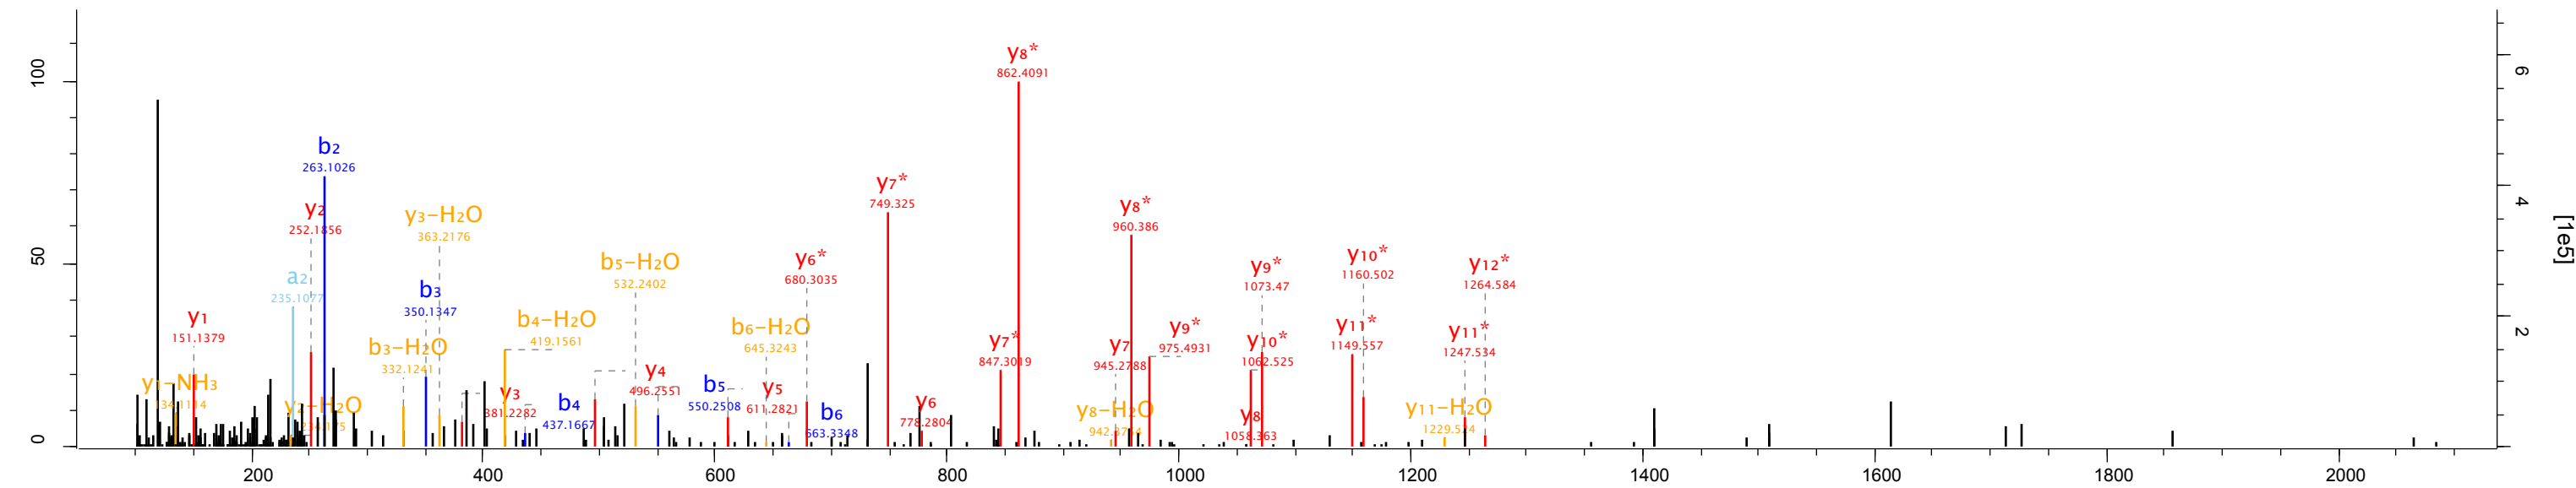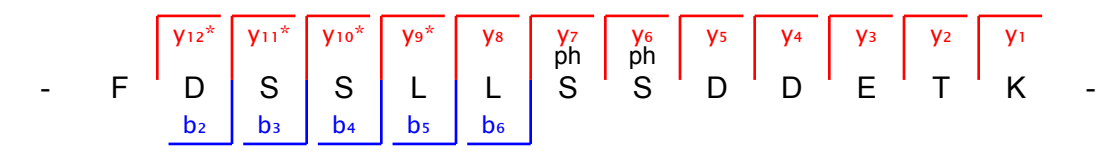



Raw file: 20171215\_MaS\_33SR\_LMH\_phospho2\_03  
 Scan: 13014 Method: FTMS; HCD Score: 76.86 m/z: 1145 Gene names: FAM114A1

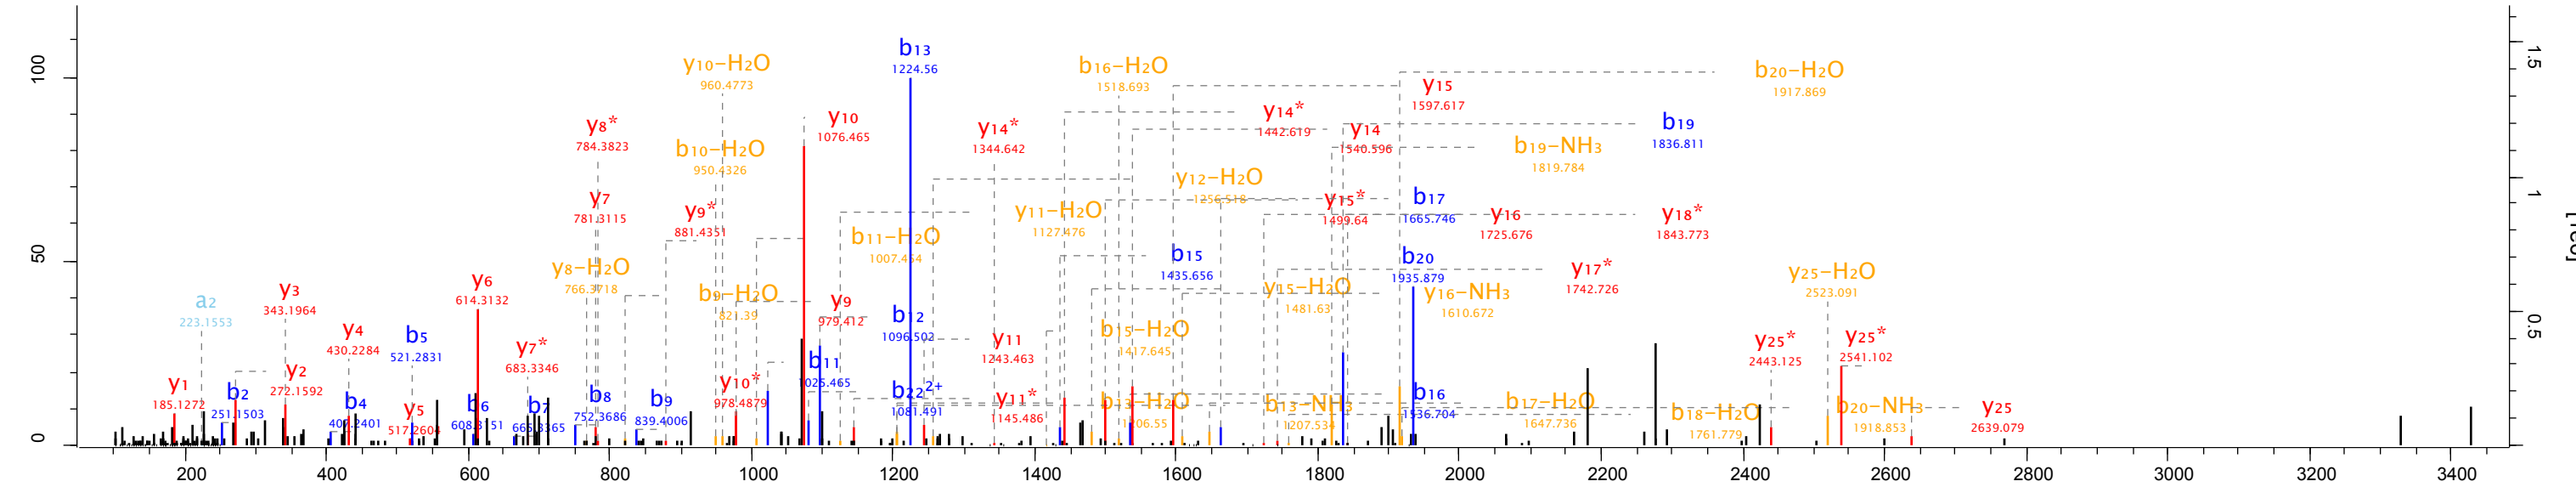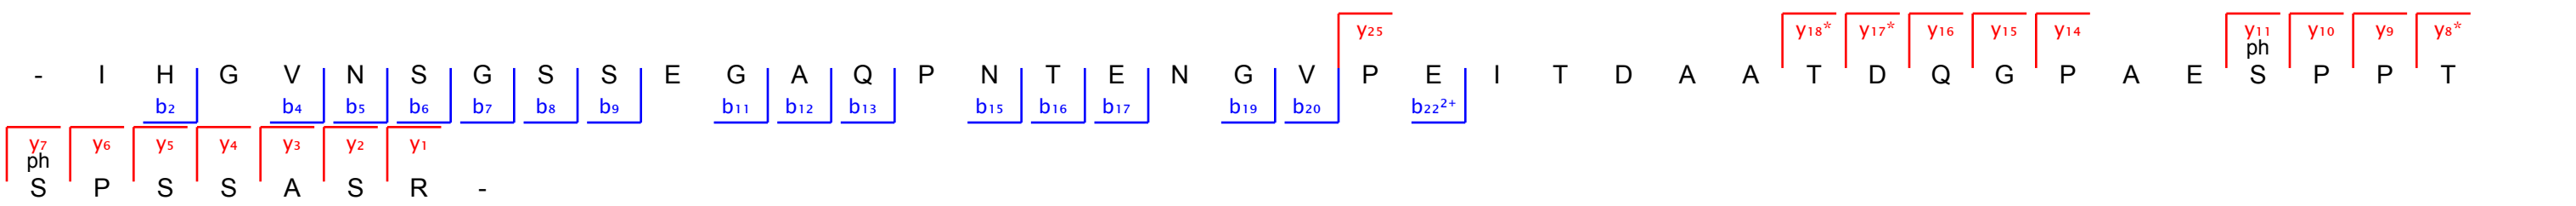

Raw file 20171215\_MaS\_33SR\_LMH\_phospho2\_03 Scan 13314 Method FTMS; HCD Score 84.68 m/z 1173.47 Gene names KIDINS220

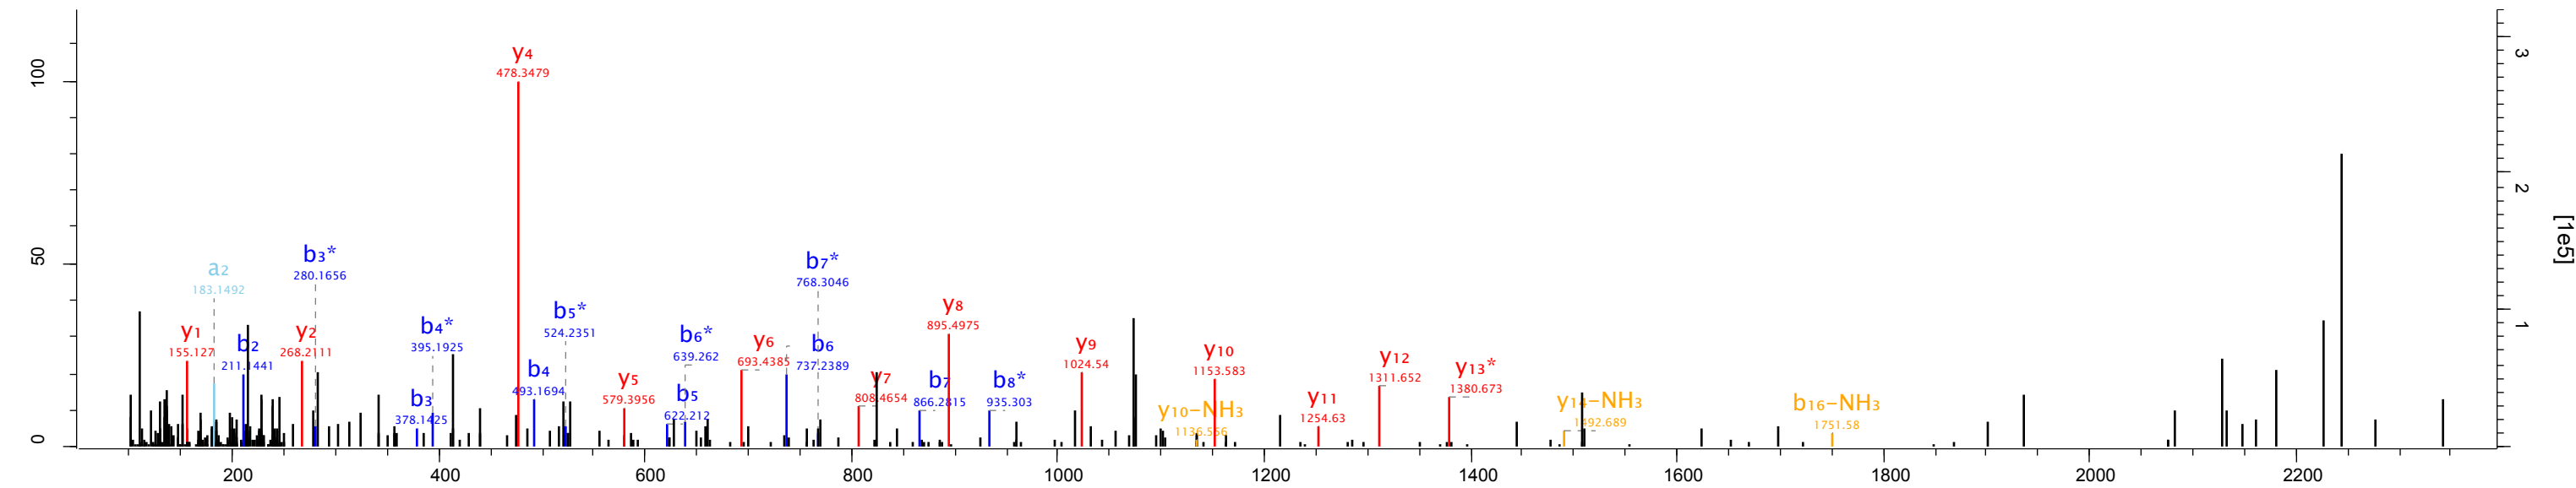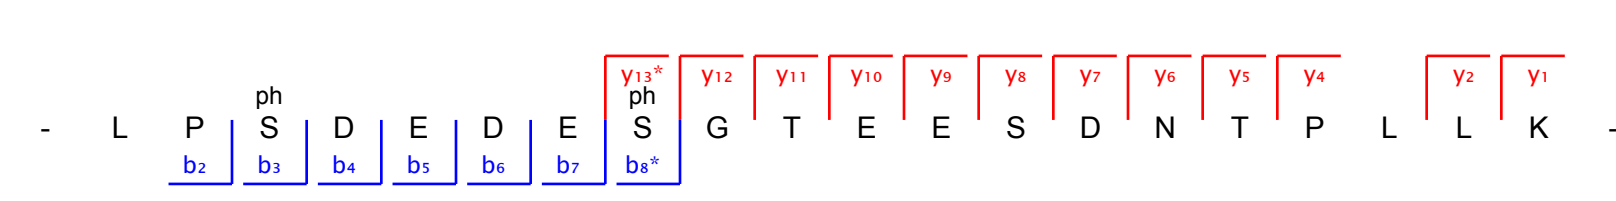

Raw file 20171215\_MaS\_33SR\_LMH\_phospho2\_03 Scan 13374 Method FTMS; HCD Score 137.5 m/z 835.35 Gene names USP20

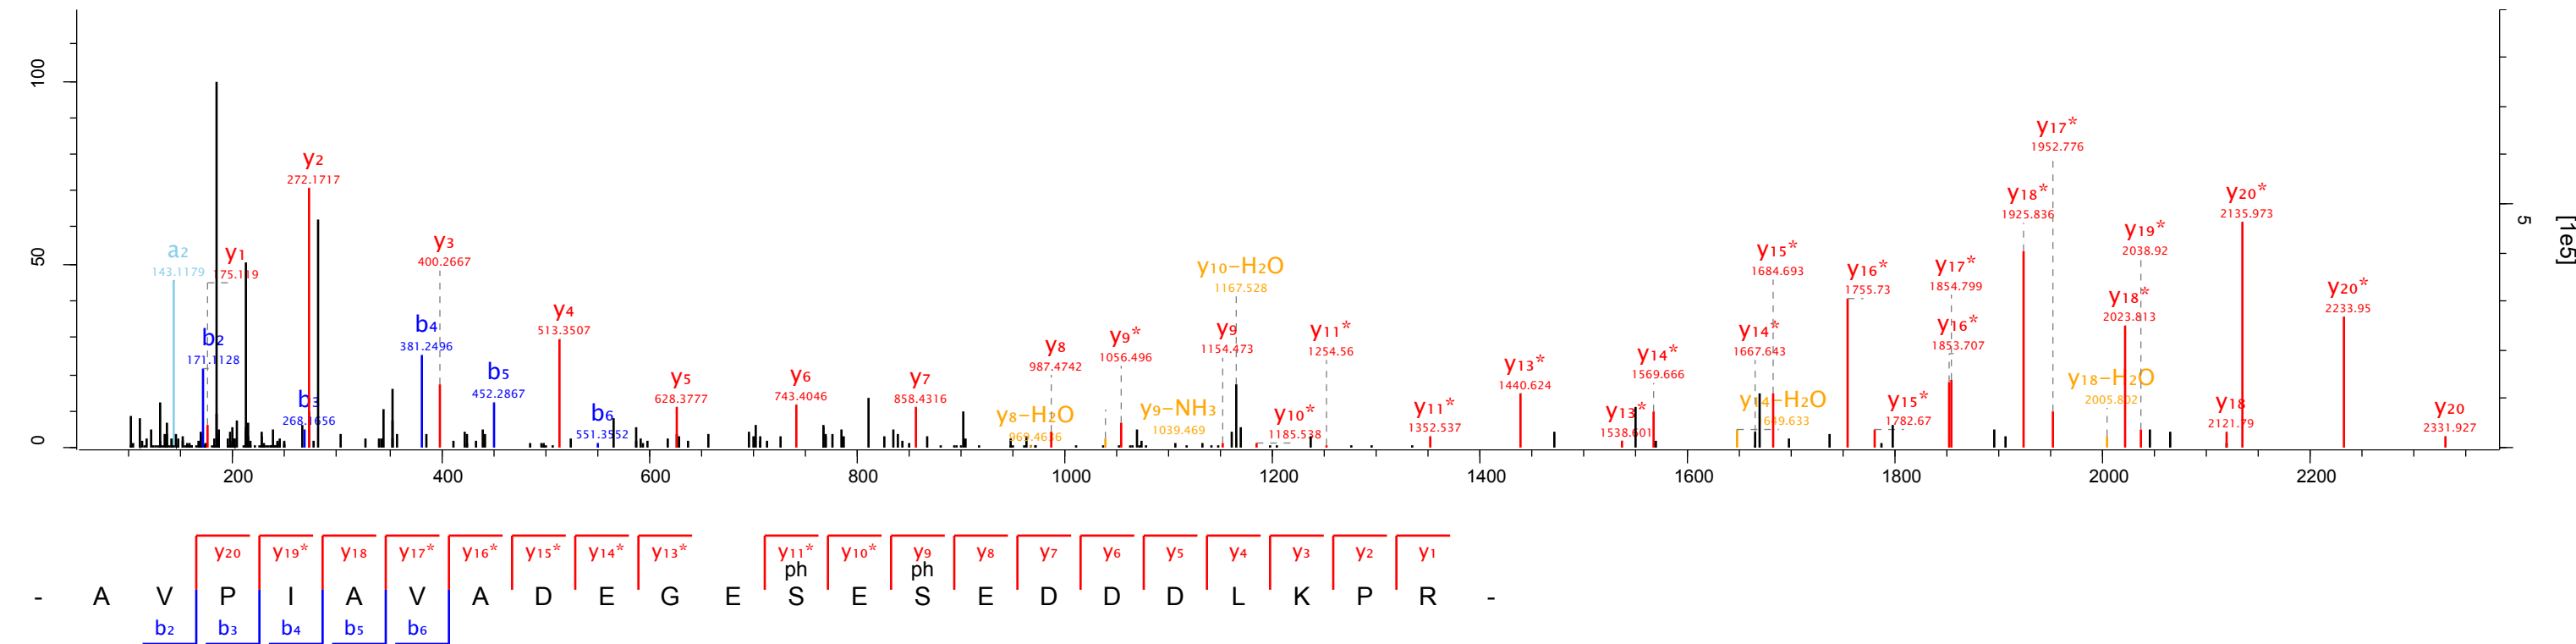

Raw file 20171215\_MaS\_33SR\_LMH\_phospho2\_03 Scan 13644 Method FTMS; HCD Score 191.43 m/z 752.31 Gene names EPHA2

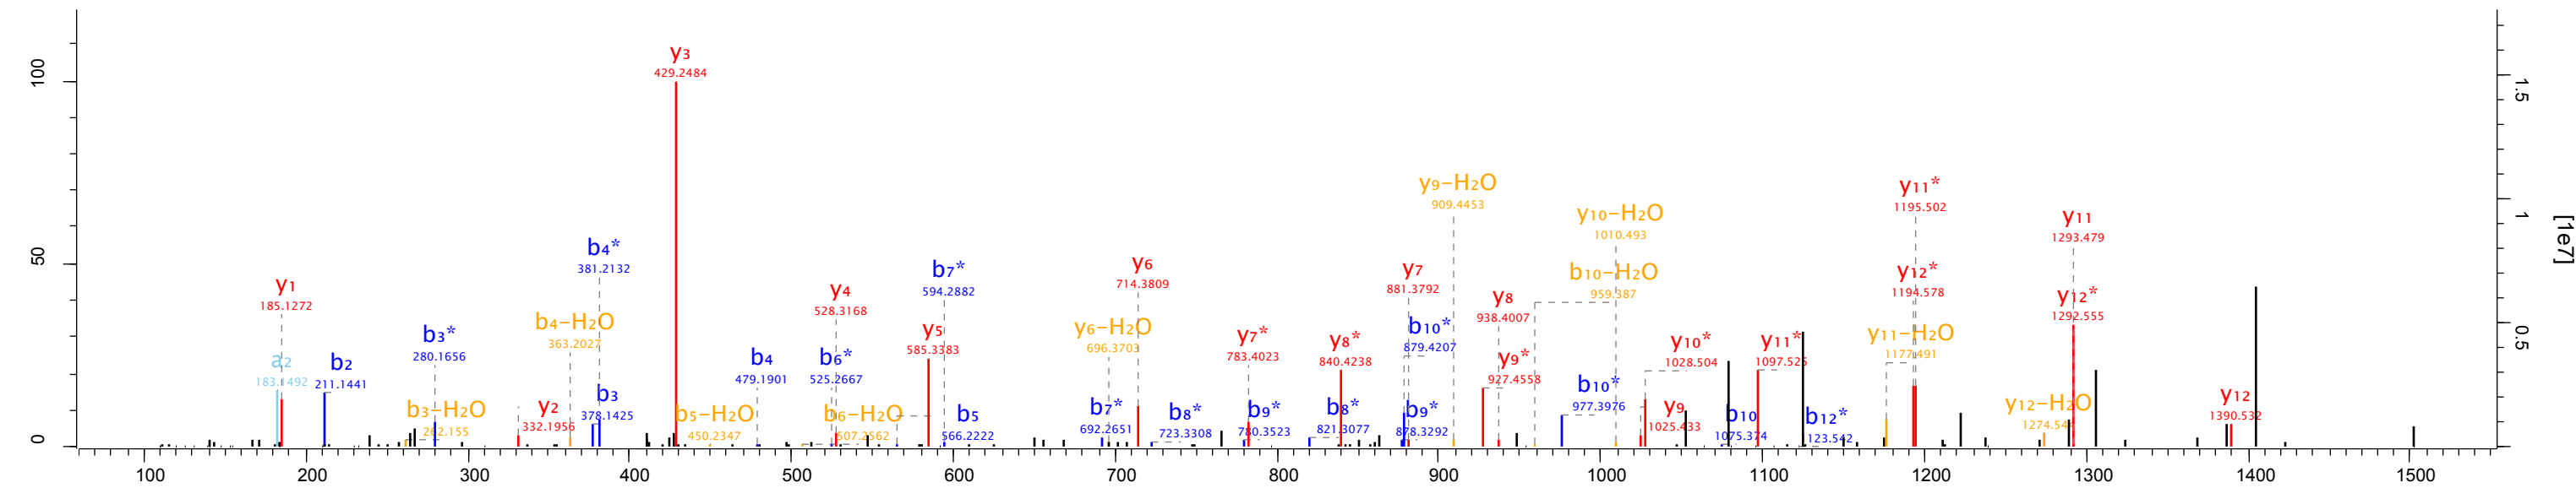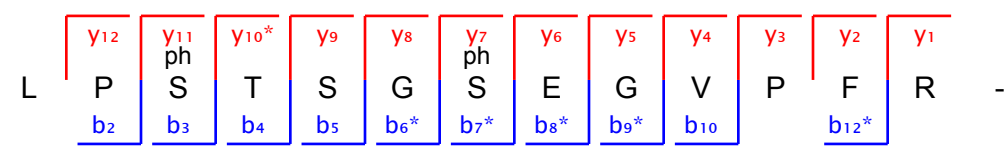

Raw file

20171215\_MaS\_33SR\_LMH\_phospho2\_03

| Scan  | Method    | Score | m/z    | Gene names |
|-------|-----------|-------|--------|------------|
| 14064 | FTMS; HCD | 62.3  | 746.33 | ARHGEF11   |

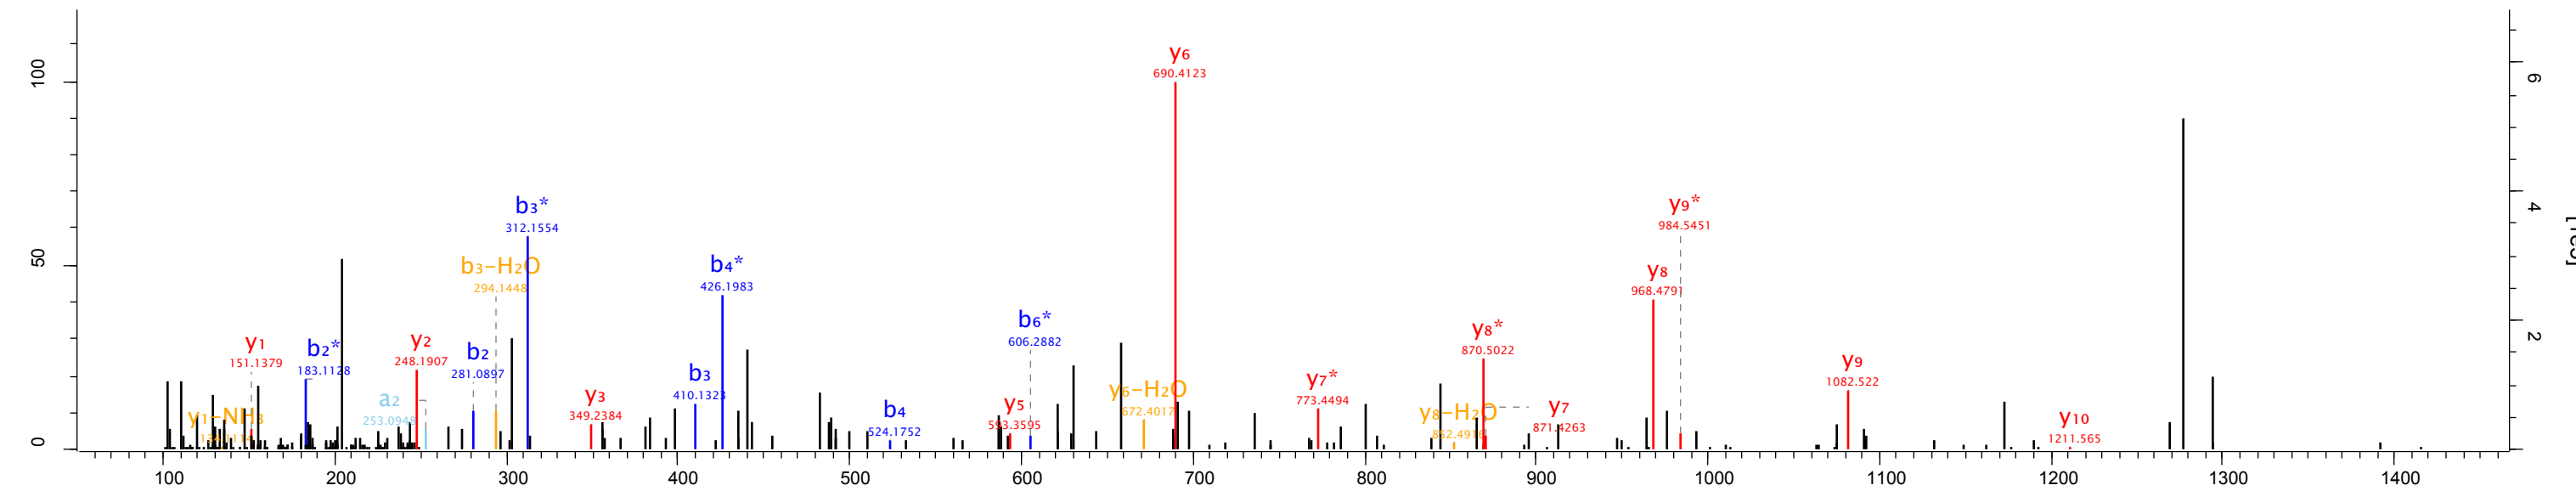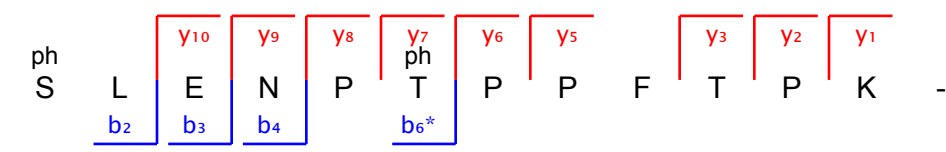

Raw file 20171215\_MaS\_33SR\_LMH\_phospho2\_03 Scan 14134 Method FTMS; HCD Score 133.16 m/z 743.33 Gene names PLEKHA4

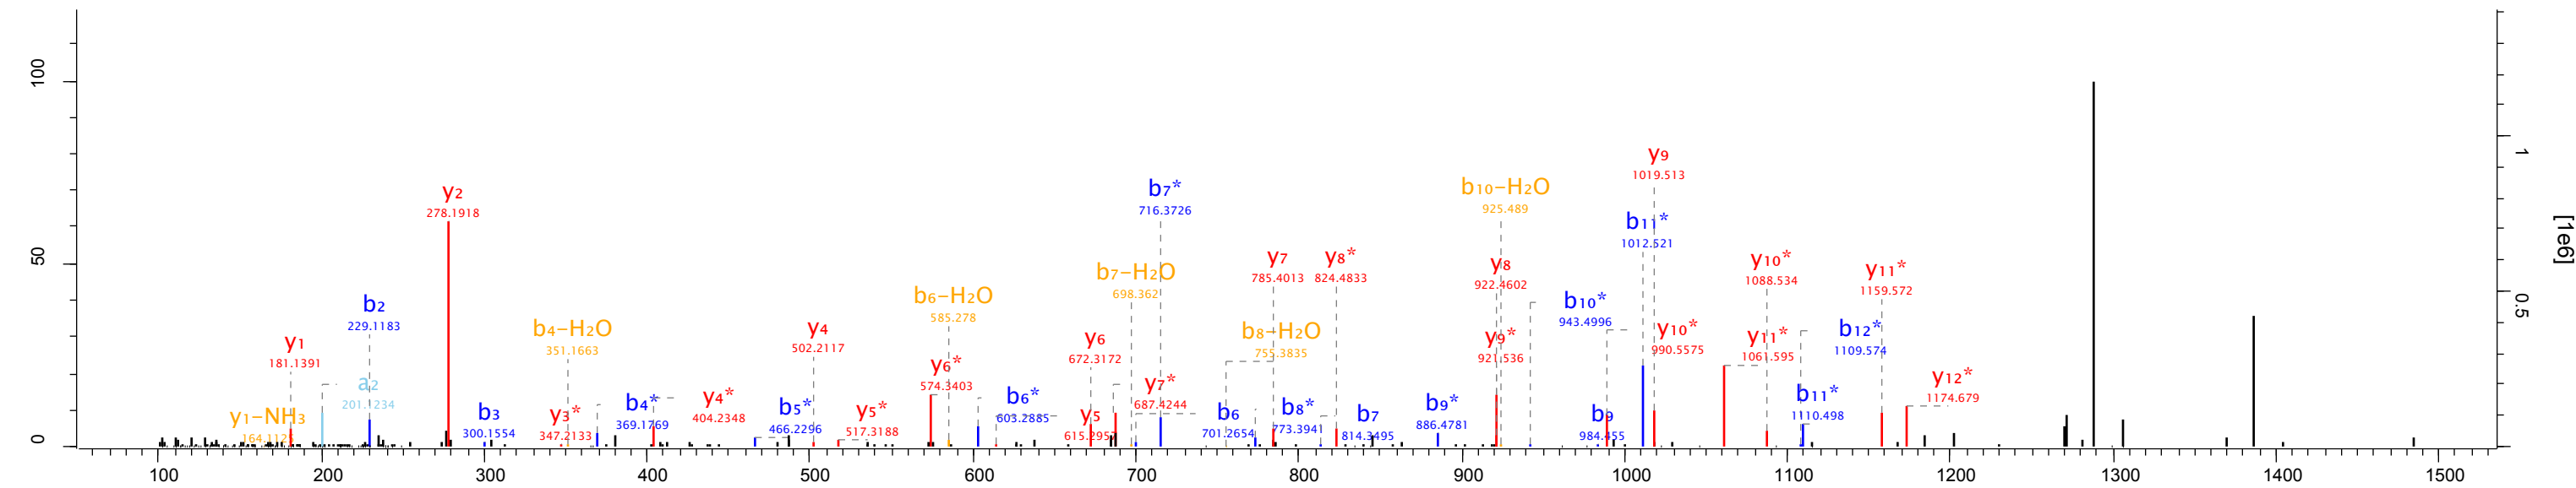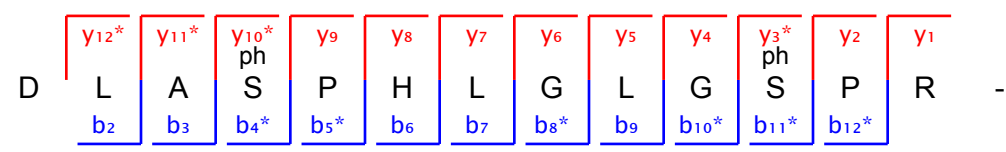

Raw file 20171215\_MaS\_33SR\_LMH\_phospho2\_03 Scan 14504 Method FTMS; HCD Score 267.83 m/z 1191.48 Gene names ADNP

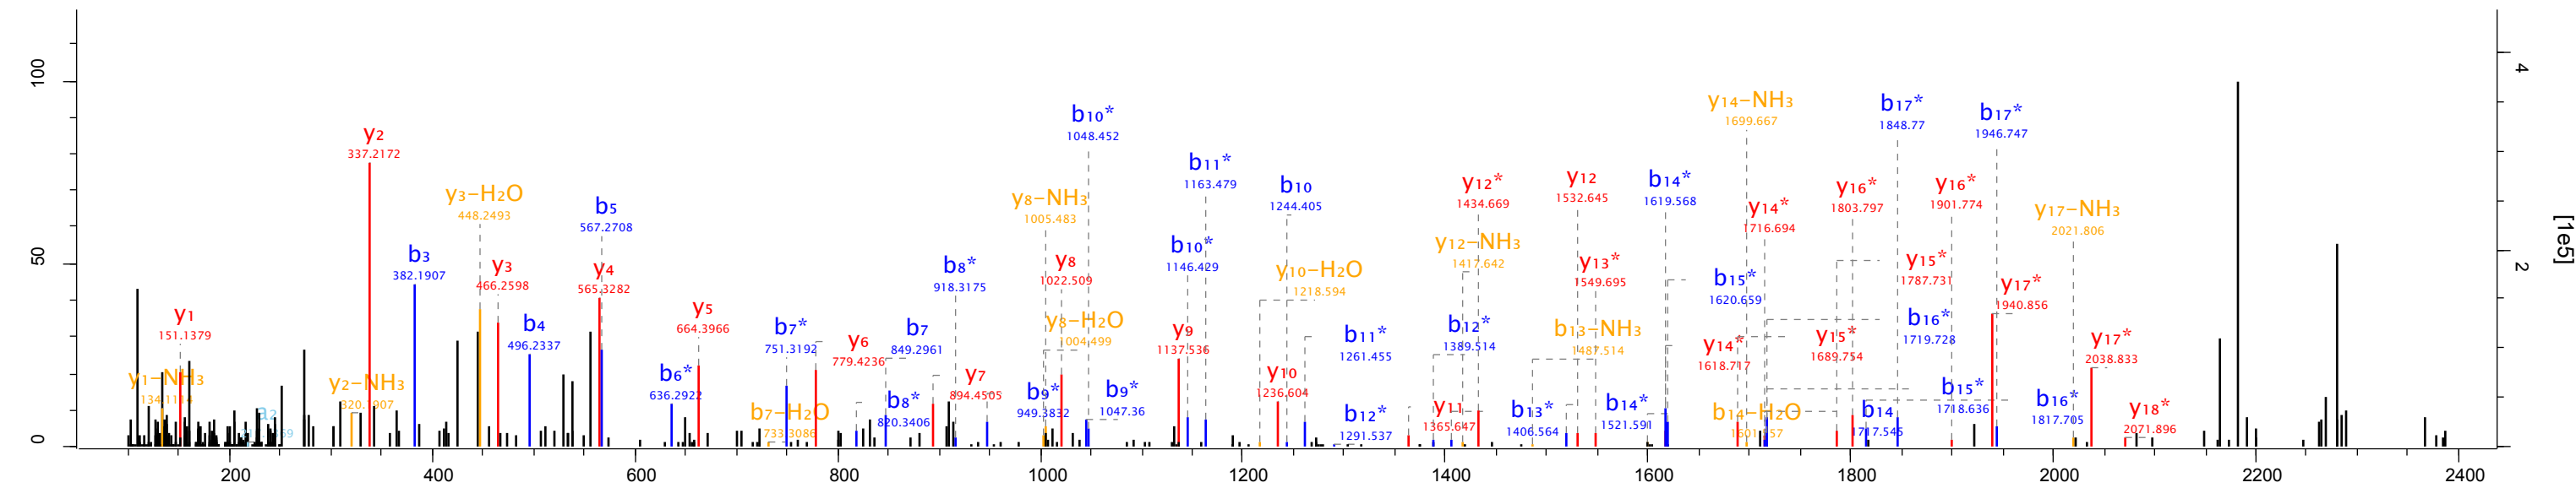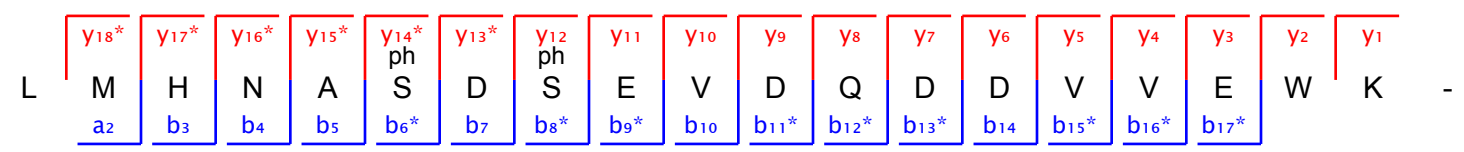

Raw file 20171215\_MaS\_33SR\_LMH\_phospho2\_03 Scan 14634 Method FTMS; HCD Score 76.94 m/z 881.36 Gene names APC

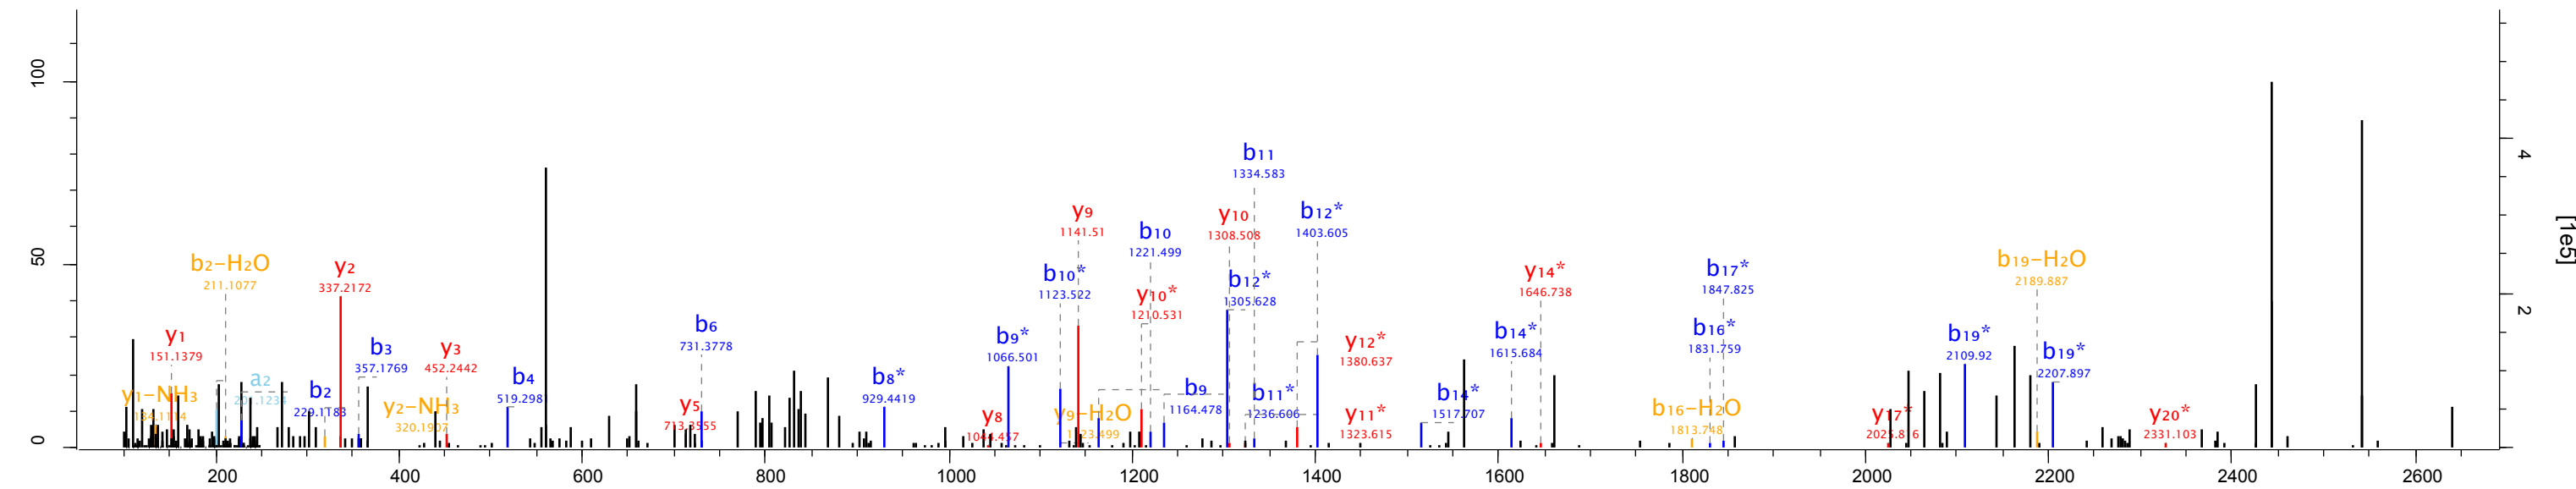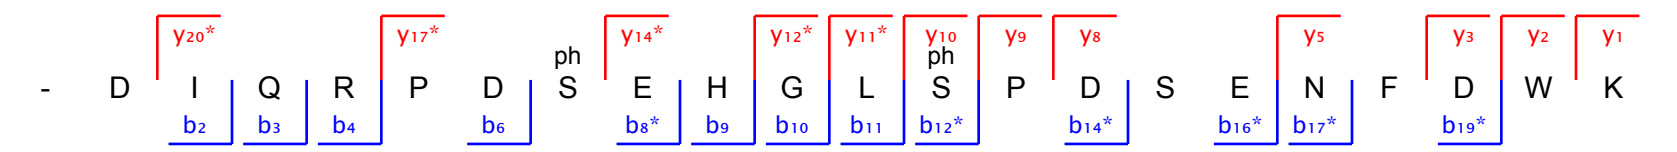



Raw file 20171215\_MaS\_33SR\_LMH\_phospho2\_03 Scan 14964 Method FTMS; HCD Score 46.15 m/z 819.74 Gene names SLC9A3R1

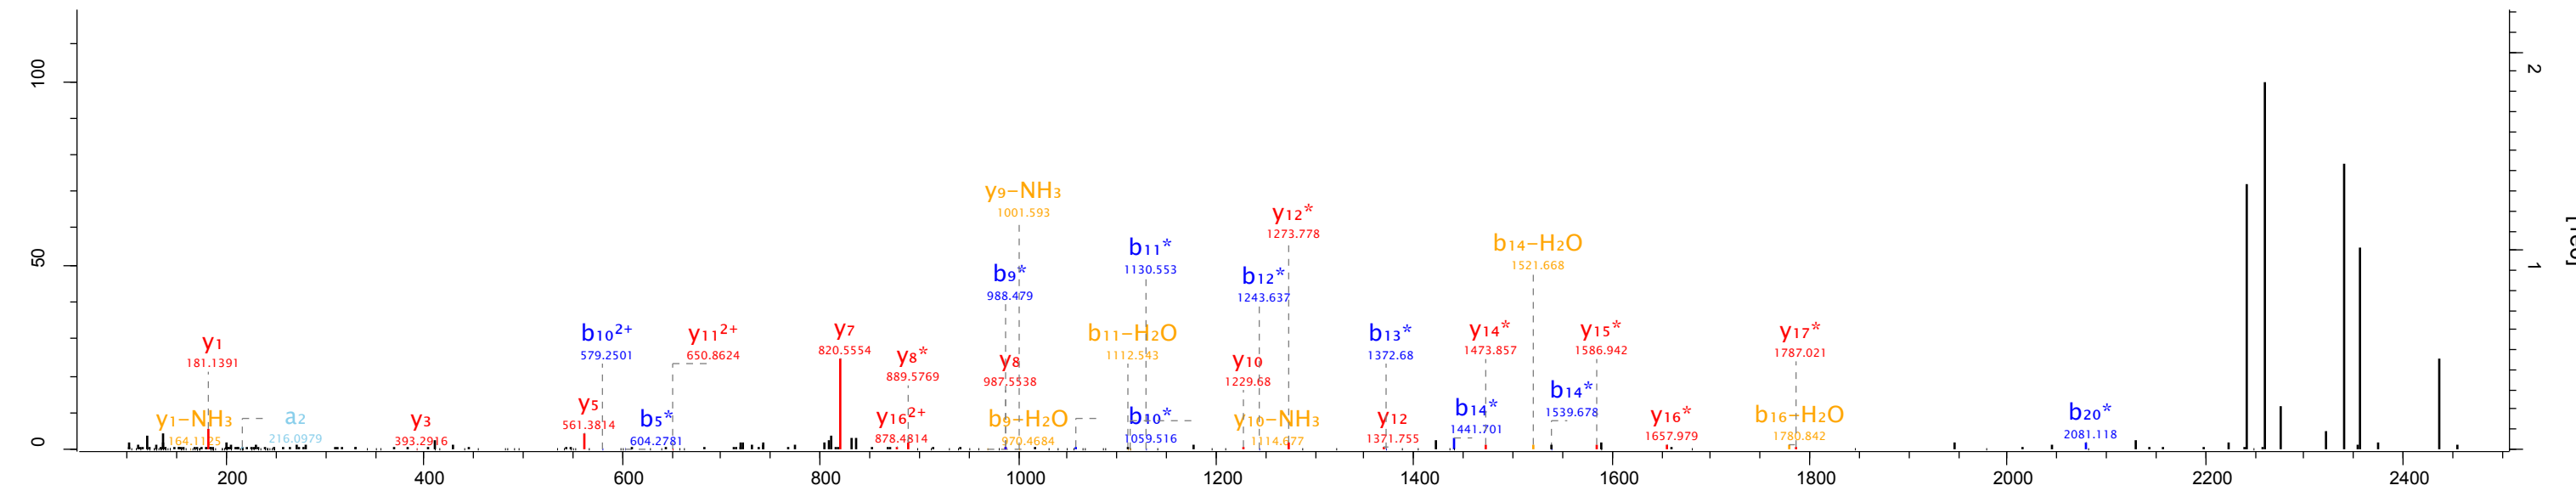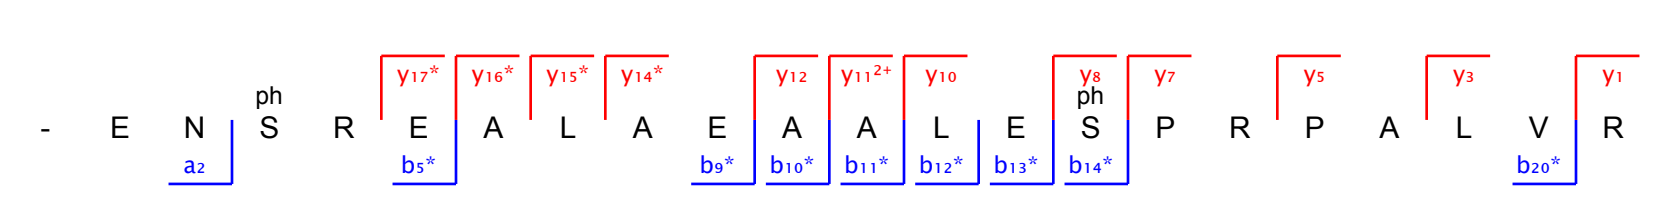

Raw file: 20171215\_MaS\_33SR\_LMH\_phospho2\_03  
 Scan: 15054 Method: FTMS; HCD Score: 226.74 m/z: 1105.98 Gene names: AHNAK

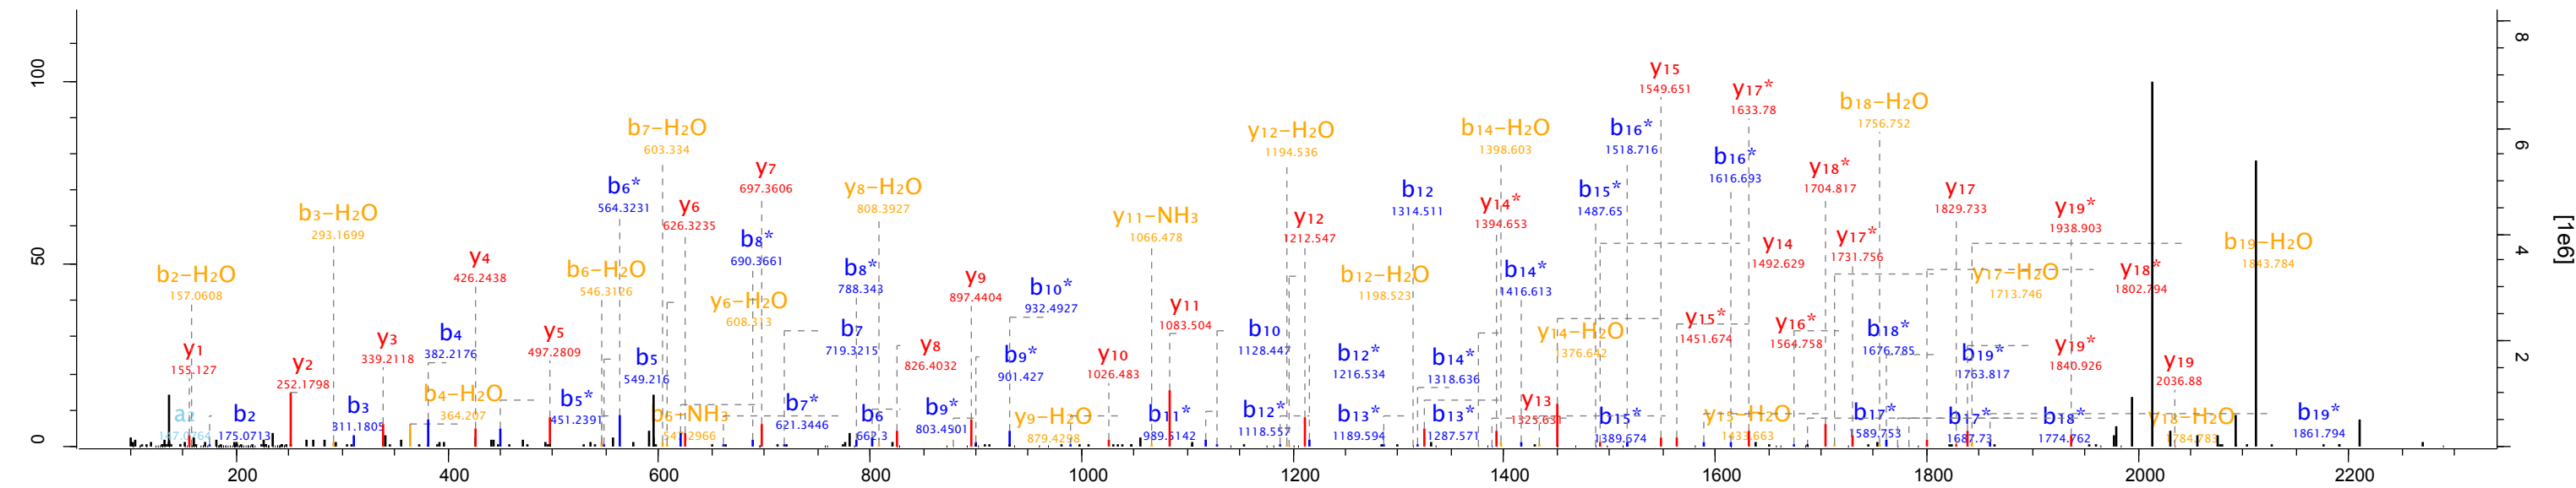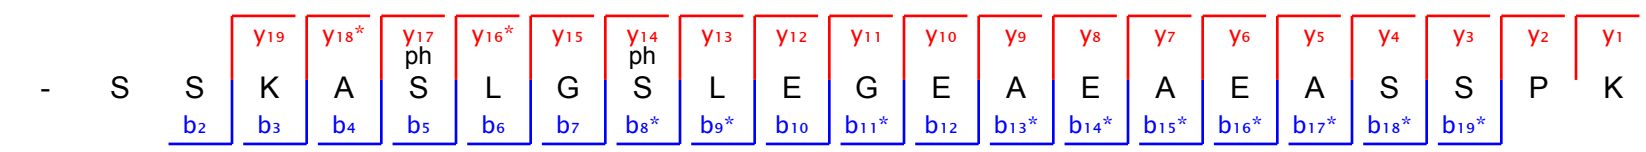

Raw file 20171215\_MaS\_33SR\_LMH\_phospho2\_03 Scan 15124 Method FTMS; HCD Score 204.35 m/z 748.34 Gene names OSBPL3

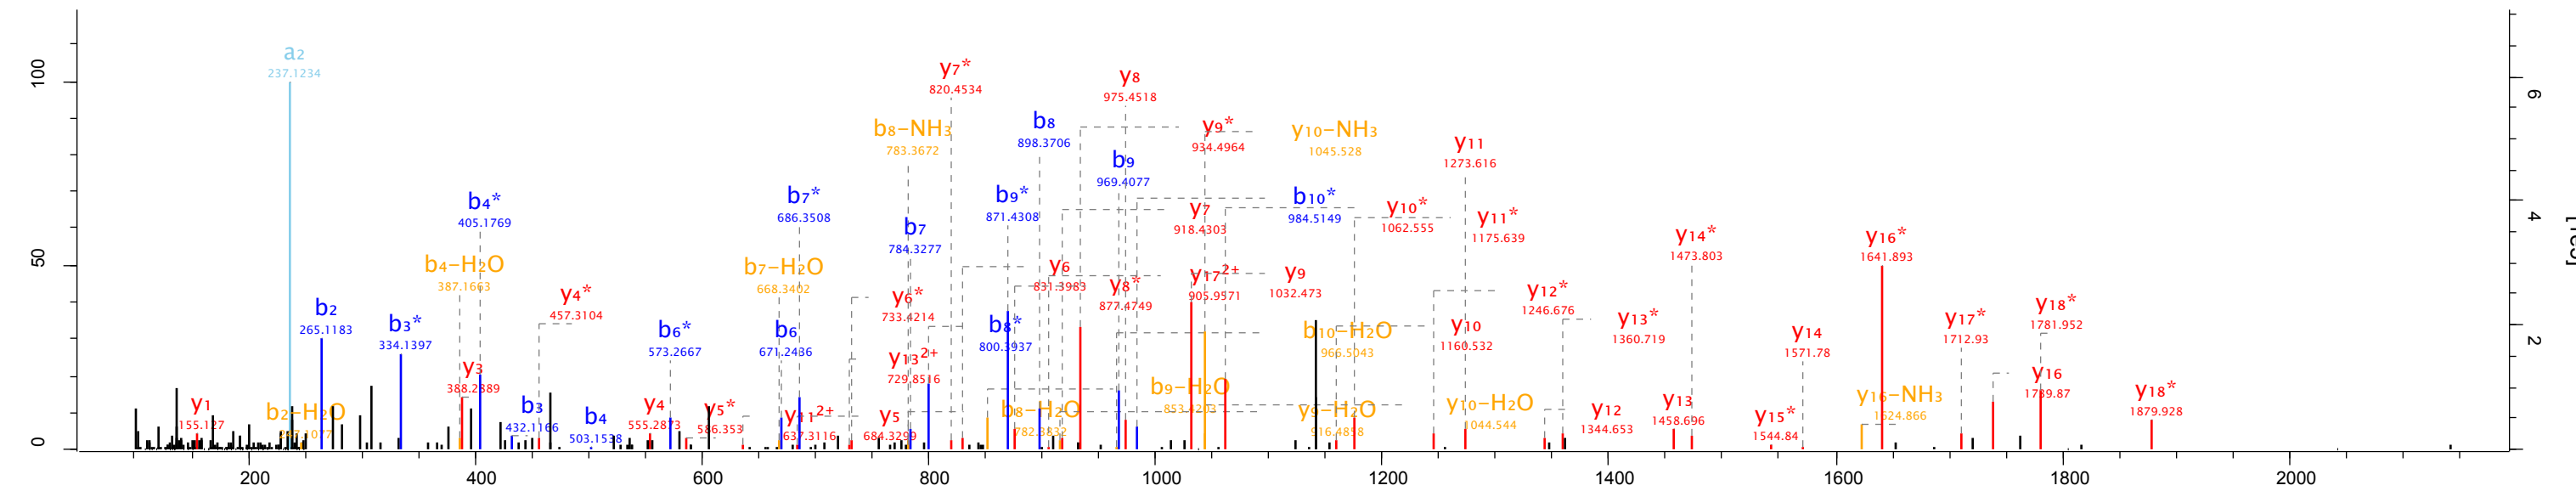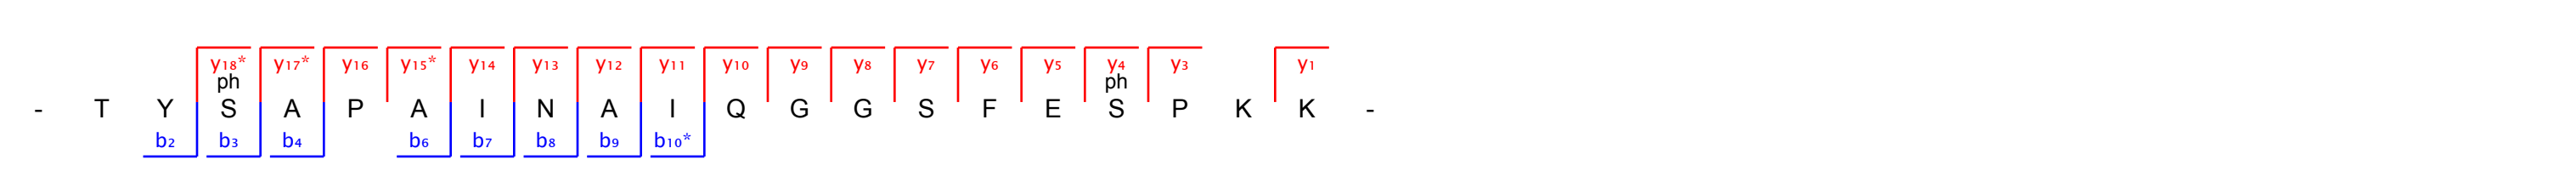



Raw file 20171215\_MaS\_33SR\_LMH\_phospho2\_03 Scan 15424 Method FTMS; HCD Score 166.52 m/z 740.31 Gene names LYSMD1

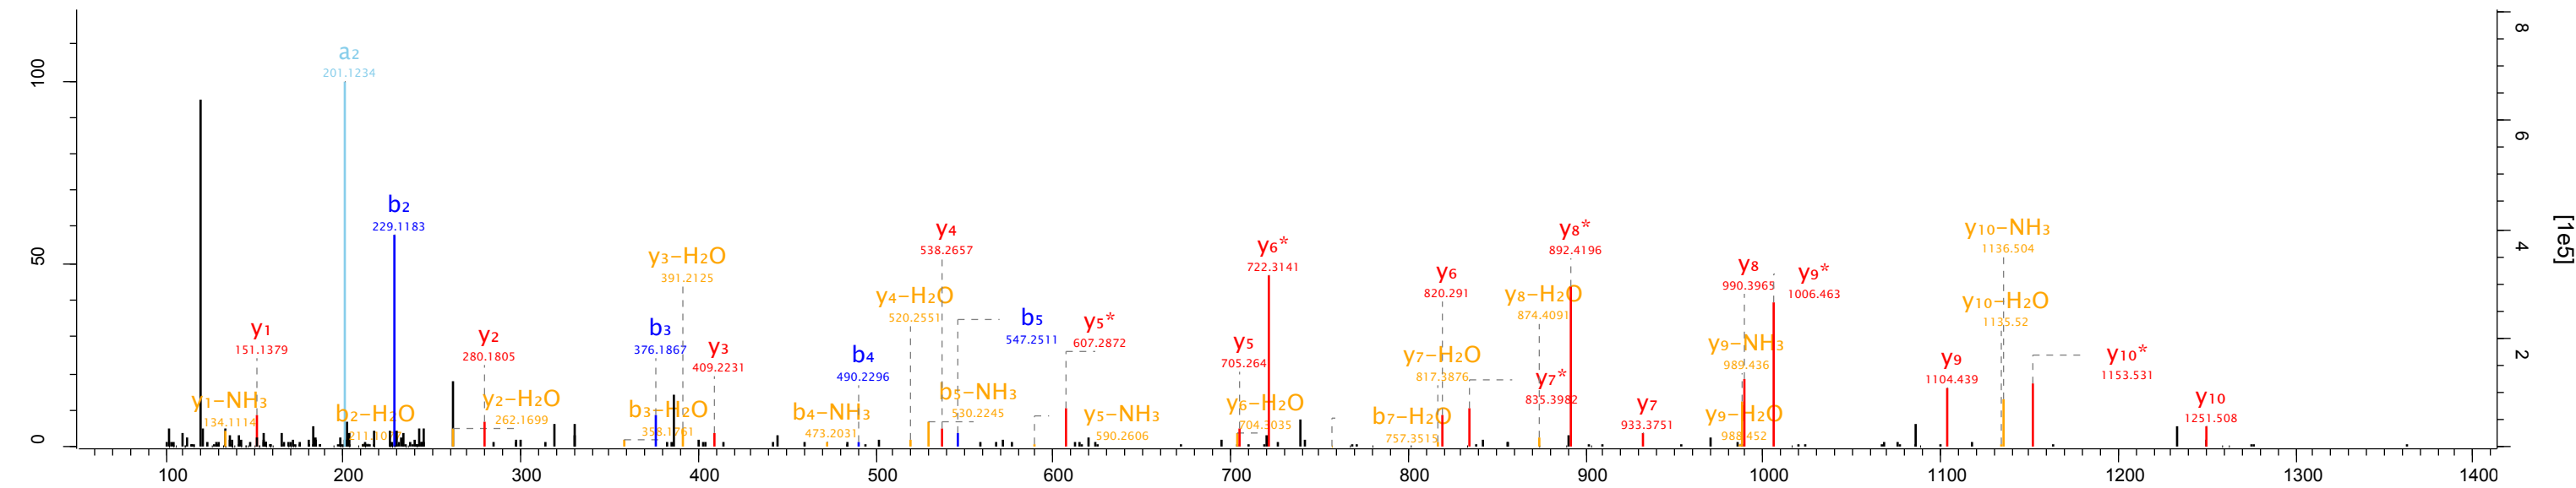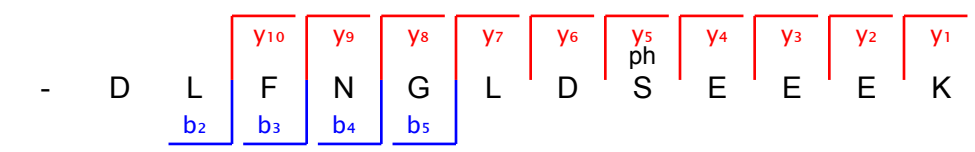

Raw file 20171215\_MaS\_33SR\_LMH\_phospho2\_03 Scan 15574 Method FTMS; HCD Score 112.34 m/z 682.96 Gene names NCBP1

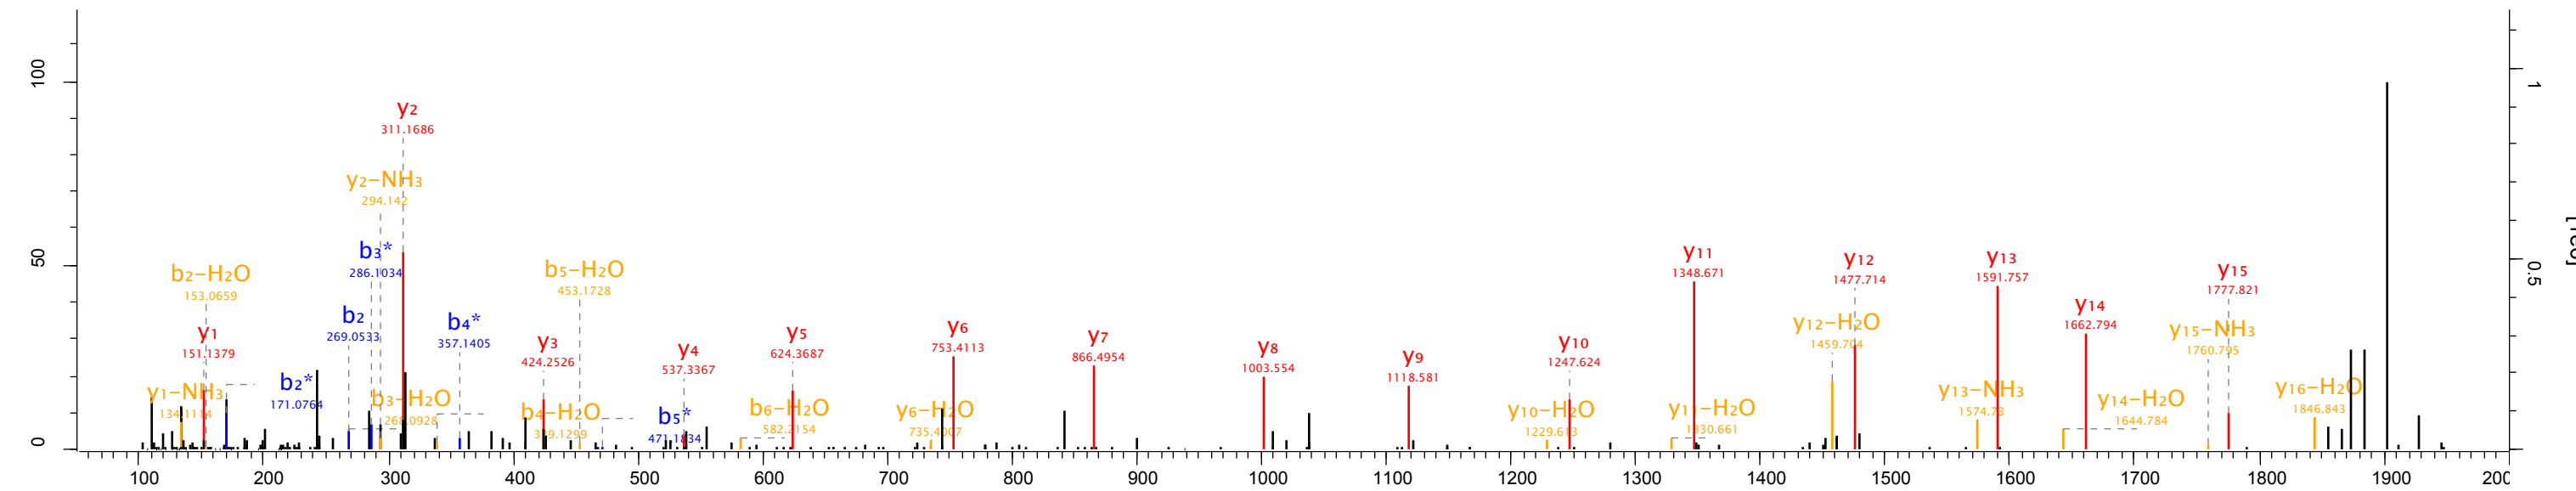

ph T S D A N E T E D H L E S L I C K -

Fragmentation mapping: b2 (S), b3\* (D), b4\* (A), b5\* (N). y-ions (y1 to y16) are mapped to the corresponding amino acids in the sequence above.

Raw file 20171215\_MaS\_33SR\_LMH\_phospho2\_03 Scan 15894 Method FTMS; HCD Score 152.32 m/z 845.87 Gene names PRKD1;PRKD3

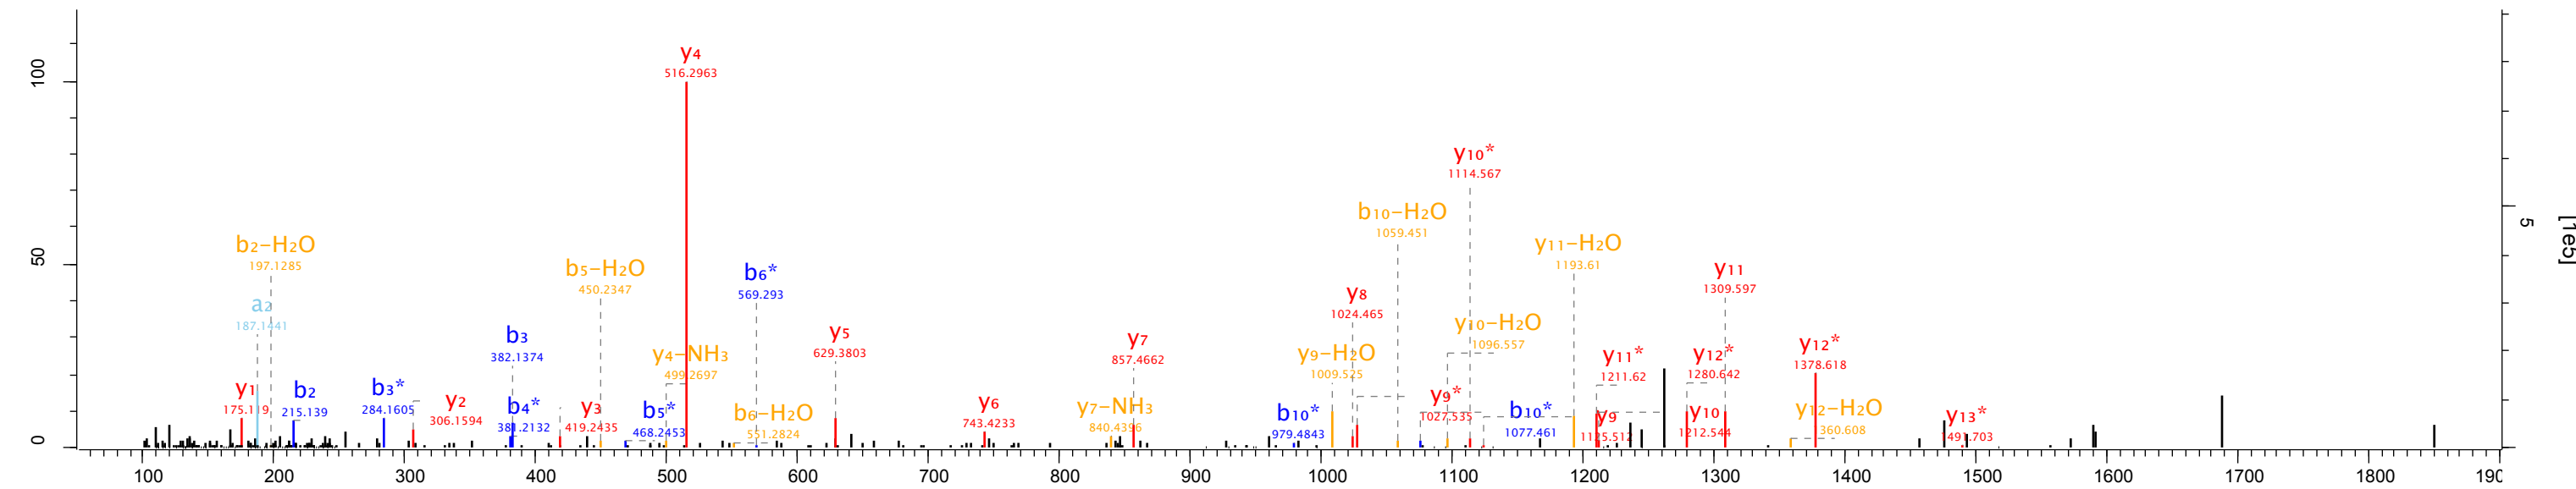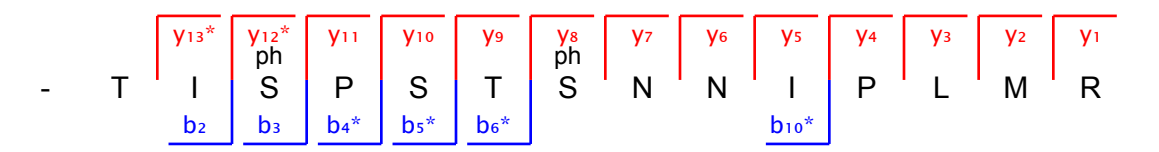

Raw file 20171215\_MaS\_33SR\_LMH\_phospho2\_03 Scan 15984 Method FTMS; HCD Score 53.55 m/z 1273.44 Gene names PTGES3

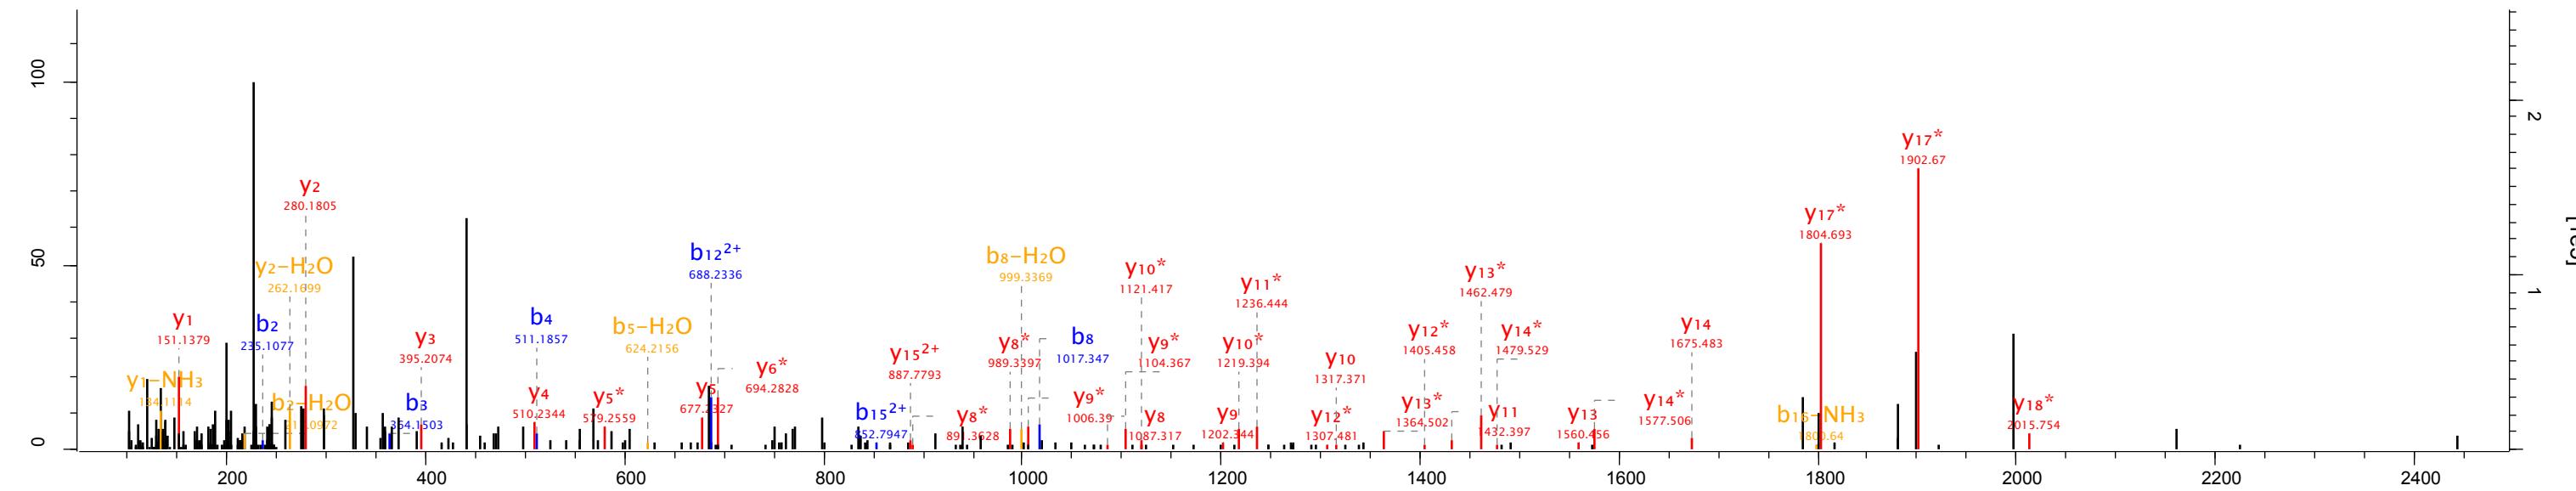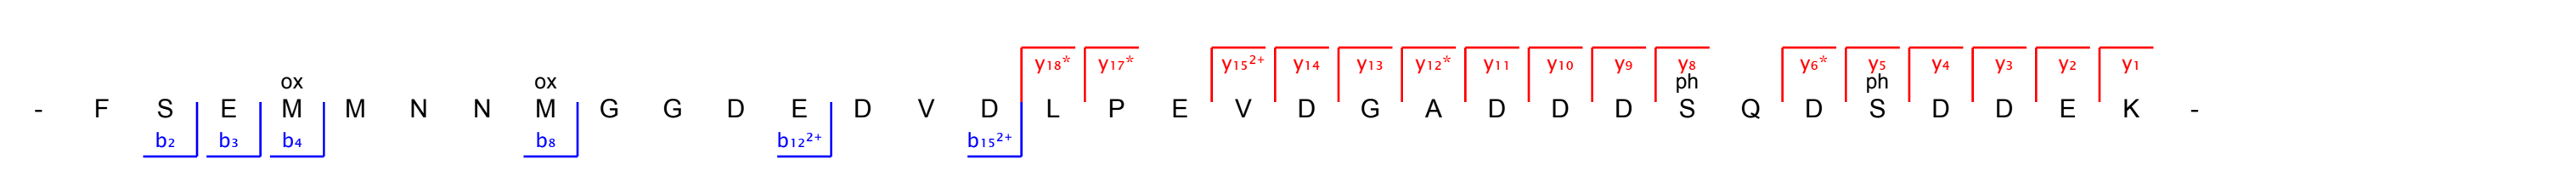



Raw file: 20171215\_MaS\_33SR\_LMH\_phospho2\_03  
 Scan: 16174 Method: FTMS; HCD Score: 205.24 m/z: 970.43 Gene names: ZFYVE20

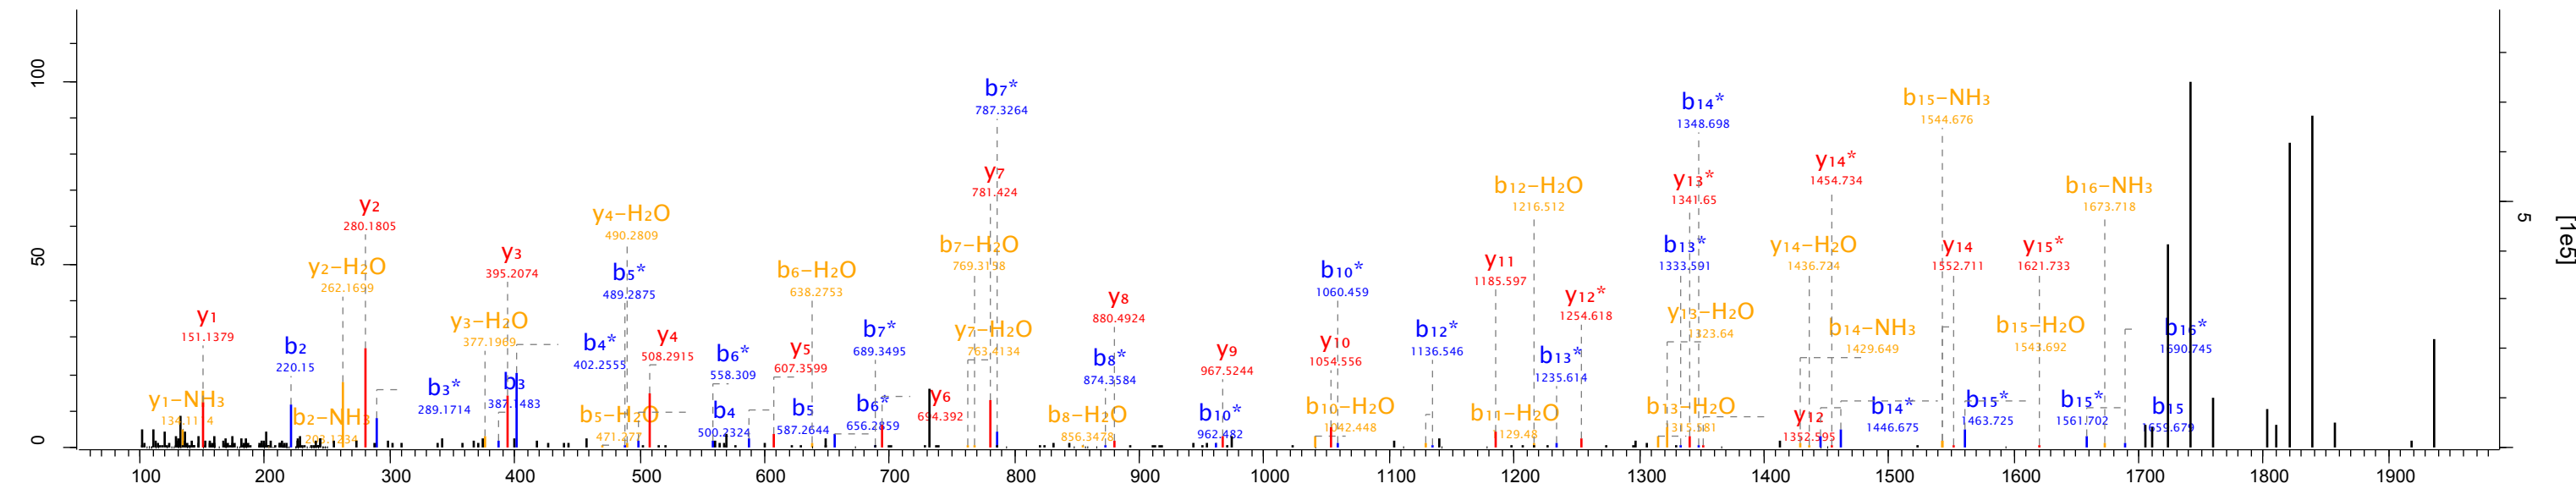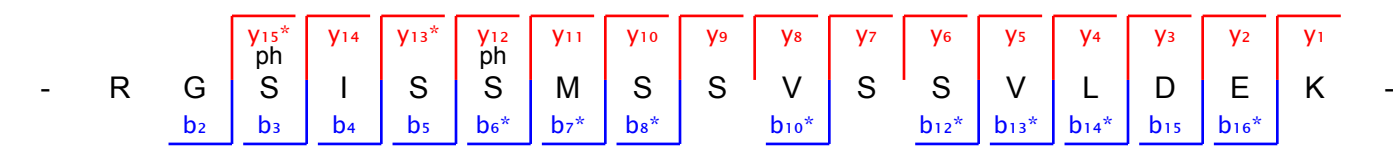

Raw file 20171215\_MaS\_33SR\_LMH\_phospho2\_03 Scan 16304 Method FTMS; HCD Score 153.4 m/z 1261.21 Gene names SMARCD1

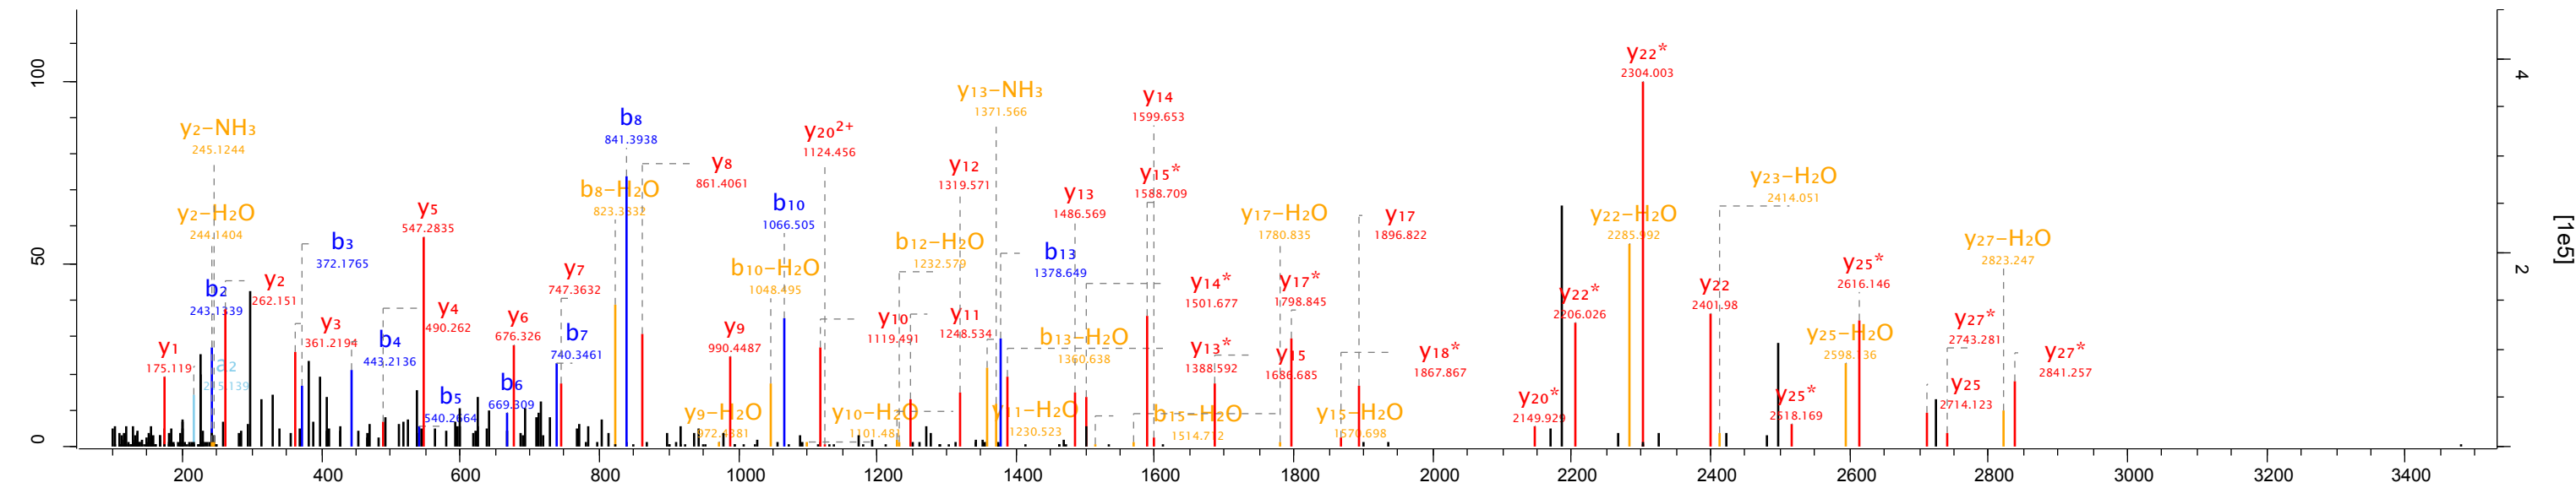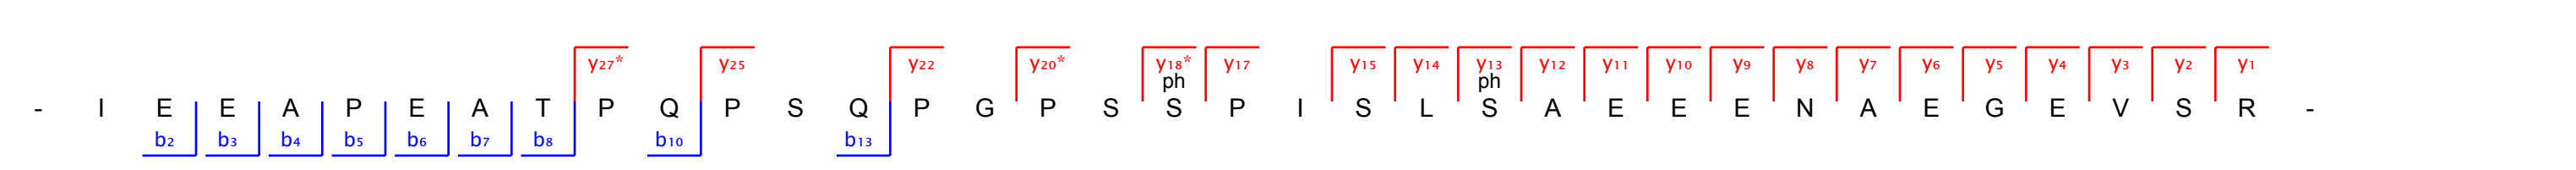

20171215\_MaS\_33SR\_LMH\_phospho2\_03

16544 FTMS; HCD 49.52 843.37 BRSK1

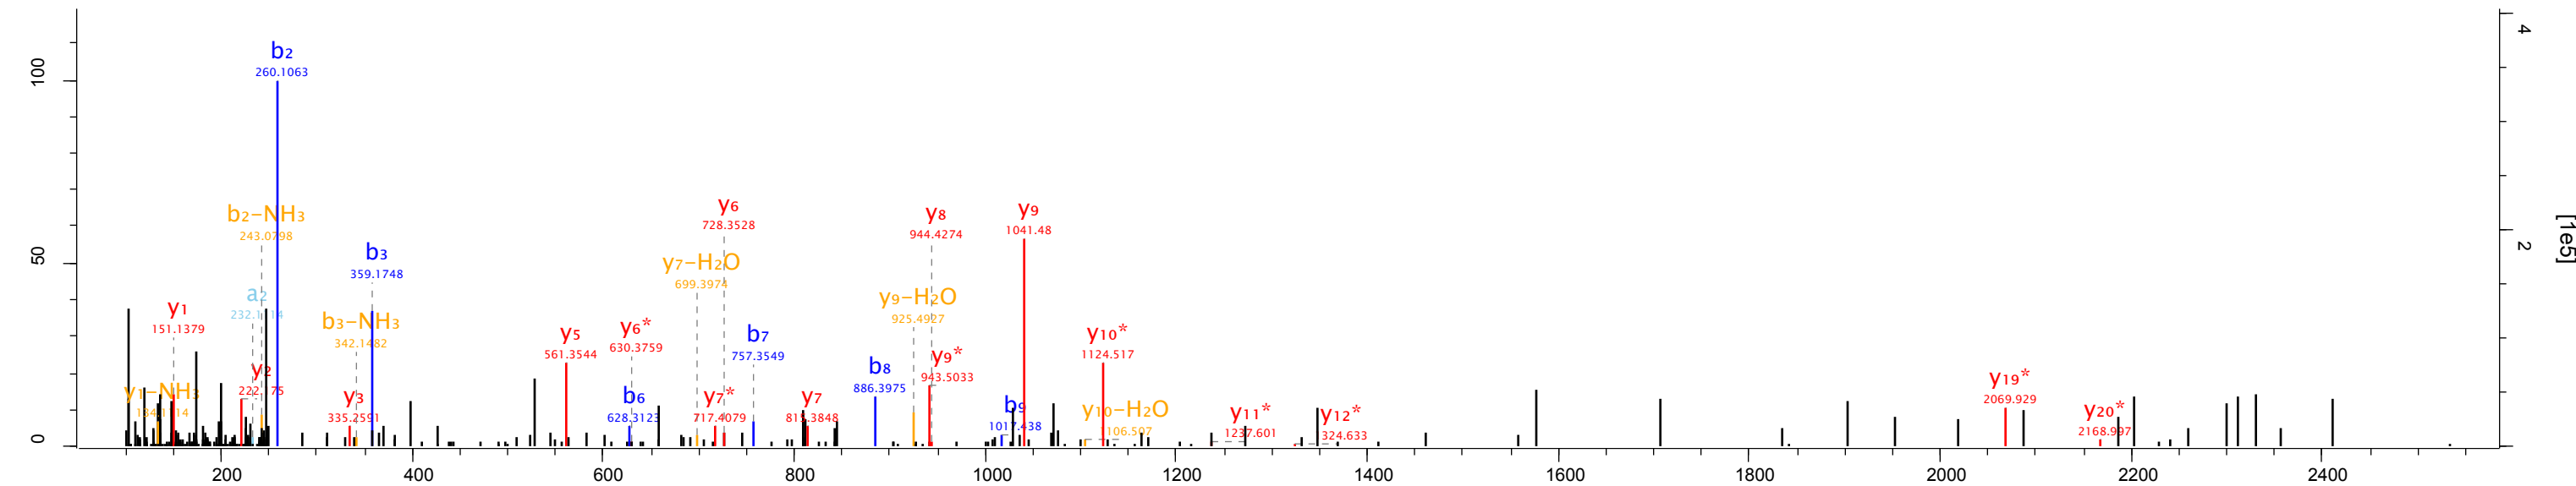

- M Q V P T A E E M S S L T P E S S P E L A K -

Fragmentation sites are indicated by brackets below the sequence:

- Blue brackets (b-ions): M-Q, Q-V, V-P, T-A, A-E, E-E, E-M, M-S.
- Red brackets (y-ions): V-P, P-T, T-S, S-L, L-T, T-P, P-E, E-S, S-S, S-P, P-E, E-L, L-A, A-K.

Raw file 20171215\_MaS\_33SR\_LMH\_phospho2\_03 Scan 16884 Method FTMS; HCD Score 151.71 m/z 1071.95 Gene names KIF21A

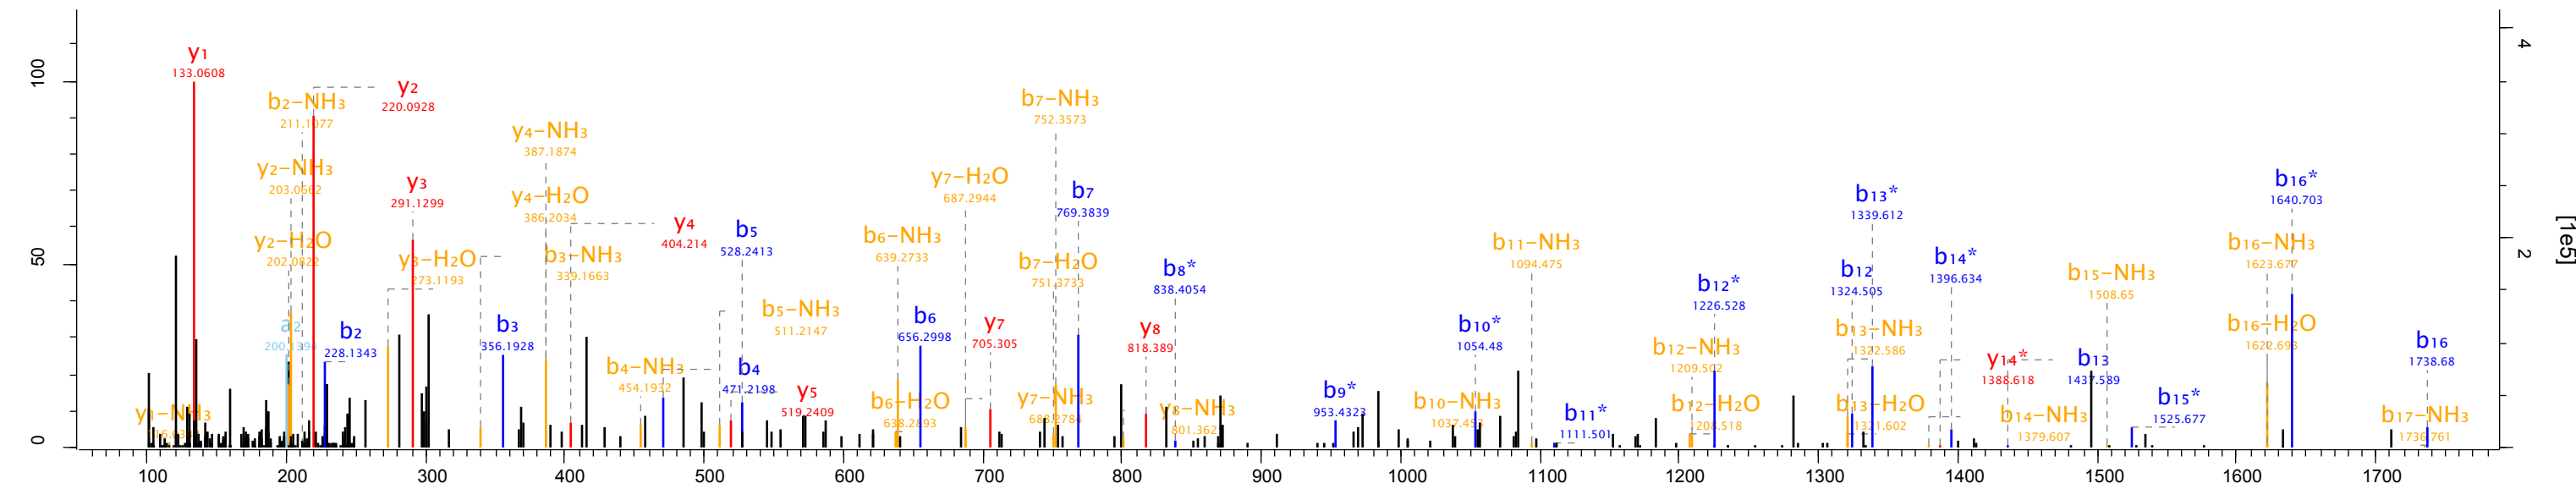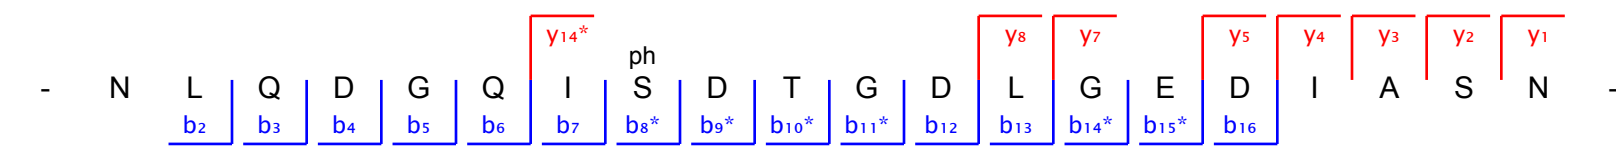

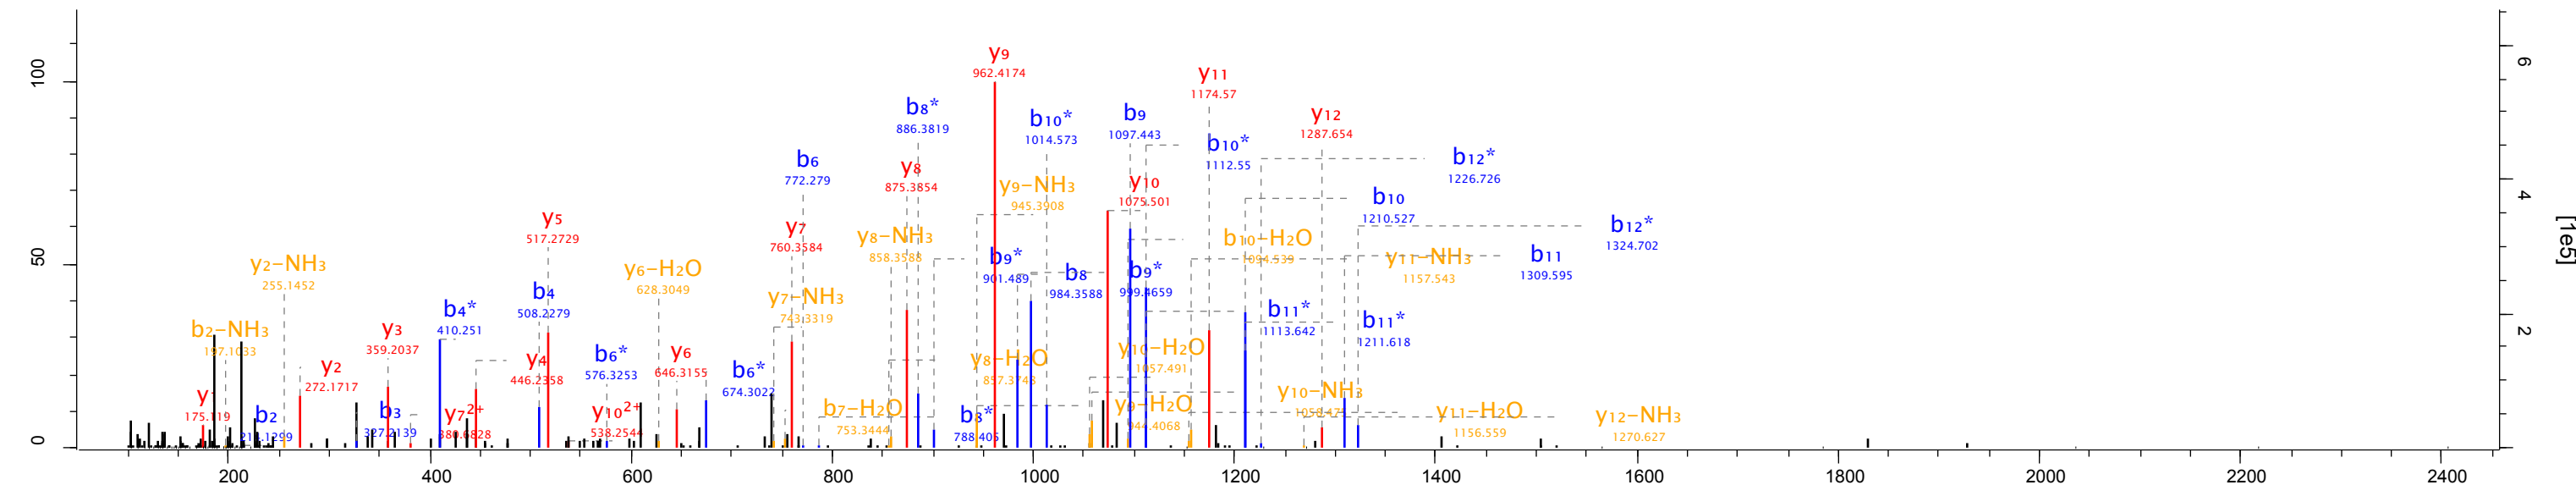

- G R L T P S P D I I V L S D N E A S S P R -

ph ph

b<sub>2</sub> b<sub>3</sub> b<sub>4</sub> b<sub>6</sub> b<sub>8</sub> b<sub>9</sub> b<sub>10</sub> b<sub>11</sub> b<sub>12</sub>\*

y<sub>12</sub> y<sub>11</sub> y<sub>10</sub> y<sub>9</sub> y<sub>8</sub> y<sub>7</sub> y<sub>6</sub> y<sub>5</sub> y<sub>4</sub> y<sub>3</sub> y<sub>2</sub> y<sub>1</sub>

20171215\_MaS\_33SR\_LMH\_phospho2\_03 17184 FTMS; HCD 177.48 878.9 EPS15

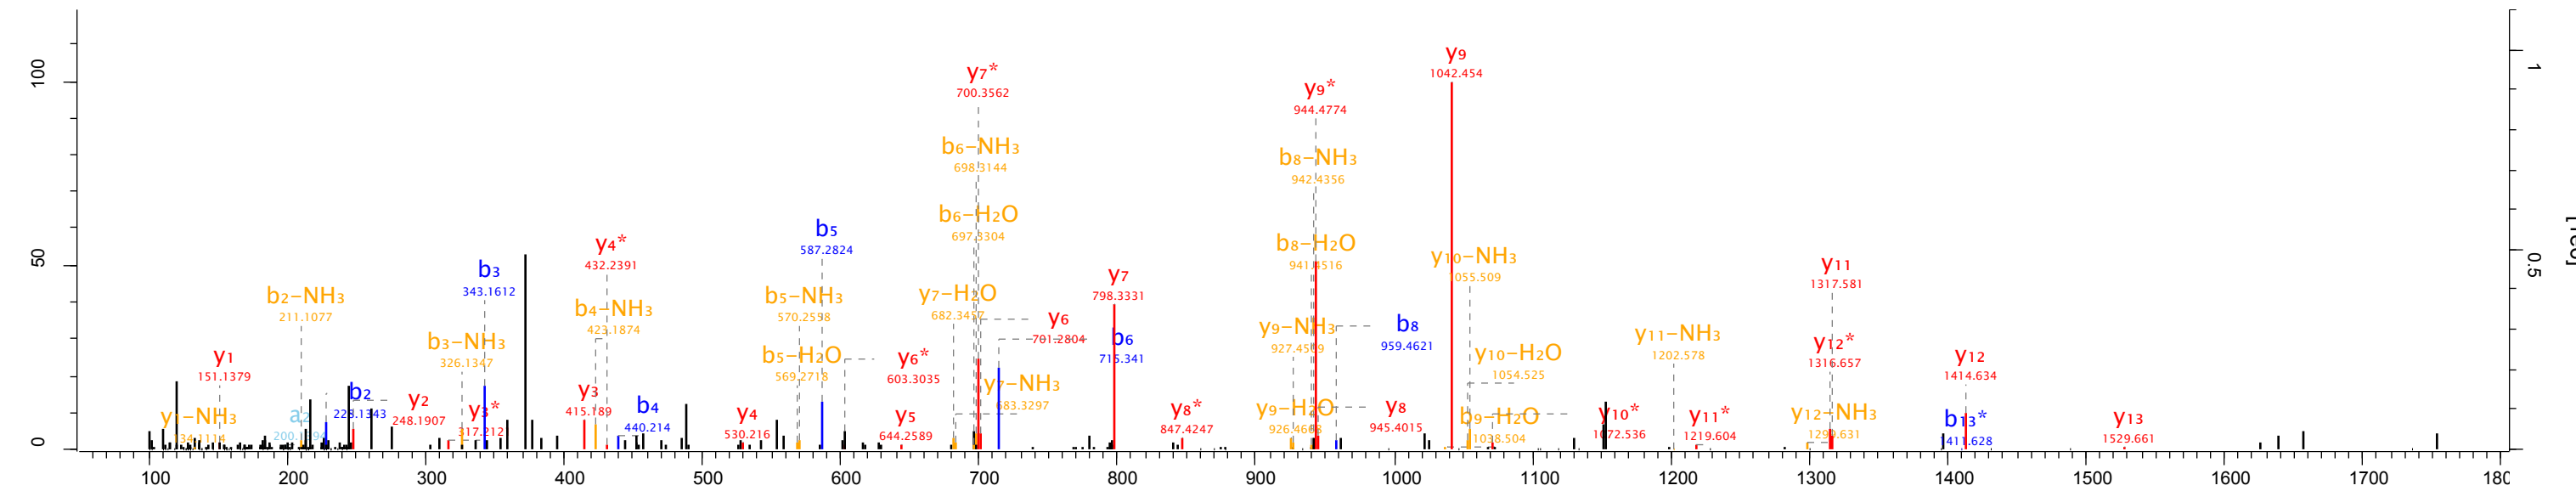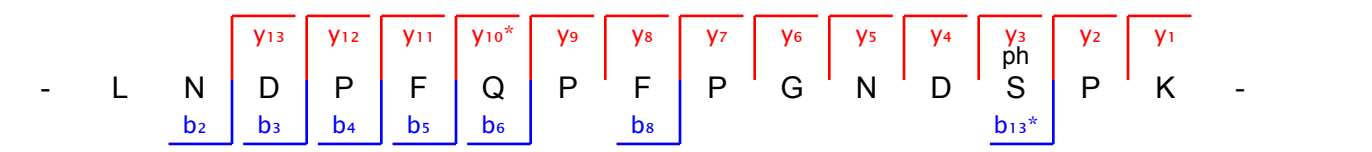

Raw file 20171215\_MaS\_33SR\_LMH\_phospho2\_03 Scan 17784 Method FTMS; HCD Score 95.21 m/z 817.35 Gene names SEPSECS

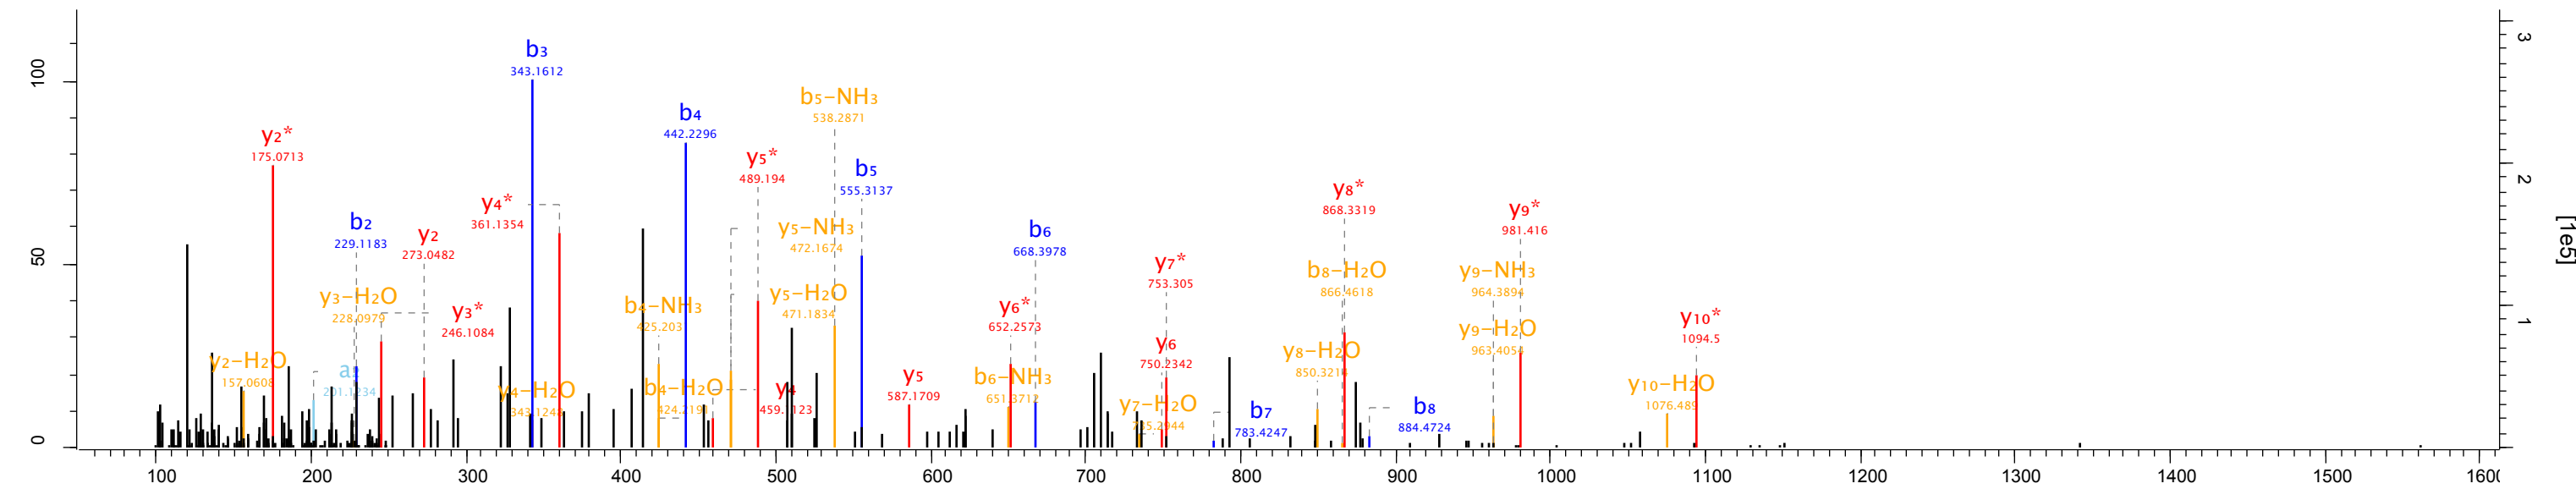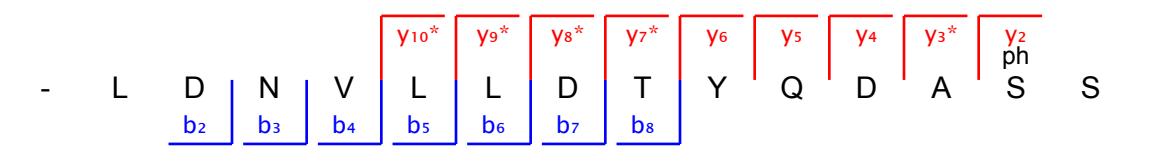

Raw file 20171215\_MaS\_33SR\_LMH\_phospho2\_03 Scan 18054 Method FTMS; HCD Score 210.96 m/z 1184.49 Gene names MFAP1

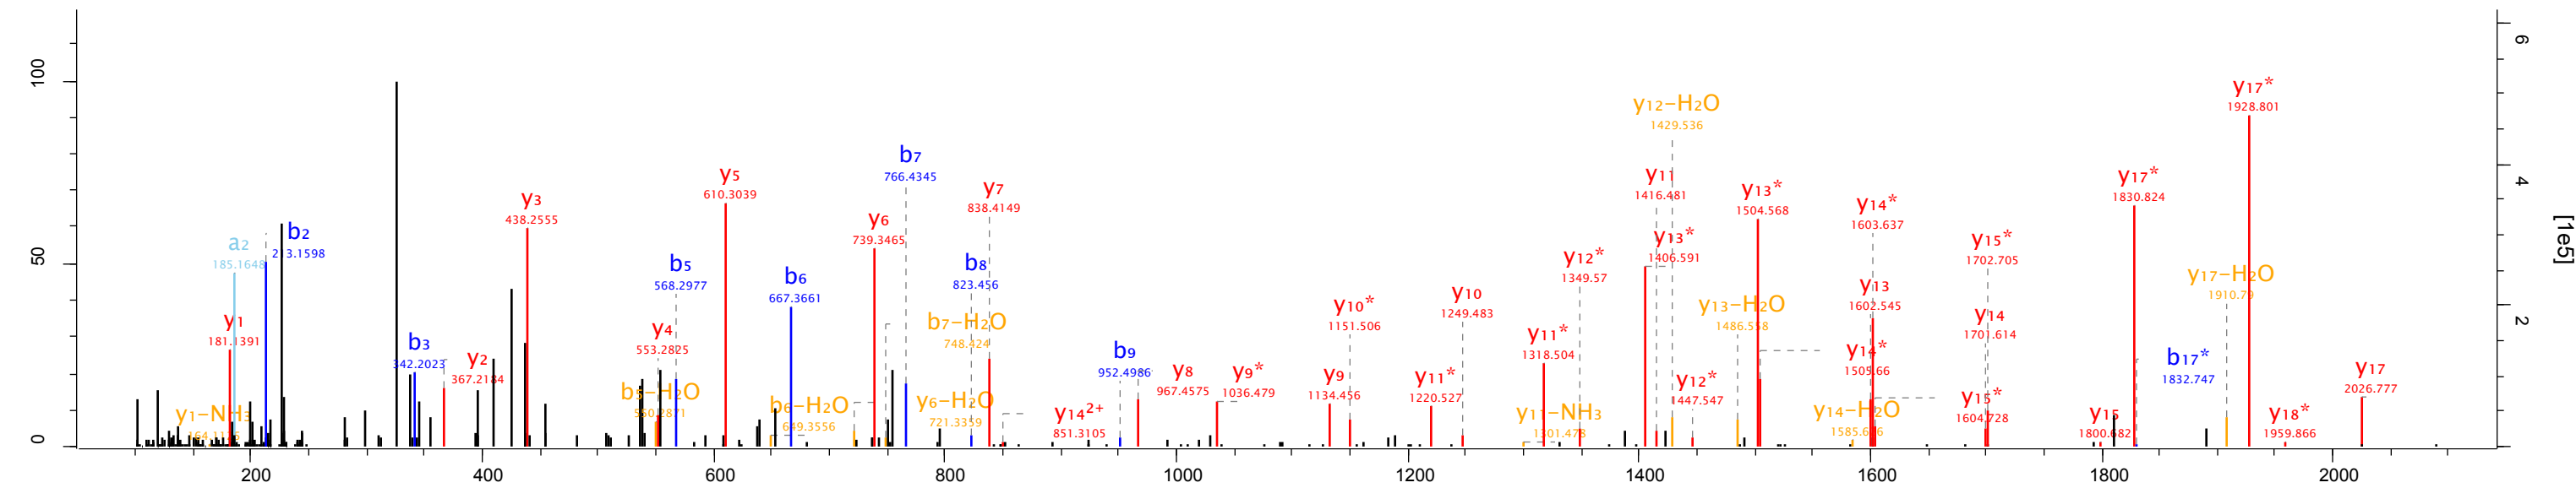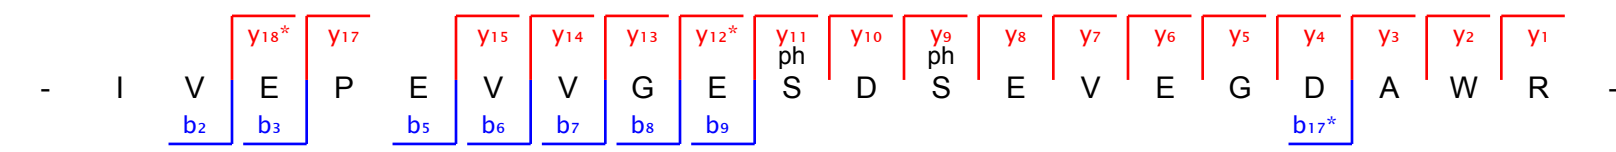



Raw file 20171215\_MaS\_33SR\_LMH\_phospho2\_03 Scan 18094 Method FTMS; HCD Score 69.98 m/z 1267.99 Gene names YWHAQ

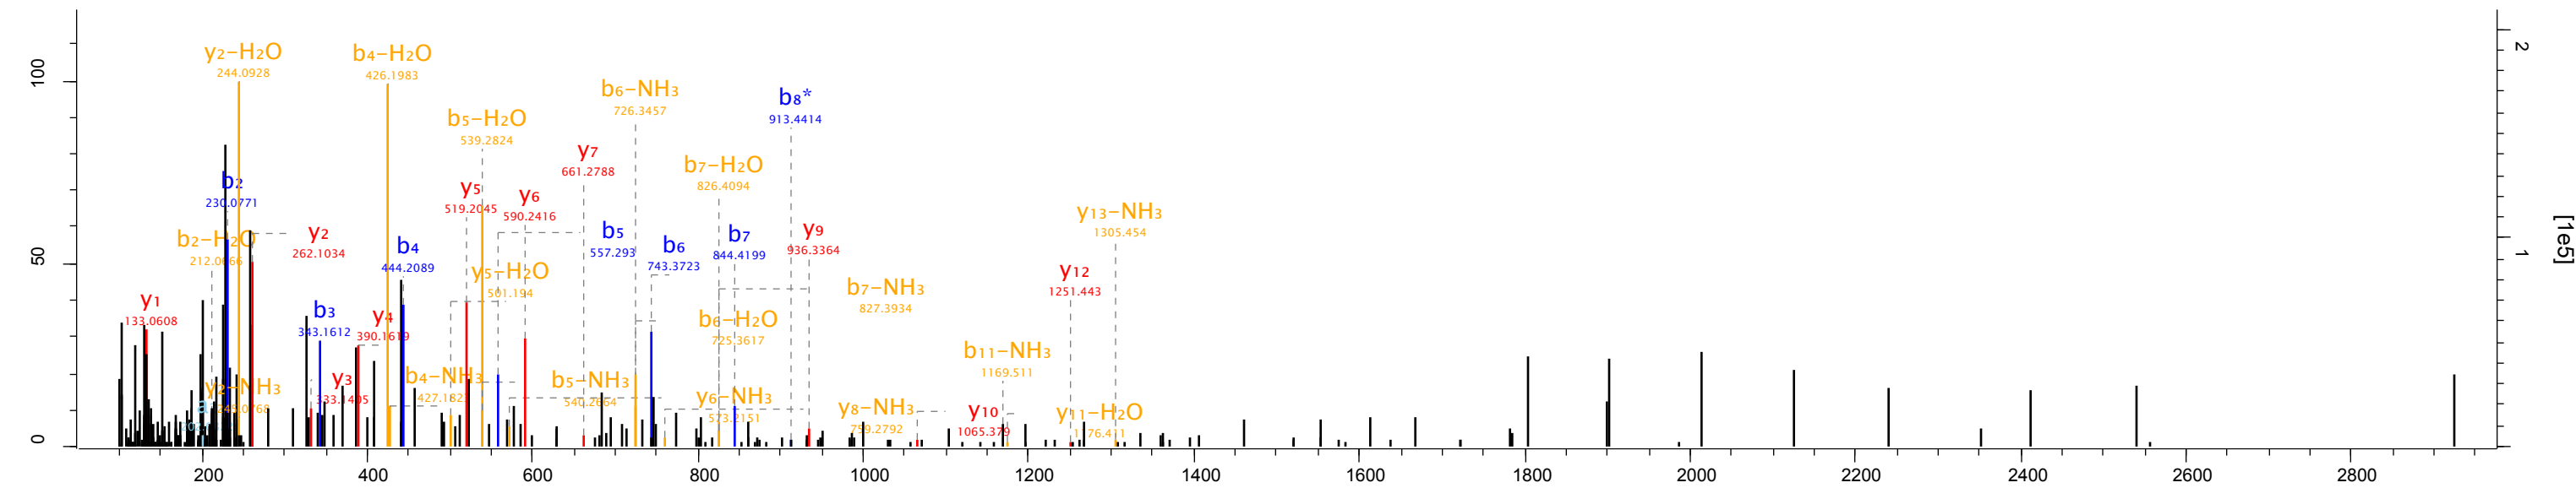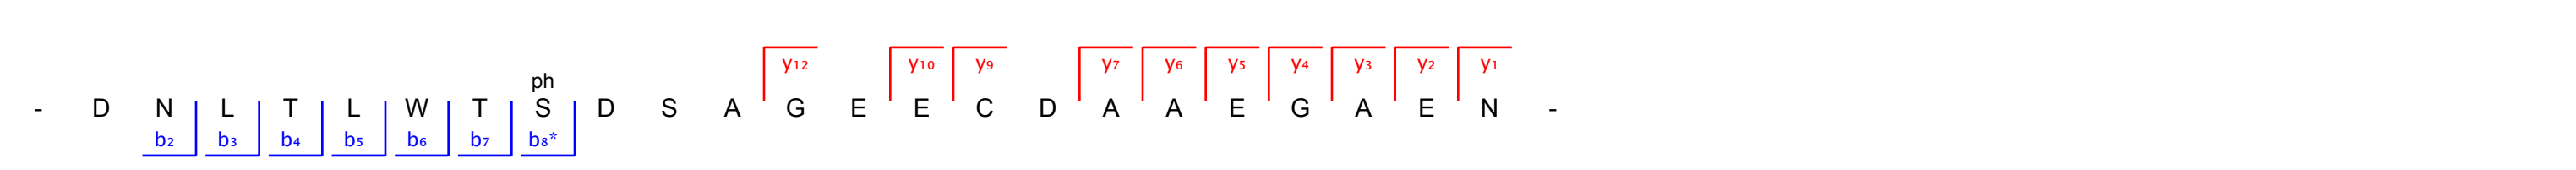

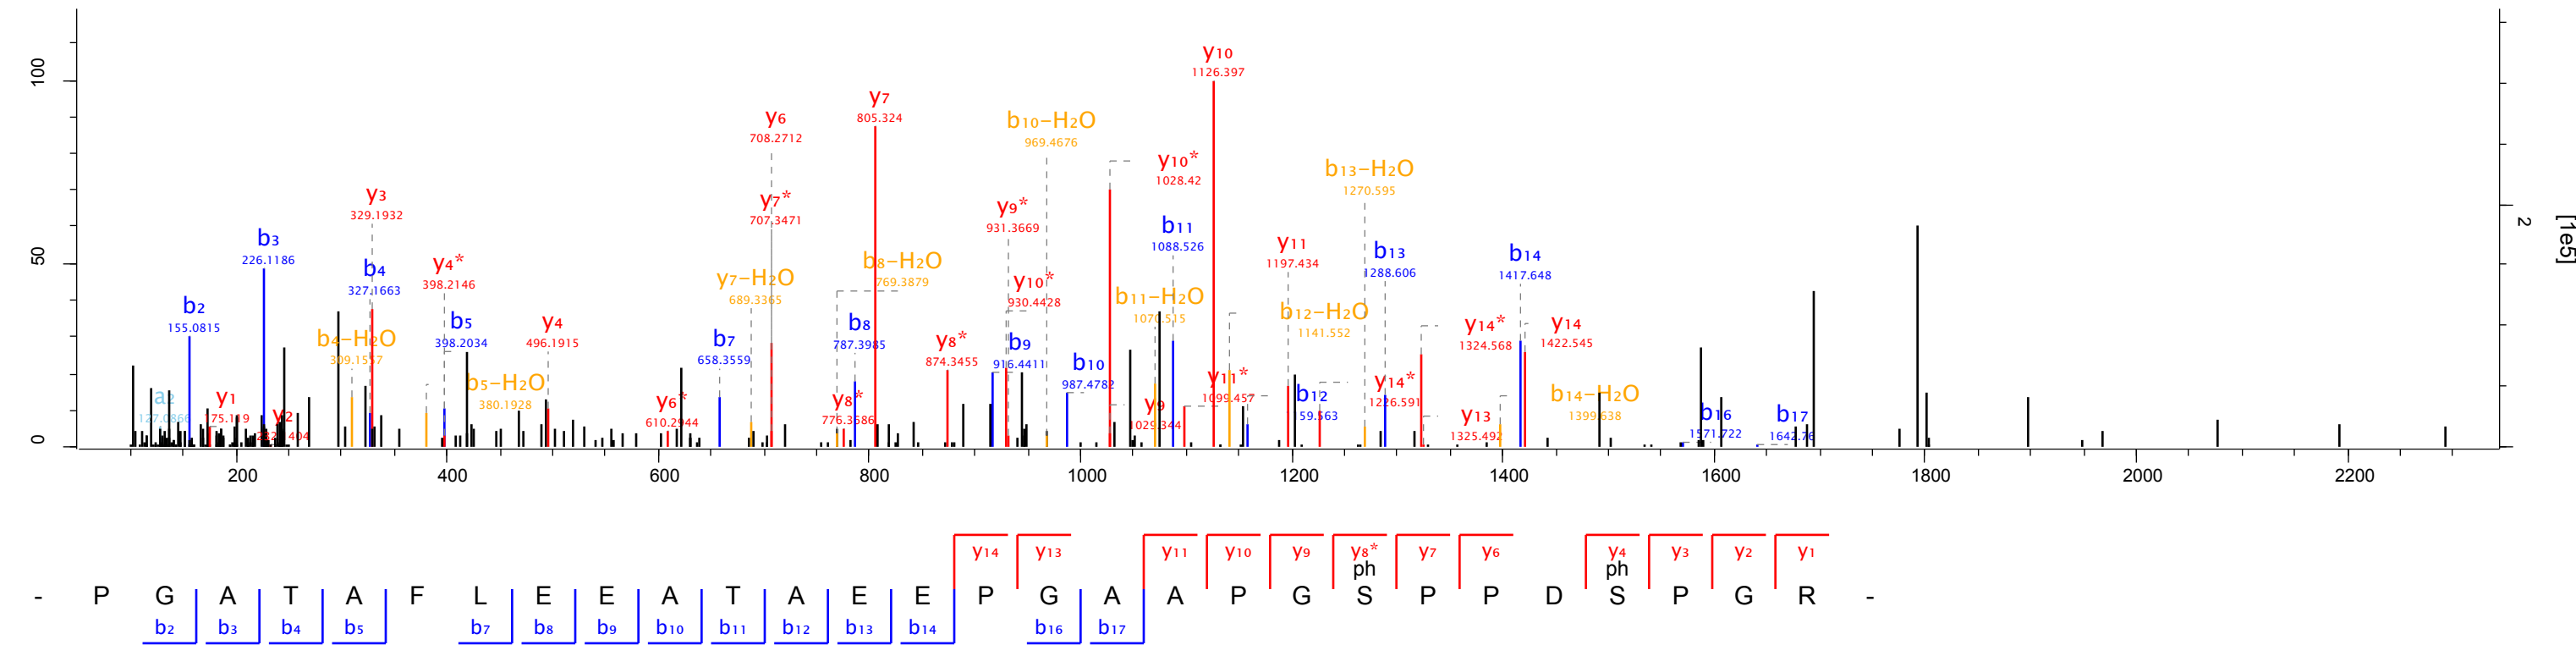

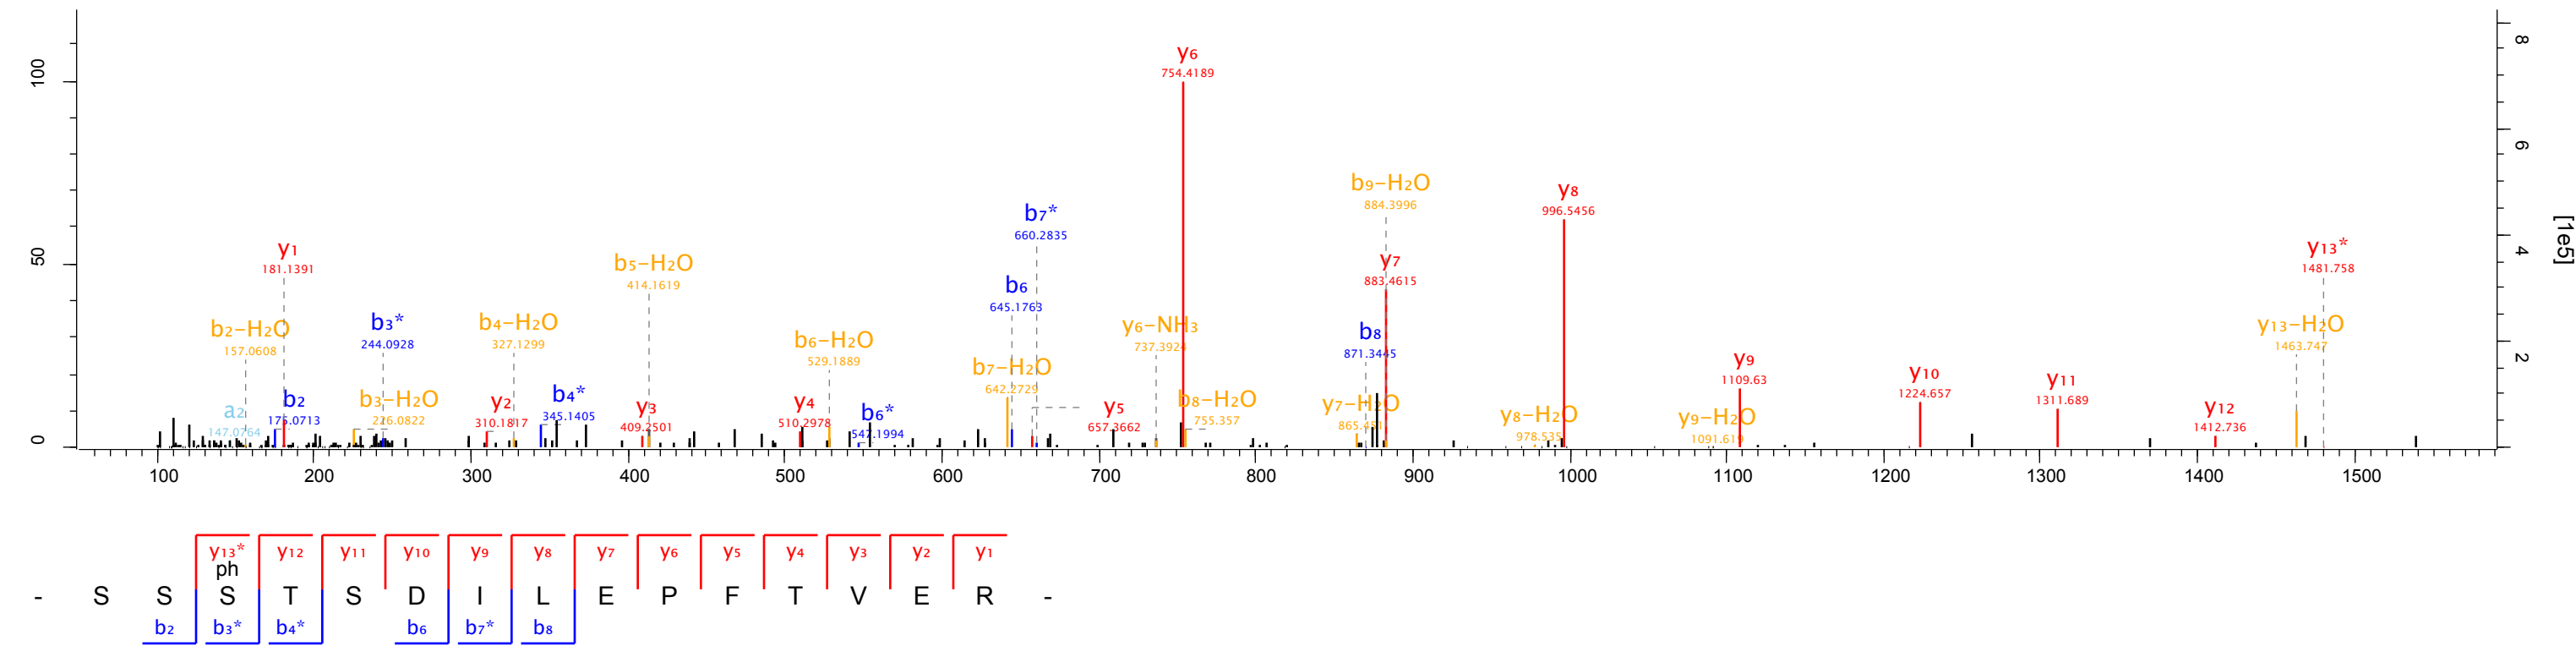

20171215\_MaS\_33SR\_LMH\_phospho2\_03 19214 FTMS; HCD 179.17 922.4 ATF7

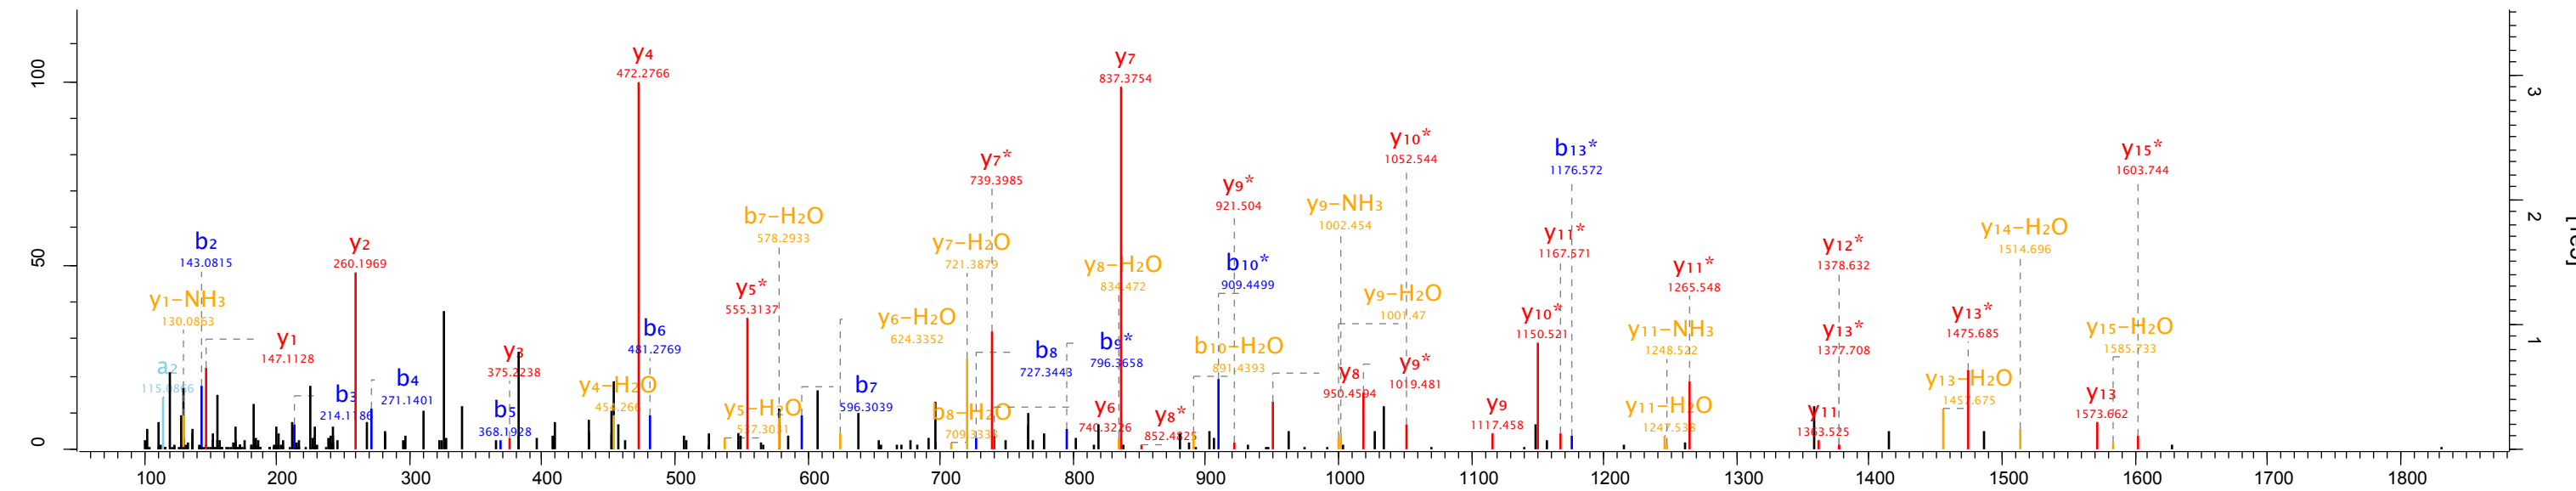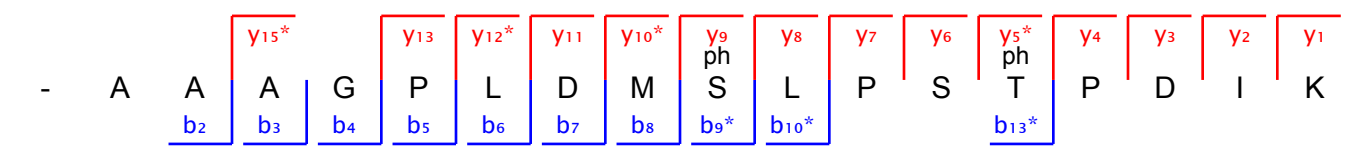

Raw file 20171215\_MaS\_33SR\_LMH\_phospho2\_03 Scan 19304 Method FTMS; HCD Score 117.09 m/z 727.77 Gene names TOP2A

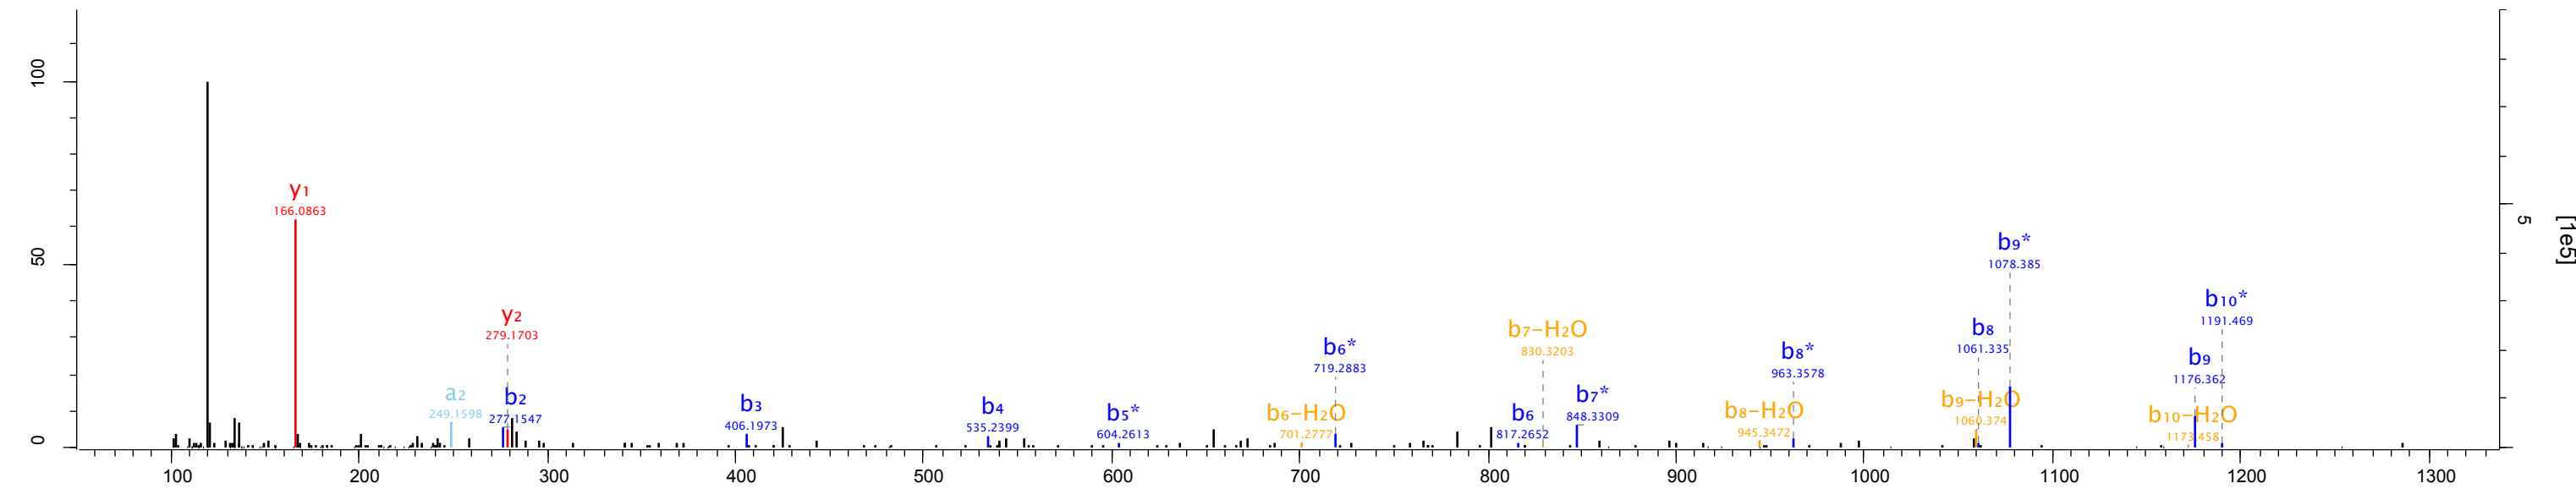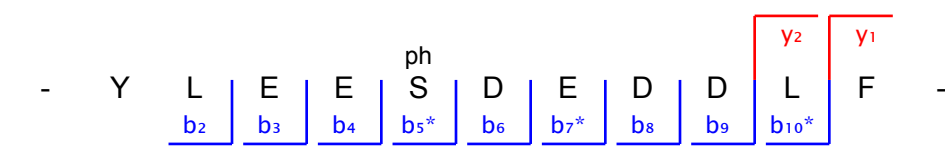

Raw file 20171215\_MaS\_33SR\_LMH\_phospho2\_03 Scan 19574 Method FTMS; HCD Score 144.17 m/z 920.39 Gene names SERBP1

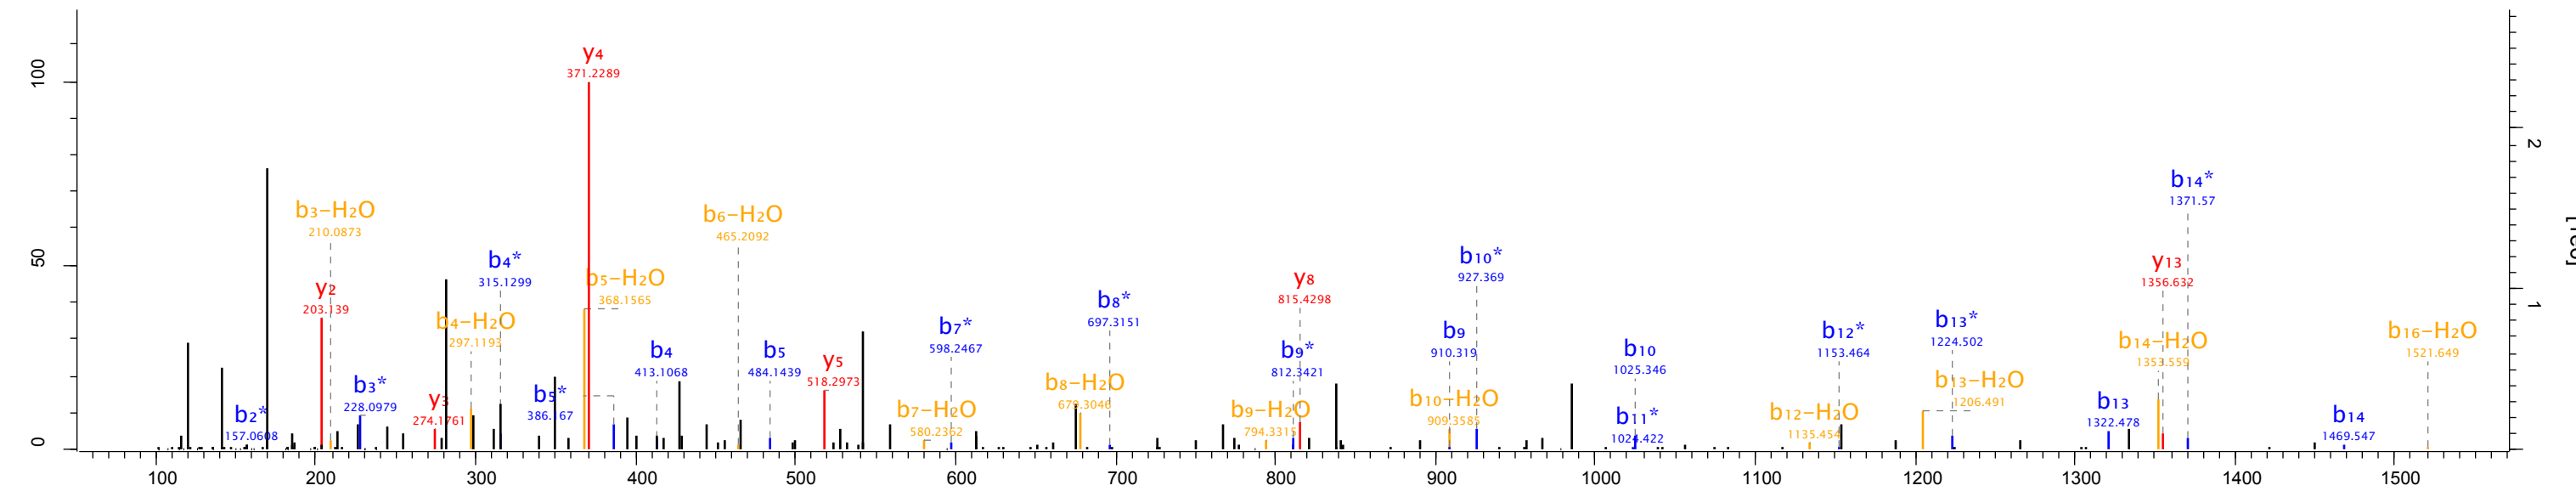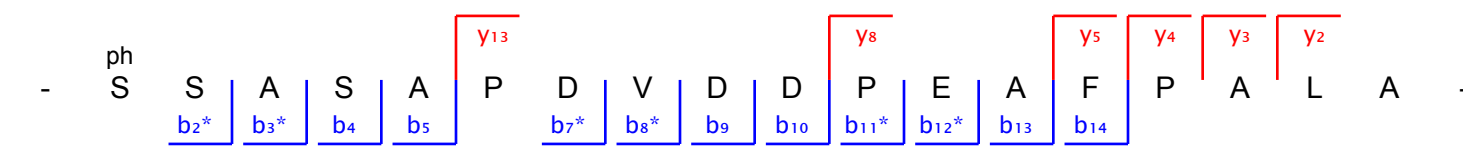

Raw file 20171215\_MaS\_33SR\_LMH\_phospho2\_03 Scan 20074 Method FTMS; HCD Score 45 m/z 949.39 Gene names ZCCHC6

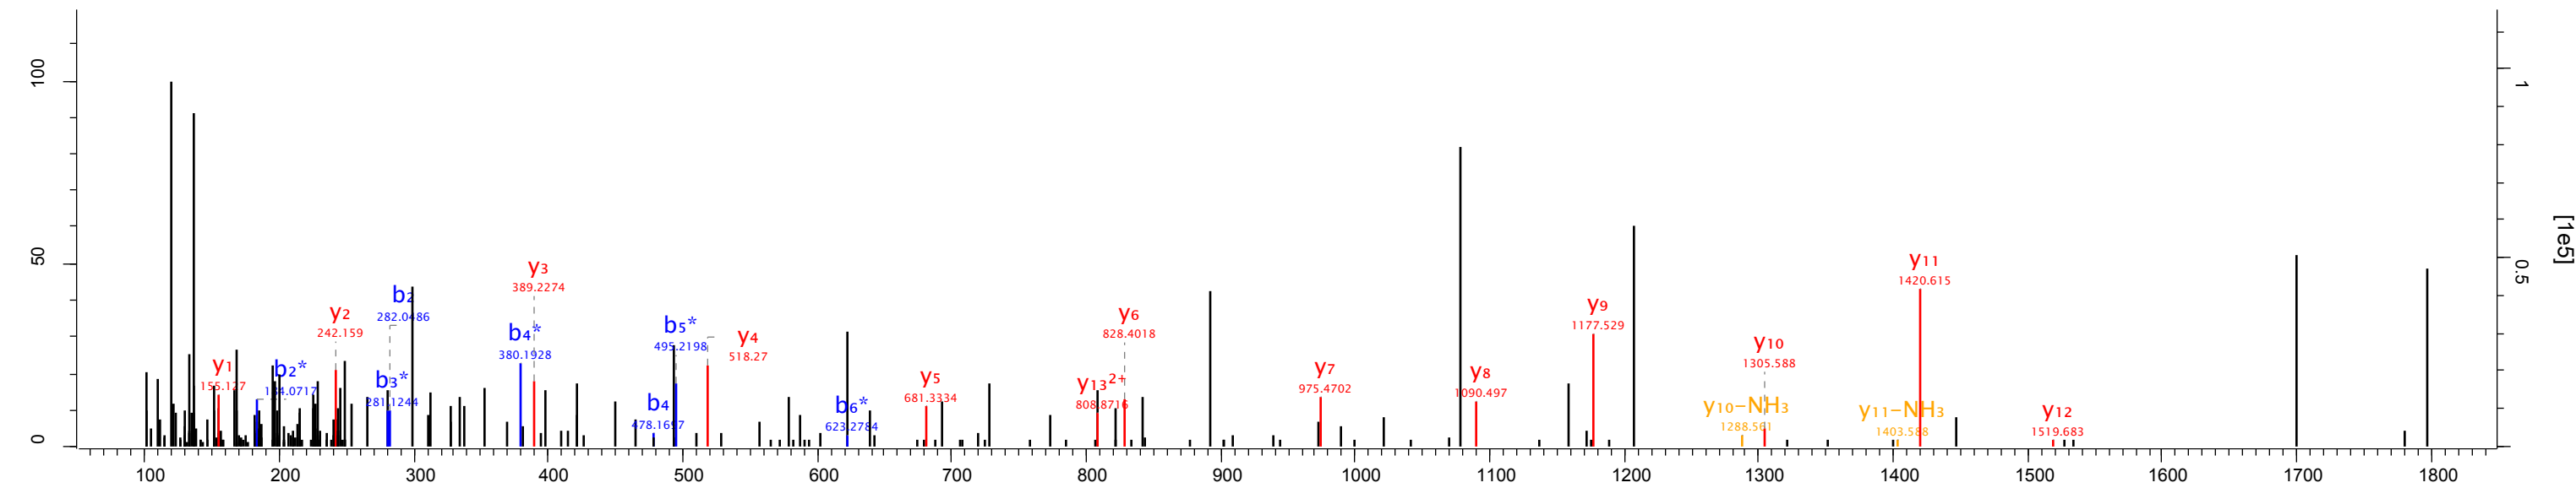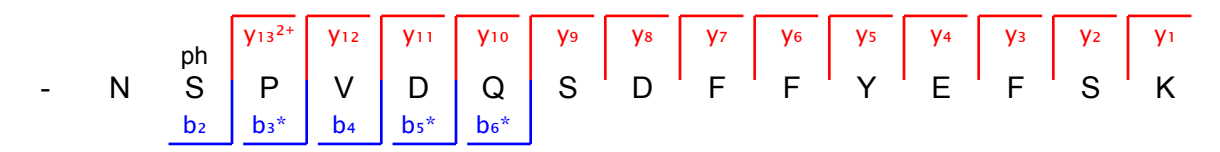

Raw file 20171215\_MaS\_33SR\_LMH\_phospho2\_03 Scan 20304 Method FTMS; HCD Score 64.7 m/z 1295.62 Gene names ACIN1

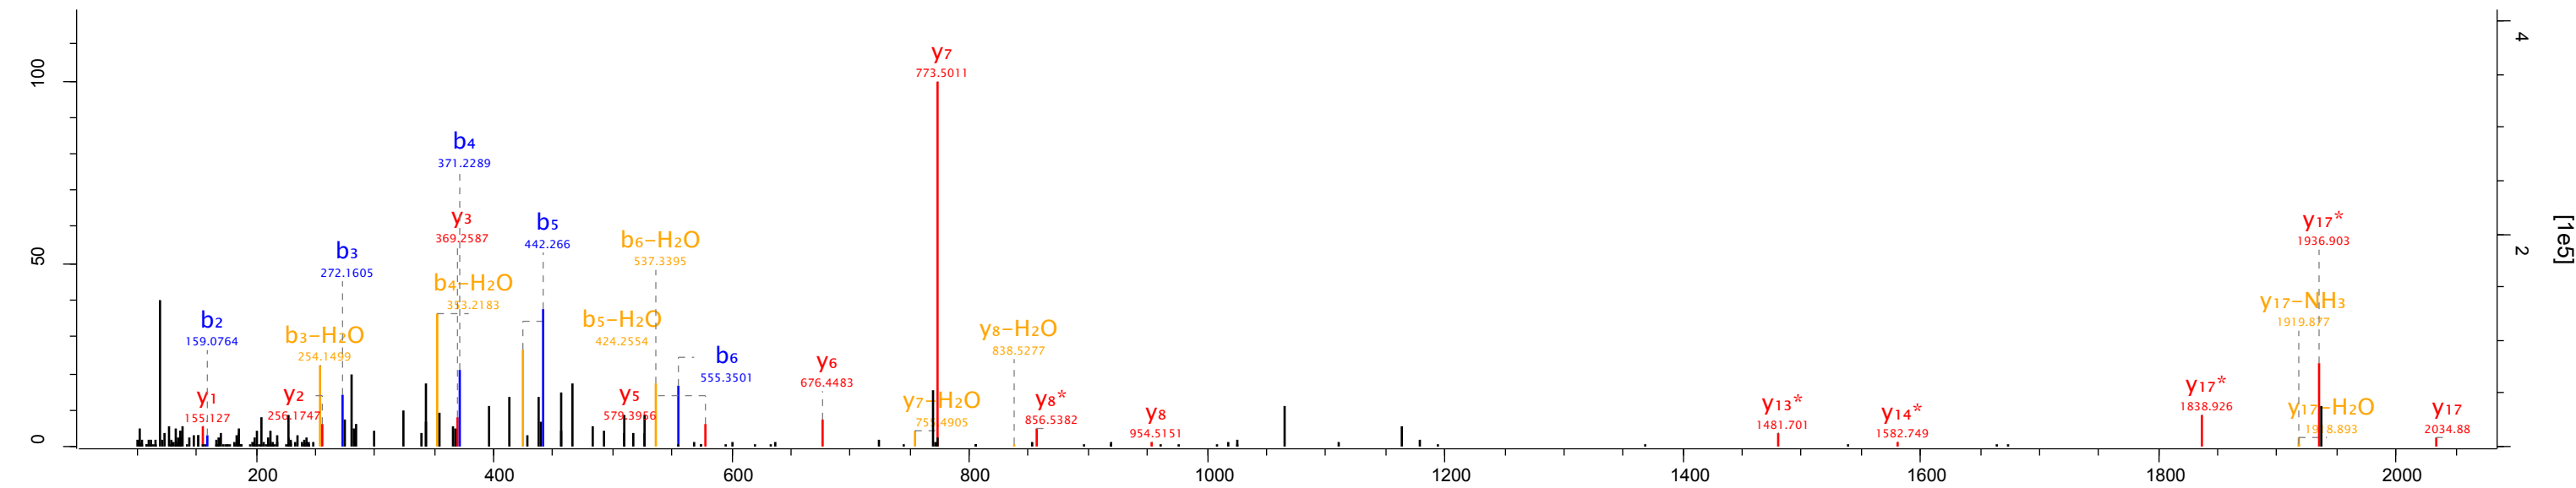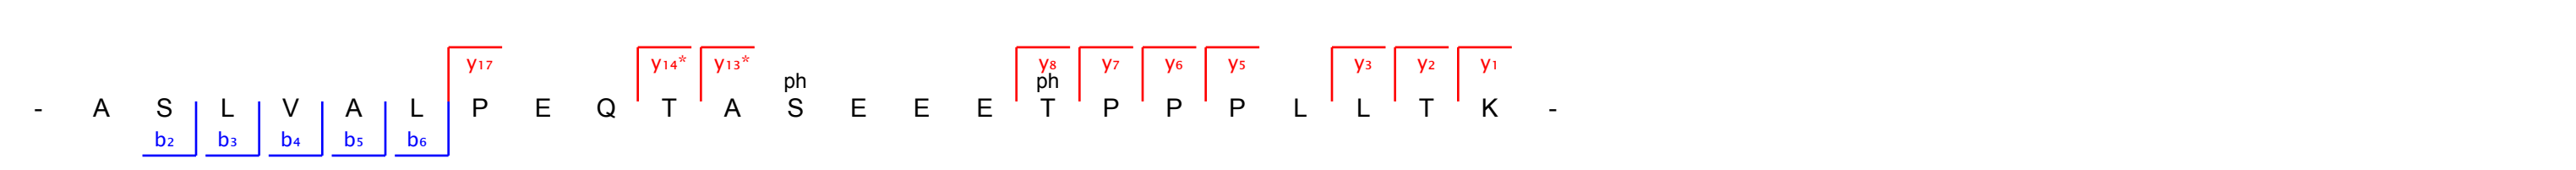



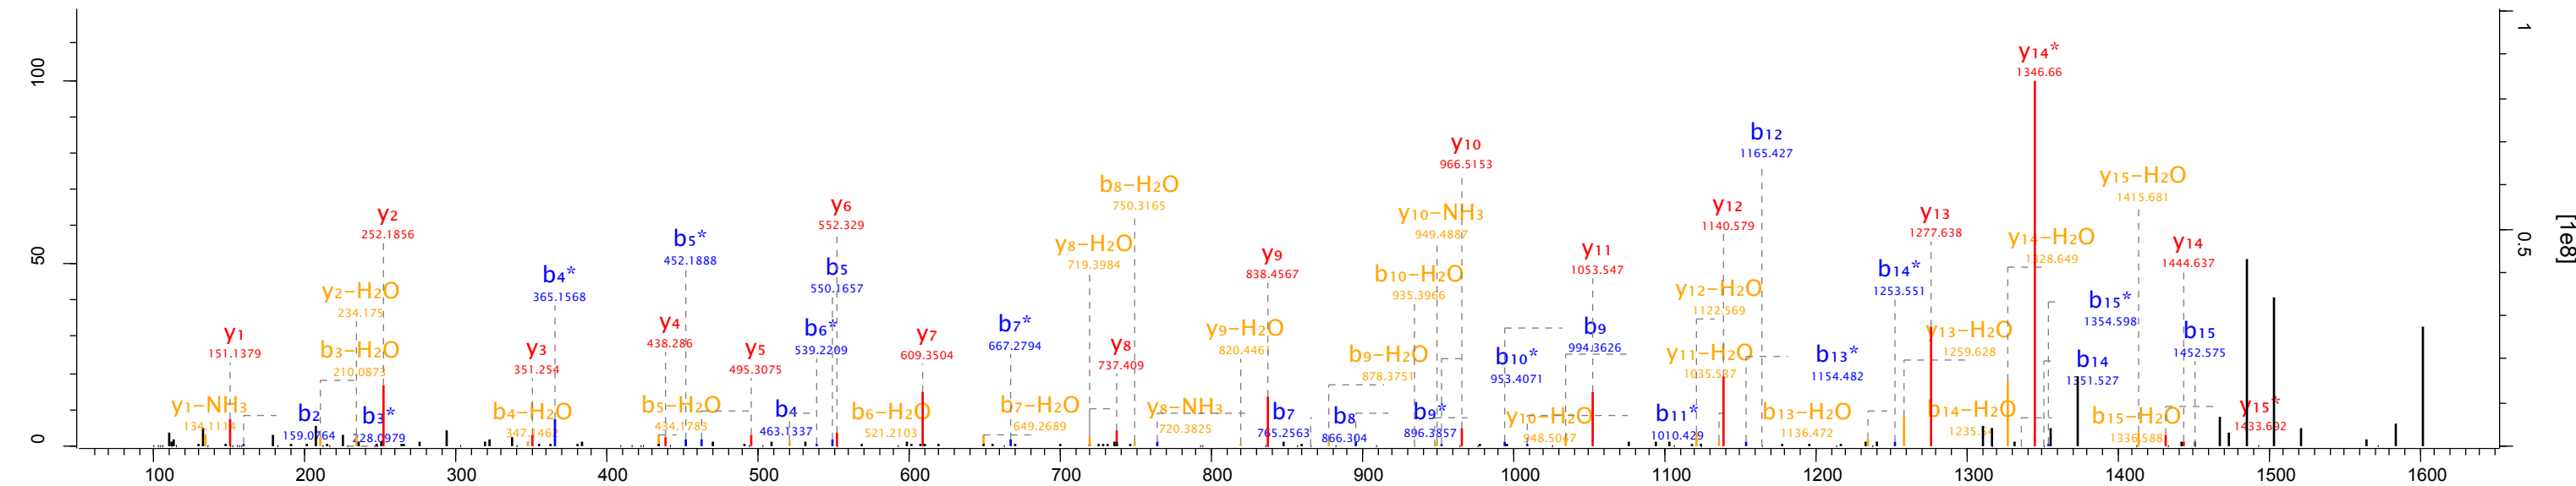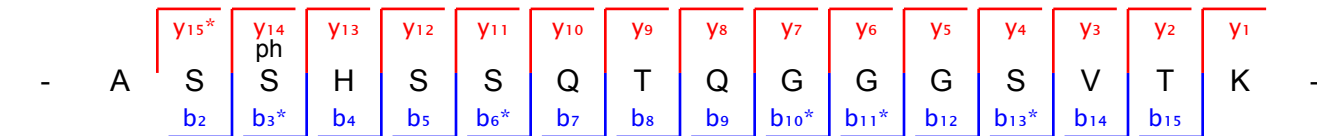

Raw file 20171215\_MaS\_33SR\_LMH\_phospho2\_03 Scan 2124 Method FTMS; HCD Score 61.44 m/z 446.54 Gene names SRRM2

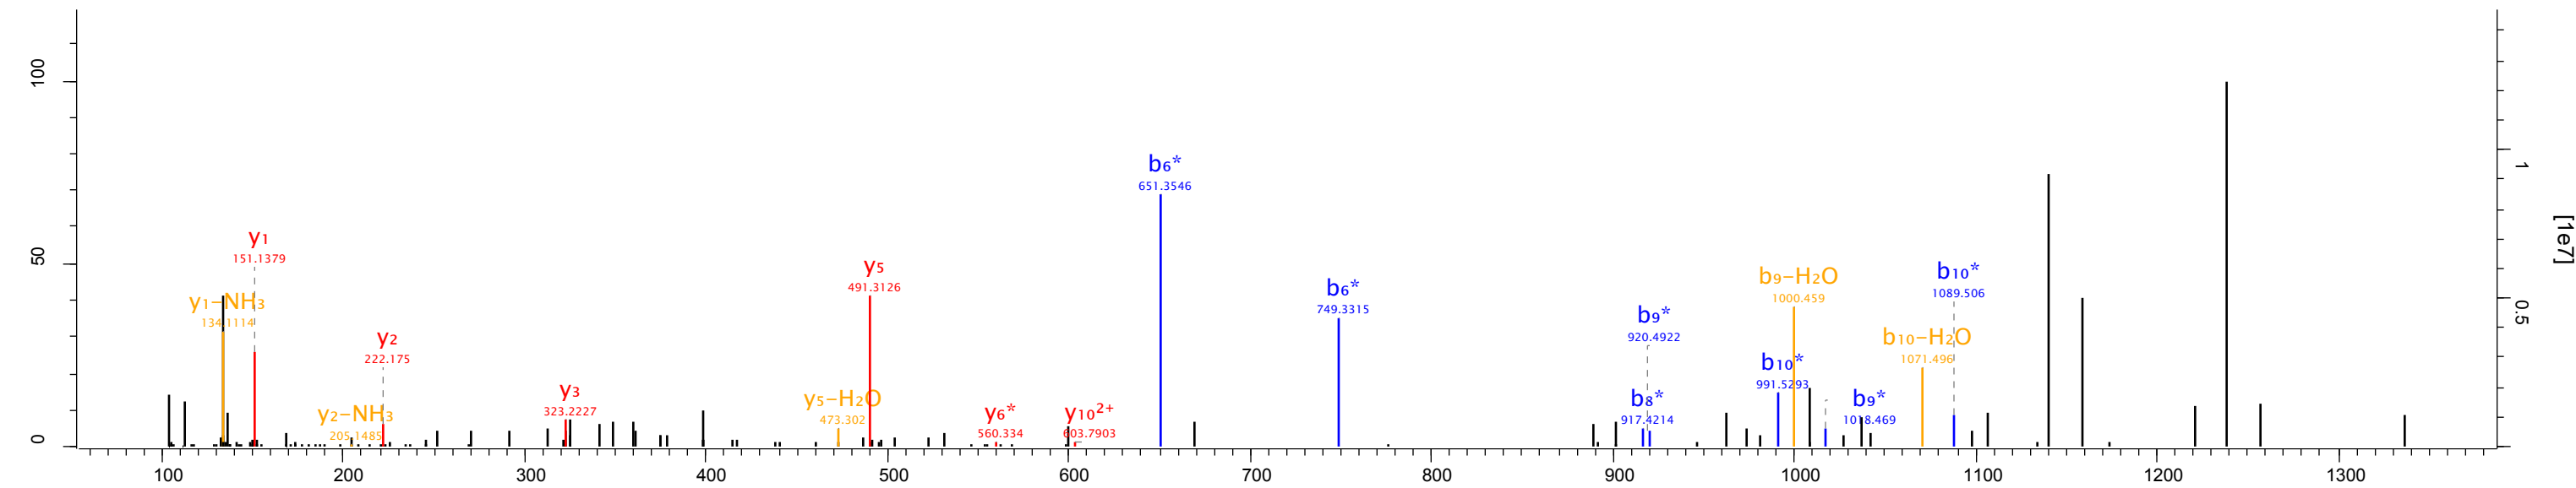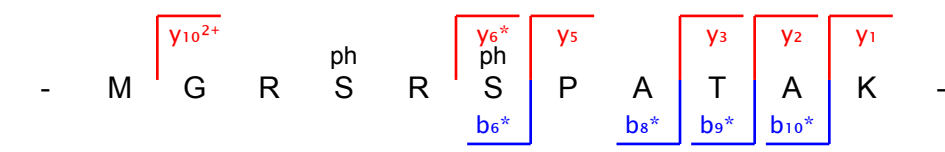

Raw file 20171215\_MaS\_33SR\_LMH\_phospho2\_03 Scan 22314 Method FTMS; HCD Score 83.6 m/z 1032.95 Gene names MCRS1

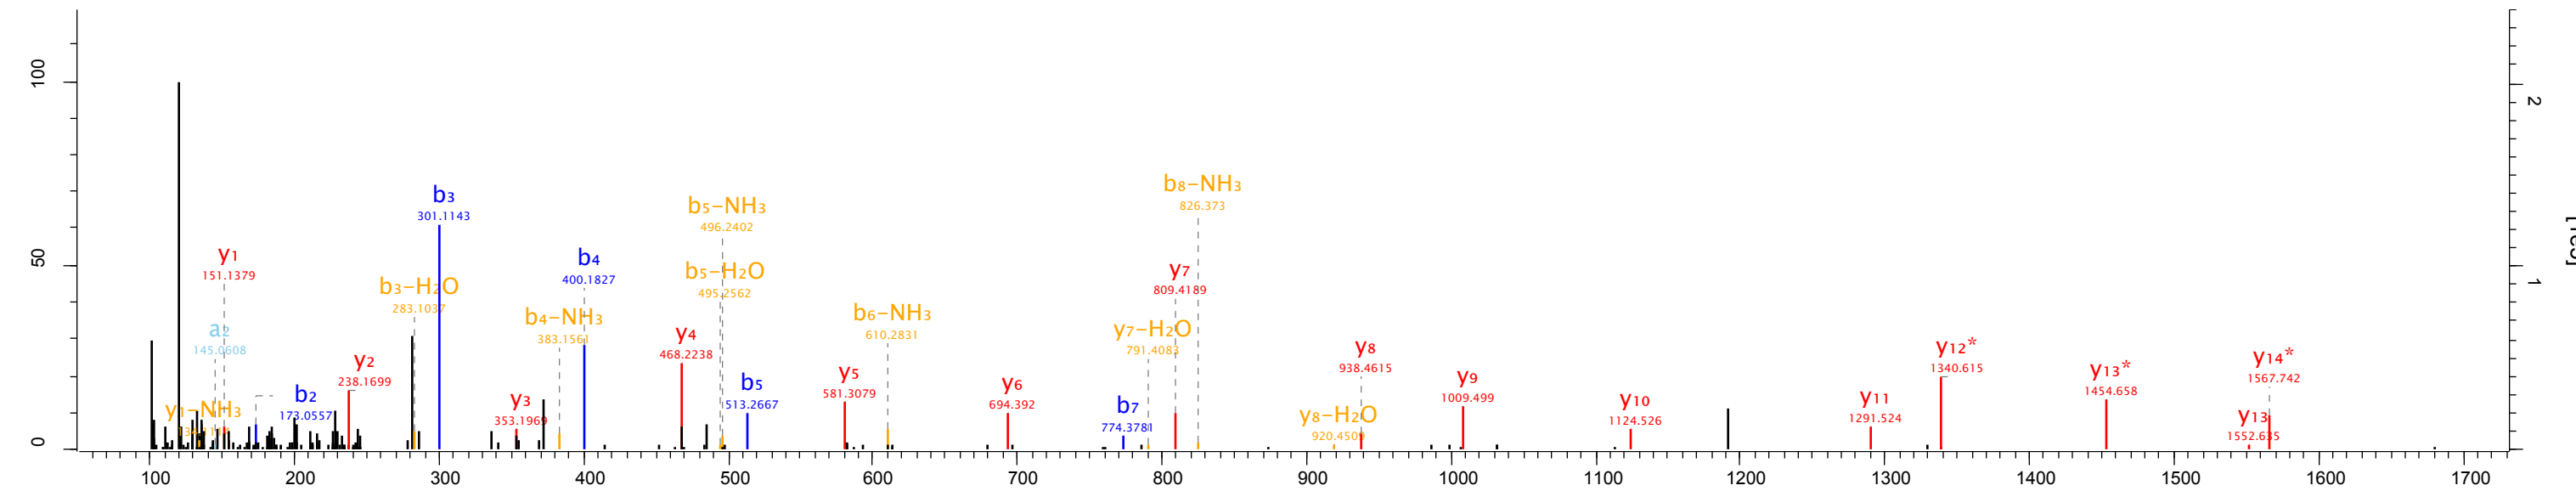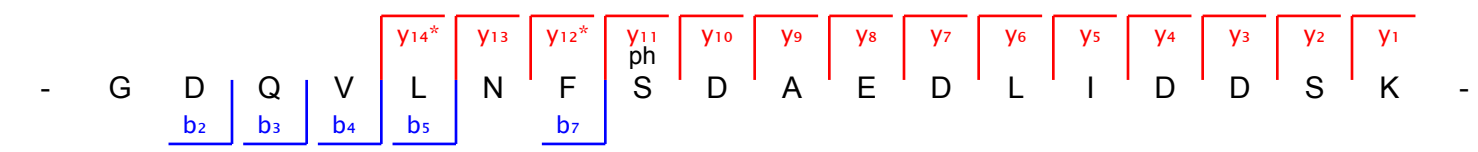

Raw file Scan Method Score m/z Gene names

20171215\_MaS\_33SR\_LMH\_phospho2\_03 2254 FTMS; HCD 94.09 631.27 BUD13

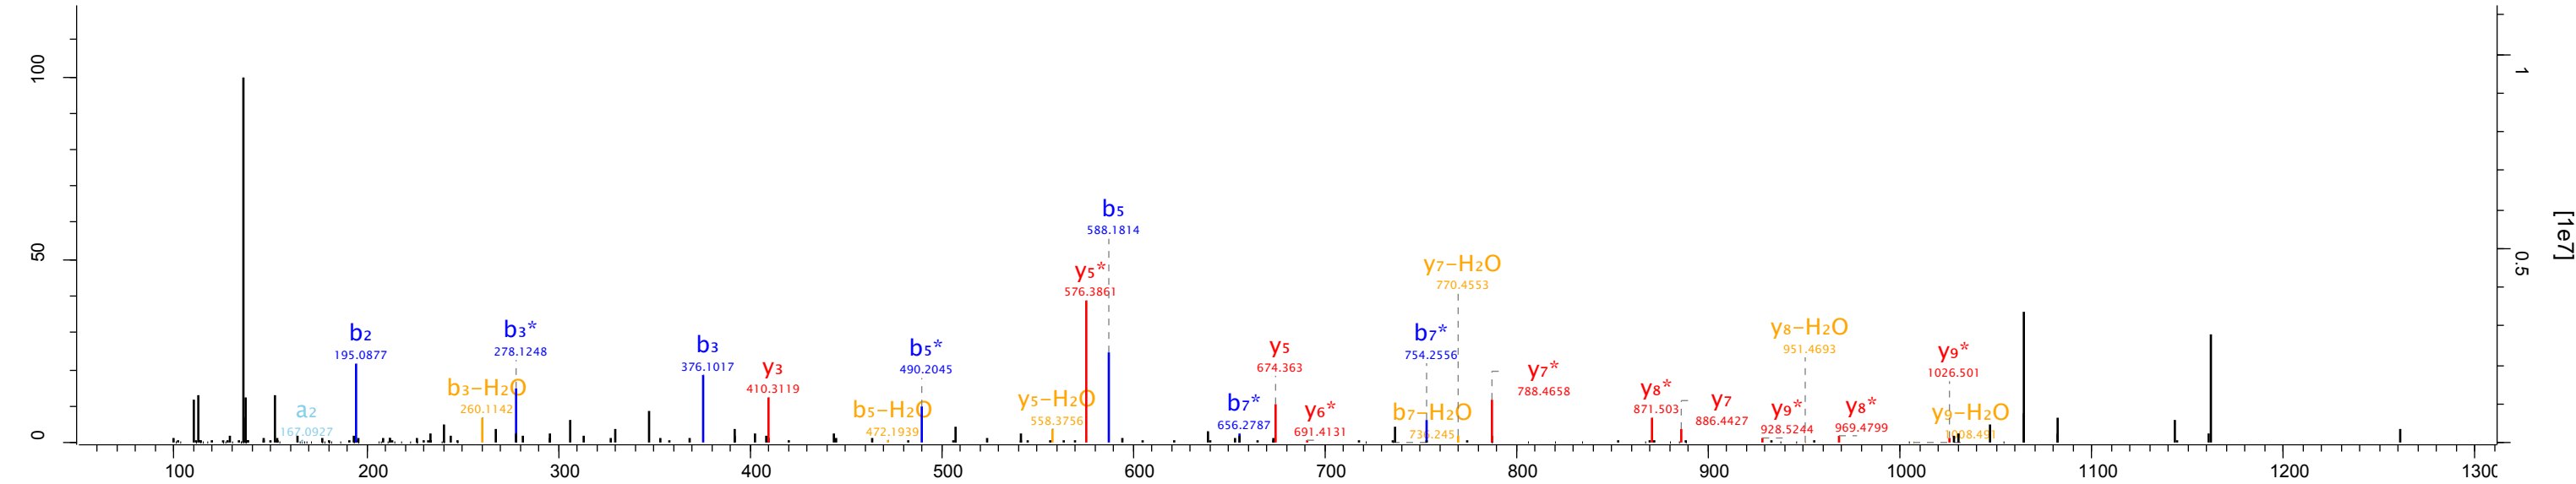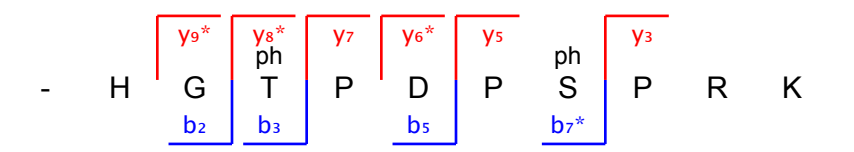

Raw file: 20171215\_MaS\_33SR\_LMH\_phospho2\_03  
 Scan: 2274 Method: FTMS; HCD Score: 218.05 m/z: 750.32 Gene names: RSL1D1

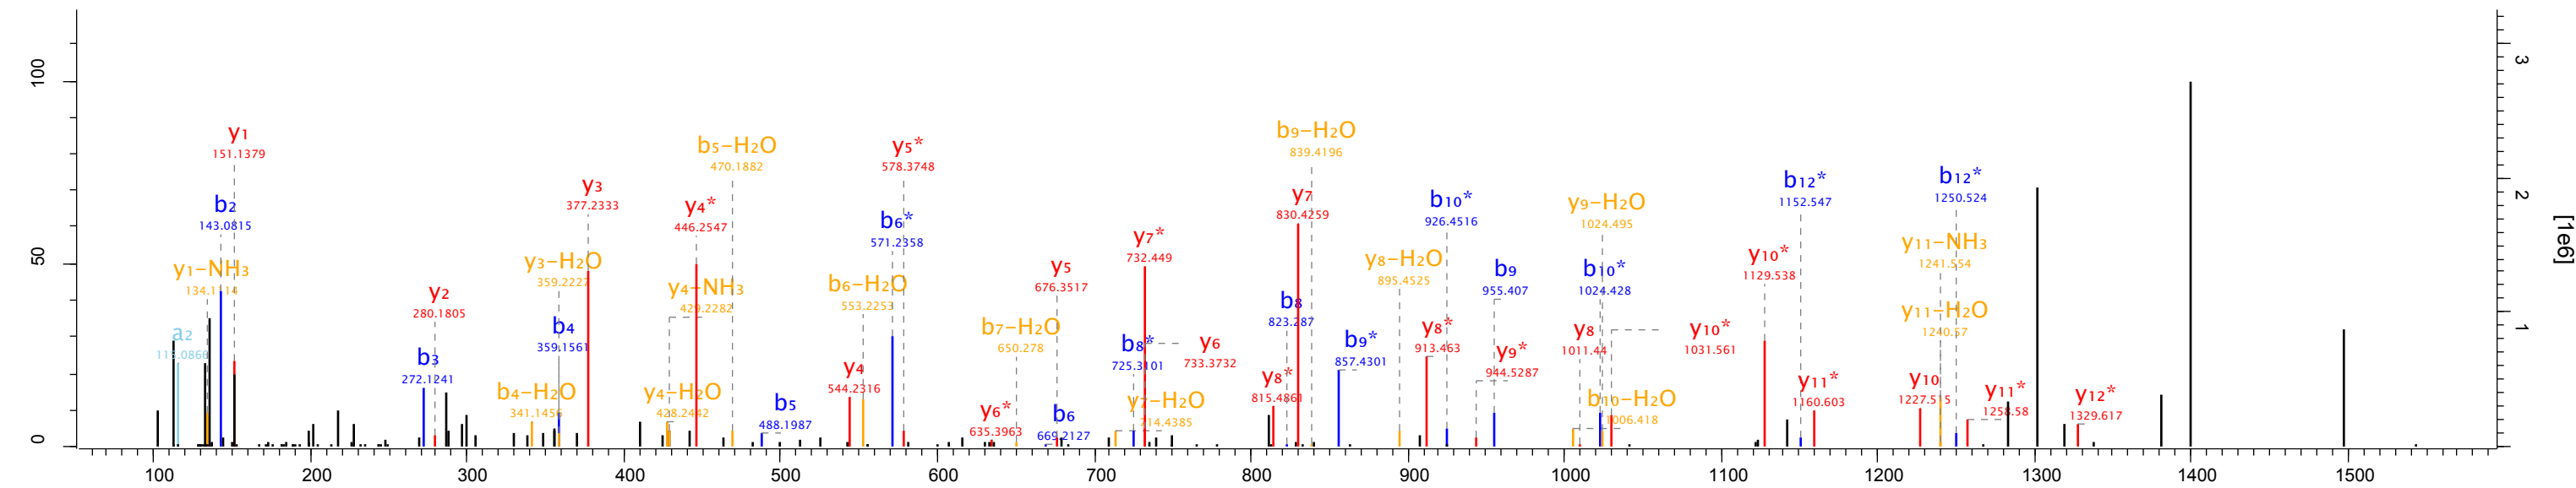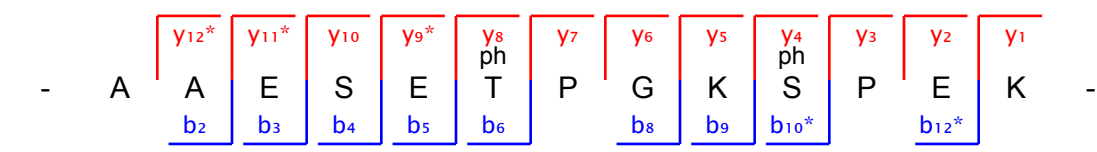

20171215\_MaS\_33SR\_LMH\_phospho2\_03 2324 FTMS; HCD 54.01 541.21 PNN

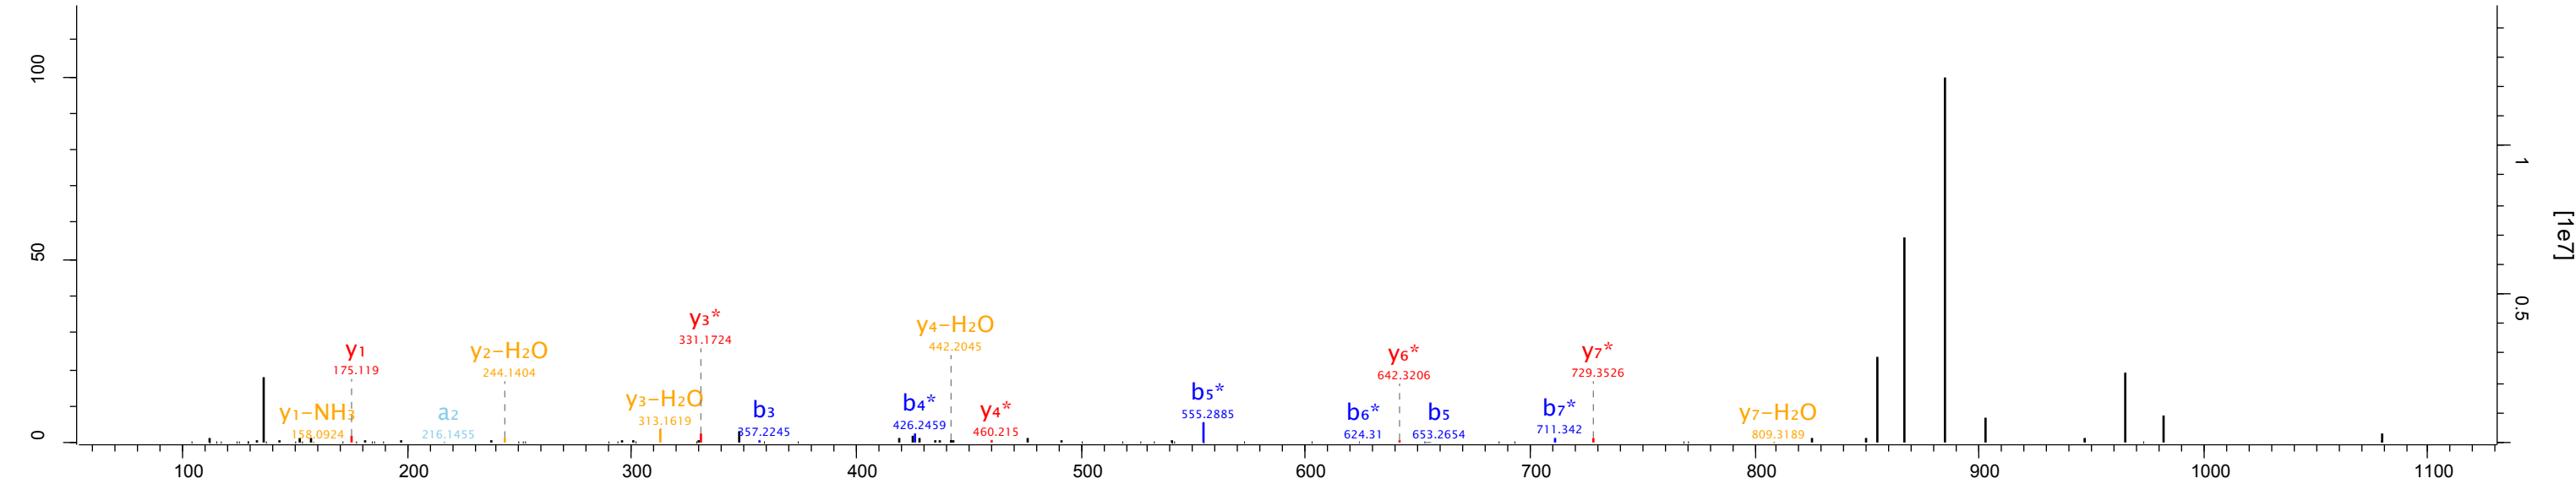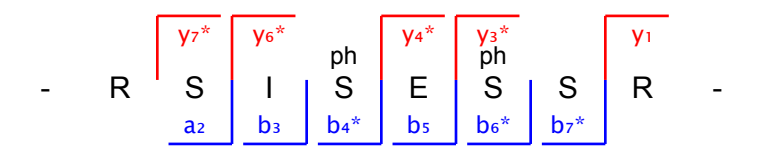

Raw file  
20171215\_MaS\_33SR\_LMH\_phospho2\_03

Scan Method Score m/z Gene names  
2674 FTMS; HCD 164.3 601.72 BUD13

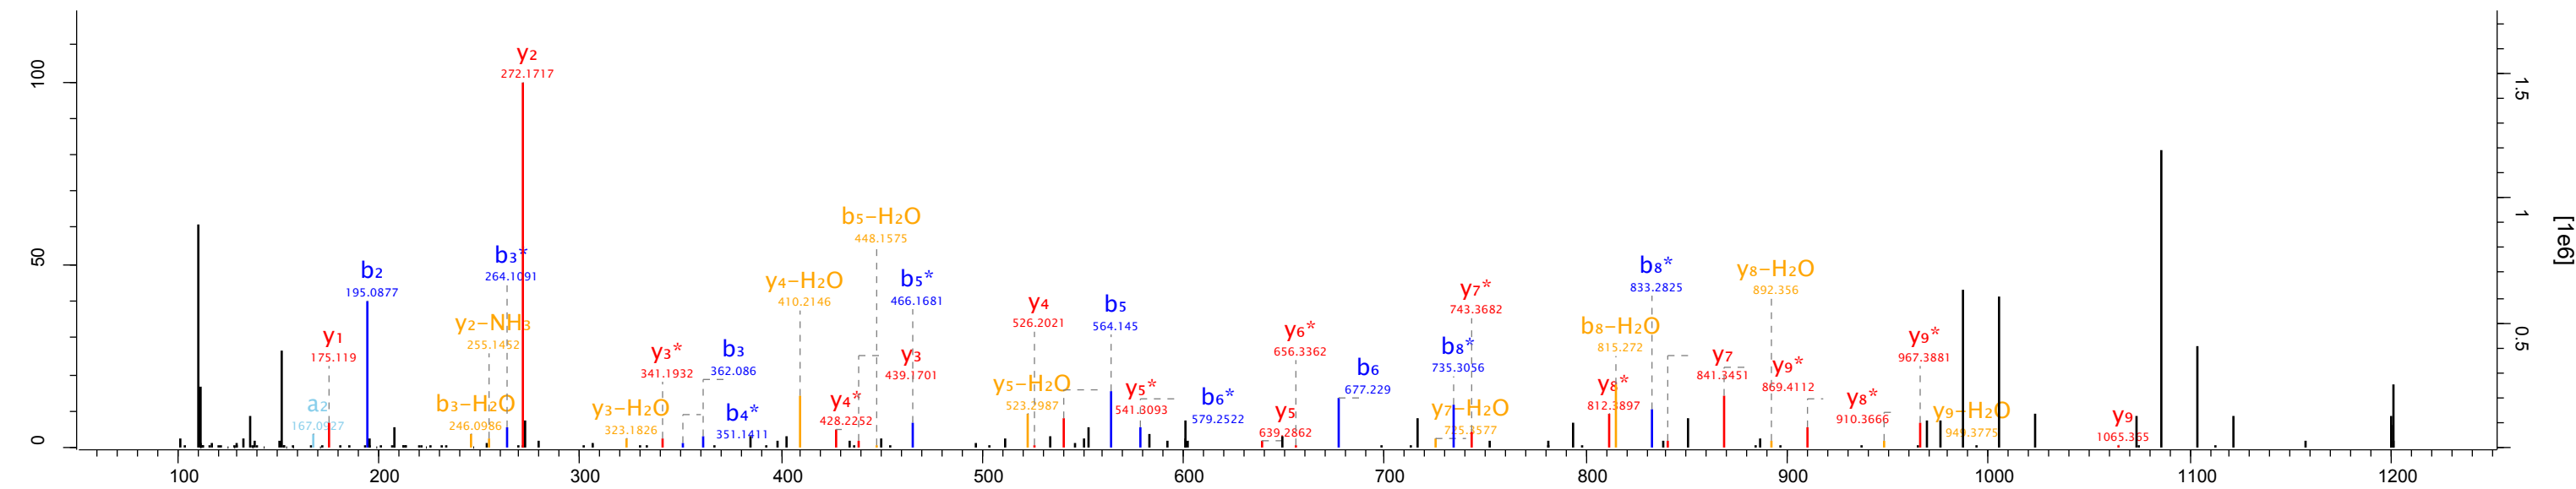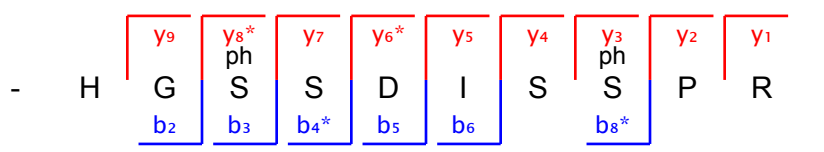

Raw file  
20171215\_MaS\_33SR\_LMH\_phospho2\_03

Scan 2774 Method FTMS; HCD Score 103.58 m/z 680.58 Gene names STX4

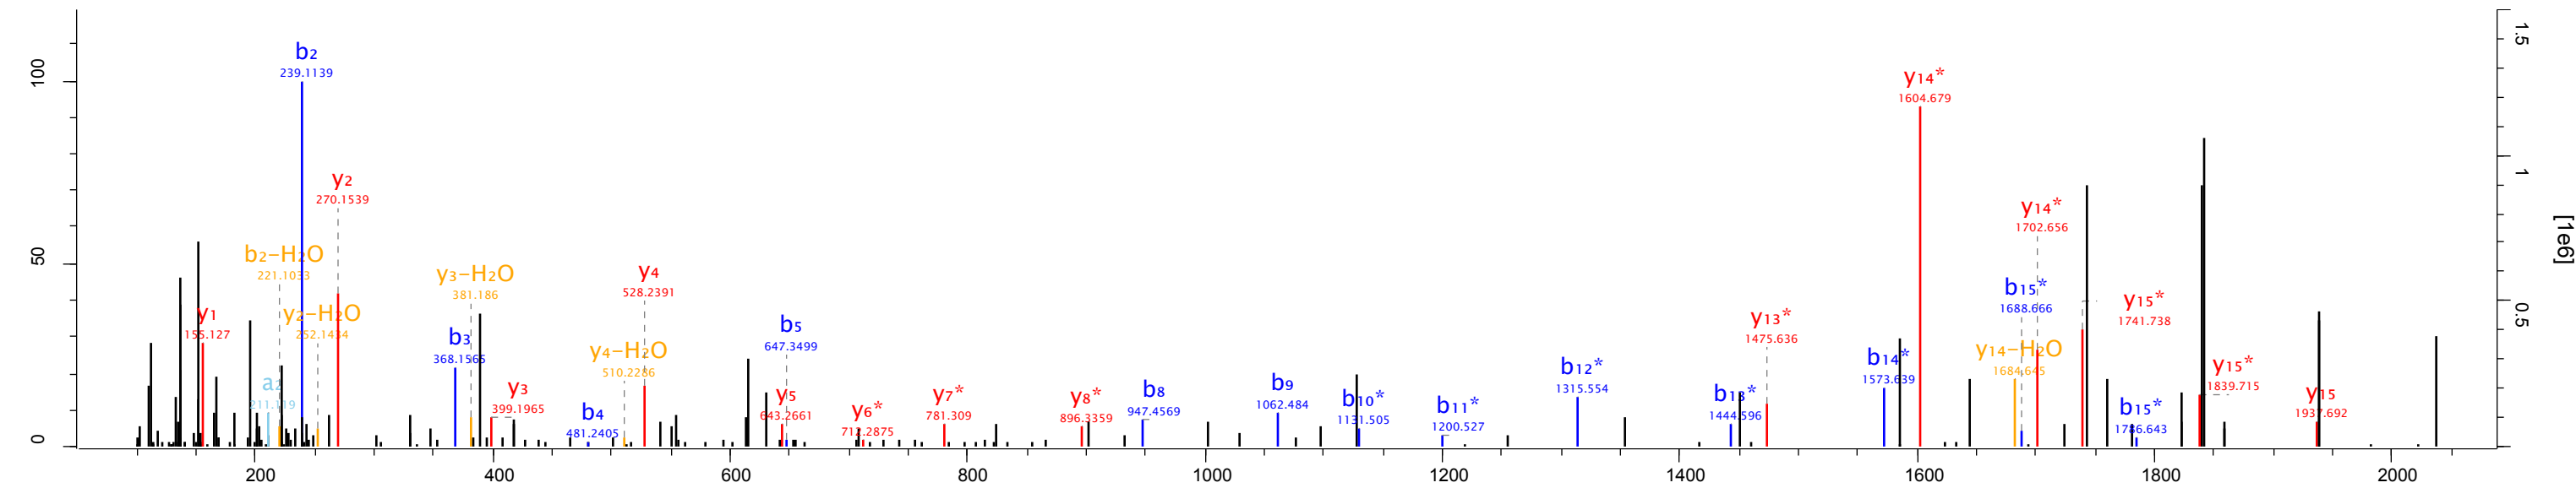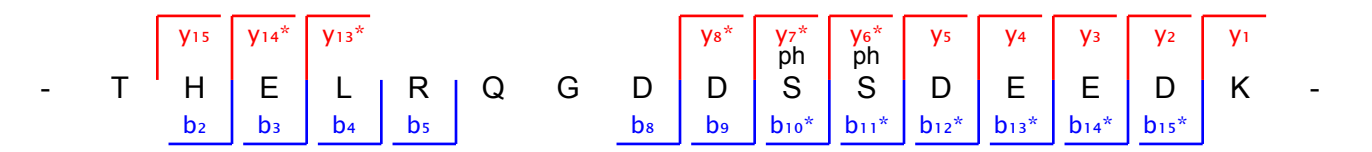



Raw file 20171215\_MaS\_33SR\_LMH\_phospho2\_03 Scan 3014 Method FTMS; HCD Score 106 m/z 802.83 Gene names MID1

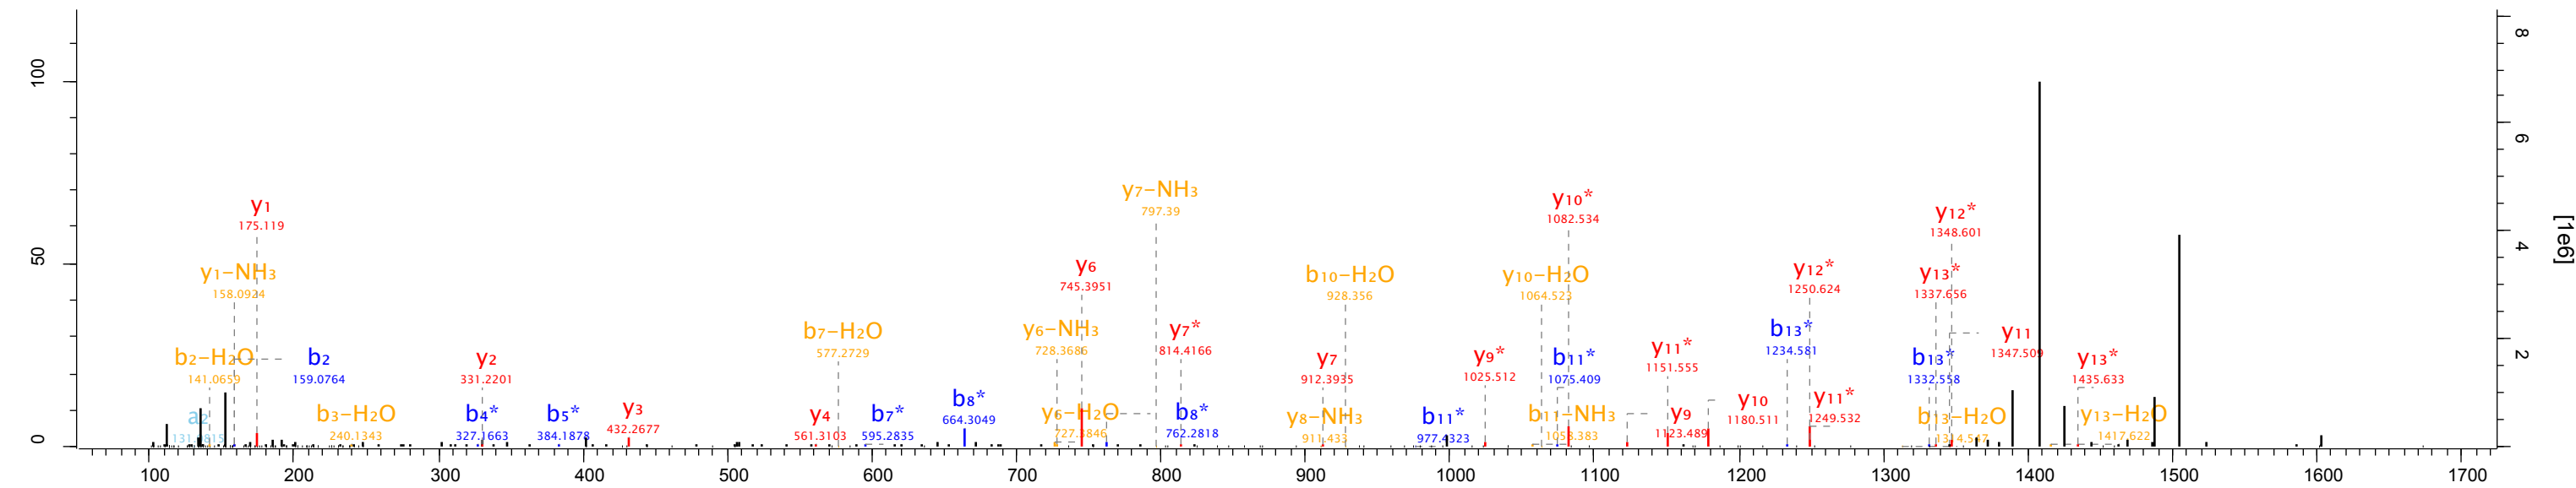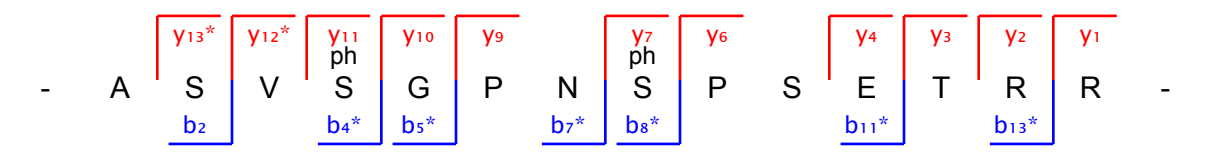

Raw file 20171215\_MaS\_33SR\_LMH\_phospho2\_03 Scan 3134 Method FTMS; HCD Score 74.97 m/z 580.23 Gene names SRRM1

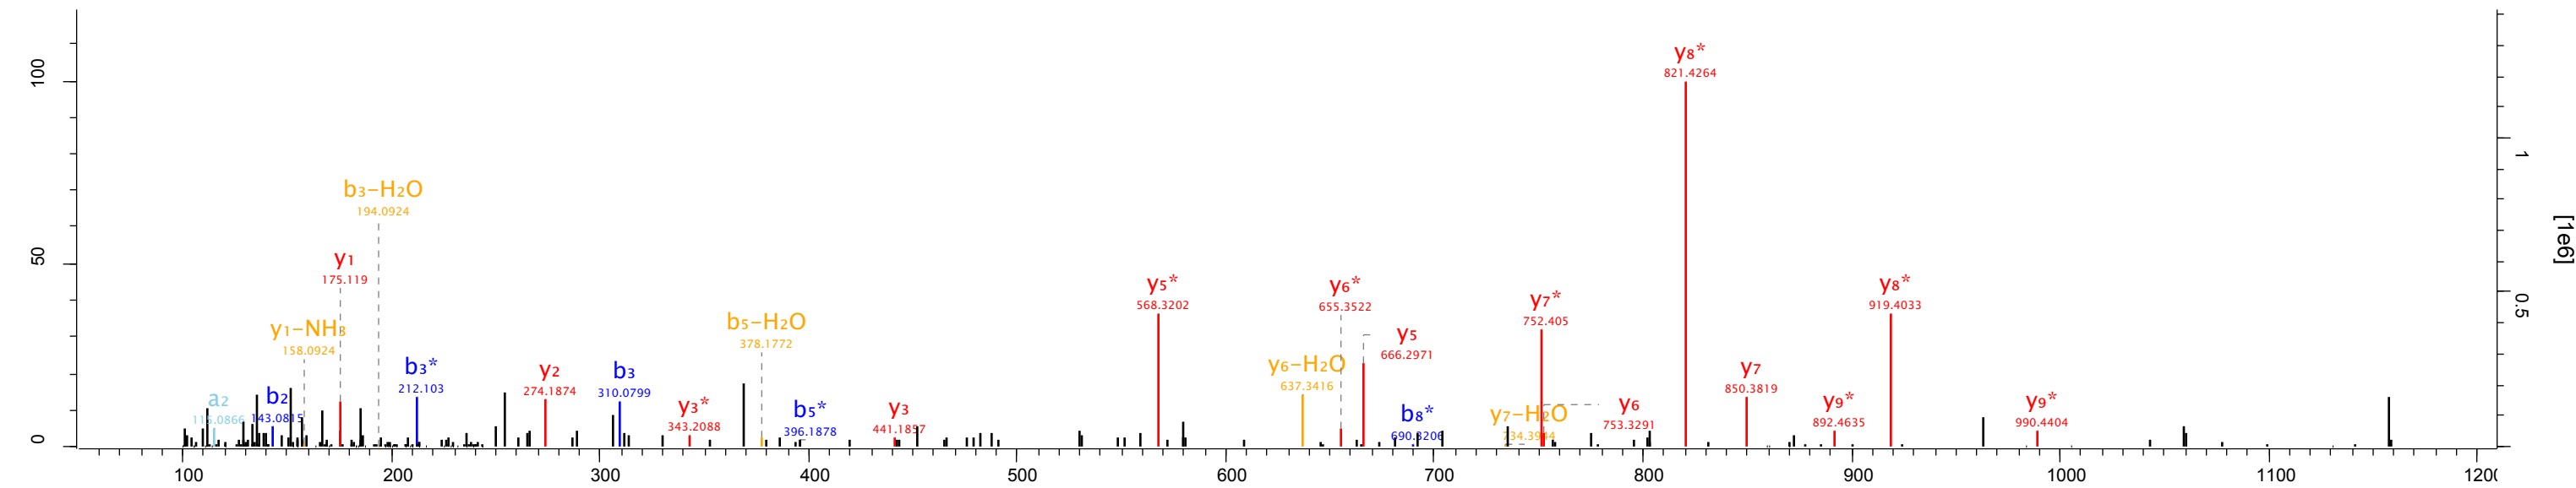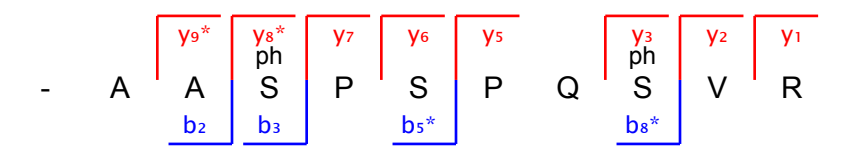

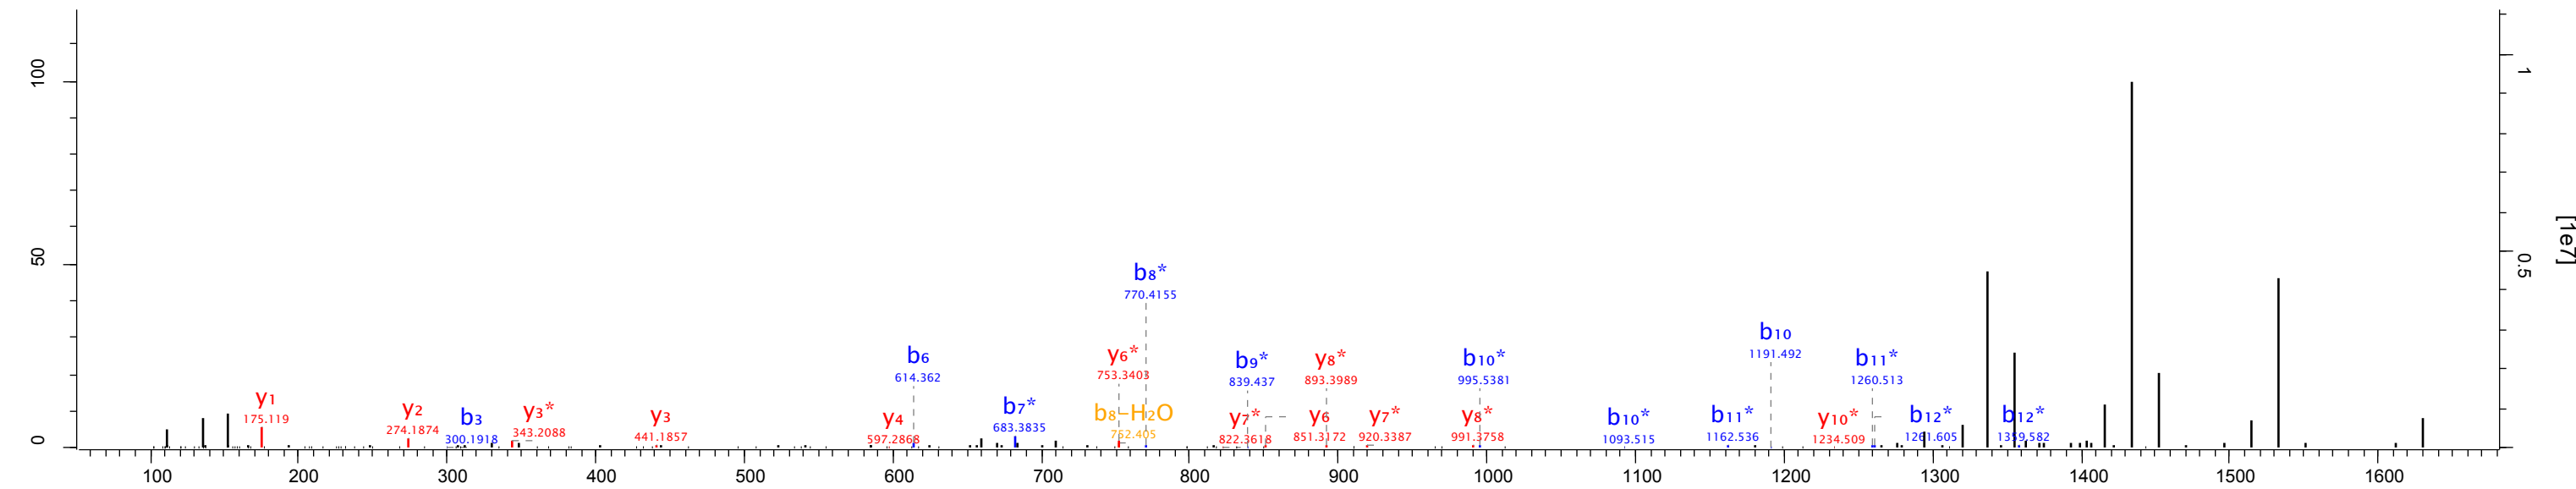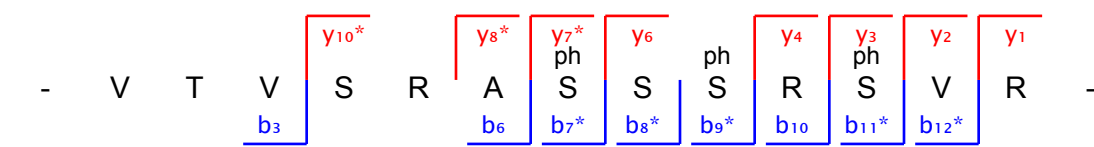

Raw file: 20171215\_MaS\_33SR\_LMH\_phospho2\_03  
 Scan: 3254 Method: FTMS; HCD Score: 123.81 m/z: 552.73 Gene names: SRRM1

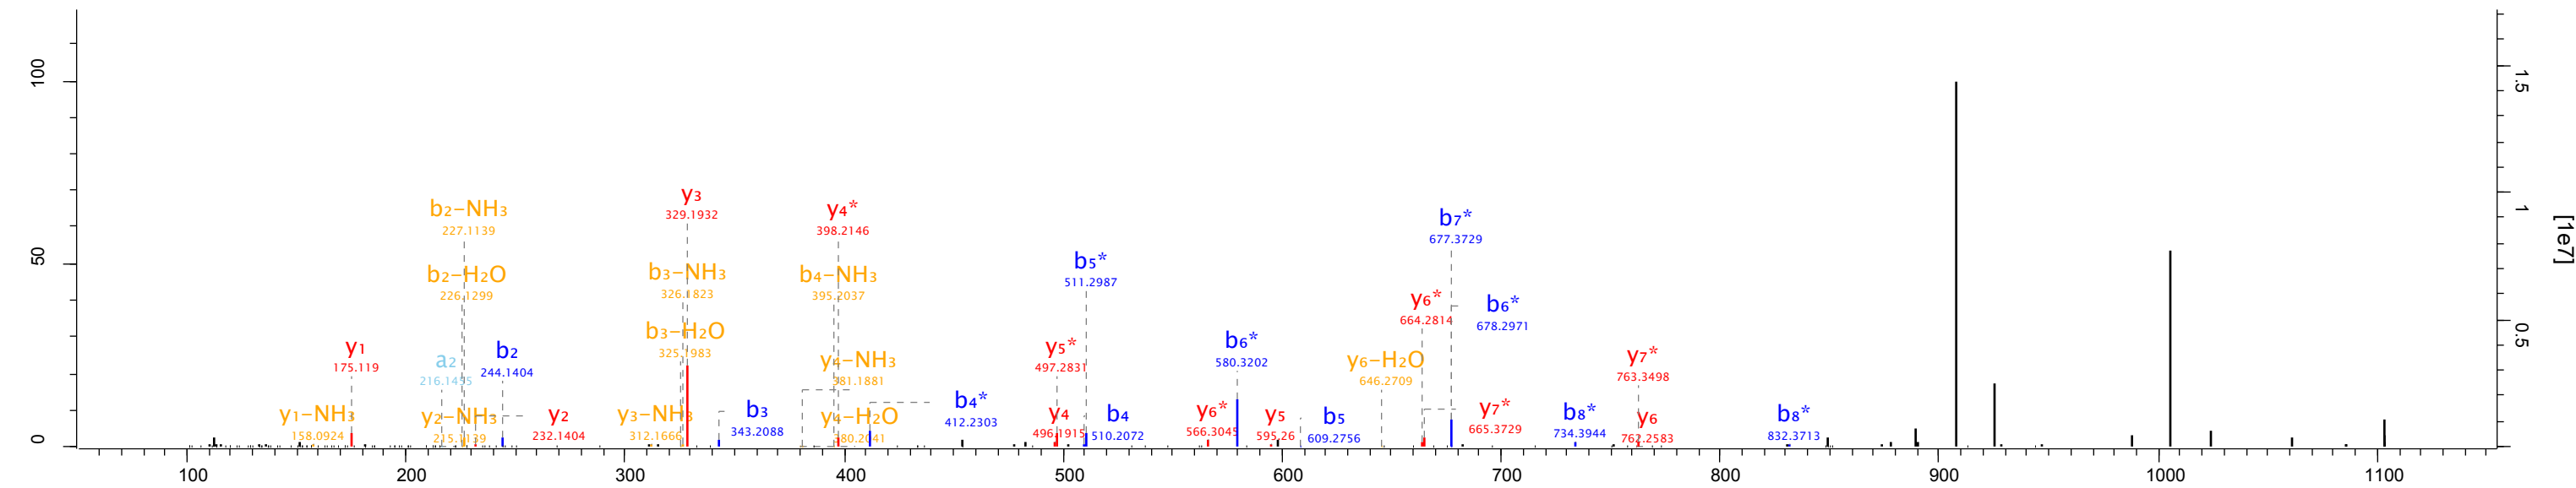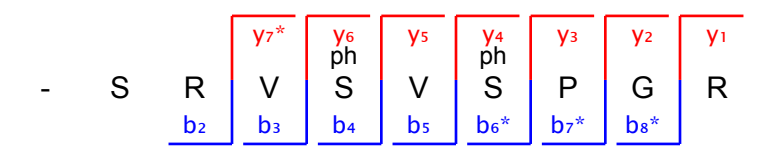

Raw file: 20171215\_MaS\_33SR\_LMH\_phospho2\_03  
 Scan: 3414 Method: FTMS; HCD Score: 112.91 m/z: 780.38 Gene names: SRRM1

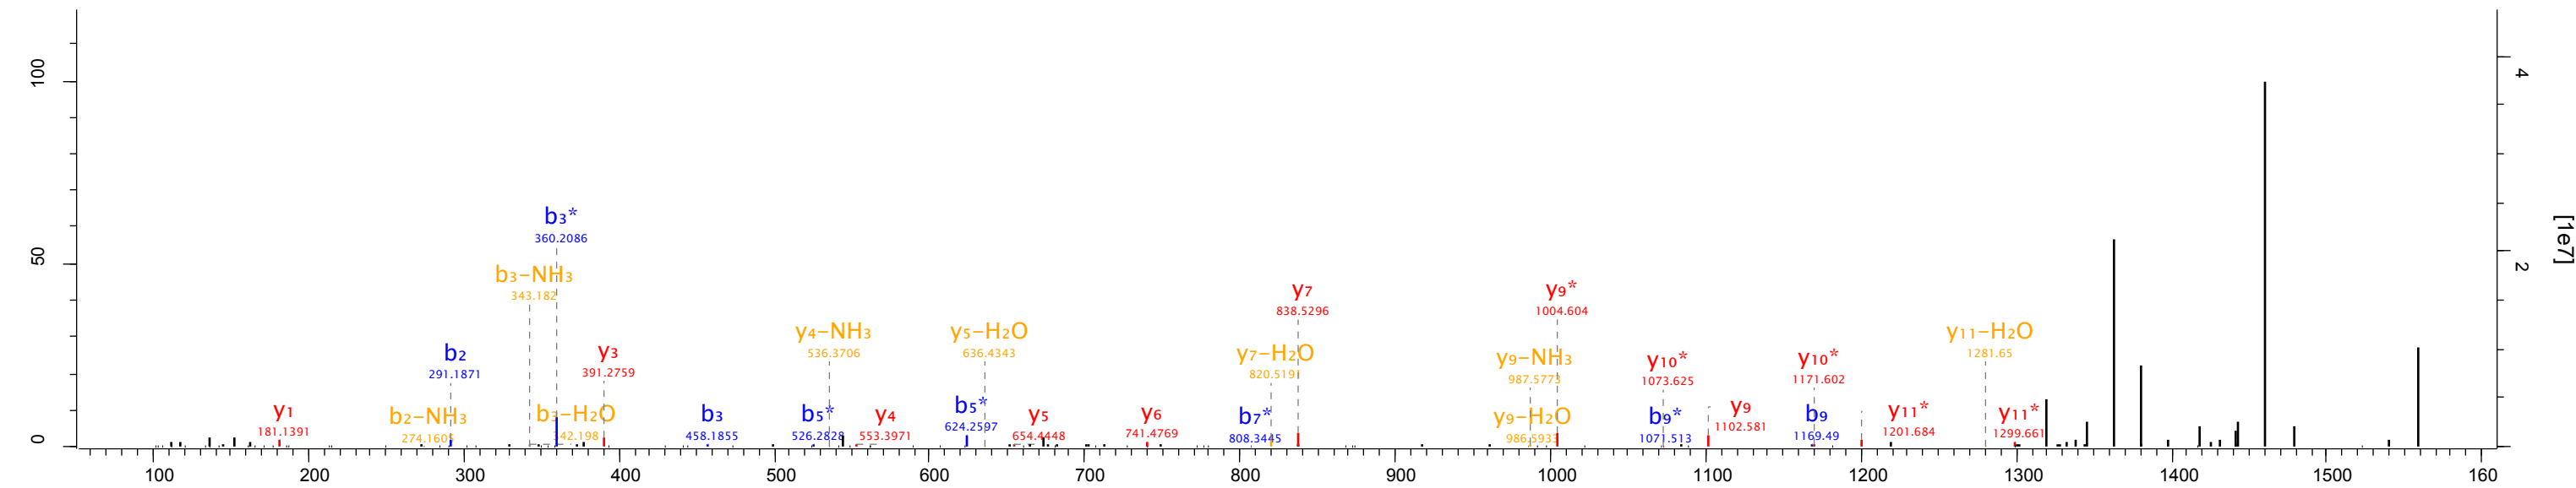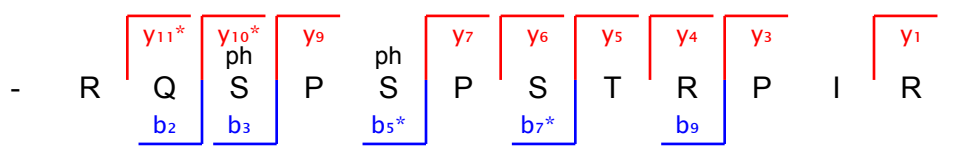

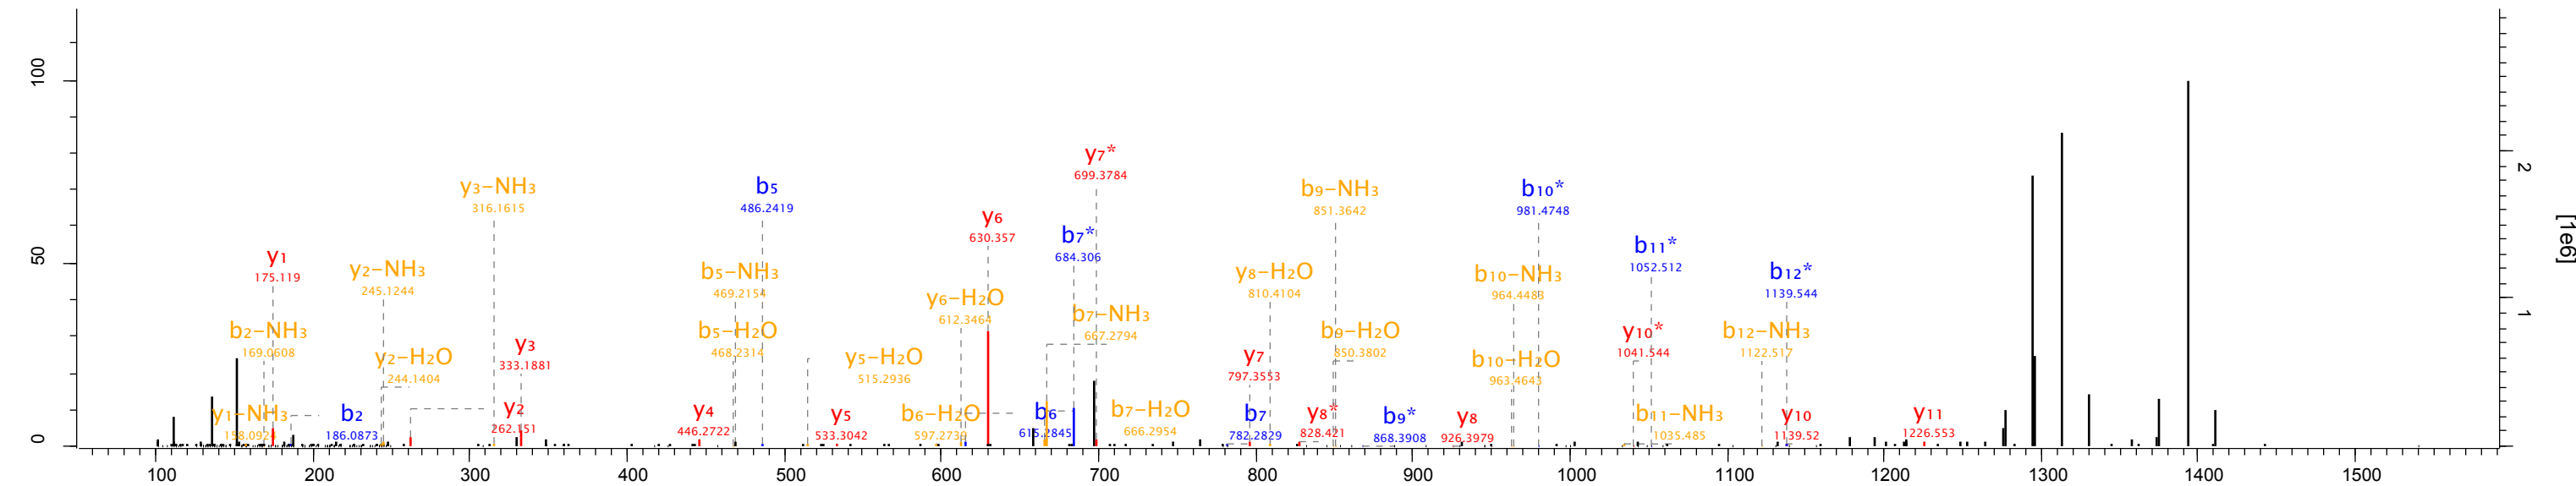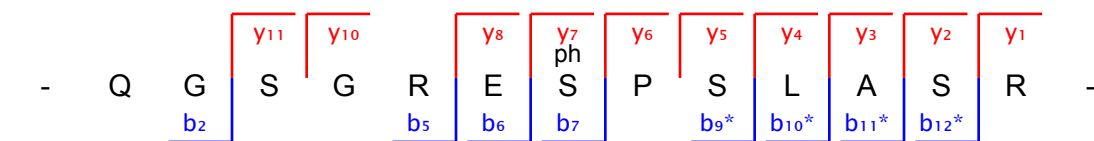

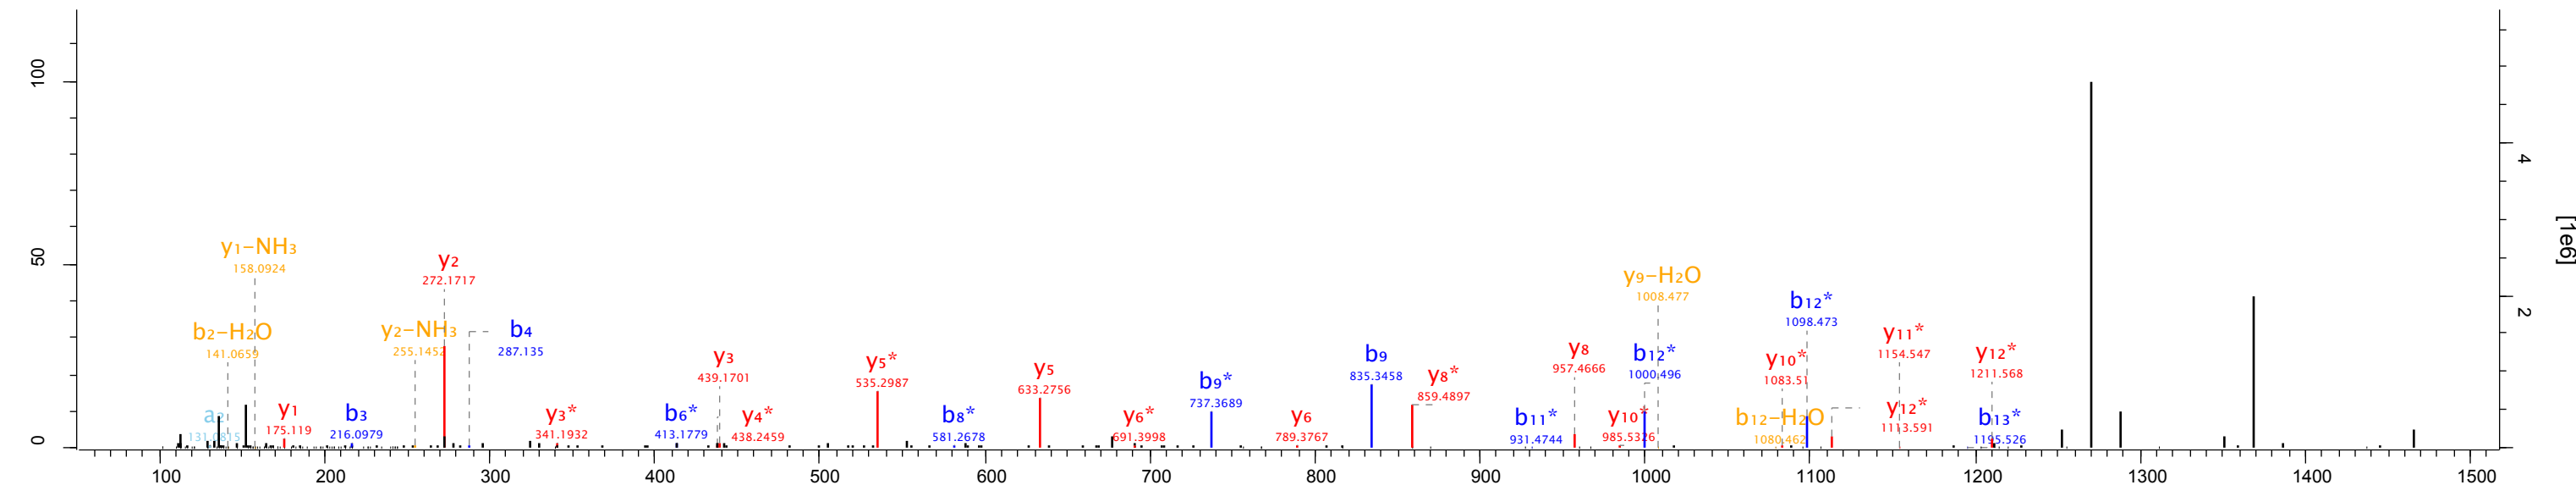

- S A G A G ph S P A R P P S P R -

a<sub>2</sub>
b<sub>3</sub>
b<sub>4</sub>
b<sub>6</sub>\*
b<sub>8</sub>\*
b<sub>9</sub>
b<sub>11</sub>\*
b<sub>12</sub>\*
b<sub>13</sub>\*
y<sub>12</sub>\*
y<sub>11</sub>\*
y<sub>10</sub>\*
y<sub>8</sub>
y<sub>6</sub>
y<sub>5</sub>
y<sub>4</sub>\*
y<sub>3</sub> ph
y<sub>2</sub>
y<sub>1</sub>

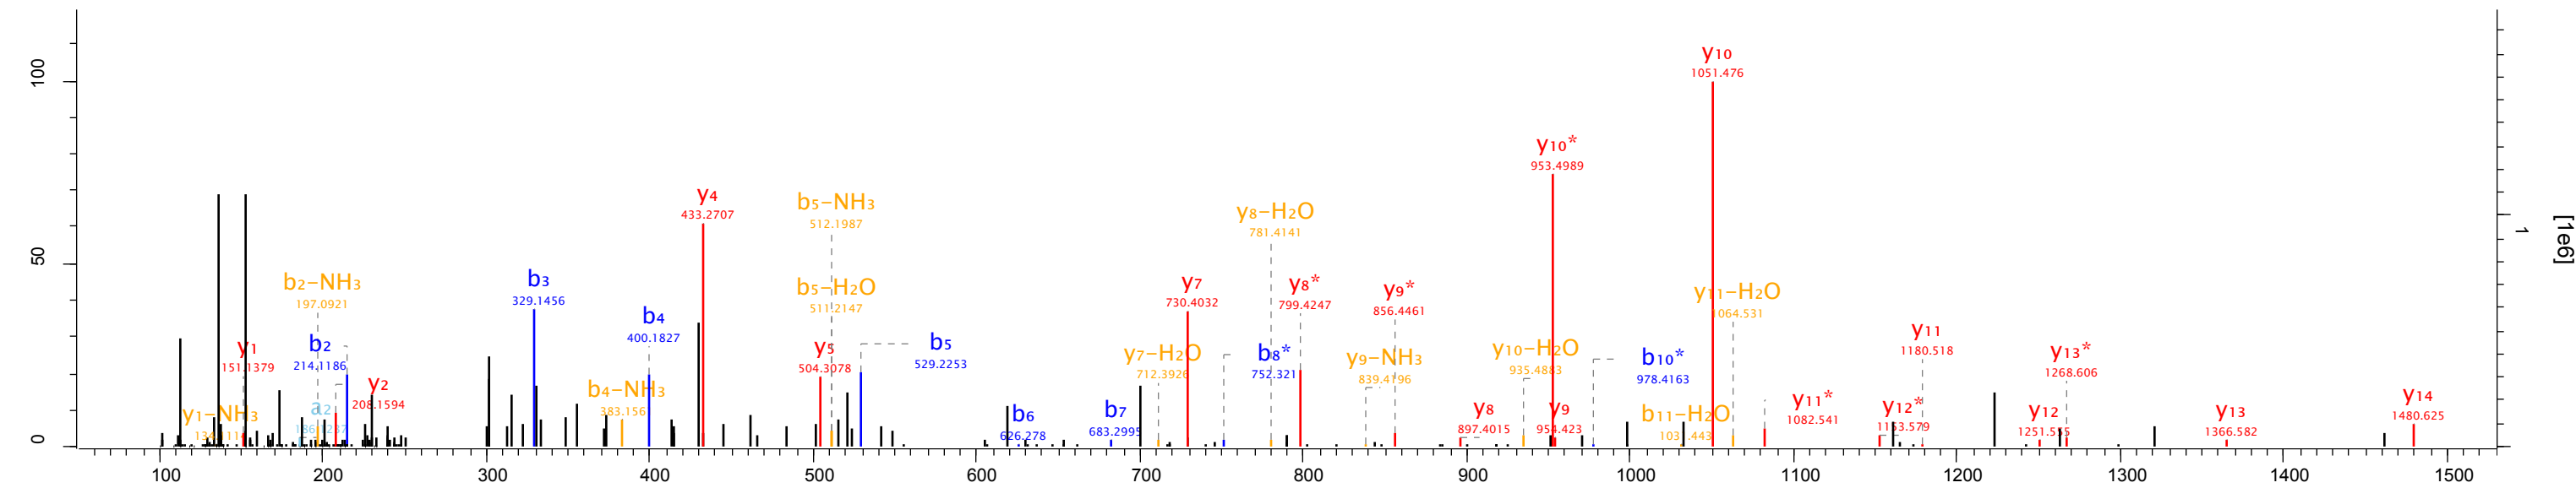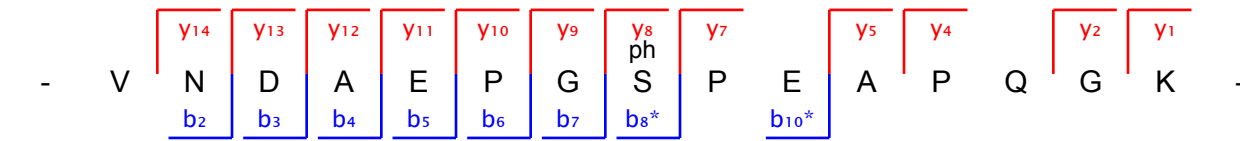



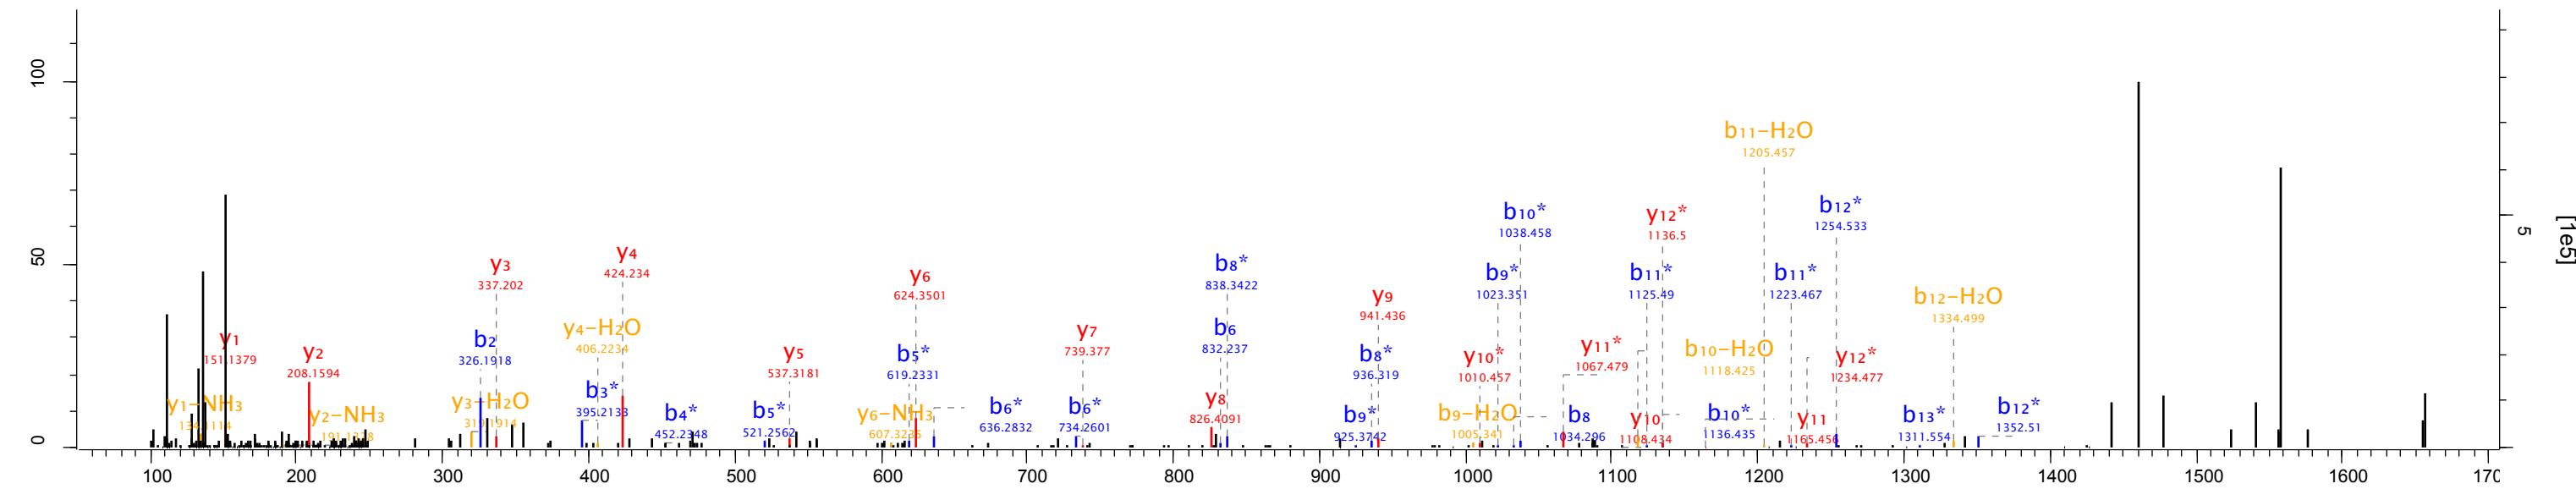

- R Y Y<sub>12</sub><sup>\*</sup>  
ph  
S Y<sub>11</sub>  
G Y<sub>10</sub>  
ph  
S Y<sub>9</sub>  
D S Y<sub>8</sub>  
D Y<sub>7</sub>  
D Y<sub>6</sub>  
S Y<sub>5</sub>  
I Y<sub>4</sub>  
S Y<sub>3</sub>  
E Y<sub>2</sub>  
G Y<sub>1</sub>  
K -

b<sub>2</sub> b<sub>3</sub><sup>\*</sup> b<sub>4</sub><sup>\*</sup> b<sub>5</sub><sup>\*</sup> b<sub>6</sub>
b<sub>8</sub> b<sub>9</sub><sup>\*</sup> b<sub>10</sub><sup>\*</sup> b<sub>11</sub><sup>\*</sup> b<sub>12</sub><sup>\*</sup> b<sub>13</sub><sup>\*</sup>

Raw file  
20171215\_MaS\_33SR\_LMH\_phospho2\_03

Scan 4084 Method FTMS; HCD Score 302.61 m/z 1031.92 Gene names ATN1

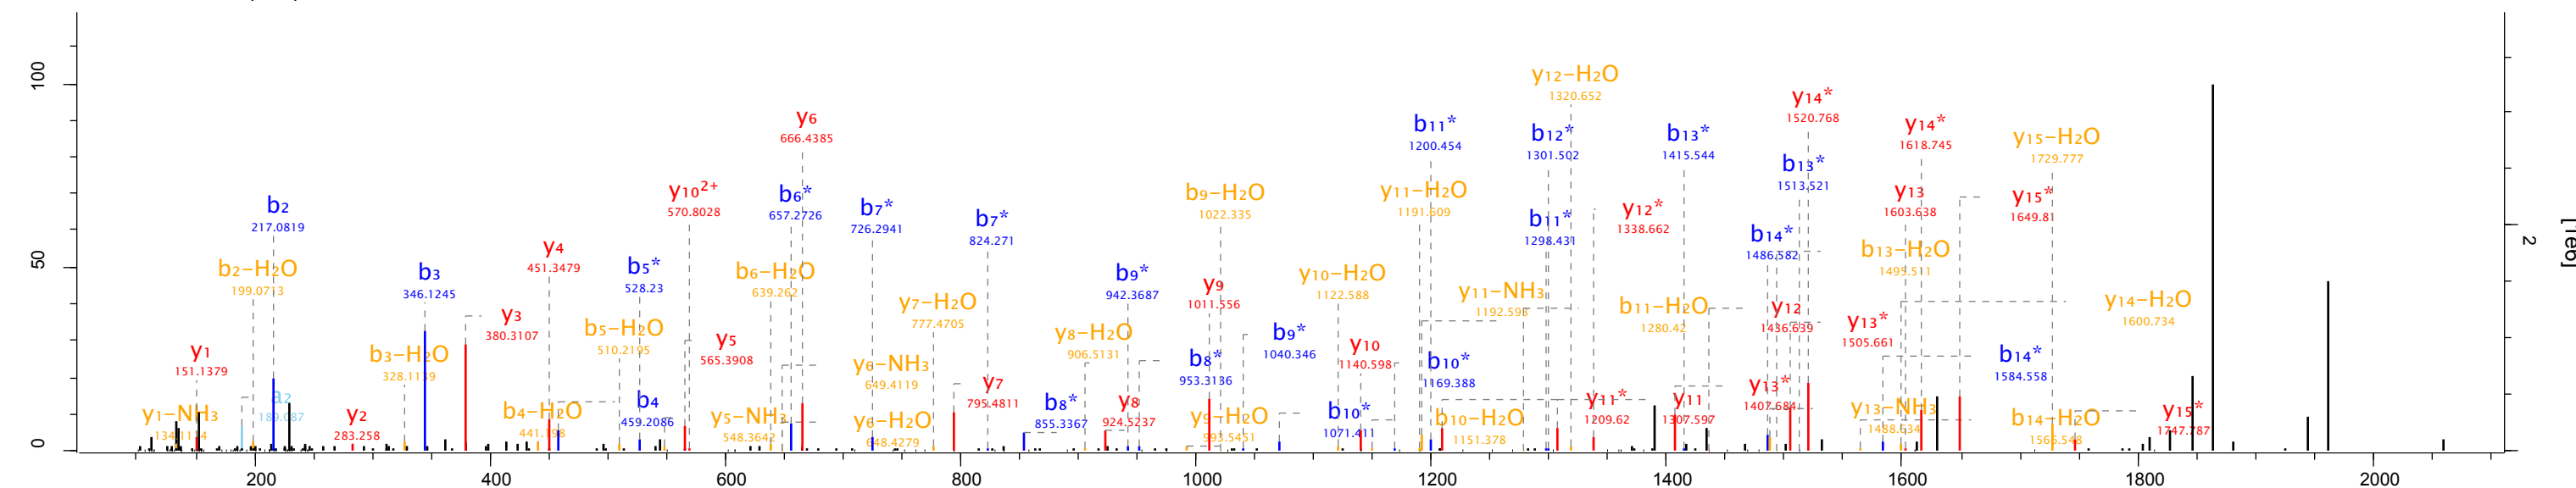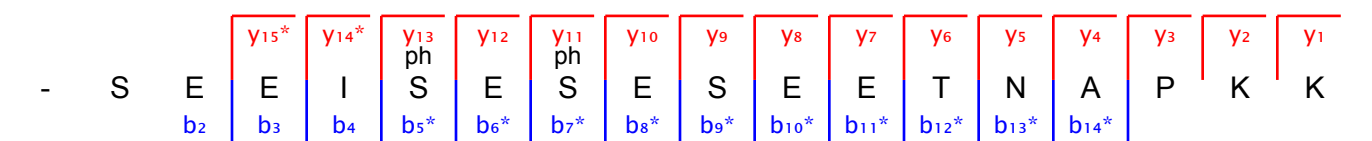

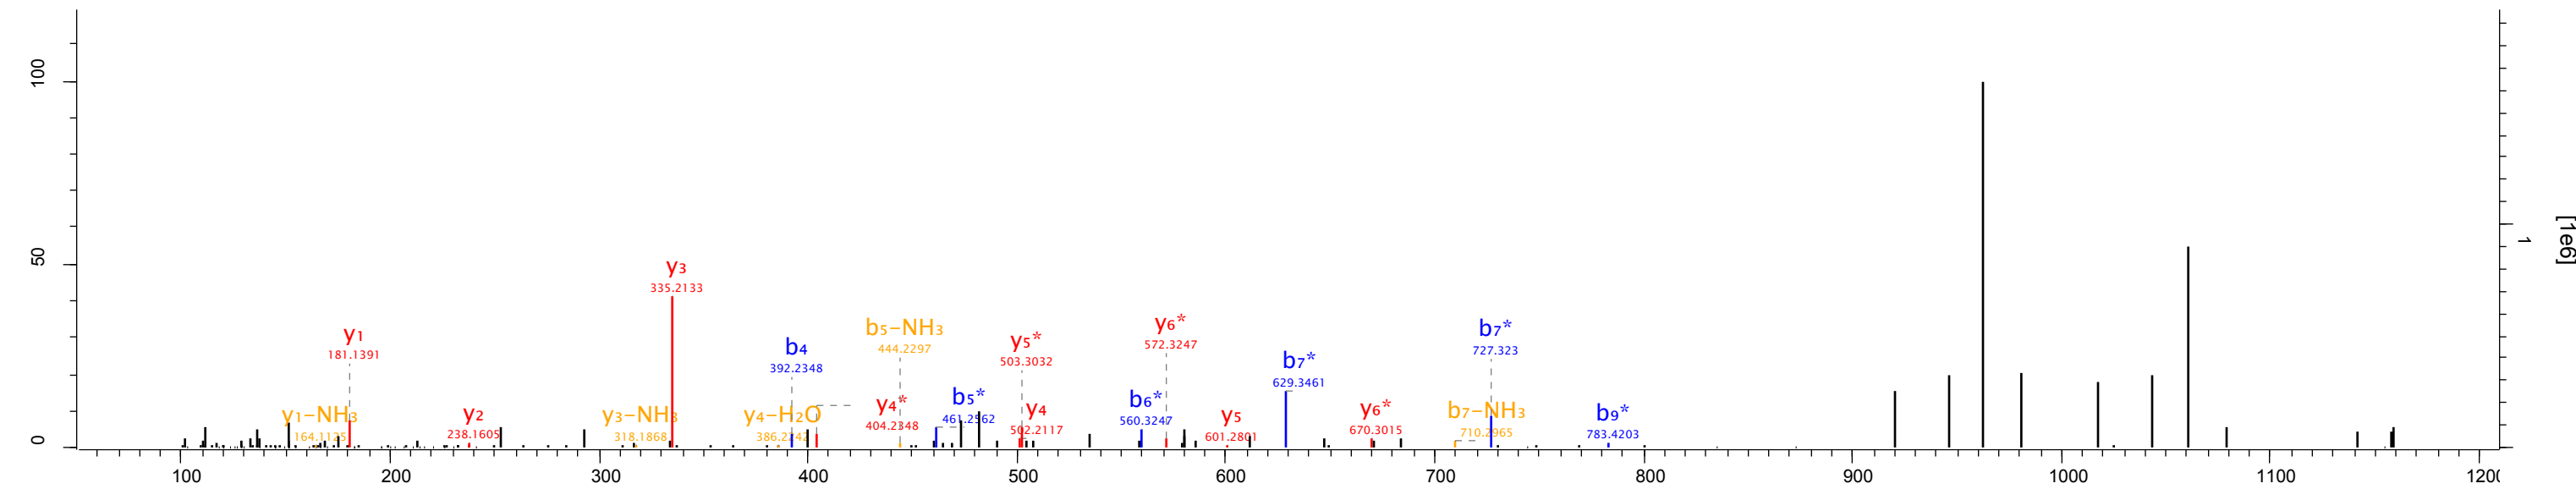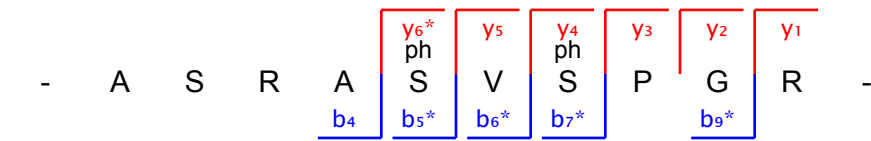

Raw file  
20171215\_MaS\_33SR\_LMH\_phospho2\_03

Scan 4454 Method FTMS; HCD Score 177.79 m/z 800.83 Gene names COL4A3BP

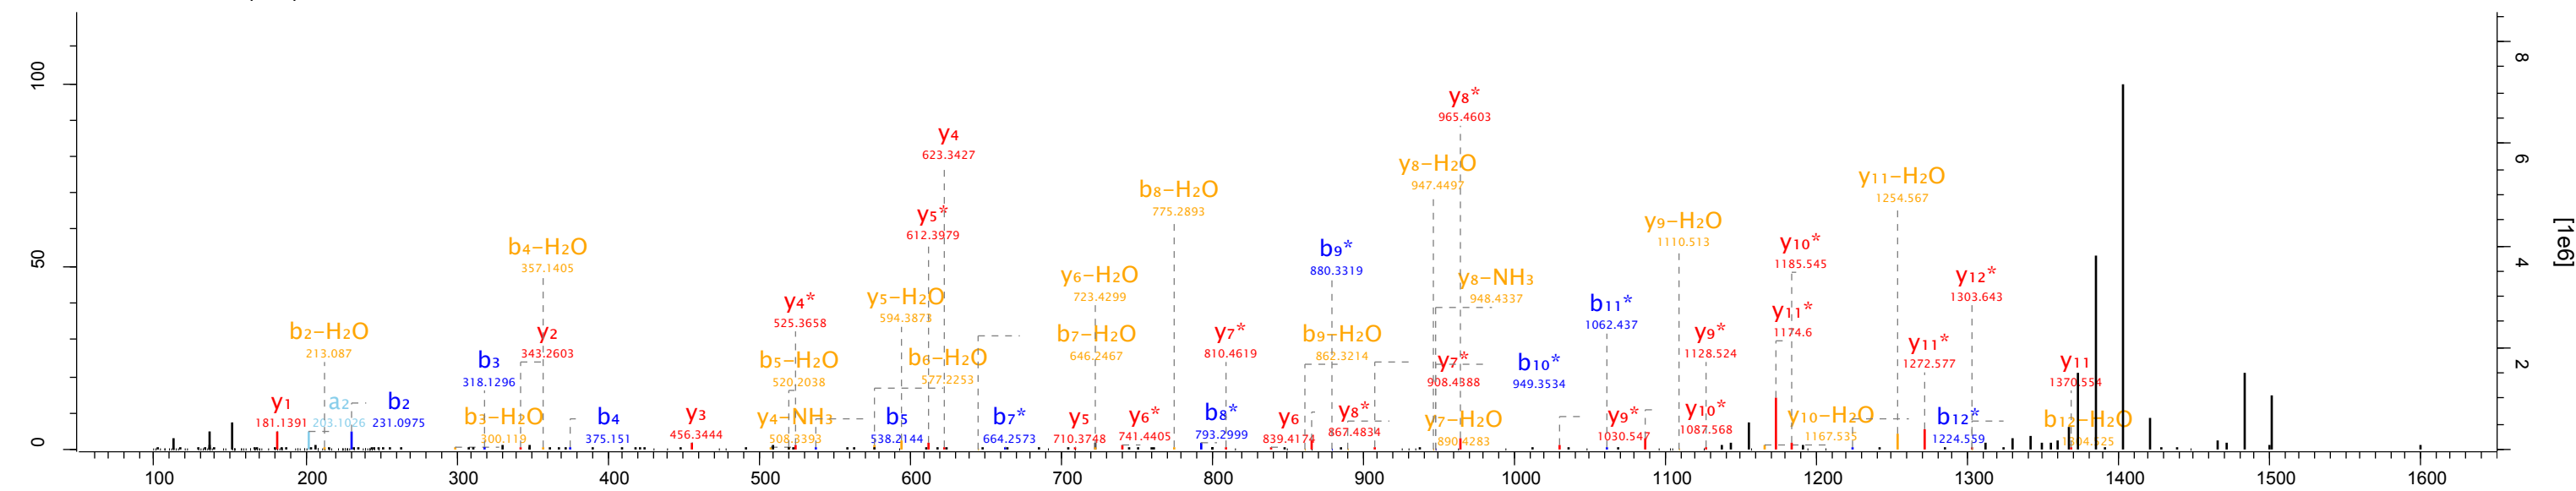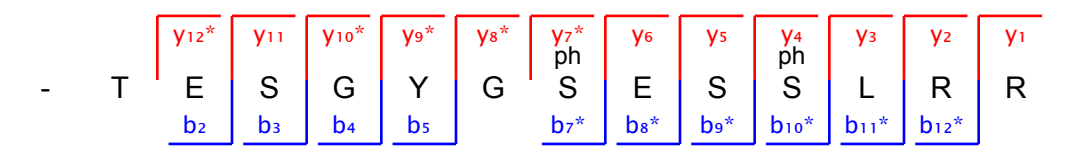

Raw file 20171215\_MaS\_33SR\_LMH\_phospho2\_03 Scan 4834 Method FTMS; HCD Score 114.75 m/z 860.33 Gene names ABL2

20171215\_MaS\_33SR\_LMH\_phospho2\_03

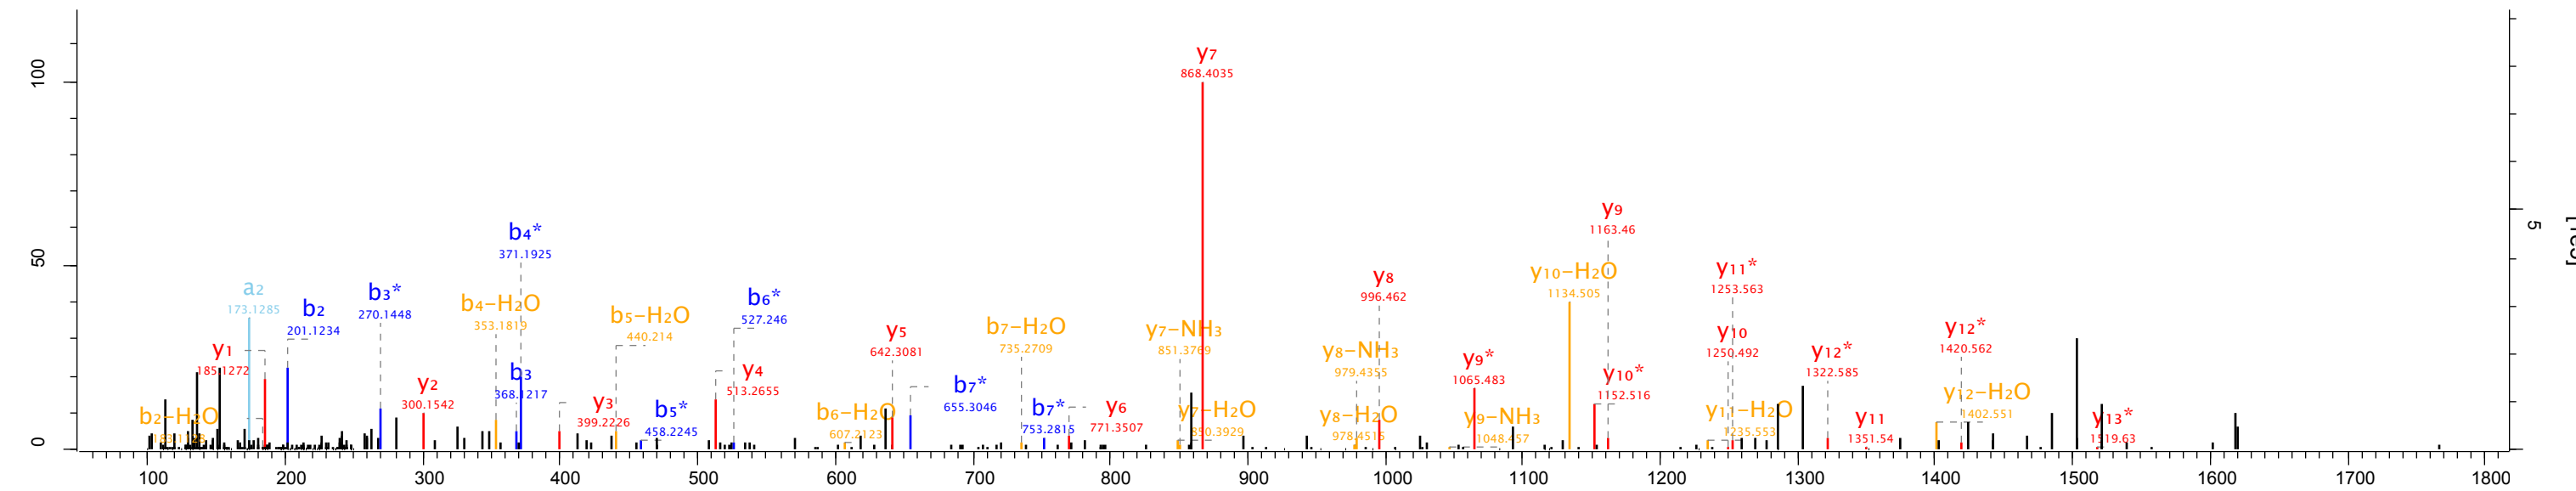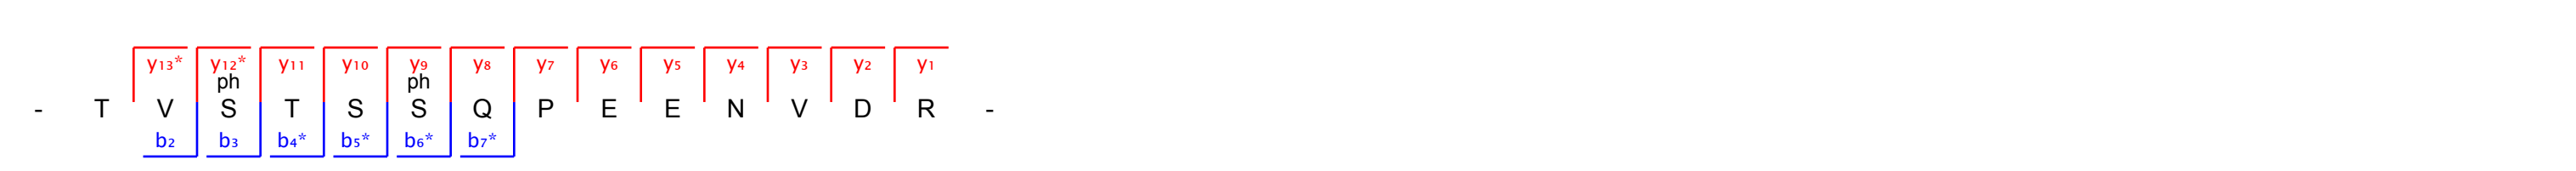

Raw file  
20171215\_MaS\_33SR\_LMH\_phospho2\_03

Scan 4934 Method FTMS; HCD Score 134.24 m/z 907.38 Gene names RAD23B

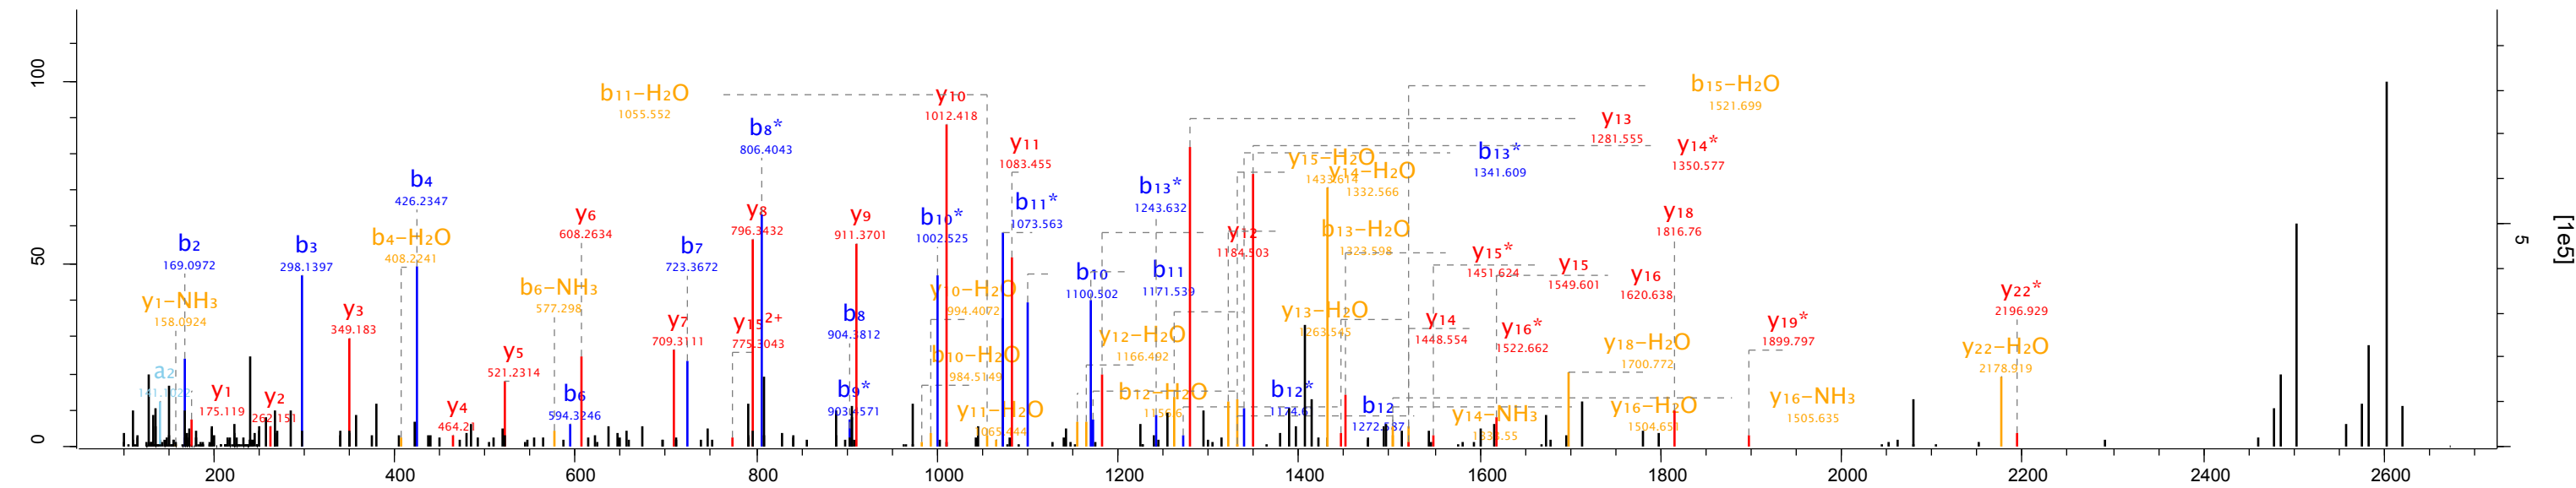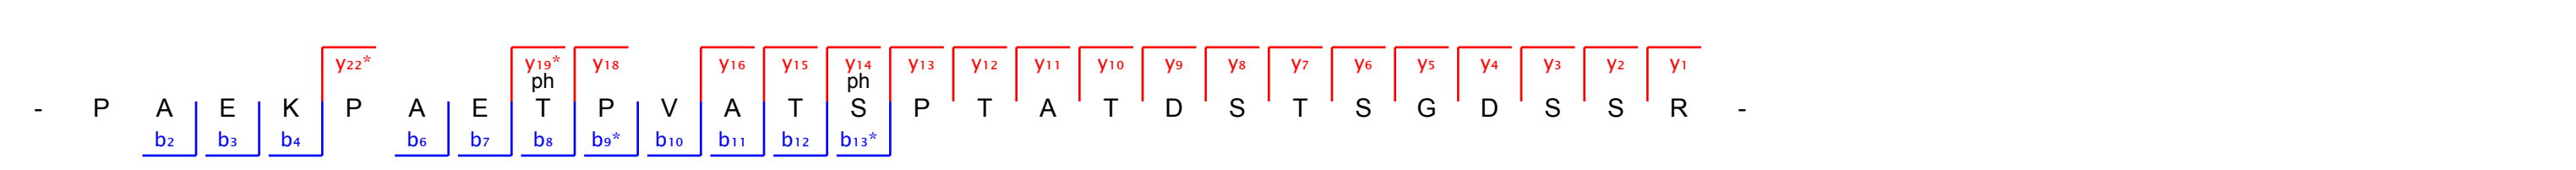

Raw file  
20171215\_MaS\_33SR\_LMH\_phospho2\_03

Scan Method Score m/z Gene names  
4954 FTMS; HCD 64.97 838.35 TCOF1

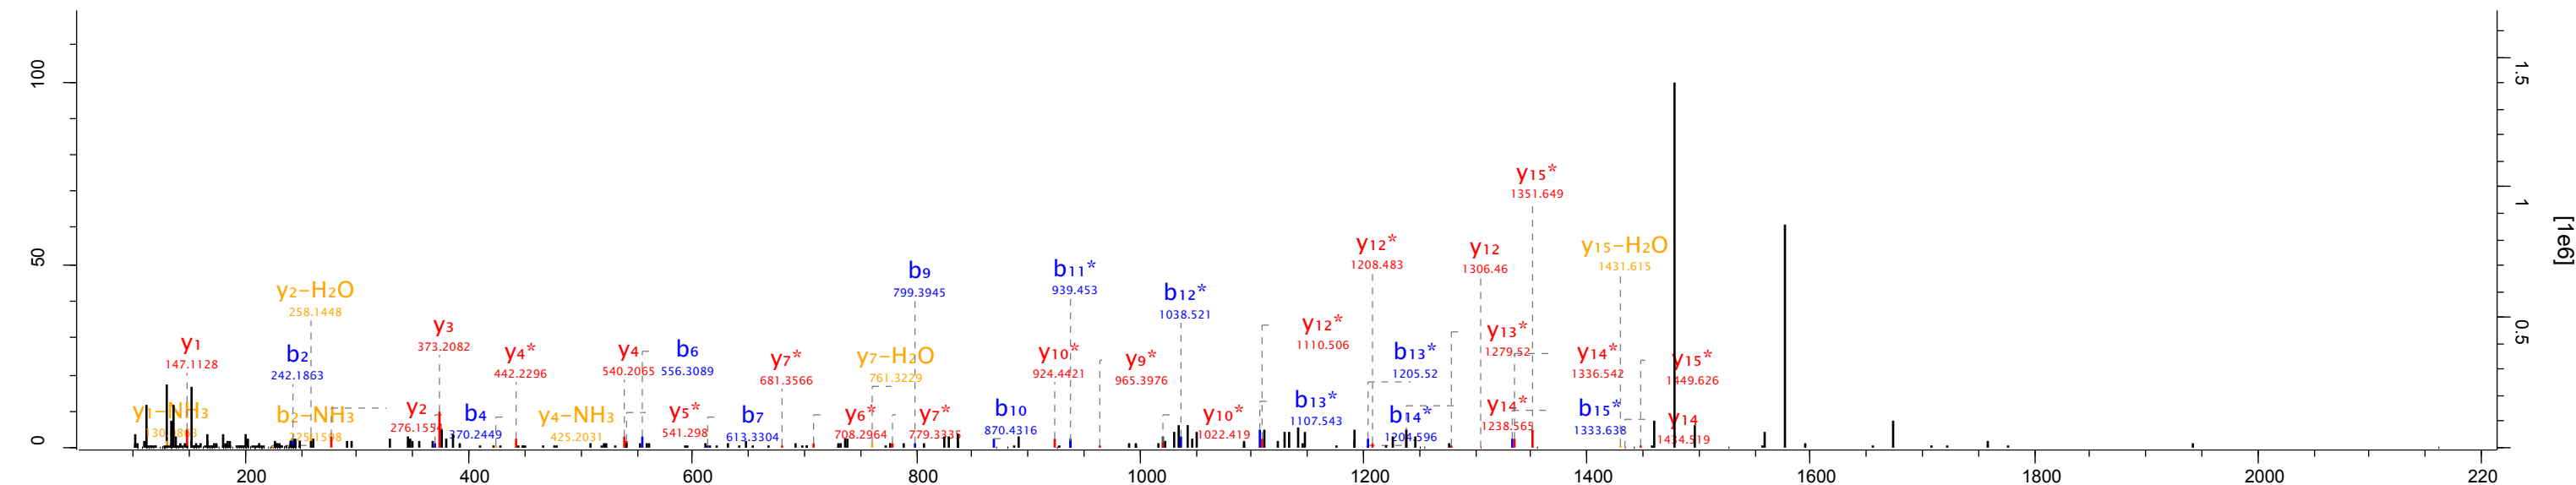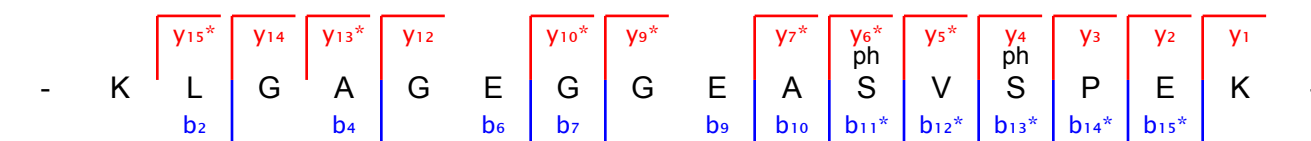

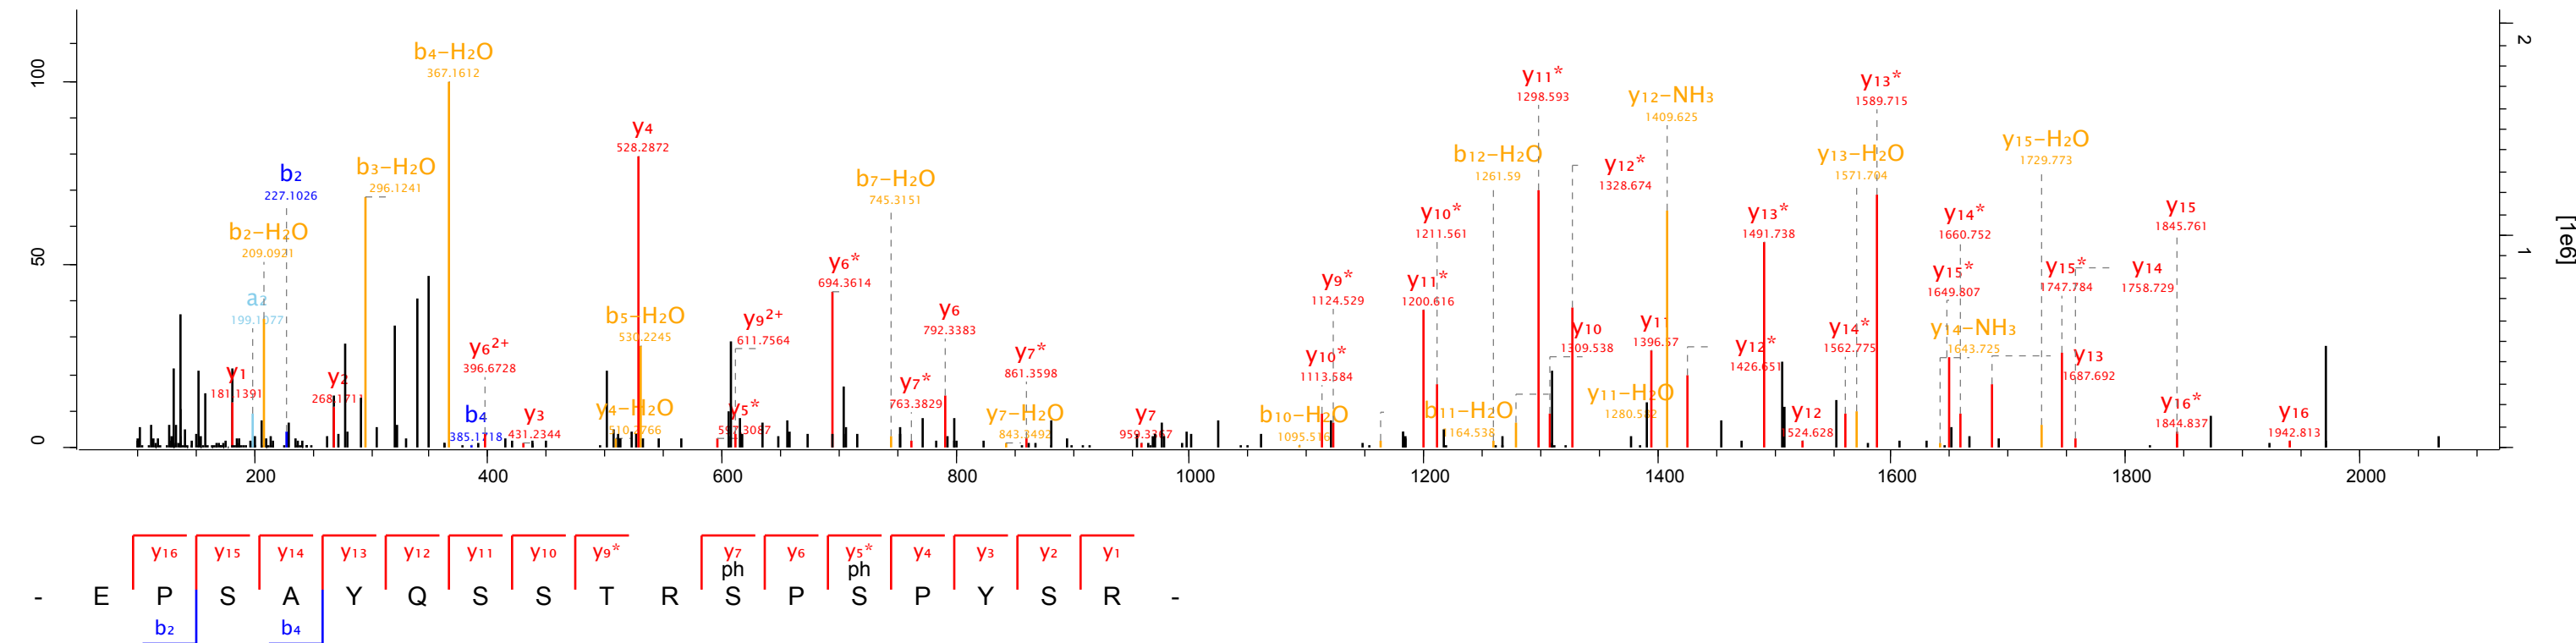



Raw file: 20171215\_MaS\_33SR\_LMH\_phospho2\_03  
 Scan: 5554 Method: FTMS; HCD Score: 123.28 m/z: 728.28 Gene names: NDEL1

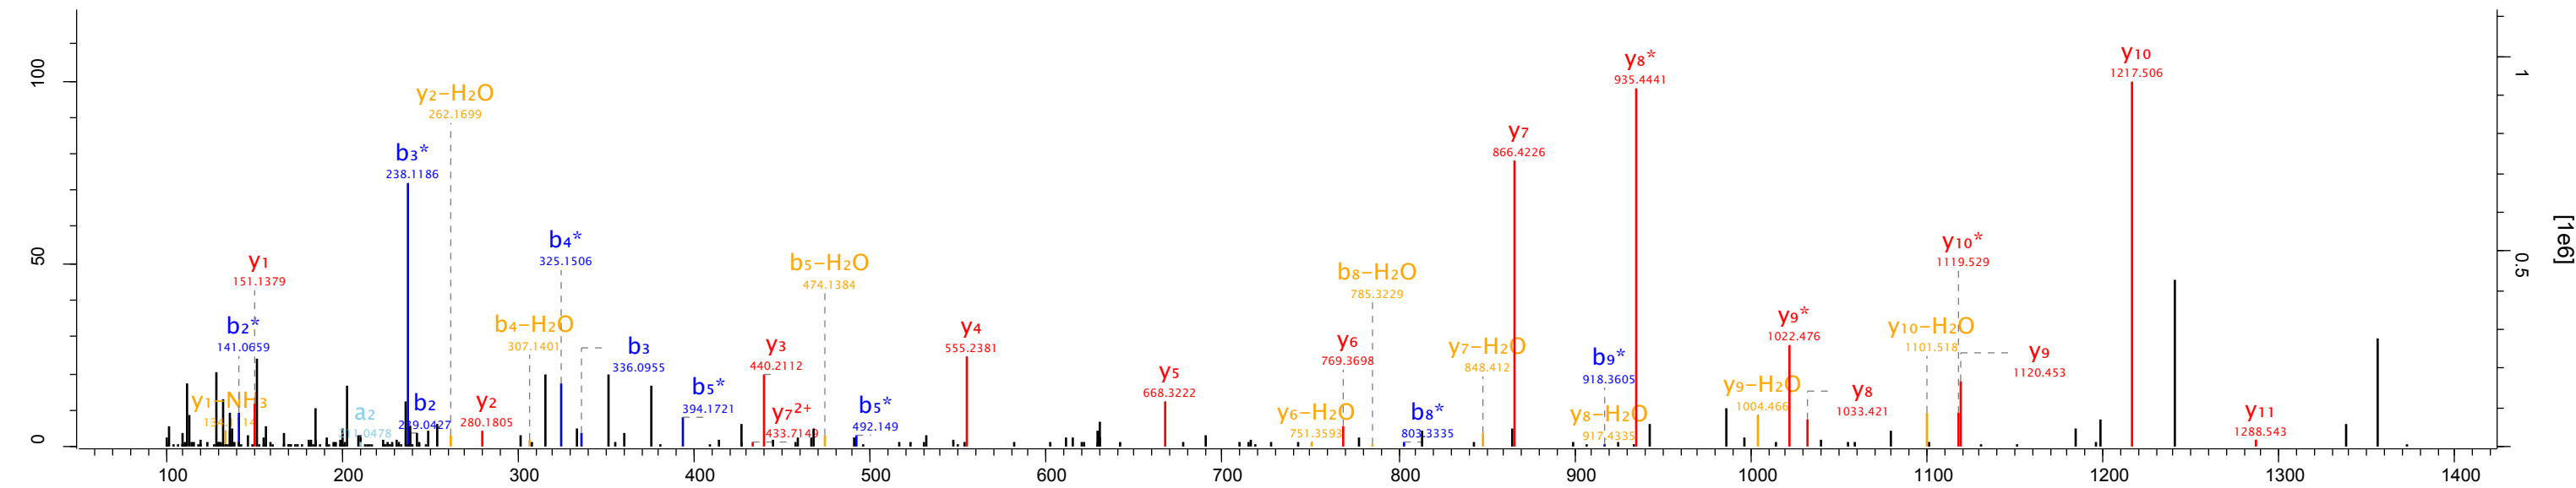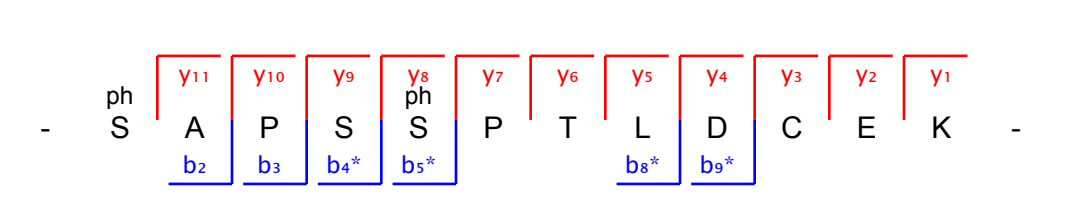

Raw file 20171215\_MaS\_33SR\_LMH\_phospho2\_03 Scan 5594 Method FTMS; HCD Score 47.69 m/z 758.34 Gene names CLASP2

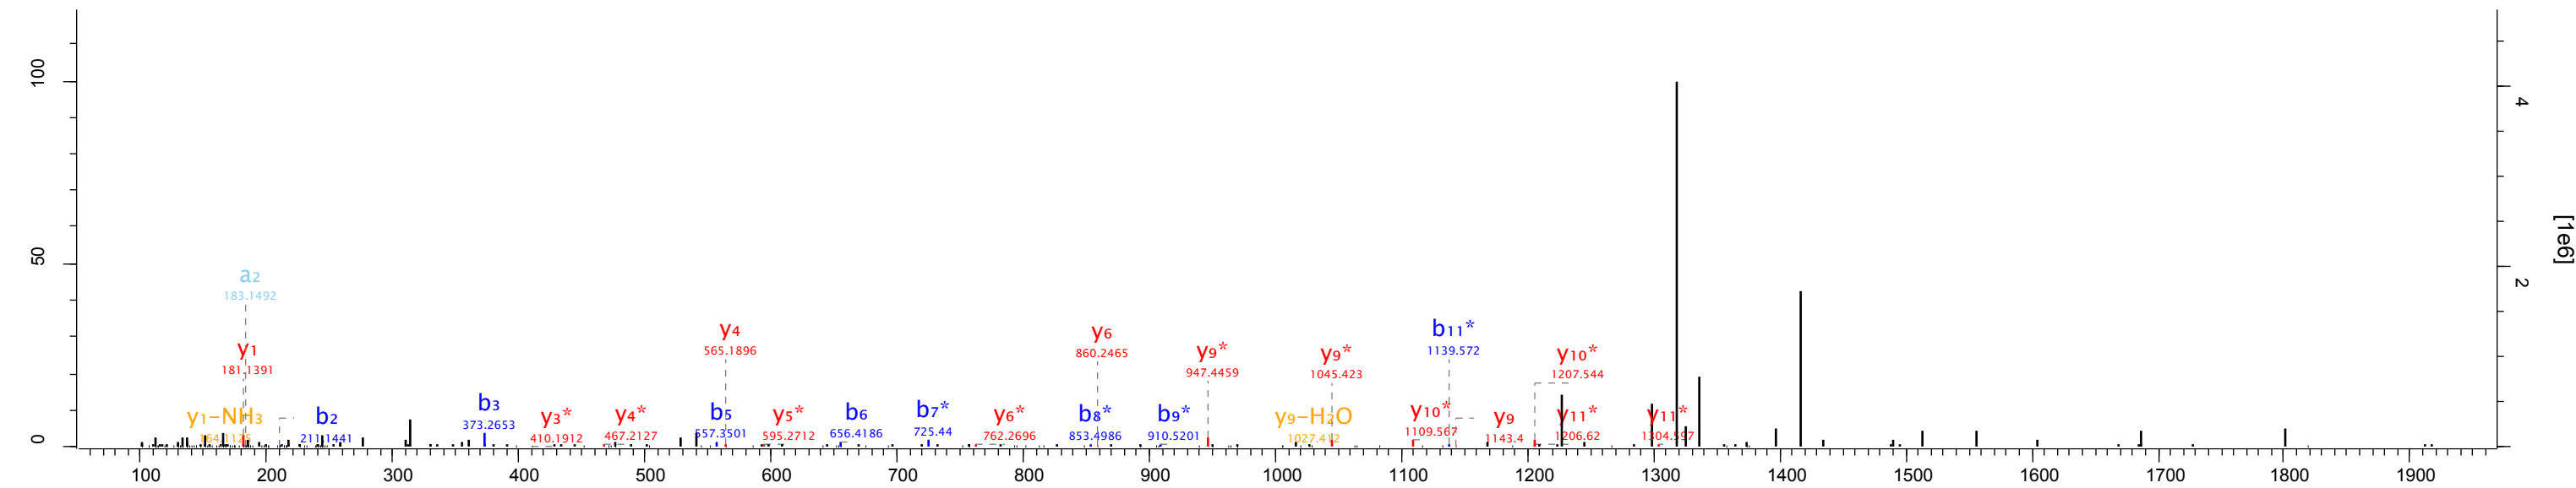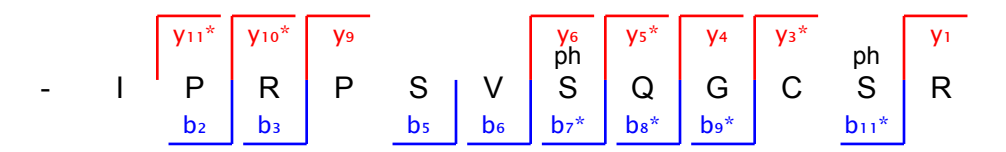

Raw file 20171215\_MaS\_33SR\_LMH\_phospho2\_03 Scan 5654 Method FTMS; HCD Score 133.86 m/z 671.8 Gene names ANKRD11

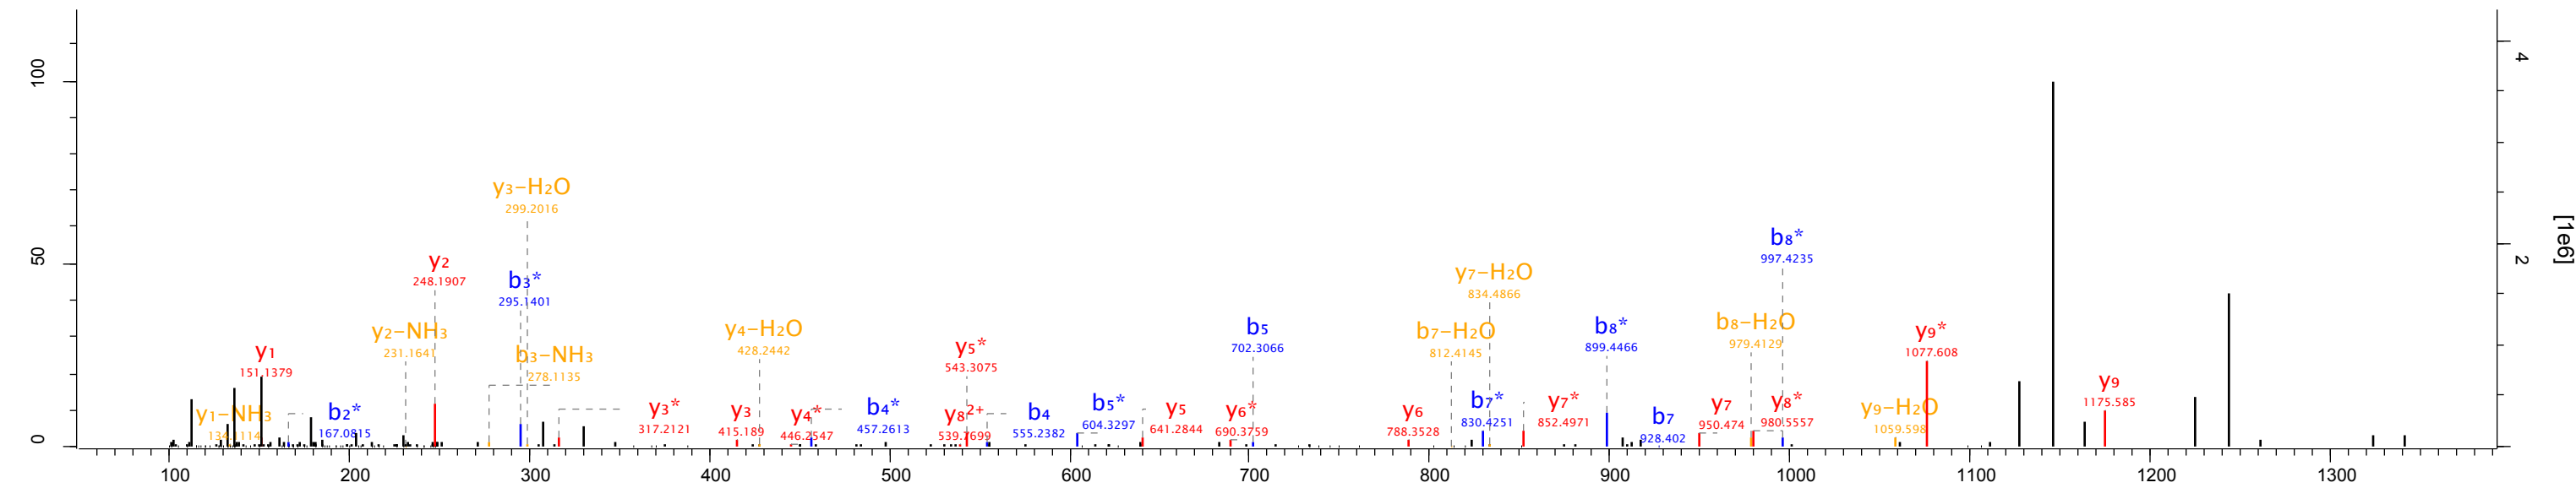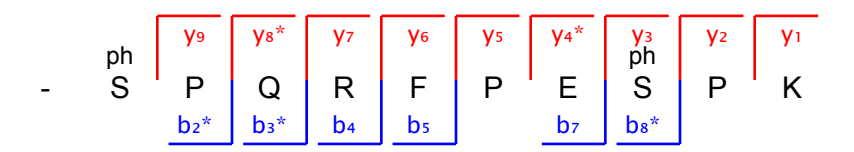

Raw file 20171215\_MaS\_33SR\_LMH\_phospho2\_03 Scan 5674 Method FTMS; HCD Score 171.99 m/z 1179.08 Gene names SMARCA2

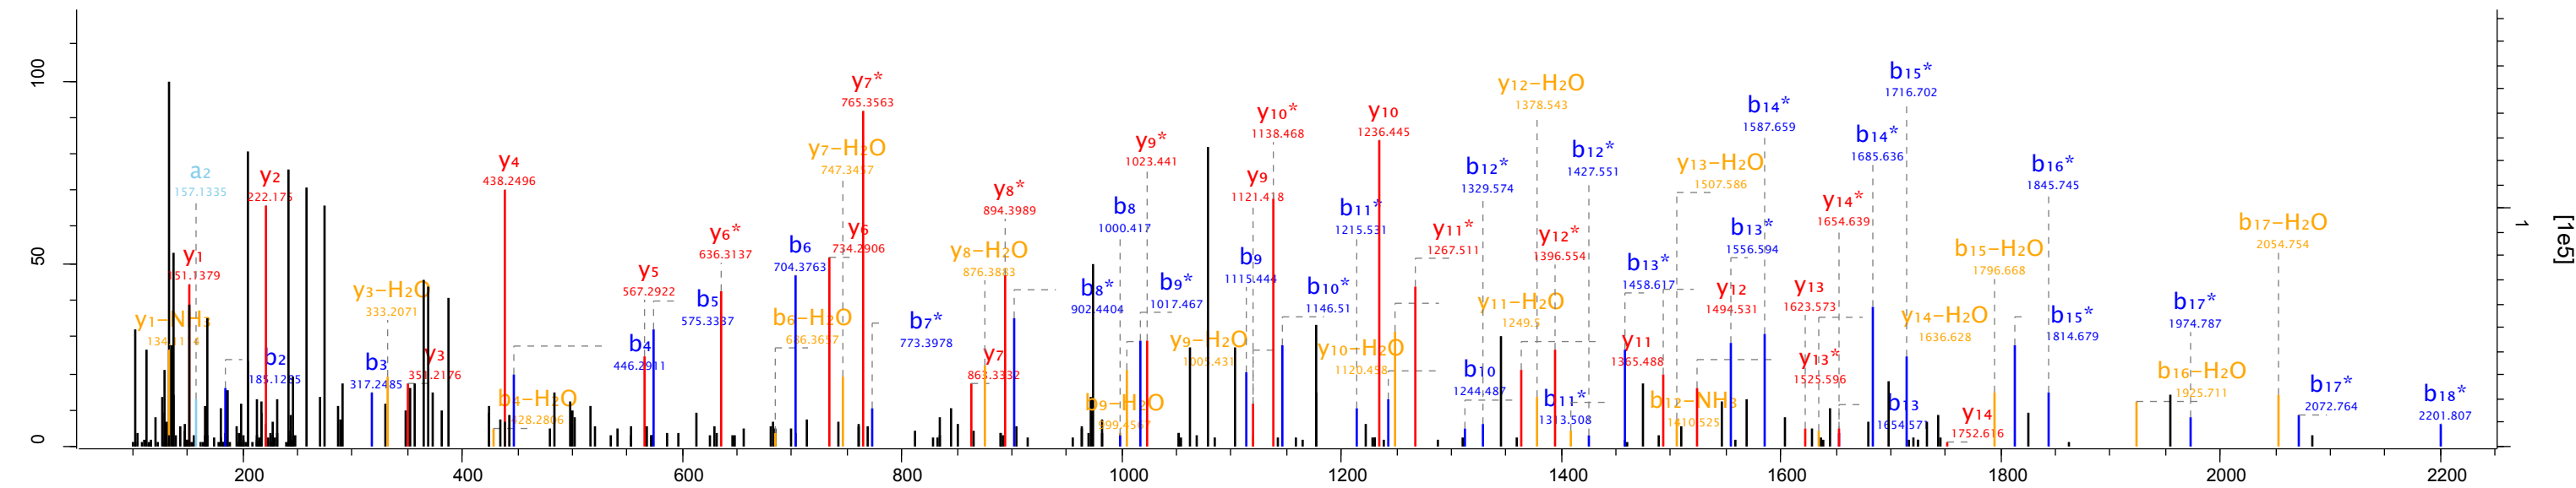

- I A K E E E S E D E S N E E E E D E E E S E S E A K -

b<sub>2</sub>
b<sub>3</sub>
b<sub>4</sub>
b<sub>5</sub>
b<sub>6</sub>
b<sub>7</sub><sup>\*</sup>
b<sub>8</sub>
b<sub>9</sub>
b<sub>10</sub>
b<sub>11</sub><sup>\*</sup>
b<sub>12</sub><sup>\*</sup>
b<sub>13</sub>
b<sub>14</sub><sup>\*</sup>
b<sub>15</sub><sup>\*</sup>
b<sub>16</sub><sup>\*</sup>
b<sub>17</sub><sup>\*</sup>
b<sub>18</sub><sup>\*</sup>
y<sub>14</sub>
y<sub>13</sub>
y<sub>12</sub>
y<sub>11</sub>
y<sub>10</sub>
y<sub>9</sub>
y<sub>8</sub><sup>\*</sup>
y<sub>7</sub>
y<sub>6</sub>
y<sub>5</sub>
y<sub>4</sub>
y<sub>3</sub>
y<sub>2</sub>
y<sub>1</sub>

Raw file  
20171215\_MaS\_33SR\_LMH\_phospho2\_03

Scan 5734 Method FTMS; HCD Score 233.3 m/z 810.36 Gene names YAP1

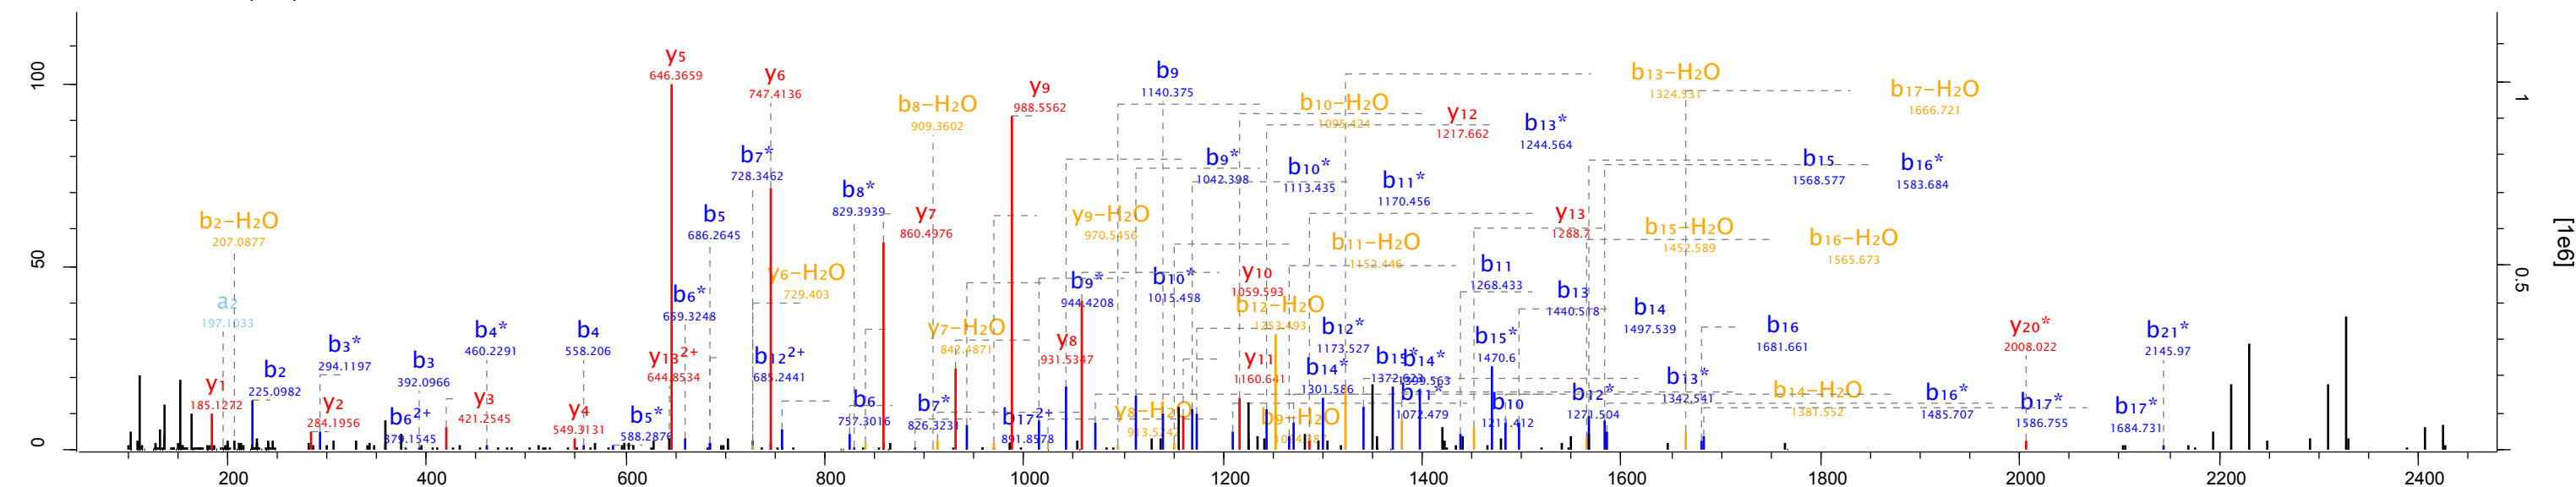



Raw file  
20171215\_MaS\_33SR\_LMH\_phospho2\_03

Scan 6114 Method FTMS; HCD Score 128.22 m/z 854.67 Gene names SMARCD1

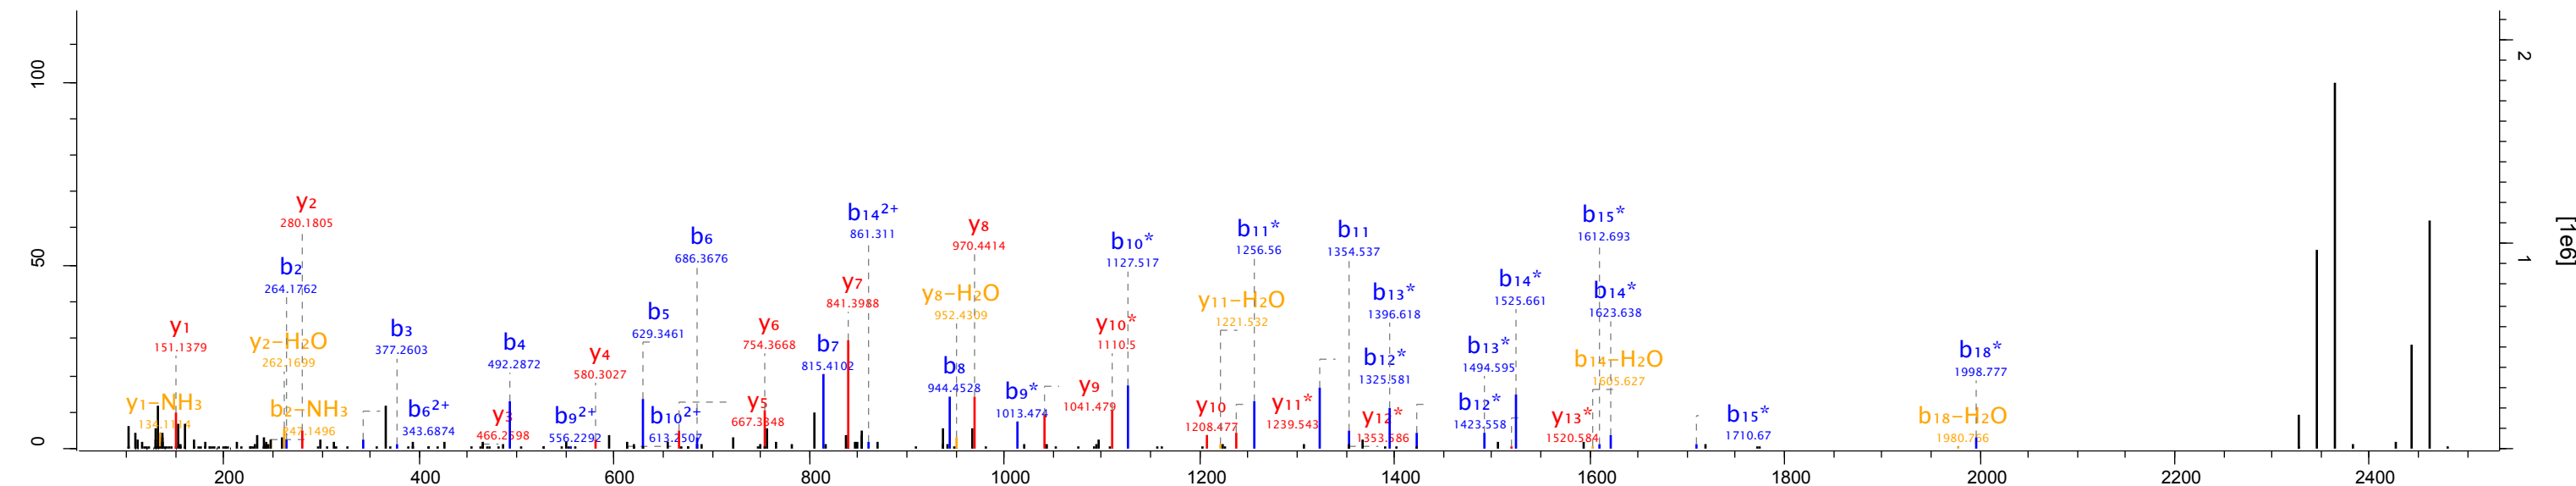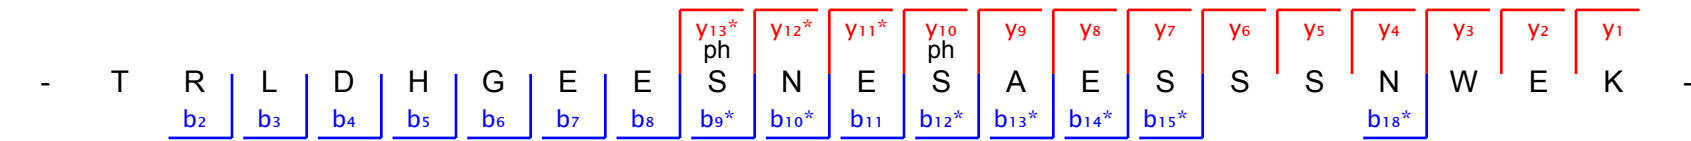

Raw file 20171215\_MaS\_33SR\_LMH\_phospho2\_03 Scan 6244 Method FTMS; HCD Score 92.41 m/z 473.23 Gene names SH3BP5L

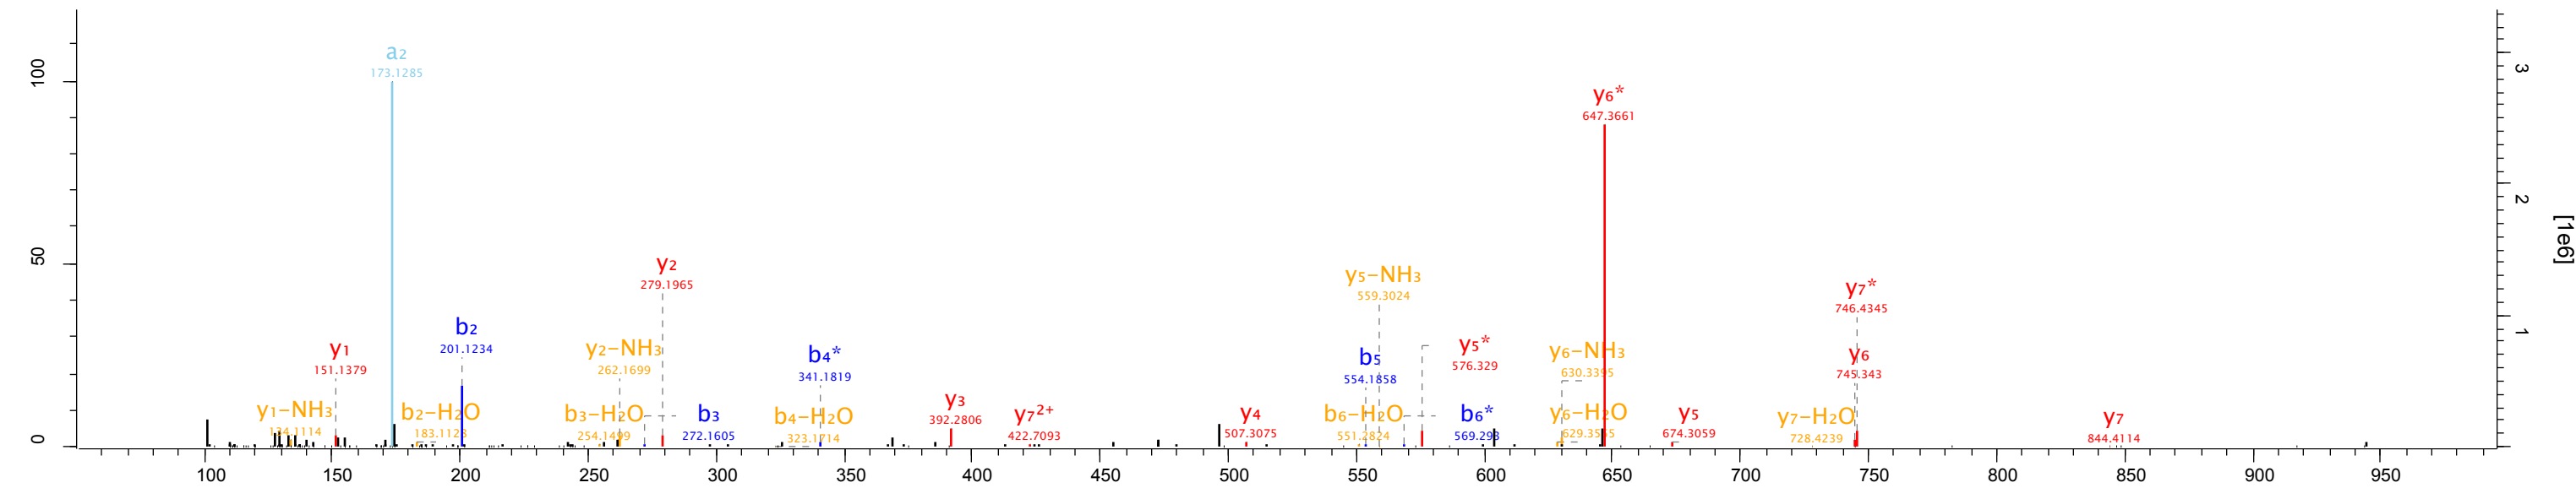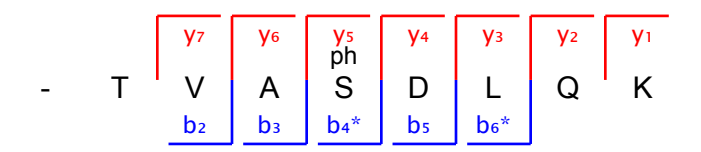



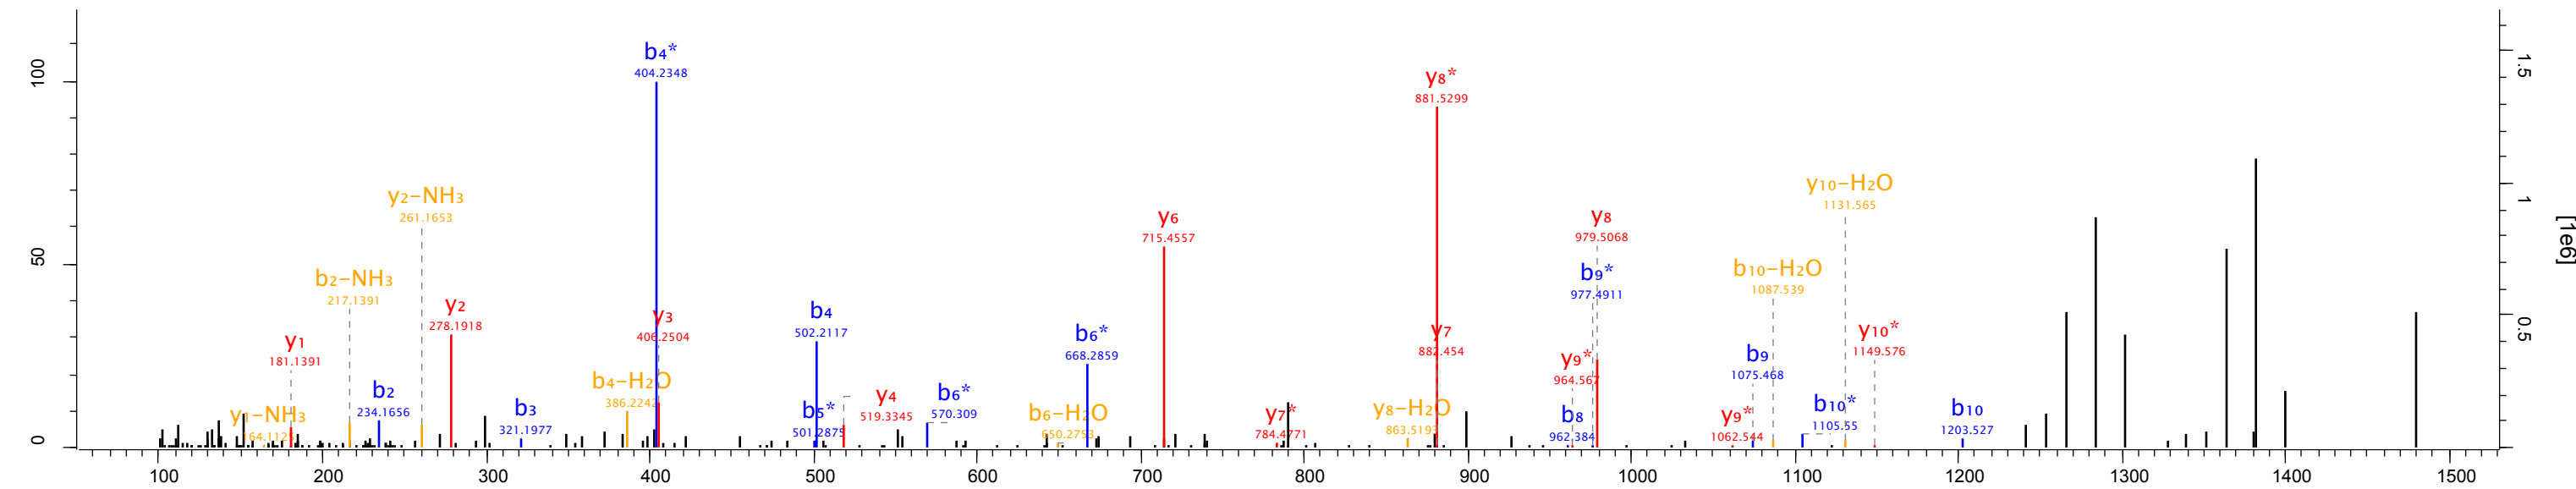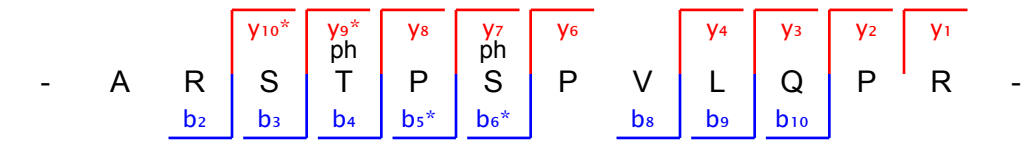

Raw file 20171215\_MaS\_33SR\_LMH\_phospho2\_03 Scan 6474 Method FTMS; HCD Score 257.54 m/z 1020.92 Gene names PDS5B

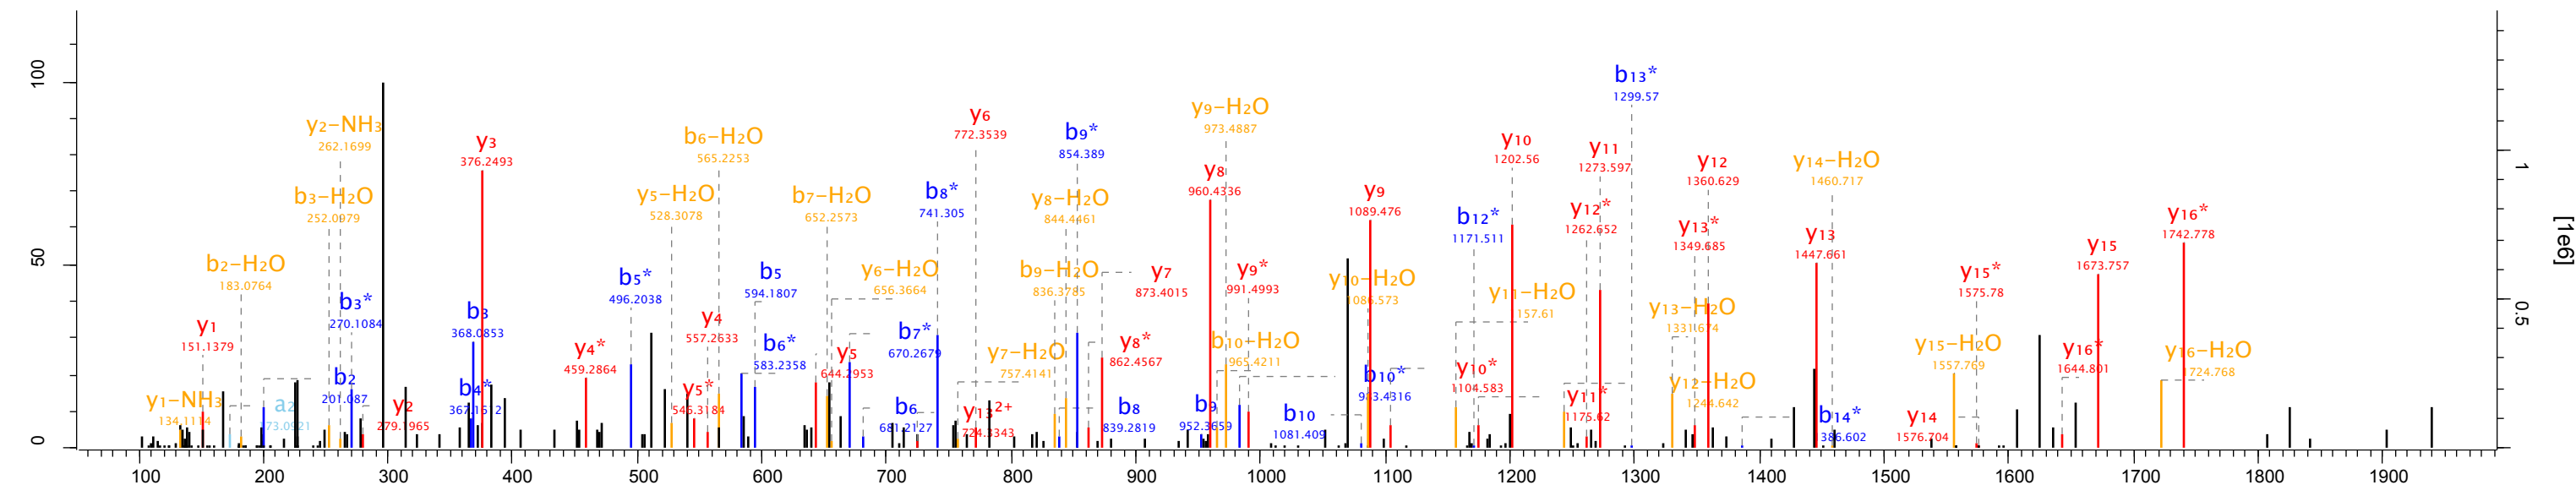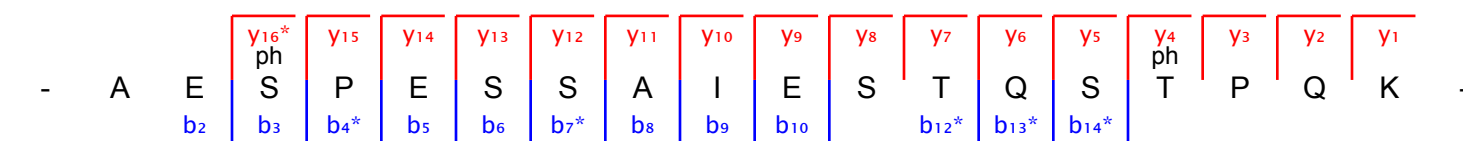

Raw file  
20171215\_MaS\_33SR\_LMH\_phospho2\_03

Scan 6774 Method FTMS; HCD Score 166.66 m/z 966.04 Gene names PNISR

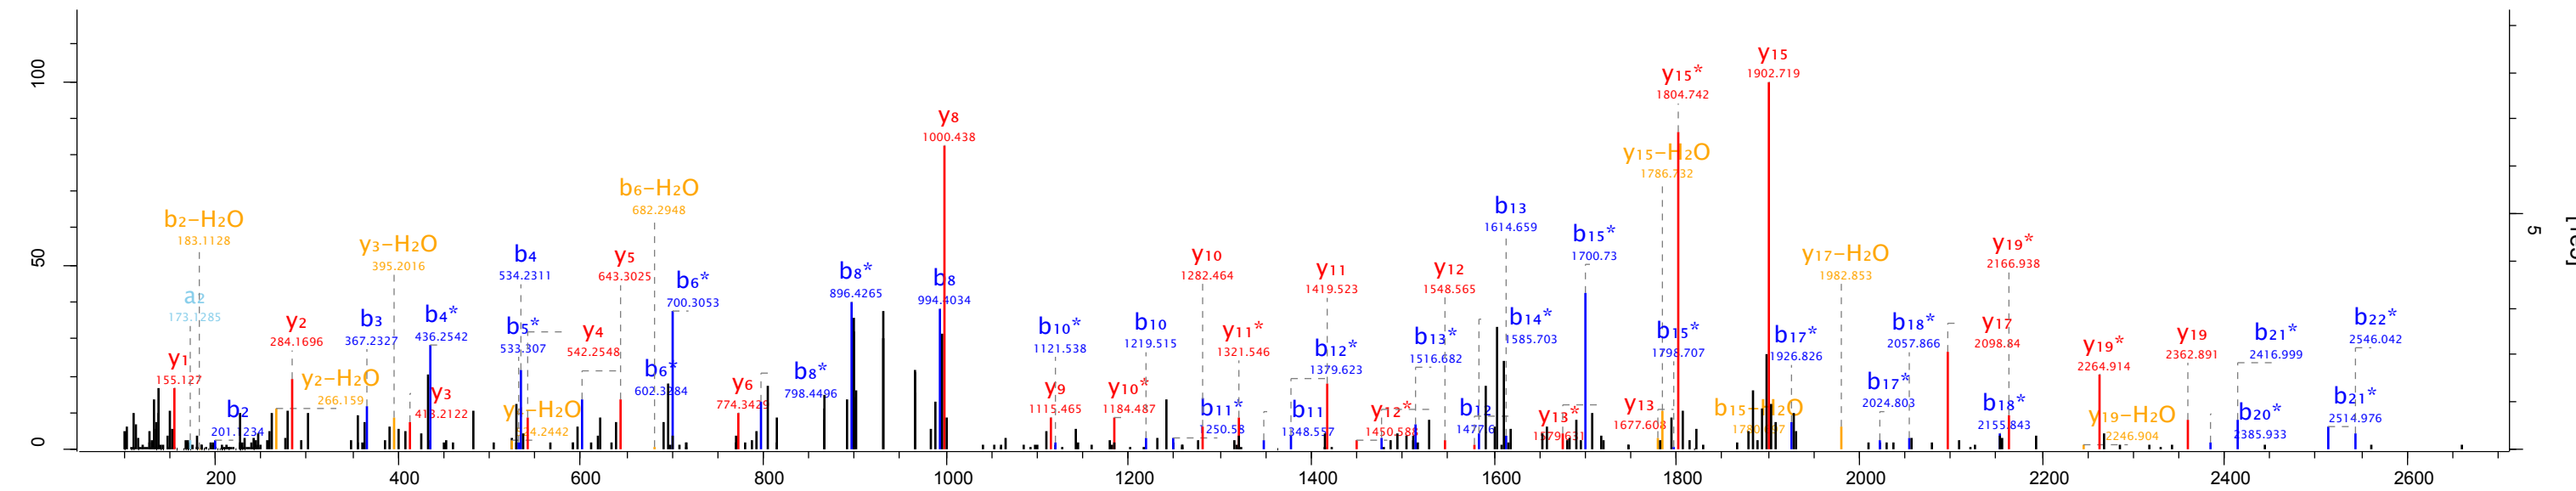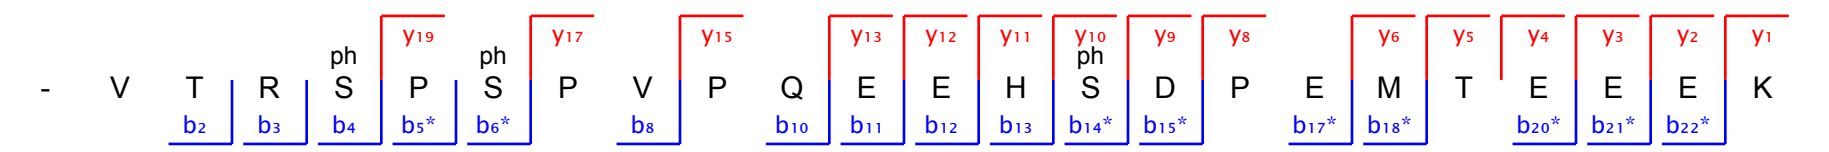

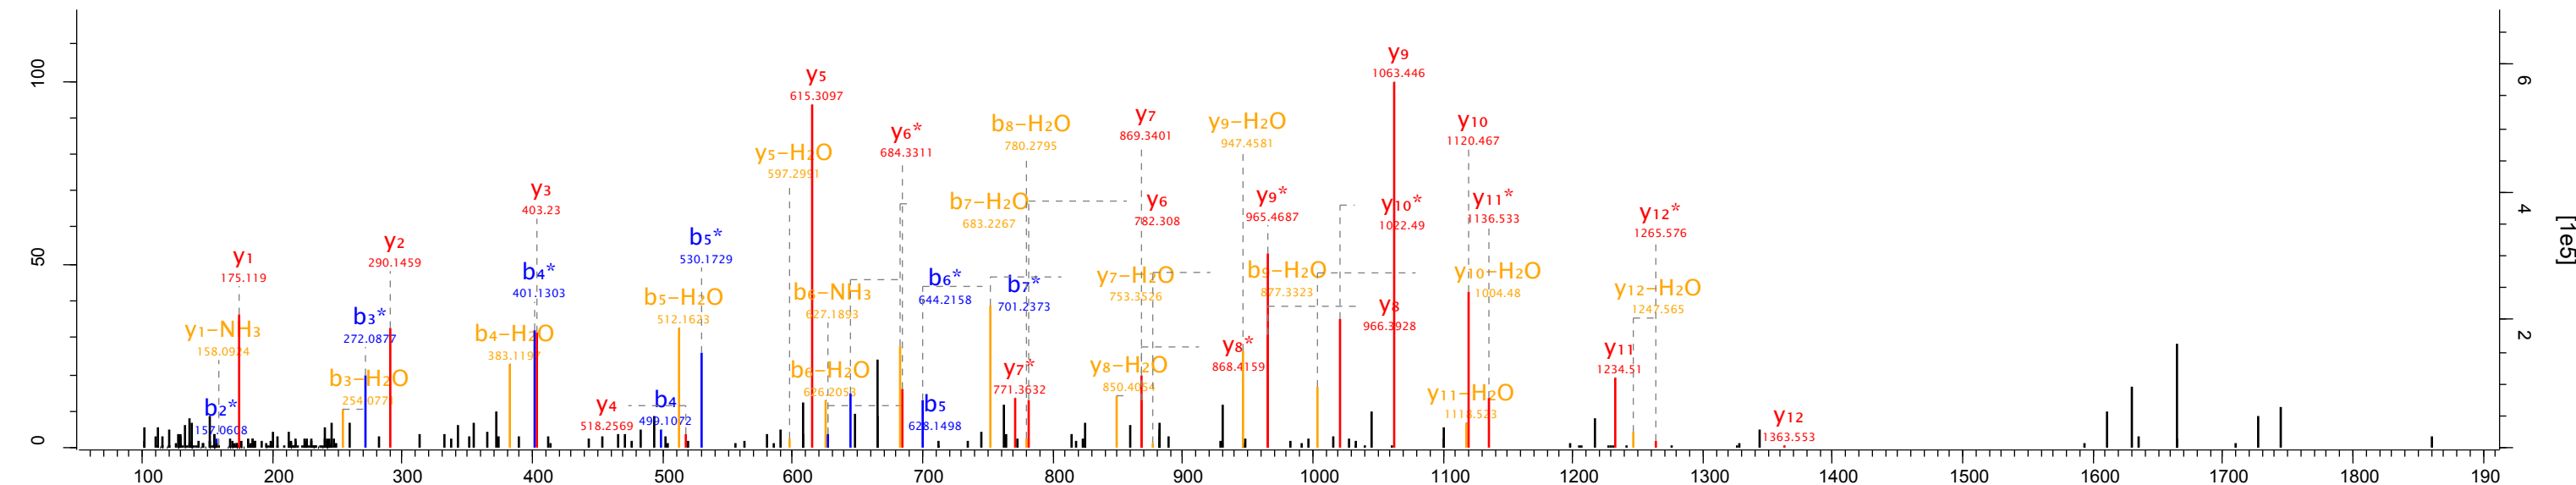

- S ph S D E E N G P P S S P D L D R -

b2\* b3\* b4 b5 b6\* b7\*

y12 y11 y10 y9 y8 y7 y6 ph y5 y4 y3 y2 y1

Raw file  
20171215\_MaS\_33SR\_LMH\_phospho2\_03

Scan 7004 Method FTMS; HCD Score 192.12 m/z 814.86 Gene names CAPI

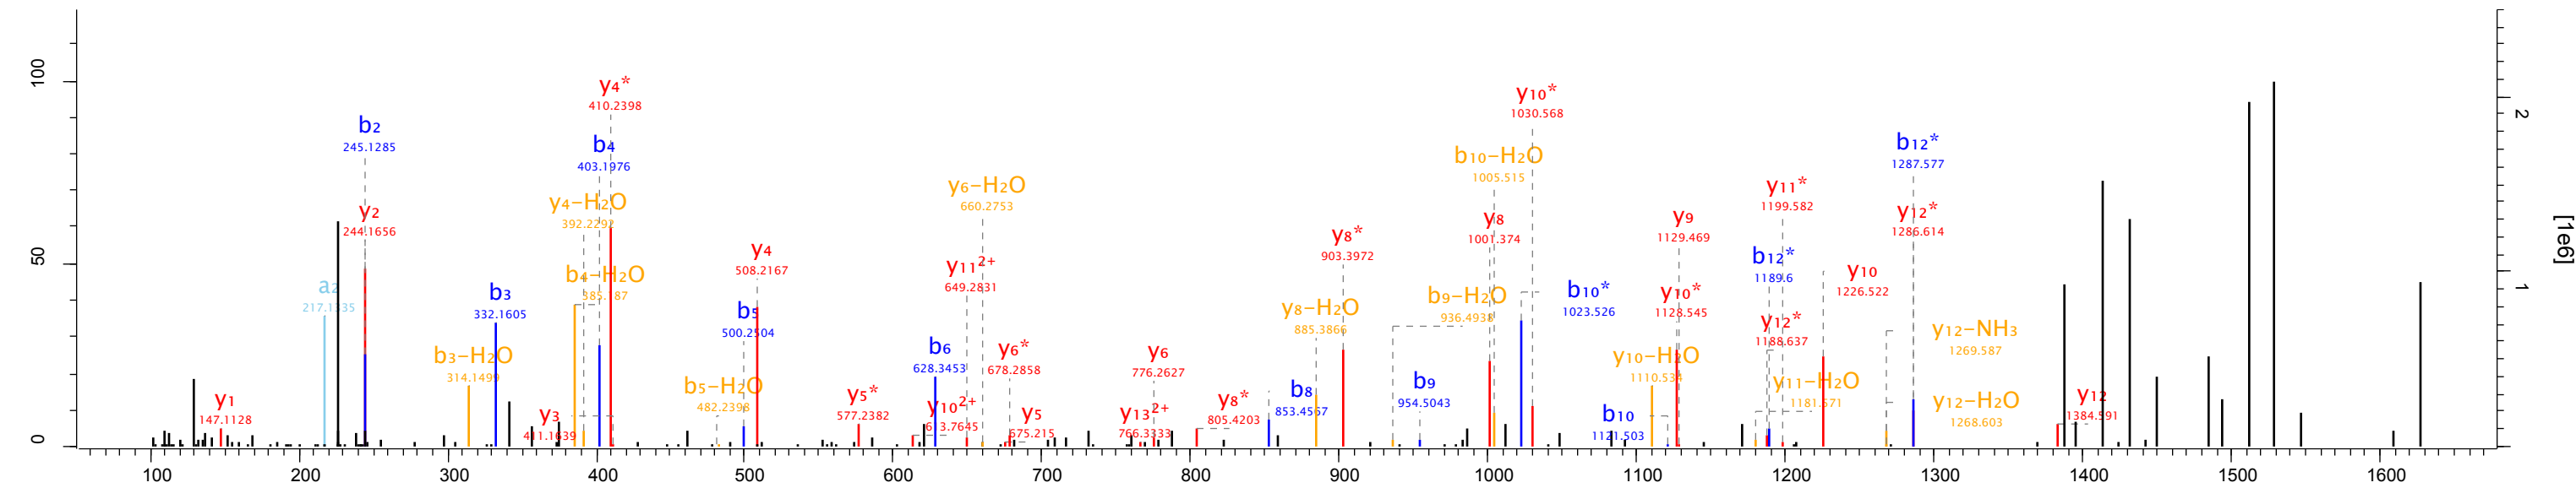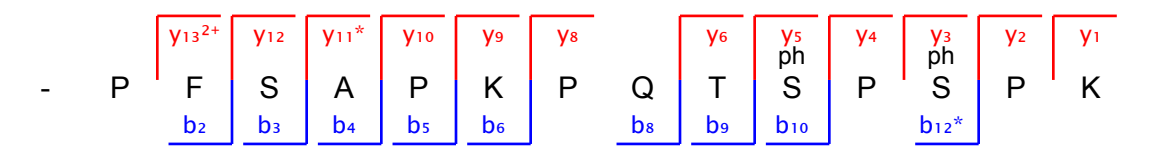

Raw file  
20171215\_MaS\_33SR\_LMH\_phospho2\_03

Scan 7114 Method FTMS; HCD Score 294.99 m/z 1168.99 Gene names PRCC

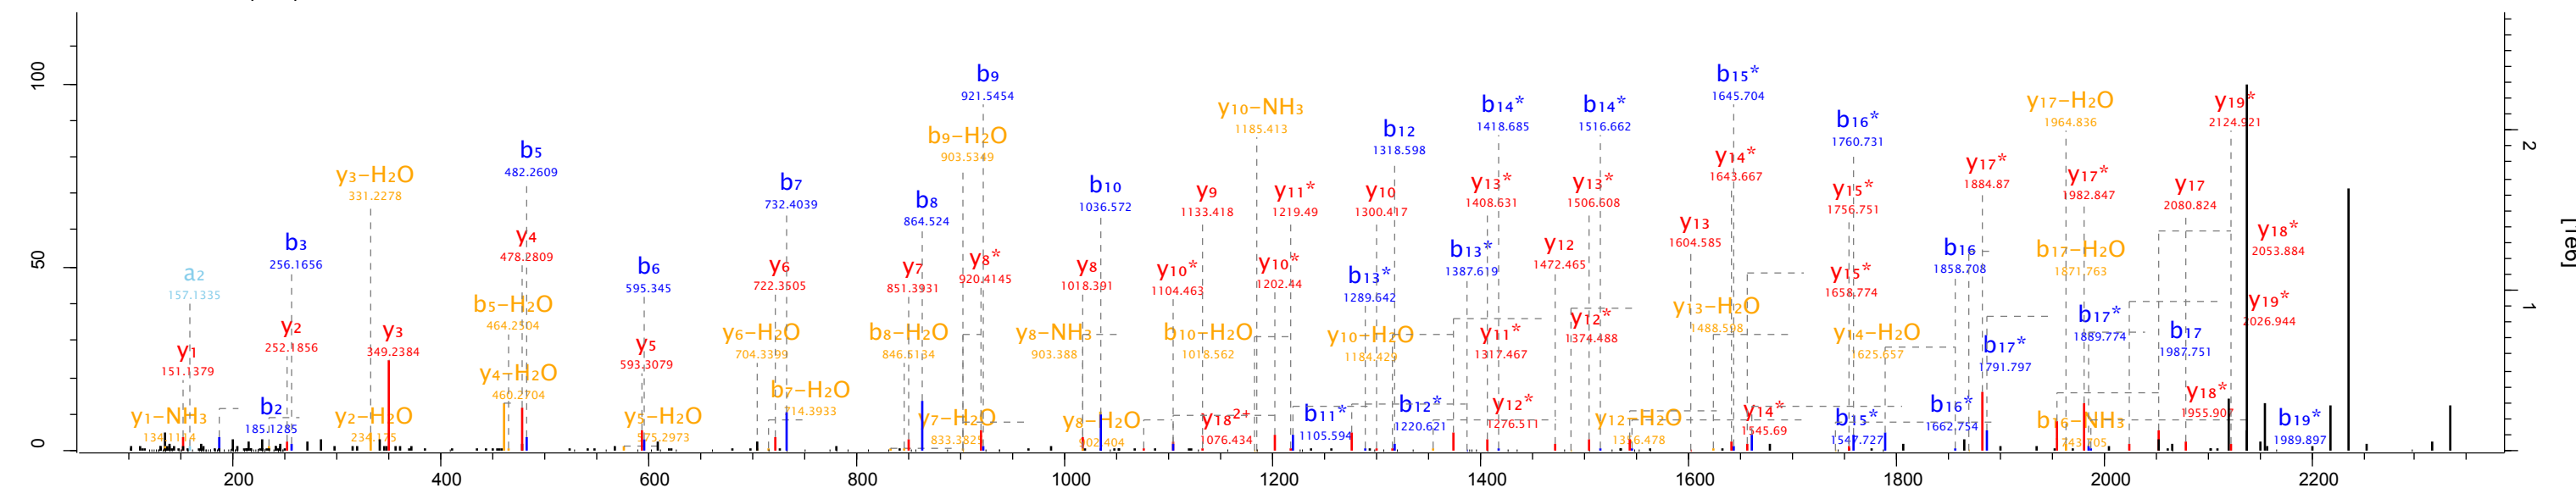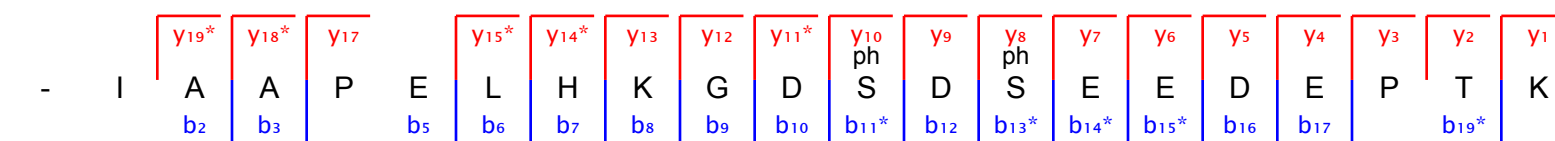

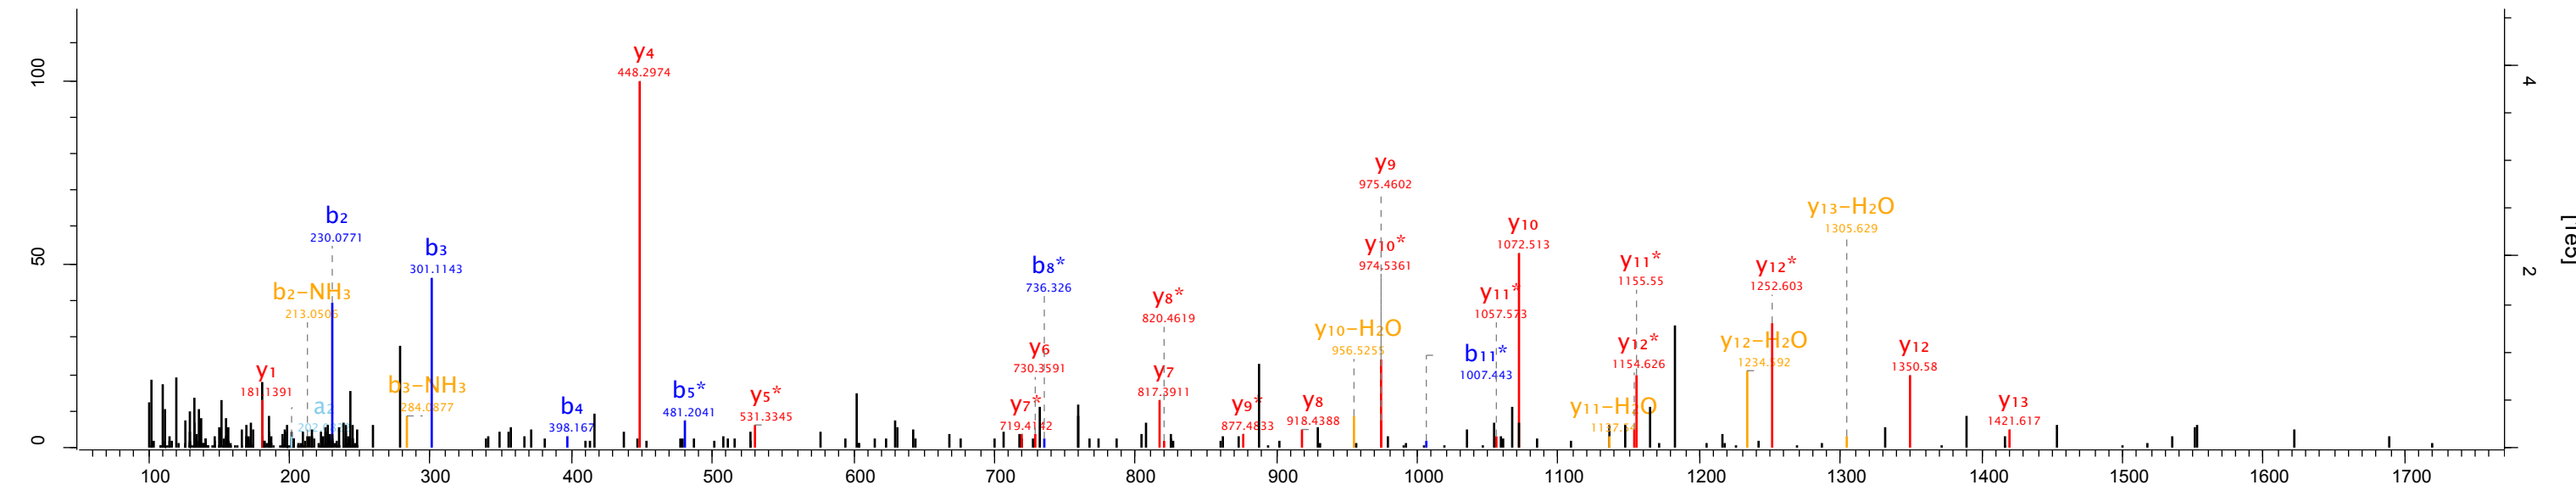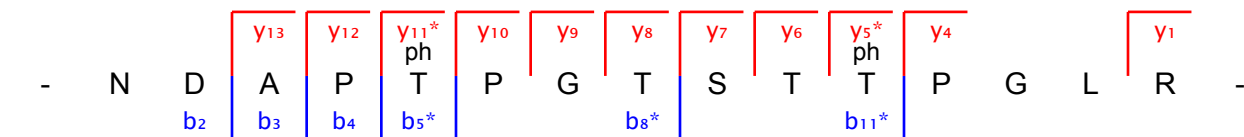

Raw file  
20171215\_MaS\_33SR\_LMH\_phospho2\_03

Scan 7414 Method FTMS; HCD Score 152.05 m/z 927.4 Gene names NDRG1

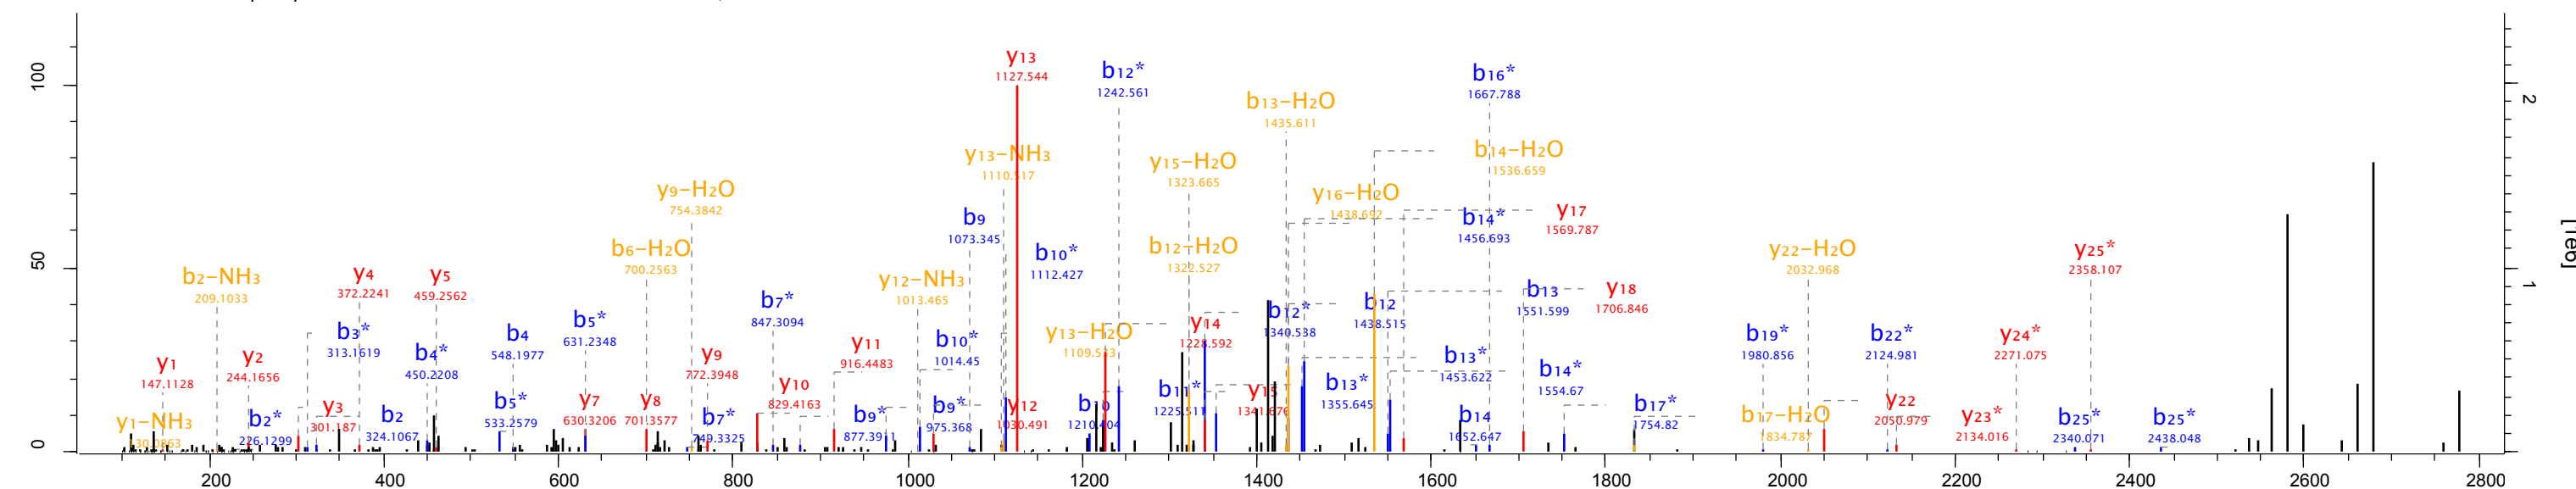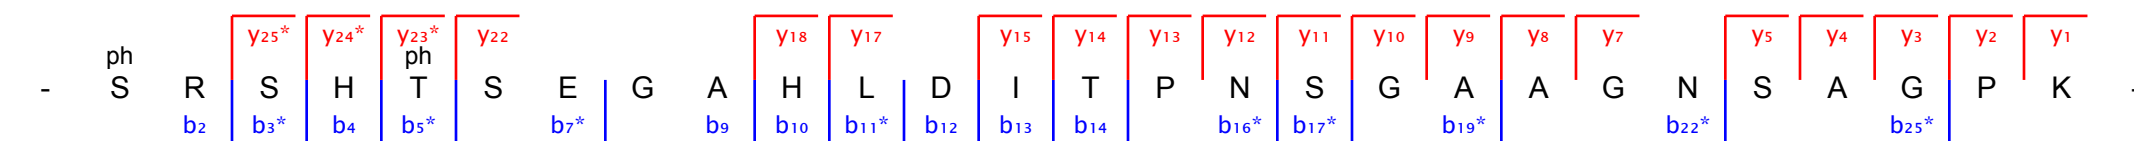



Raw file

20171215\_MaS\_33SR\_LMH\_phospho2\_03

| Scan | Method    | Score  | m/z   | Gene names |
|------|-----------|--------|-------|------------|
| 7914 | FTMS; HCD | 157.64 | 782.3 | RBPJ       |

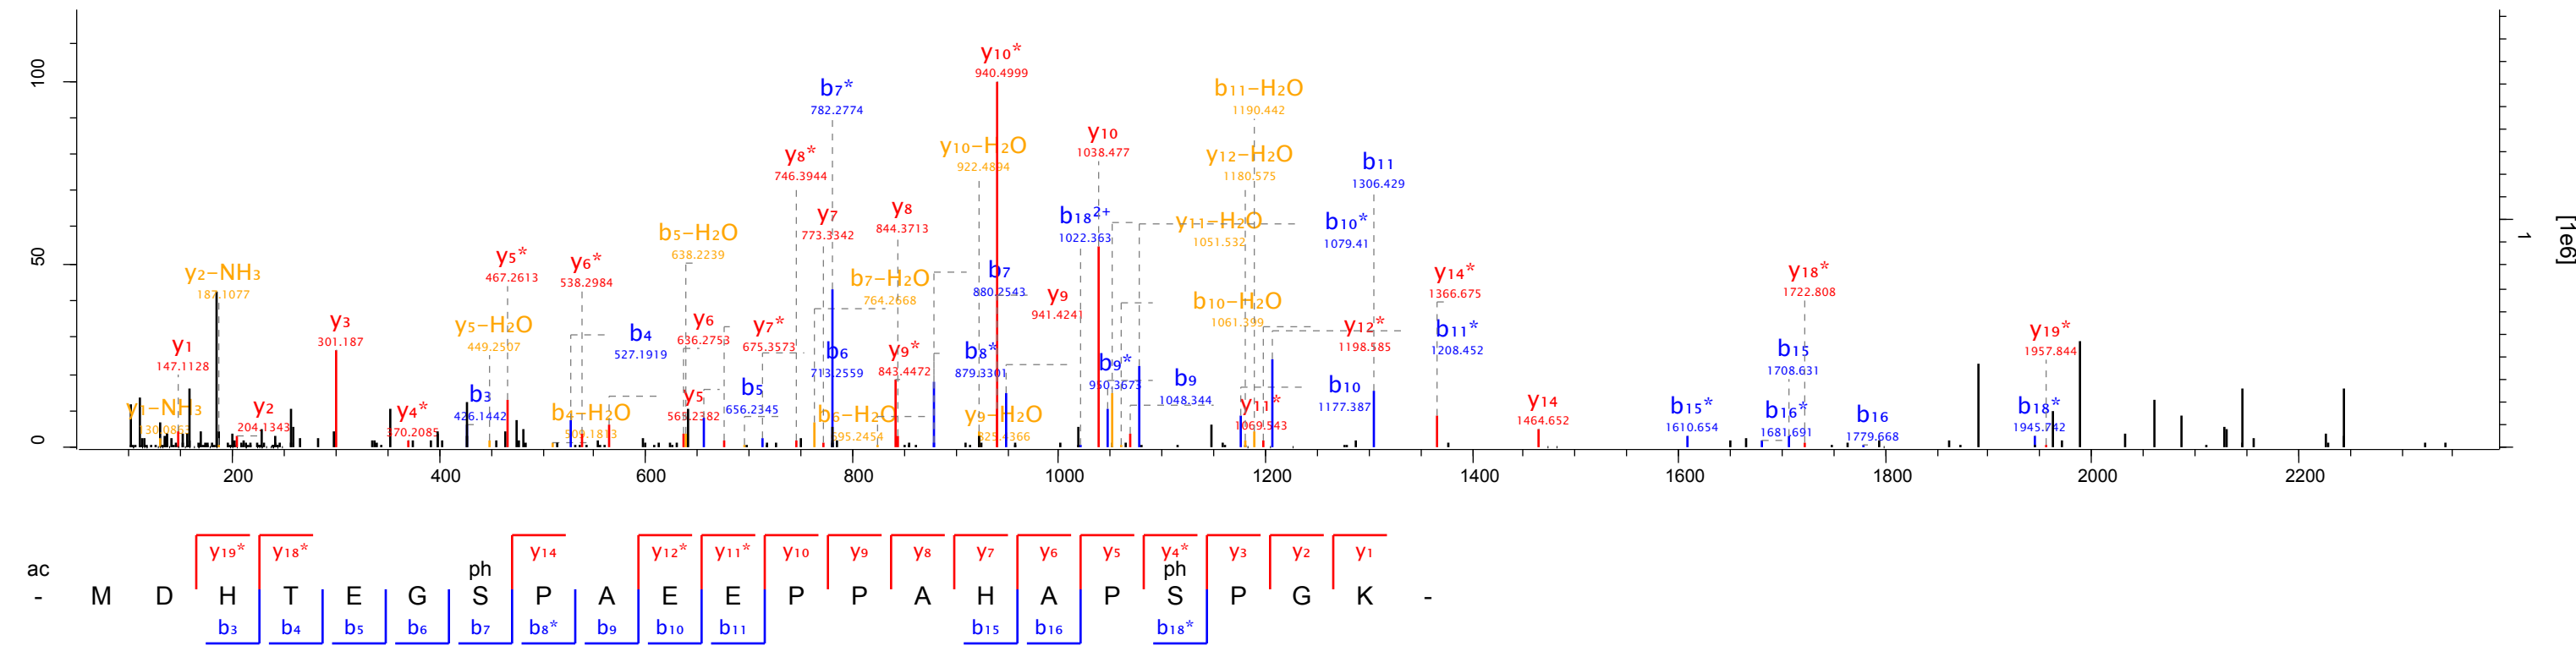

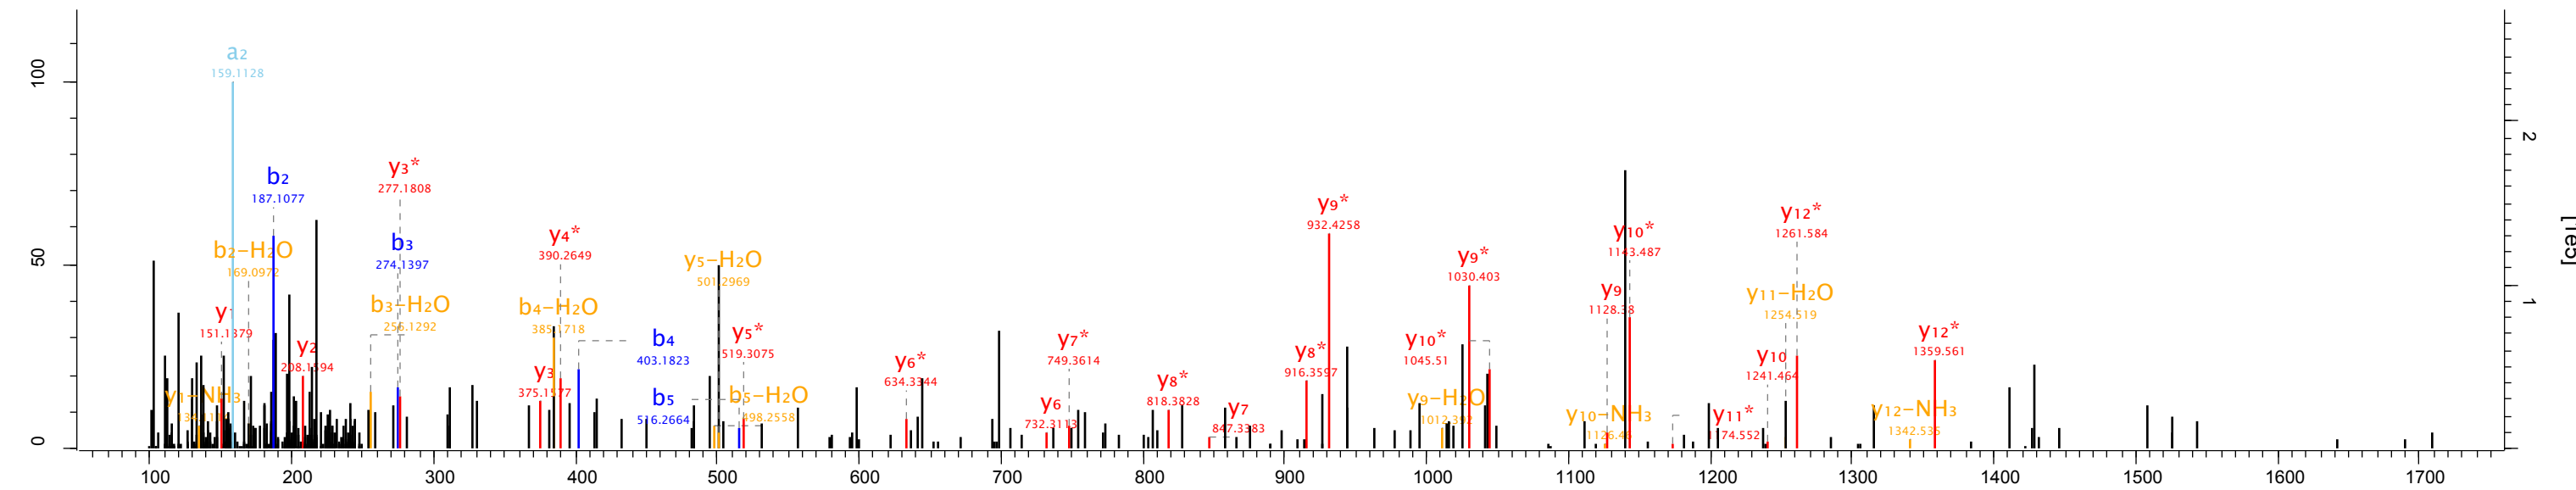

- S V S E I N S D D E L S G K -

Fragmentation mapping (b and y ions):

- b2: V
- b3: S
- b4: E
- b5: I
- y1: K
- y2: G
- y3: I
- y4: L
- y5: E
- y6: D
- y7: D
- y8: S
- y9: N
- y10: I
- y11: E
- y12: S

Raw file 20171215\_MaS\_33SR\_LMH\_phospho2\_03 Scan 8364 Method FTMS; HCD Score 153.1 m/z 873.88 Gene names ARID1A

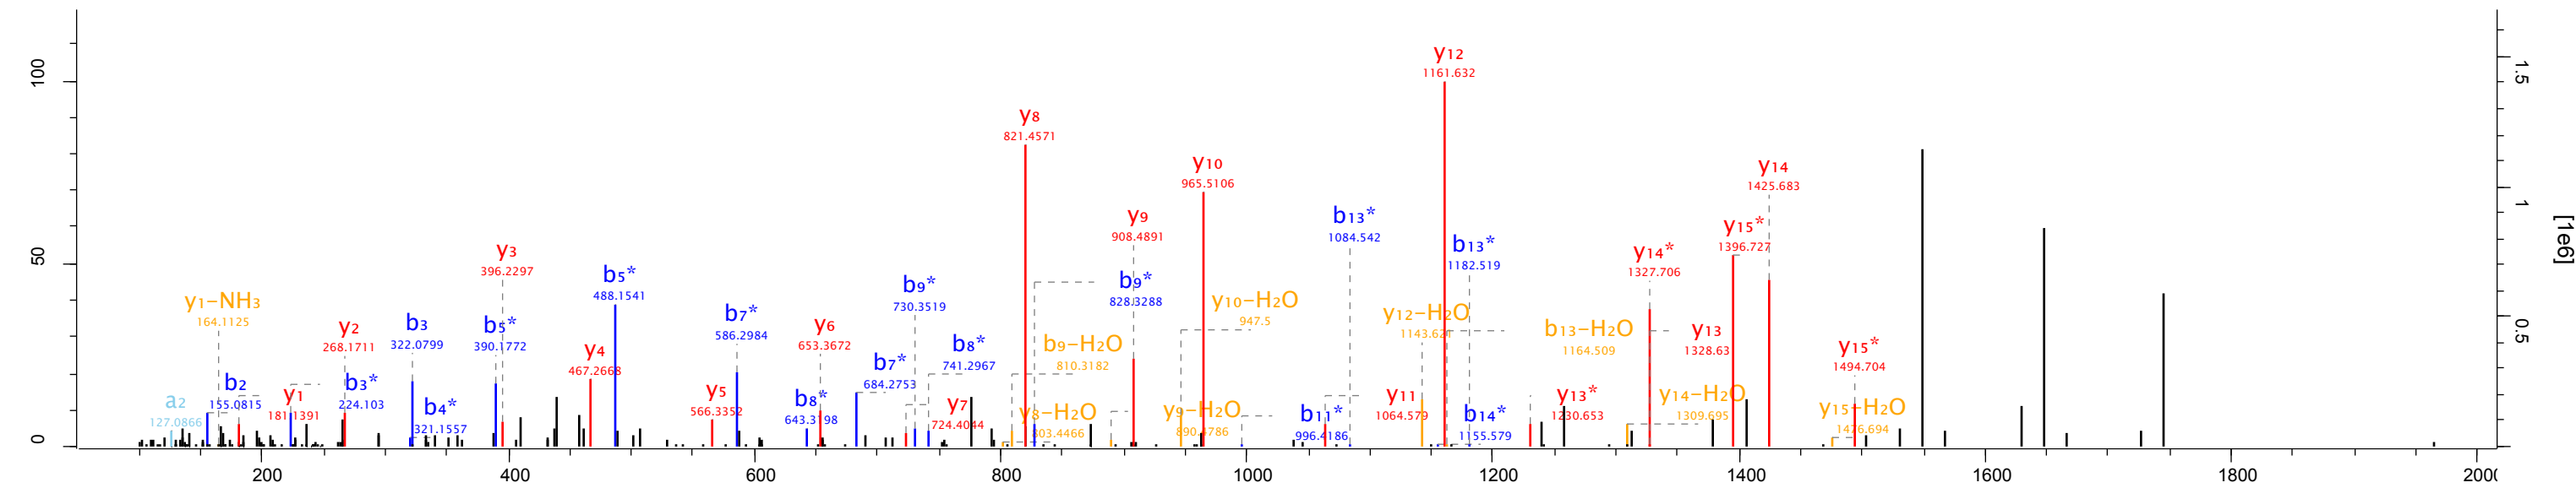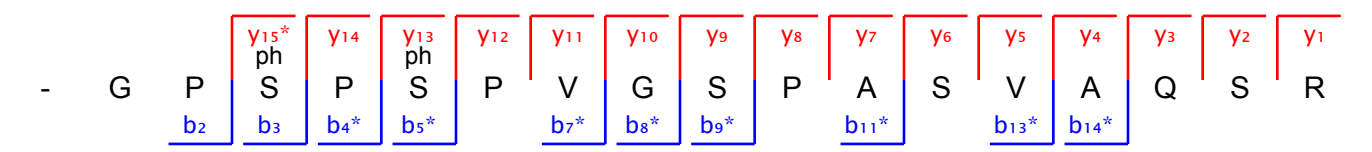

Raw file 20171215\_MaS\_33SR\_LMH\_phospho2\_03 Scan 8394 Method FTMS; HCD Score 81.28 m/z 829.69 Gene names MON1B

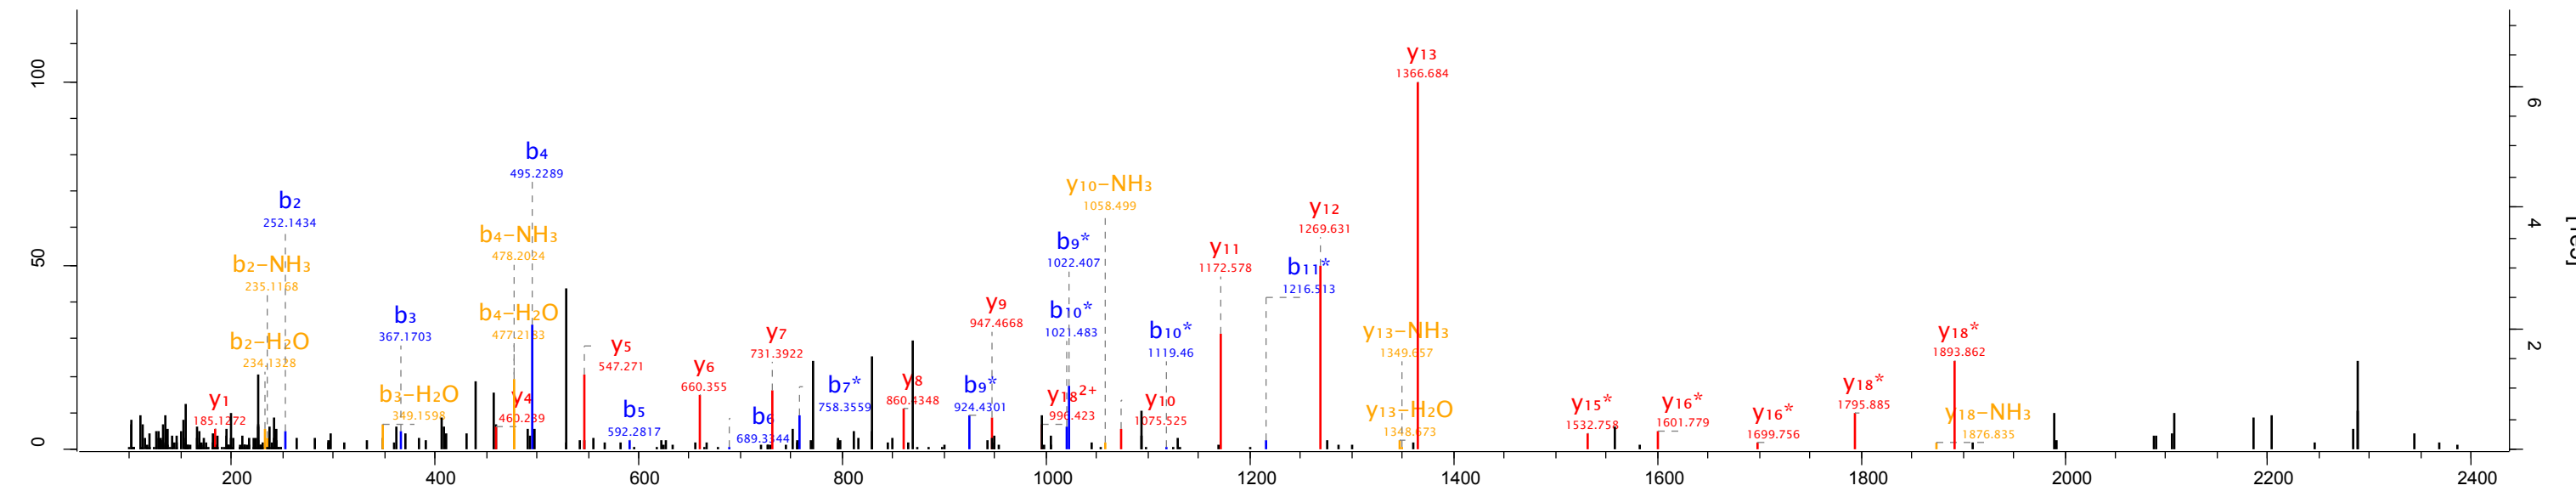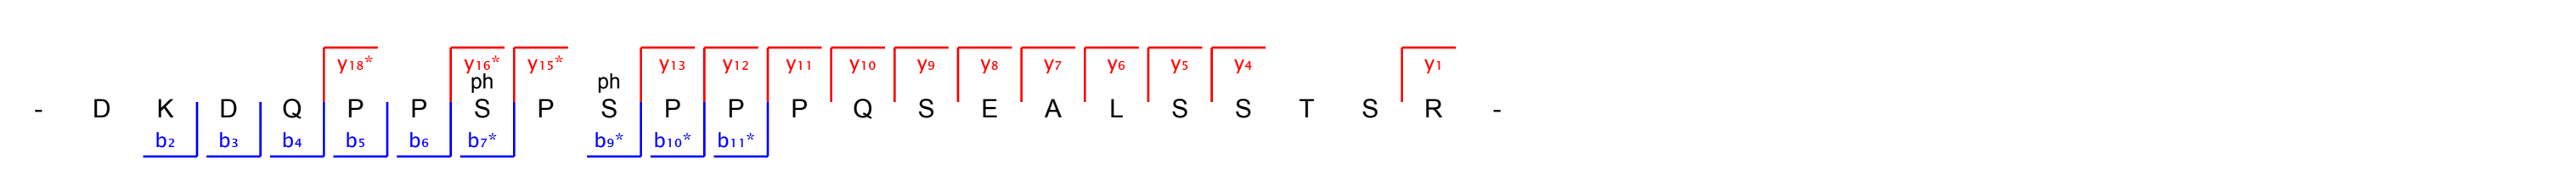

Raw file: 20171215\_MaS\_33SR\_LMH\_phospho2\_03  
 Scan: 8434 Method: FTMS; HCD Score: 116.04 m/z: 906.37 Gene names: SLC20A1

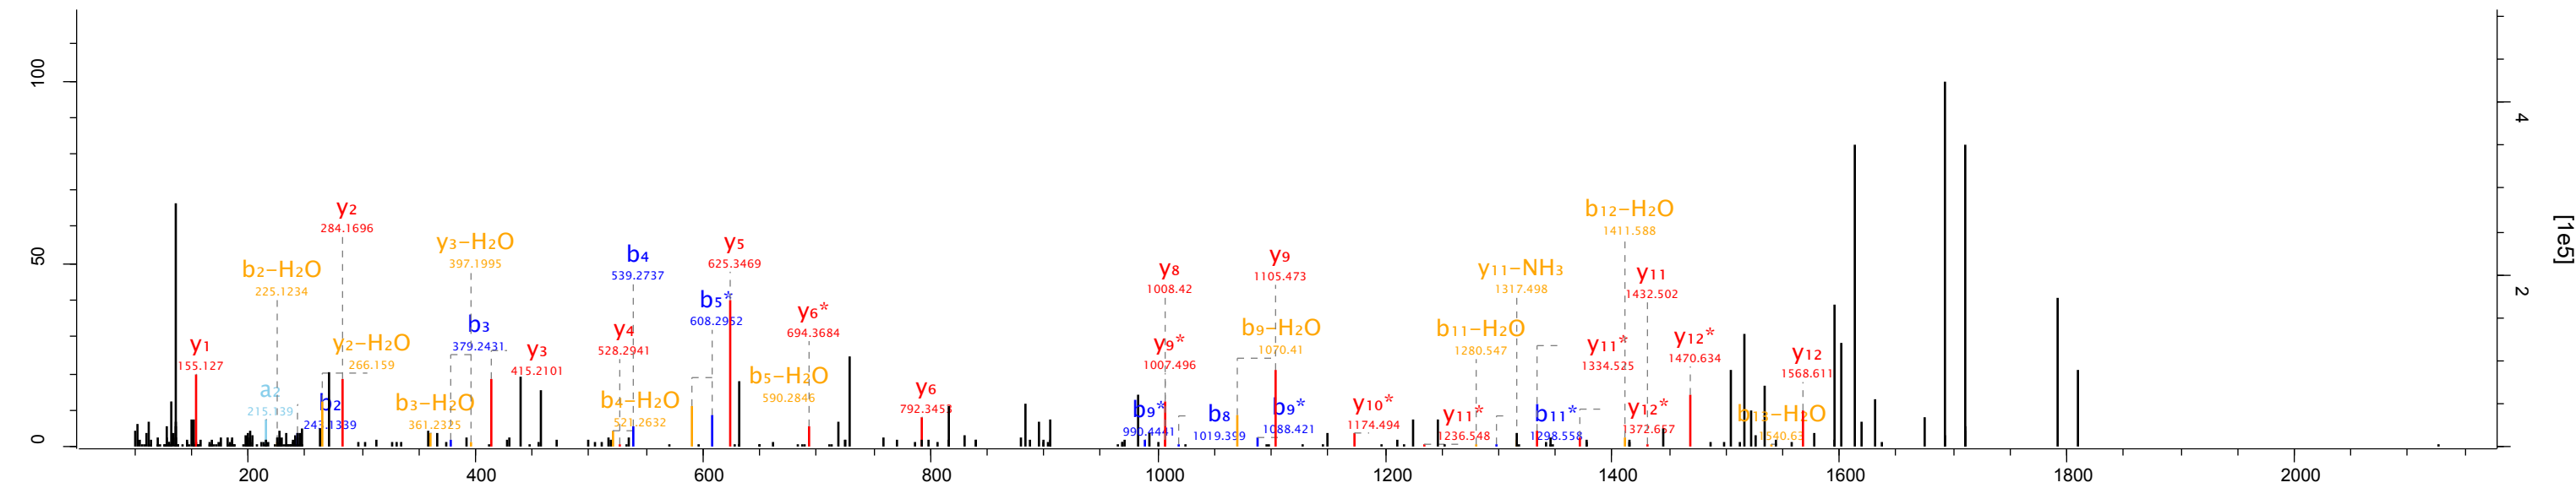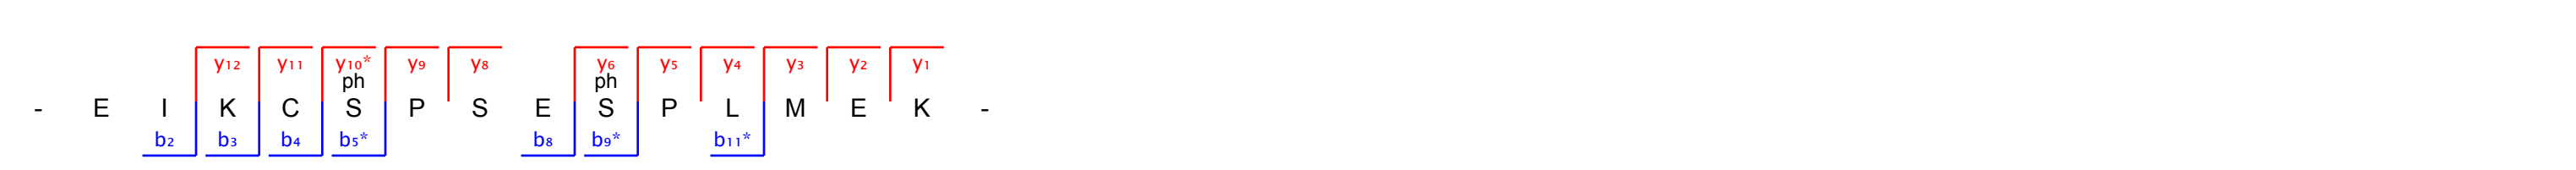

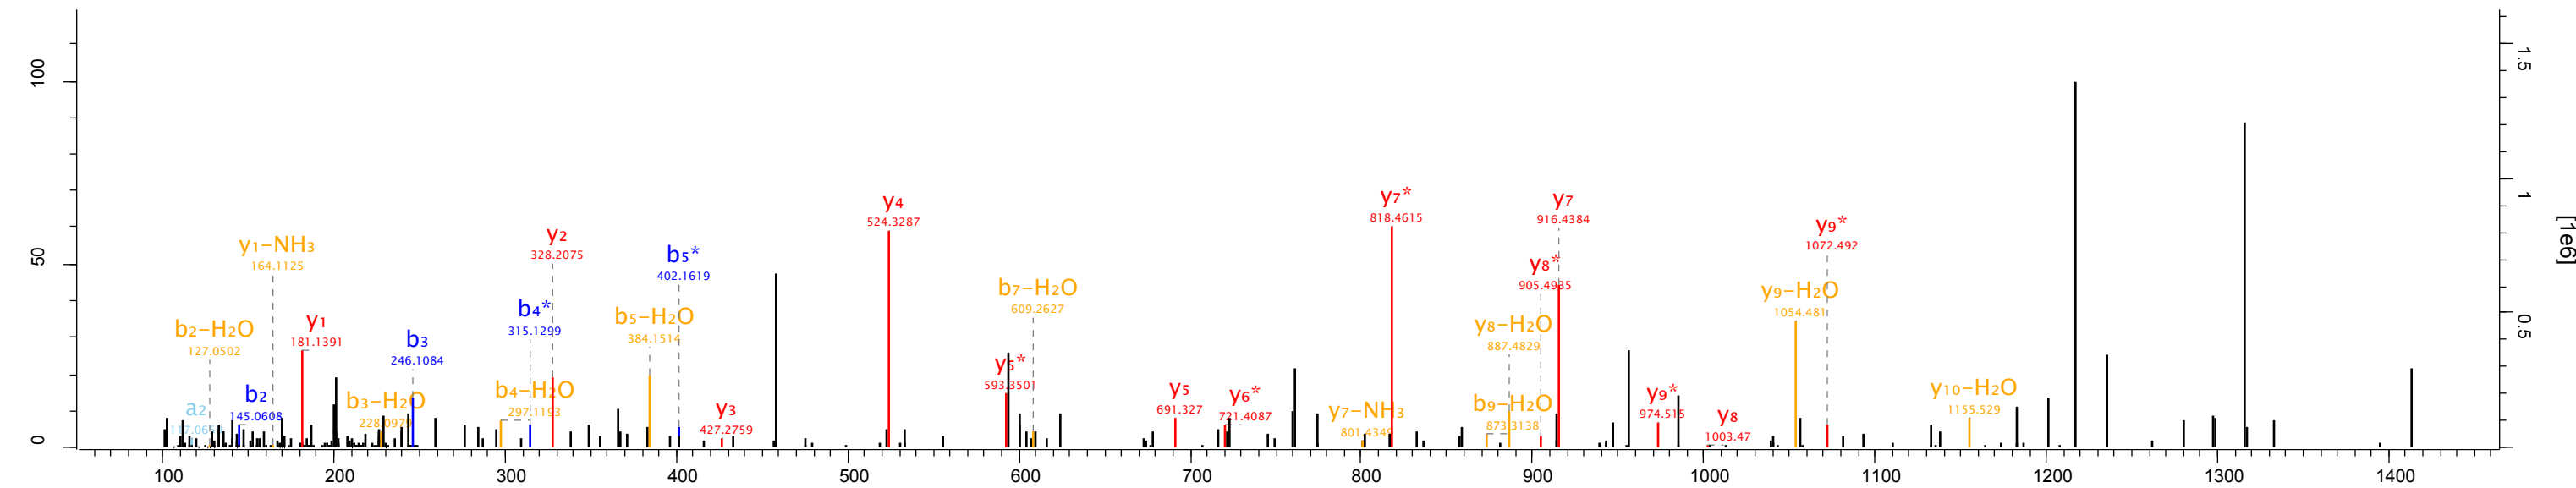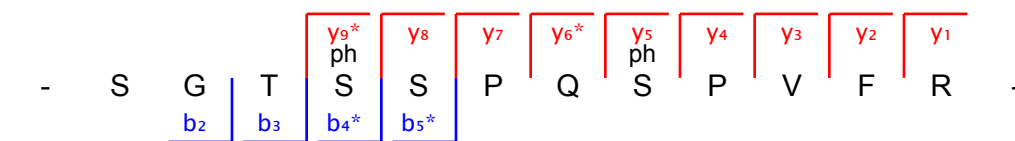

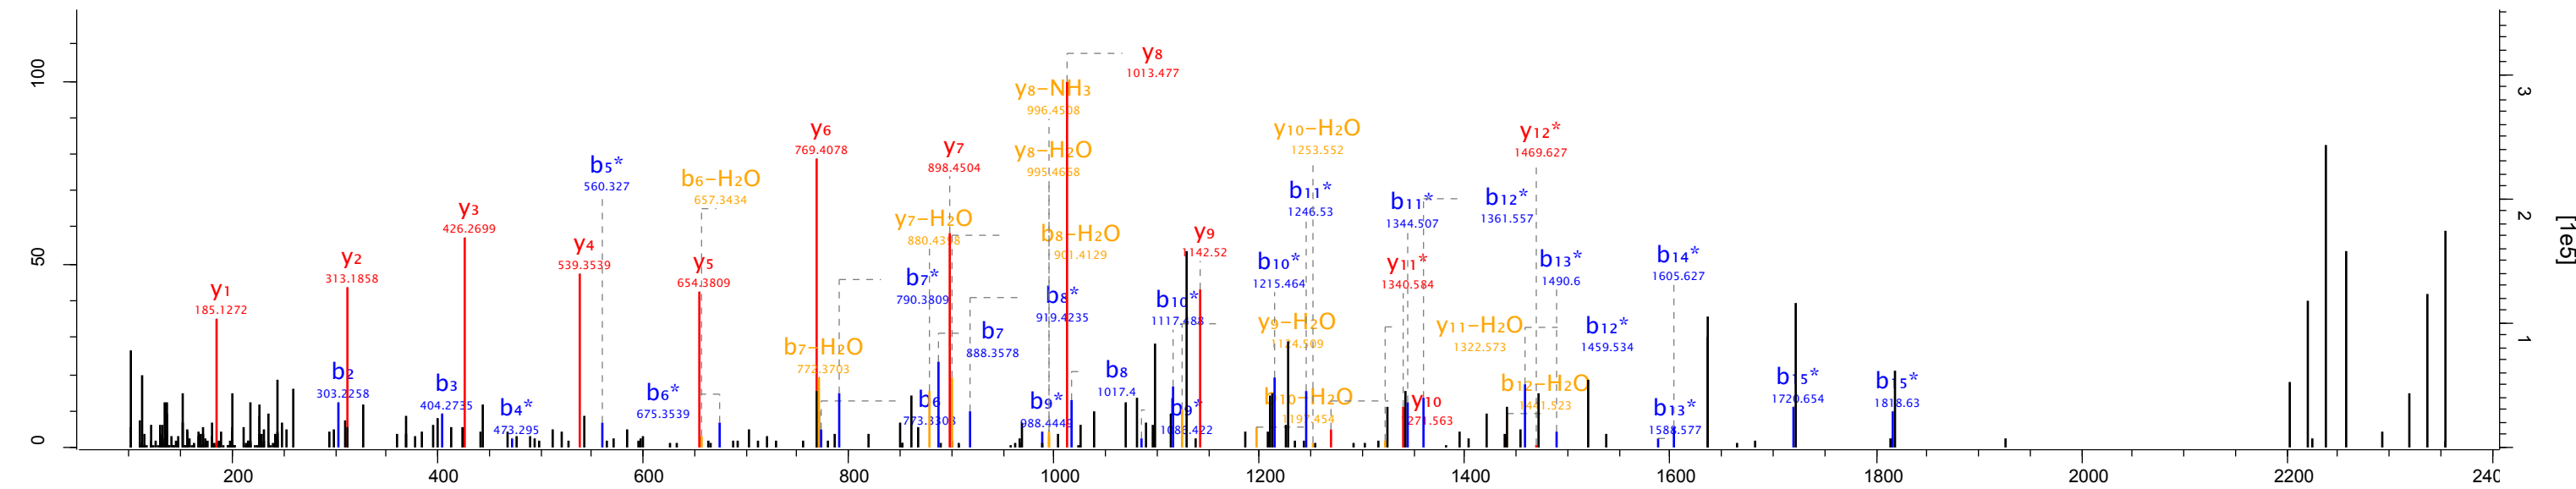

- R K T S S D D E S E E D E D L L Q R -

ph  
ph

b<sub>2</sub> b<sub>3</sub> b<sub>4</sub>\* b<sub>5</sub>\* b<sub>6</sub> b<sub>7</sub> b<sub>8</sub> b<sub>9</sub>\* b<sub>10</sub>\* b<sub>11</sub>\* b<sub>12</sub>\* b<sub>13</sub>\* b<sub>14</sub>\* b<sub>15</sub>\*

y<sub>12</sub>\* y<sub>11</sub>\* y<sub>10</sub> y<sub>9</sub> y<sub>8</sub> y<sub>7</sub> y<sub>6</sub> y<sub>5</sub> y<sub>4</sub> y<sub>3</sub> y<sub>2</sub> y<sub>1</sub>

Raw file  
20171215\_MaS\_33SR\_LMH\_phospho2\_03

Scan 8854 Method FTMS; HCD Score 141.18 m/z 843.84 Gene names POLR2A

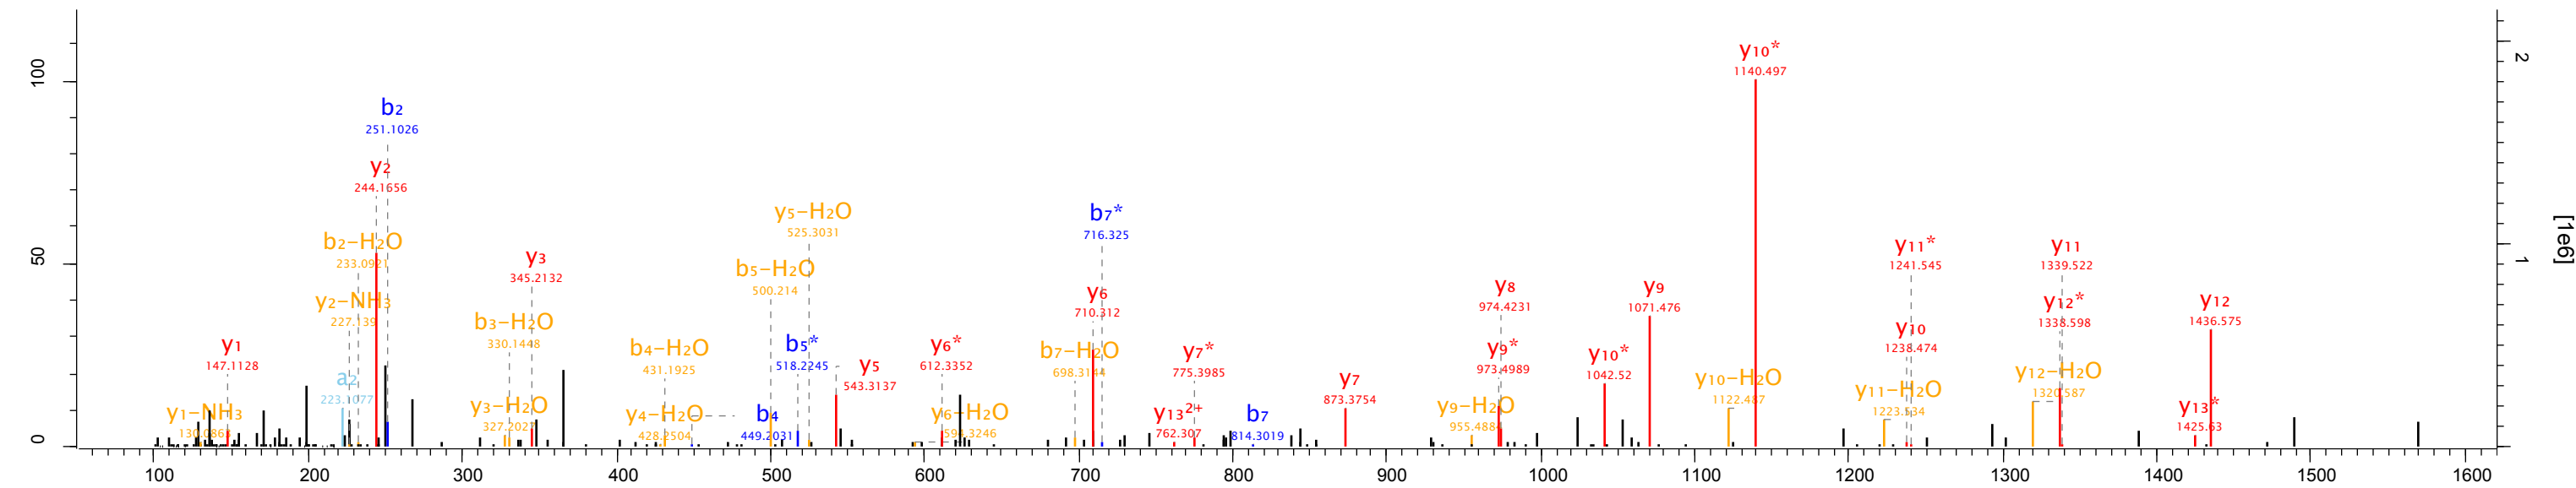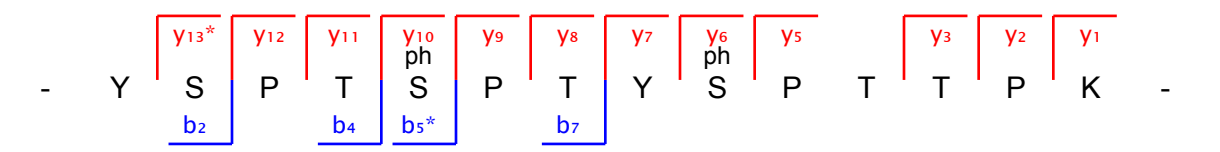



Raw file 20171215\_MaS\_33SR\_LMH\_phospho2\_03 Scan 9034 Method FTMS; HCD Score 236.99 m/z 973.94 Gene names ADD3

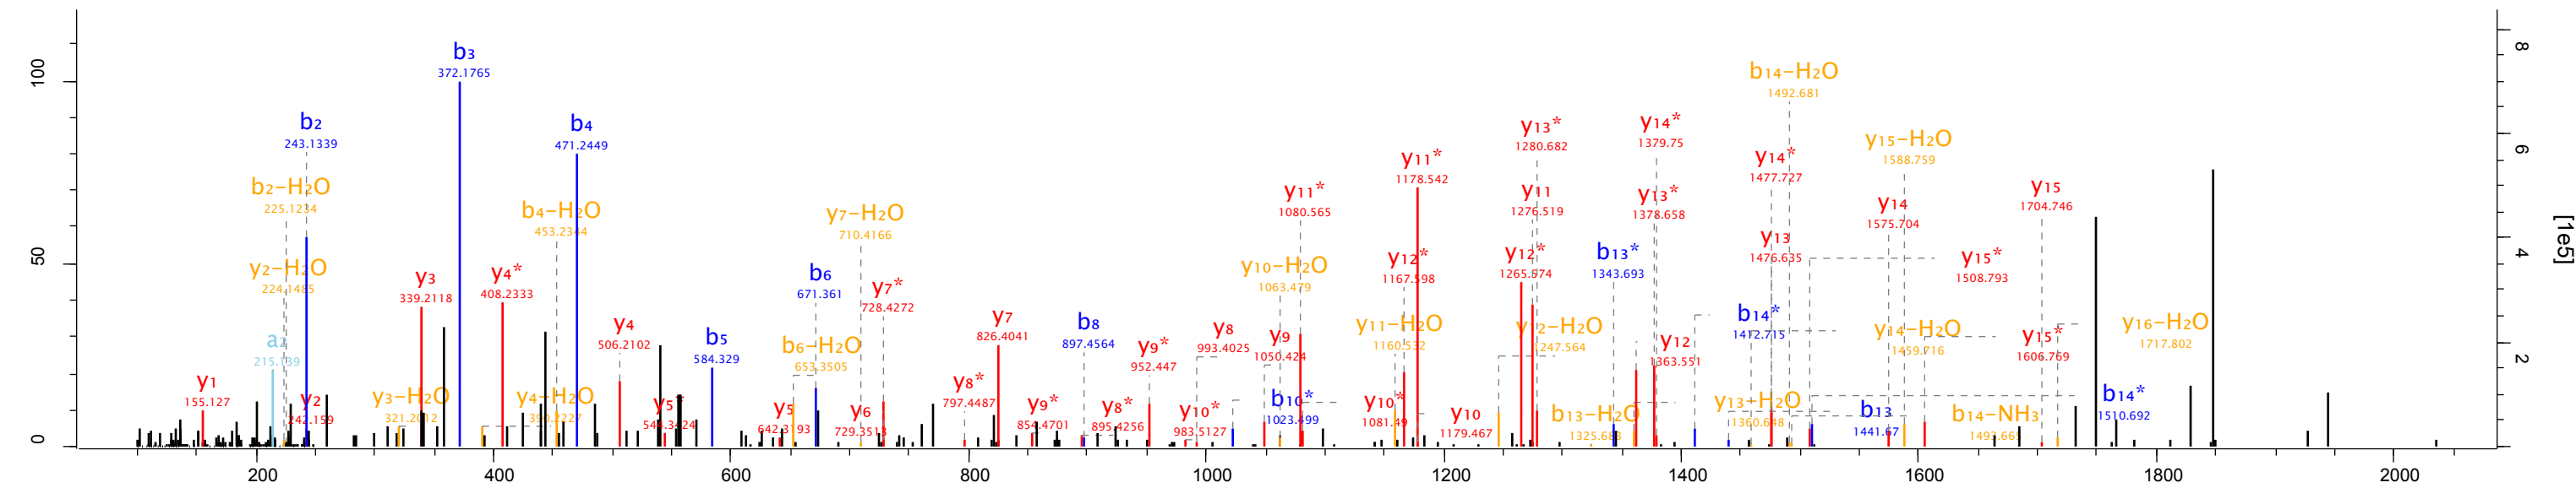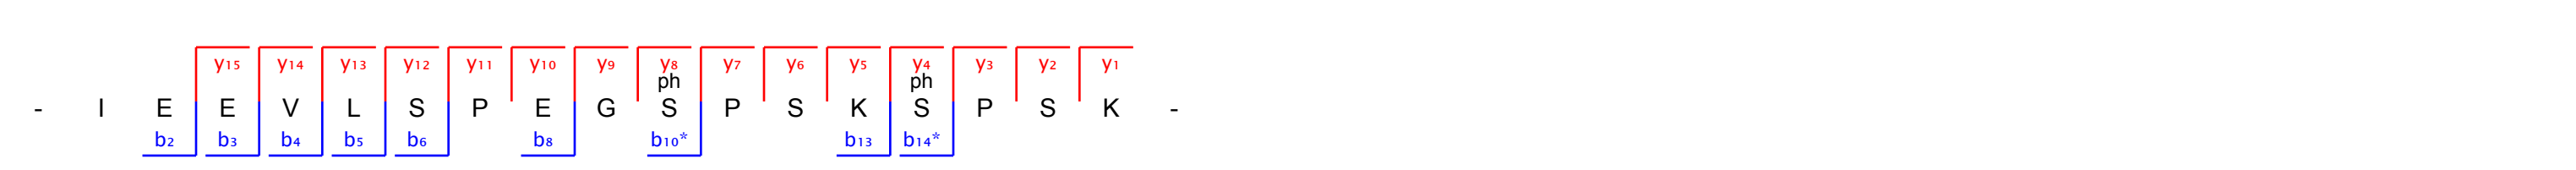



Raw file 20171215\_MaS\_33SR\_LMH\_phospho2\_03 Scan 9444 Method FTMS; HCD Score 155.94 m/z 719.32 Gene names MICALL1

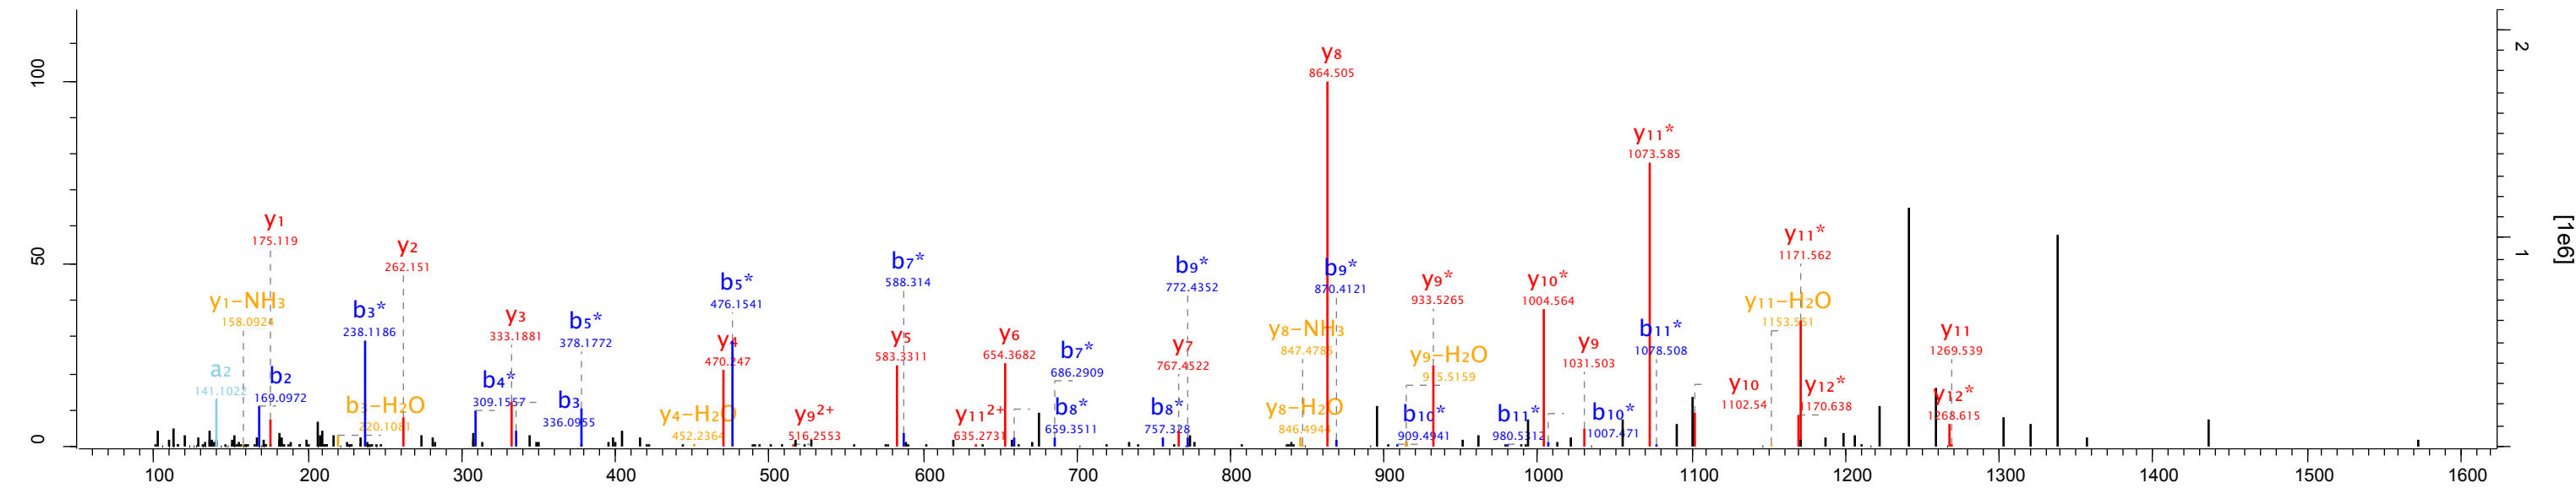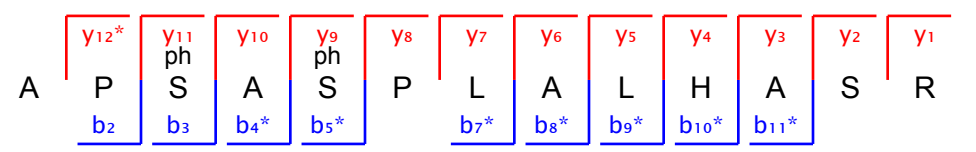

Raw file 20171215\_MaS\_33SR\_LMH\_phospho2\_03 Scan 9534 Method FTMS; HCD Score 104.21 m/z 647.75 Gene names WDR13

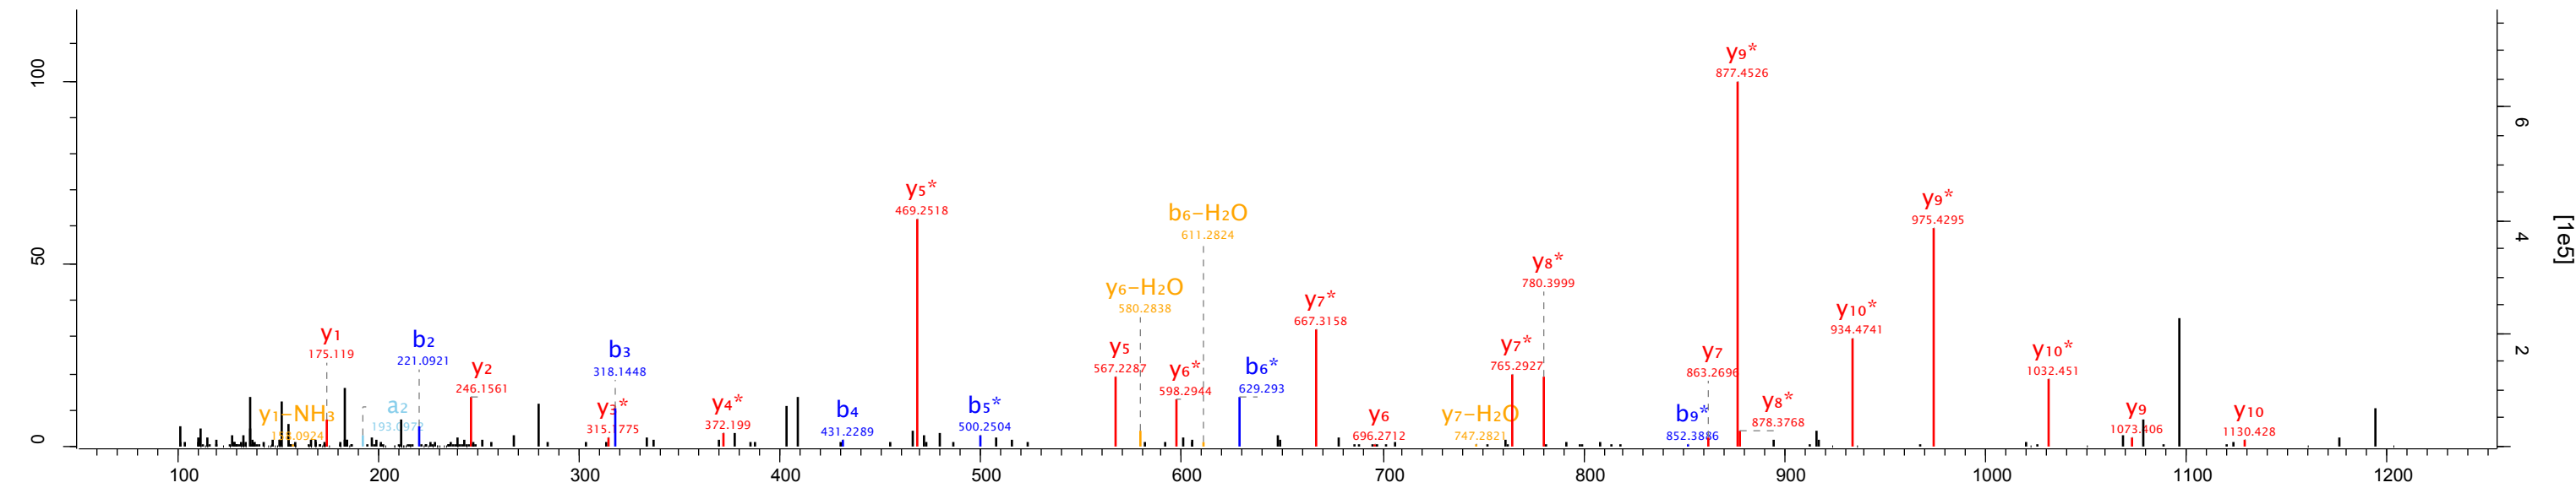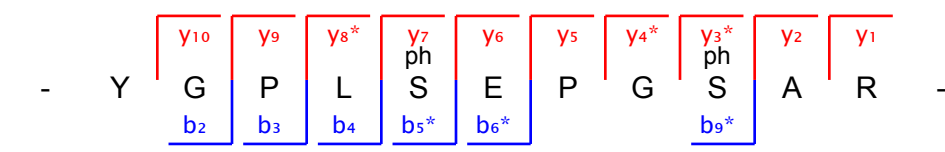

Raw file: 20171215\_MaS\_33SR\_LMH\_phospho2\_03  
 Scan: 9614 Method: FTMS; HCD Score: 117.62 m/z: 897.37 Gene names: AEBP2

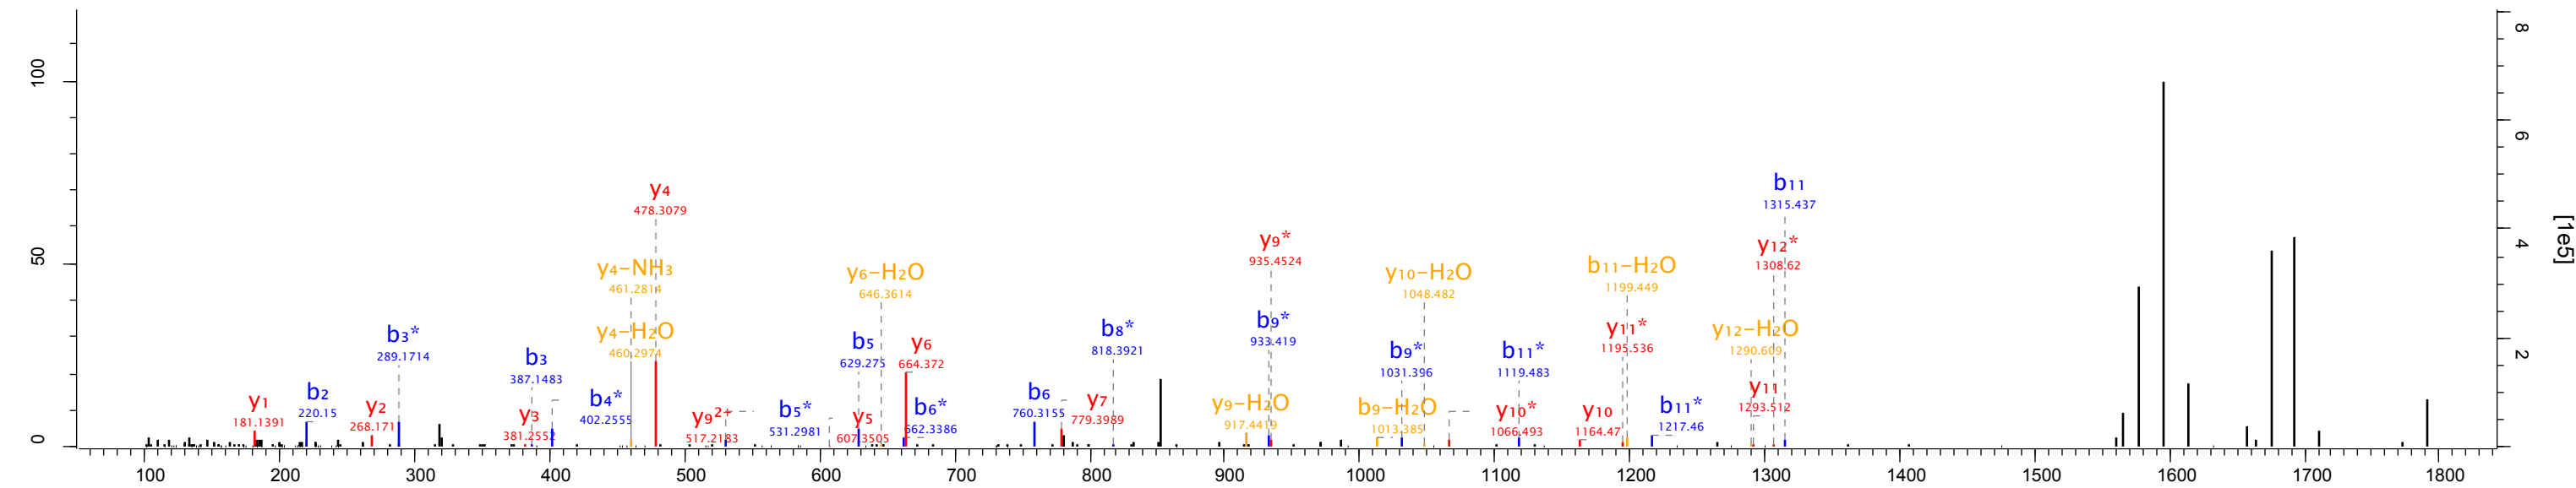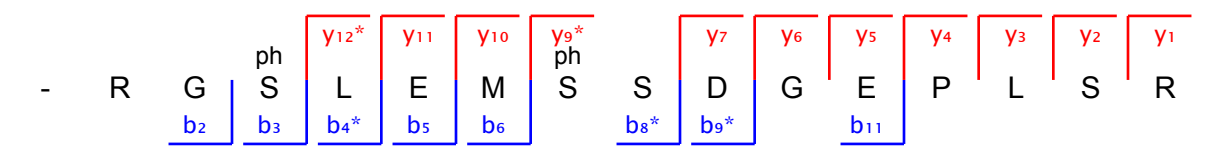

Raw file 20171215\_MaS\_33SR\_LMH\_phospho2\_03 Scan 9704 Method FTMS; HCD Score 104.66 m/z 657.64 Gene names ASAP1

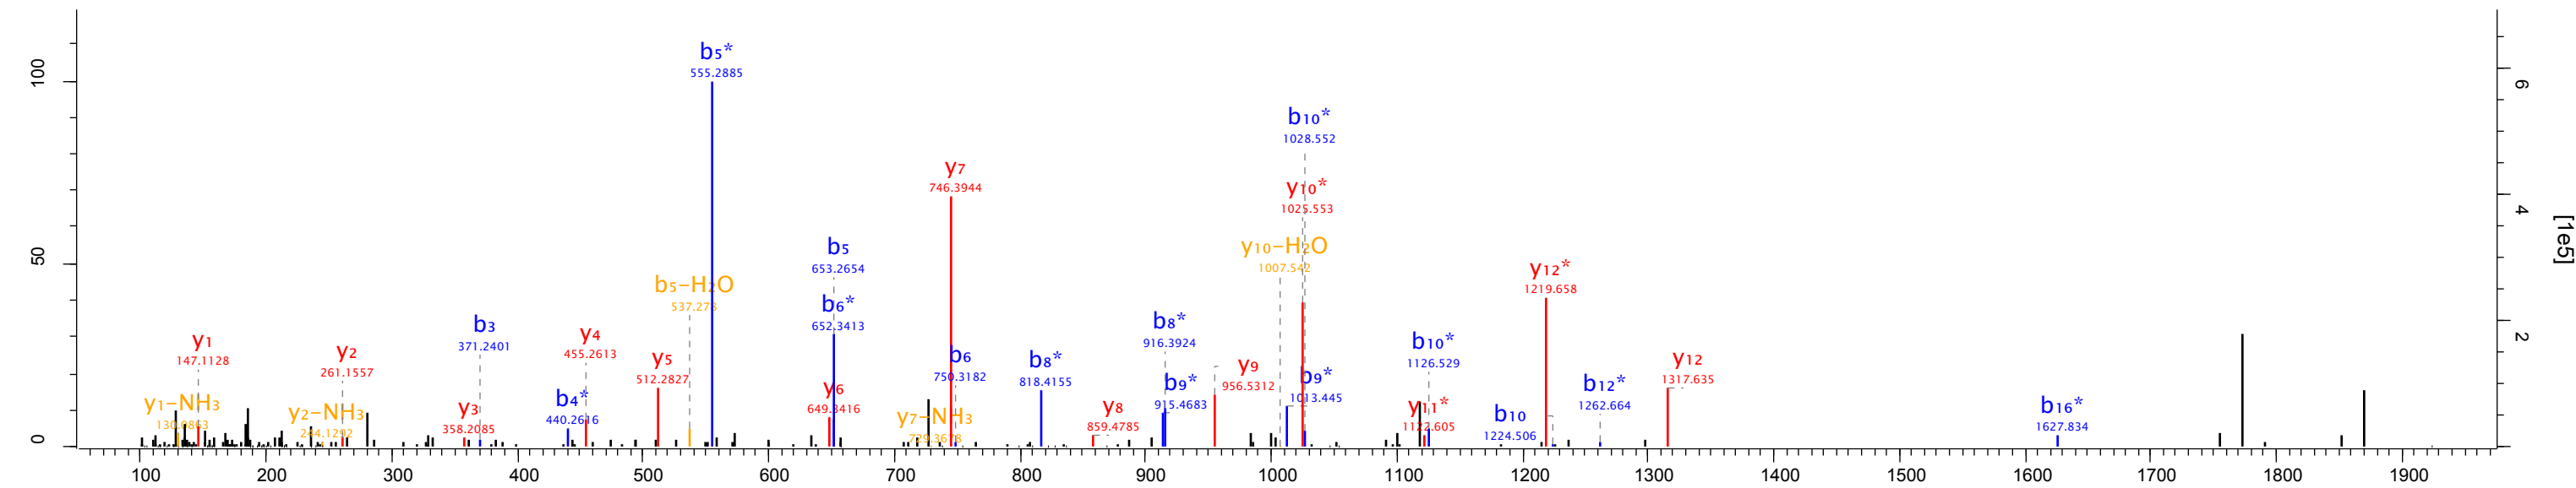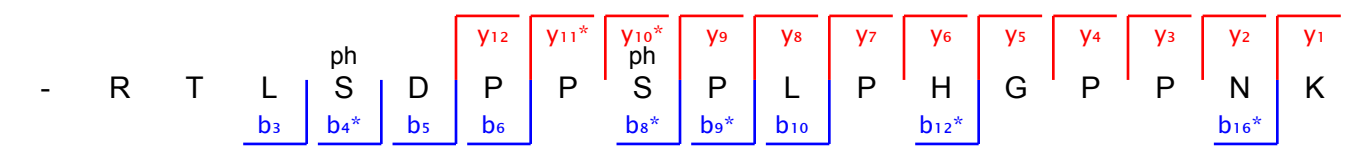

Raw file  
20171215\_MaS\_33SR\_LMH\_phospho2\_03

Scan 9724 Method FTMS; HCD Score 224.53 m/z 972.41 Gene names BCL7B

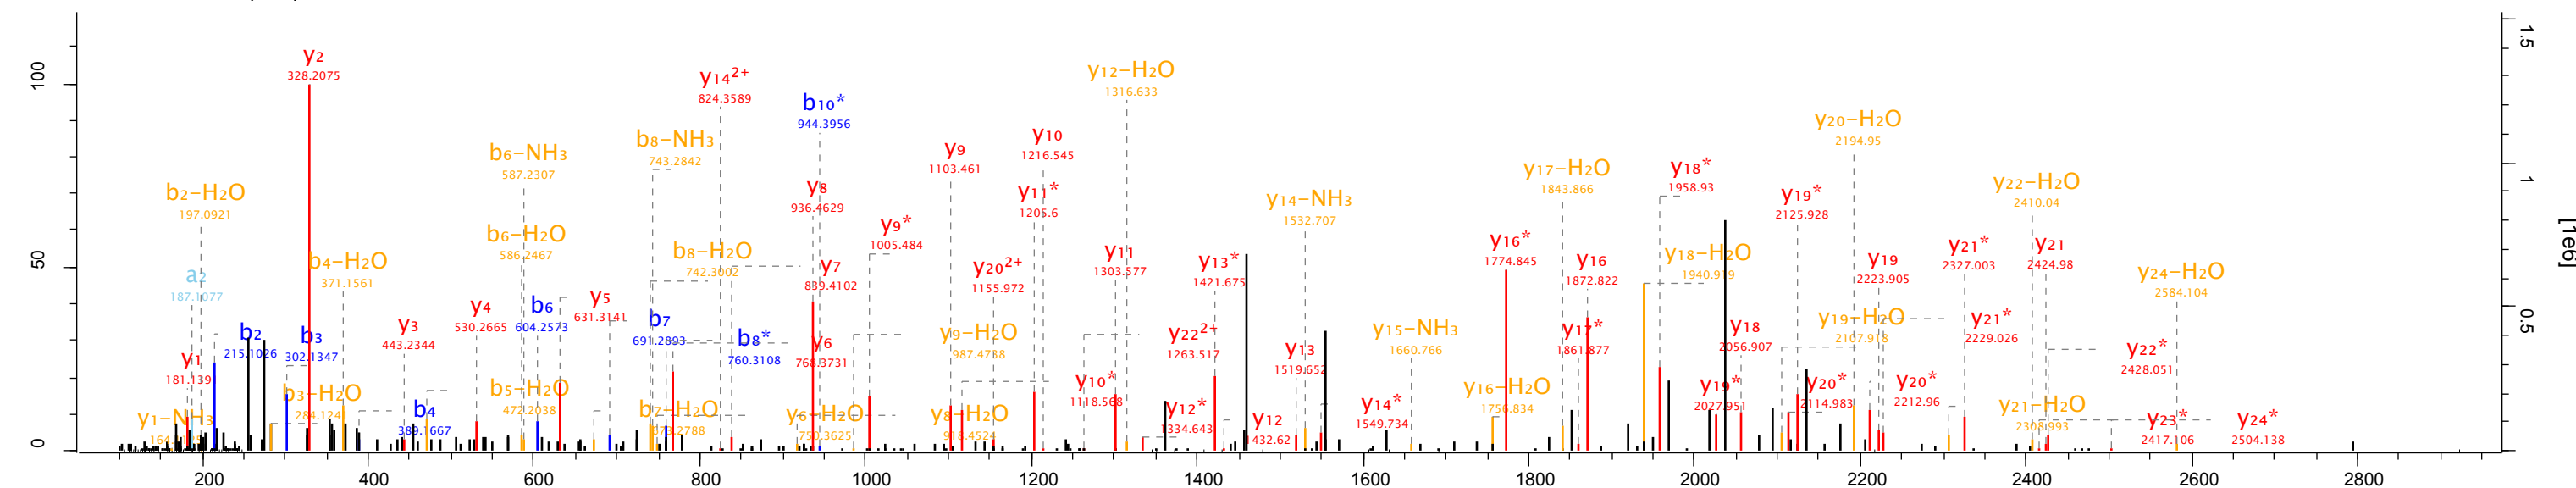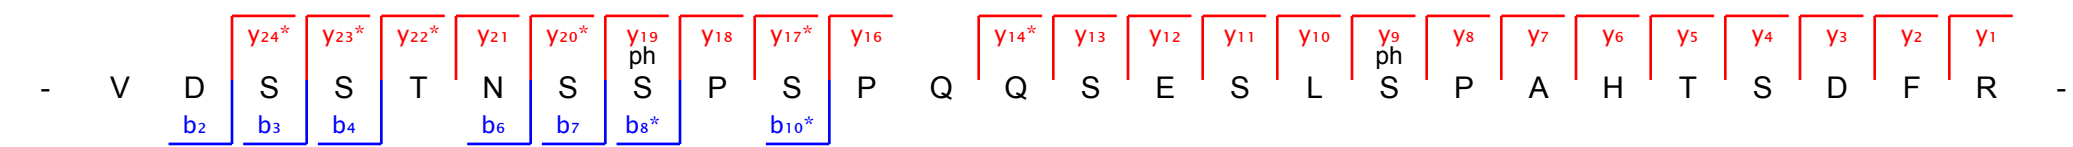

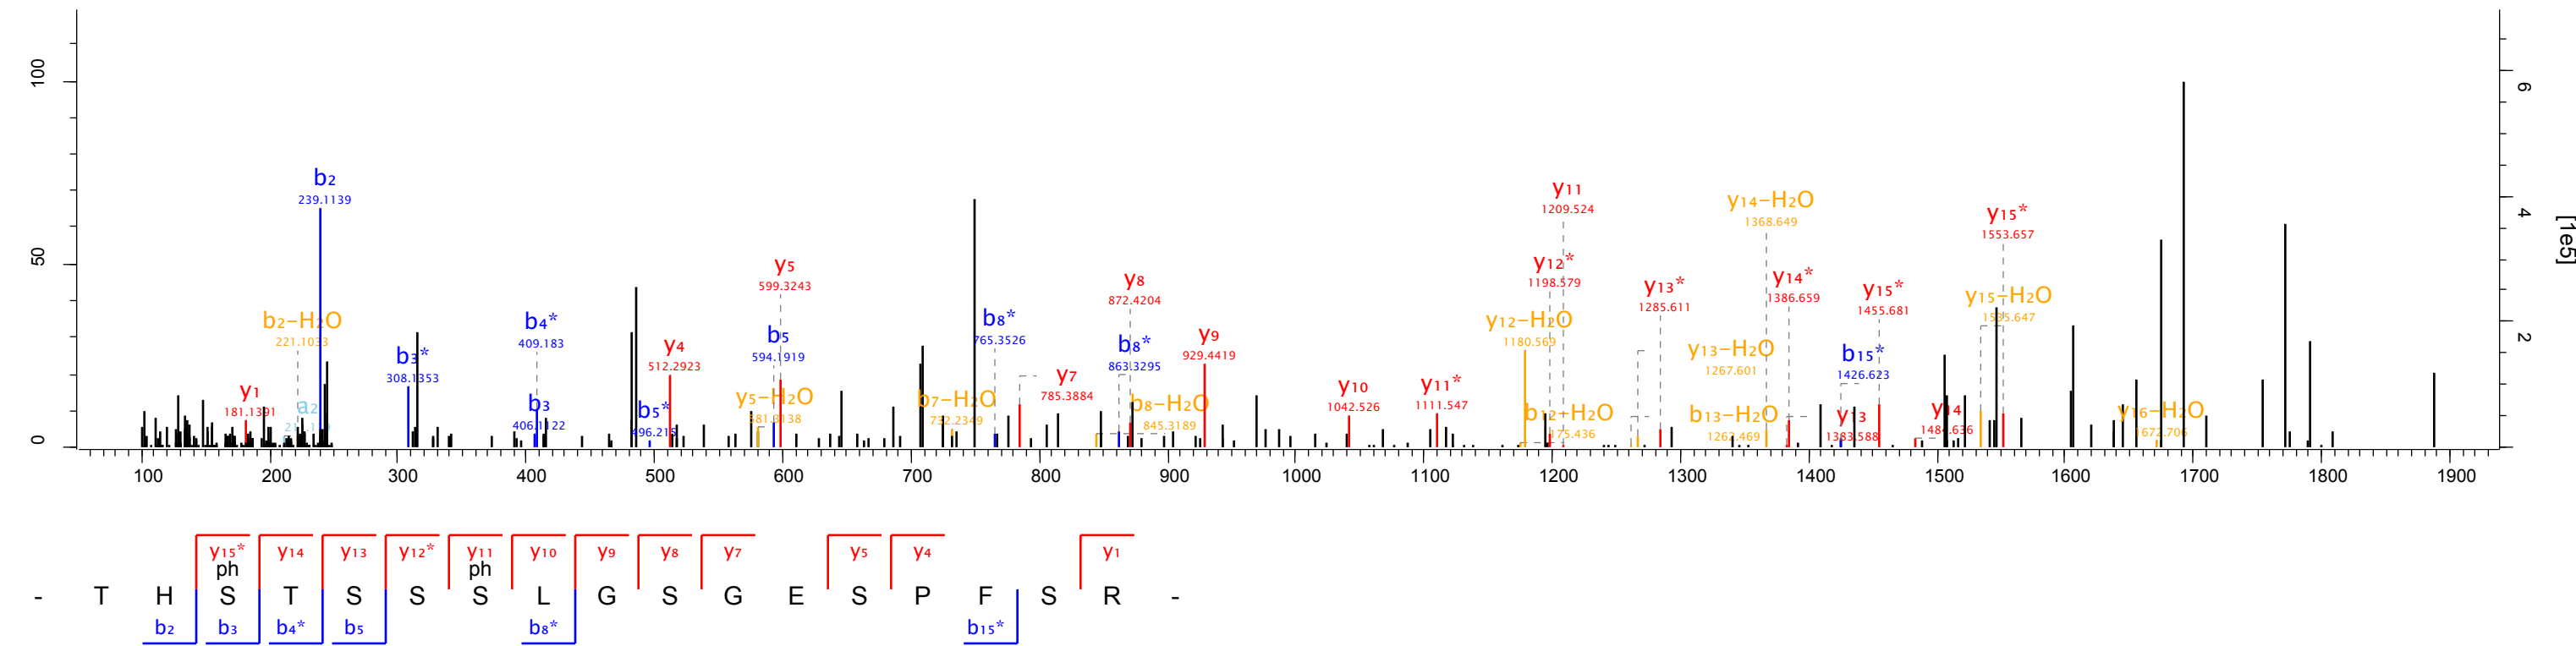



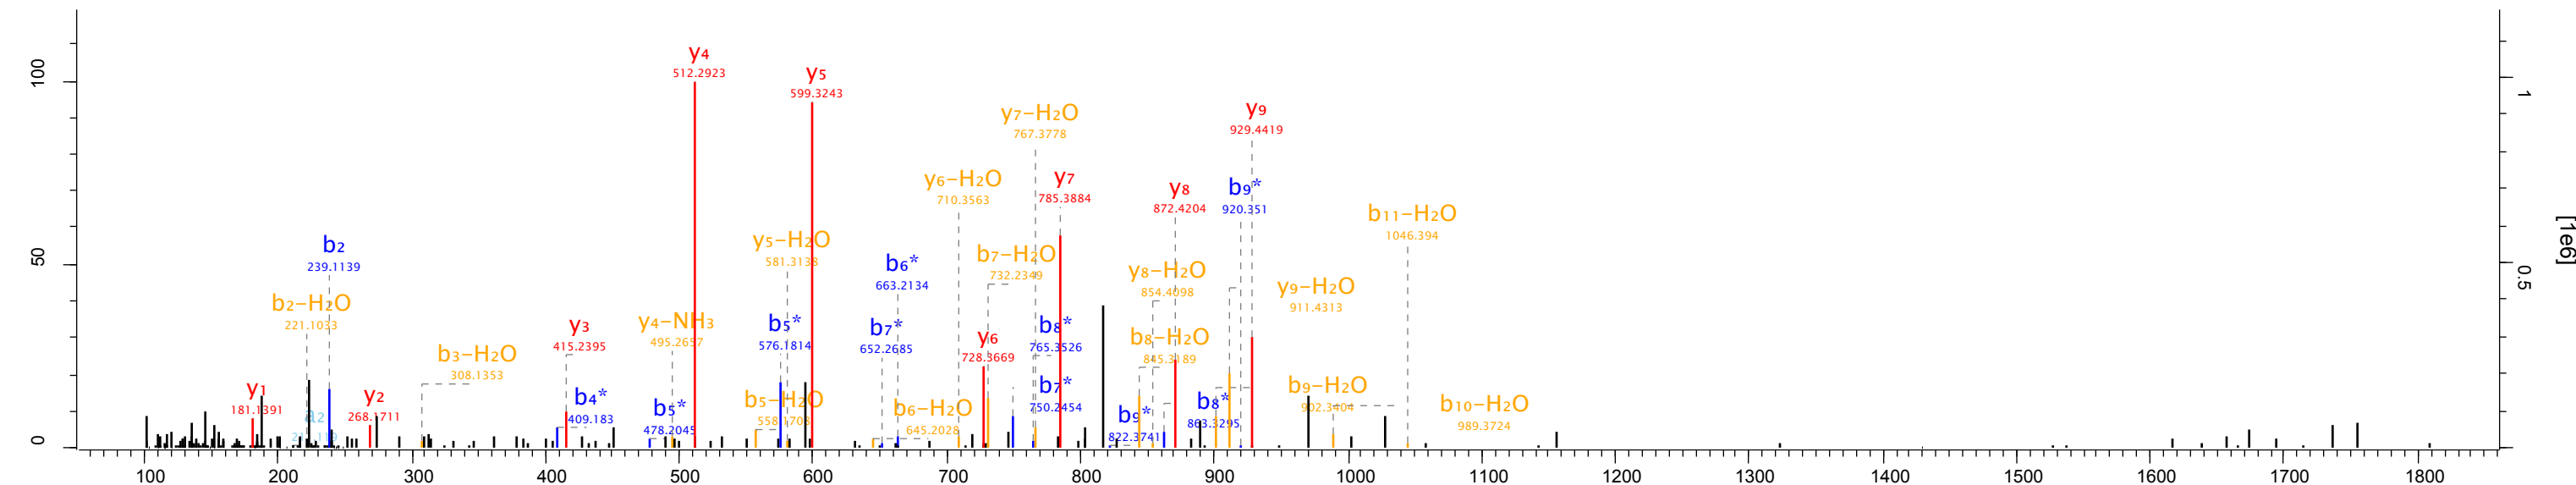

- T H S ph T ph S S S L G S G E S P F S R -

Fragmentation labels (b and y ions) are shown below the corresponding amino acids:

- H: b<sub>2</sub>
- T: b<sub>4</sub>\*
- S: b<sub>5</sub>\*
- S: b<sub>6</sub>\*
- S: b<sub>7</sub>\*
- L: b<sub>8</sub>\*
- G: b<sub>9</sub>\*
- S: y<sub>9</sub>
- G: y<sub>8</sub>
- E: y<sub>7</sub>
- S: y<sub>6</sub>
- P: y<sub>5</sub>
- F: y<sub>4</sub>
- S: y<sub>3</sub>
- R: y<sub>2</sub>

Raw file 20171215\_MaS\_33SR\_LMH\_phospho2\_04 Scan 3254 Method FTMS; HCD Score 103.45 m/z 717.78 Gene names LMNB2

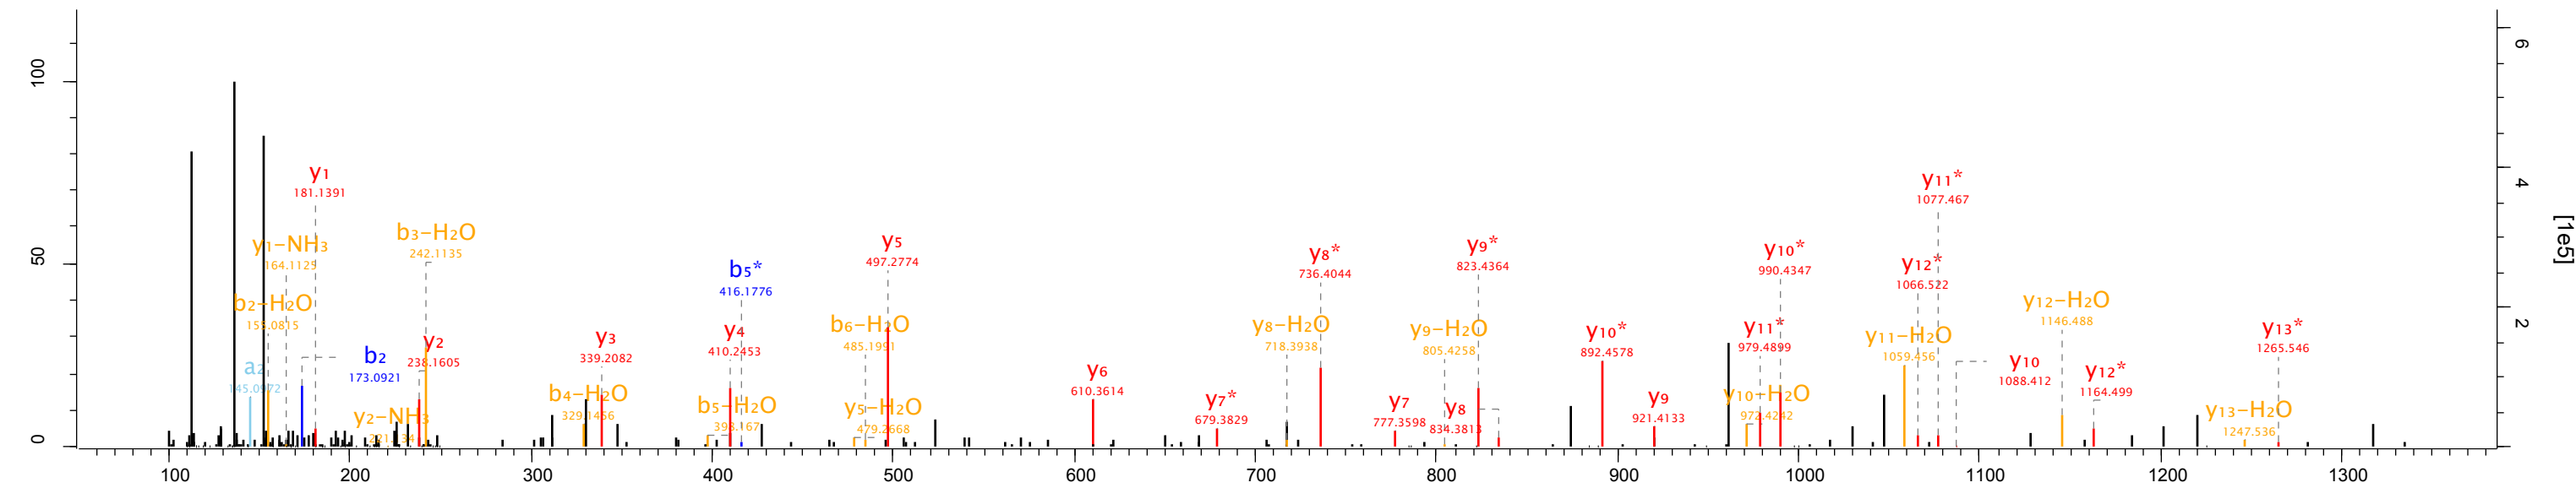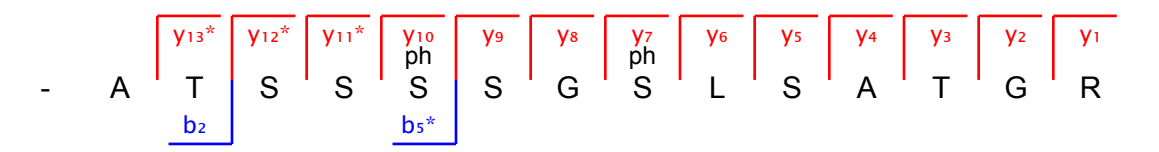

Raw file 20171215\_MaS\_33SR\_LMH\_phospho2\_04 Scan 3434 Method FTMS; HCD Score 92.79 m/z 529.67 Gene names SRSF7

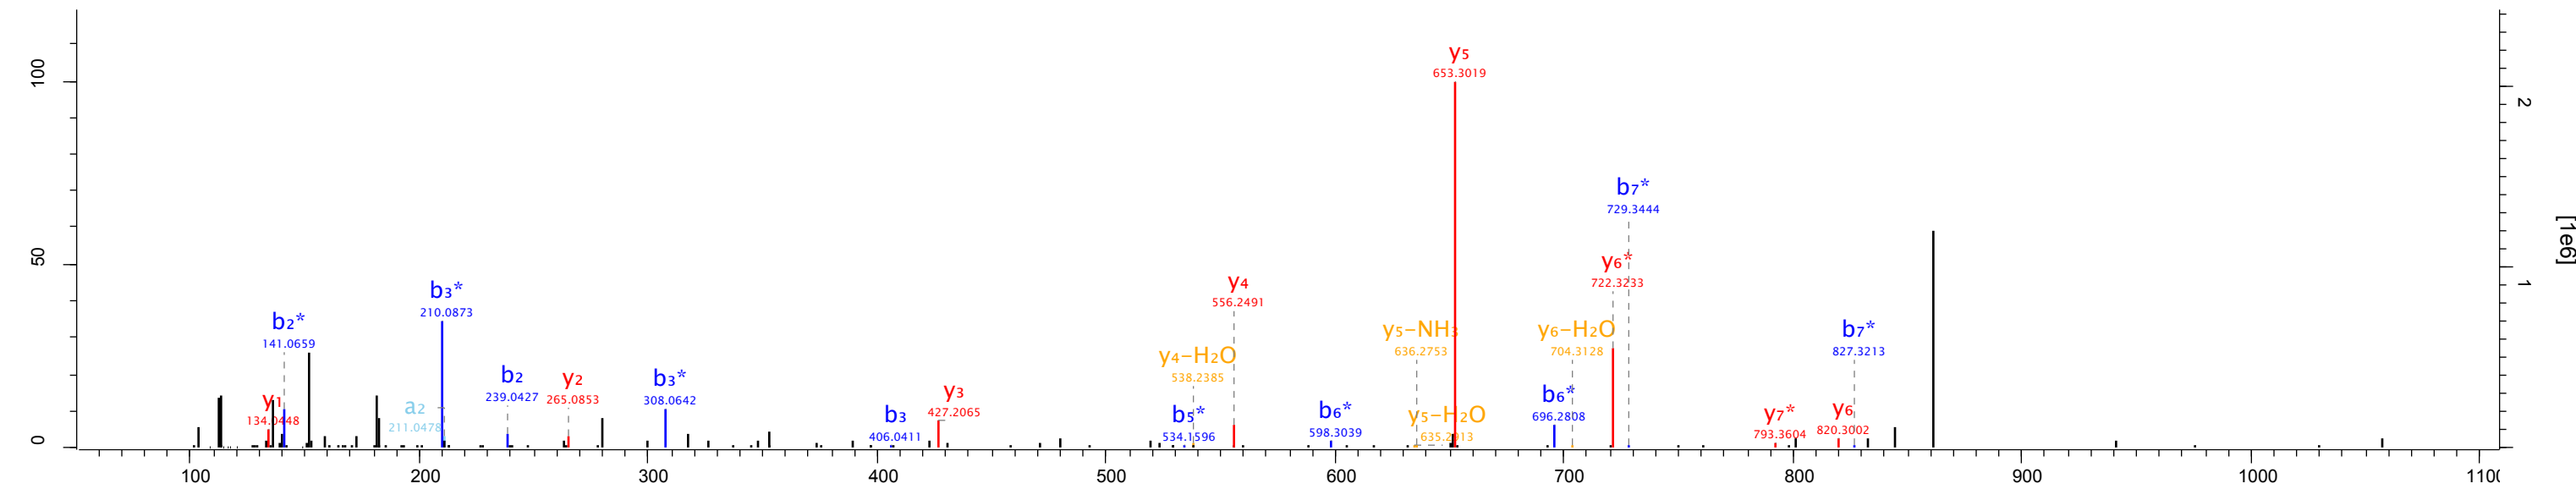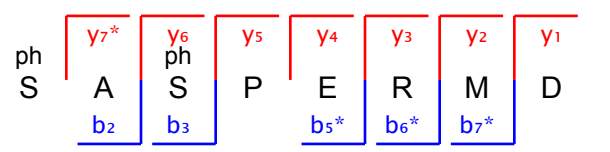

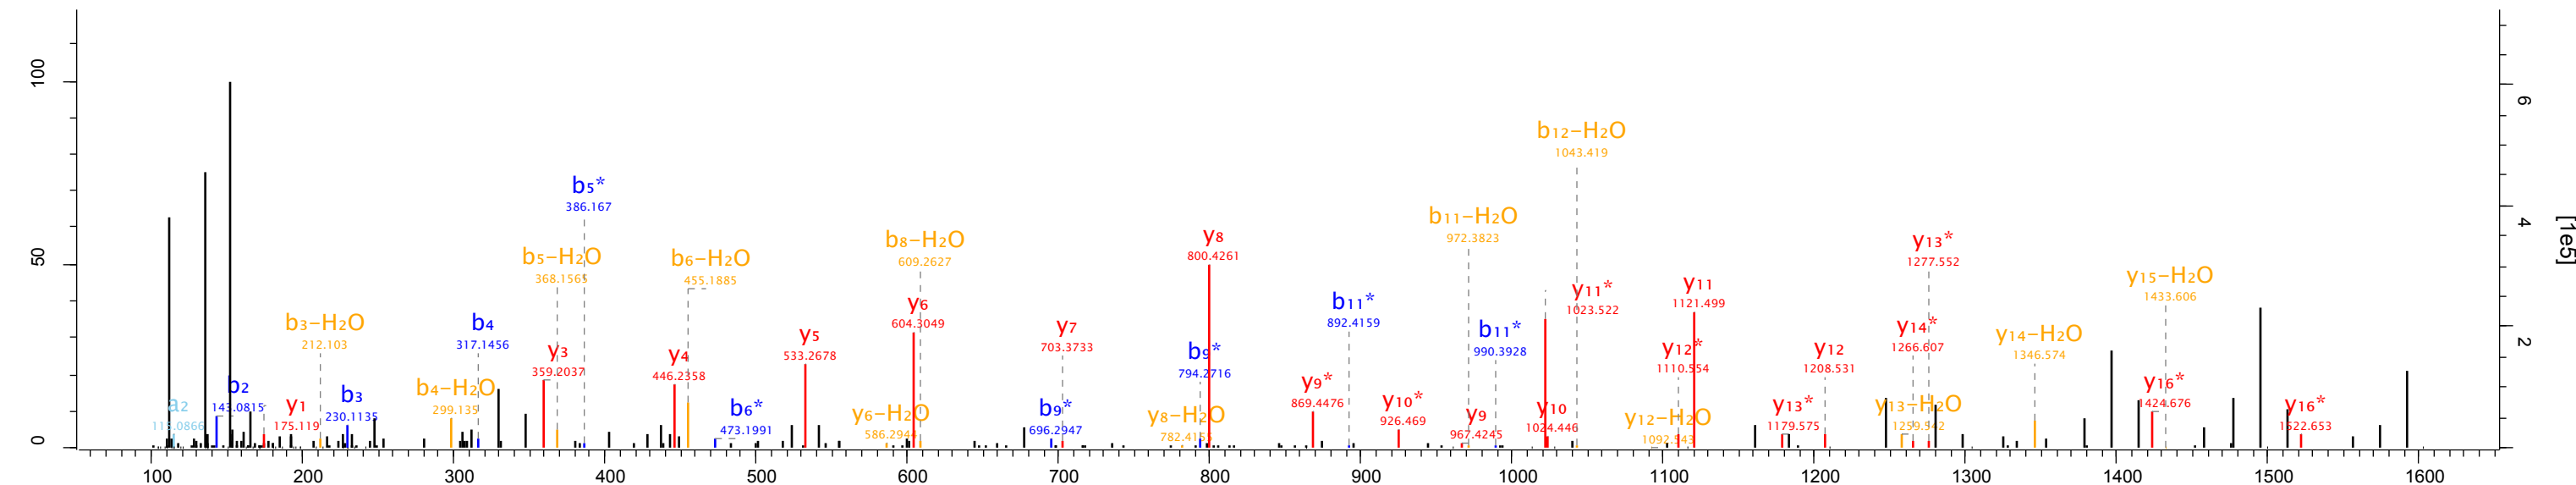

- A A S S S P G S P V A S S P S R -

y<sub>16</sub>\*
y<sub>14</sub>\*
y<sub>13</sub>\*
y<sub>12</sub>
y<sub>11</sub>
y<sub>10</sub>
y<sub>9</sub>
y<sub>8</sub>
y<sub>7</sub>
y<sub>6</sub>
y<sub>5</sub>
y<sub>4</sub>
y<sub>3</sub>
y<sub>1</sub>

b<sub>2</sub>
b<sub>3</sub>
b<sub>4</sub>
b<sub>5</sub>\*
b<sub>6</sub>\*
b<sub>9</sub>\*
b<sub>11</sub>\*

Raw file 20171215\_MaS\_33SR\_LMH\_phospho2\_04 Scan 3834 Method FTMS; HCD Score 138.37 m/z 898.8 Gene names CMTR1

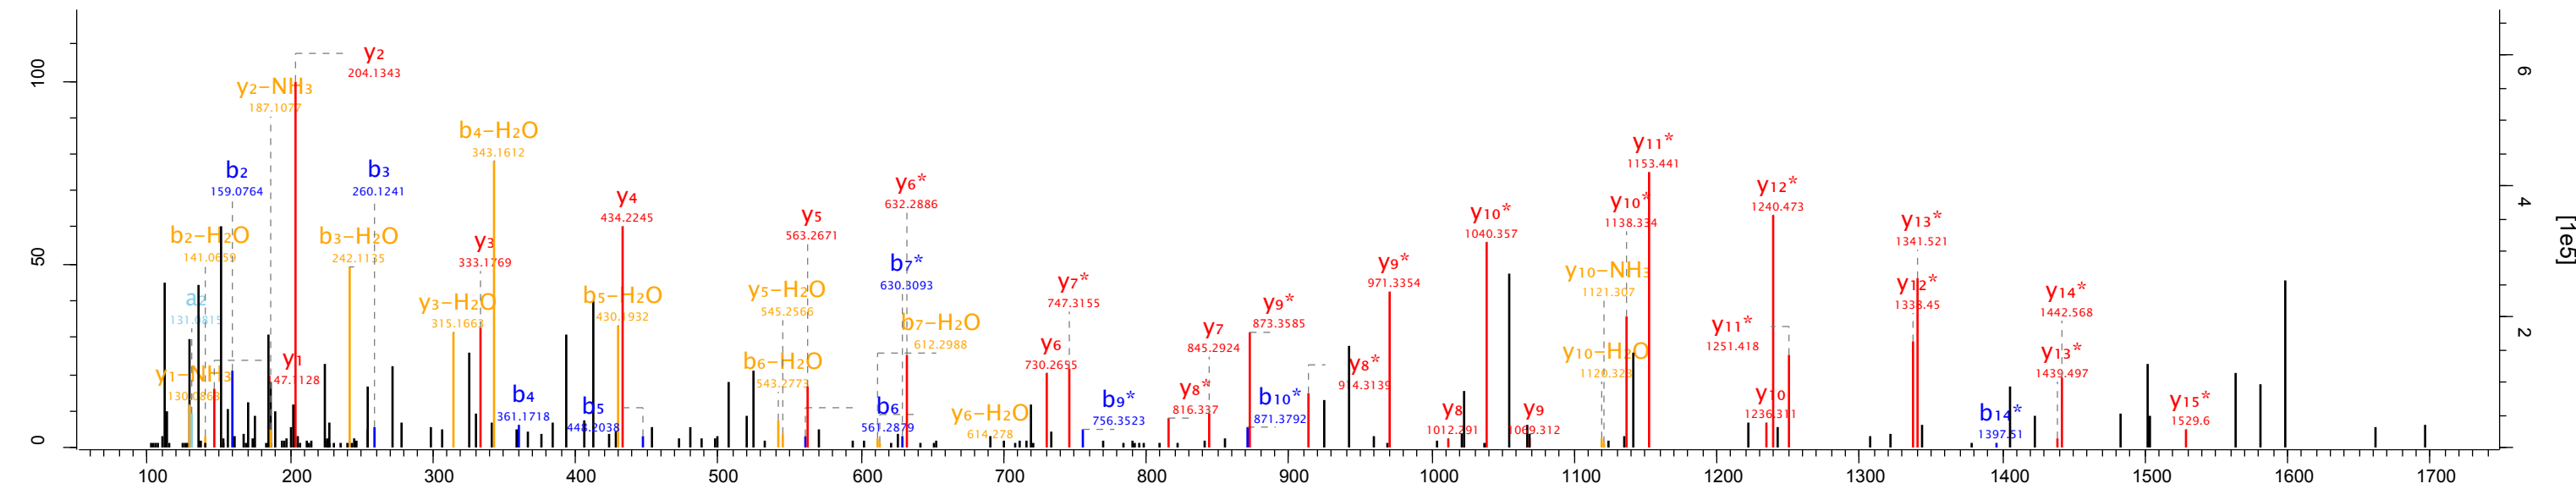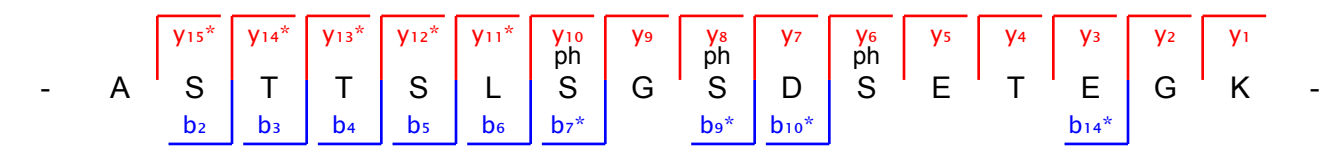

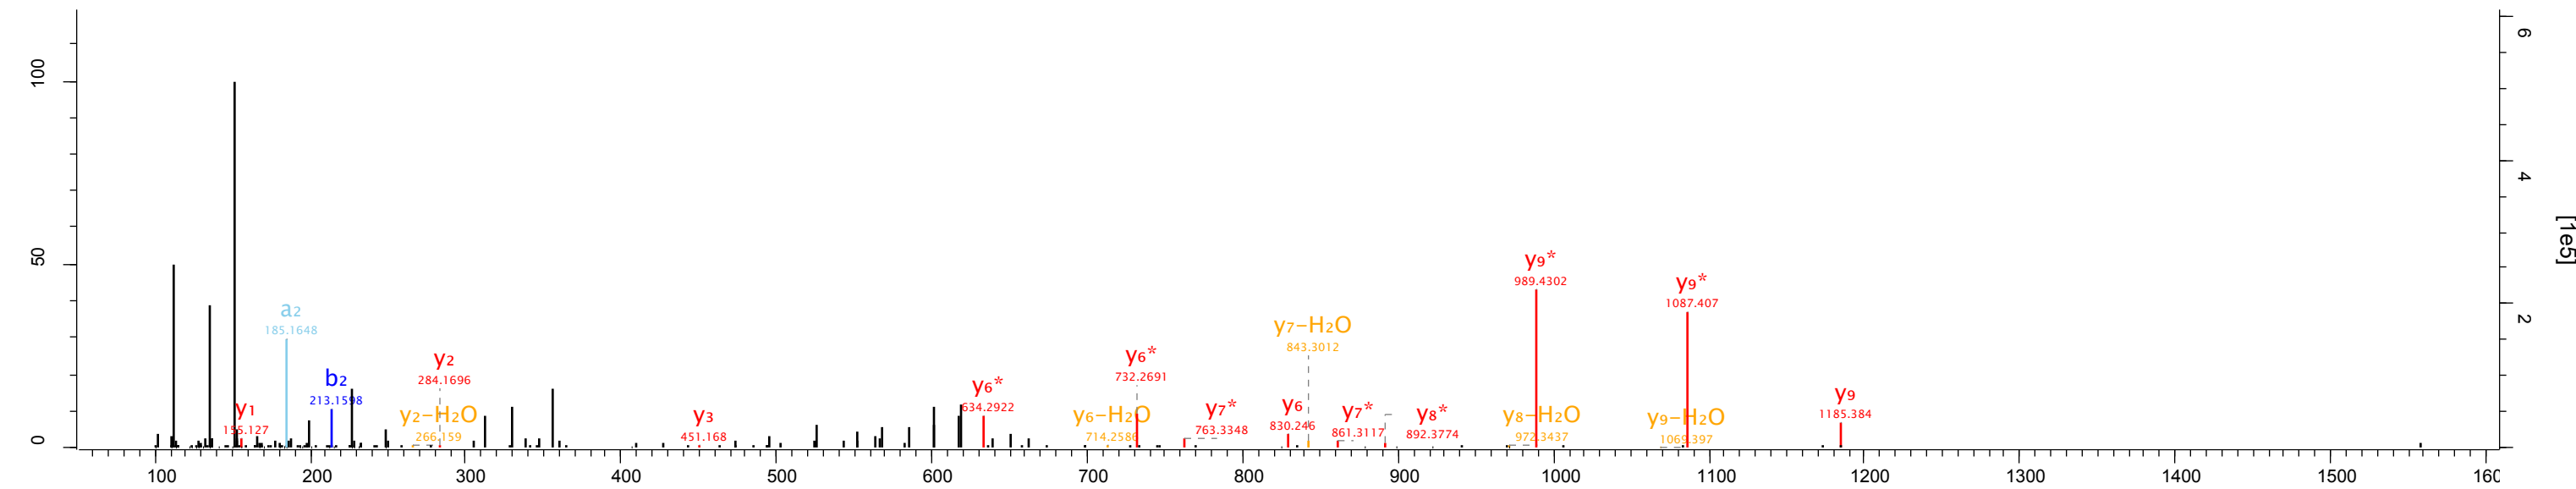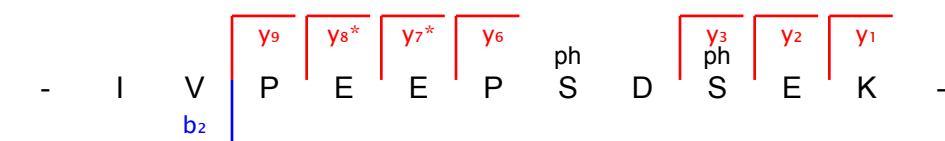

Raw file 20171215\_MaS\_33SR\_LMH\_phospho2\_04 Scan 5634 Method FTMS; HCD Score 112.91 m/z 699.77 Gene names TERF1

20171215\_MaS\_33SR\_LMH\_phospho2\_04

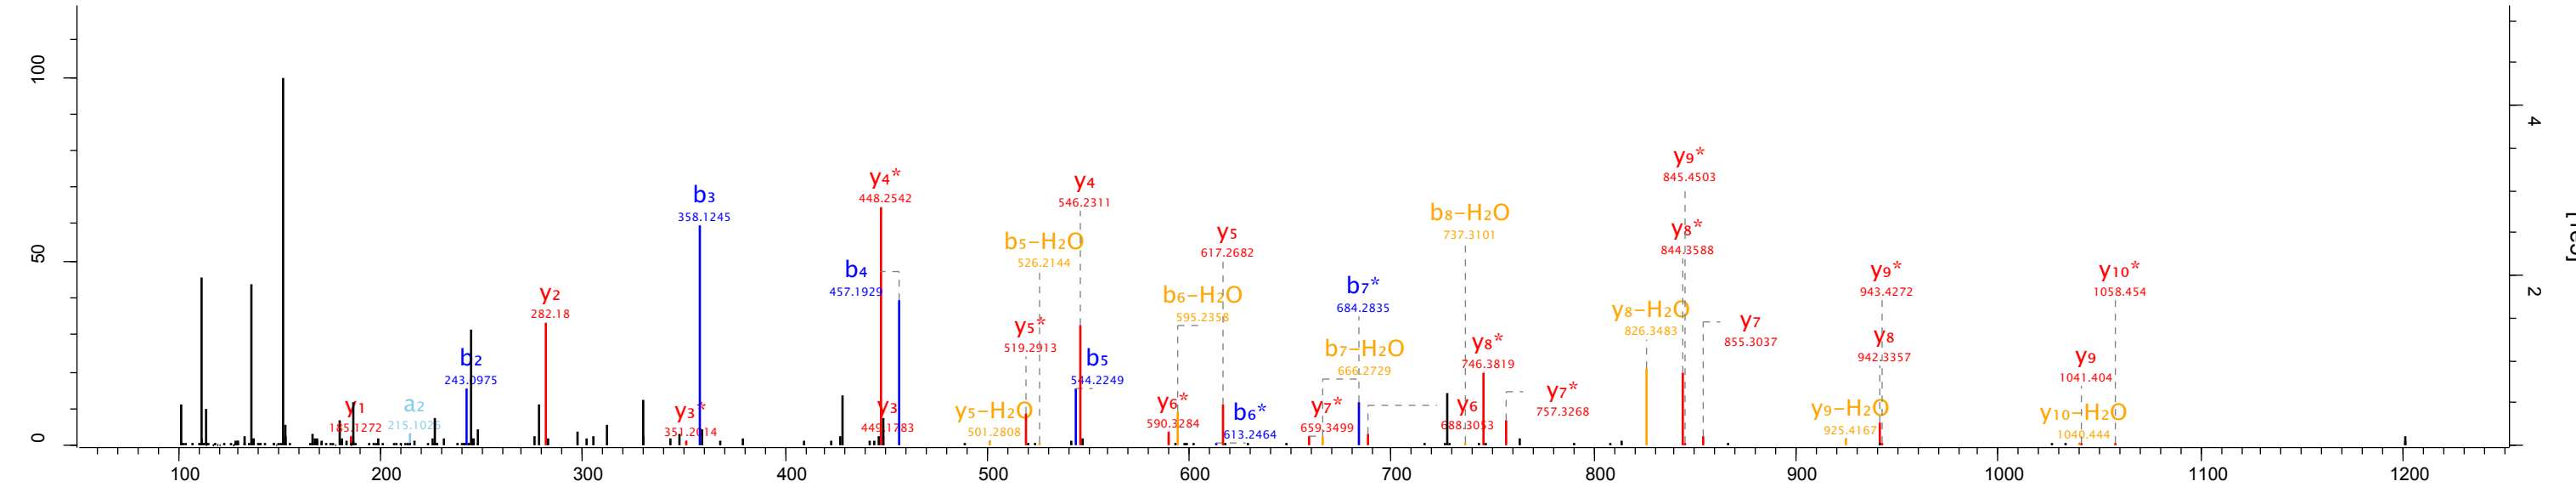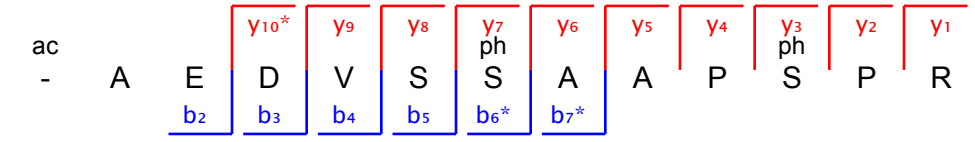

Raw file  
20171215\_MaS\_33SR\_LMH\_phospho2\_04

Scan 6624 Method FTMS; HCD Score 109.04 m/z 795.95 Gene names  
LIG1

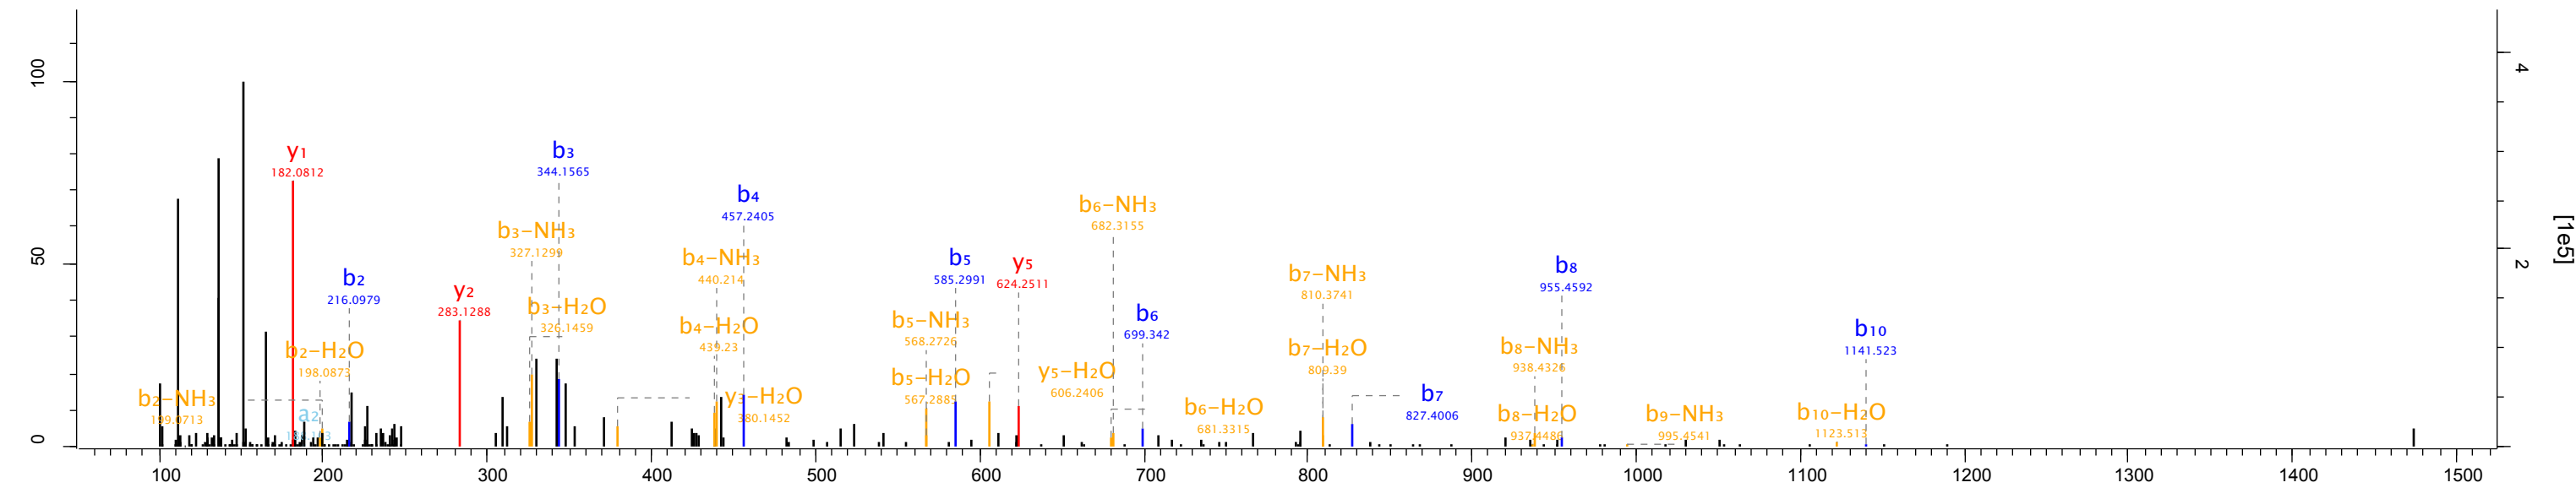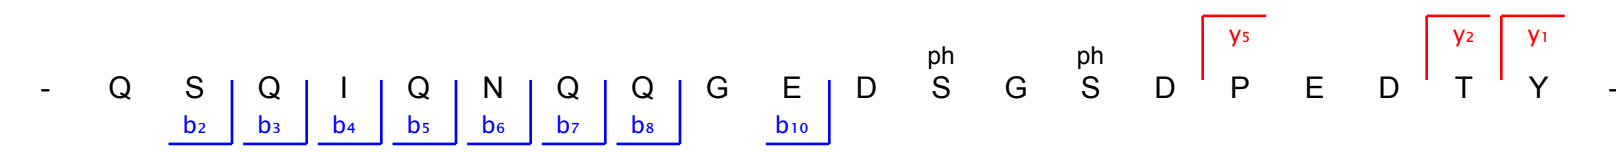



Raw file 20171215\_MaS\_33SR\_LMH\_phospho2\_04 Scan 7014 Method FTMS; HCD Score 49.52 m/z 746.66 Gene names SF3B2

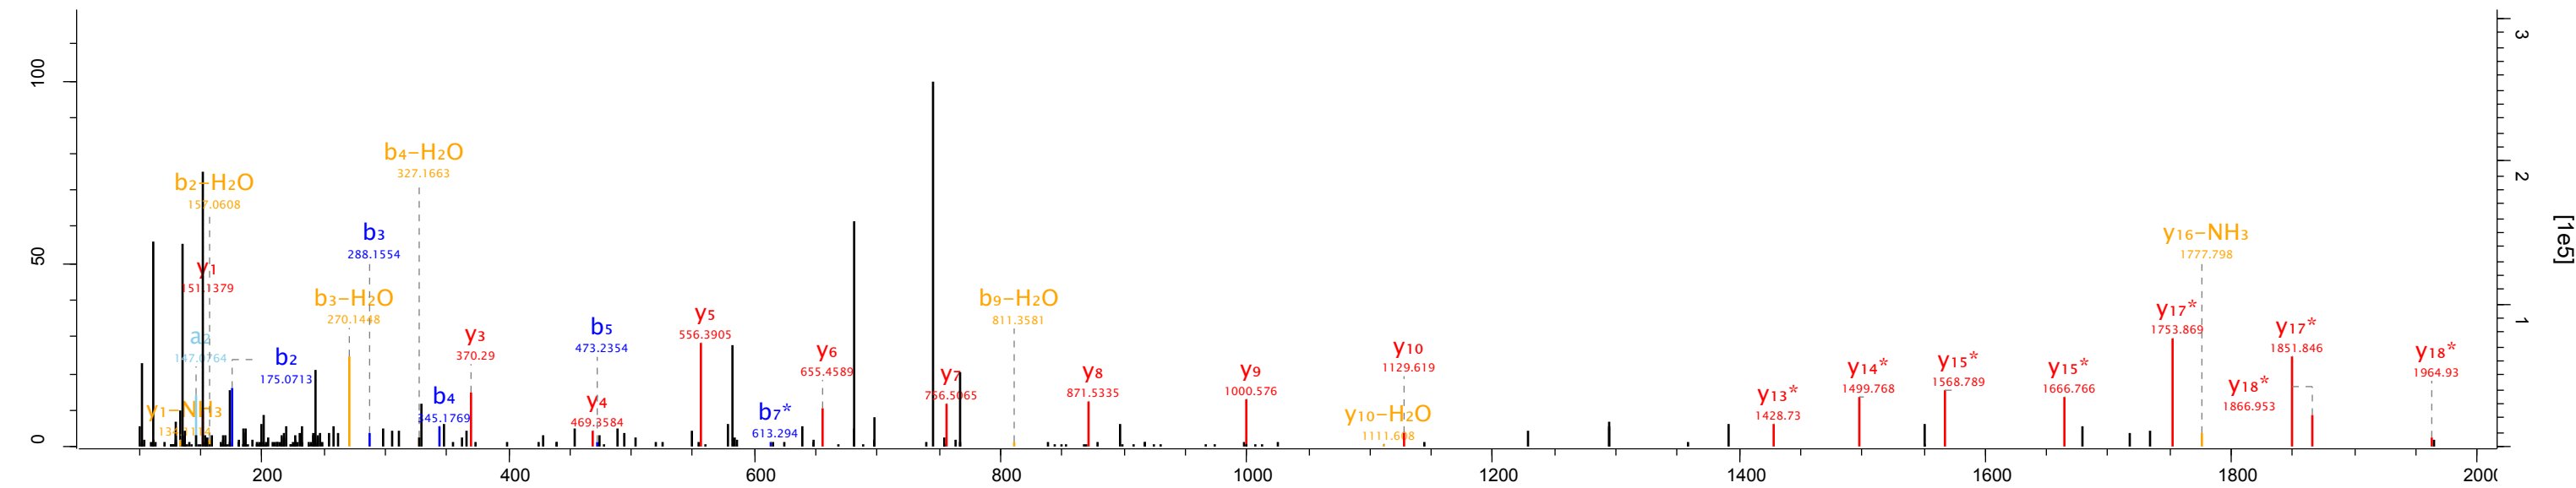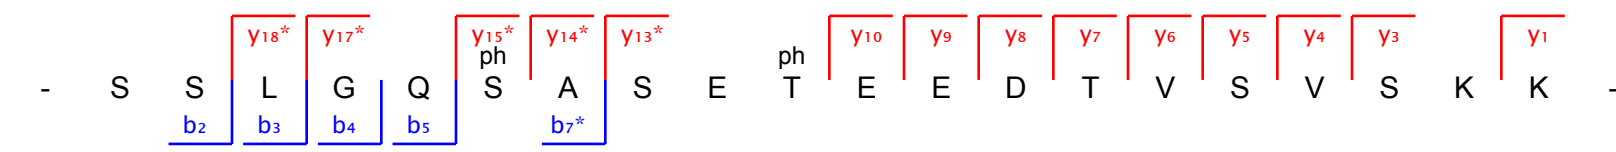

Raw file 20171215\_MaS\_33SR\_LMH\_phospho2\_04 Scan 8134 Method FTMS; HCD Score 142.41 m/z 695.29 Gene names PRRC2A

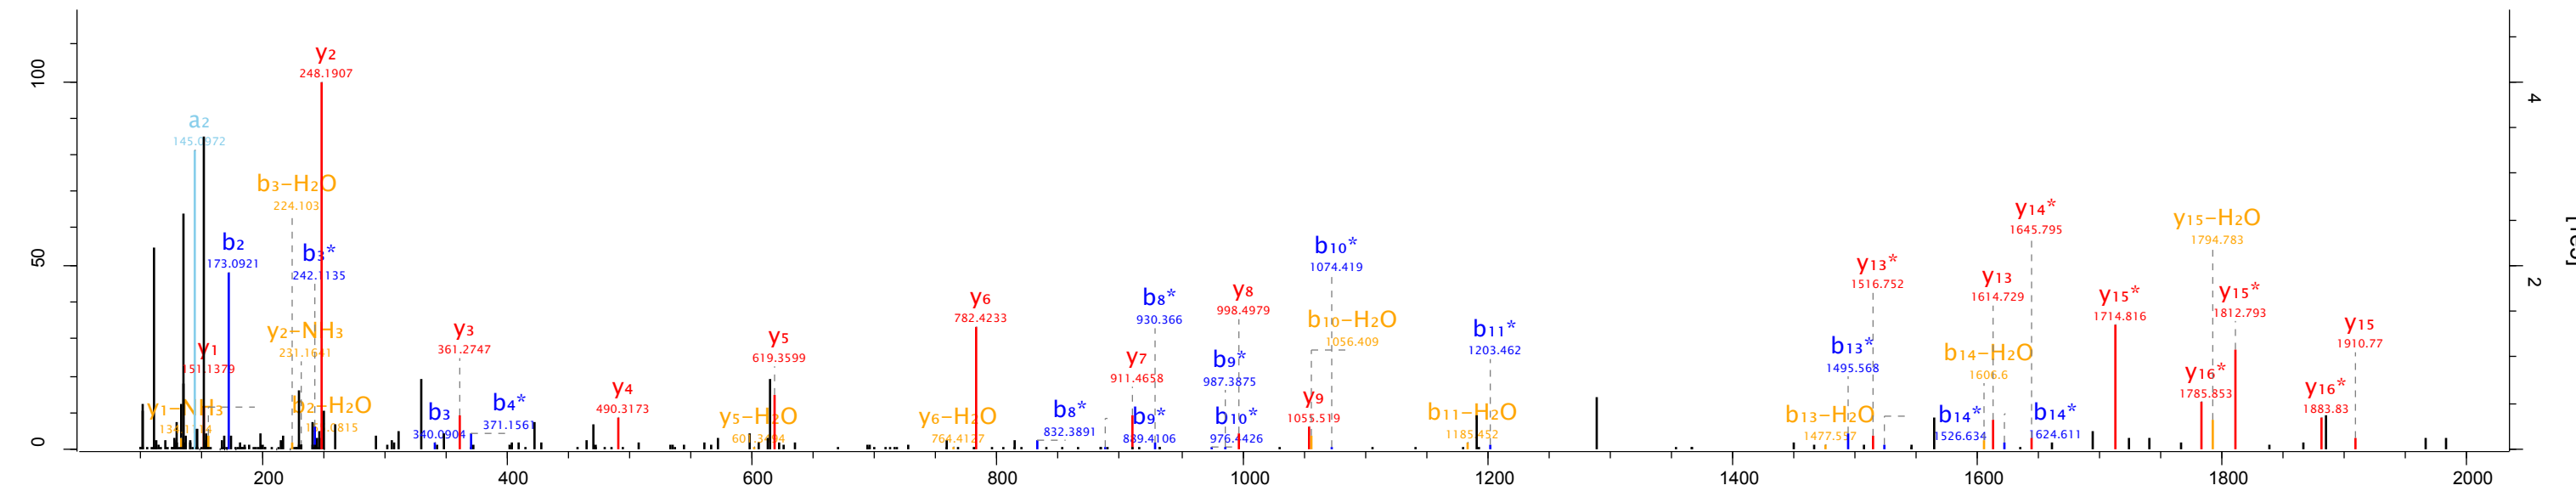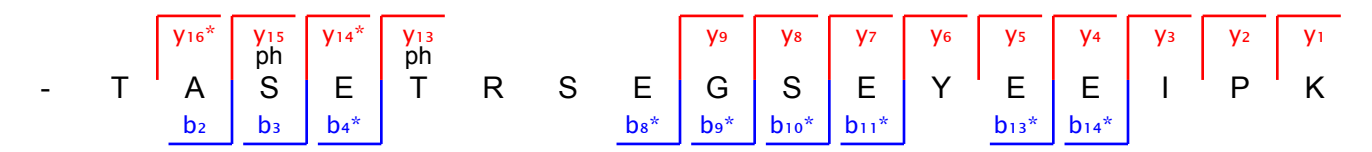

Raw file 20171215\_MaS\_33SR\_LMH\_phospho2\_04 Scan 8274 Method FTMS; HCD Score 75.53 m/z 720.33 Gene names BAIAP2L2

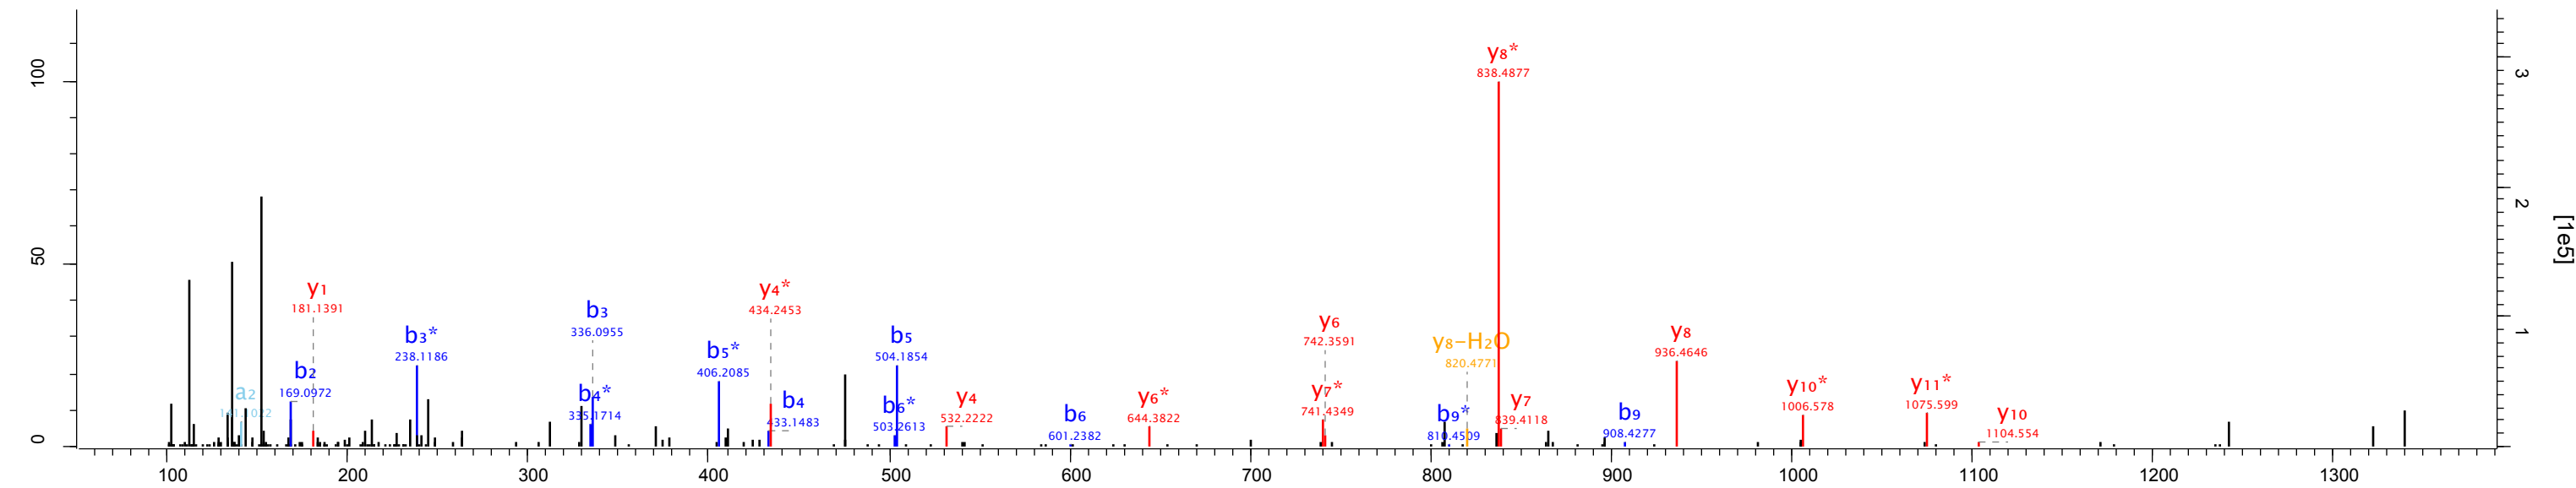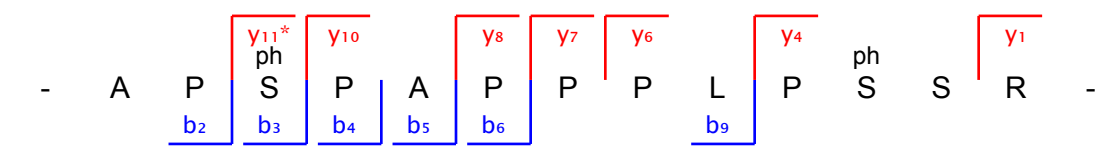

Raw file 20171215\_MaS\_33SR\_LMH\_phospho2\_05 Scan 4194 Method FTMS; HCD Score 103.66 m/z 1223.36 Gene names ARID4B

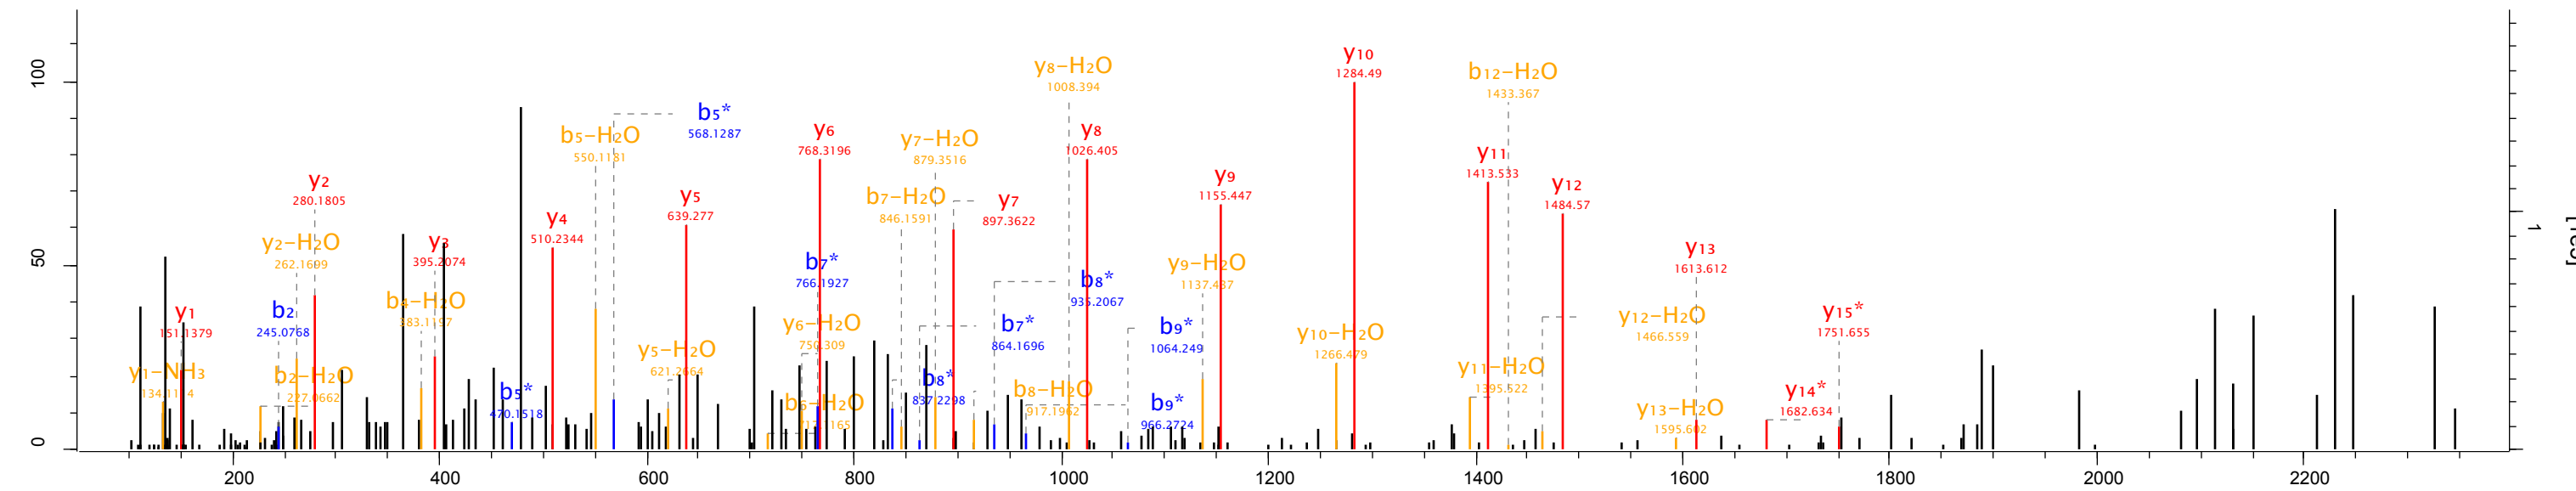

- E D S ph S y<sub>15</sub>\* ph S y<sub>14</sub>\* ph S y<sub>13</sub> E y<sub>12</sub> A E y<sub>11</sub> E y<sub>10</sub> E y<sub>9</sub> E y<sub>8</sub> E y<sub>7</sub> E y<sub>6</sub> E y<sub>5</sub> E y<sub>4</sub> D y<sub>3</sub> D y<sub>2</sub> E y<sub>1</sub> K -

b<sub>2</sub> b<sub>5</sub>\* b<sub>7</sub>\* b<sub>8</sub>\* b<sub>9</sub>\*

Raw file: 20171215\_MaS\_33SR\_LMH\_phospho2\_05  
 Scan: 6724 Method: FTMS; HCD Score: 96.79 m/z: 931.34 Gene names: SRRM2

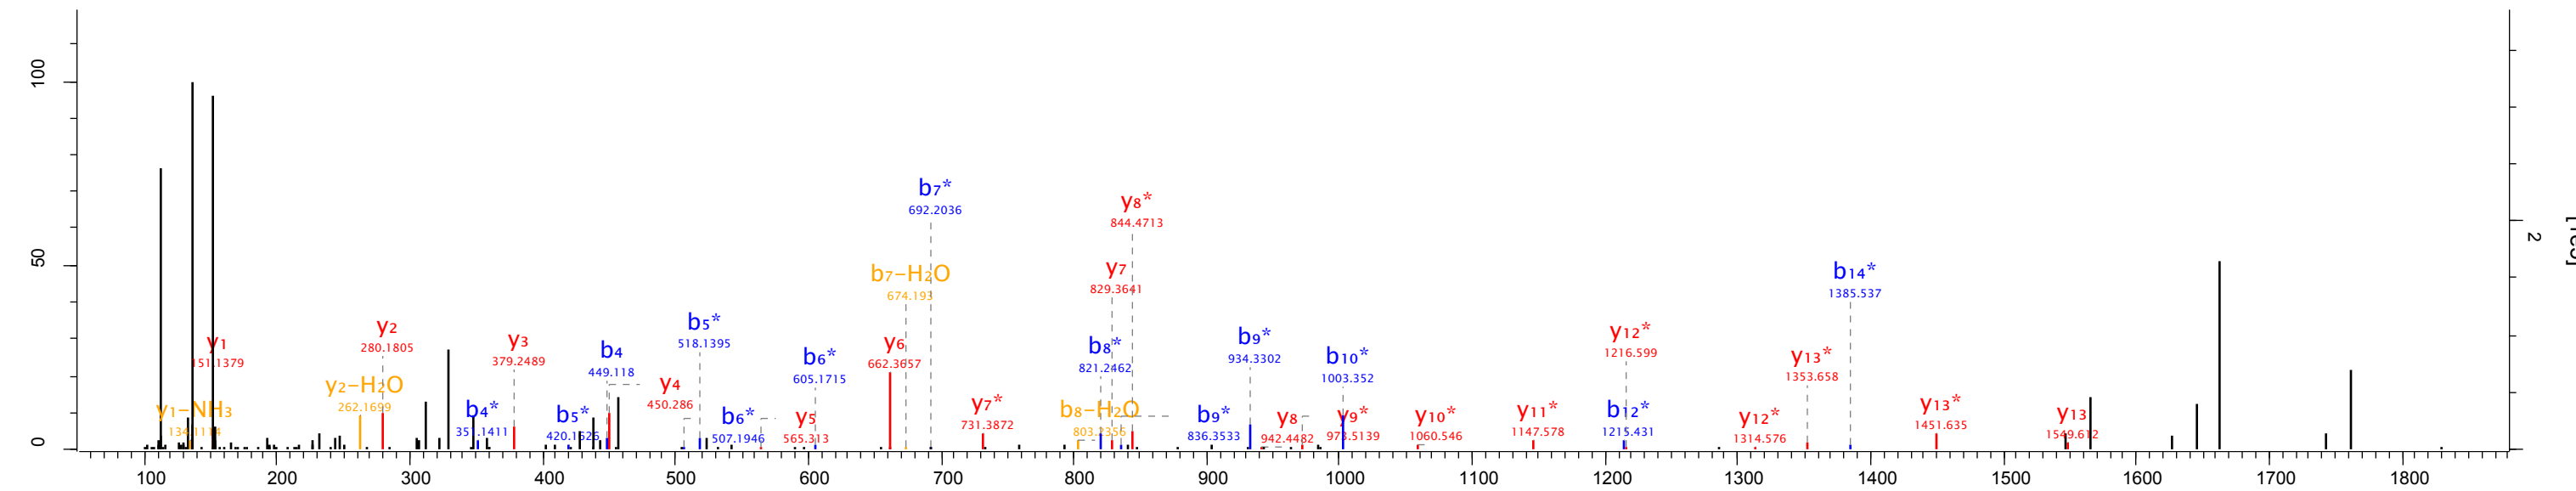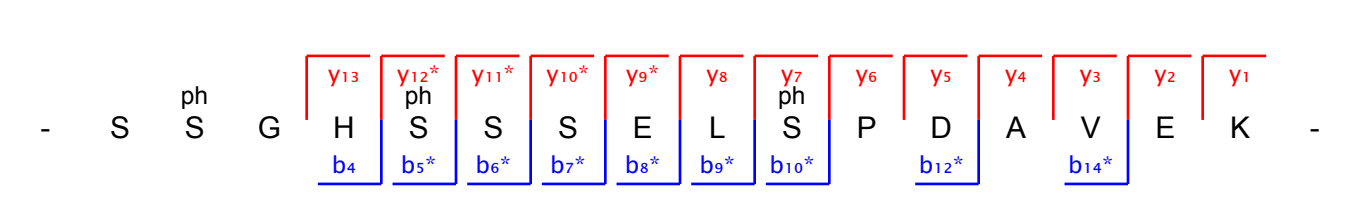

Raw file 20171215\_MaS\_33SR\_LMH\_phospho2\_05 Scan 9174 Method FTMS; HCD Score 118.54 m/z 1068.89 Gene names PRRC2B

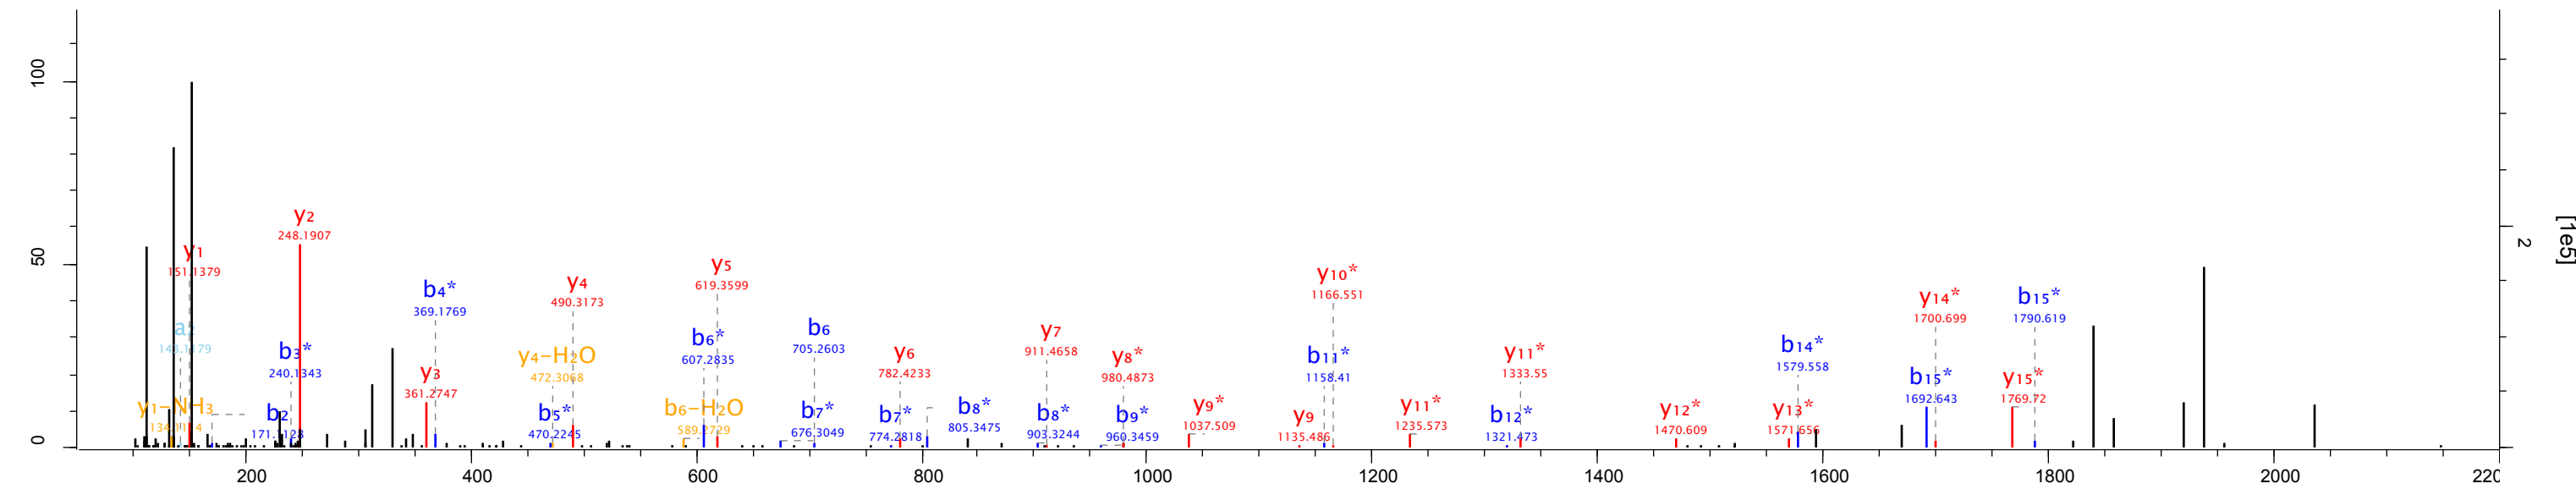

- V A S E T H S E G S E Y E E L P K -

b2 b3\* b4\* b5\* b6 b7\* b8\* b9\* b11\* b12\* b14\* b15\*

y15\* ph y14\* y13\* y12\* y11\* ph y10\* y9 y8\* ph y7 y6 y5 y4 y3 y2 y1

Raw file 20171215\_MaS\_33SR\_LMH\_phospho2\_06 Scan 2664 Method FTMS; HCD Score 77.12 m/z 565.72 Gene names SRRM2

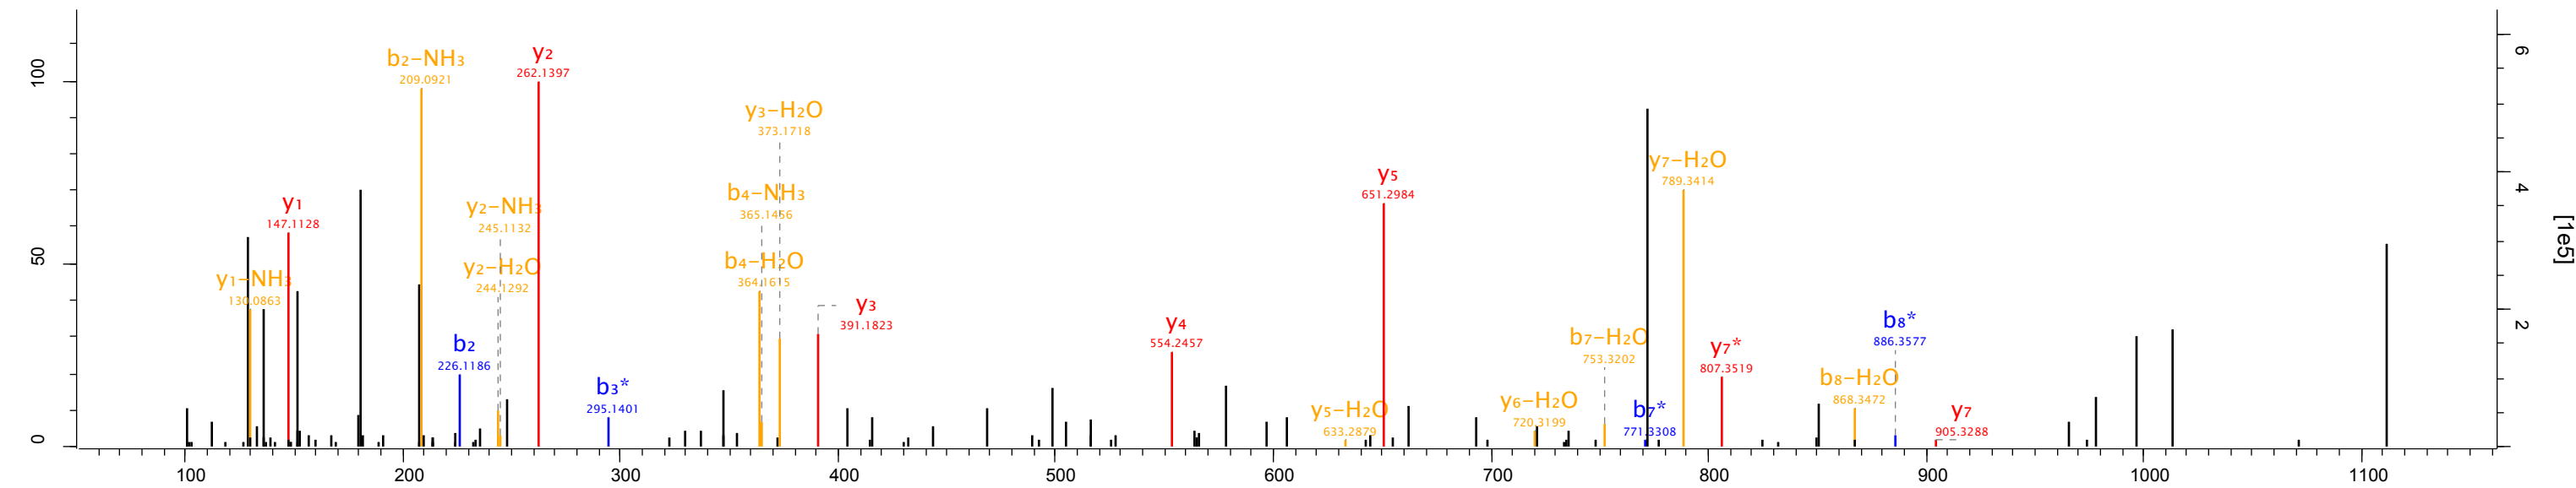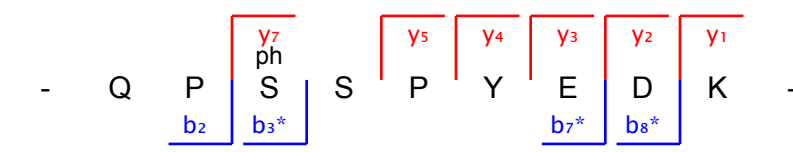

Raw file  
20171215\_MaS\_33SR\_LMH\_phospho2\_06

Scan 9514 Method FTMS; HCD Score 44.17 m/z 1169.94 Gene names MAP1B

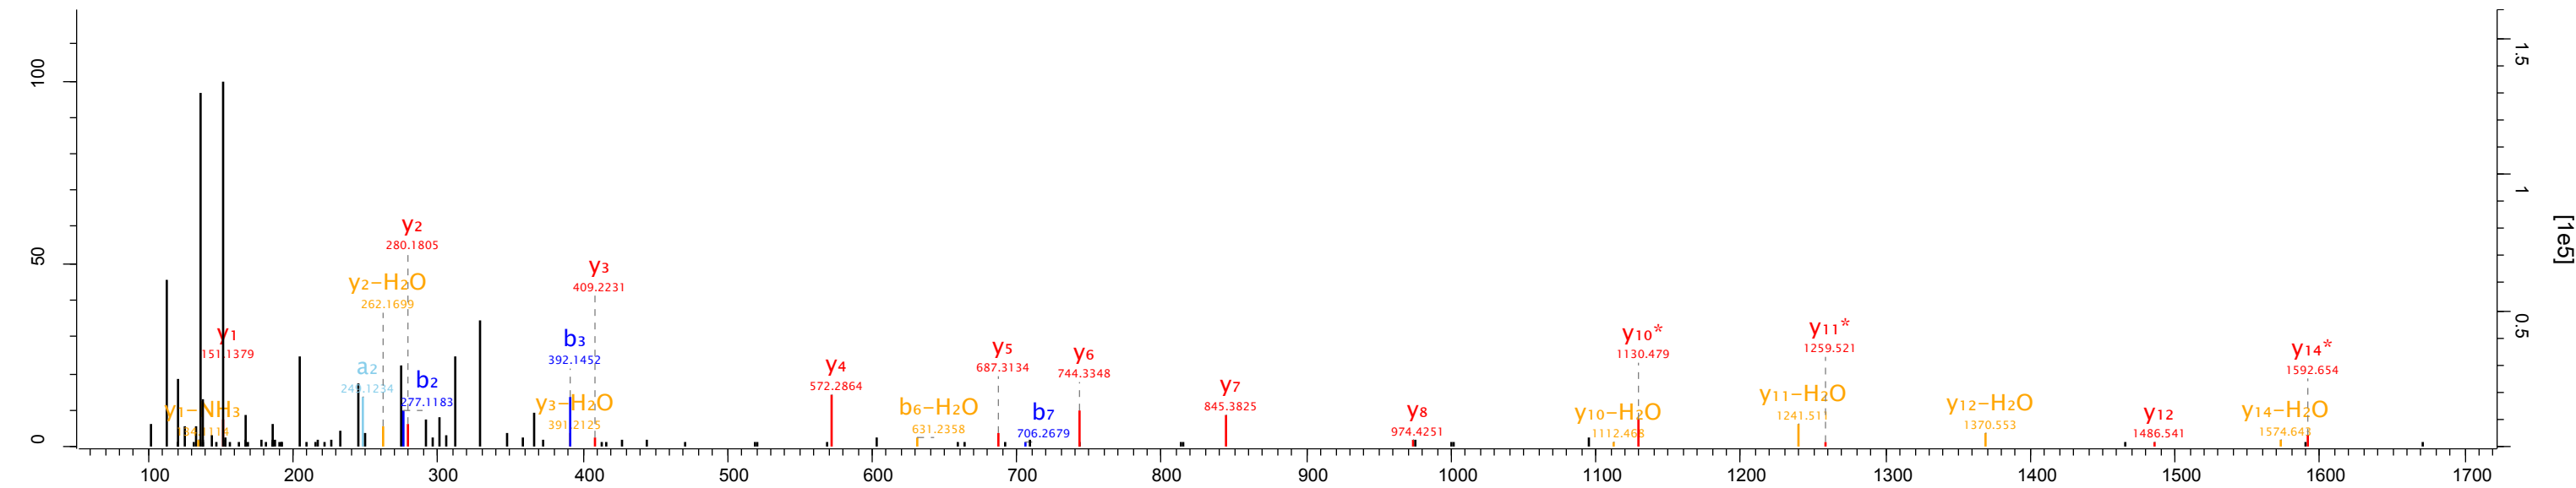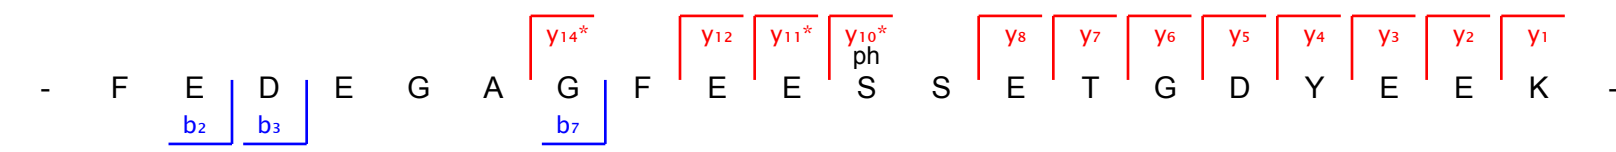



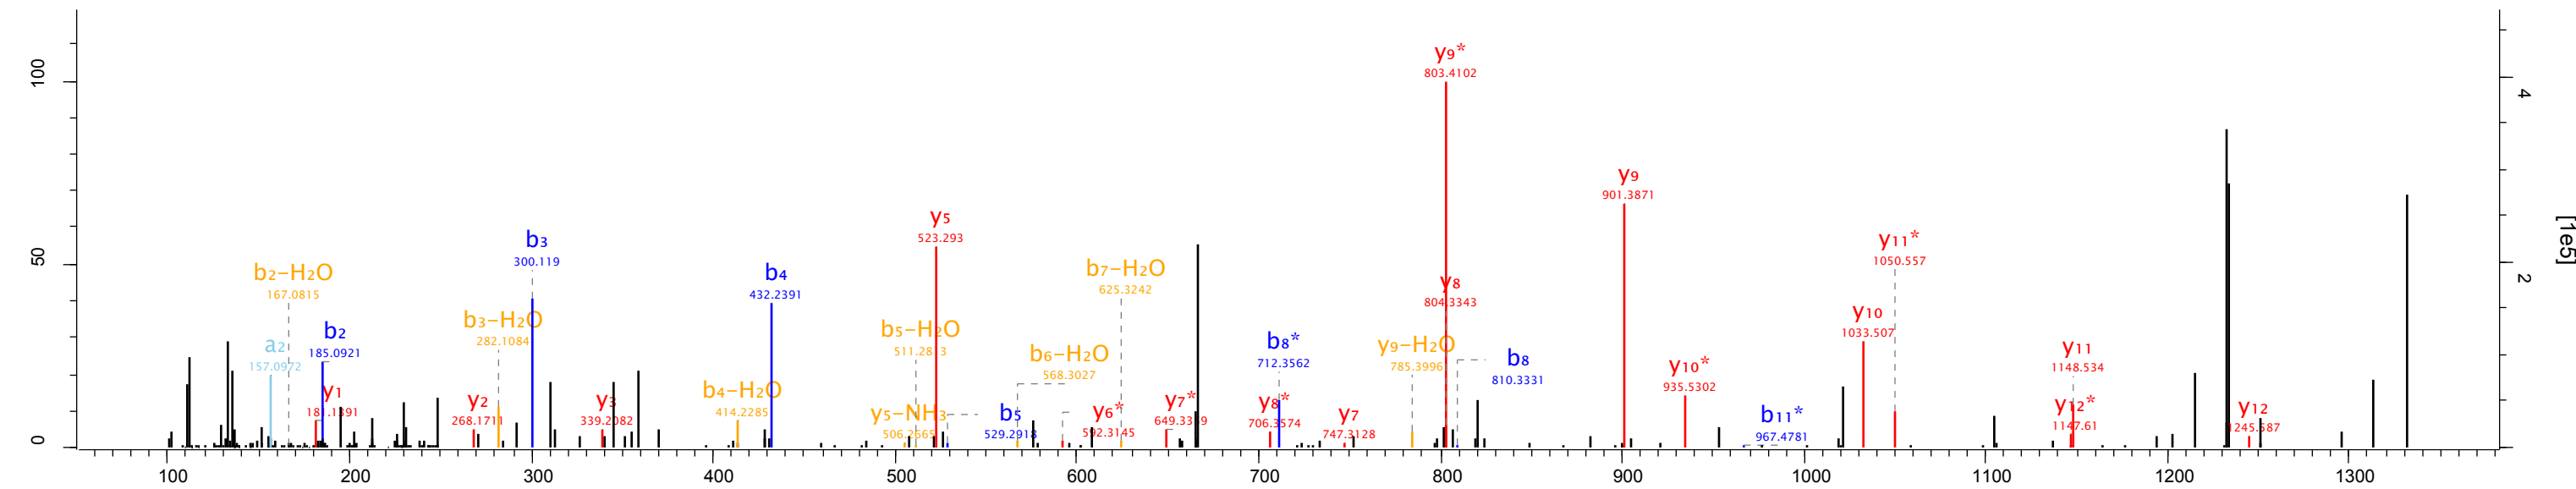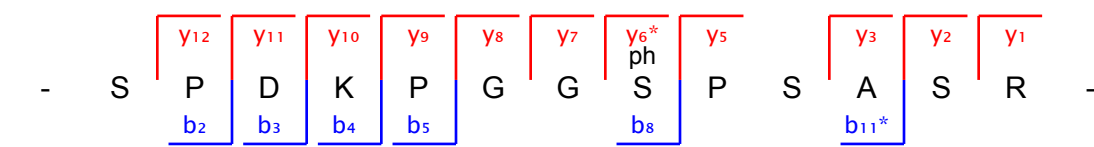

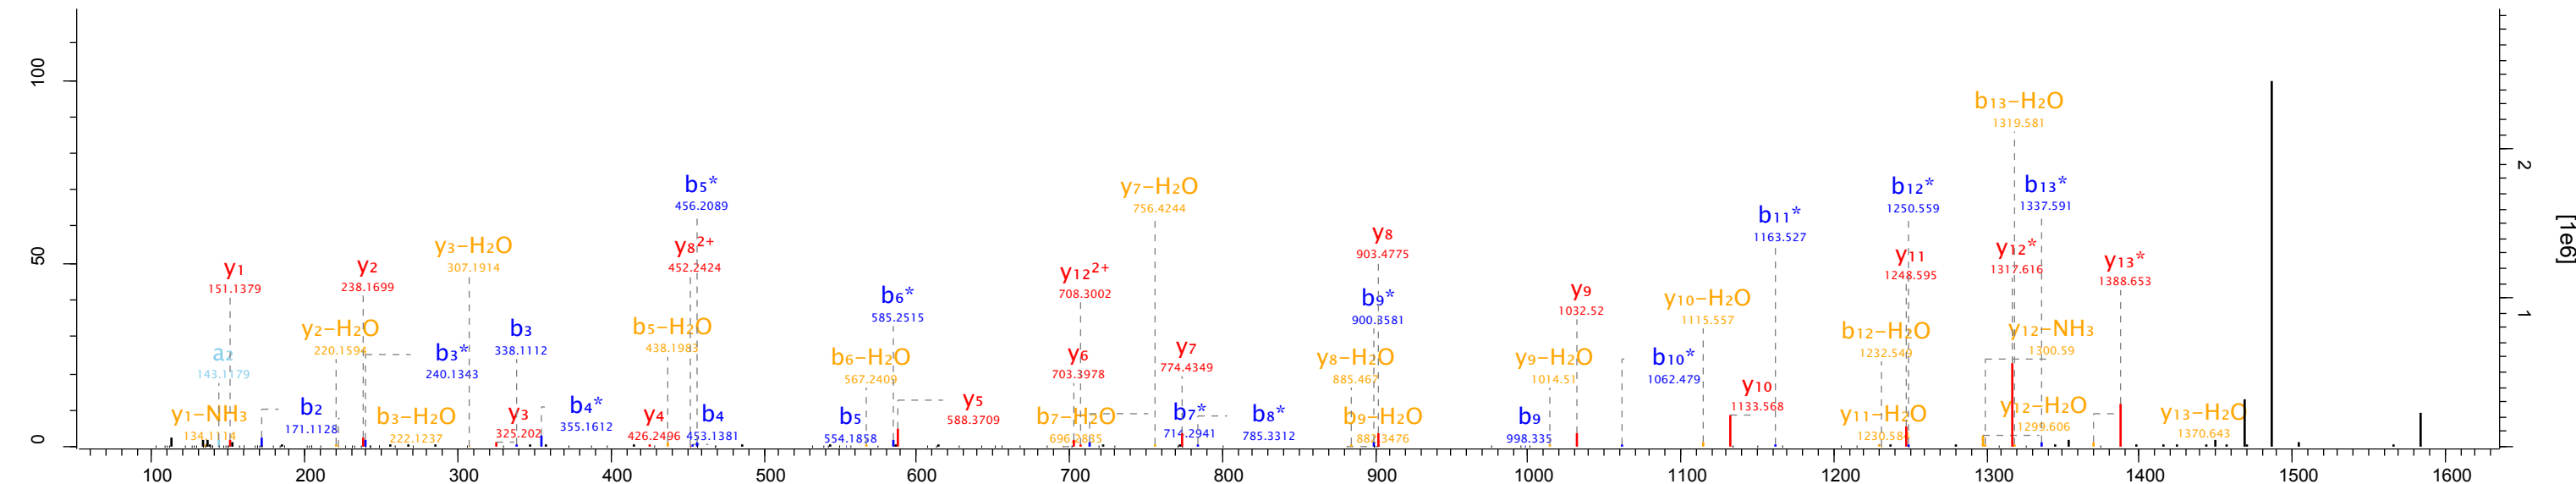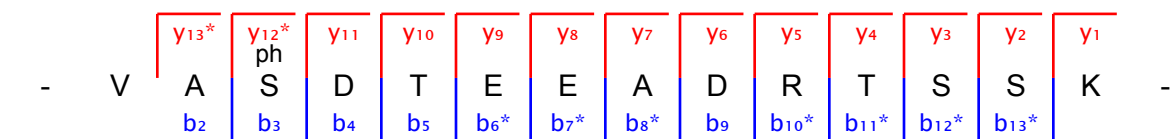

Raw file 20171215\_MaS\_33SR\_LMH\_phospho2\_08 Scan 2514 Method FTMS; HCD Score 224.67 m/z 687.29 Gene names KPNA2;POU2F2

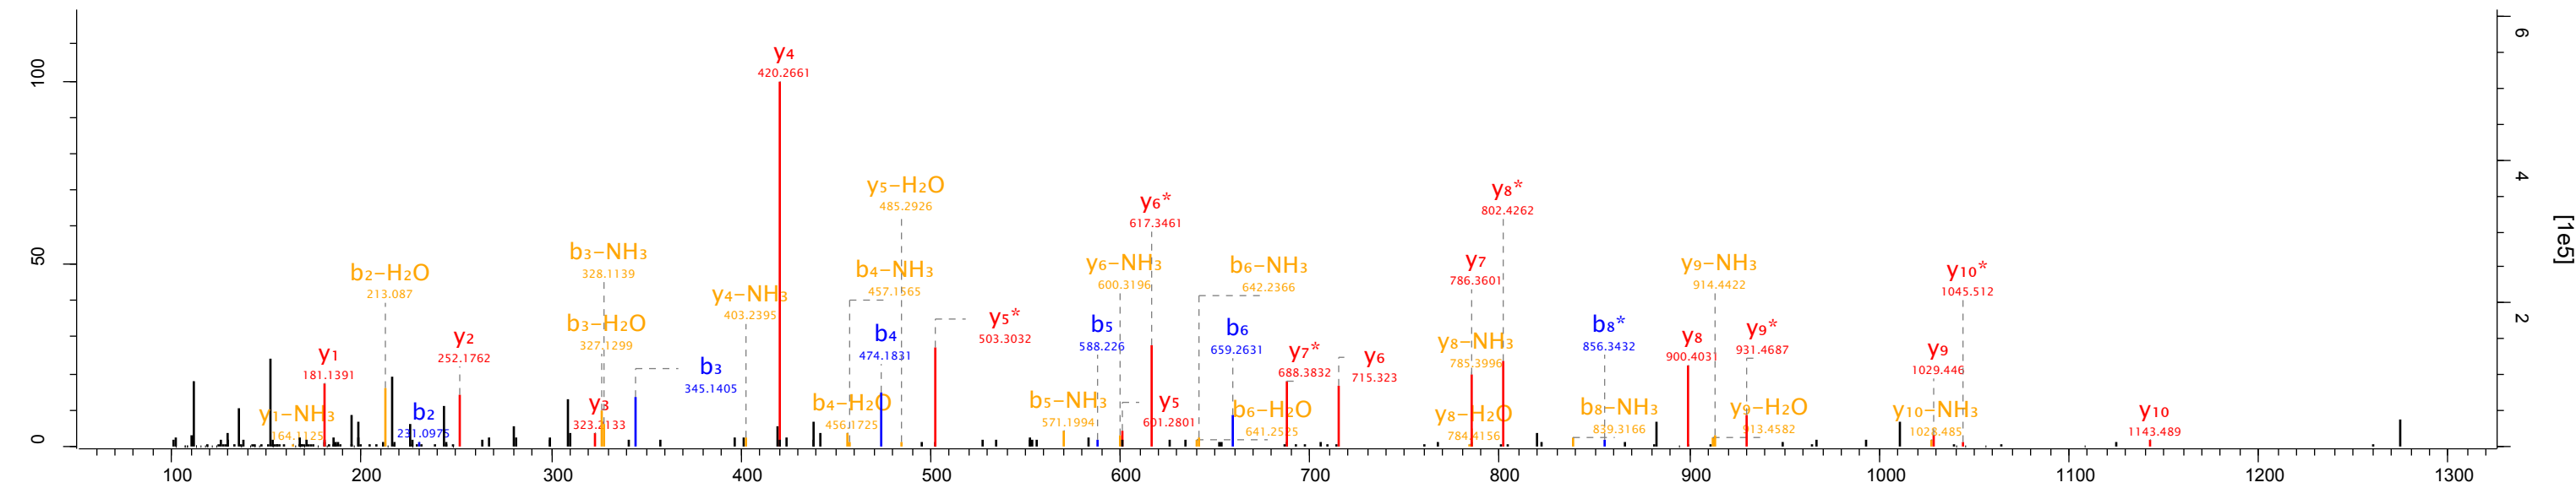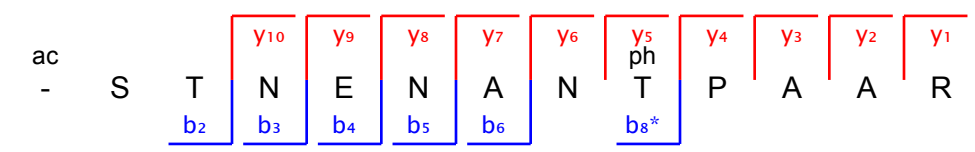

Raw file 20171215\_MaS\_33SR\_LMH\_phospho2\_08 Scan 3384 Method FTMS; HCD Score 119.39 m/z 561.27 Gene names CLASP1

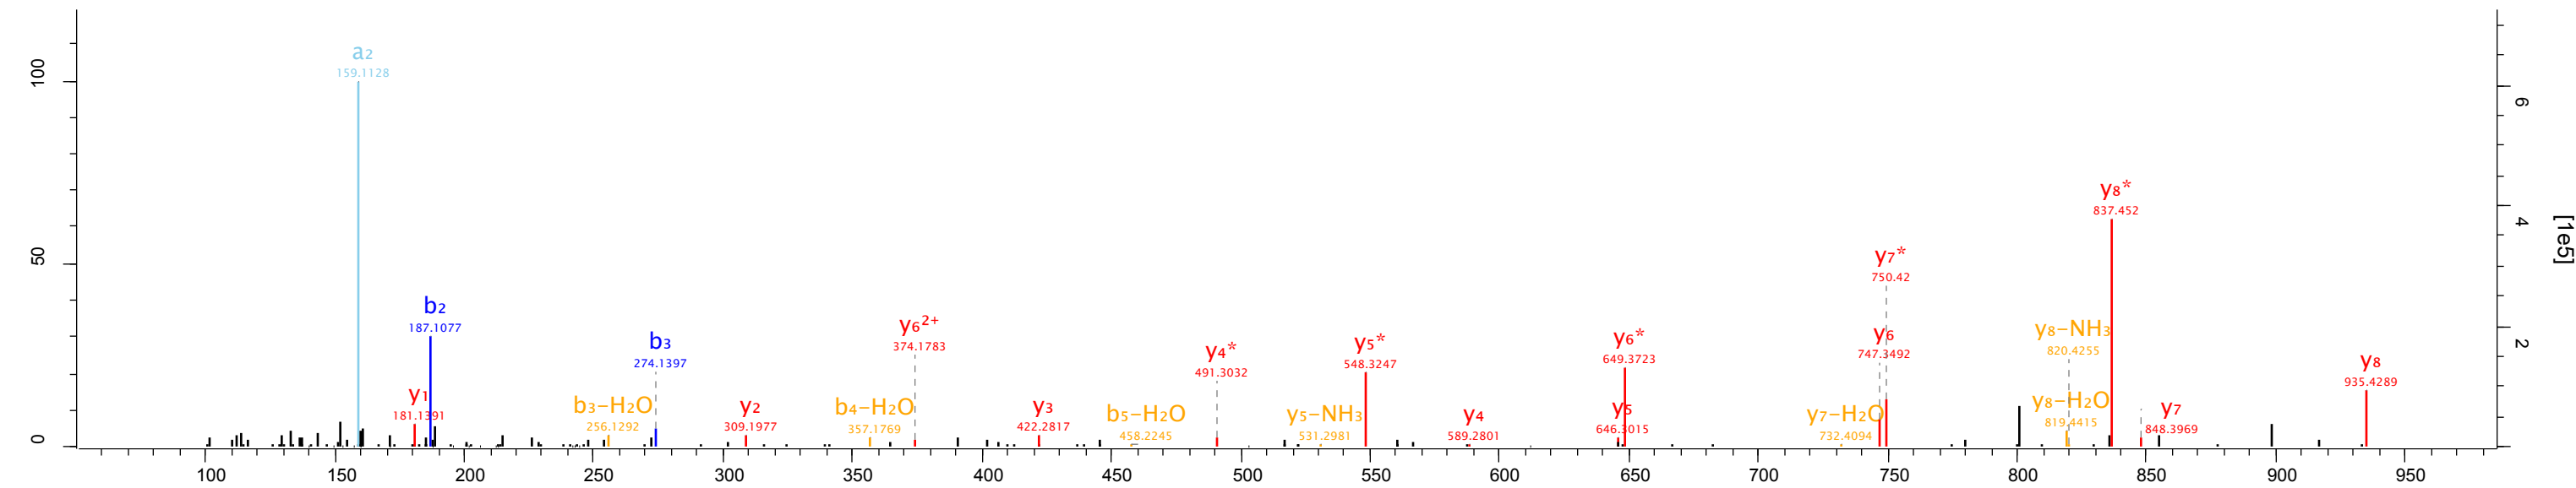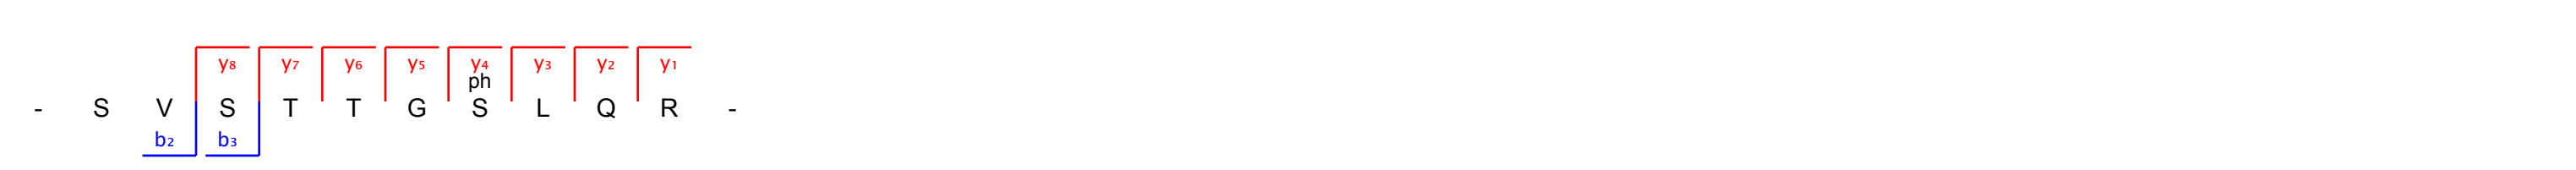

Raw file 20171215\_MaS\_33SR\_LMH\_phospho2\_08 Scan 4644 Method FTMS; HCD Score 71.08 m/z 640.29 Gene names PDE1C

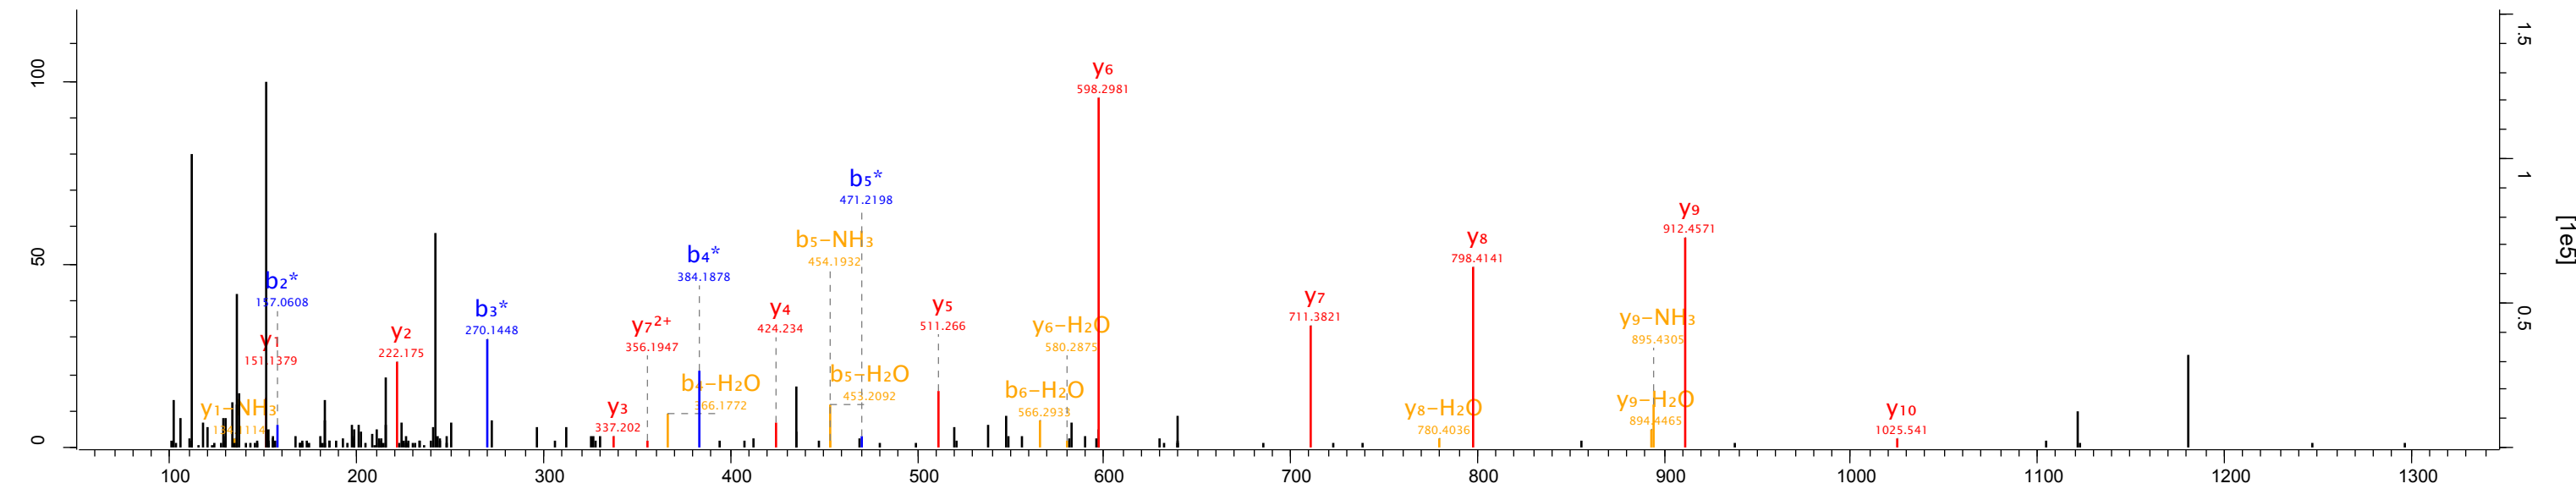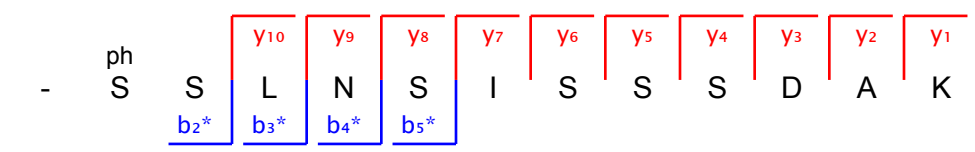

Raw file 20171215\_MaS\_33SR\_LMH\_phospho2\_08 Scan 5314 Method FTMS; HCD Score 86.46 m/z 545.22 Gene names PDHA1

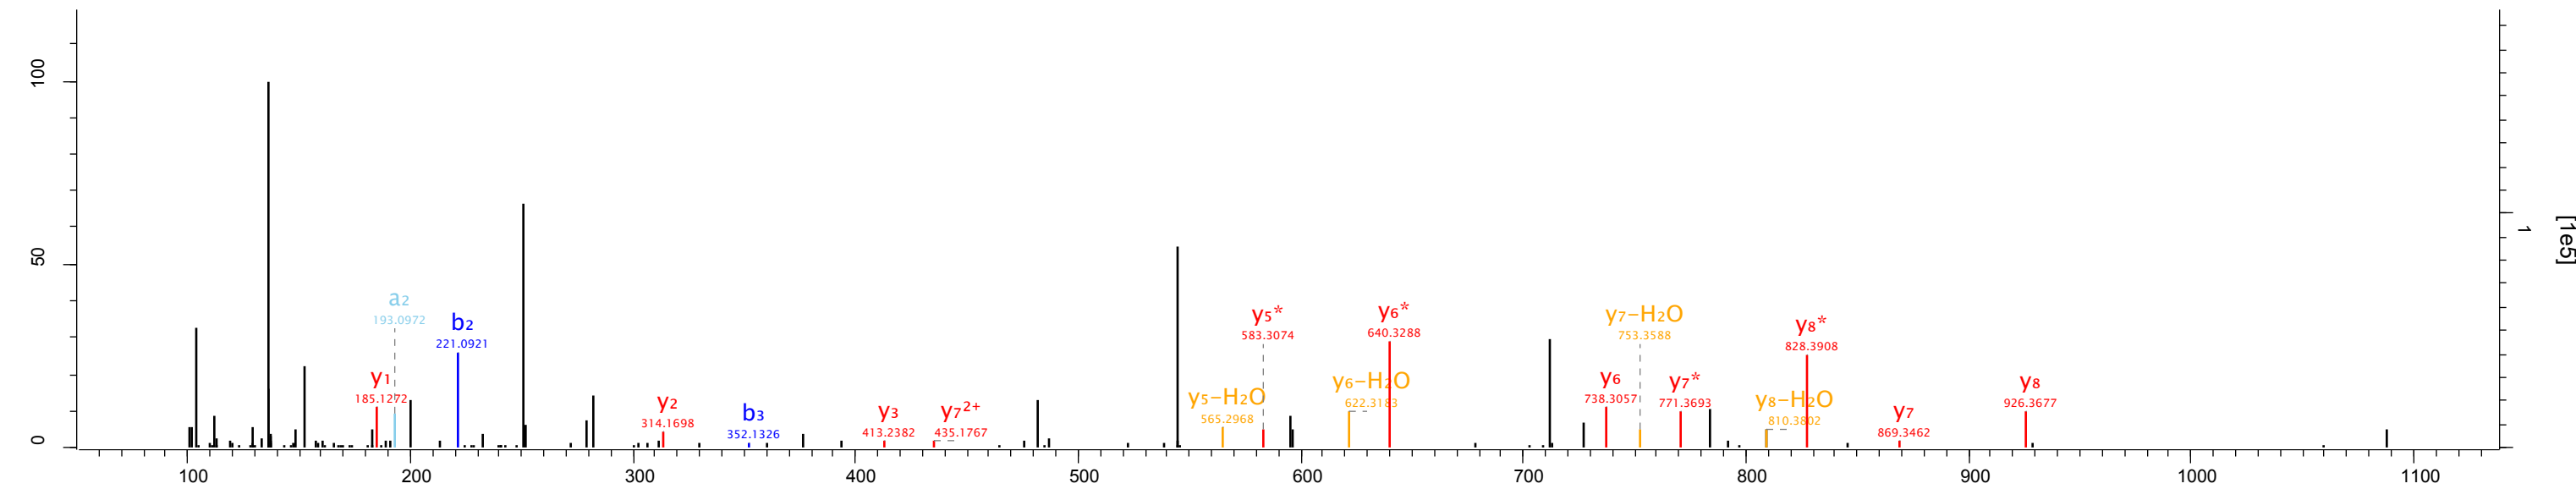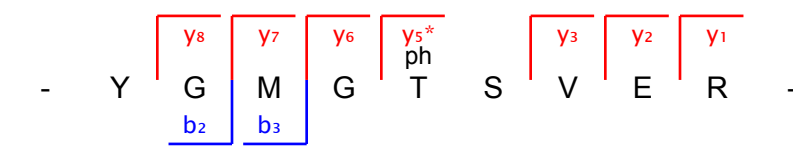

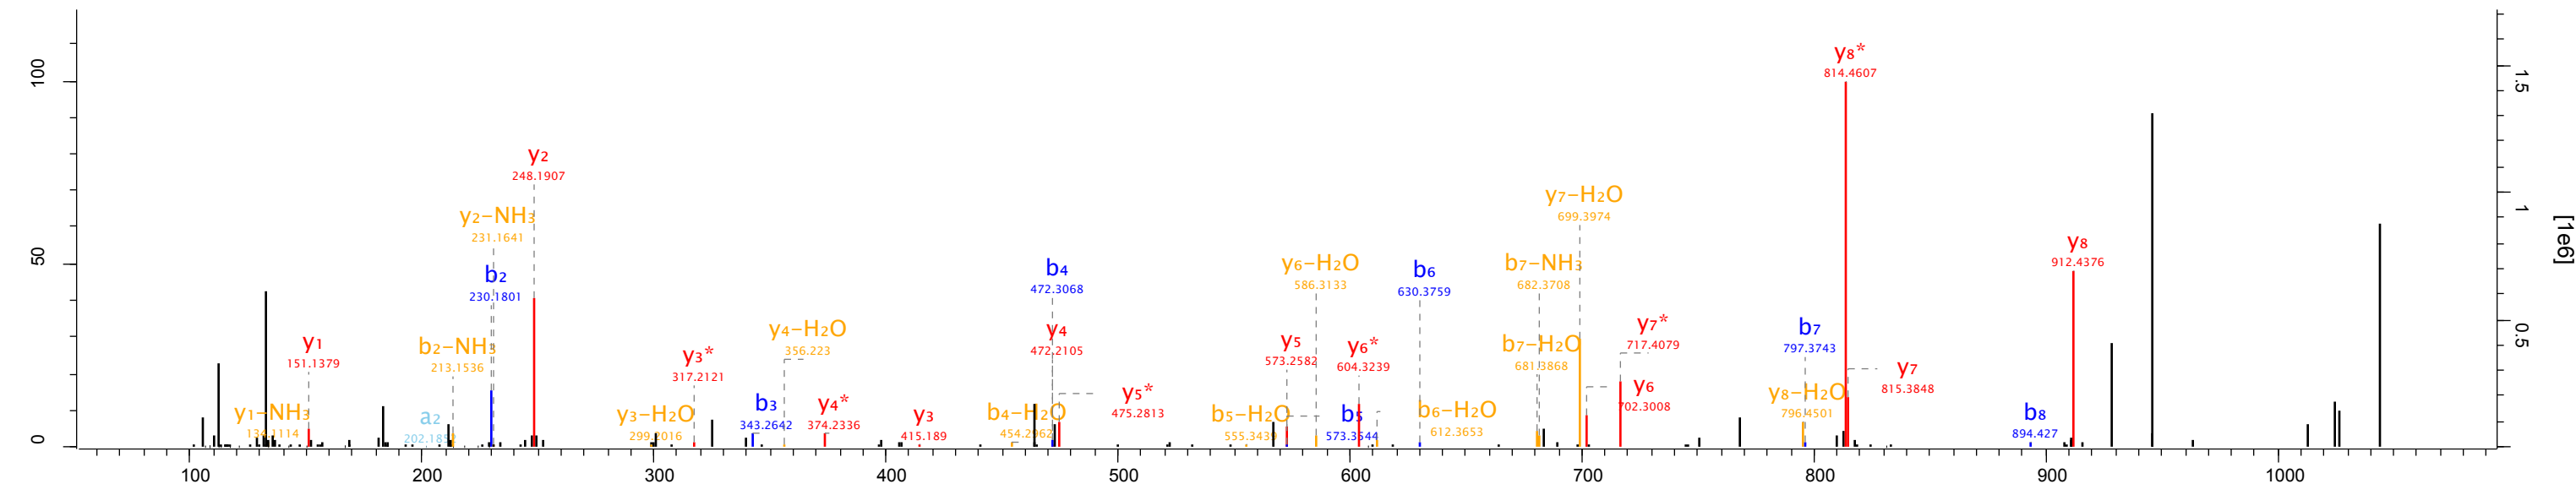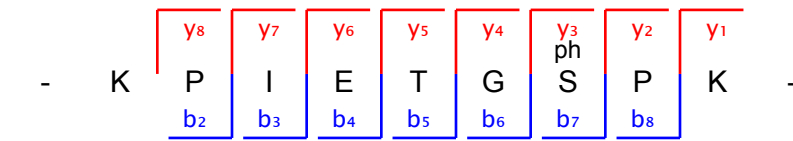

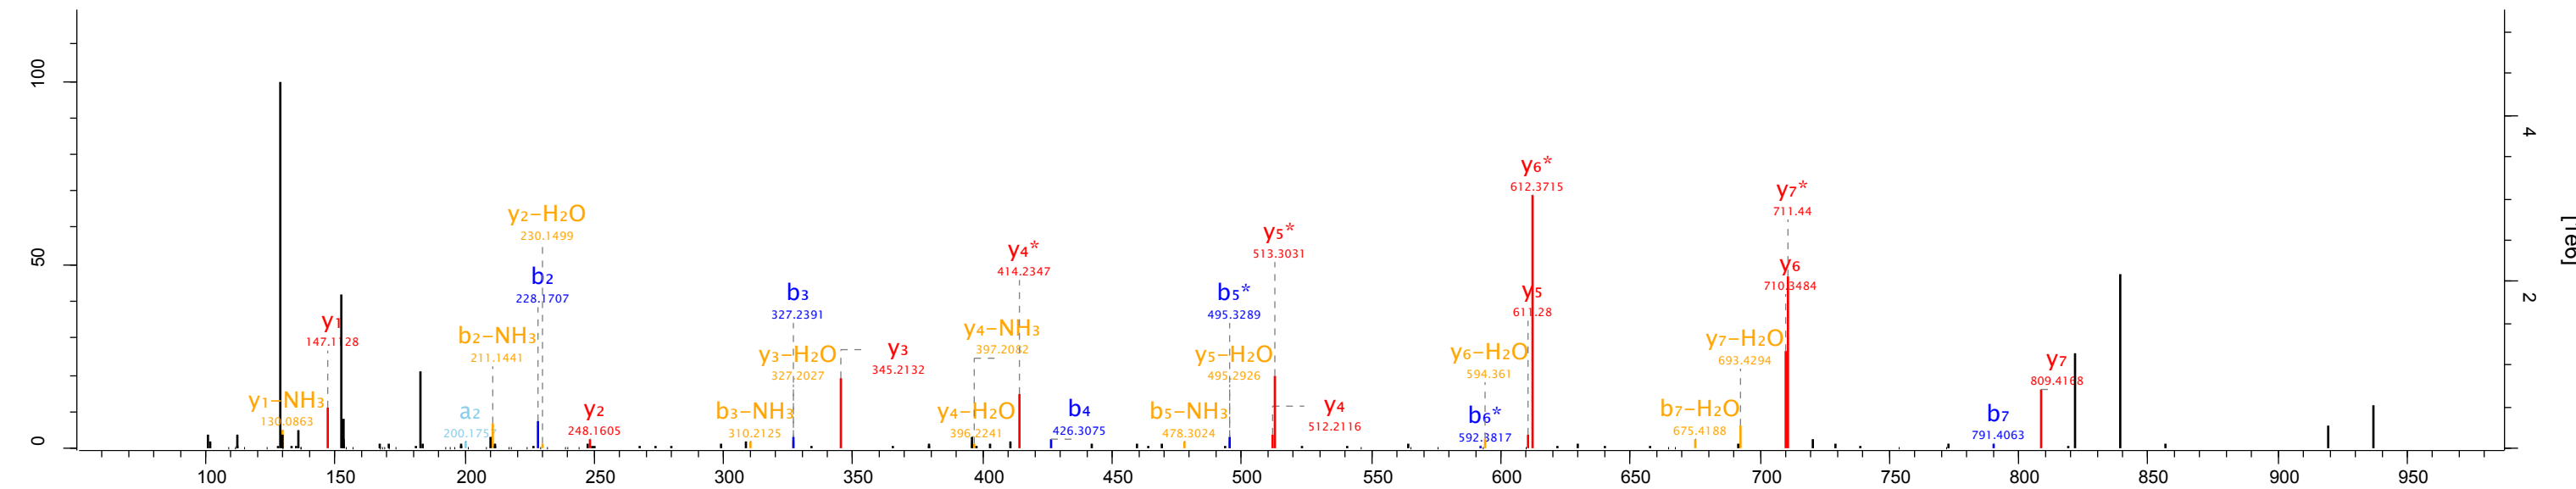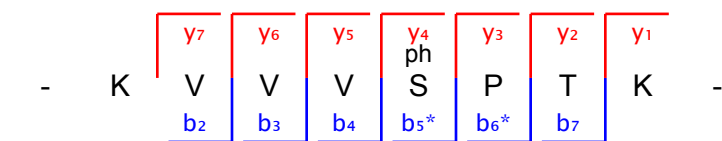



20171215\_MaS\_33SR\_LMH\_phospho2\_09 3734 FTMS; HCD 173.28 753.32 PSIP1

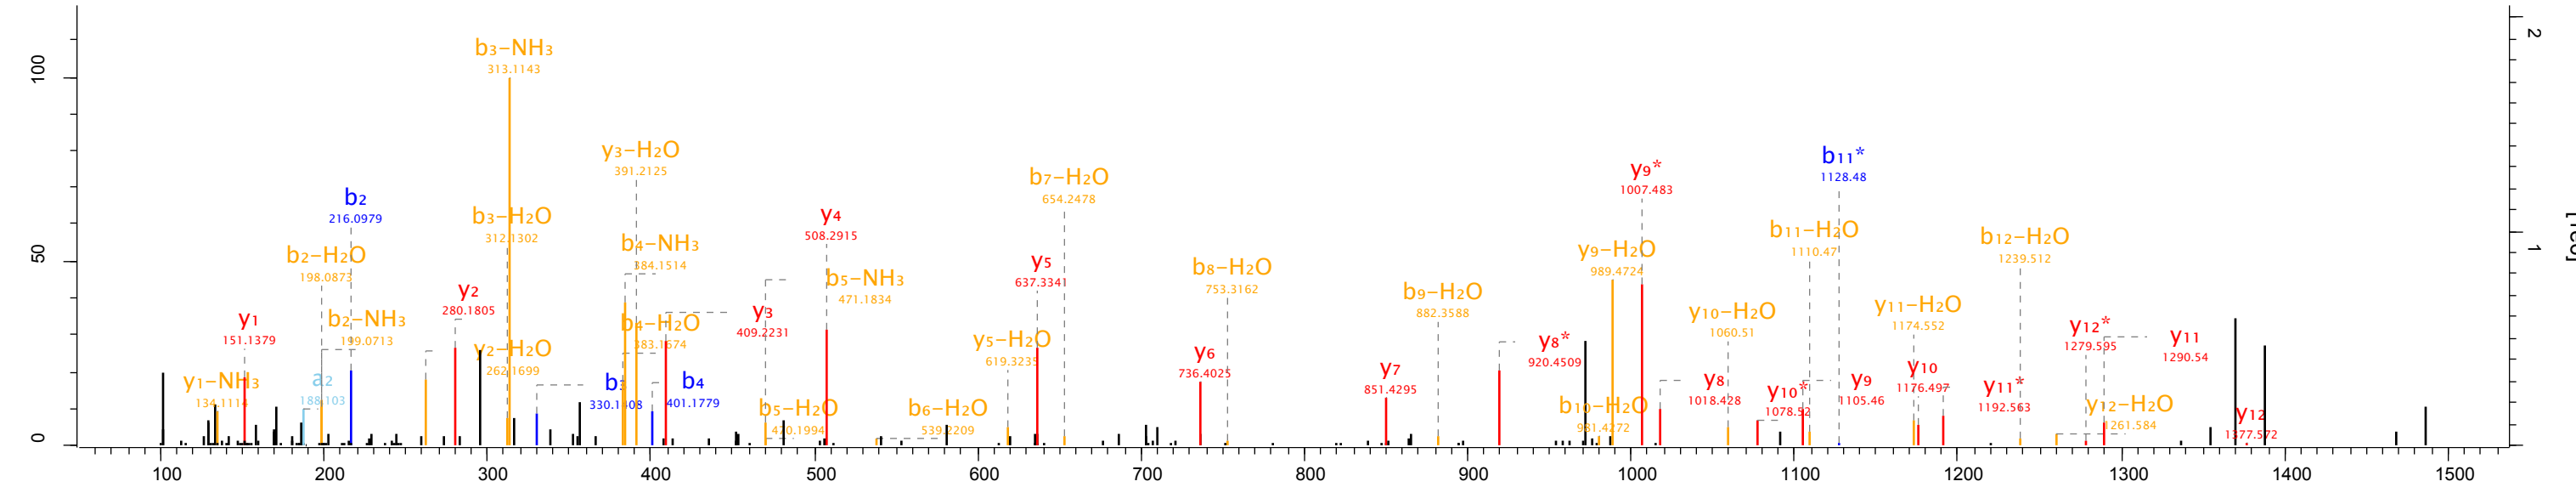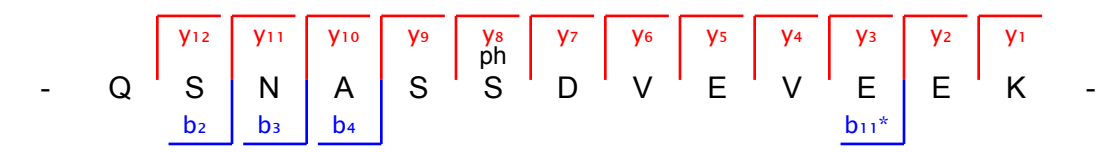

Raw file 20171215\_MaS\_33SR\_LMH\_phospho2\_09 Scan 4564 Method FTMS; HCD Score 55.34 m/z 634.79 Gene names MCMBP

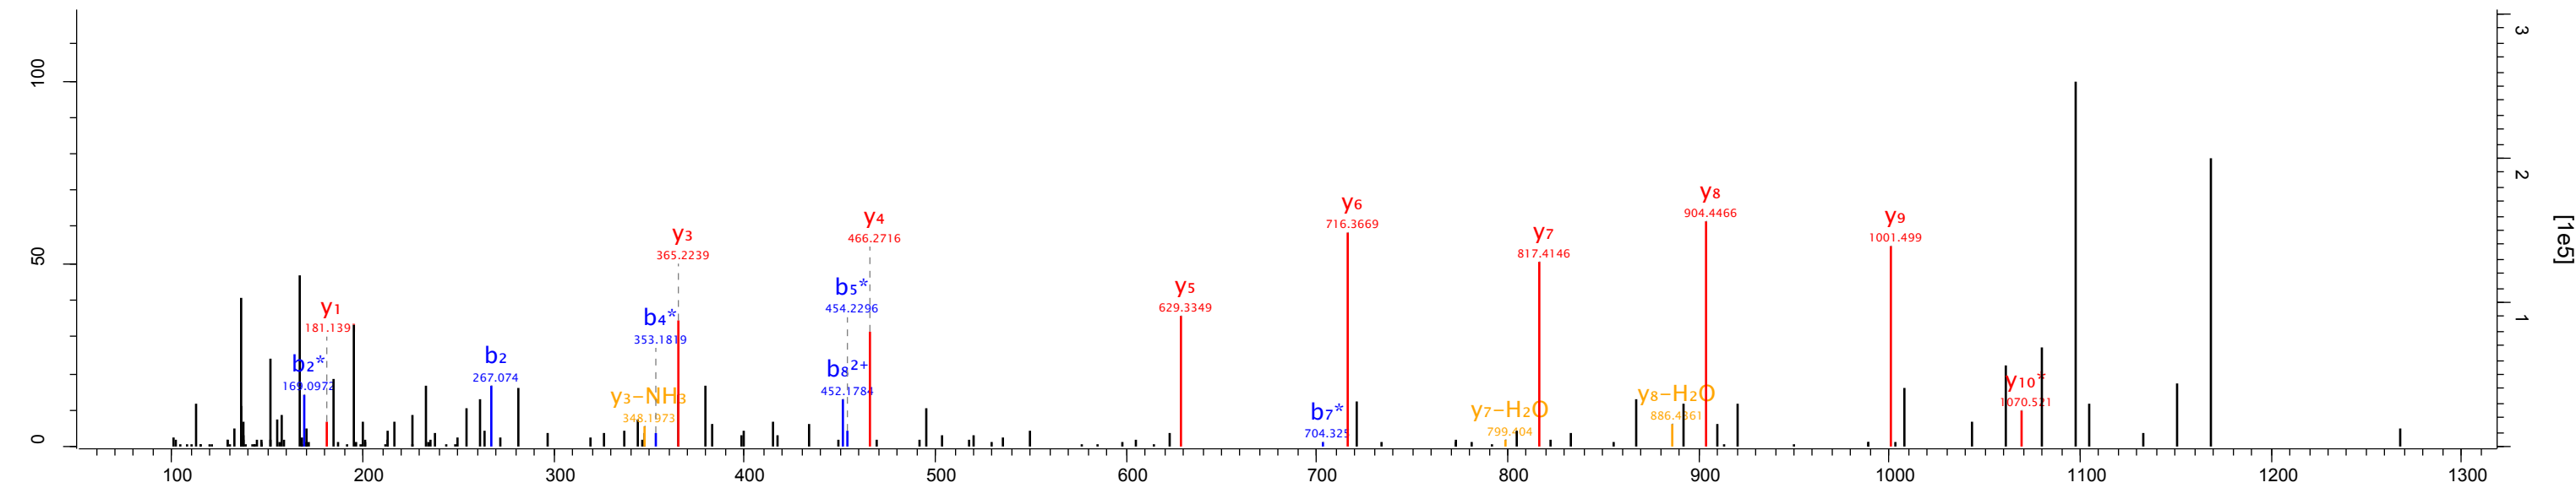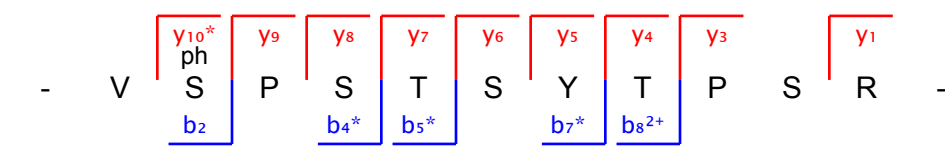

Raw file 20171215\_MaS\_33SR\_LMH\_phospho2\_09 Scan 7384 Method FTMS; HCD Score 141.6 m/z 820.89 Gene names HEATR6

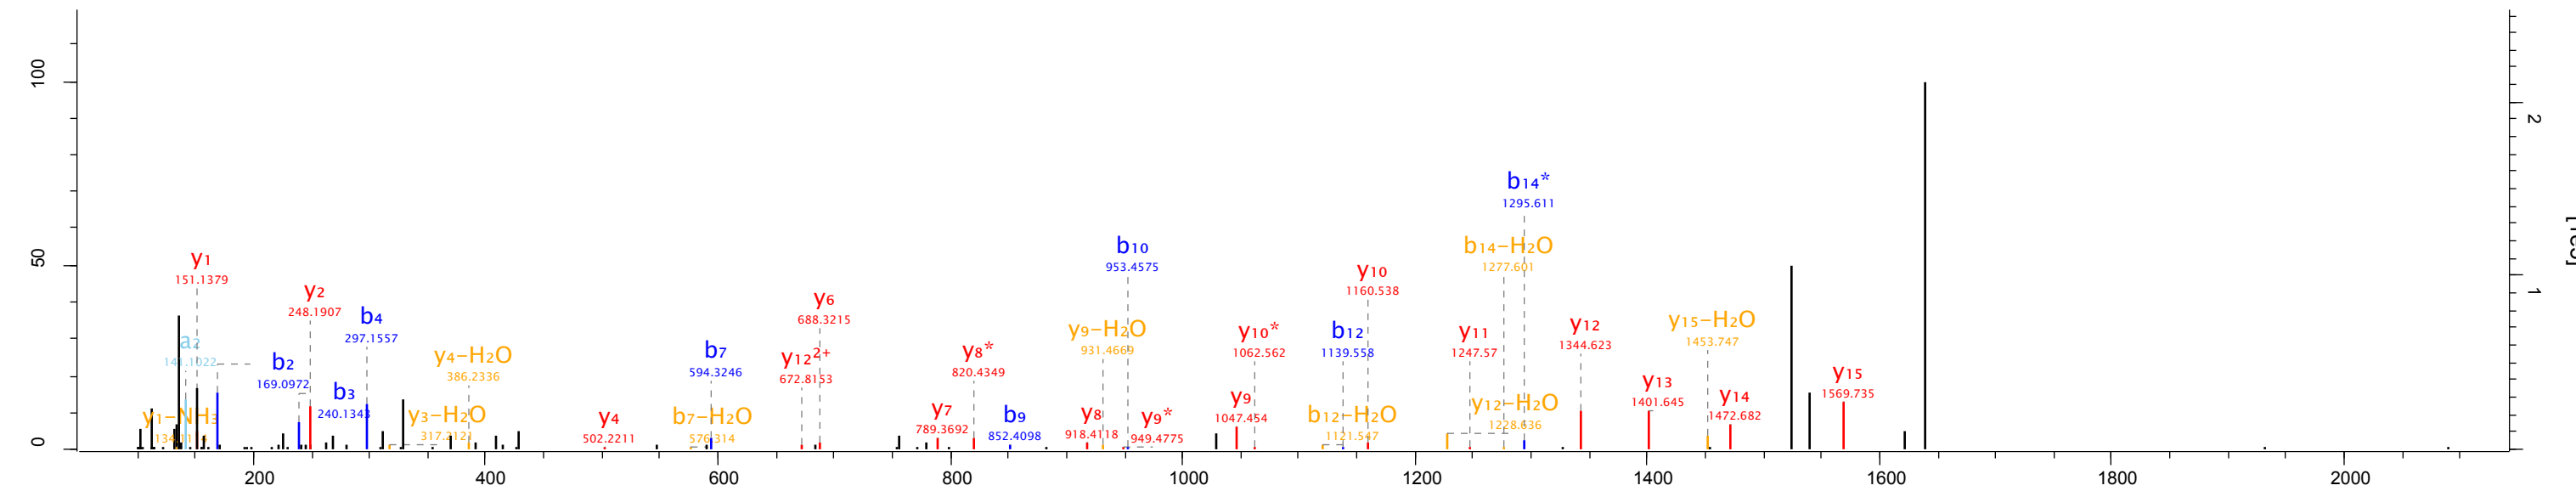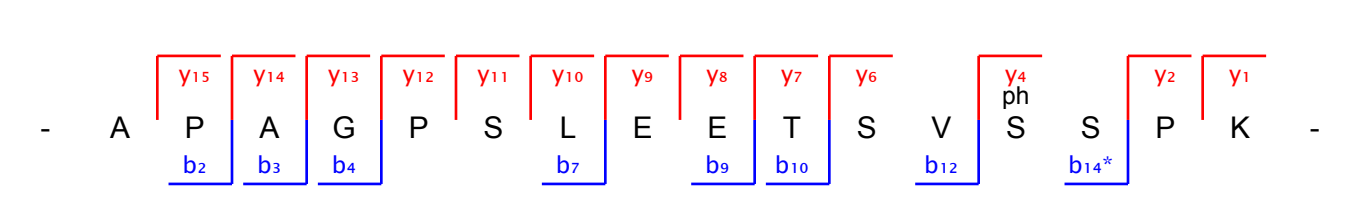

Raw file: 20171215\_MaS\_33SR\_LMH\_proteome\_01  
 Scan: 34854 Method: FTMS; HCD Score: 41.24 m/z: 524.95 Gene names: SETX

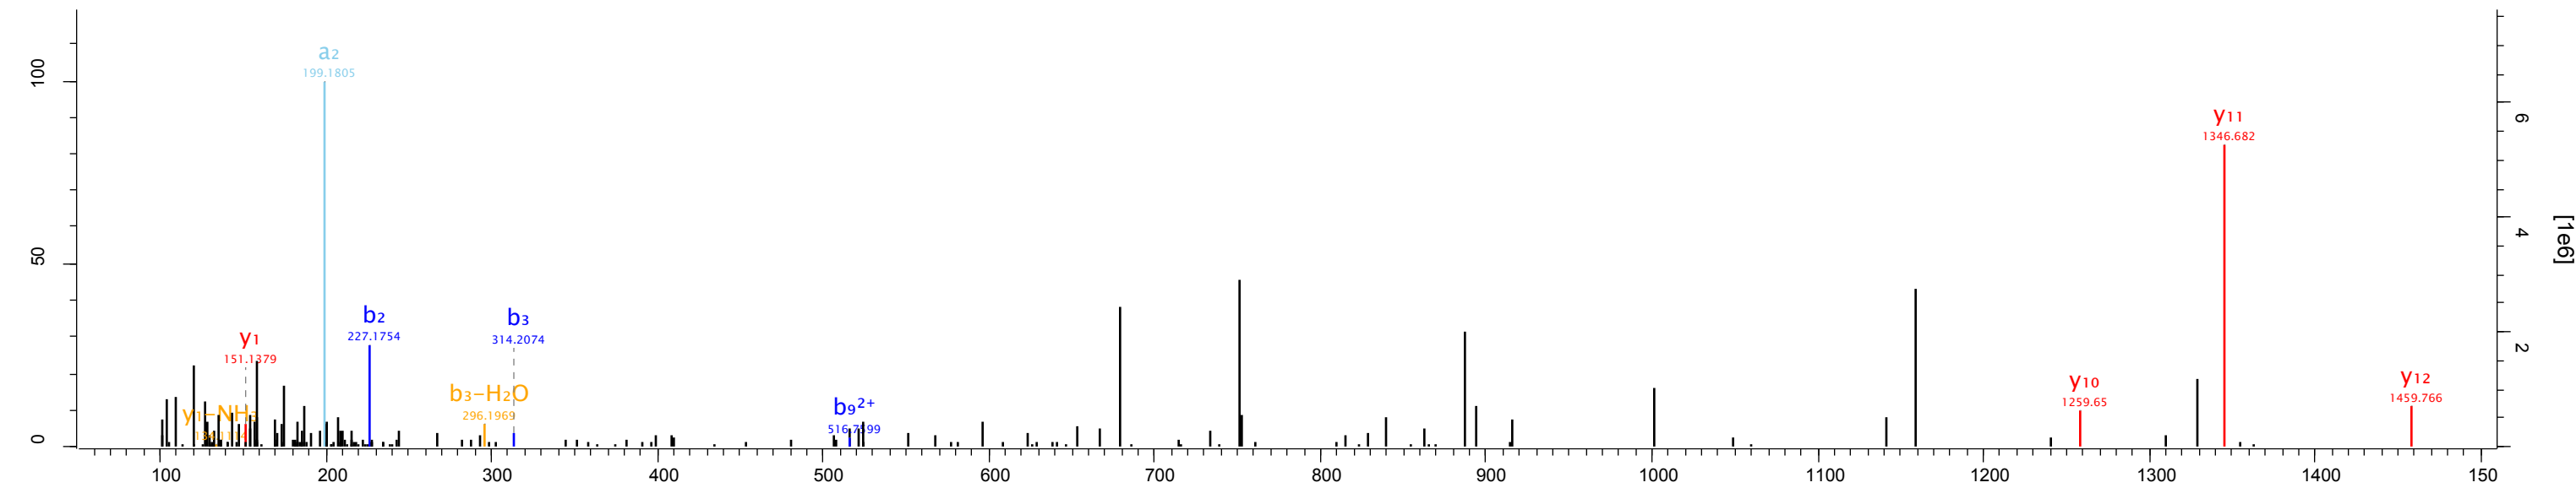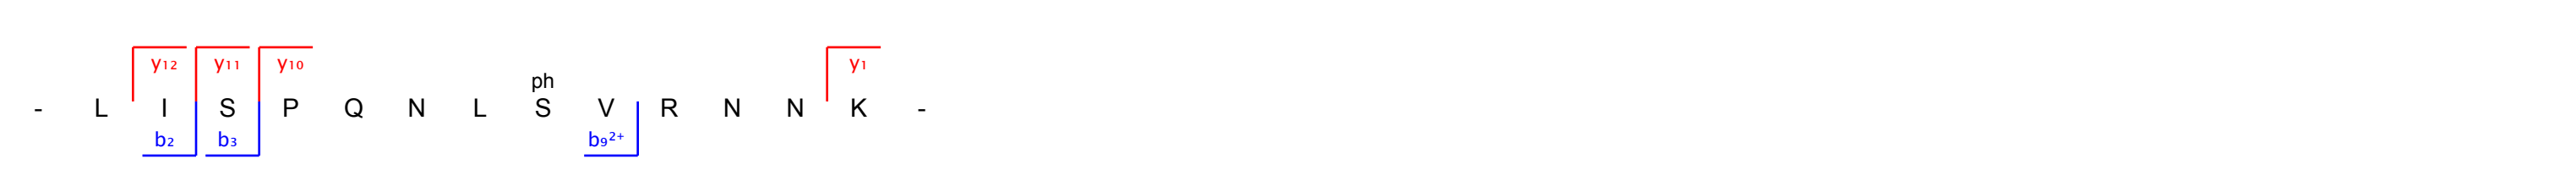

Raw file 20171215\_MaS\_33SR\_LMH\_proteome\_01 Scan 48404 Method FTMS; HCD Score 41.22 m/z 754.88 Gene names RAP1B

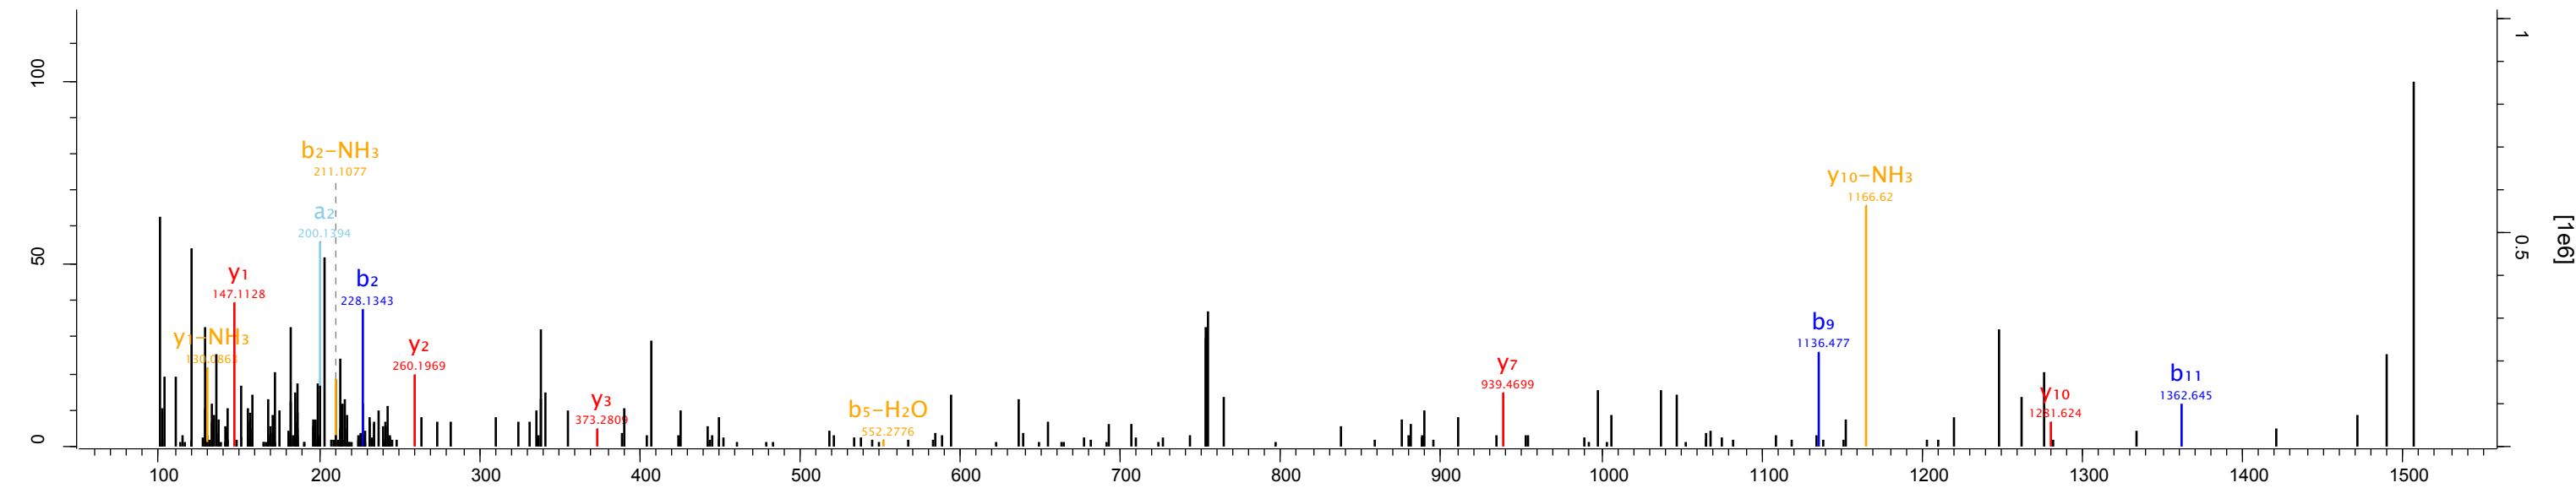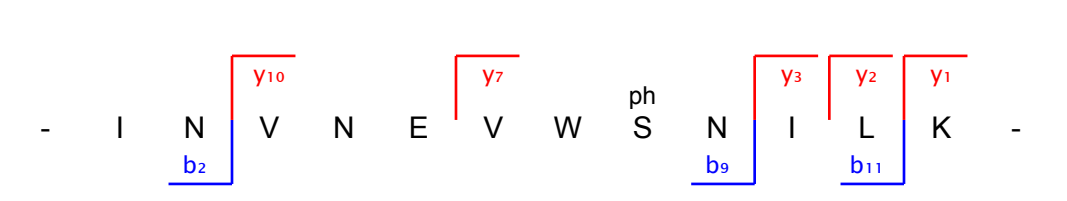

Raw file: 20171215\_MaS\_33SR\_LMH\_proteome\_01  
 Scan: 68144 Method: FTMS; HCD Score: 55.46 m/z: 634.81 Gene names: CEP135

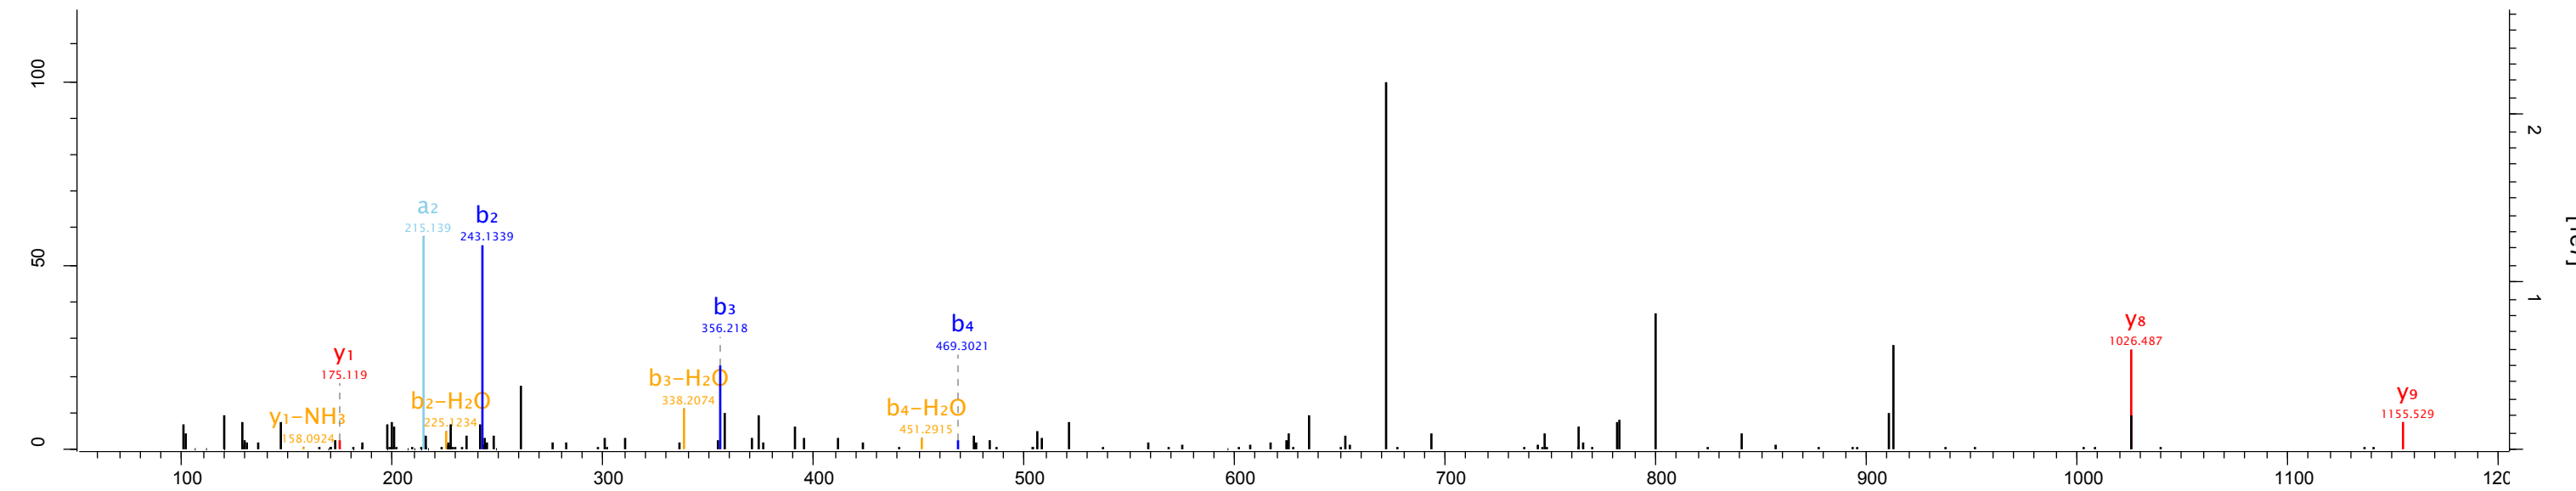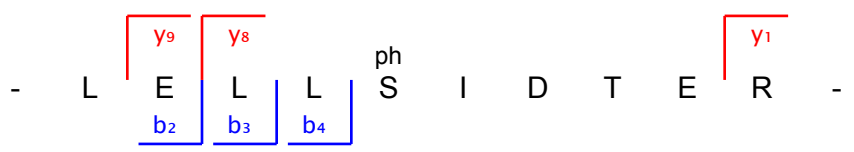

Raw file 20171215\_MaS\_33SR\_LMH\_proteome\_01 Scan 9644 Method FTMS; HCD Score 43.76 m/z 840.35

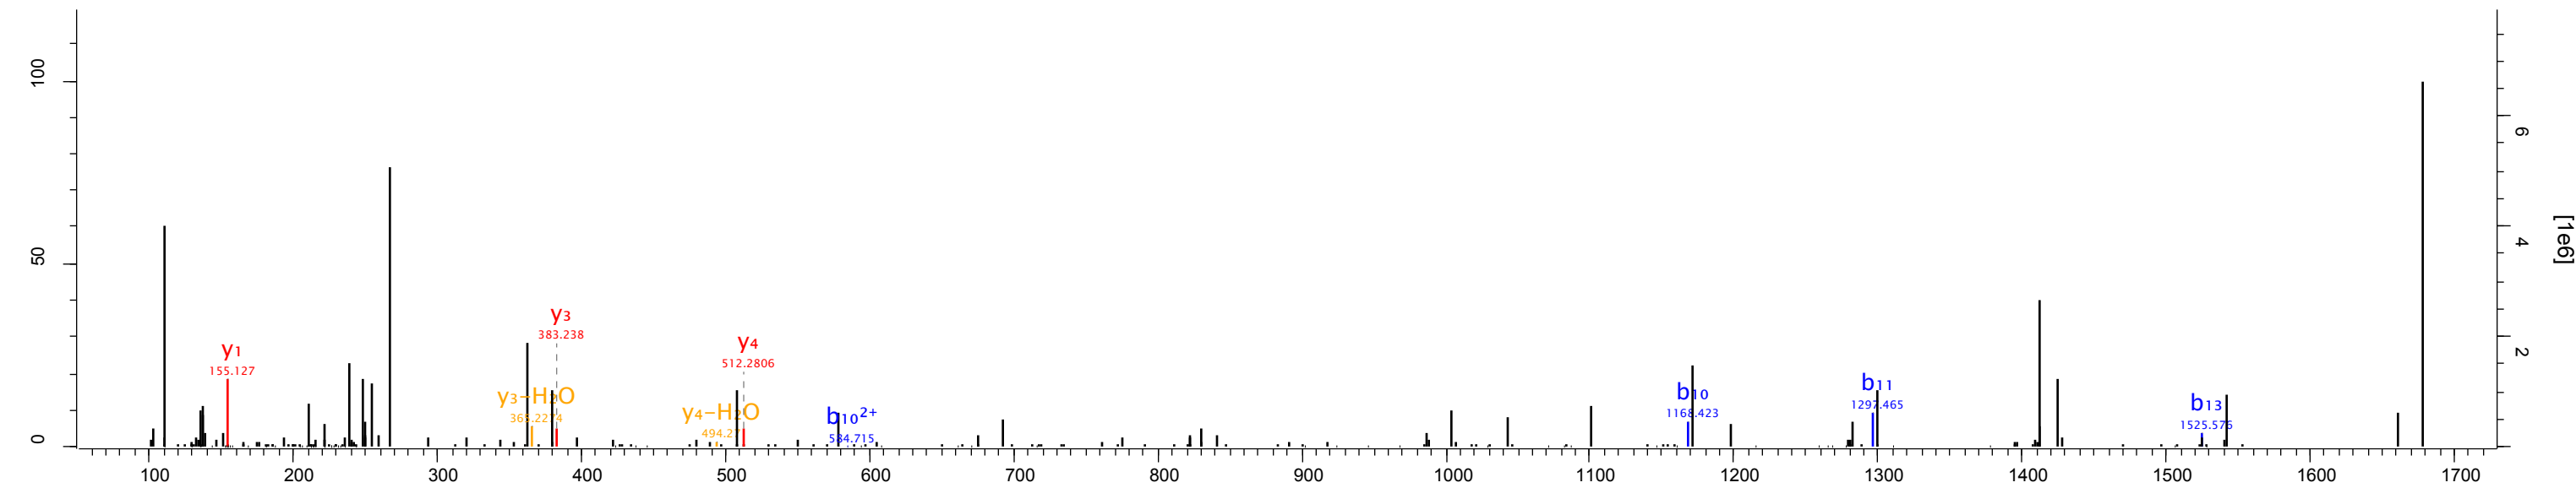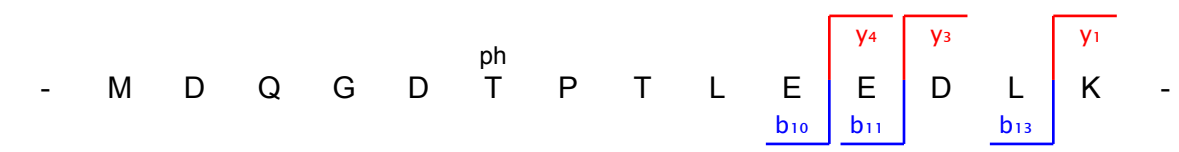

Raw file 20171215\_MaS\_33SR\_LMH\_proteome\_01 Scan 9824 Method FTMS; HCD Score 50.13 m/z 446.71 Gene names ZNF24

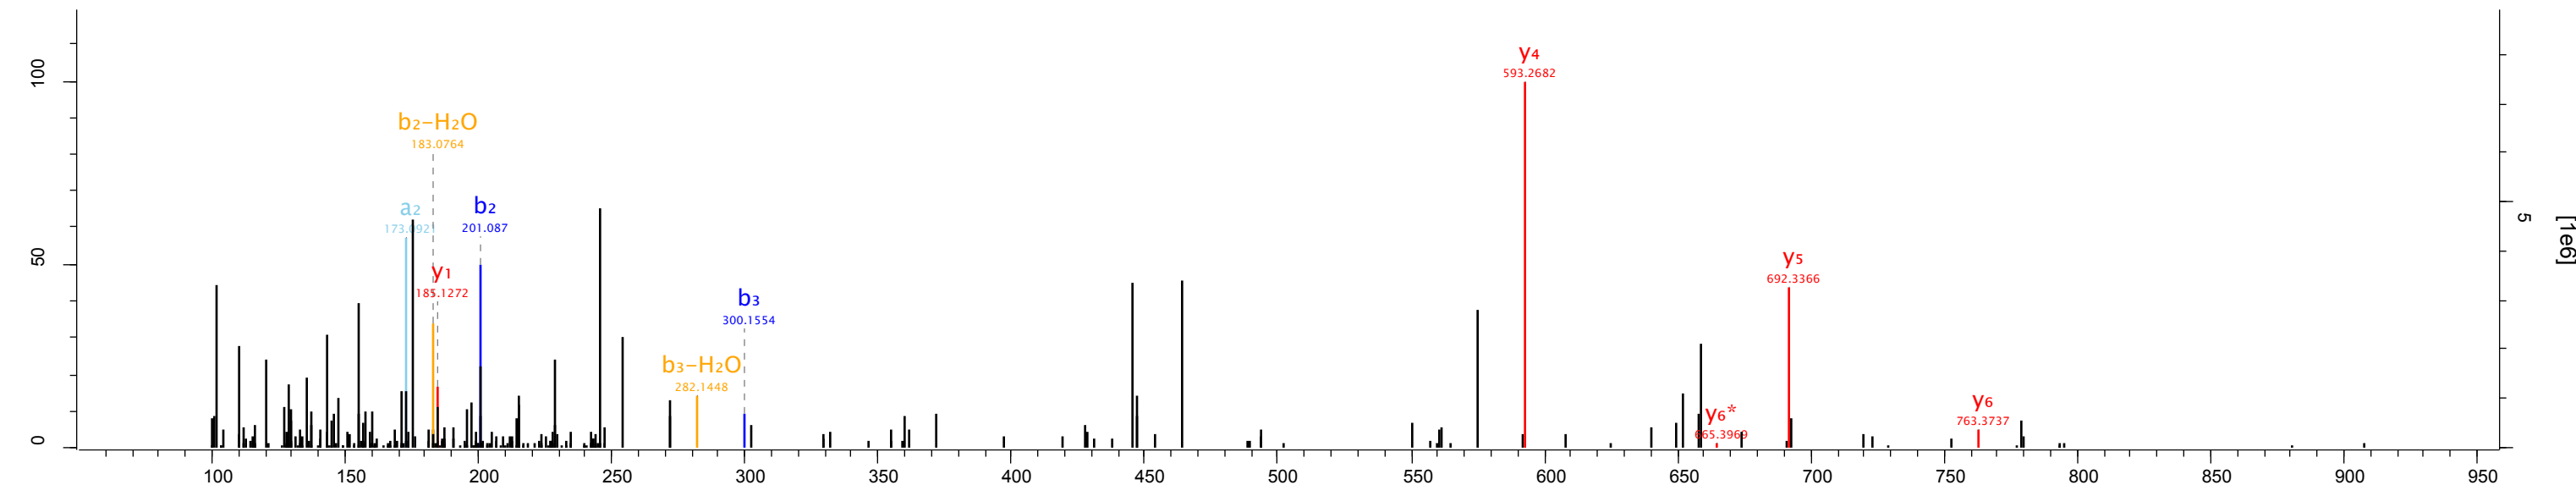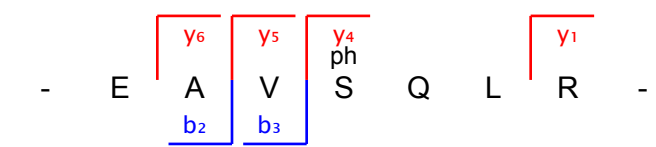



Raw file 20171215\_MaS\_33SR\_LMH\_proteome\_02 Scan 103724 Method FTMS; HCD Score 58.17 m/z 778.89 Gene names PROM1

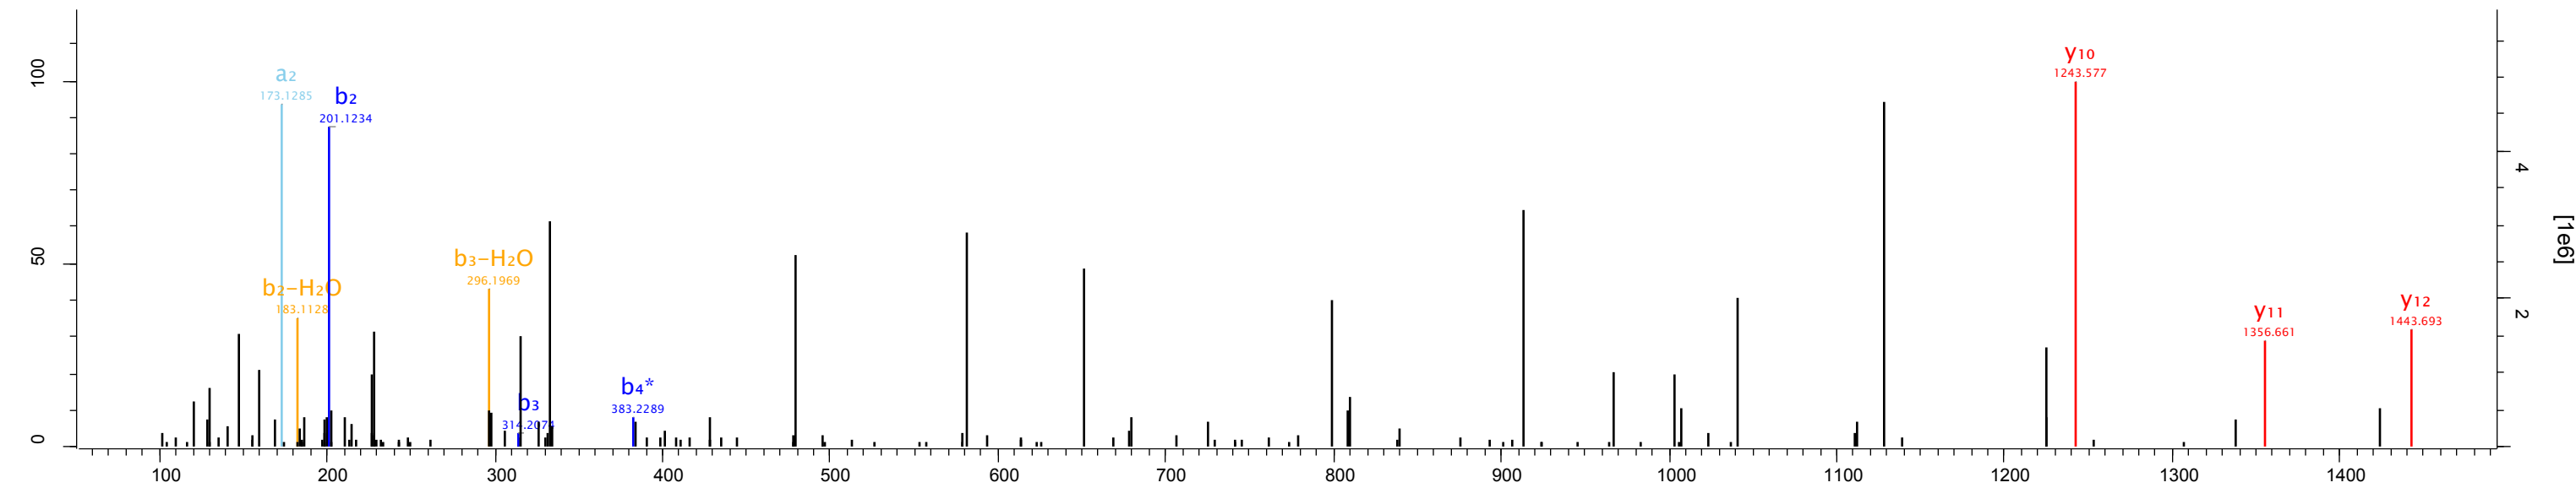

- L S L S Q L N S N P E L R -

b<sub>2</sub>
b<sub>3</sub>
b<sub>4</sub>\*

Raw file  
20171215\_MaS\_33SR\_LMH\_proteome\_02

Scan 37194 Method FTMS; HCD Score 42.16 m/z 609.33 Gene names LRP2

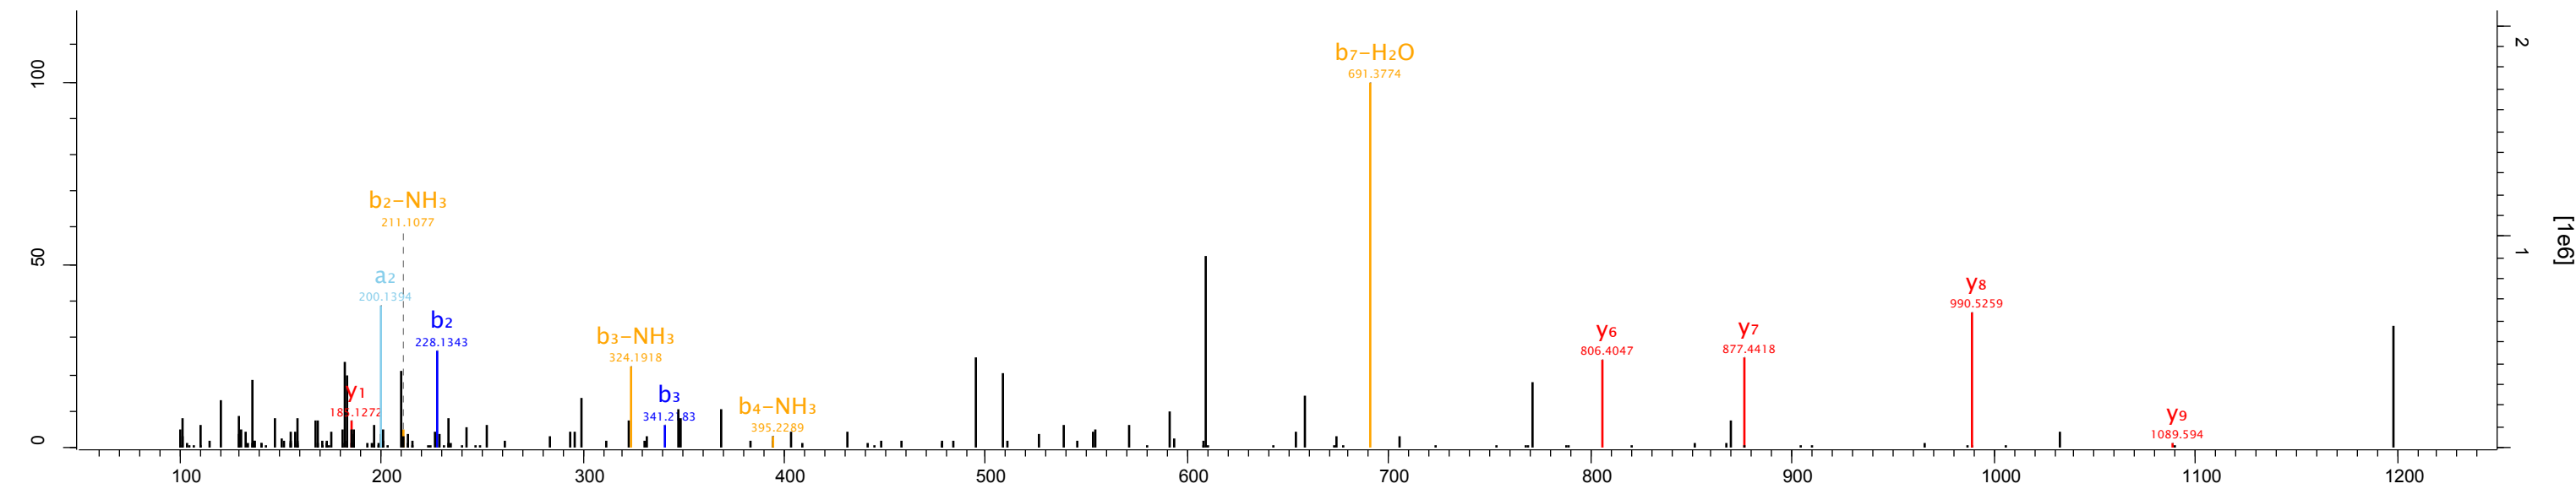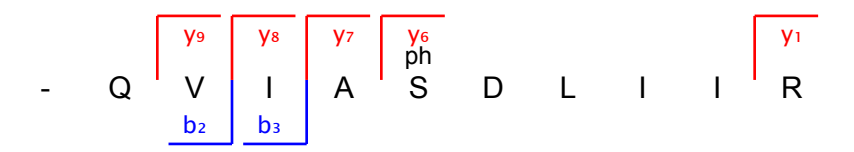

Raw file 20171215\_MaS\_33SR\_LMH\_phospho\_01 Scan 11255 Method FTMS; HCD Score 67.65 m/z 853.35 Gene names COIL

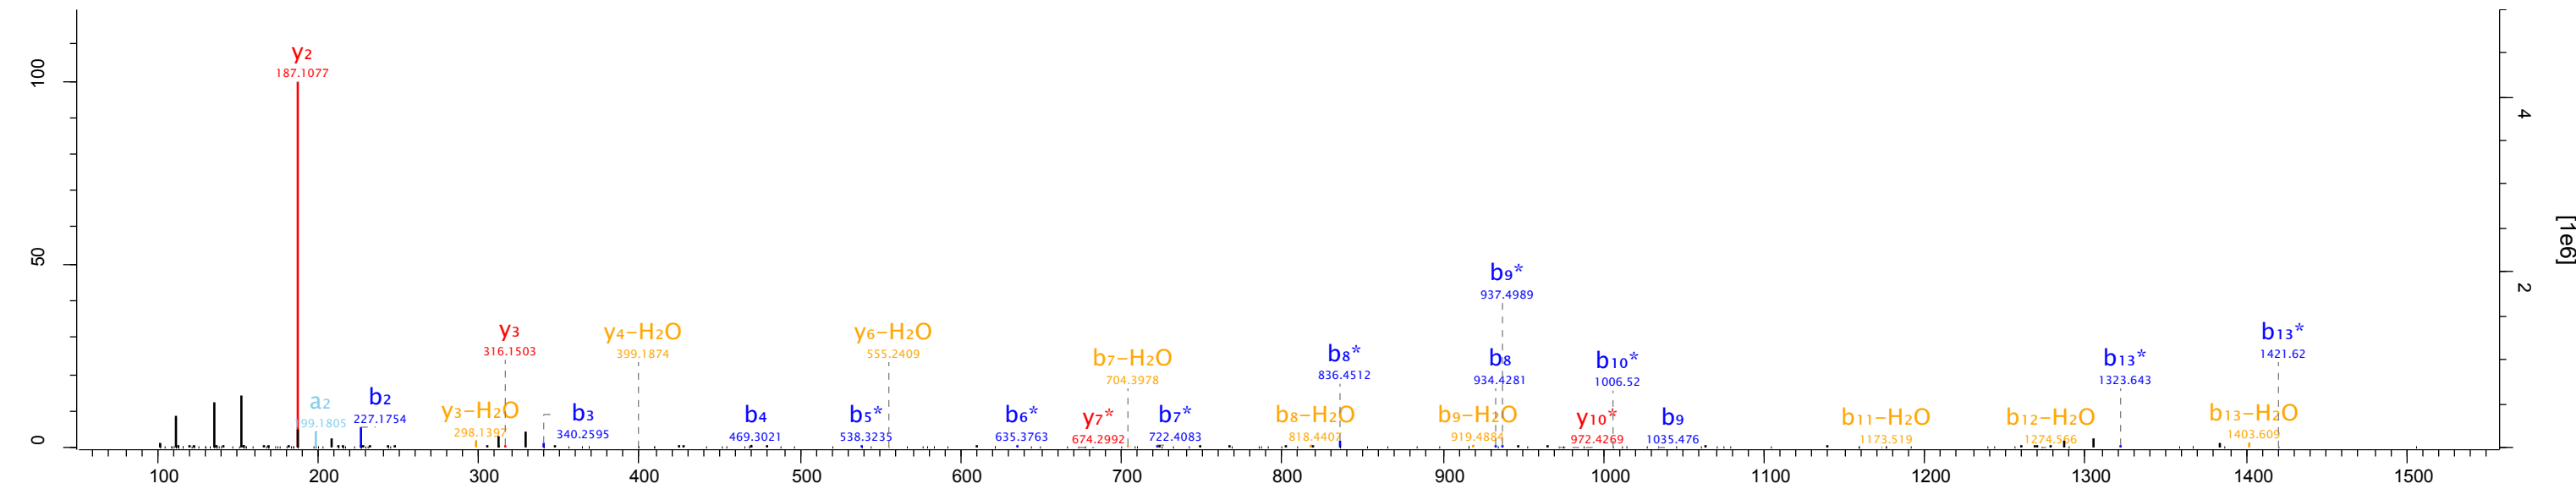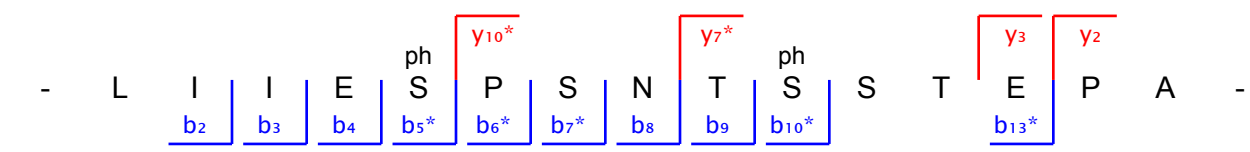

Raw file 20171215\_MaS\_33SR\_LMH\_phospho\_01 Scan 12385 Method FTMS; HCD Score 53.6 m/z 742.83 Gene names ARHGAP23

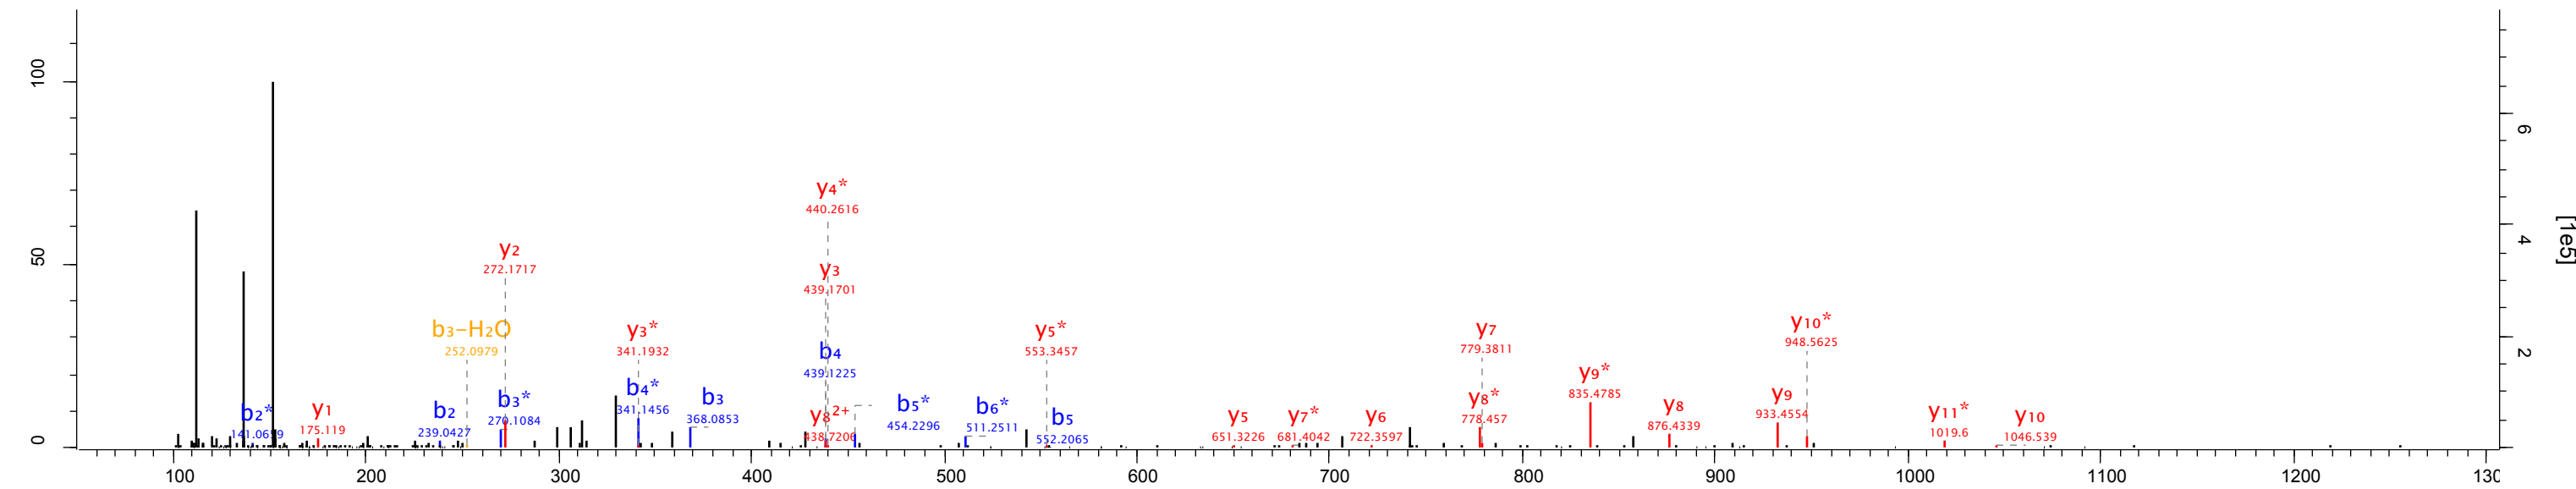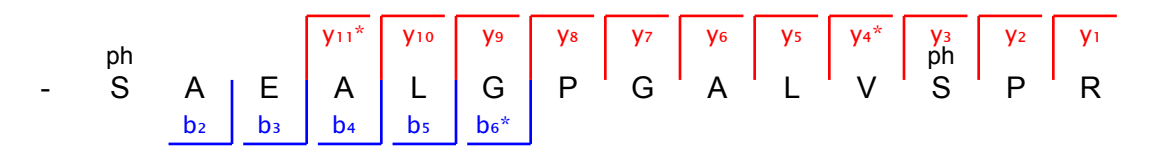

Raw file 20171215\_MaS\_33SR\_LMH\_phospho\_01 Scan 2775 Method FTMS; HCD Score 110.64 m/z 481.69 Gene names RBM15

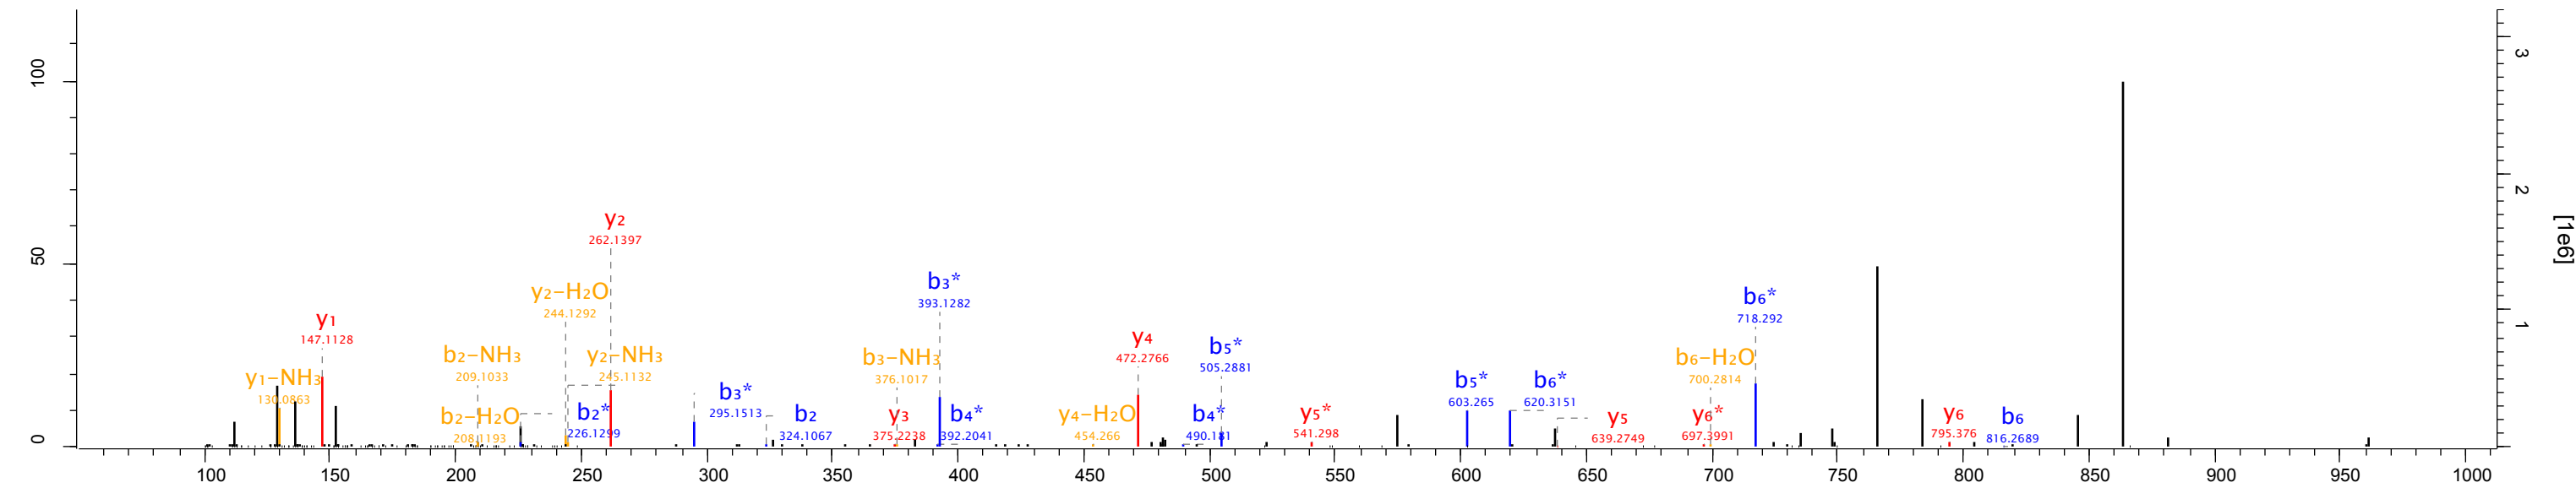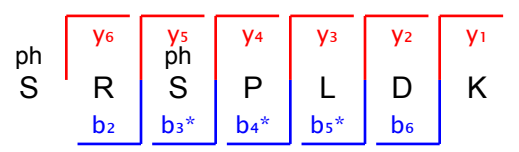

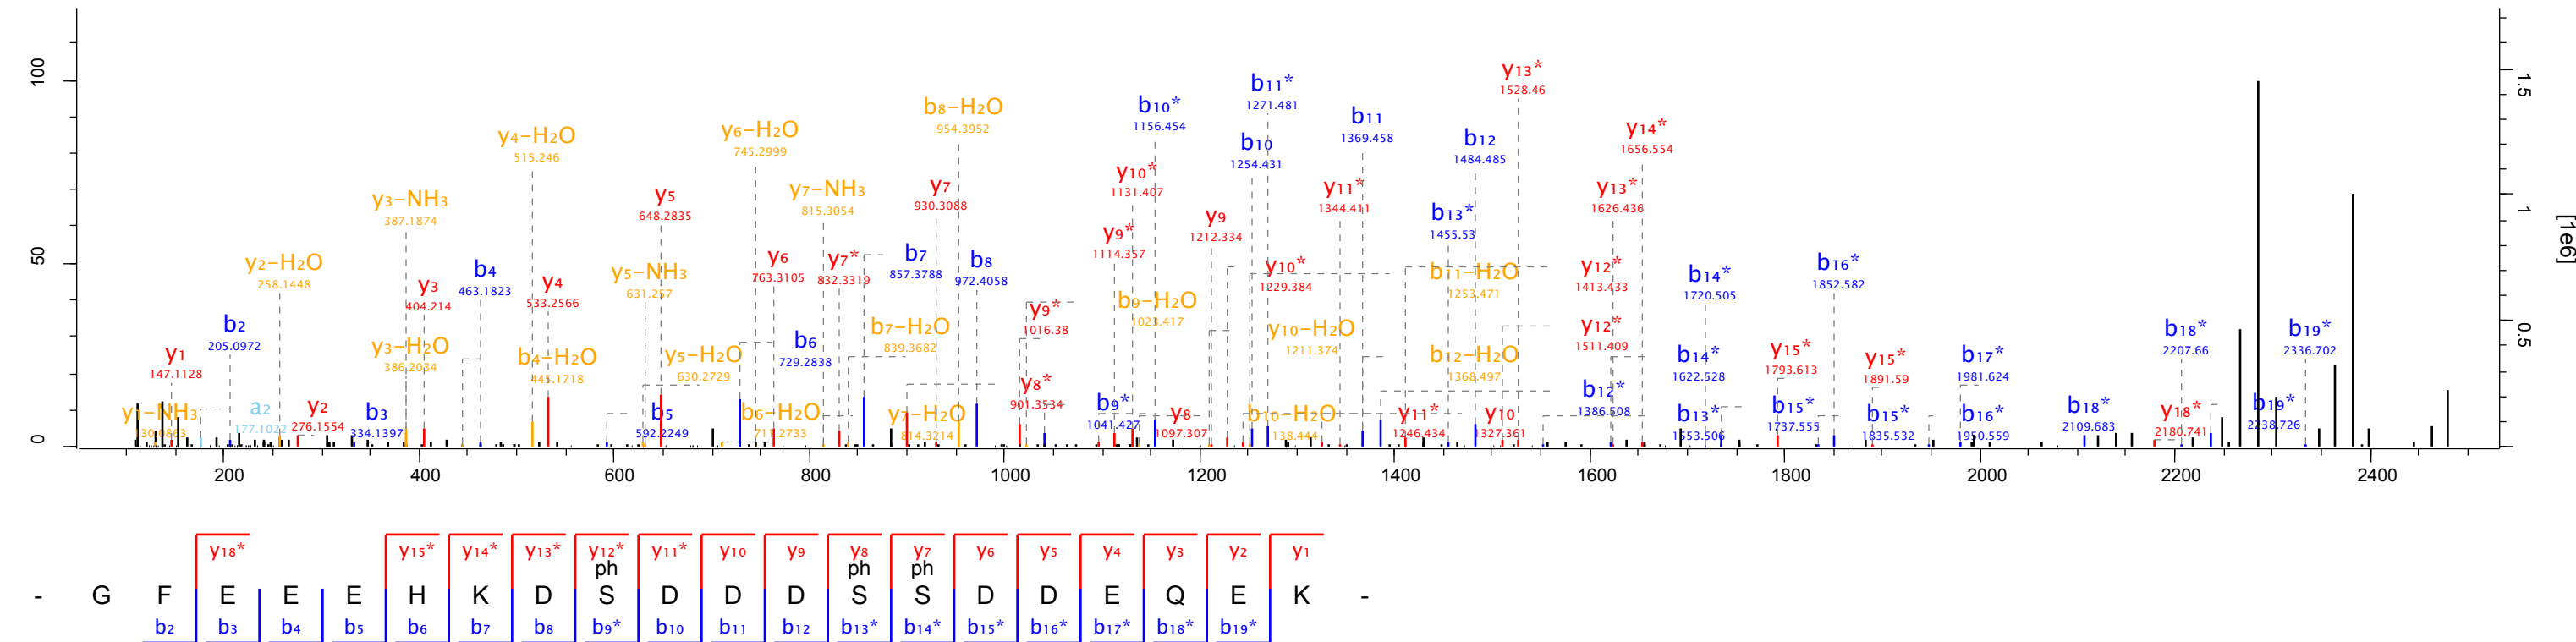

Raw file 20171215\_MaS\_33SR\_LMH\_phospho\_01 Scan 3885 Method FTMS; HCD Score 47.06 m/z 791.3 Gene names ZNF687

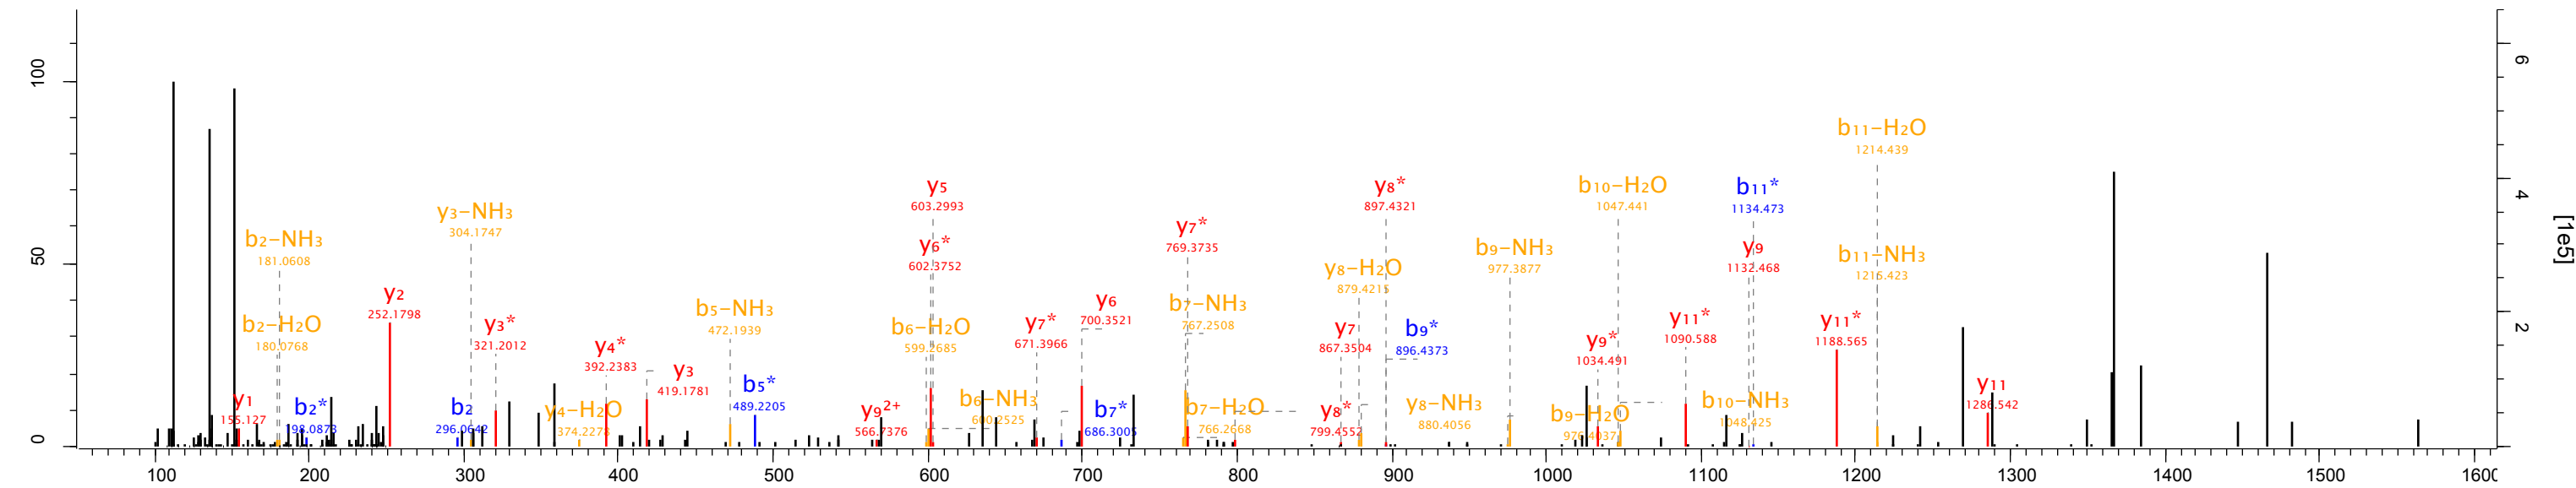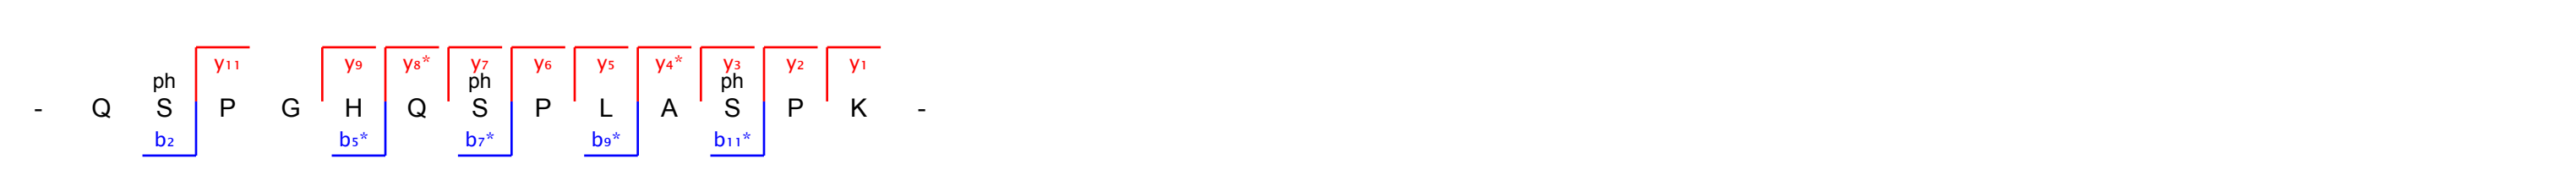

Raw file 20171215\_MaS\_33SR\_LMH\_phospho\_01 Scan 4965 Method FTMS; HCD Score 79.51 m/z 788.8 Gene names UBAP2L

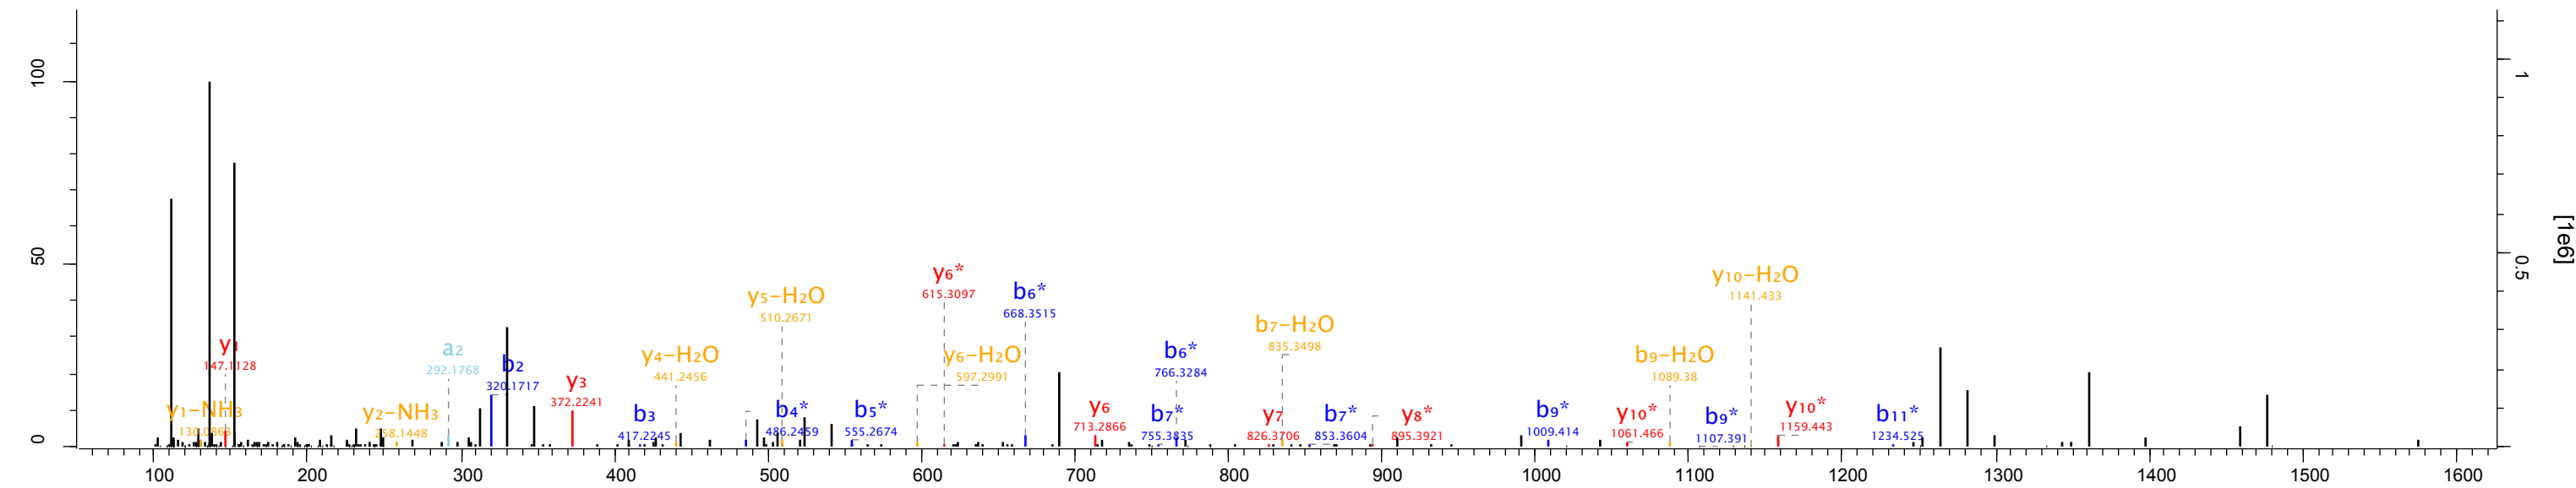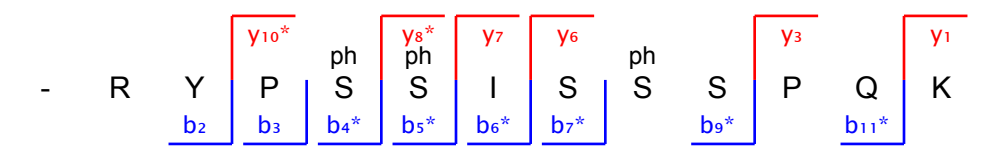



Raw file: 20171215\_MaS\_33SR\_LMH\_phospho\_01  
 Scan: 5405 Method: FTMS; HCD Score: 78.38 m/z: 1019.87 Gene names: SLC9A3R1

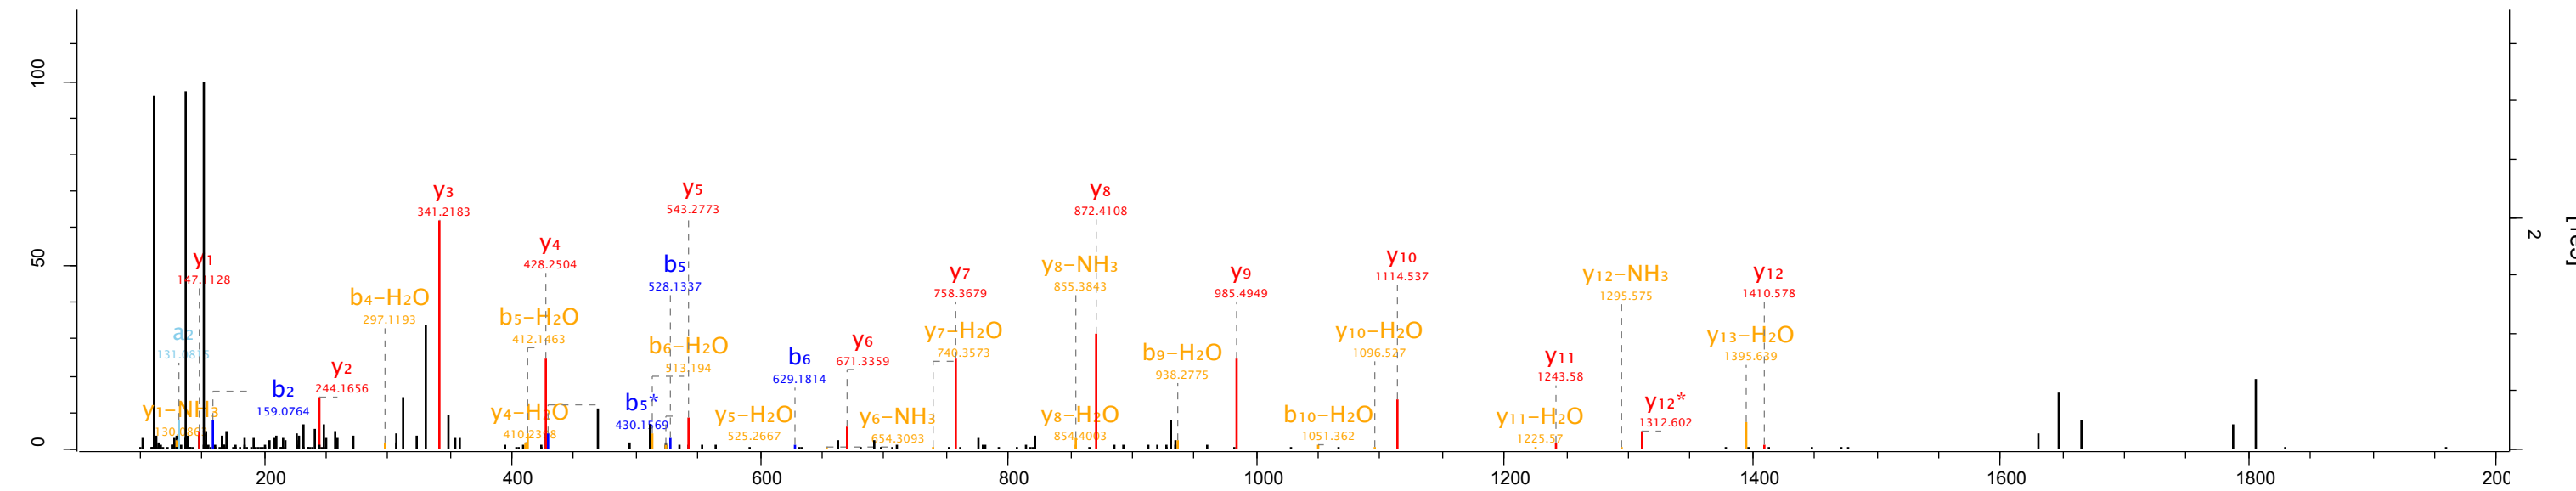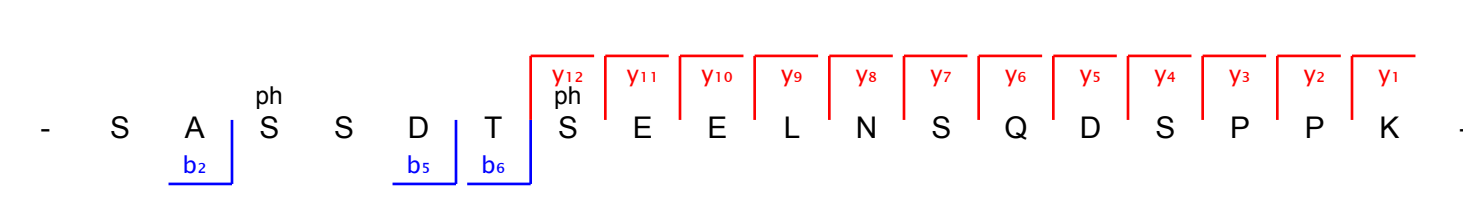



Raw file: 20171215\_MaS\_33SR\_LMH\_phospho\_01  
 Scan: 6235 Method: FTMS; HCD Score: 88.97 m/z: 639.59 Gene names: VIM

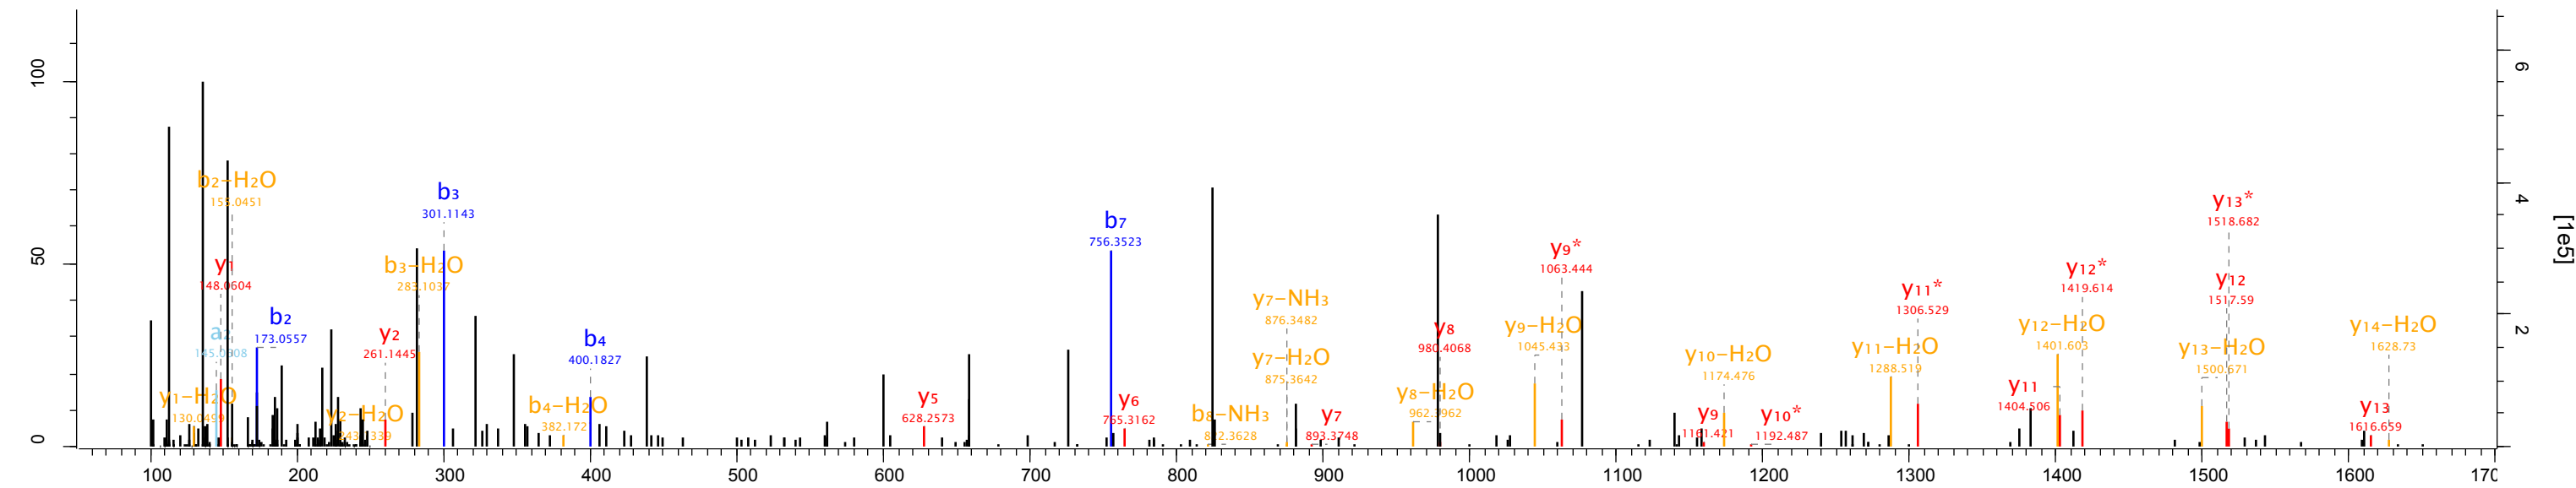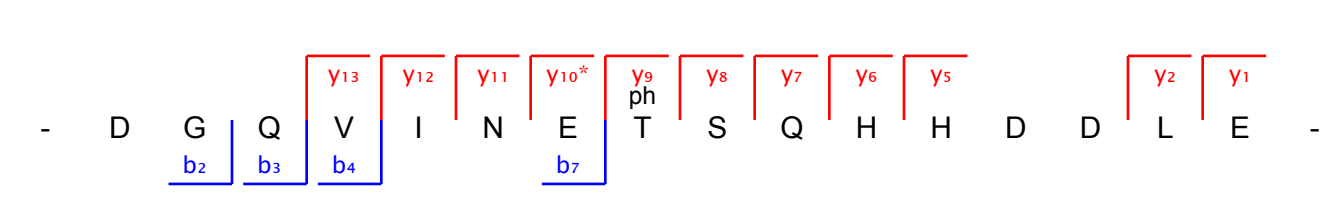

Raw file  
20171215\_MaS\_33SR\_LMH\_phospho\_01

Scan Method Score m/z Gene names  
7455 FTMS; HCD 48.73 706.64 GLCC11

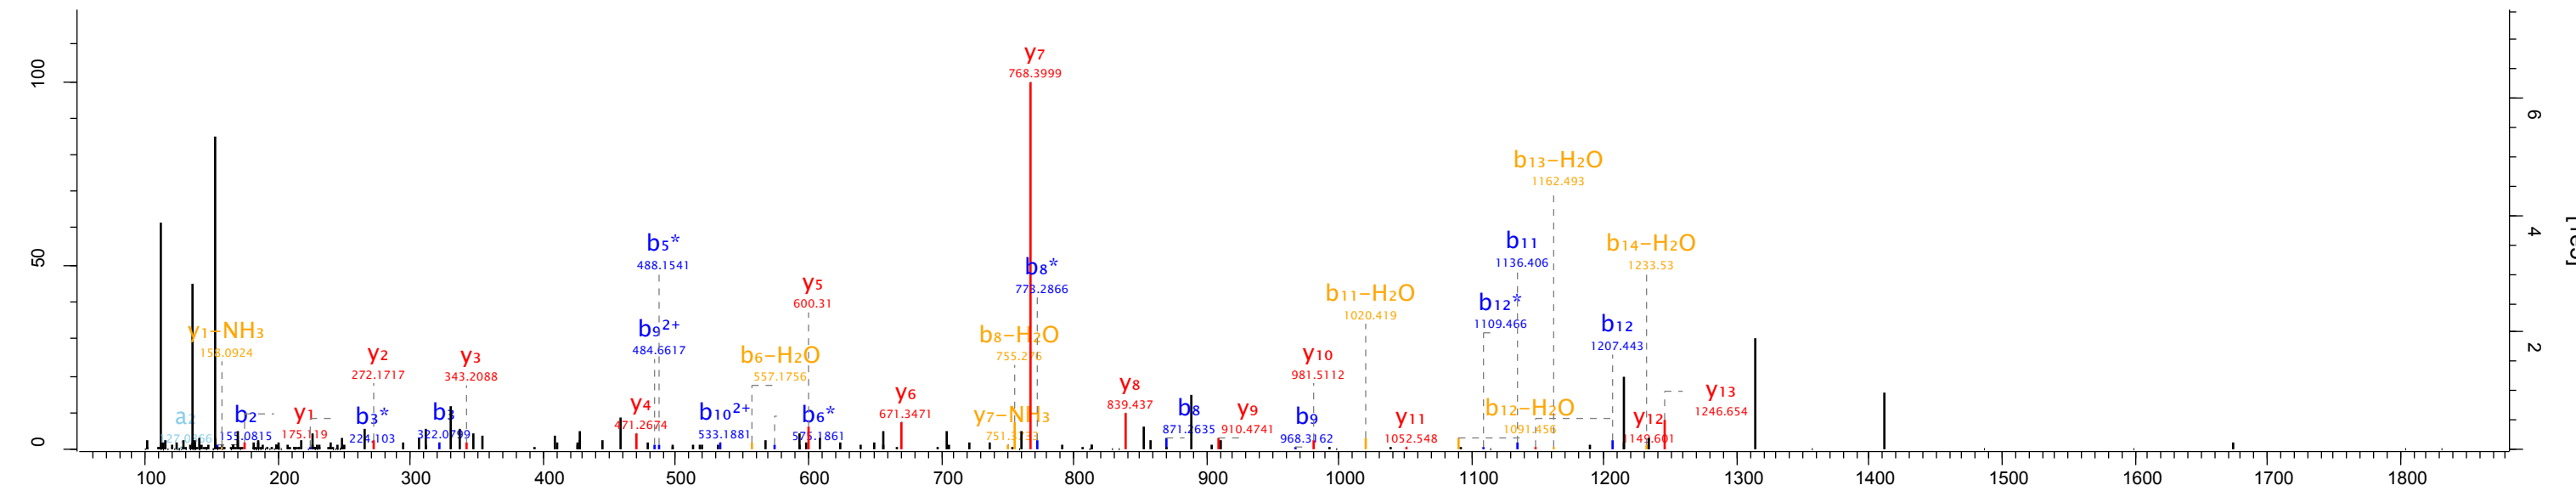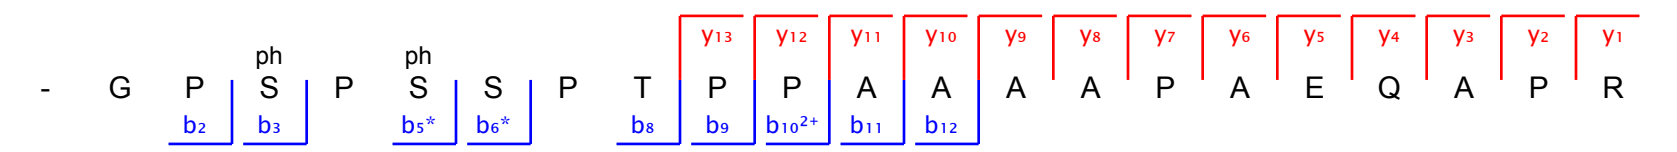

Raw file 20171215\_MaS\_33SR\_LMH\_phospho\_01 Scan 7615 Method FTMS; HCD Score 132.3 m/z 864.3 Gene names RANBP10

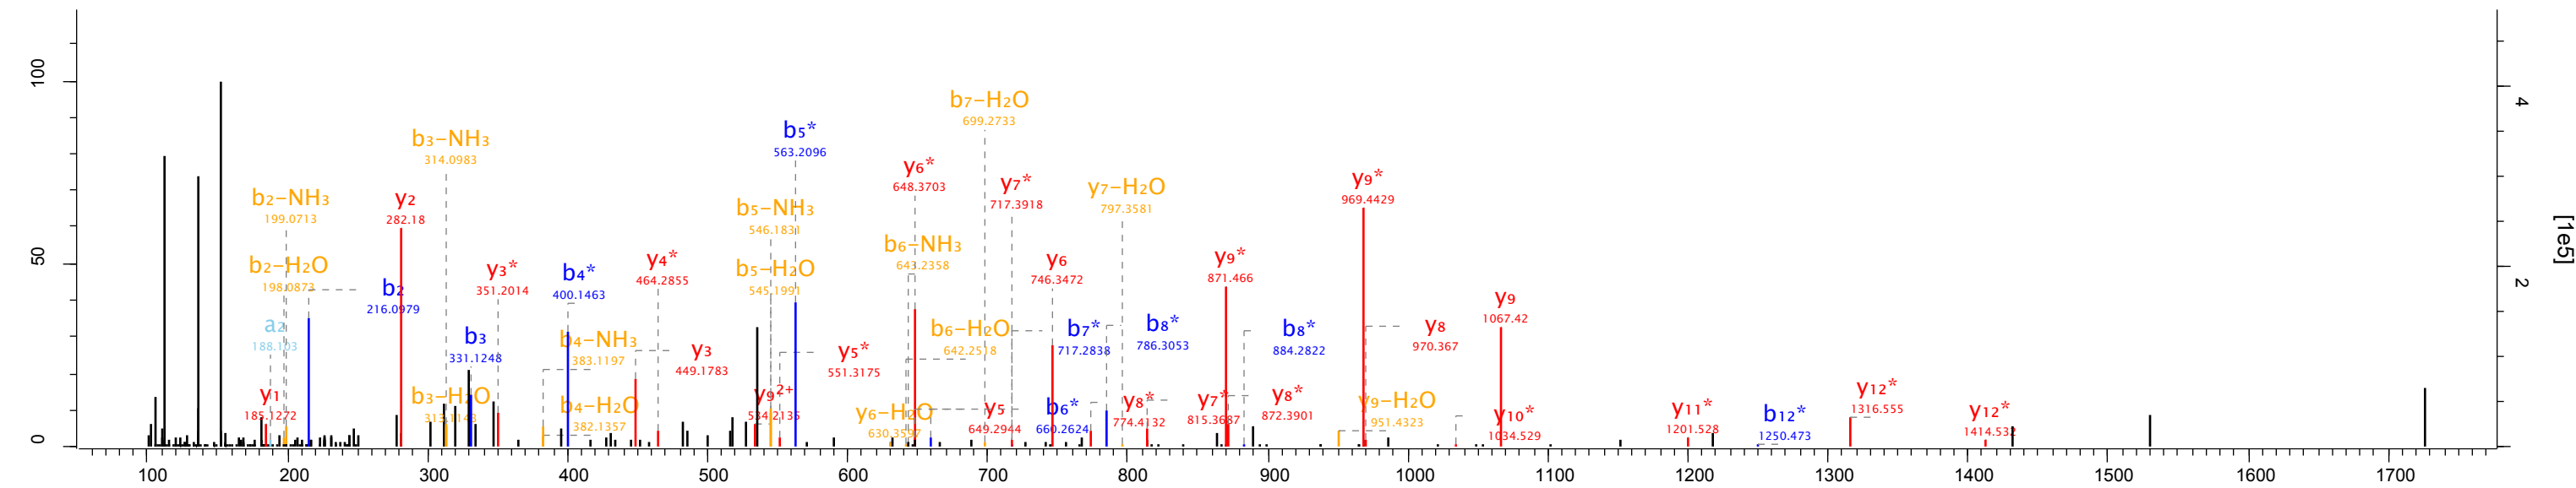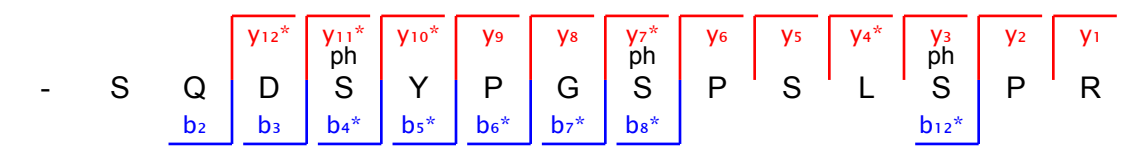

Raw file Scan Method Score m/z Gene names

20171215\_MaS\_33SR\_LMH\_phospho\_01 9335 FTMS; HCD 54.93 881.07 TP53BP1

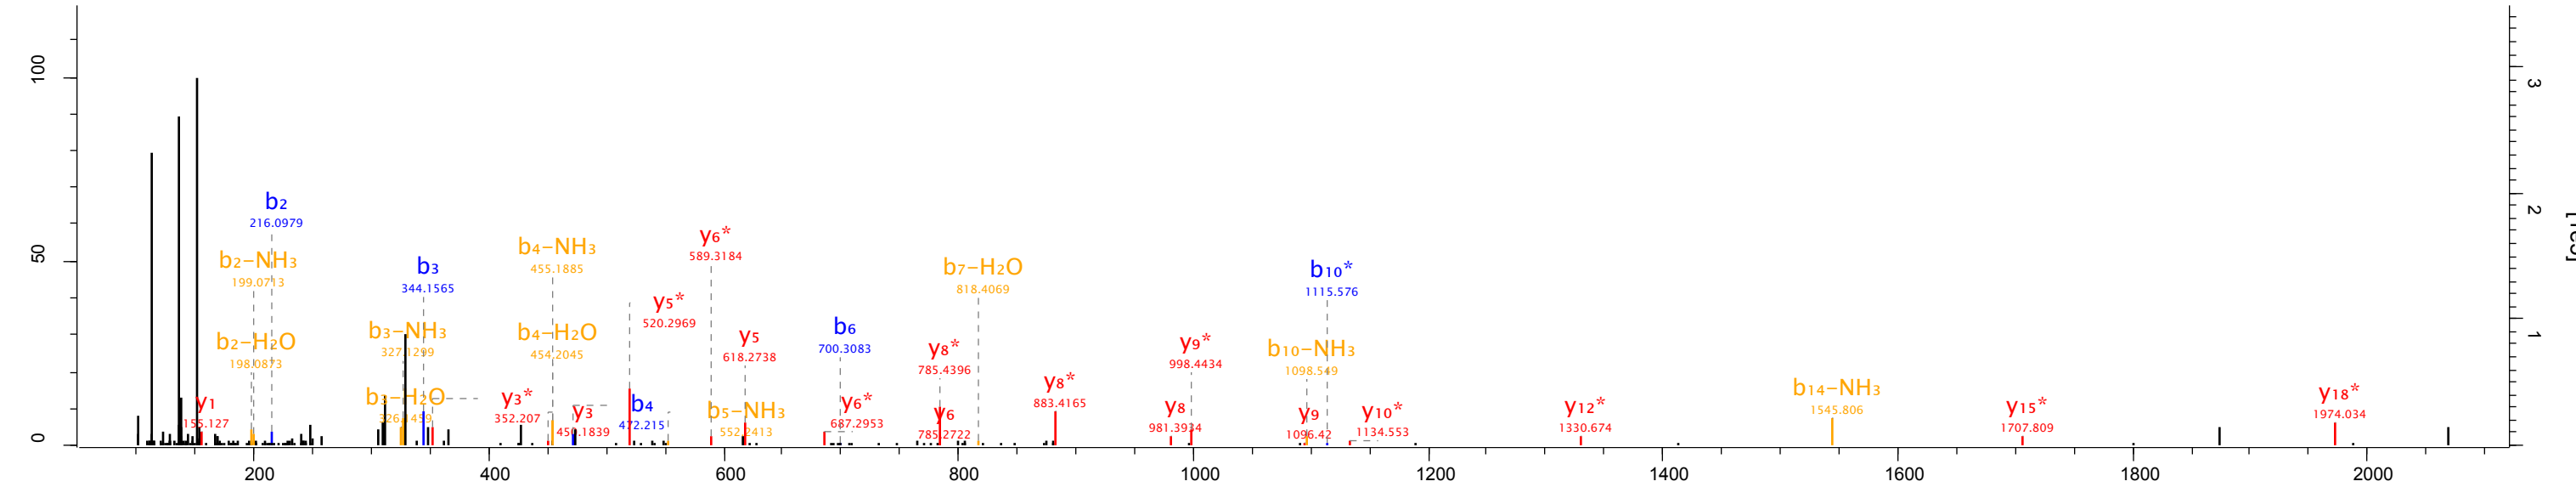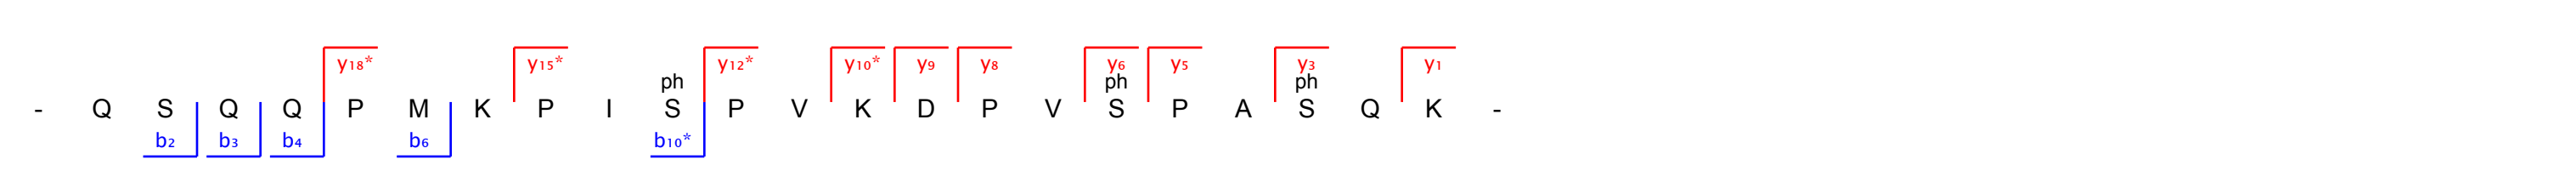



Raw file 20171215\_MaS\_33SR\_LMH\_phospho\_01 Scan 9675 Method FTMS; HCD Score 257.91 m/z 877.37 Gene names CLIP1

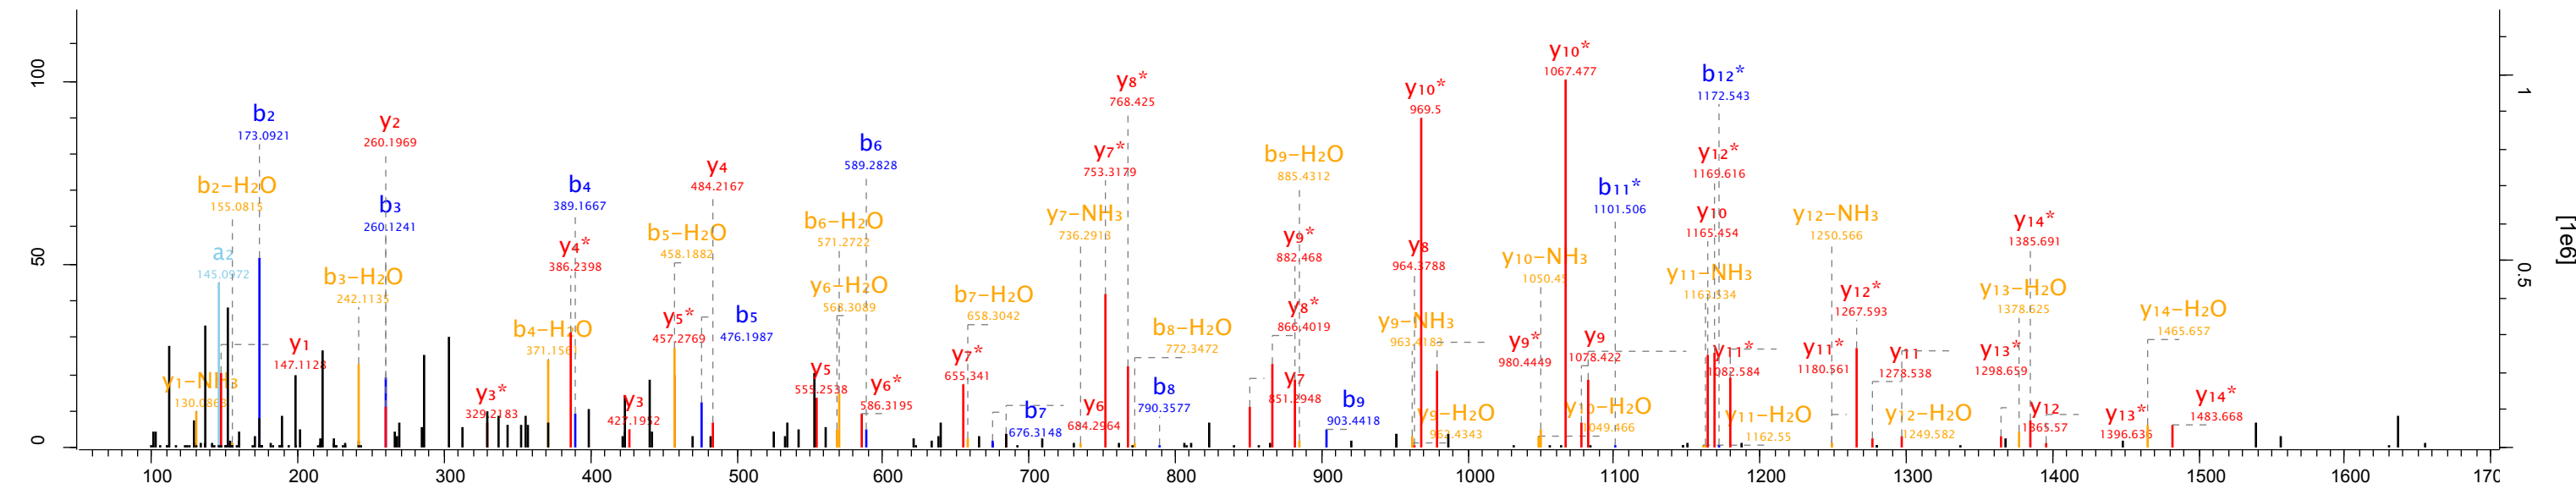

- T A S E S I S N L S E A G S I K -

b2
b3
b4
b5
b6
b7
b8
b9
b11\*
b12\*
y14\*
y13\*
y12
y11
y10
y9
y8
y7<sup>ph</sup>
y6
y5
y4
y3<sup>ph</sup>
y2
y1



Raw file 20171215\_MaS\_33SR\_LMH\_phospho\_01 Scan 9815 Method FTMS; HCD Score 96.46 m/z 836.32 Gene names PLEC

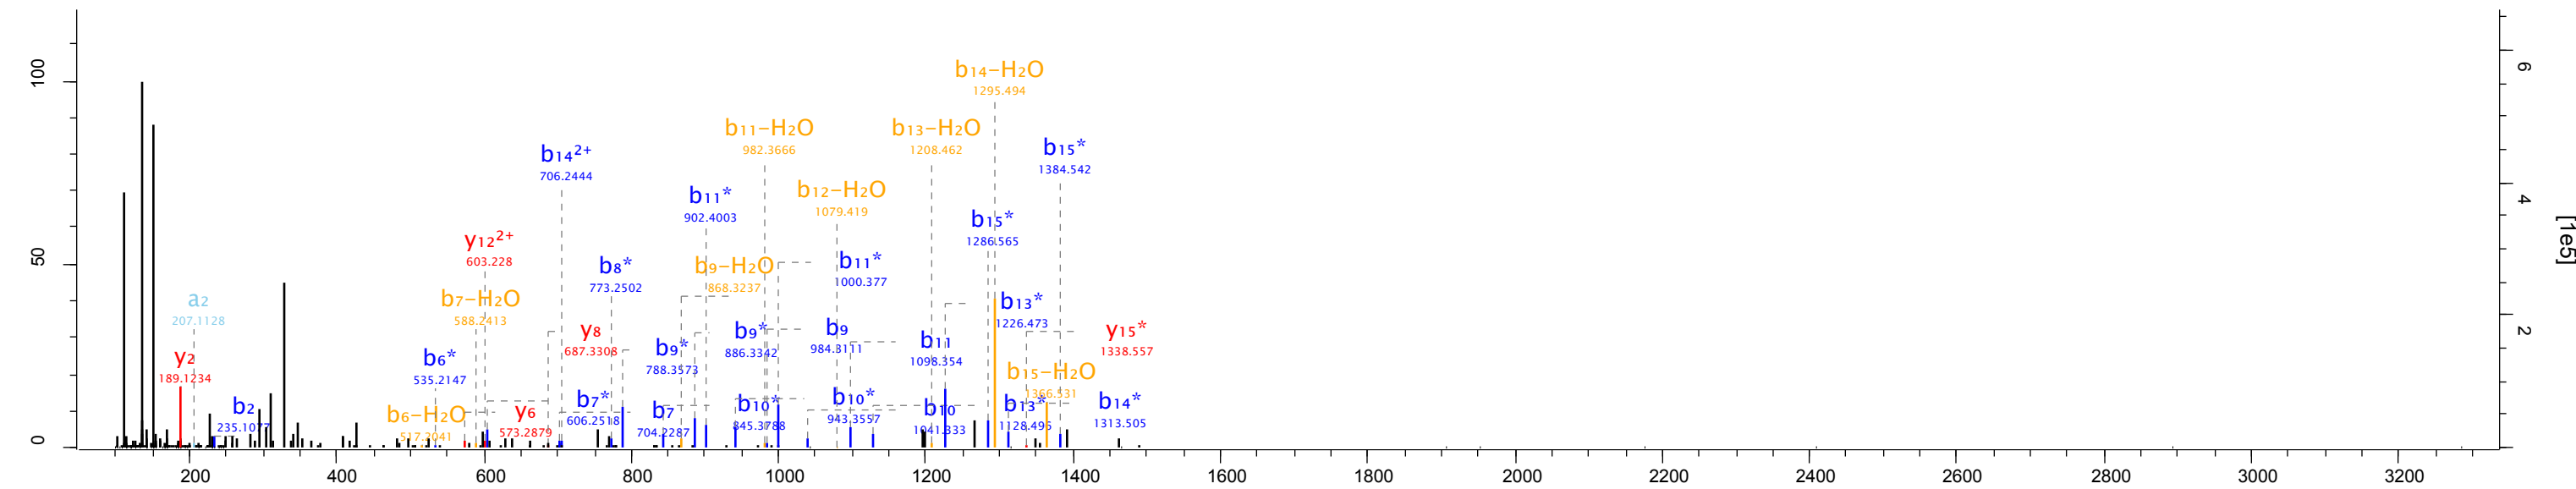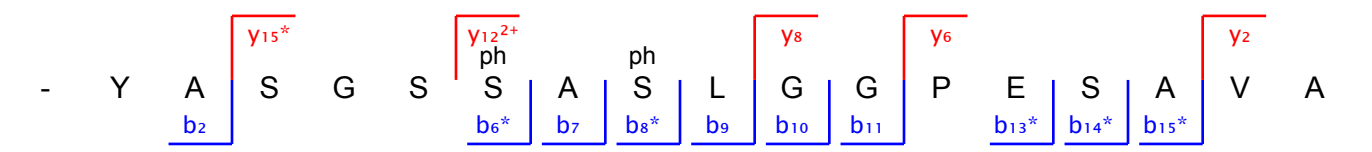

20171215\_MaS\_33SR\_LMH\_phospho\_02 10725 FTMS; HCD 106.43 816.04 PAGE5

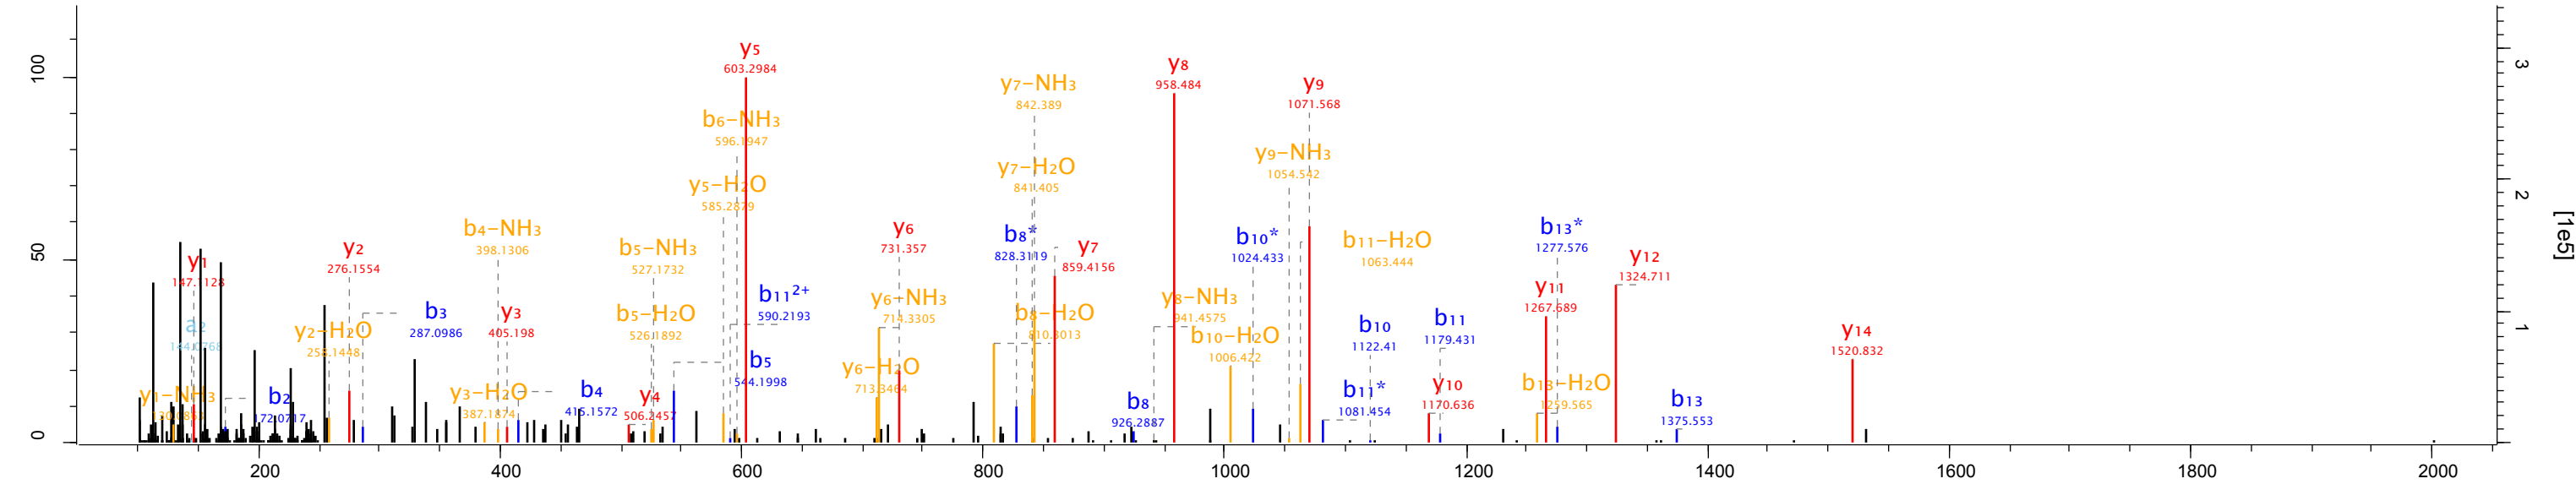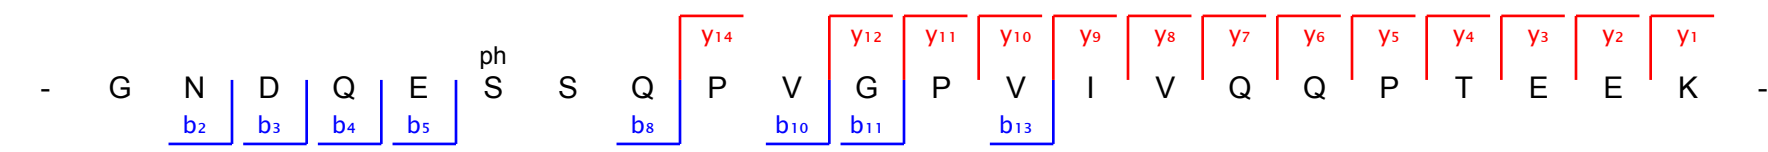

Raw file: 20171215\_MaS\_33SR\_LMH\_phospho\_02  
 Scan: 10925 Method: FTMS; HCD Score: 96.53 m/z: 996.93 Gene names: MLLT4

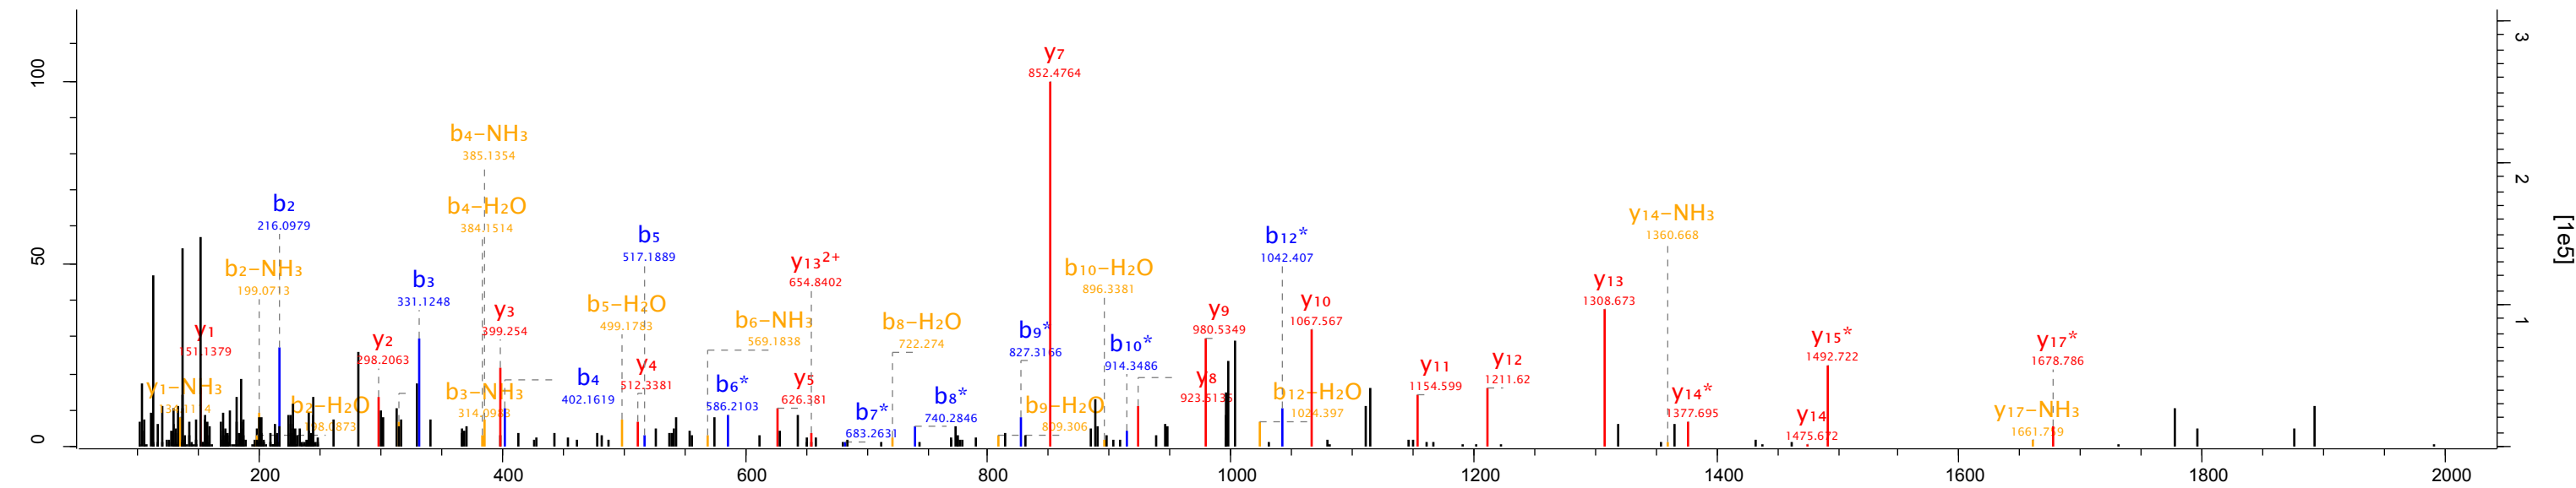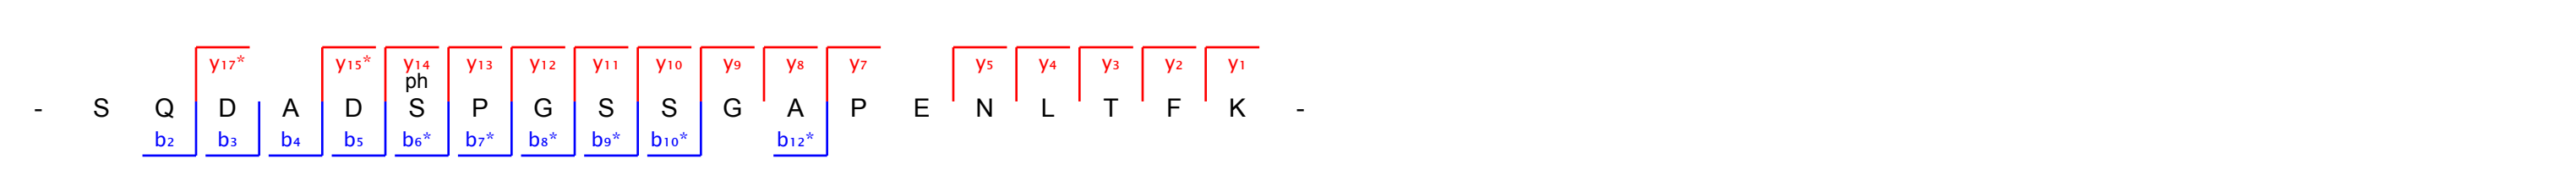

Raw file 20171215\_MaS\_33SR\_LMH\_phospho\_02 Scan 11205 Method FTMS; HCD Score 174.2 m/z 876.83 Gene names SCAF1

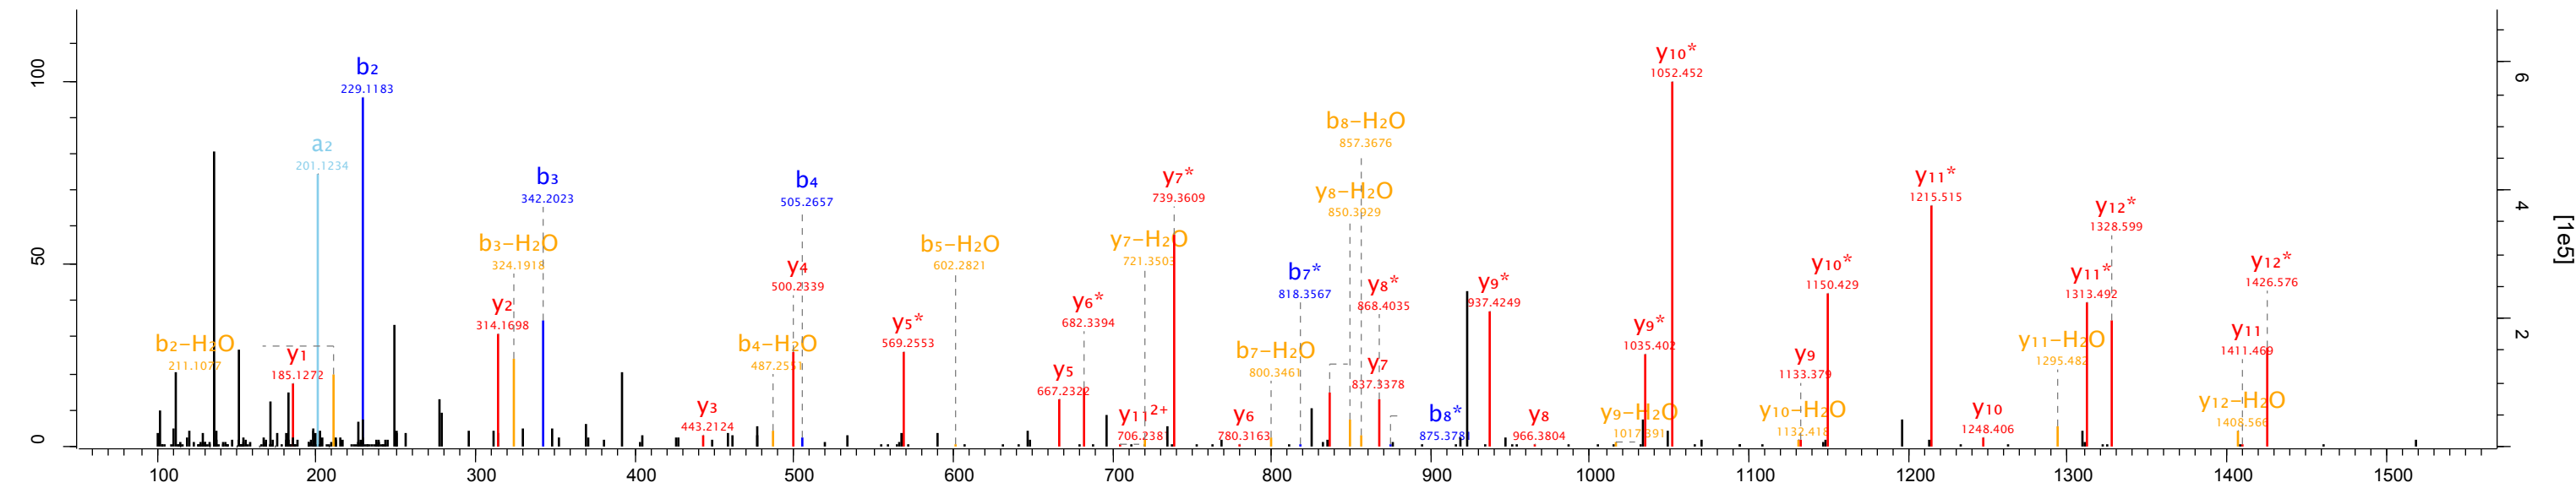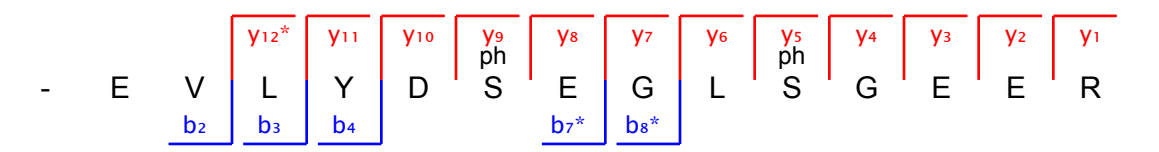

Raw file 20171215\_MaS\_33SR\_LMH\_phospho\_02 Scan 11885 Method FTMS; HCD Score 104.55 m/z 634.27 Gene names PARD3

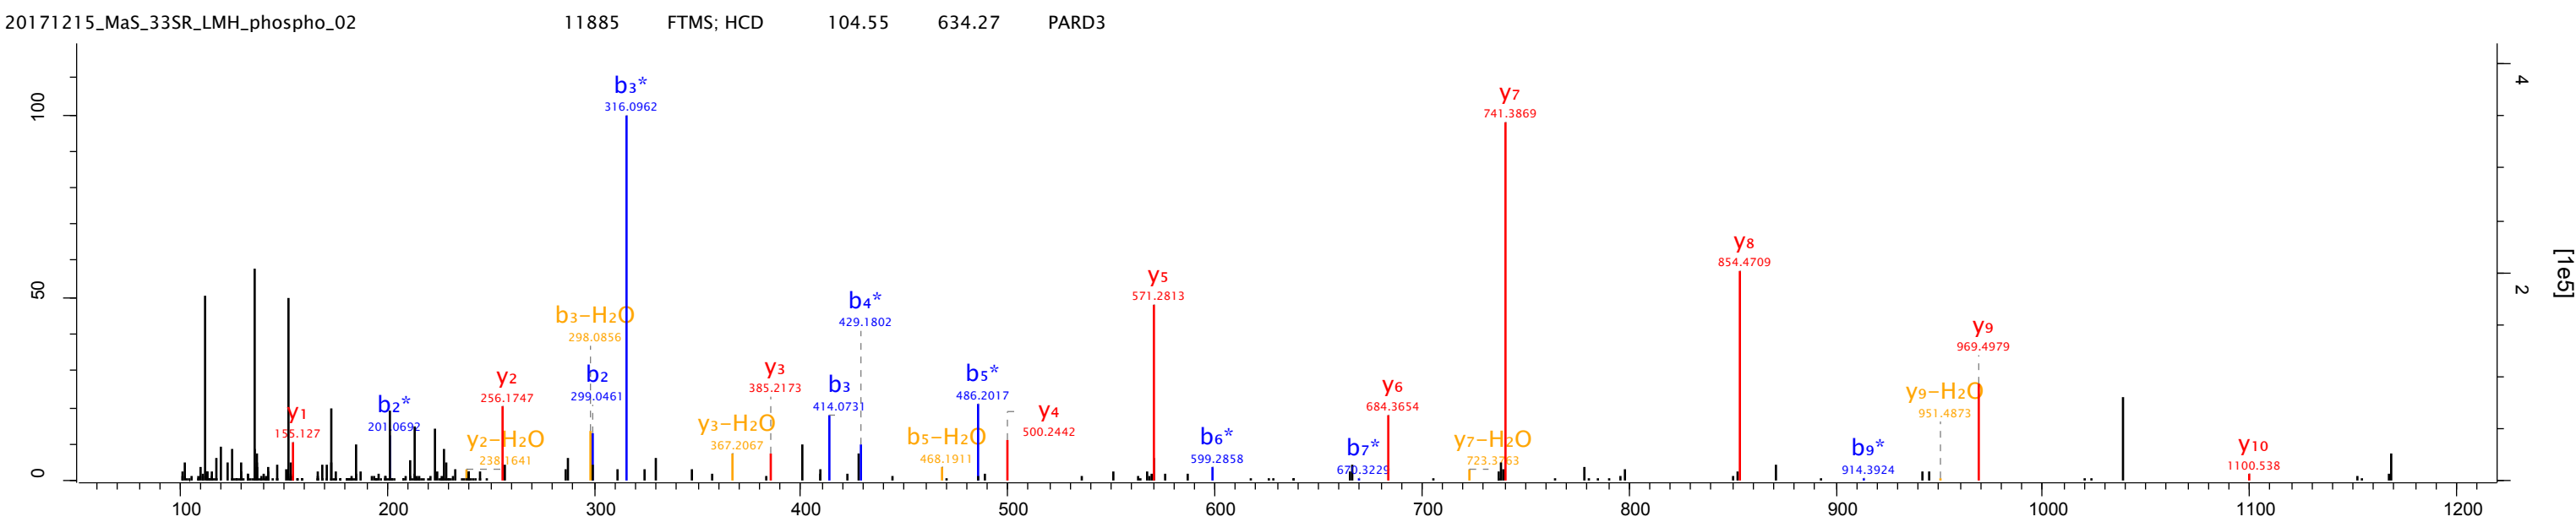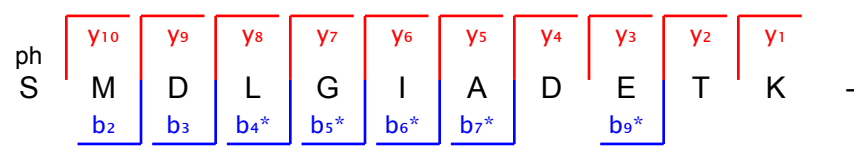

Raw file 20171215\_MaS\_33SR\_LMH\_phospho\_02 Scan 12075 Method FTMS; HCD Score 154.66 m/z 1190.56 Gene names BAG3

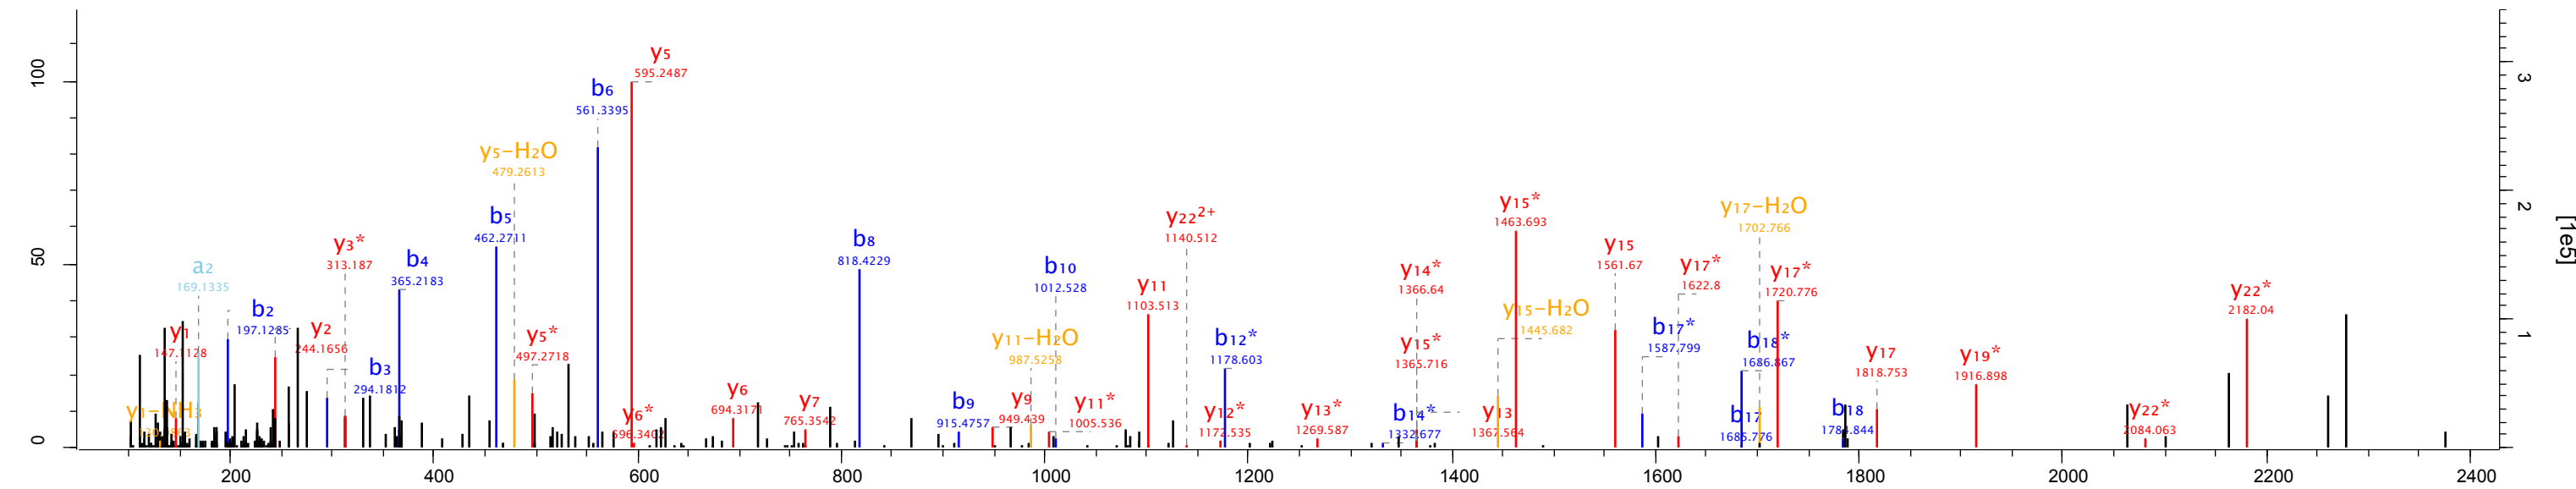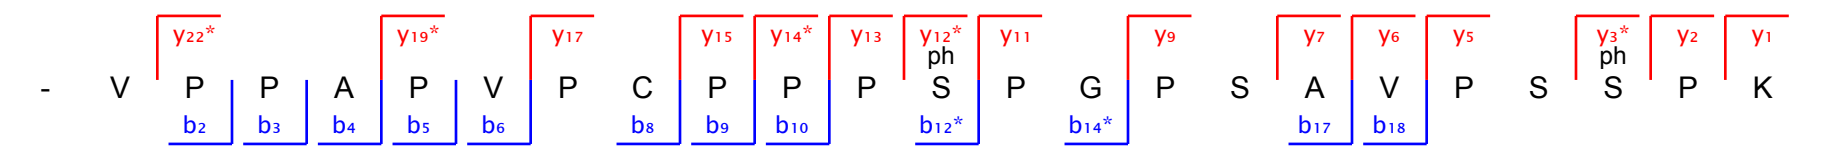

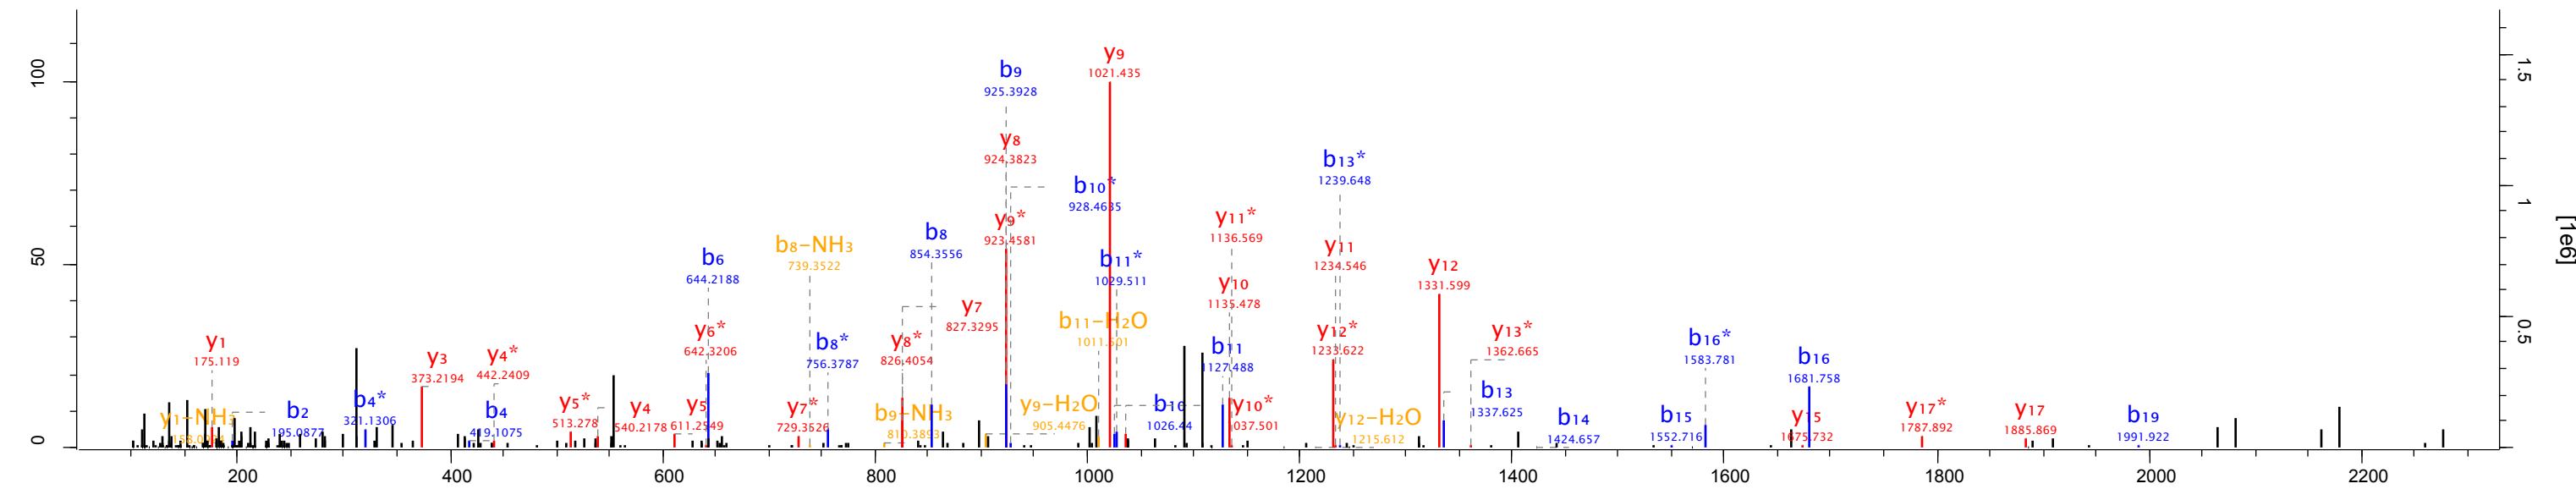

- H G G S P Q P L A T T P L S Q E P V N P P S E A S P T R -  
 (b2) (b4) (b6) (b8) (b9) (b10) (b11) (b13) (b14) (b15) (b16) (b19)

(y17) (y15) (y13\*) (y12) (y11) (y10) (y9) (y8) (y7) (y6\*) (y5) (y4 ph) (y3) (y1)

Raw file

20171215\_MaS\_33SR\_LMH\_phospho\_02

| Scan  | Method    | Score  | m/z    | Gene names |
|-------|-----------|--------|--------|------------|
| 13815 | FTMS; HCD | 102.39 | 924.38 | RTL1       |

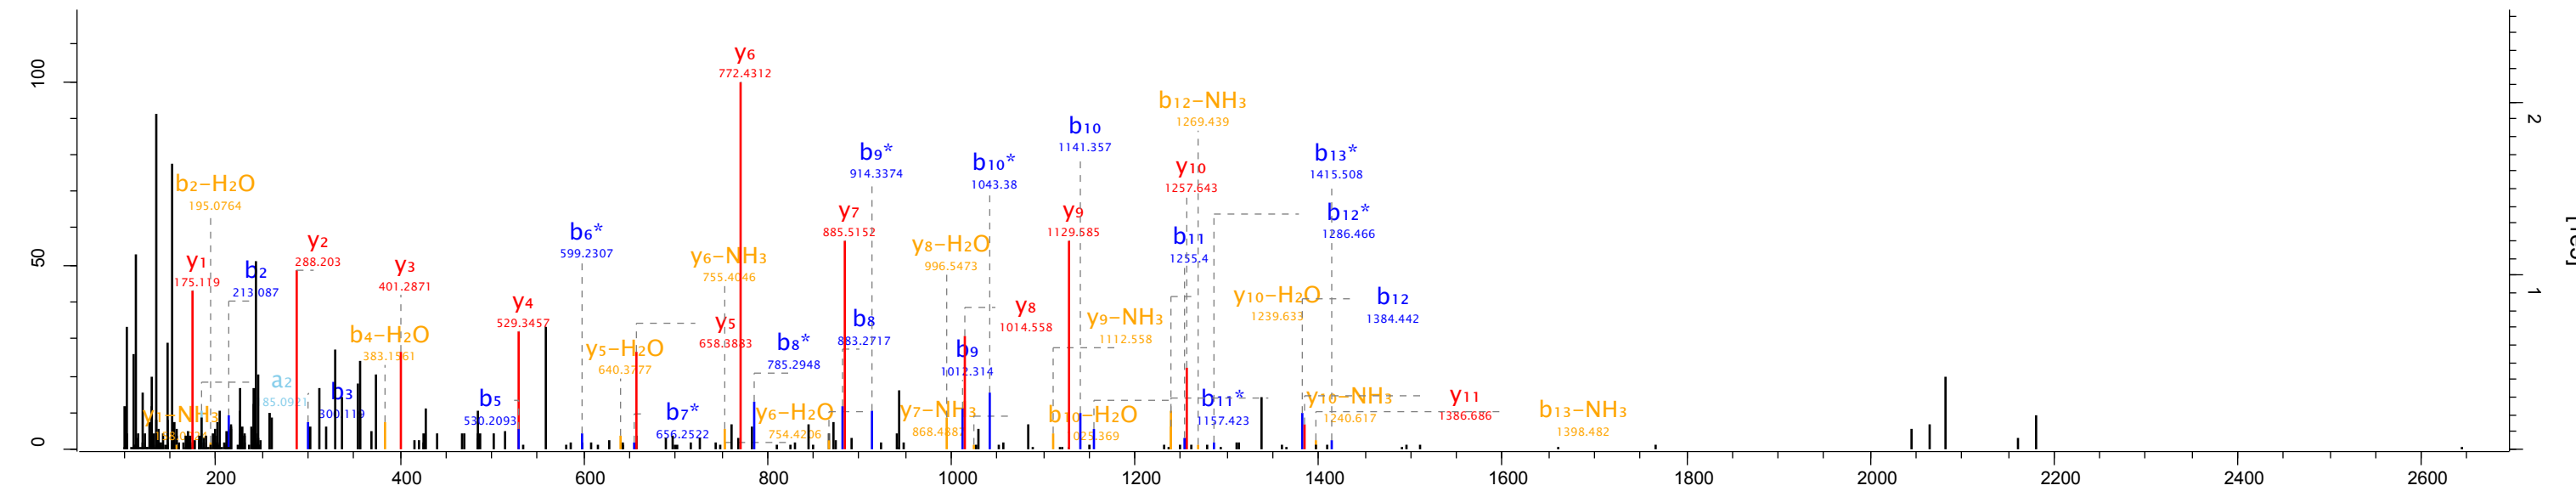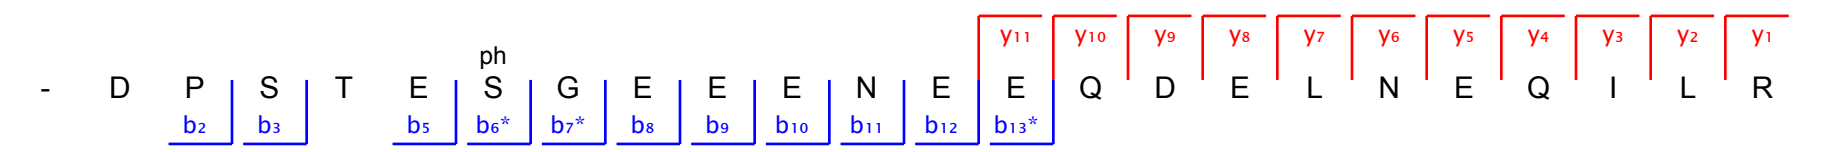



Raw file 20171215\_MaS\_33SR\_LMH\_phospho\_02 Scan 14005 Method FTMS; HCD Score 80.41 m/z 713 Gene names PHC3

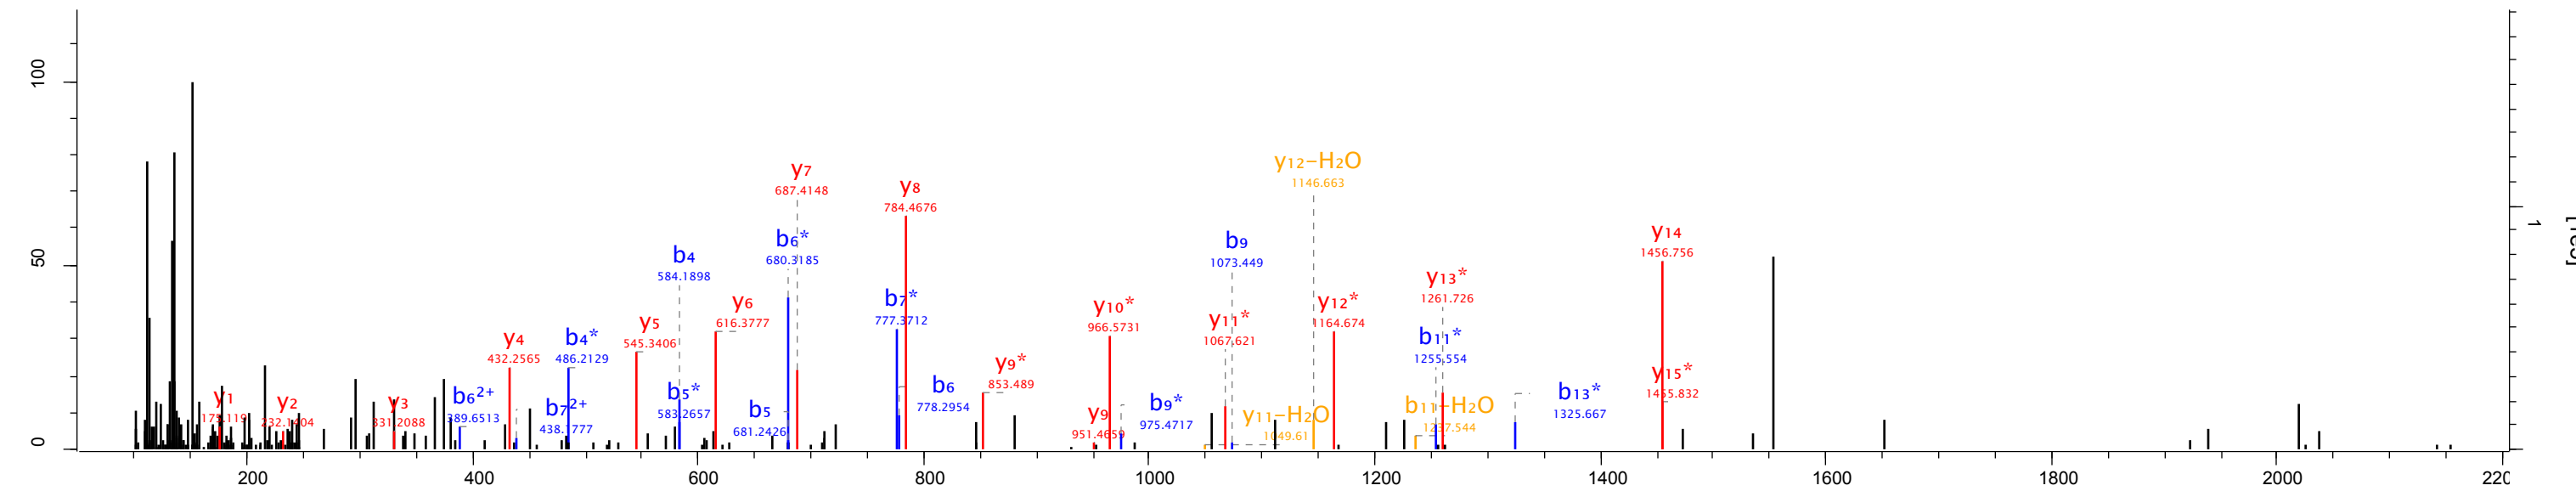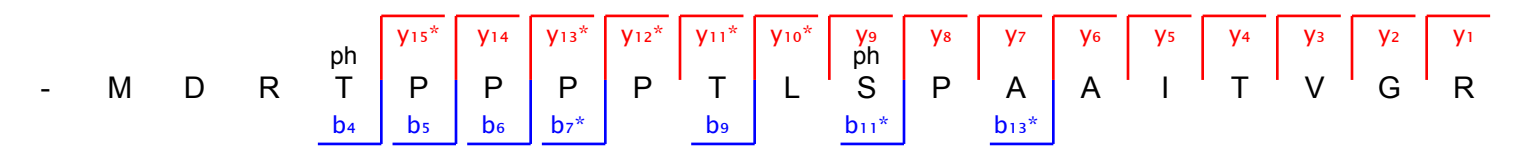

Raw file 20171215\_MaS\_33SR\_LMH\_phospho\_02 Scan 14735 Method FTMS; HCD Score 51.13 m/z 582.78 Gene names C5orf30

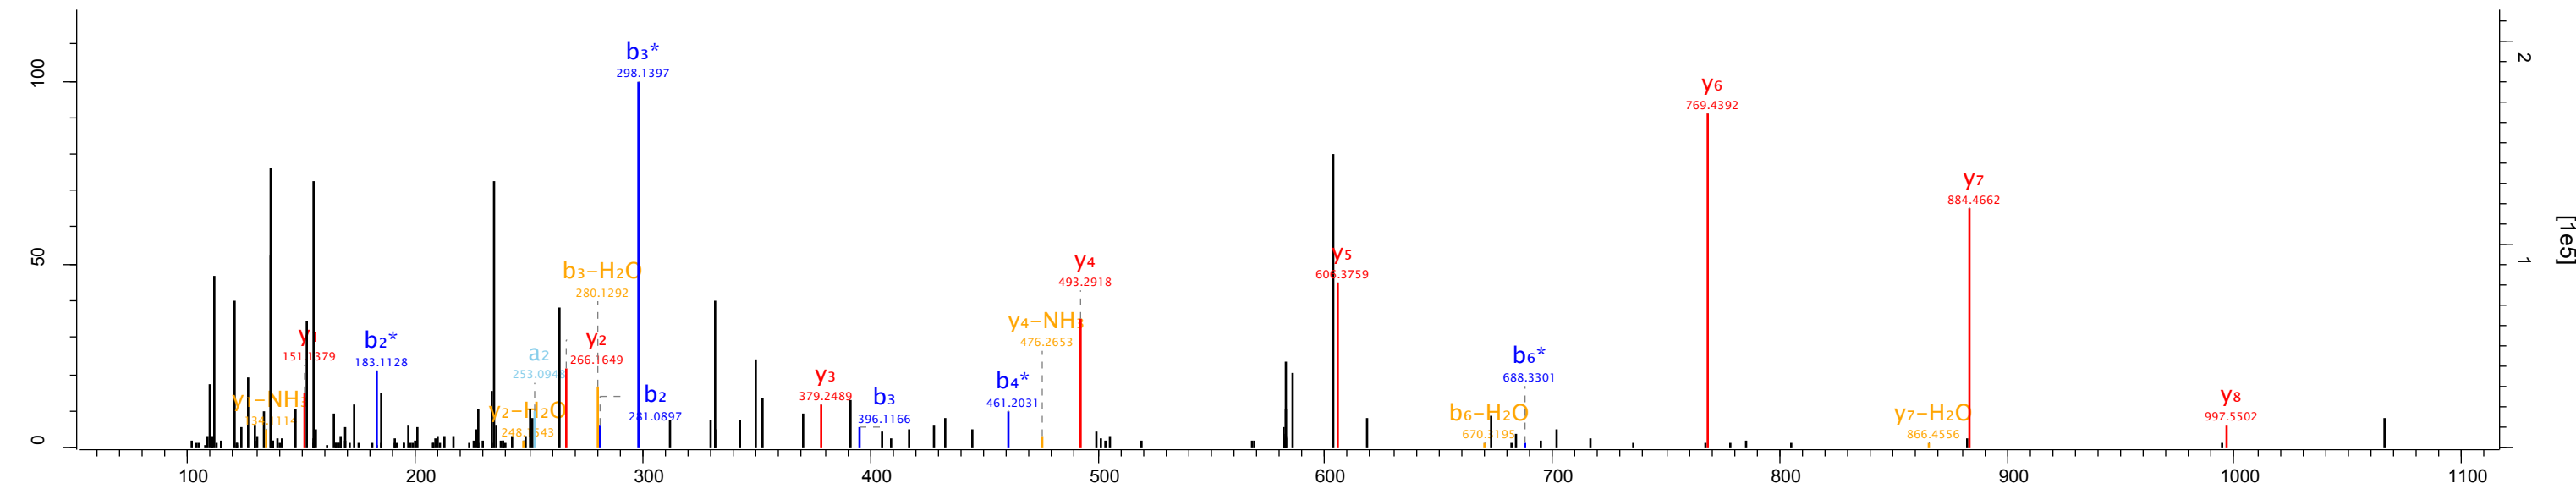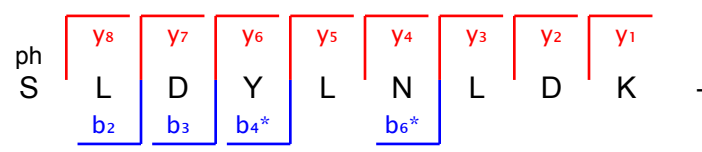

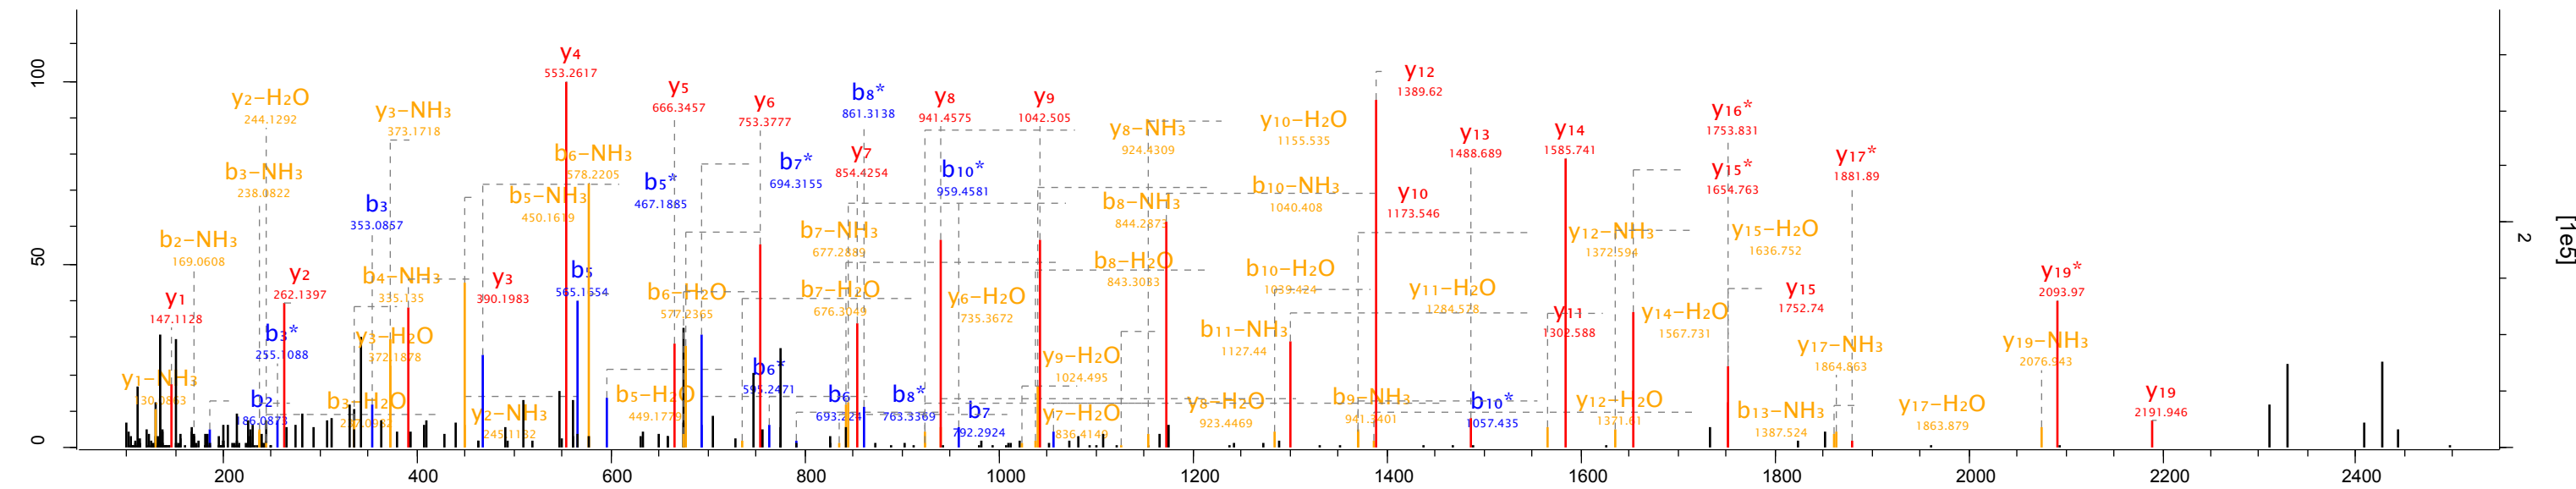

- Q G S P D Q V S P V S E M T S T S L Y Q D K -  
 b<sub>2</sub> b<sub>3</sub> b<sub>5</sub> b<sub>6</sub> b<sub>7</sub> b<sub>8</sub><sup>\*</sup> b<sub>10</sub><sup>\*</sup>

y<sub>19</sub> y<sub>17</sub><sup>\*</sup> y<sub>16</sub><sup>\*</sup> y<sub>15</sub> ph y<sub>14</sub> y<sub>13</sub> y<sub>12</sub> y<sub>11</sub> y<sub>10</sub> y<sub>9</sub> y<sub>8</sub> y<sub>7</sub> y<sub>6</sub> y<sub>5</sub> y<sub>4</sub> y<sub>3</sub> y<sub>2</sub> y<sub>1</sub>

Raw file 20171215\_MaS\_33SR\_LMH\_phospho\_02 Scan 15855 Method FTMS; HCD Score 176.7 m/z 1019.93 Gene names YTHDF2

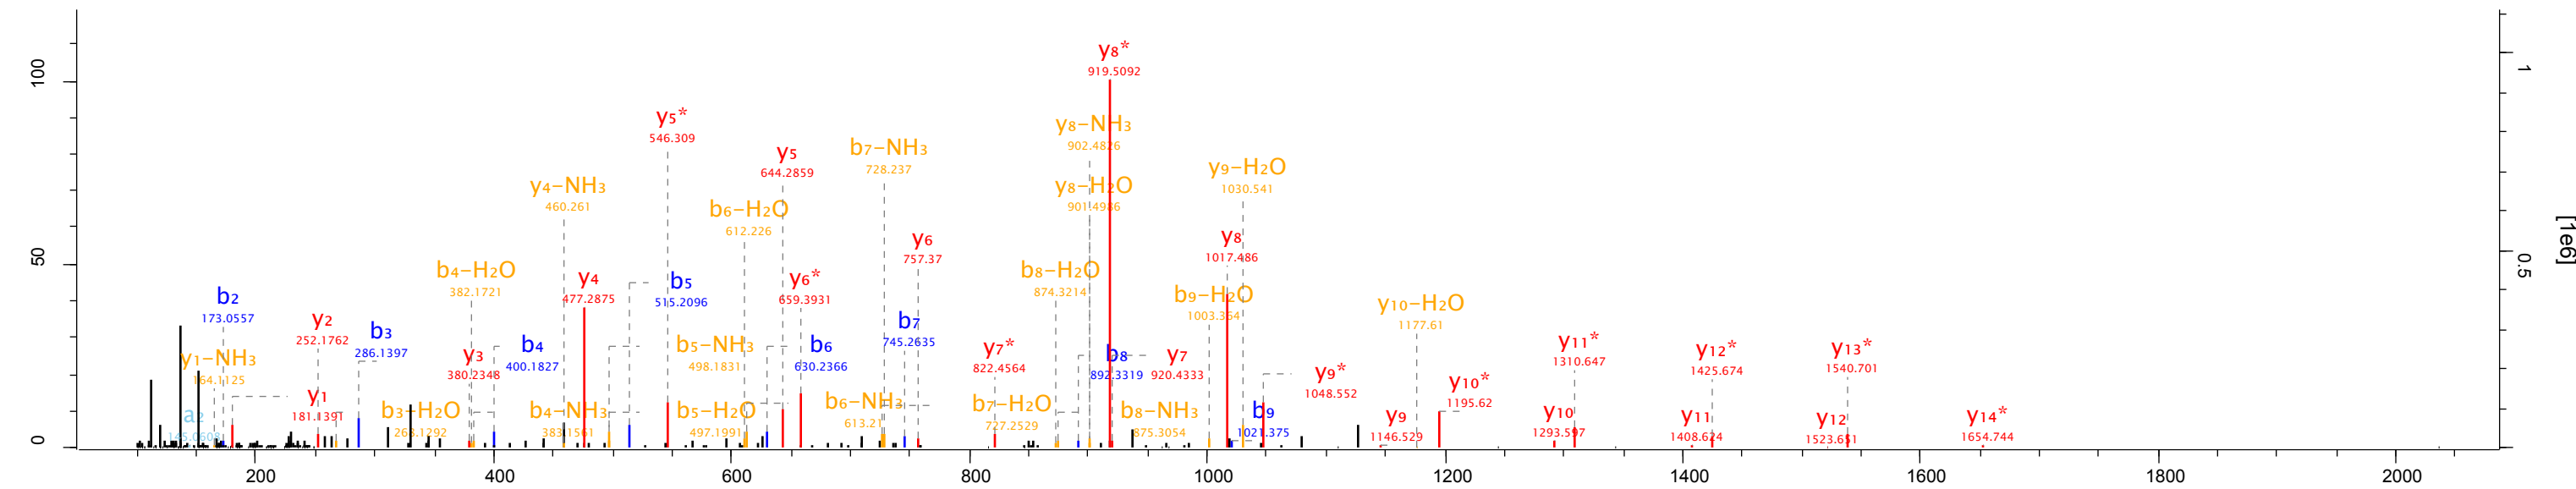

- D G L N D D D F E P Y L S P Q A R -

b<sub>2</sub>
b<sub>3</sub>
y<sub>14</sub>\*
y<sub>13</sub>\*
y<sub>12</sub>
y<sub>11</sub>
y<sub>10</sub>
y<sub>9</sub>
y<sub>8</sub>
y<sub>7</sub>
y<sub>6</sub>
y<sub>5</sub><sub>ph</sub>
y<sub>4</sub>
y<sub>3</sub>
y<sub>2</sub>
y<sub>1</sub>

b<sub>2</sub>
b<sub>3</sub>
b<sub>4</sub>
b<sub>5</sub>
b<sub>6</sub>
b<sub>7</sub>
b<sub>8</sub>
b<sub>9</sub>

Raw file 20171215\_MaS\_33SR\_LMH\_phospho\_02 Scan 17915 Method FTMS; HCD Score 45.71 m/z 969.91 Gene names C1orf226

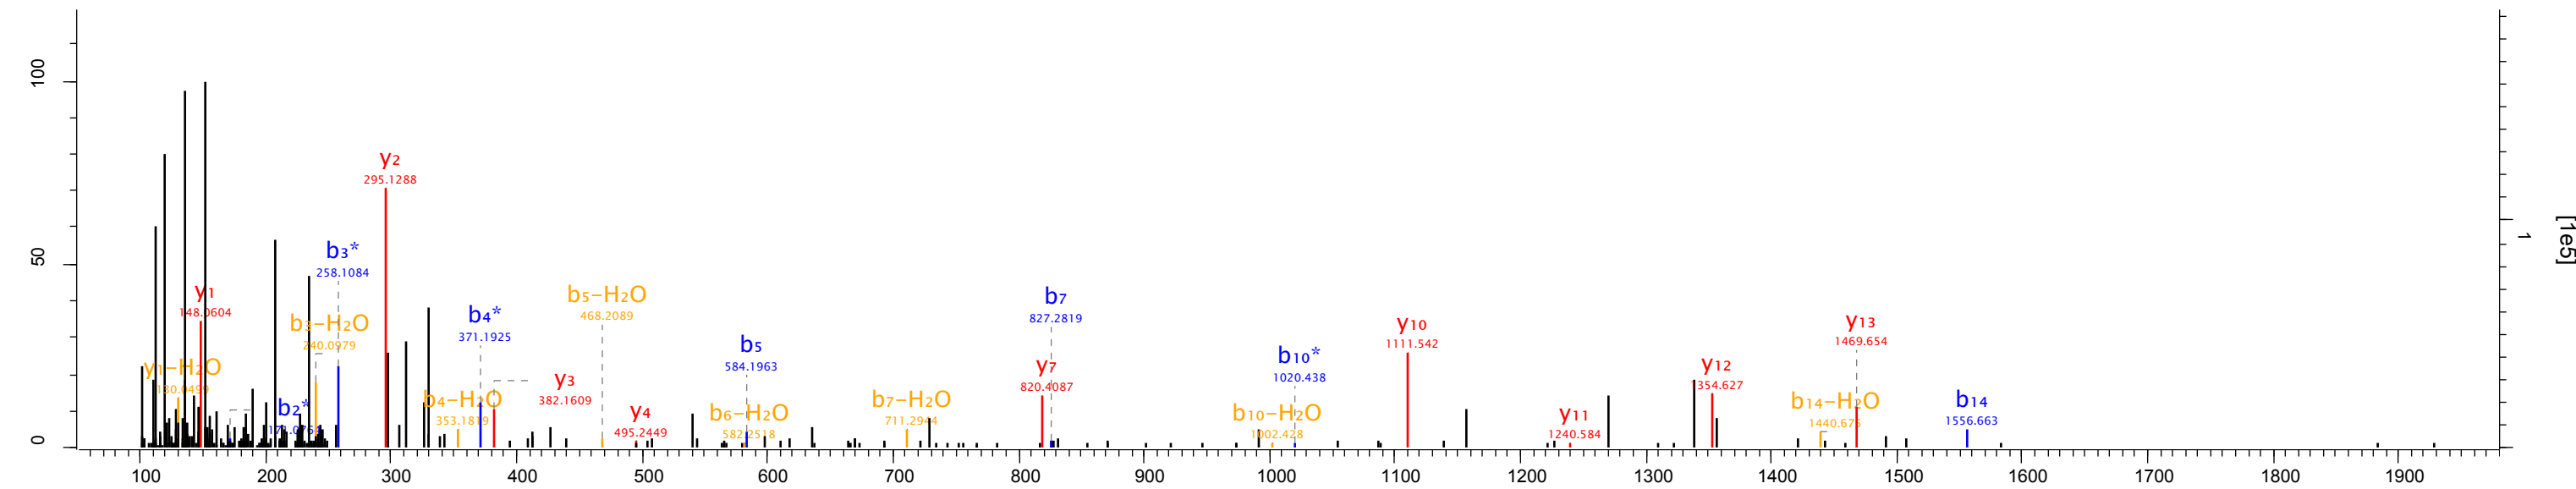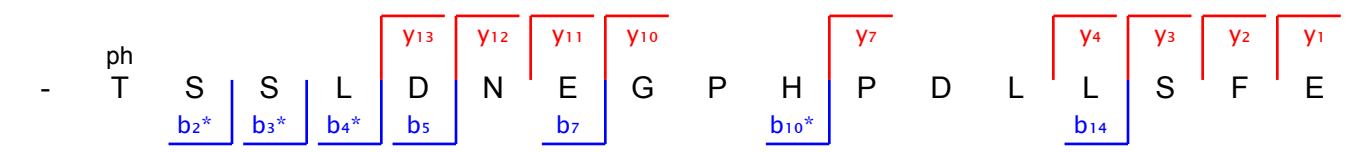

Raw file: 20171215\_MaS\_33SR\_LMH\_phospho\_02  
 Scan: 2005 Method: FTMS; HCD Score: 211.33 m/z: 827.33 Gene names: EIF4B

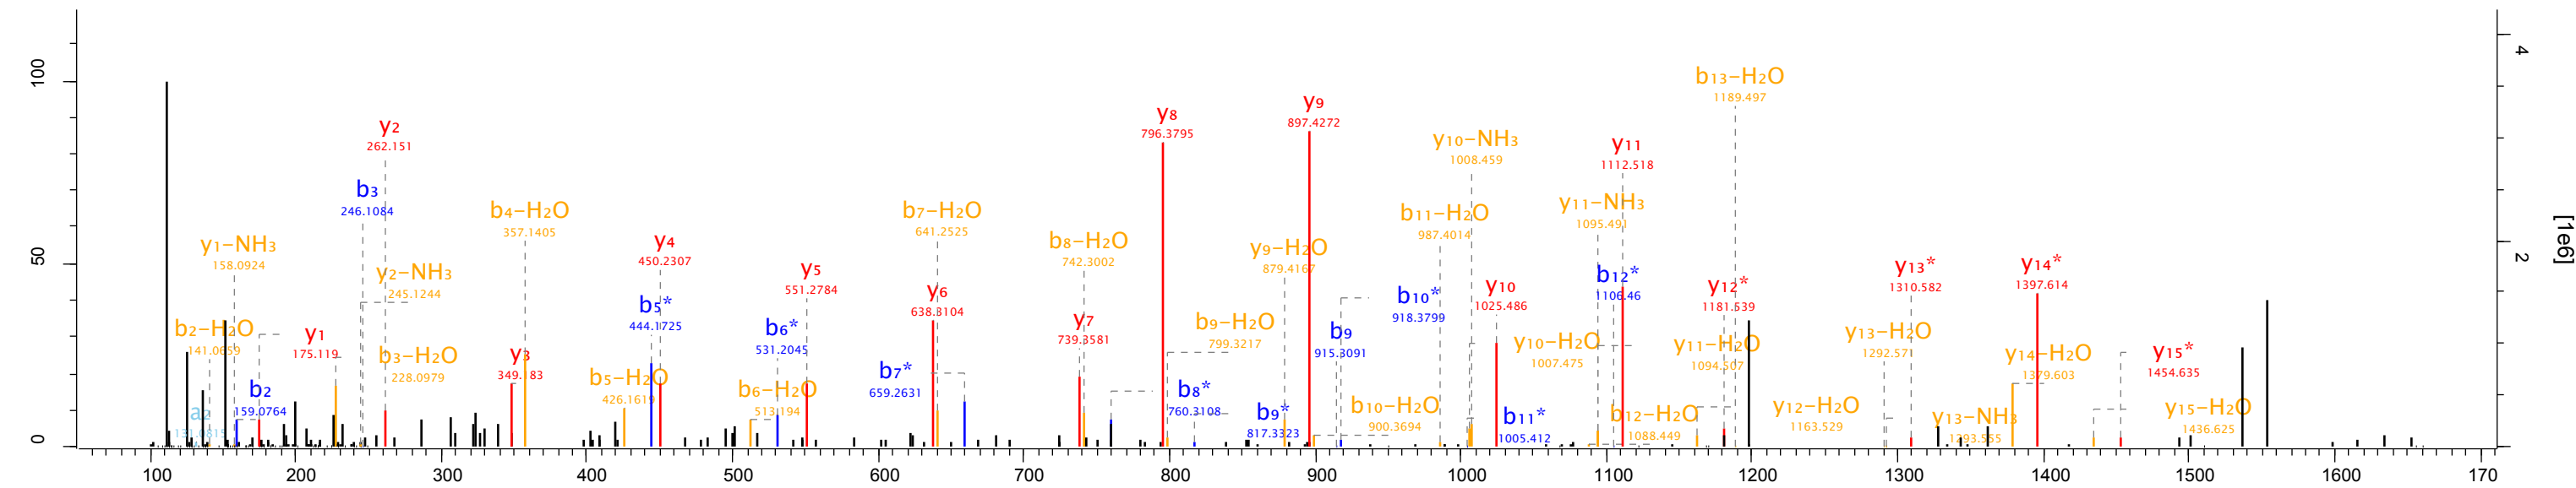

- T G S E S S Q T G T S T T S S R -

y15\*
y14\*
y13\*
y12\*  
ph
y11
y10
y9
y8
y7
y6
y5
y4
y3
y2
y1

b2
b3
b5\*
b6\*
b7\*
b8\*
b9
b10\*
b11\*
b12\*

Raw file 20171215\_MaS\_33SR\_LMH\_phospho\_02 Scan 2405 Method FTMS; HCD Score 234.24 m/z 717.61 Gene names HNRNPD

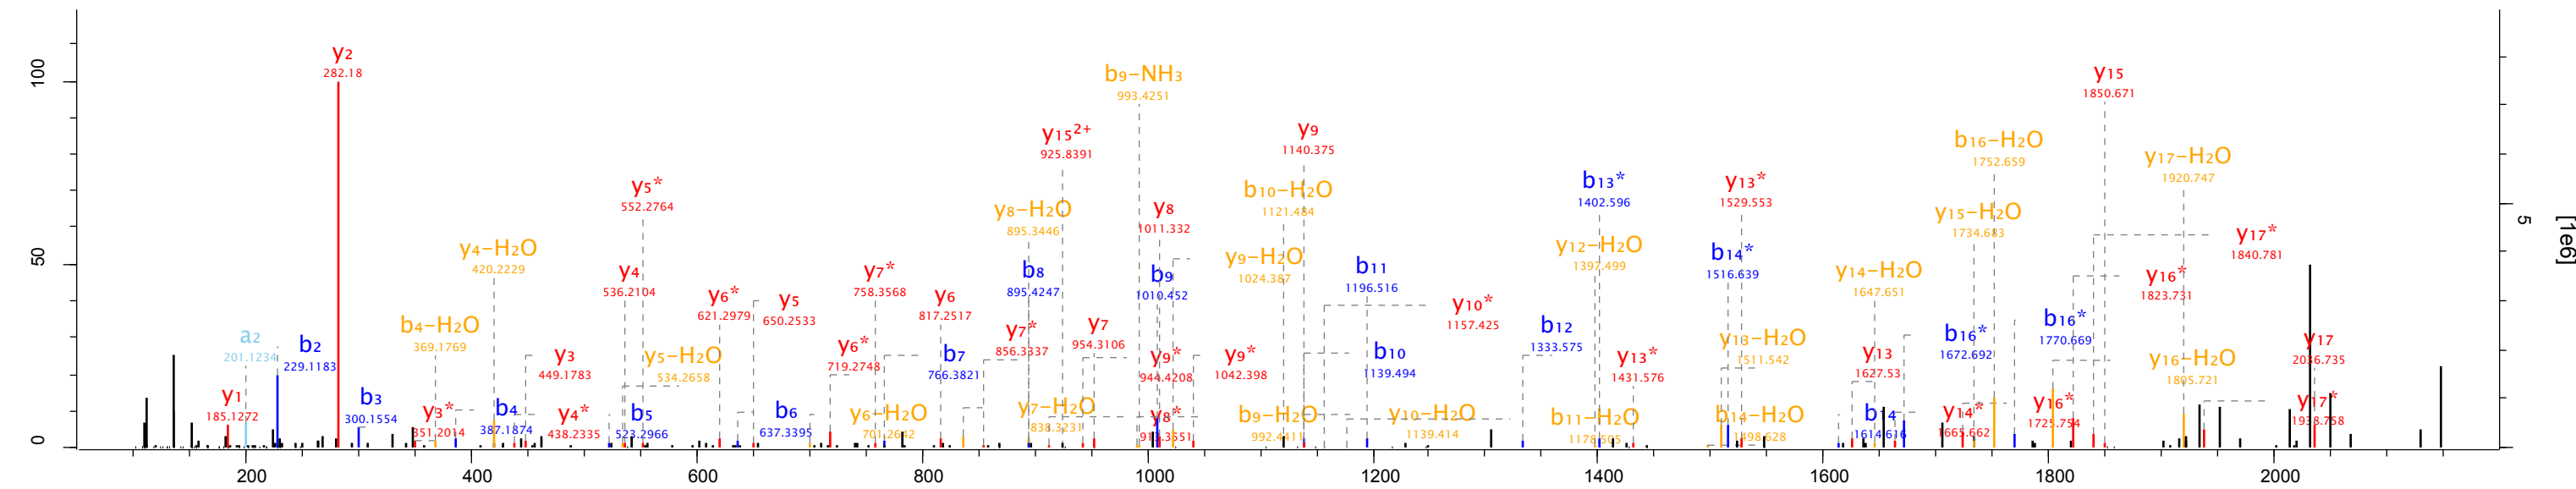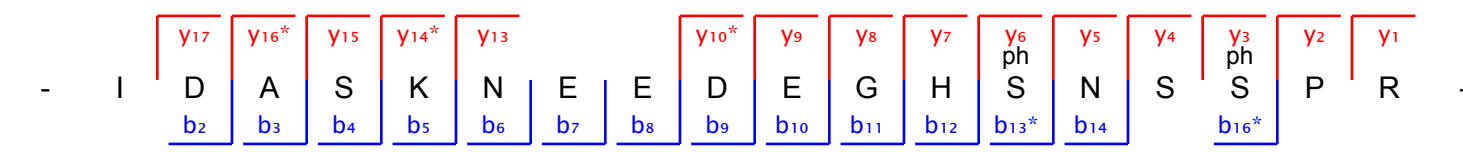

Raw file 20171215\_MaS\_33SR\_LMH\_phospho\_02 Scan 2845 Method FTMS; HCD Score 96.24 m/z 812.84 Gene names MID1

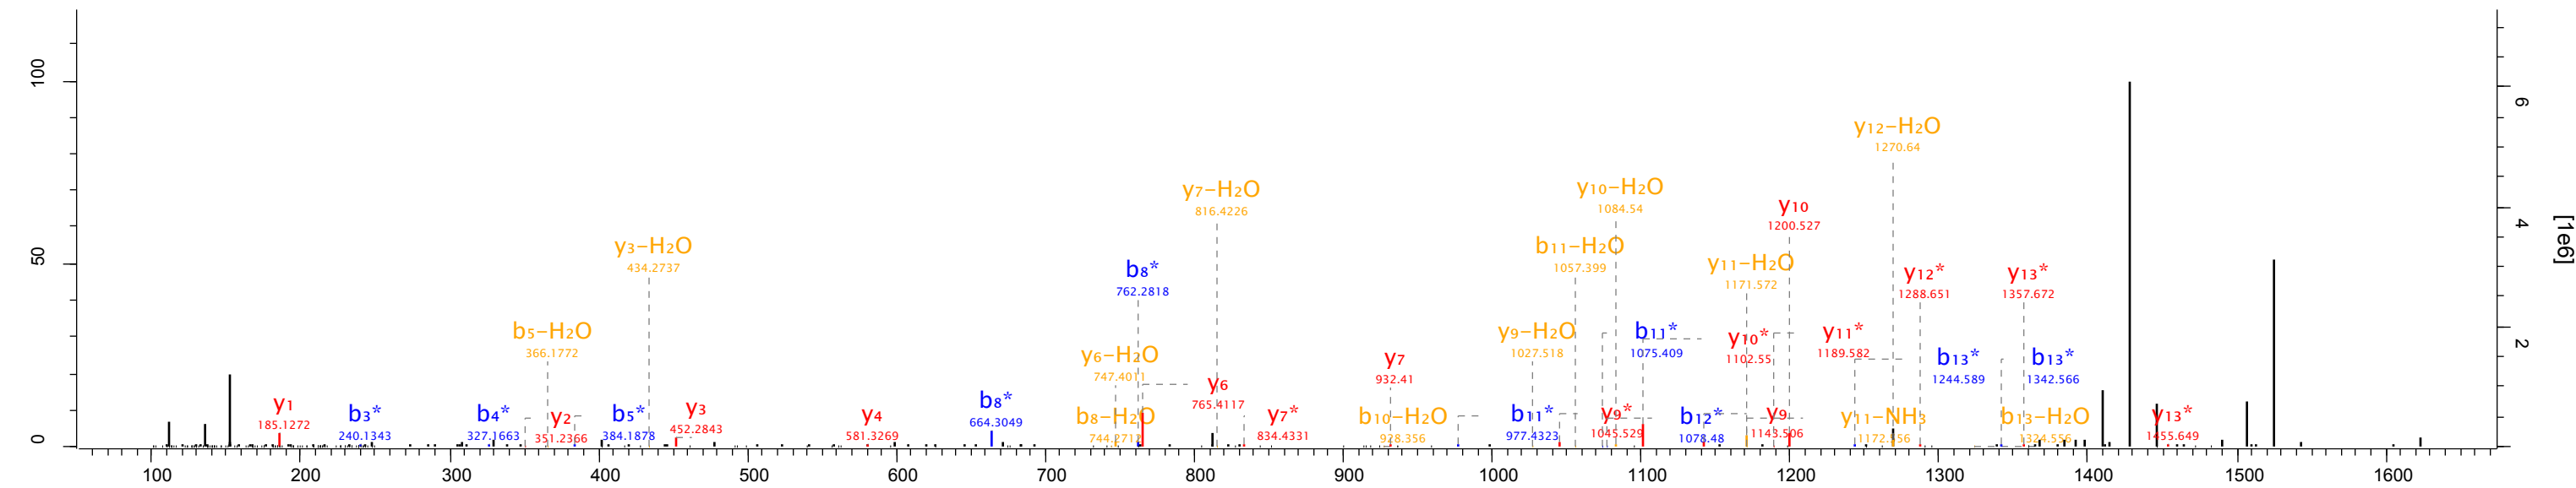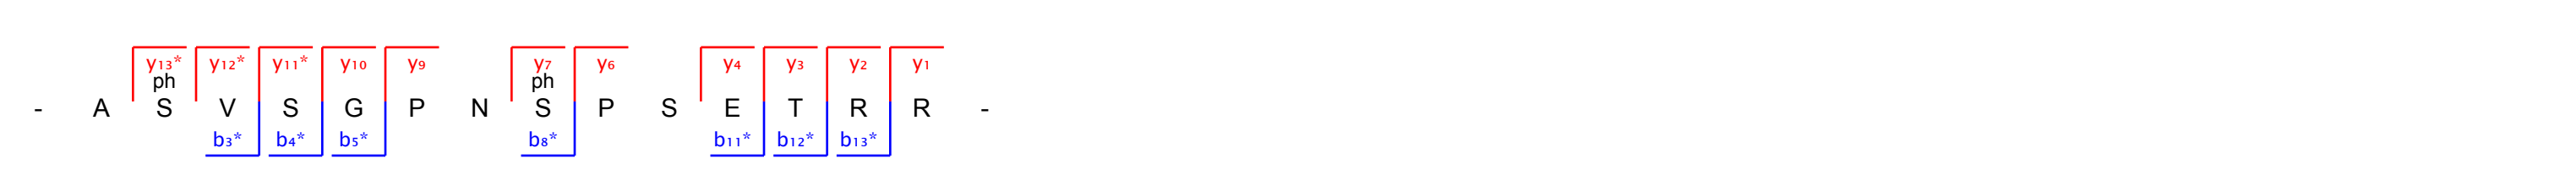



Raw file 20171215\_MaS\_33SR\_LMH\_phospho\_02 Scan 3075 Method FTMS; HCD Score 99.93 m/z 576.24 Gene names C15orf52

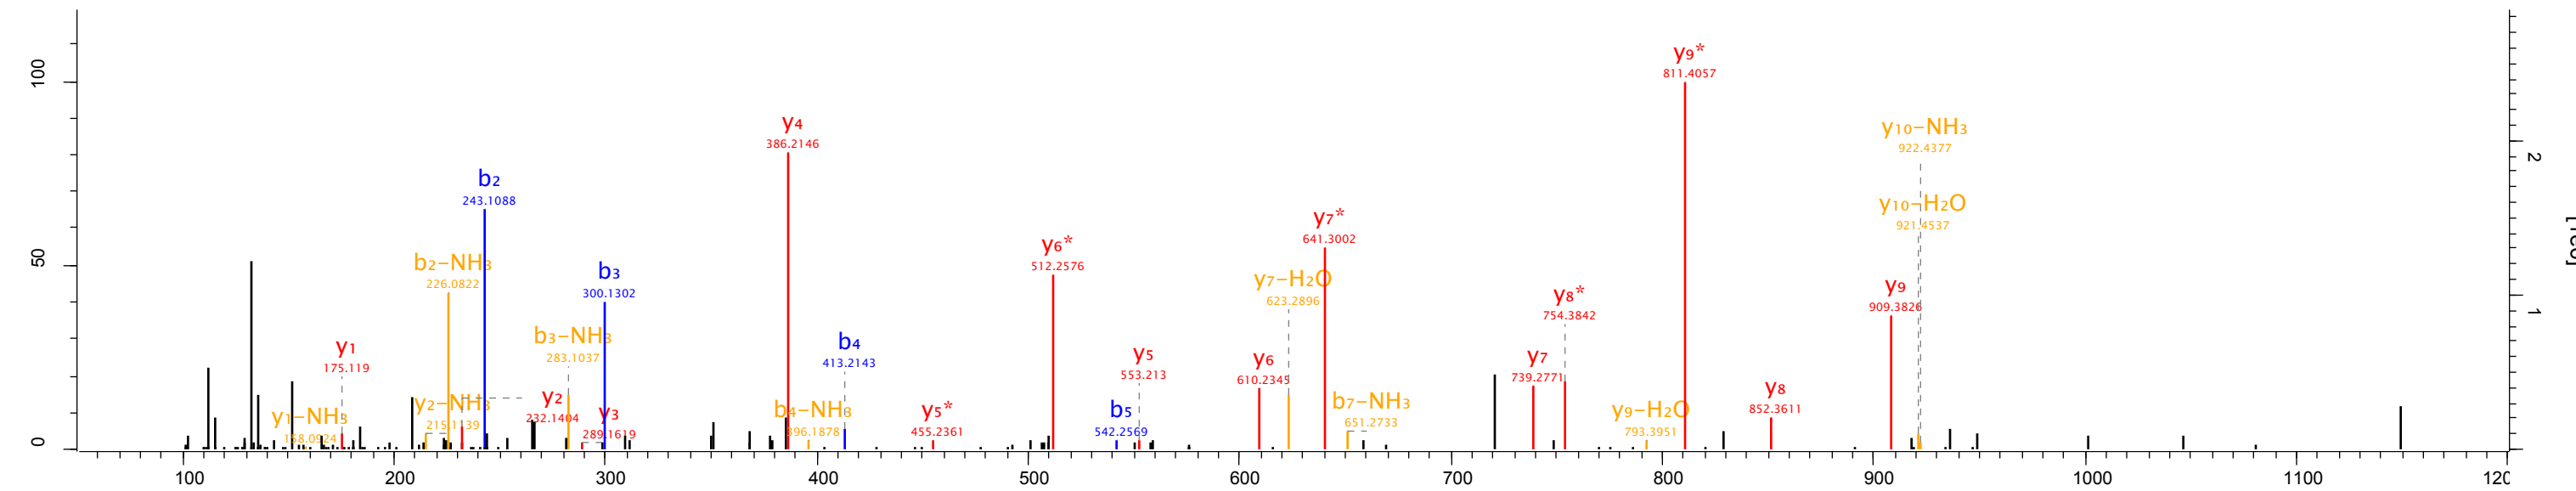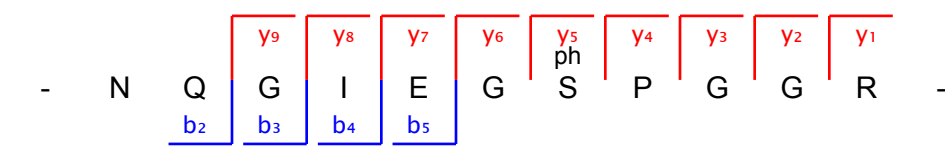

Raw file 20171215\_MaS\_33SR\_LMH\_phospho\_02 Scan 3405 Method FTMS; HCD Score 123.01 m/z 516.19 Gene names AHNAK

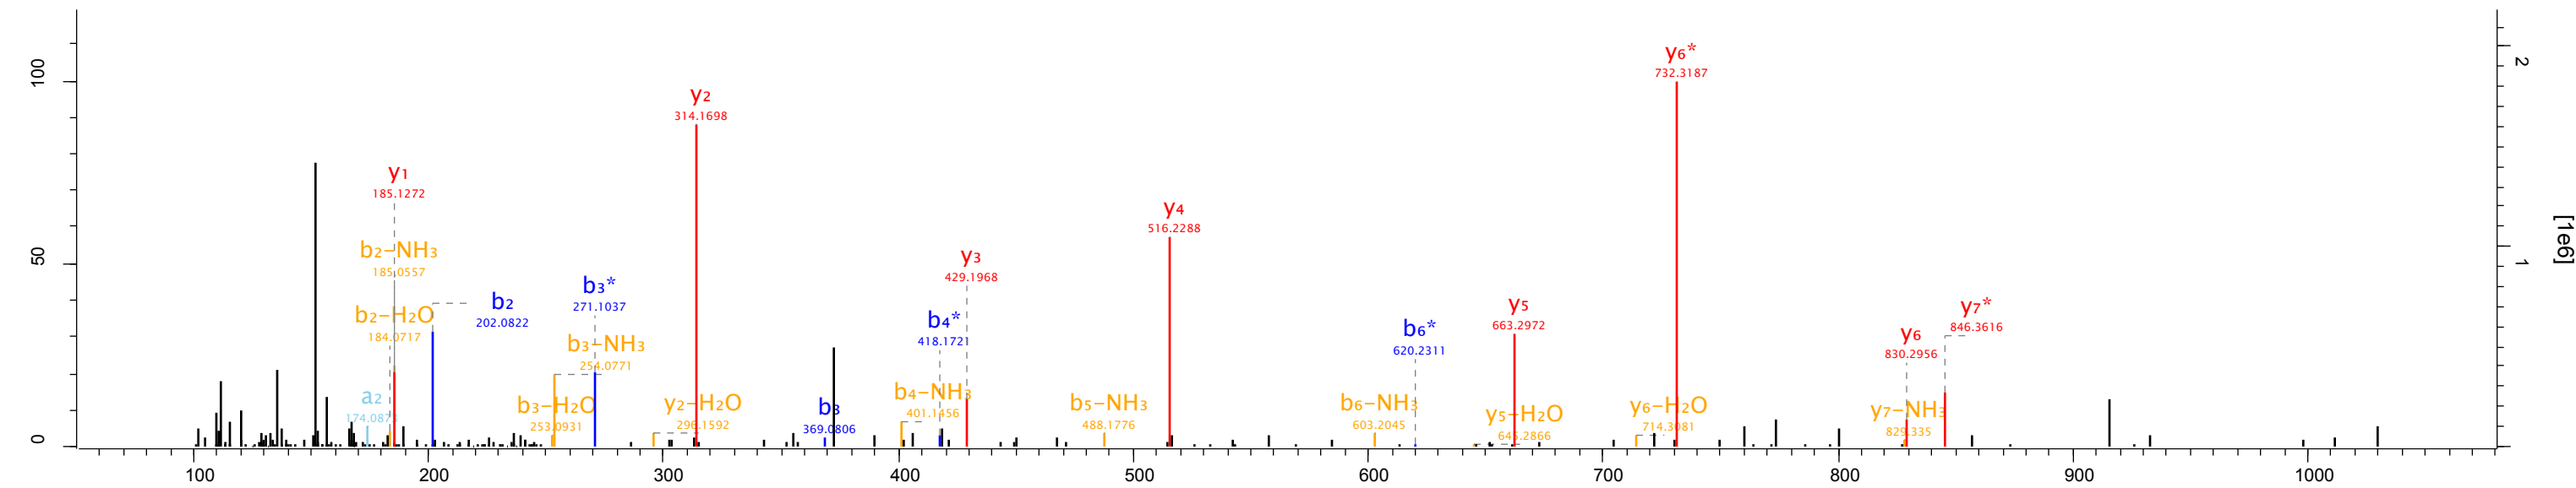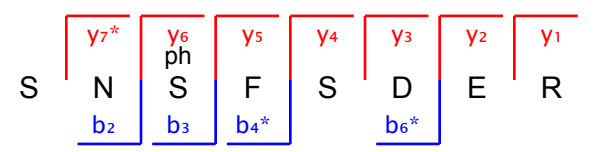

Raw file 20171215\_MaS\_33SR\_LMH\_phospho\_02 Scan 3425 Method FTMS; HCD Score 71.43 m/z 613.62 Gene names SRRM2

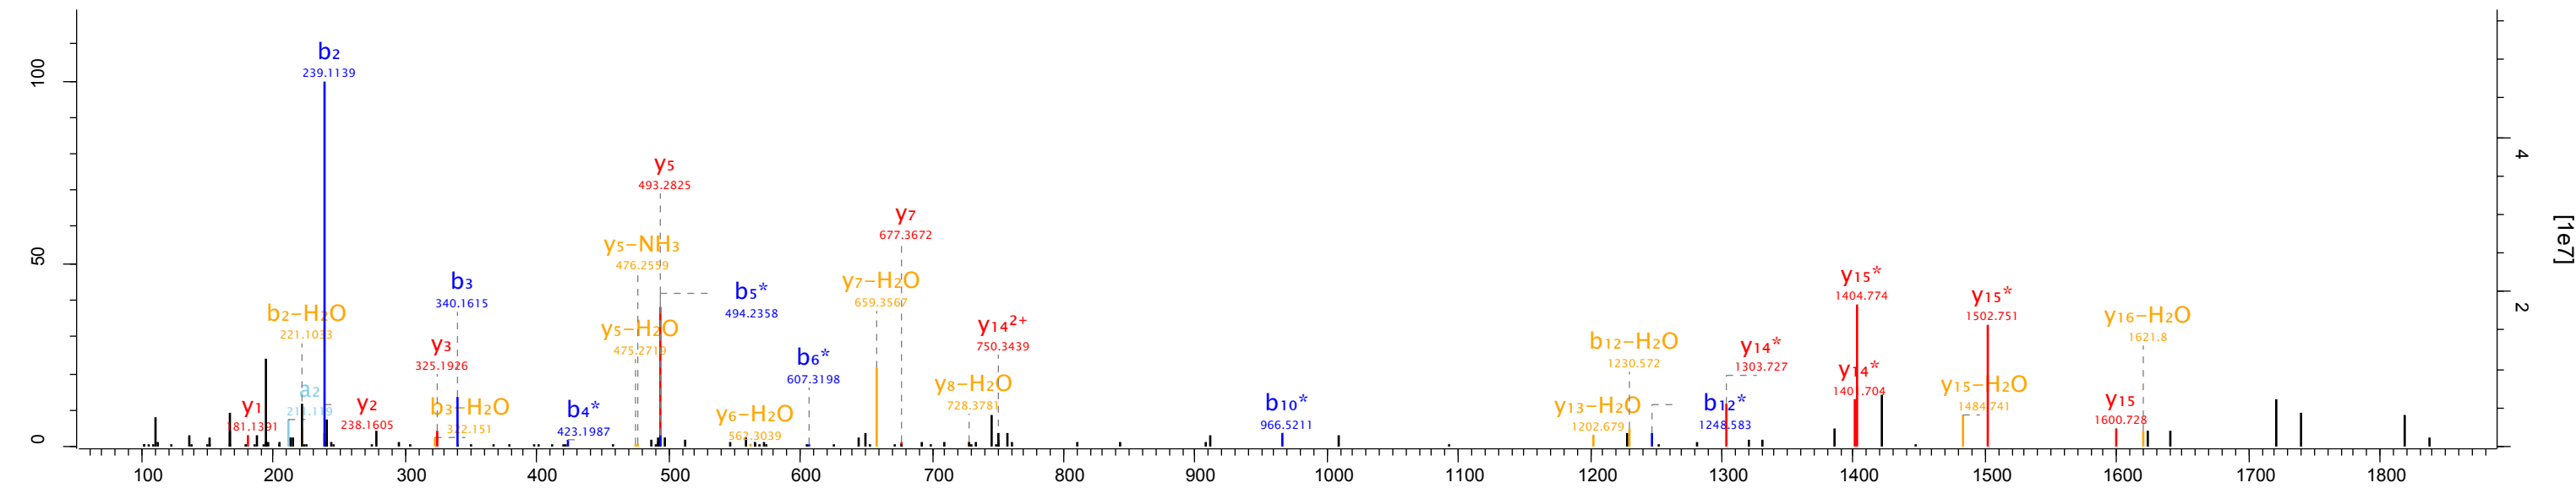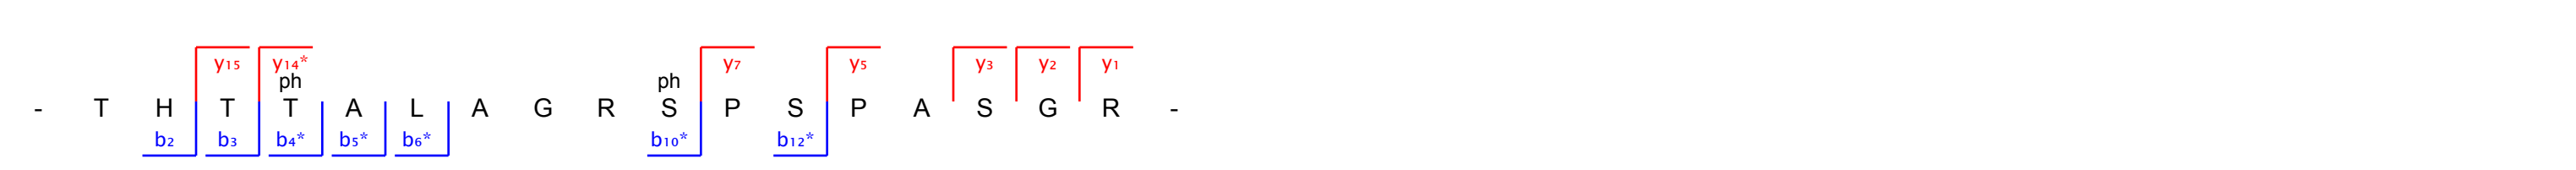

Raw file 20171215\_MaS\_33SR\_LMH\_phospho\_02 Scan 4085 Method FTMS; HCD Score 219.78 m/z 996.87 Gene names HIRIP3

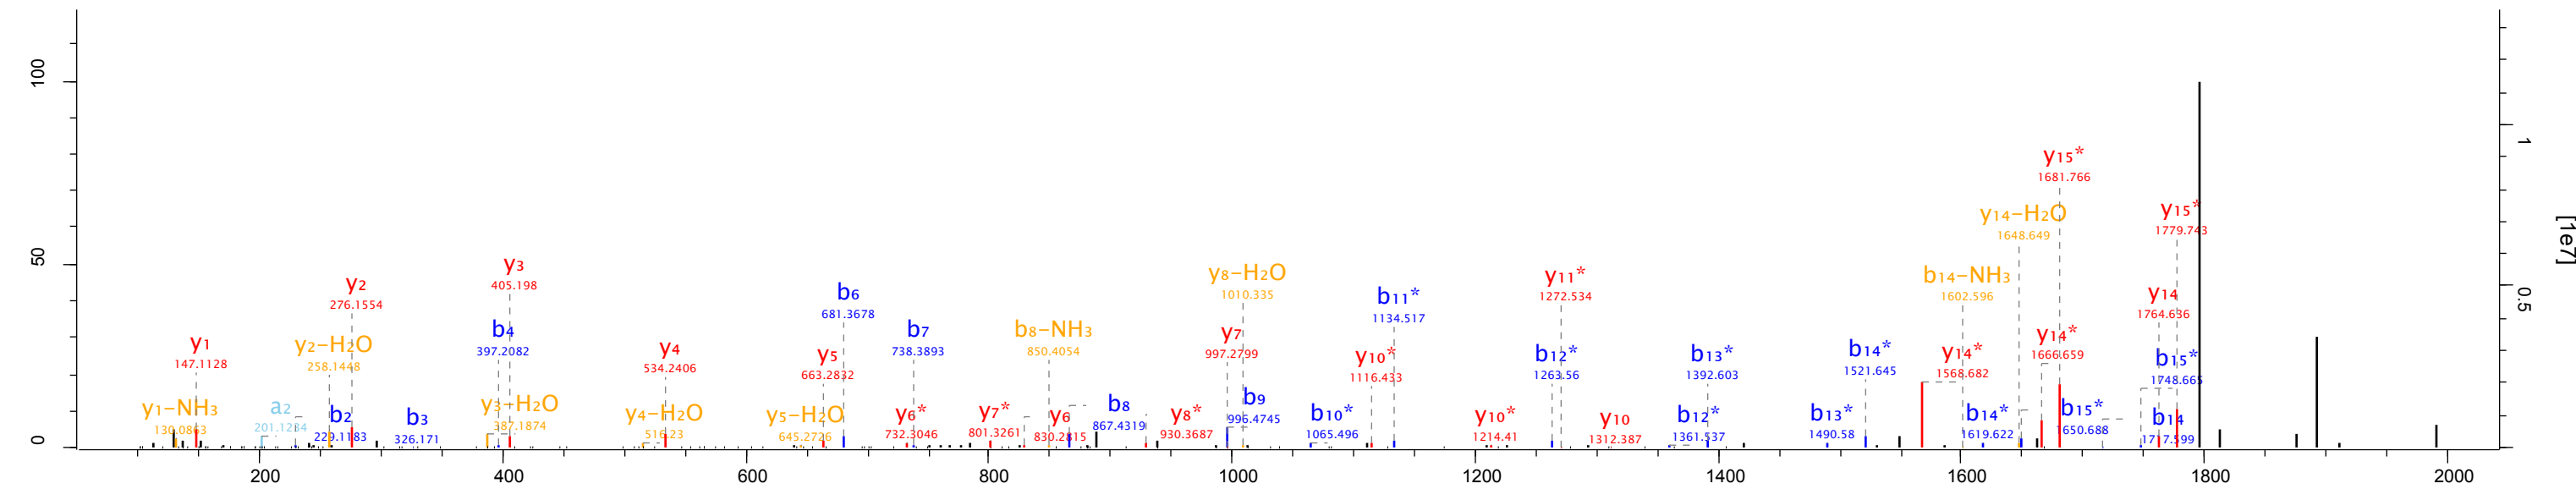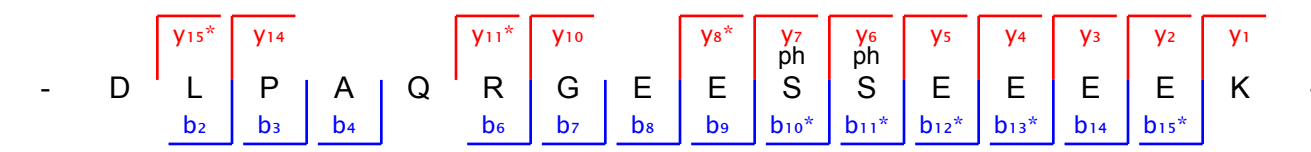

Raw file 20171215\_MaS\_33SR\_LMH\_phospho\_02 Scan 4165 Method FTMS; HCD Score 50.25 m/z 759.84 Gene names RASAL2

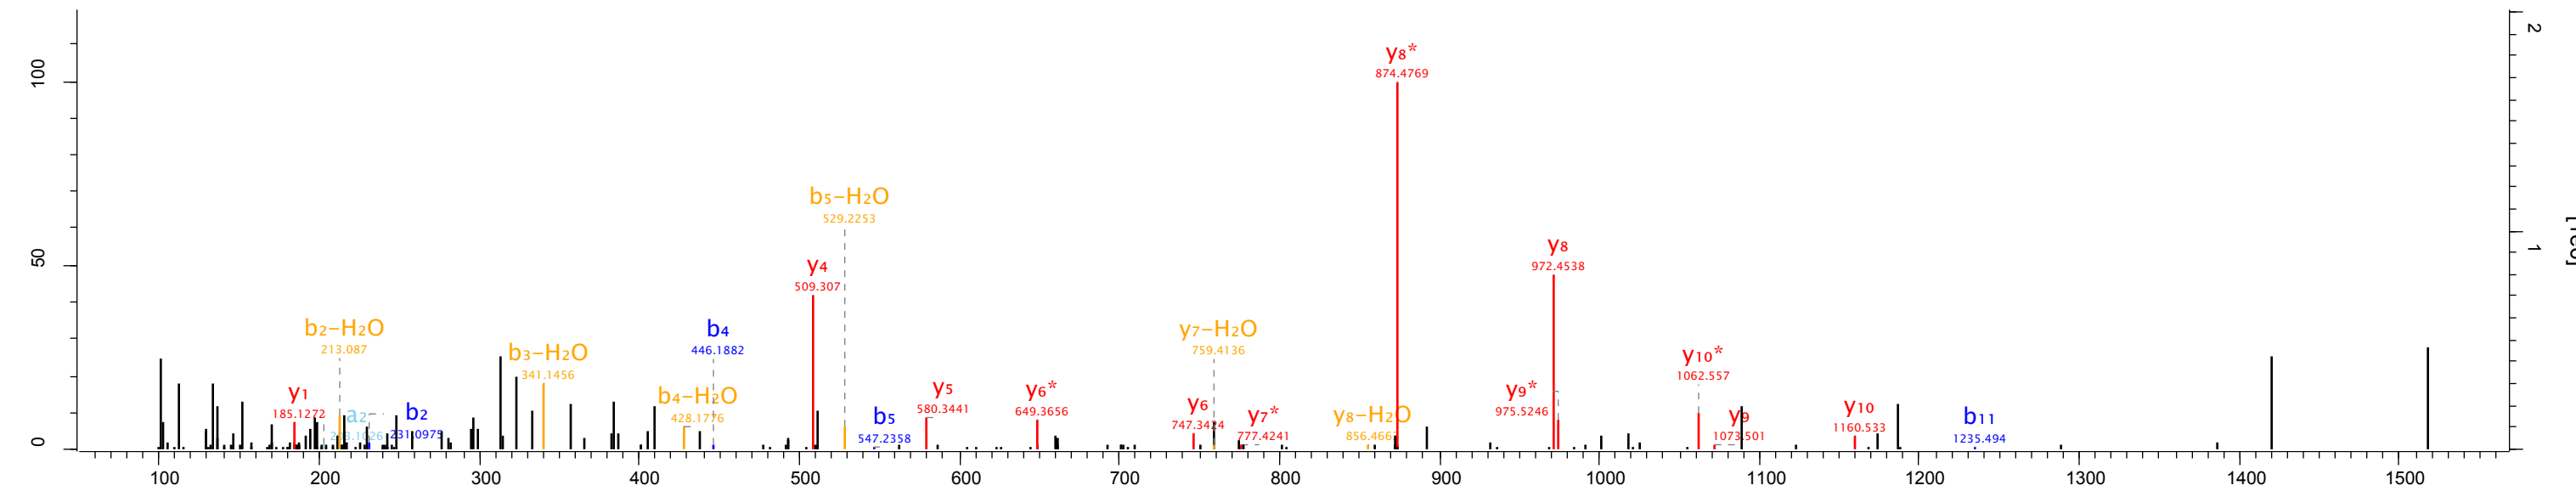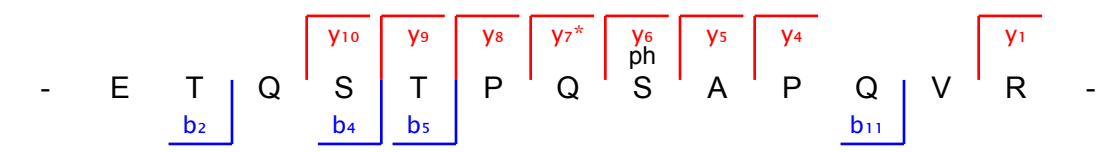

Raw file 20171215\_MaS\_33SR\_LMH\_phospho\_02 Scan 4405 Method FTMS; HCD Score 54.22 m/z 519.26 Gene names JMJD1C

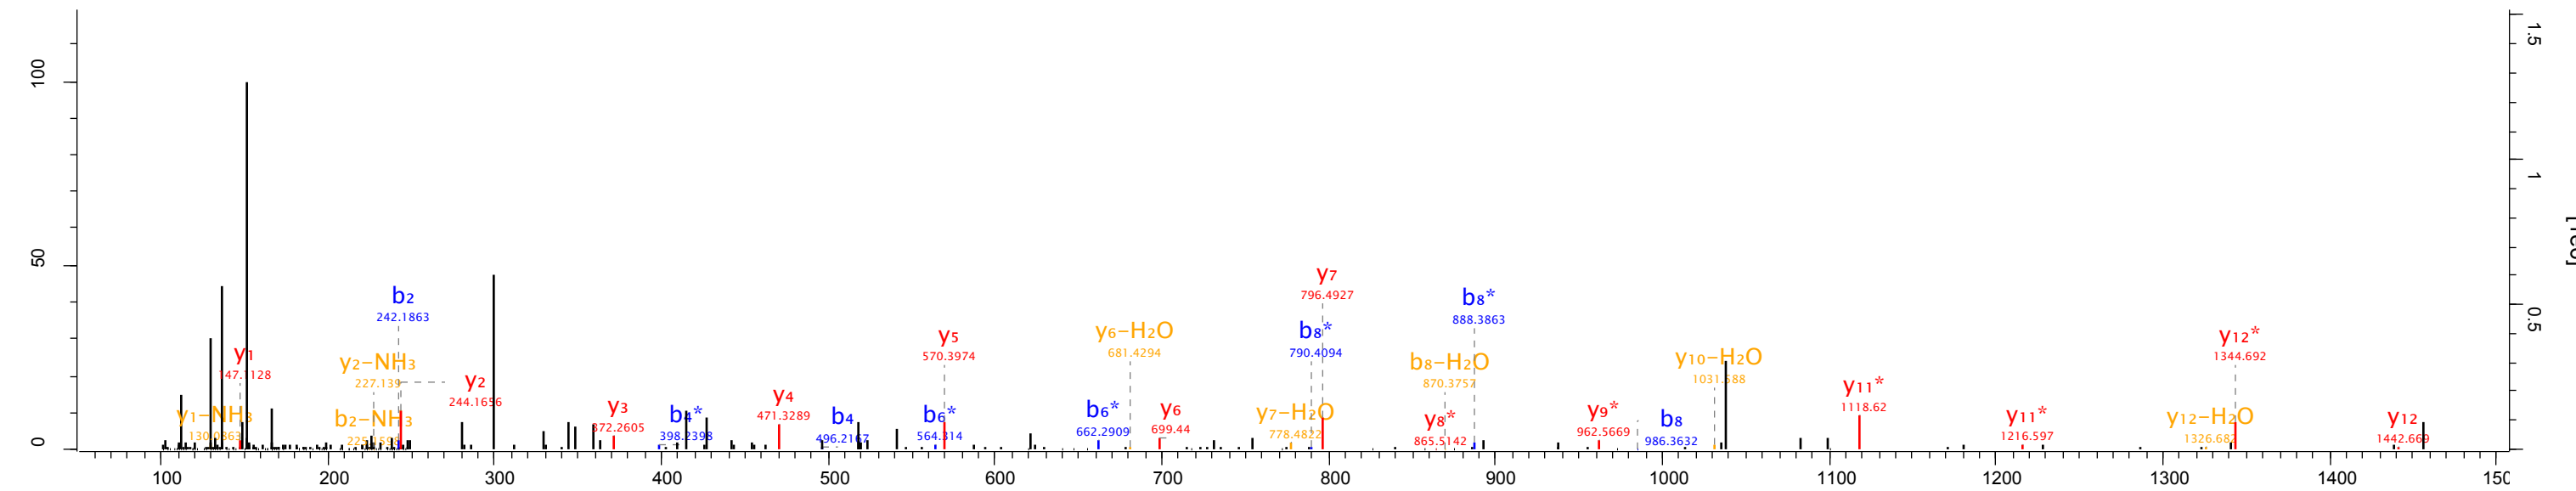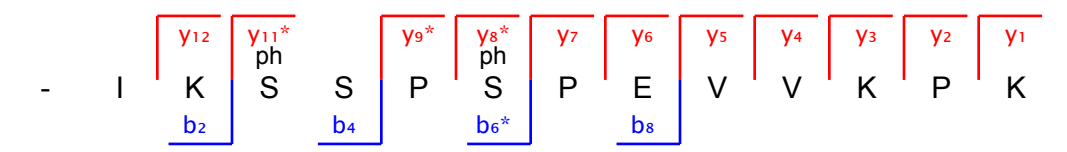

Raw file 20171215\_MaS\_33SR\_LMH\_phospho\_02 Scan 4805 Method FTMS; HCD Score 47.97 m/z 483.7 Gene names TCF20

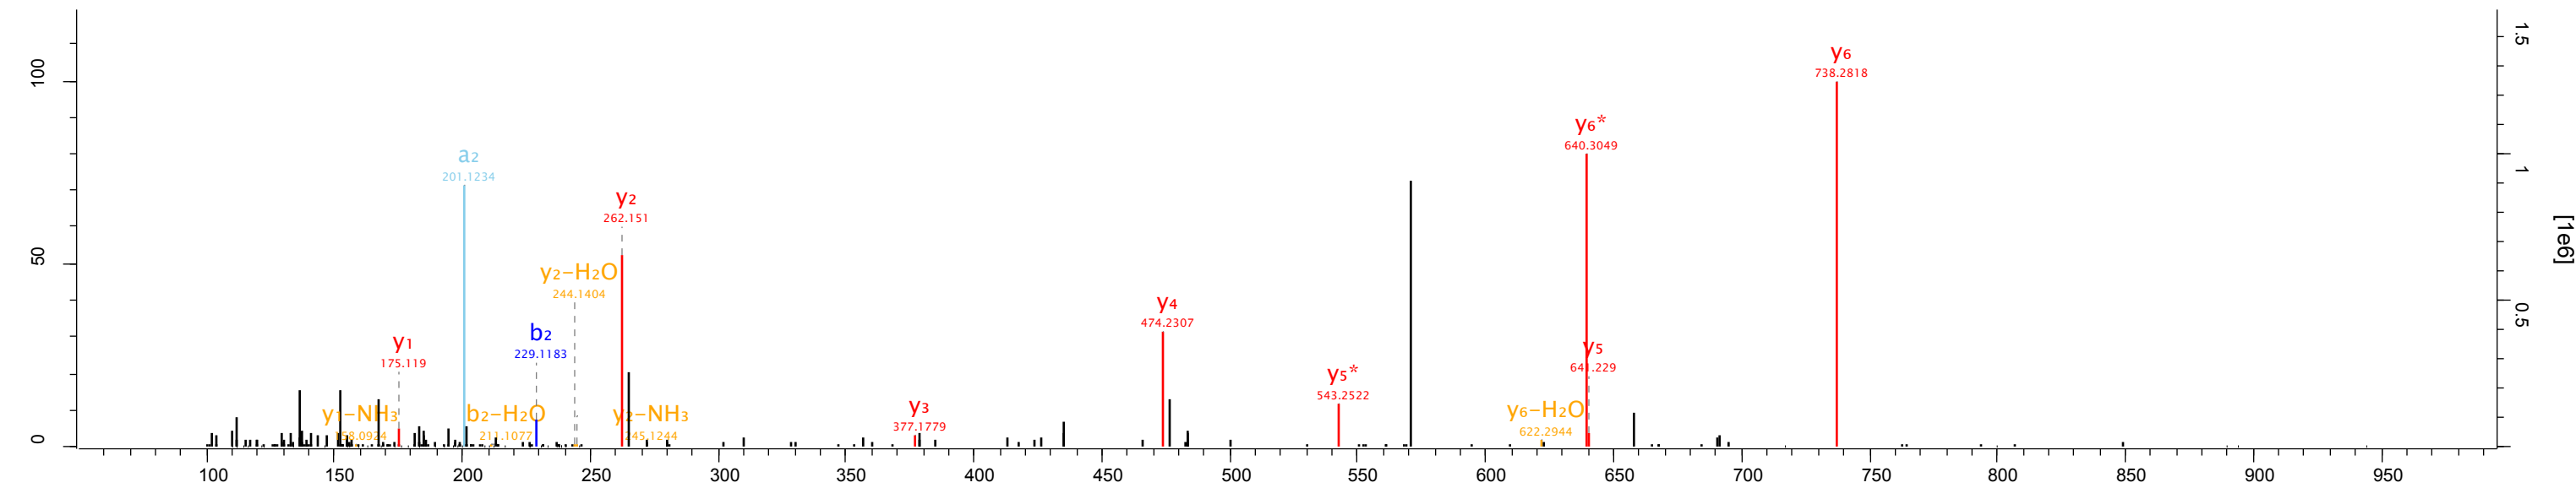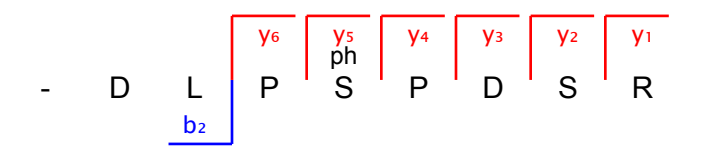

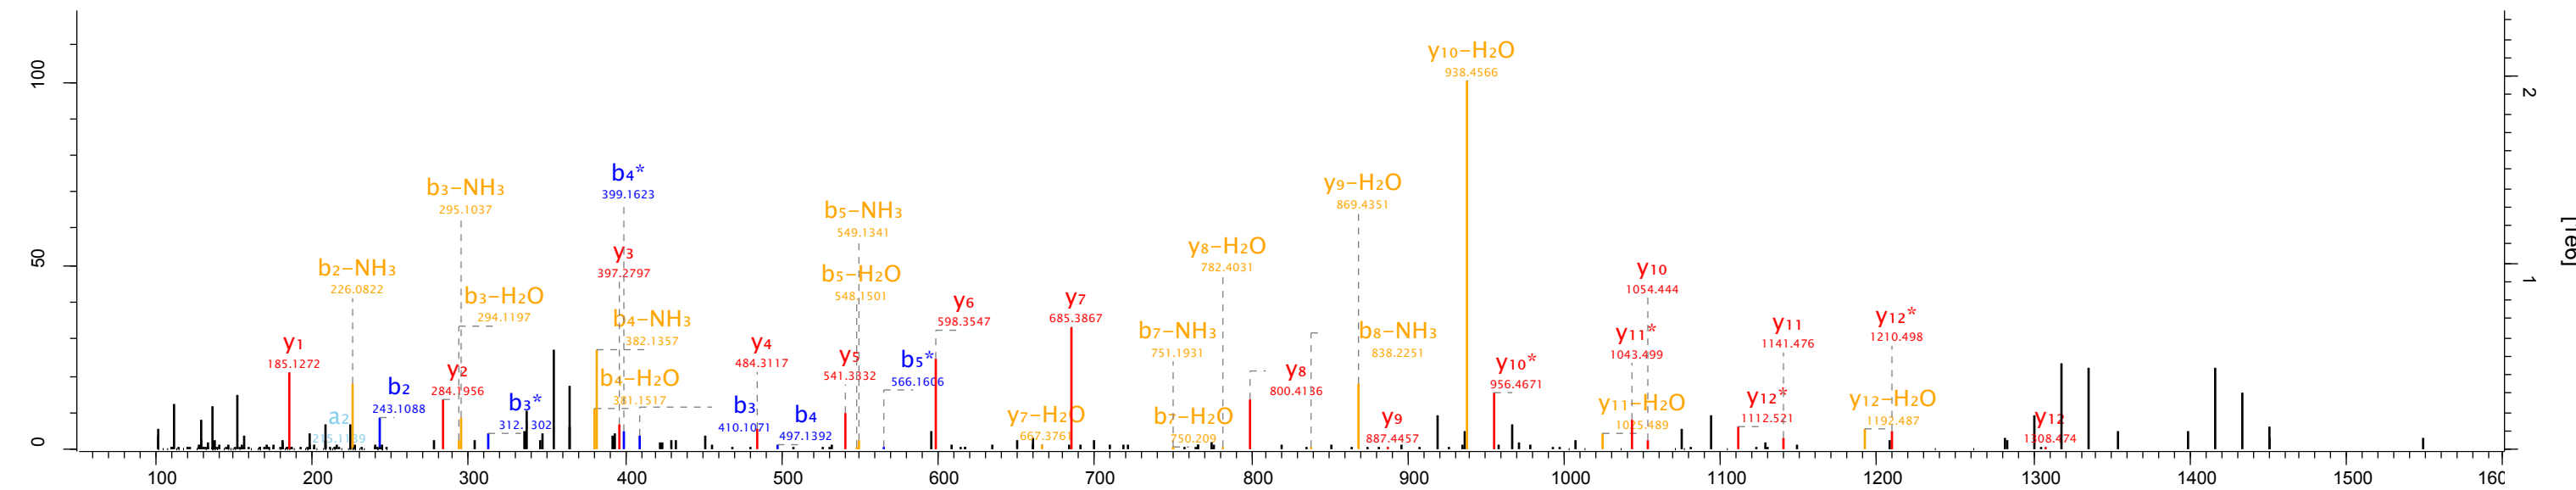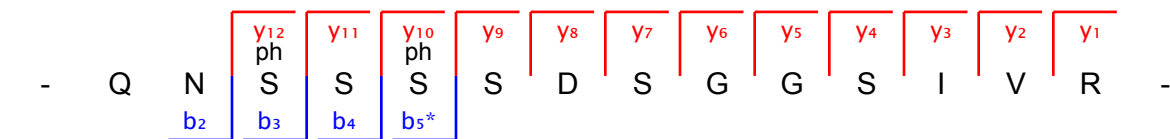



Raw file 20171215\_MaS\_33SR\_LMH\_phospho\_02 Scan 5005 Method FTMS; HCD Score 80.32 m/z 585.27 Gene names PRPF31

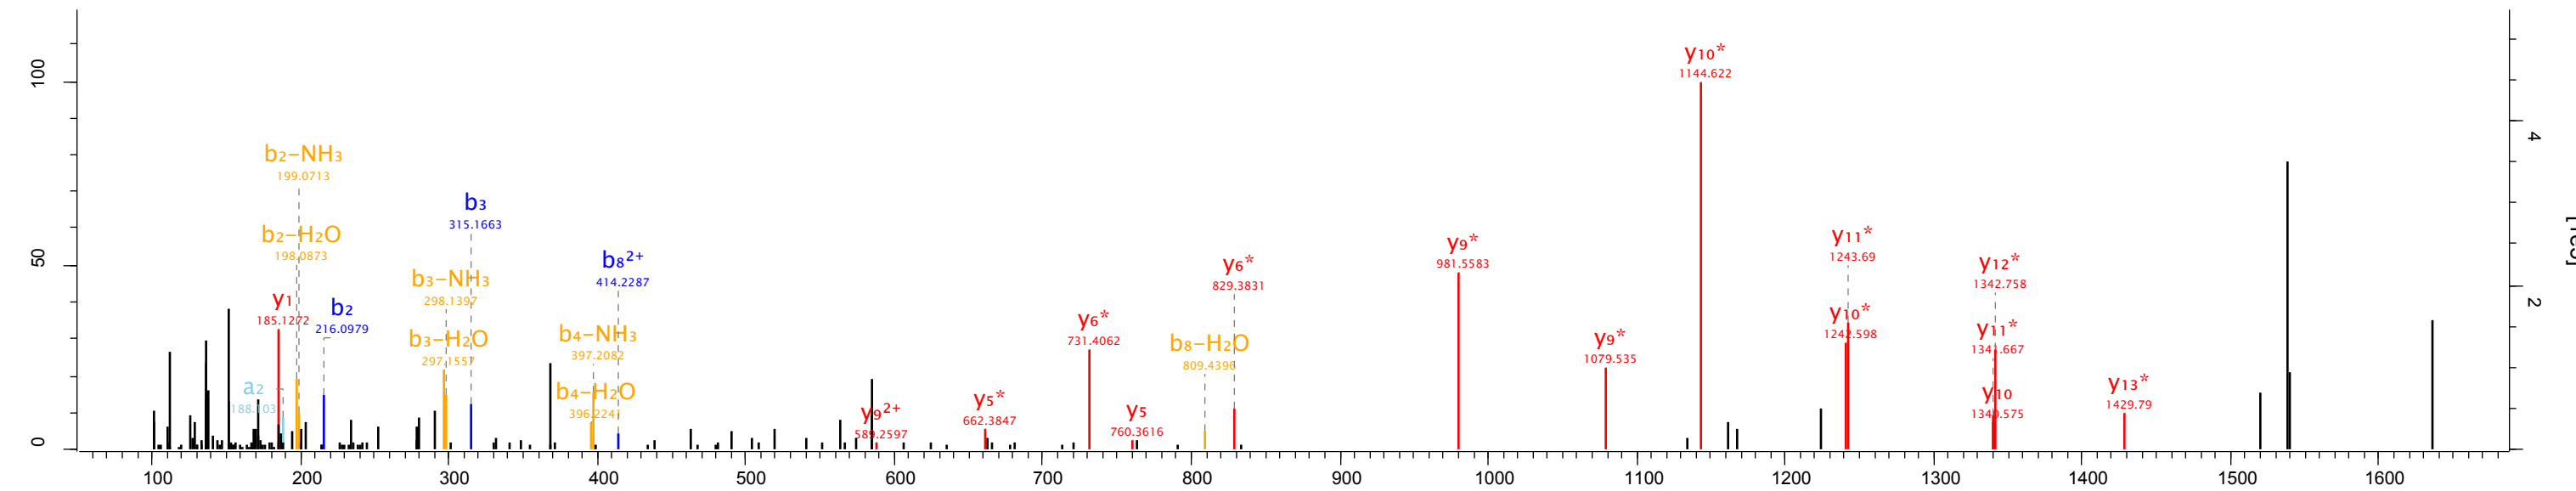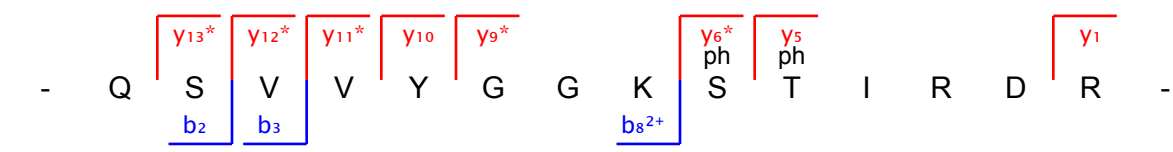

Raw file 20171215\_MaS\_33SR\_LMH\_phospho\_02 Scan 5065 Method FTMS; HCD Score 172.56 m/z 754.32 Gene names CDKN2AIP

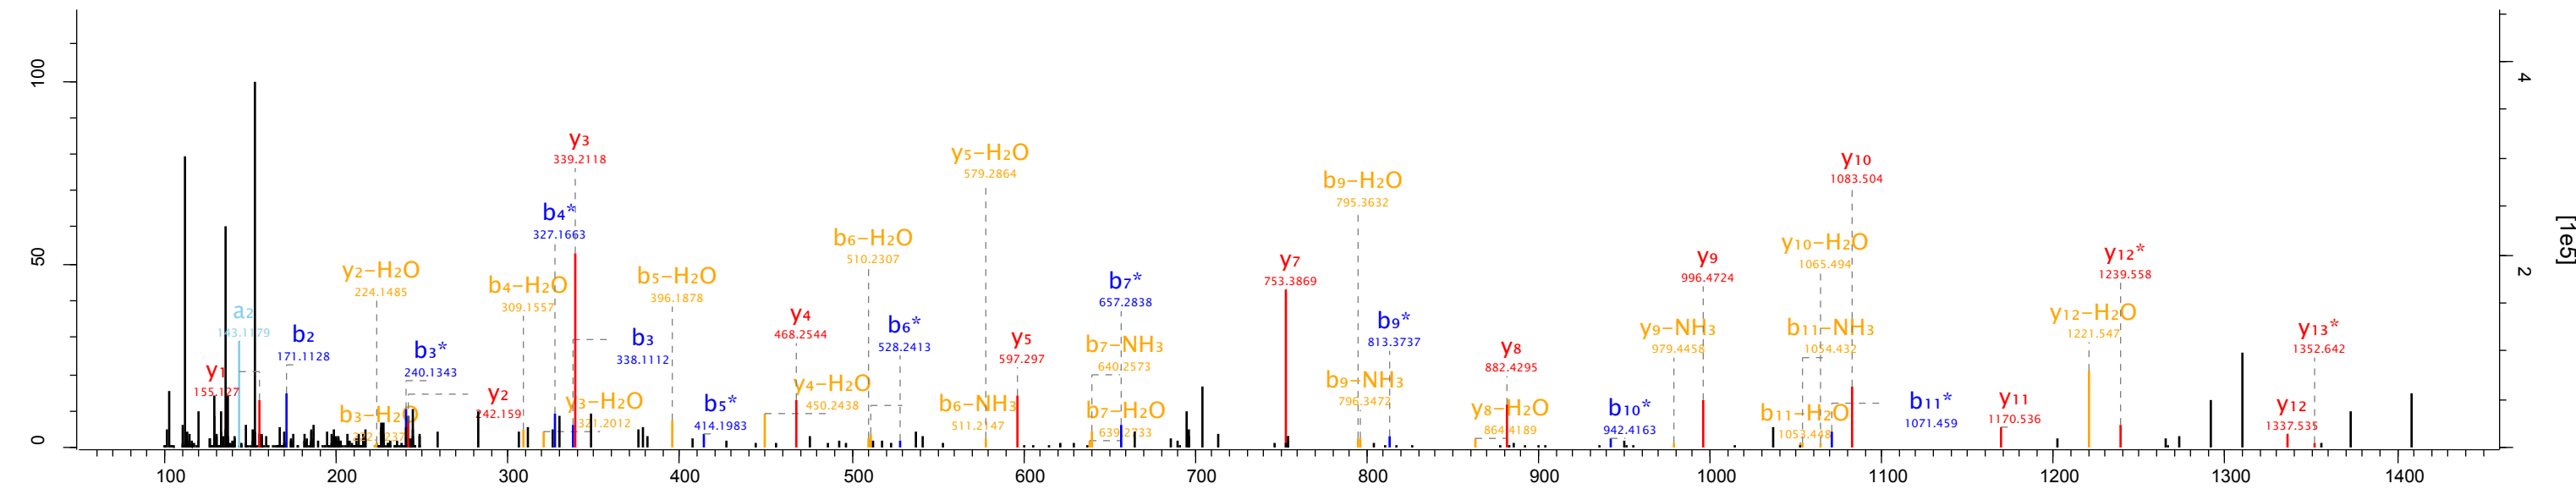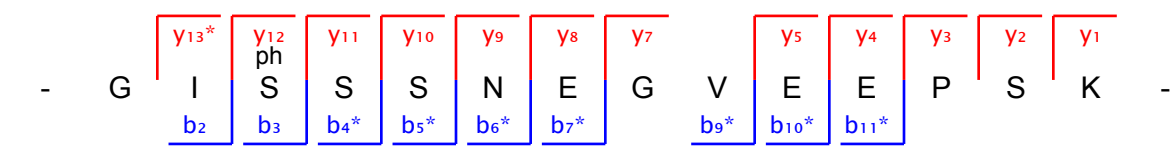



Raw file 20171215\_MaS\_33SR\_LMH\_phospho\_02 Scan 6385 Method FTMS; HCD Score 79.33 m/z 461.86 Gene names MAP7D1

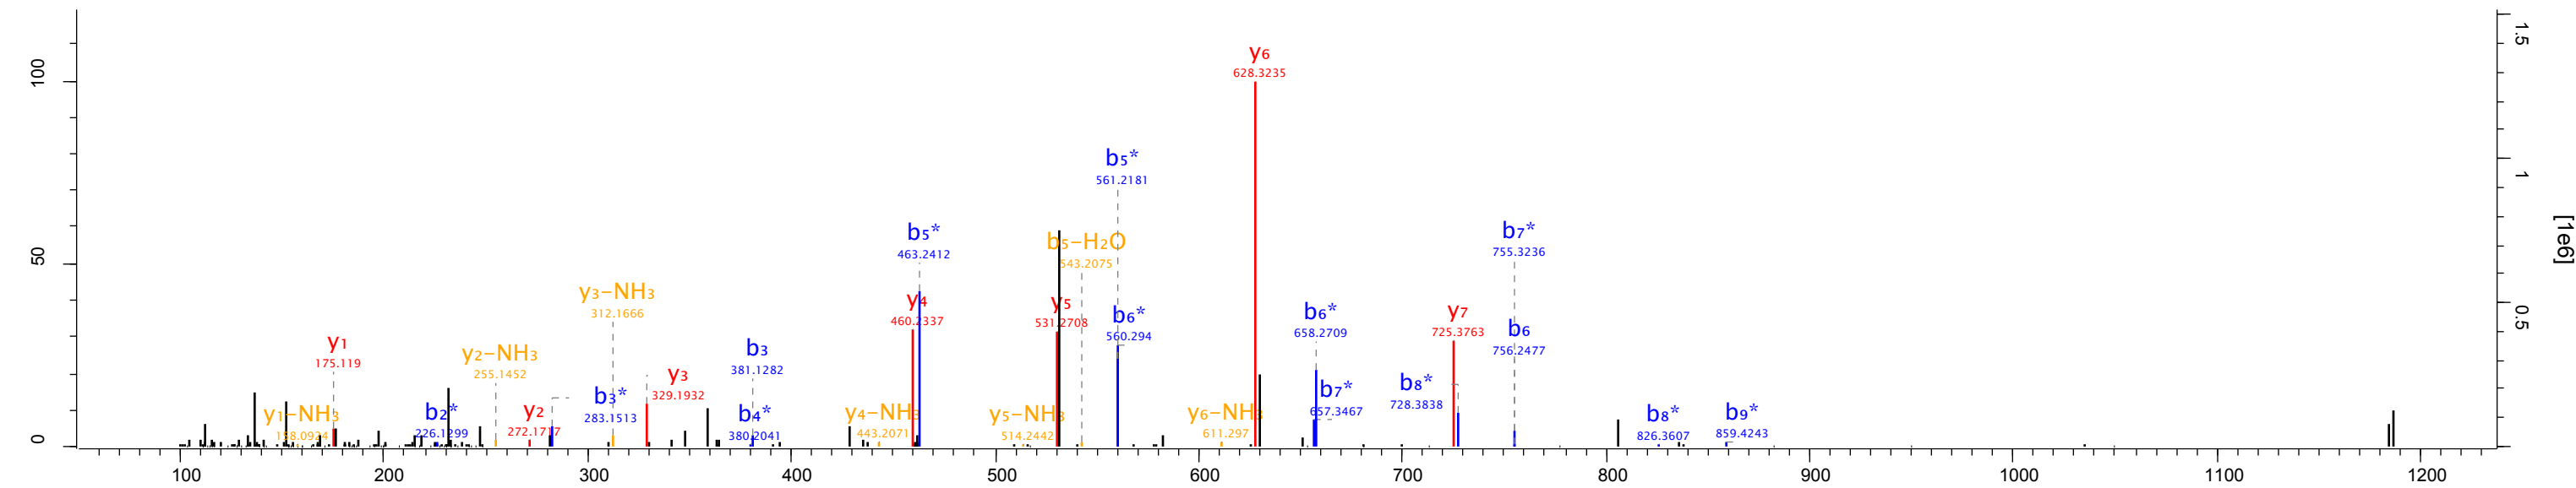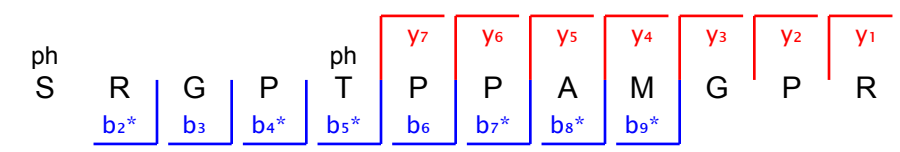

Raw file: 20171215\_MaS\_33SR\_LMH\_phospho\_02  
 Scan: 6435 Method: FTMS; HCD Score: 109.48 m/z: 625.29 Gene names: LMNB1;LMNB2

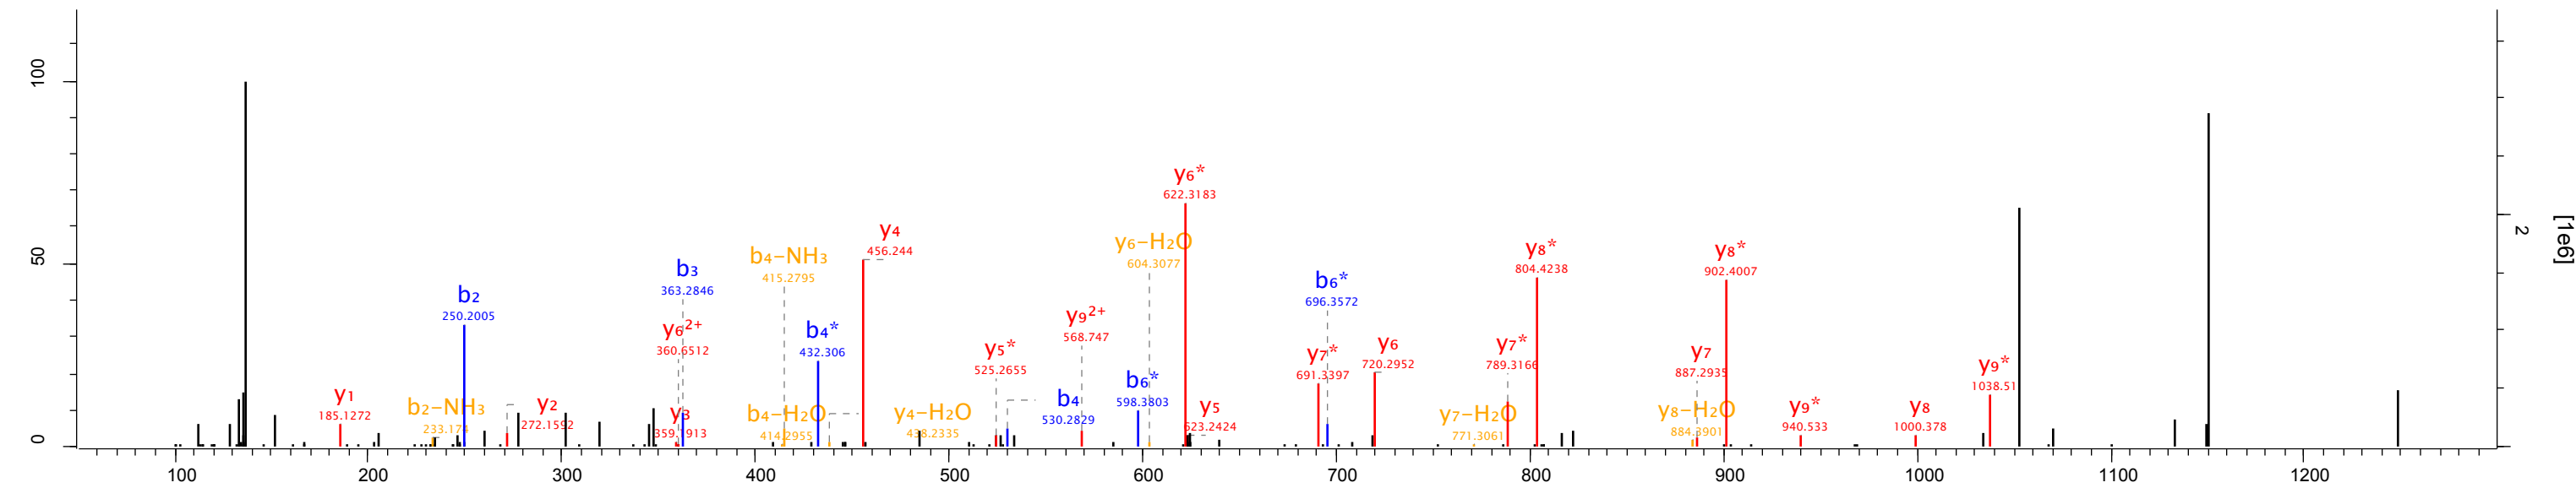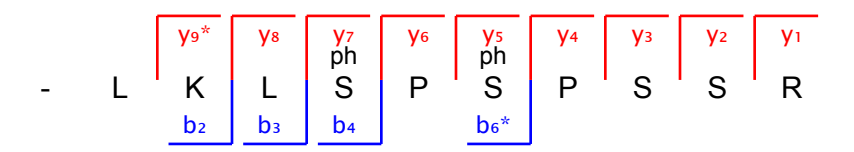

Raw file 20171215\_MaS\_33SR\_LMH\_phospho\_02 Scan 6685 Method FTMS; HCD Score 81.13 m/z 623.75 Gene names PRRC2C

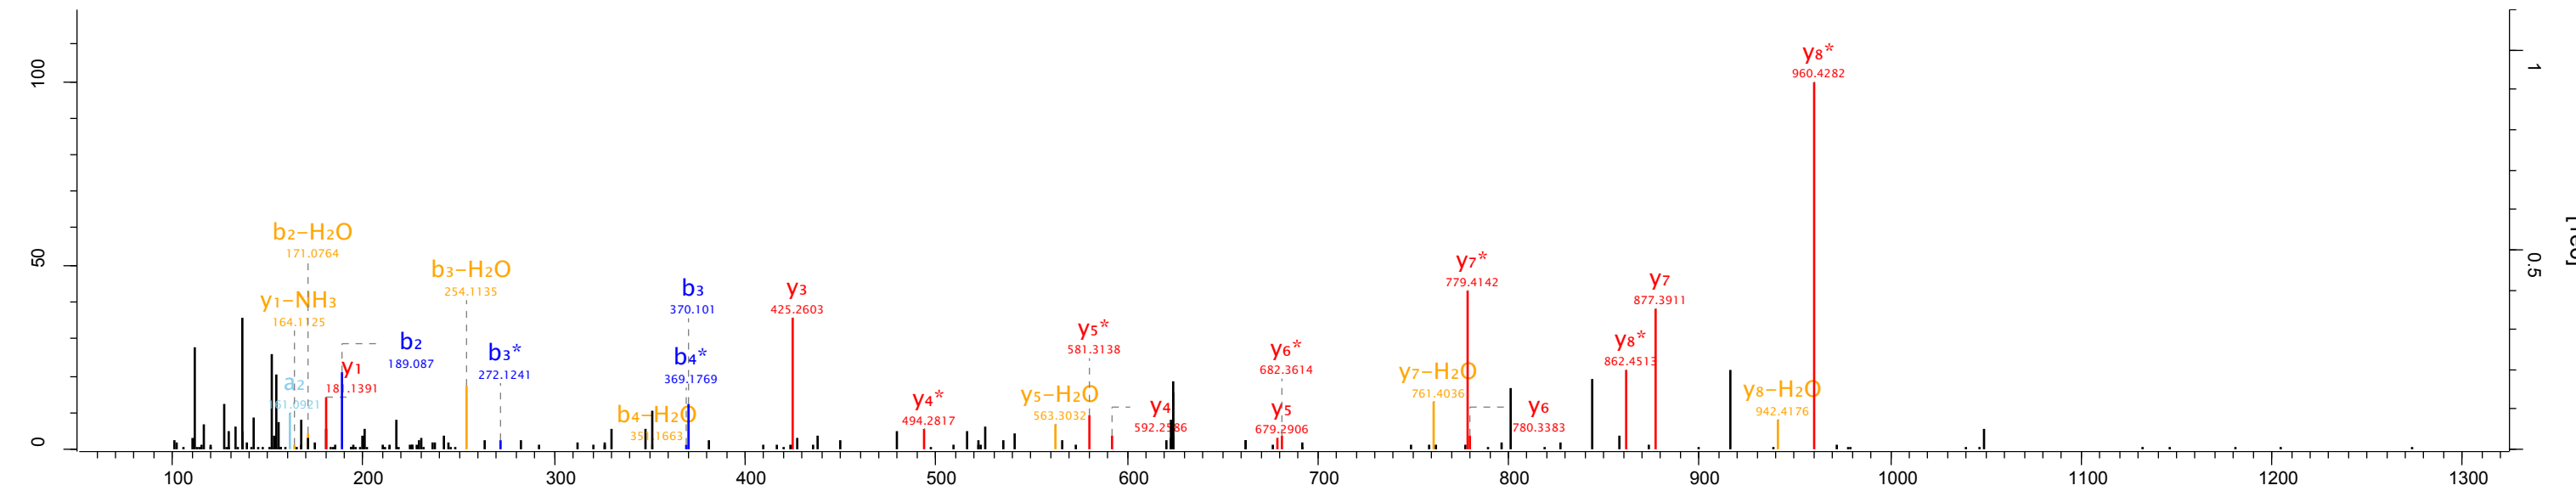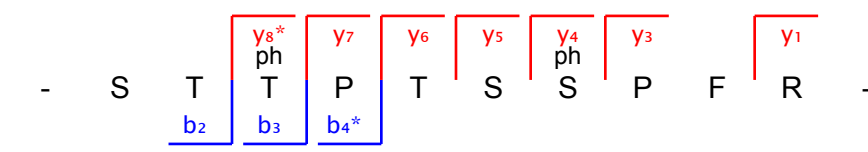

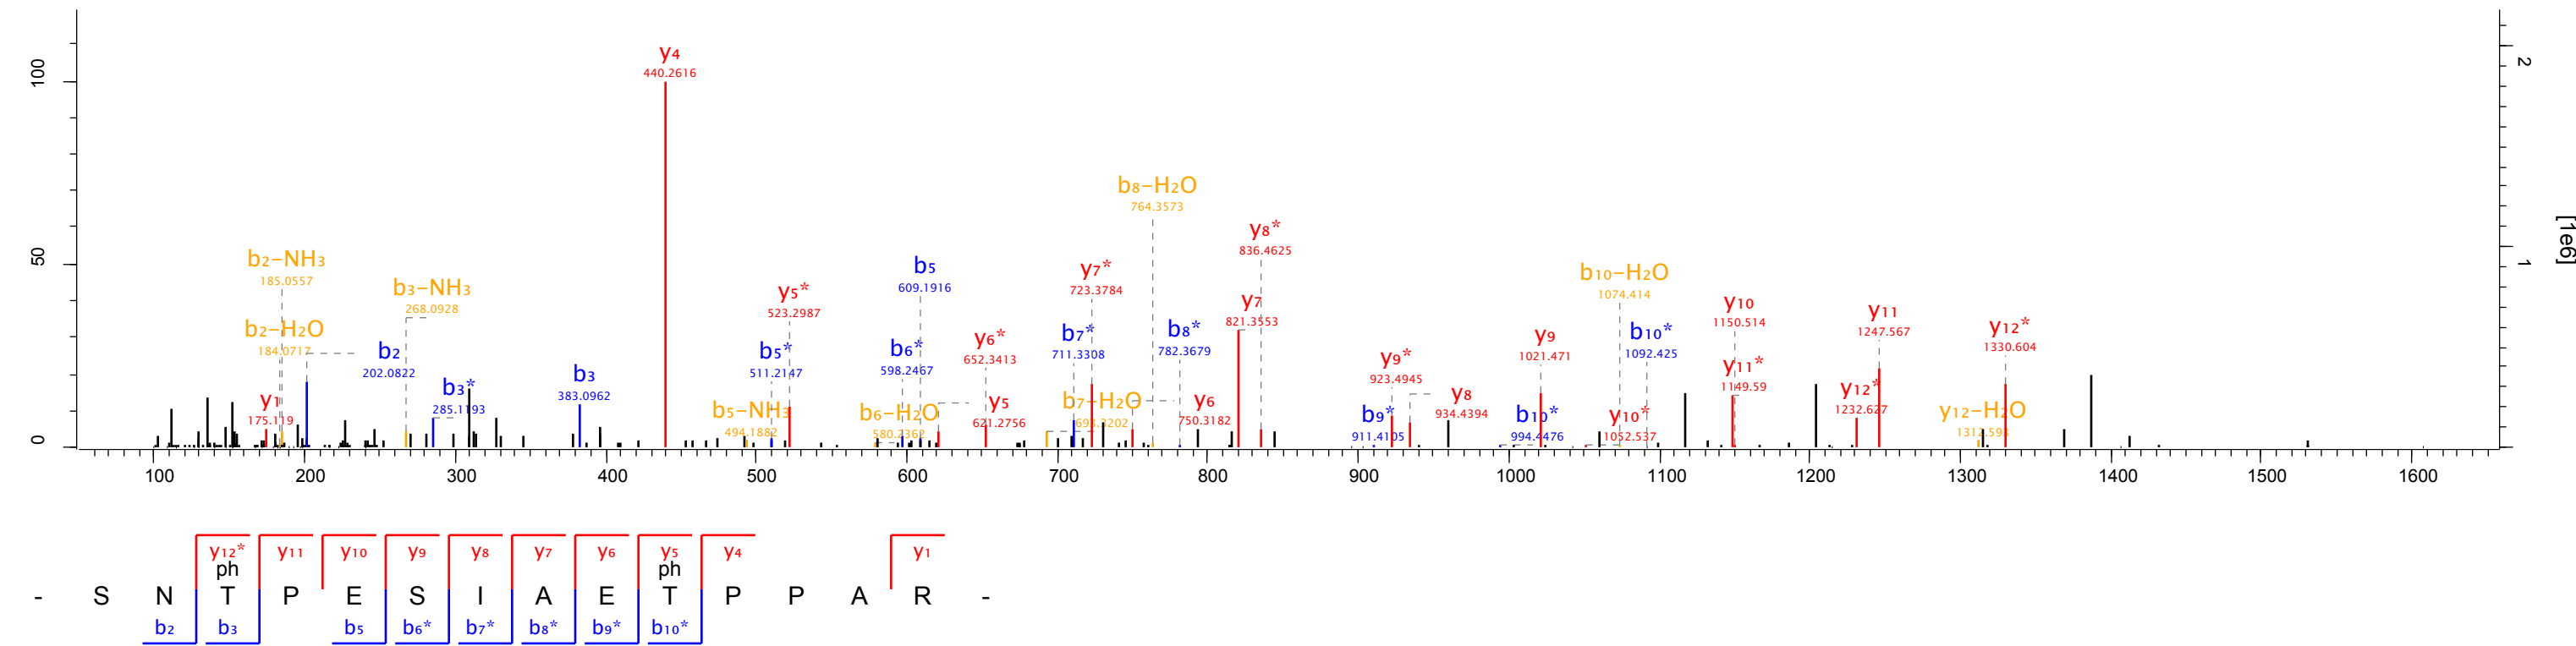

Raw file 20171215\_MaS\_33SR\_LMH\_phospho\_02 Scan 7445 Method FTMS; HCD Score 42 m/z 651.23 Gene names DOCK11

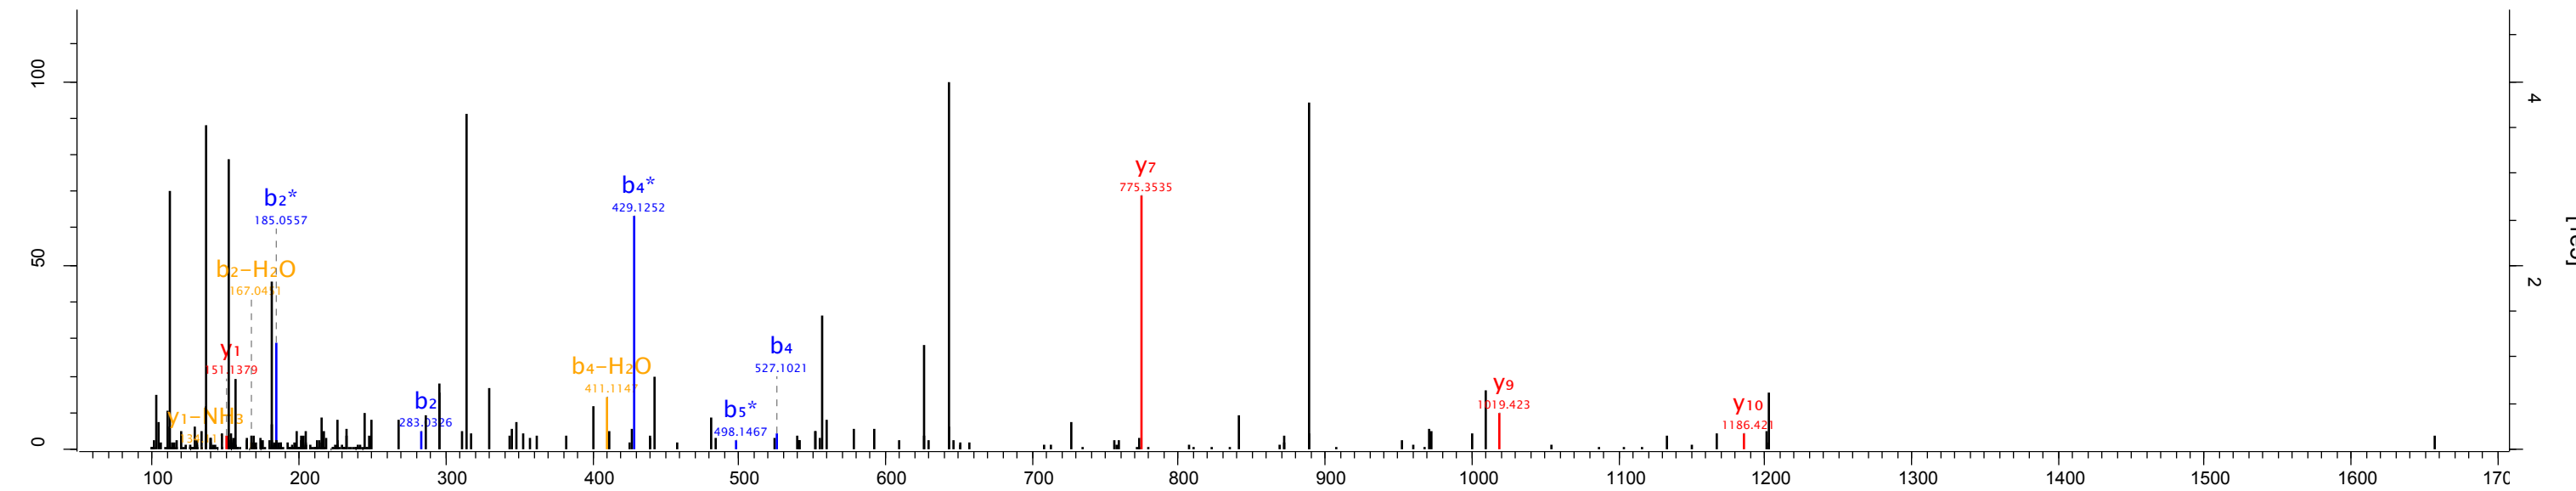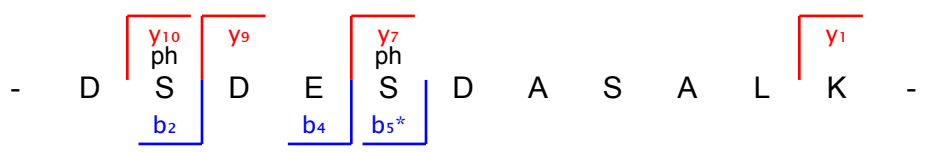



Raw file 20171215\_MaS\_33SR\_LMH\_phospho\_02 Scan 7515 Method FTMS; HCD Score 101.54 m/z 851.82 Gene names SLC2A13

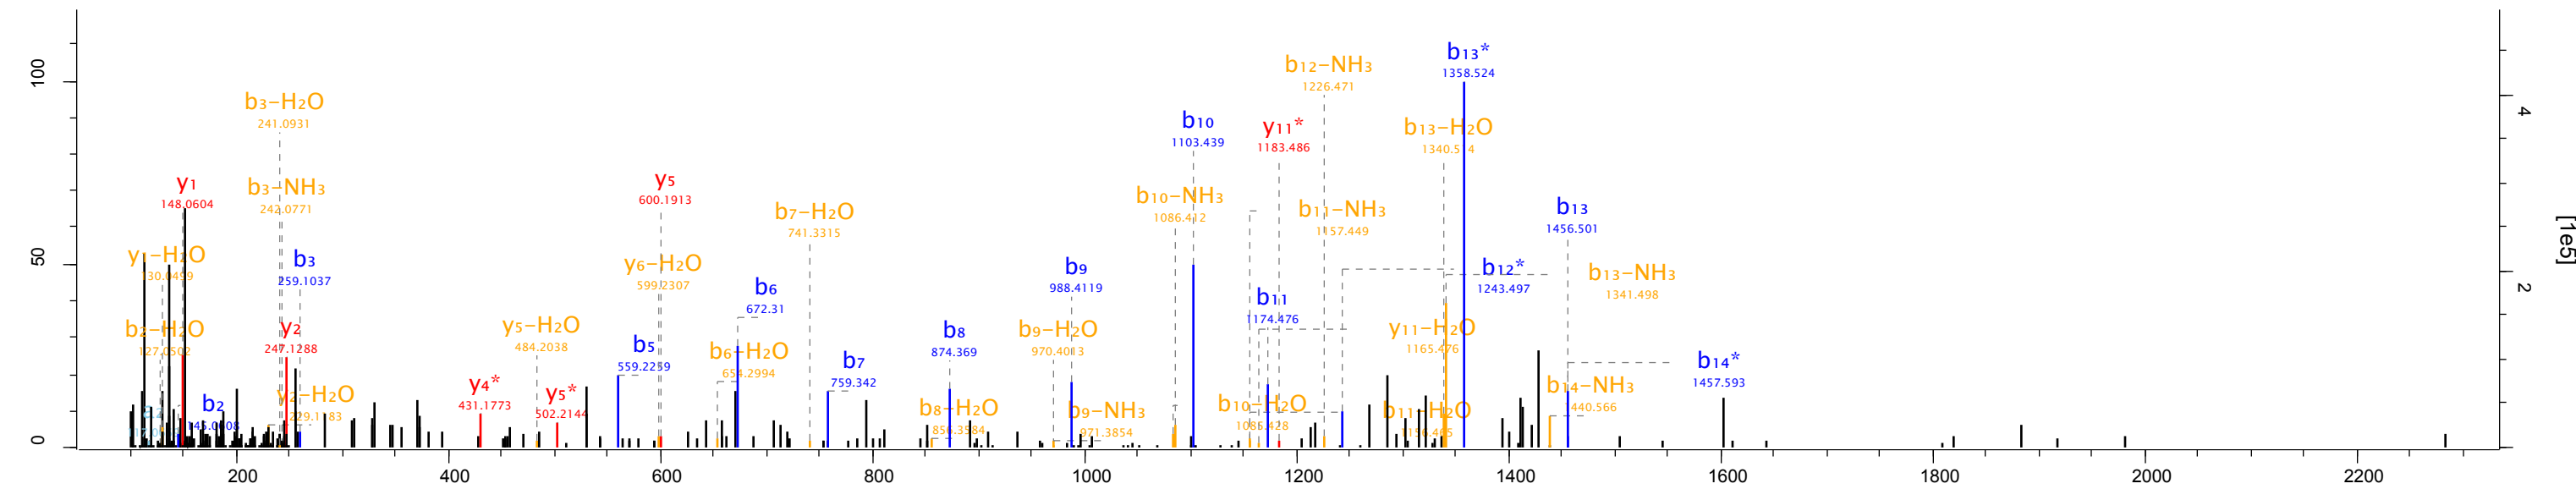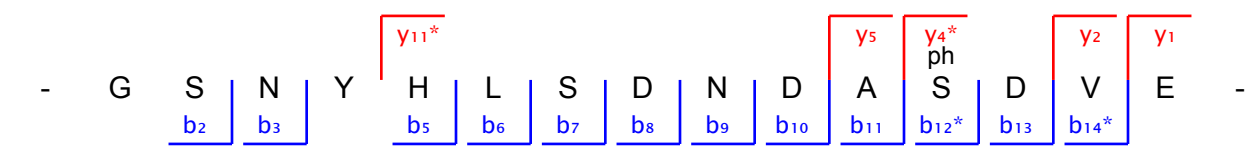

Raw file 20171215\_MaS\_33SR\_LMH\_phospho\_02 Scan 7805 Method FTMS; HCD Score 81.53 m/z 686.3 Gene names ACLY

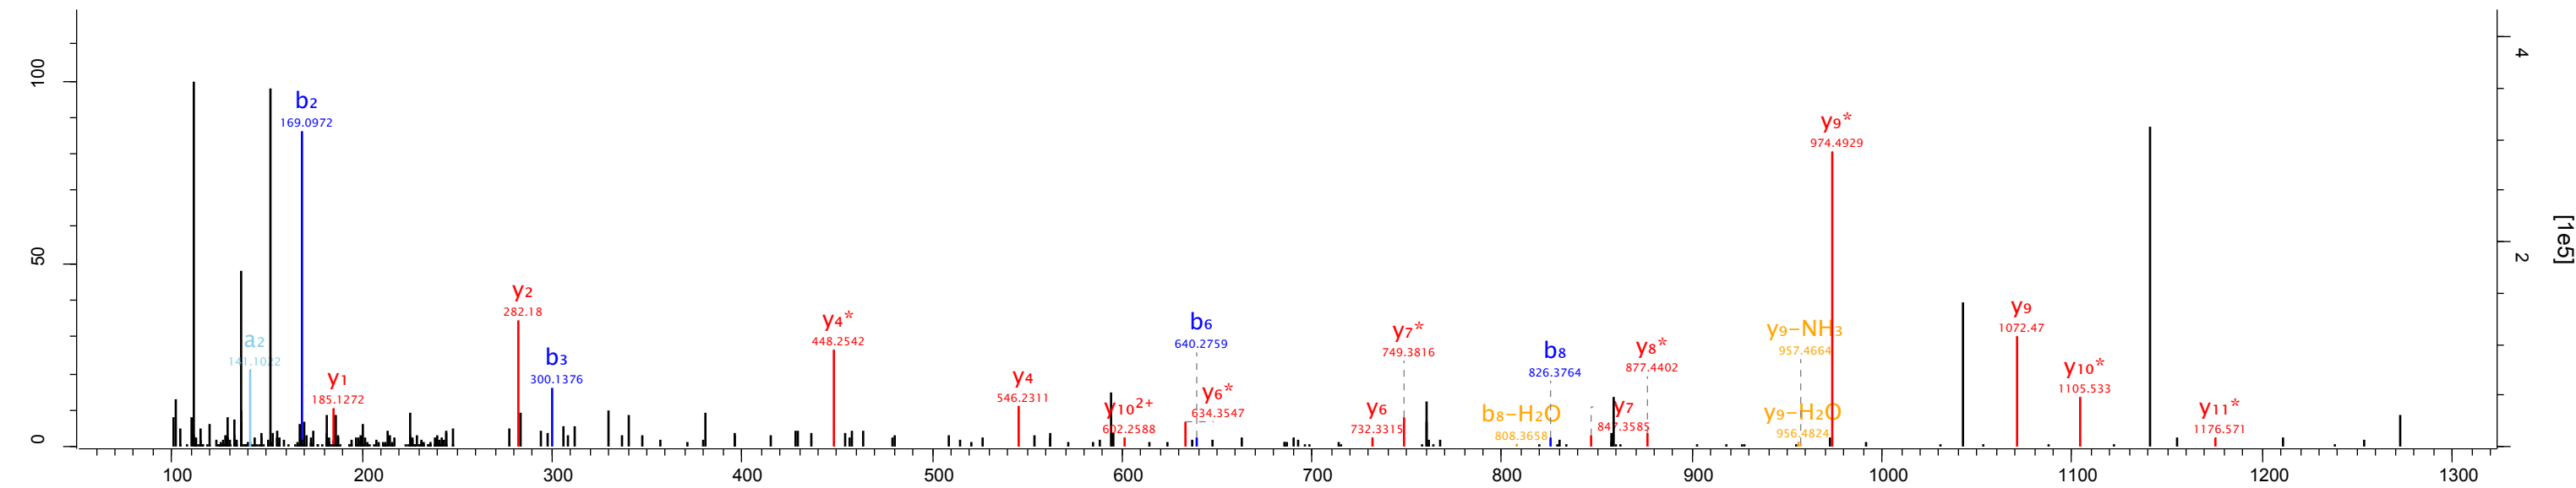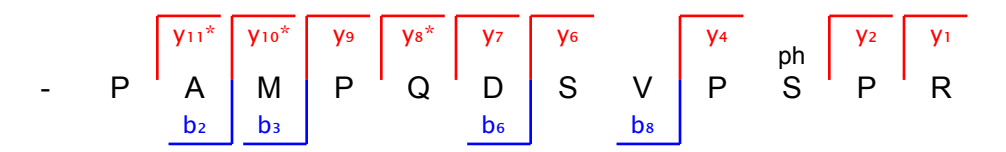

Raw file 20171215\_MaS\_33SR\_LMH\_phospho\_02 Scan 8735 Method FTMS; HCD Score 92.59 m/z 965.78 Gene names TMPO

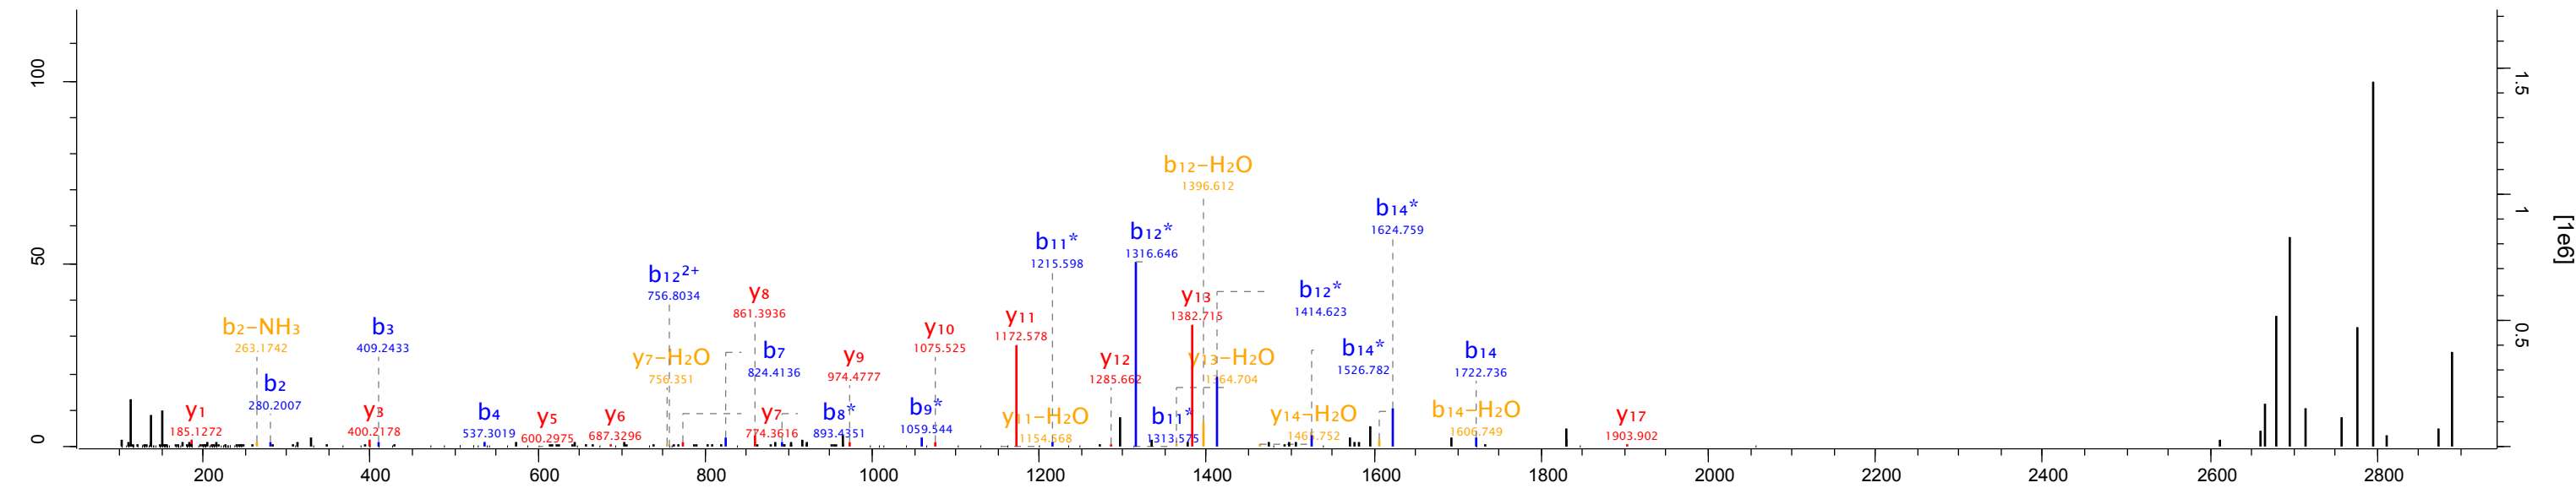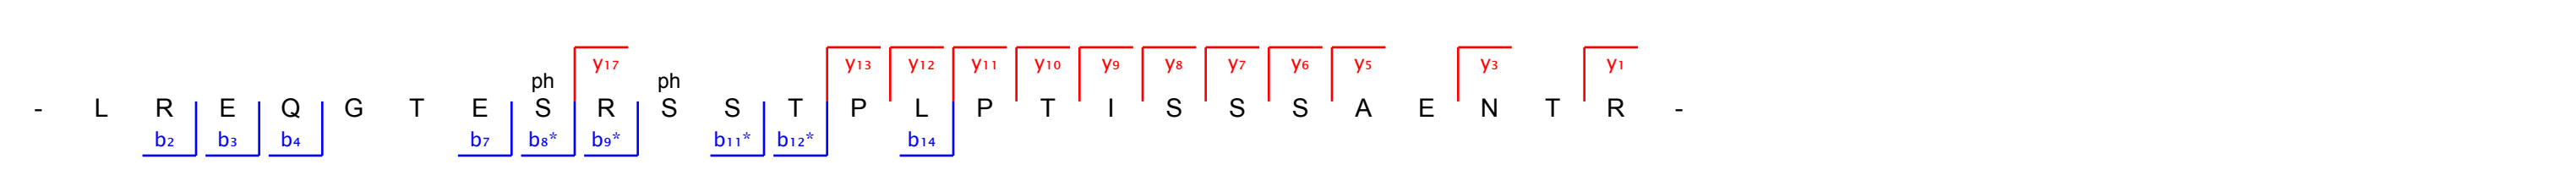

Raw file 20171215\_MaS\_33SR\_LMH\_phospho\_02 Scan 9185 Method FTMS; HCD Score 96.15 m/z 678.3 Gene names WHSC1

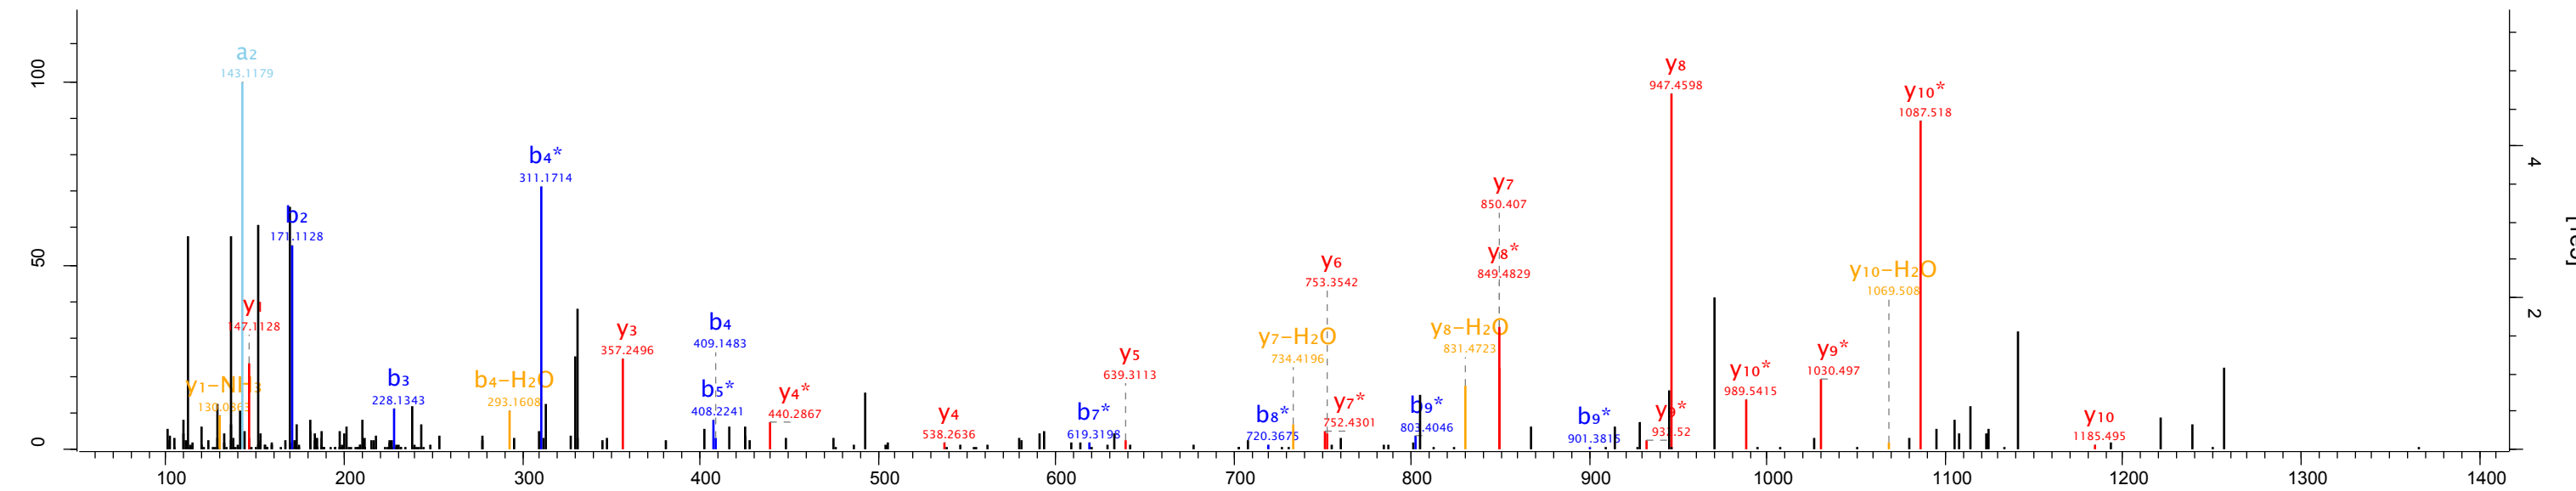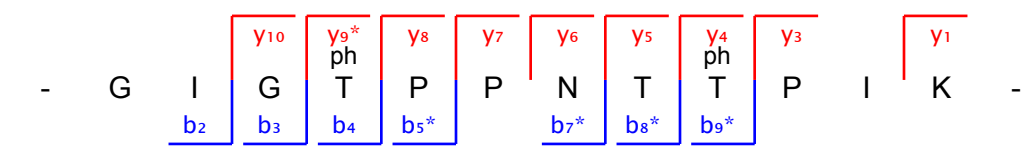

Raw file 20171215\_MaS\_33SR\_LMH\_phospho\_02 Scan 9435 Method FTMS; HCD Score 120.4 m/z 766.34 Gene names TCOF1

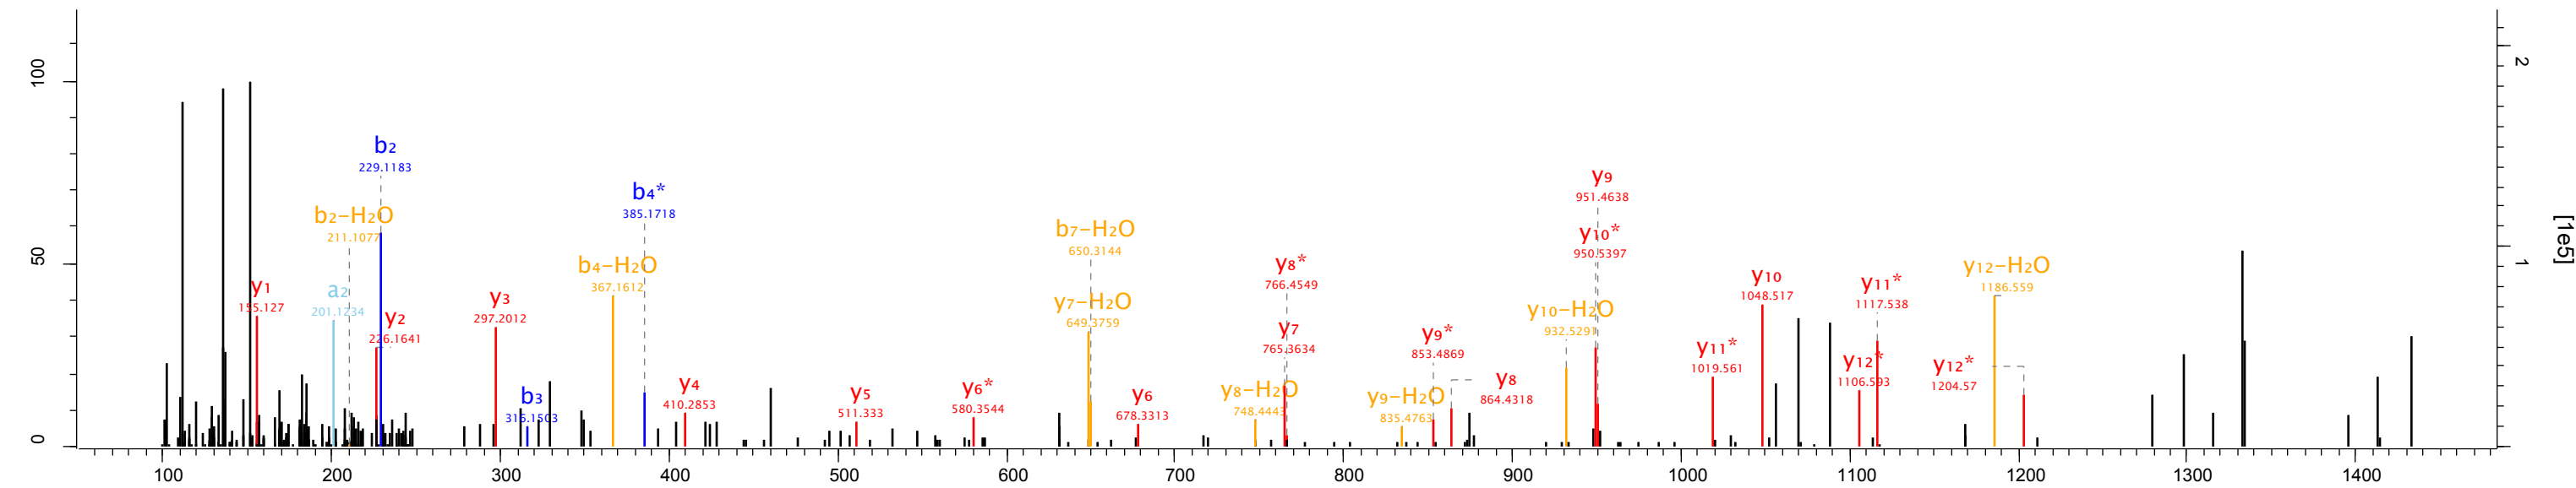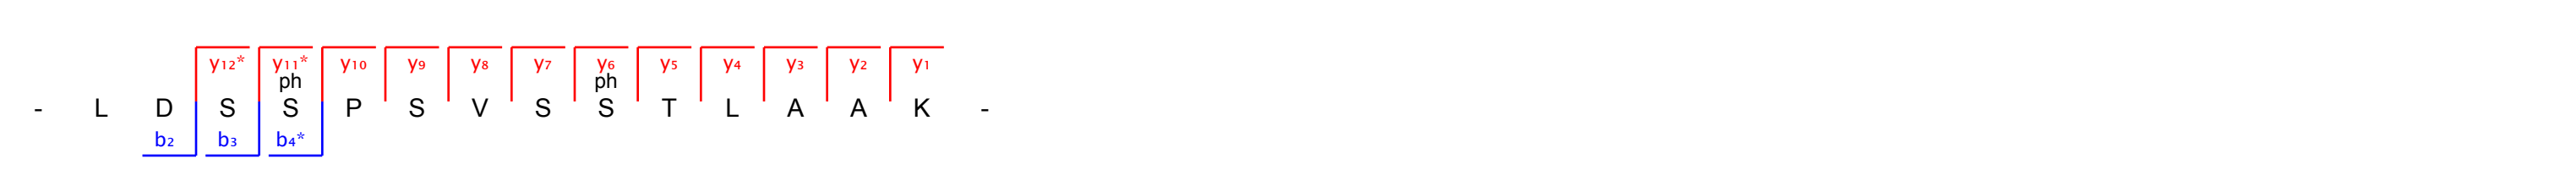

Raw file 20171215\_MaS\_33SR\_LMH\_phospho\_02 Scan 9705 Method FTMS; HCD Score 170.35 m/z 739.79 Gene names OSTM1

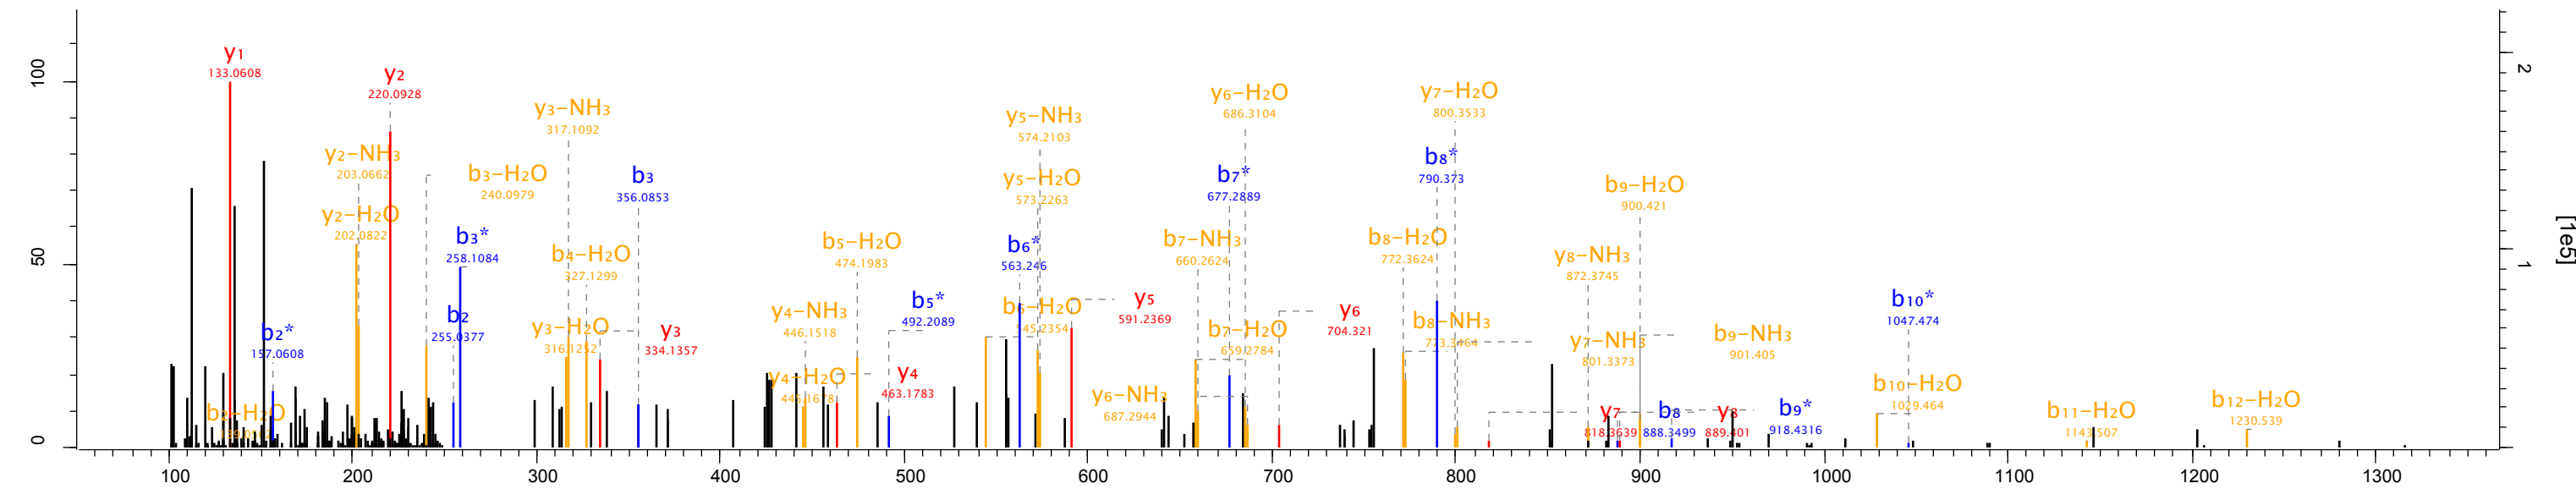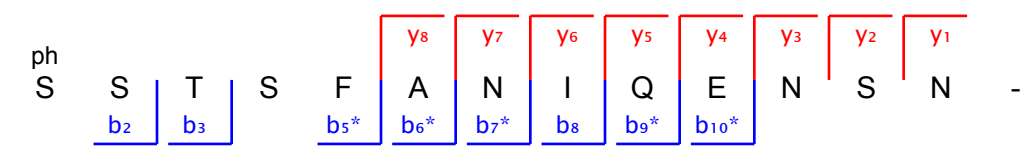

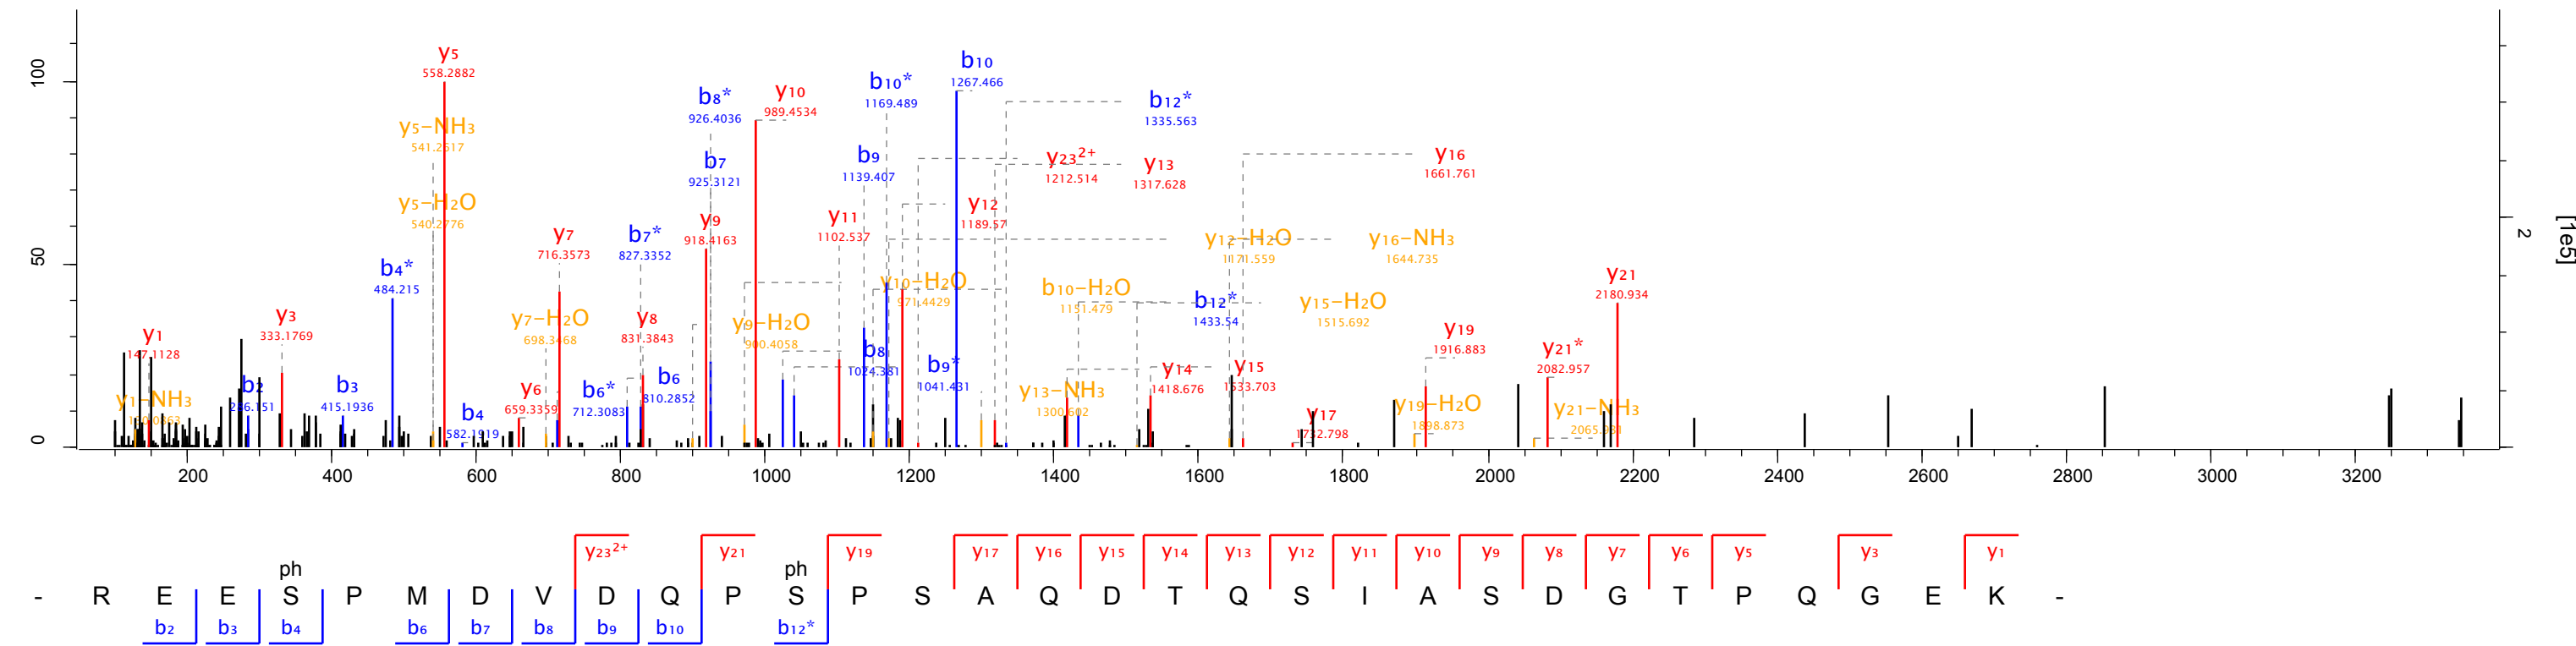

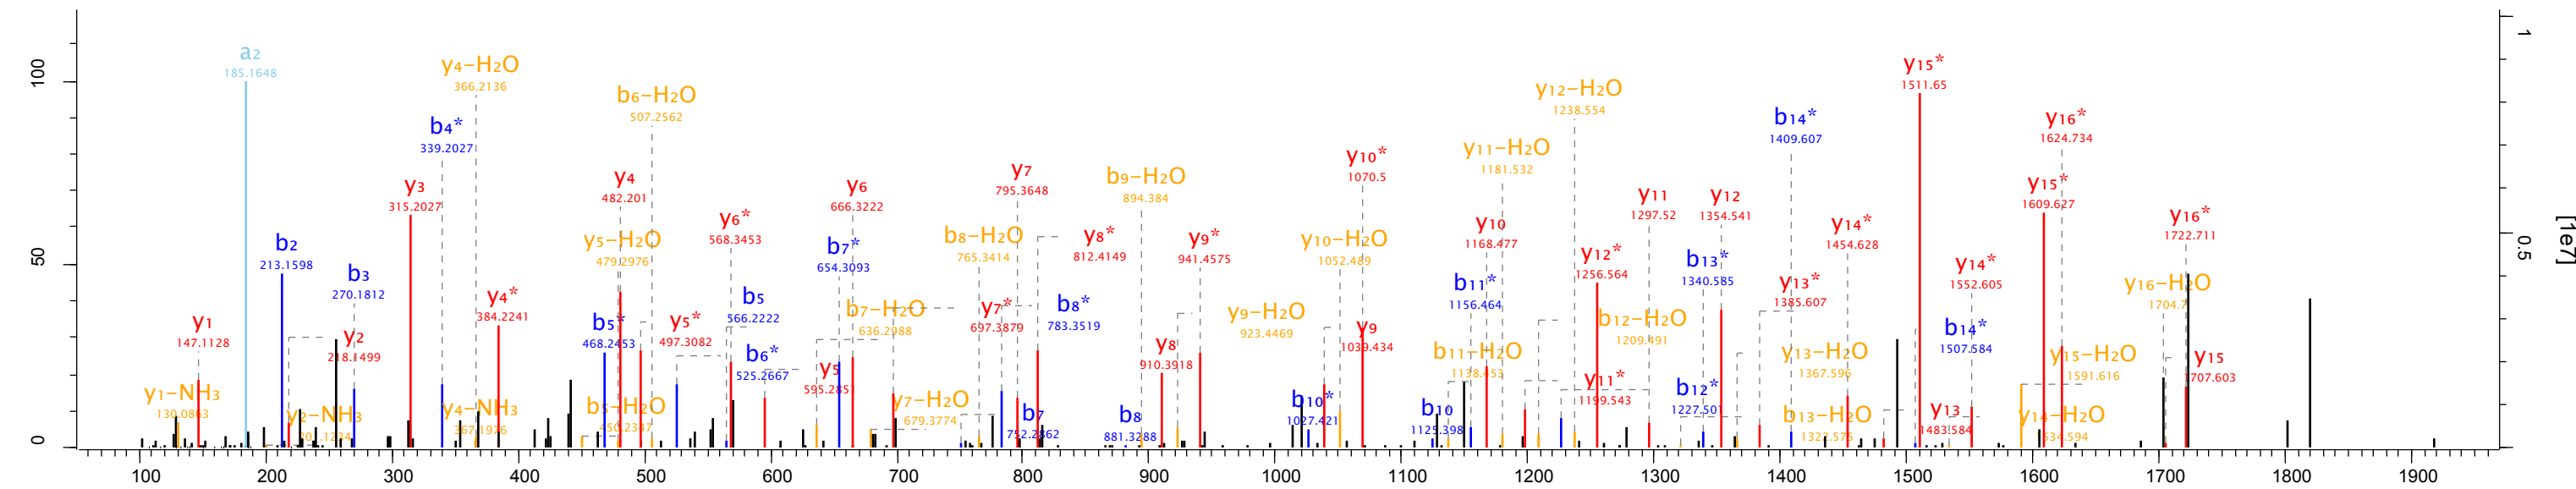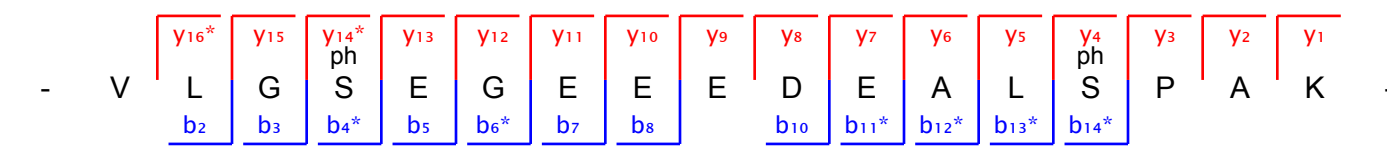



Raw file 20171215\_MaS\_33SR\_LMH\_phospho\_03 Scan 10555 Method FTMS; HCD Score 65.18 m/z 1079.86 Gene names TUBA1C

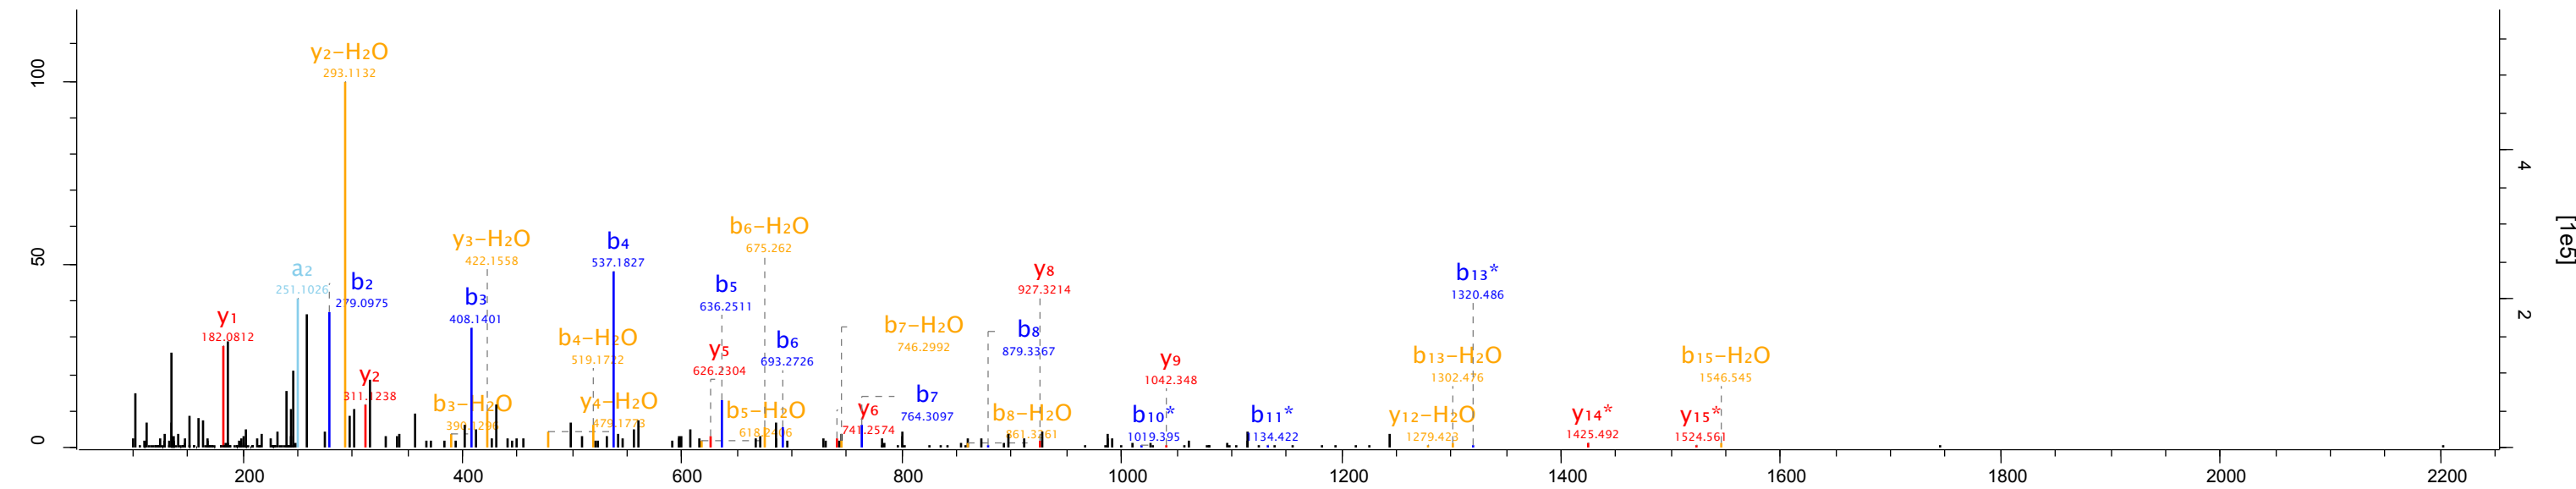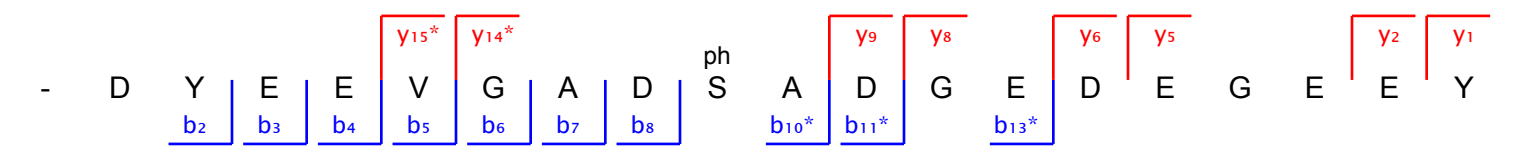

Raw file: 20171215\_MaS\_33SR\_LMH\_phospho\_03  
 Scan: 10615 Method: FTMS; HCD Score: 238.51 m/z: 789.31 Gene names: HUWE1

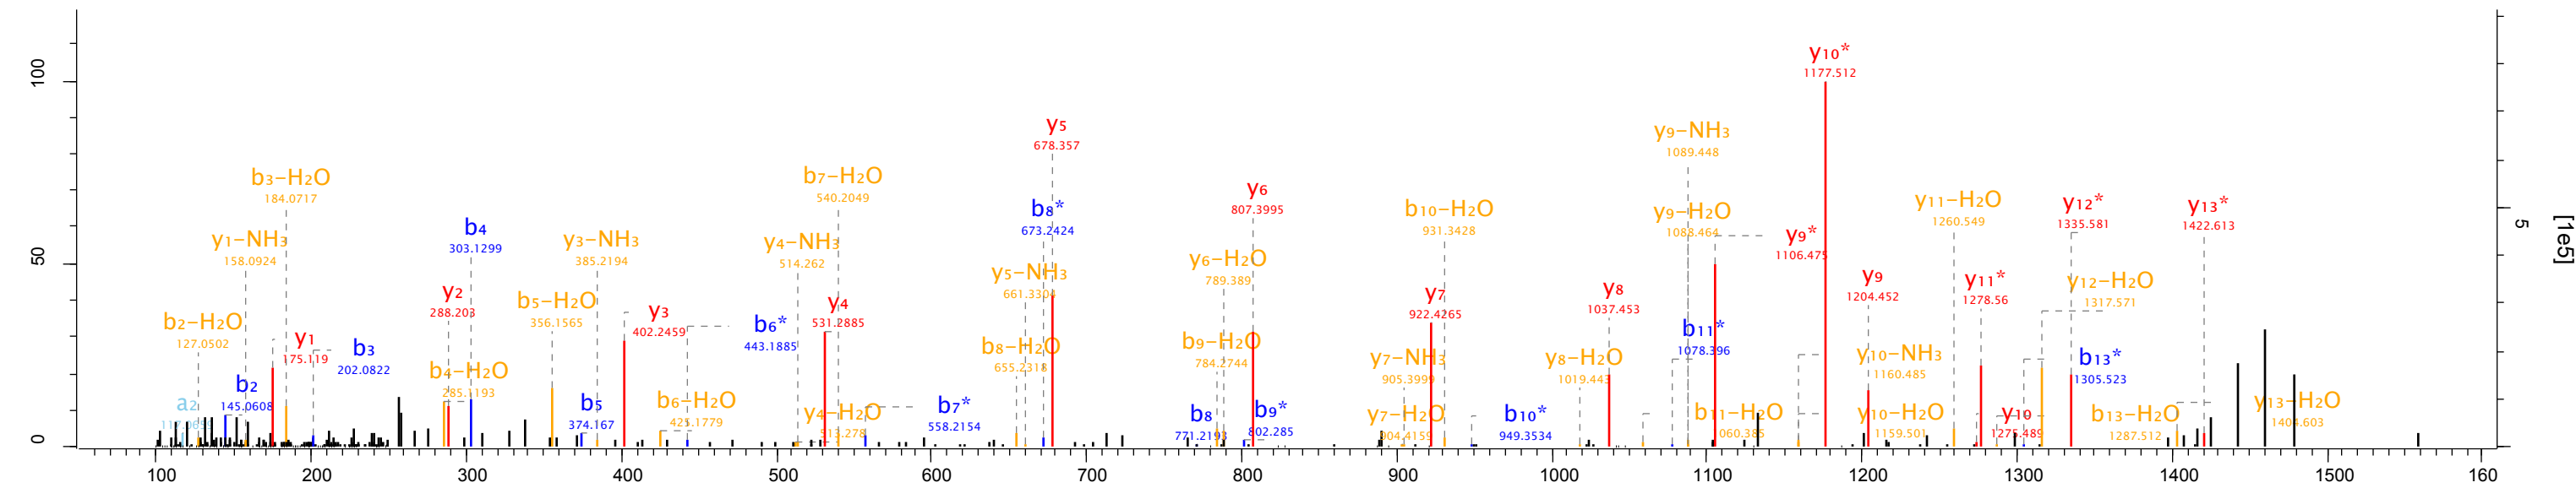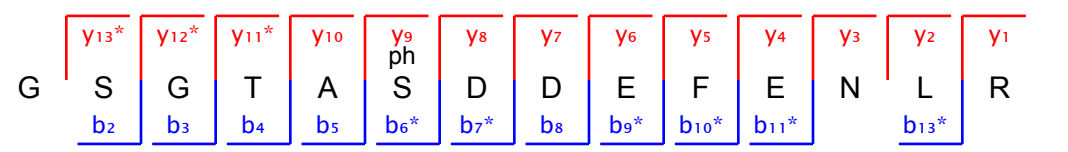

Raw file 20171215\_MaS\_33SR\_LMH\_phospho\_03 Scan 10765 Method FTMS; HCD Score 134.49 m/z 559.22 Gene names TP53BP1

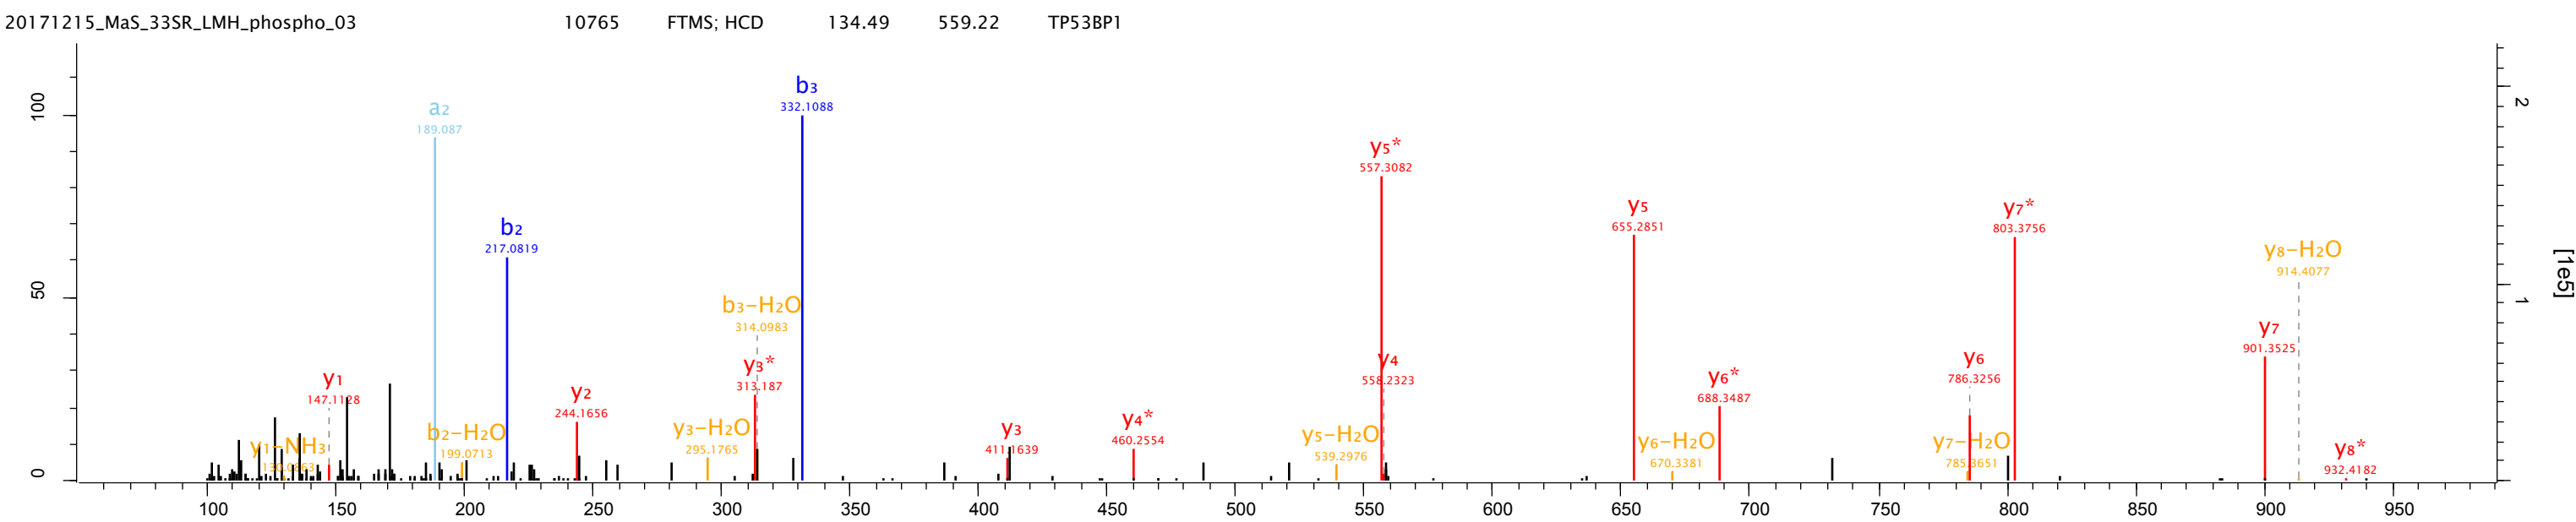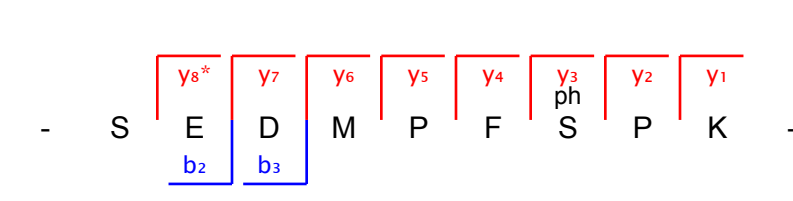

Raw file 20171215\_MaS\_33SR\_LMH\_phospho\_03 Scan 11235 Method FTMS; HCD Score 227.24 m/z 845.71 Gene names SAFB;SAFB2

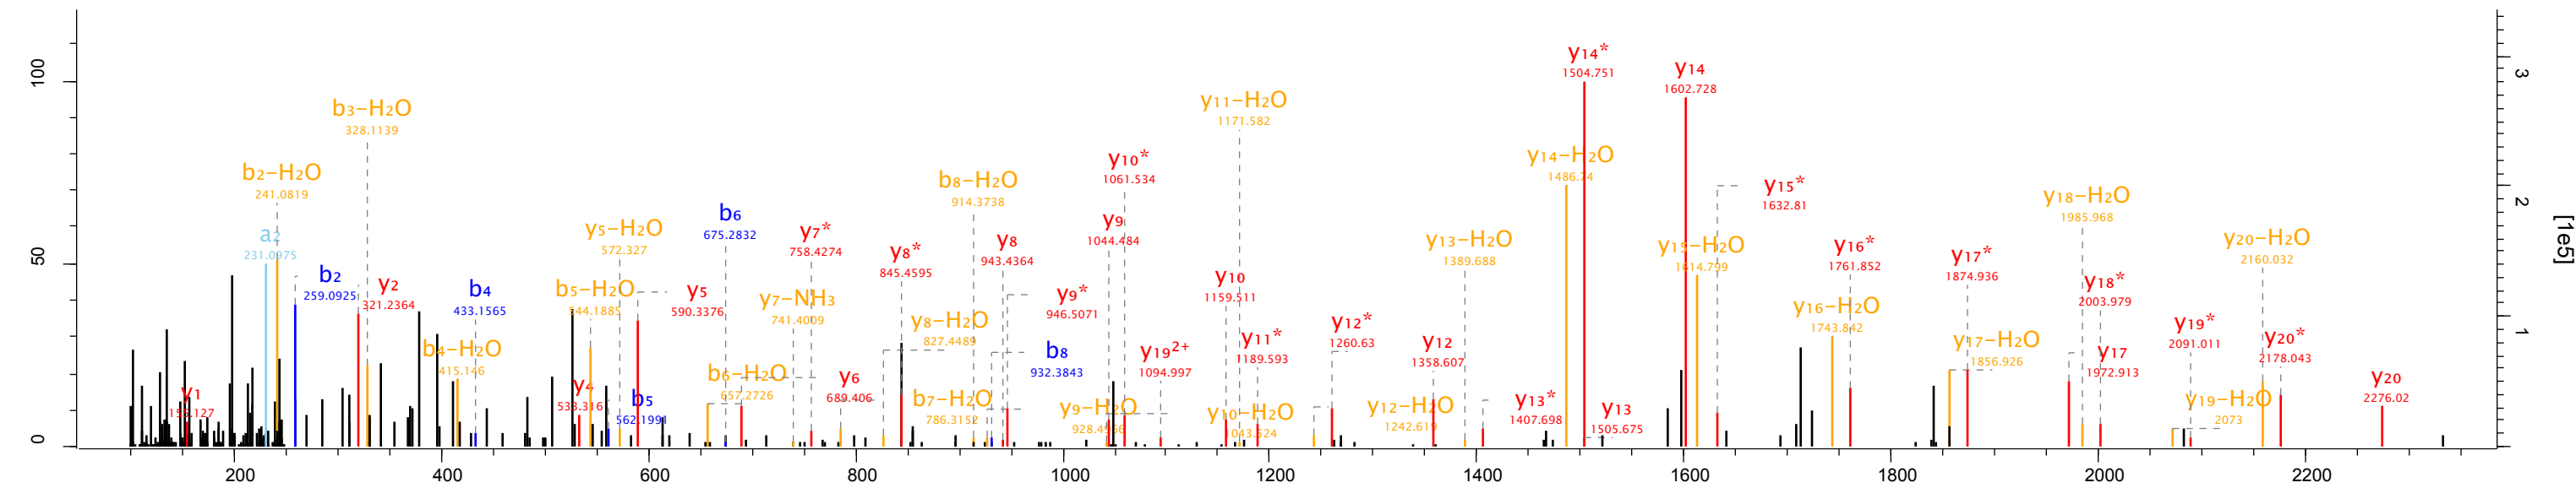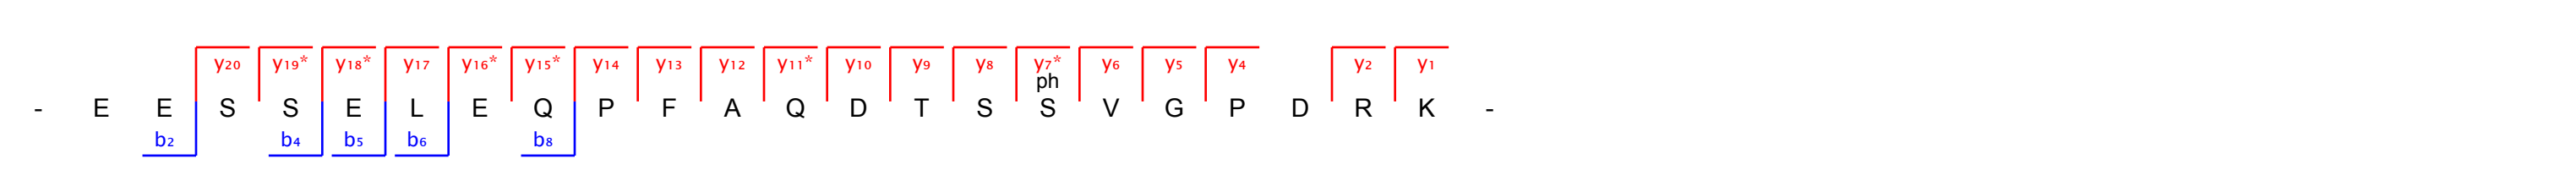

Raw file: 20171215\_MaS\_33SR\_LMH\_phospho\_03  
 Scan: 11495 Method: FTMS; HCD Score: 148.75 m/z: 947.4 Gene names: INF2

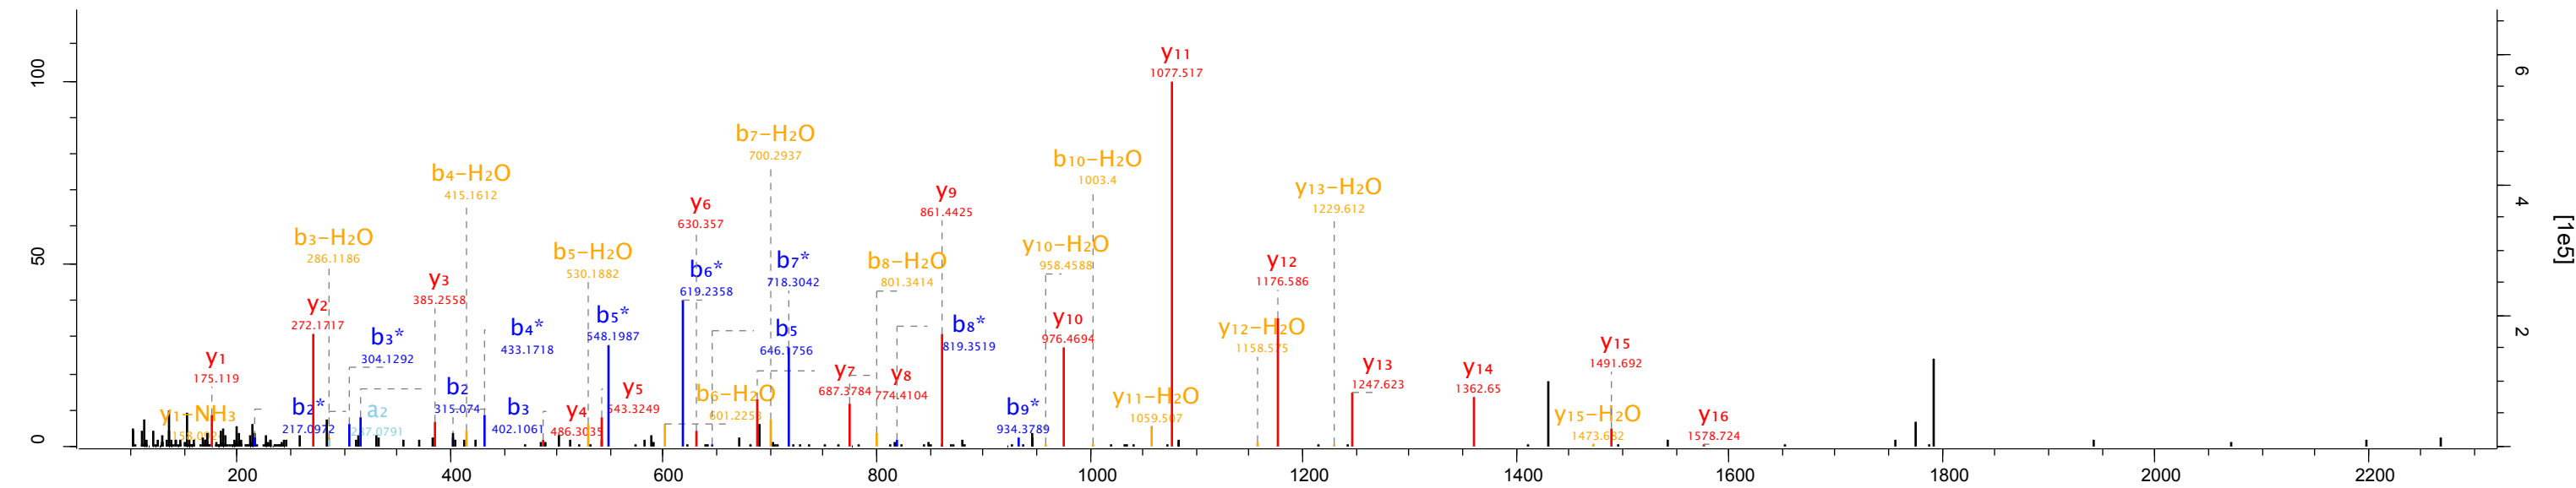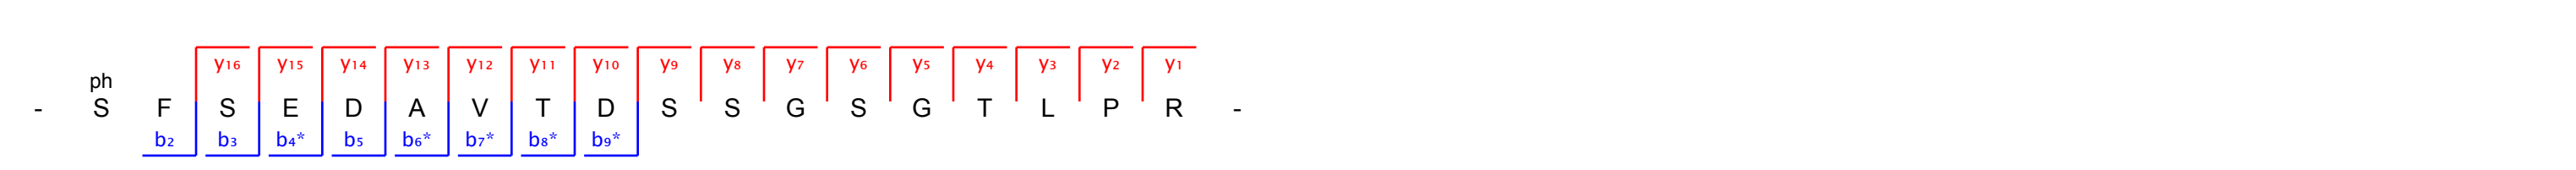

Raw file 20171215\_MaS\_33SR\_LMH\_phospho\_03 Scan 11645 Method FTMS; HCD Score 166.74 m/z 946.78 Gene names QSER1

20171215\_MaS\_33SR\_LMH\_phospho\_03

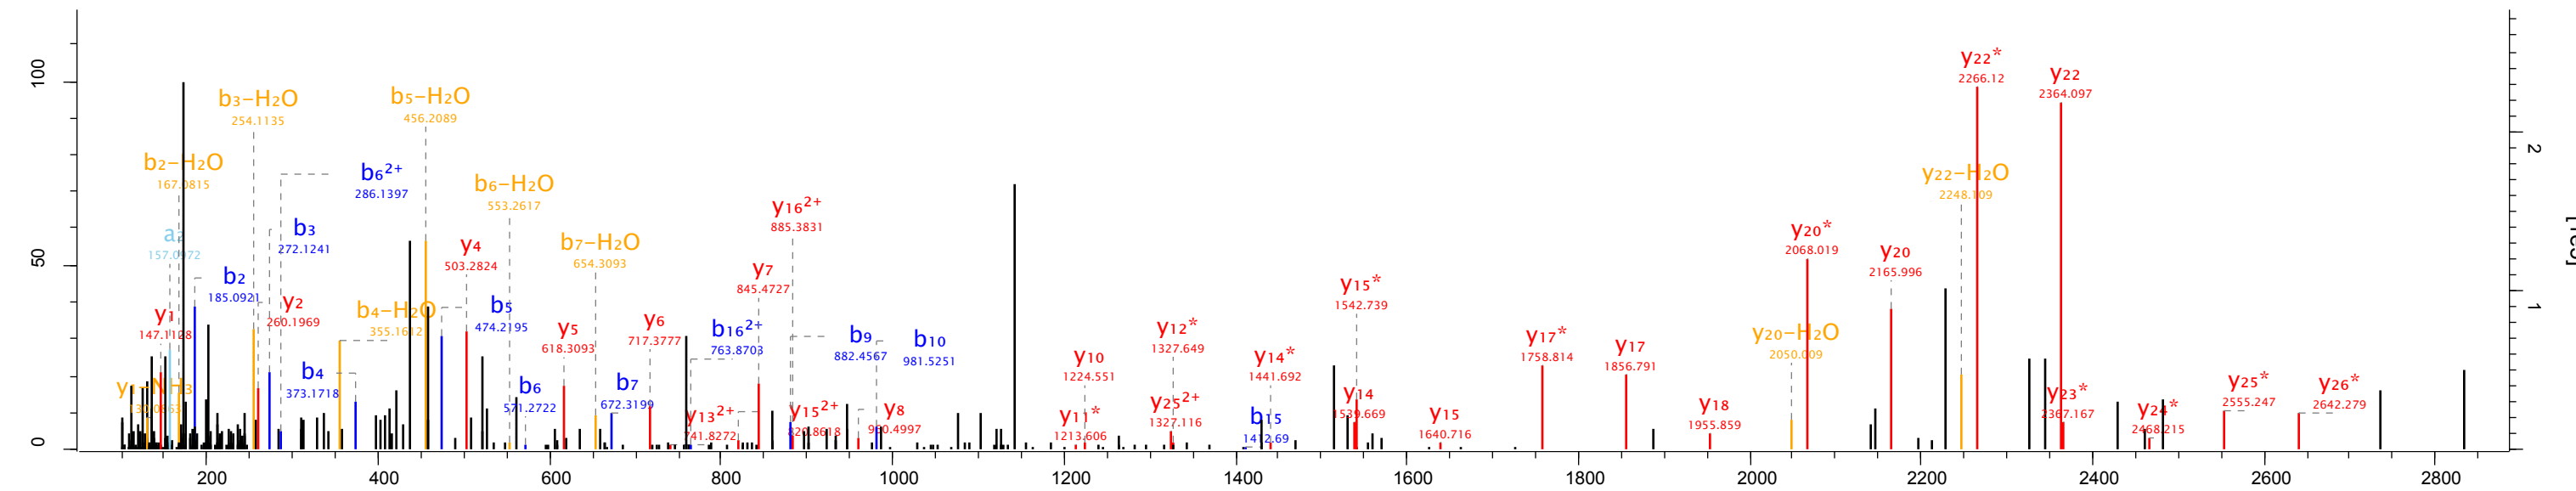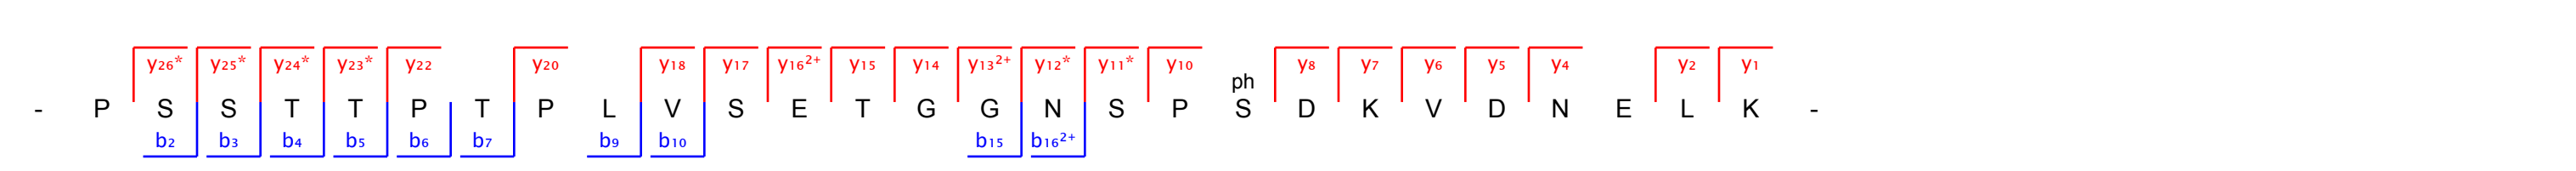

Raw file 20171215\_MaS\_33SR\_LMH\_phospho\_03 Scan 12195 Method FTMS; HCD Score 44.53 m/z 960.05 Gene names EHP1L1

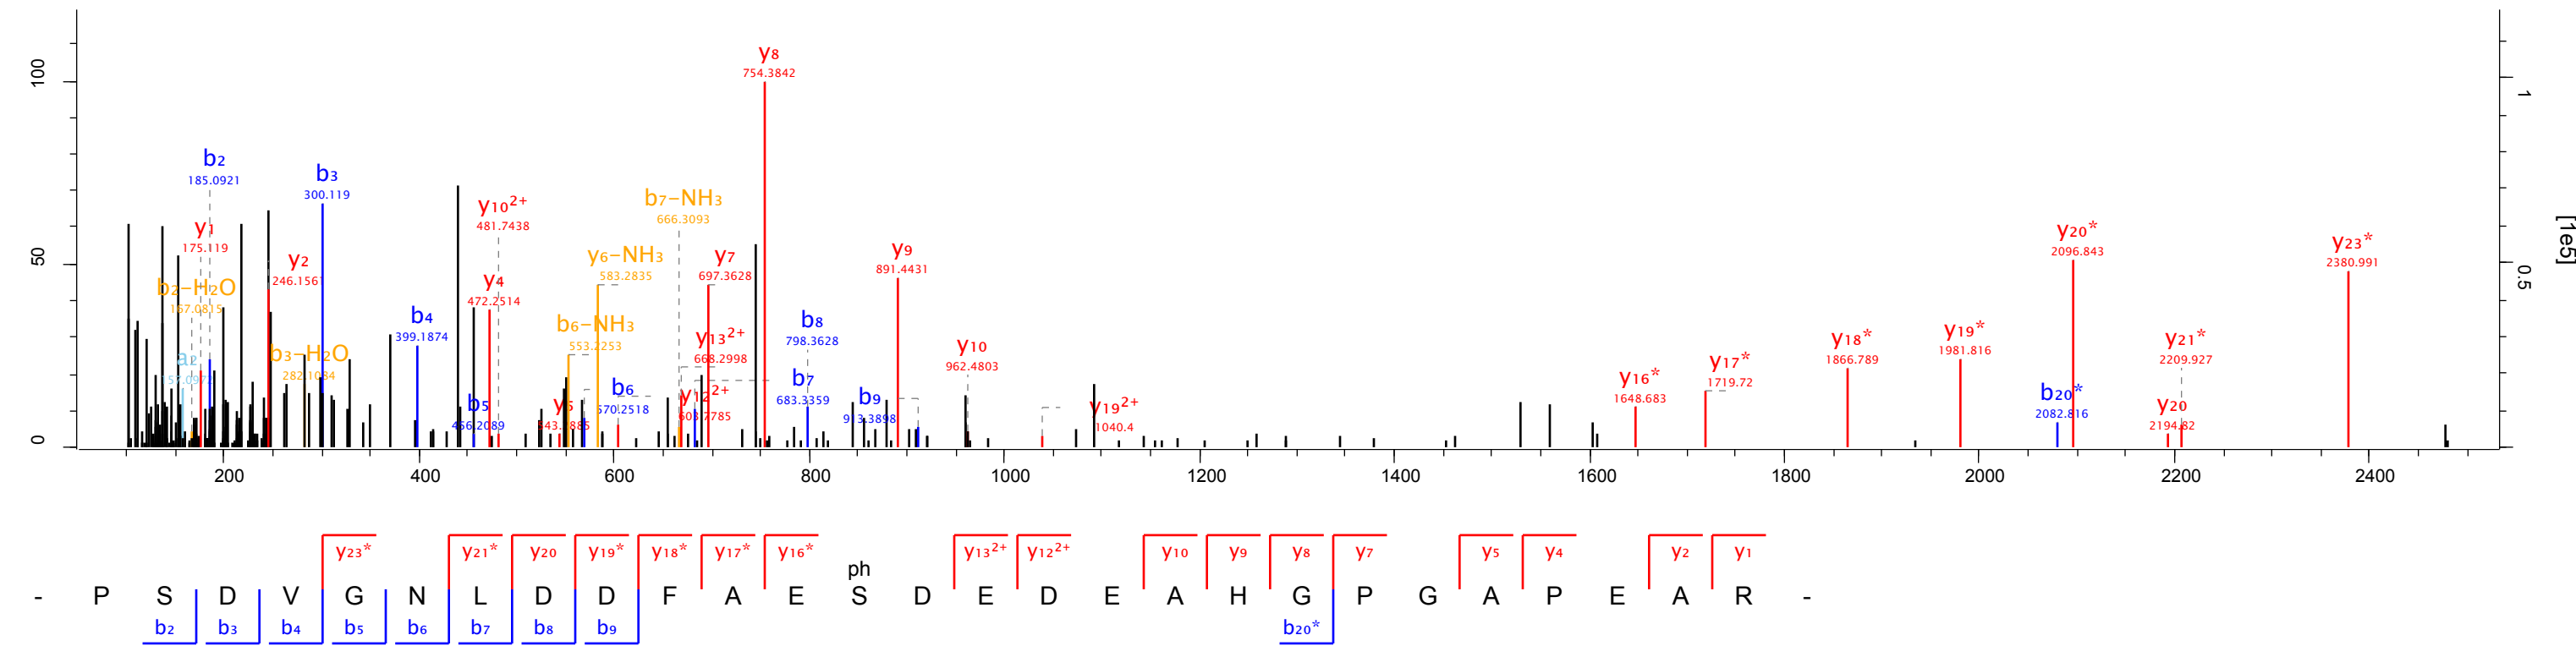

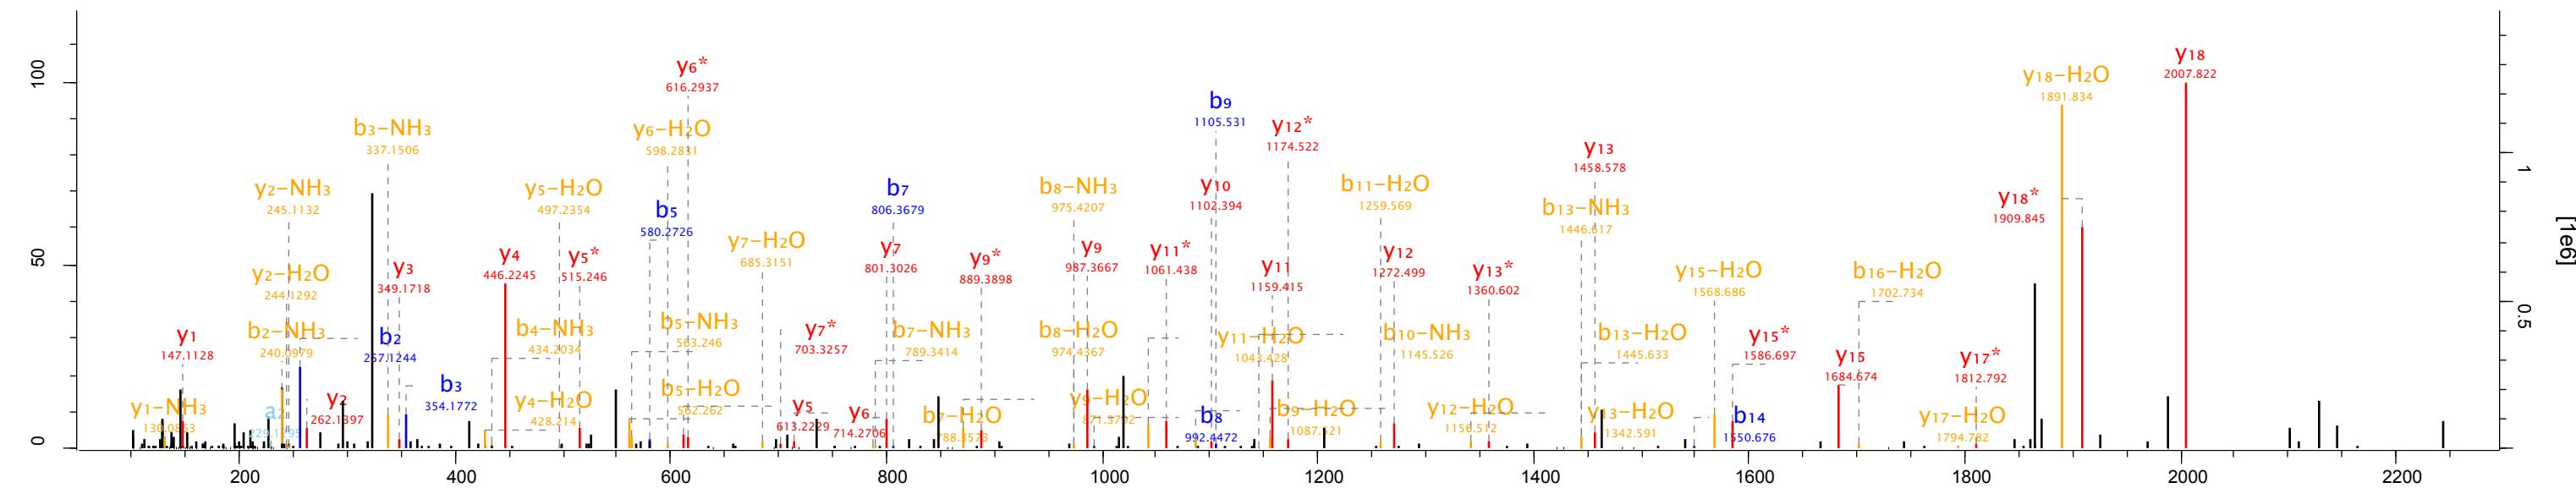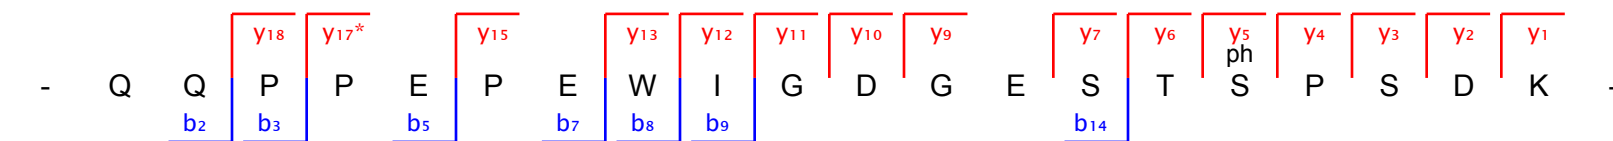



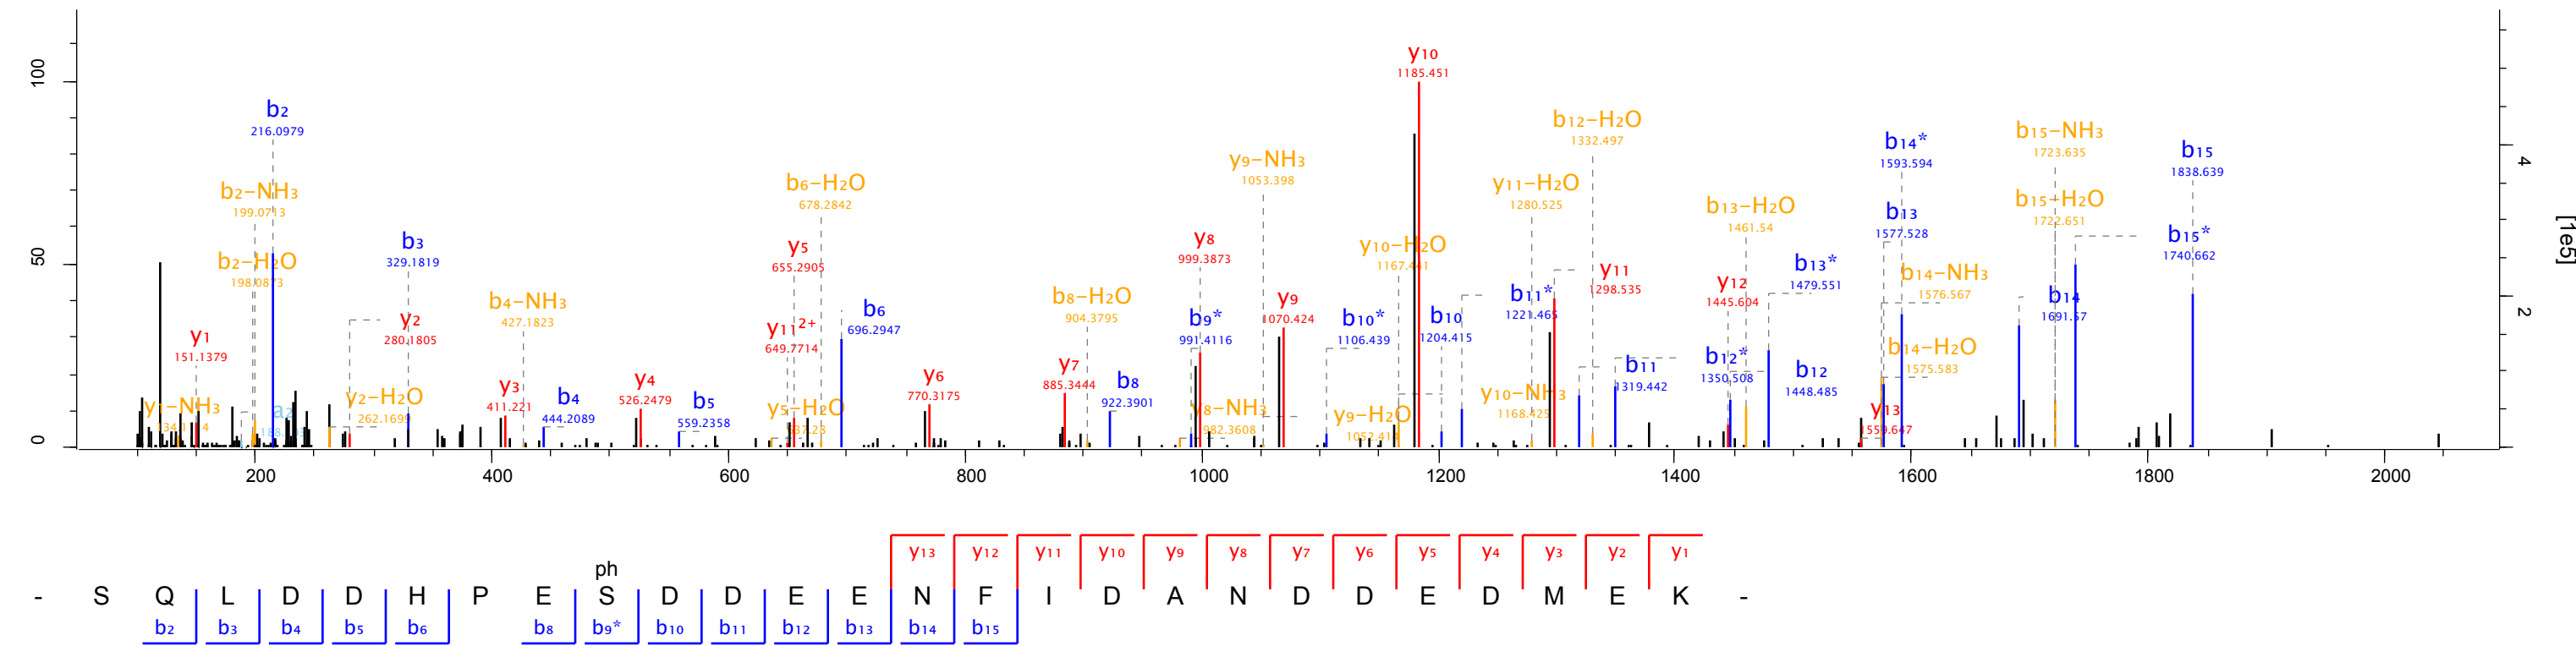

Raw file: 20171215\_MaS\_33SR\_LMH\_phospho\_03  
 Scan: 12535 Method: FTMS; HCD Score: 126.77 m/z: 712.84 Gene names: CTTNBP2NL

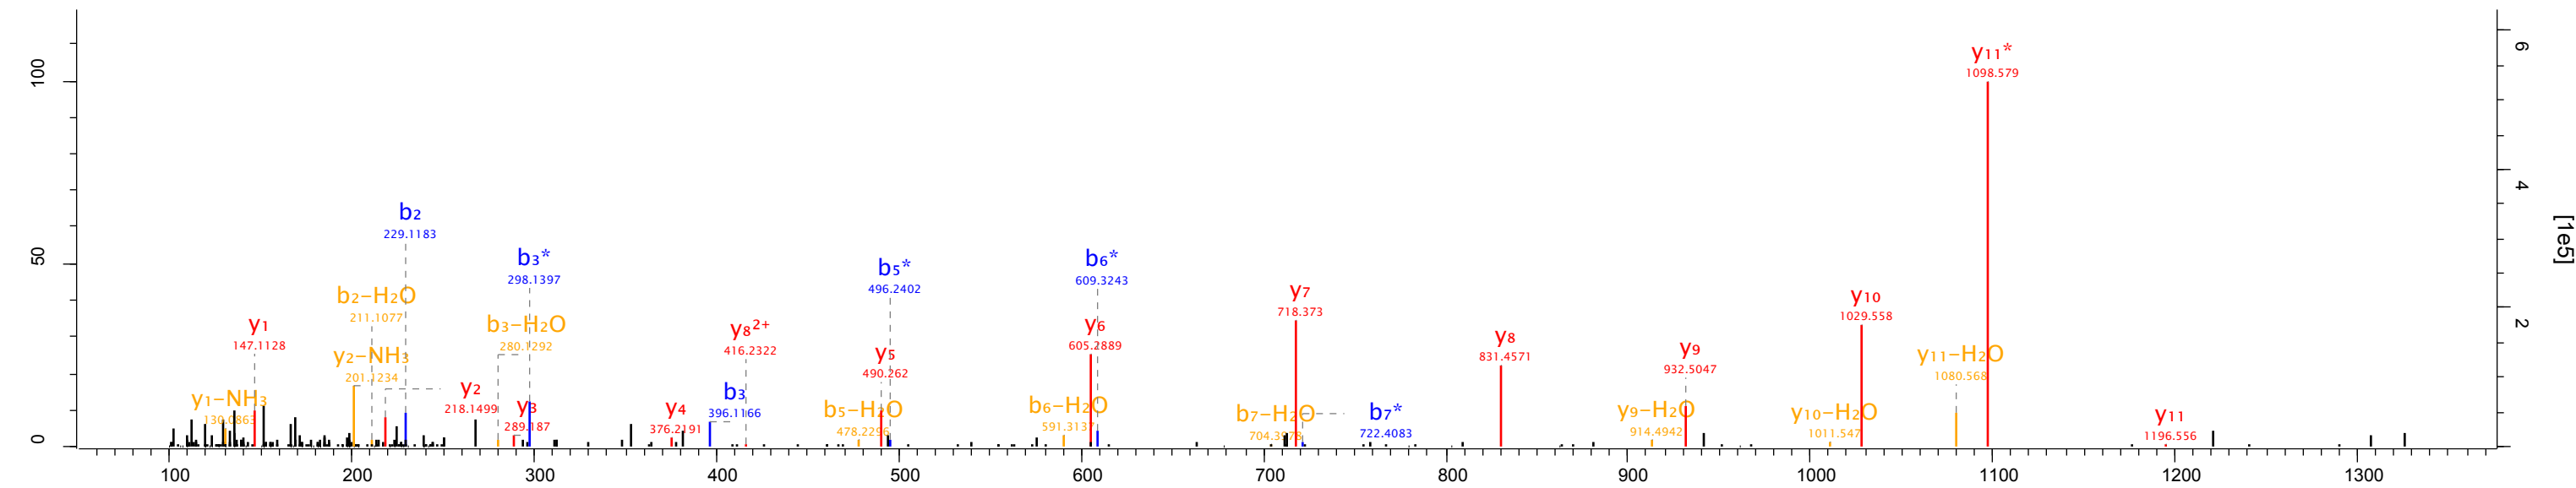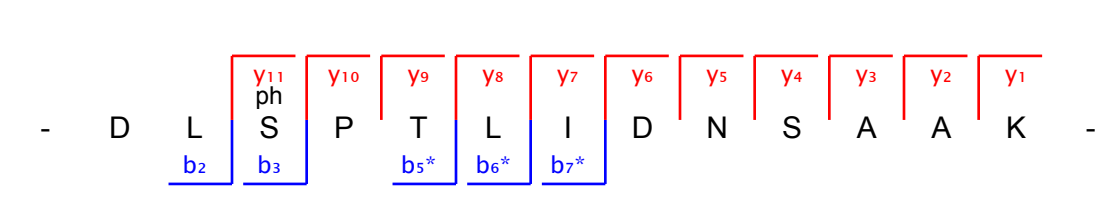

Raw file 20171215\_MaS\_33SR\_LMH\_phospho\_03 Scan 12595 Method FTMS; HCD Score 172.3 m/z 1013.4 Gene names NAF1

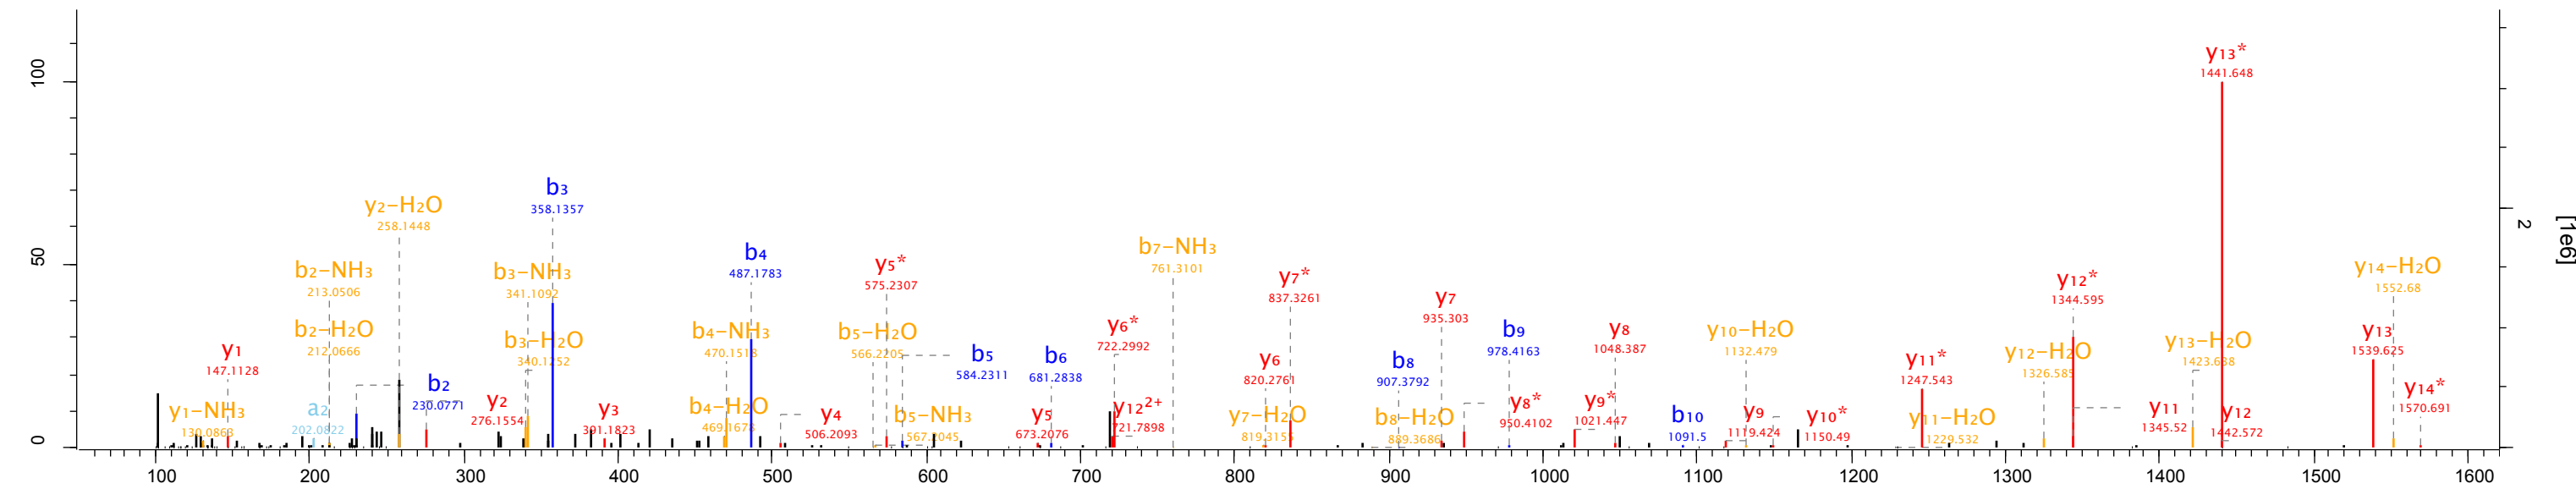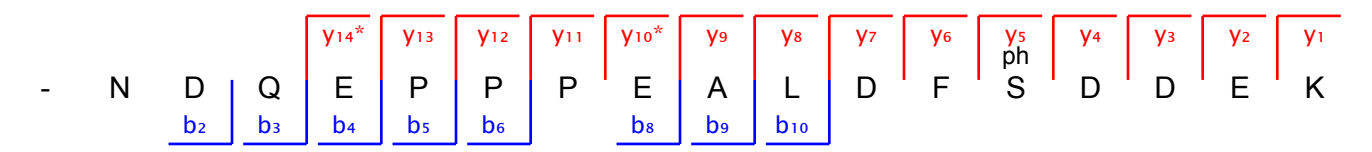

Raw file 20171215\_MaS\_33SR\_LMH\_phospho\_03 Scan 12725 Method FTMS; HCD Score 67.78 m/z 865.9 Gene names PEBP1

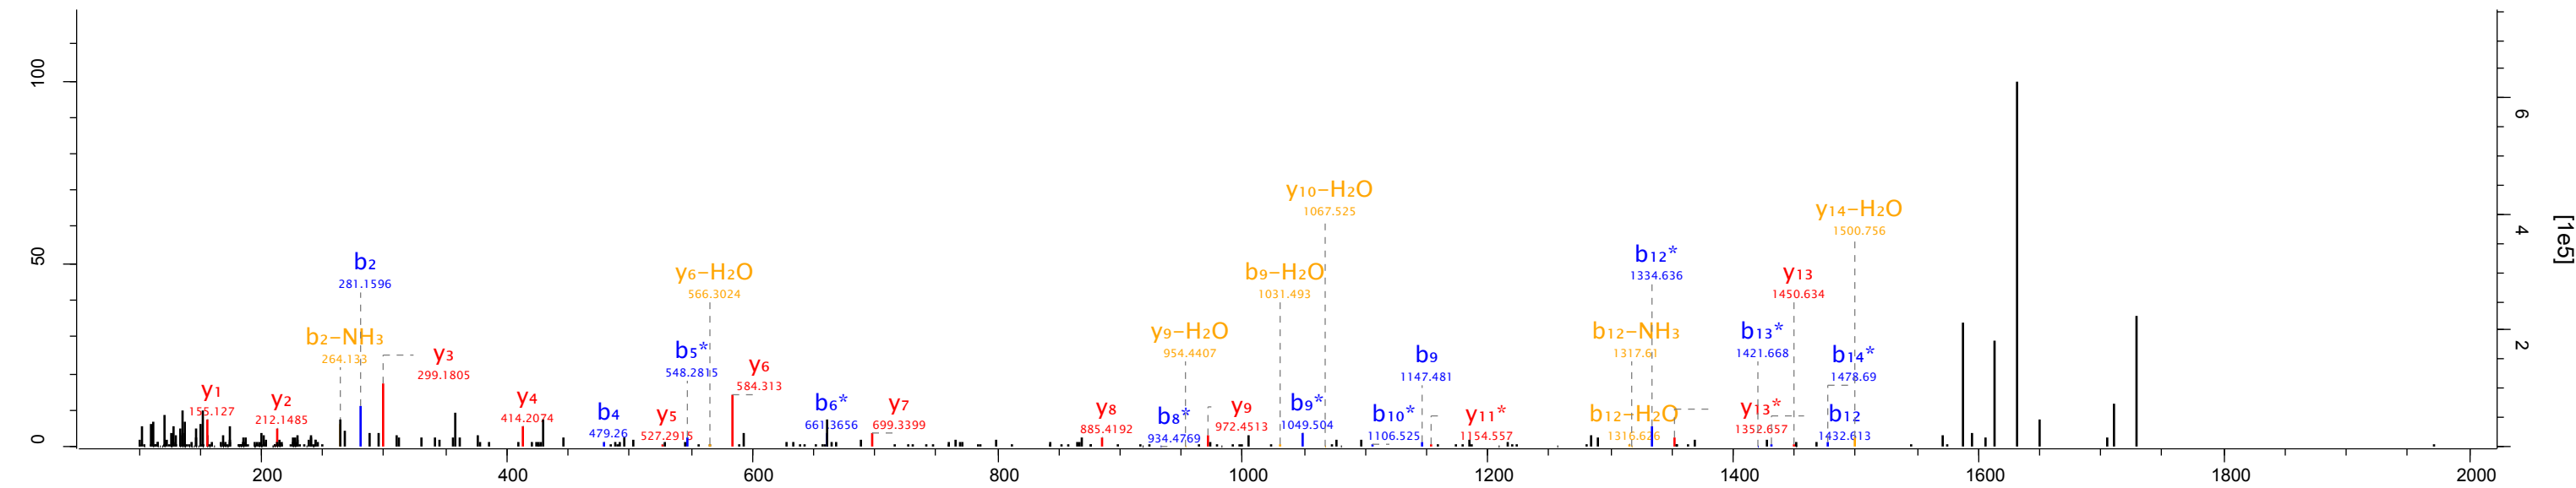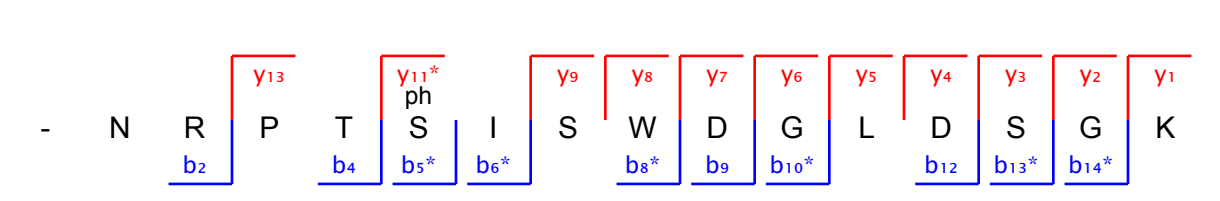

Raw file: 20171215\_MaS\_33SR\_LMH\_phospho\_03  
 Scan: 13255 Method: FTMS; HCD Score: 132.17 m/z: 581.26 Gene names: PAK2

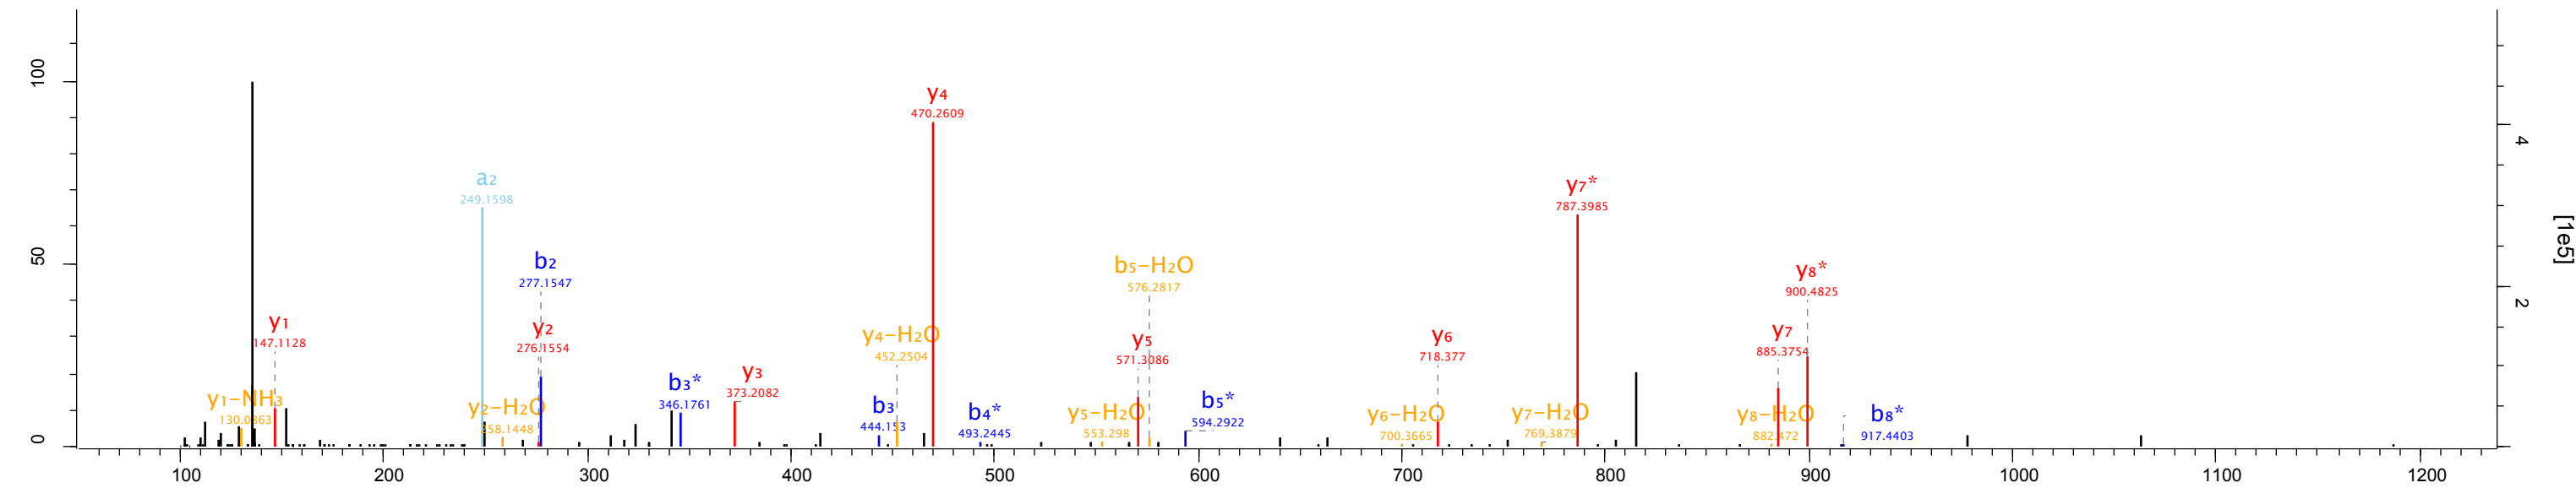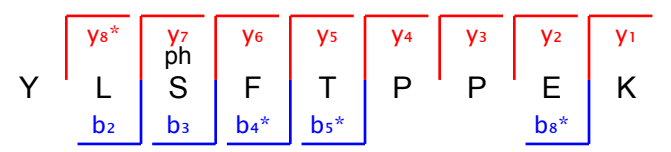

Raw file 20171215\_MaS\_33SR\_LMH\_phospho\_03 Scan 13415 Method FTMS; HCD Score 242.01 m/z 700.31 Gene names UTP14A

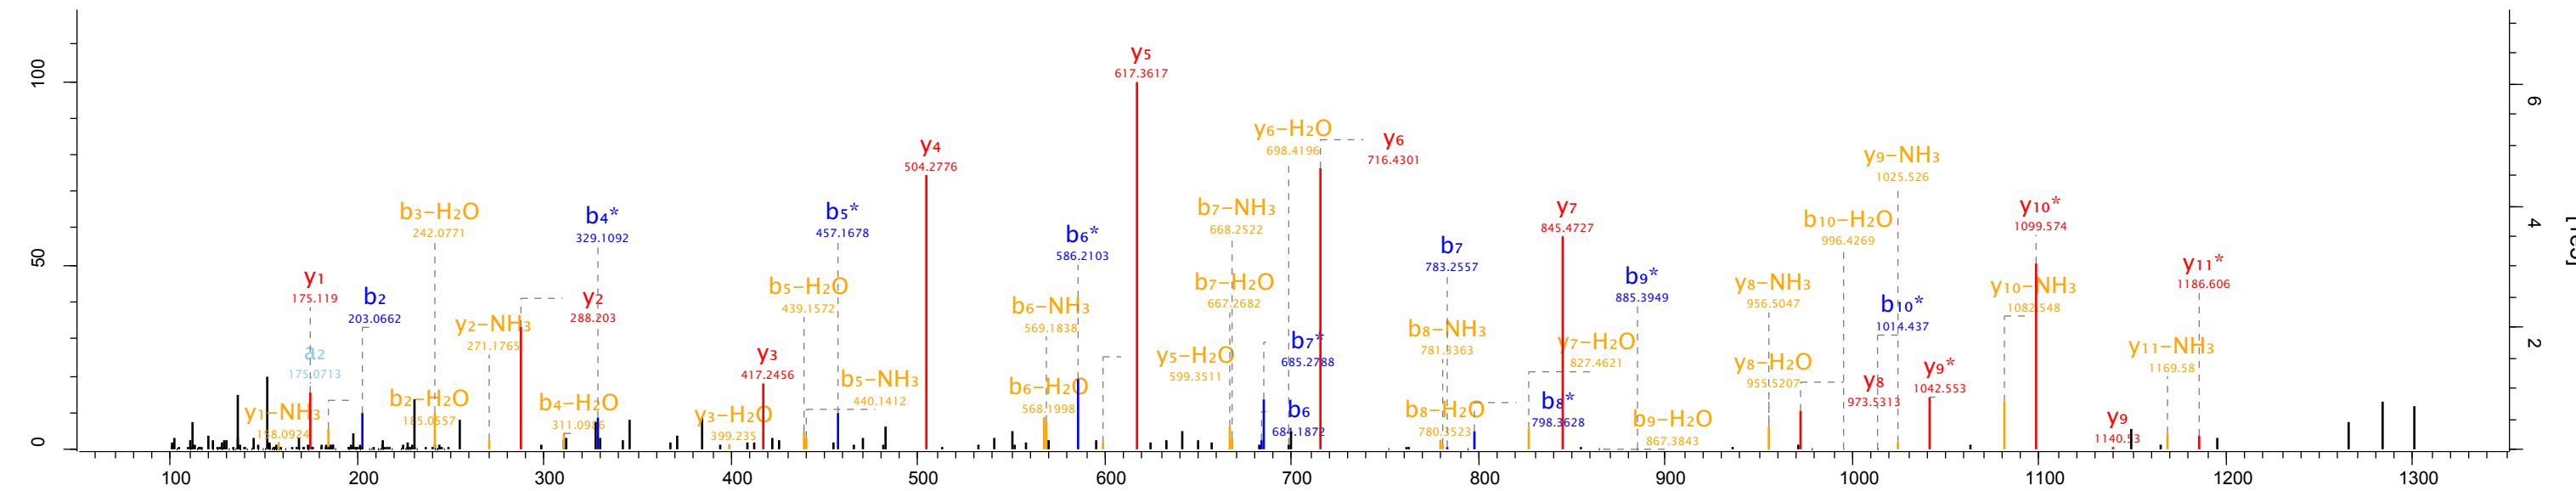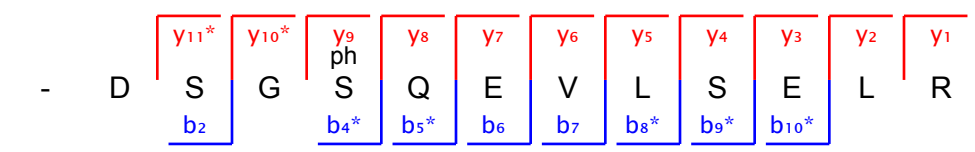

Raw file: 20171215\_MaS\_33SR\_LMH\_phospho\_03  
 Scan: 13495 Method: FTMS; HCD Score: 236.19 m/z: 1203.55 Gene names: LARP1

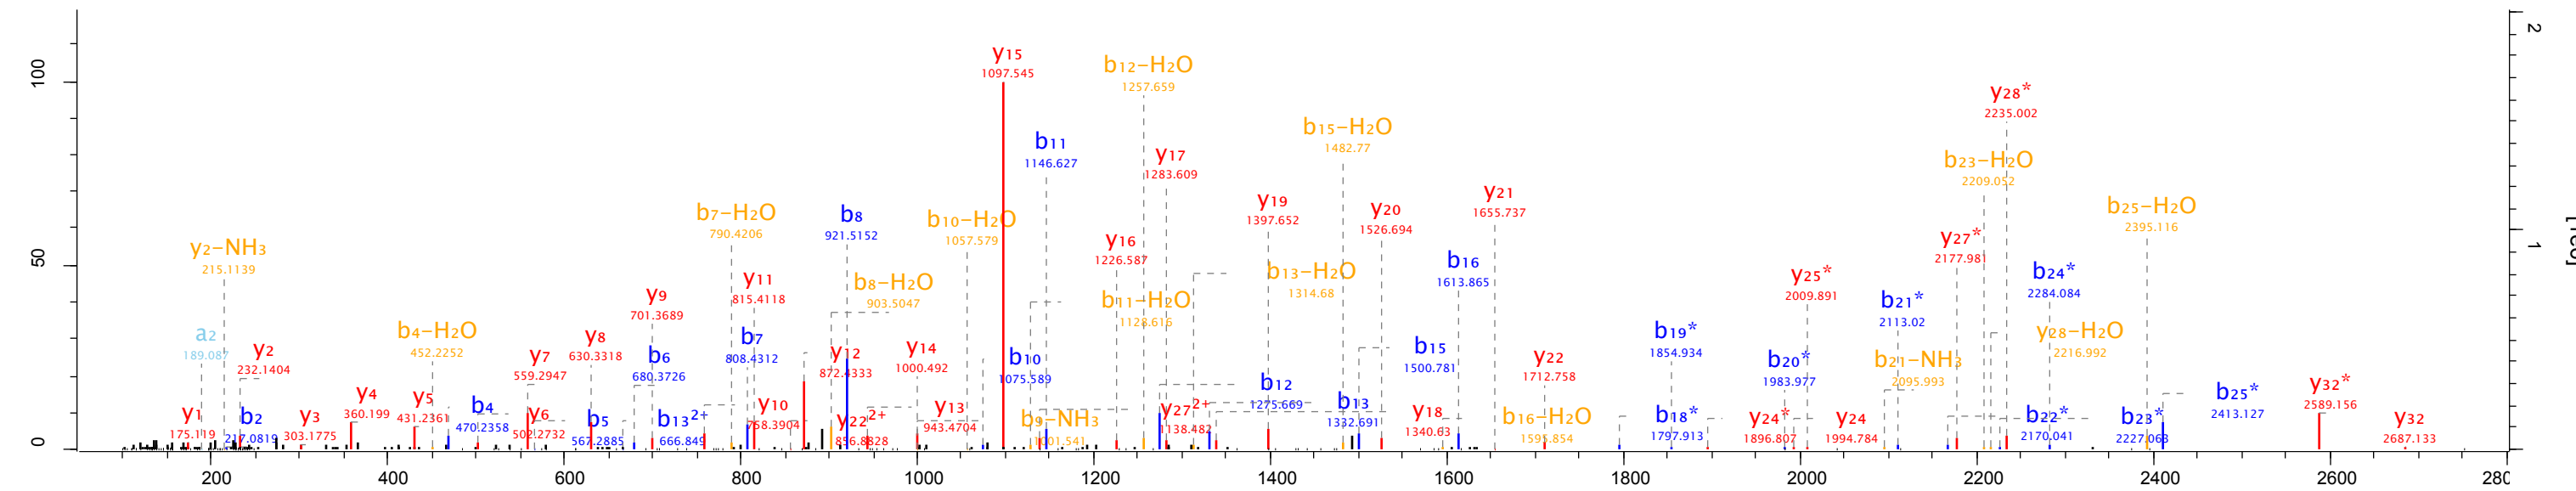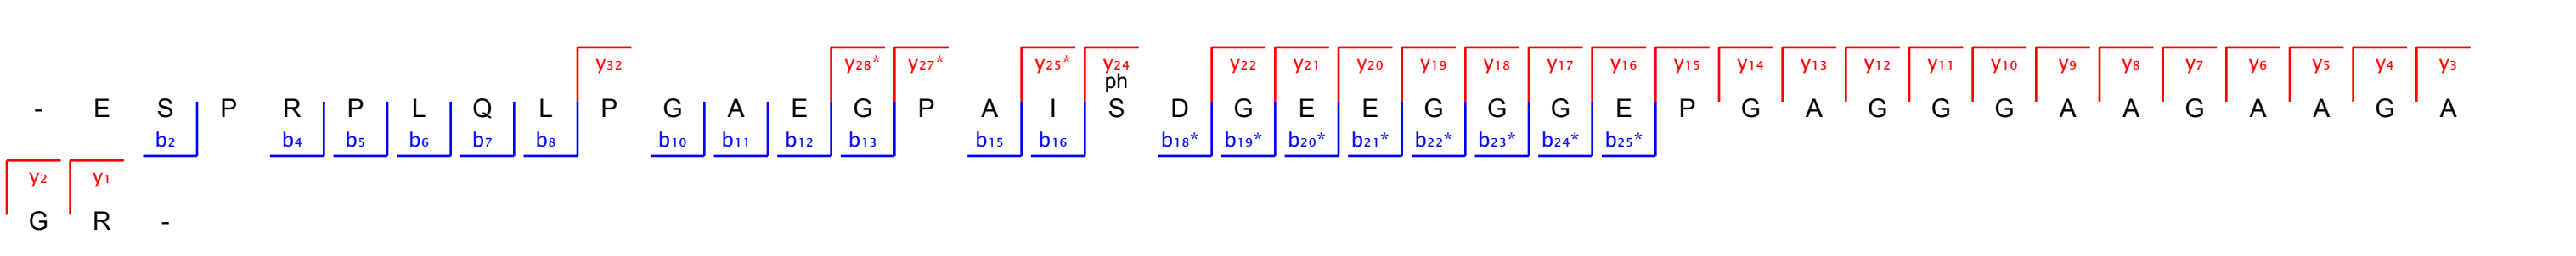

Raw file: 20171215\_MaS\_33SR\_LMH\_phospho\_03  
 Scan: 13555 Method: FTMS; HCD Score: 225.55 m/z: 988.4 Gene names: EDC4

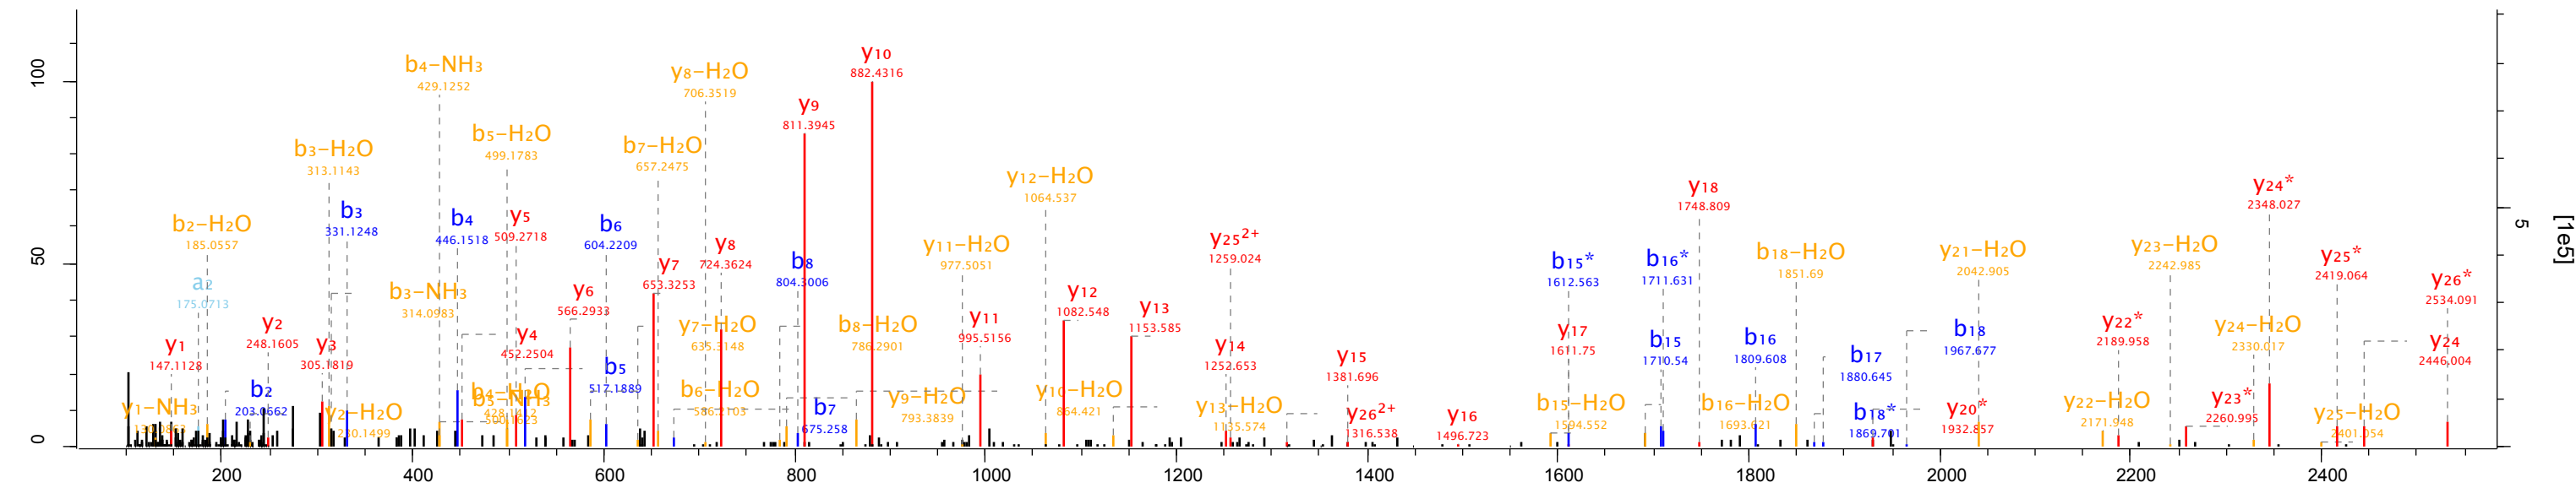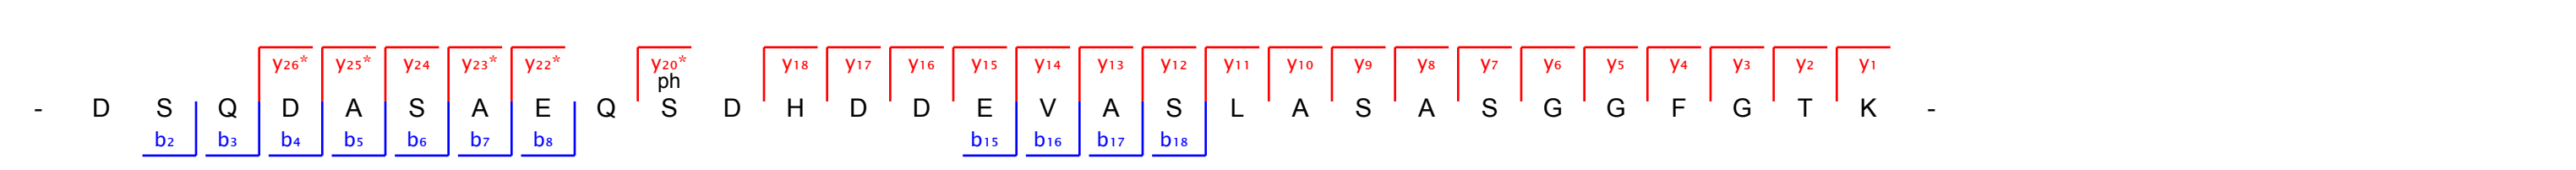



Raw file 20171215\_MaS\_33SR\_LMH\_phospho\_03 Scan 13985 Method FTMS; HCD Score 130.83 m/z 1099.99 Gene names NCAPD2

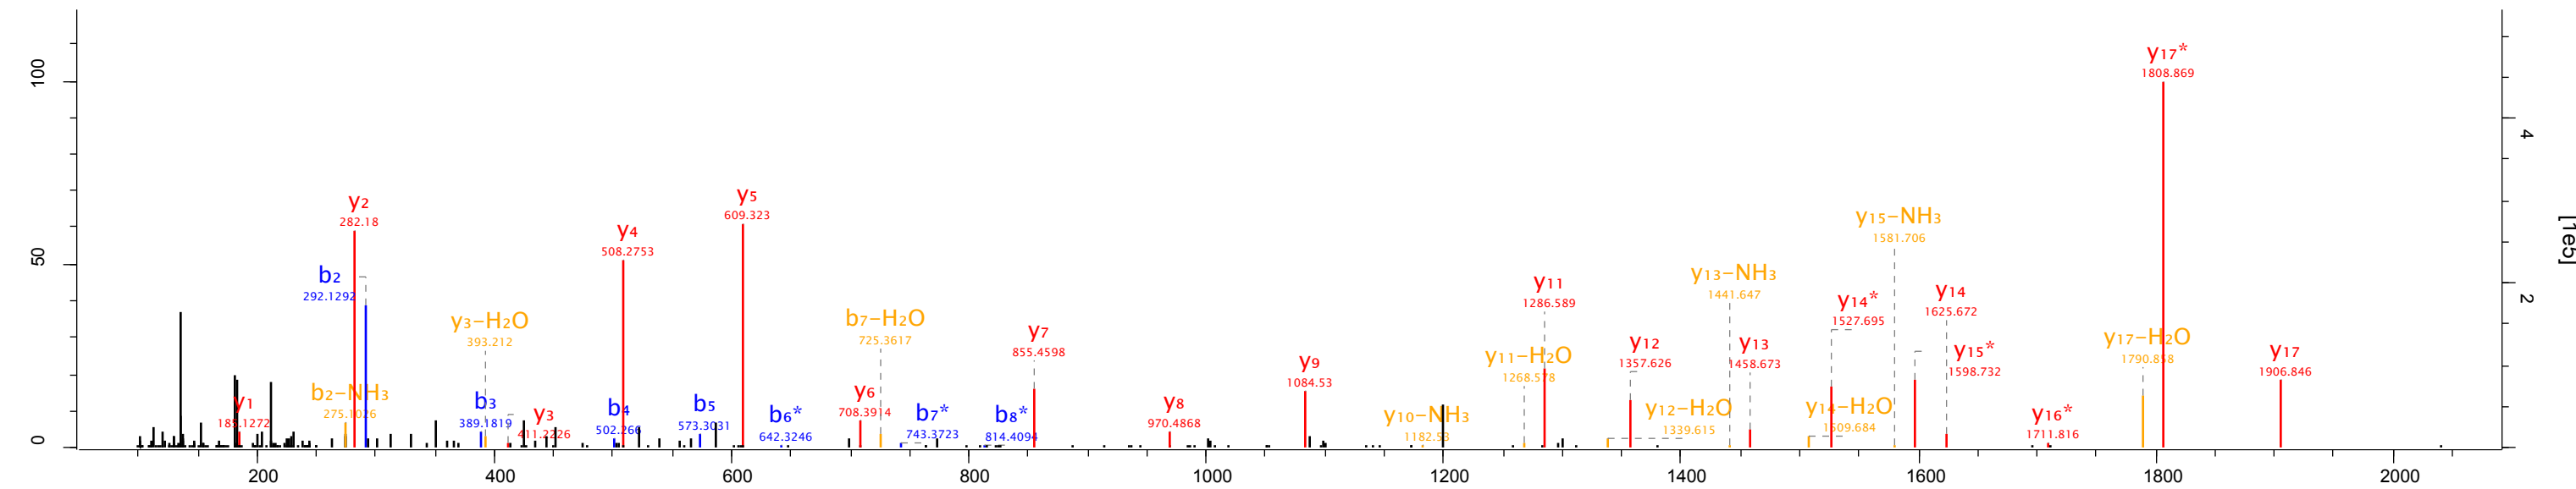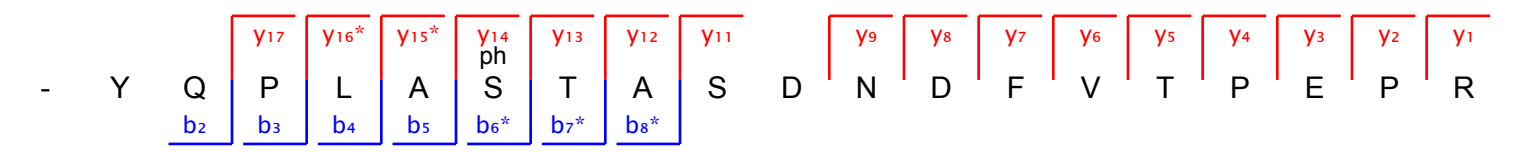

Raw file: 20171215\_MaS\_33SR\_LMH\_phospho\_03  
 Scan: 14095 Method: FTMS; HCD Score: 163.62 m/z: 950.41 Gene names: SYNRG

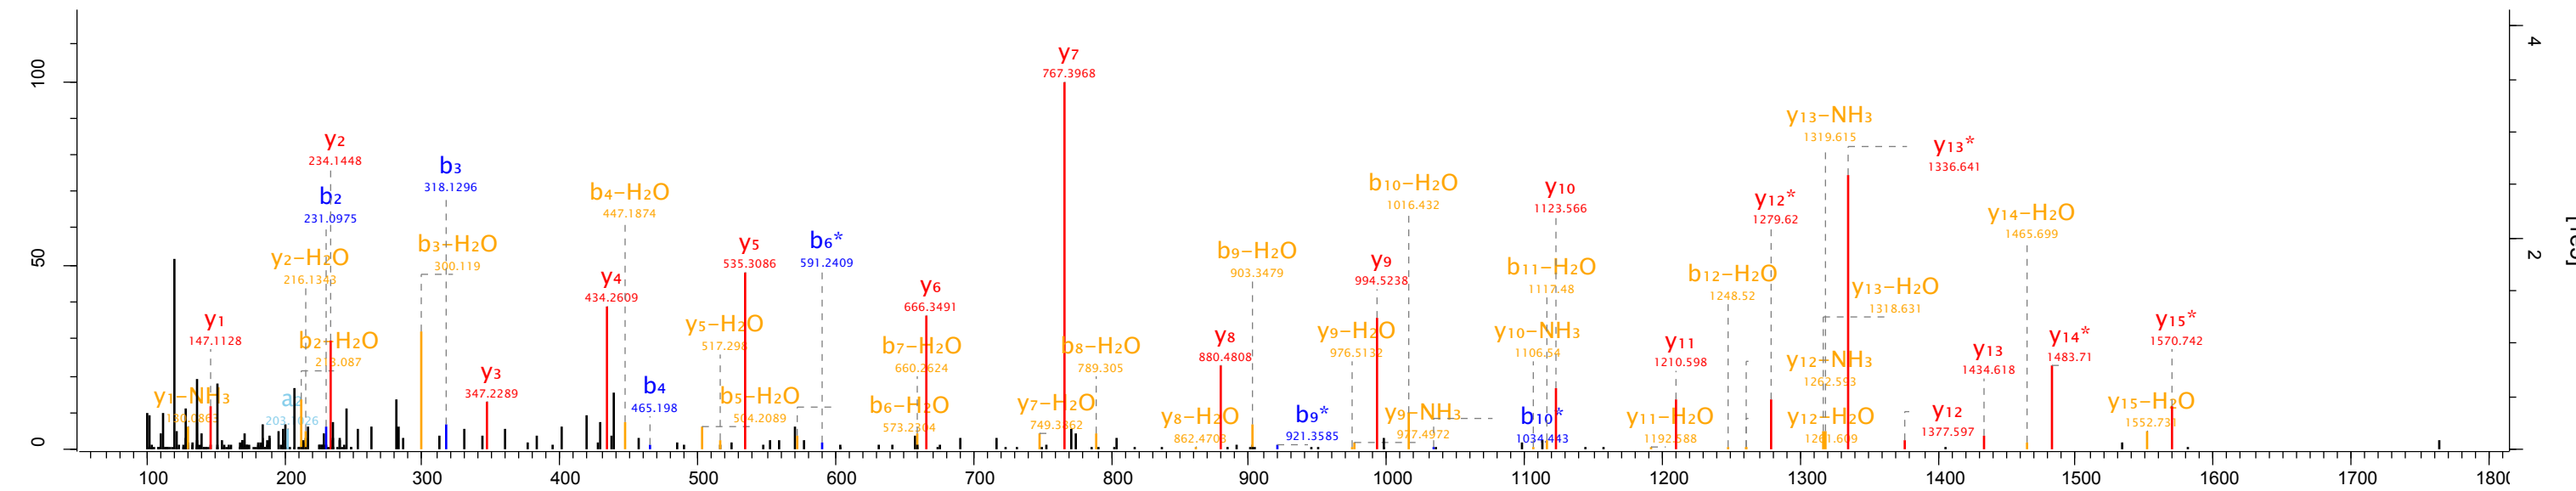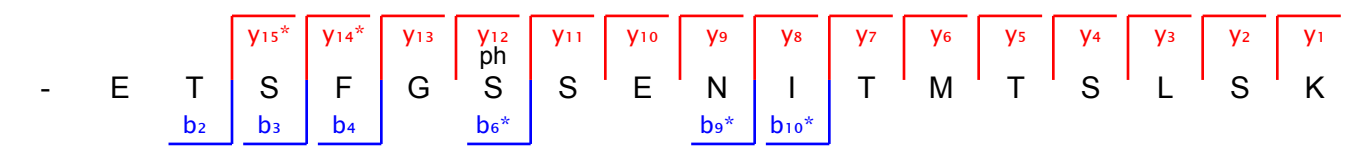

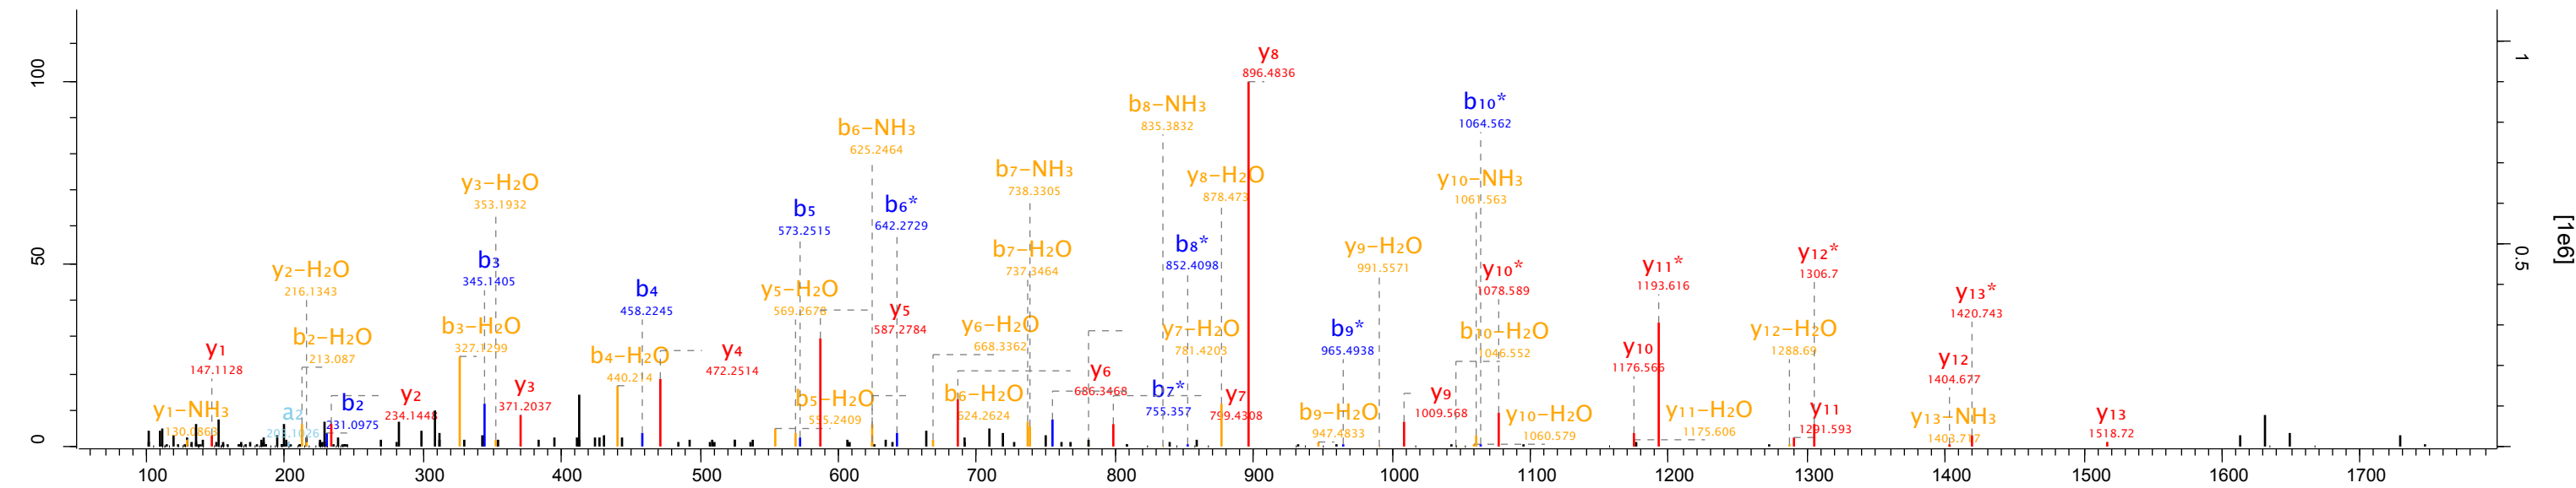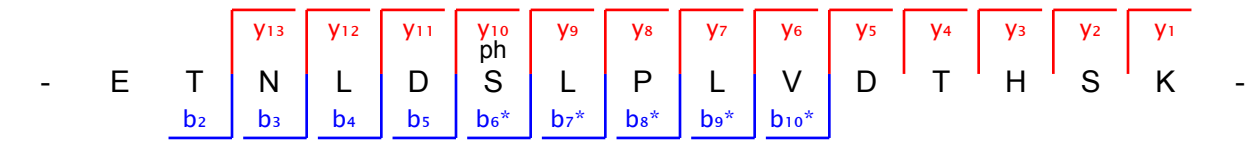

Raw file: 20171215\_MaS\_33SR\_LMH\_phospho\_03  
 Scan: 14215 Method: FTMS; HCD Score: 174.39 m/z: 800.32 Gene names: TNKS1BP1

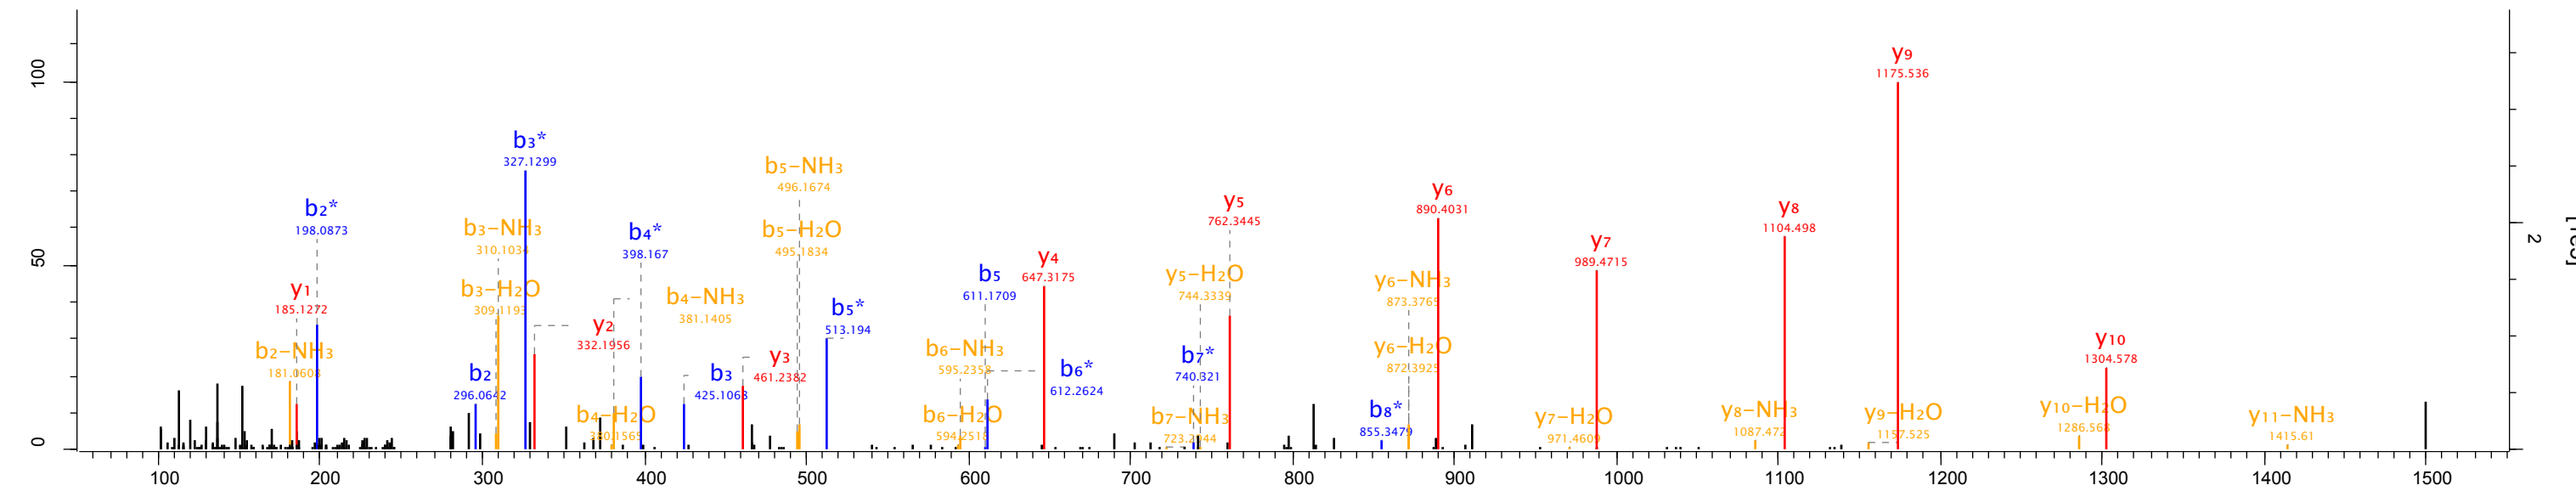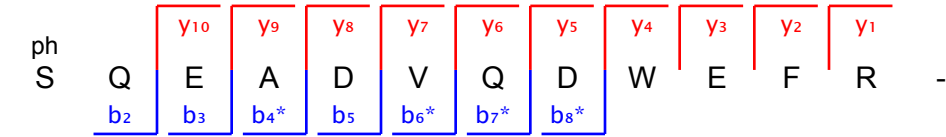

Raw file 20171215\_MaS\_33SR\_LMH\_phospho\_03 Scan 14275 Method FTMS; HCD Score 54.22 m/z 876.89 Gene names PKP3

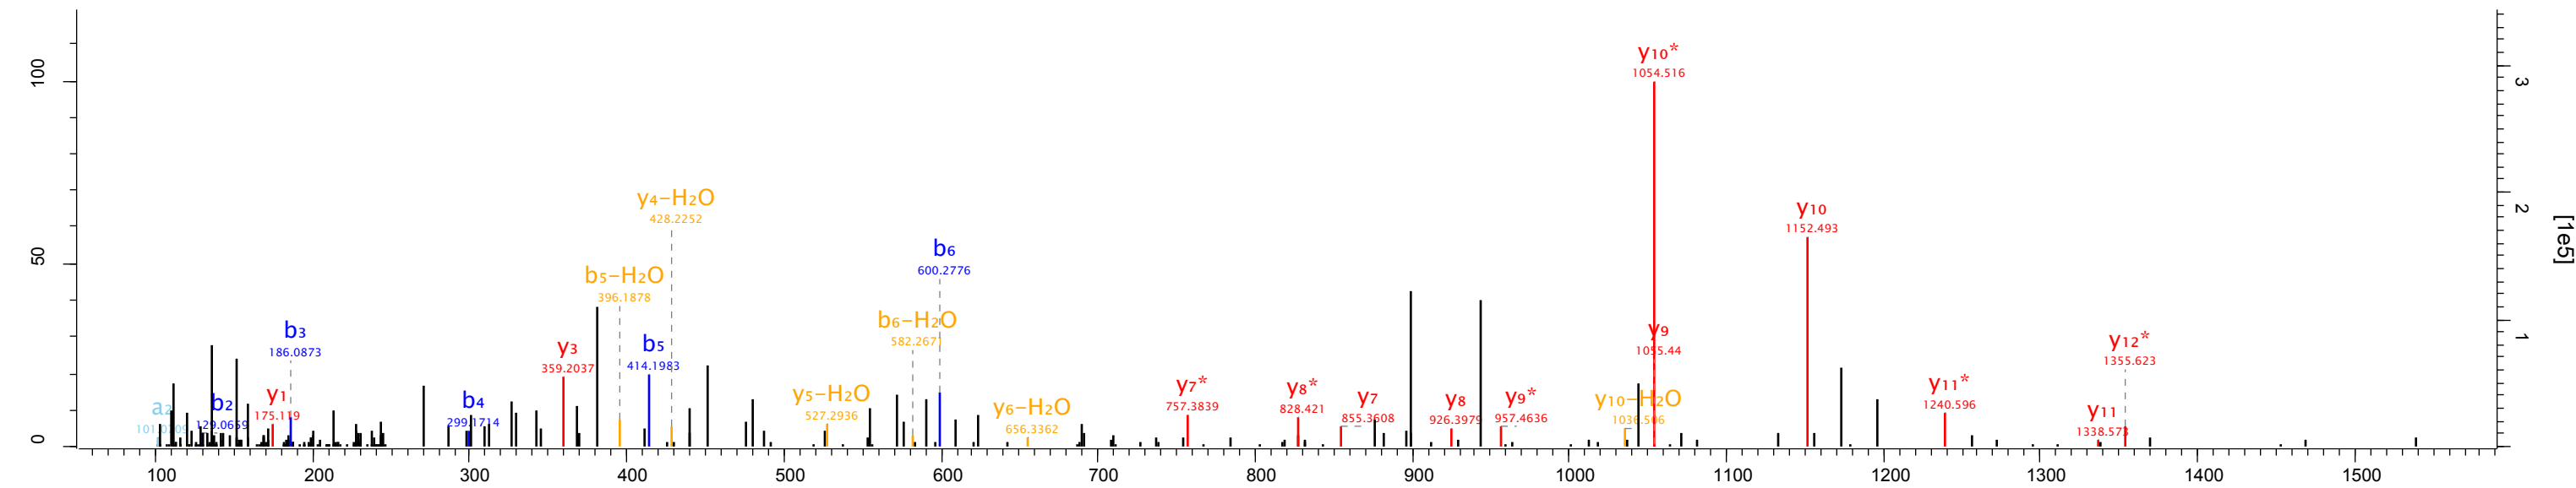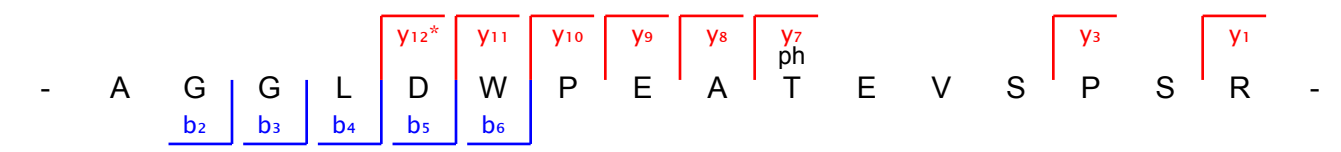

Raw file 20171215\_MaS\_33SR\_LMH\_phospho\_03 Scan 15375 Method FTMS; HCD Score 156.9 m/z 1130.18 Gene names CTTN

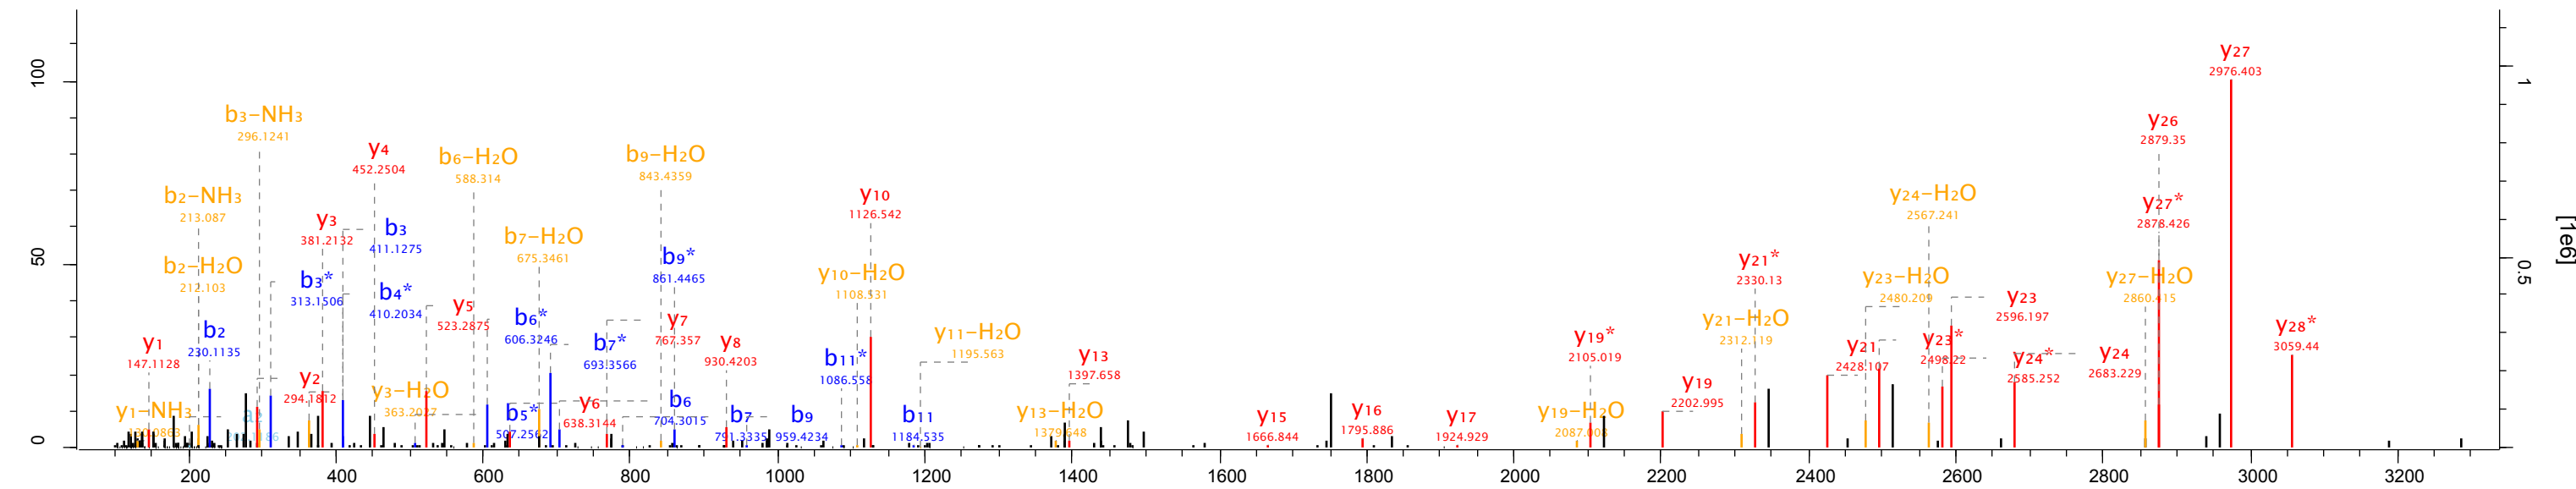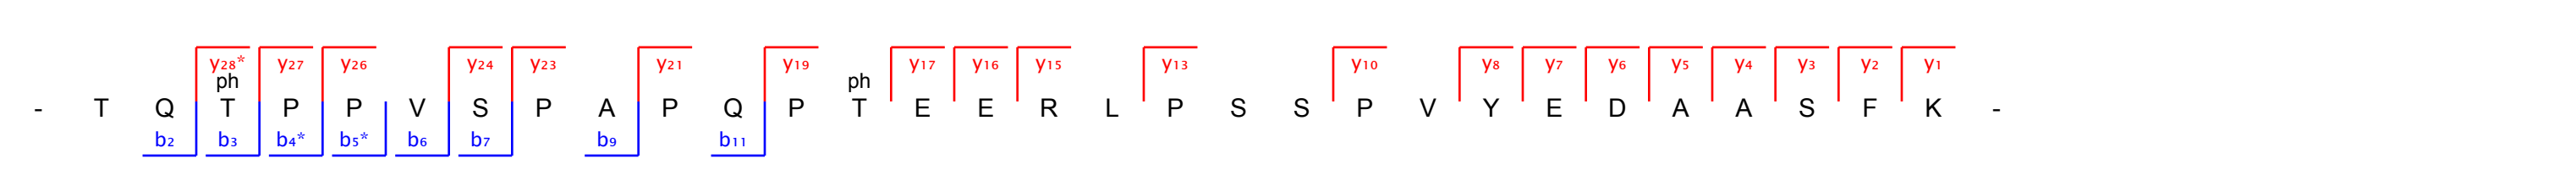

Raw file 20171215\_MaS\_33SR\_LMH\_phospho\_03 Scan 15525 Method FTMS; HCD Score 252.44 m/z 1416.09 Gene names MAP1B

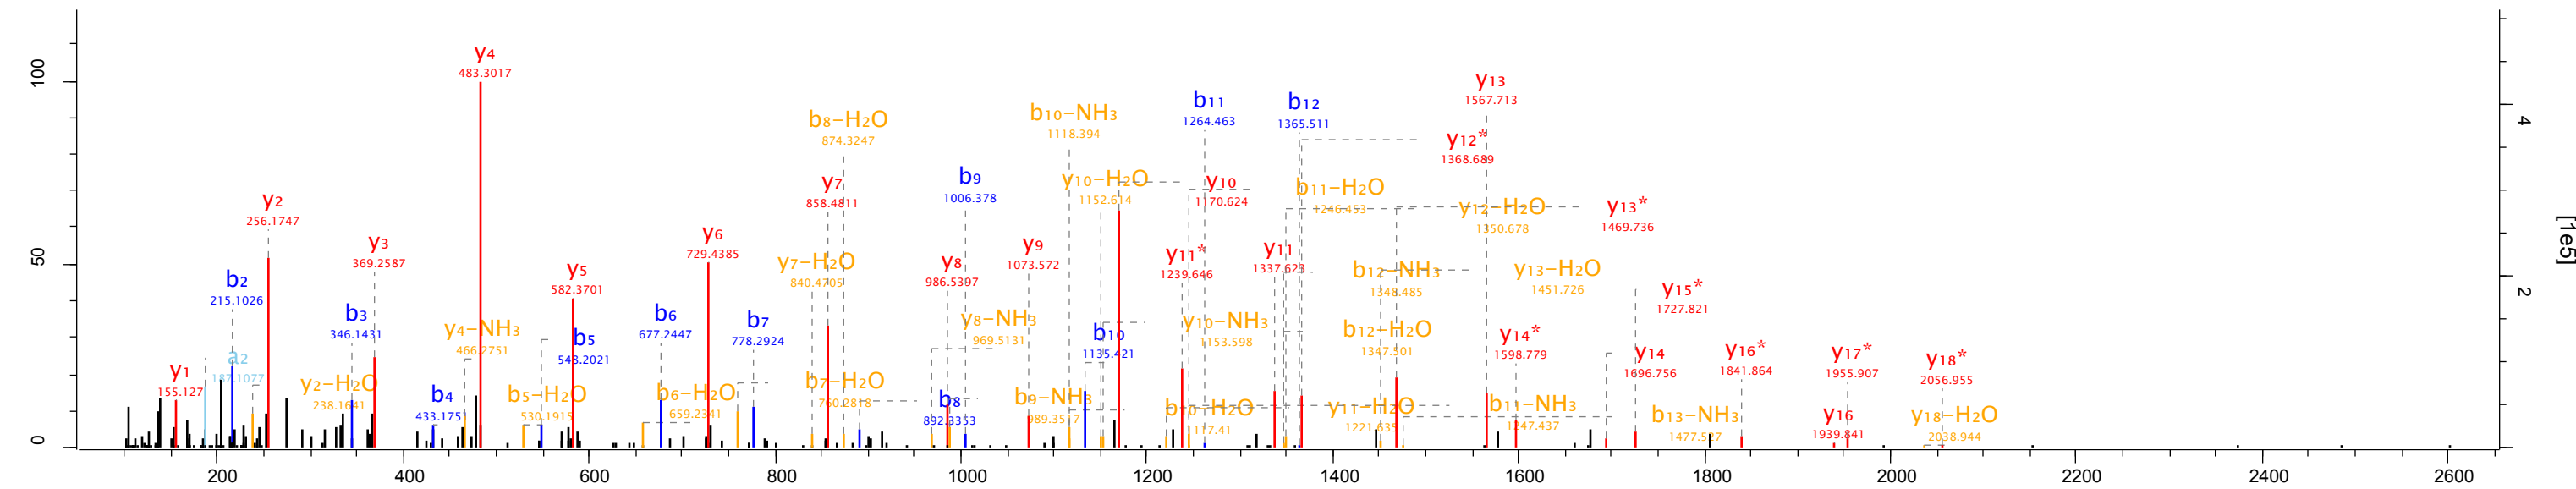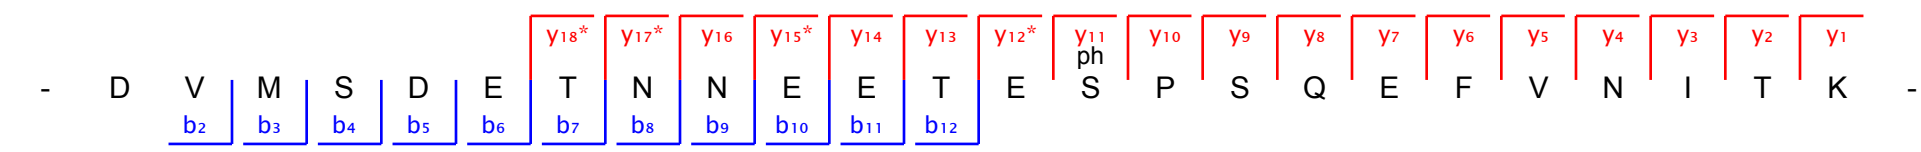

Raw file 20171215\_MaS\_33SR\_LMH\_phospho\_03 Scan 18285 Method FTMS; HCD Score 139.74 m/z 920.89 Gene names SERBP1

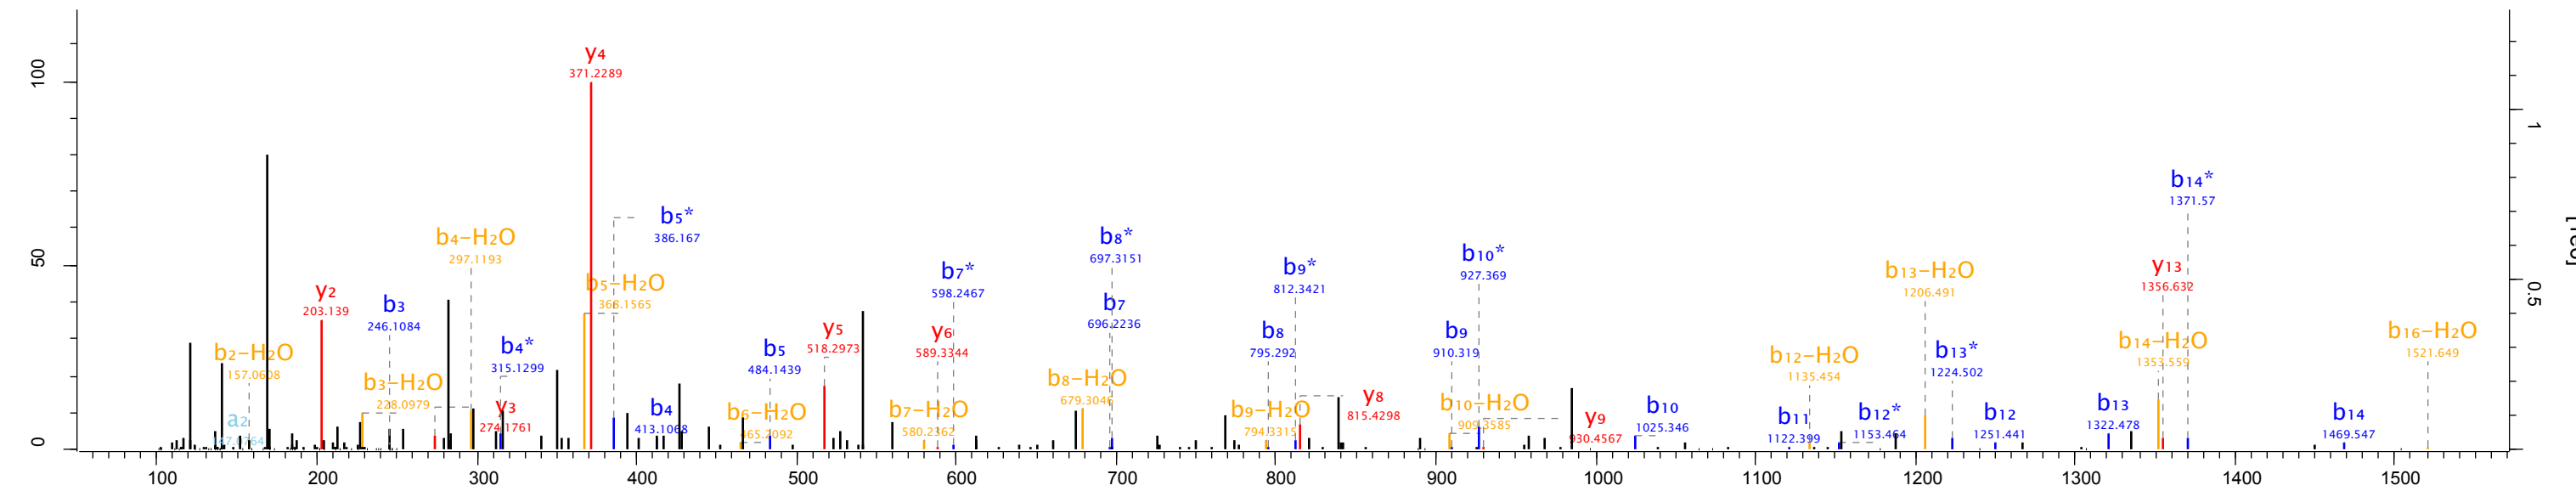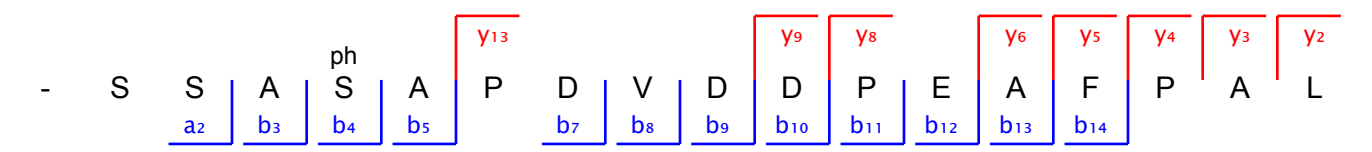



Raw file 20171215\_MaS\_33SR\_LMH\_phospho\_03 Scan 1935 Method FTMS; HCD Score 185.09 m/z 677.6 Gene names IWS1

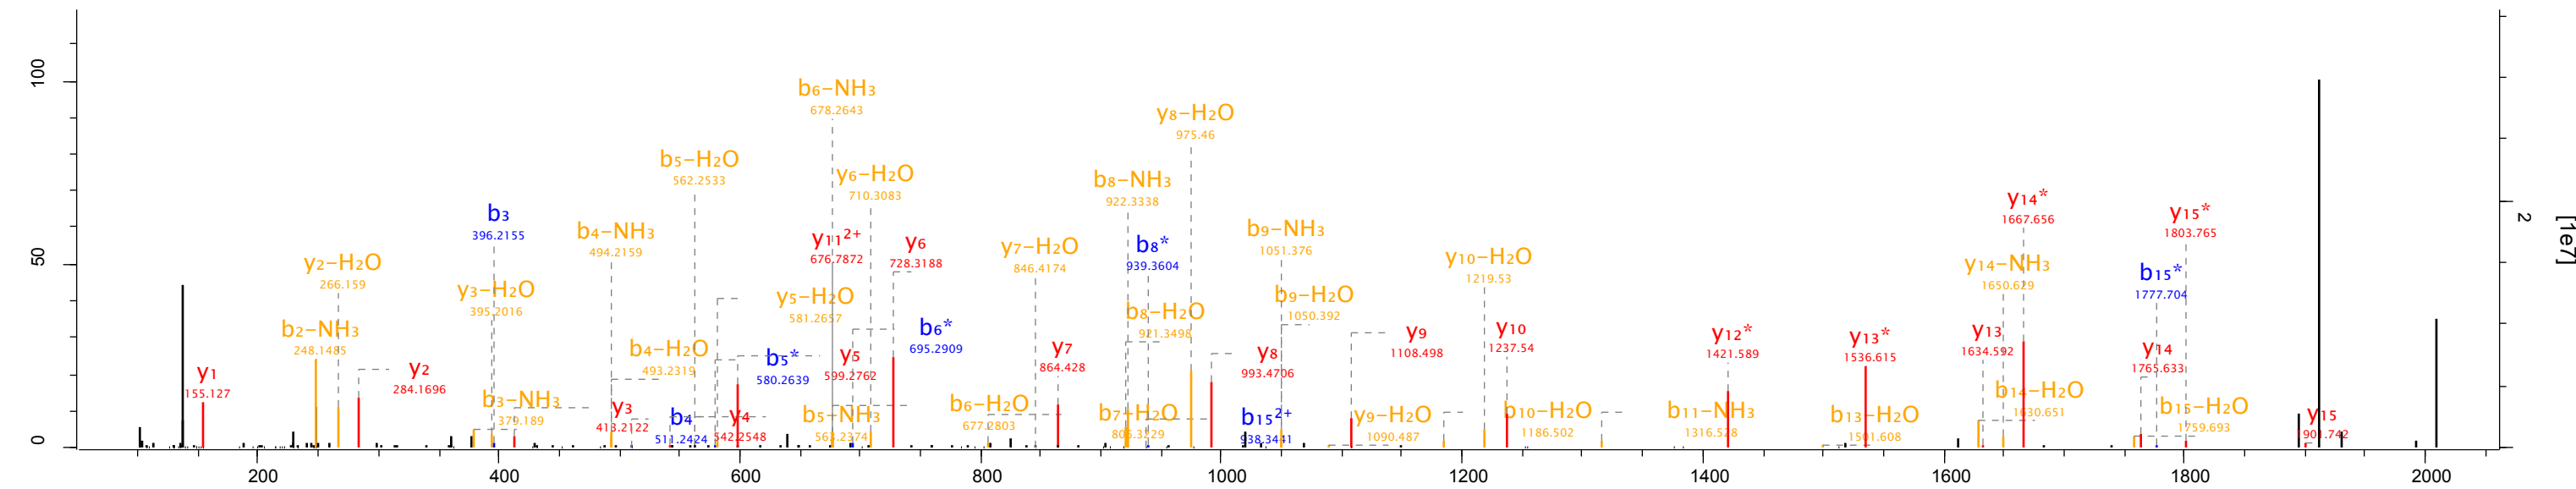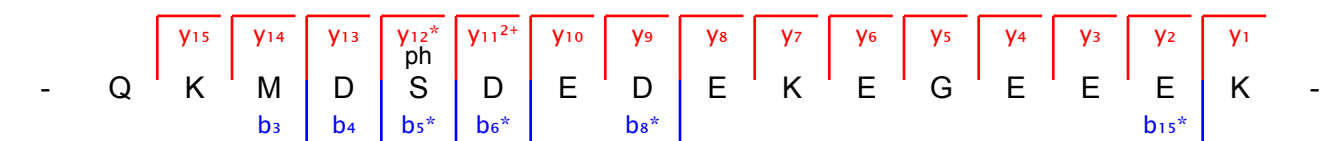

Raw file 20171215\_MaS\_33SR\_LMH\_phospho\_03 Scan 2045 Method FTMS; HCD Score 200.99 m/z 552.9 Gene names TBC1D4

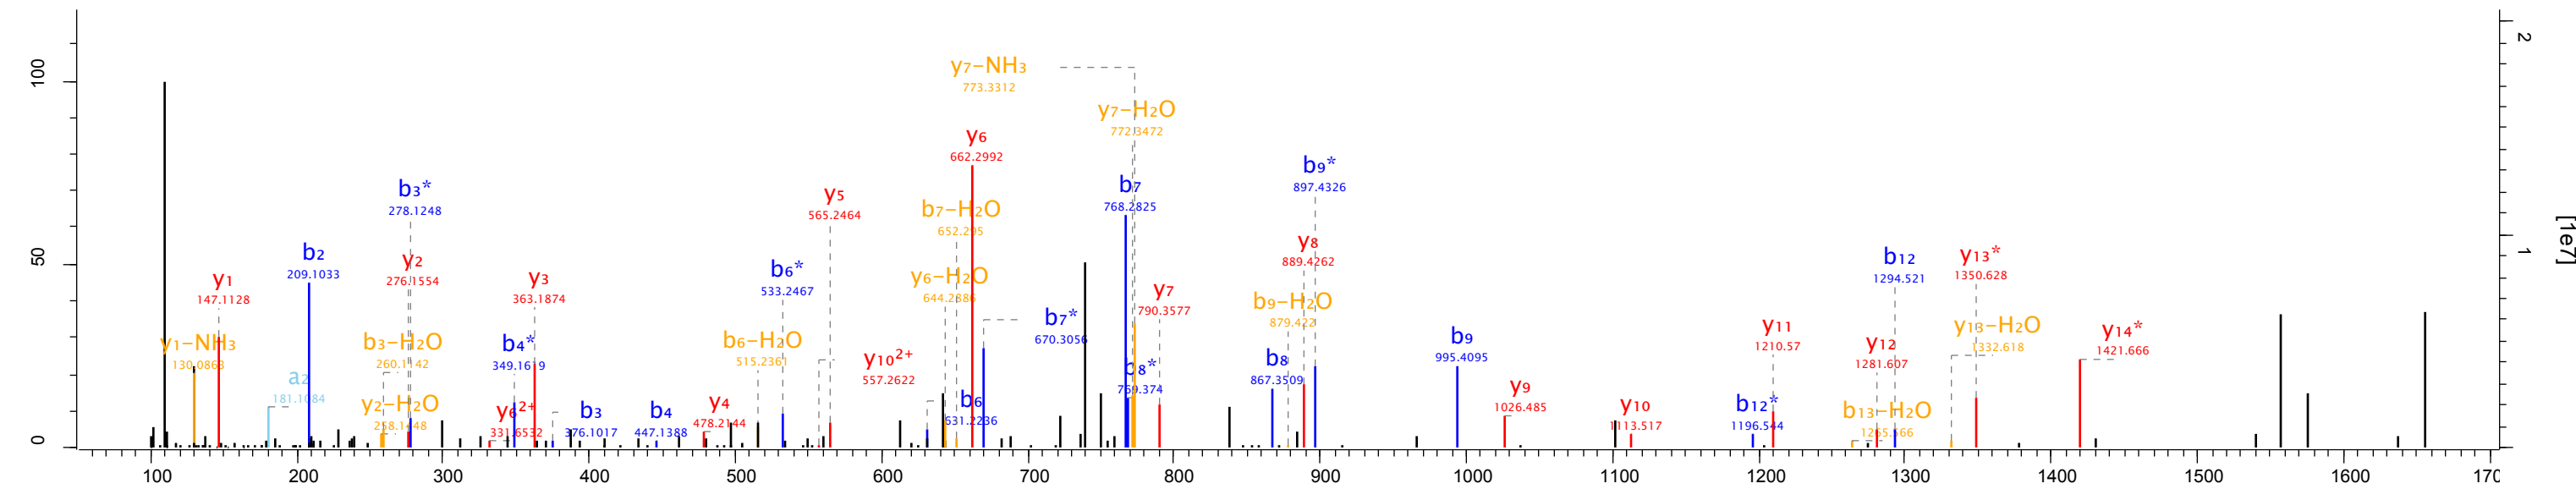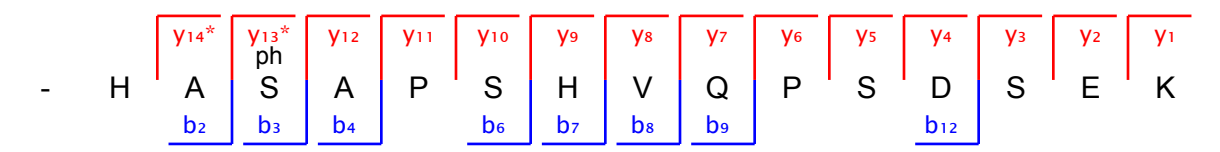

Raw file: 20171215\_MaS\_33SR\_LMH\_phospho\_03  
 Scan: 2075 Method: FTMS; HCD Score: 98.08 m/z: 732.34 Gene names: ERC1

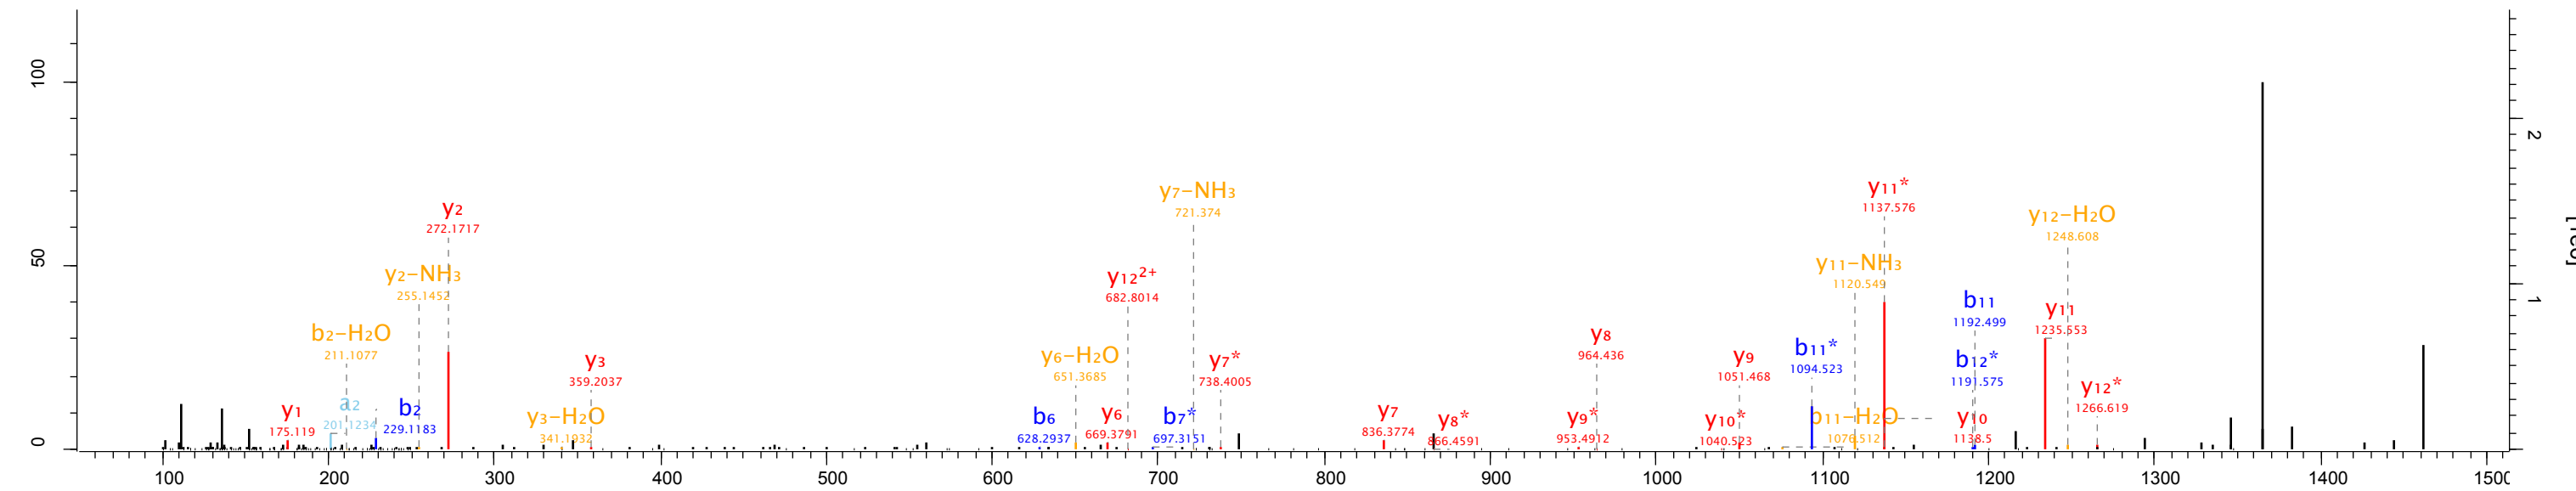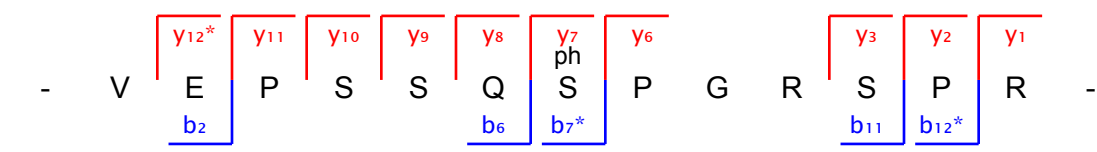

Raw file 20171215\_MaS\_33SR\_LMH\_phospho\_03 Scan 2585 Method FTMS; HCD Score 224.02 m/z 924.91 Gene names CLASP1

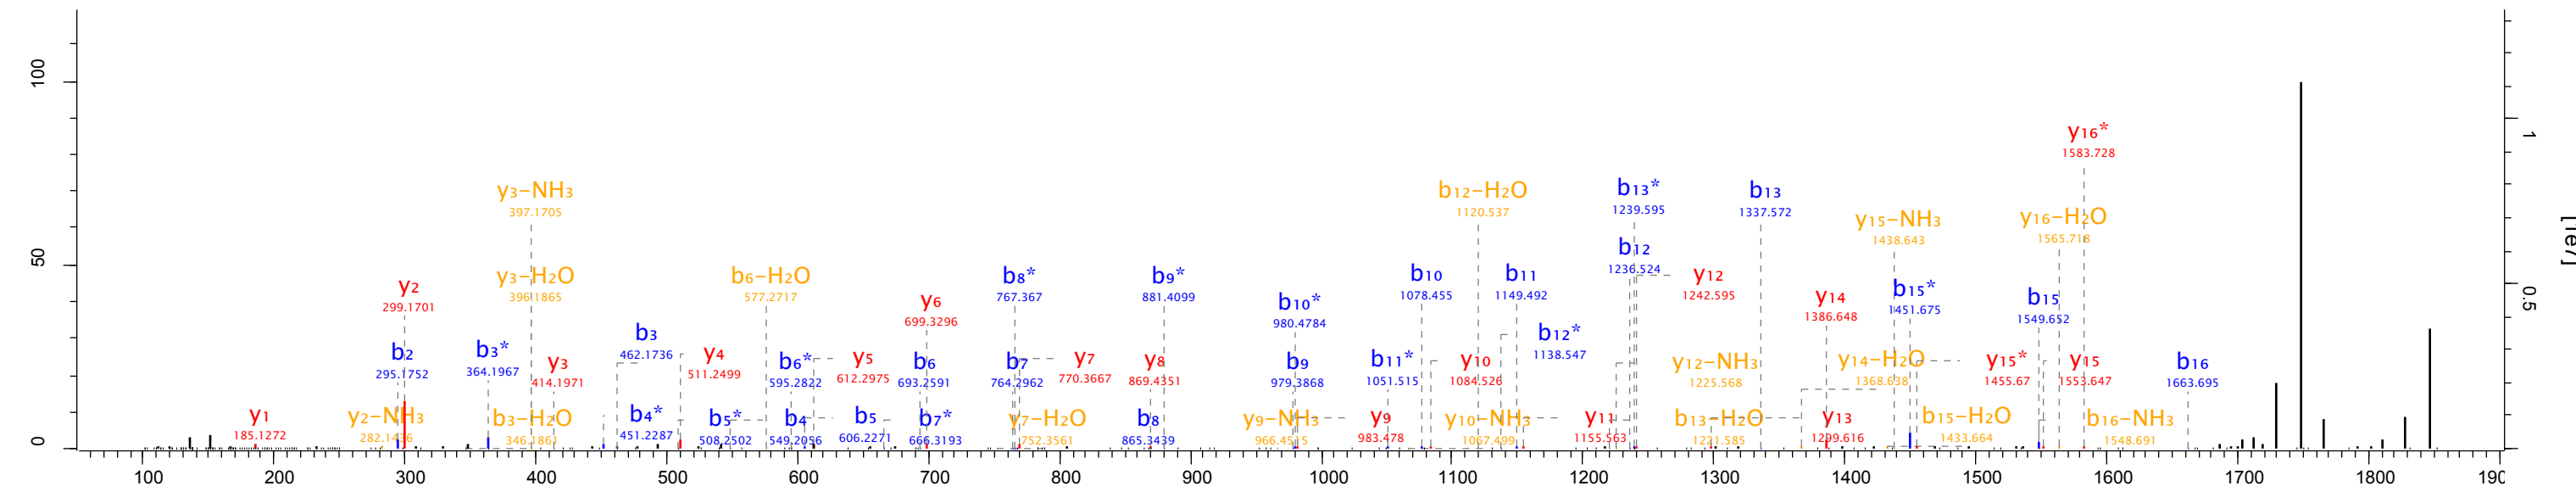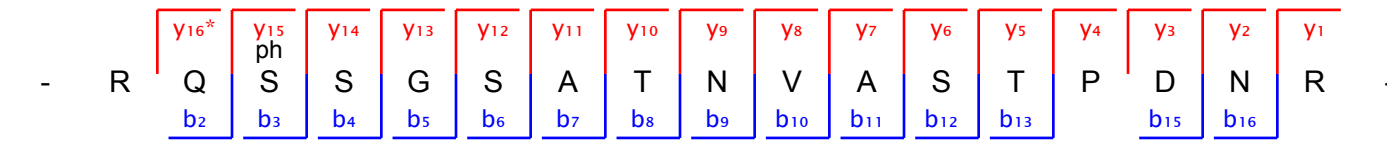

Raw file 20171215\_MaS\_33SR\_LMH\_phospho\_03 Scan 2625 Method FTMS; HCD Score 119.92 m/z 621.26 Gene names SSH1

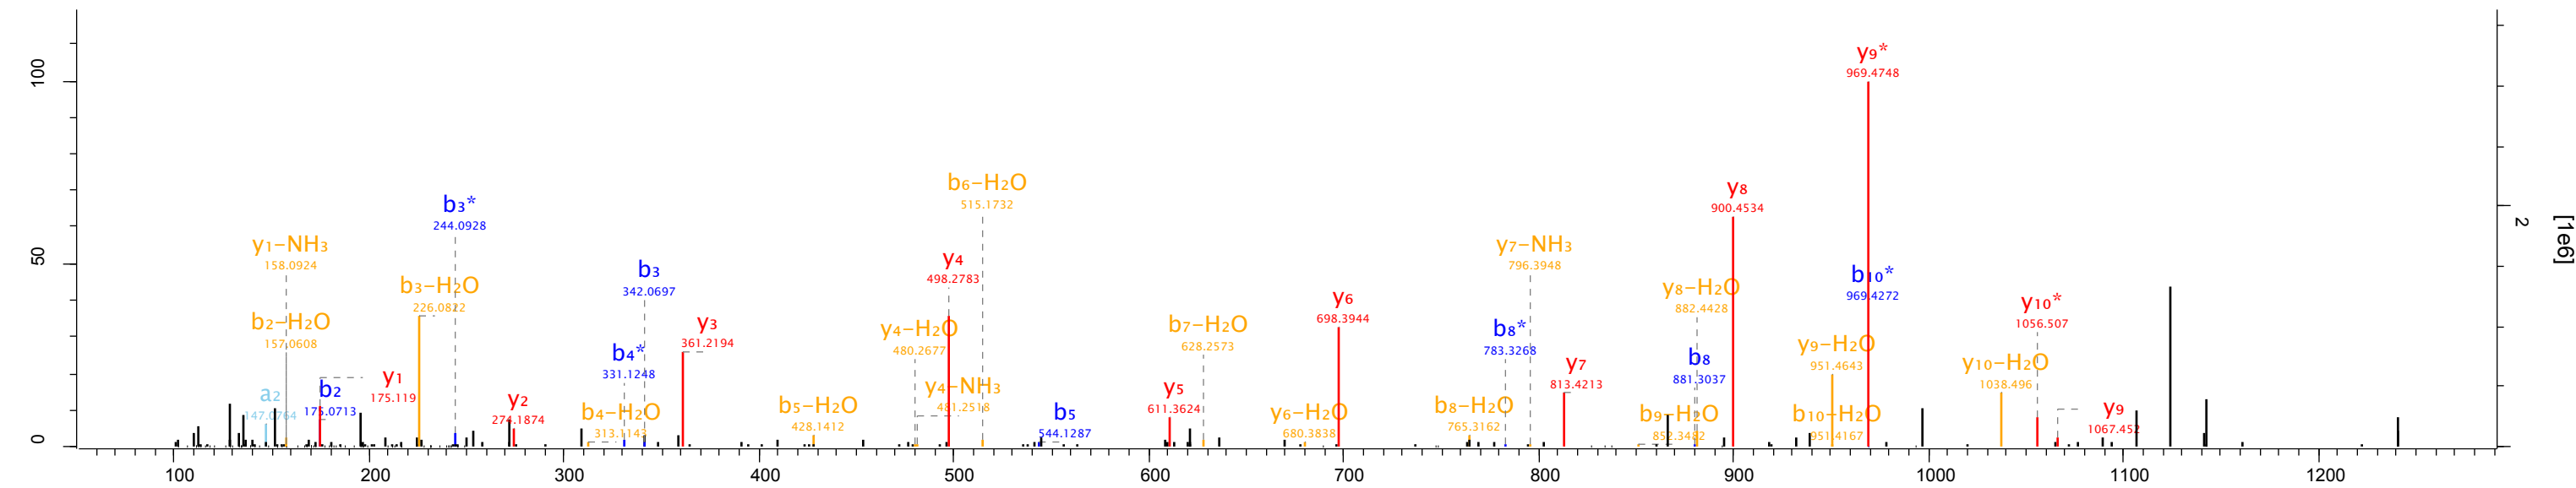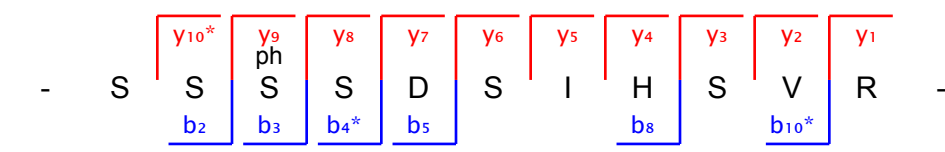

Raw file 20171215\_MaS\_33SR\_LMH\_phospho\_03 Scan 2655 Method FTMS; HCD Score 79.74 m/z 418.23 Gene names SRRM2

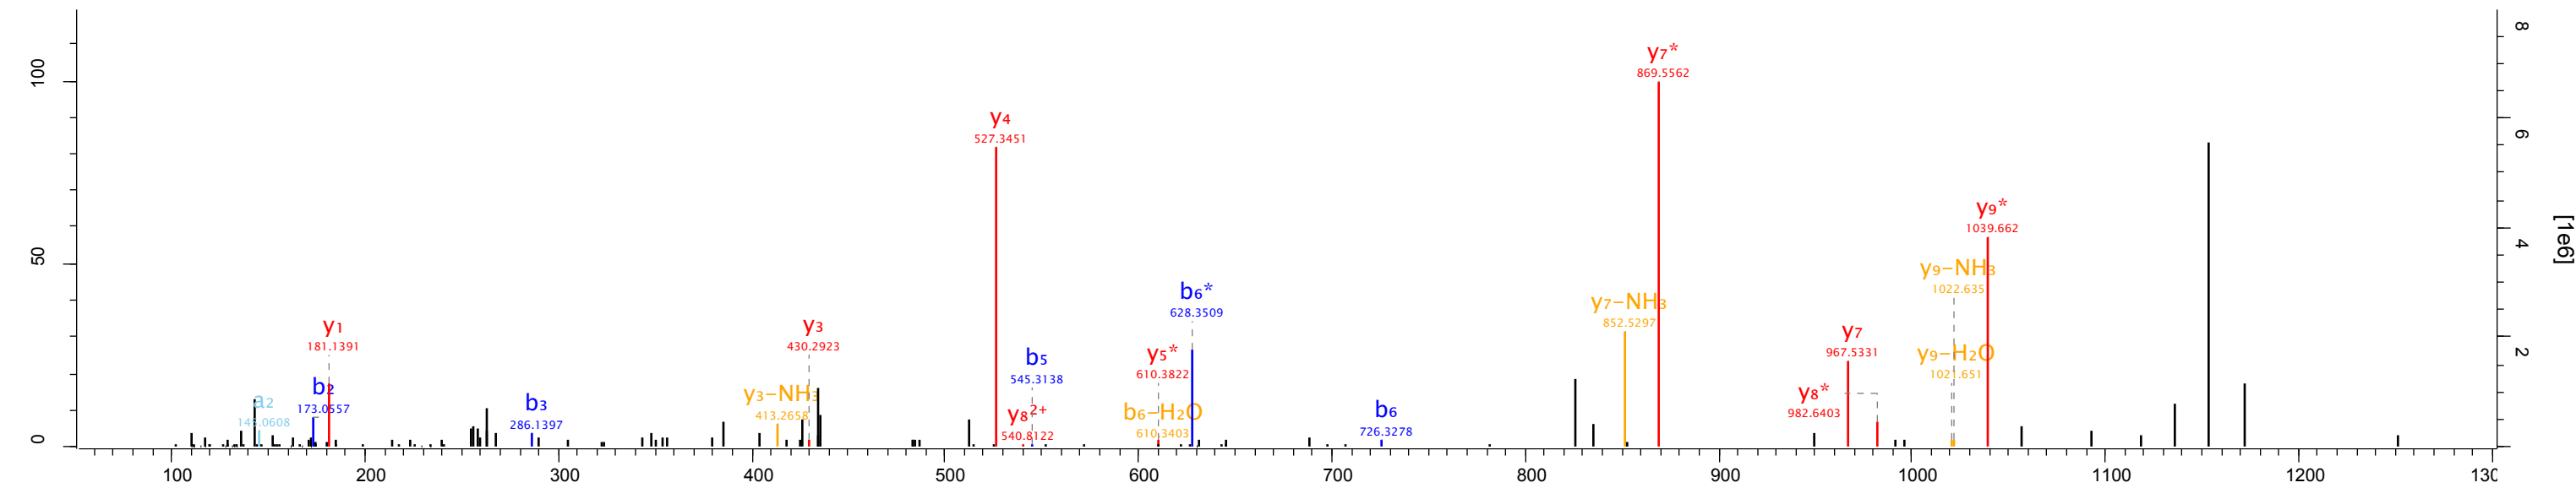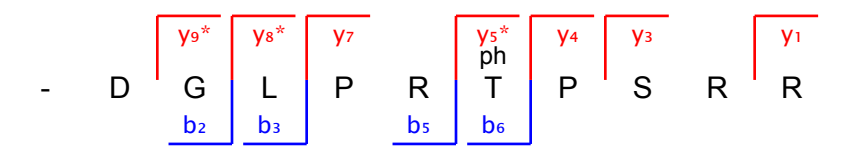

Raw file 20171215\_MaS\_33SR\_LMH\_phospho\_03 Scan 2705 Method FTMS; HCD Score 55.34 m/z 577.94 Gene names MED1

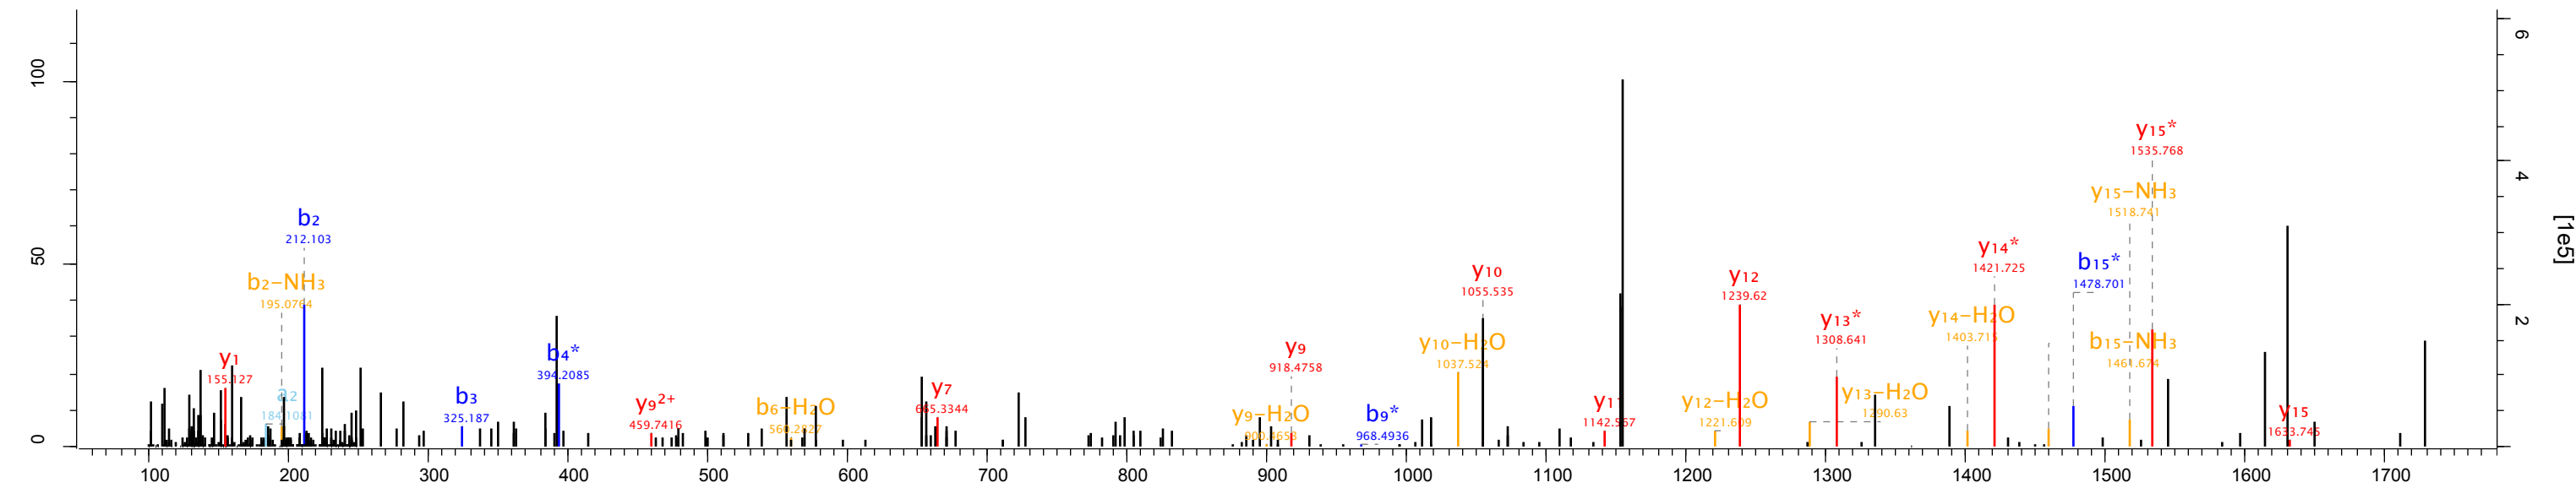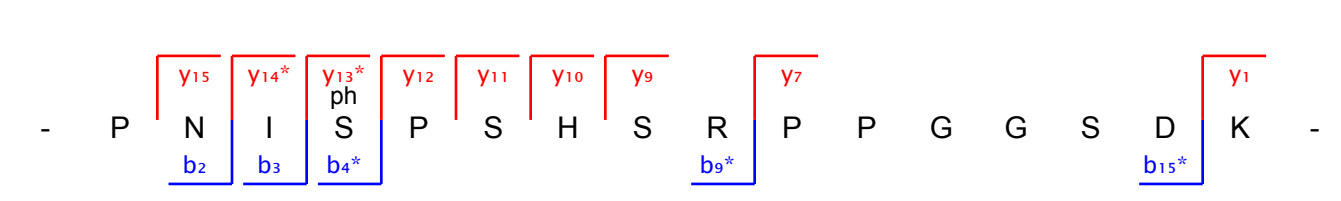

Raw file 20171215\_MaS\_33SR\_LMH\_phospho\_03 Scan 2735 Method FTMS; HCD Score 156 m/z 545.29 Gene names ESF1

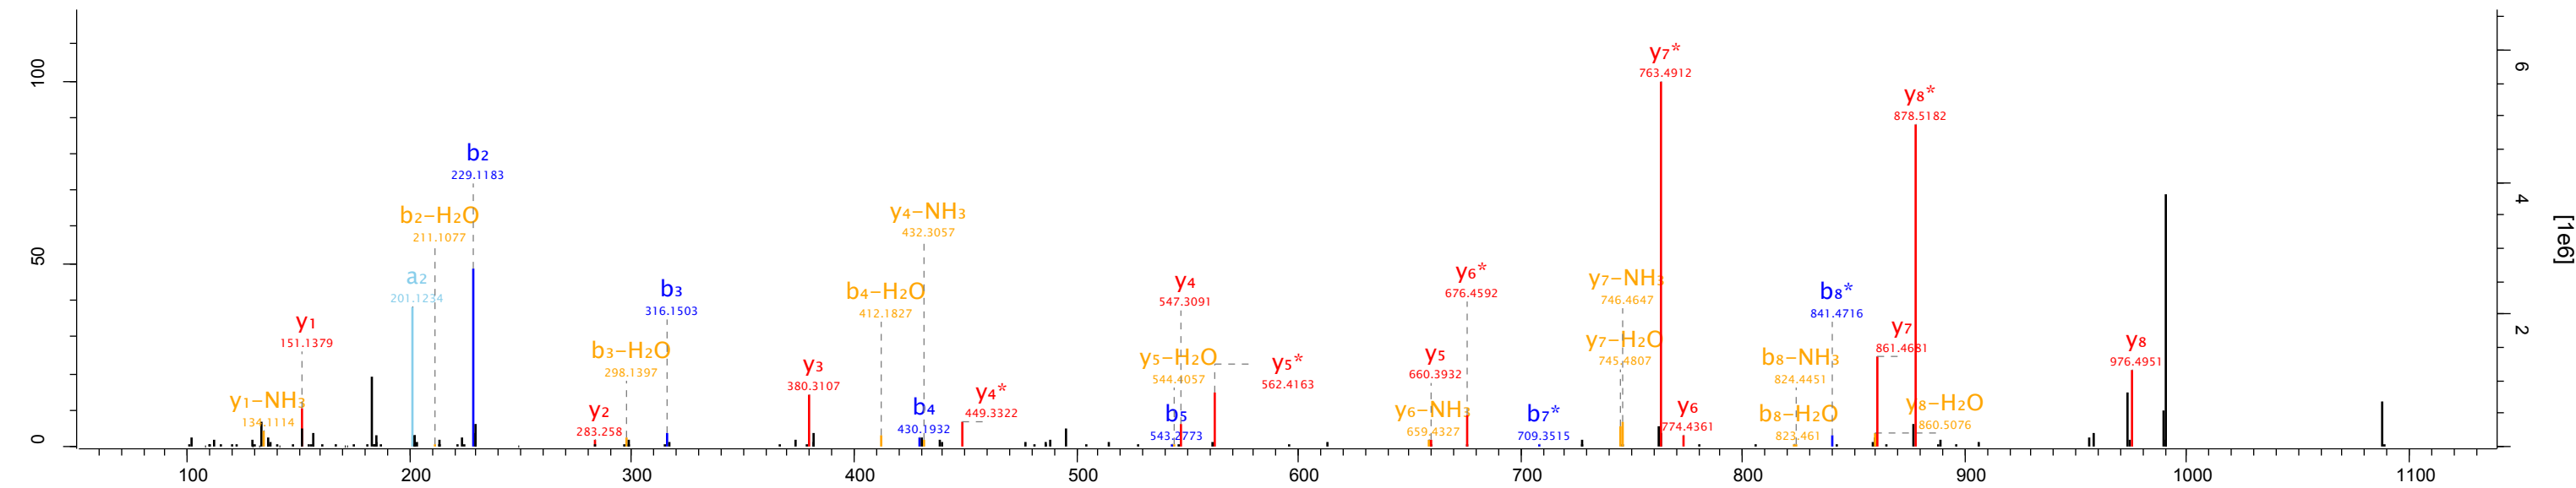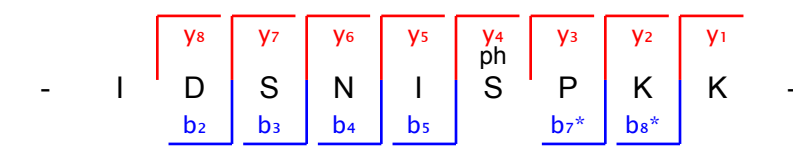



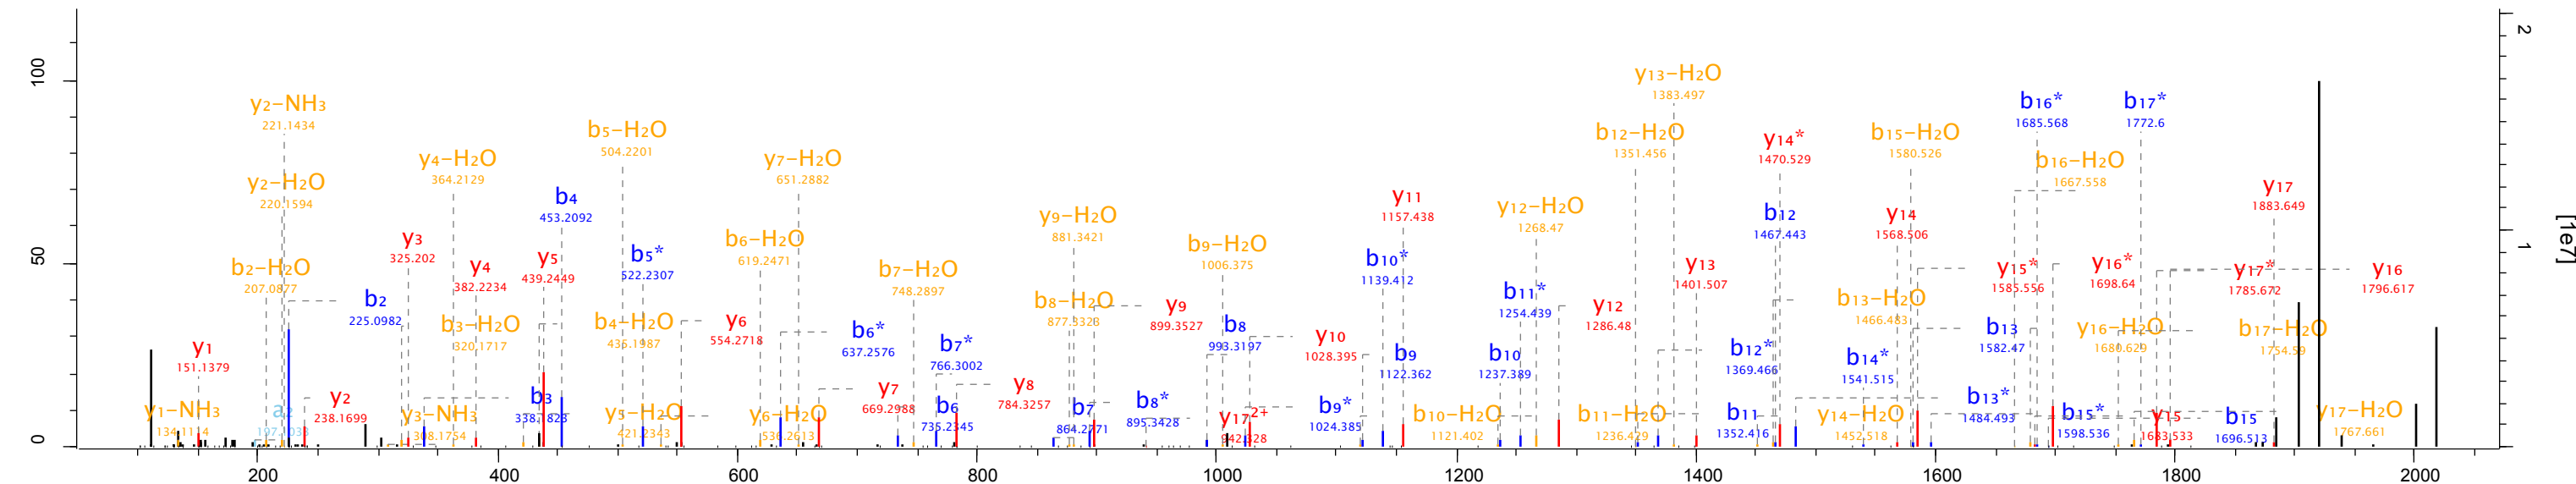

- H 

|     |     |     |           |     |     |     |     |     |     |     |     |      |     |      |      |    |
|-----|-----|-----|-----------|-----|-----|-----|-----|-----|-----|-----|-----|------|-----|------|------|----|
| y17 | y16 | y15 | y14<br>ph | y13 | y12 | y11 | y10 | y9  | y8  | y7  | y6  | y5   | y4  | y3   | y2   | y1 |
| S   | L   | D   | S         | D   | E   | E   | E   | D   | D   | D   | D   | G    | G   | S    | S    | K  |
| b2  | b3  | b4  | b5*       | b6  | b7  | b8  | b9  | b10 | b11 | b12 | b13 | b14* | b15 | b16* | b17* |    |

 -

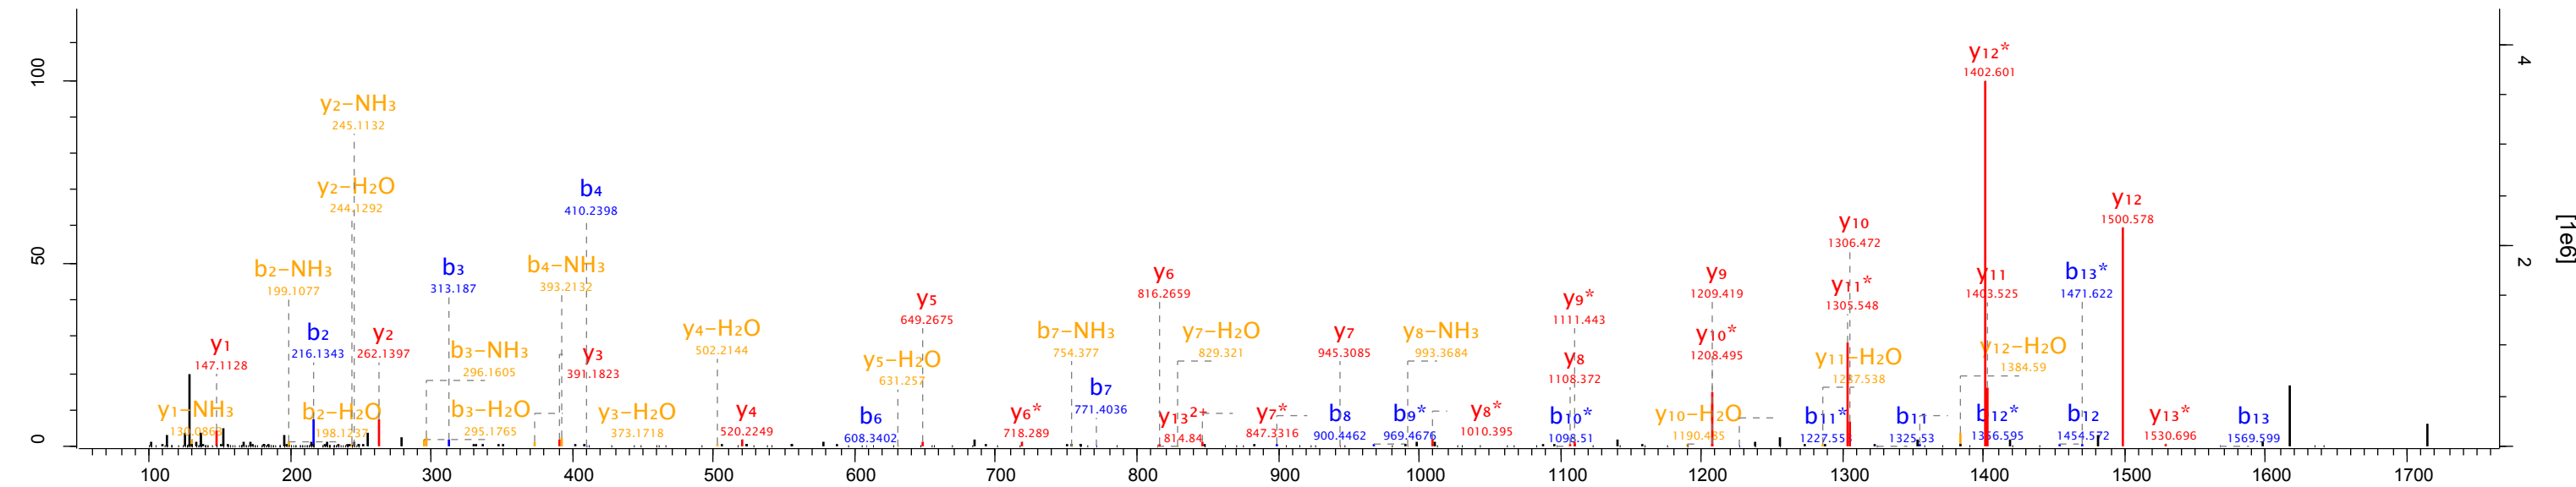

- S -

|      |     |     |     |    |    |     |                  |     |     |     |    |    |
|------|-----|-----|-----|----|----|-----|------------------|-----|-----|-----|----|----|
| y13* | y12 | y11 | y10 | y9 | y8 | y7  | y6 <sub>ph</sub> | y5  | y4  | y3  | y2 | y1 |
| K    | P   | P   | P   | T  | Y  | E   | S                | E   | E   | E   | D  | K  |
| b2   | b3  | b4  | b6  | b7 | b8 | b9* | b10*             | b11 | b12 | b13 |    |    |

Raw file 20171215\_MaS\_33SR\_LMH\_phospho\_03 Scan 3315 Method FTMS; HCD Score 235.61 m/z 892.84 Gene names HNRNPA1

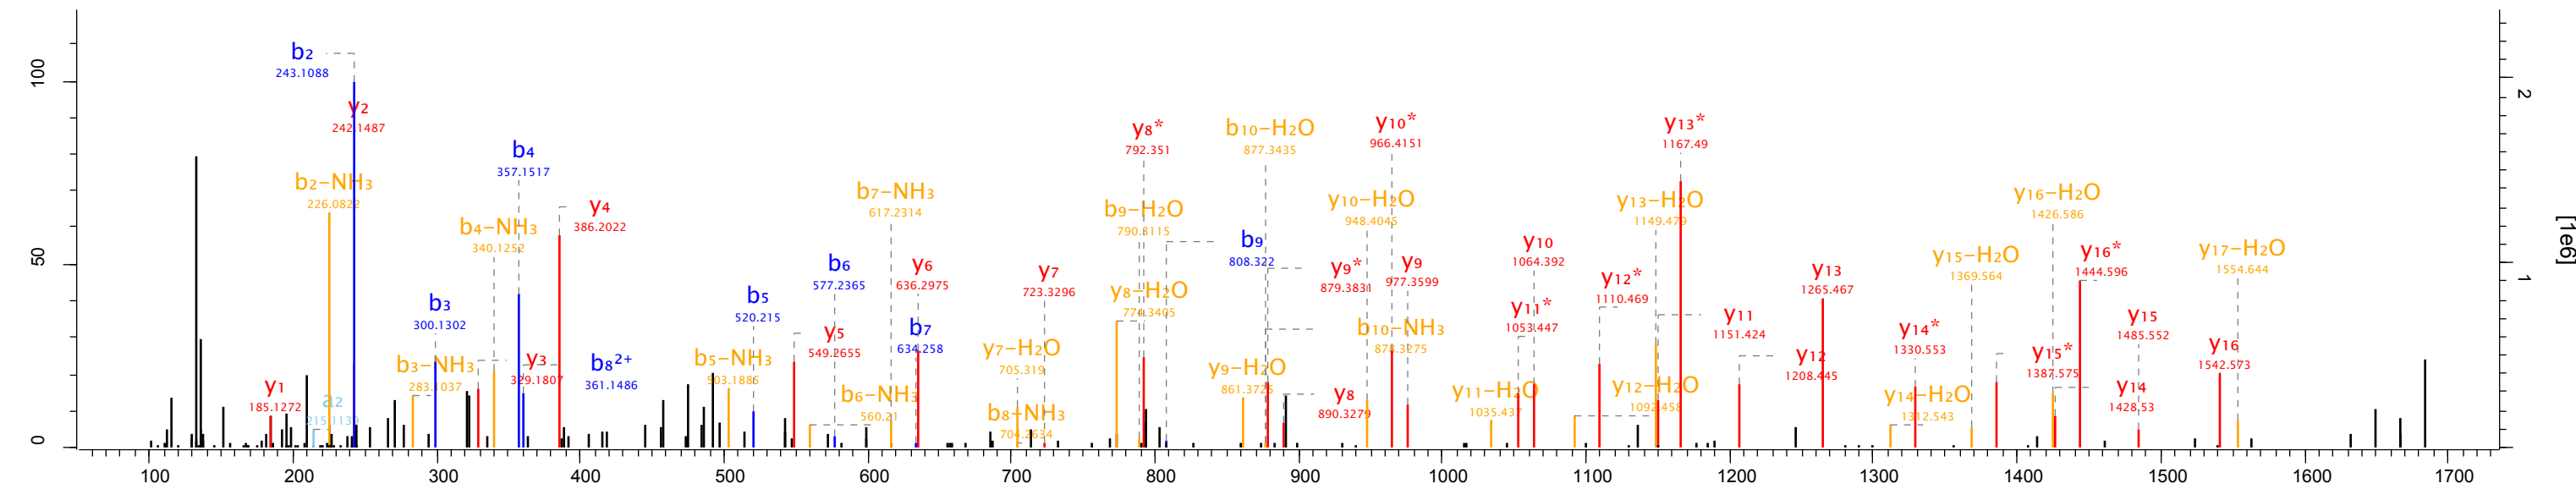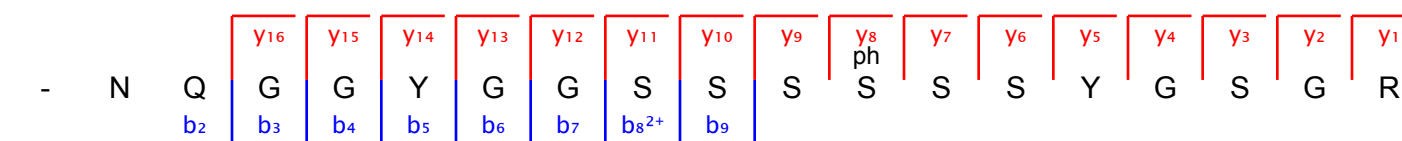

Raw file: 20171215\_MaS\_33SR\_LMH\_phospho\_03  
 Scan: 3435 Method: FTMS; HCD Score: 275.39 m/z: 1115.42 Gene names: RBM33

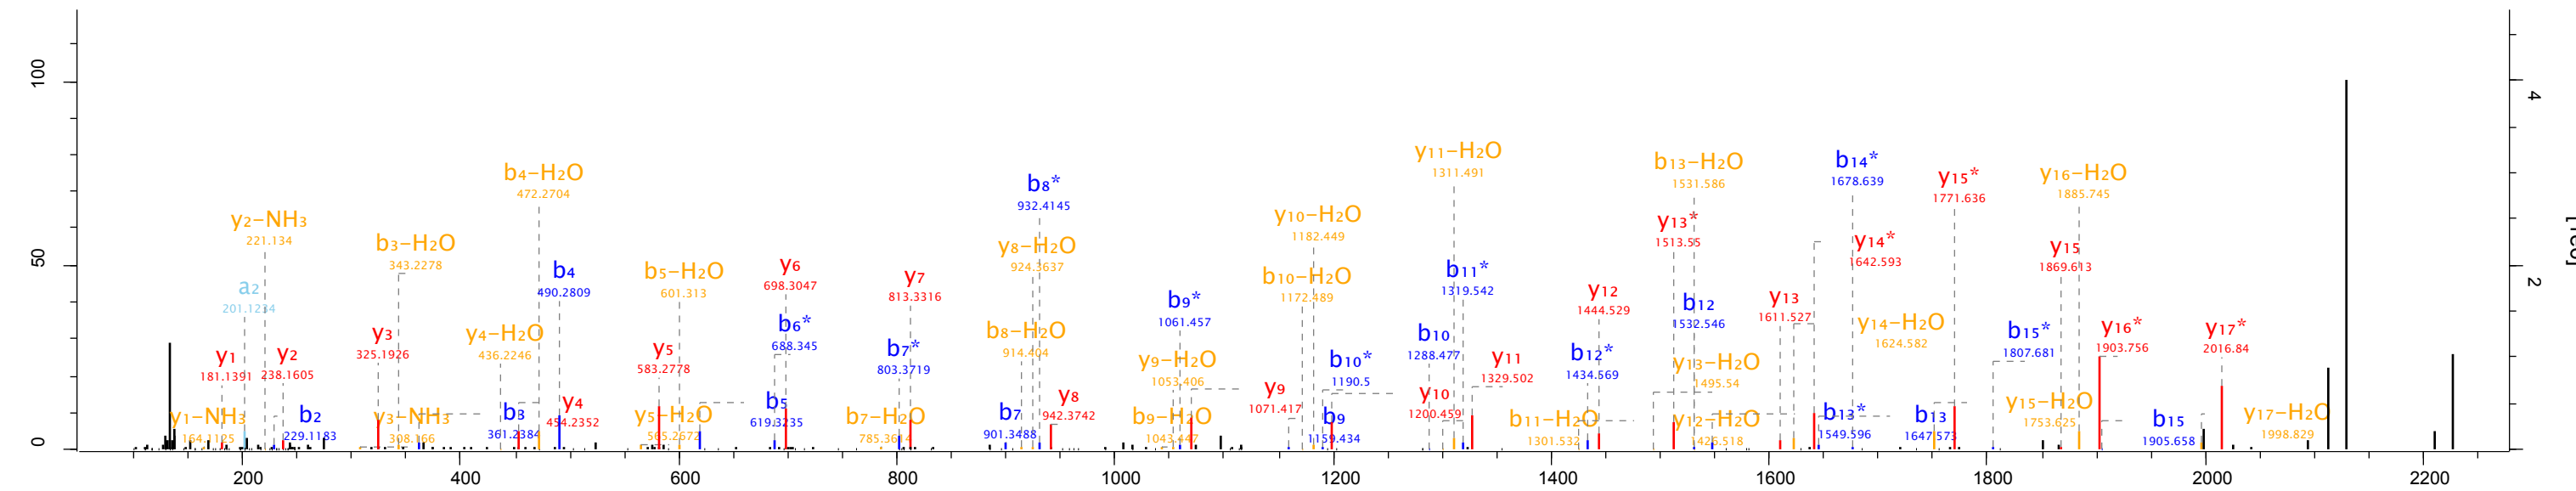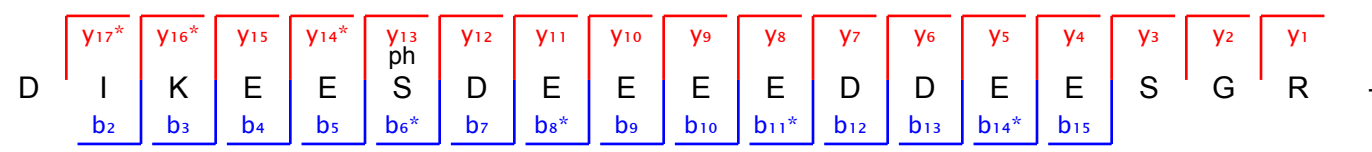

Raw file 20171215\_MaS\_33SR\_LMH\_phospho\_03 Scan 3525 Method FTMS; HCD Score 158.76 m/z 665.82 Gene names U2AF2

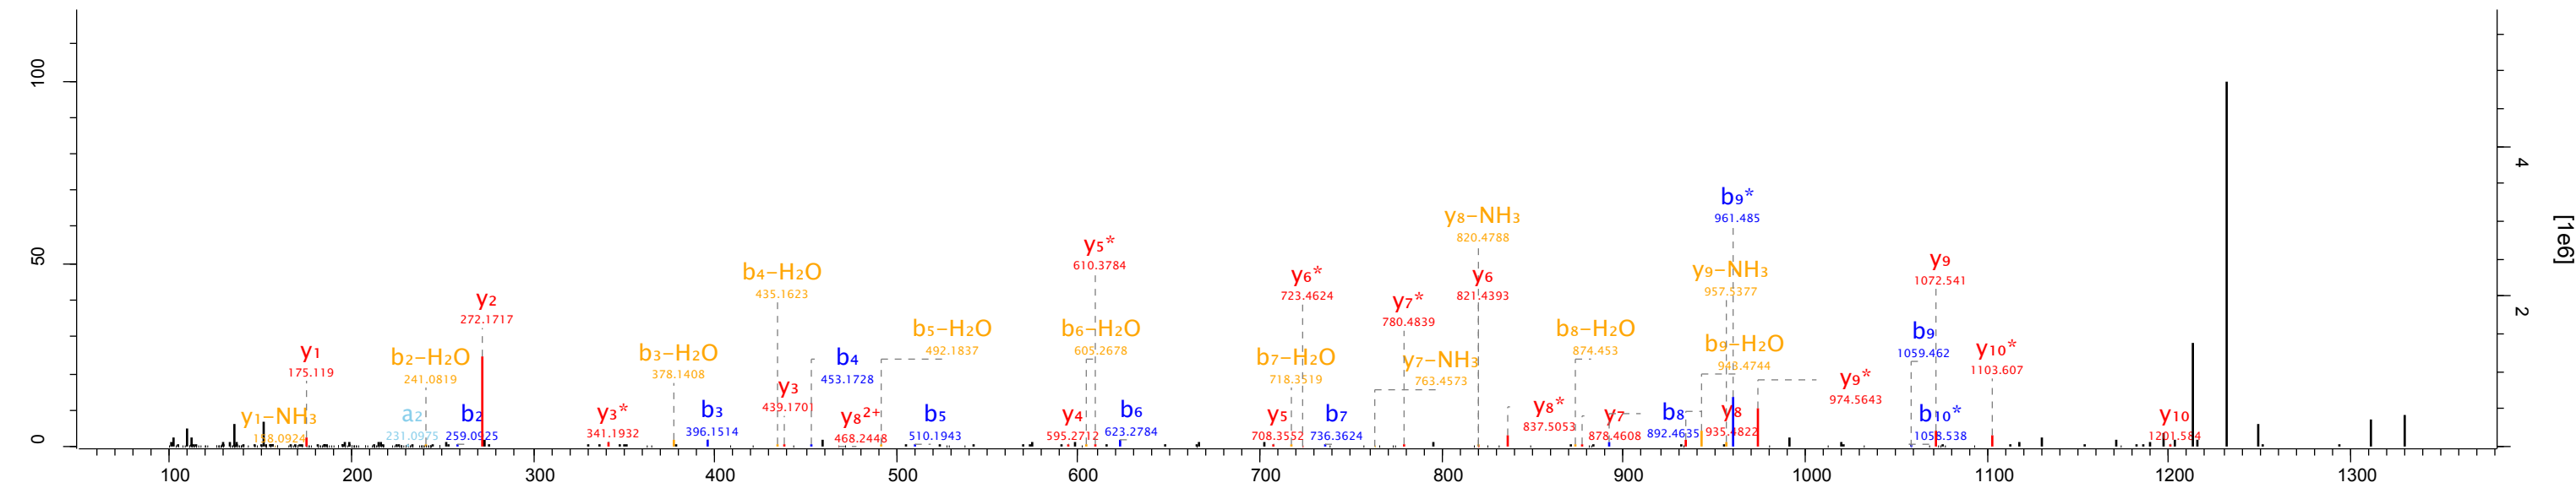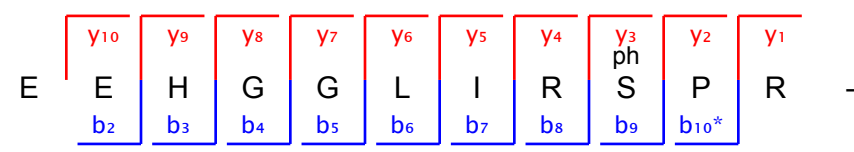



Raw file 20171215\_MaS\_33SR\_LMH\_phospho\_03 Scan 3775 Method FTMS; HCD Score 79.87 m/z 623.28 Gene names INTS1

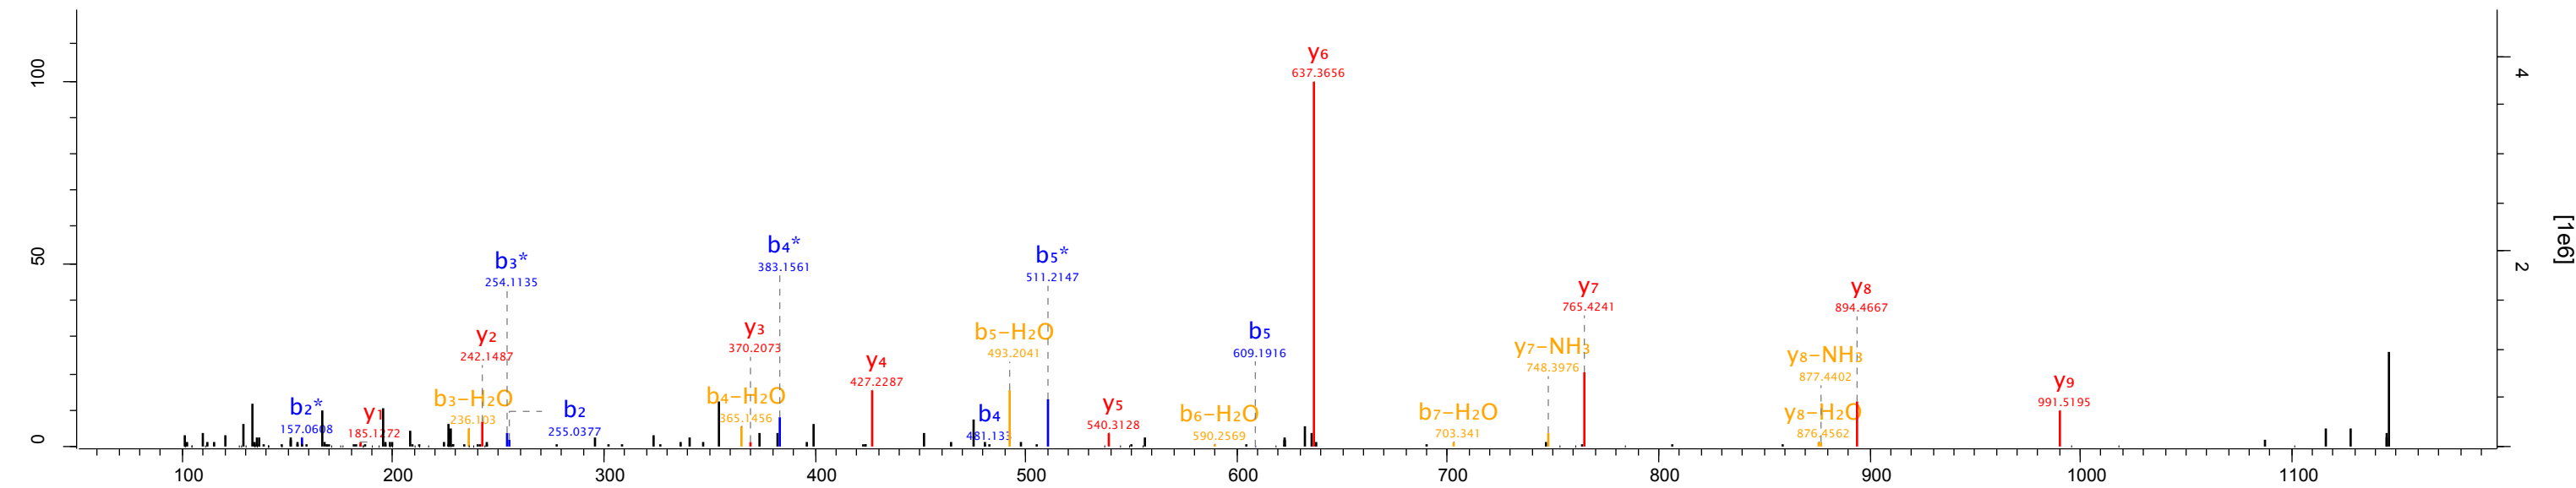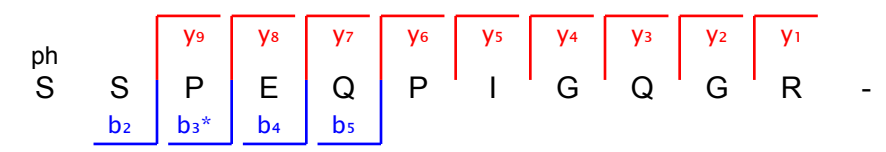

Raw file 20171215\_MaS\_33SR\_LMH\_phospho\_03 Scan 3895 Method FTMS; HCD Score 111.27 m/z 502.24 Gene names SPEN

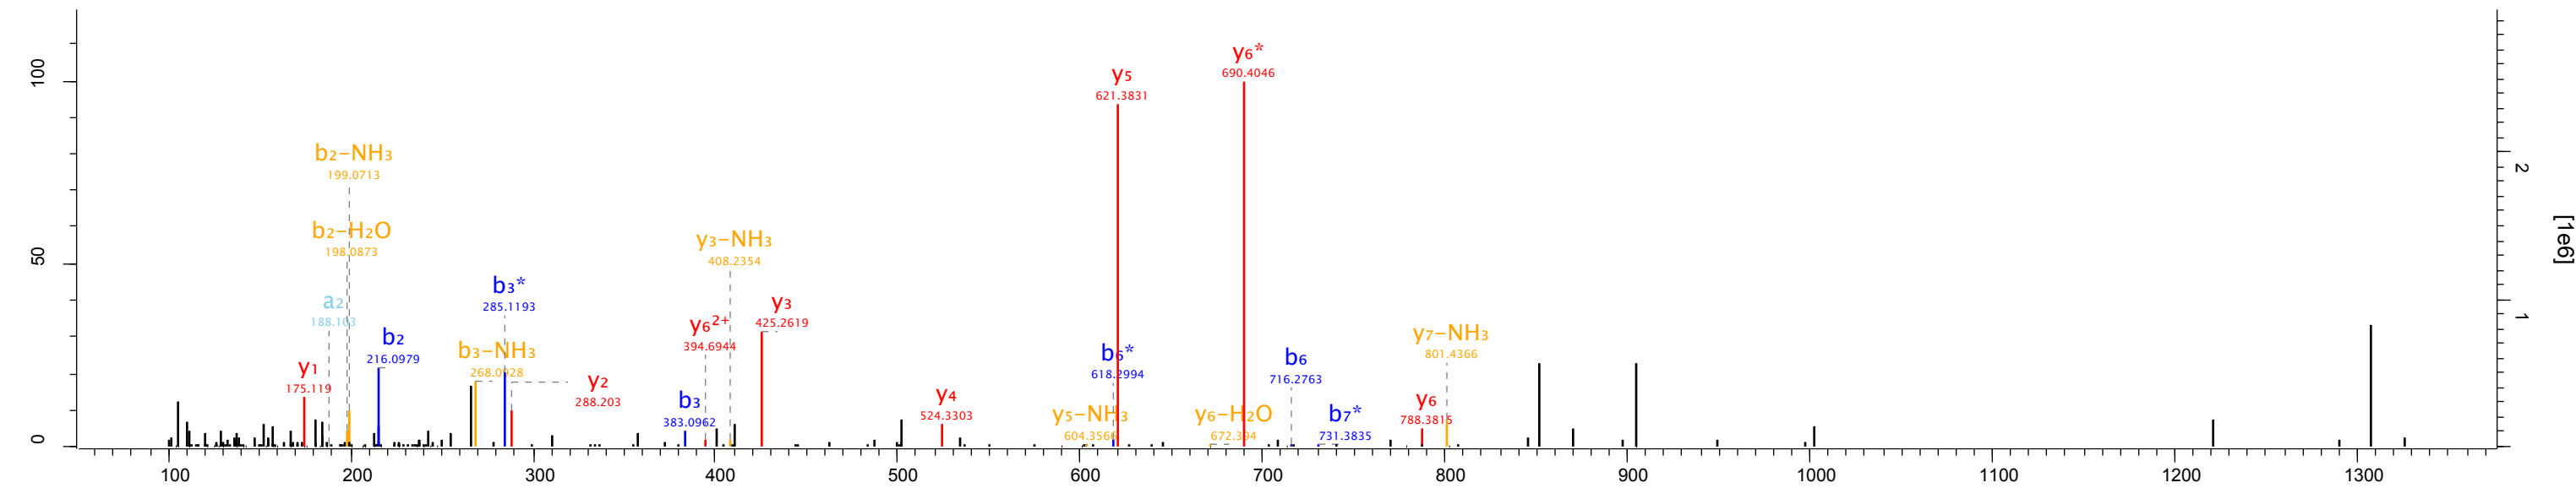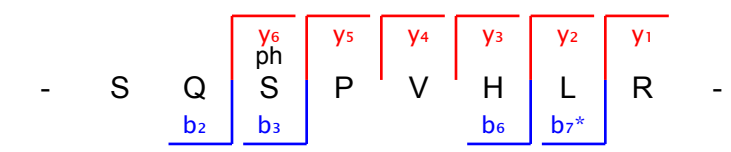



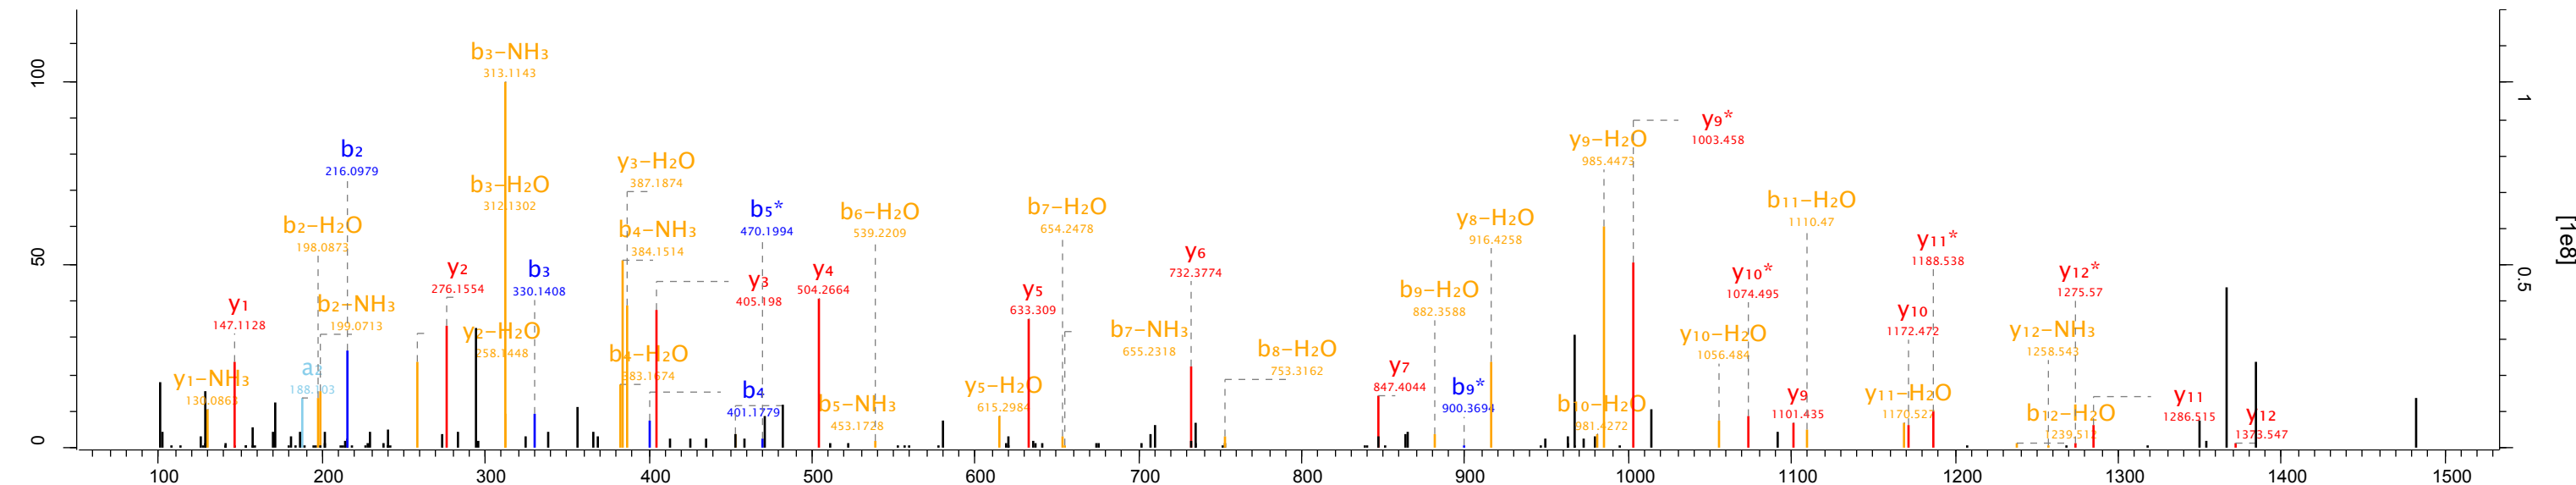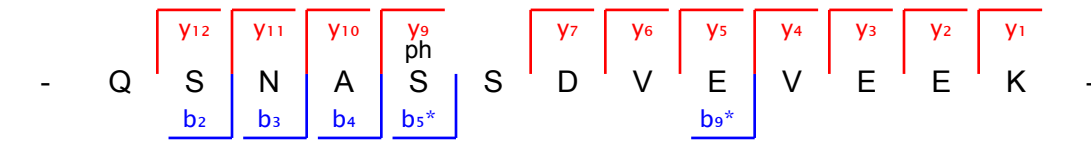

Raw file 20171215\_MaS\_33SR\_LMH\_phospho\_03 Scan 4415 Method FTMS; HCD Score 166.37 m/z 825.85 Gene names GPS1

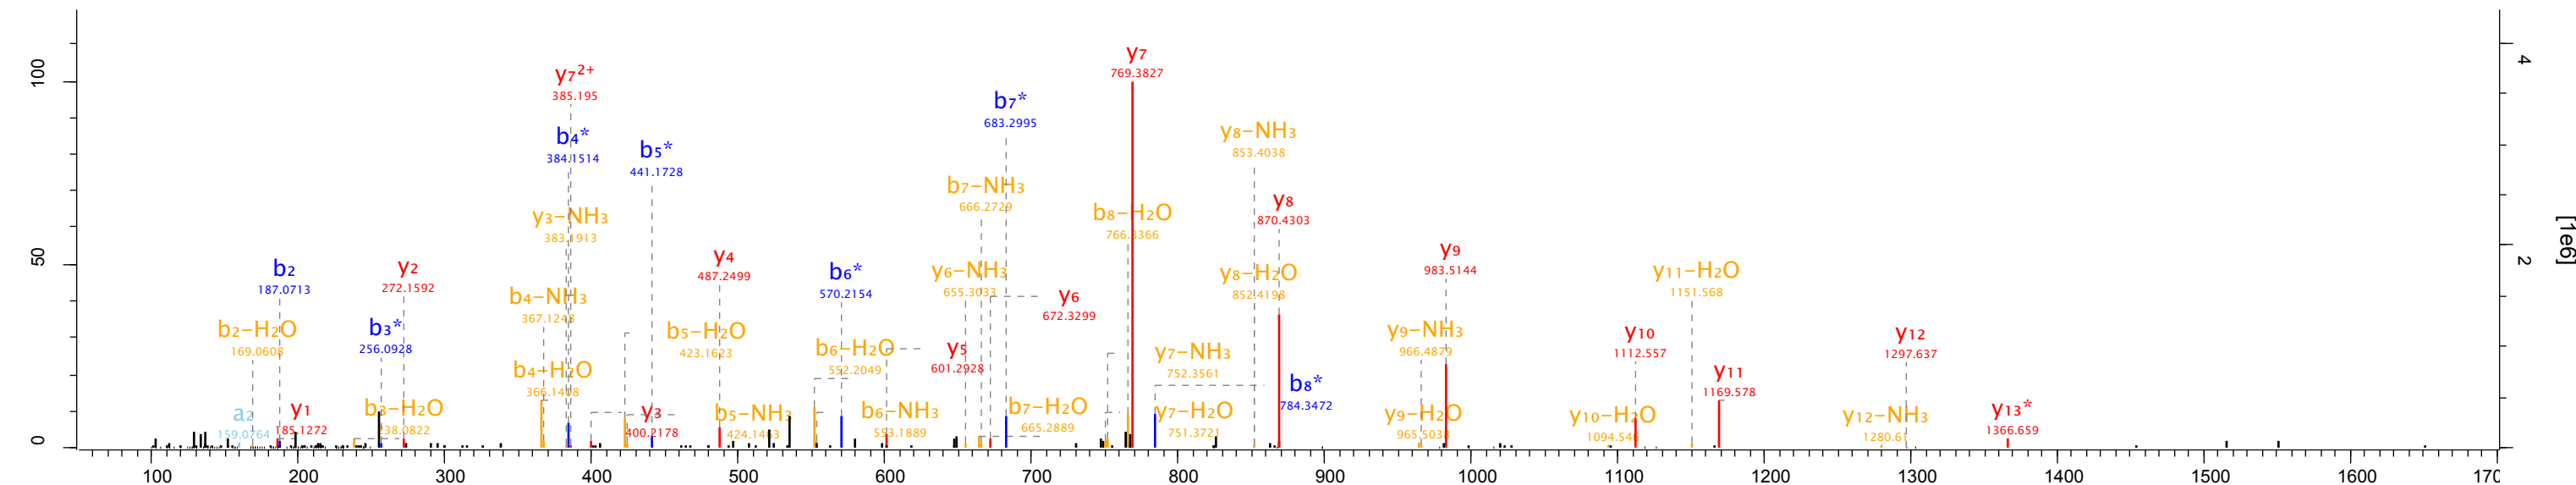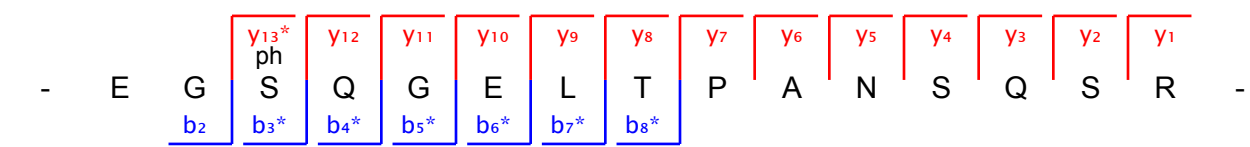

Raw file 20171215\_MaS\_33SR\_LMH\_phospho\_03 Scan 4565 Method FTMS; HCD Score 106.97 m/z 659.29 Gene names CNOT2

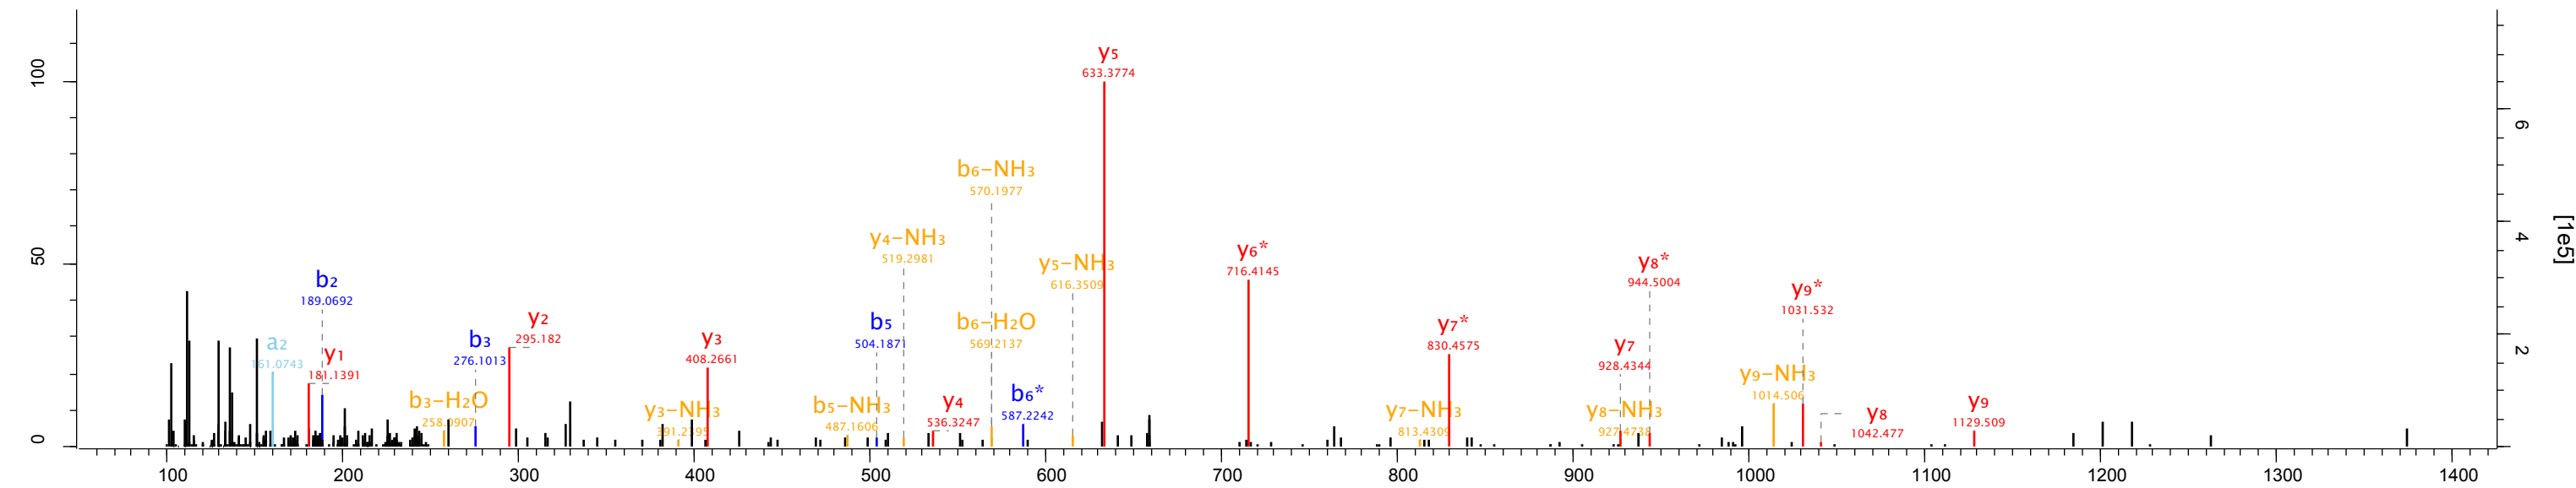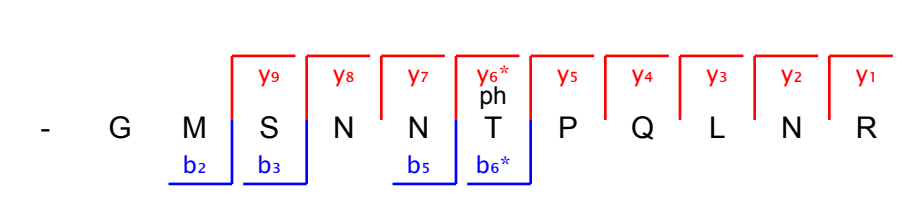

Raw file 20171215\_MaS\_33SR\_LMH\_phospho\_03 Scan Method Score m/z Gene names  
 4725 FTMS; HCD 199.7 732.86 CLASP2

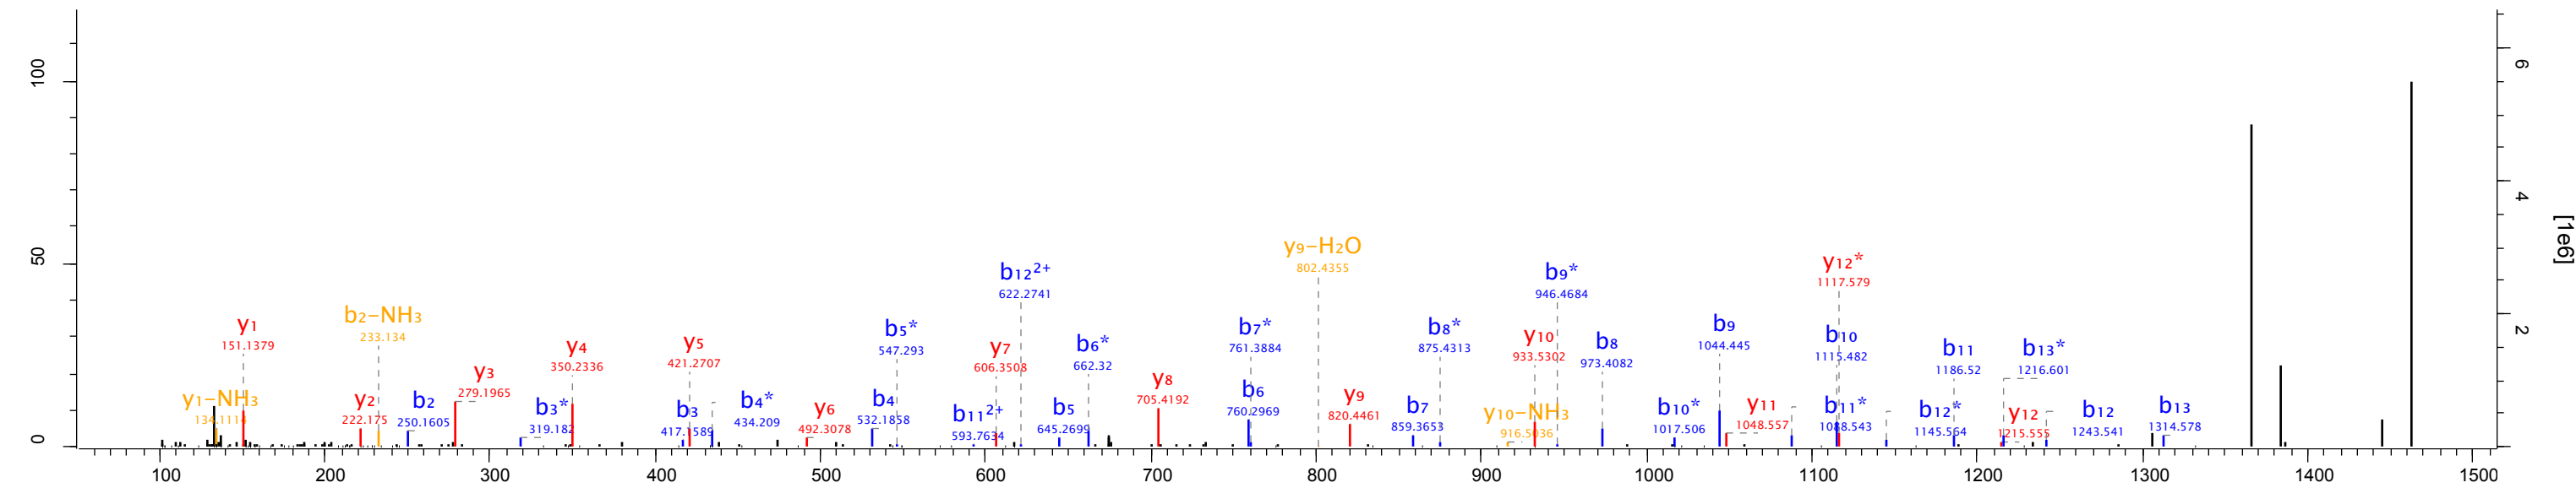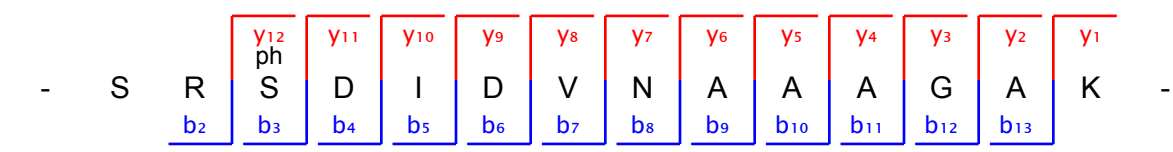

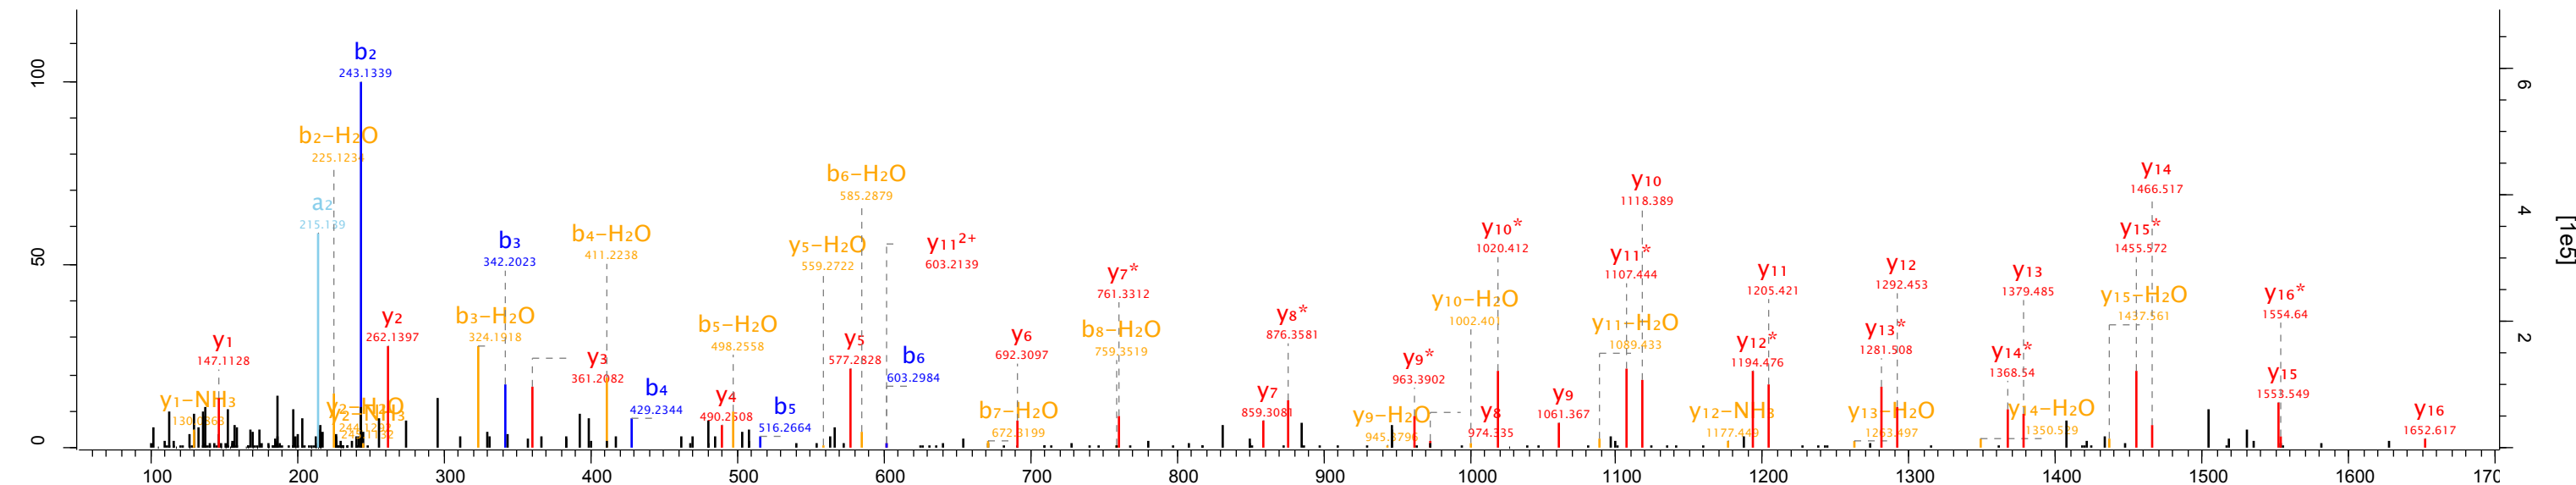

- E L V S S S S S G S D S D S E V D K -

b<sub>2</sub> b<sub>3</sub> b<sub>4</sub> b<sub>5</sub> b<sub>6</sub>

y<sub>16</sub> y<sub>15</sub> y<sub>14</sub> y<sub>13</sub> y<sub>12</sub> y<sub>11</sub> y<sub>10</sub> y<sub>9</sub> y<sub>8</sub> y<sub>7</sub> y<sub>6</sub> y<sub>5</sub> y<sub>4</sub> y<sub>3</sub> y<sub>2</sub> y<sub>1</sub>

y<sub>7</sub><sup>ph</sup>

Raw file 20171215\_MaS\_33SR\_LMH\_phospho\_03 Scan 5015 Method FTMS; HCD Score 65.16 m/z 484.7 Gene names ACTL6A

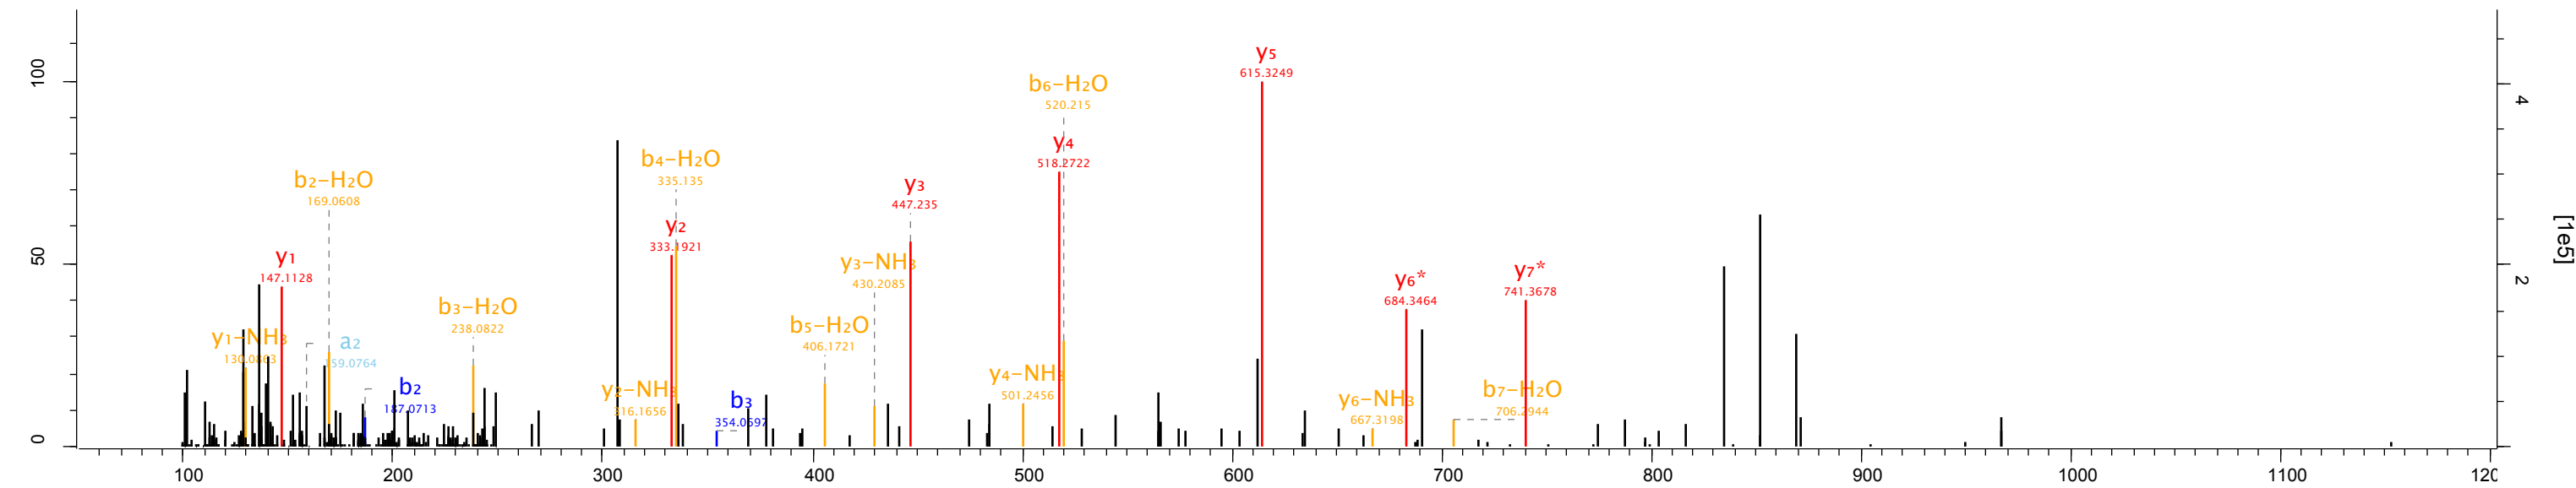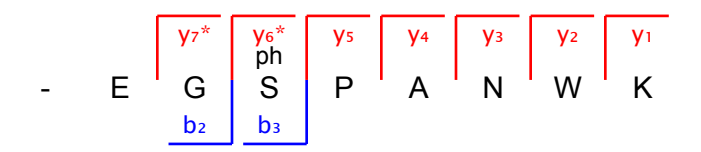

Raw file 20171215\_MaS\_33SR\_LMH\_phospho\_03 Scan 5175 Method FTMS; HCD Score 95.07 m/z 750.81 Gene names SMG9

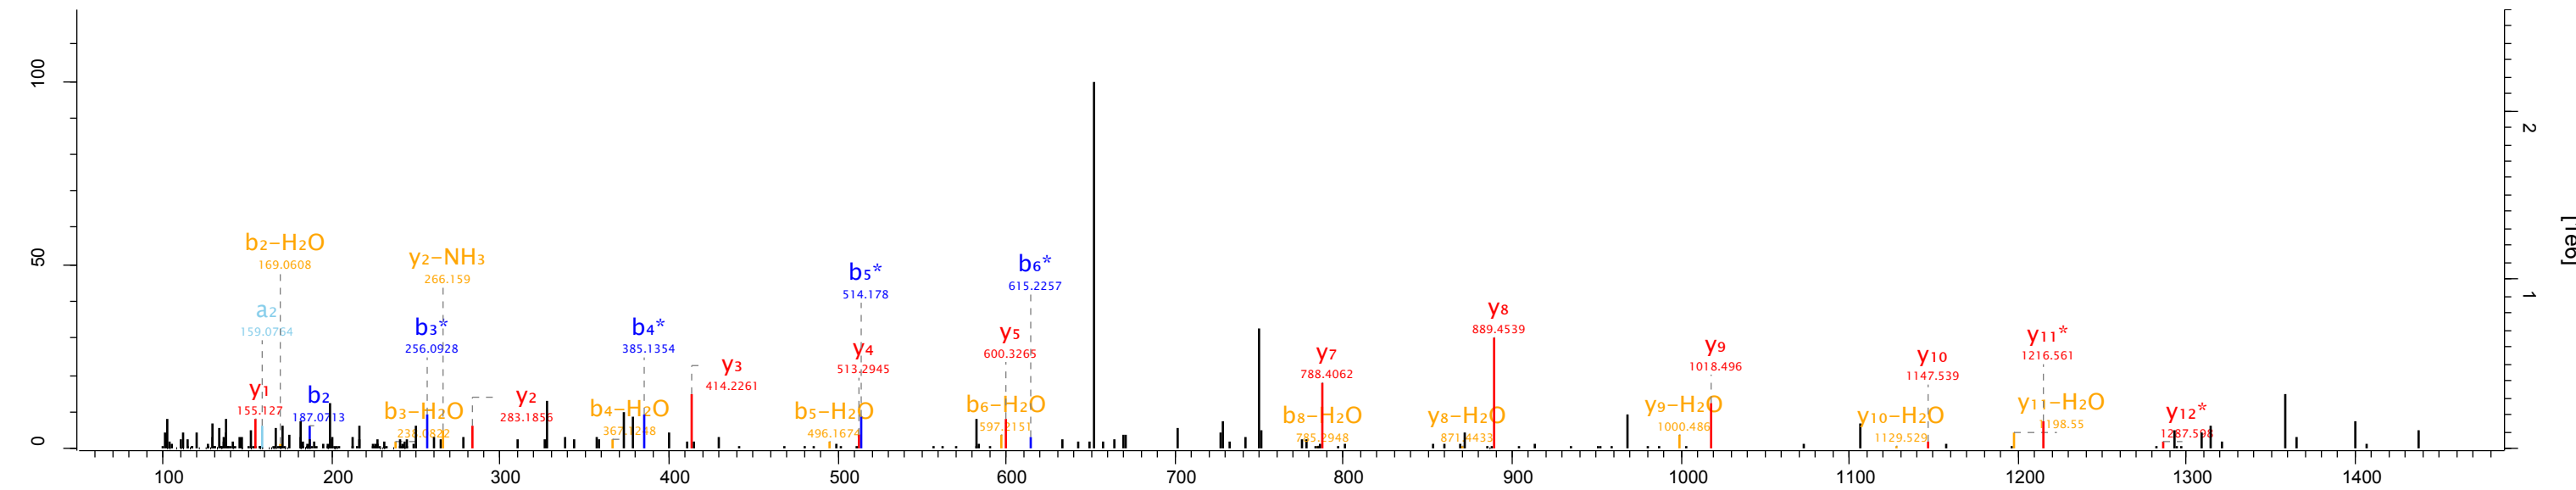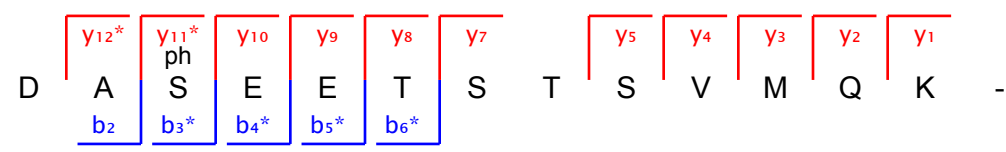

Raw file 20171215\_MaS\_33SR\_LMH\_phospho\_03 Scan 5275 Method FTMS; HCD Score 125.45 m/z 534.25 Gene names SNRNP70

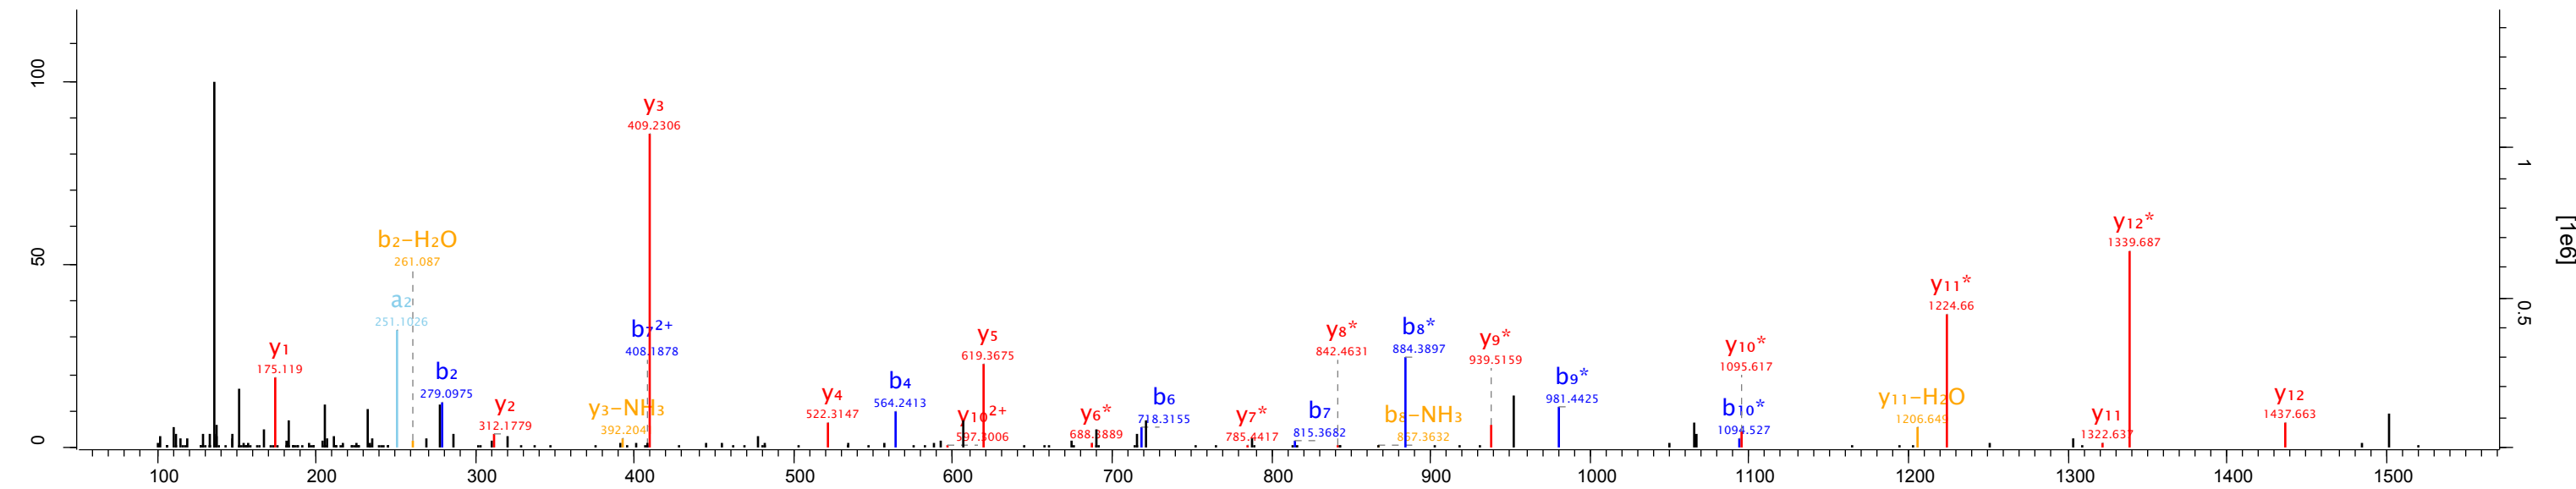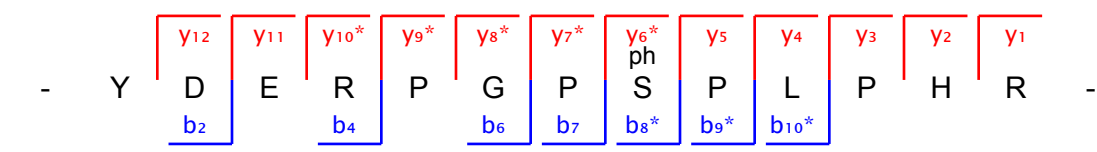



Raw file: 20171215\_MaS\_33SR\_LMH\_phospho\_03  
 Scan: 5675 Method: FTMS; HCD Score: 75.51 m/z: 423.71 Gene names: IRF2BP1

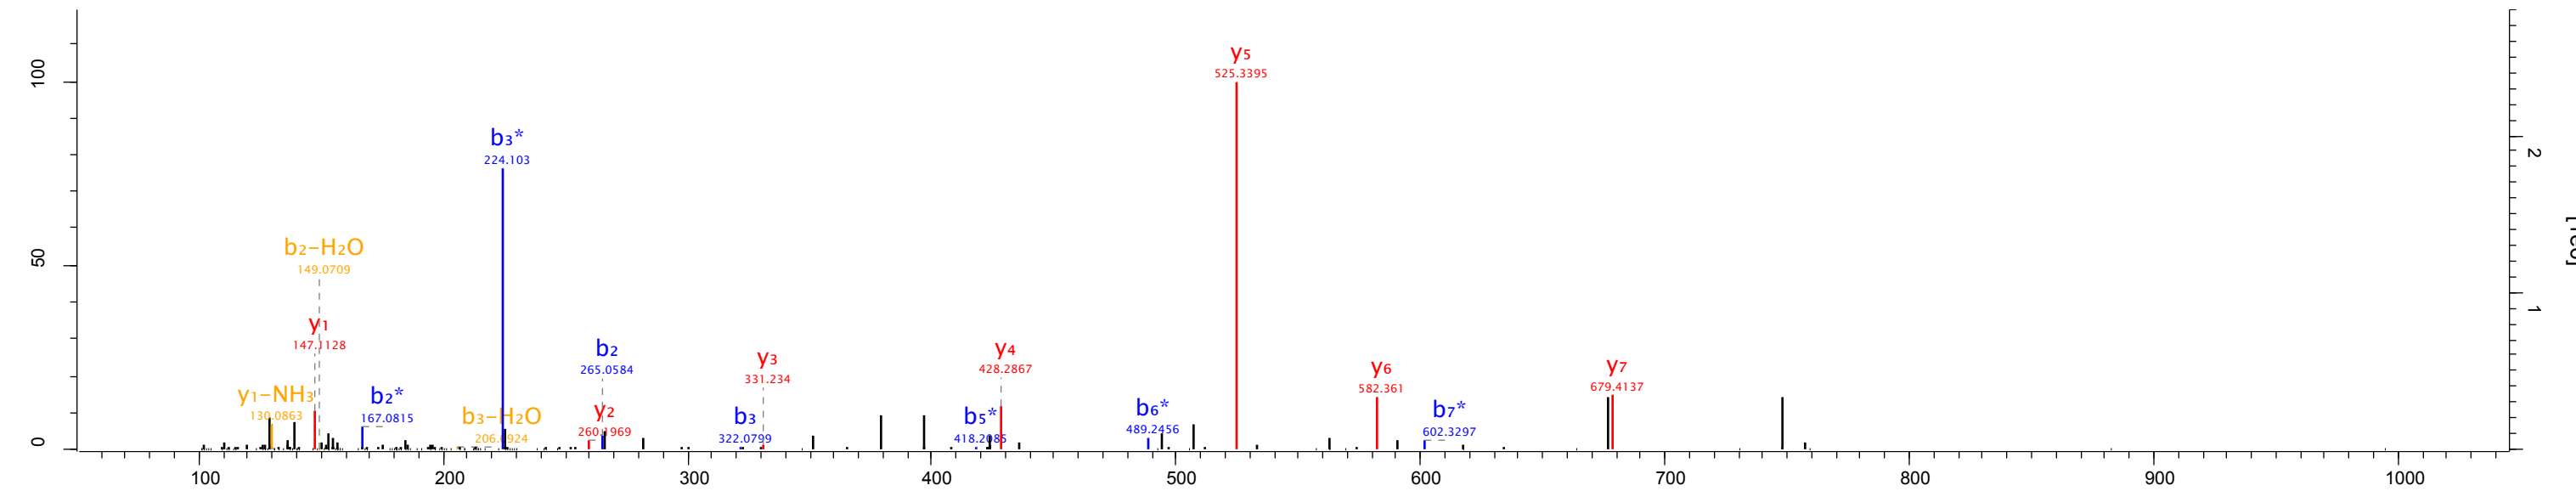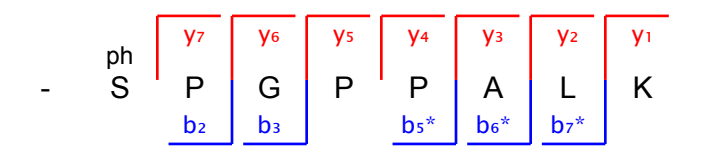

Raw file 20171215\_MaS\_33SR\_LMH\_phospho\_03 Scan 5945 Method FTMS; HCD Score 220.1 m/z 853.38 Gene names AFF4

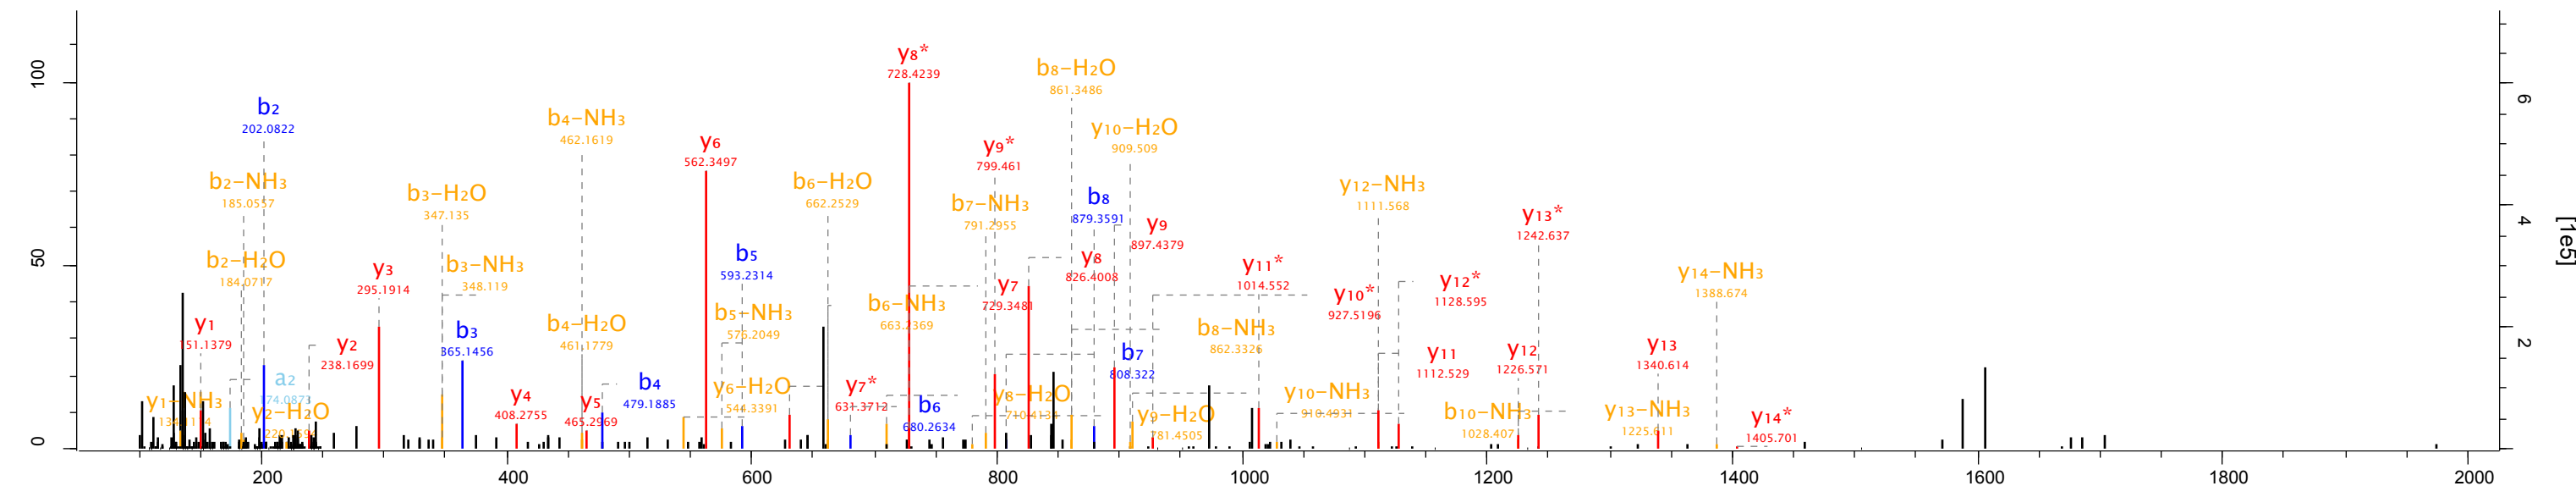

- N S Y N N S Q A P S P G L G S K -

b<sub>2</sub>
b<sub>3</sub>
b<sub>4</sub>
b<sub>5</sub>
b<sub>6</sub>
b<sub>7</sub>
b<sub>8</sub>
y<sub>14</sub>\*
y<sub>13</sub>
y<sub>12</sub>
y<sub>11</sub>
y<sub>10</sub>\*
y<sub>9</sub>
y<sub>8</sub>
y<sub>7</sub><sup>ph</sup>
y<sub>6</sub>
y<sub>5</sub>
y<sub>4</sub>
y<sub>3</sub>
y<sub>2</sub>
y<sub>1</sub>

Raw file 20171215\_MaS\_33SR\_LMH\_phospho\_03 Scan 5985 Method FTMS; HCD Score 57.17 m/z 499.22

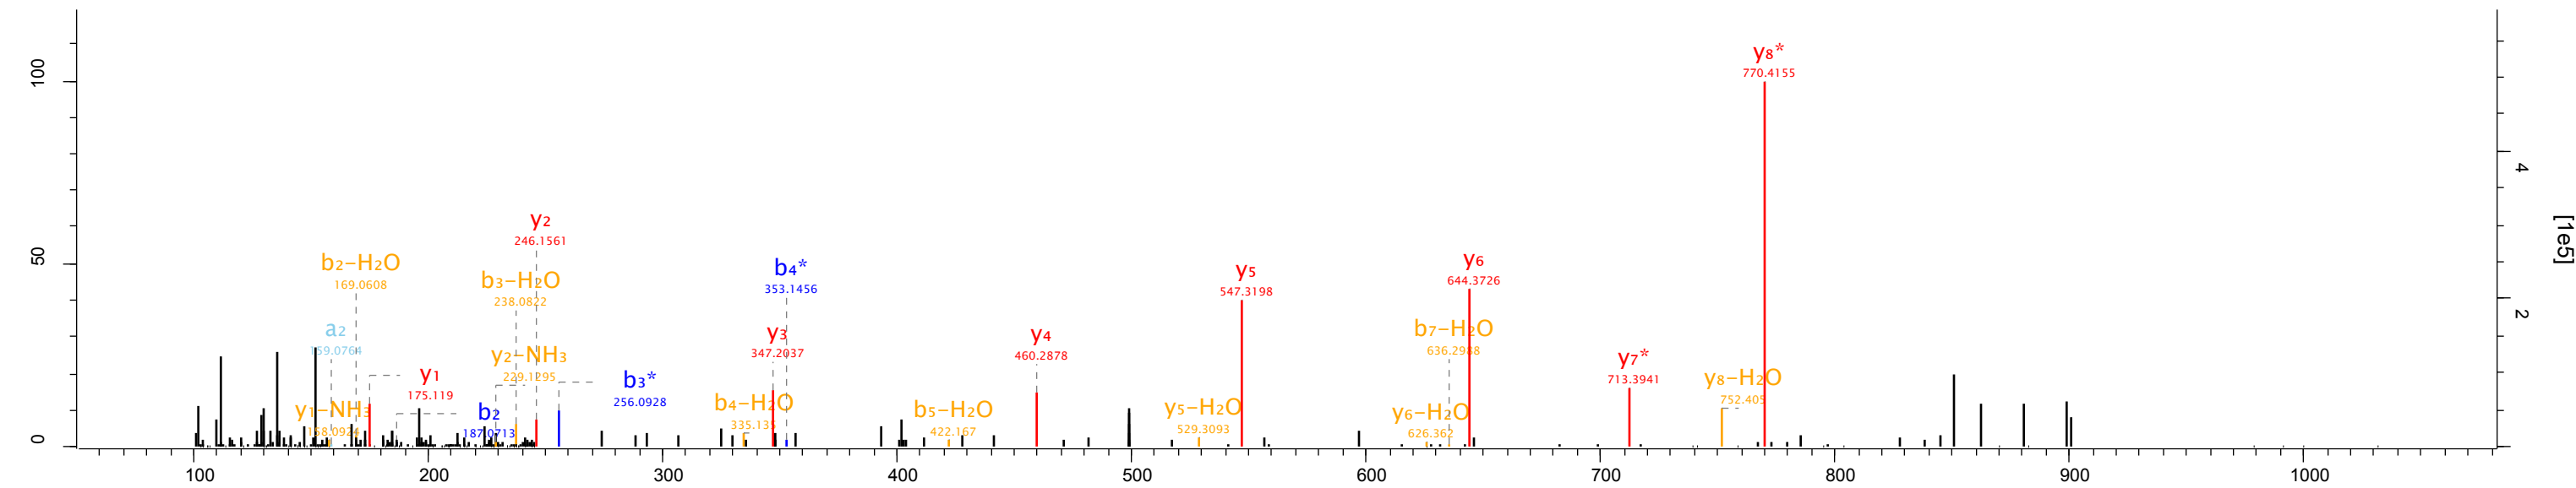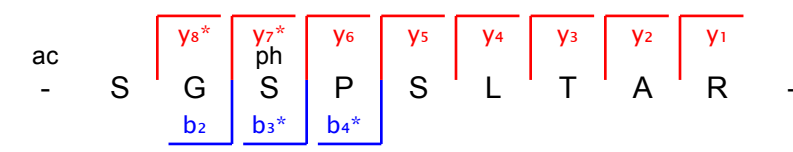

Raw file 20171215\_MaS\_33SR\_LMH\_phospho\_03 Scan 6035 Method FTMS; HCD Score 270.05 m/z 996.38 Gene names HNRNPA3

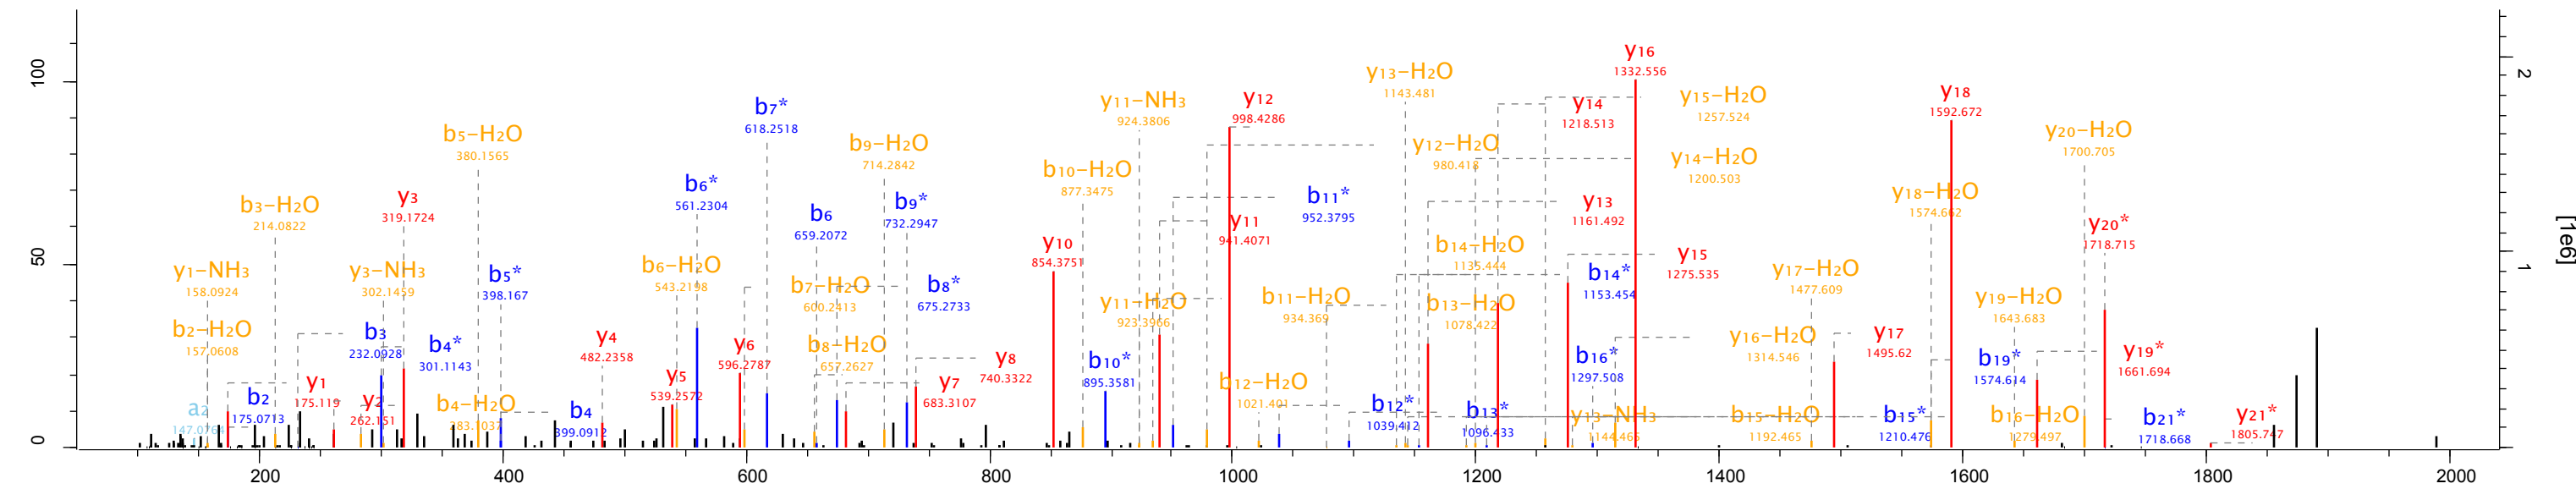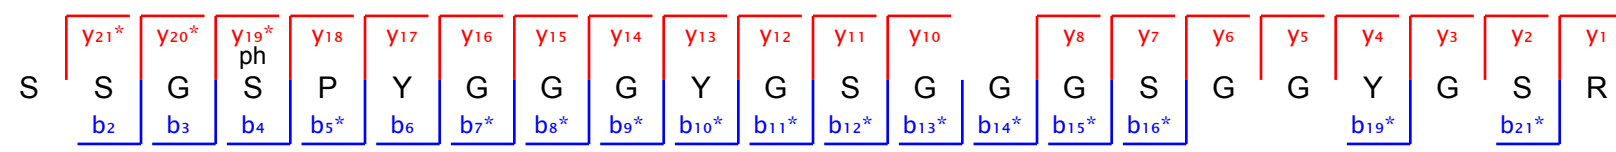

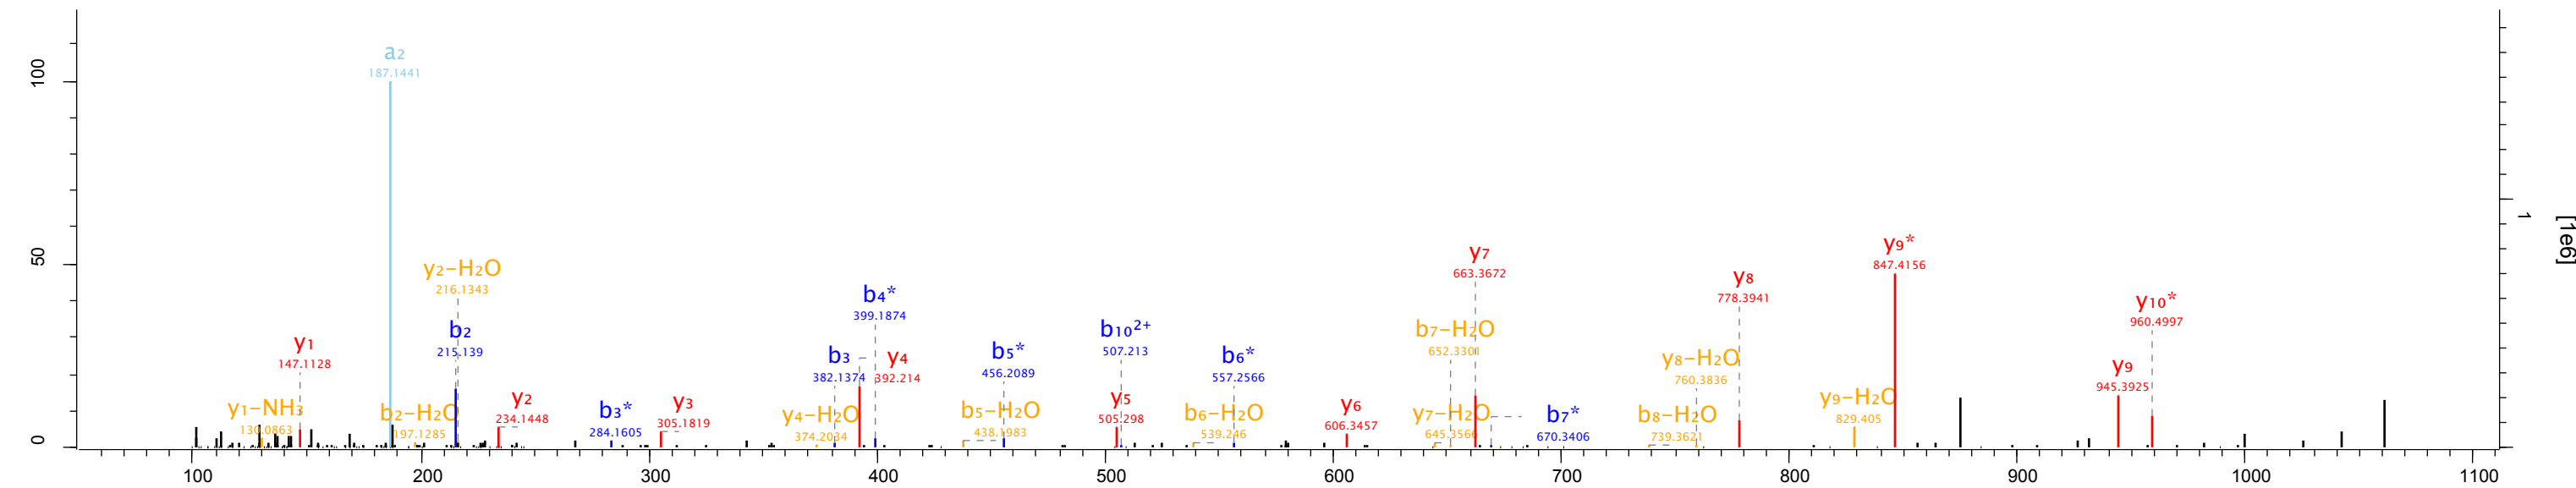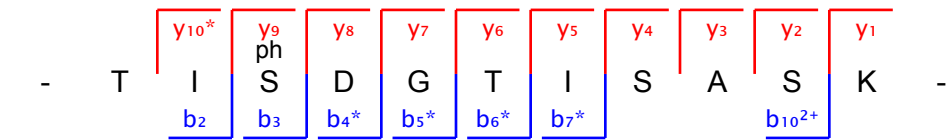

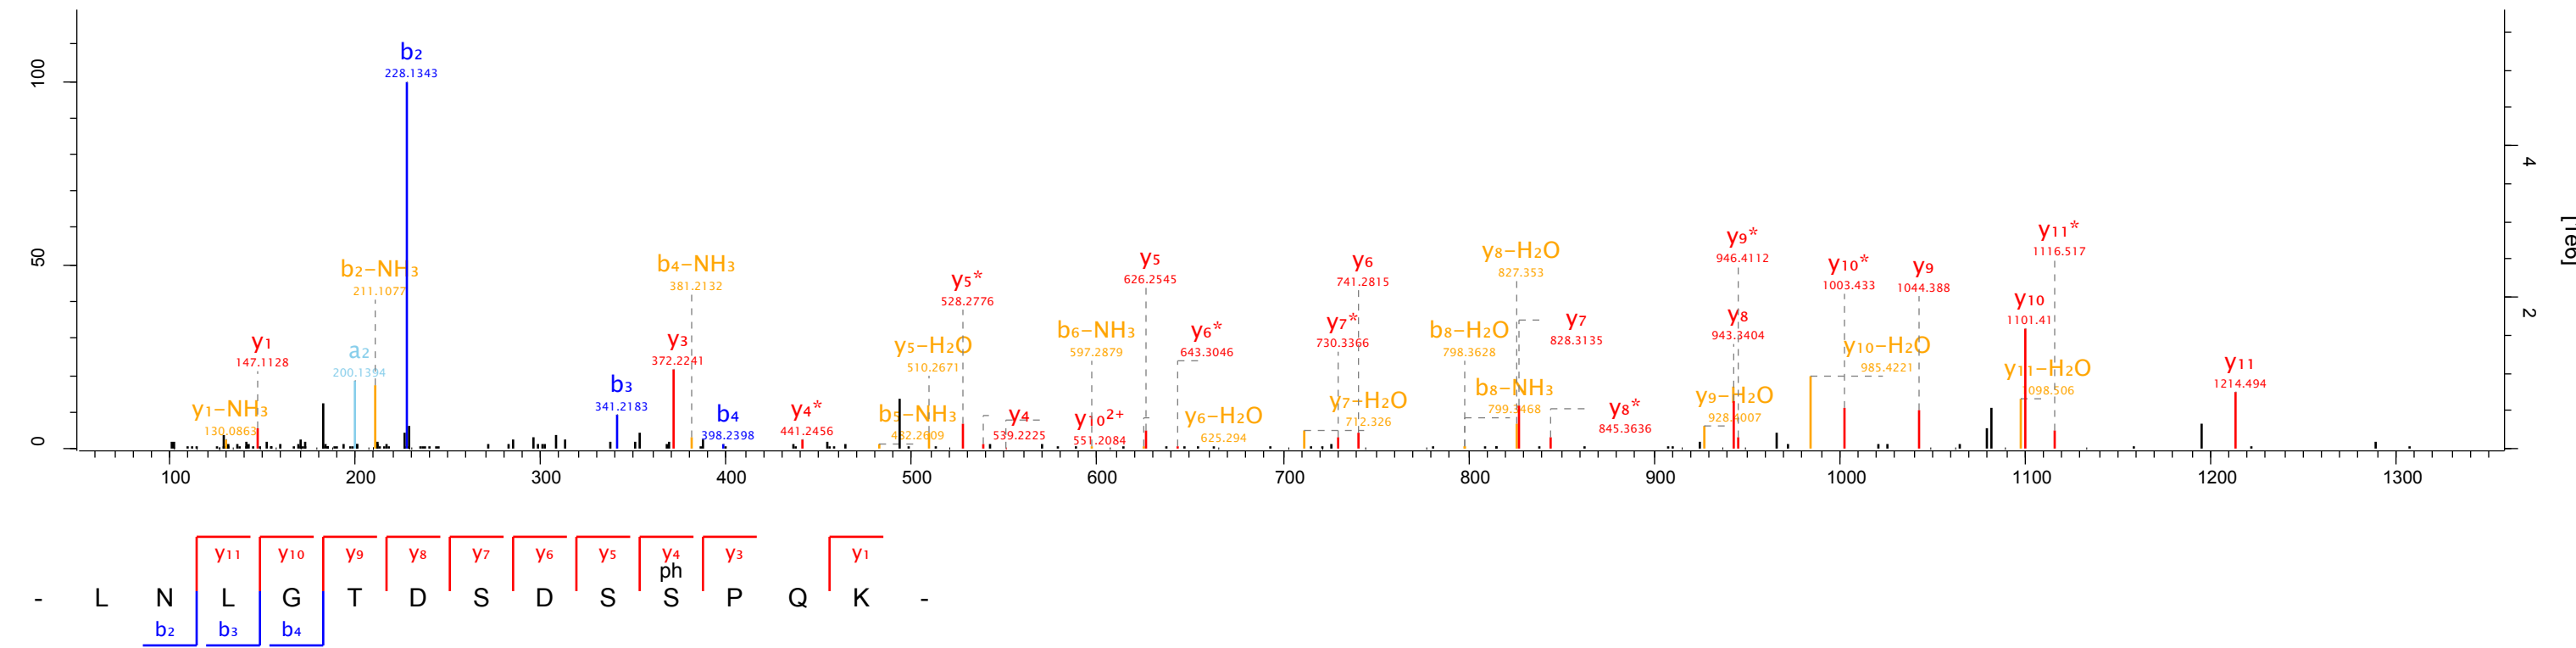

Raw file 20171215\_MaS\_33SR\_LMH\_phospho\_03 Scan 6645 Method FTMS; HCD Score 103.76 m/z 624.78 Gene names ZAK

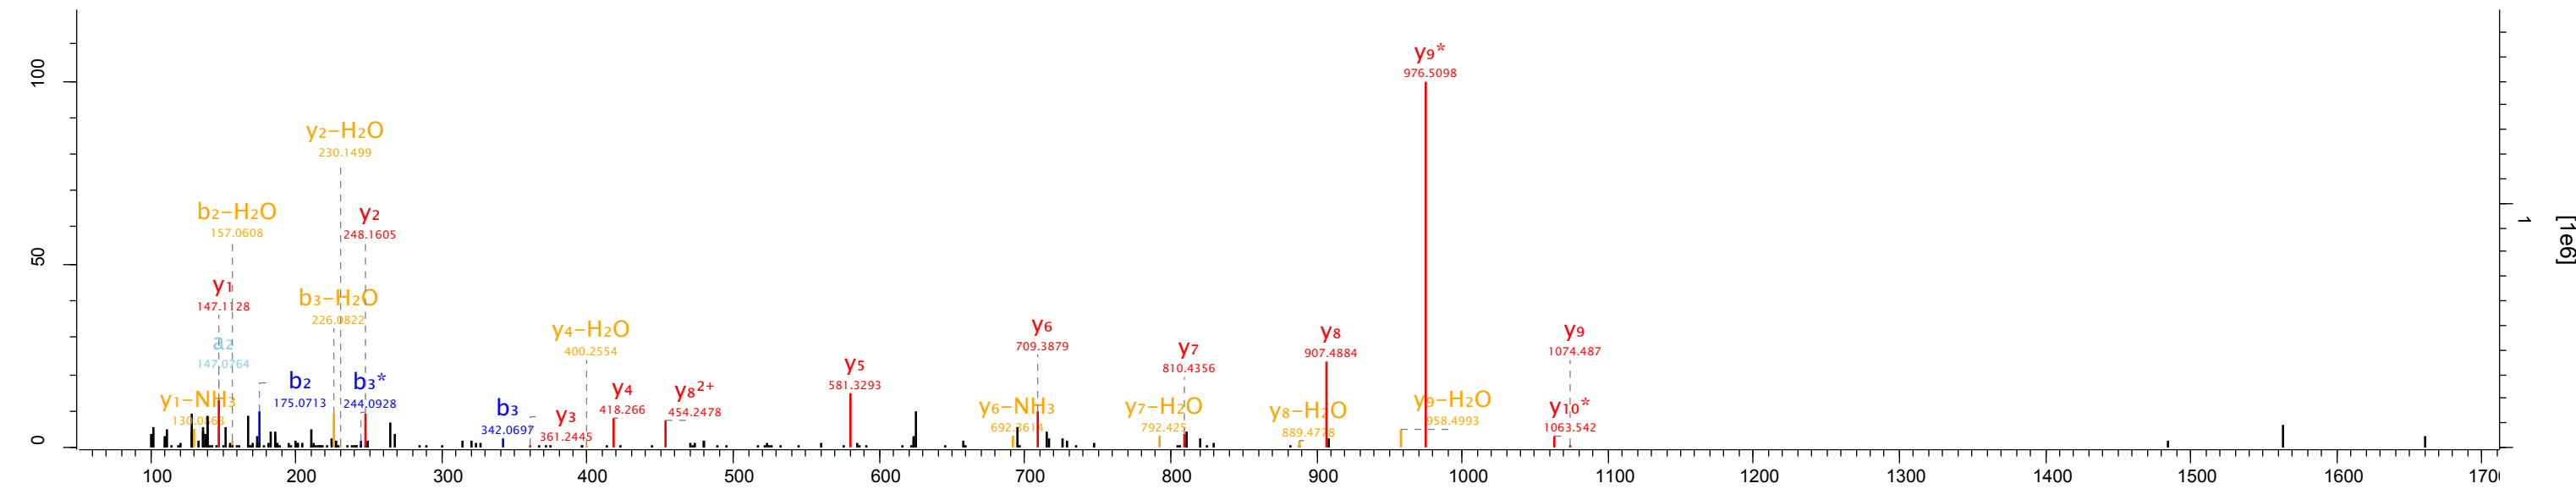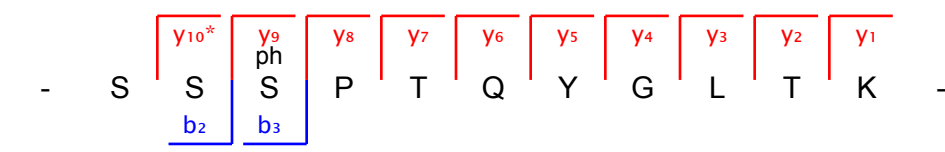

Raw file 20171215\_MaS\_33SR\_LMH\_phospho\_03 Scan 6785 Method FTMS; HCD Score 41.84 m/z 684.28 Gene names SIPA1L2

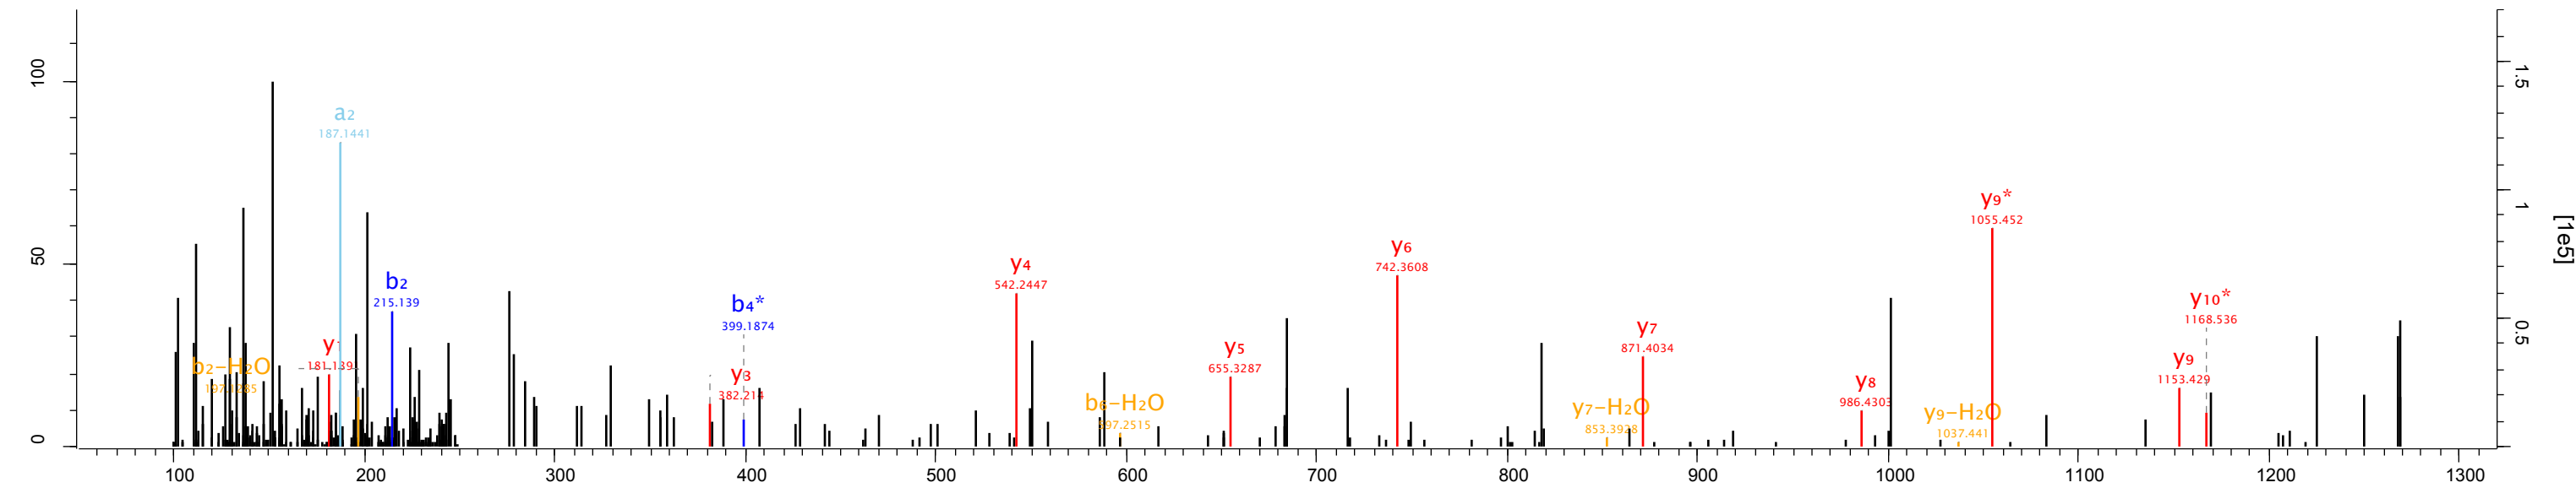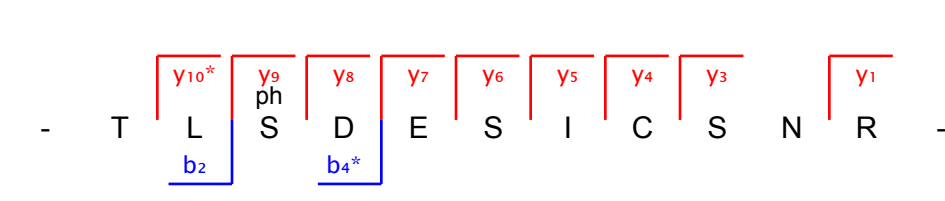



Raw file 20171215\_MaS\_33SR\_LMH\_phospho\_03 Scan 6865 Method FTMS; HCD Score 70.68 m/z 790.32 Gene names ZFR

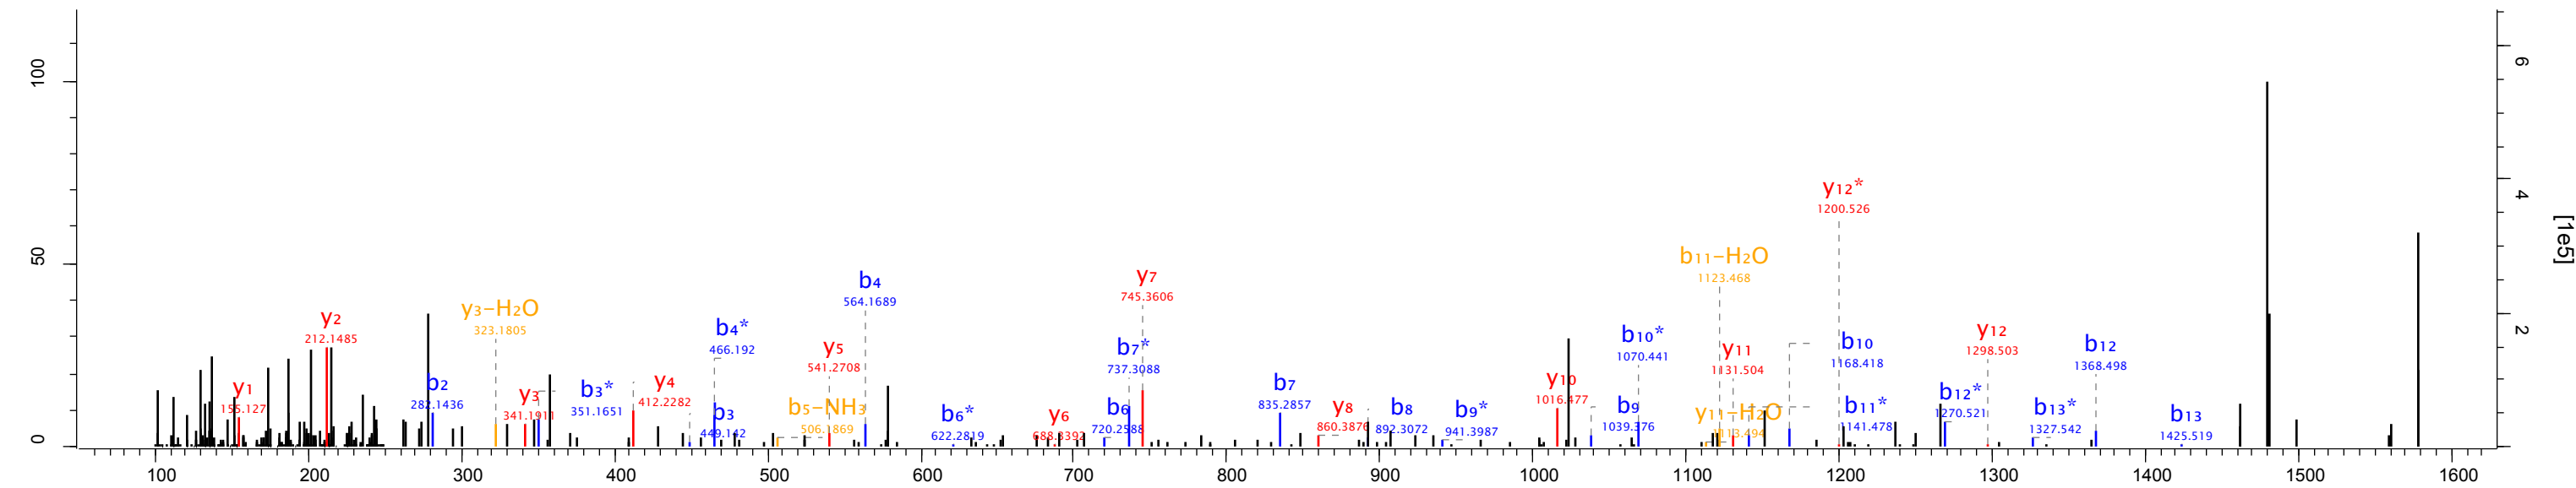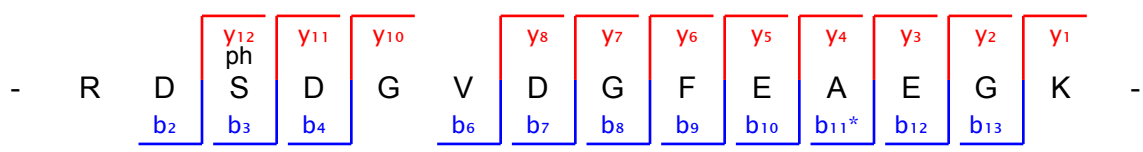

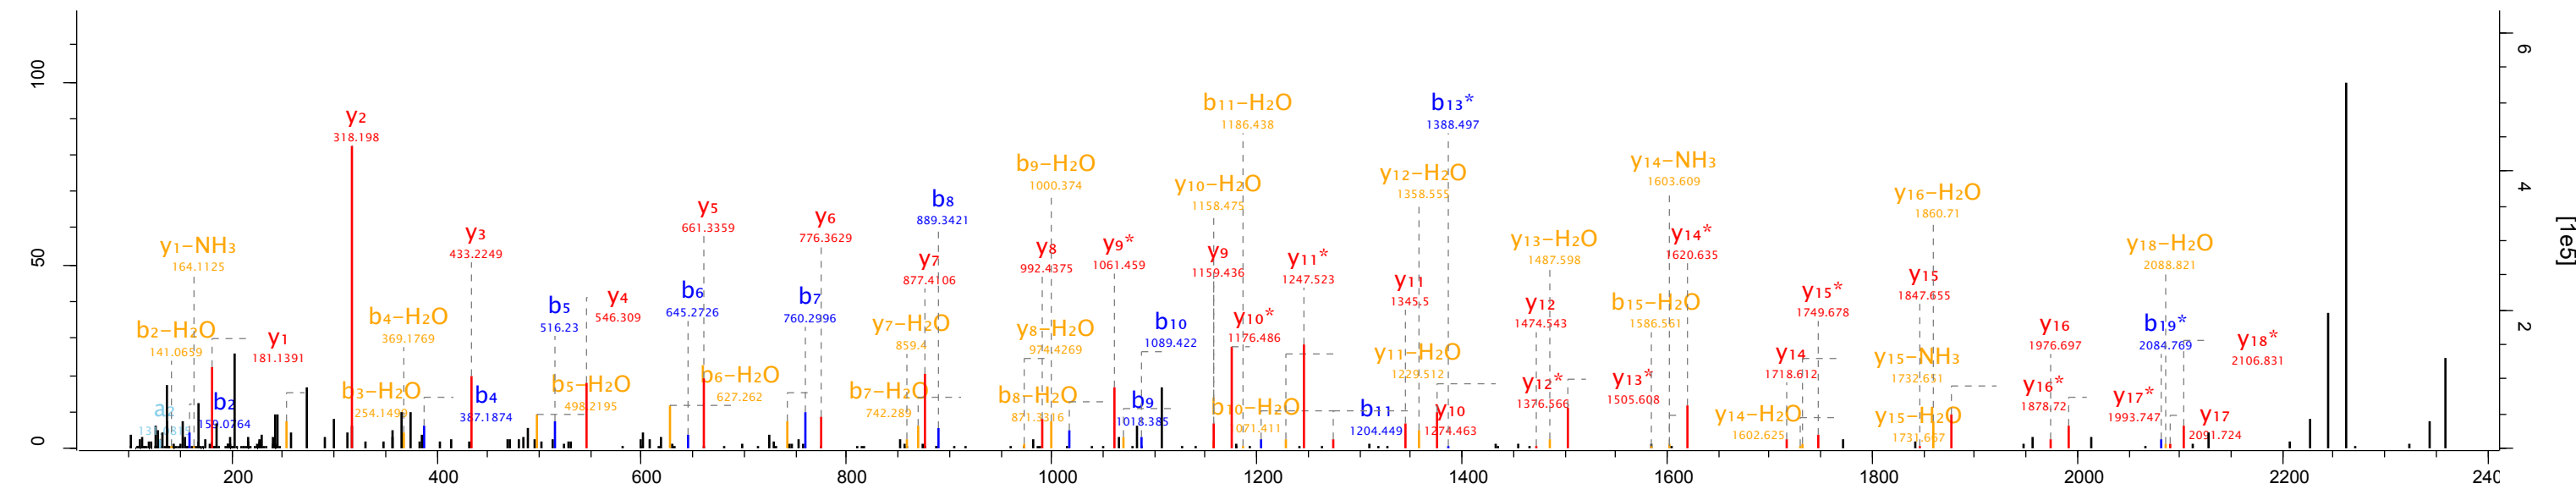

- G T L D E E D E E A D S D T D D I D H R -

b<sub>2</sub> b<sub>4</sub> b<sub>5</sub> b<sub>6</sub> b<sub>7</sub> b<sub>8</sub> b<sub>9</sub> b<sub>10</sub> b<sub>11</sub> y<sub>ph</sub> b<sub>13</sub>\* b<sub>19</sub>\*

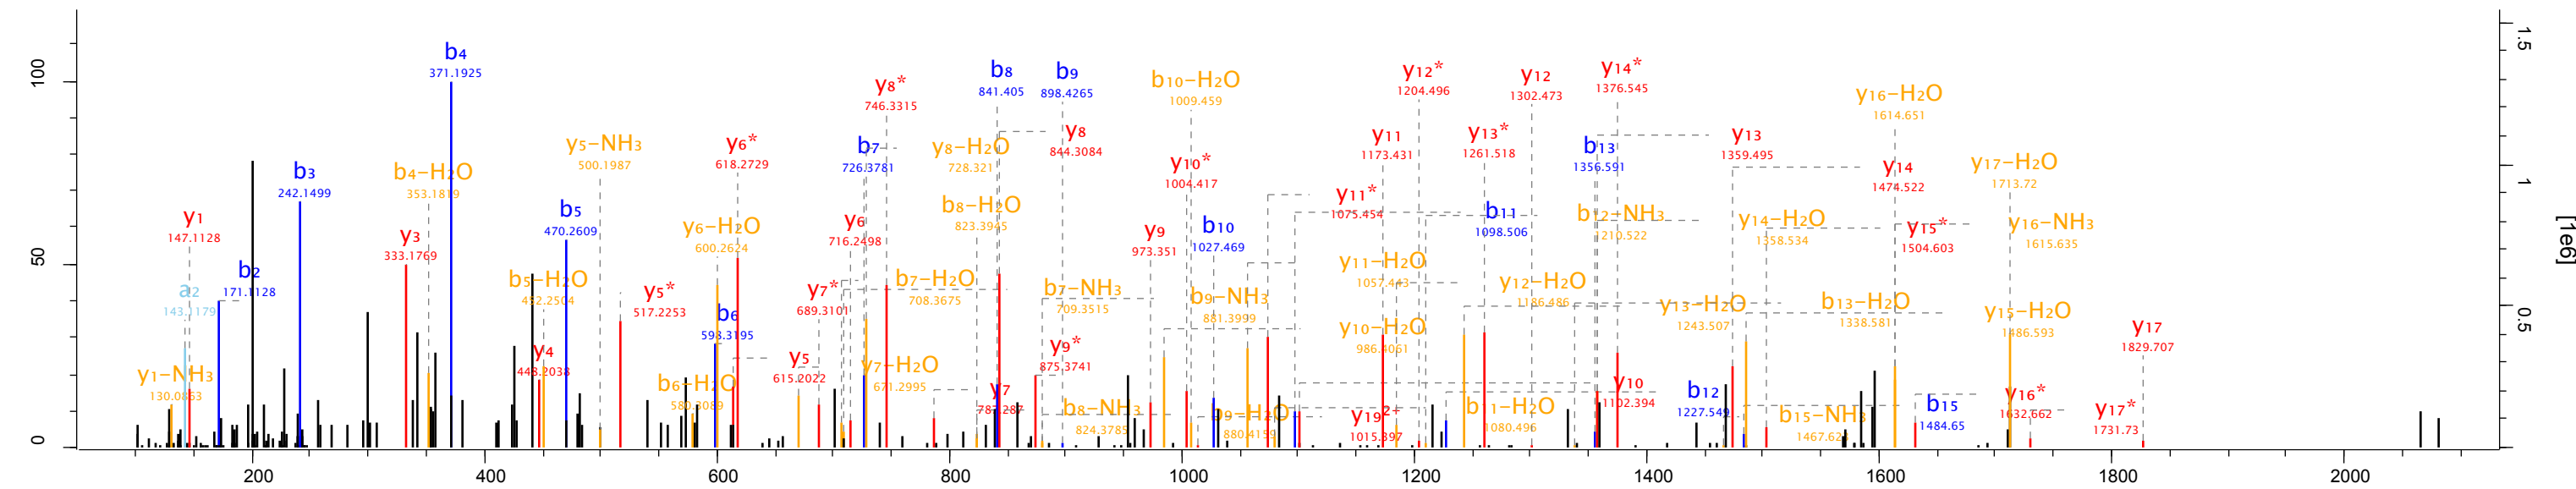

- G L A E V Q Q D G E A E E G A T S D G E K -

b<sub>2</sub>
b<sub>3</sub>
b<sub>4</sub>
b<sub>5</sub>
b<sub>6</sub>
b<sub>7</sub>
b<sub>8</sub>
b<sub>9</sub>
b<sub>10</sub>
b<sub>11</sub>
b<sub>12</sub>
b<sub>13</sub>
b<sub>15</sub>
y<sub>19</sub><sup>2+</sup>
y<sub>17</sub>
y<sub>16</sub><sup>\*</sup>
y<sub>15</sub><sup>\*</sup>
y<sub>14</sub>
y<sub>13</sub>
y<sub>12</sub>
y<sub>11</sub>
y<sub>10</sub>
y<sub>9</sub>
y<sub>8</sub>
y<sub>7</sub>
y<sub>6</sub>
y<sub>5</sub><sub>ph</sub>
y<sub>4</sub>
y<sub>3</sub>
y<sub>1</sub>

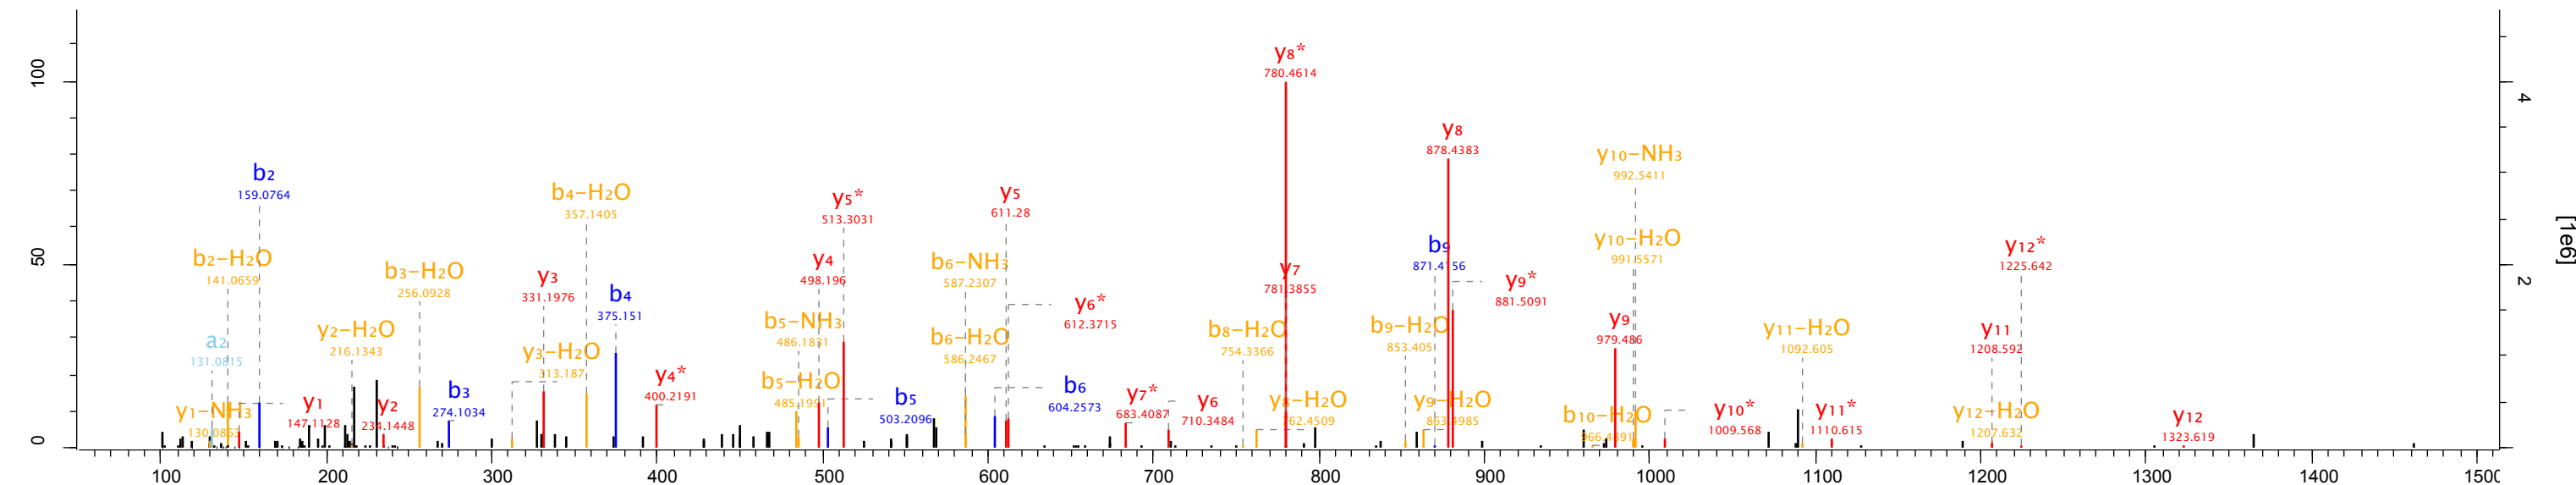

- G T D T Q T P A V L S P S K -

Fragmentation labels (b and y ions) are shown below the corresponding amino acids:

- b<sub>2</sub> (under T)
- b<sub>3</sub> (under D)
- b<sub>4</sub> (under T)
- b<sub>5</sub> (under Q)
- b<sub>6</sub> (under T)
- b<sub>9</sub> (under V)
- y<sub>1</sub> (under K)
- y<sub>2</sub> (under S)
- y<sub>3</sub> (under P)
- y<sub>4</sub> (under S)
- y<sub>4</sub>ph (under L)
- y<sub>5</sub> (under L)
- y<sub>6</sub> (under V)
- y<sub>7</sub> (under A)
- y<sub>8</sub> (under P)
- y<sub>9</sub> (under T)
- y<sub>10</sub>\* (under Q)
- y<sub>11</sub> (under T)
- y<sub>12</sub> (under D)

Raw file 20171215\_MaS\_33SR\_LMH\_phospho\_03 Scan 7725 Method FTMS; HCD Score 130.29 m/z 766.85 Gene names PHACTR4

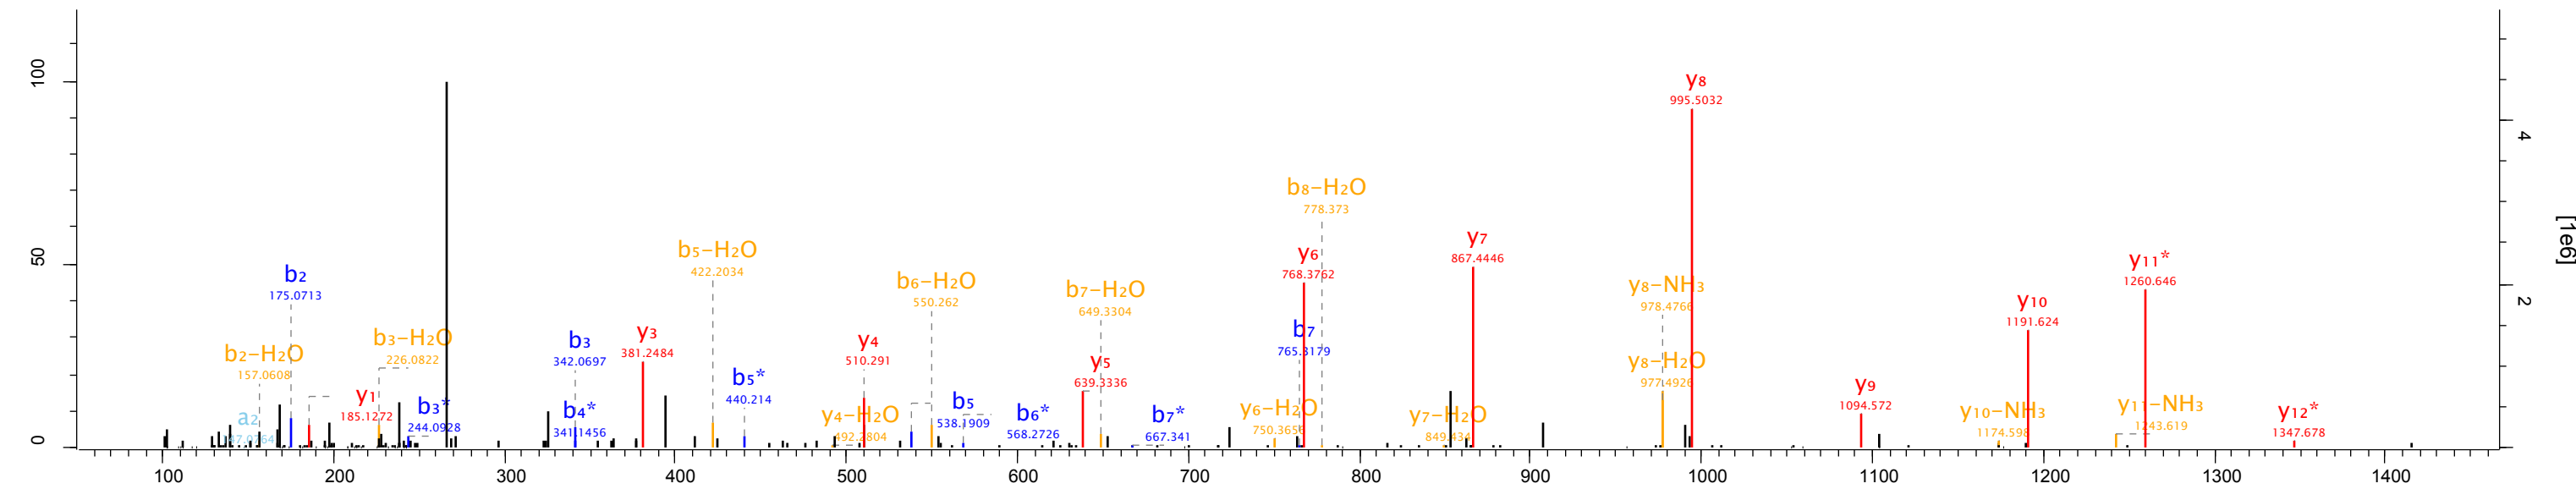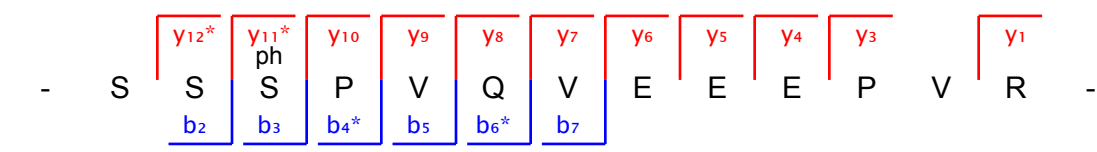

Raw file 20171215\_MaS\_33SR\_LMH\_phospho\_03 Scan 7815 Method FTMS; HCD Score 93.84 m/z 562.25 Gene names TP53BP1

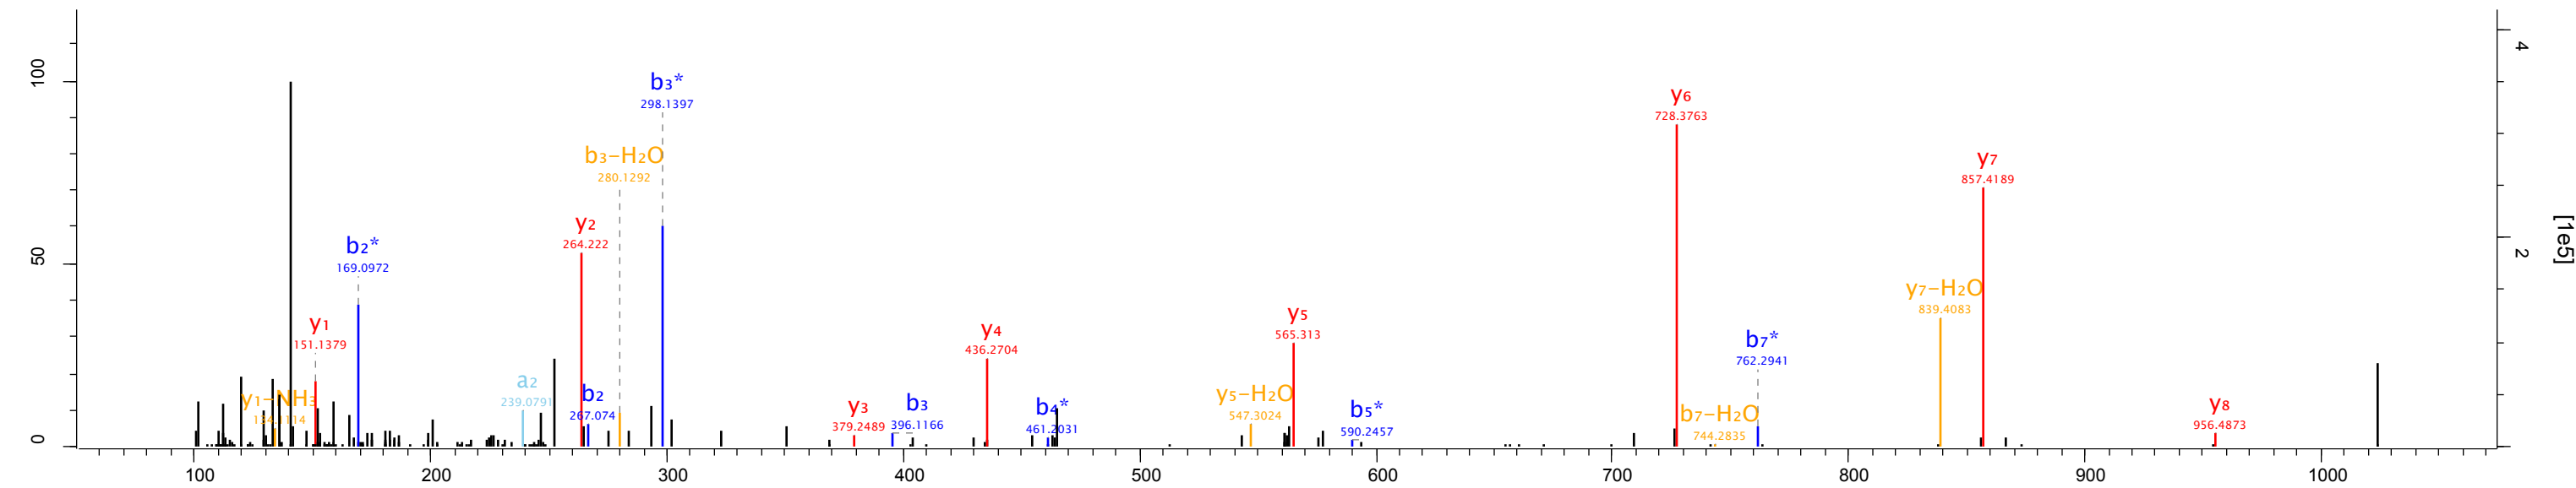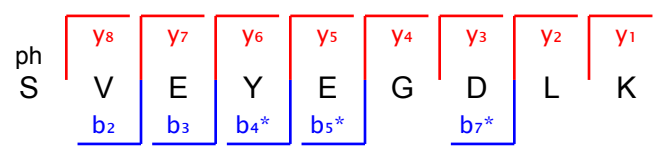

Raw file 20171215\_MaS\_33SR\_LMH\_phospho\_03 Scan 7835 Method FTMS; HCD Score 201.16 m/z 768.29 Gene names ERCC6L

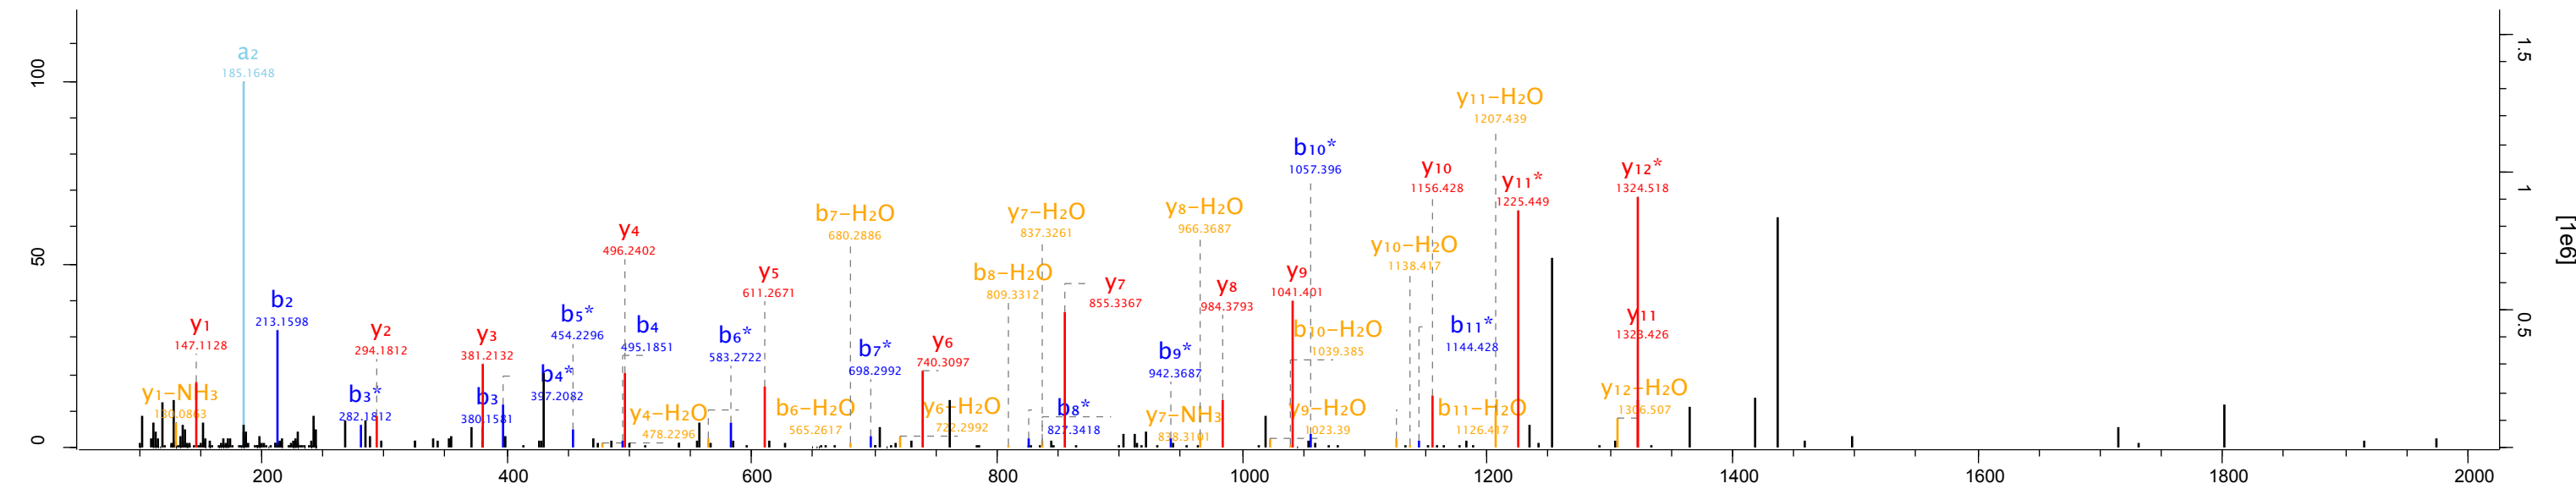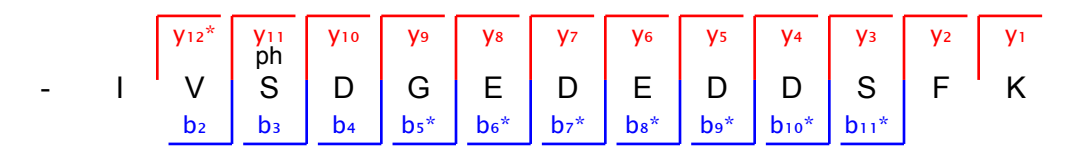

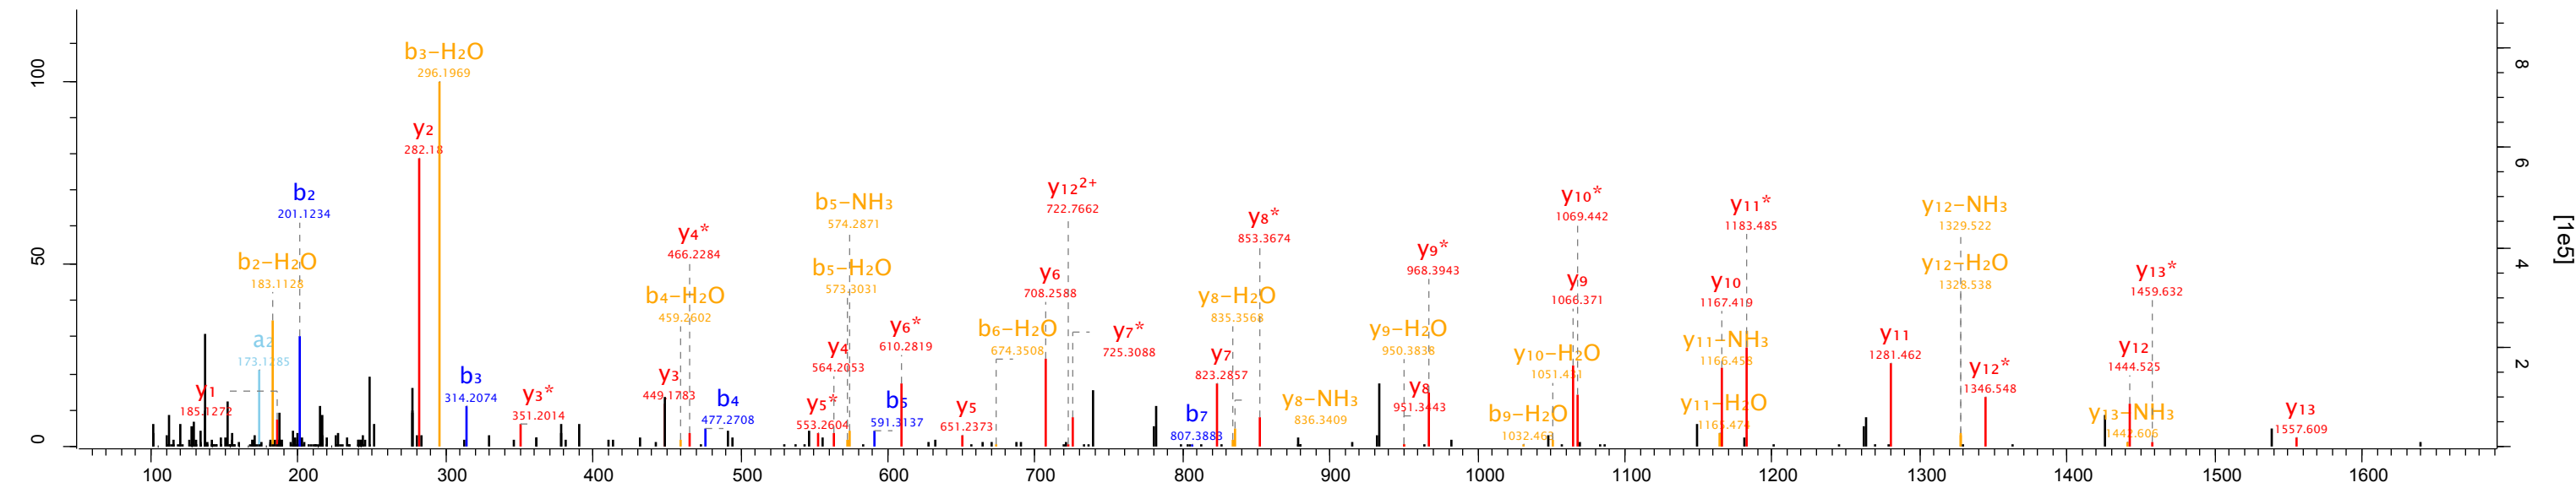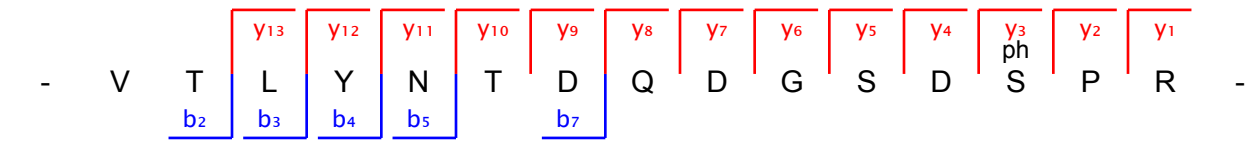



Raw file 20171215\_MaS\_33SR\_LMH\_phospho\_03 Scan 7955 Method FTMS; HCD Score 139.64 m/z 639.79 Gene names EPB41L2

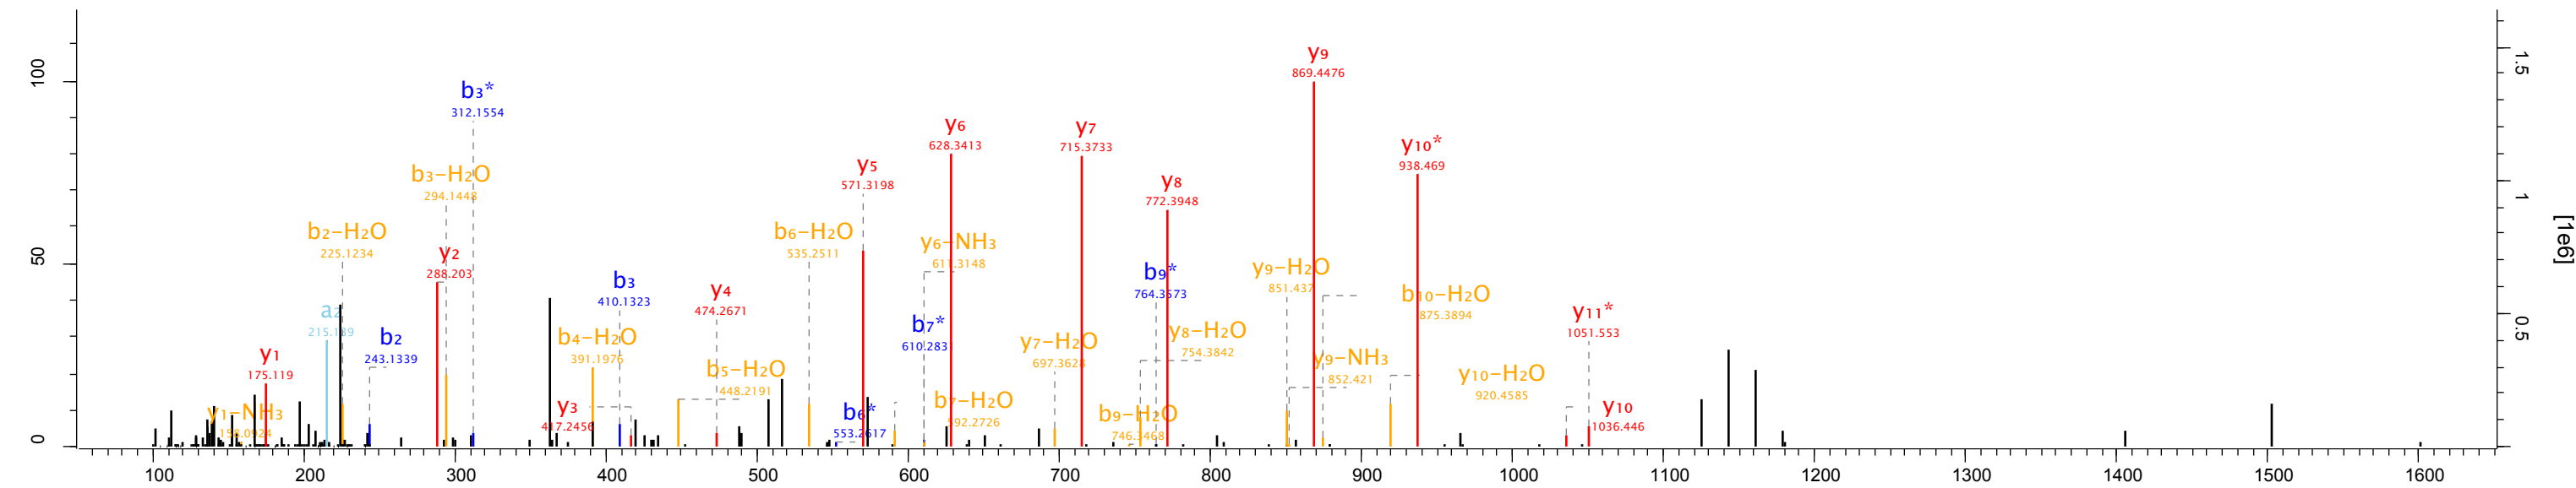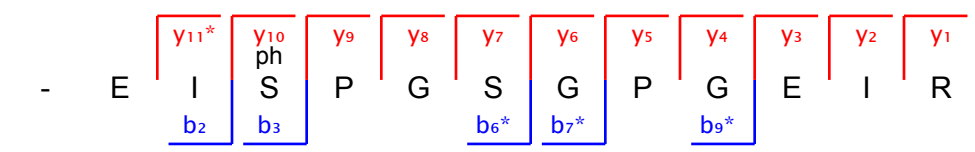

Raw file 20171215\_MaS\_33SR\_LMH\_phospho\_03 Scan 8115 Method FTMS; HCD Score 176.69 m/z 936.36 Gene names TIMELESS

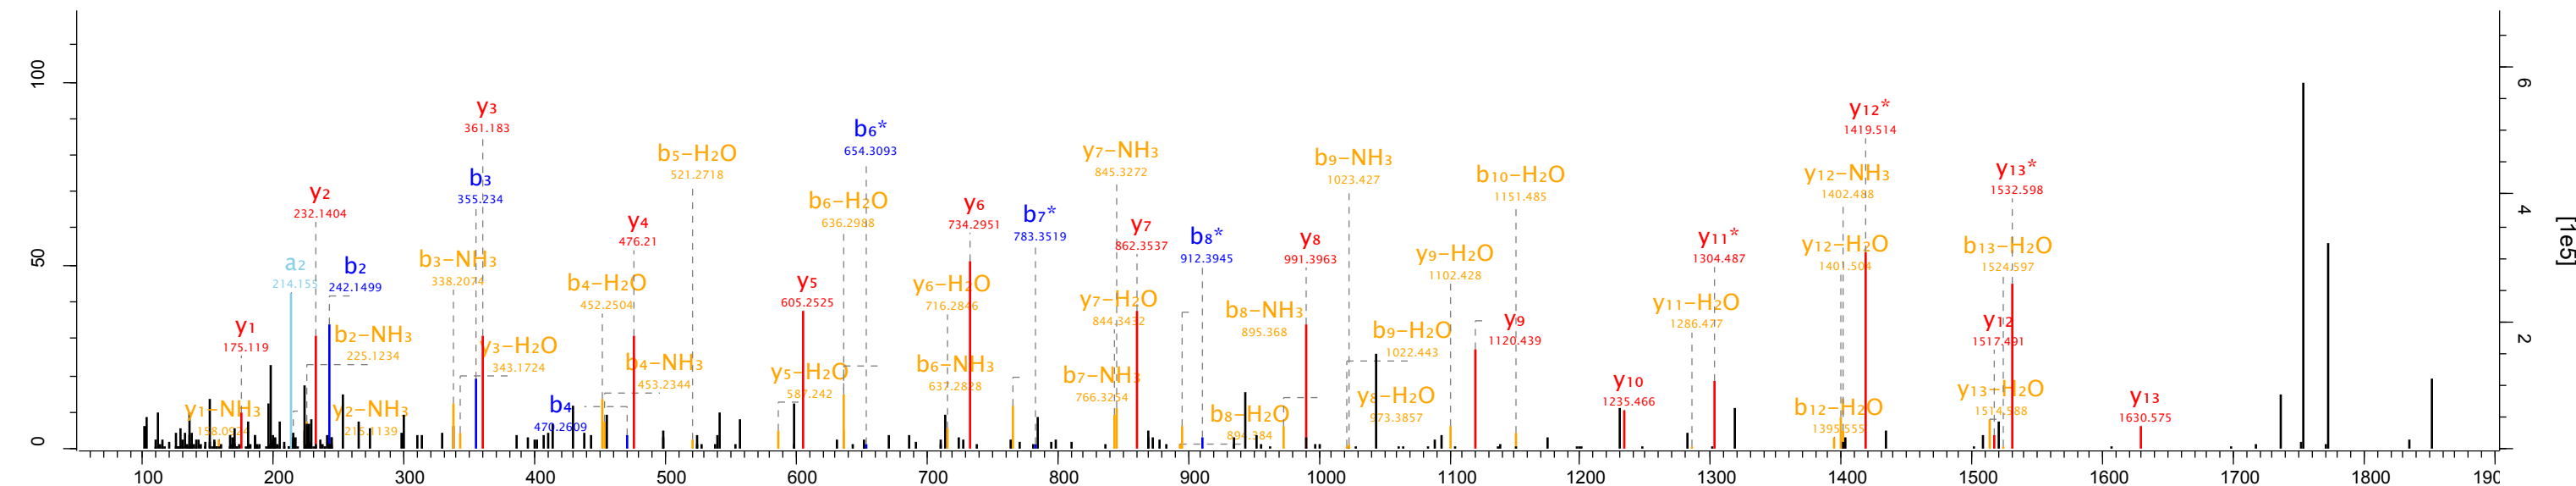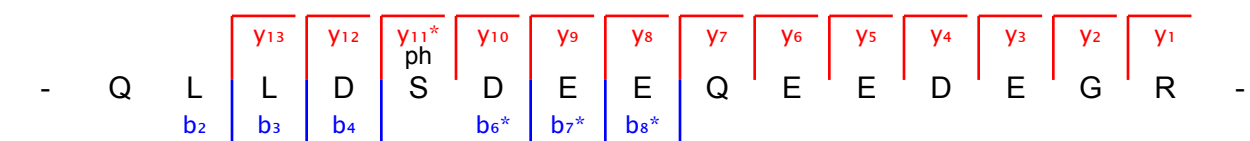

Raw file 20171215\_MaS\_33SR\_LMH\_phospho\_03 Scan 8275 Method FTMS; HCD Score 134.88 m/z 798.85 Gene names OPTN

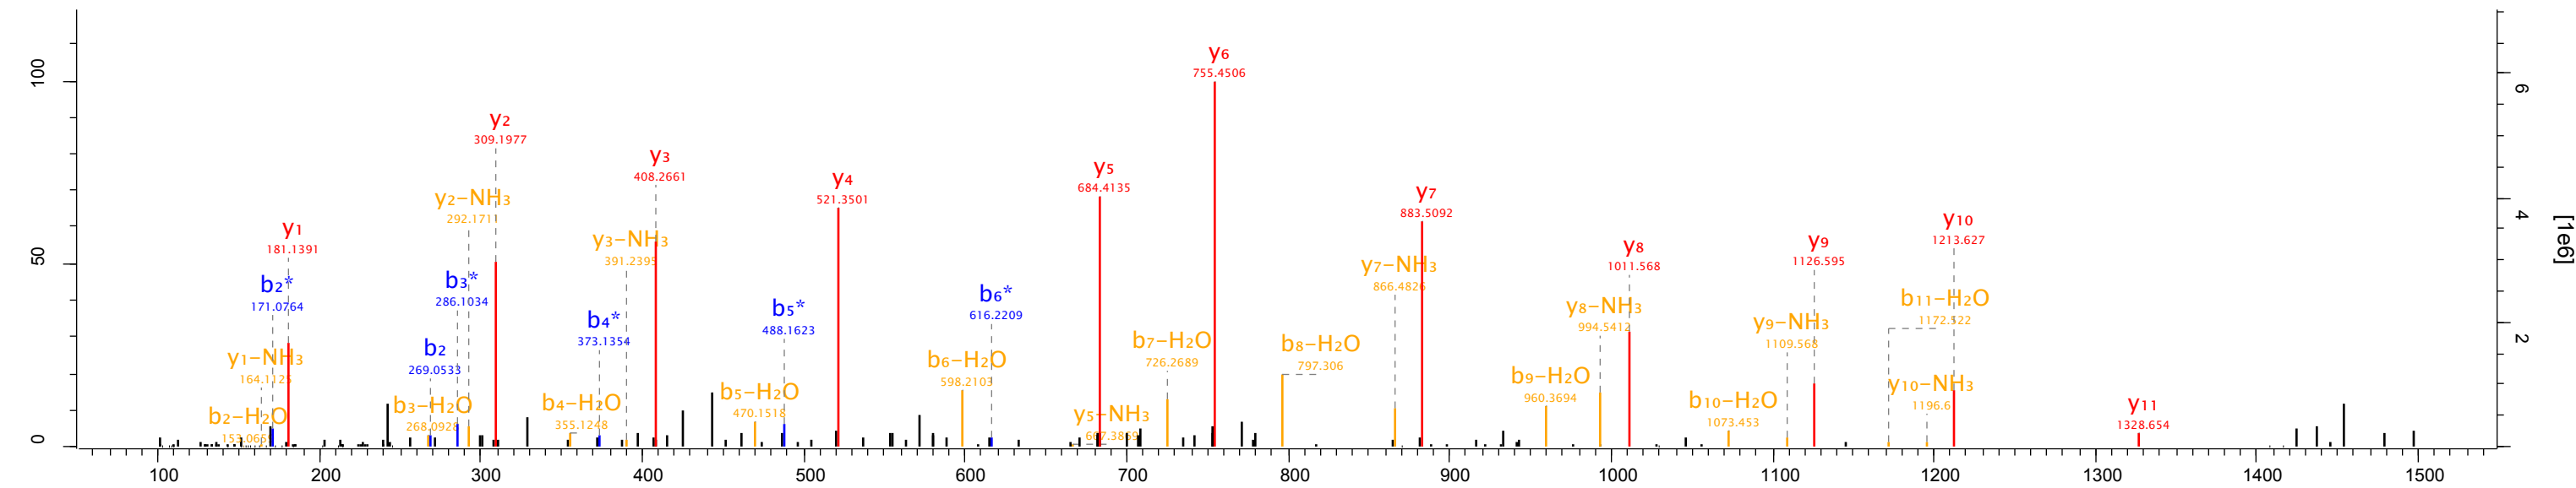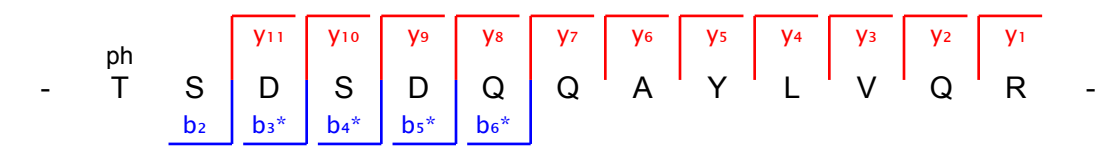

Raw file 20171215\_MaS\_33SR\_LMH\_phospho\_03 Scan 8305 Method FTMS; HCD Score 201.85 m/z 1018.95 Gene names NEDD4L

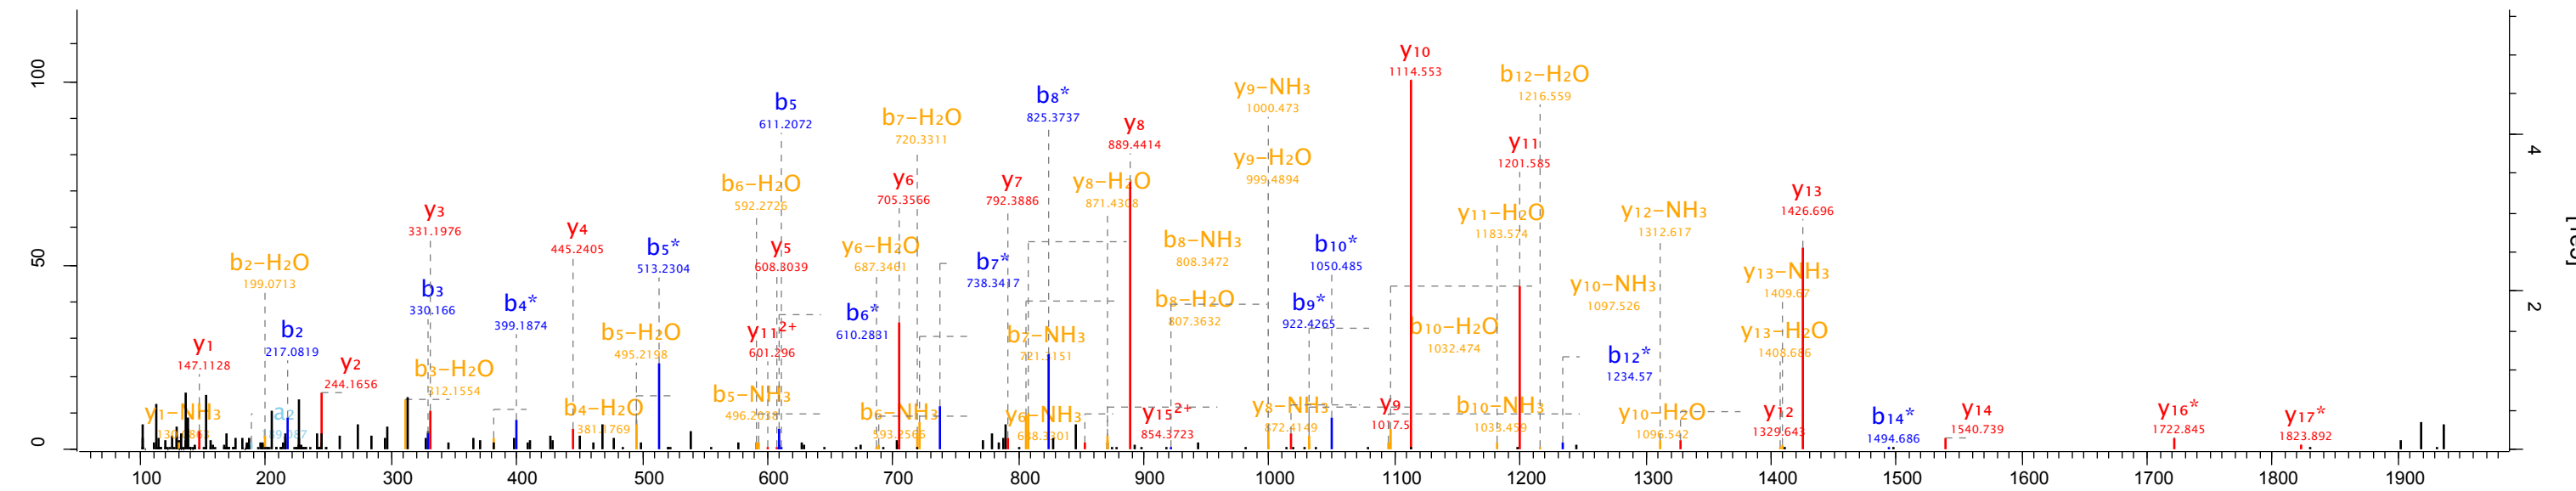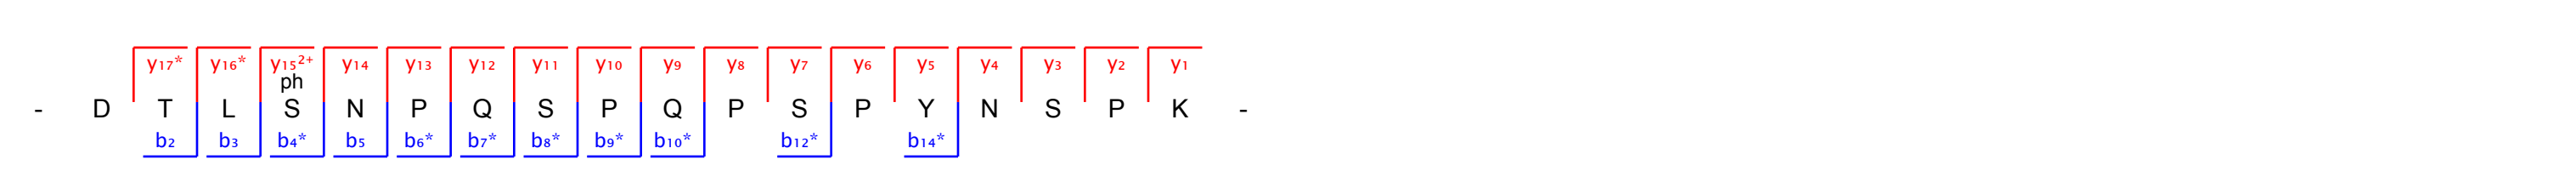

Raw file 20171215\_MaS\_33SR\_LMH\_phospho\_03 Scan 8405 Method FTMS; HCD Score 255.56 m/z 949.05 Gene names TOR1AIP1

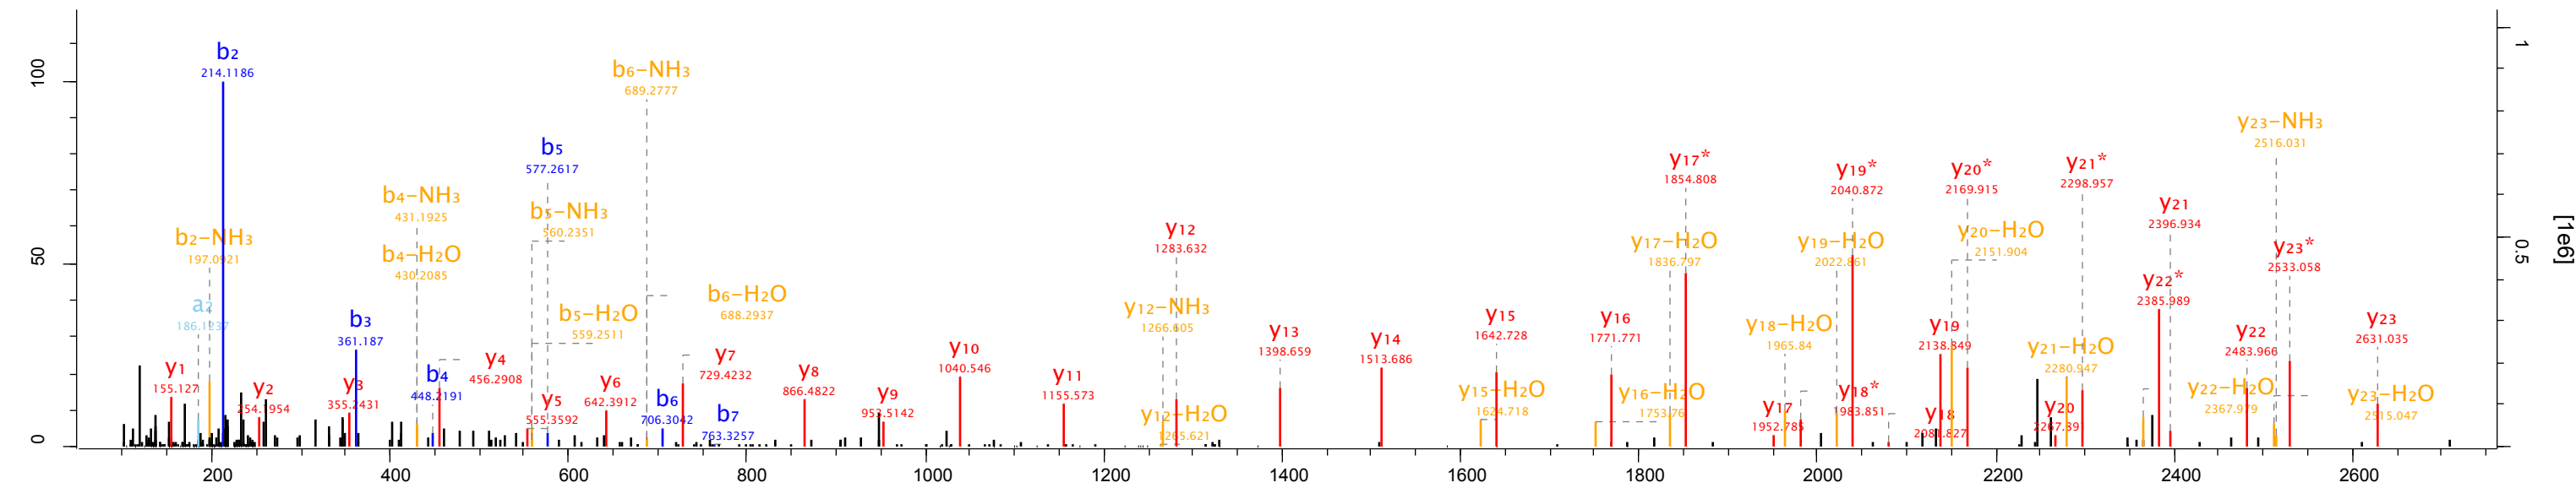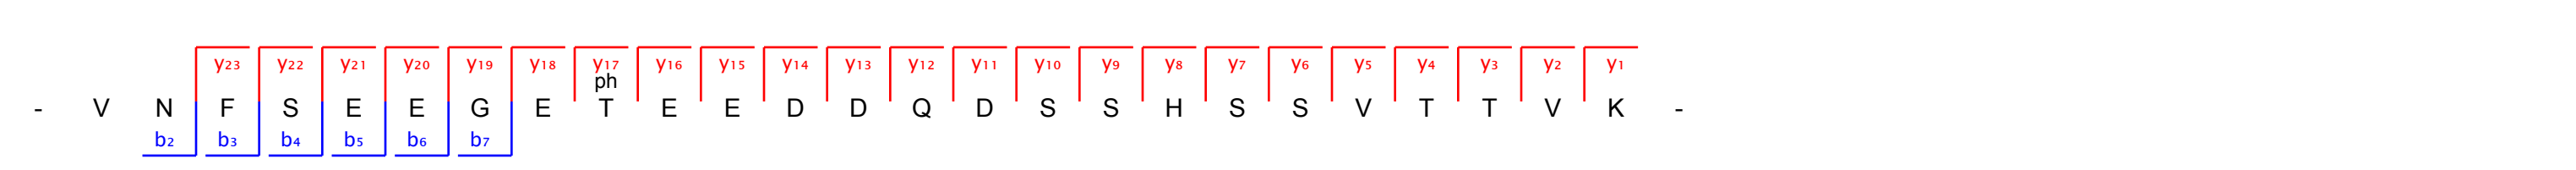

Raw file 20171215\_MaS\_33SR\_LMH\_phospho\_03 Scan 8485 Method FTMS; HCD Score 124.91 m/z 887.32 Gene names PDCL

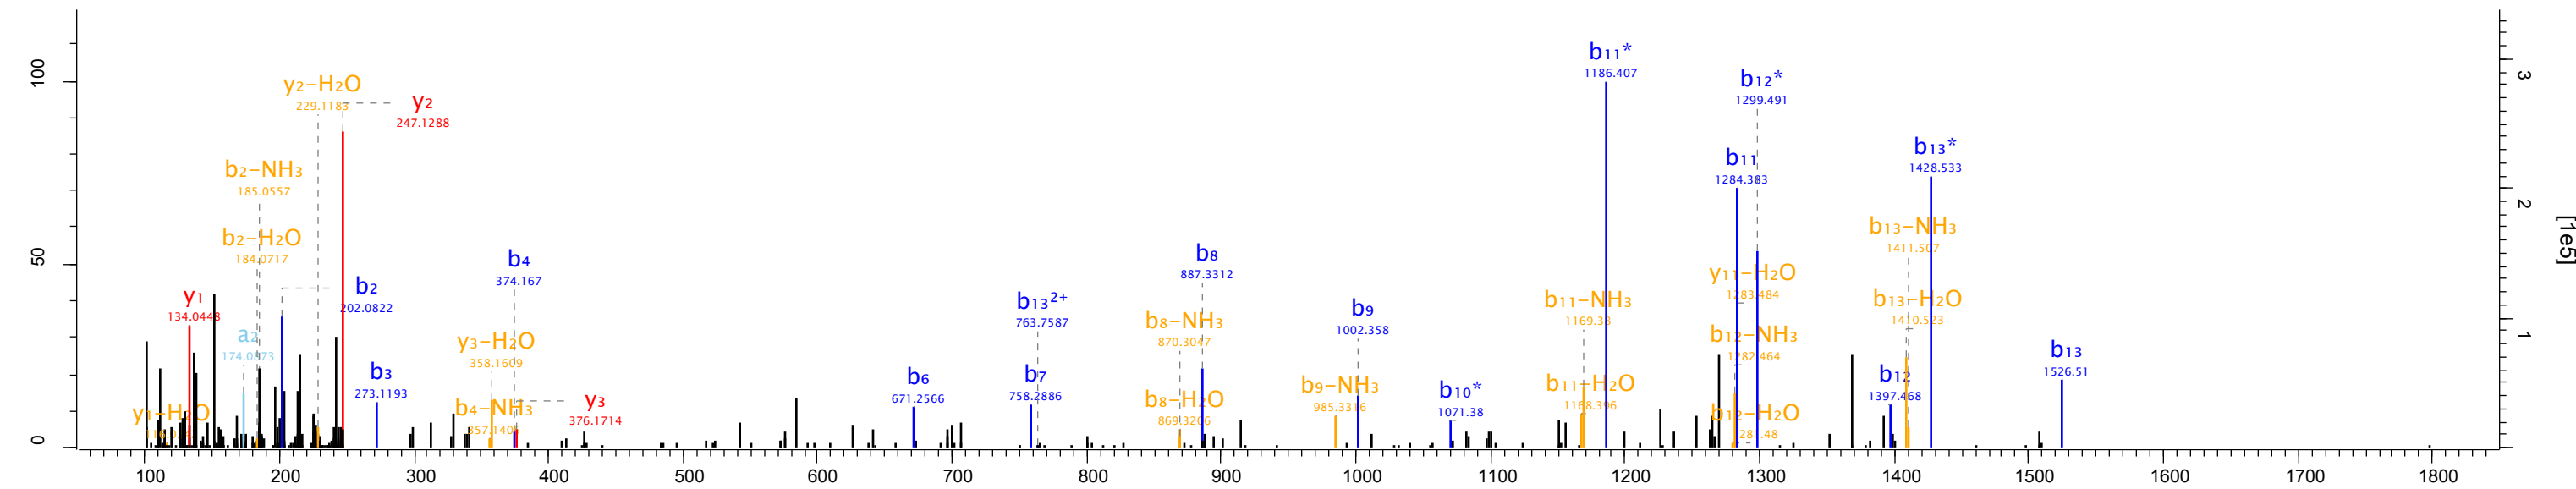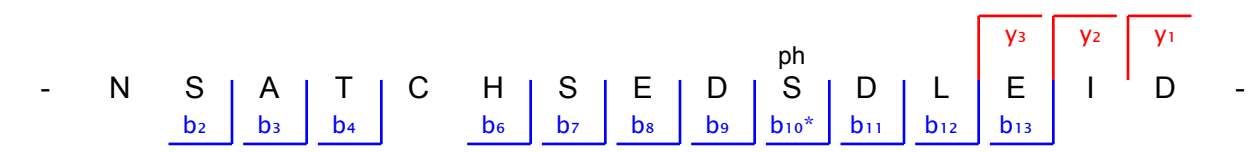

Raw file 20171215\_MaS\_33SR\_LMH\_phospho\_03 Scan 8605 Method FTMS; HCD Score 118.48 m/z 790.86 Gene names TENC1

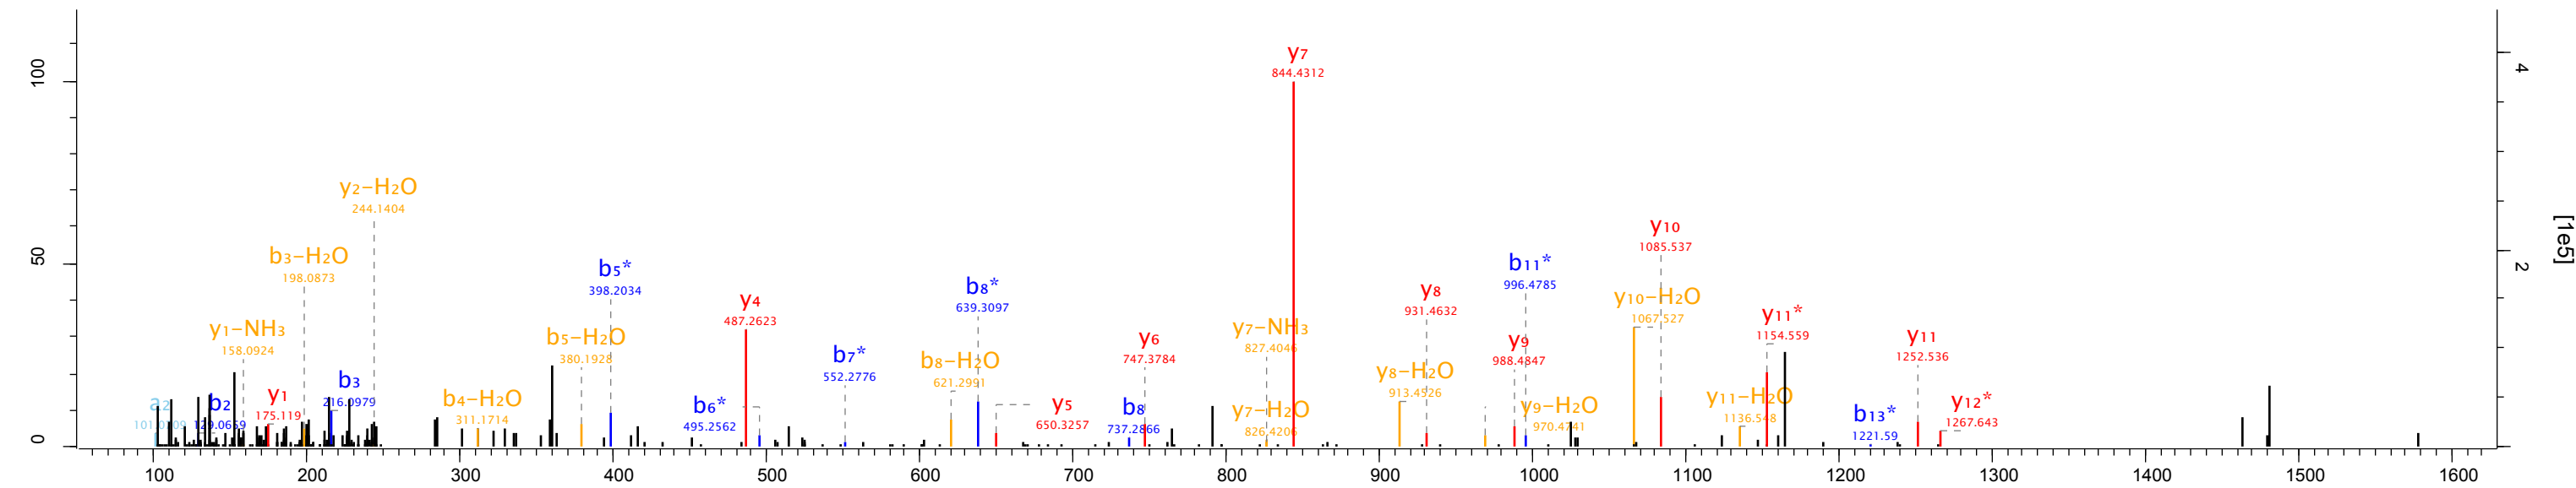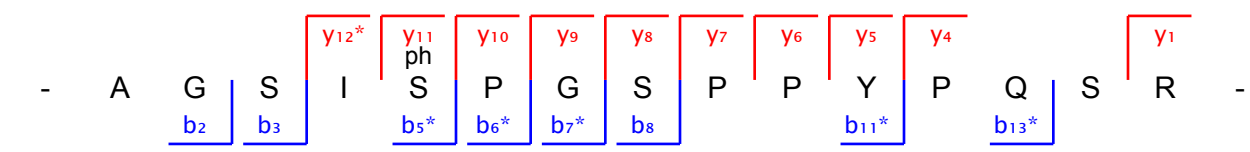

Raw file 20171215\_MaS\_33SR\_LMH\_phospho\_03 Scan 8675 Method FTMS; HCD Score 170.47 m/z 758.82 Gene names DOCK7

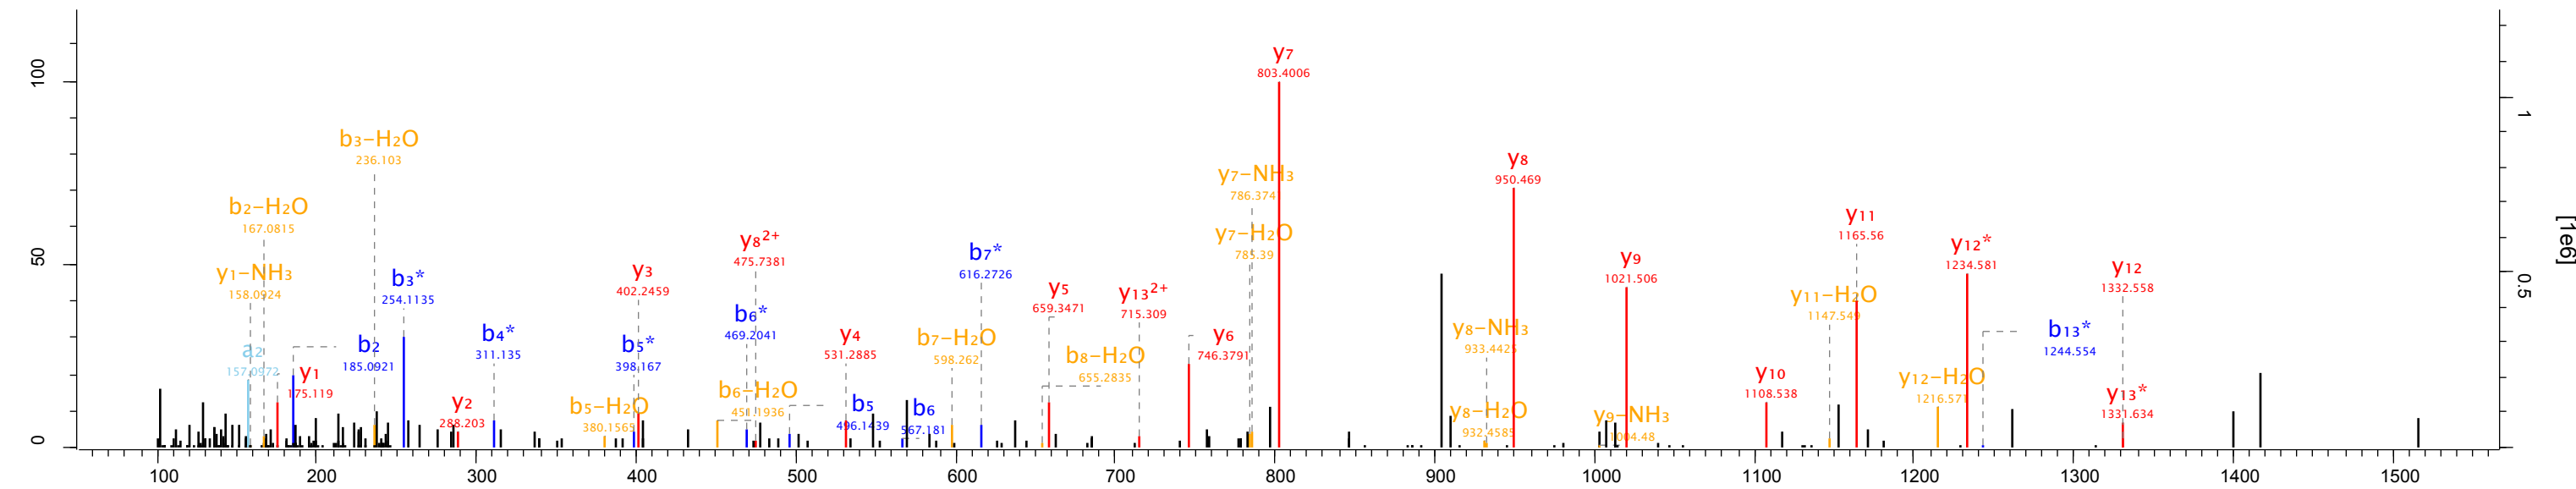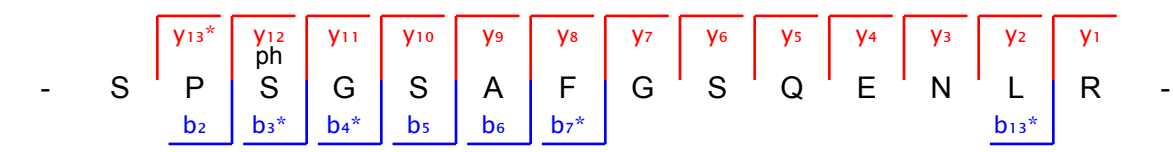



Raw file 20171215\_MaS\_33SR\_LMH\_phospho\_03 Scan 8705 Method FTMS; HCD Score 334.14 m/z 1031.92

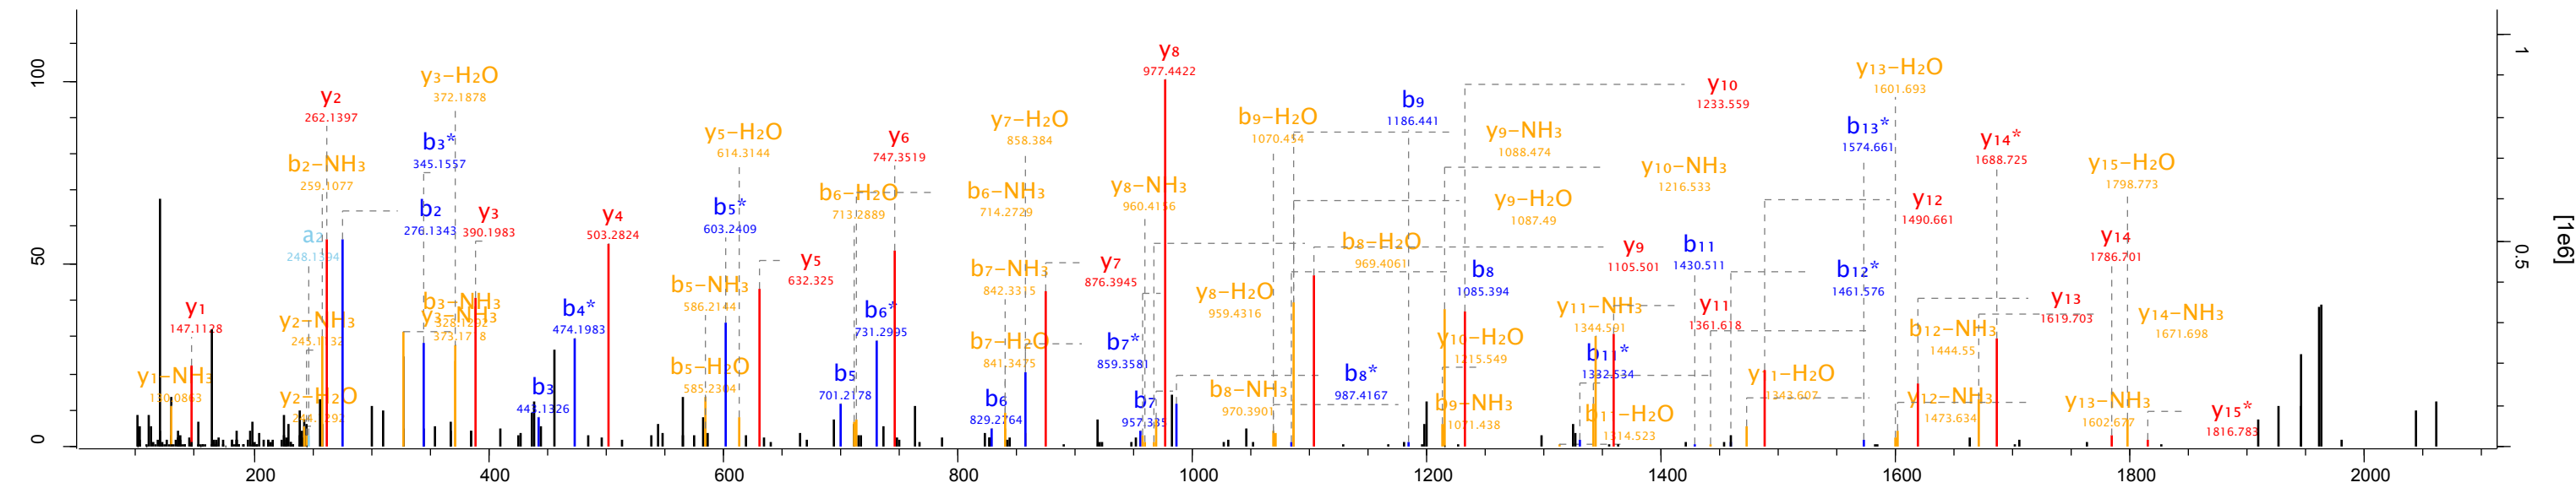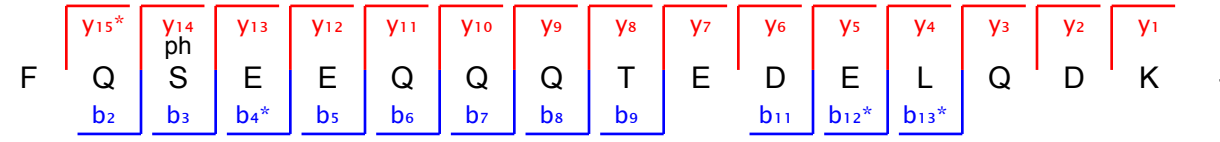

20171215\_MaS\_33SR\_LMH\_phospho\_03 8945 FTMS; HCD 124.7 762.34 RIOK1

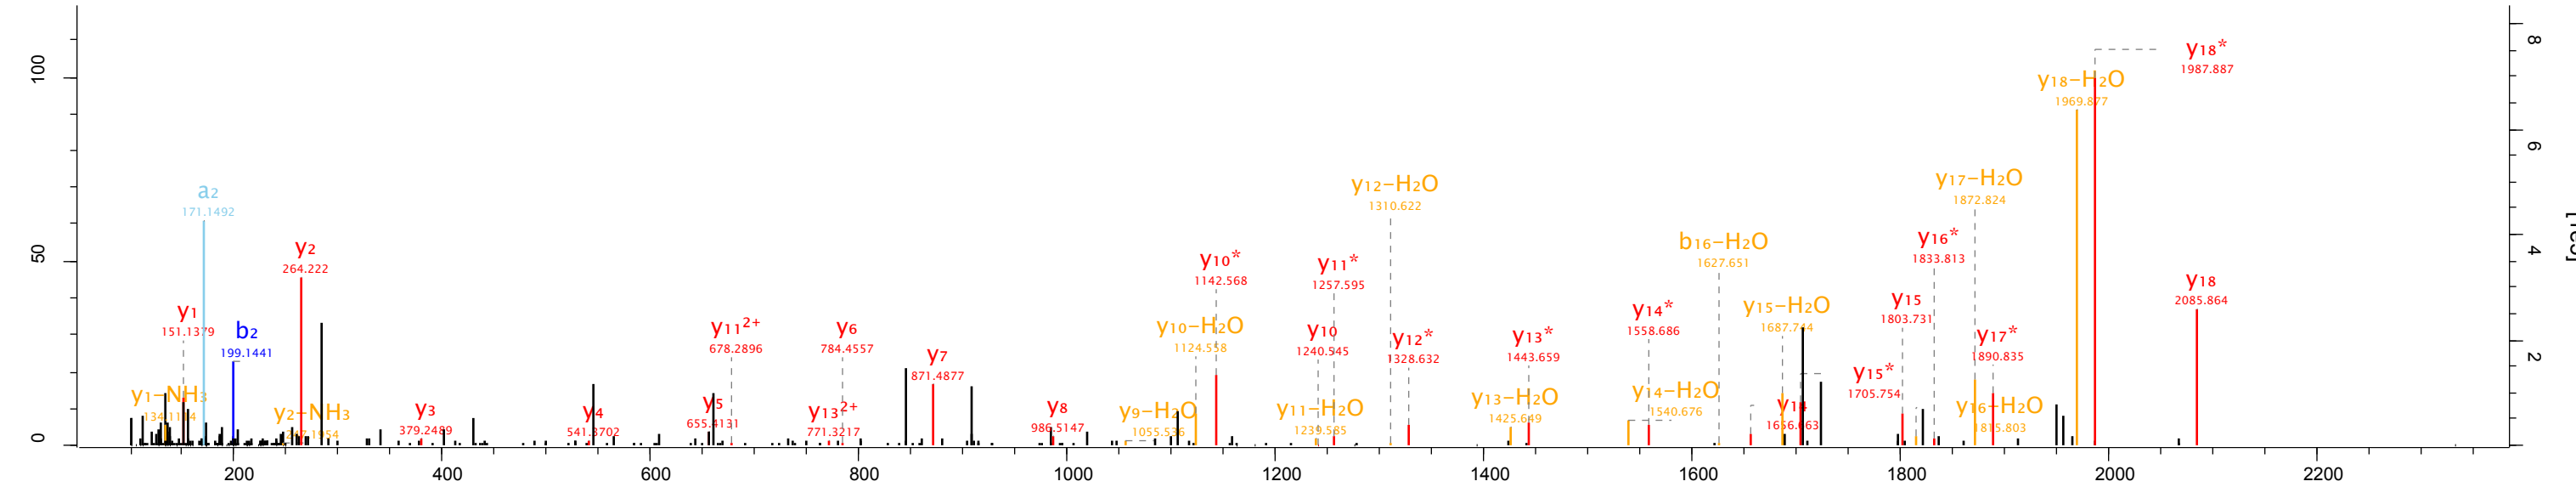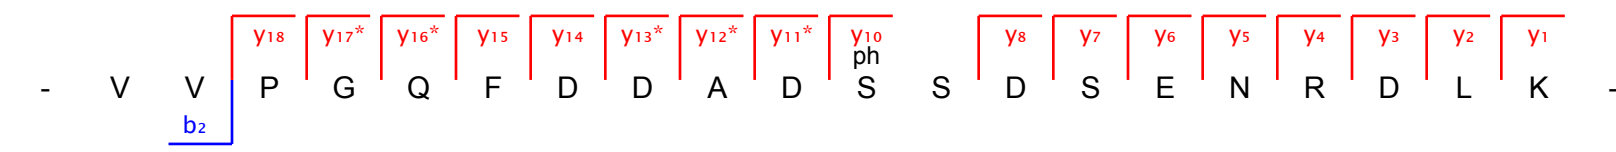

Raw file 20171215\_MaS\_33SR\_LMH\_phospho\_03 Scan 9035 Method FTMS; HCD Score 130.89 m/z 927.37 Gene names NMD3

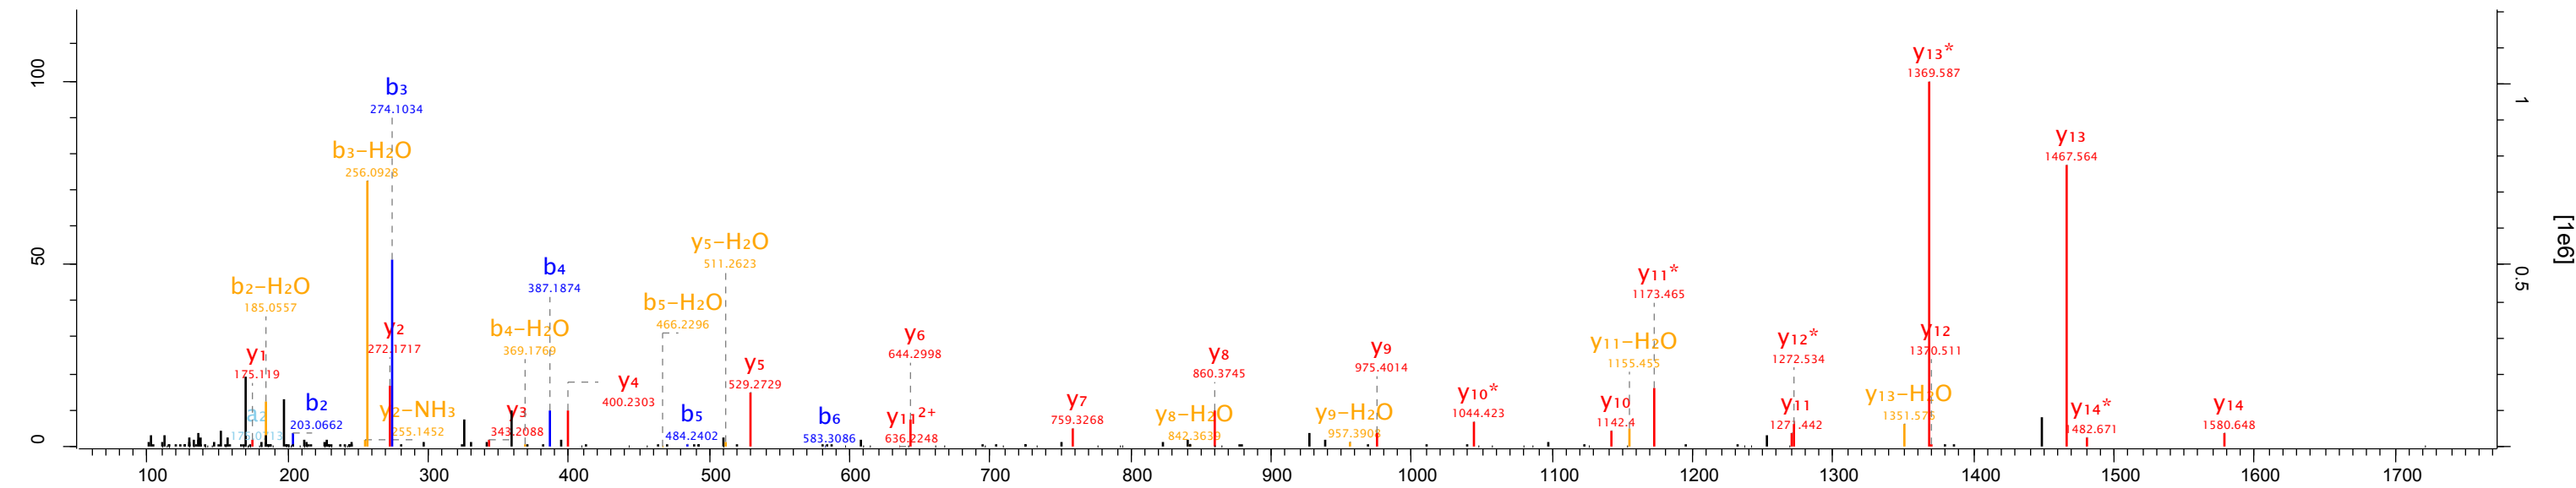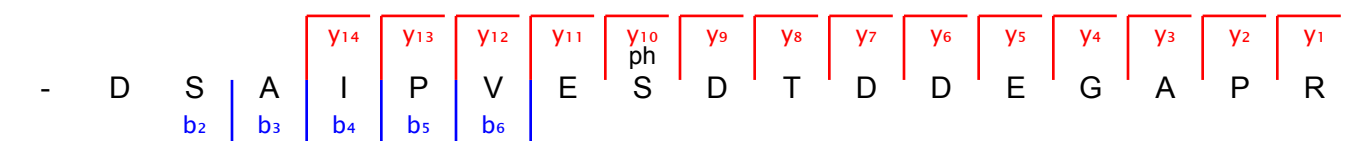

Raw file 20171215\_MaS\_33SR\_LMH\_phospho\_03 Scan 9055 Method FTMS; HCD Score 119.66 m/z 636.64 Gene names NUP98

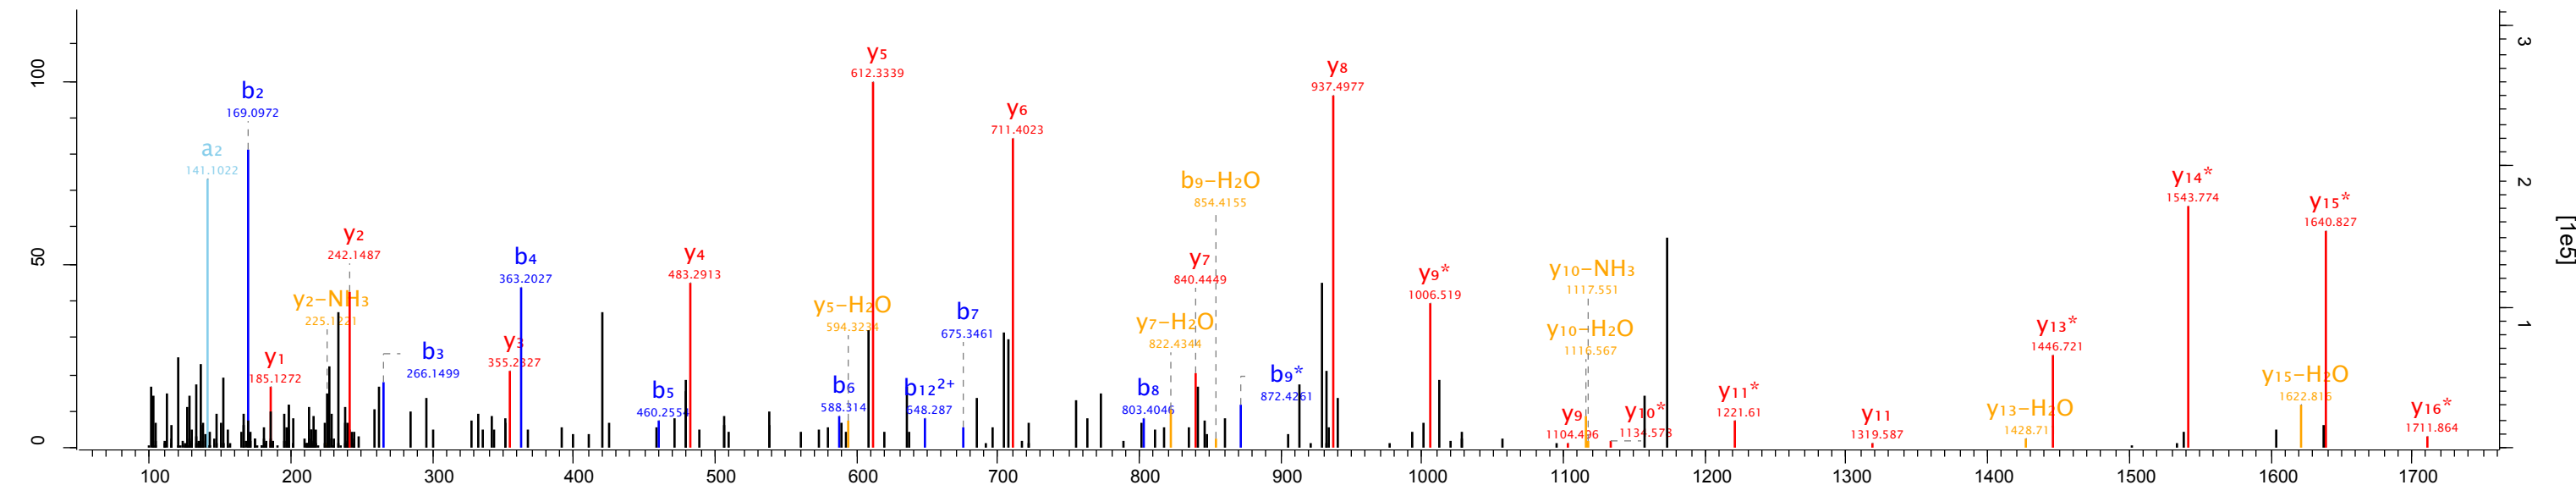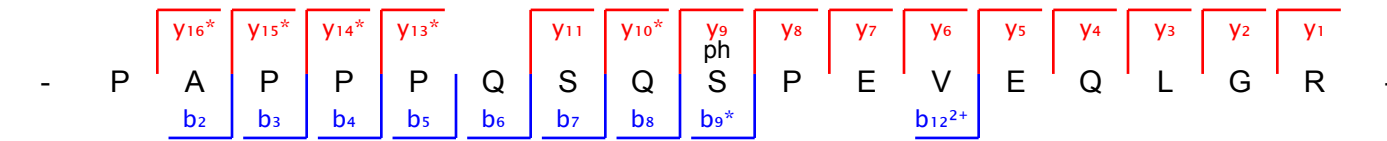

Raw file: 20171215\_MaS\_33SR\_LMH\_phospho\_03  
 Scan: 9175 Method: FTMS; HCD Score: 125.36 m/z: 658.31 Gene names: NOL8

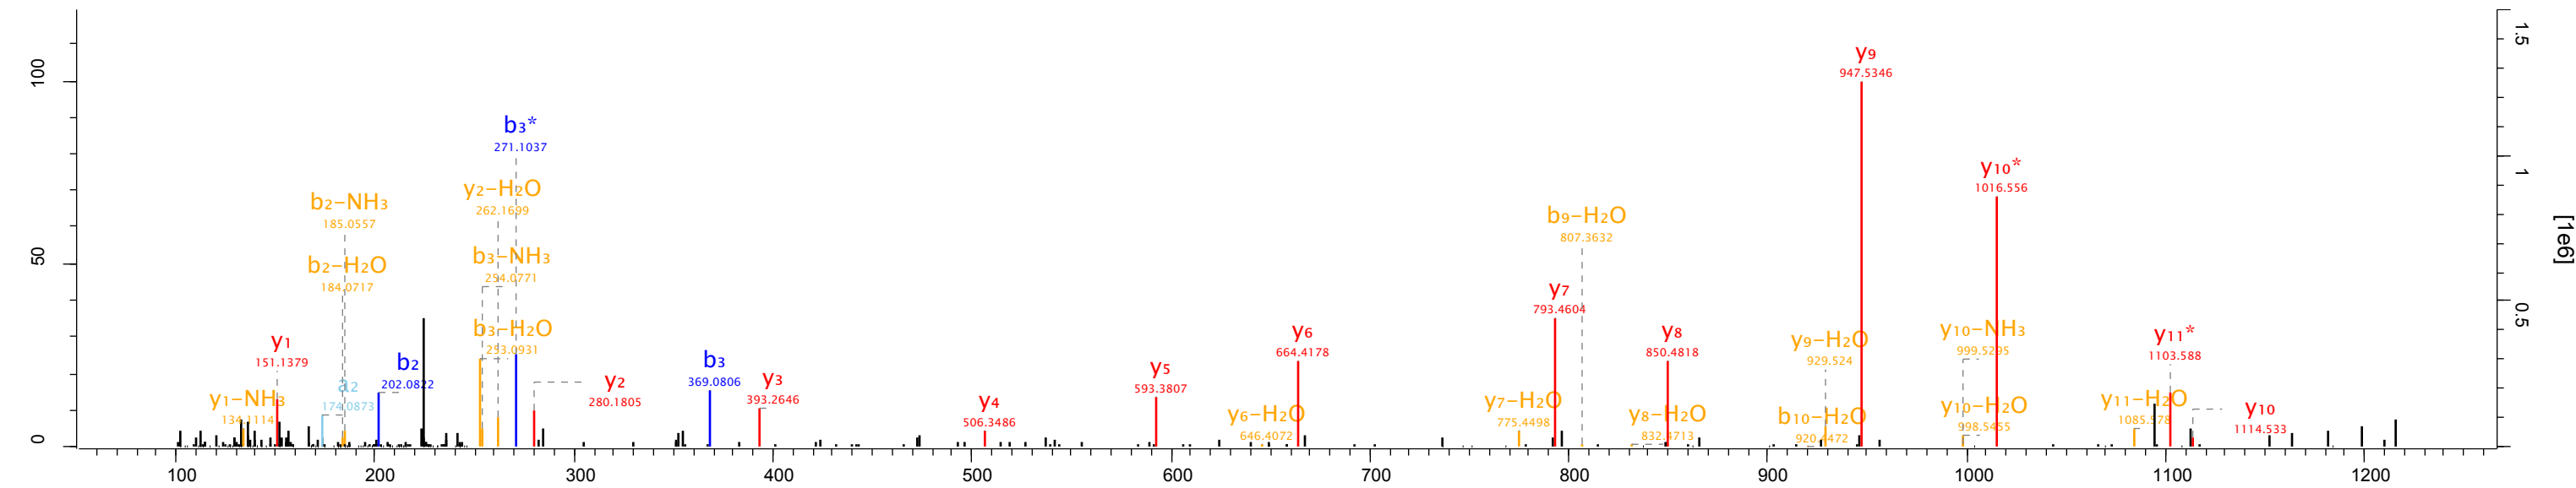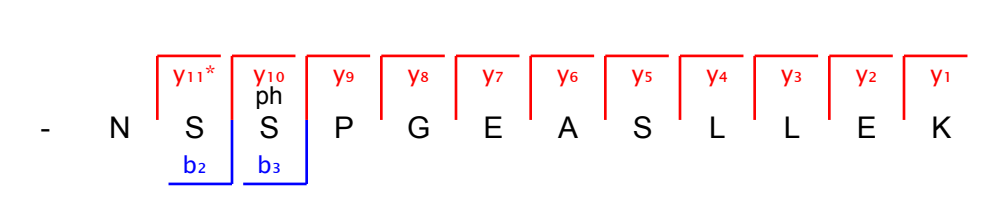

Raw file 20171215\_MaS\_33SR\_LMH\_phospho\_03 Scan 9365 Method FTMS; HCD Score 154.49 m/z 872.35 Gene names ST13;ST13P4

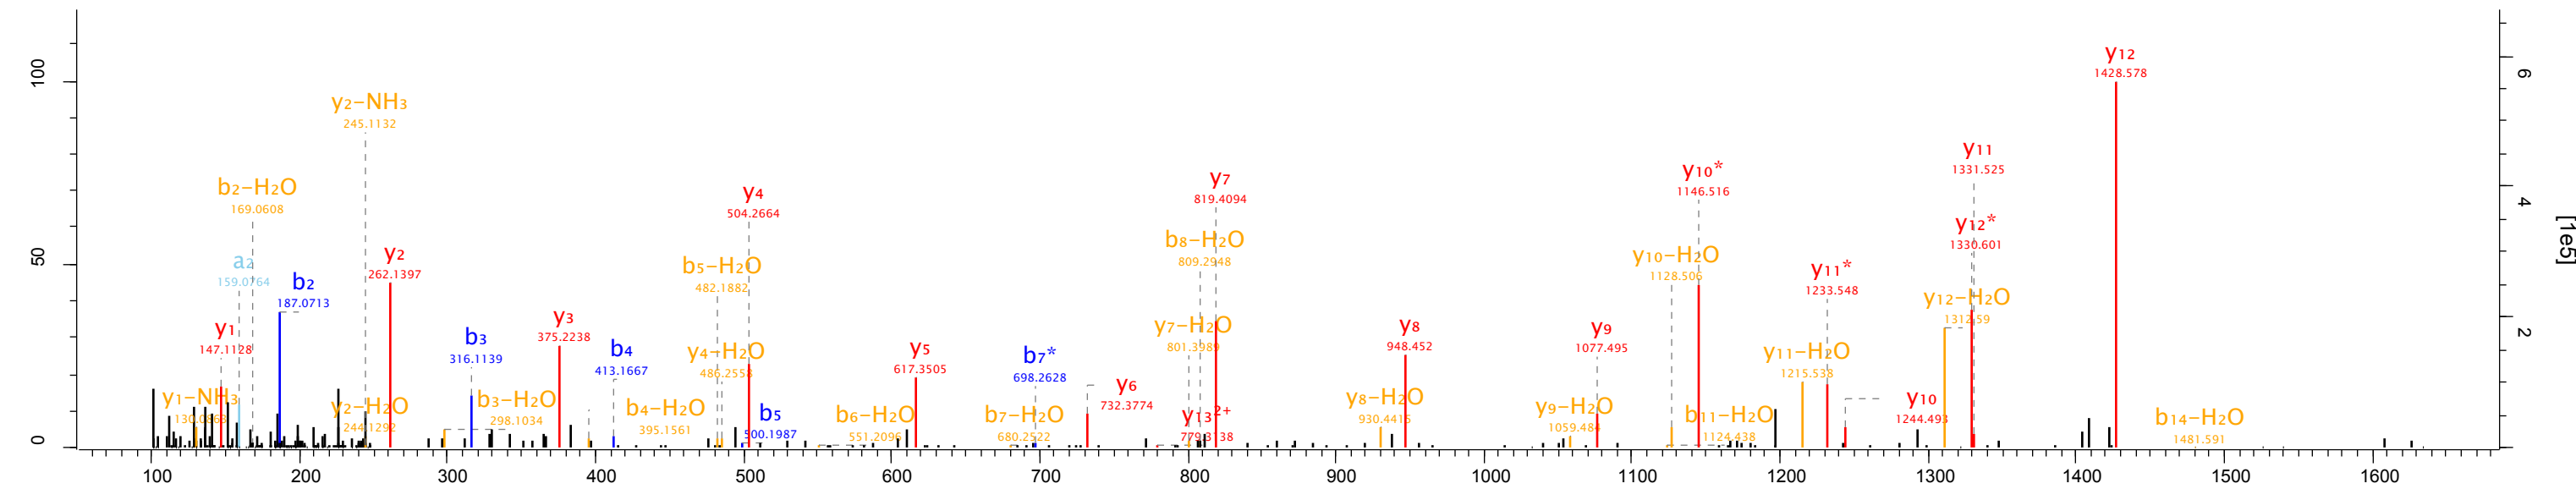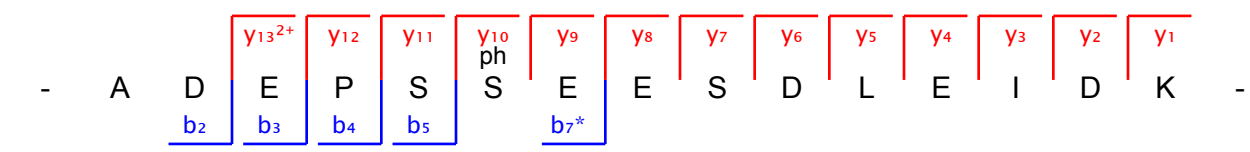

Raw file 20171215\_MaS\_33SR\_LMH\_phospho\_03 Scan 9375 Method FTMS; HCD Score 76.16 m/z 966.42 Gene names TRPT1

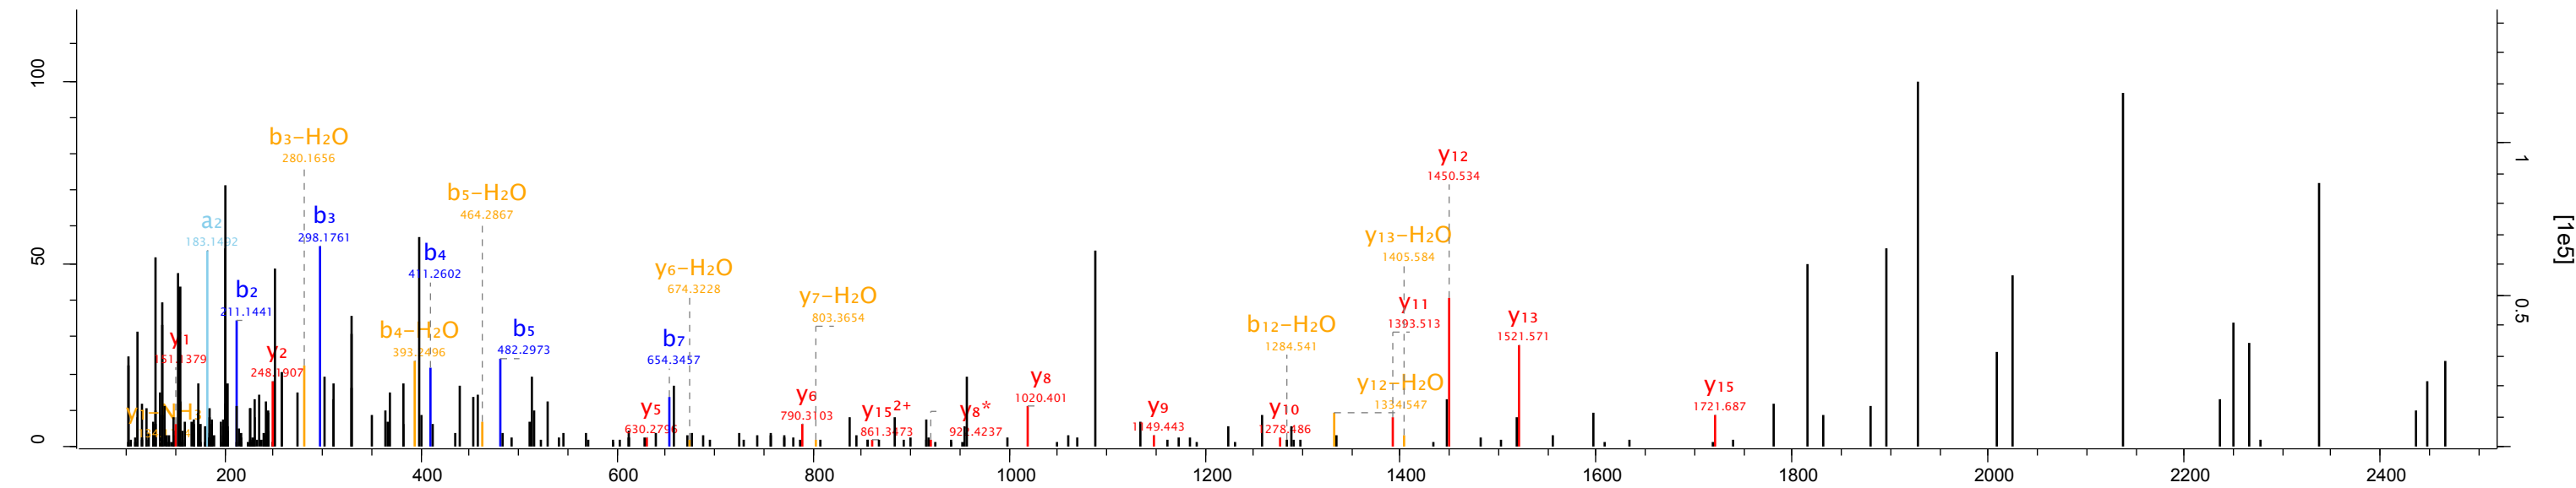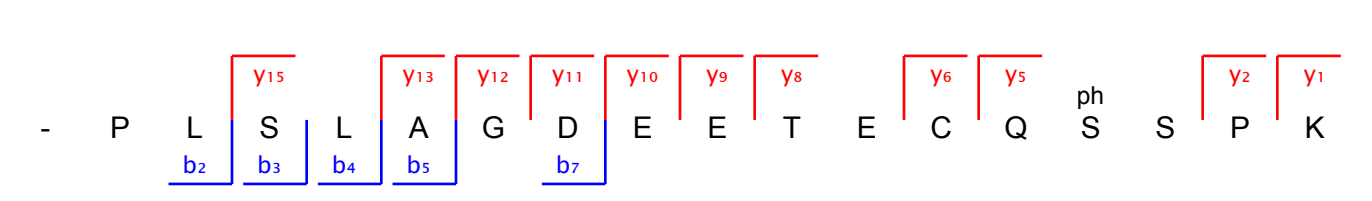

Raw file 20171215\_MaS\_33SR\_LMH\_phospho\_03 Scan 9585 Method FTMS; HCD Score 96.76 m/z 635.75 Gene names PPP1R12A

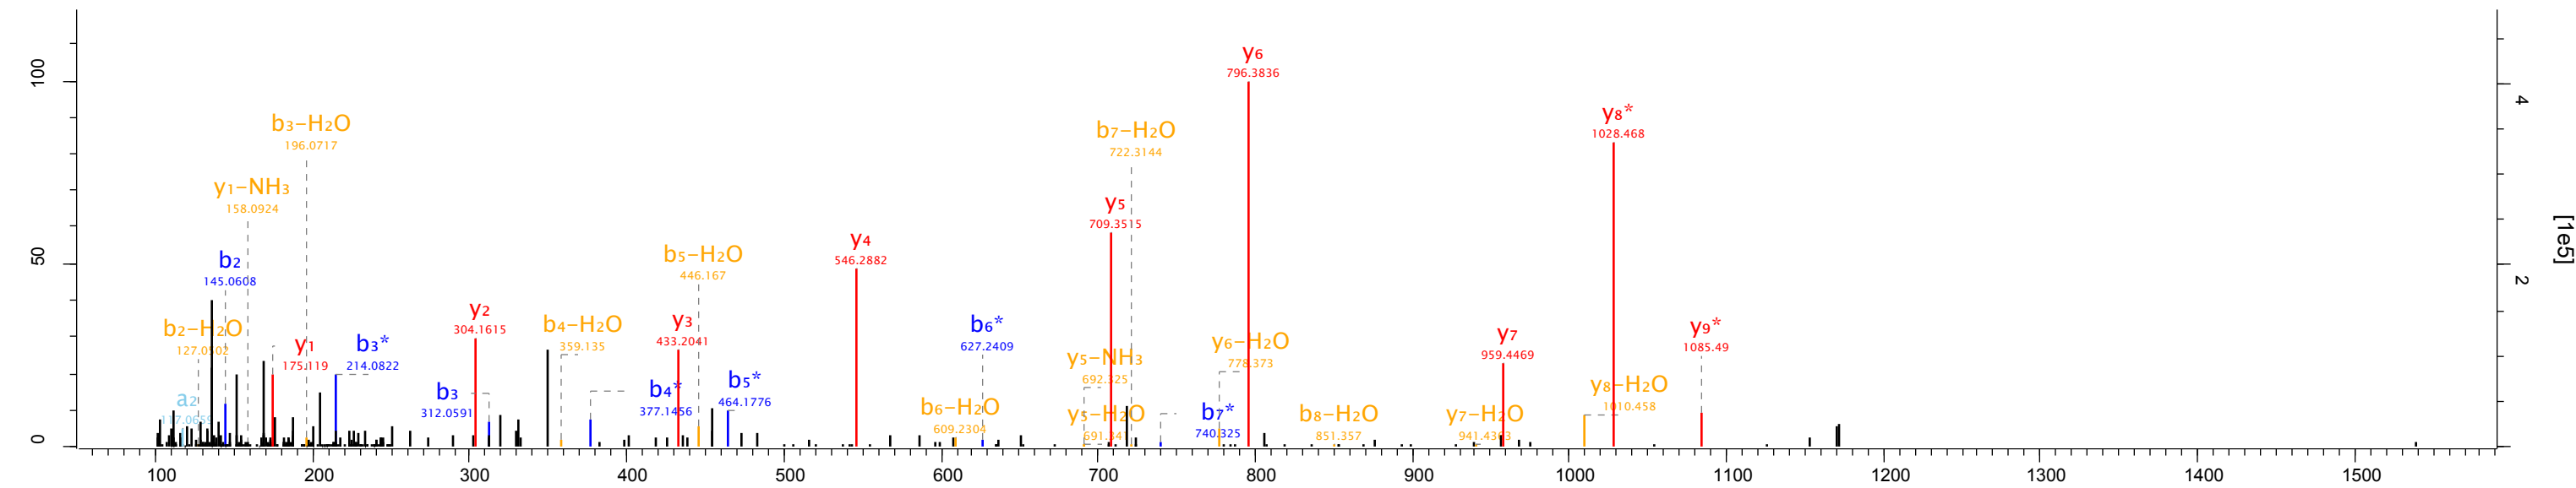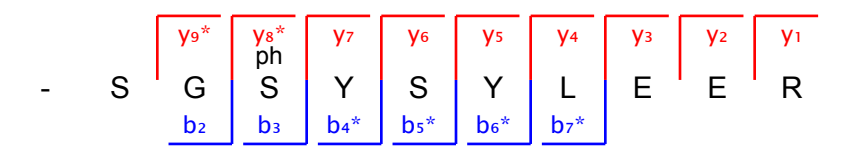



Raw file 20171215\_MaS\_33SR\_LMH\_phospho\_03 Scan 9655 Method FTMS; HCD Score 129.82 m/z 561.73 Gene names MYO18A

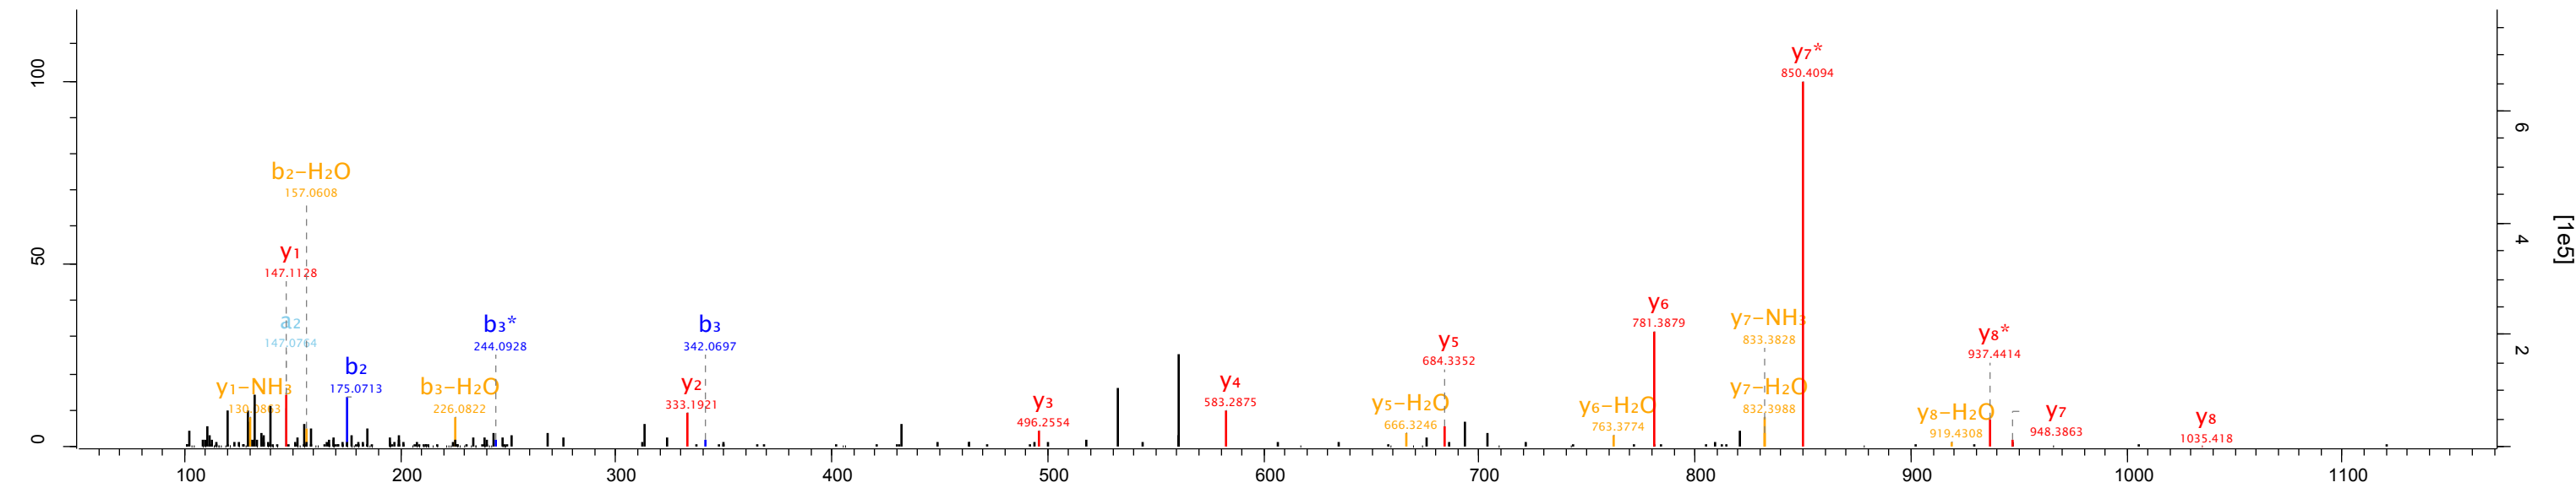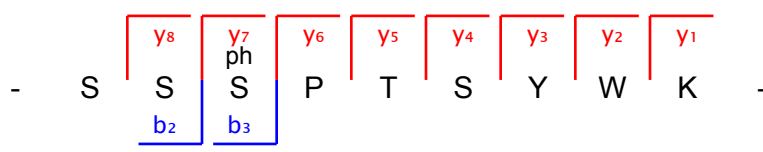

Raw file 20171215\_MaS\_33SR\_LMH\_phospho\_03 Scan 9665 Method FTMS; HCD Score 163.91 m/z 717.83 Gene names KHSRP

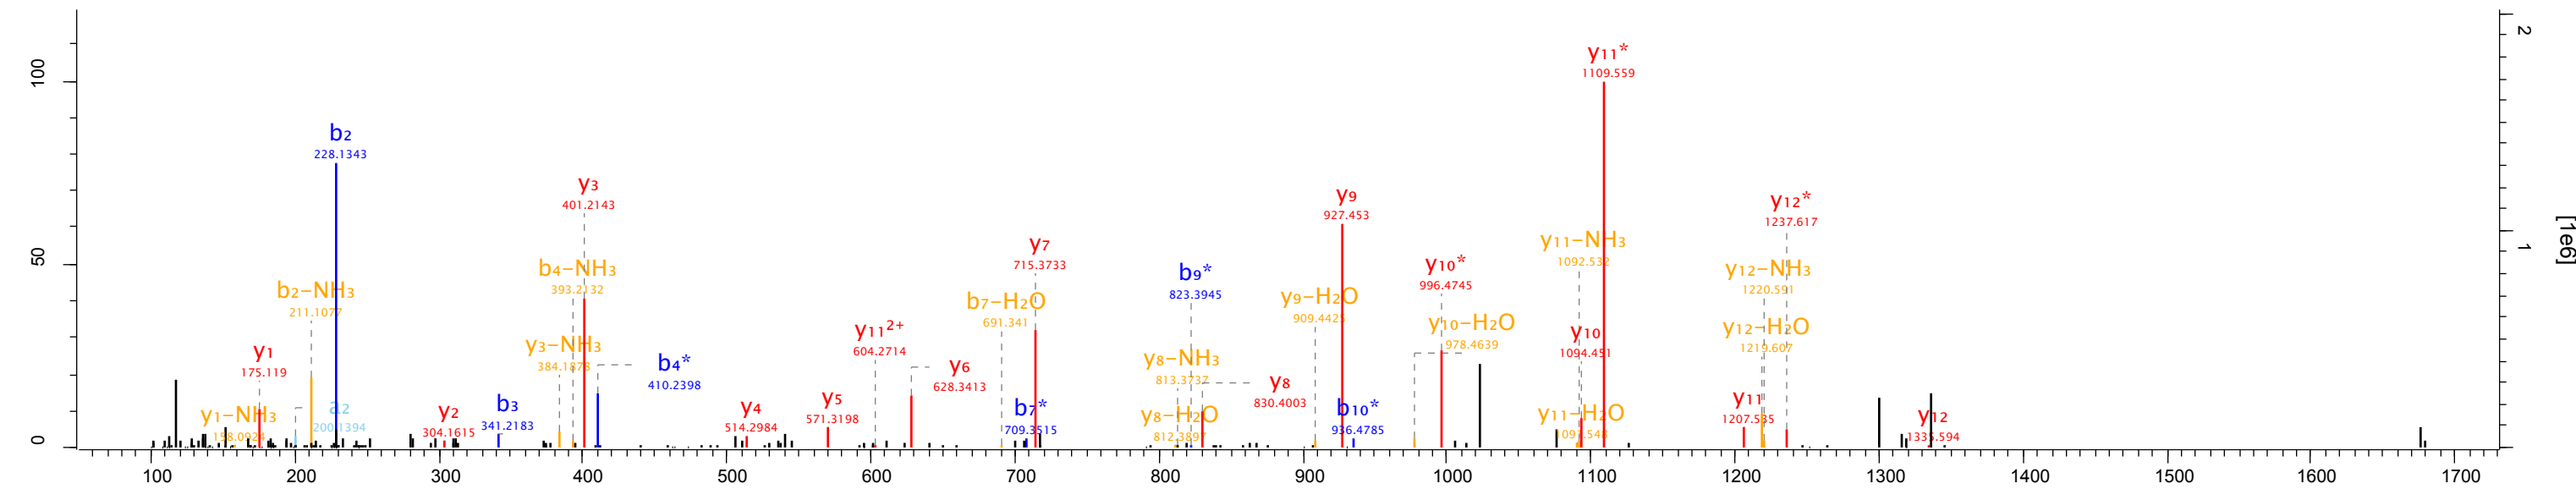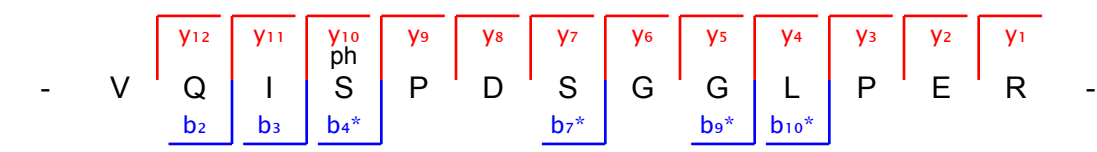

Raw file 20171215\_MaS\_33SR\_LMH\_phospho\_03 Scan 9735 Method FTMS; HCD Score 250.24 m/z 1308.5 Gene names YBX3

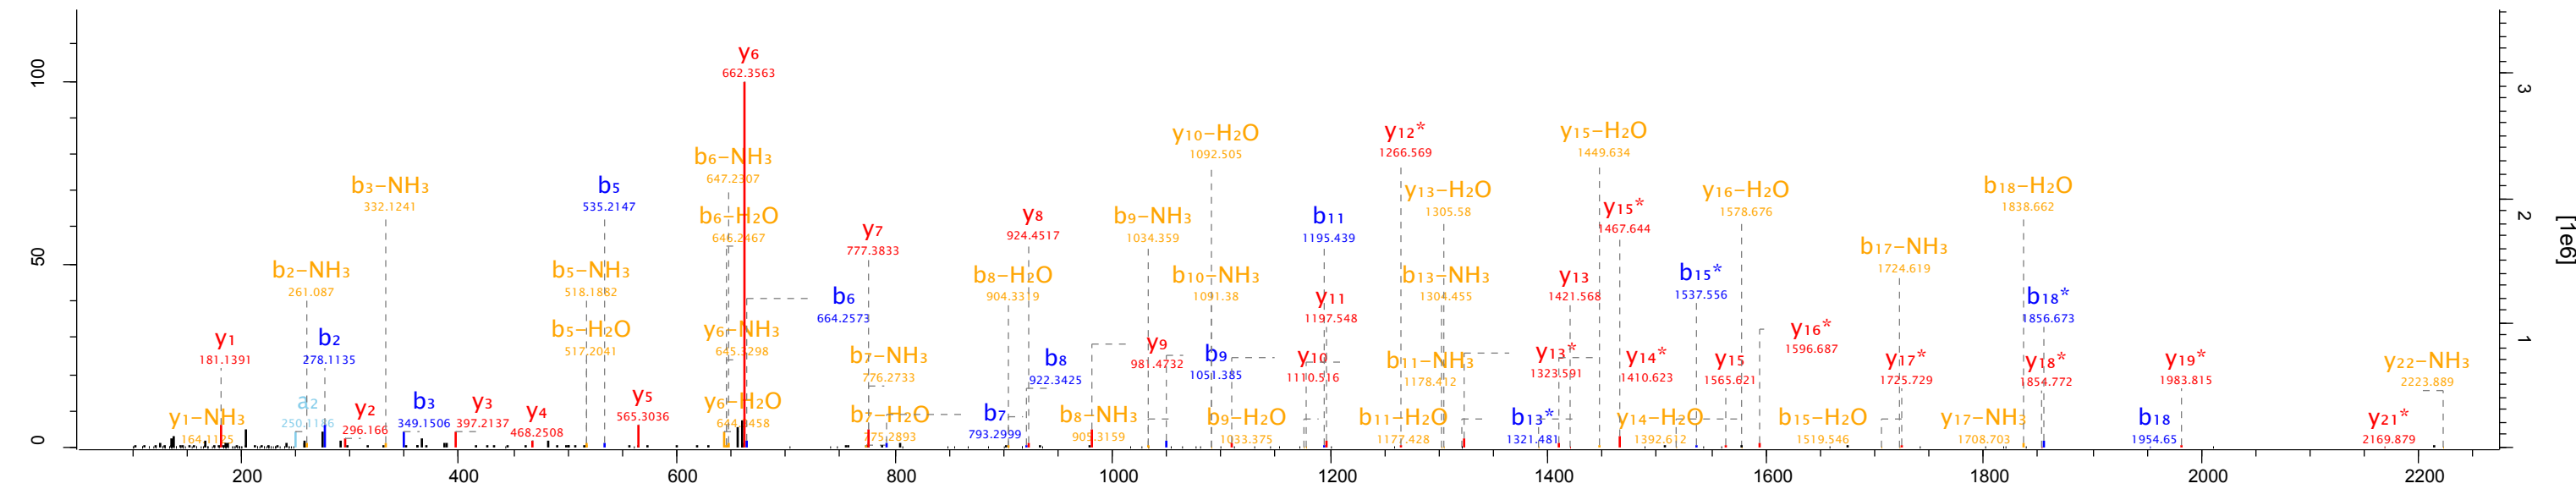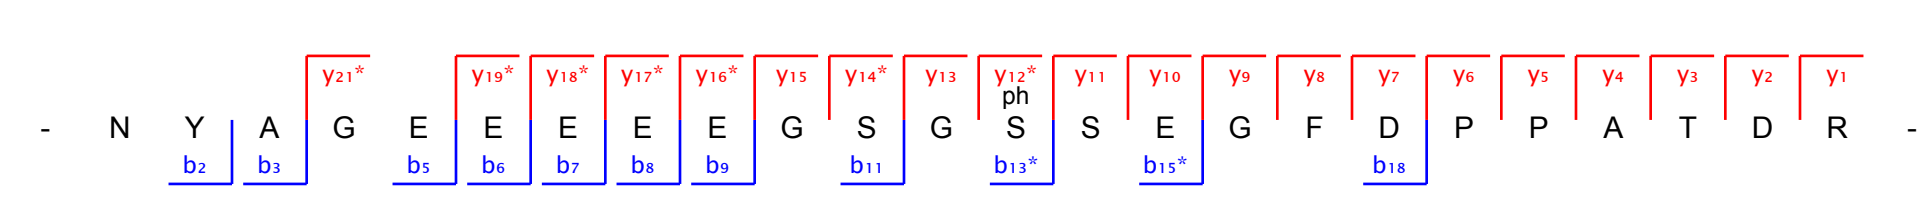

Raw file 20171215\_MaS\_33SR\_LMH\_phospho\_03 Scan 9775 Method FTMS; HCD Score 196.14 m/z 1063.93 Gene names PGRMC1

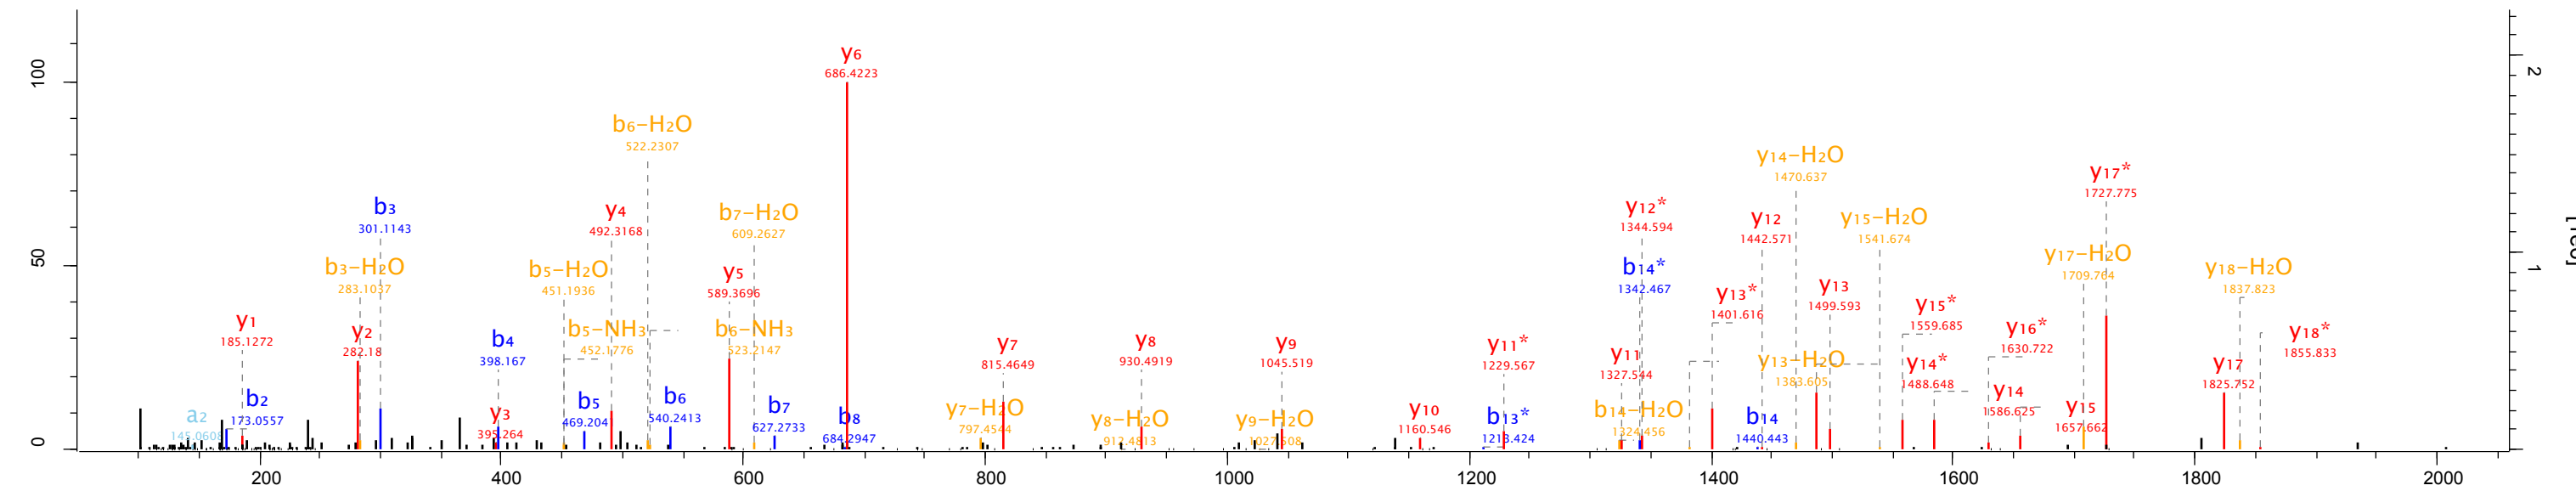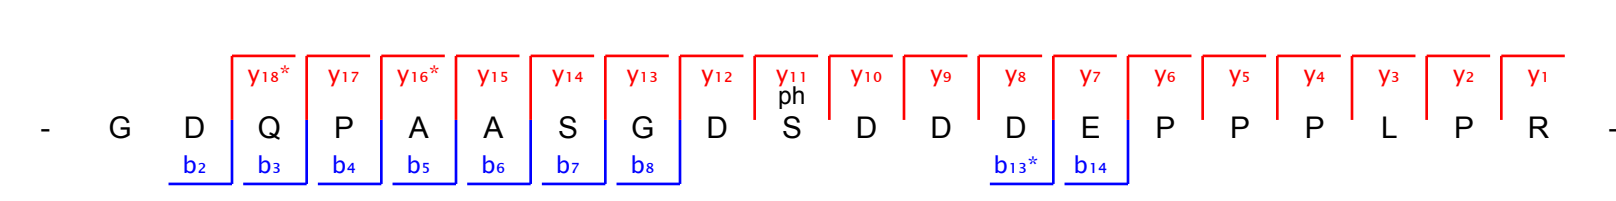

Raw file 20171215\_MaS\_33SR\_LMH\_phospho\_03 Scan 9885 Method FTMS; HCD Score 68.54 m/z 495.2 Gene names RNF13

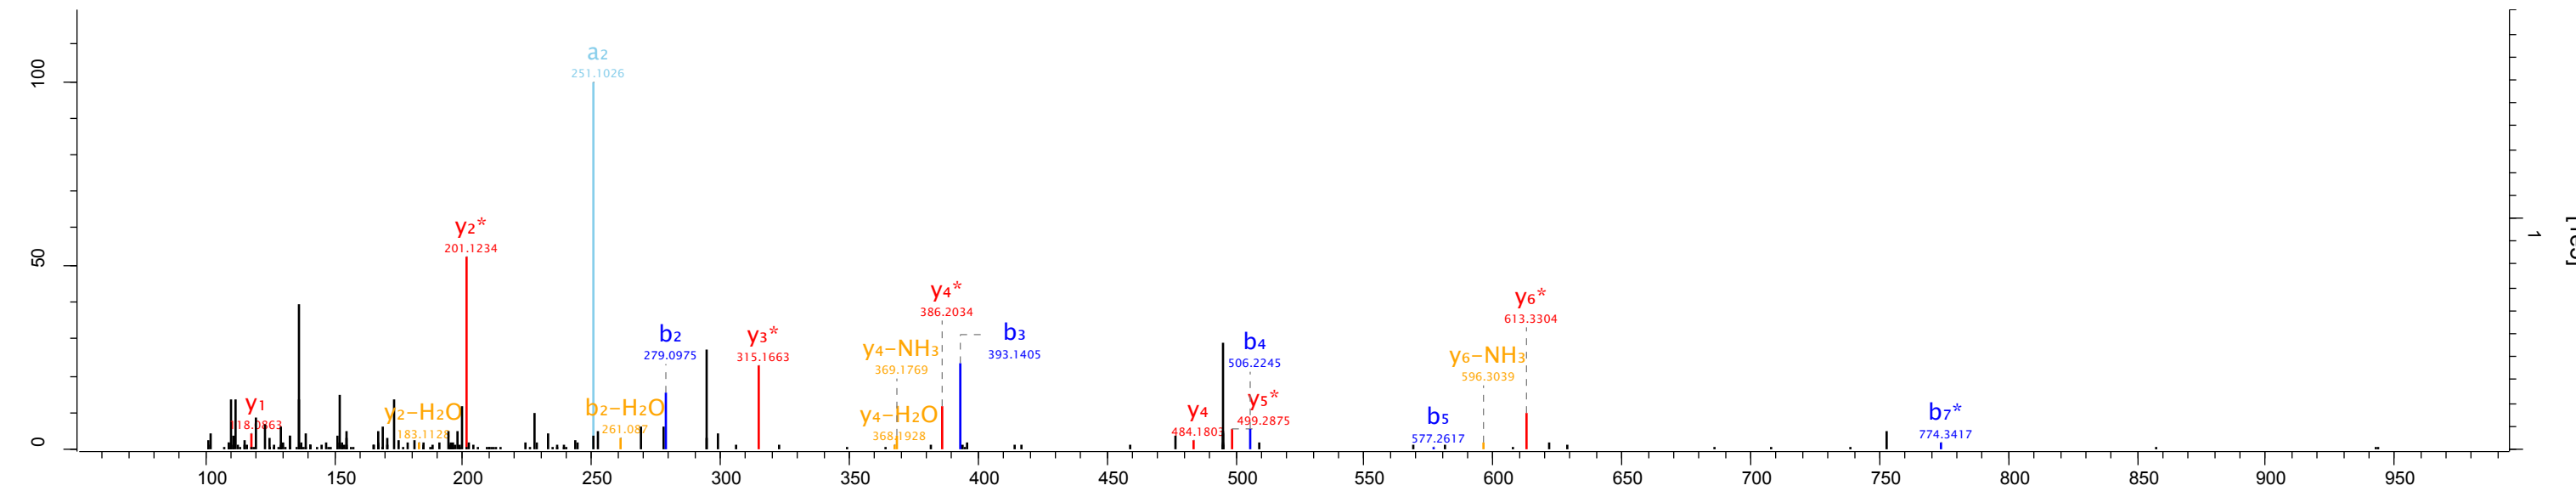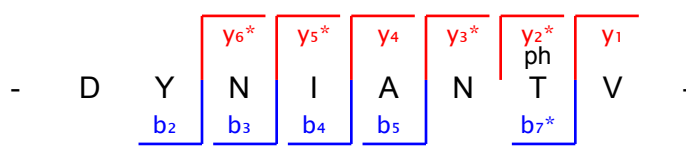

Raw file: 20171215\_MaS\_33SR\_LMH\_phospho\_05  
 Scan: 10645 Method: FTMS; HCD Score: 209.45 m/z: 866.37 Gene names: PTPN12

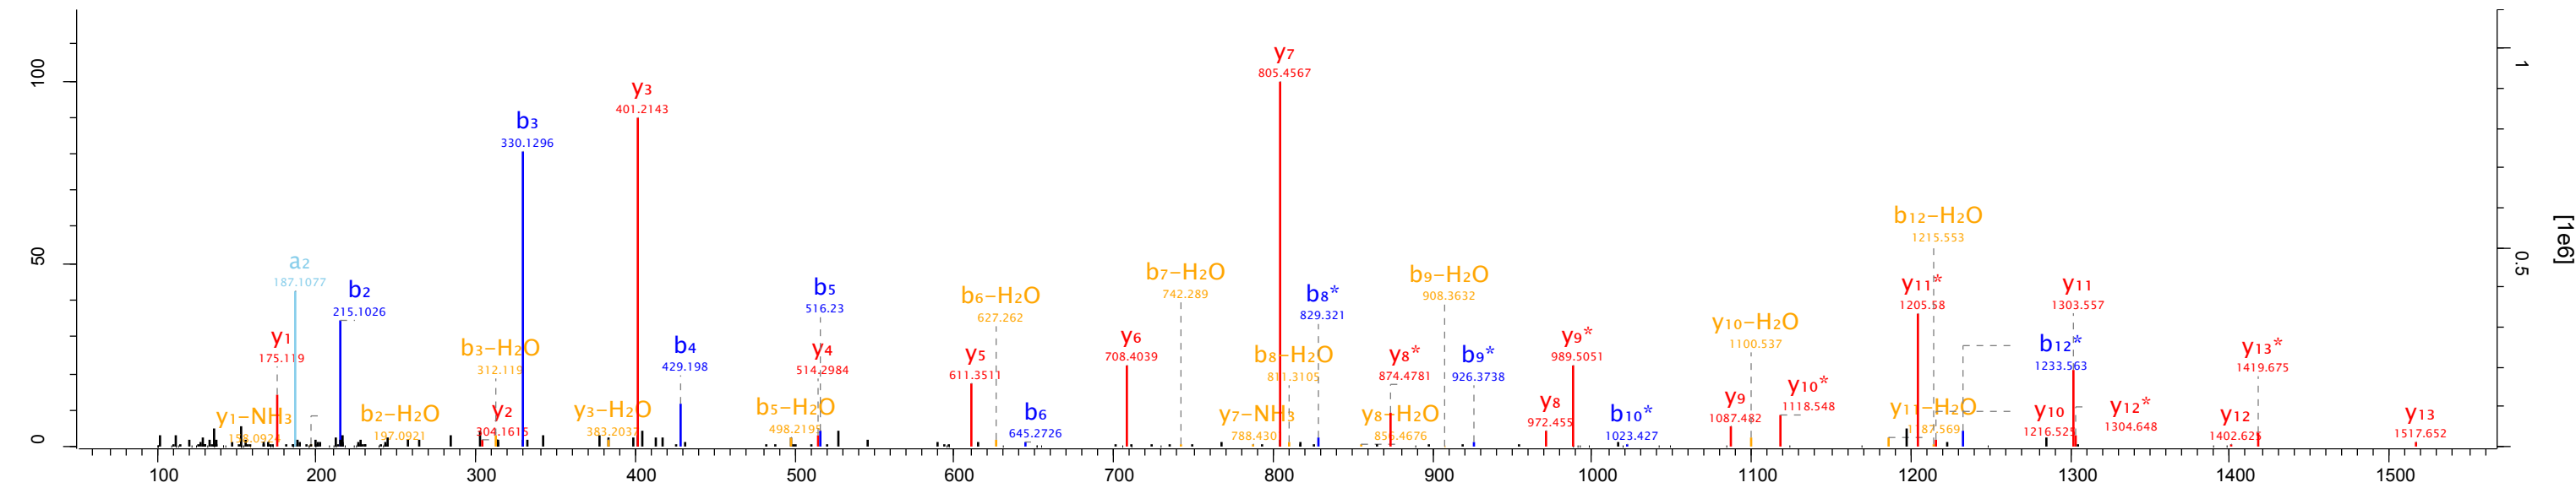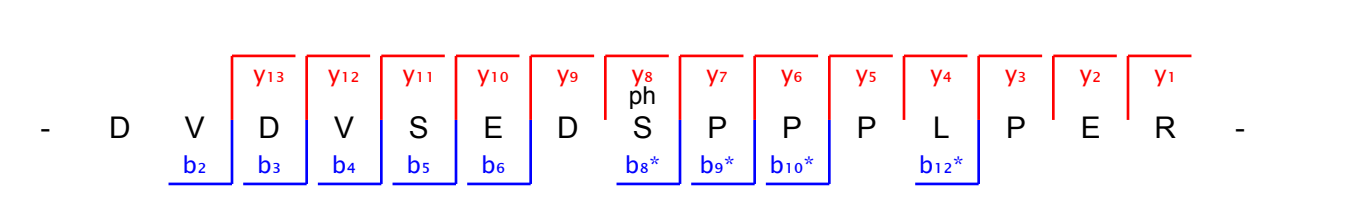

Raw file 20171215\_MaS\_33SR\_LMH\_phospho\_05 Scan 10915 Method FTMS; HCD Score 210.31 m/z 1068.98 Gene names EPRS

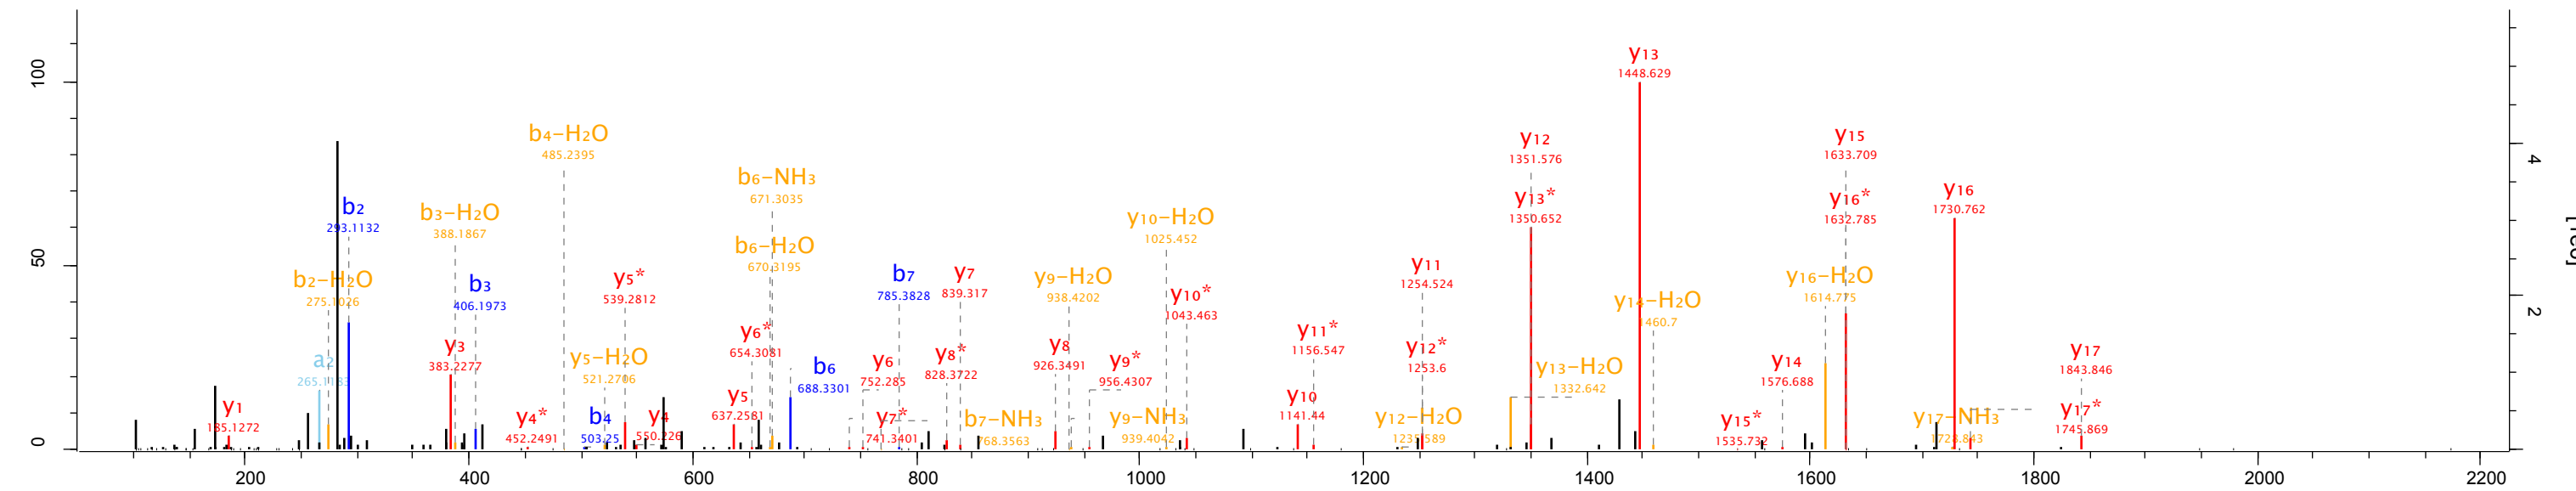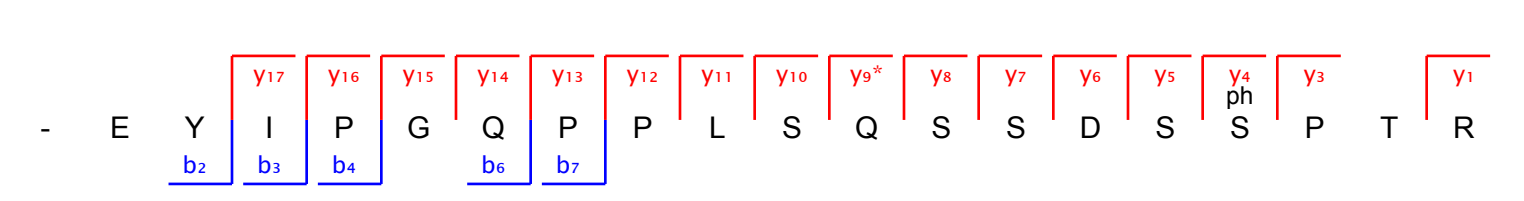

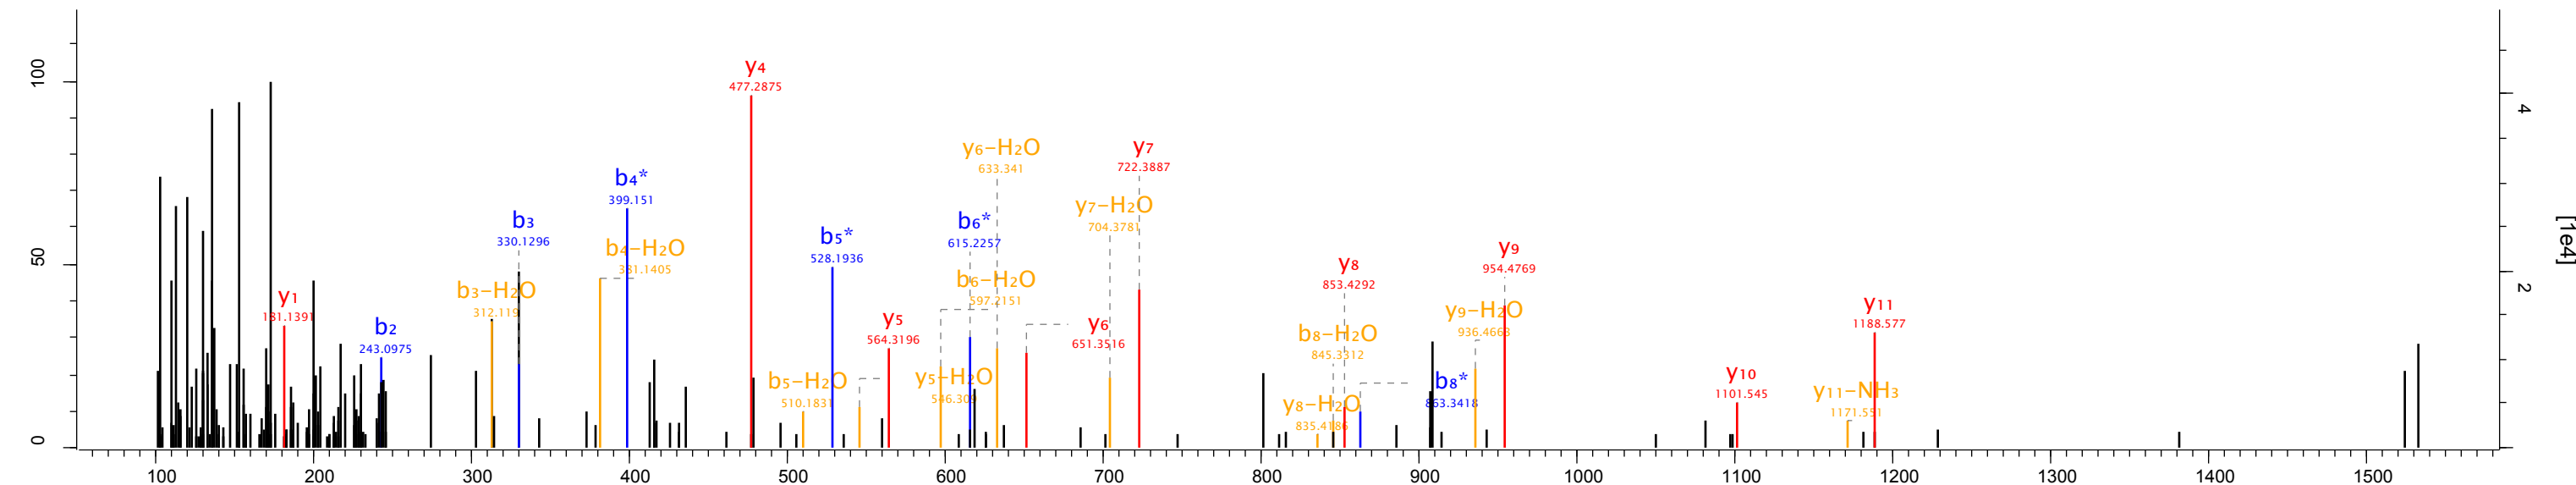

ac

-

A E S S E S F T M A S S P A Q R -

b<sub>2</sub> b<sub>3</sub> b<sub>4</sub>\* b<sub>5</sub>\* b<sub>6</sub>\* b<sub>8</sub>\* y<sub>11</sub> y<sub>10</sub> y<sub>9</sub> y<sub>8</sub> y<sub>7</sub> y<sub>6</sub> y<sub>5</sub> y<sub>4</sub> y<sub>1</sub>



Raw file 20171215\_MaS\_33SR\_LMH\_phospho\_05 Scan 13725 Method FTMS; HCD Score 66.54 m/z 803.7 Gene names TP53BP1

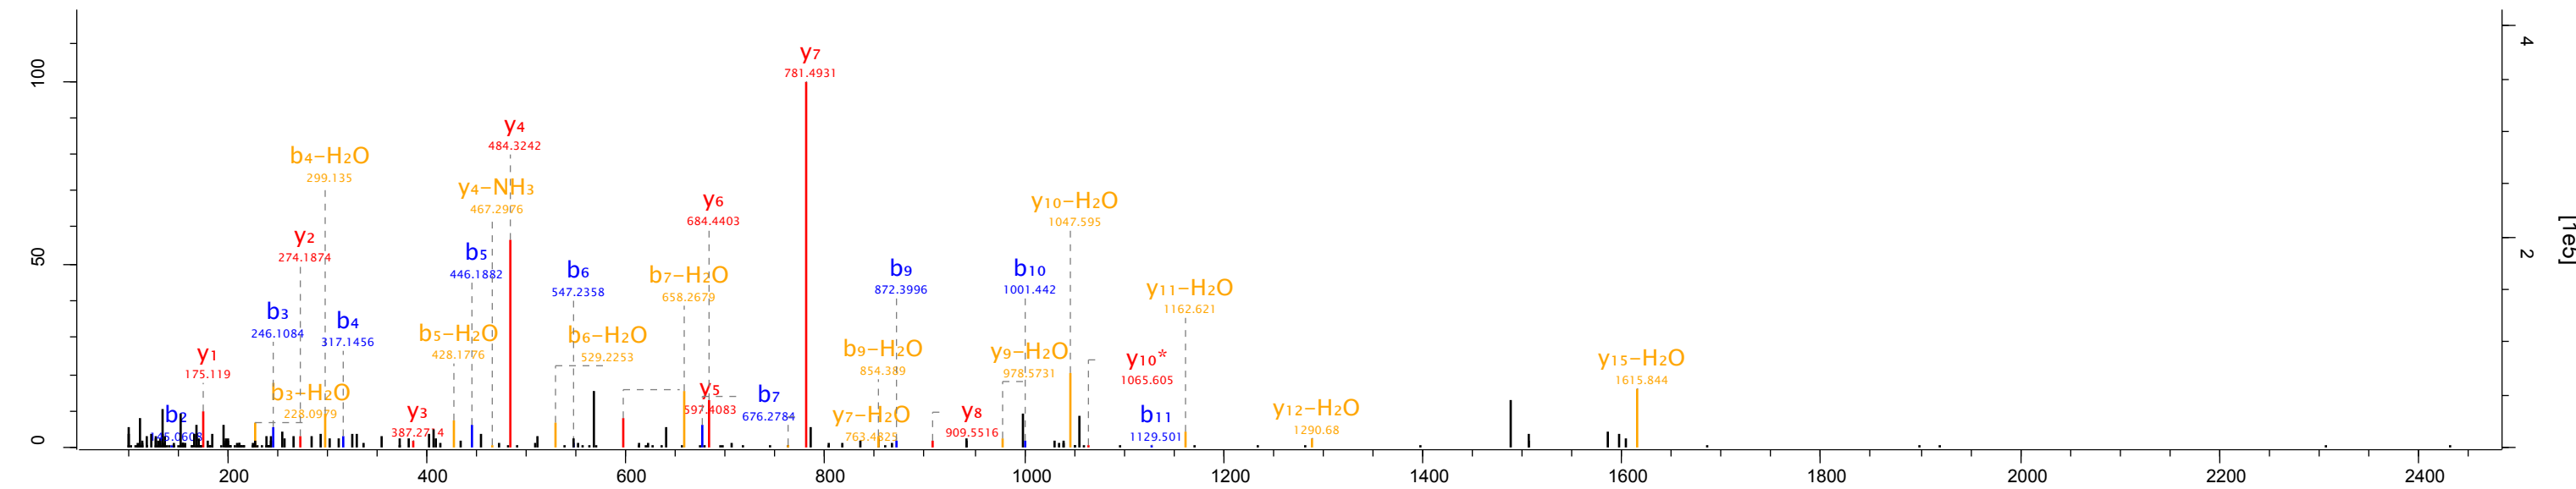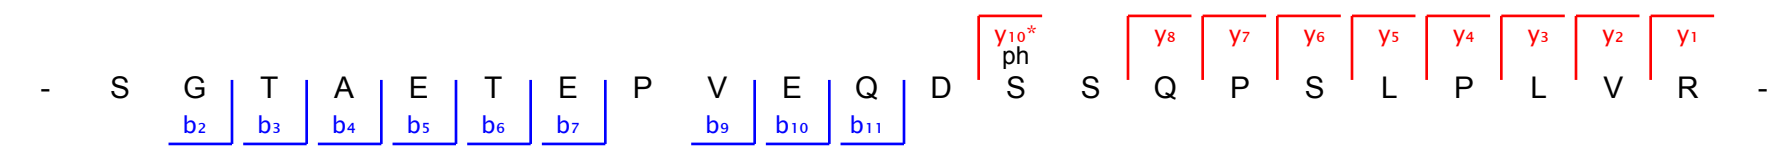

Raw file 20171215\_MaS\_33SR\_LMH\_phospho\_05 Scan 2085 Method FTMS; HCD Score 45.83 m/z 602.75 Gene names VCX3A;VCX;VCX3B;VCX2

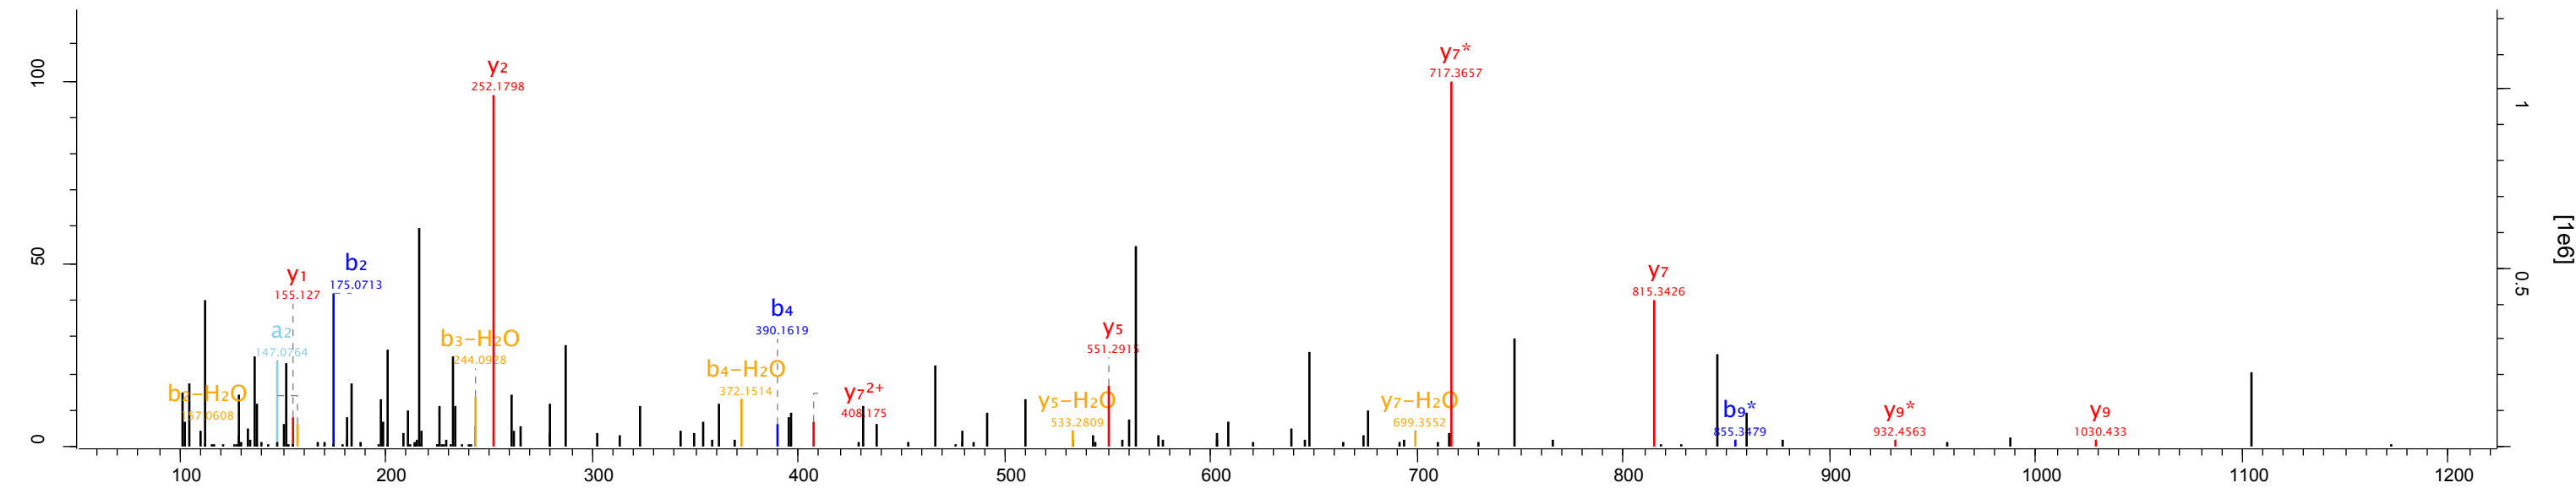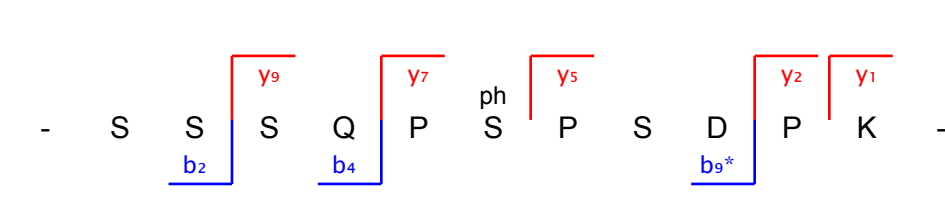

Raw file 20171215\_MaS\_33SR\_LMH\_phospho\_05 Scan 2525 Method FTMS; HCD Score 247.74 m/z 741.98 Gene names OGFR

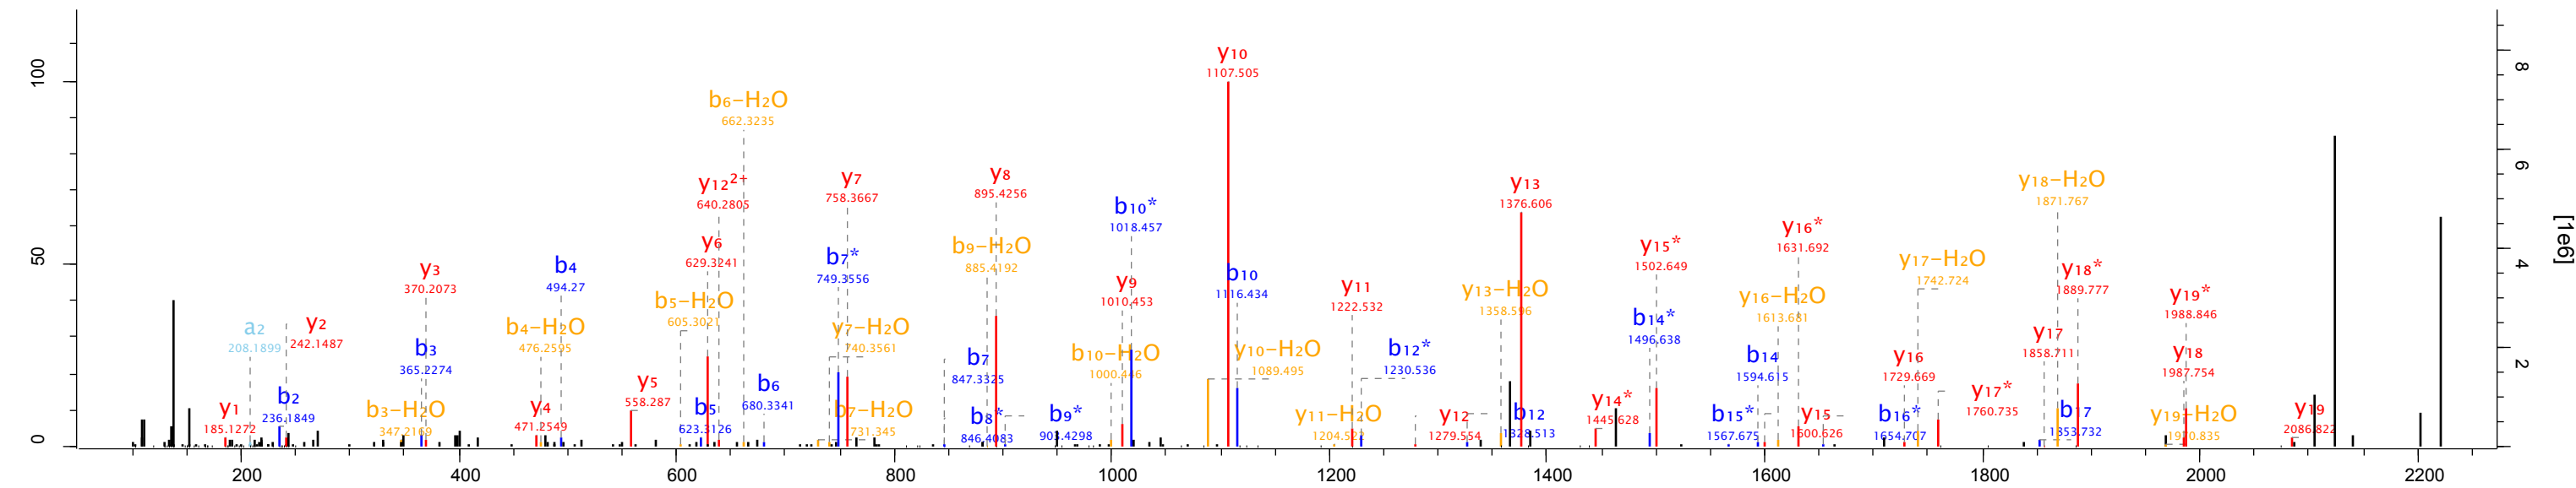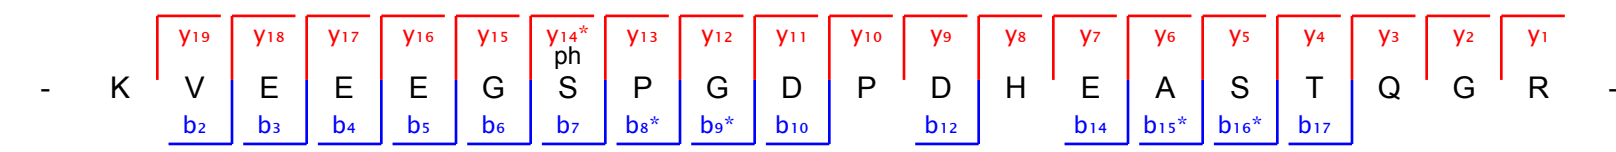

Raw file 20171215\_MaS\_33SR\_LMH\_phospho\_05 Scan 2635 Method FTMS; HCD Score 63.18 m/z 538.74 Gene names CHAMP1

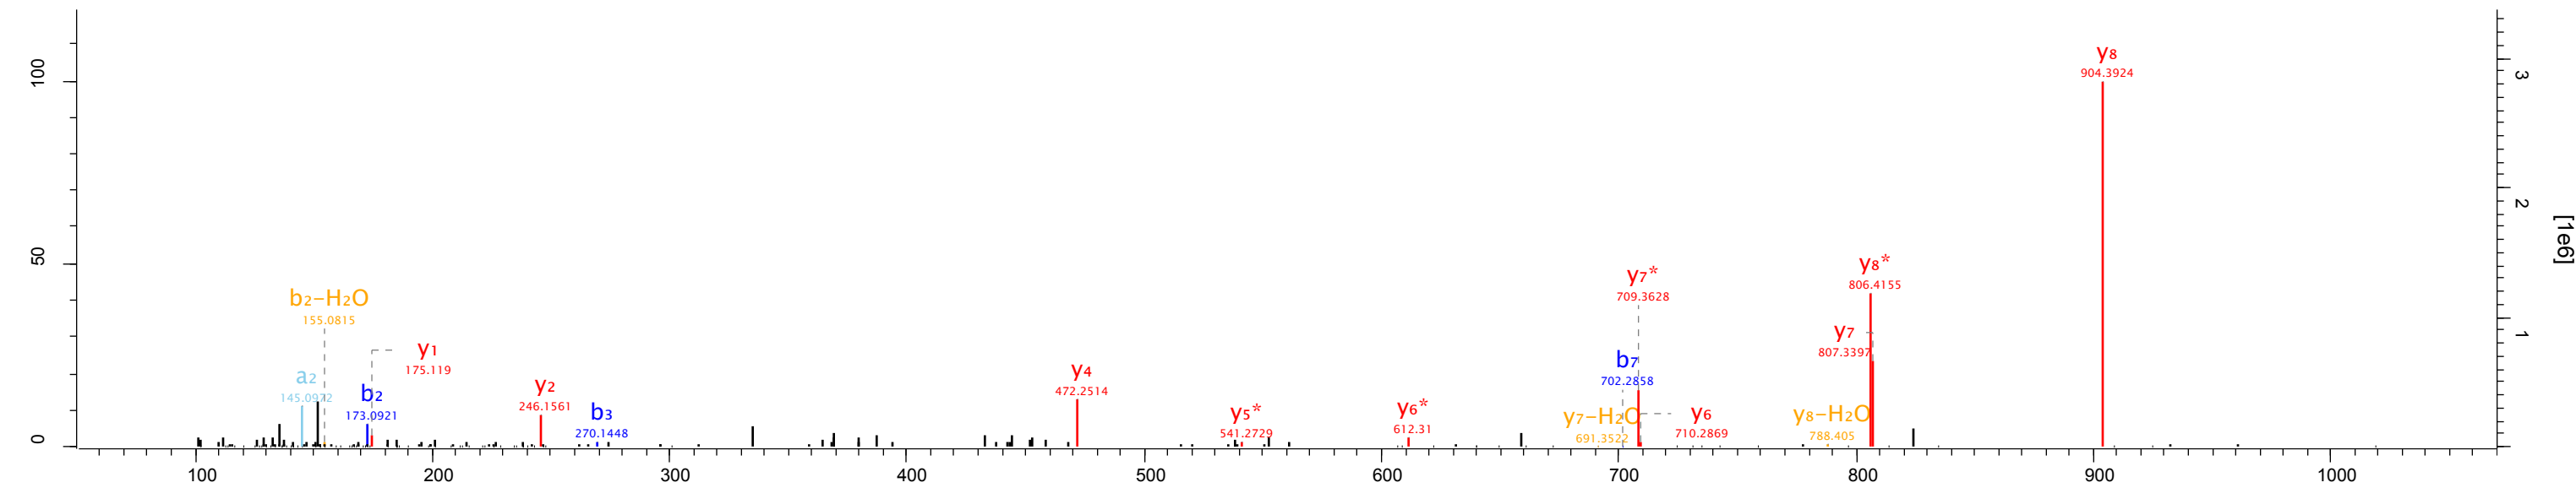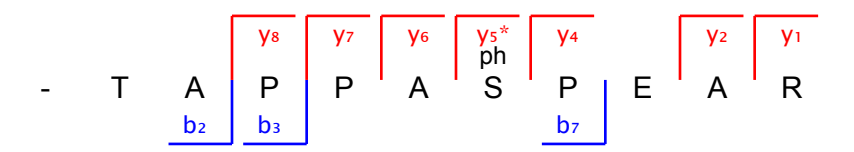

Raw file 20171215\_MaS\_33SR\_LMH\_phospho\_05 Scan 2835 Method FTMS; HCD Score 64 m/z 565.91 Gene names CEP170

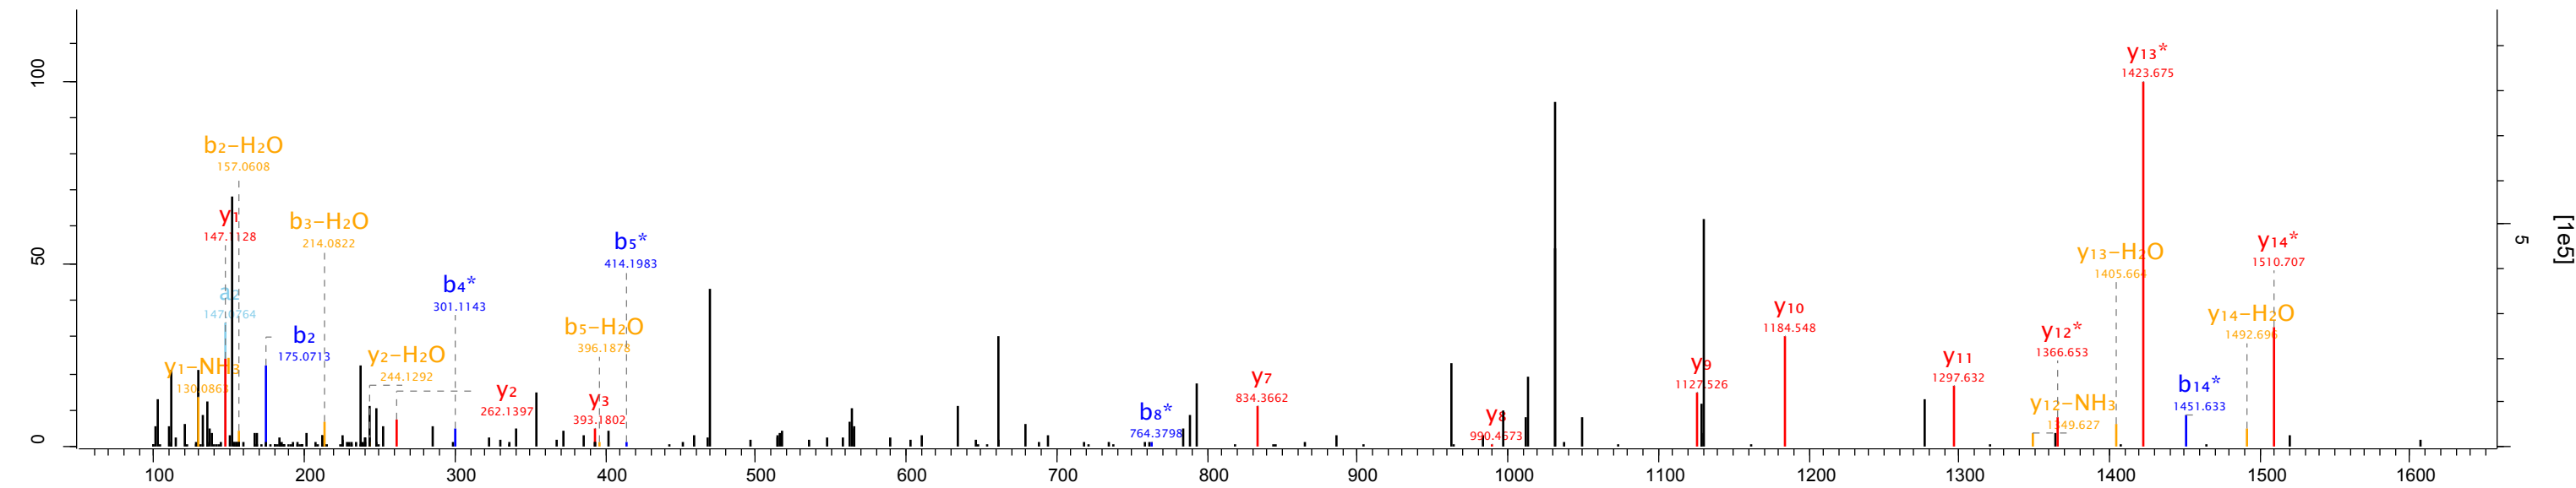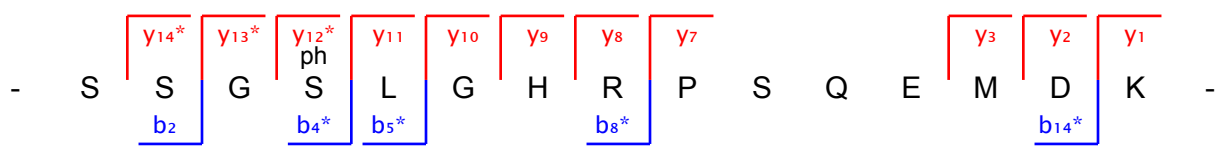

Raw file 20171215\_MaS\_33SR\_LMH\_phospho\_05 Scan 2975 Method FTMS; HCD Score 62.53 m/z 613.28 Gene names LIN54

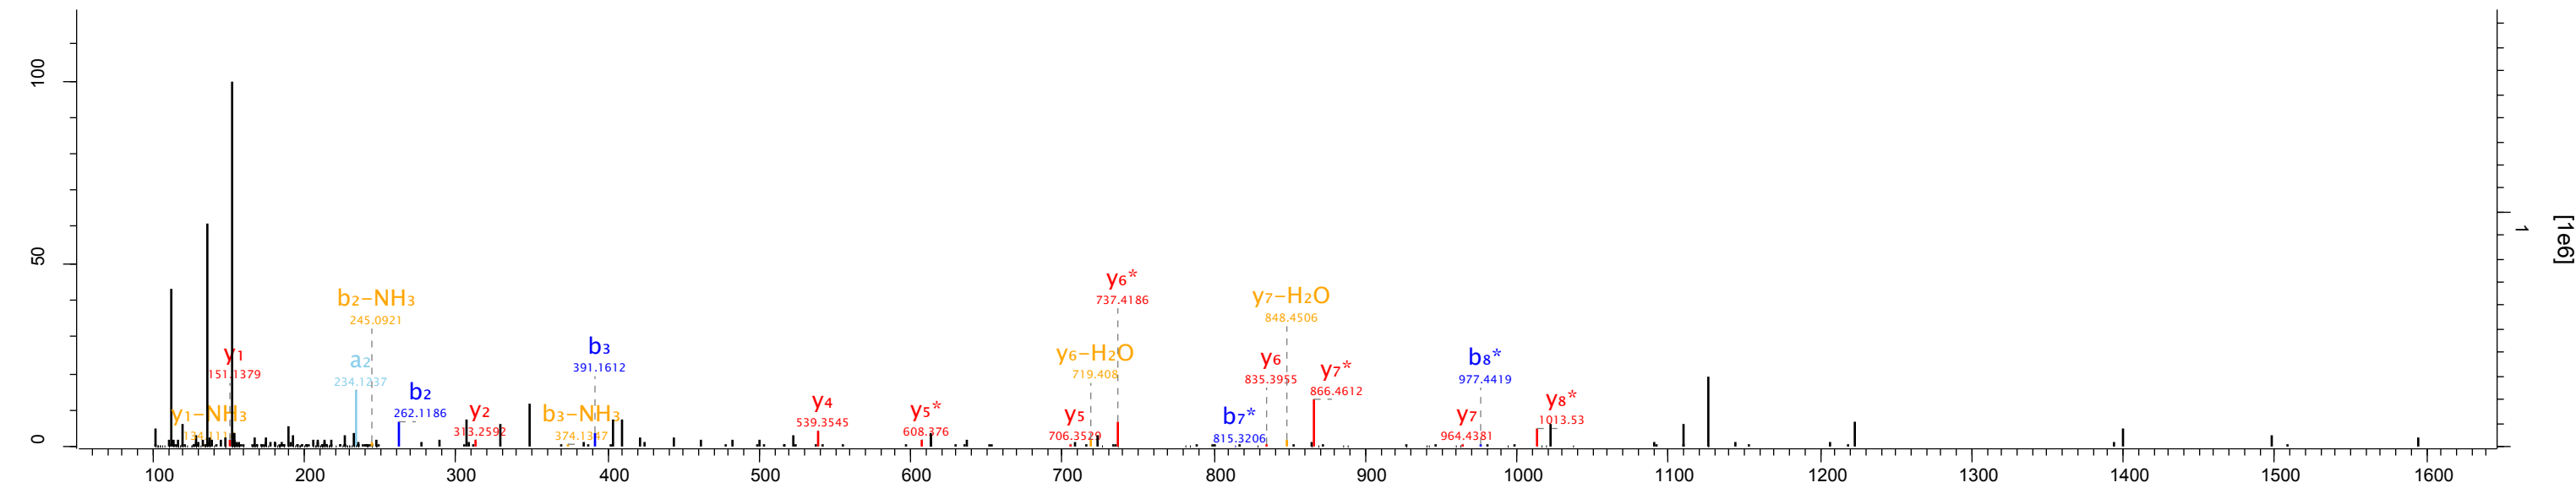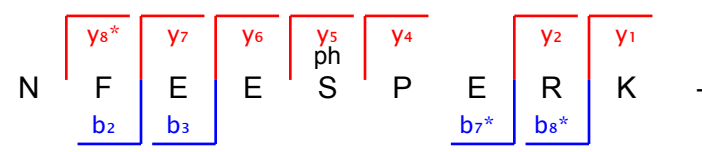

Raw file 20171215\_MaS\_33SR\_LMH\_phospho\_05 Scan 3425 Method FTMS; HCD Score 201.48 m/z 820.85 Gene names GPS1

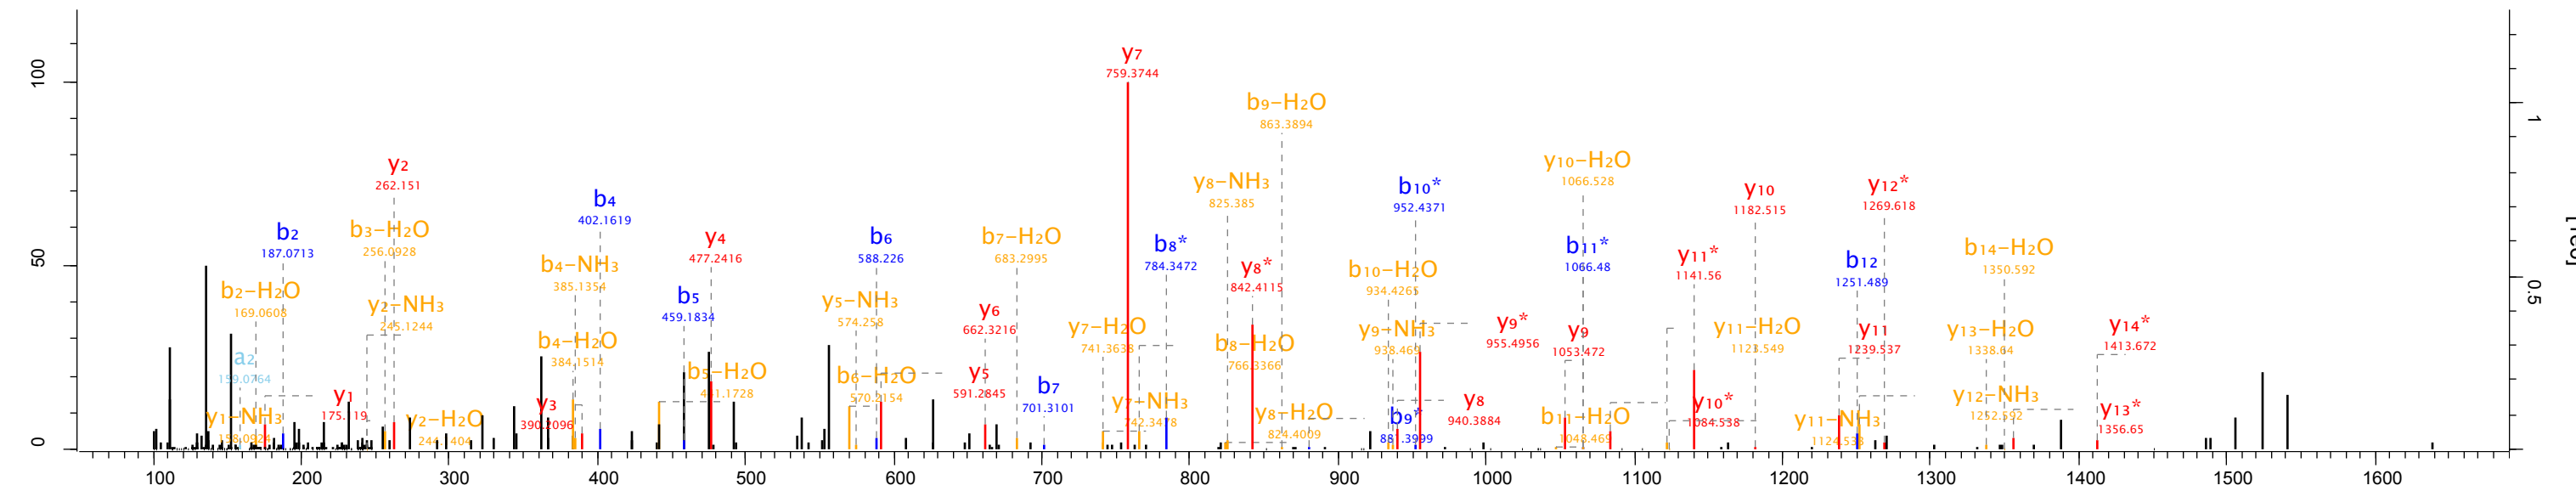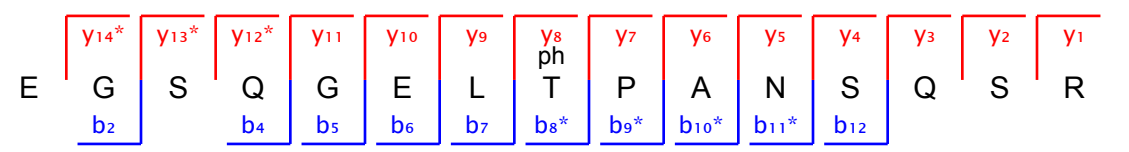

Raw file 20171215\_MaS\_33SR\_LMH\_phospho\_05 Scan 3485 Method FTMS; HCD Score 112.44 m/z 665.8 Gene names PNN

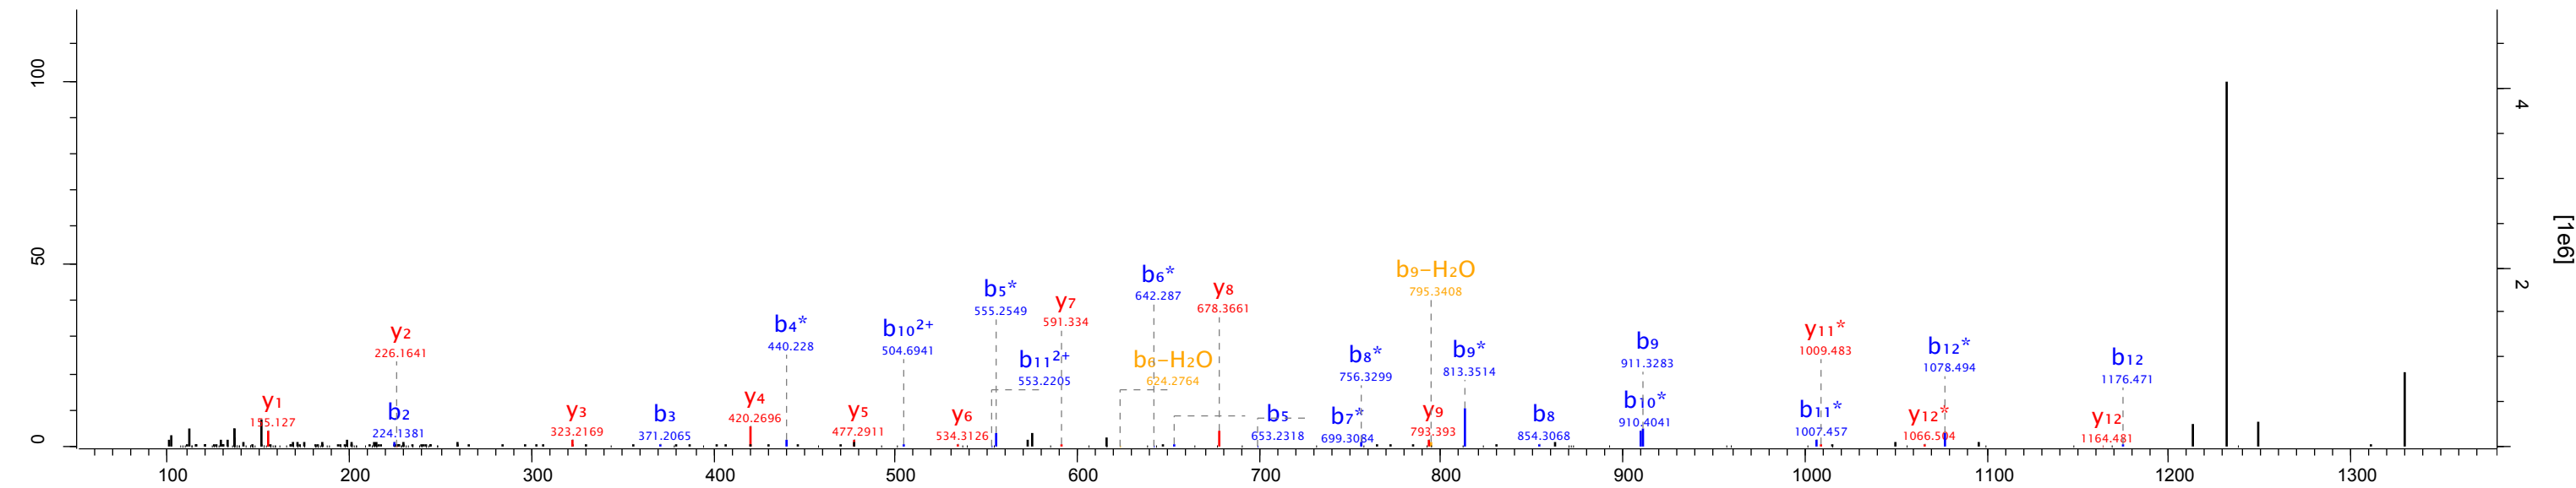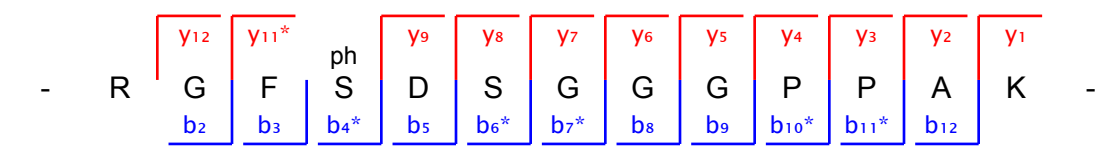



Raw file 20171215\_MaS\_33SR\_LMH\_phospho\_05 Scan 3635 Method FTMS; HCD Score 293.22 m/z 932.92 Gene names MARCKS

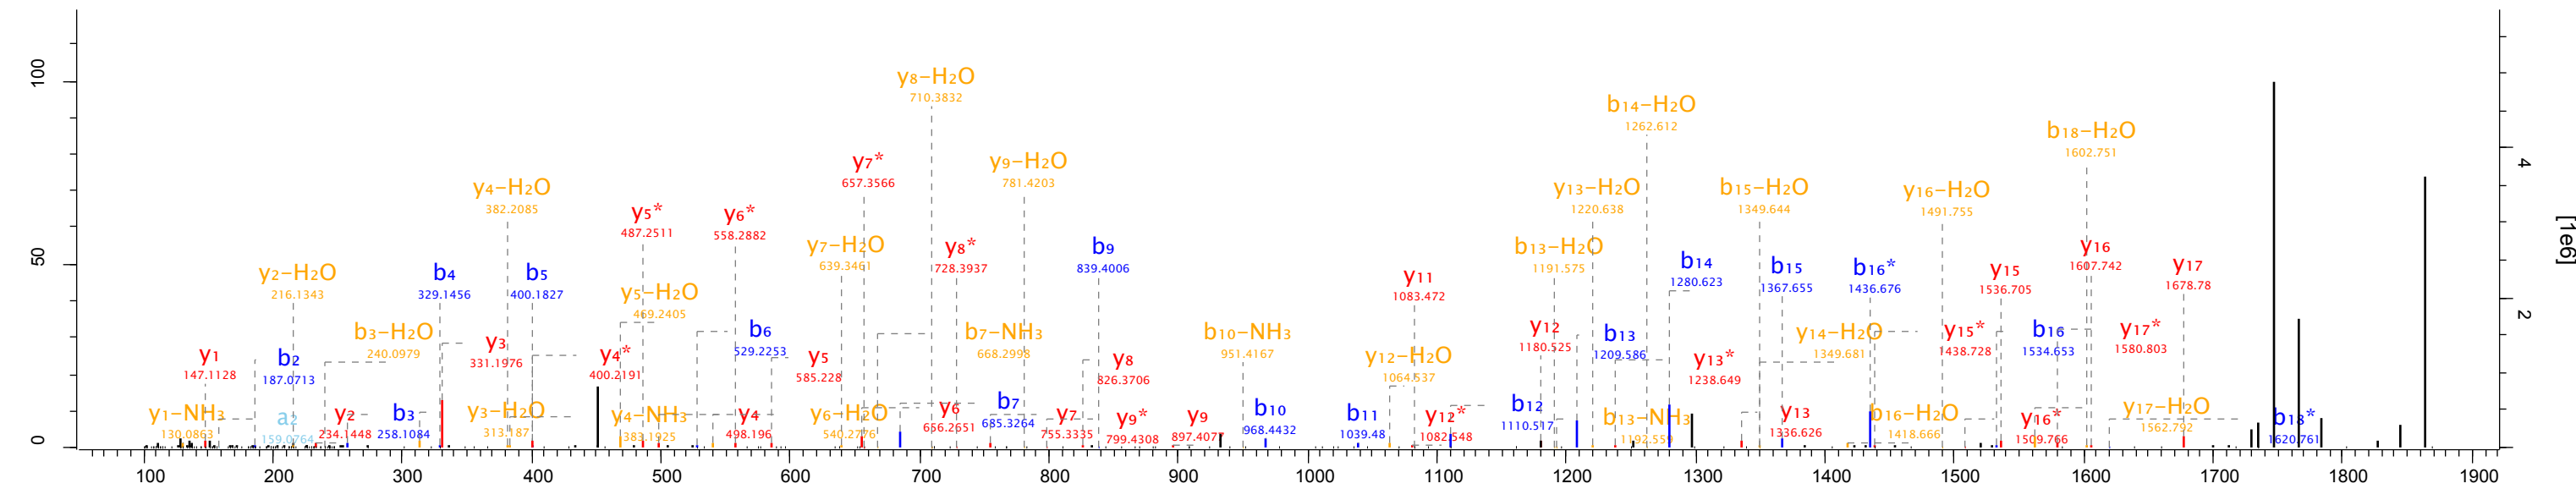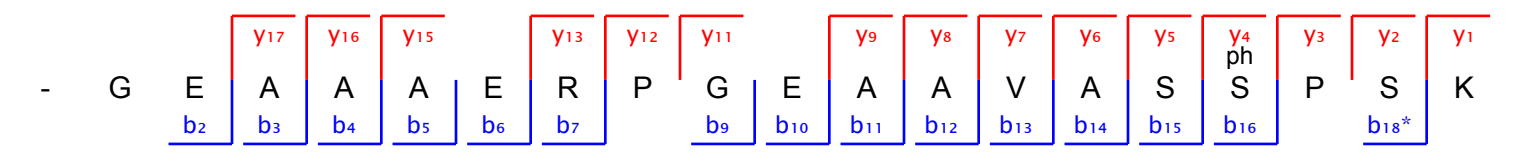

Raw file 20171215\_MaS\_33SR\_LMH\_phospho\_05 Scan 5395 Method FTMS; HCD Score 110.88 m/z 418.21 Gene names EIF4G3

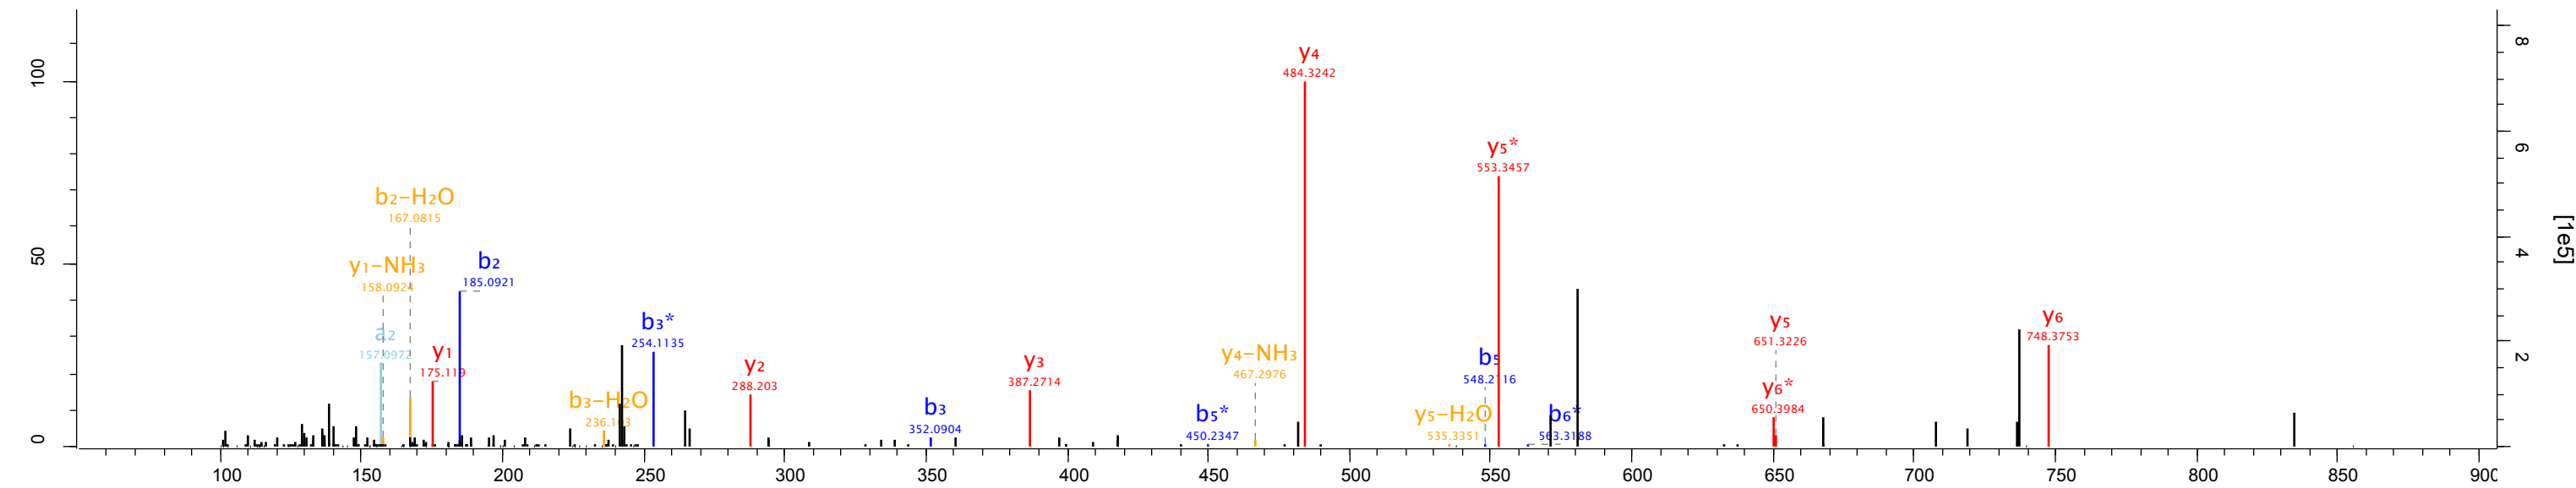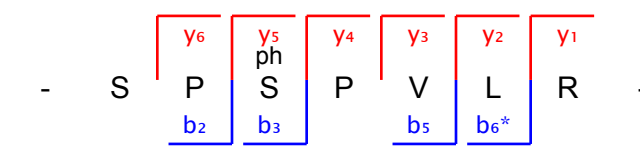

Raw file 20171215\_MaS\_33SR\_LMH\_phospho\_05 Scan 5595 Method FTMS; HCD Score 110.38 m/z 627.3 Gene names KRR1

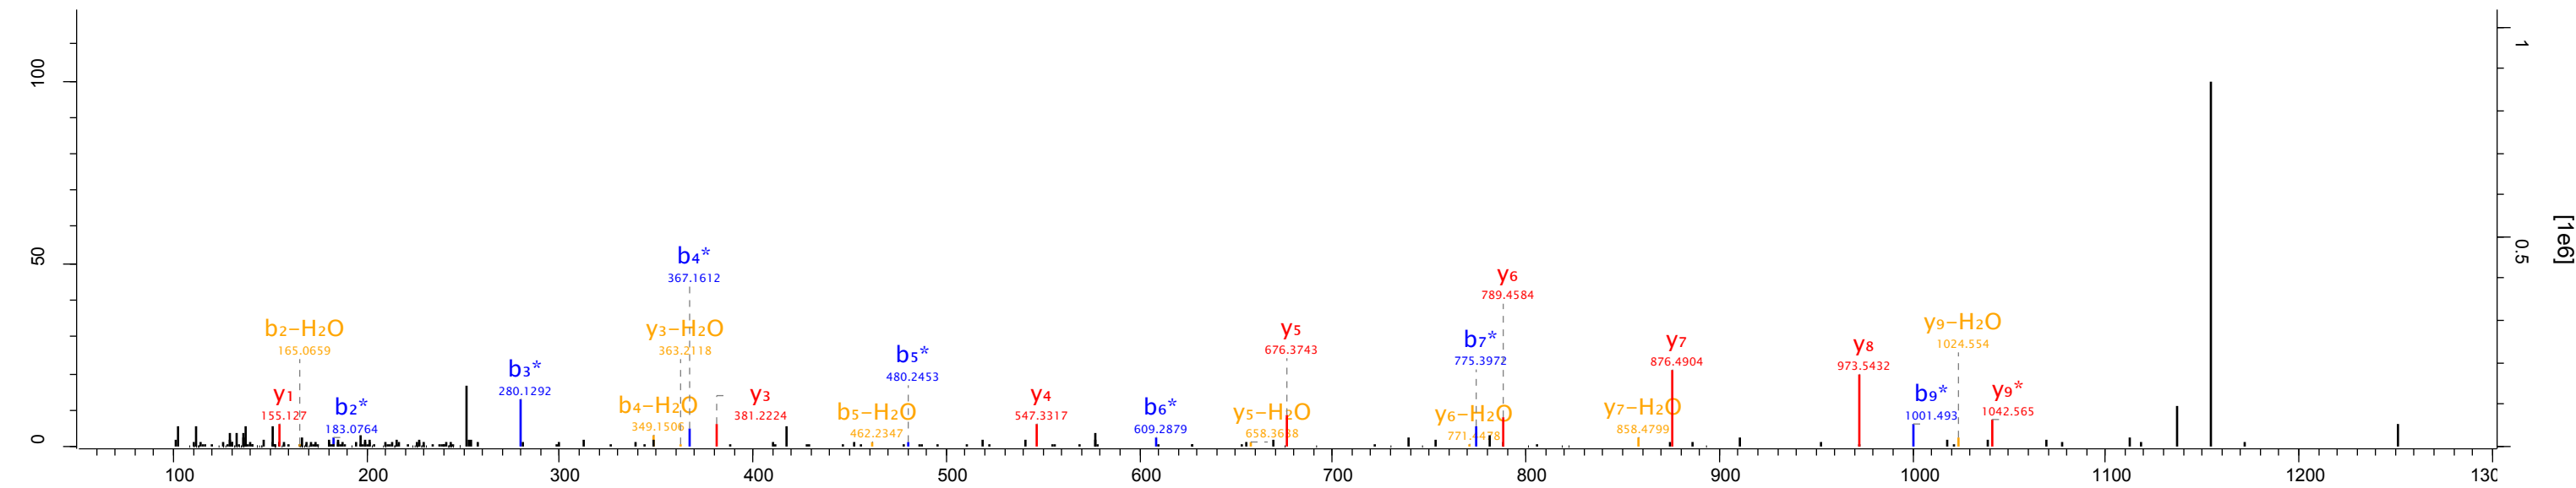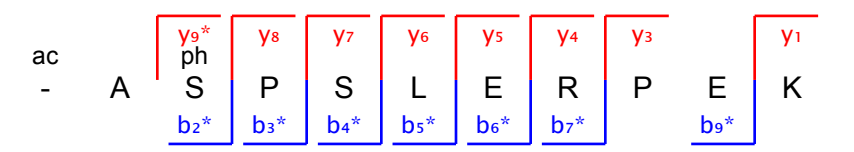

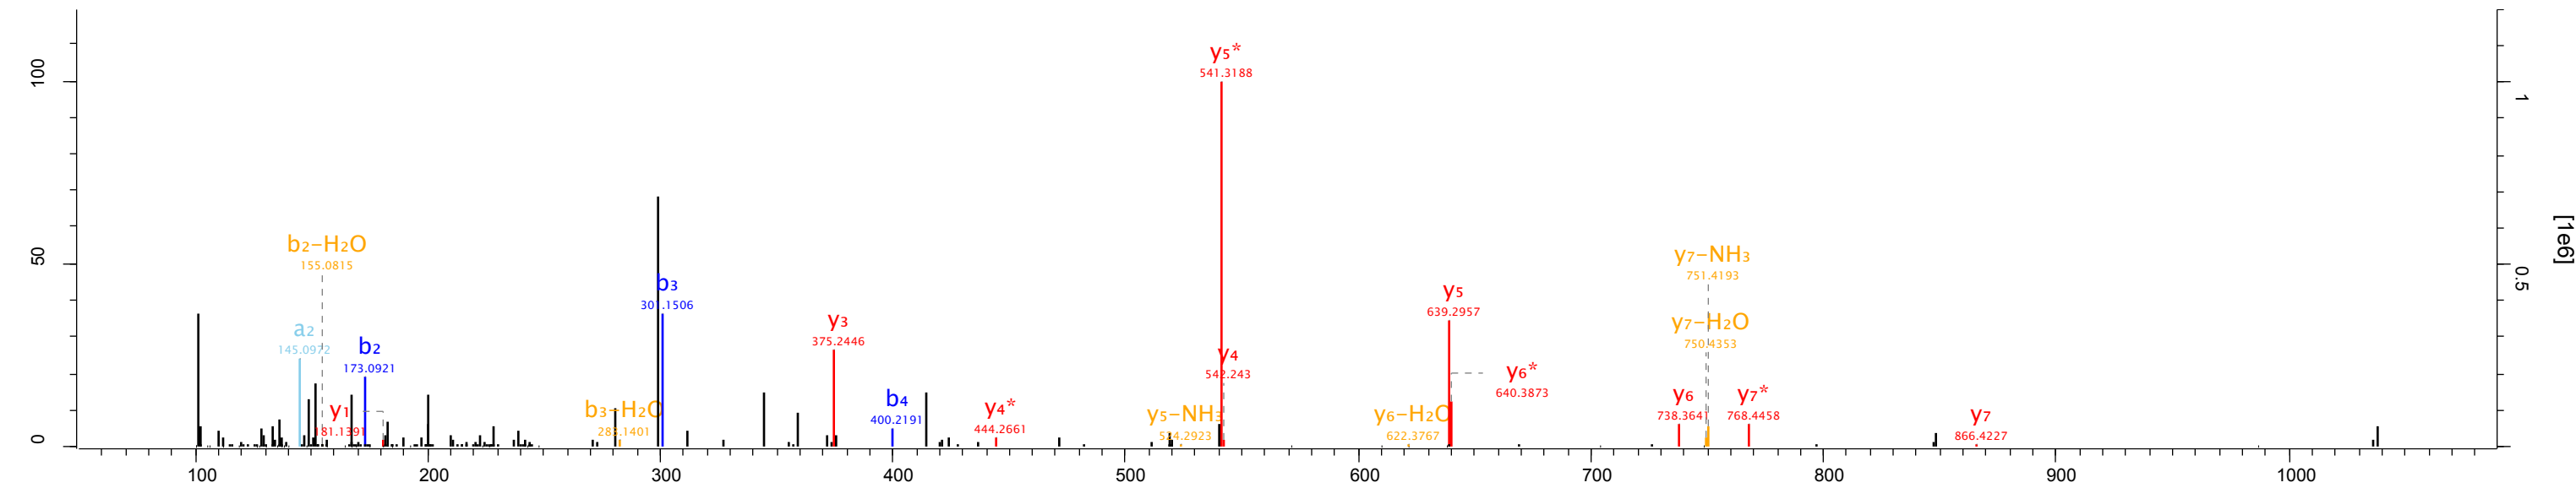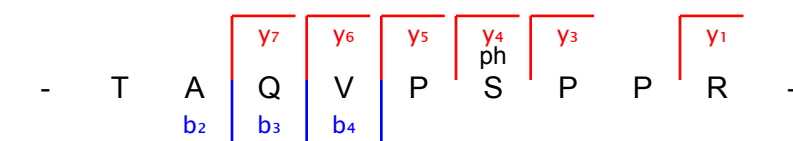

Raw file 20171215\_MaS\_33SR\_LMH\_phospho\_05 Scan 6615 Method FTMS; HCD Score 77.9 m/z 622.28 Gene names CASC3

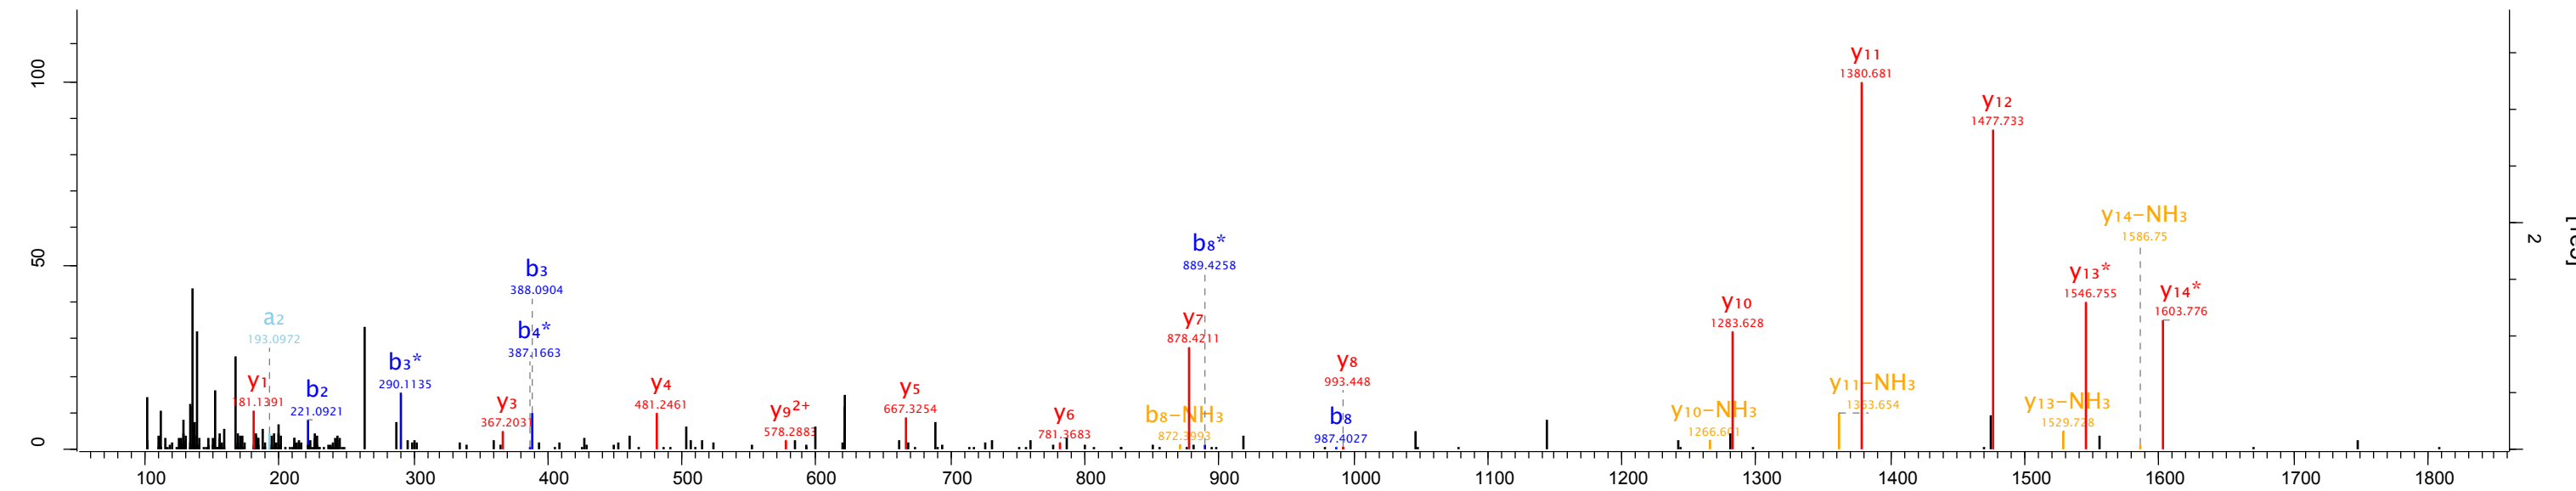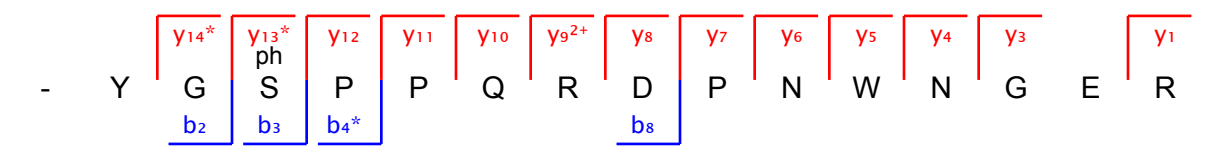

Raw file 20171215\_MaS\_33SR\_LMH\_phospho\_05 Scan 7075 Method FTMS; HCD Score 175.23 m/z 983.46 Gene names DYNC1LI1

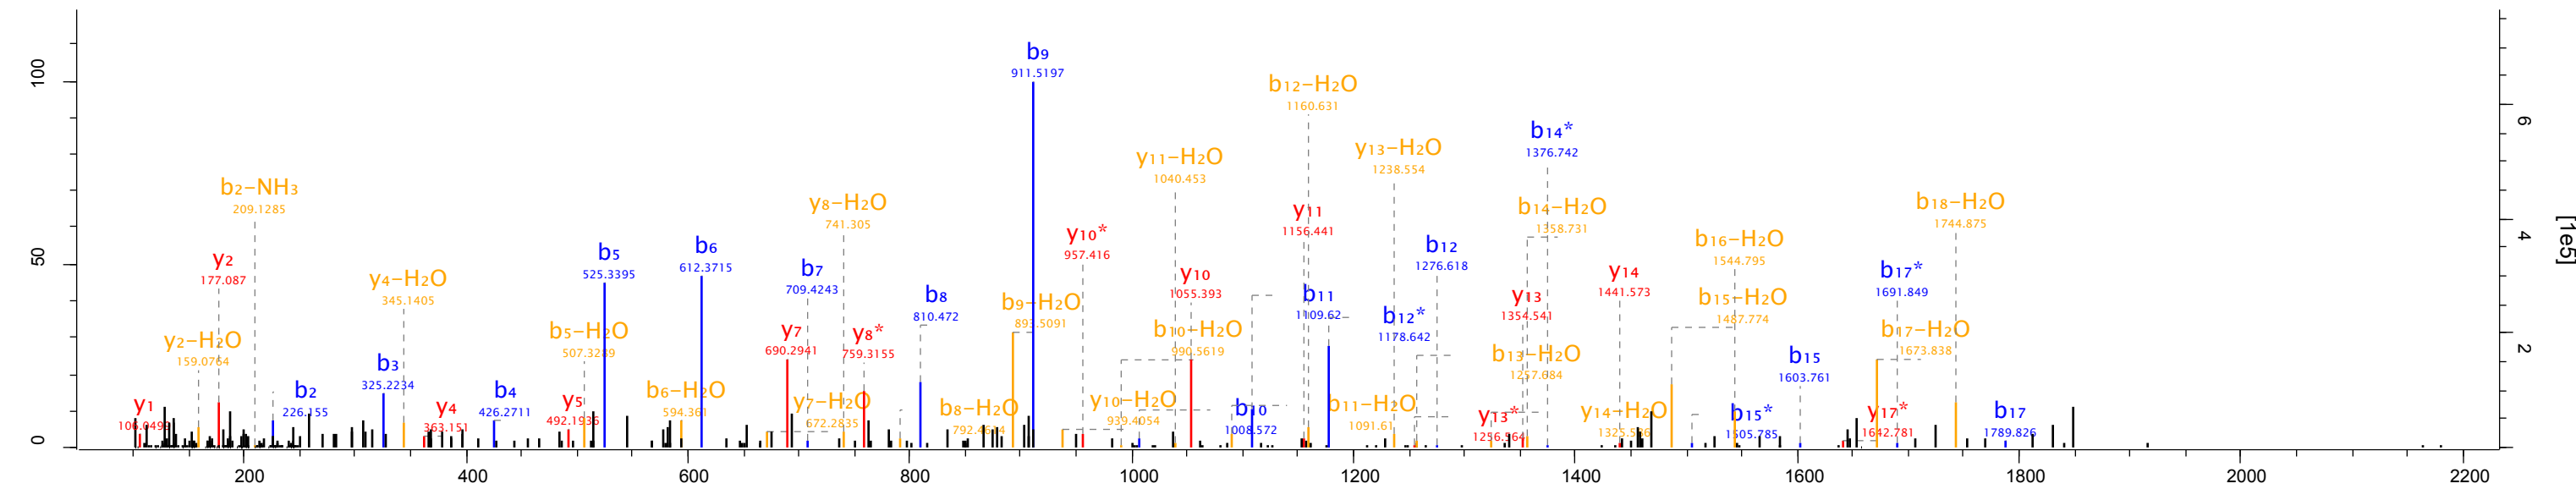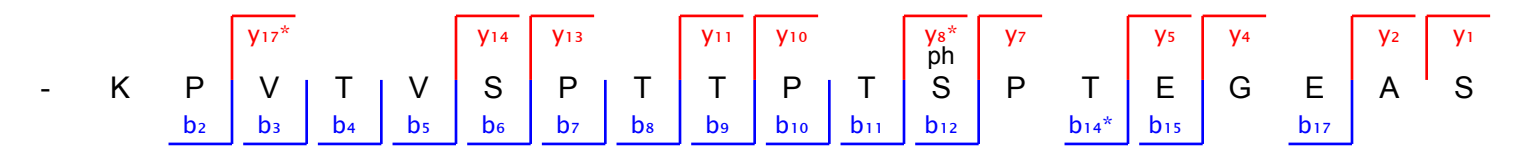

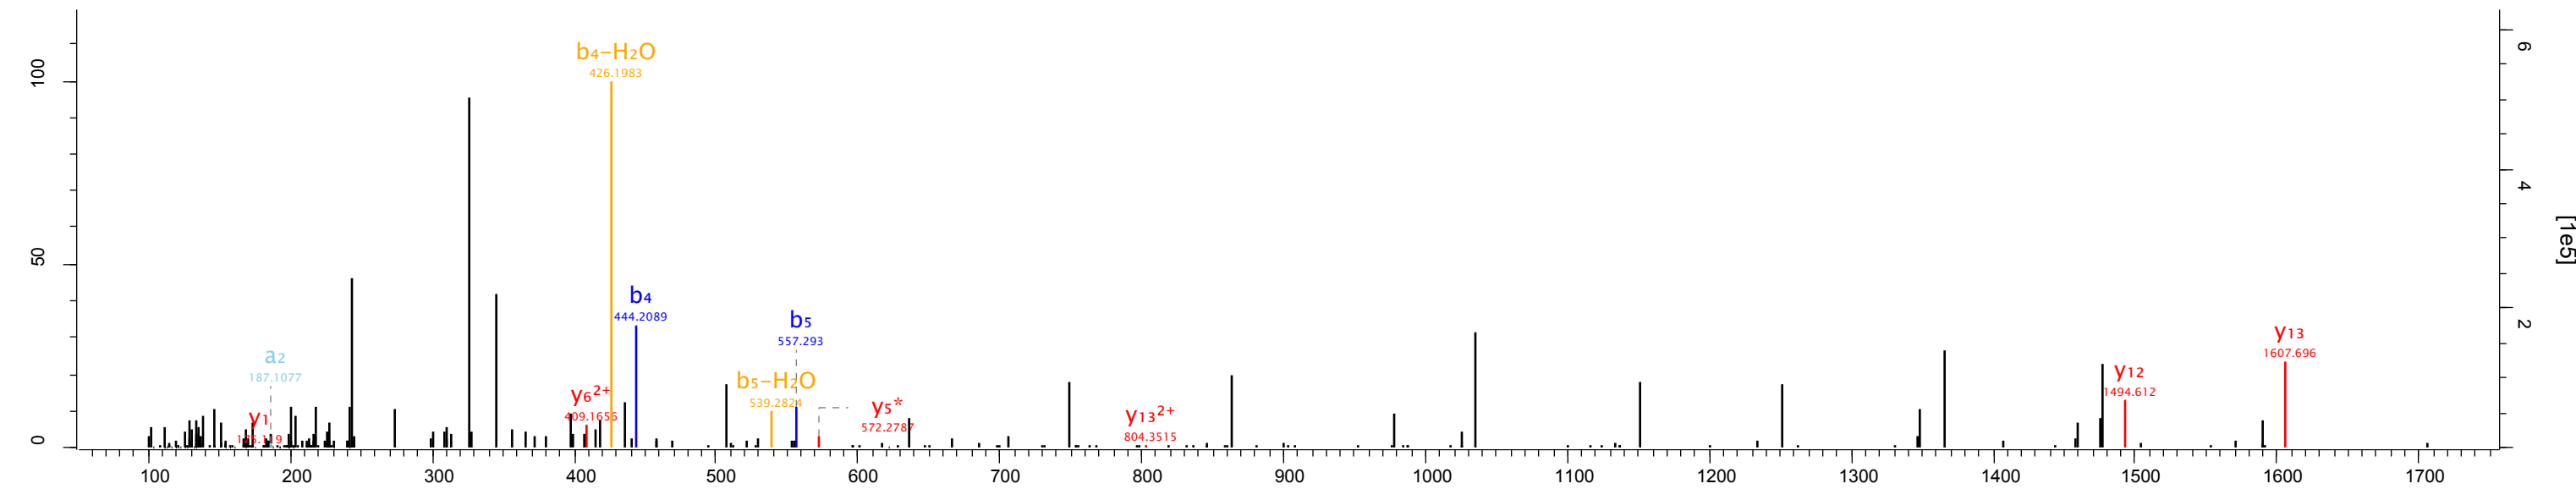

- D V Q T L A ox M L C S V F E A Q S R -

Fragmentation sites are indicated by brackets below the sequence:

- Blue brackets: a<sub>2</sub> (V), b<sub>4</sub> (T), b<sub>5</sub> (L)
- Red brackets: y<sub>13</sub> (L), y<sub>12</sub> (A), y<sub>6</sub><sup>2+</sup> (F), y<sub>5</sub><sup>\*</sup> (E), y<sub>1</sub> (R)

Raw file 20171215\_MaS\_33SR\_LMH\_phospho\_05 Scan 7915 Method FTMS; HCD Score 85.52 m/z 884.39 Gene names SPEN

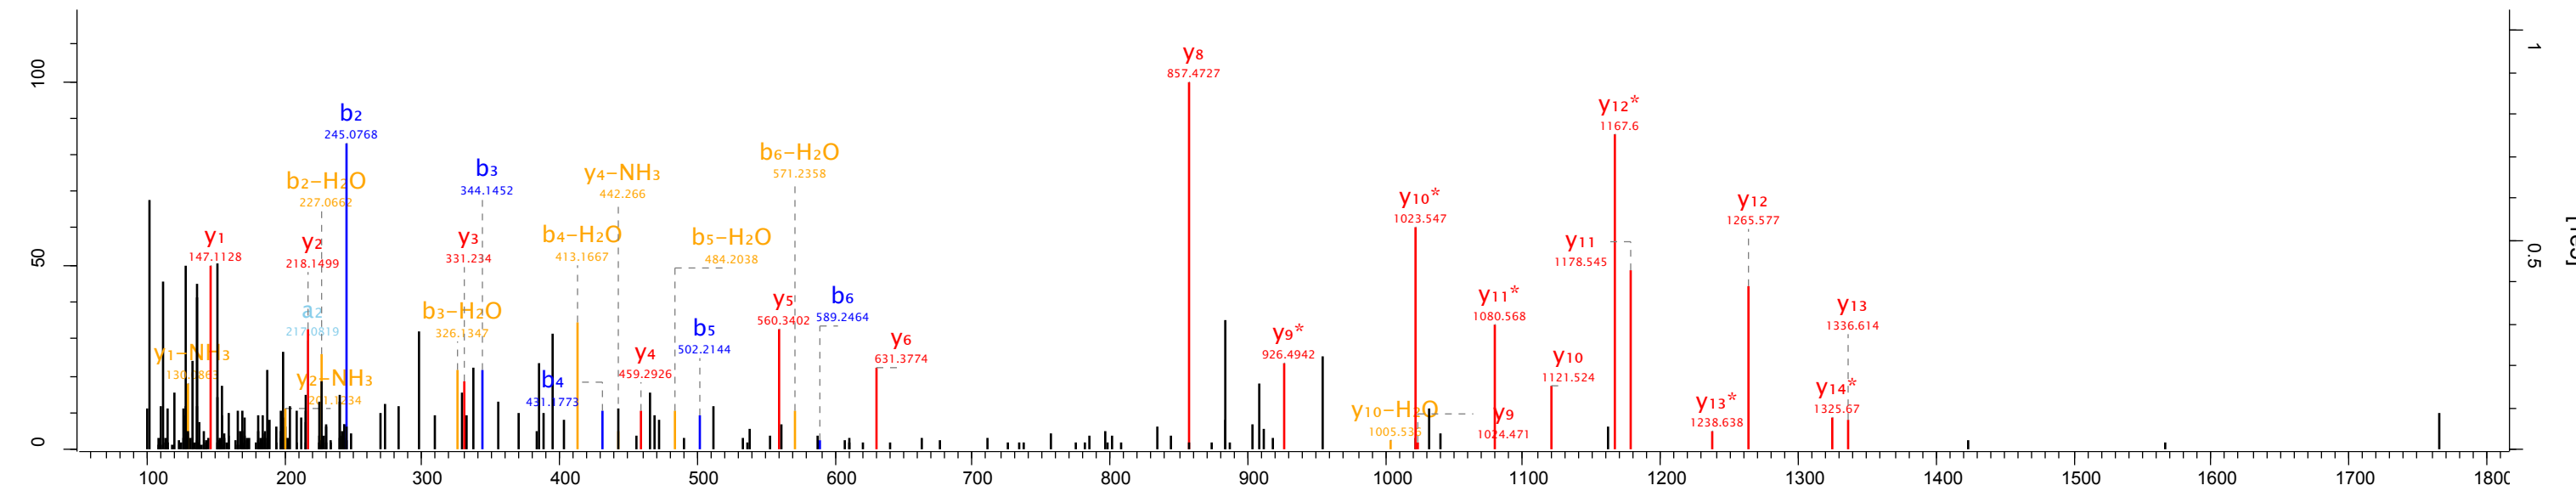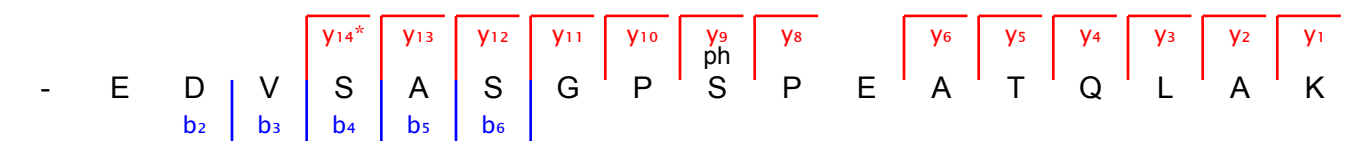



Raw file 20171215\_MaS\_33SR\_LMH\_phospho\_05 Scan 8375 Method FTMS; HCD Score 100.69 m/z 485.23 Gene names RASSF8

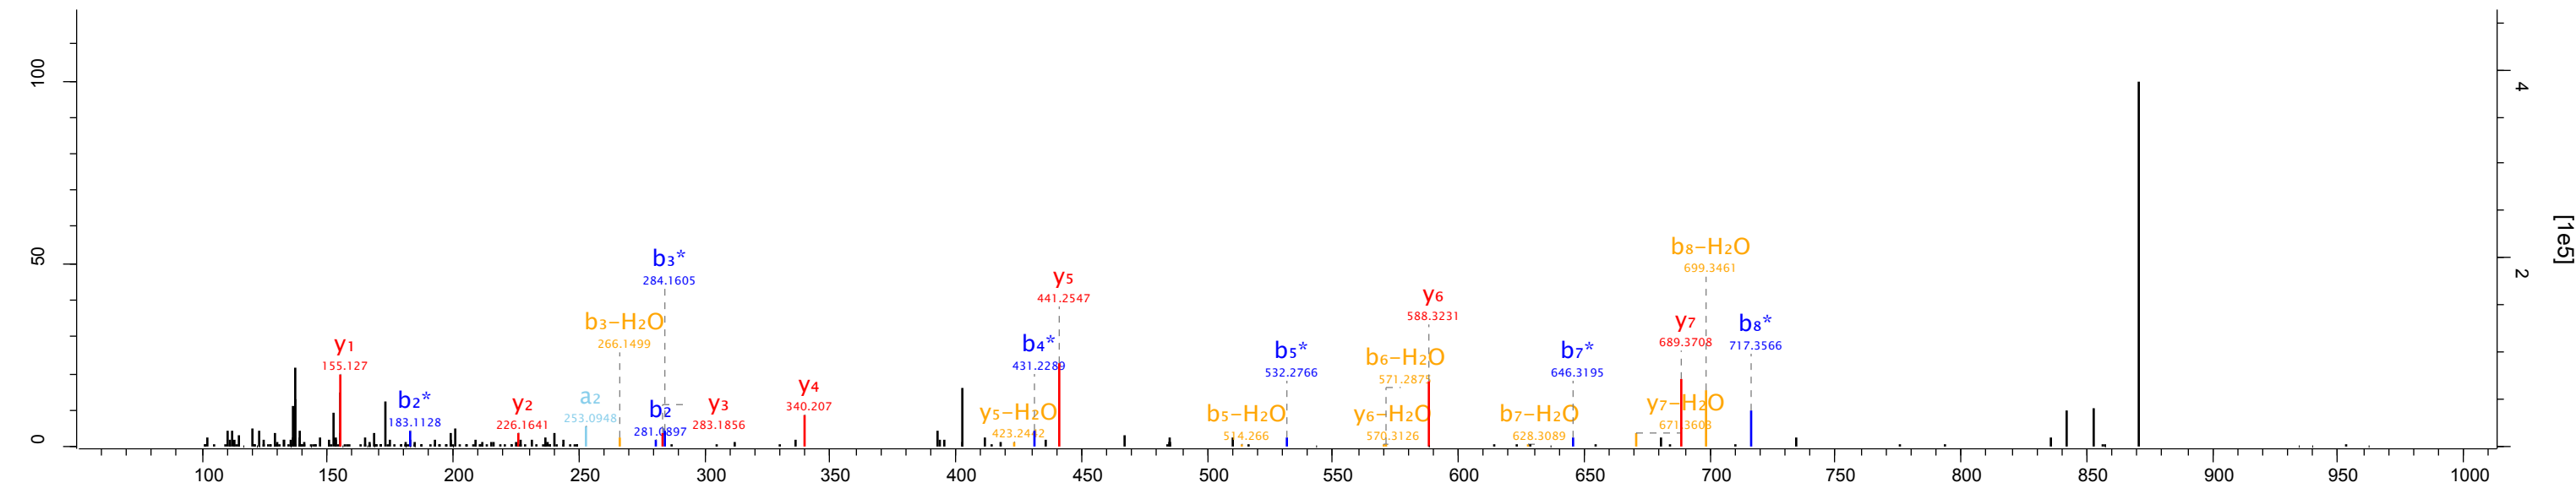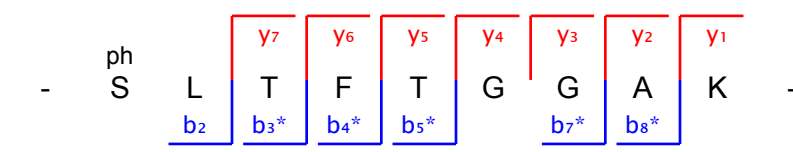

Raw file 20171215\_MaS\_33SR\_LMH\_phospho\_05 Scan 9005 Method FTMS; HCD Score 184.15 m/z 835.37 Gene names HUWE1

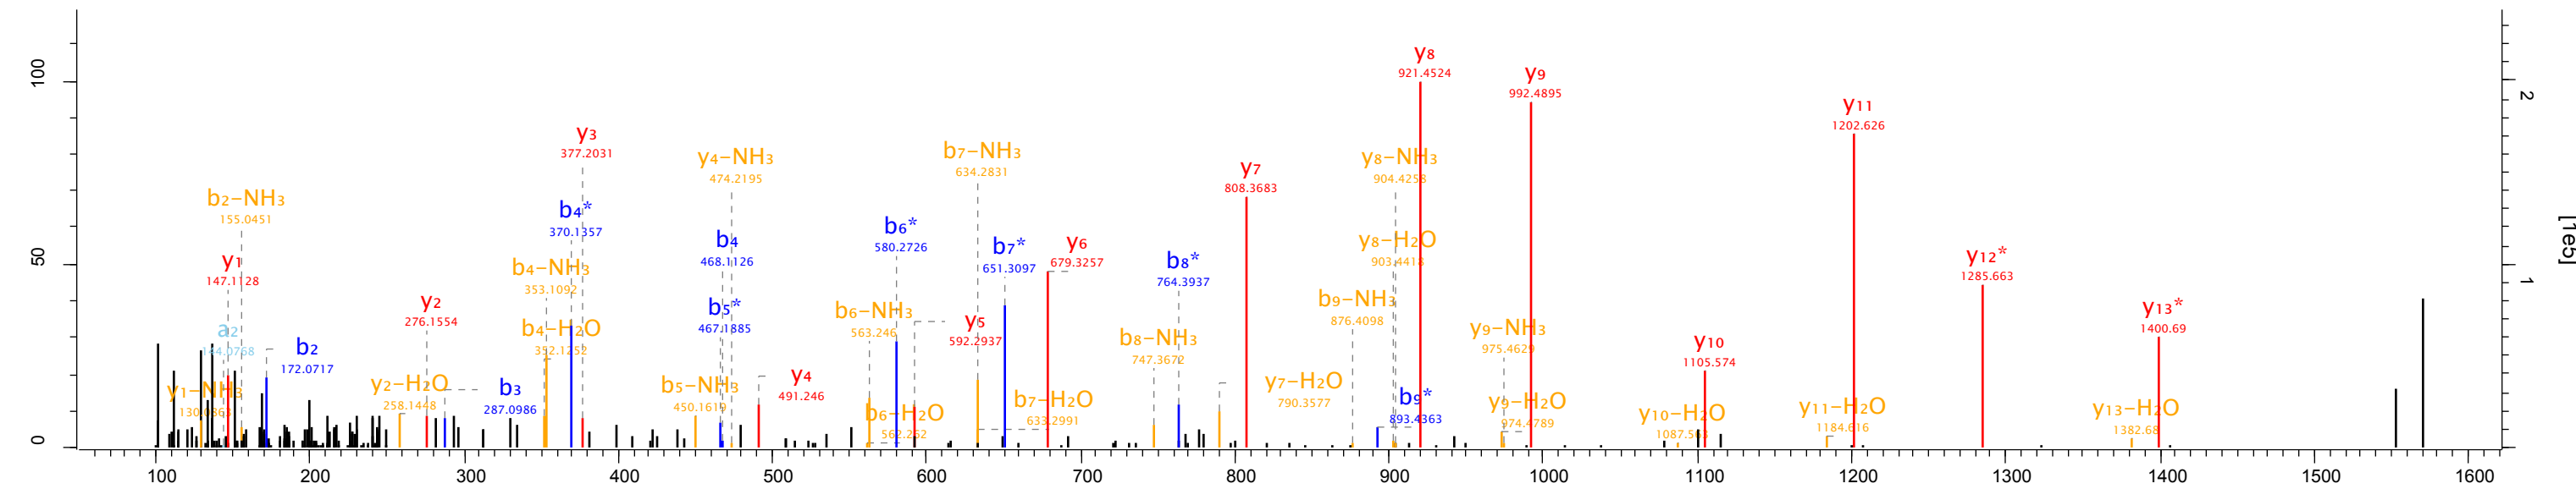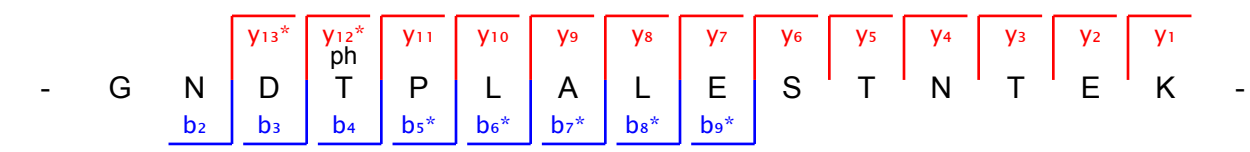

Raw file 20171215\_MaS\_33SR\_LMH\_phospho\_06 Scan 10225 Method FTMS; HCD Score 224.08 m/z 881.78 Gene names DIDO1

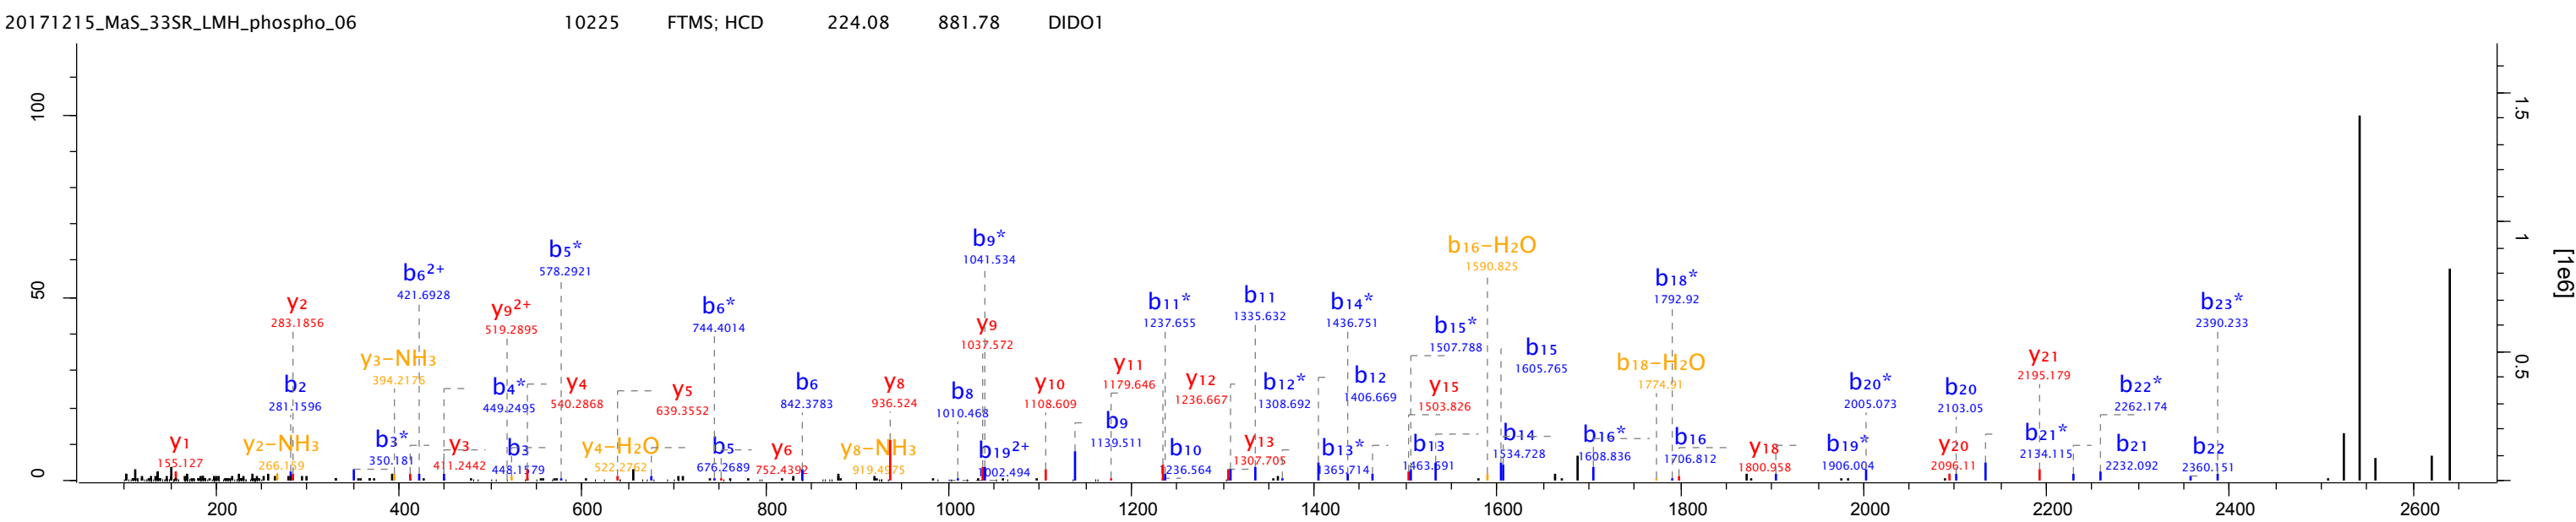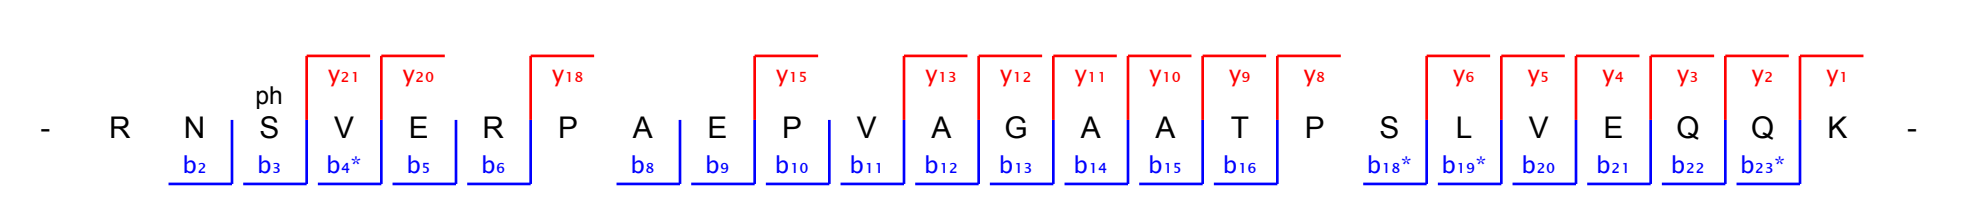

Raw file 20171215\_MaS\_33SR\_LMH\_phospho\_06 Scan 10255 Method FTMS; HCD Score 105.5 m/z 792.38 Gene names SH3PXD2A

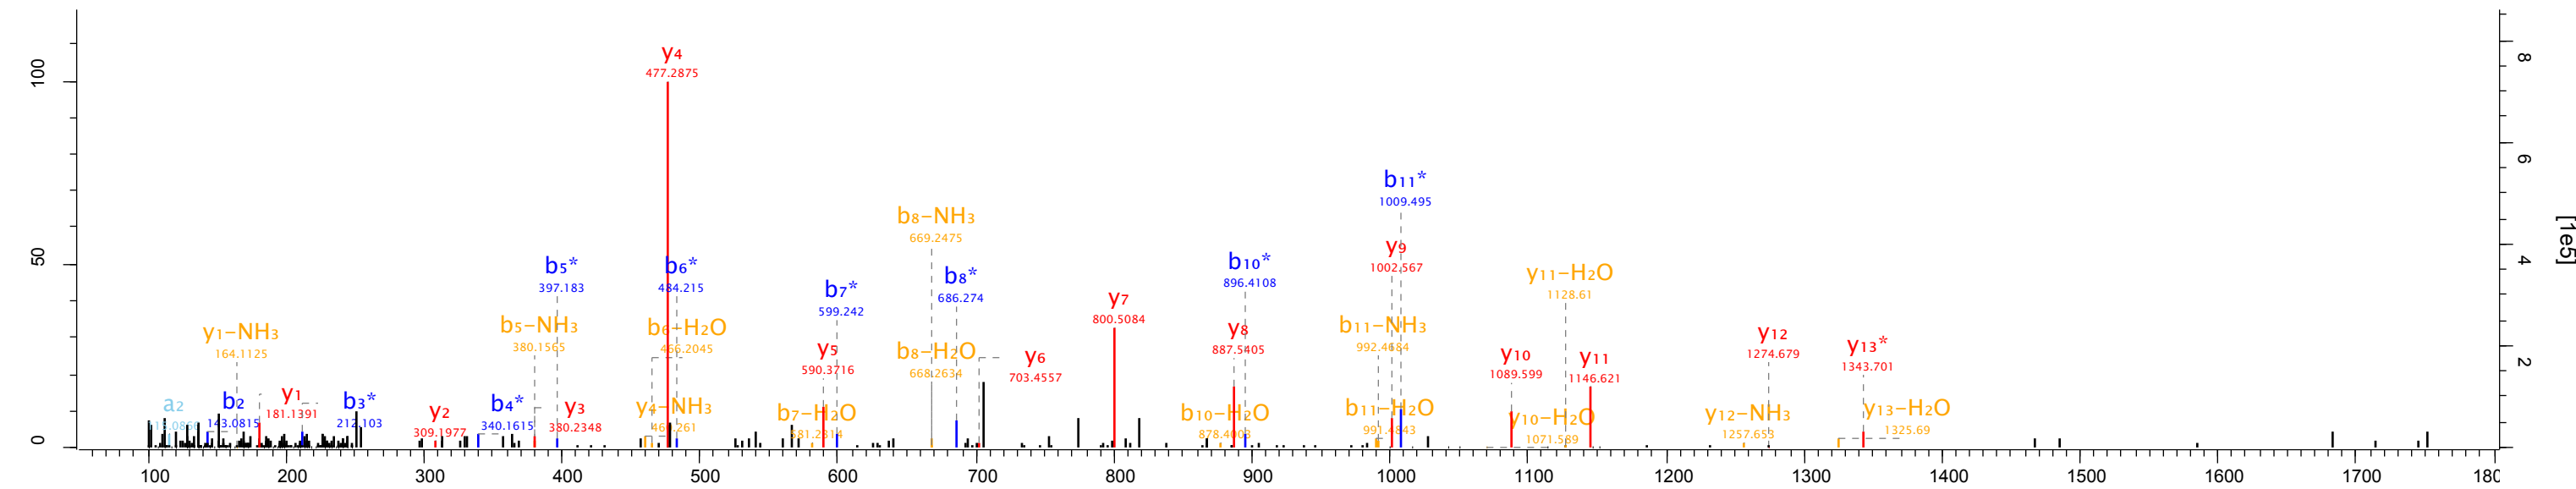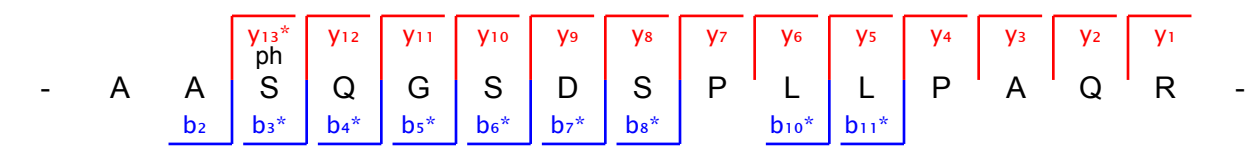

Raw file 20171215\_MaS\_33SR\_LMH\_phospho\_06 Scan 10305 Method FTMS; HCD Score 64.16 m/z 824.03 Gene names BCL9

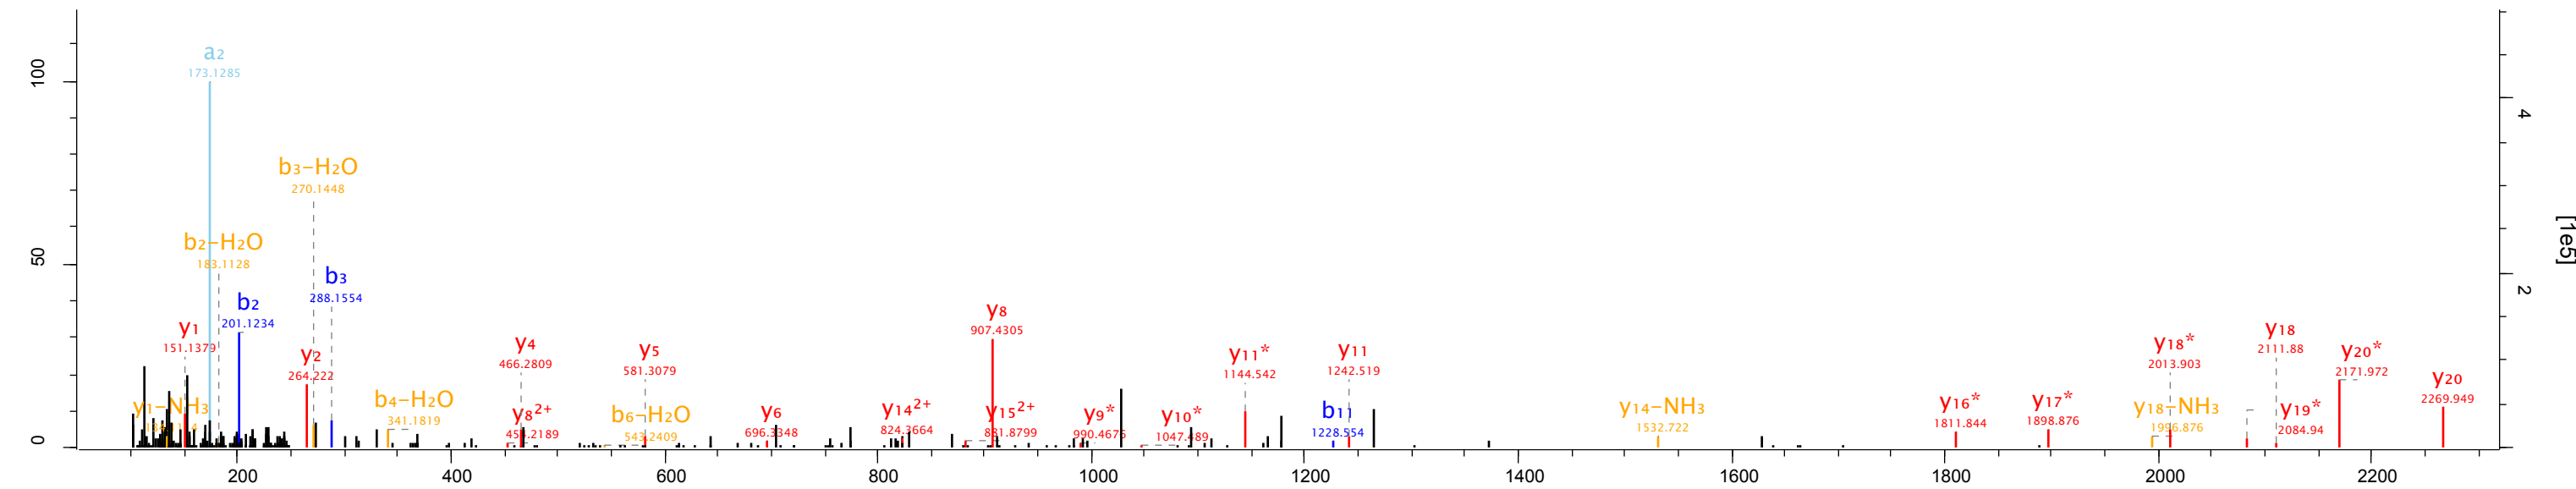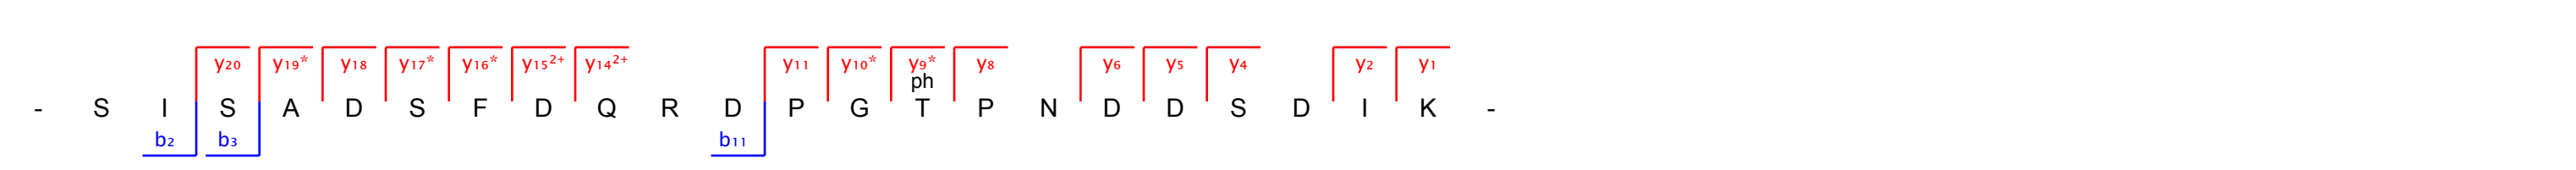

Raw file: 20171215\_MaS\_33SR\_LMH\_phospho\_06  
 Scan: 10385 Method: FTMS; HCD Score: 122.13 m/z: 387.69 Gene names: TELO2

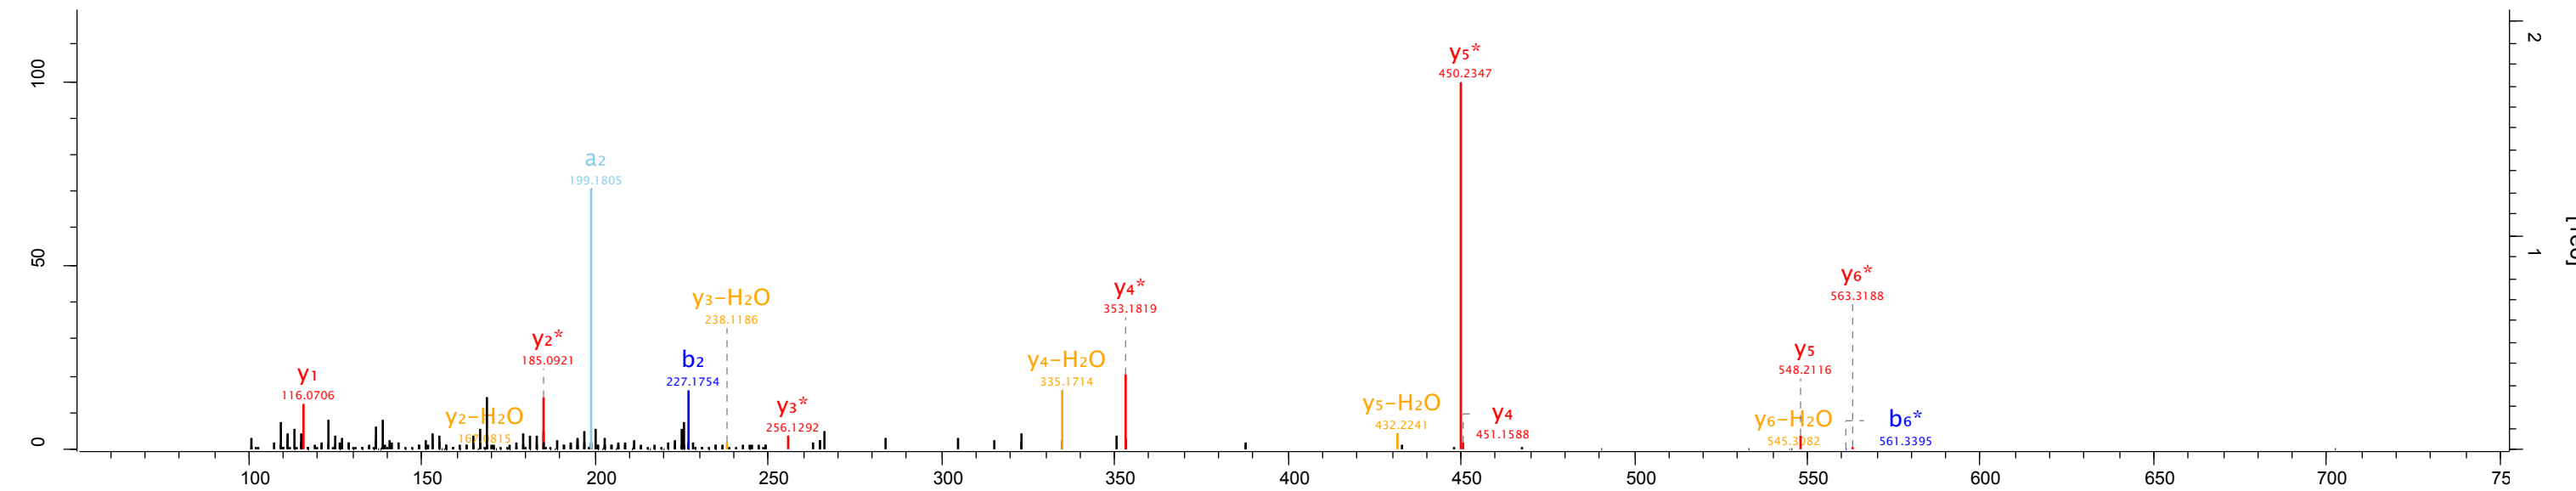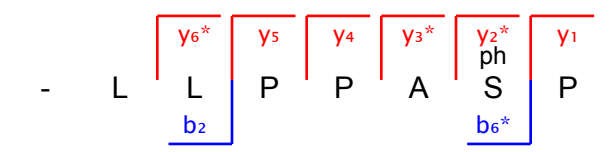

Raw file 20171215\_MaS\_33SR\_LMH\_phospho\_06 Scan 10695 Method FTMS; HCD Score 65.37 m/z 611.8 Gene names *SNTB2*

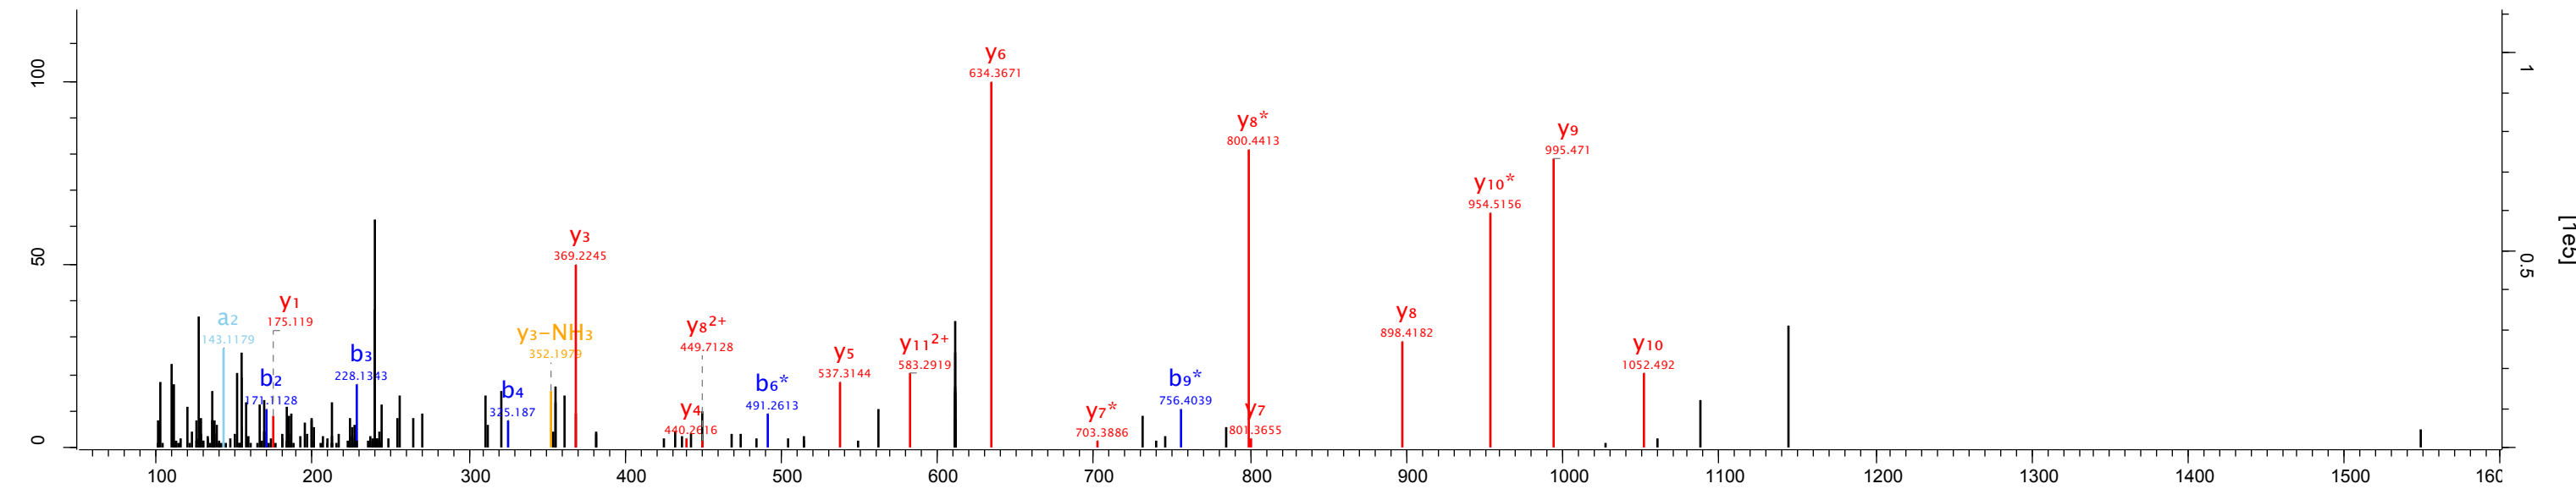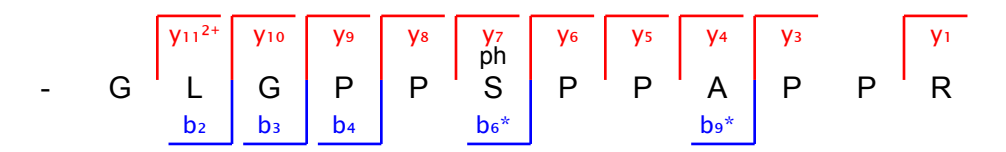

Raw file: 20171215\_MaS\_33SR\_LMH\_phospho\_06  
 Scan: 10745 Method: FTMS; HCD Score: 127.32 m/z: 898.89 Gene names: ZC3H13

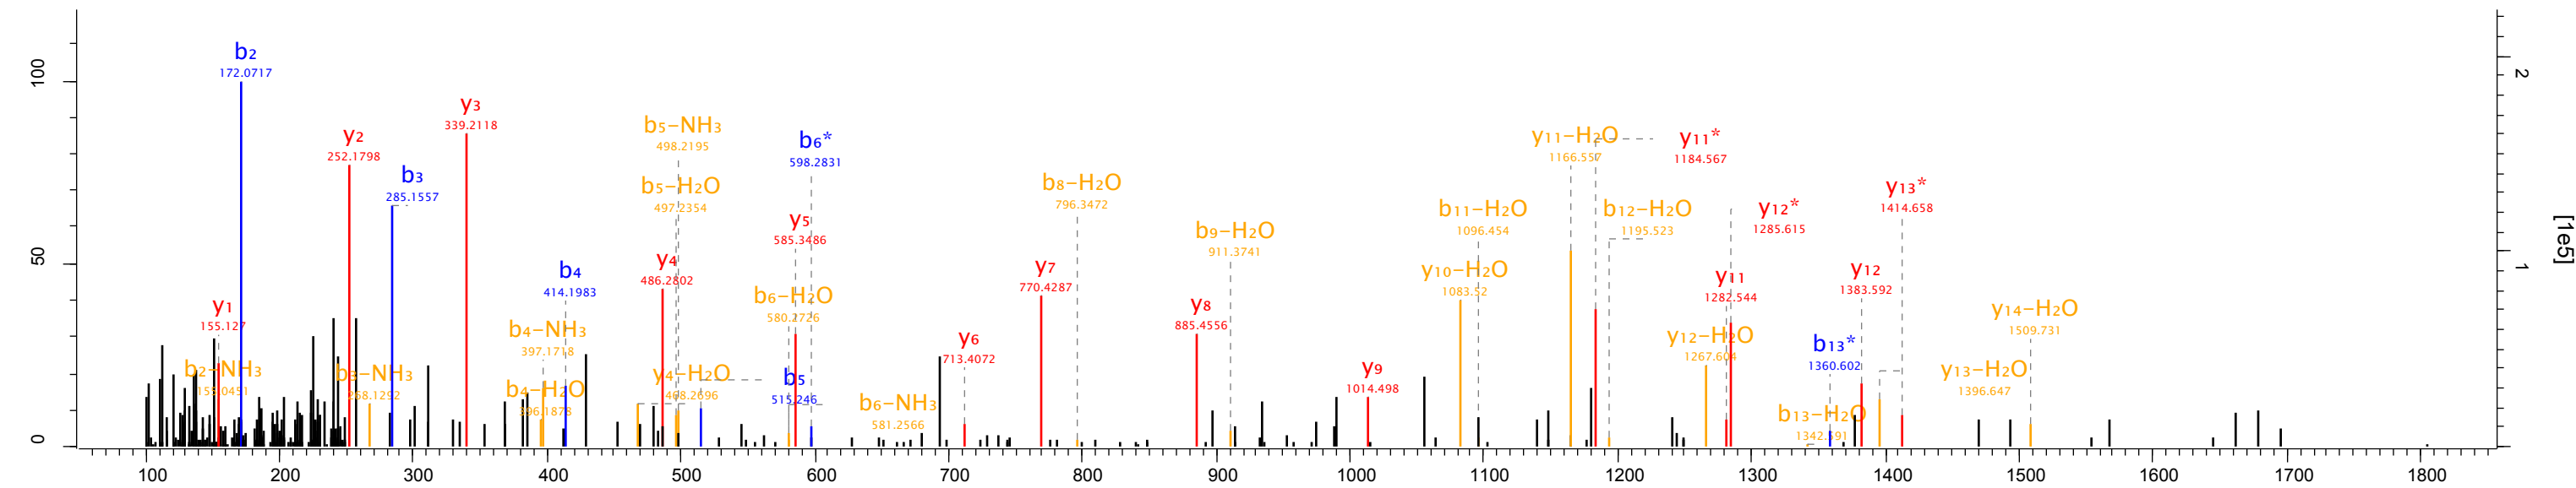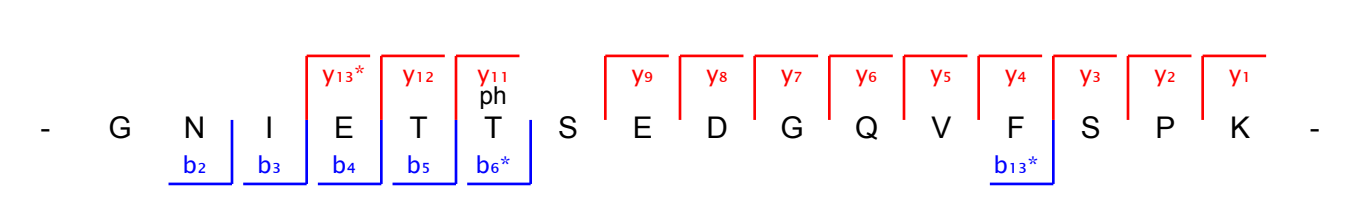



Raw file

20171215\_MaS\_33SR\_LMH\_phospho\_06

| Scan  | Method    | Score | m/z    | Gene names |
|-------|-----------|-------|--------|------------|
| 10855 | FTMS; HCD | 78.23 | 502.24 | PCBP2      |

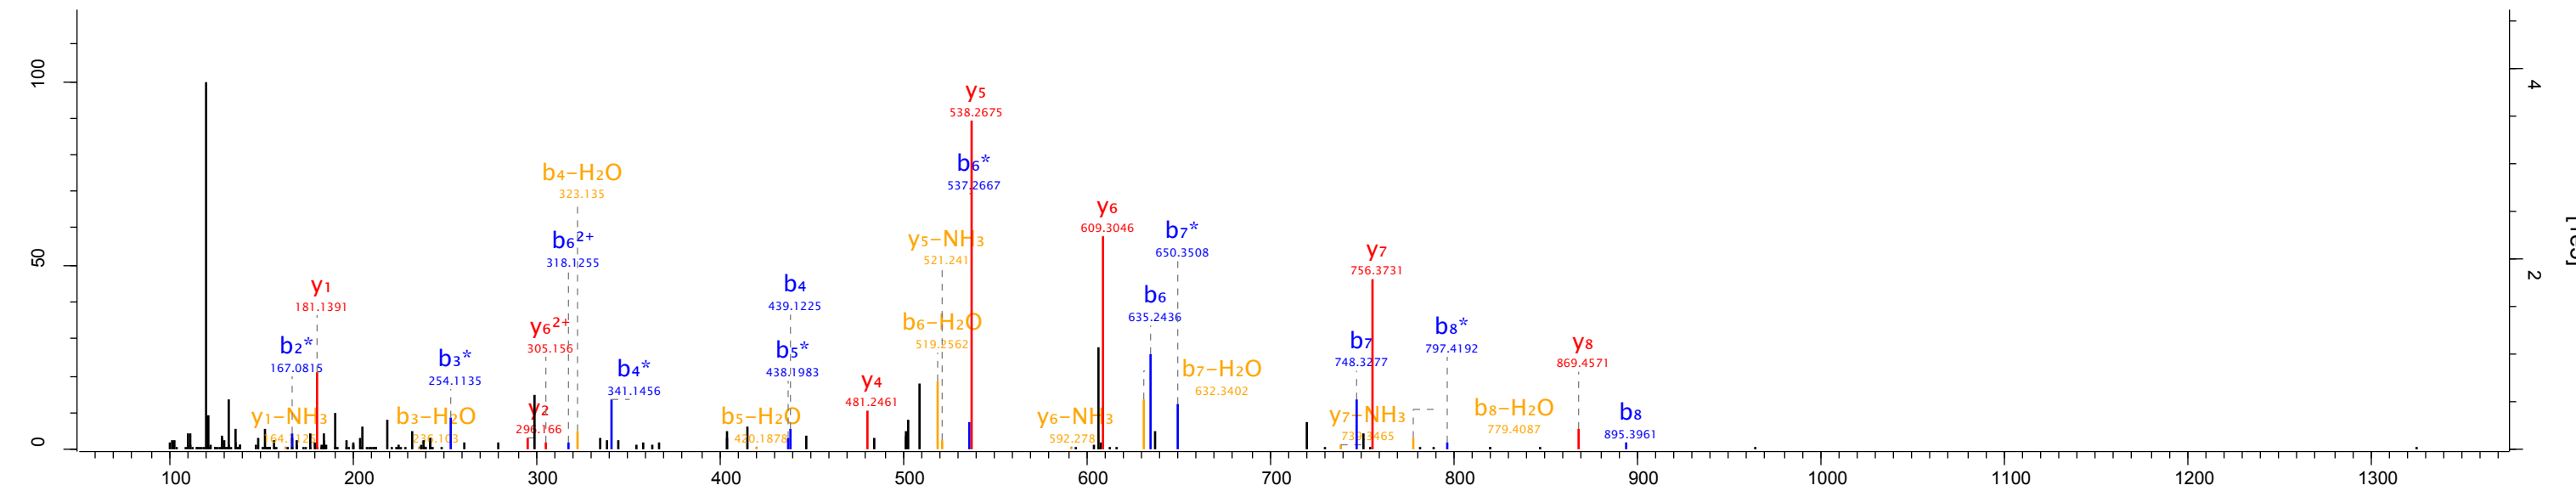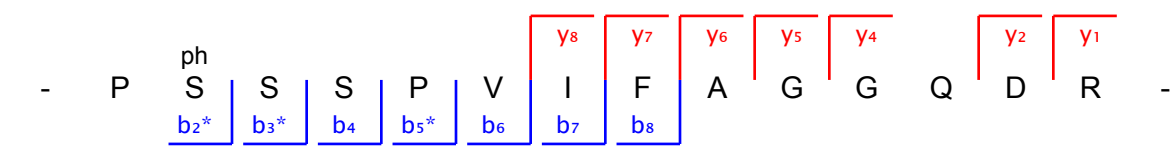

Raw file 20171215\_MaS\_33SR\_LMH\_phospho\_06 Scan 10865 Method FTMS; HCD Score 166.9 m/z 644.28 Gene names SH3KBP1

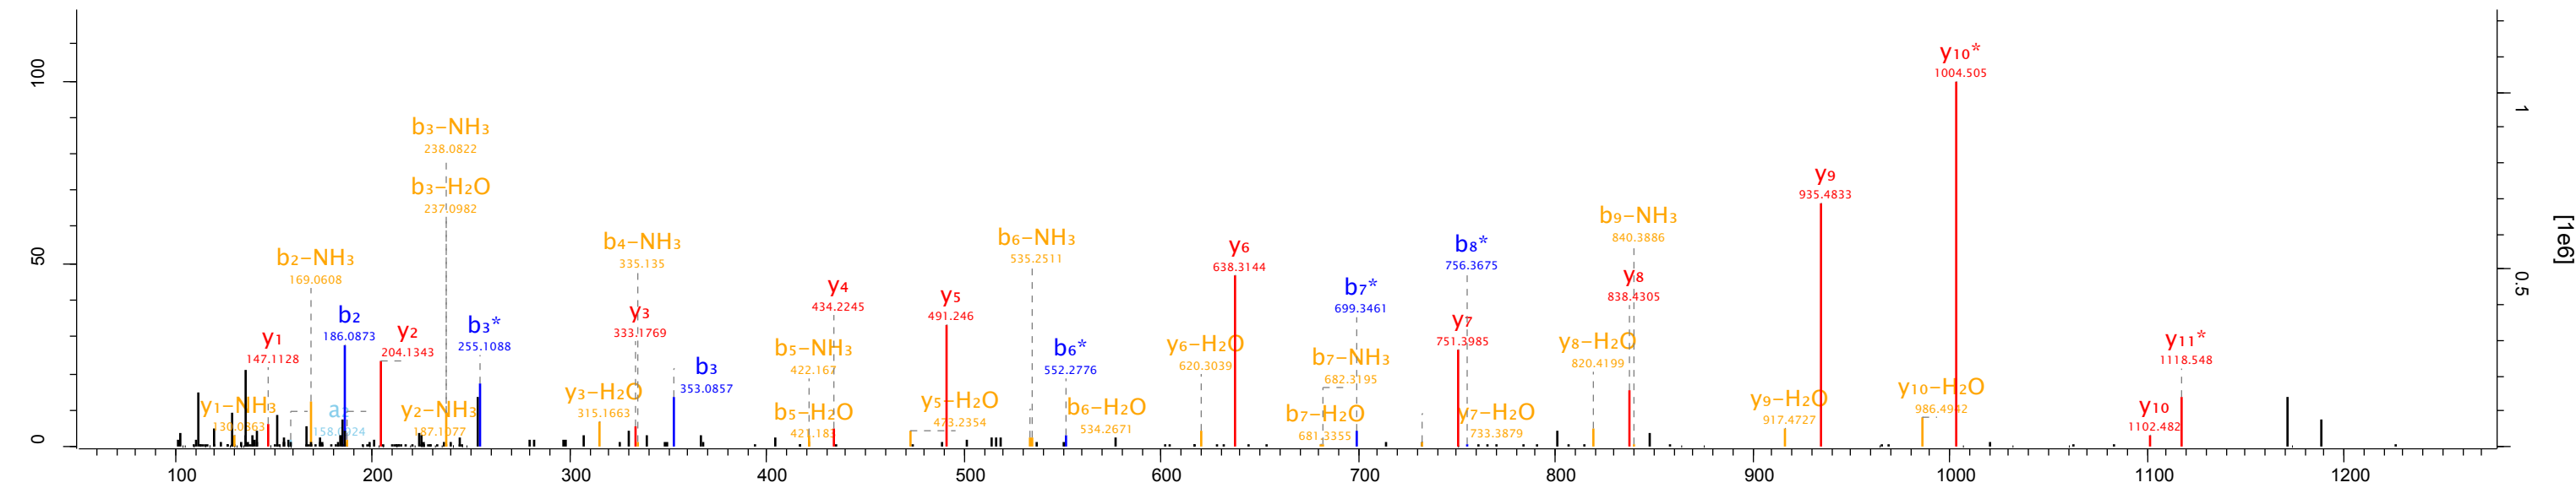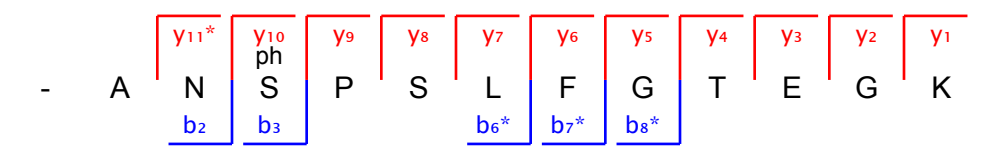

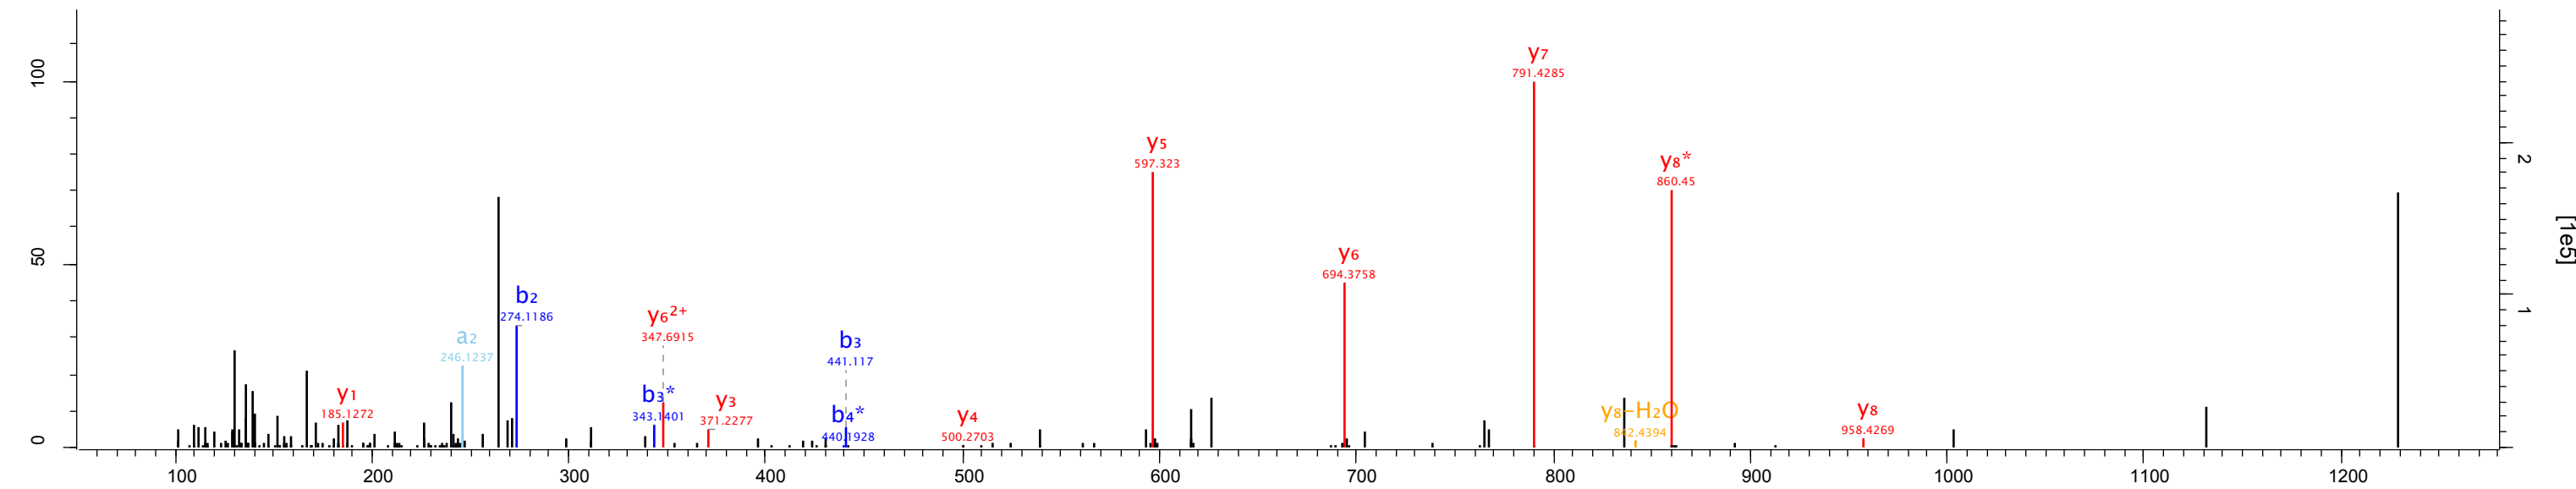

- S W S P P P E V S R -

Fragmentation mapping:

- W: b<sub>2</sub>
- S: b<sub>3</sub>
- P: b<sub>4</sub>\*
- P: y<sub>8</sub>ph
- P: y<sub>7</sub>
- P: y<sub>6</sub>
- E: y<sub>5</sub>
- V: y<sub>4</sub>
- S: y<sub>3</sub>
- R: y<sub>1</sub>

Raw file 20171215\_MaS\_33SR\_LMH\_phospho\_06 Scan 11115 Method FTMS; HCD Score 61.17 m/z 657.82 Gene names RPS28

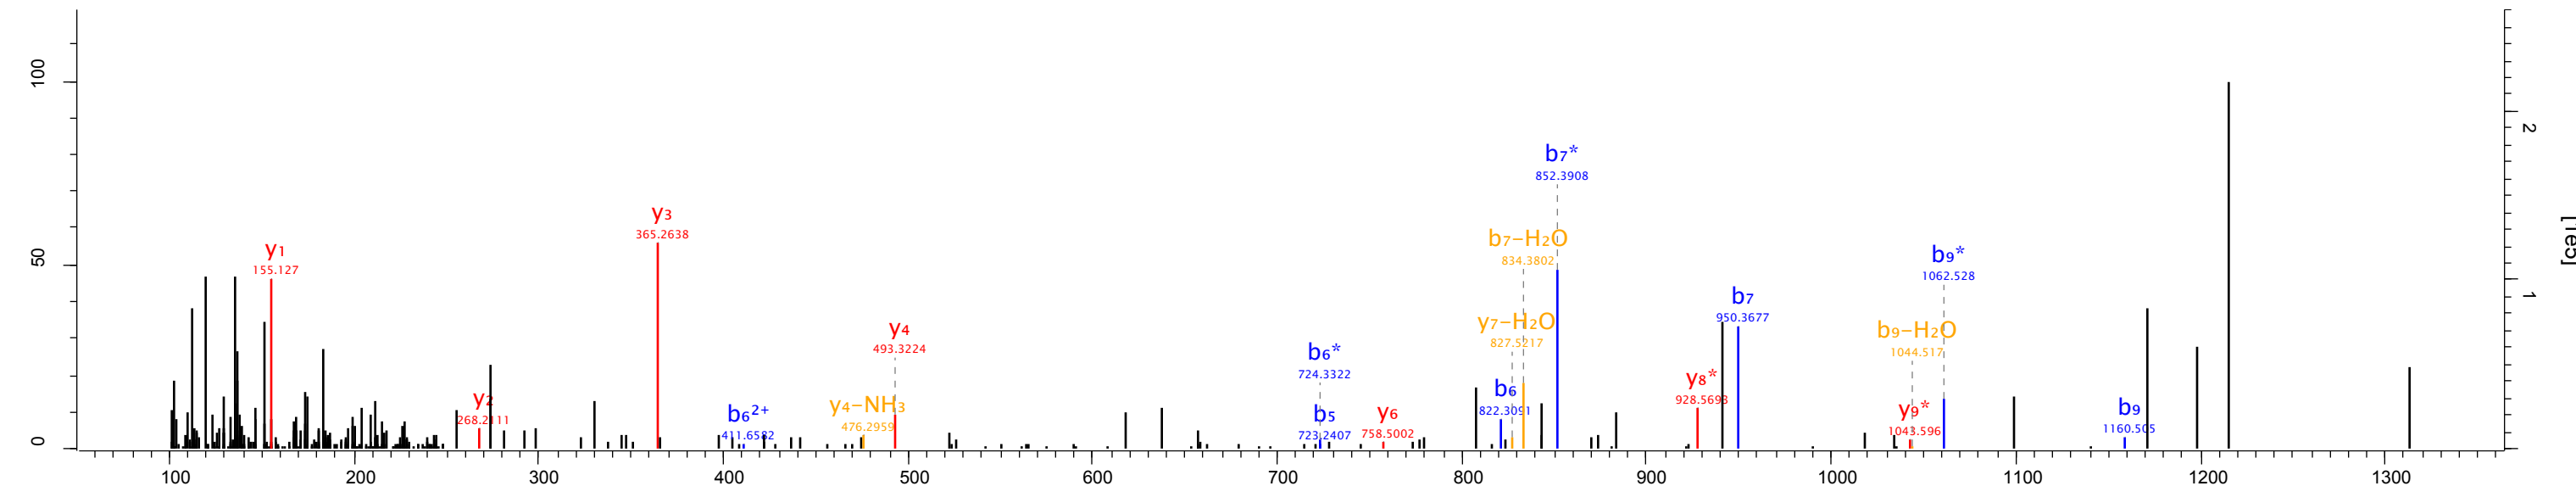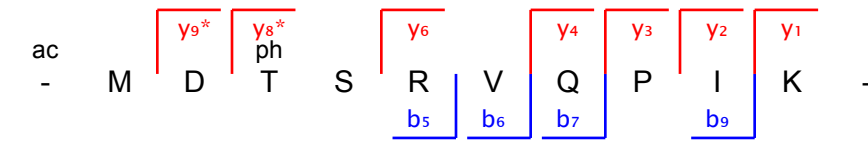

Raw file: 20171215\_MaS\_33SR\_LMH\_phospho\_06  
 Scan: 11525 Method: FTMS; HCD Score: 171.02 m/z: 826.05 Gene names: MCM3AP

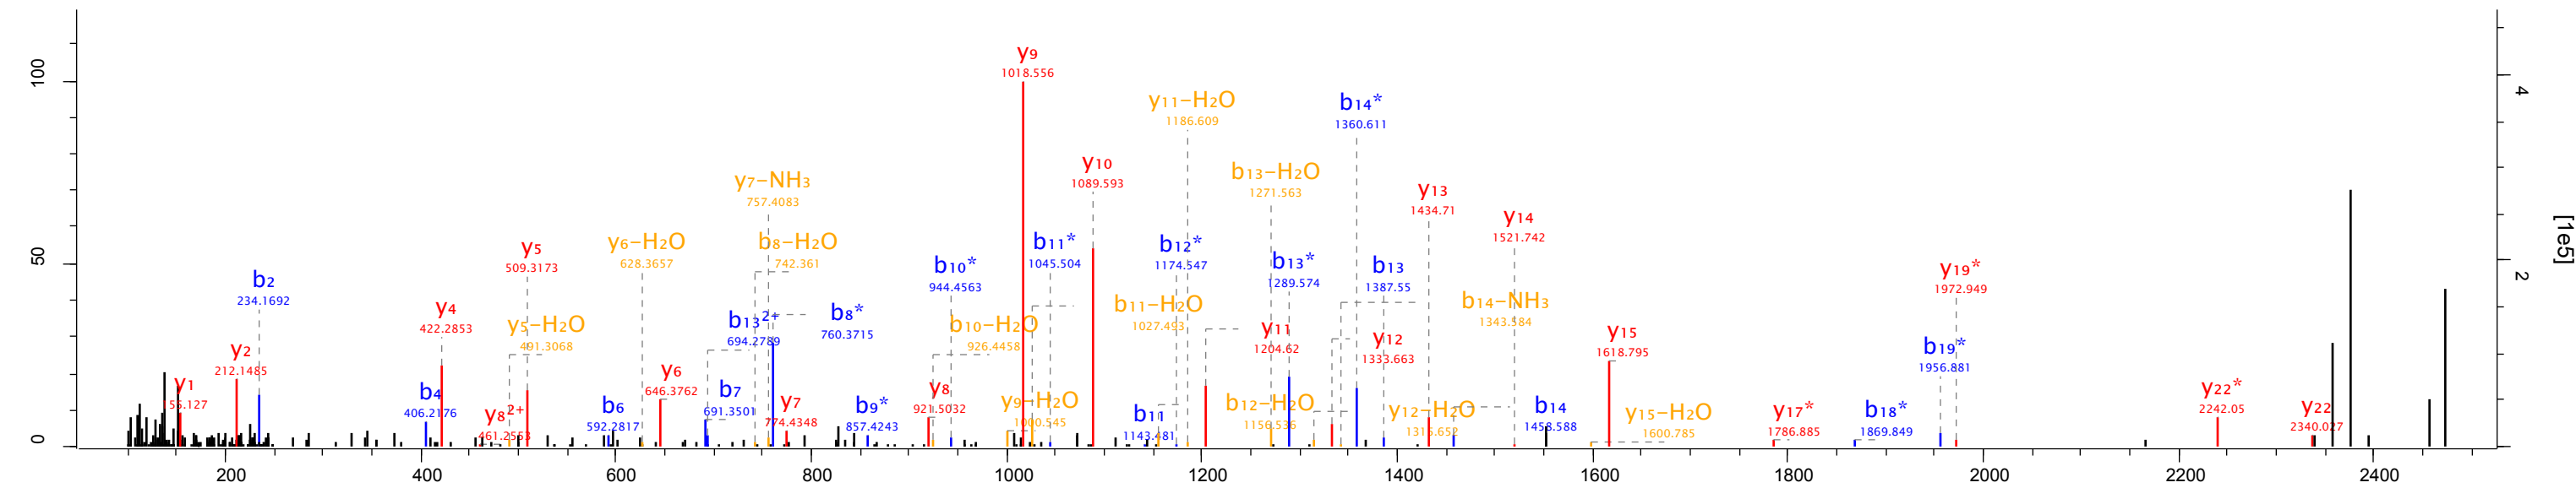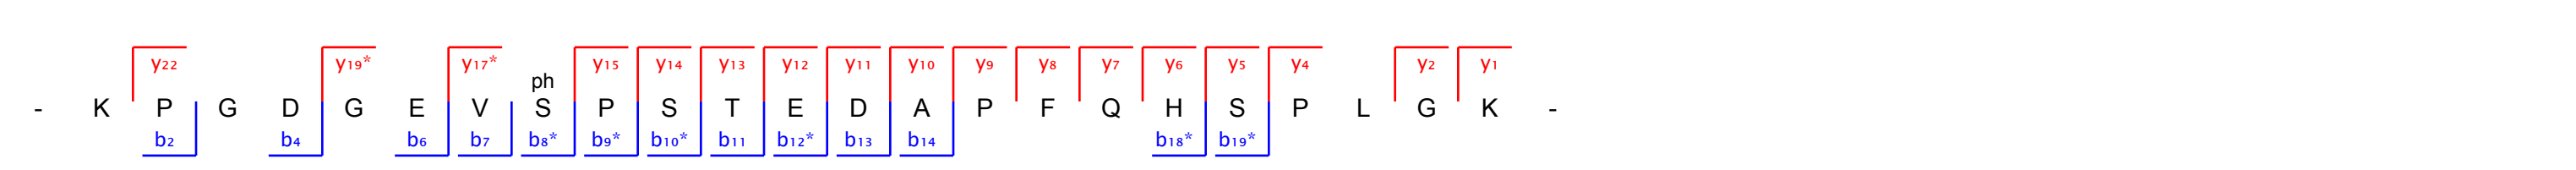

20171215\_MaS\_33SR\_LMH\_phospho\_06 11625 FTMS; HCD 264.36 947.07 GBF1

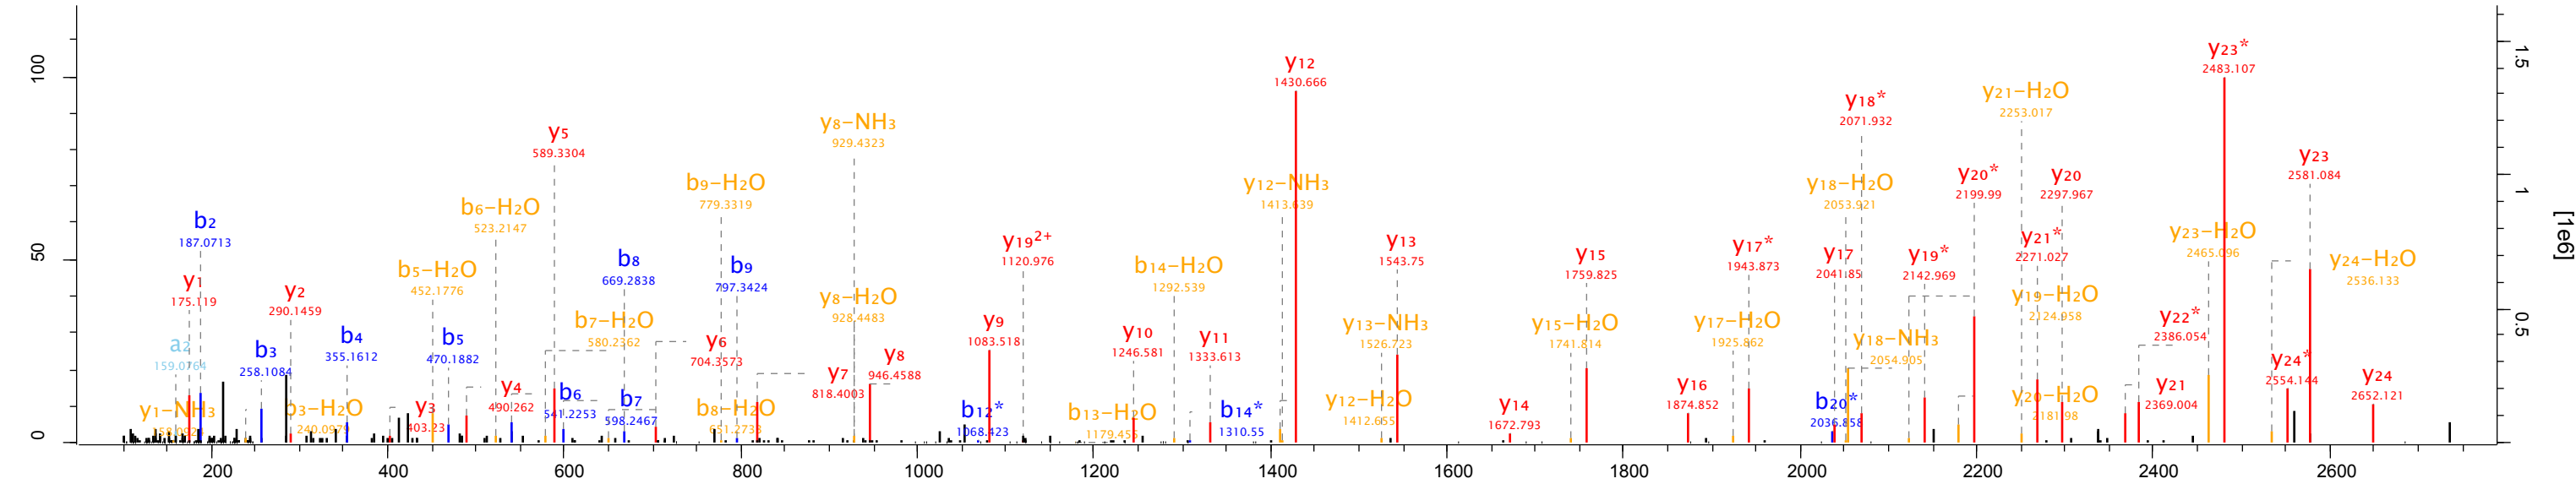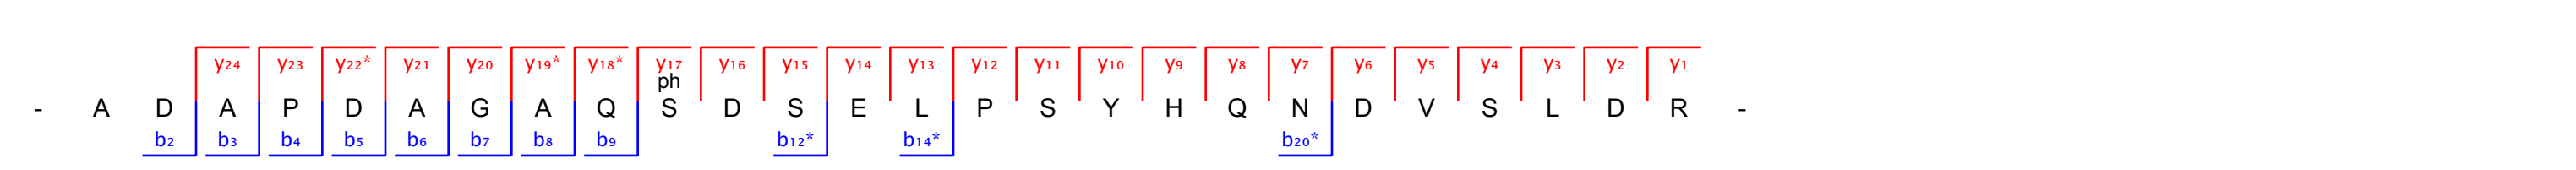

Raw file 20171215\_MaS\_33SR\_LMH\_phospho\_06 Scan 11935 Method FTMS; HCD Score 54.98 m/z 424.24 Gene names BICD2

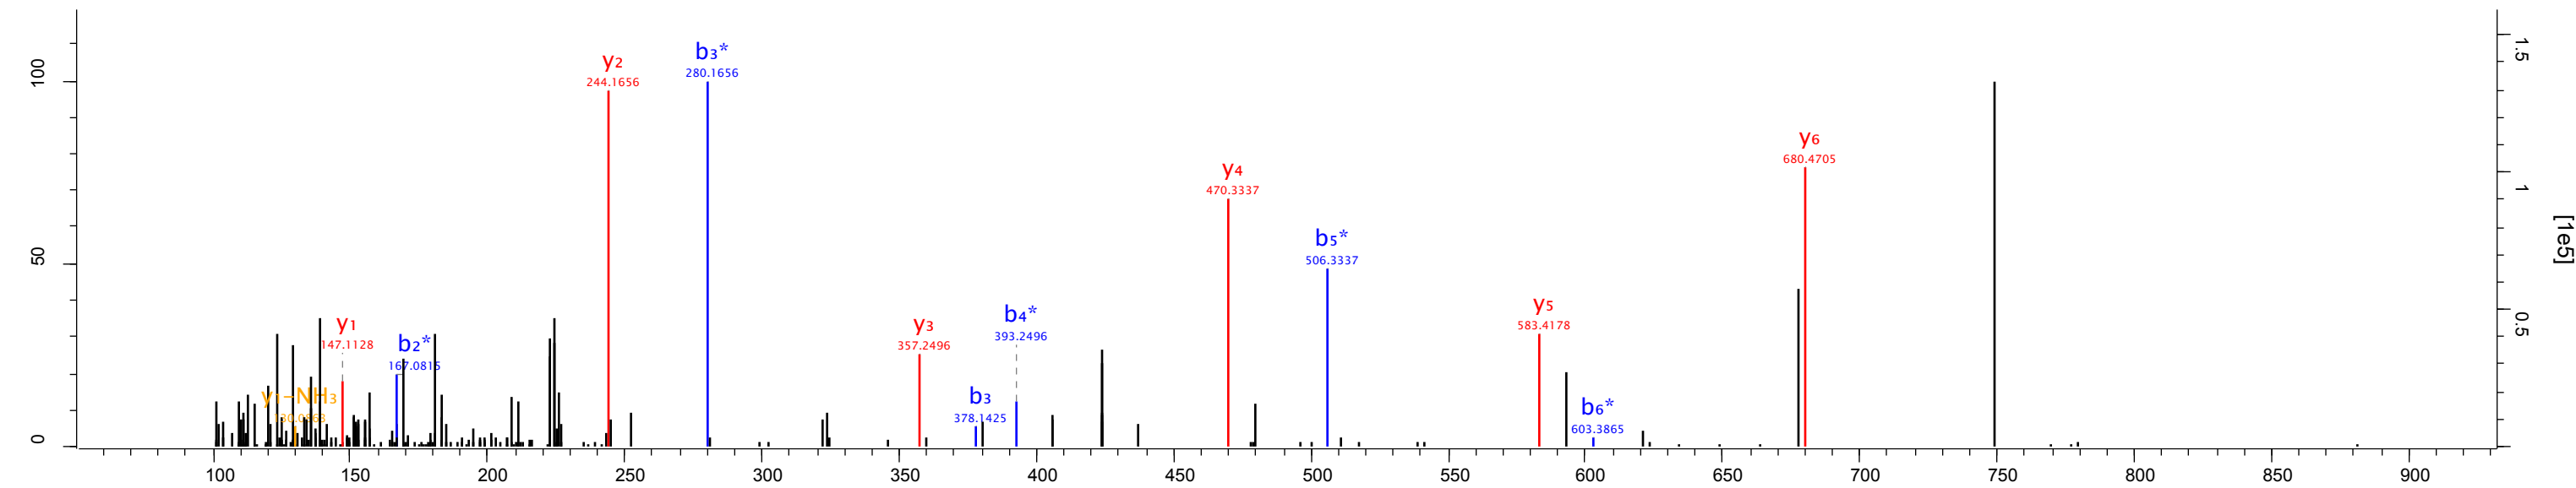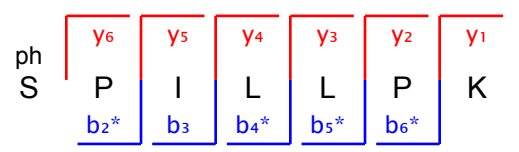

Raw file 20171215\_MaS\_33SR\_LMH\_phospho\_06 Scan 12155 Method FTMS; HCD Score 67.21 m/z 1004.82 Gene names UBXN1

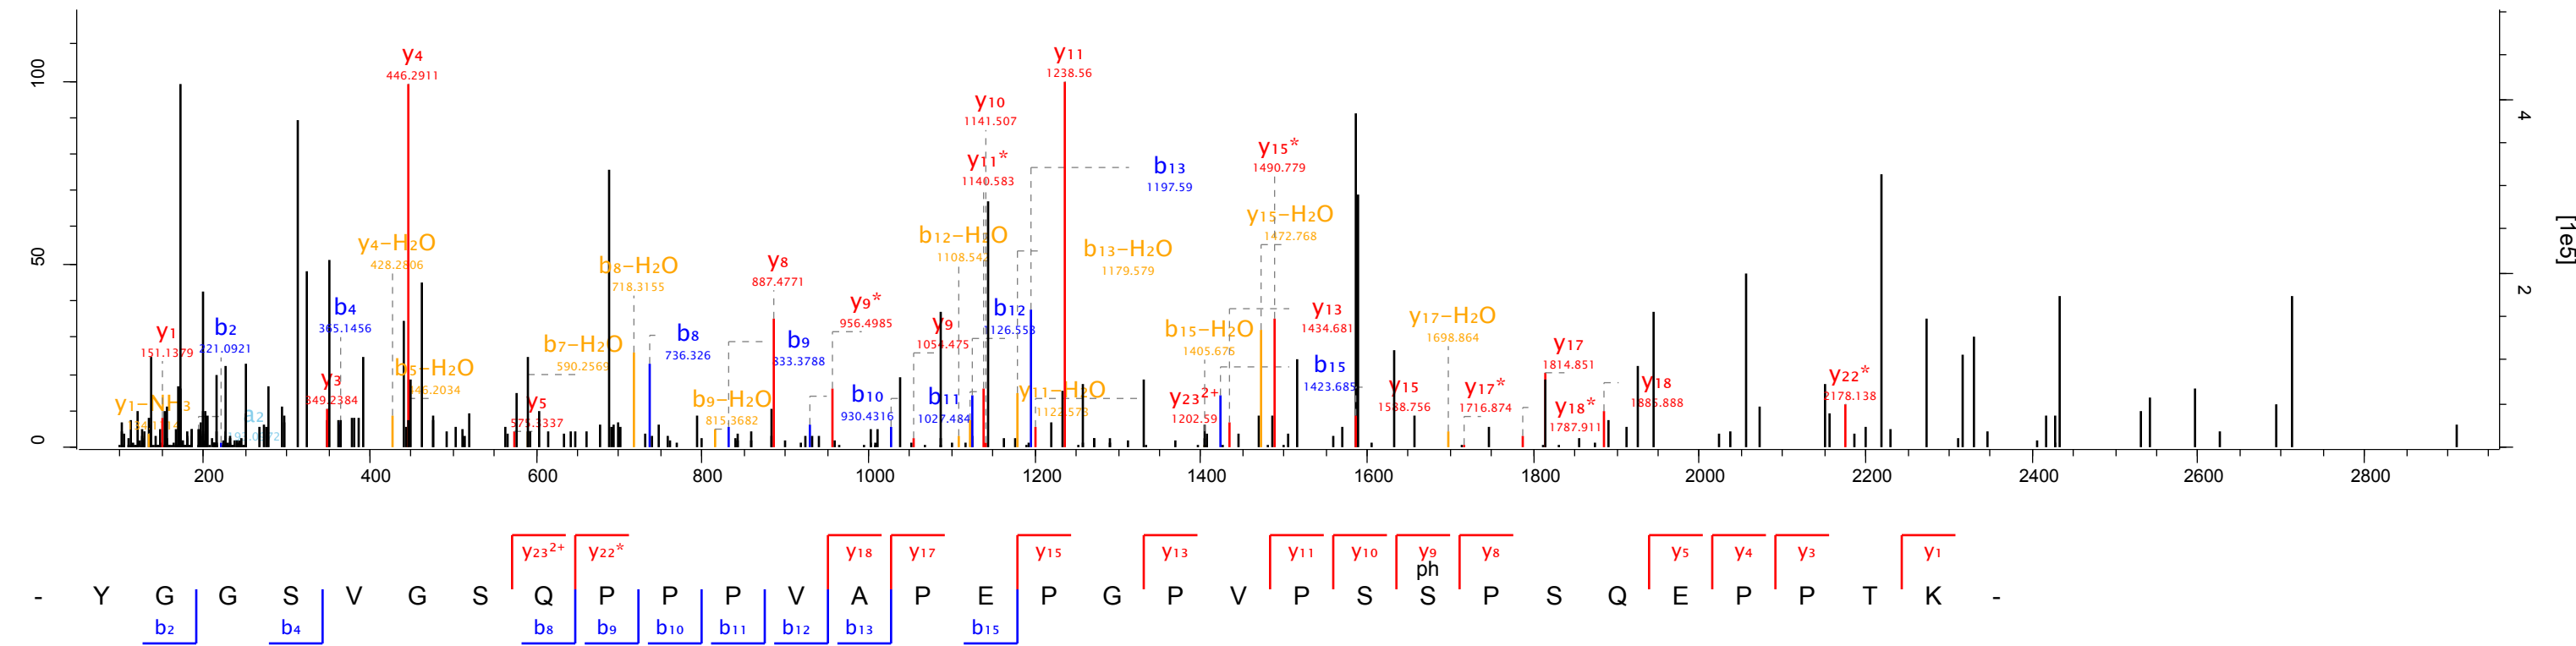



Raw file 20171215\_MaS\_33SR\_LMH\_phospho\_06 Scan 12275 Method FTMS; HCD Score 162.37 m/z 633.8 Gene names PIKFYVE

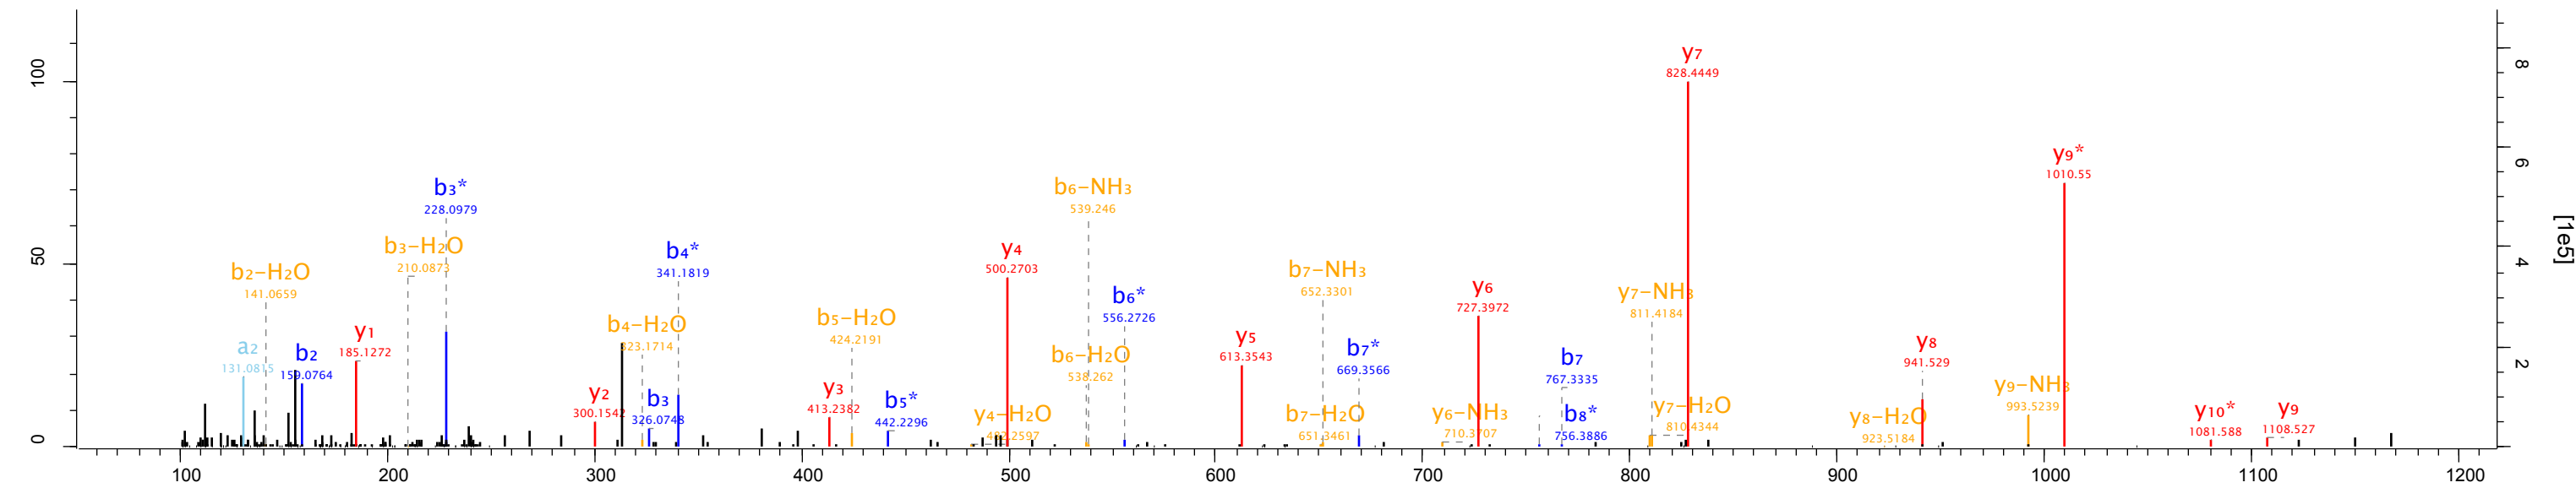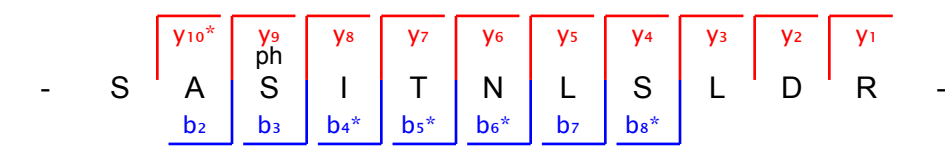

Raw file 20171215\_MaS\_33SR\_LMH\_phospho\_06 Scan 12345 Method FTMS; HCD Score 67.19 m/z 819.38 Gene names MSANTD2

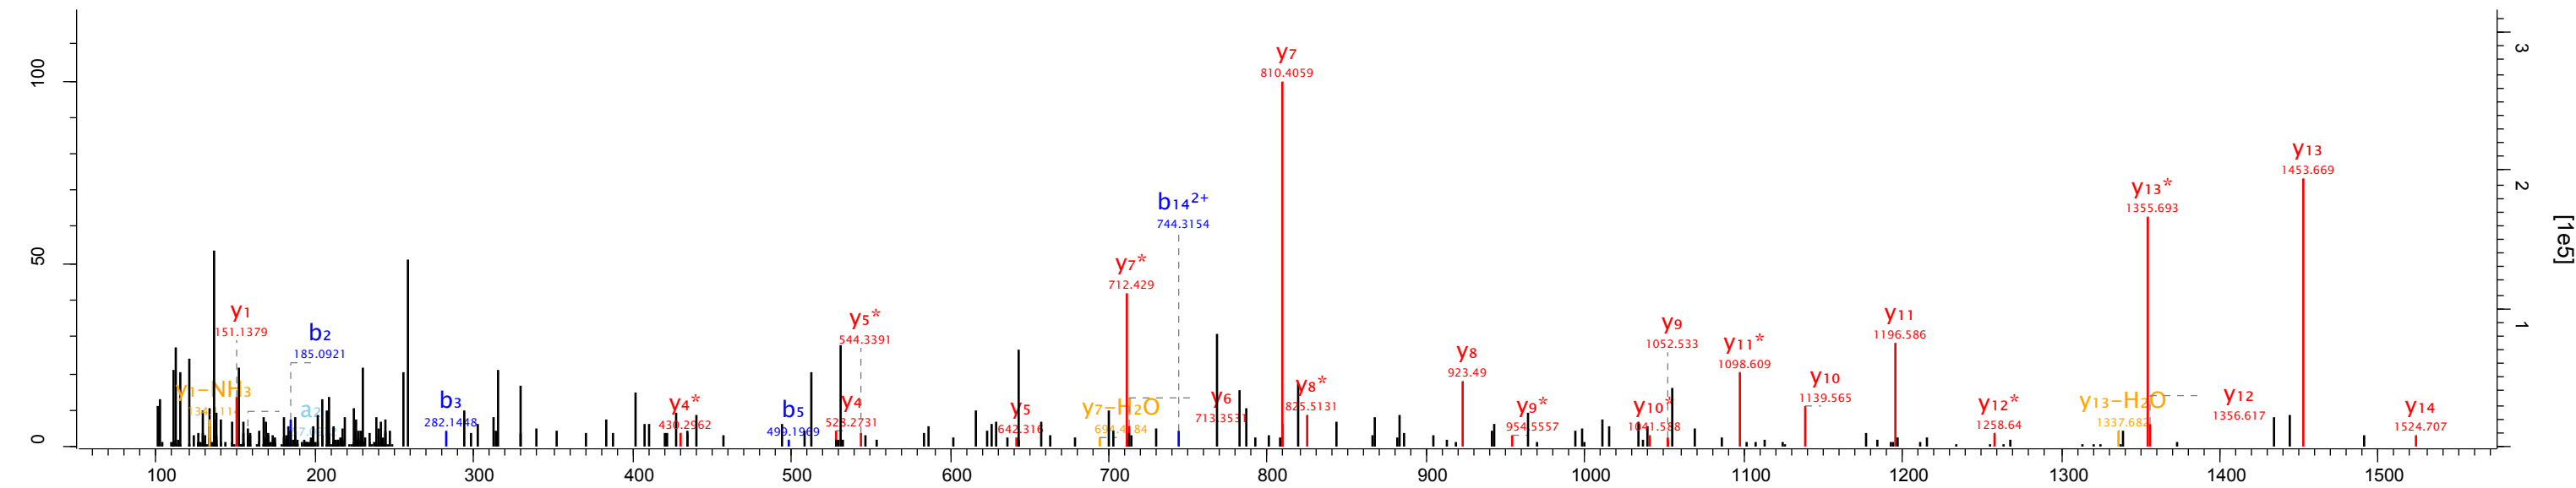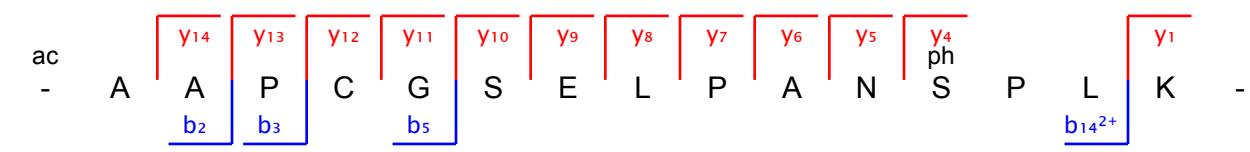

Raw file 20171215\_MaS\_33SR\_LMH\_phospho\_06 Scan 12725 Method FTMS; HCD Score 137.4 m/z 1021.46 Gene names SOX10

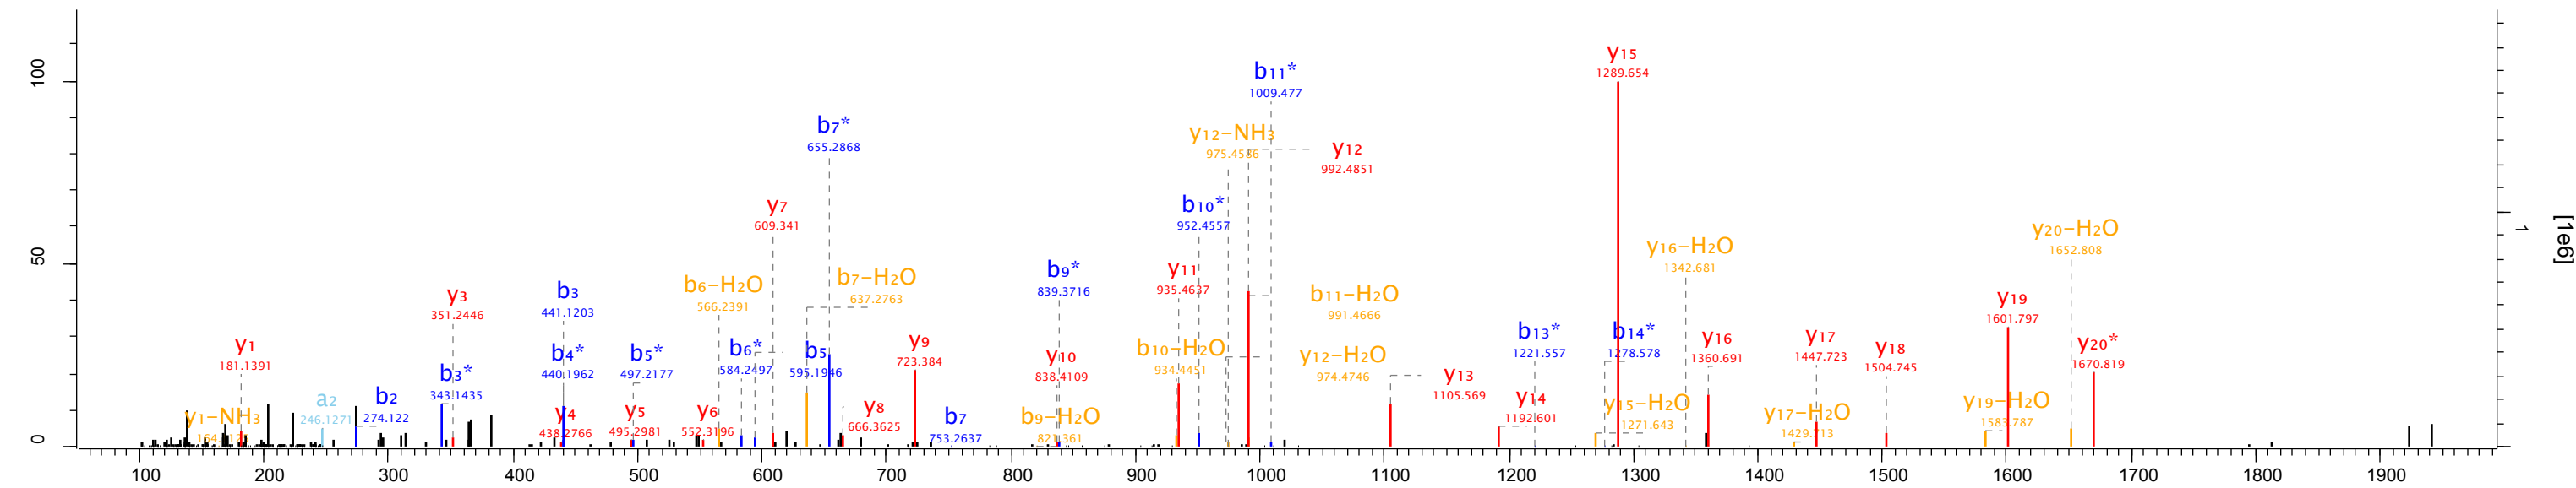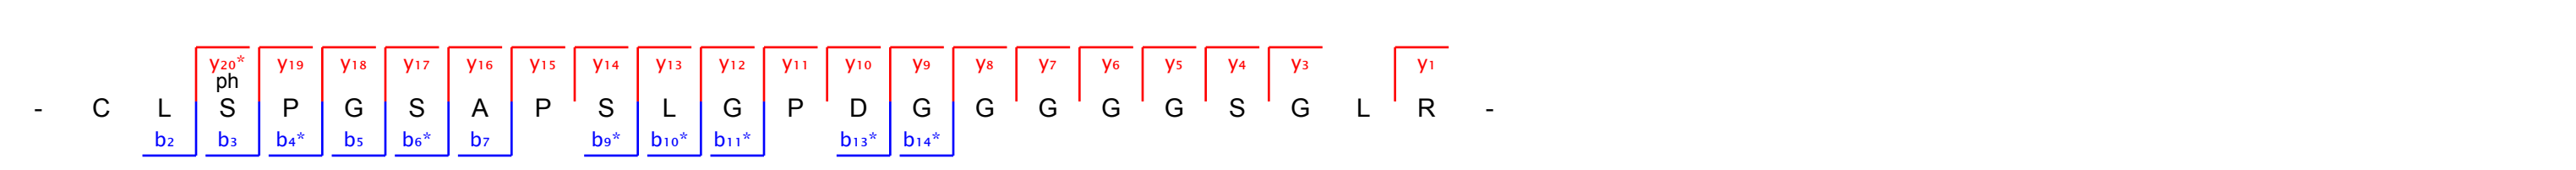

Raw file 20171215\_MaS\_33SR\_LMH\_phospho\_06 Scan 12755 Method FTMS; HCD Score 72.19 m/z 481.26 Gene names ZNF318

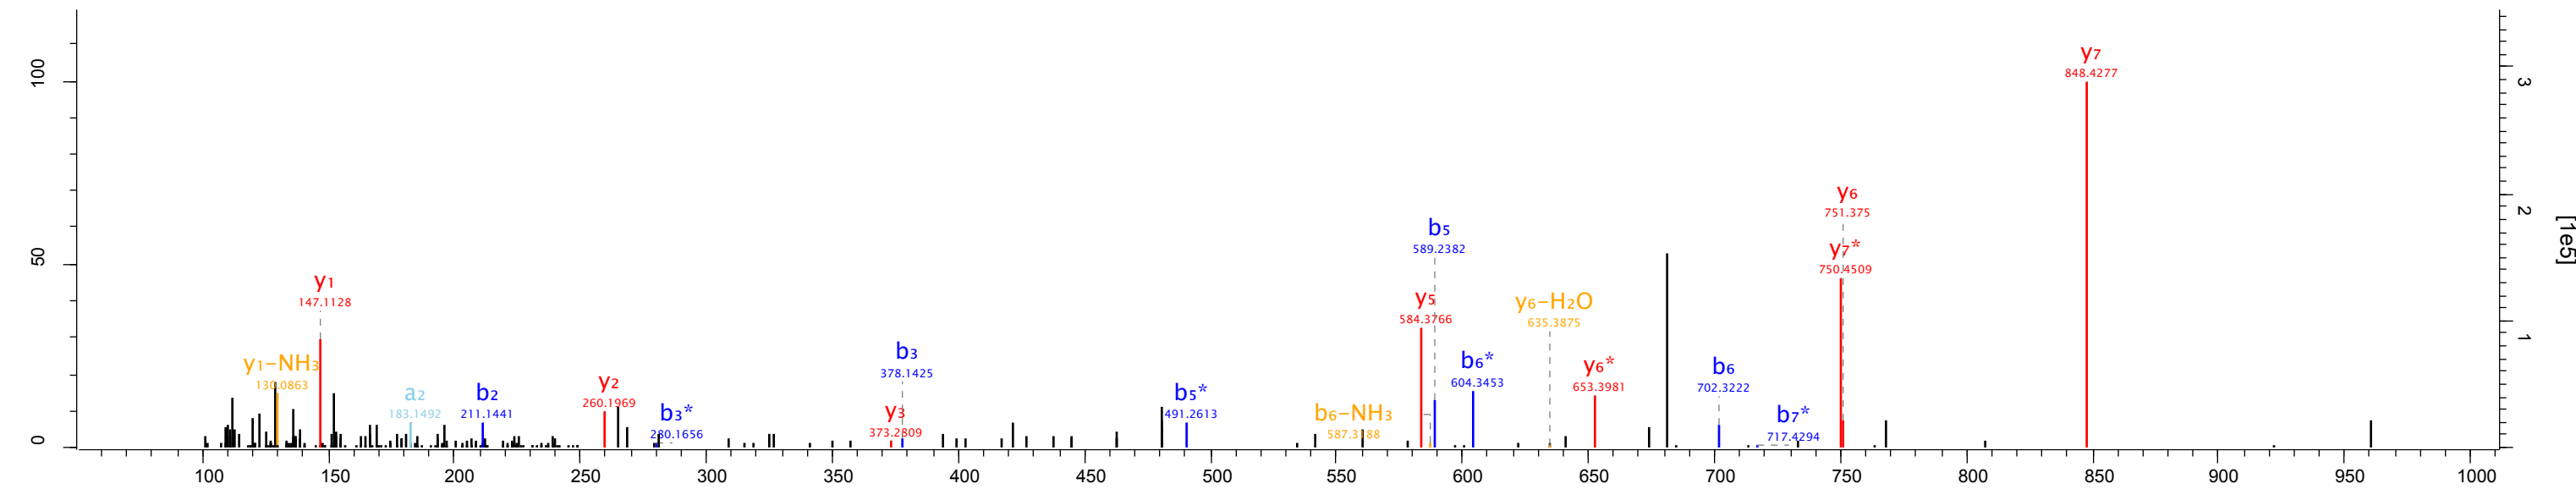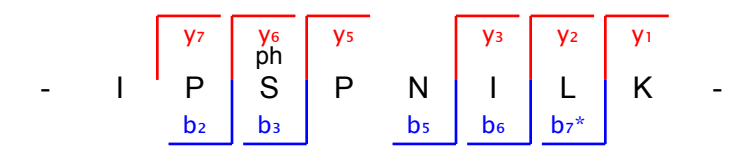

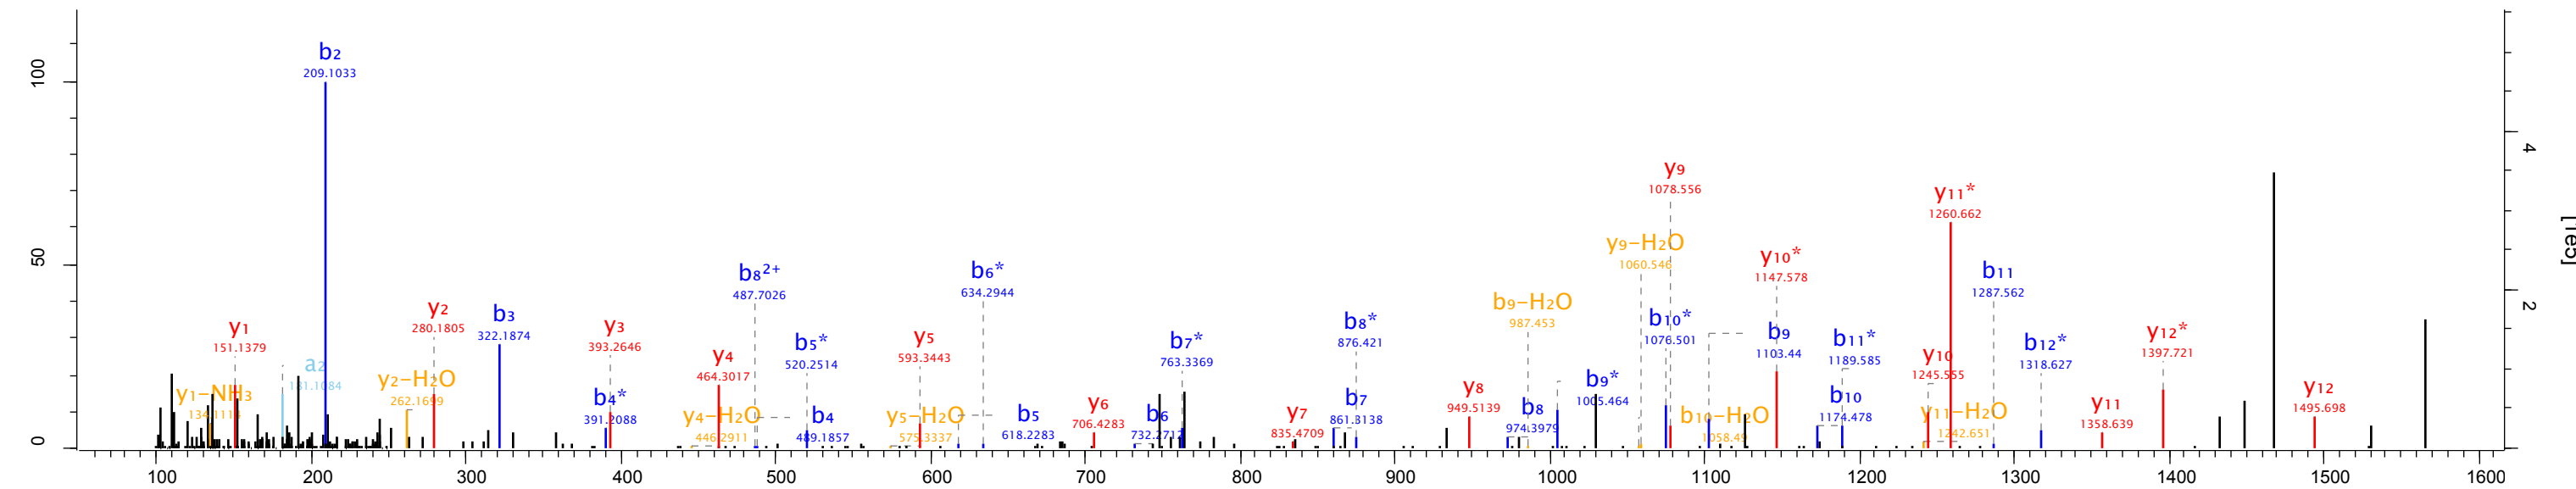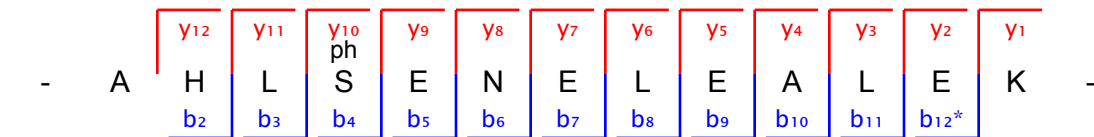

Raw file: 20171215\_MaS\_33SR\_LMH\_phospho\_06  
 Scan: 13215 Method: FTMS; HCD Score: 264.83 m/z: 818.91 Gene names: MAP4

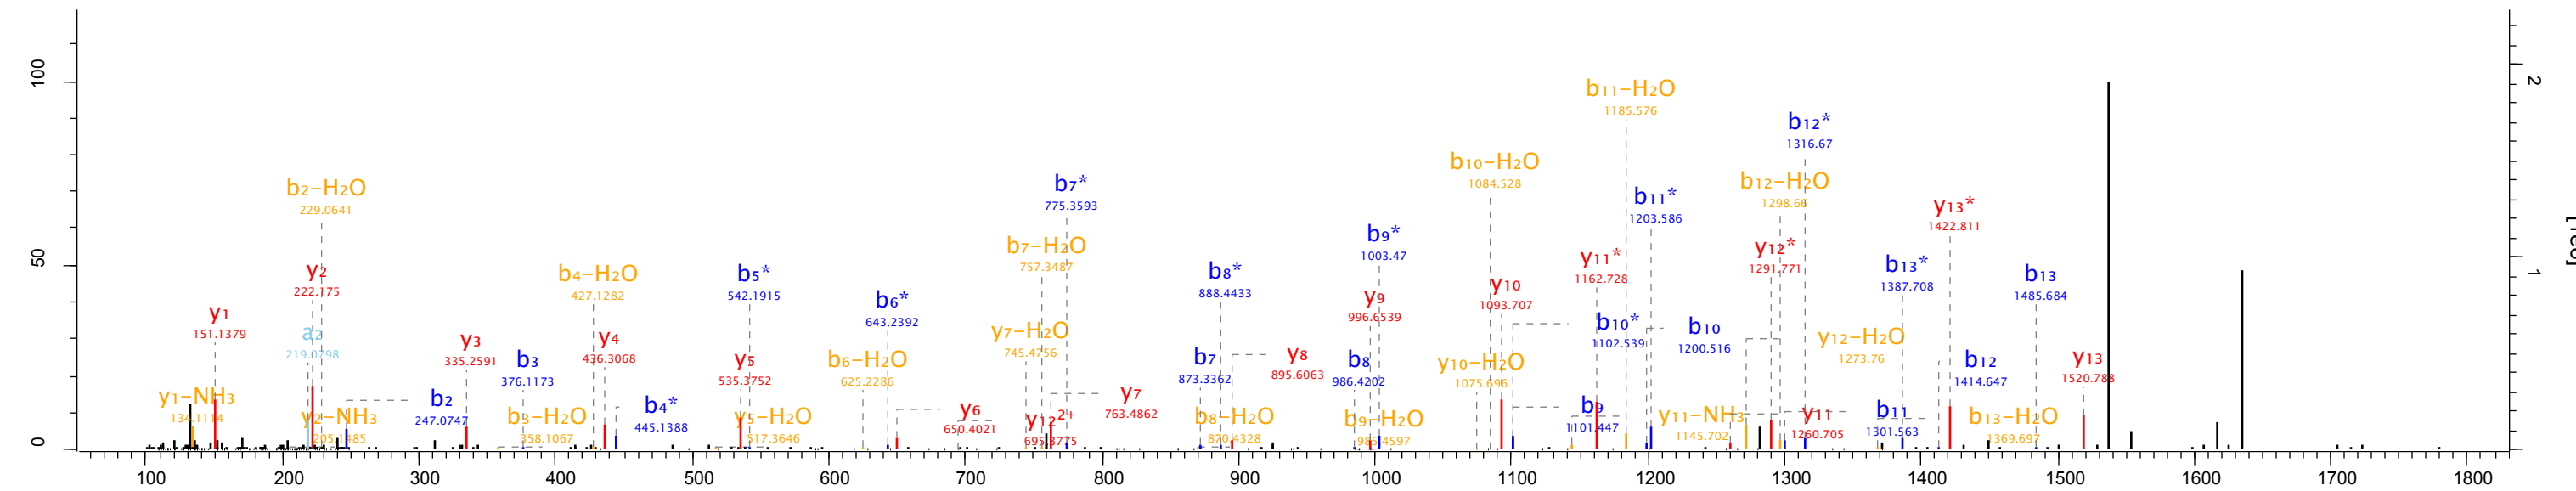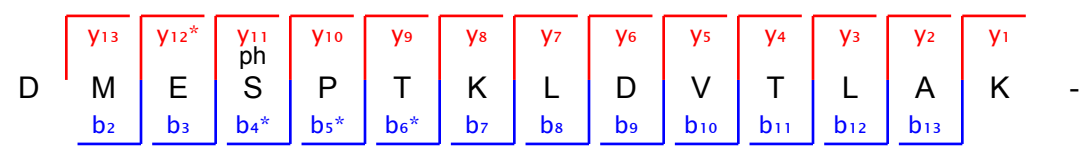

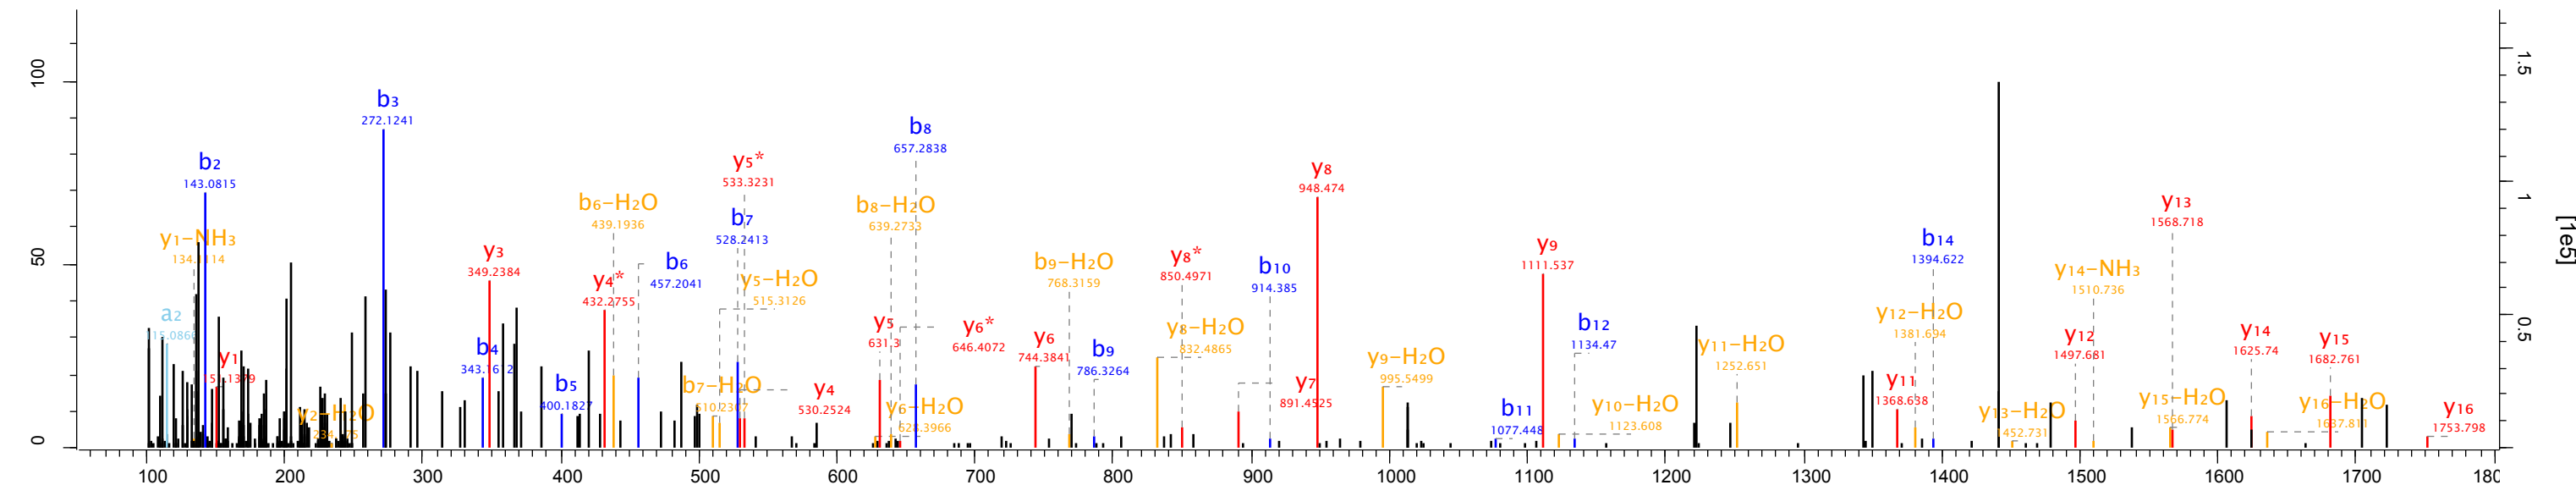

- A A E A G G A E E Q Y G F L T T P T K -

b<sub>2</sub> b<sub>3</sub> b<sub>4</sub> b<sub>5</sub> b<sub>6</sub> b<sub>7</sub> b<sub>8</sub> b<sub>9</sub> b<sub>10</sub> b<sub>11</sub> b<sub>12</sub> b<sub>14</sub> y<sub>1</sub> y<sub>3</sub> y<sub>4</sub> y<sub>5</sub> y<sub>6</sub> y<sub>7</sub> y<sub>8</sub> y<sub>9</sub> y<sub>11</sub> y<sub>12</sub> y<sub>13</sub> y<sub>14</sub> y<sub>15</sub> y<sub>16</sub>

Raw file 20171215\_MaS\_33SR\_LMH\_phospho\_06 Scan 13755 Method FTMS; HCD Score 46.41 m/z 773.03 Gene names RSBN1L

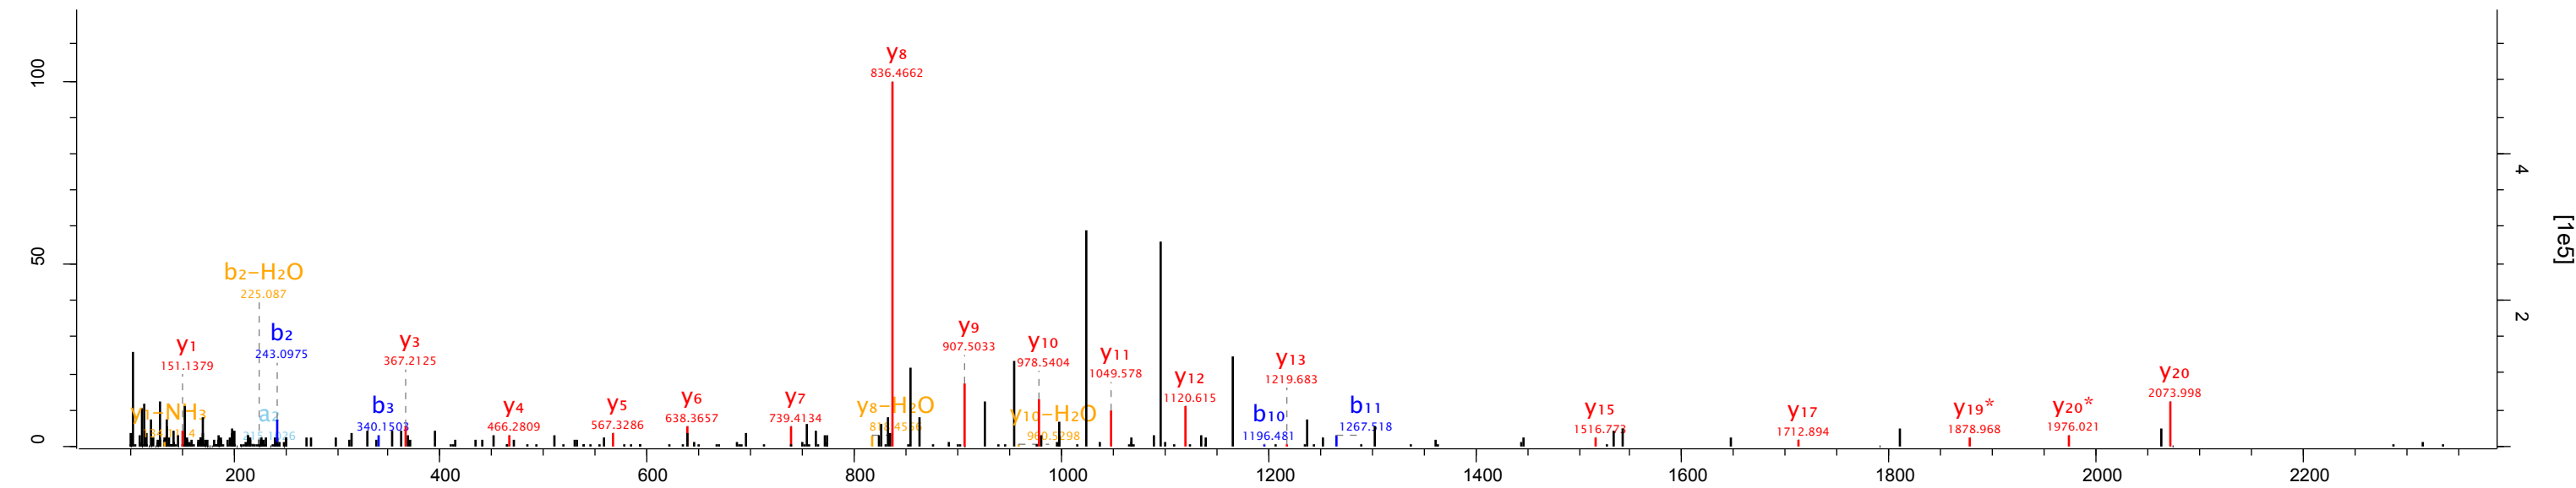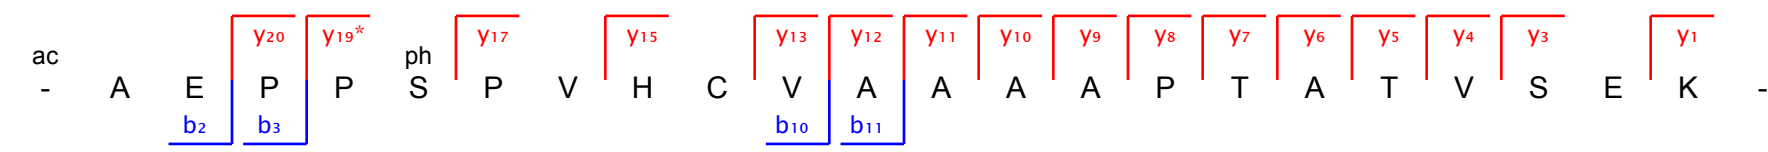



Raw file 20171215\_MaS\_33SR\_LMH\_phospho\_06 Scan 13865 Method FTMS; HCD Score 54.07 m/z 683.35 Gene names AFF4

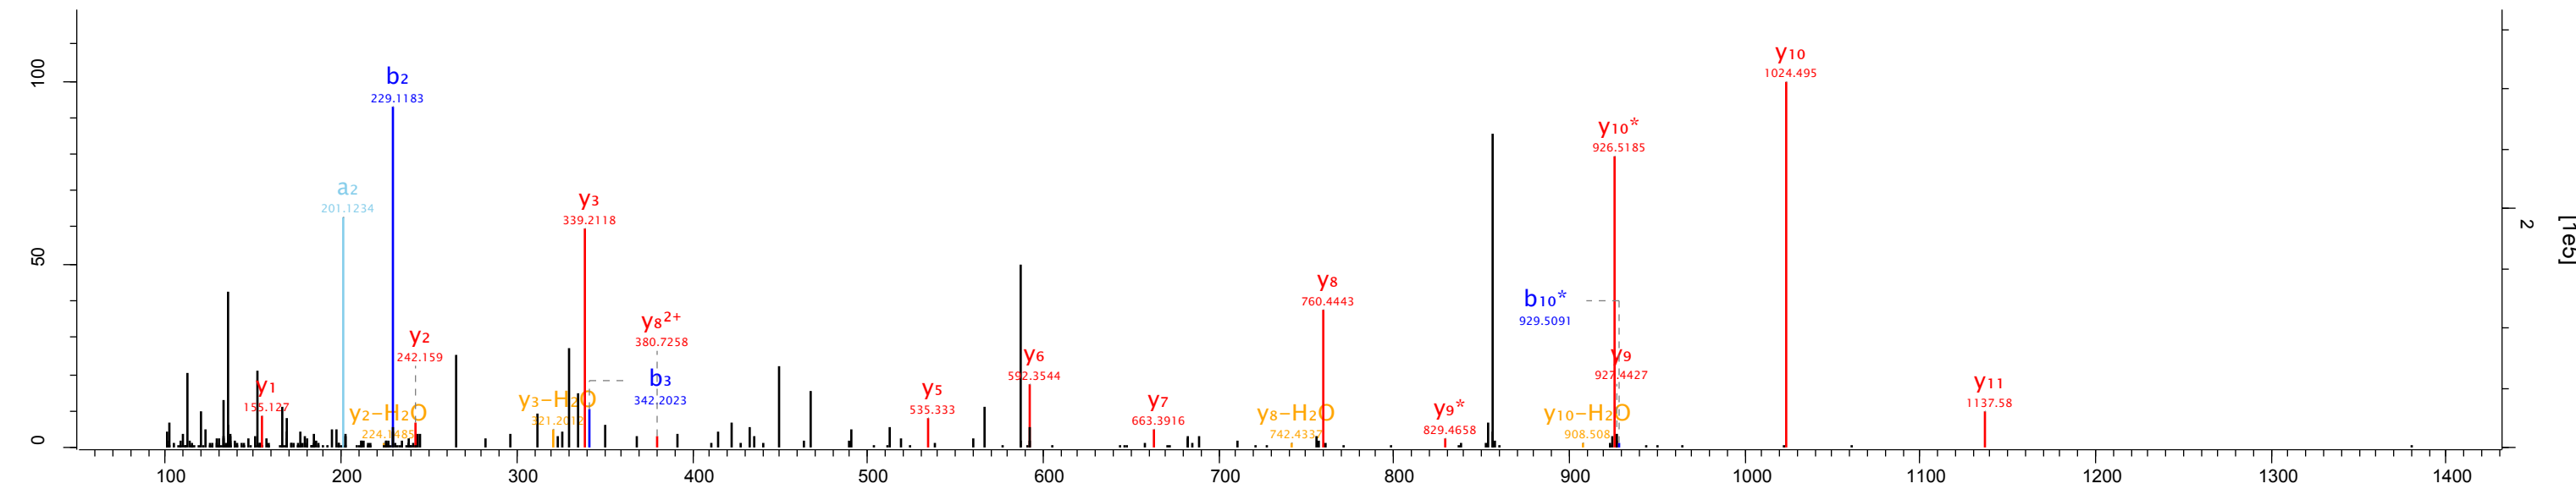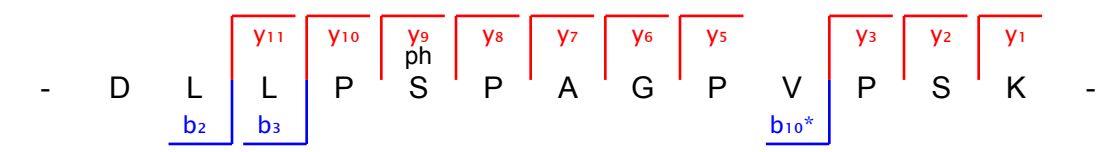

Raw file 20171215\_MaS\_33SR\_LMH\_phospho\_06 Scan 14065 Method FTMS; HCD Score 104.26 m/z 757.32 Gene names OTUD4

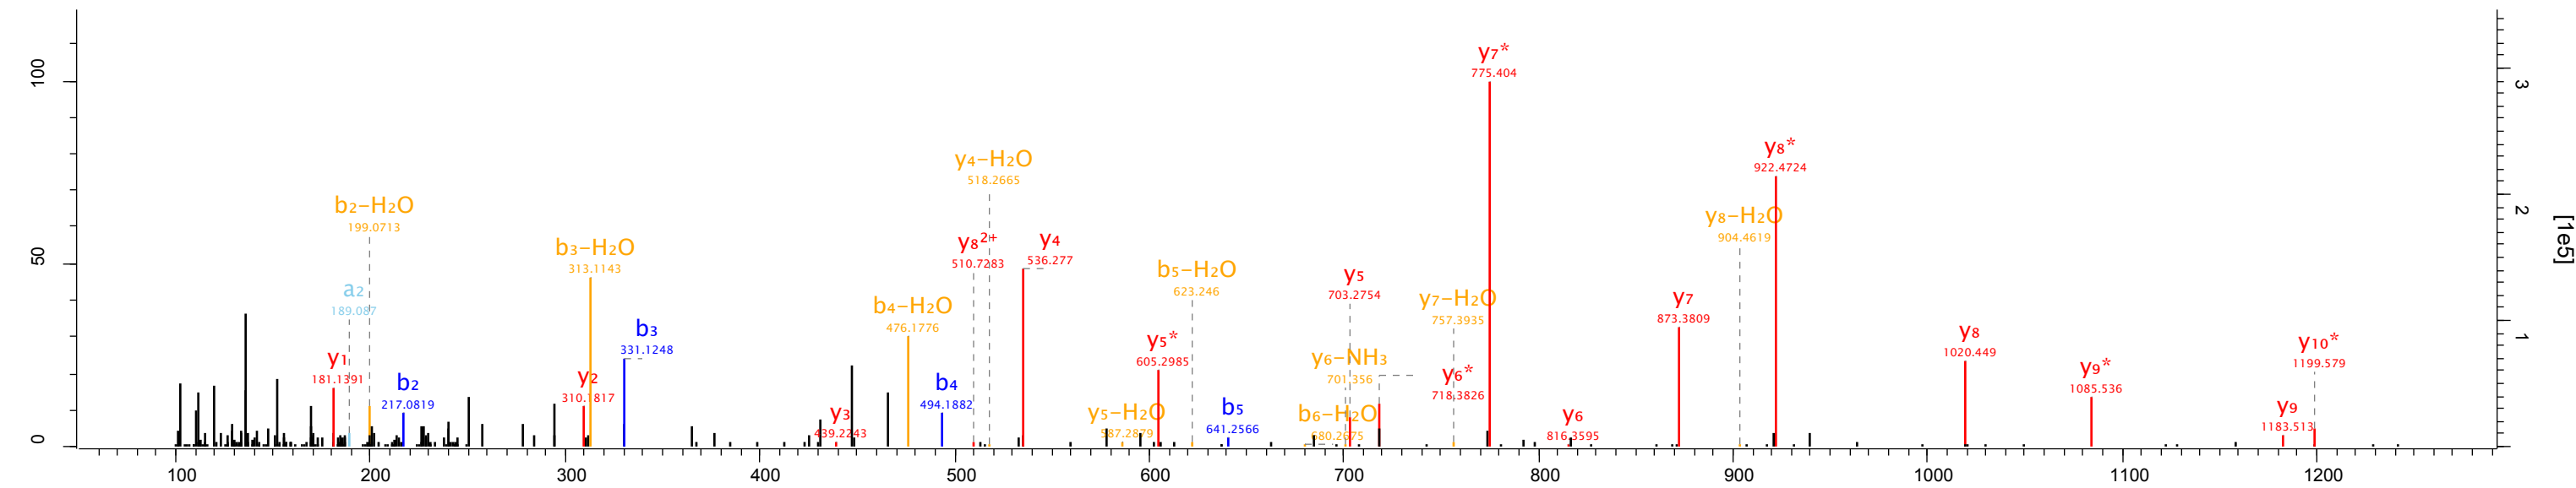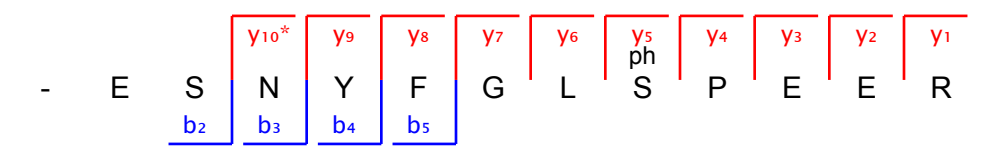

Raw file 20171215\_MaS\_33SR\_LMH\_phospho\_06 Scan 14105 Method FTMS; HCD Score 288.61 m/z 1303.07 Gene names GTF3C4

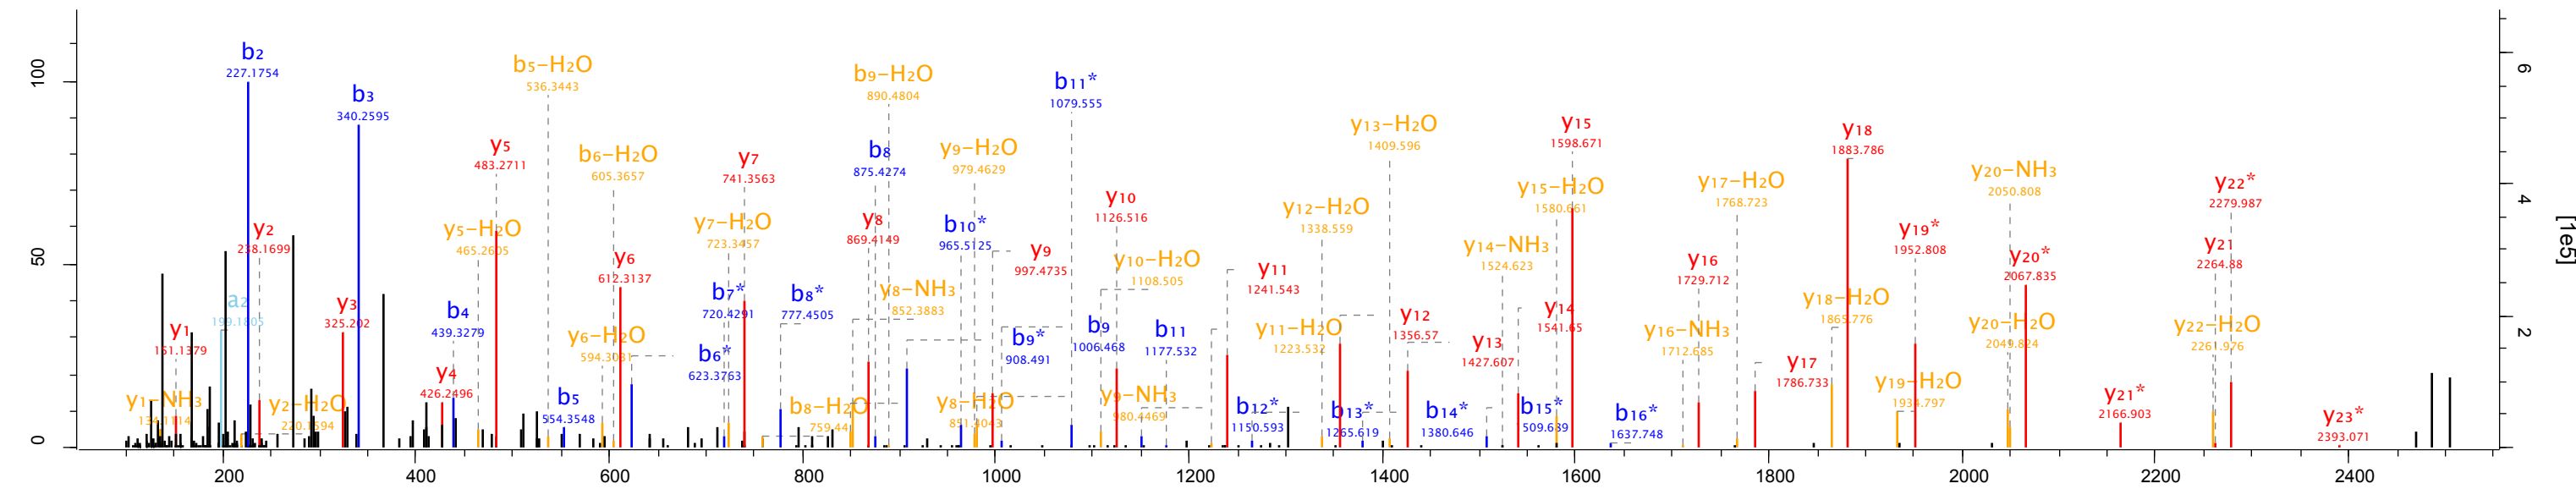

y23\*
y22\*
y21
y20\*
y19\*
y18
y17
y16
y15
y14
y13
y12
y11
y10
y9
y8
y7
y6
y5
y4
y3
y2
y1

L
L
V
D
ph
S
P
G
M
G
N
A
D
D
E
Q
Q
E
E
G
T
S
S
K

b2
b3
b4
b5
b6\*
b7\*
b8
b9
b10\*
b11
b12\*
b13\*
b14\*
b15\*
b16\*

Raw file 20171215\_MaS\_33SR\_LMH\_phospho\_06 Scan 14775 Method FTMS; HCD Score 91.24 m/z 1200.91 Gene names ATXN2L

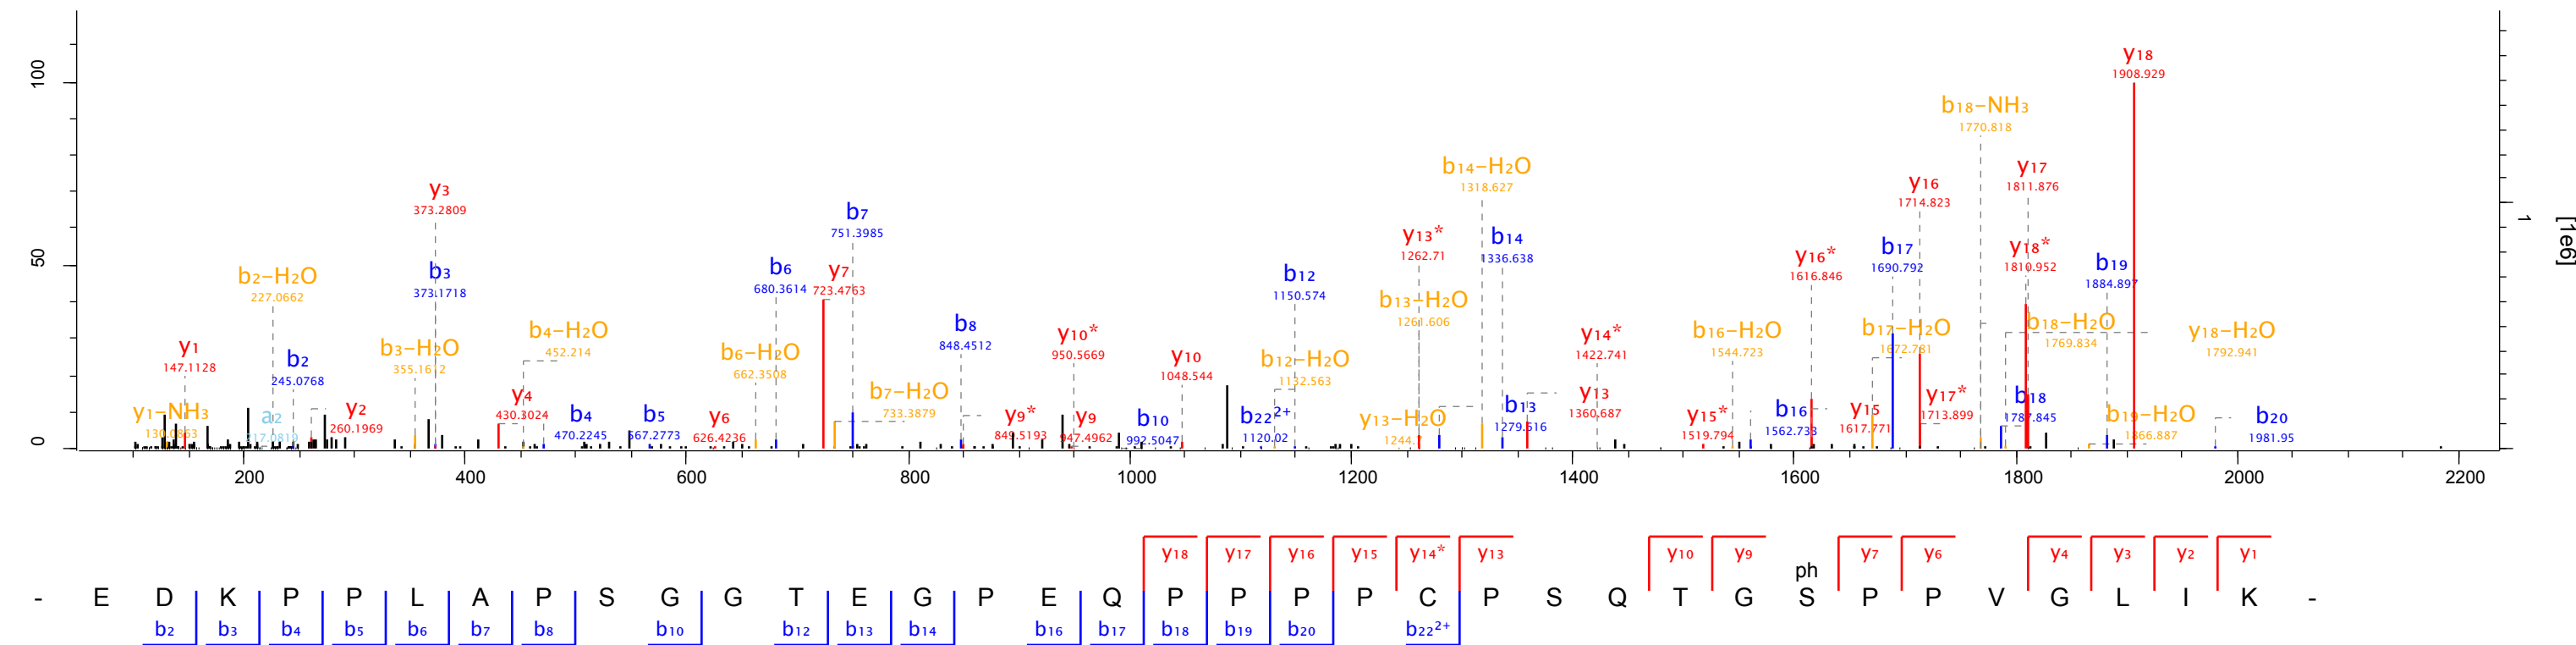

Raw file: 20171215\_MaS\_33SR\_LMH\_phospho\_06  
 Scan: 15075 Method: FTMS; HCD Score: 41 m/z: 759.29 Gene names: KMT2A

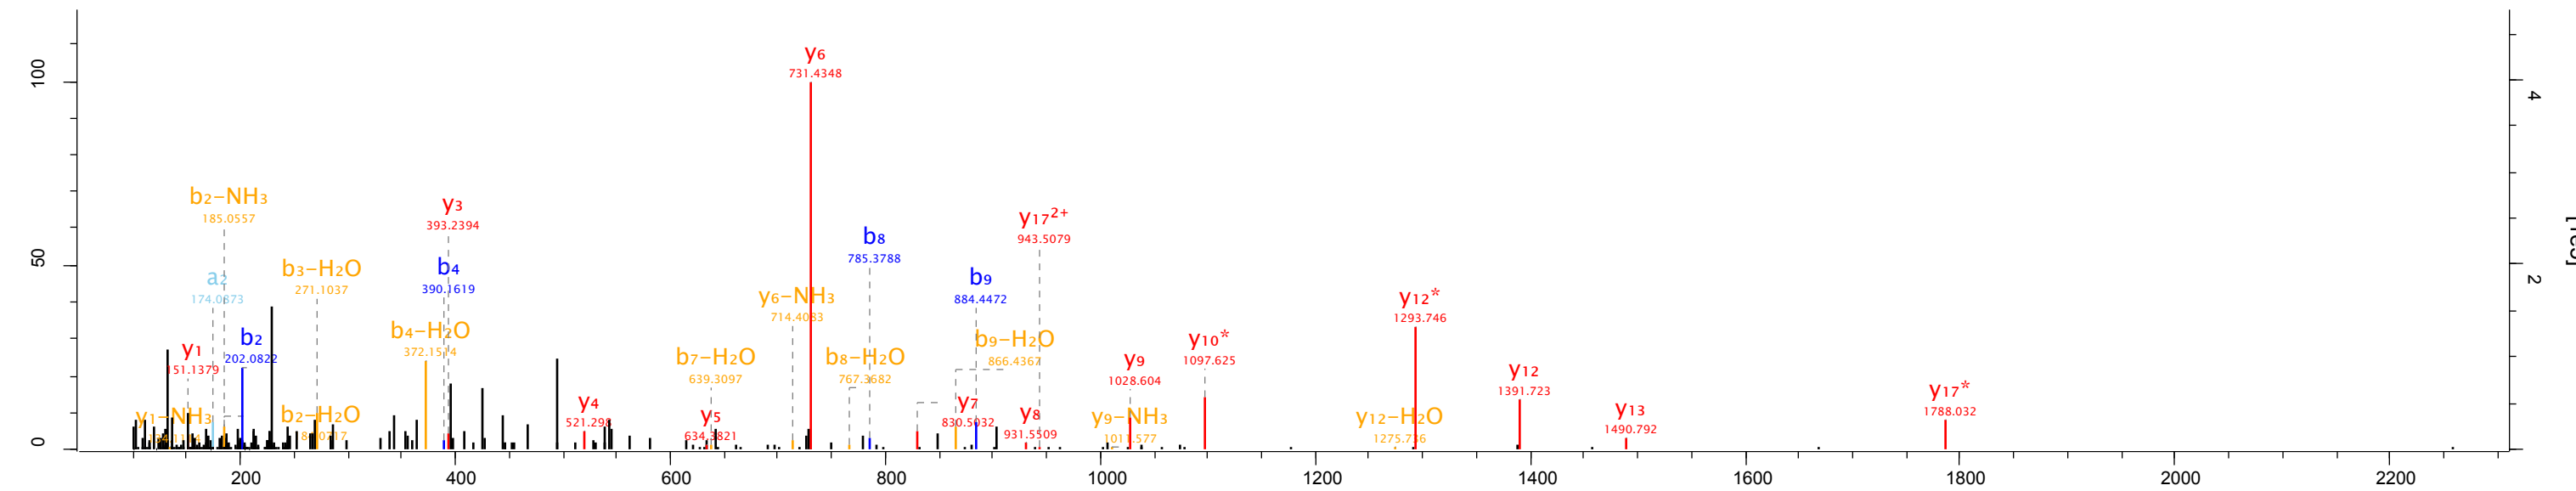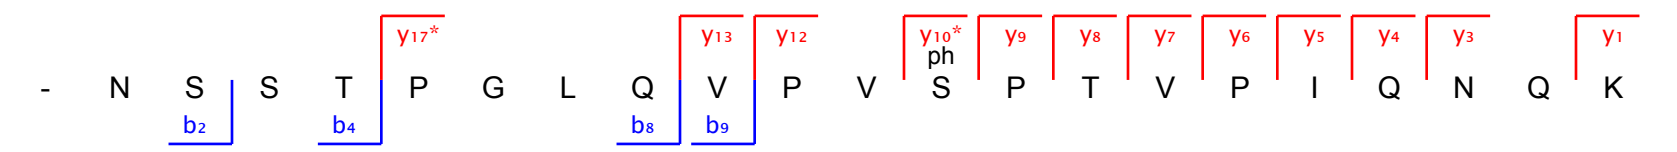

Raw file: 20171215\_MaS\_33SR\_LMH\_phospho\_06  
 Scan: 15295 Method: FTMS; HCD Score: 111.97 m/z: 1052.96 Gene names: NOP56

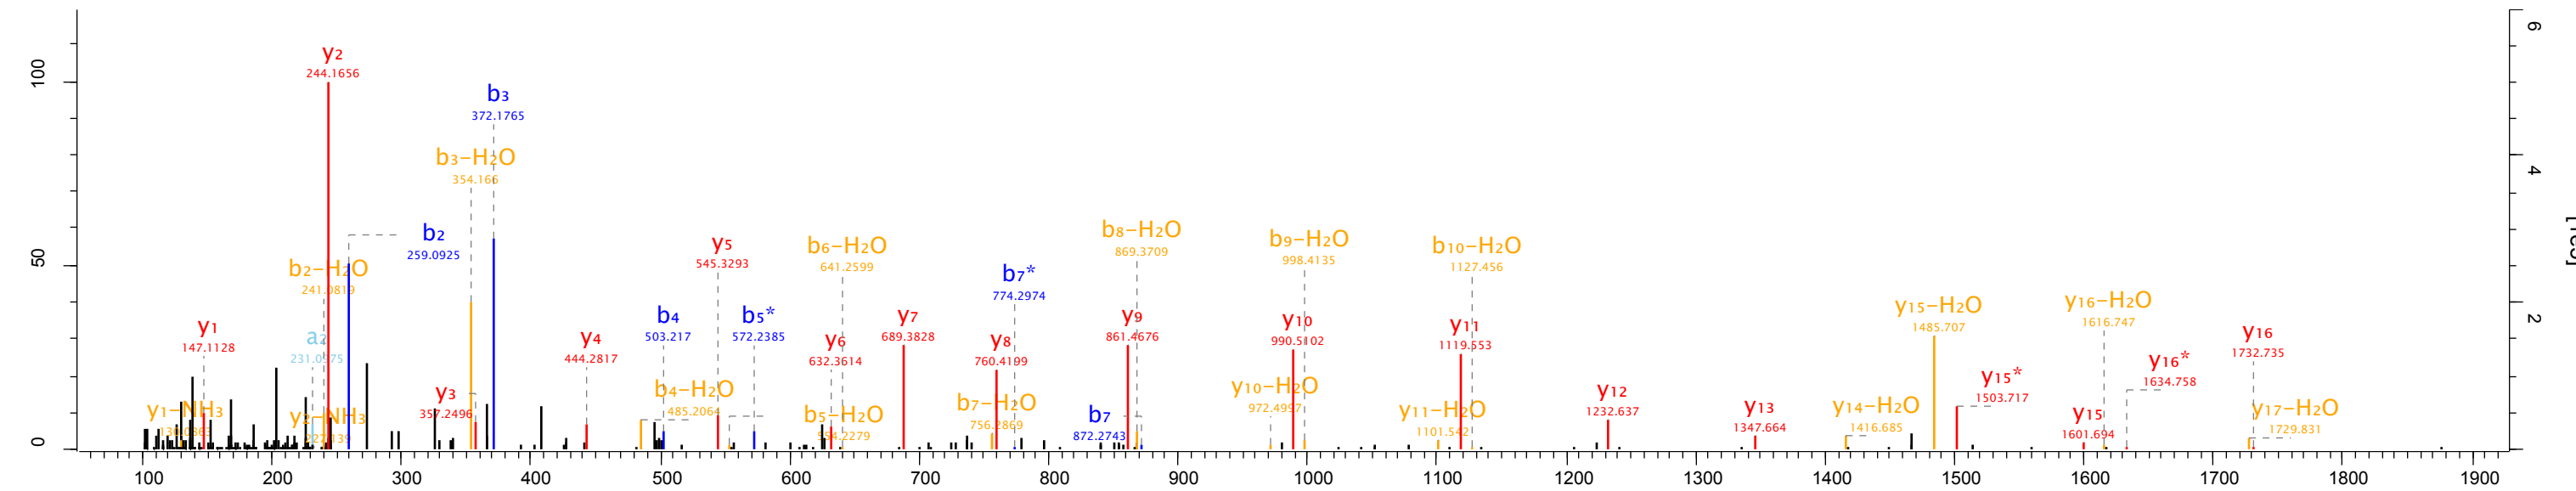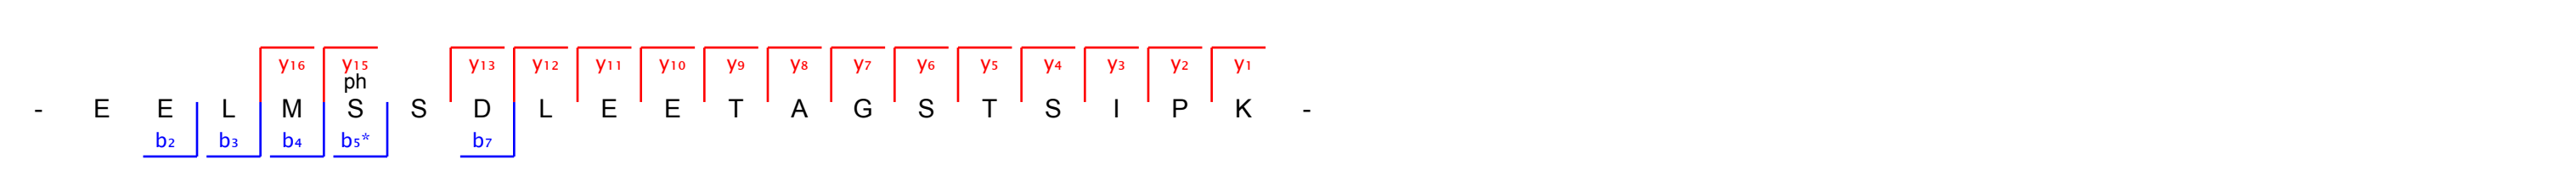

Raw file 20171215\_MaS\_33SR\_LMH\_phospho\_06 Scan 15325 Method FTMS; HCD Score 82.58 m/z 645.79 Gene names ABLIM1

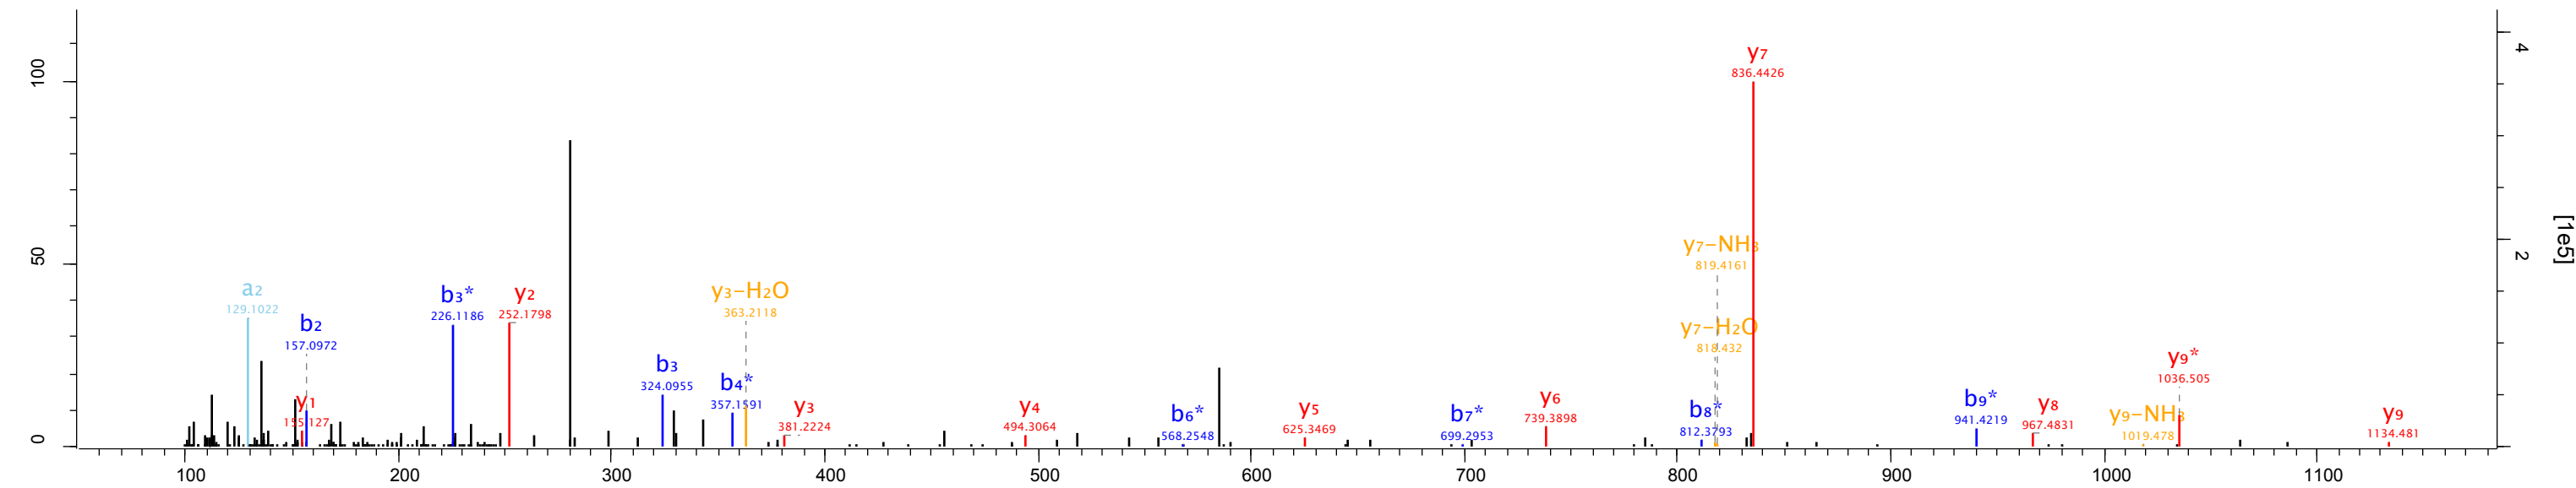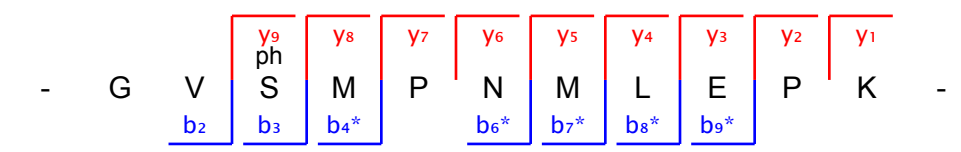

Raw file 20171215\_MaS\_33SR\_LMH\_phospho\_06 Scan 15355 Method FTMS; HCD Score 99.11 m/z 1141.96

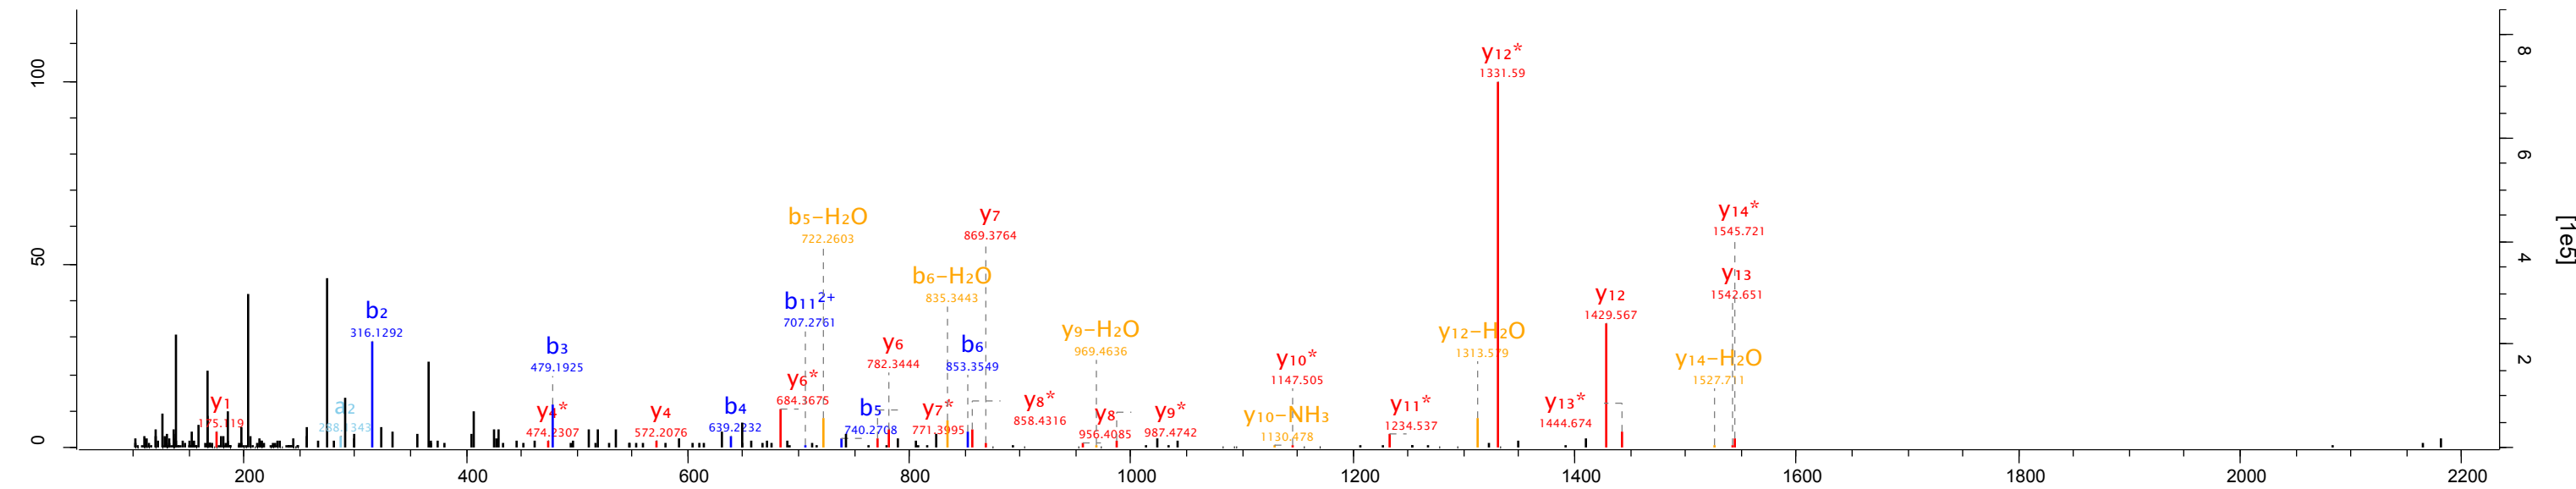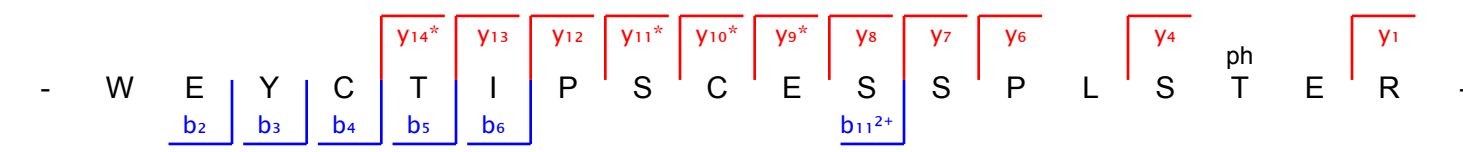



Raw file 20171215\_MaS\_33SR\_LMH\_phospho\_06 Scan 15615 Method FTMS; HCD Score 135.91 m/z 974.95 Gene names ATXN2L

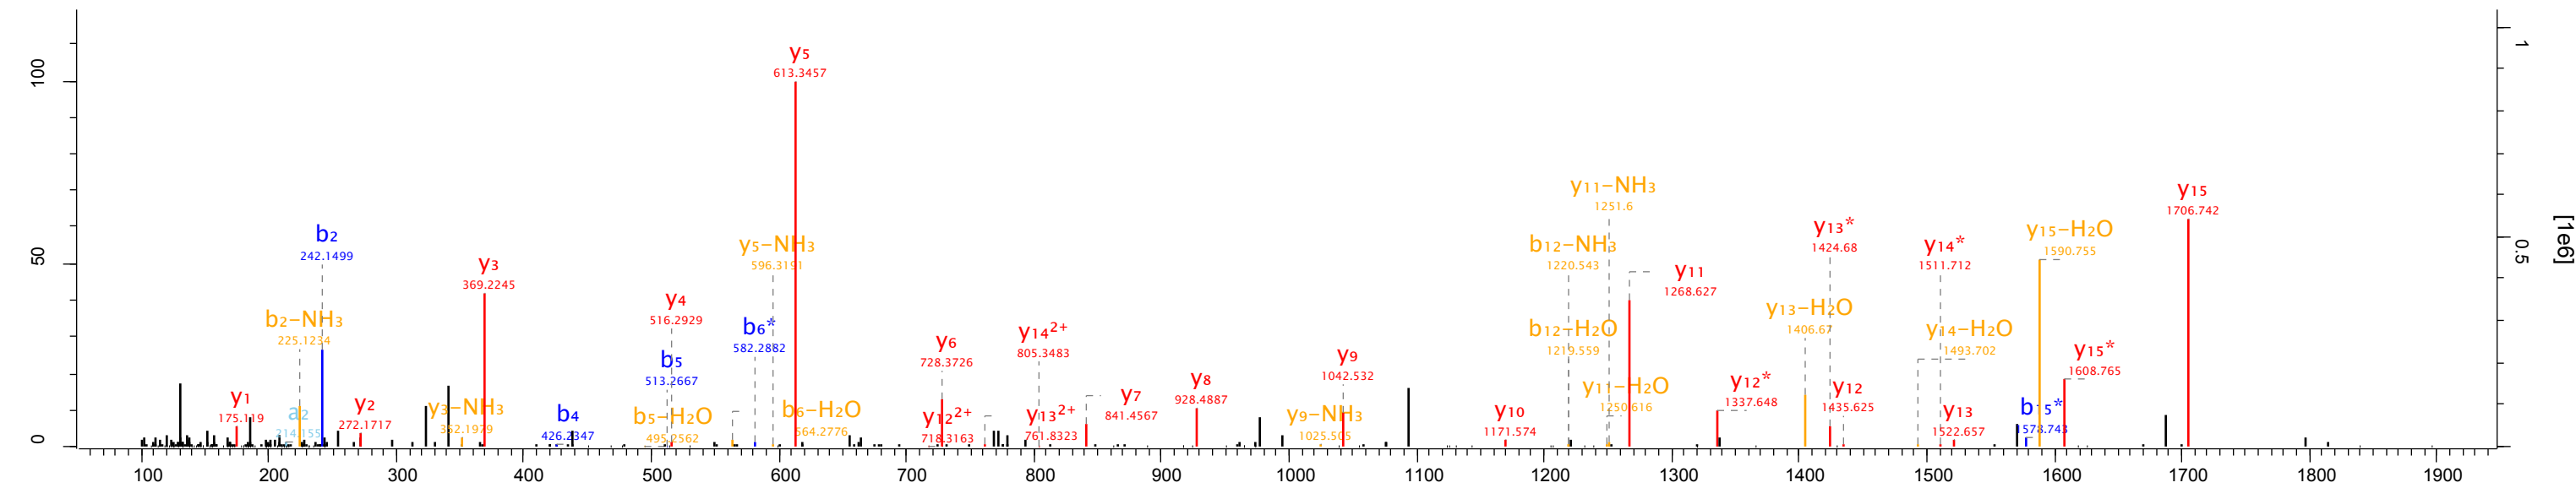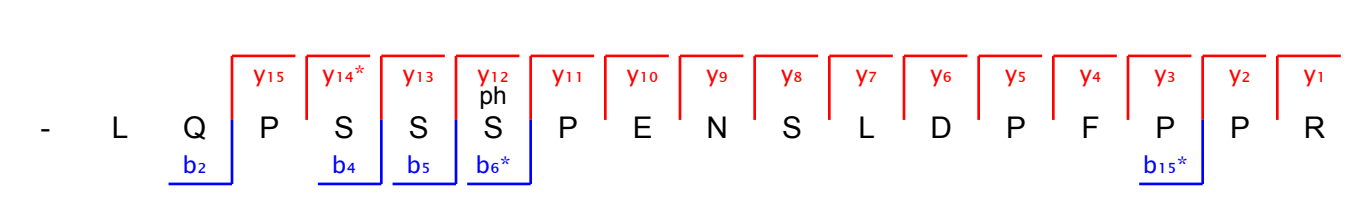

Raw file 20171215\_MaS\_33SR\_LMH\_phospho\_06 Scan 16255 Method FTMS; HCD Score 64 m/z 1198.05 Gene names DLGAP4

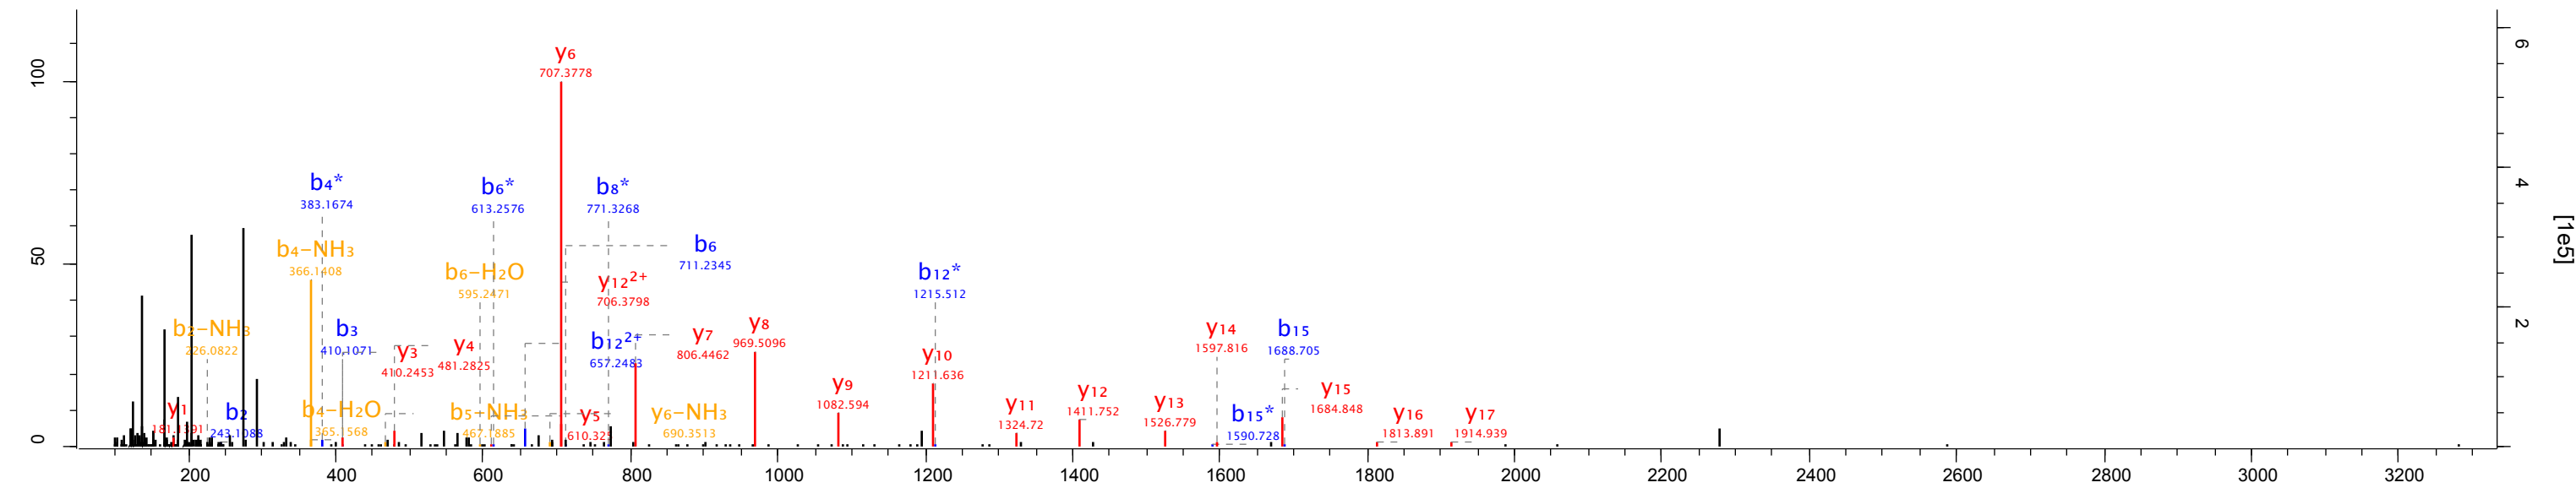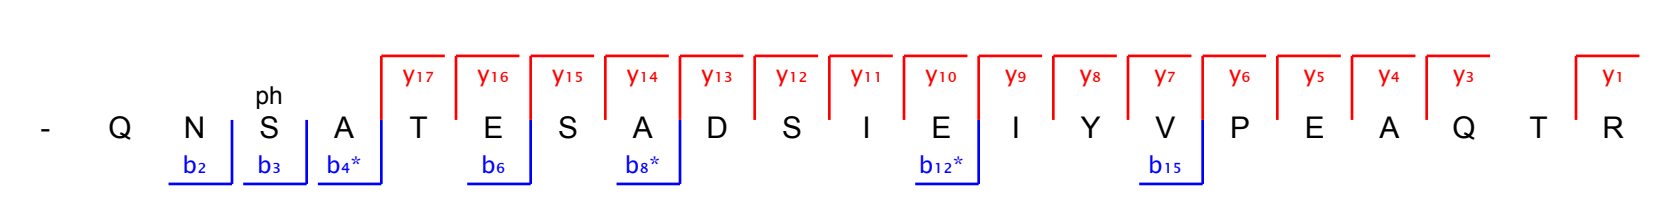

Raw file 20171215\_MaS\_33SR\_LMH\_phospho\_06 Scan 17005 Method FTMS; HCD Score 196.01 m/z 817.4 Gene names SYNRG

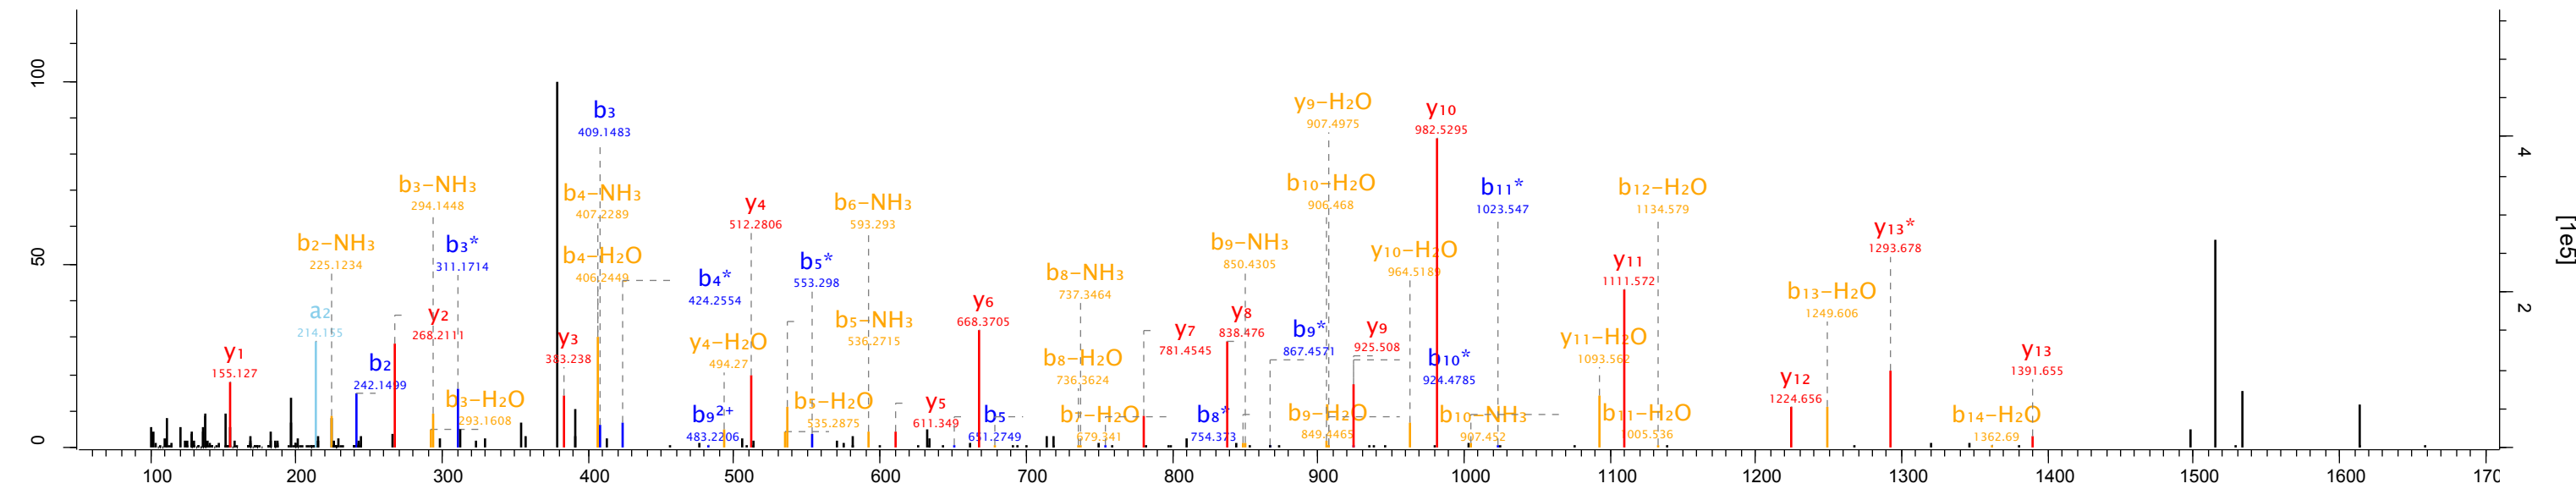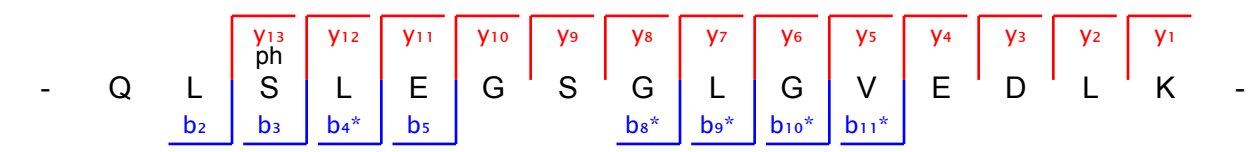

Raw file 20171215\_MaS\_33SR\_LMH\_phospho\_06 Scan 2285 Method FTMS; HCD Score 64.45 m/z 547.25 Gene names POGZ

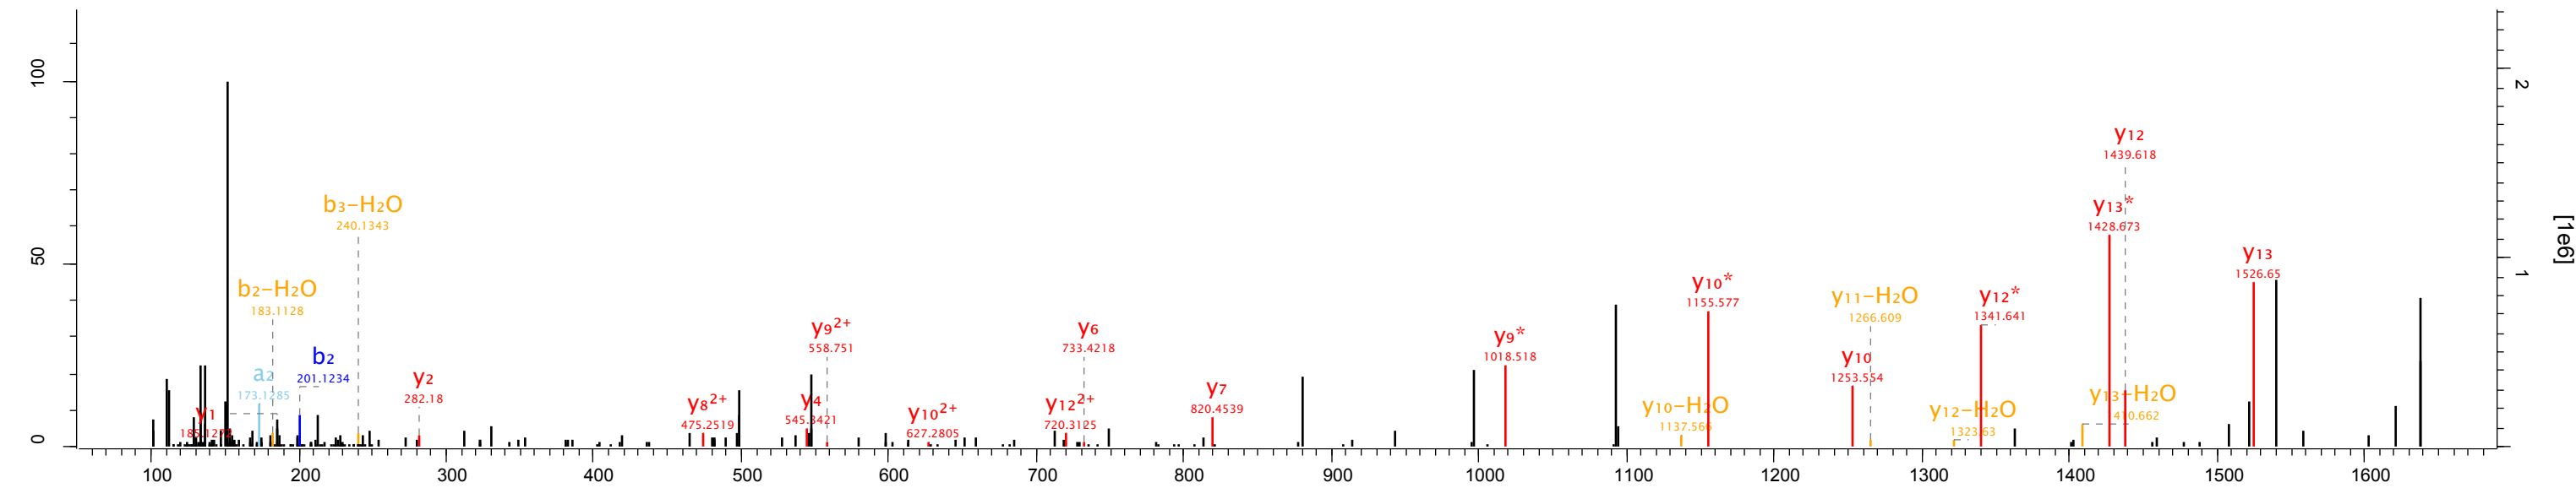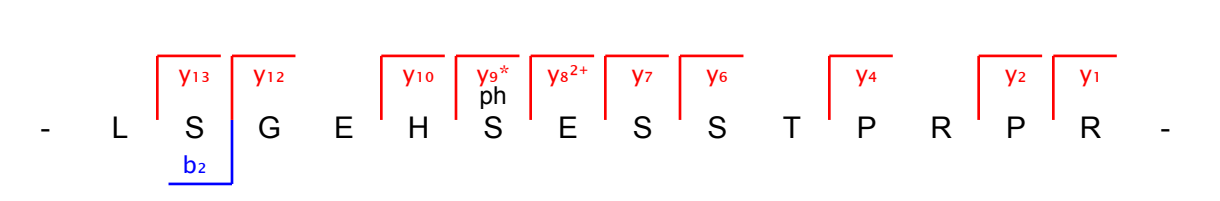

Raw file 20171215\_MaS\_33SR\_LMH\_phospho\_06 Scan 2785 Method FTMS; HCD Score 58.51 m/z 451.22 Gene names AHCTF1

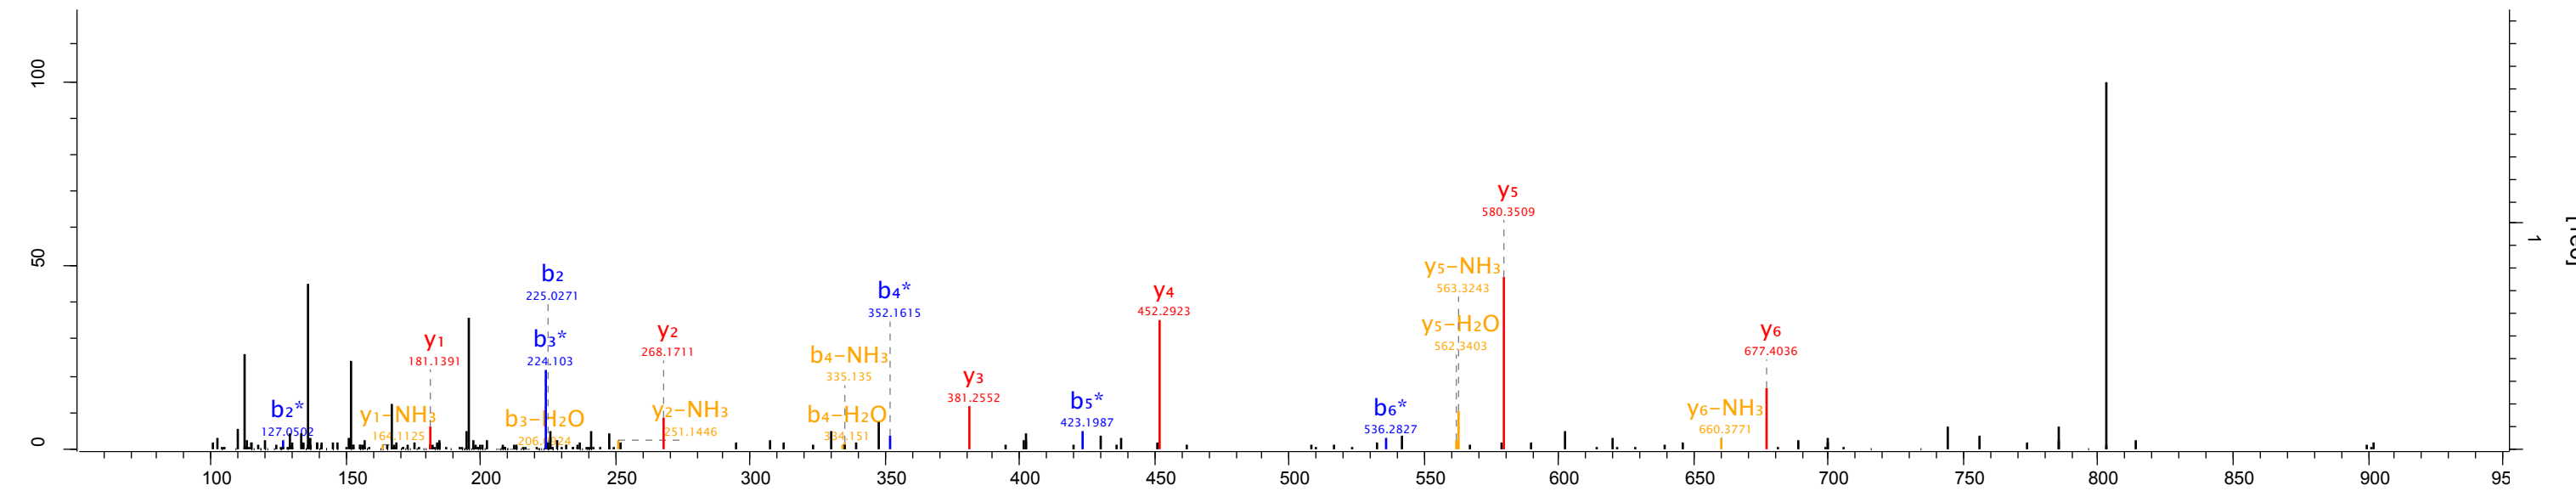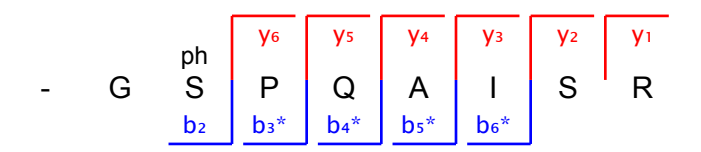

Raw file 20171215\_MaS\_33SR\_LMH\_phospho\_06 Scan 2815 Method FTMS; HCD Score 127.3 m/z 741.32 Gene names RBMX2

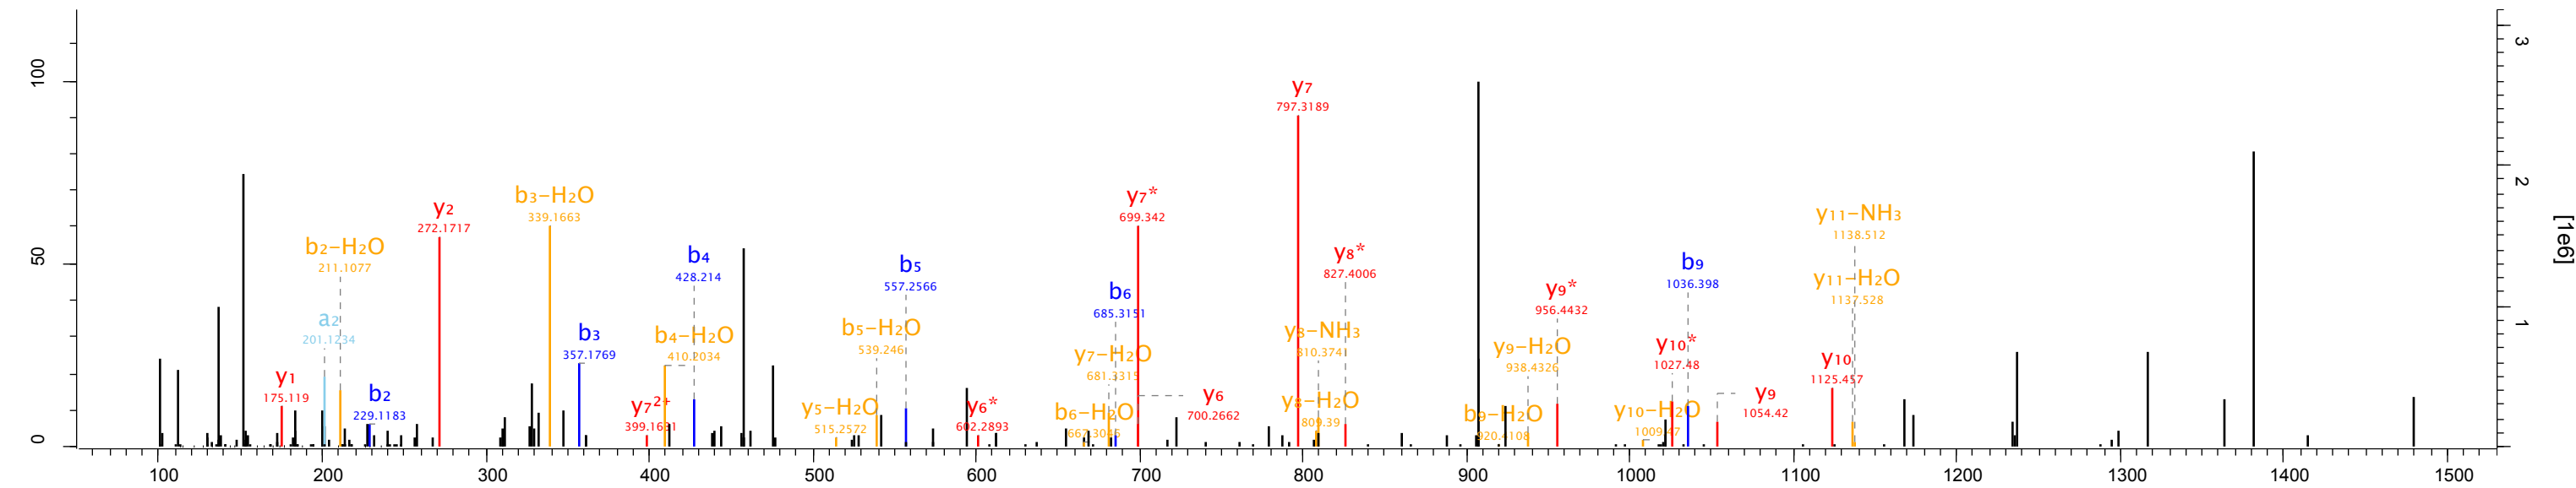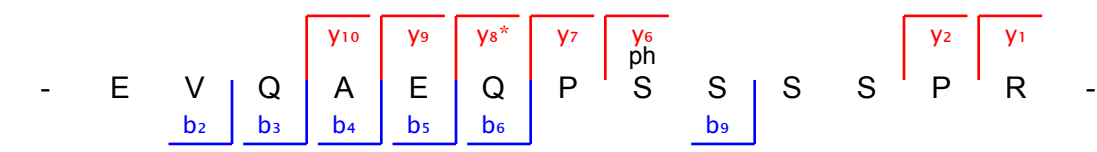

Raw file  
20171215\_MaS\_33SR\_LMH\_phospho\_06

Scan 2975 Method FTMS; HCD Score 144.17 m/z 655.33 Gene names SF3B1

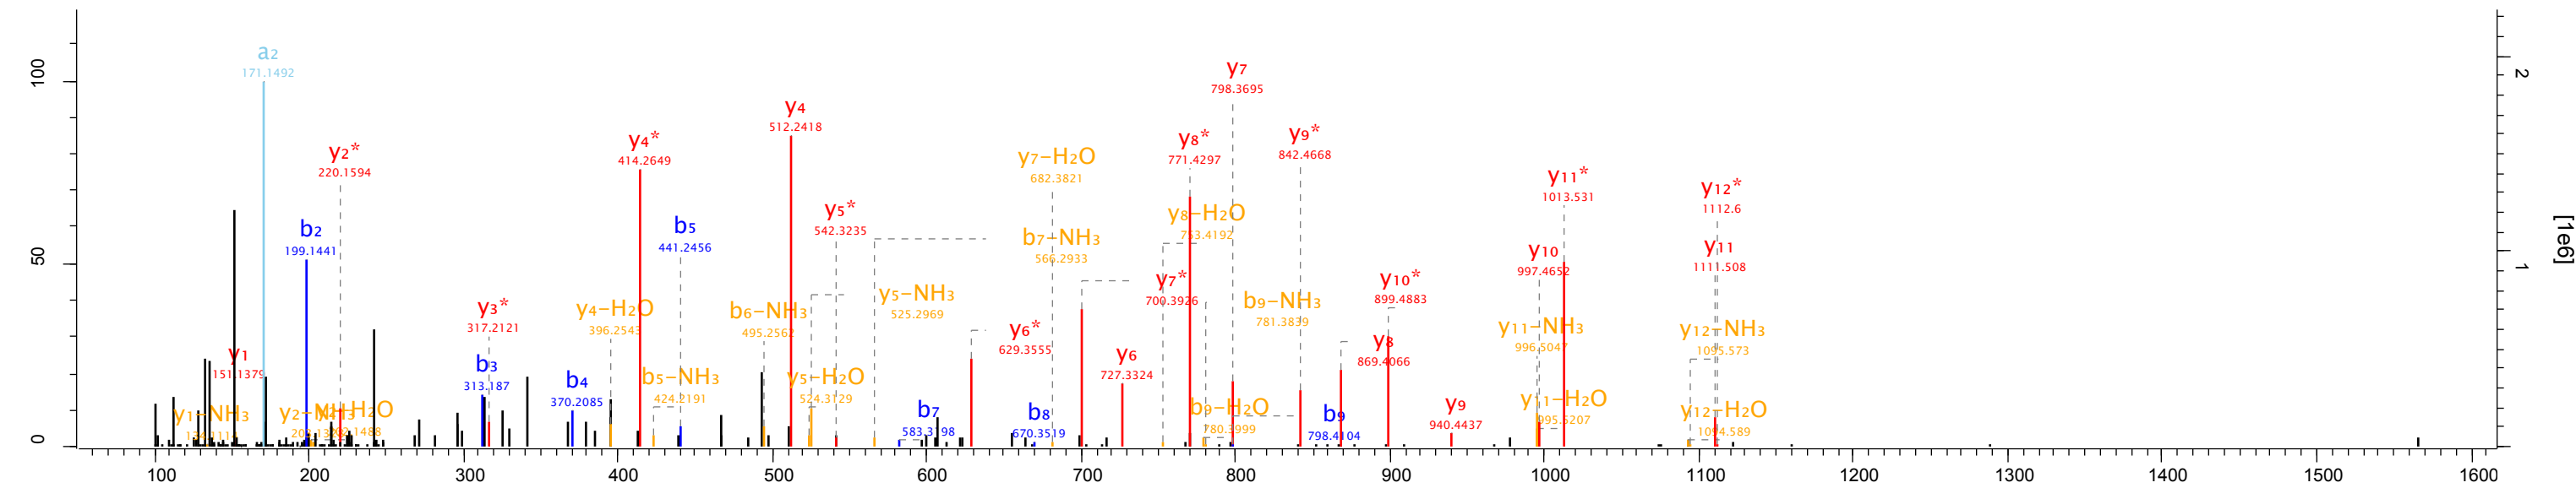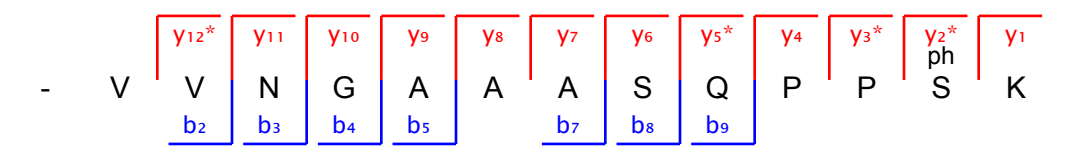

Raw file 20171215\_MaS\_33SR\_LMH\_phospho\_06 Scan 3345 Method FTMS; HCD Score 196.81 m/z 930.45 Gene names SEC61B

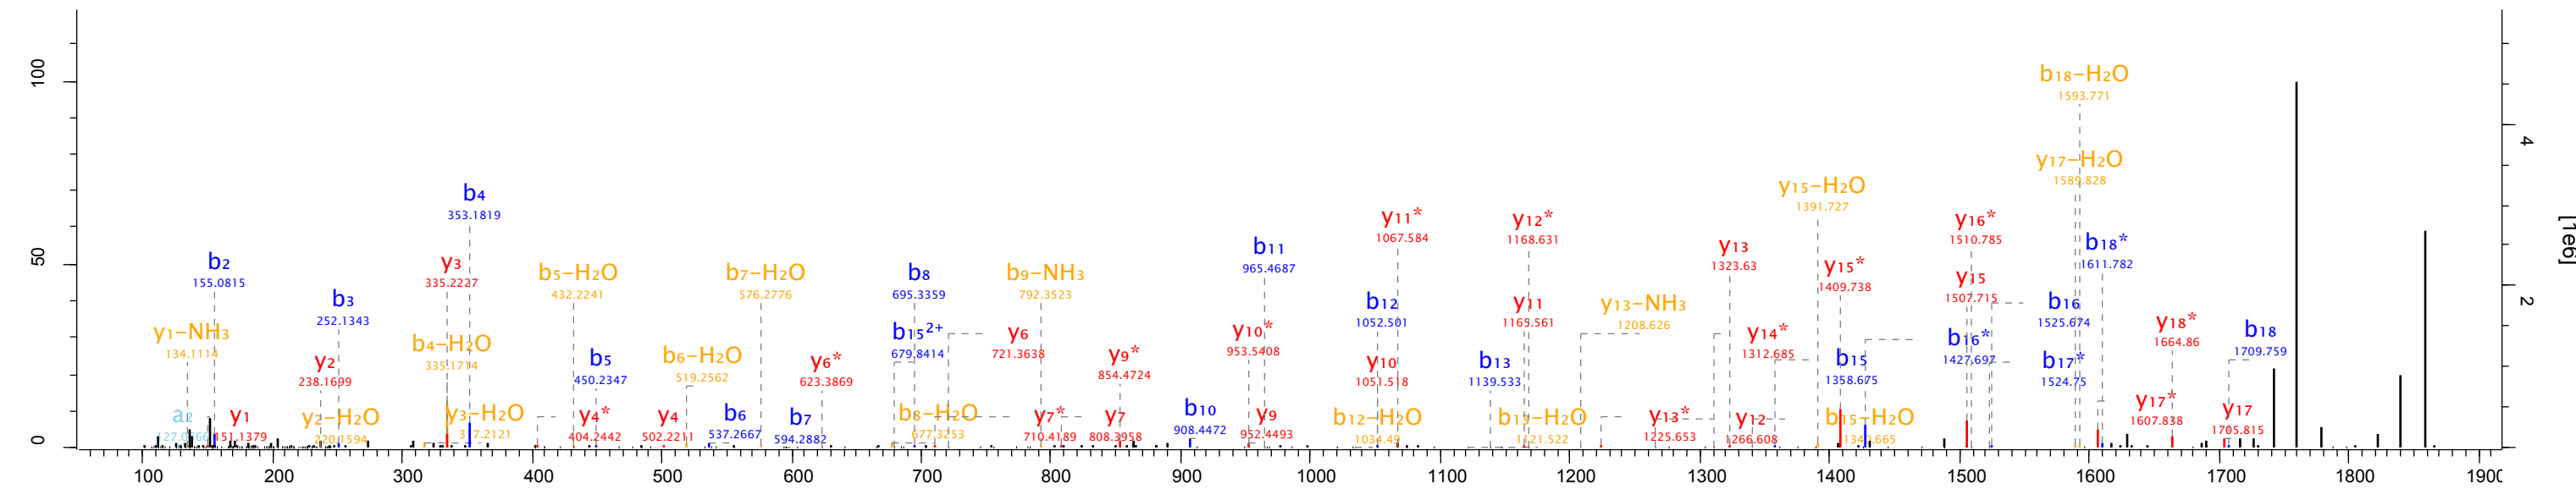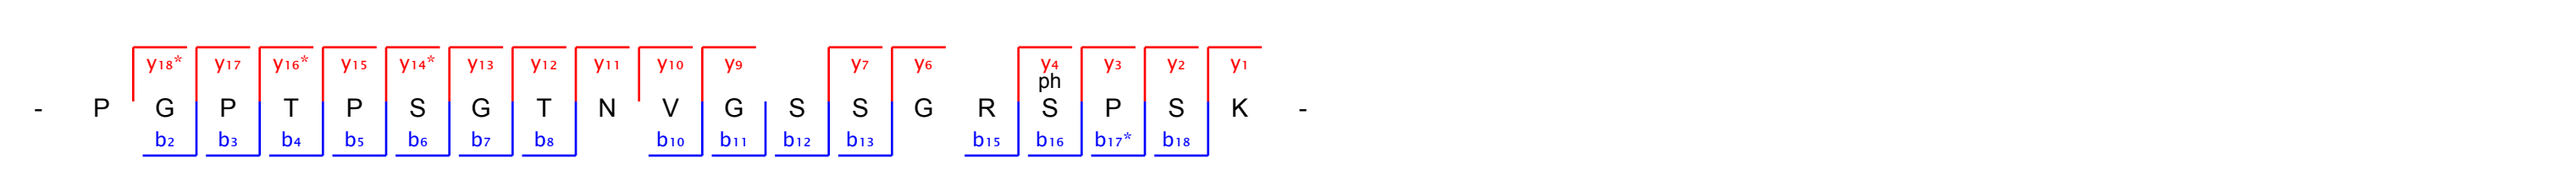



Raw file 20171215\_MaS\_33SR\_LMH\_phospho\_06 Scan 3745 Method FTMS; HCD Score 160.57 m/z 707.62 Gene names RBM17

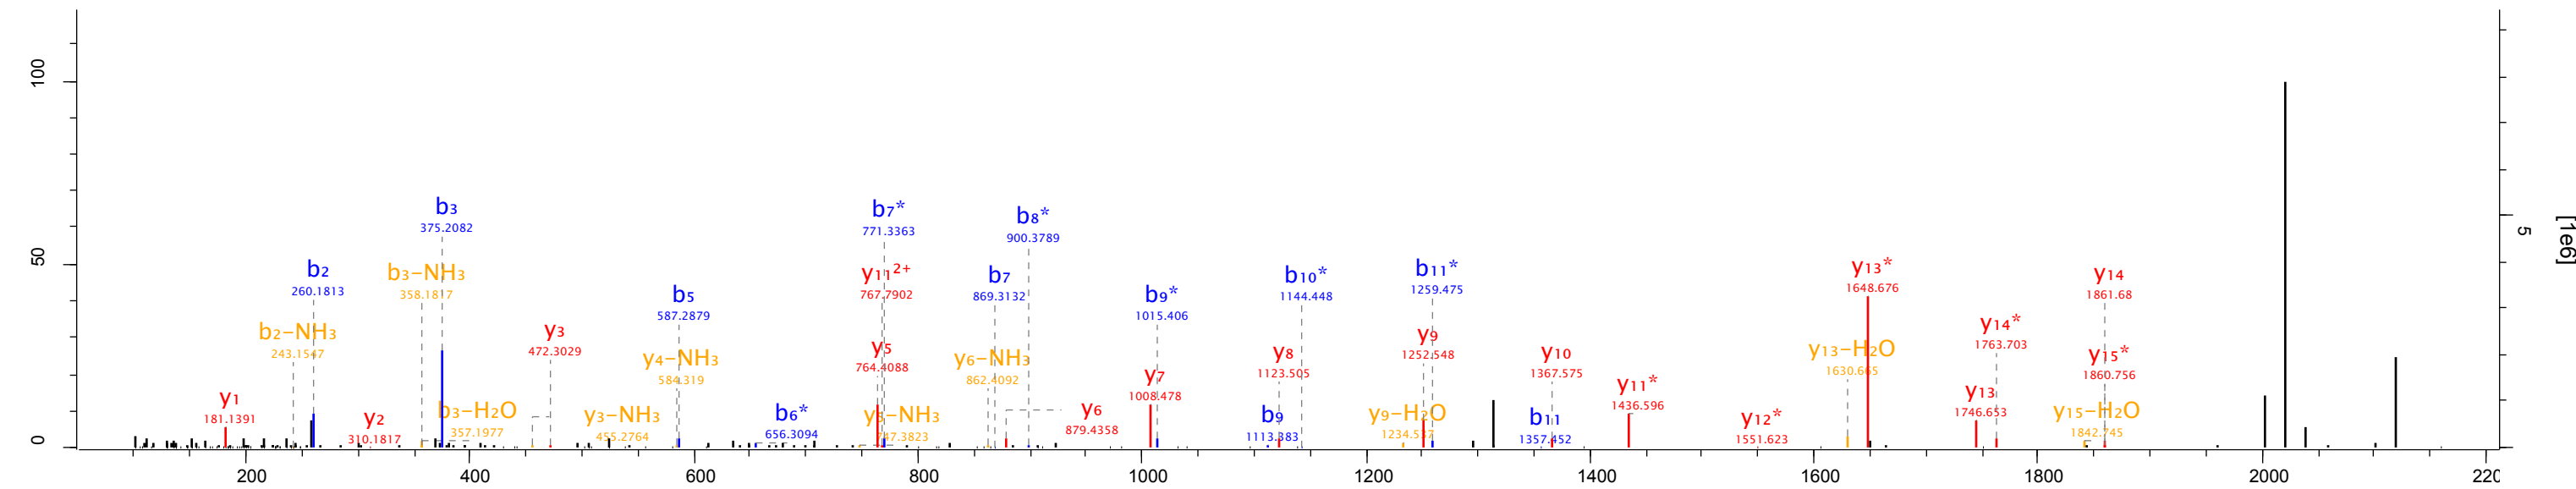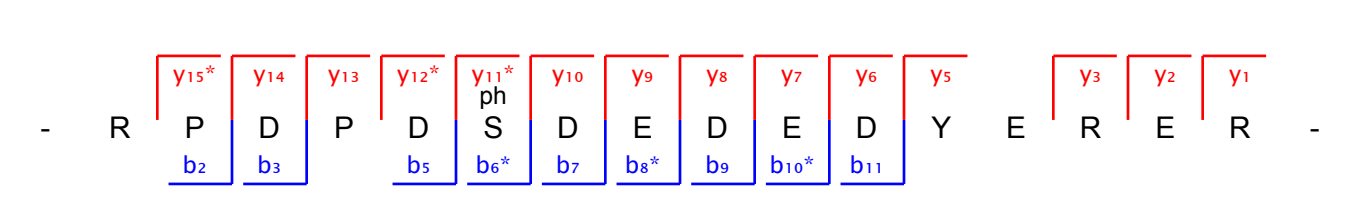

Raw file 20171215\_MaS\_33SR\_LMH\_phospho\_06 Scan 3805 Method FTMS; HCD Score 47.92 m/z 649.81 Gene names ATXN2L

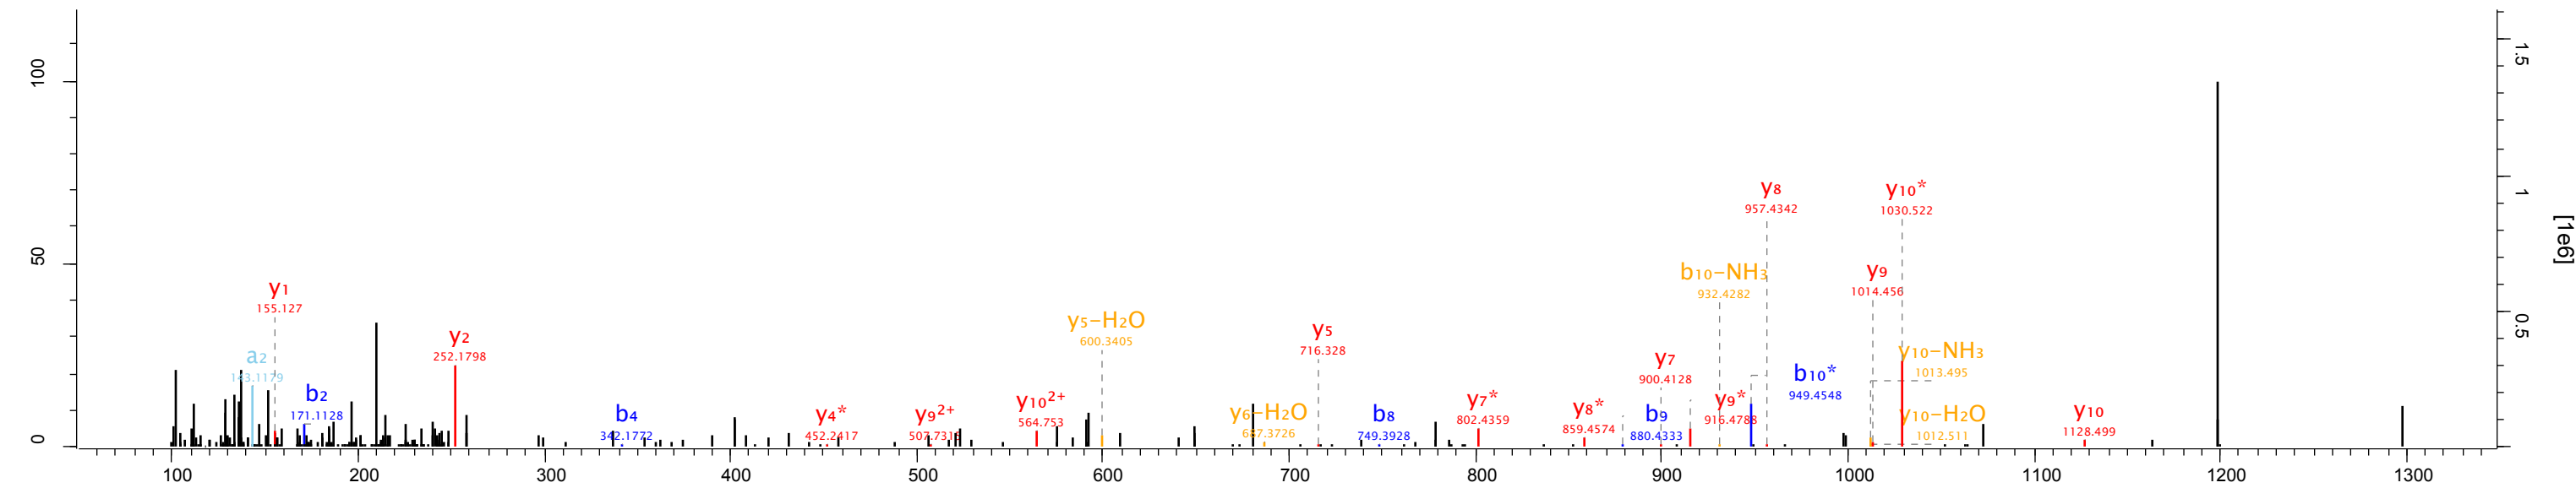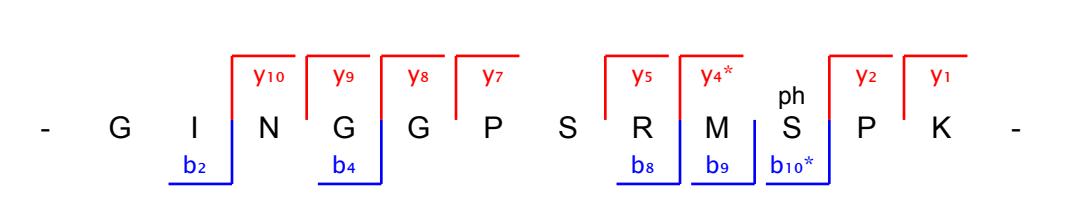

Raw file 20171215\_MaS\_33SR\_LMH\_phospho\_06 Scan 4545 Method FTMS; HCD Score 73.93 m/z 588.89 Gene names RBMX;RBMXL1

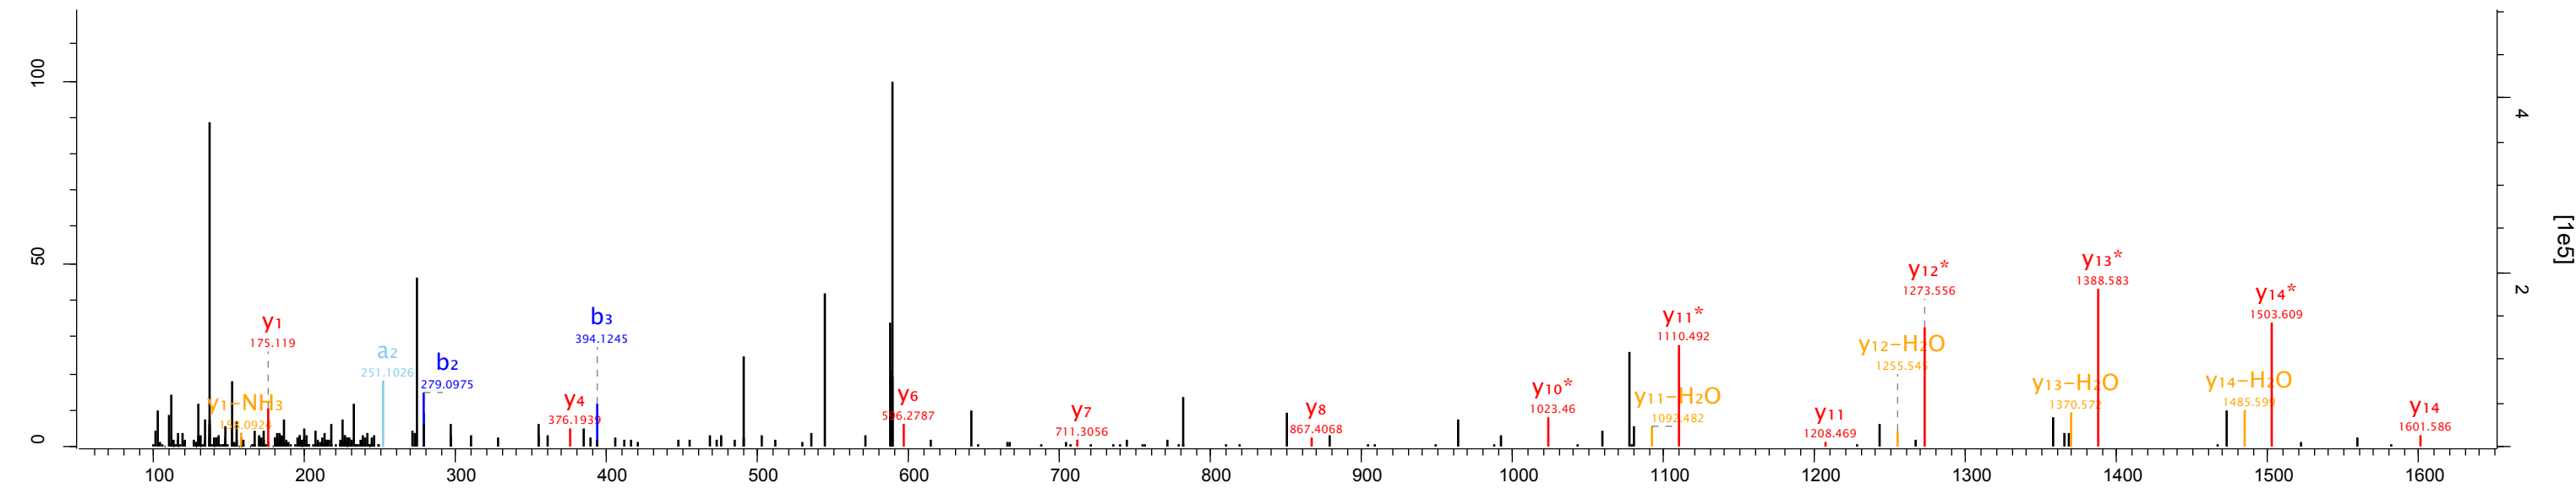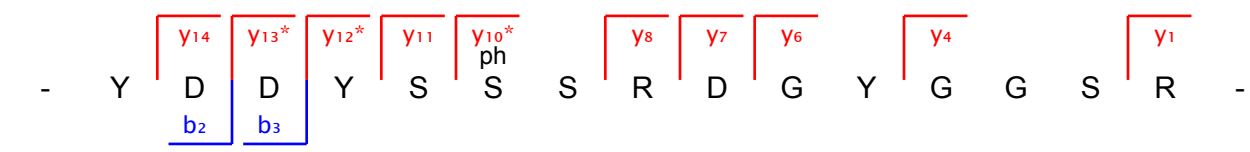

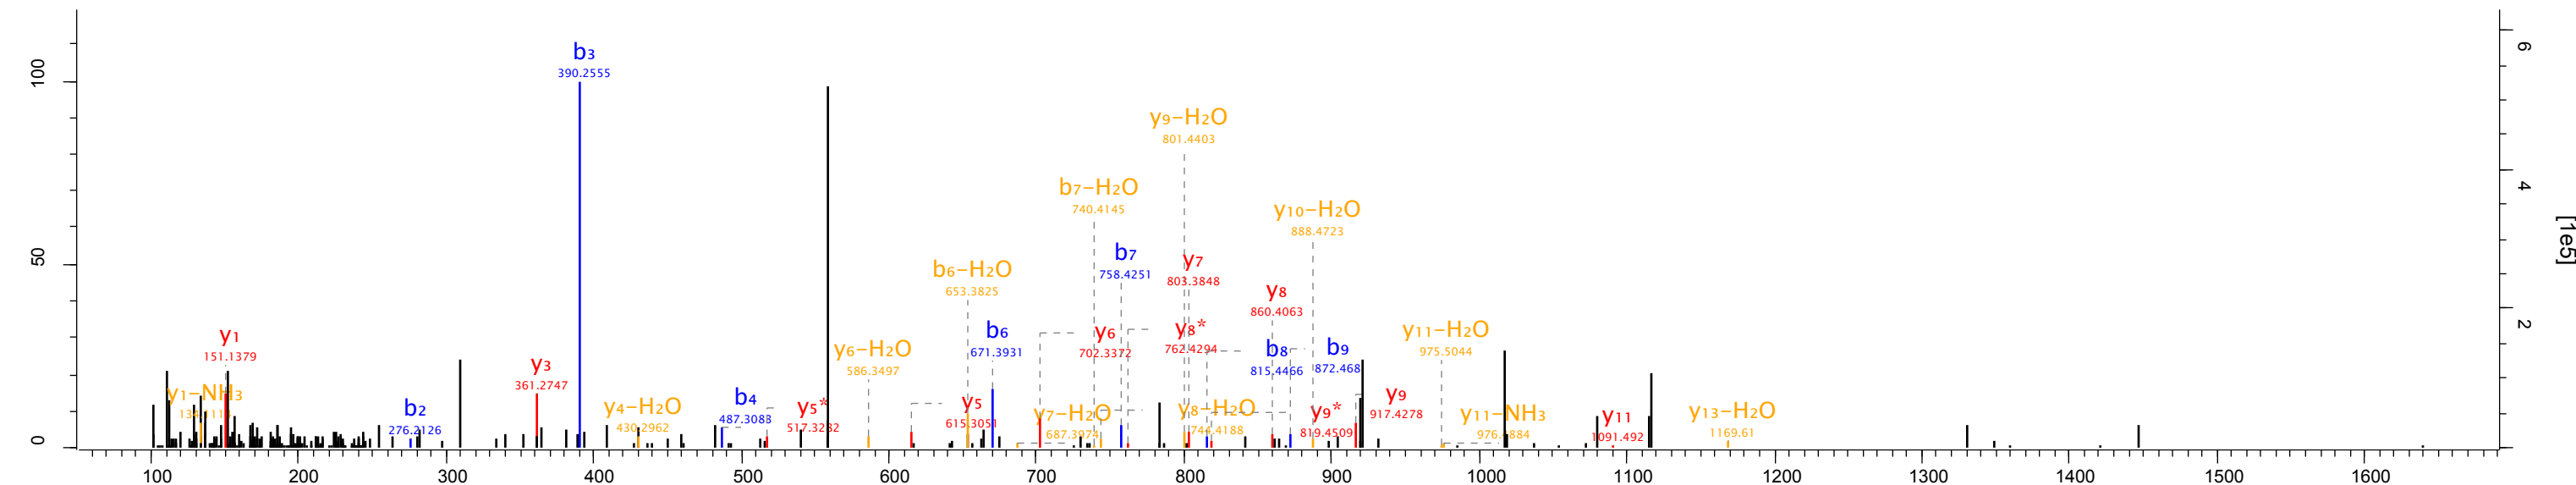

- R I N P P S S G G T S S S P I K -

b<sub>2</sub>
b<sub>3</sub>
b<sub>4</sub>
b<sub>6</sub>
b<sub>7</sub>
b<sub>8</sub>
b<sub>9</sub>
y<sub>11</sub>
y<sub>9</sub>
y<sub>8</sub>
y<sub>7</sub>
y<sub>6</sub>
y<sub>5</sub><sup>ph</sup>
y<sub>3</sub>
y<sub>1</sub>

Raw file 20171215\_MaS\_33SR\_LMH\_phospho\_06 Scan 5215 Method FTMS; HCD Score 193.27 m/z 766.39 Gene names HDGF

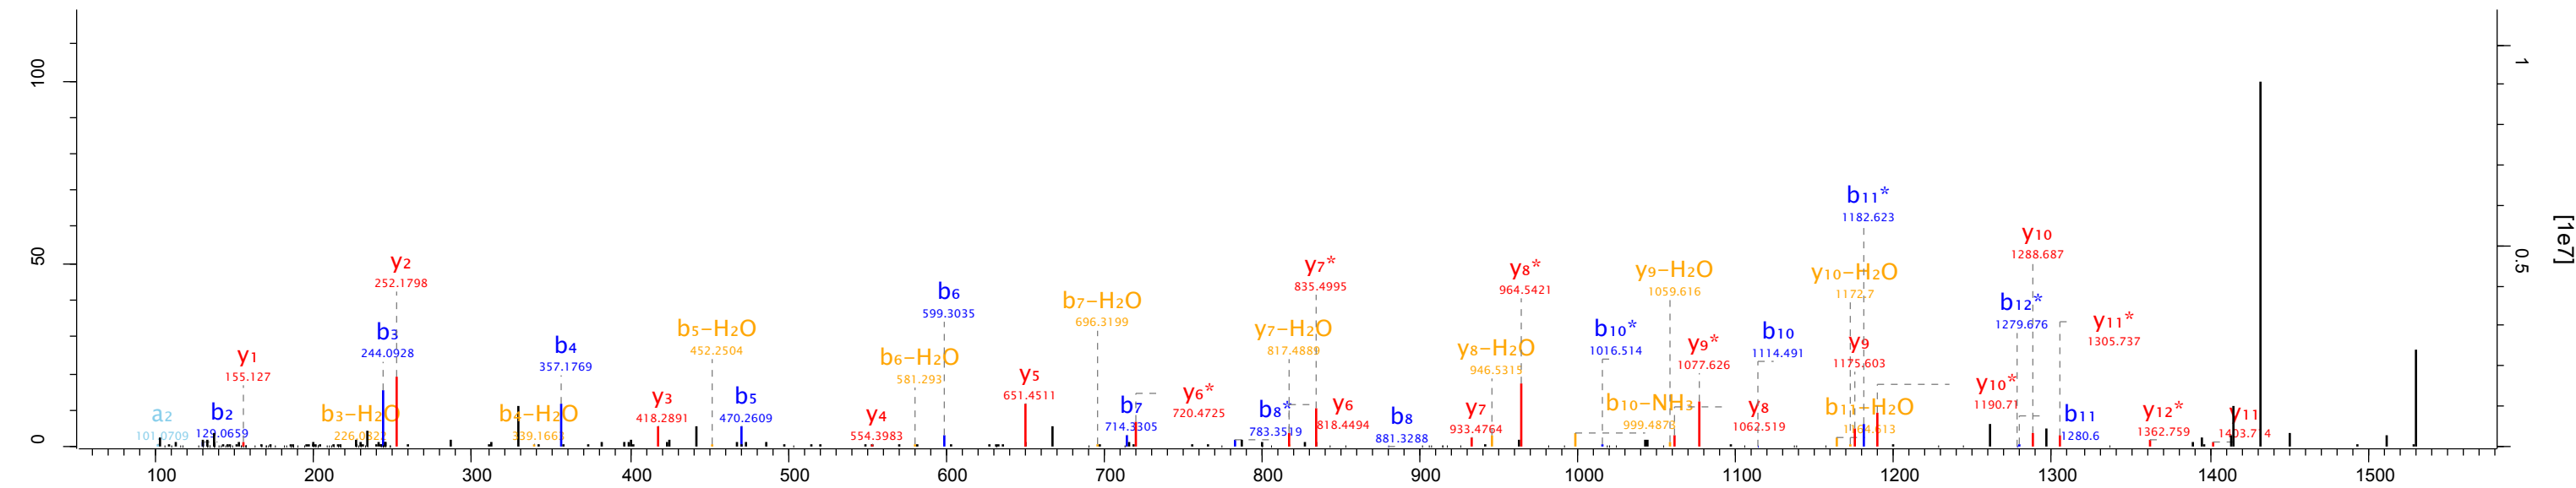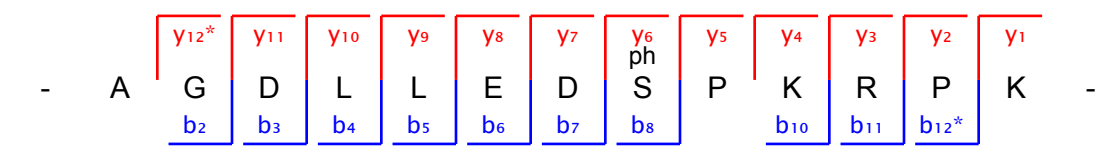

Raw file 20171215\_MaS\_33SR\_LMH\_phospho\_06 Scan 5245 Method FTMS; HCD Score 212.95 m/z 707.33 Gene names ZKSCAN1

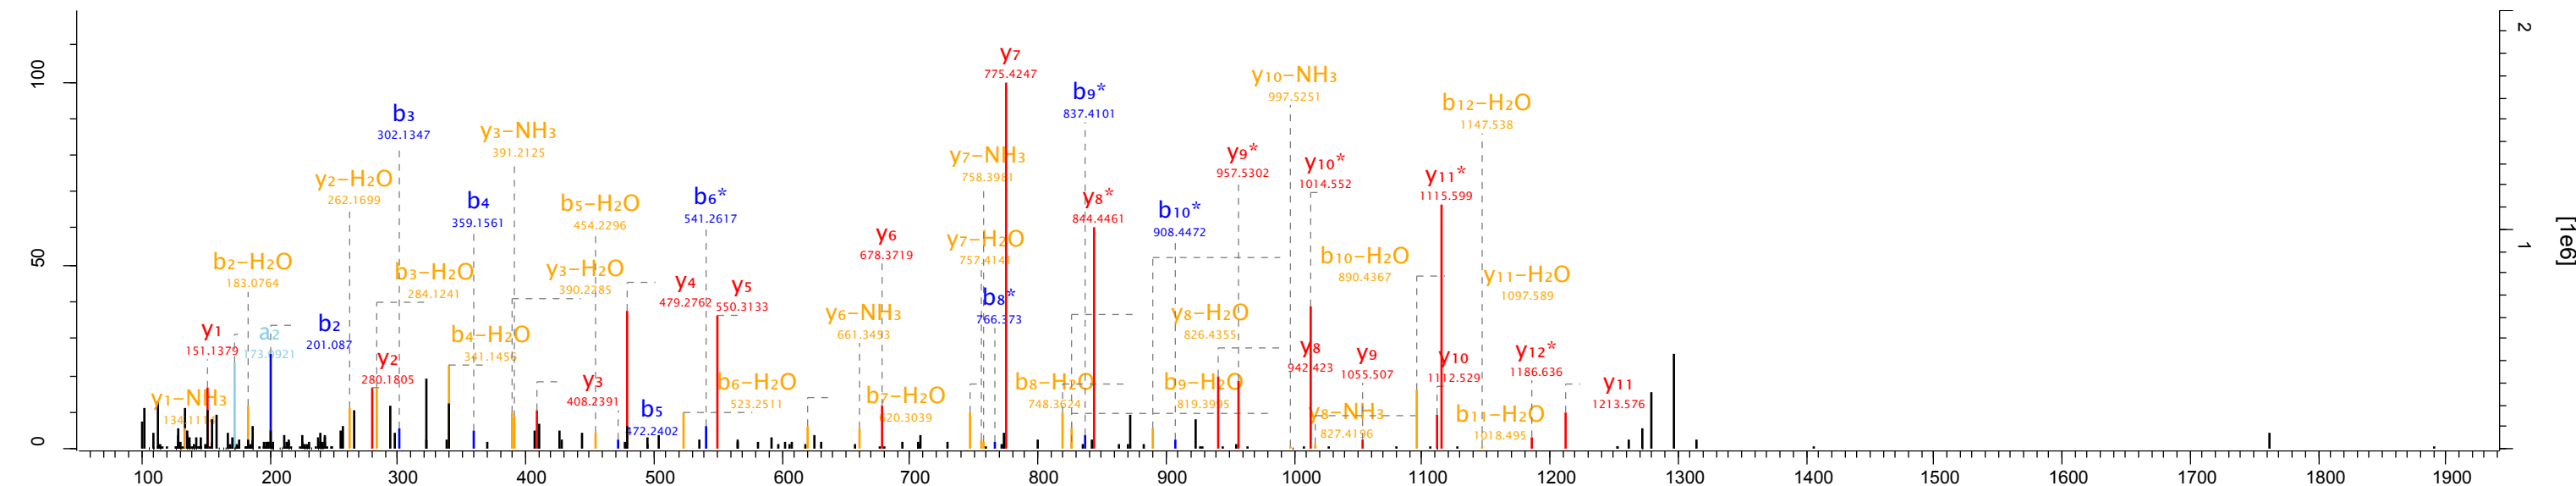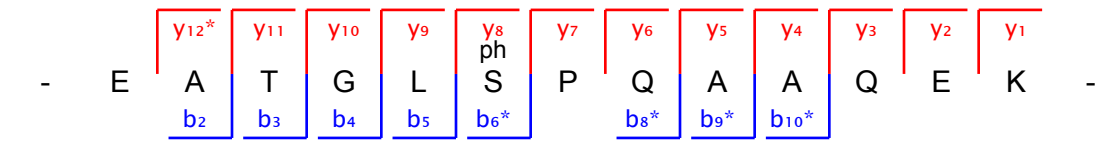

Raw file 20171215\_MaS\_33SR\_LMH\_phospho\_06 Scan 5495 Method FTMS; HCD Score 187.04 m/z 932.38 Gene names CAMK2D

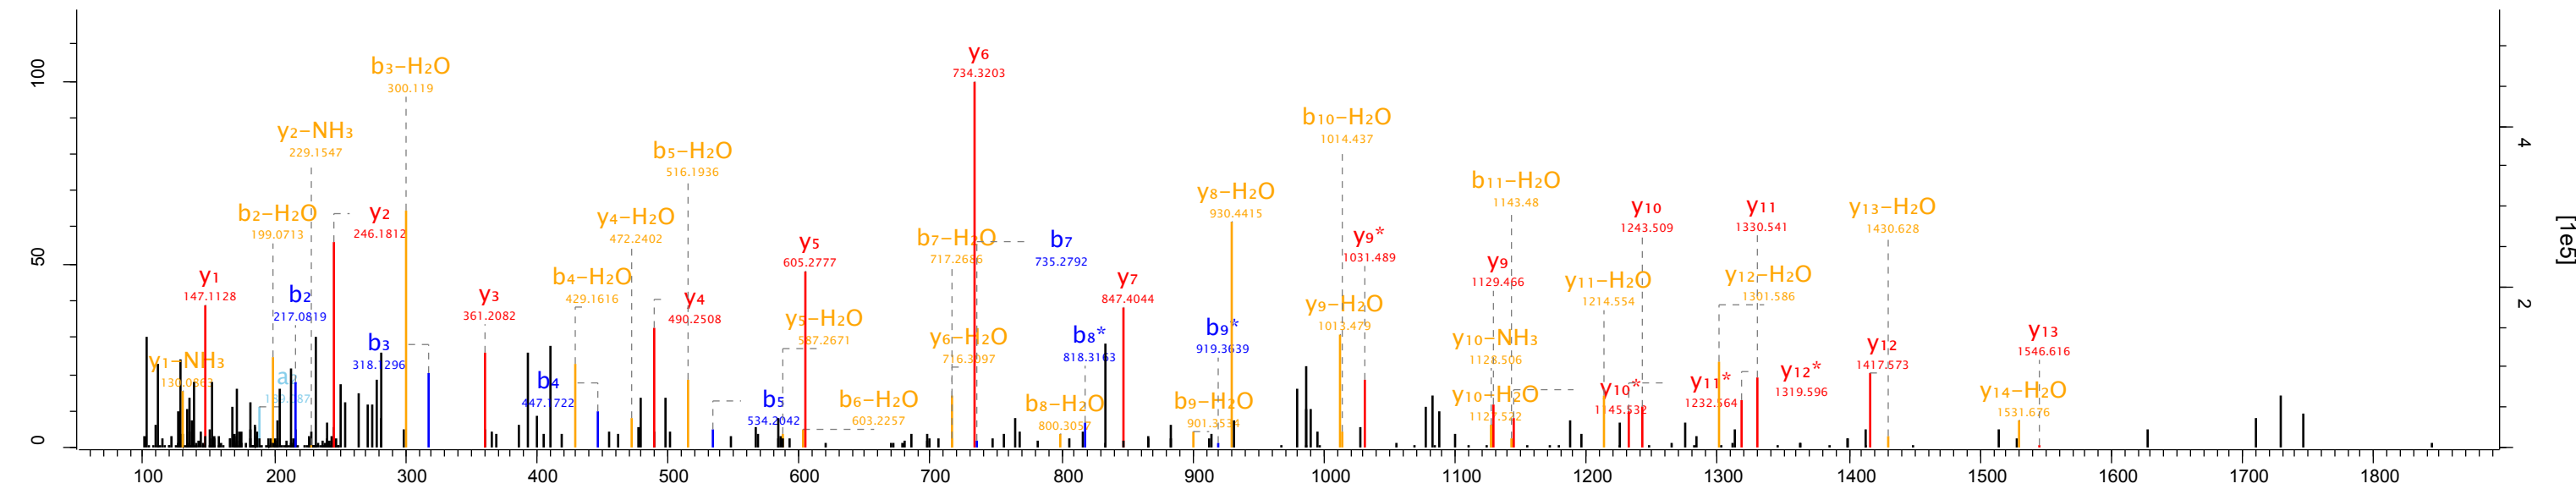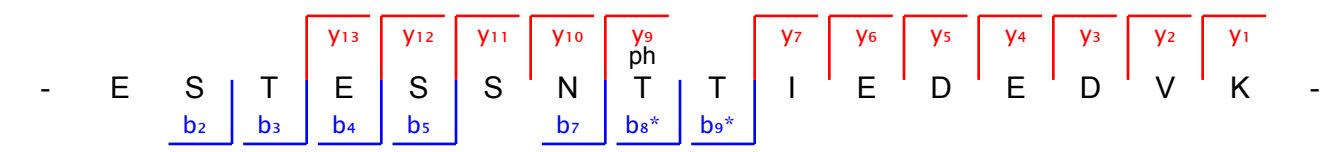

Raw file 20171215\_MaS\_33SR\_LMH\_phospho\_06 Scan 5545 Method FTMS; HCD Score 337.82 m/z 1234.98 Gene names HNRNPUL2-BSCL2;HNRNPUL2

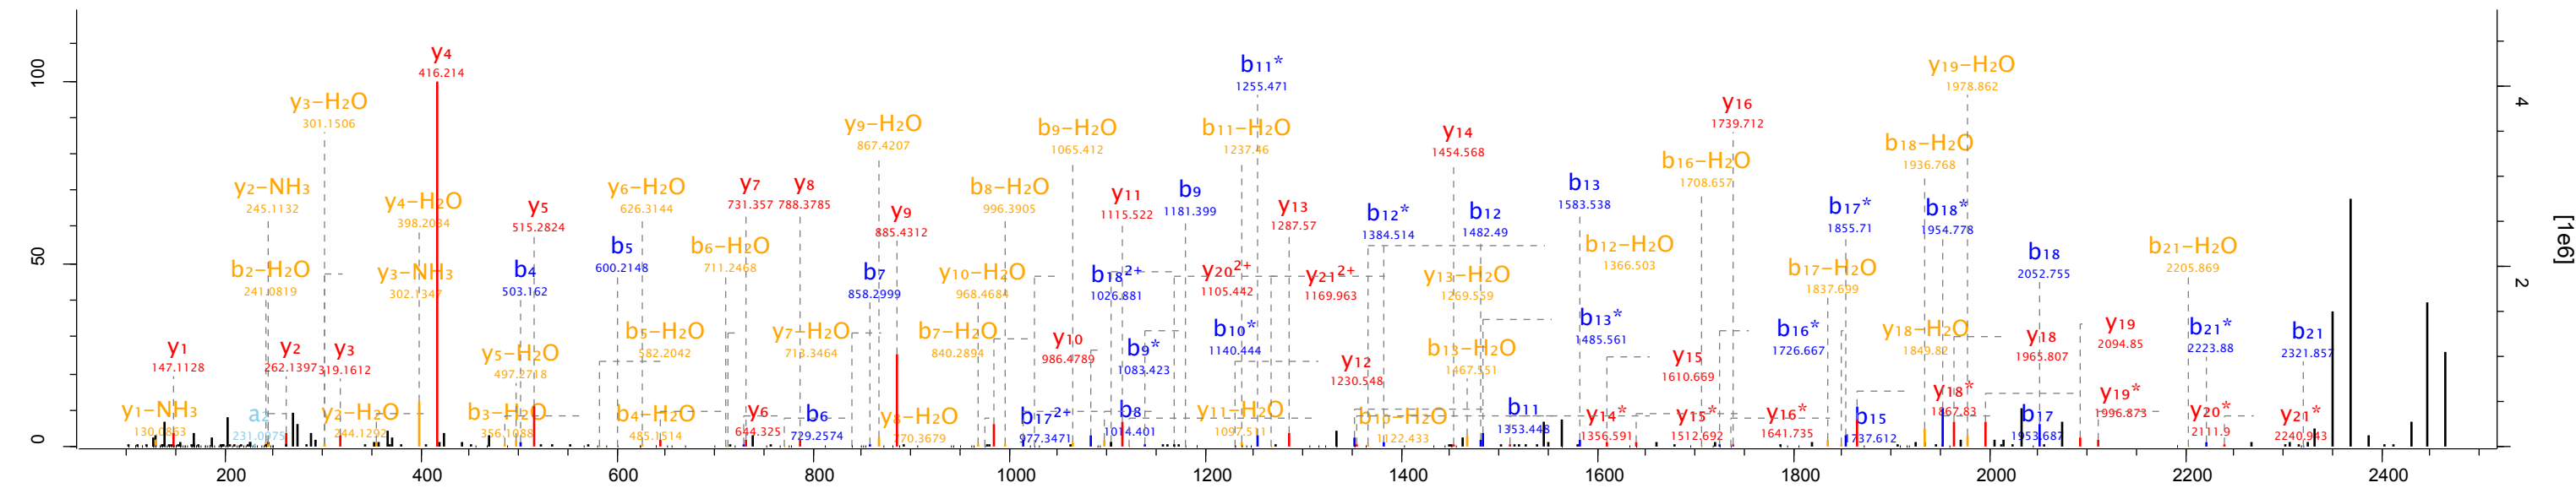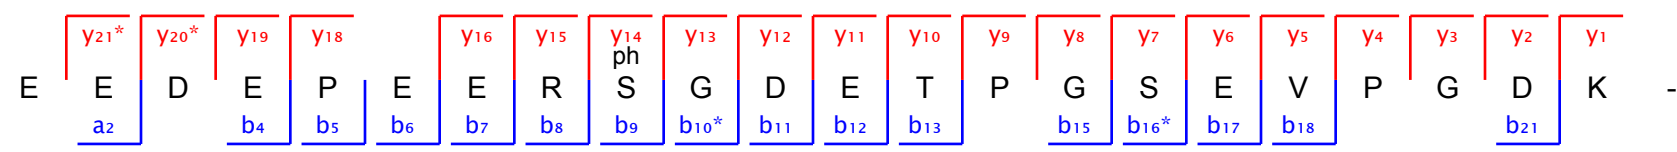



Raw file 20171215\_MaS\_33SR\_LMH\_phospho\_06 Scan 5565 Method FTMS; HCD Score 63.19 m/z 577.76 Gene names WIPI2

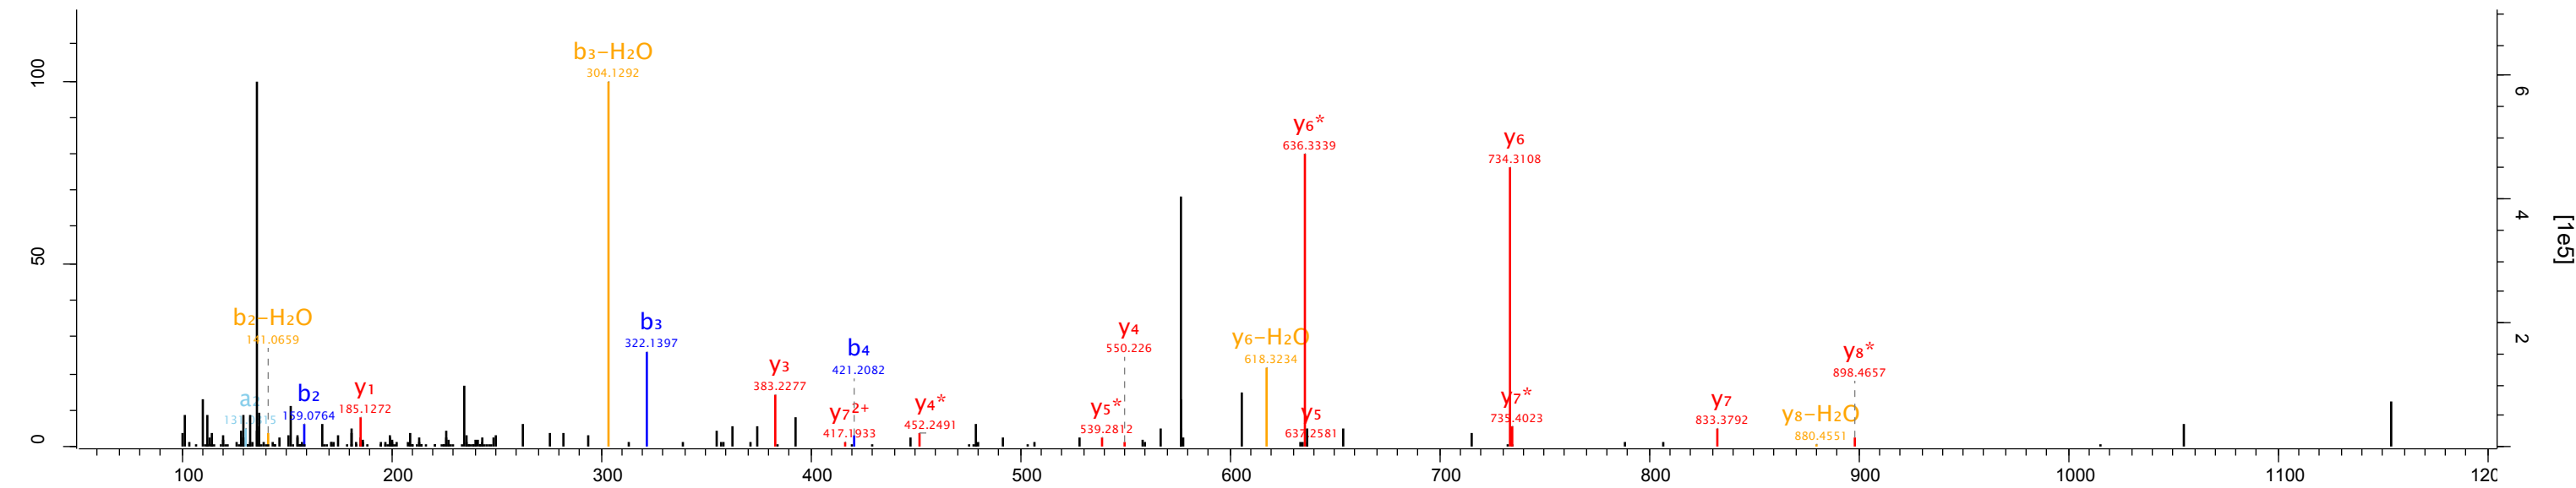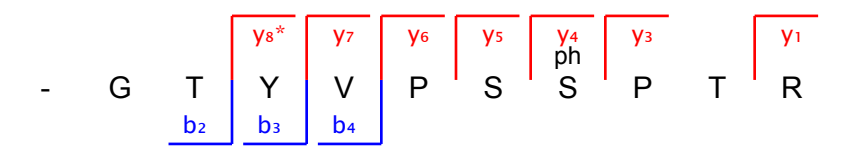

Raw file 20171215\_MaS\_33SR\_LMH\_phospho\_06 Scan 5665 Method FTMS; HCD Score 55.27 m/z 749.86 Gene names DYNC1LI2

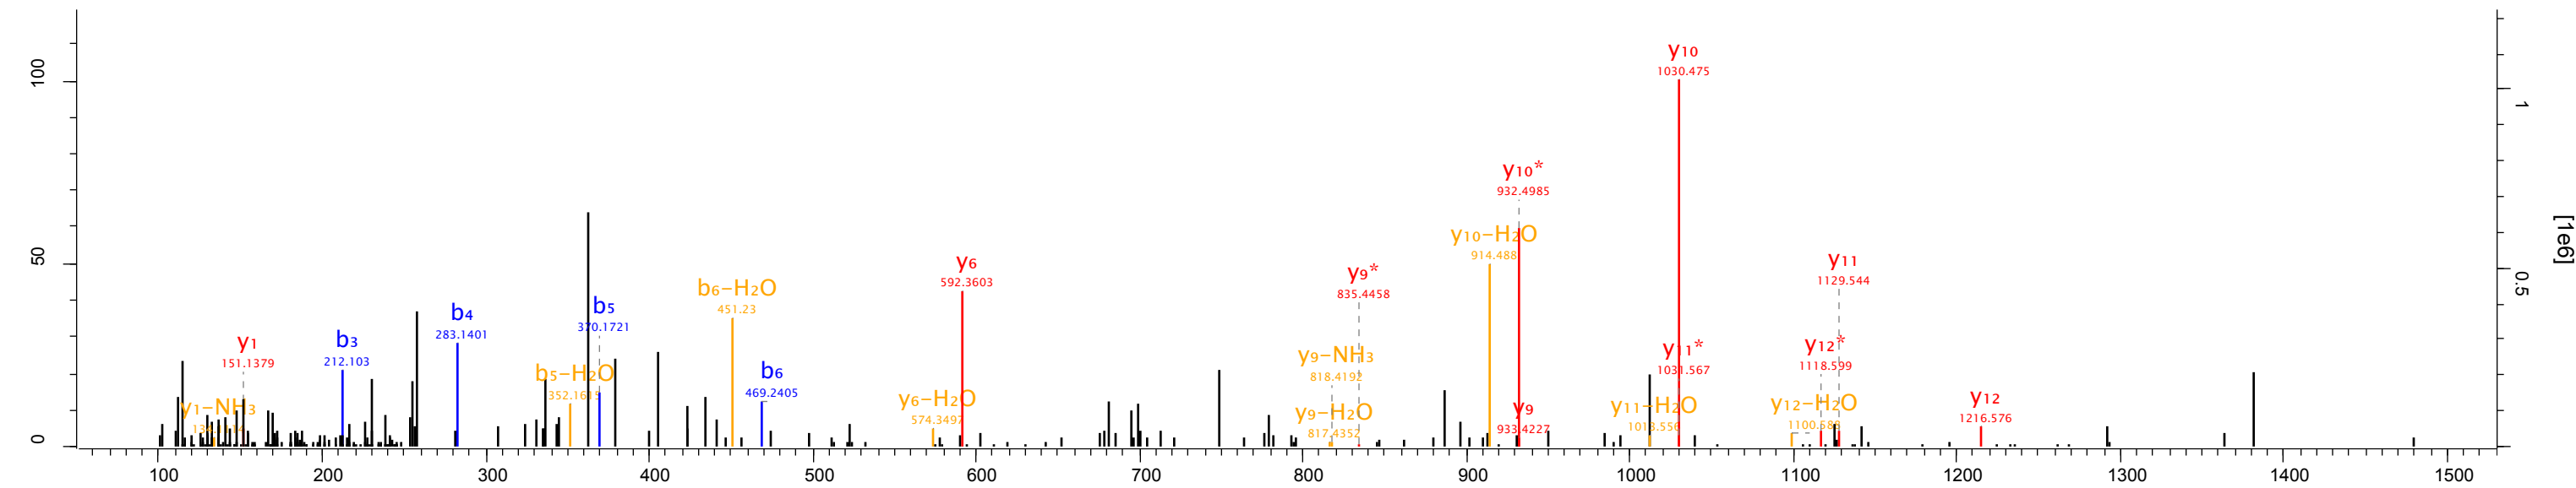

- G G P A S V P S S P G T S V K -

Fragmentation mapping (b and y ions):

- b3: P
- b4: A
- b5: S
- b6: V
- y9: S
- y10: P
- y11: V
- y12: S
- y6: P
- y1: K

Raw file 20171215\_MaS\_33SR\_LMH\_phospho\_06 Scan 5695 Method FTMS; HCD Score 176.29 m/z 727.81 Gene names PPFIA1

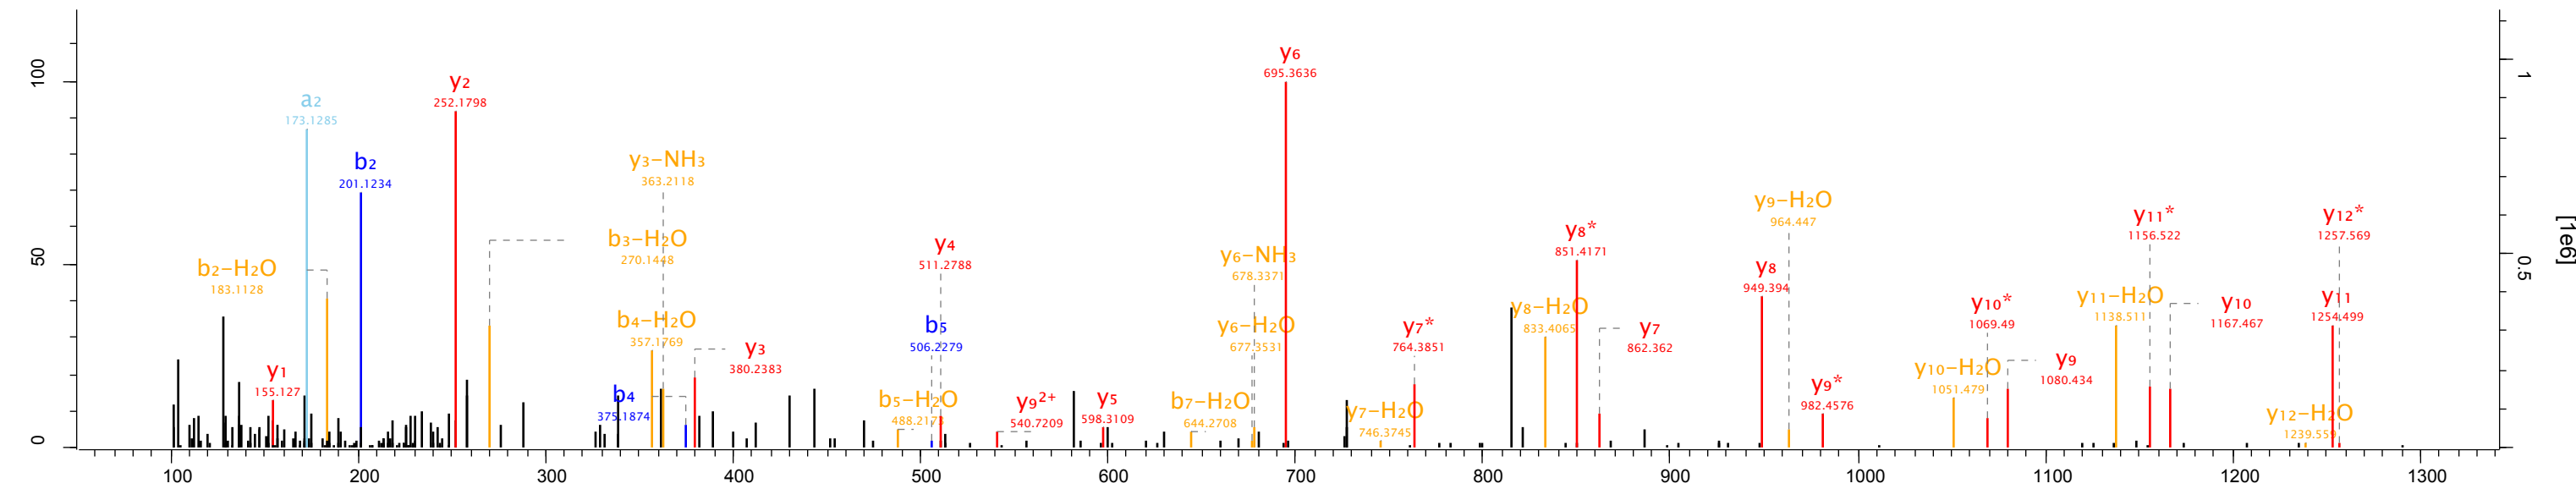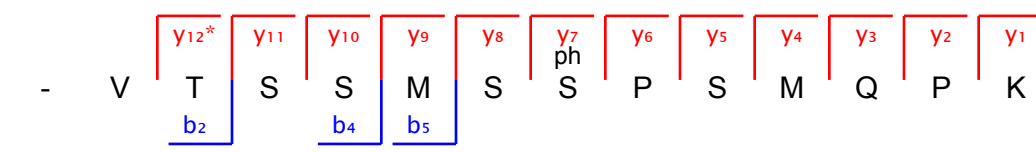

Raw file 20171215\_MaS\_33SR\_LMH\_phospho\_06 Scan 6165 Method FTMS; HCD Score 126.5 m/z 441.2 Gene names BCLAF1

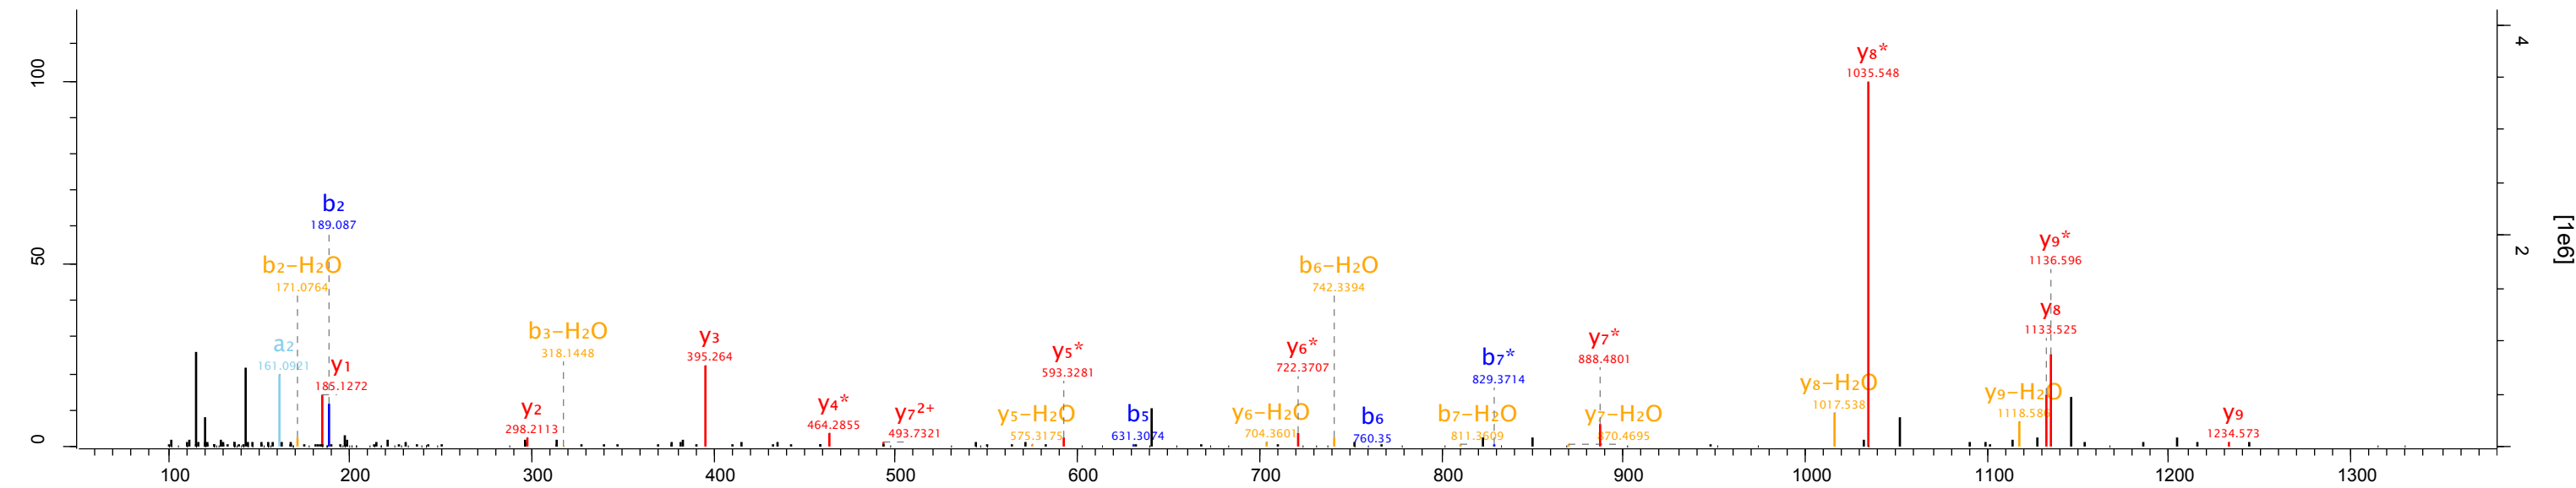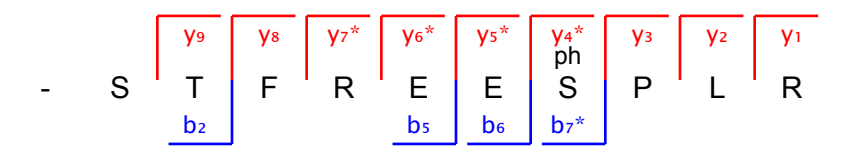



Raw file 20171215\_MaS\_33SR\_LMH\_phospho\_06 Scan 6405 Method FTMS; HCD Score 149.86 m/z 748.37 Gene names NCL

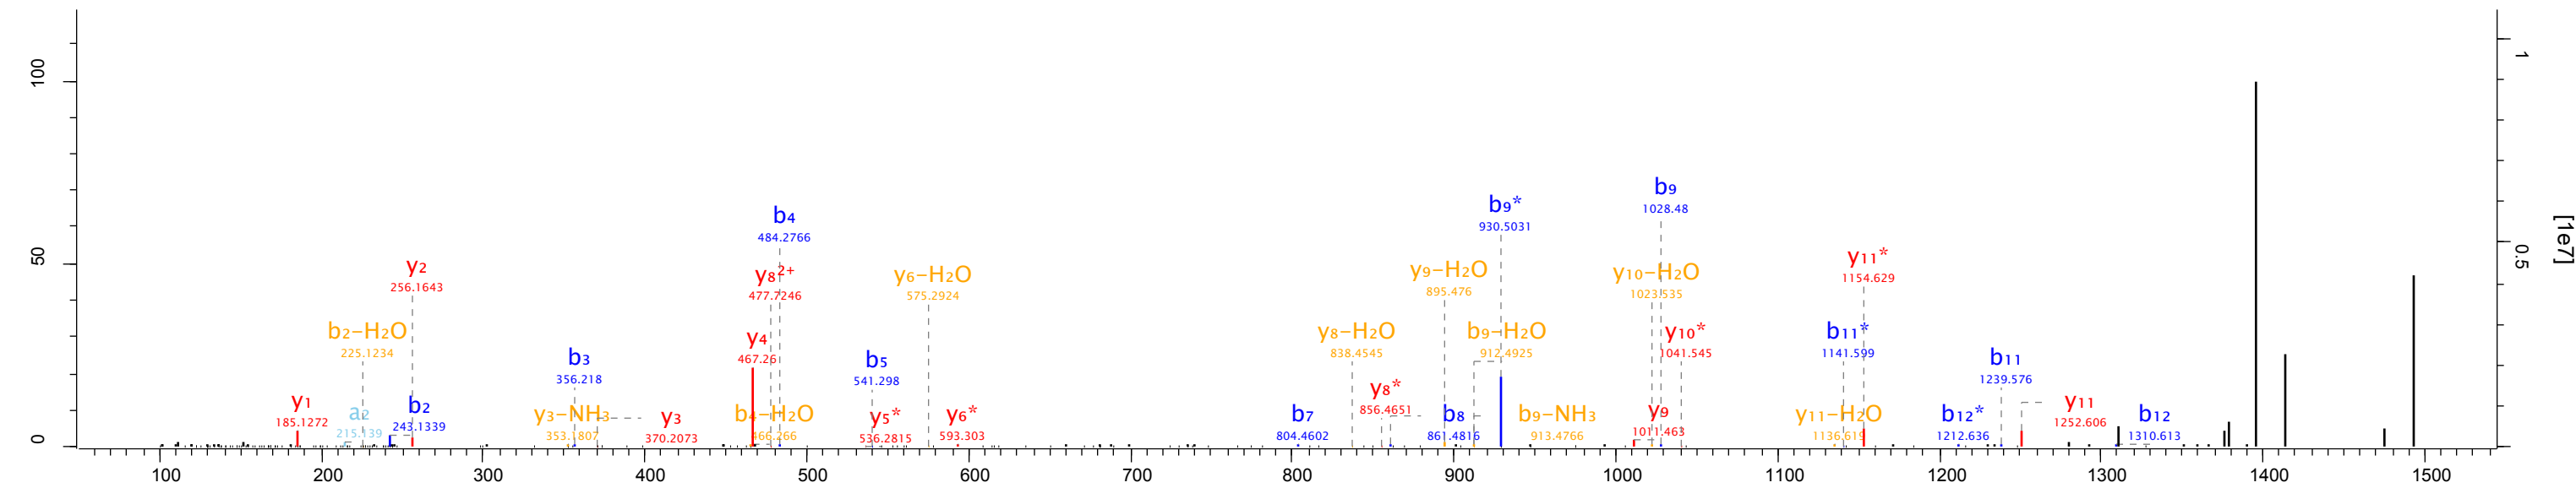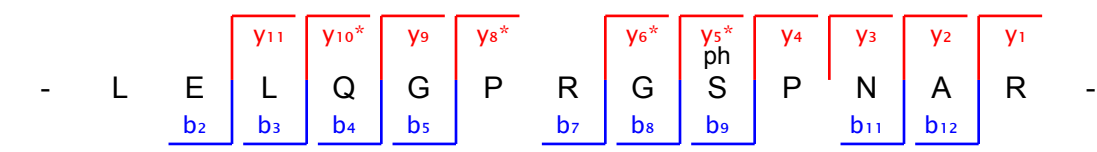

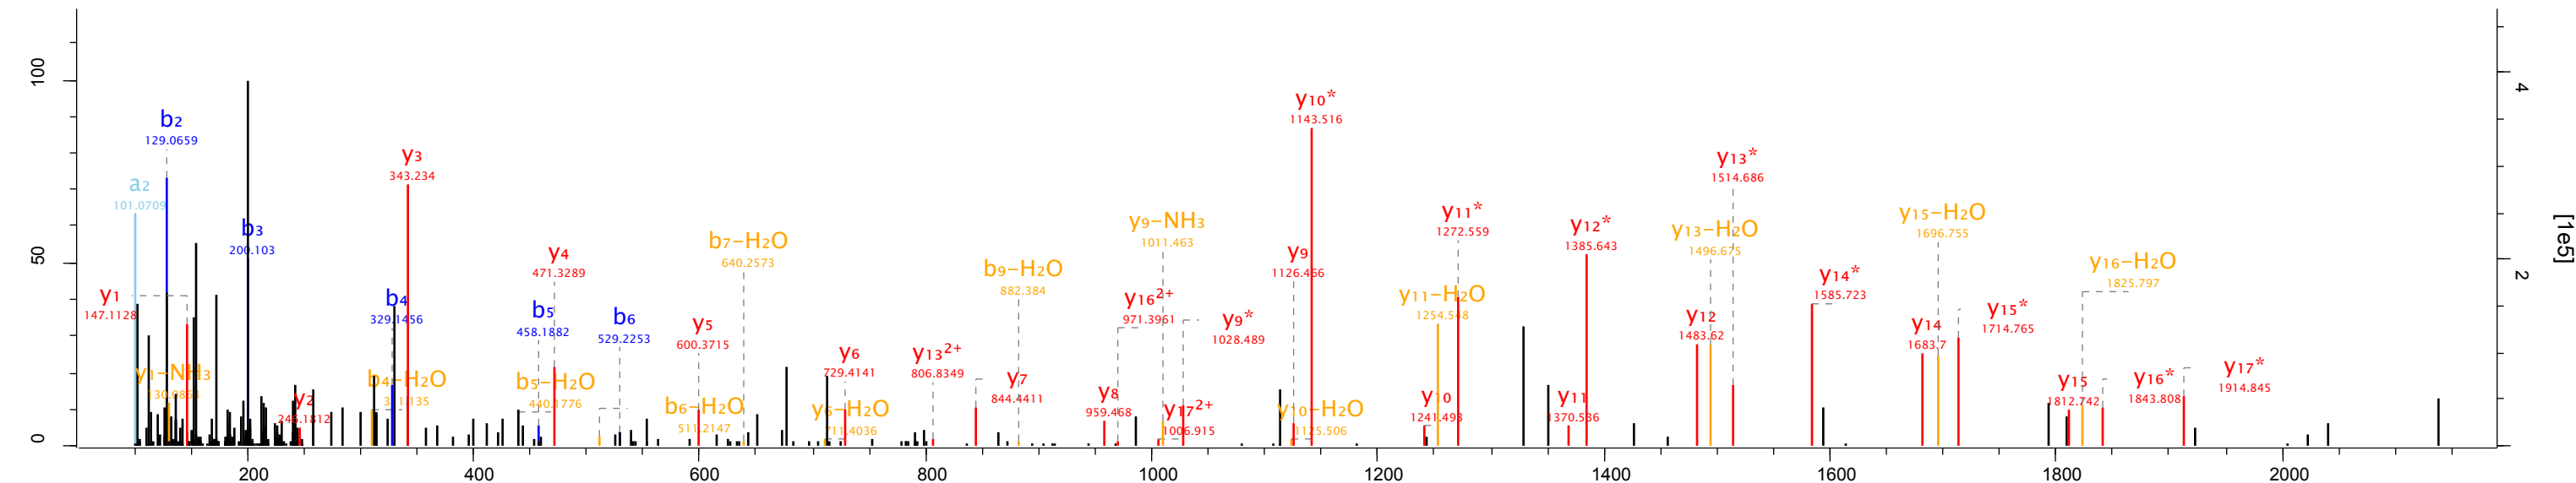

- G A A A E E A E L E D S D D E E K P V K -

b<sub>2</sub> b<sub>3</sub> b<sub>4</sub> b<sub>5</sub> b<sub>6</sub> y<sub>17</sub>\* y<sub>16</sub>\* y<sub>15</sub> y<sub>14</sub> y<sub>13</sub>\* y<sub>12</sub> y<sub>11</sub> y<sub>10</sub> y<sub>9</sub>ph y<sub>8</sub> y<sub>7</sub> y<sub>6</sub> y<sub>5</sub> y<sub>4</sub> y<sub>3</sub> y<sub>2</sub> y<sub>1</sub>

Raw file 20171215\_MaS\_33SR\_LMH\_phospho\_06 Scan 6785 Method FTMS; HCD Score 183.27 m/z 820.39 Gene names PDS5A

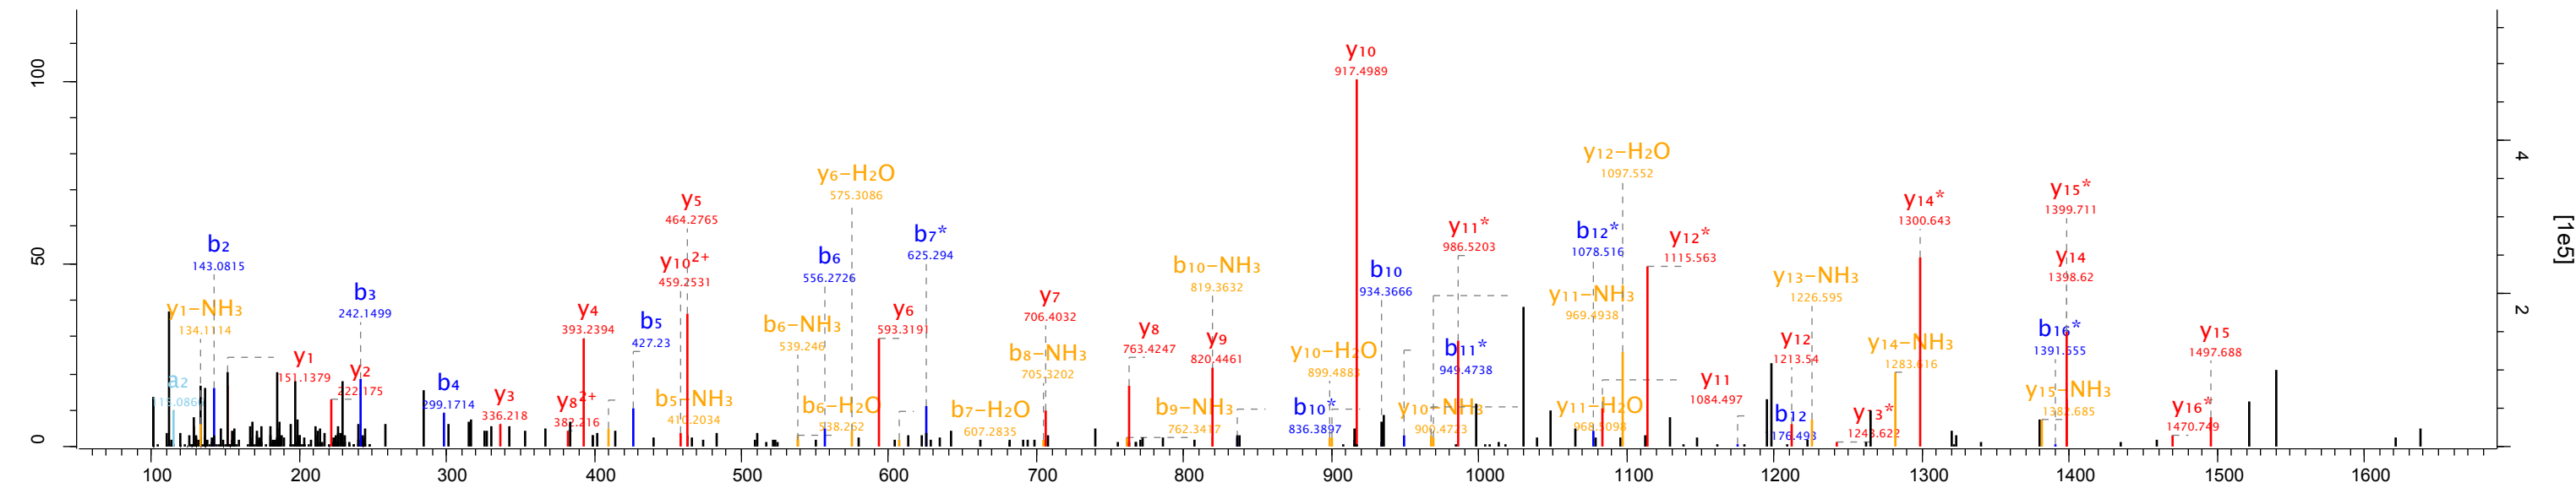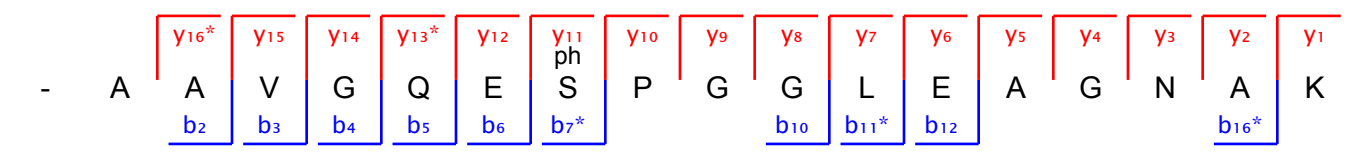



20171215\_MaS\_33SR\_LMH\_phospho\_06

6855 FTMS; HCD 95.57 666.26 EPB41L1

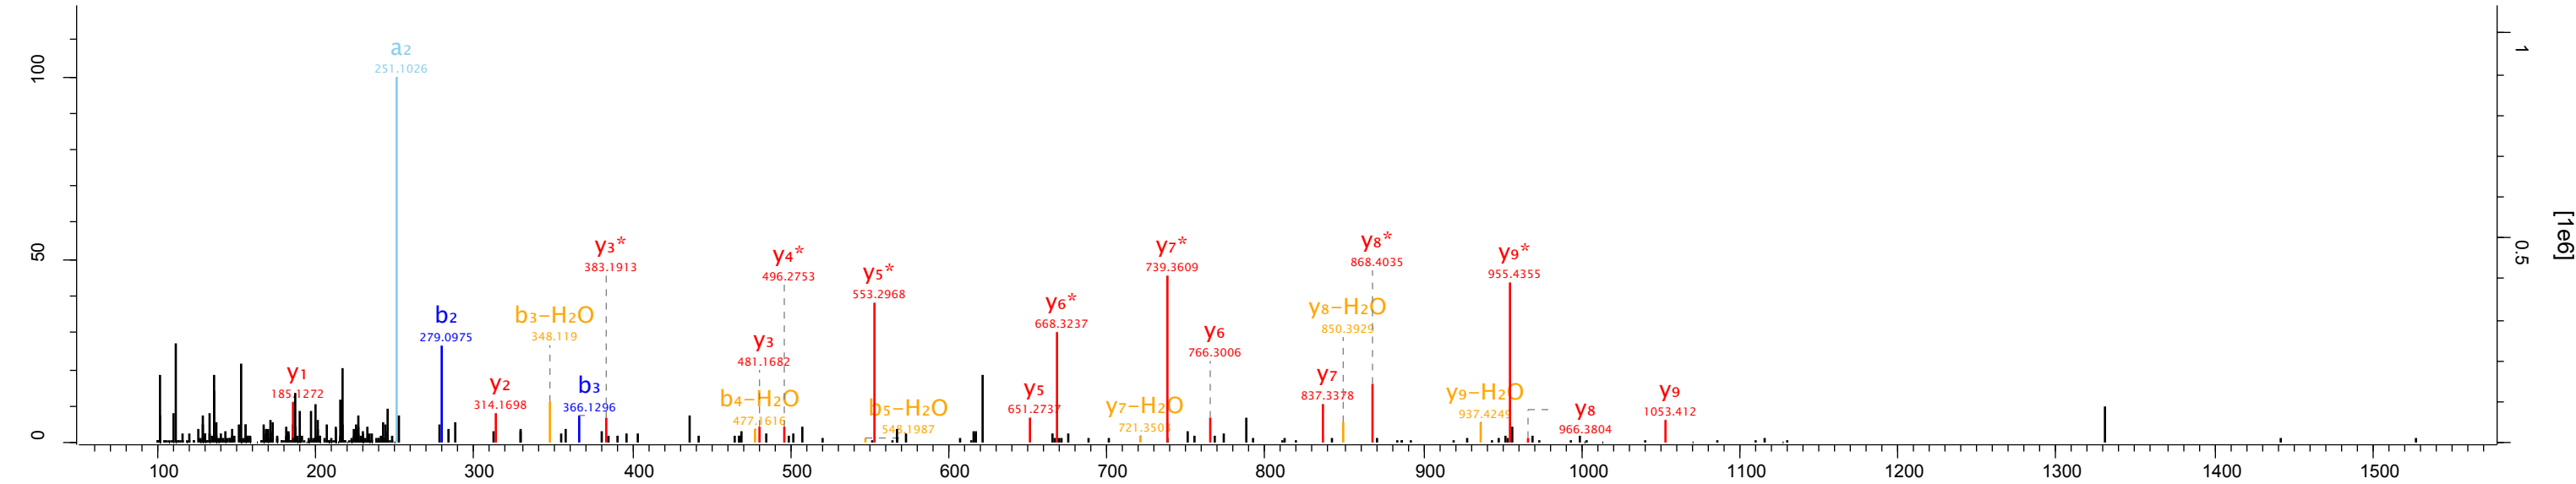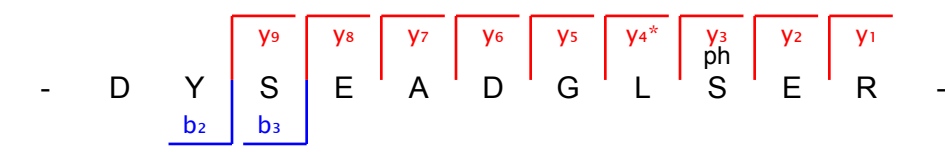

20171215\_MaS\_33SR\_LMH\_phospho\_06 6975 FTMS; HCD 65.18 650.99 RRP15

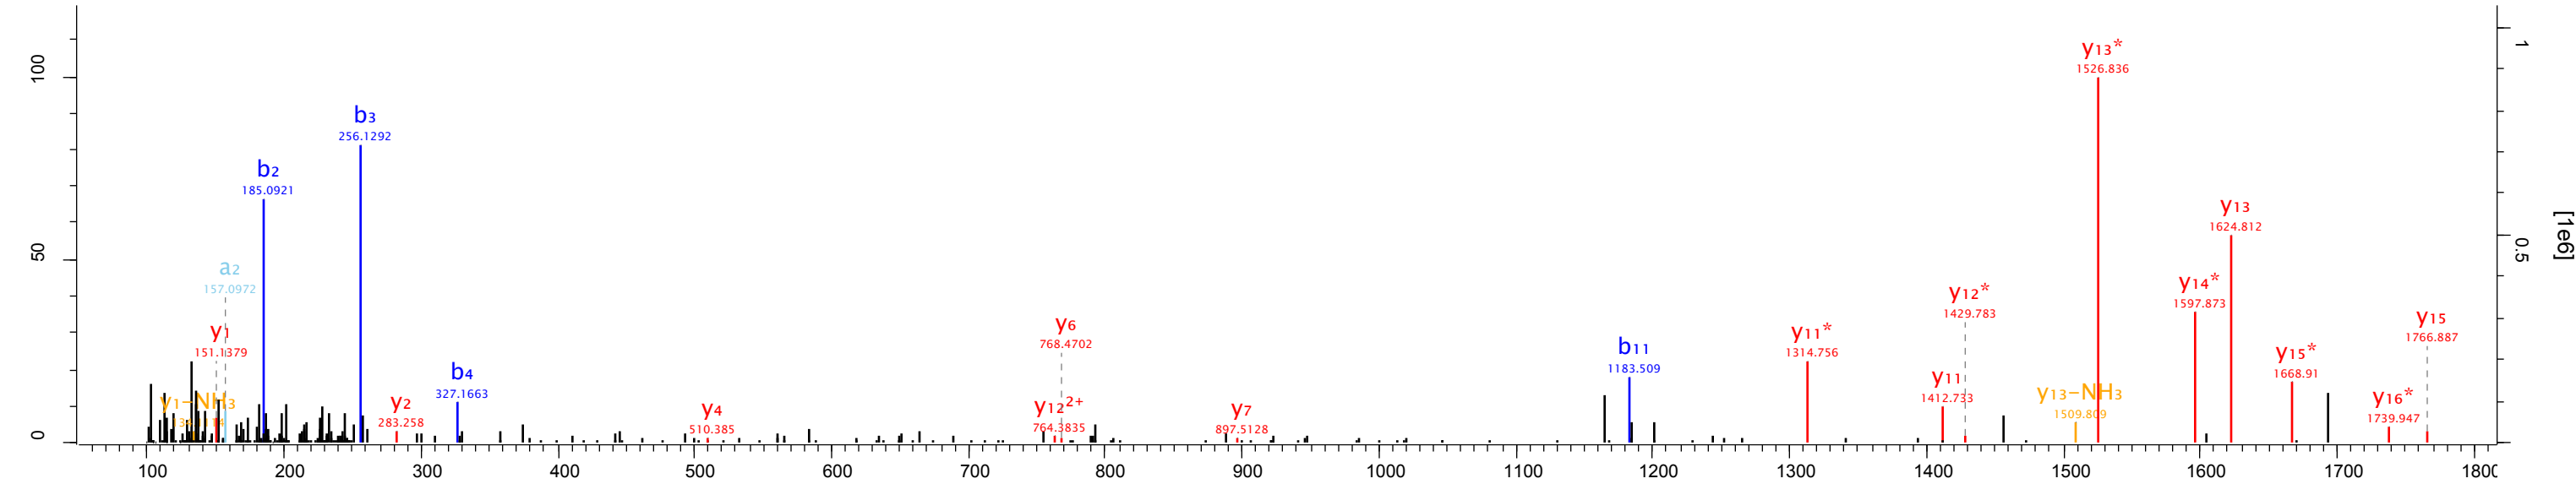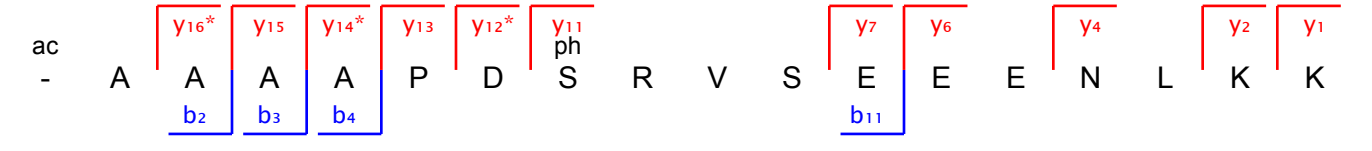



Raw file 20171215\_MaS\_33SR\_LMH\_phospho\_06 Scan 7725 Method FTMS; HCD Score 151.42 m/z 679.66 Gene names USP24

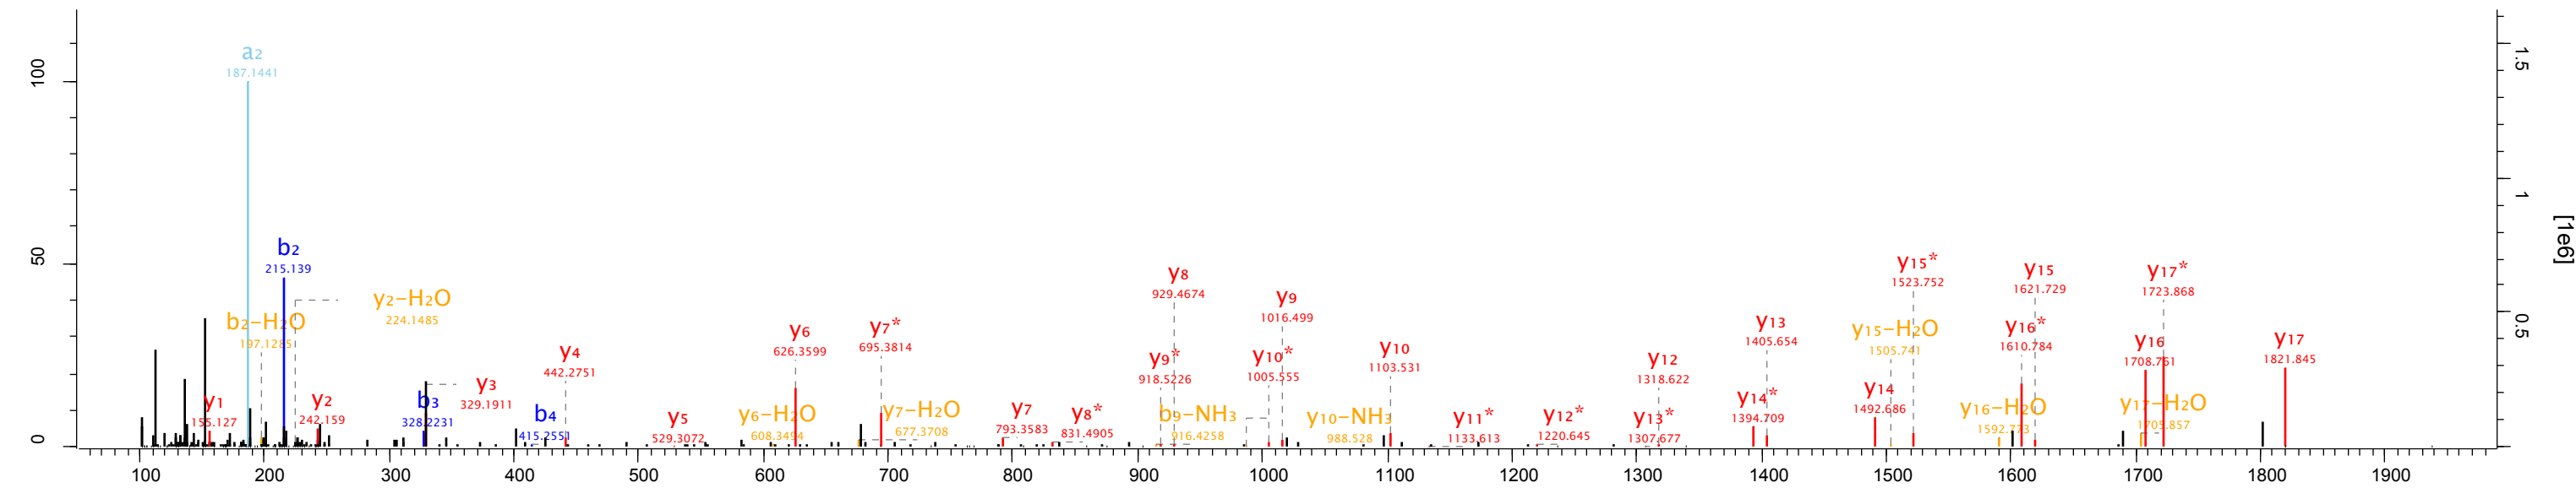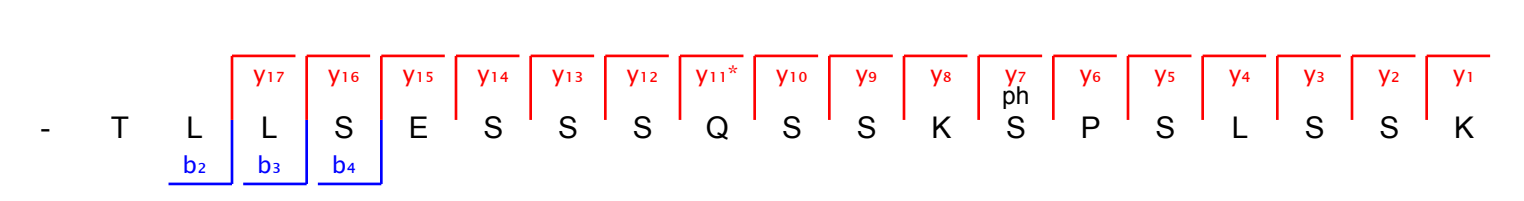

Raw file 20171215\_MaS\_33SR\_LMH\_phospho\_06 Scan 8025 Method FTMS; HCD Score 94.34 m/z 703.33 Gene names AKAP12

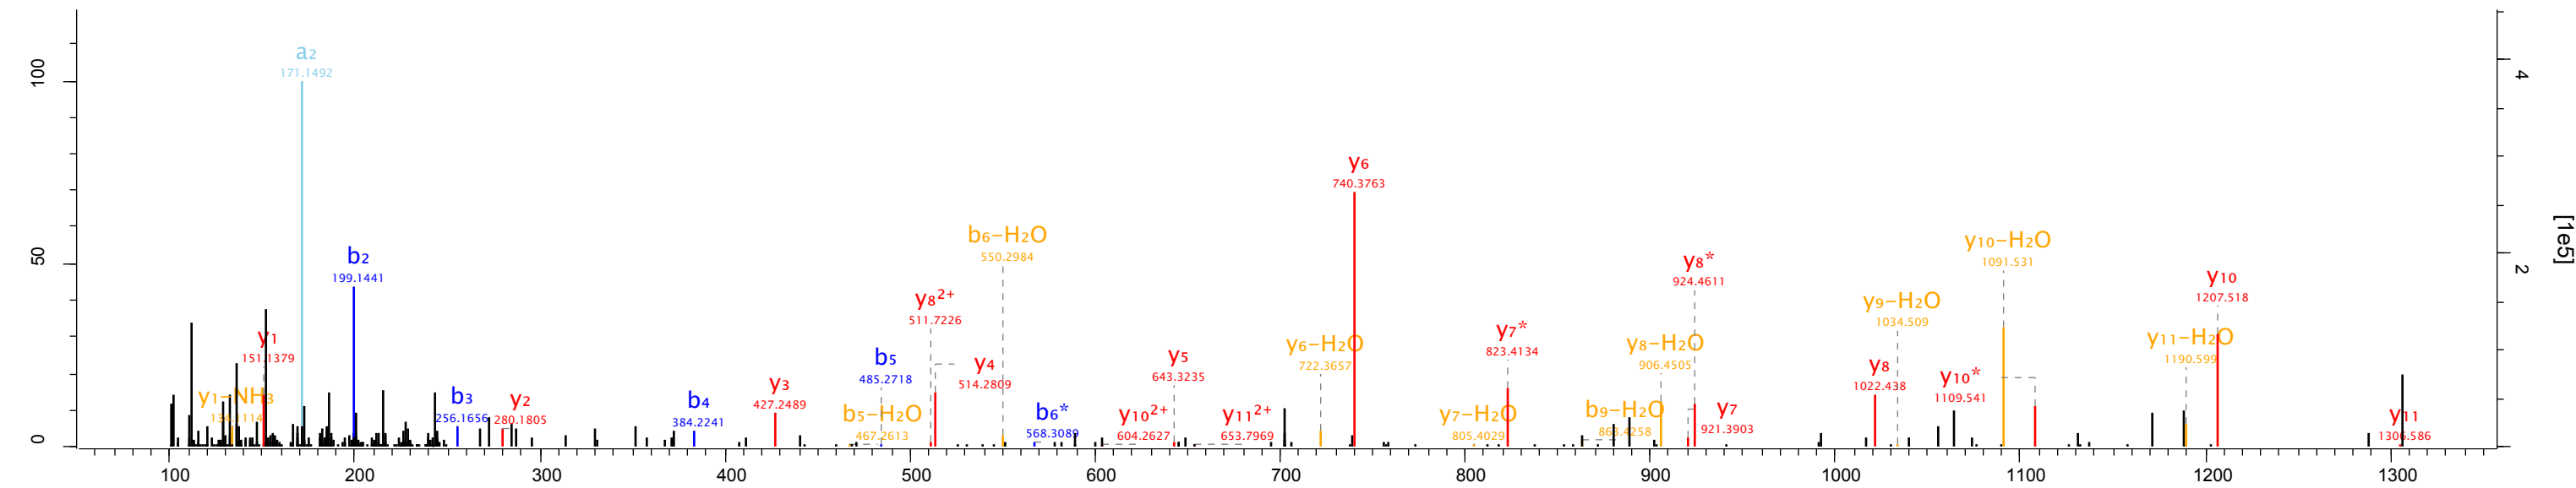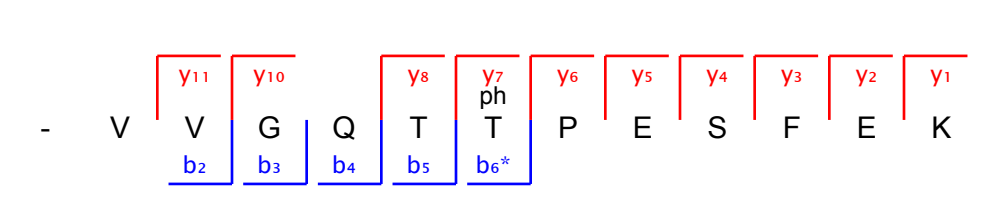



Raw file 20171215\_MaS\_33SR\_LMH\_phospho\_06 Scan 8365 Method FTMS; HCD Score 202.22 m/z 774.36 Gene names RREB1

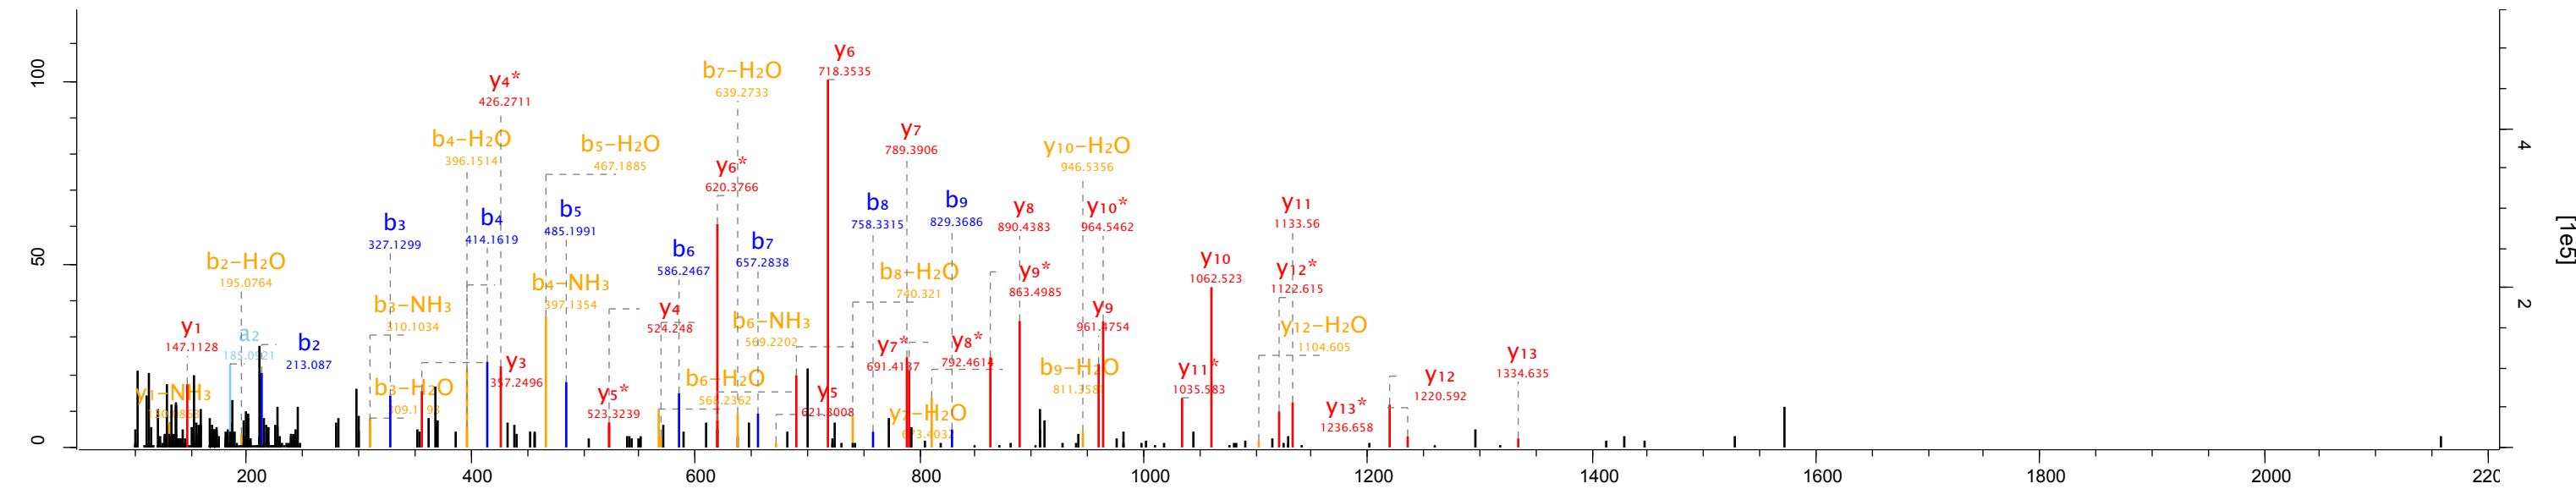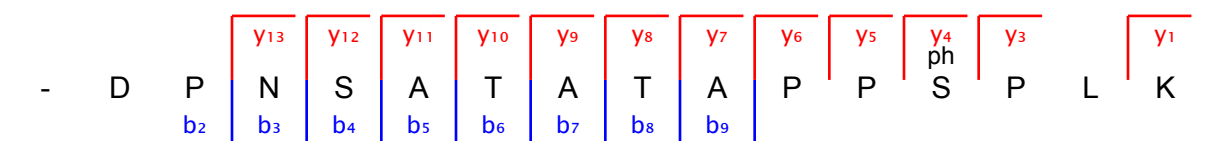

Raw file 20171215\_MaS\_33SR\_LMH\_phospho\_06 Scan 8585 Method FTMS; HCD Score 113.54 m/z 533.76 Gene names PDCD4

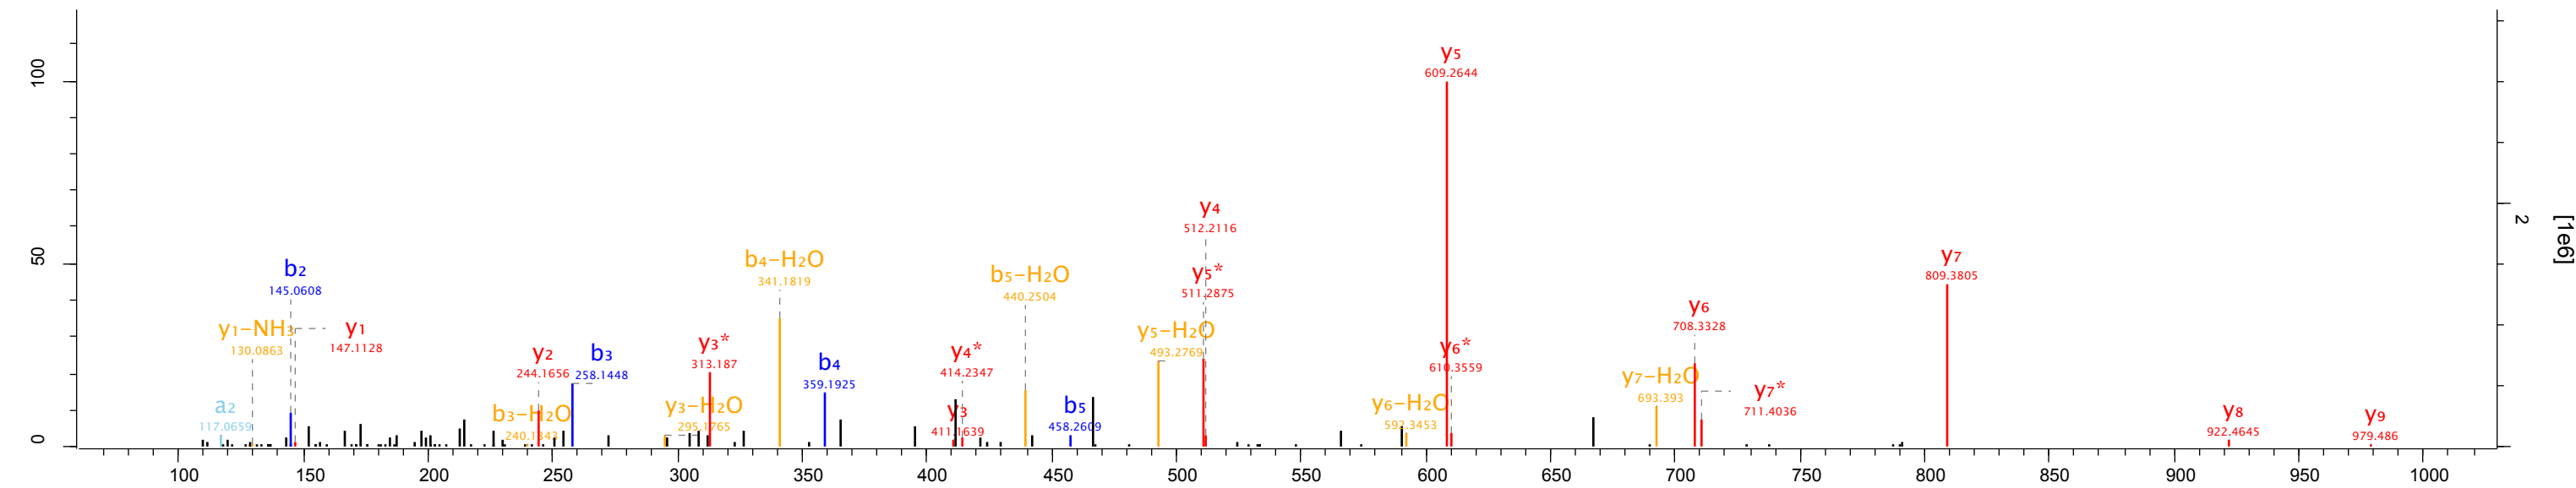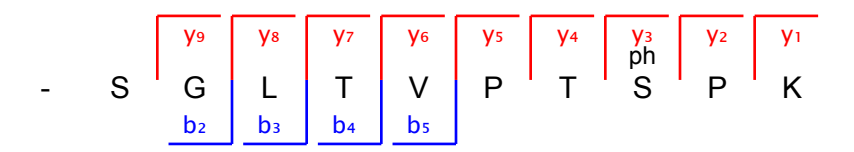



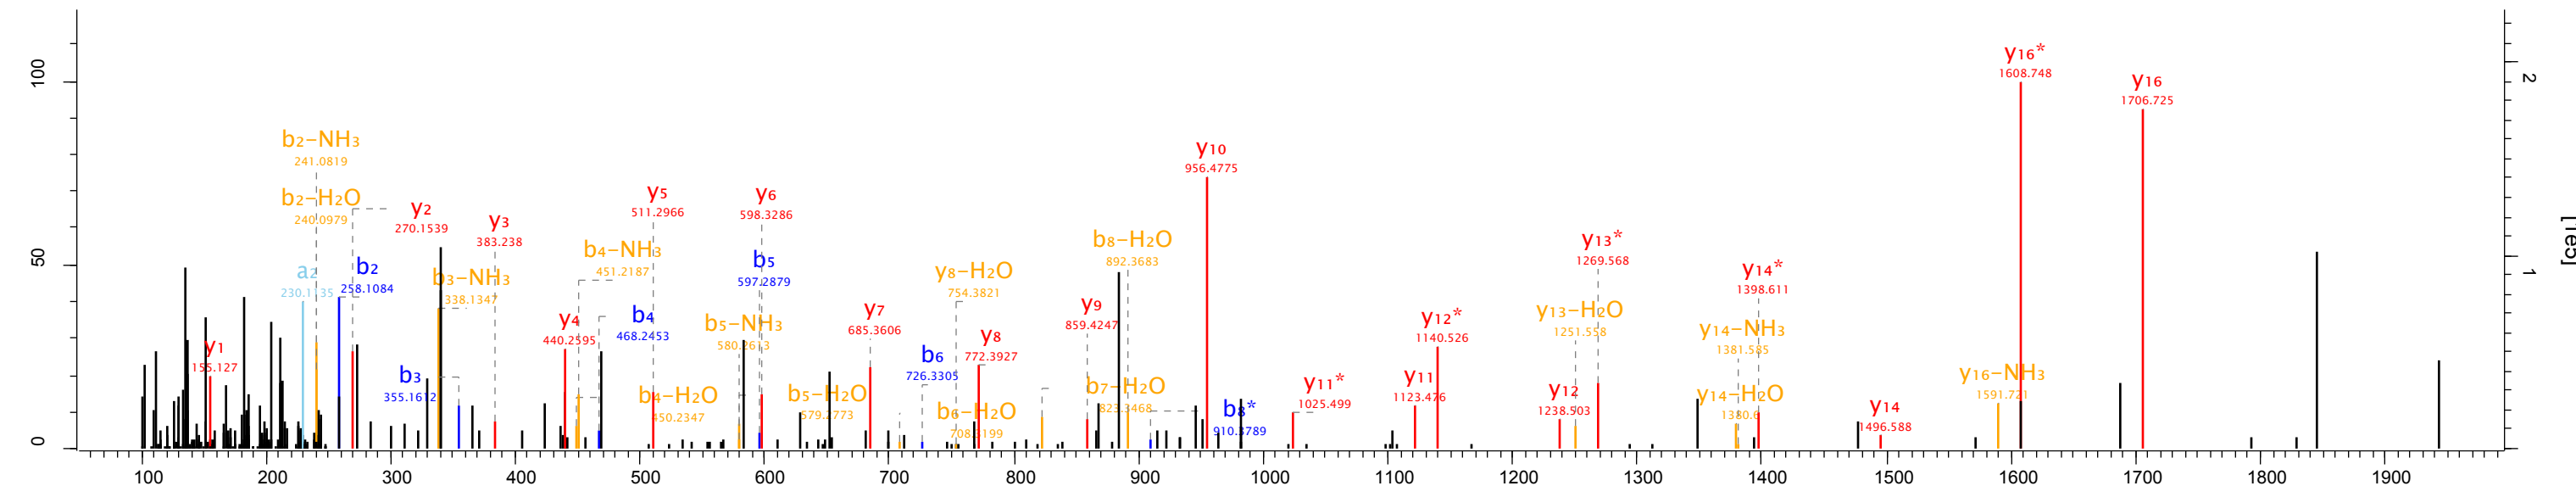

- Q E P L E E D S P S S S S A G L D K -  
 b<sub>2</sub> b<sub>3</sub> b<sub>4</sub> b<sub>5</sub> b<sub>6</sub> b<sub>8</sub>\* y<sub>16</sub> y<sub>14</sub> y<sub>13</sub>\* y<sub>12</sub> y<sub>11</sub>ph y<sub>10</sub> y<sub>9</sub> y<sub>8</sub> y<sub>7</sub> y<sub>6</sub> y<sub>5</sub> y<sub>4</sub> y<sub>3</sub> y<sub>2</sub> y<sub>1</sub>

Raw file 20171215\_MaS\_33SR\_LMH\_phospho\_06 Scan 8855 Method FTMS; HCD Score 81.81 m/z 860.89 Gene names HIST1H1B

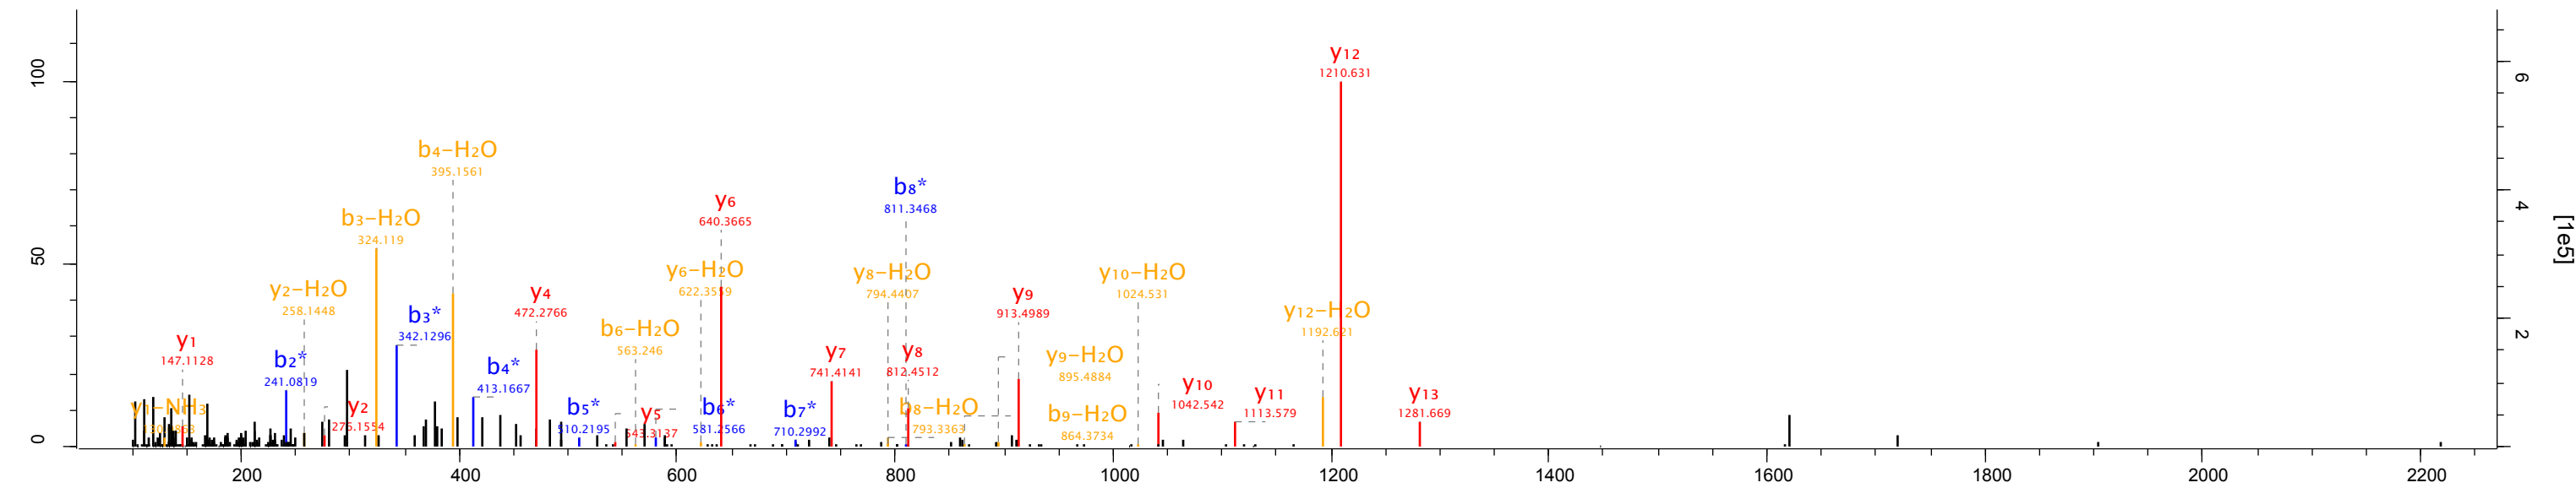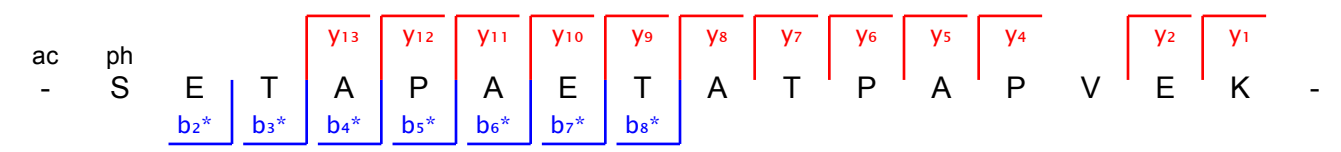

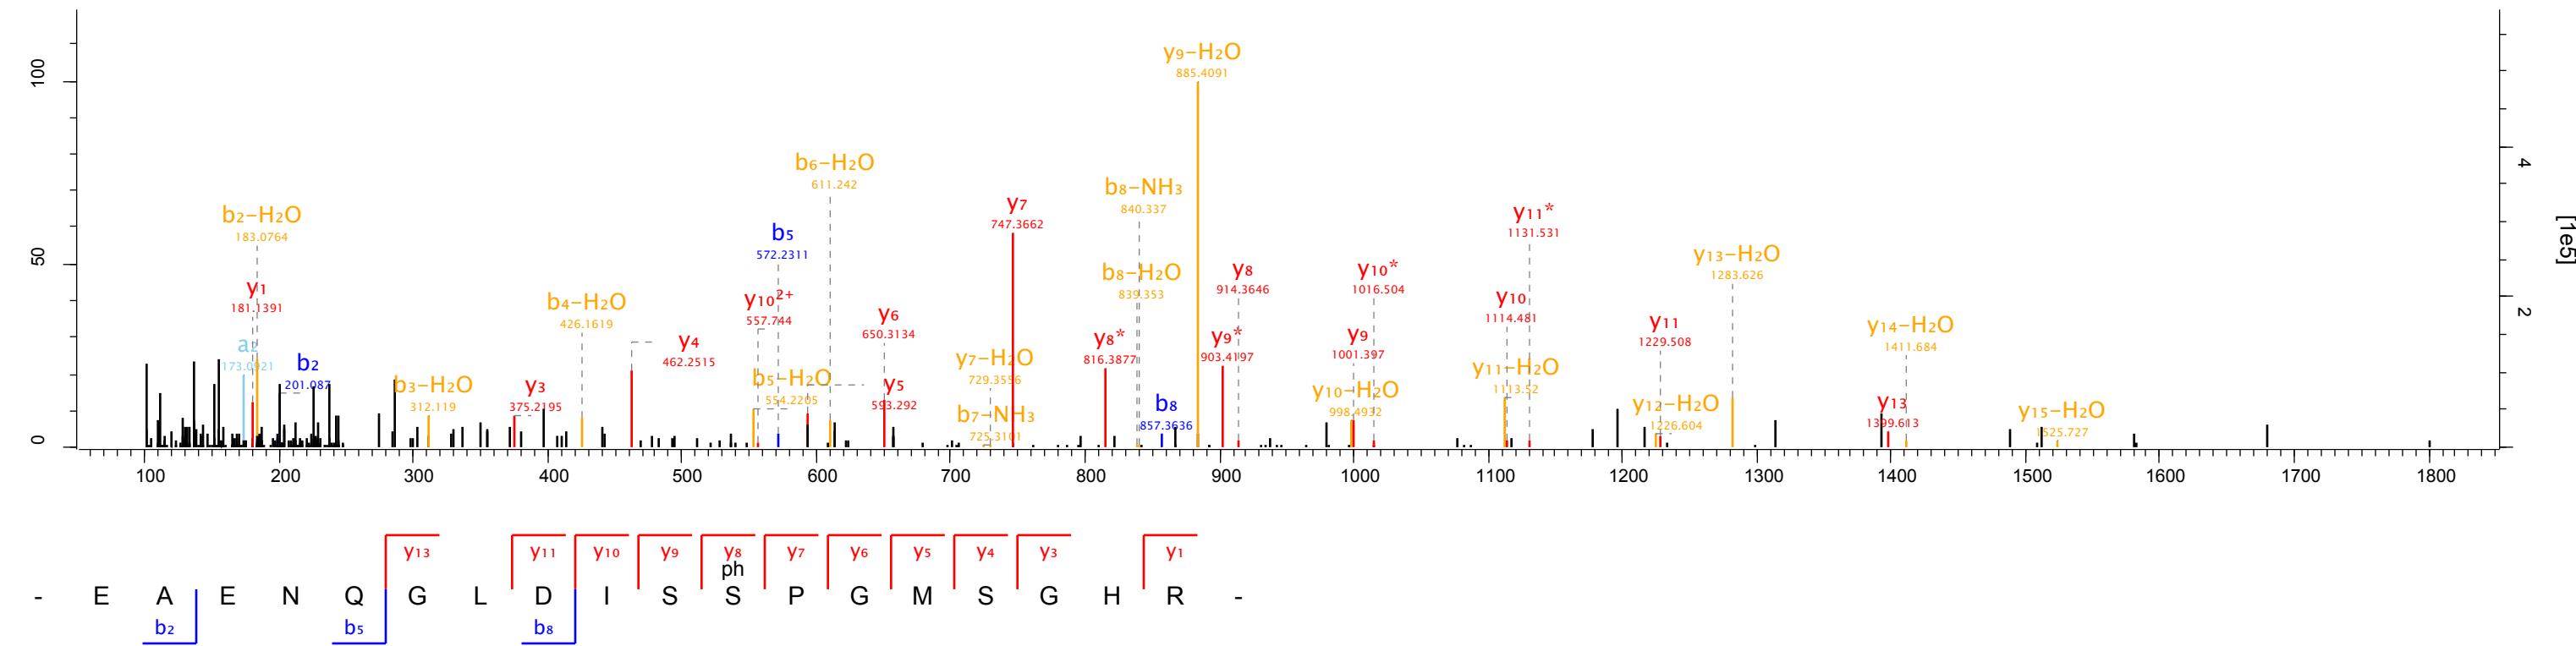

Raw file 20171215\_MaS\_33SR\_LMH\_phospho\_06 Scan 9095 Method FTMS; HCD Score 157.68 m/z 691.81 Gene names RPS27

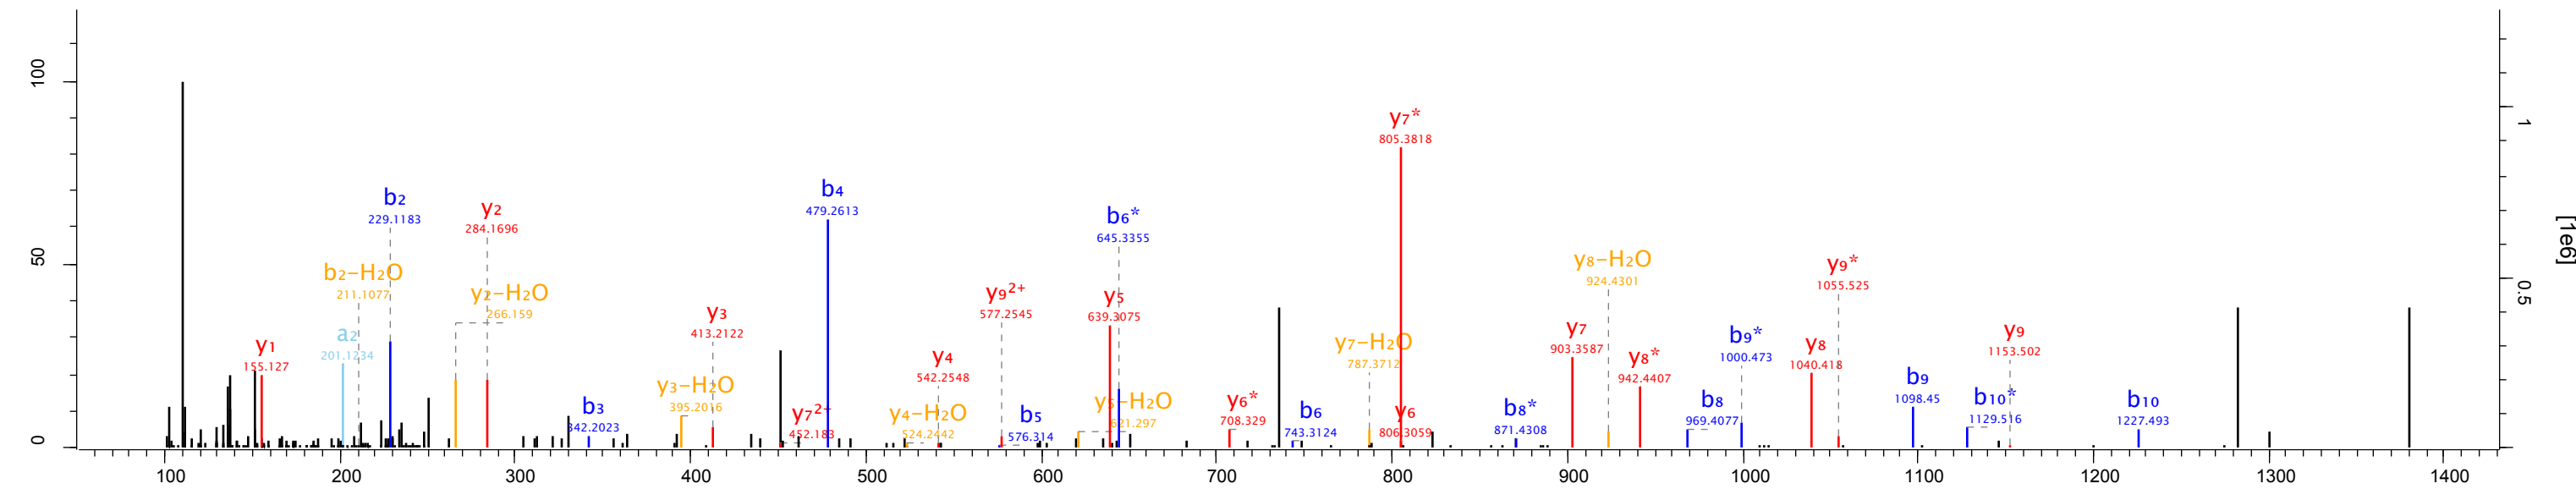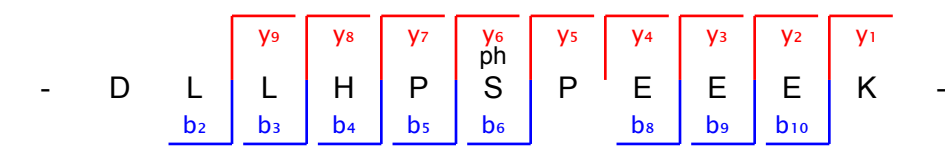

Raw file 20171215\_MaS\_33SR\_LMH\_phospho\_06 Scan 9155 Method FTMS; HCD Score 55.26 m/z 528.25 Gene names WDR33

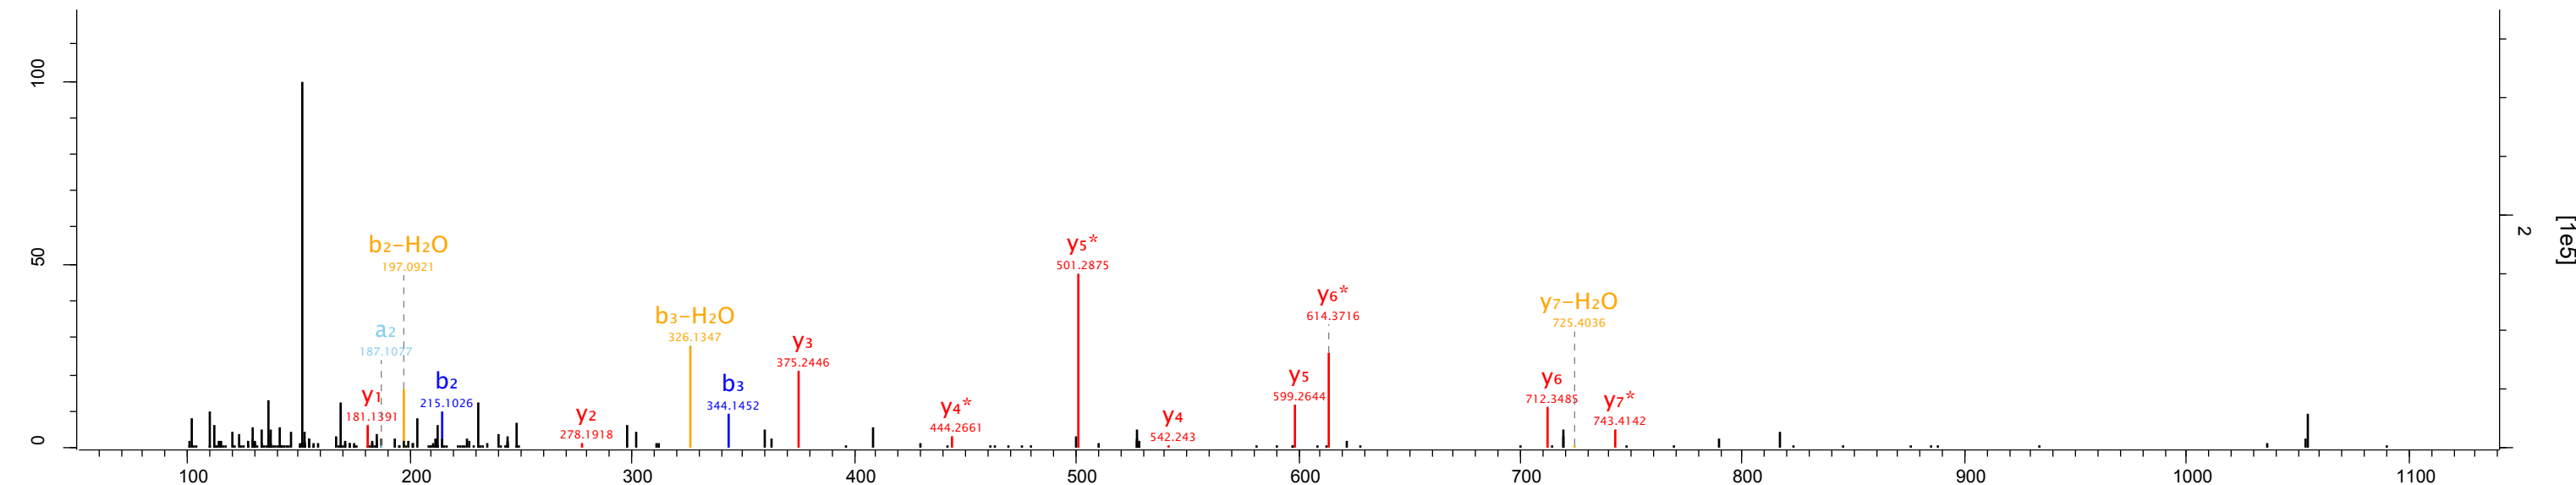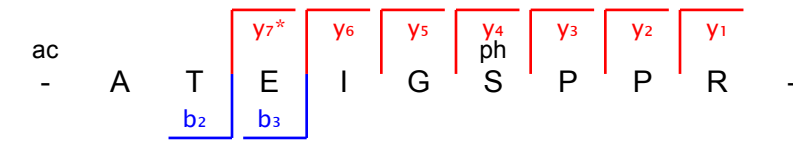

Raw file 20171215\_MaS\_33SR\_LMH\_phospho\_06 Scan 9205 Method FTMS; HCD Score 61.56 m/z 511.26

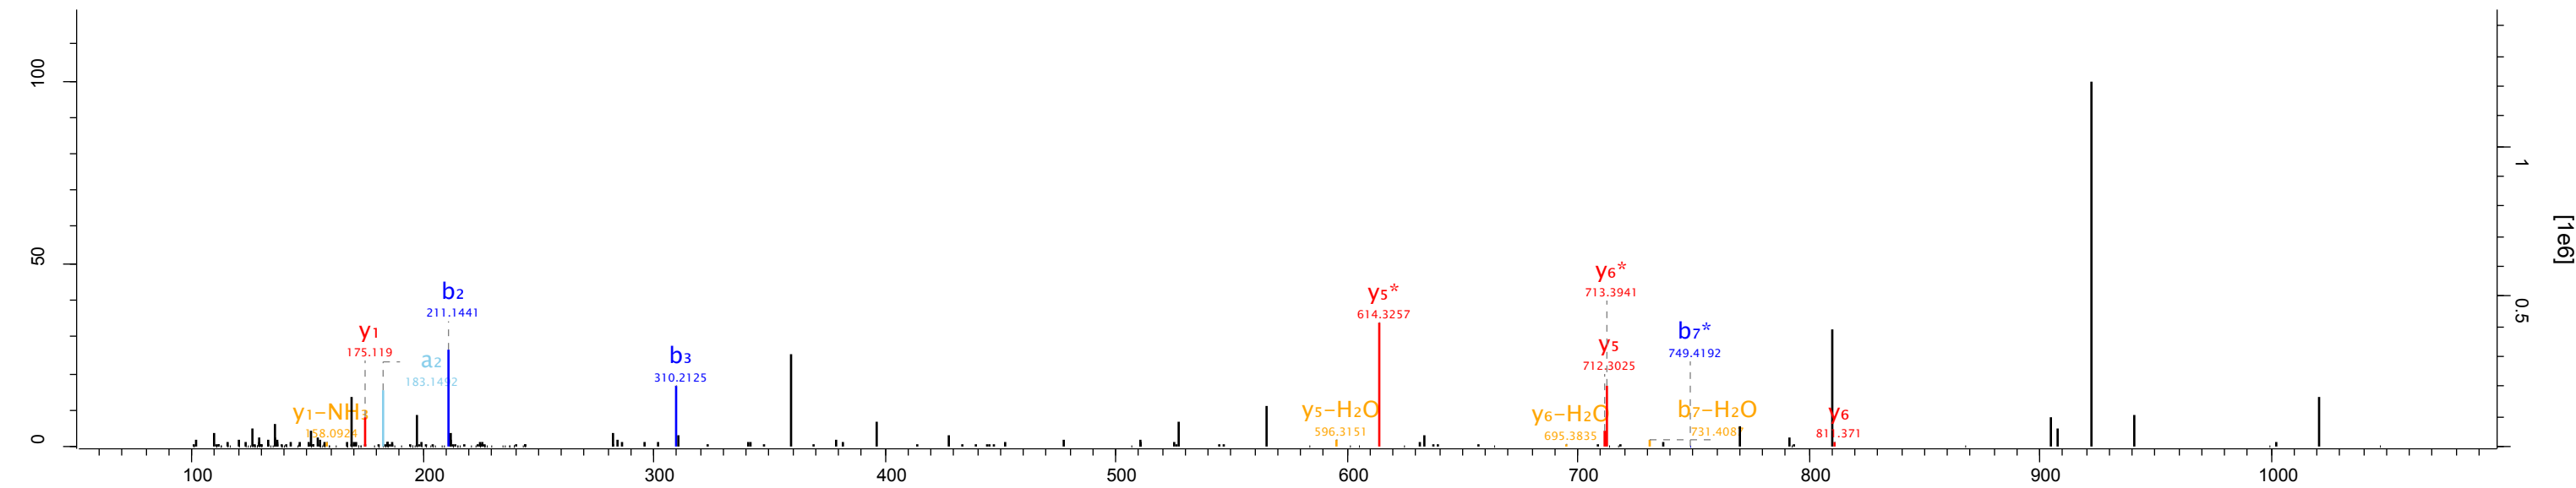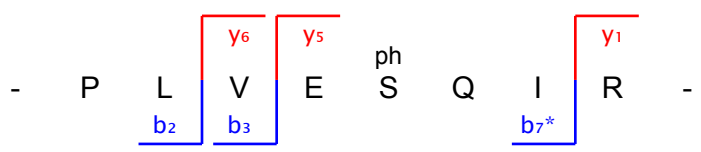

Raw file 20171215\_MaS\_33SR\_LMH\_phospho\_06 Scan 9255 Method FTMS; HCD Score 48.29 m/z 607.29 Gene names RAB3GAP1

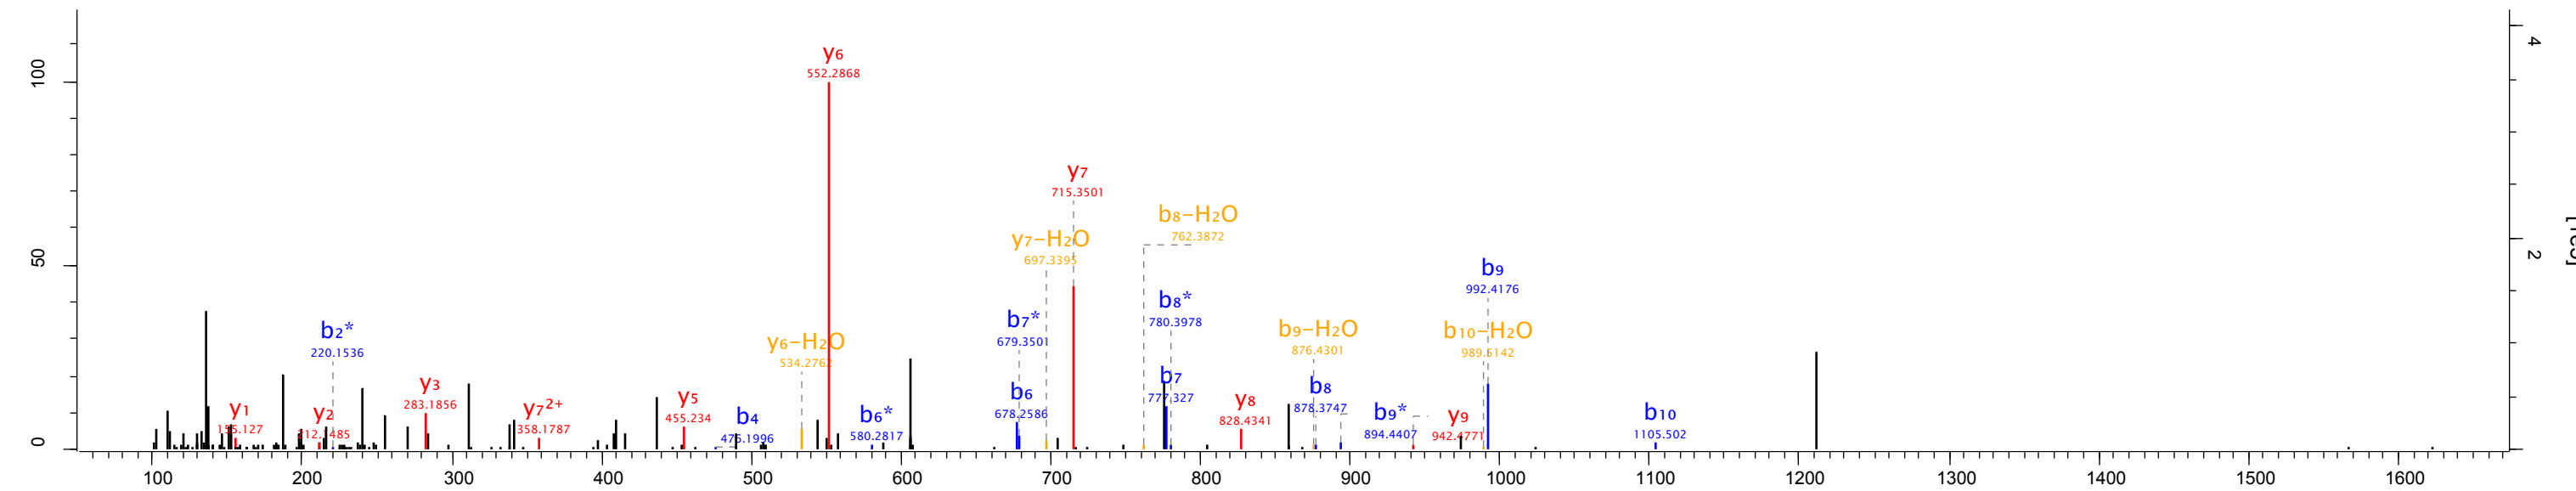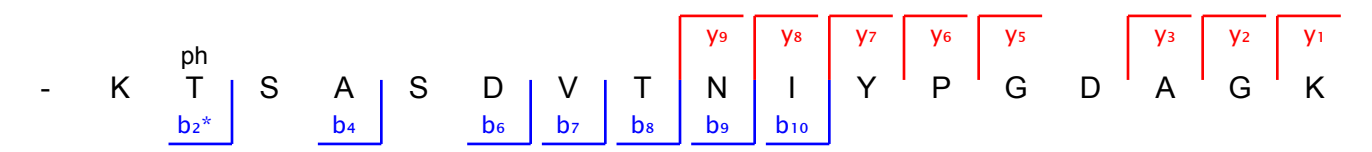

Raw file 20171215\_MaS\_33SR\_LMH\_phospho\_06 Scan 9305 Method FTMS; HCD Score 101.05 m/z 677.33 Gene names BAIAP2L2

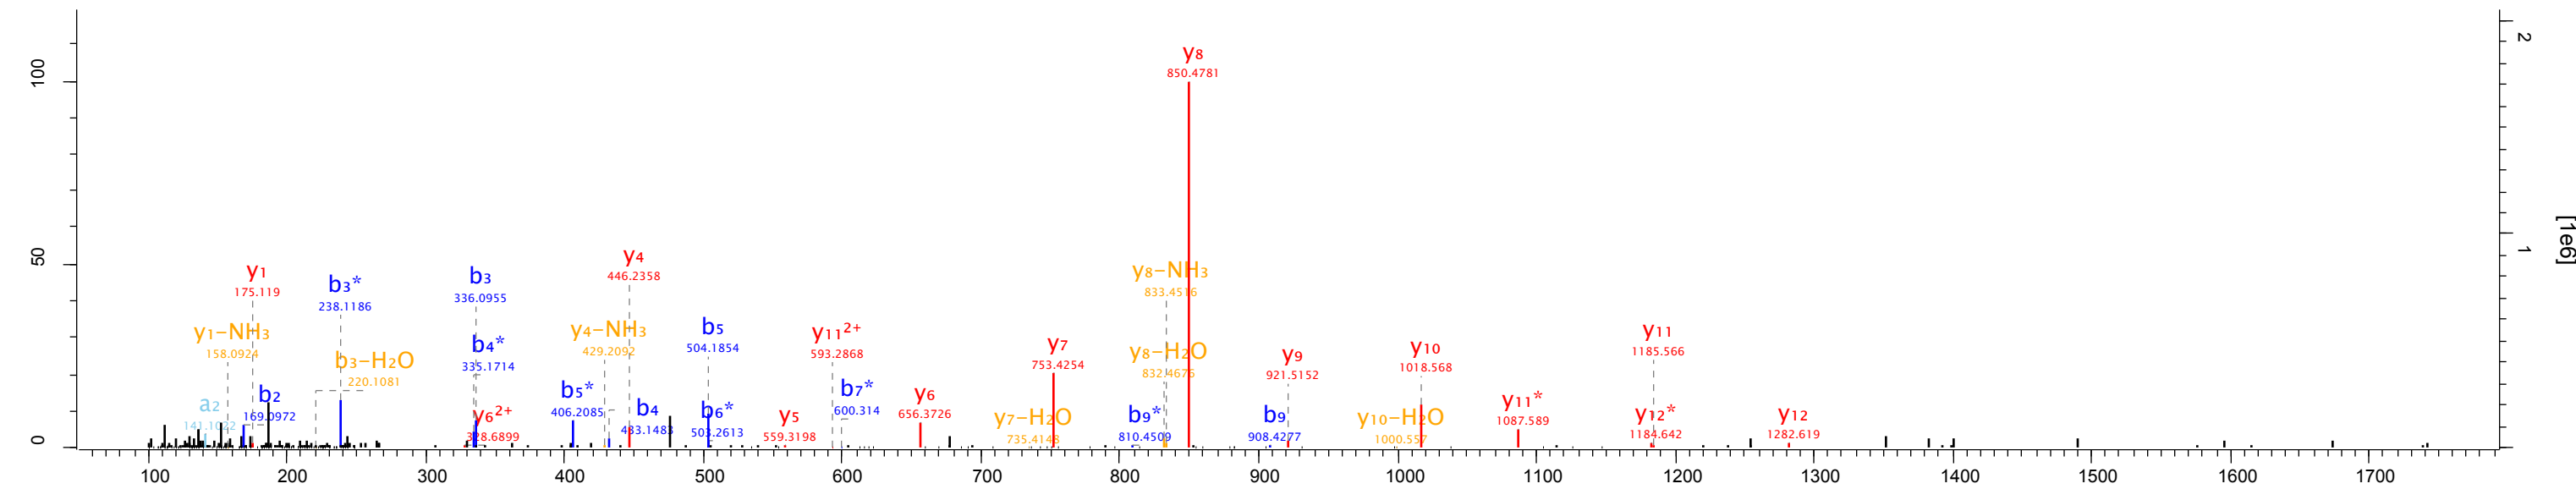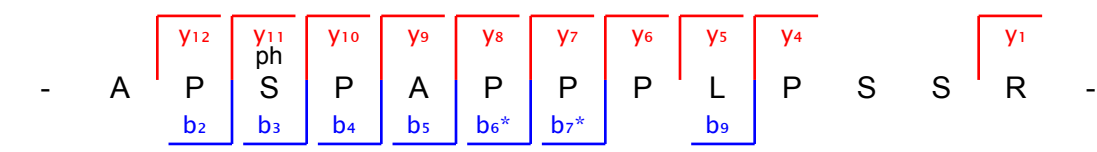



Raw file: 20171215\_MaS\_33SR\_LMH\_phospho\_06  
 Scan: 9315 Method: FTMS; HCD Score: 80.69 m/z: 433.71 Gene names: SLAIN2

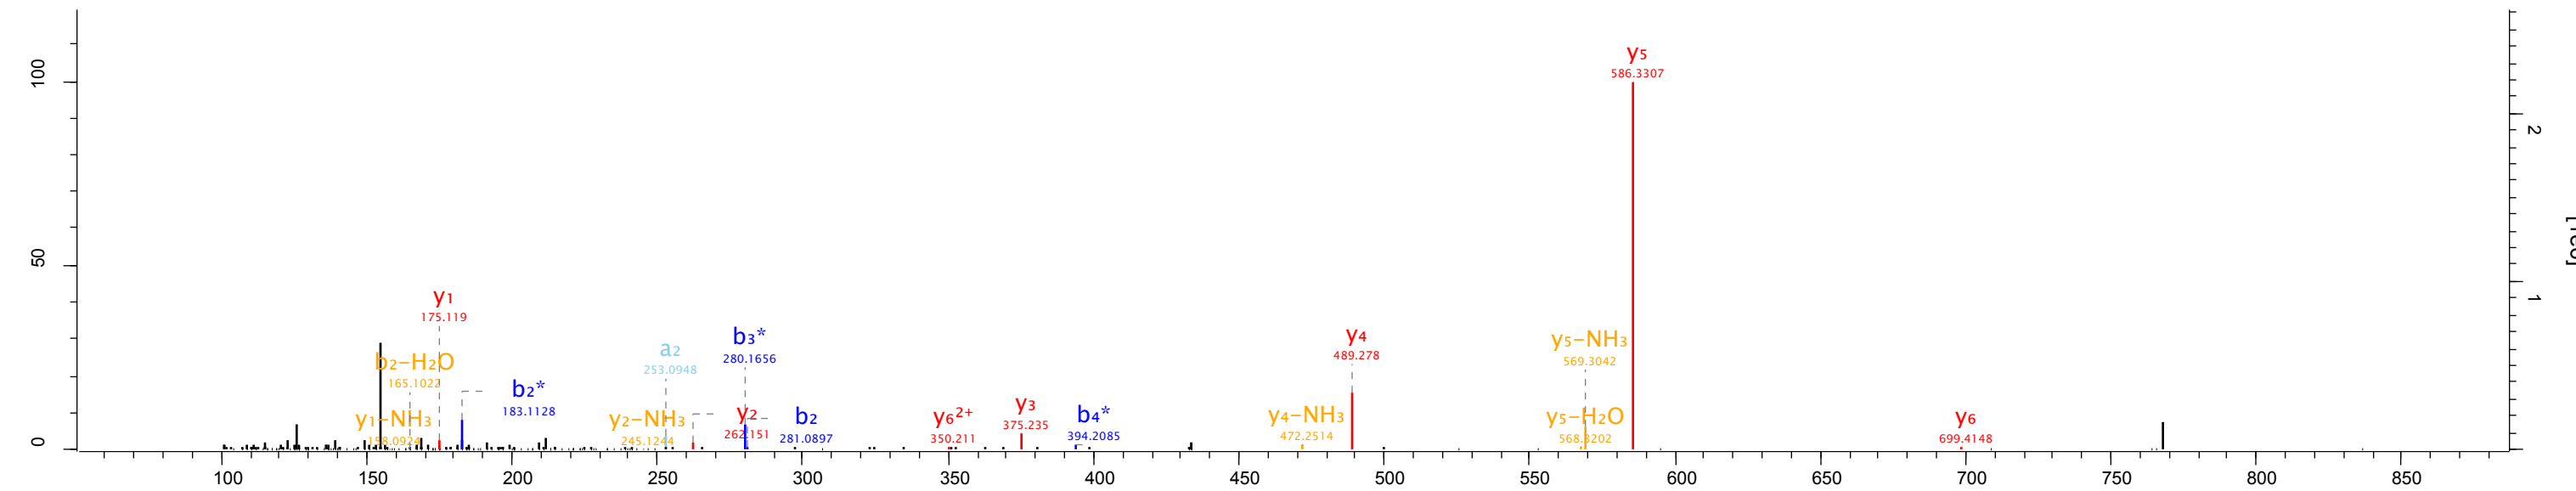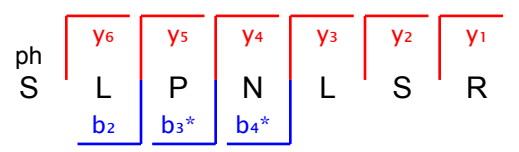

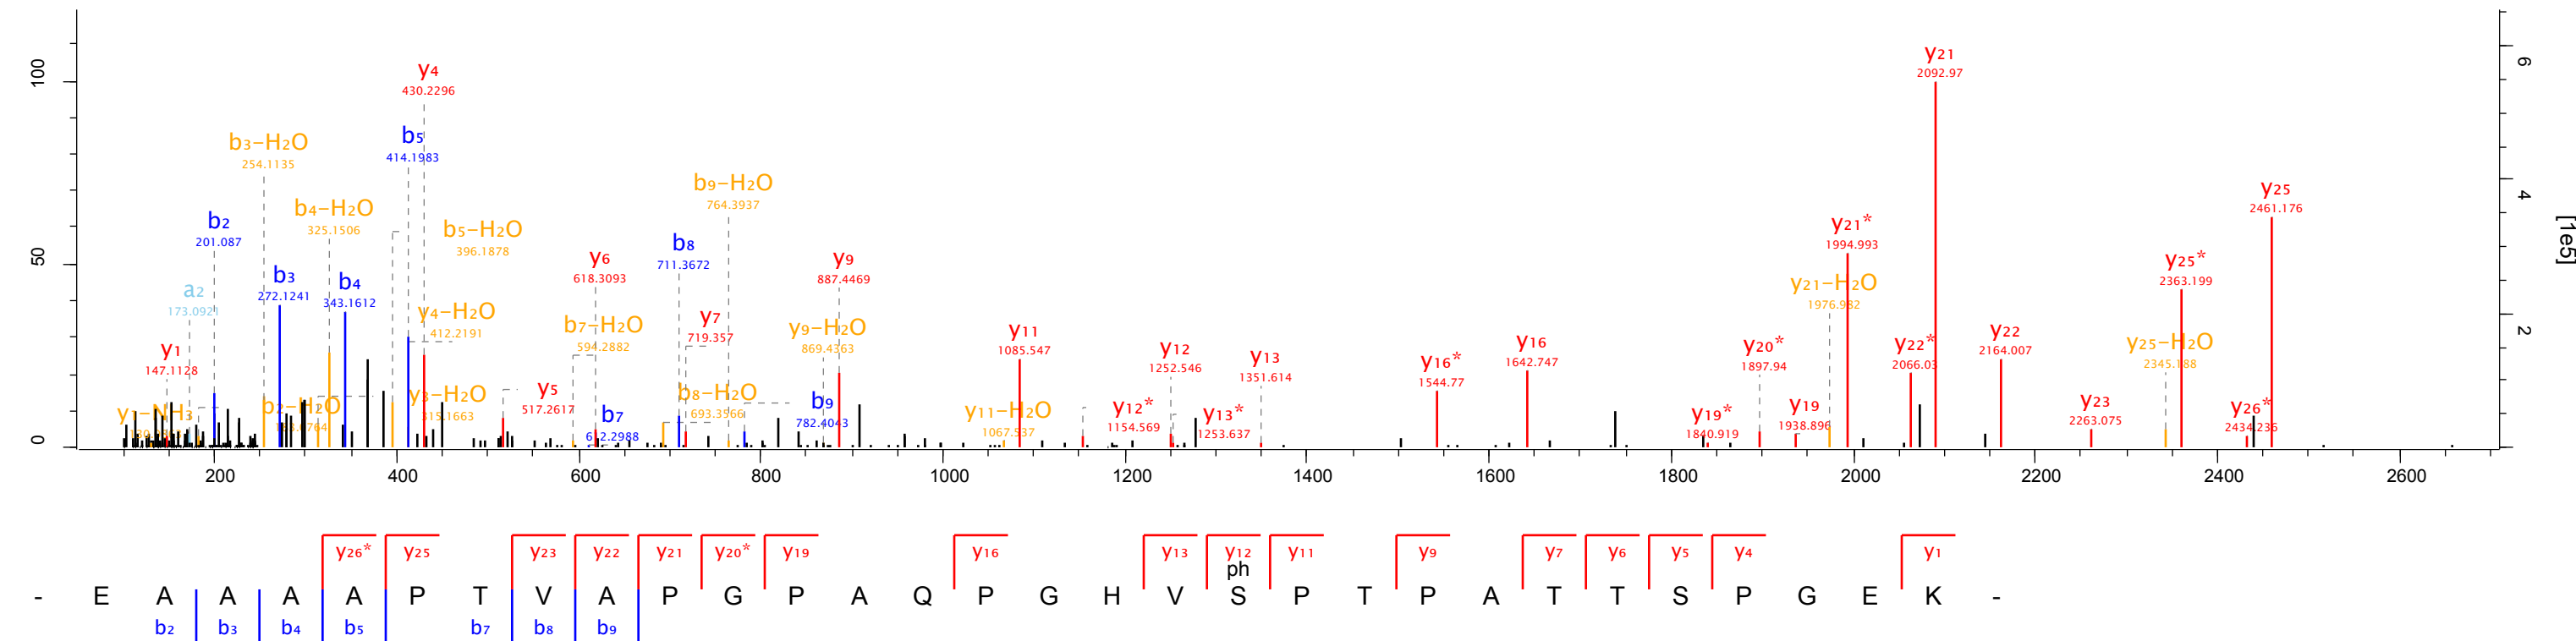

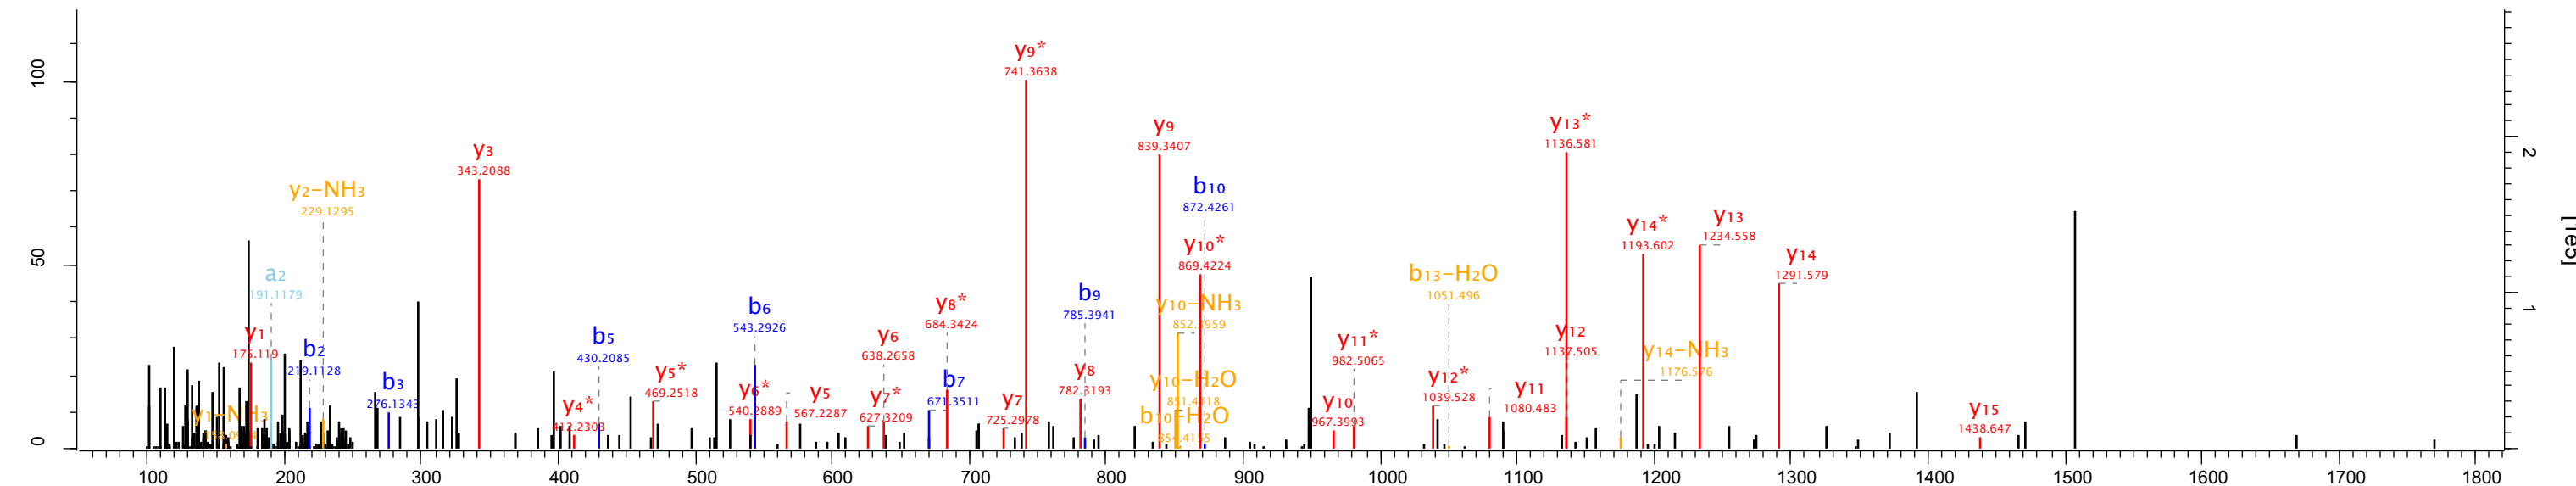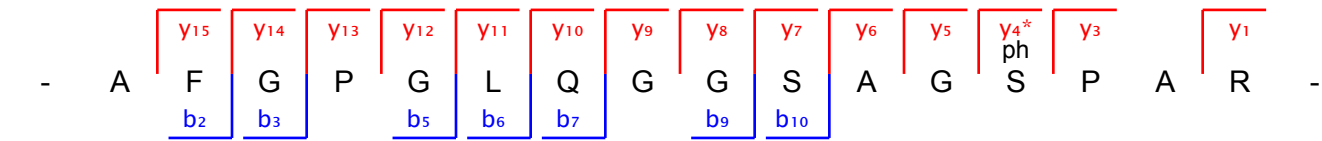

Raw file 20171215\_MaS\_33SR\_LMH\_phospho\_06 Scan 9535 Method FTMS; HCD Score 244.89 m/z 891.38

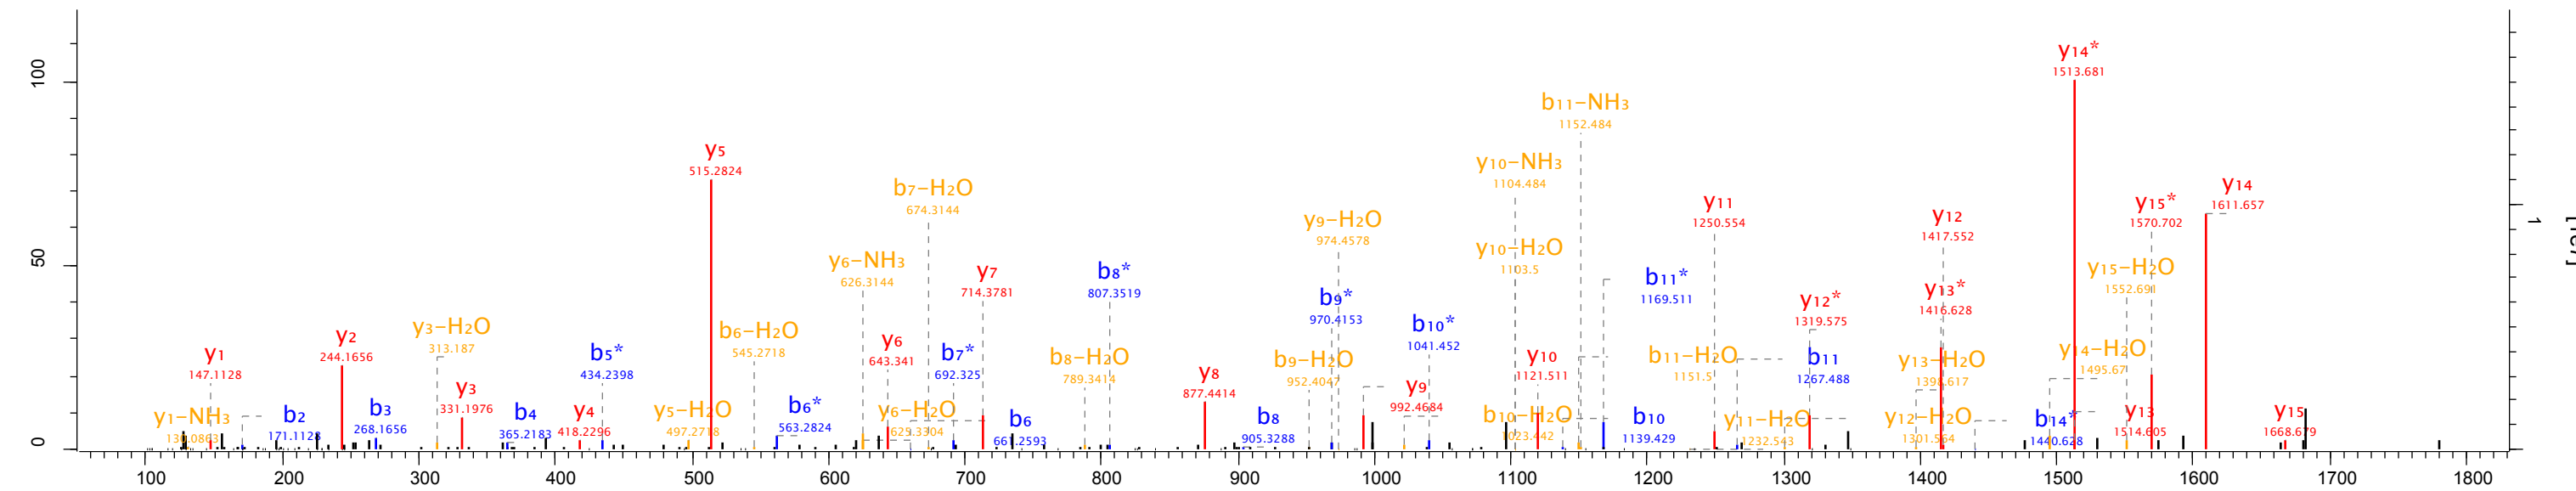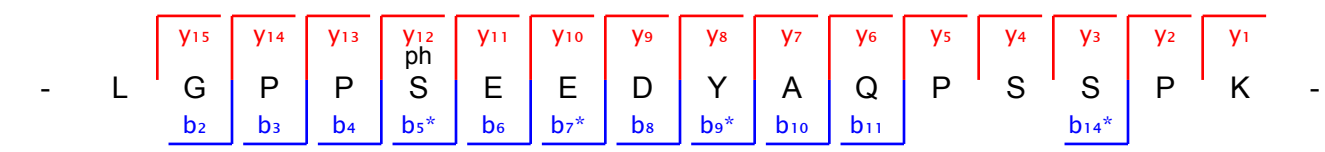

Raw file 20171215\_MaS\_33SR\_LMH\_phospho\_06 Scan 9655 Method FTMS; HCD Score 41.85 m/z 831.36 Gene names LIMCH1

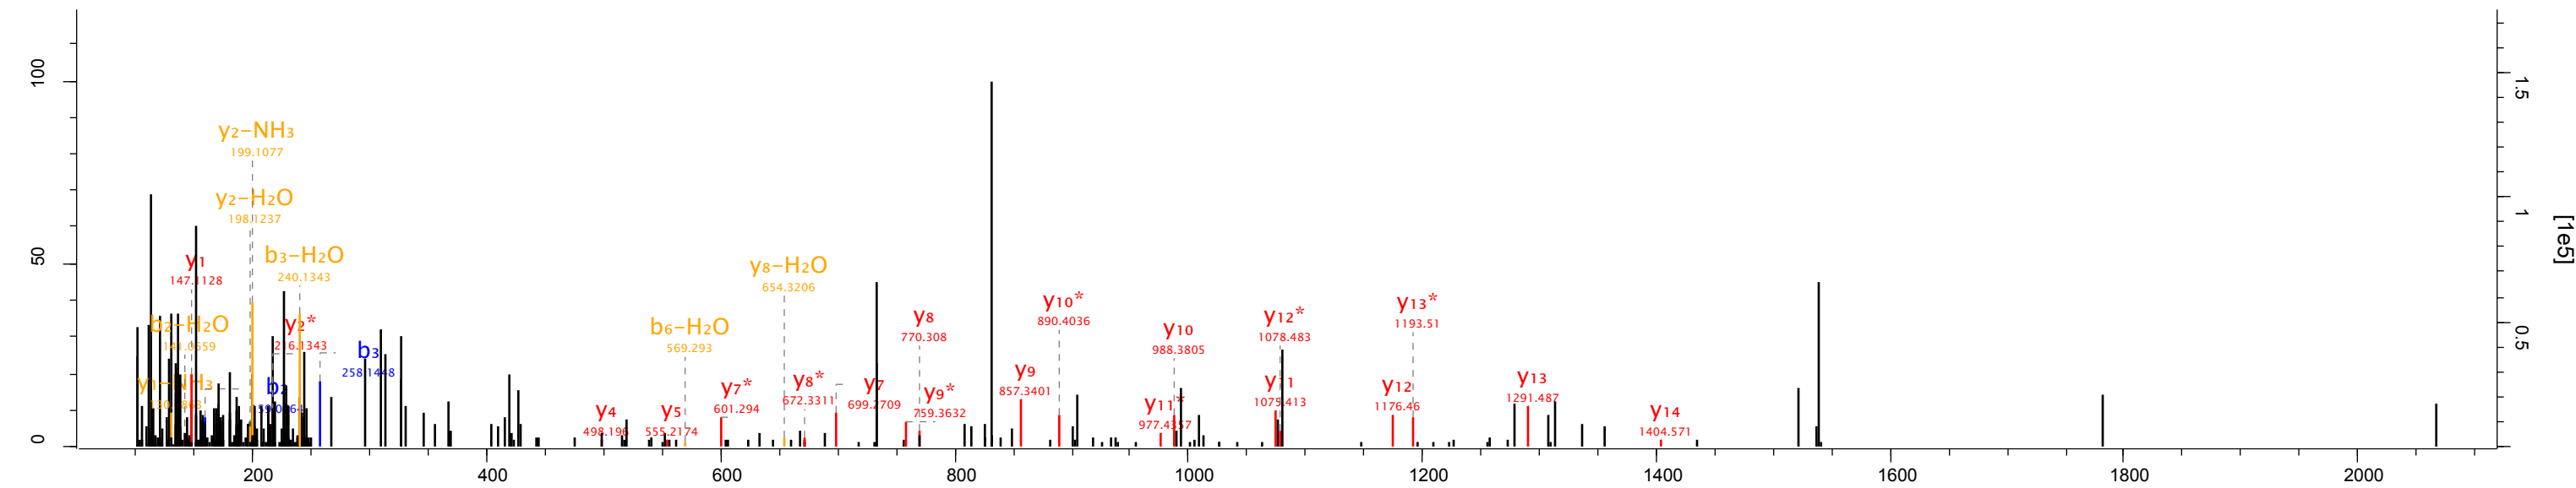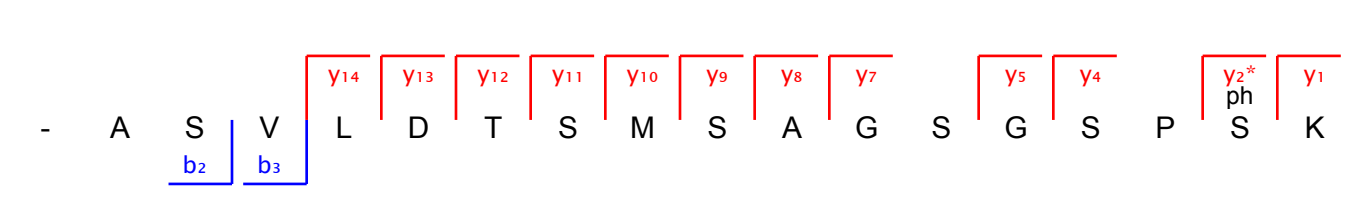

Raw file 20171215\_MaS\_33SR\_LMH\_phospho\_06 Scan 9955 Method FTMS; HCD Score 311.7 m/z 909.79 Gene names COPB2

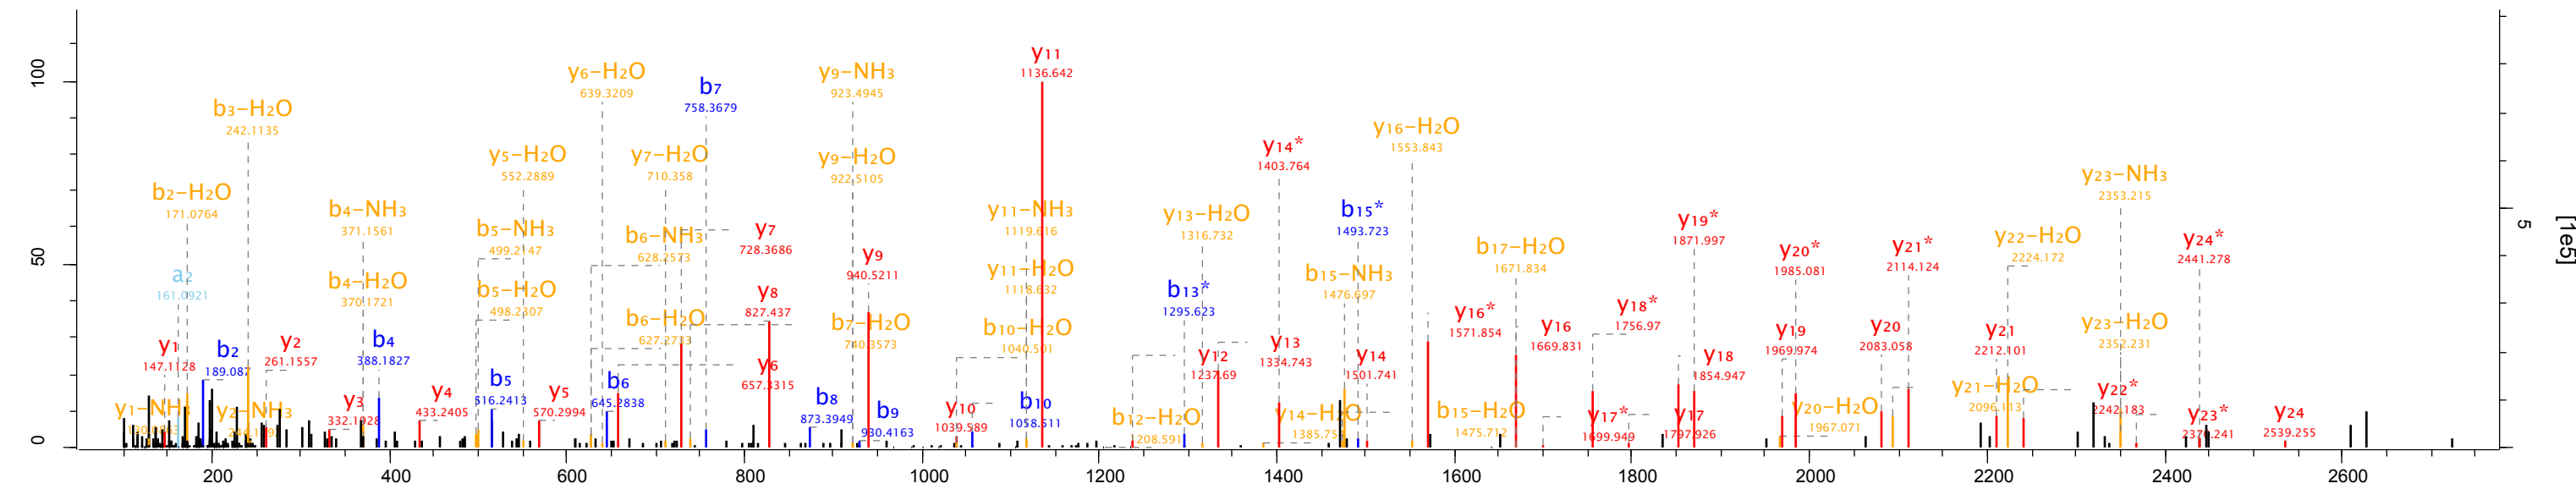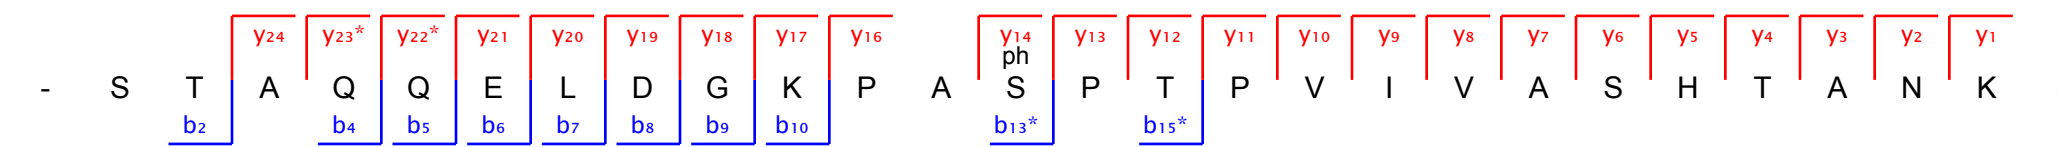

Raw file 20171215\_MaS\_33SR\_LMH\_phospho\_07 Scan 1905 Method FTMS; HCD Score 189.59 m/z 656.27 Gene names BABAM1

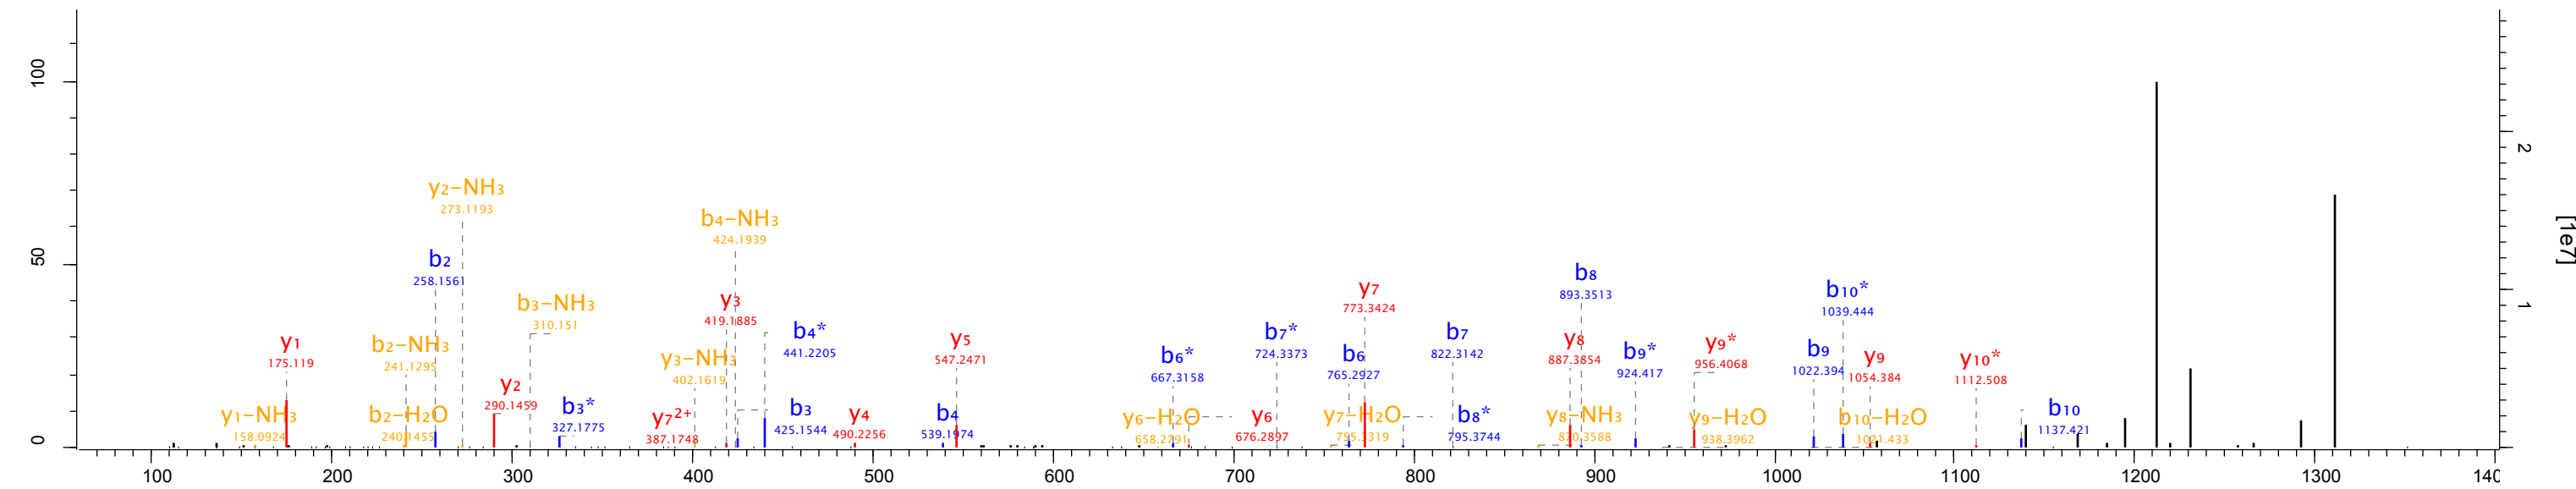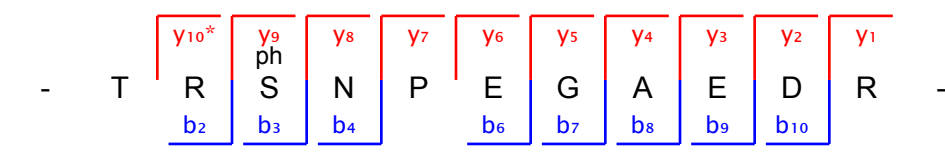

Raw file 20171215\_MaS\_33SR\_LMH\_phospho\_07 Scan 2165 Method FTMS; HCD Score 92.79 m/z 527.73 Gene names FOXK2

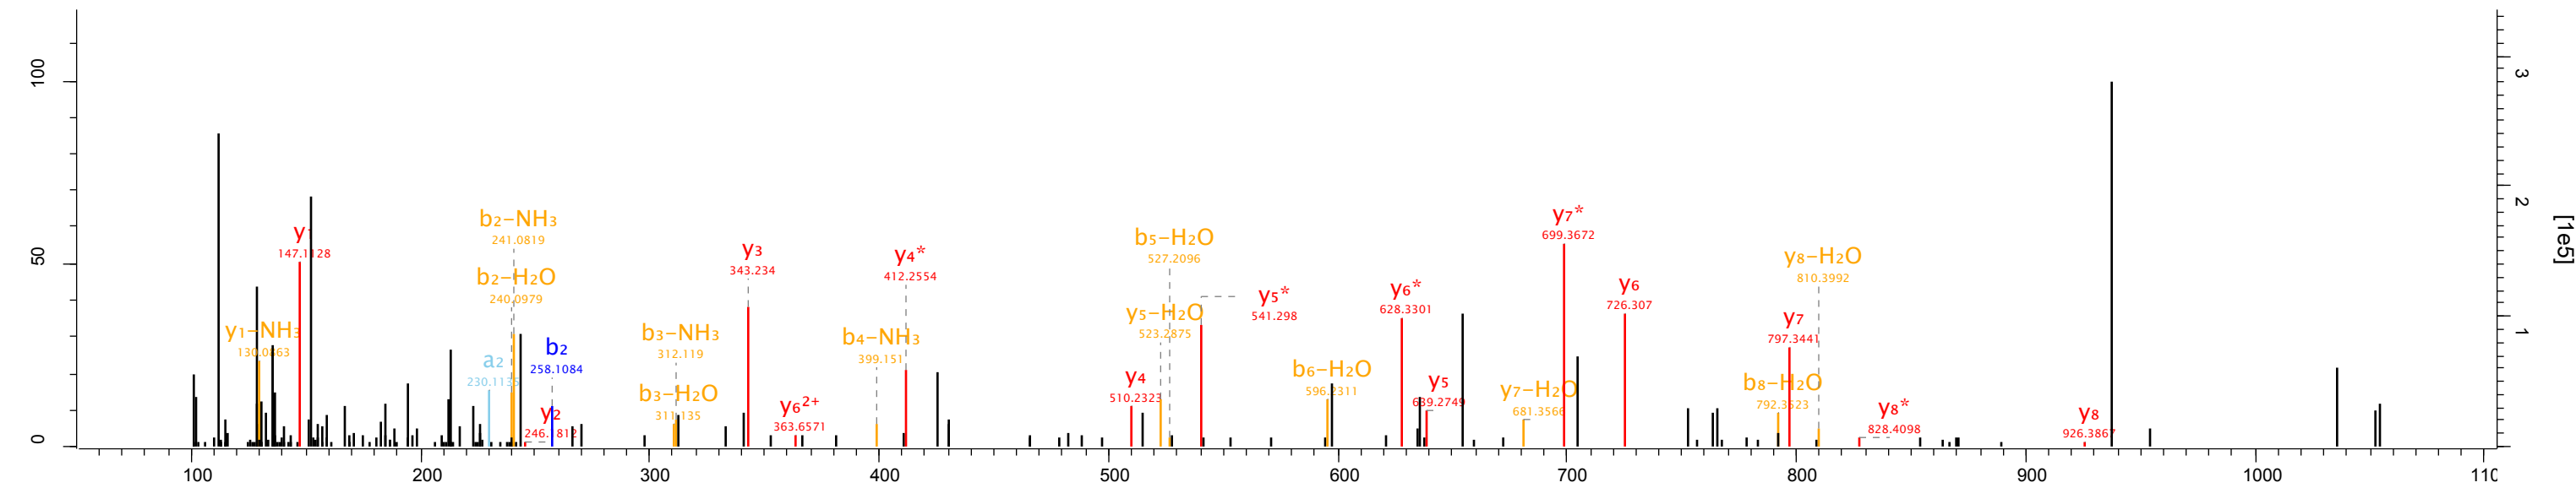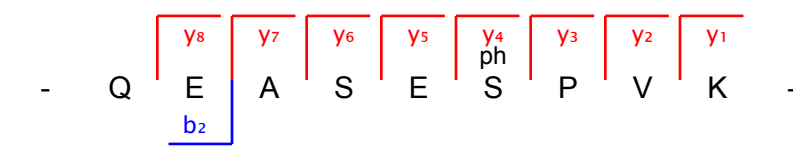



Raw file 20171215\_MaS\_33SR\_LMH\_phospho\_07 Scan 2305 Method FTMS; HCD Score 188.9 m/z 737.83 Gene names C18orf25;ARKL1

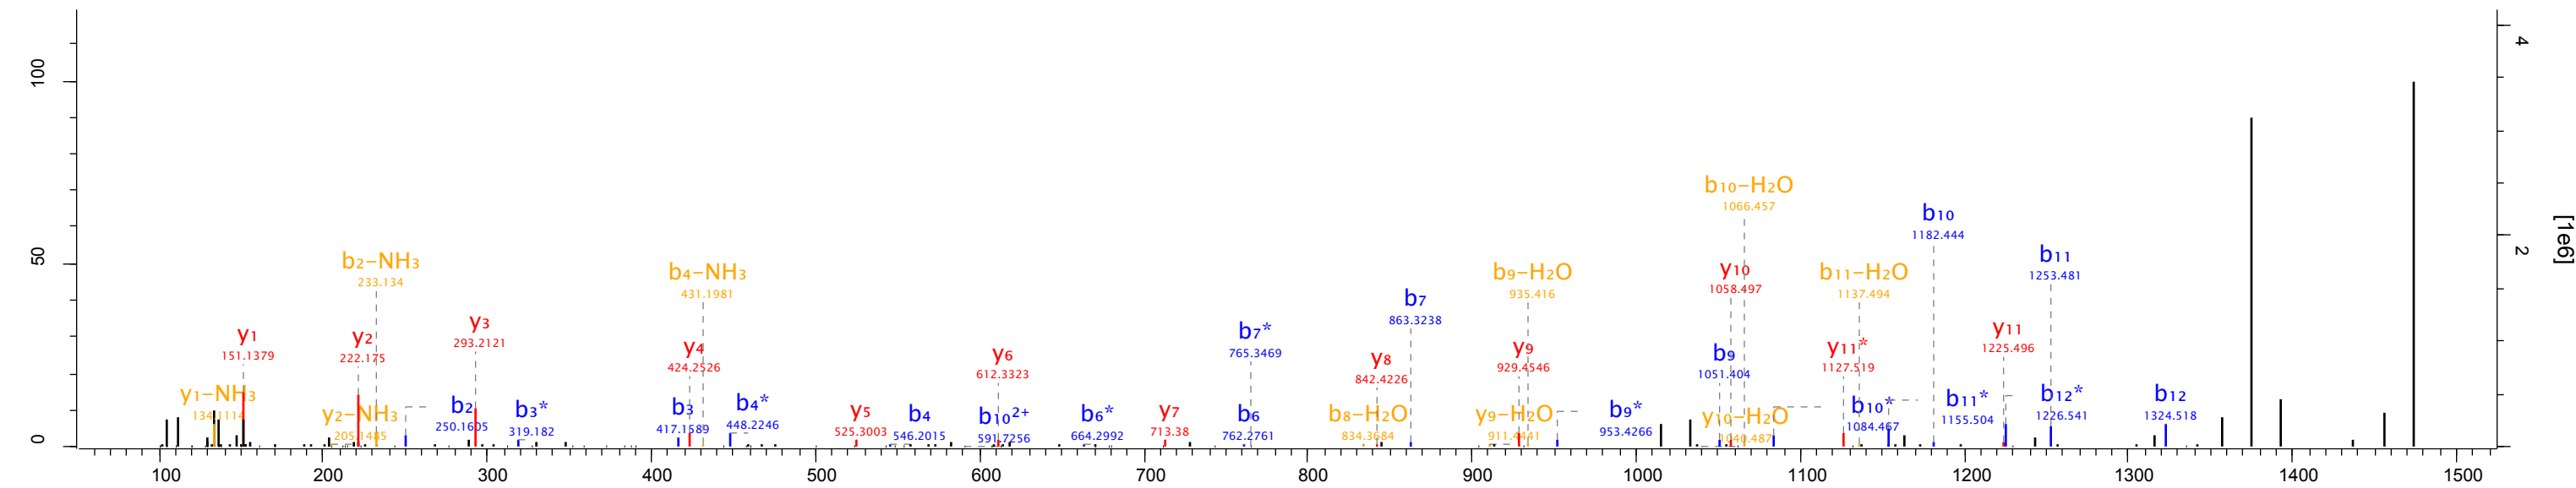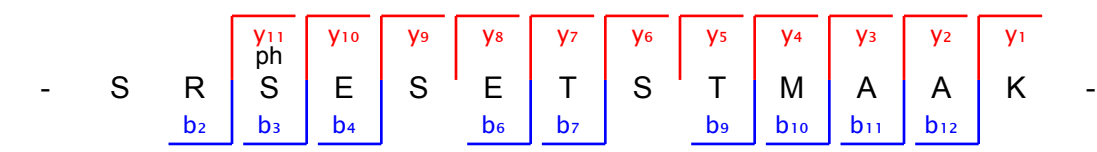

Raw file 20171215\_MaS\_33SR\_LMH\_phospho\_07 Scan 2735 Method FTMS; HCD Score 84.75 m/z 406.56 Gene names RBM33

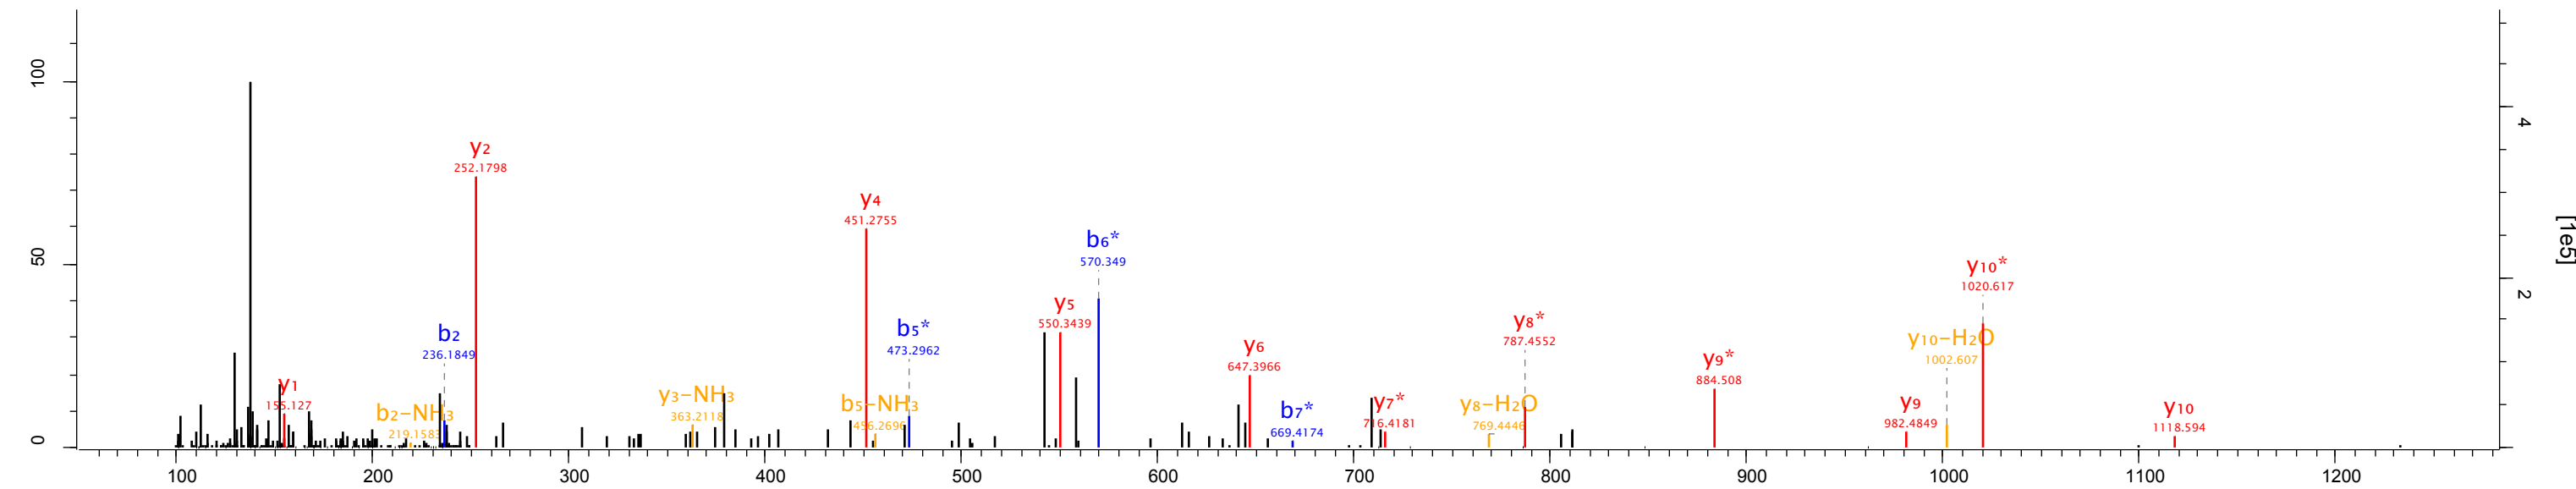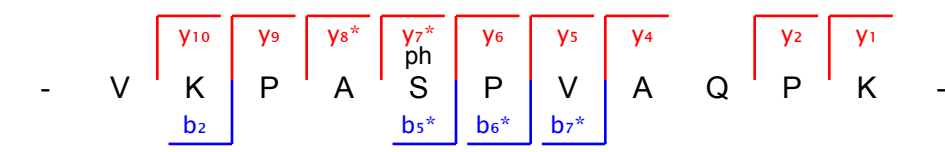

Raw file: 20171215\_MaS\_33SR\_LMH\_phospho\_07  
 Scan: 2785 Method: FTMS; HCD Score: 41.69 m/z: 490.25 Gene names: MORC2

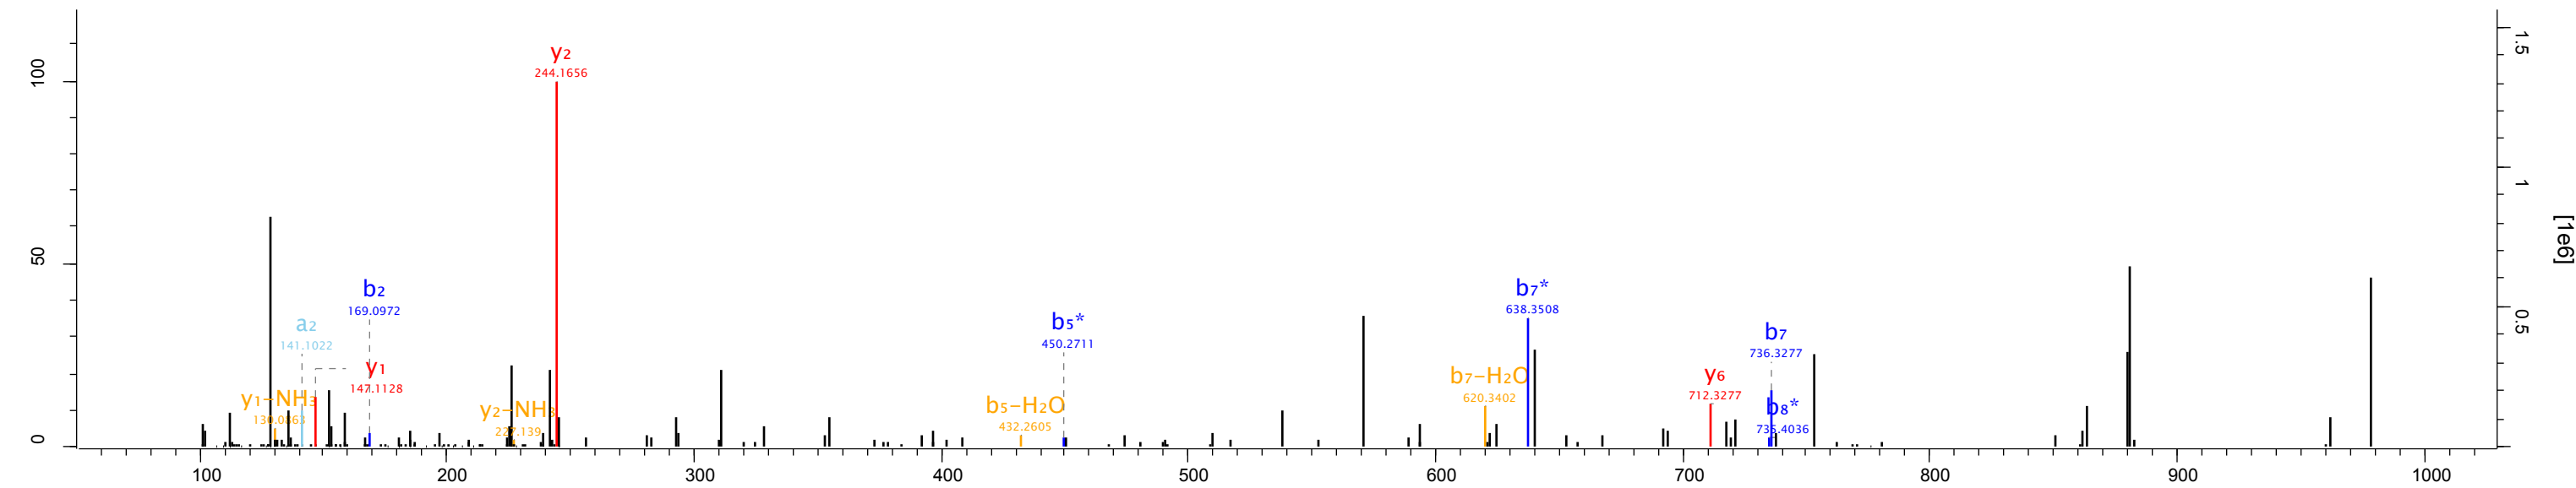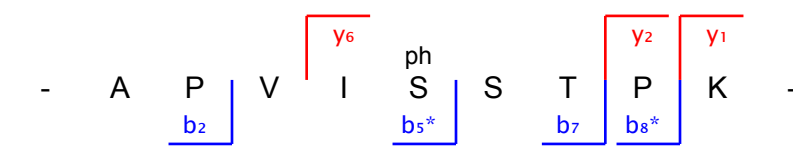

20171215\_MaS\_33SR\_LMH\_phospho\_07 2895 FTMS; HCD 108.7 454.71 EHBP1

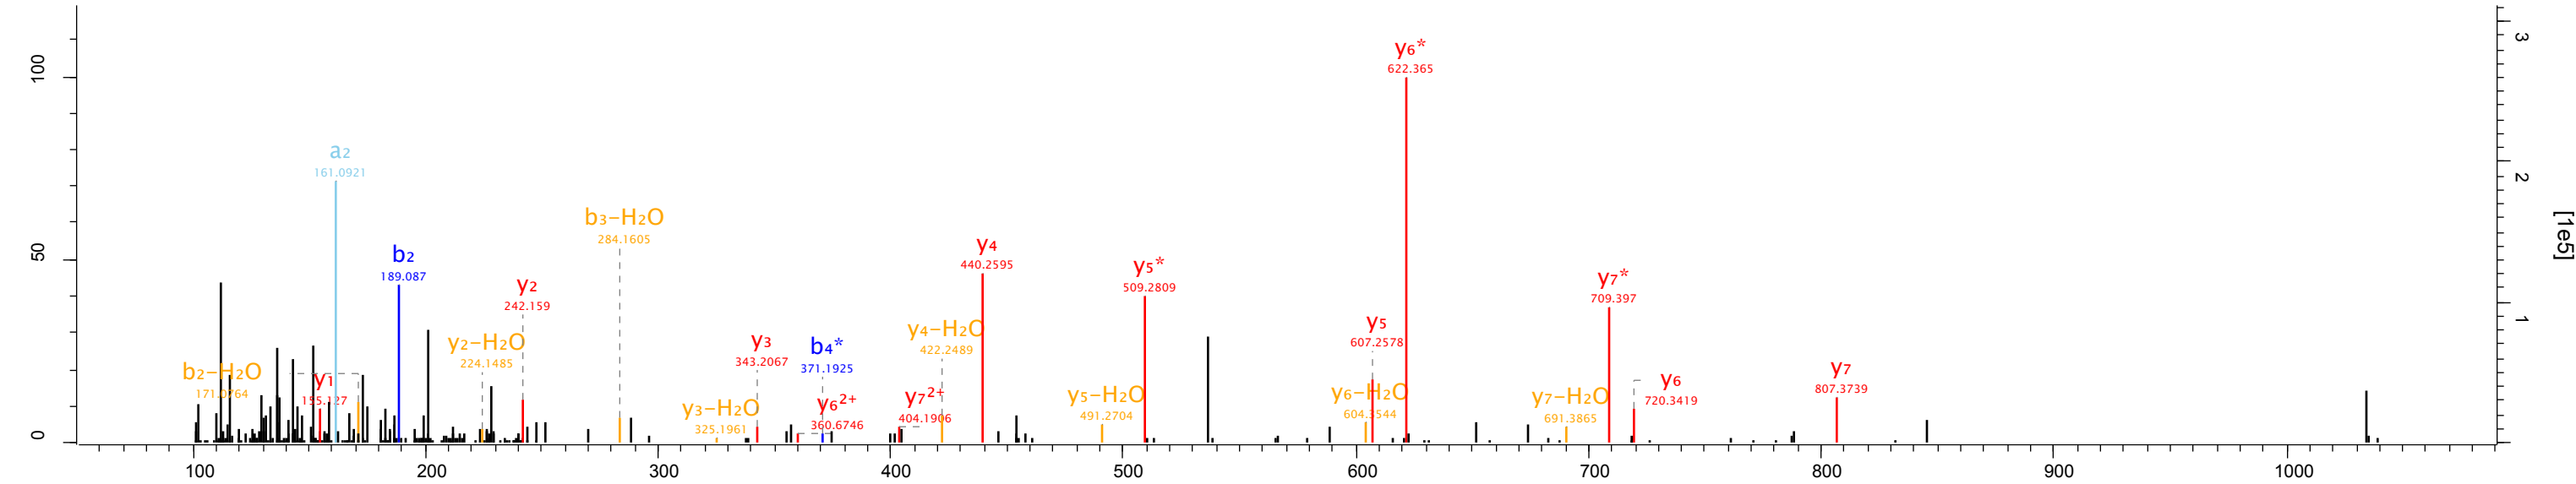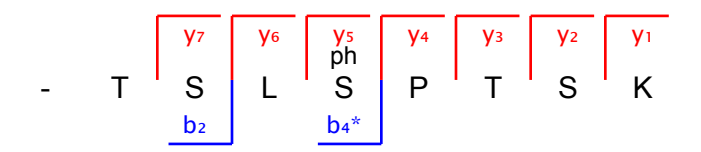

Raw file 20171215\_MaS\_33SR\_LMH\_phospho\_07 Scan 3125 Method FTMS; HCD Score 81.01 m/z 677.8 Gene names LMNB2

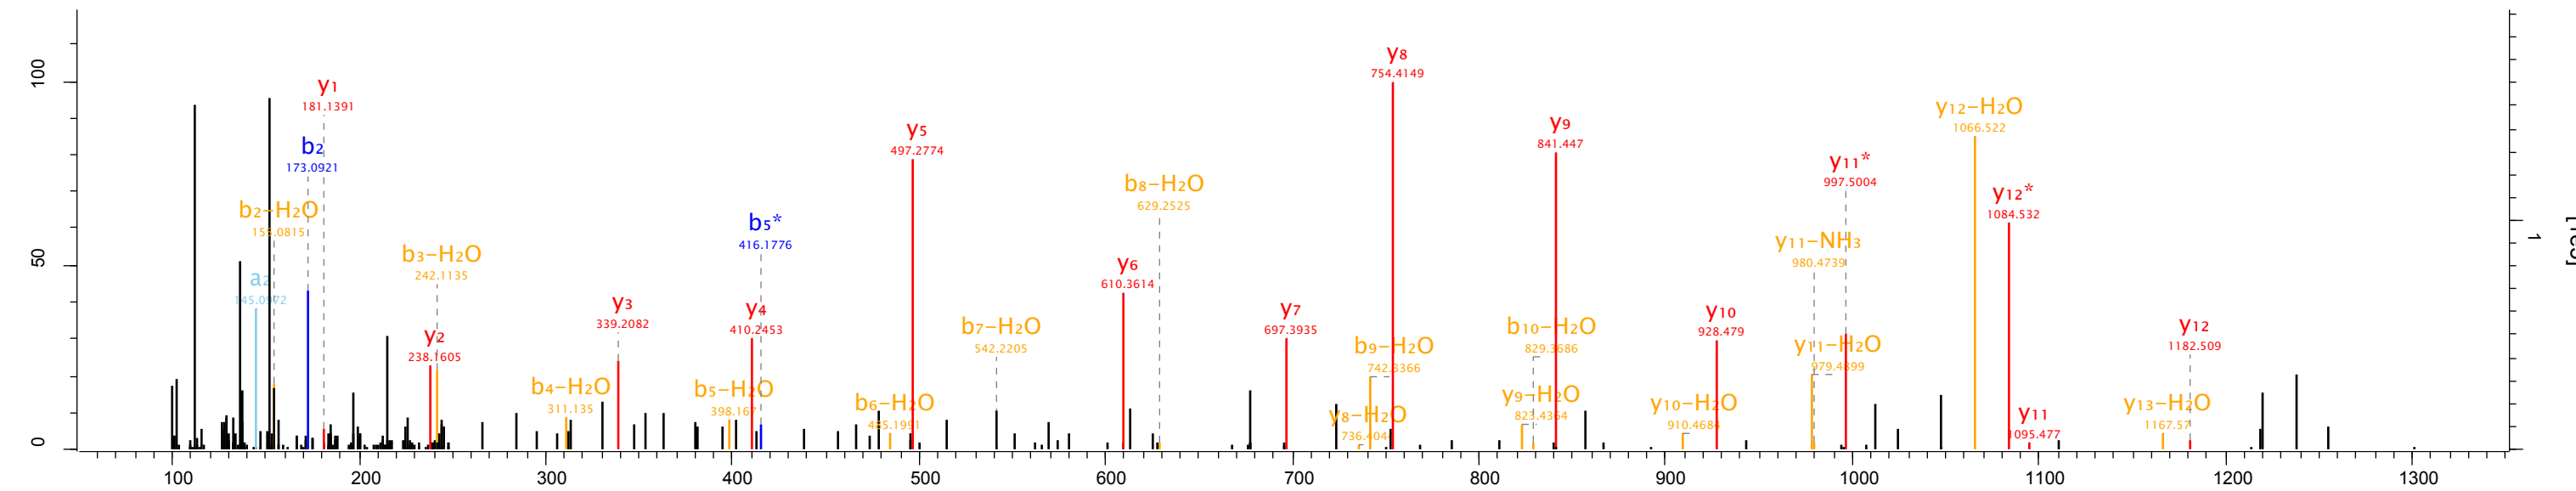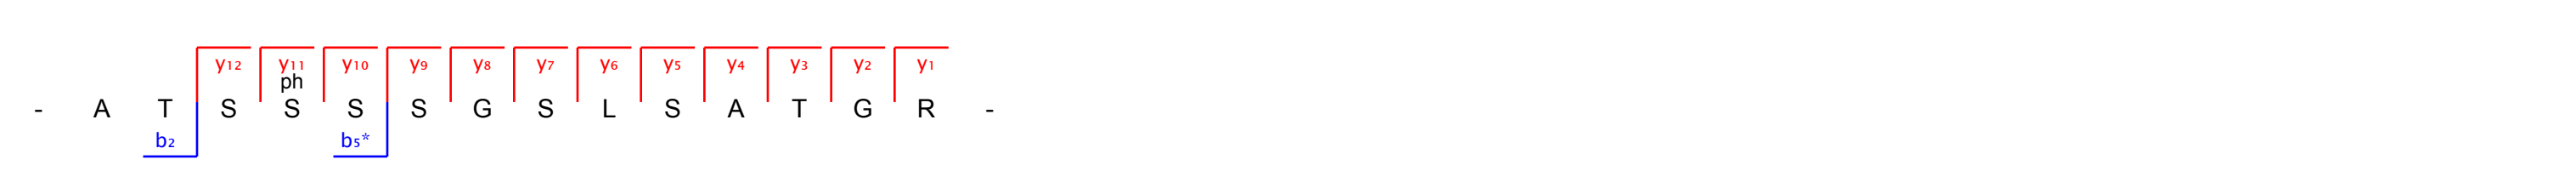

Raw file 20171215\_MaS\_33SR\_LMH\_phospho\_07 Scan 3345 Method FTMS; HCD Score 189.09 m/z 652.31 Gene names SRRM1

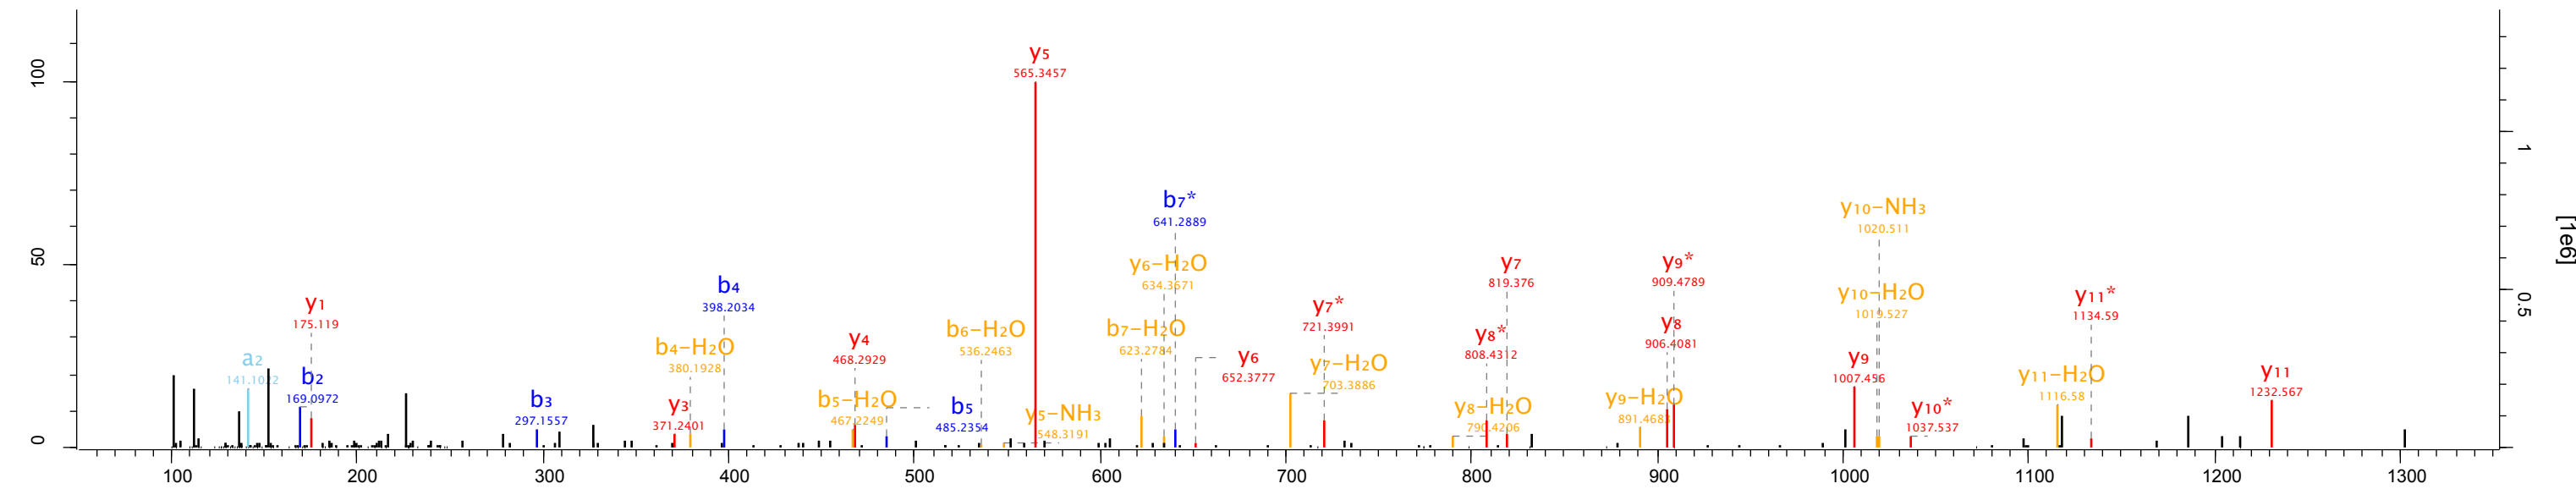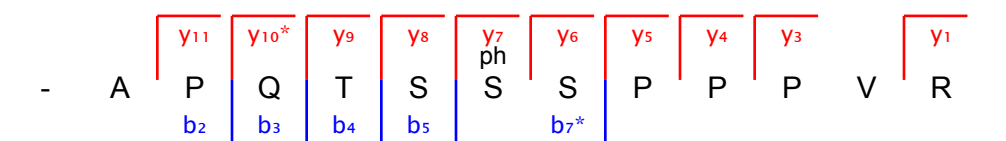

Raw file 20171215\_MaS\_33SR\_LMH\_phospho\_07 Scan 4335 Method FTMS; HCD Score 119.62 m/z 618.78 Gene names MTDH

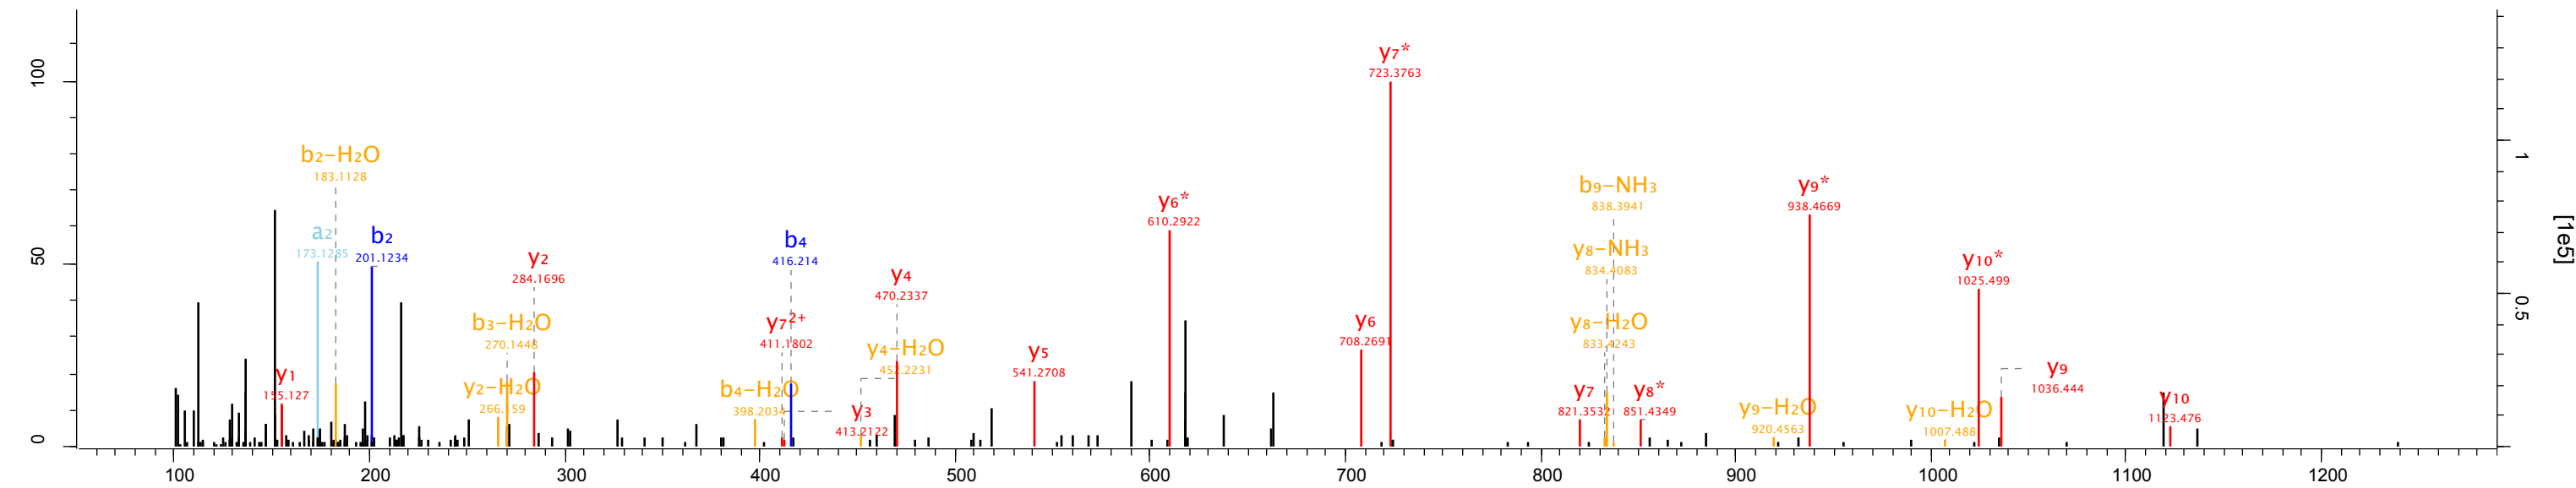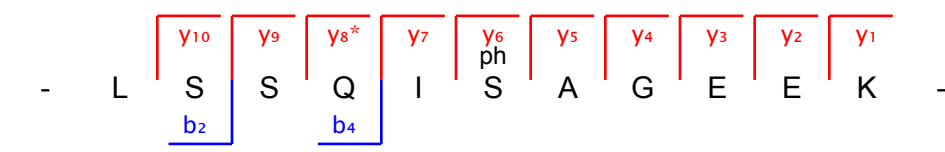

Raw file 20171215\_MaS\_33SR\_LMH\_phospho\_08 Scan 10285 Method FTMS; HCD Score 41.51 m/z 871.38 Gene names PTPN12

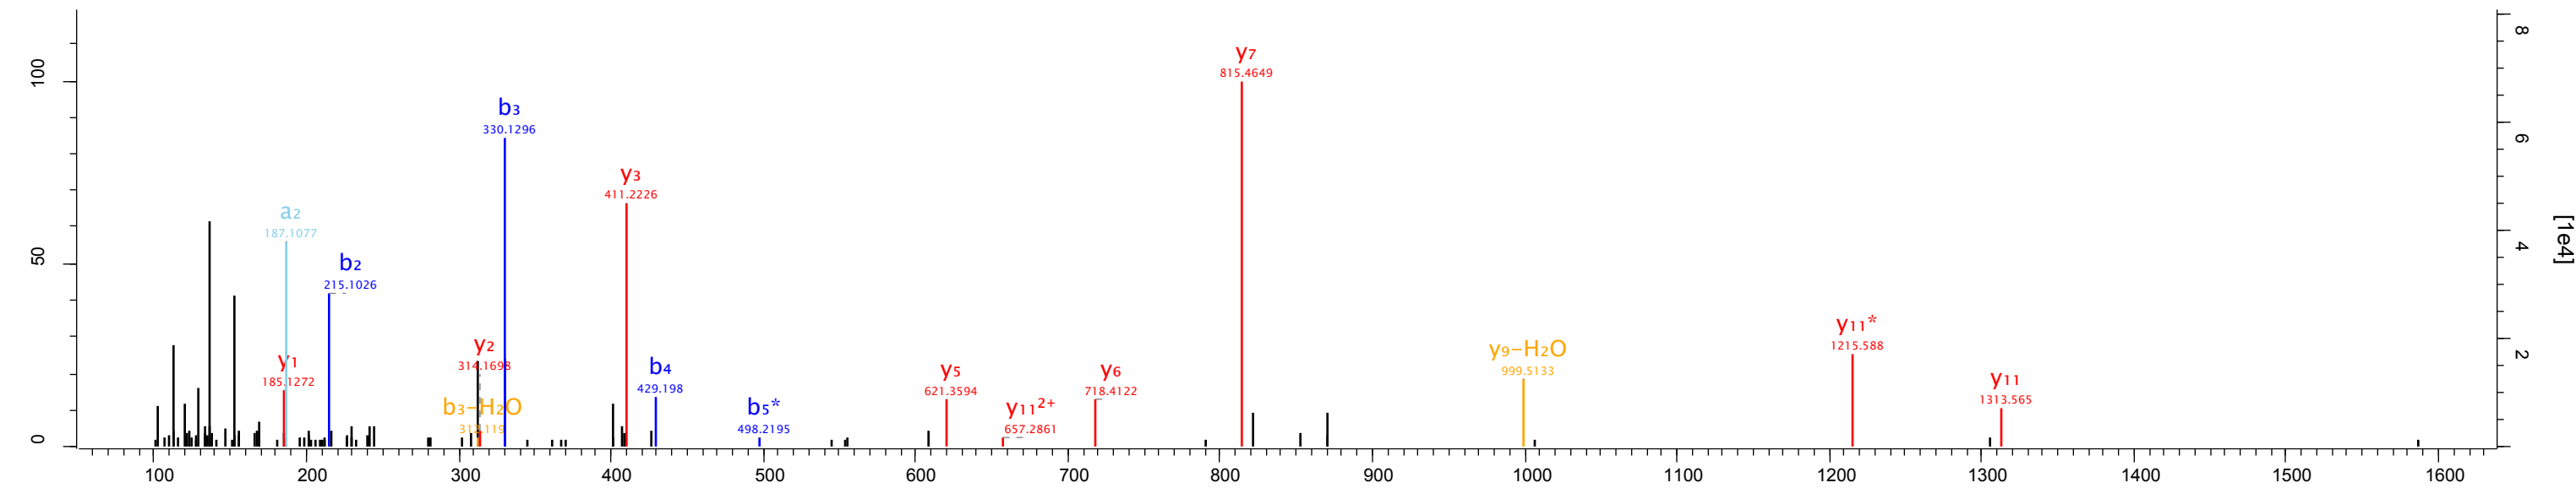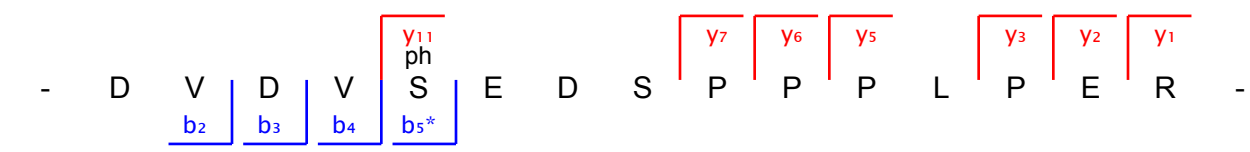



Raw file 20171215\_MaS\_33SR\_LMH\_phospho\_08 Scan 11895 Method FTMS; HCD Score 45.35 m/z 991.93 Gene names MAP1B

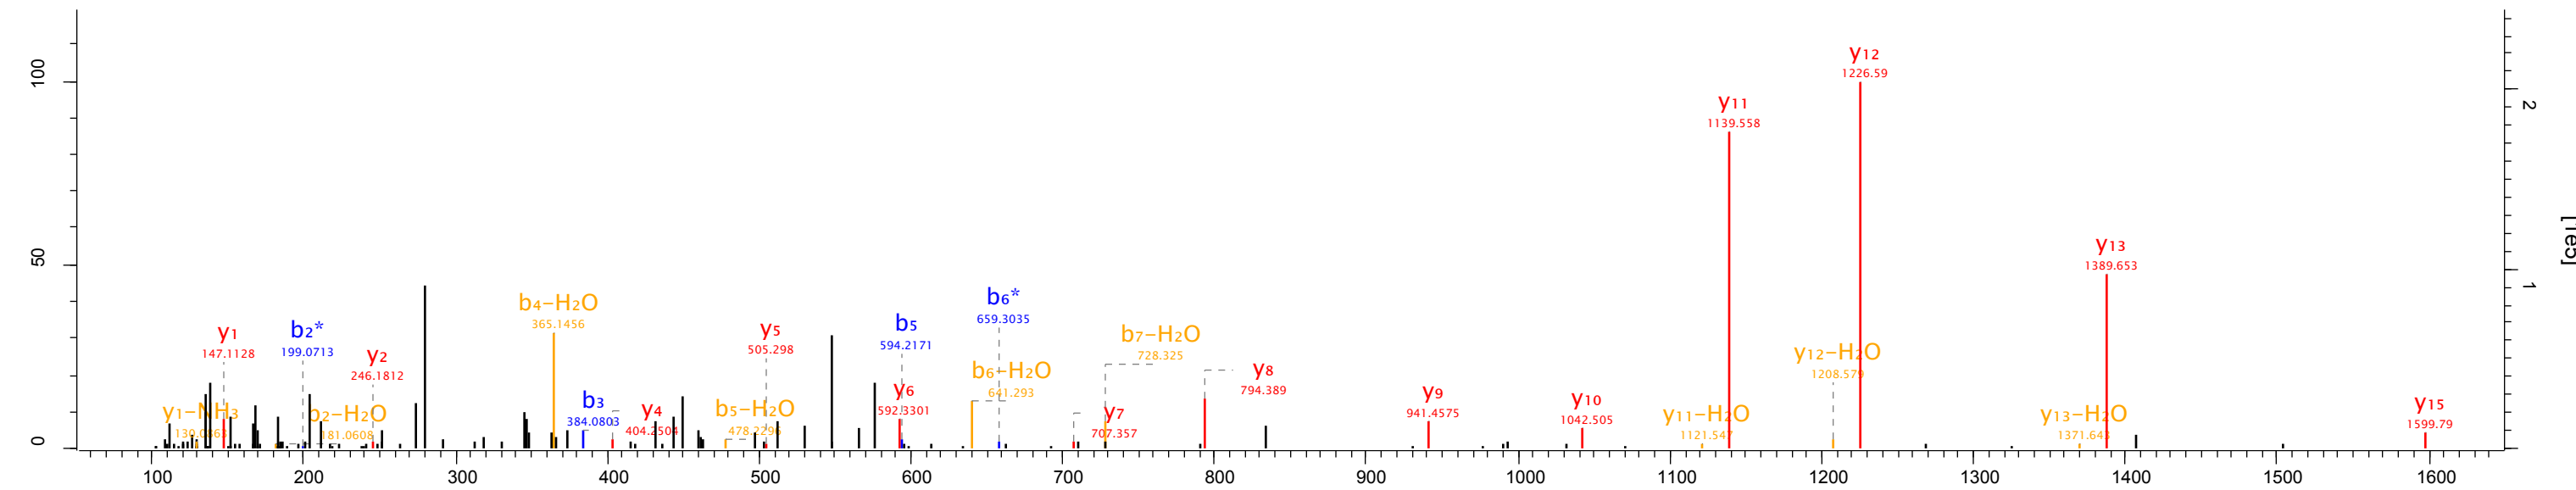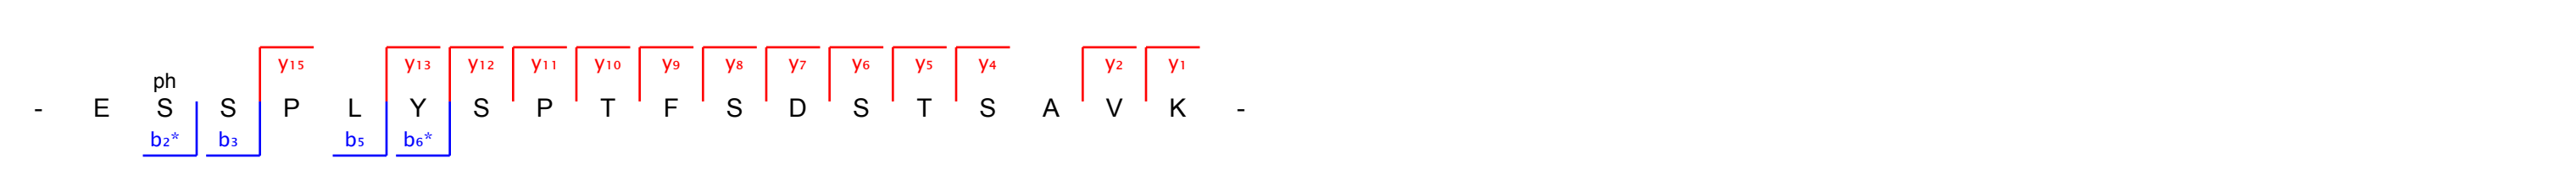

Raw file 20171215\_MaS\_33SR\_LMH\_phospho\_08 Scan 1955 Method FTMS; HCD Score 288.53 m/z 566.91 Gene names ILF3

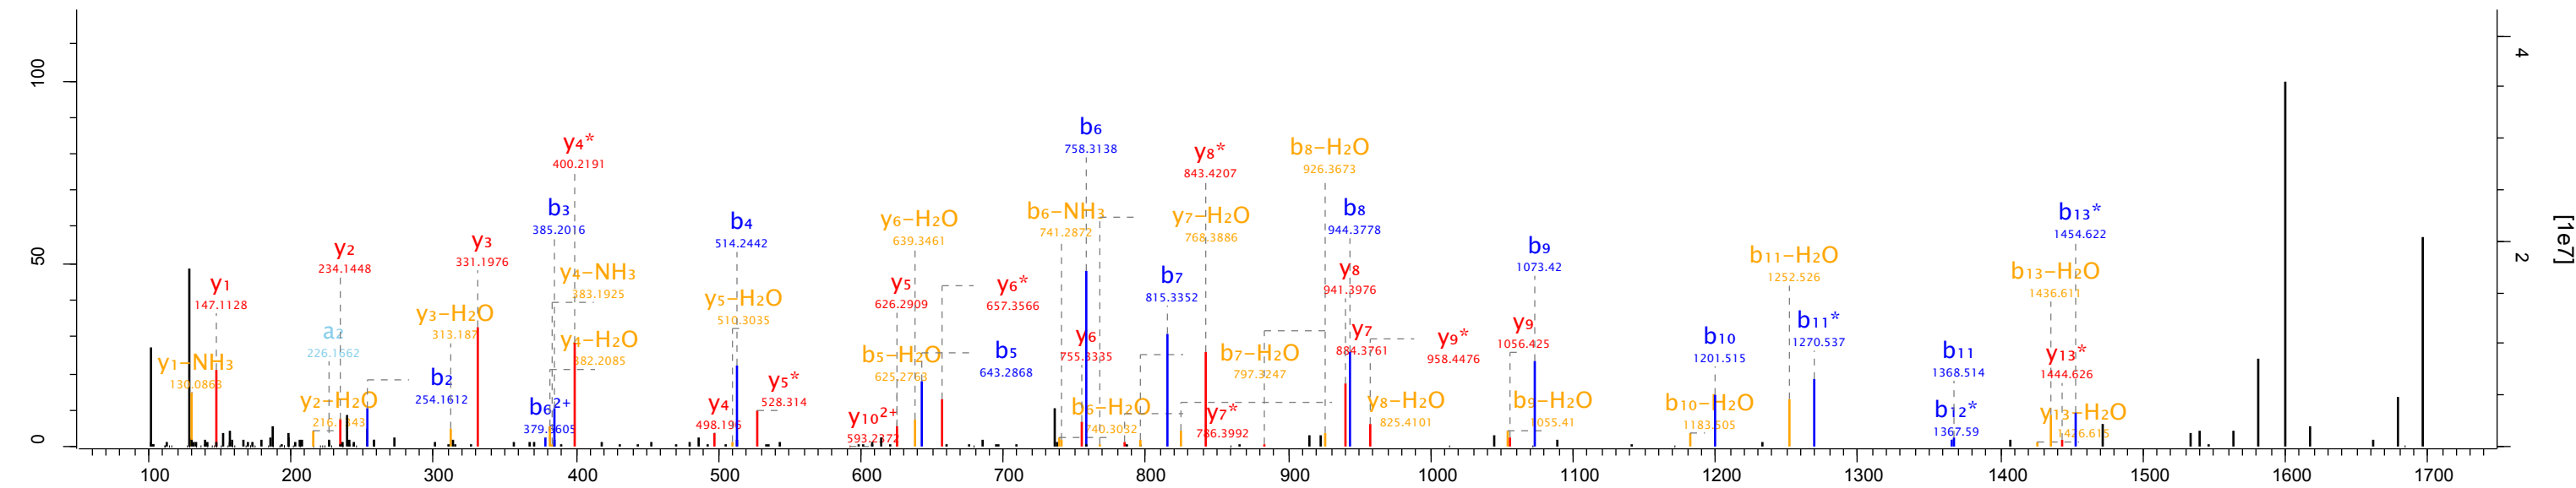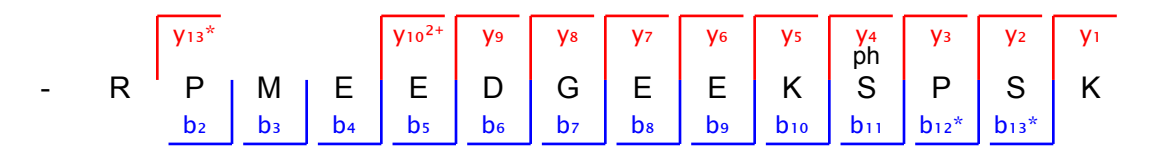

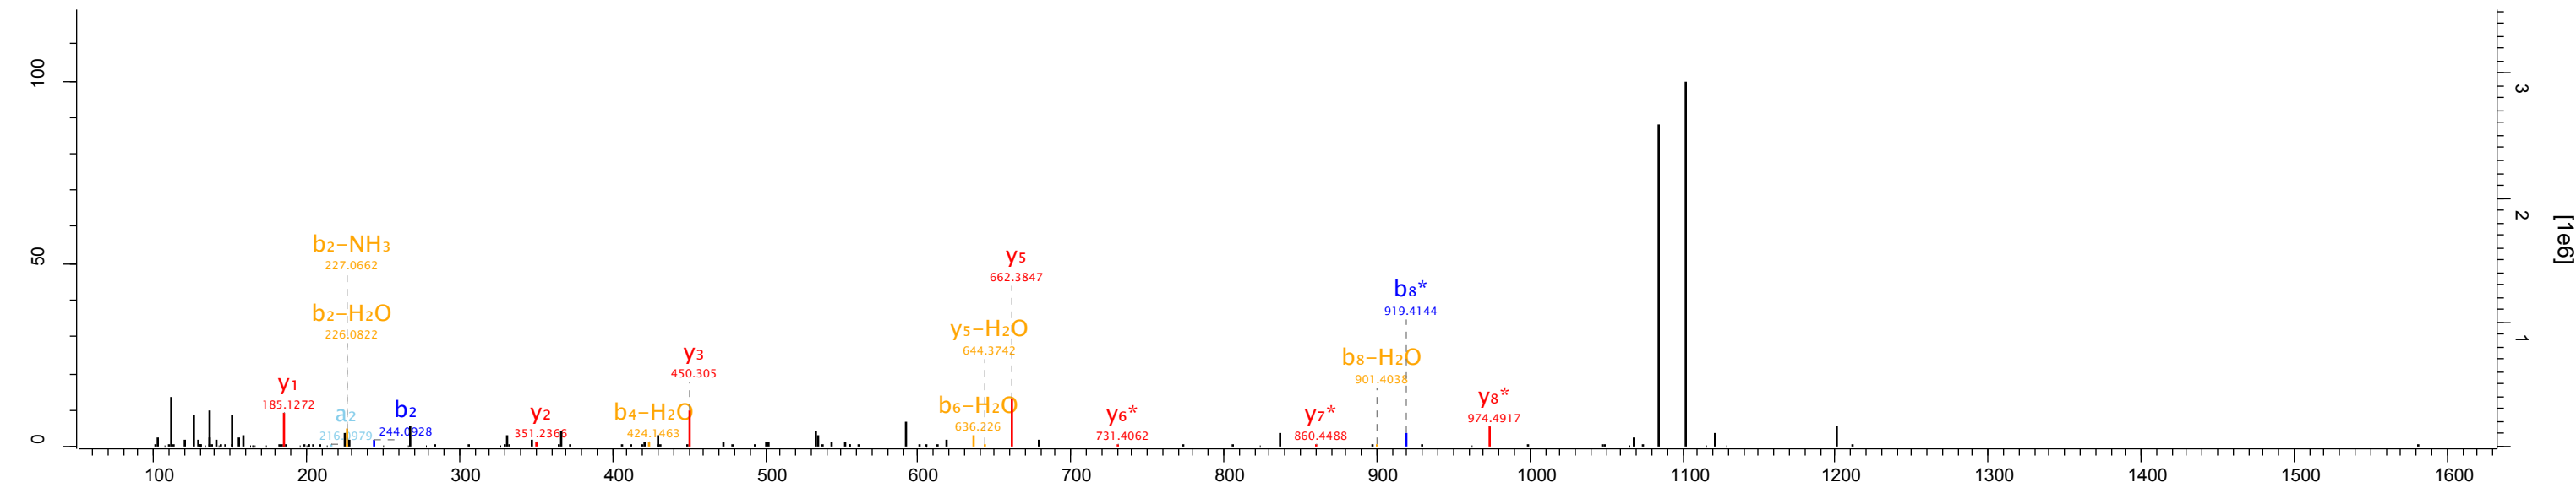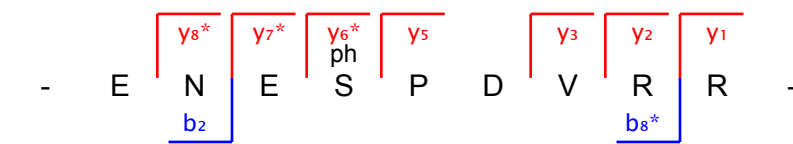

Raw file 20171215\_MaS\_33SR\_LMH\_phospho\_08 Scan 2555 Method FTMS; HCD Score 73.41 m/z 614.77 Gene names TBC1D13

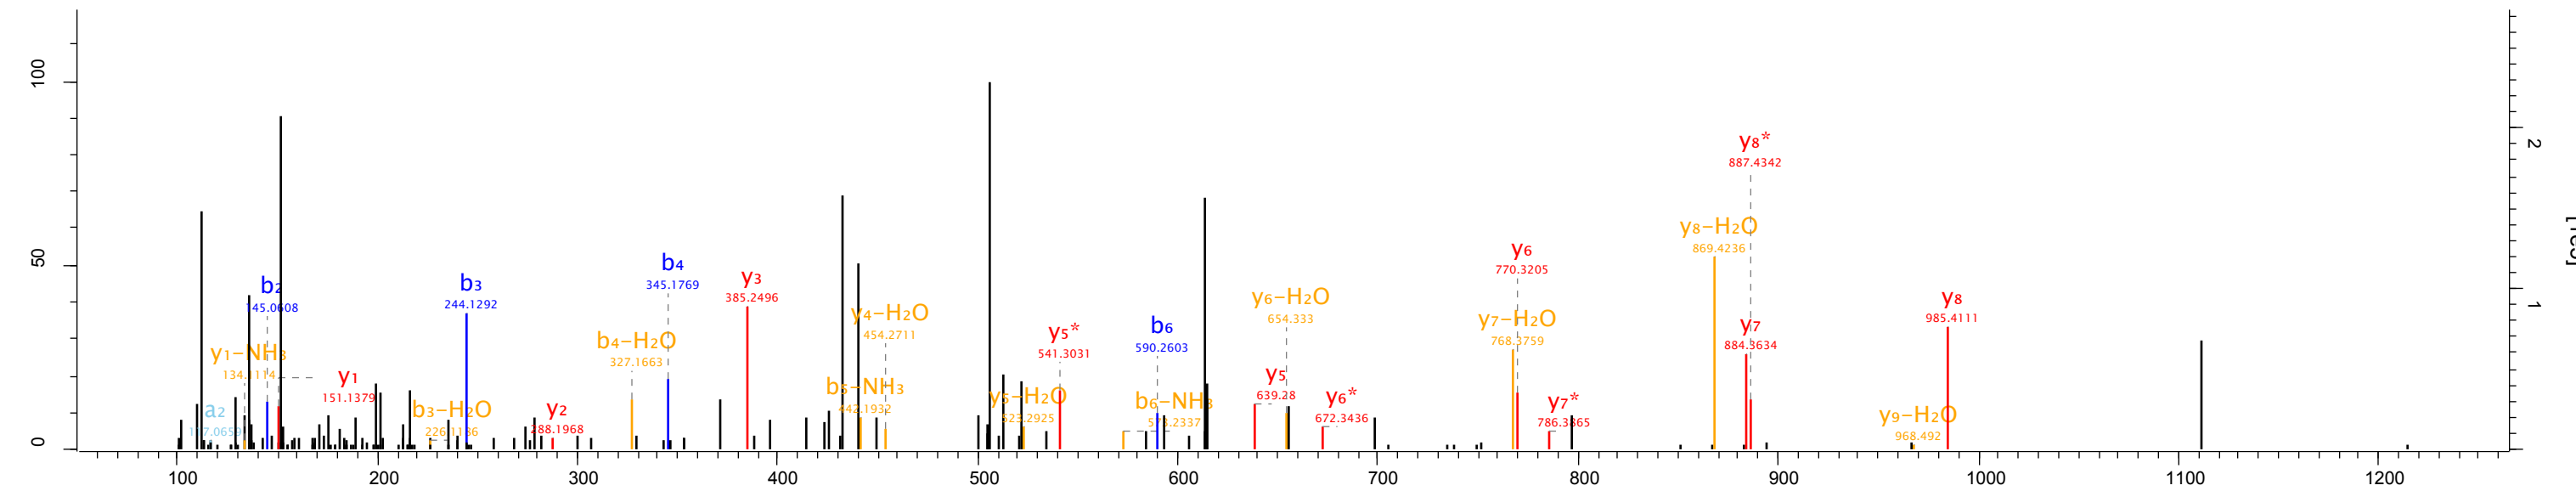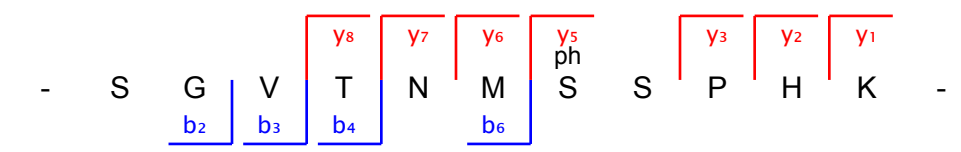

Raw file 20171215\_MaS\_33SR\_LMH\_phospho\_08 Scan 2945 Method FTMS; HCD Score 154.49 m/z 737.85 Gene names SPECC1L-ADORA2A;SPECC1L

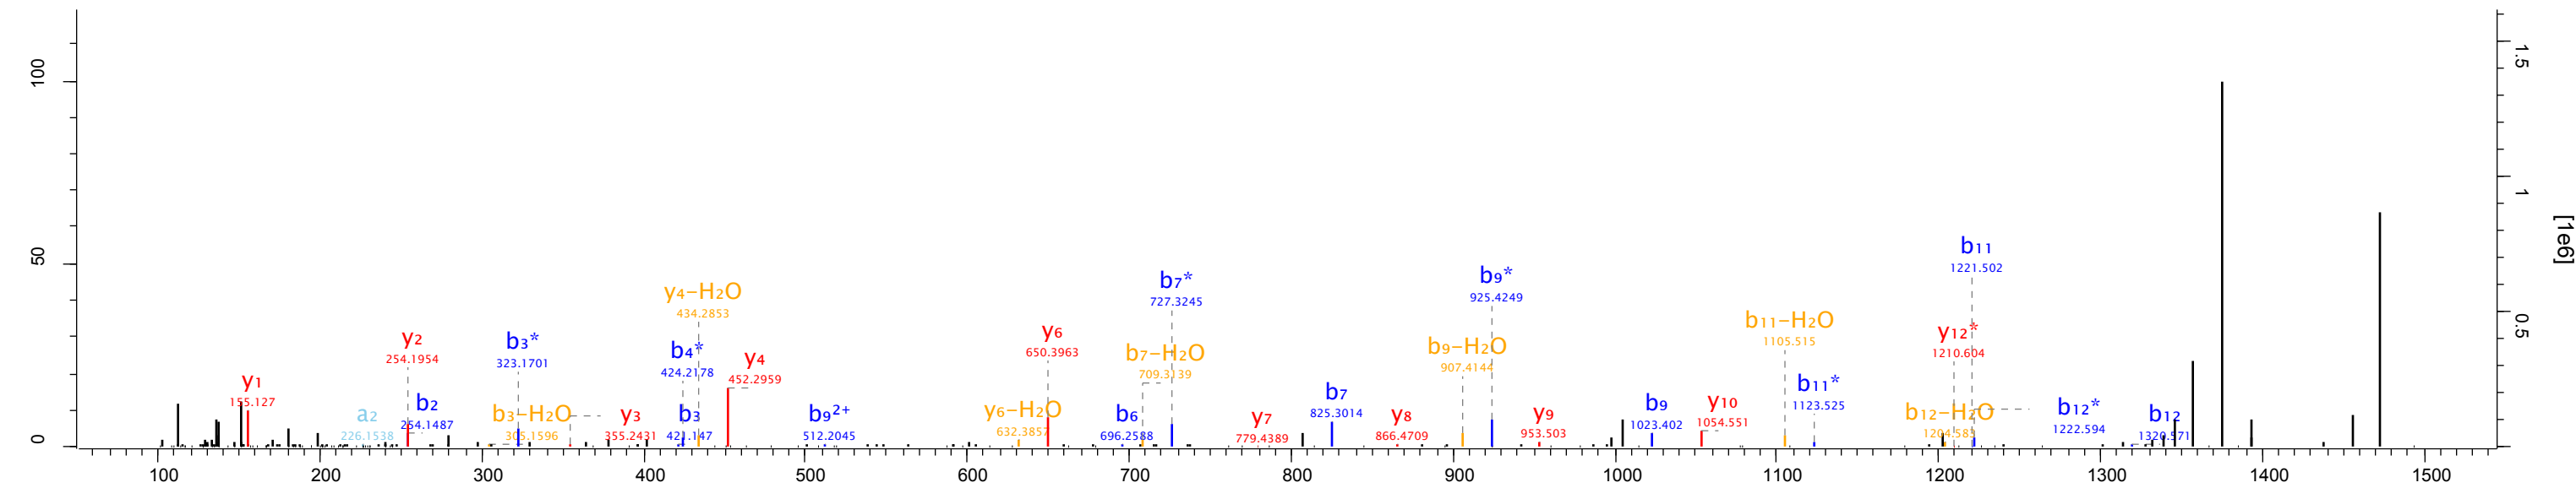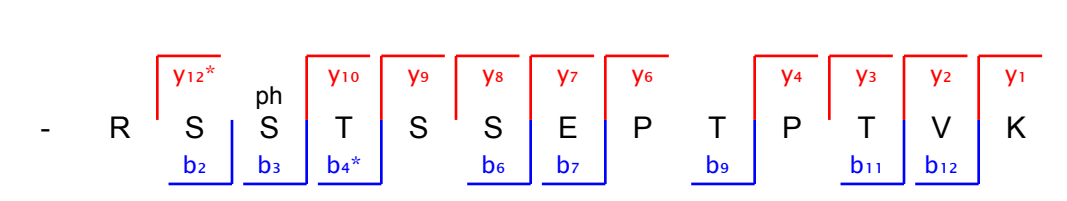

Raw file 20171215\_MaS\_33SR\_LMH\_phospho\_08 Scan 3445 Method FTMS; HCD Score 81.66 m/z 468.21 Gene names MTPN

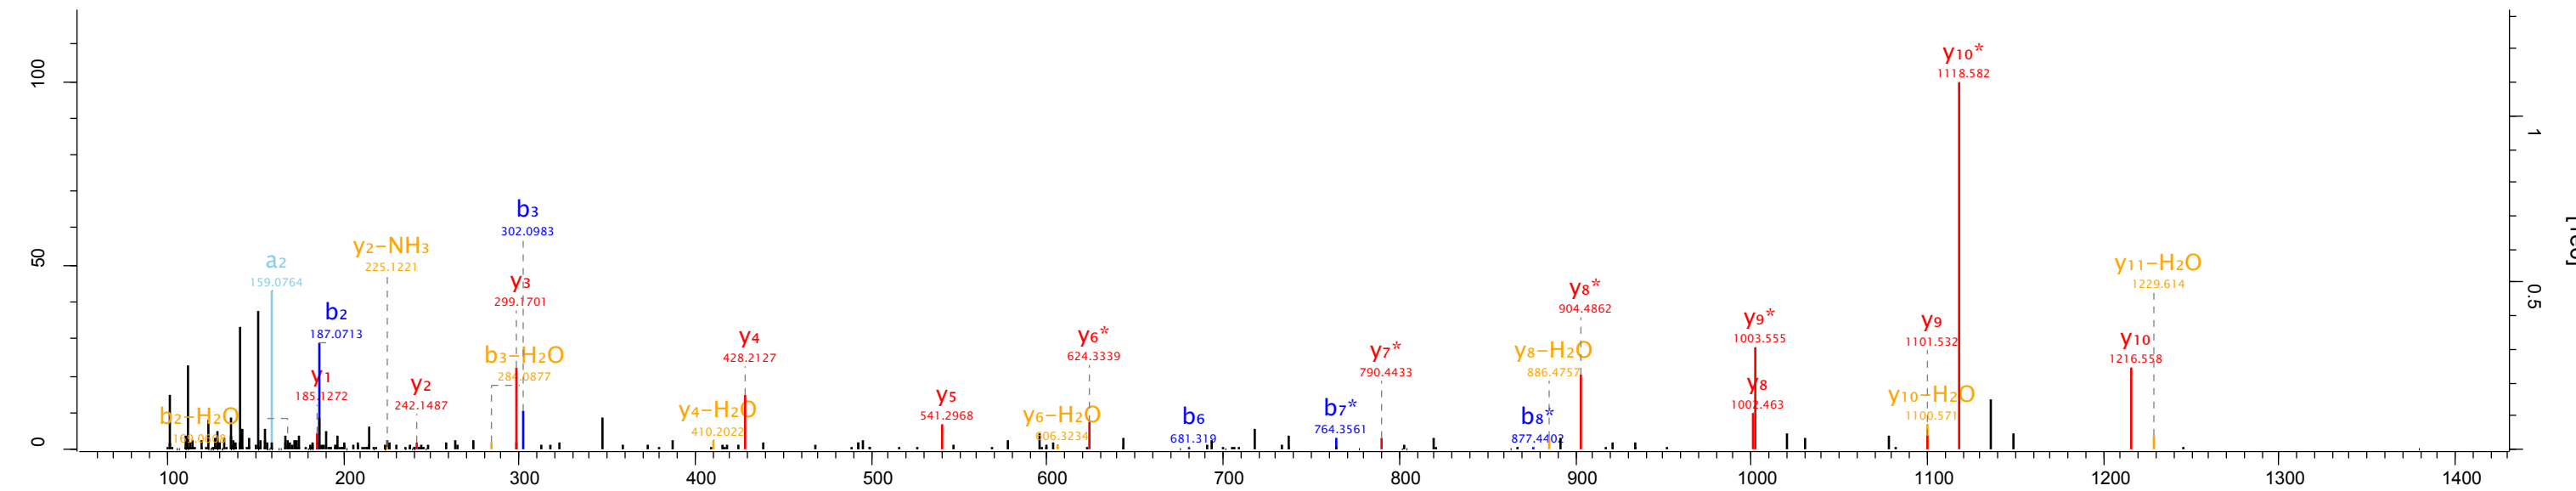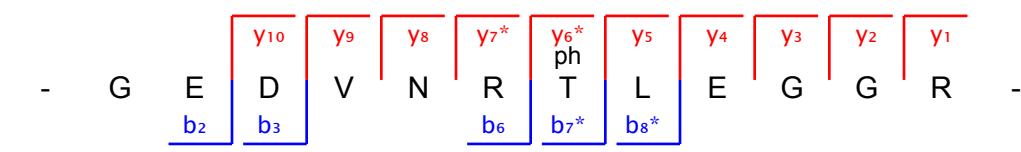

Raw file 20171215\_MaS\_33SR\_LMH\_phospho\_08 Scan 3745 Method FTMS; HCD Score 61.41 m/z 578.75 Gene names BIVM-ERCC5;ERCC5

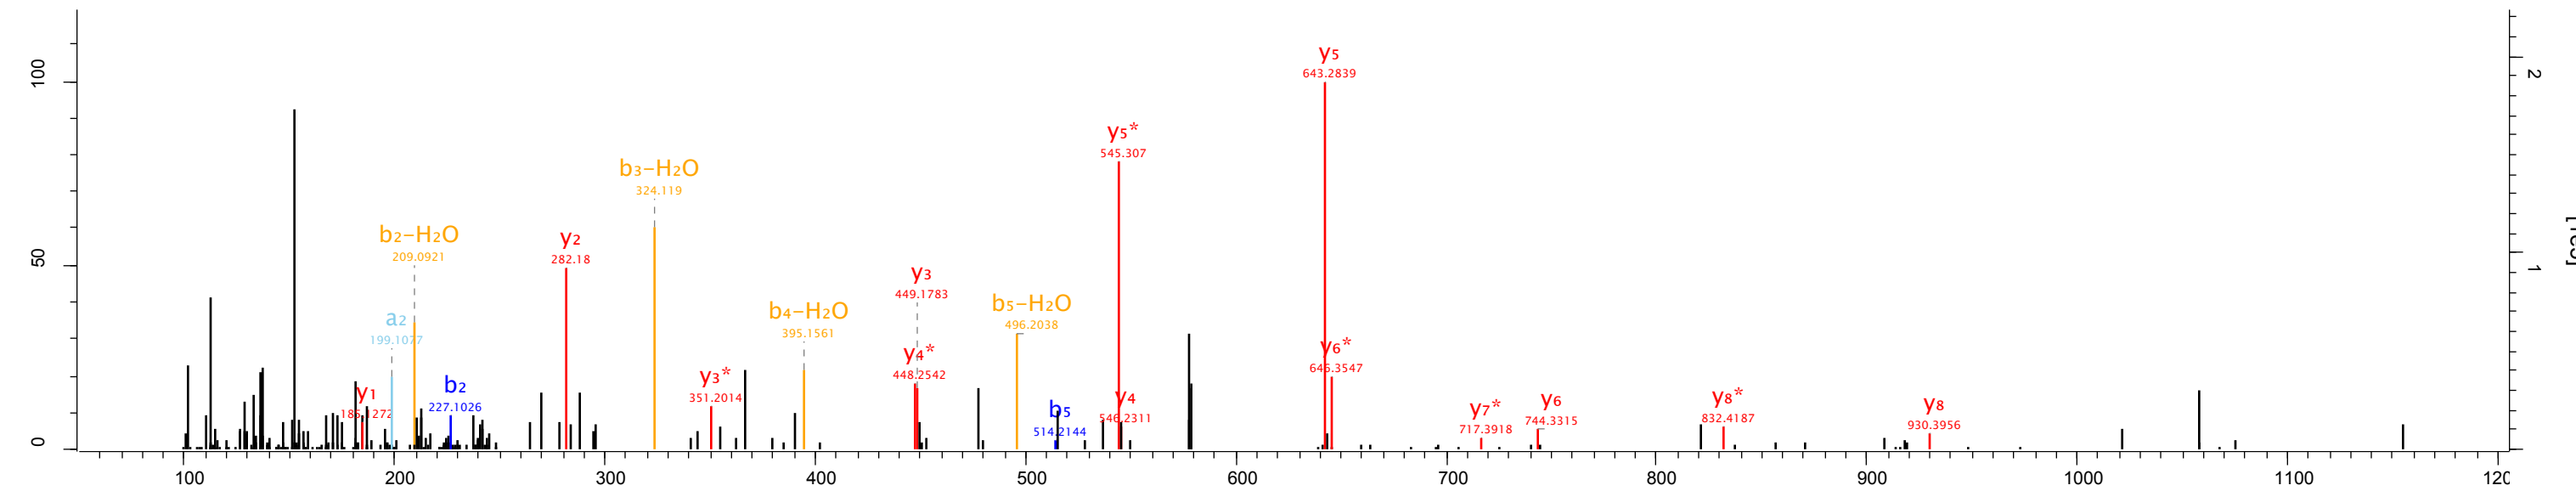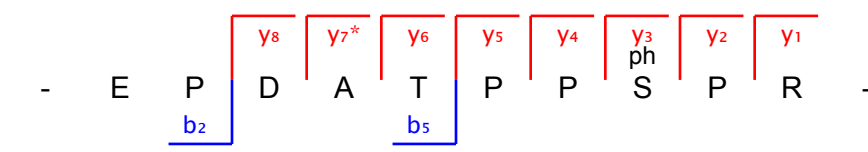

Raw file 20171215\_MaS\_33SR\_LMH\_phospho\_08 Scan 3875 Method FTMS; HCD Score 55.2 m/z 780.86 Gene names EGLN1

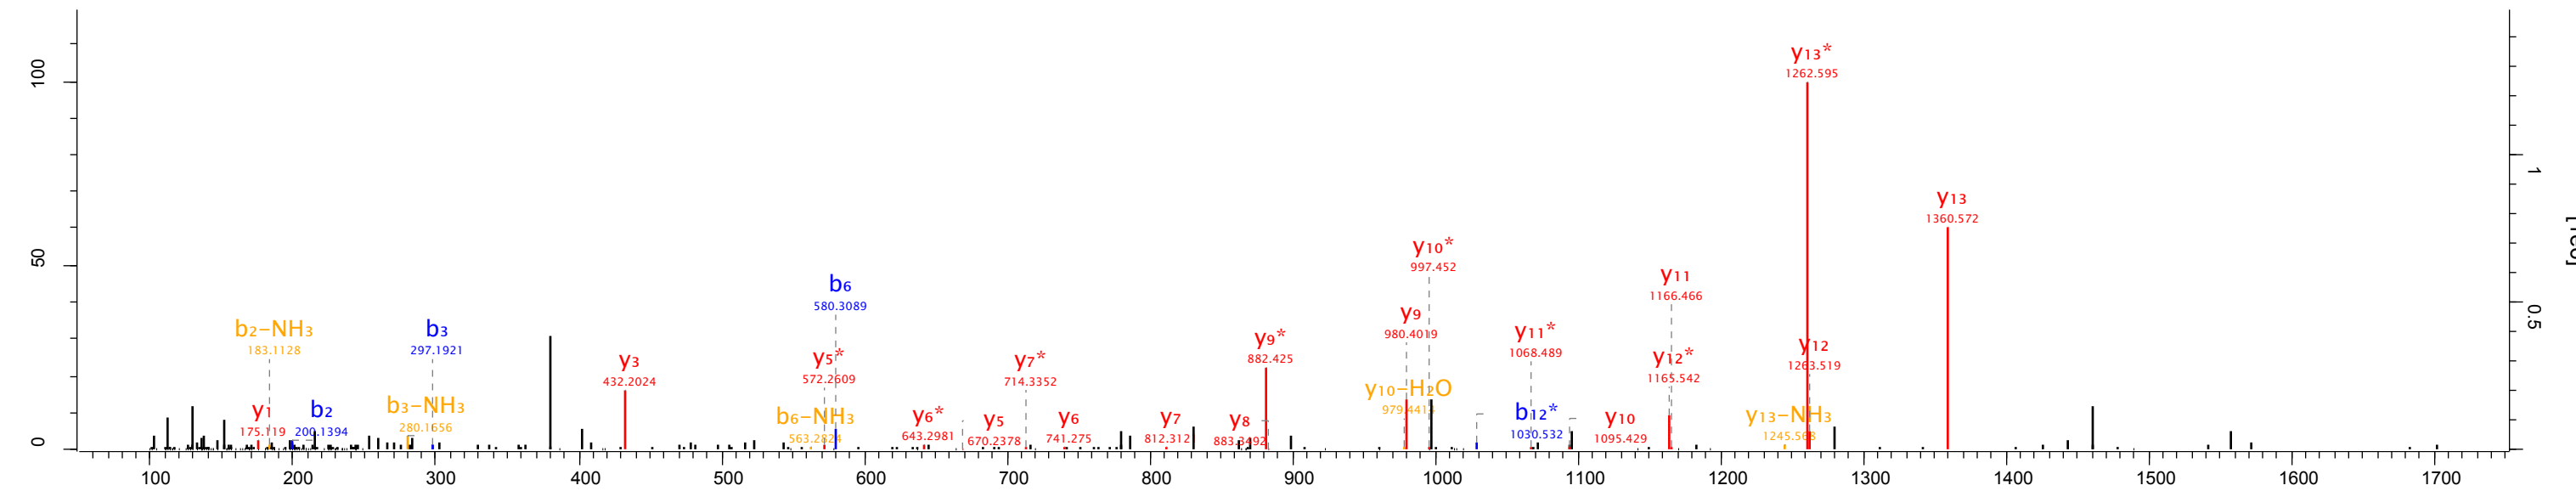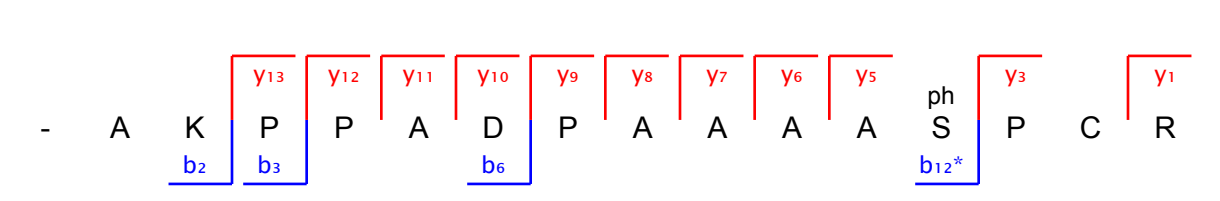



Raw file 20171215\_MaS\_33SR\_LMH\_phospho\_08 Scan 4845 Method FTMS; HCD Score 59.73 m/z 592.6 Gene names CCNK

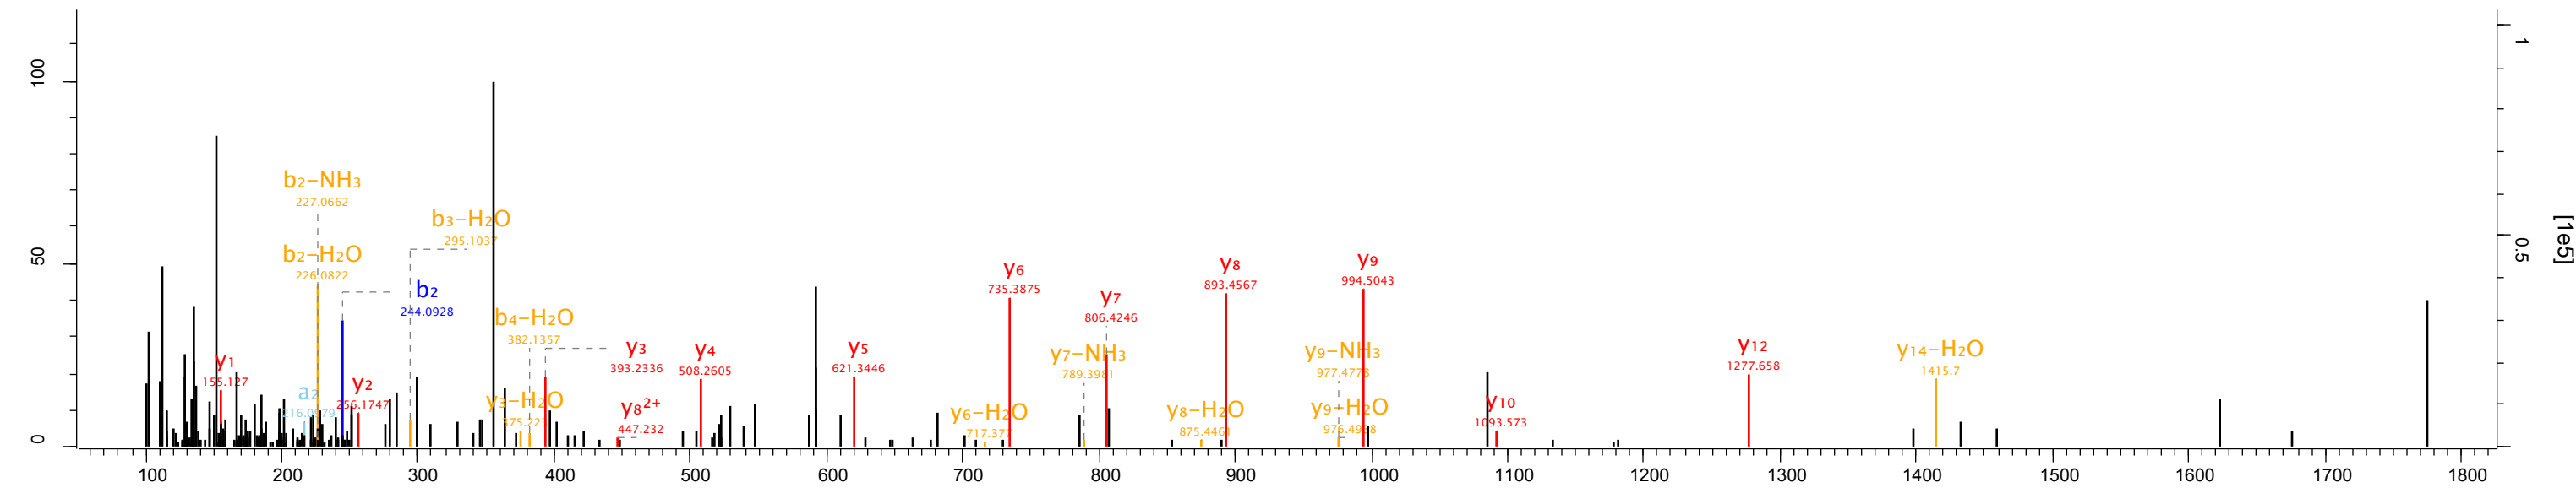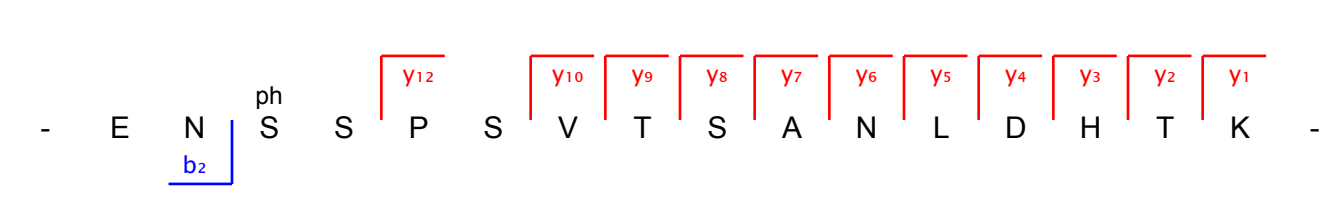

Raw file 20171215\_MaS\_33SR\_LMH\_phospho\_08 Scan 6185 Method FTMS; HCD Score 110.98 m/z 582.76 Gene names CAMSAP2

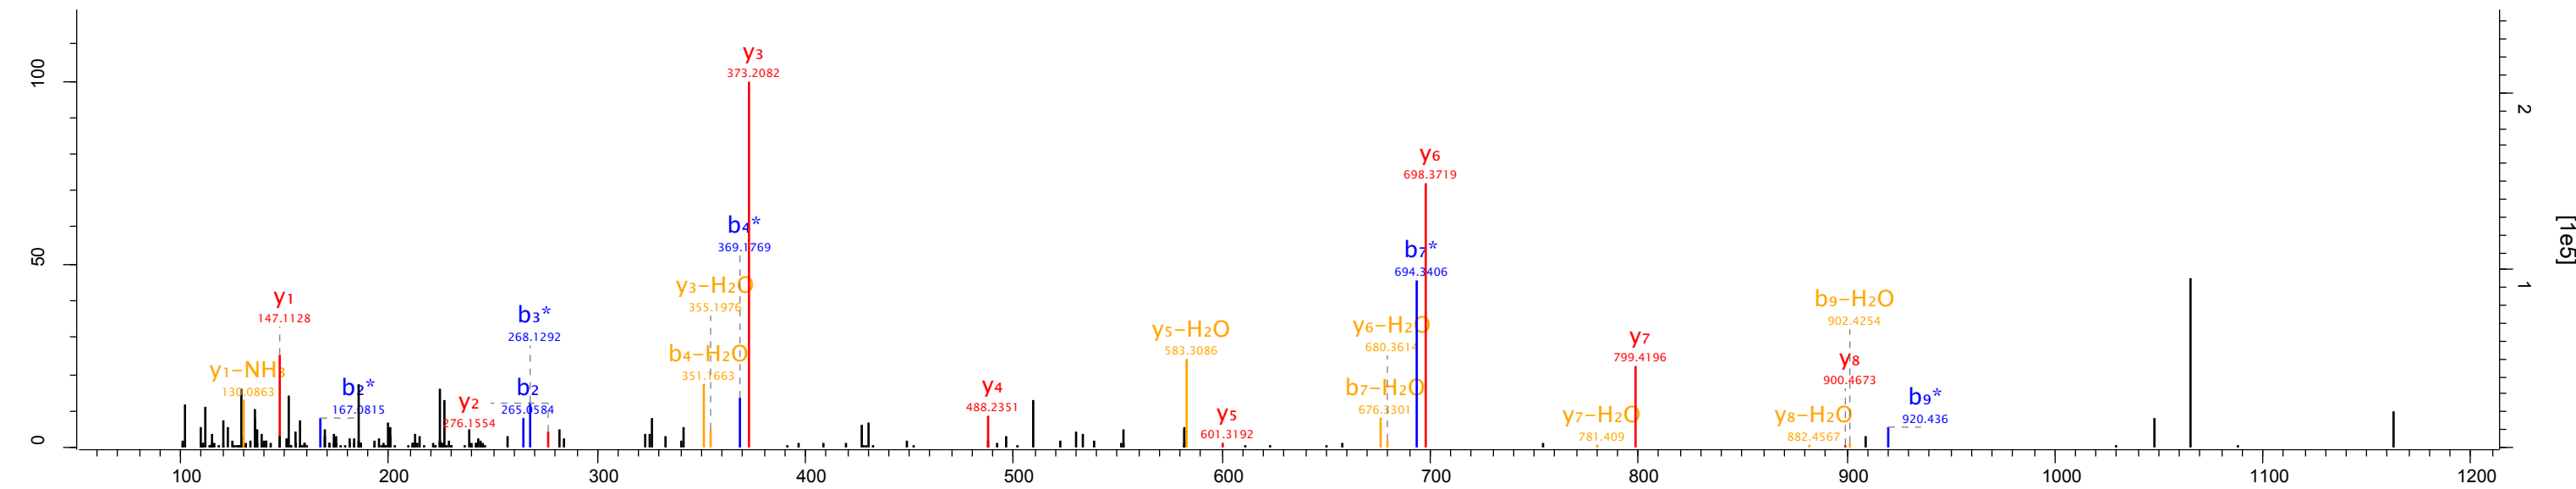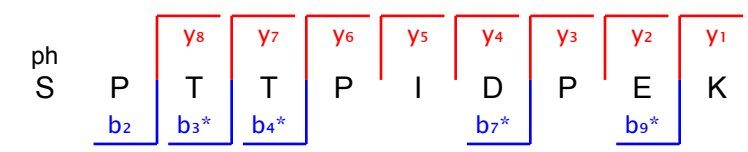



Raw file 20171215\_MaS\_33SR\_LMH\_phospho\_08 Scan 7915 Method FTMS; HCD Score 87.51 m/z 688.66 Gene names DPYSL3

20171215\_MaS\_33SR\_LMH\_phospho\_08

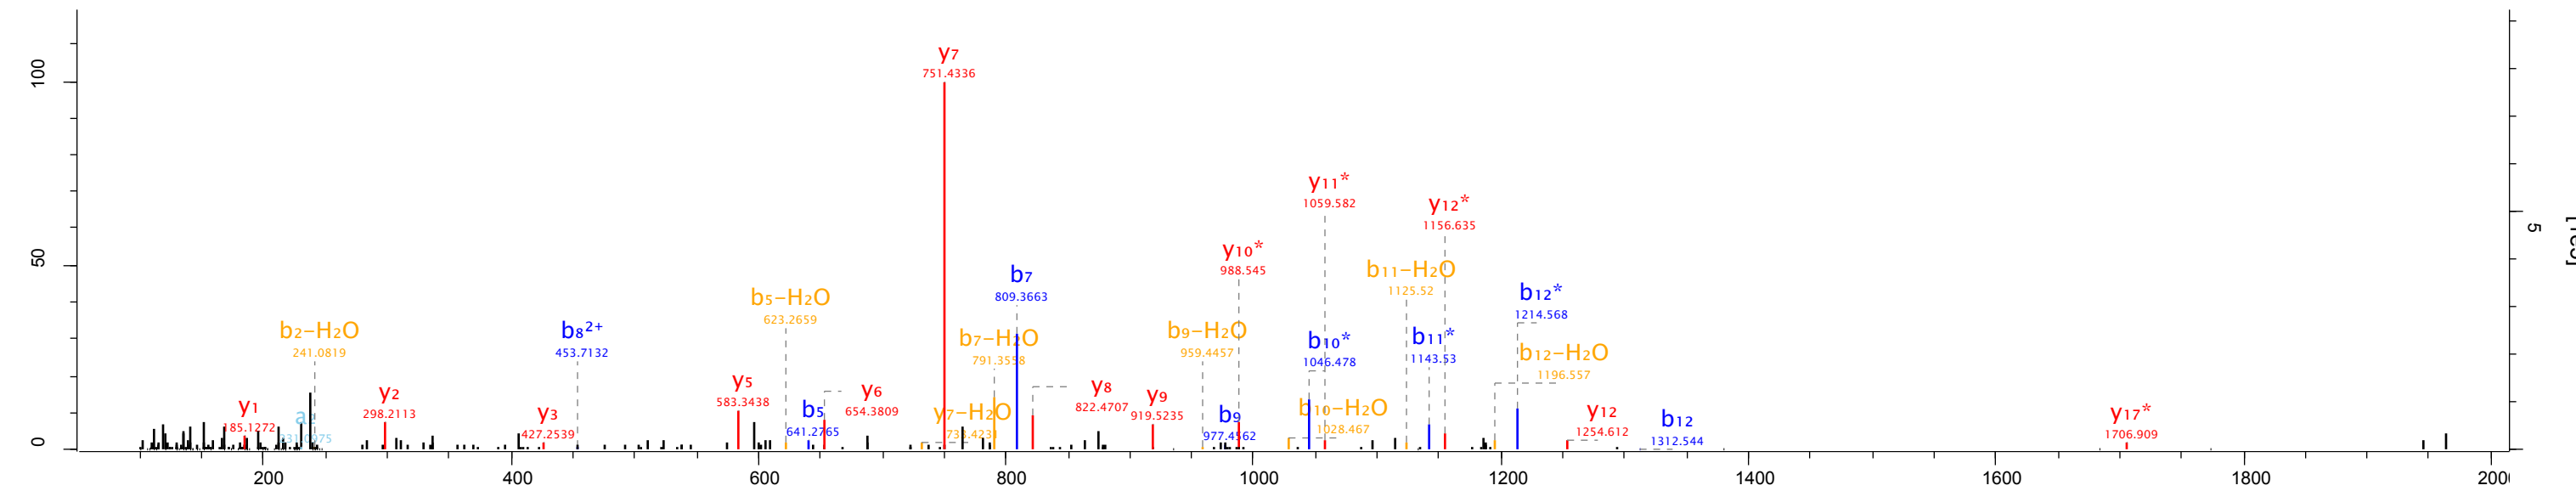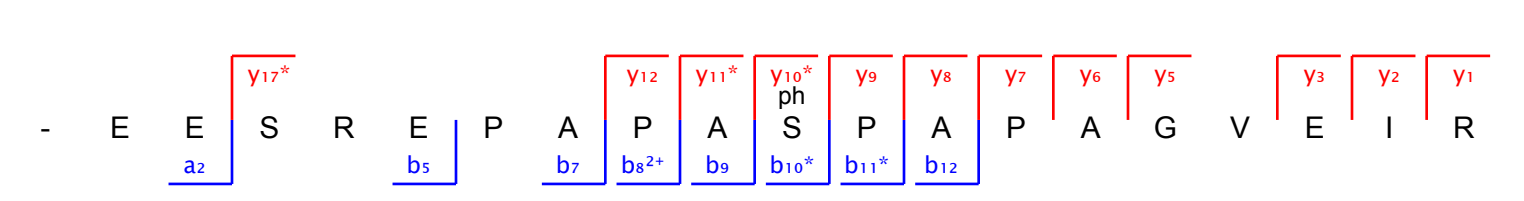

Raw file 20171215\_MaS\_33SR\_LMH\_phospho\_08 Scan 8065 Method FTMS; HCD Score 40.94 m/z 629.29 Gene names CCP110

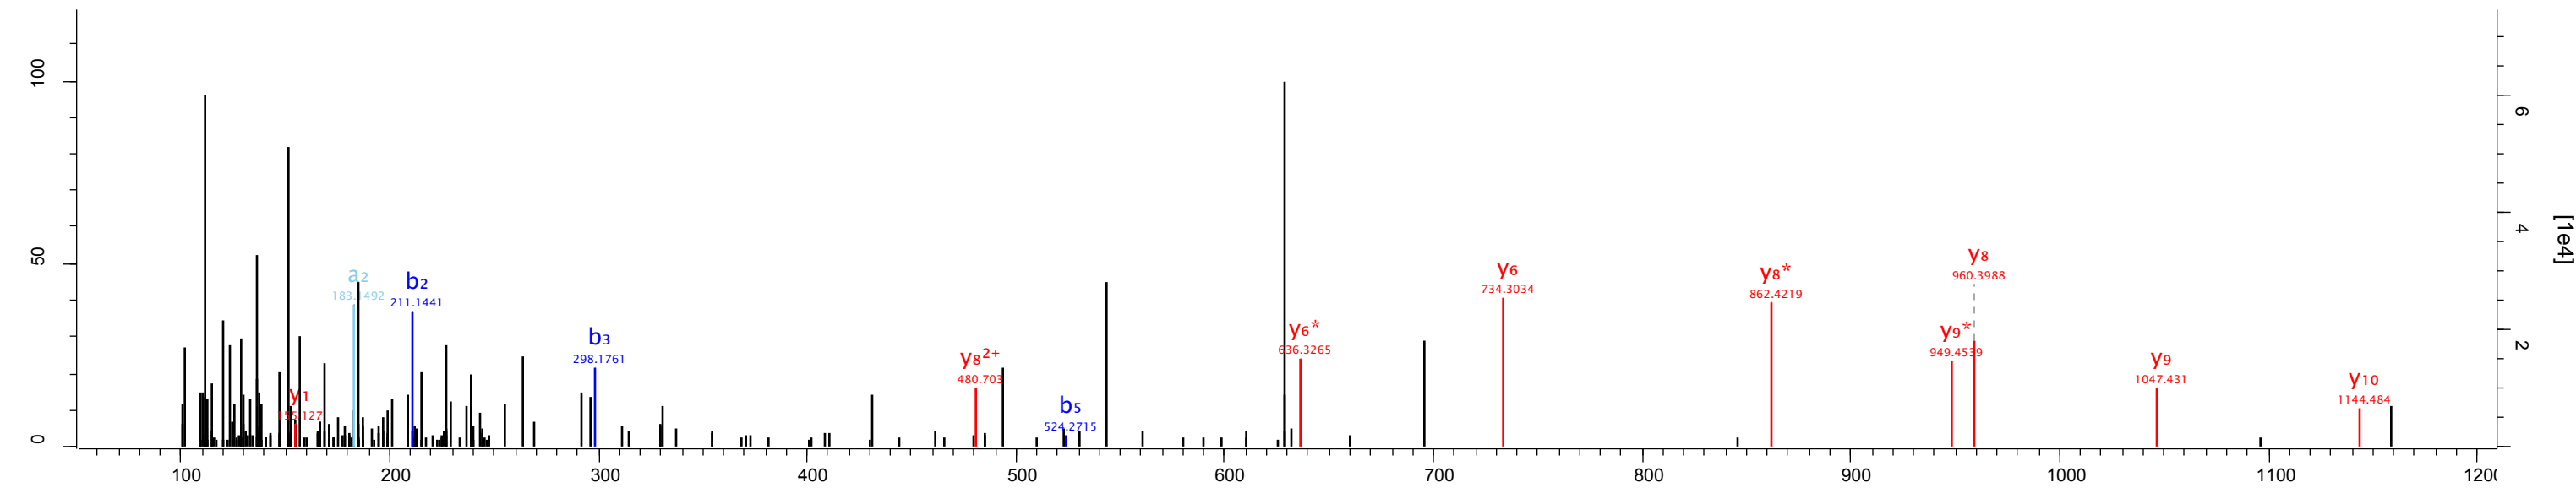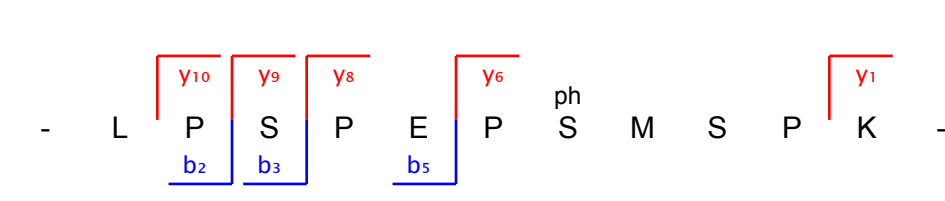

Raw file 20171215\_MaS\_33SR\_LMH\_phospho\_08 Scan 8075 Method FTMS; HCD Score 126.84 m/z 774.37 Gene names WDR44

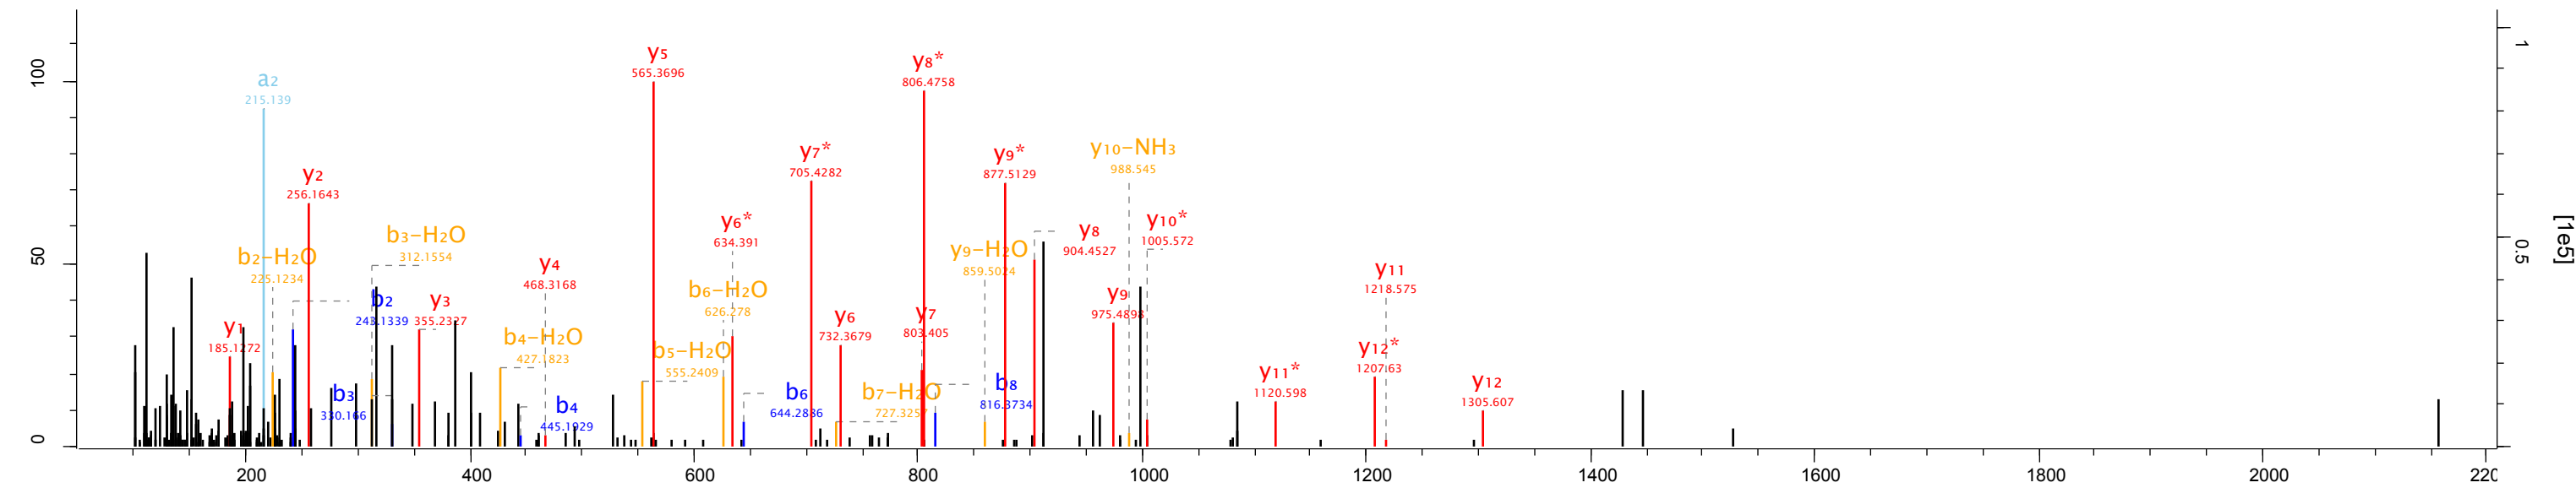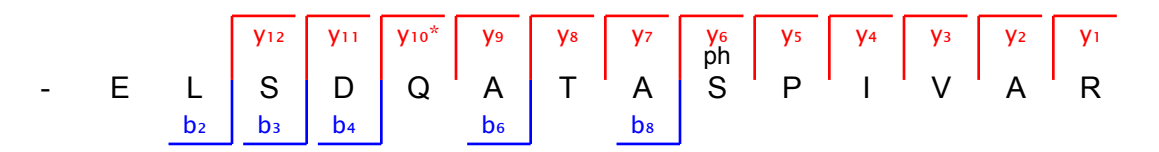

Raw file 20171215\_MaS\_33SR\_LMH\_phospho\_08 Scan 8625 Method FTMS; HCD Score 48.53 m/z 643.33 Gene names ZNF687

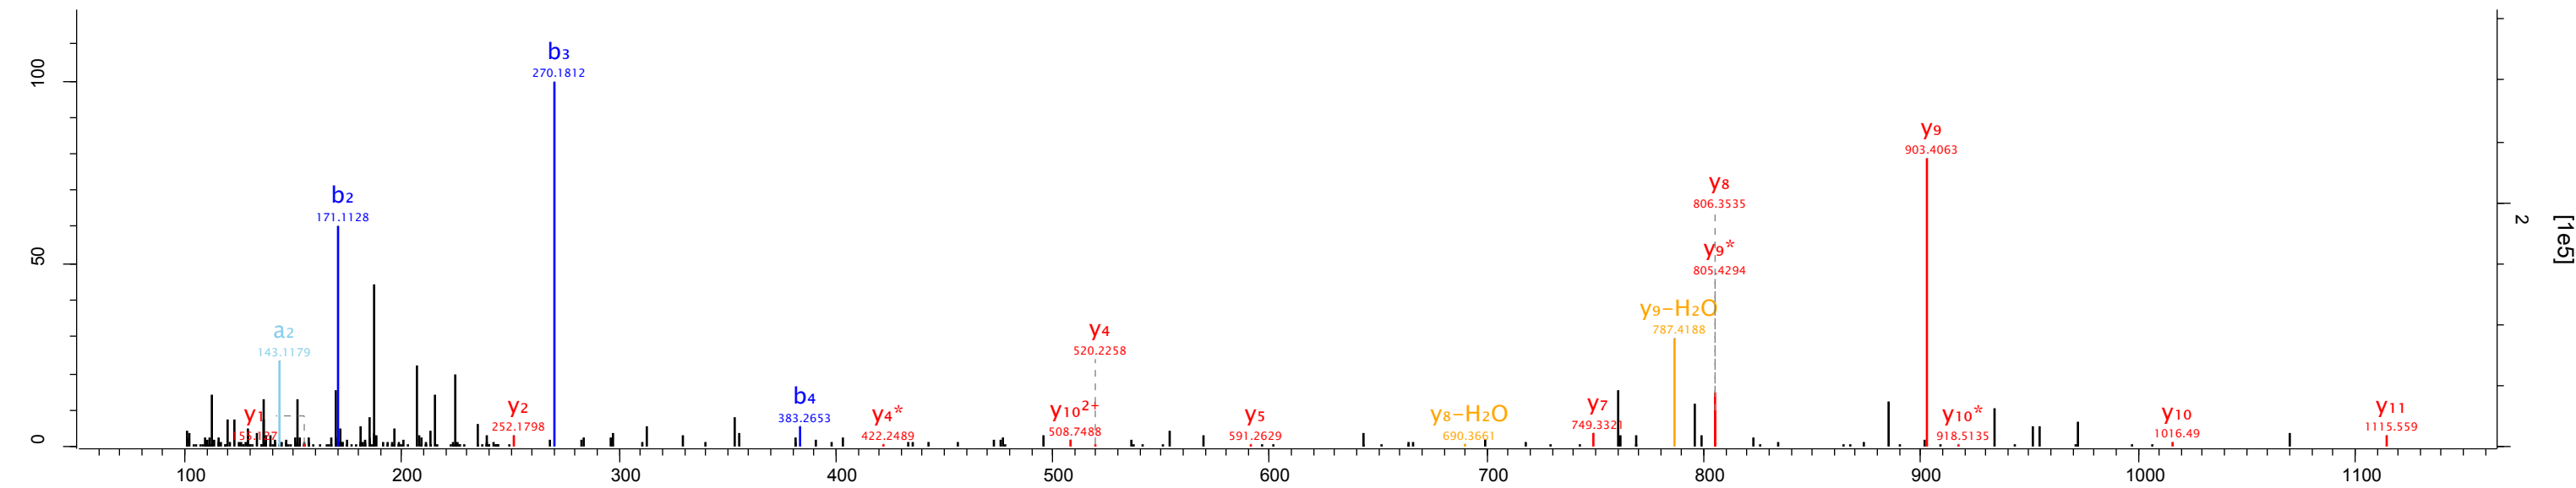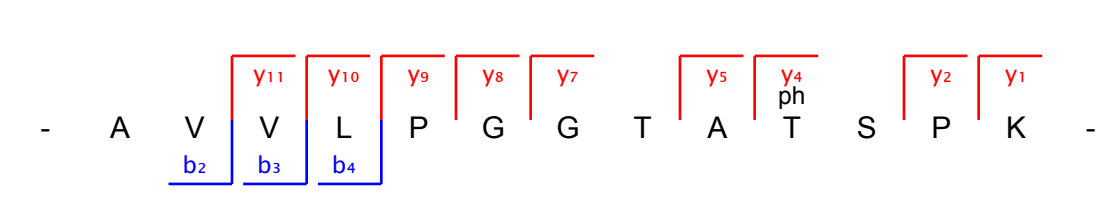

Raw file 20171215\_MaS\_33SR\_LMH\_phospho\_08 Scan 9485 Method FTMS; HCD Score 66.89 m/z 830.88 Gene names SRRM2

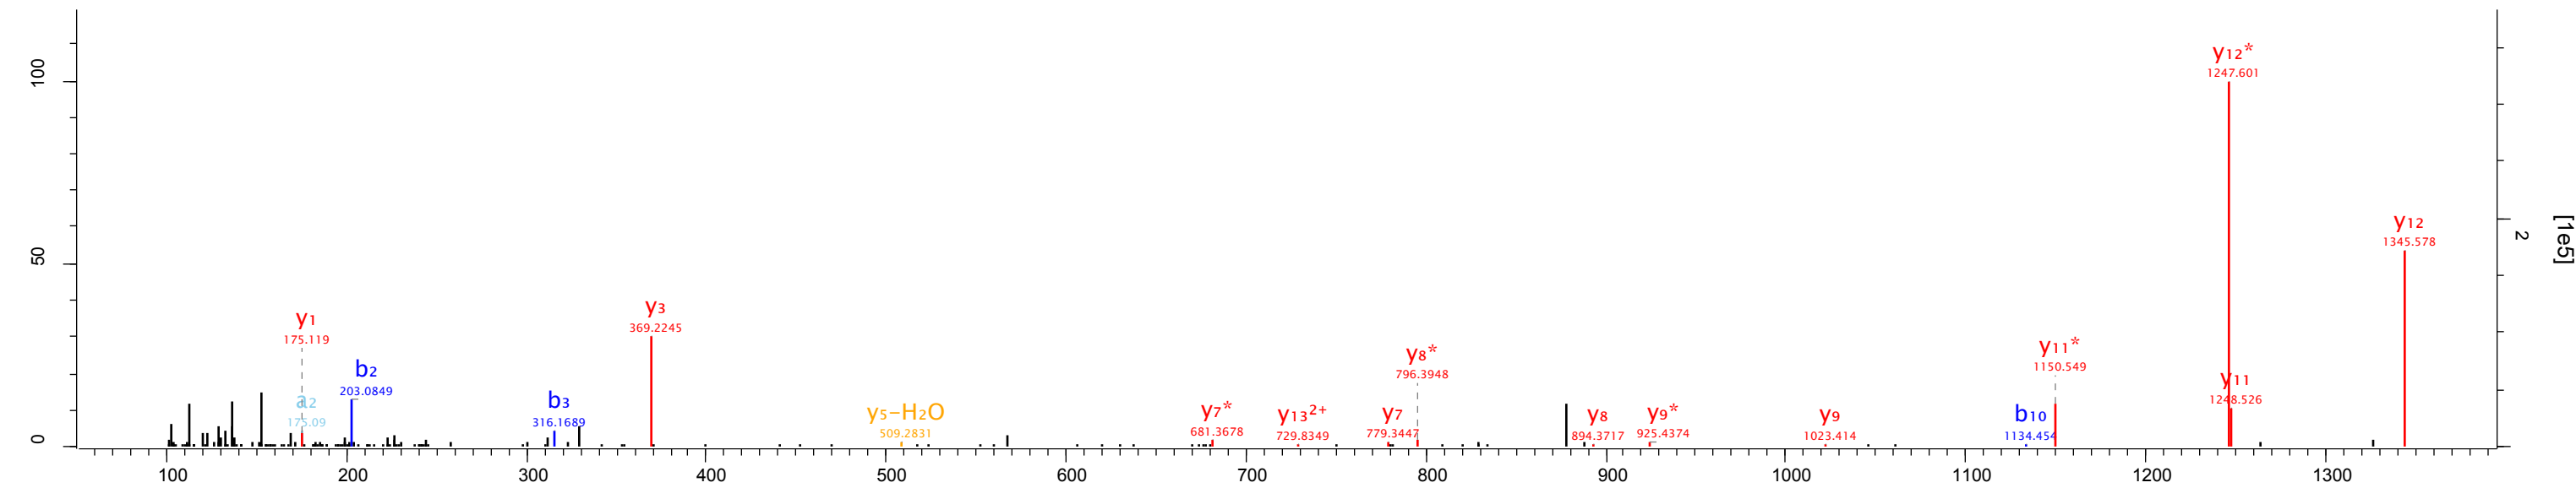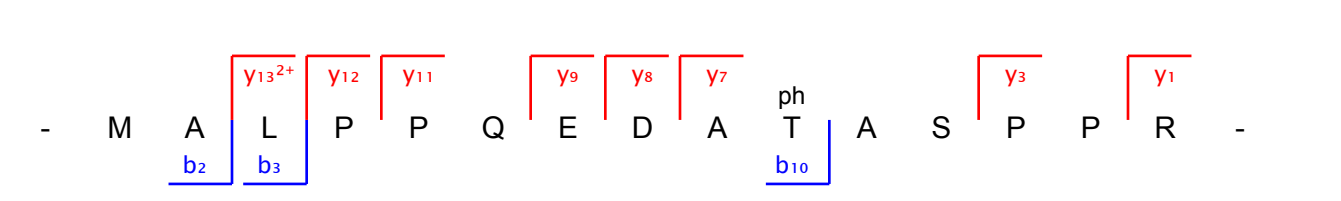



Raw file 20171215\_MaS\_33SR\_LMH\_phospho\_09 Scan 1925 Method FTMS; HCD Score 125.22 m/z 444.55 Gene names SPTBN1

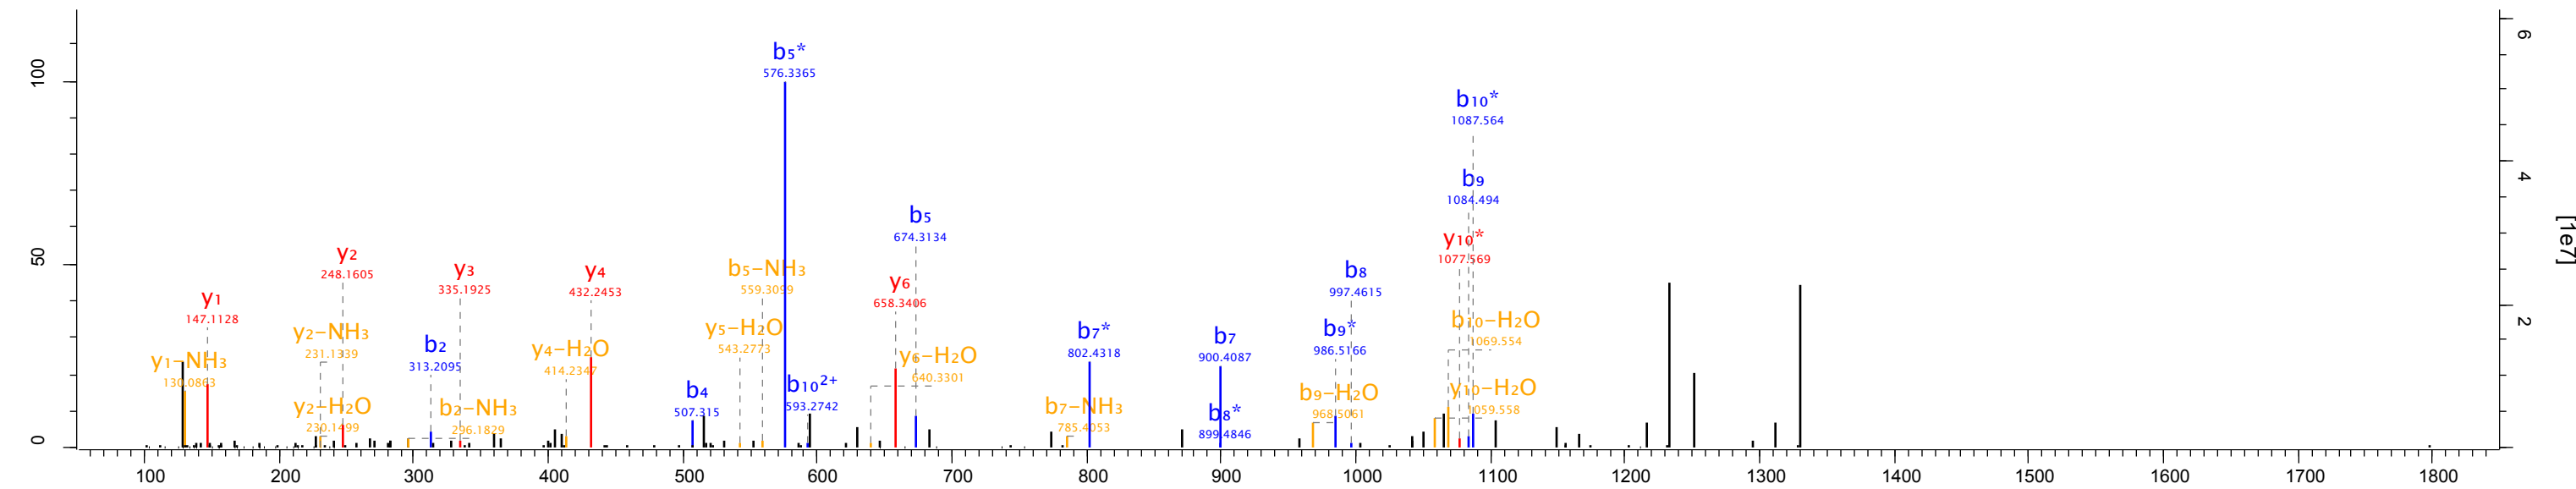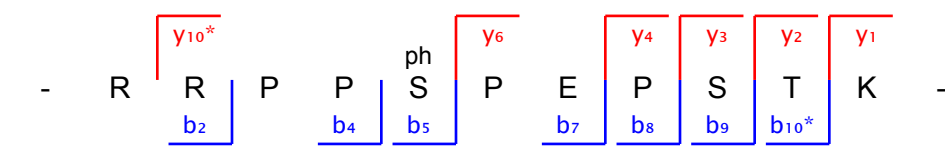

Raw file 20171215\_MaS\_33SR\_LMH\_phospho\_09 Scan 2045 Method FTMS; HCD Score 199.01 m/z 675.8 Gene names IRF2BP1

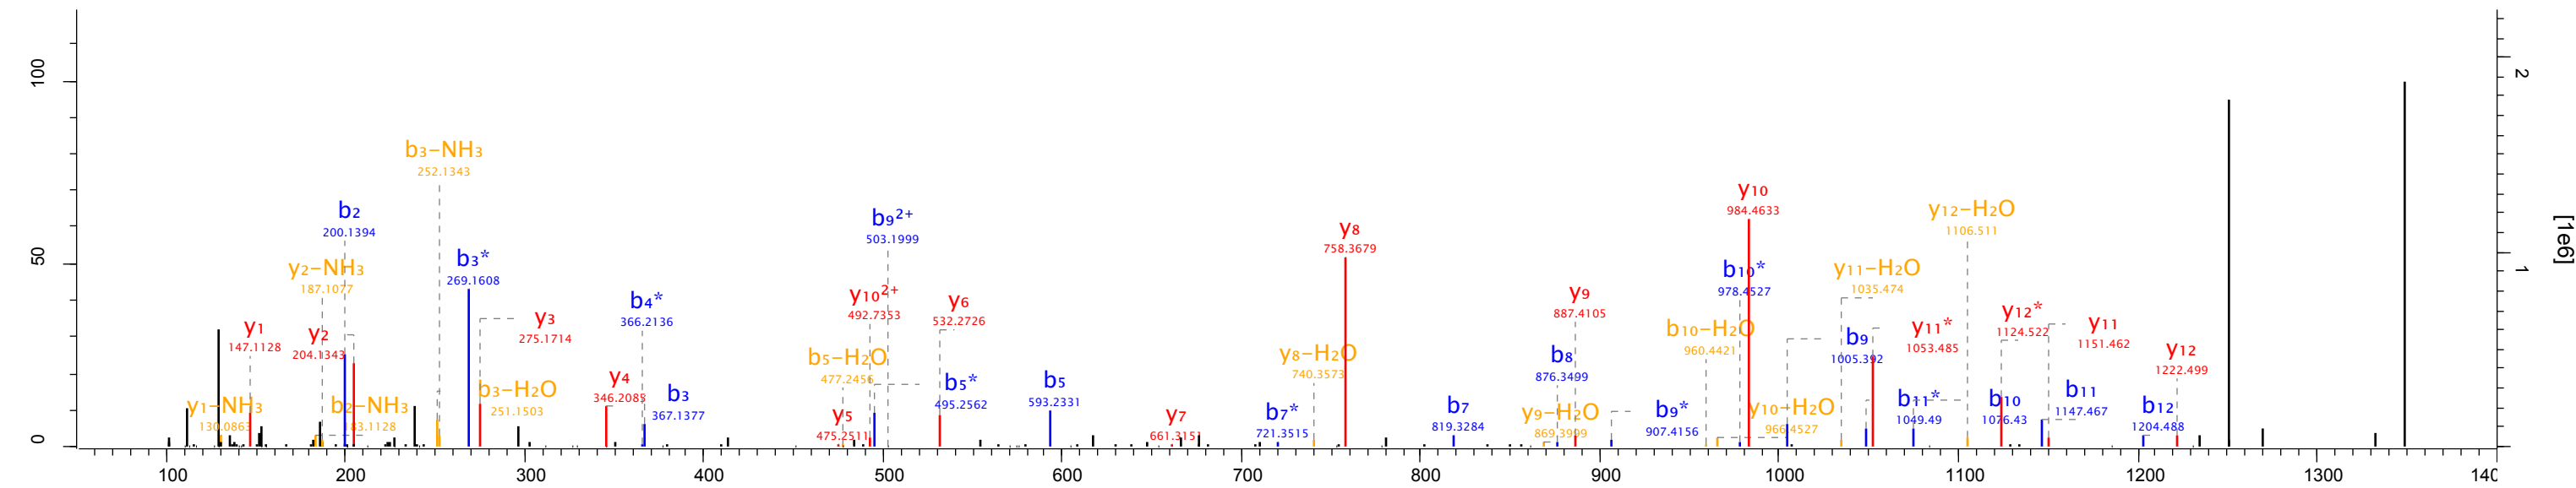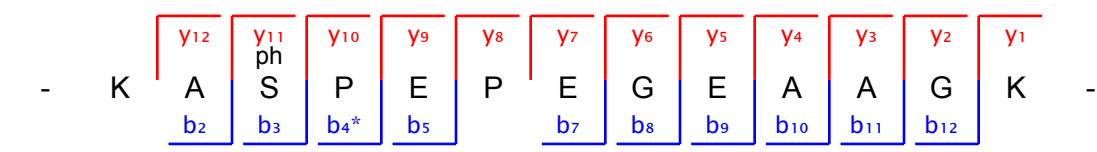

Raw file 20171215\_MaS\_33SR\_LMH\_phospho\_09 Scan 2215 Method FTMS; HCD Score 80.51 m/z 425.86 Gene names PRRC2B

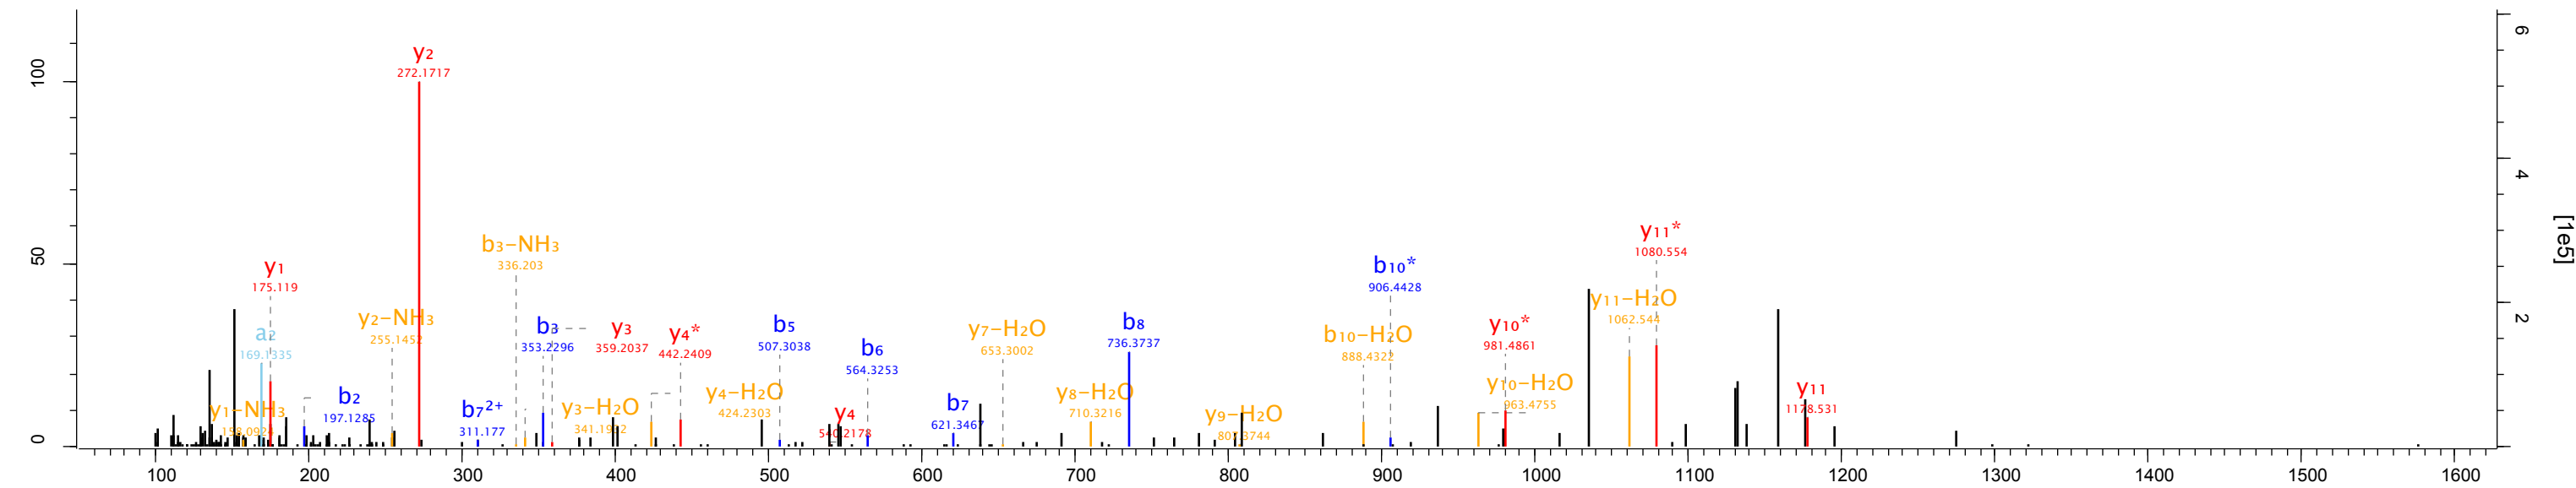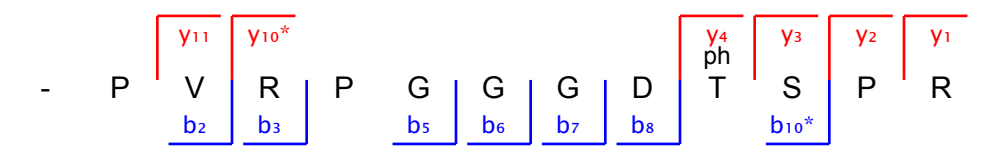

Raw file 20171215\_MaS\_33SR\_LMH\_phospho\_09 Scan 2455 Method FTMS; HCD Score 106.03 m/z 597.77 Gene names MYO9B

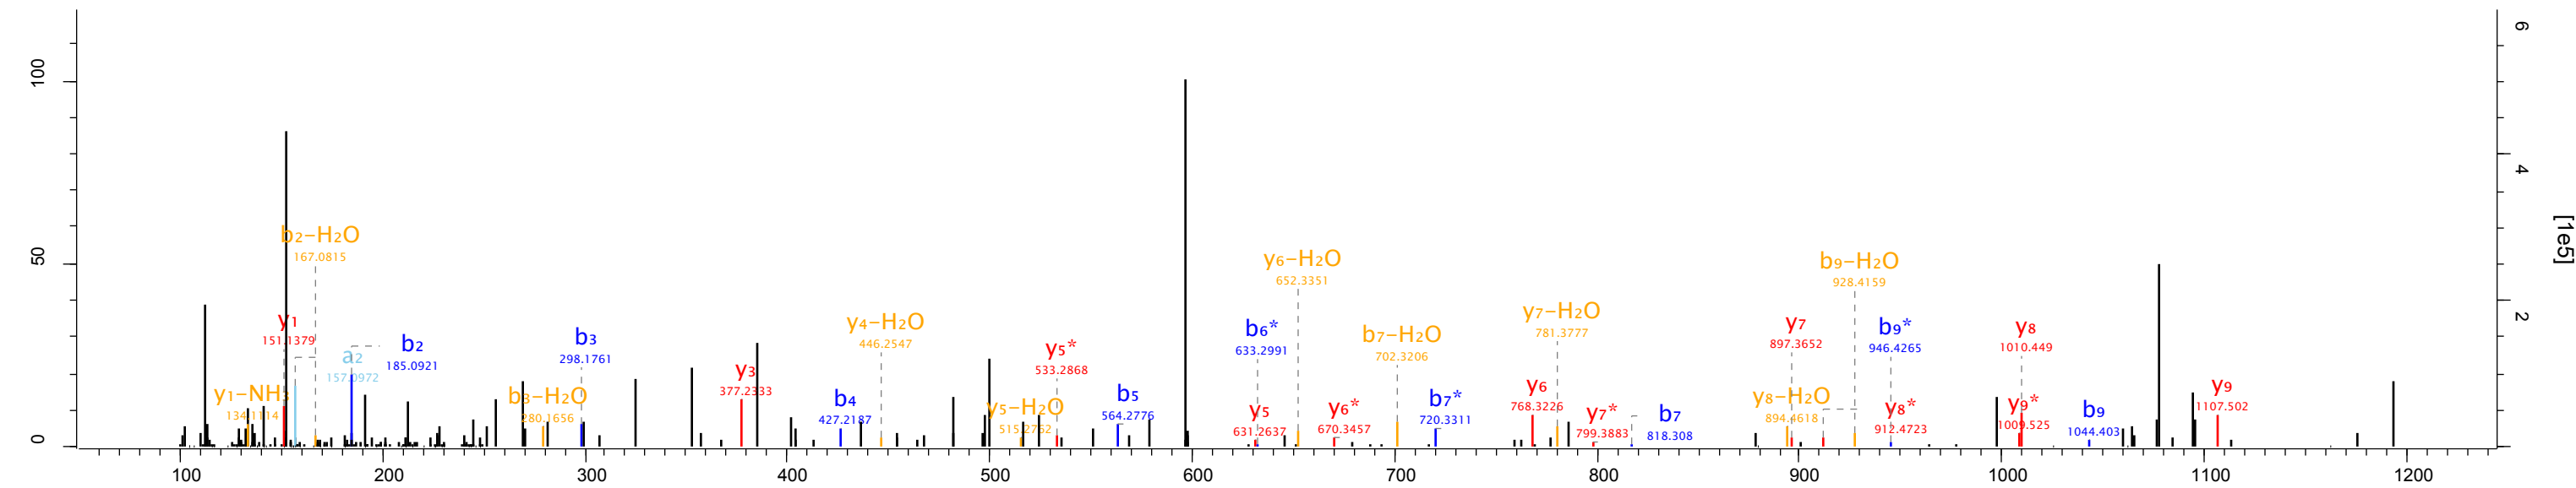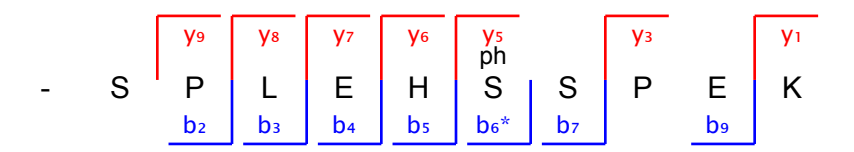

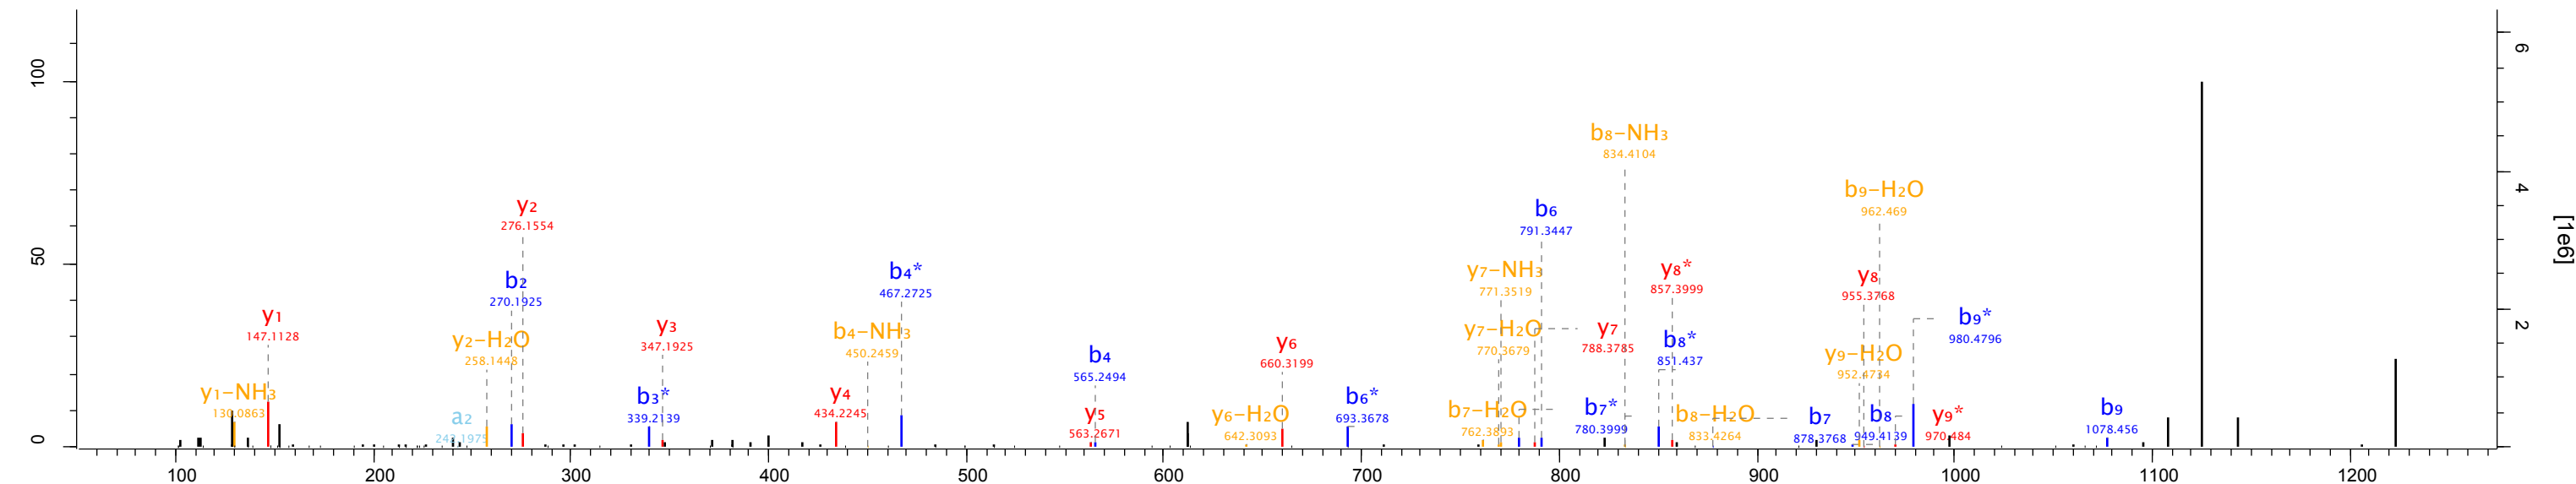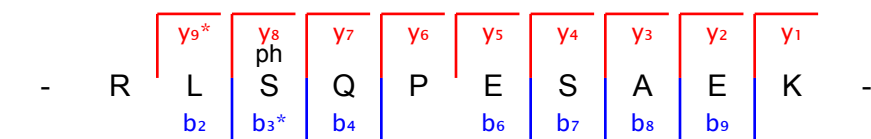

Raw file  
 20171215\_MaS\_33SR\_LMH\_phospho\_09  
 Scan 2685 Method FTMS; HCD Score 162.79 m/z 690.3 Gene names MAP7D1

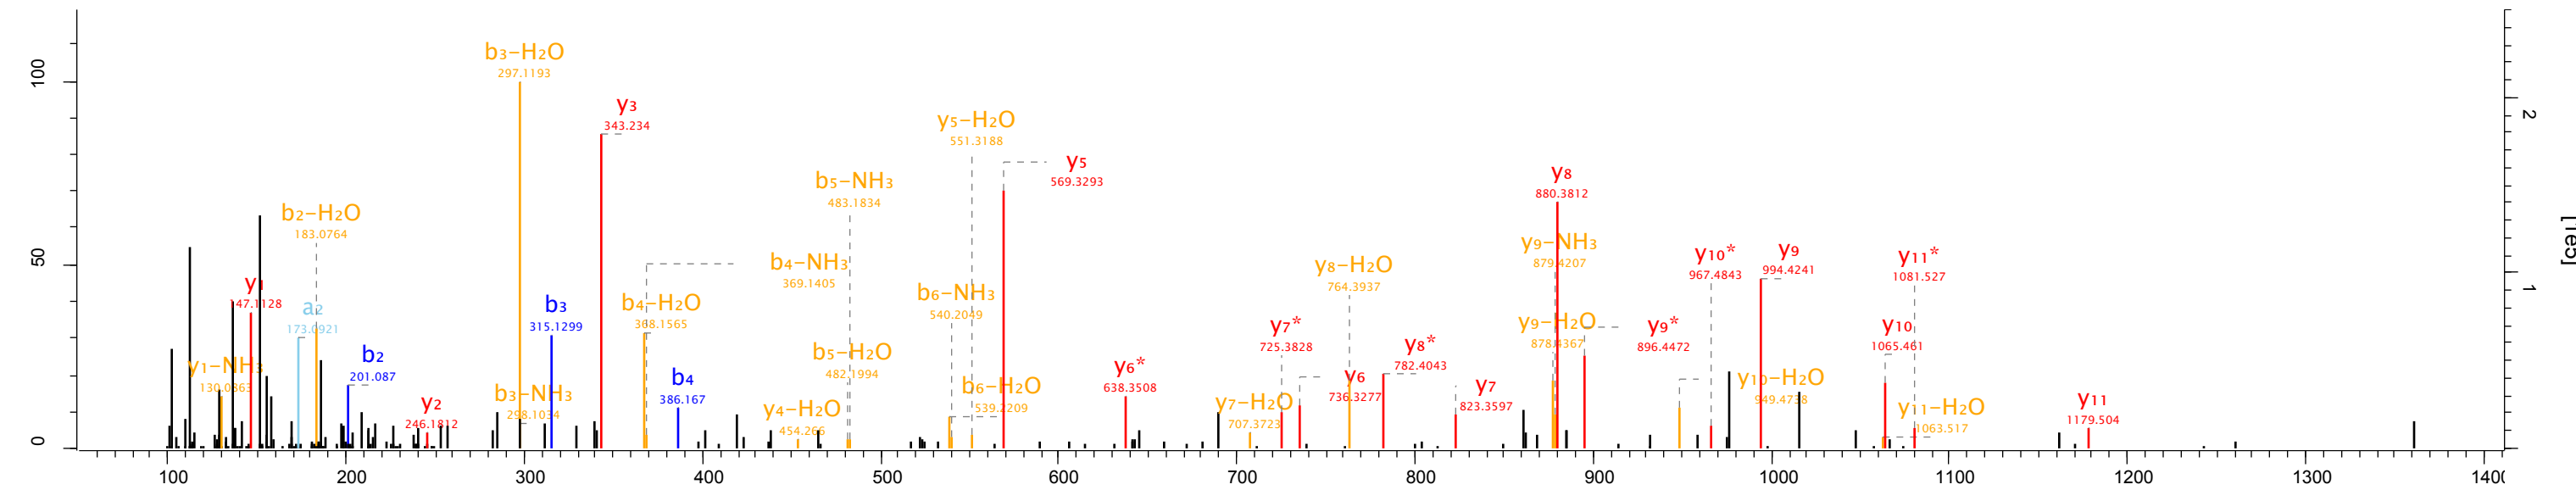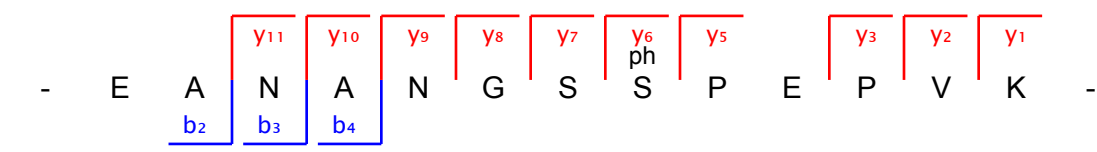

Raw file 20171215\_MaS\_33SR\_LMH\_phospho\_09 Scan 2915 Method FTMS; HCD Score 67.08 m/z 352.5 Gene names ATXN2L

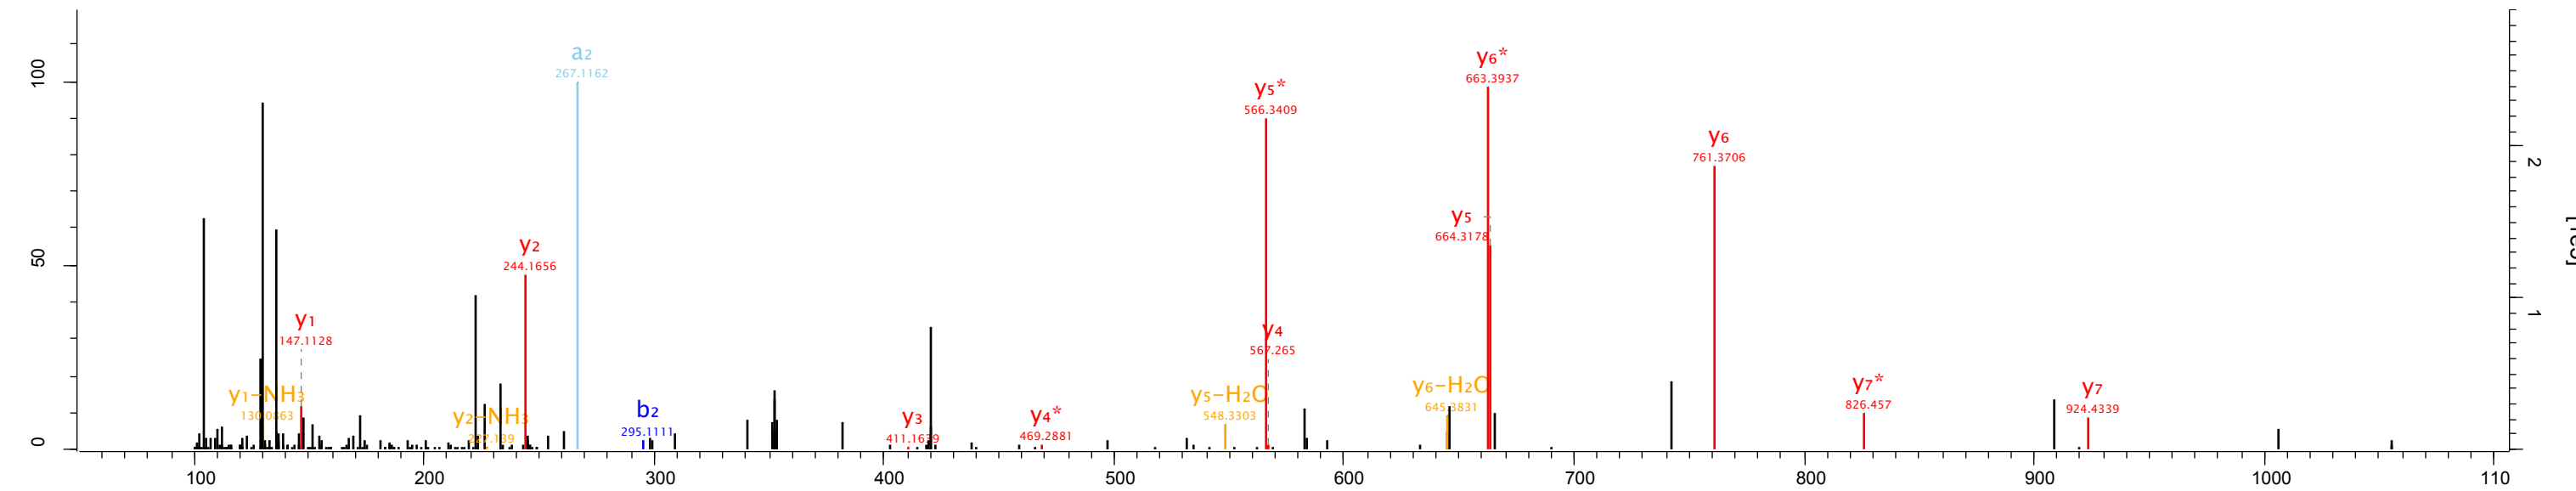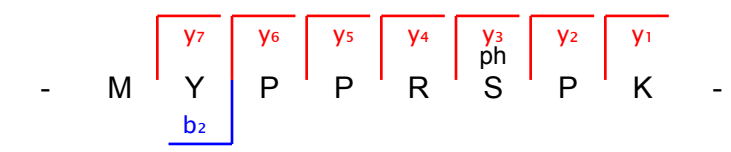

Raw file 20171215\_MaS\_33SR\_LMH\_phospho\_09 Scan 3015 Method FTMS; HCD Score 55.53 m/z 615.29 Gene names HEATR5B

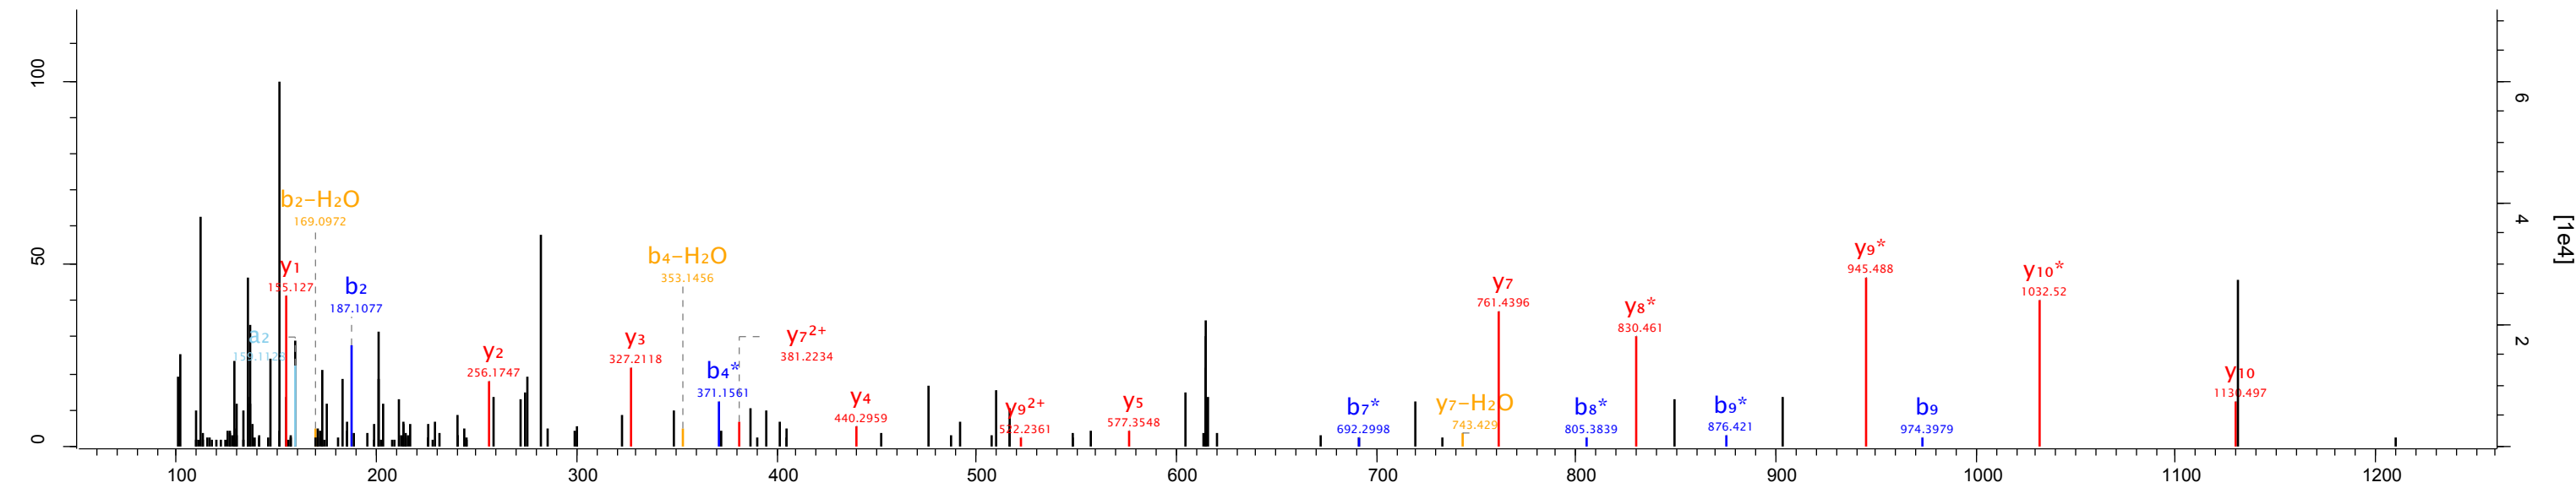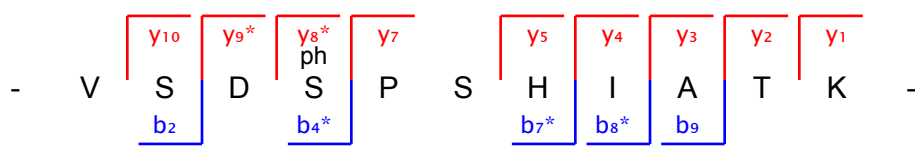



Raw file: 20171215\_MaS\_33SR\_LMH\_phospho\_09  
 Scan: 3075 Method: FTMS; HCD Score: 93.35 m/z: 490.24 Gene names: SRRM1

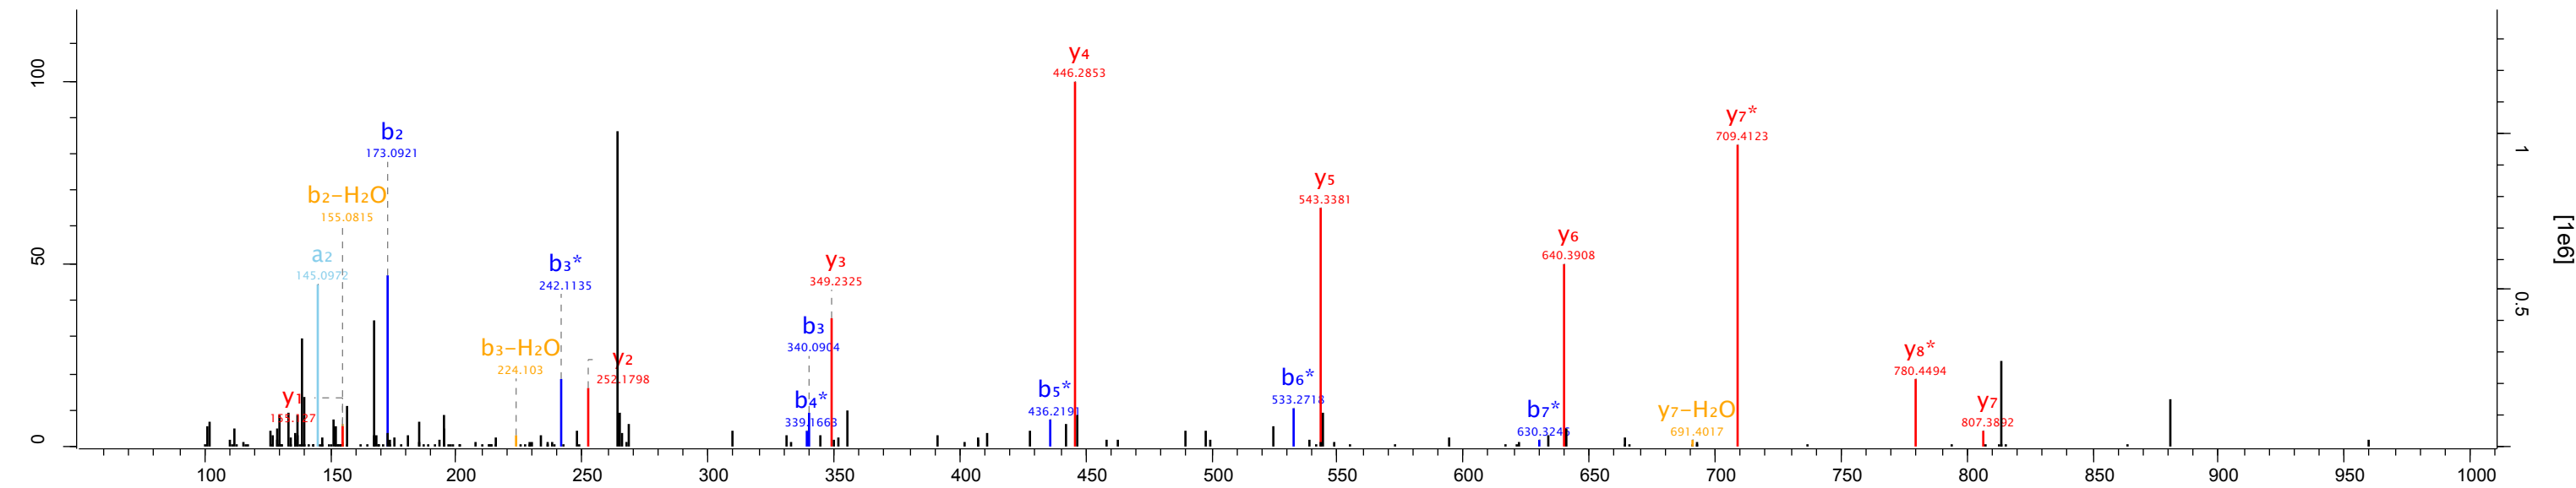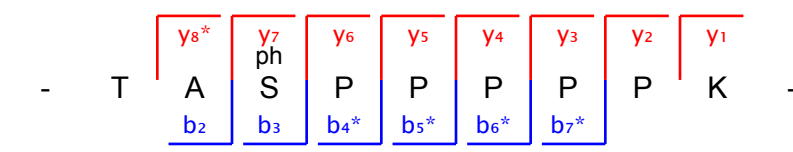

Raw file 20171215\_MaS\_33SR\_LMH\_phospho\_09 Scan 3675 Method FTMS; HCD Score 157.09 m/z 585.26 Gene names LIMA1;TRMT1

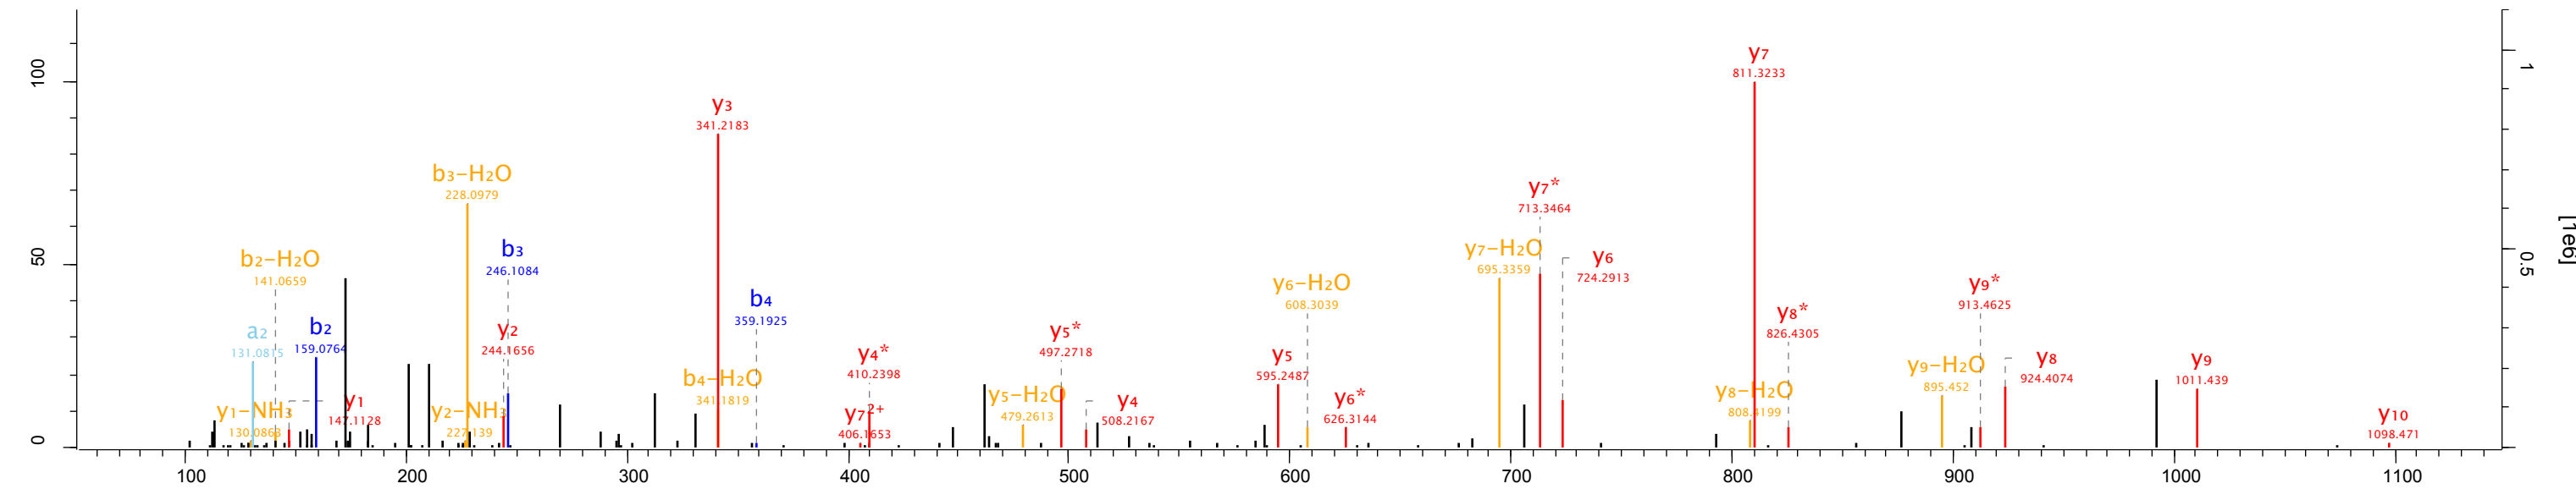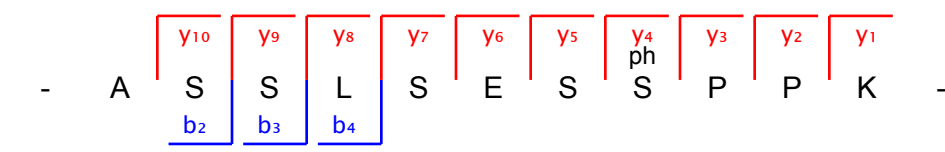

Raw file 20171215\_MaS\_33SR\_LMH\_phospho\_09 Scan 3725 Method FTMS; HCD Score 94.41 m/z 412.2 Gene names SMARCA5

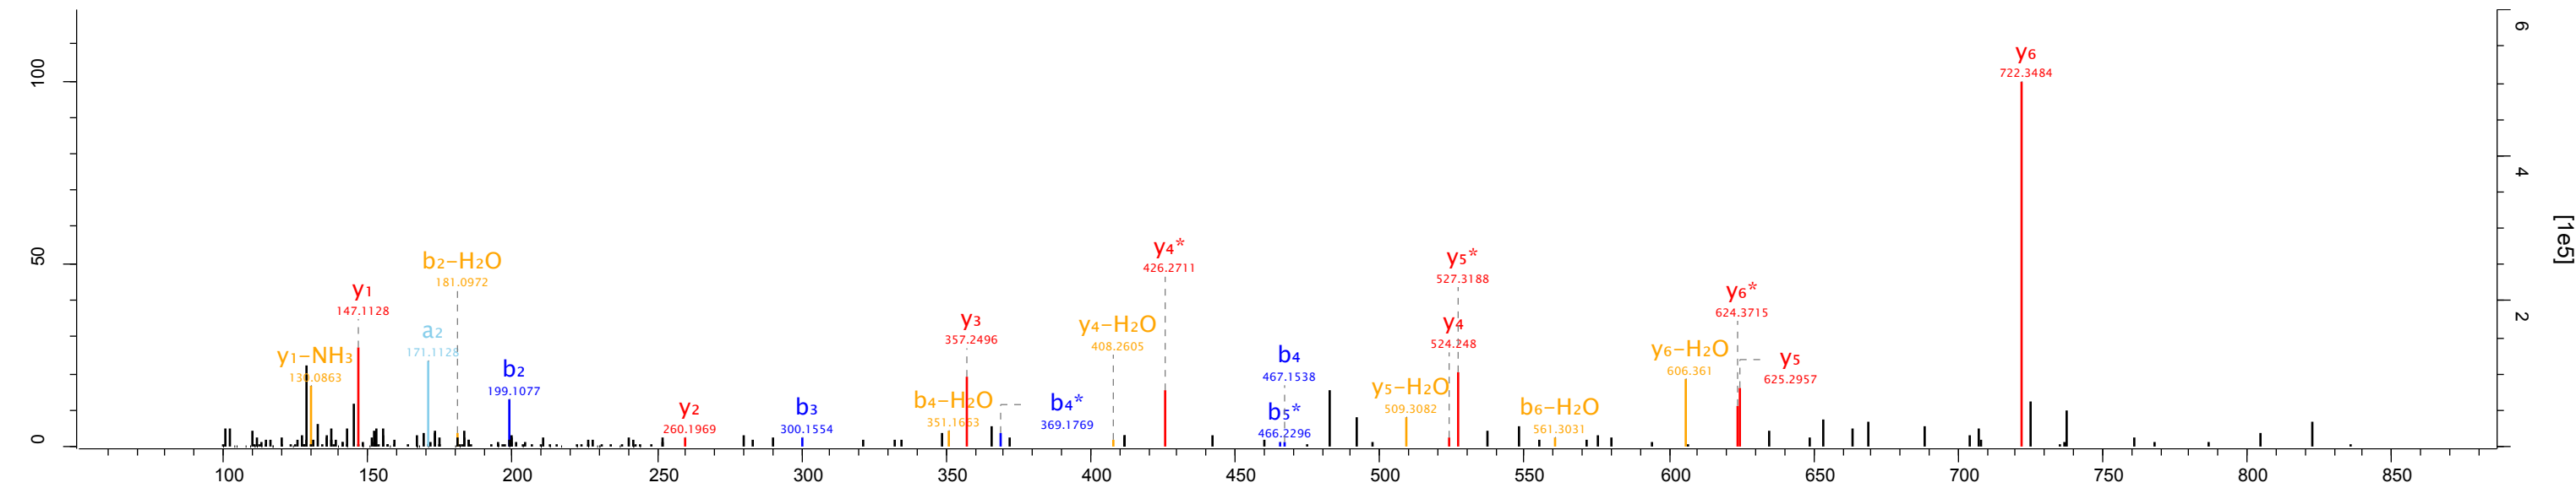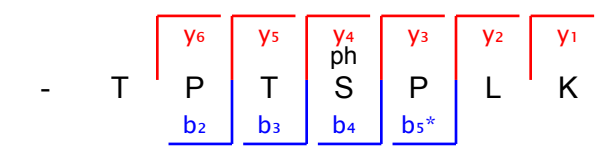

Raw file 20171215\_MaS\_33SR\_LMH\_phospho\_09 Scan 4595 Method FTMS; HCD Score 46.84 m/z 662.31 Gene names FAM19A2

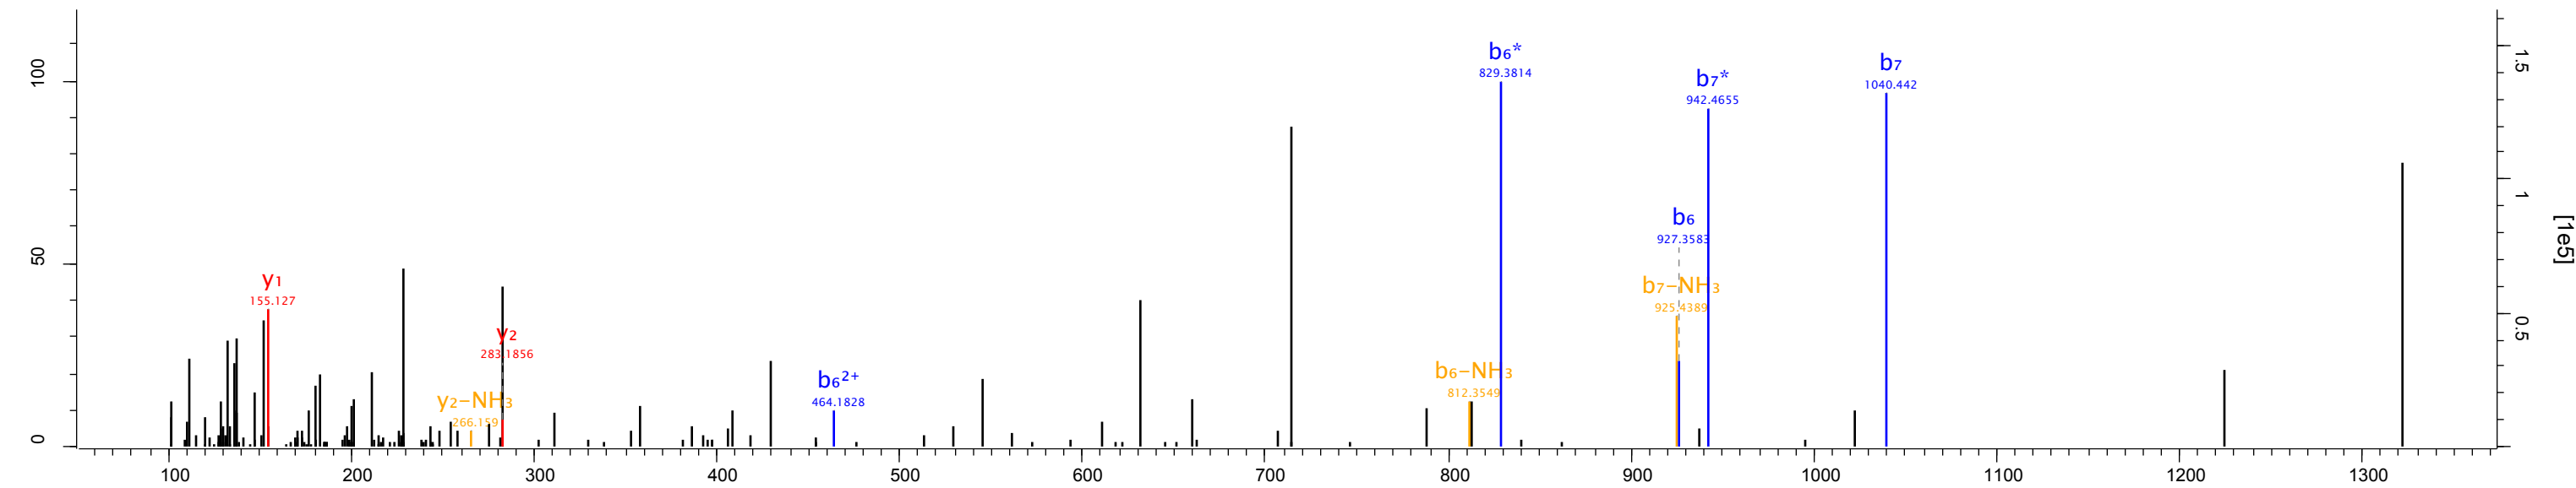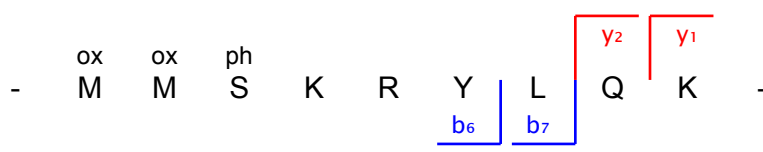

Raw file: 20171215\_MaS\_33SR\_LMH\_phospho2\_01  
 Scan: 10125 Method: FTMS; HCD Score: 66.15 m/z: 812.36 Gene names: PPP1R12C

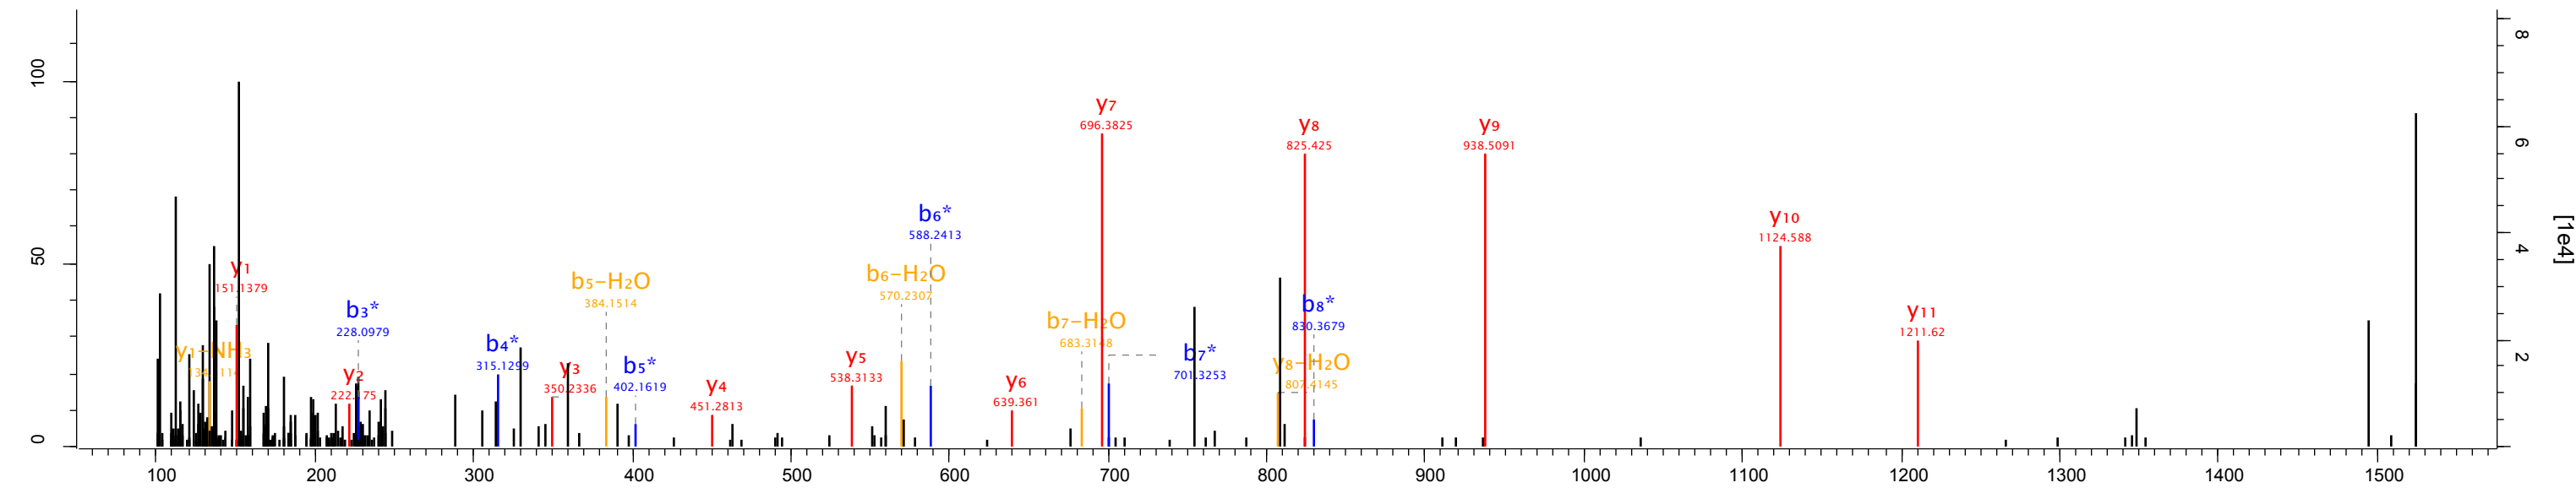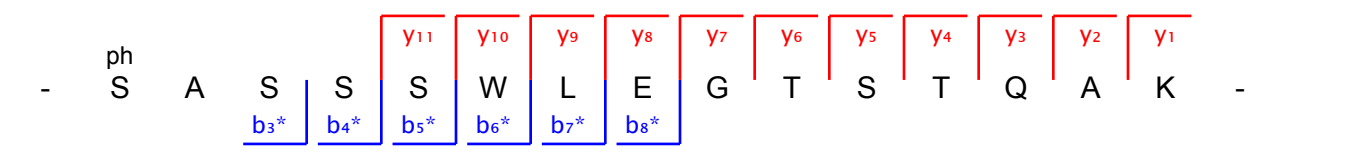

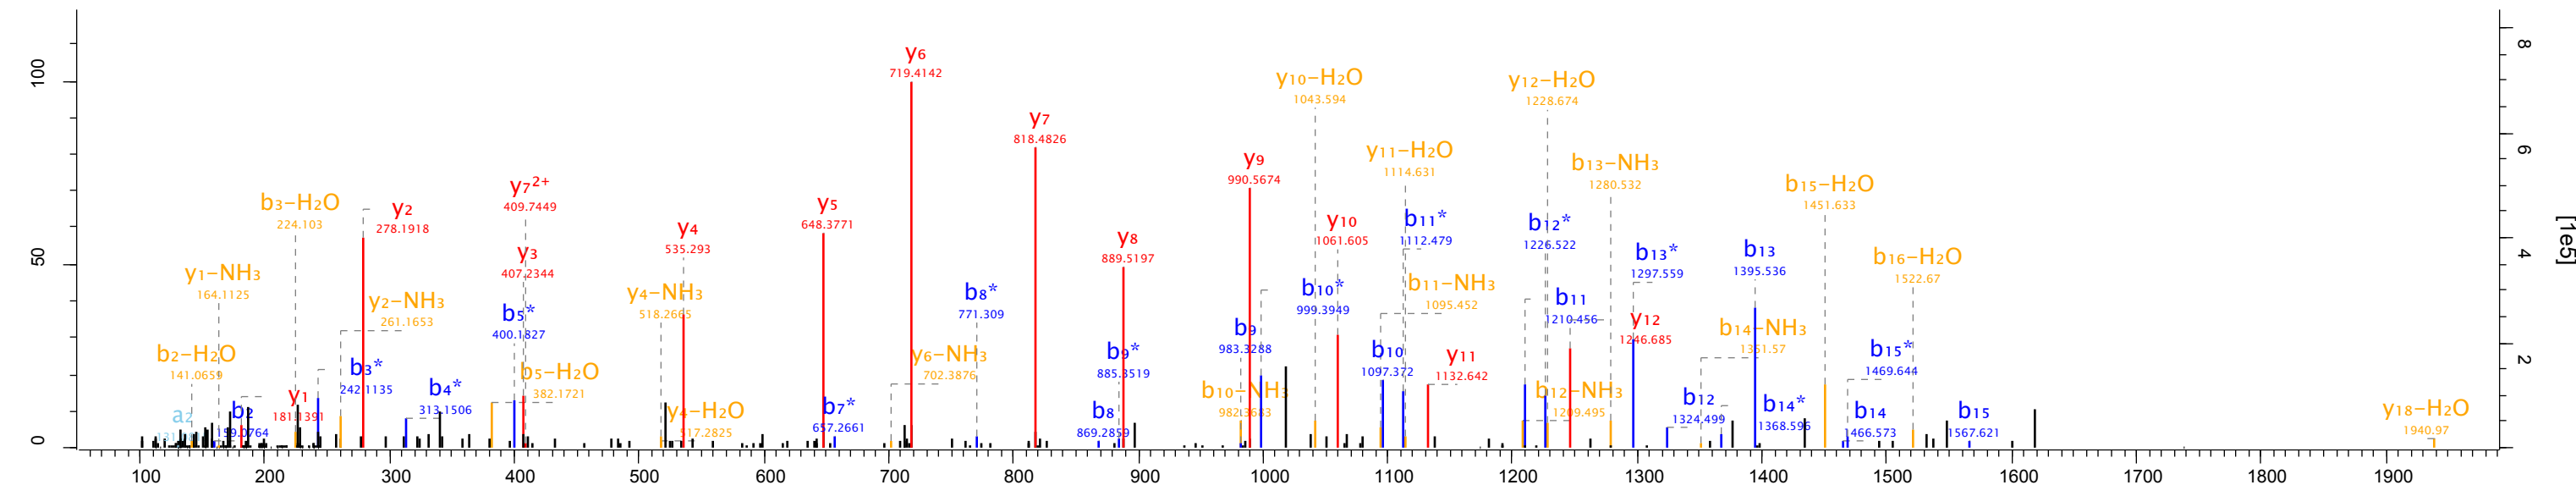

- A S T A S P C N N N I N A A T A V A L Q E P R -

ph

b<sub>2</sub> b<sub>3</sub><sup>\*</sup> b<sub>4</sub><sup>\*</sup> b<sub>5</sub><sup>\*</sup> b<sub>7</sub><sup>\*</sup> b<sub>8</sub> b<sub>9</sub> b<sub>10</sub> b<sub>11</sub> b<sub>12</sub> b<sub>13</sub> b<sub>14</sub> b<sub>15</sub> y<sub>12</sub> y<sub>11</sub> y<sub>10</sub> y<sub>9</sub> y<sub>8</sub> y<sub>7</sub> y<sub>6</sub> y<sub>5</sub> y<sub>4</sub> y<sub>3</sub> y<sub>2</sub> y<sub>1</sub>

Raw file 20171215\_MaS\_33SR\_LMH\_phospho2\_01 Scan 14295 Method FTMS; HCD Score 109.72 m/z 794.88 Gene names KIAA0368;ECM29

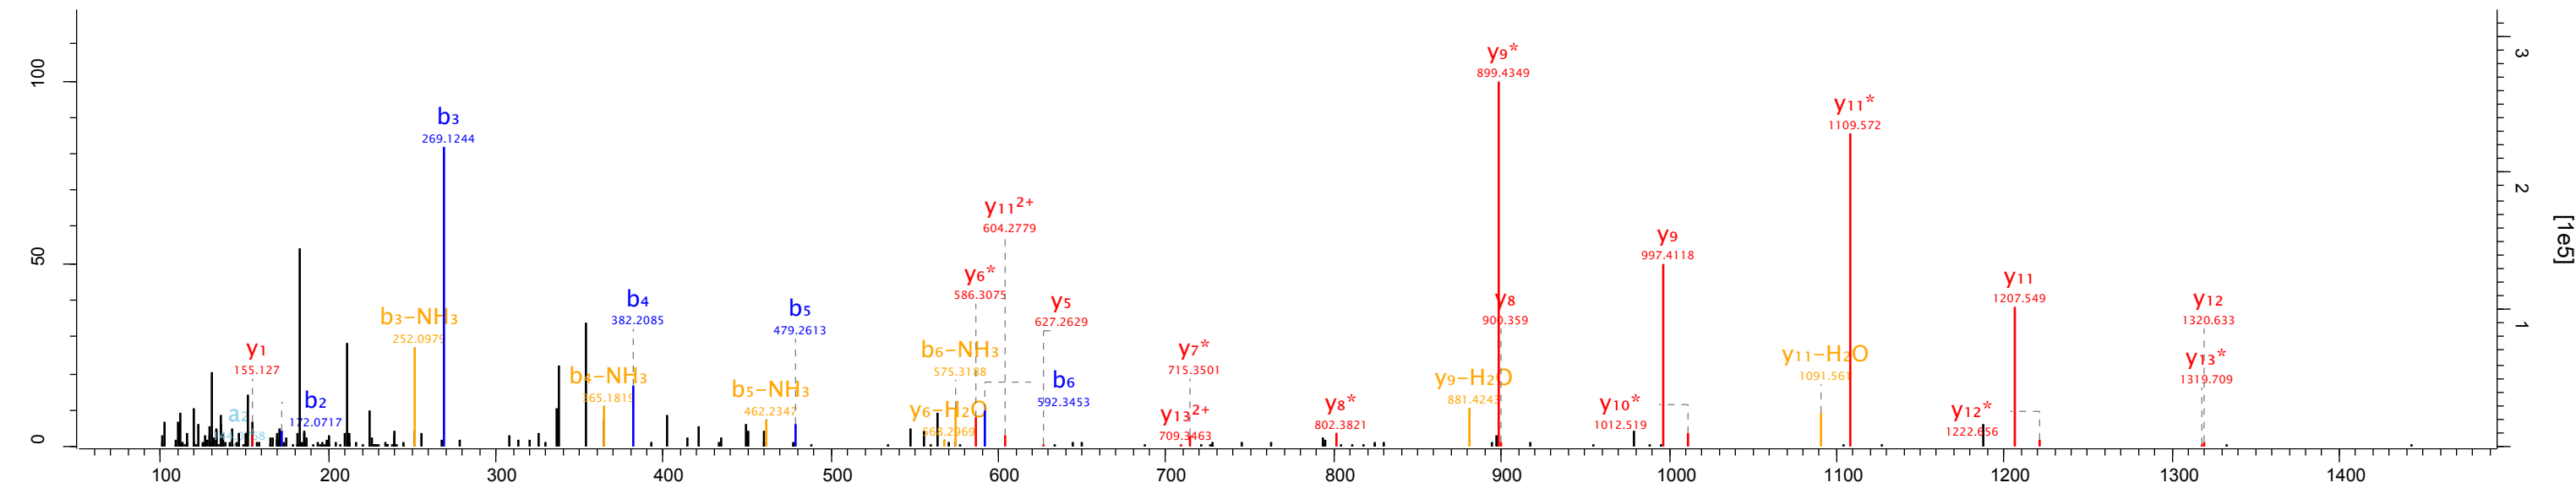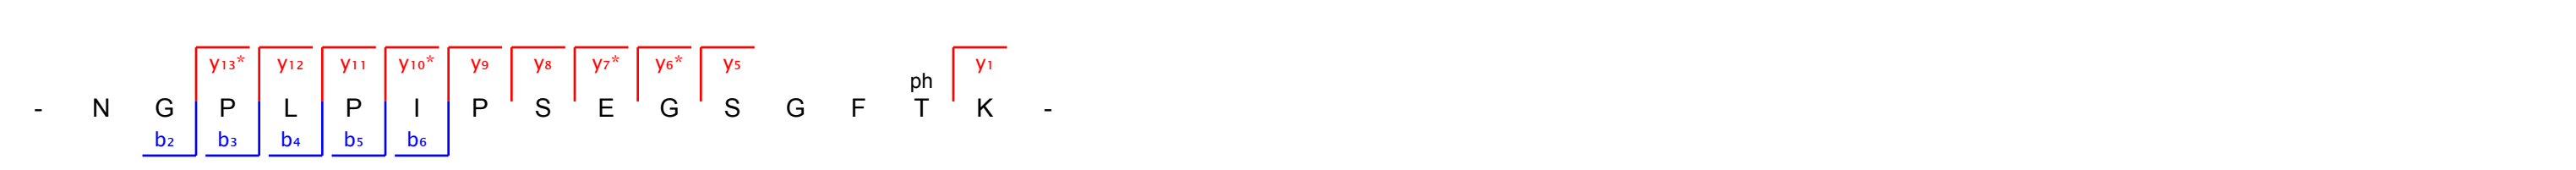

Raw file

20171215\_MaS\_33SR\_LMH\_phospho2\_01

| Scan | Method    | Score | m/z    | Gene names |
|------|-----------|-------|--------|------------|
| 1935 | FTMS; HCD | 56.87 | 437.53 | SRRM1      |

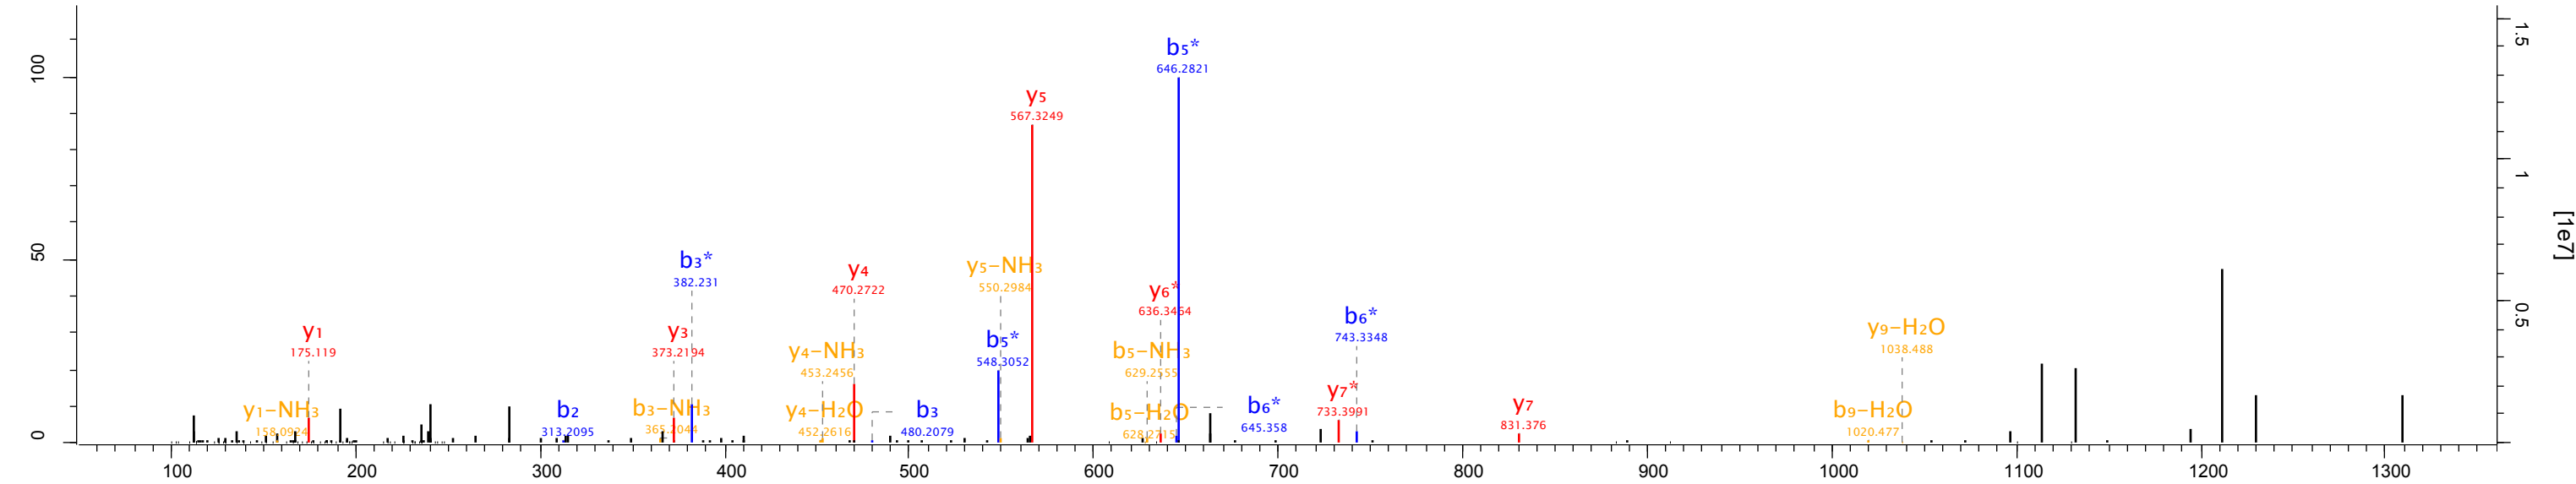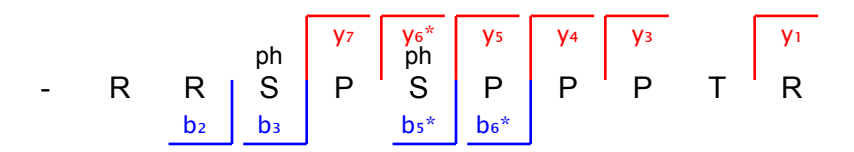



Raw file 20171215\_MaS\_33SR\_LMH\_phospho2\_01 Scan 2525 Method FTMS; HCD Score 158.76 m/z 768.8 Gene names FNTA

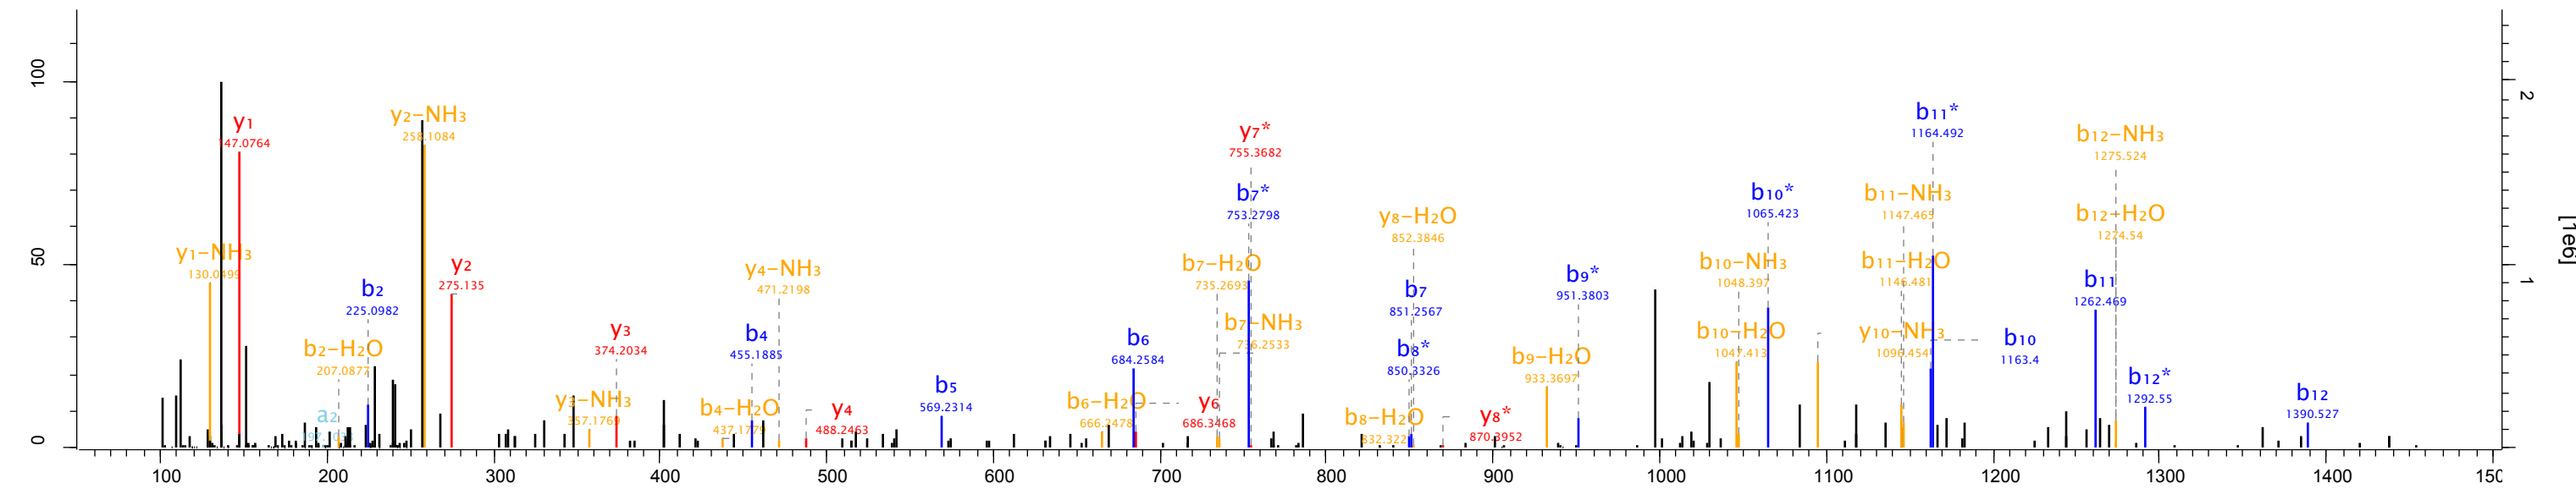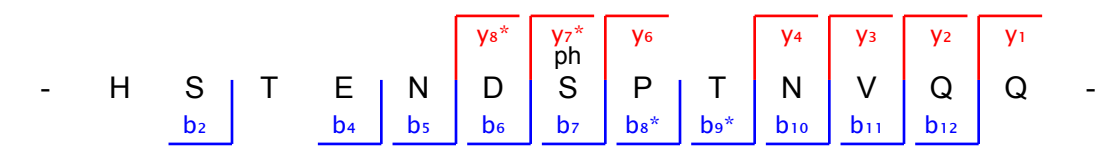

Raw file  
20171215\_MaS\_33SR\_LMH\_phospho2\_01

Scan 3175 Method FTMS; HCD Score 119.55 m/z 734.32 Gene names THRAP3

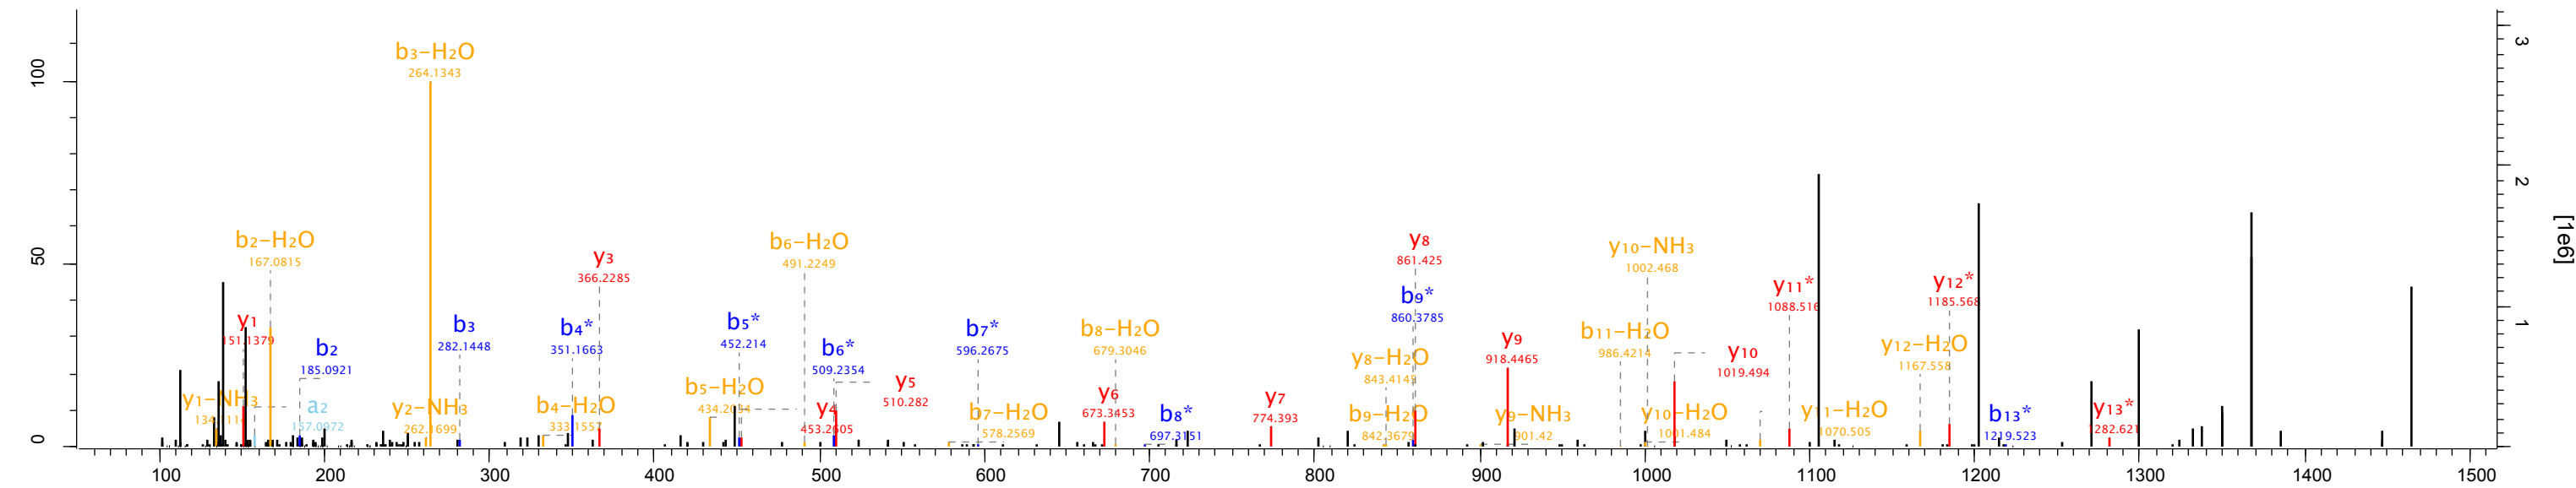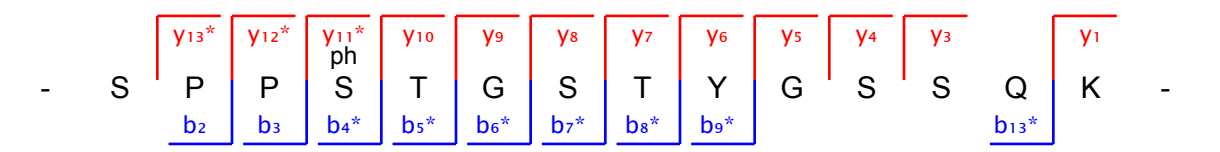

Raw file 20171215\_MaS\_33SR\_LMH\_phospho2\_01 Scan 3325 Method FTMS; HCD Score 250.39 m/z 891.35 Gene names HNRNPA1

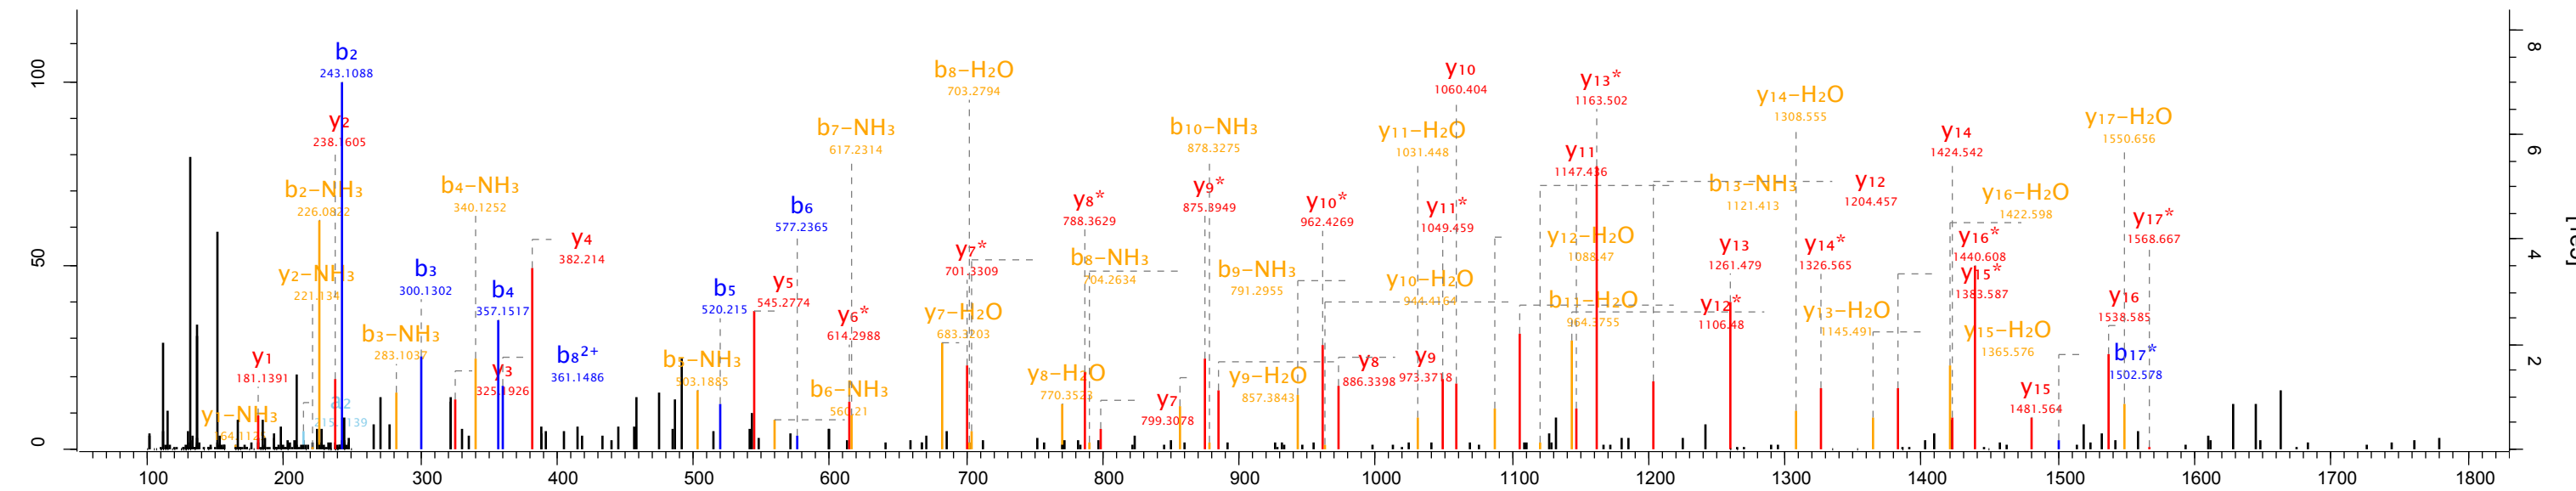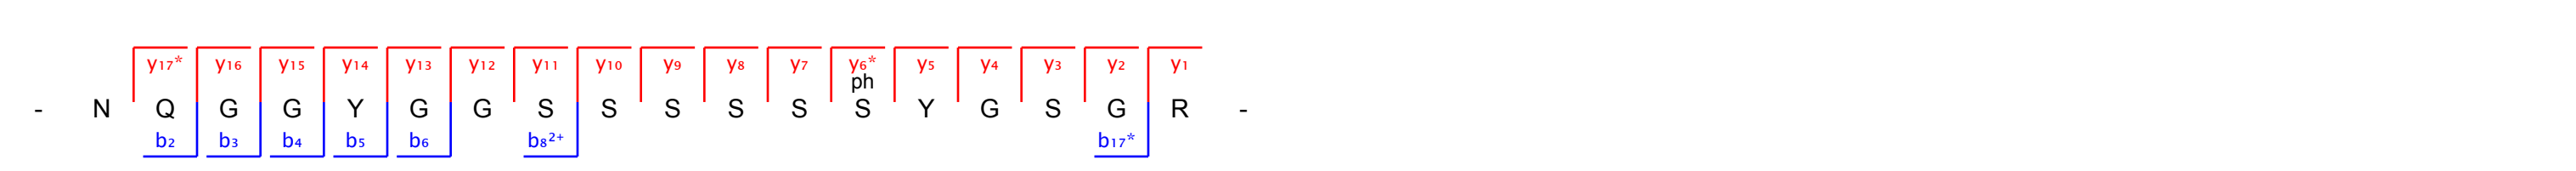

Raw file Scan Method Score m/z Gene names

20171215\_MaS\_33SR\_LMH\_phospho2\_01 3415 FTMS; HCD 214.54 874.85 TRA2B

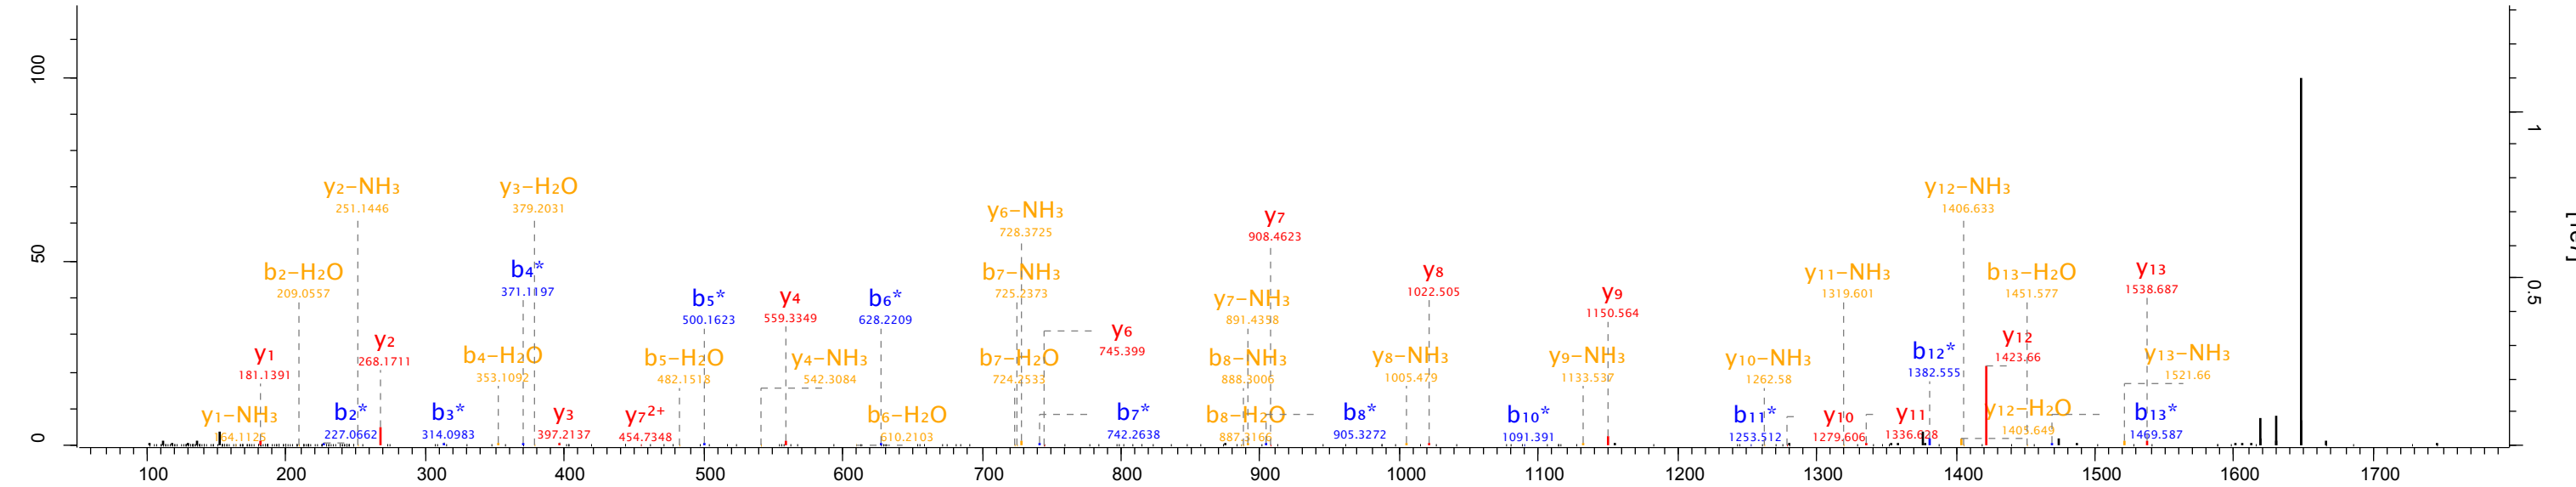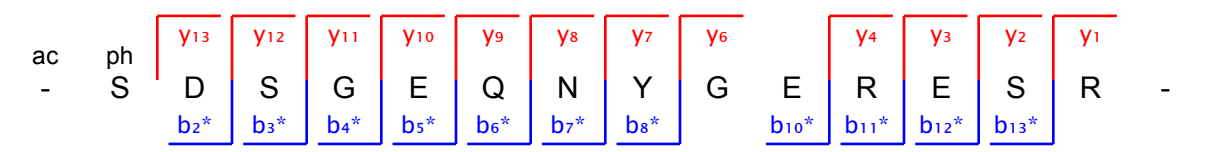

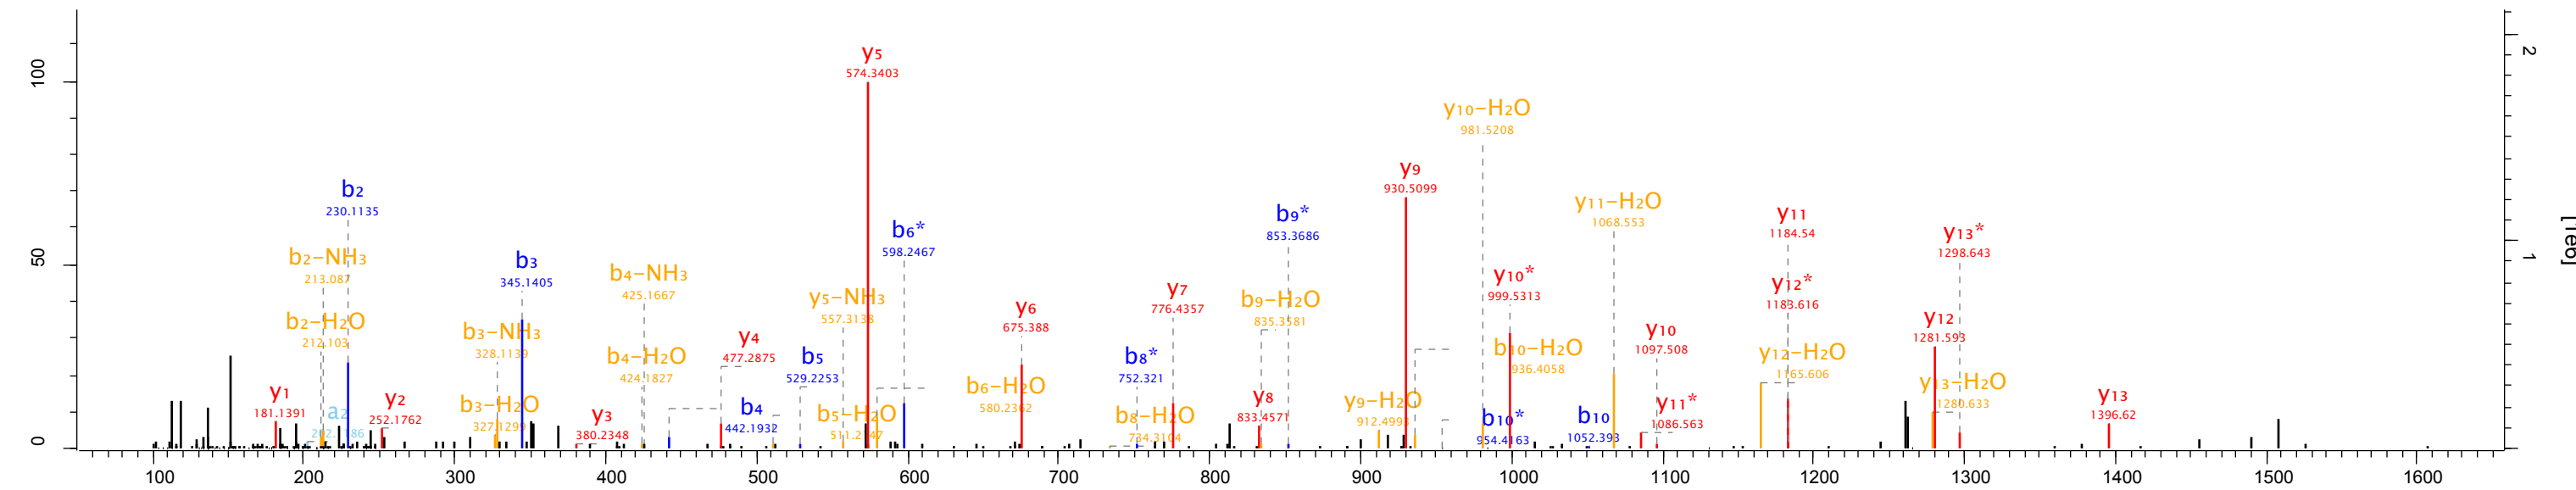

- T Q D P S S P G T T P P Q A R -

b<sub>2</sub>
b<sub>3</sub>
b<sub>4</sub>
b<sub>5</sub>
b<sub>6</sub>\*
b<sub>8</sub>\*
b<sub>9</sub>\*
b<sub>10</sub>

y<sub>13</sub>
y<sub>12</sub>
y<sub>11</sub>
y<sub>10</sub> ph
y<sub>9</sub>
y<sub>8</sub>
y<sub>7</sub>
y<sub>6</sub>
y<sub>5</sub>
y<sub>4</sub>
y<sub>3</sub>
y<sub>2</sub>
y<sub>1</sub>

Raw file 20171215\_MaS\_33SR\_LMH\_phospho2\_01 Scan 3805 Method FTMS; HCD Score 242.34 m/z 863.84 Gene names NUFIP2

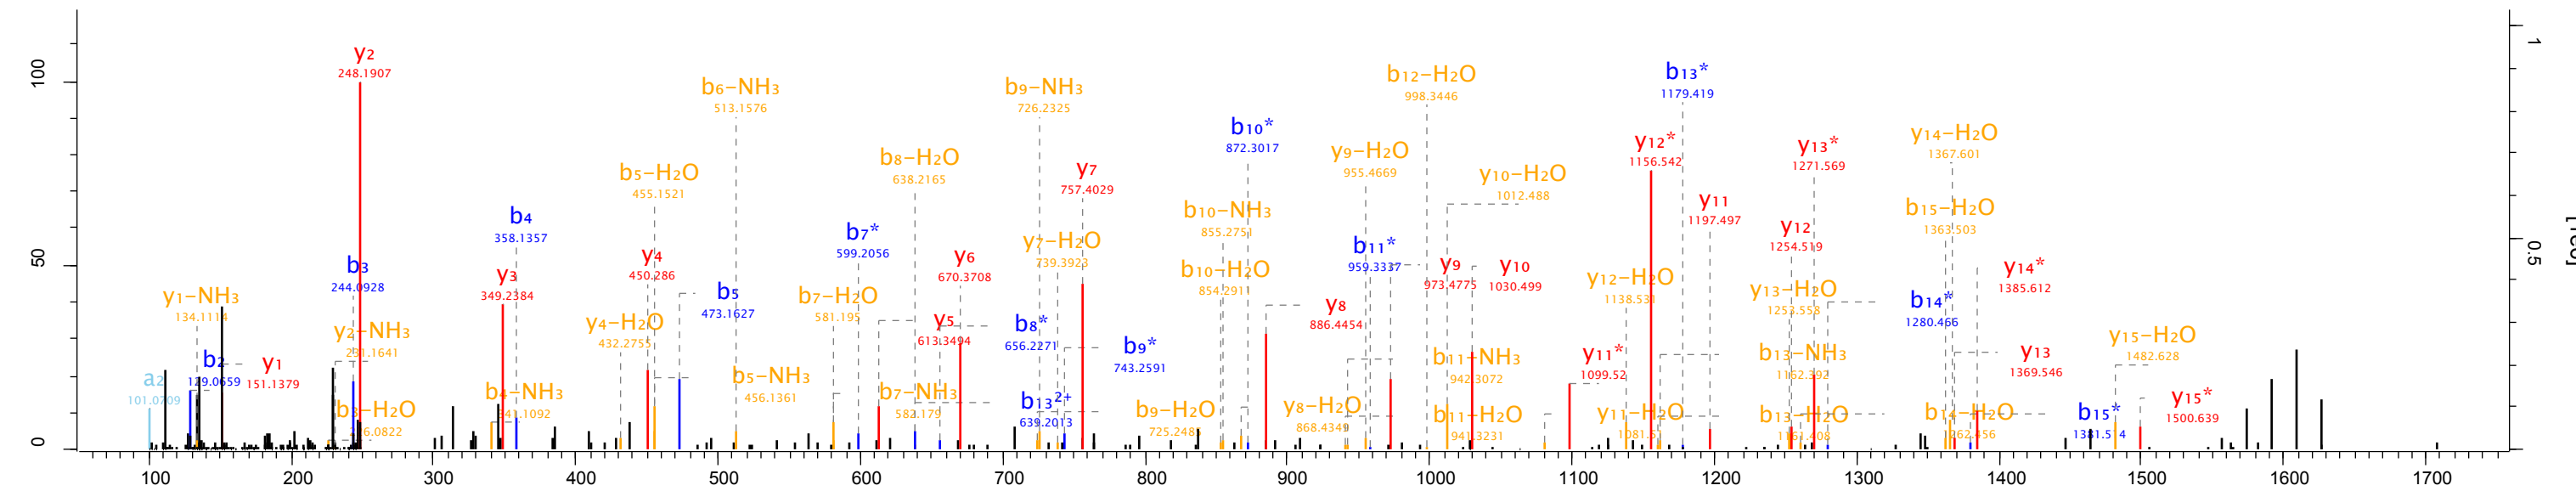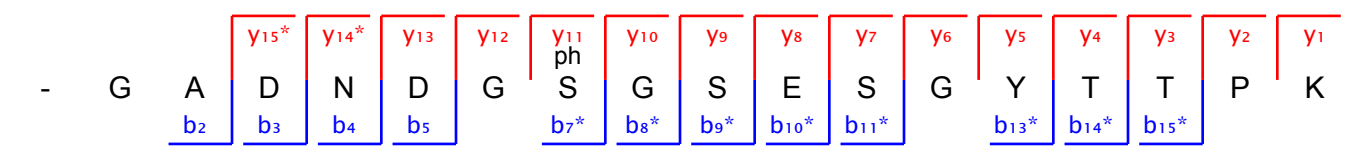

Raw file 20171215\_MaS\_33SR\_LMH\_phospho2\_01 Scan 3985 Method FTMS; HCD Score 72.82 m/z 409.85 Gene names RPS6

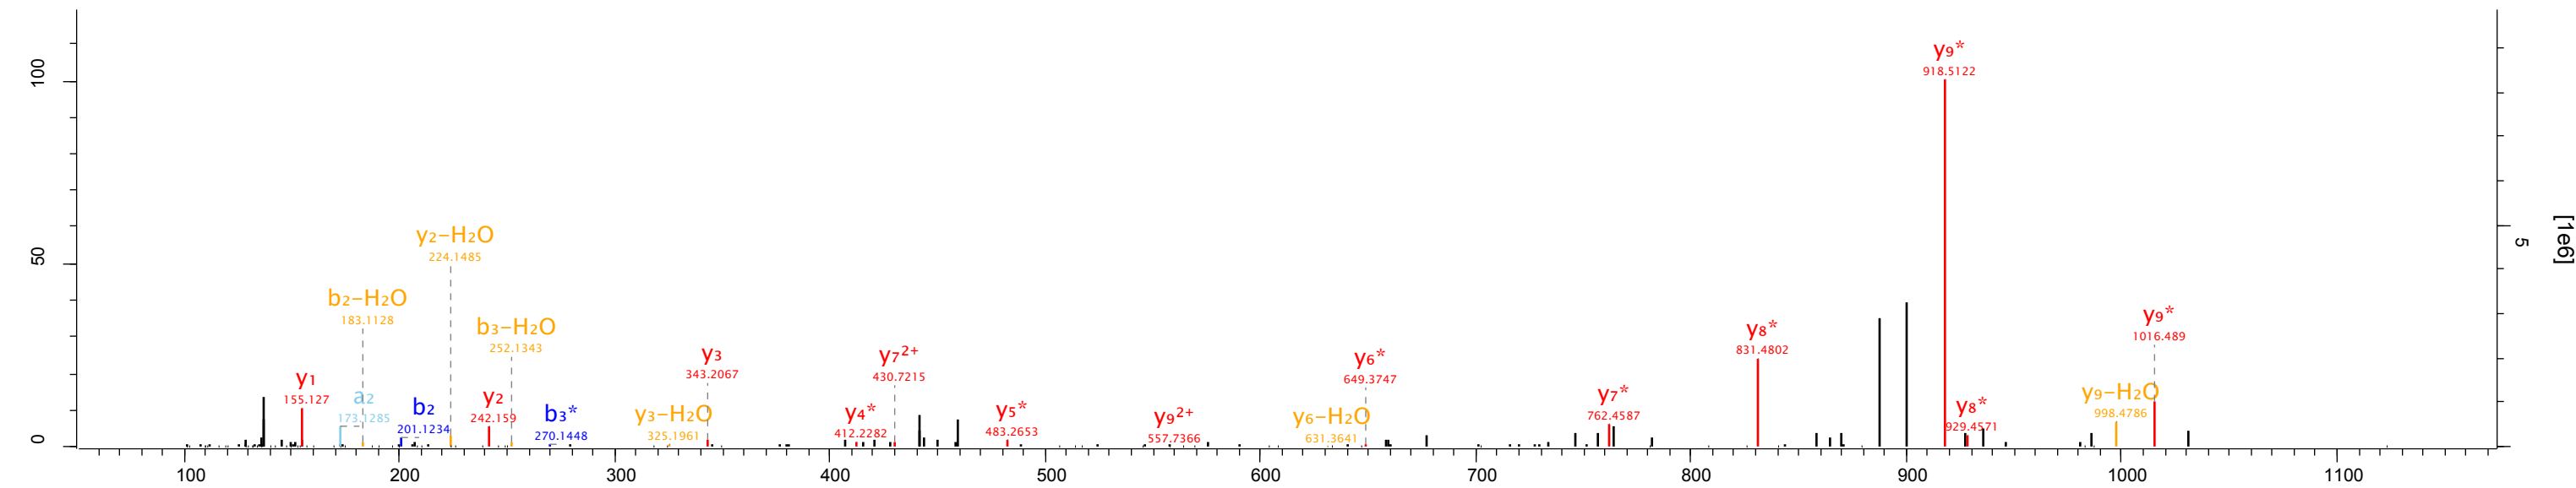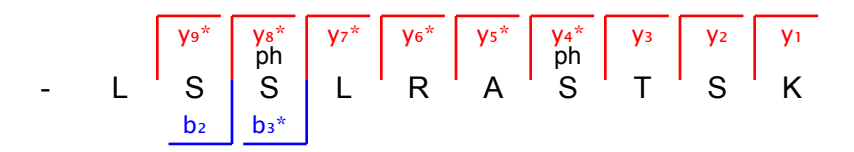

Raw file 20171215\_MaS\_33SR\_LMH\_phospho2\_01 Scan 4245 Method FTMS; HCD Score 93.84 m/z 546.7 Gene names PCBP2

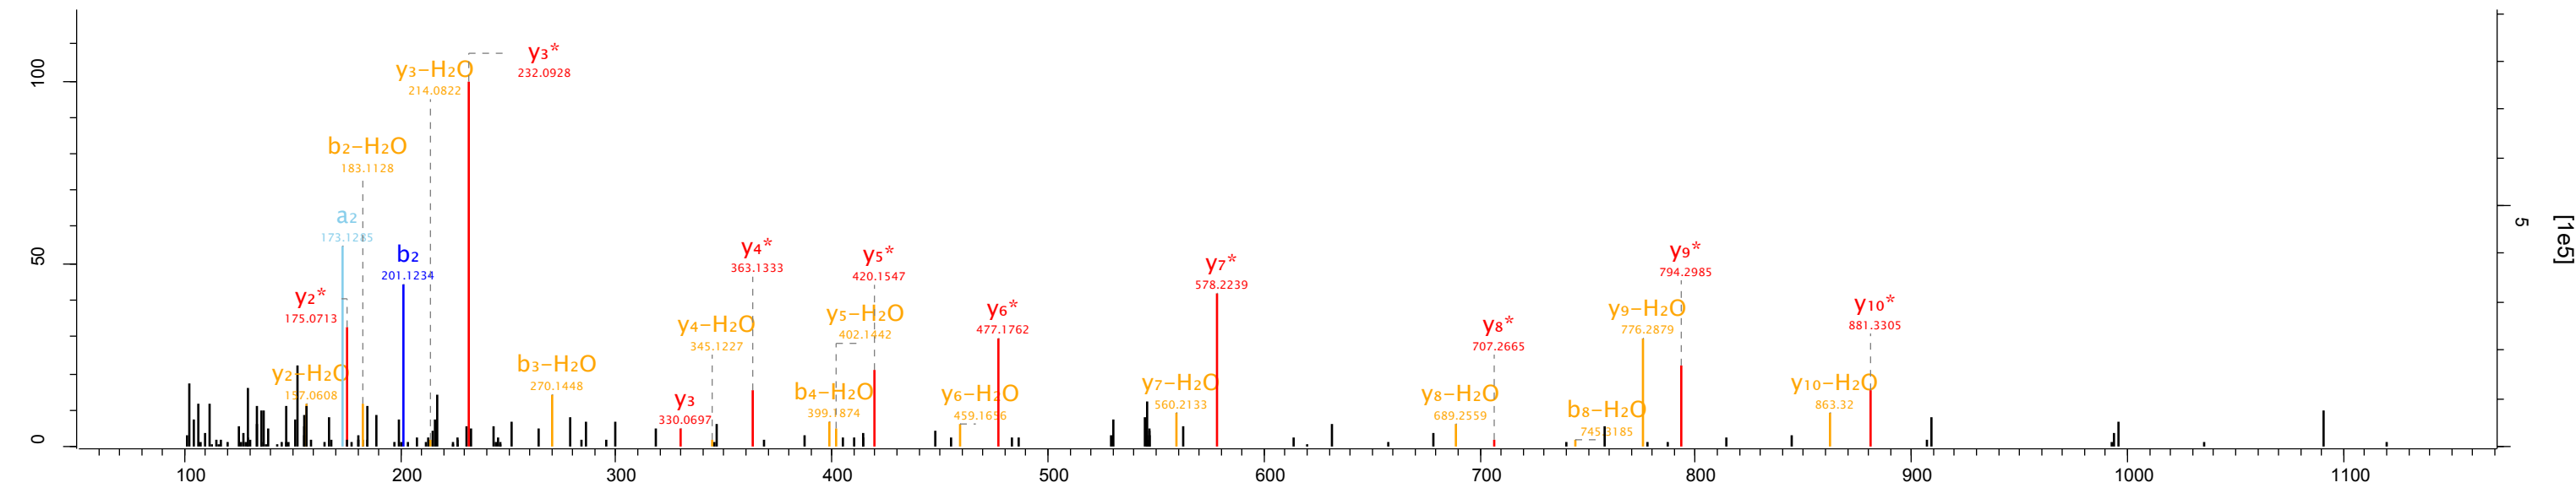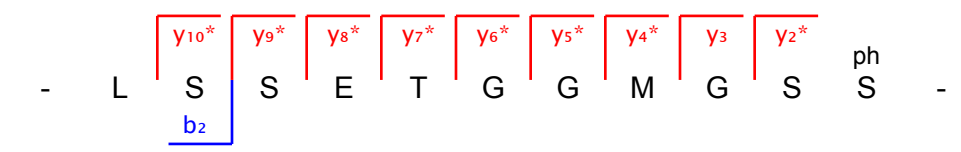



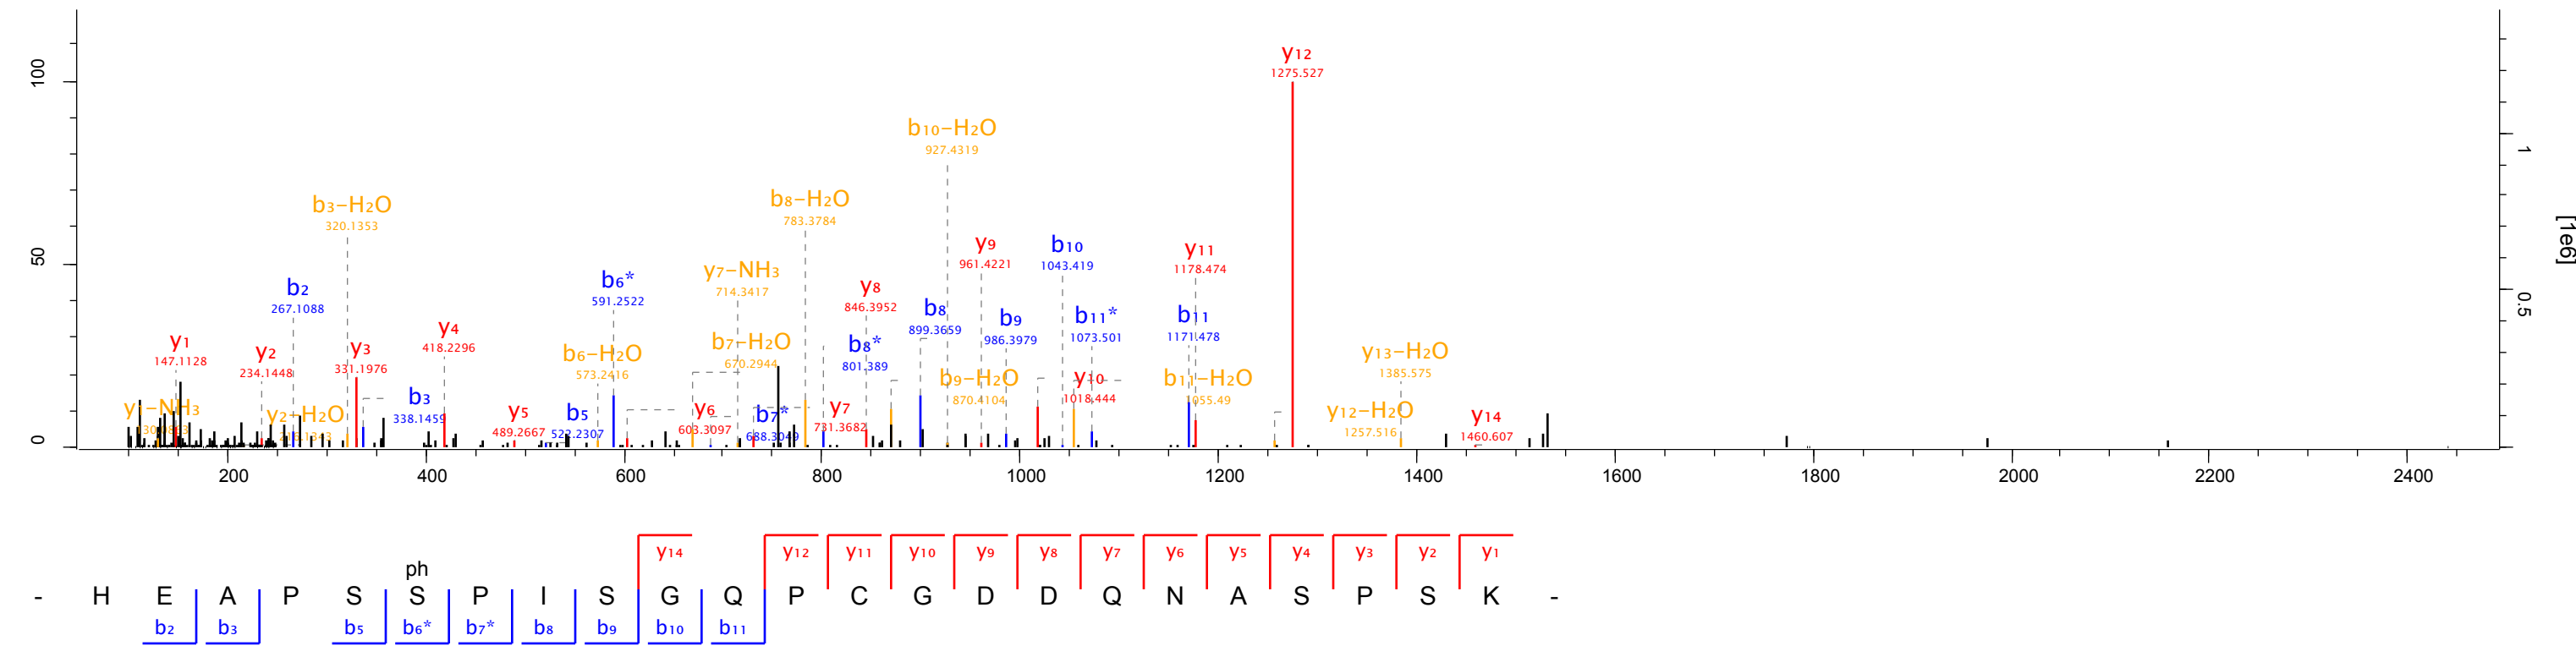

Raw file: 20171215\_MaS\_33SR\_LMH\_phospho2\_01  
 Scan: 4415 Method: FTMS; HCD Score: 186.36 m/z: 770.37 Gene names: TJP1

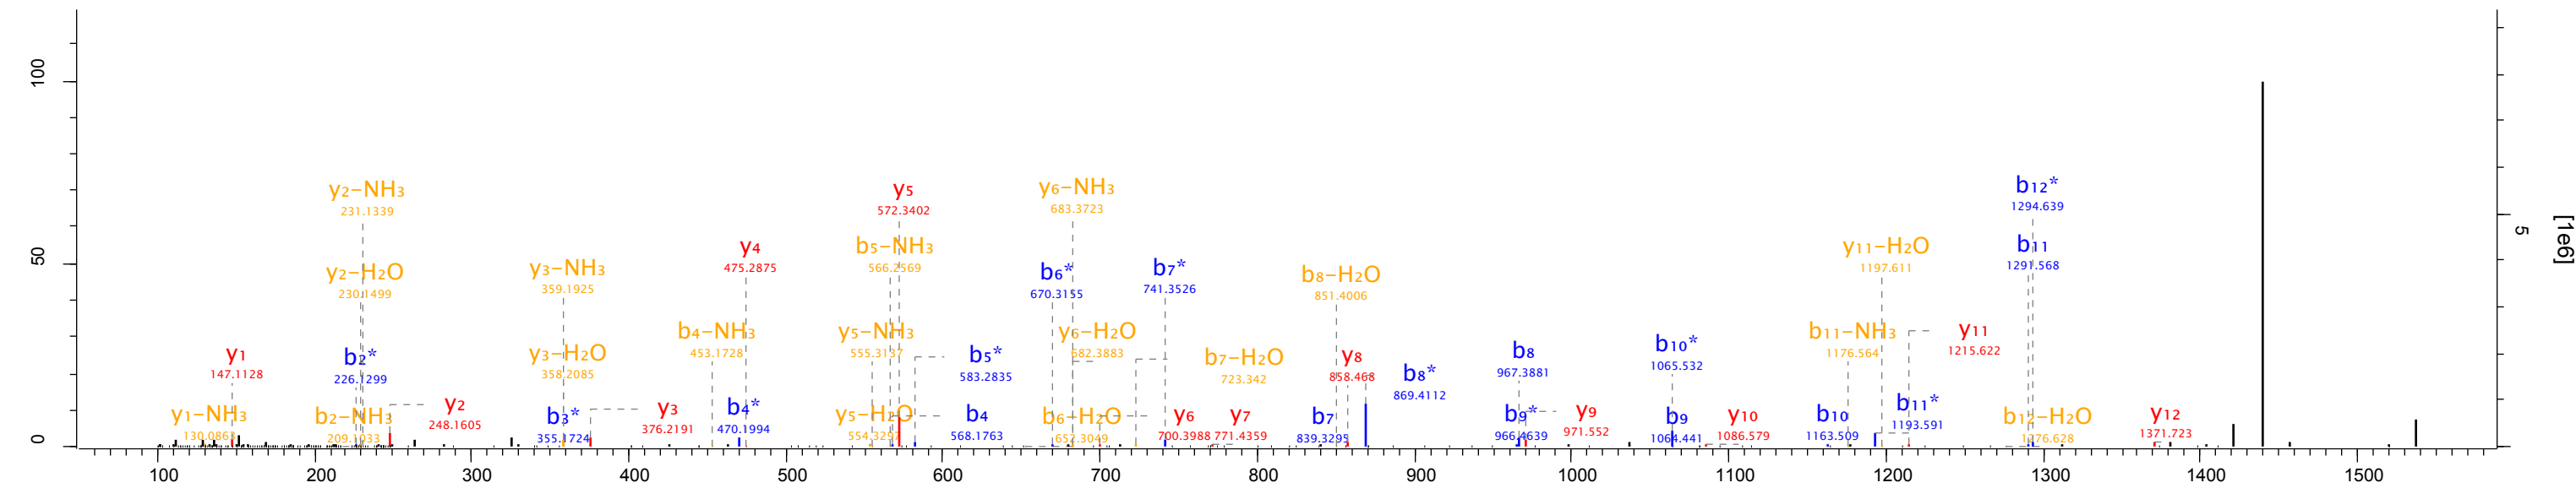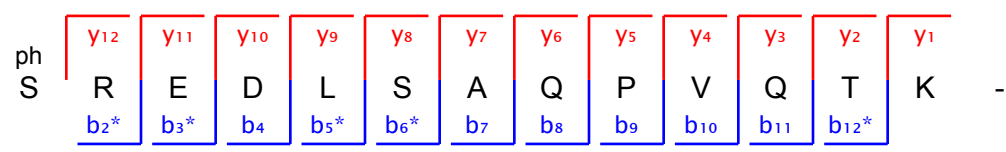

Raw file

20171215\_MaS\_33SR\_LMH\_phospho2\_01

| Scan | Method    | Score  | m/z    | Gene names |
|------|-----------|--------|--------|------------|
| 5865 | FTMS; HCD | 100.93 | 557.24 | NAV3       |

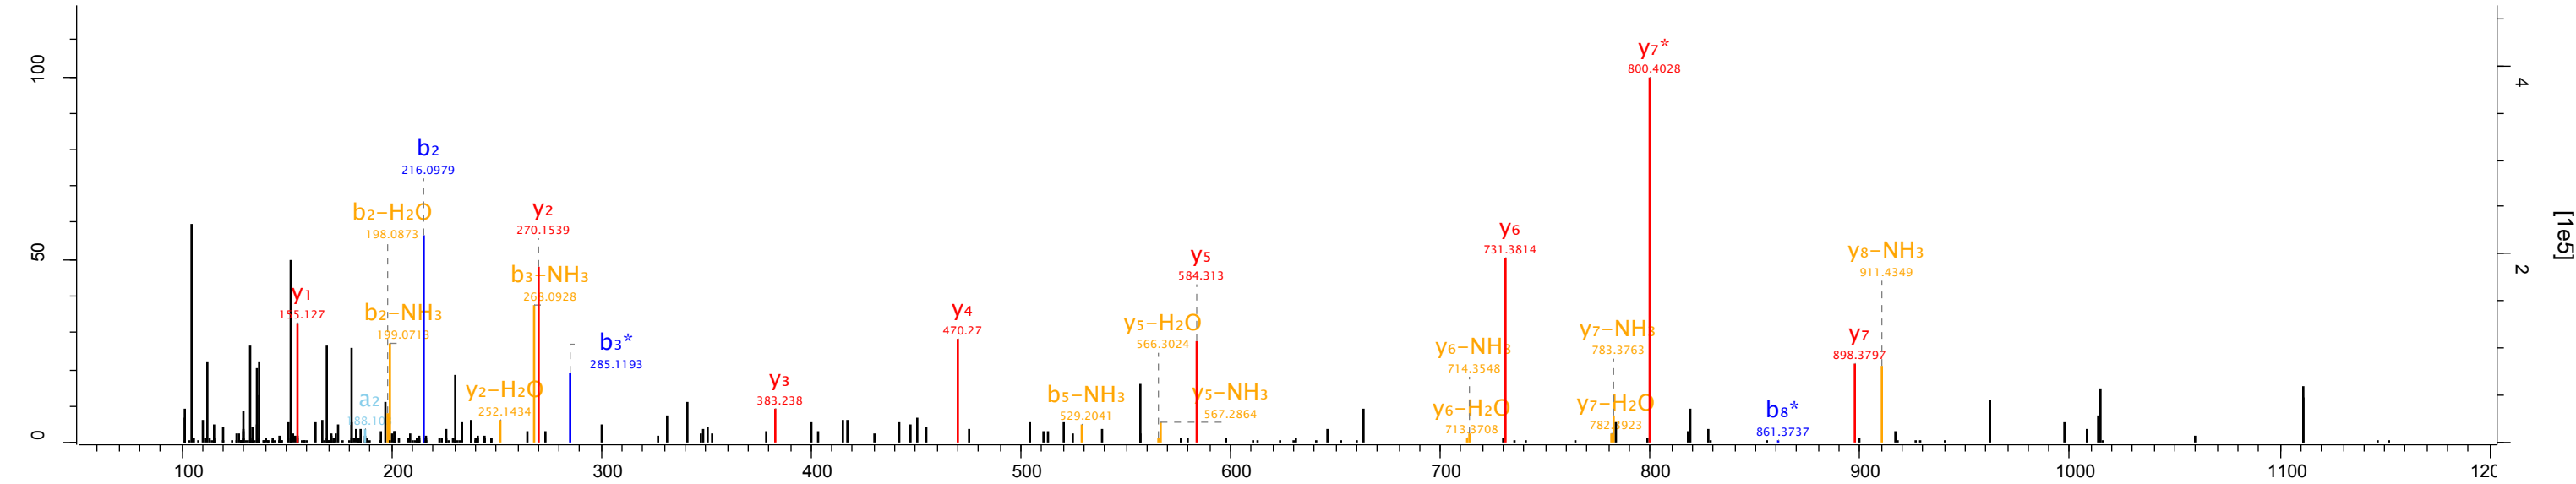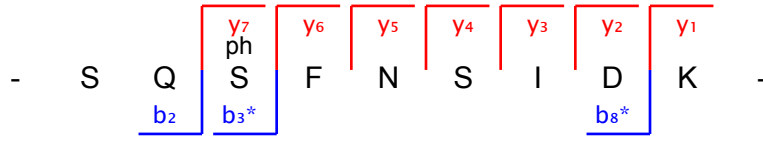

Raw file 20171215\_MaS\_33SR\_LMH\_phospho2\_01 Scan 6225 Method FTMS; HCD Score 83.87 m/z 774.31 Gene names RBM3

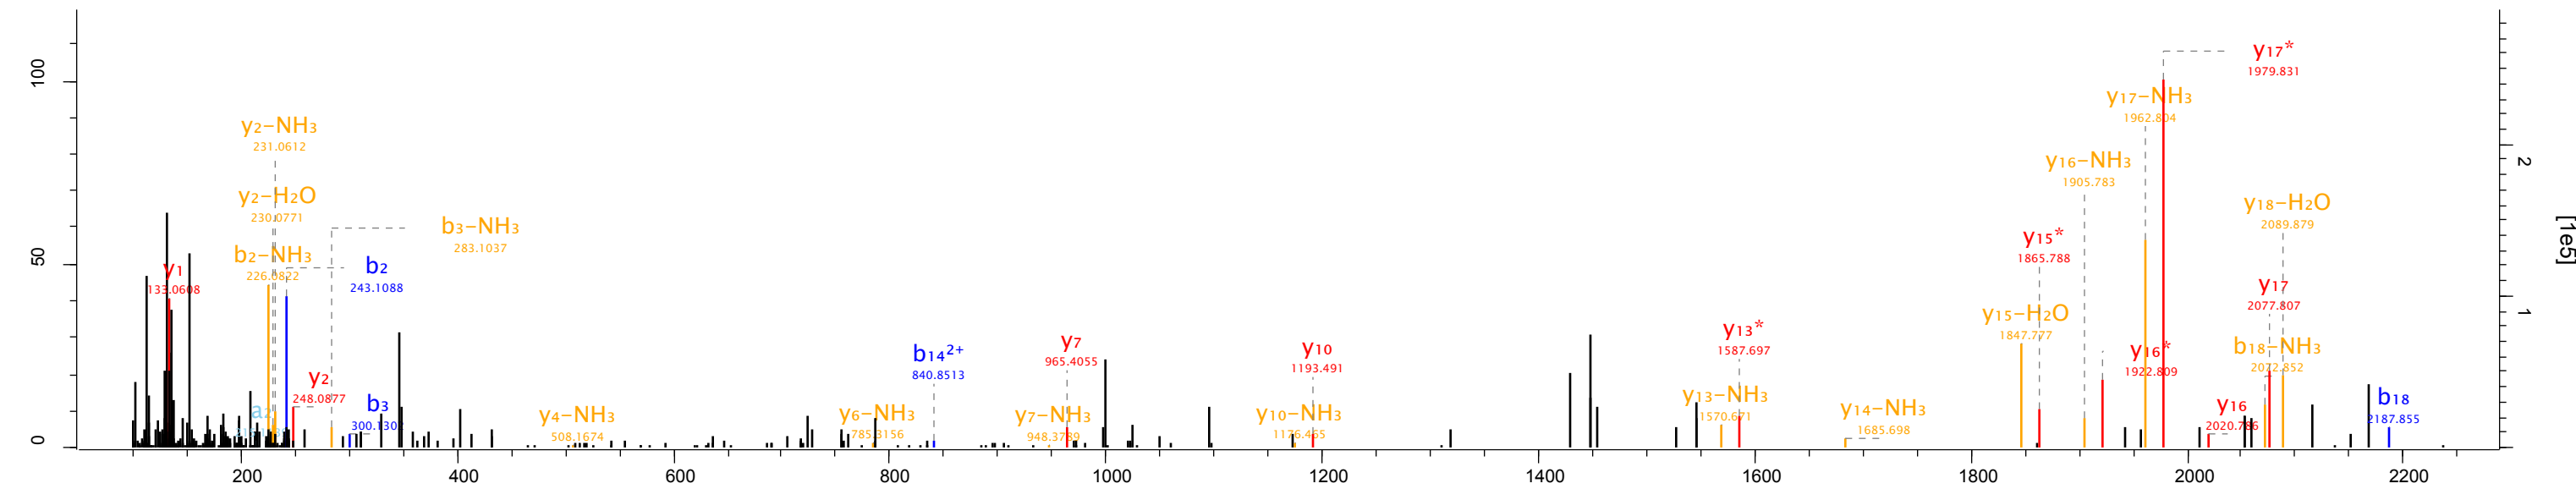

- N Q G G Y D R Y S G G N Y R D N Y D N -

Fragmentation mapping (b and y ions):

- b2: N-Q
- b3: Q-G
- y1: G-G
- y2: G-Y
- y7: Y-R
- y10: S-G
- y13\*: R-D
- y15\*: Y-D
- y16: G-G
- y17: G-G
- b14<sup>2+</sup>: R-D
- b18: Y-D
- y1: D-N

Raw file 20171215\_MaS\_33SR\_LMH\_phospho2\_02 Scan 10335 Method FTMS; HCD Score 138.03 m/z 938.92 Gene names ARHGAP5

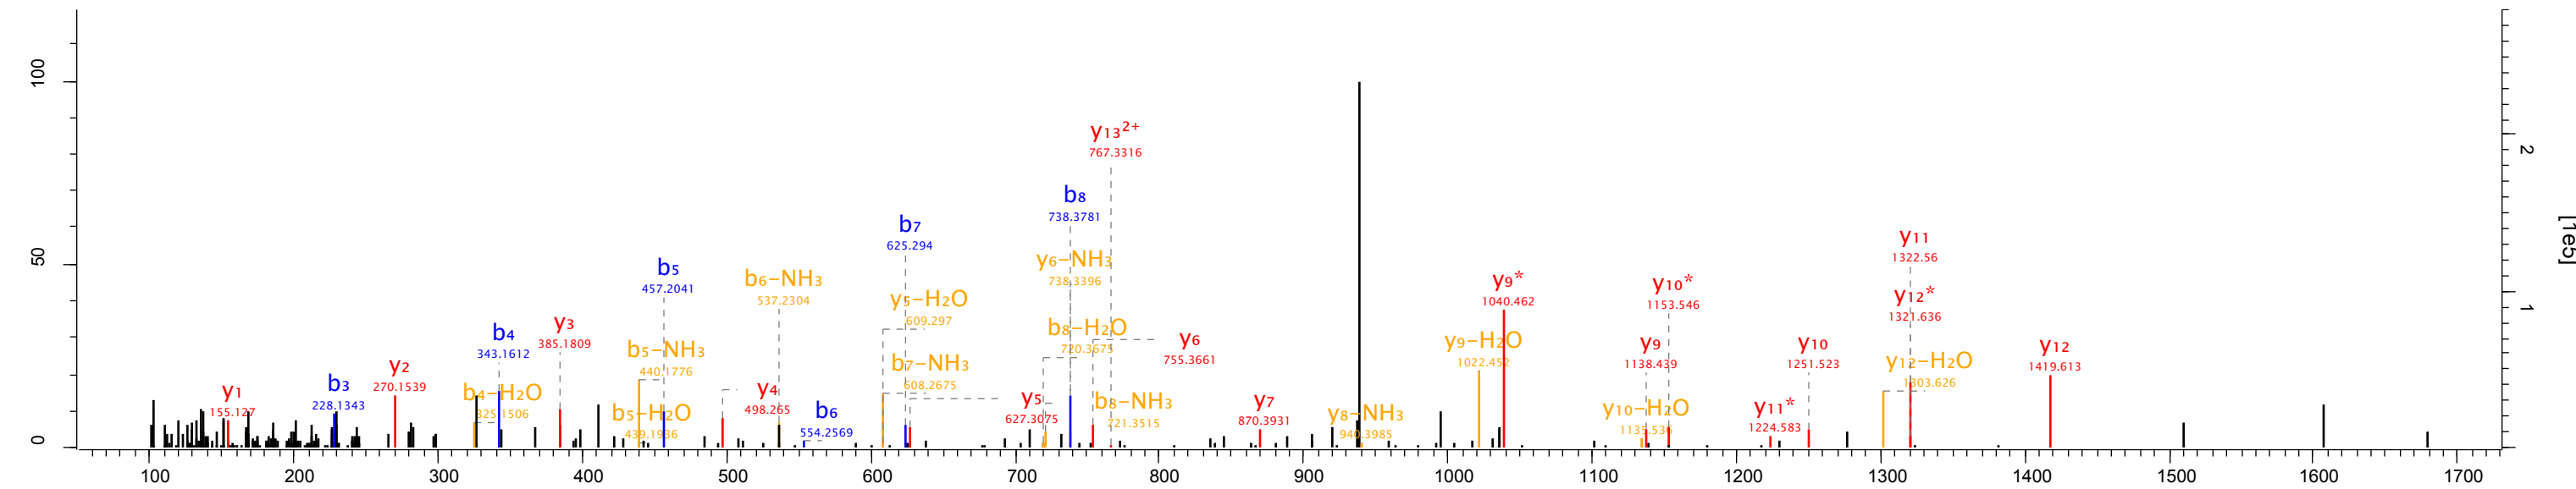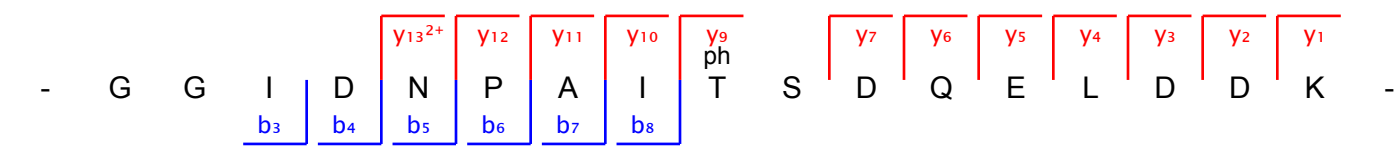

Raw file 20171215\_MaS\_33SR\_LMH\_phospho2\_02 Scan 10425 Method FTMS; HCD Score 165.44 m/z 695.33 Gene names AKAP13

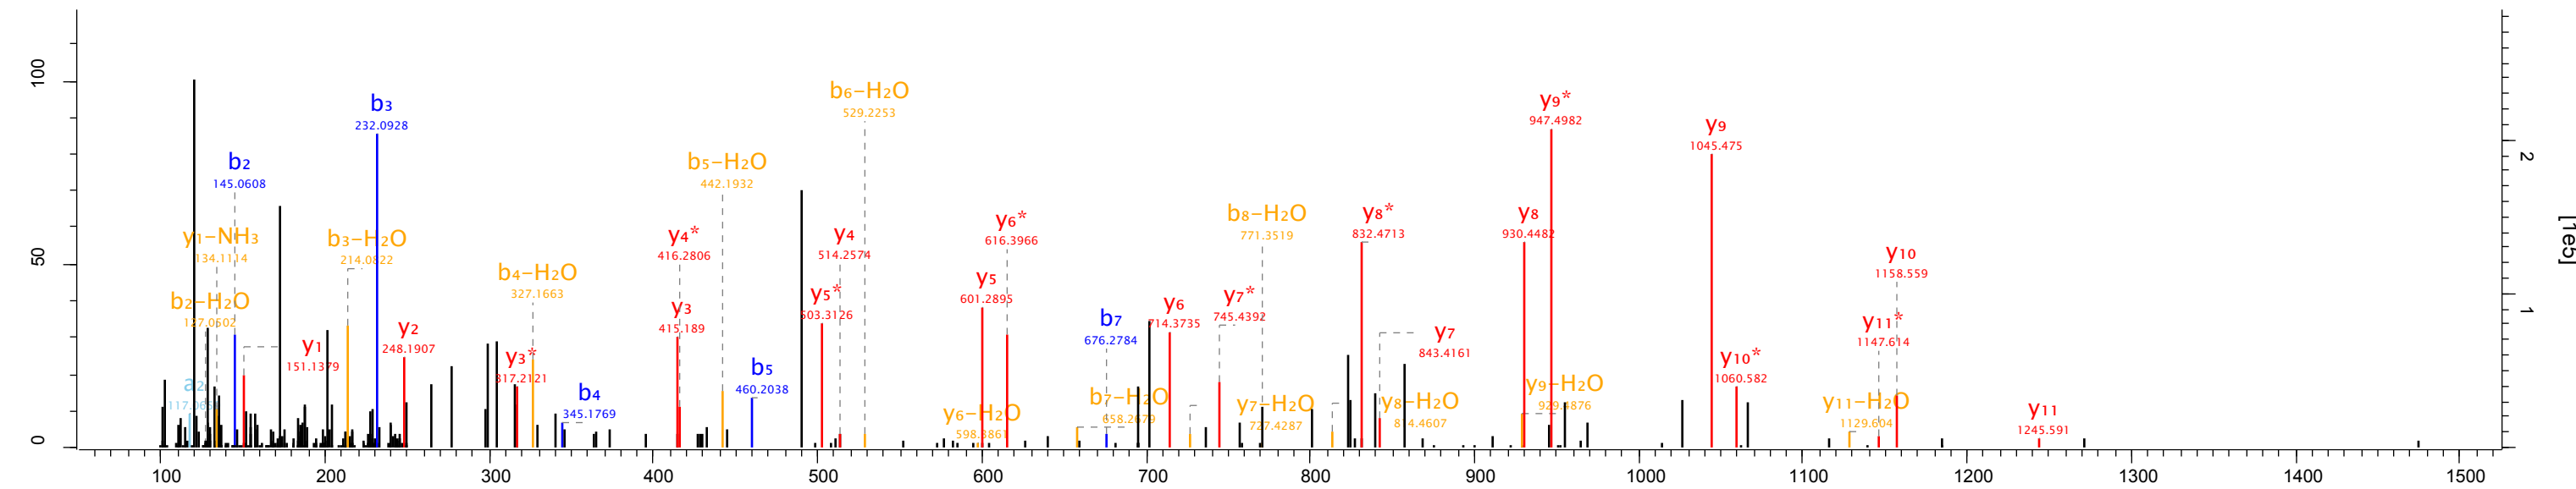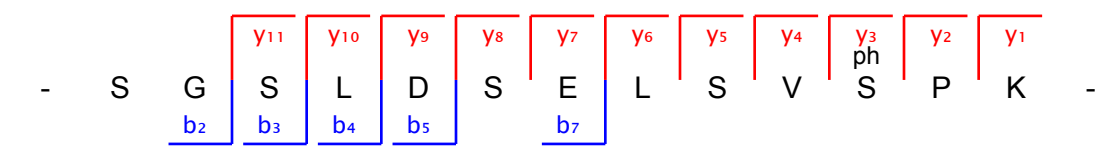

Raw file: 20171215\_MaS\_33SR\_LMH\_phospho2\_02  
 Scan: 10535 Method: FTMS; HCD Score: 155.23 m/z: 1045.14 Gene names: TBC1D9B

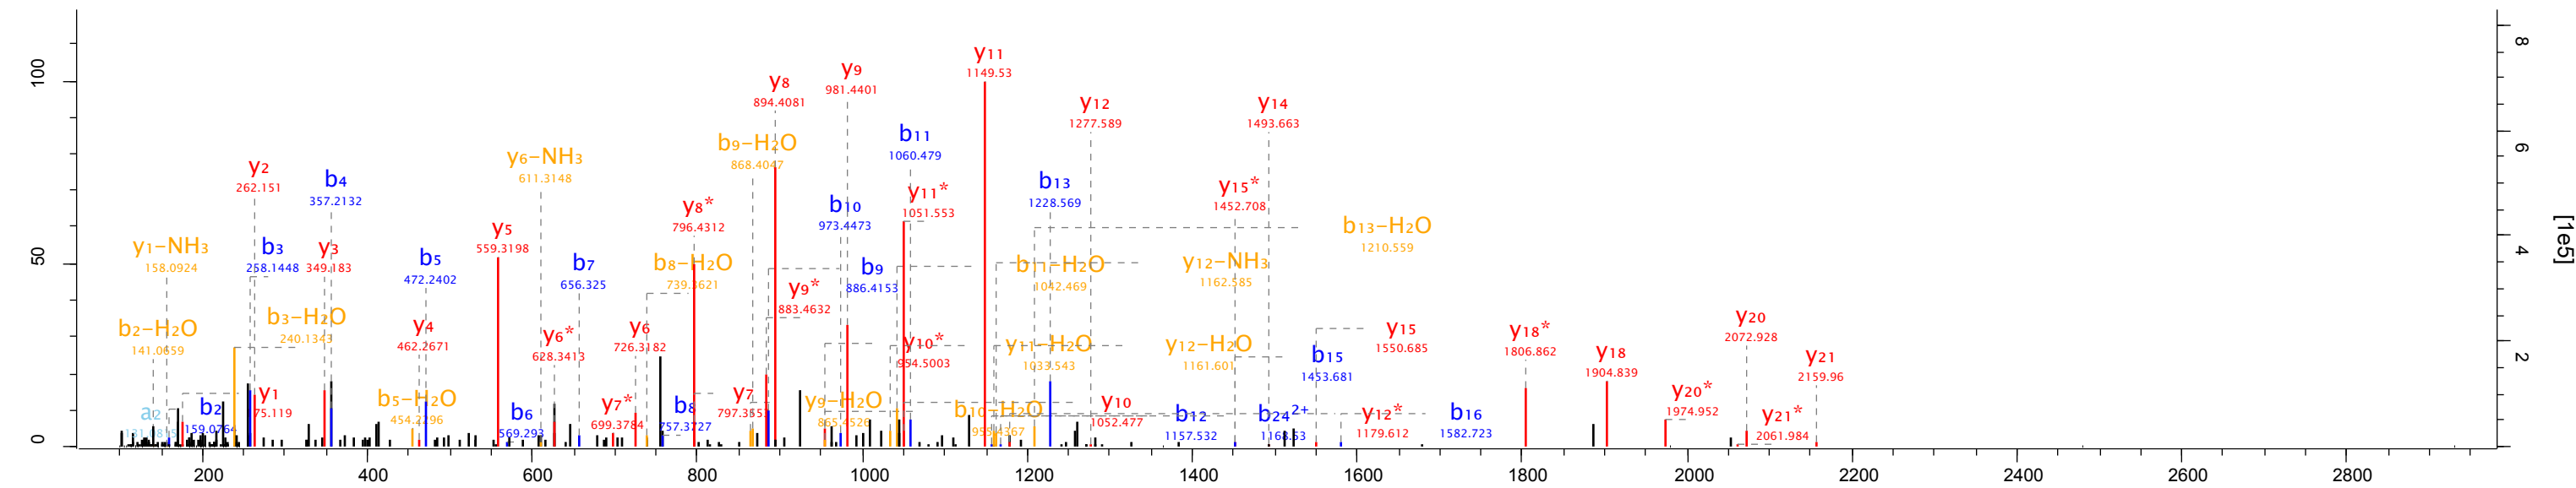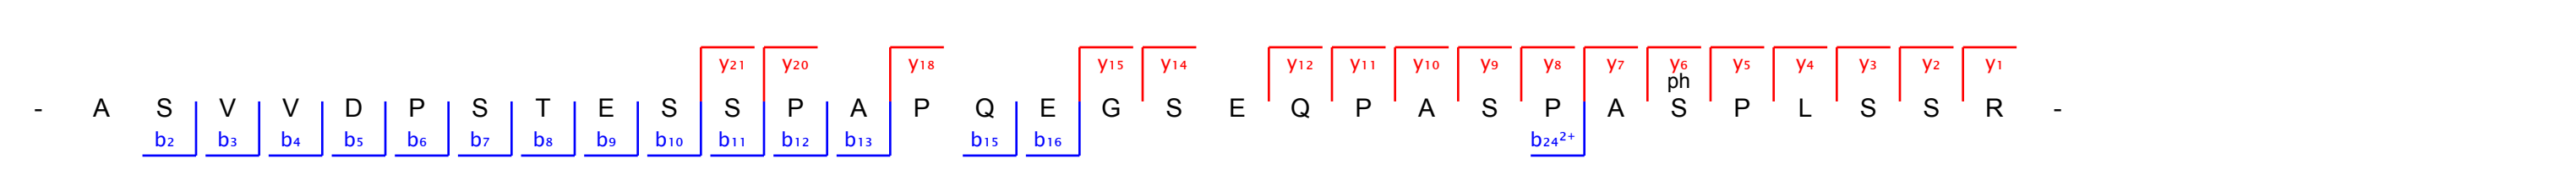

Raw file: 20171215\_MaS\_33SR\_LMH\_phospho2\_02  
 Scan: 10875 Method: FTMS; HCD Score: 116.35 m/z: 979.94 Gene names: RNF20

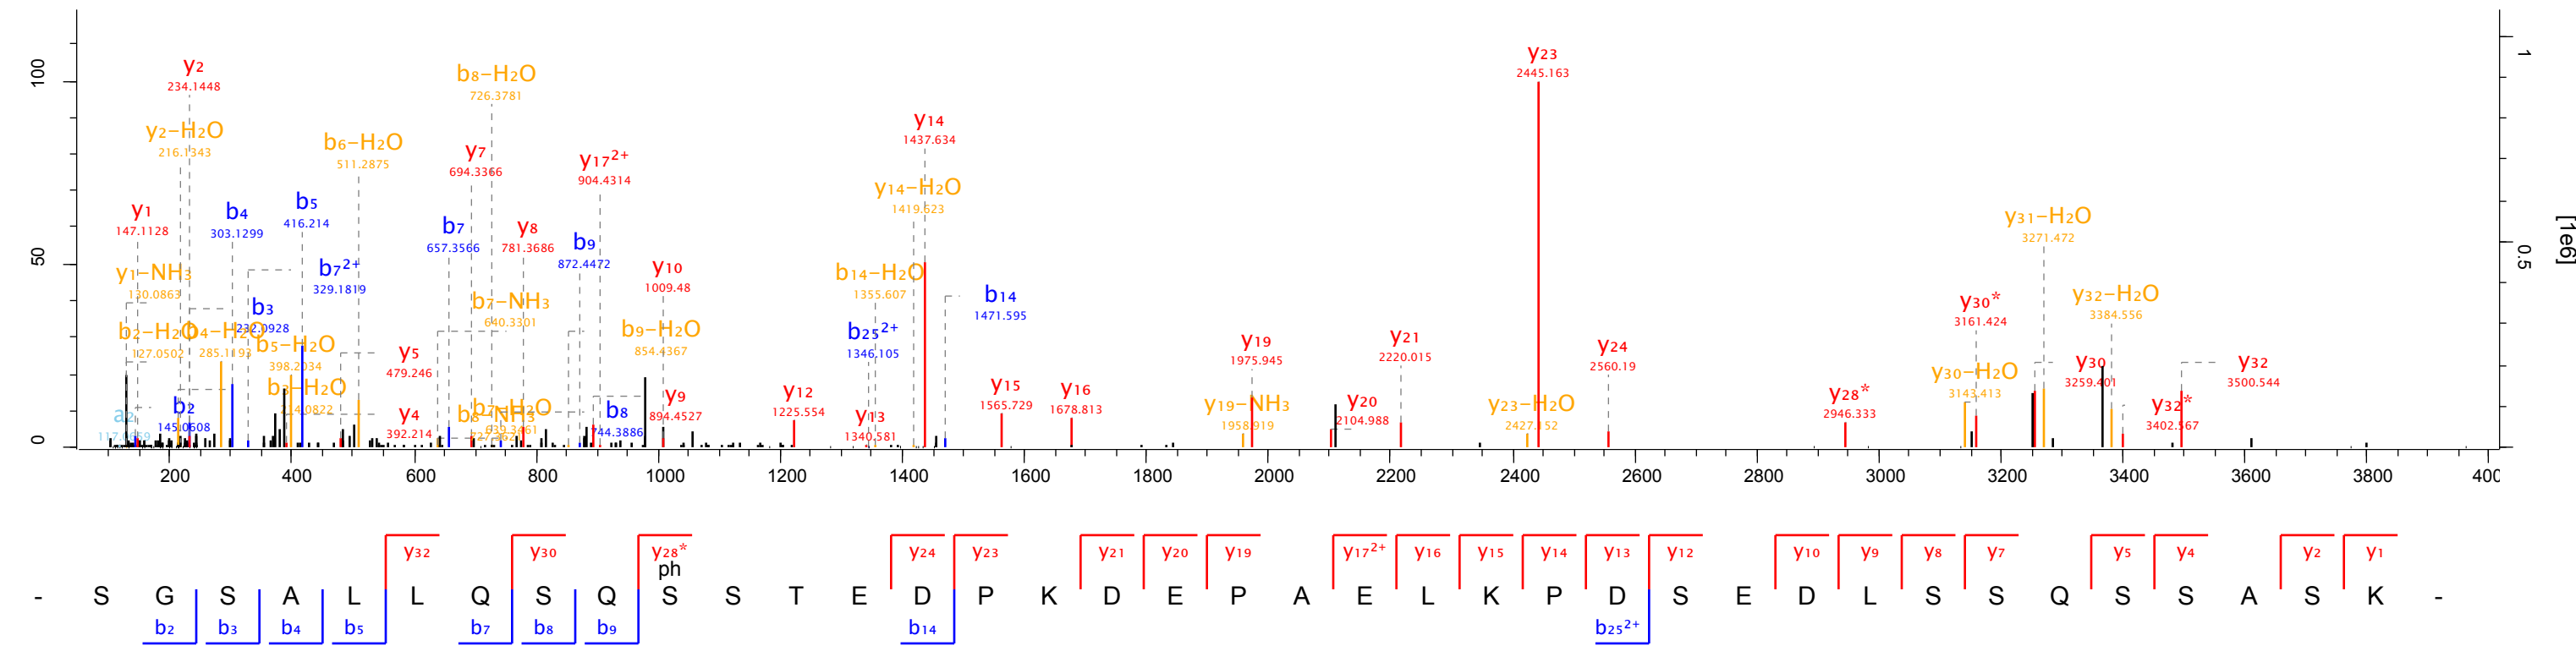



Raw file 20171215\_MaS\_33SR\_LMH\_phospho2\_02 Scan 11155 Method FTMS; HCD Score 150.39 m/z 797.38 Gene names DARS

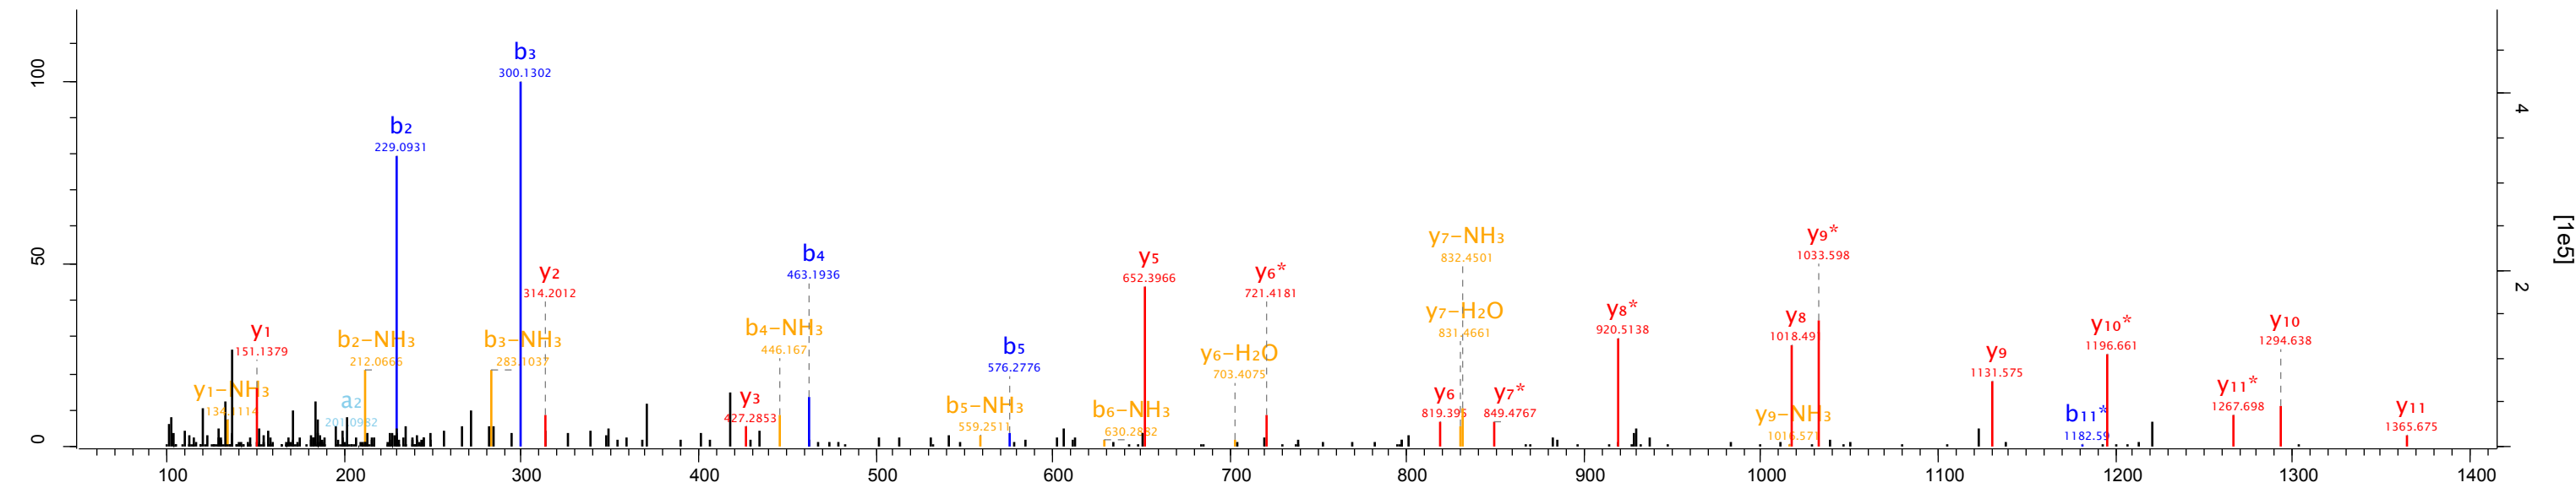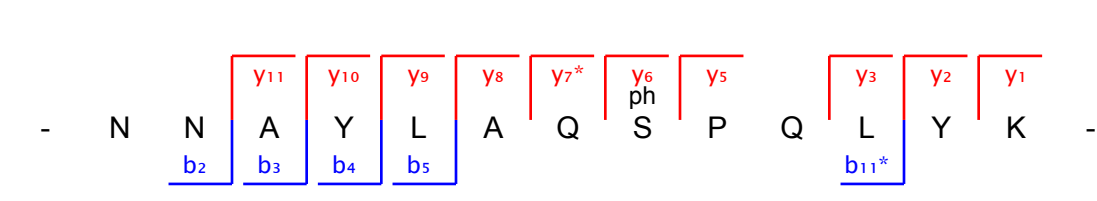

Raw file 20171215\_MaS\_33SR\_LMH\_phospho2\_02 Scan 11825 Method FTMS; HCD Score 110.84 m/z 730.85 Gene names ACAP2

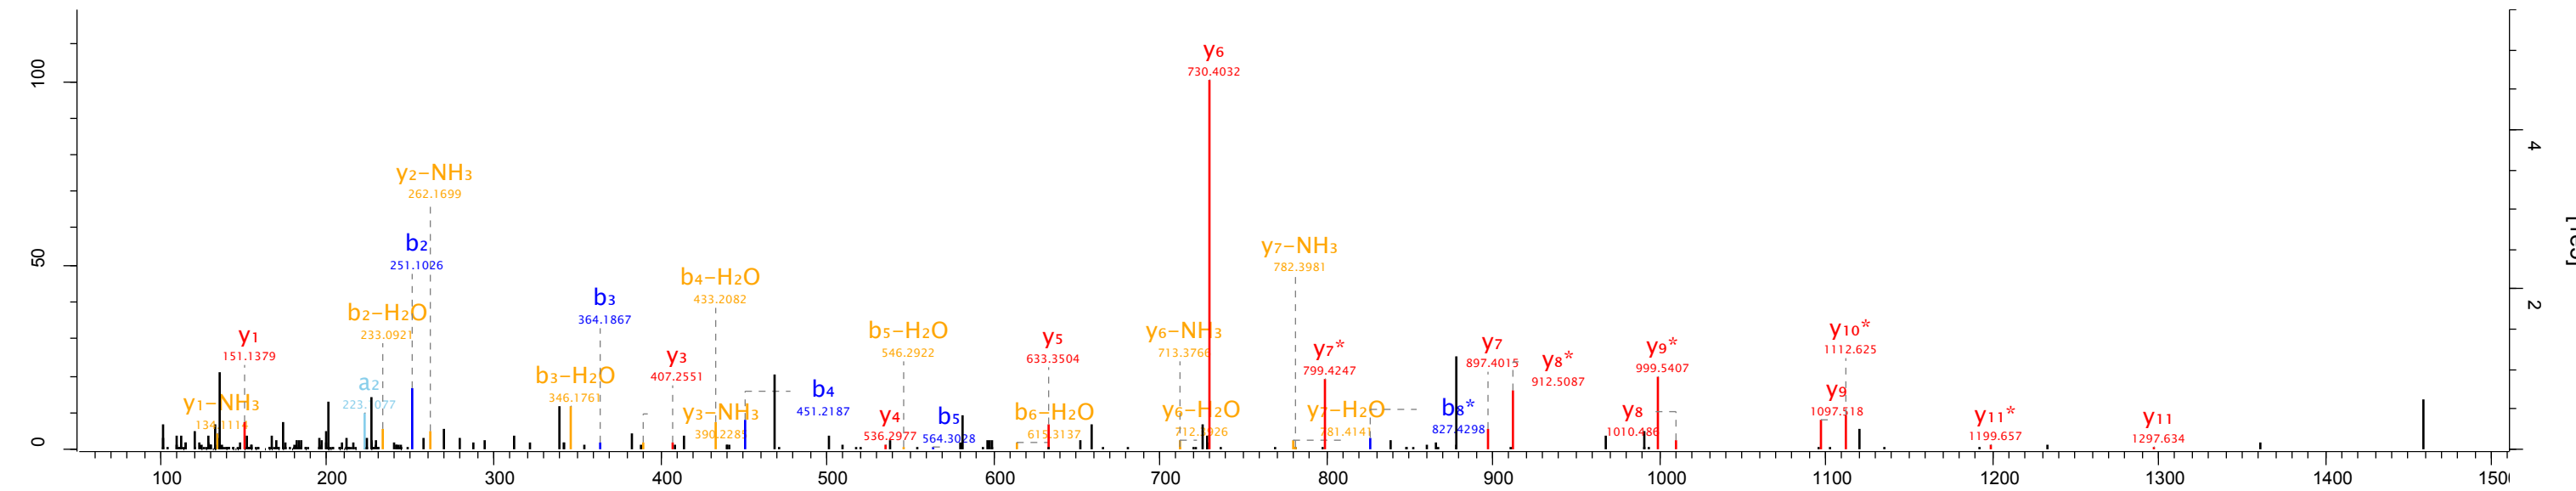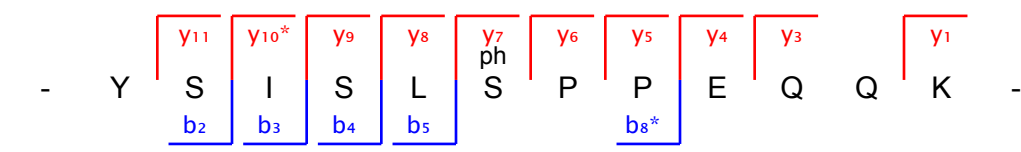

Raw file 20171215\_MaS\_33SR\_LMH\_phospho2\_02 Scan 12125 Method FTMS; HCD Score 91.77 m/z 1232.04 Gene names AKAP12

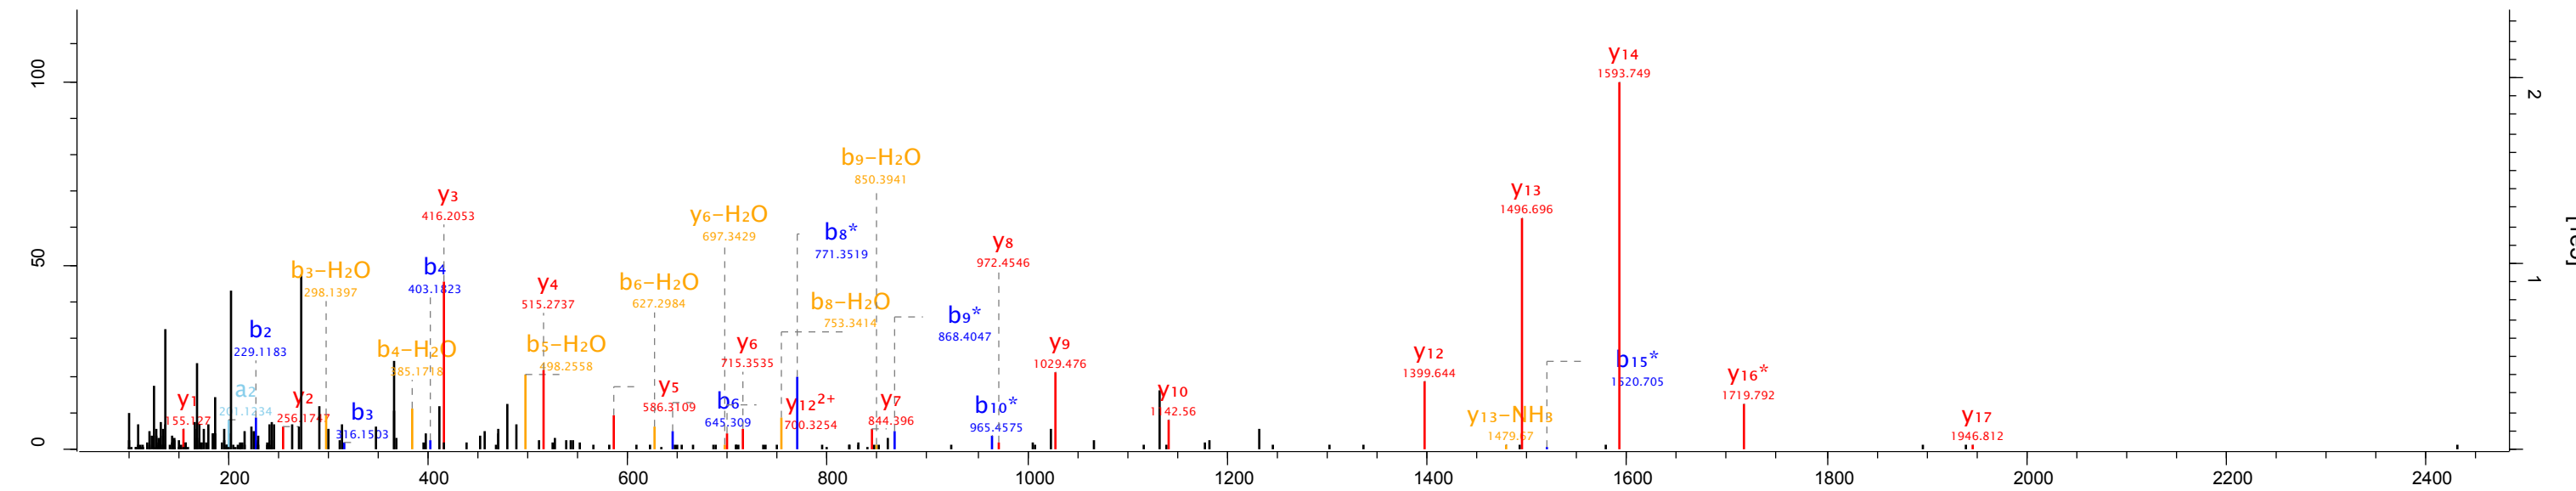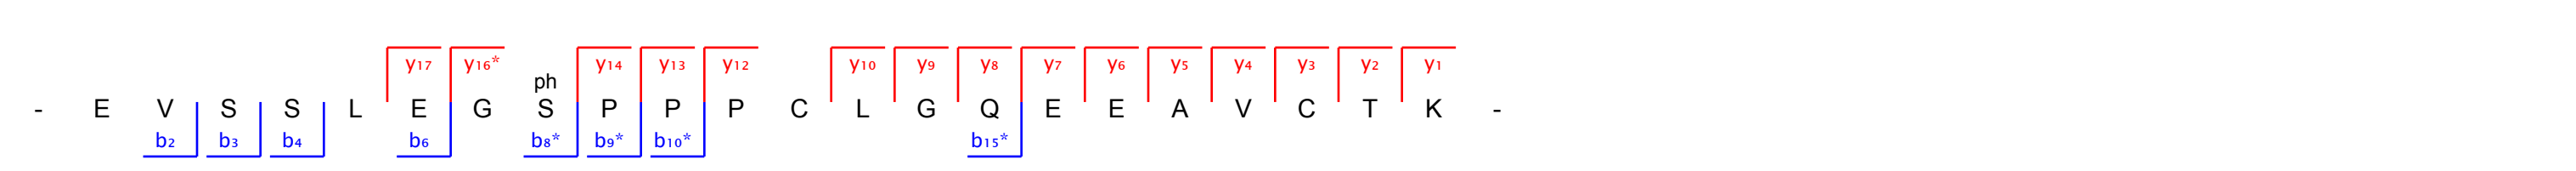

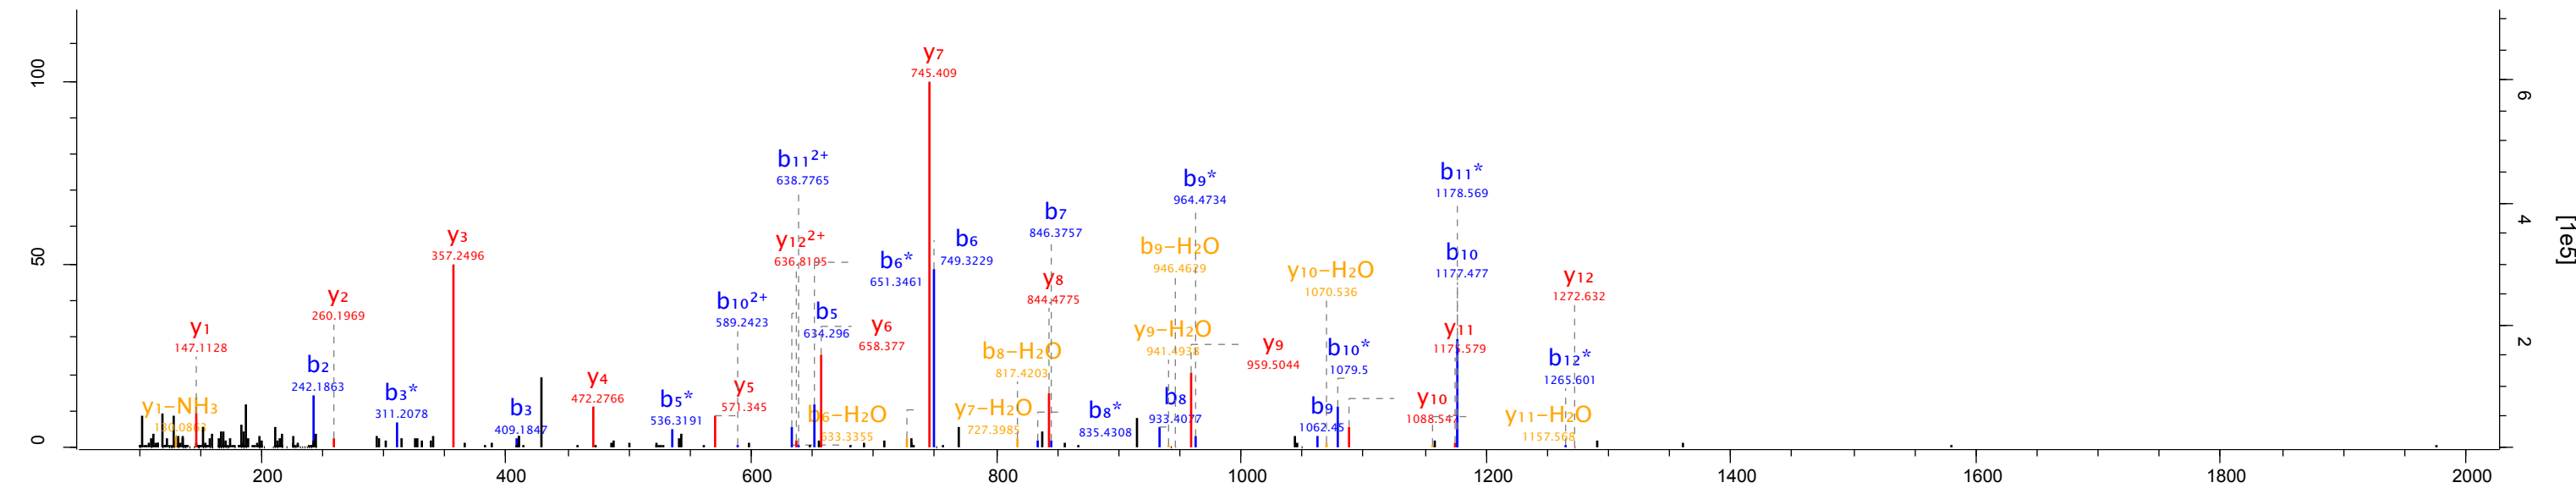

- K L S ph P Q D P S E D V S S V D P L K -

b<sub>2</sub> b<sub>3</sub> b<sub>5</sub> b<sub>6</sub> b<sub>7</sub> b<sub>8</sub> b<sub>9</sub> b<sub>10</sub> b<sub>11</sub>\* b<sub>12</sub>\*

y<sub>12</sub> y<sub>11</sub> y<sub>10</sub> y<sub>9</sub> y<sub>8</sub> y<sub>7</sub> y<sub>6</sub> y<sub>5</sub> y<sub>4</sub> y<sub>3</sub> y<sub>2</sub> y<sub>1</sub>

Raw file  
20171215\_MaS\_33SR\_LMH\_phospho2\_02

Scan 13435 Method FTMS; HCD Score 149.35 m/z 916.04 Gene names MAGEA4

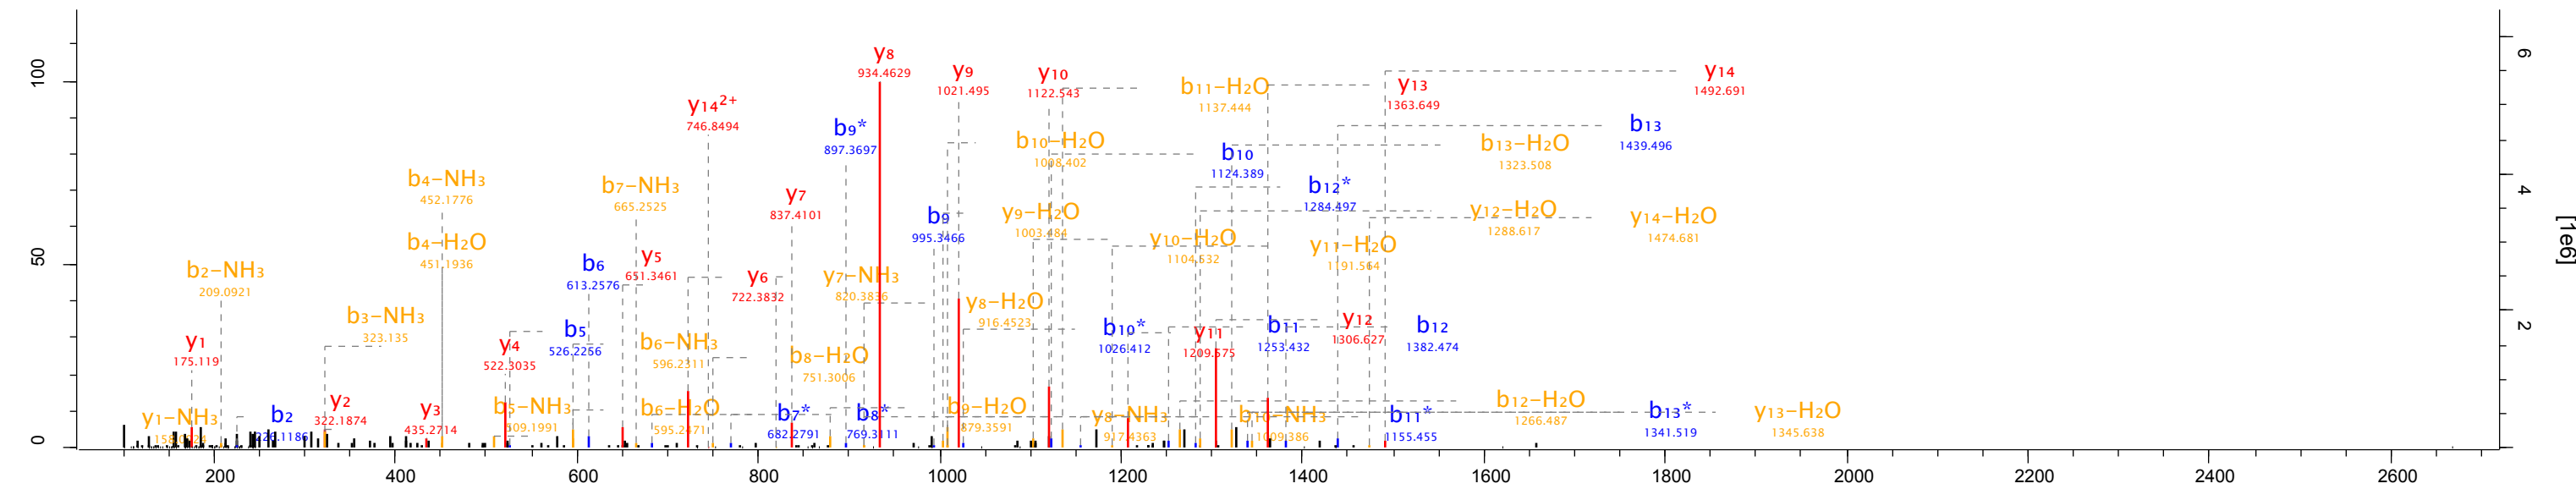

- Q P N E G S S Q E E E G P S T S P D A E S L F R -

ph

b2 b5 b6 b7\* b8\* b9 b10 b11 b12 b13

y14 y13 y12 y11 y10 y9 y8 y7 y6 y5 y4 y3 y2 y1

Raw file 20171215\_MaS\_33SR\_LMH\_phospho2\_02 Scan 16685 Method FTMS; HCD Score 151.73 m/z 805.34 Gene names ANKS1A

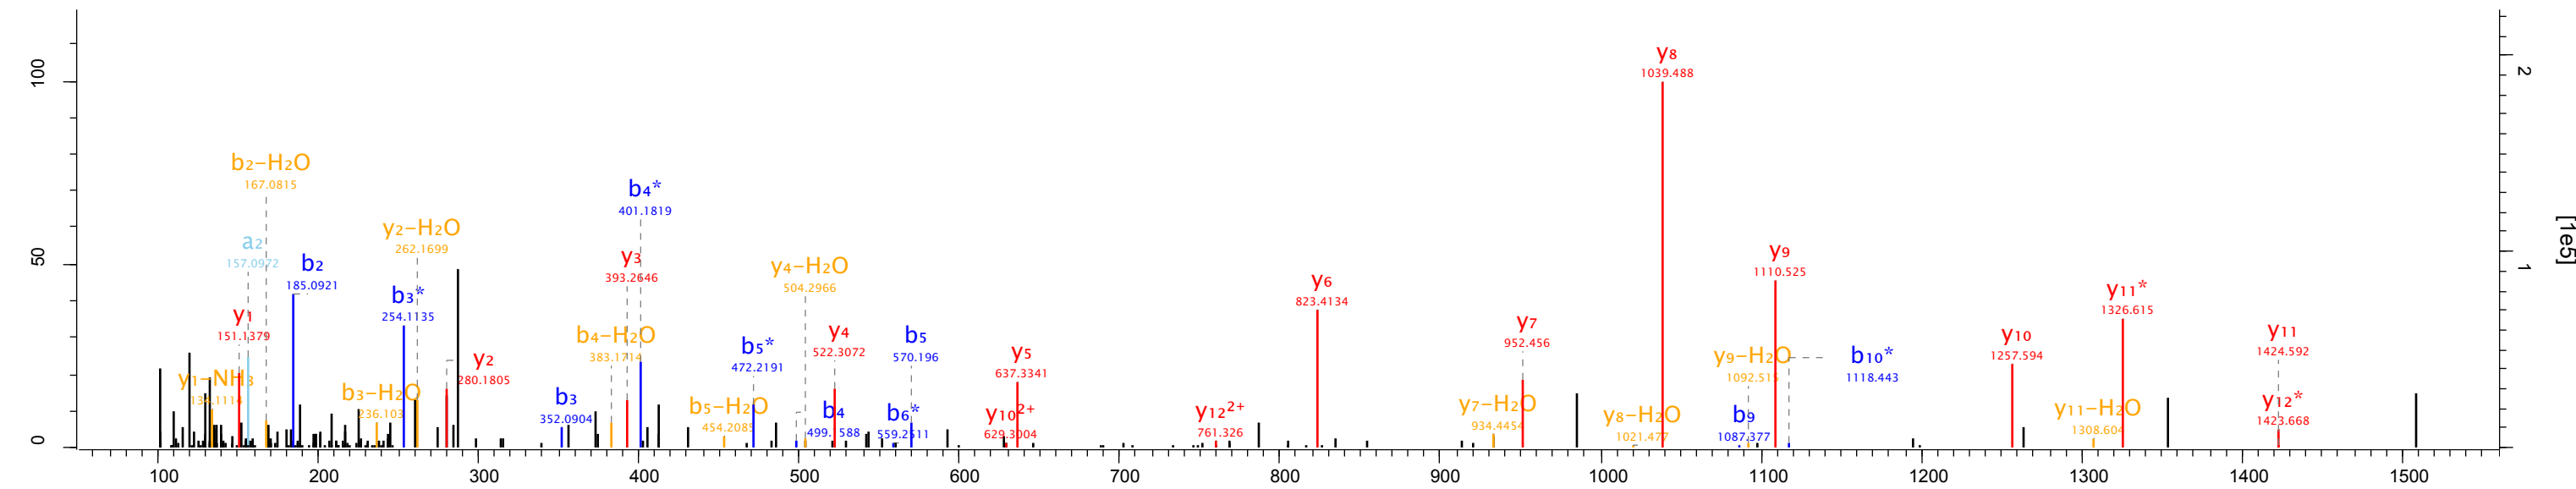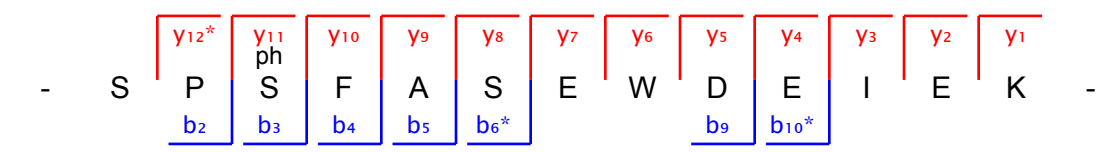

Raw file: 20171215\_MaS\_33SR\_LMH\_phospho2\_02  
 Scan: 1975 Method: FTMS; HCD Score: 142.04 m/z: 512.25 Gene names: ZC3H18

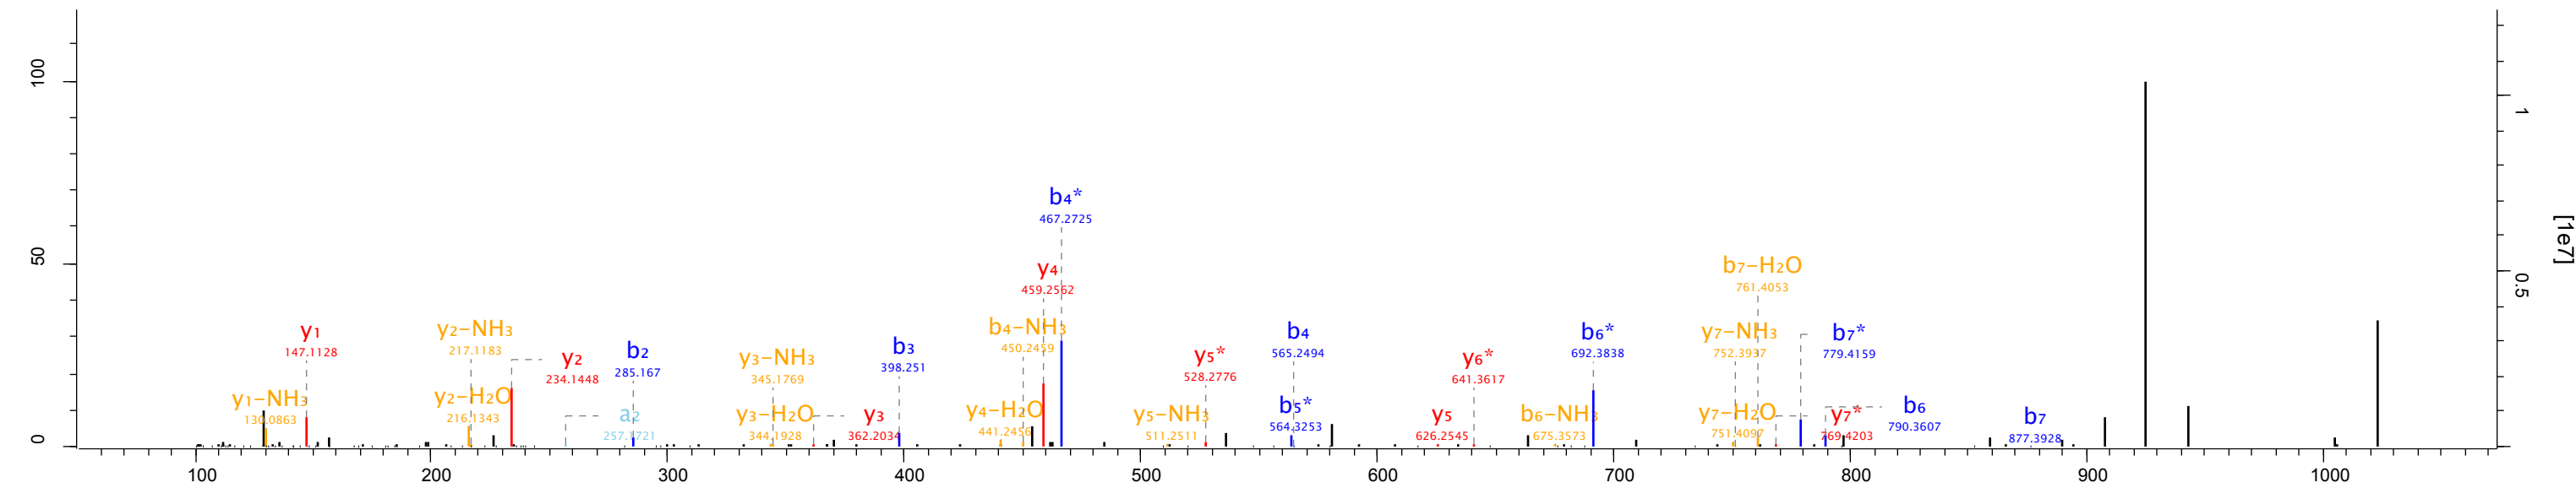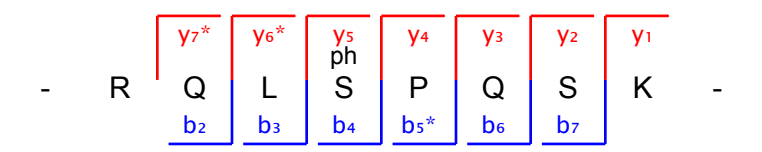

Raw file  
 20171215\_MaS\_33SR\_LMH\_phospho2\_02  
 Scan 2045 Method FTMS; HCD Score 63.91 m/z 551.29 Gene names ACIN1

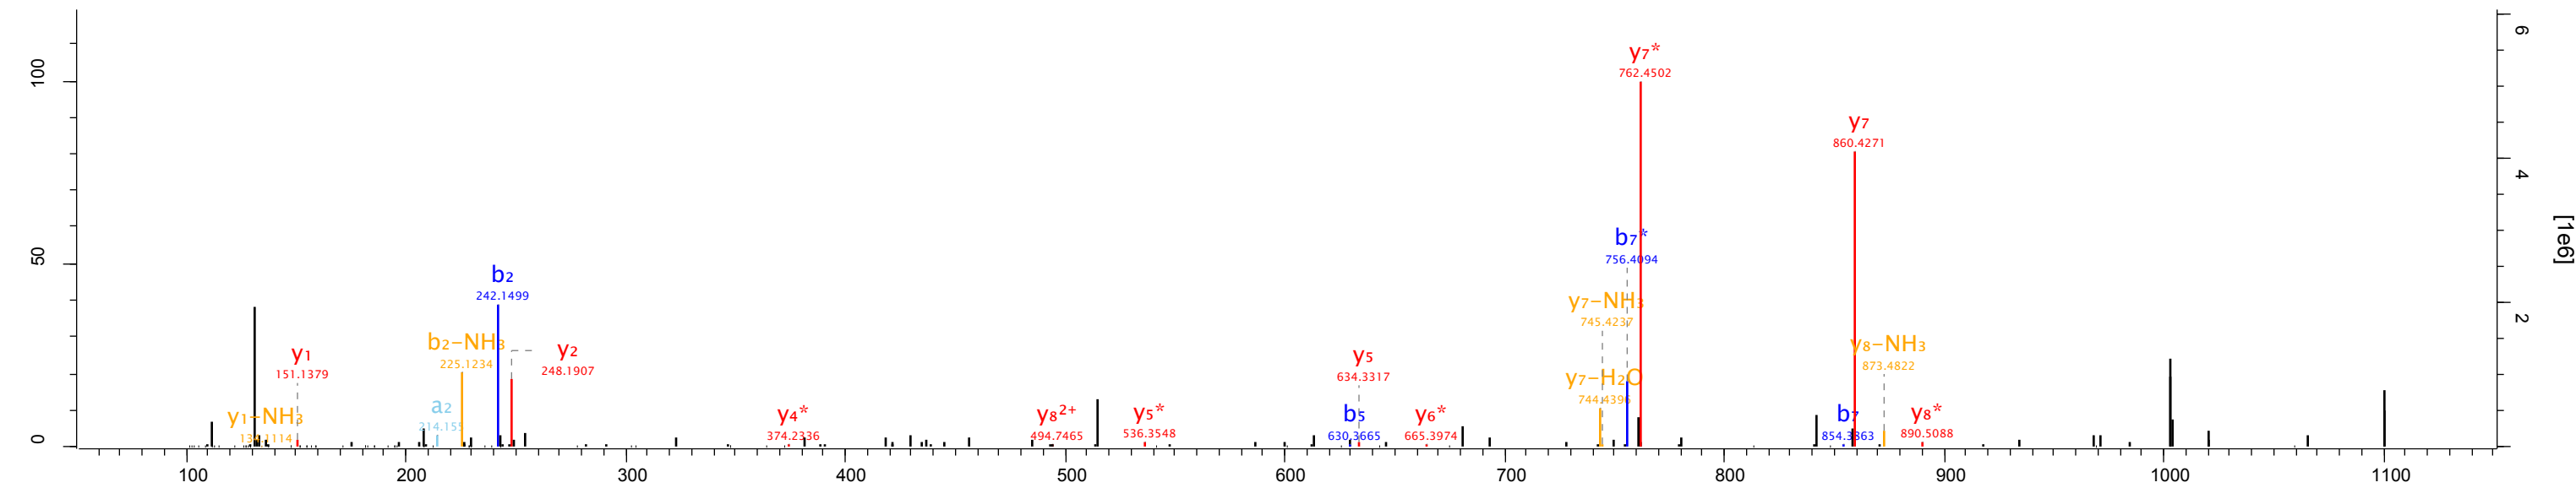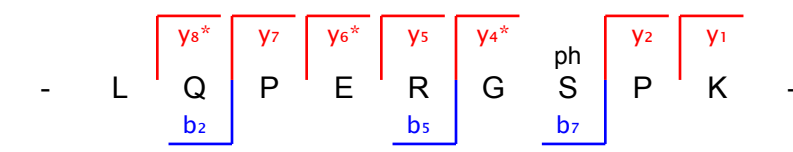



Raw file

20171215\_MaS\_33SR\_LMH\_phospho2\_02

| Scan | Method    | Score  | m/z    | Gene names |
|------|-----------|--------|--------|------------|
| 2745 | FTMS; HCD | 166.24 | 535.26 | SLU7       |

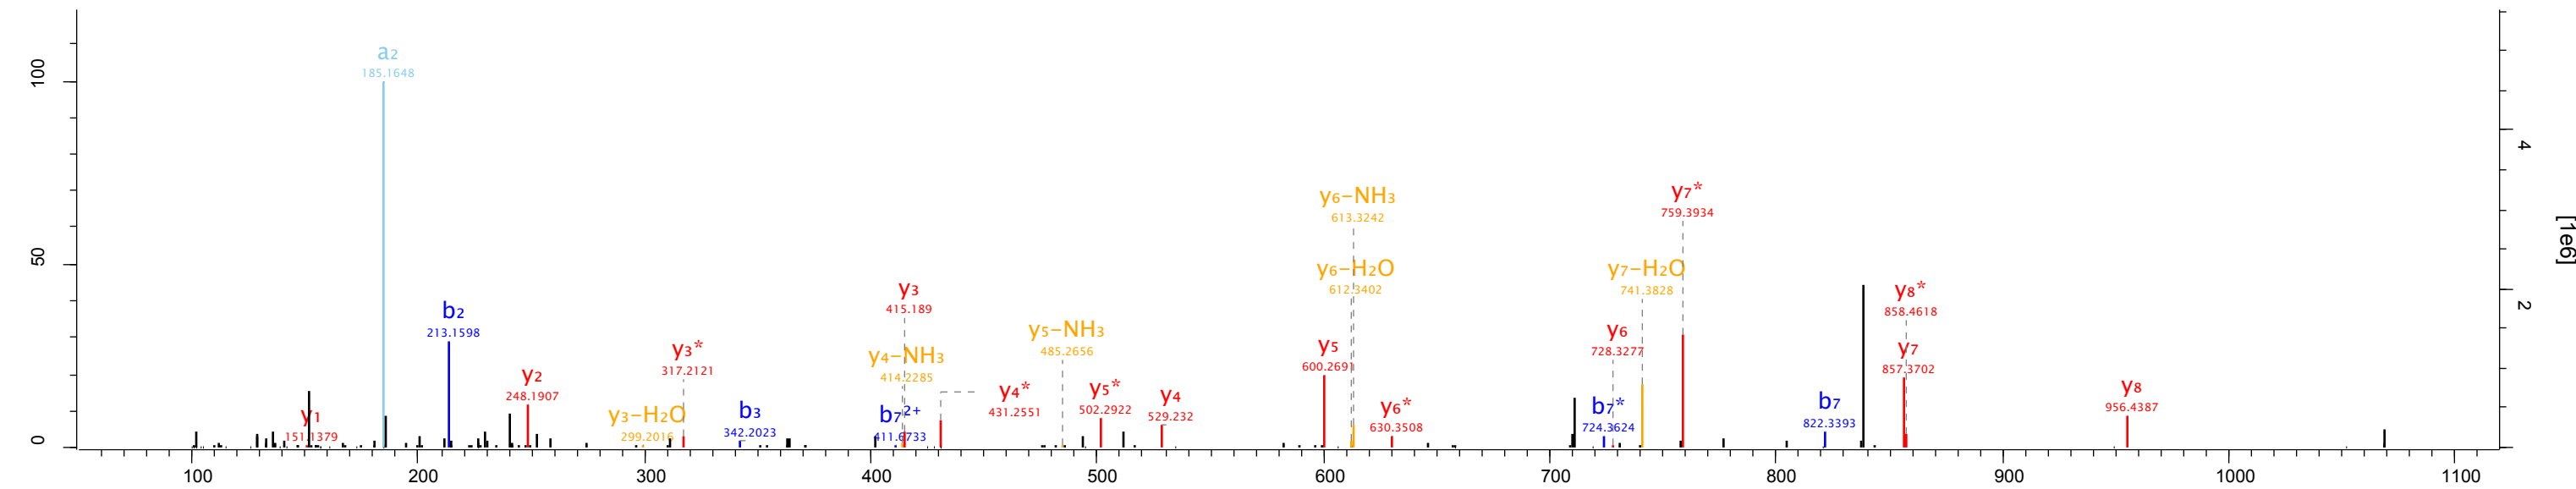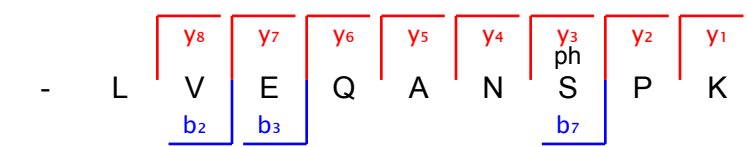

Raw file  
20171215\_MaS\_33SR\_LMH\_phospho2\_02

Scan Method Score m/z Gene names  
2945 FTMS; HCD 223.9 647.28 XRN2

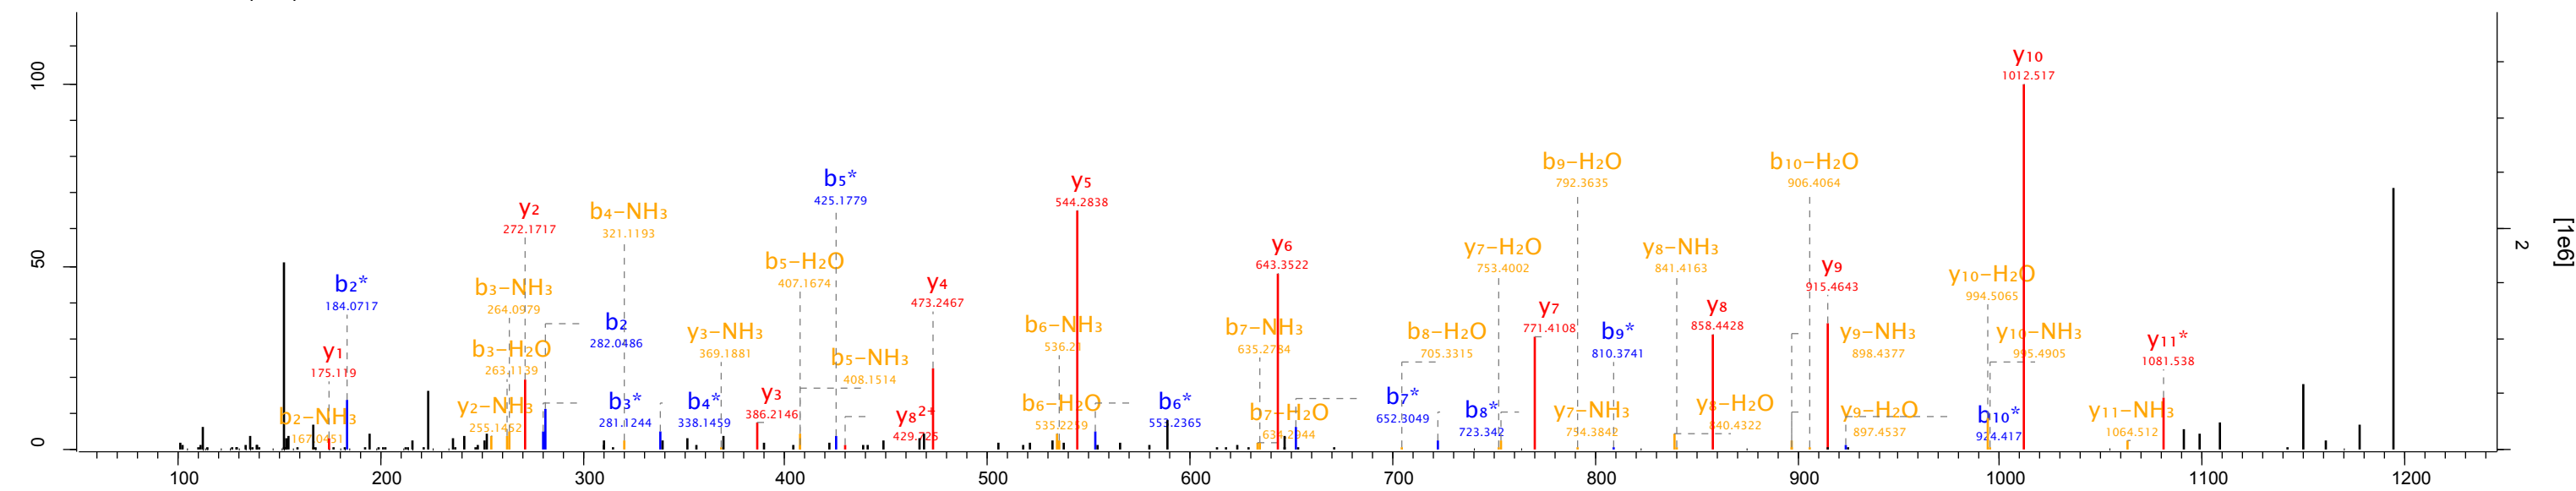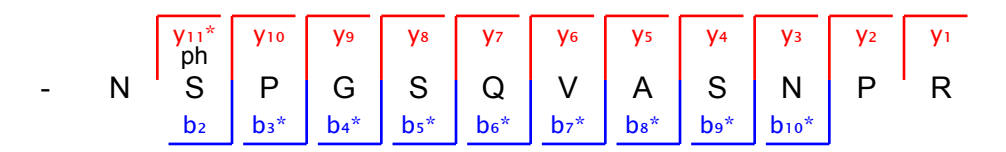

Raw file  
20171215\_MaS\_33SR\_LMH\_phospho2\_02

Scan 2995 Method FTMS; HCD Score 168.86 m/z 802.76 Gene names BZW1

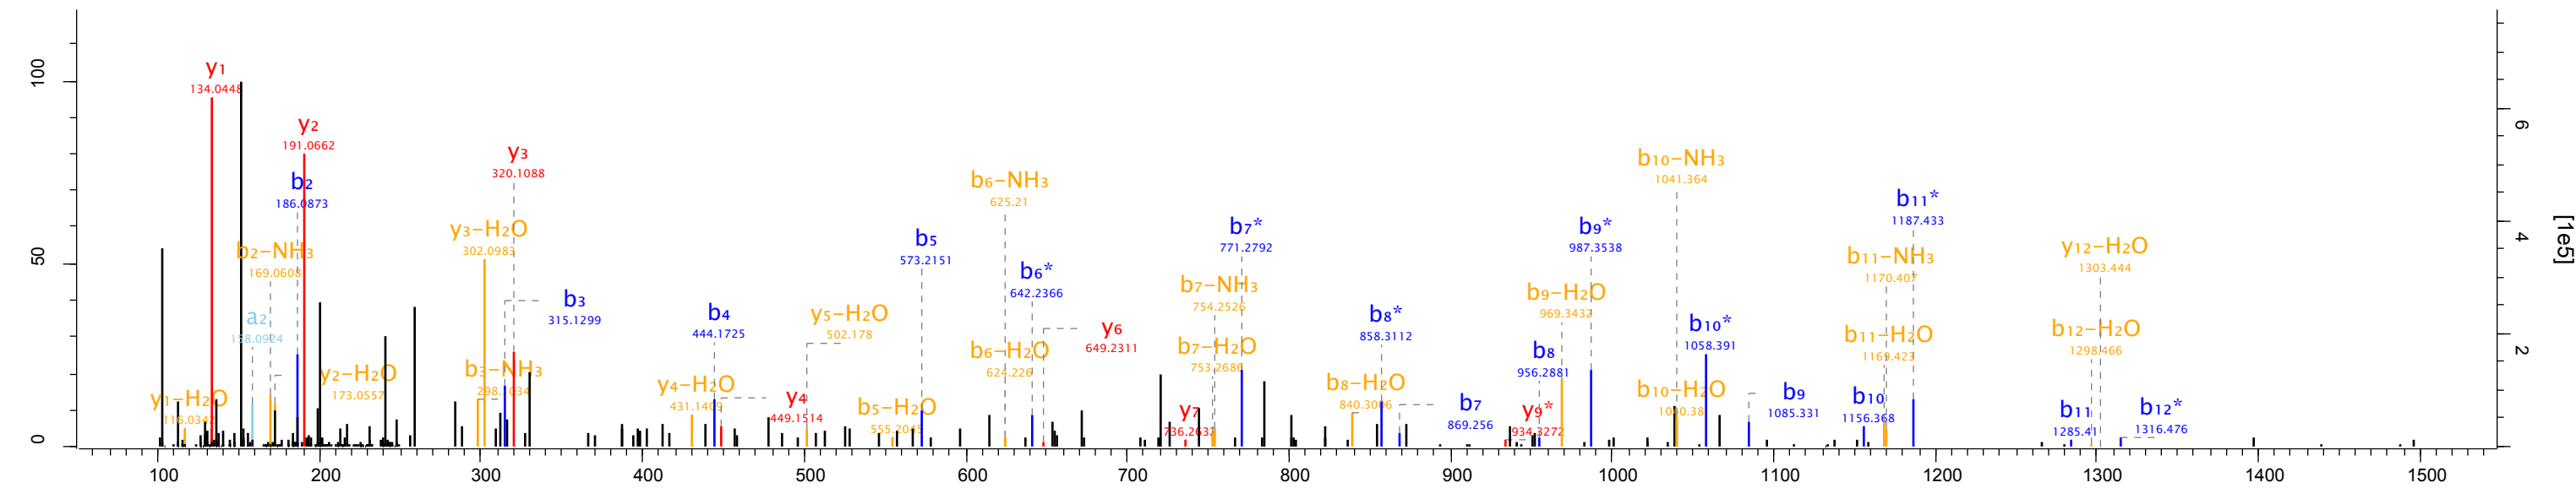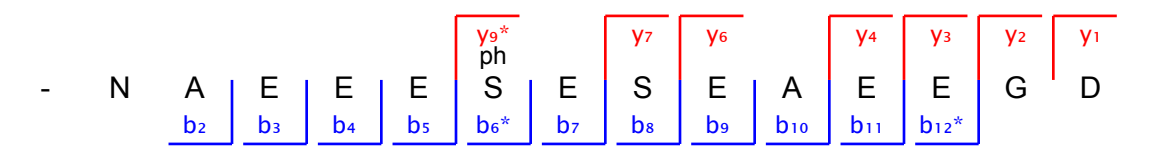

Raw file 20171215\_MaS\_33SR\_LMH\_phospho2\_02 Scan 3115 Method FTMS; HCD Score 77.87 m/z 525.2 Gene names RBMX;RBMXL1

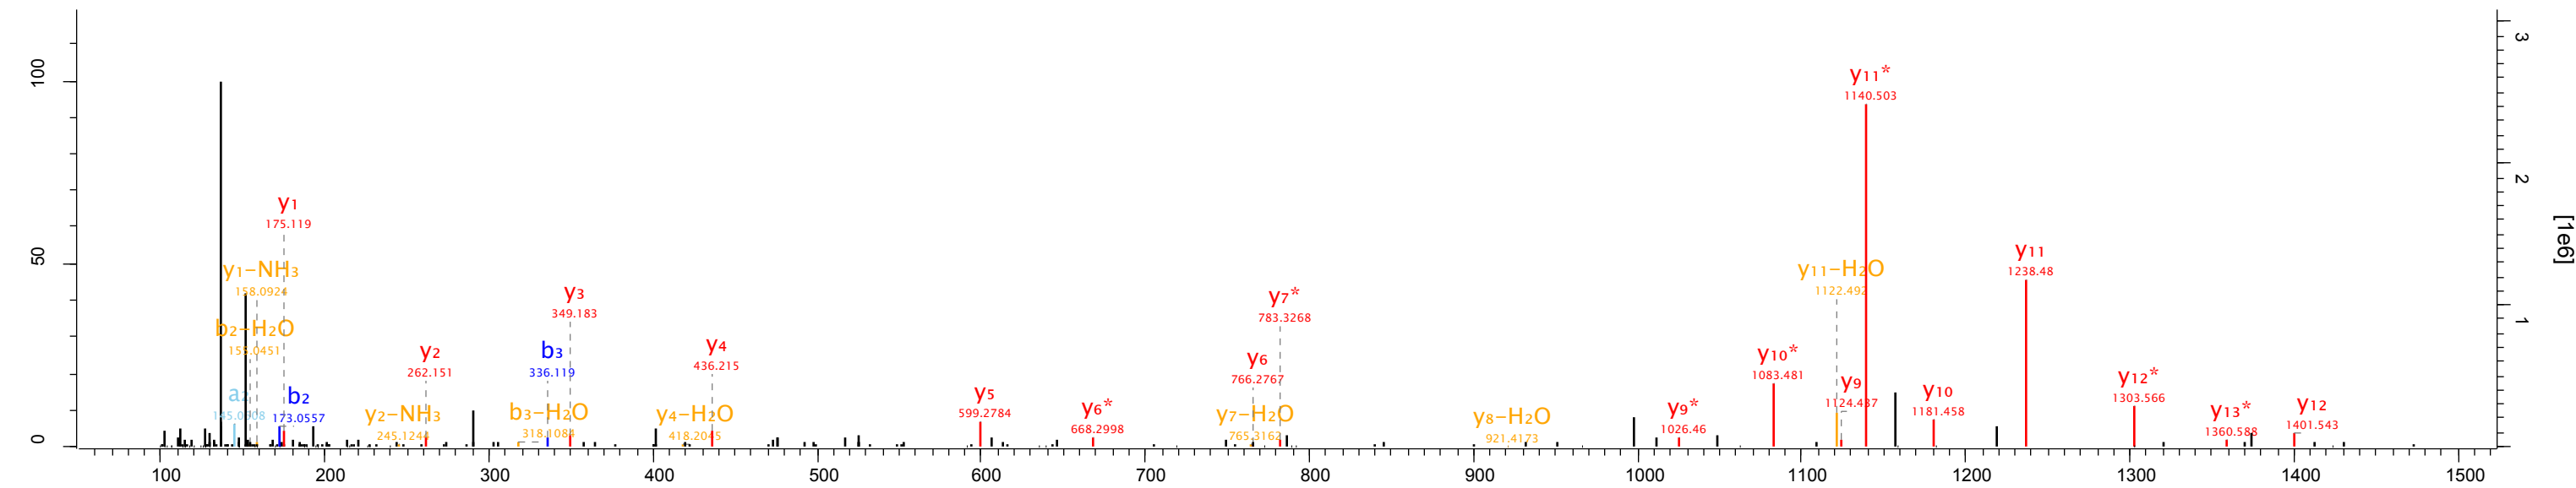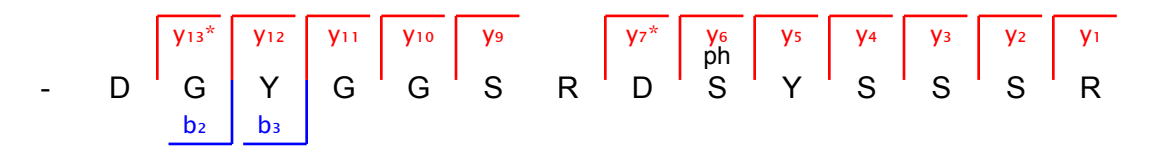

Raw file: 20171215\_MaS\_33SR\_LMH\_phospho2\_02  
 Scan: 3345 Method: FTMS; HCD Score: 135.02 m/z: 618.74 Gene names: ATF7IP

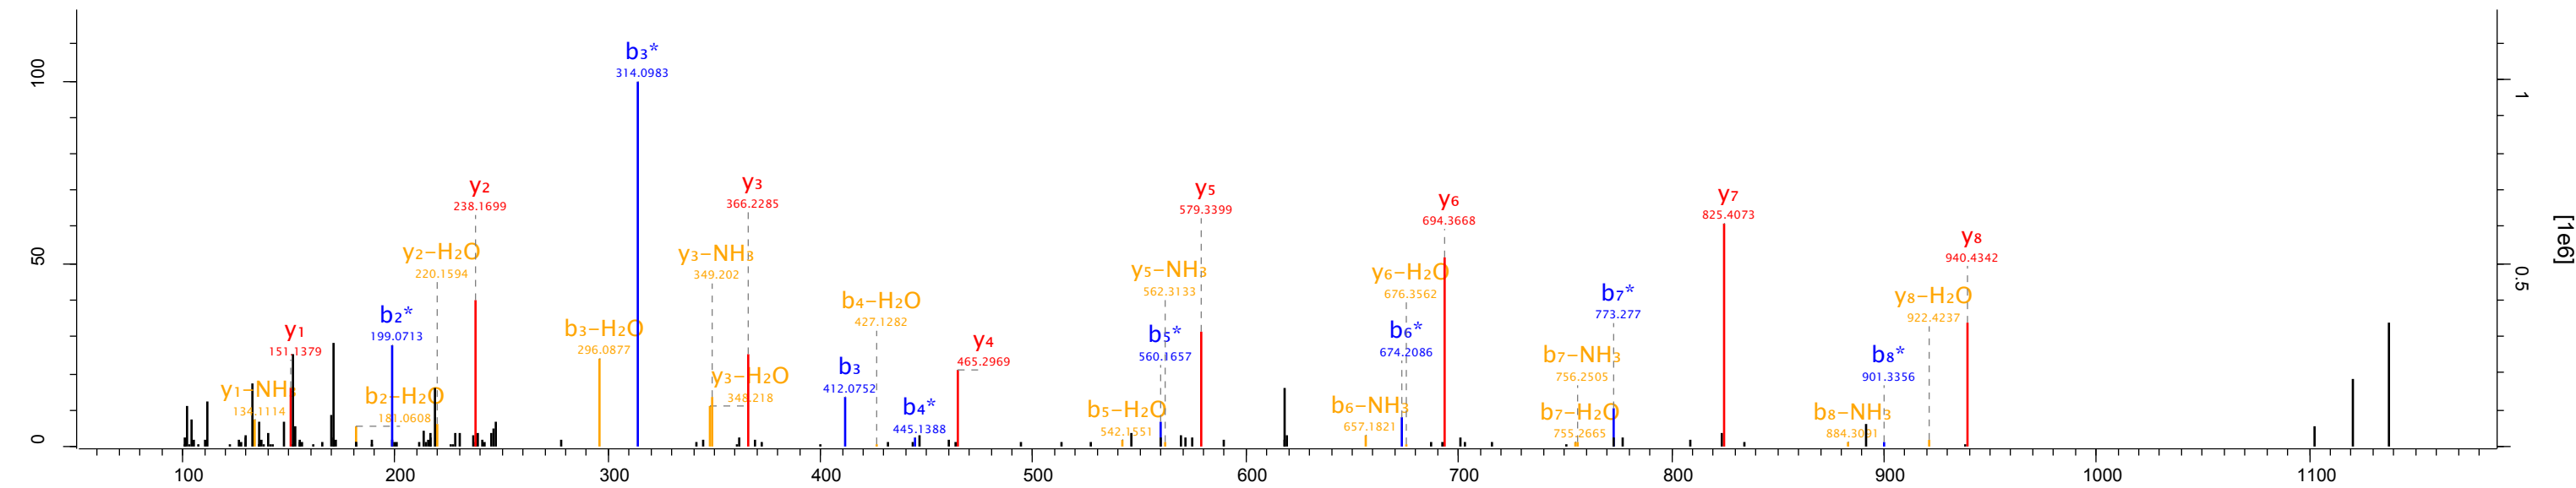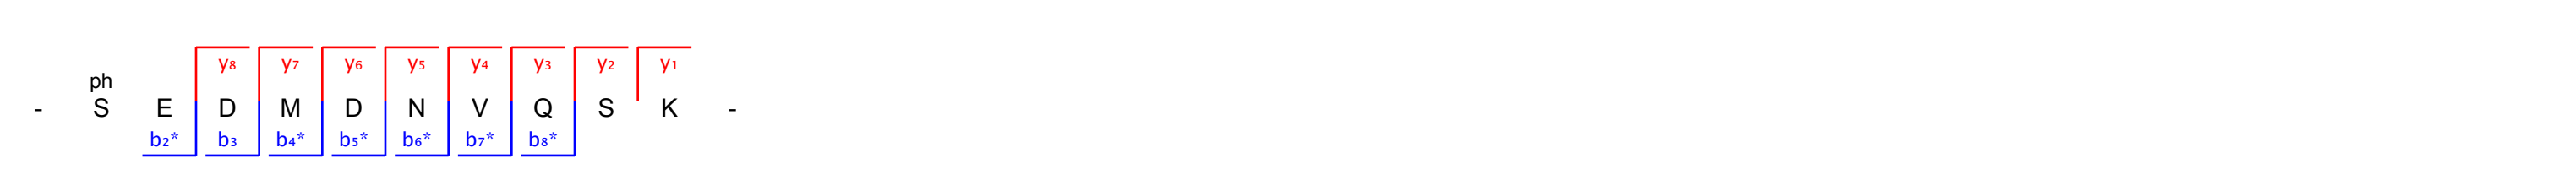

Raw file: 20171215\_MaS\_33SR\_LMH\_phospho2\_02  
 Scan: 3705 Method: FTMS; HCD Score: 99.75 m/z: 546.74 Gene names: ERBB2IP

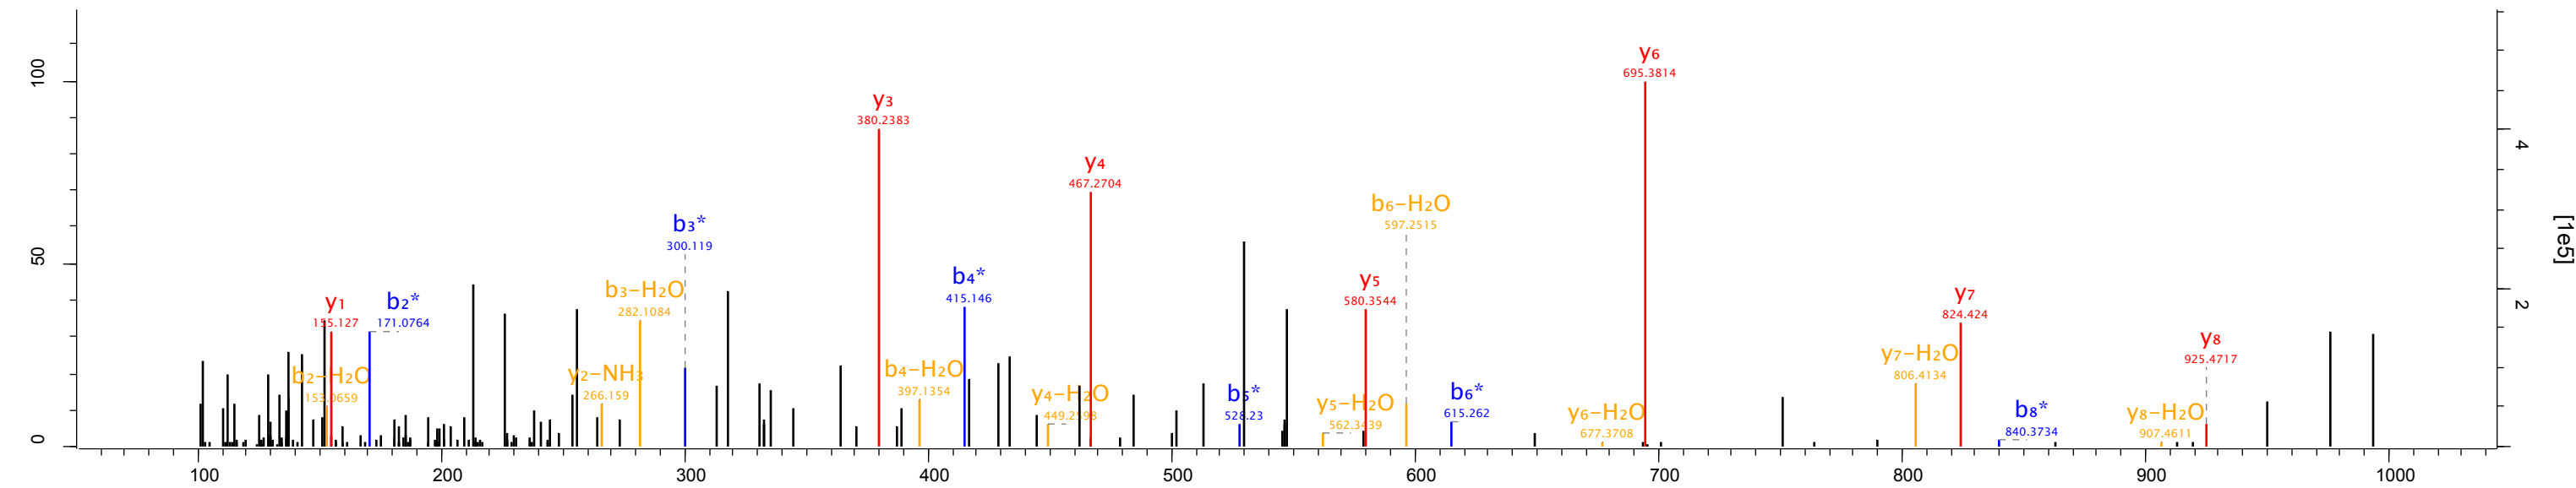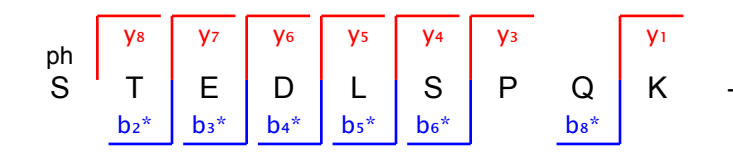

Raw file 20171215\_MaS\_33SR\_LMH\_phospho2\_02 Scan 4655 Method FTMS; HCD Score 83.53 m/z 592.77 Gene names ARHGEF7

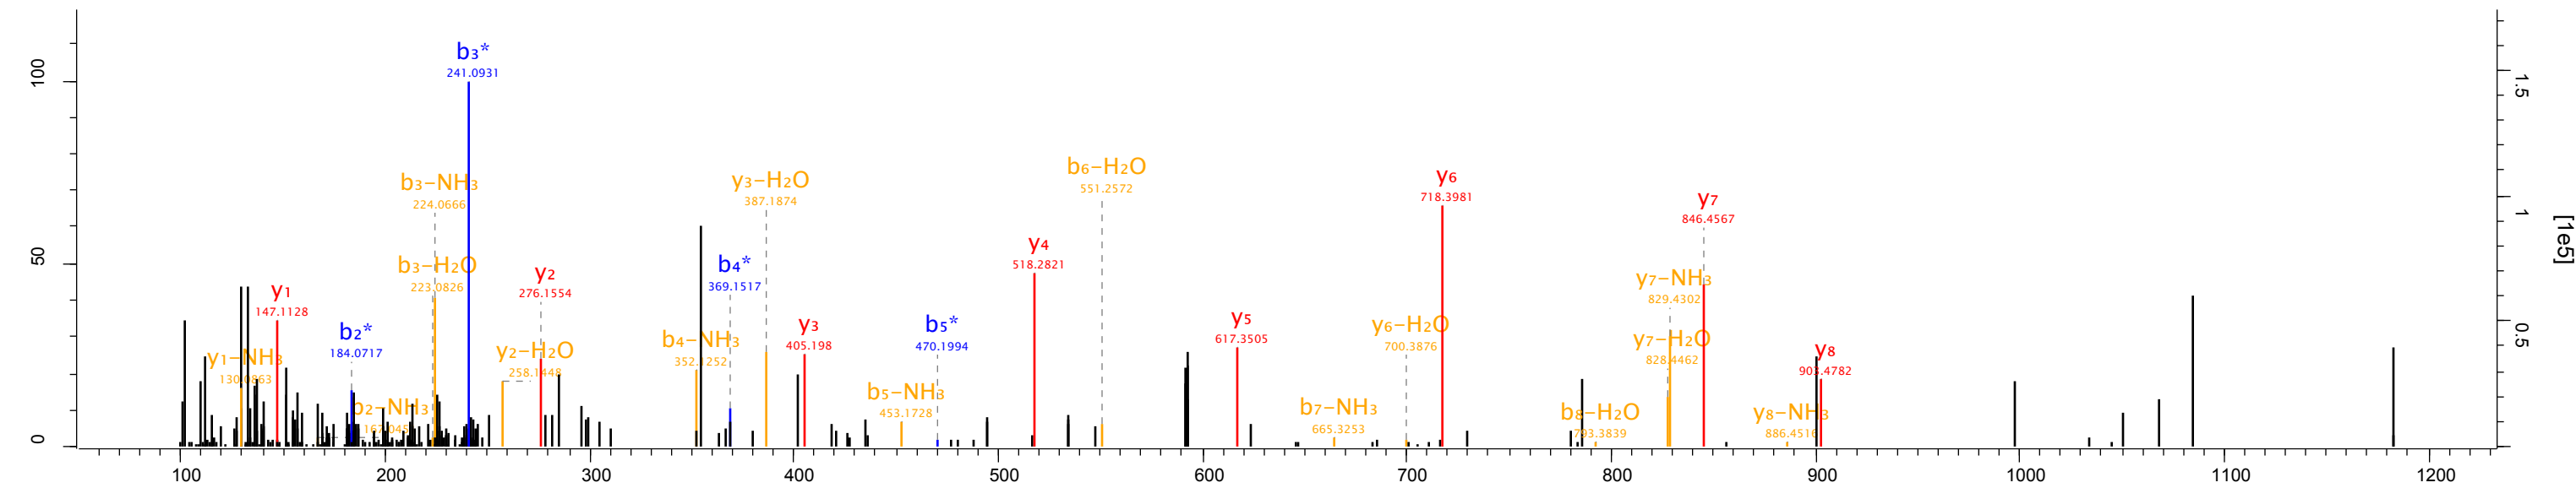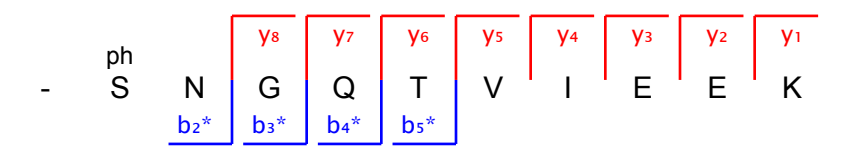

Raw file 20171215\_MaS\_33SR\_LMH\_phospho2\_02 Scan 5435 Method FTMS; HCD Score 51.61 m/z 669.99 Gene names MAP7D1

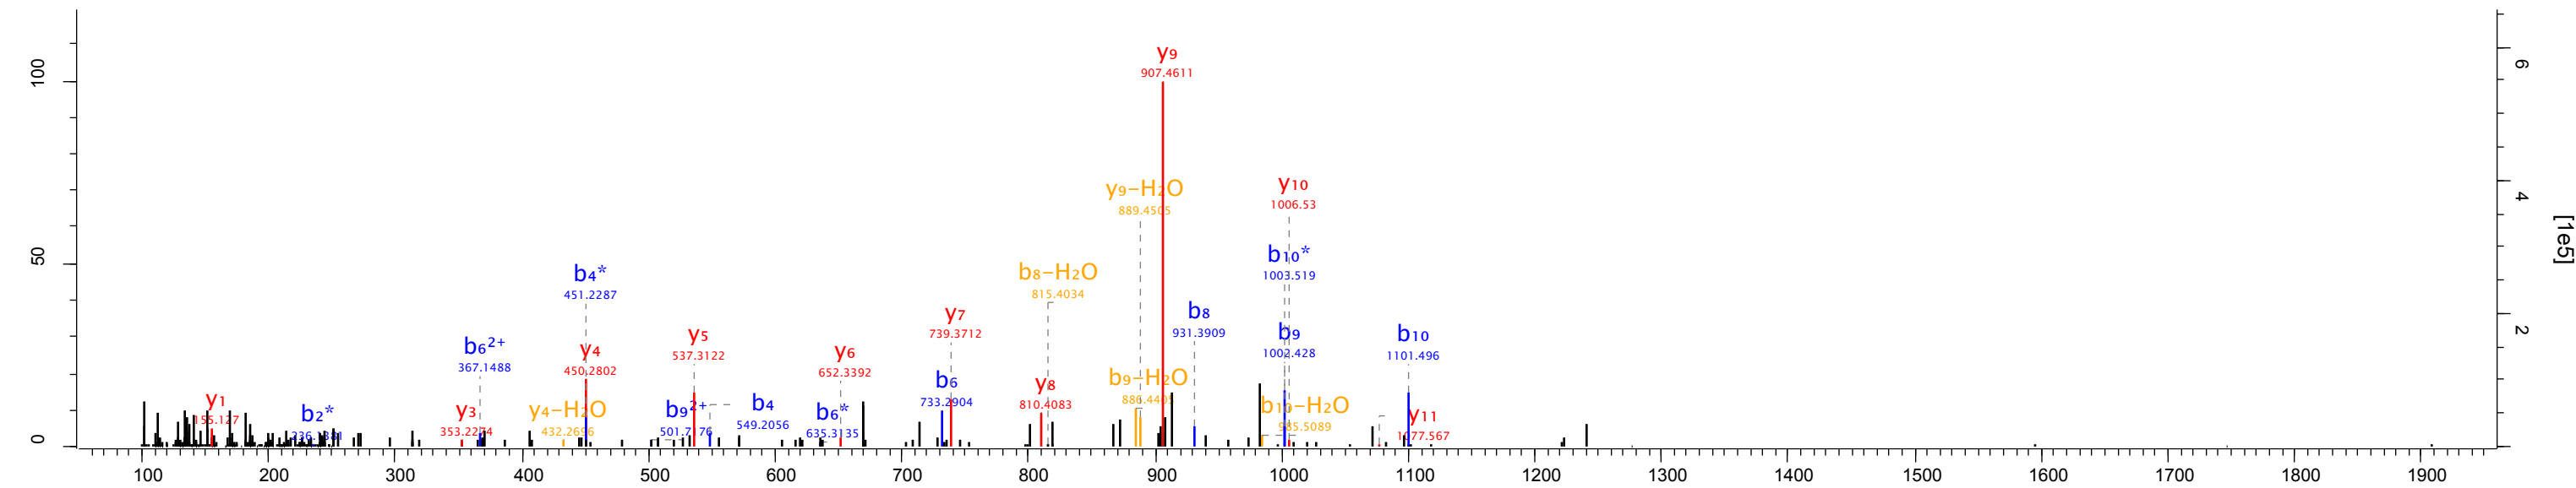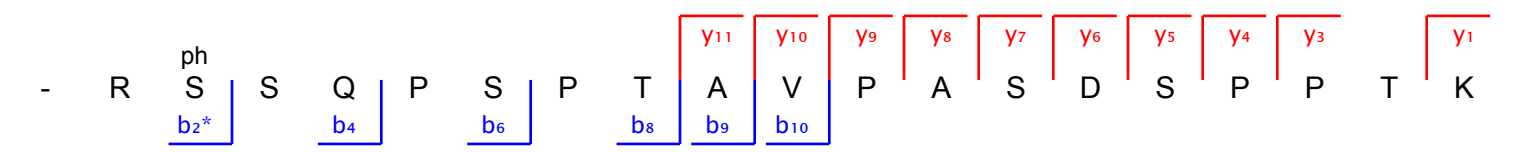



Raw file 20171215\_MaS\_33SR\_LMH\_phospho2\_02 Scan 5635 Method FTMS; HCD Score 194.37 m/z 709.29 Gene names MAF1

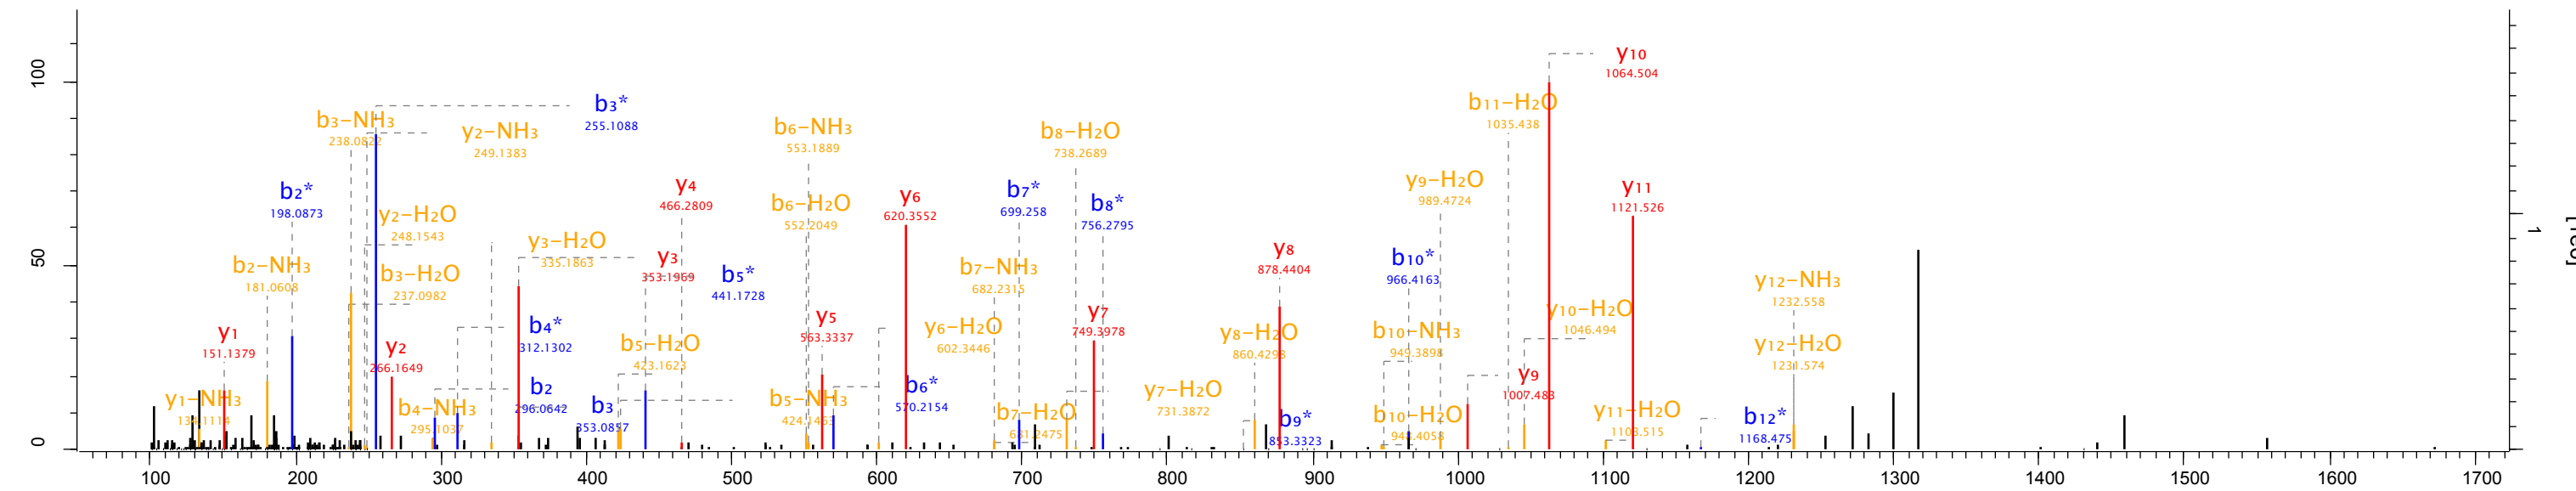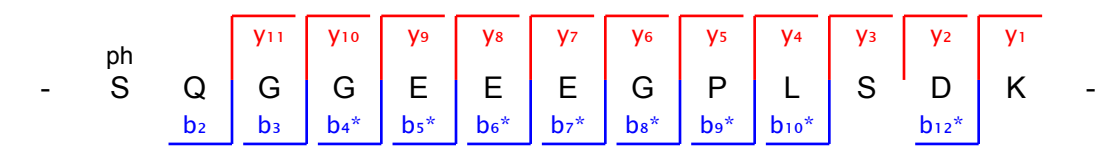

Raw file 20171215\_MaS\_33SR\_LMH\_phospho2\_02 Scan 5665 Method FTMS; HCD Score 86.54 m/z 653.62 Gene names GBF1

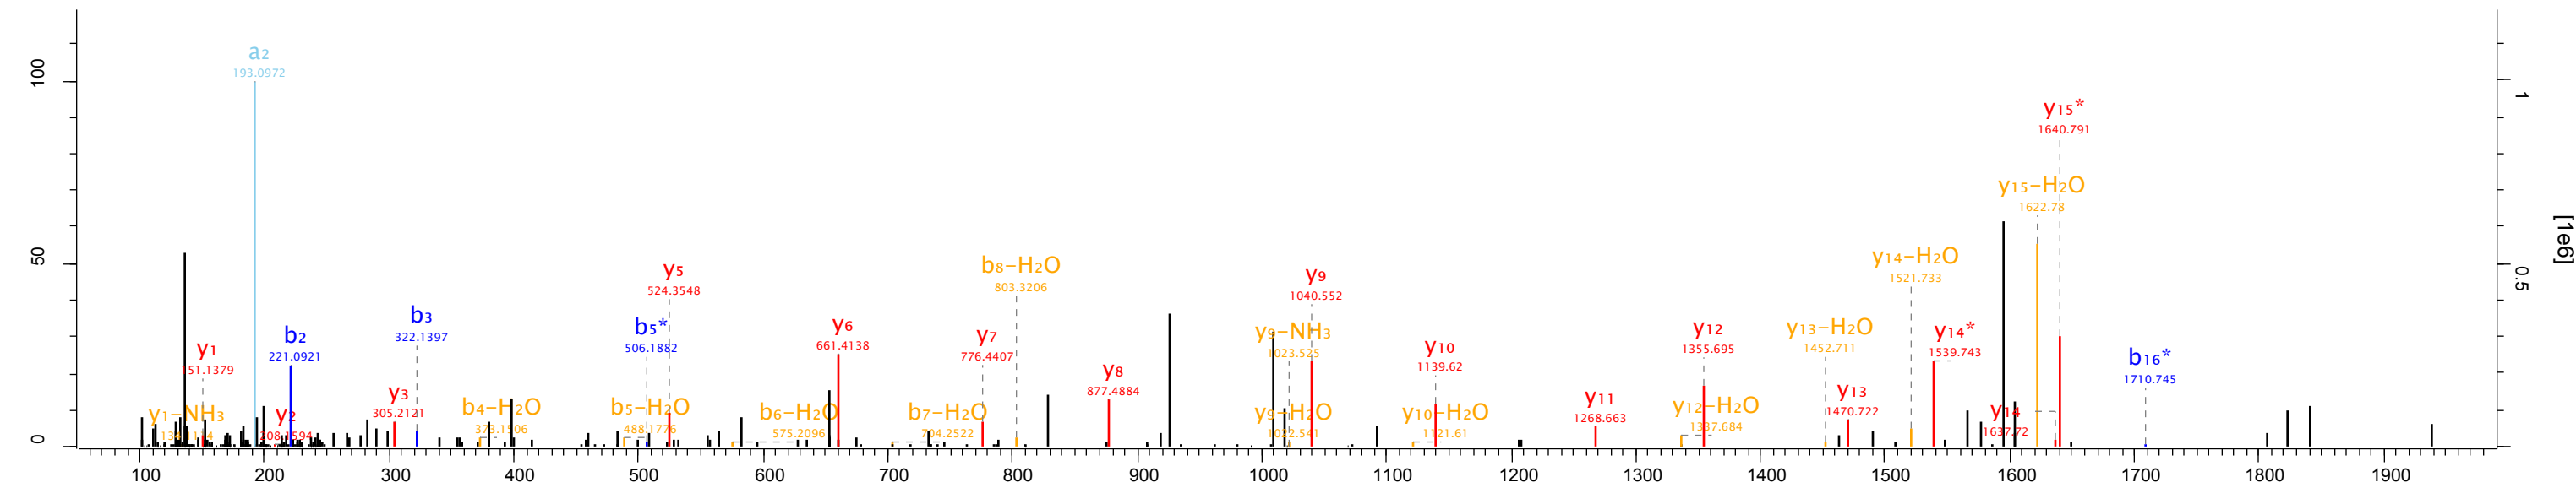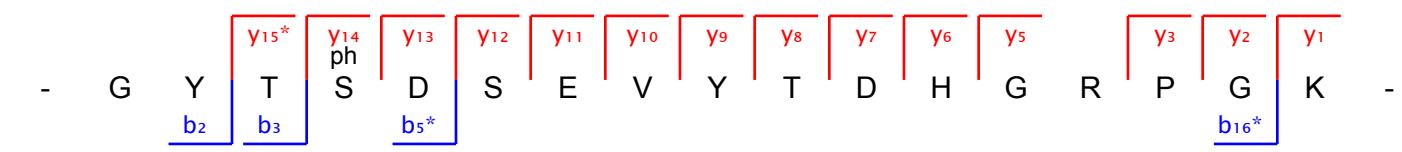

Raw file  
20171215\_MaS\_33SR\_LMH\_phospho2\_02

Scan 5675 Method FTMS; HCD Score 141.31 m/z 587.25 Gene names RBMX

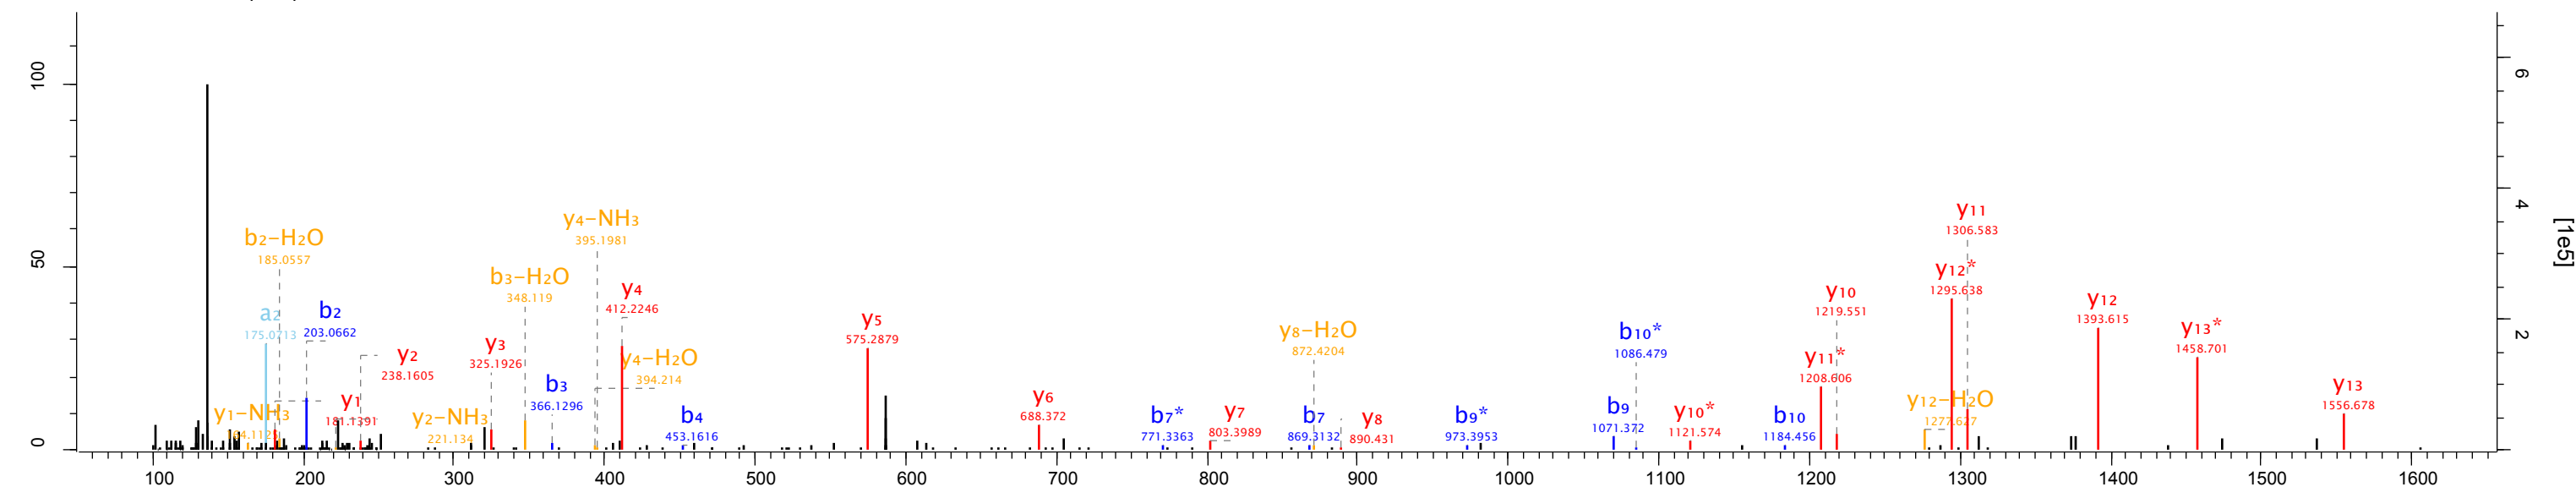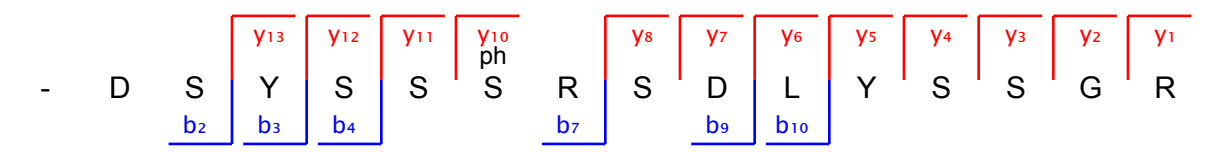

Raw file 20171215\_MaS\_33SR\_LMH\_phospho2\_02 Scan 5775 Method FTMS; HCD Score 135.47 m/z 748.31 Gene names CTNND1

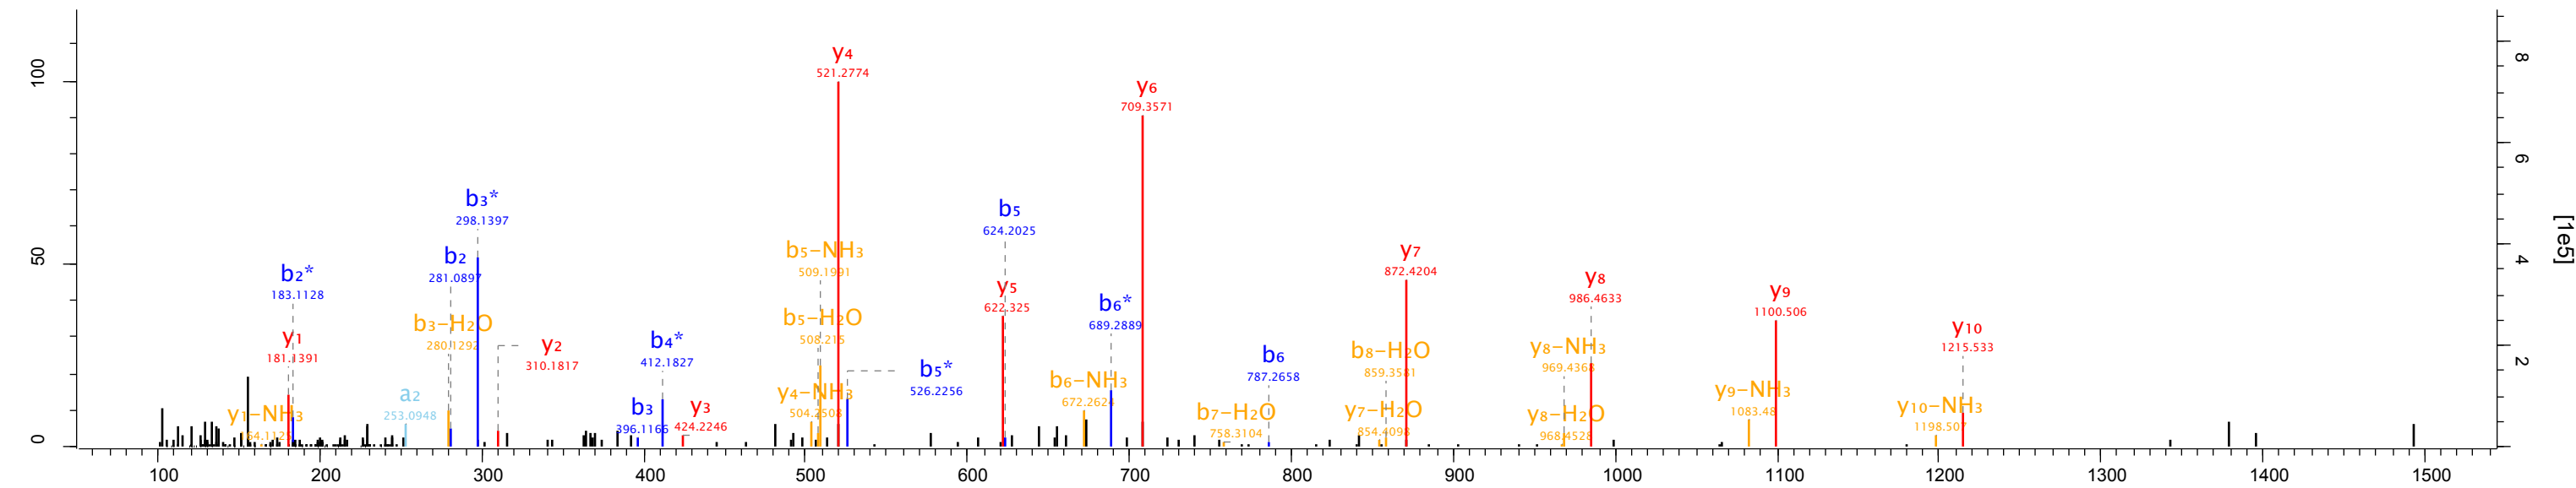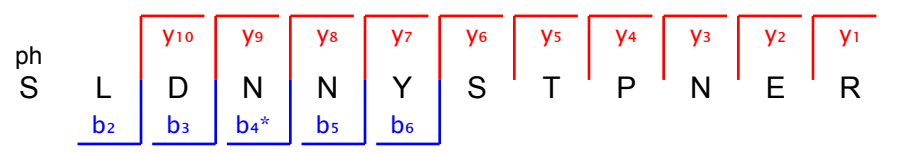

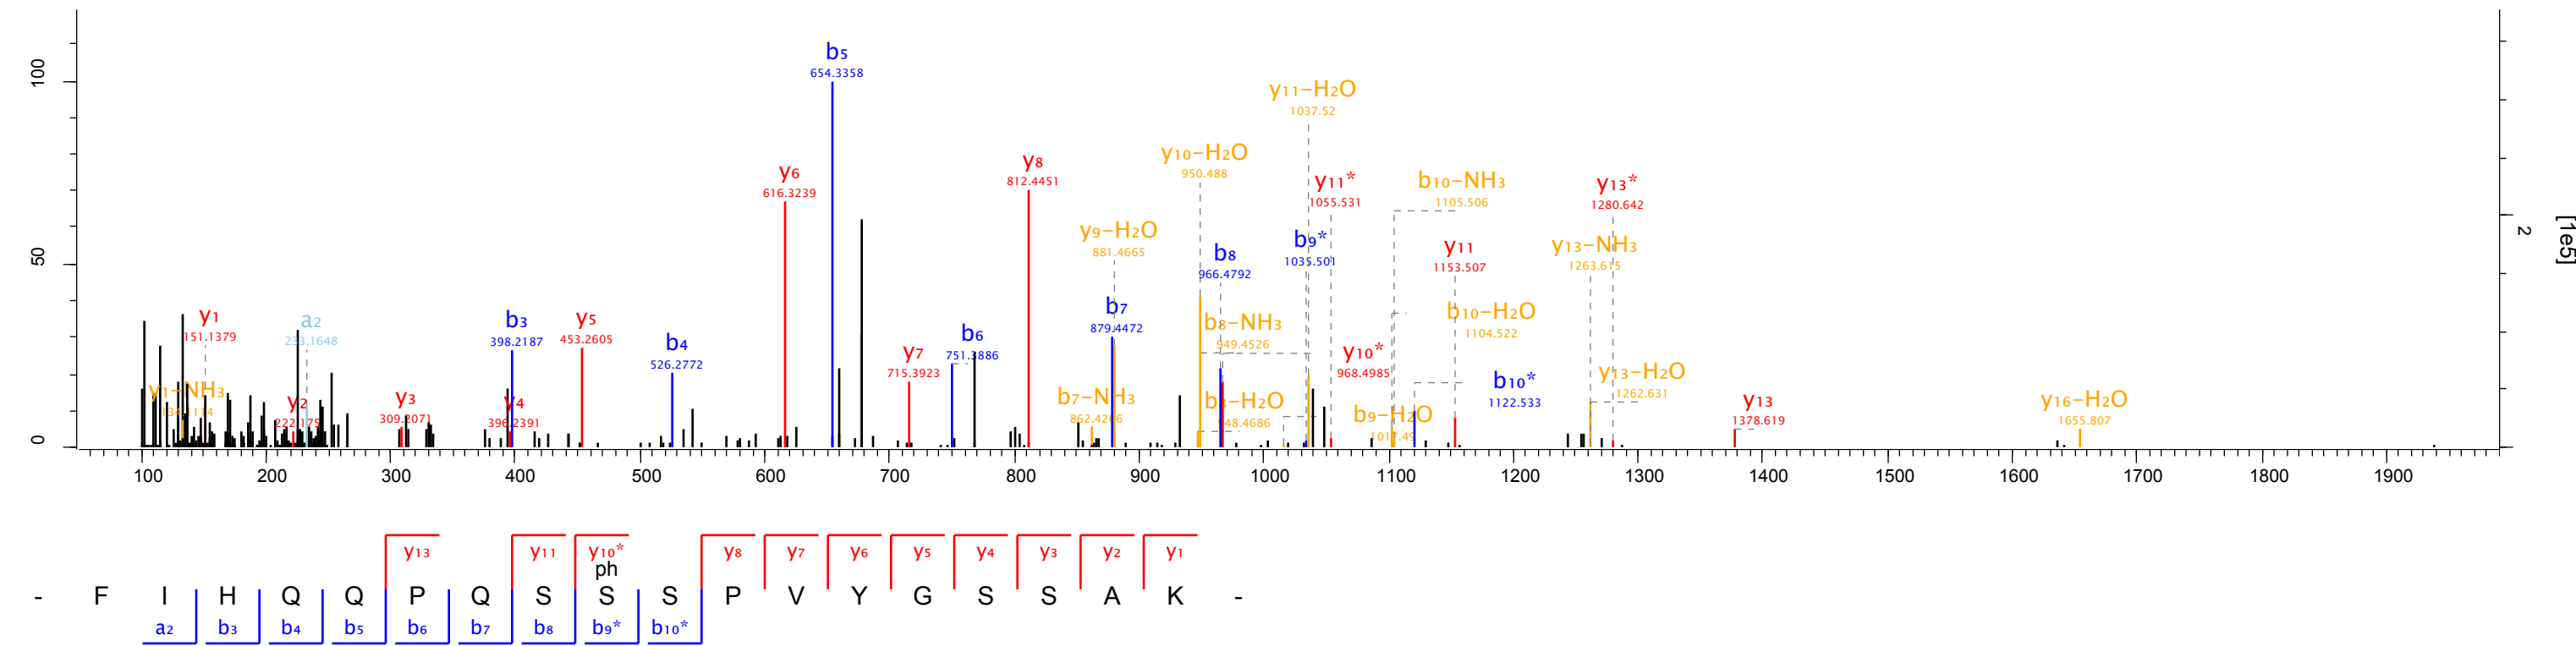

Raw file 20171215\_MaS\_33SR\_LMH\_phospho2\_02 Scan 6955 Method FTMS; HCD Score 205.43 m/z 1068.44 Gene names IGFBP3

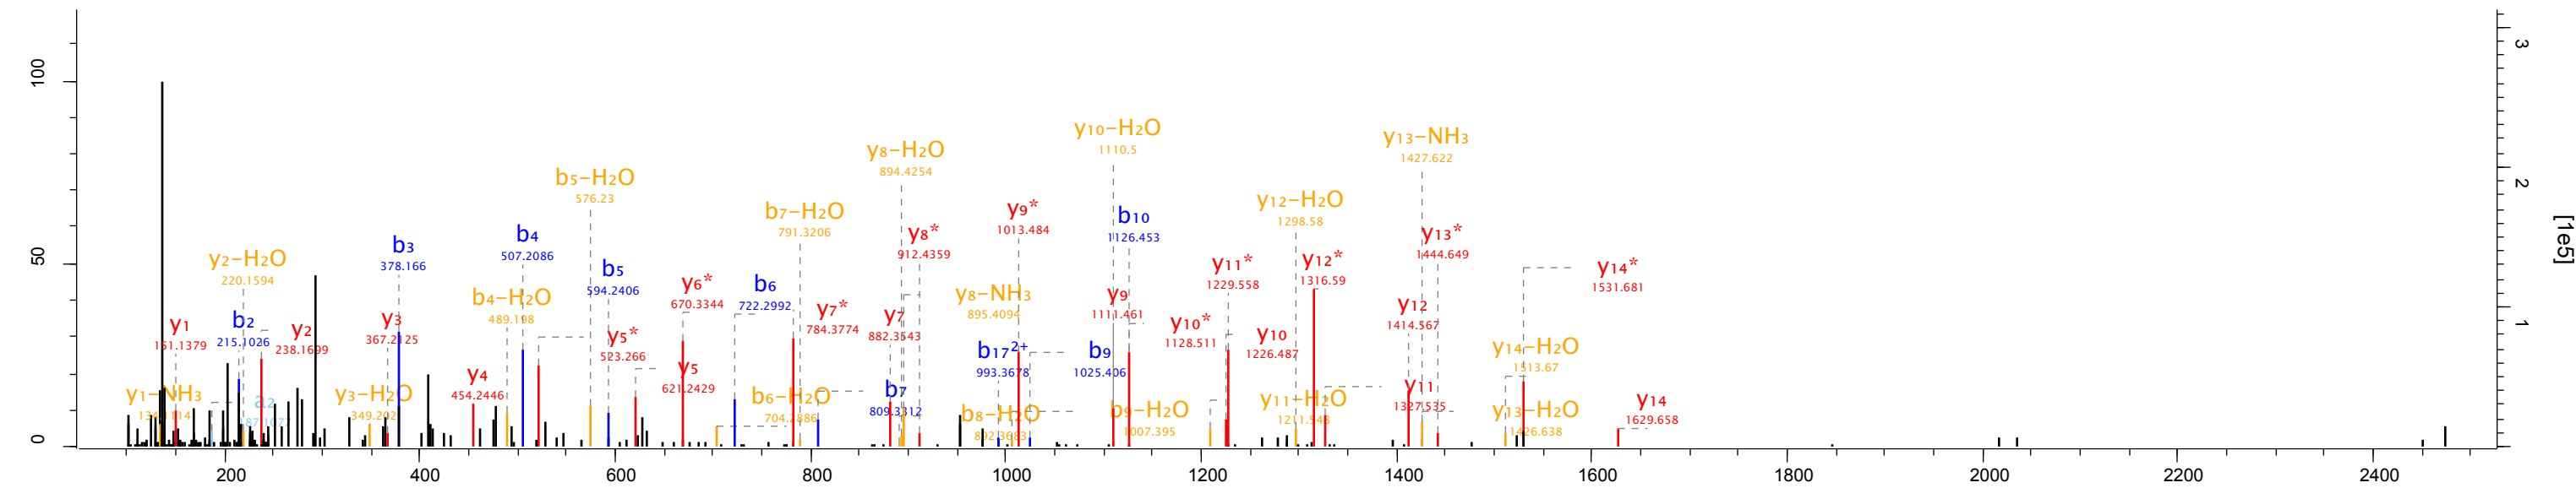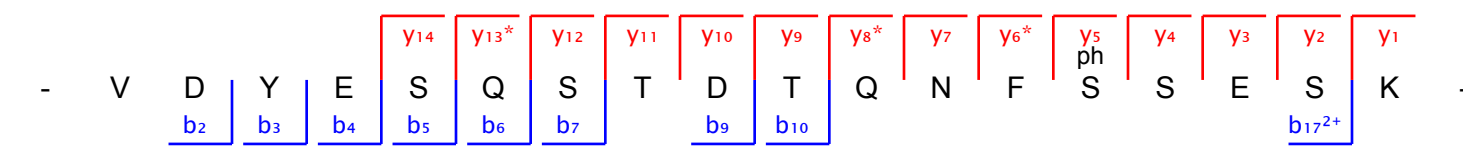

Raw file 20171215\_MaS\_33SR\_LMH\_phospho2\_02 Scan 7295 Method FTMS; HCD Score 233.62 m/z 684.8 Gene names RAD18

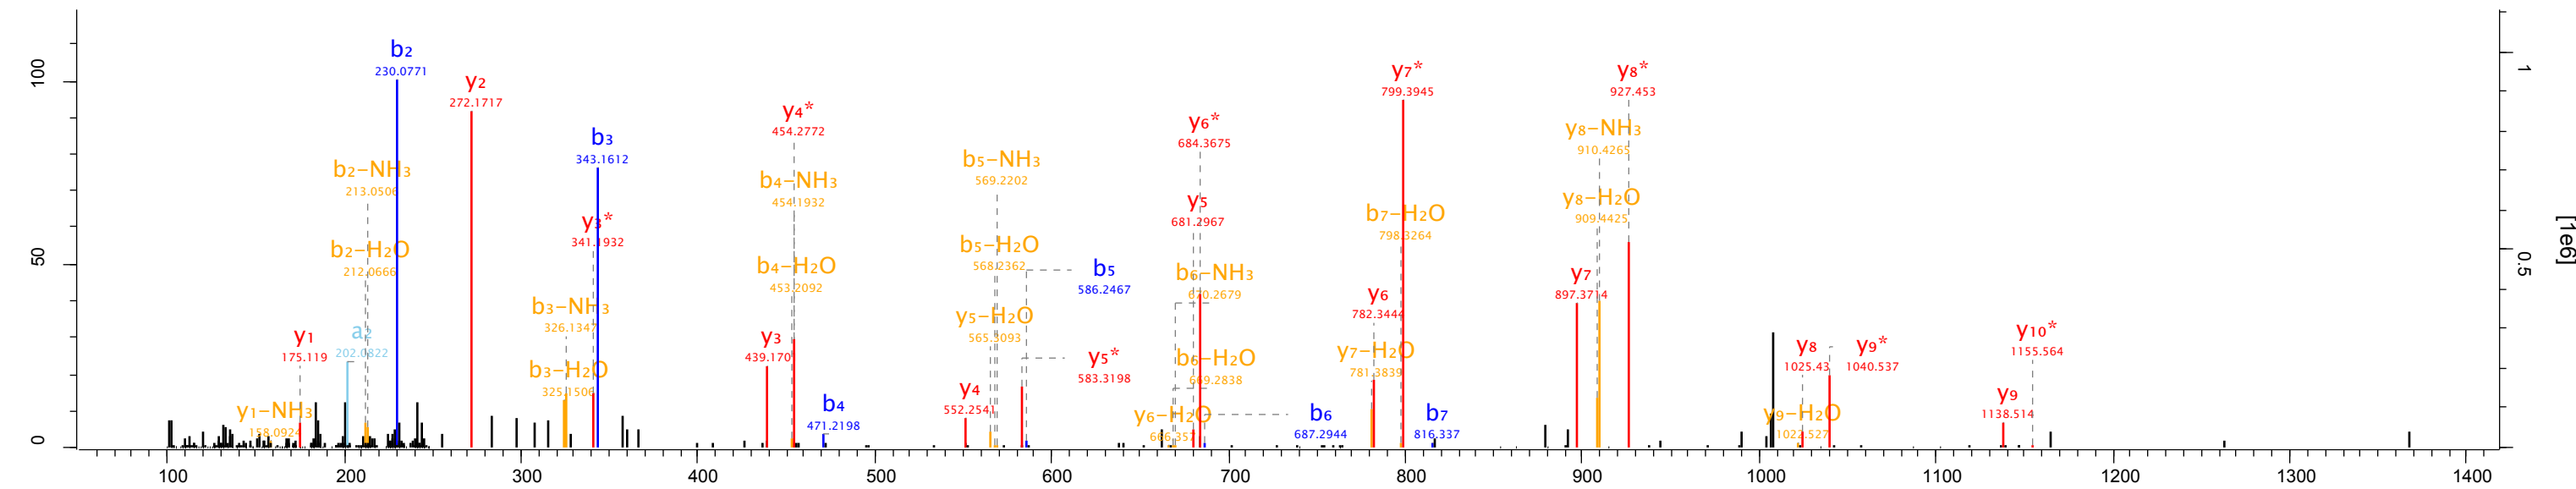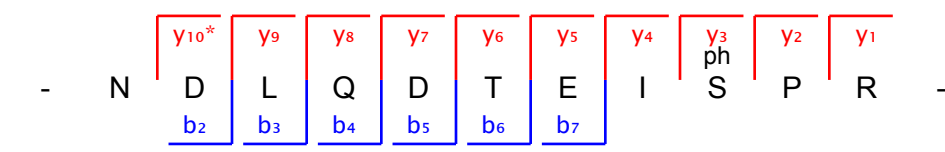

Raw file  
20171215\_MaS\_33SR\_LMH\_phospho2\_02

Scan 8095 Method FTMS; HCD Score 42.79 m/z 987.5 Gene names THRAP3

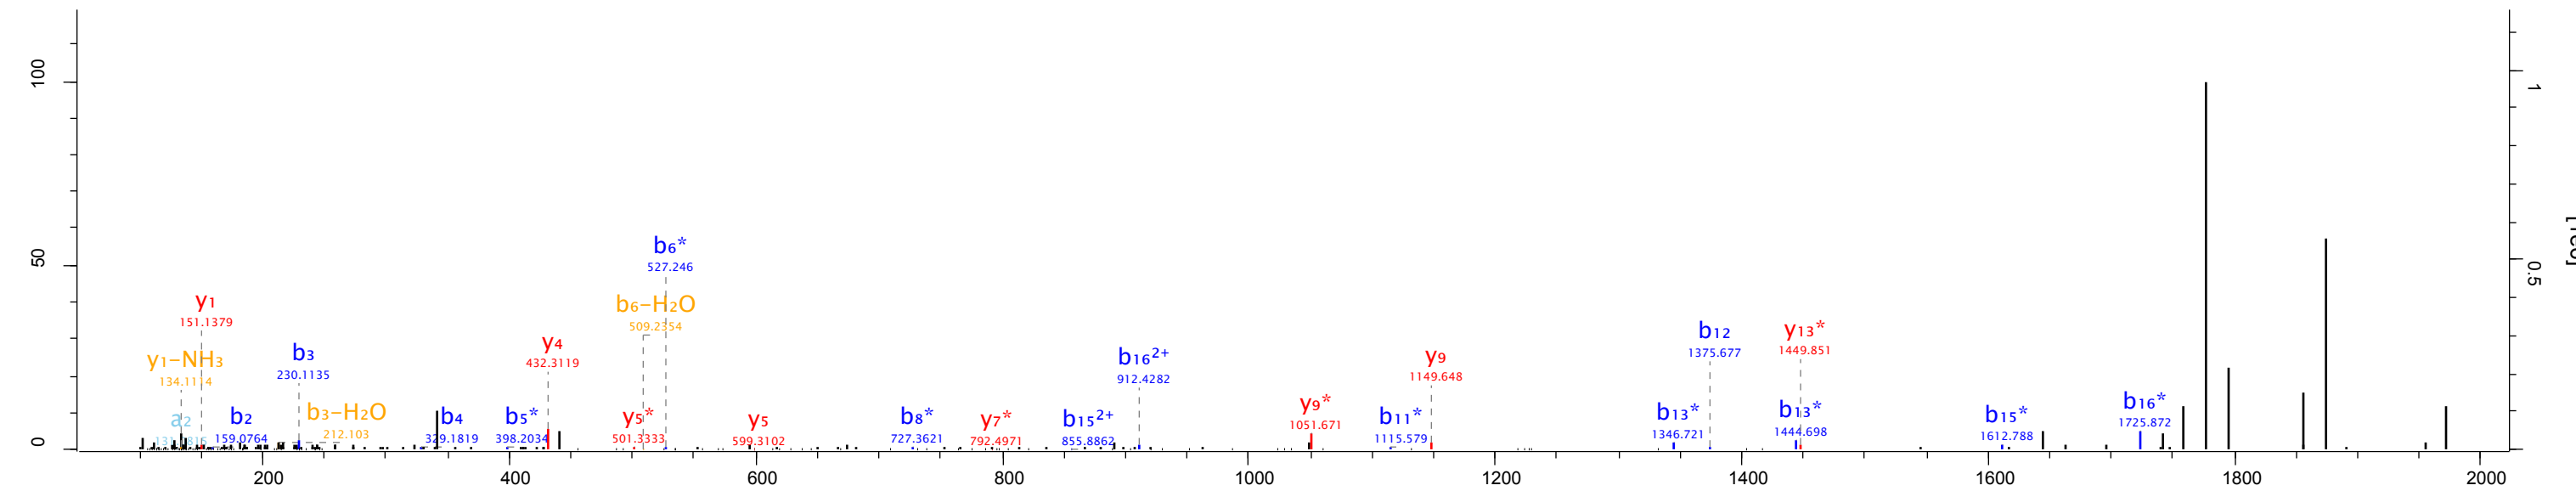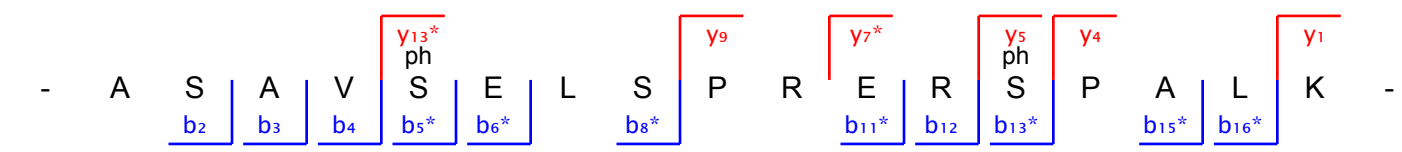



Raw file 20171215\_MaS\_33SR\_LMH\_phospho2\_02 Scan 8695 Method FTMS; HCD Score 177.6 m/z 853.89 Gene names RBMX;RBMXL1

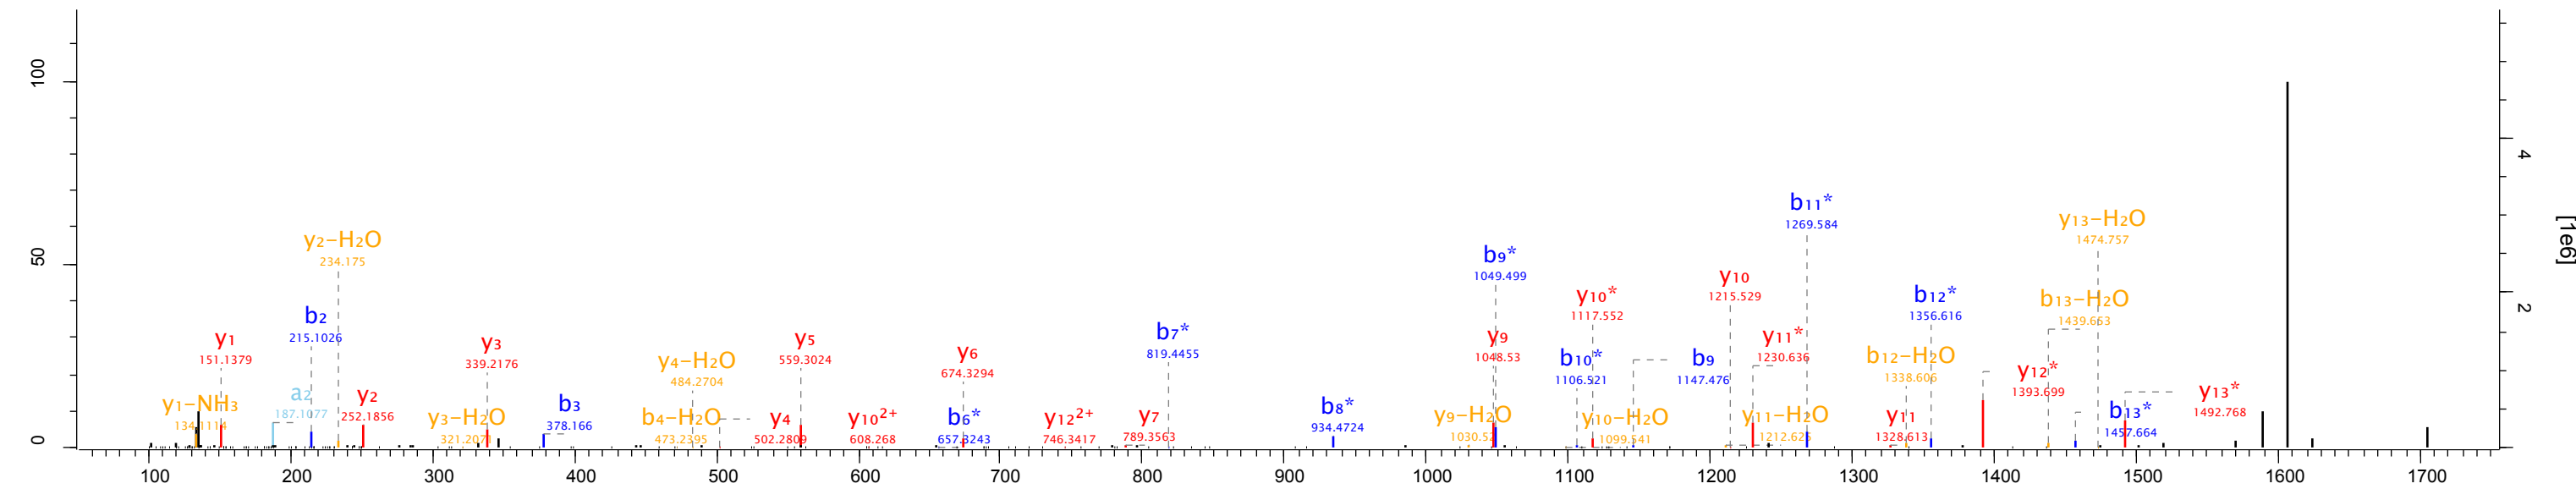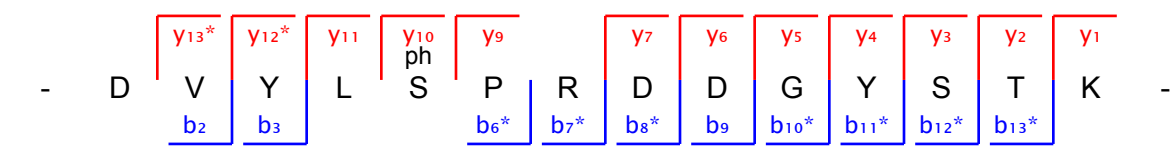

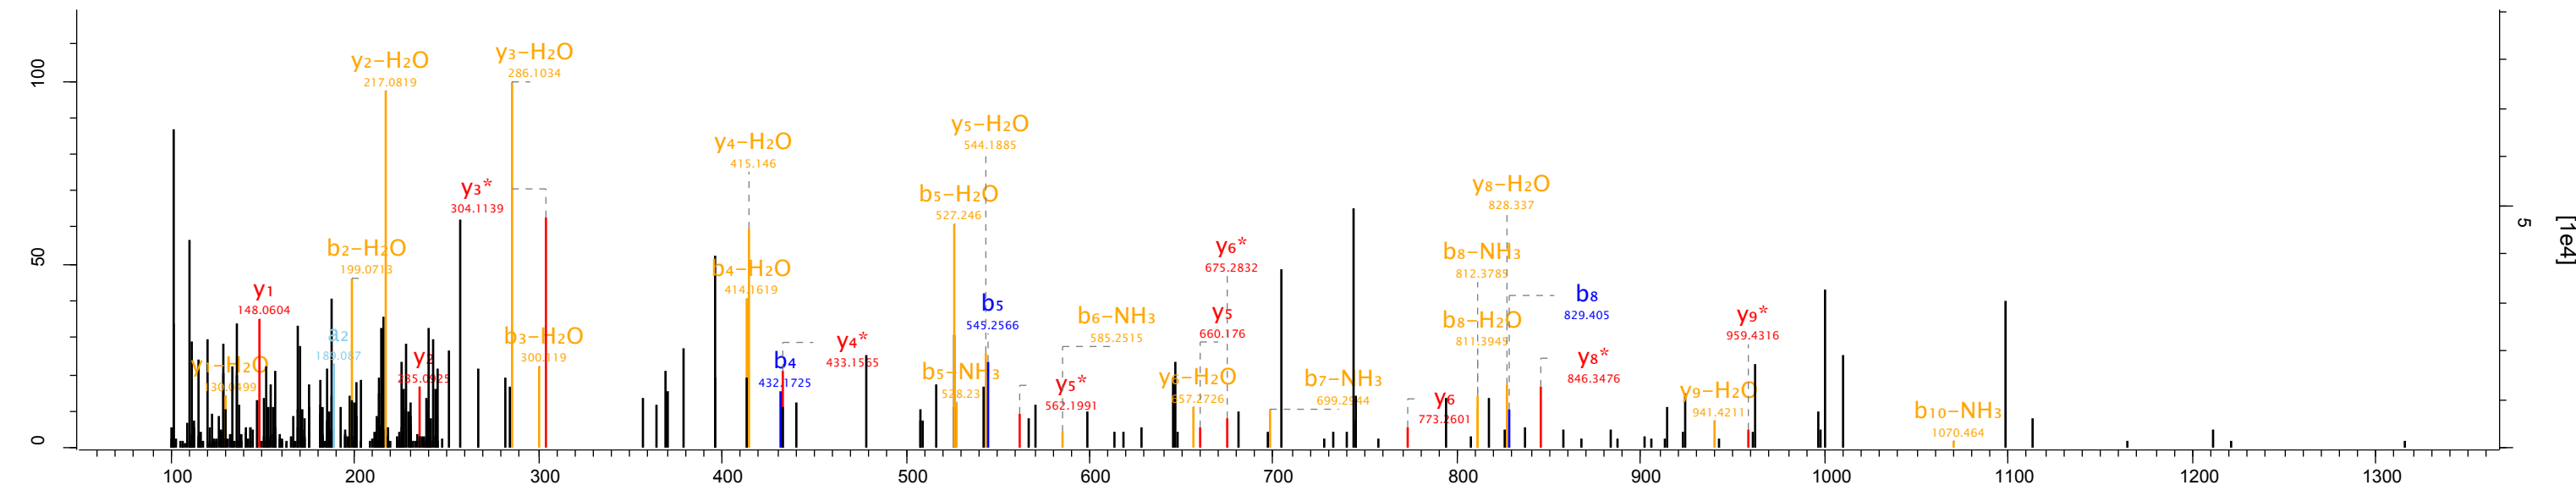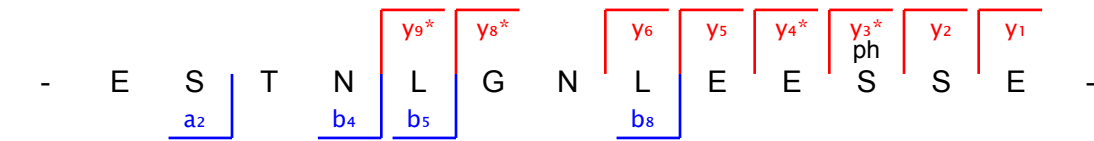

Raw file: 20171215\_MaS\_33SR\_LMH\_phospho2\_02  
 Scan: 9655 Method: FTMS; HCD Score: 251.49 m/z: 705.34 Gene names: SLTM

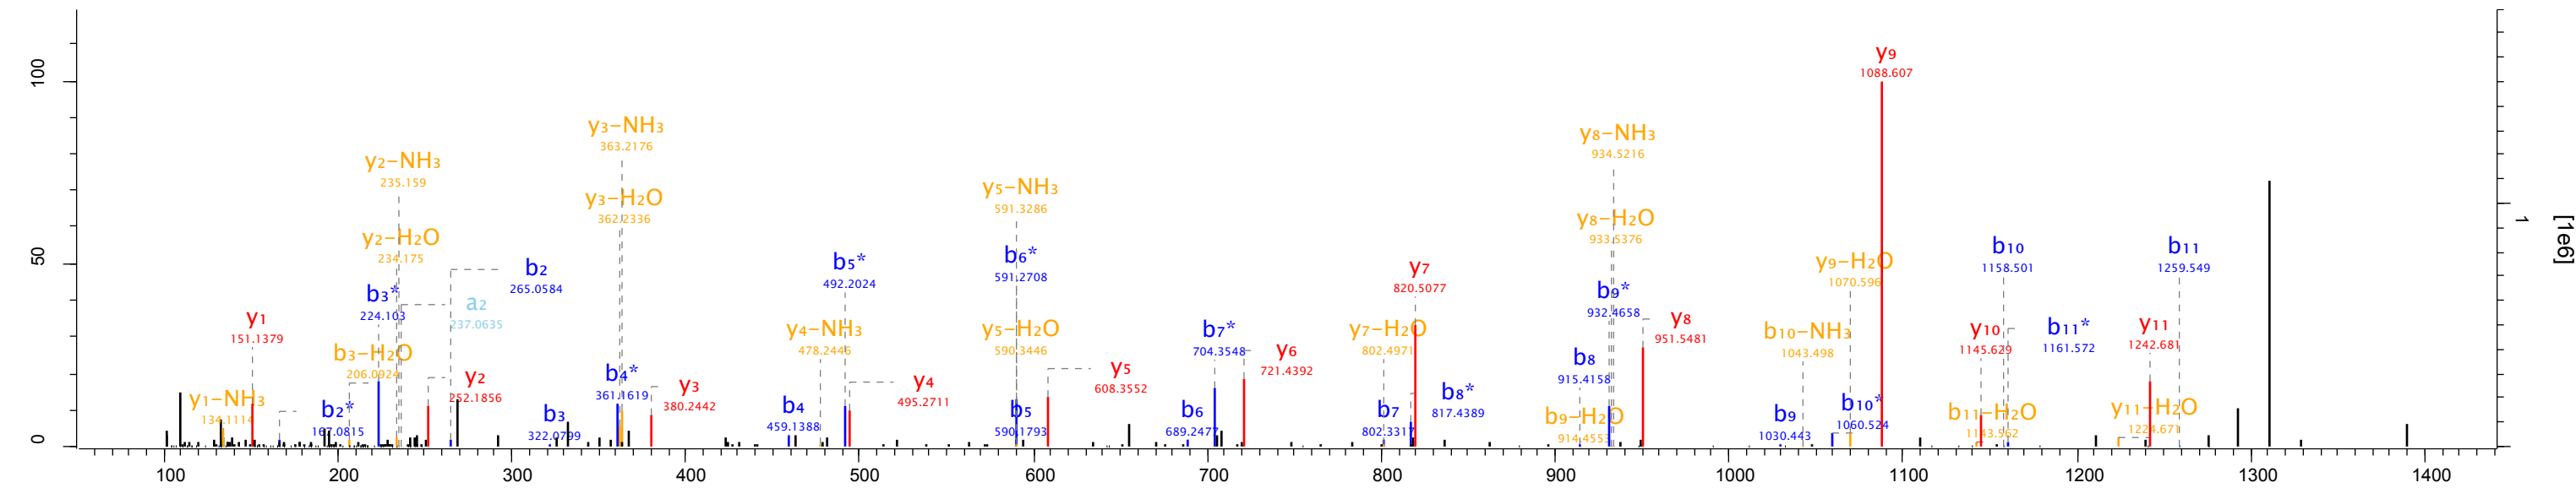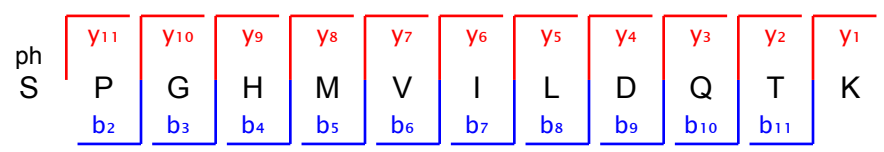

Raw file 20171215\_MaS\_33SR\_LMH\_phospho2\_03 Scan 10045 Method FTMS; HCD Score 199.05 m/z 720.31 Gene names EPHA2

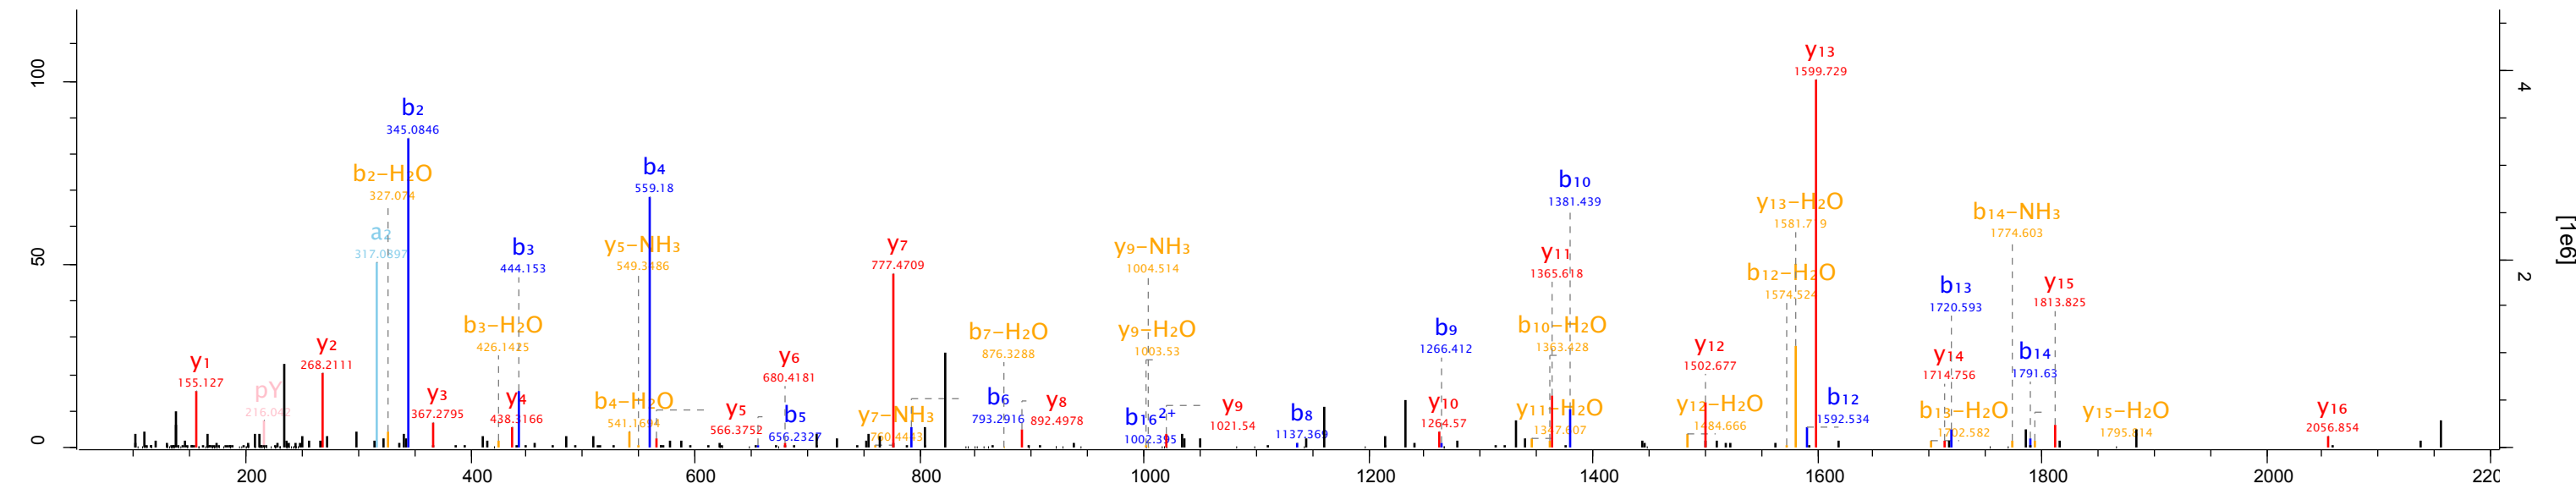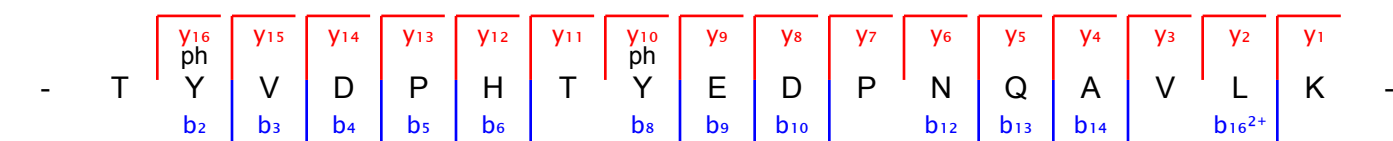

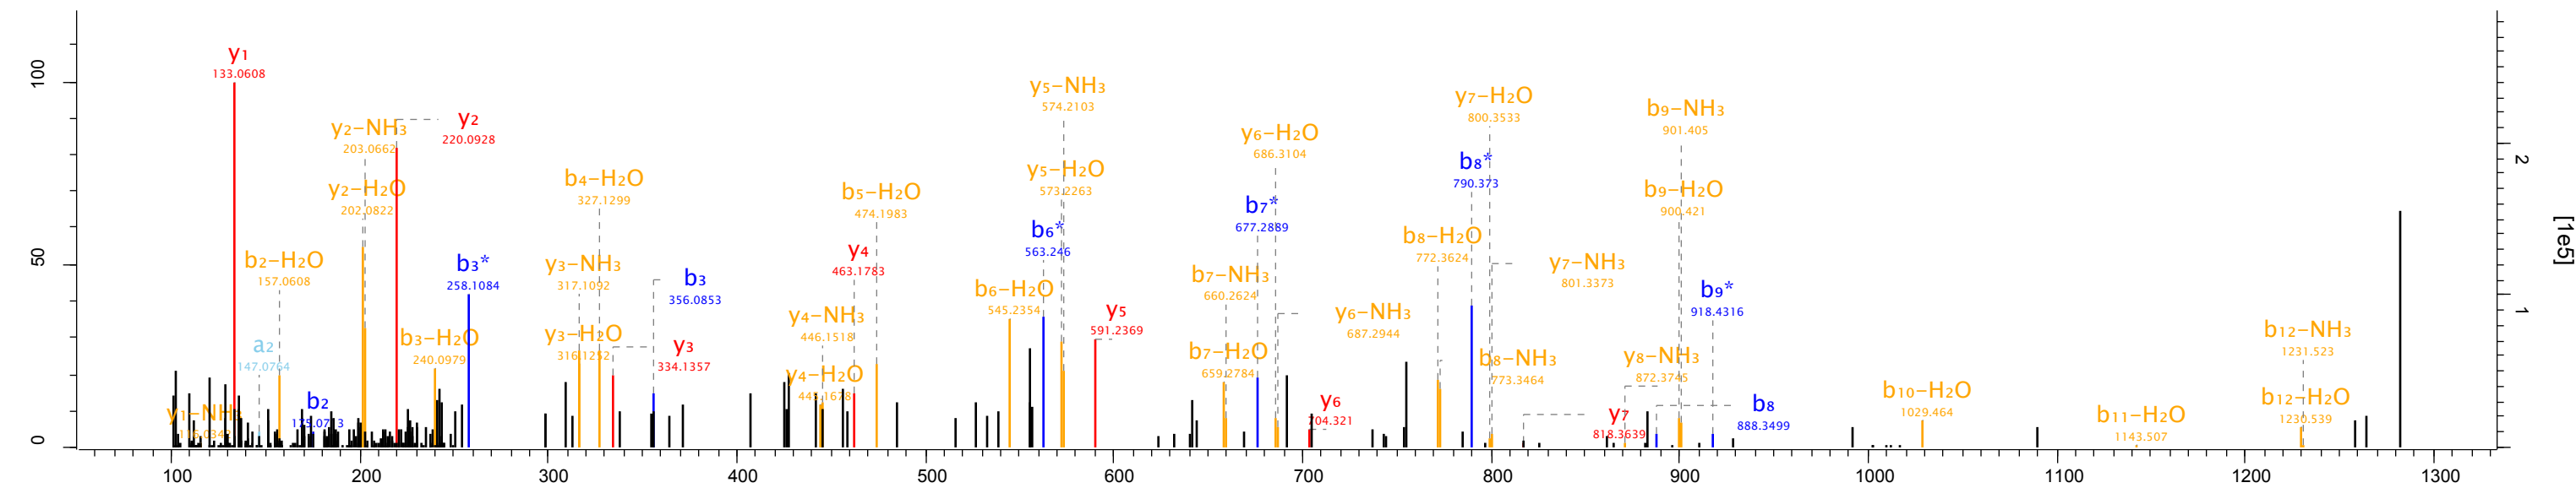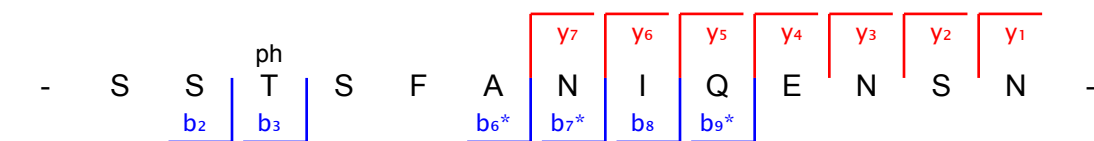

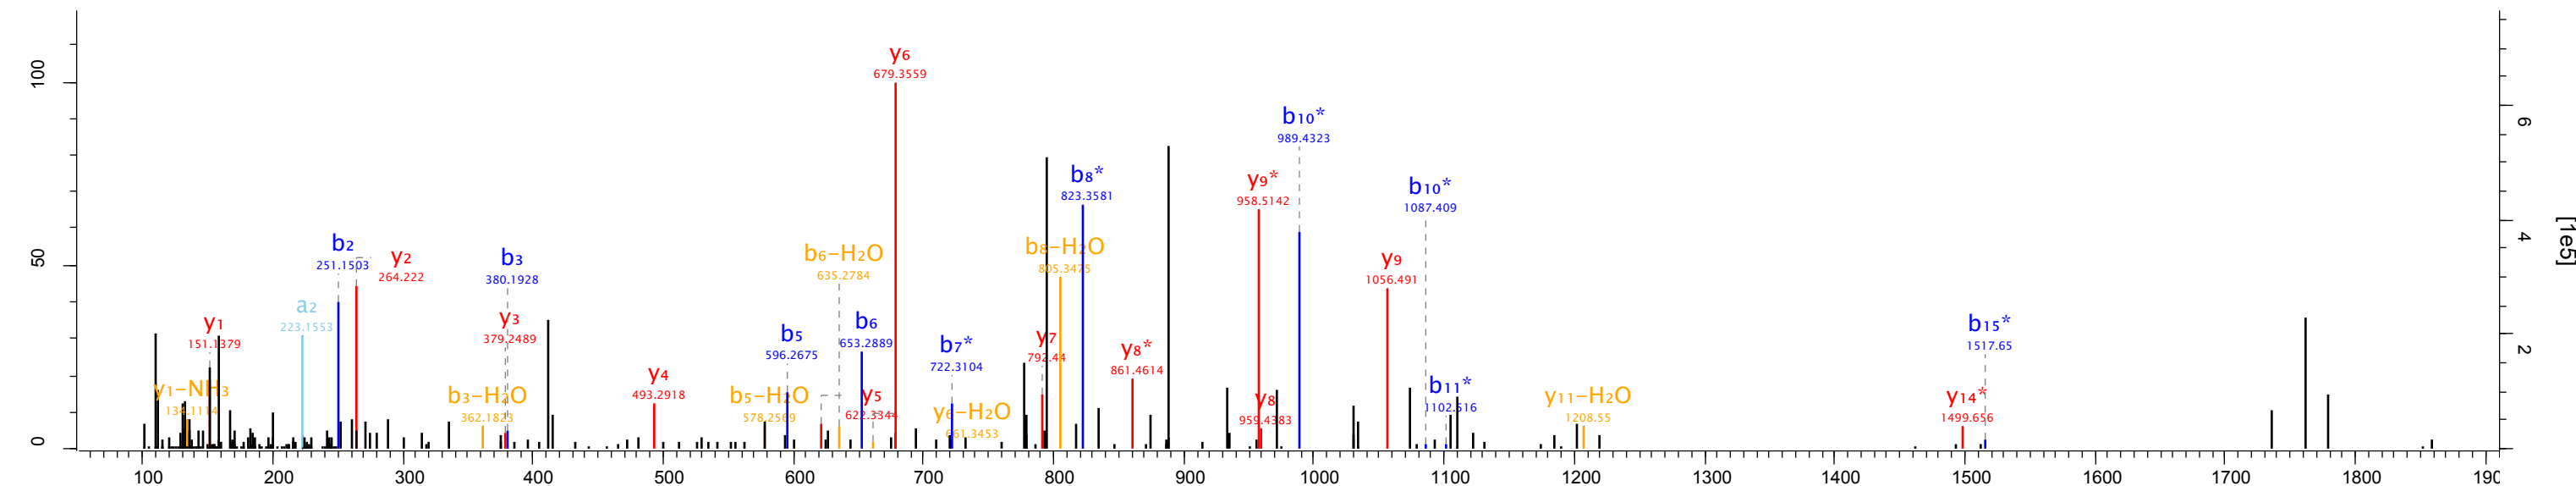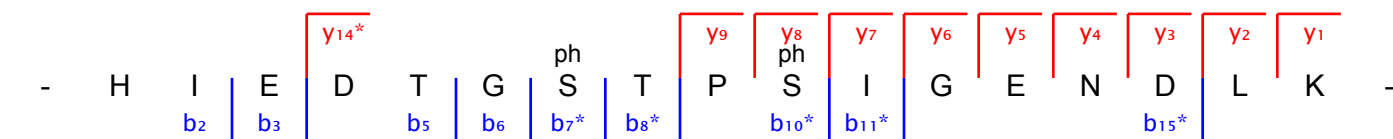

Raw file 20171215\_MaS\_33SR\_LMH\_phospho2\_03 Scan 10495 Method FTMS; HCD Score 203.79 m/z 757.03 Gene names ABCF1

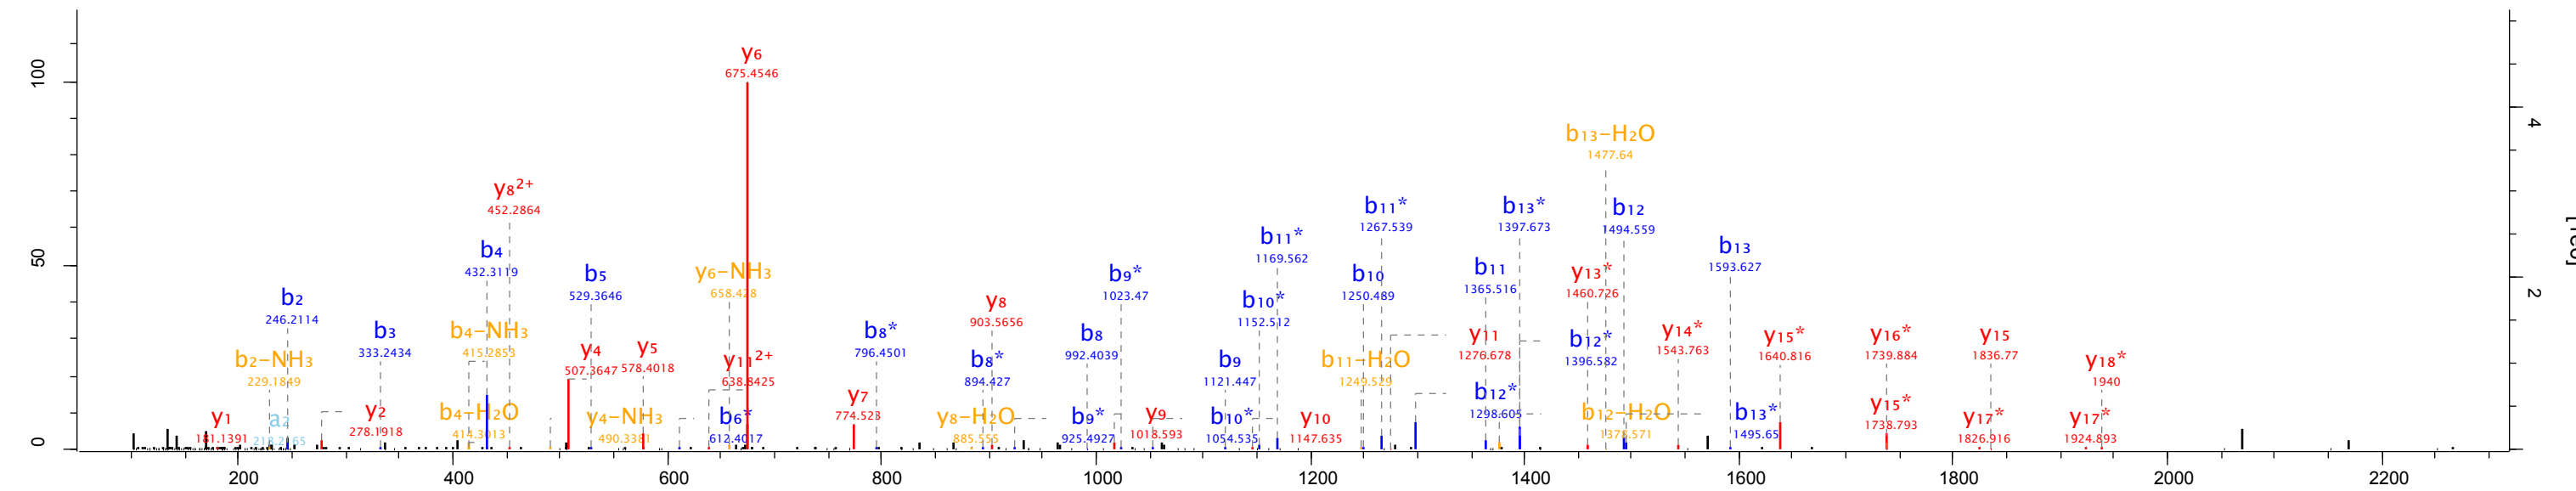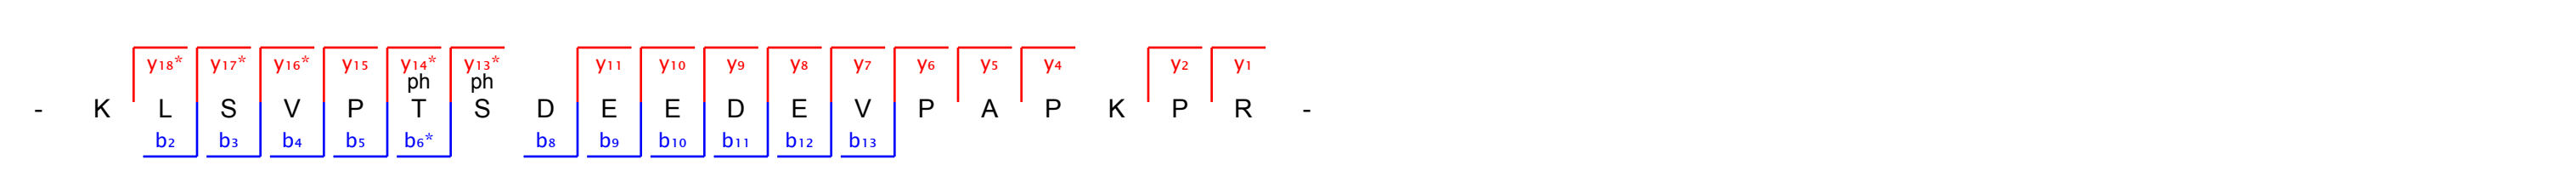

Raw file 20171215\_MaS\_33SR\_LMH\_phospho2\_03 Scan 10585 Method FTMS; HCD Score 96.5 m/z 602 Gene names EIF4G3

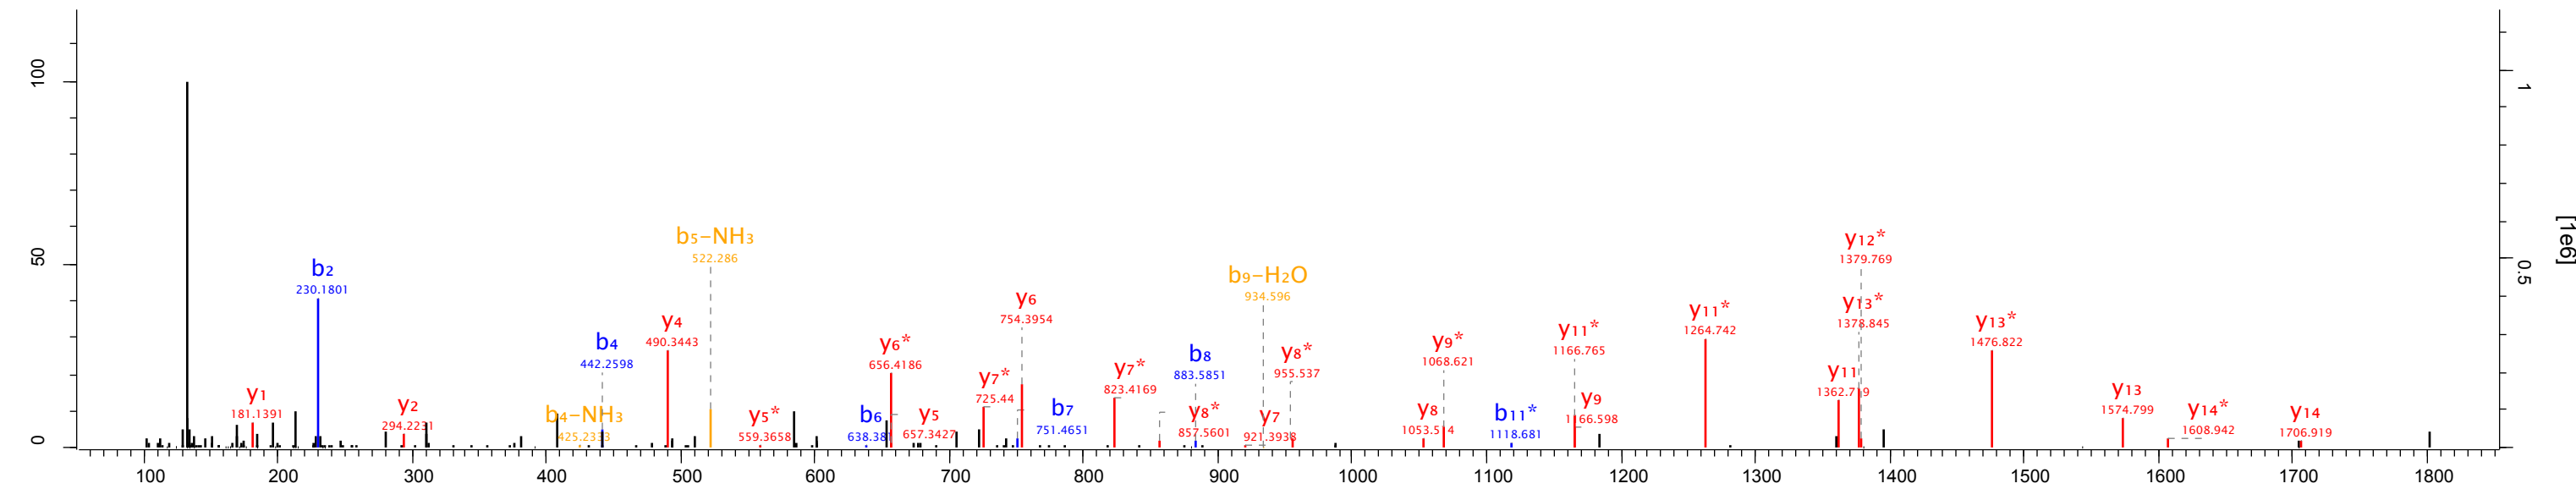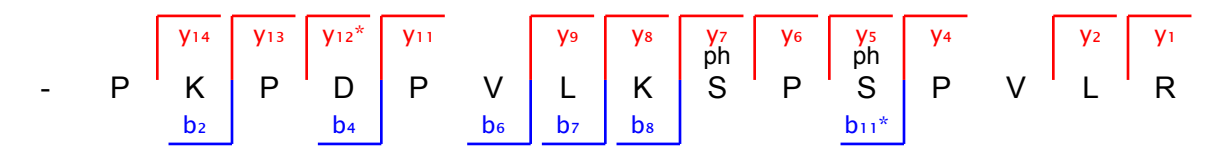



Raw file 20171215\_MaS\_33SR\_LMH\_phospho2\_03 Scan 10645 Method FTMS; HCD Score 86.47 m/z 979.41 Gene names IFI16

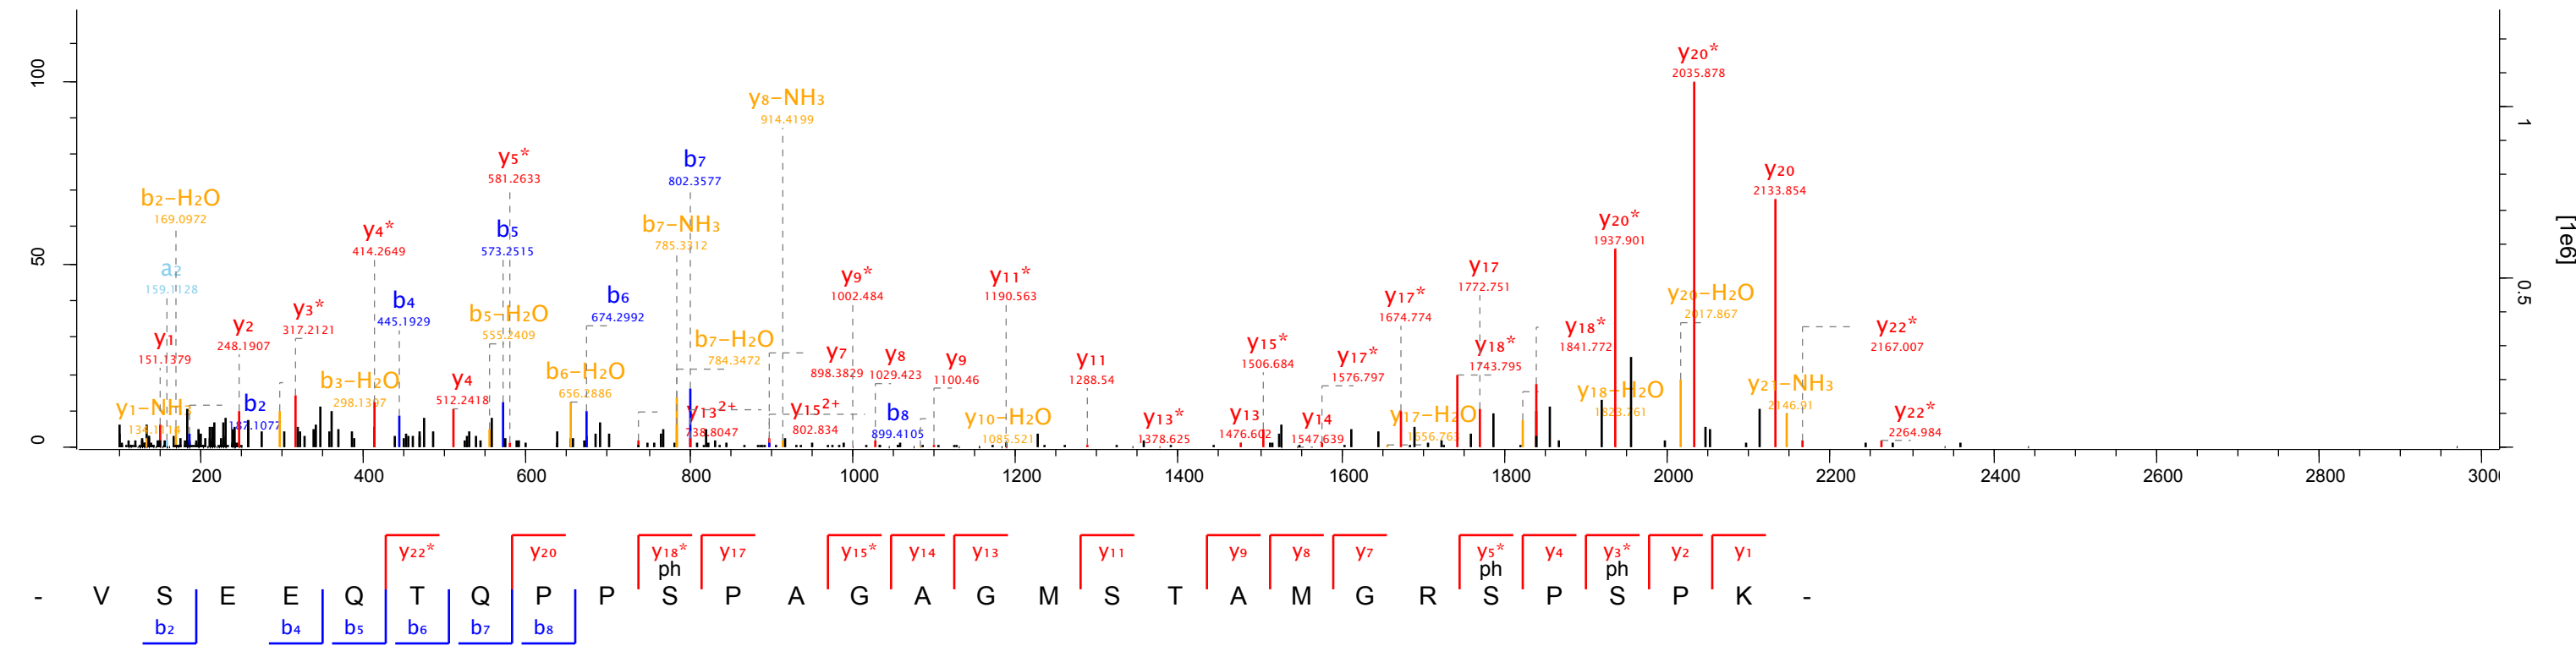

Raw file: 20171215\_MaS\_33SR\_LMH\_phospho2\_03  
 Scan: 10655 Method: FTMS; HCD Score: 68.07 m/z: 1114.48 Gene names: PHF10

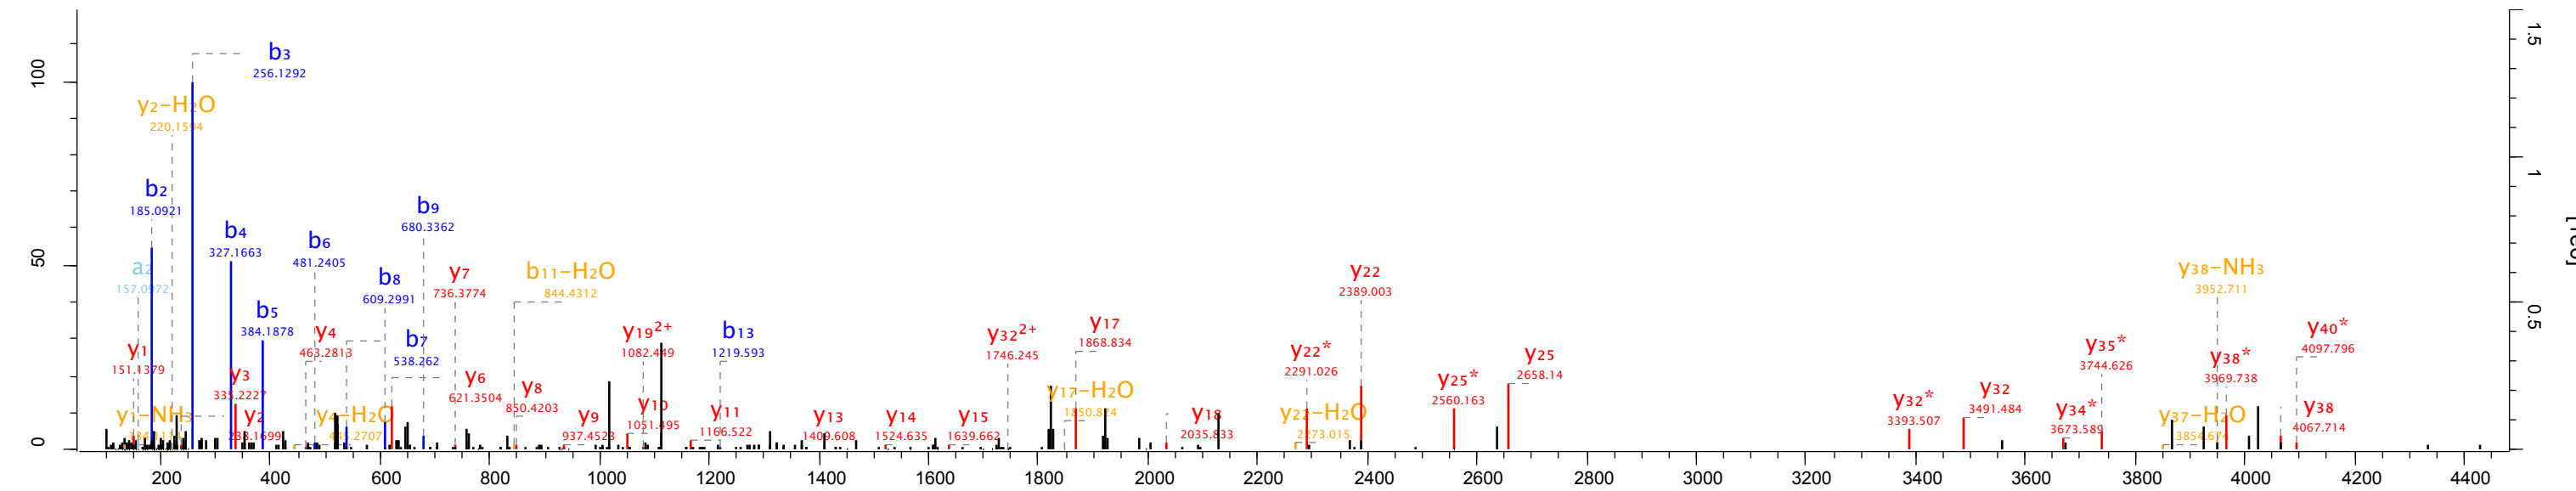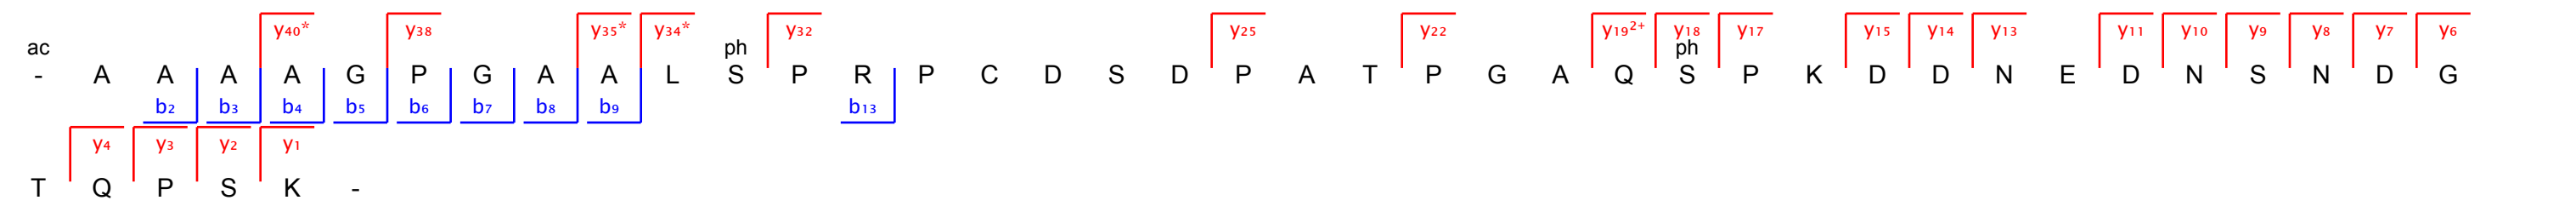

Raw file: 20171215\_MaS\_33SR\_LMH\_phospho2\_03  
 Scan: 10665 Method: FTMS; HCD Score: 159.52 m/z: 648.29 Gene names: MAP7D1

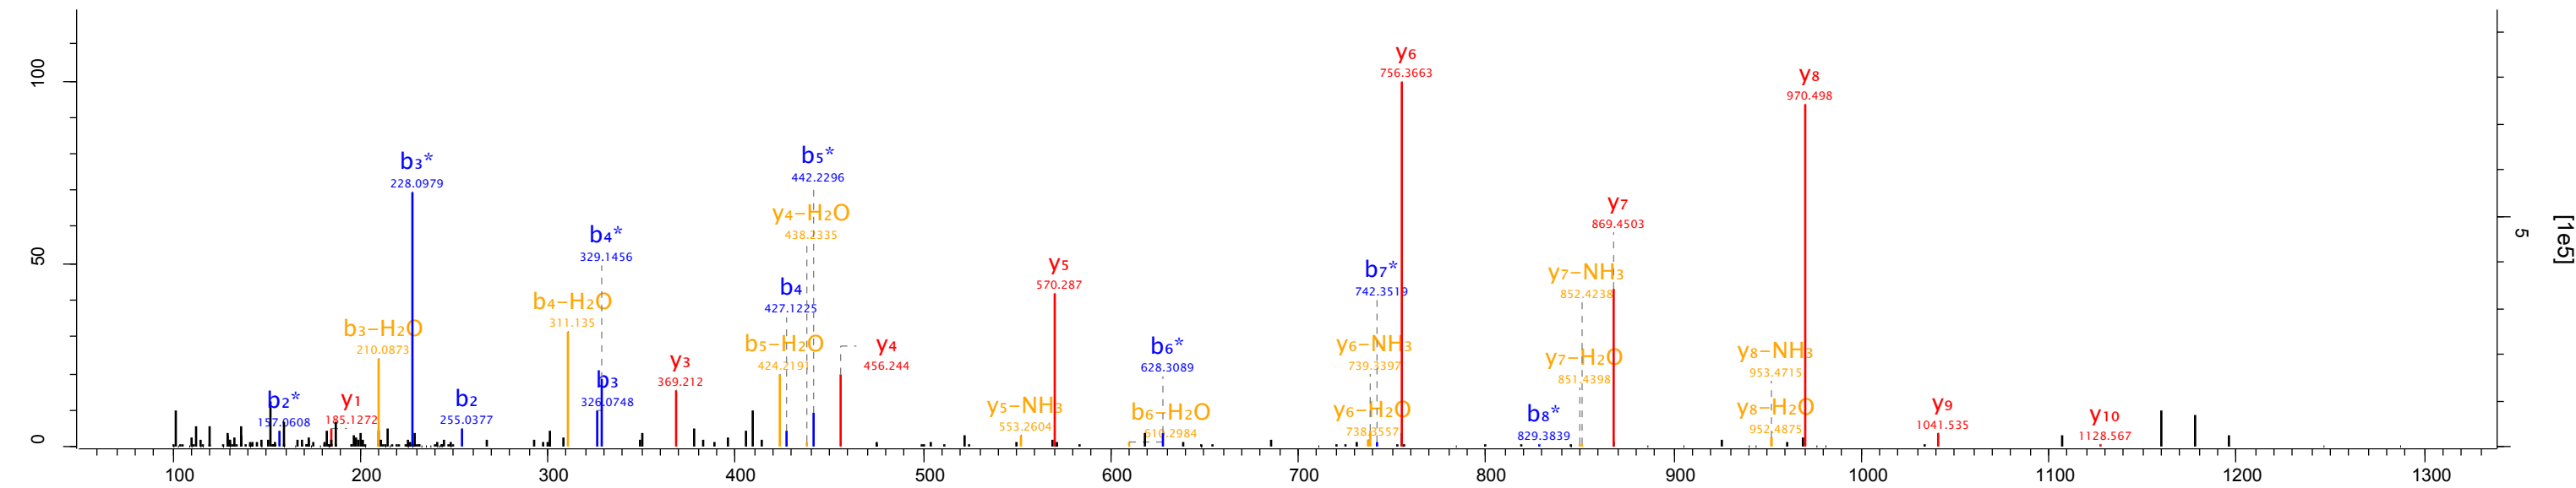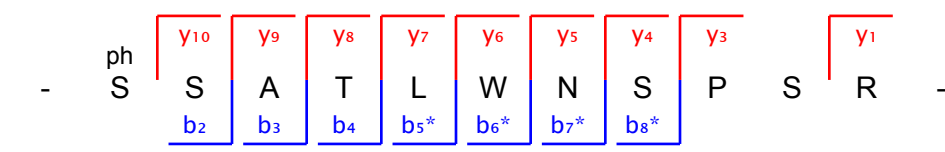

Raw file: 20171215\_MaS\_33SR\_LMH\_phospho2\_03  
 Scan: 10765 Method: FTMS; HCD Score: 138.84 m/z: 1150.47 Gene names: HUWE1

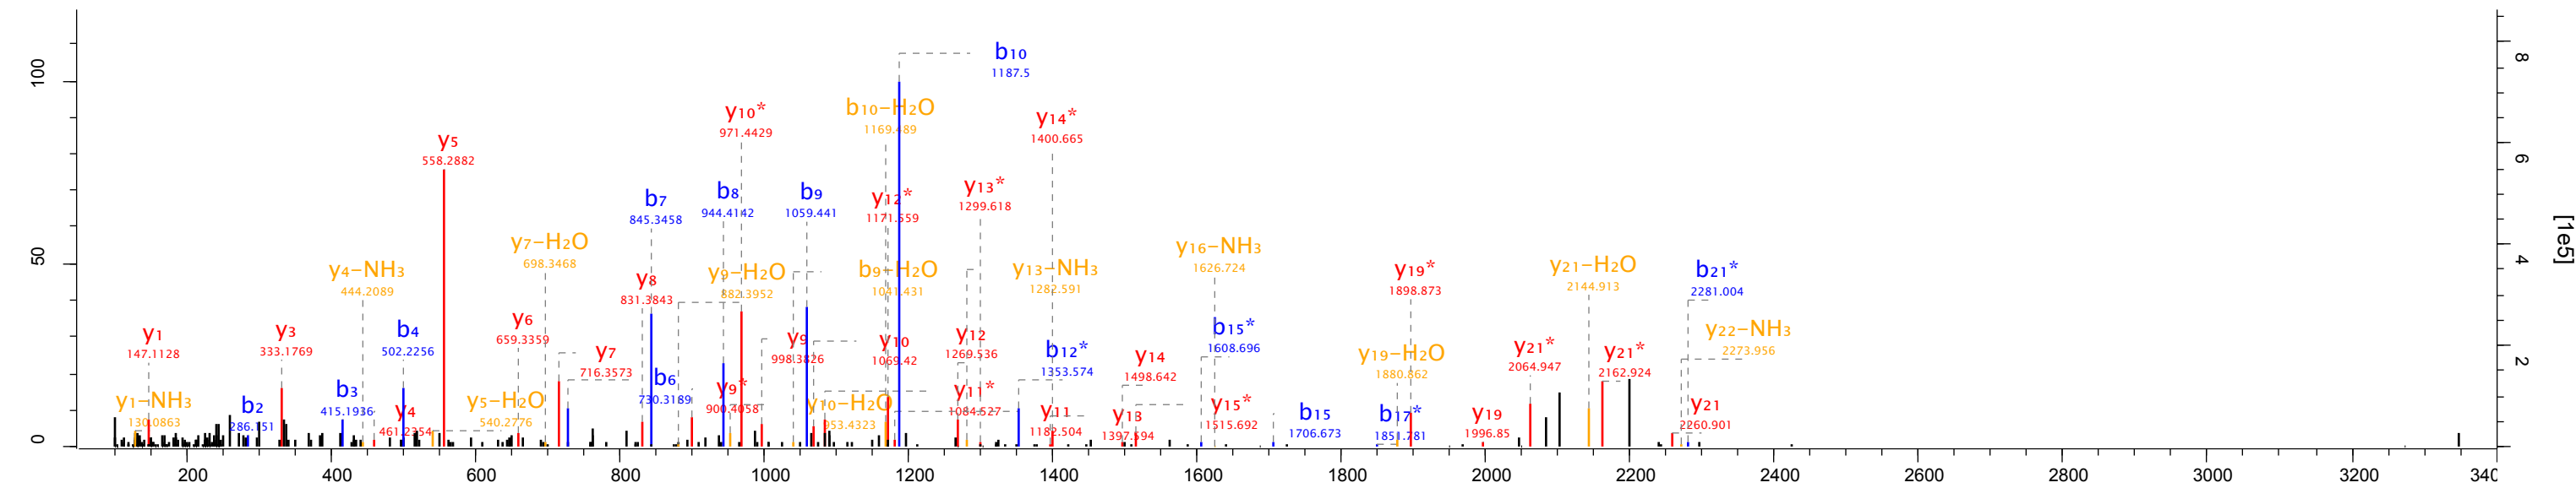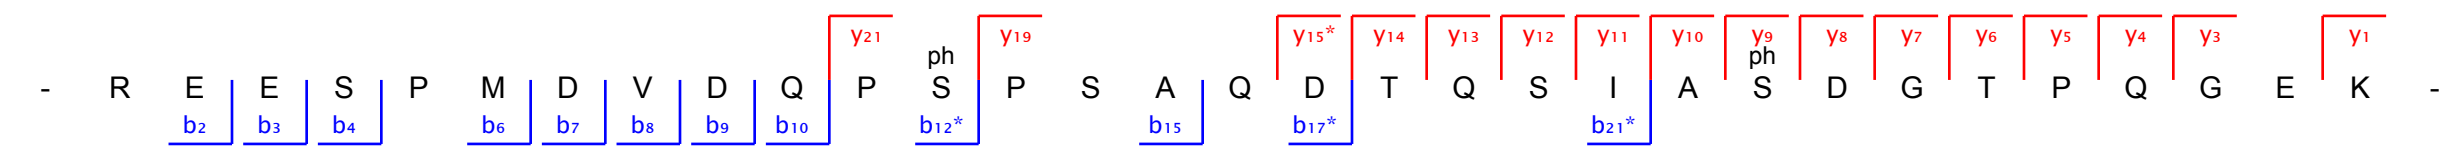

Raw file 20171215\_MaS\_33SR\_LMH\_phospho2\_03 Scan 10845 Method FTMS; HCD Score 63.43 m/z 848.36 Gene names SPTBN1

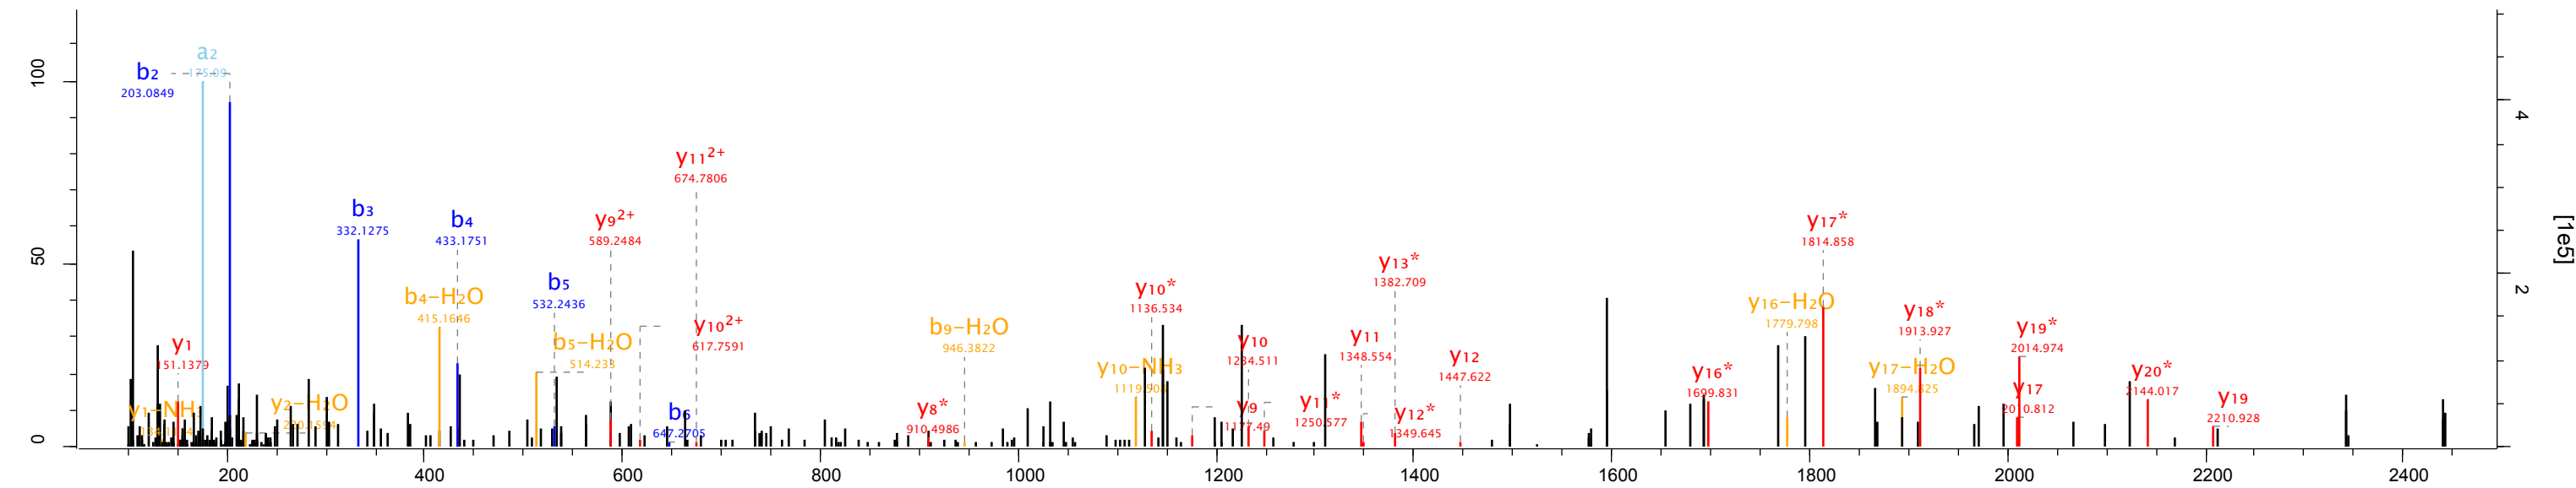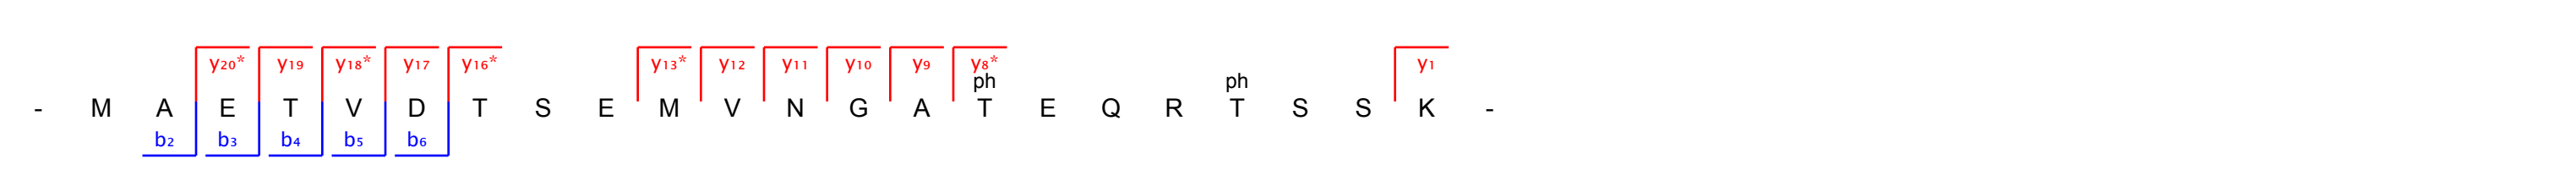

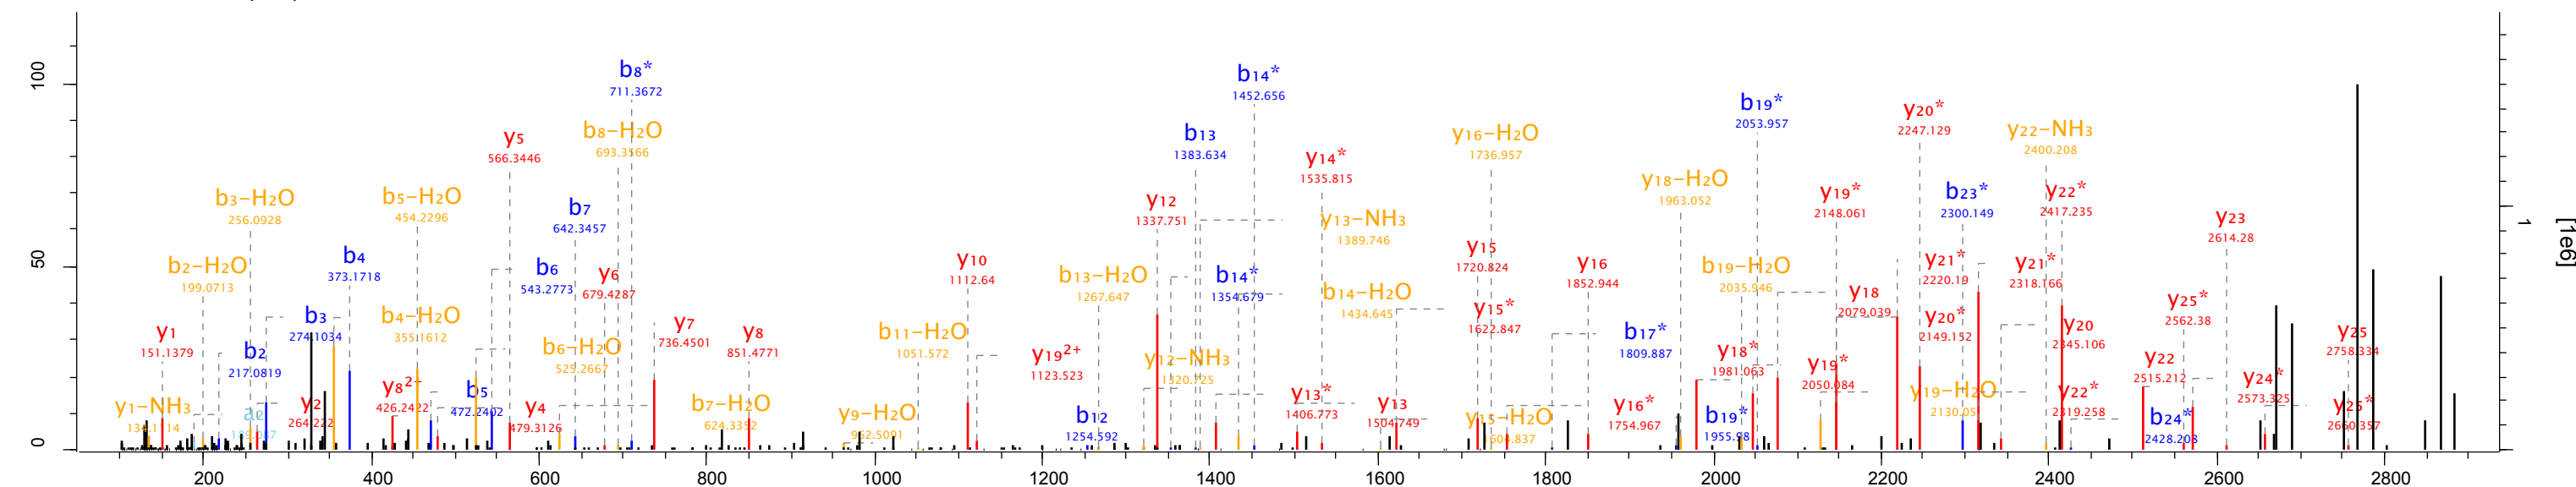

- E S G V V A V S P E K S E S P Q K E D G L S S Q L K -

y25
y24\*
y23
y22
y21\*
y20
y19\*
y18
y16
y15
y14\*
y13
y12
y10
y8
y7
y6
y5
y4
y2
y1

b2
b3
b4
b5
b6
b7
b8\*
b12
b13
b14\*
b17\*
b19\*
b23\*
b24\*

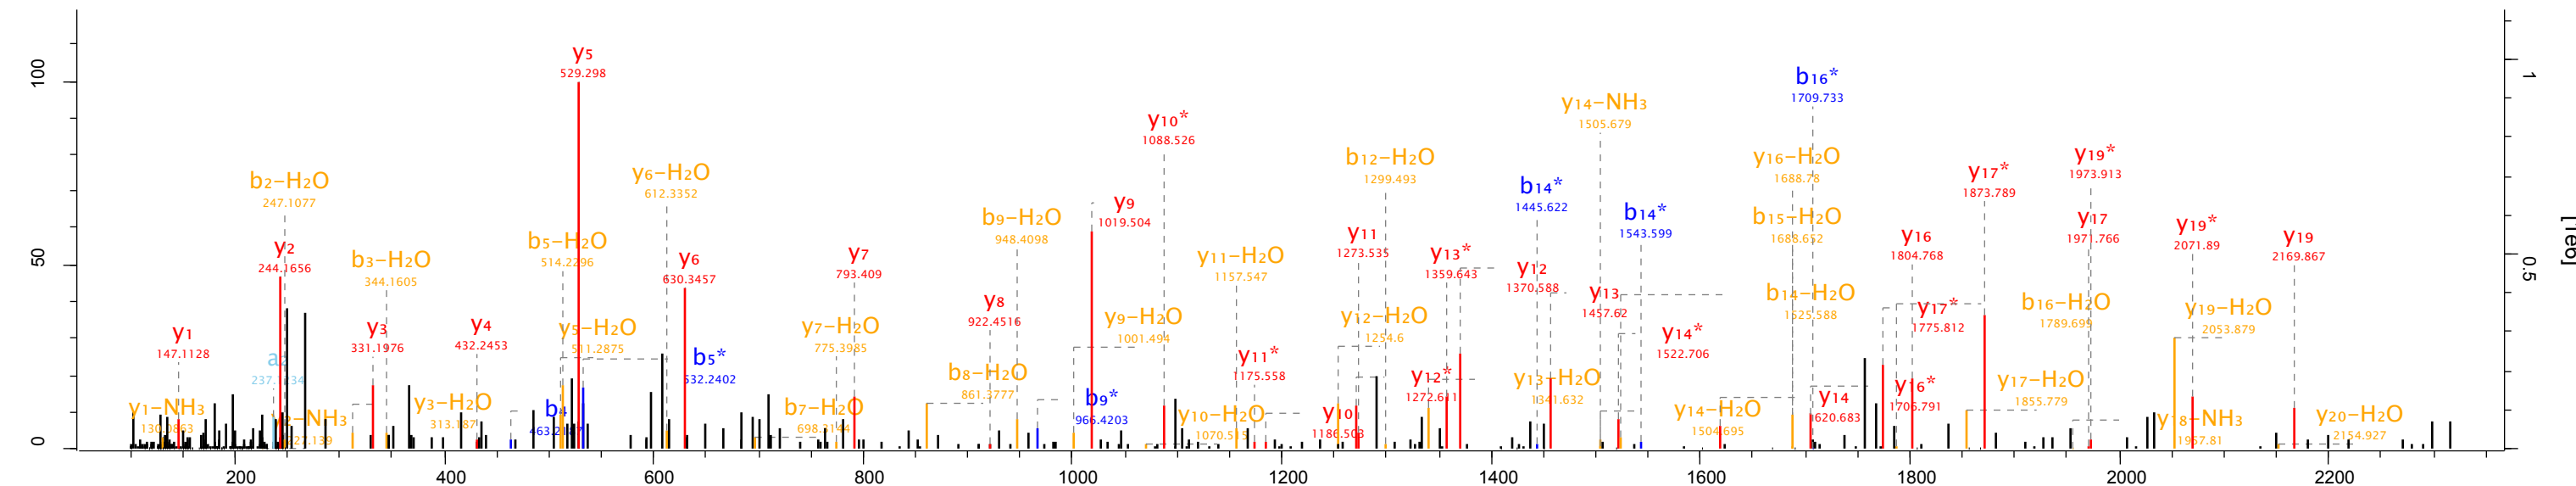

- Y T P T S Y S P S S P E Y T P T S P K -

Fragmentation sites are indicated by brackets below the sequence:

- Red brackets: y19 (T-P), y17<sup>ph</sup> (S), y16 (P-S), y14 (Y-S), y13 (S-P), y12 (P-S), y11 (S-S), y10<sup>ph</sup> (S-P), y9 (P-E), y8 (E-Y), y7 (Y-T), y6 (T-P), y5 (P-T), y4 (T-S), y3 (S-P), y2 (P-K), y1 (K).
- Blue brackets: a<sub>2</sub> (T), b<sub>4</sub> (T), b<sub>5</sub><sup>\*</sup> (S), b<sub>9</sub><sup>\*</sup> (S), b<sub>14</sub><sup>\*</sup> (E), b<sub>16</sub><sup>\*</sup> (T).

Raw file: 20171215\_MaS\_33SR\_LMH\_phospho2\_03  
 Scan: 11175 Method: FTMS; HCD Score: 234.71 m/z: 959.71 Gene names: MATR3;DKFZp686L22104

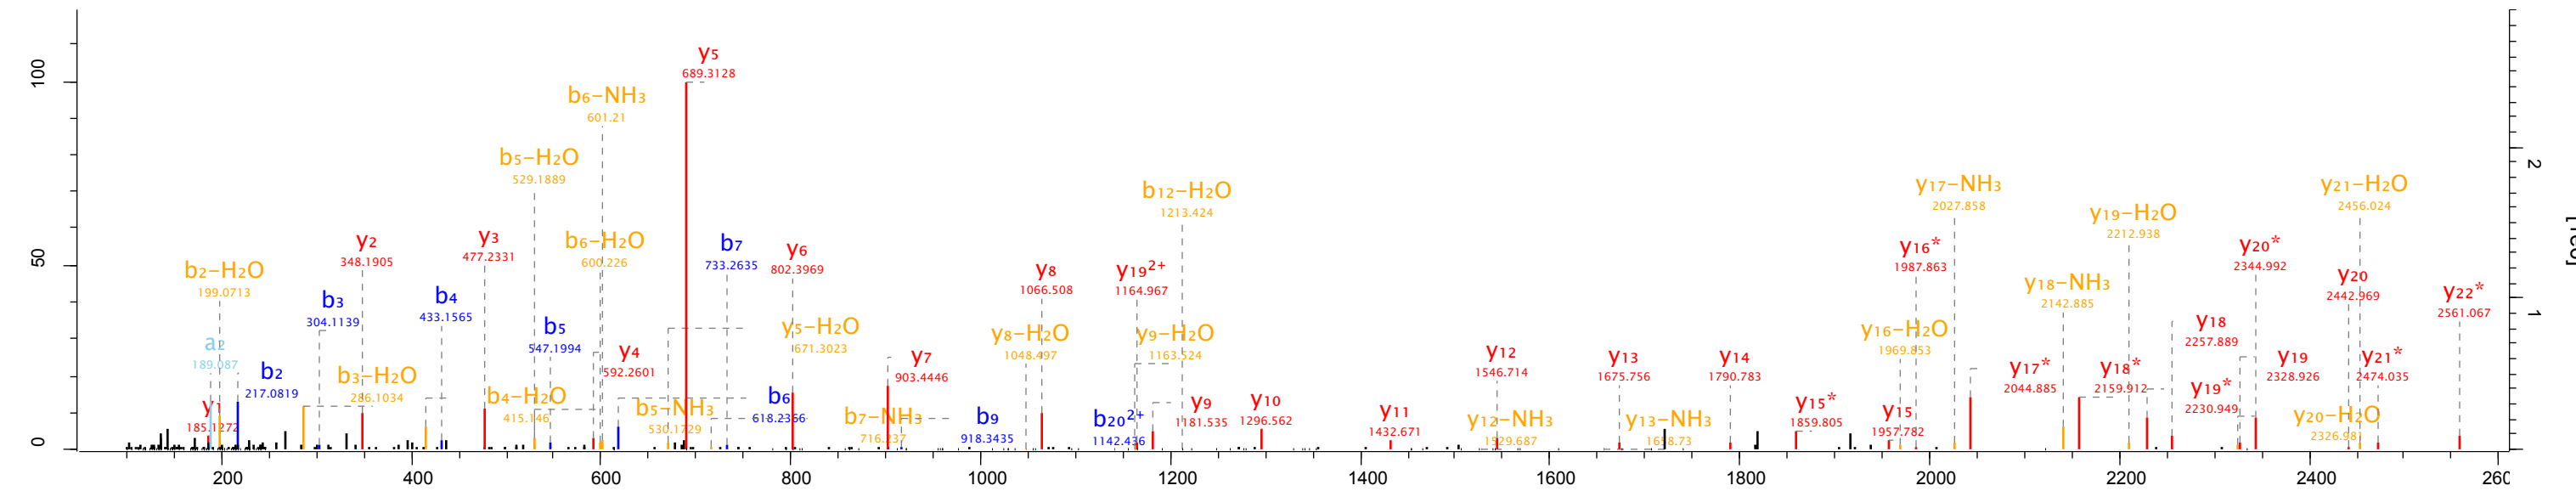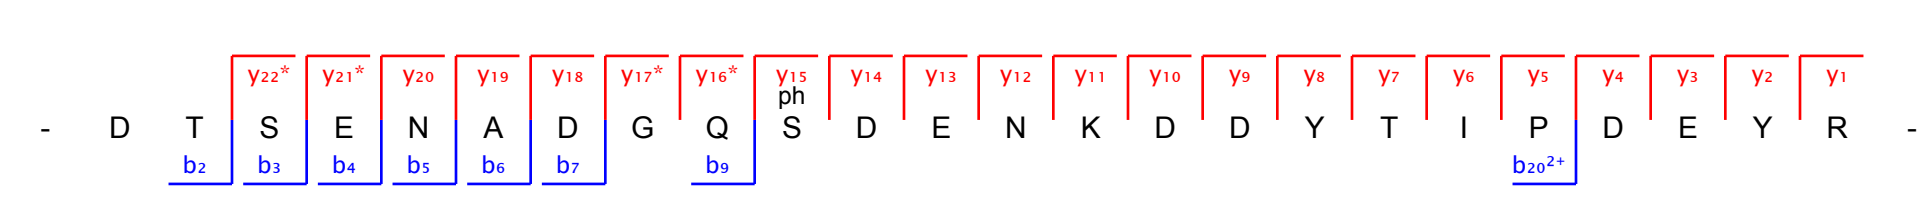



Raw file 20171215\_MaS\_33SR\_LMH\_phospho2\_03 Scan 11385 Method FTMS; HCD Score 130.07 m/z 875.39 Gene names UNG;DKFZp781L1143

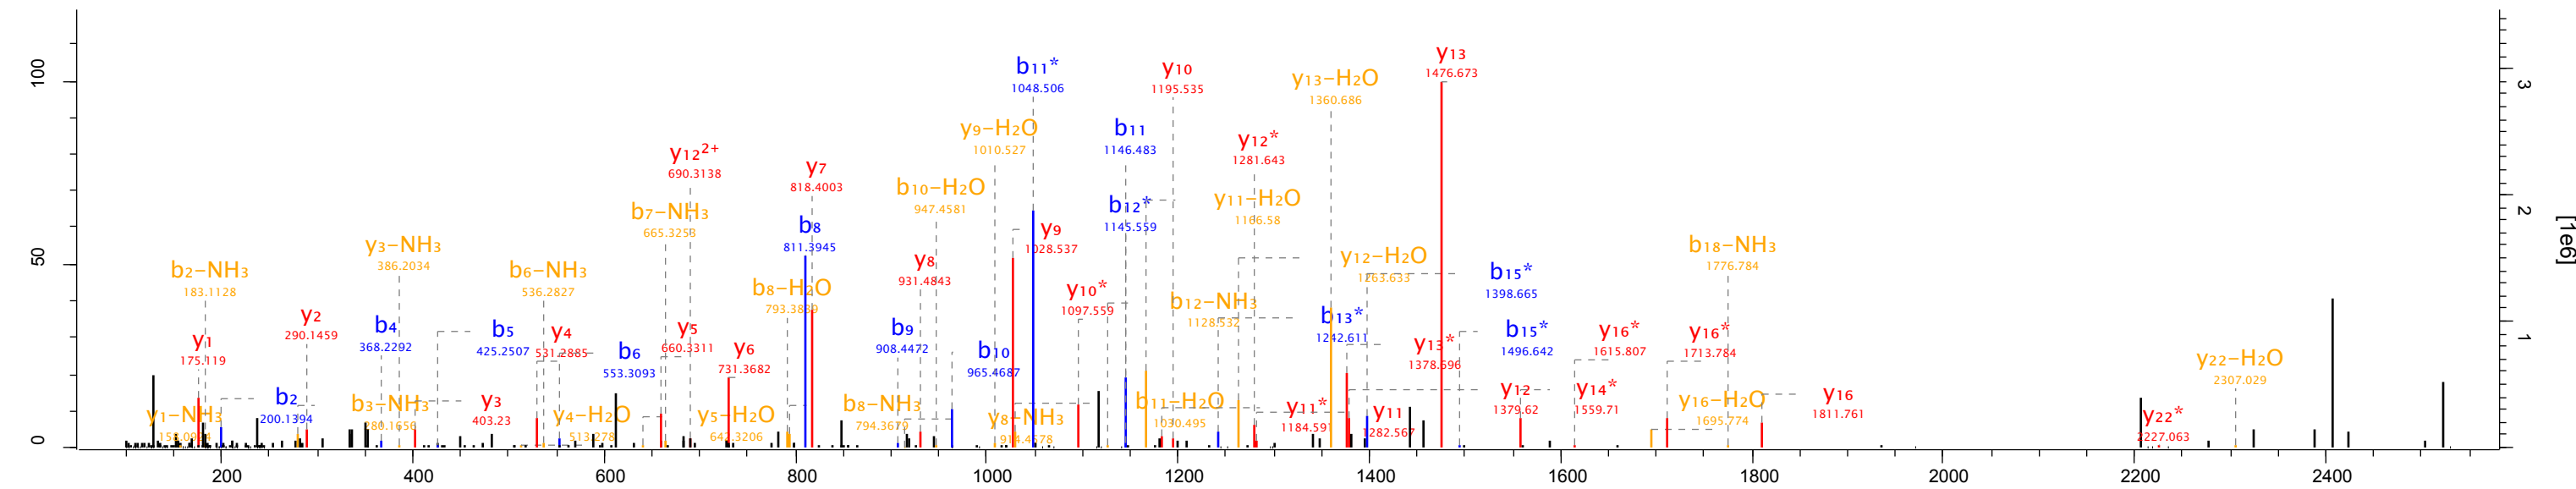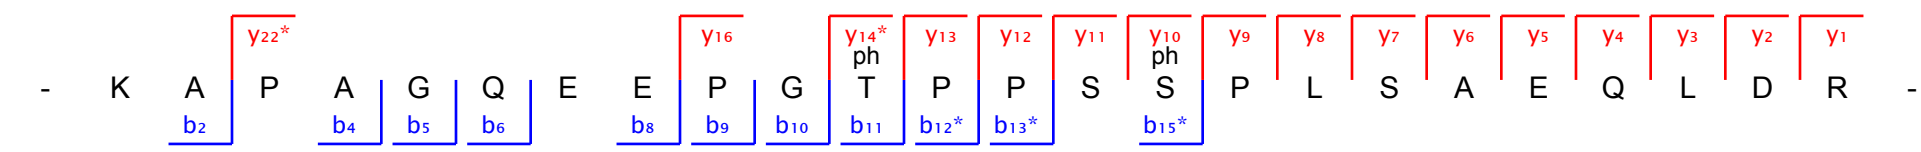

Raw file: 20171215\_MaS\_33SR\_LMH\_phospho2\_03  
 Scan: 11395 Method: FTMS; HCD Score: 105.67 m/z: 789.35 Gene names: SYMPK

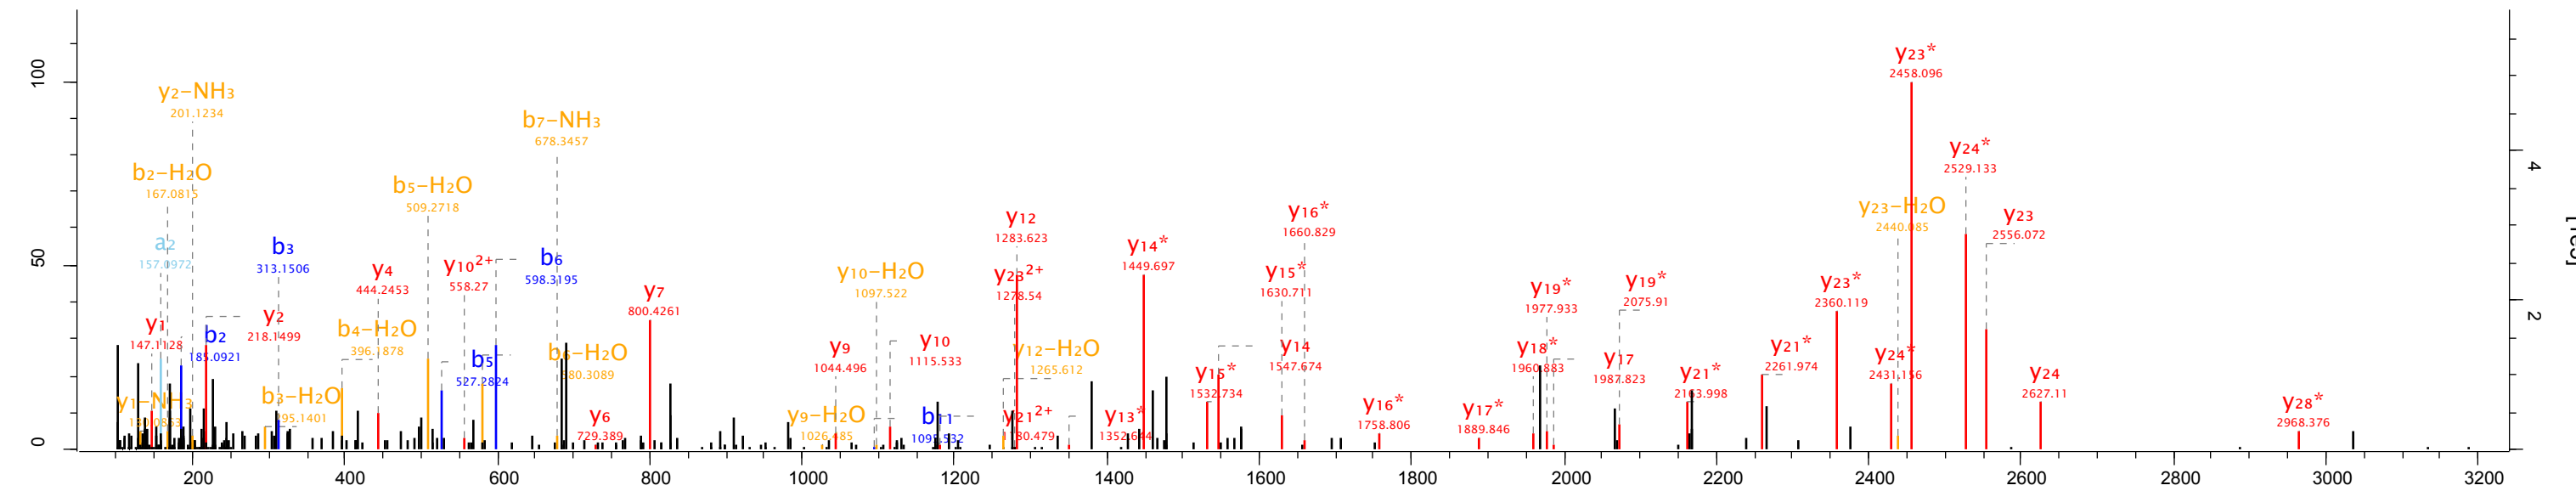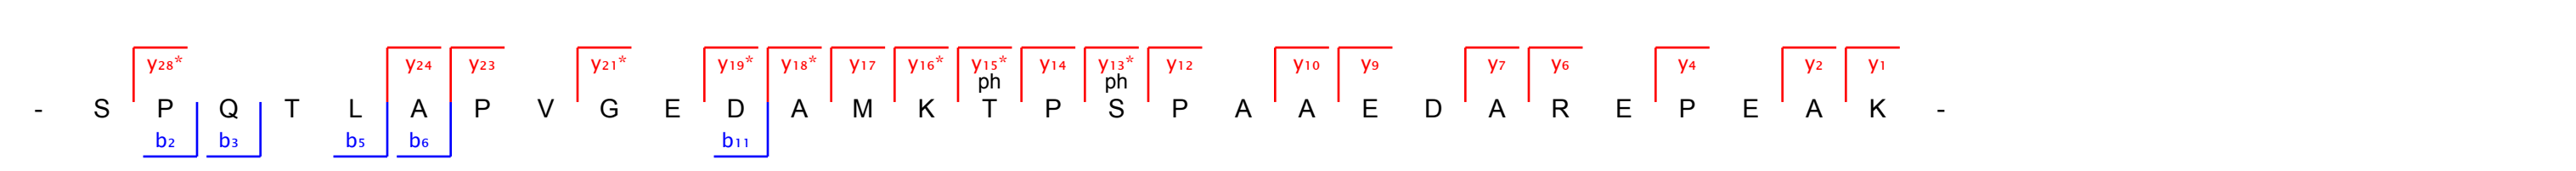

20171215\_MaS\_33SR\_LMH\_phospho2\_03 11665 FTMS; HCD 116.38 632.3 TNRC18

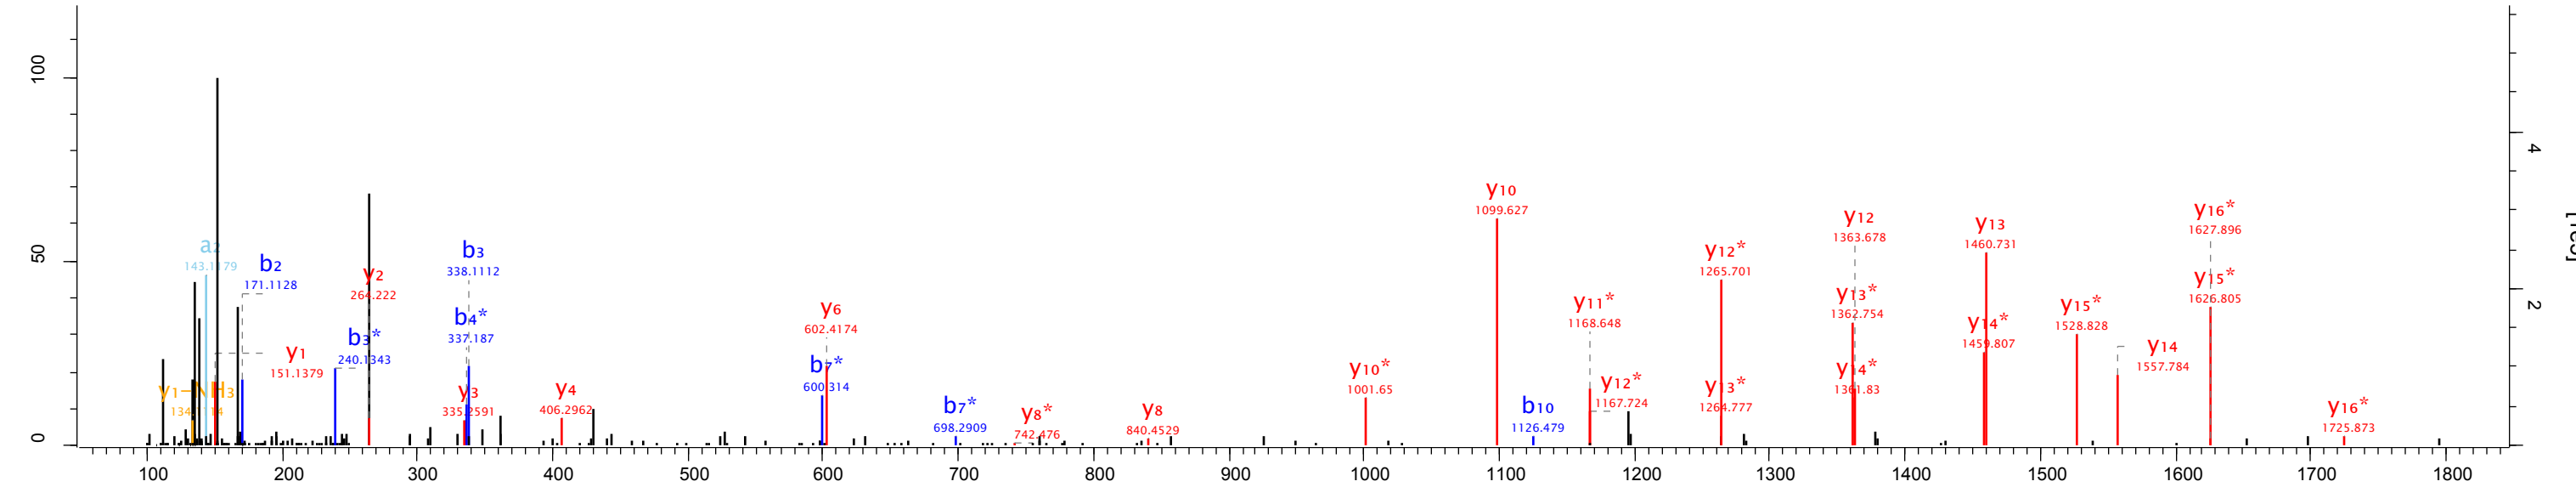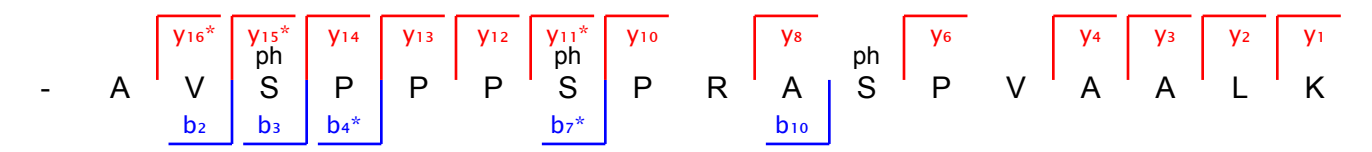

Raw file: 20171215\_MaS\_33SR\_LMH\_phospho2\_03  
 Scan: 11745 Method: FTMS; HCD Score: 362.4 m/z: 1012.89 Gene names: SRRM1

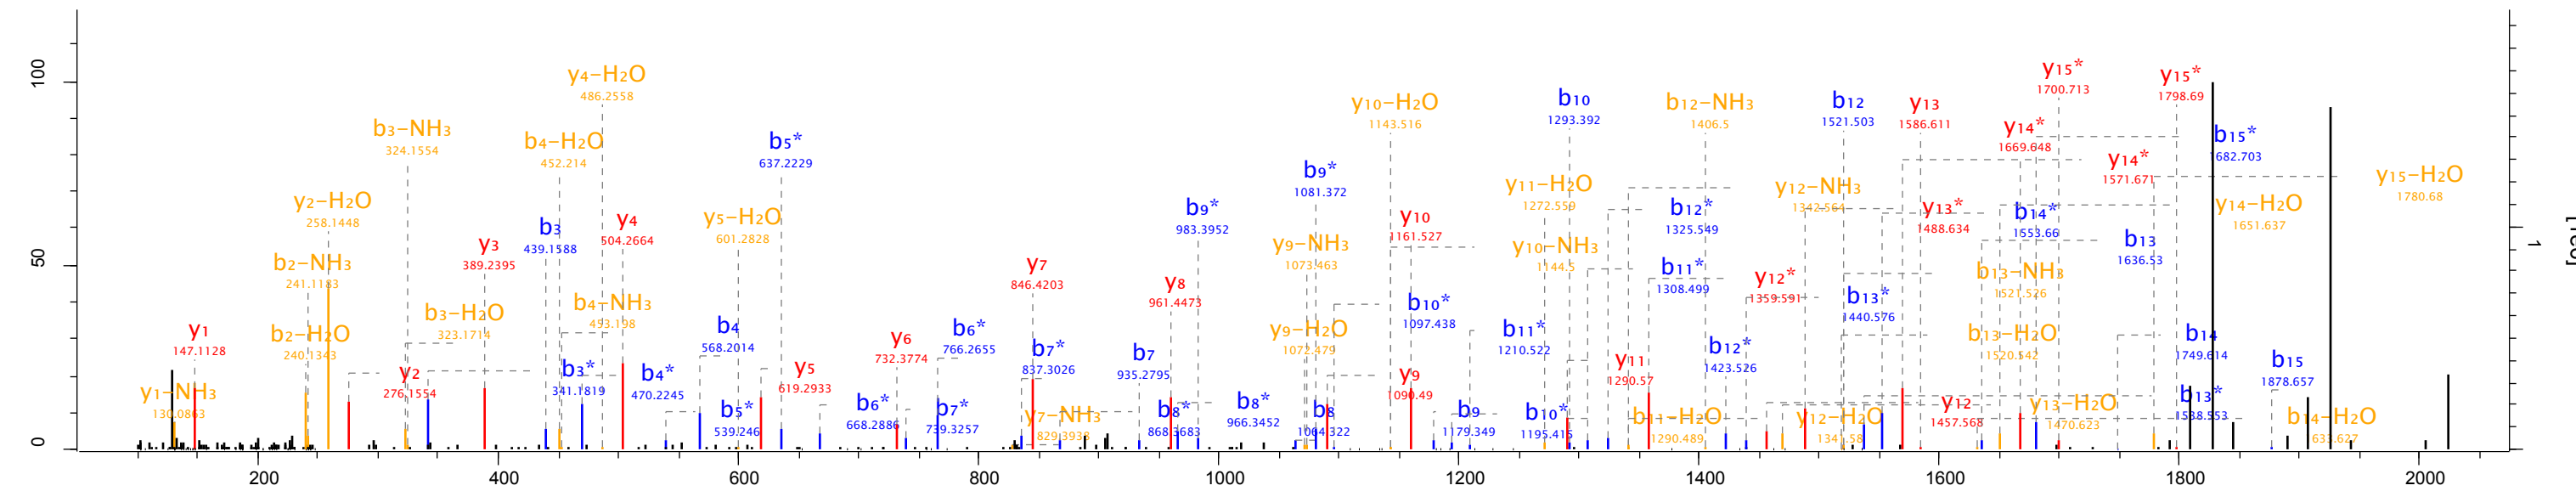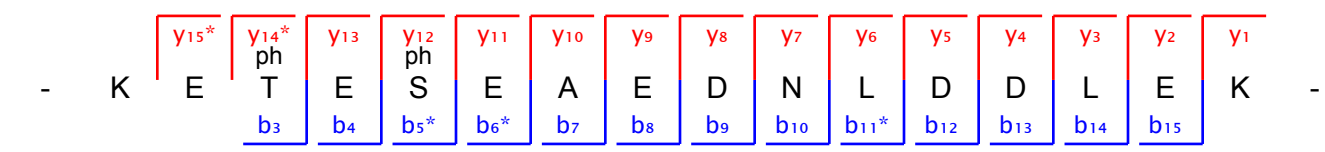



20171215\_MaS\_33SR\_LMH\_phospho2\_03 11815 FTMS; HCD 113.53 994.4 THOC5

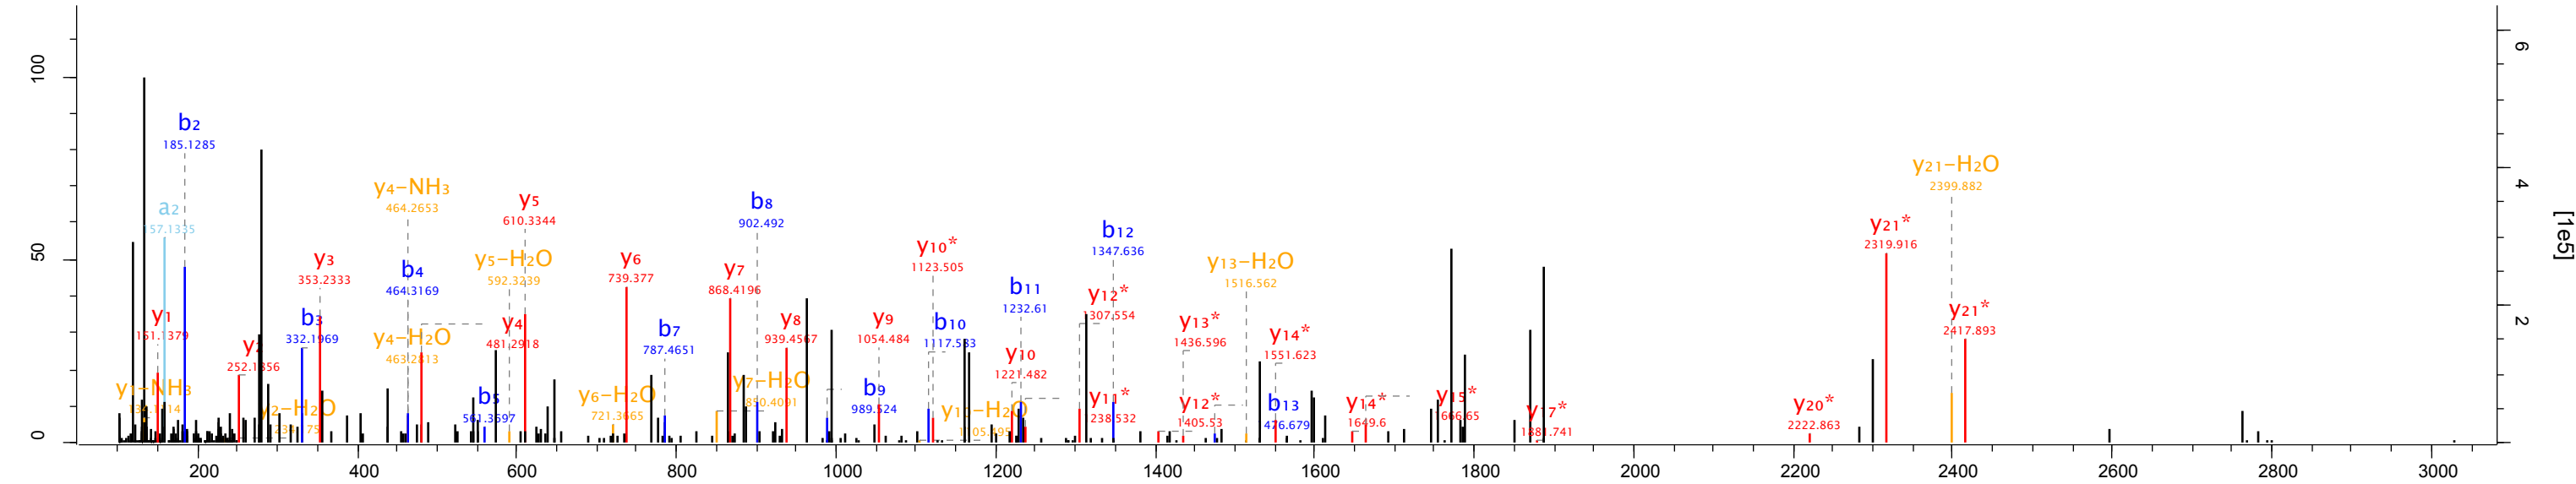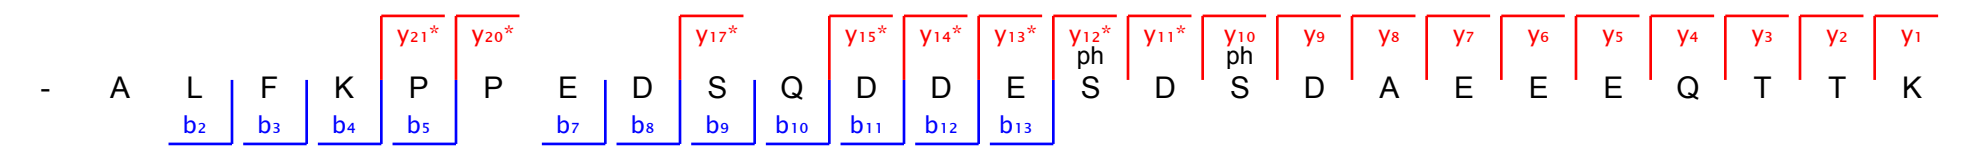

Raw file 20171215\_MaS\_33SR\_LMH\_phospho2\_03 Scan 11995 Method FTMS; HCD Score 248.62 m/z 1016.45 Gene names LAS1L

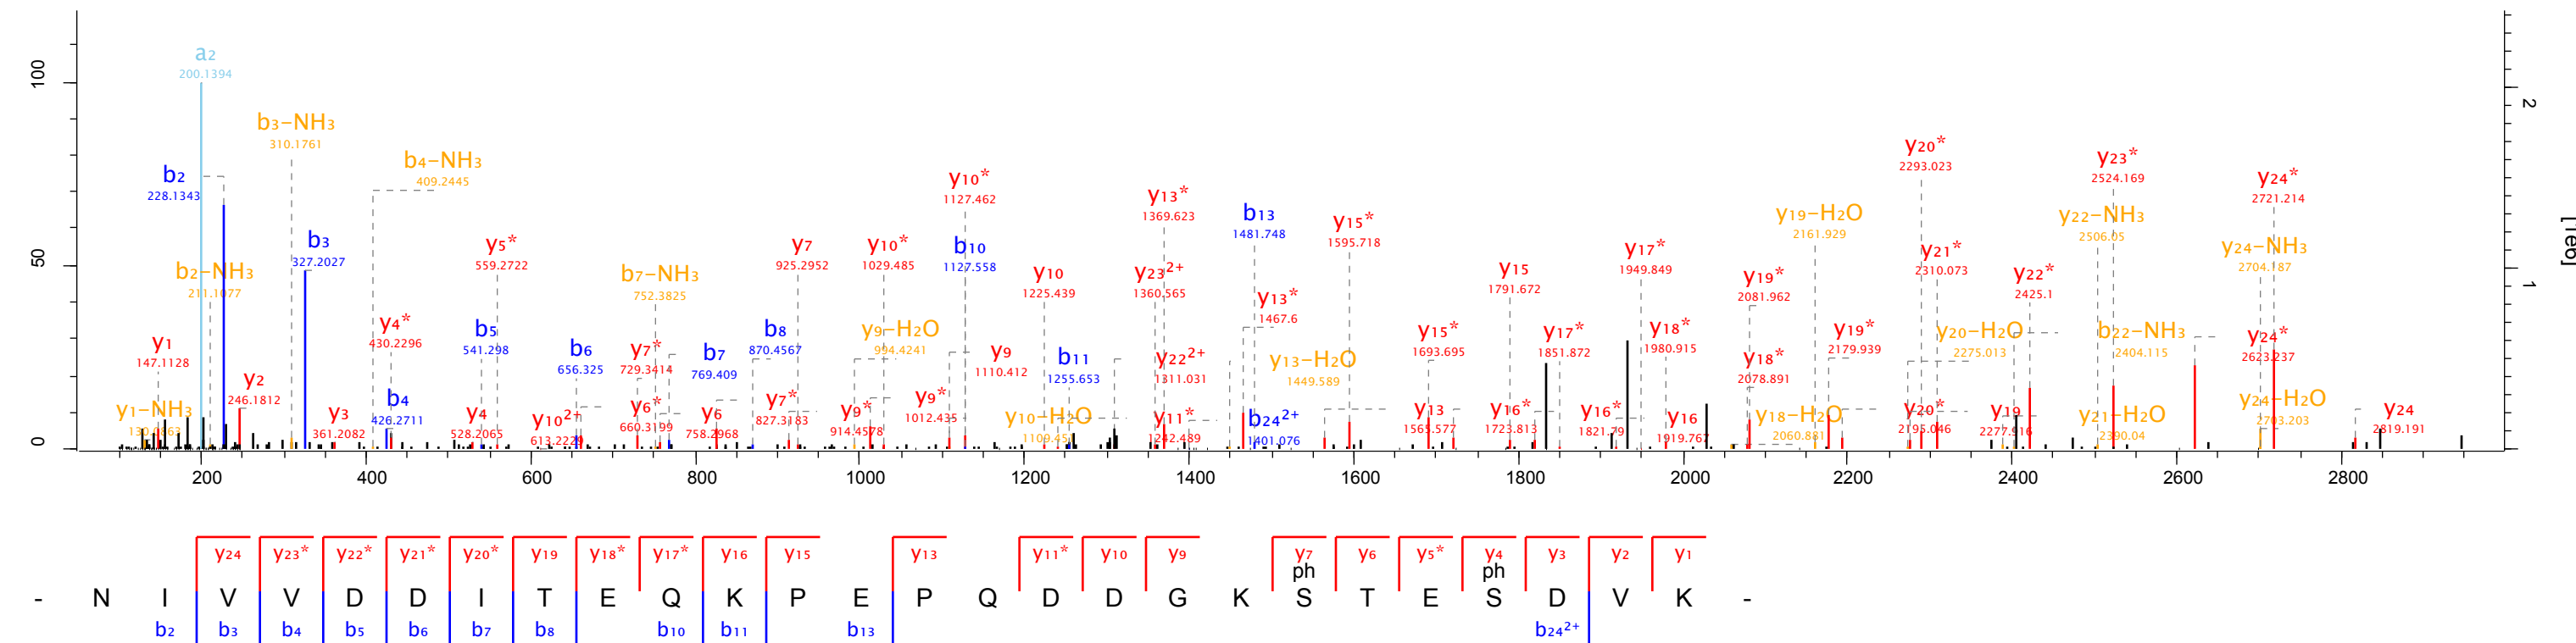

Raw file 20171215\_MaS\_33SR\_LMH\_phospho2\_03 Scan 12045 Method FTMS; HCD Score 156.92 m/z 917.72 Gene names FAM169A

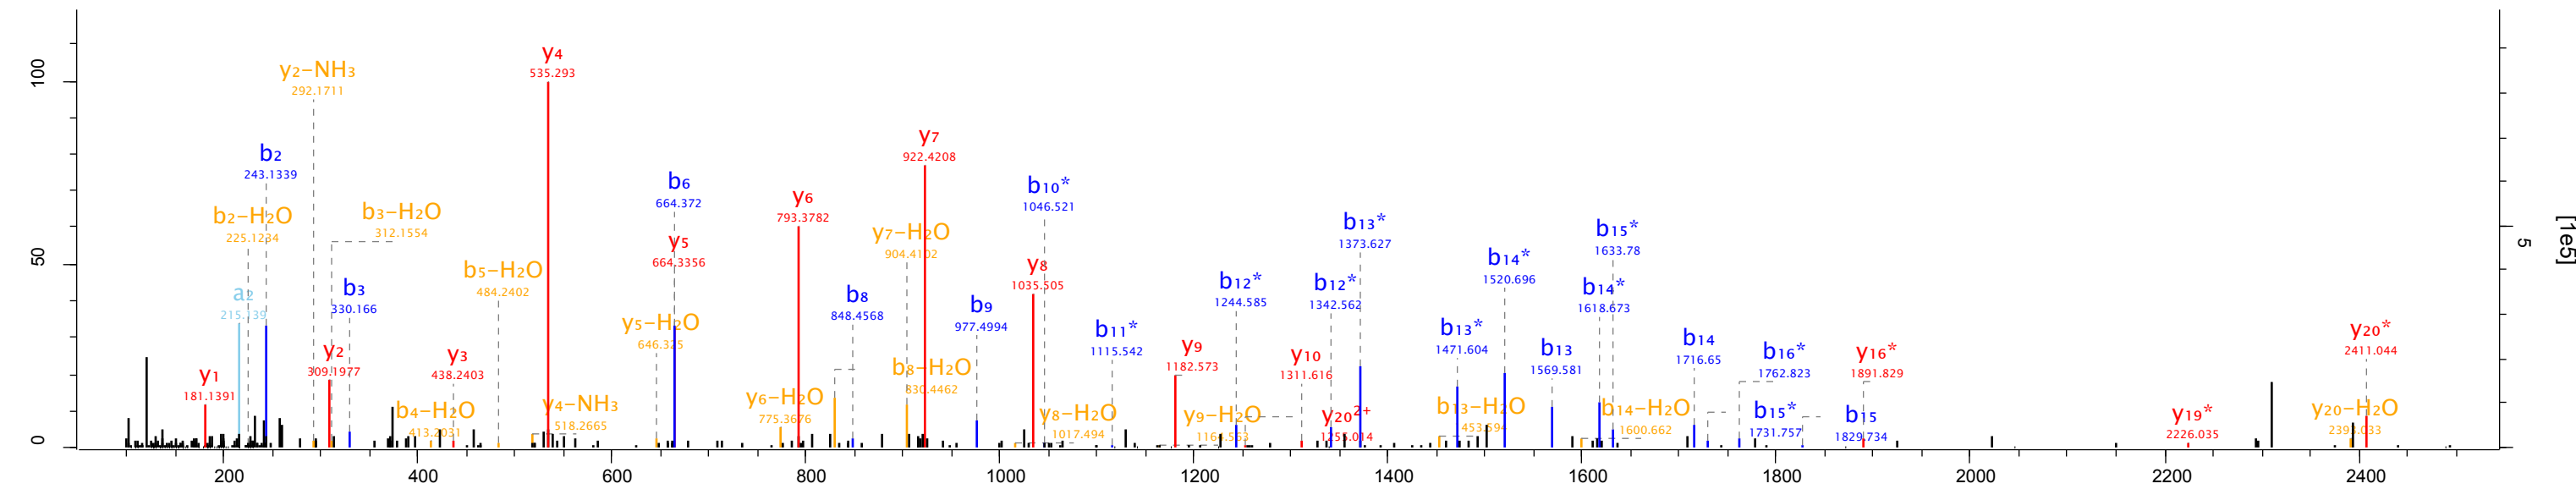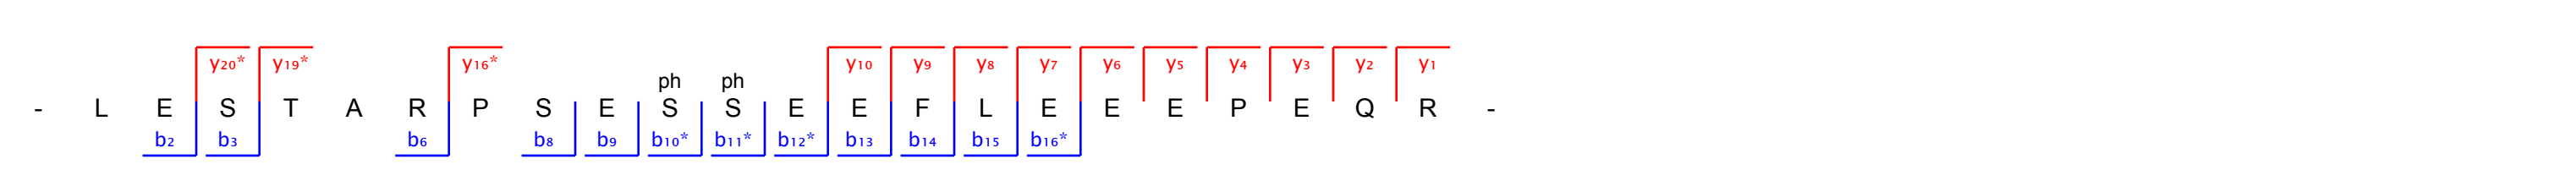



Raw file 20171215\_MaS\_33SR\_LMH\_phospho2\_03 Scan 12075 Method FTMS; HCD Score 50.83 m/z 542.9 Gene names LARP1

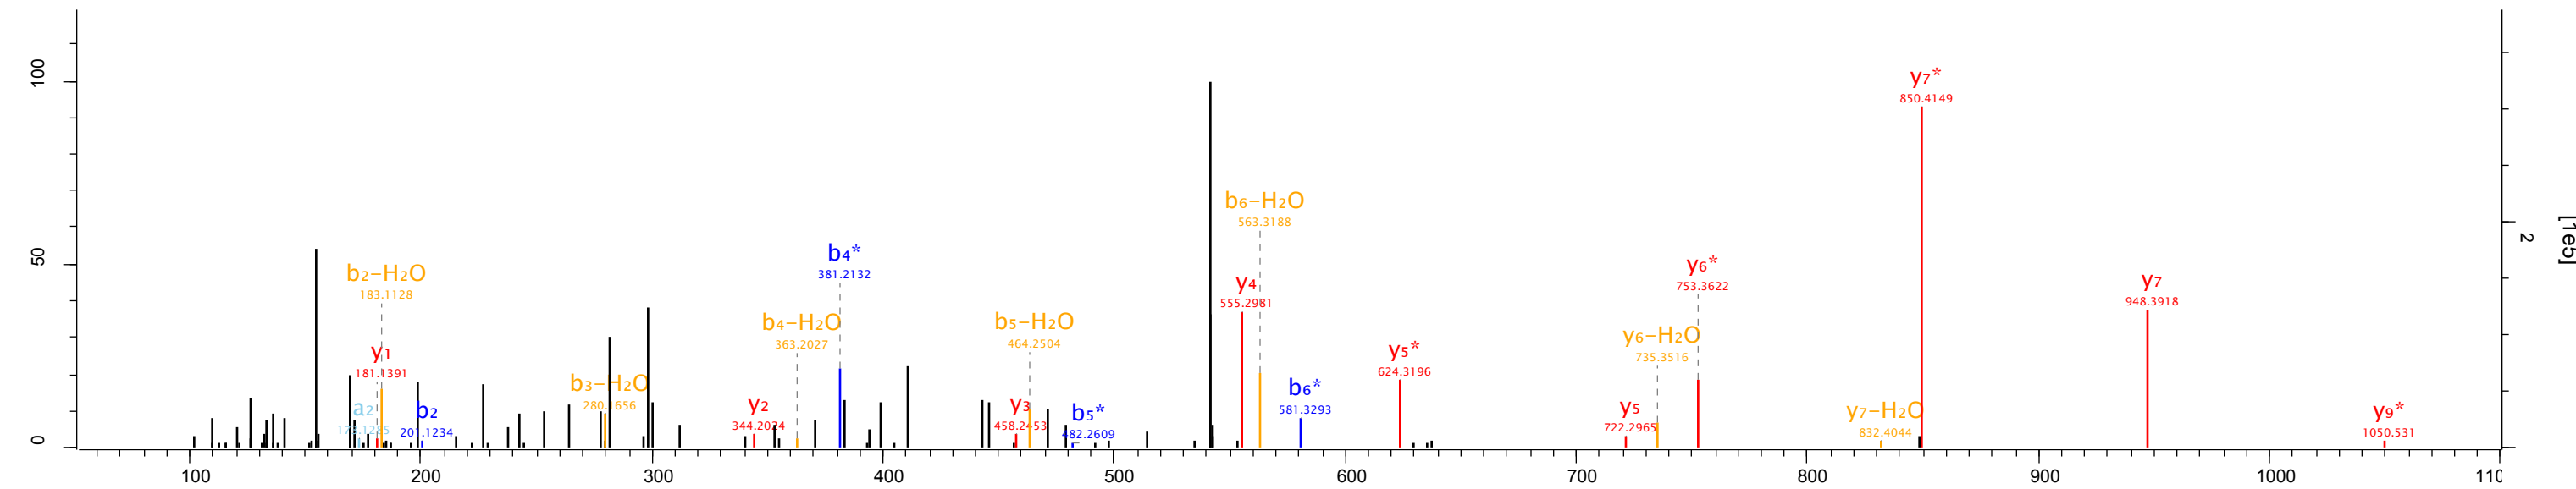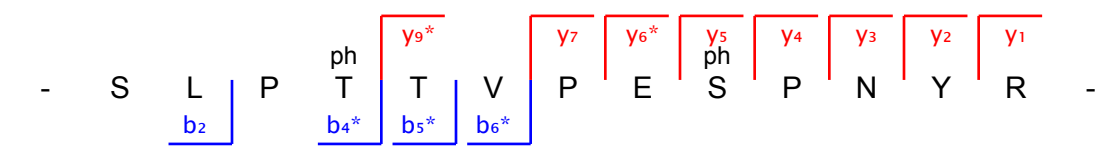

Raw file 20171215\_MaS\_33SR\_LMH\_phospho2\_03 Scan 12165 Method FTMS; HCD Score 93.76 m/z 1035.77 Gene names REPS1

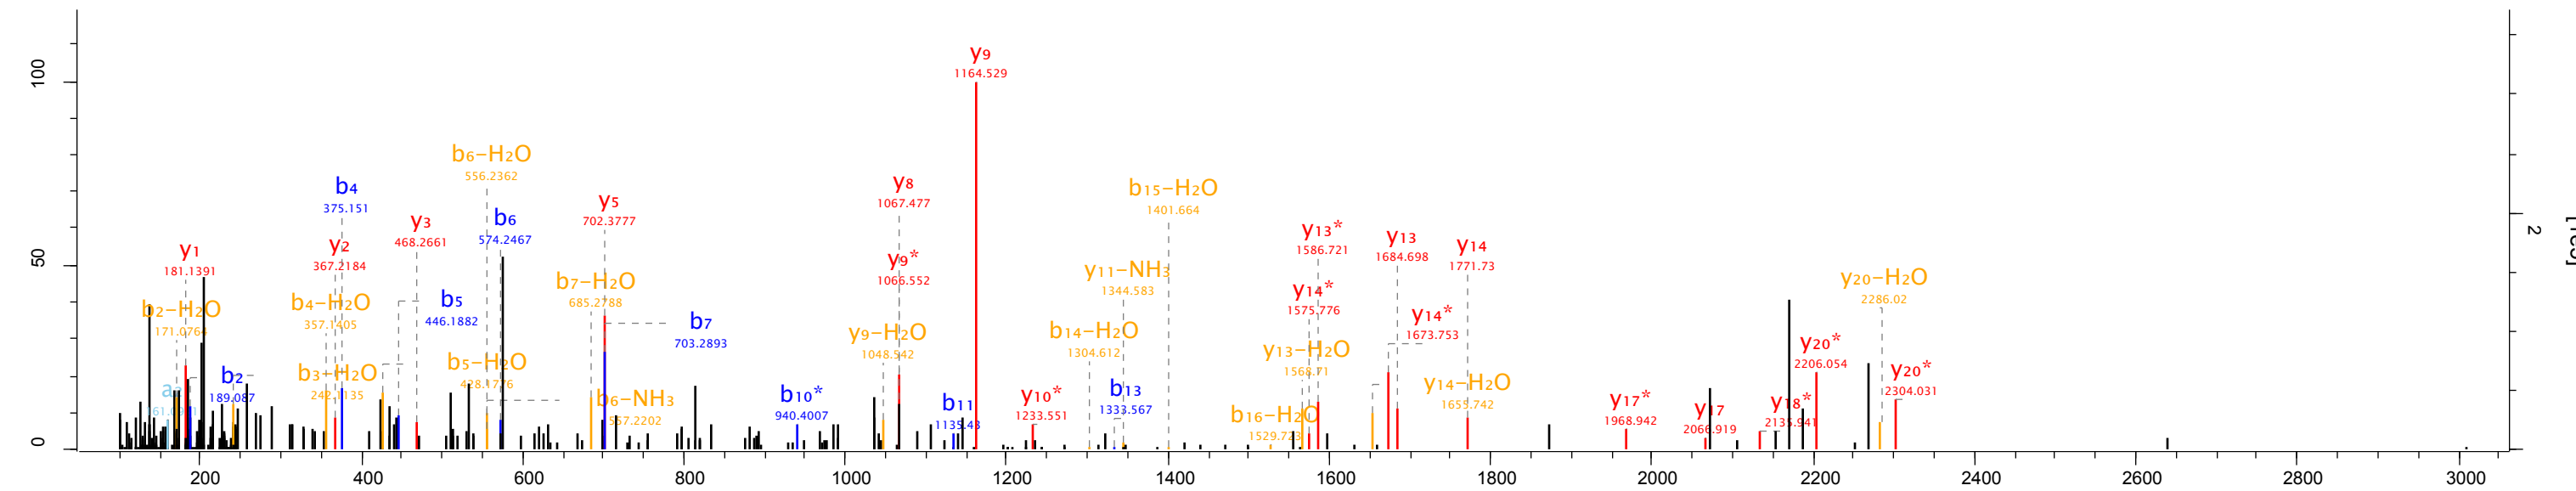

- T S A D A Q E P A S P V V S P Q Q S P P T S P H T W R -

b<sub>2</sub>
b<sub>4</sub>
b<sub>5</sub>
b<sub>6</sub>
b<sub>7</sub>
b<sub>10</sub>\*
b<sub>11</sub>
b<sub>13</sub>
y<sub>20</sub>\*
y<sub>18</sub><sup>ph</sup>
y<sub>17</sub>
y<sub>14</sub>
y<sub>13</sub>
y<sub>10</sub><sup>ph</sup>
y<sub>9</sub>
y<sub>8</sub>
y<sub>5</sub>
y<sub>3</sub>
y<sub>2</sub>
y<sub>1</sub>

Raw file 20171215\_MaS\_33SR\_LMH\_phospho2\_03 Scan 12235 Method FTMS; HCD Score 105.9 m/z 717.83 Gene names CDK13

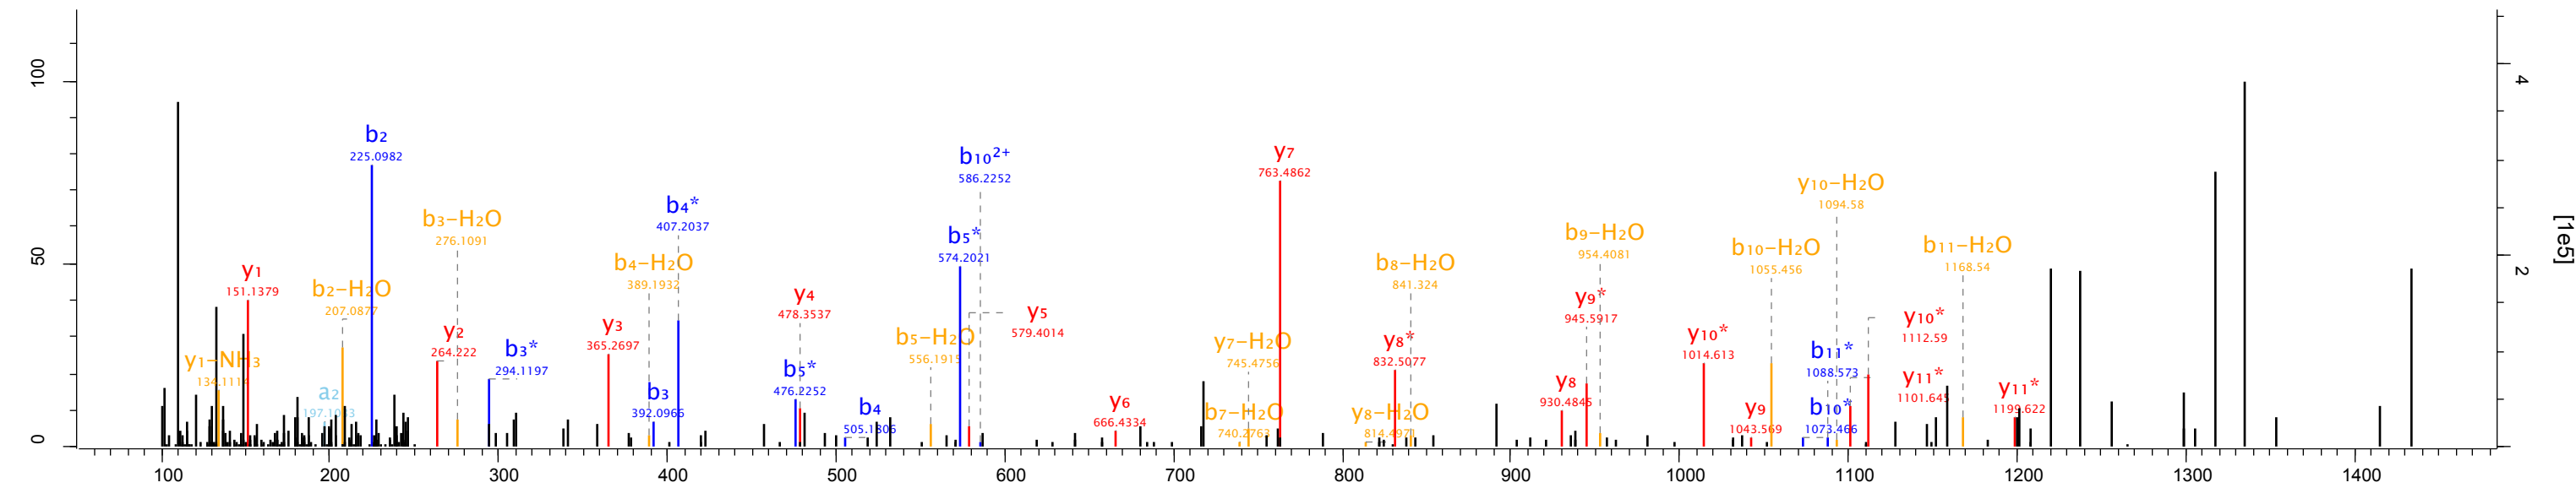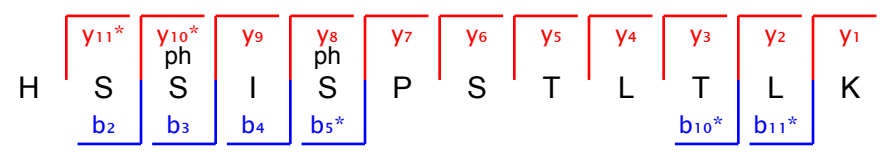

Raw file: 20171215\_MaS\_33SR\_LMH\_phospho2\_03  
 Scan: 12295 Method: FTMS; HCD Score: 77.22 m/z: 1124.46 Gene names: RBM6

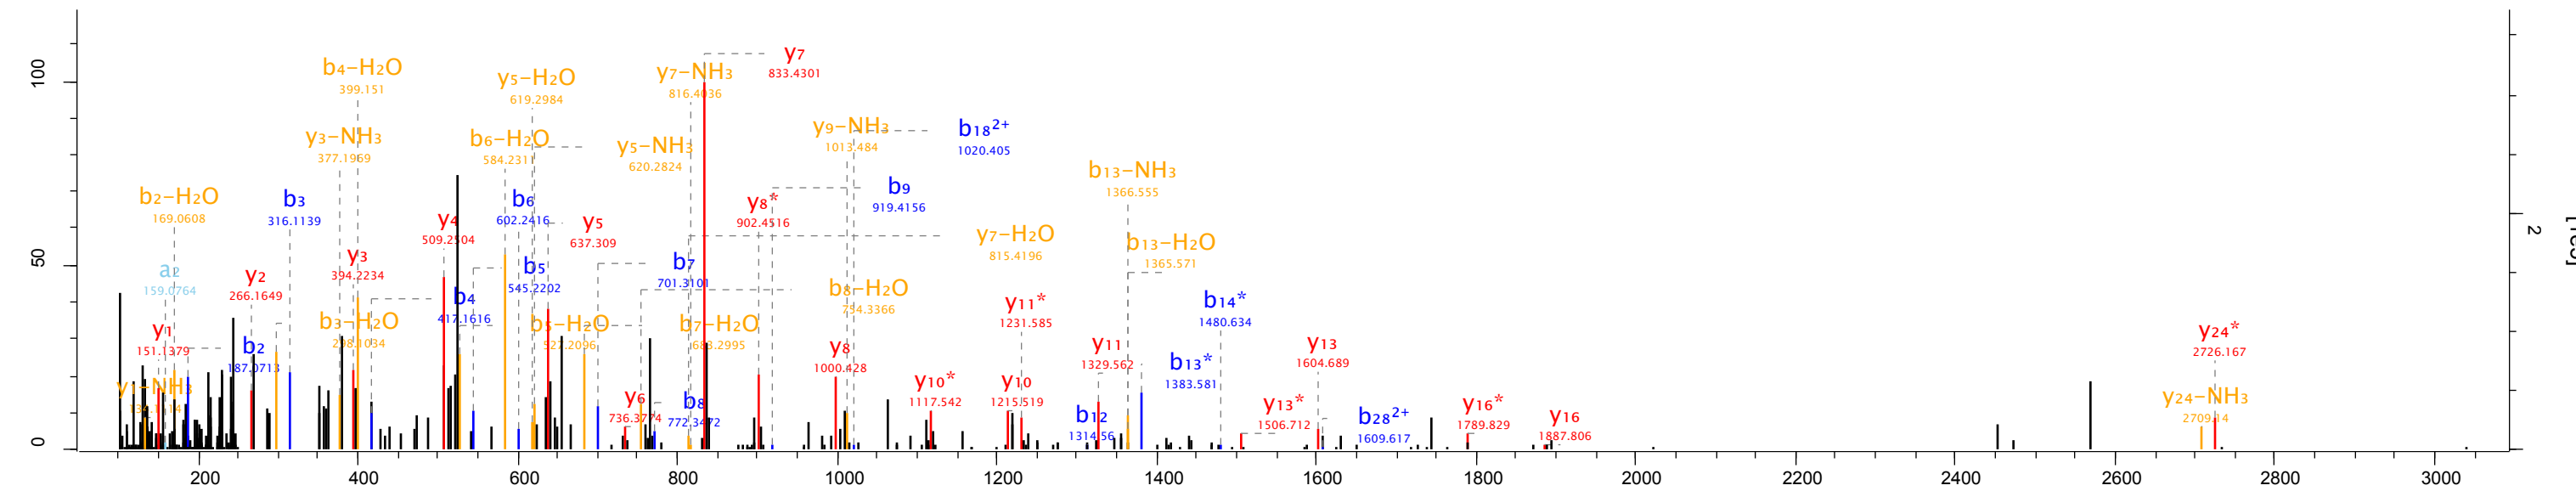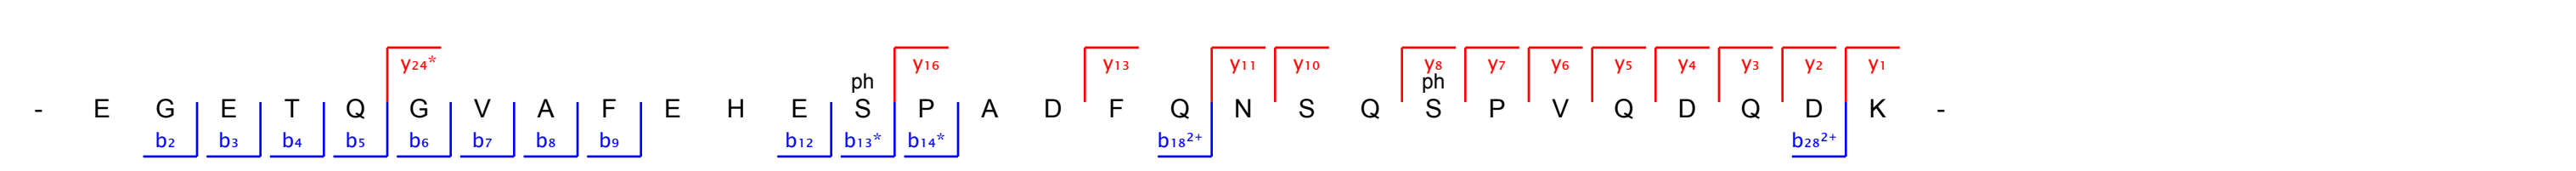

Raw file 20171215\_MaS\_33SR\_LMH\_phospho2\_03 Scan 12315 Method FTMS; HCD Score 254.58 m/z 791.85 Gene names MAP1B

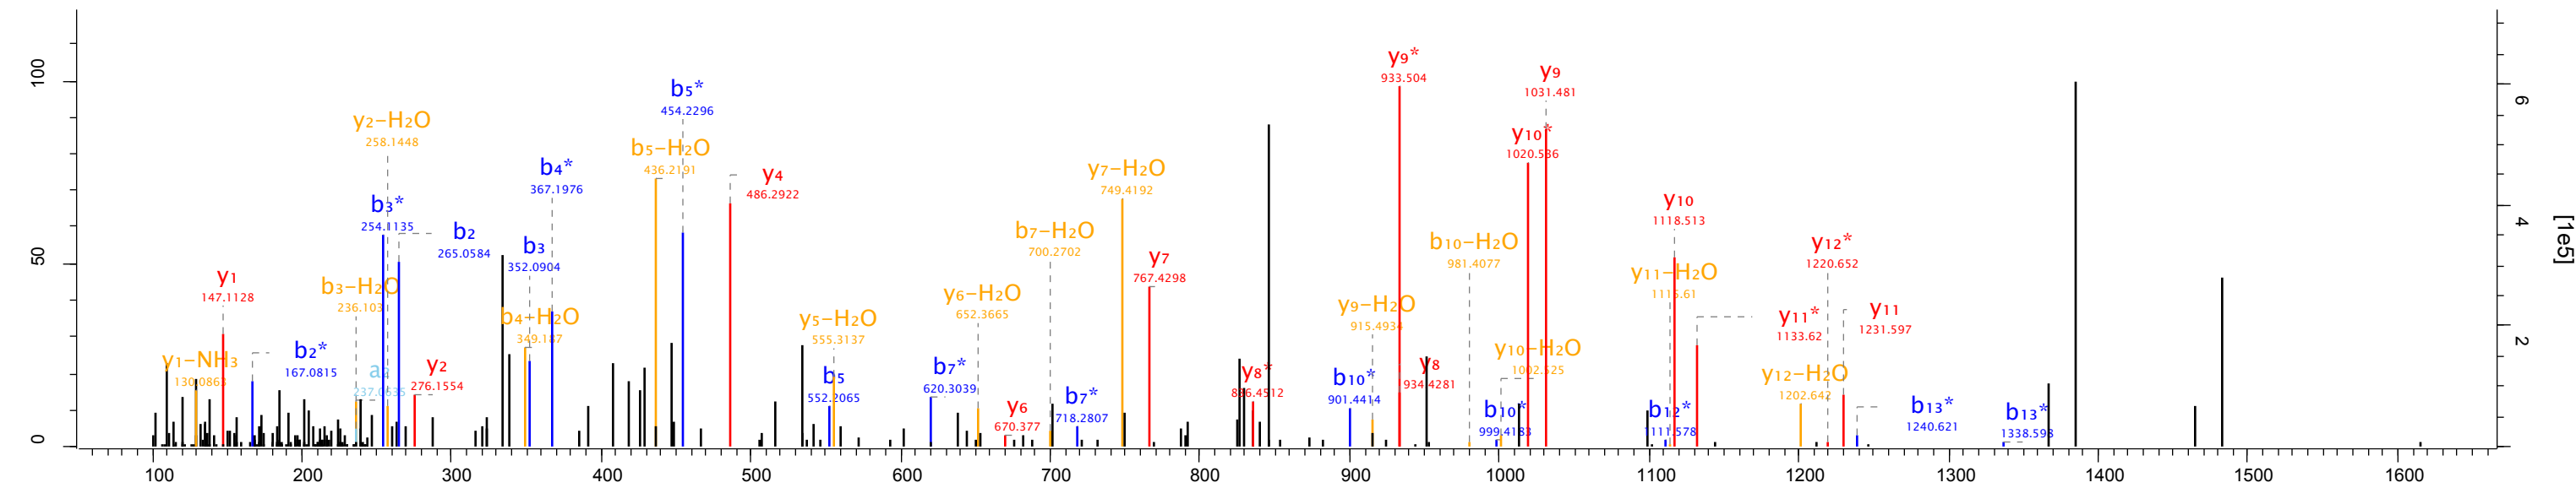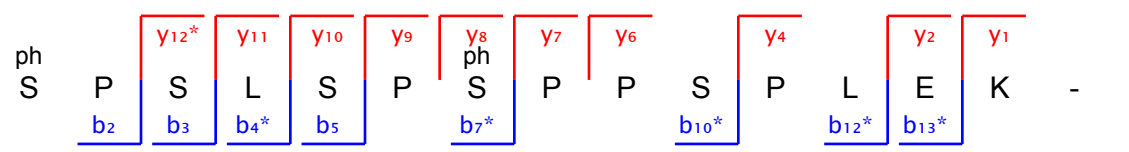

Raw file 20171215\_MaS\_33SR\_LMH\_phospho2\_03 Scan 12395 Method FTMS; HCD Score 72.66 m/z 785.1 Gene names LARP4B

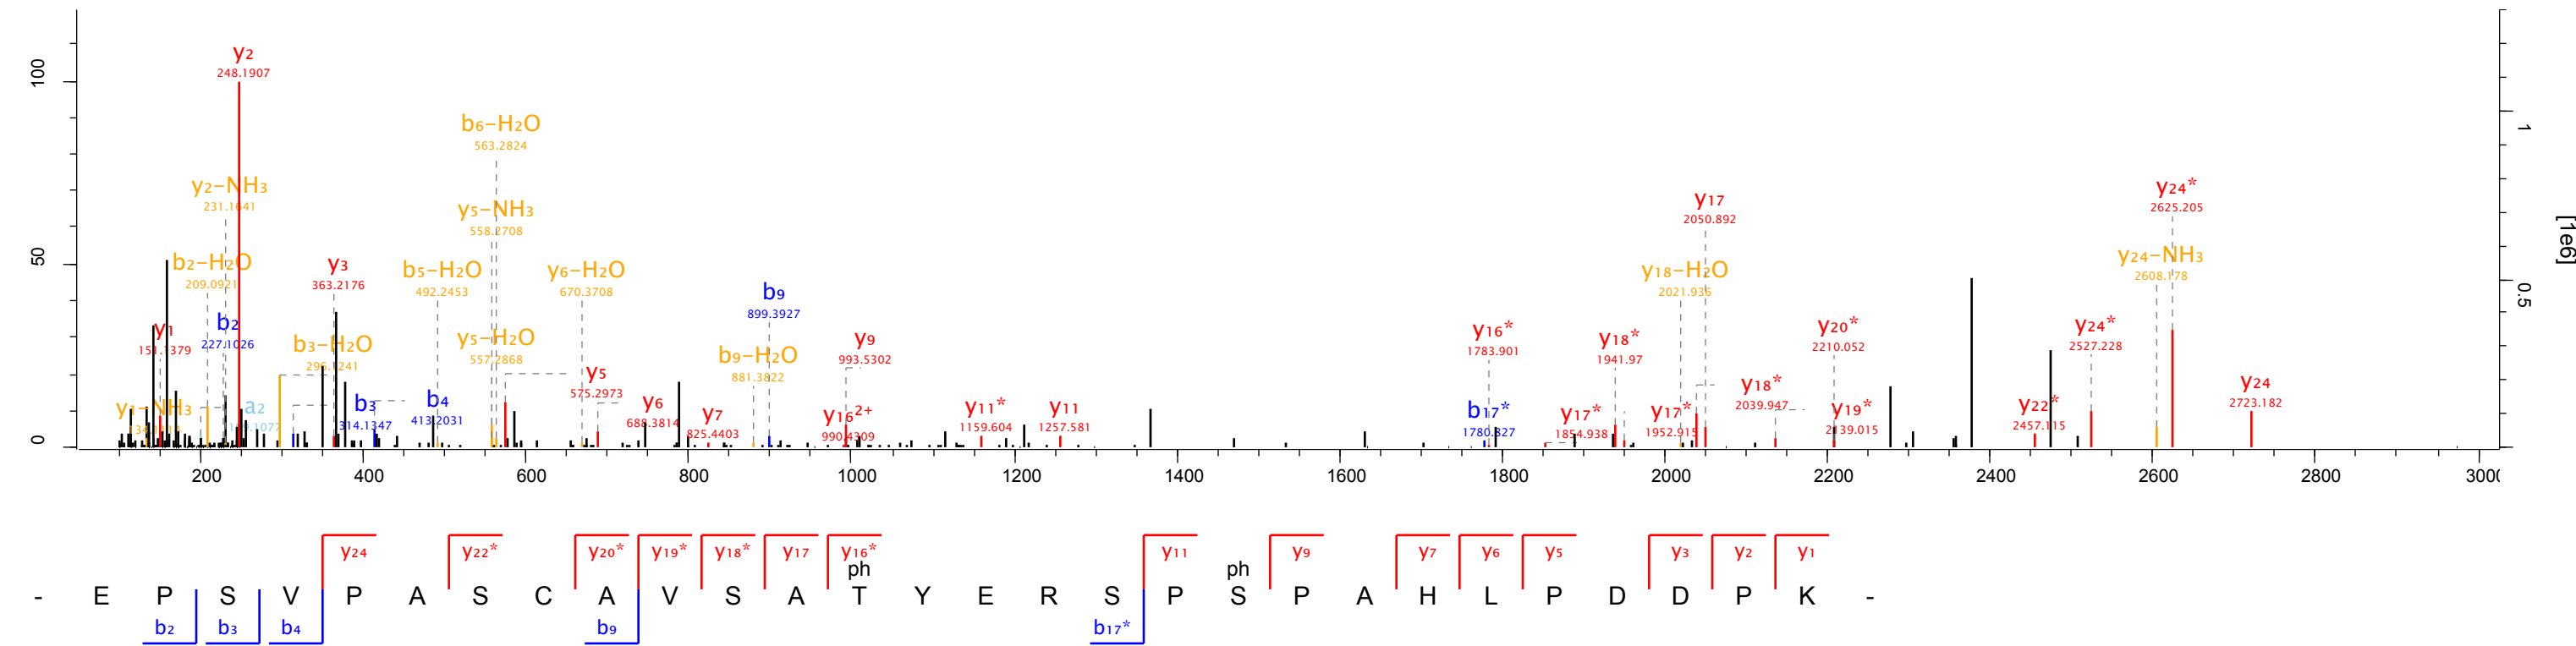

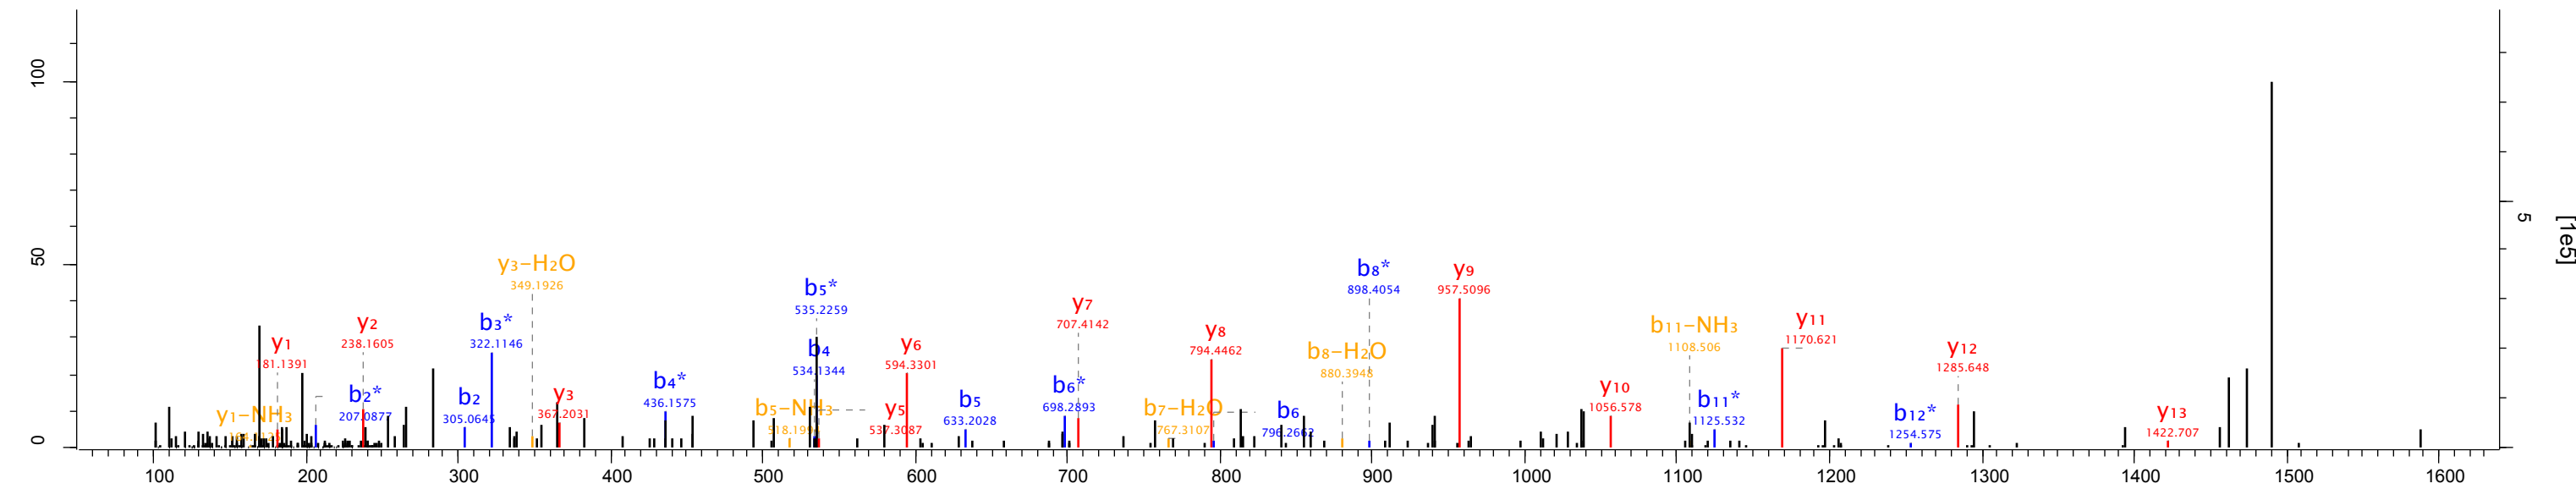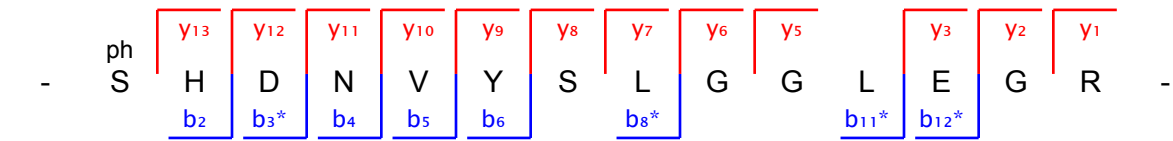

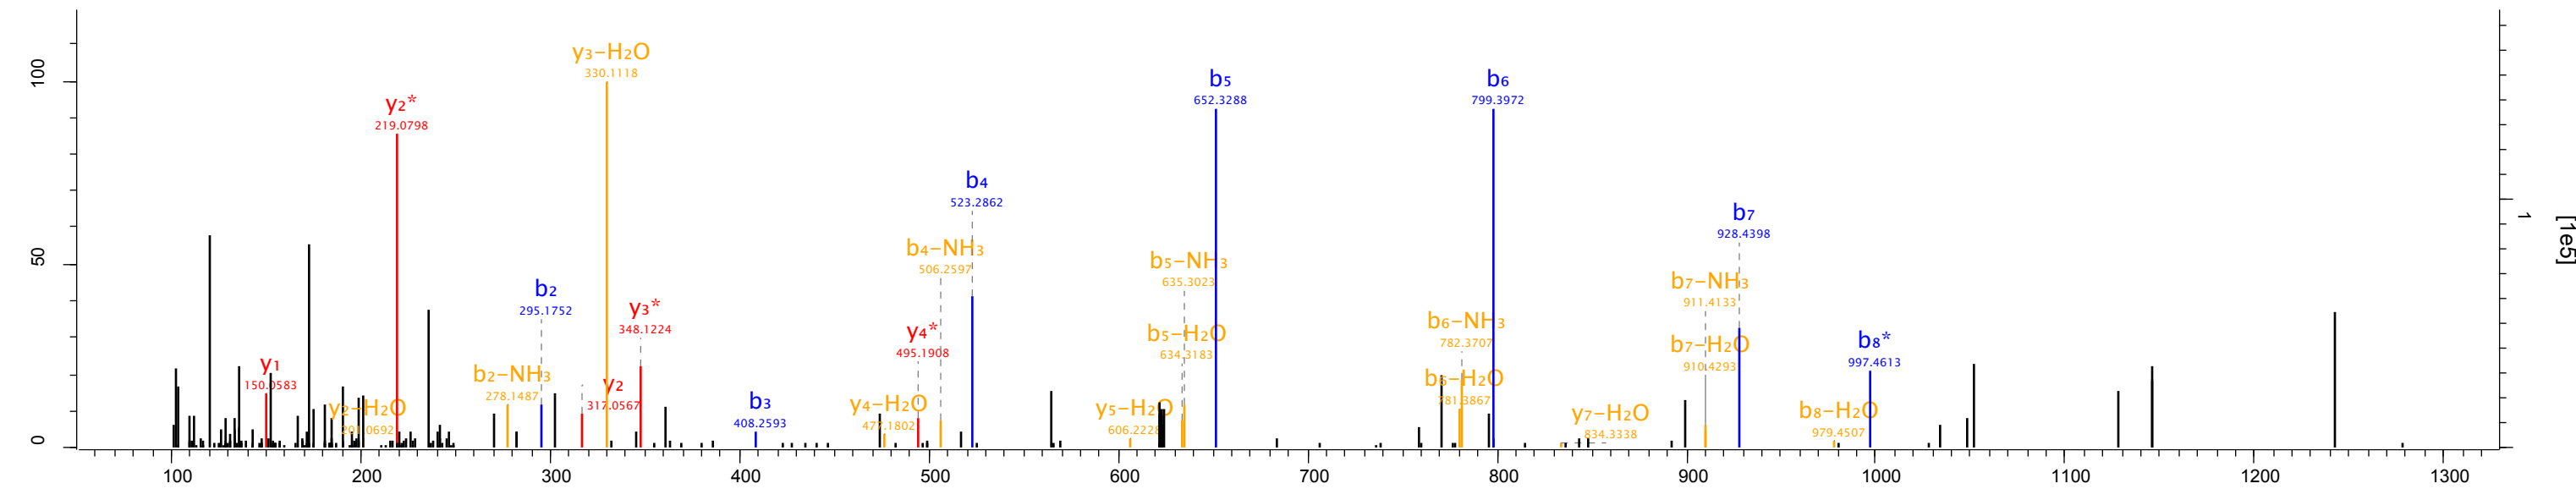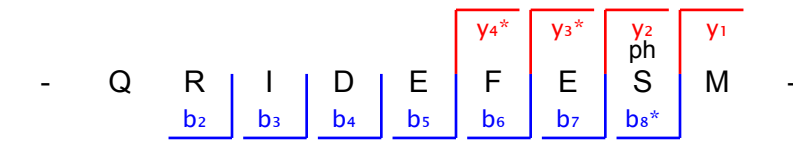



Raw file 20171215\_MaS\_33SR\_LMH\_phospho2\_03 Scan 12745 Method FTMS; HCD Score 224.13 m/z 781.04 Gene names CHAMP1

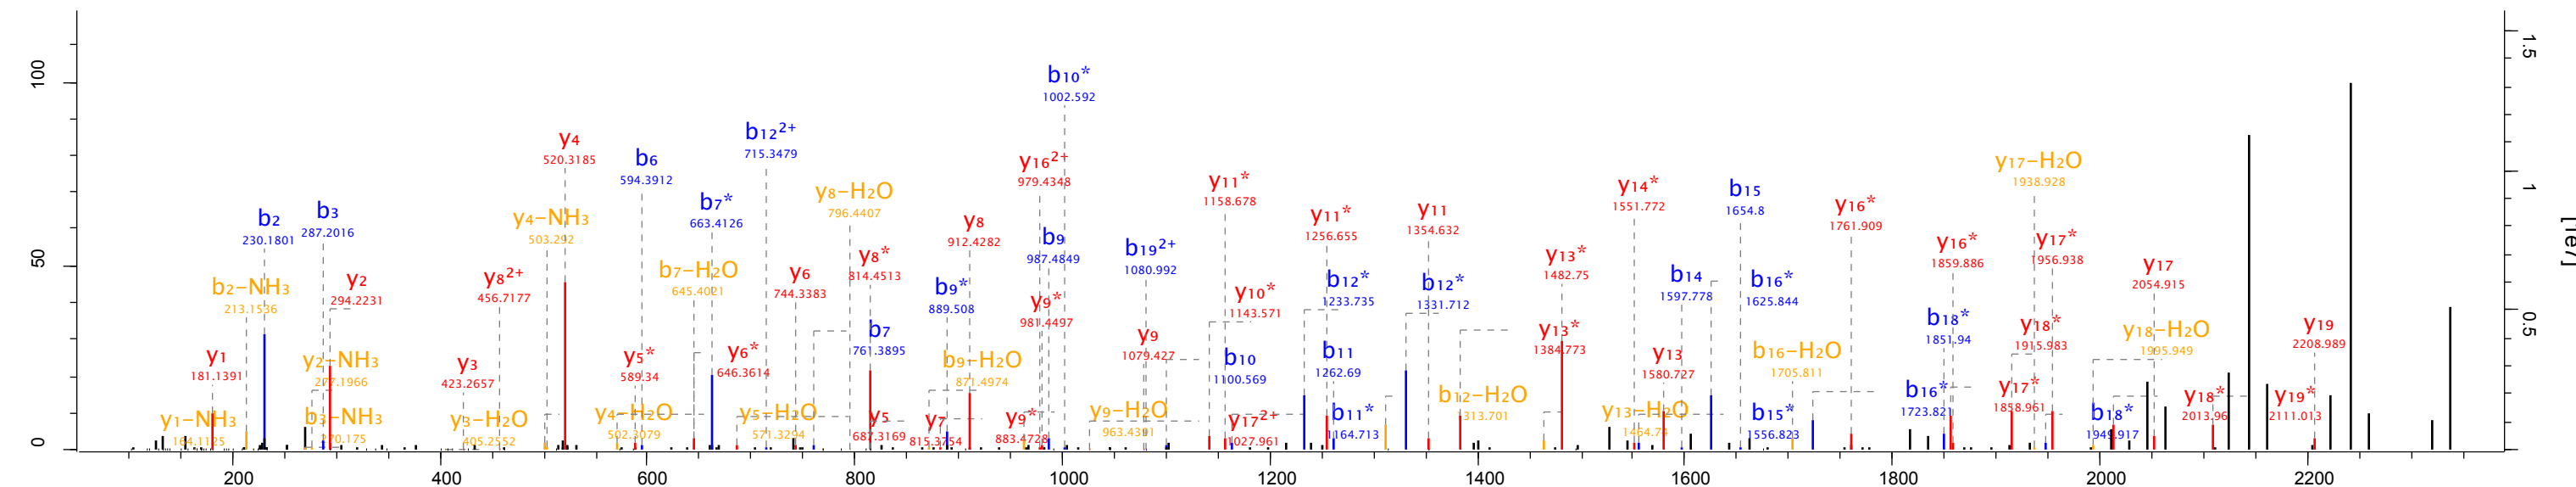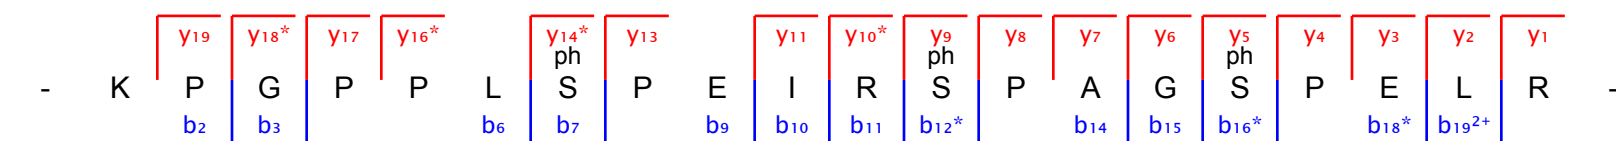

Raw file 20171215\_MaS\_33SR\_LMH\_phospho2\_03 Scan 12945 Method FTMS; HCD Score 47.39 m/z 1233.15 Gene names RALY

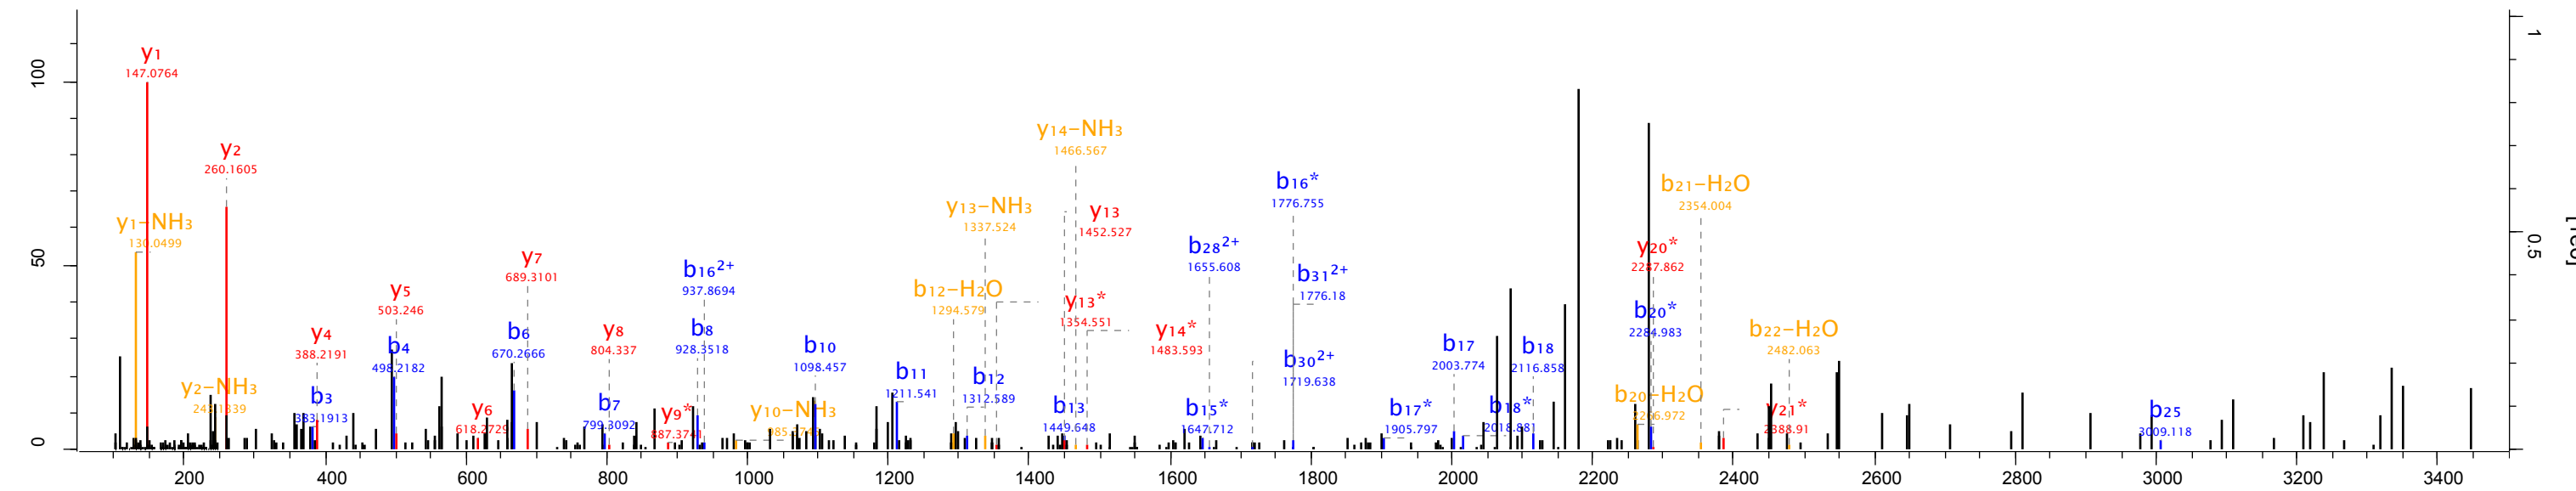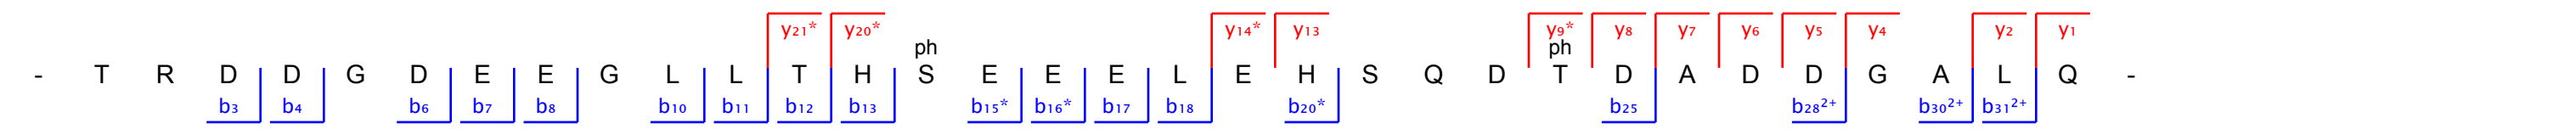

Raw file: 20171215\_MaS\_33SR\_LMH\_phospho2\_03  
 Scan: 13075 Method: FTMS; HCD Score: 144.91 m/z: 901.41 Gene names: SPACIA2;FAM122B

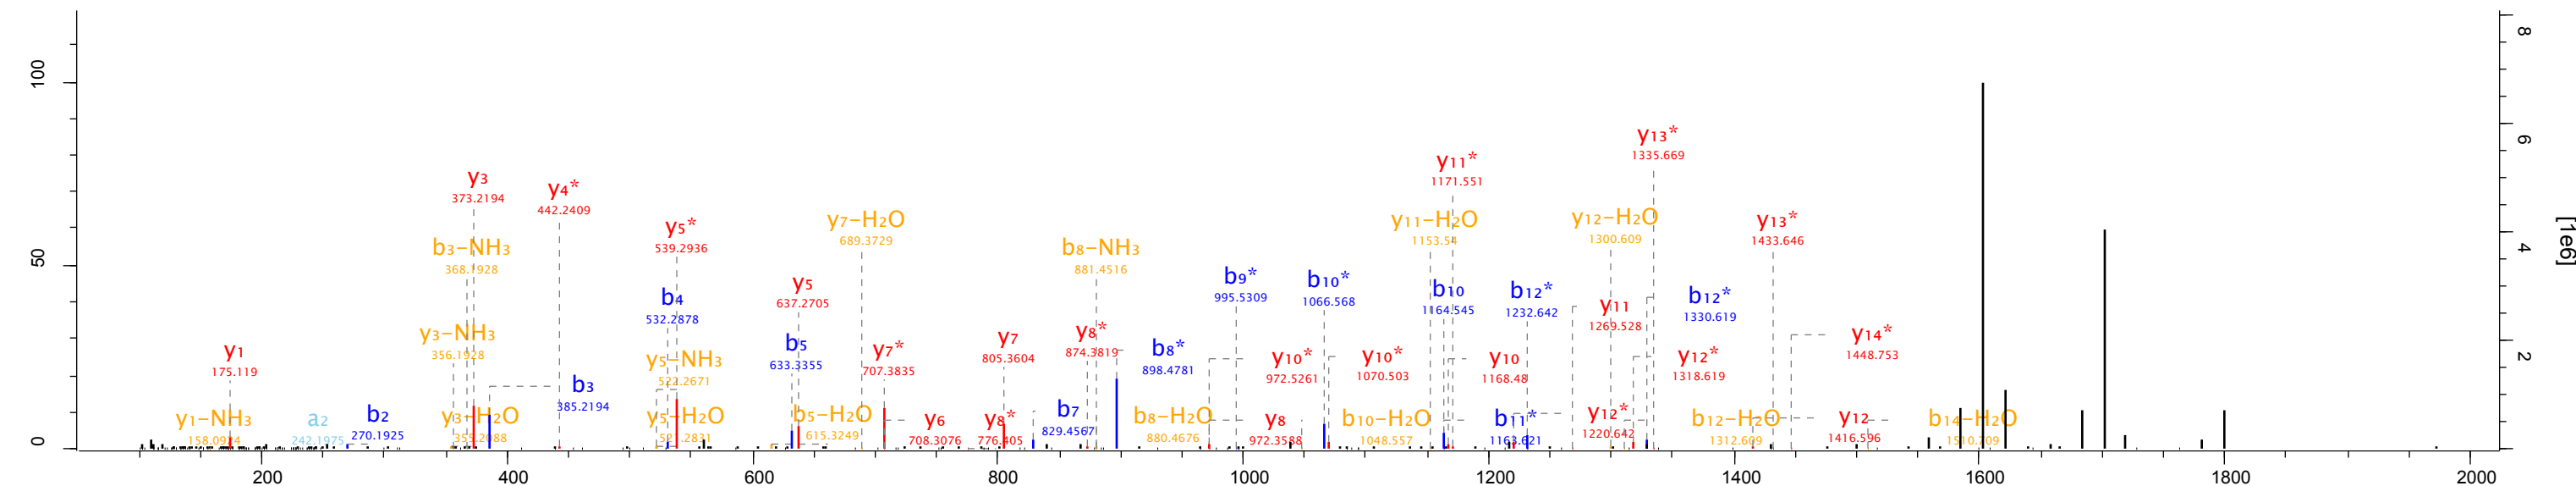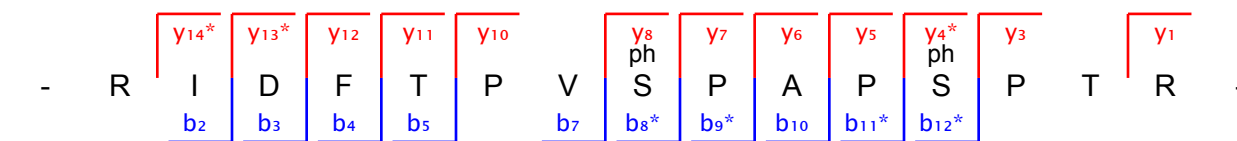

Raw file 20171215\_MaS\_33SR\_LMH\_phospho2\_03 Scan 13135 Method FTMS; HCD Score 50.27 m/z 808.64 Gene names CTPS1

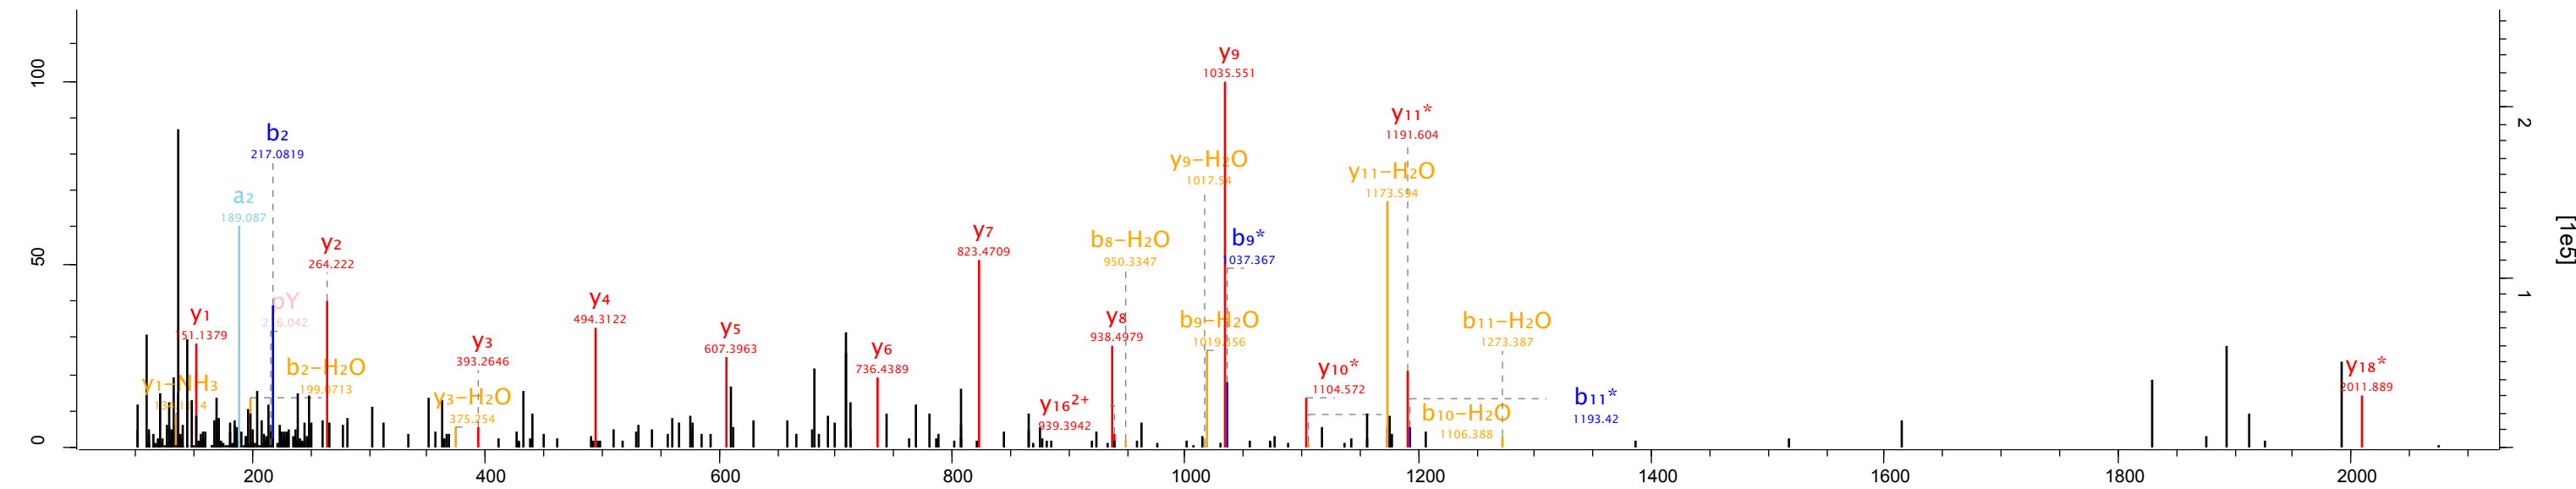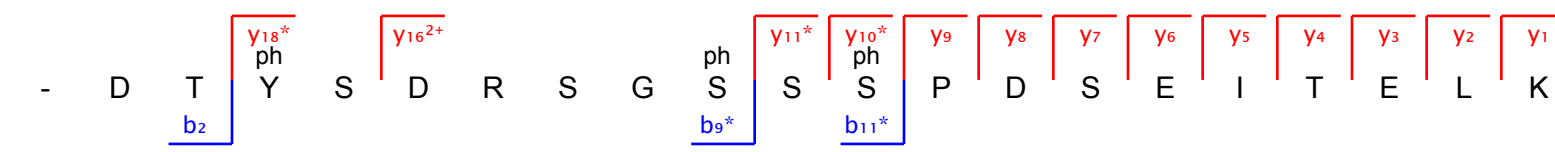

Raw file  
20171215\_MaS\_33SR\_LMH\_phospho2\_03

Scan 13525 Method FTMS; HCD Score 112.75 m/z 1061.45 Gene names CEP170

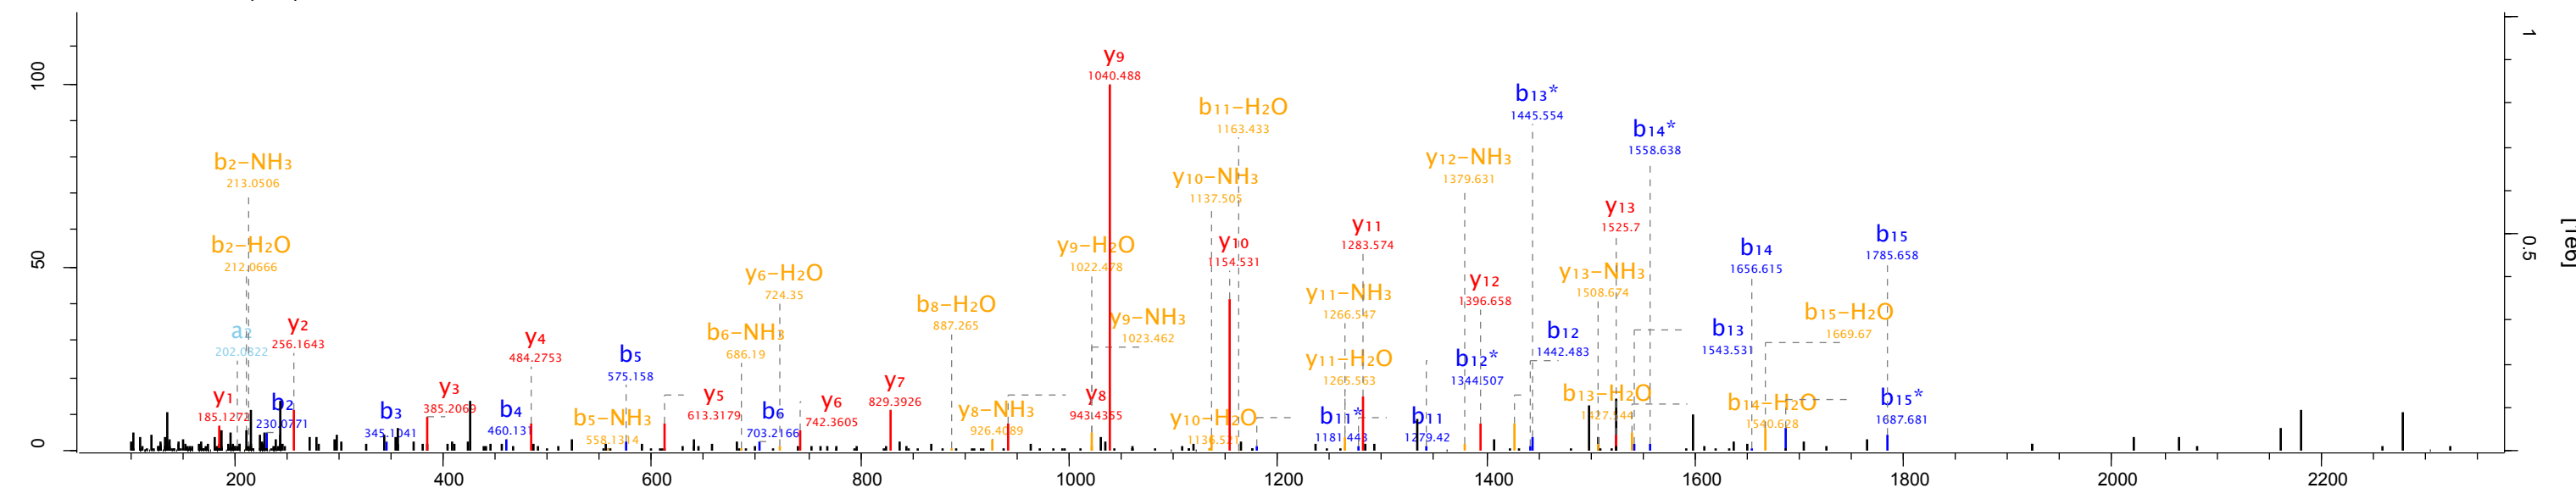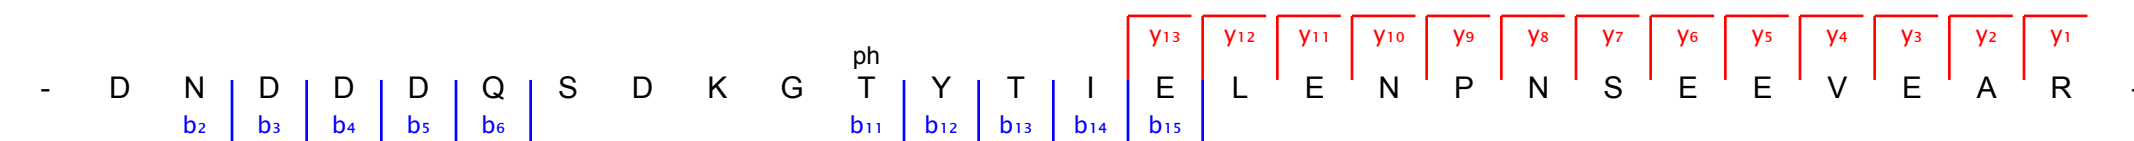

Raw file 20171215\_MaS\_33SR\_LMH\_phospho2\_03 Scan 14015 Method FTMS; HCD Score 67.01 m/z 697.95 Gene names CTNND1

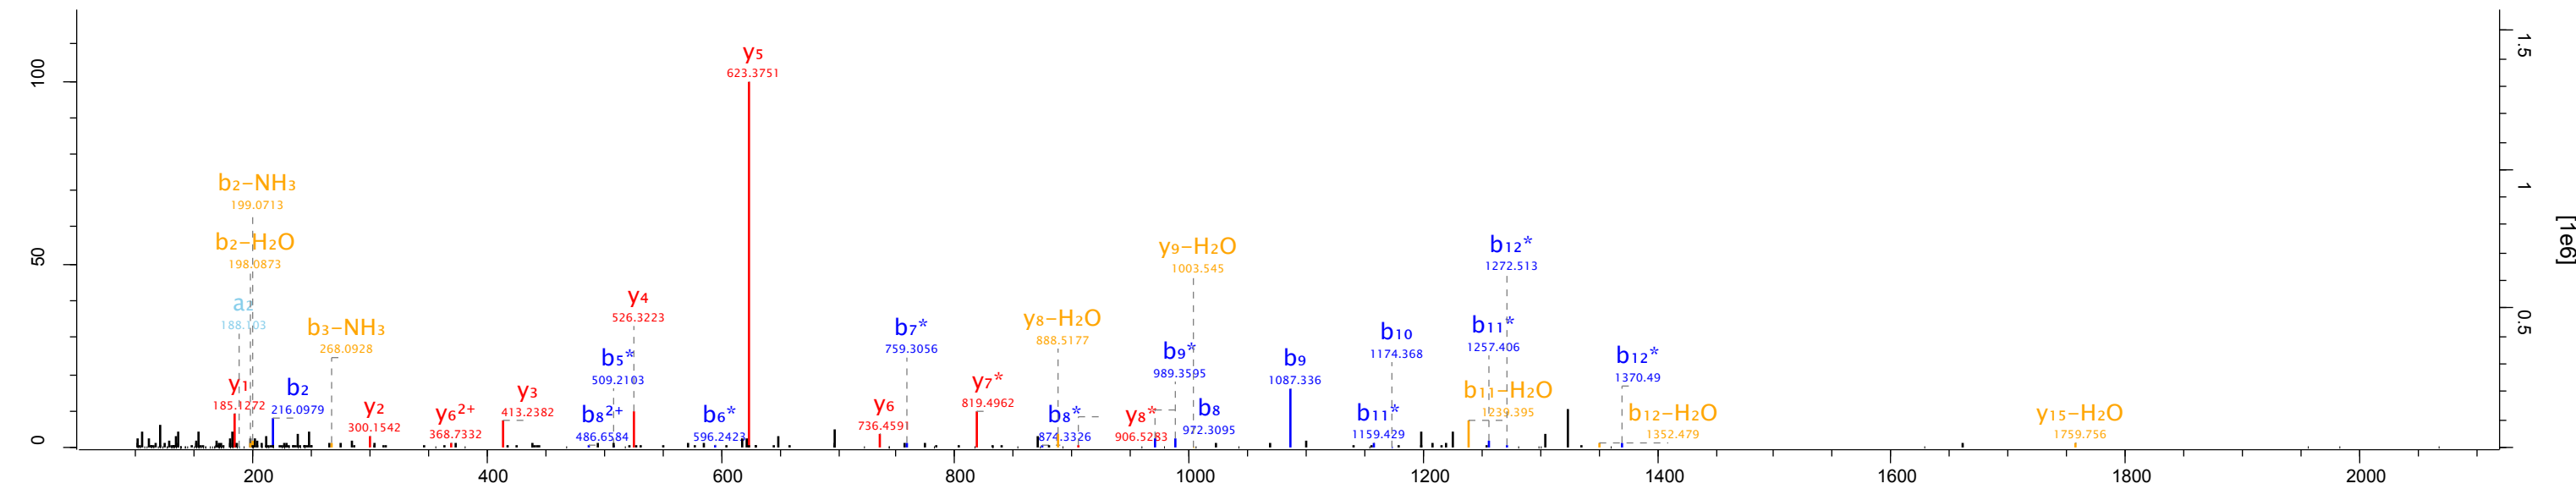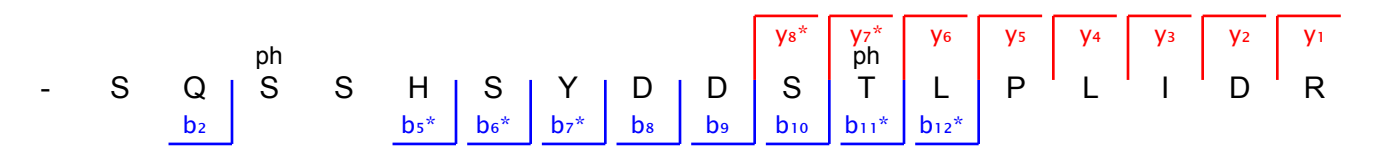

Raw file 20171215\_MaS\_33SR\_LMH\_phospho2\_03 Scan 14185 Method FTMS; HCD Score 85.94 m/z 736.29 Gene names SLC6A15

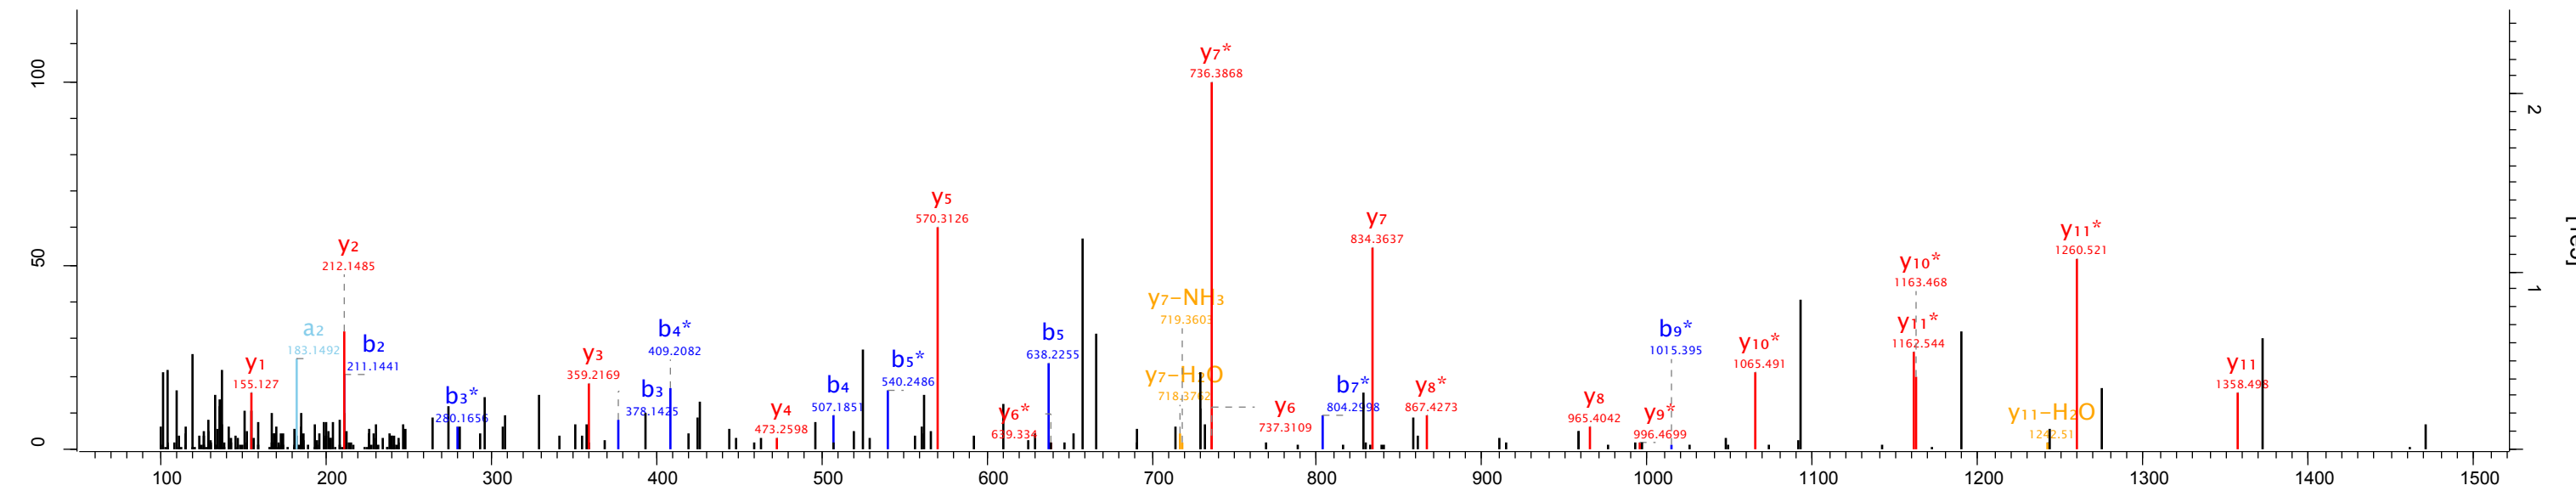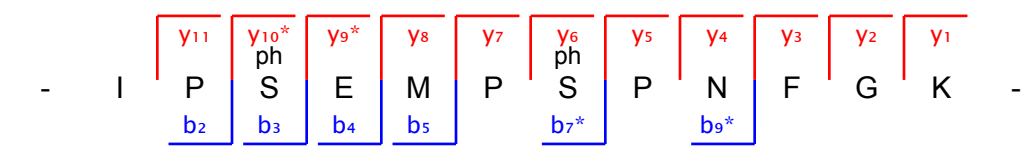

Raw file 20171215\_MaS\_33SR\_LMH\_phospho2\_03 Scan 15375 Method FTMS; HCD Score 158.57 m/z 1416.55 Gene names MAGEA4

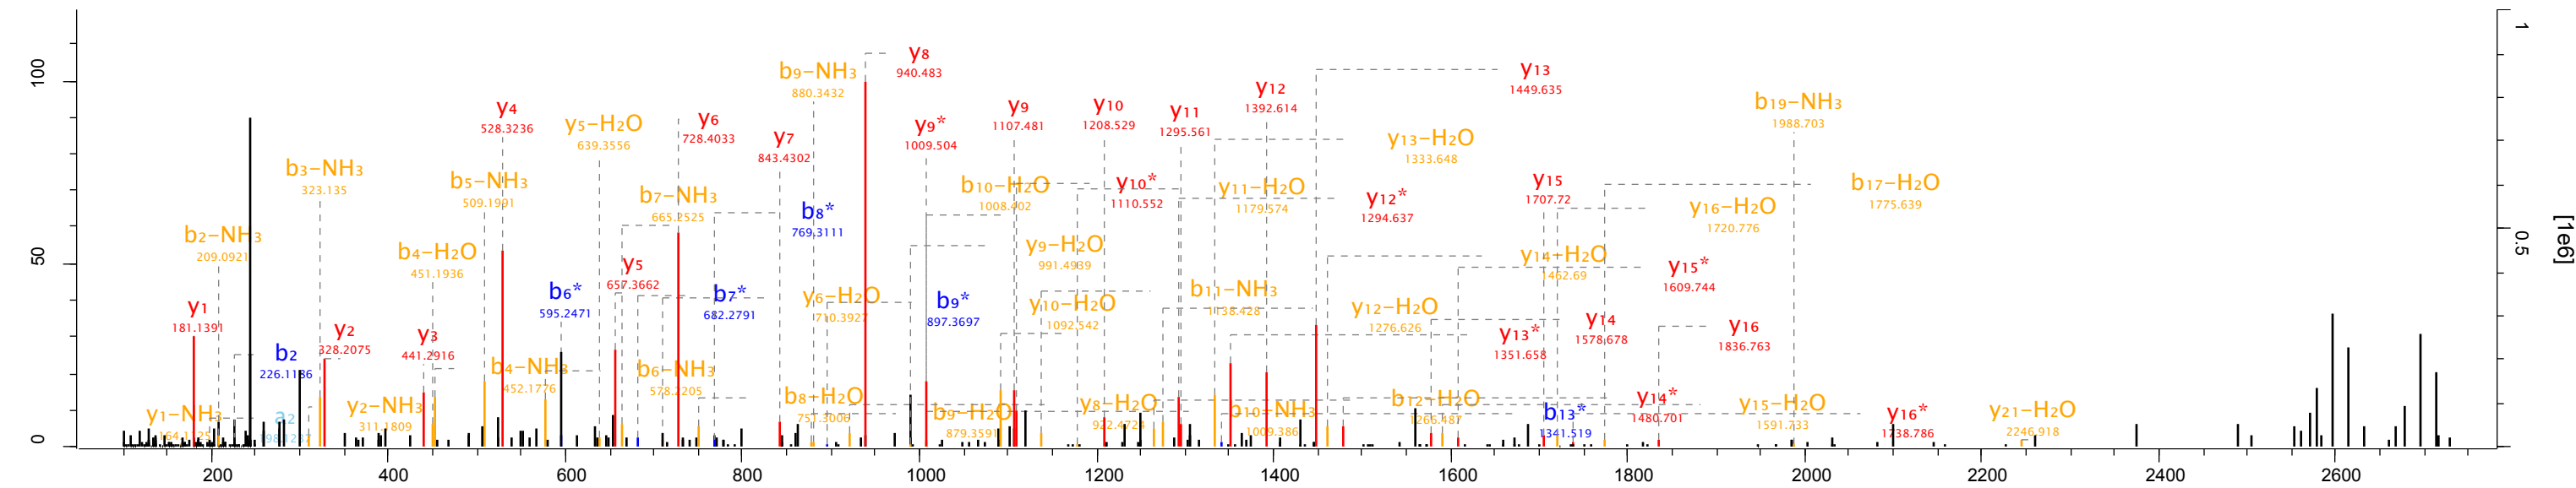

- Q P N E G ph S S S Q E E E G P S T S ph S P D A E S L F R -

b<sub>2</sub>
b<sub>6</sub><sup>\*</sup>
b<sub>7</sub><sup>\*</sup>
b<sub>8</sub><sup>\*</sup>
b<sub>9</sub><sup>\*</sup>
b<sub>13</sub><sup>\*</sup>
y<sub>16</sub>
y<sub>15</sub>
y<sub>14</sub>
y<sub>13</sub>
y<sub>12</sub>
y<sub>11</sub>
y<sub>10</sub>
y<sub>9</sub>
y<sub>8</sub>
y<sub>7</sub>
y<sub>6</sub>
y<sub>5</sub>
y<sub>4</sub>
y<sub>3</sub>
y<sub>2</sub>
y<sub>1</sub>



Raw file: 20171215\_MaS\_33SR\_LMH\_phospho2\_03  
 Scan: 15495 Method: FTMS; HCD Score: 138.33 m/z: 984.74 Gene names: SEC31A

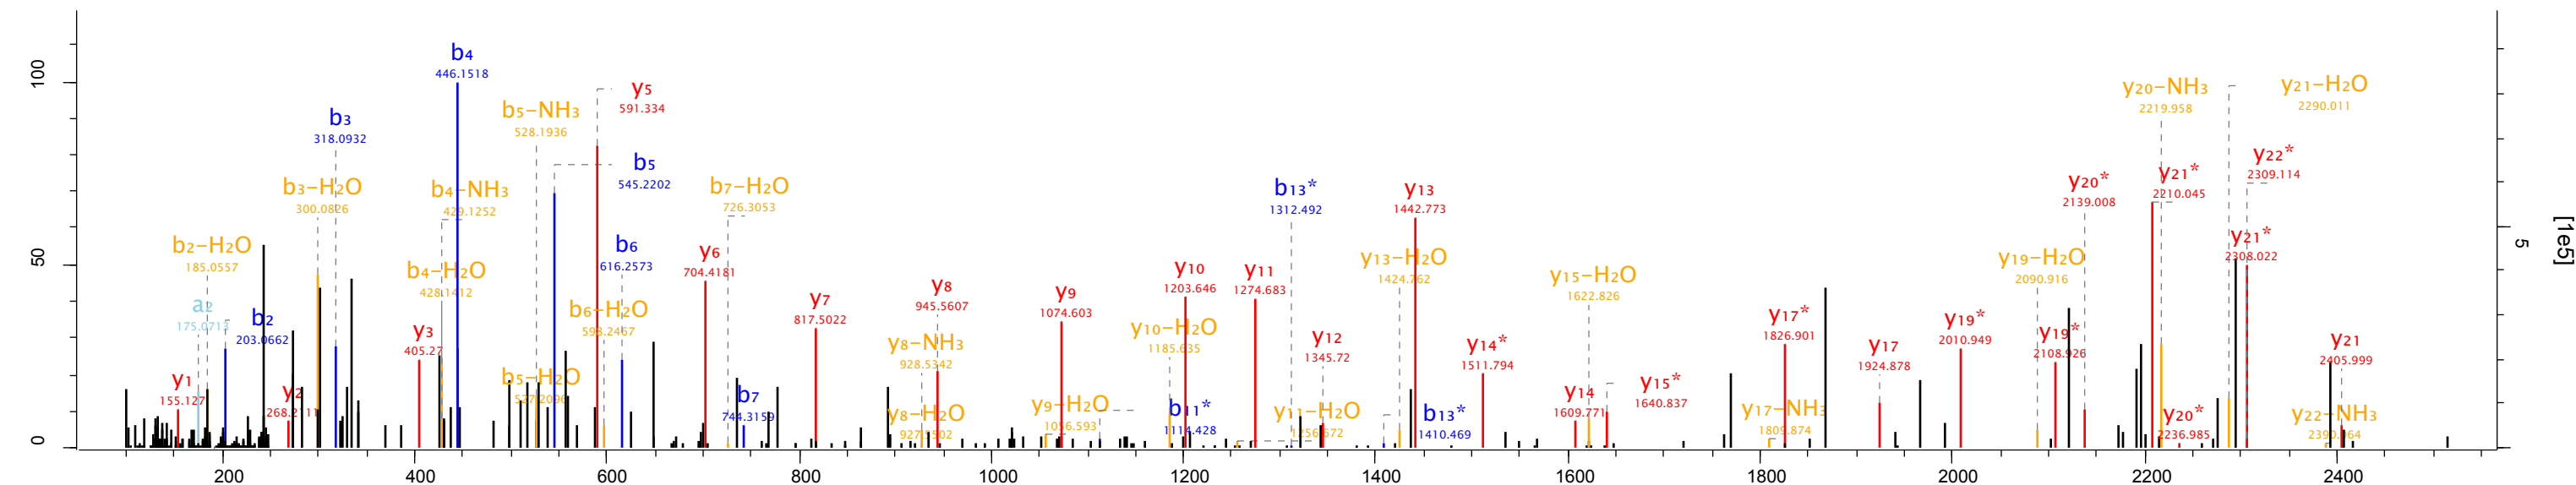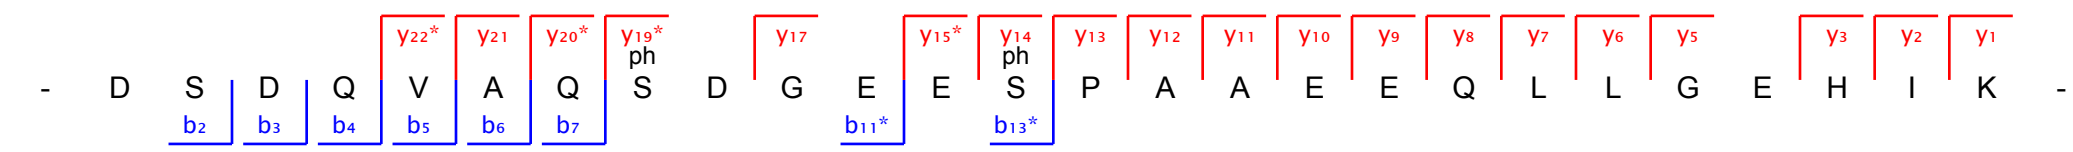

Raw file 20171215\_MaS\_33SR\_LMH\_phospho2\_03 Scan 15535 Method FTMS; HCD Score 181.93 m/z 773.01 Gene names FXR2

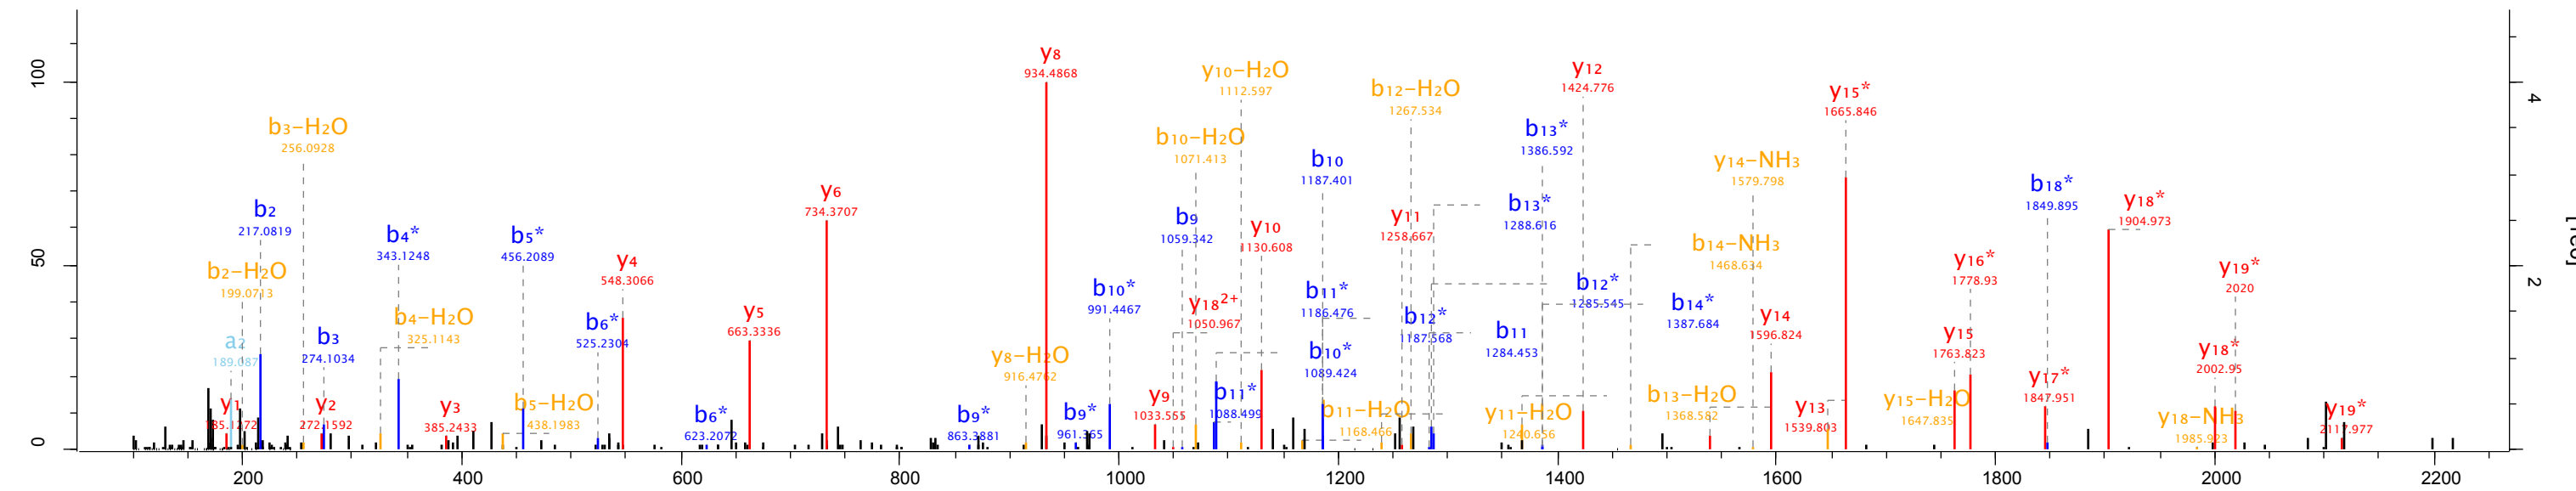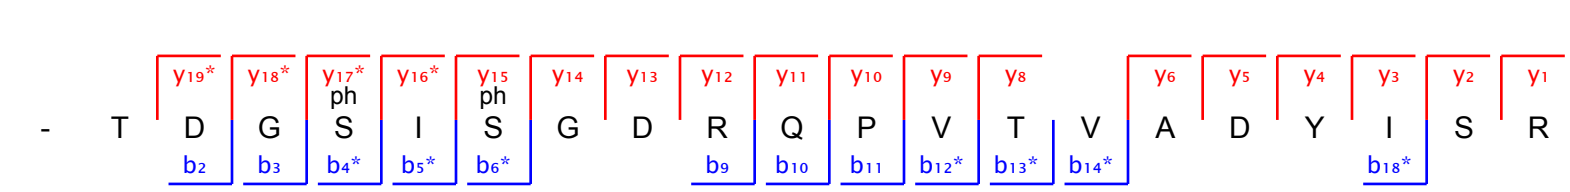

Raw file 20171215\_MaS\_33SR\_LMH\_phospho2\_03 Scan 15615 Method FTMS; HCD Score 160.57 m/z 789.86 Gene names HMGXB4

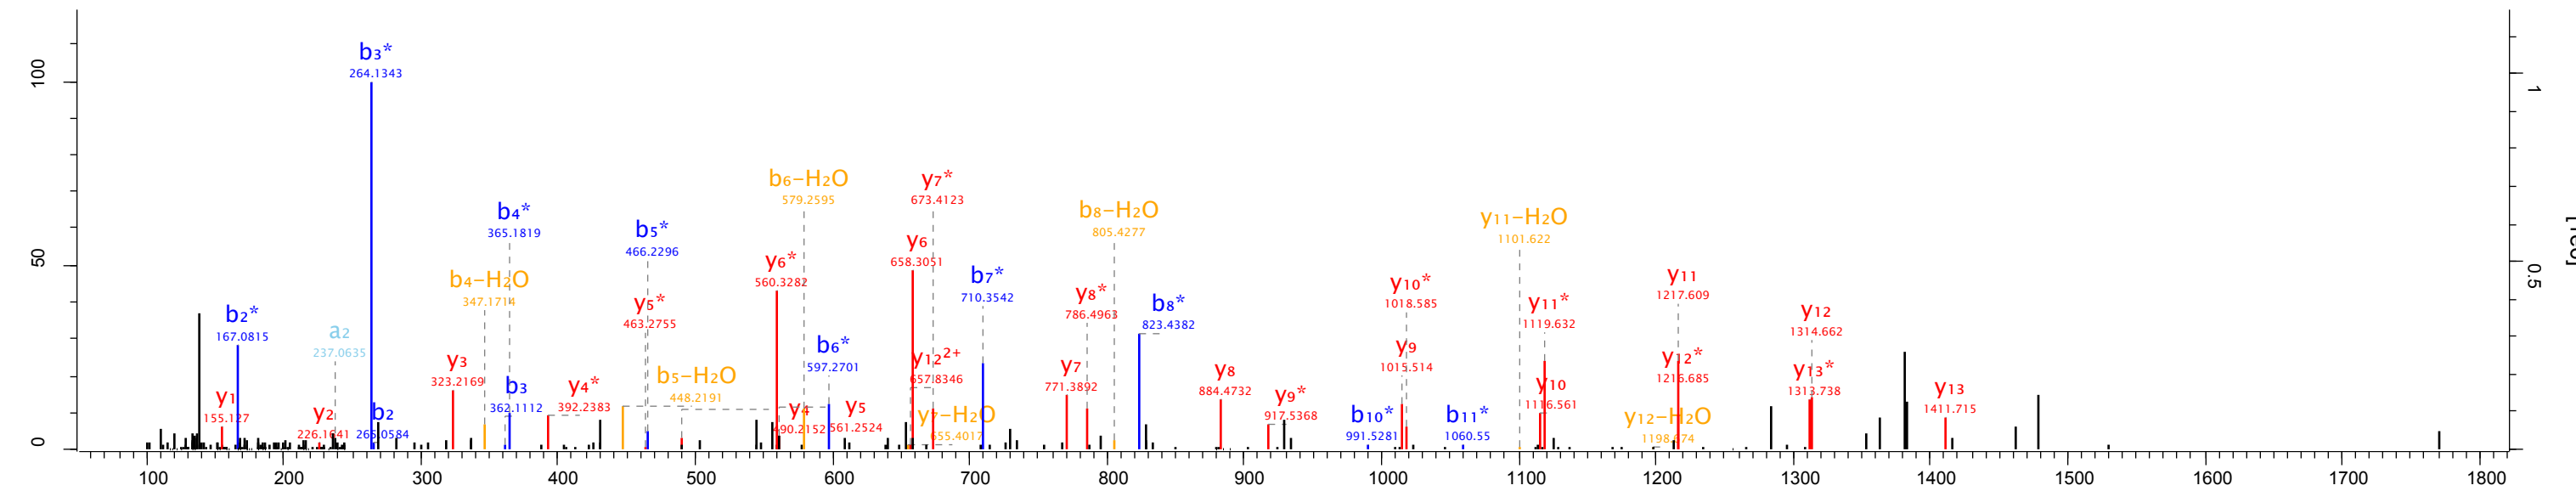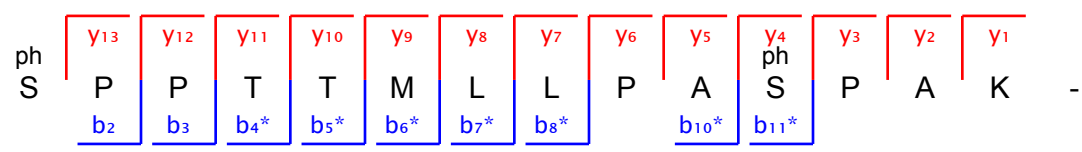

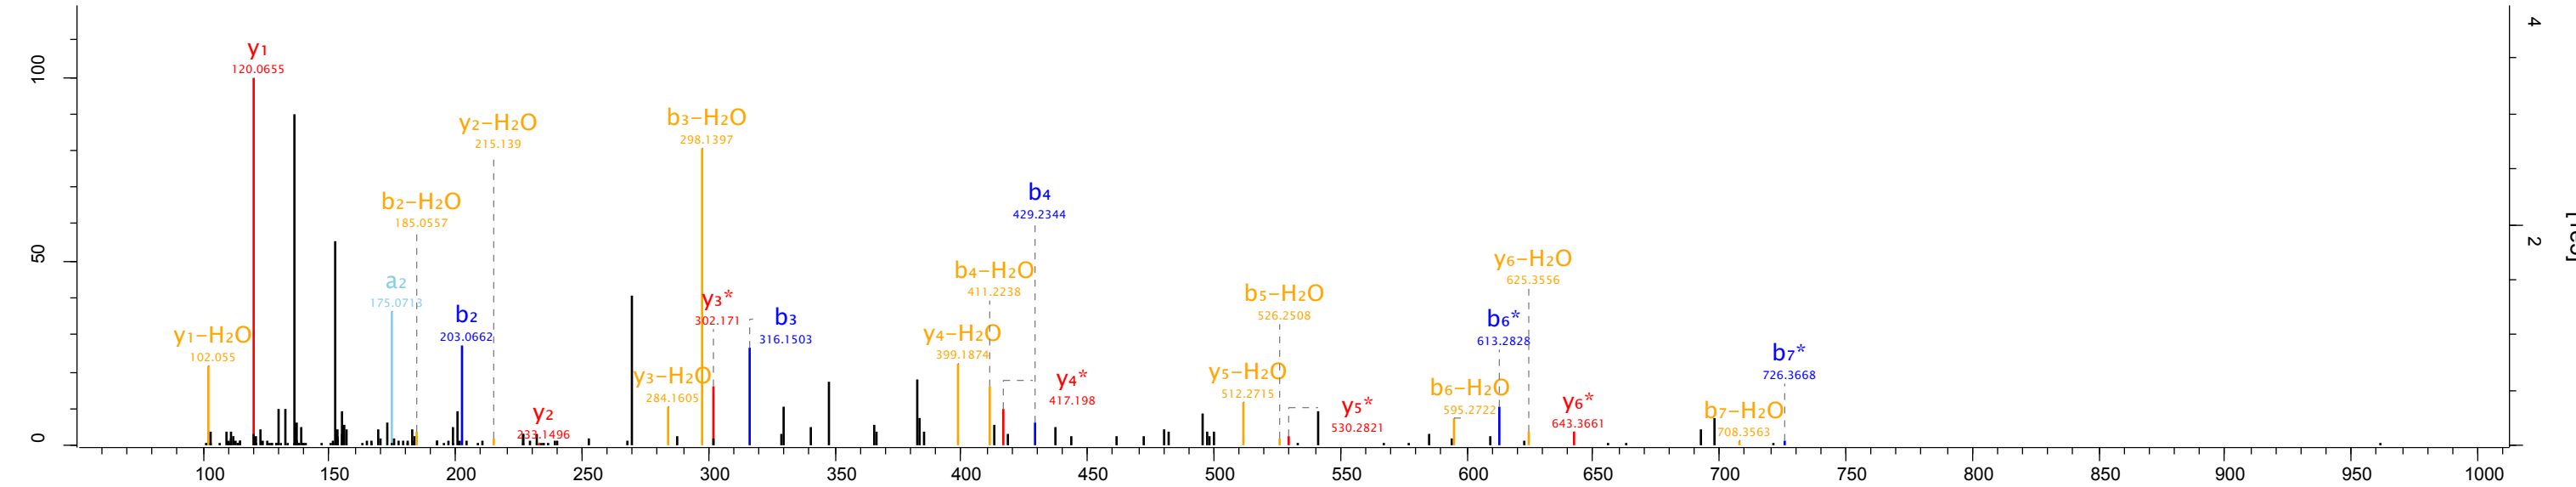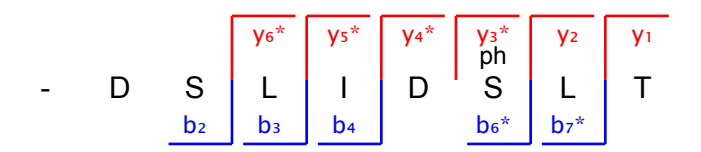

Raw file 20171215\_MaS\_33SR\_LMH\_phospho2\_03 Scan 16255 Method FTMS; HCD Score 199.75 m/z 1122.44 Gene names MPHOSPH8

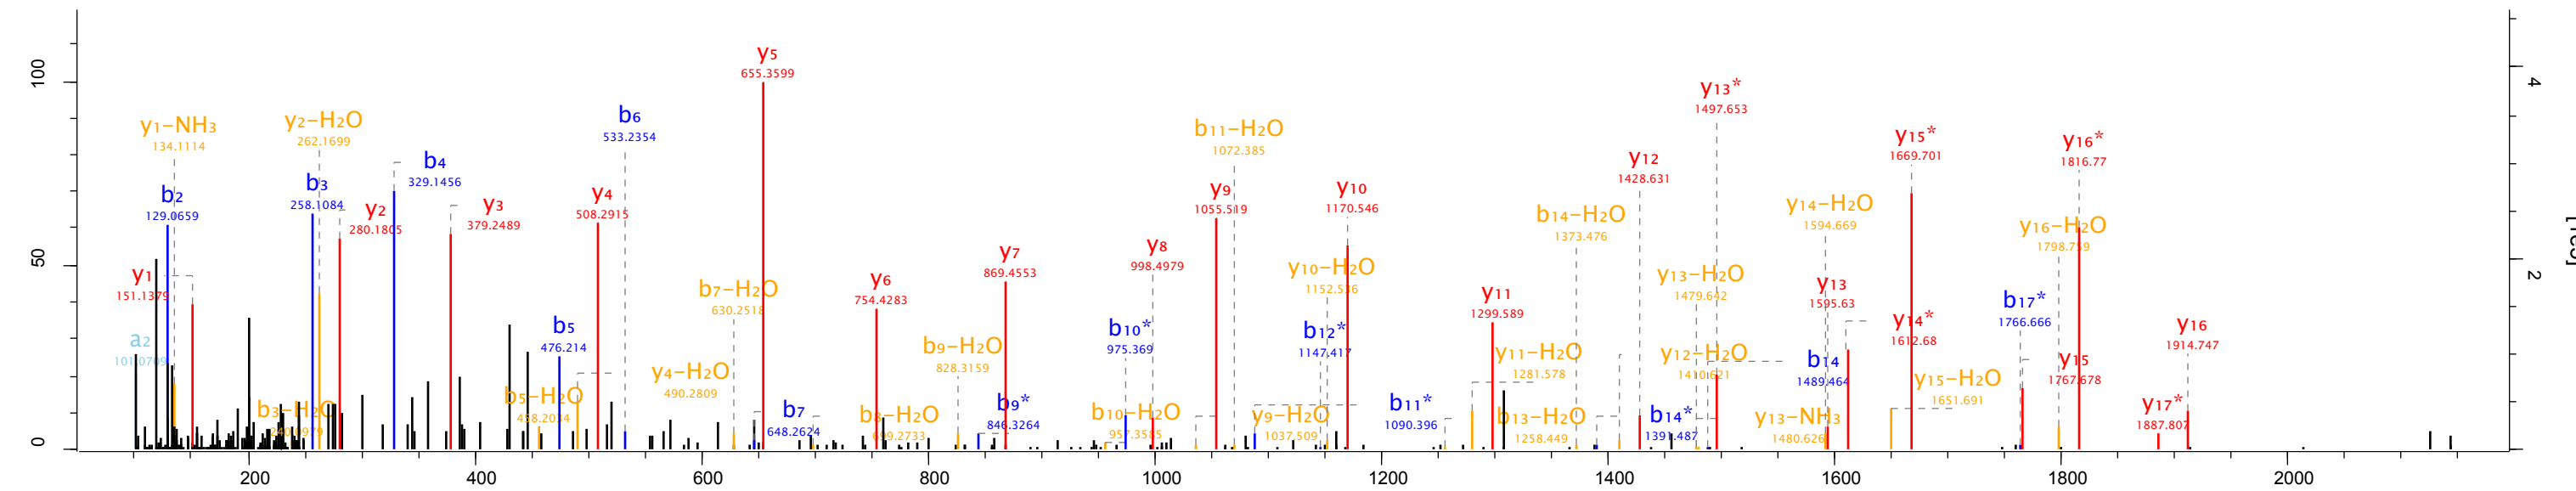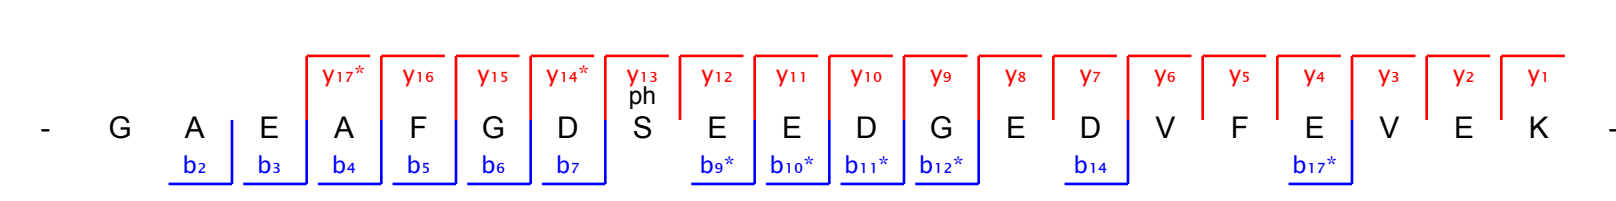

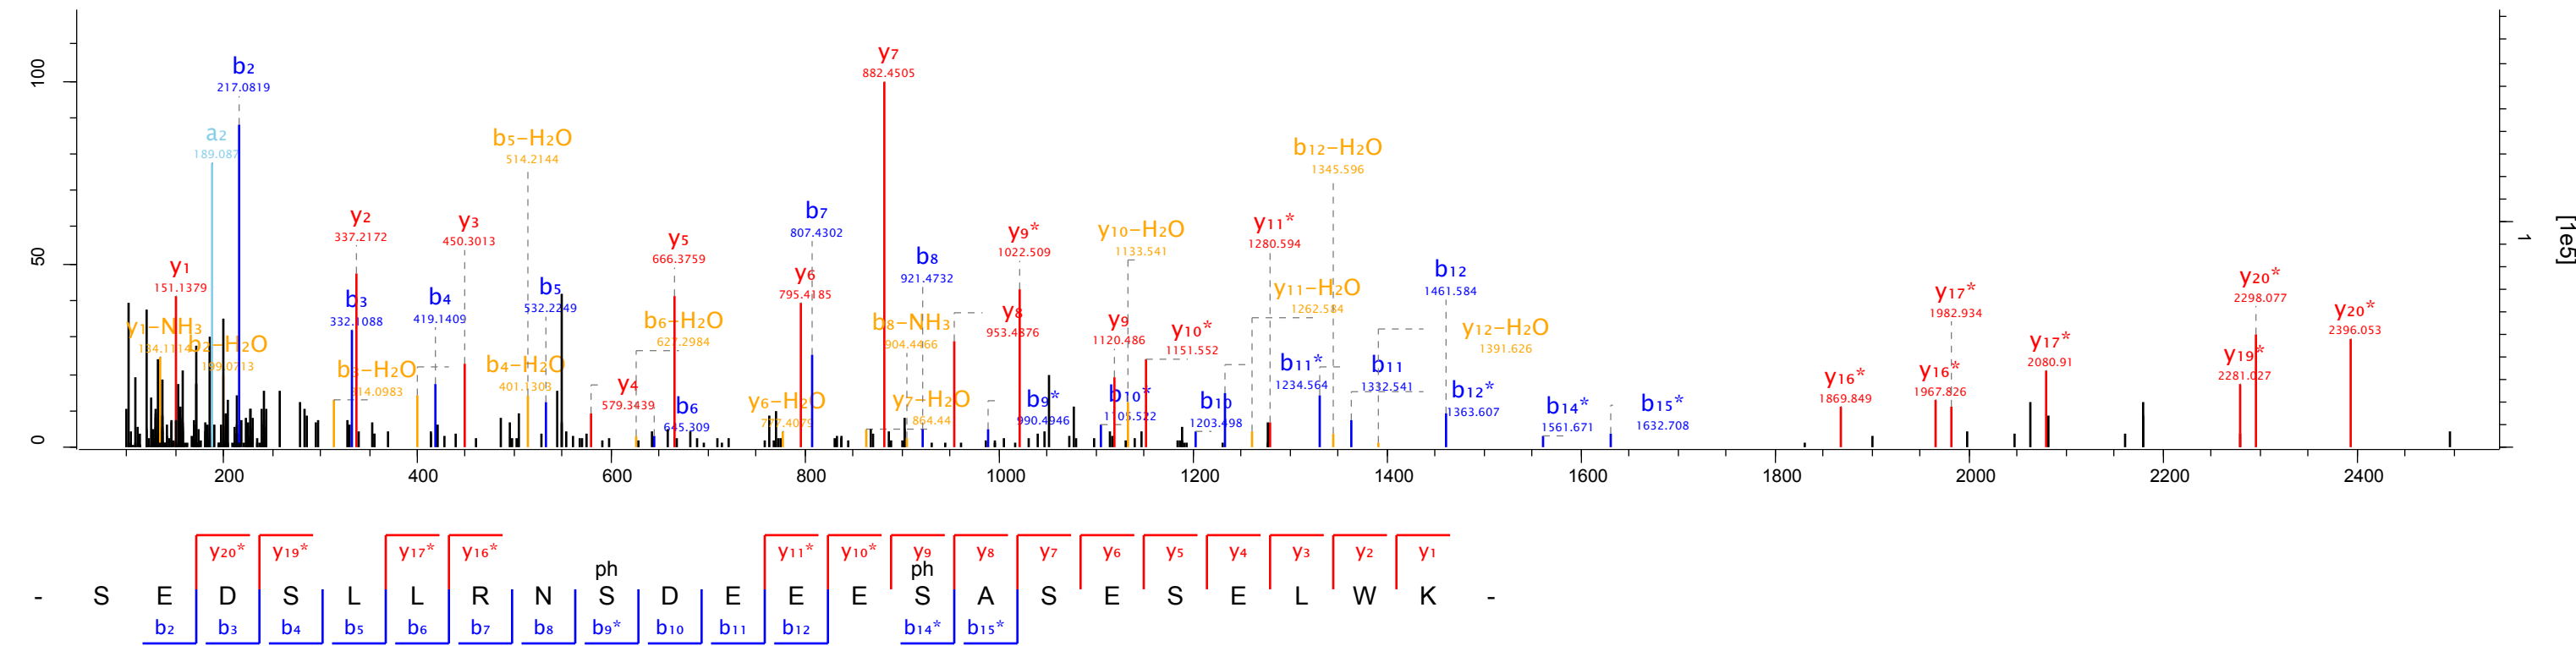

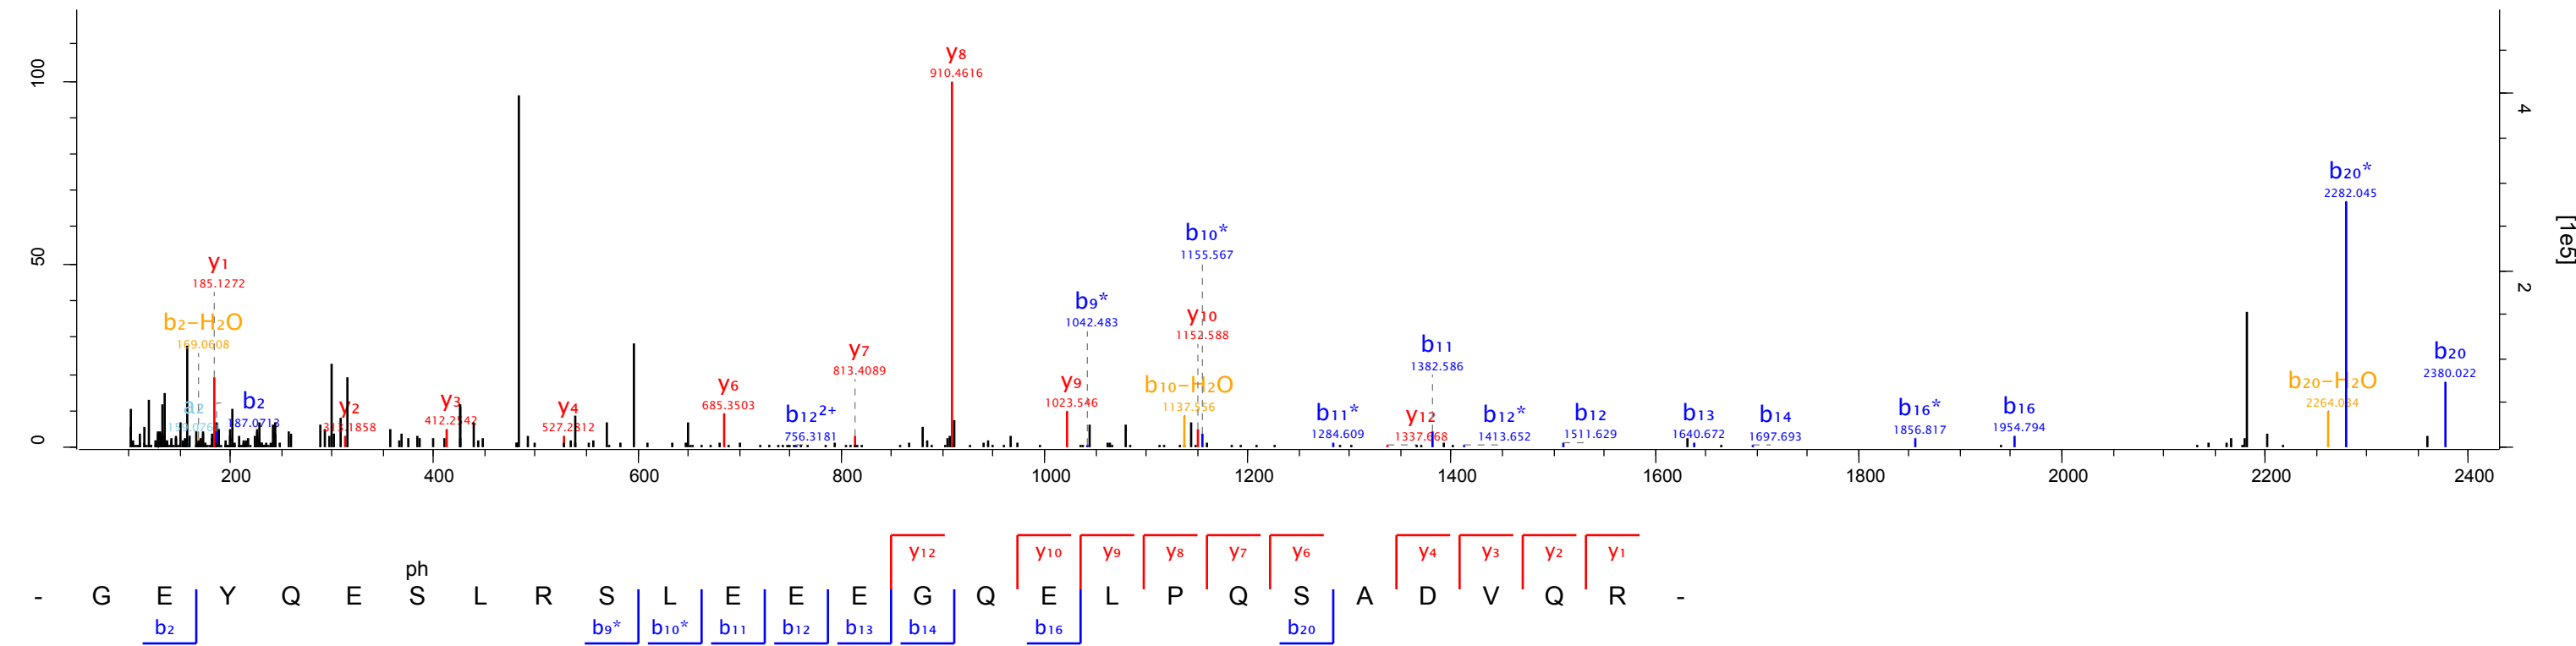

Raw file 20171215\_MaS\_33SR\_LMH\_phospho2\_03 Scan 17475 Method FTMS; HCD Score 68.46 m/z 873.36 Gene names ARHGAP35

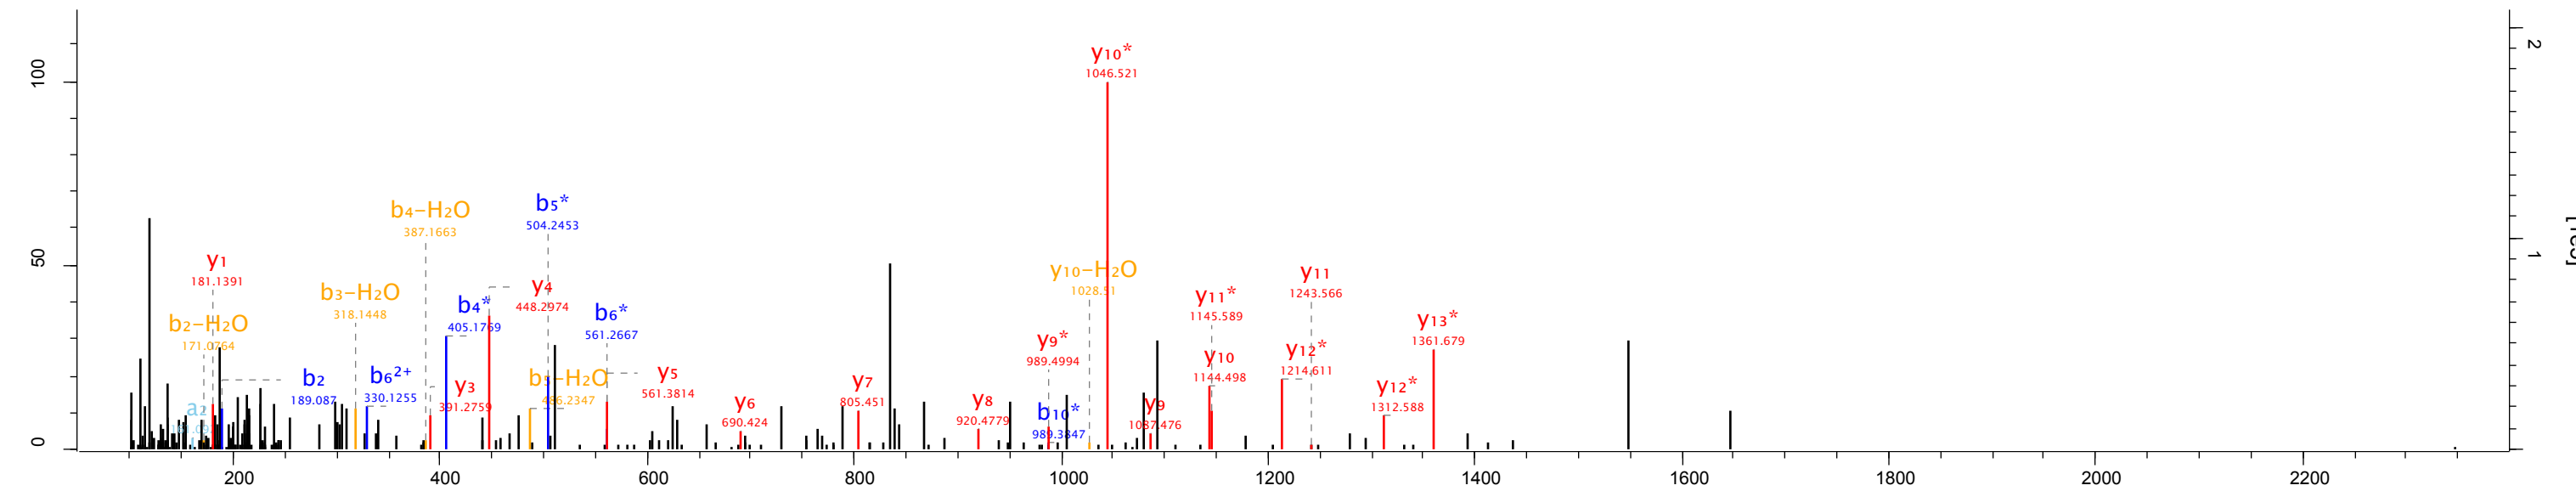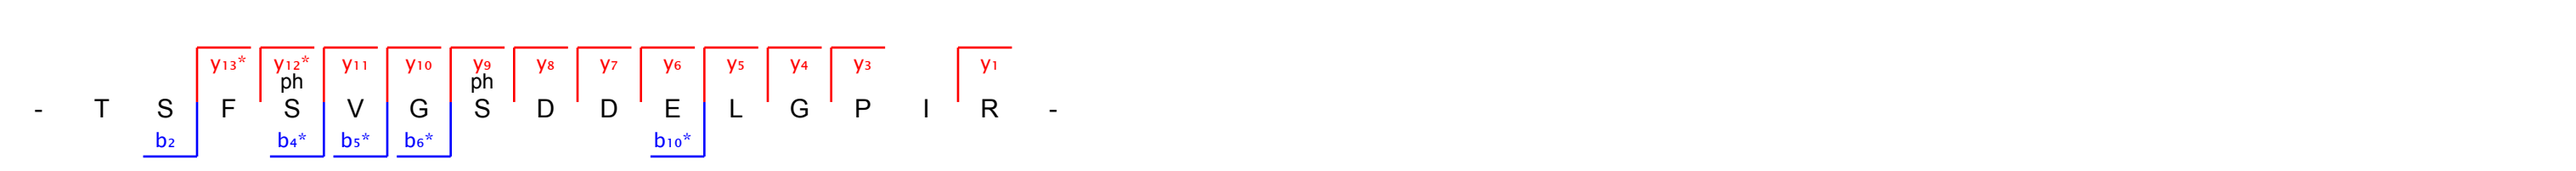



Raw file 20171215\_MaS\_33SR\_LMH\_phospho2\_03 Scan 17505 Method FTMS; HCD Score 151.12 m/z 1065 Gene names FAM129B

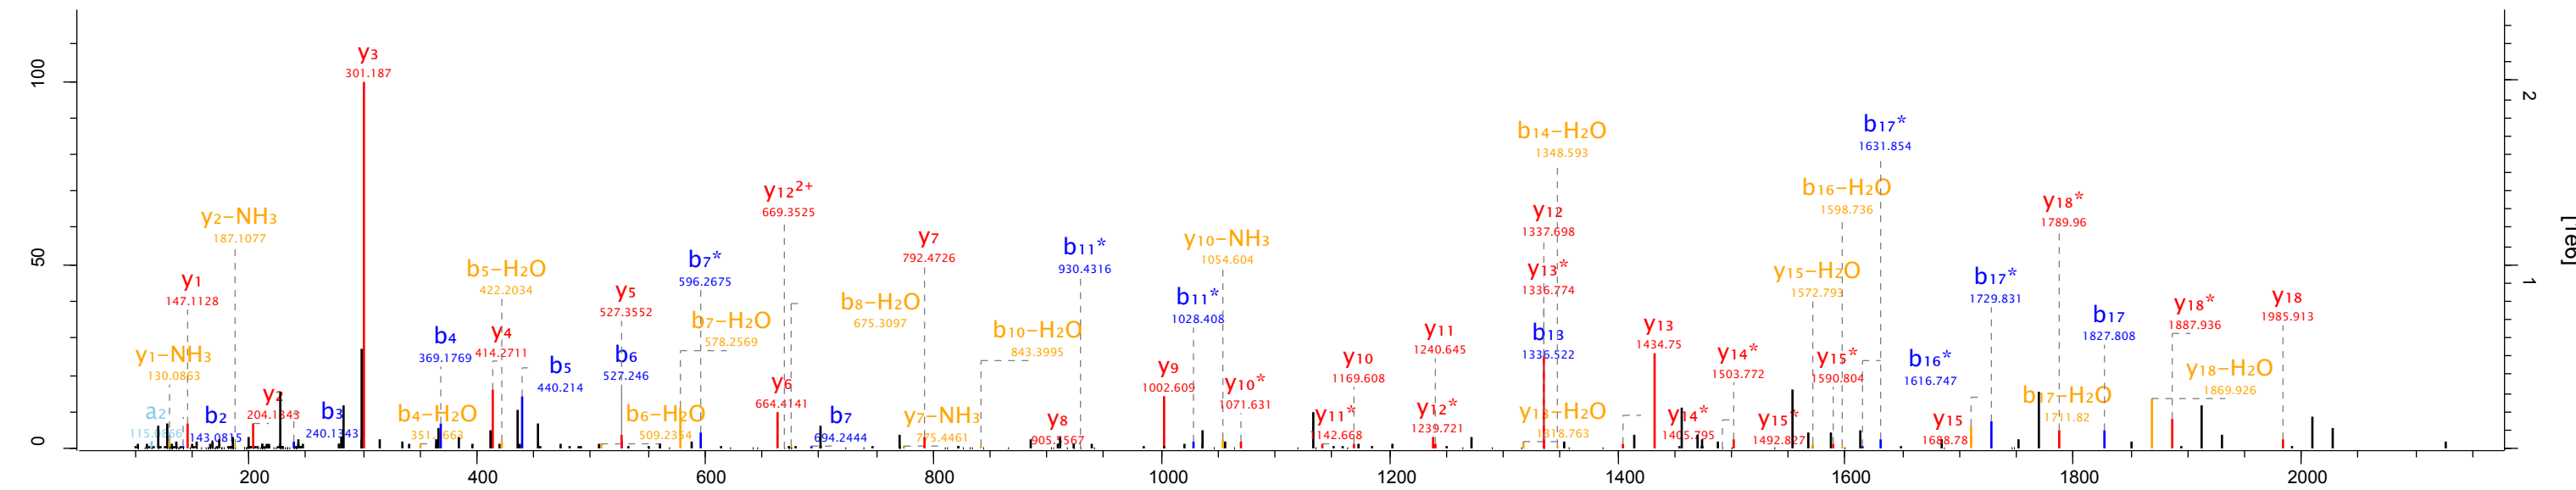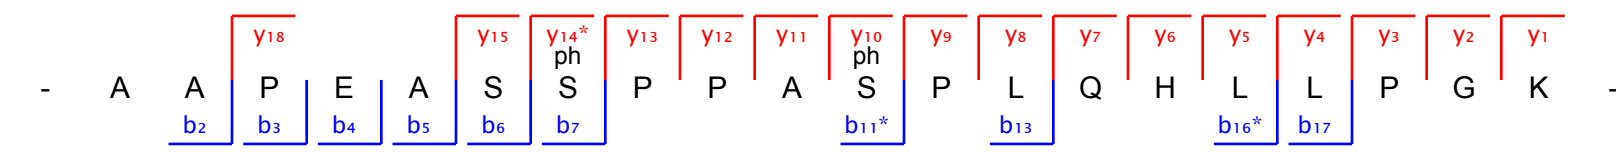

Raw file 20171215\_MaS\_33SR\_LMH\_phospho2\_03 Scan 17615 Method FTMS; HCD Score 50.27 m/z 998.06 Gene names SLC38A2

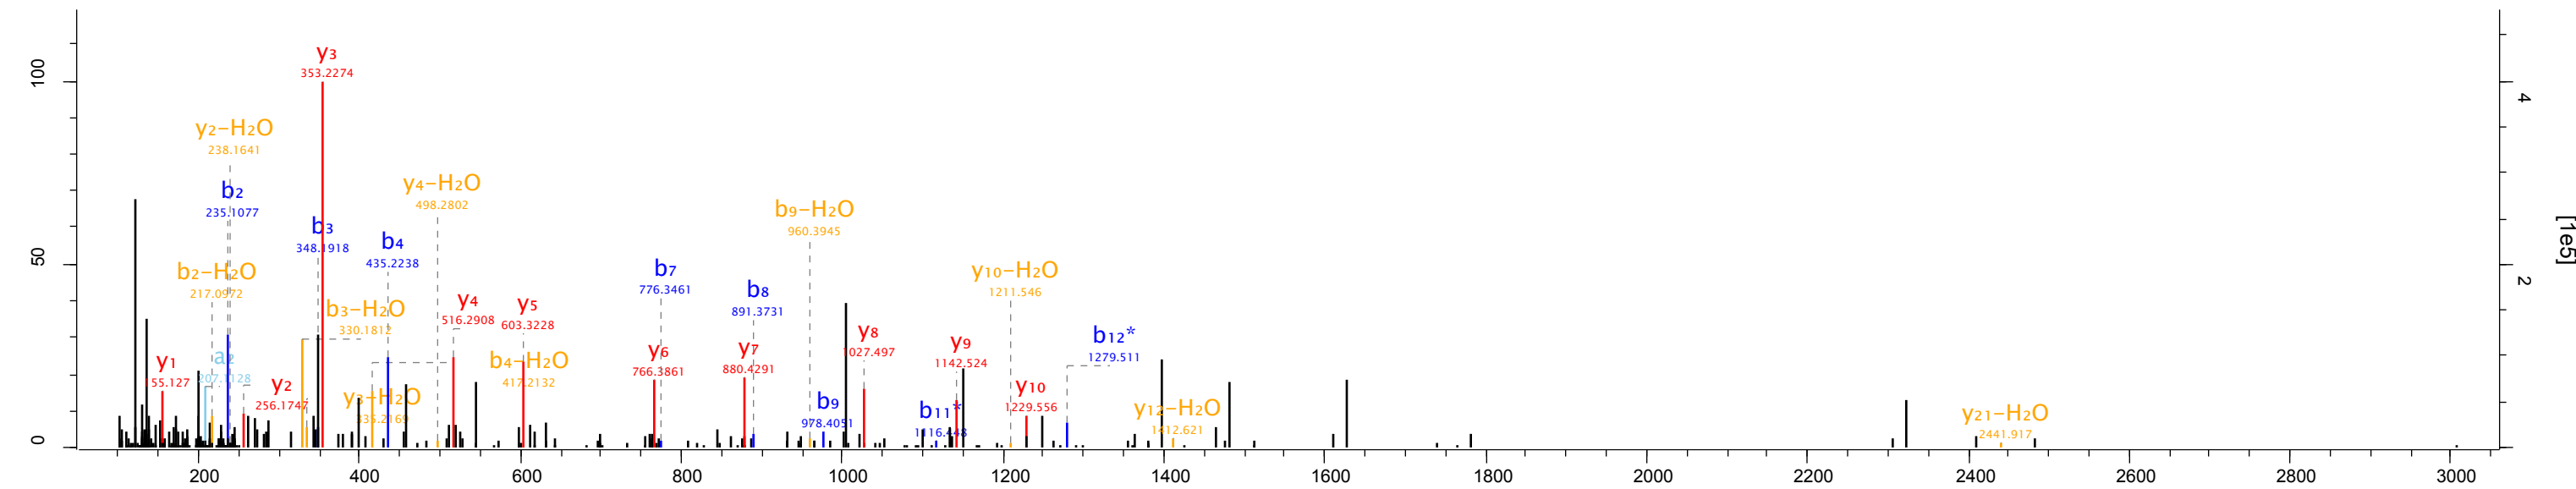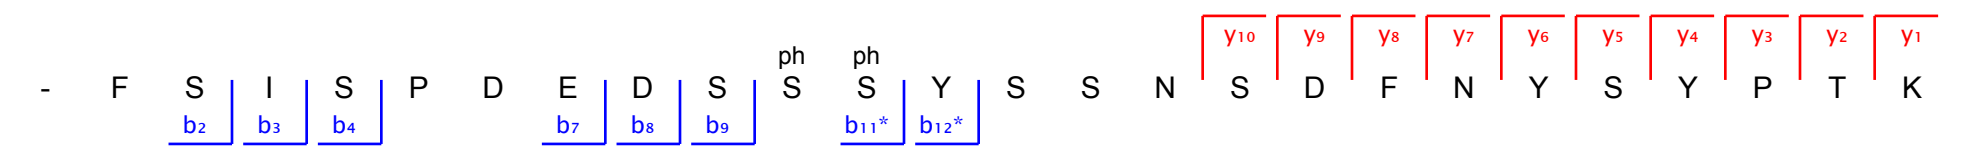

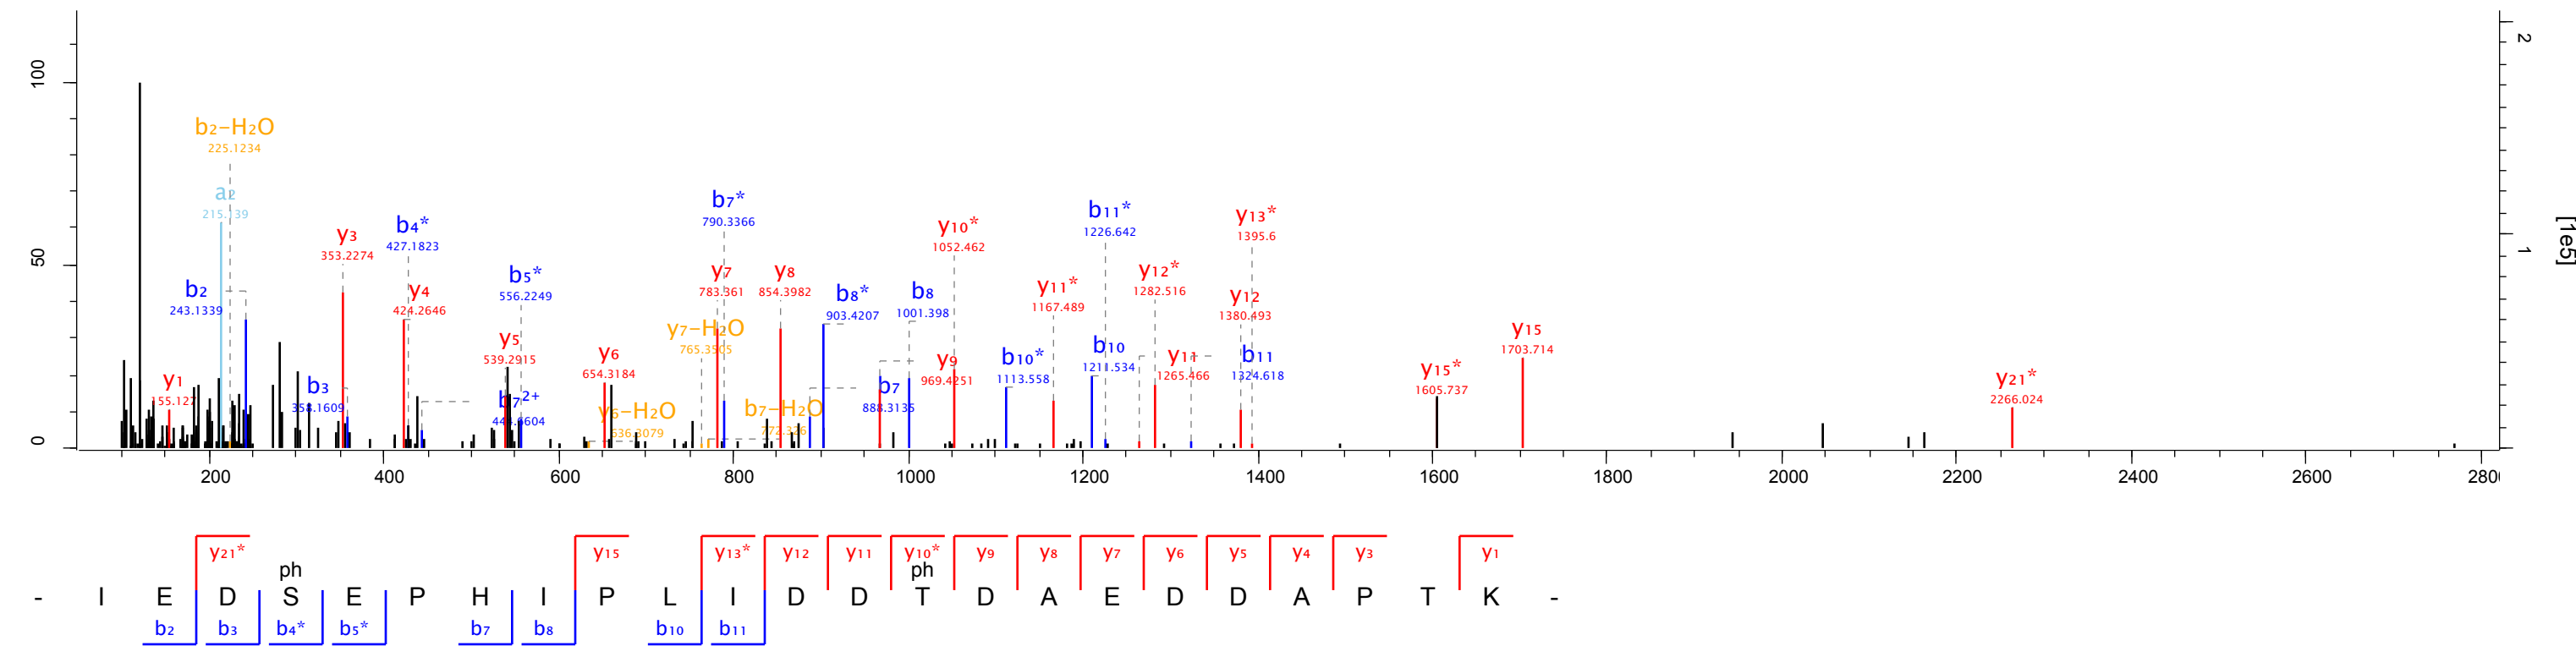

Raw file: 20171215\_MaS\_33SR\_LMH\_phospho2\_03  
 Scan: 17695 Method: FTMS; HCD Score: 45.14 m/z: 1216.87 Gene names: SLC39A10

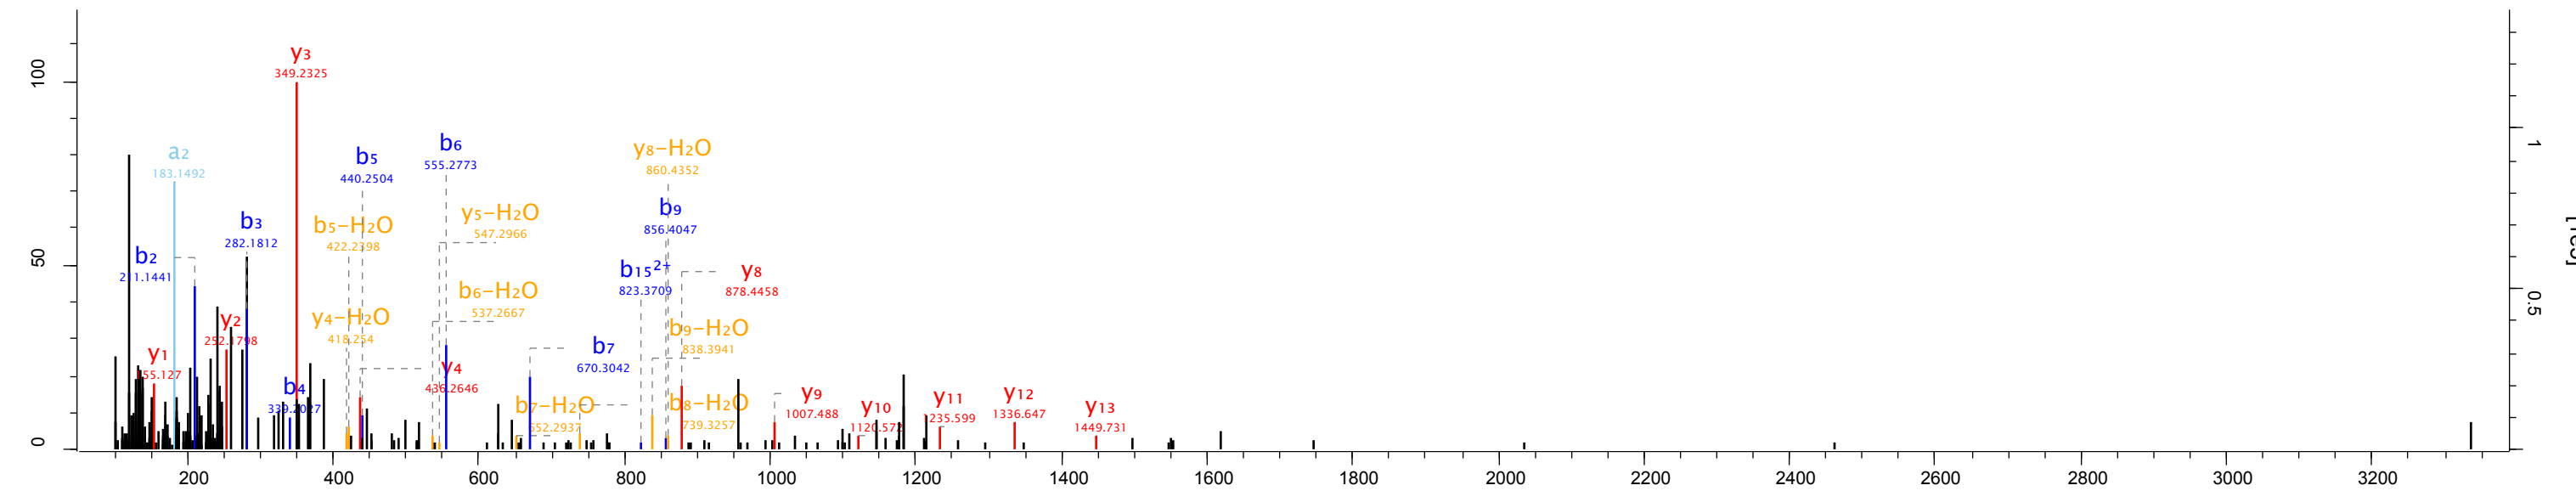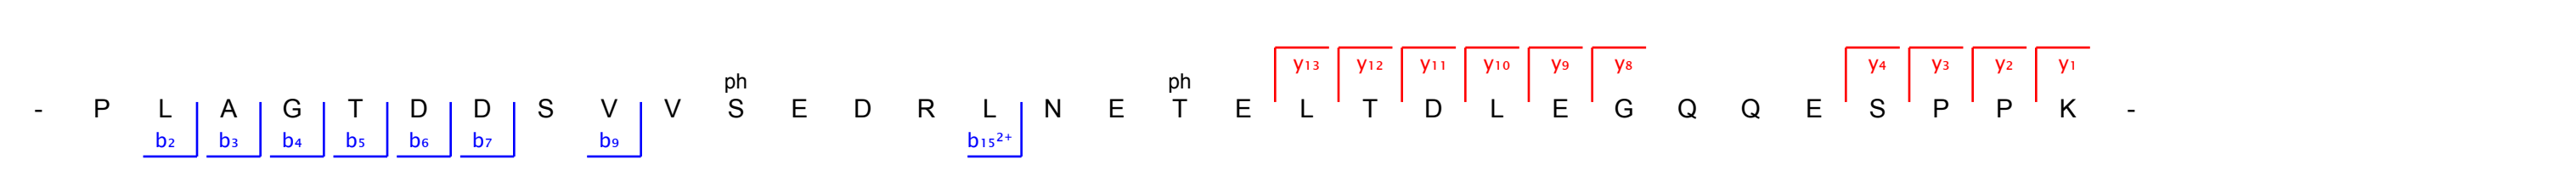

Raw file  
20171215\_MaS\_33SR\_LMH\_phospho2\_03

Scan 18025 Method FTMS; HCD Score 92.37 m/z 1029.1 Gene names JUN

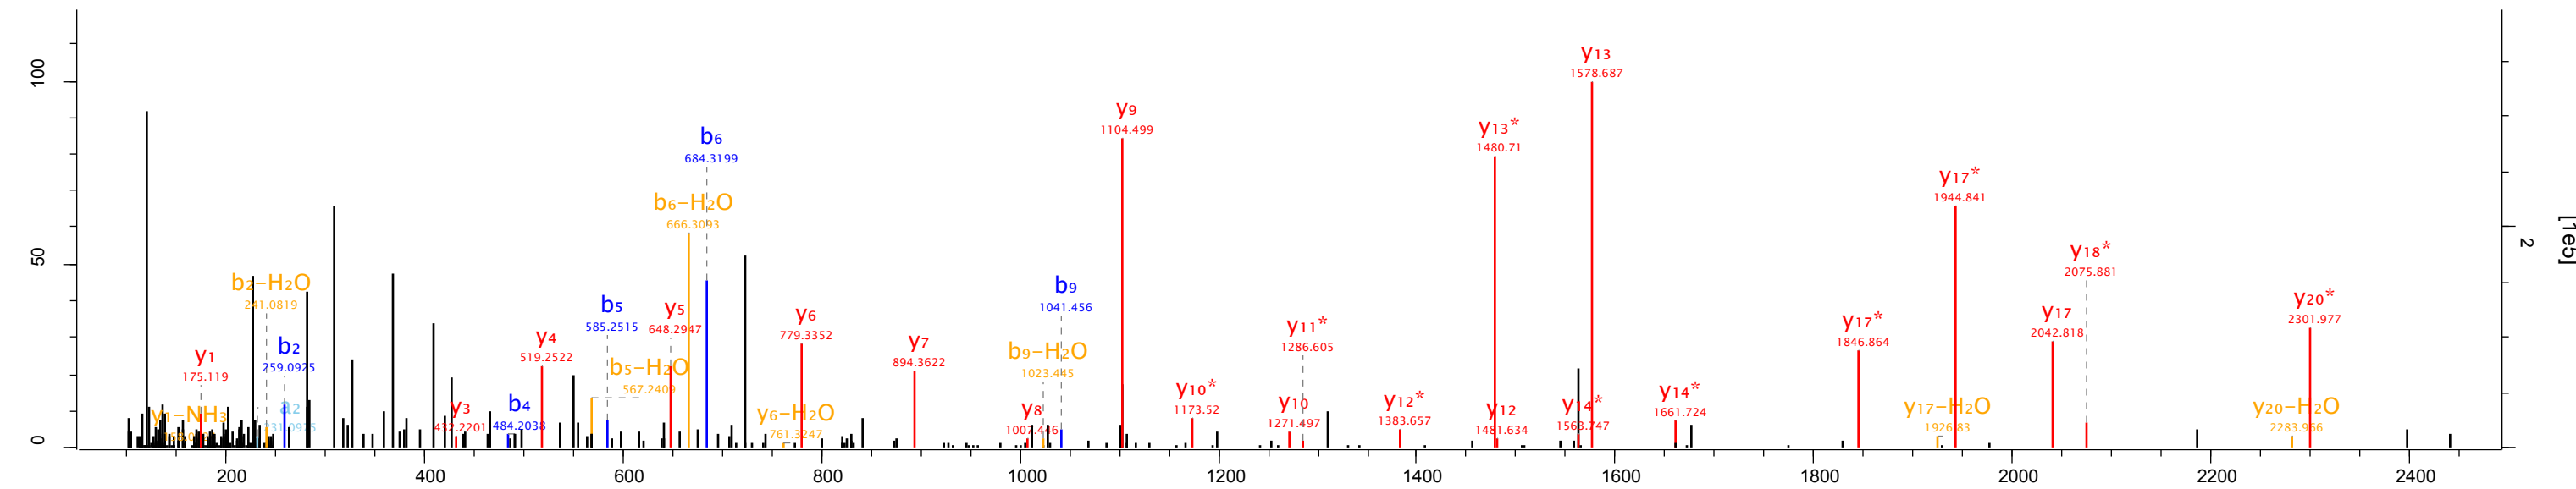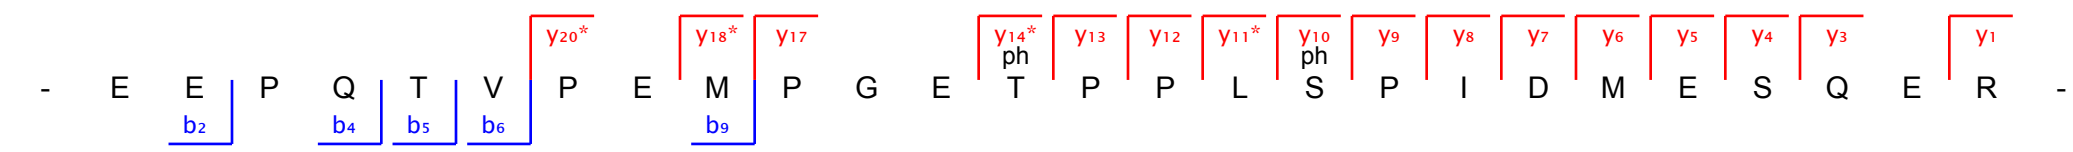

Raw file: 20171215\_MaS\_33SR\_LMH\_phospho2\_03  
 Scan: 19695 Method: FTMS; HCD Score: 156.72 m/z: 753.32 Gene names: TFPT

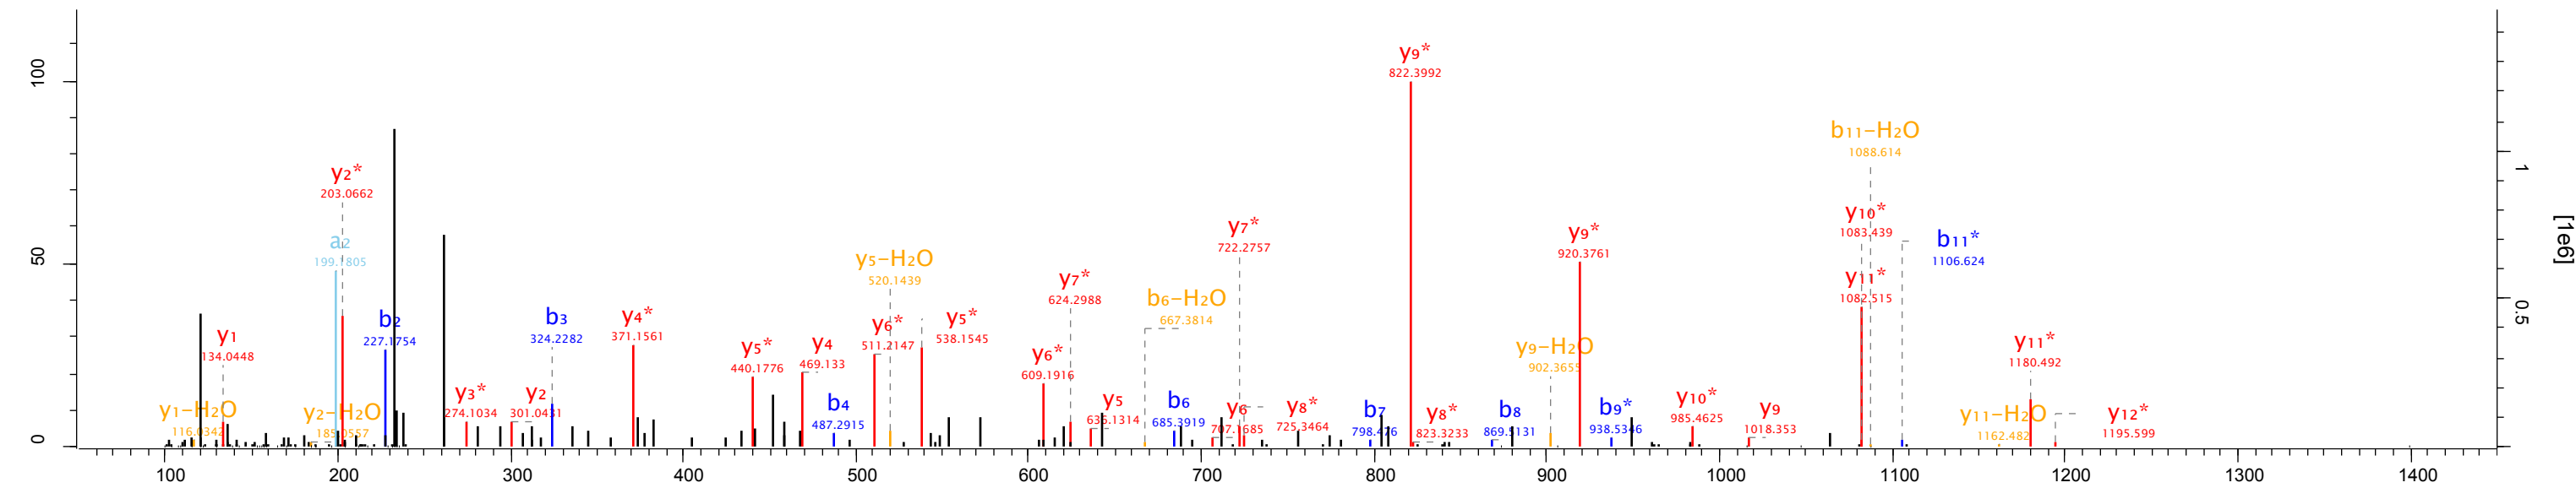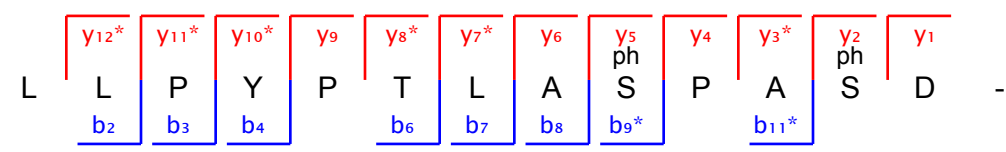

Raw file: 20171215\_MaS\_33SR\_LMH\_phospho2\_03  
 Scan: 20085 Method: FTMS; HCD Score: 148.94 m/z: 1283.54 Gene names: RRAGC

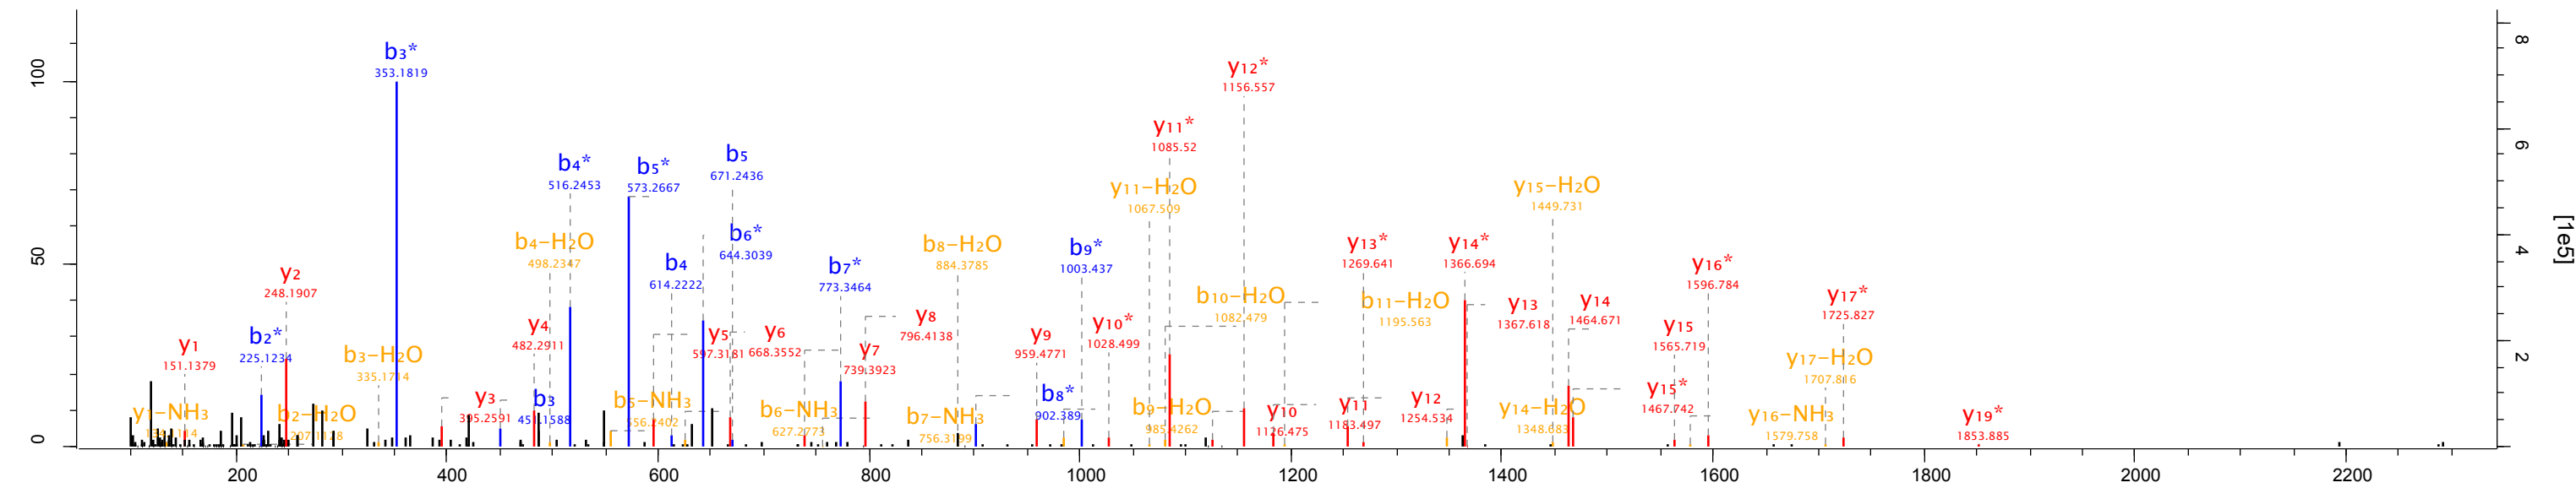

ac - ph S L Q Y G A E E T P L A G S Y G A A D S F P K -

b<sub>2</sub>\*
b<sub>3</sub>
b<sub>4</sub>
b<sub>5</sub>
b<sub>6</sub>\*
b<sub>7</sub>\*
b<sub>8</sub>\*
b<sub>9</sub>\*
y<sub>19</sub>\*
y<sub>17</sub>\*
y<sub>16</sub>\*
y<sub>15</sub>
y<sub>14</sub>
y<sub>13</sub>
y<sub>12</sub>
y<sub>11</sub>
y<sub>10</sub> ph
y<sub>9</sub>
y<sub>8</sub>
y<sub>7</sub>
y<sub>6</sub>
y<sub>5</sub>
y<sub>4</sub>
y<sub>3</sub>
y<sub>2</sub>
y<sub>1</sub>

Raw file 20171215\_MaS\_33SR\_LMH\_phospho2\_03 Scan 20215 Method FTMS; HCD Score 117.96 m/z 813.68 Gene names PXN

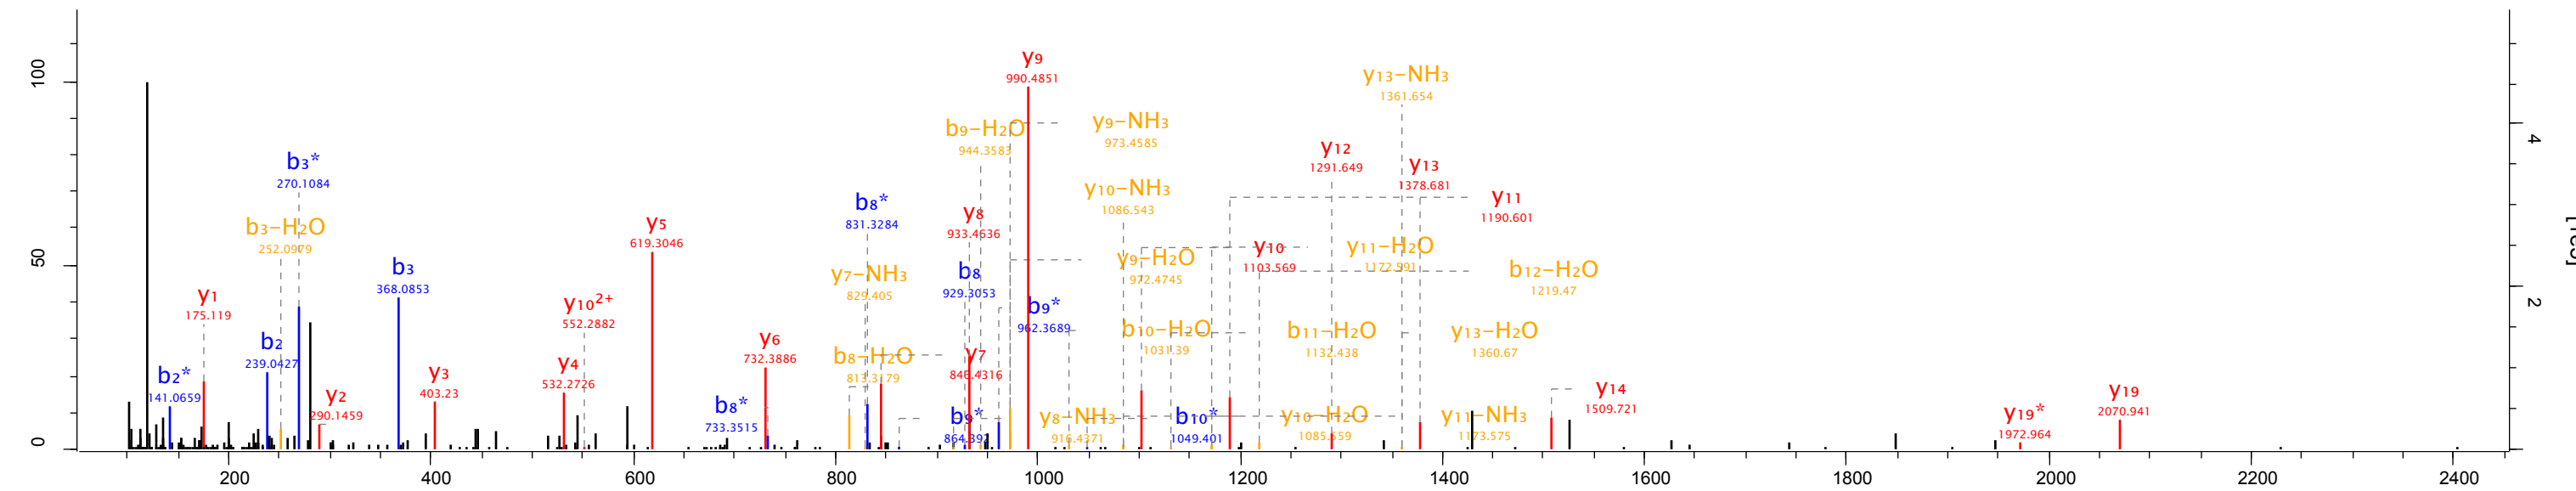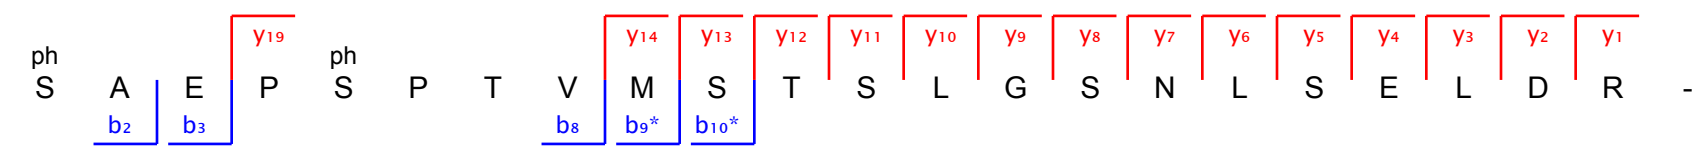



Raw file 20171215\_MaS\_33SR\_LMH\_phospho2\_03 Scan 20745 Method FTMS; HCD Score 211.72 m/z 1219.93 Gene names RPLP0;RPLPOP6

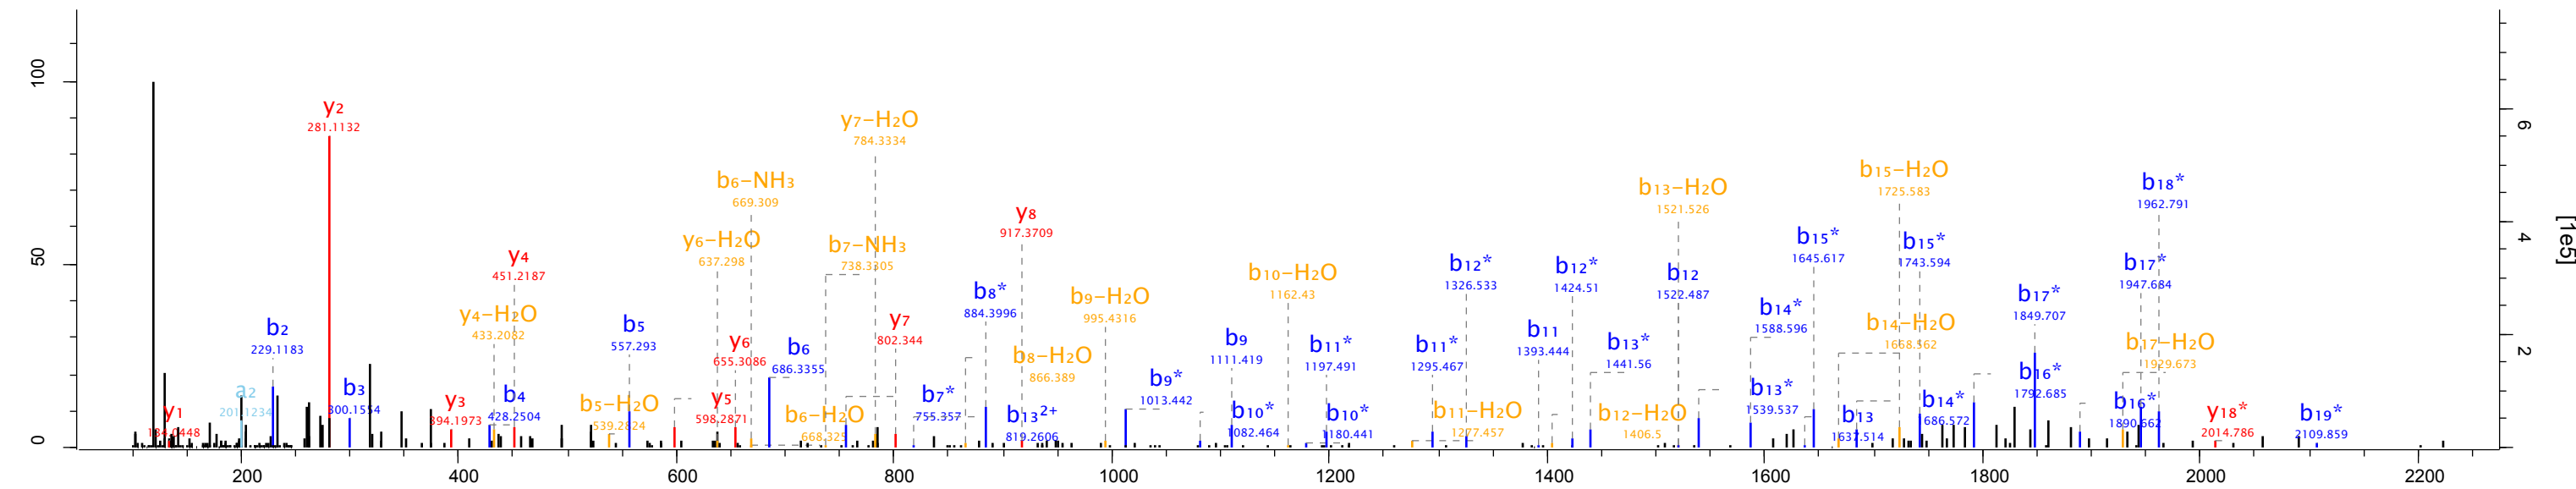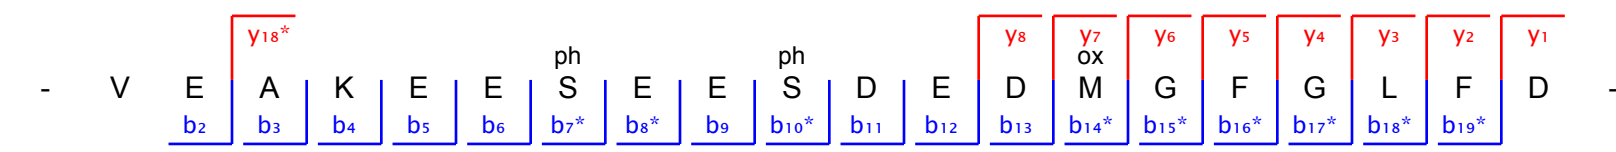

Raw file 20171215\_MaS\_33SR\_LMH\_phospho2\_03 Scan 2285 Method FTMS; HCD Score 62.97 m/z 688.27 Gene names BICD2

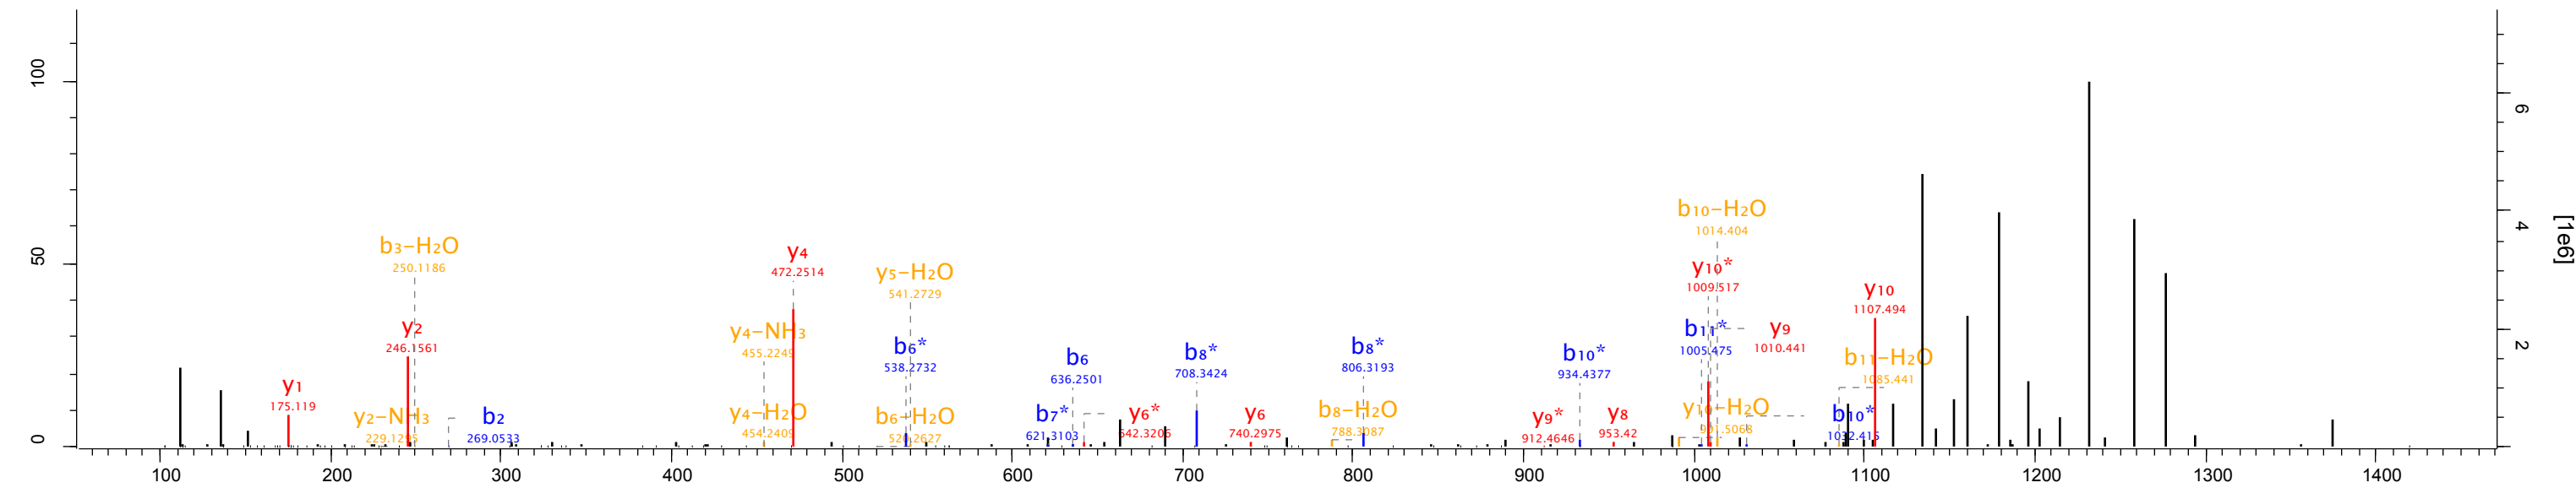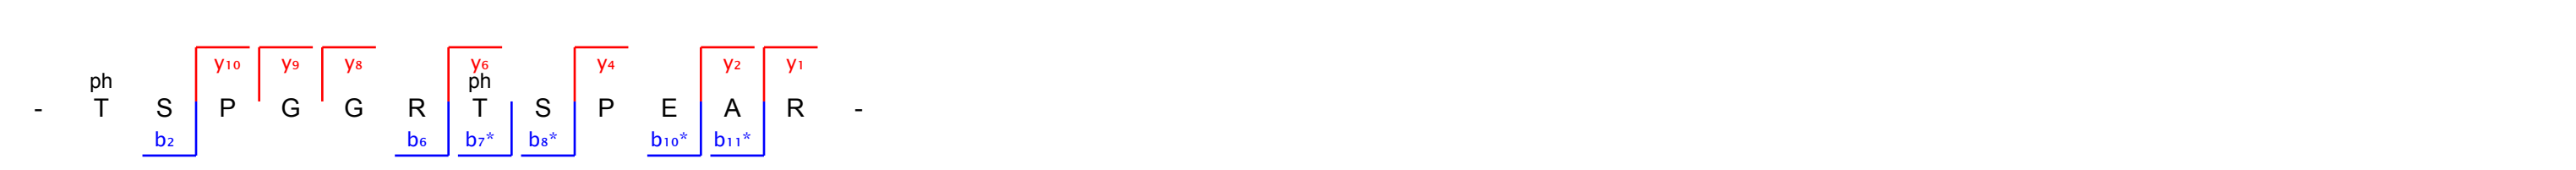

20171215\_MaS\_33SR\_LMH\_phospho2\_03 2325 FTMS; HCD 162.46 797.79 HIRIP3

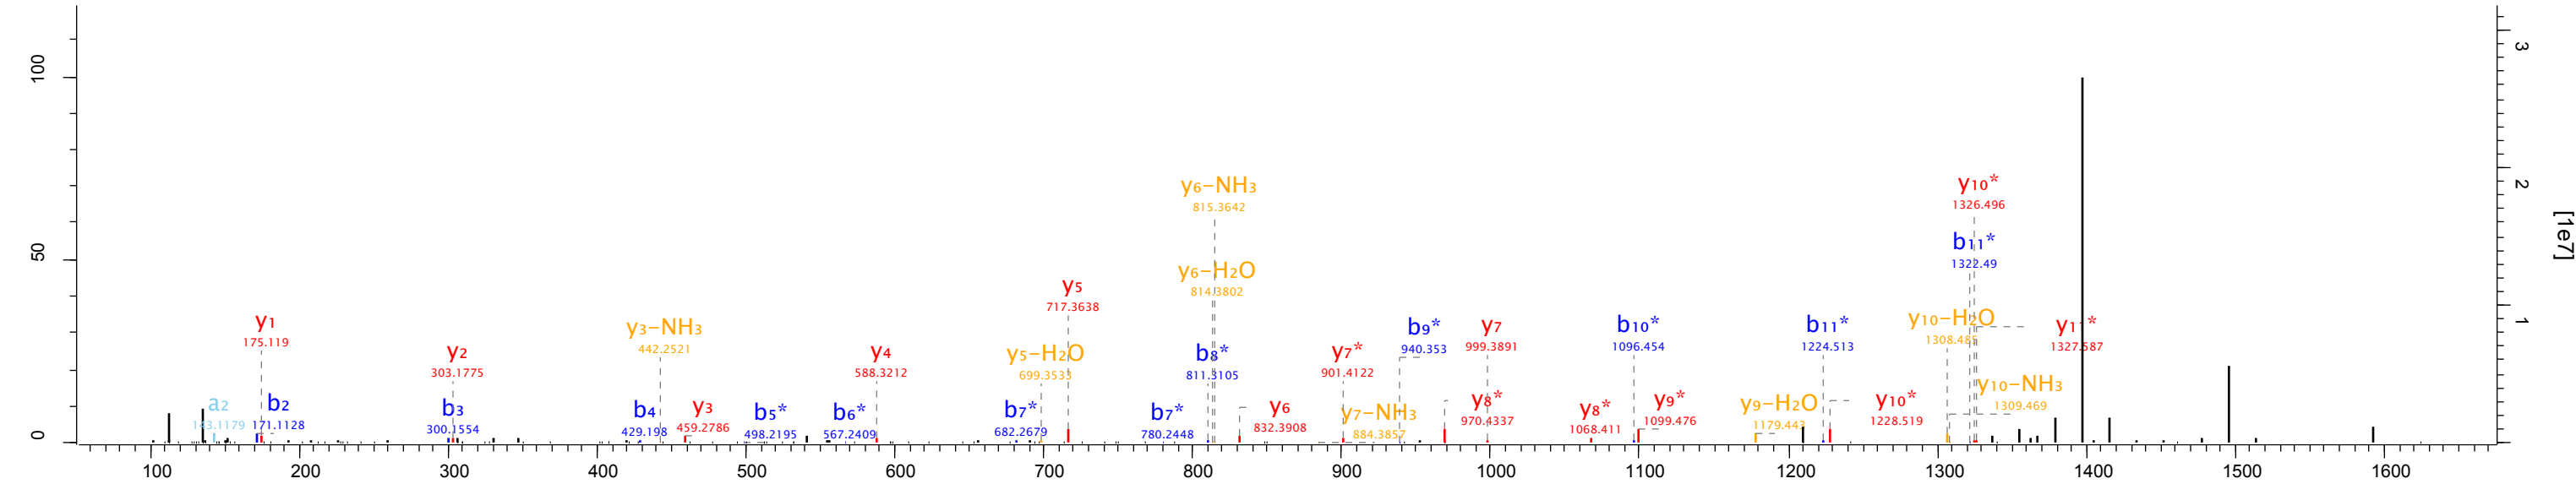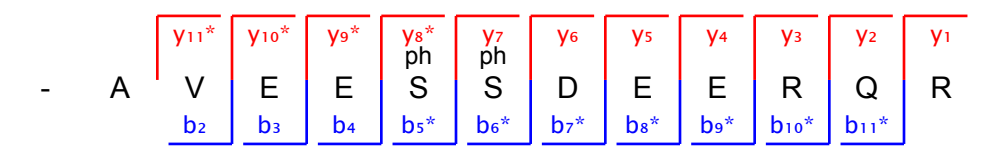

Raw file: 20171215\_MaS\_33SR\_LMH\_phospho2\_03  
 Scan: 2345 Method: FTMS; HCD Score: 174.87 m/z: 607.76 Gene names: MICALL1

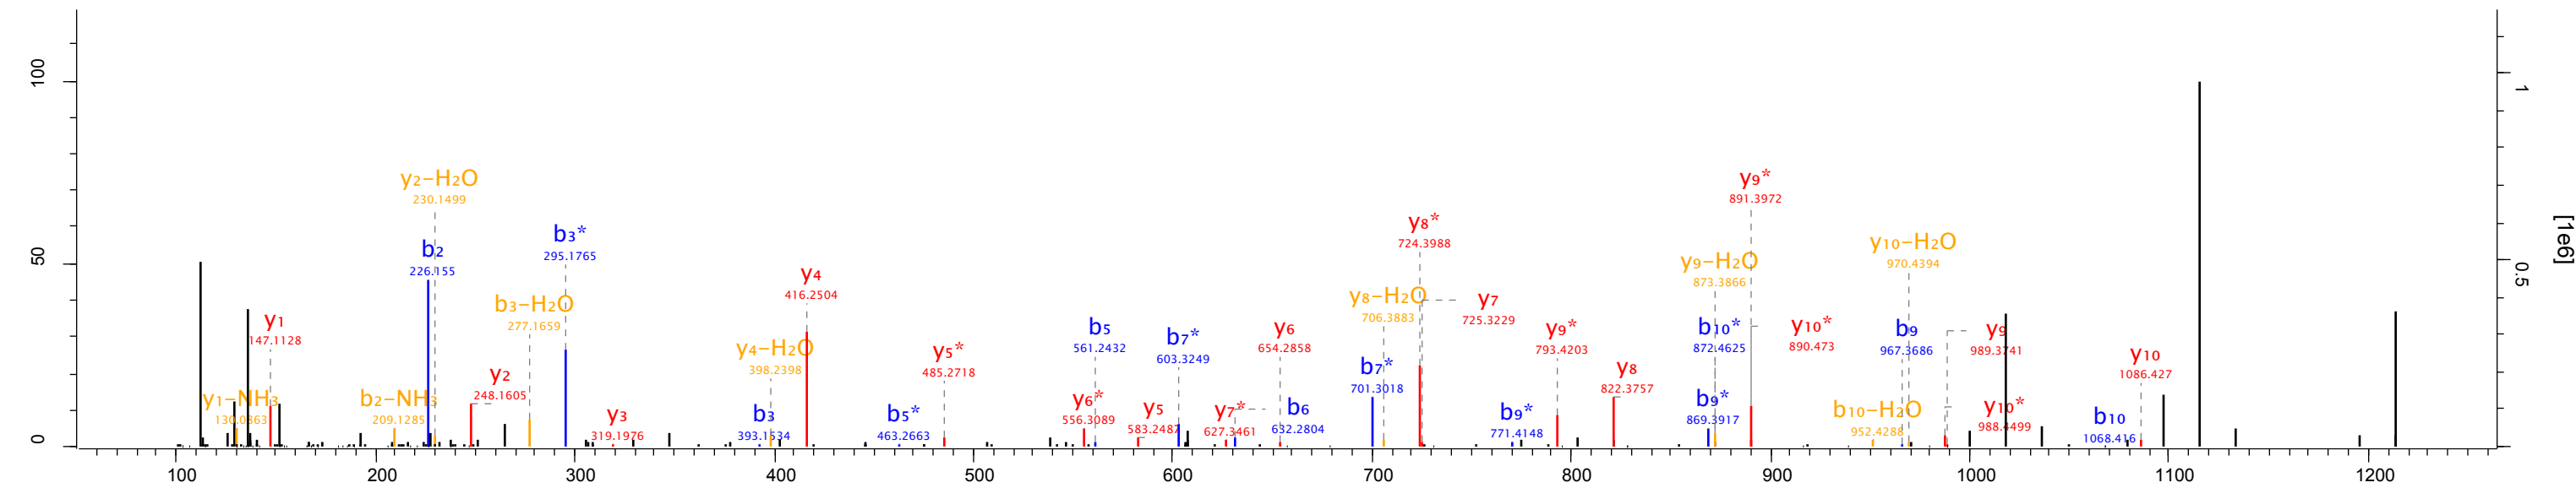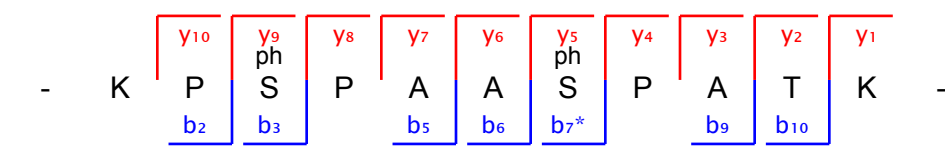



Raw file Scan Method Score m/z Gene names

20171215\_MaS\_33SR\_LMH\_phospho2\_03 2445 FTMS; HCD 101.55 393.18 SRRM1

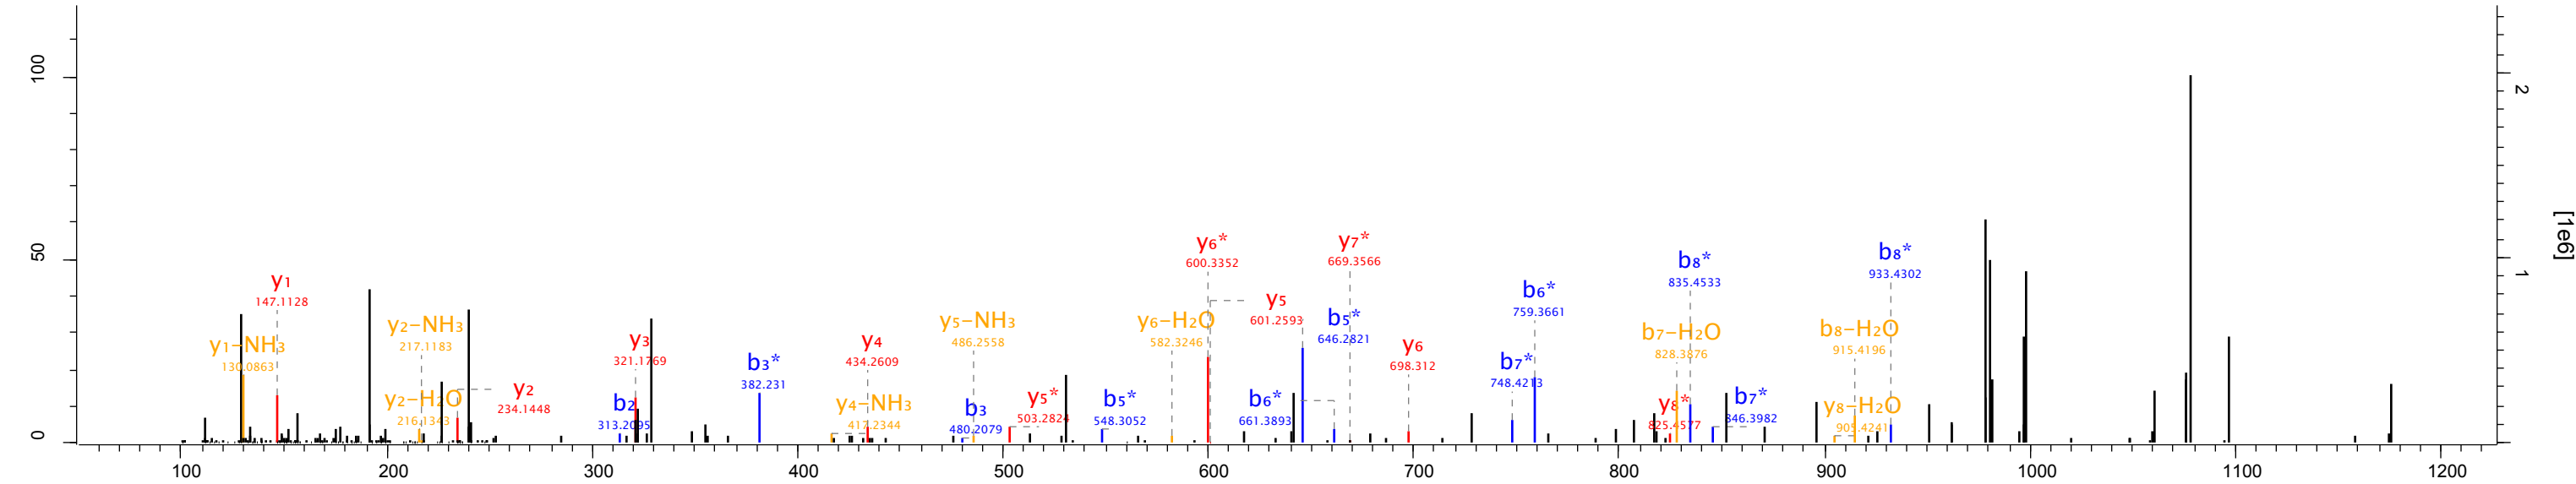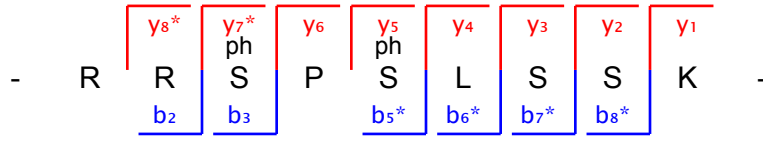

[1e6]

Raw file: 20171215\_MaS\_33SR\_LMH\_phospho2\_03  
 Scan: 2915 Method: FTMS; HCD Score: 104.95 m/z: 627.25 Gene names: ATXN2L

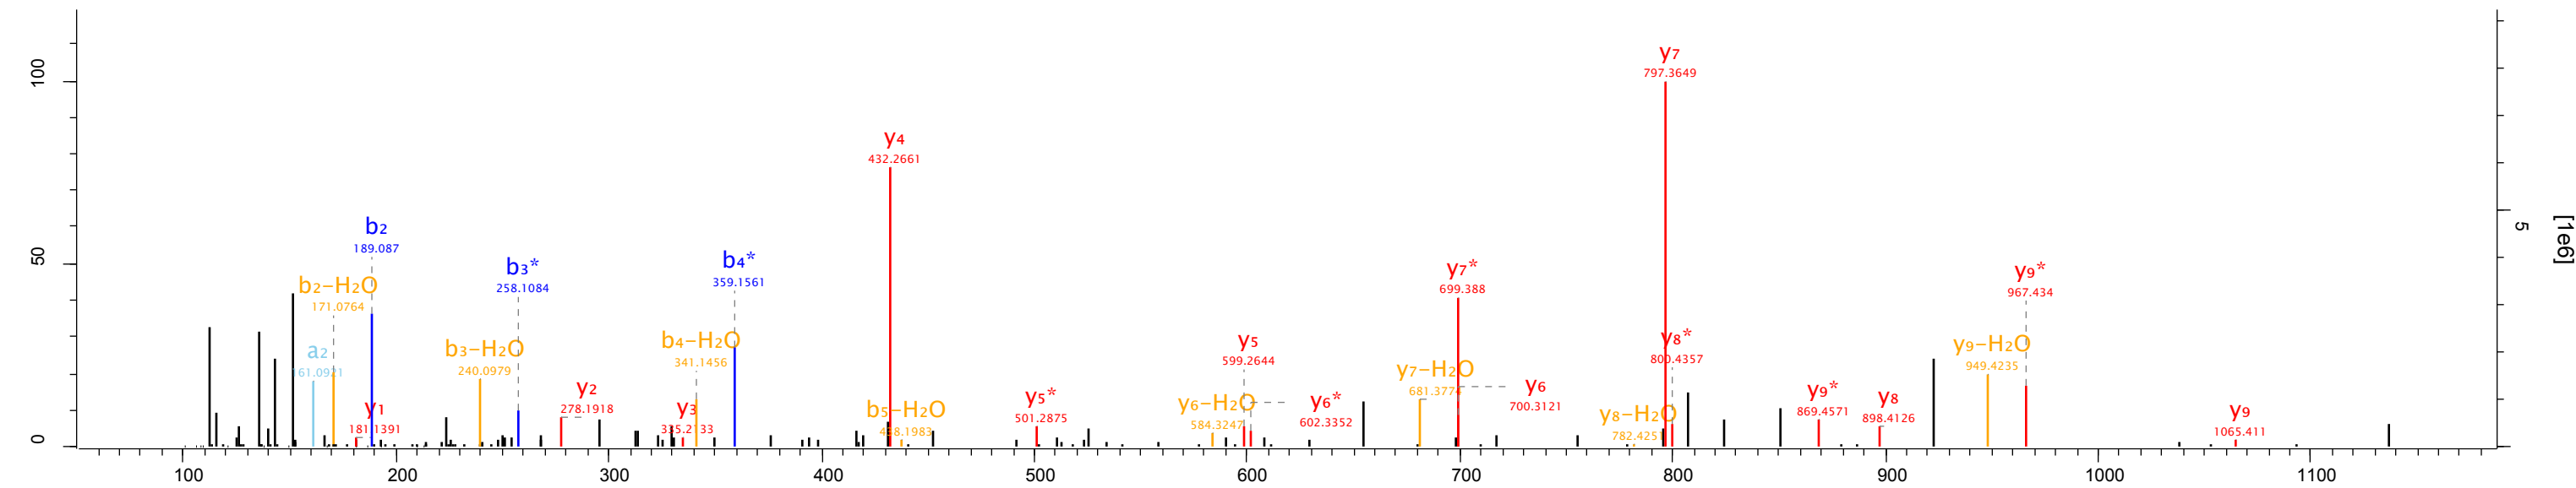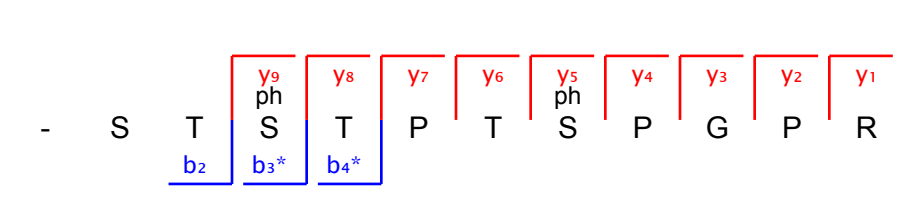

Raw file 20171215\_MaS\_33SR\_LMH\_phospho2\_03 Scan 3215 Method FTMS; HCD Score 58.08 m/z 606.73 Gene names PPP2R5A

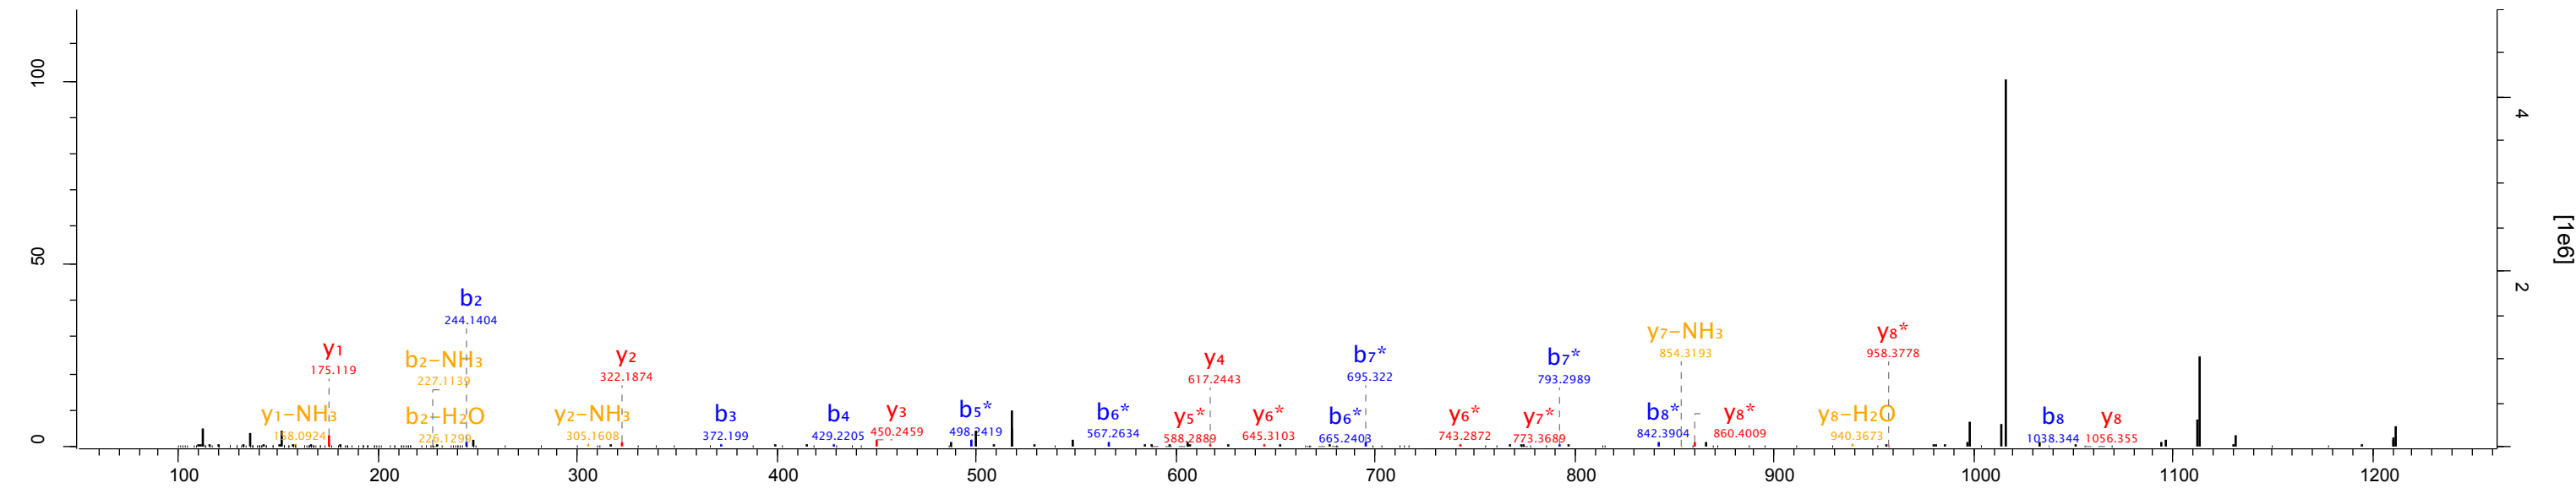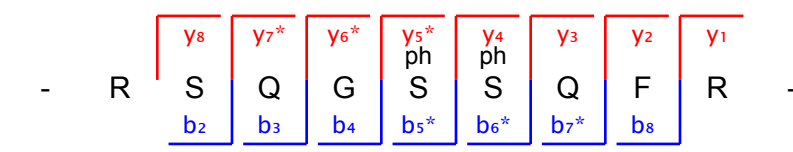



Raw file 20171215\_MaS\_33SR\_LMH\_phospho2\_03 Scan 3365 Method FTMS; HCD Score 168.3 m/z 799.31 Gene names EPN2

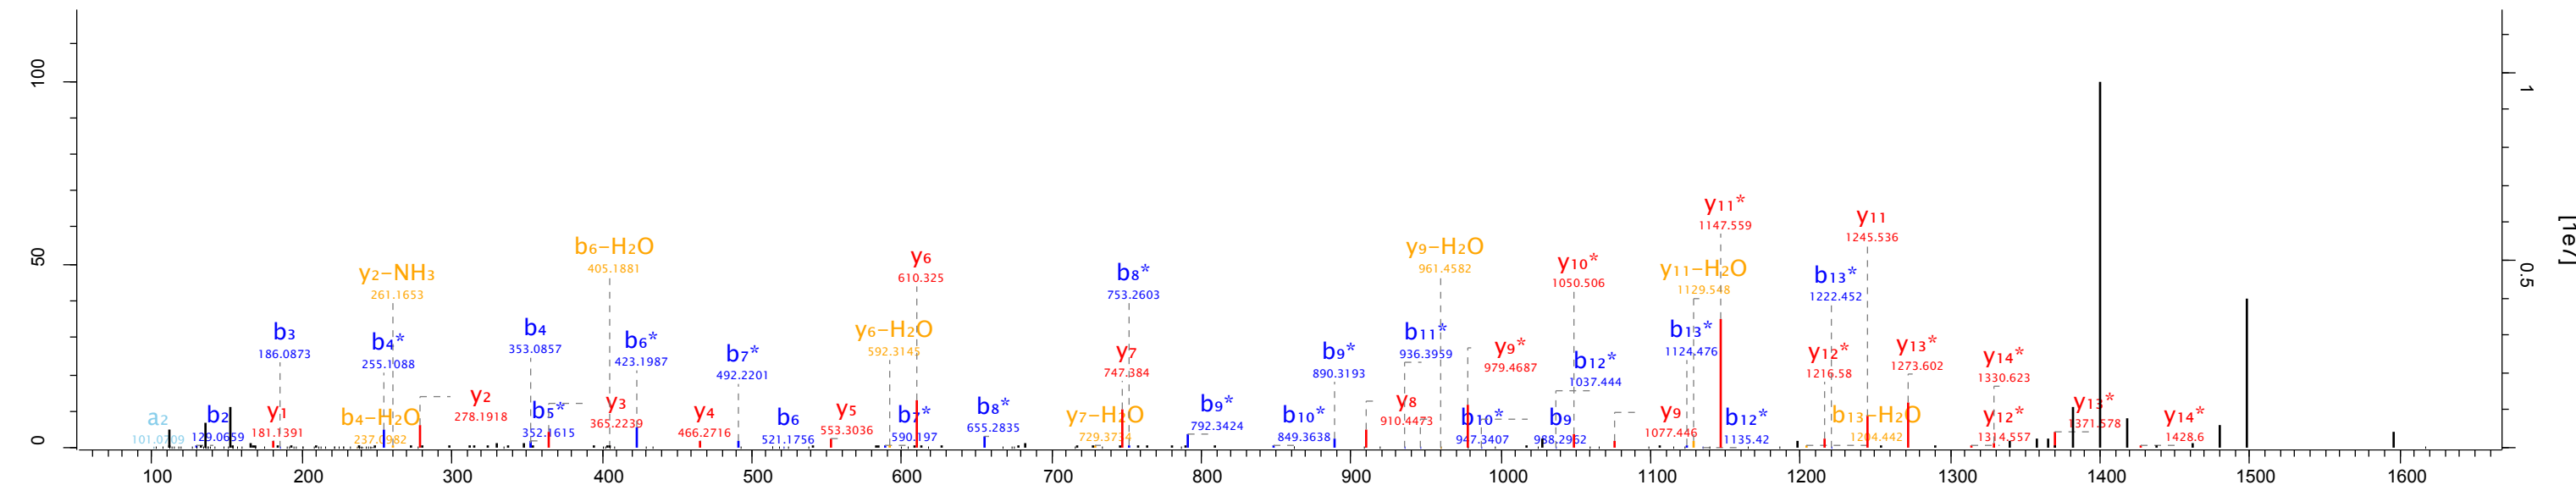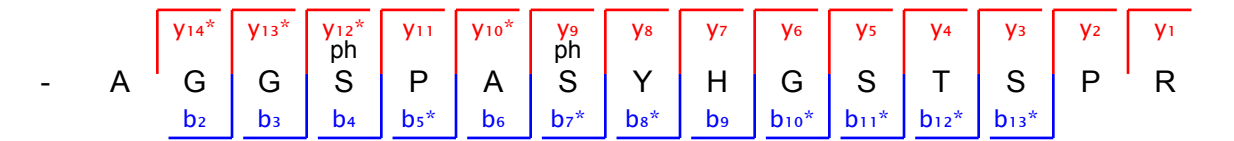



Raw file 20171215\_MaS\_33SR\_LMH\_phospho2\_03 Scan 3475 Method FTMS; HCD Score 89.92 m/z 730.63 Gene names HIRIP3

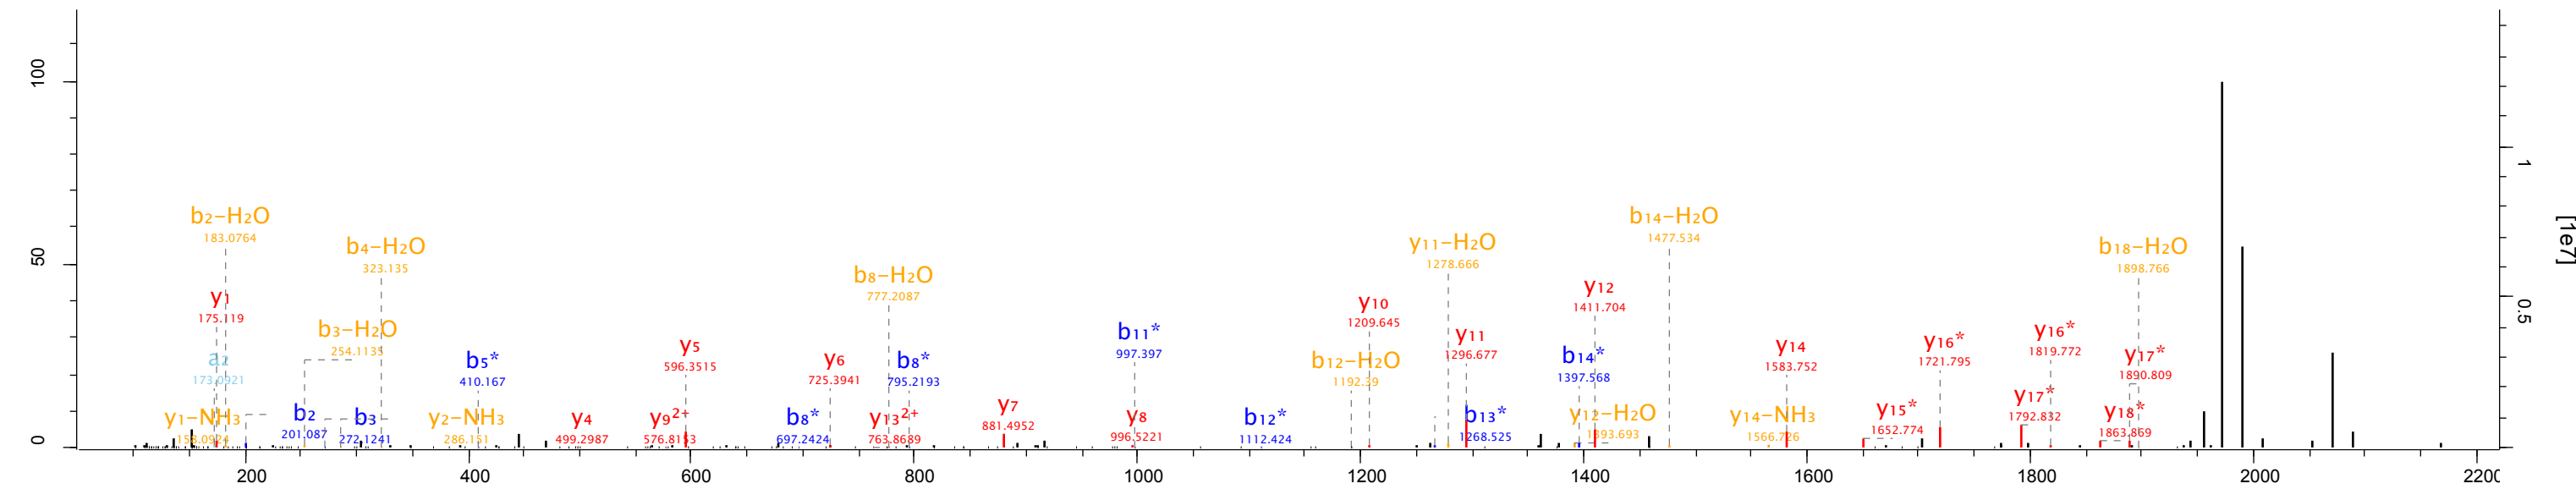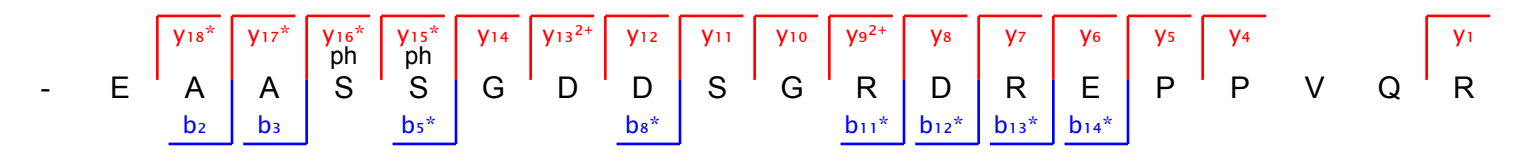

Raw file 20171215\_MaS\_33SR\_LMH\_phospho2\_03 Scan 4135 Method FTMS; HCD Score 73.45 m/z 877.37 Gene names CCDC132

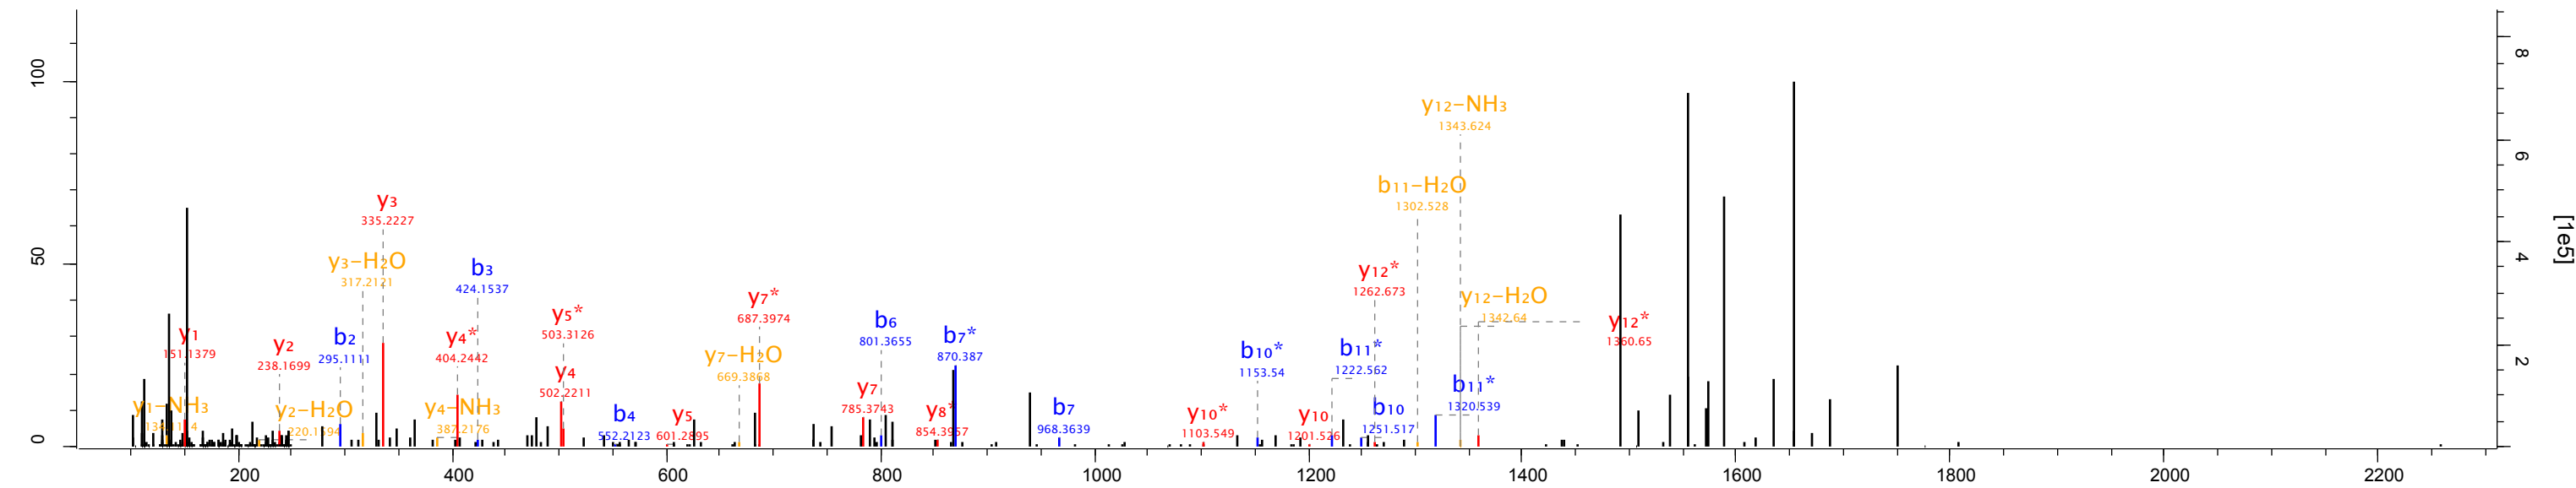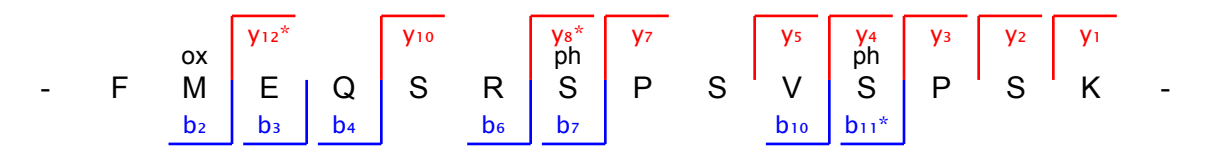

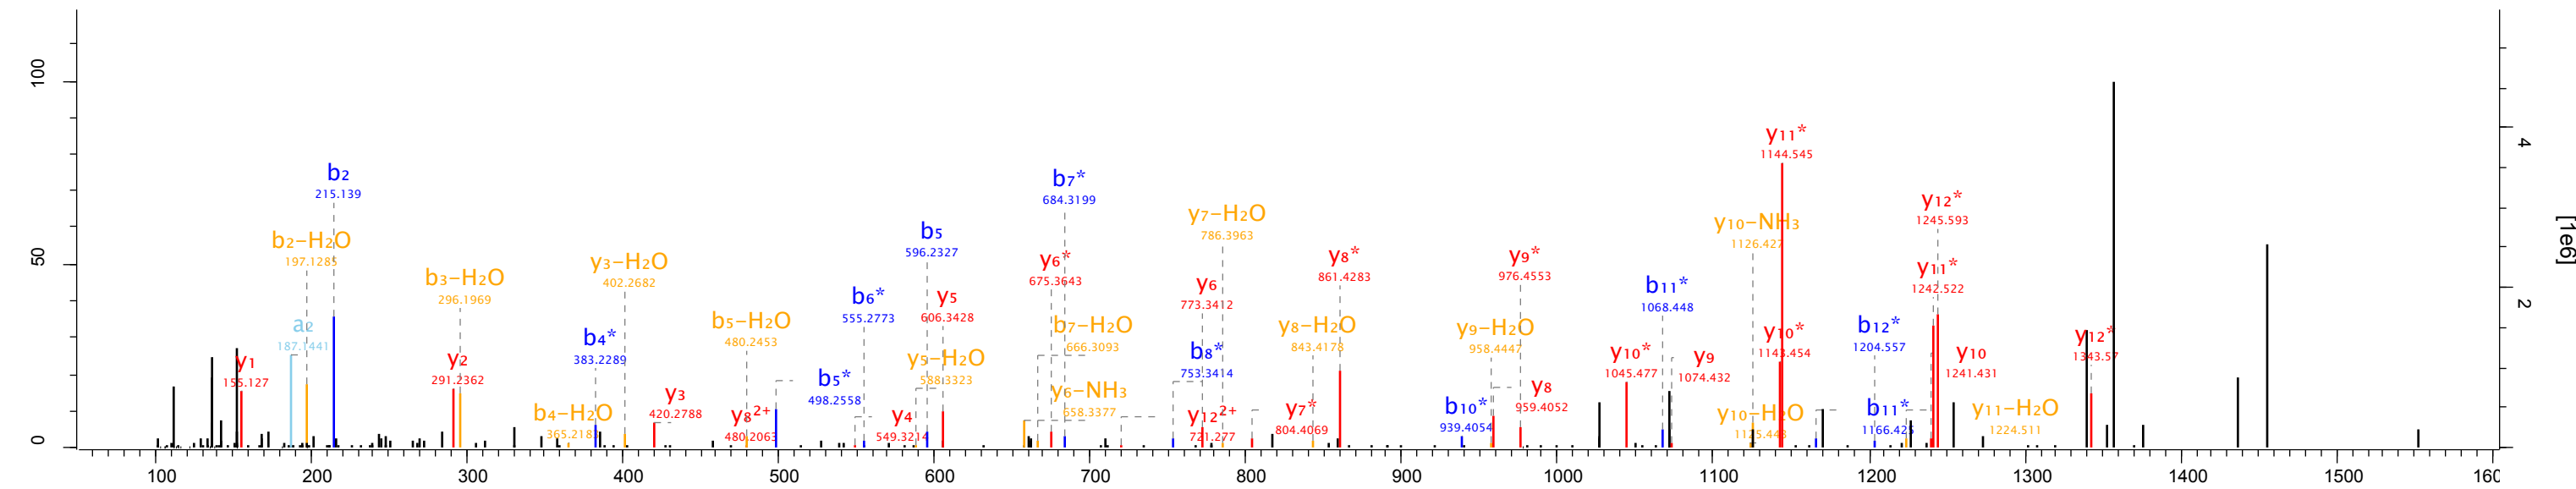

- L T V S D G E S G E E K K -

Fragmentation mapping:

- b<sub>2</sub>** (blue box) covers T and V.
- b<sub>4</sub>\*** (blue box) covers S.
- b<sub>5</sub>** (blue box) covers D.
- b<sub>6</sub>\*** (blue box) covers G.
- b<sub>7</sub>\*** (blue box) covers E.
- b<sub>8</sub>\*** (blue box) covers S.
- b<sub>10</sub>\*** (blue box) covers G.
- b<sub>11</sub>\*** (blue box) covers E.
- b<sub>12</sub>\*** (blue box) covers E.
- y<sub>1</sub>** (red box) covers K.
- y<sub>2</sub>** (red box) covers K.
- y<sub>3</sub>** (red box) covers E.
- y<sub>4</sub>** (red box) covers E.
- y<sub>5</sub>** (red box) covers G.
- y<sub>6</sub>** (red box) covers S.
- y<sub>7</sub>\*** (red box) covers E.
- y<sub>8</sub>** (red box) covers G.
- y<sub>9</sub>** (red box) covers D.
- y<sub>10</sub> ph** (red box) covers S.
- y<sub>11</sub>\*** (red box) covers V.
- y<sub>12</sub>\*** (red box) covers T.

Raw file 20171215\_MaS\_33SR\_LMH\_phospho2\_03 Scan 4205 Method FTMS; HCD Score 44.93 m/z 425.87 Gene names MAP4K4

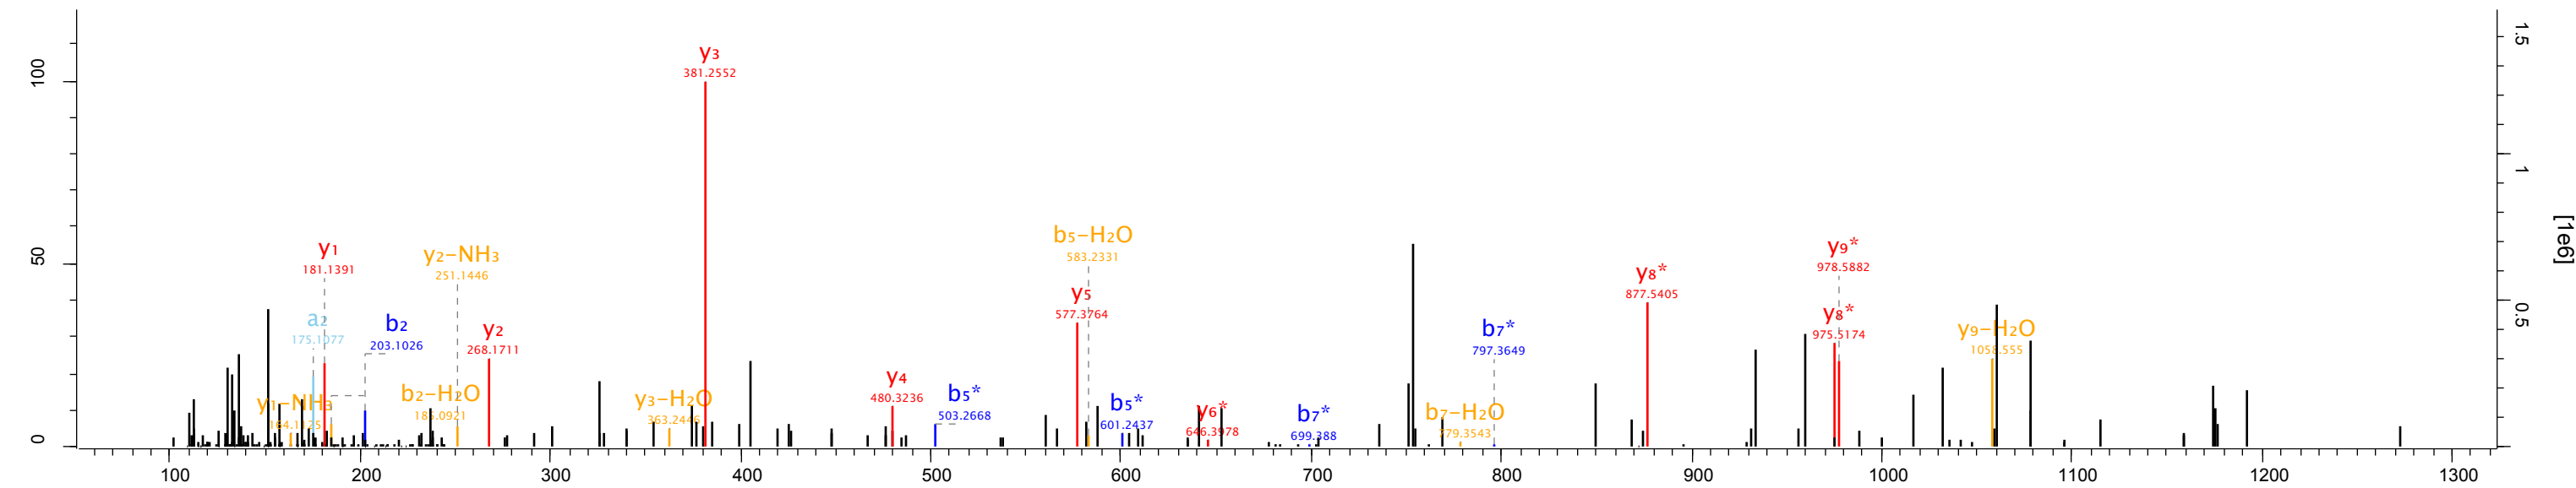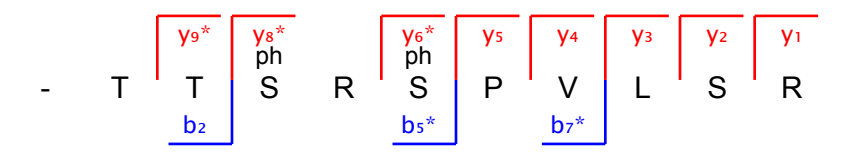

Raw file 20171215\_MaS\_33SR\_LMH\_phospho2\_03 Scan 4595 Method FTMS; HCD Score 59.54 m/z 613.95 Gene names TCF20

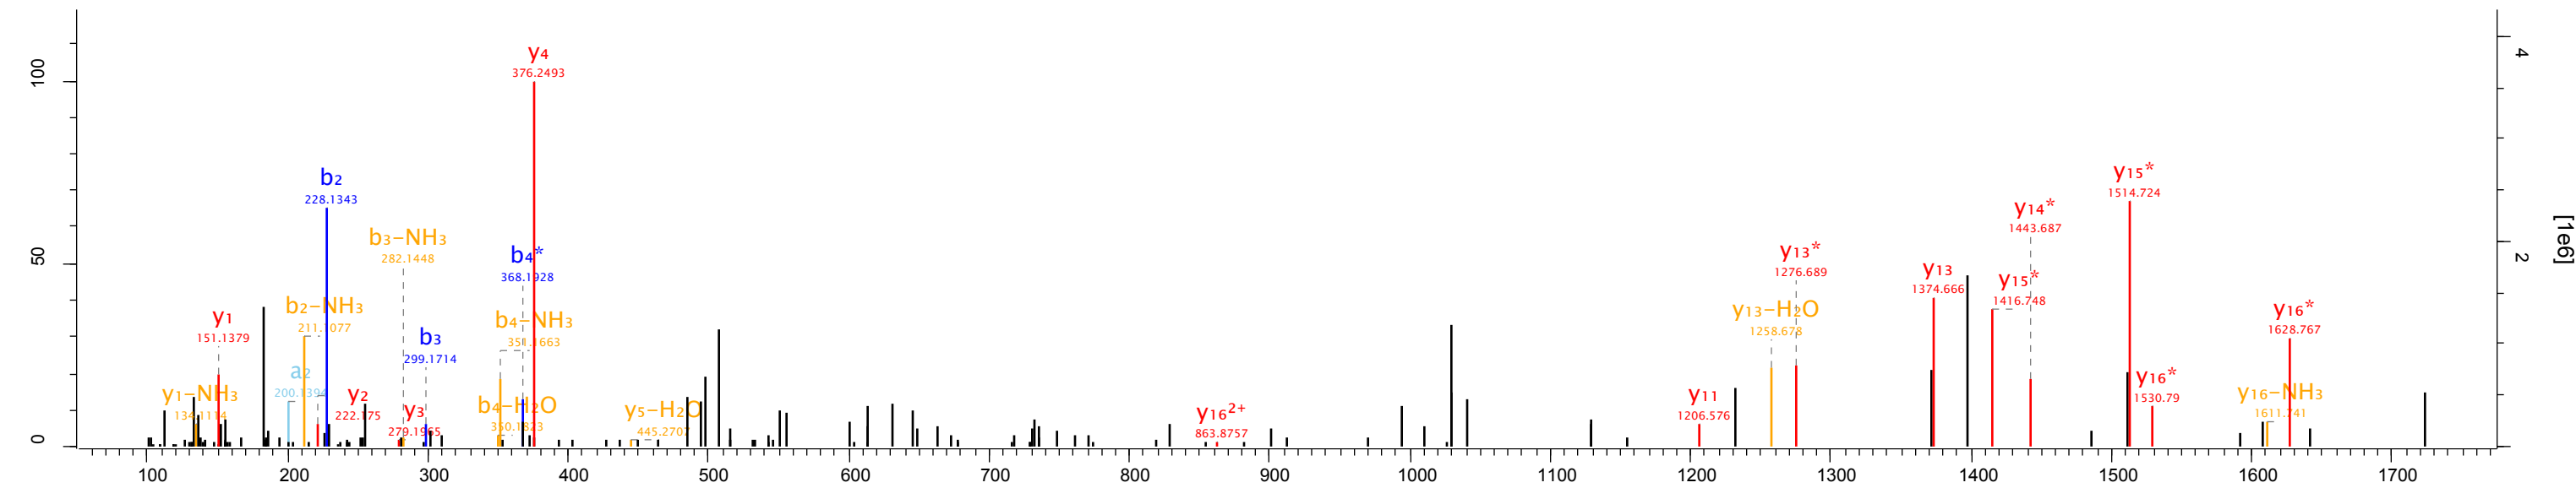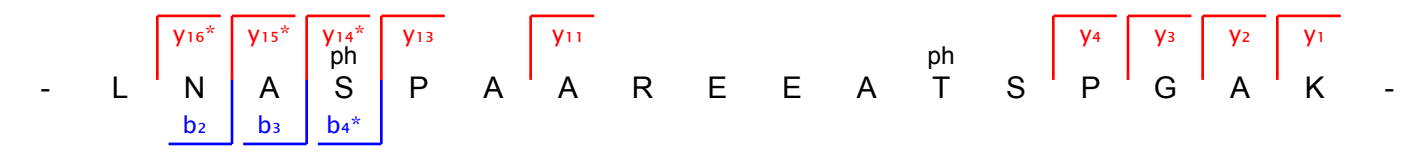

Raw file 20171215\_MaS\_33SR\_LMH\_phospho2\_03 Scan 4675 Method FTMS; HCD Score 135.09 m/z 677.76 Gene names SMARCD1

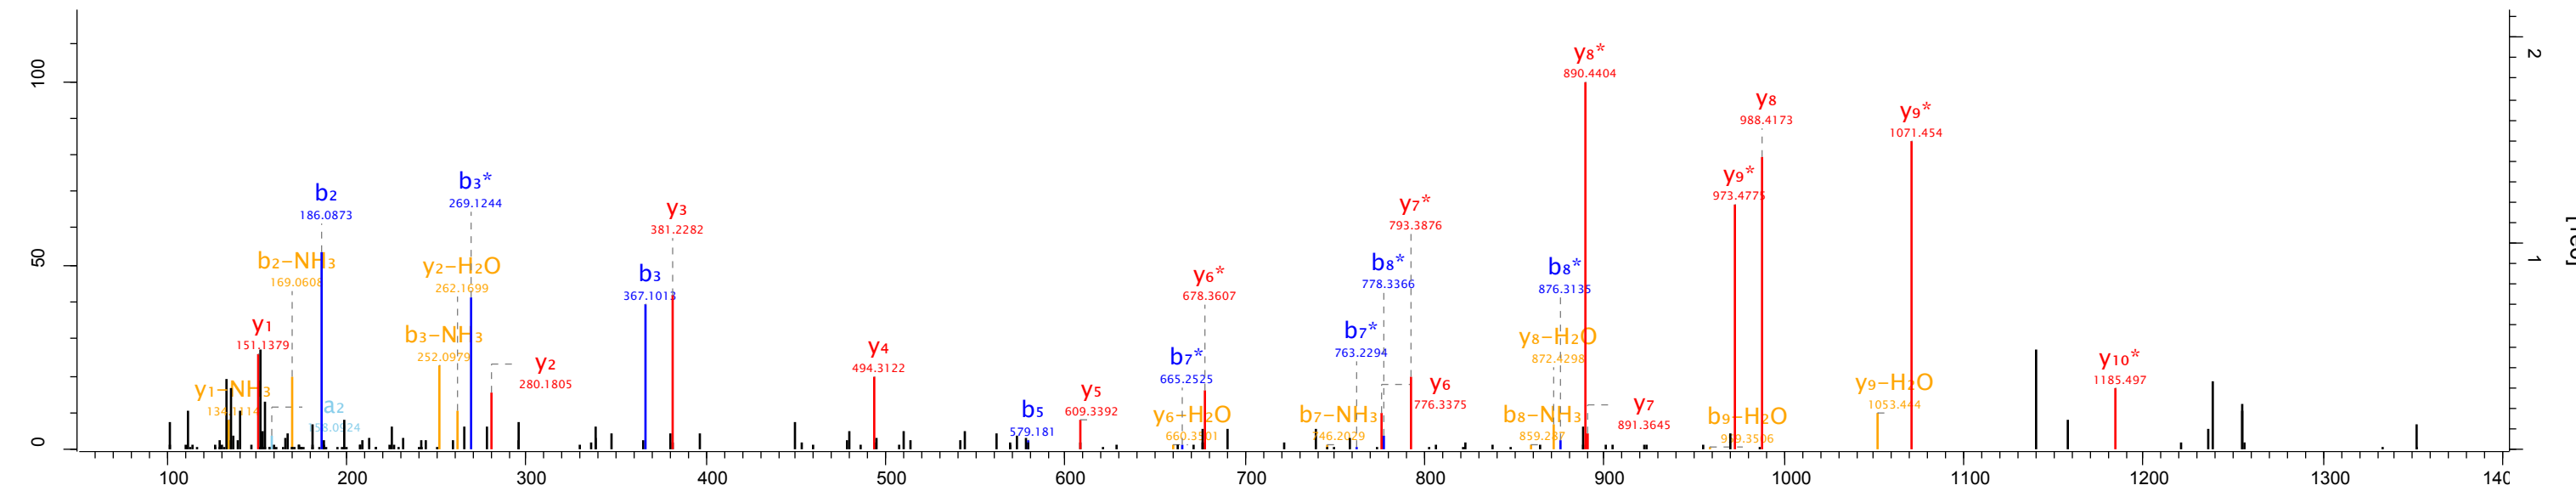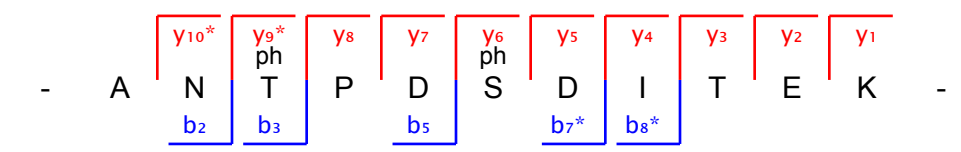



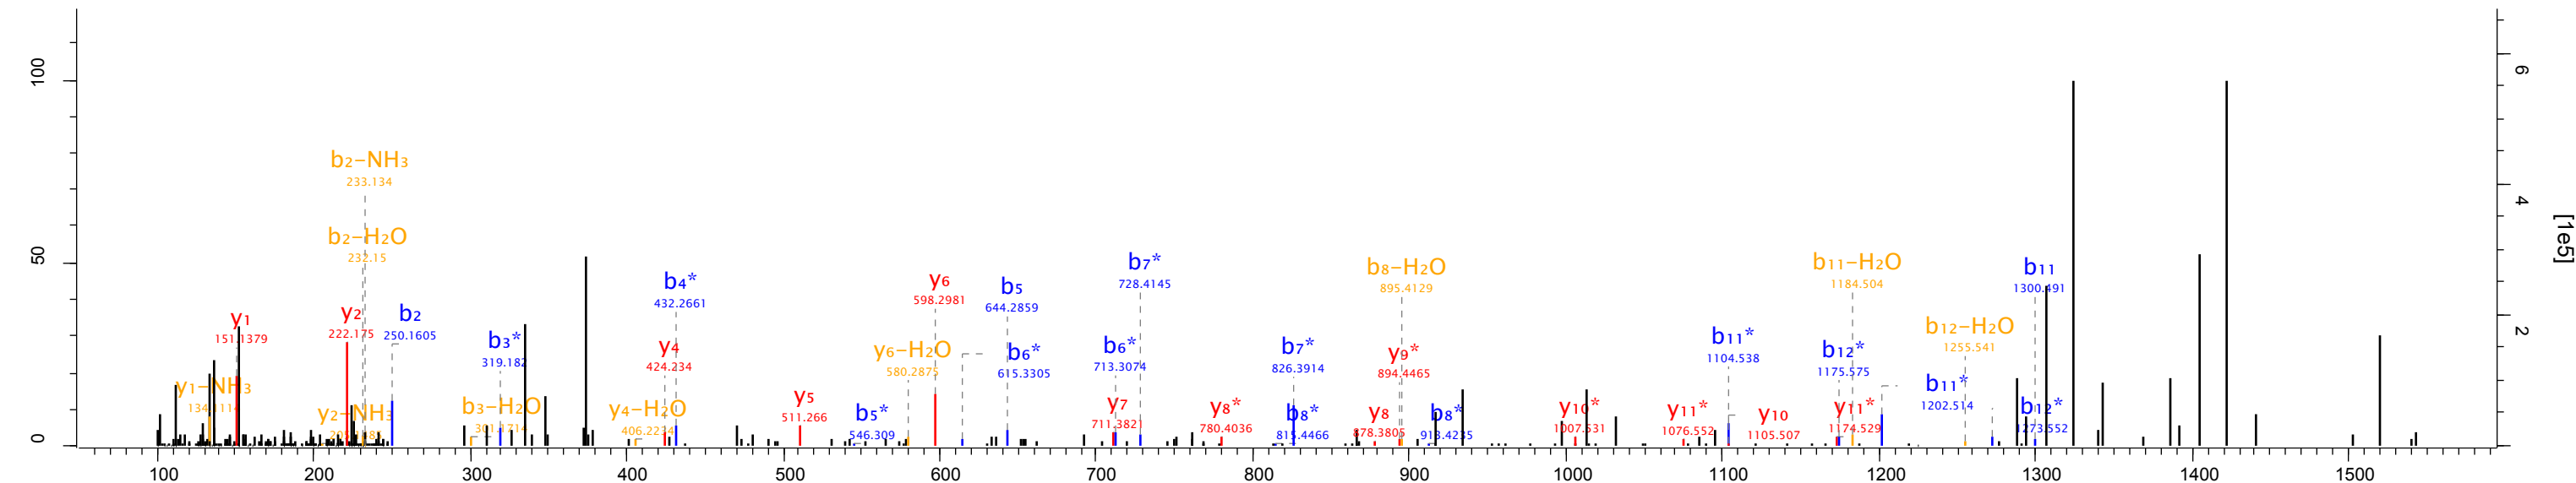

- R S S Y<sub>11</sub>\* Y<sub>10</sub> Y<sub>9</sub>\* Y<sub>8</sub> Y<sub>7</sub> Y<sub>6</sub> Y<sub>5</sub> Y<sub>4</sub> D Y<sub>2</sub> Y<sub>1</sub> -

ph S L N S I S S A K

b<sub>2</sub> b<sub>3</sub>\* b<sub>4</sub>\* b<sub>5</sub> b<sub>6</sub>\* b<sub>7</sub>\* b<sub>8</sub>\* b<sub>11</sub> b<sub>12</sub>\*

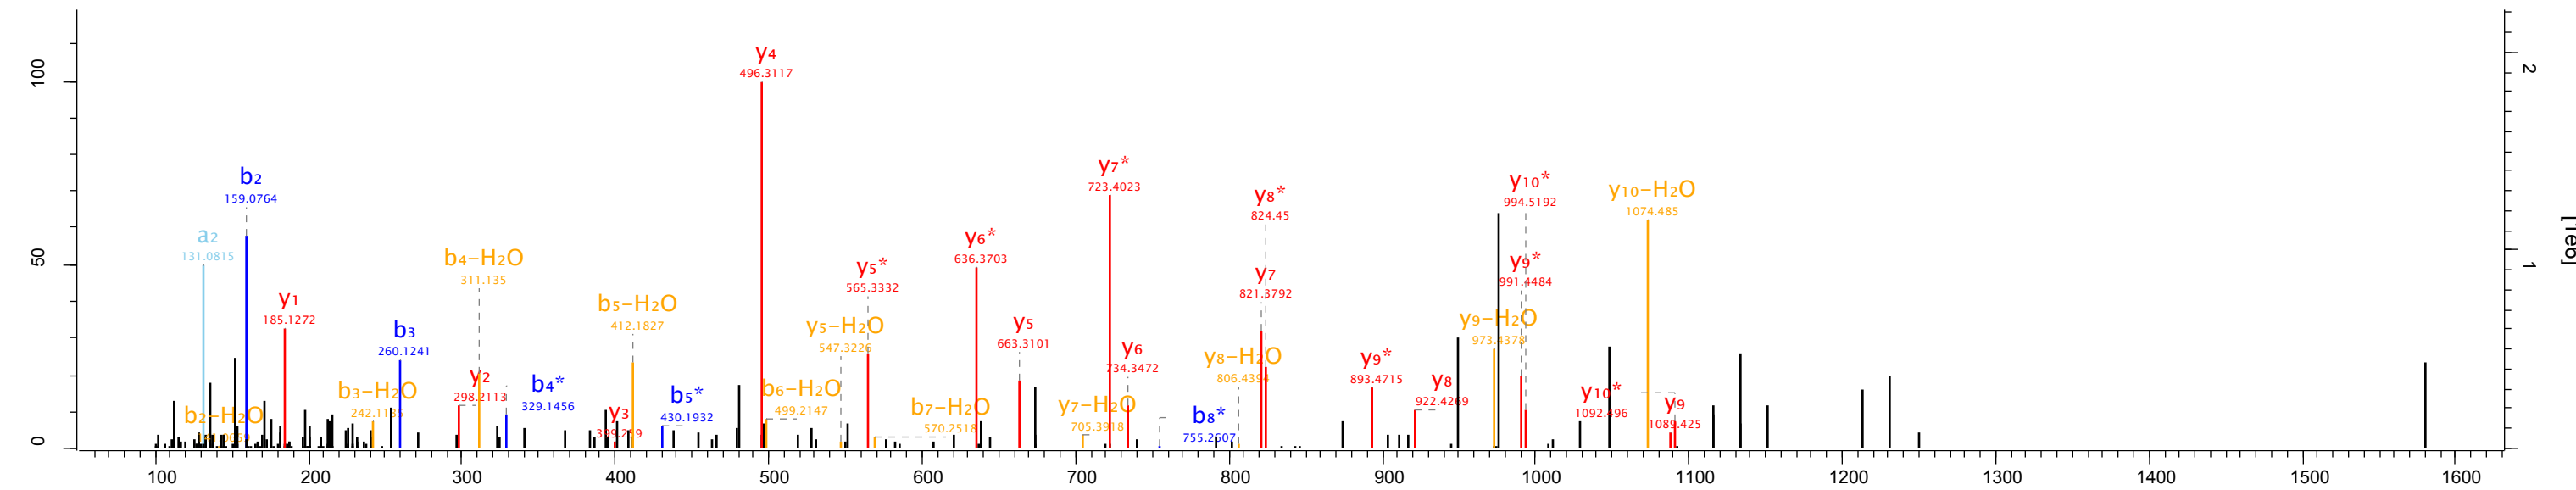

- S A T S A S P T L R -

Fragmentation mapping (b and y ions):

- b2: A
- b3: AT
- b4\*: ATS
- b5\*: AT
- b8\*: AS
- y1: R
- y2: L
- y3: T
- y4: P
- y5: SP
- y6: AS
- y7: S
- y8: TS
- y9: ST
- y10\*: AT

Raw file

20171215\_MaS\_33SR\_LMH\_phospho2\_03

Scan 5135 Method FTMS; HCD Score 84.03 m/z 912.89 Gene names SIPA1

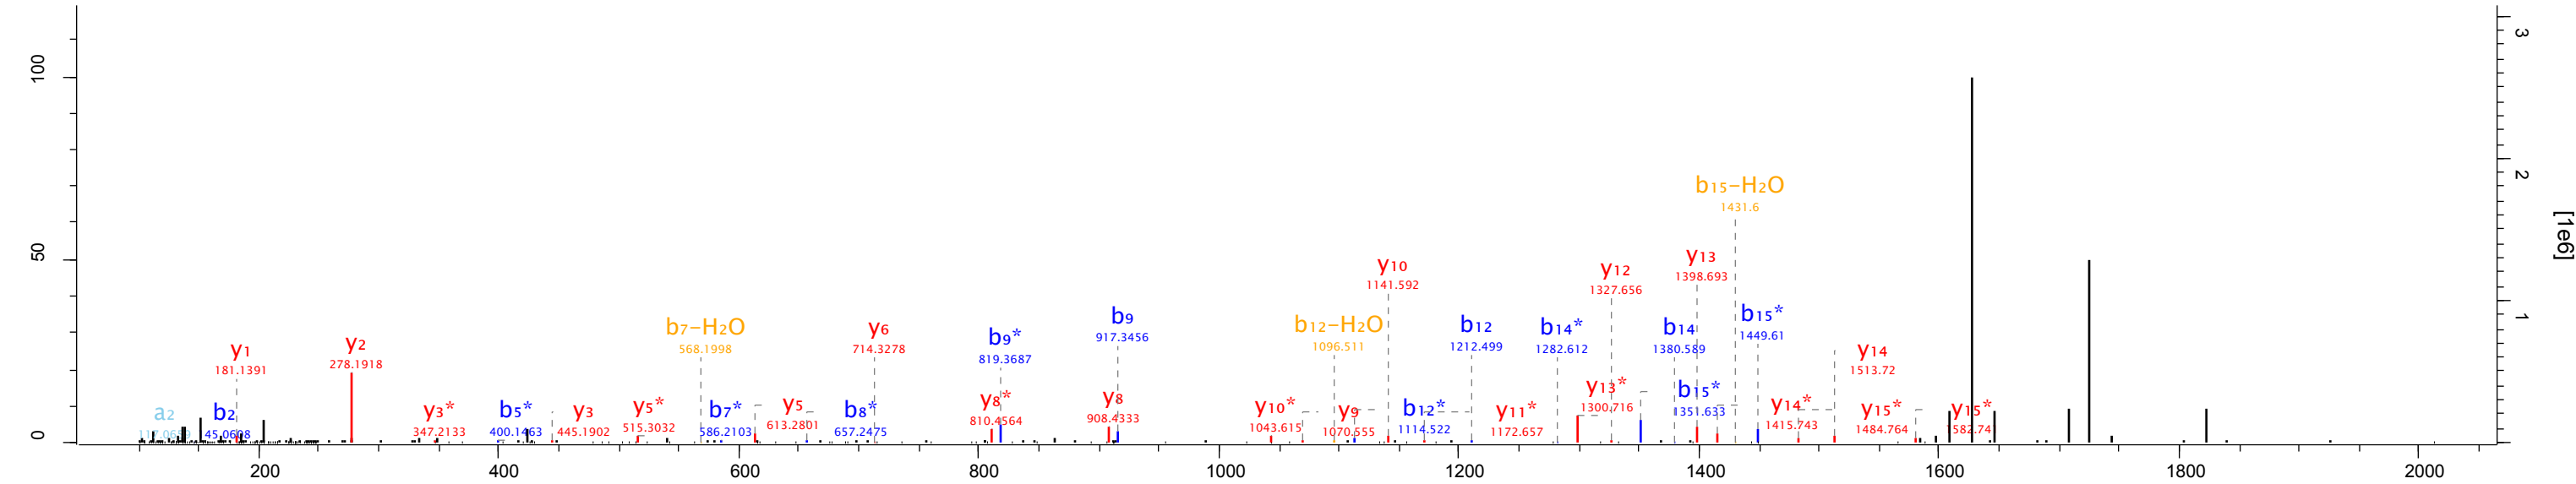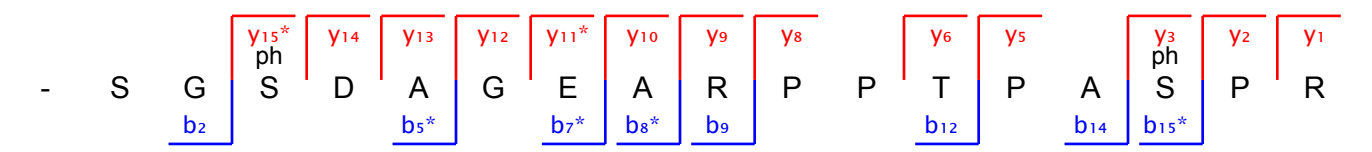

Raw file 20171215\_MaS\_33SR\_LMH\_phospho2\_03 Scan 5175 Method FTMS; HCD Score 71.78 m/z 772.78 Gene names ZC3HAV1

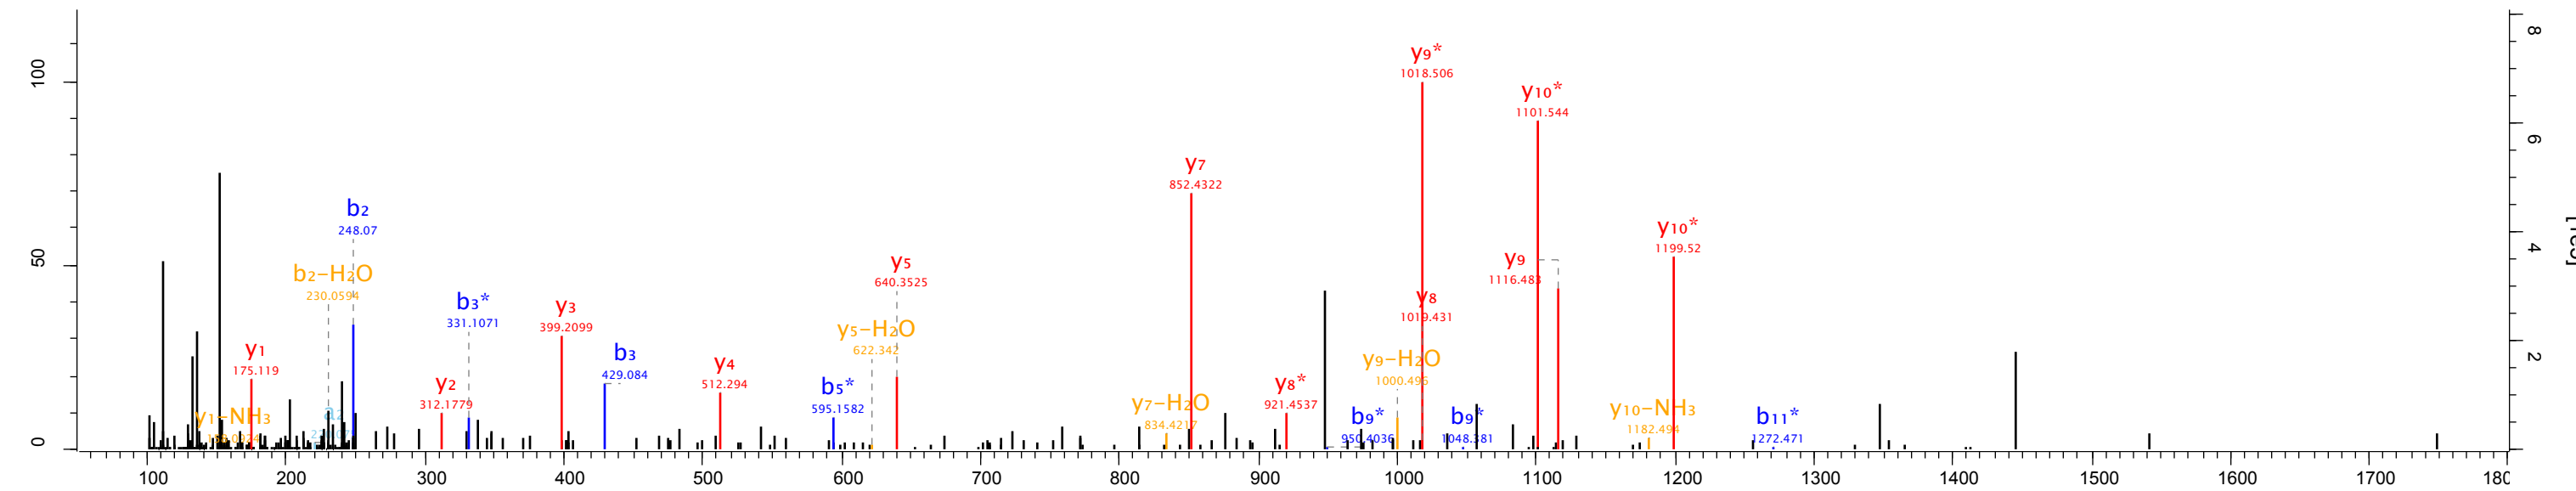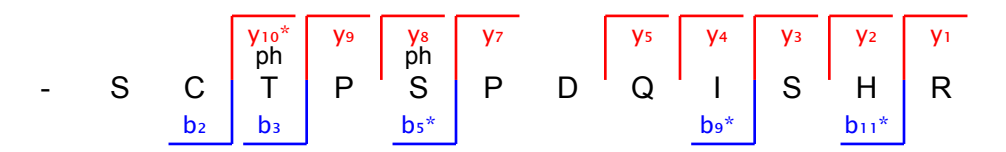

Raw file: 20171215\_MaS\_33SR\_LMH\_phospho2\_03  
 Scan: 5365 Method: FTMS; HCD Score: 294.09 m/z: 888.32 Gene names: ARHGAP5

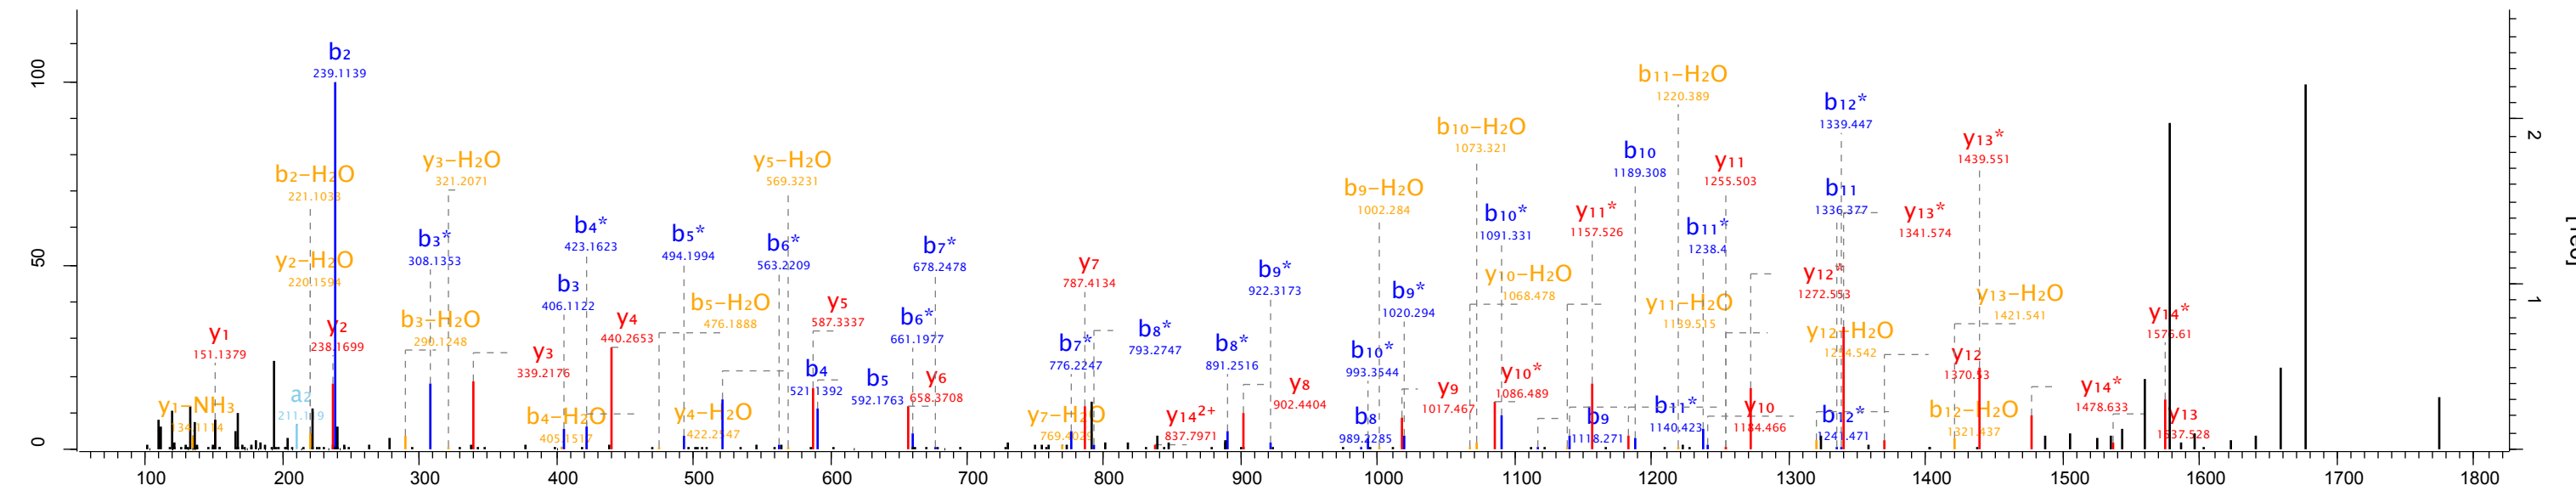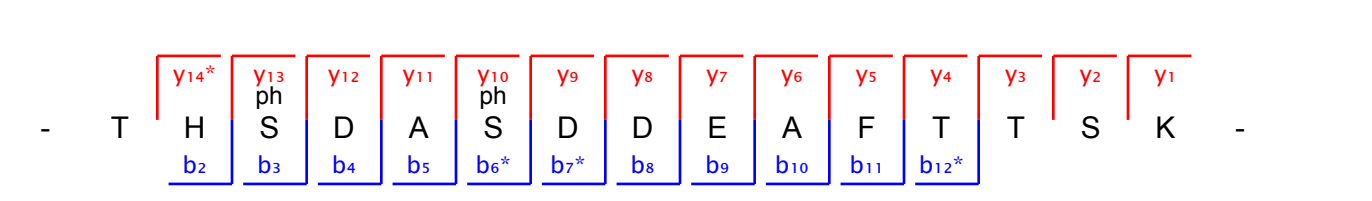

Raw file 20171215\_MaS\_33SR\_LMH\_phospho2\_03 Scan 5395 Method FTMS; HCD Score 88.08 m/z 616.28 Gene names CDK12

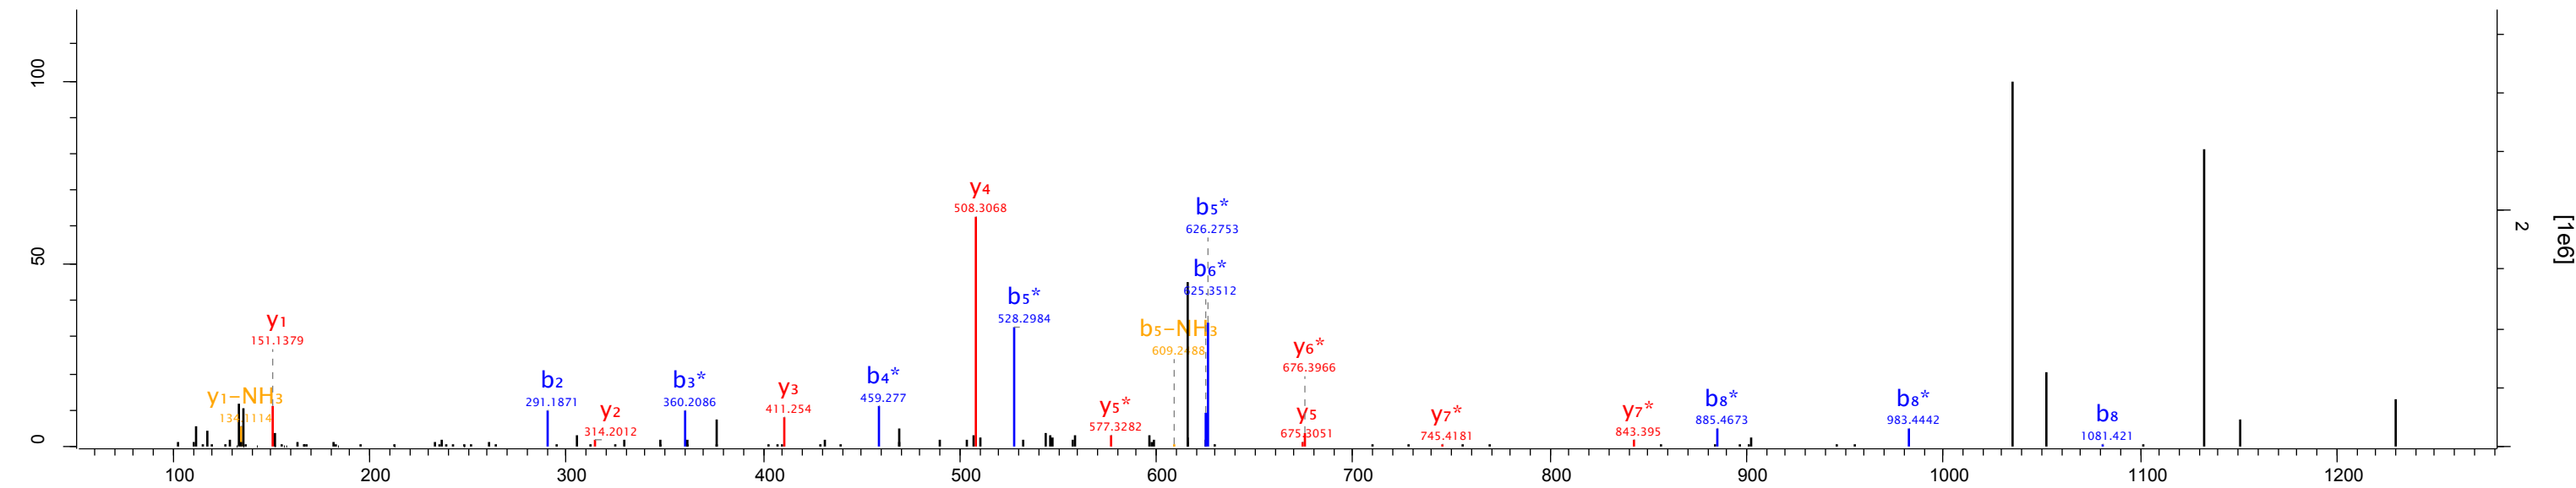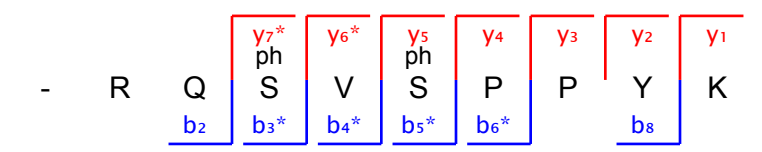

Raw file 20171215\_MaS\_33SR\_LMH\_phospho2\_03 Scan 5455 Method FTMS; HCD Score 113.52 m/z 697.28 Gene names TCF12

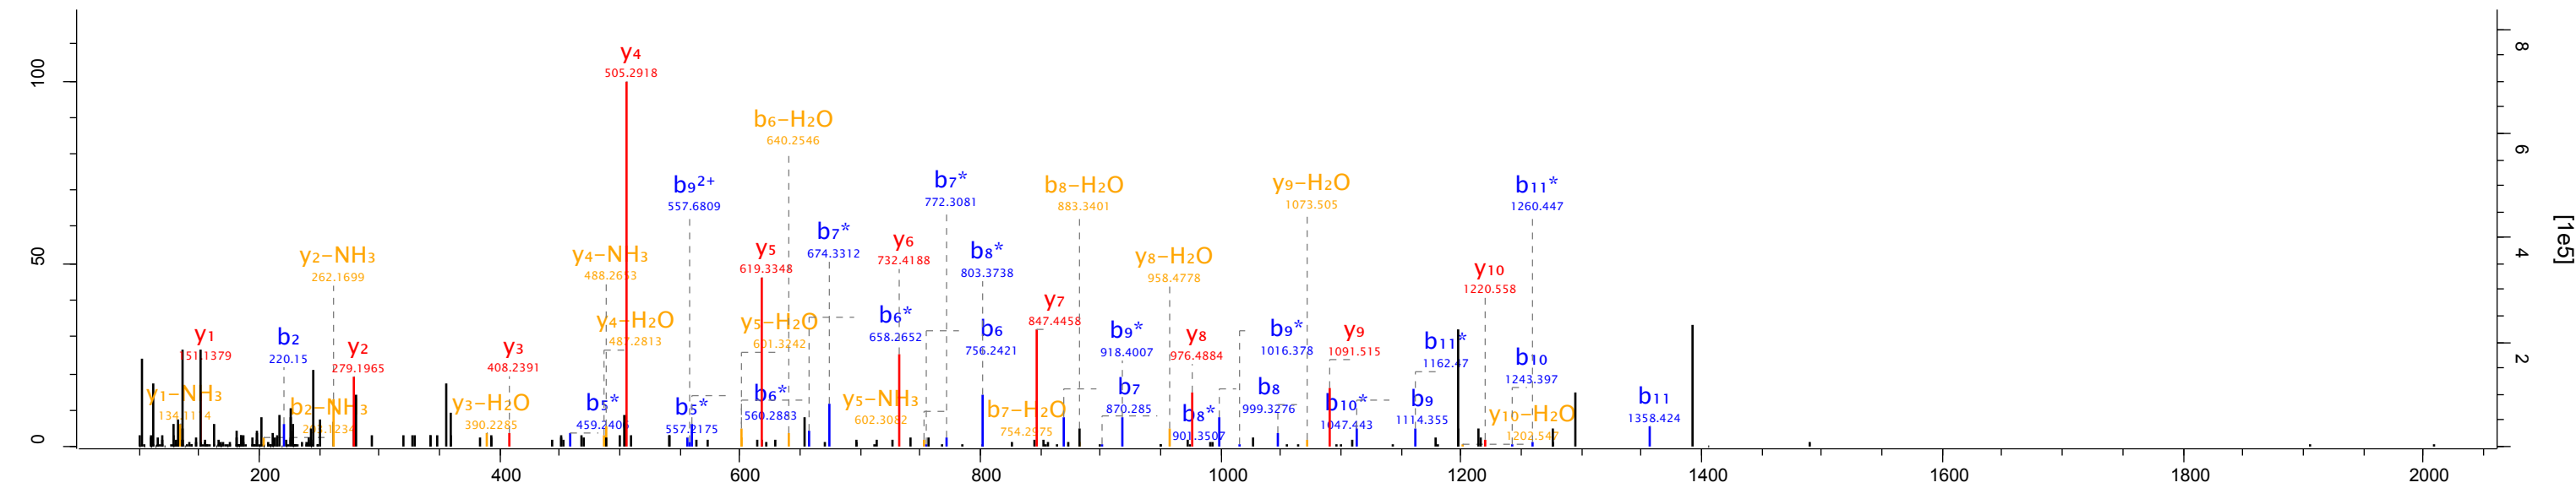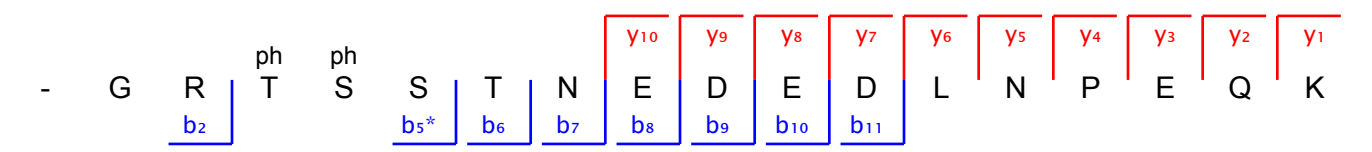

Raw file 20171215\_MaS\_33SR\_LMH\_phospho2\_03 Scan 5495 Method FTMS; HCD Score 95.83 m/z 926.42 Gene names SRRM2

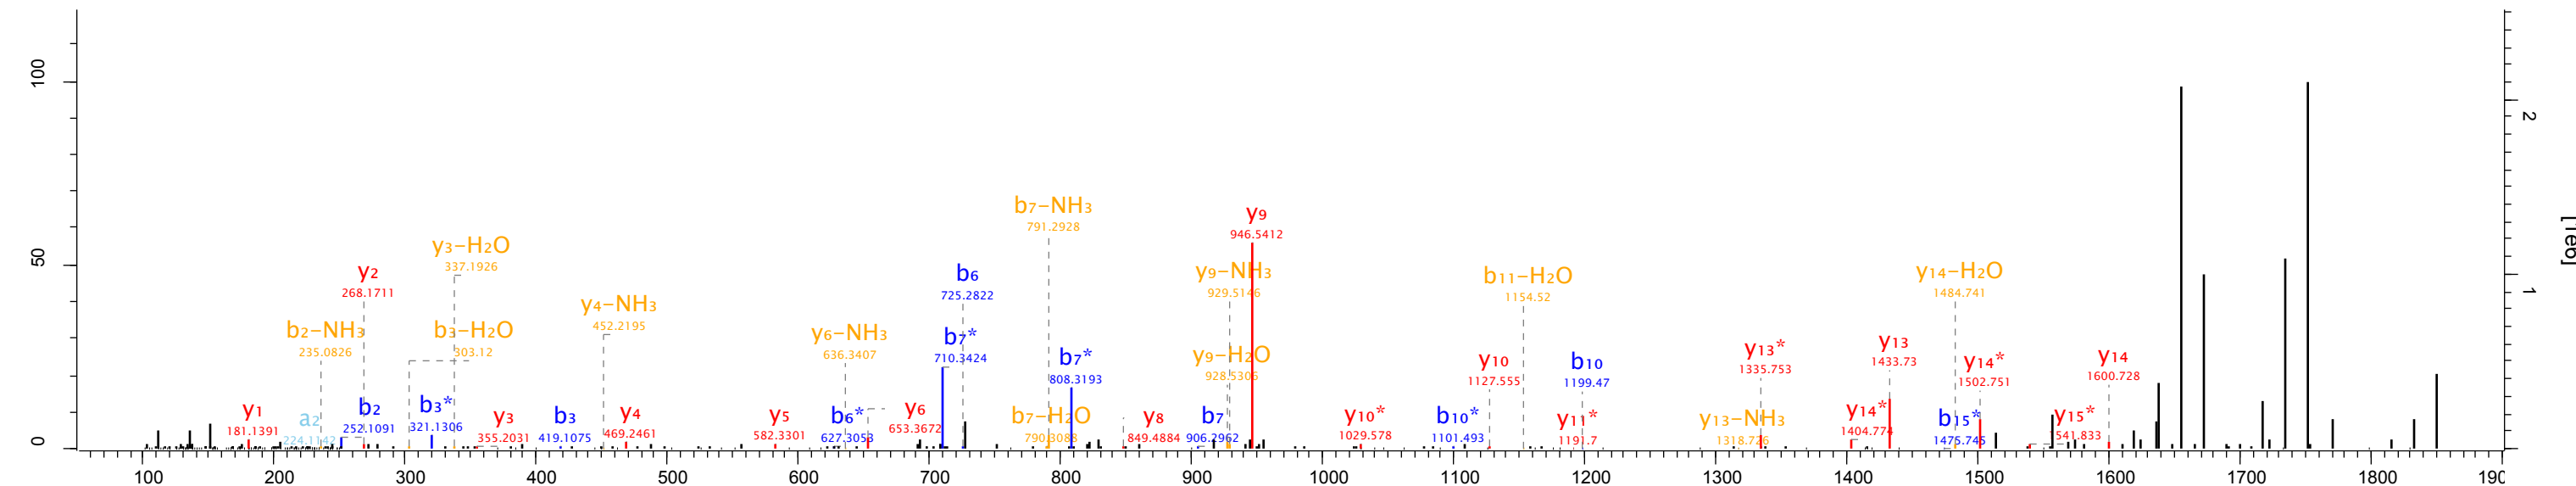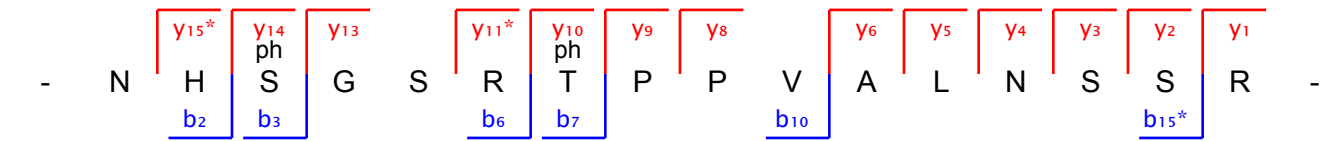



Raw file 20171215\_MaS\_33SR\_LMH\_phospho2\_03 Scan 5515 Method FTMS; HCD Score 87.28 m/z 789.72 Gene names SRRM2

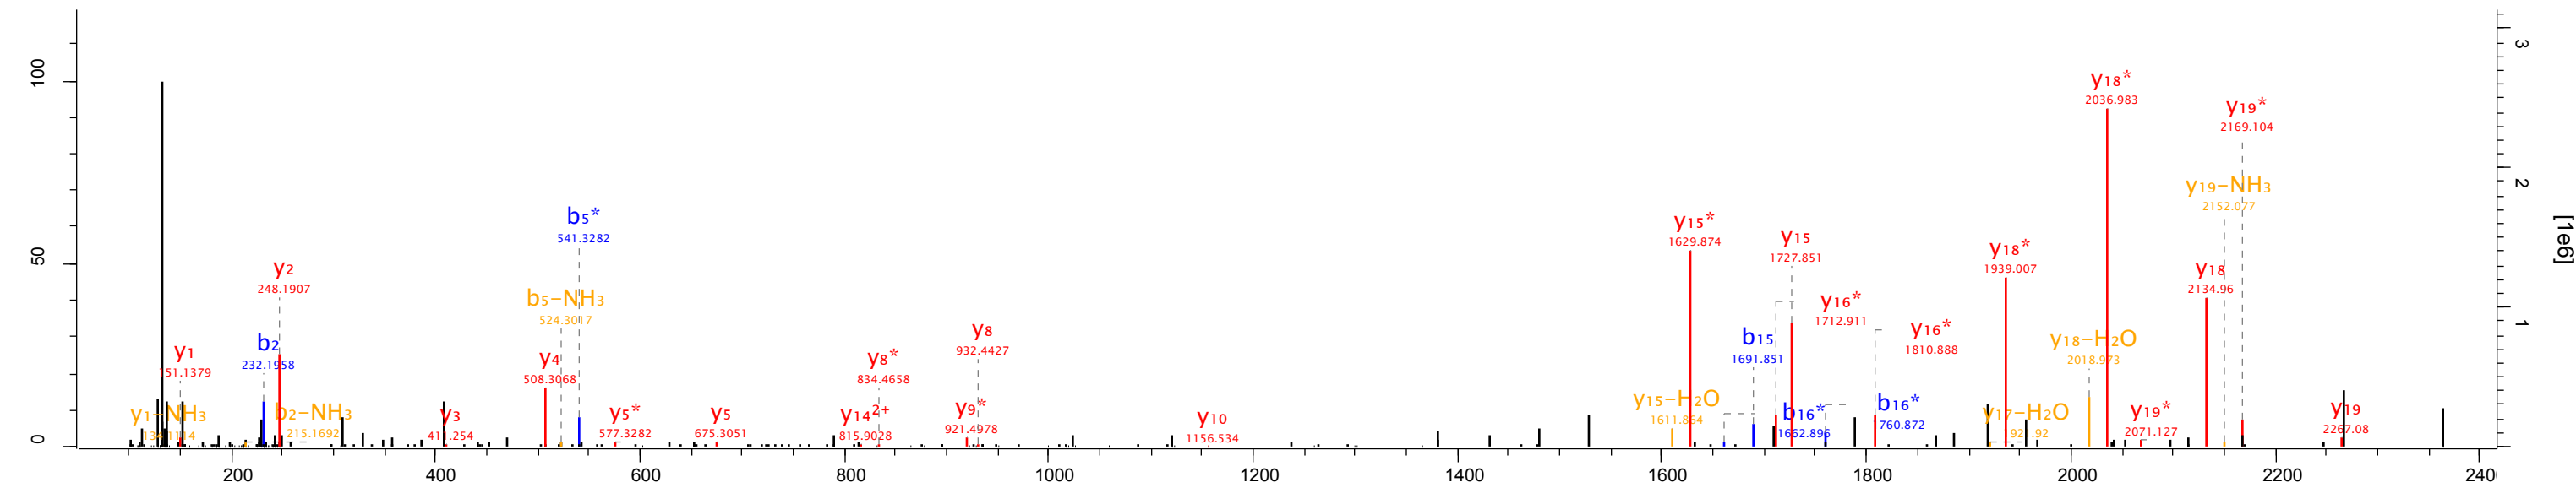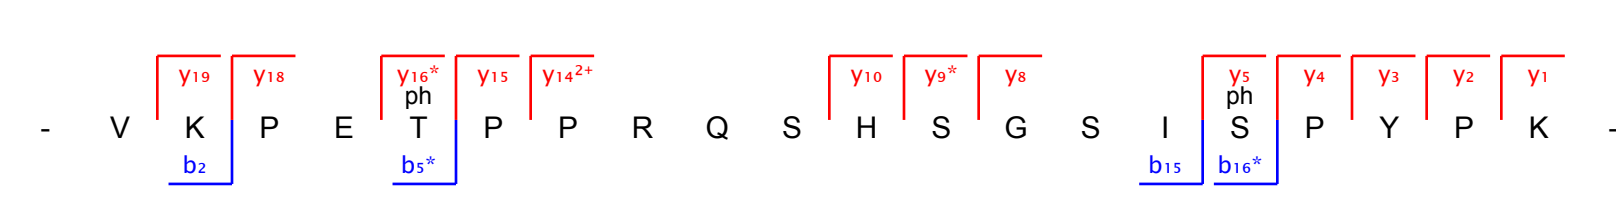

Raw file 20171215\_MaS\_33SR\_LMH\_phospho2\_03 Scan 5715 Method FTMS; HCD Score 67.95 m/z 580.77 Gene names WRNIP1

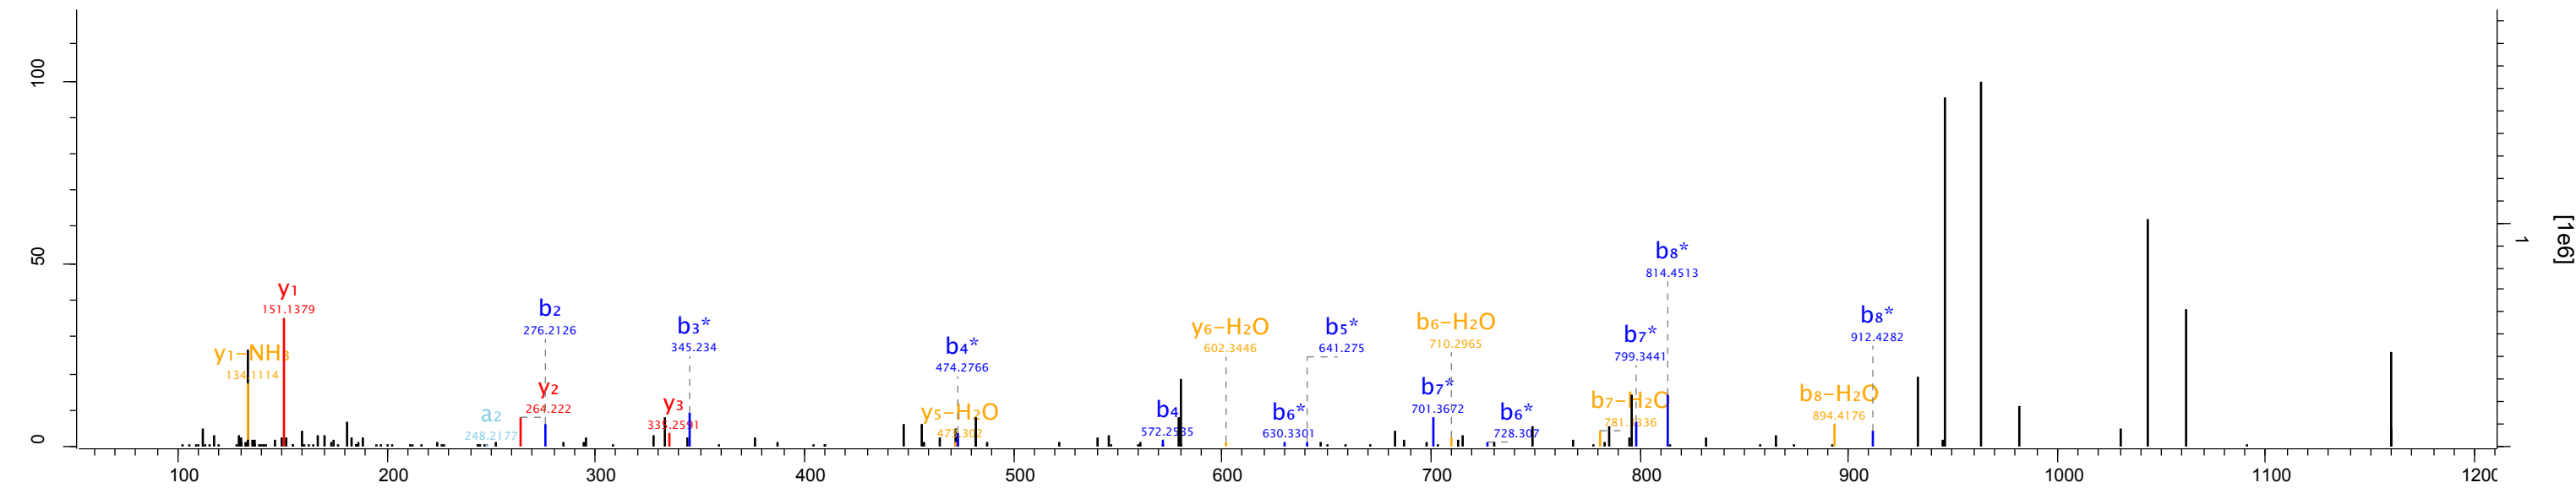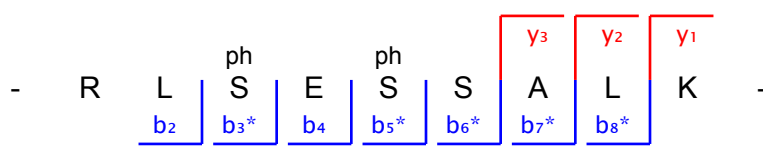

Raw file 20171215\_MaS\_33SR\_LMH\_phospho2\_03 Scan 5845 Method FTMS; HCD Score 137.5 m/z 1124.47 Gene names CCDC9

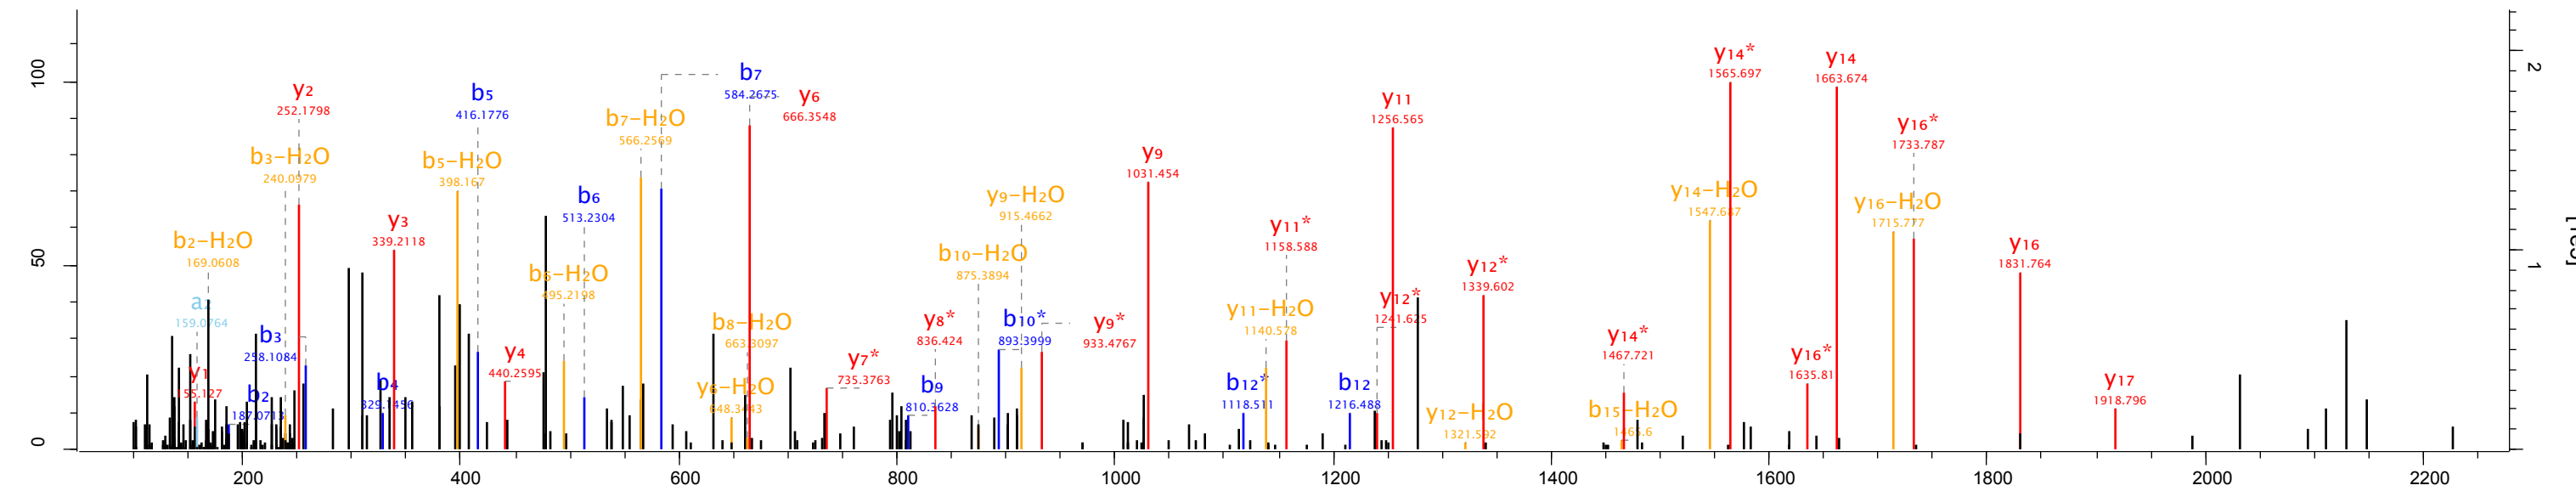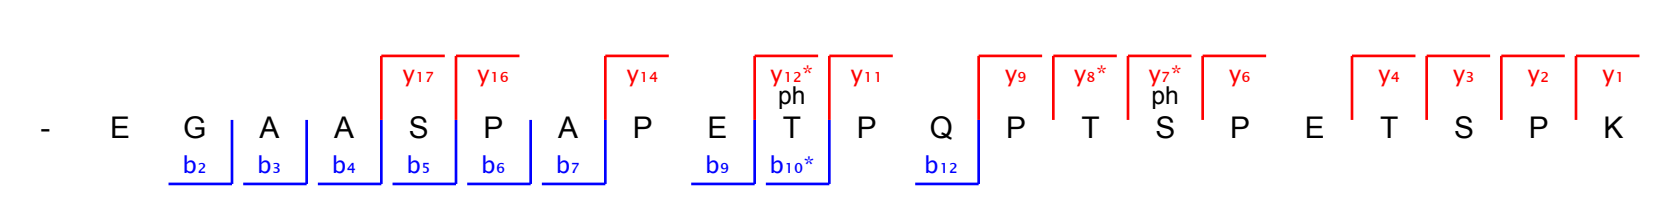

Raw file 20171215\_MaS\_33SR\_LMH\_phospho2\_03 Scan 5915 Method FTMS; HCD Score 62.09 m/z 527.71 Gene names NFATC2

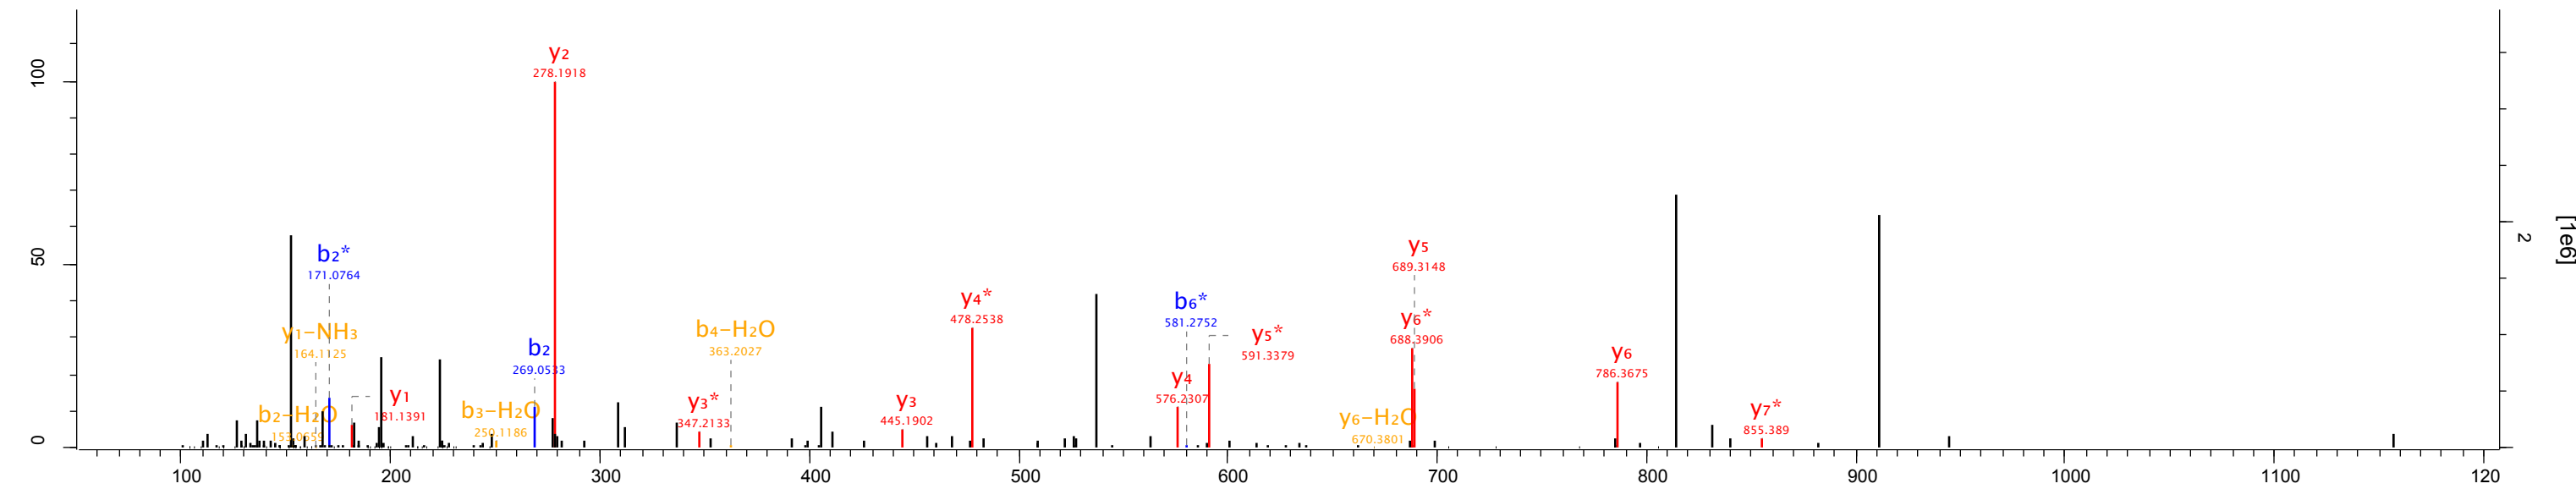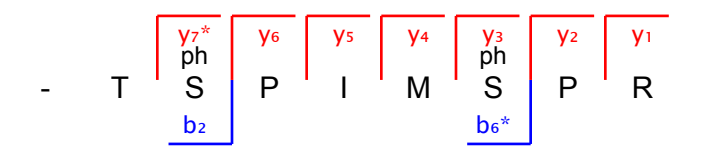

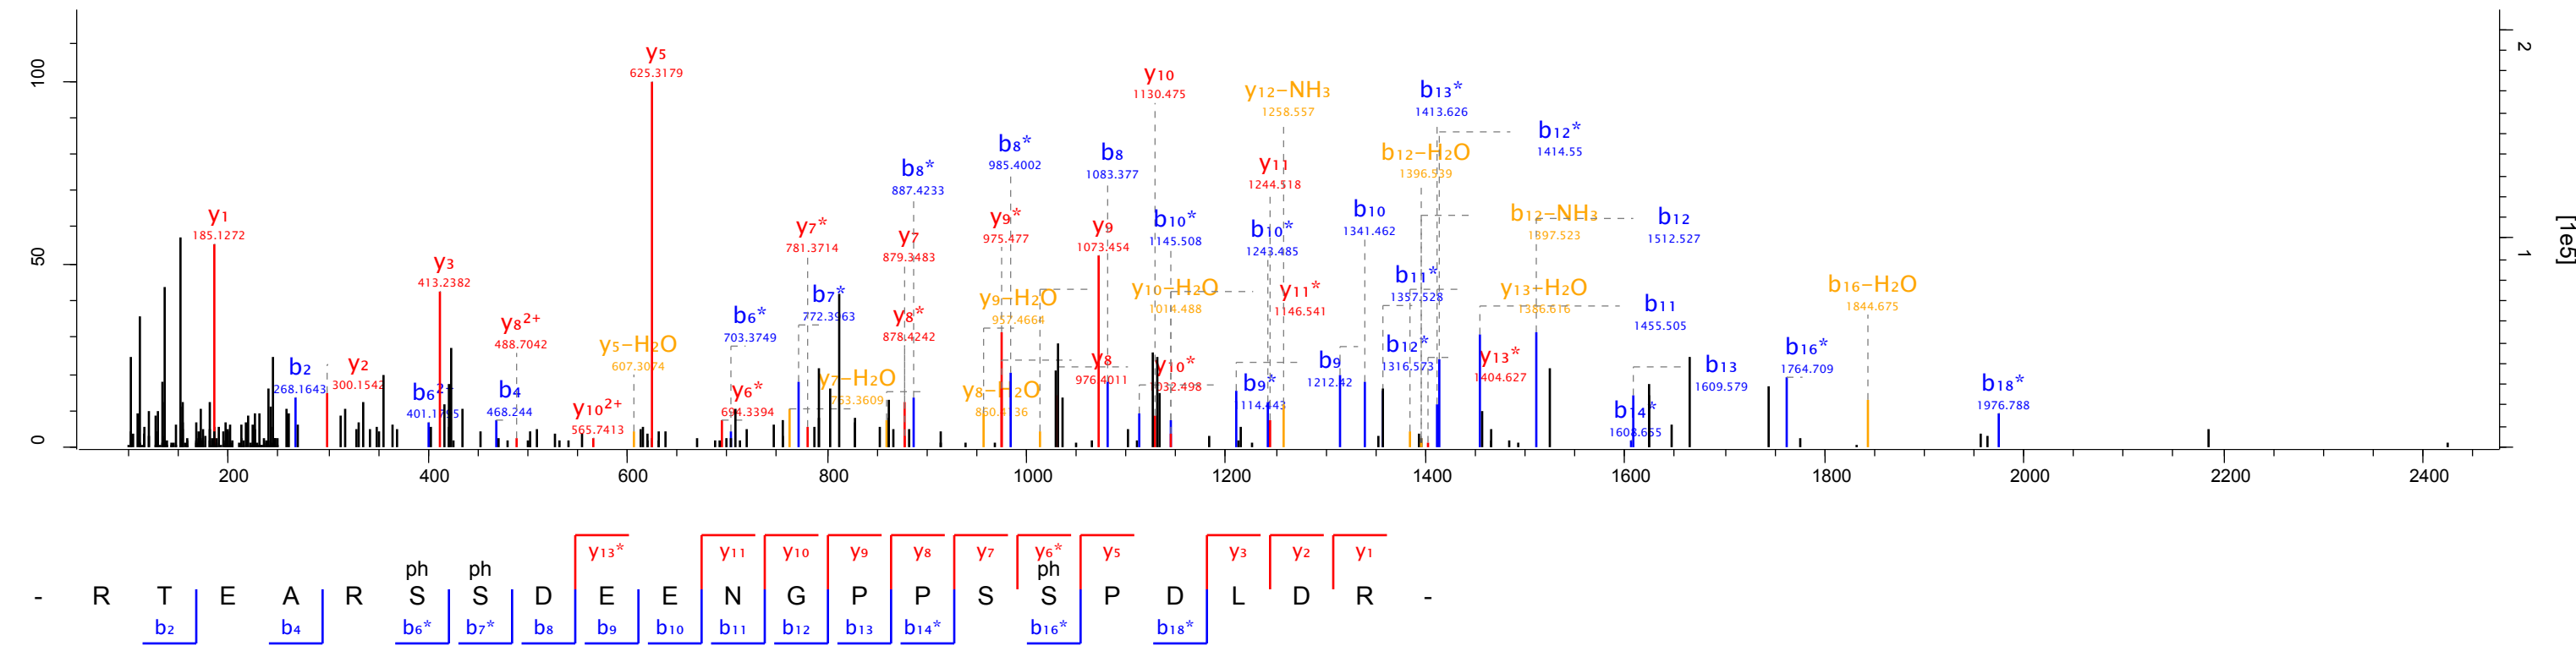

Raw file: 20171215\_MaS\_33SR\_LMH\_phospho2\_03  
 Scan: 6055 Method: FTMS; HCD Score: 302.29 m/z: 1280.04 Gene names: ACIN1

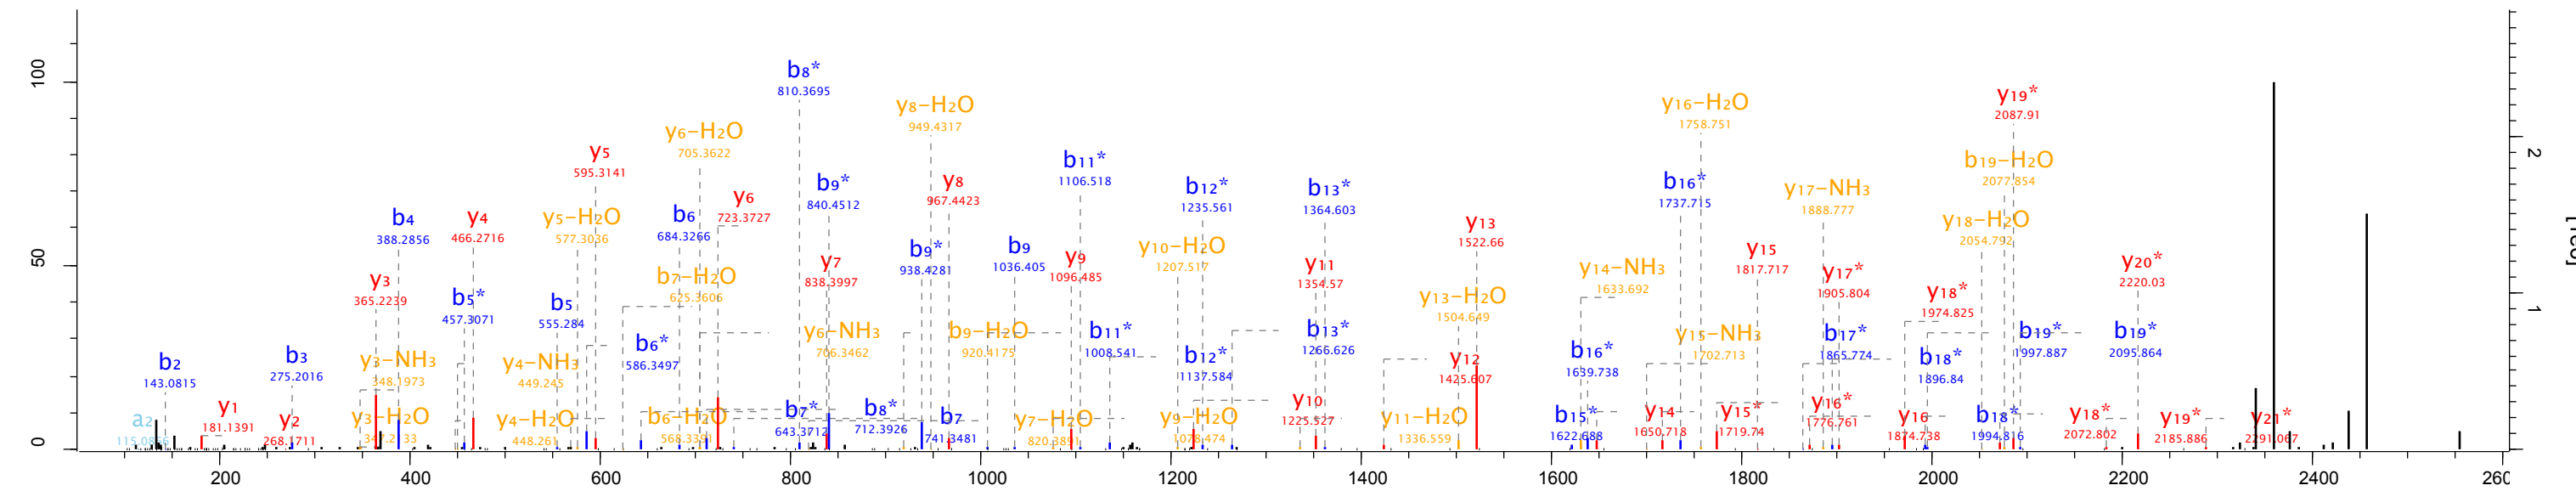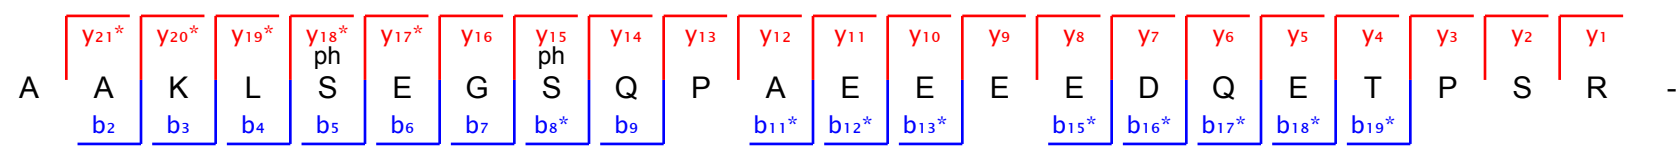

Raw file: 20171215\_MaS\_33SR\_LMH\_phospho2\_03  
 Scan: 6095 Method: FTMS; HCD Score: 108.96 m/z: 704.29 Gene names: PRRC2C

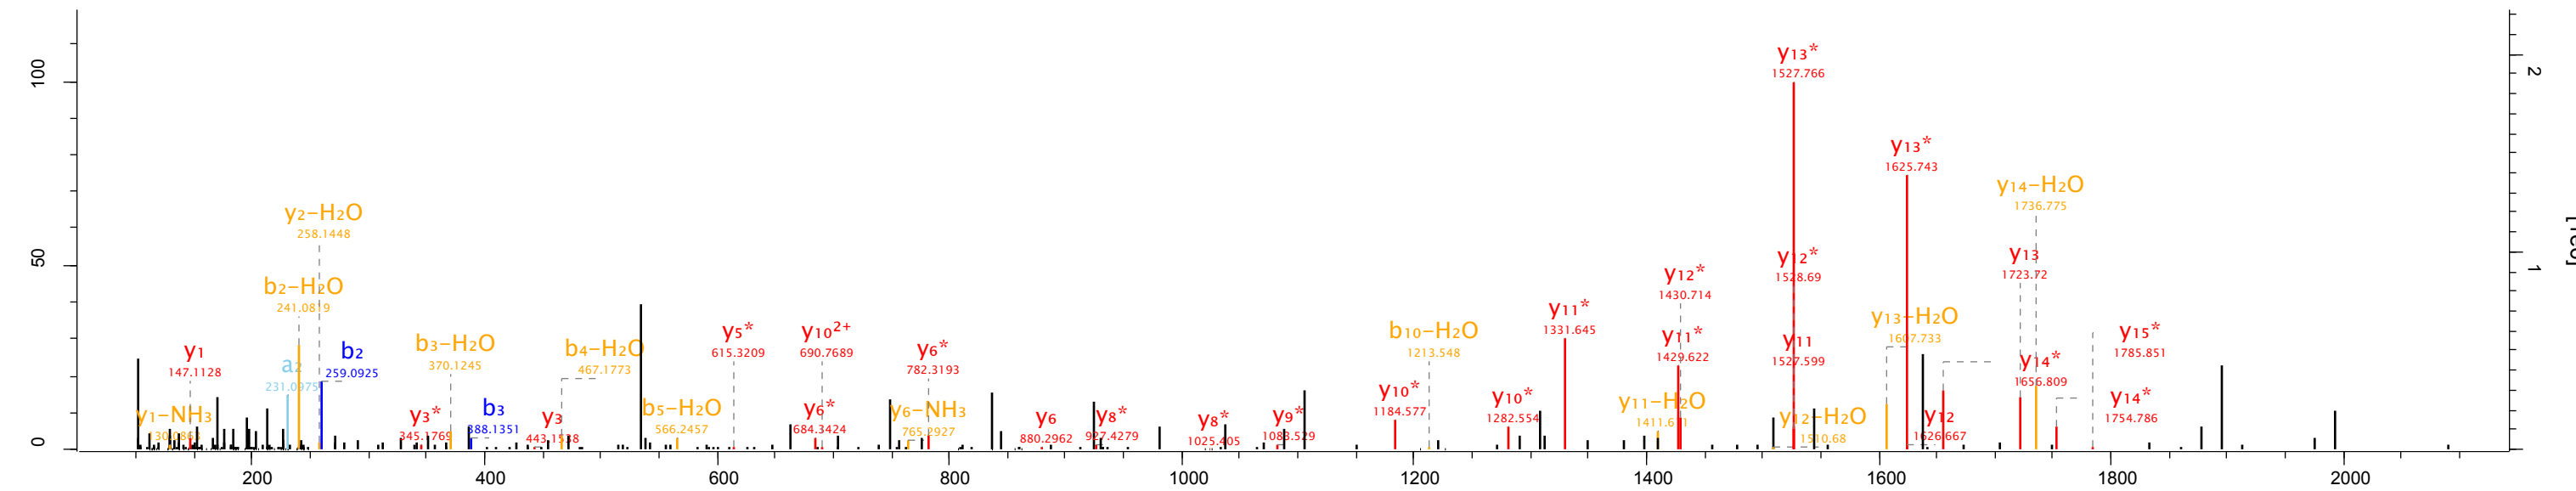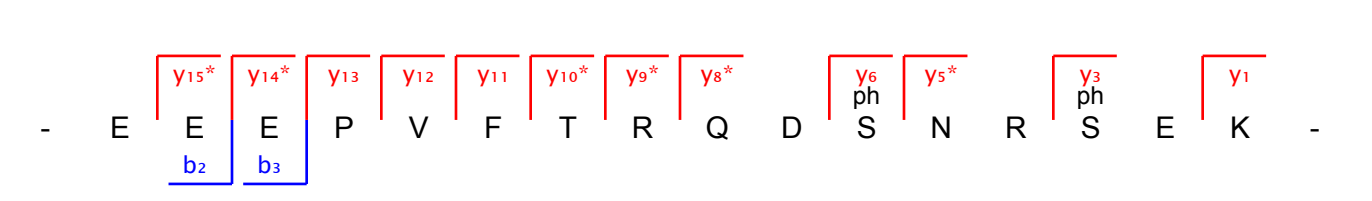

Raw file  
20171215\_MaS\_33SR\_LMH\_phospho2\_03

Scan 6285 Method FTMS; HCD Score 177.6 m/z 885.35 Gene names LARP7

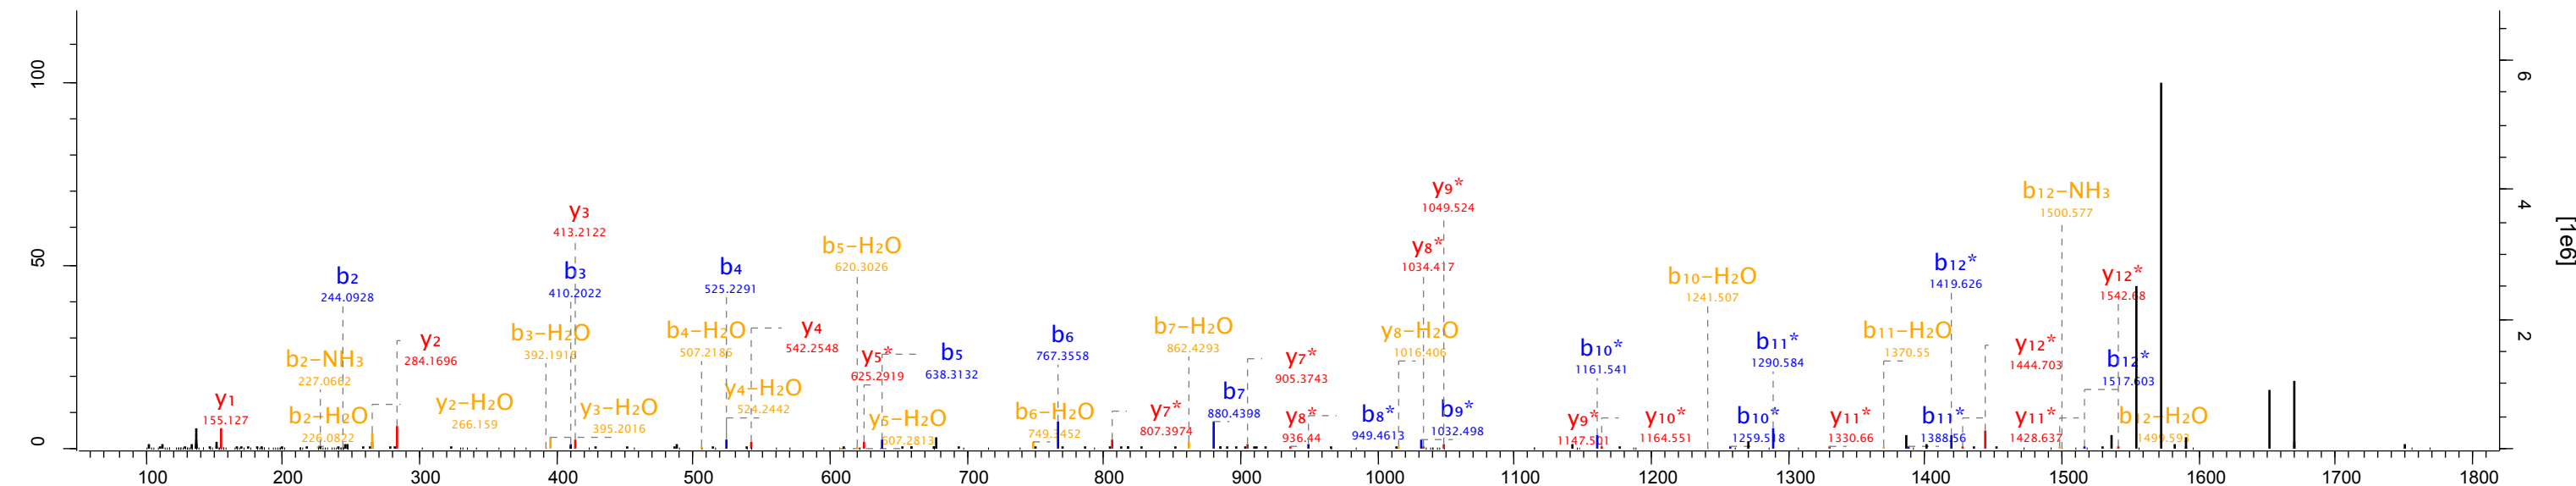

- E N R D I E I S P T E E E K -

Peptide sequence: E N R D I E I S P T E E E K

Fragmentation sites (b and y ions) are indicated by boxes below the sequence:

- b2: N
- b3: NR
- b4: NRD
- b5: NRDI
- b6: NRDE
- b7: NRDEI
- b8\*: NRS
- b9\*: NRSP
- b10\*: NRSPTE
- b11\*: NRSPTEE
- b12\*: NRSPTEEE



Raw file: 20171215\_MaS\_33SR\_LMH\_phospho2\_03  
 Scan: 6565 Method: FTMS; HCD Score: 61.24 m/z: 810.7 Gene names: SPEN

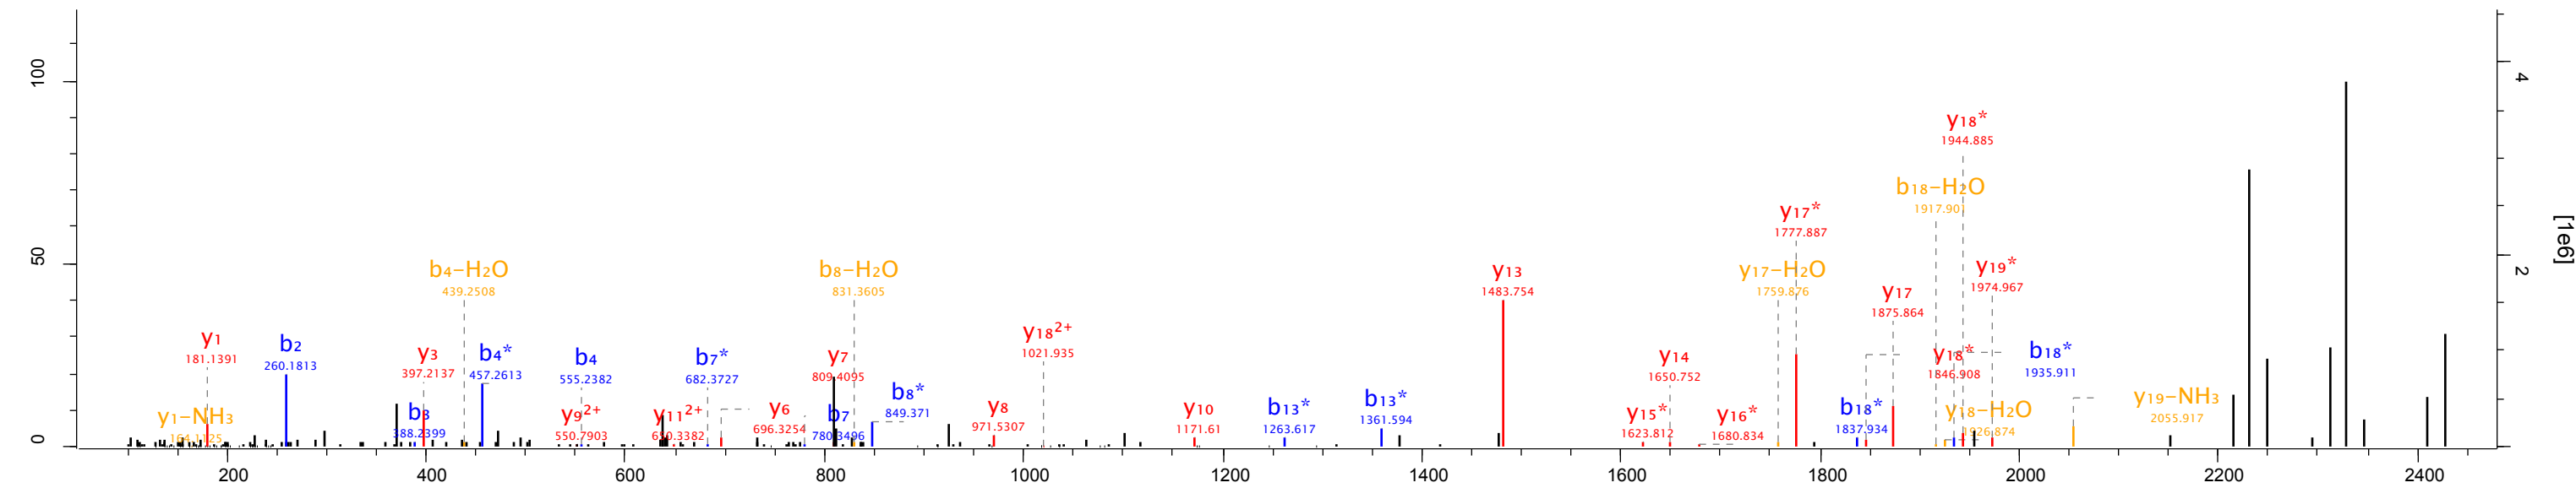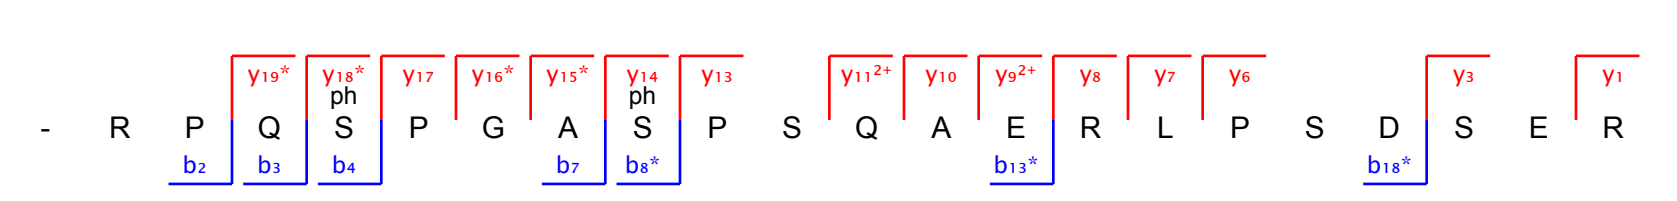

Raw file 20171215\_MaS\_33SR\_LMH\_phospho2\_03 Scan 6675 Method FTMS; HCD Score 134.74 m/z 1115.49 Gene names SRRM2

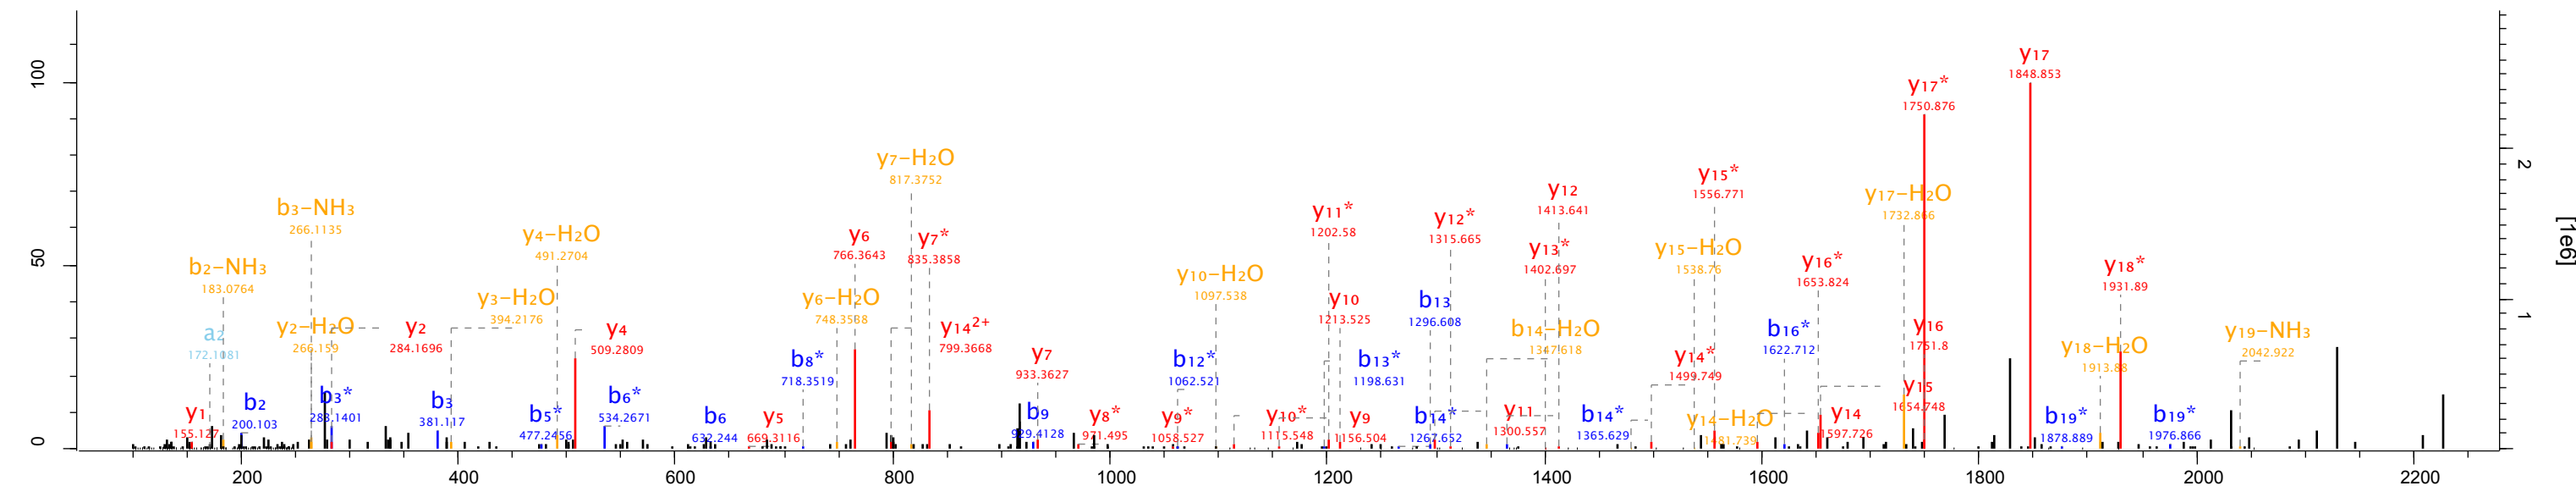

- A Q Y18\* Y17 Y16 Y15 Y14 Y13\* Y12 Y11 Y10 Y9 Y8\* Y7 Y6 Y5 Y4 Y2 Y1 -  
 - A Q b2 b3 P b5\* b6 P b8\* b9 S G b12\* b13 b14\* P b16\* Q b19\* K -  
 - A Q b2 b3 P b5\* b6 P b8\* b9 S G b12\* b13 b14\* P b16\* Q b19\* K -

Raw file 20171215\_MaS\_33SR\_LMH\_phospho2\_03 Scan 6725 Method FTMS; HCD Score 77.37 m/z 604.25 Gene names SRRM2

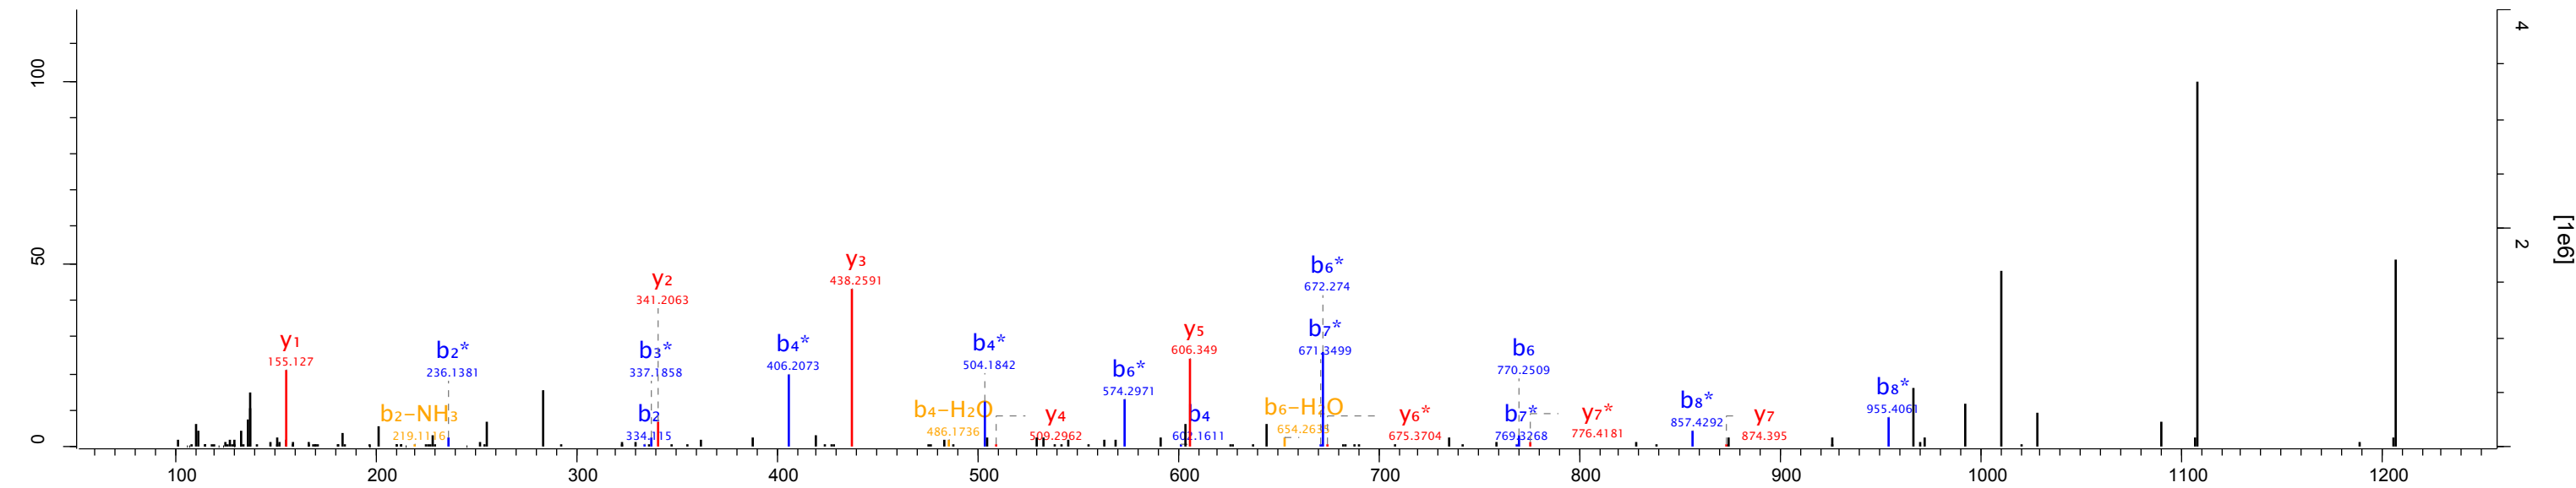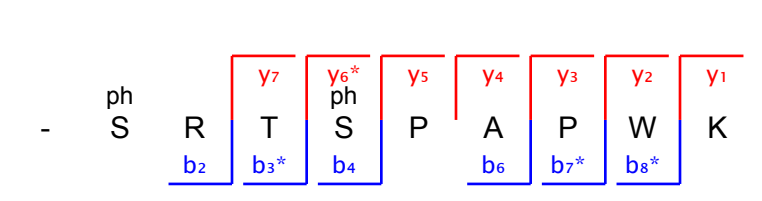

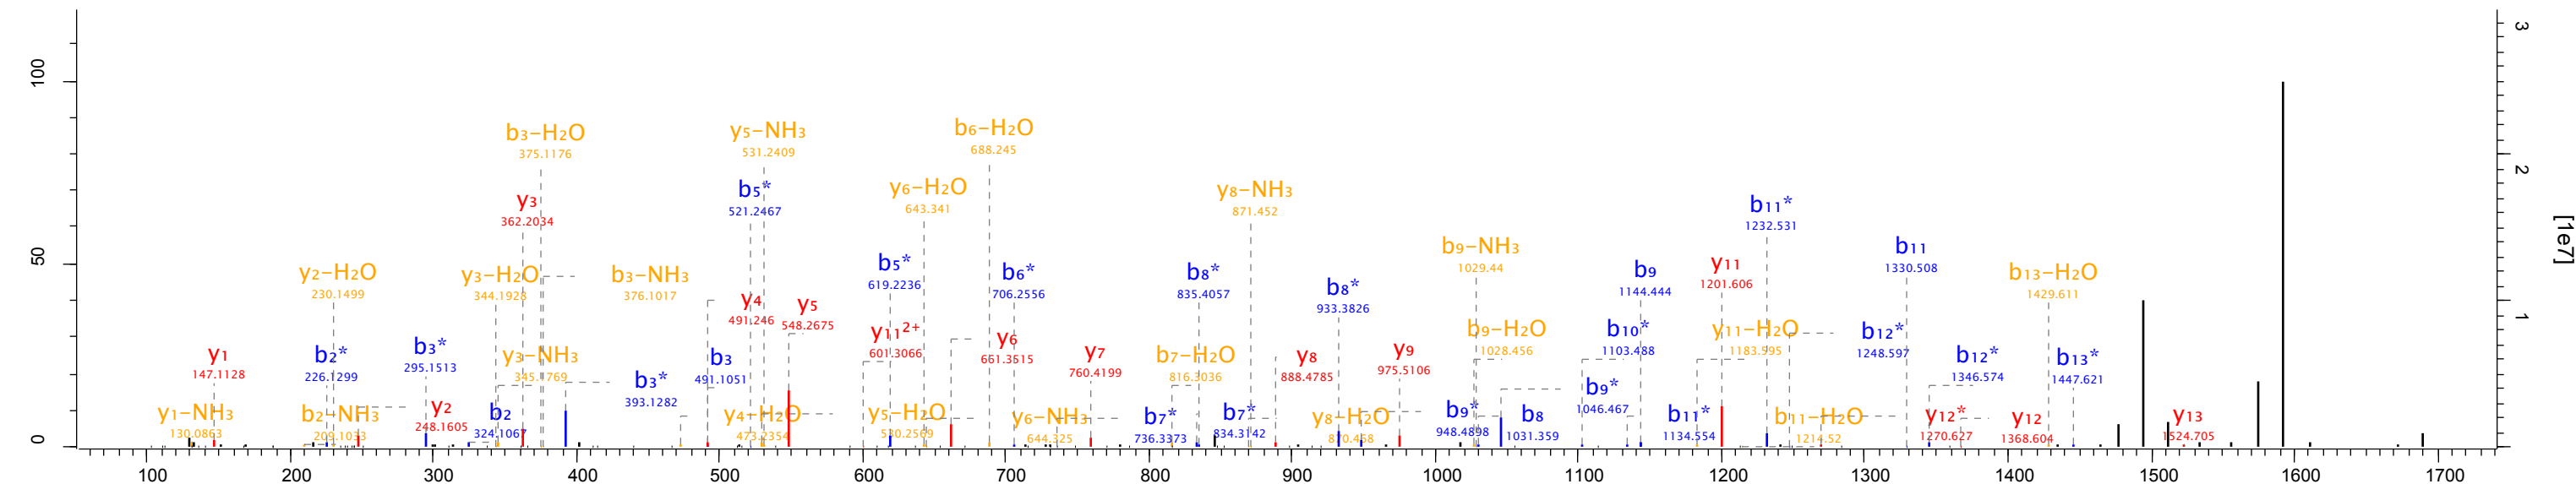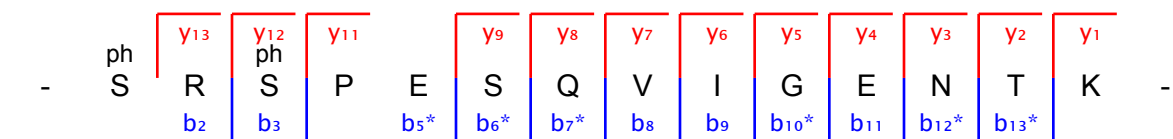

Raw file  
20171215\_MaS\_33SR\_LMH\_phospho2\_03

Scan 6895 Method FTMS; HCD Score 114.29 m/z 809.86 Gene names PPP1R12A

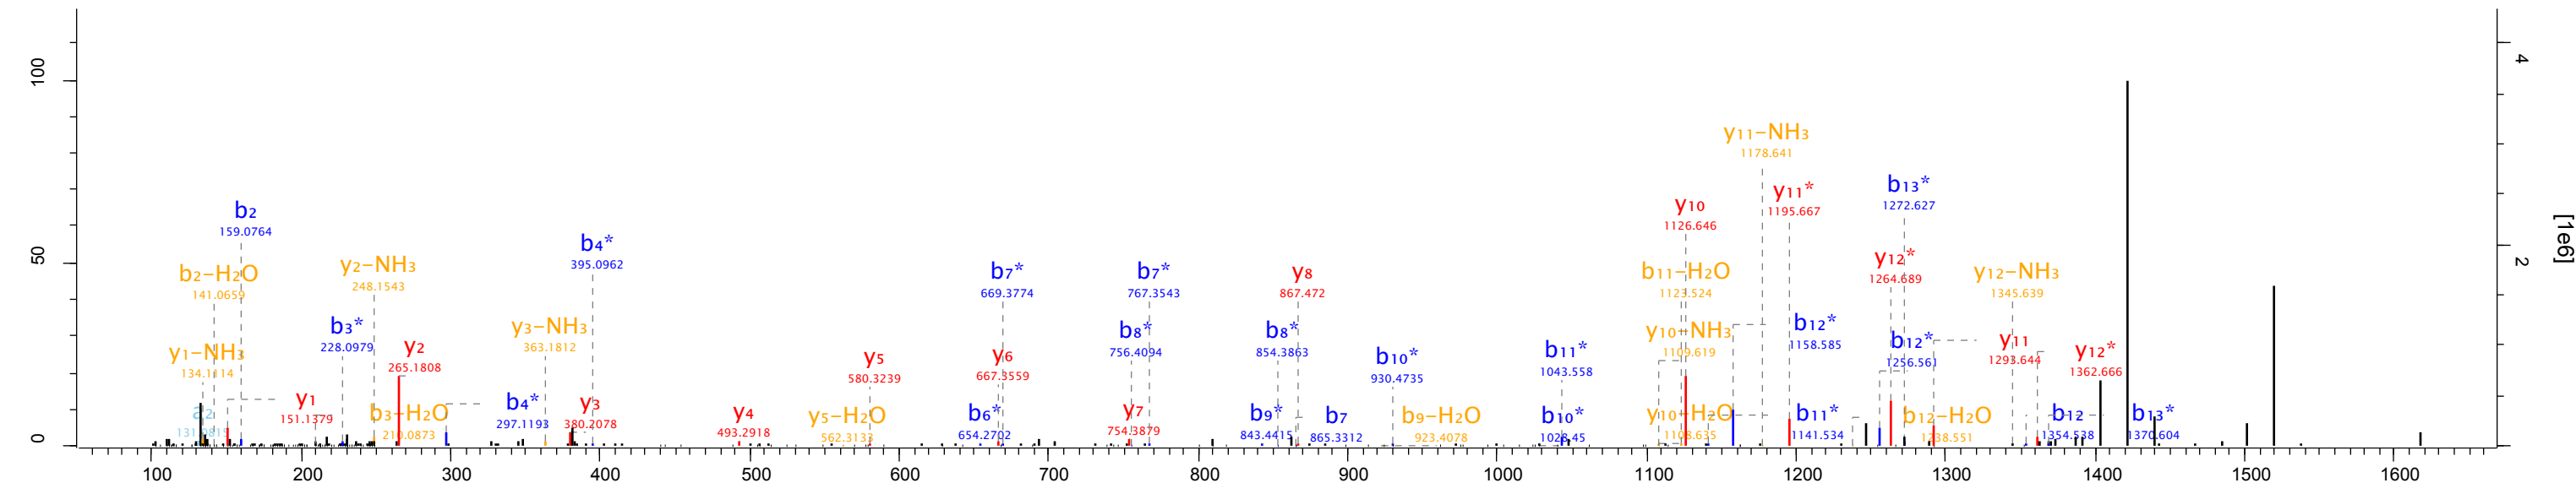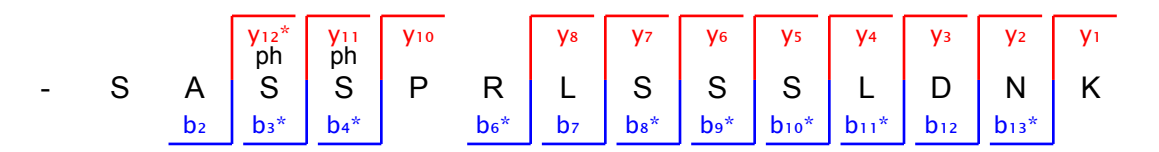

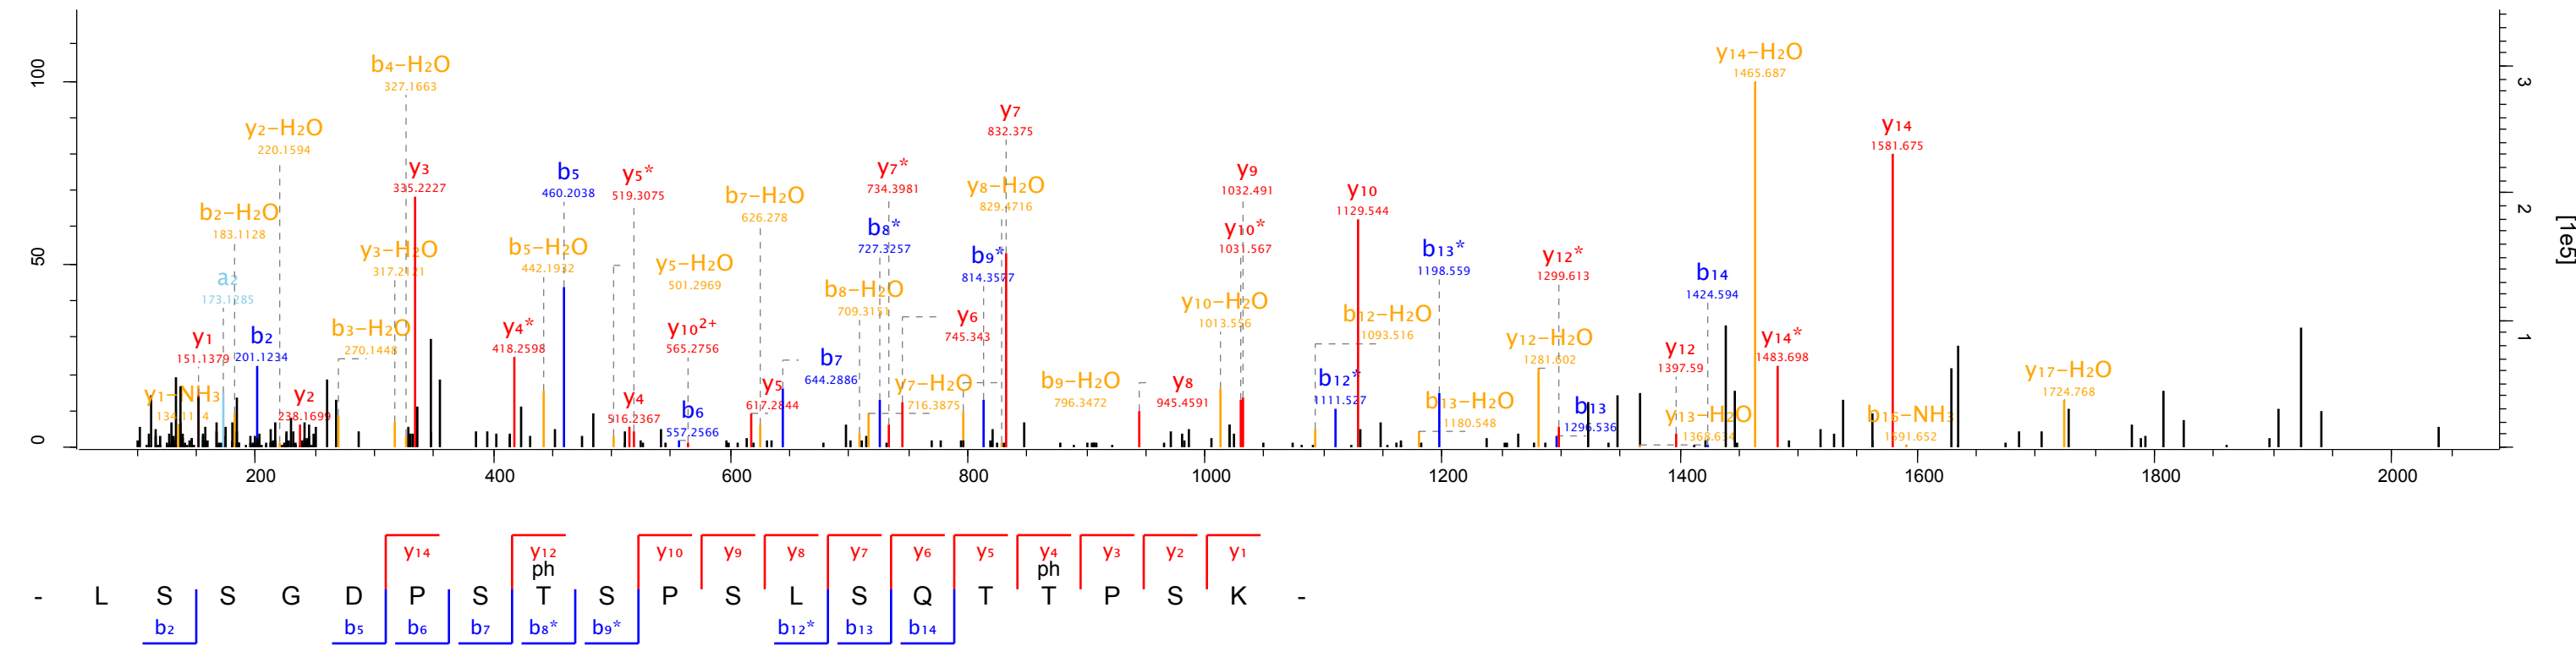

Raw file  
20171215\_MaS\_33SR\_LMH\_phospho2\_03

Scan 7035 Method FTMS; HCD Score 225.95 m/z 960.91 Gene names SPTBN1

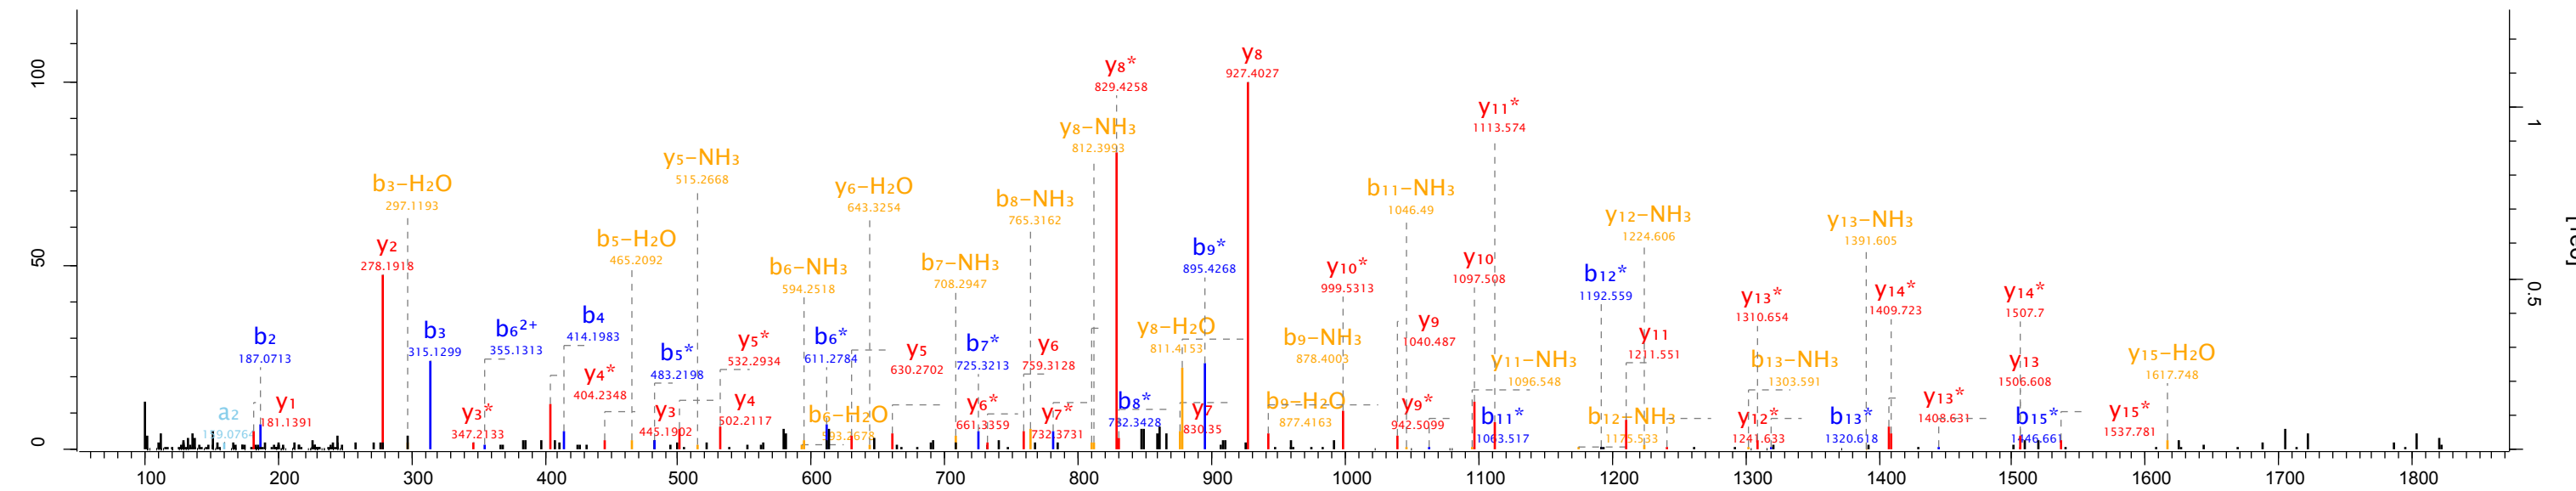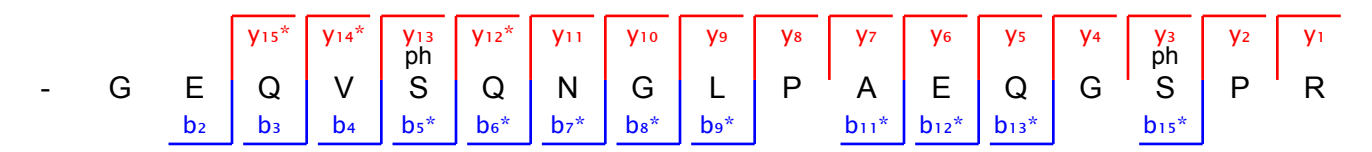

20171215\_MaS\_33SR\_LMH\_phospho2\_03 7045 FTMS; HCD 112.36 663.78 SRPK2

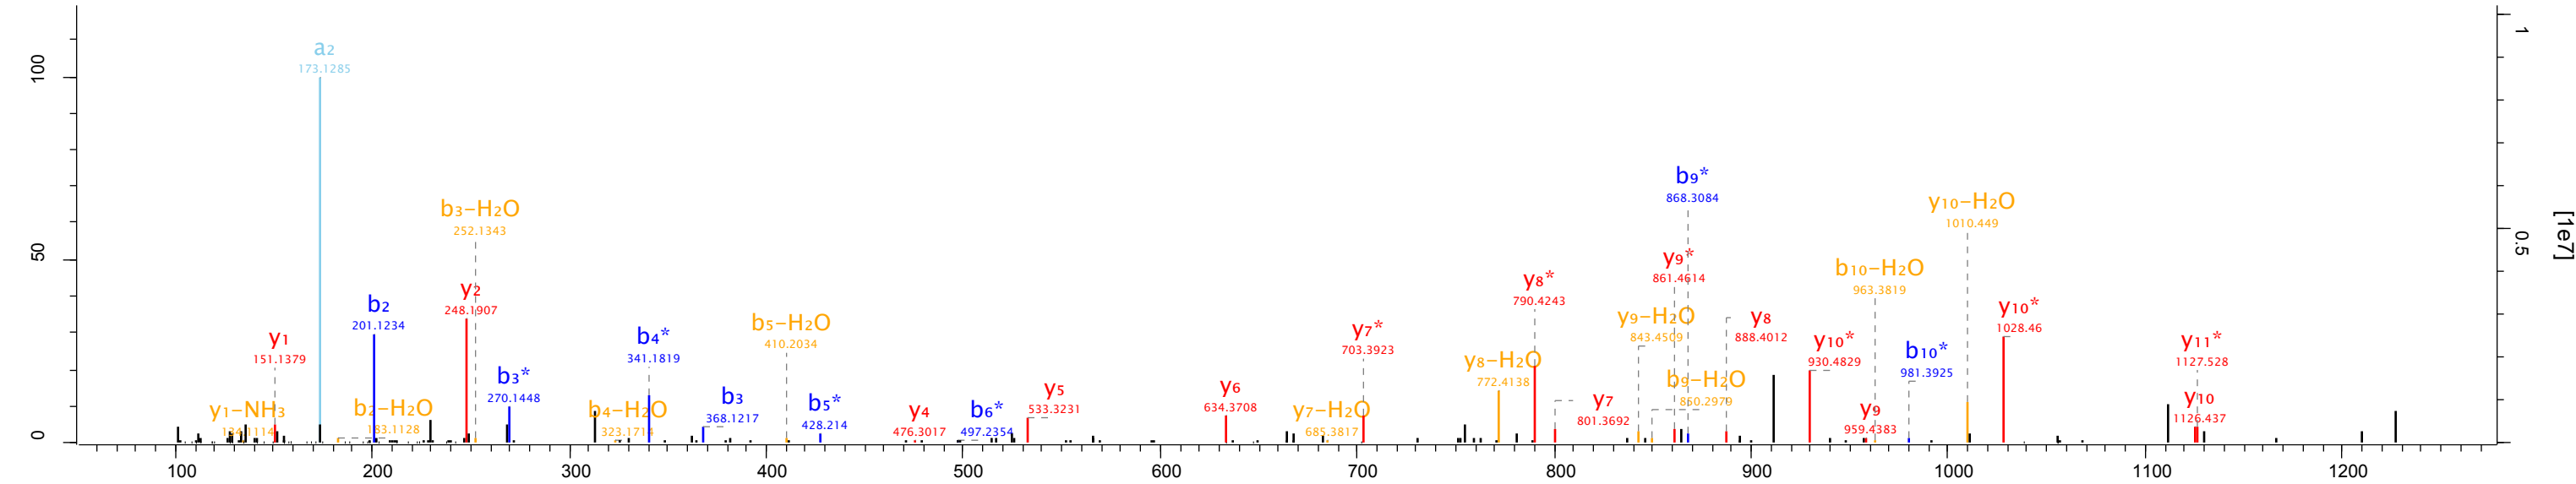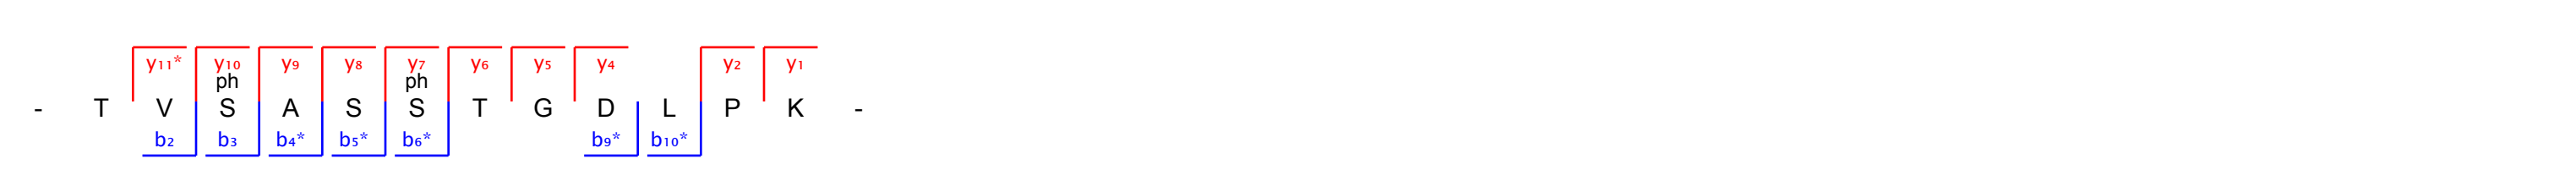



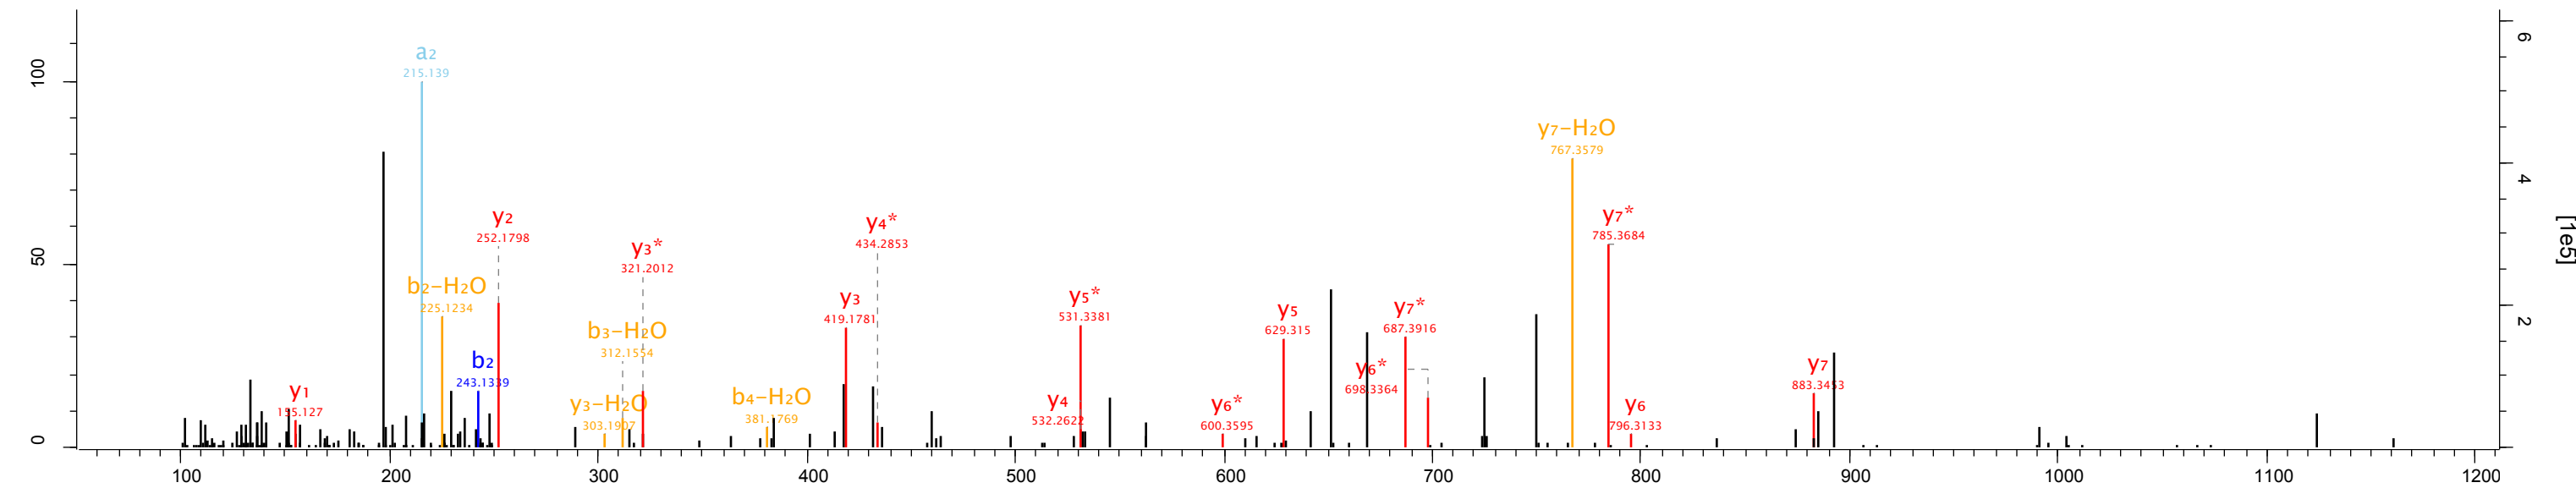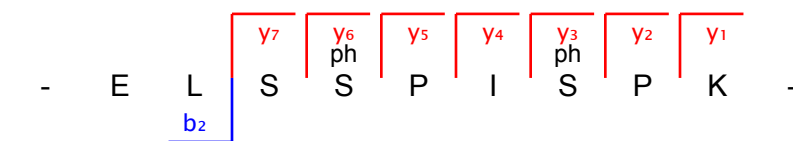

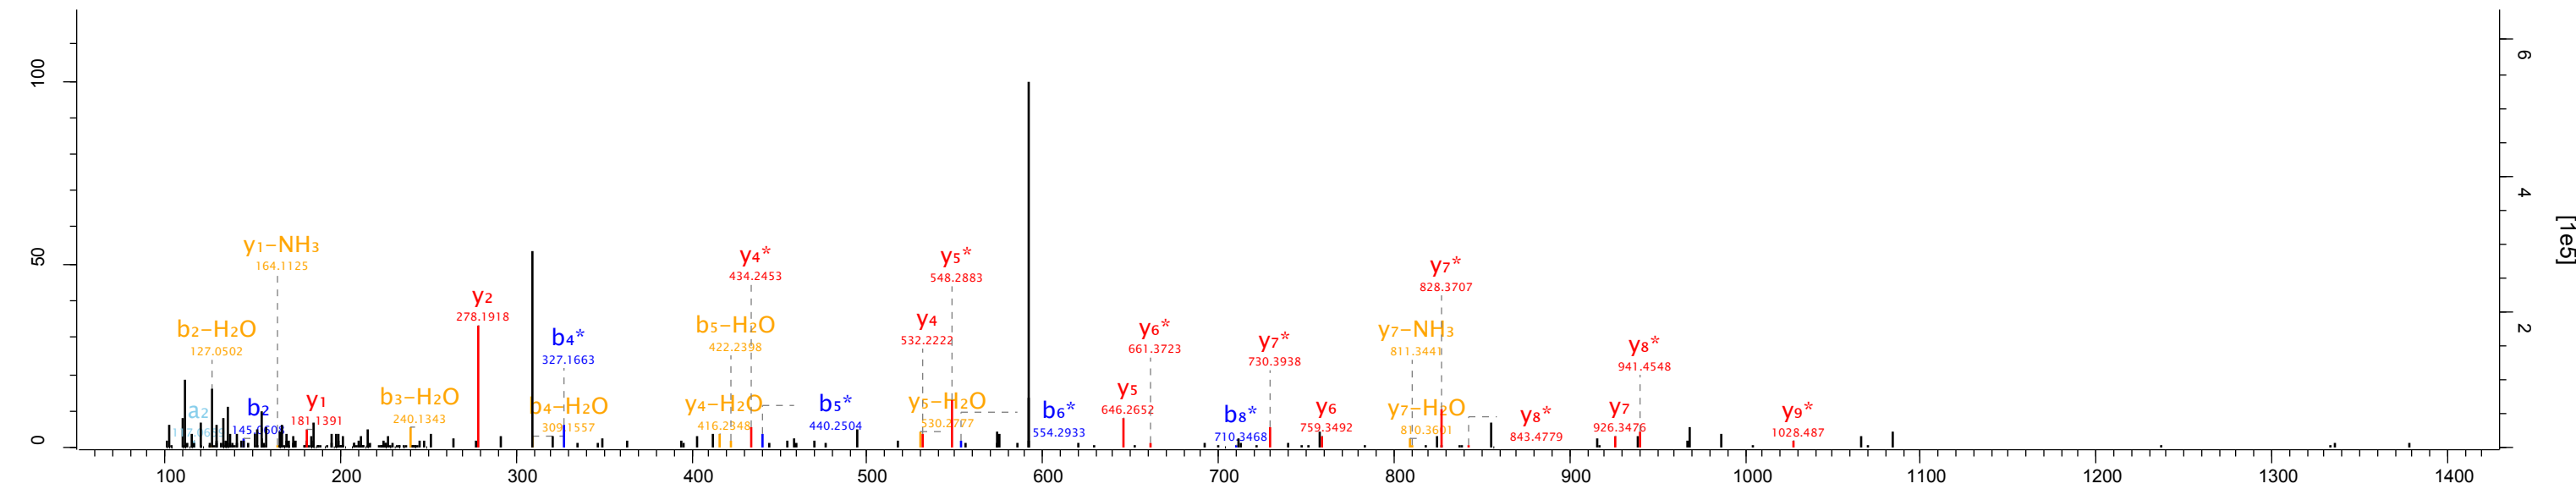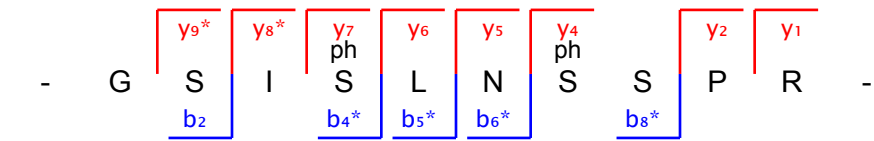

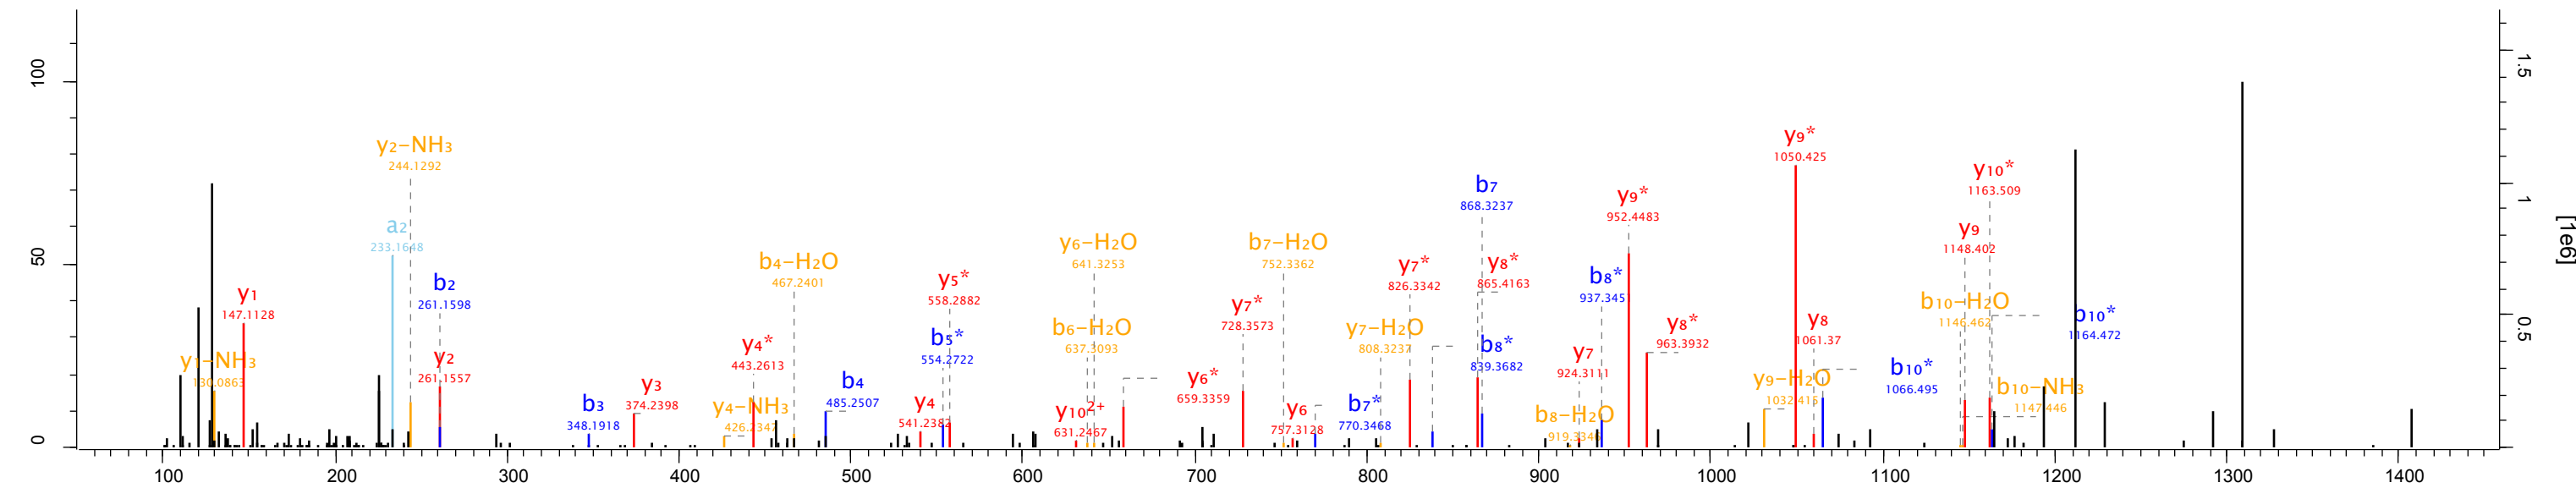

- F y10\* y9 y8 y7  
ph y6 y5\* y4  
ph y3 y2 y1 -

b2 b3 b4 b5\* b7 b8\* b10\*

Raw file 20171215\_MaS\_33SR\_LMH\_phospho2\_03 Scan 7465 Method FTMS; HCD Score 84.4 m/z 688.81

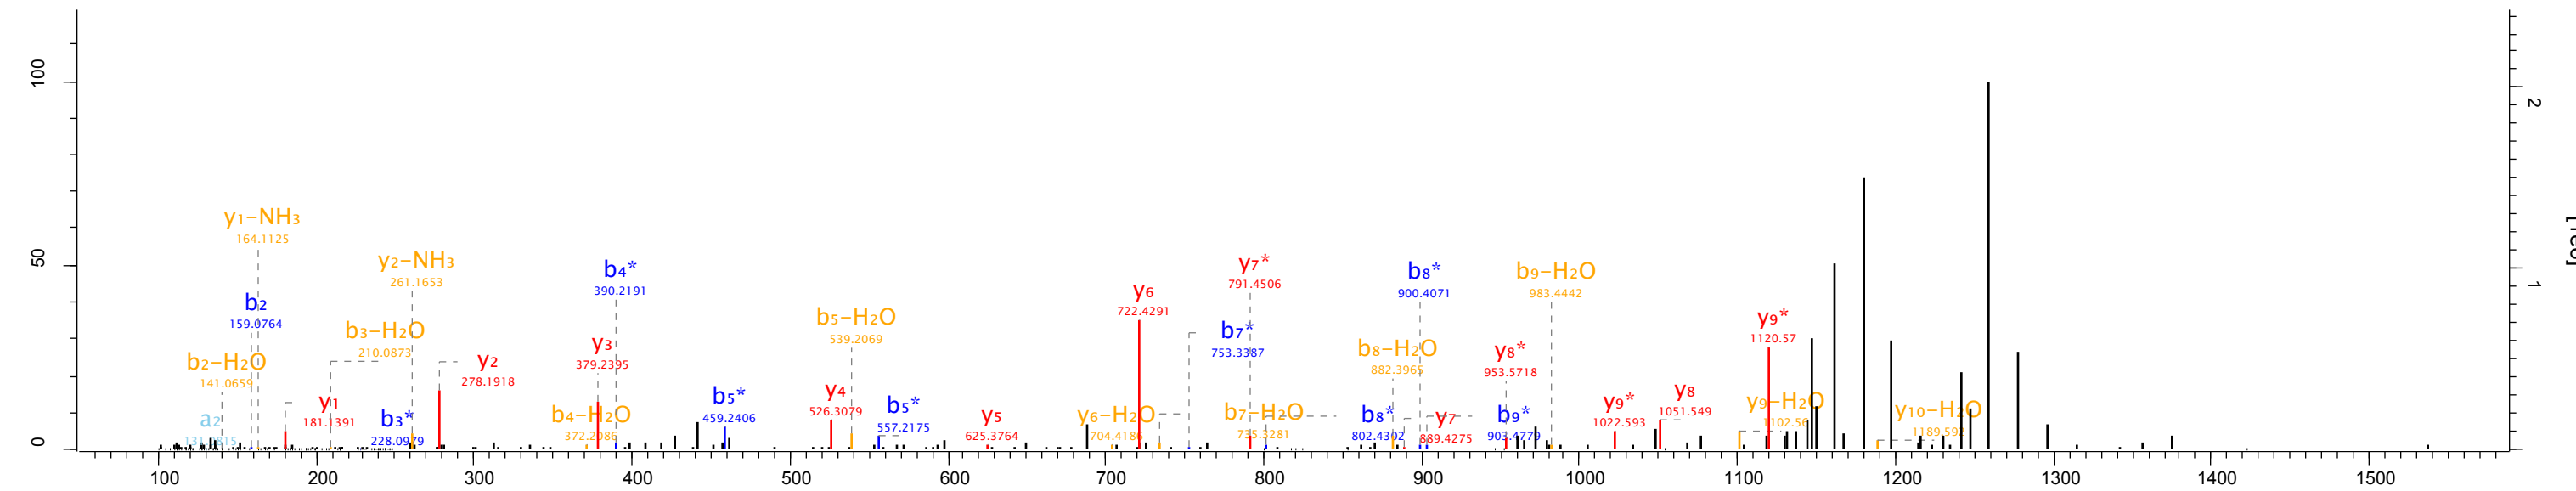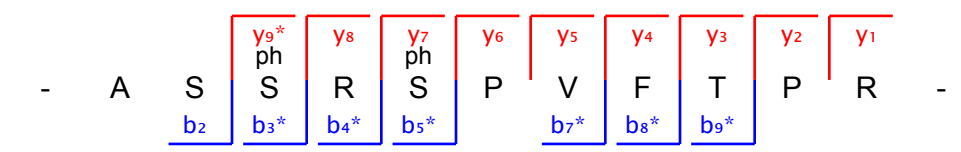

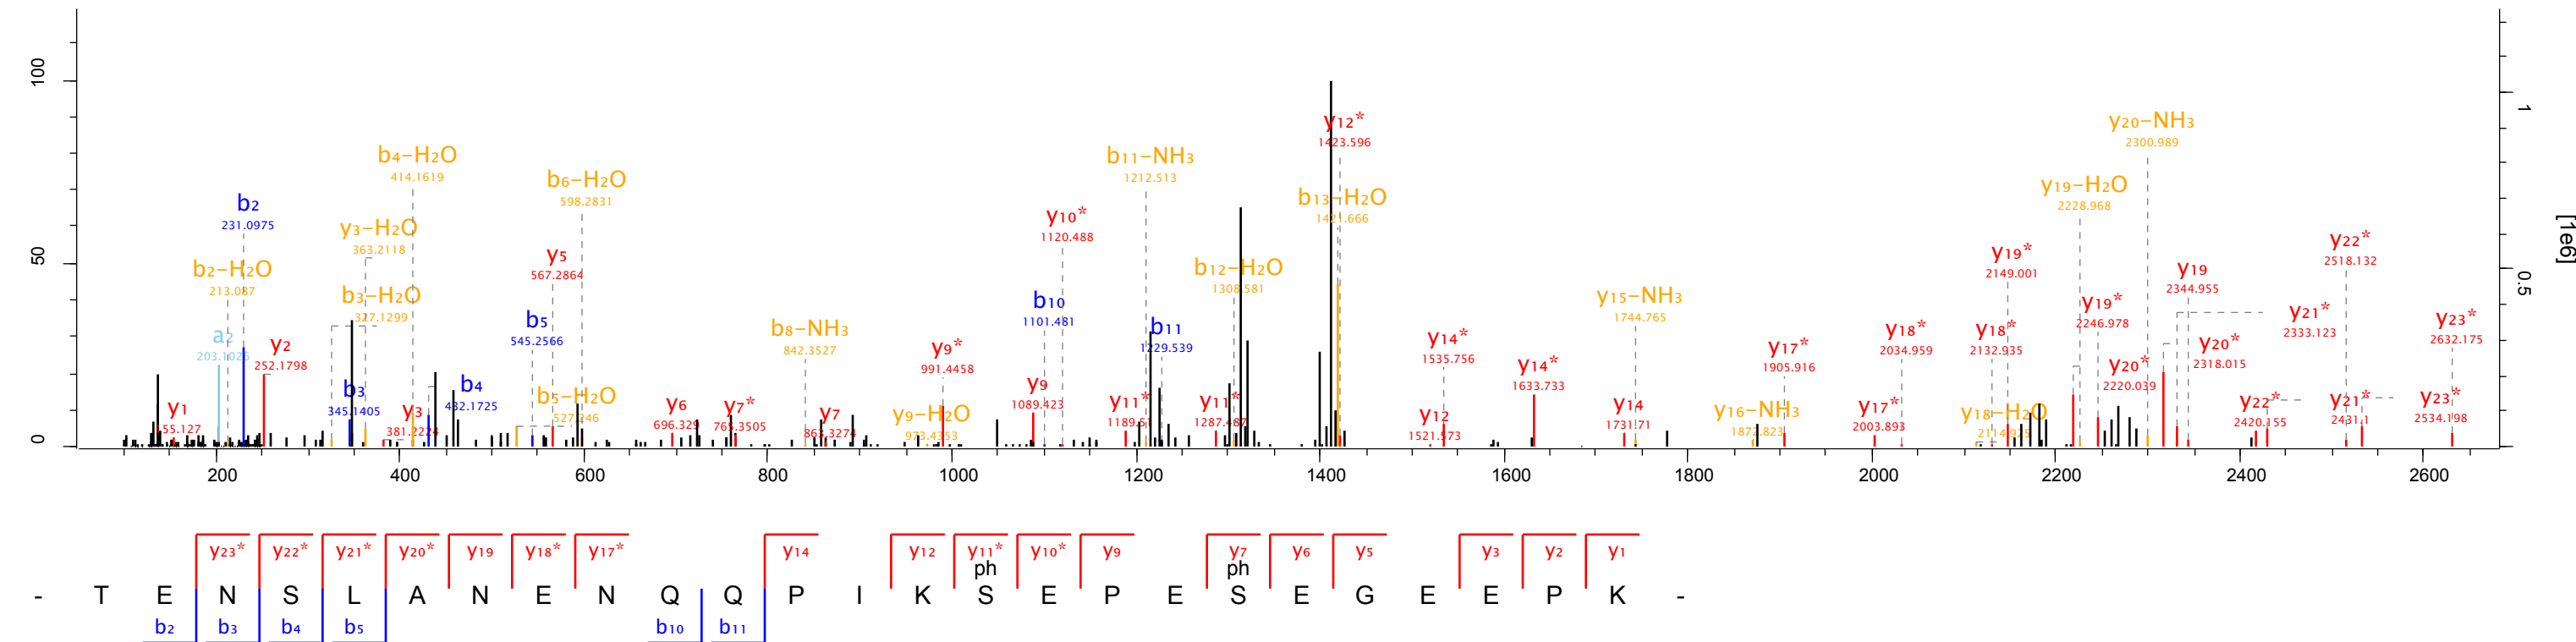

Raw file 20171215\_MaS\_33SR\_LMH\_phospho2\_03 Scan 7685 Method FTMS; HCD Score 109.44 m/z 788.66 Gene names PACS1

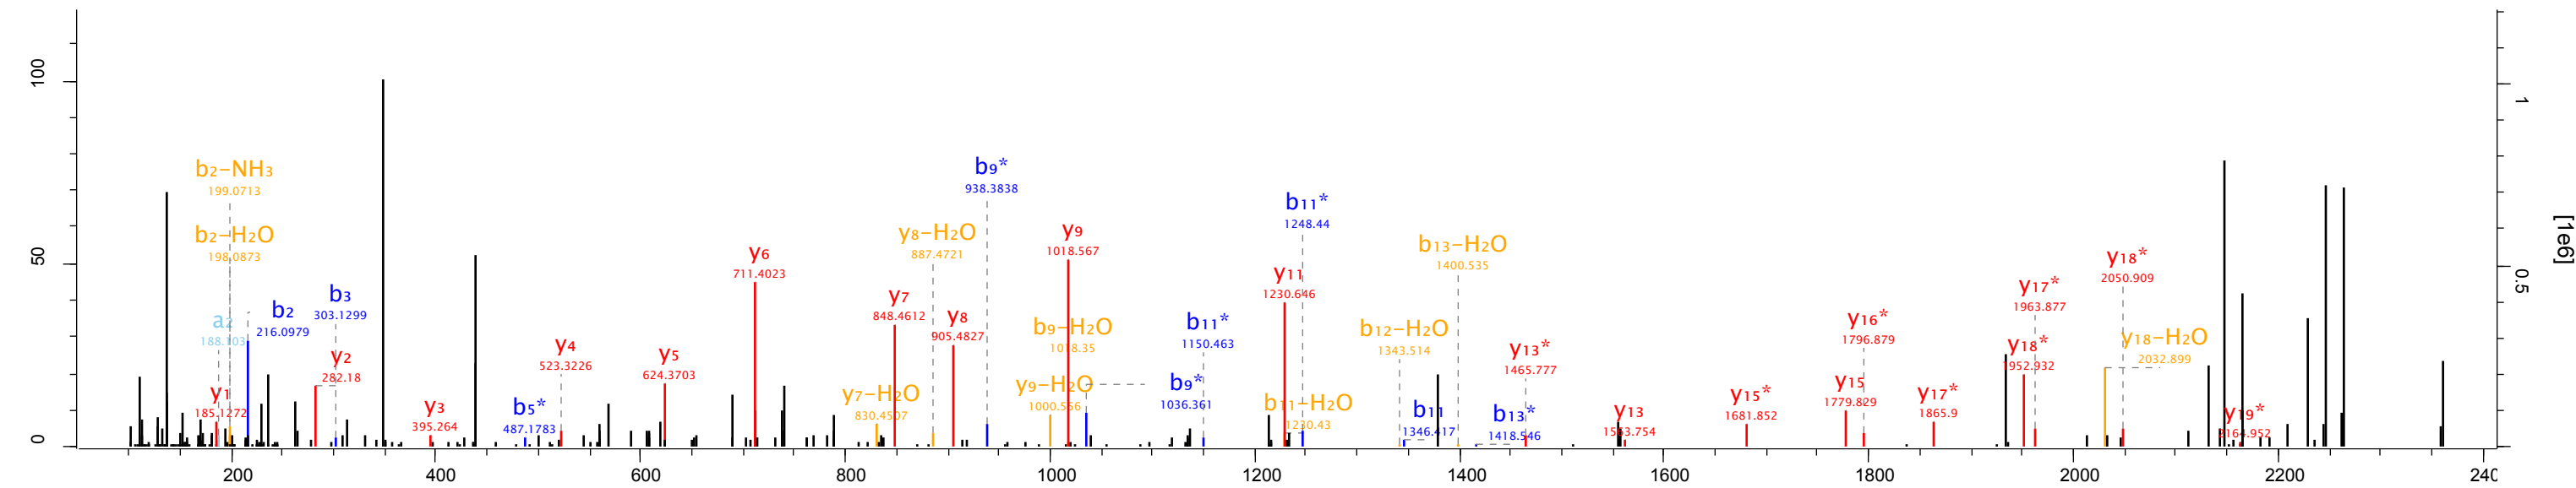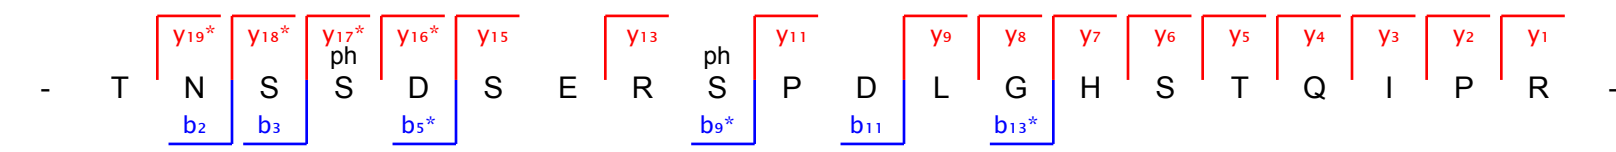

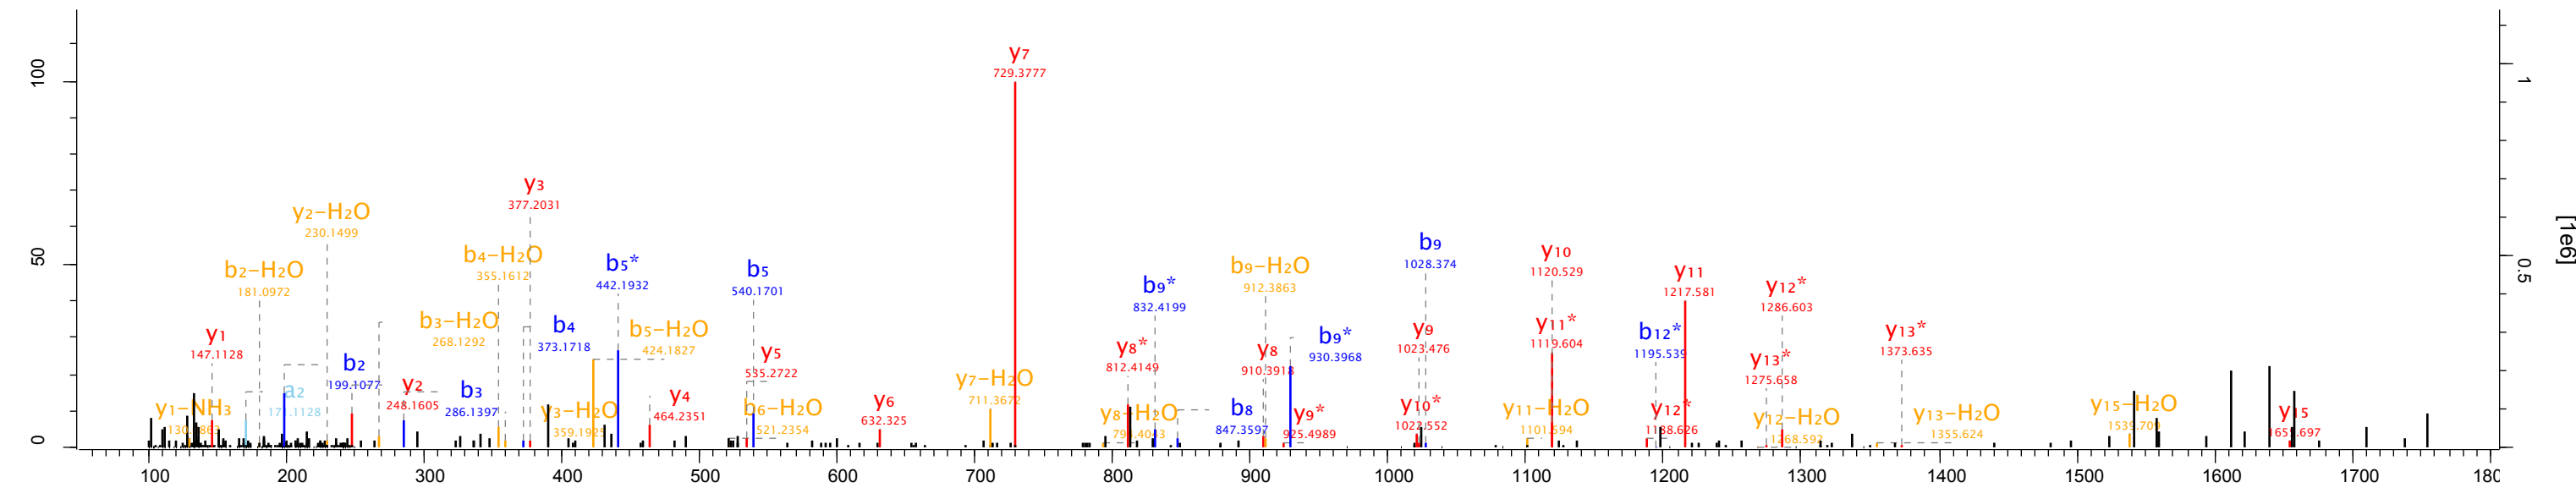

- T P S S P P I T P P A S E T K -

b<sub>2</sub> b<sub>3</sub> b<sub>4</sub> b<sub>5</sub> b<sub>8</sub> b<sub>9</sub> b<sub>12</sub>\*

y<sub>15</sub> y<sub>13</sub>\* y<sub>12</sub>\* y<sub>11</sub> y<sub>10</sub> y<sub>9</sub> y<sub>8</sub> y<sub>7</sub> y<sub>6</sub> y<sub>5</sub> y<sub>4</sub> y<sub>3</sub> y<sub>2</sub> y<sub>1</sub>

ph

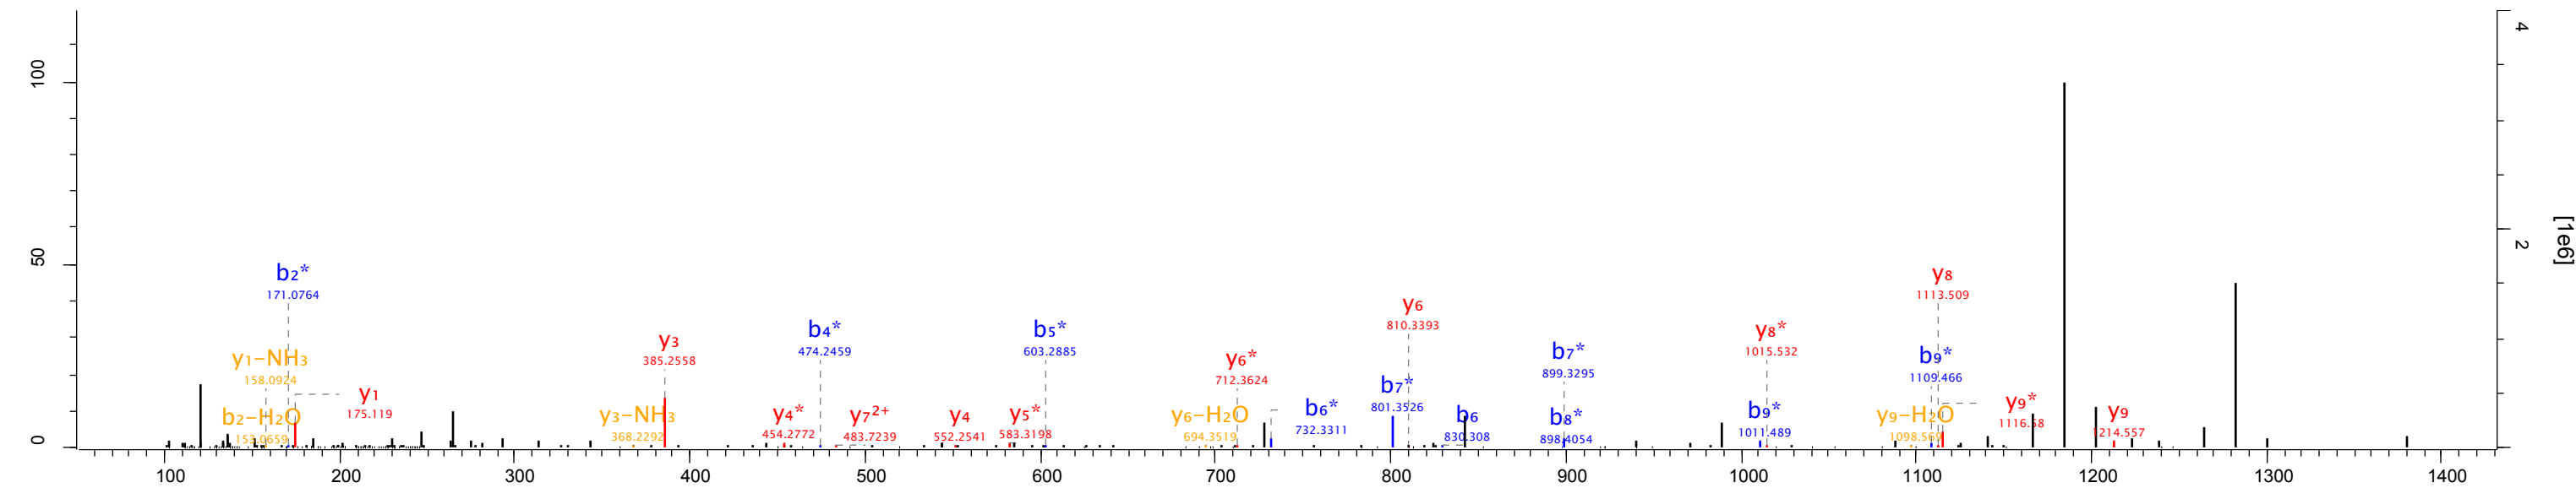

ph S -

|                  |                |                              |                  |                  |                   |                  |                  |
|------------------|----------------|------------------------------|------------------|------------------|-------------------|------------------|------------------|
| y <sub>9</sub>   | y <sub>8</sub> | y <sub>7</sub> <sup>2+</sup> | y <sub>6</sub>   | y <sub>5</sub> * | y <sub>4</sub> ph | y <sub>3</sub>   | y <sub>1</sub>   |
| T                | F              | R                            | E                | E                | S                 | P                | R                |
| b <sub>2</sub> * |                | b <sub>4</sub> *             | b <sub>5</sub> * | b <sub>6</sub>   | b <sub>7</sub> *  | b <sub>8</sub> * | b <sub>9</sub> * |

-



Raw file 20171215\_MaS\_33SR\_LMH\_phospho2\_03 Scan 8055 Method FTMS; HCD Score 178.1 m/z 973.88 Gene names TBC1D2B

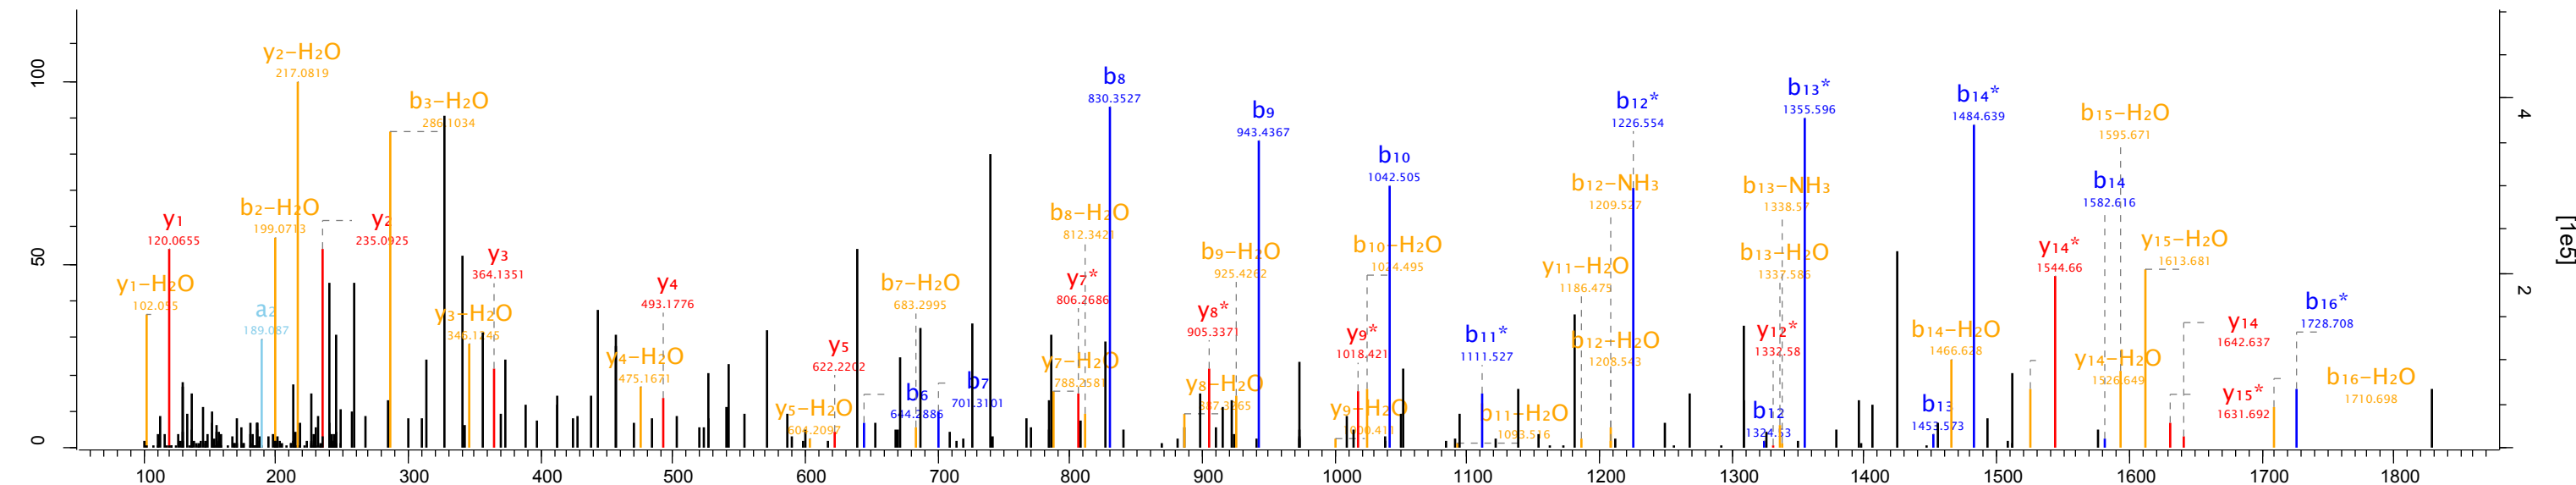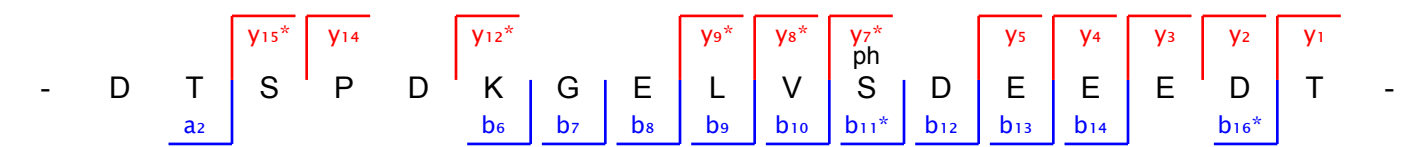

Raw file Scan Method Score m/z Gene names

20171215\_MaS\_33SR\_LMH\_phospho2\_03 8095 FTMS; HCD 151.28 807.33 RIOK2

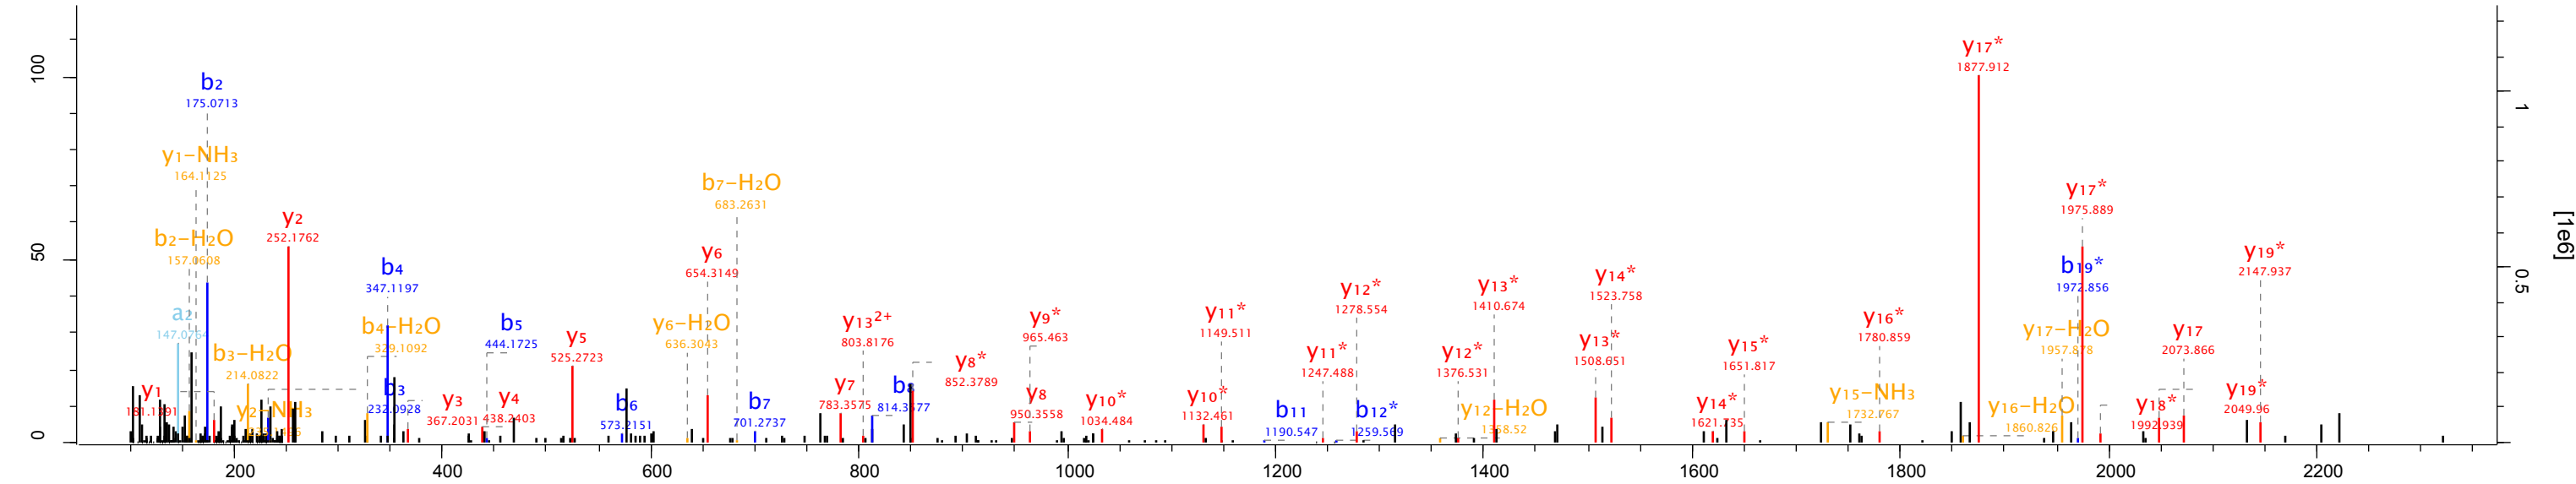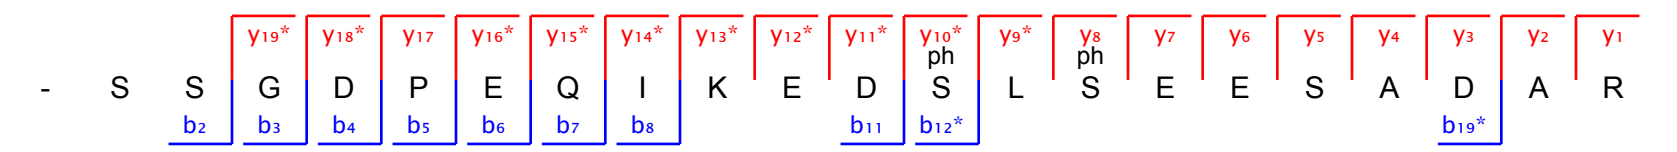

Raw file  
20171215\_MaS\_33SR\_LMH\_phospho2\_03

Scan 8255 Method FTMS; HCD Score 291.68 m/z 890.68 Gene names BRPF1

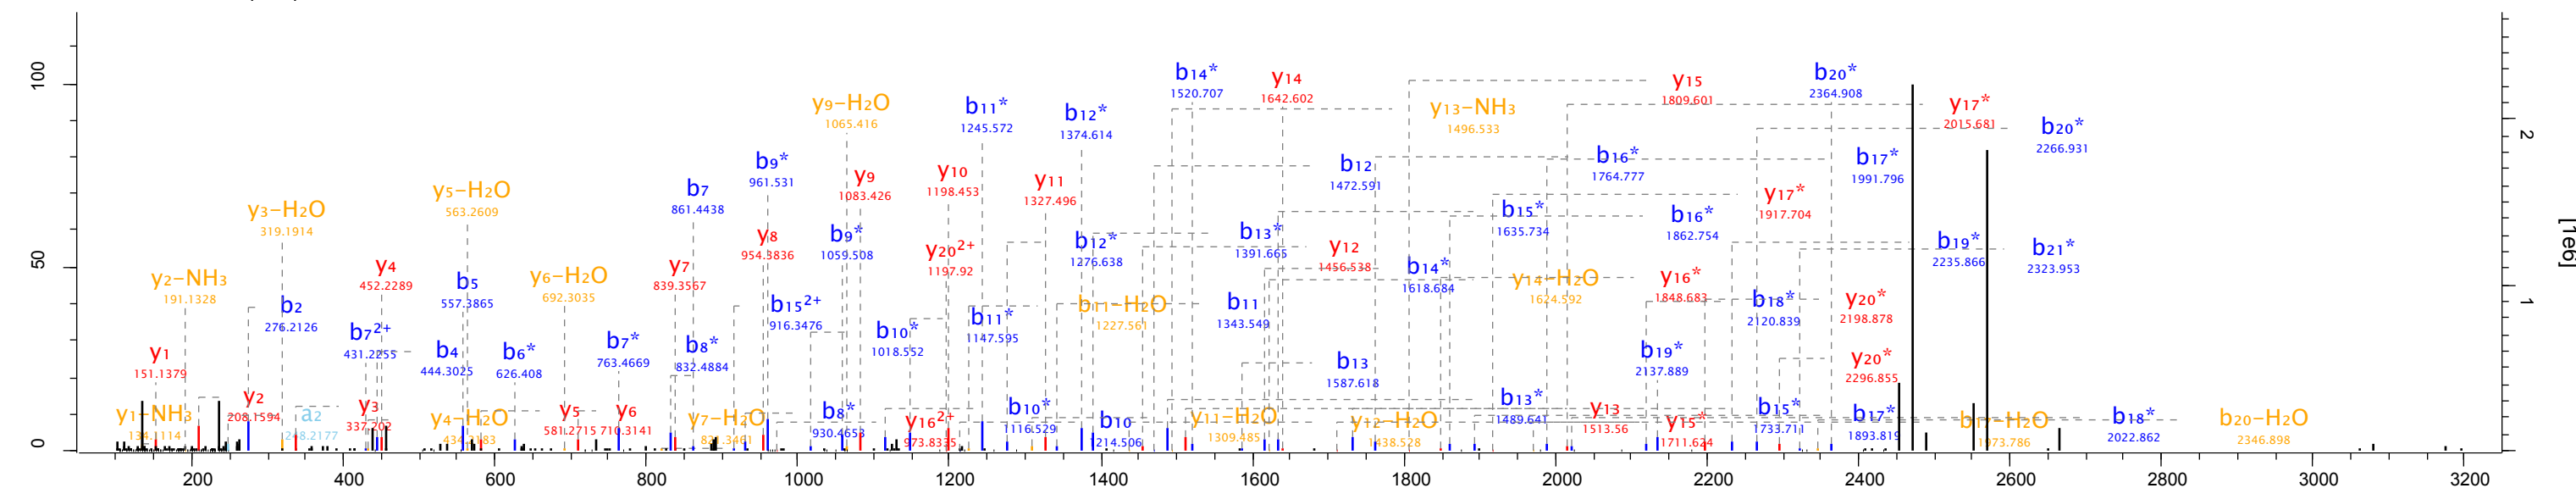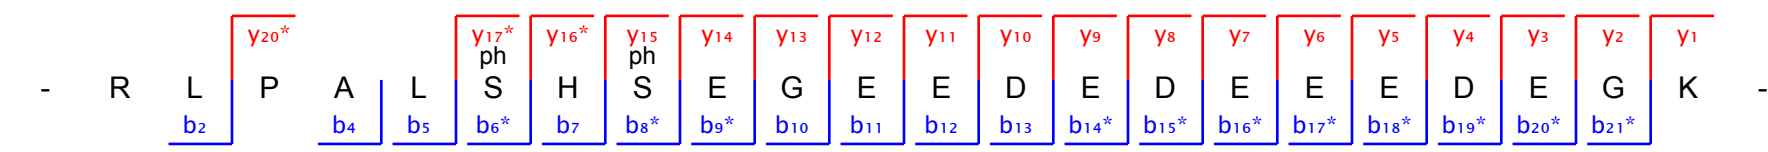

Raw file 20171215\_MaS\_33SR\_LMH\_phospho2\_03 Scan 8295 Method FTMS; HCD Score 142.07 m/z 1047.96 Gene names SPATA22;EPS15L1

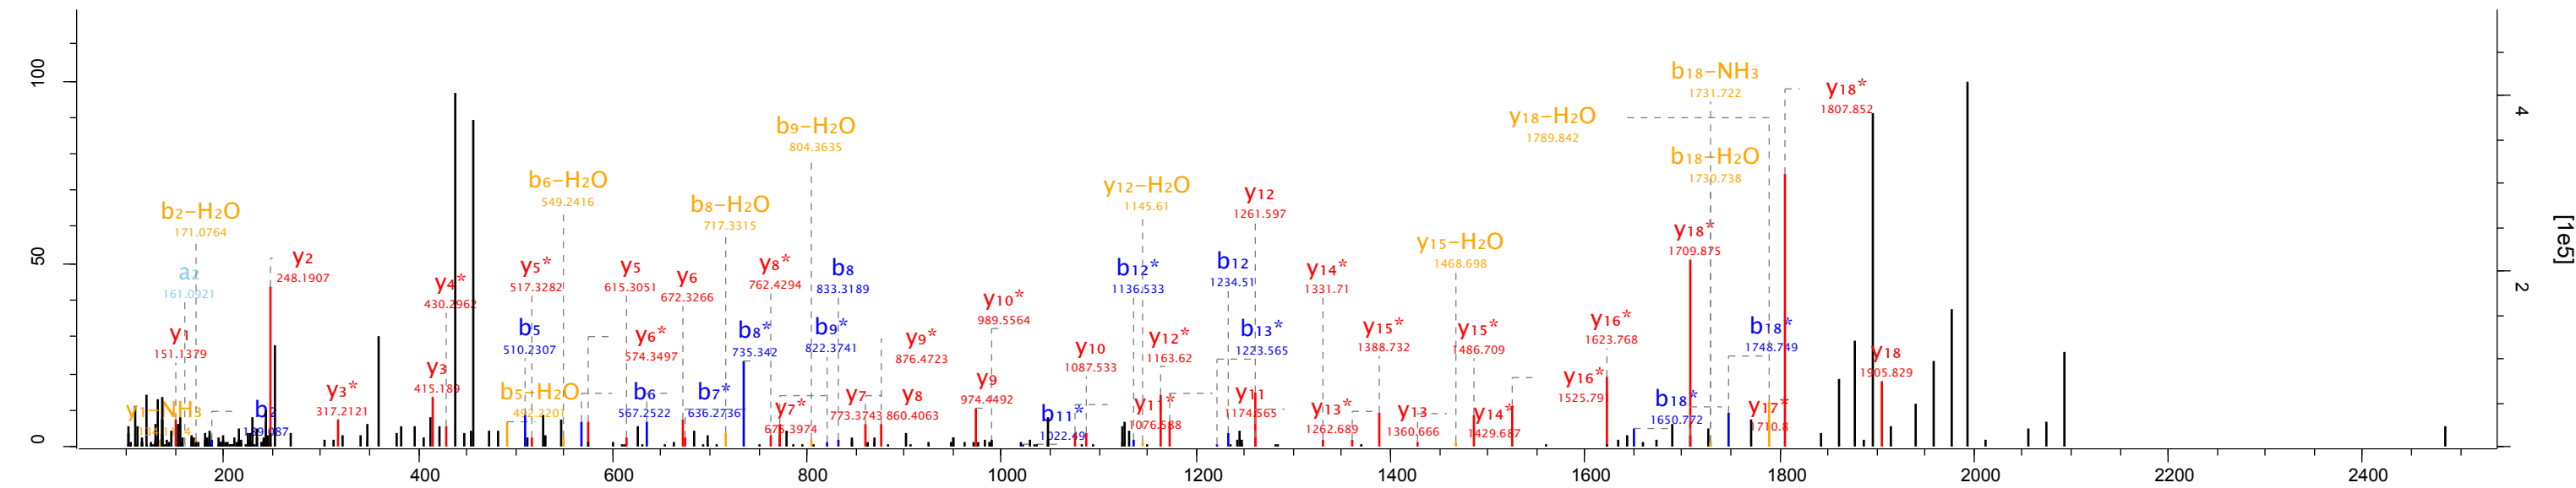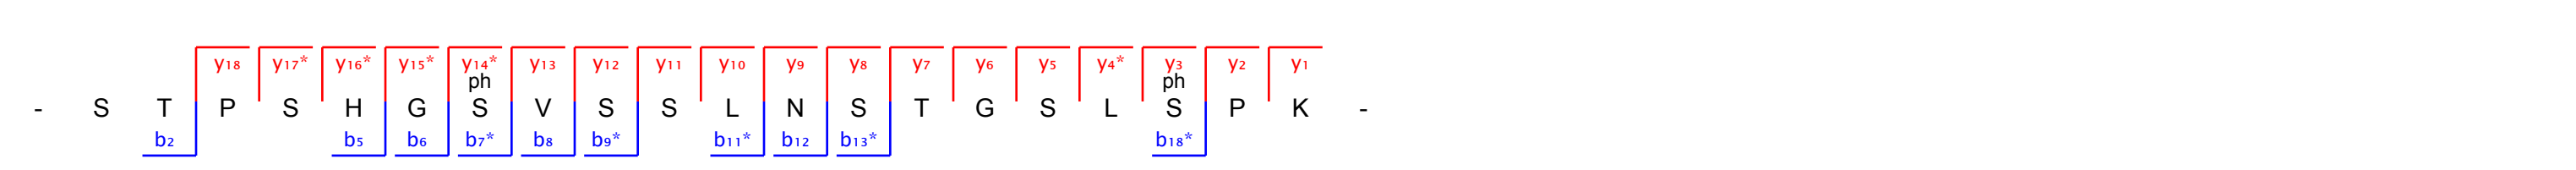

Raw file 20171215\_MaS\_33SR\_LMH\_phospho2\_03 Scan 8425 Method FTMS; HCD Score 134.19 m/z 787.02 Gene names RALGPS2

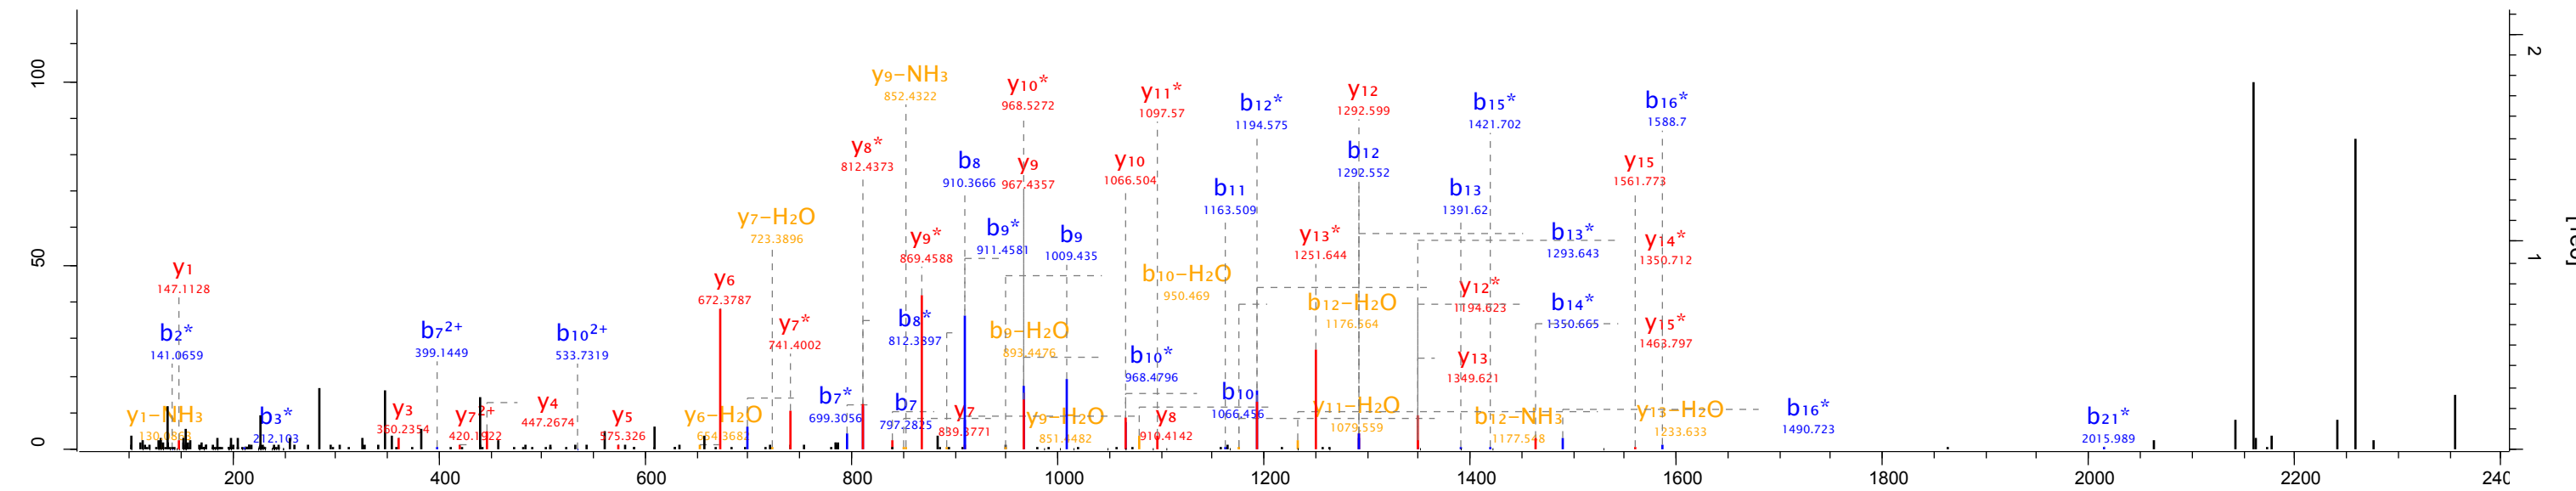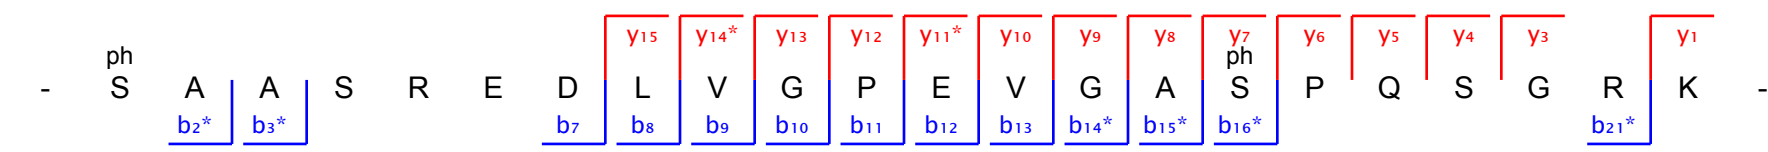

Raw file: 20171215\_MaS\_33SR\_LMH\_phospho2\_03  
 Scan: 8485 Method: FTMS; HCD Score: 217.91 m/z: 904.37 Gene names: IRS1

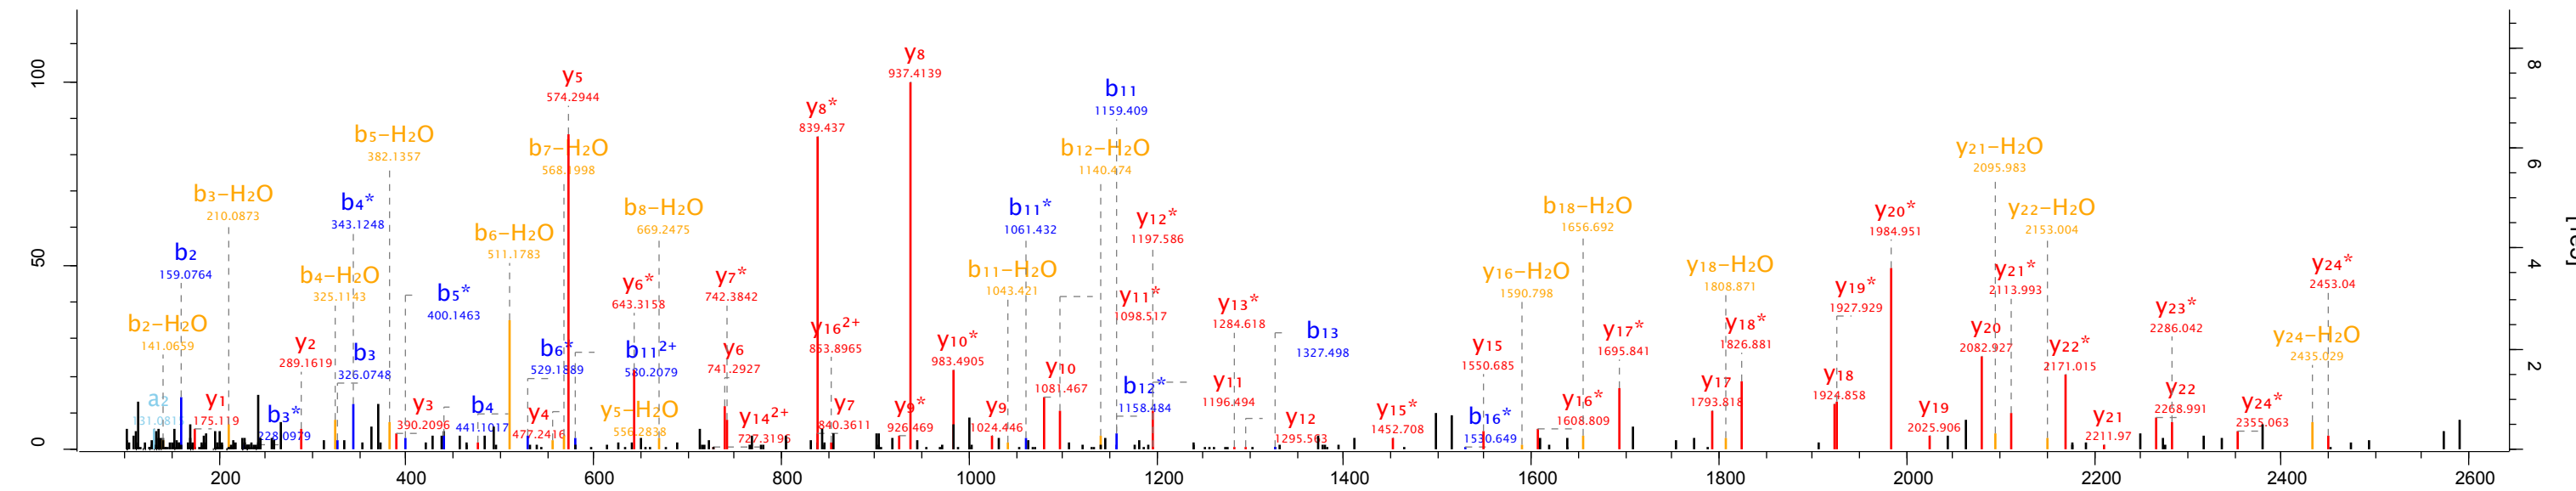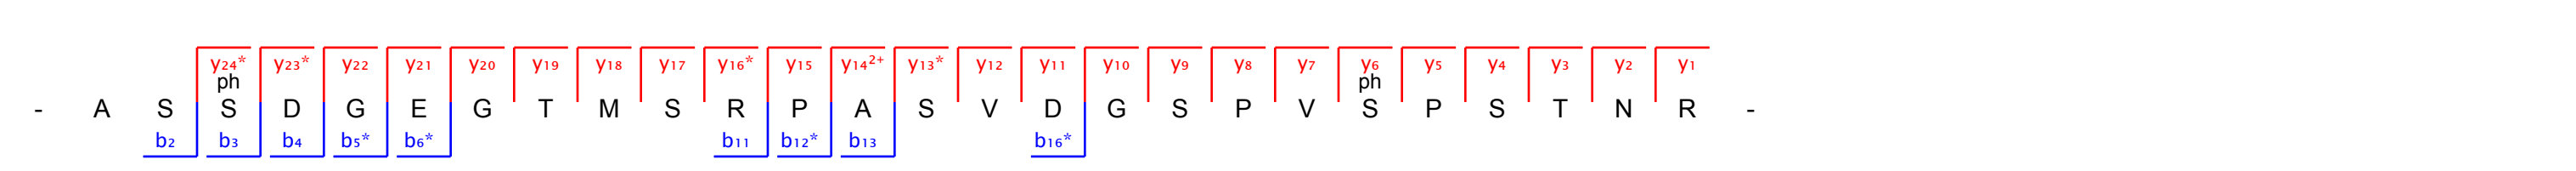

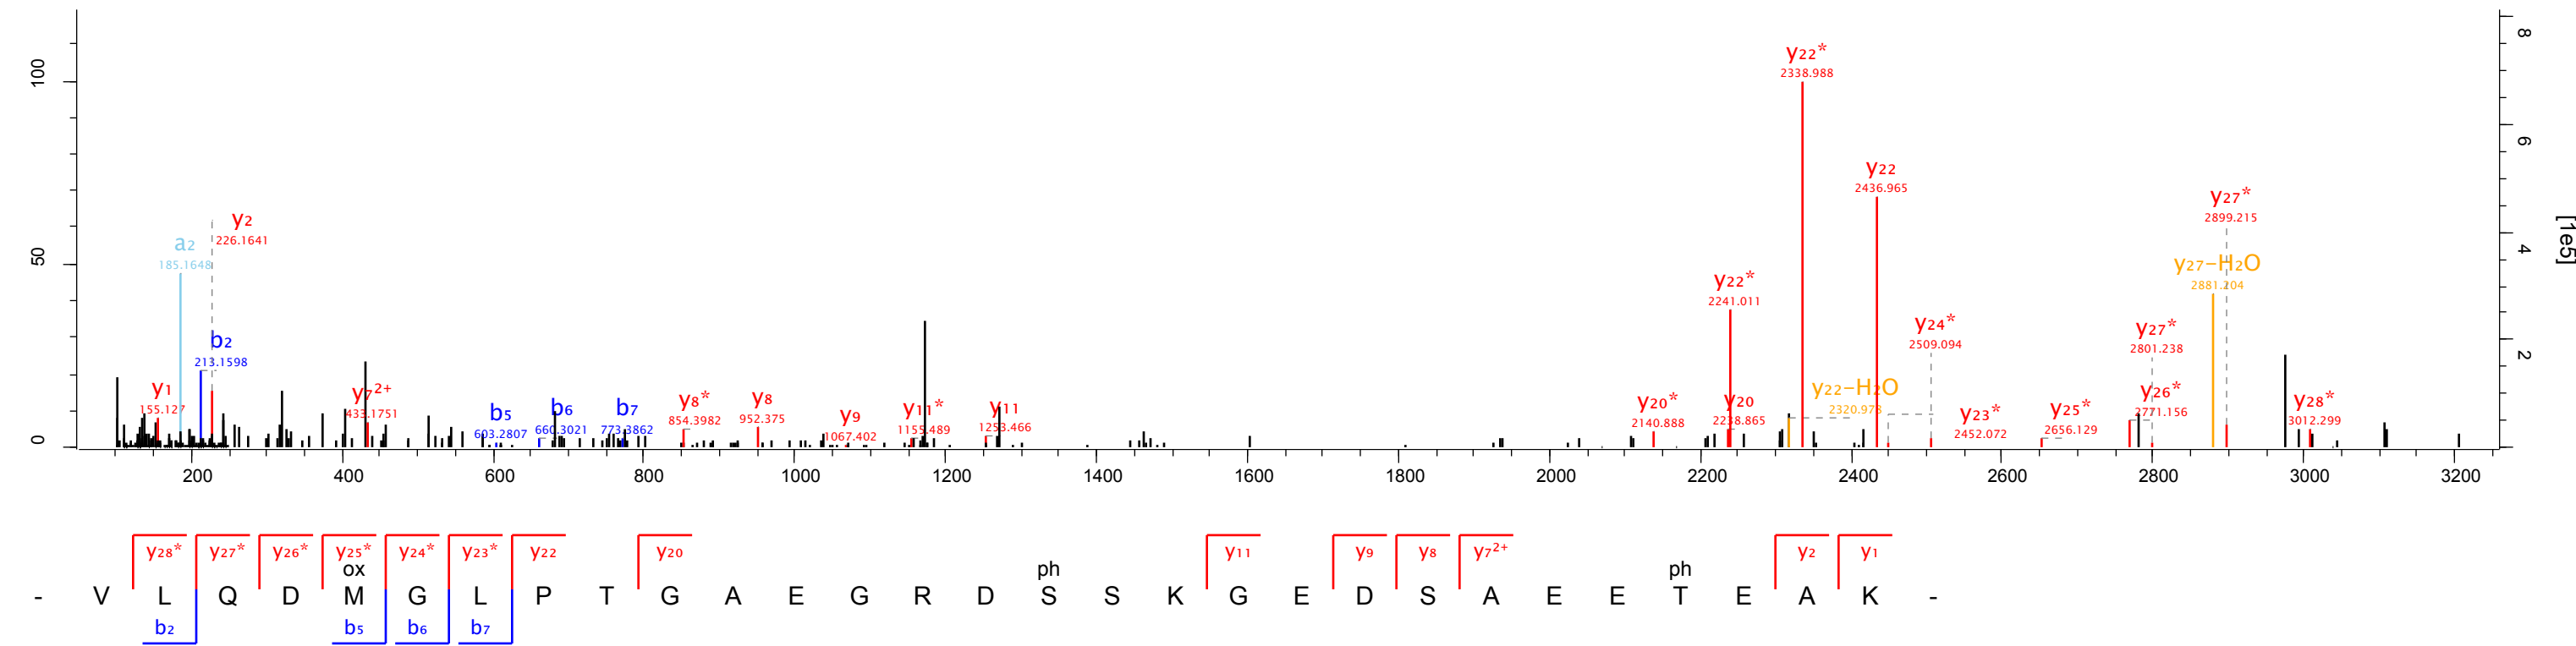

Raw file: 20171215\_MaS\_33SR\_LMH\_phospho2\_03  
 Scan: 8605 Method: FTMS; HCD Score: 97.46 m/z: 615.83 Gene names: LSM14A

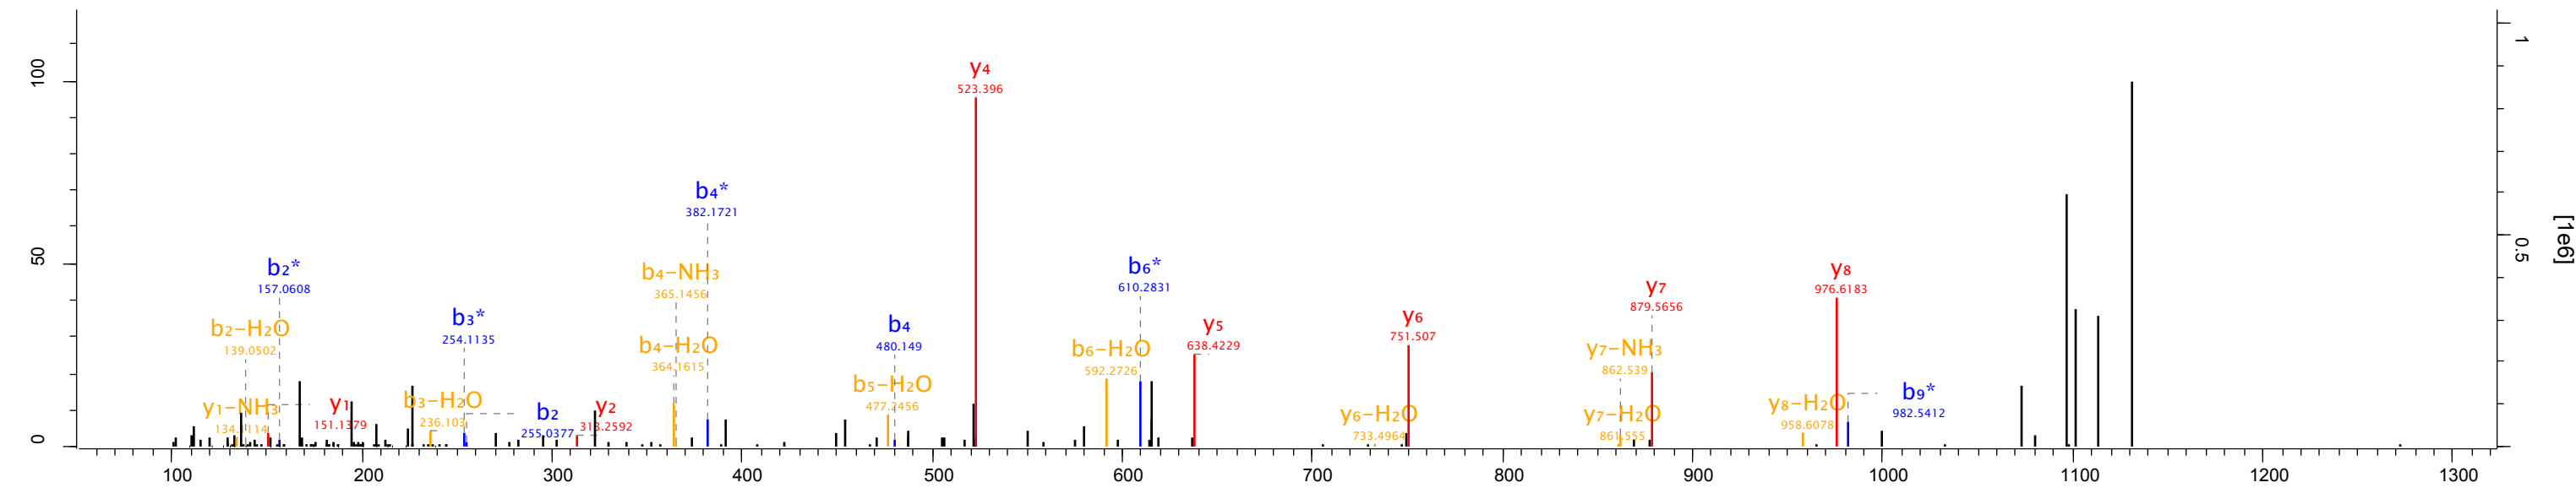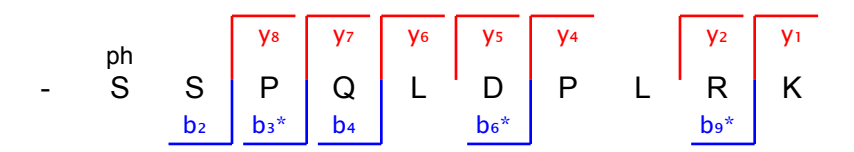



Raw file Scan Method Score m/z Gene names

20171215\_MaS\_33SR\_LMH\_phospho2\_03 8735 FTMS; HCD 190.67 737.78 IRS1

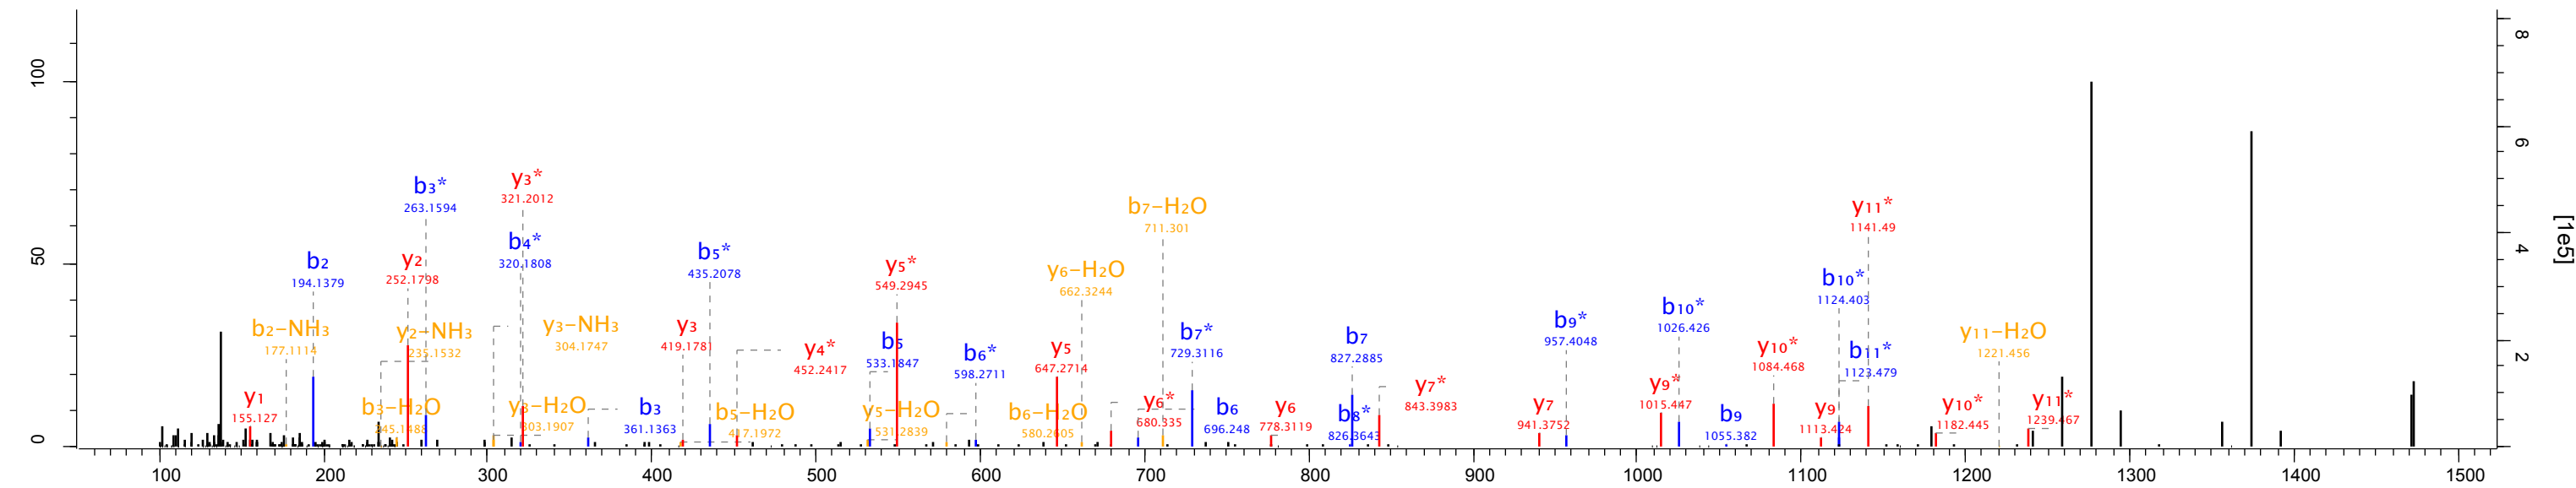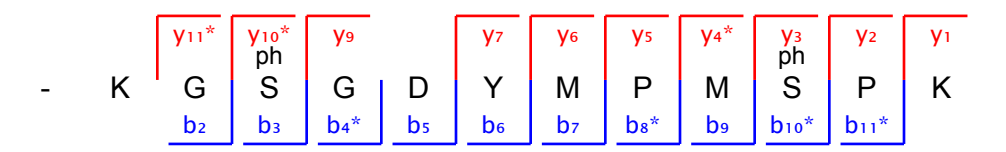

Raw file: 20171215\_MaS\_33SR\_LMH\_phospho2\_03  
 Scan: 8845 Method: FTMS; HCD Score: 184.14 m/z: 1001.42 Gene names: TRIP10

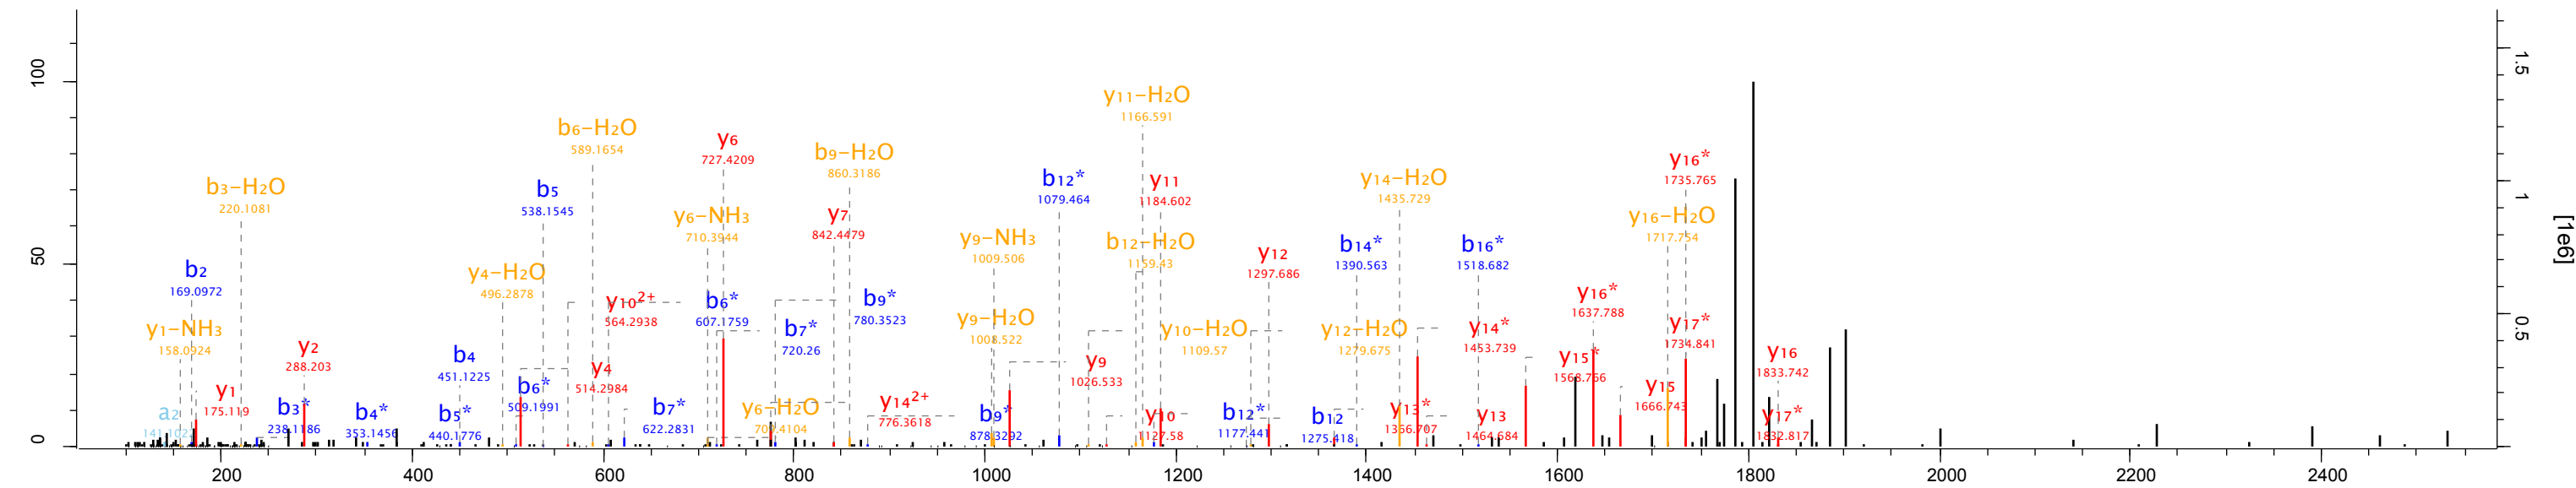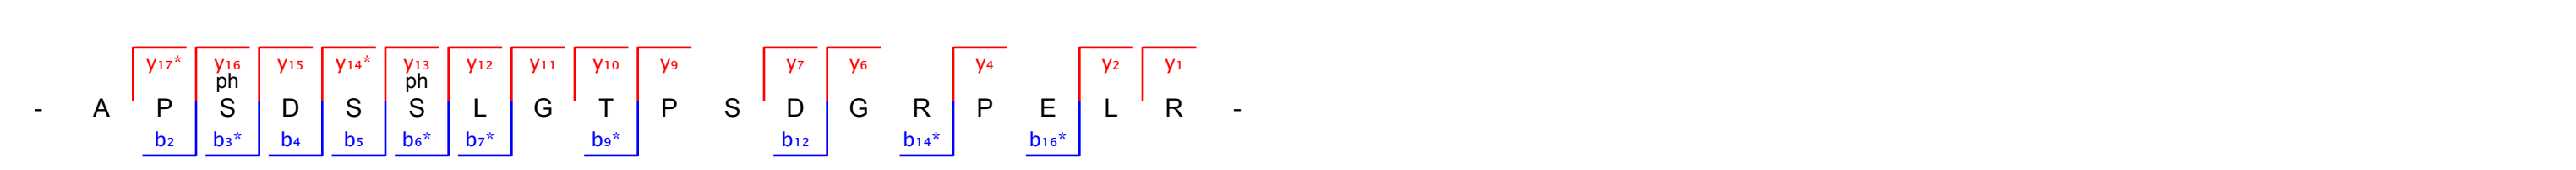

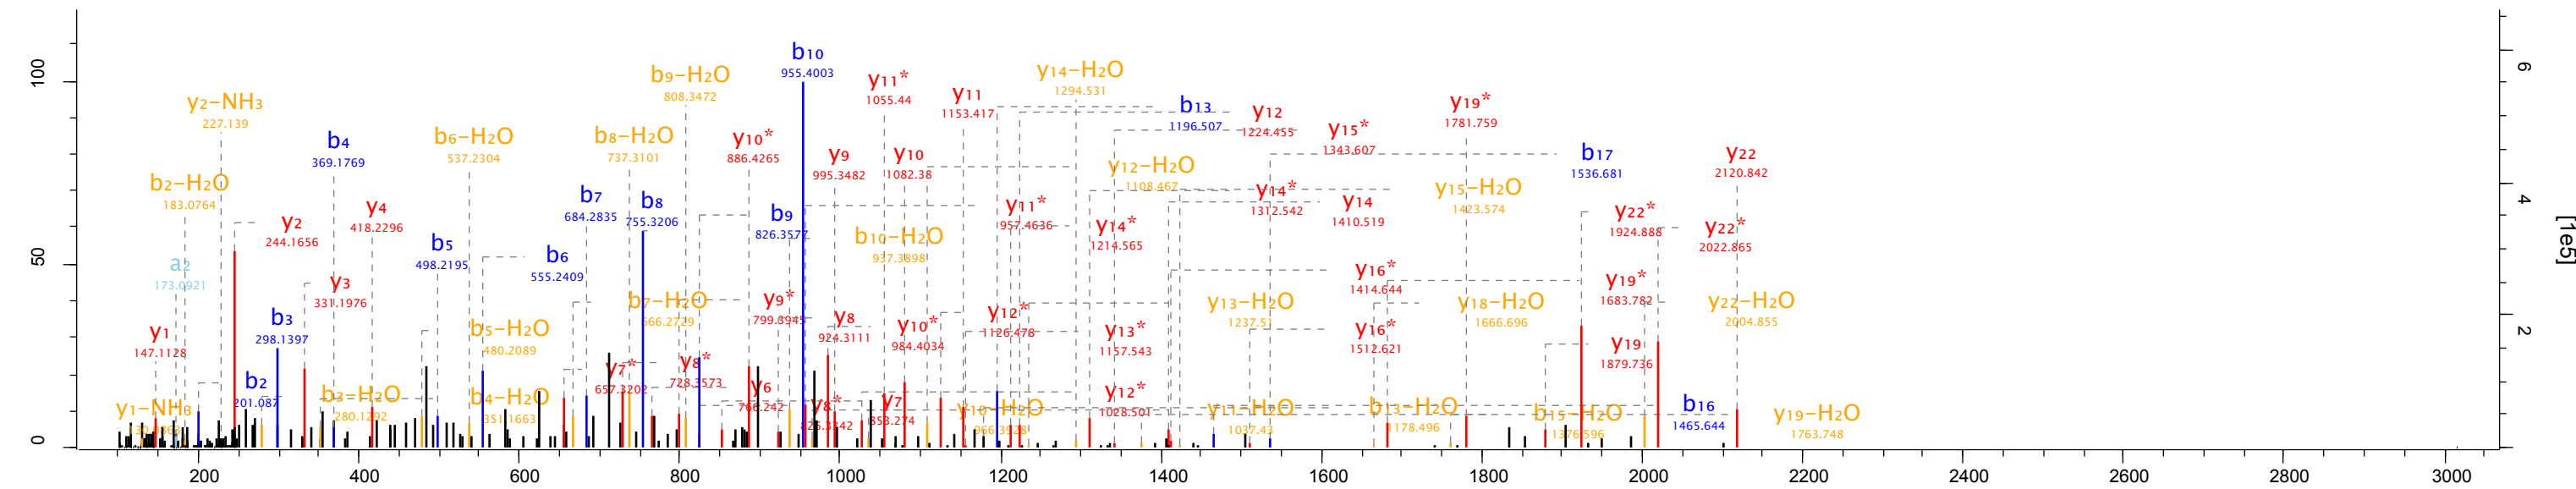

- E A P A E G E A A E P G S P T A A E G E A A S A A S S ph T S S P K -

Fragmentation labels (b and y ions) are shown below the corresponding amino acids in the sequence:

- b<sub>2</sub> (under A), b<sub>3</sub> (under P), b<sub>4</sub> (under A), b<sub>5</sub> (under E), b<sub>6</sub> (under G), b<sub>7</sub> (under E), b<sub>8</sub> (under A), b<sub>9</sub> (under A), b<sub>10</sub> (under E)
- b<sub>13</sub> (under S), b<sub>16</sub> (under A), b<sub>17</sub> (under A)
- y<sub>1</sub> (under K), y<sub>2</sub> (under P), y<sub>3</sub> (under S), y<sub>4</sub> (under S), y<sub>6</sub> (under S), y<sub>7</sub> (under S), y<sub>8</sub> (under A), y<sub>9</sub> (under A), y<sub>10</sub> (under S), y<sub>11</sub> (under A), y<sub>12</sub> (under E), y<sub>13</sub> (under G), y<sub>14</sub> (under E), y<sub>15</sub> (under E), y<sub>16</sub> (under A), y<sub>19</sub> (under P), y<sub>22</sub> (under P)

Raw file  
20171215\_MaS\_33SR\_LMH\_phospho2\_03

Scan 9045 Method FTMS; HCD Score 216.48 m/z 1014.42 Gene names ADD3

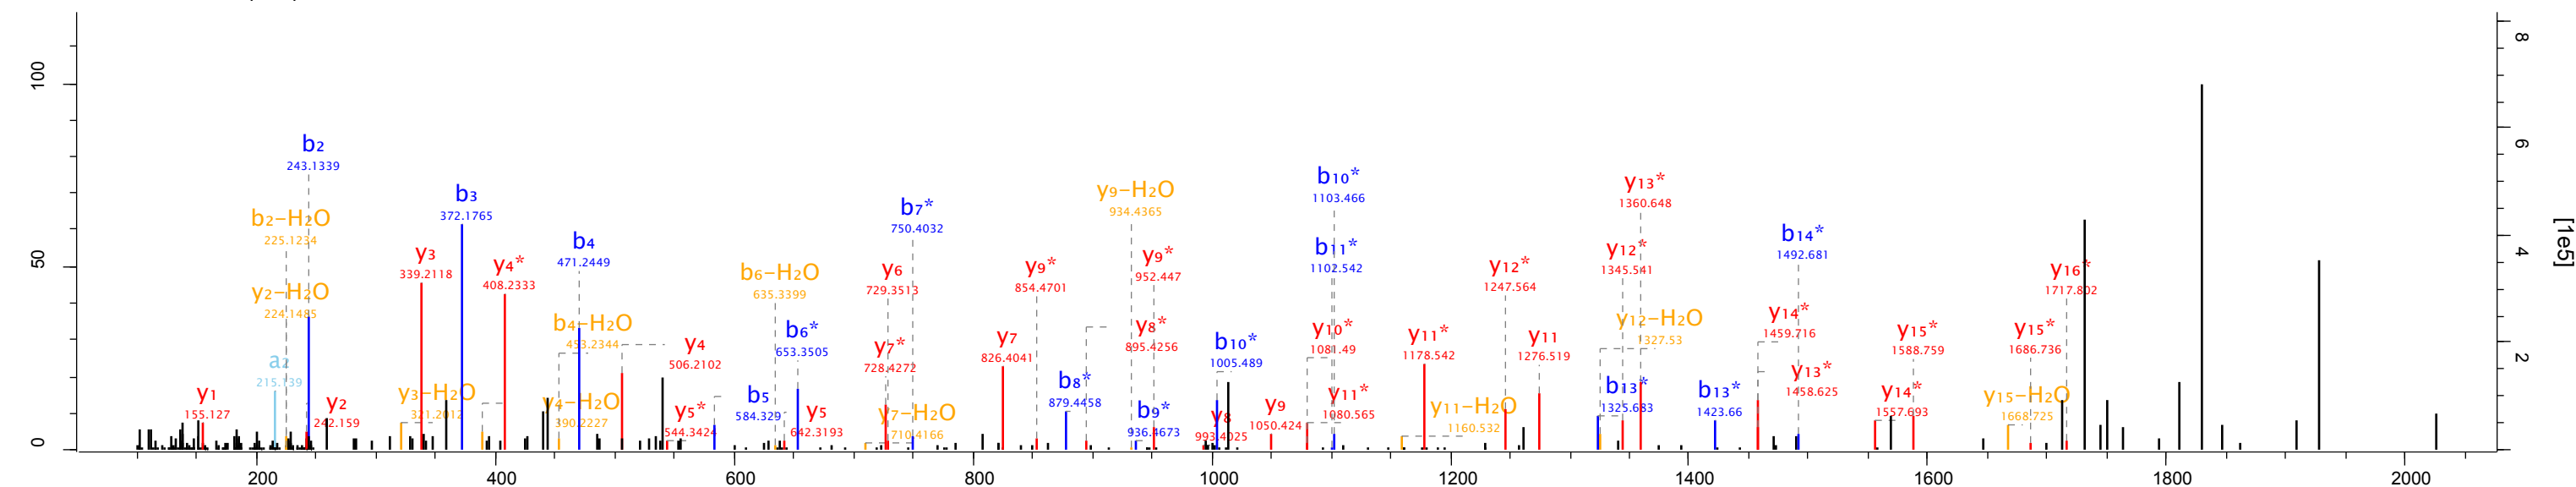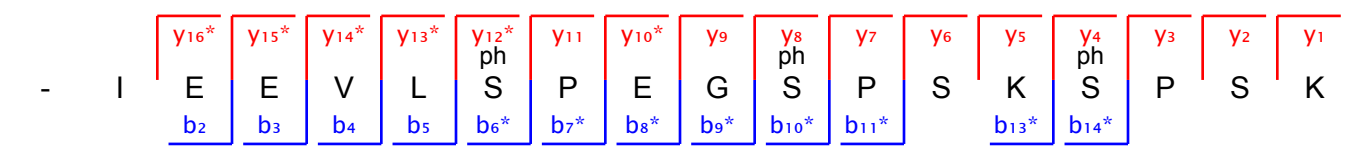

Raw file: 20171215\_MaS\_33SR\_LMH\_phospho2\_03  
 Scan: 9125 Method: FTMS; HCD Score: 260.68 m/z: 954.38 Gene names: FARP1

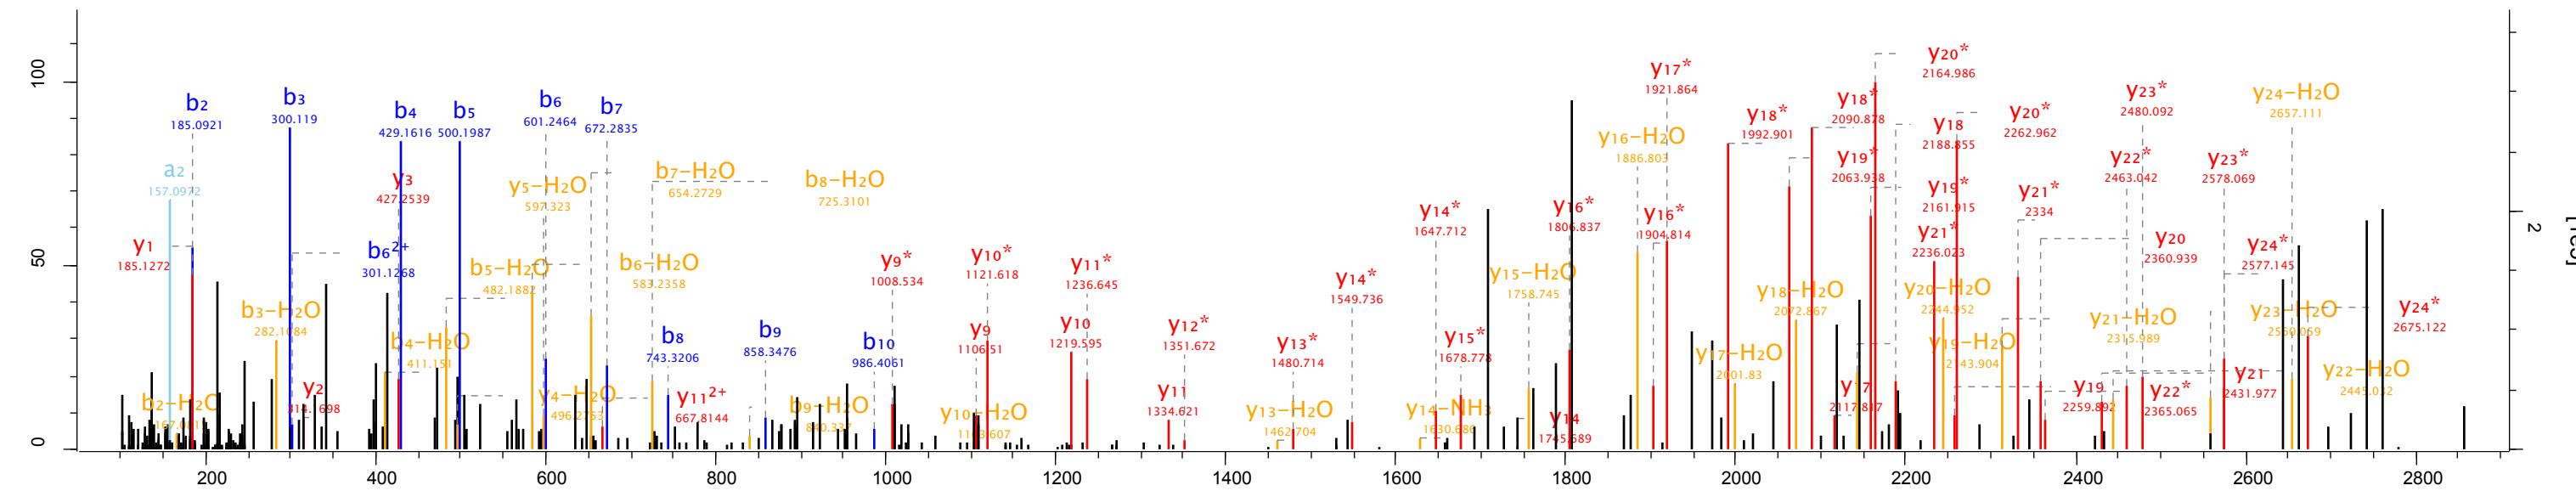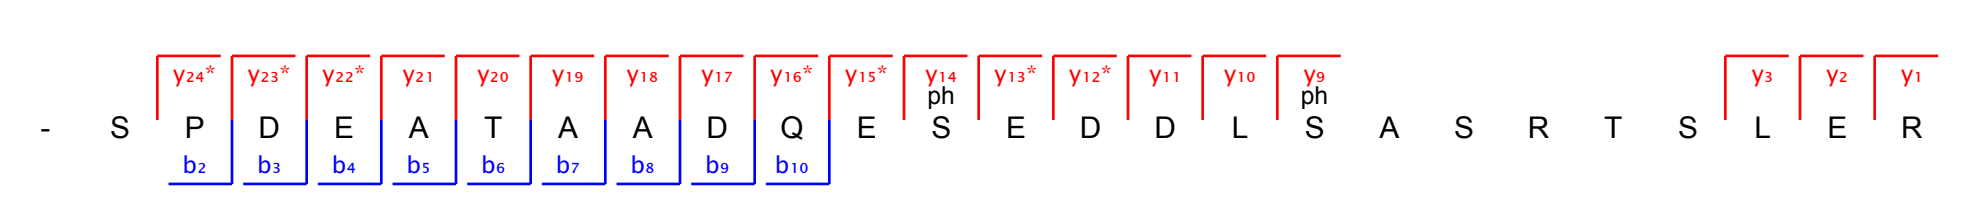

Raw file: 20171215\_MaS\_33SR\_LMH\_phospho2\_03  
 Scan: 9255 Method: FTMS; HCD Score: 250.29 m/z: 810.82 Gene names: PTPN2

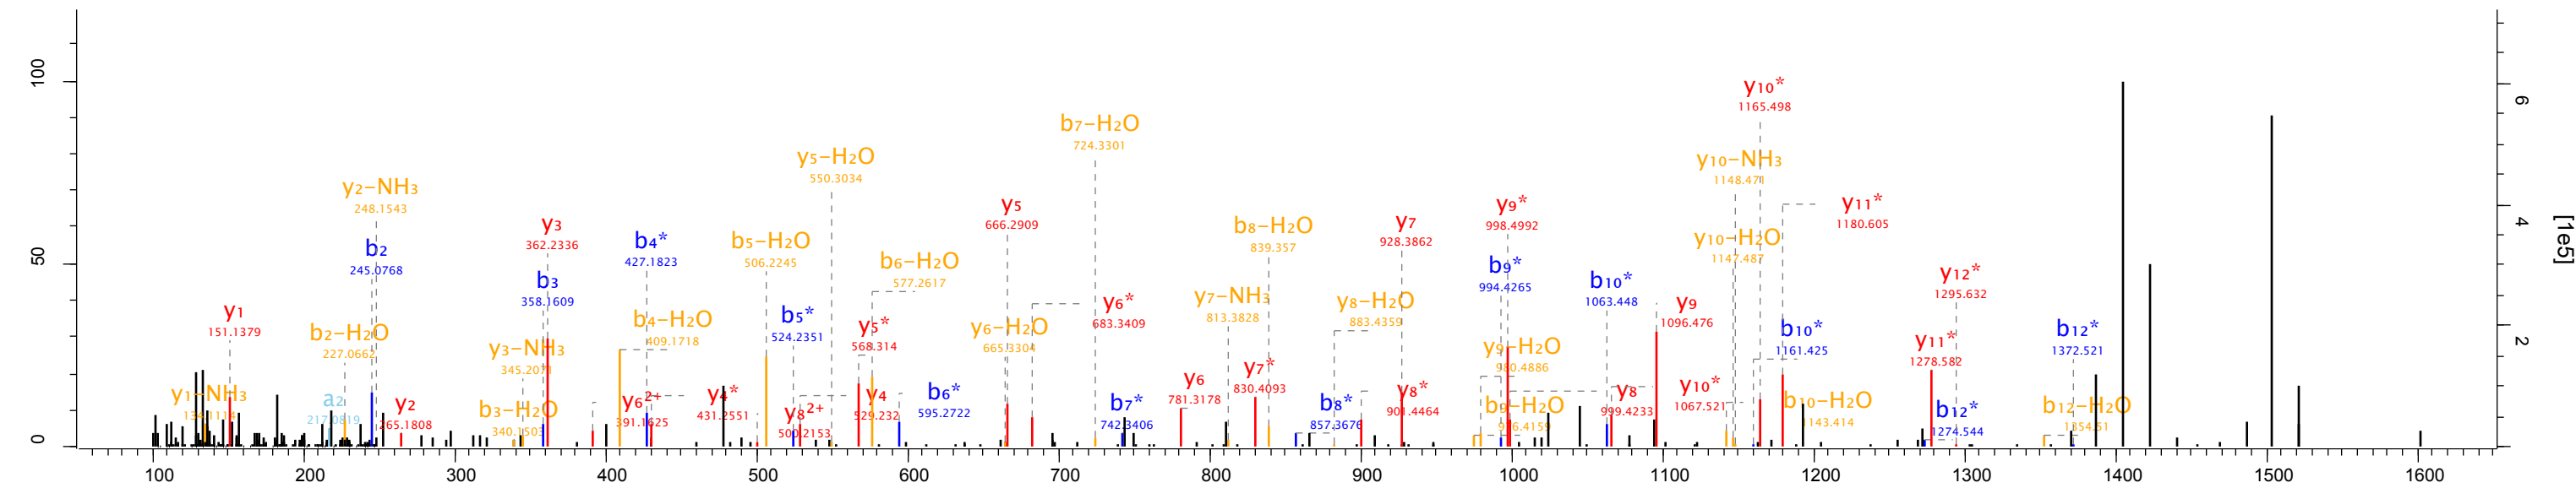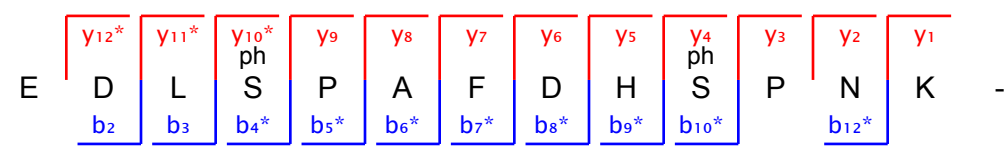

Raw file: 20171215\_MaS\_33SR\_LMH\_phospho2\_03  
 Scan: 9485 Method: FTMS; HCD Score: 142.09 m/z: 742.66 Gene names: ZNF217

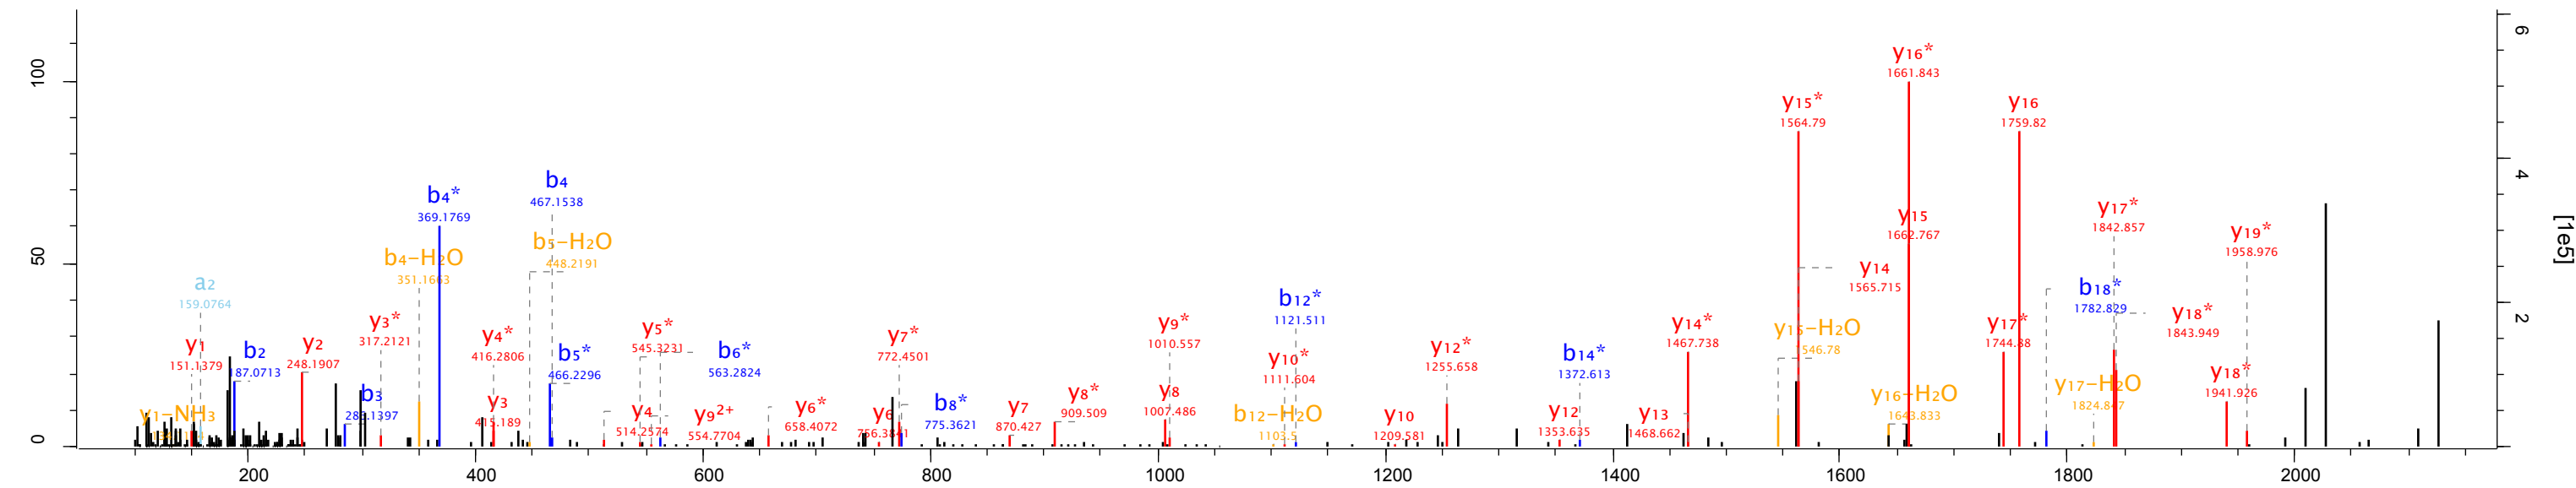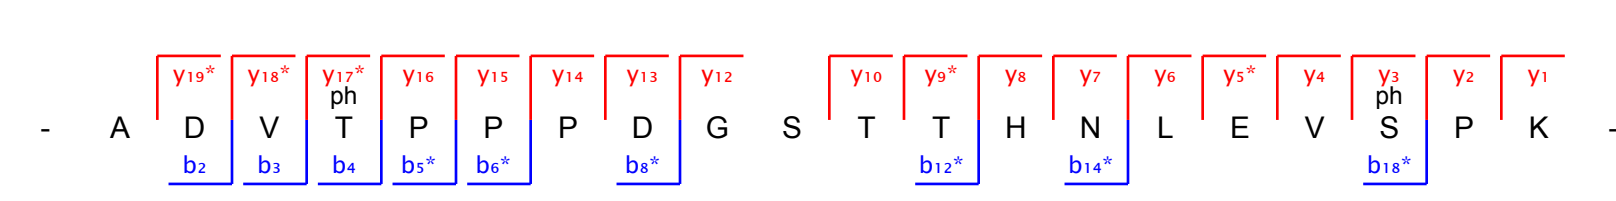

Raw file 20171215\_MaS\_33SR\_LMH\_phospho2\_03 Scan 9715 Method FTMS; HCD Score 218.04 m/z 756.33 Gene names MORC2

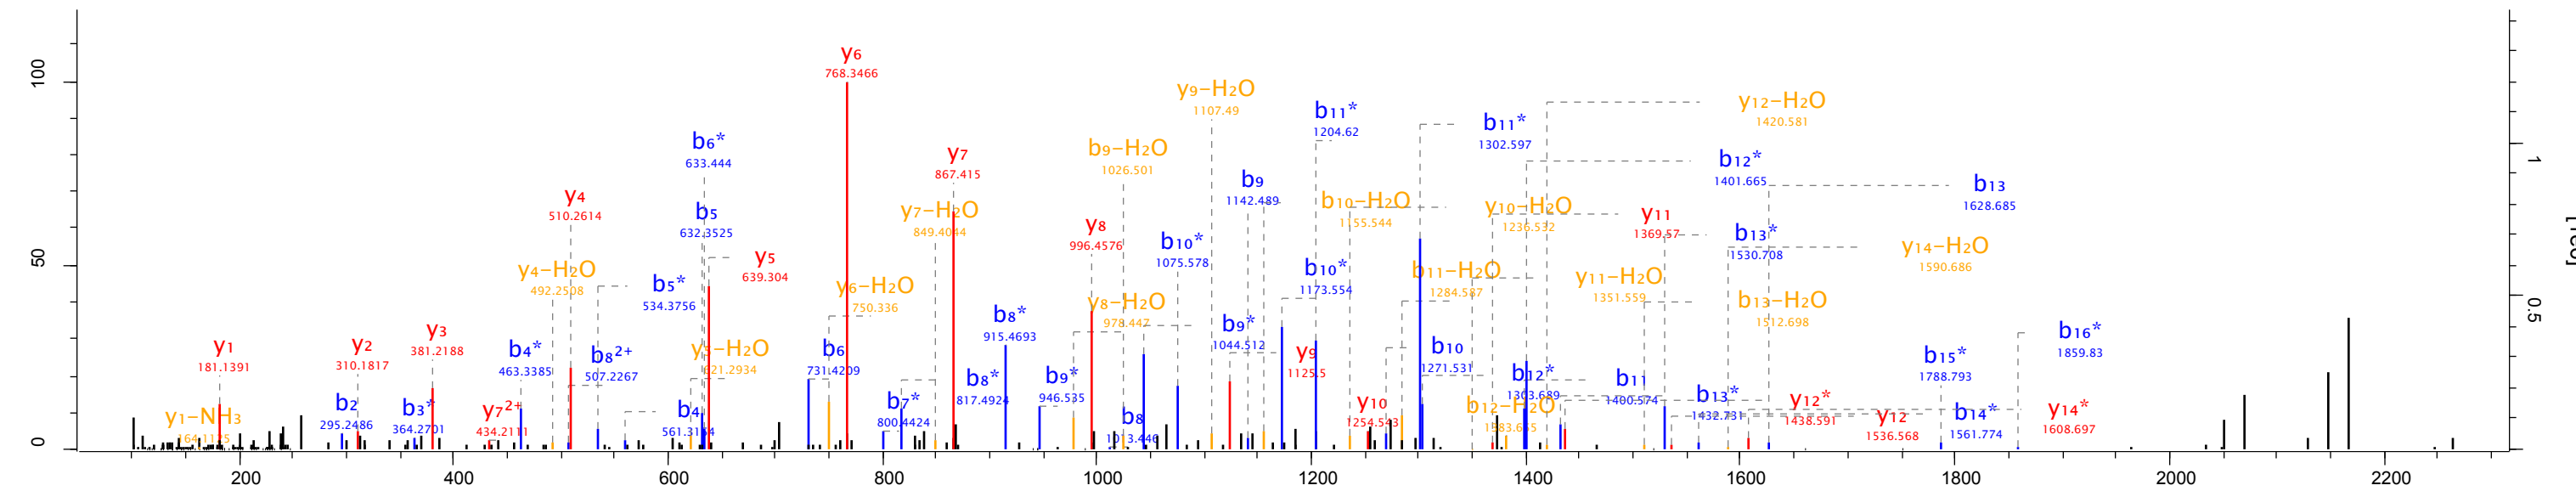

- K R S V A V S D E E E V E E E A E R -  
 b<sub>2</sub> b<sub>3</sub><sup>\*</sup> b<sub>4</sub> b<sub>5</sub> b<sub>6</sub> b<sub>7</sub><sup>\*</sup> b<sub>8</sub> b<sub>9</sub> b<sub>10</sub> b<sub>11</sub> b<sub>12</sub><sup>\*</sup> b<sub>13</sub> b<sub>14</sub><sup>\*</sup> b<sub>15</sub><sup>\*</sup> b<sub>16</sub><sup>\*</sup>  
 y<sub>14</sub><sup>\*</sup> y<sub>12</sub> ph y<sub>11</sub> y<sub>10</sub> y<sub>9</sub> y<sub>8</sub> y<sub>7</sub> y<sub>6</sub> y<sub>5</sub> y<sub>4</sub> y<sub>3</sub> y<sub>2</sub> y<sub>1</sub>



Raw file 20171215\_MaS\_33SR\_LMH\_phospho2\_03 Scan 9735 Method FTMS; HCD Score 133.65 m/z 713.65 Gene names SOX5

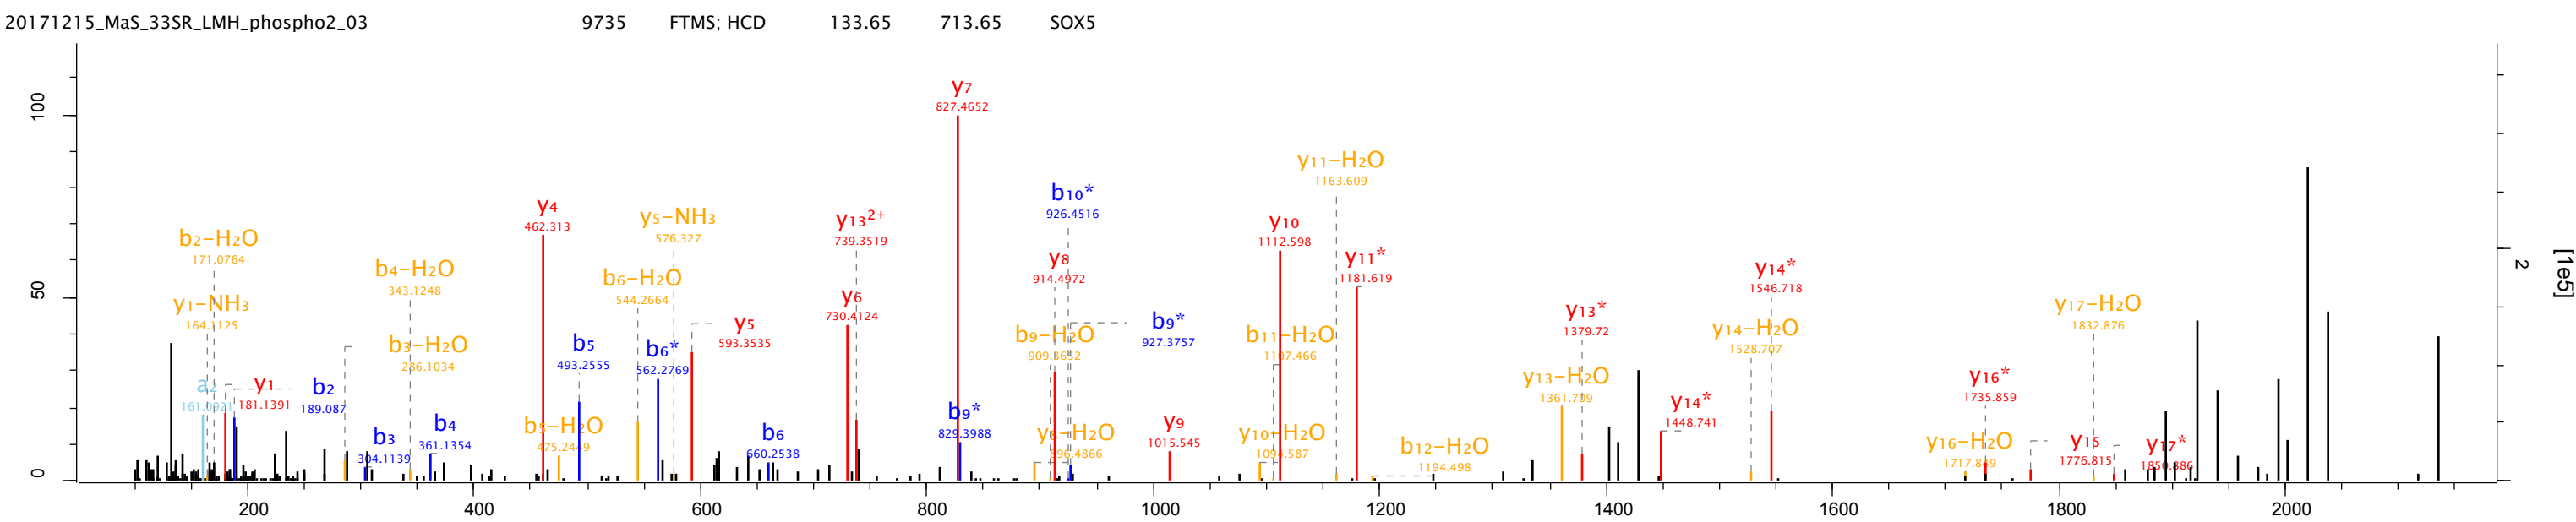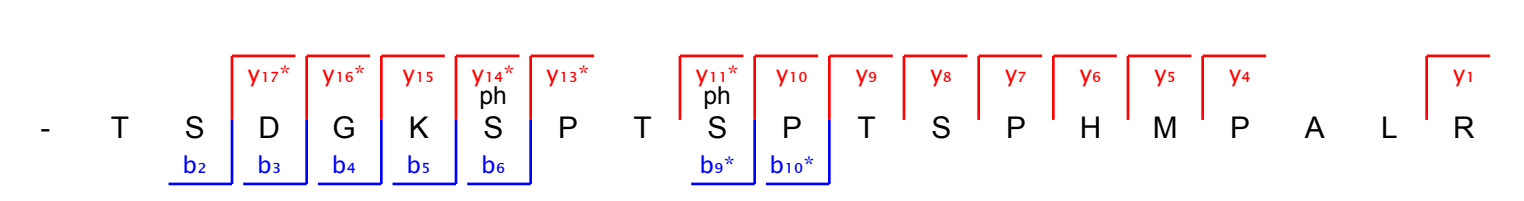

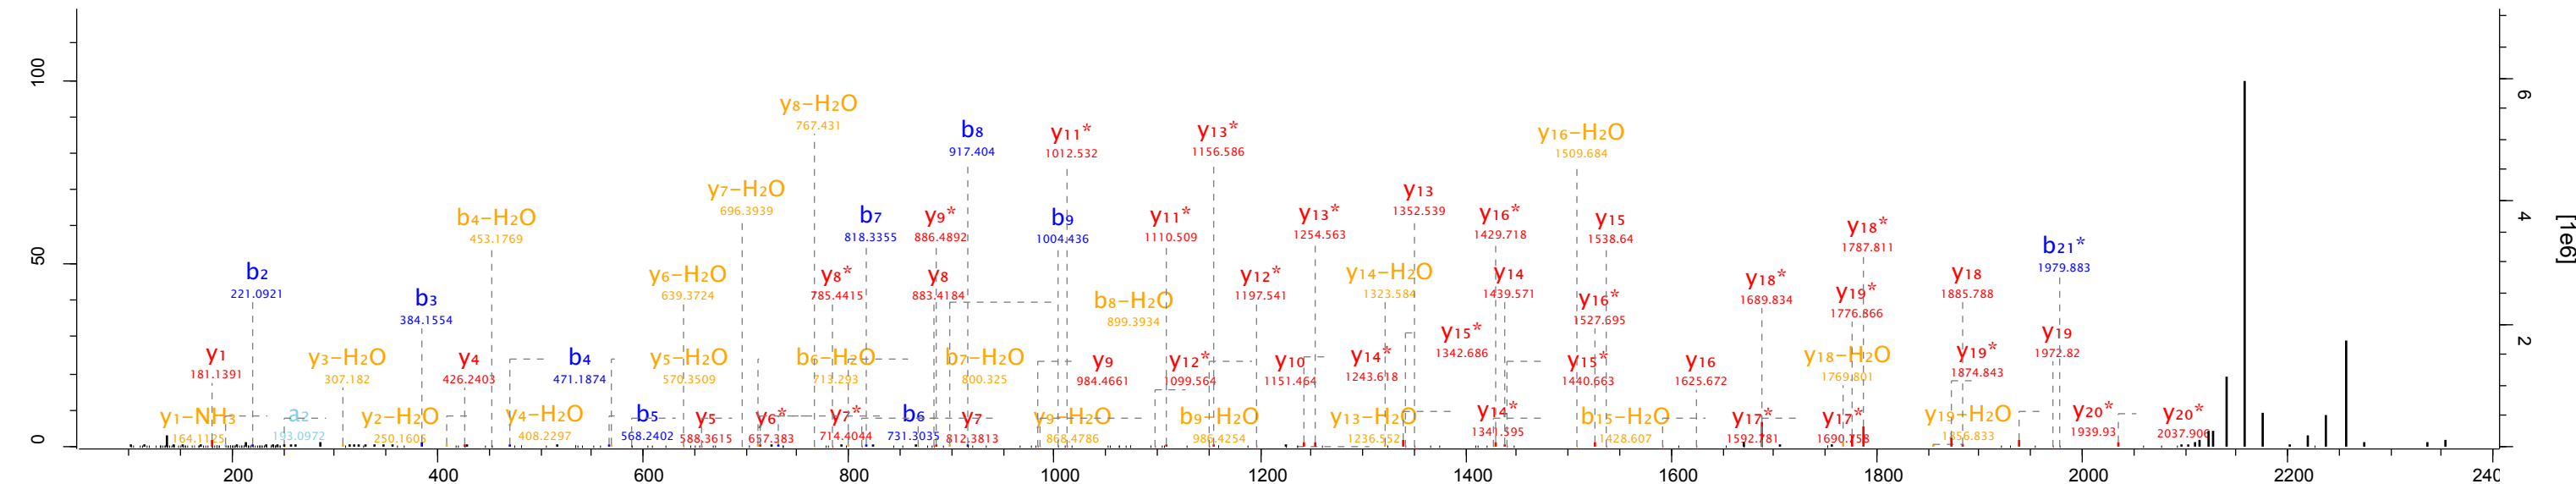

- G Y Y S P Y S V S G S G S T A G S R T G S R -

b<sub>2</sub>
b<sub>3</sub>
b<sub>4</sub>
b<sub>5</sub>
b<sub>6</sub>
b<sub>7</sub>
b<sub>8</sub>
b<sub>9</sub>
b<sub>21</sub>\*

y<sub>20</sub>\*
y<sub>19</sub>
y<sub>18</sub>
y<sub>17</sub>\*
y<sub>16</sub>
y<sub>15</sub>
y<sub>14</sub>
y<sub>13</sub>
y<sub>12</sub>\*
y<sub>11</sub>\*
y<sub>10</sub>ph
y<sub>9</sub>
y<sub>8</sub>
y<sub>7</sub>
y<sub>6</sub>\*
y<sub>5</sub>
y<sub>4</sub>
y<sub>1</sub>

Raw file  
20171215\_MaS\_33SR\_LMH\_phospho2\_03

Scan 9835 Method FTMS; HCD Score 129.8 m/z 963.39 Gene names PHC2

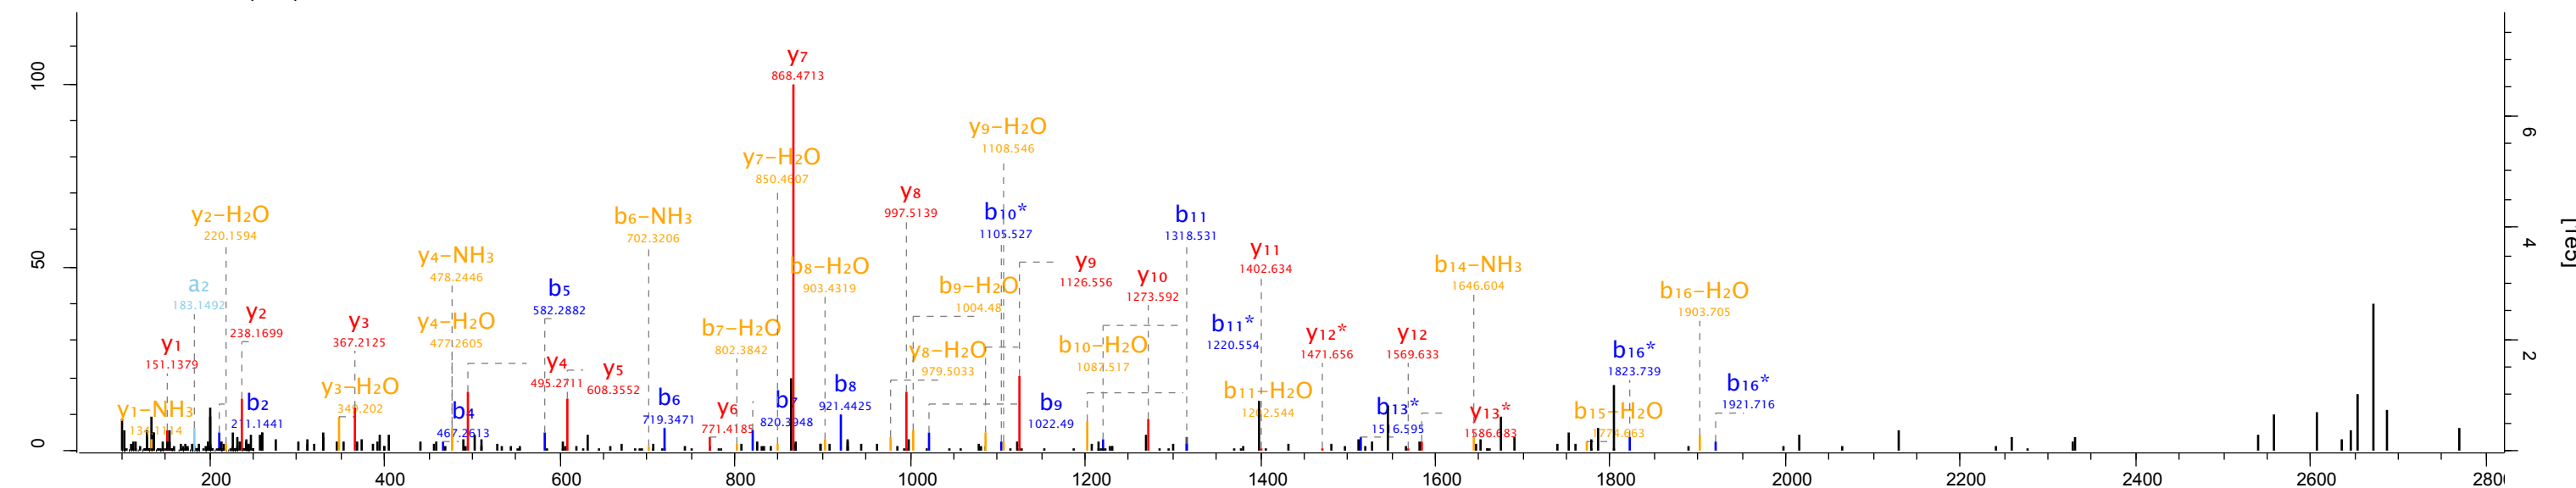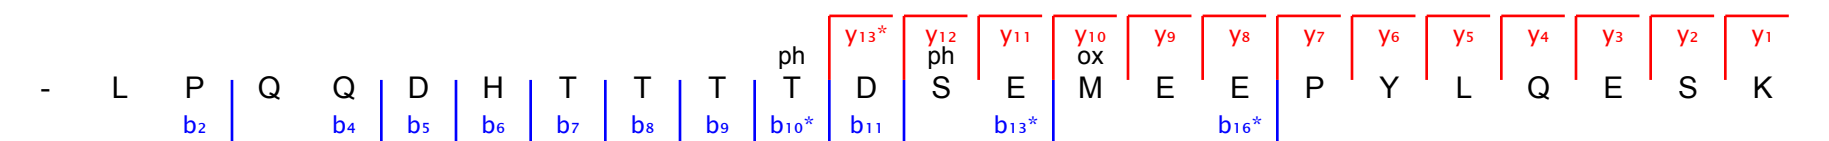

Raw file  
20171215\_MaS\_33SR\_LMH\_phospho2\_03

Scan Method Score m/z Gene names  
9855 FTMS; HCD 186.62 757.84 LIMCH1

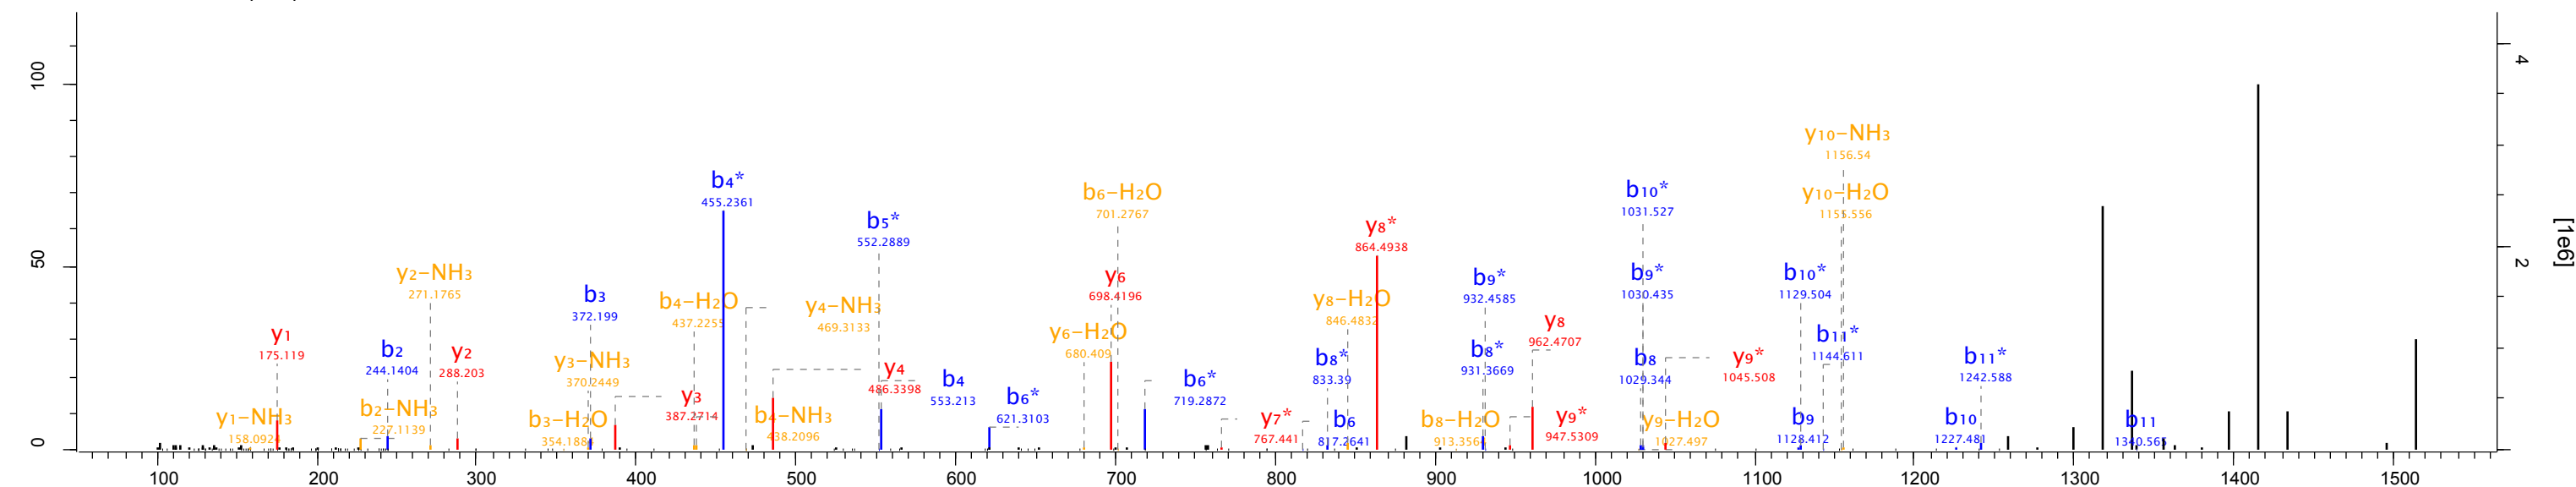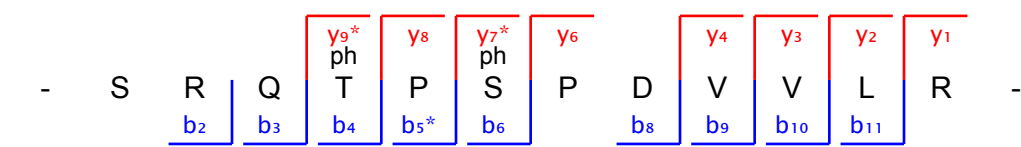

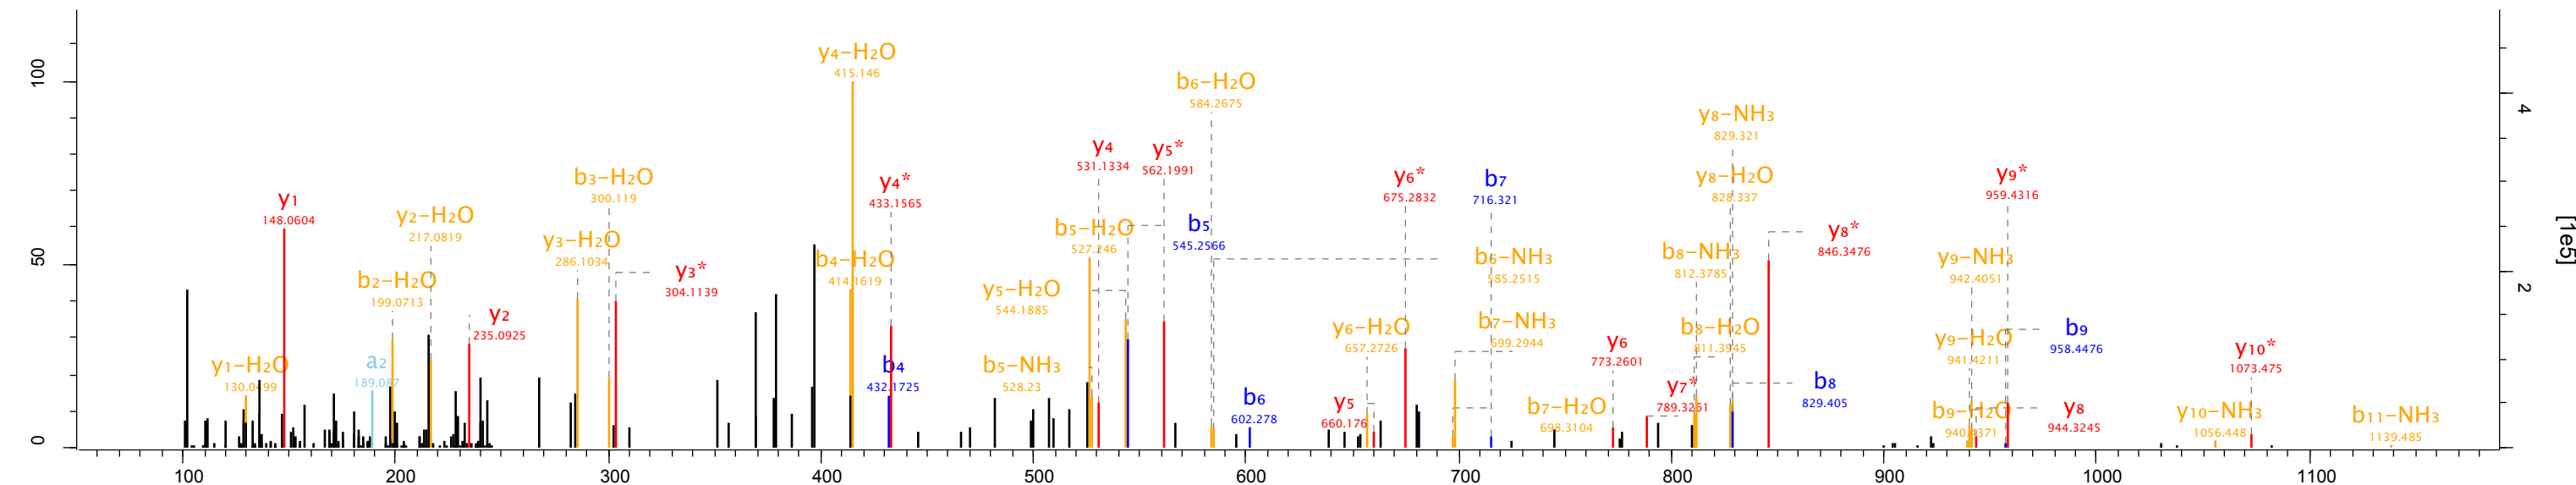

- E S T N L G N L E E S S E -

az
y10\*
y9\*
y8
y7\*
y6
y5
y4
y3\*
y2
y1

b4
b5
b6
b7
b8
b9
ph

Raw file  
20171215\_MaS\_33SR\_LMH\_phospho2\_04

Scan 11235 Method FTMS; HCD Score 58.12 m/z 865.03 Gene names TRIM28

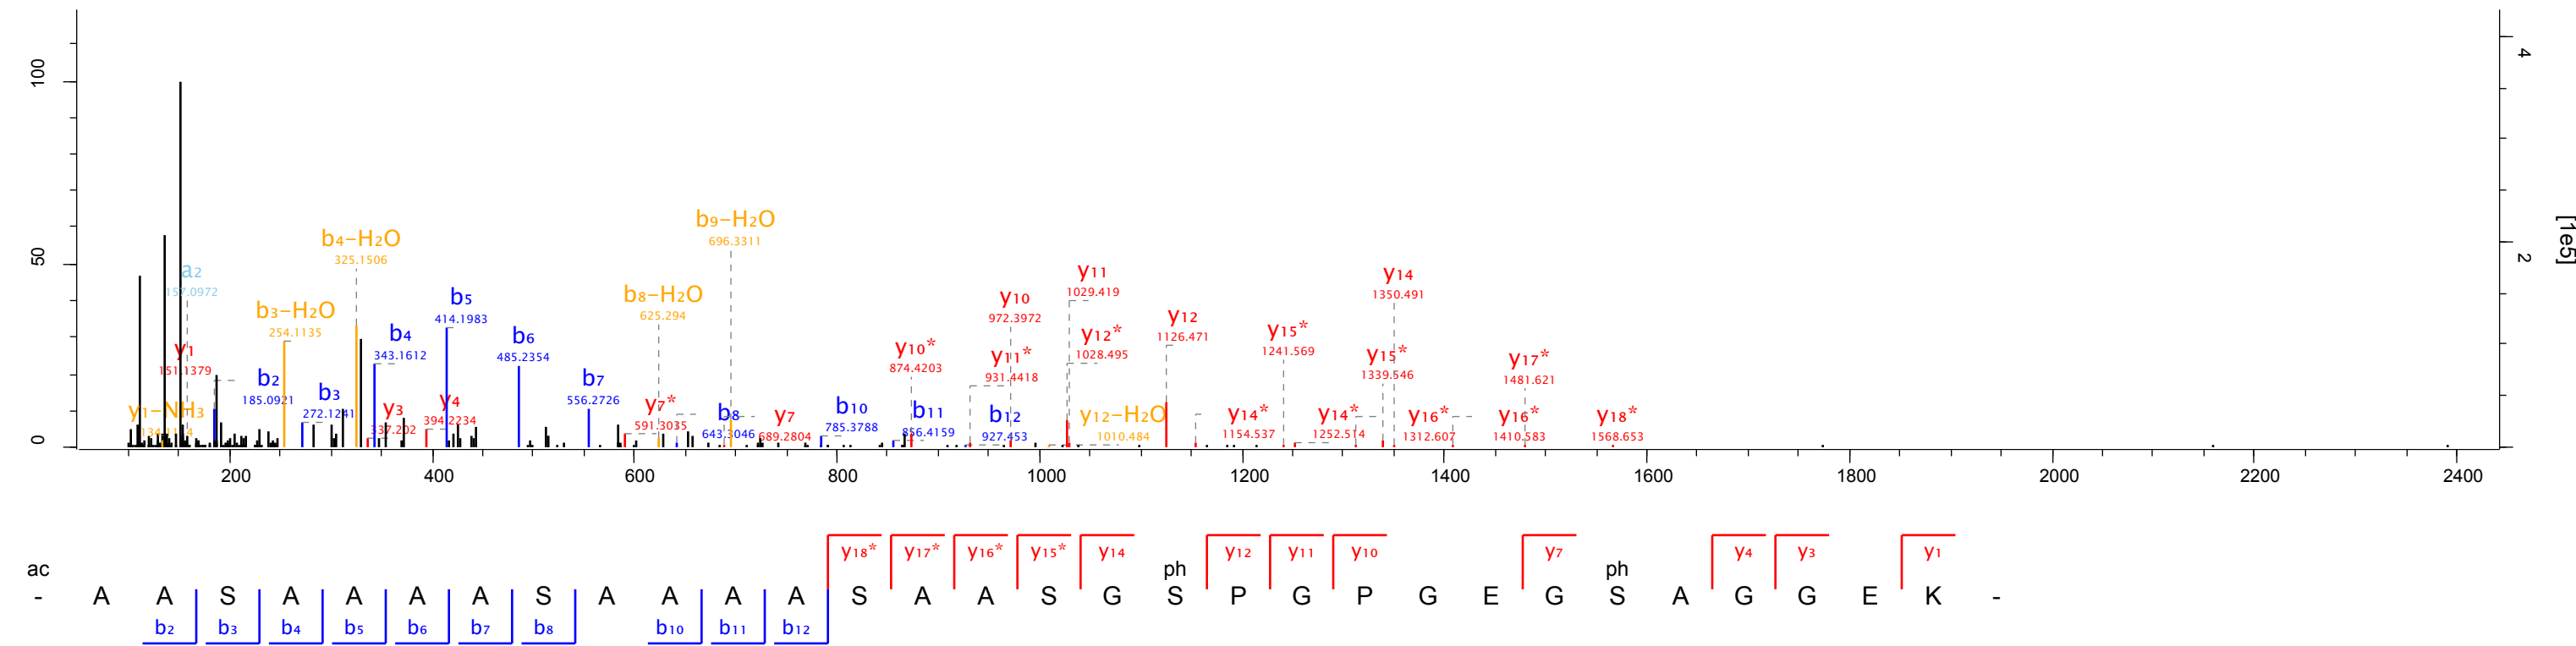

Raw file 20171215\_MaS\_33SR\_LMH\_phospho2\_04 Scan 12165 Method FTMS; HCD Score 84.17 m/z 1209.51 Gene names POLR2A

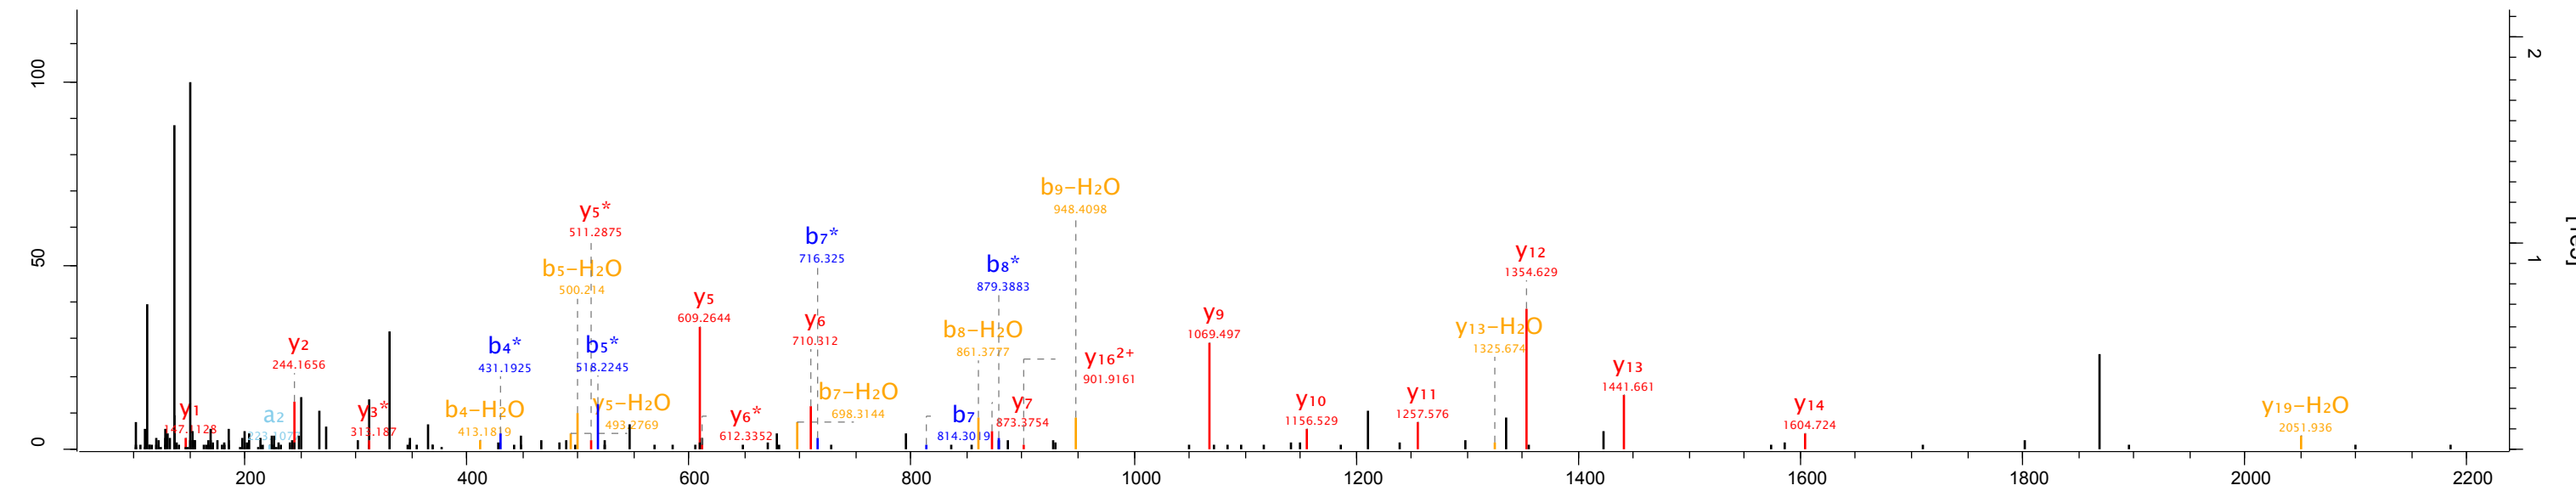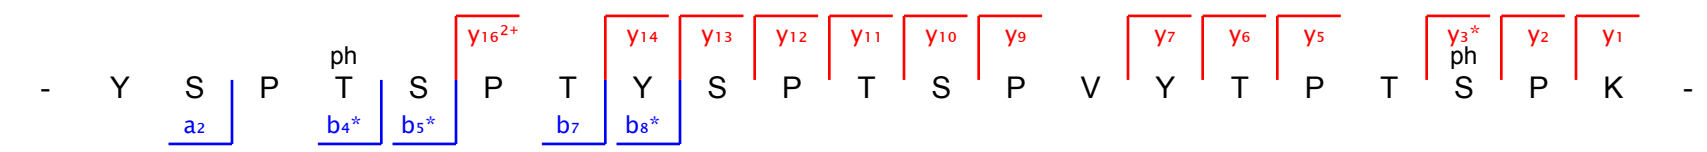

Raw file 20171215\_MaS\_33SR\_LMH\_phospho2\_04 Scan 2125 Method FTMS; HCD Score 136.92 m/z 867.32 Gene names EIF4B

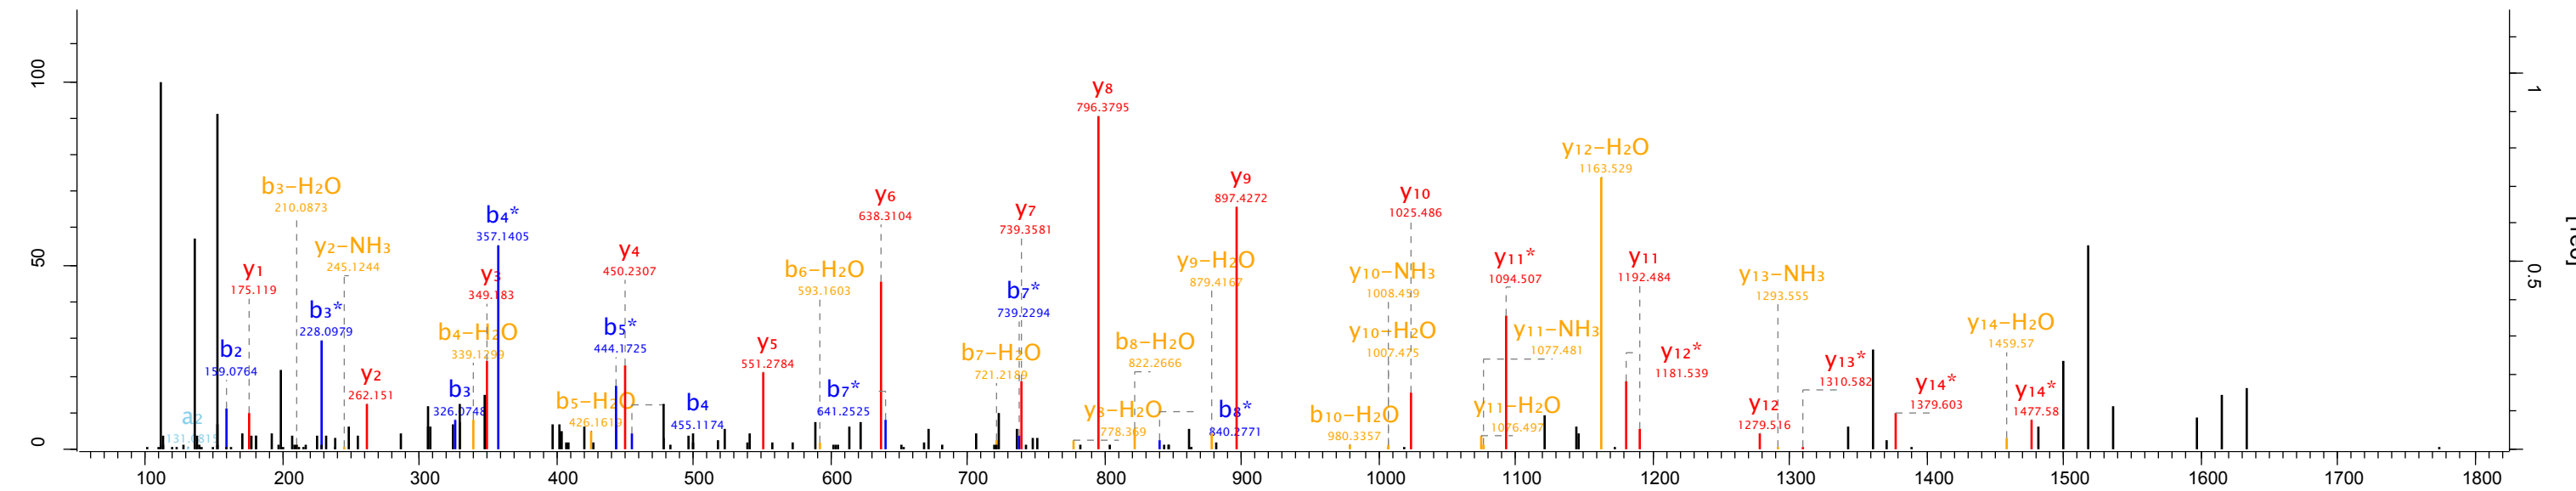

- T G S E S S Q T G T S T T S S R -

b<sub>2</sub>
b<sub>3</sub>
b<sub>4</sub>
b<sub>5</sub><sup>\*</sup>
b<sub>7</sub><sup>\*</sup>
b<sub>8</sub><sup>\*</sup>
y<sub>14</sub><sup>\*</sup>
y<sub>13</sub><sup>\*</sup>
y<sub>12</sub>
y<sub>11</sub>
y<sub>10</sub>
y<sub>9</sub>
y<sub>8</sub>
y<sub>7</sub>
y<sub>6</sub>
y<sub>5</sub>
y<sub>4</sub>
y<sub>3</sub>
y<sub>2</sub>
y<sub>1</sub>



Raw file: 20171215\_MaS\_33SR\_LMH\_phospho2\_04  
 Scan: 2635 Method: FTMS; HCD Score: 105.66 m/z: 516.23 Gene names: DDX23

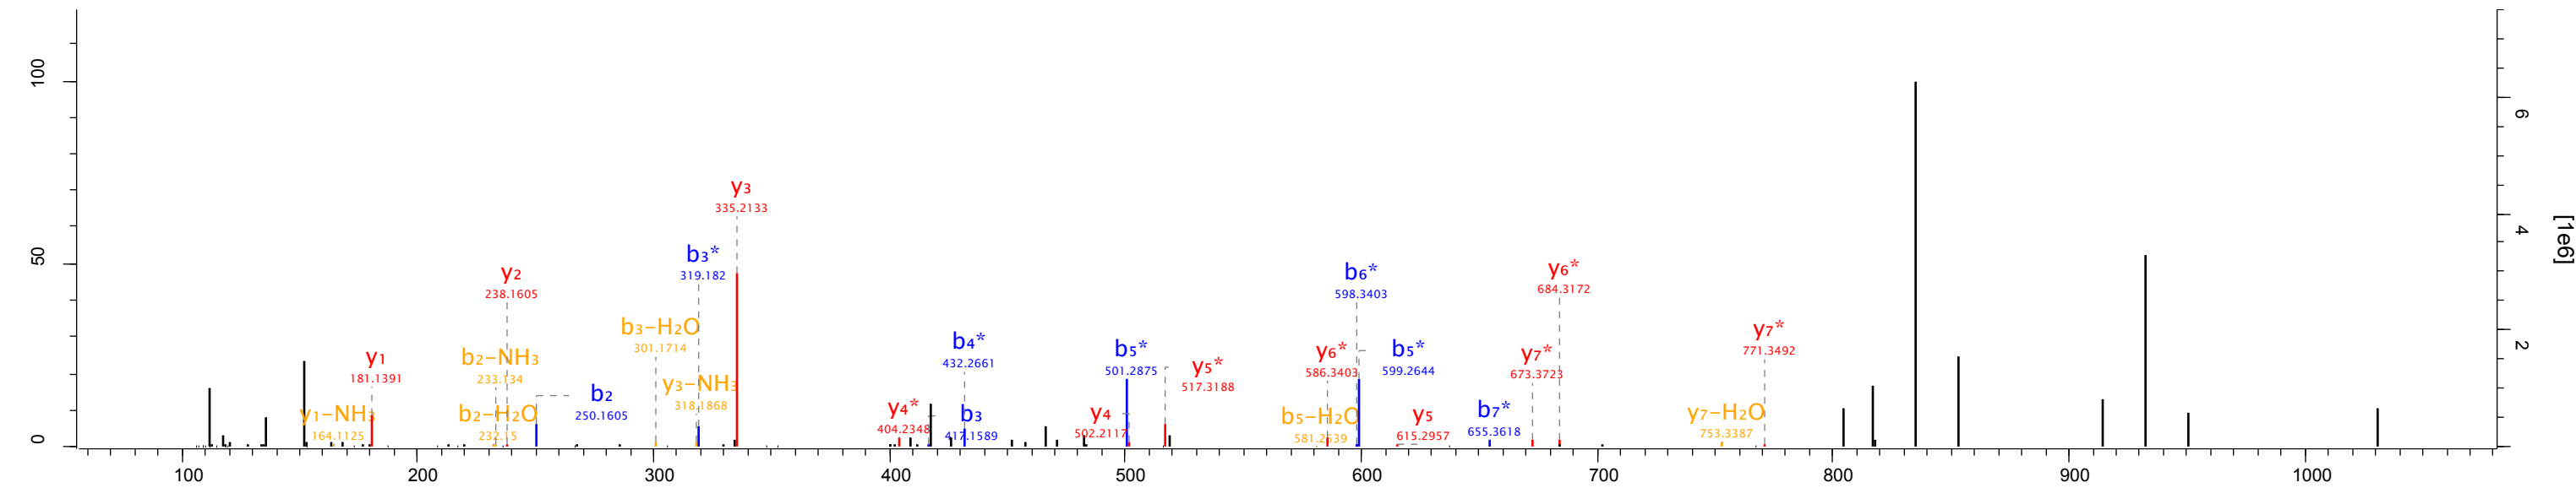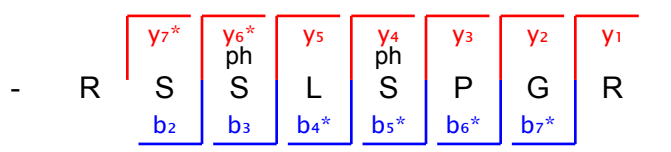

Raw file  
20171215\_MaS\_33SR\_LMH\_phospho2\_04

Scan 2745 Method FTMS; HCD Score 190.46 m/z 714.76 Gene names SPAG9

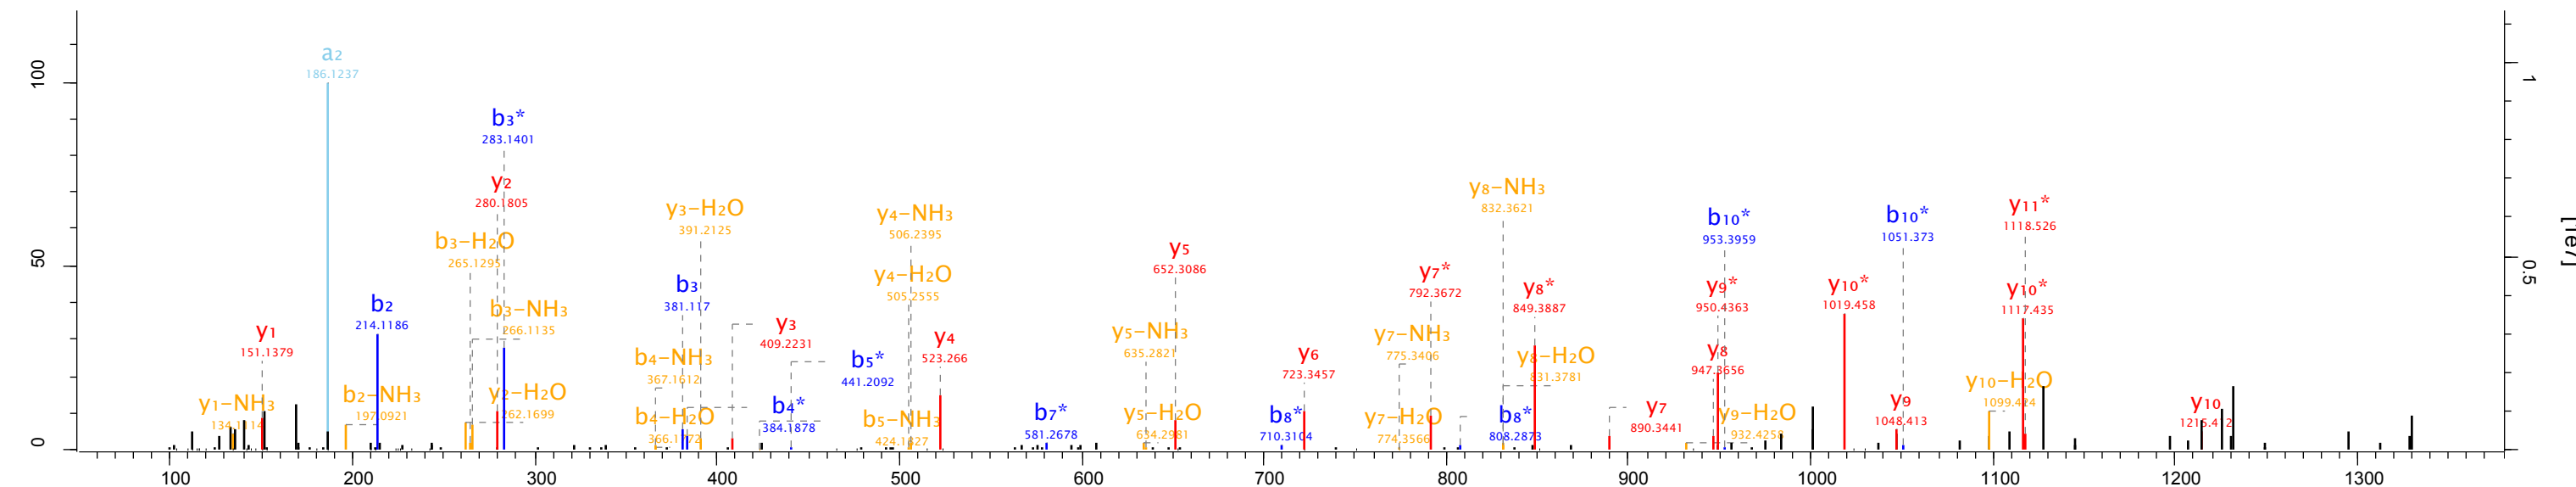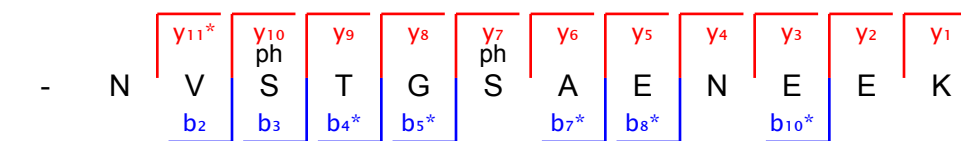

Raw file 20171215\_MaS\_33SR\_LMH\_phospho2\_04 Scan 2875 Method FTMS; HCD Score 78.19 m/z 590.23 Gene names CHD4

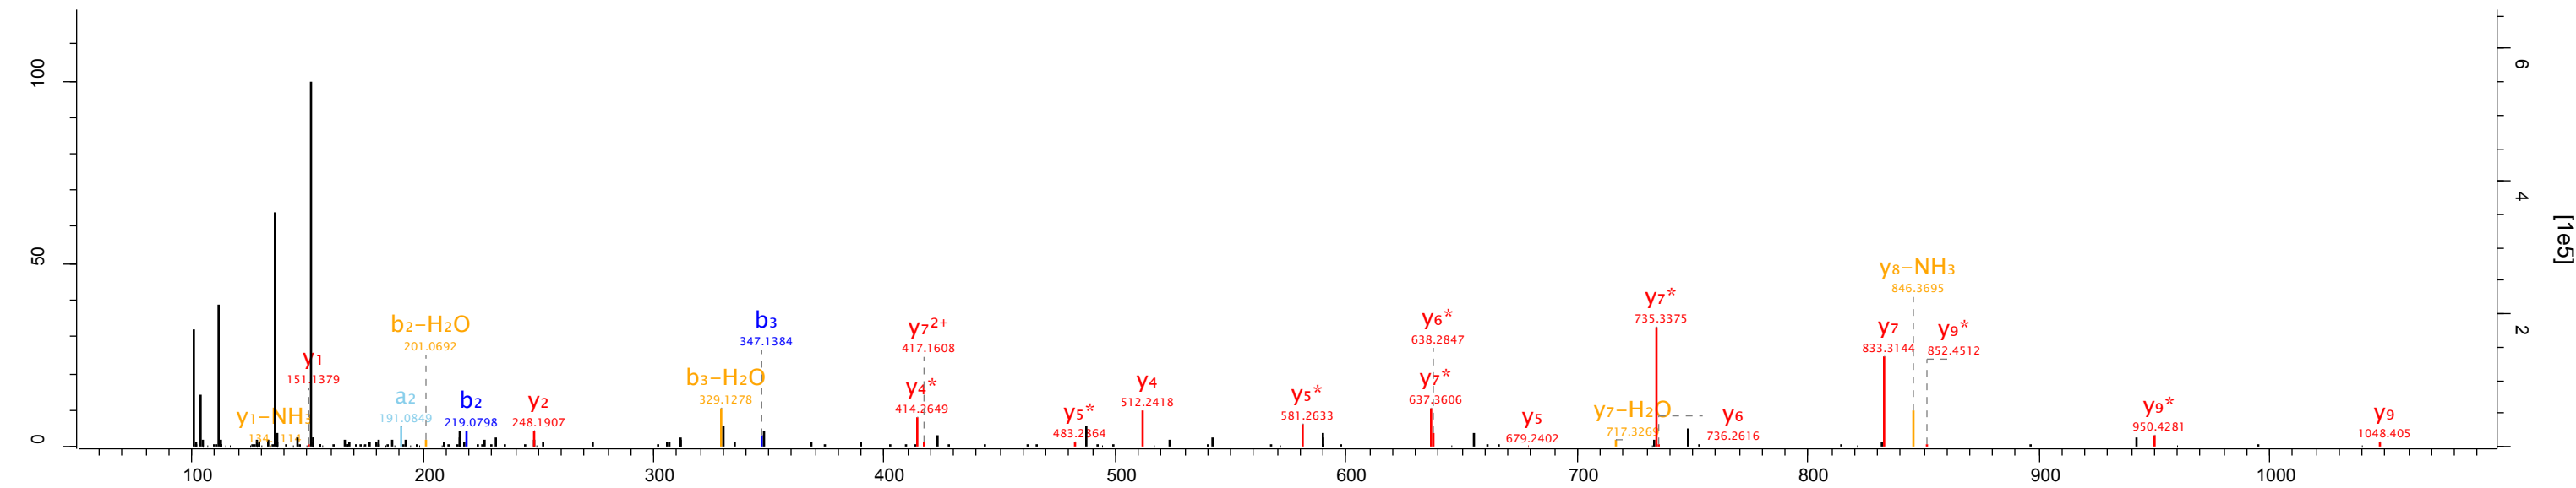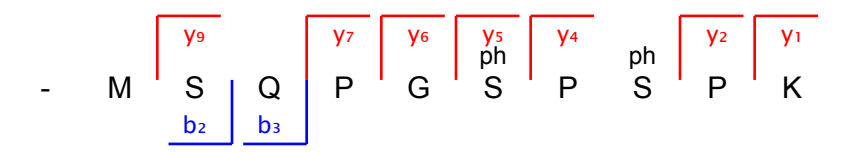

Raw file 20171215\_MaS\_33SR\_LMH\_phospho2\_04 Scan 3565 Method FTMS; HCD Score 192.51 m/z 1030.38 Gene names MAK16

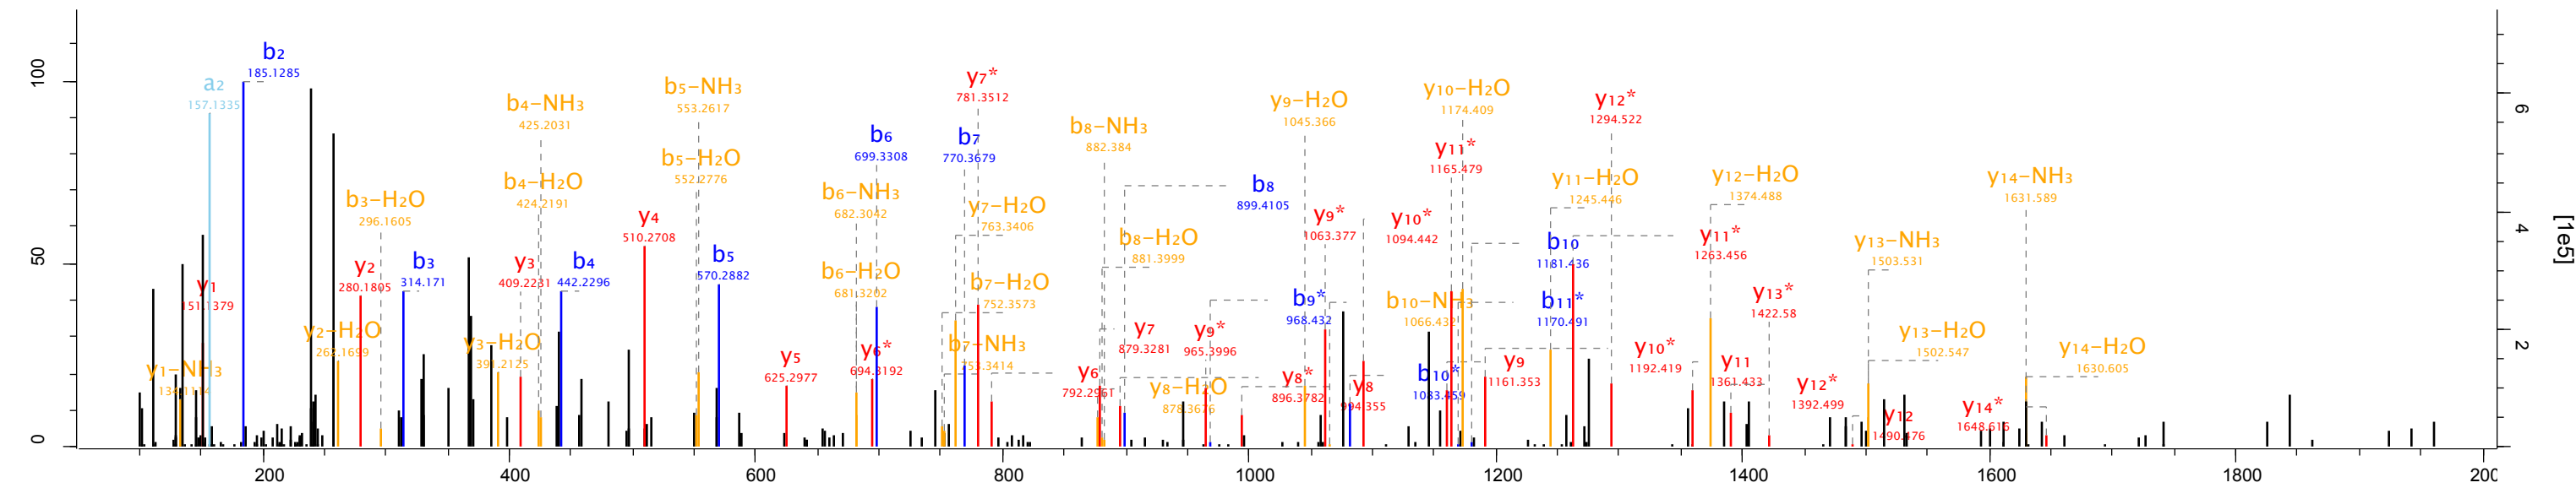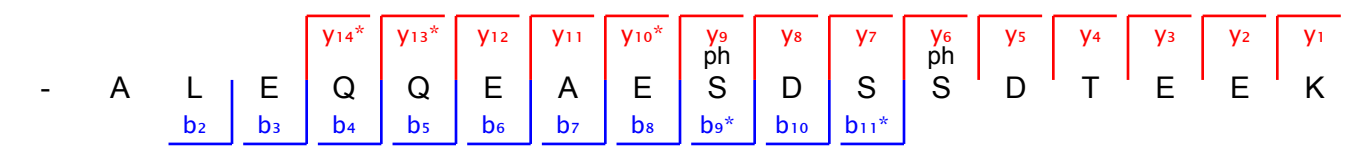

Raw file 20171215\_MaS\_33SR\_LMH\_phospho2\_04 Scan 5075 Method FTMS; HCD Score 158.89 m/z 791.29 Gene names AHNAK

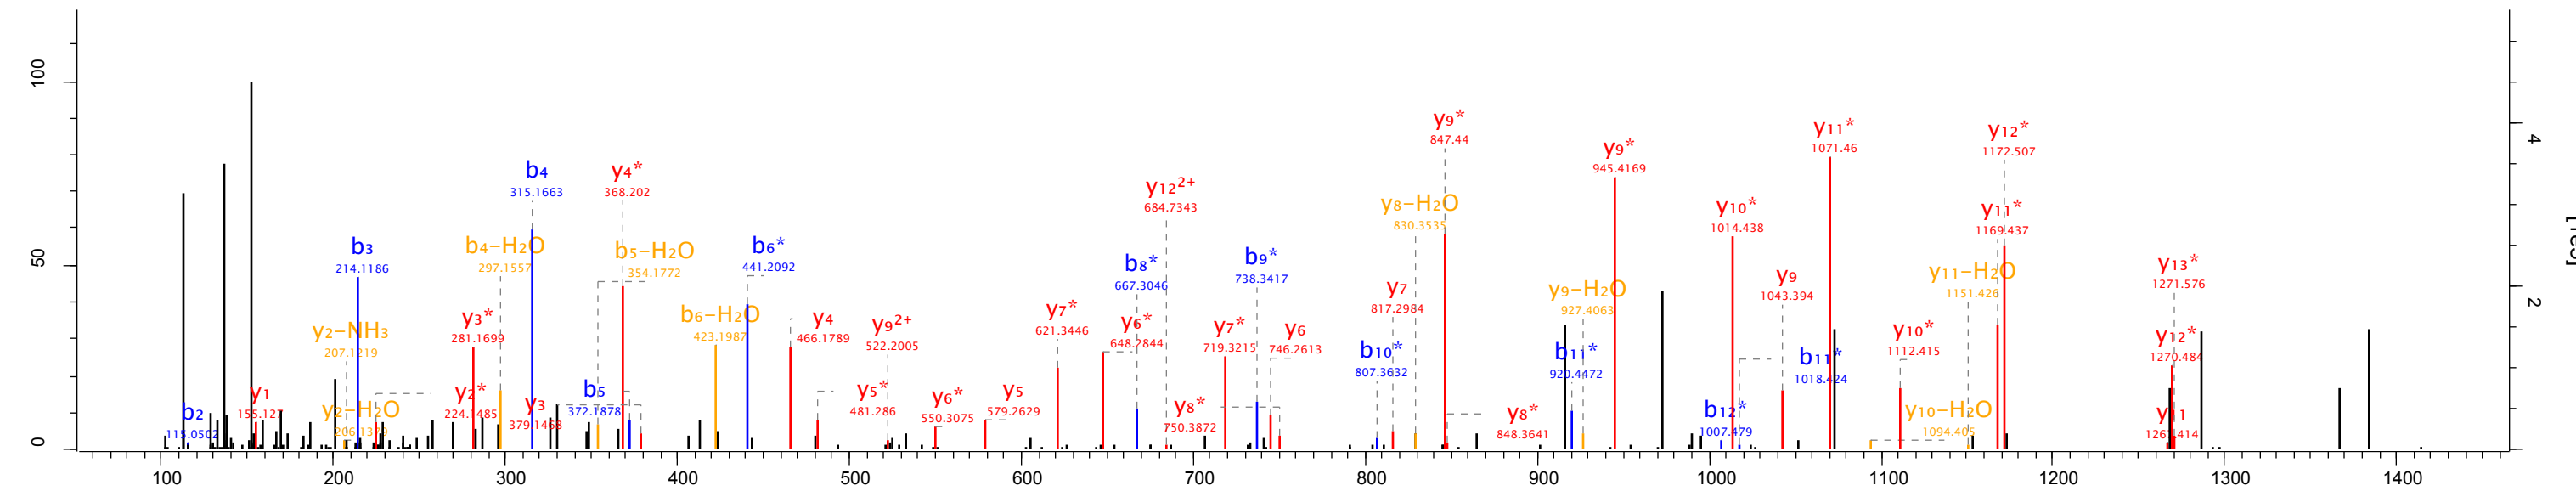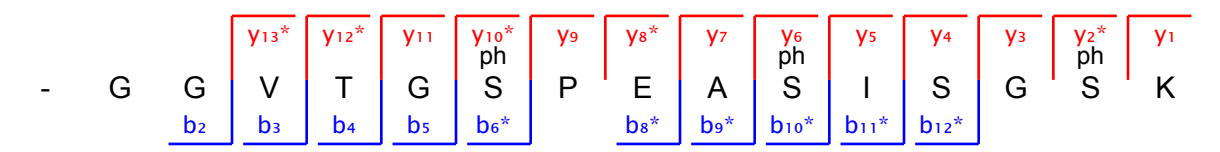

Raw file 20171215\_MaS\_33SR\_LMH\_phospho2\_04 Scan 5205 Method FTMS; HCD Score 151.75 m/z 1131.38 Gene names GCFC2

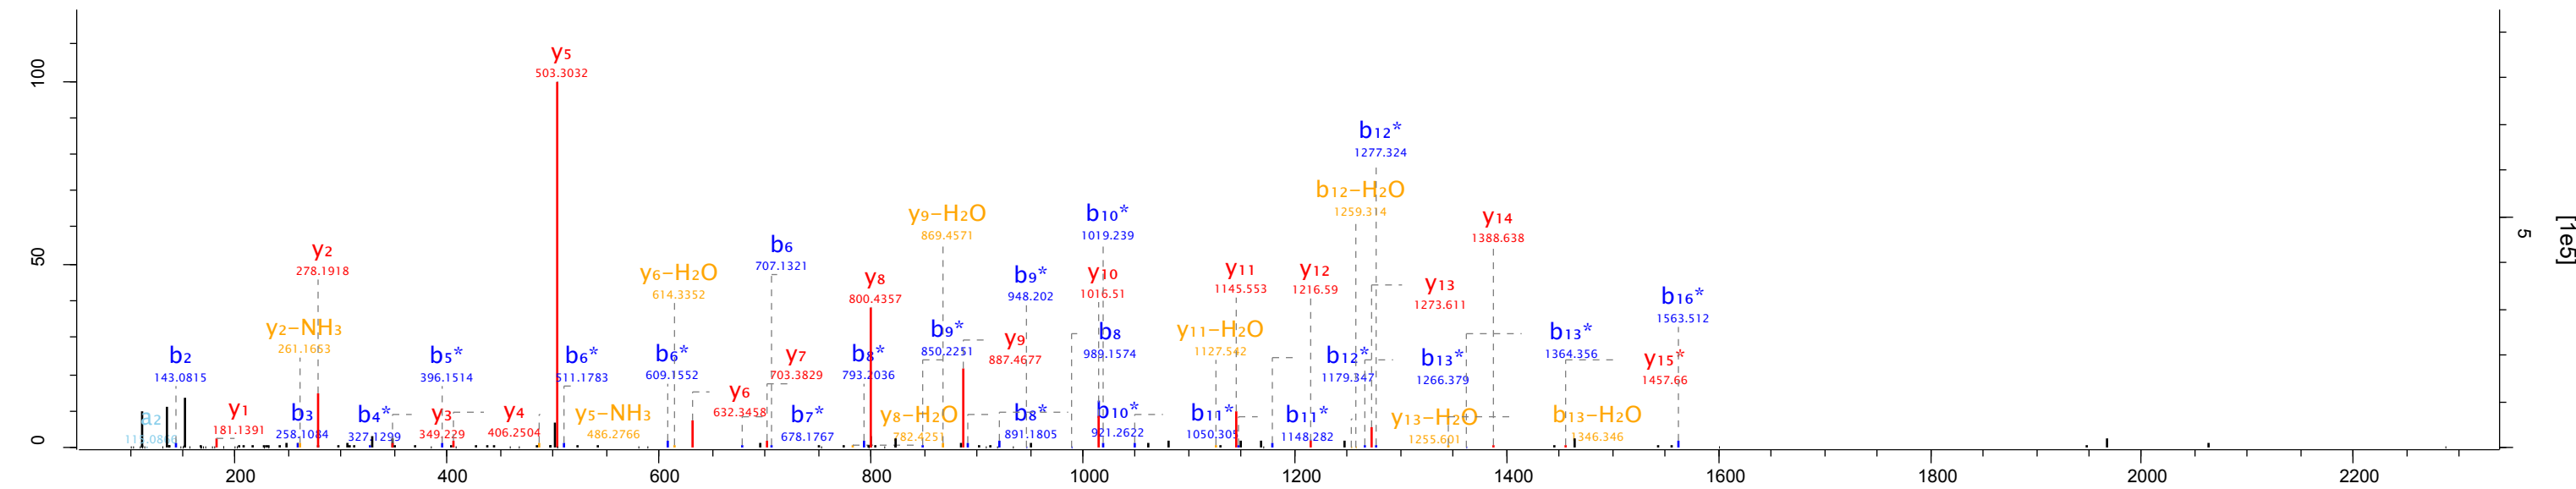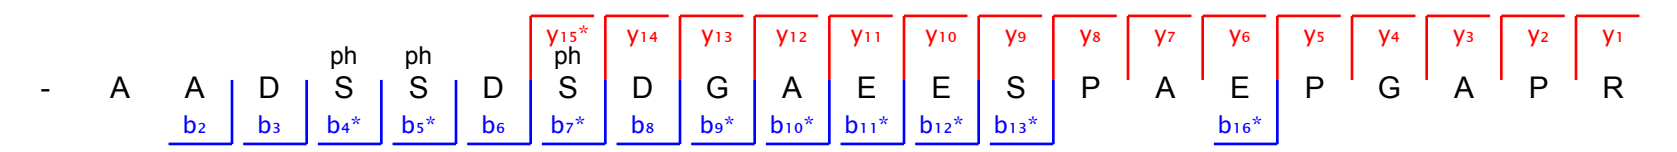

Raw file 20171215\_MaS\_33SR\_LMH\_phospho2\_04 Scan 5355 Method FTMS; HCD Score 53.96 m/z 905.03 Gene names CUL4B

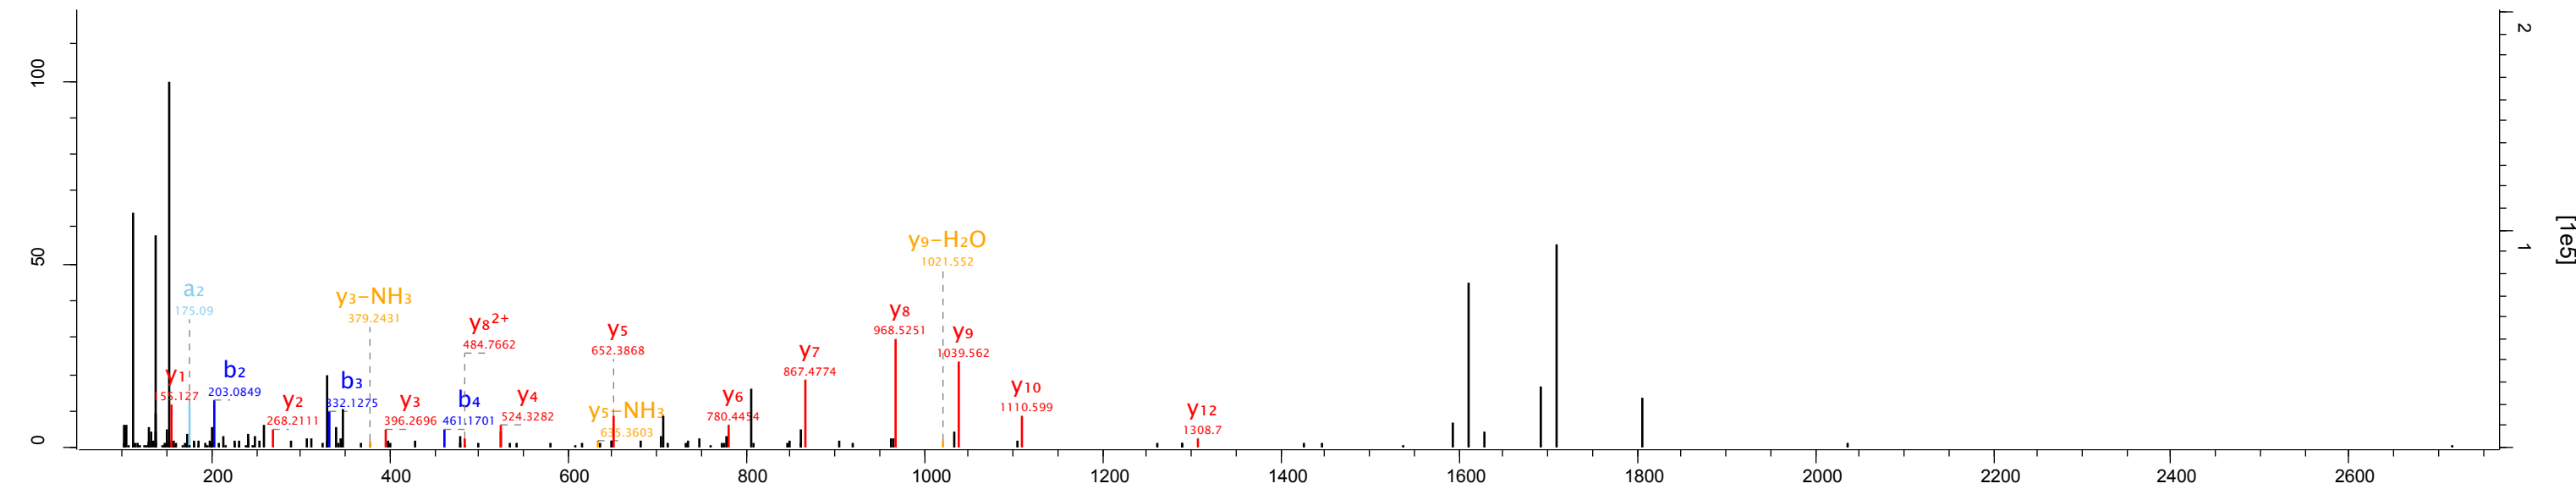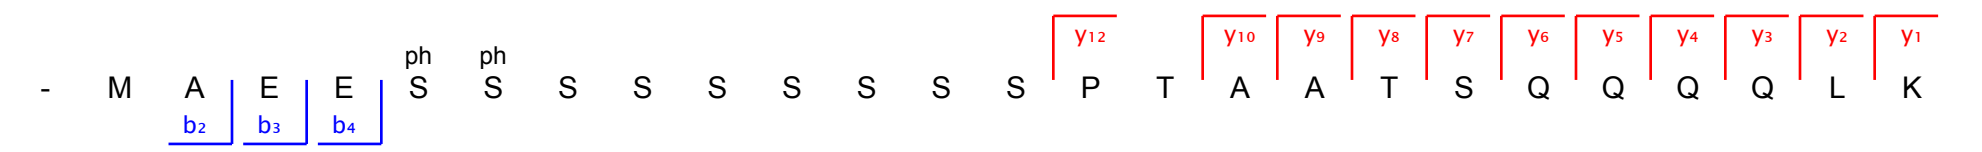

Raw file 20171215\_MaS\_33SR\_LMH\_phospho2\_04 Scan 5485 Method FTMS; HCD Score 114.62 m/z 911.34 Gene names NDRG1

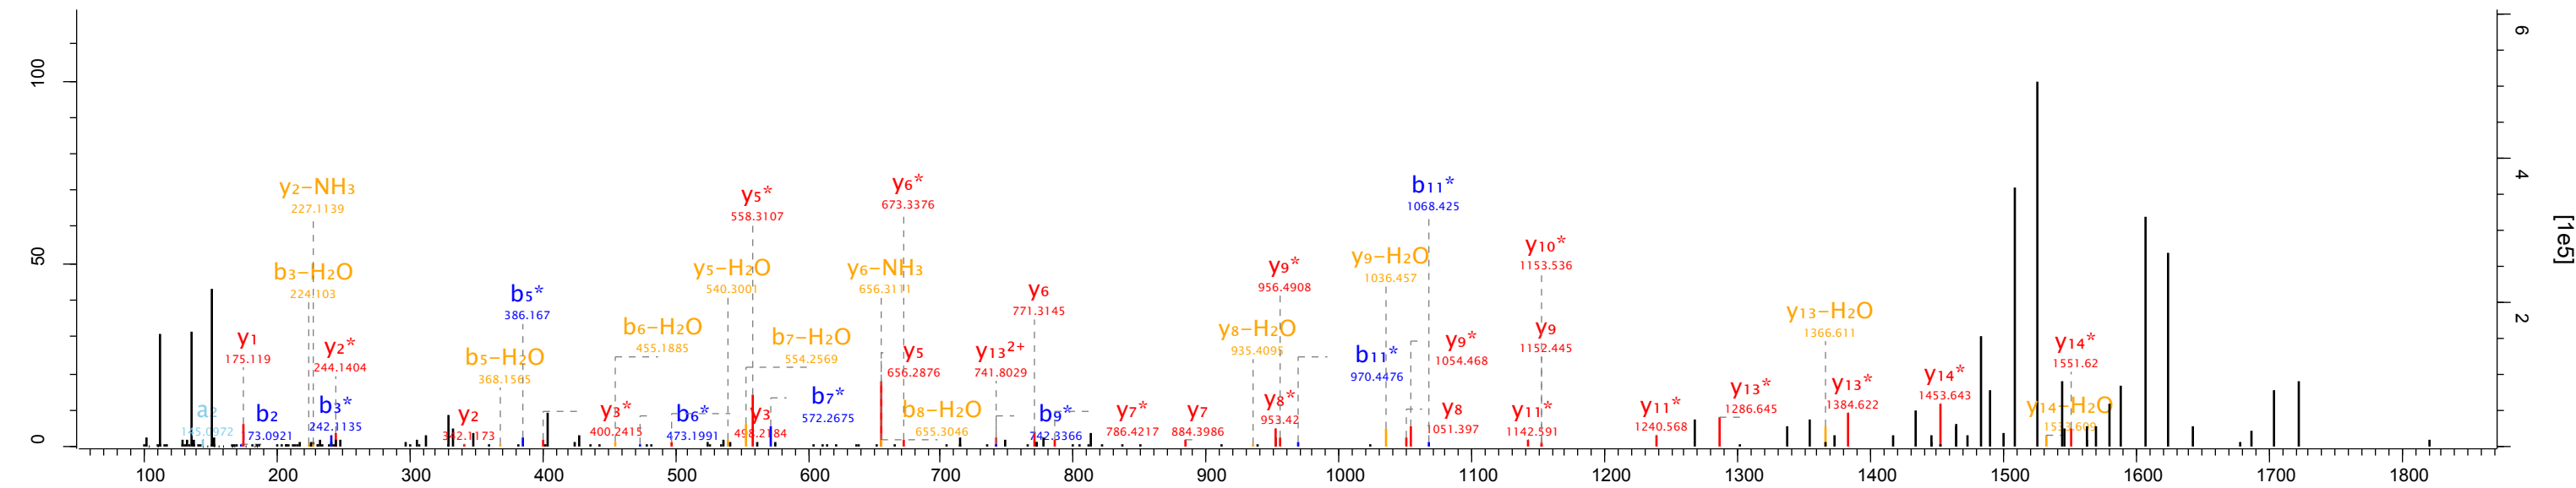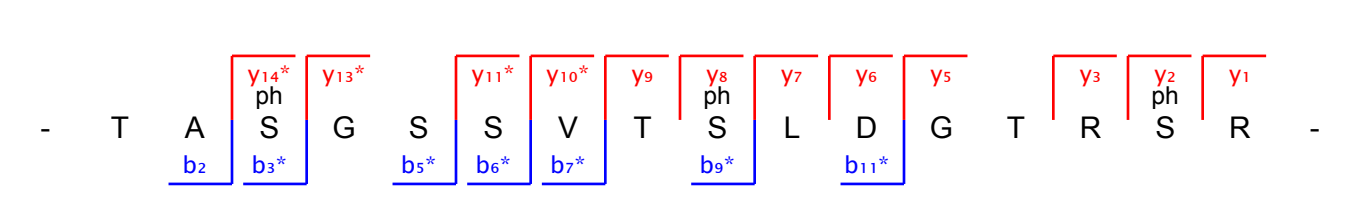



Raw file 20171215\_MaS\_33SR\_LMH\_phospho2\_04 Scan 5685 Method FTMS; HCD Score 119.28 m/z 873.33 Gene names ZC3HC1

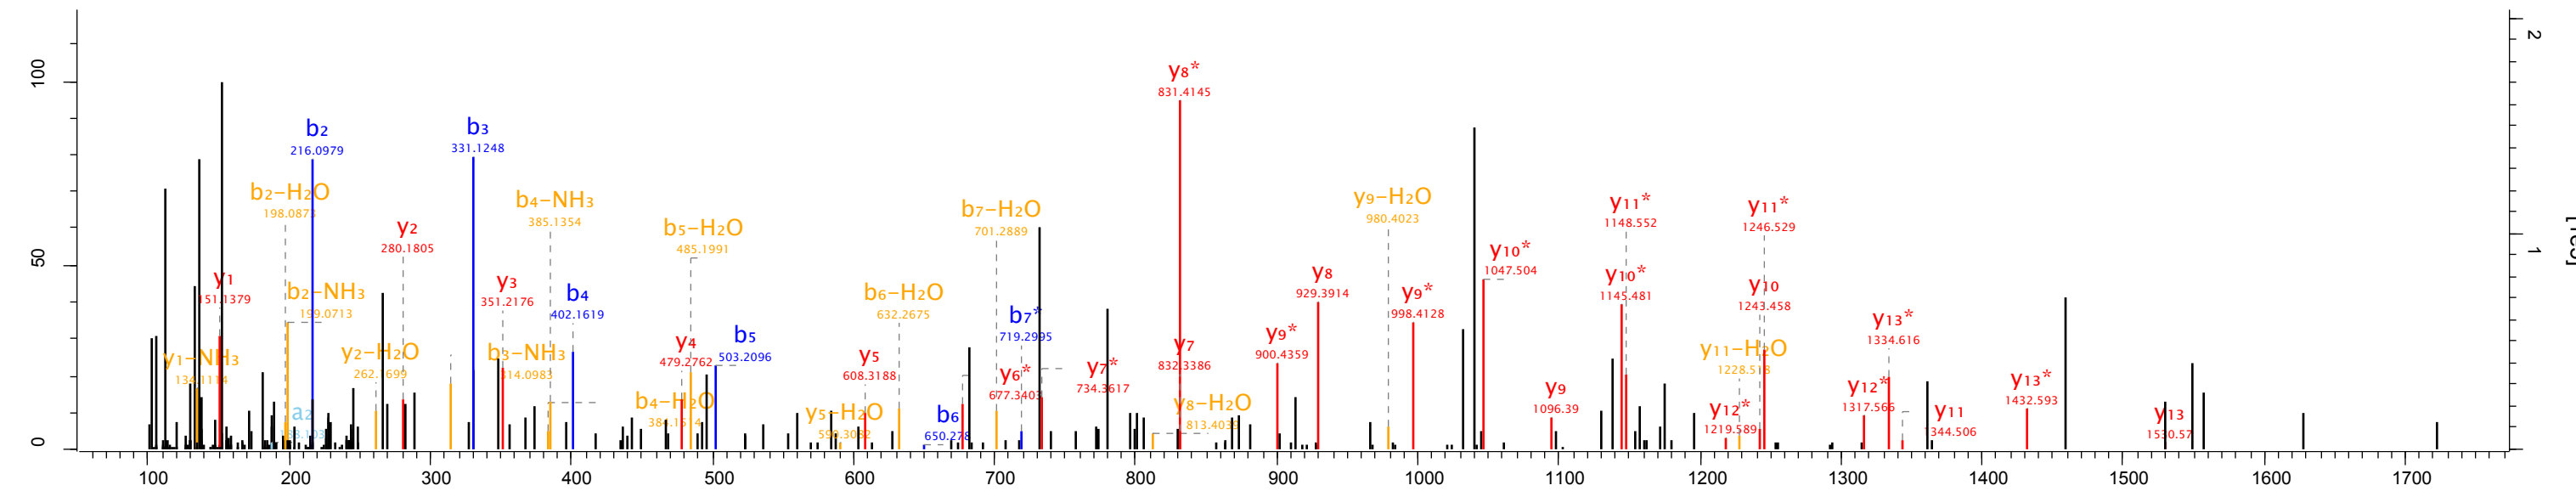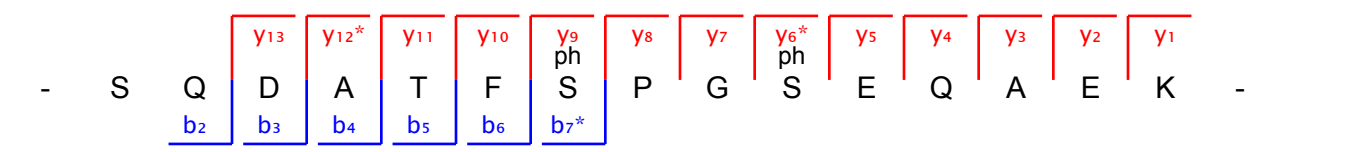

Raw file: 20171215\_MaS\_33SR\_LMH\_phospho2\_04  
 Scan: 5745 Method: FTMS; HCD Score: 87.24 m/z: 723.3 Gene names: MAP7D1

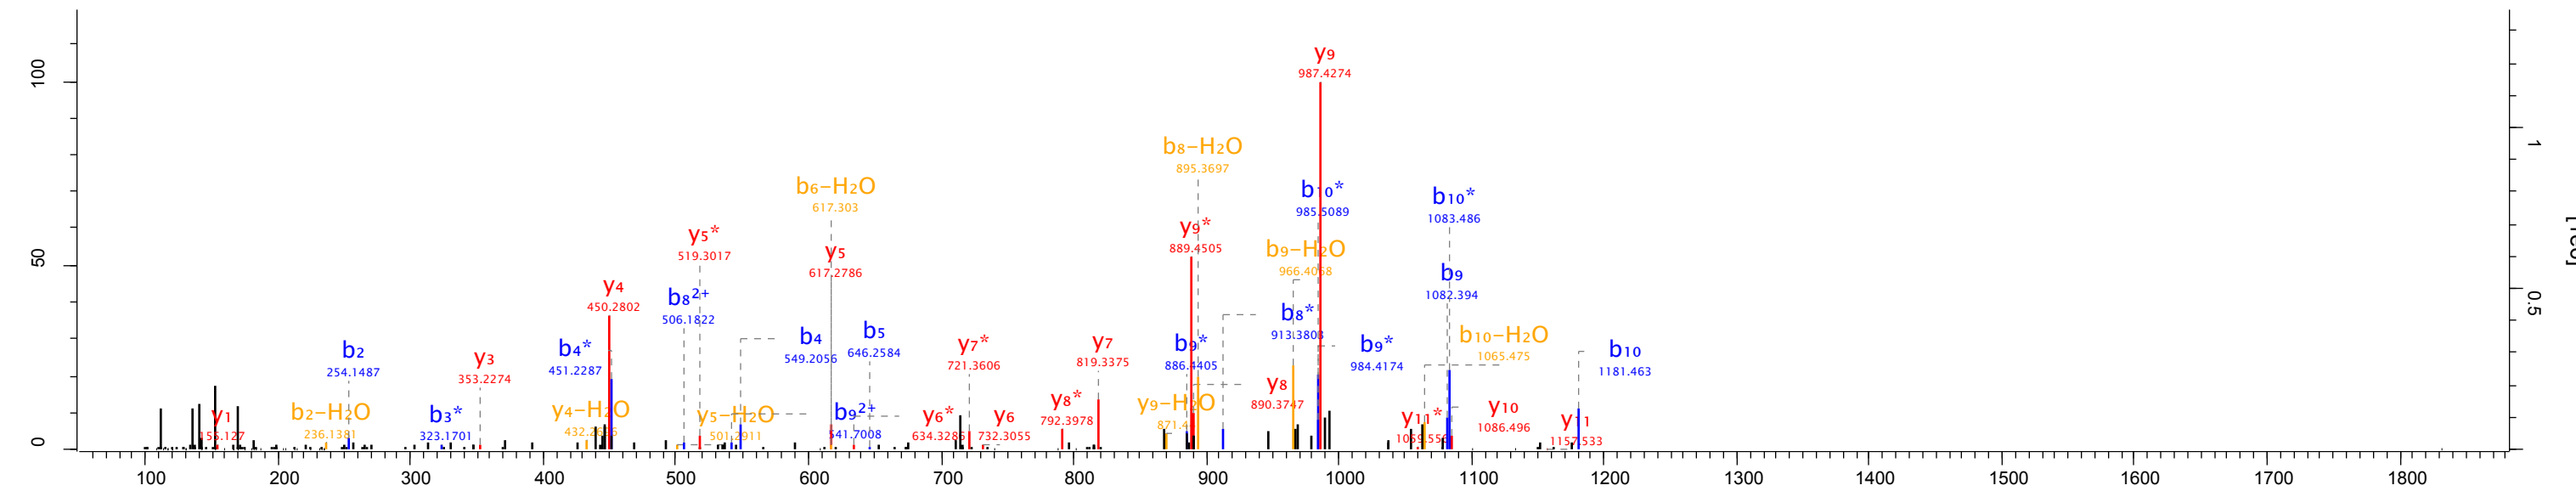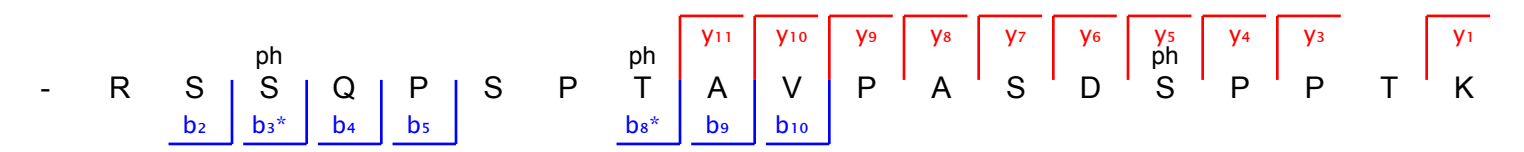

Raw file 20171215\_MaS\_33SR\_LMH\_phospho2\_04 Scan 5925 Method FTMS; HCD Score 89.14 m/z 574.74 Gene names PARN

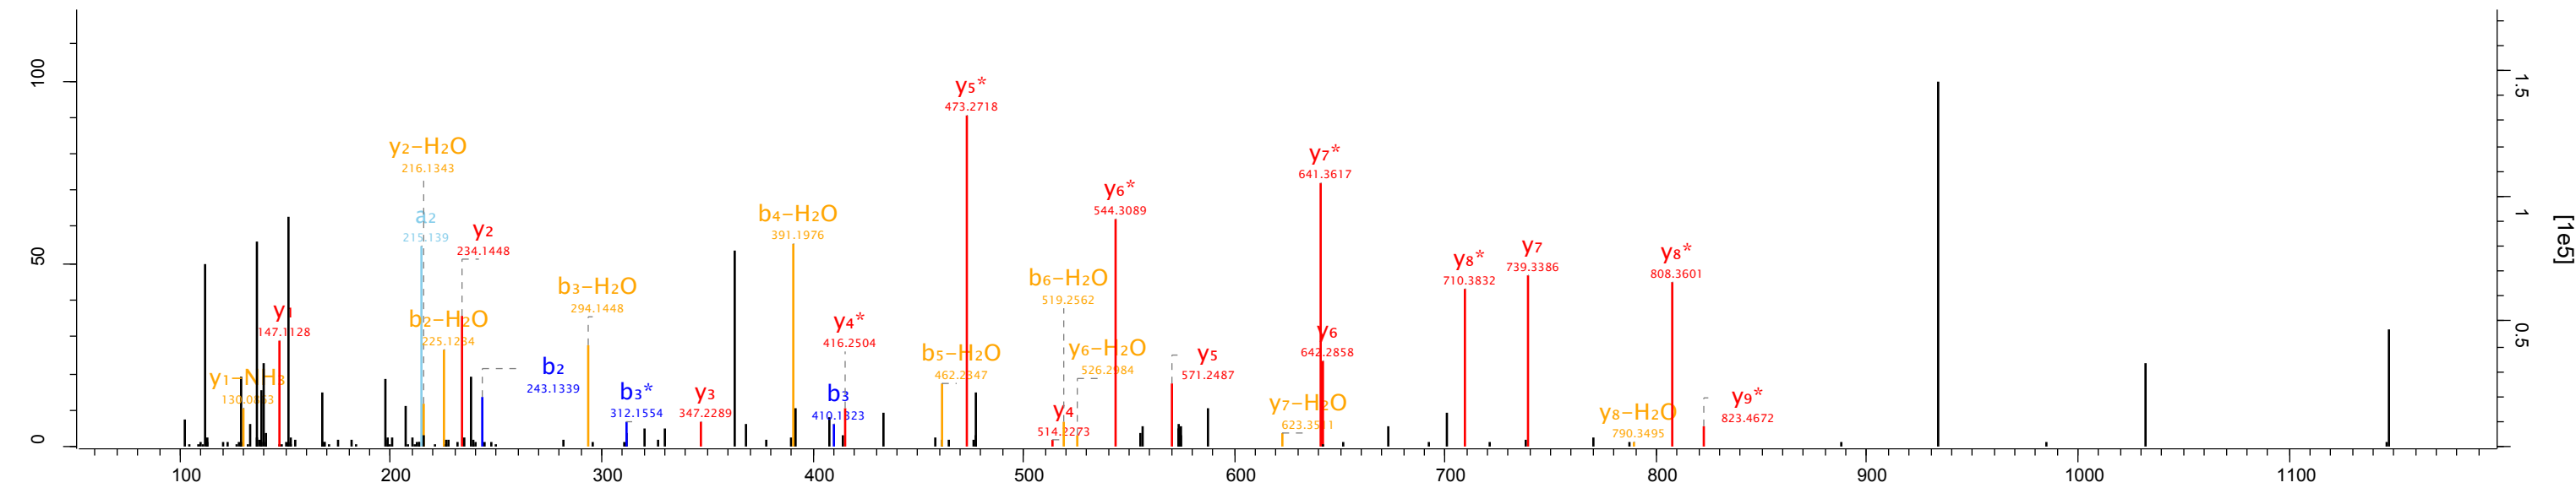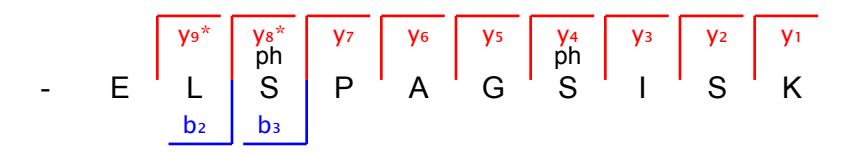

Raw file: 20171215\_MaS\_33SR\_LMH\_phospho2\_04  
 Scan: 7695 Method: FTMS; HCD Score: 179.79 m/z: 741.26 Gene names: PPF1BP1

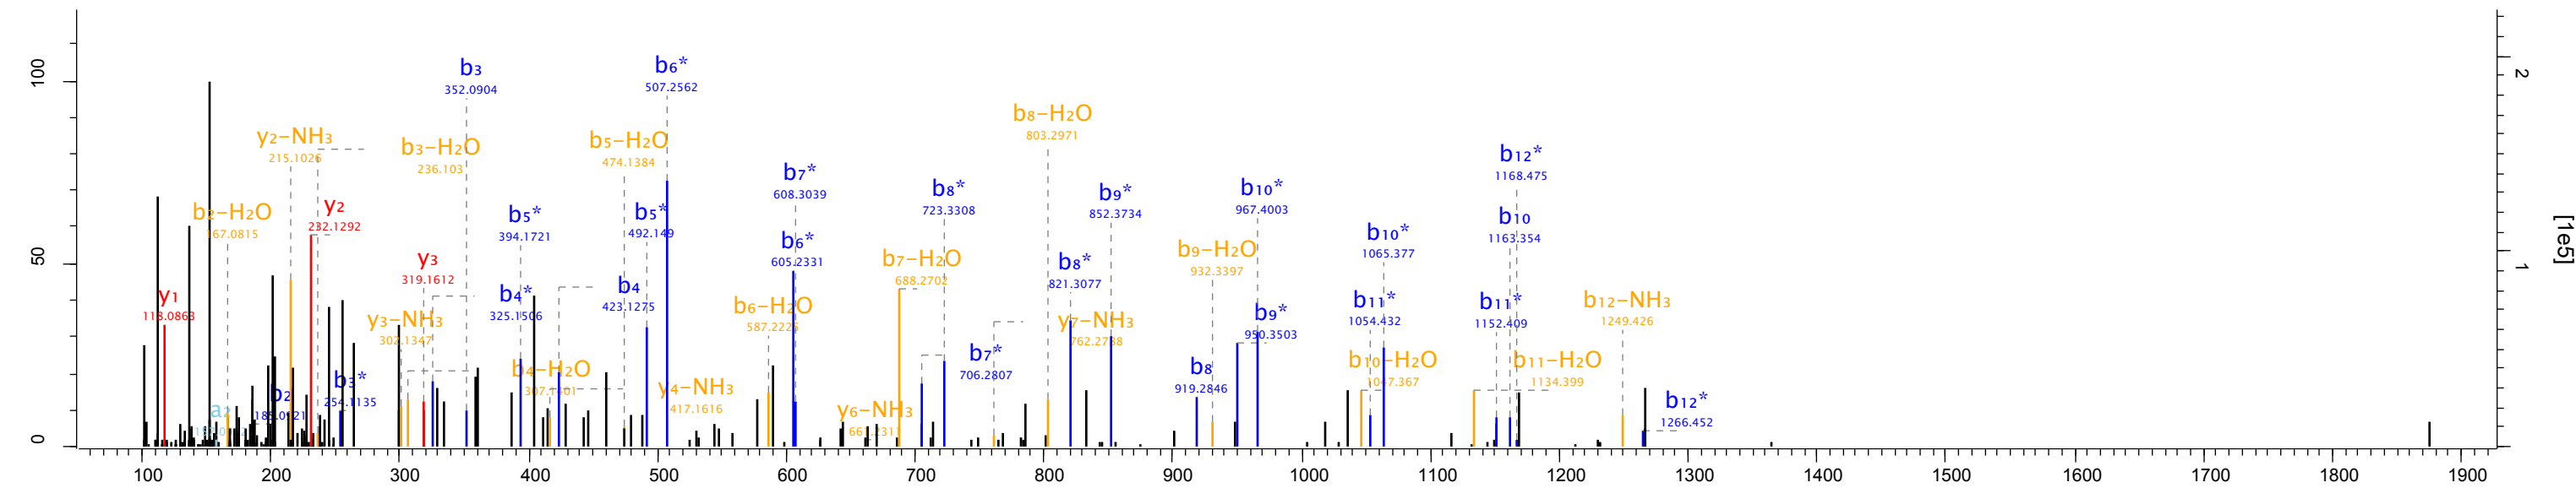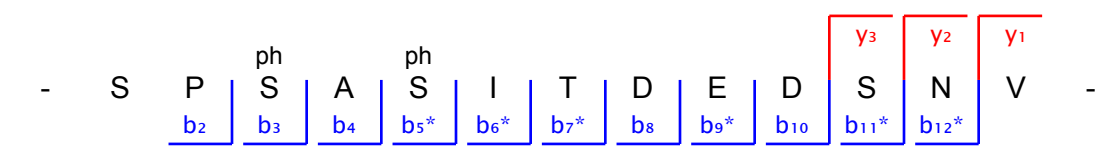

Raw file 20171215\_MaS\_33SR\_LMH\_phospho2\_04 Scan 7745 Method FTMS; HCD Score 110.67 m/z 1117.1 Gene names SF3A1

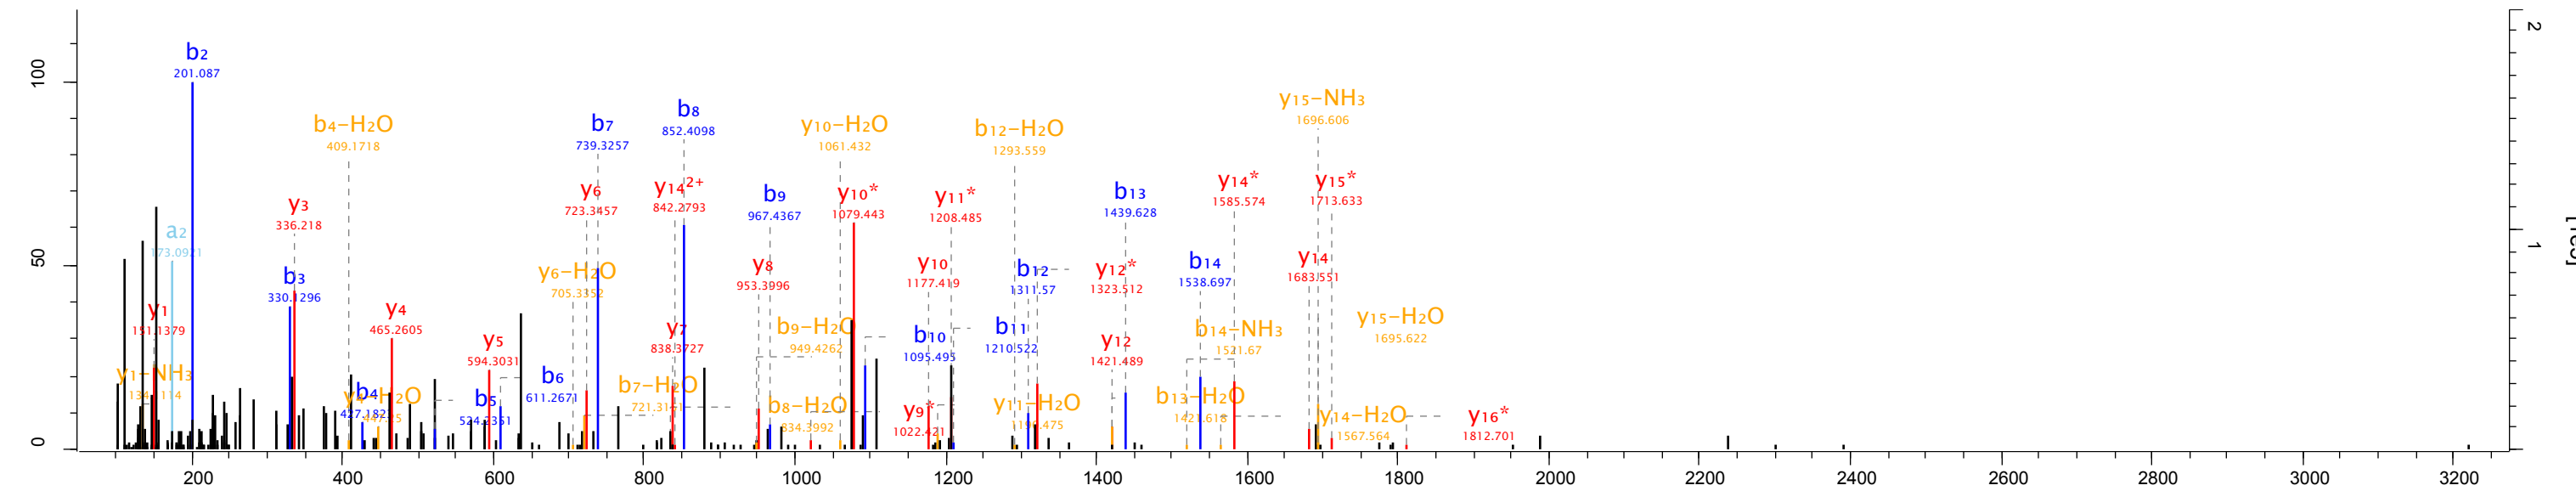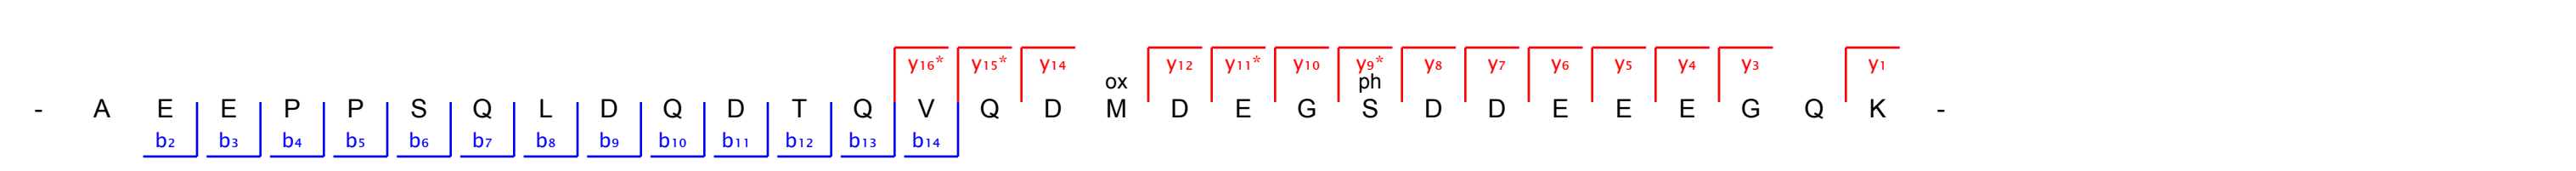

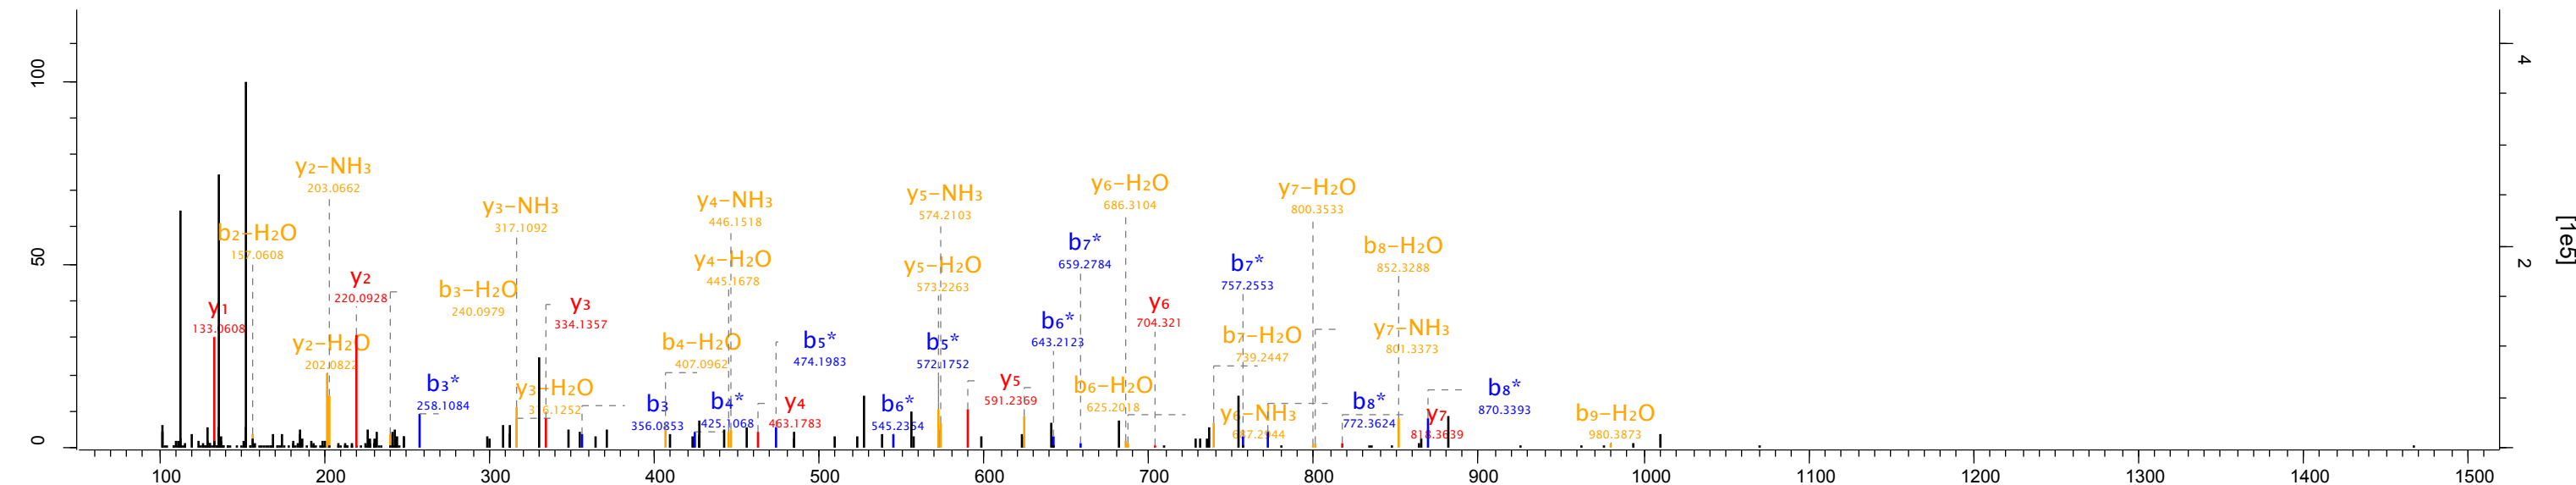

- S S ph T S F A N I Q E N S N -

b<sub>3</sub> b<sub>4</sub>\* b<sub>5</sub>\* b<sub>6</sub>\* b<sub>7</sub>\* b<sub>8</sub>\* y<sub>7</sub> y<sub>6</sub> y<sub>5</sub> y<sub>4</sub> y<sub>3</sub> y<sub>2</sub> y<sub>1</sub>

Raw file 20171215\_MaS\_33SR\_LMH\_phospho2\_04 Scan 9085 Method FTMS; HCD Score 61.94 m/z 634.94 Gene names SHROOM2

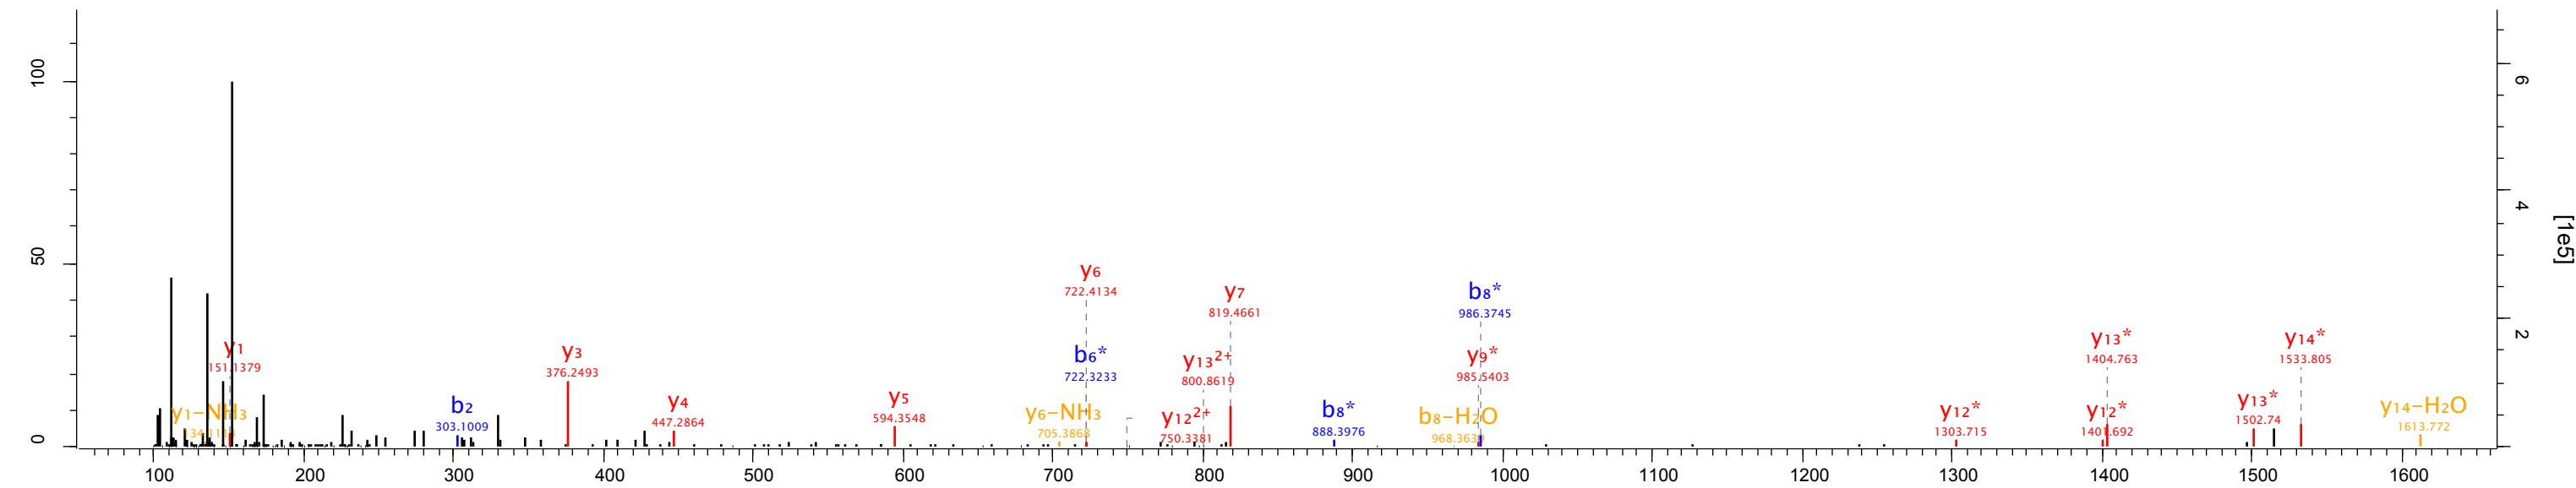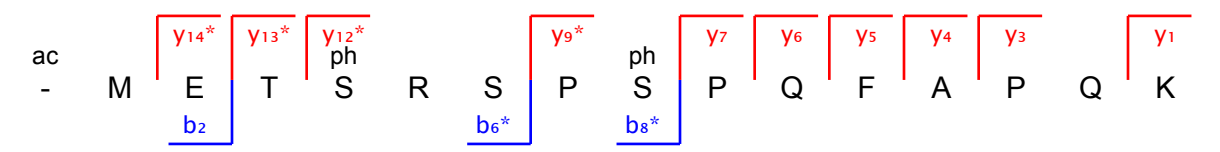

Raw file 20171215\_MaS\_33SR\_LMH\_phospho2\_05 Scan 10845 Method FTMS; HCD Score 44.16 m/z 836.33 Gene names CCDC61

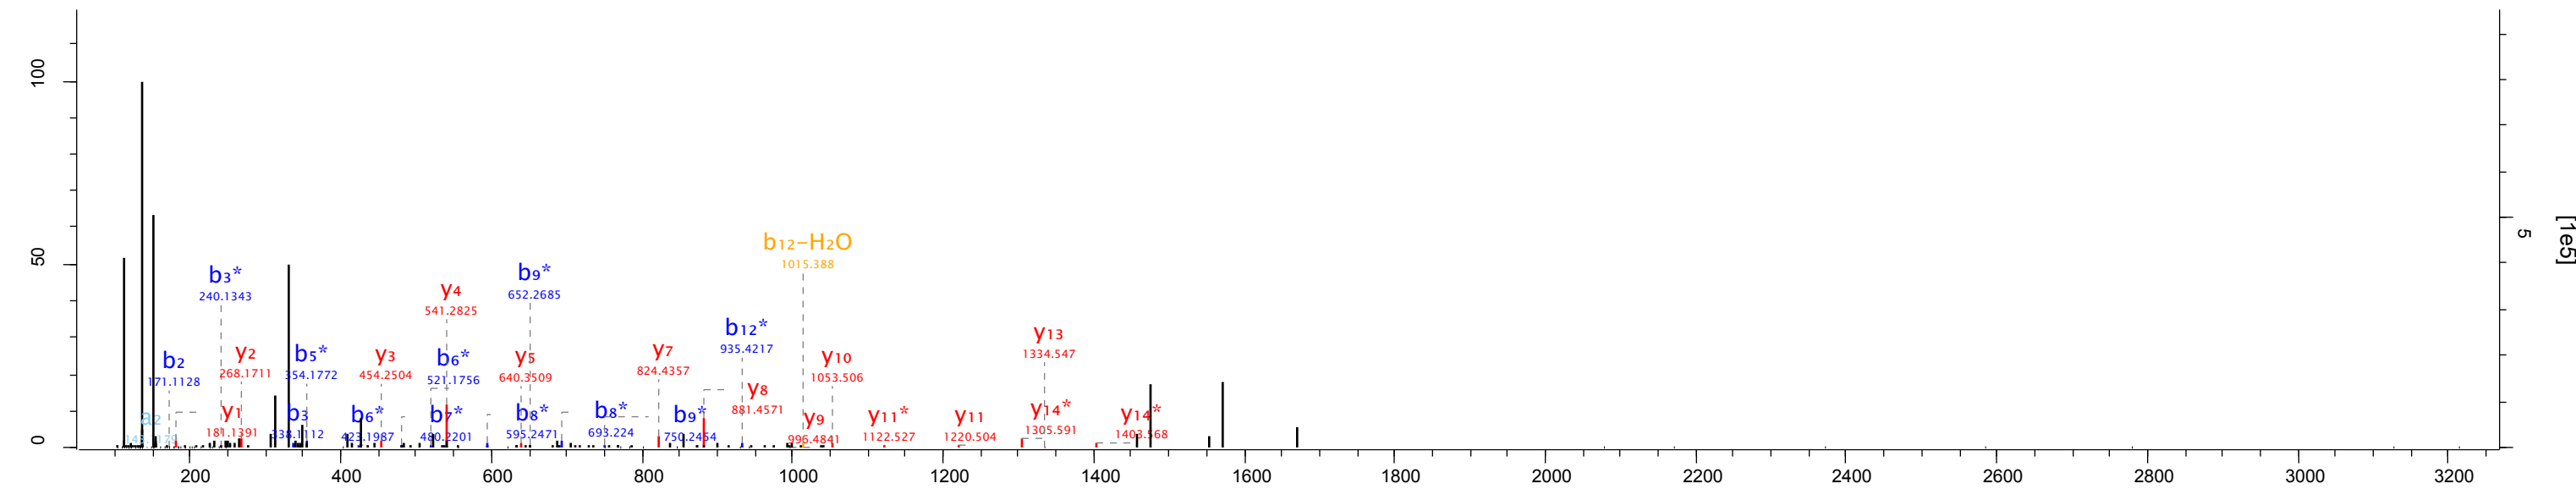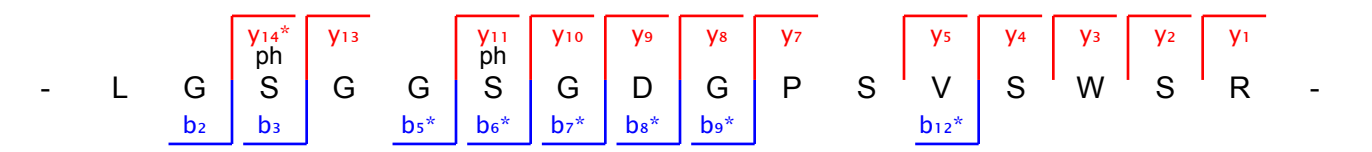





Raw file  
20171215\_MaS\_33SR\_LMH\_phospho2\_05

Scan 4045 Method FTMS; HCD Score 160.62 m/z 904.33 Gene names NUFIP2

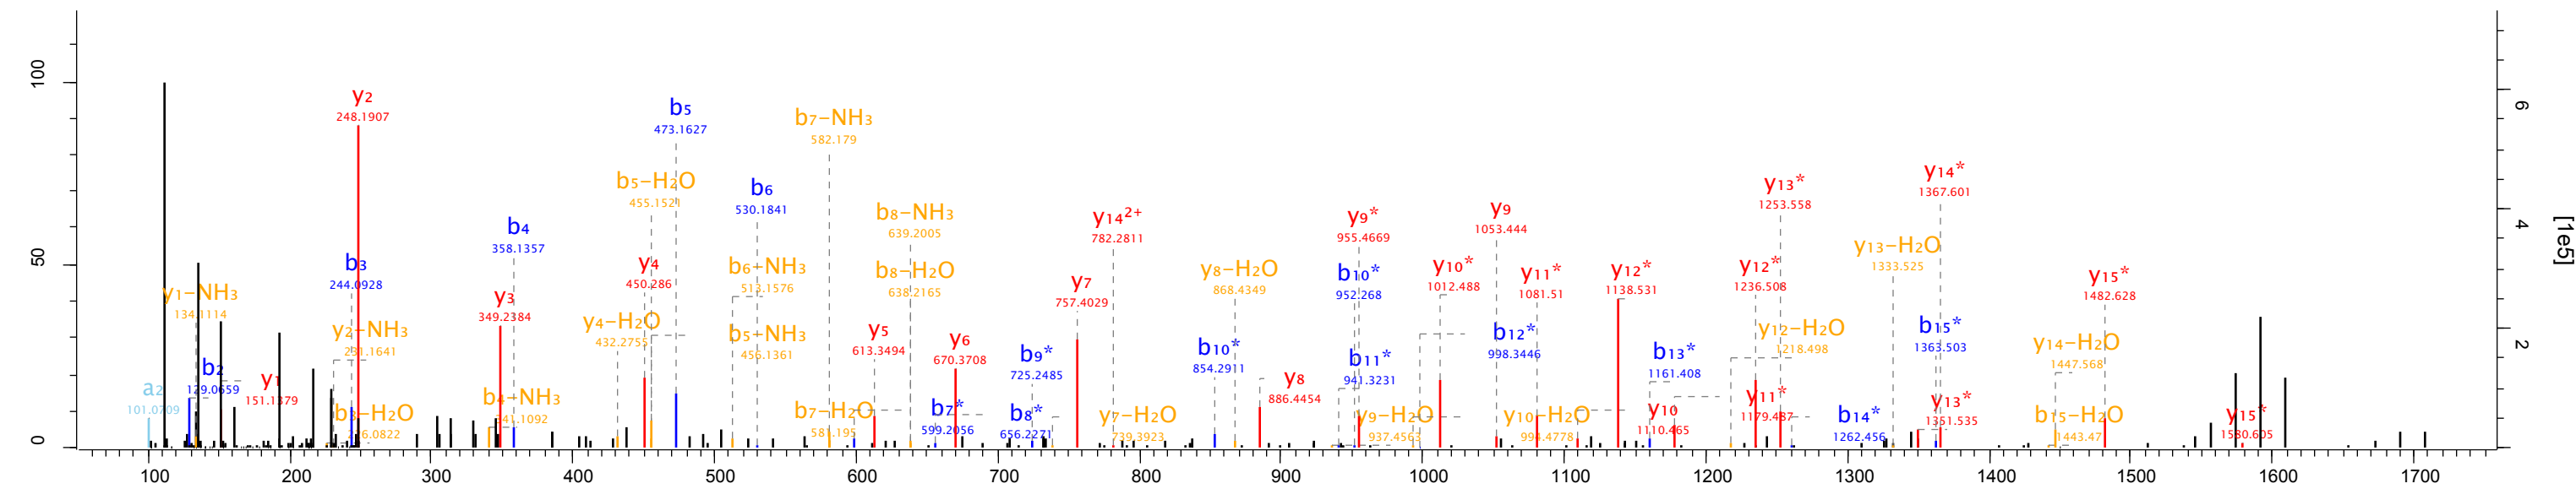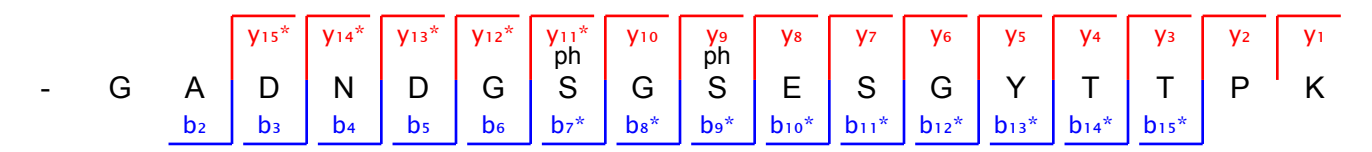

Raw file 20171215\_MaS\_33SR\_LMH\_phospho2\_05 Scan 4085 Method FTMS; HCD Score 74.44 m/z 799.29 Gene names CEP170

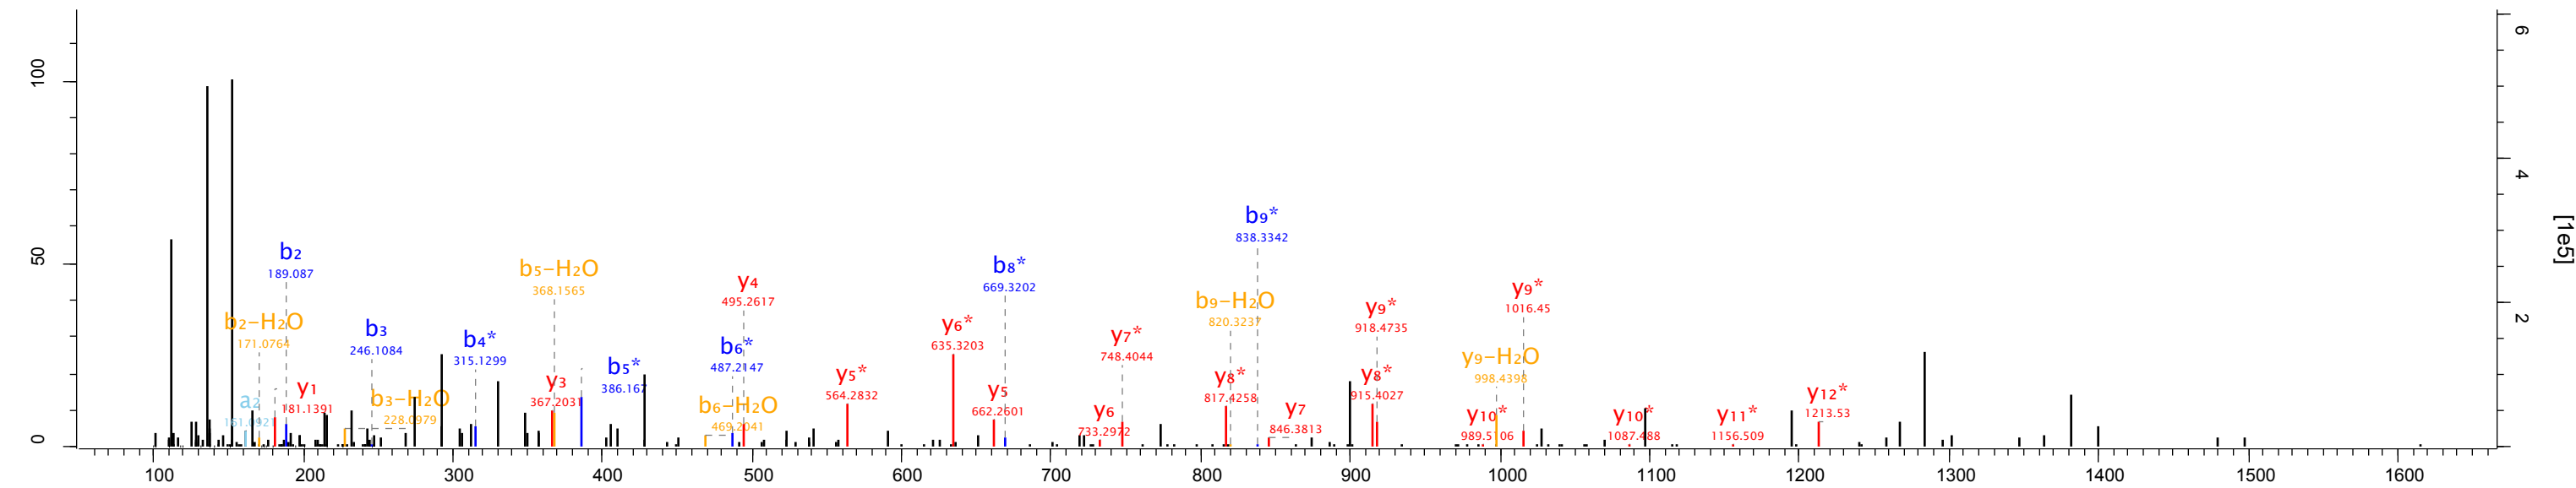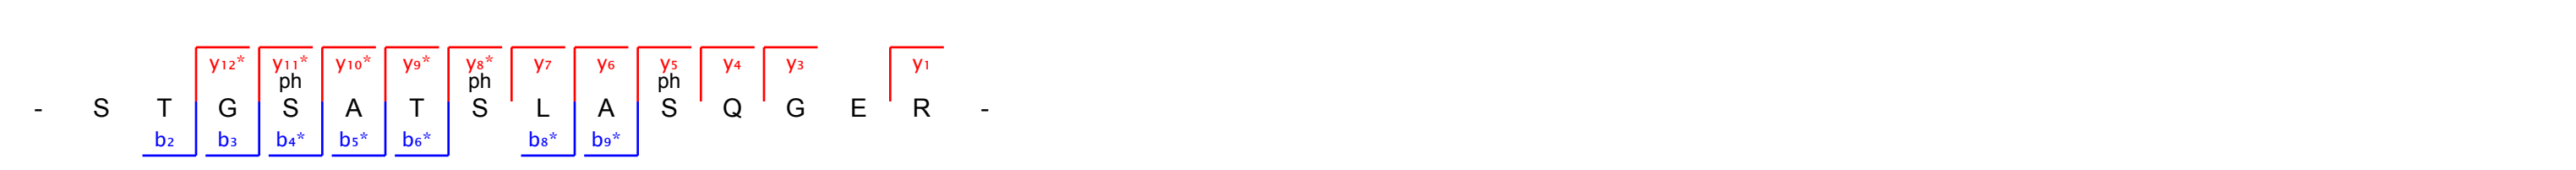

Raw file 20171215\_MaS\_33SR\_LMH\_phospho2\_05 Scan 4275 Method FTMS; HCD Score 66.98 m/z 650.24 Gene names SNRNP27

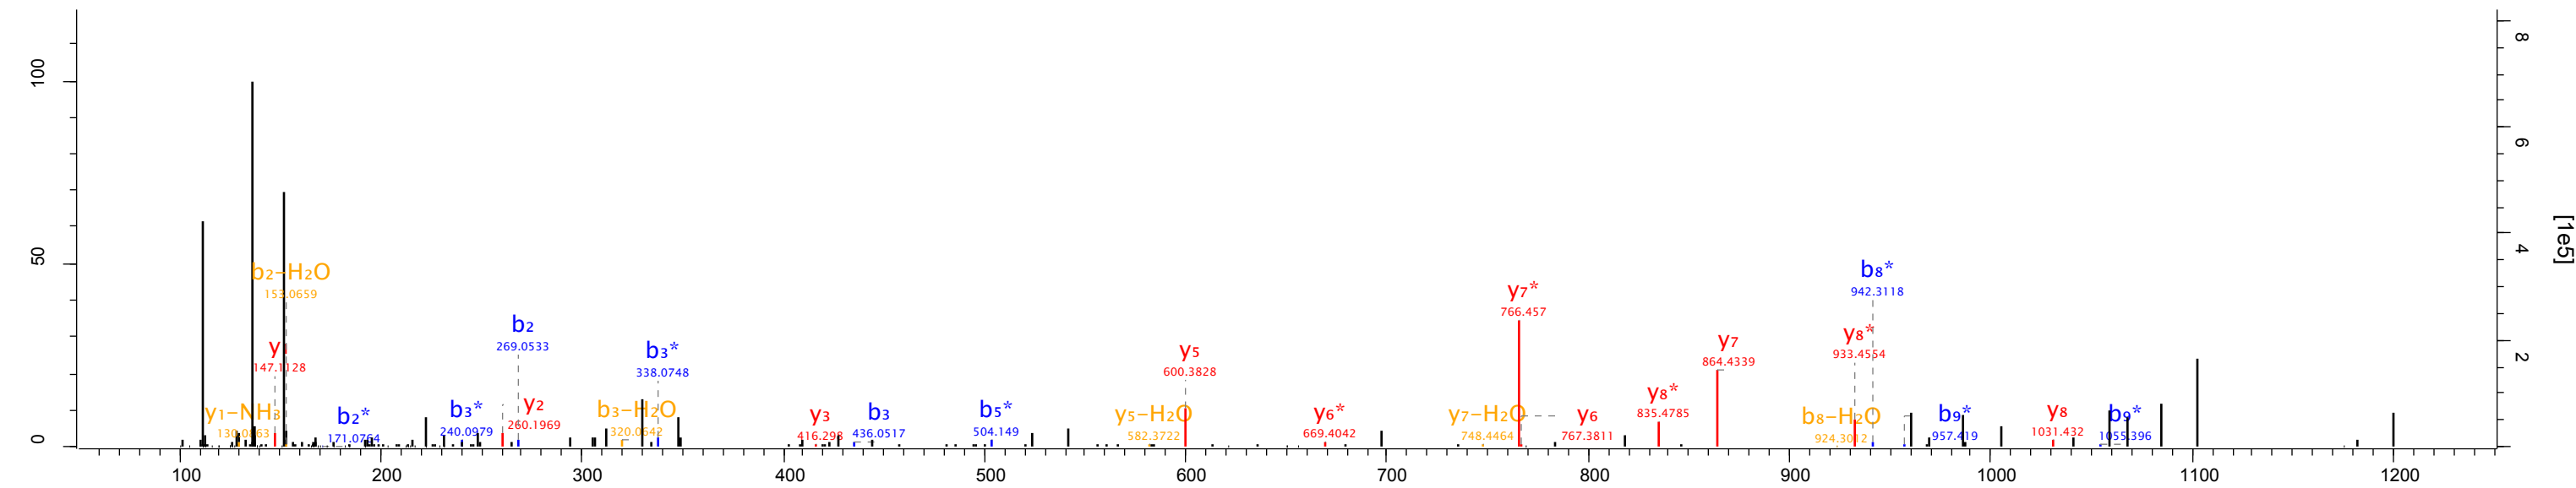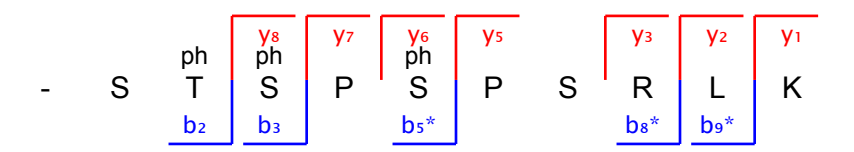

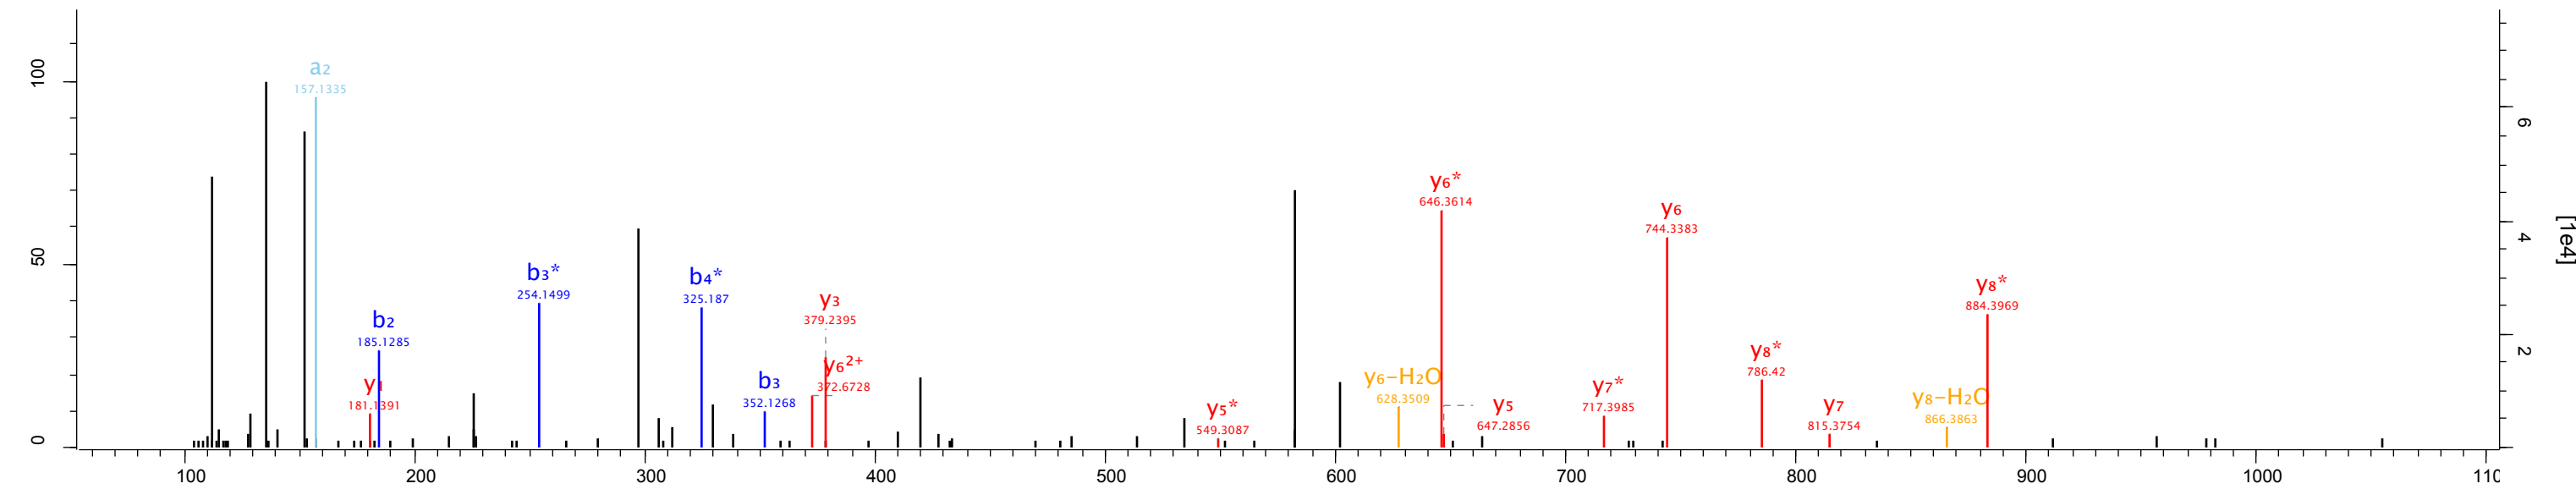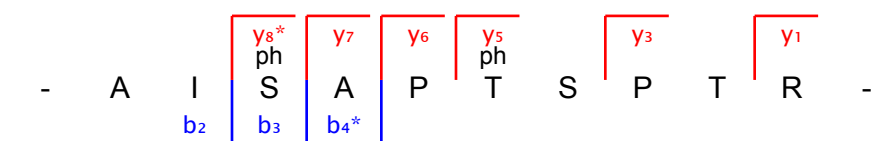

Raw file 20171215\_MaS\_33SR\_LMH\_phospho2\_05 Scan 5315 Method FTMS; HCD Score 55.05 m/z 958.85 Gene names STK11IP

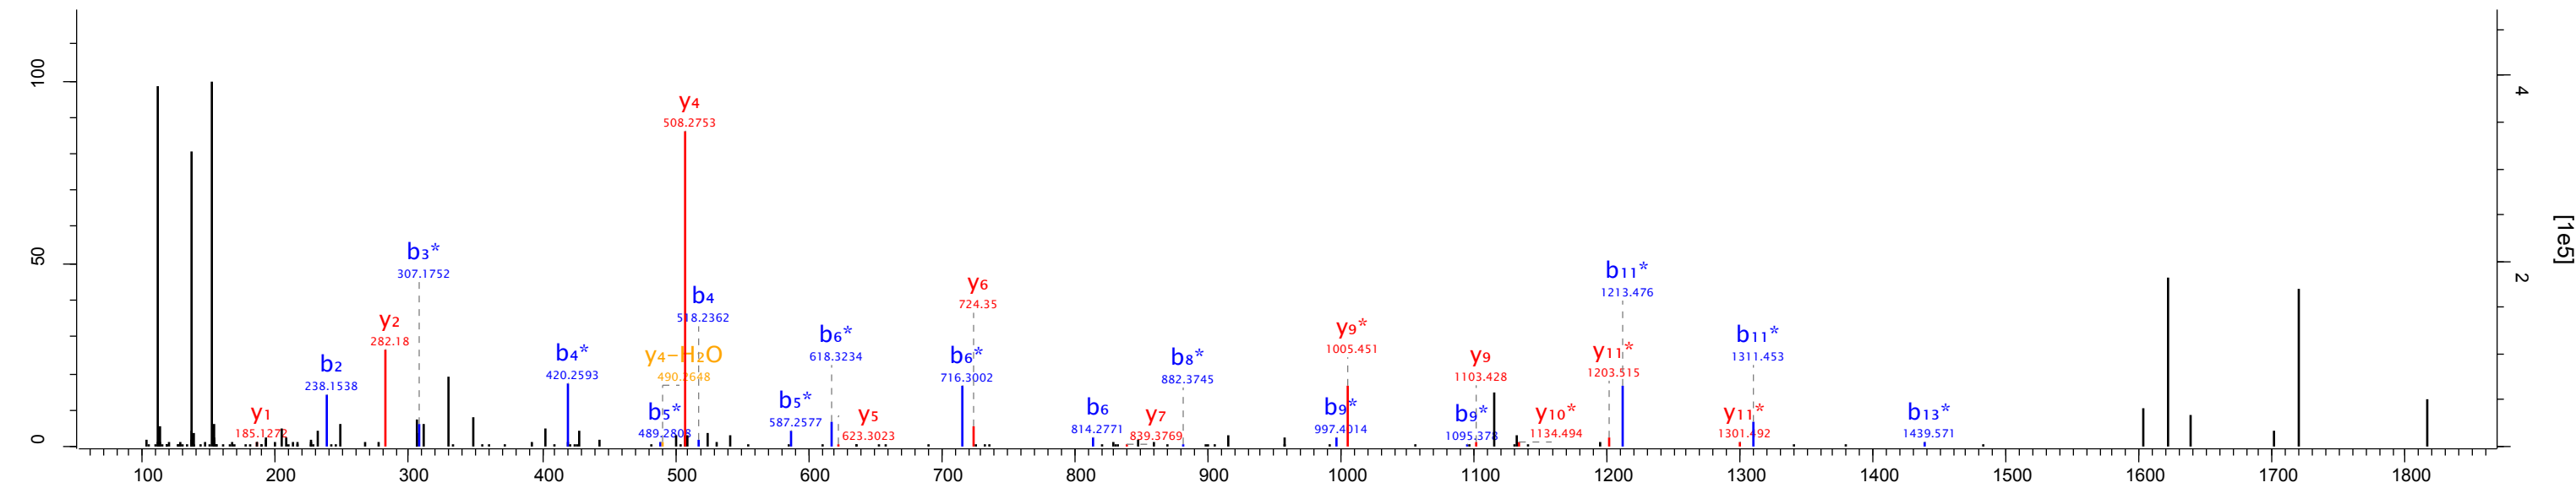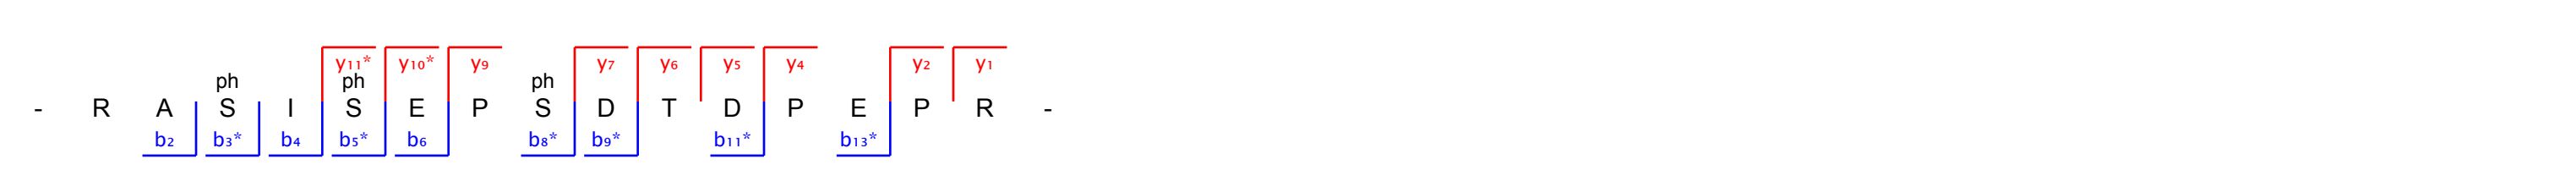

Raw file  
20171215\_MaS\_33SR\_LMH\_phospho2\_05

Scan 5435 Method FTMS; HCD Score 140.3 m/z 706.25 Gene names GCFC2

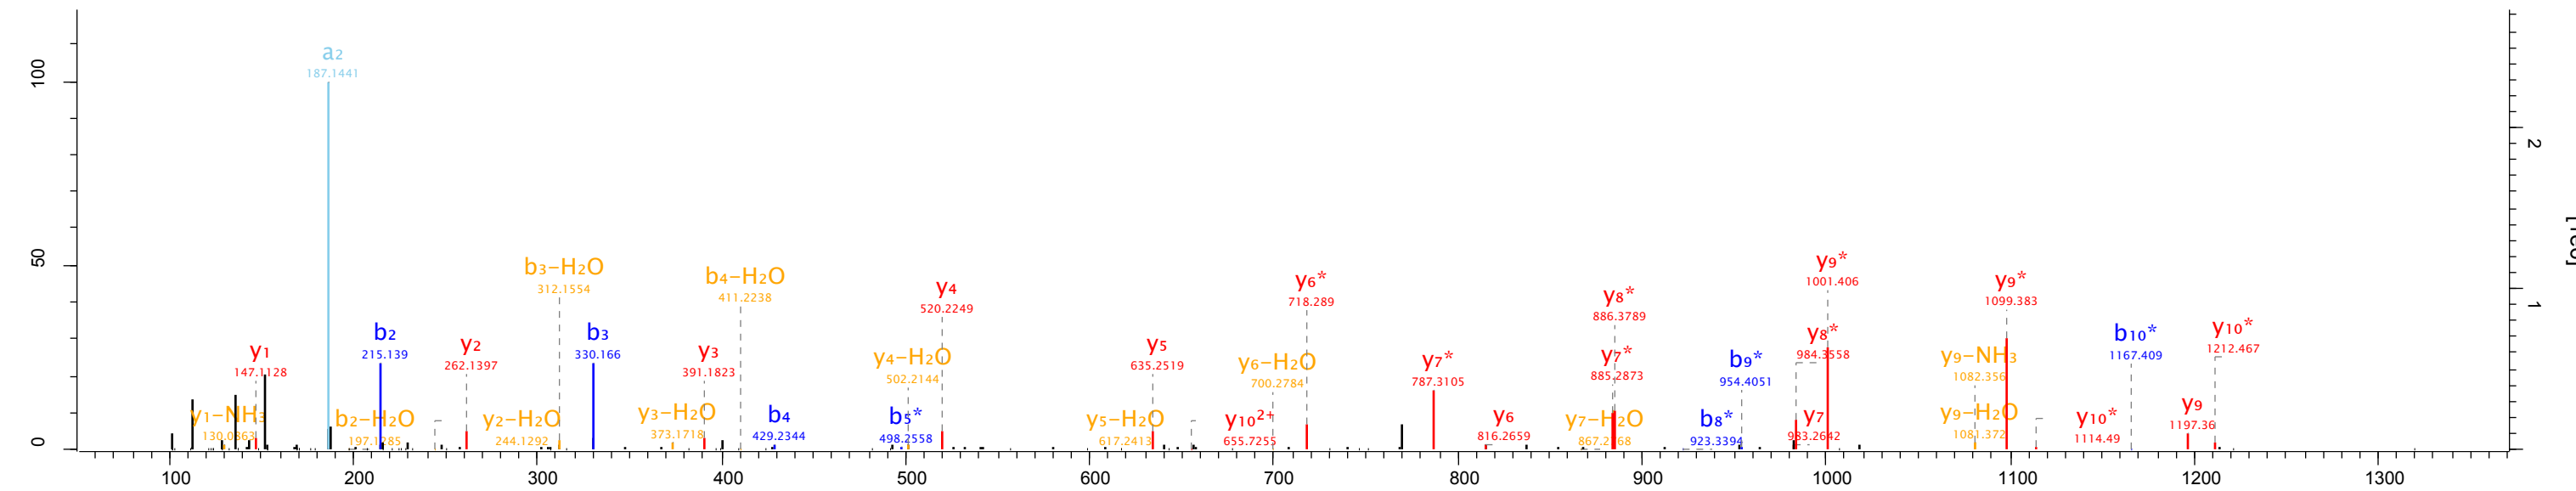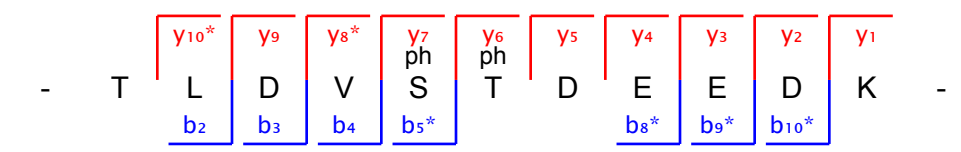

Raw file 20171215\_MaS\_33SR\_LMH\_phospho2\_05 Scan 5795 Method FTMS; HCD Score 94.37 m/z 709.81 Gene names PPP1R12A

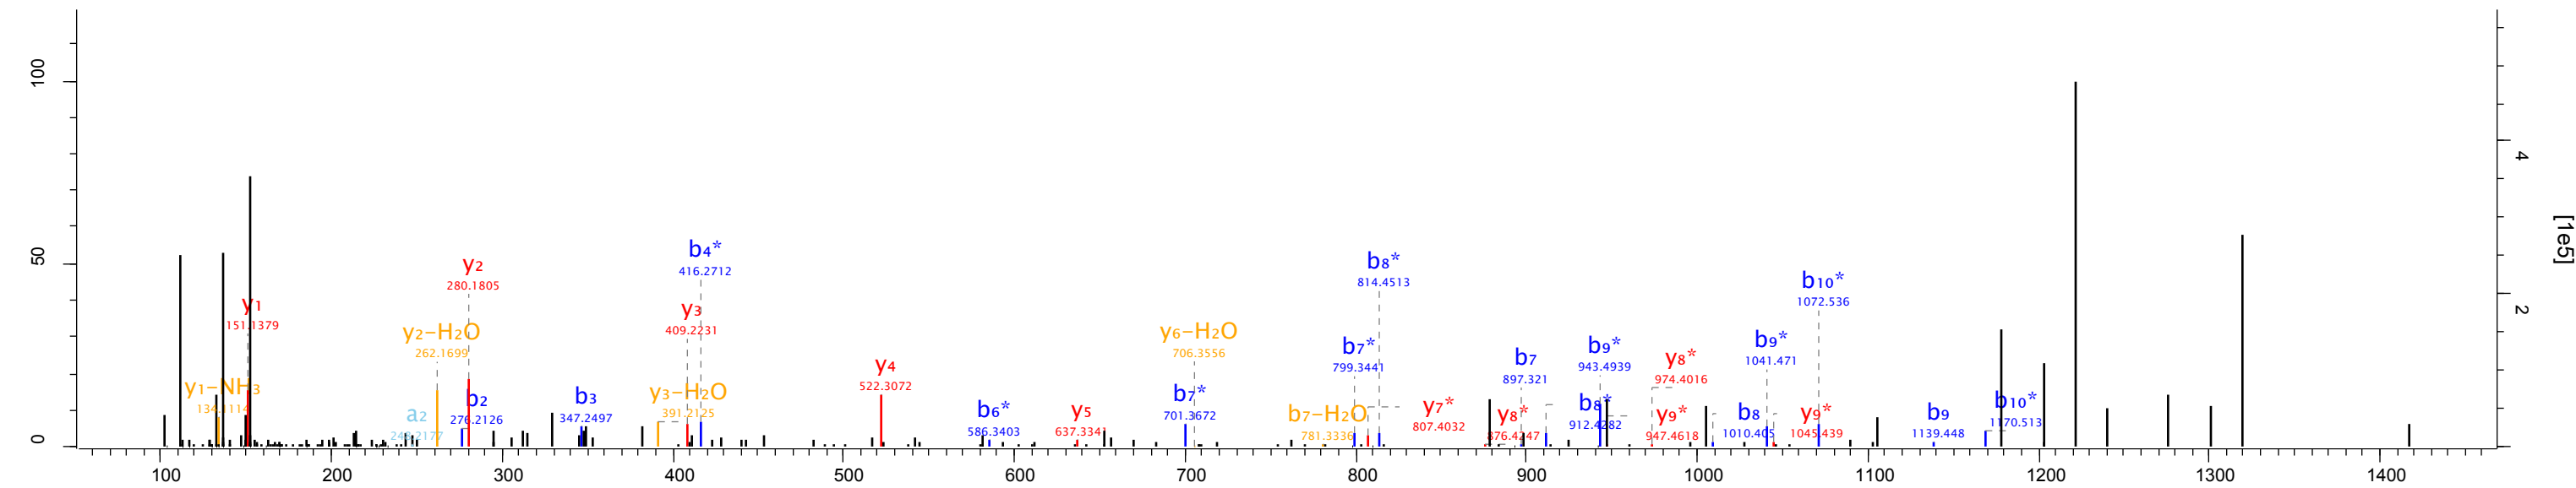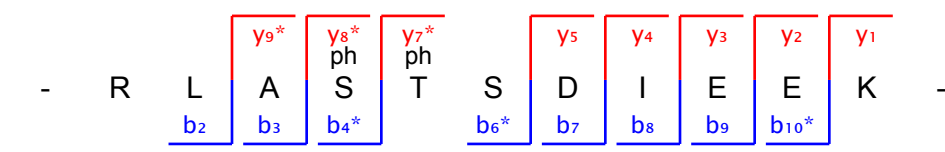



Raw file

20171215\_MaS\_33SR\_LMH\_phospho2\_05

| Scan | Method    | Score  | m/z    | Gene names |
|------|-----------|--------|--------|------------|
| 5845 | FTMS; HCD | 122.44 | 780.76 | TSSC4      |

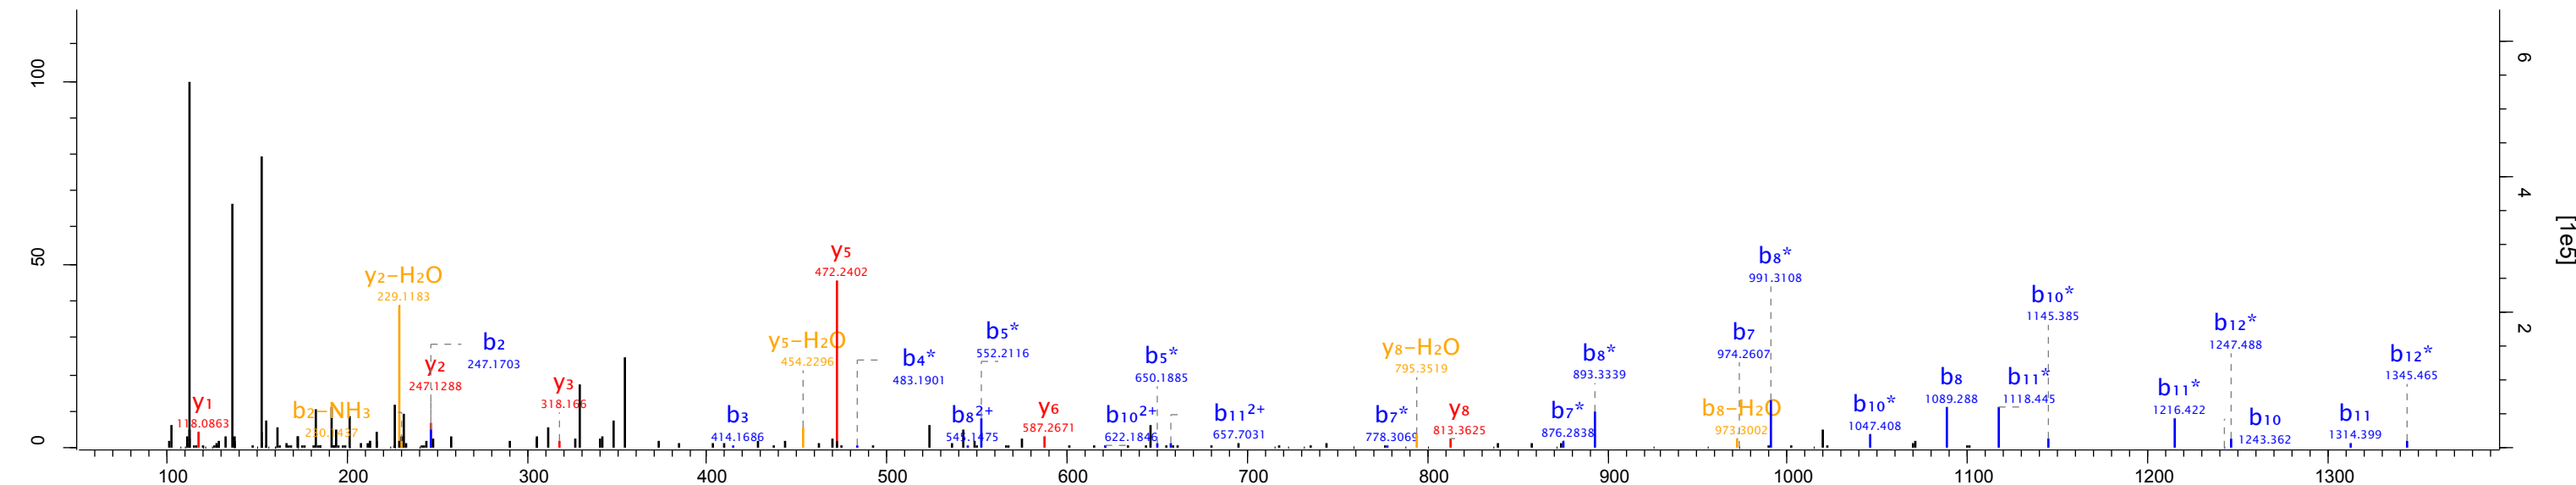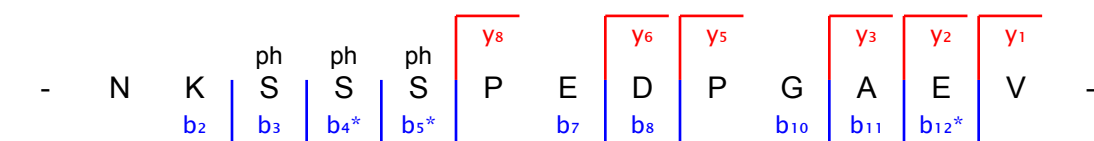

Raw file 20171215\_MaS\_33SR\_LMH\_phospho2\_05 Scan 6405 Method FTMS; HCD Score 207.31 m/z 923.85 Gene names ZC3H13

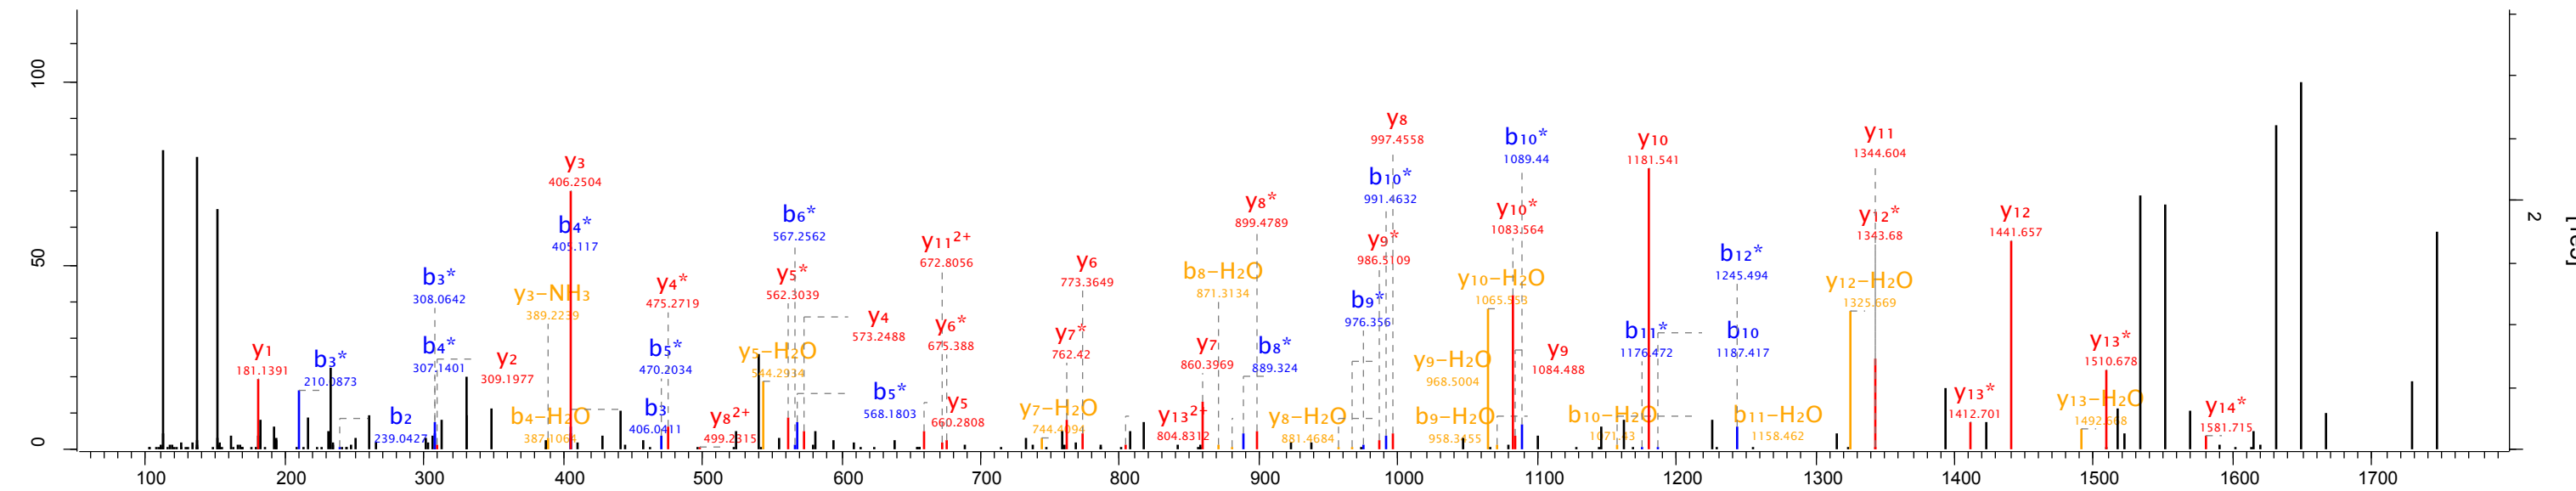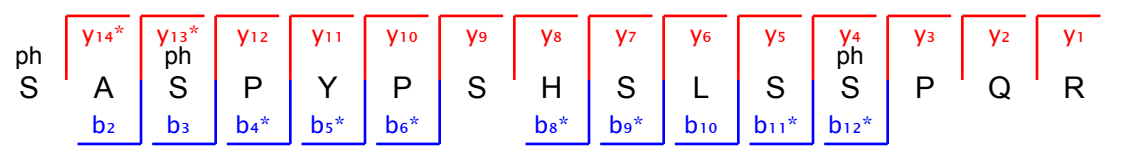

Raw file 20171215\_MaS\_33SR\_LMH\_phospho2\_06 Scan 11635 Method FTMS; HCD Score 78.95 m/z 898.4 Gene names ZNF148

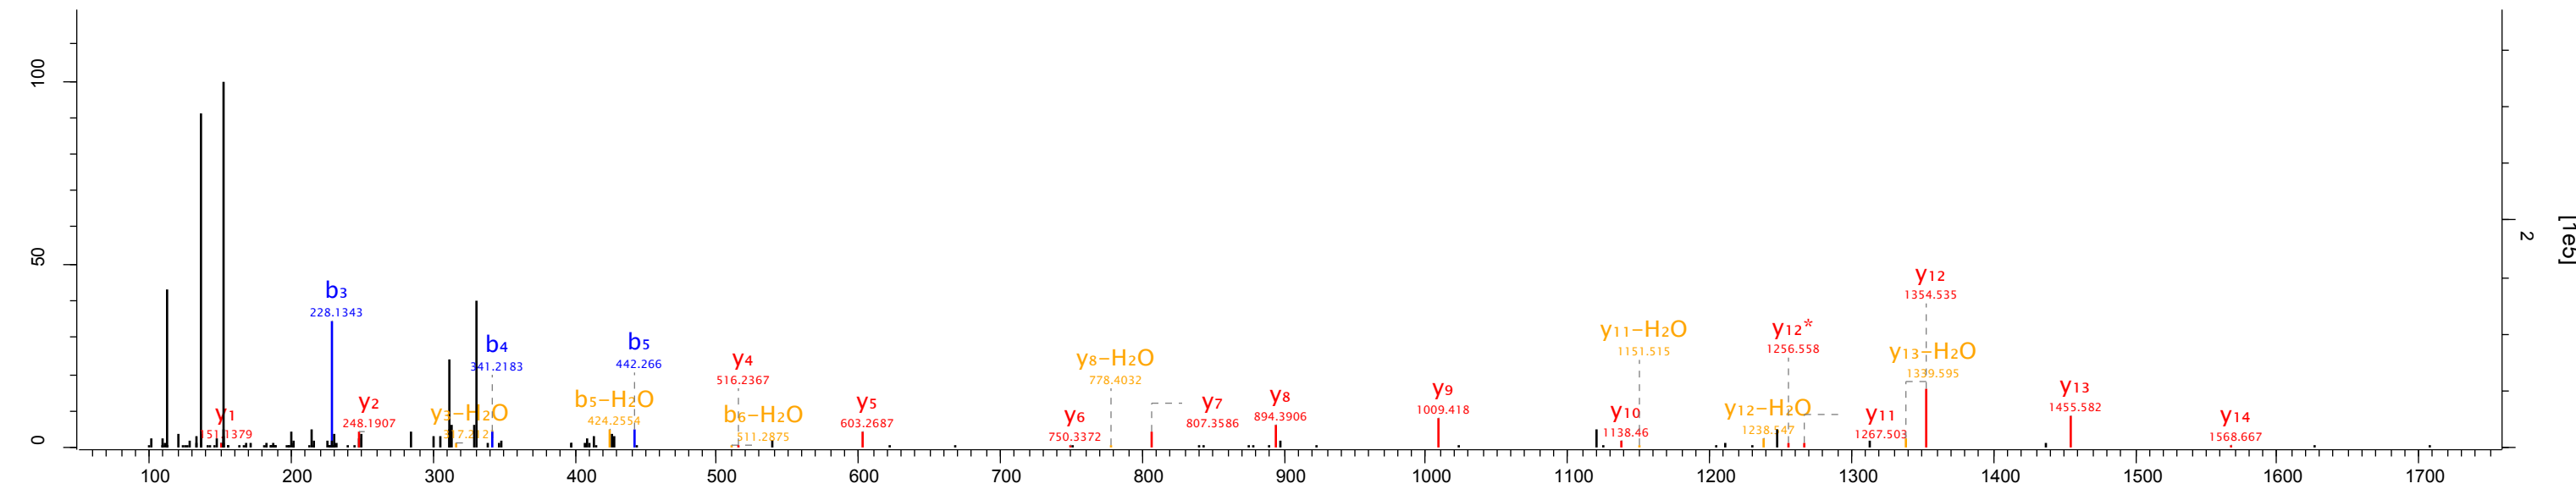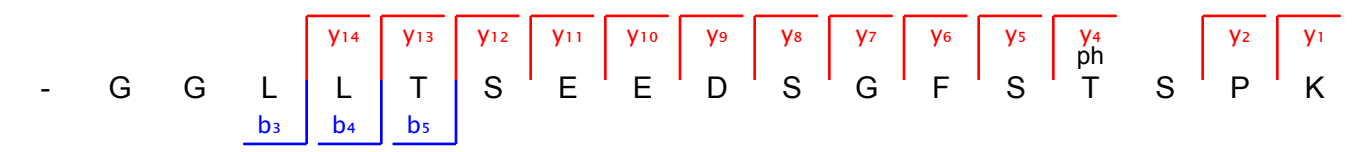

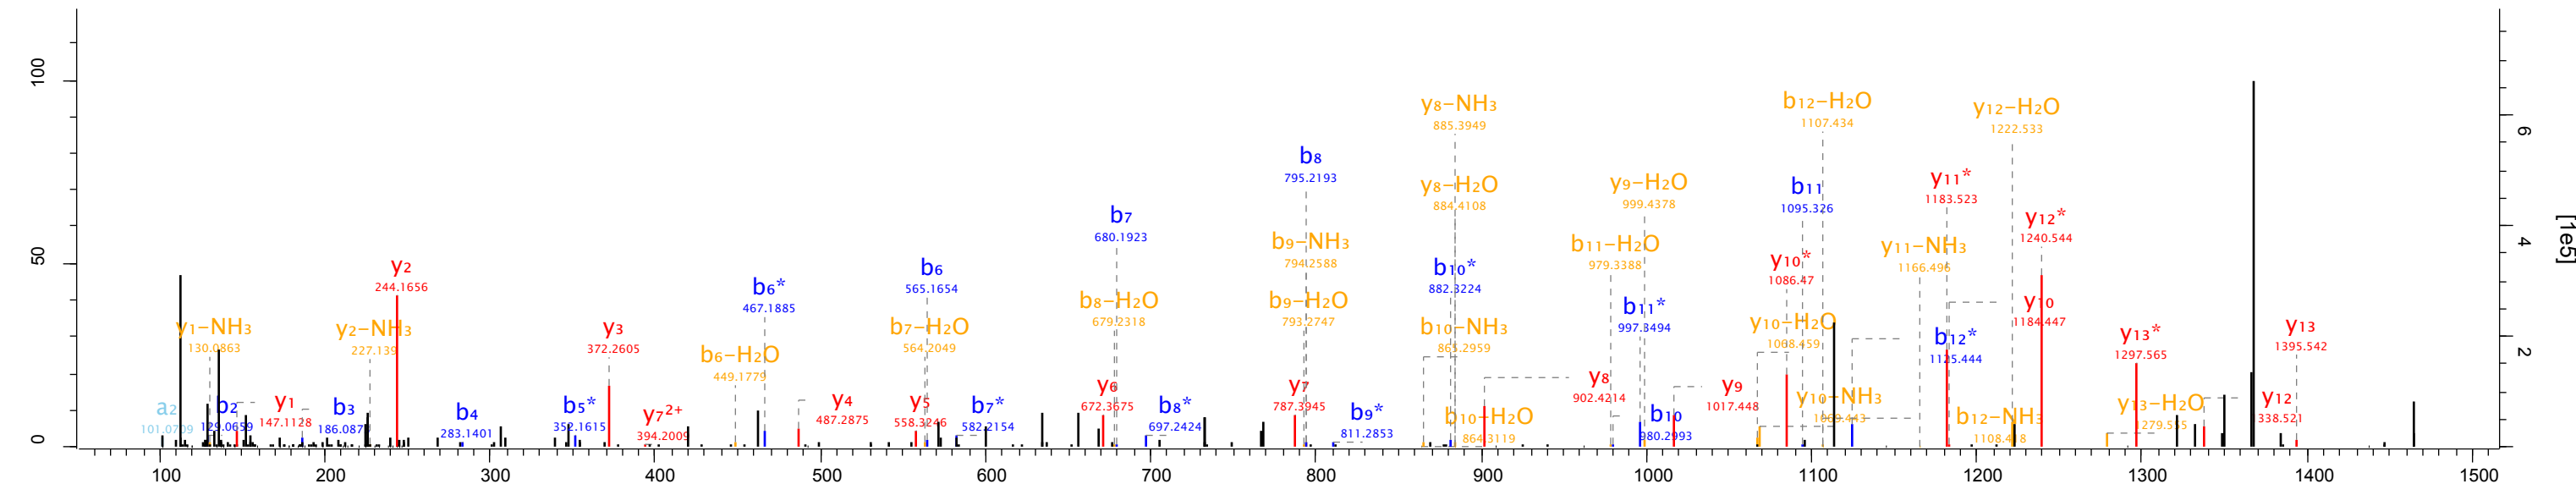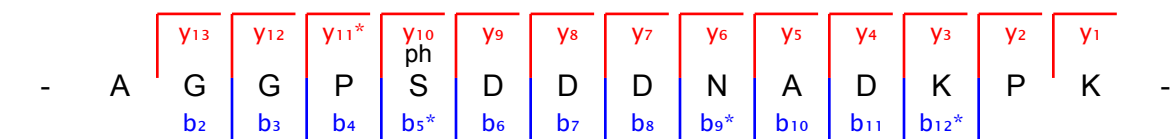

Raw file 20171215\_MaS\_33SR\_LMH\_phospho2\_06 Scan 2375 Method FTMS; HCD Score 213.71 m/z 652.61 Gene names SH3PXD2A

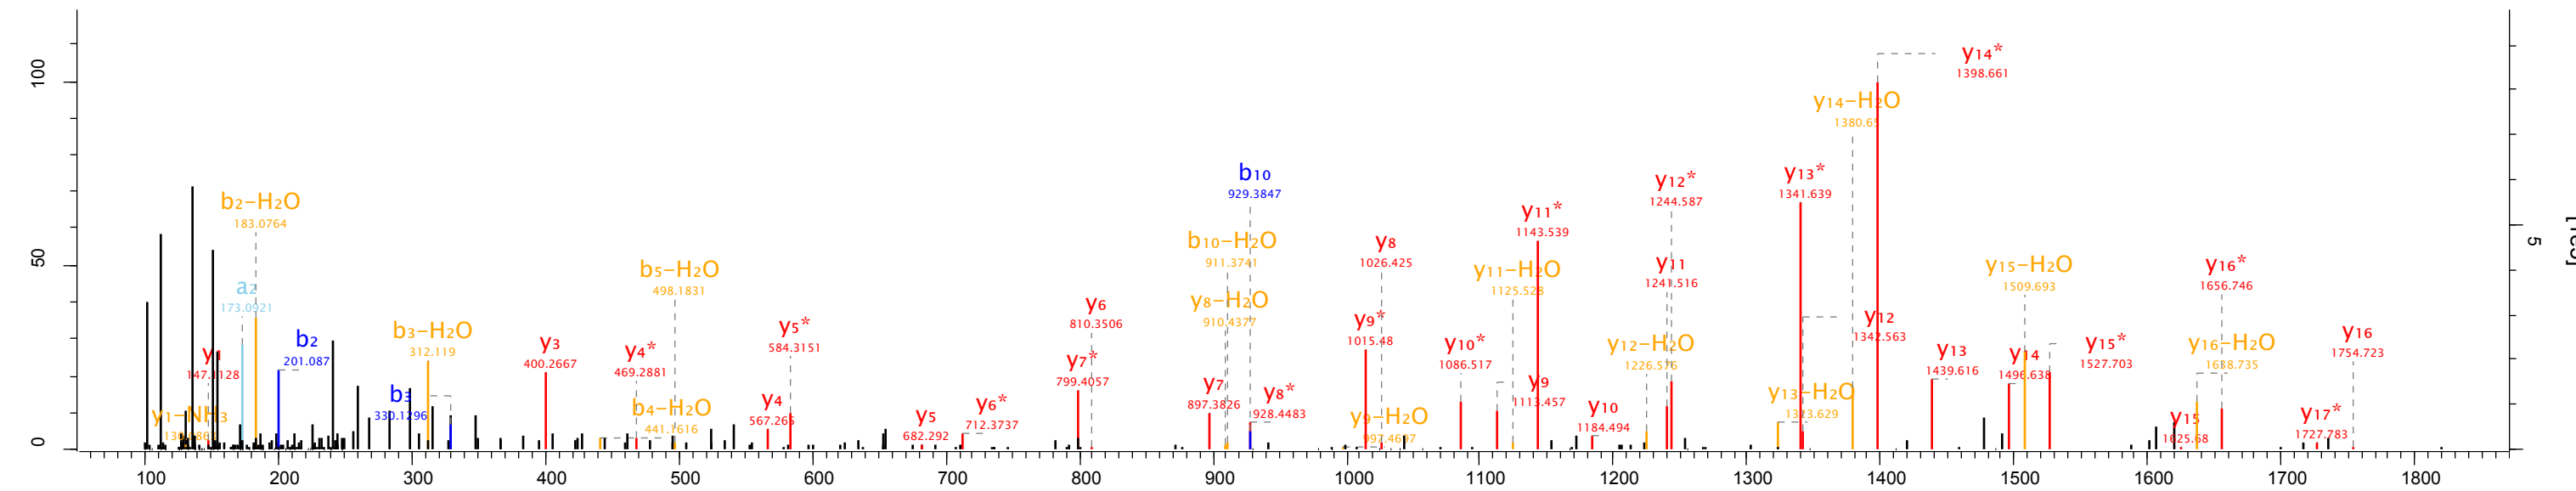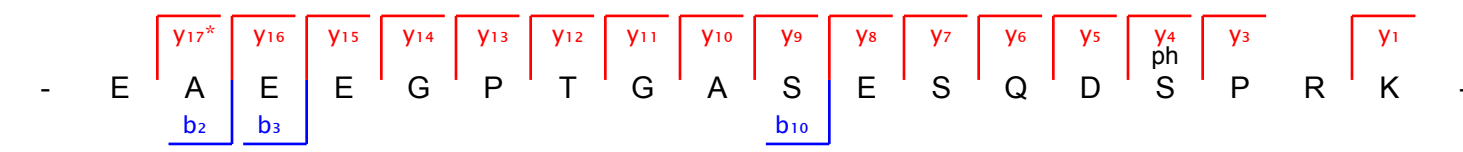

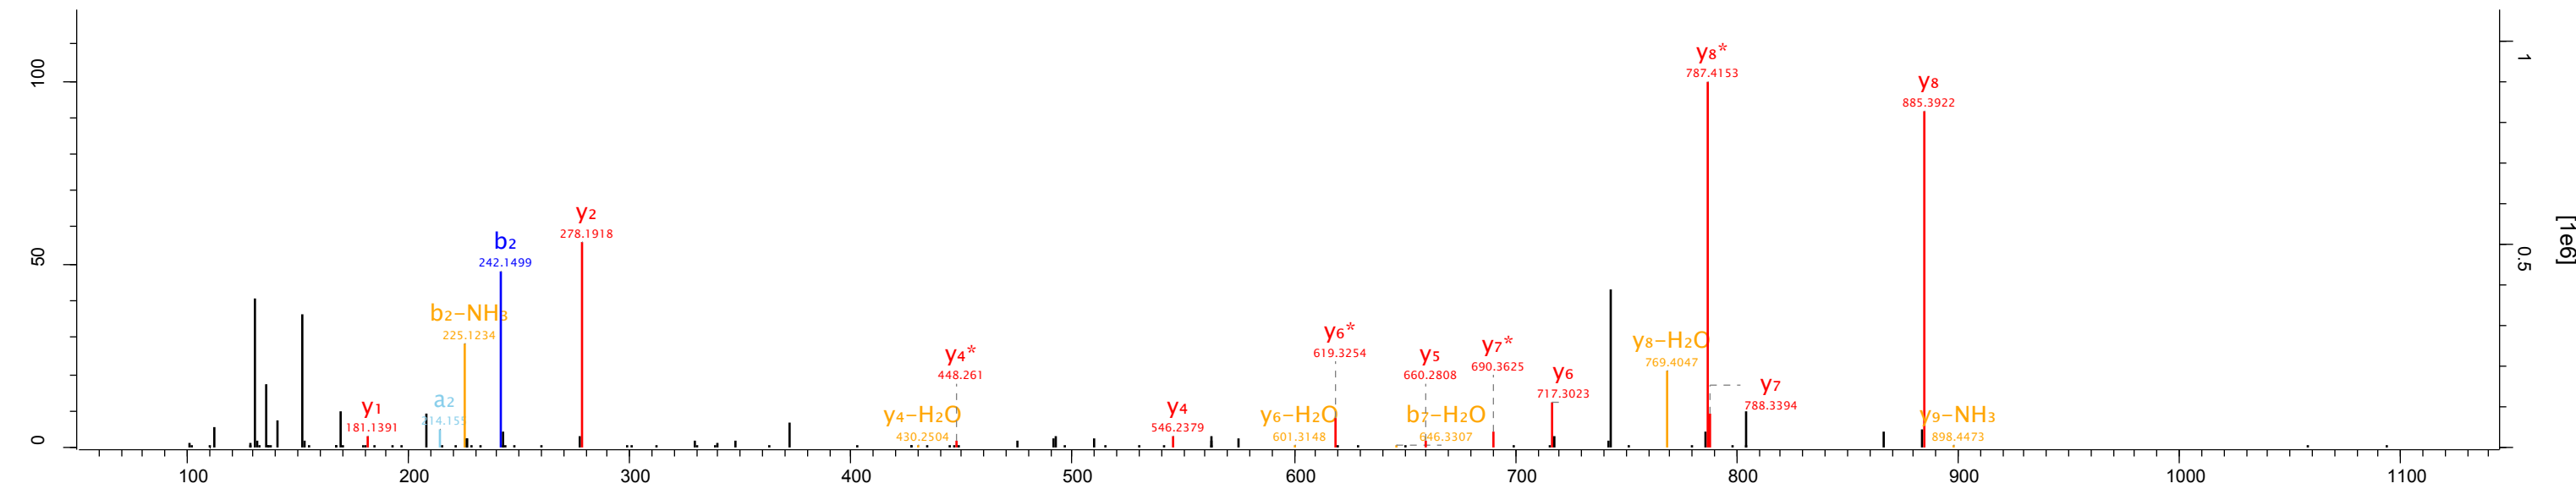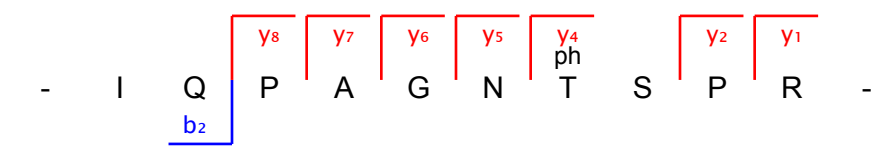

Raw file: 20171215\_MaS\_33SR\_LMH\_phospho2\_06  
 Scan: 4325 Method: FTMS; HCD Score: 116.87 m/z: 675.82 Gene names: DNTTIP2

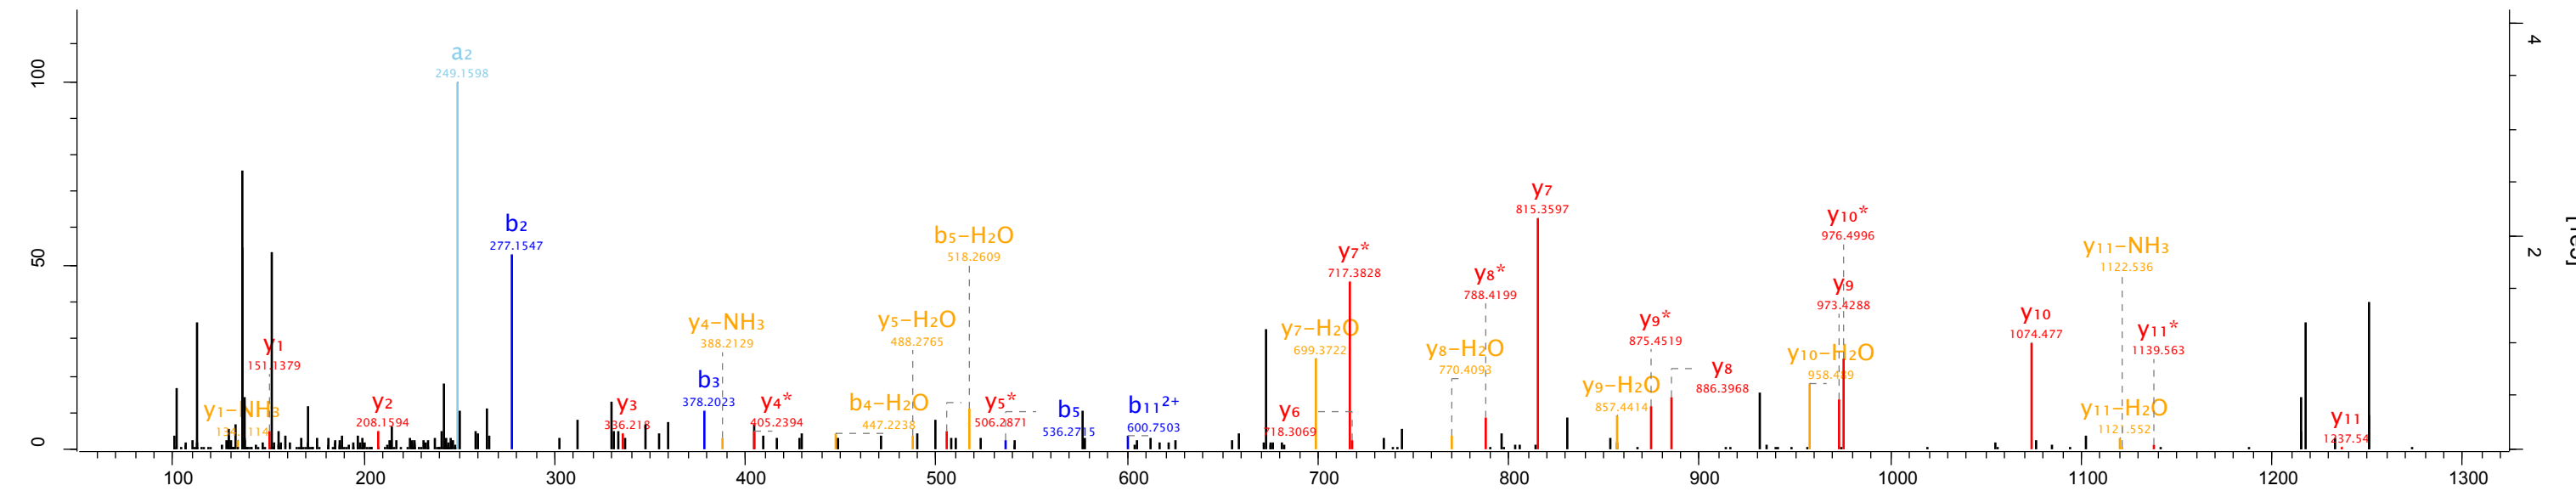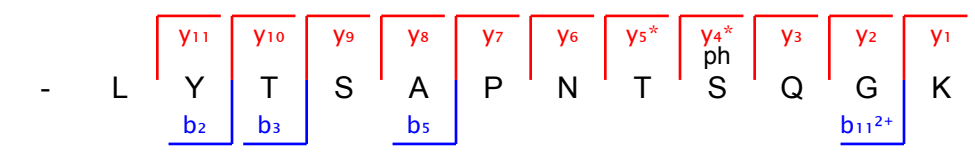

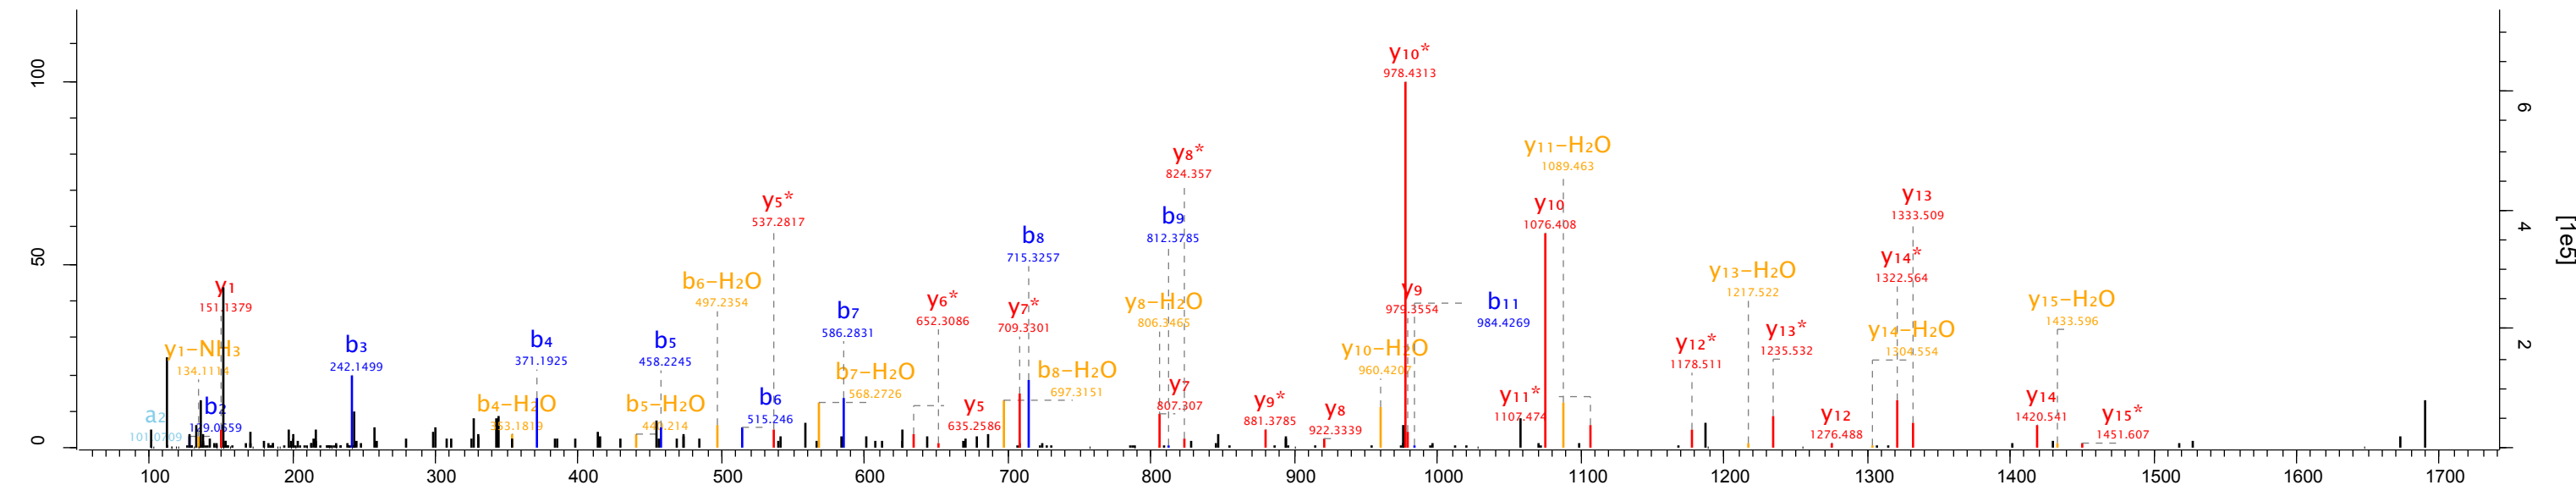

- A G L E S G A E P G D G D S D ph T T K -

Fragmentation mapping (b and y ions) is shown below the sequence:

- b2: G
- b3: L
- b4: E
- b5: S
- b6: G
- b7: A
- b8: E
- b9: P
- b11: D
- y1: K
- y5: S
- y6\*: D
- y7: G
- y8: D
- y9: G
- y10: P
- y11\*: E
- y12: A
- y13: G
- y14: S
- y15\*: E



Raw file: 20171215\_MaS\_33SR\_LMH\_phospho2\_06  
 Scan: 5075 Method: FTMS; HCD Score: 125.18 m/z: 445.22 Gene names: PPFIBP1

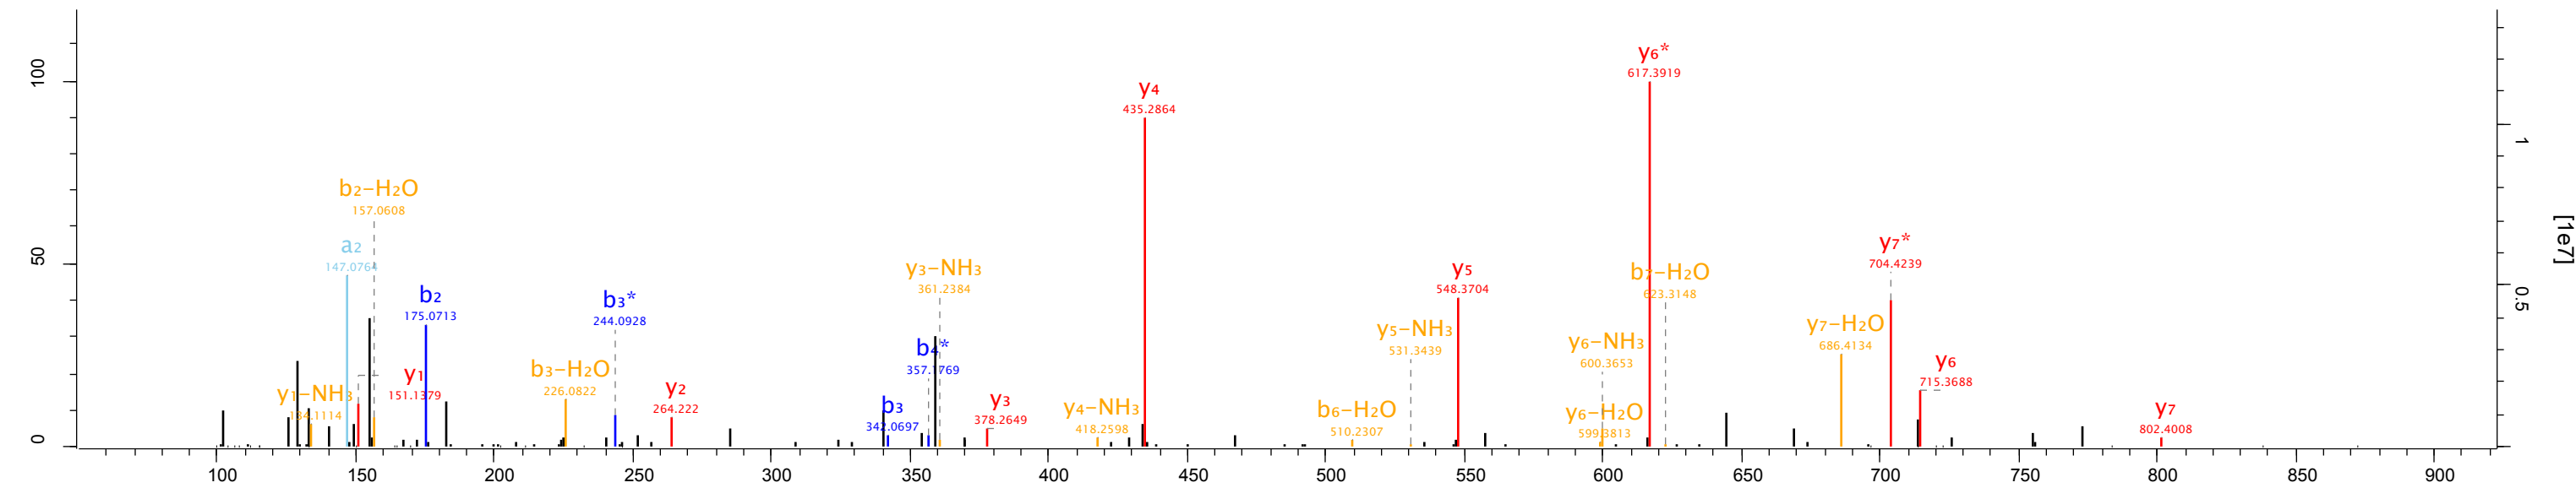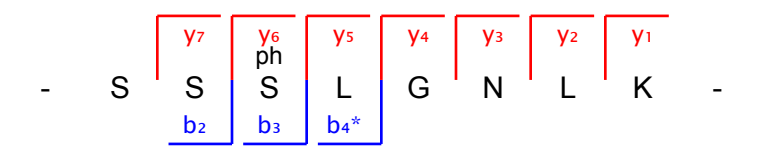

Raw file 20171215\_MaS\_33SR\_LMH\_phospho2\_06 Scan 6205 Method FTMS; HCD Score 75.68 m/z 747.35 Gene names FAM208A

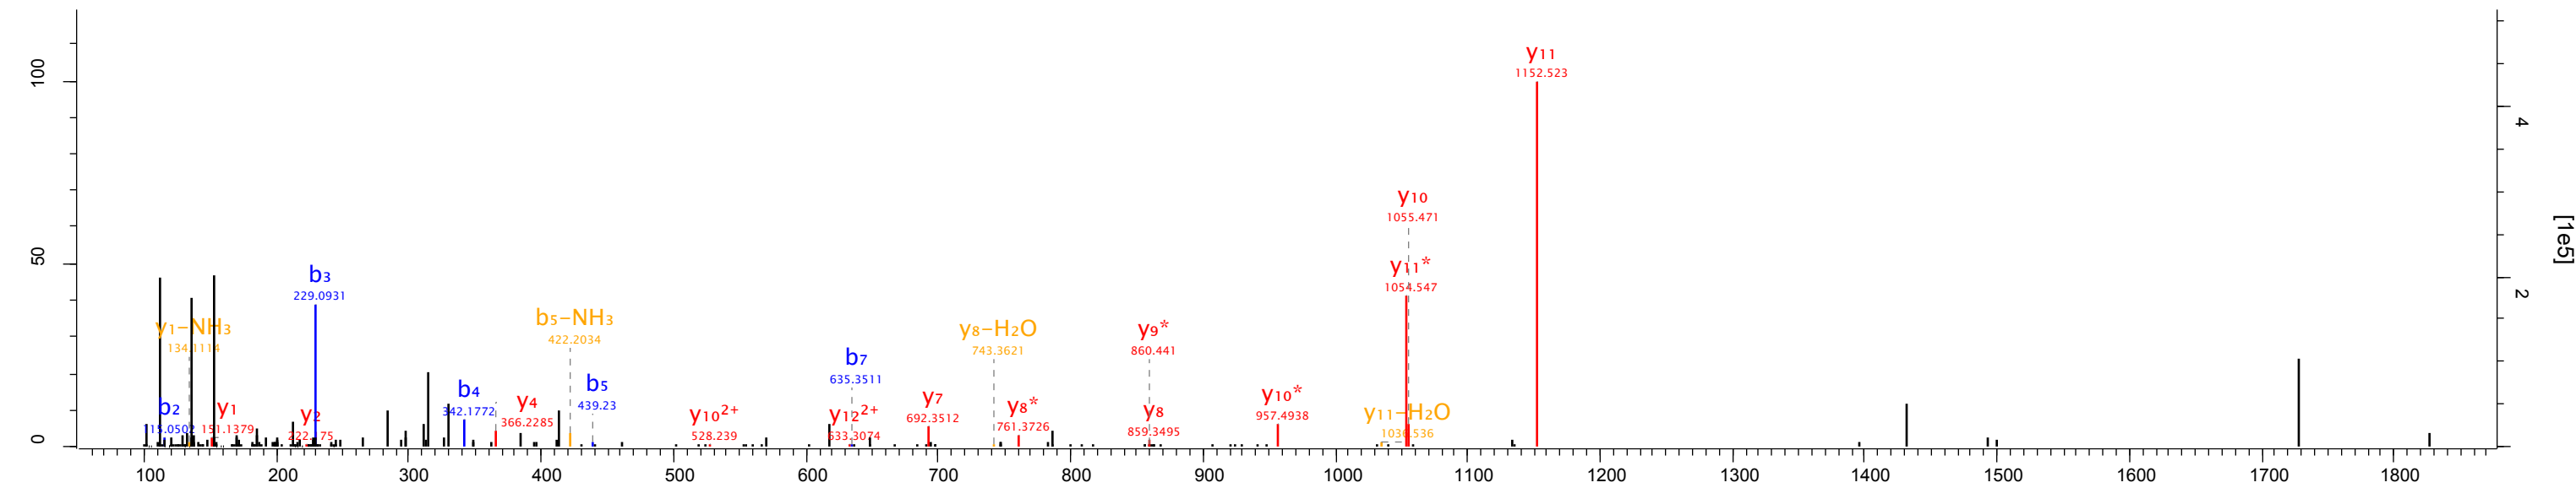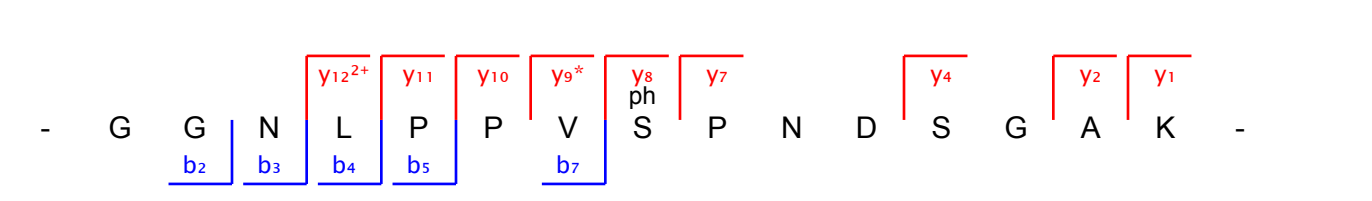

Raw file 20171215\_MaS\_33SR\_LMH\_phospho2\_06 Scan 6255 Method FTMS; HCD Score 110.31 m/z 614.73 Gene names SORBS2

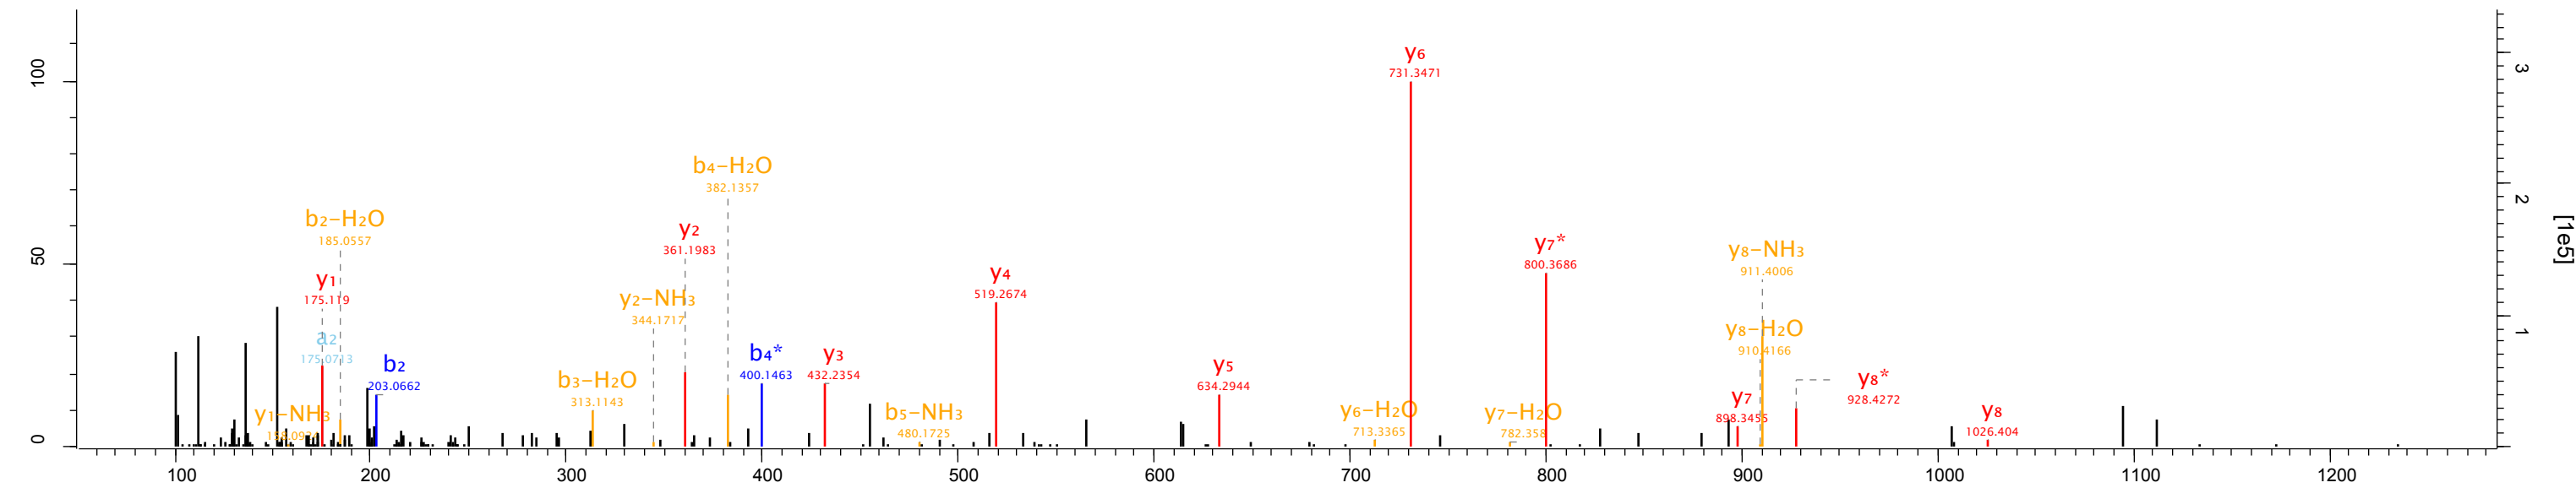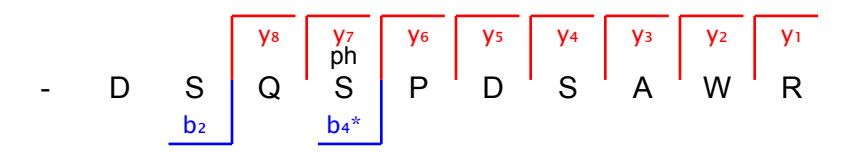

Raw file 20171215\_MaS\_33SR\_LMH\_phospho2\_06 Scan 7115 Method FTMS; HCD Score 43.5 m/z 569.74 Gene names AQR

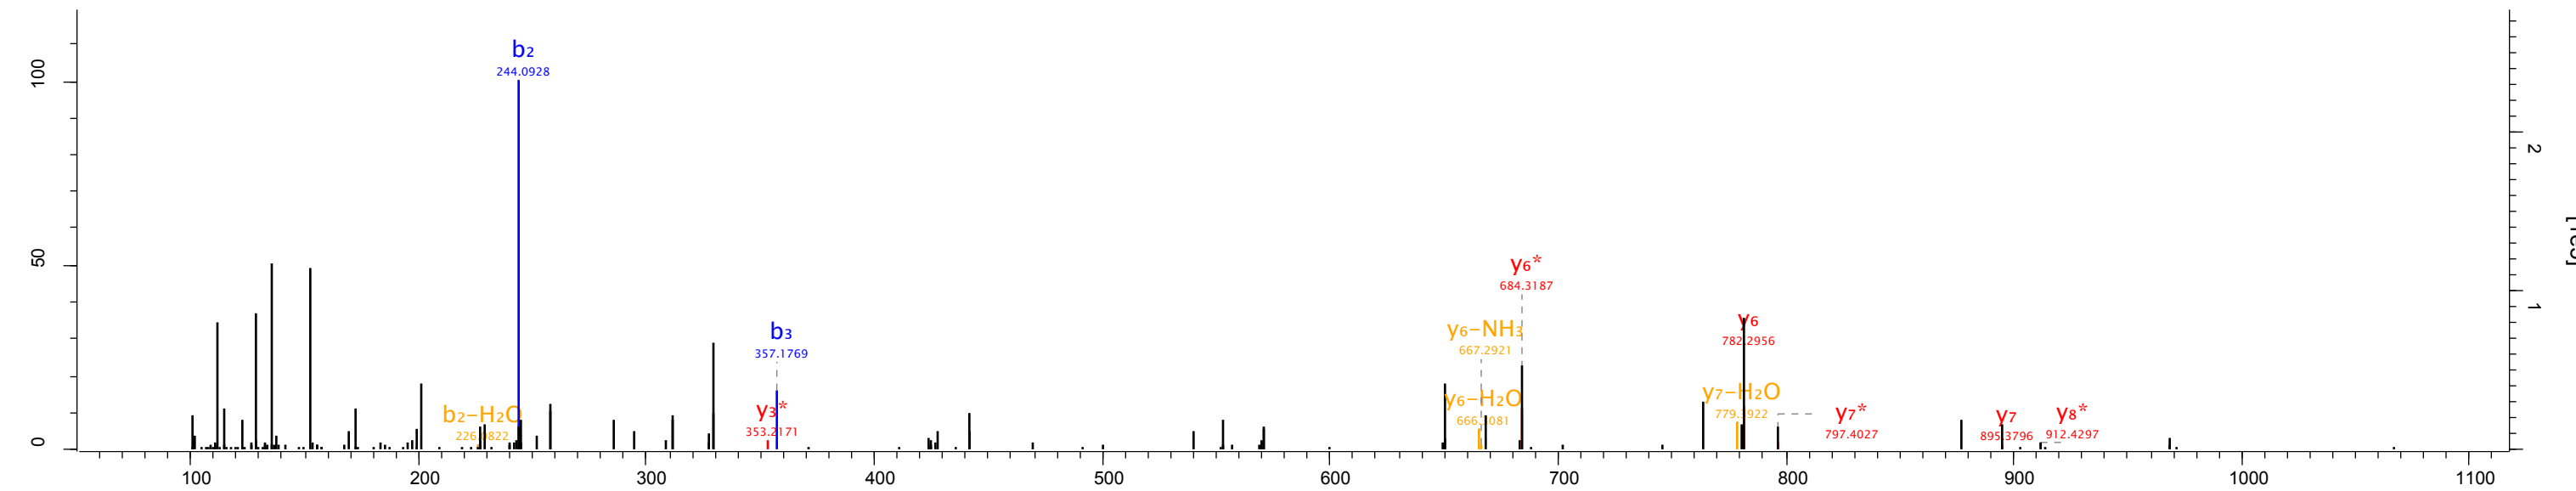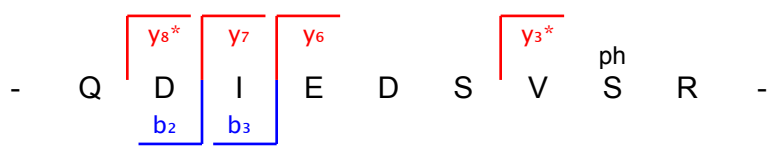

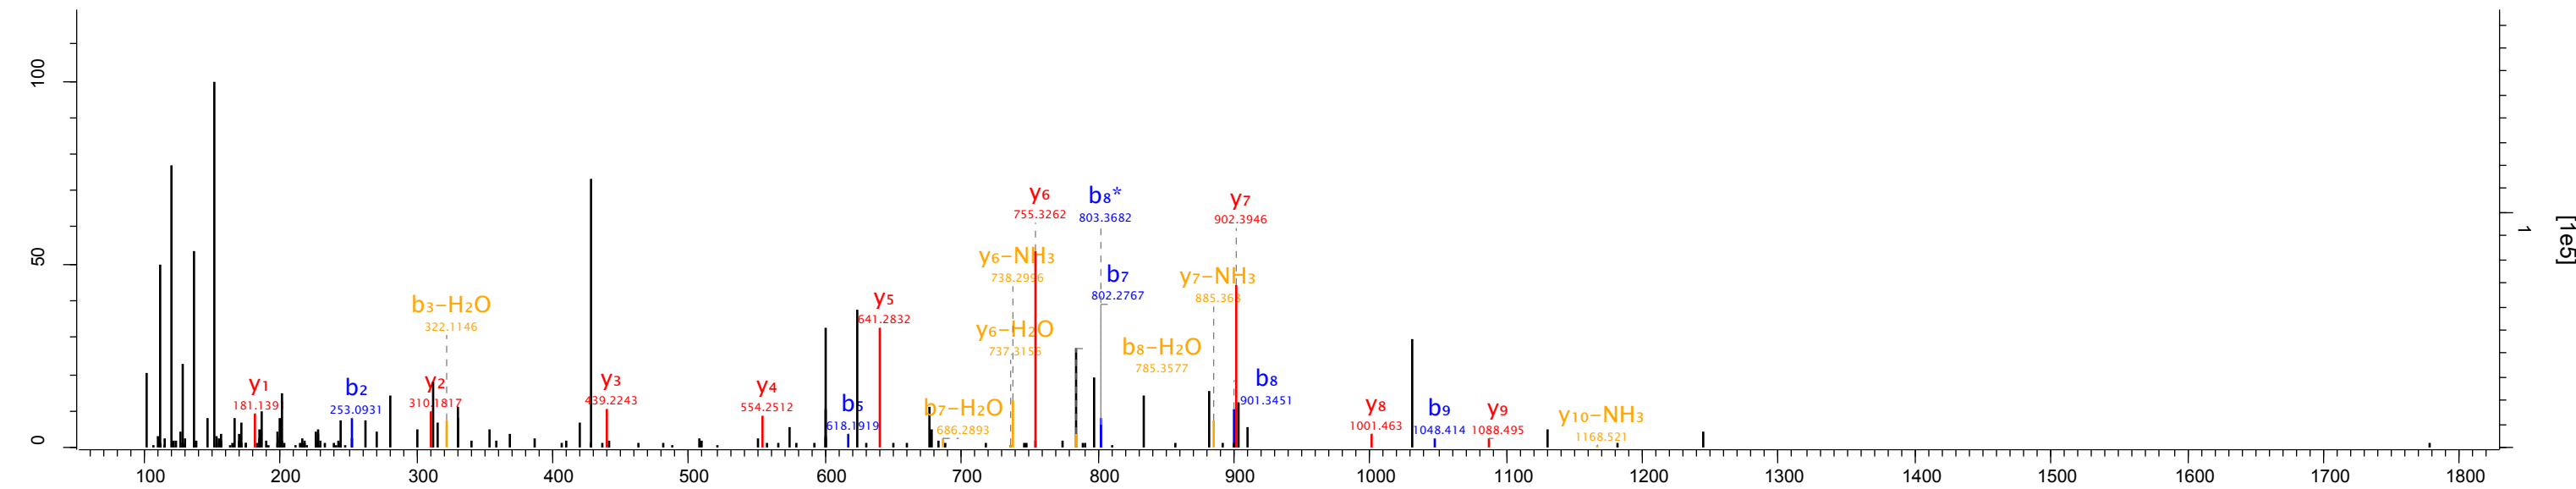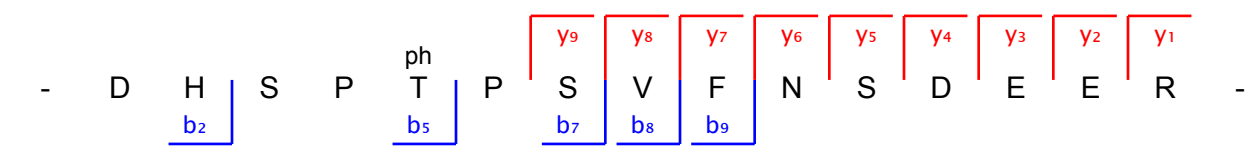

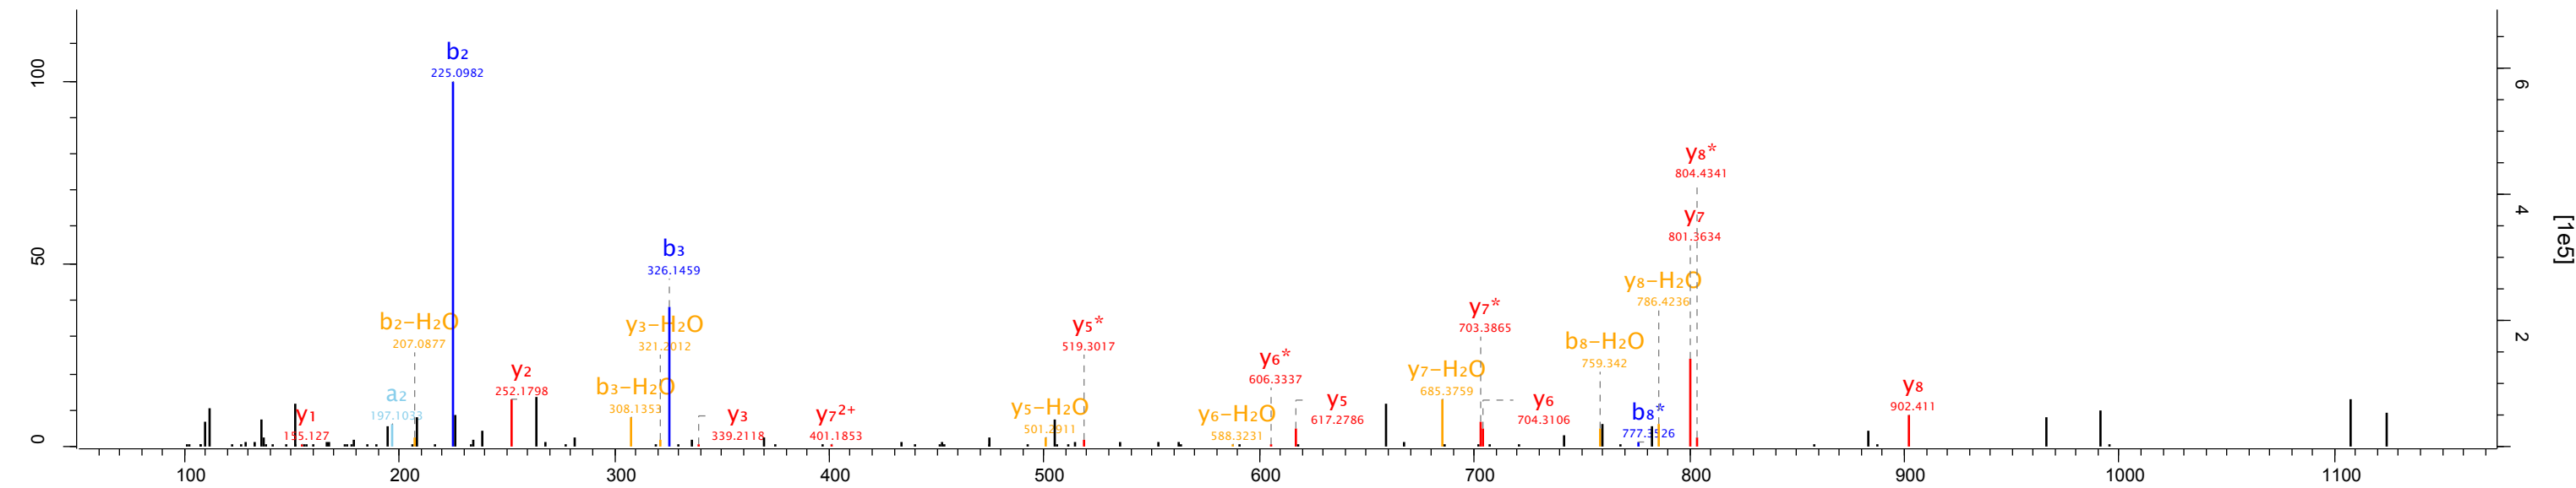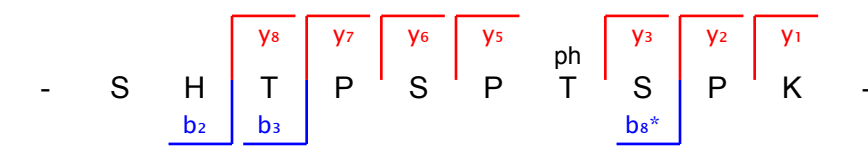

Raw file: 20171215\_MaS\_33SR\_LMH\_phospho2\_08  
 Scan: 2865 Method: FTMS; HCD Score: 55.84 m/z: 523.74 Gene names: NR3C1

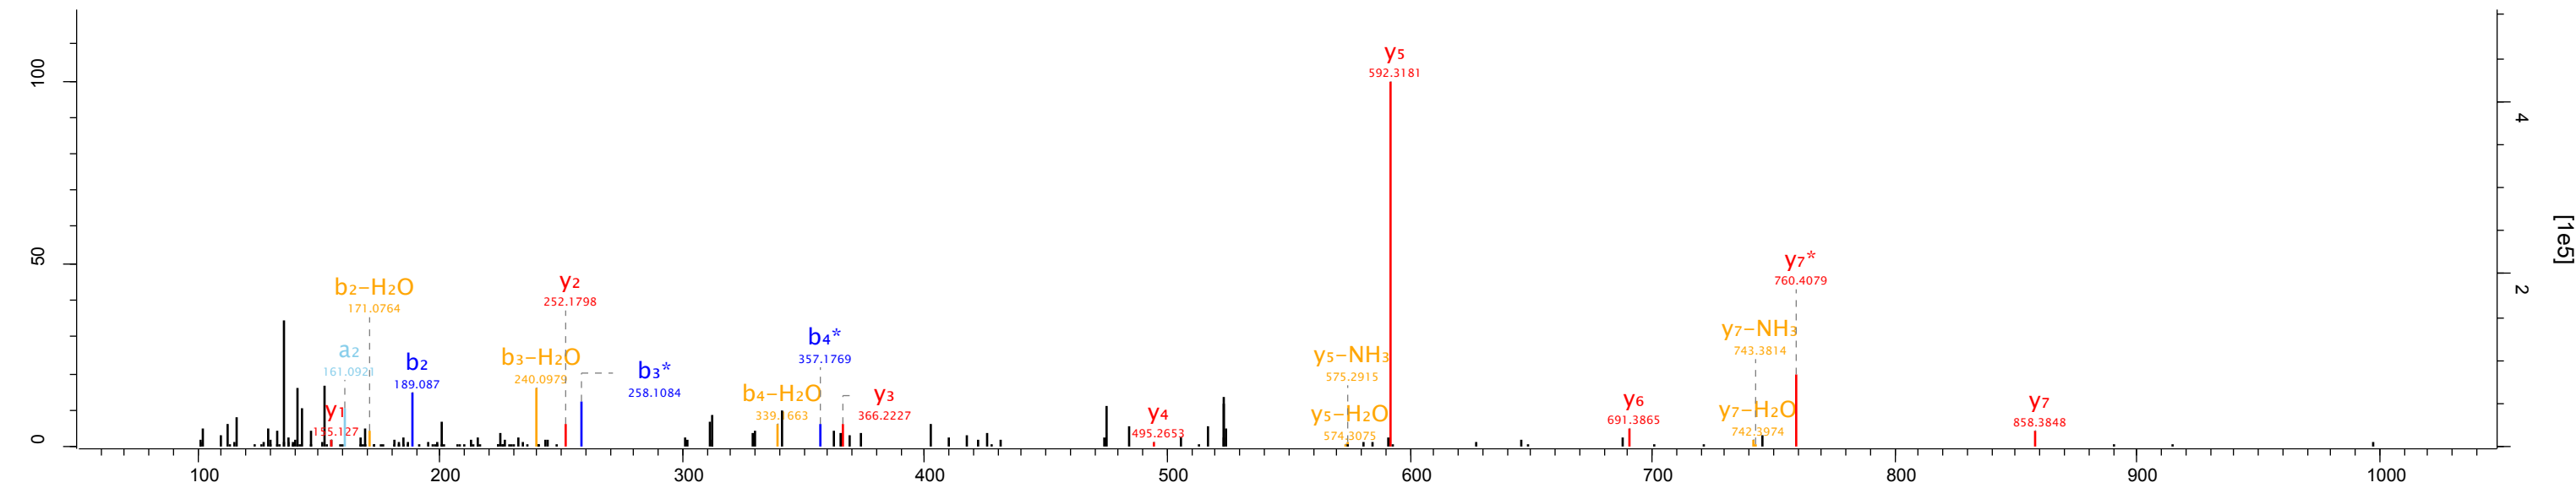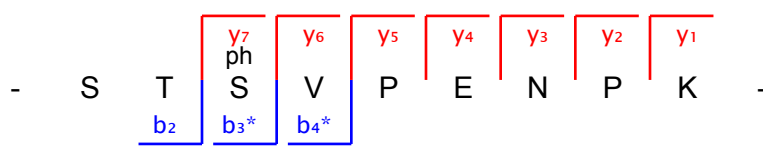

Raw file 20171215\_MaS\_33SR\_LMH\_phospho2\_08 Scan 3345 Method FTMS; HCD Score 139.32 m/z 490.2 Gene names MFF

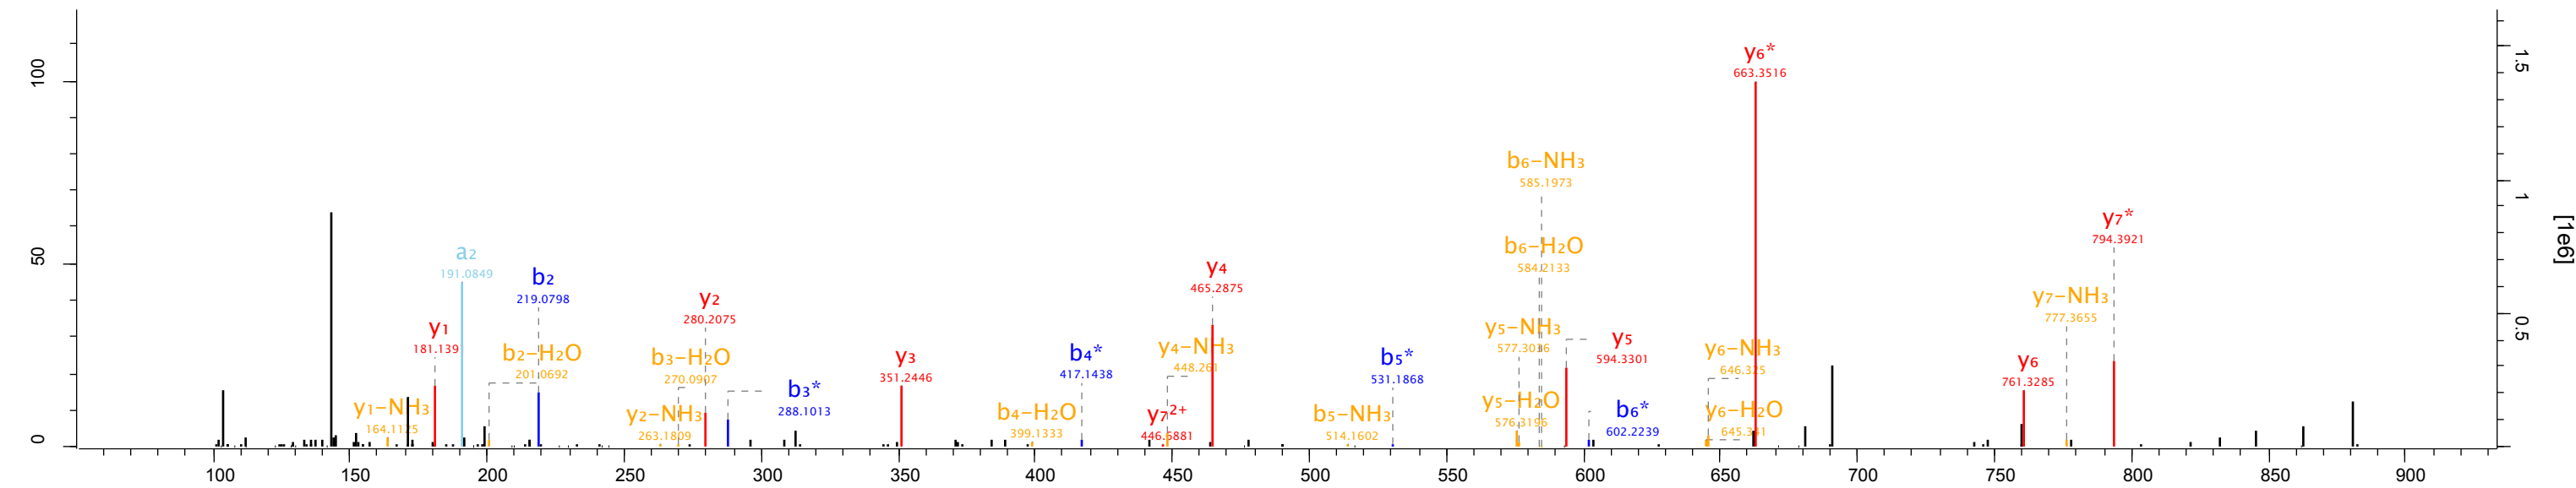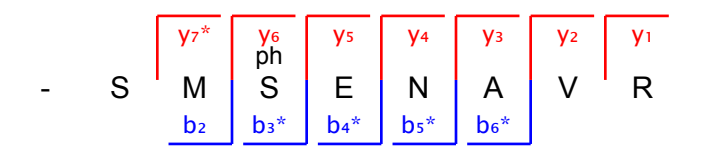



Raw file 20171215\_MaS\_33SR\_LMH\_phospho2\_08 Scan 3505 Method FTMS; HCD Score 86.55 m/z 634.27

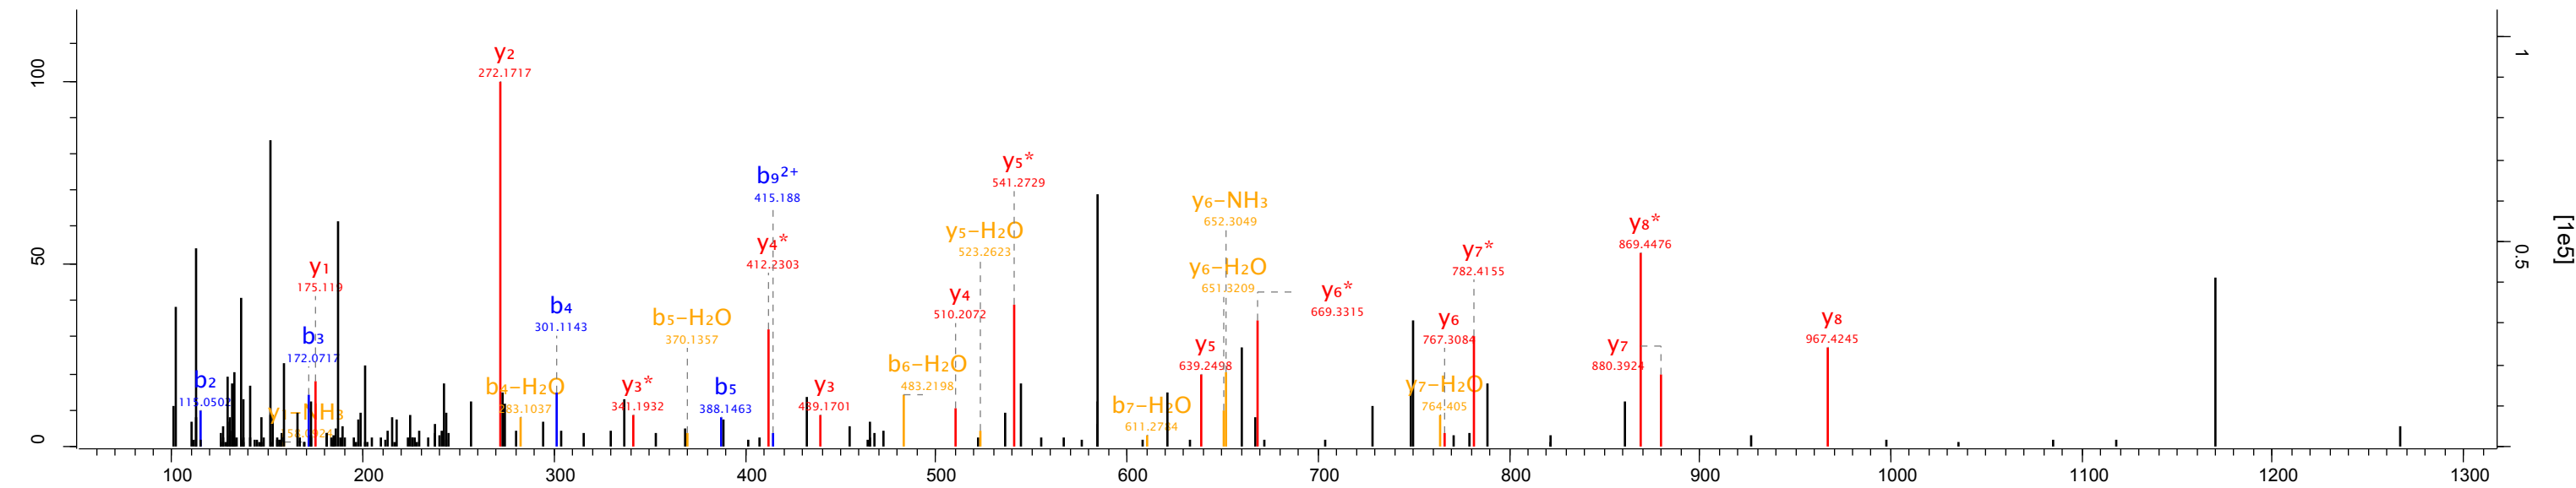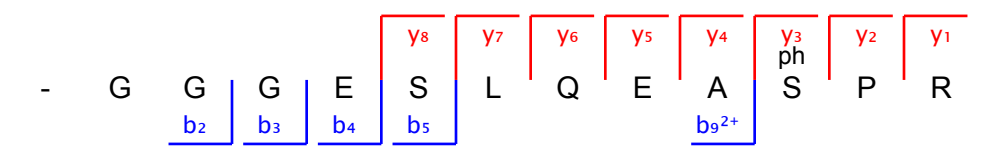

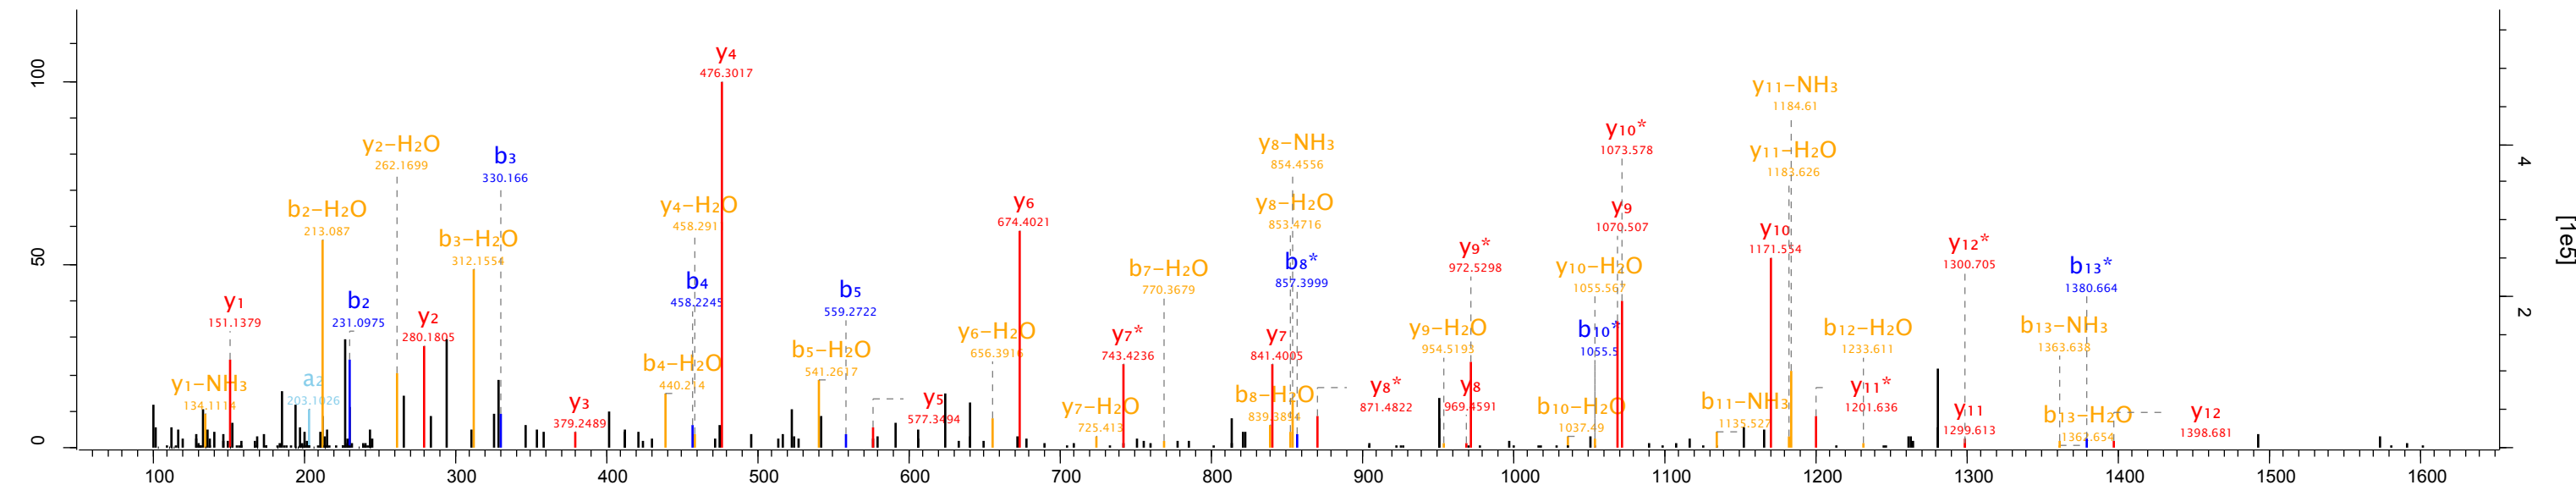

- E T V Q T T Q ph S P T P V E K -

b<sub>2</sub> b<sub>3</sub> b<sub>4</sub> b<sub>5</sub> b<sub>8</sub>\* b<sub>10</sub>\* b<sub>13</sub>\*

y<sub>12</sub> y<sub>11</sub> y<sub>10</sub> y<sub>9</sub> y<sub>8</sub> y<sub>7</sub> y<sub>6</sub> y<sub>5</sub> y<sub>4</sub> y<sub>3</sub> y<sub>2</sub> y<sub>1</sub>

Raw file 20171215\_MaS\_33SR\_LMH\_phospho2\_08 Scan 5615 Method FTMS; HCD Score 56.68 m/z 1082 Gene names CCDC9

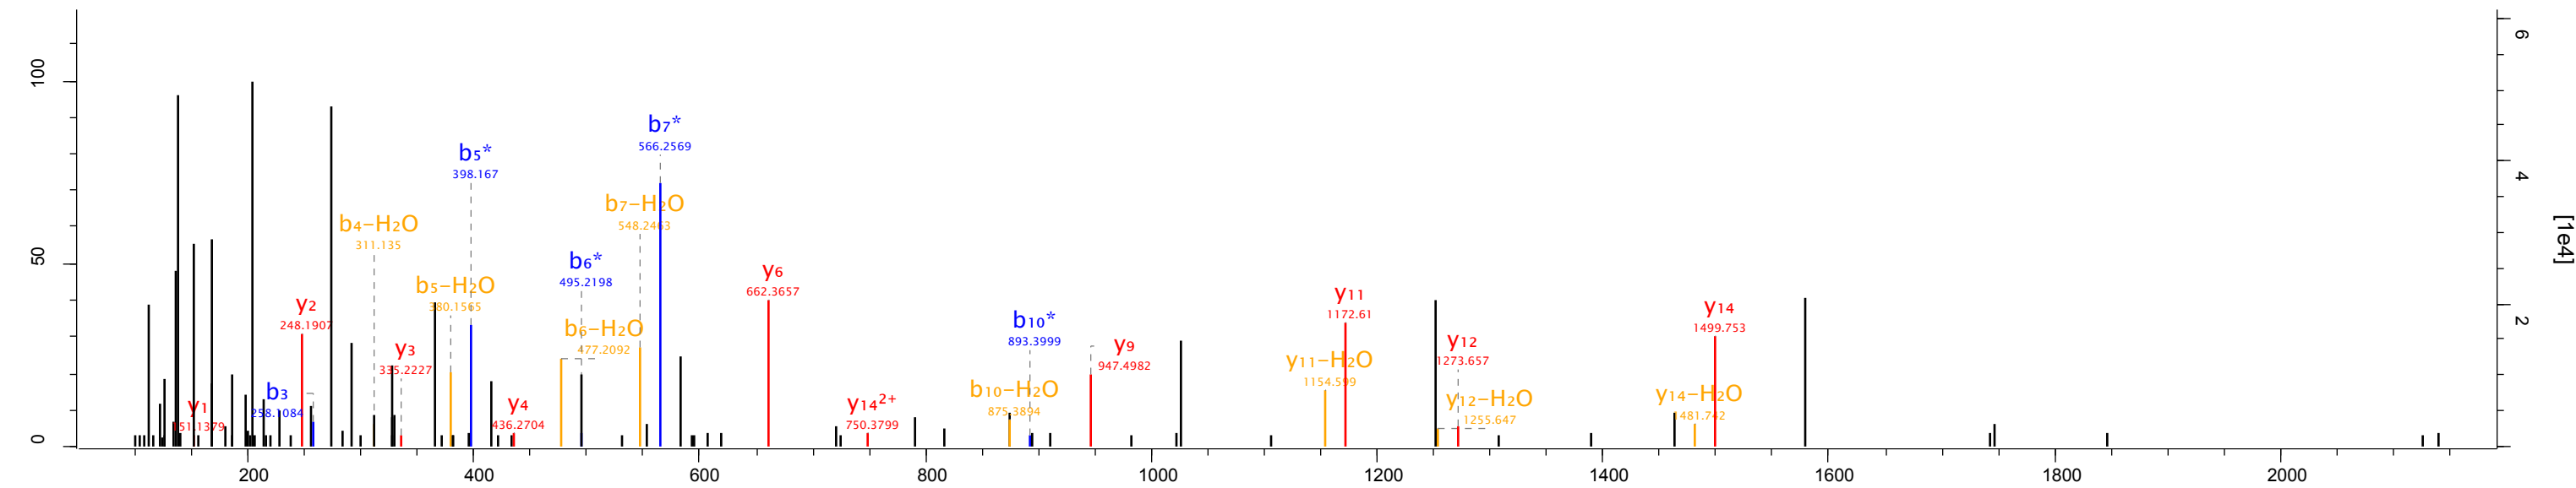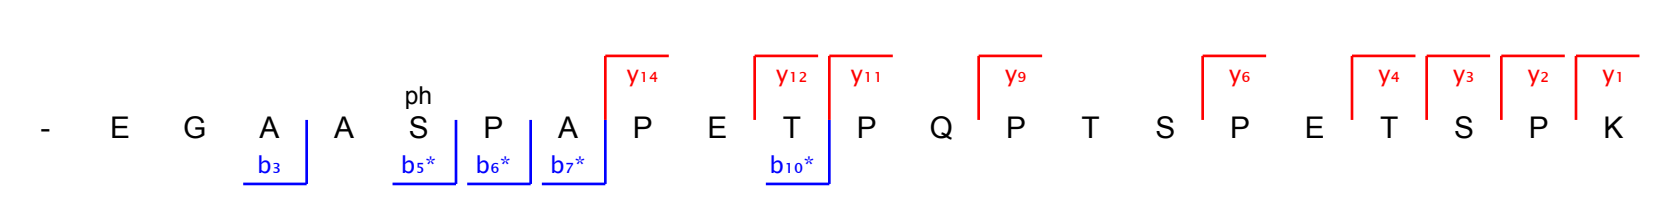

Raw file 20171215\_MaS\_33SR\_LMH\_phospho2\_09 Scan 2545 Method FTMS; HCD Score 144.55 m/z 727.89 Gene names CC2D1A

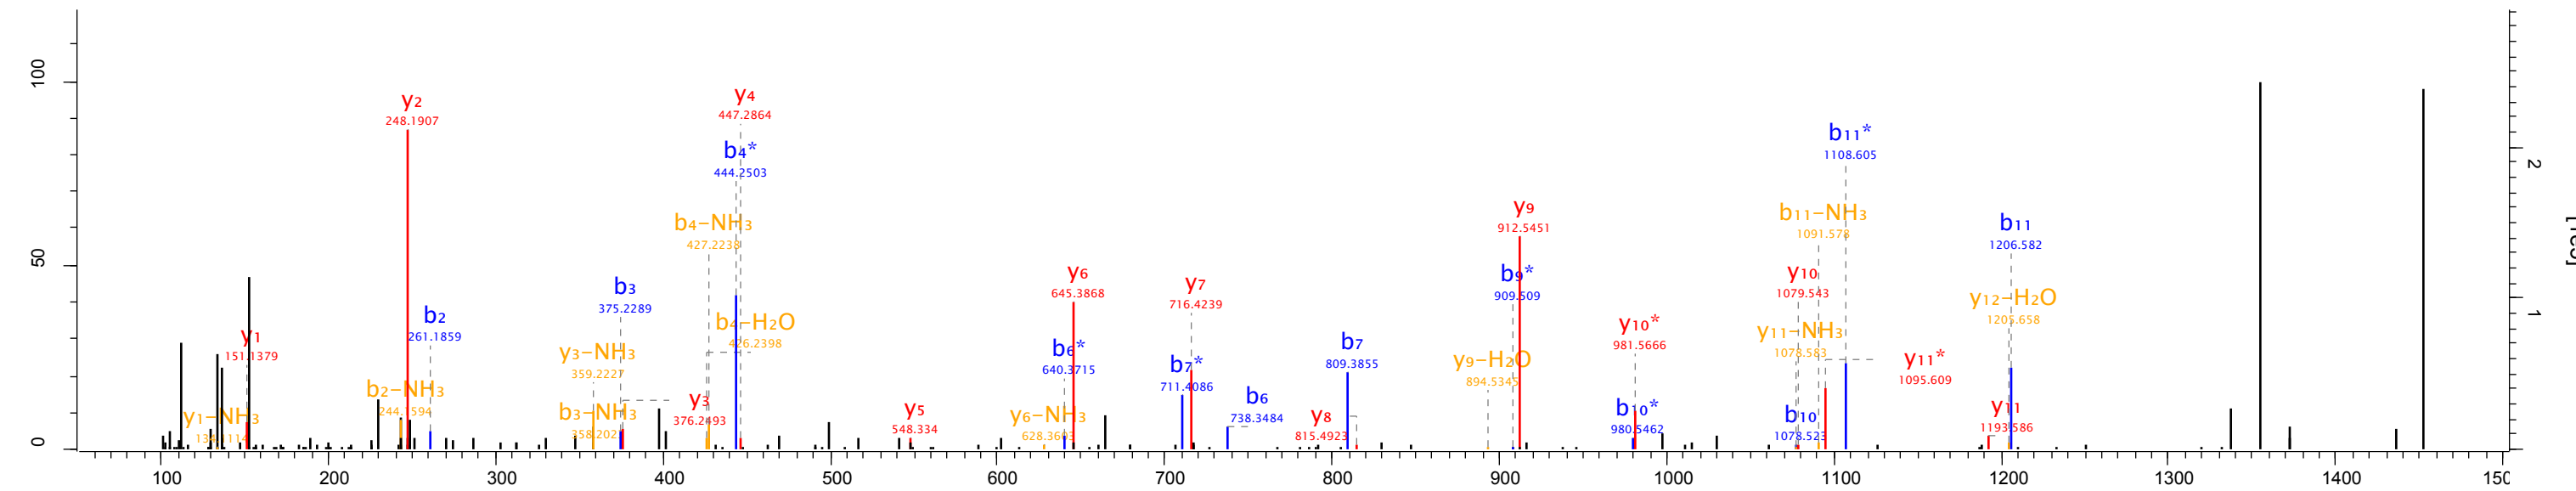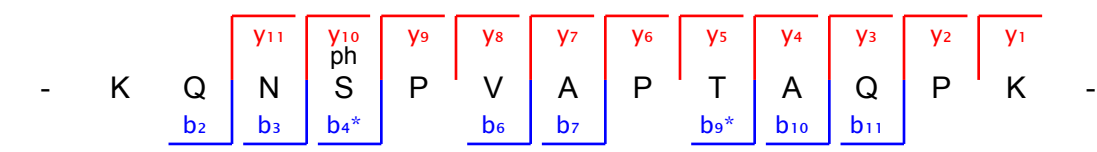

Raw file 20171215\_MaS\_33SR\_LMH\_phospho2\_09 Scan 3575 Method FTMS; HCD Score 72.61 m/z 543.26 Gene names PHF14

20171215\_MaS\_33SR\_LMH\_phospho2\_09

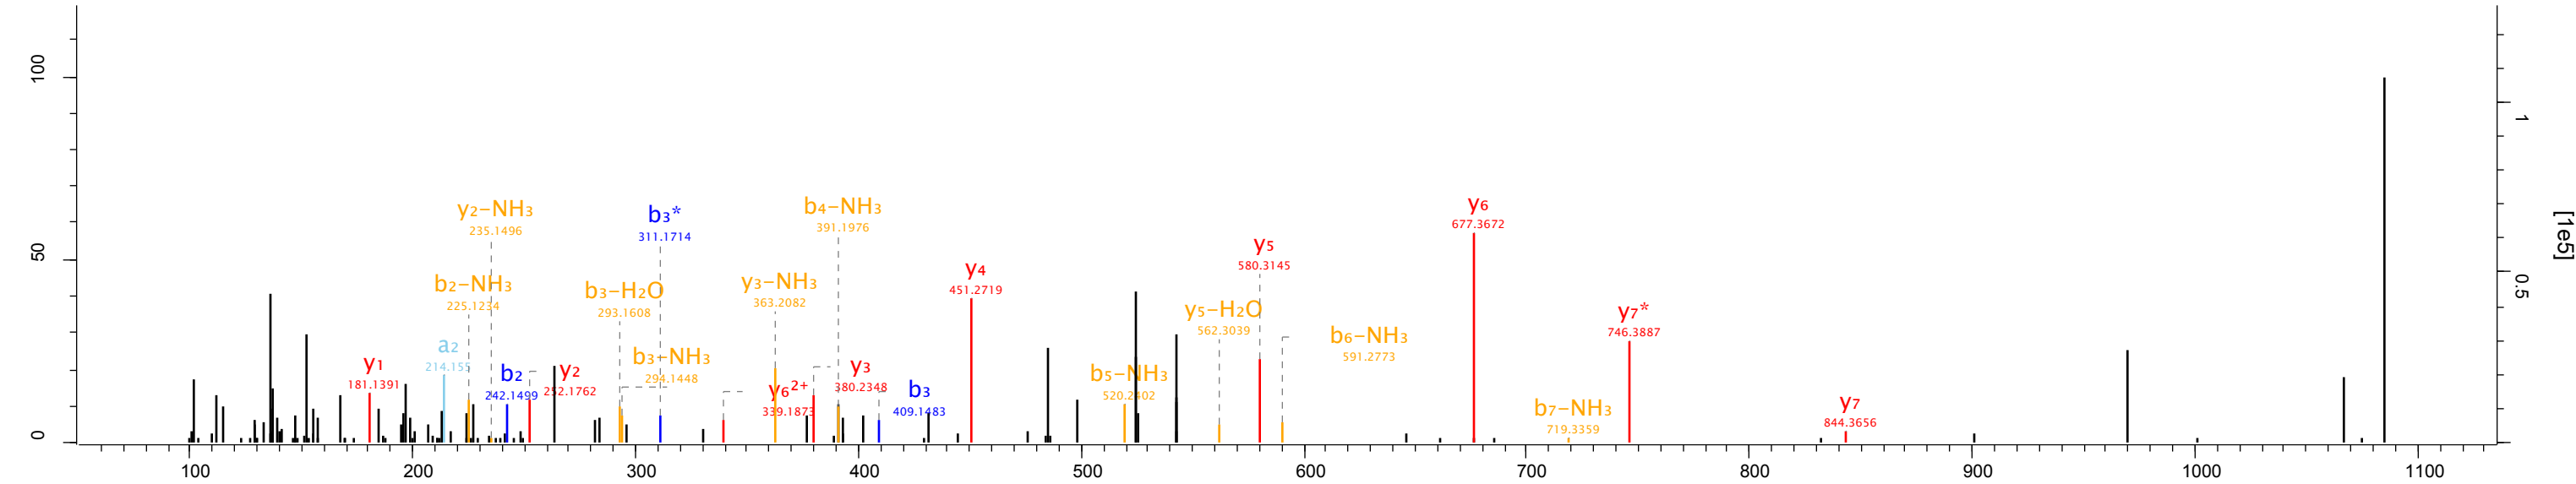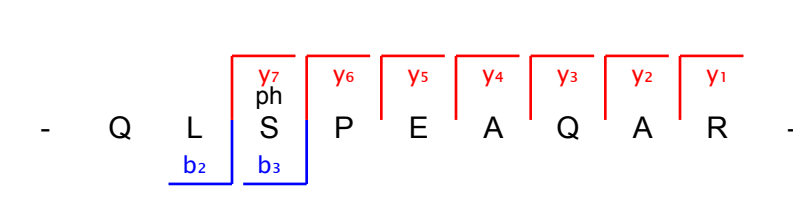

Raw file 20171215\_MaS\_33SR\_LMH\_phospho2\_09 Scan 3585 Method FTMS; HCD Score 82.03 m/z 411.18 Gene names BTN2A2;BTN2A1

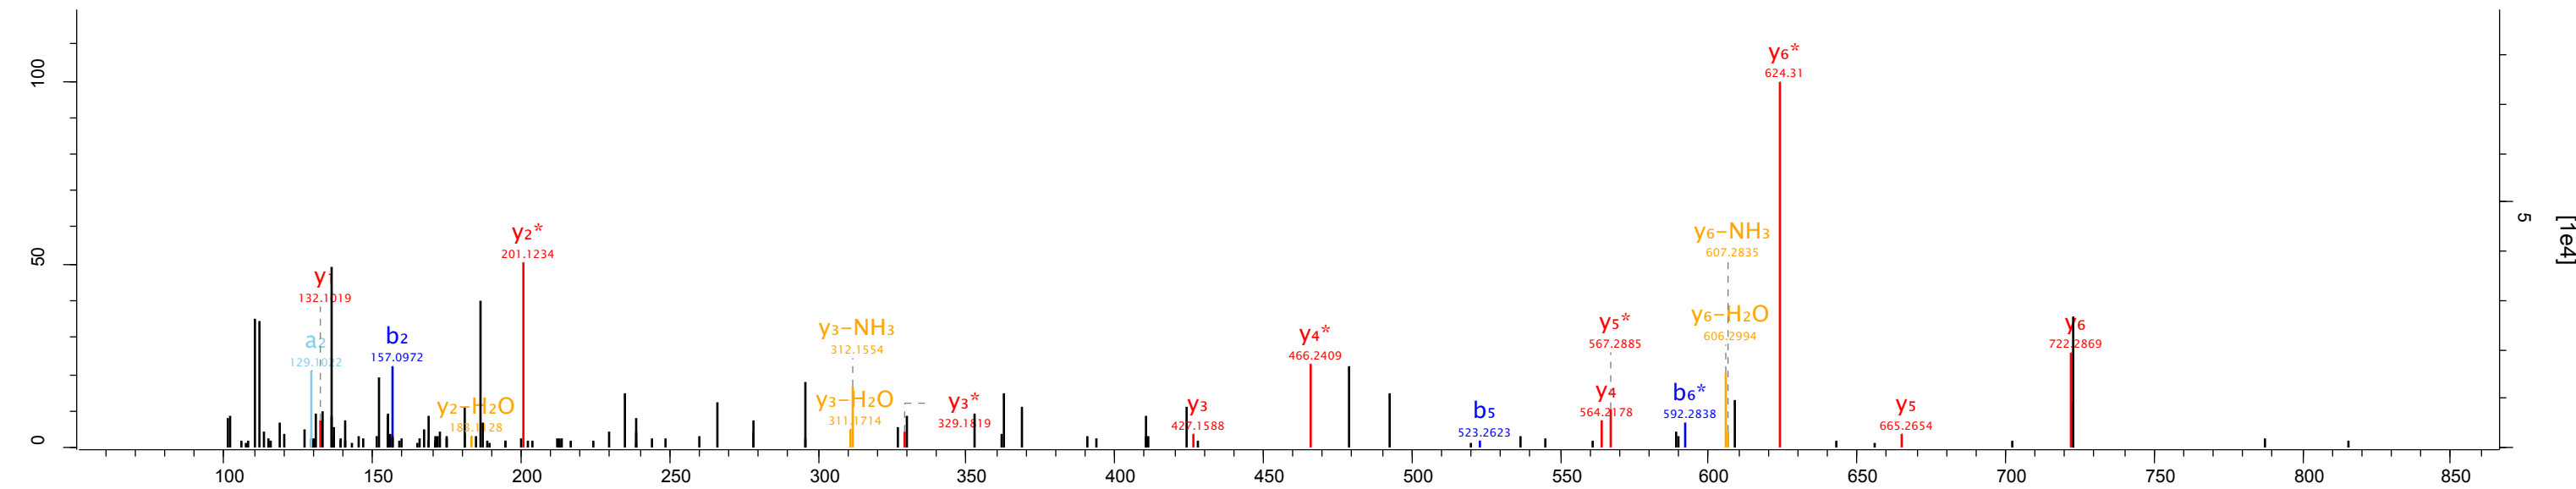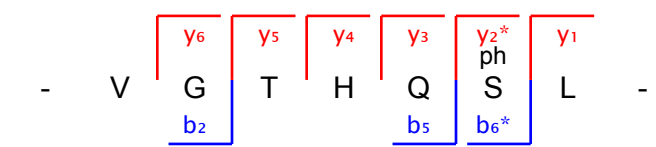

Raw file Scan Method Score m/z Gene names

20171215\_MaS\_33SR\_LMH\_phospho2\_09 3655 FTMS; HCD 167.03 625.77 PLEC

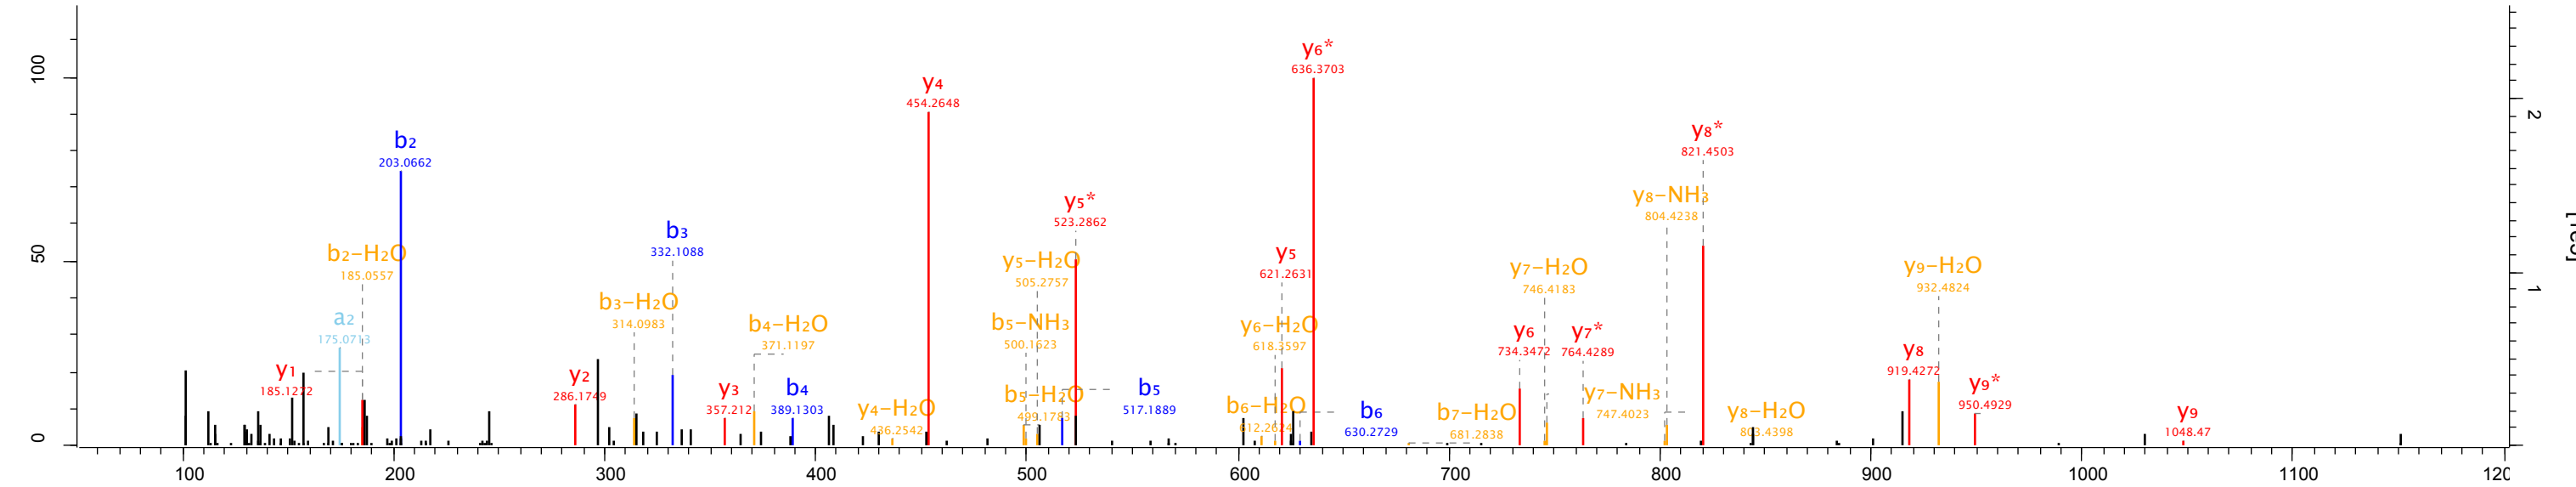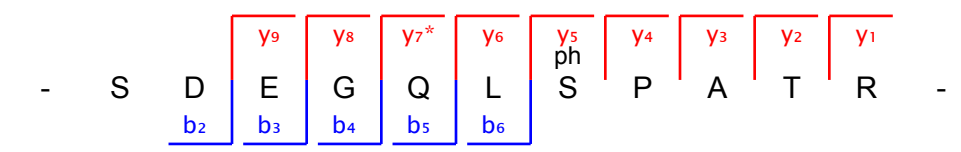

Raw file 20171215\_MaS\_33SR\_LMH\_phospho2\_09 Scan 3775 Method FTMS; HCD Score 70.54 m/z 533.27 Gene names NUP155

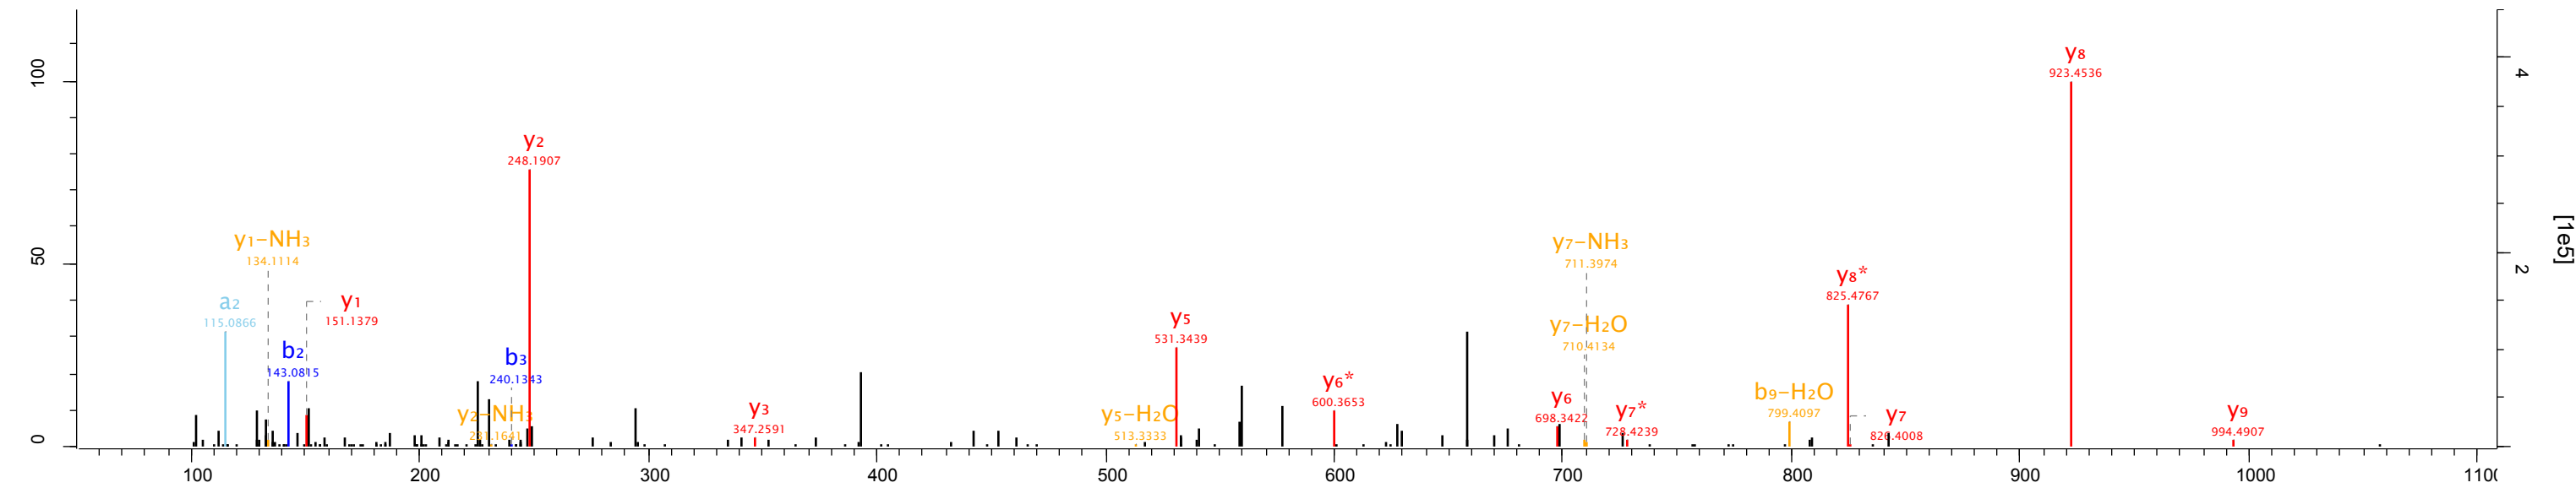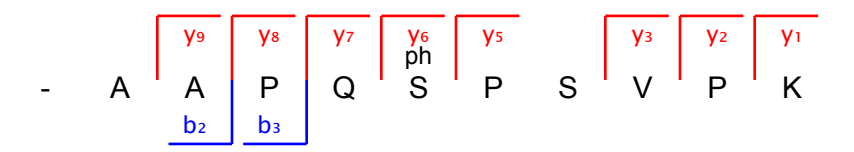



Raw file 20171215\_MaS\_33SR\_LMH\_phospho2\_09 Scan 4395 Method FTMS; HCD Score 59.04 m/z 437.7 Gene names NUP153

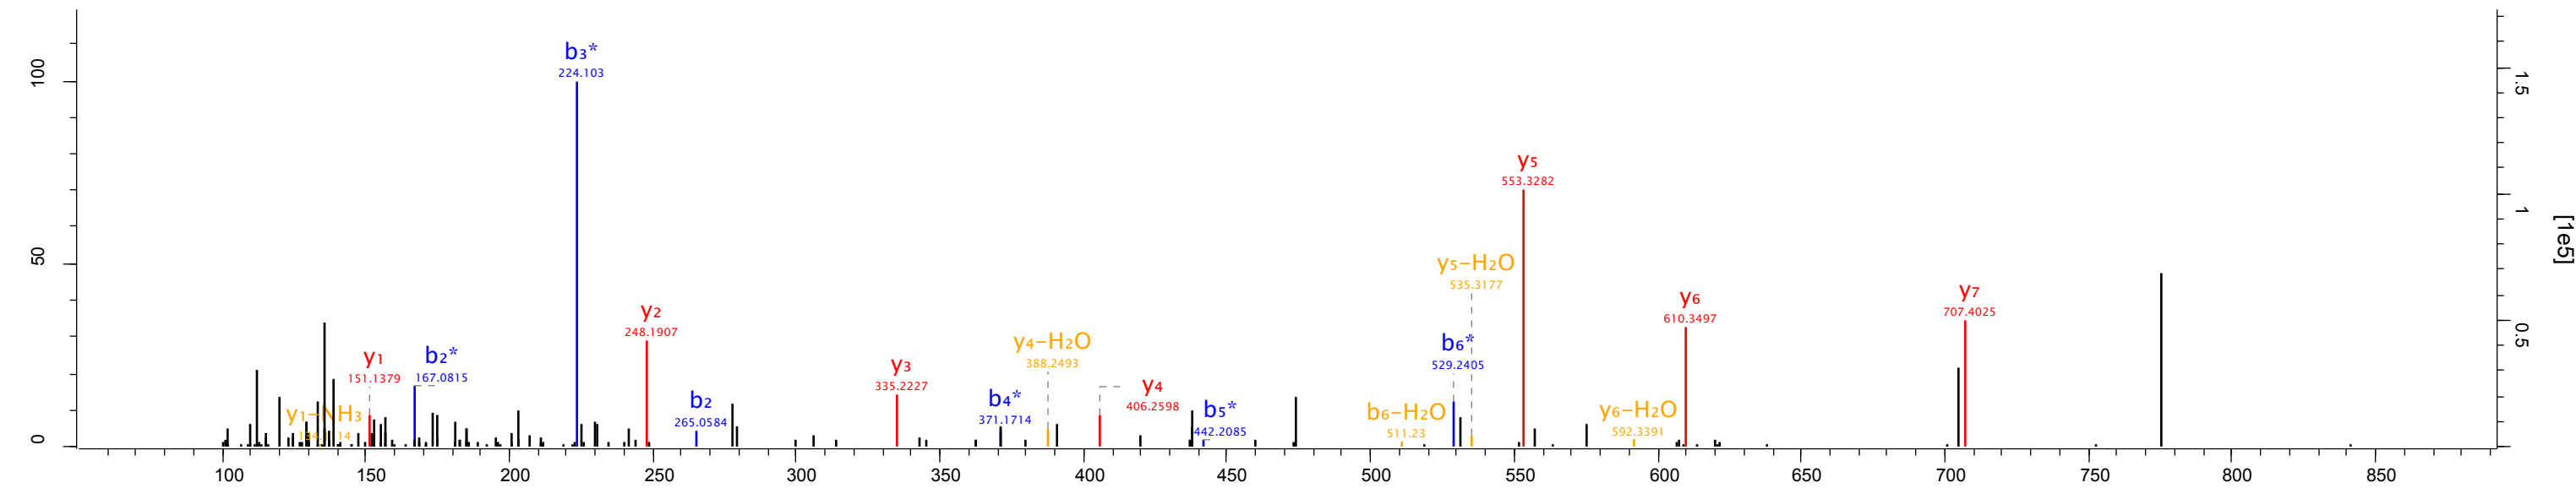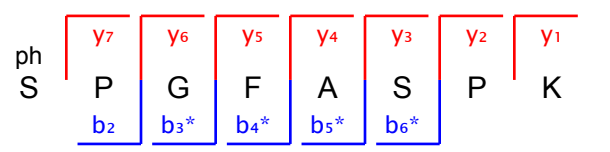

Raw file

20171215\_MaS\_33SR\_LMH\_phospho2\_09

| Scan | Method    | Score | m/z    | Gene names |
|------|-----------|-------|--------|------------|
| 4465 | FTMS; HCD | 40.28 | 544.27 | SSFA2      |

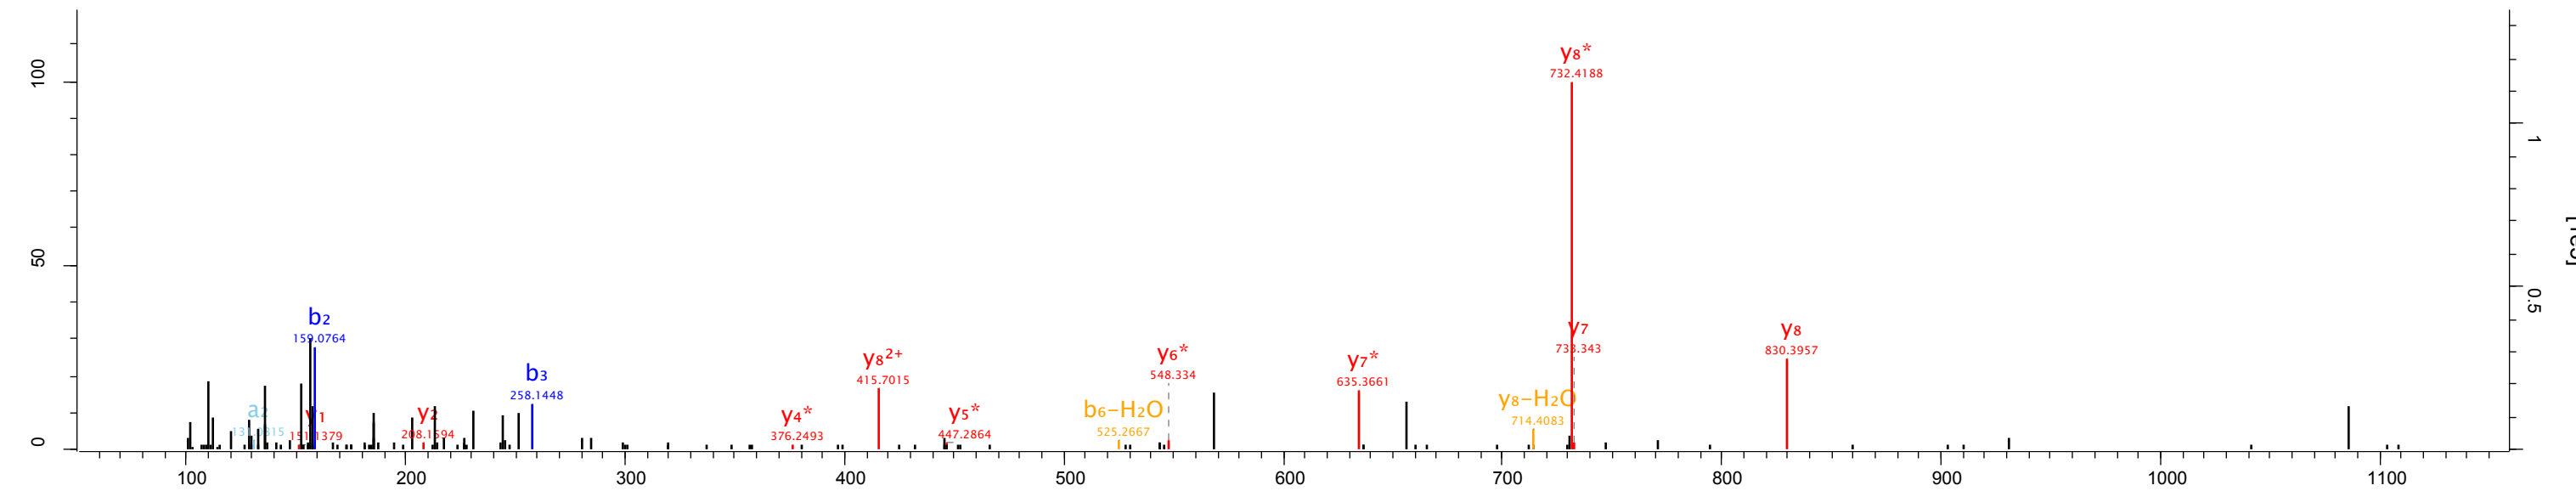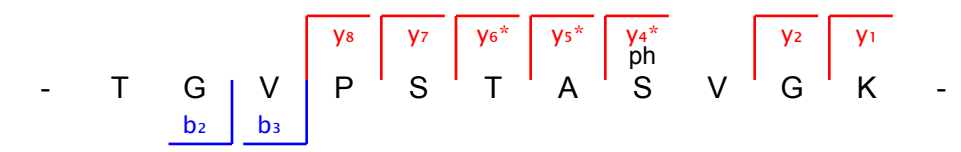

Raw file 20171215\_MaS\_33SR\_LMH\_phospho2\_09 Scan 5945 Method FTMS; HCD Score 112.14 m/z 773.34 Gene names C9orf40

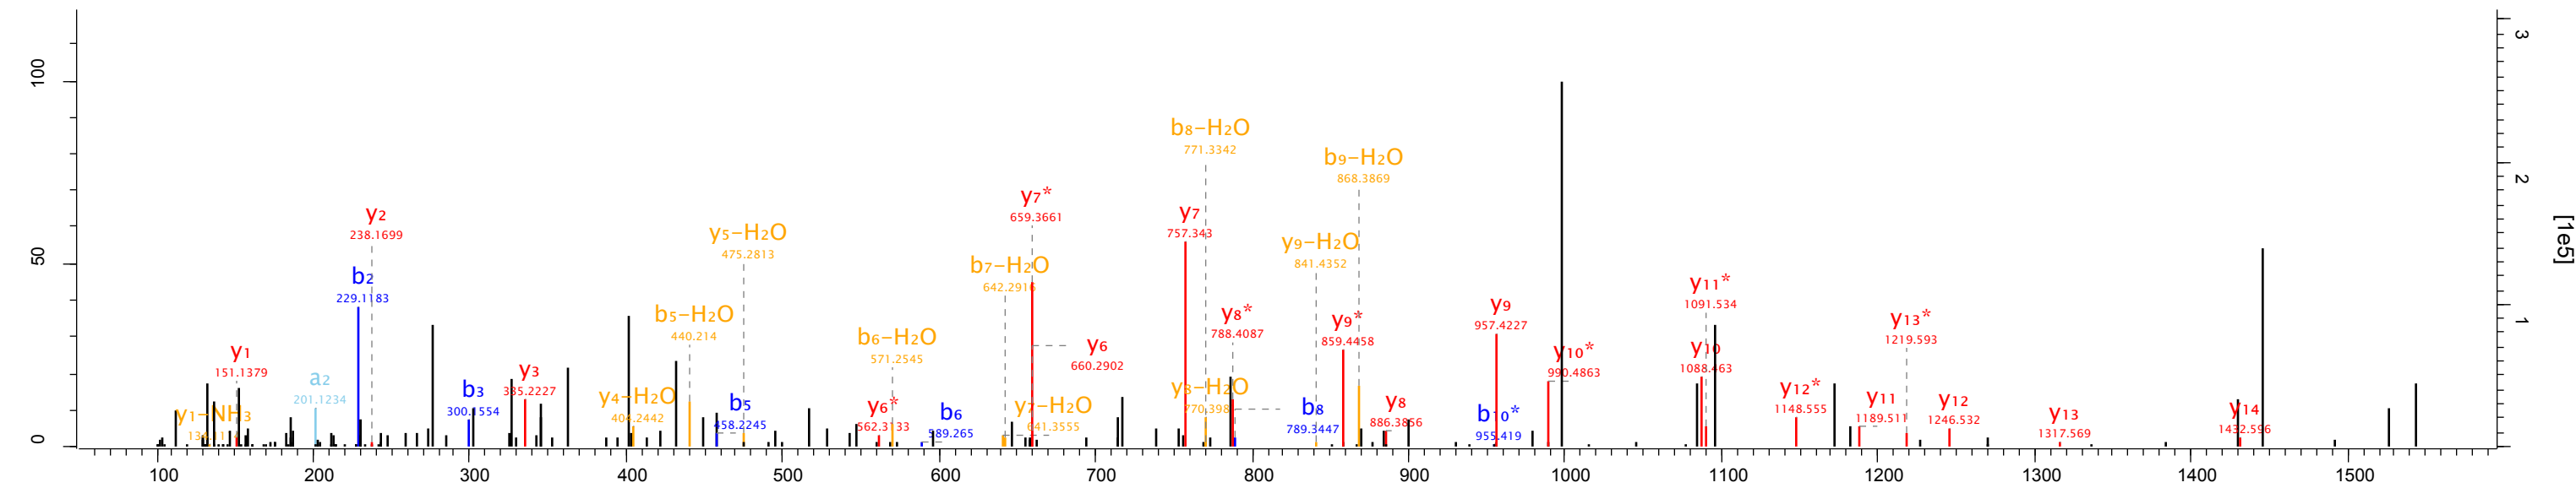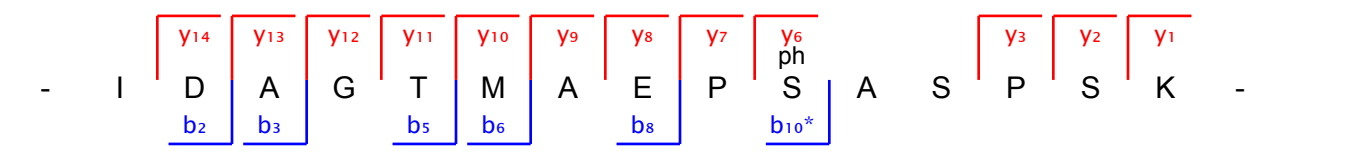

Raw file 20171215\_MaS\_33SR\_LMH\_phospho2\_09 Scan 8125 Method FTMS; HCD Score 54.74 m/z 776.38 Gene names DUT

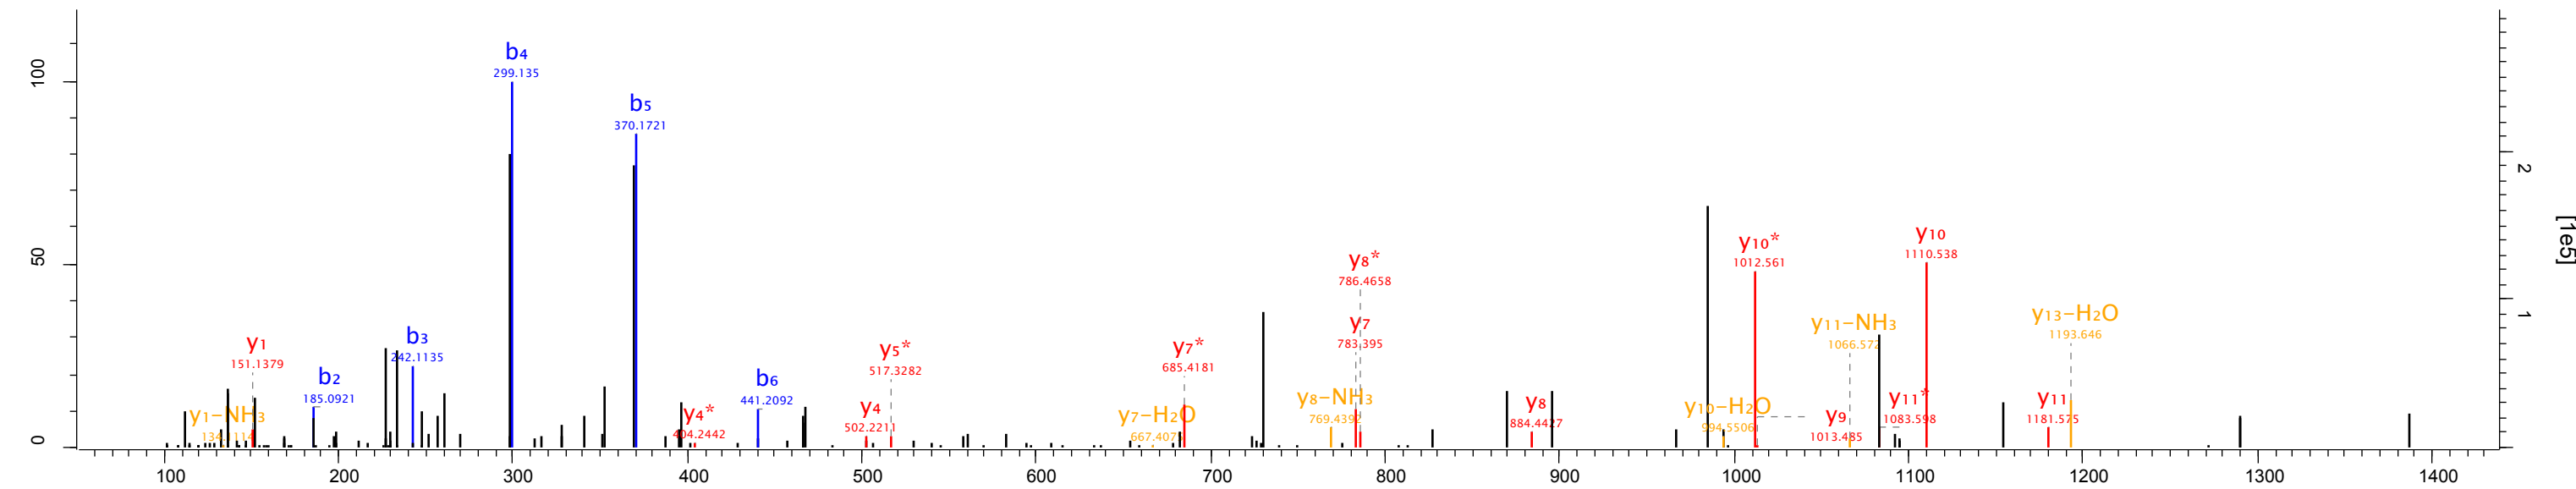

ac  
 - A A G G A A P E T P A I S P S K -  
 b<sub>2</sub> b<sub>3</sub> b<sub>4</sub> b<sub>5</sub> b<sub>6</sub> y<sub>11</sub> y<sub>10</sub> y<sub>9</sub> y<sub>8</sub> y<sub>7</sub> y<sub>5</sub>\* y<sub>4</sub> y<sub>1</sub>

Raw file: 20171215\_MaS\_33SR\_LMH\_proteome\_01  
 Scan: 131215 Method: FTMS; HCD Score: 57.69 m/z: 1089.98 Gene names: MYL12A;MYL12B;MYL9

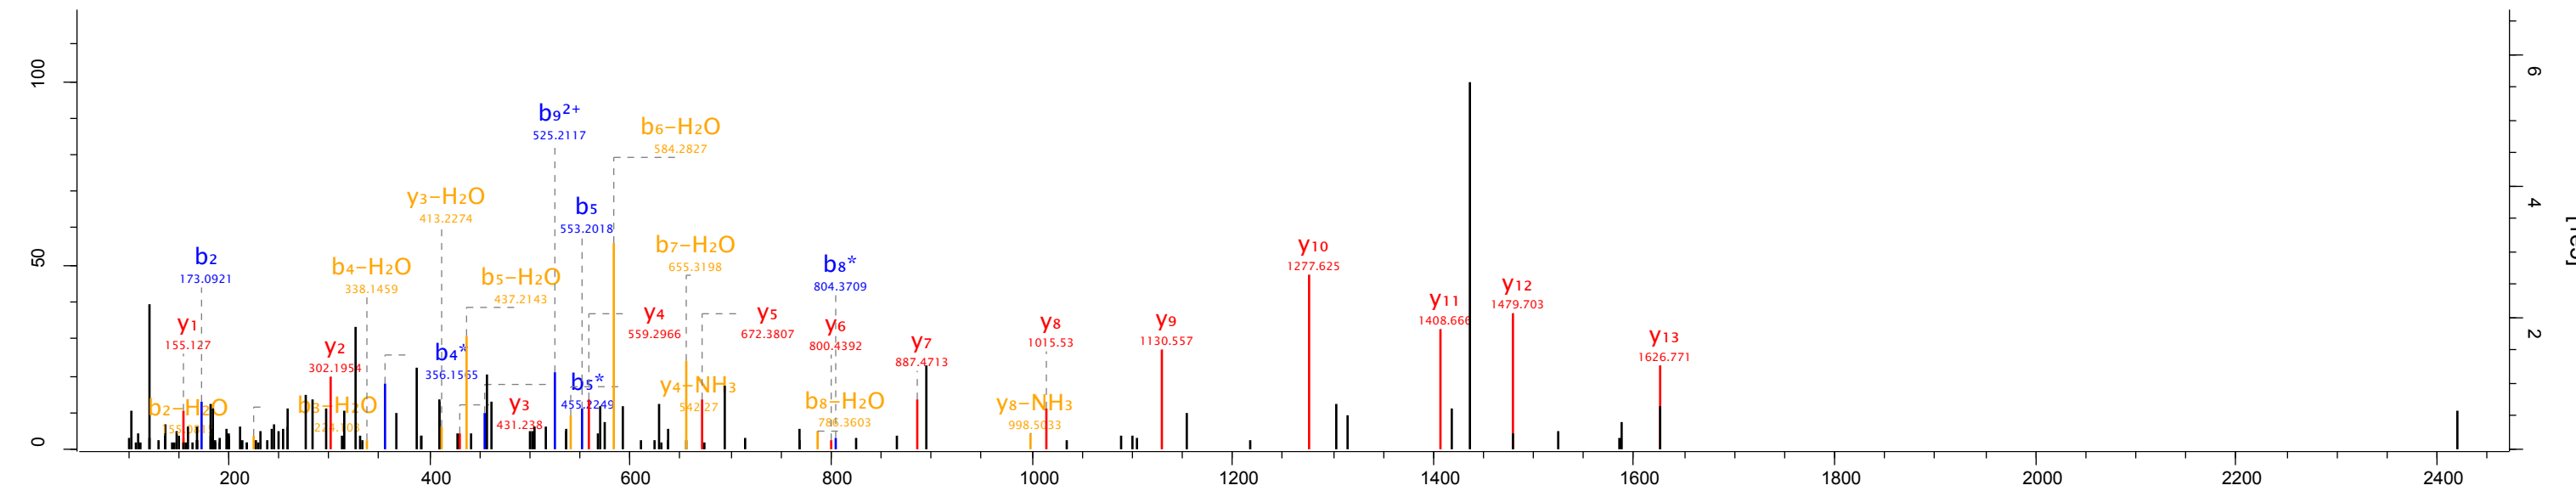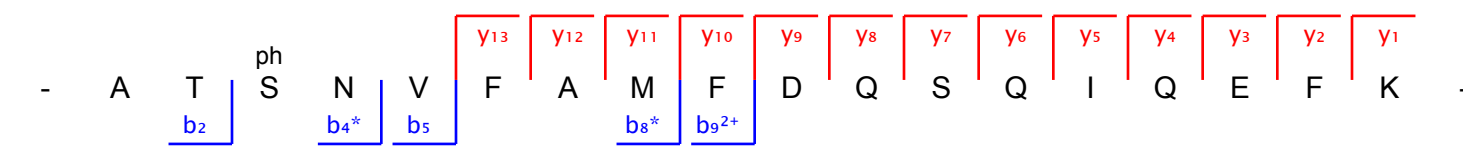

Raw file 20171215\_MaS\_33SR\_LMH\_proteome\_01 Scan 4025 Method FTMS; HCD Score 44.86 m/z 571.76 Gene names RGL2

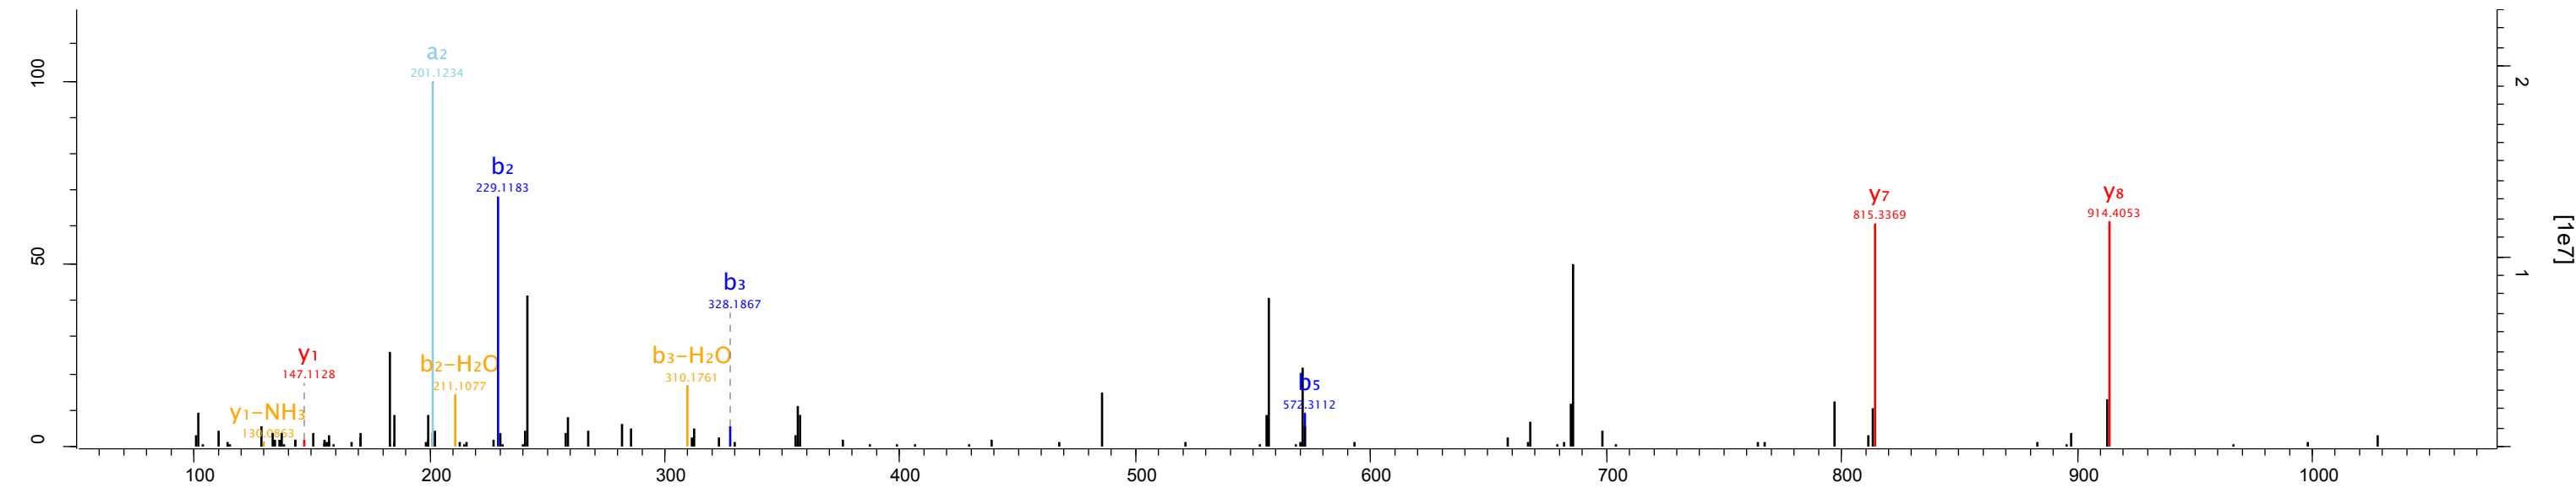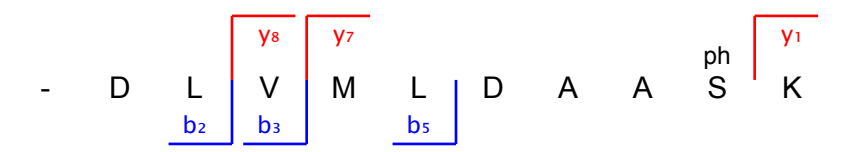

Raw file: 20171215\_MaS\_33SR\_LMH\_proteome\_01  
 Scan: 72195 Method: FTMS; HCD Score: 45.08 m/z: 482.78 Gene names: ARMCX5

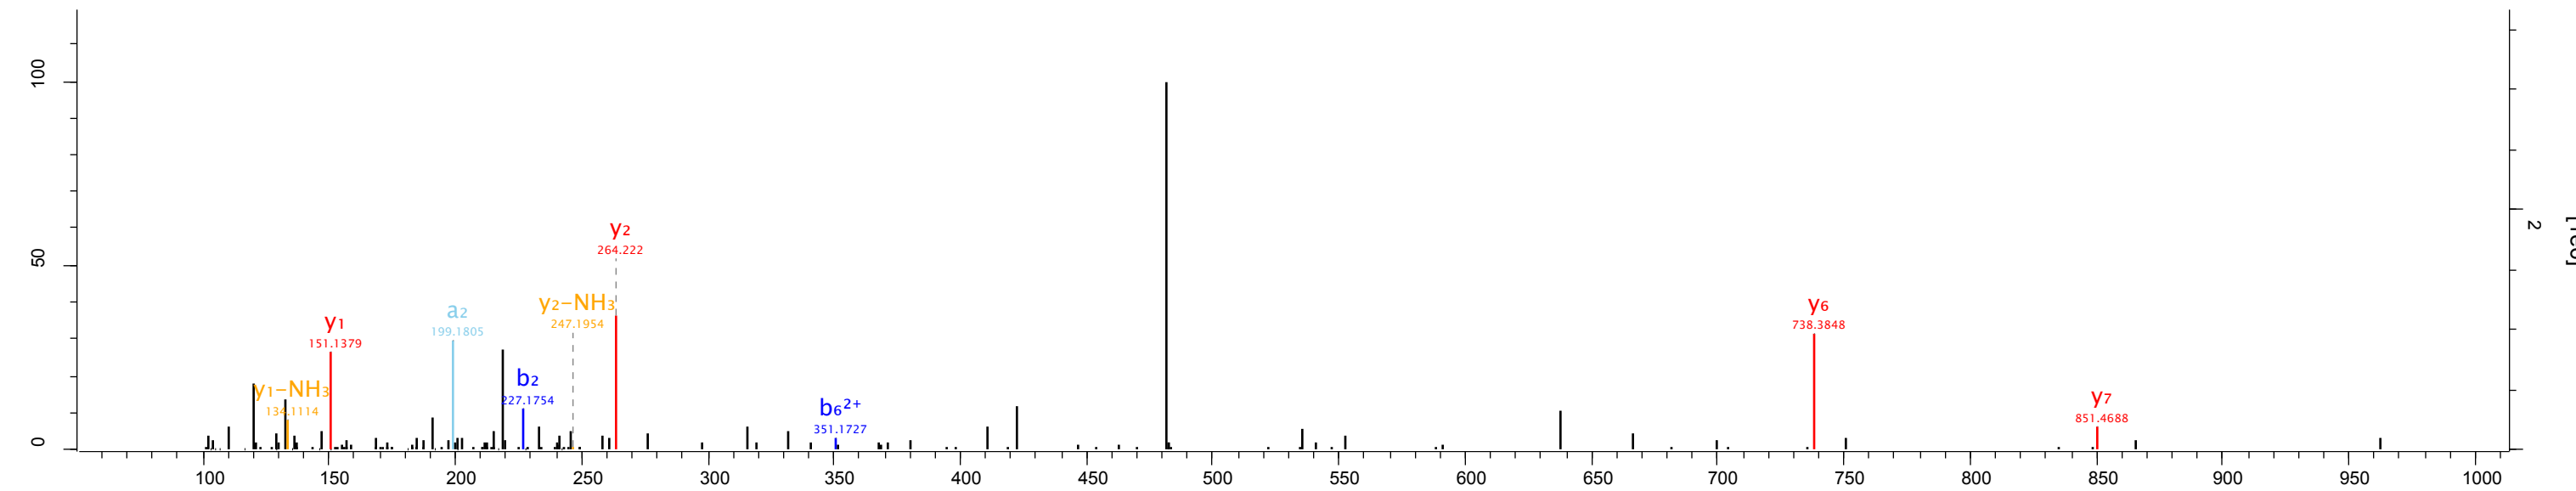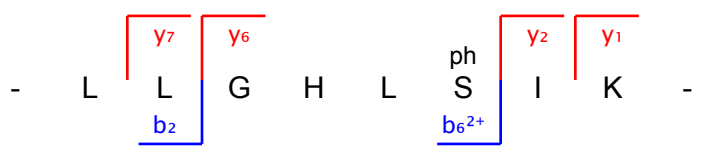

Raw file 20171215\_MaS\_33SR\_LMH\_proteome\_01 Scan 85595 Method FTMS; HCD Score 70.95 m/z 905.22 Gene names YAP1

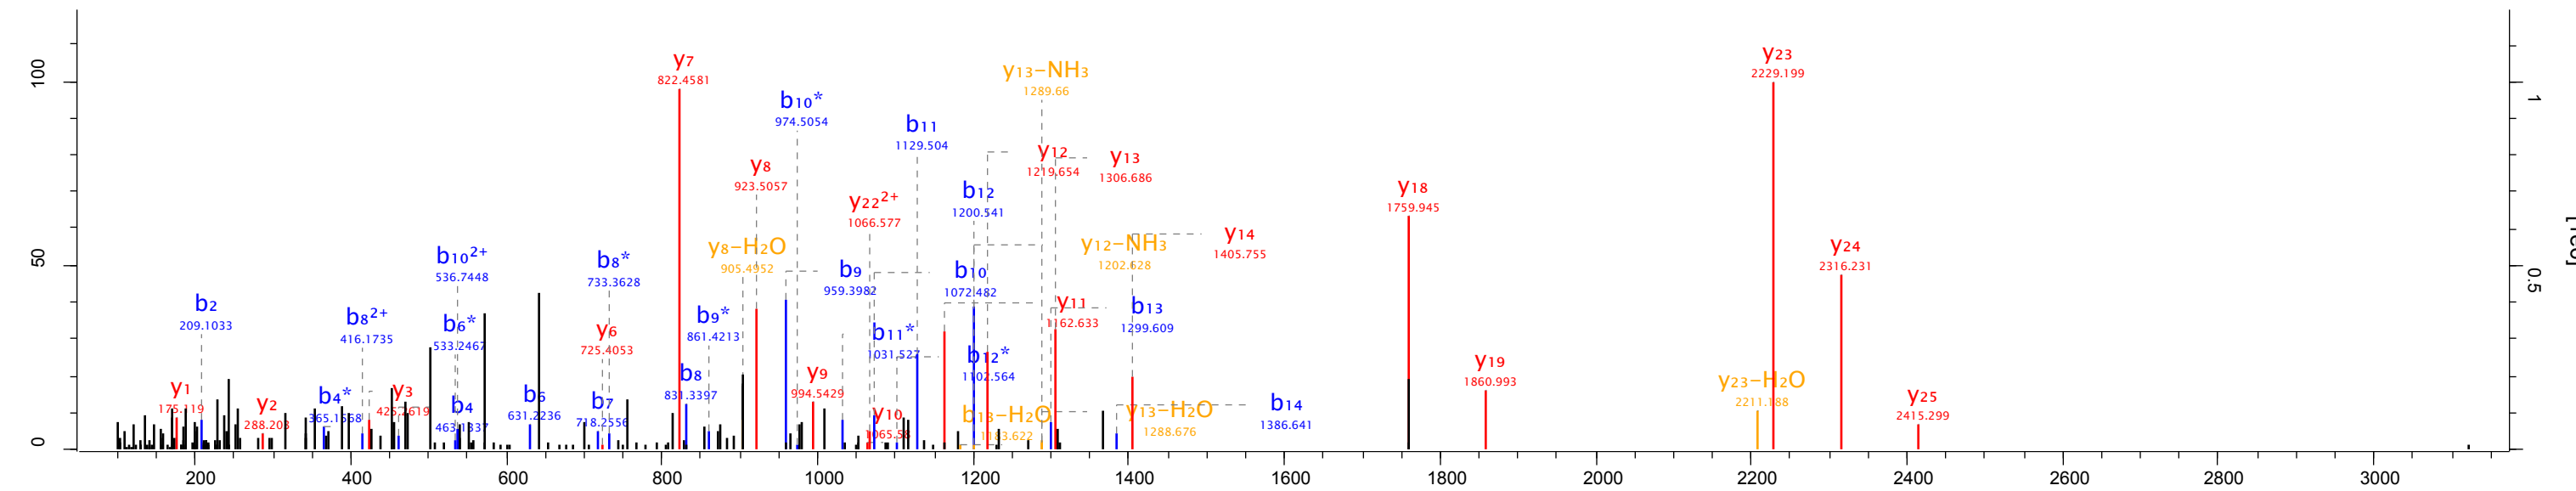

- A H S S P A S L Q L G A V S P G T L T P T G V V S G P A A T P T A Q H L R -

b<sub>2</sub>
b<sub>4</sub>
b<sub>6</sub>
b<sub>7</sub>
b<sub>8</sub>
b<sub>9</sub>
b<sub>10</sub>
b<sub>11</sub>
b<sub>12</sub>
b<sub>13</sub>
b<sub>14</sub>
y<sub>25</sub>
y<sub>24</sub>
y<sub>23</sub>
y<sub>22</sub><sup>2+</sup>
y<sub>19</sub>
y<sub>18</sub>
y<sub>14</sub>
y<sub>13</sub>
y<sub>12</sub>
y<sub>11</sub>
y<sub>10</sub>
y<sub>9</sub>
y<sub>8</sub>
y<sub>7</sub>
y<sub>6</sub>
y<sub>3</sub>
y<sub>2</sub>
y<sub>1</sub>



Raw file 20171215\_MaS\_33SR\_LMH\_proteome\_02 Scan 11075 Method FTMS; HCD Score 40.73 m/z 666.31

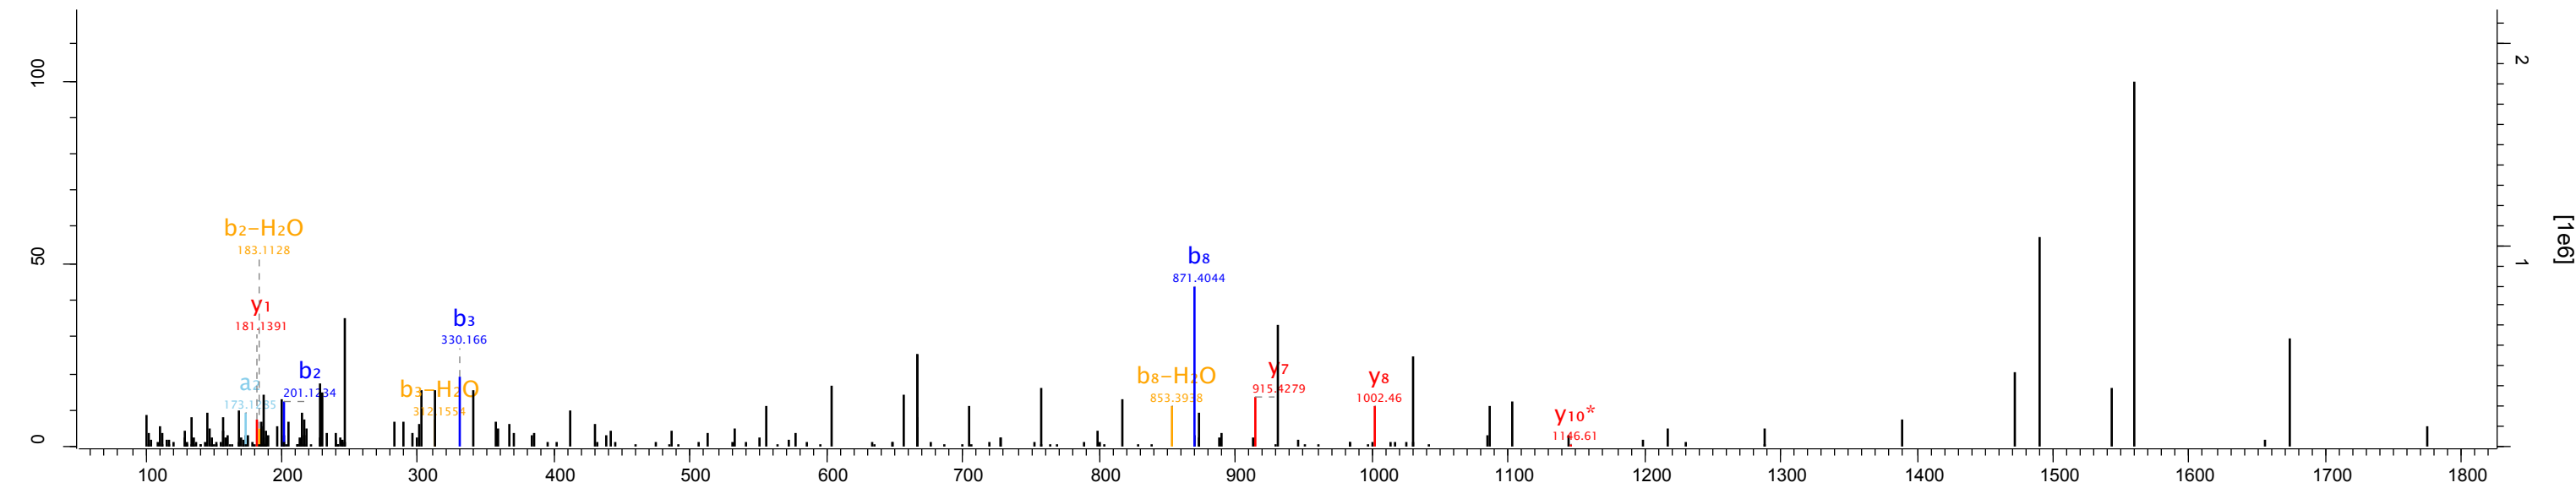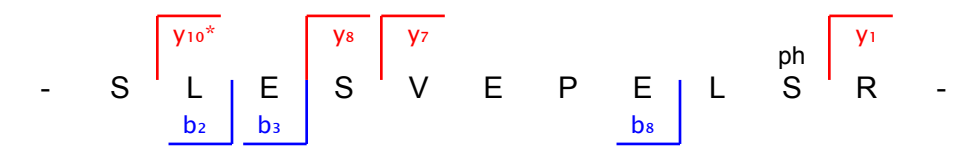

Raw file: 20171215\_MaS\_33SR\_LMH\_proteome\_02  
 Scan: 119645 Method: FTMS; HCD Score: 47.06 m/z: 701.91

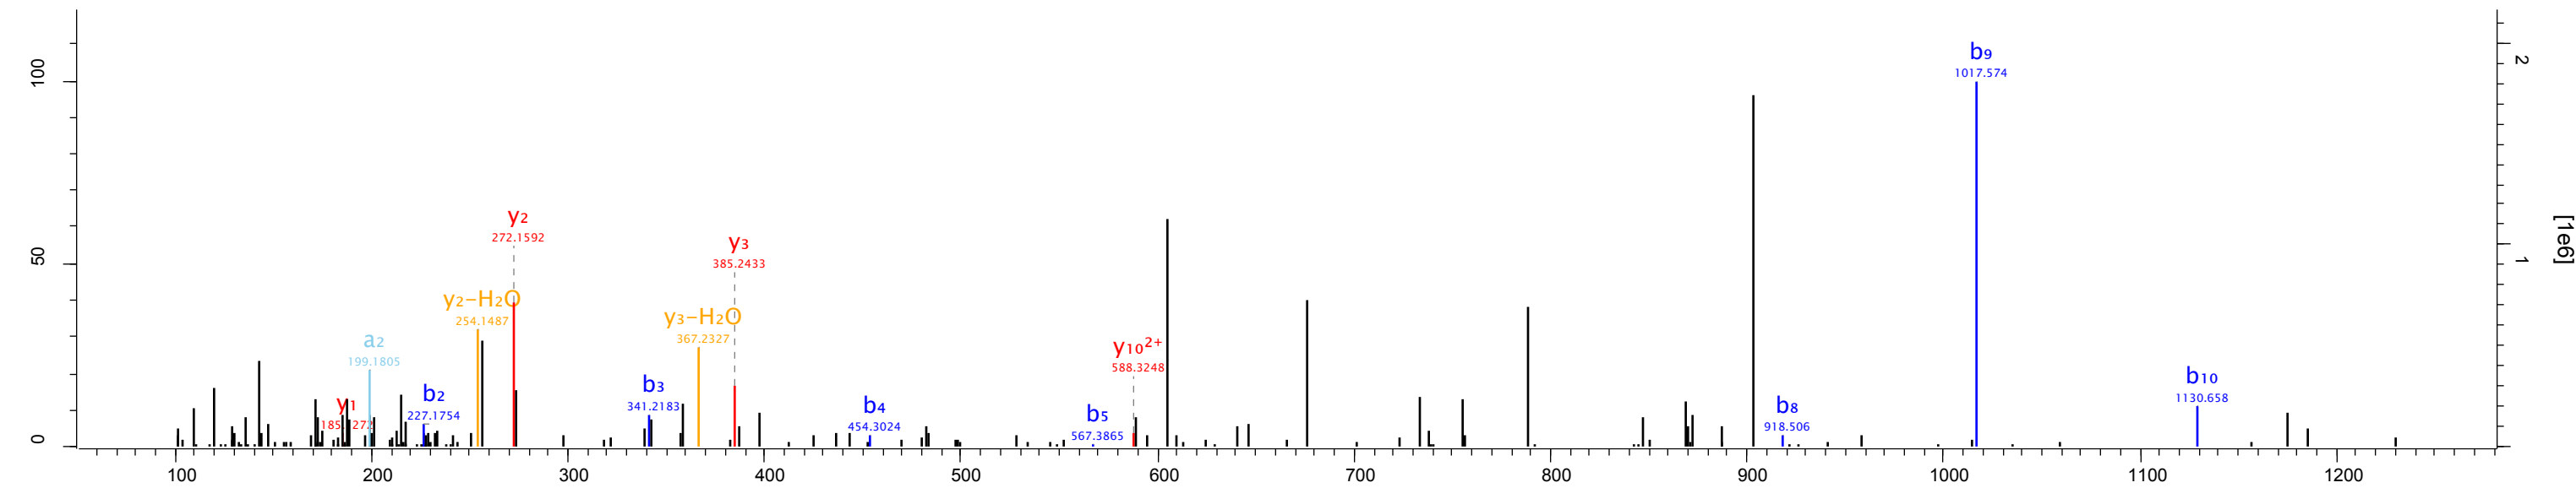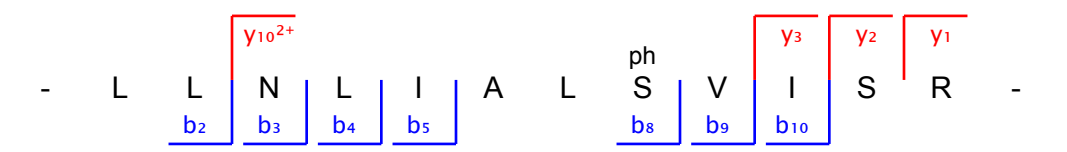

Raw file 20171215\_MaS\_33SR\_LMH\_proteome\_02 Scan 2505 Method FTMS; HCD Score 54.49 m/z 628.28

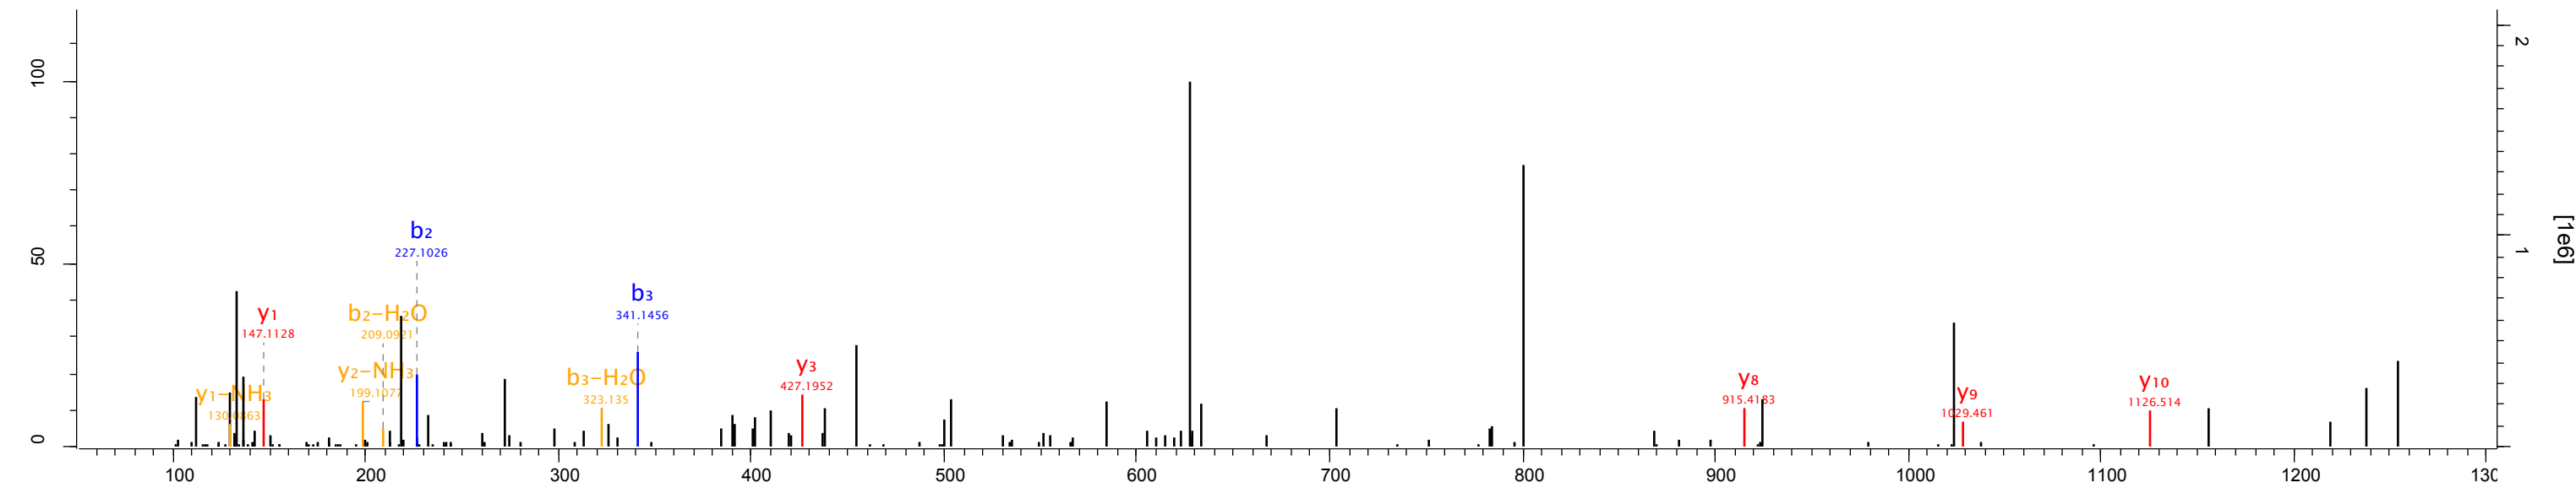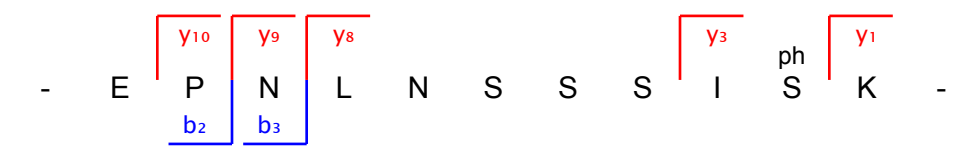

Raw file 20171215\_MaS\_33SR\_LMH\_proteome\_02 Scan 43295 Method FTMS; HCD Score 41.7 m/z 687.88 Gene names SLC13A1

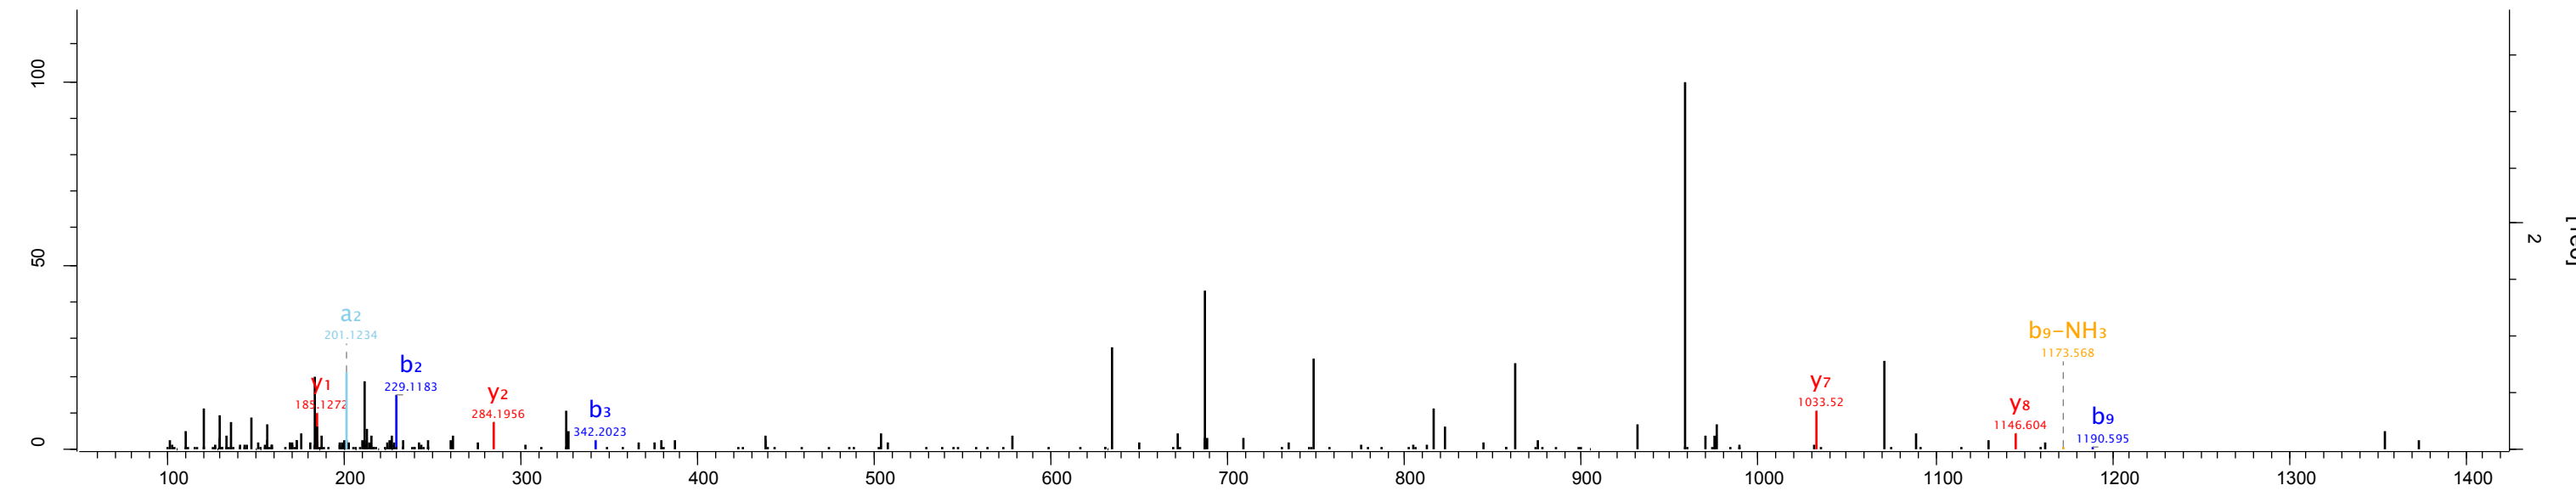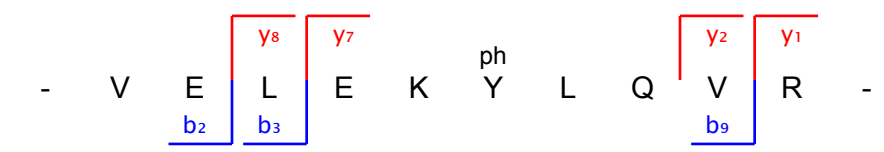

Raw file 20171215\_MaS\_33SR\_LMH\_proteome\_02 Scan 6945 Method FTMS; HCD Score 60.69 m/z 596.3

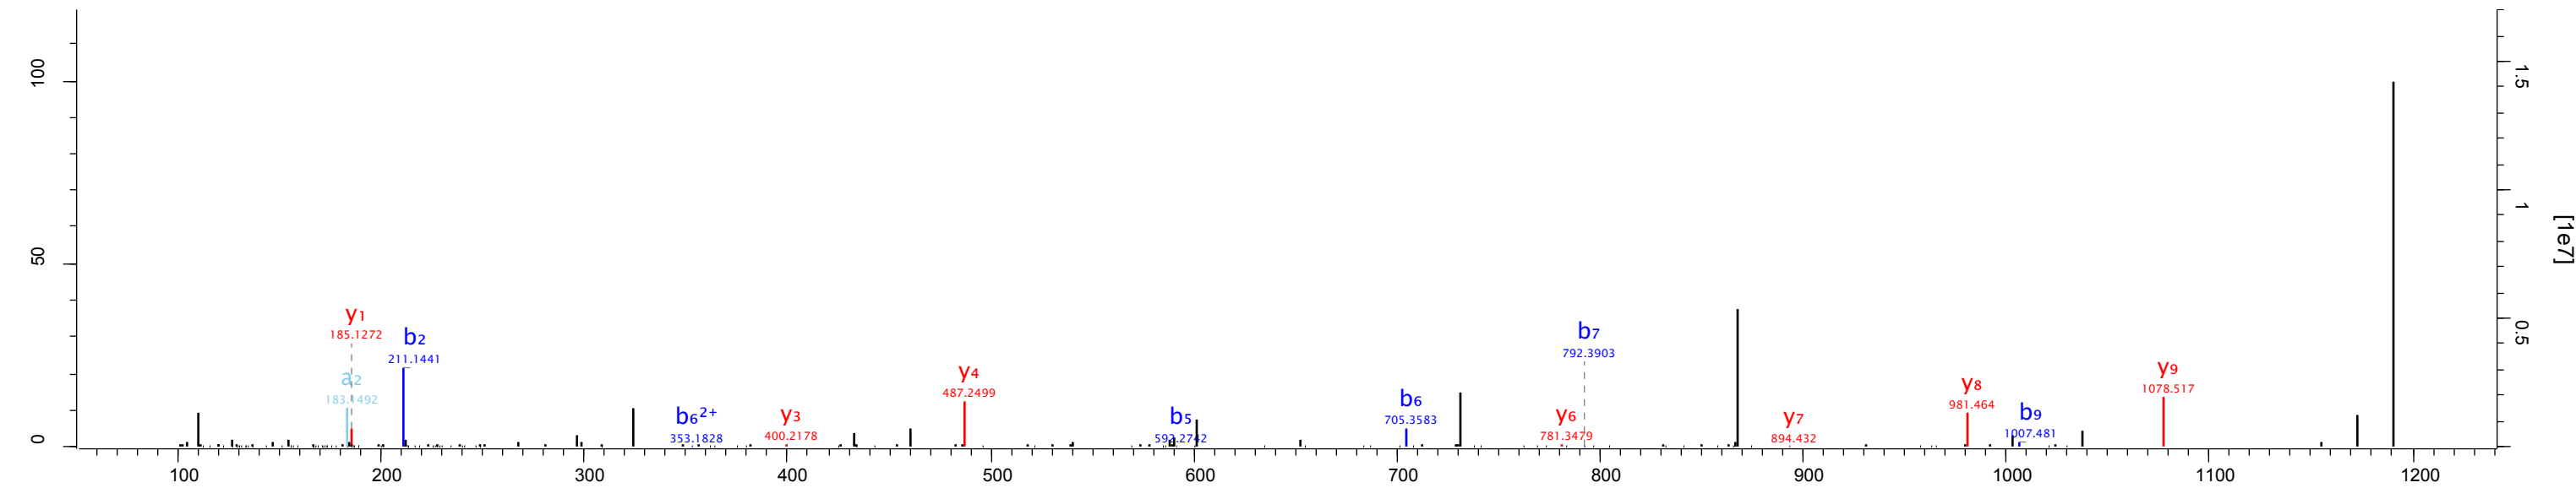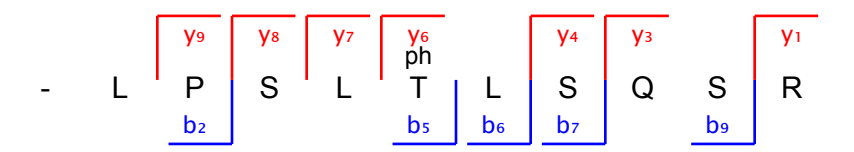

Raw file 20171215\_MaS\_33SR\_LMH\_phospho\_01 Scan 10166 Method FTMS; HCD Score 114.44 m/z 968.05 Gene names ZC3H4

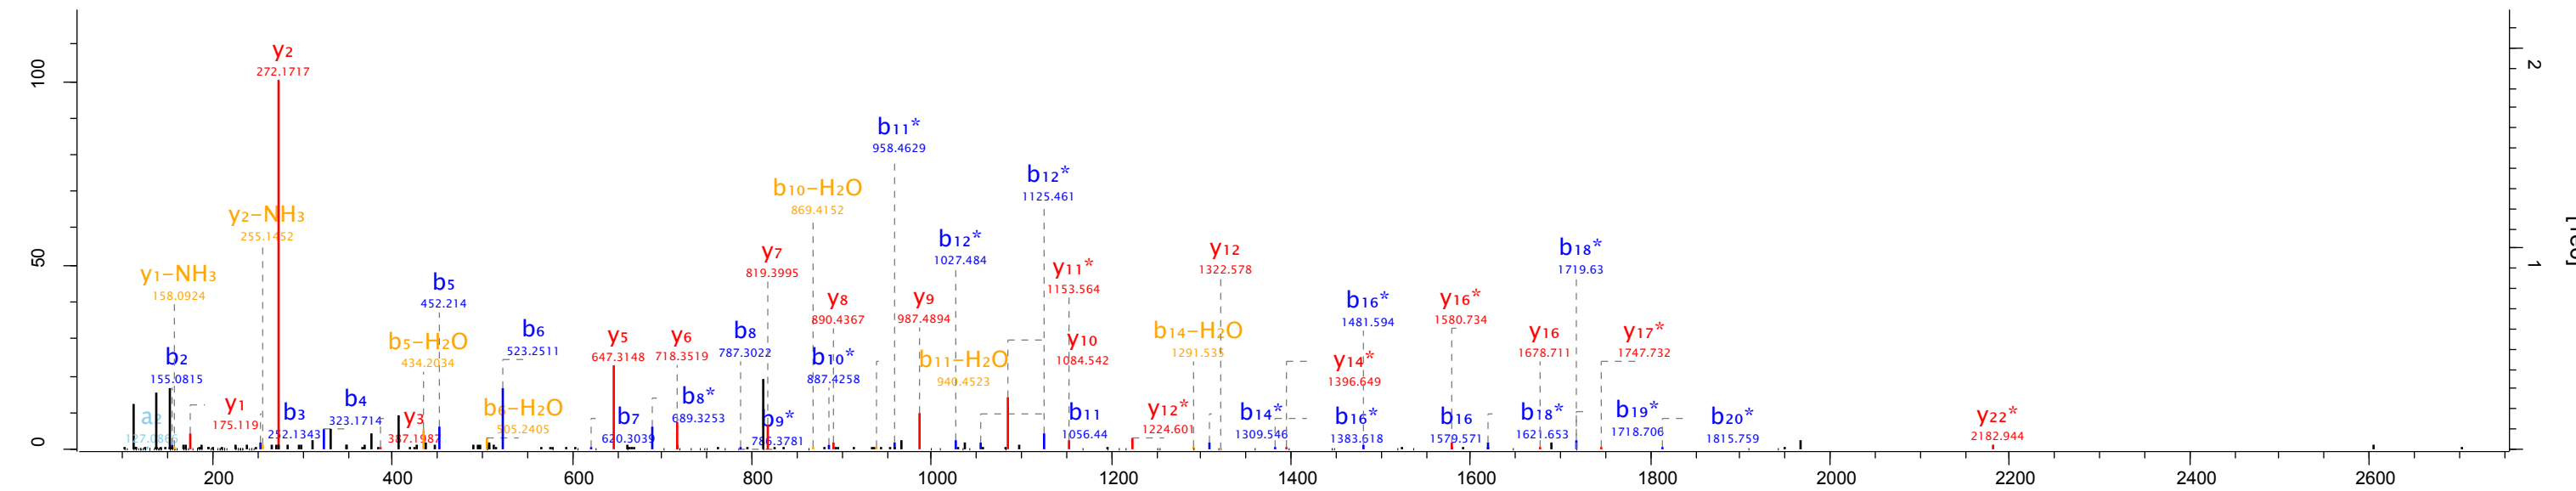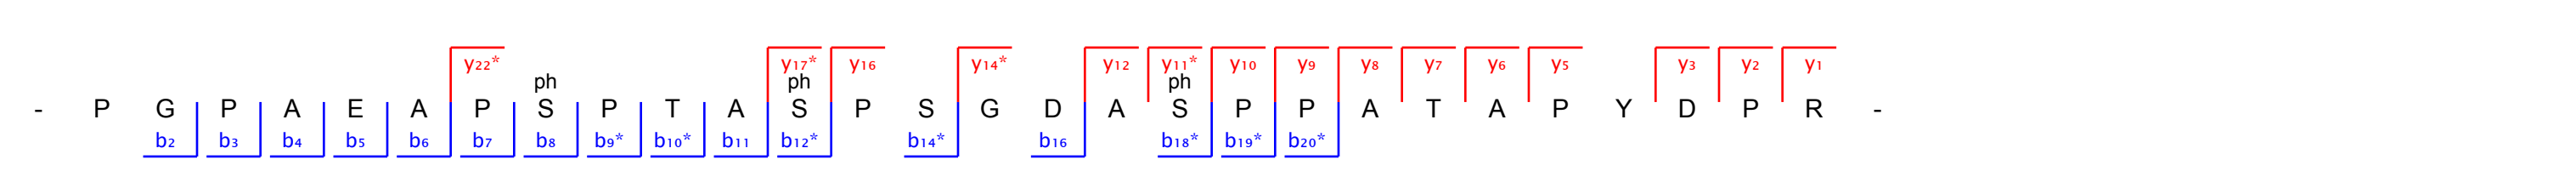

Raw file: 20171215\_MaS\_33SR\_LMH\_phospho\_01  
 Scan: 11206 Method: FTMS; HCD Score: 64.5 m/z: 747.32 Gene names: BCL9L

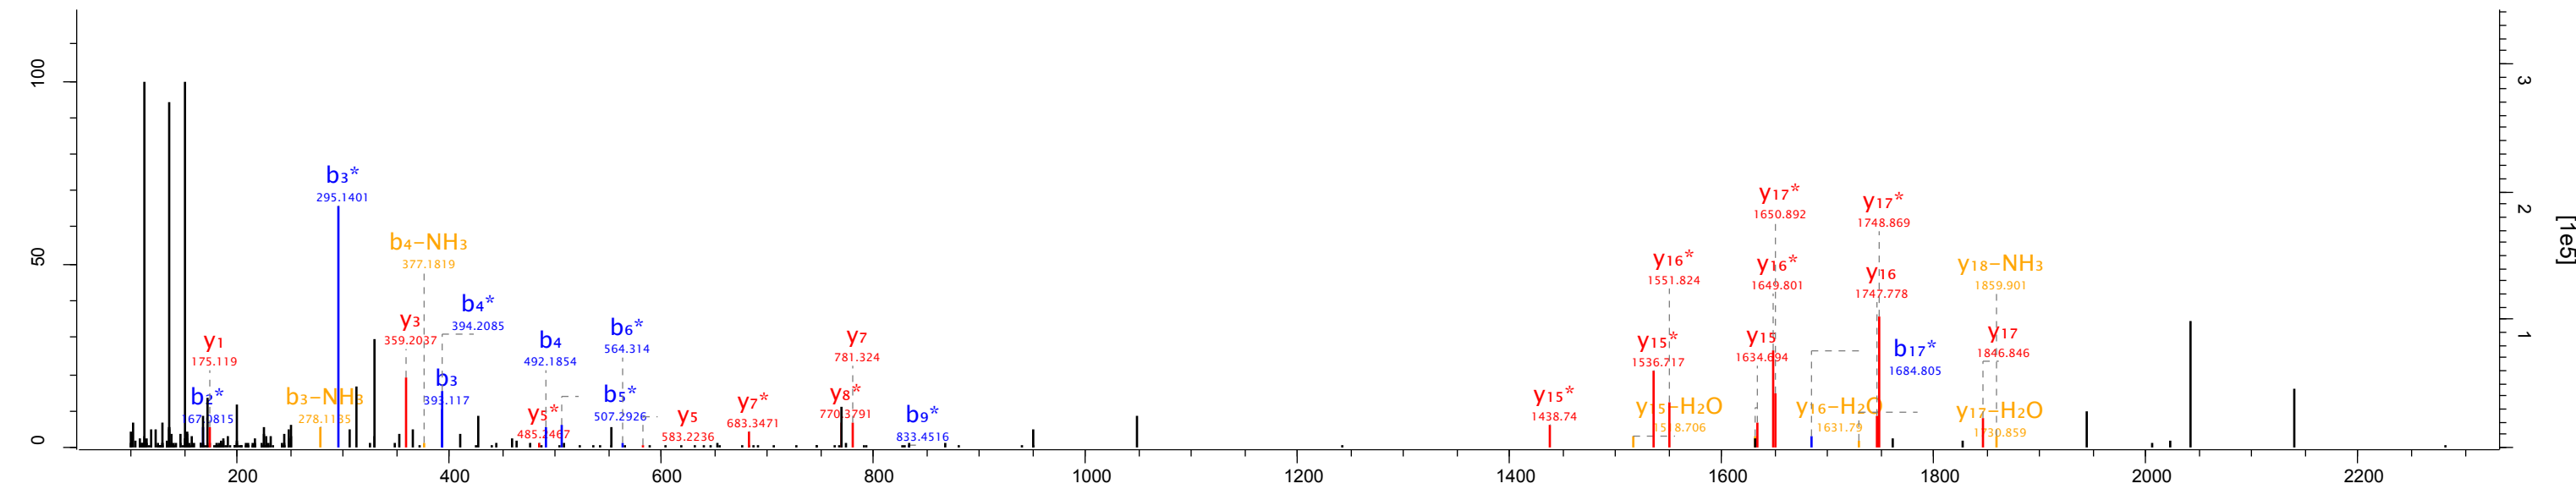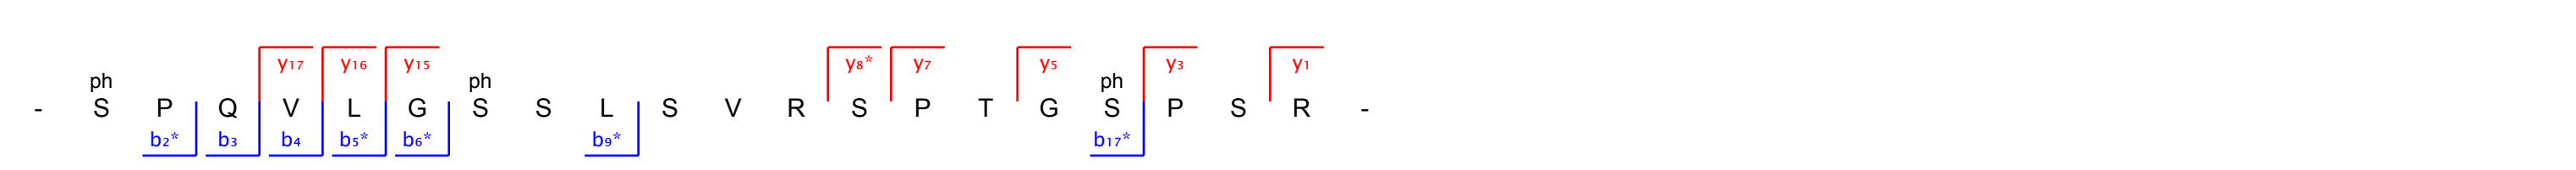

Raw file: 20171215\_MaS\_33SR\_LMH\_phospho\_01  
 Scan: 11256 Method: FTMS; HCD Score: 119.41 m/z: 914.87 Gene names: SMG9

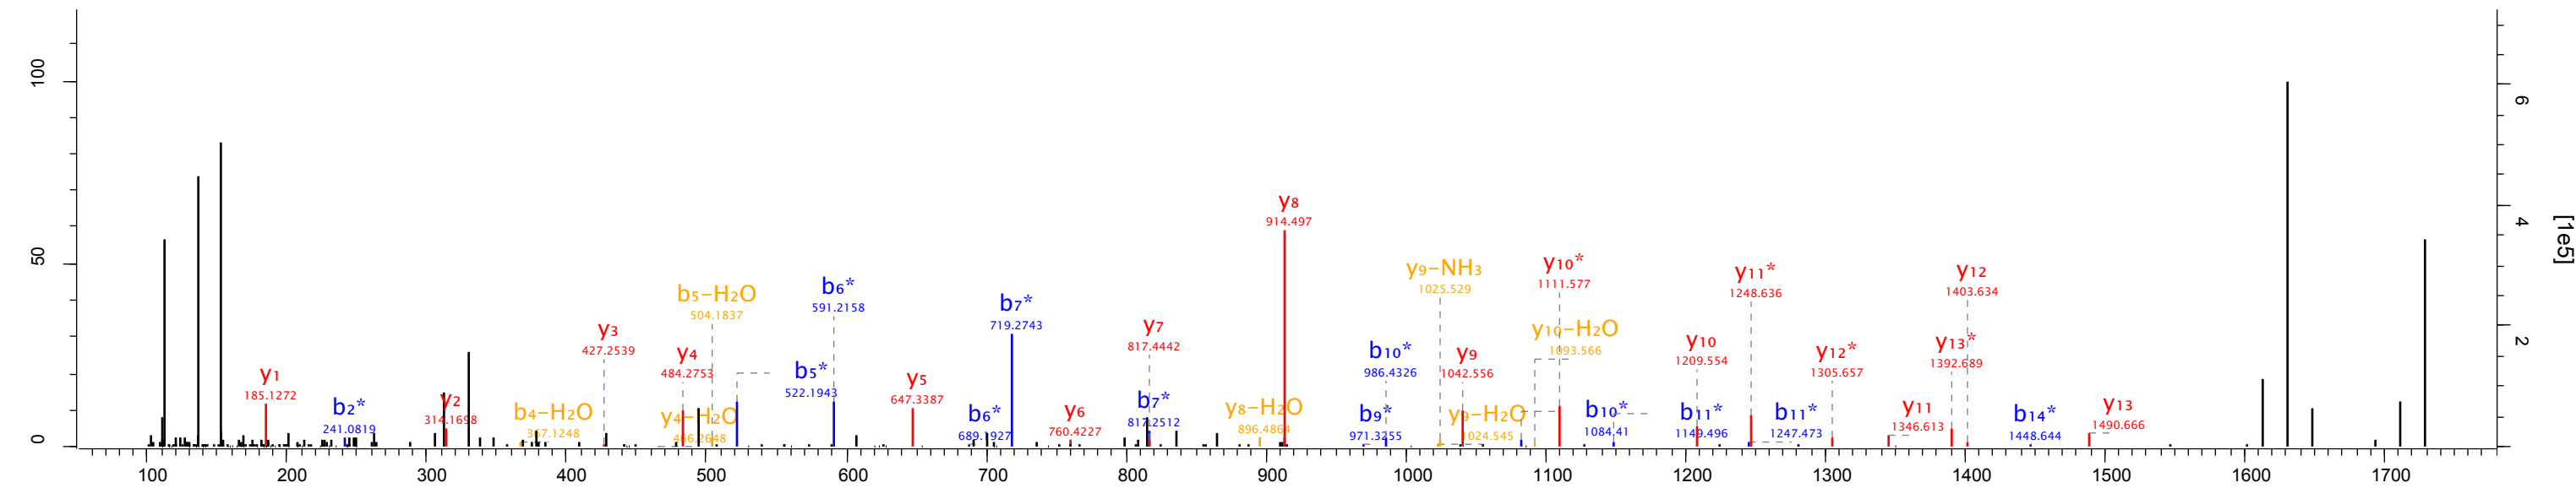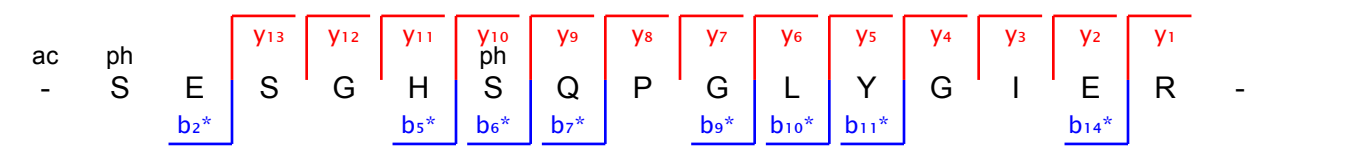



Raw file: 20171215\_MaS\_33SR\_LMH\_phospho\_01  
 Scan: 12406 Method: FTMS; HCD Score: 44.28 m/z: 1263.57 Gene names: ARHGEF2

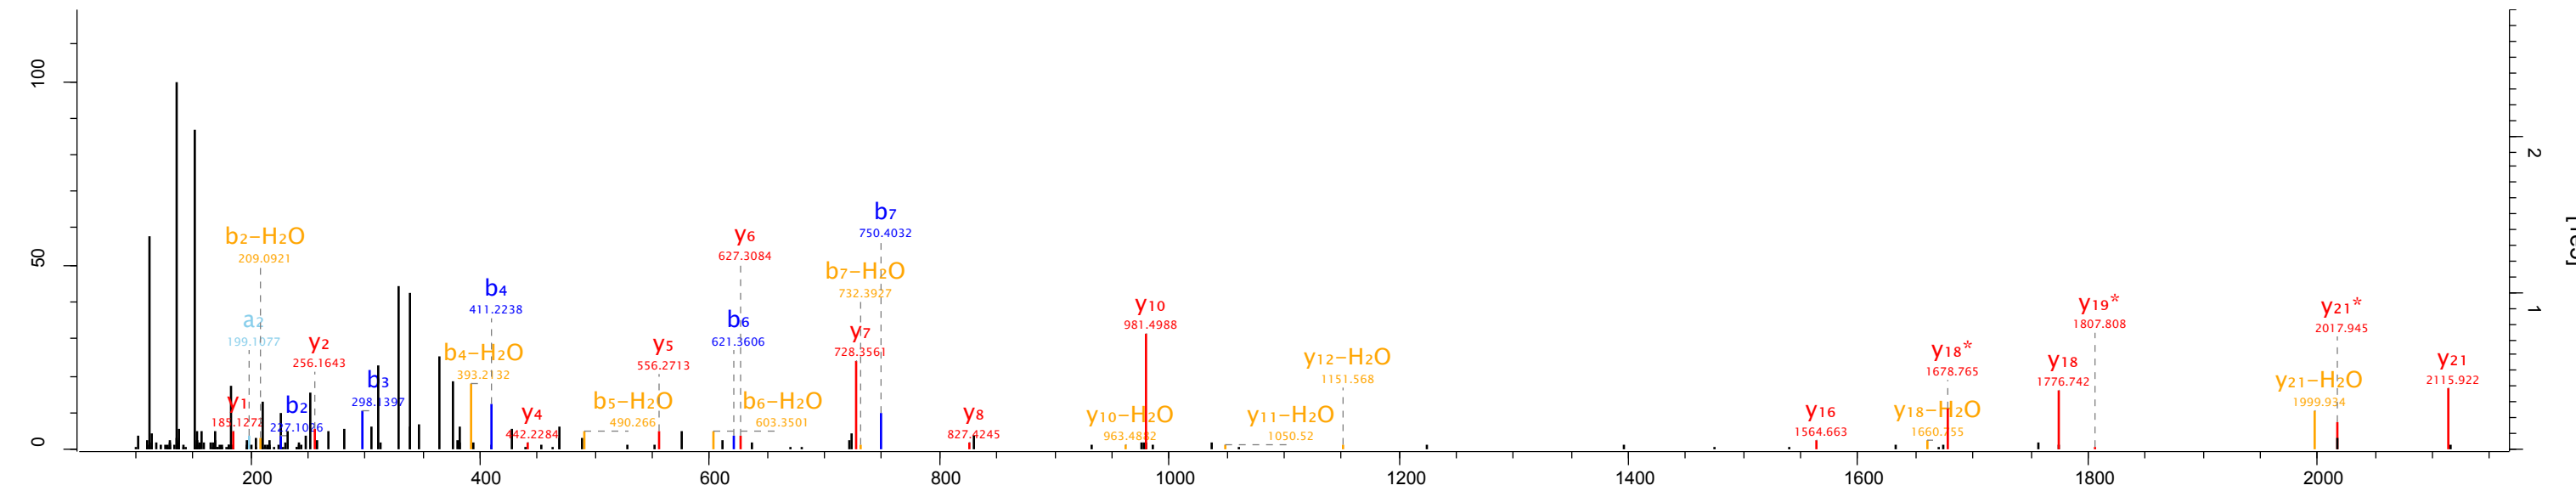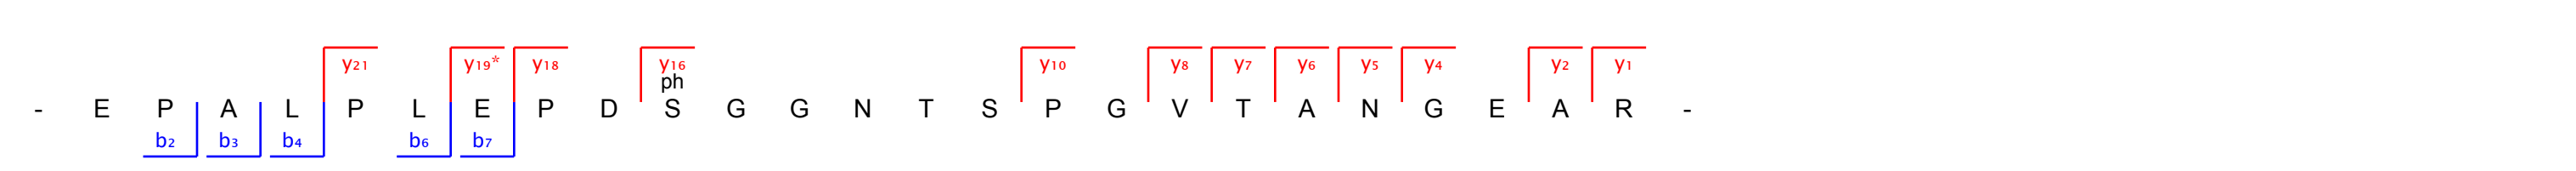

Raw file: 20171215\_MaS\_33SR\_LMH\_phospho\_01  
 Scan: 2226 Method: FTMS; HCD Score: 145.18 m/z: 648.23 Gene names: SRRM1

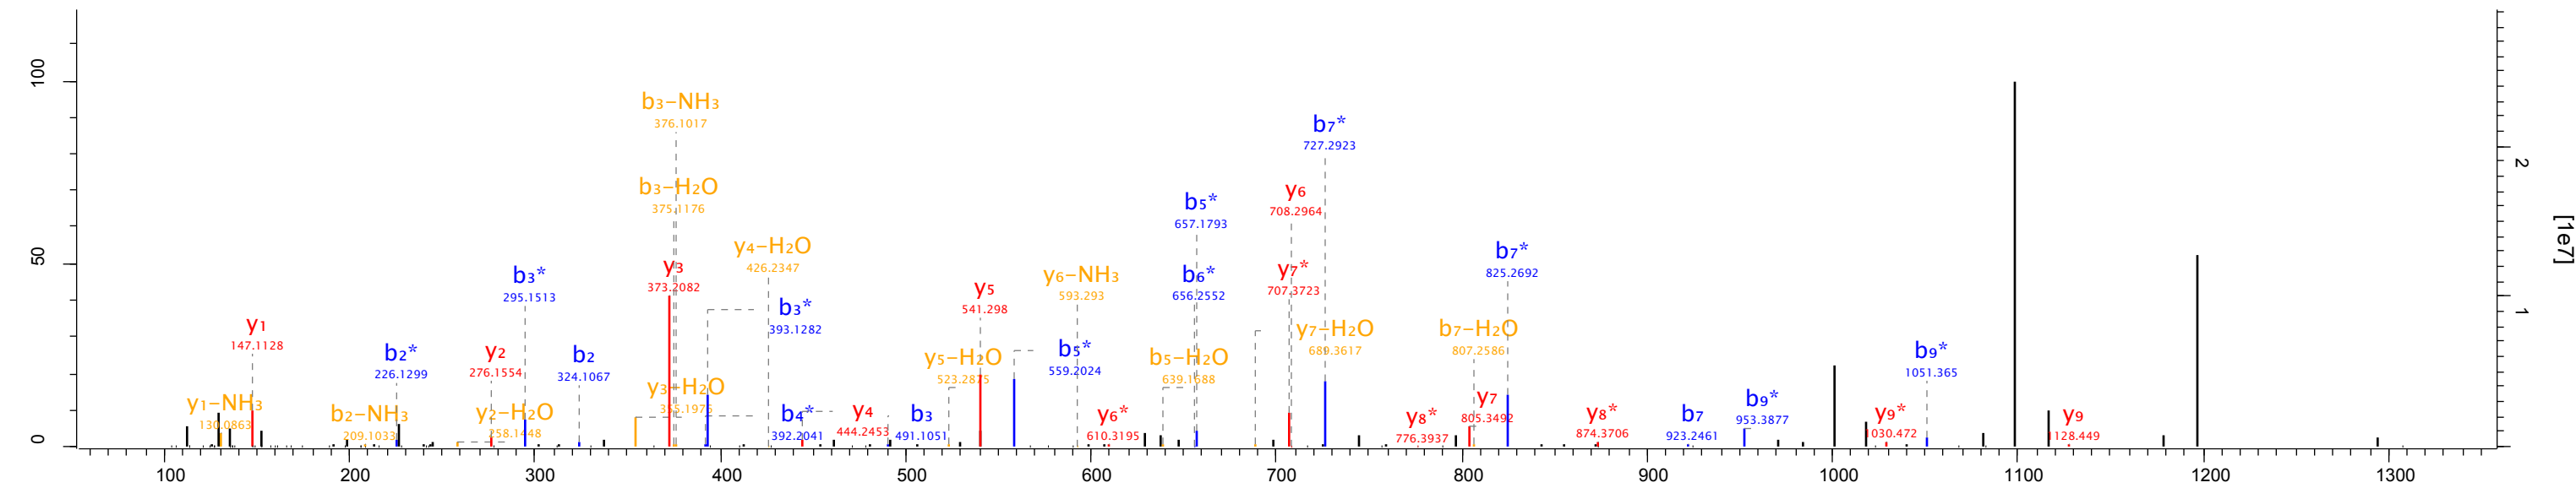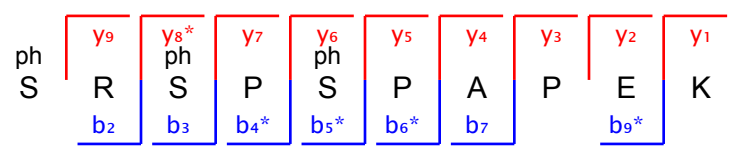

Raw file 20171215\_MaS\_33SR\_LMH\_phospho\_01 Scan 2356 Method FTMS; HCD Score 54.09 m/z 586.72 Gene names SRSF7

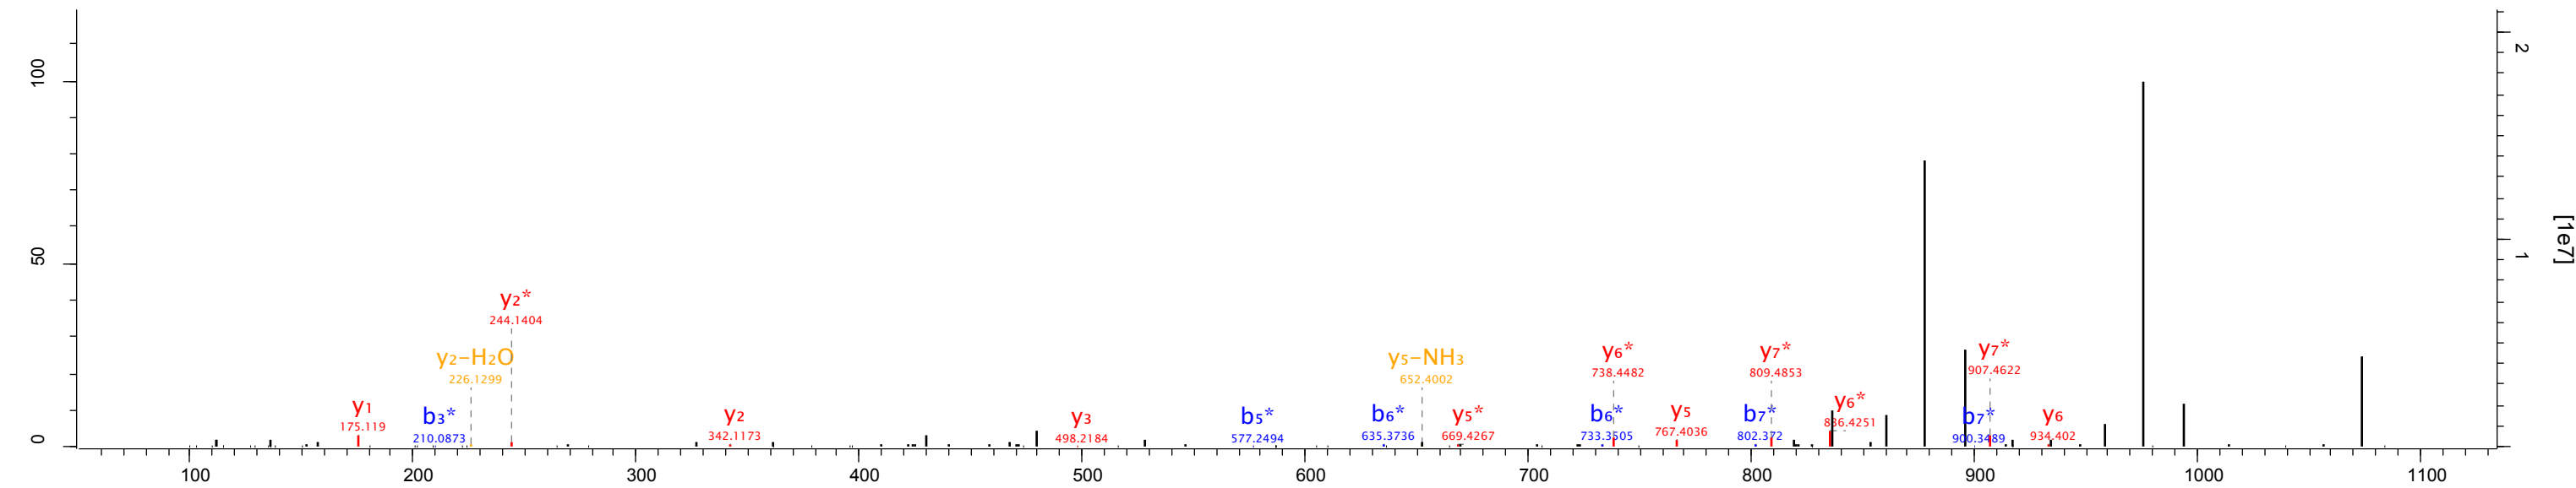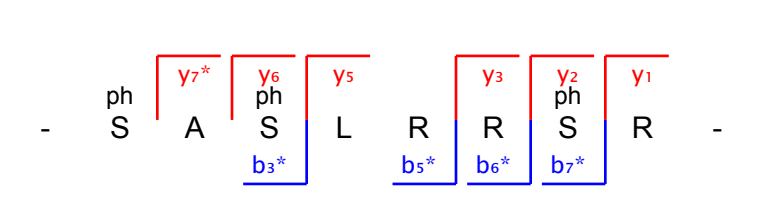

Raw file 20171215\_MaS\_33SR\_LMH\_phospho\_01 Scan 2546 Method FTMS; HCD Score 64.52 m/z 531.9 Gene names DPYSL2

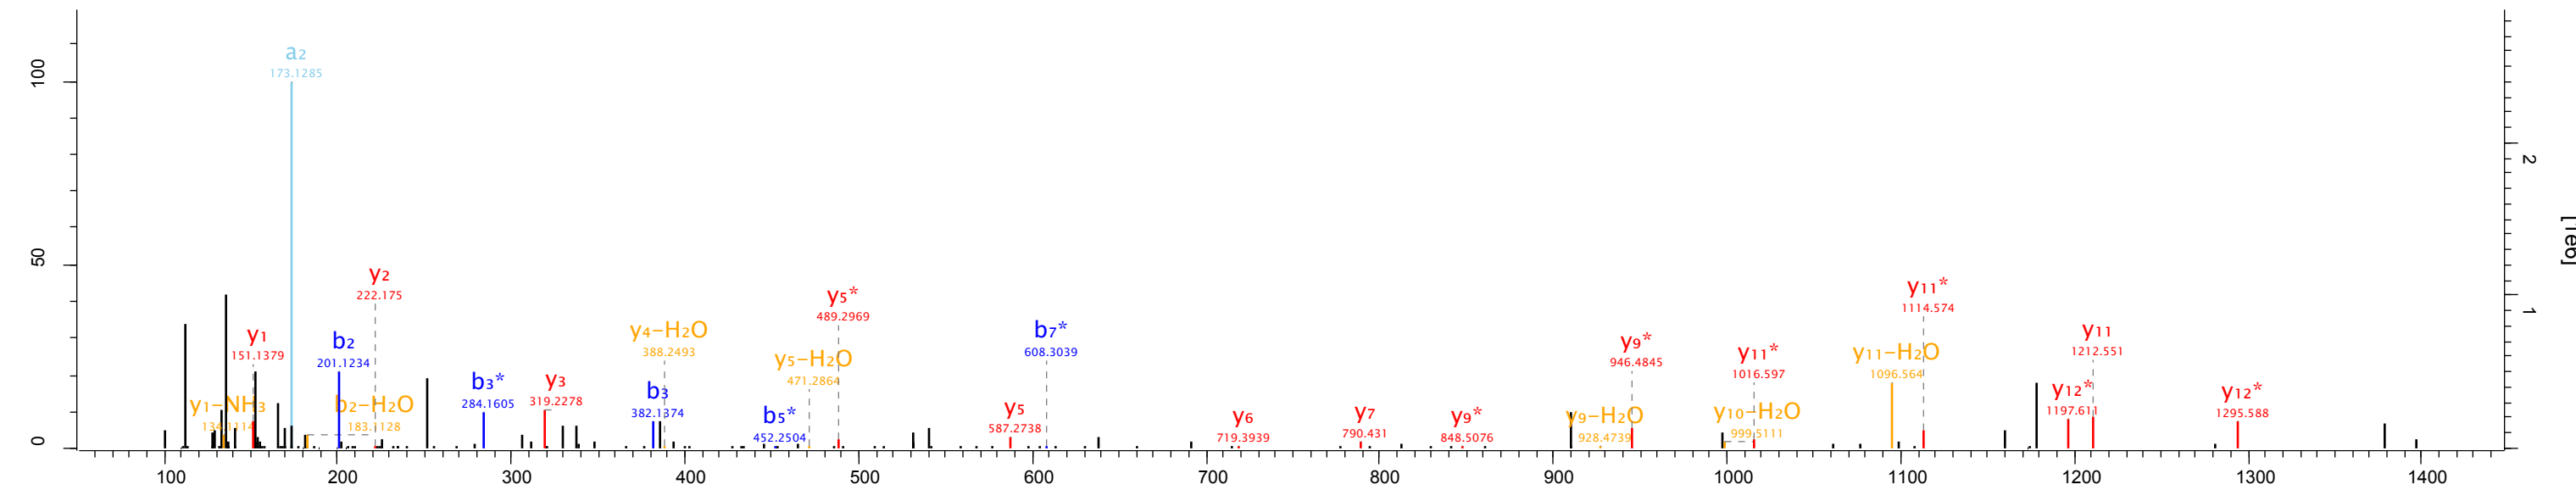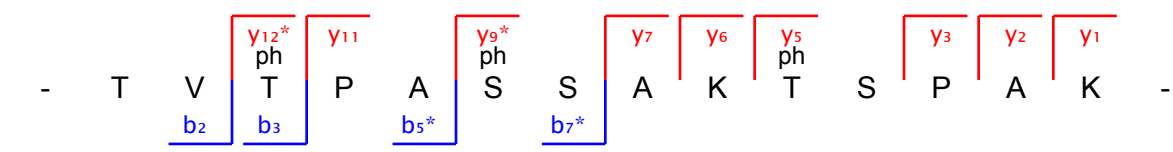

Raw file 20171215\_MaS\_33SR\_LMH\_phospho\_01 Scan 2966 Method FTMS; HCD Score 137.53 m/z 649.3 Gene names SRRM1

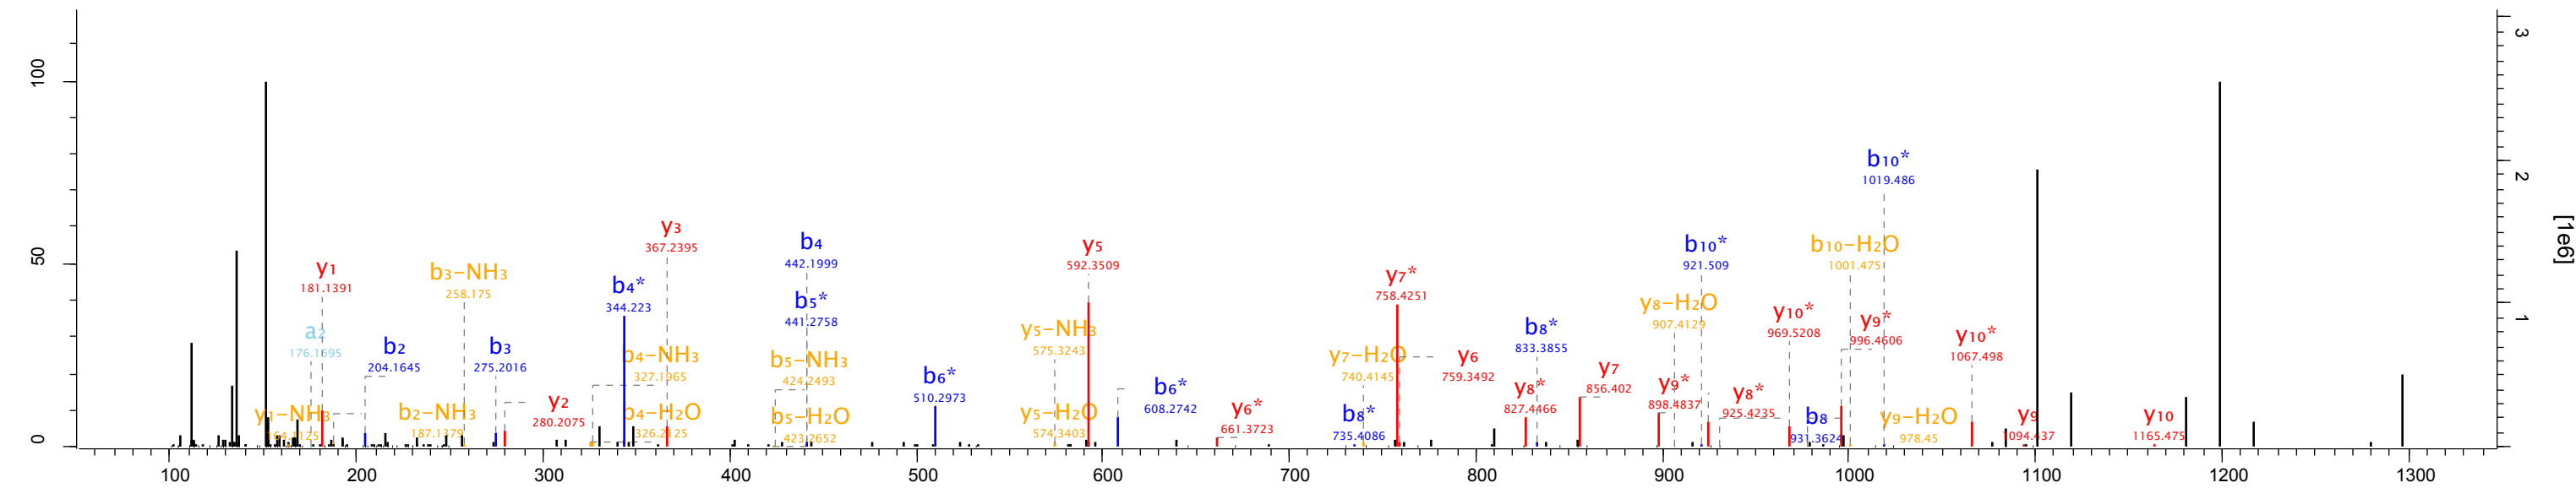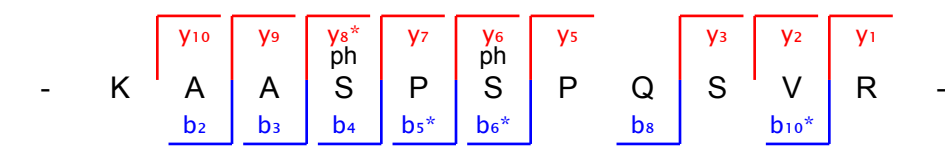

Raw file 20171215\_MaS\_33SR\_LMH\_phospho\_01 Scan 3536 Method FTMS; HCD Score 196.61 m/z 914.33 Gene names TRA2B

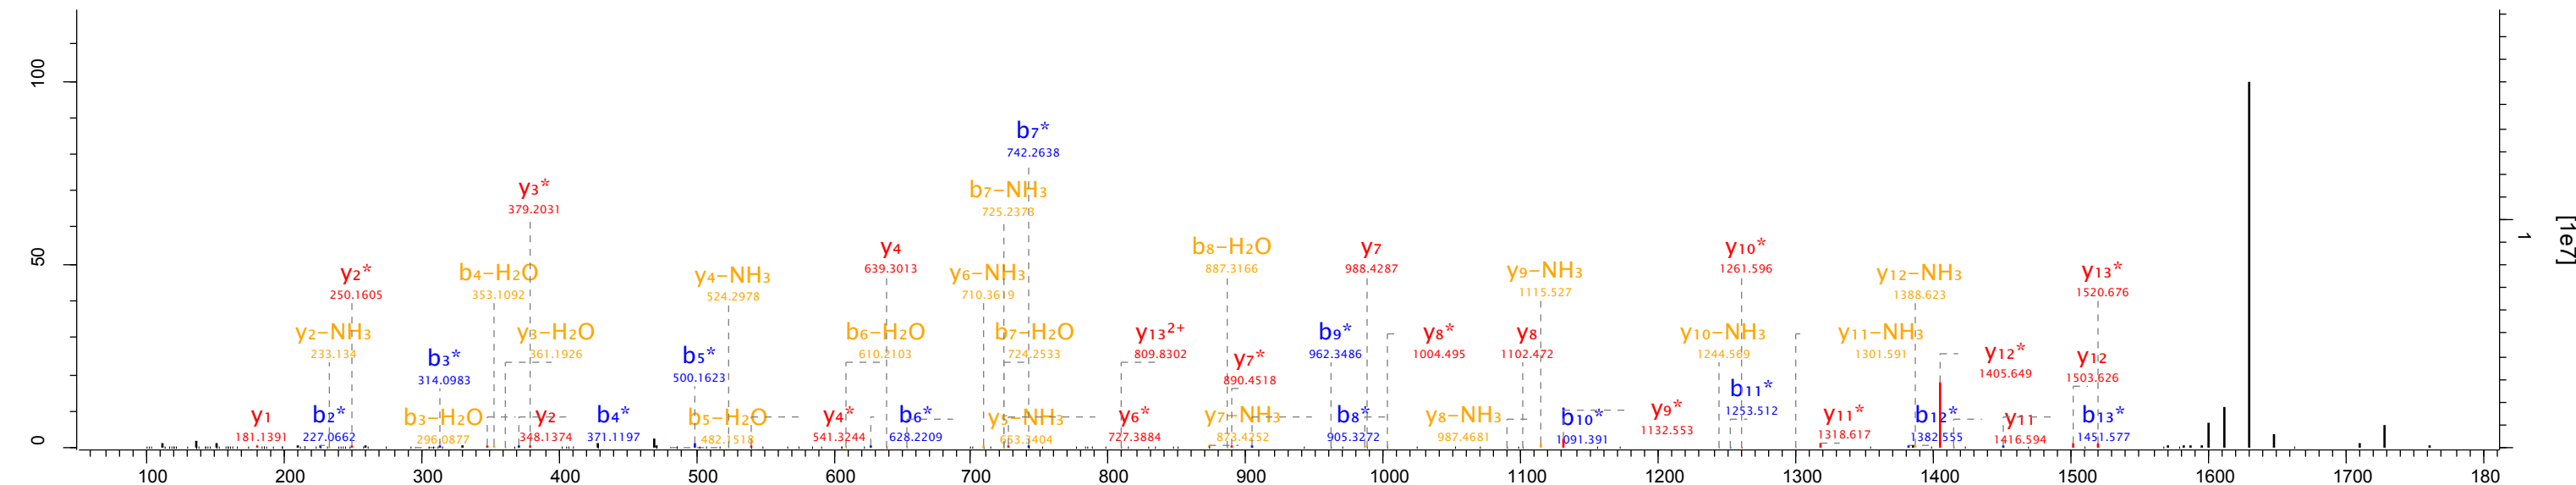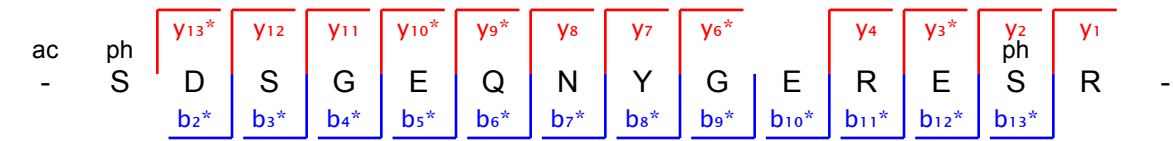

Raw file 20171215\_MaS\_33SR\_LMH\_phospho\_01 Scan 4246 Method FTMS; HCD Score 114.63 m/z 719.78 Gene names VIM

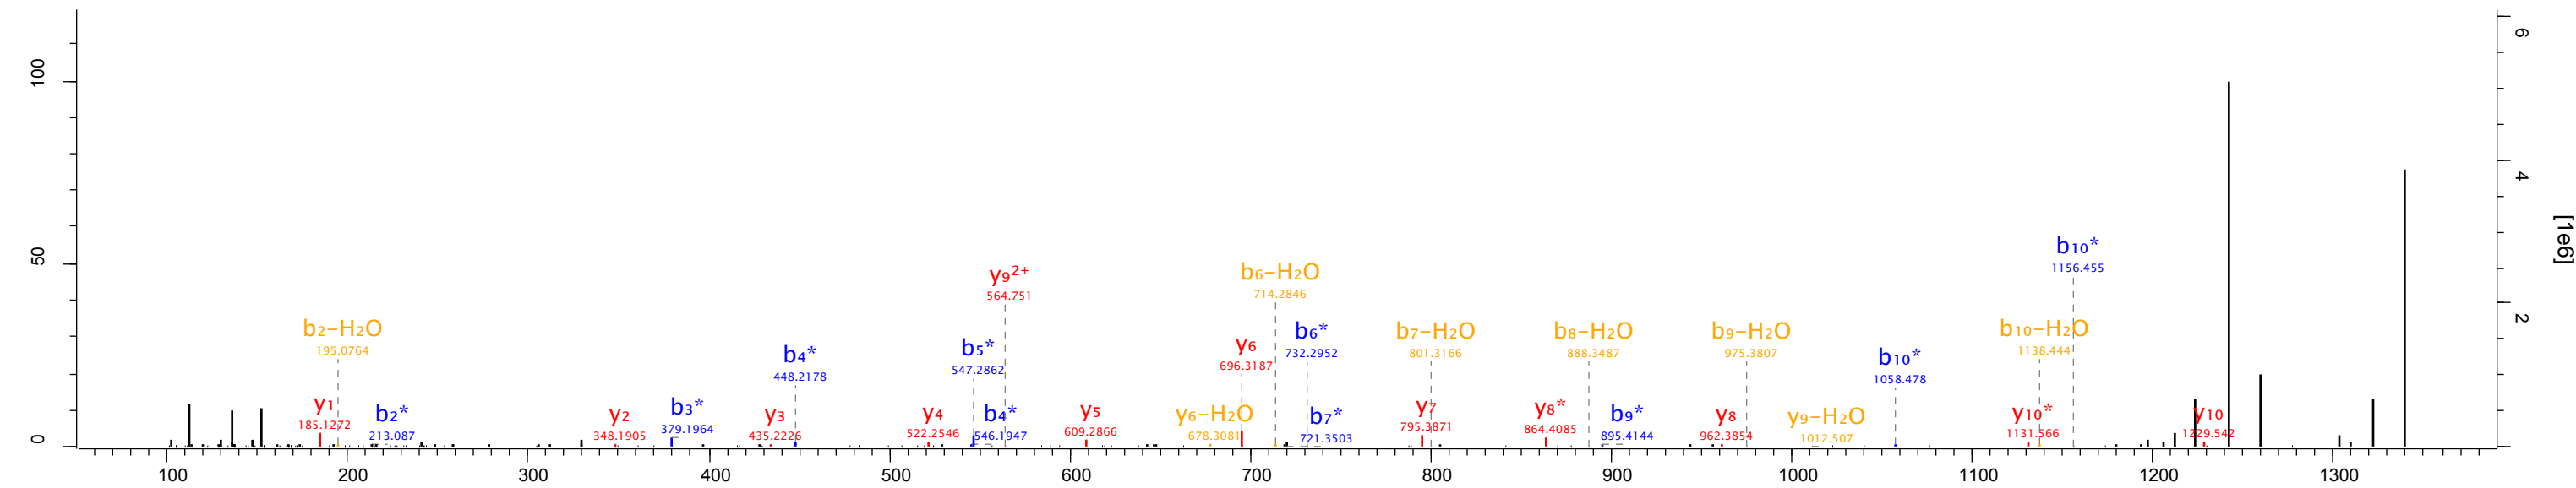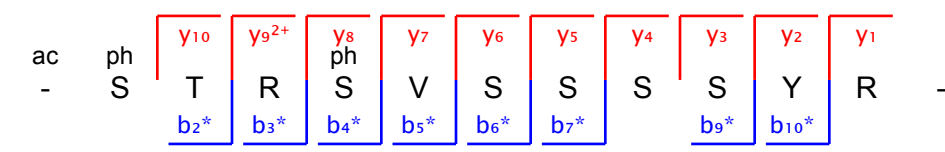

Raw file 20171215\_MaS\_33SR\_LMH\_phospho\_01 Scan 4336 Method FTMS; HCD Score 158.08 m/z 760.31 Gene names LMNA

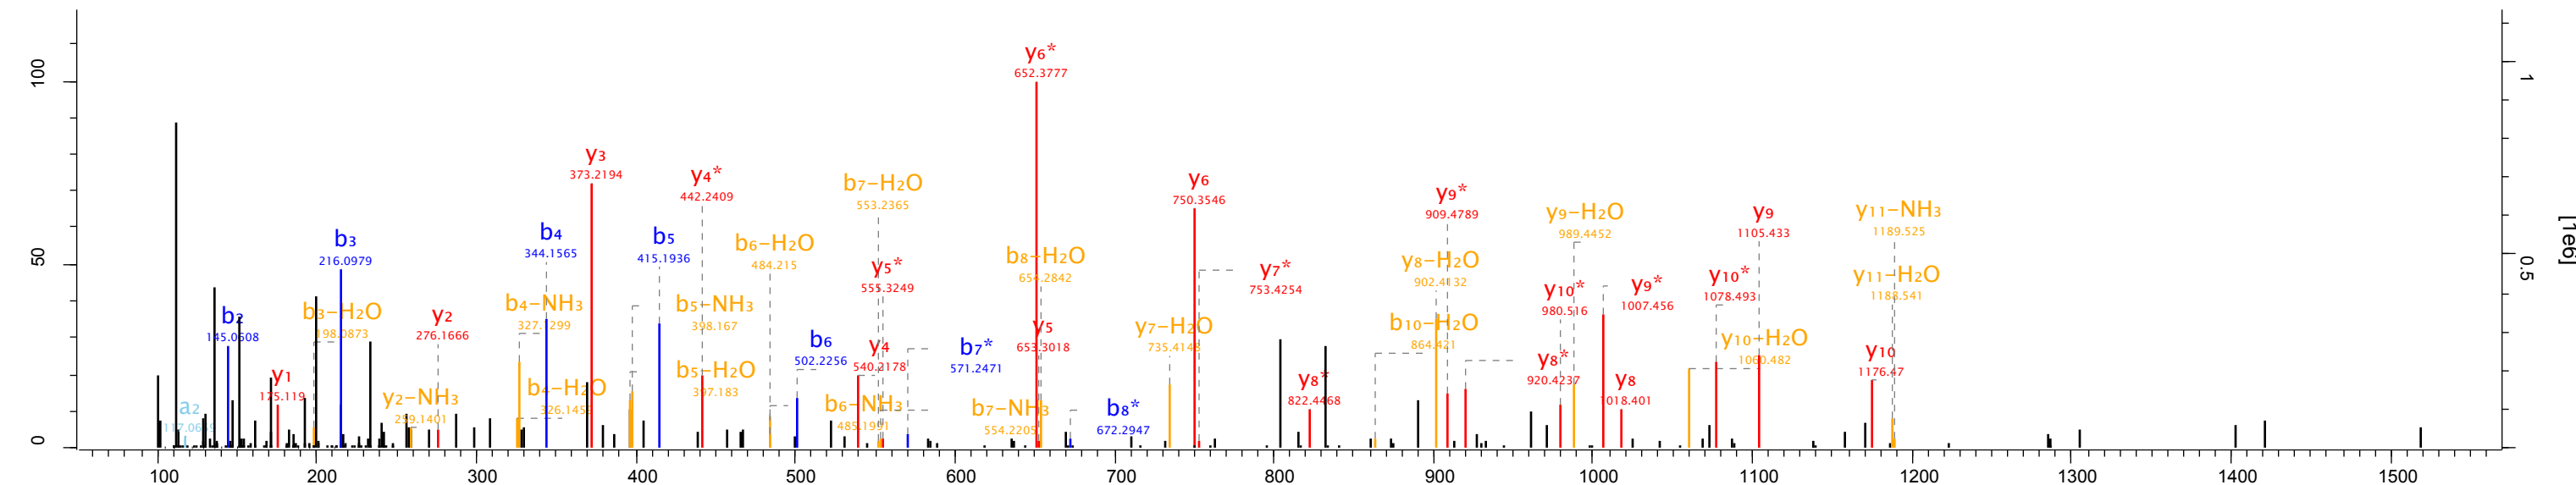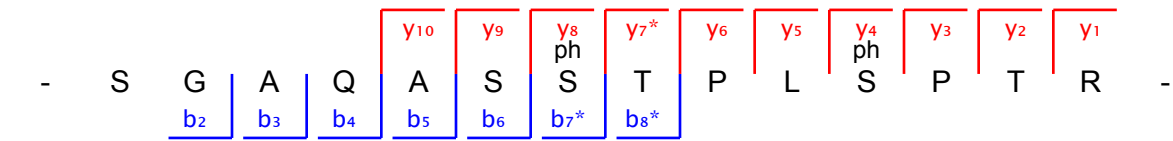



Raw file 20171215\_MaS\_33SR\_LMH\_phospho\_01 Scan 4586 Method FTMS; HCD Score 164.5 m/z 753.84 Gene names UBAP2L

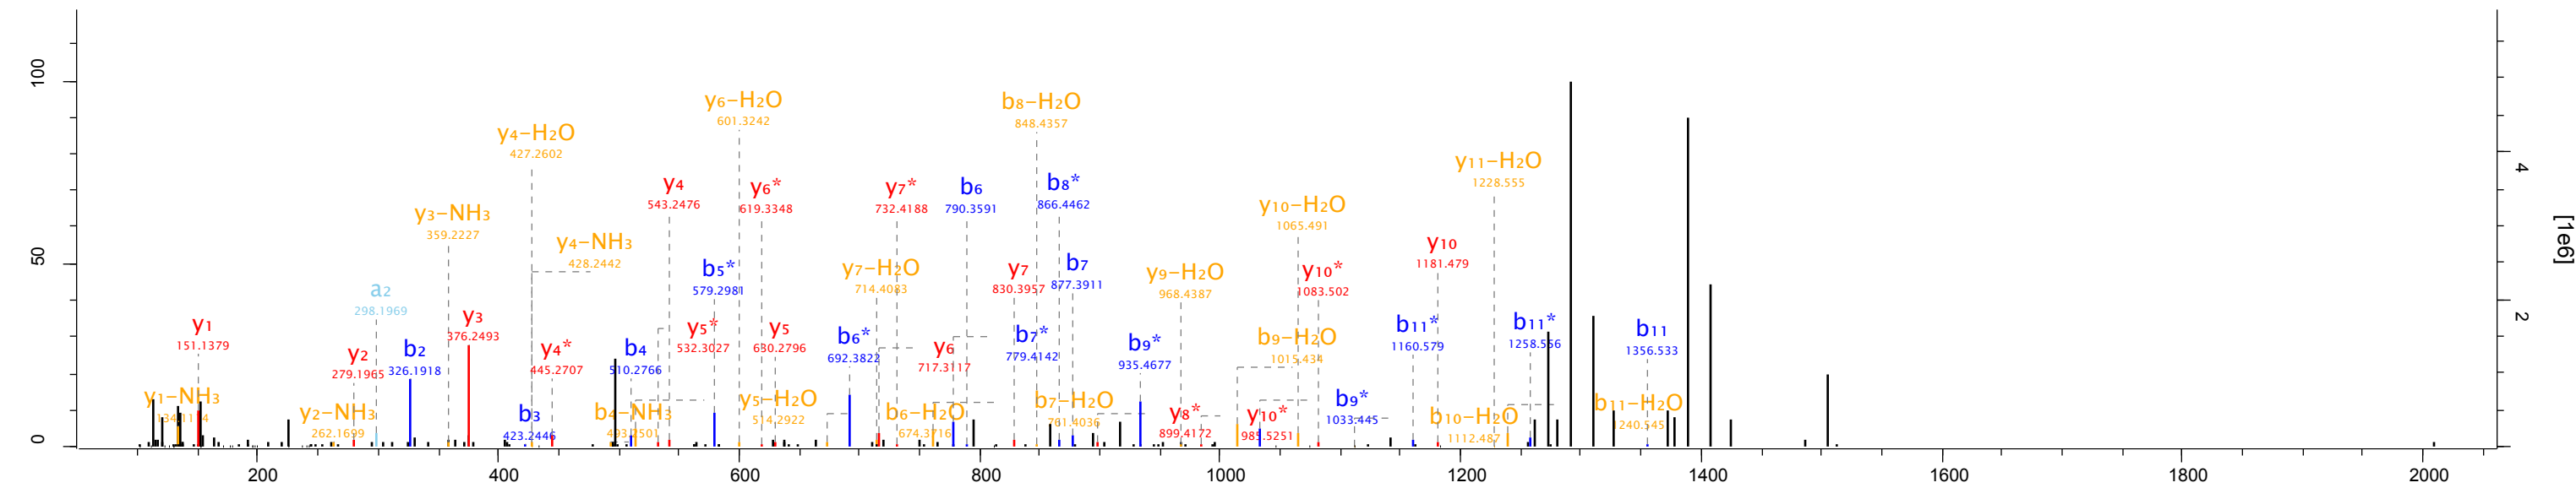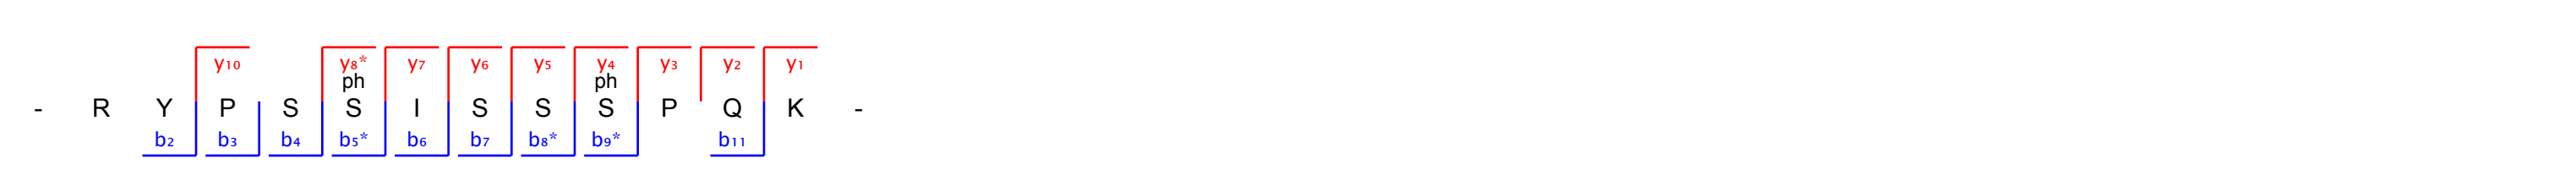

Raw file 20171215\_MaS\_33SR\_LMH\_phospho\_01 Scan 5306 Method FTMS; HCD Score 72.69 m/z 867.66 Gene names HTATSF1

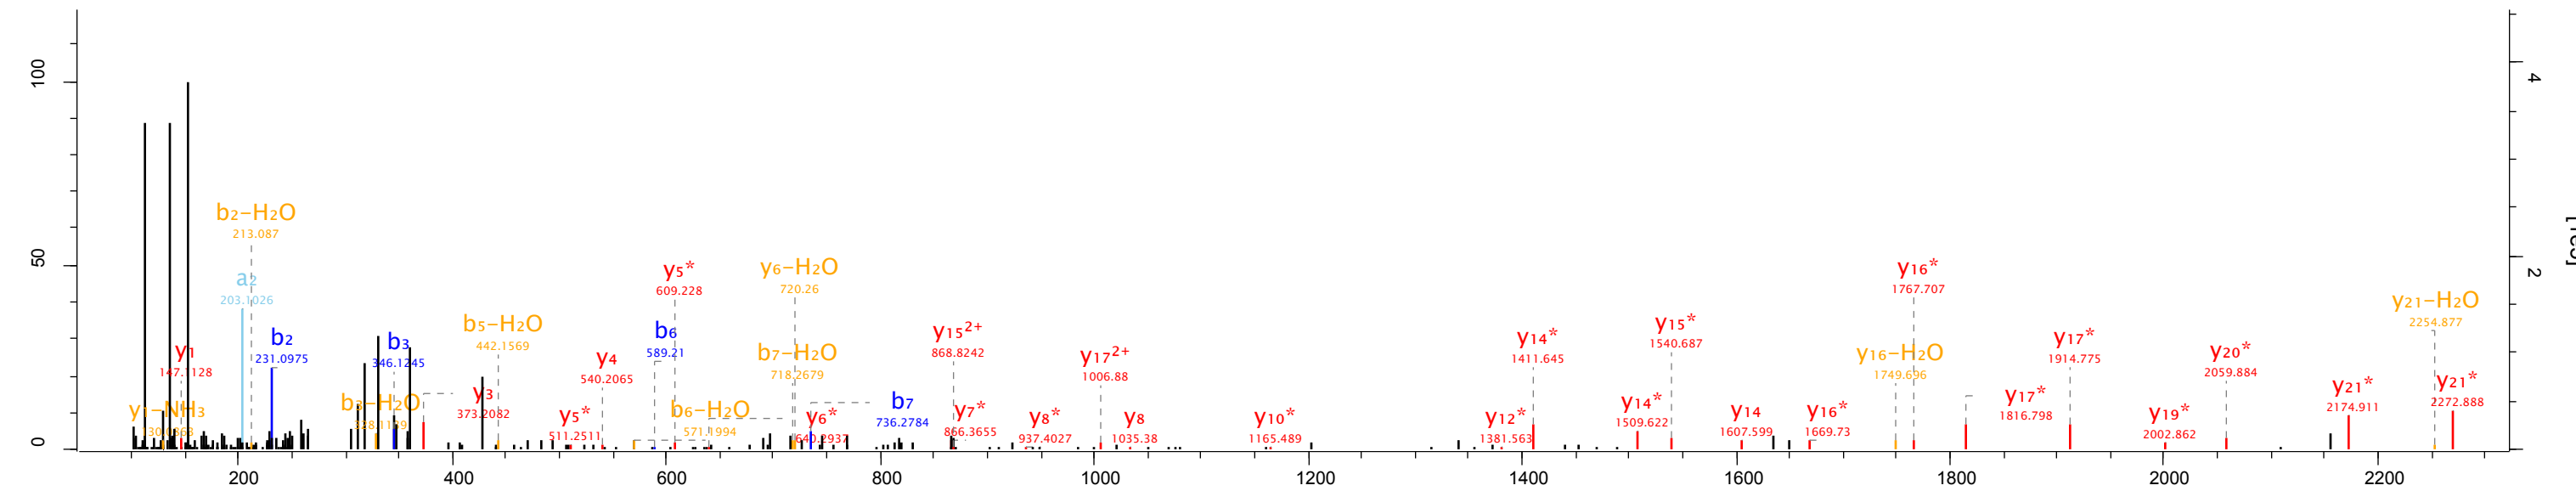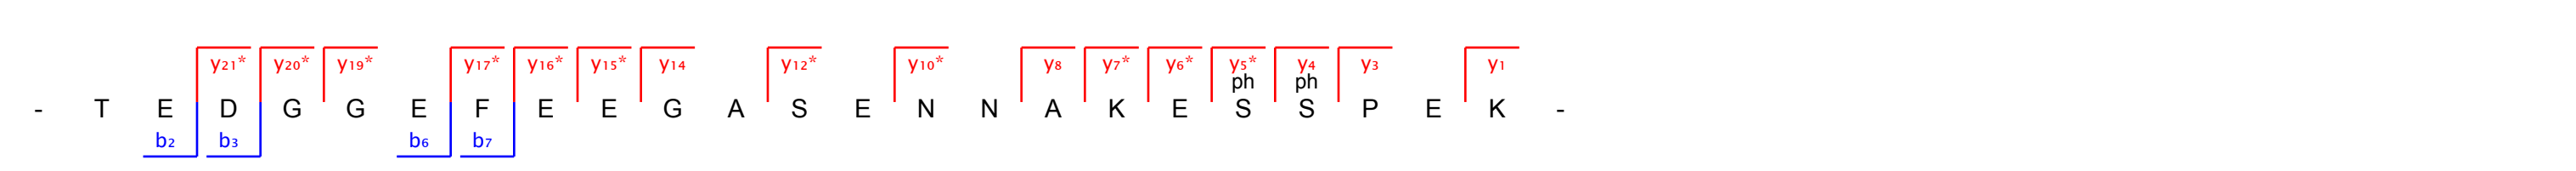

Raw file 20171215\_MaS\_33SR\_LMH\_phospho\_01 Scan 6086 Method FTMS; HCD Score 113.32 m/z 963.72 Gene names PNISR

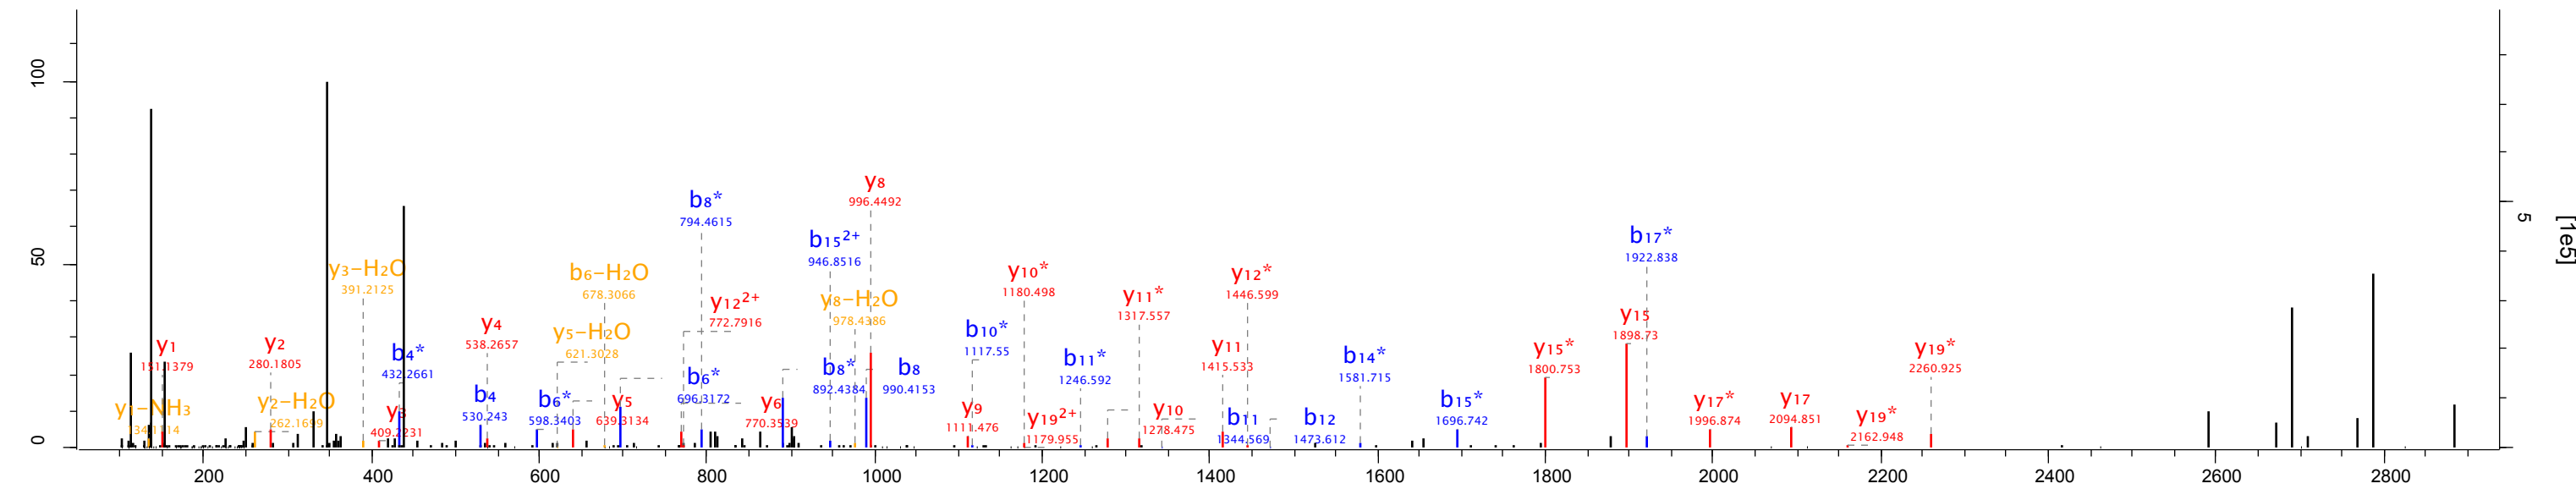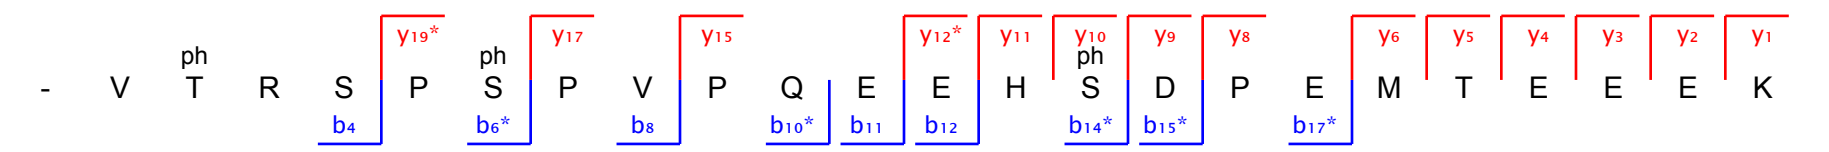

Raw file 20171215\_MaS\_33SR\_LMH\_phospho\_01 Scan 6946 Method FTMS; HCD Score 317.78 m/z 1108.9 Gene names OSBP

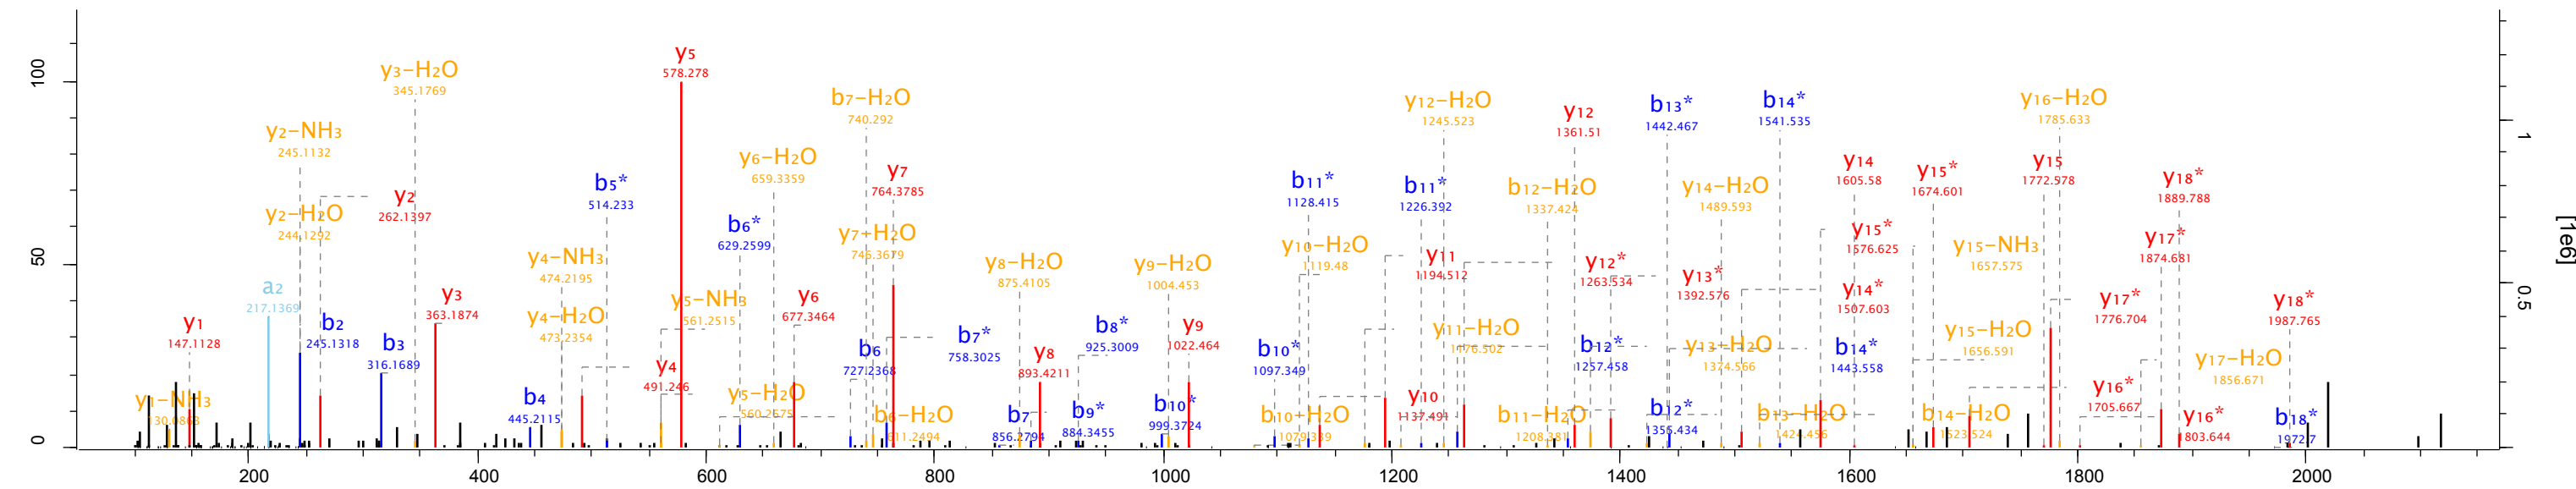

- M L A E S D E S G D E E S V S Q T D K -

y18\*
y17\*
y16\*
y15  
ph
y14
y13\*
y12
y11
y10
y9
y8
y7
y6
y5
y4
y3
y2
y1

b2
b3
b4
b5\*
b6
b7
b8\*
b9\*
b10\*
b11\*
b12\*
b13\*
b14\*
b18\*

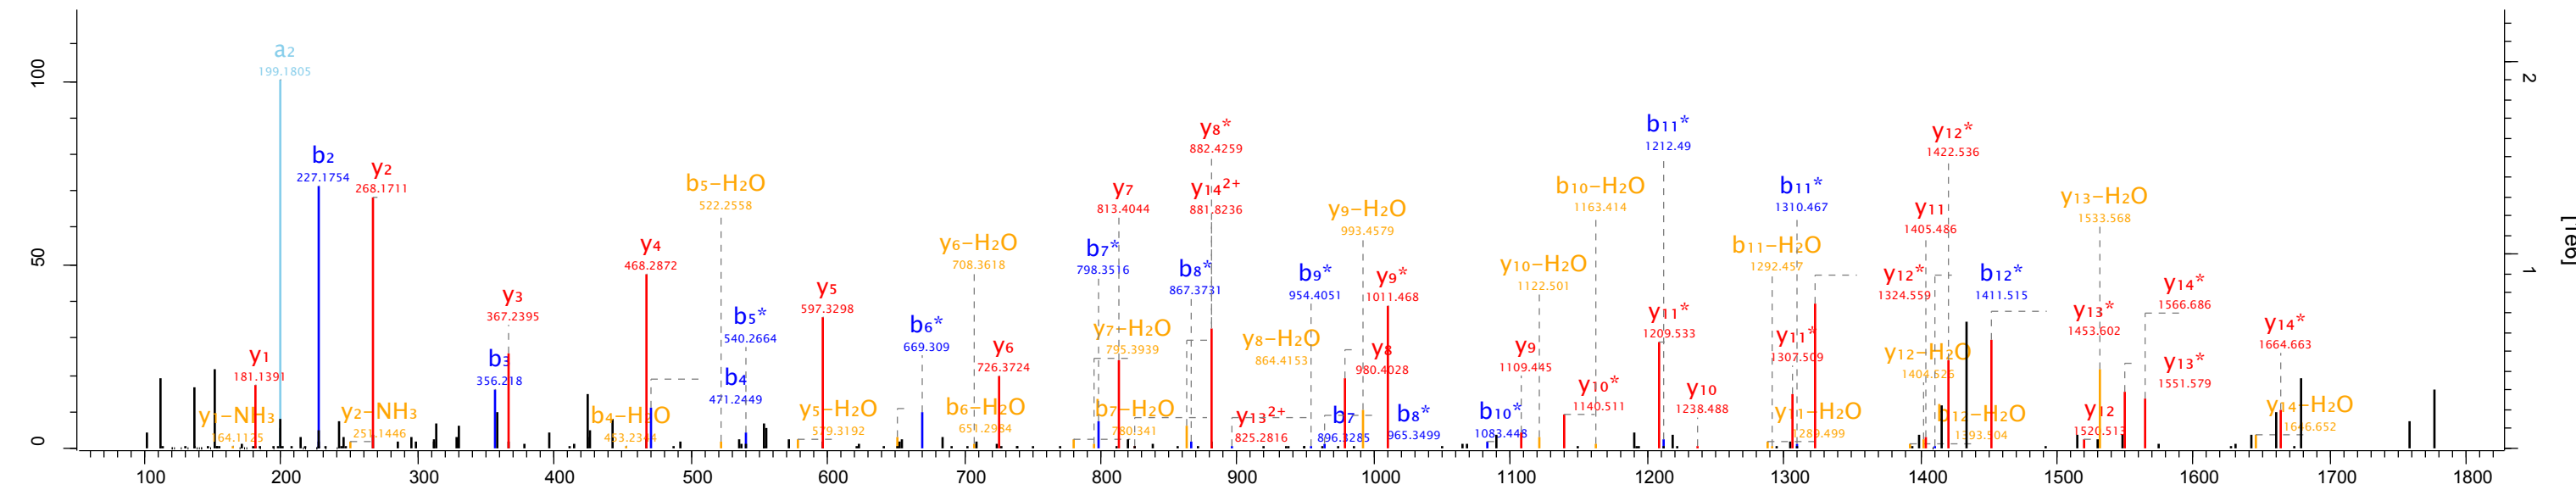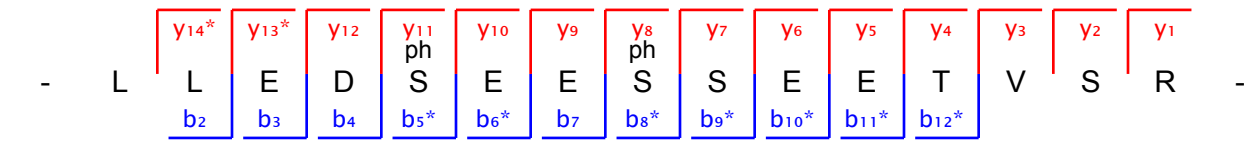

Raw file 20171215\_MaS\_33SR\_LMH\_phospho\_01 Scan 7626 Method FTMS; HCD Score 75.3 m/z 891.8 Gene names SLC2A13

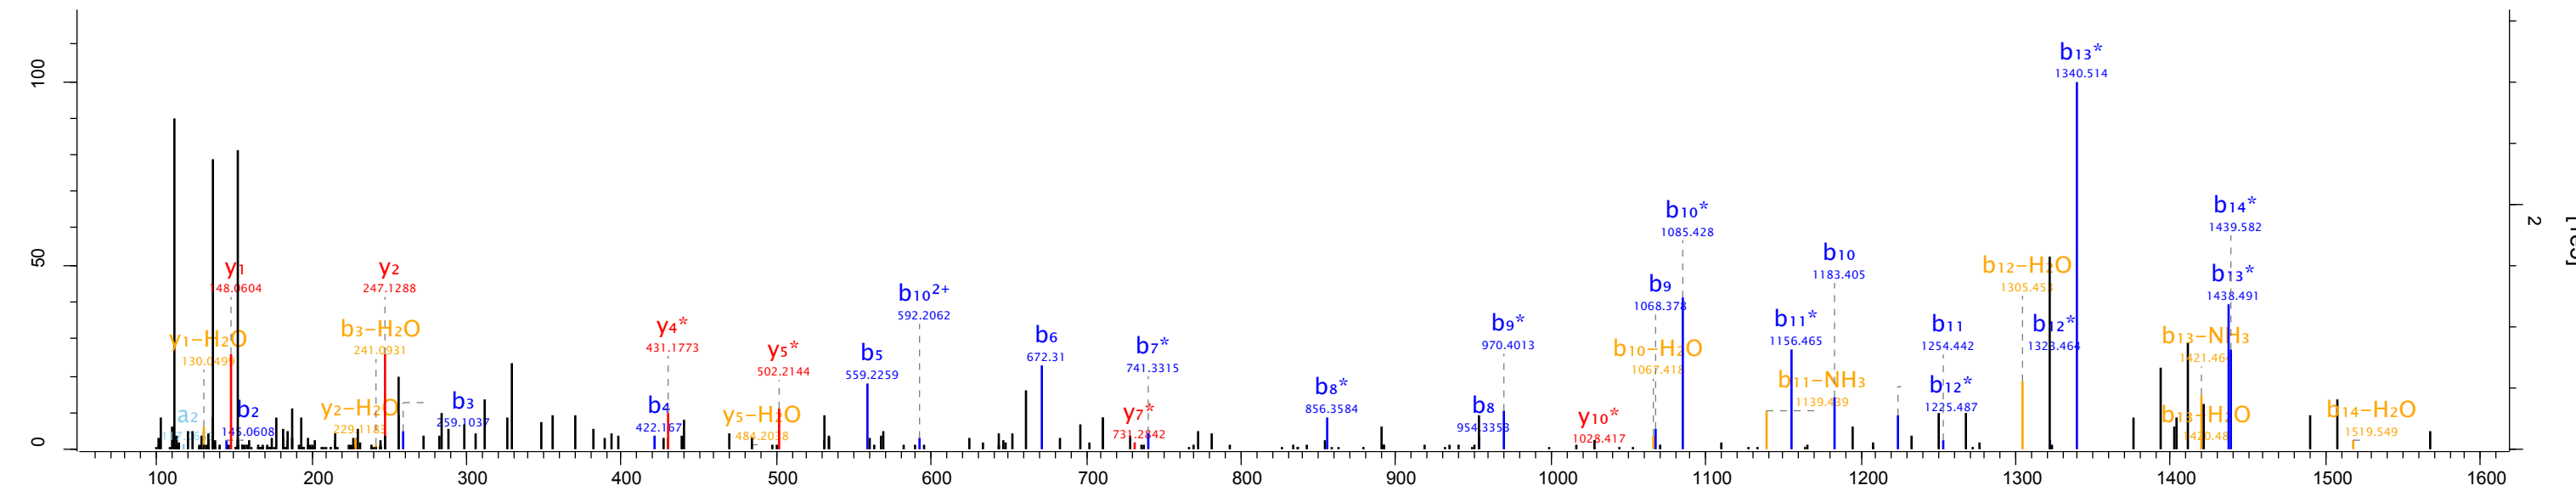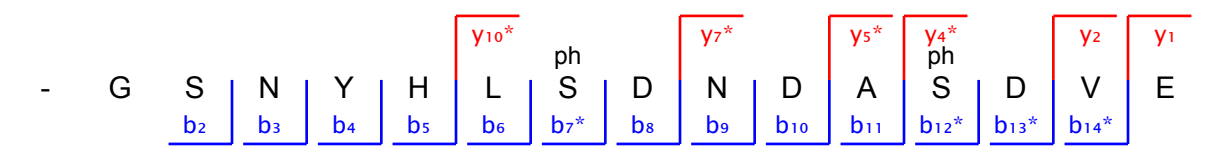

Raw file 20171215\_MaS\_33SR\_LMH\_phospho\_01 Scan 7676 Method FTMS; HCD Score 98.76 m/z 888.98 Gene names NCAPG

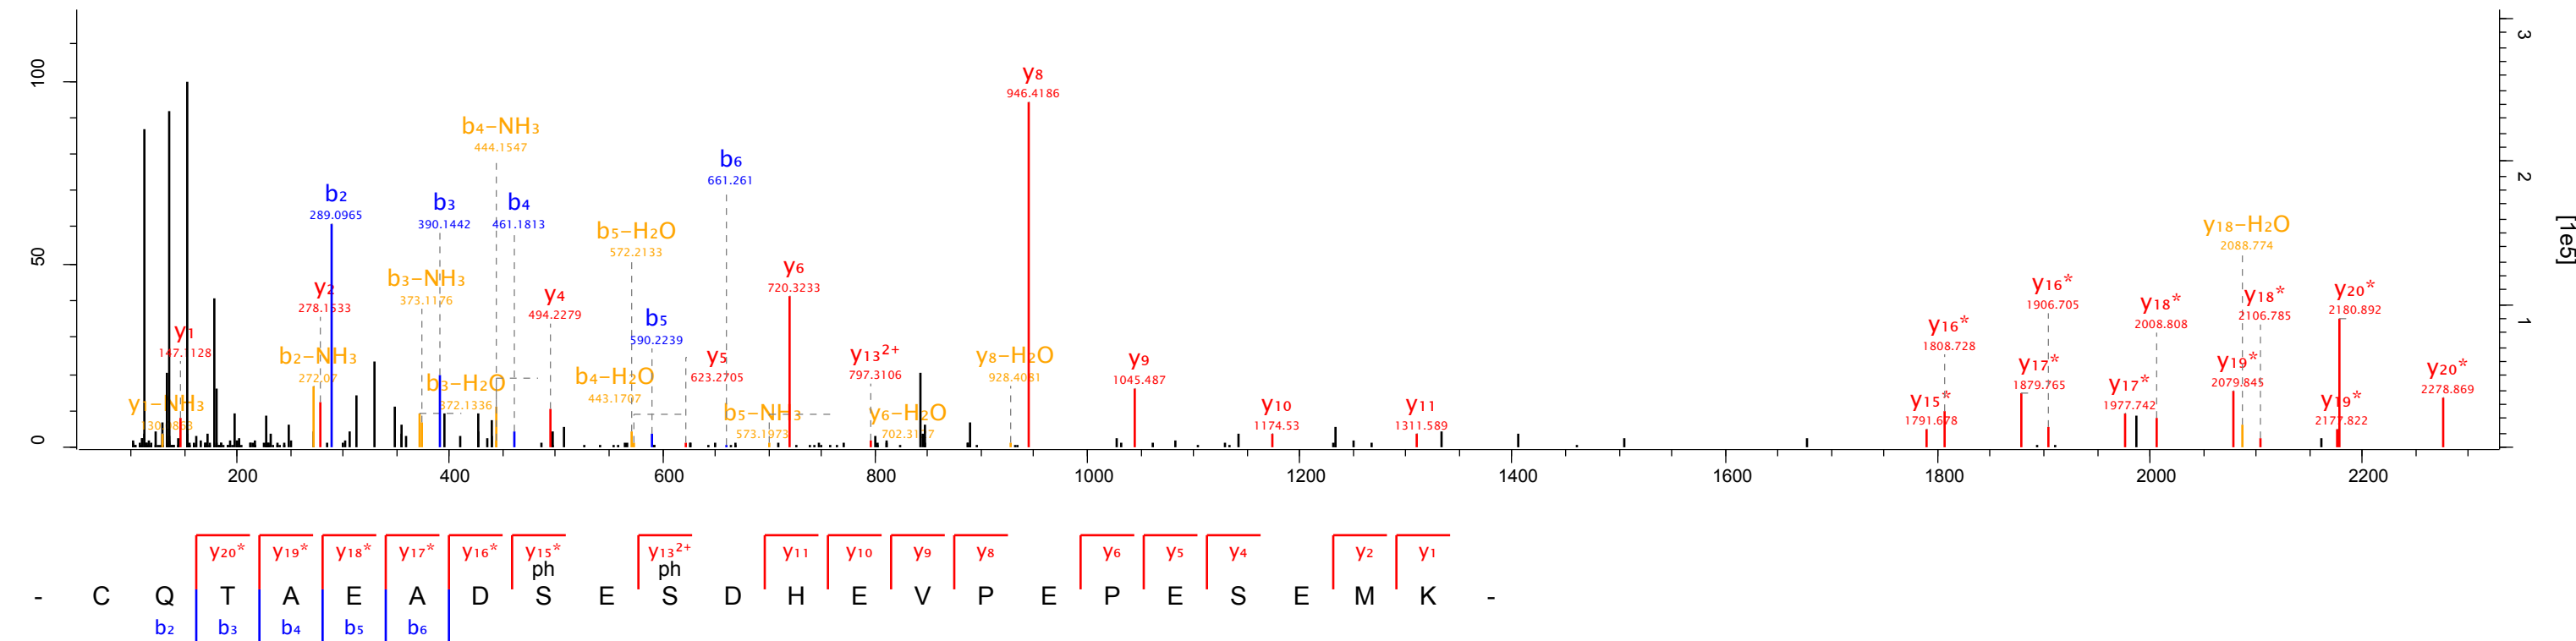

Raw file 20171215\_MaS\_33SR\_LMH\_phospho\_01 Scan 7696 Method FTMS; HCD Score 43.69 m/z 763.31

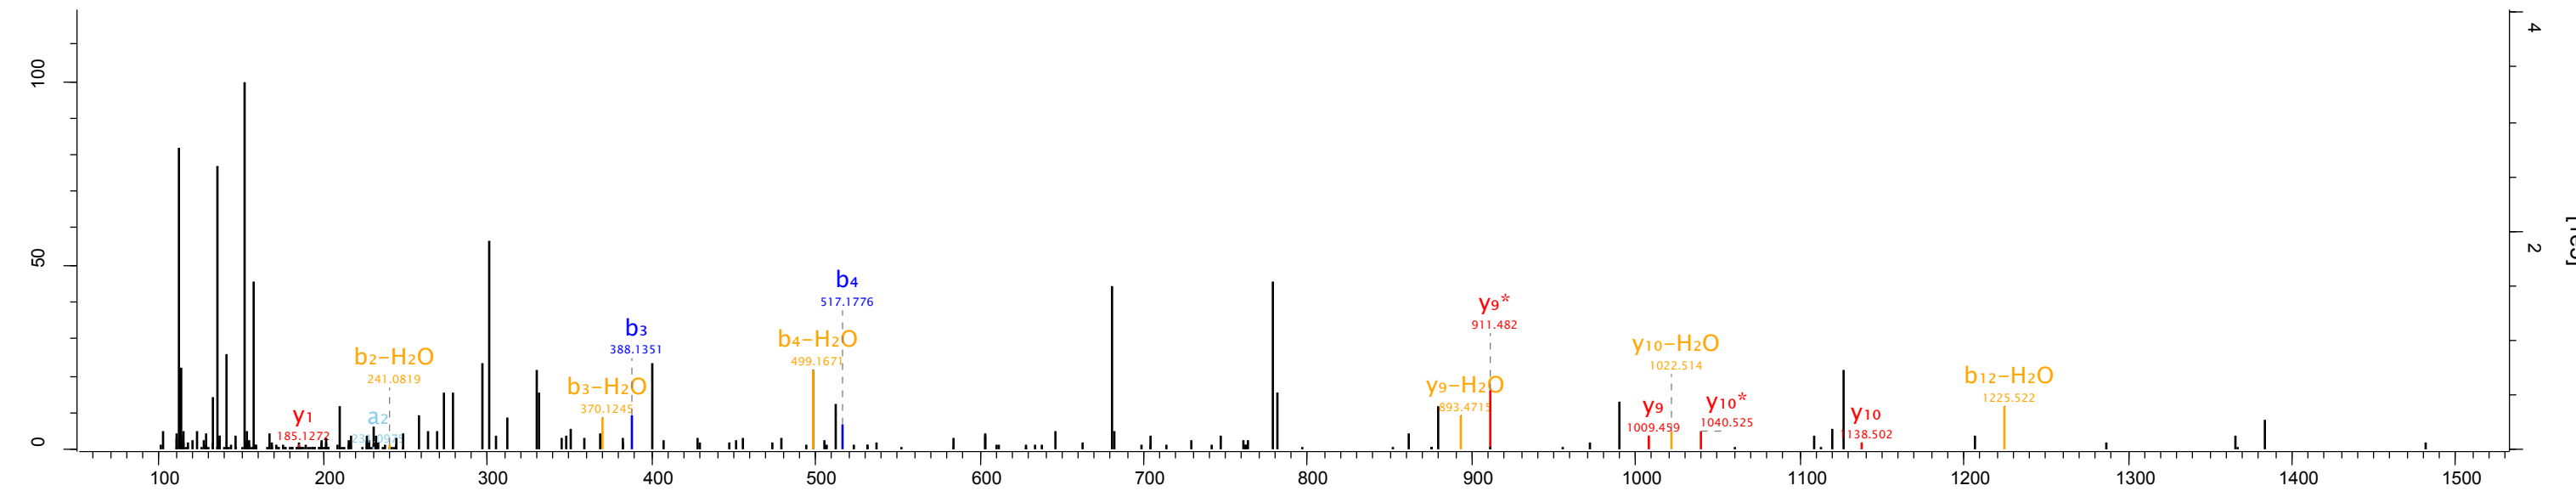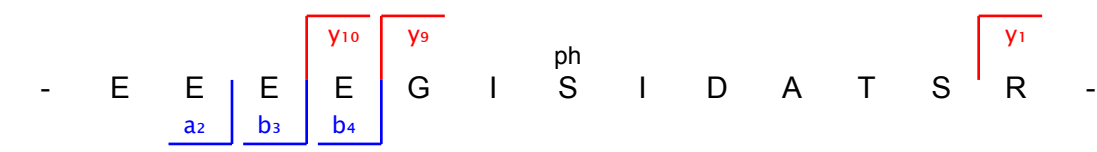



Raw file 20171215\_MaS\_33SR\_LMH\_phospho\_01 Scan 8086 Method FTMS; HCD Score 55.75 m/z 817.28 Gene names CTU2

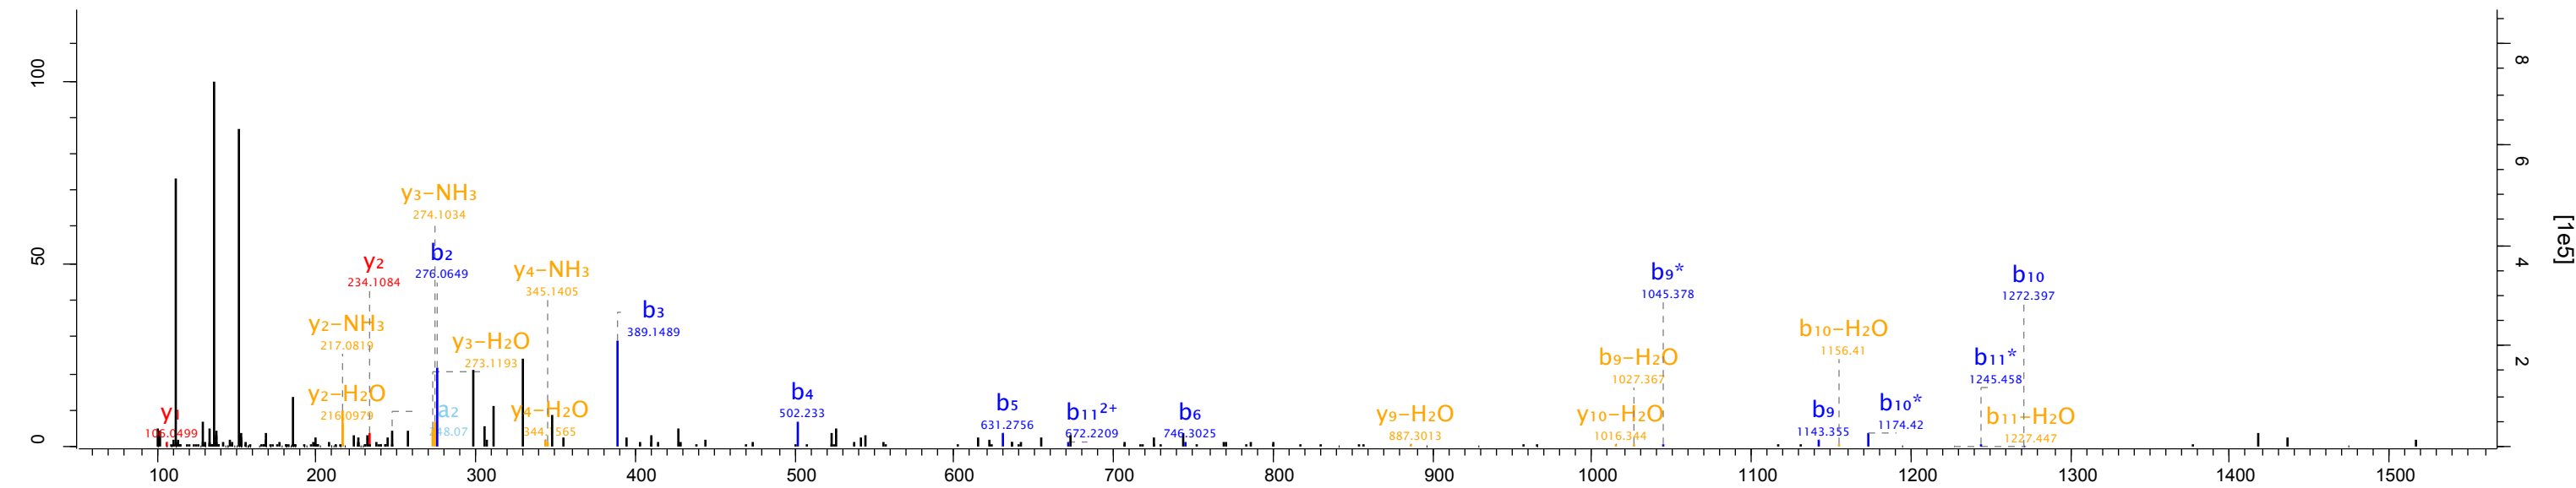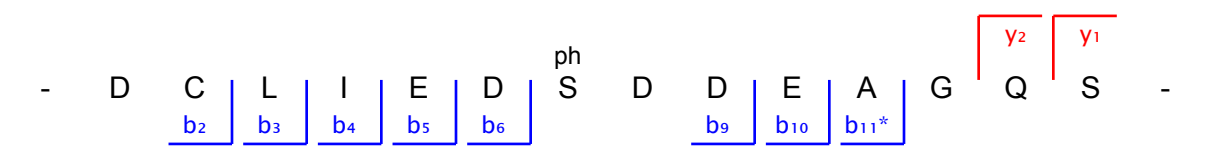

Raw file 20171215\_MaS\_33SR\_LMH\_phospho\_01 Scan 8136 Method FTMS; HCD Score 50.64 m/z 981.03 Gene names FARP1

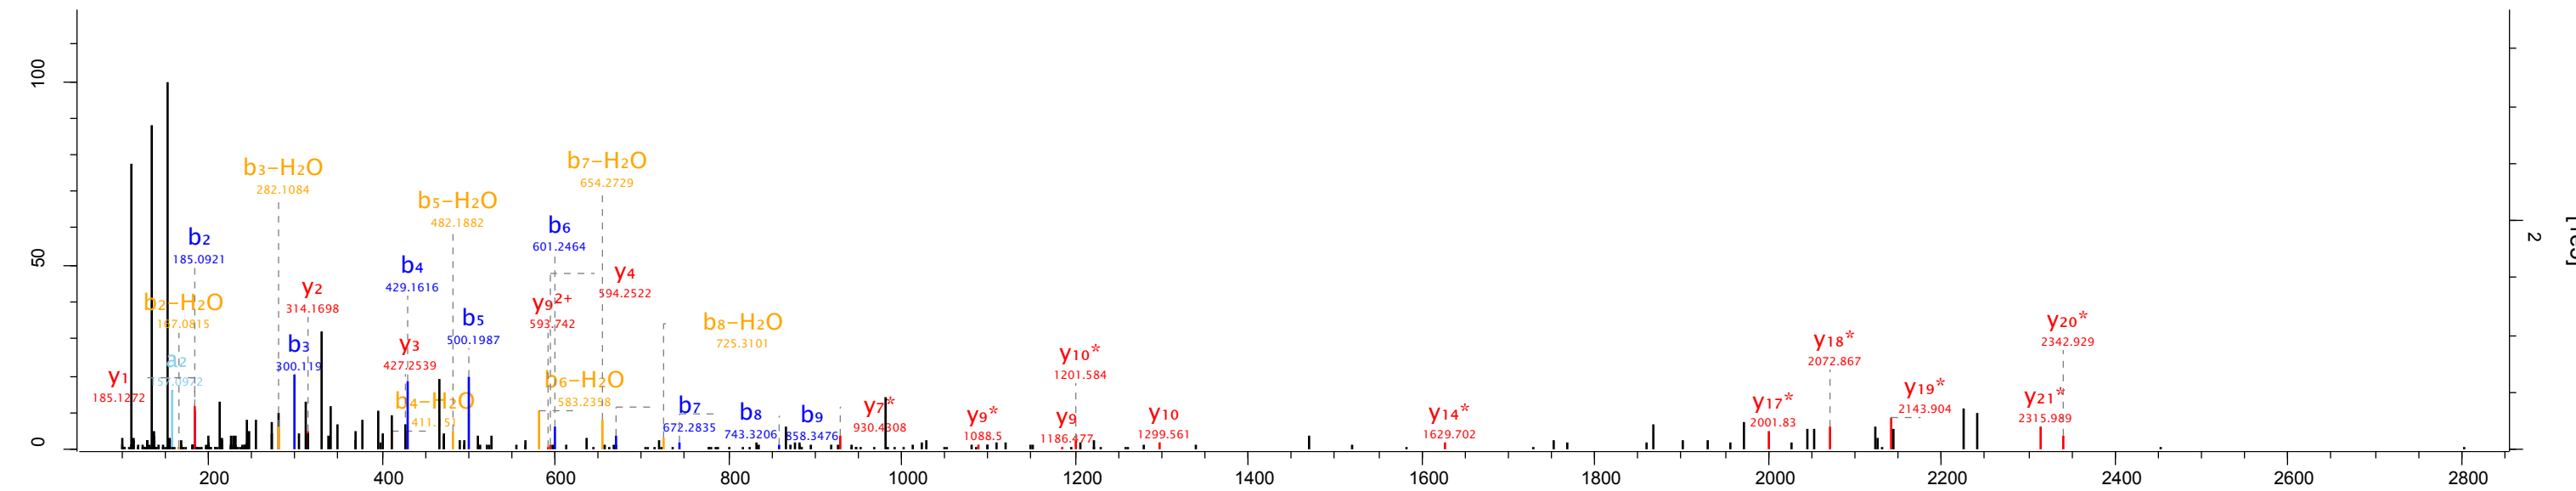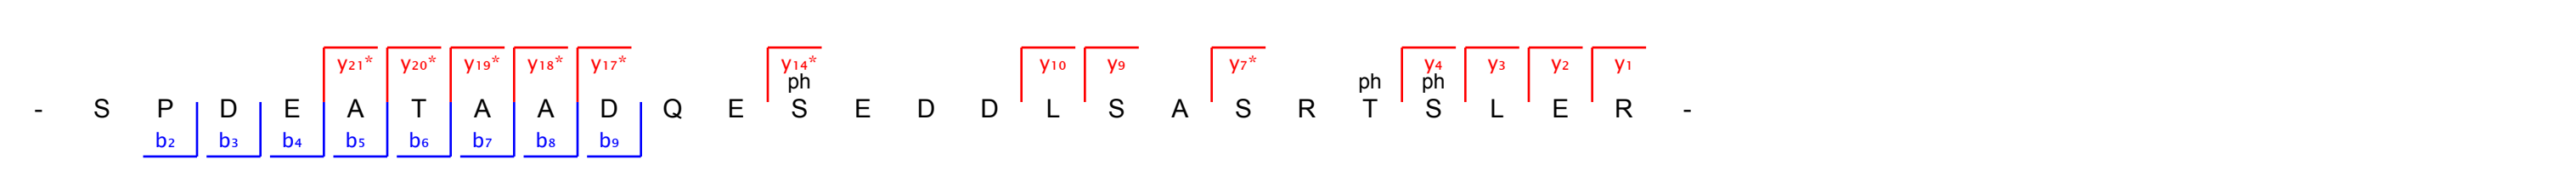

Raw file: 20171215\_MaS\_33SR\_LMH\_phospho\_01  
 Scan: 8486 Method: FTMS; HCD Score: 98.64 m/z: 1283.46 Gene names: SCAF11

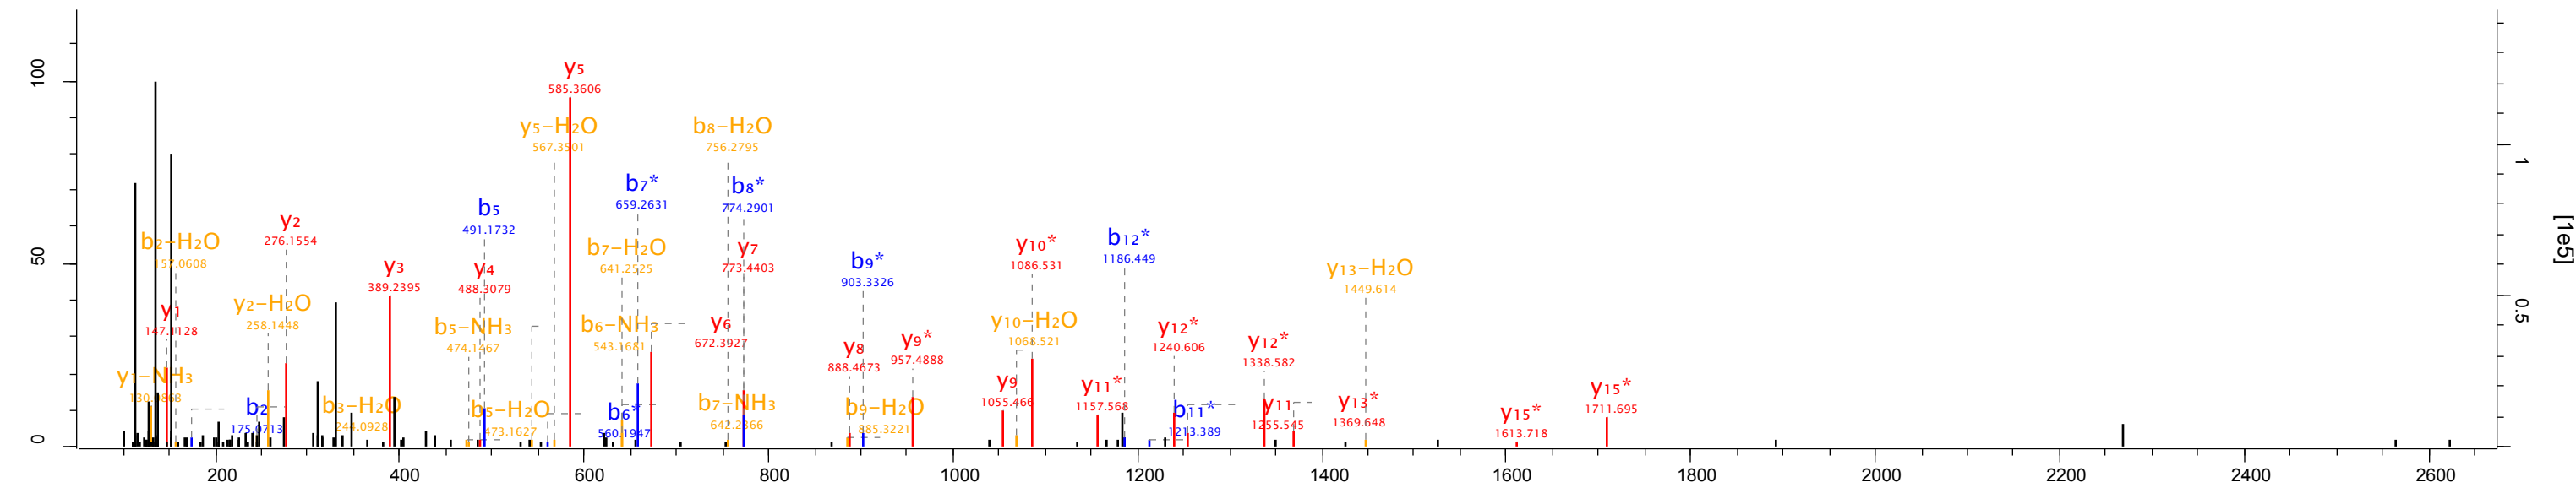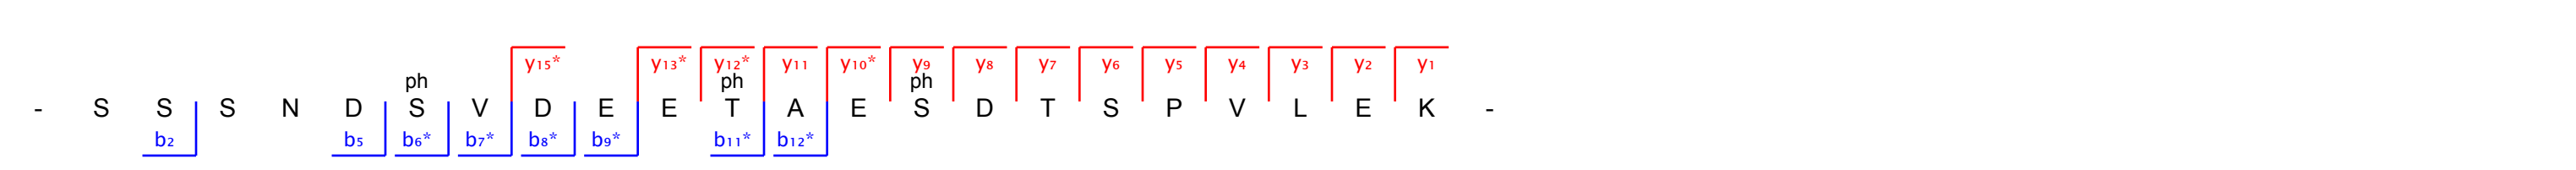

Raw file 20171215\_MaS\_33SR\_LMH\_phospho\_01 Scan 8626 Method FTMS; HCD Score 58.32 m/z 585.89 Gene names FOXK1

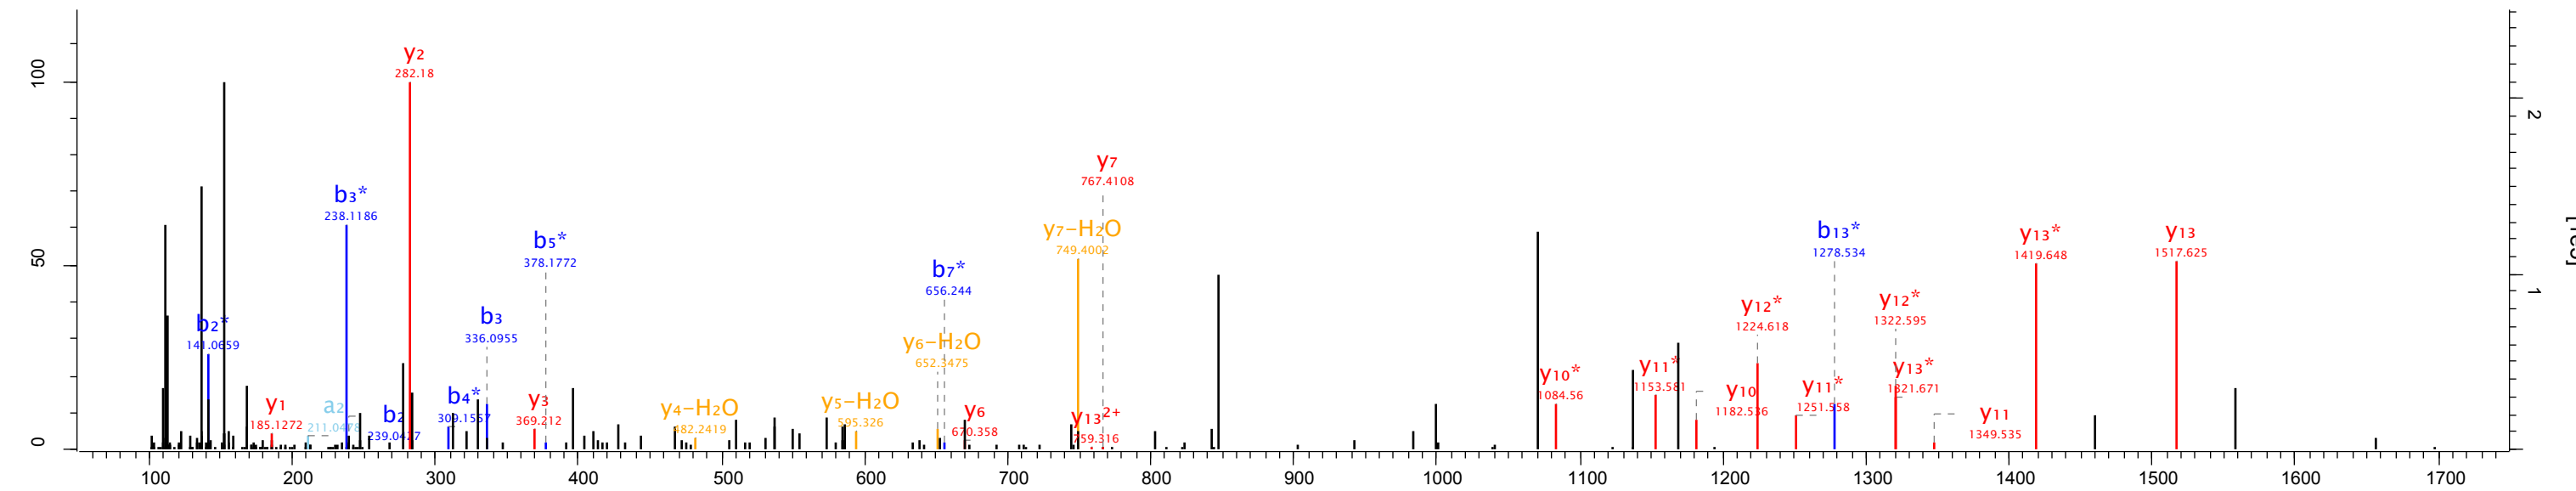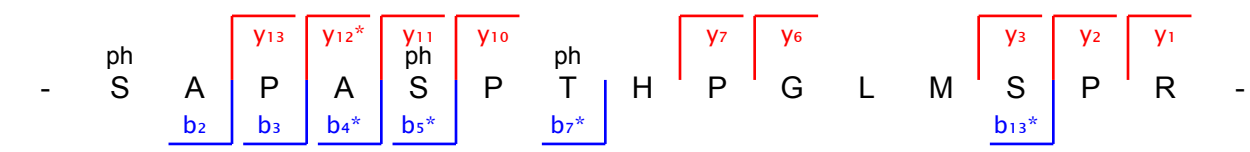

Raw file 20171215\_MaS\_33SR\_LMH\_phospho\_01 Scan 8776 Method FTMS; HCD Score 144.95 m/z 1060.99 Gene names UBAP2L

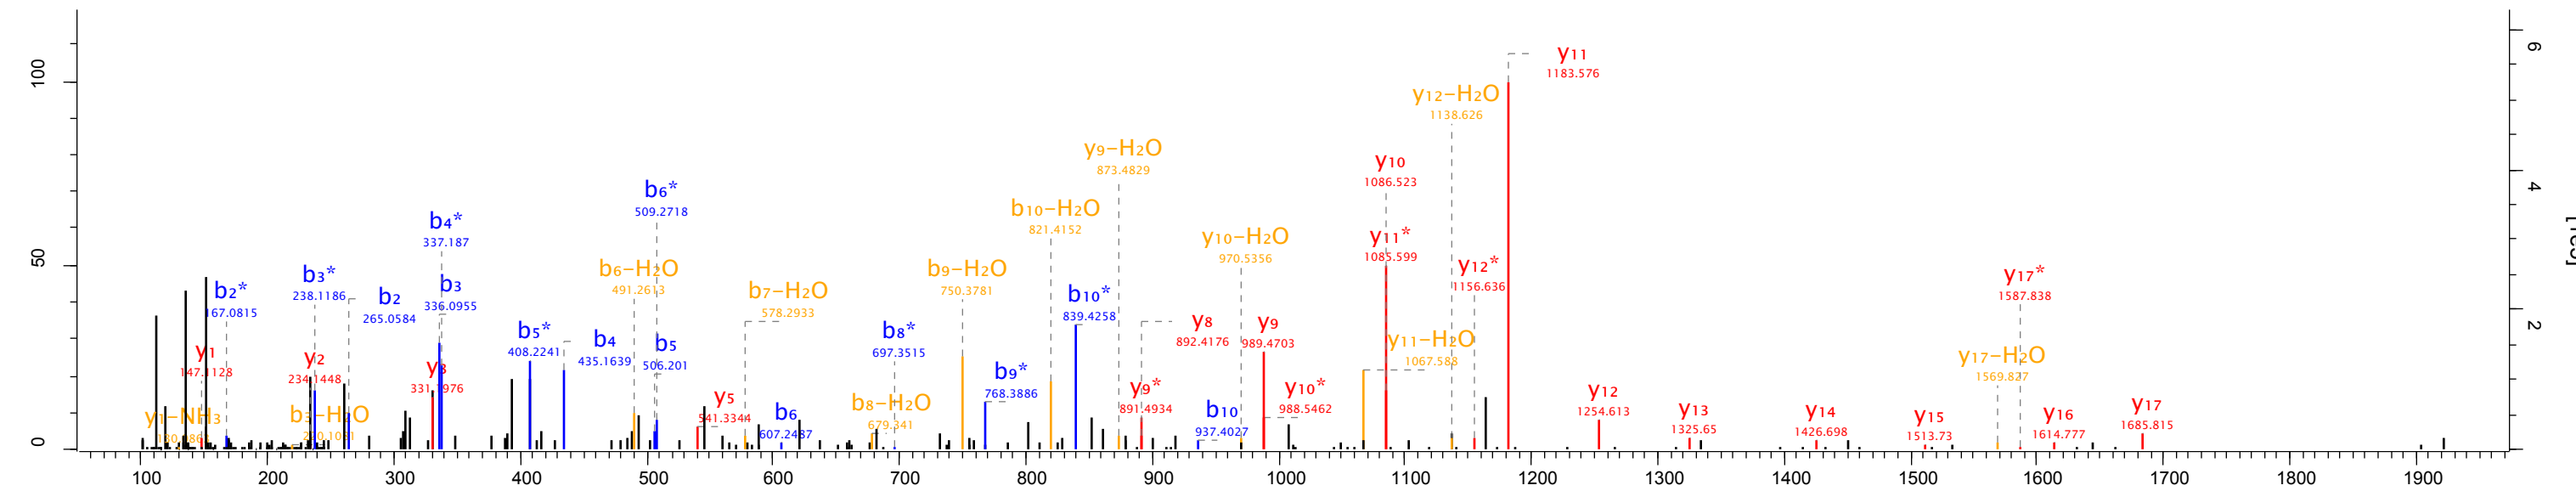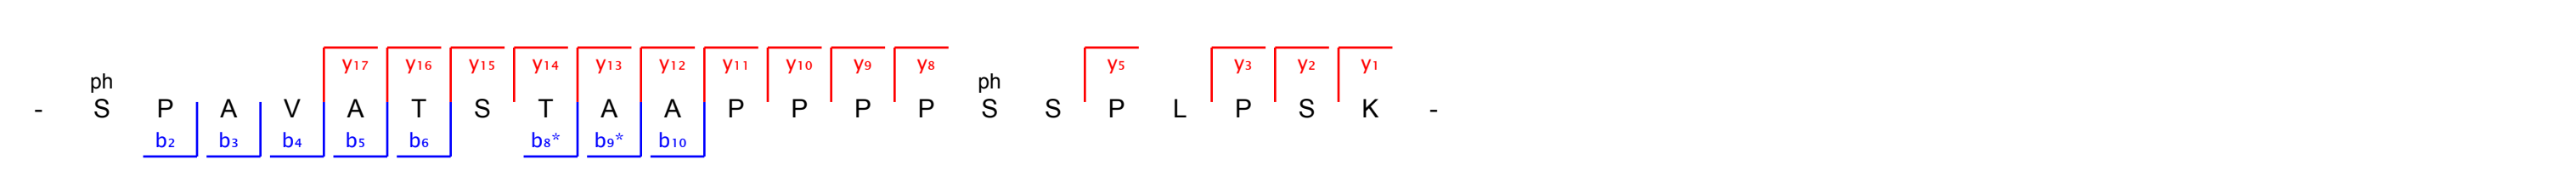

Raw file 20171215\_MaS\_33SR\_LMH\_phospho\_01 Scan 9016 Method FTMS; HCD Score 192.77 m/z 1177.47 Gene names DOCK7

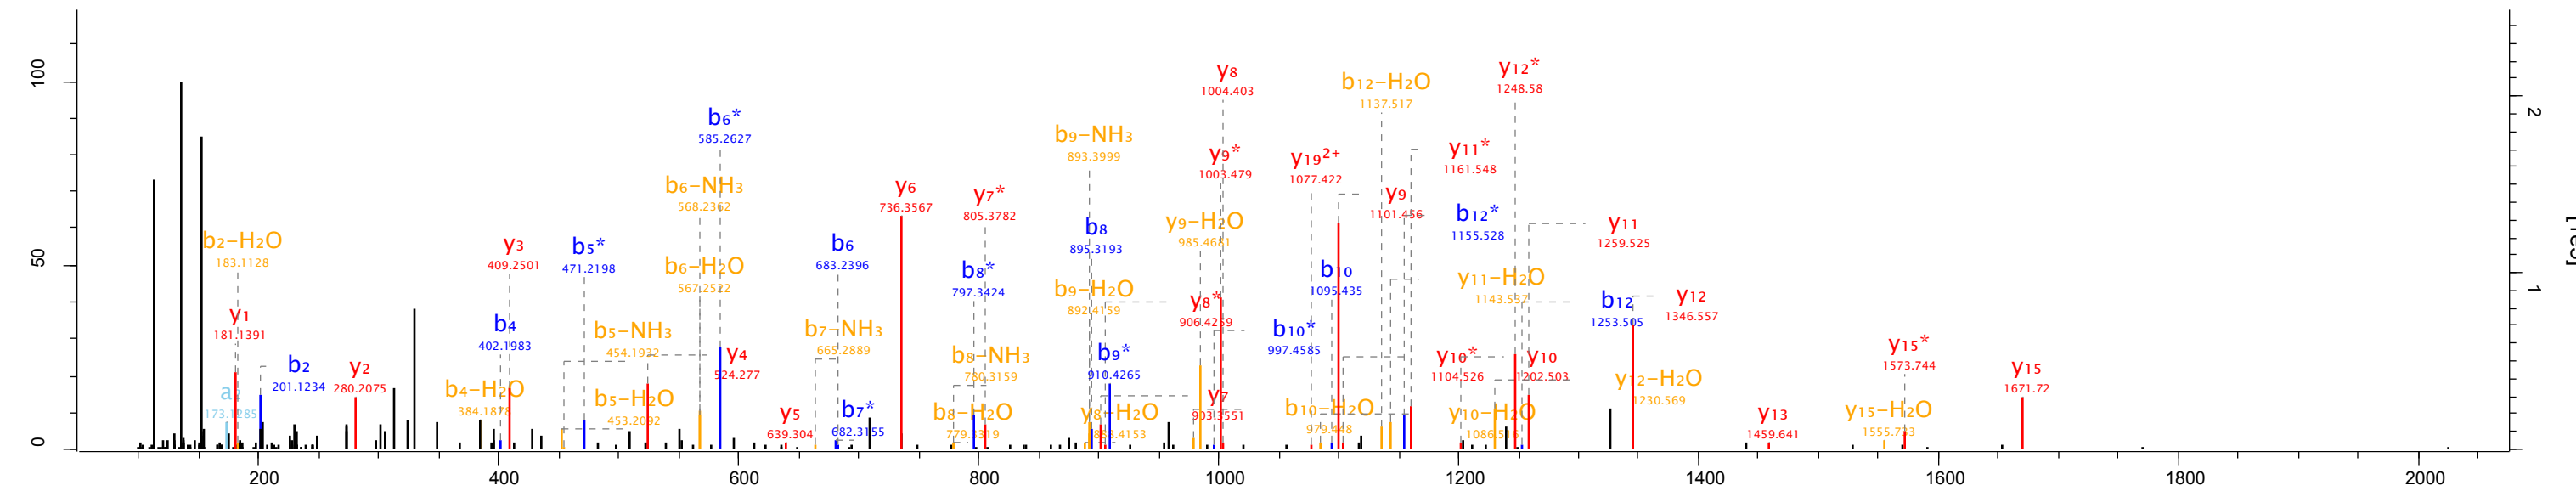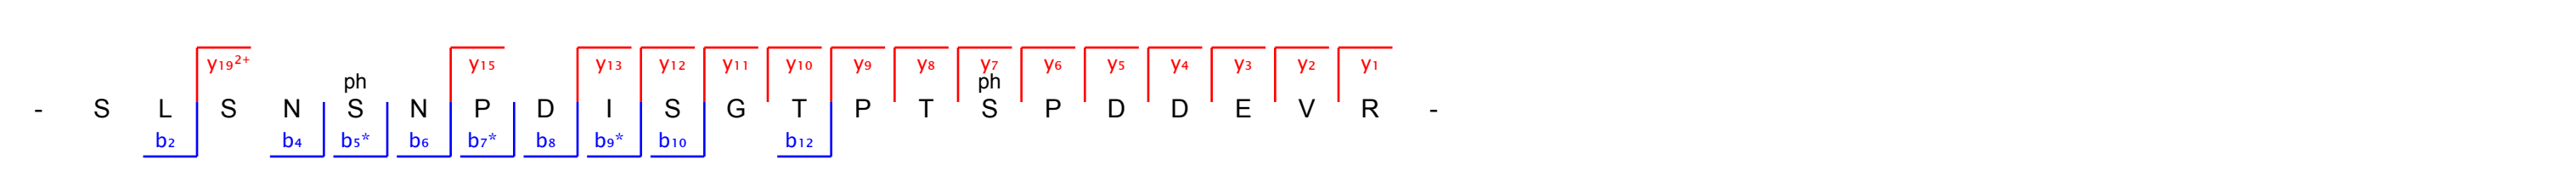

Raw file 20171215\_MaS\_33SR\_LMH\_phospho\_01 Scan 9366 Method FTMS; HCD Score 176.77 m/z 974.88 Gene names PLEC

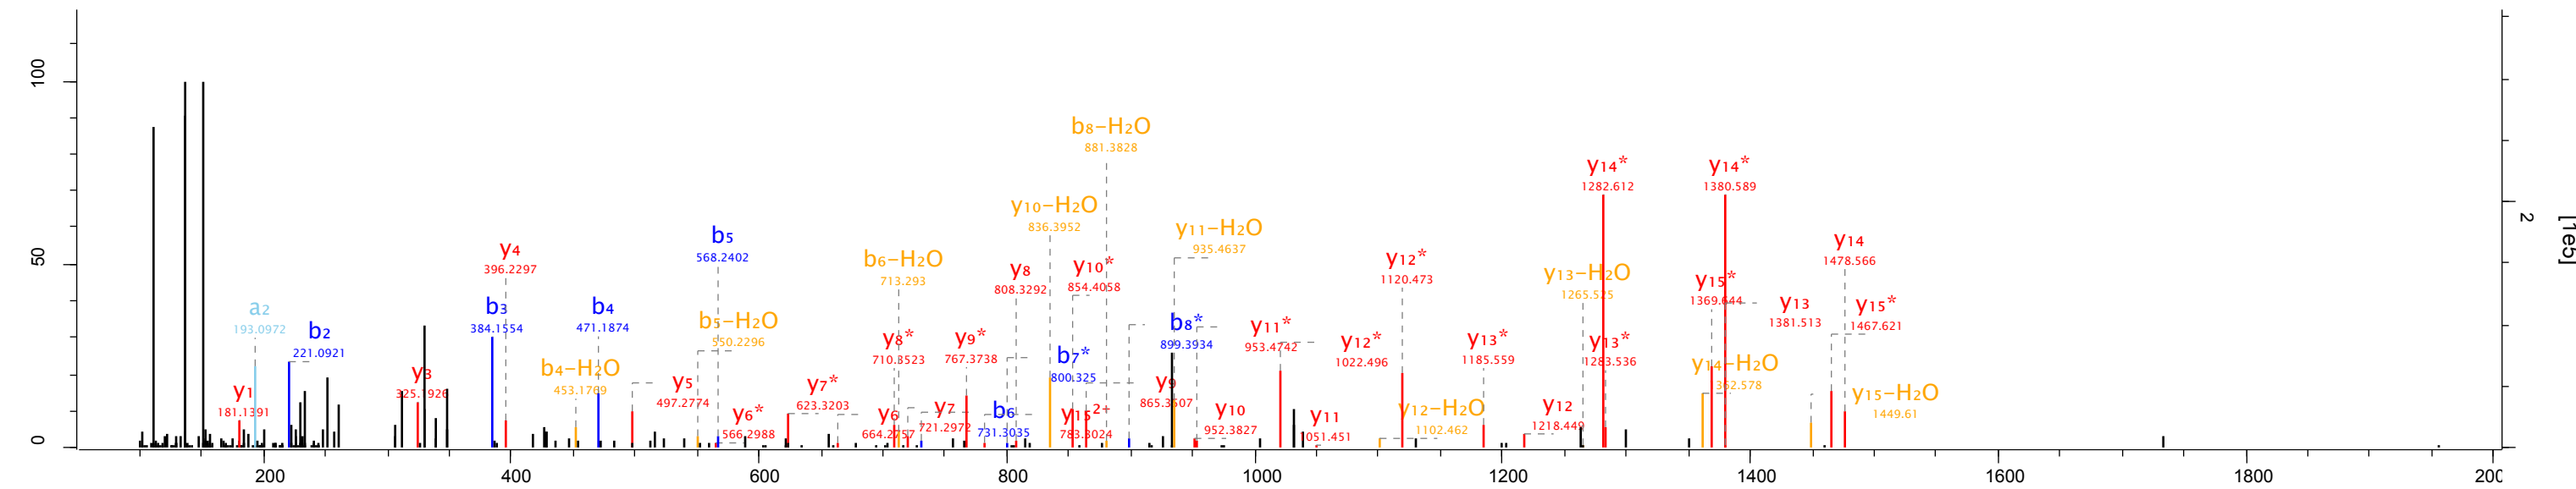

- G Y Y S P Y S V S G S G S T A G S R -

Fragmentation scheme showing amino acid sequence: G Y Y S P Y S V S G S G S T A G S R. Fragmentation sites are indicated by brackets below the sequence, with labels b1-b8 (blue) and y1-y15\* (red) corresponding to the peaks in the mass spectrum above.





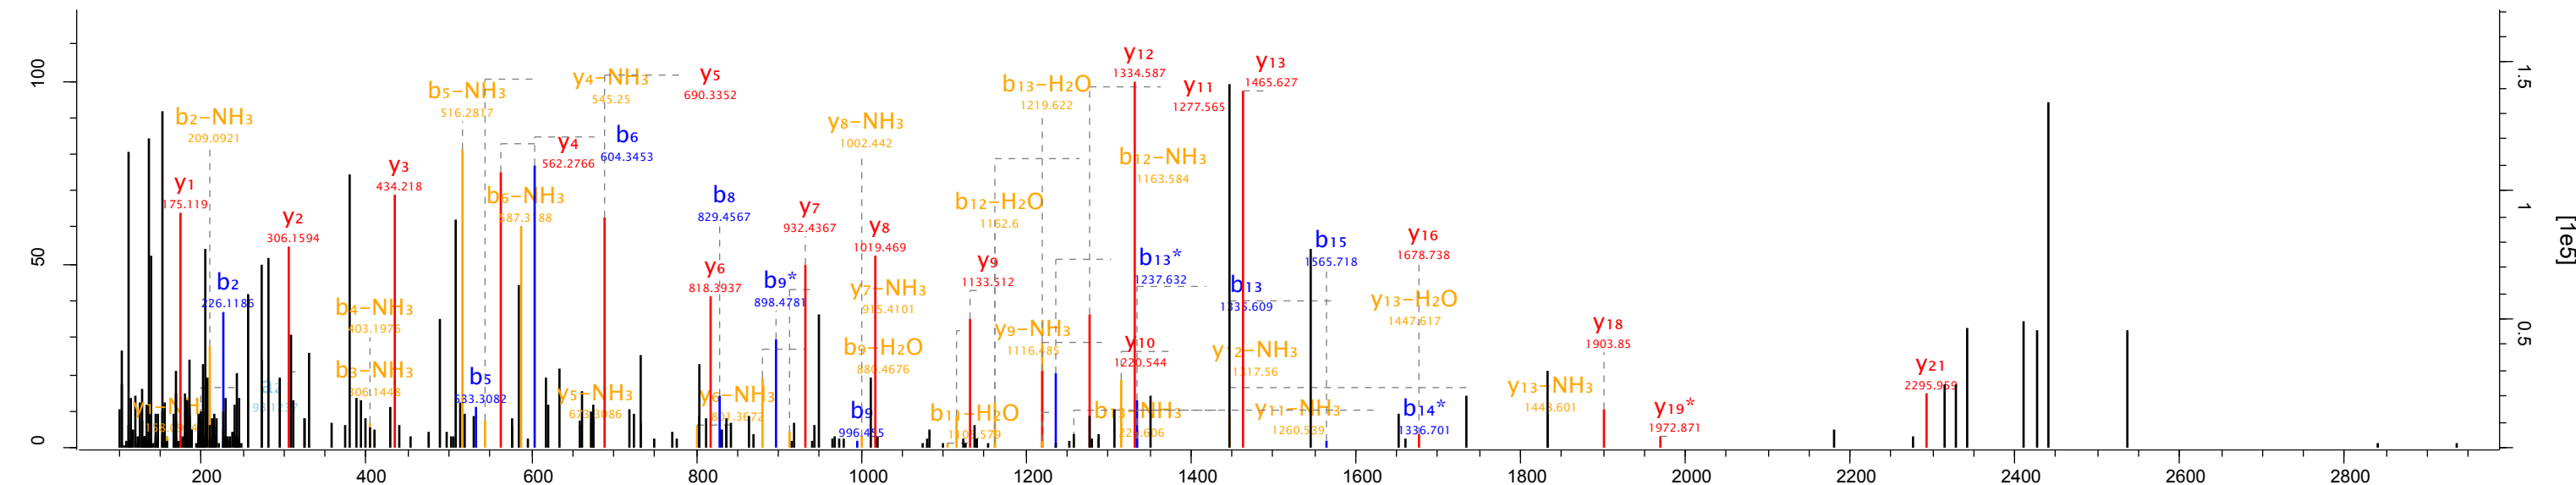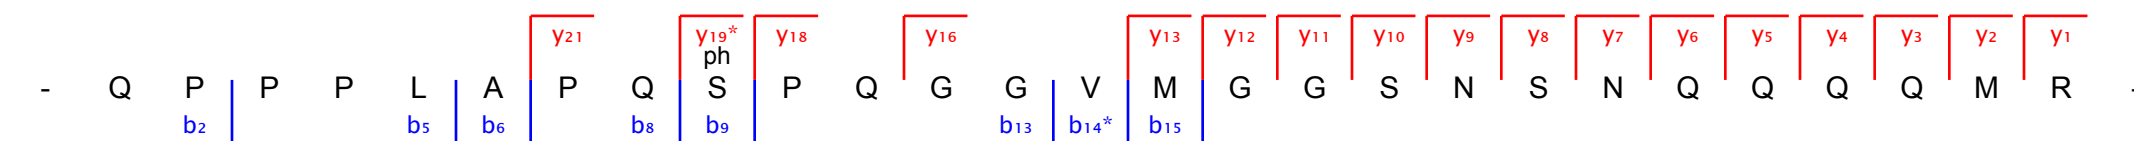



Raw file 20171215\_MaS\_33SR\_LMH\_phospho\_02 Scan 10926 Method FTMS; HCD Score 52.96 m/z 813.04 Gene names WIPF2

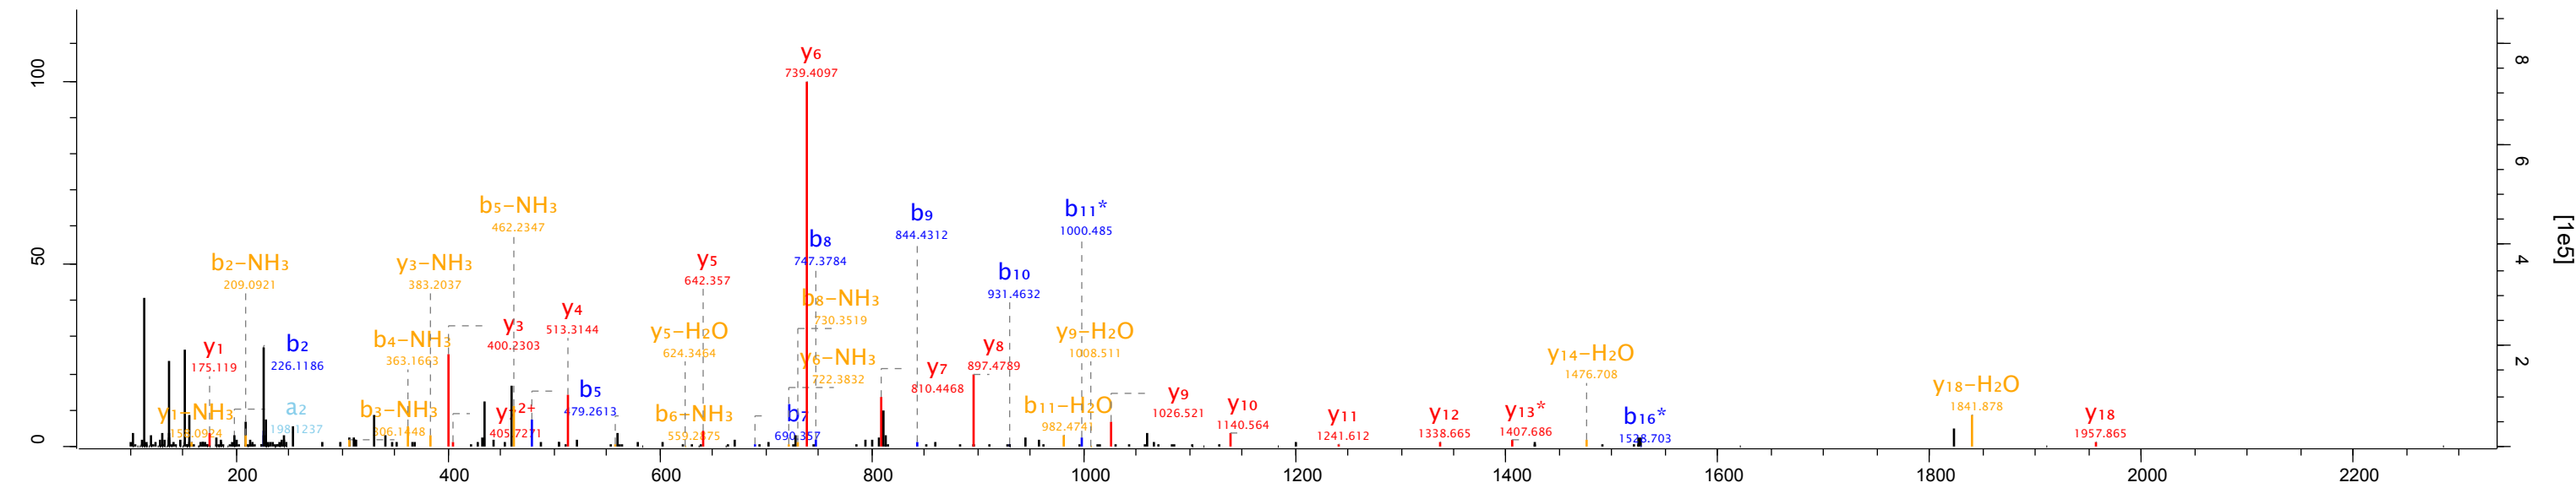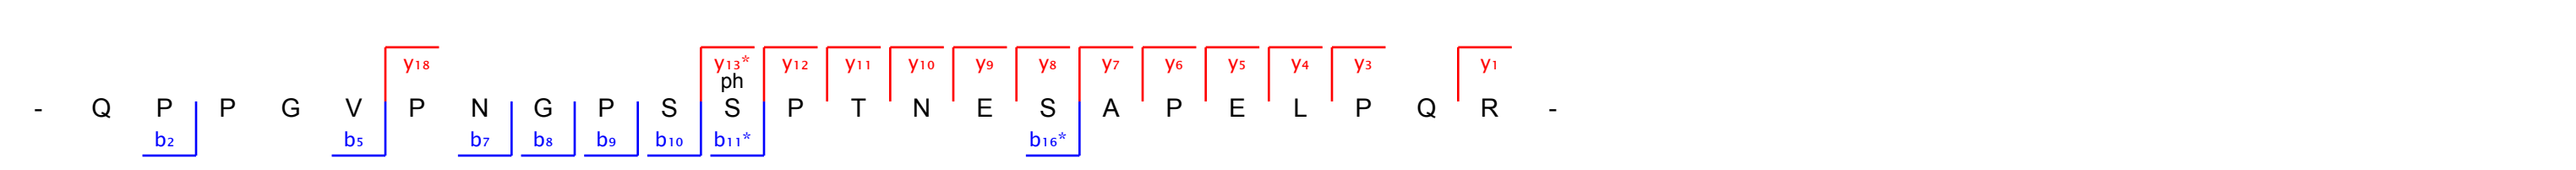

Raw file 20171215\_MaS\_33SR\_LMH\_phospho\_02 Scan 11406 Method FTMS; HCD Score 104.32 m/z 782.14 Gene names AKT1S1

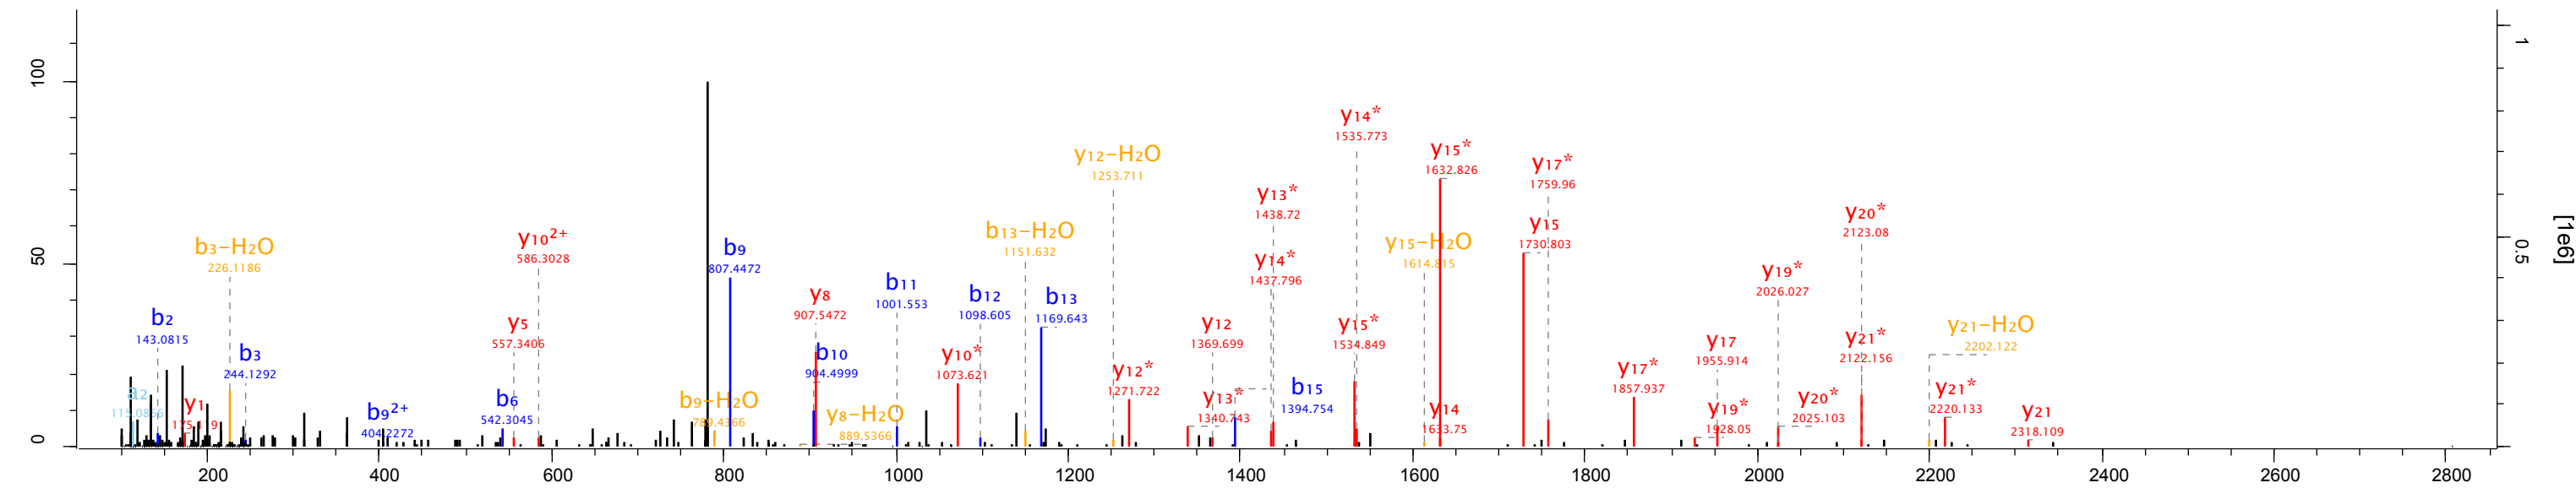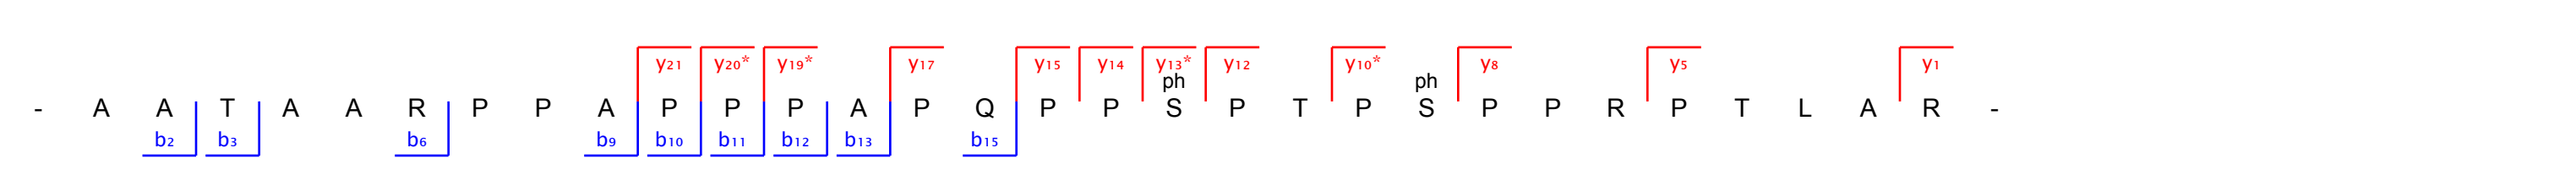

Raw file 20171215\_MaS\_33SR\_LMH\_phospho\_02 Scan 11636 Method FTMS; HCD Score 143.33 m/z 1051.13 Gene names NES

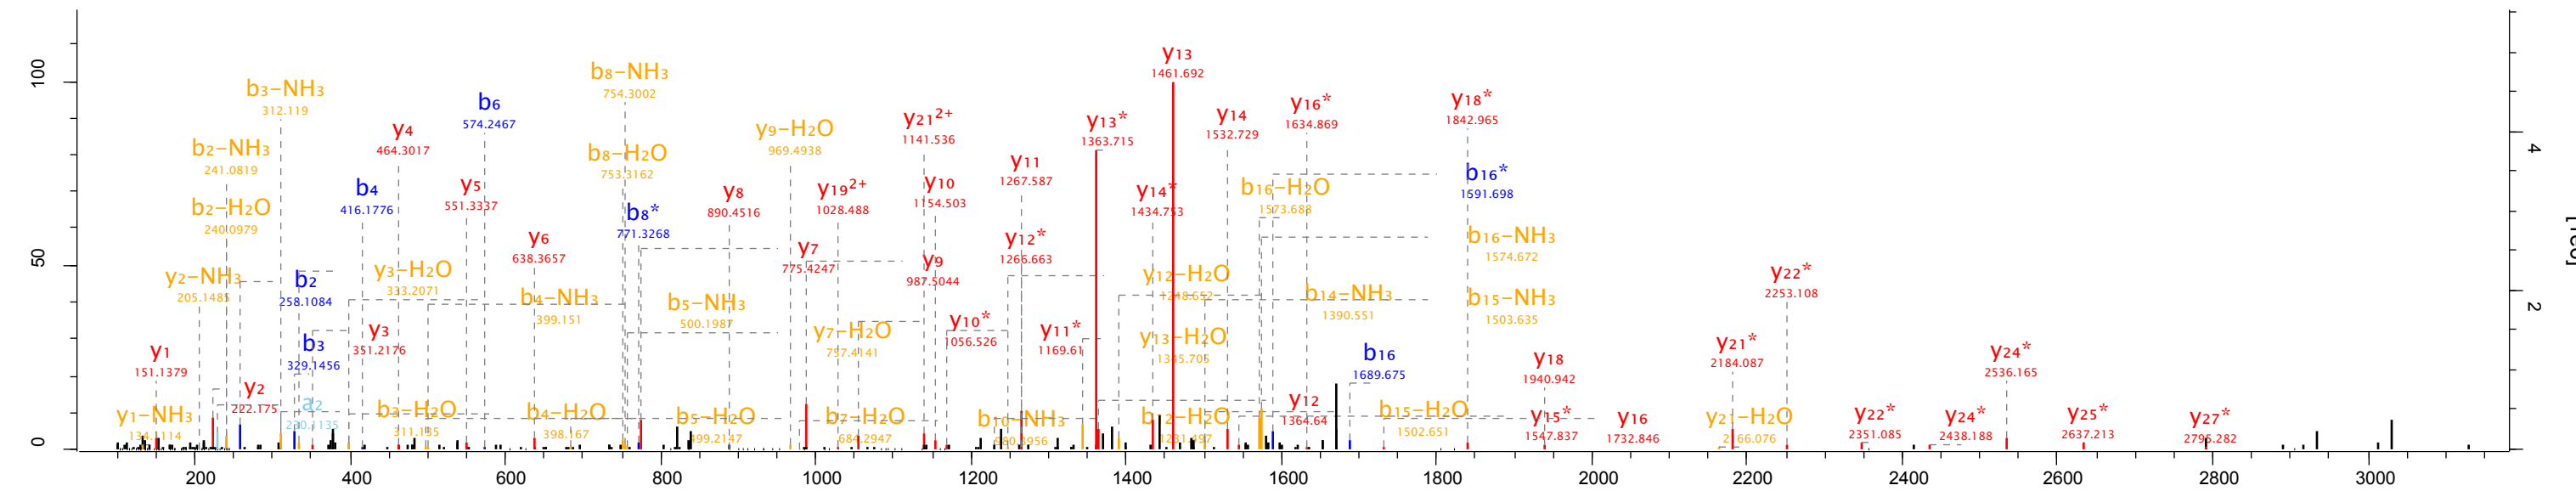

- Q E A S T G Q S P E D H A S L A P P L S P D H S S L E A K -

b<sub>2</sub>
b<sub>3</sub>
b<sub>4</sub>
b<sub>6</sub>
b<sub>8</sub>\*
b<sub>16</sub>

y<sub>27</sub>\*
y<sub>25</sub>\*
y<sub>24</sub>\*
y<sub>22</sub>\*
y<sub>21</sub>\*
y<sub>19</sub><sup>2+</sup>
y<sub>18</sub>
y<sub>16</sub>
y<sub>15</sub>\*
y<sub>14</sub>
y<sub>13</sub>
y<sub>12</sub>
y<sub>11</sub>
y<sub>10</sub>
y<sub>9</sub>
y<sub>8</sub>
y<sub>7</sub>
y<sub>6</sub>
y<sub>5</sub>
y<sub>4</sub>
y<sub>3</sub>
y<sub>2</sub>
y<sub>1</sub>

Raw file 20171215\_MaS\_33SR\_LMH\_phospho\_02 Scan 14016 Method FTMS; HCD Score 95.17 m/z 1170.83 Gene names HDAC2

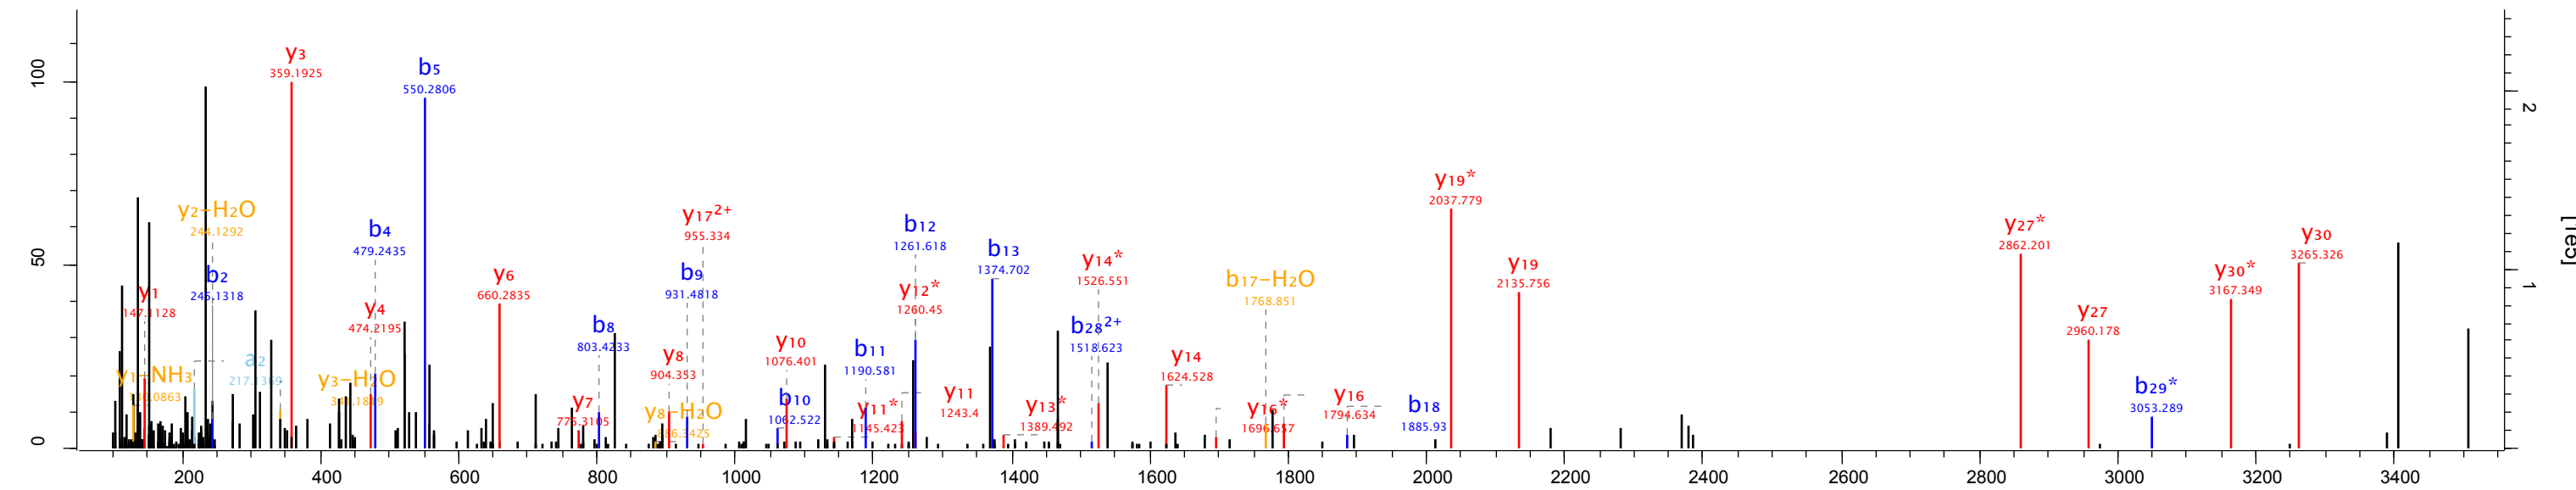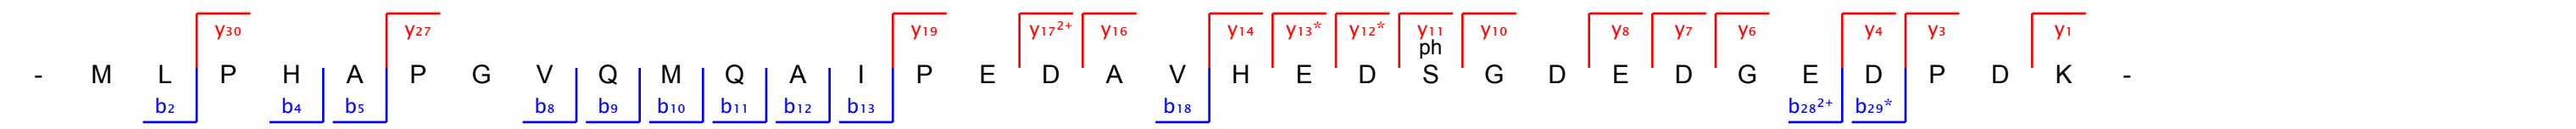

Raw file 20171215\_MaS\_33SR\_LMH\_phospho\_02 Scan 14296 Method FTMS; HCD Score 47.97 m/z 558.71 Gene names CHMP4B

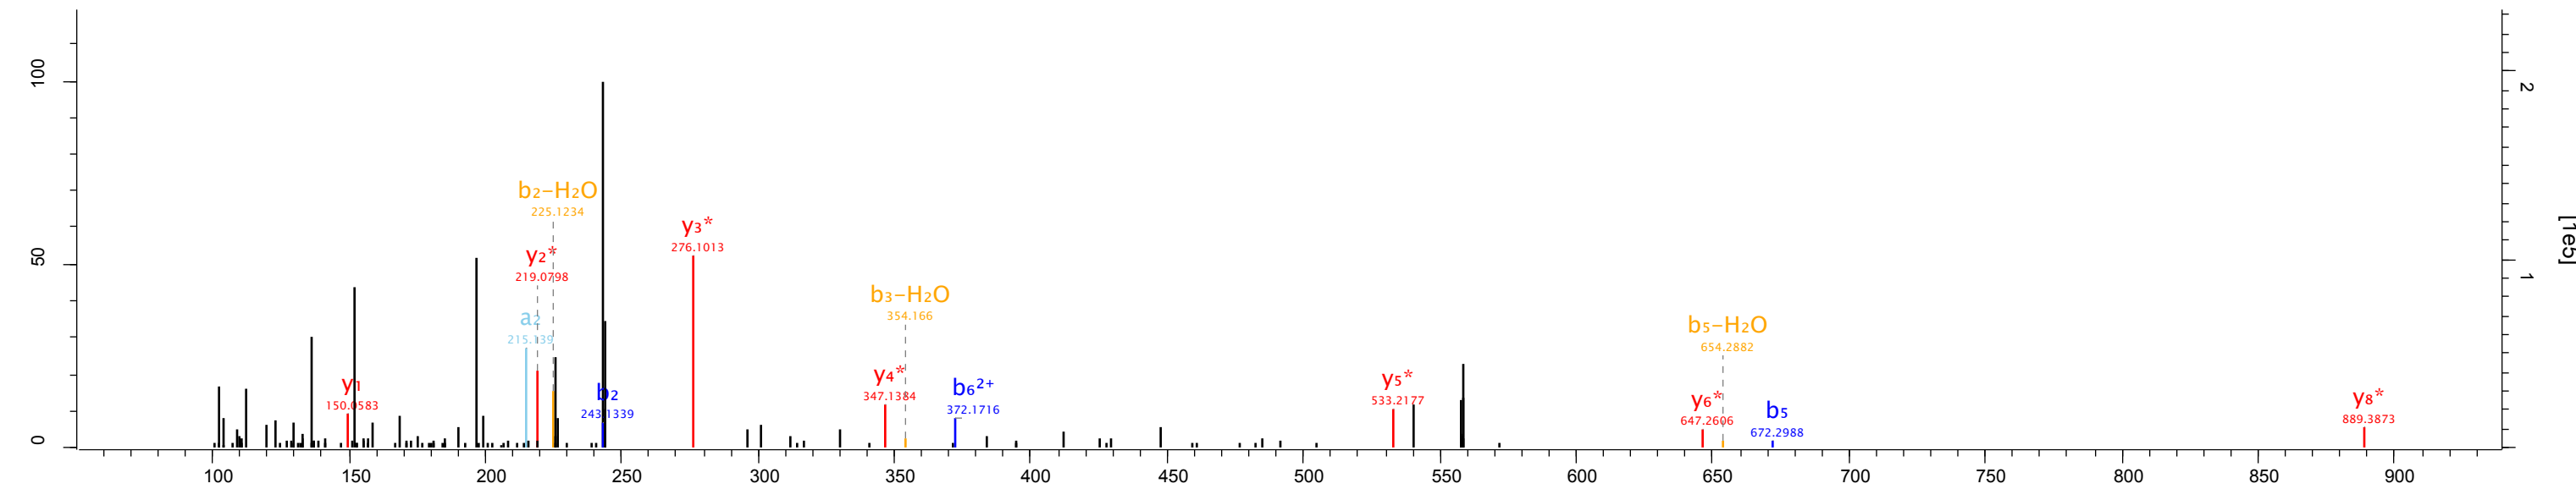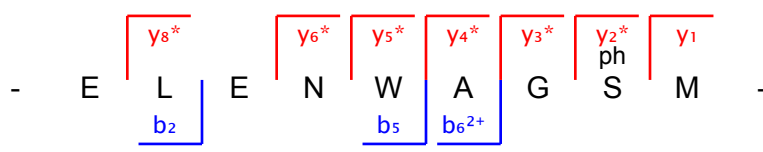

Raw file 20171215\_MaS\_33SR\_LMH\_phospho\_02 Scan 15116 Method FTMS; HCD Score 65.18 m/z 622.26 Gene names MPRIP

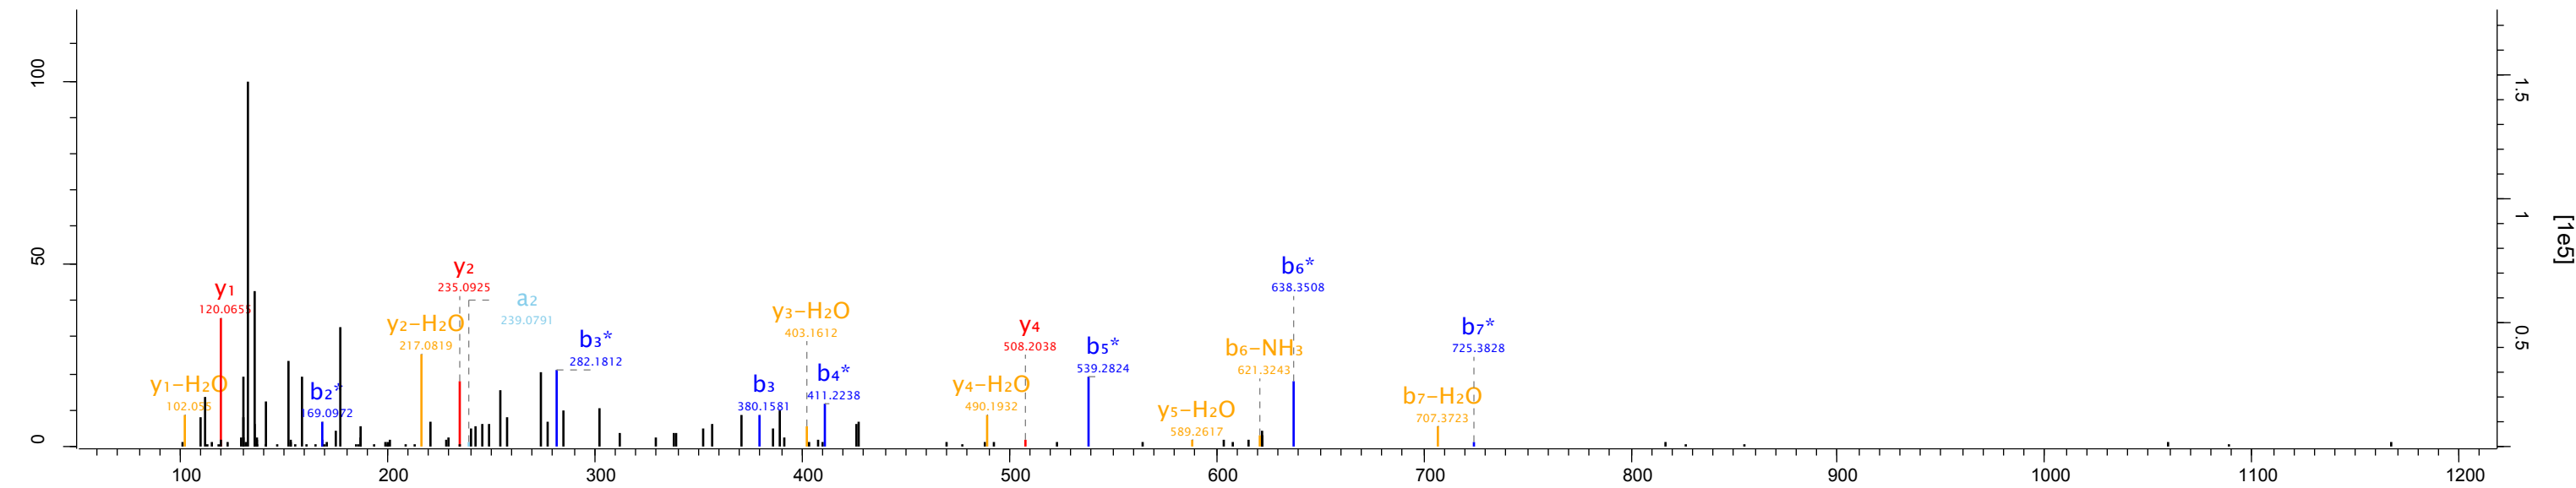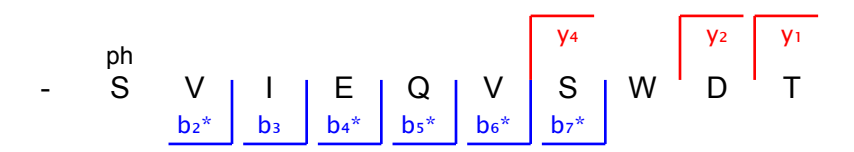



Raw file 20171215\_MaS\_33SR\_LMH\_phospho\_02 Scan 15156 Method FTMS; HCD Score 166.57 m/z 1086.93 Gene names SLC14A1

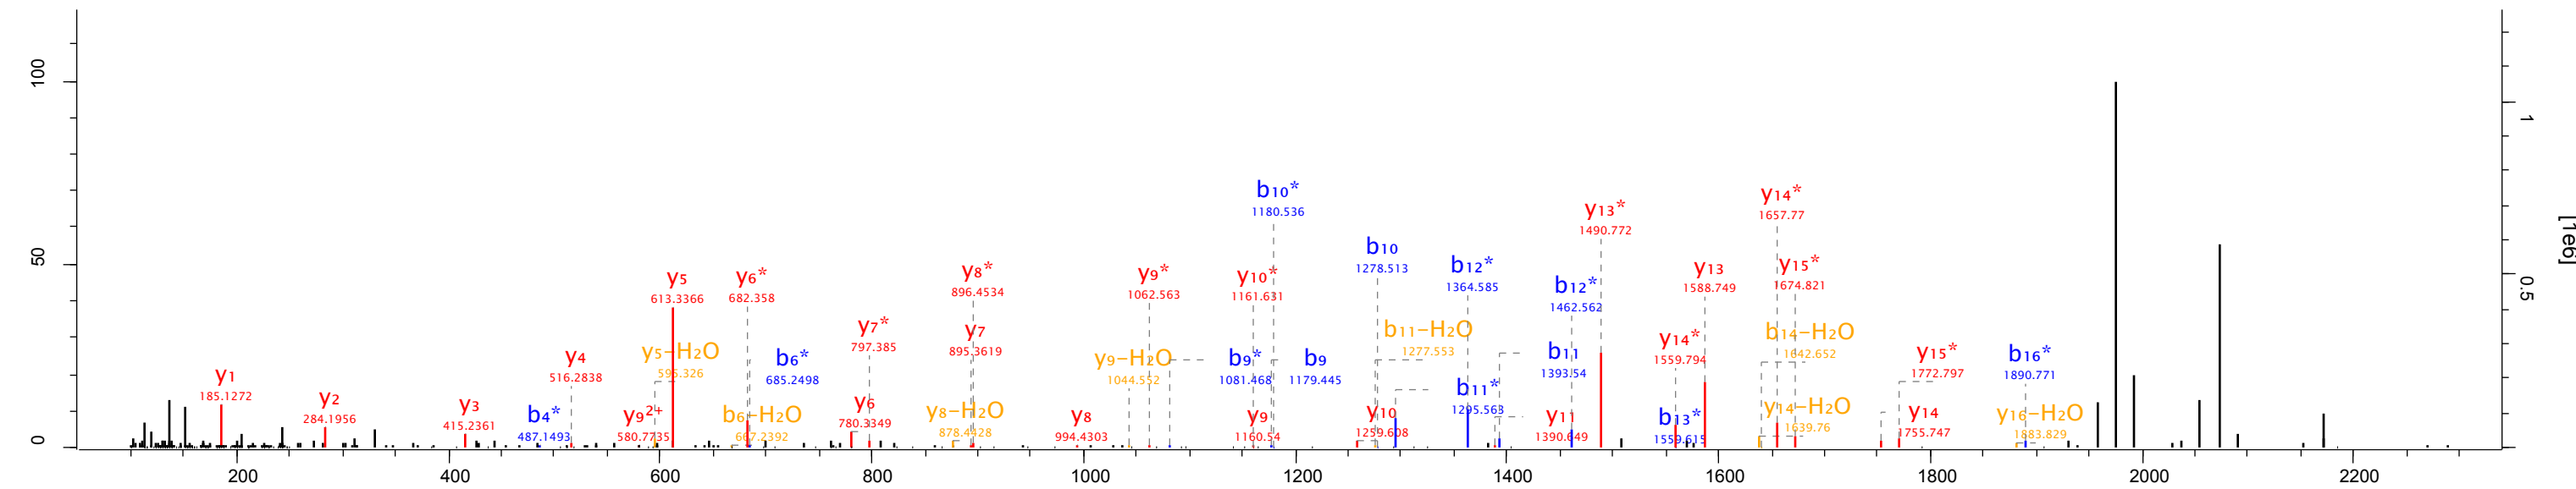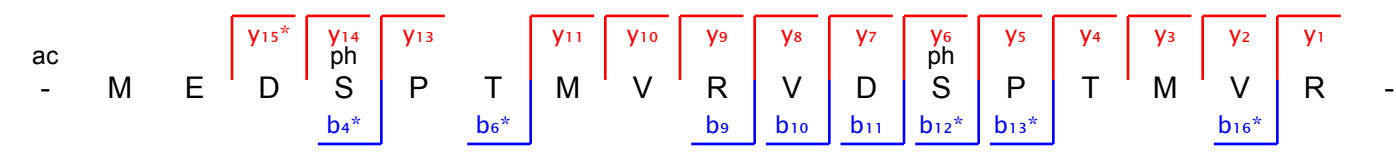

Raw file: 20171215\_MaS\_33SR\_LMH\_phospho\_02  
 Scan: 15436 Method: FTMS; HCD Score: 261.52 m/z: 946.88 Gene names: AHNAK

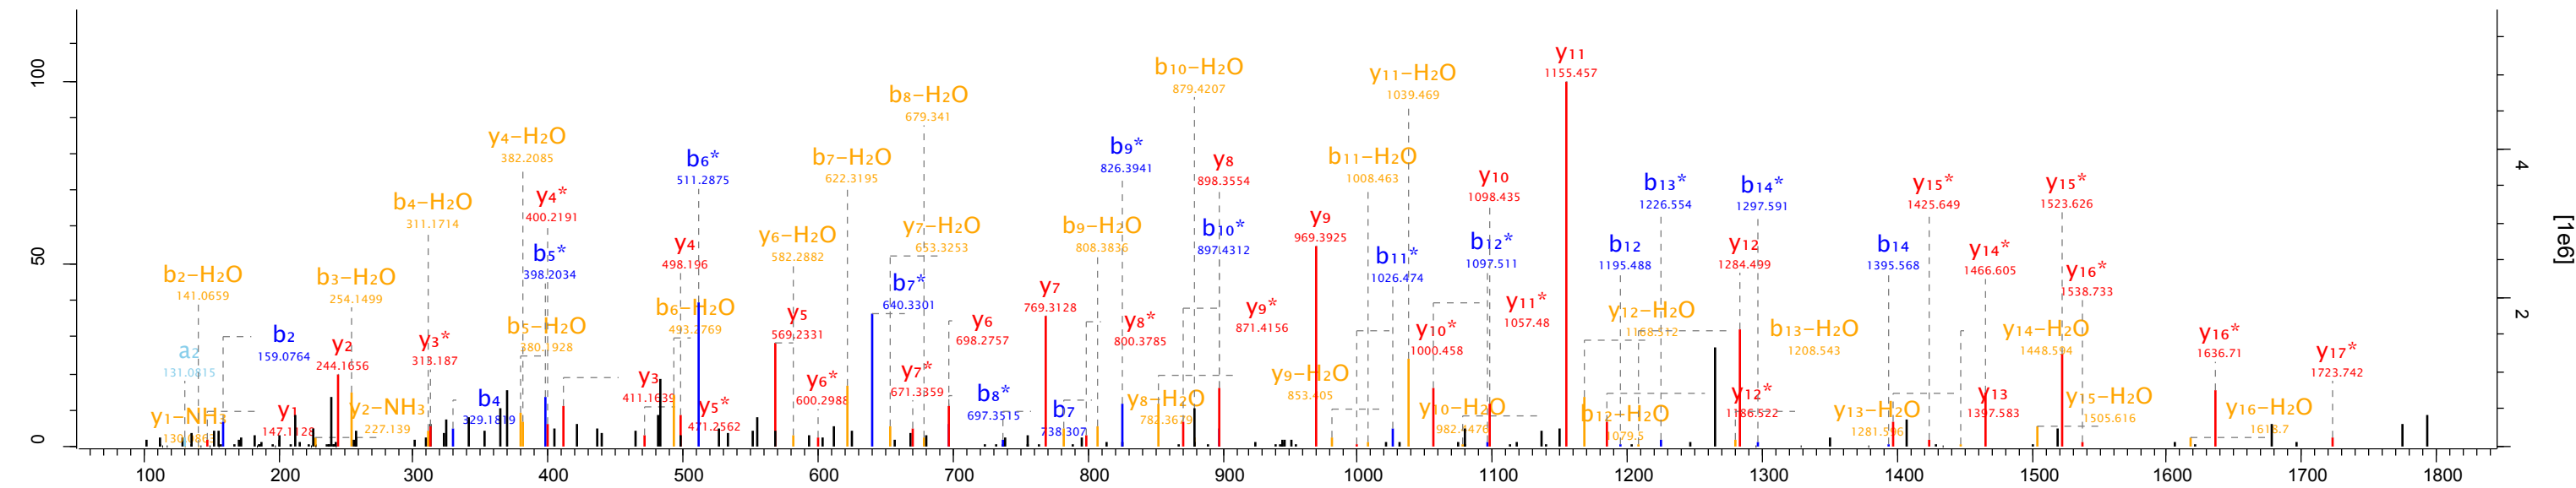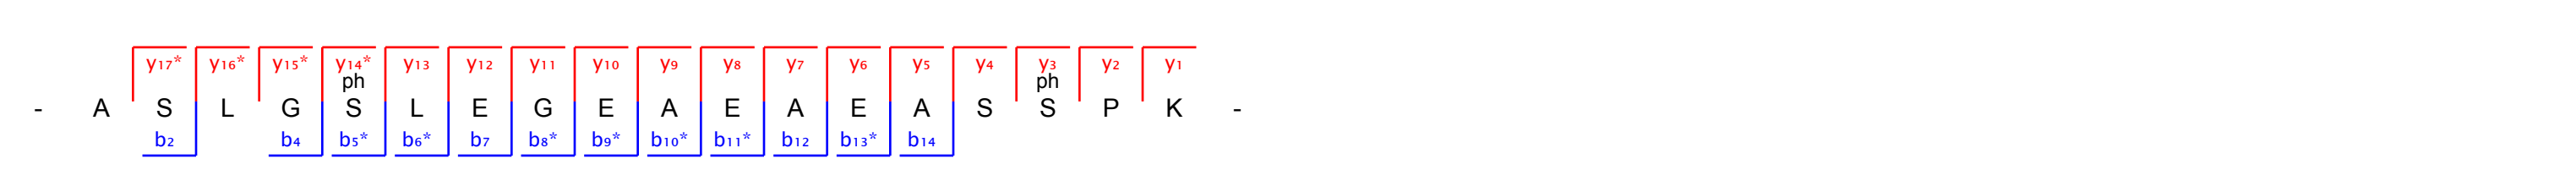

Raw file: 20171215\_MaS\_33SR\_LMH\_phospho\_02  
 Scan: 16096 Method: FTMS; HCD Score: 137.94 m/z: 1054.96 Gene names: L1CAM

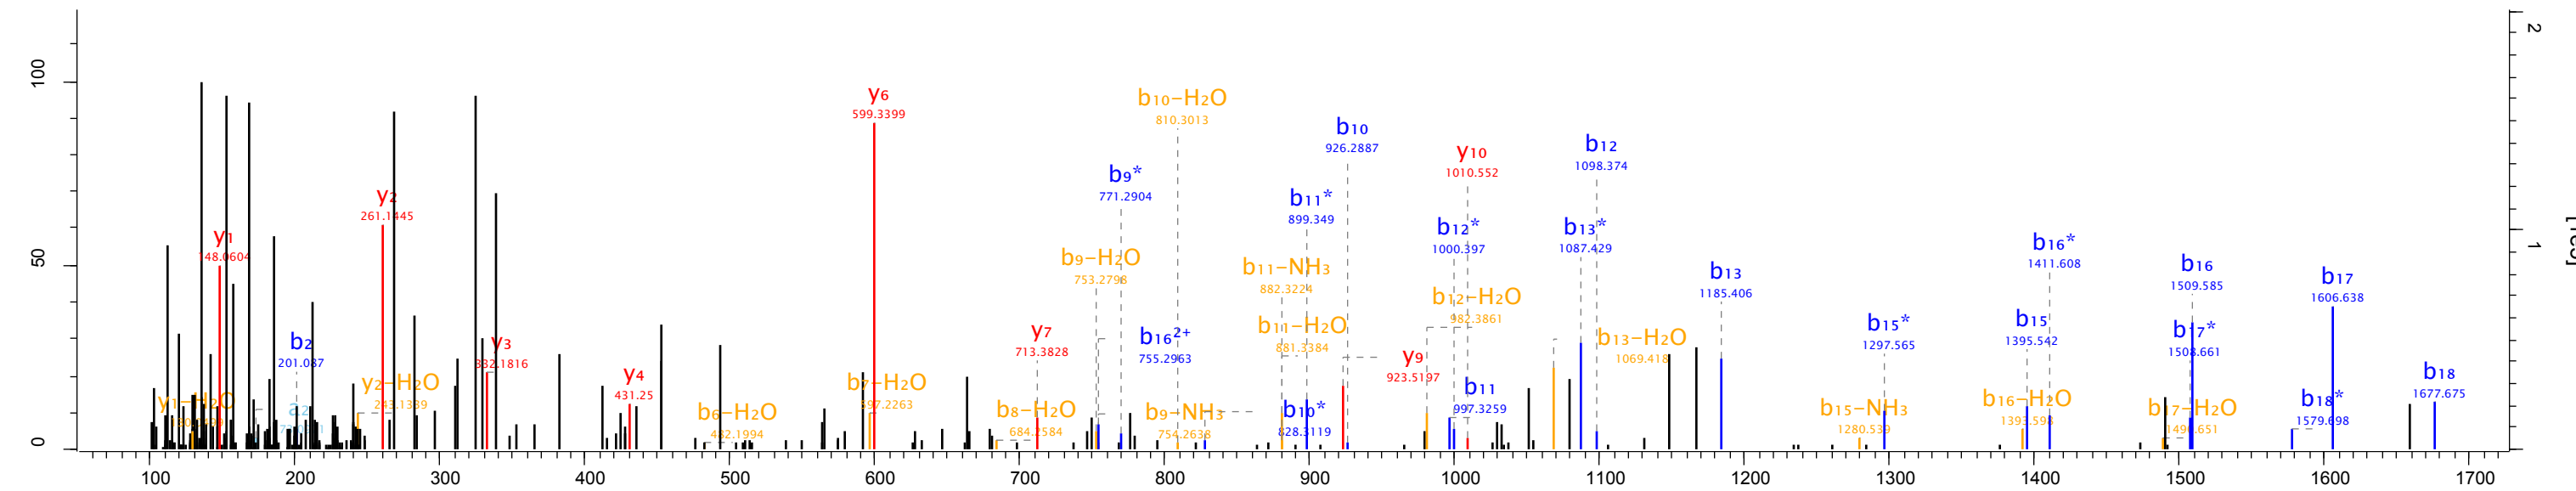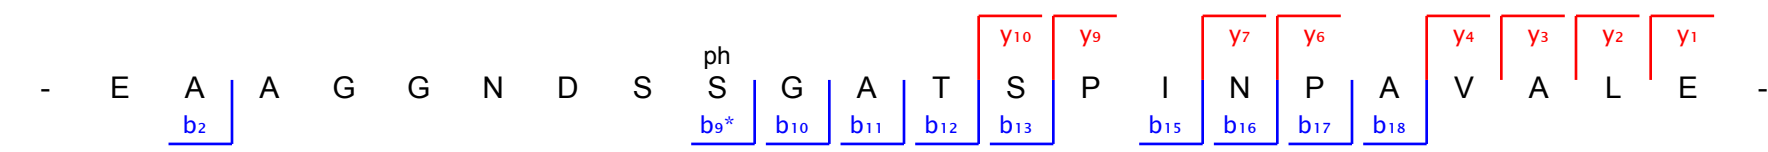

Raw file 20171215\_MaS\_33SR\_LMH\_phospho\_02 Scan 16176 Method FTMS; HCD Score 154.86 m/z 1099.47 Gene names GTF2I

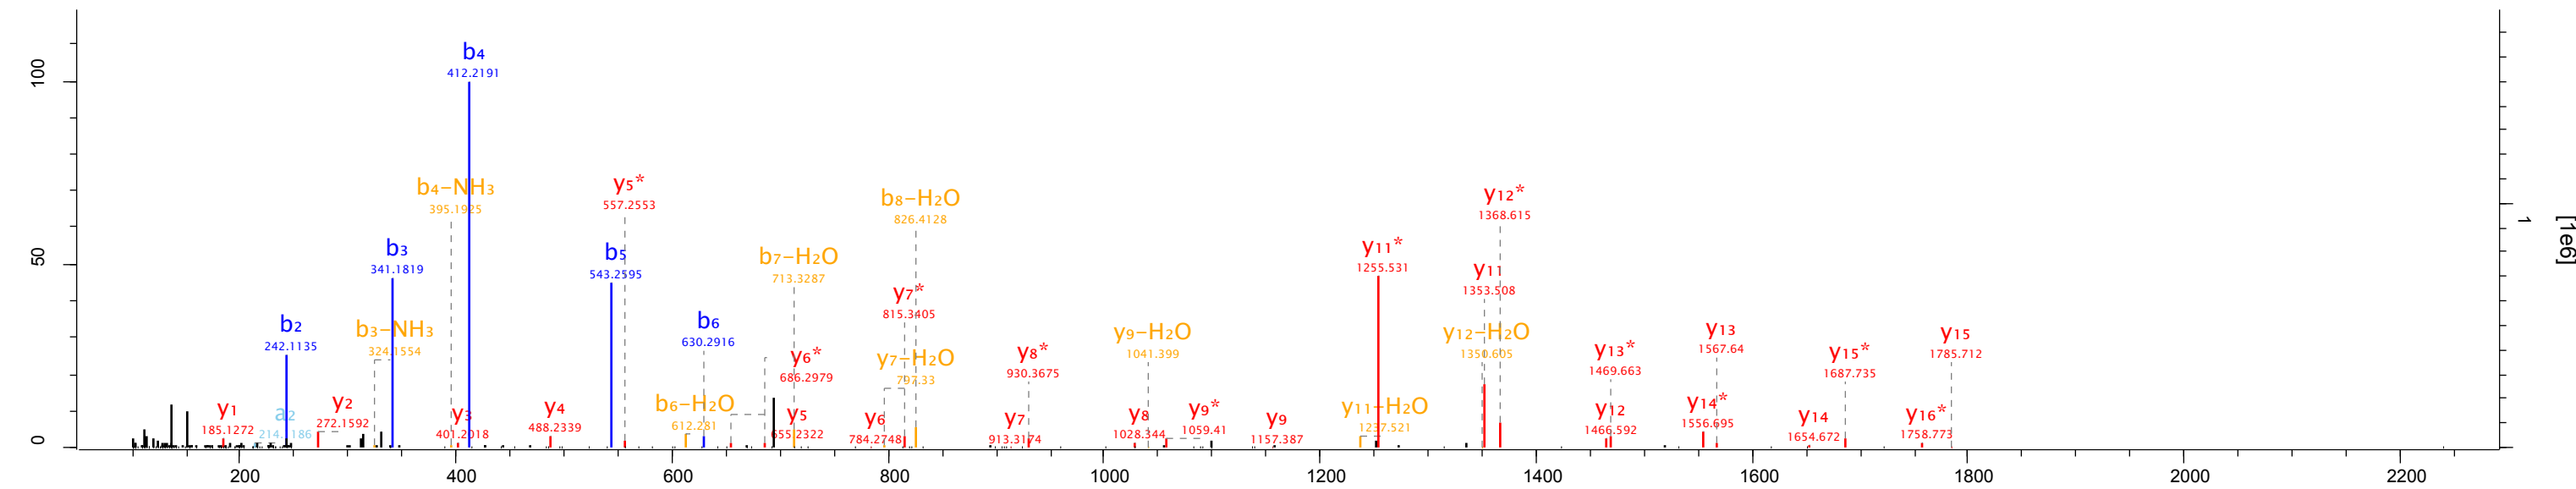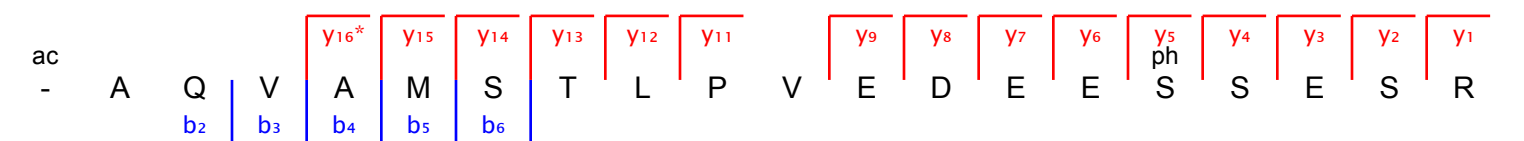

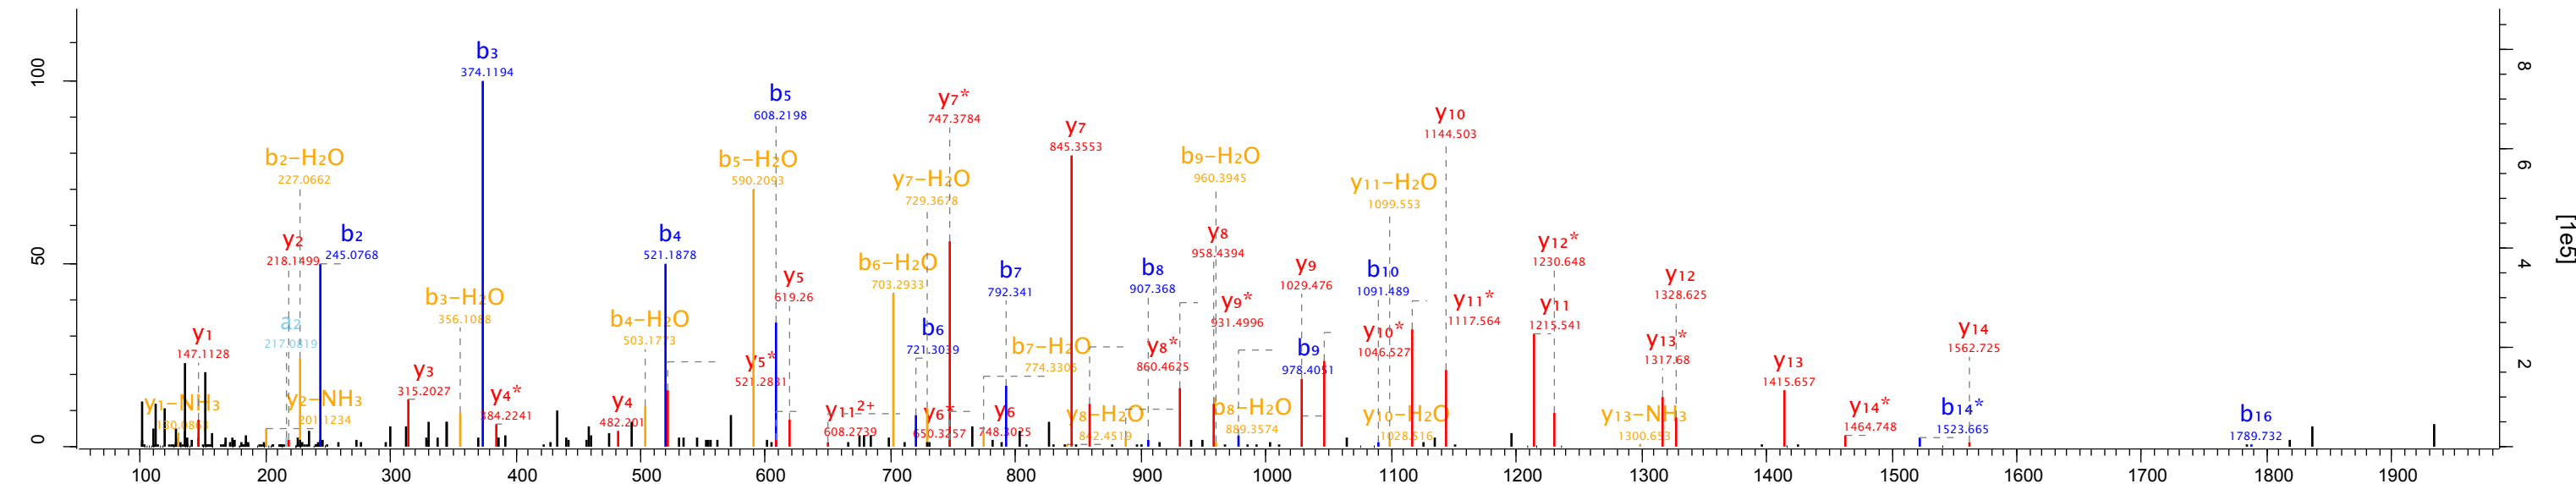

ac

- S D E F S L A D A L P E H S P A K -

b<sub>2</sub> b<sub>3</sub> b<sub>4</sub> b<sub>5</sub> b<sub>6</sub> b<sub>7</sub> b<sub>8</sub> b<sub>9</sub> b<sub>10</sub> b<sub>14</sub>\* b<sub>16</sub>

y<sub>14</sub> y<sub>13</sub> y<sub>12</sub> y<sub>11</sub> y<sub>10</sub> y<sub>9</sub> y<sub>8</sub> y<sub>7</sub> y<sub>6</sub> y<sub>5</sub> y<sub>4</sub> y<sub>3</sub> y<sub>2</sub> y<sub>1</sub>

ph

Raw file

20171215\_MaS\_33SR\_LMH\_phospho\_02

| Scan | Method    | Score | m/z    | Gene names |
|------|-----------|-------|--------|------------|
| 2066 | FTMS; HCD | 75.32 | 418.19 | SRRM1      |

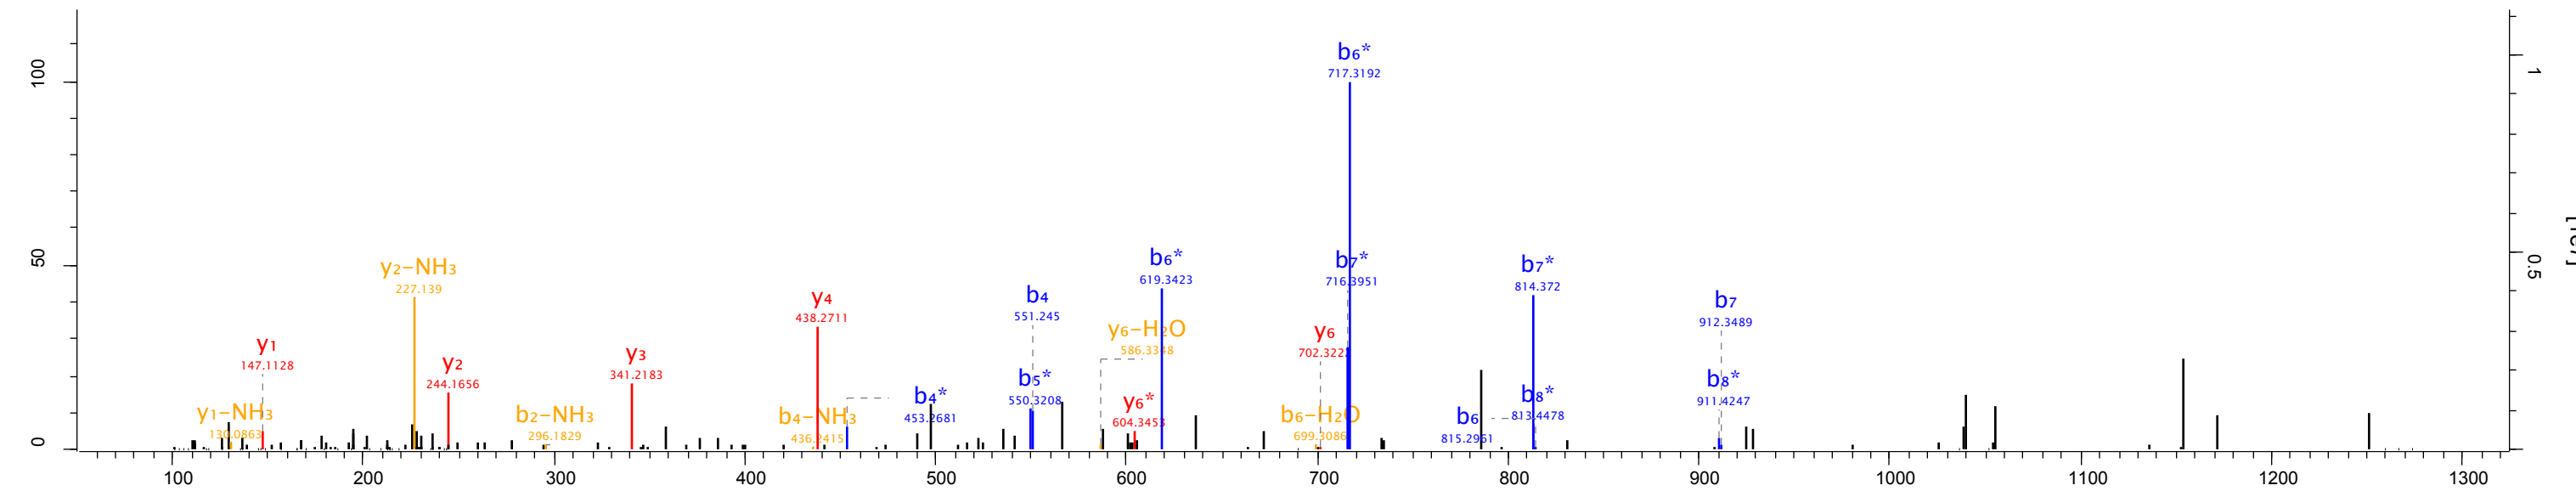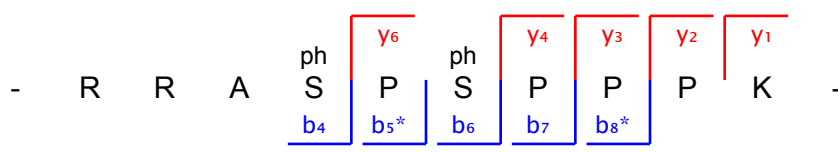

Raw file 20171215\_MaS\_33SR\_LMH\_phospho\_02 Scan 2396 Method FTMS; HCD Score 57.53 m/z 362.19 Gene names BCLAF1

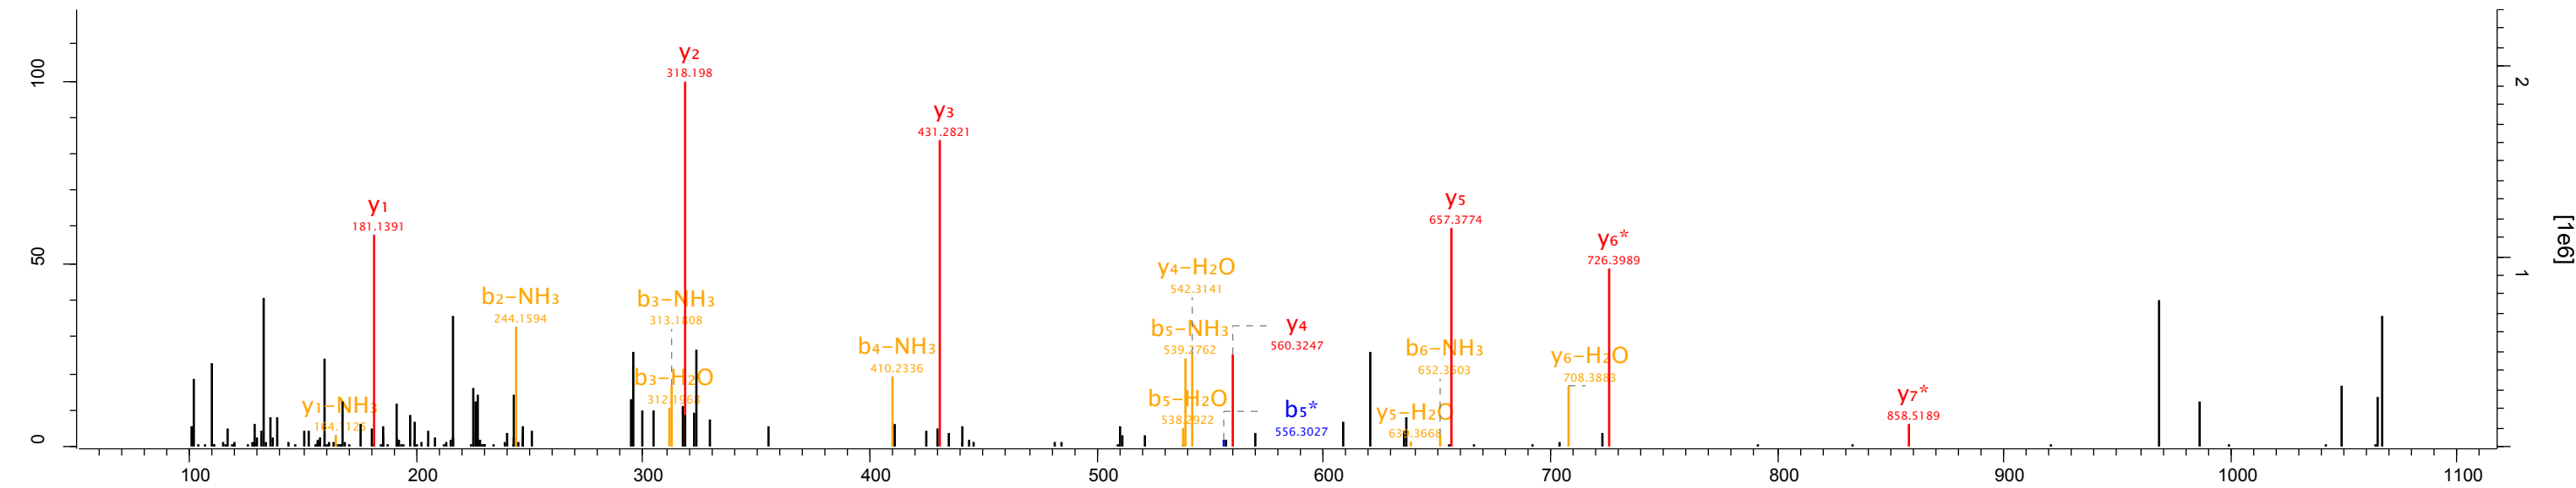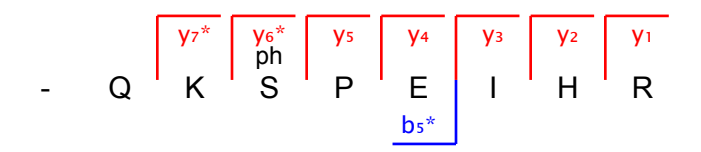

Raw file 20171215\_MaS\_33SR\_LMH\_phospho\_02 Scan 3326 Method FTMS; HCD Score 40.62 m/z 646.61 Gene names TBX3

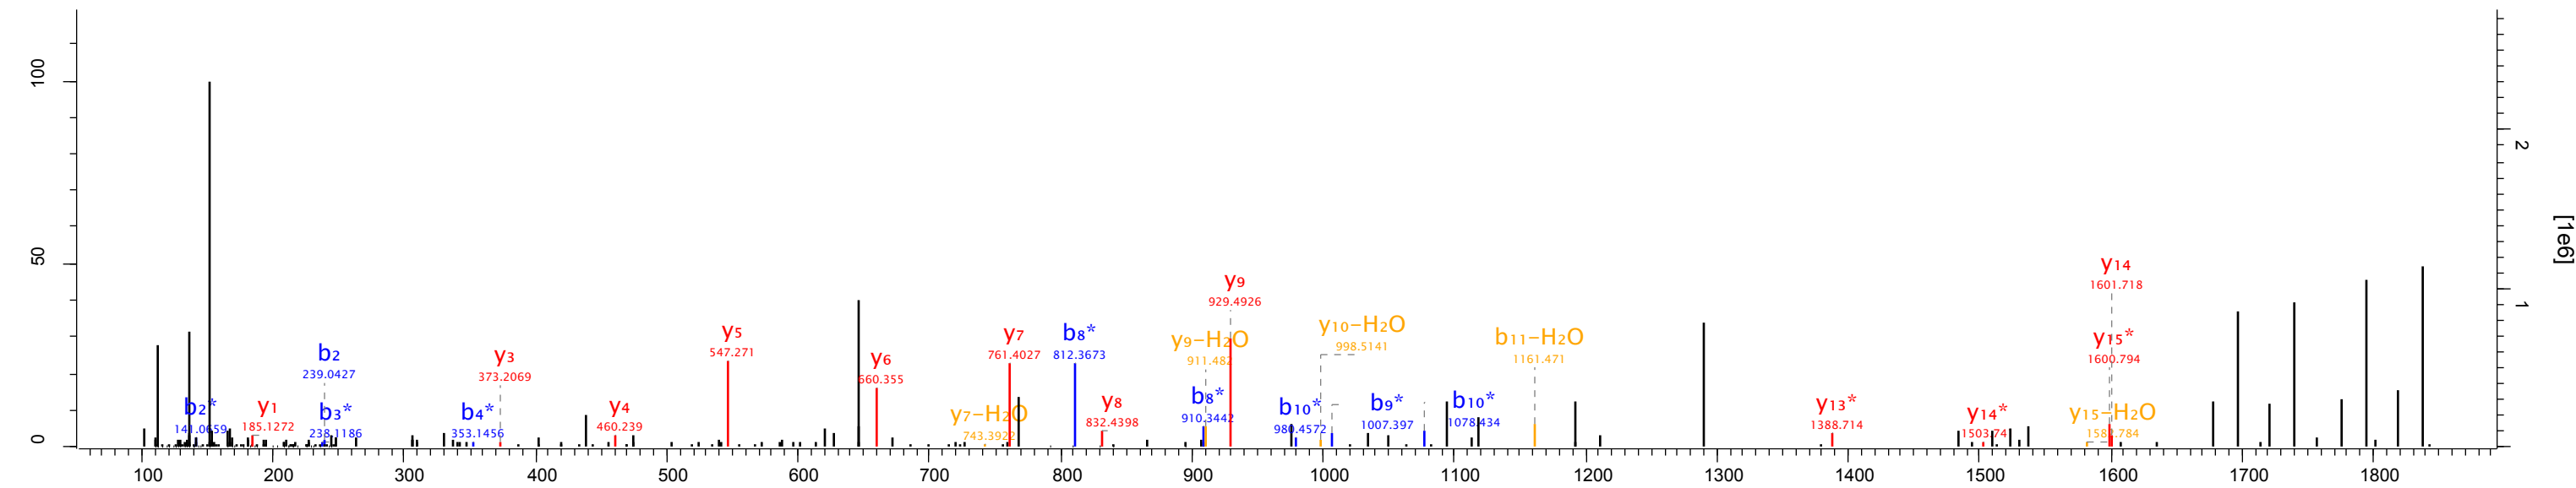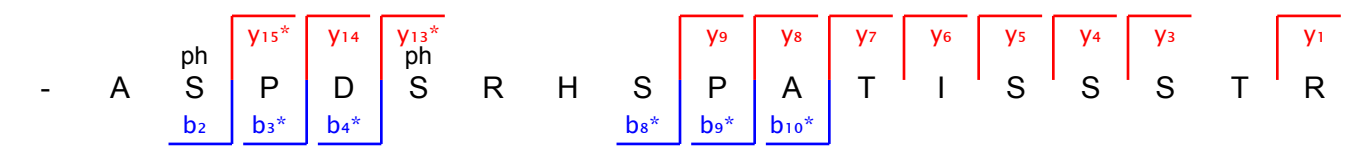



Raw file 20171215\_MaS\_33SR\_LMH\_phospho\_02 Scan 3676 Method FTMS; HCD Score 82.66 m/z 780.78 Gene names TMEM45A

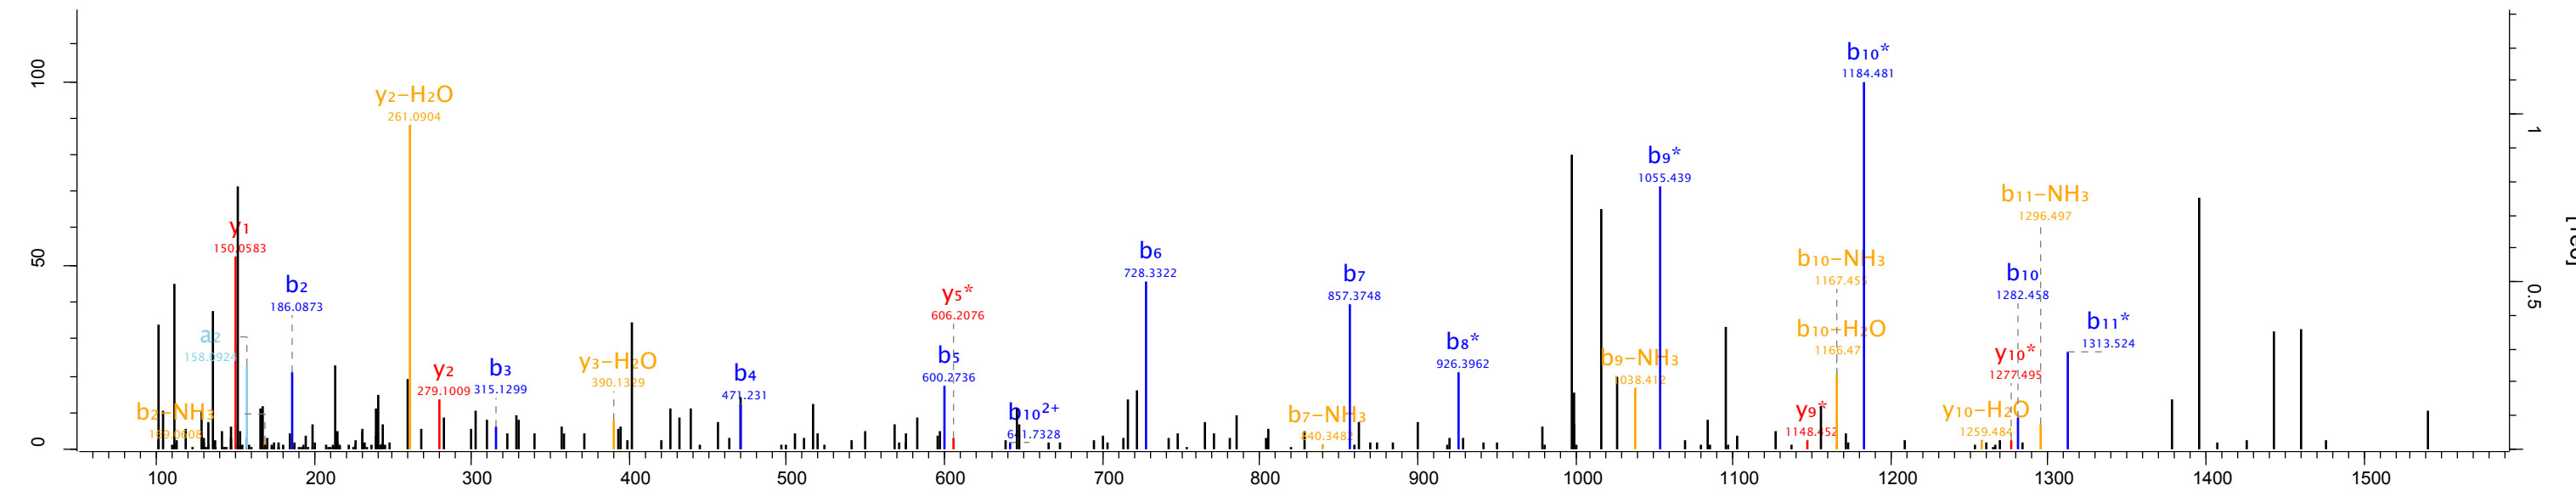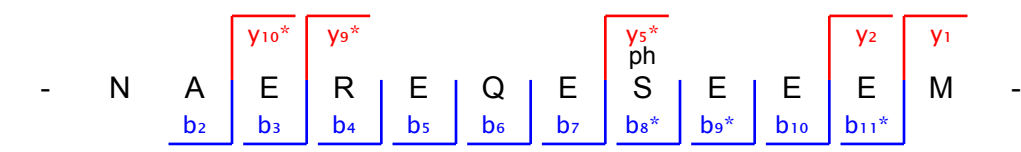

Raw file 20171215\_MaS\_33SR\_LMH\_phospho\_02 Scan 3846 Method FTMS; HCD Score 99.34 m/z 368.44 Gene names LARP1

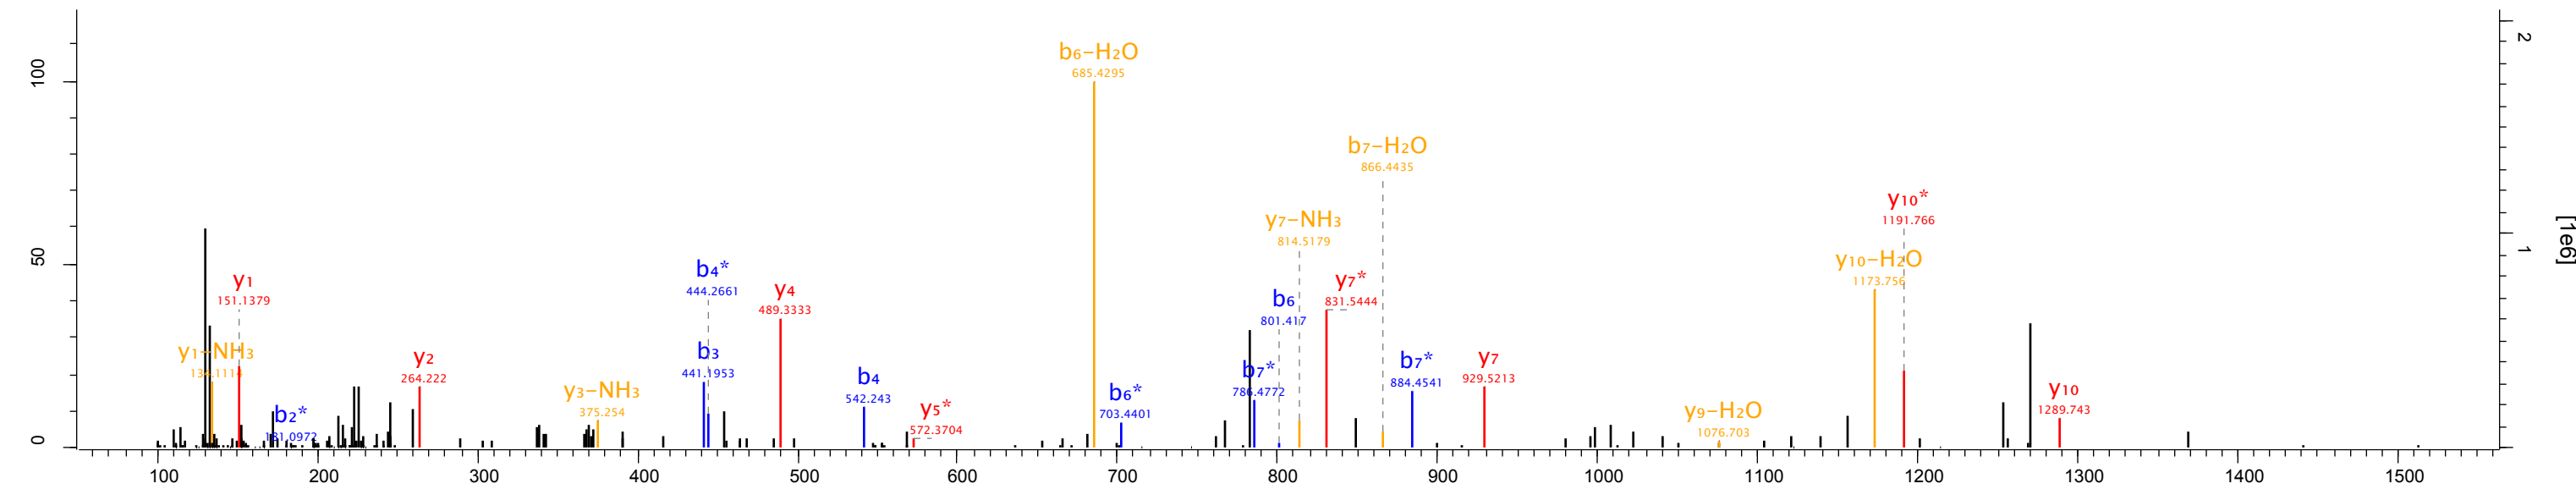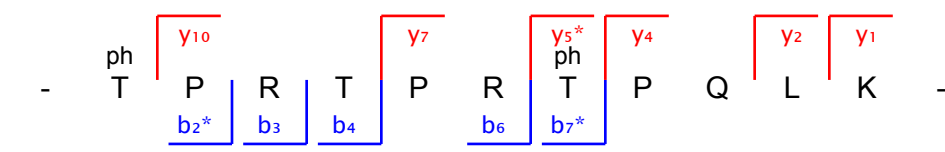

Raw file 20171215\_MaS\_33SR\_LMH\_phospho\_02 Scan 3996 Method FTMS; HCD Score 61.48 m/z 661.27 Gene names GPM3

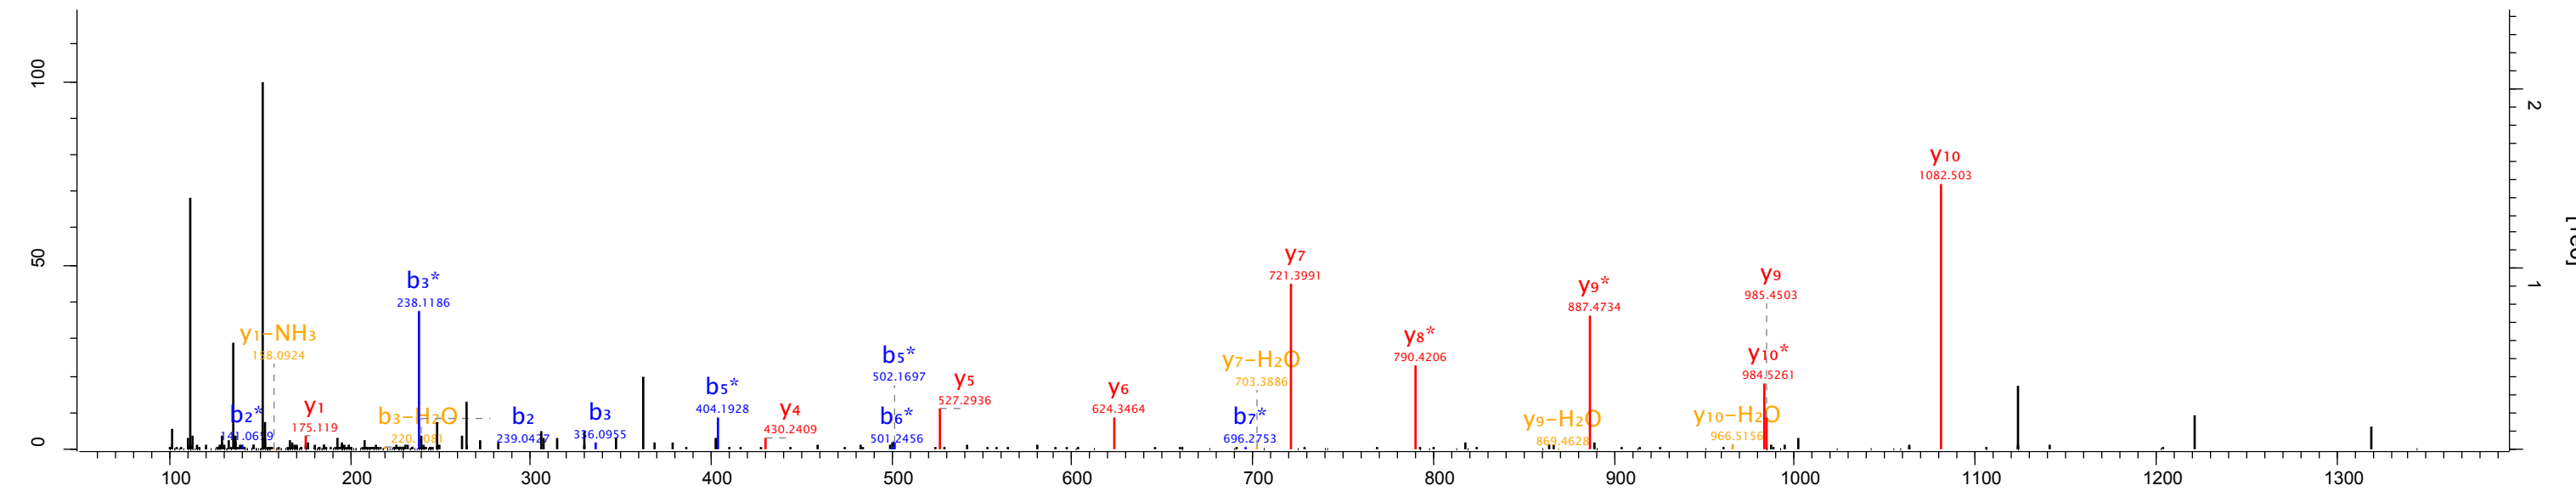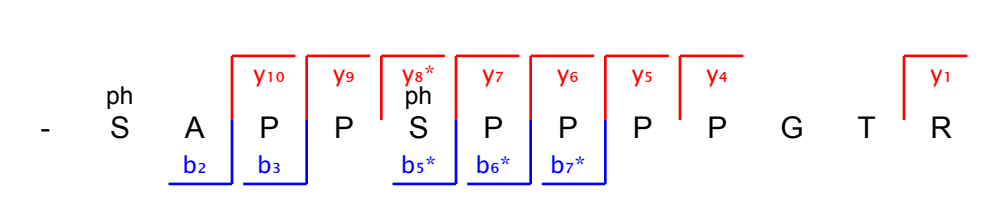

Raw file 20171215\_MaS\_33SR\_LMH\_phospho\_02 Scan 4016 Method FTMS; HCD Score 43.68 m/z 496.71 Gene names NOLC1

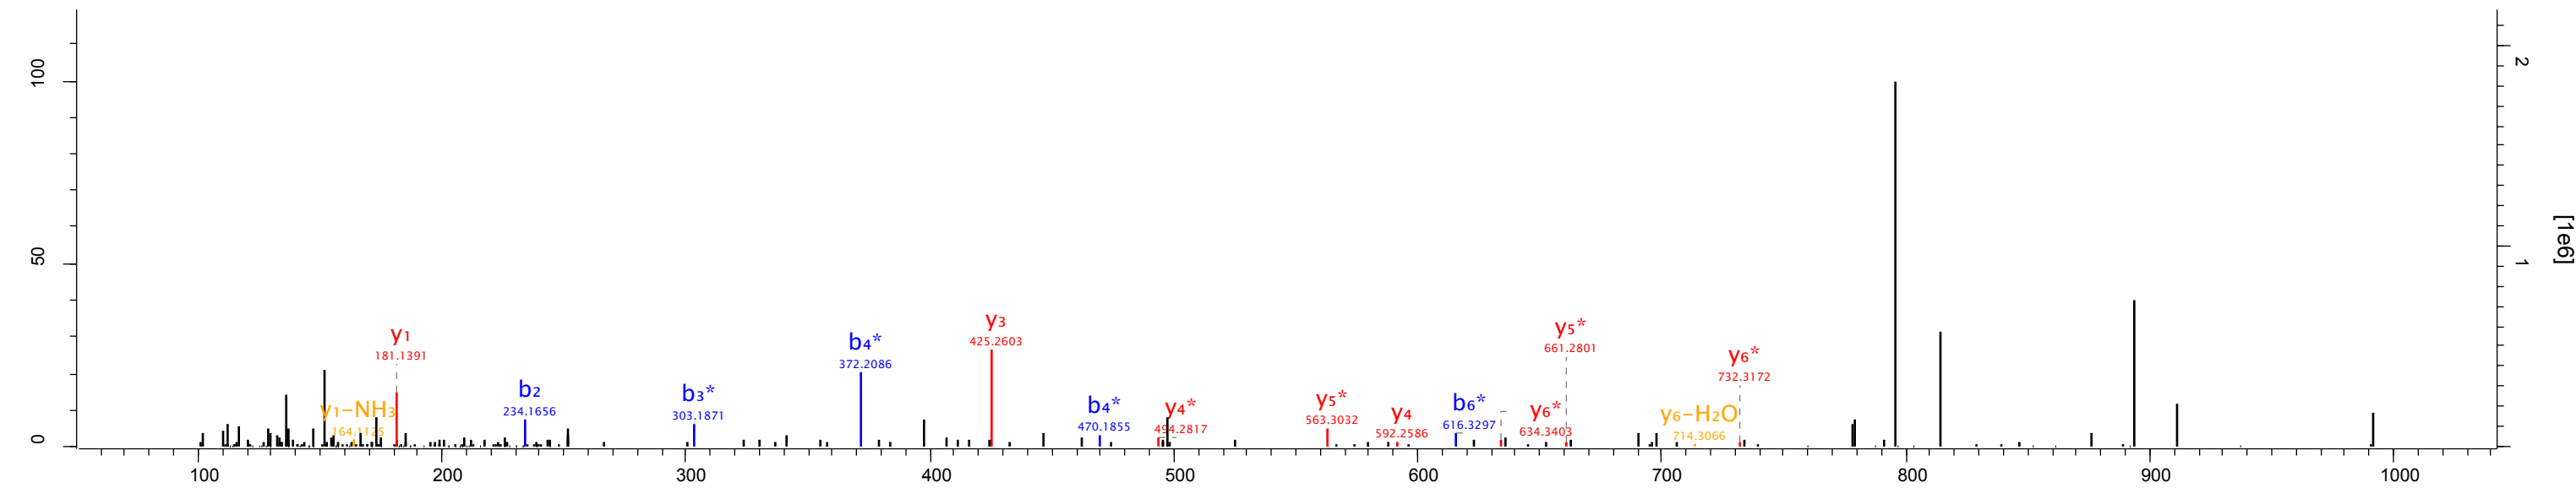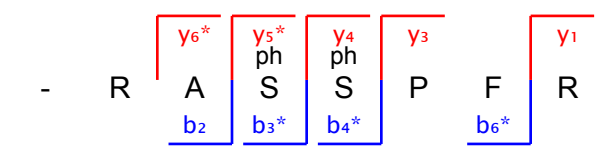

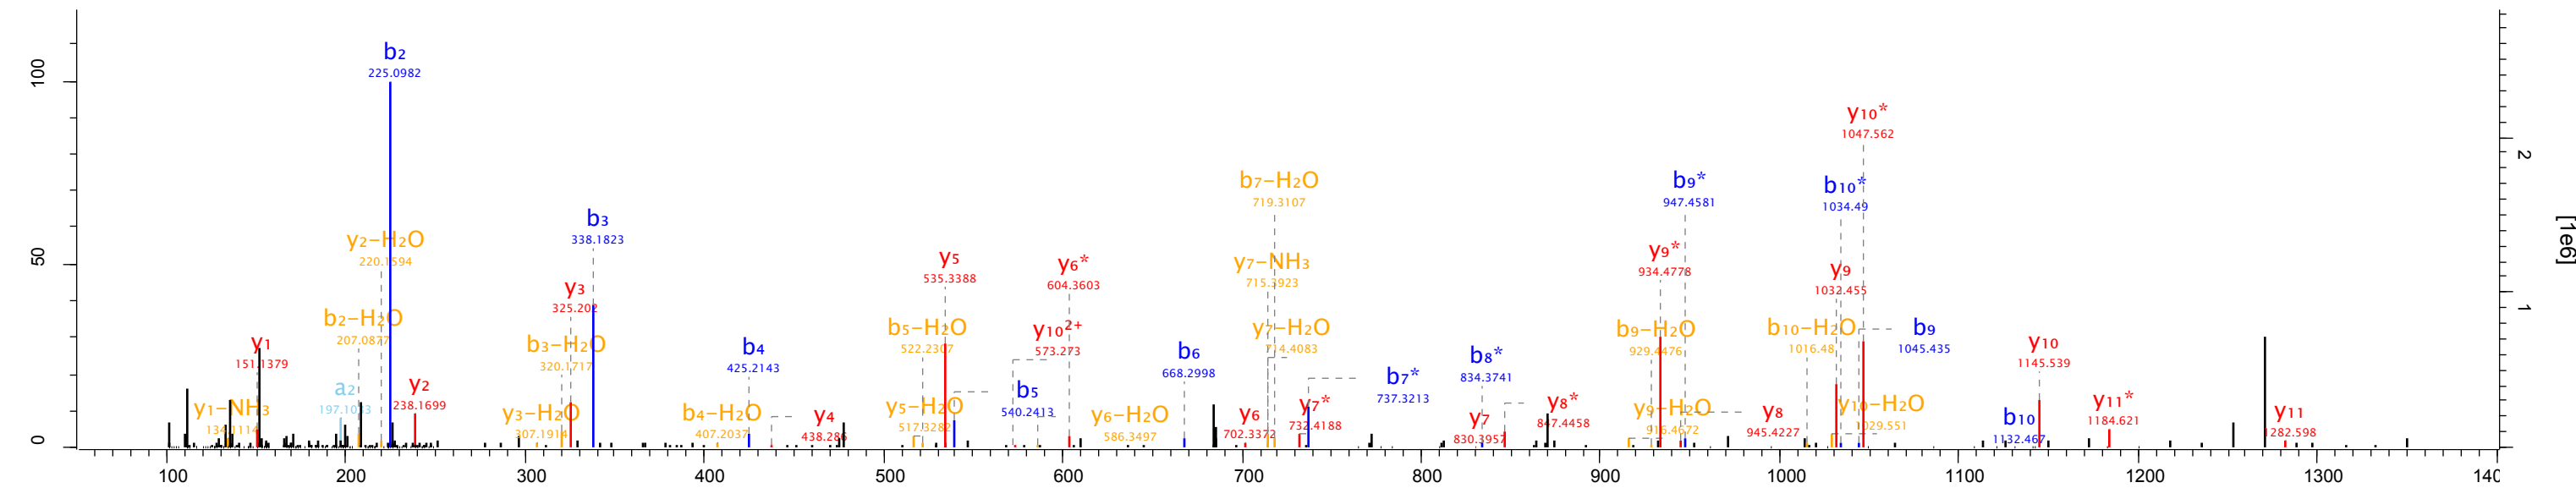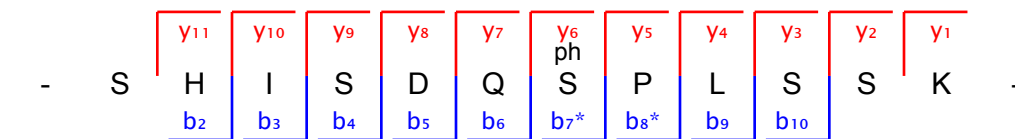

Raw file 20171215\_MaS\_33SR\_LMH\_phospho\_02 Scan 4146 Method FTMS; HCD Score 209.47 m/z 901.91 Gene names MYBBP1A

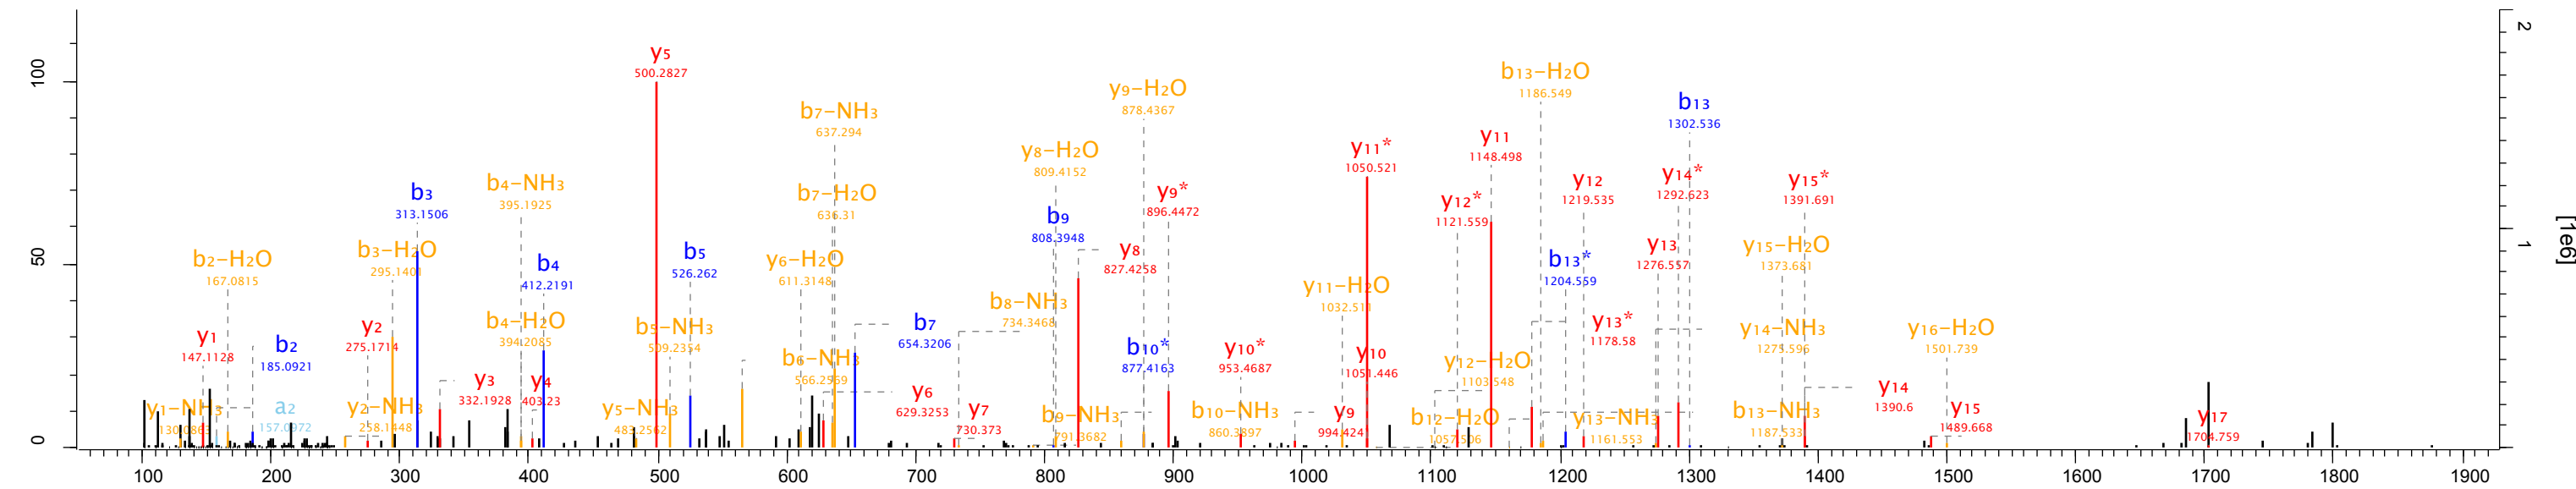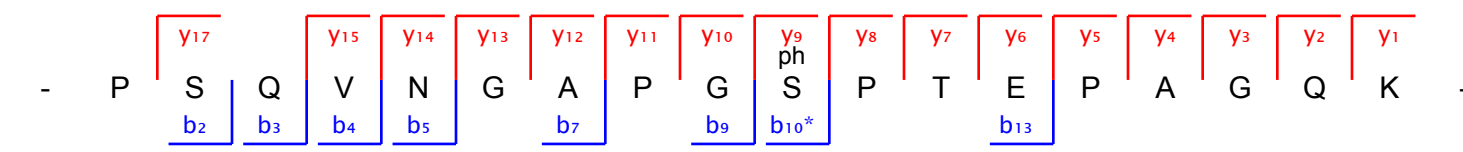

Raw file 20171215\_MaS\_33SR\_LMH\_phospho\_02 Scan 4316 Method FTMS; HCD Score 113.65 m/z 458.54 Gene names PRPF4B

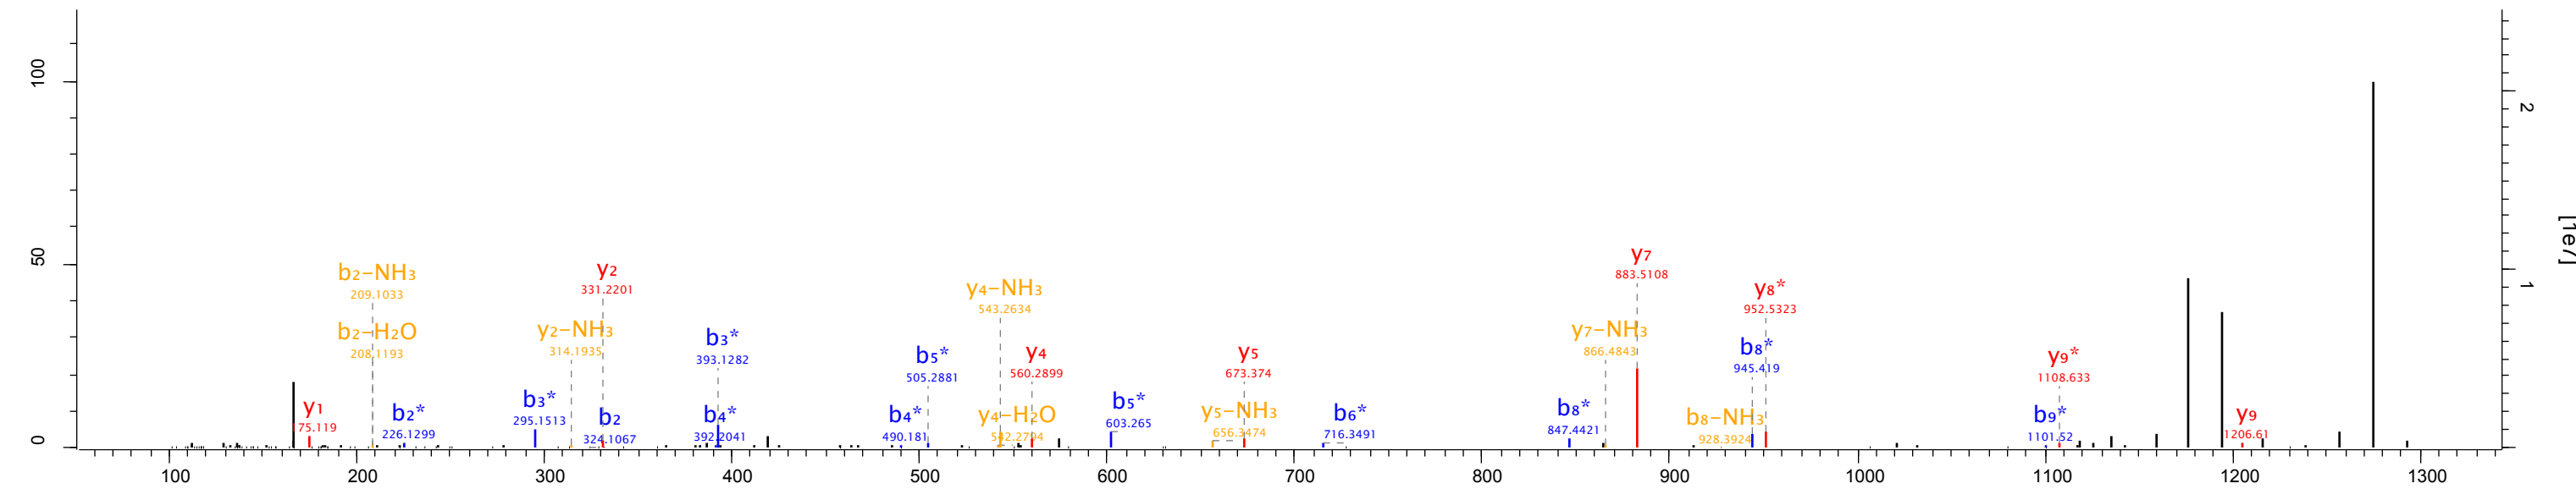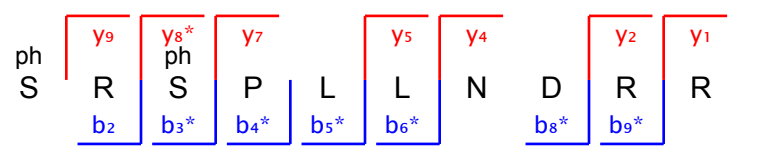

Raw file  
20171215\_MaS\_33SR\_LMH\_phospho\_02

Scan 4476 Method FTMS; HCD Score 246.3 m/z 948.07 Gene names PHF3

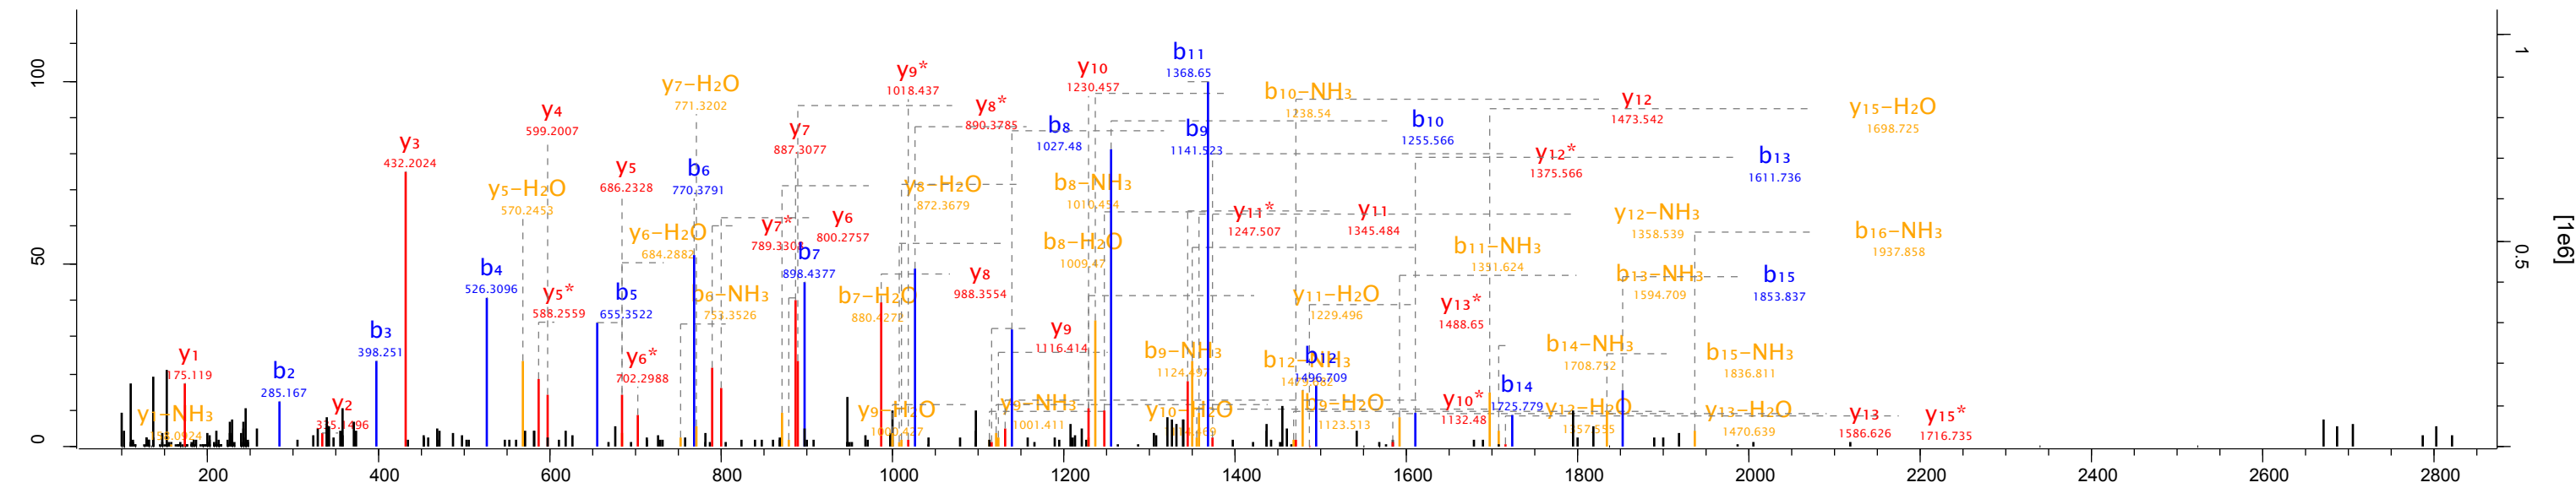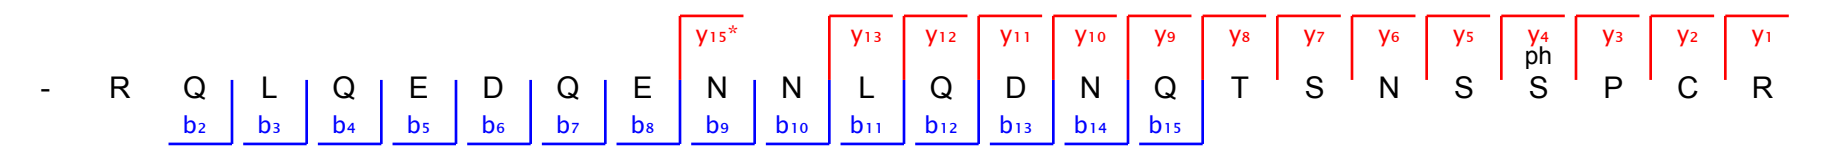



Raw file: 20171215\_MaS\_33SR\_LMH\_phospho\_02  
 Scan: 5096 Method: FTMS; HCD Score: 99.22 m/z: 986.93 Gene names: GTF3C1

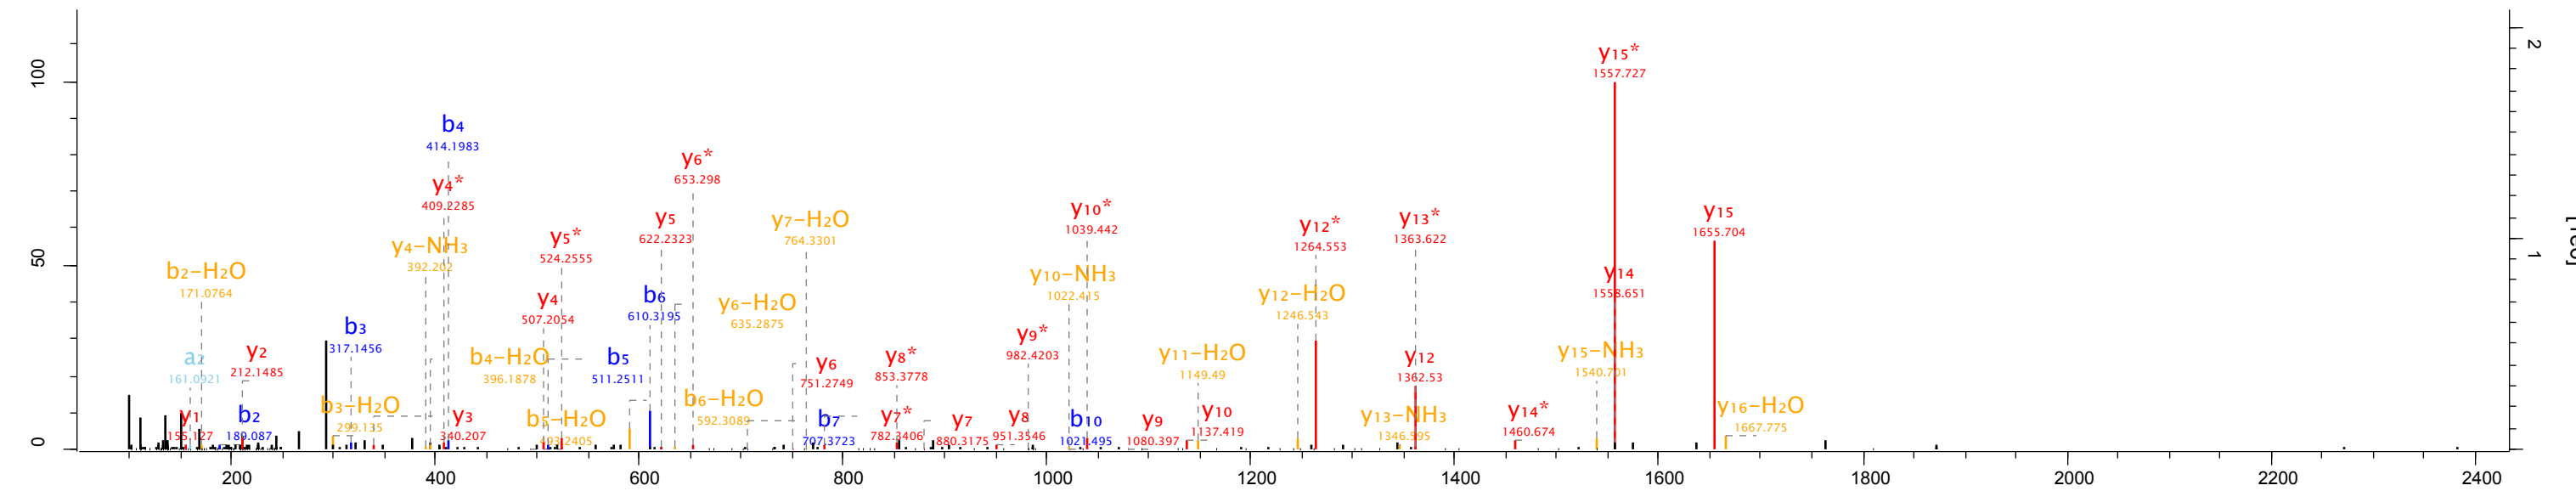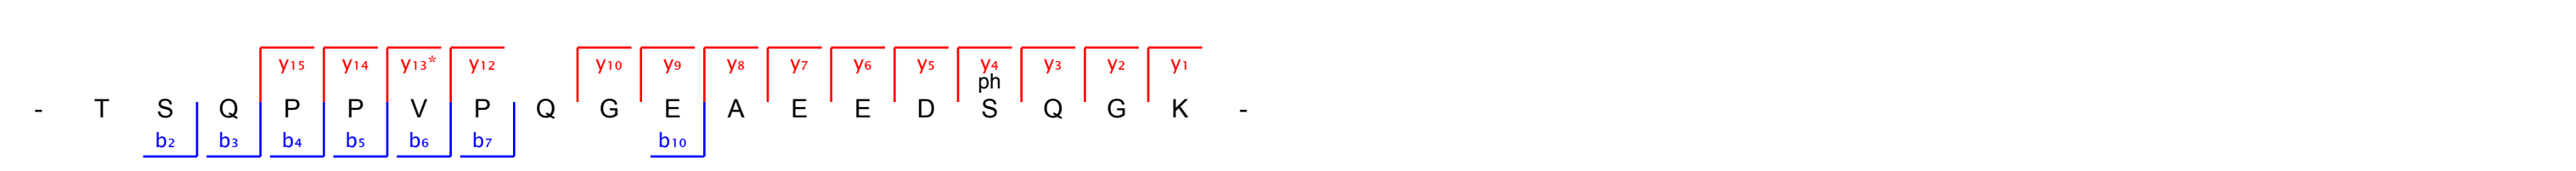

Raw file 20171215\_MaS\_33SR\_LMH\_phospho\_02 Scan 6926 Method FTMS; HCD Score 66.25 m/z 886.86 Gene names SLK

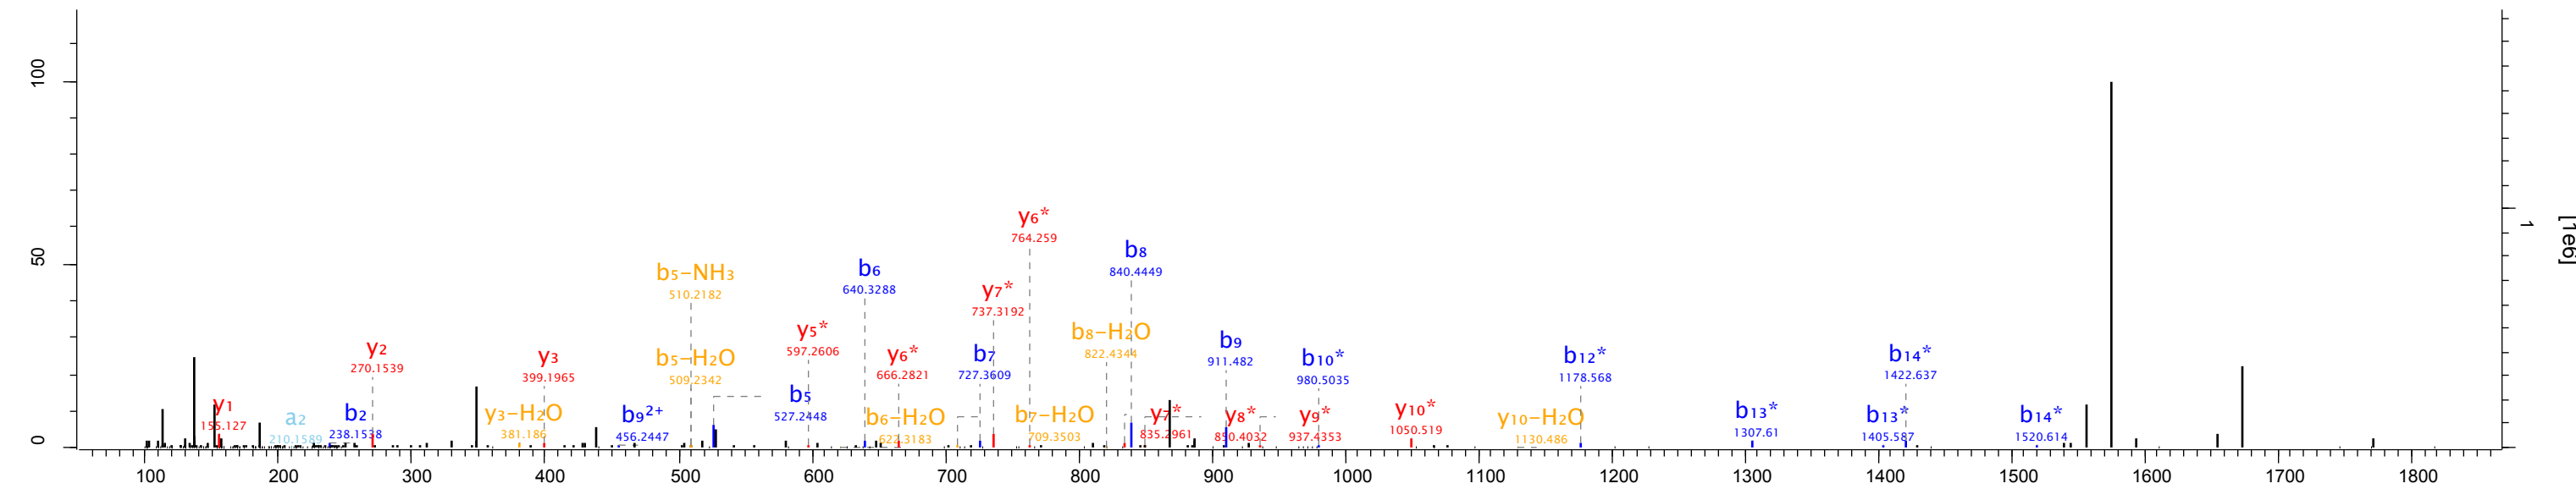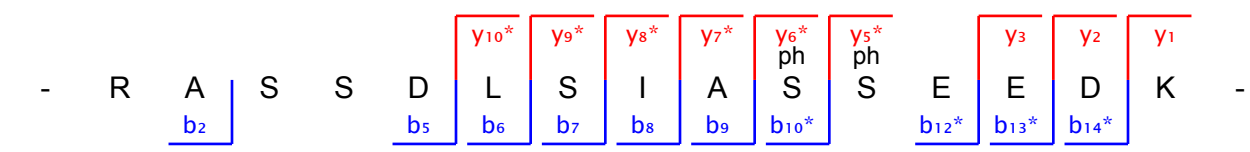

Raw file 20171215\_MaS\_33SR\_LMH\_phospho\_02 Scan 6986 Method FTMS; HCD Score 236.05 m/z 684.29 Gene names TAGLN2

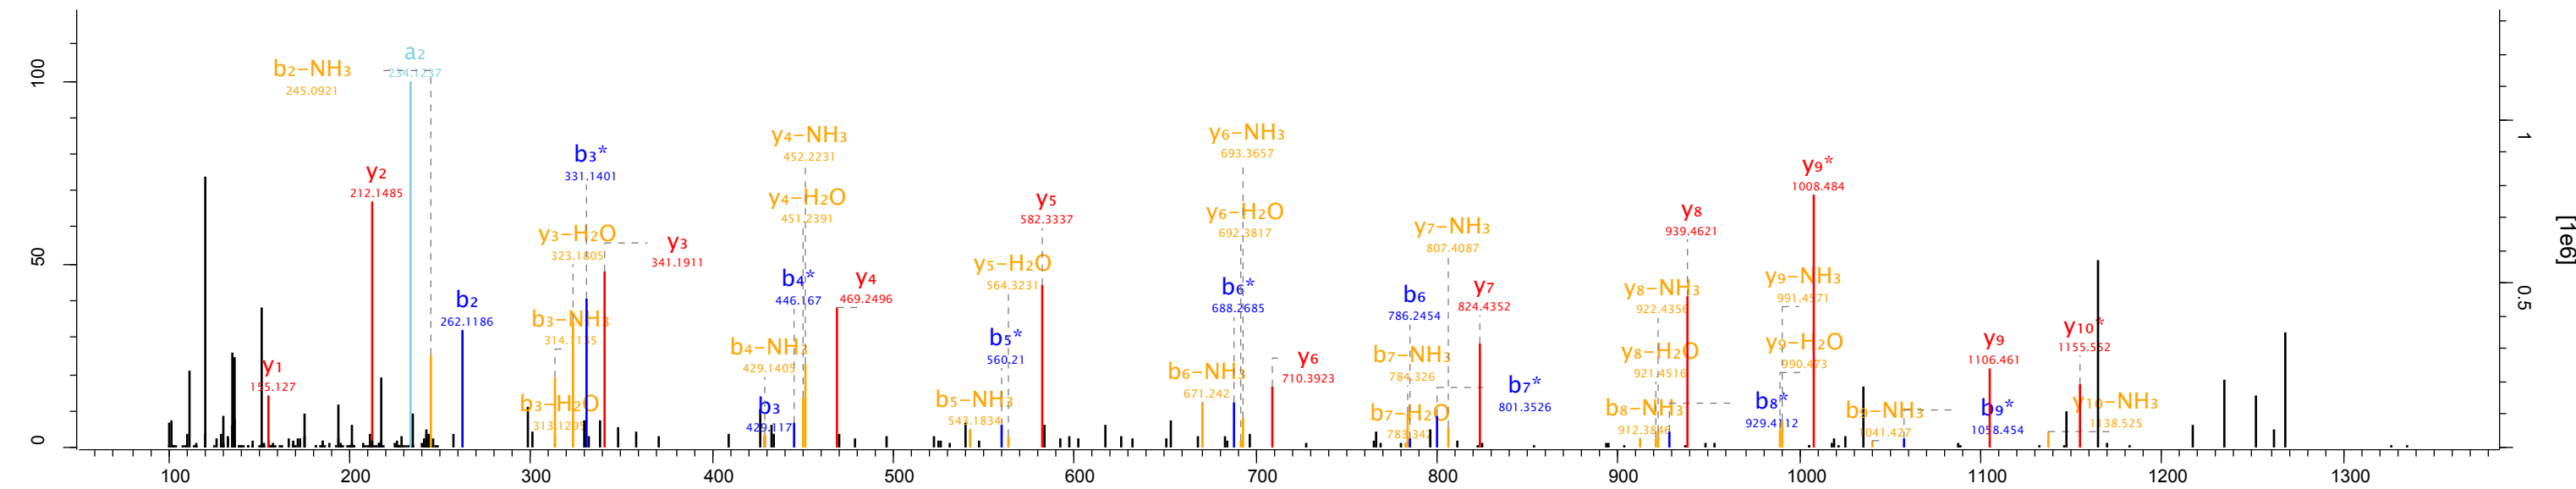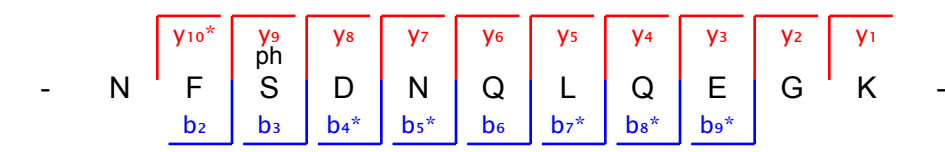

Raw file 20171215\_MaS\_33SR\_LMH\_phospho\_02 Scan 7256 Method FTMS; HCD Score 62.3 m/z 879.37 Gene names DTL

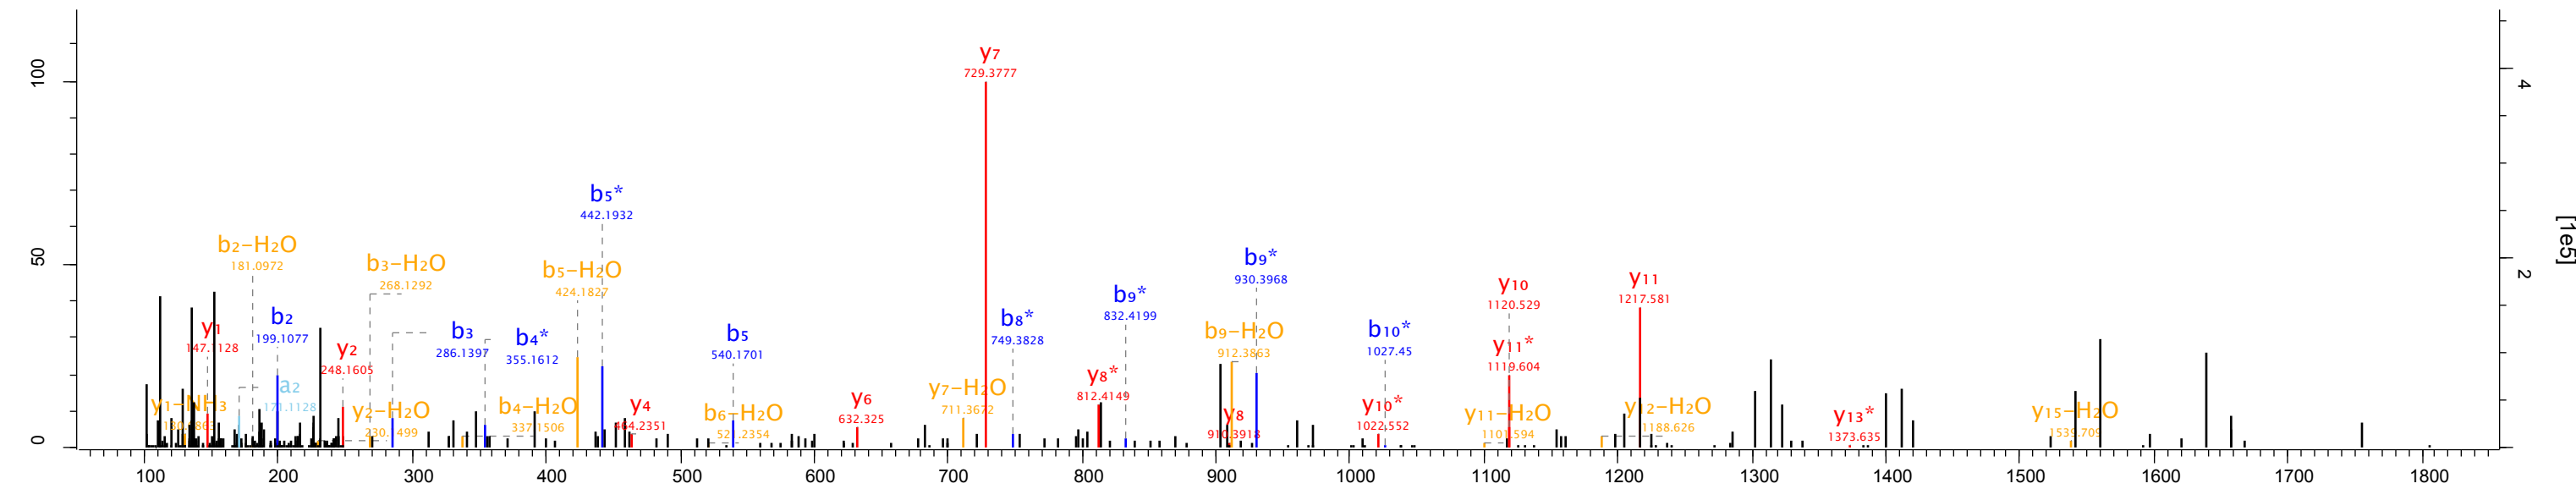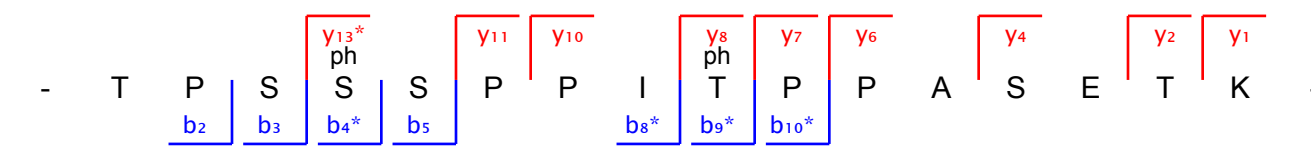

Raw file 20171215\_MaS\_33SR\_LMH\_phospho\_02 Scan 7296 Method FTMS; HCD Score 98.09 m/z 944.04 Gene names PHF10

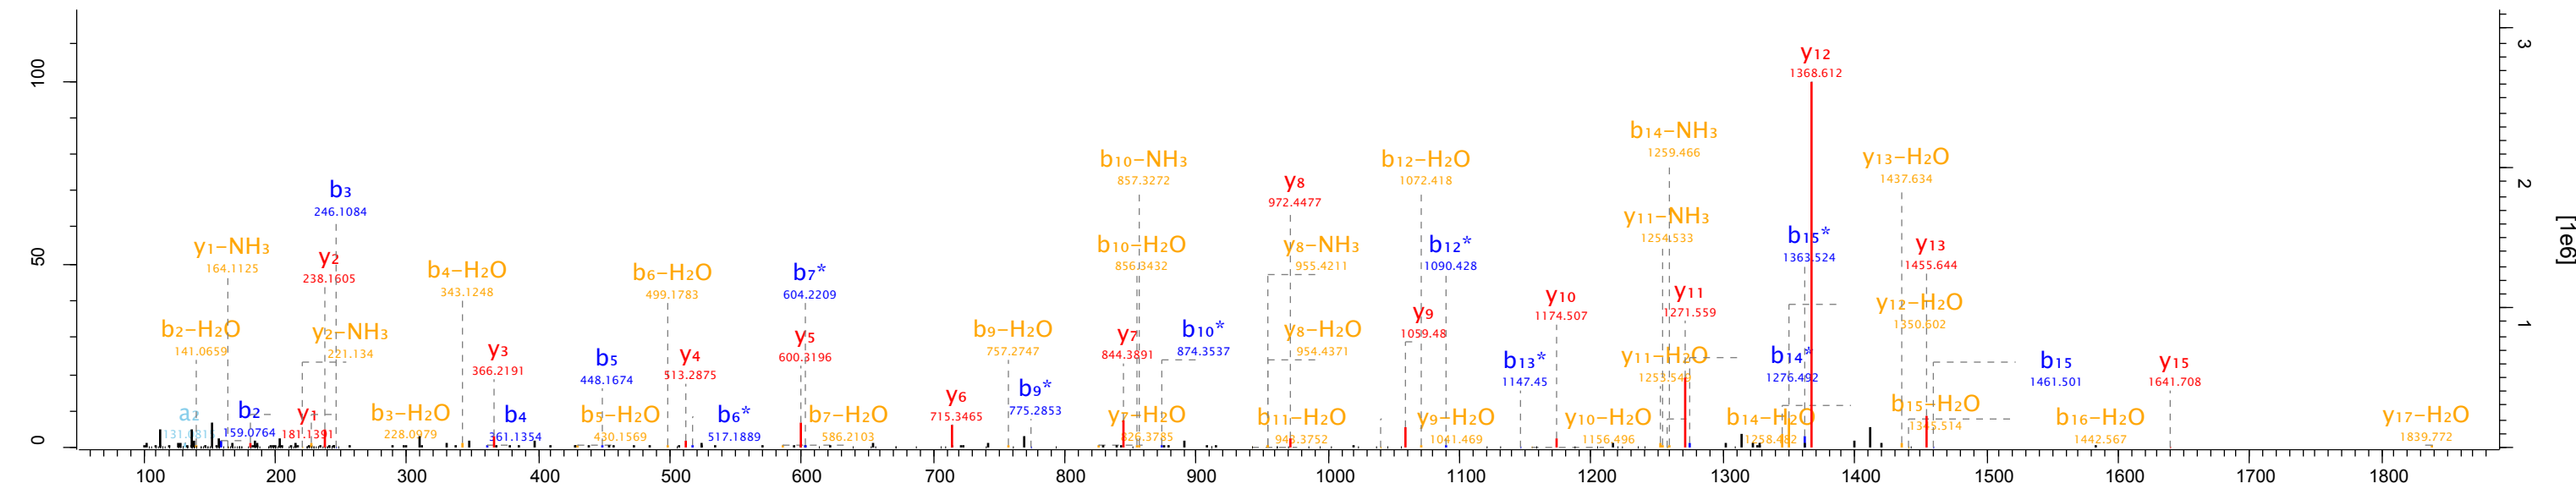

- G T S D S S G N V S E G E S P P D S Q E D S F Q G R -

b<sub>2</sub>
b<sub>3</sub>
b<sub>4</sub>
b<sub>5</sub>
b<sub>6</sub><sup>\*</sup>
b<sub>7</sub><sup>\*</sup>
b<sub>9</sub><sup>\*</sup>
b<sub>10</sub><sup>\*</sup>
b<sub>12</sub><sup>\*</sup>
b<sub>13</sub><sup>\*</sup>
b<sub>14</sub><sup>\*</sup>
b<sub>15</sub>
y<sub>15</sub>
y<sub>13</sub>
y<sub>12</sub>
y<sub>11</sub>
y<sub>10</sub>
y<sub>9</sub>
y<sub>8</sub>
y<sub>7</sub>
y<sub>6</sub>
y<sub>5</sub>
y<sub>4</sub>
y<sub>3</sub>
y<sub>2</sub>
y<sub>1</sub>

Raw file 20171215\_MaS\_33SR\_LMH\_phospho\_02 Scan 7306 Method FTMS; HCD Score 91.99 m/z 867.36 Gene names OGFR

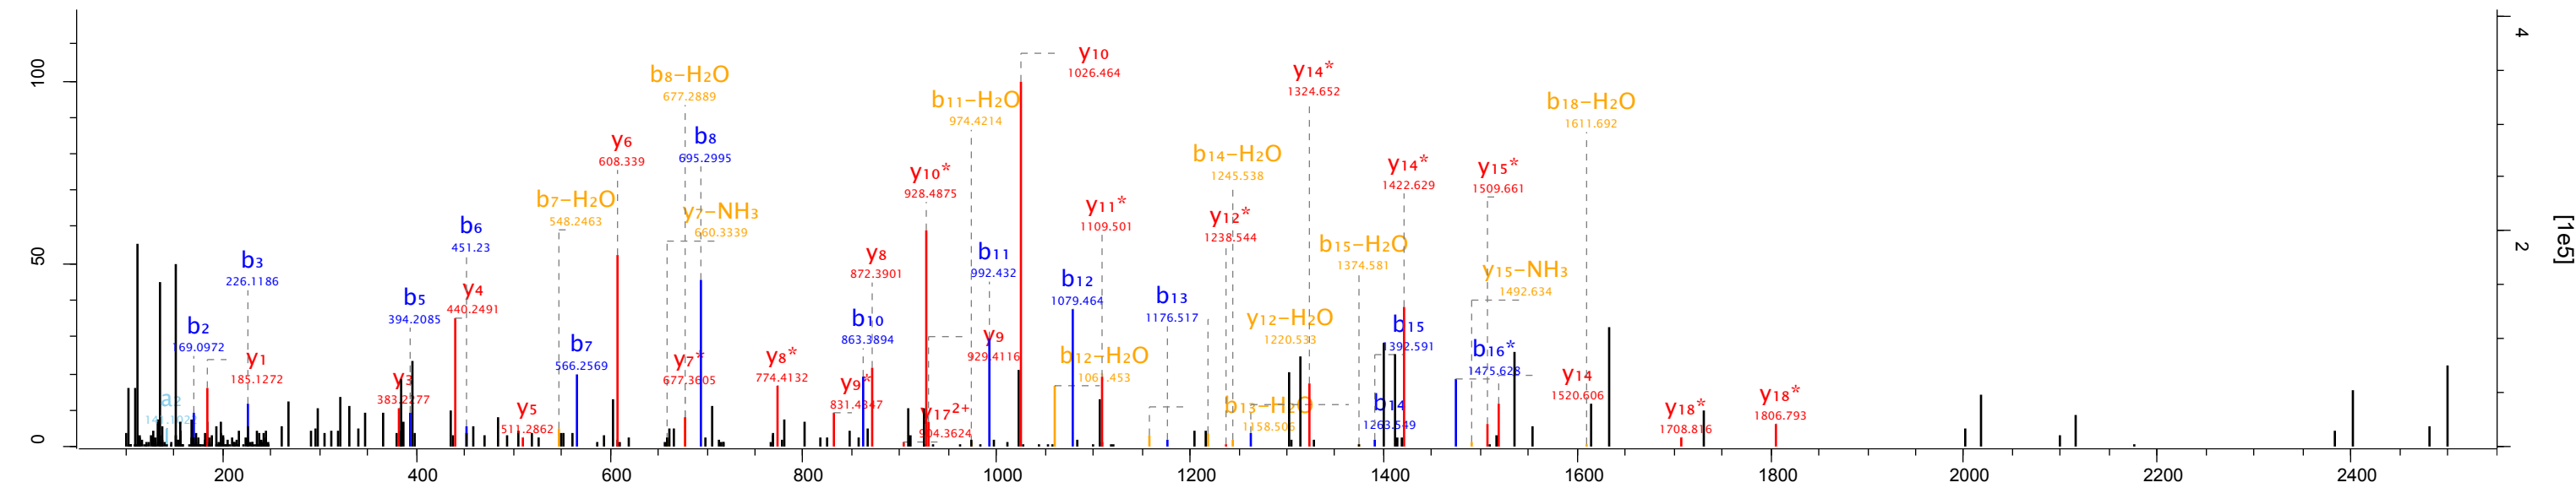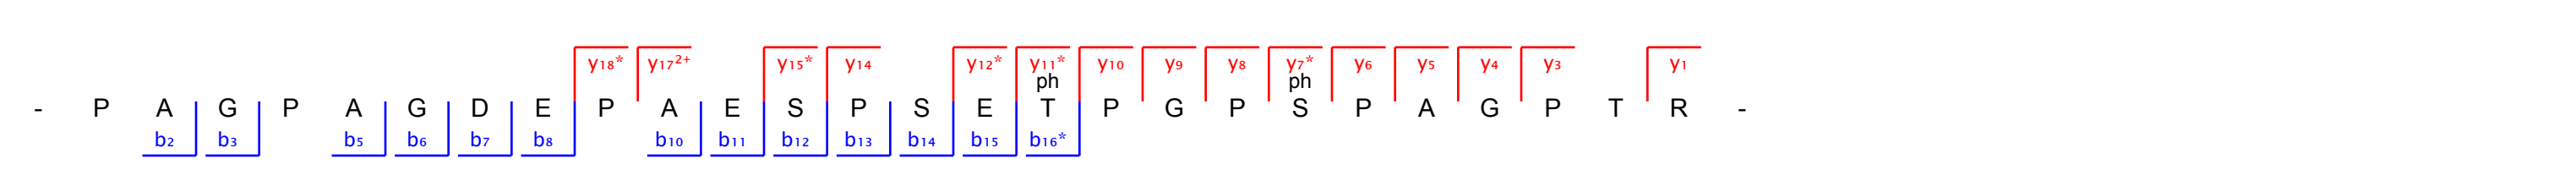

Raw file 20171215\_MaS\_33SR\_LMH\_phospho\_02 Scan 8376 Method FTMS; HCD Score 274.17 m/z 990.4 Gene names NUP98

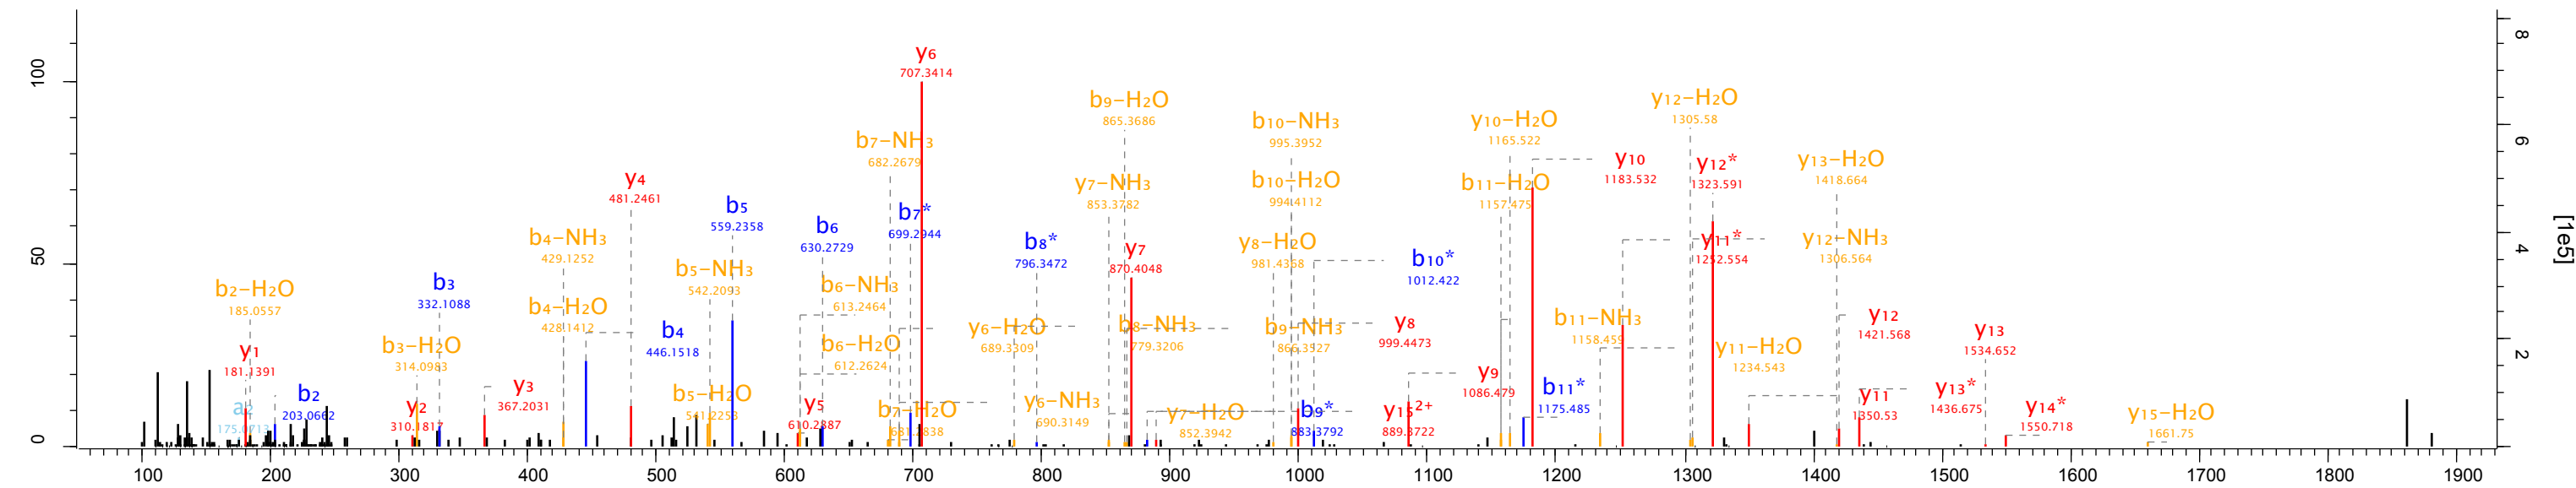

- D S E N L A S P S E Y P E N G E R -

b<sub>2</sub>
b<sub>3</sub>
b<sub>4</sub>
b<sub>5</sub>
b<sub>6</sub>
b<sub>7</sub><sup>\*</sup>
b<sub>8</sub><sup>\*</sup>
b<sub>9</sub><sup>\*</sup>
b<sub>10</sub><sup>\*</sup>
b<sub>11</sub><sup>\*</sup>
y<sub>15</sub><sup>2+</sup>
y<sub>14</sub><sup>\*</sup>
y<sub>13</sub>
y<sub>12</sub>
y<sub>11</sub><sup>ph</sup>
y<sub>10</sub>
y<sub>9</sub>
y<sub>8</sub>
y<sub>7</sub>
y<sub>6</sub>
y<sub>5</sub>
y<sub>4</sub>
y<sub>3</sub>
y<sub>2</sub>
y<sub>1</sub>

Raw file 20171215\_MaS\_33SR\_LMH\_phospho\_02 Scan 8786 Method FTMS; HCD Score 69.6 m/z 489.74 Gene names SRRM2

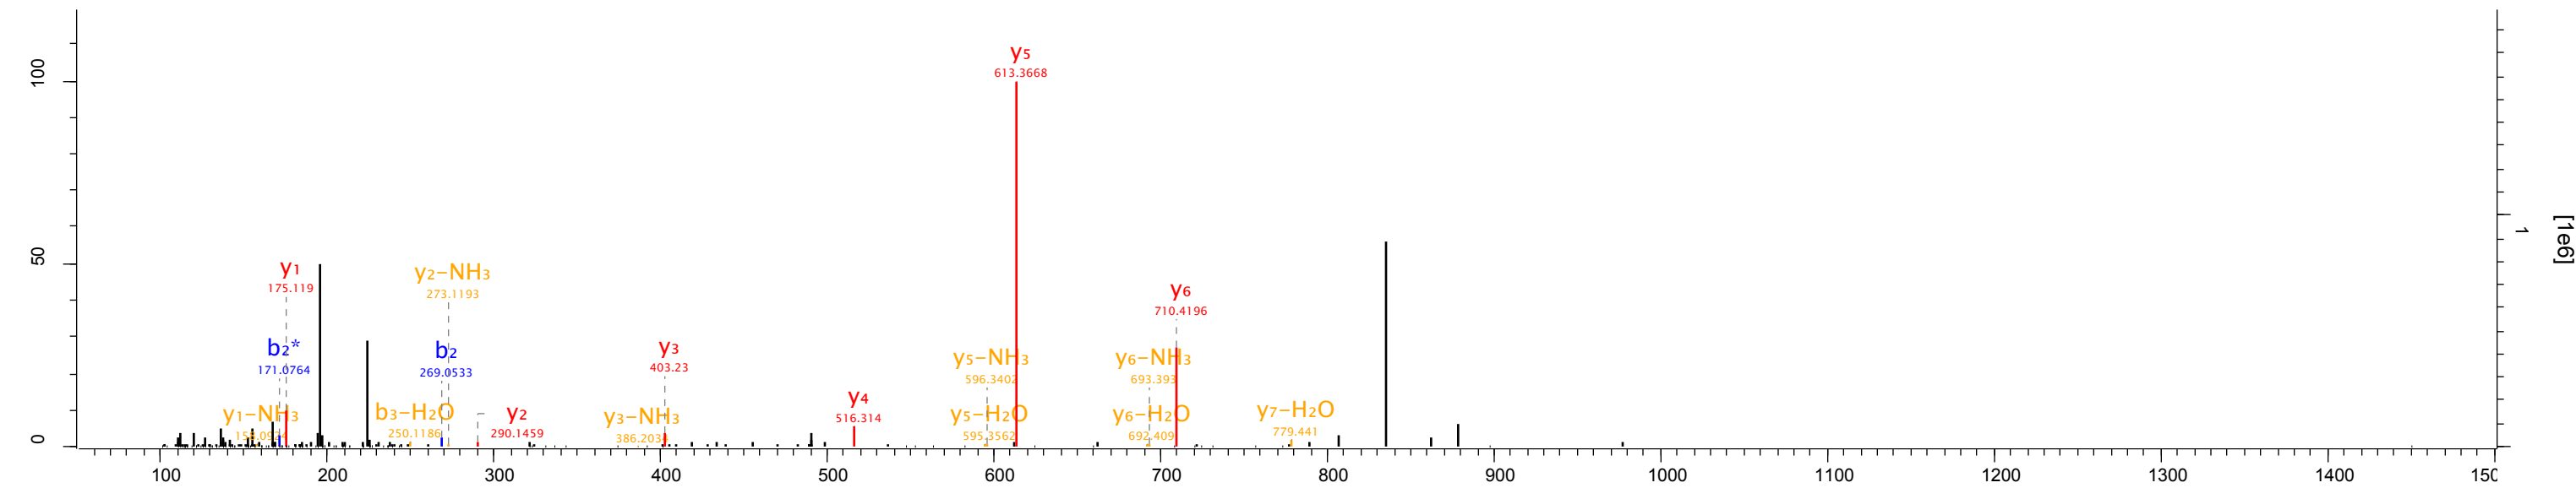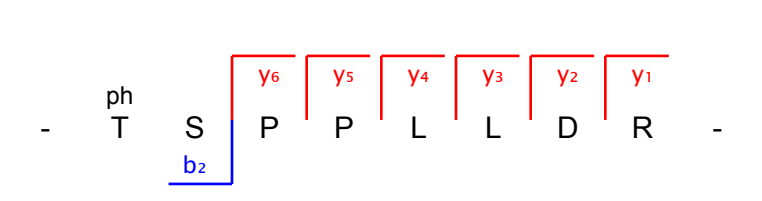



Raw file: 20171215\_MaS\_33SR\_LMH\_phospho\_02  
 Scan: 8816 Method: FTMS; HCD Score: 246.9 m/z: 982.92 Gene names: PPP1R12A

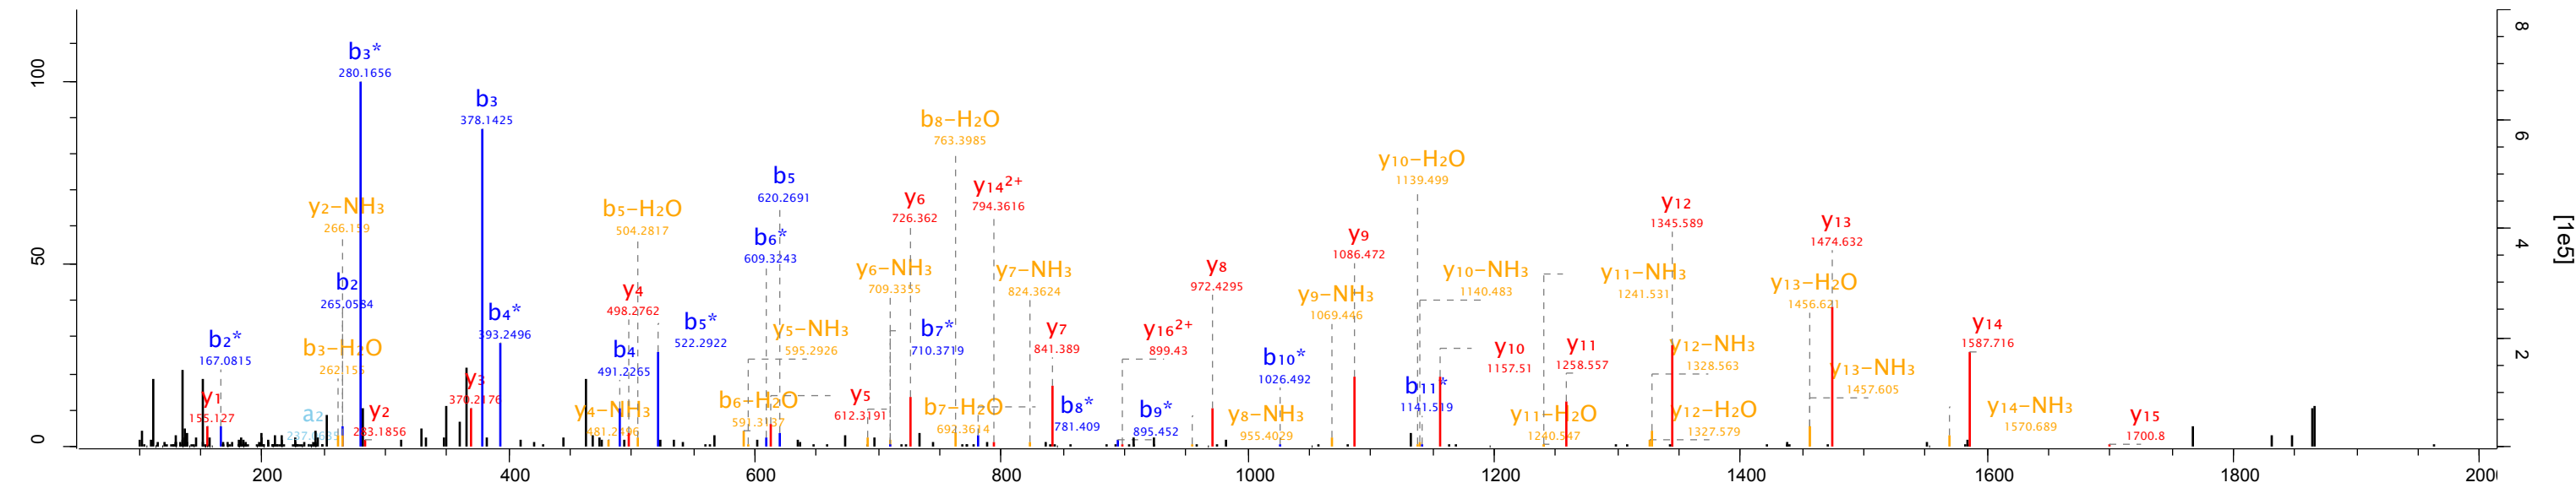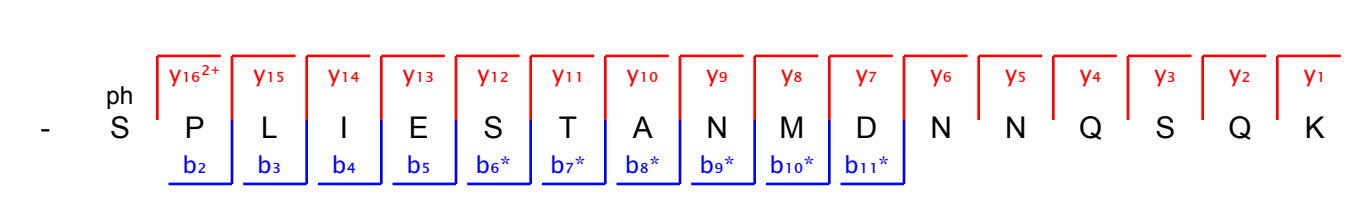

Raw file: 20171215\_MaS\_33SR\_LMH\_phospho\_02  
 Scan: 9306 Method: FTMS; HCD Score: 176.61 m/z: 1092.95 Gene names: AKAP12

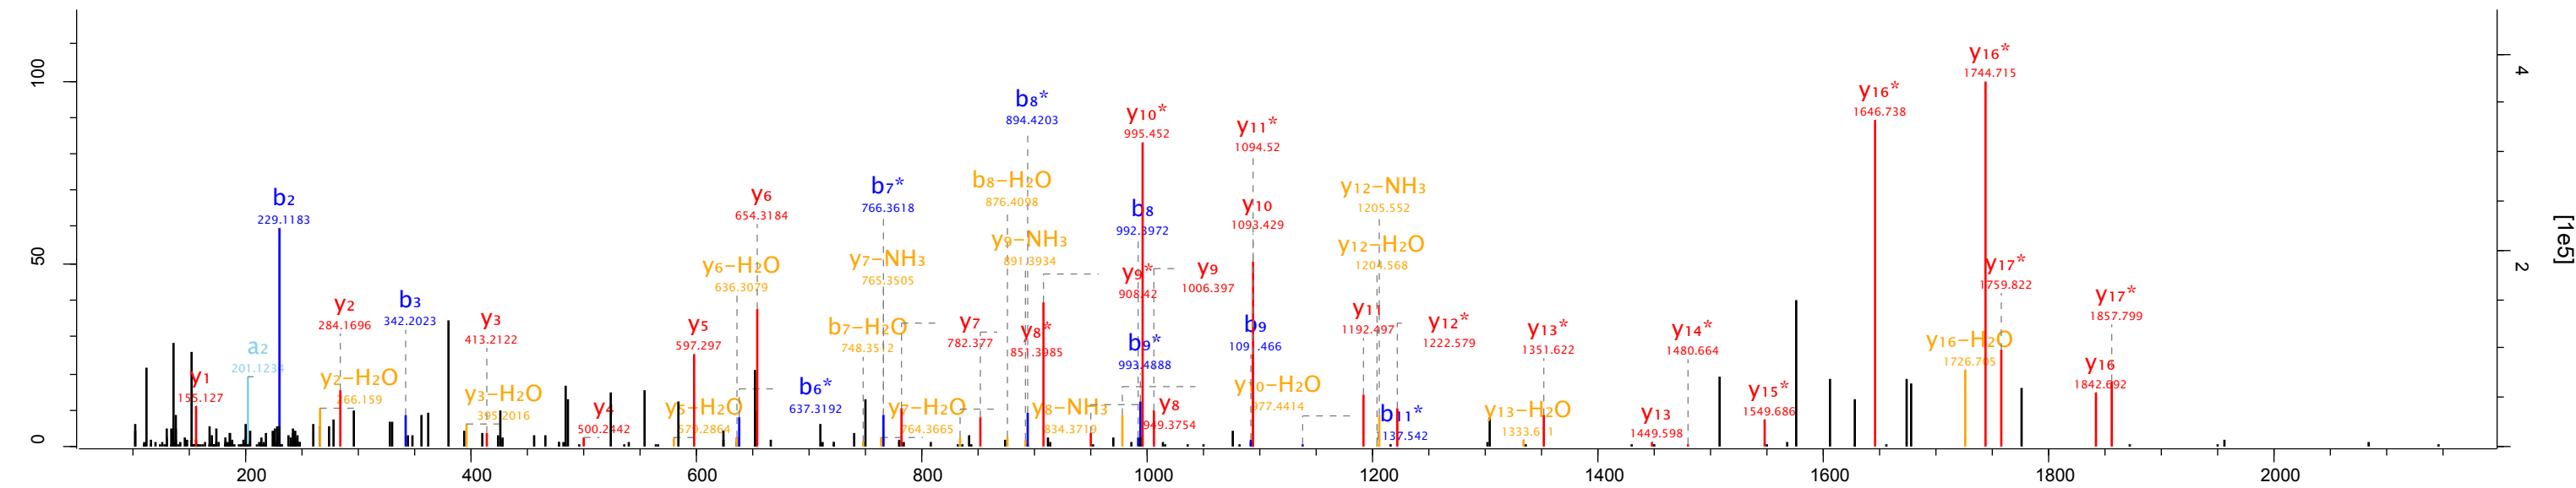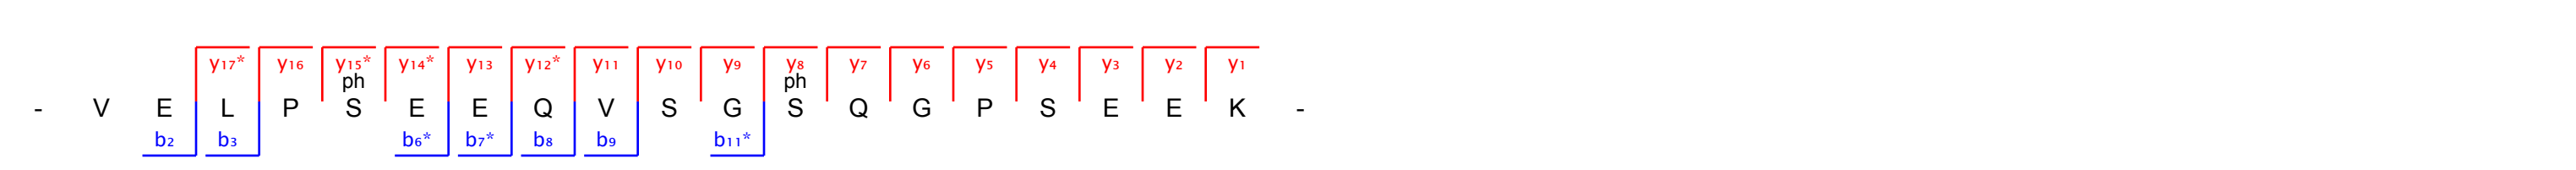

Raw file 20171215\_MaS\_33SR\_LMH\_phospho\_02 Scan 9576 Method FTMS; HCD Score 94.34 m/z 730.31 Gene names HNRNPA1;HNRNPA1L2

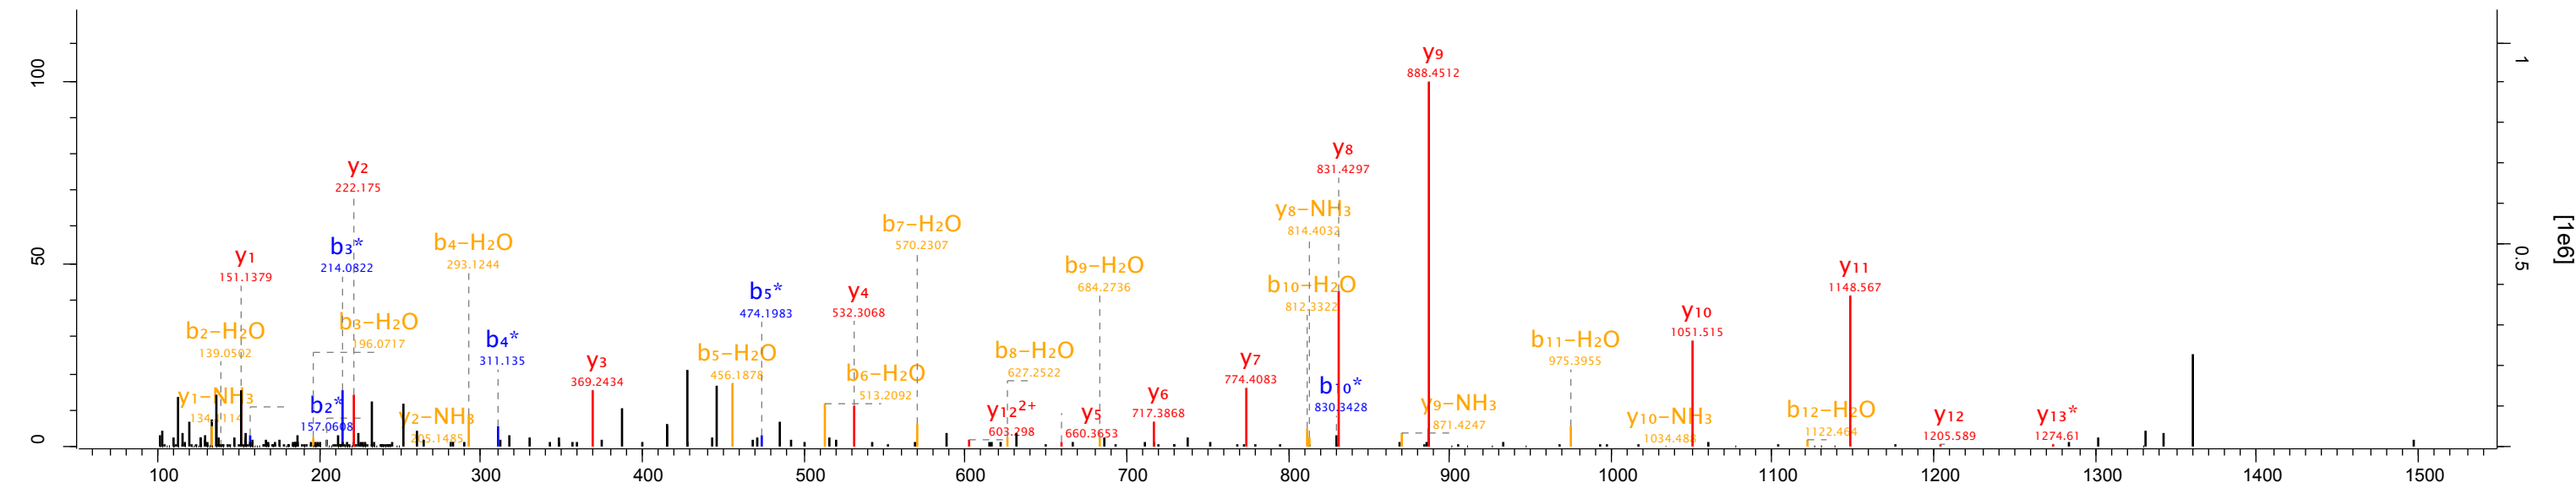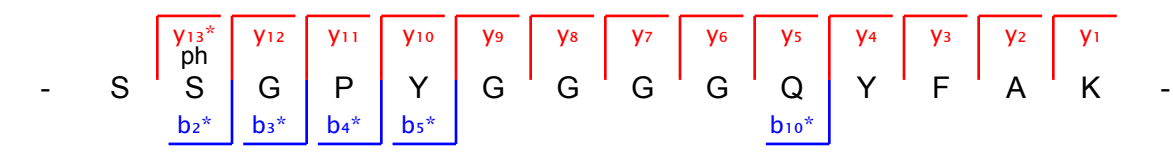

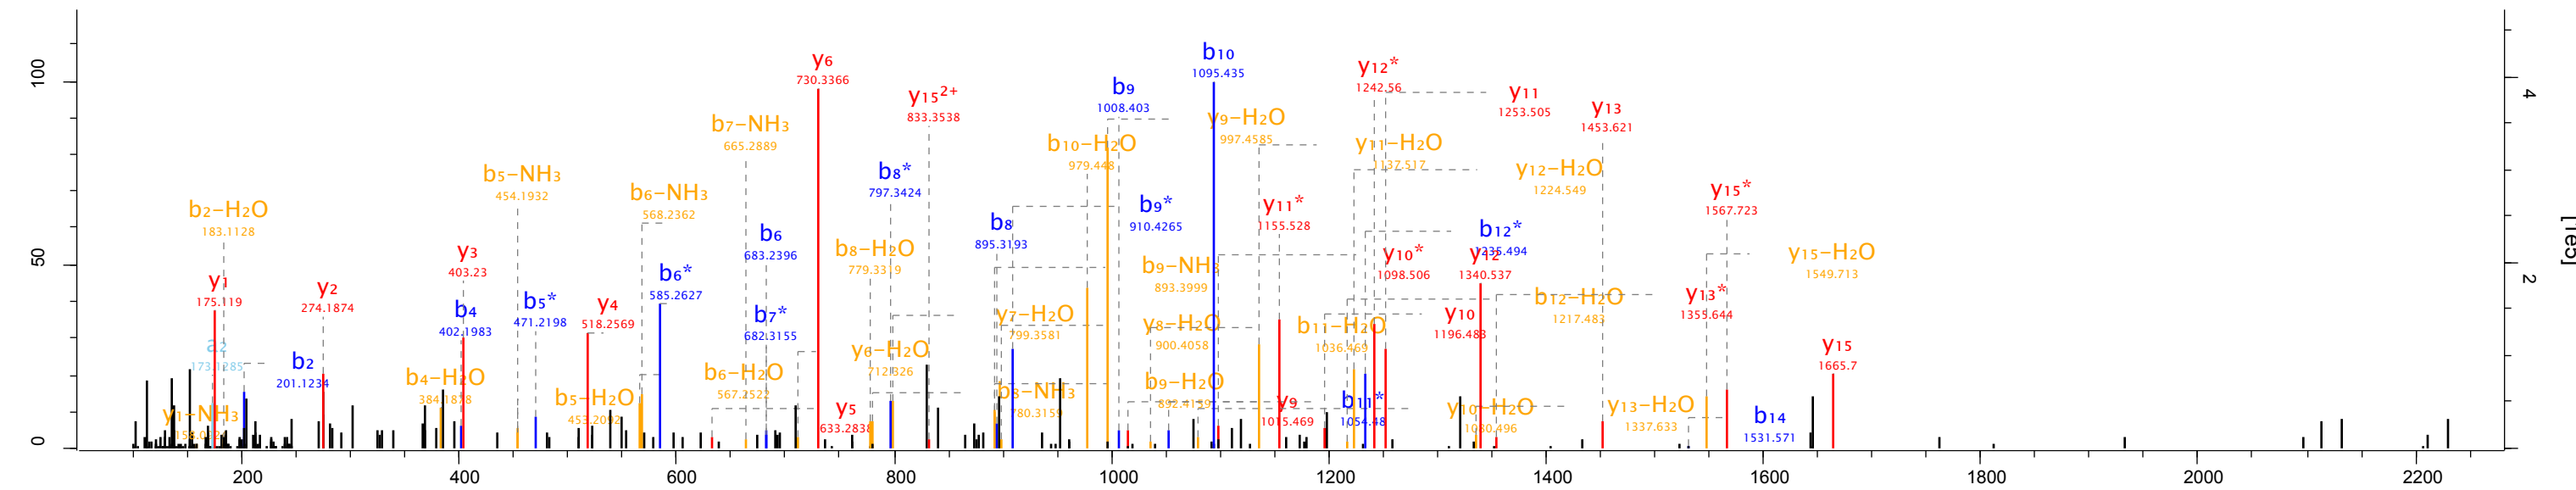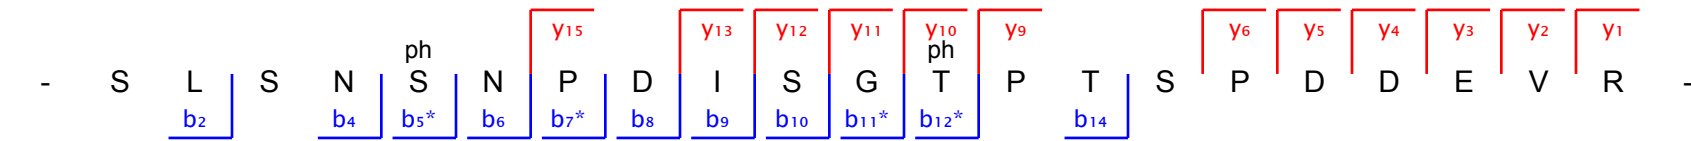

Raw file 20171215\_MaS\_33SR\_LMH\_phospho\_03 Scan 10046 Method FTMS; HCD Score 99.41 m/z 829.38 Gene names EXOC7

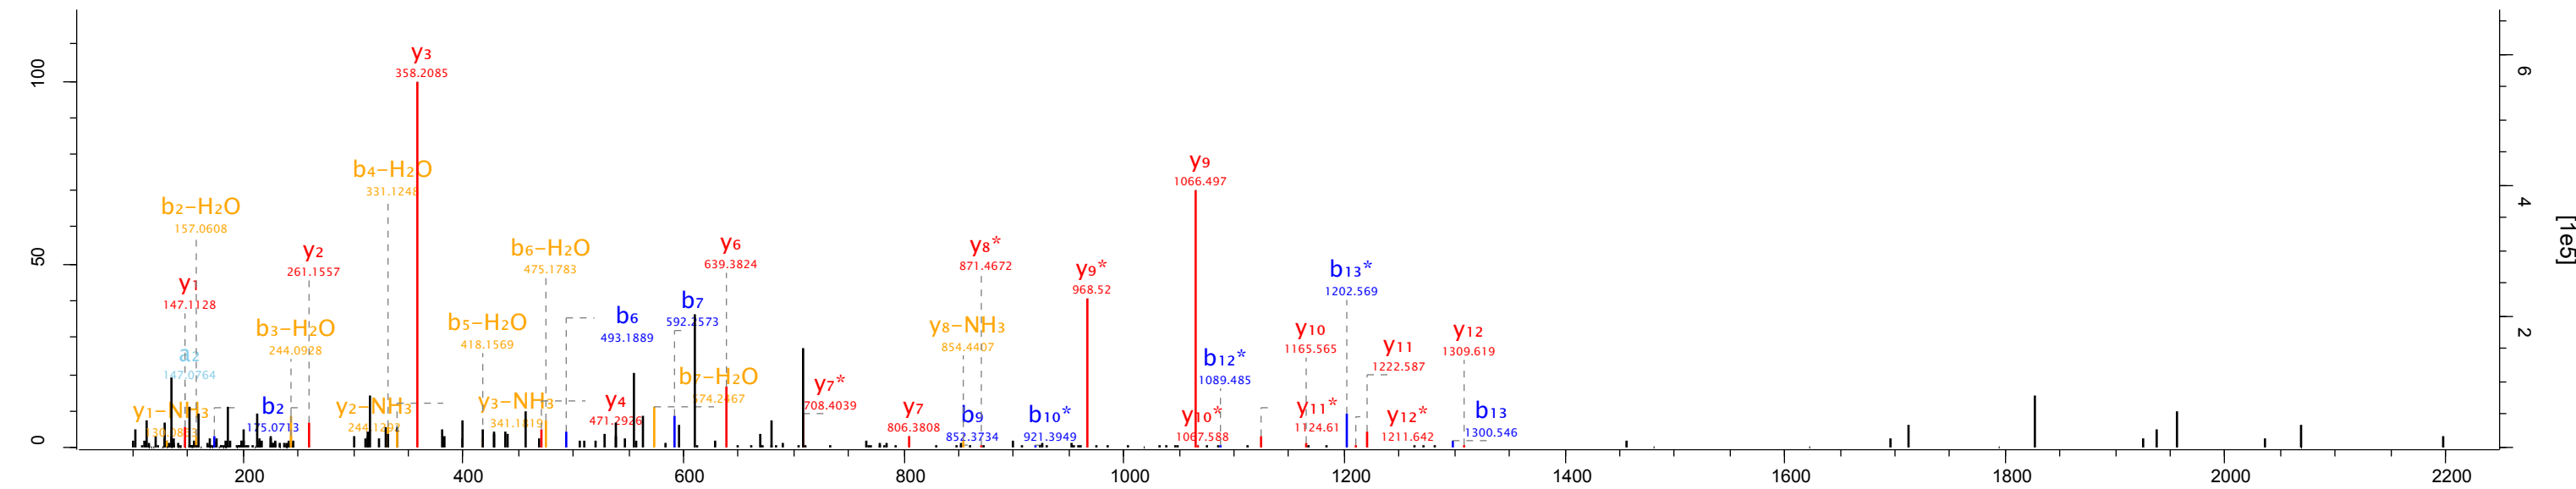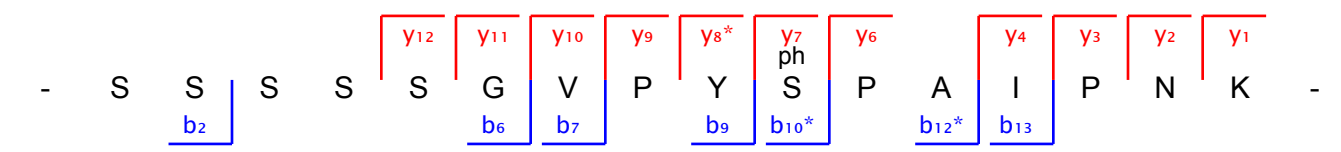

Raw file 20171215\_MaS\_33SR\_LMH\_phospho\_03 Scan 10226 Method FTMS; HCD Score 98.74 m/z 503.72 Gene names EPS15

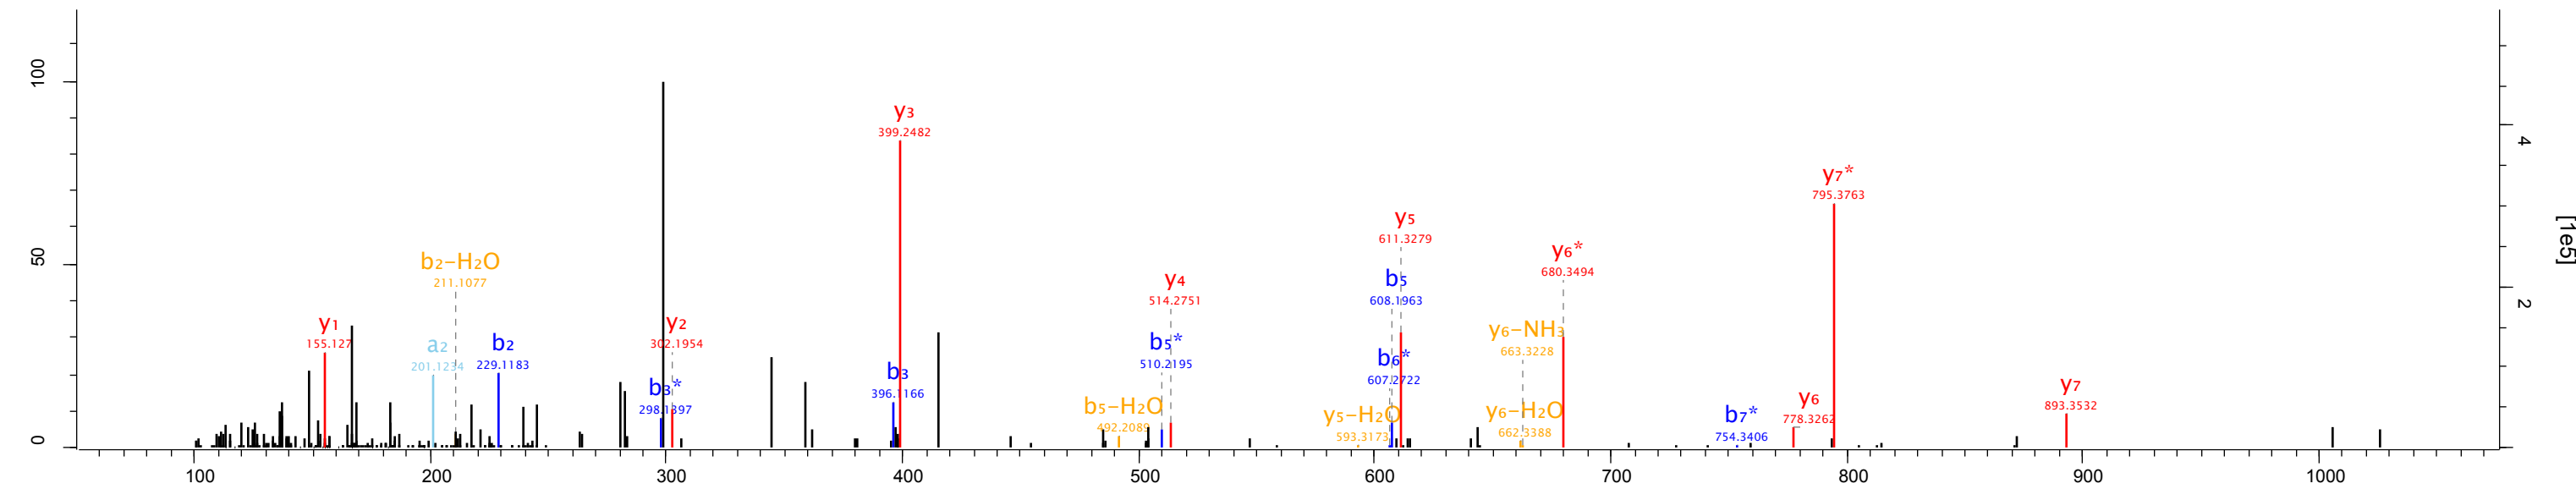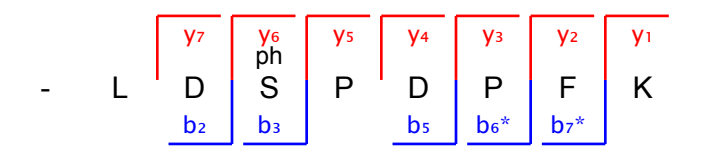

Raw file 20171215\_MaS\_33SR\_LMH\_phospho\_03 Scan 10386 Method FTMS; HCD Score 105.13 m/z 528.73 Gene names DOCK5

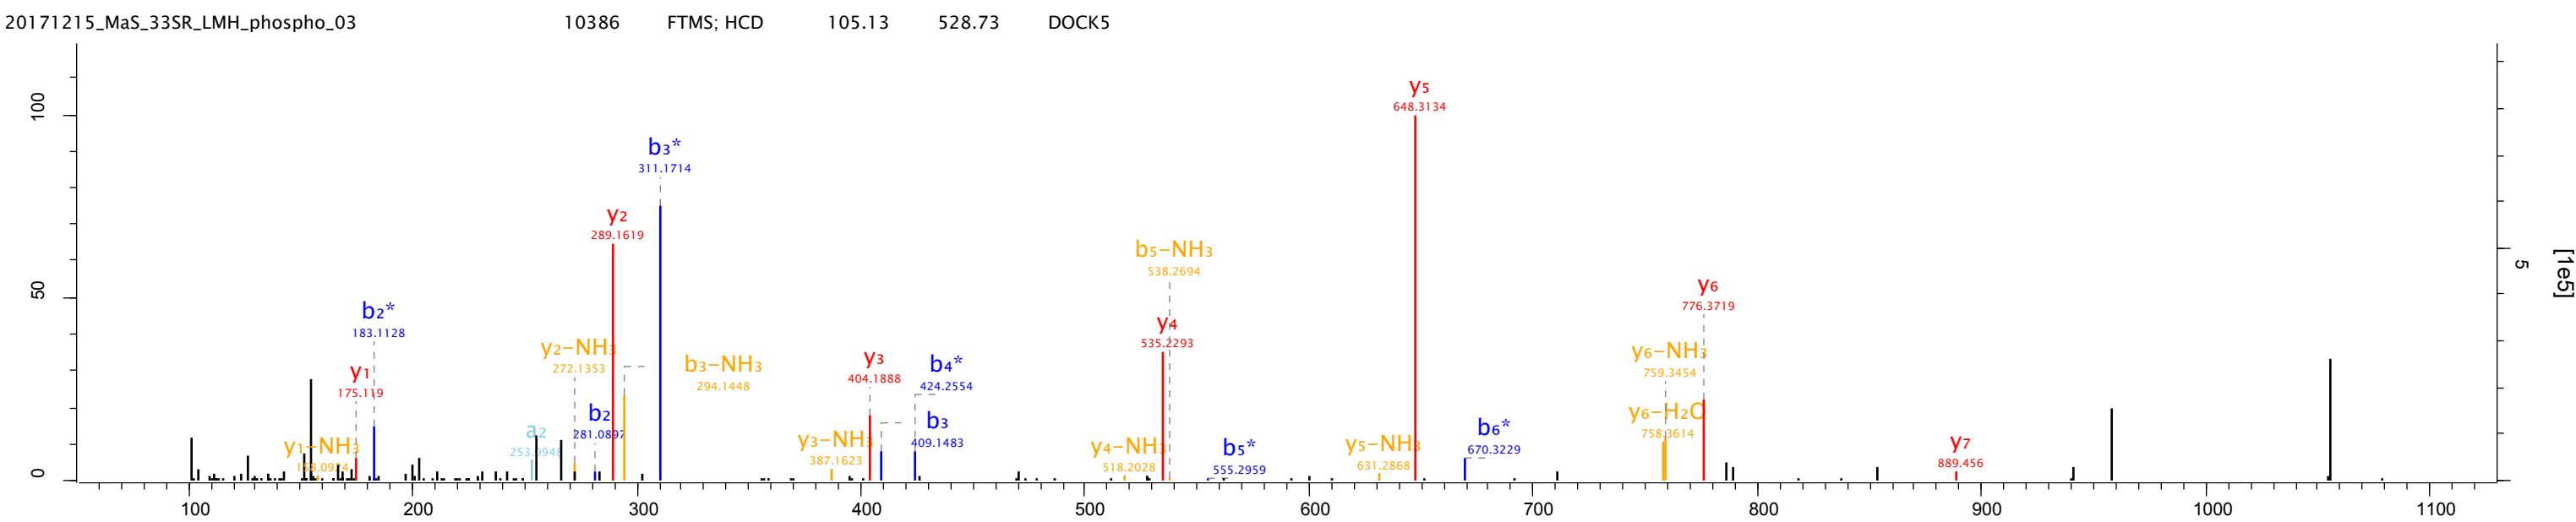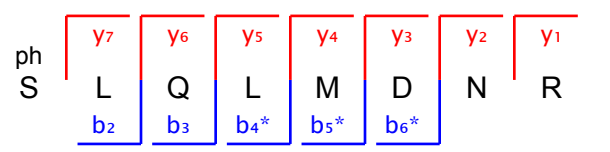

Raw file 20171215\_MaS\_33SR\_LMH\_phospho\_03 Scan 10446 Method FTMS; HCD Score 56.26 m/z 853.17 Gene names HNRNPUL1

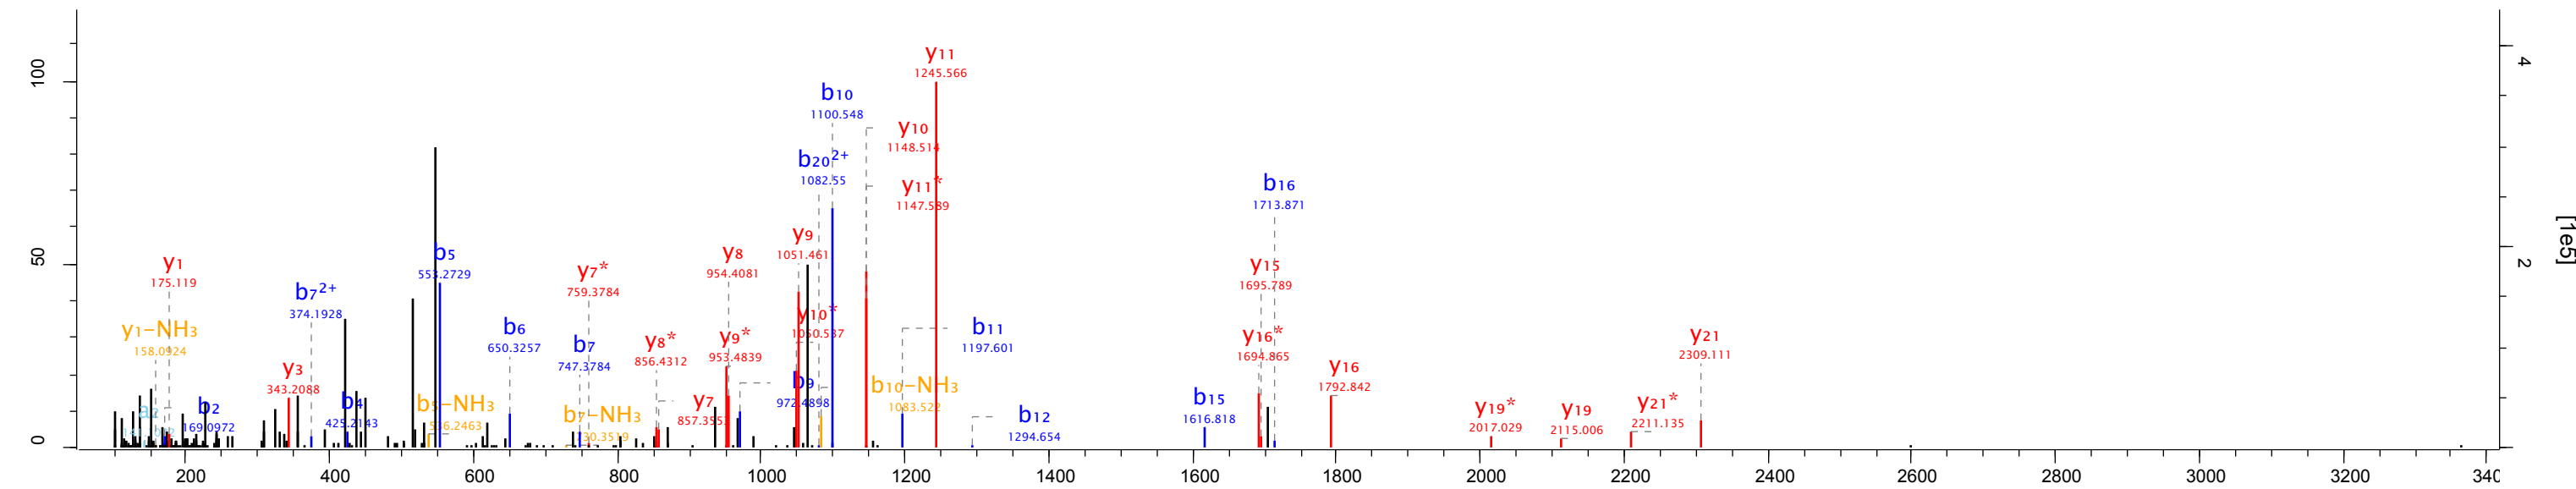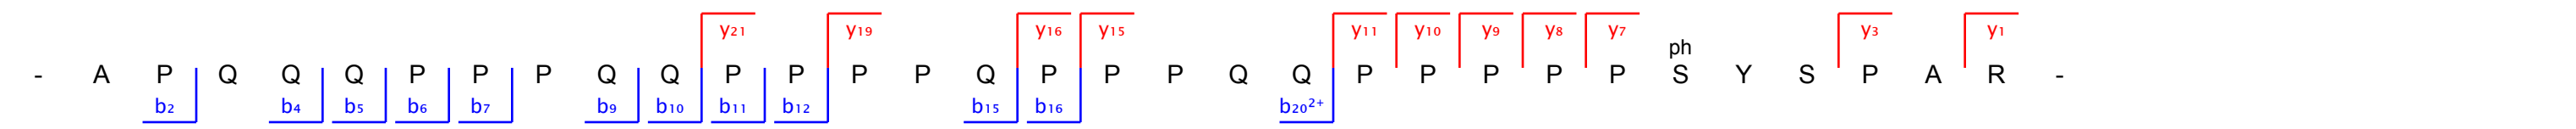



Raw file 20171215\_MaS\_33SR\_LMH\_phospho\_03 Scan 10576 Method FTMS; HCD Score 173.43 m/z 936.42 Gene names ARHGAP5

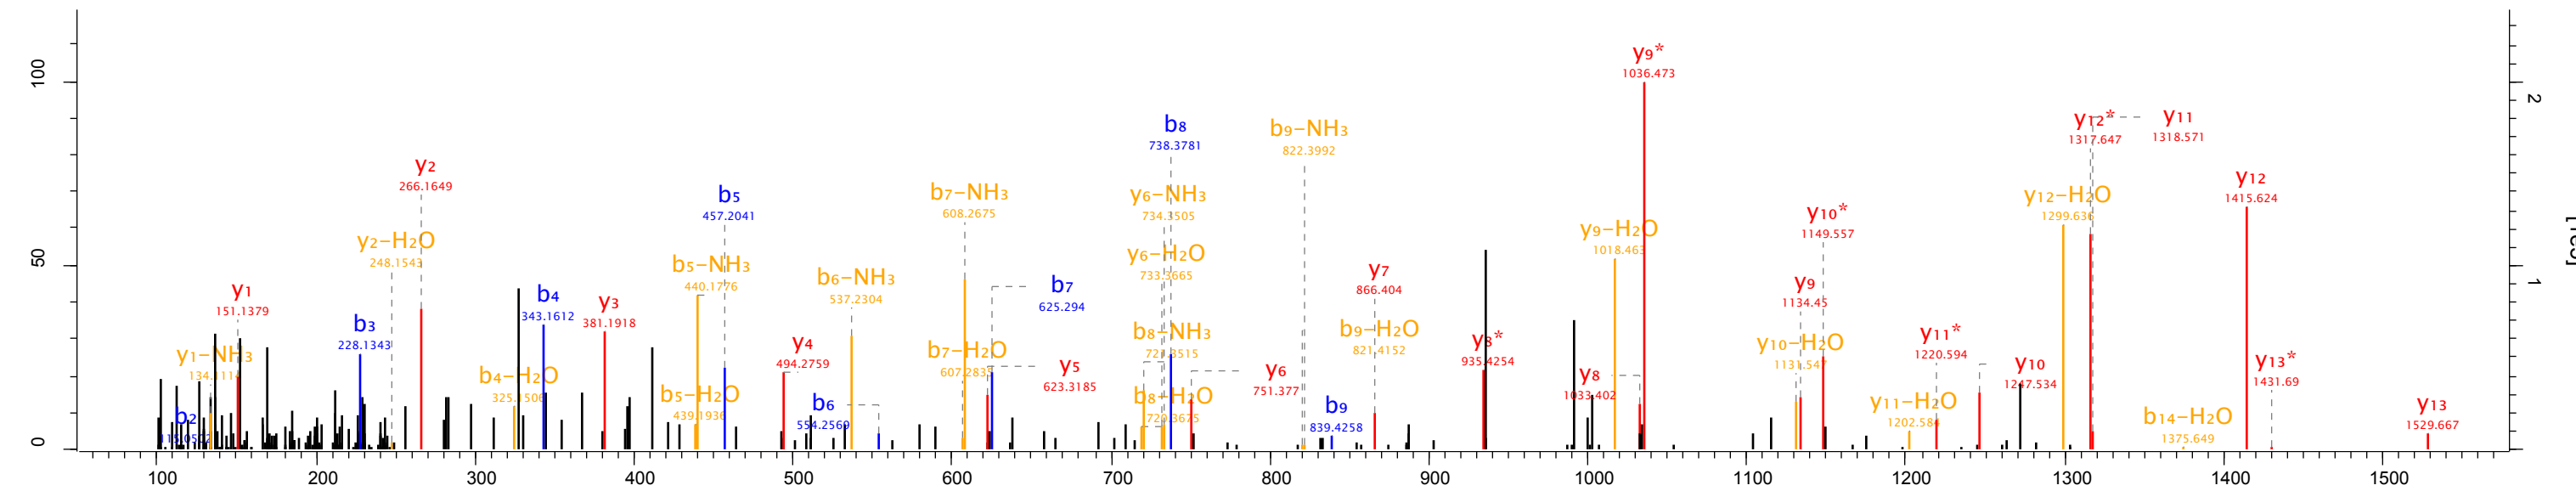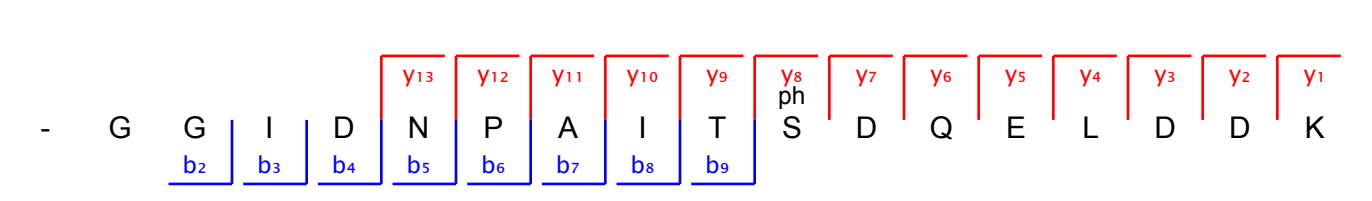

Raw file Scan Method Score m/z Gene names

20171215\_MaS\_33SR\_LMH\_phospho\_03 11556 FTMS; HCD 87.54 672.64 RAB11FIP5

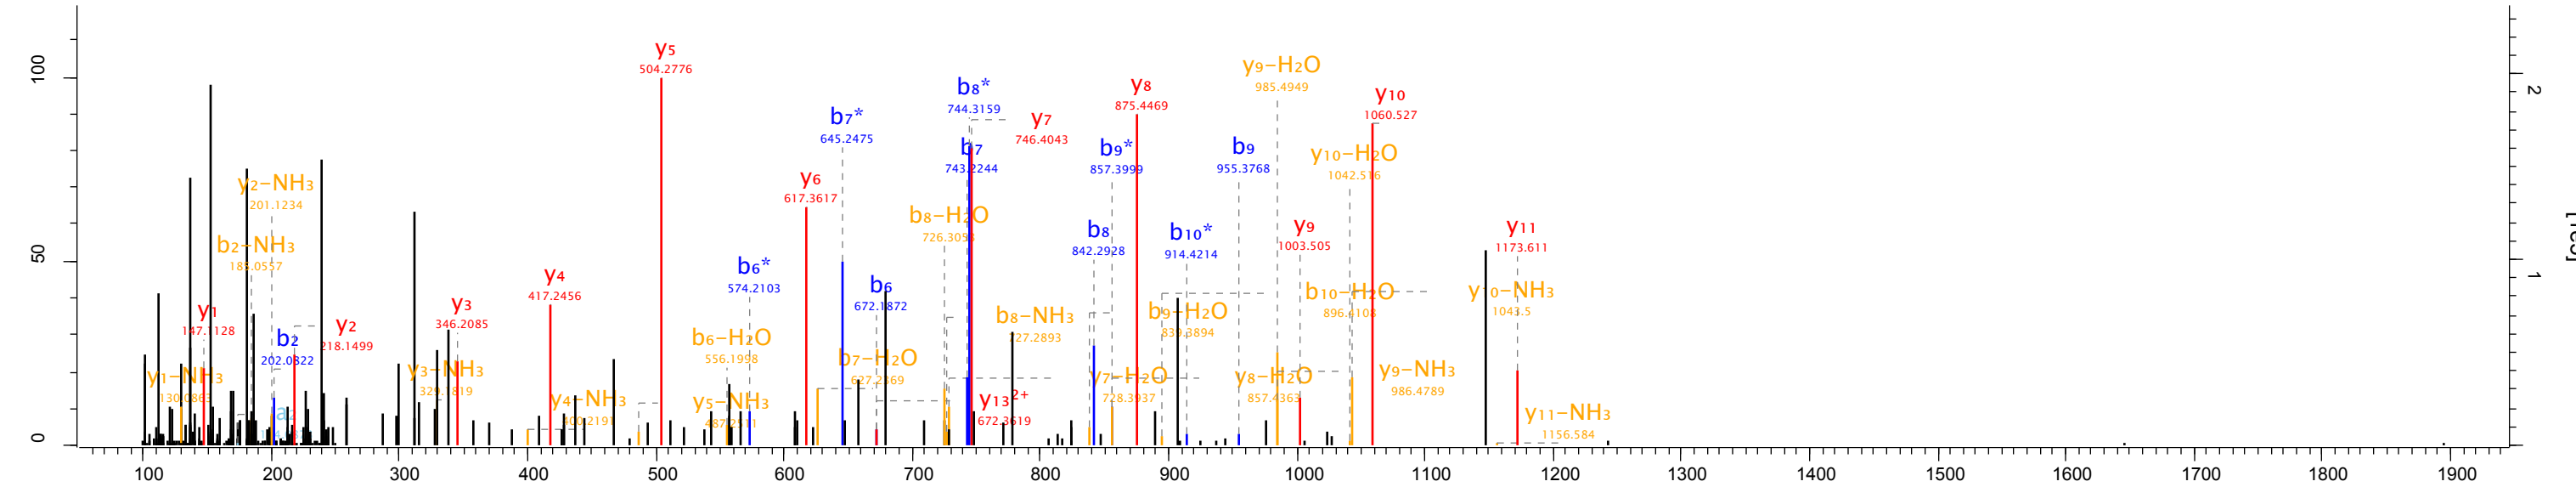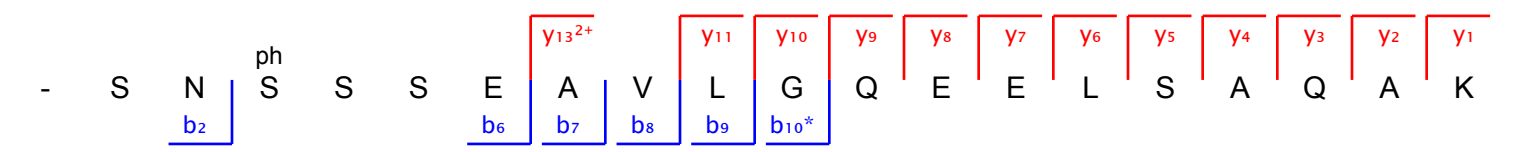

Raw file 20171215\_MaS\_33SR\_LMH\_phospho\_03 Scan 11736 Method FTMS; HCD Score 199.99 m/z 823.86 Gene names LMNA

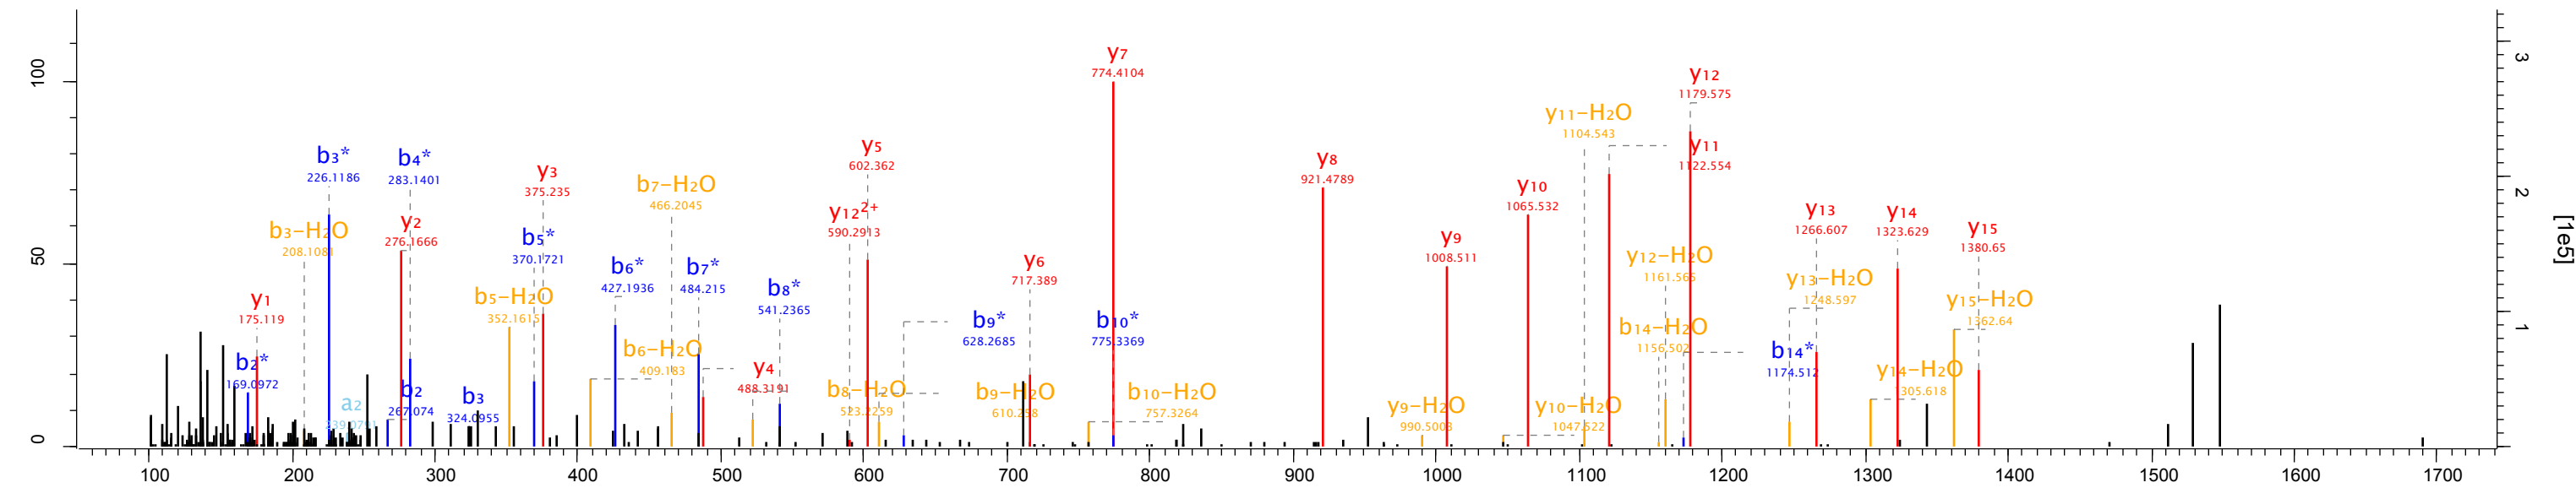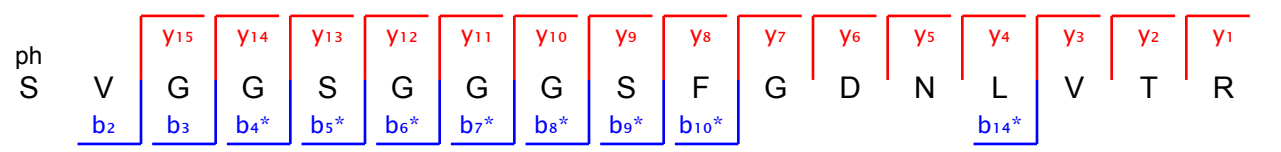

Raw file 20171215\_MaS\_33SR\_LMH\_phospho\_03 Scan 11996 Method FTMS; HCD Score 85.49 m/z 733.32 Gene names NEDD4L;ZNF227

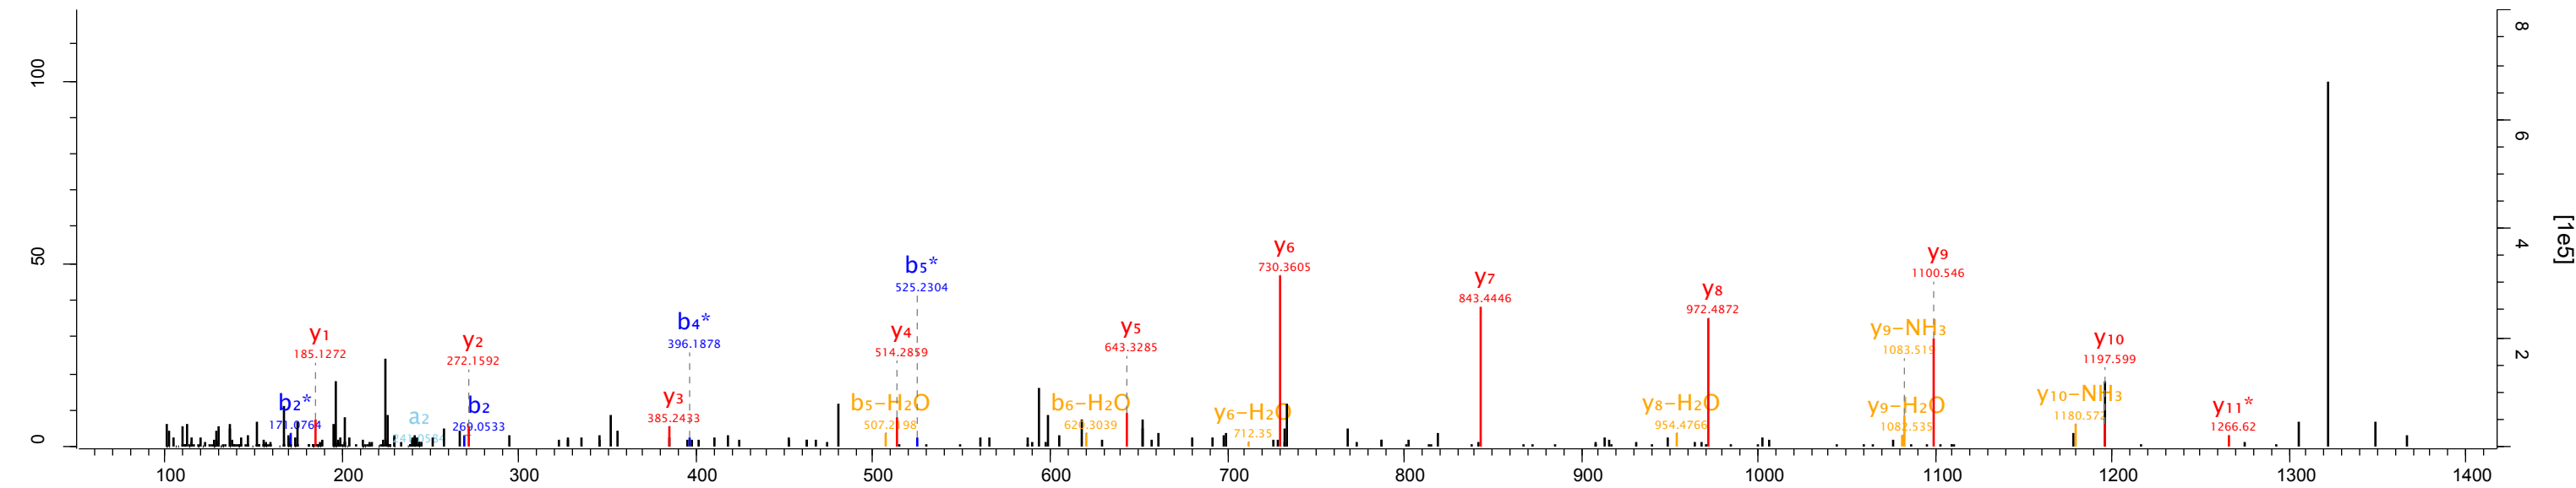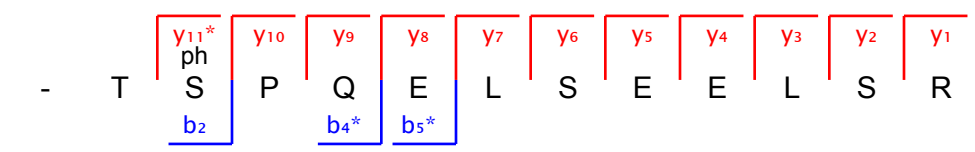

Raw file 20171215\_MaS\_33SR\_LMH\_phospho\_03 Scan 12086 Method FTMS; HCD Score 70.03 m/z 479.75 Gene names CDK12

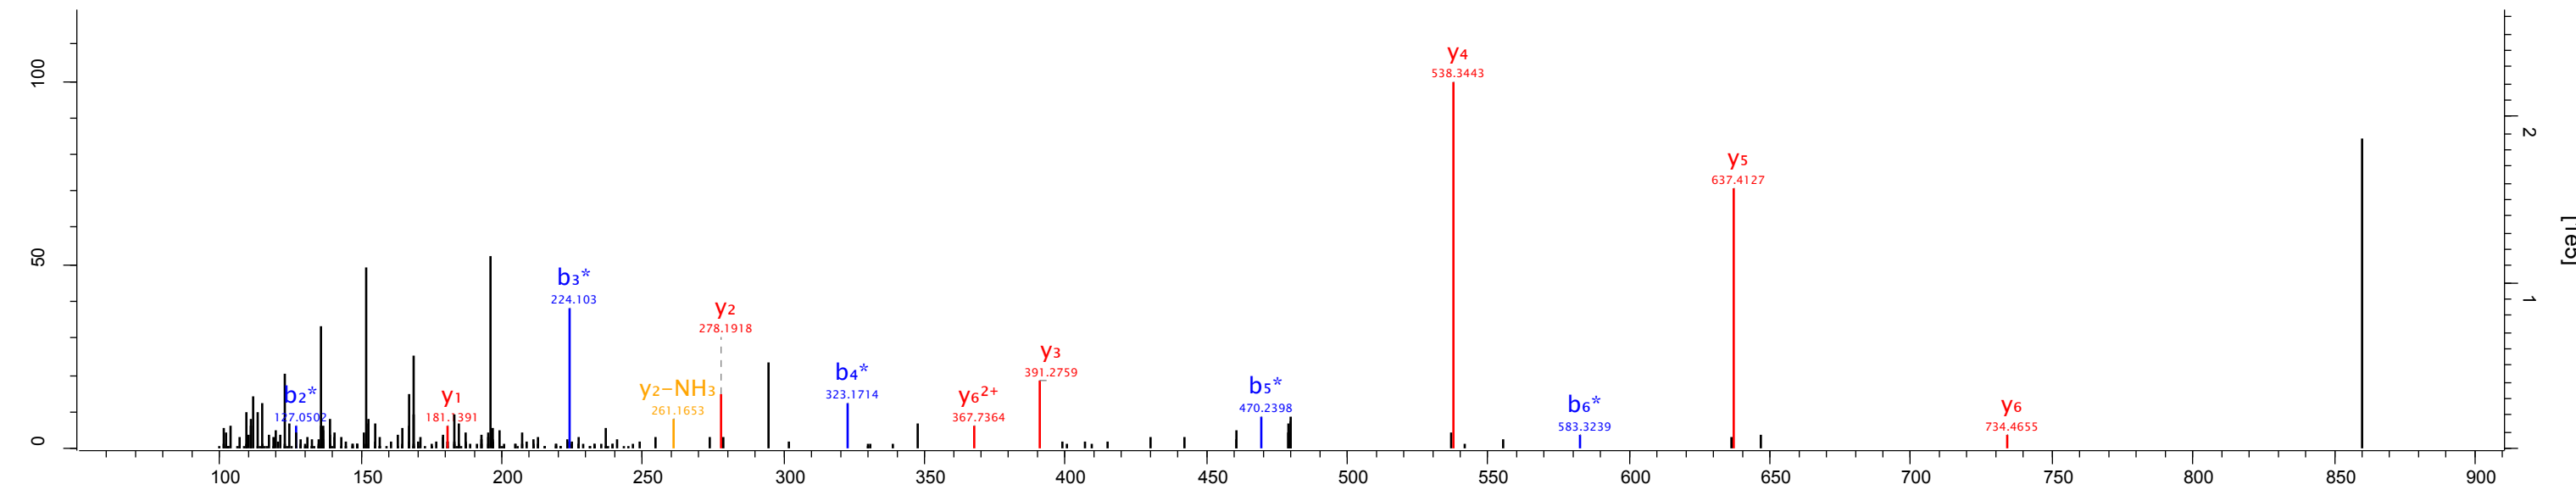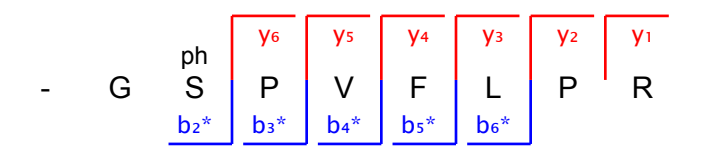

Raw file 20171215\_MaS\_33SR\_LMH\_phospho\_03 Scan 12216 Method FTMS; HCD Score 41.62 m/z 748.35 Gene names CHD7

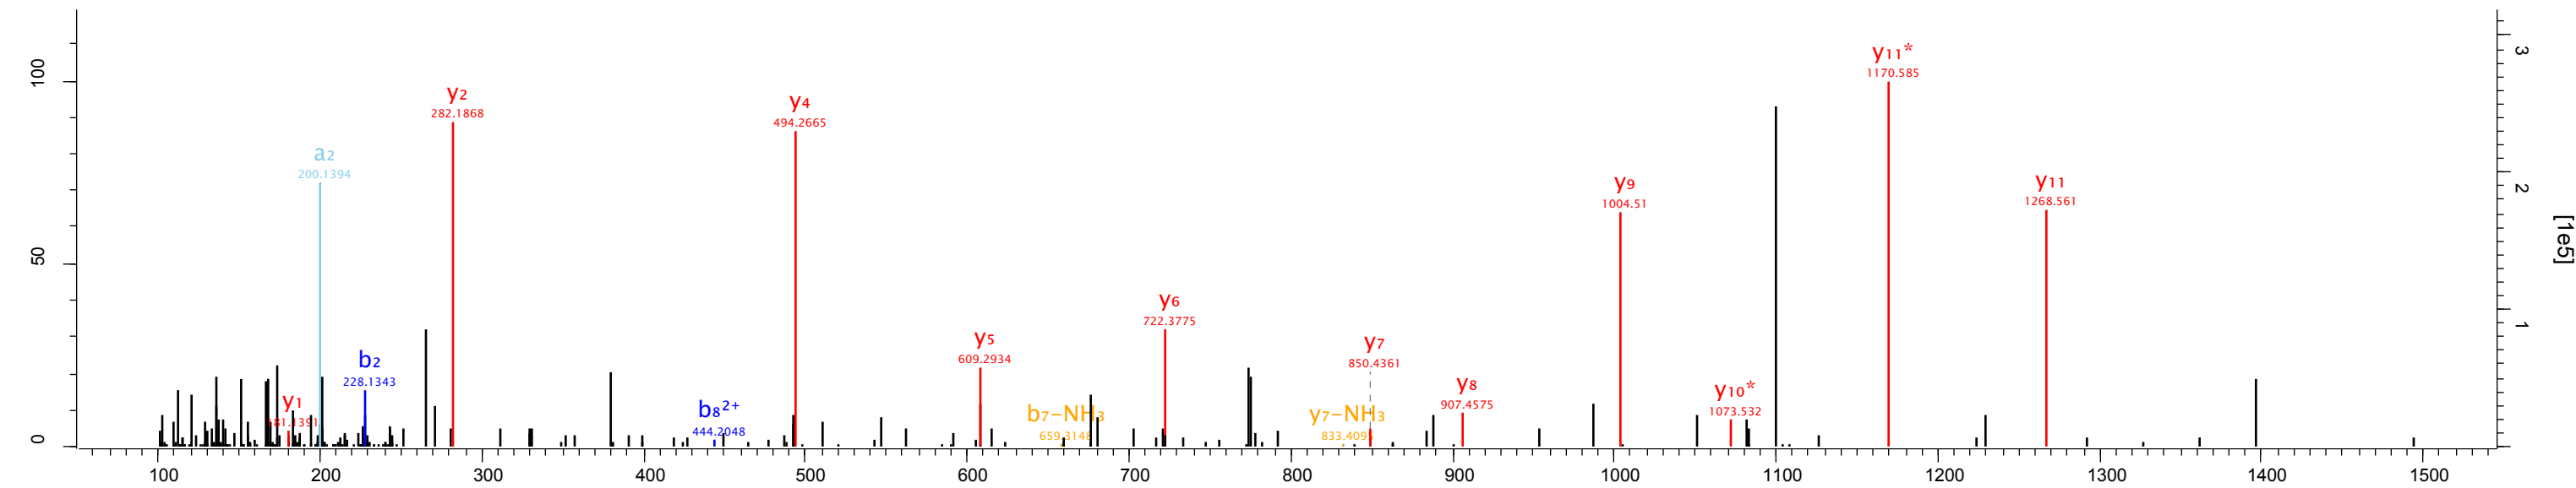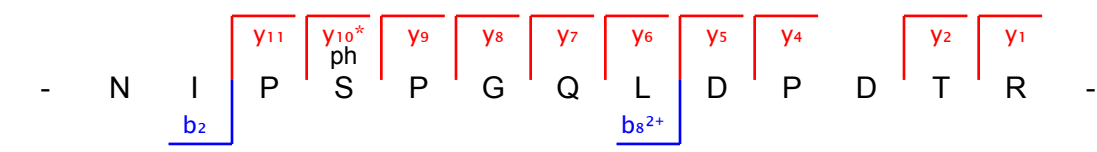

Raw file 20171215\_MaS\_33SR\_LMH\_phospho\_03 Scan 12306 Method FTMS; HCD Score 73.57 m/z 669.96 Gene names NOB1

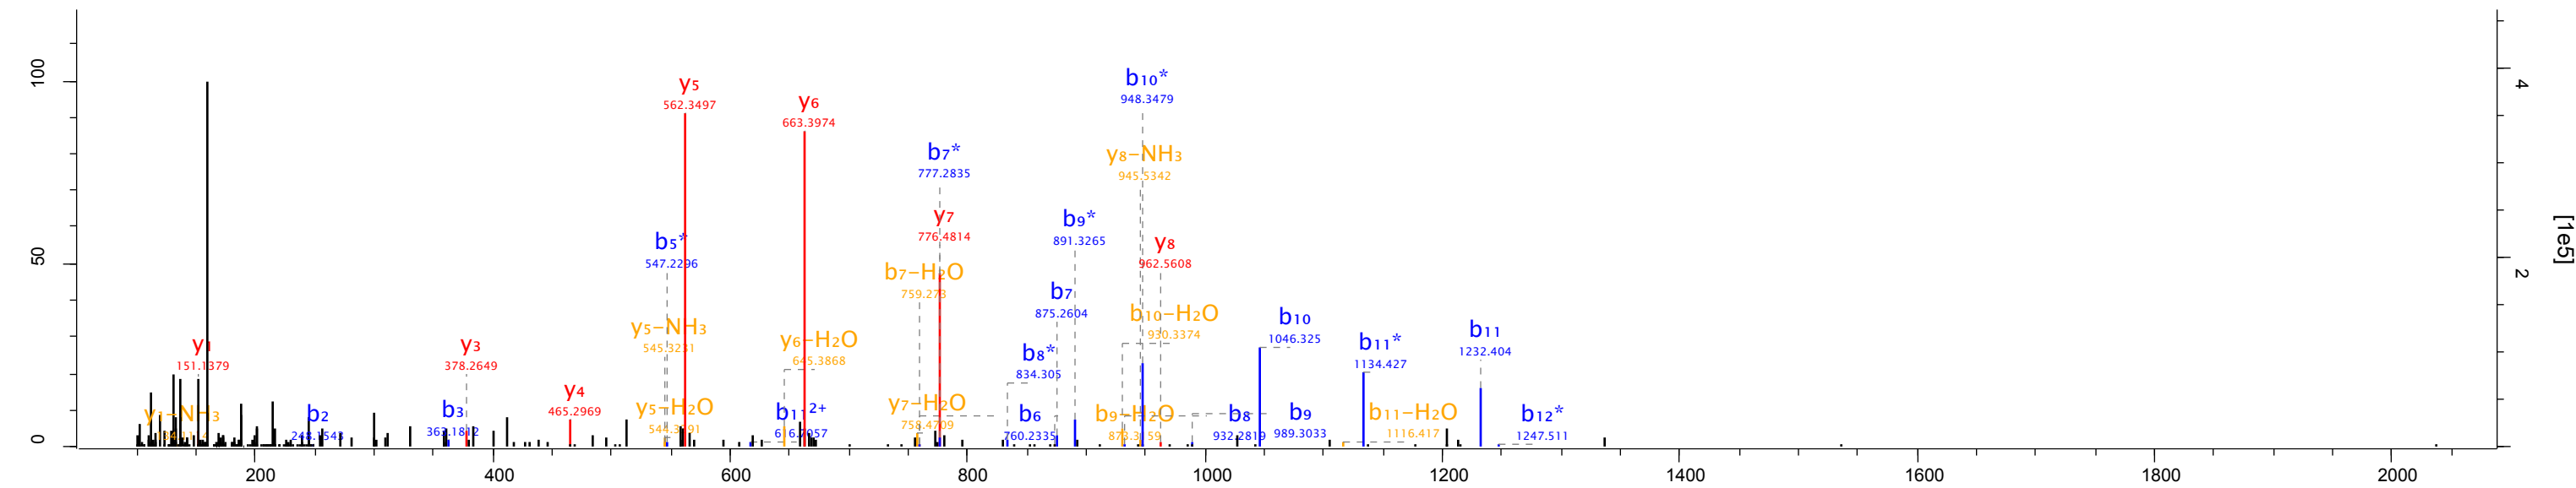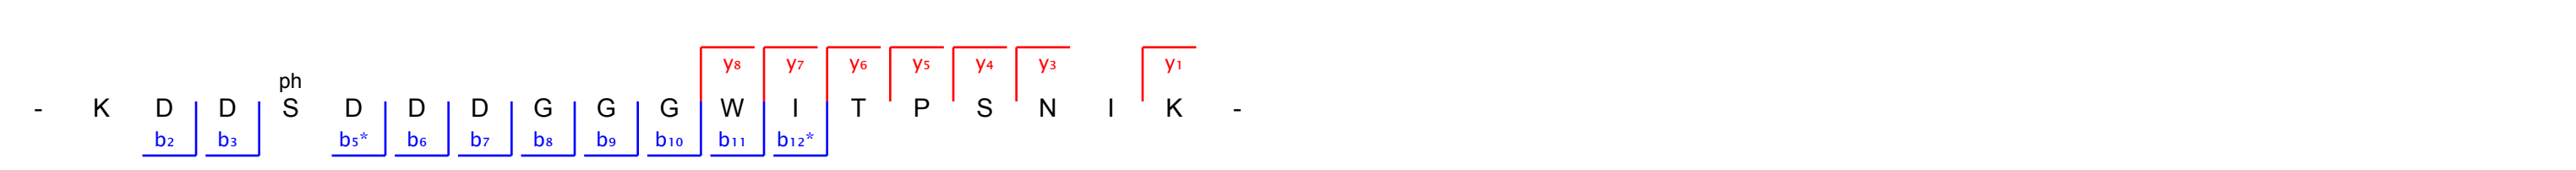

Raw file 20171215\_MaS\_33SR\_LMH\_phospho\_03 Scan 13056 Method FTMS; HCD Score 192.11 m/z 952.46 Gene names TJP2

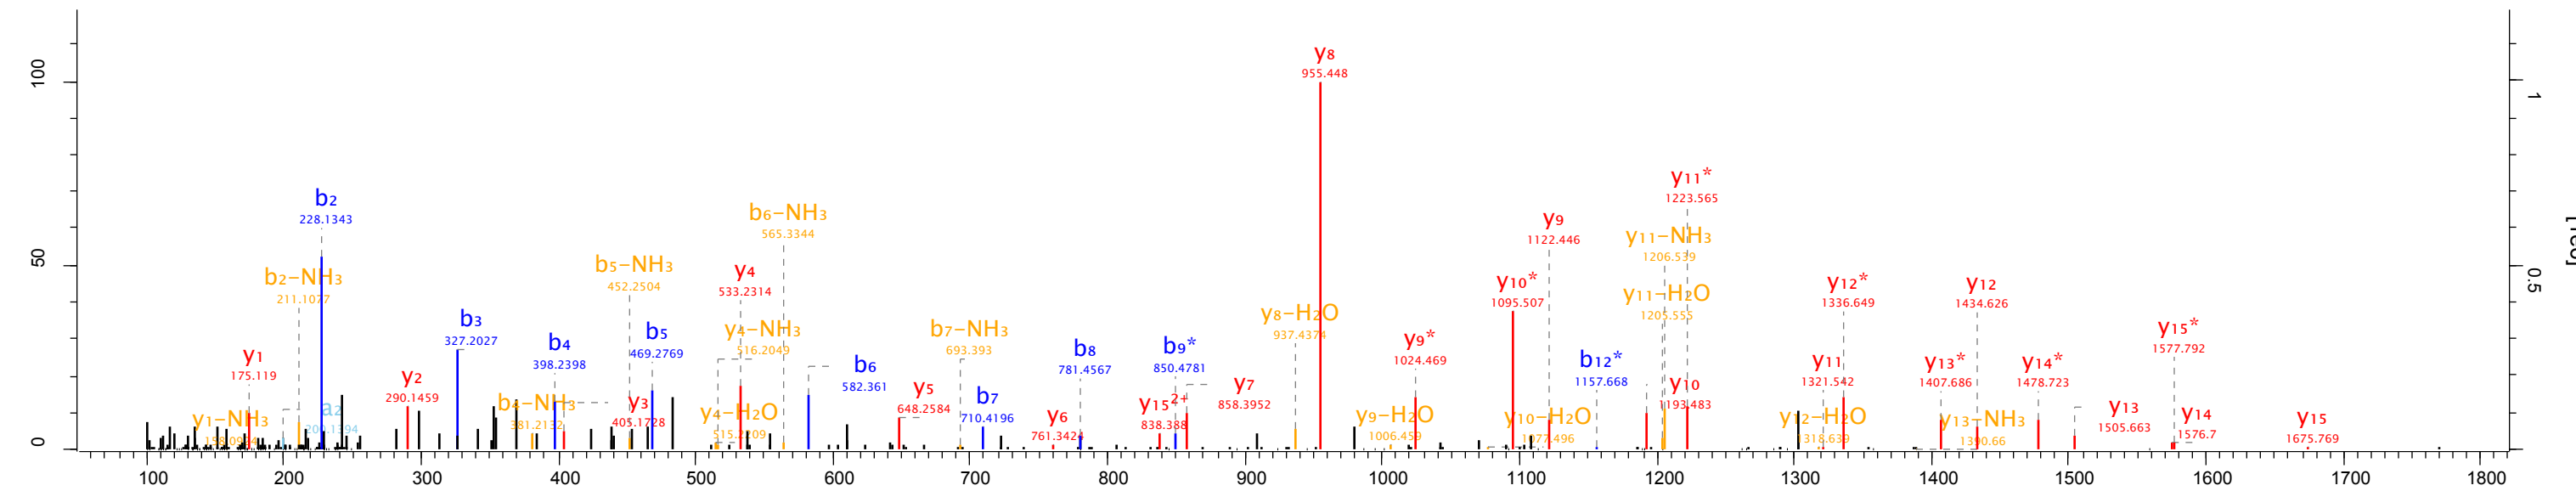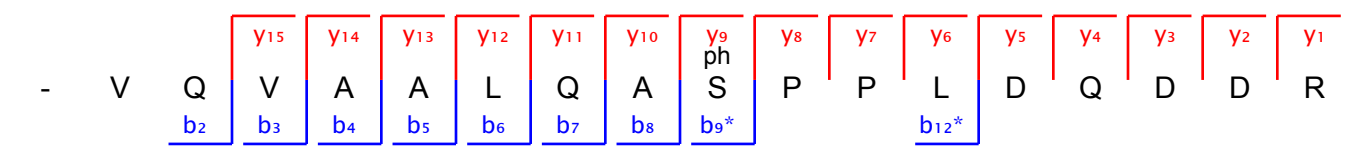



20171215\_MaS\_33SR\_LMH\_phospho\_03 13546 FTMS; HCD 217.26 865.36 NFIC

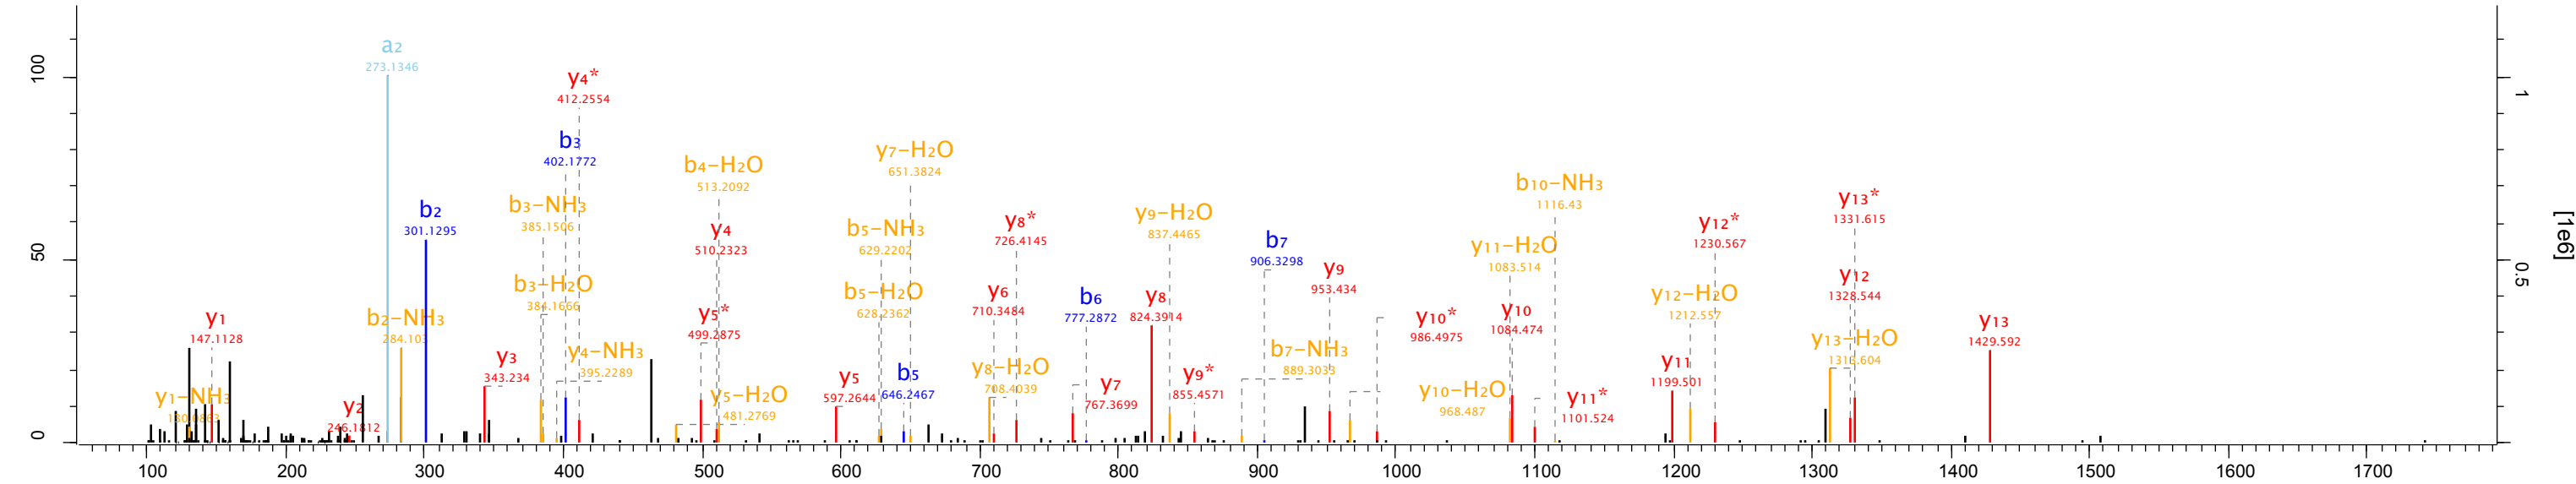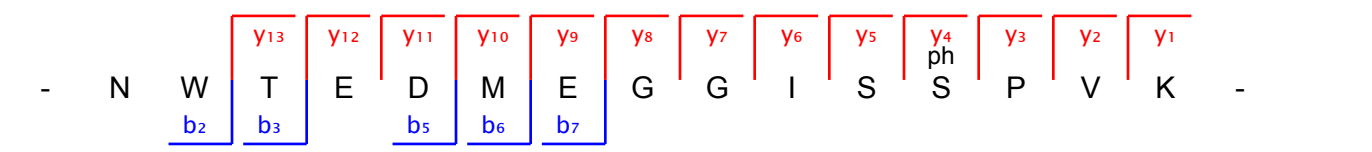

Raw file 20171215\_MaS\_33SR\_LMH\_phospho\_03 Scan 14176 Method FTMS; HCD Score 72.98 m/z 1216.18 Gene names TRIM28

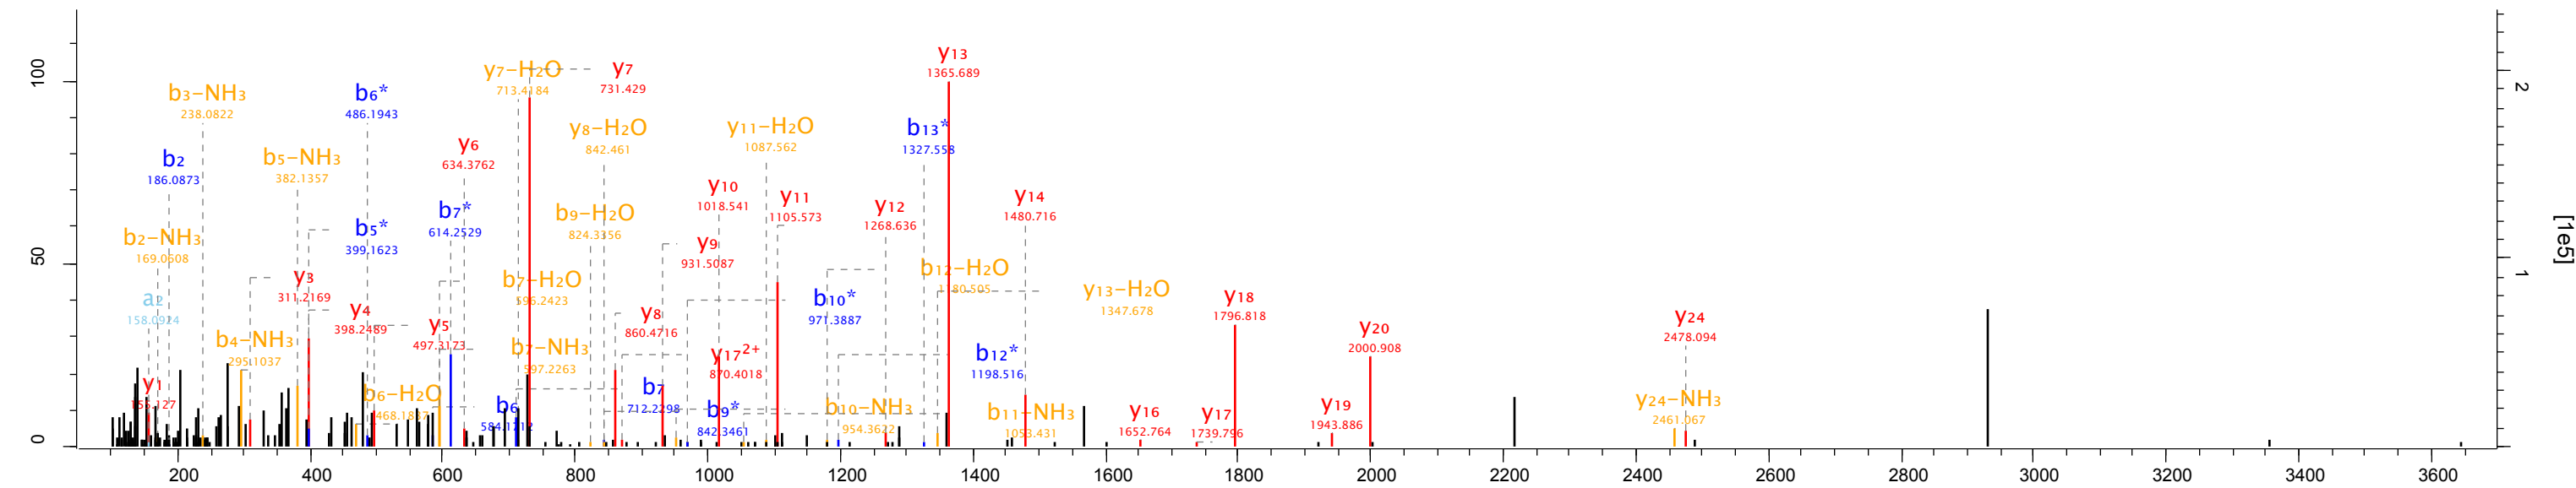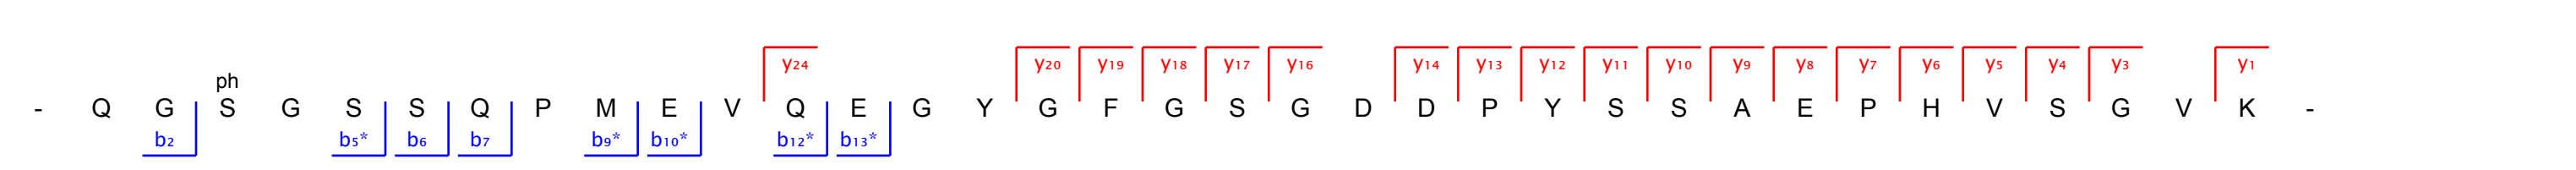

Raw file 20171215\_MaS\_33SR\_LMH\_phospho\_03 Scan 14306 Method FTMS; HCD Score 103.88 m/z 900.85 Gene names FAM129A

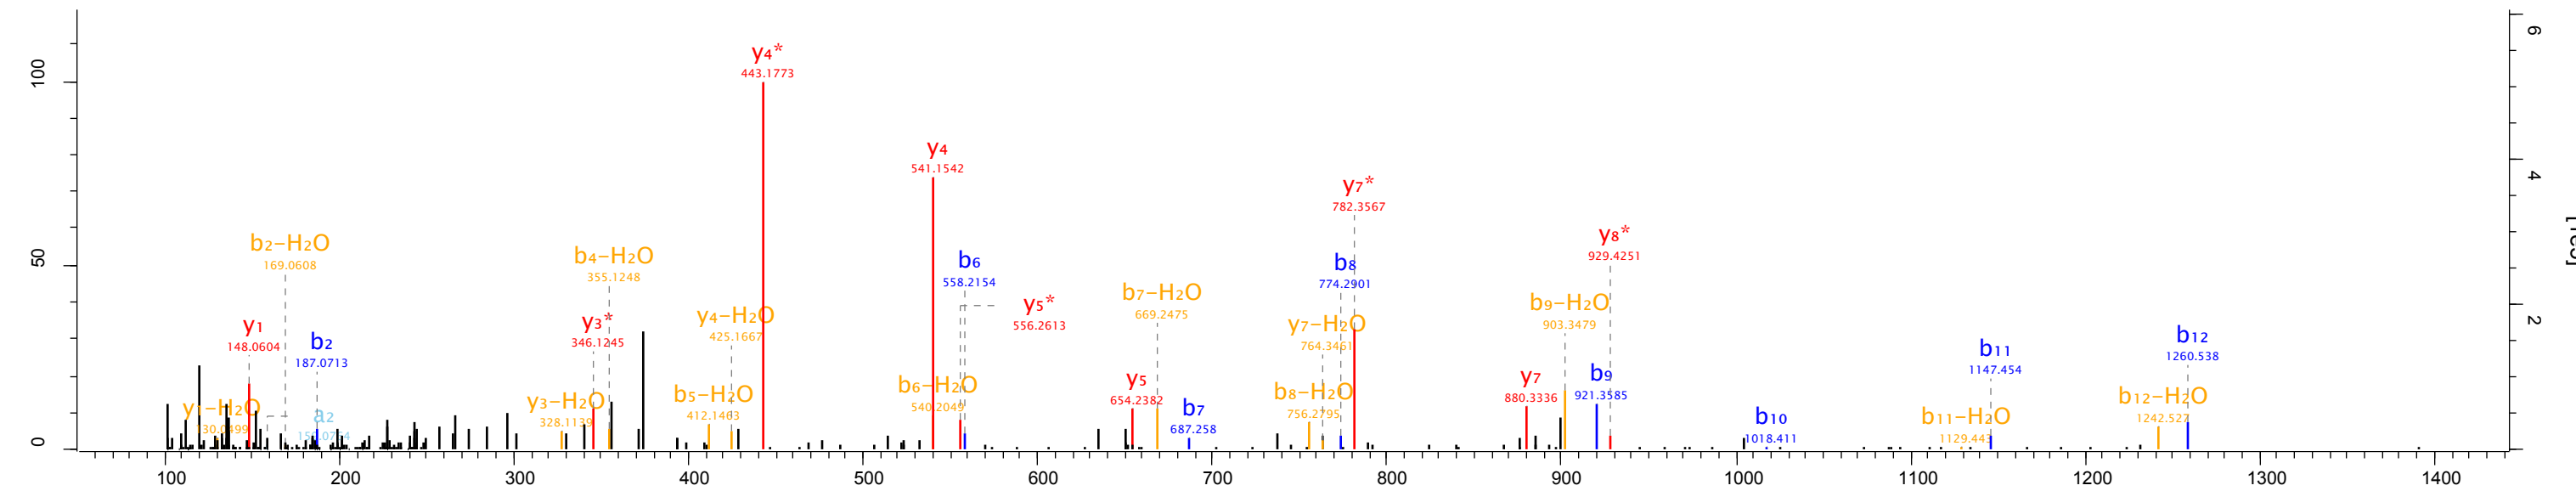

- E G E G G Q E S F P E L P S E E -

Fragmentation mapping: b2 (under G), b6 (under Q), b7 (under E), b8 (under S), b9 (under F), b10 (under P), b11 (under E), b12 (under L), y8\* (above F), y7 (above P), y5 (above L), y4 (above P), y3\* (above S), y1 (above E).

Raw file: 20171215\_MaS\_33SR\_LMH\_phospho\_03  
 Scan: 14646 Method: FTMS; HCD Score: 136.62 m/z: 1052.96 Gene names: NOP56

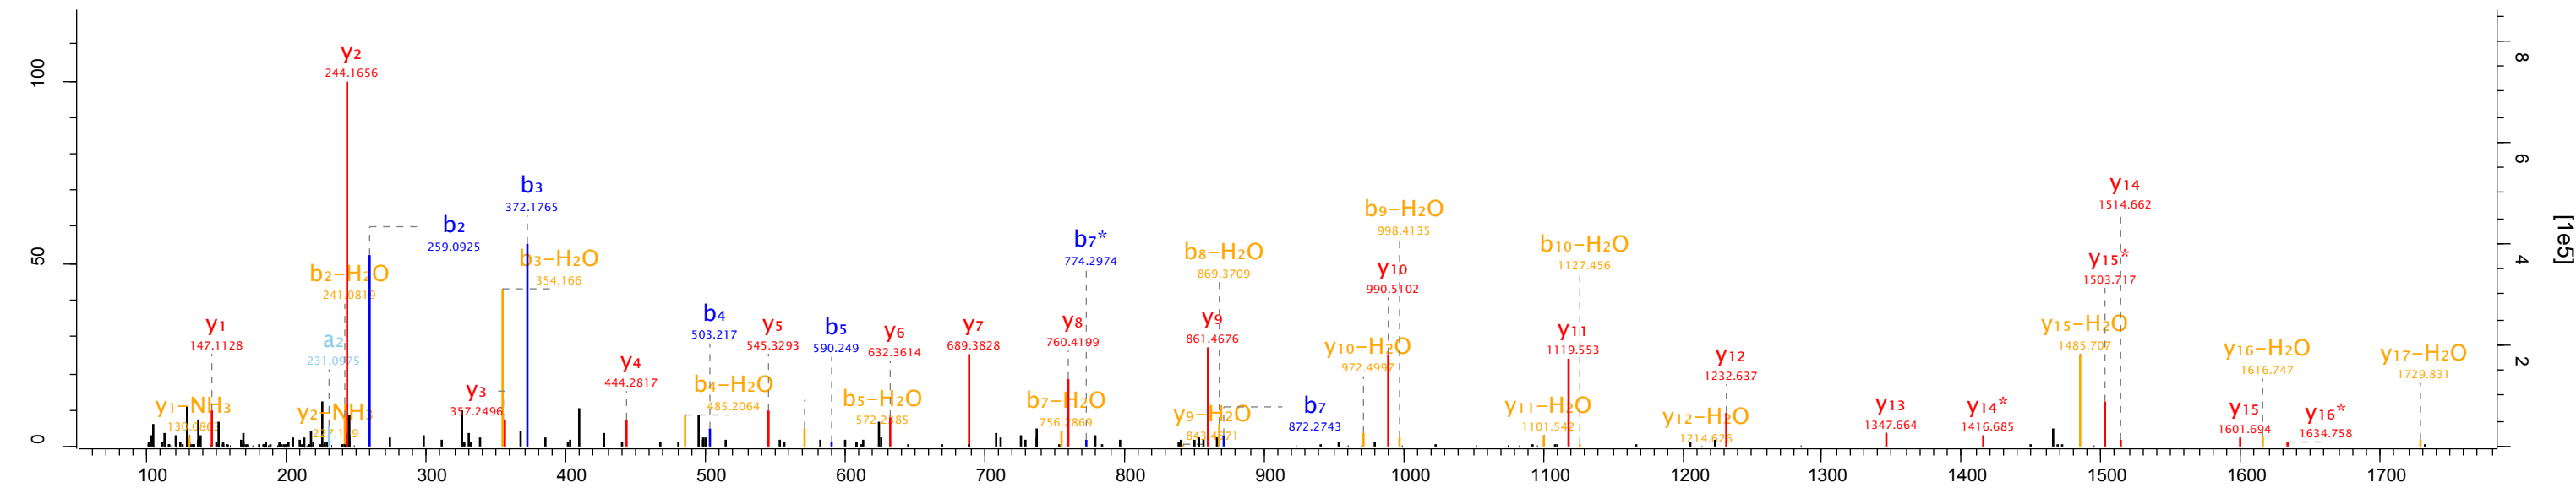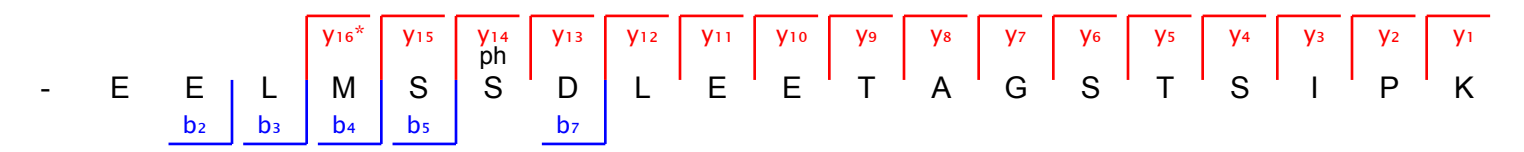

Raw file 20171215\_MaS\_33SR\_LMH\_phospho\_03 Scan 15446 Method FTMS; HCD Score 44.64 m/z 841.35 Gene names FBXO4

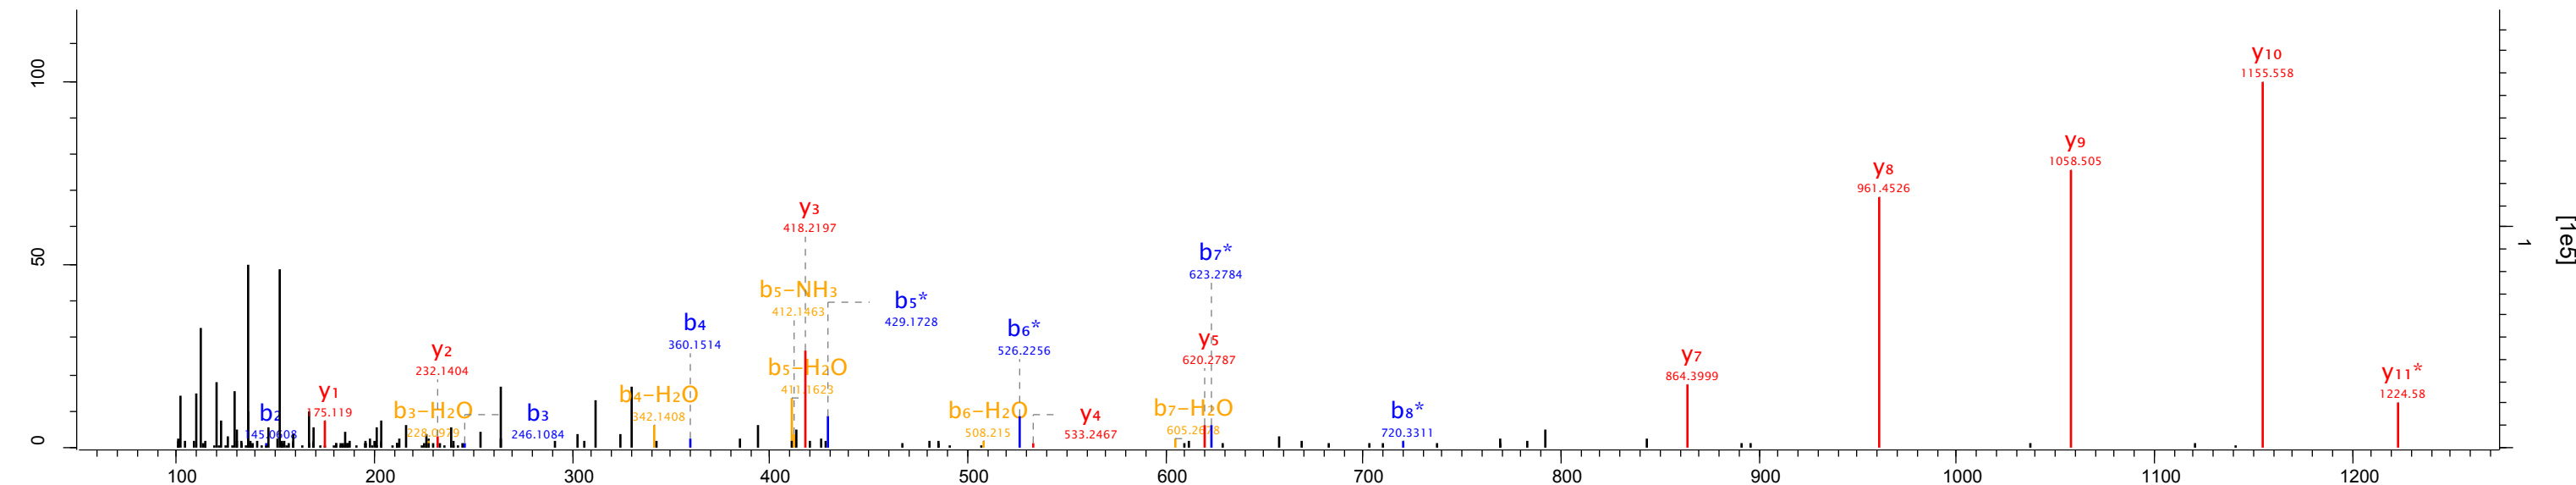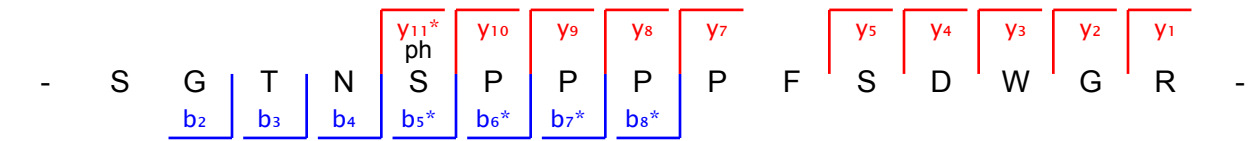

Raw file 20171215\_MaS\_33SR\_LMH\_phospho\_03 Scan 15826 Method FTMS; HCD Score 101.2 m/z 1411.58 Gene names WDR3

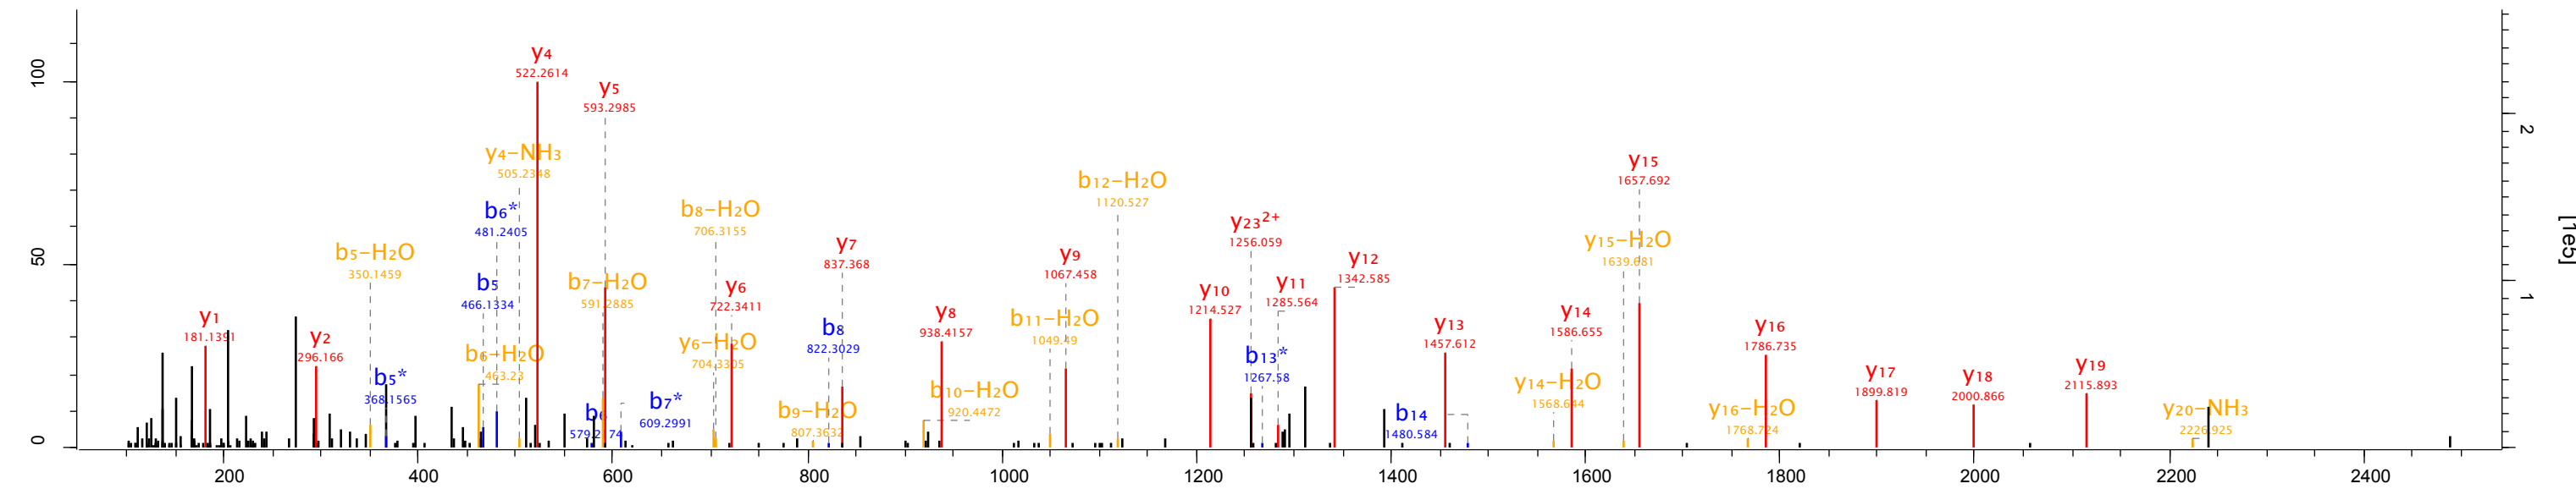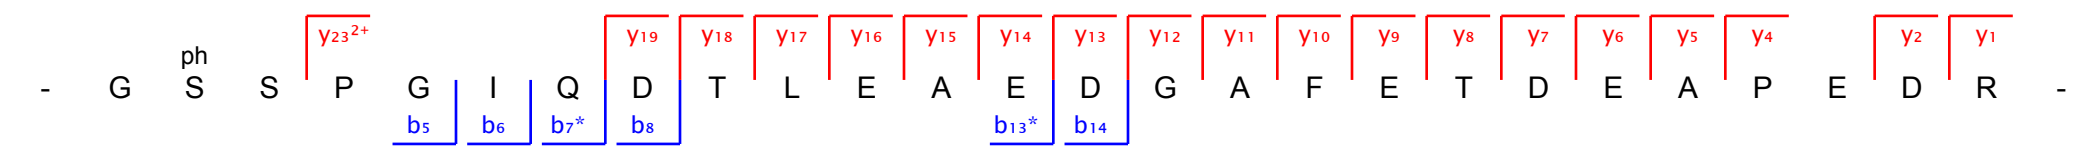

Raw file 20171215\_MaS\_33SR\_LMH\_phospho\_03 Scan 15846 Method FTMS; HCD Score 157.42 m/z 638.75 Gene names NUFIP2

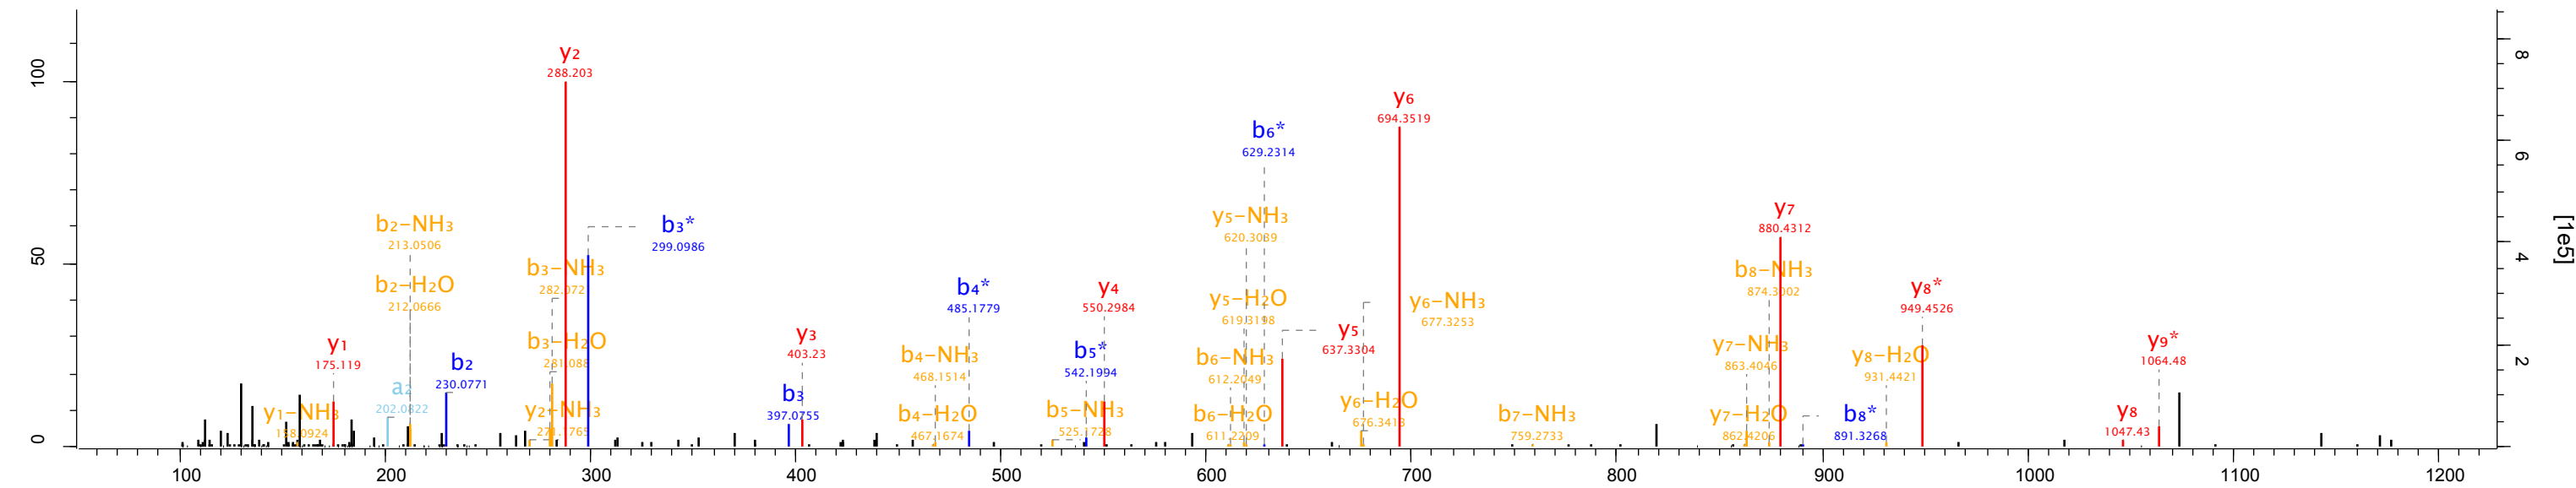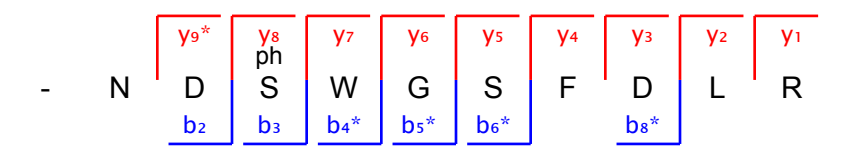

Raw file Scan Method Score m/z Gene names

20171215\_MaS\_33SR\_LMH\_phospho\_03 16236 FTMS; HCD 78.4 721.3 SLC1A1

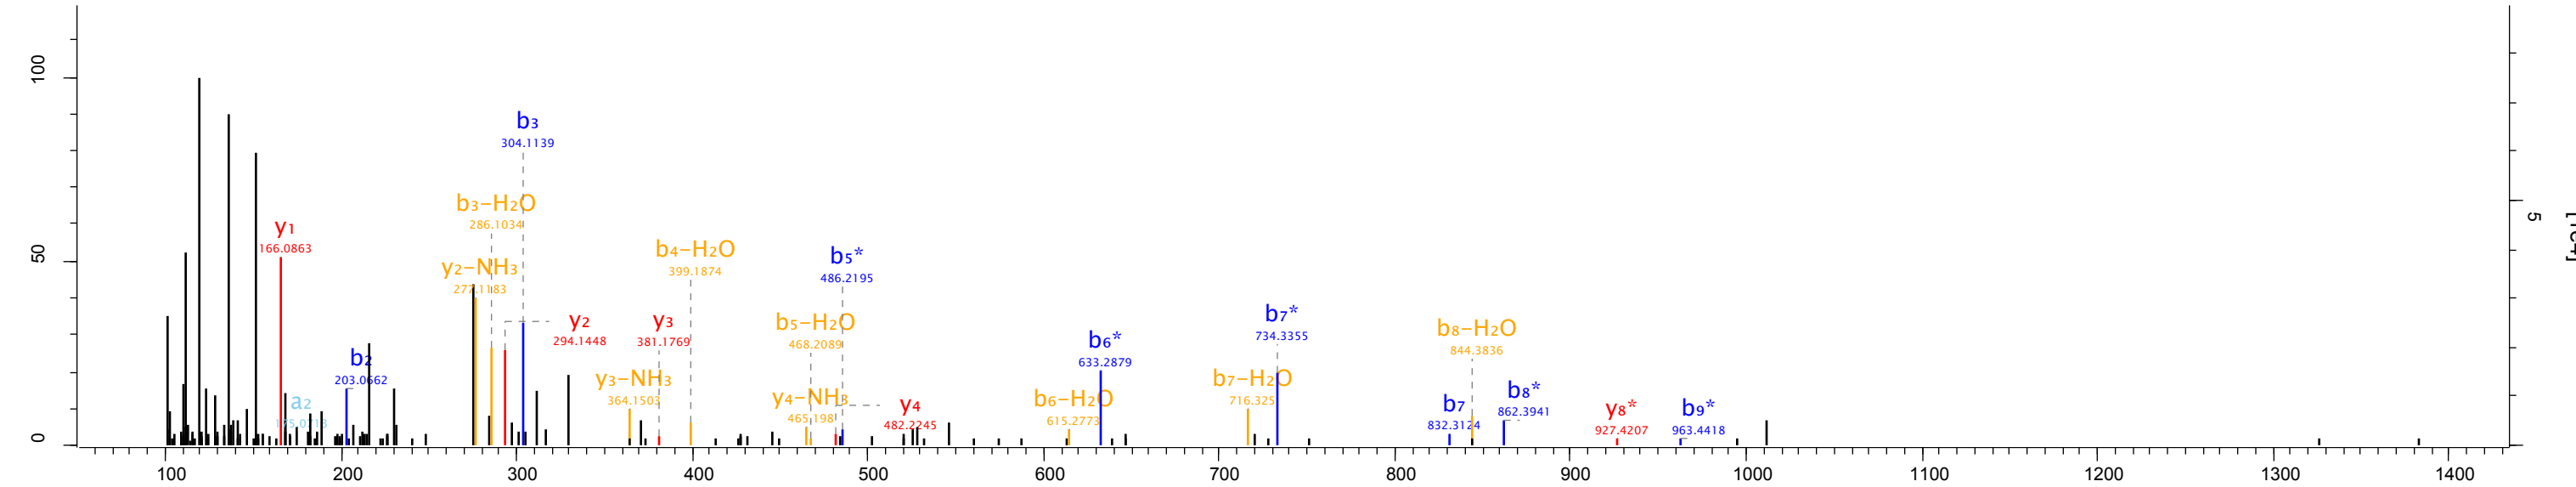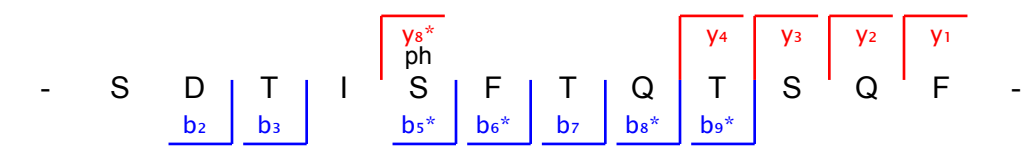

[1e4]



Raw file 20171215\_MaS\_33SR\_LMH\_phospho\_03 Scan 2166 Method FTMS; HCD Score 125.5 m/z 675.81 Gene names SRRM2

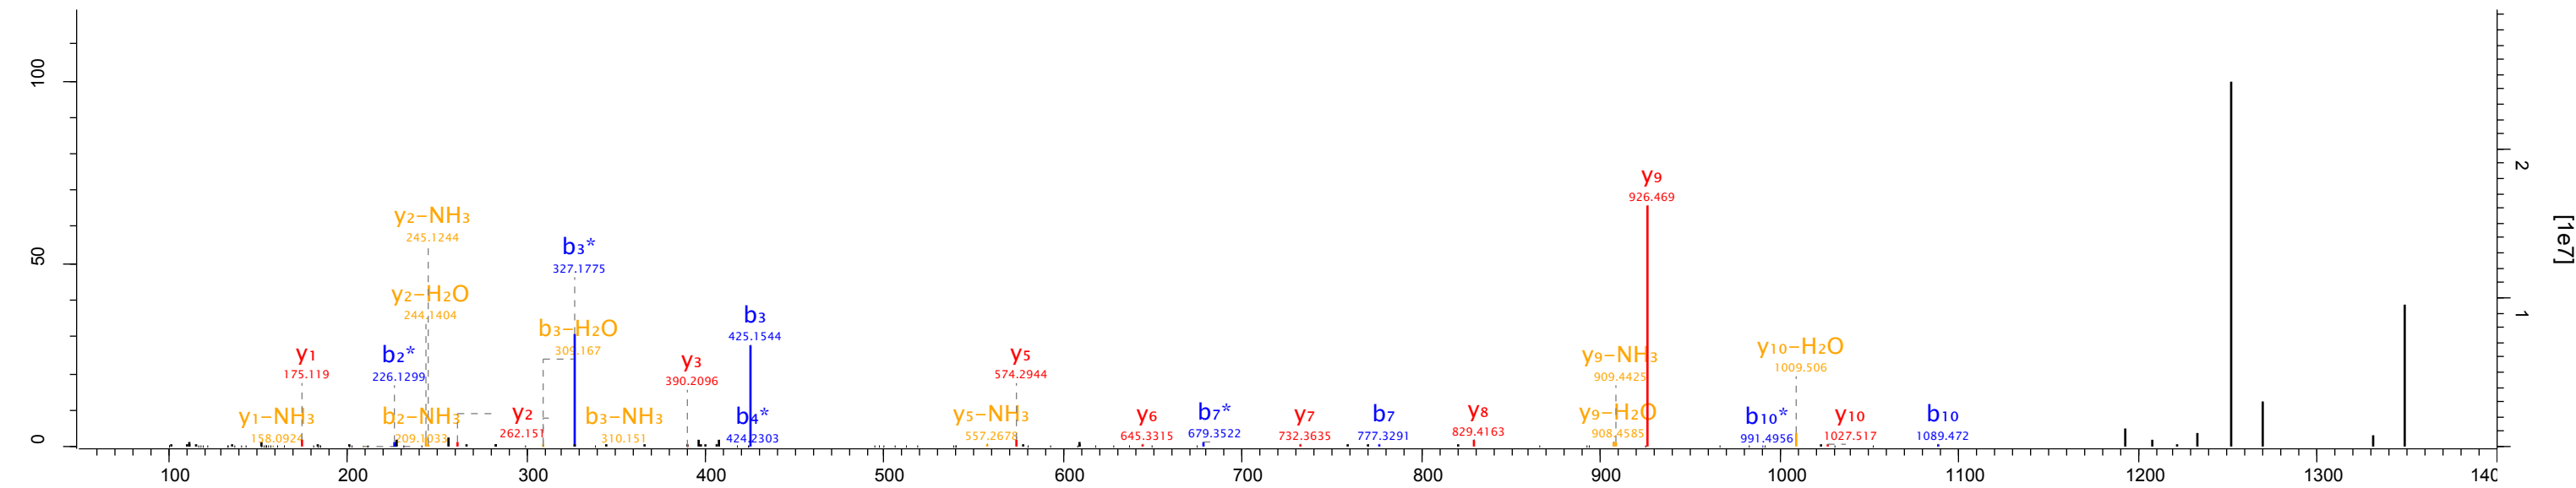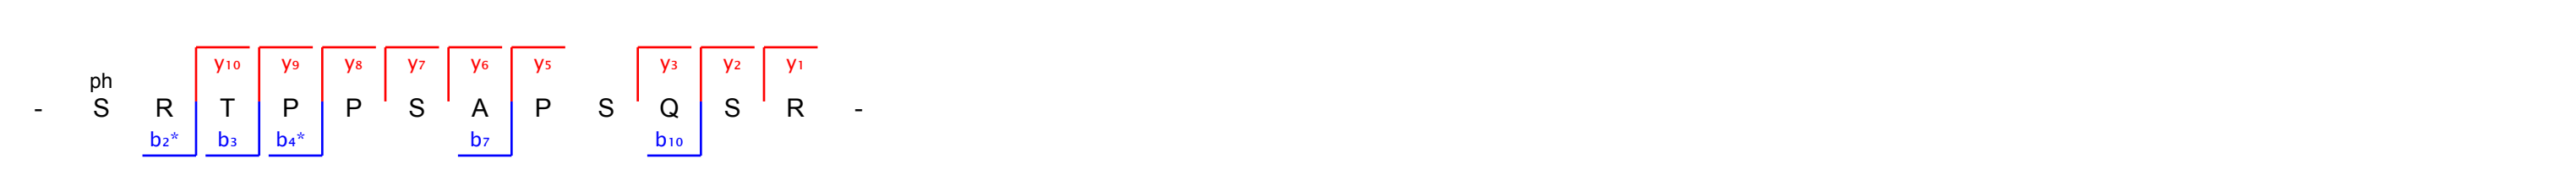

Raw file 20171215\_MaS\_33SR\_LMH\_phospho\_03 Scan 2256 Method FTMS; HCD Score 122.97 m/z 607.77 Gene names WAC

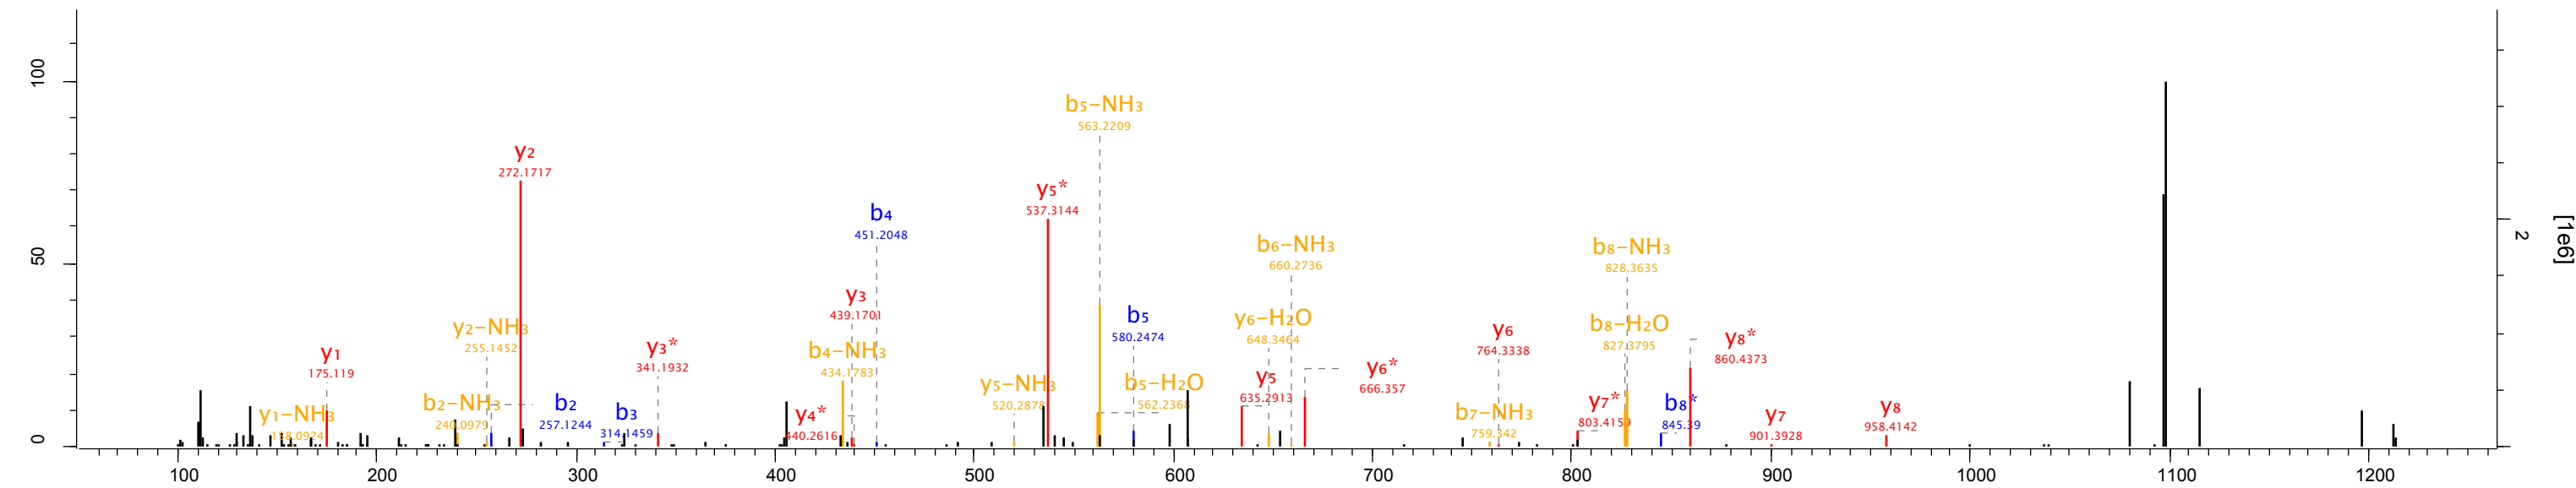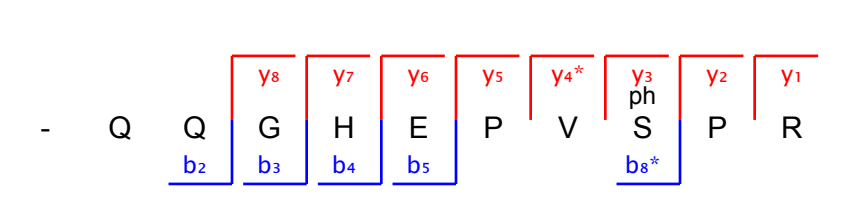

Raw file: 20171215\_MaS\_33SR\_LMH\_phospho\_03  
 Scan: 2486 Method: FTMS; HCD Score: 88.11 m/z: 688.31 Gene names: WAC

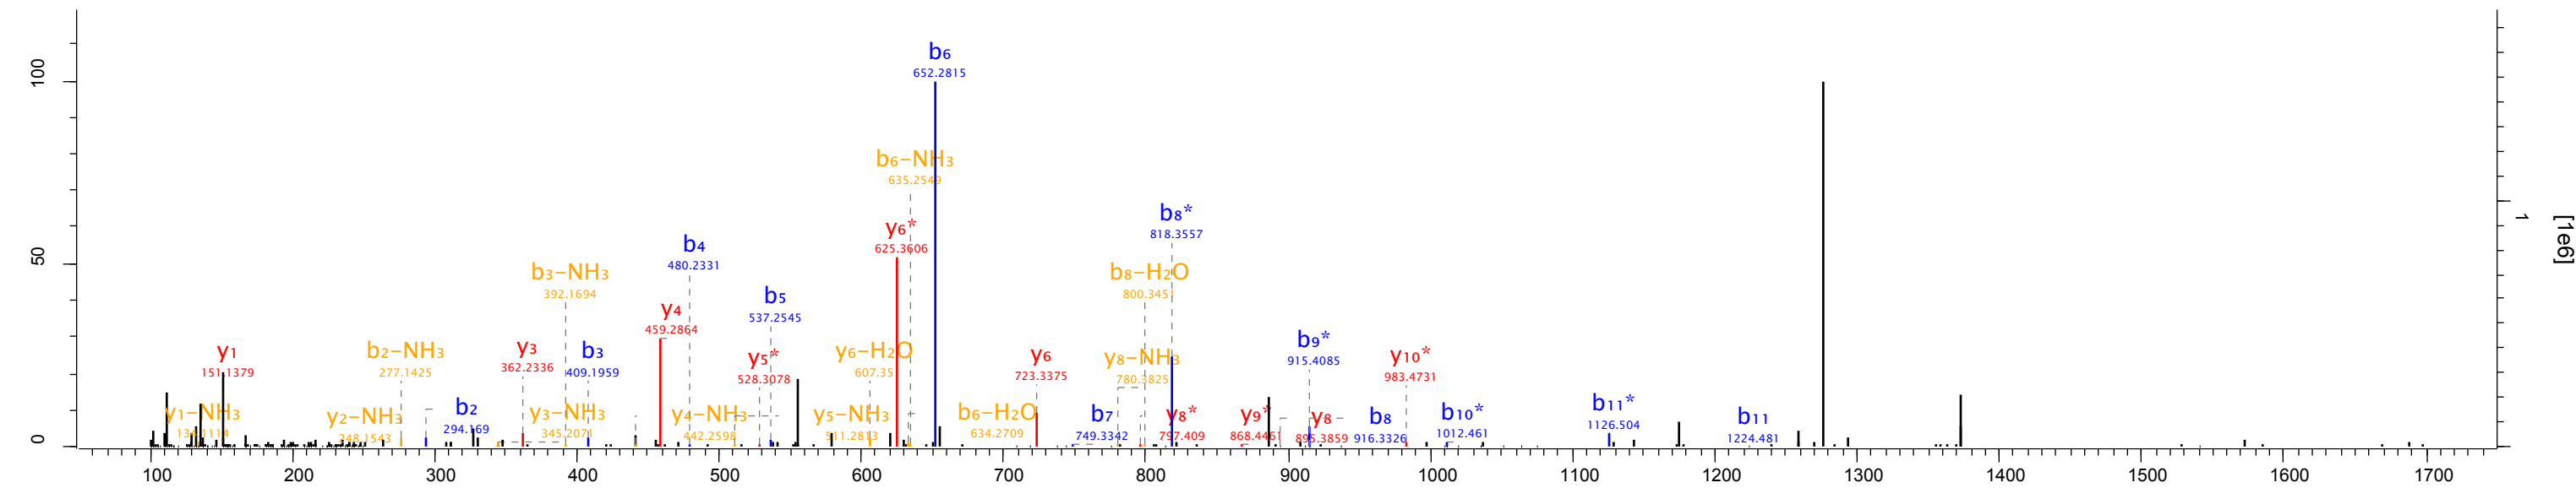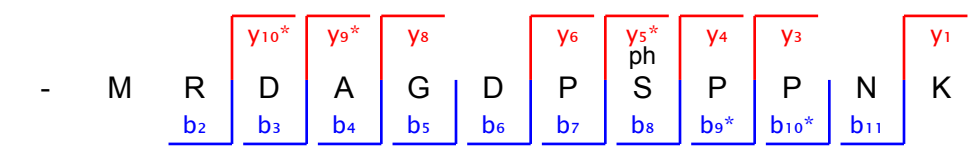

Raw file 20171215\_MaS\_33SR\_LMH\_phospho\_03 Scan 2516 Method FTMS; HCD Score 236.48 m/z 954.36 Gene names USP11

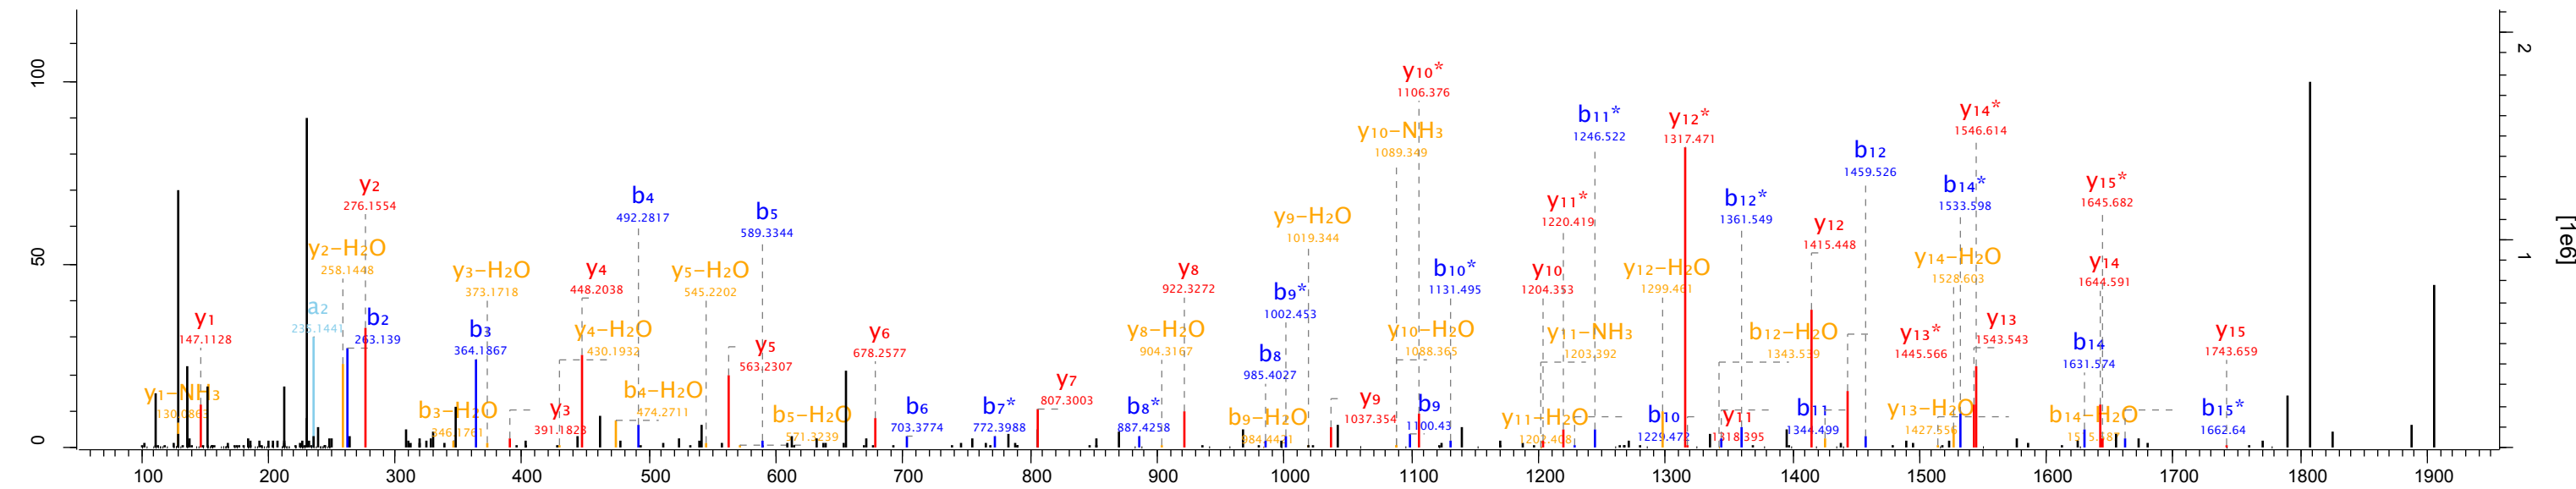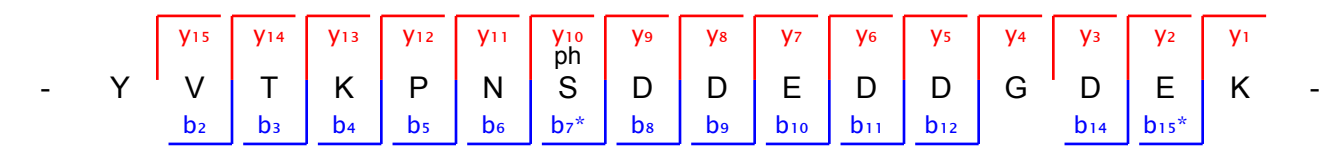

Raw file 20171215\_MaS\_33SR\_LMH\_phospho\_03 Scan 3246 Method FTMS; HCD Score 78.49 m/z 491.27 Gene names ENAH

20171215\_MaS\_33SR\_LMH\_phospho\_03

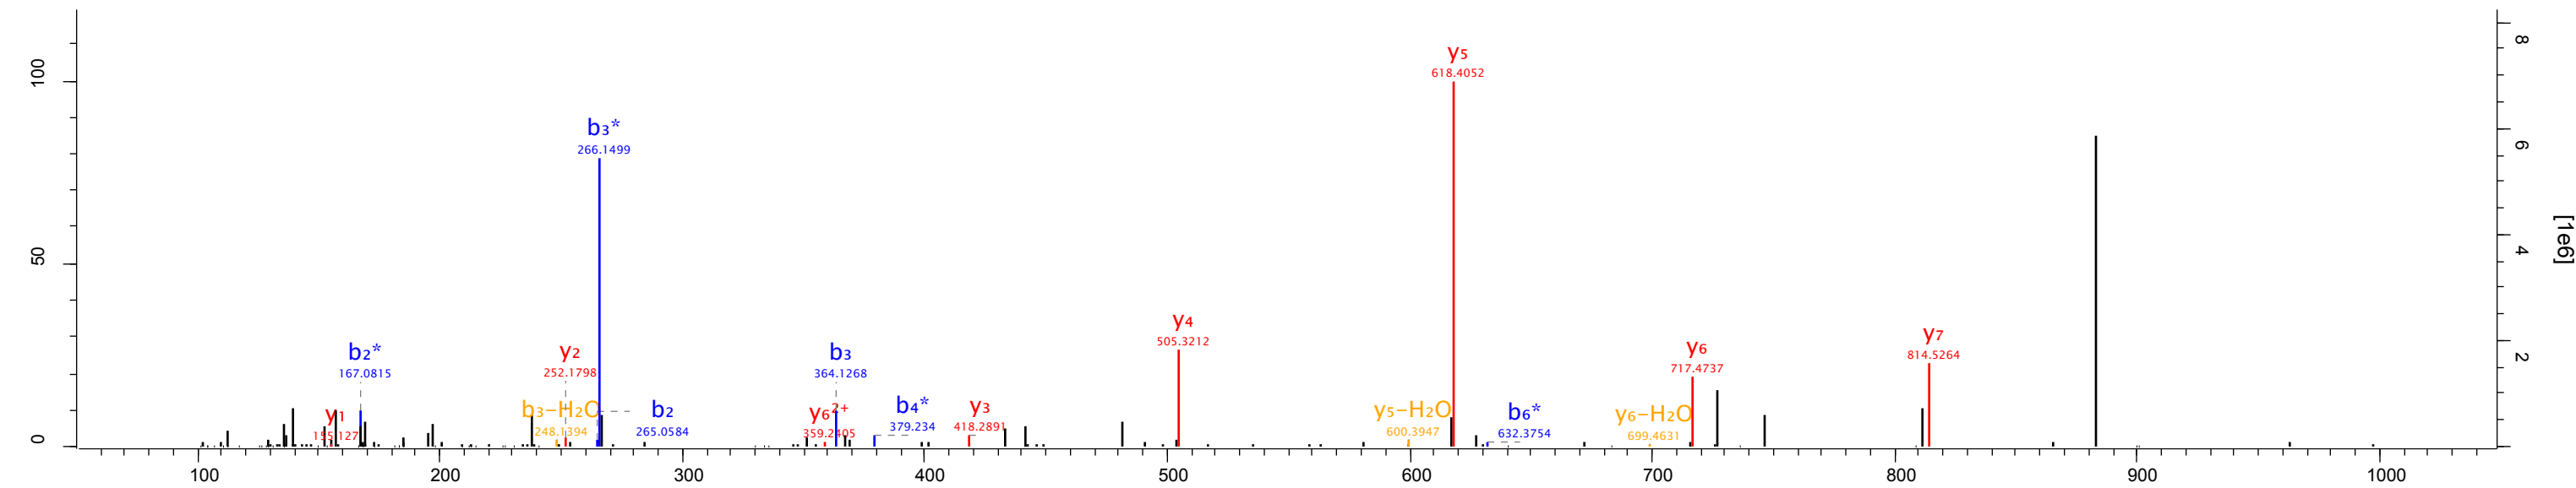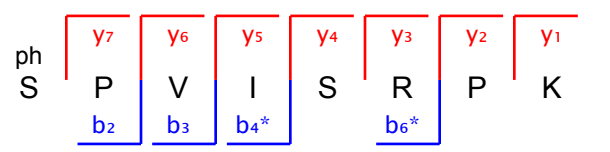

Raw file 20171215\_MaS\_33SR\_LMH\_phospho\_03 Scan 3416 Method FTMS; HCD Score 43.21 m/z 907.33 Gene names ALMS1

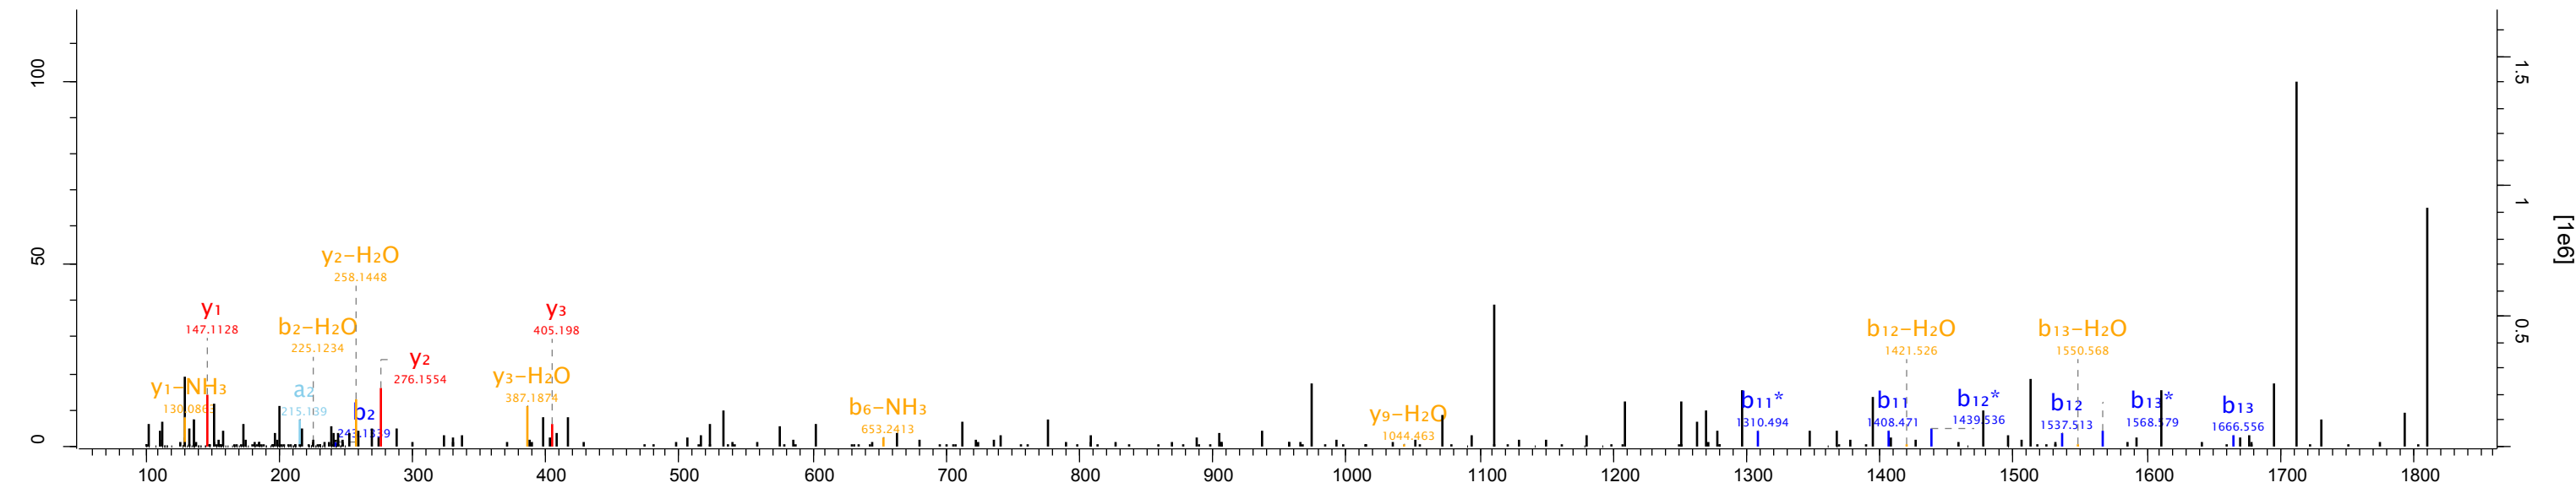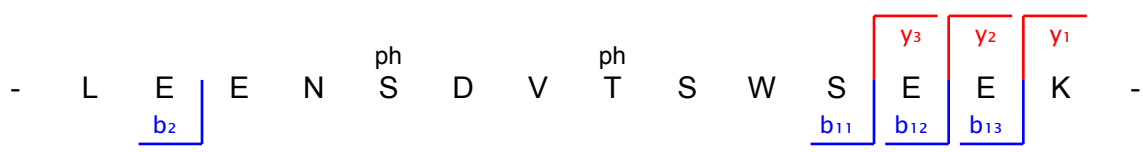

Raw file 20171215\_MaS\_33SR\_LMH\_phospho\_03 Scan 3616 Method FTMS; HCD Score 269.72 m/z 754.87 Gene names SRFBP1

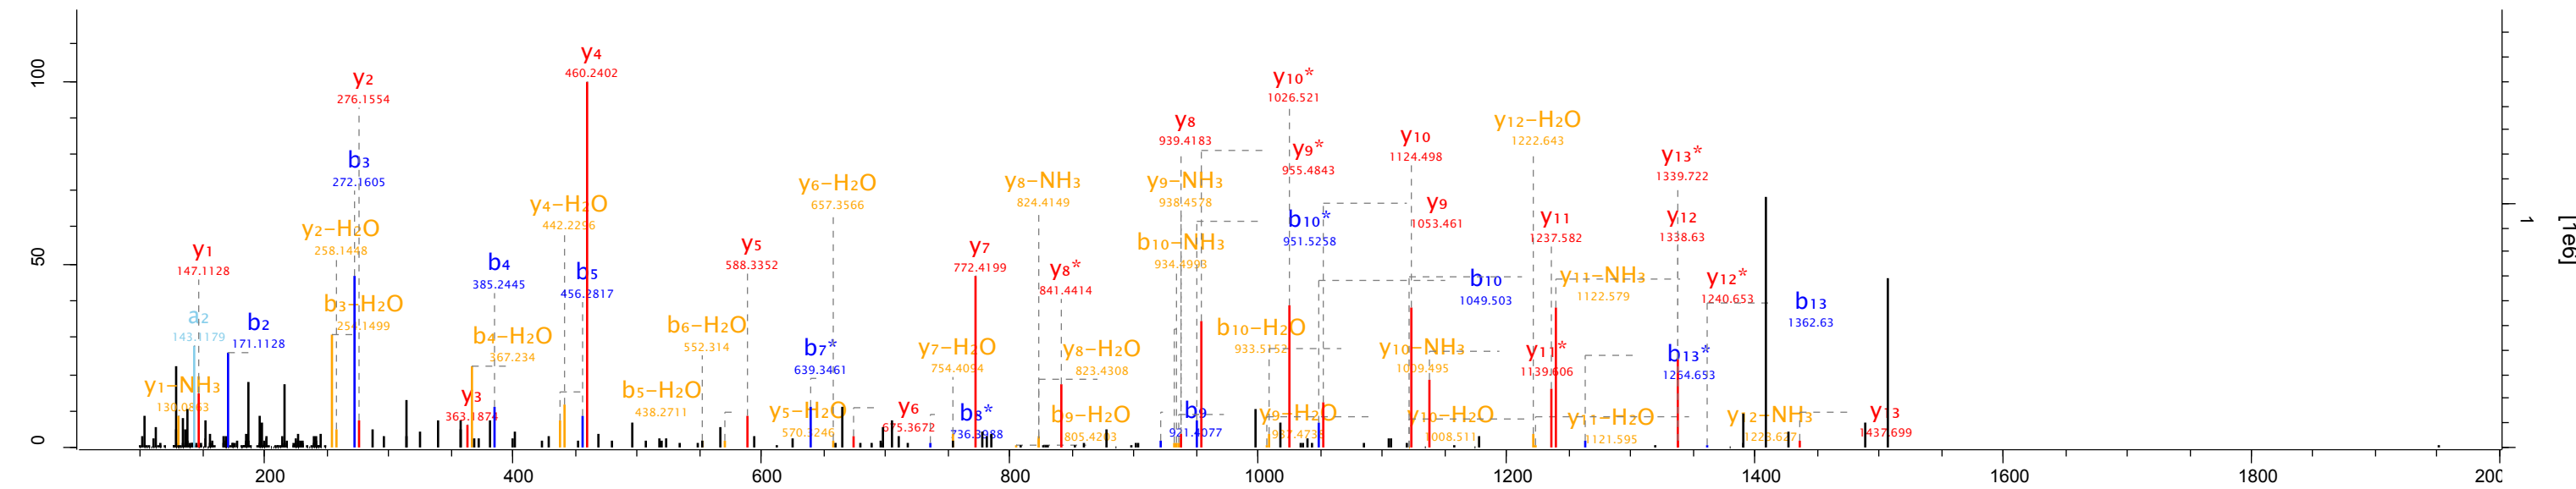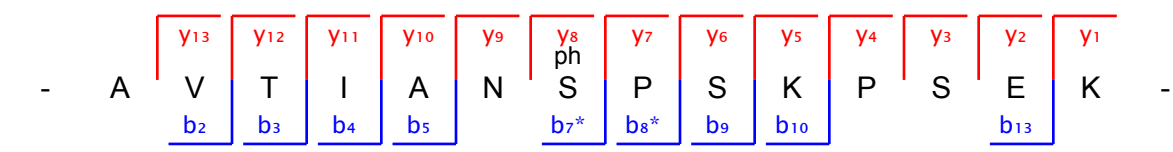

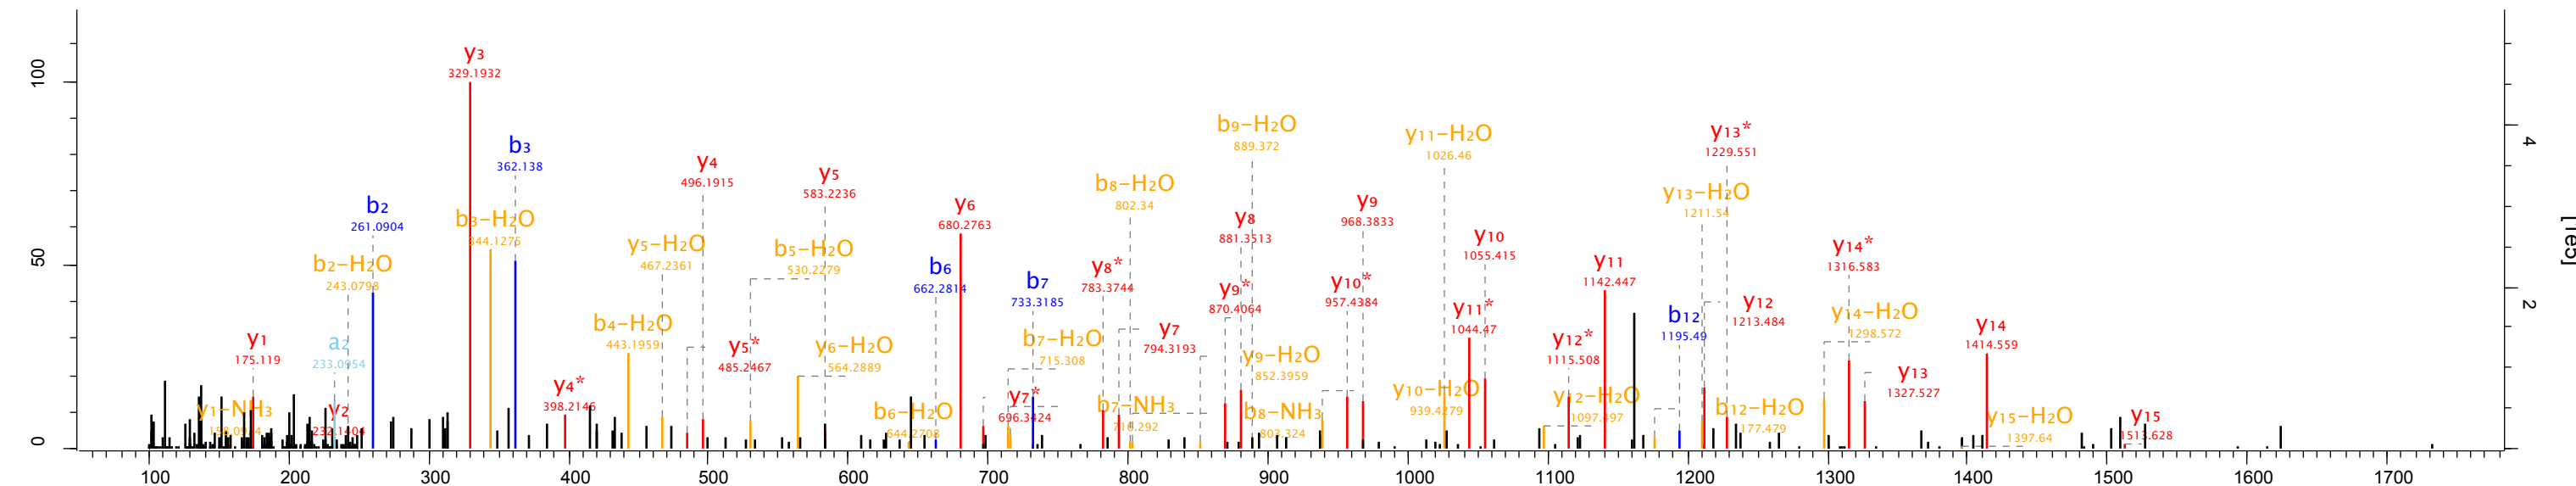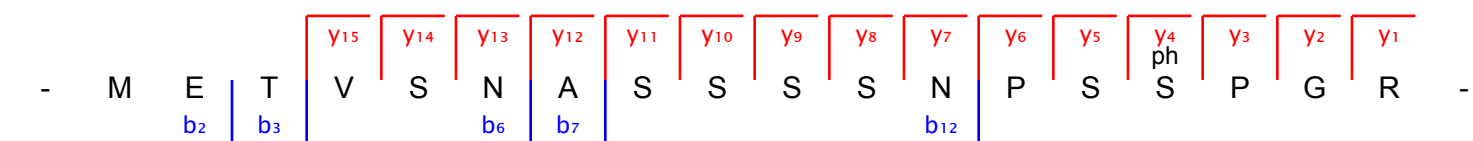



Raw file 20171215\_MaS\_33SR\_LMH\_phospho\_03 Scan 4736 Method FTMS; HCD Score 122.1 m/z 706.78 Gene names FOSL2

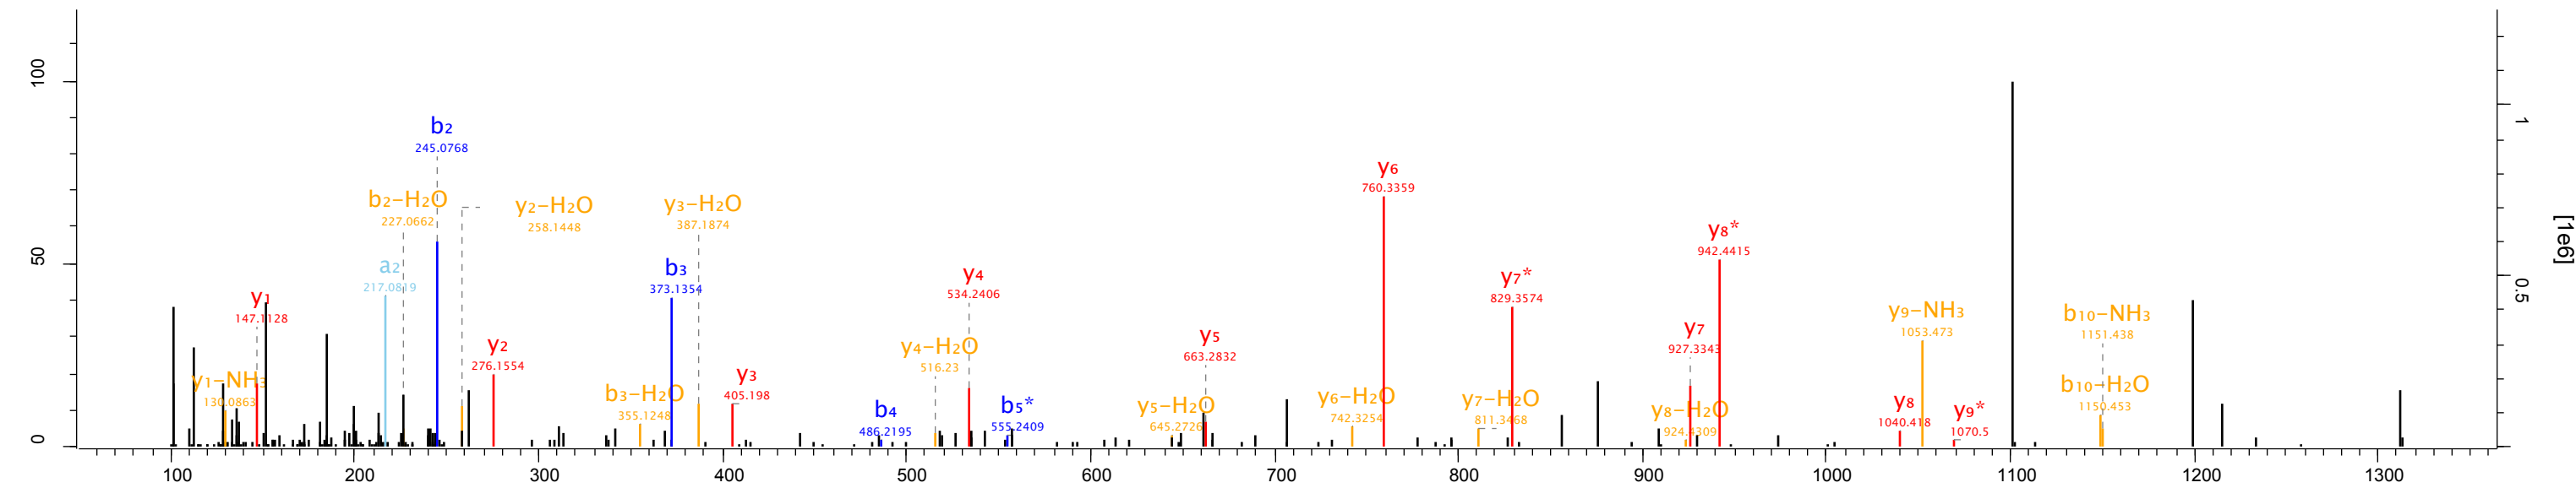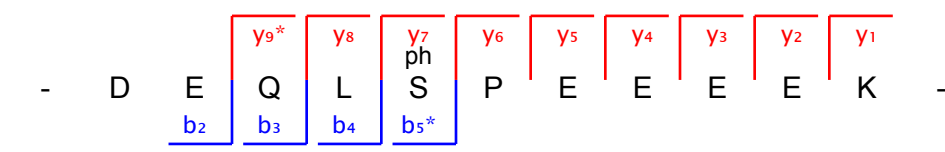

Raw file 20171215\_MaS\_33SR\_LMH\_phospho\_03 Scan 4816 Method FTMS; HCD Score 110.44 m/z 648.81 Gene names RBM6

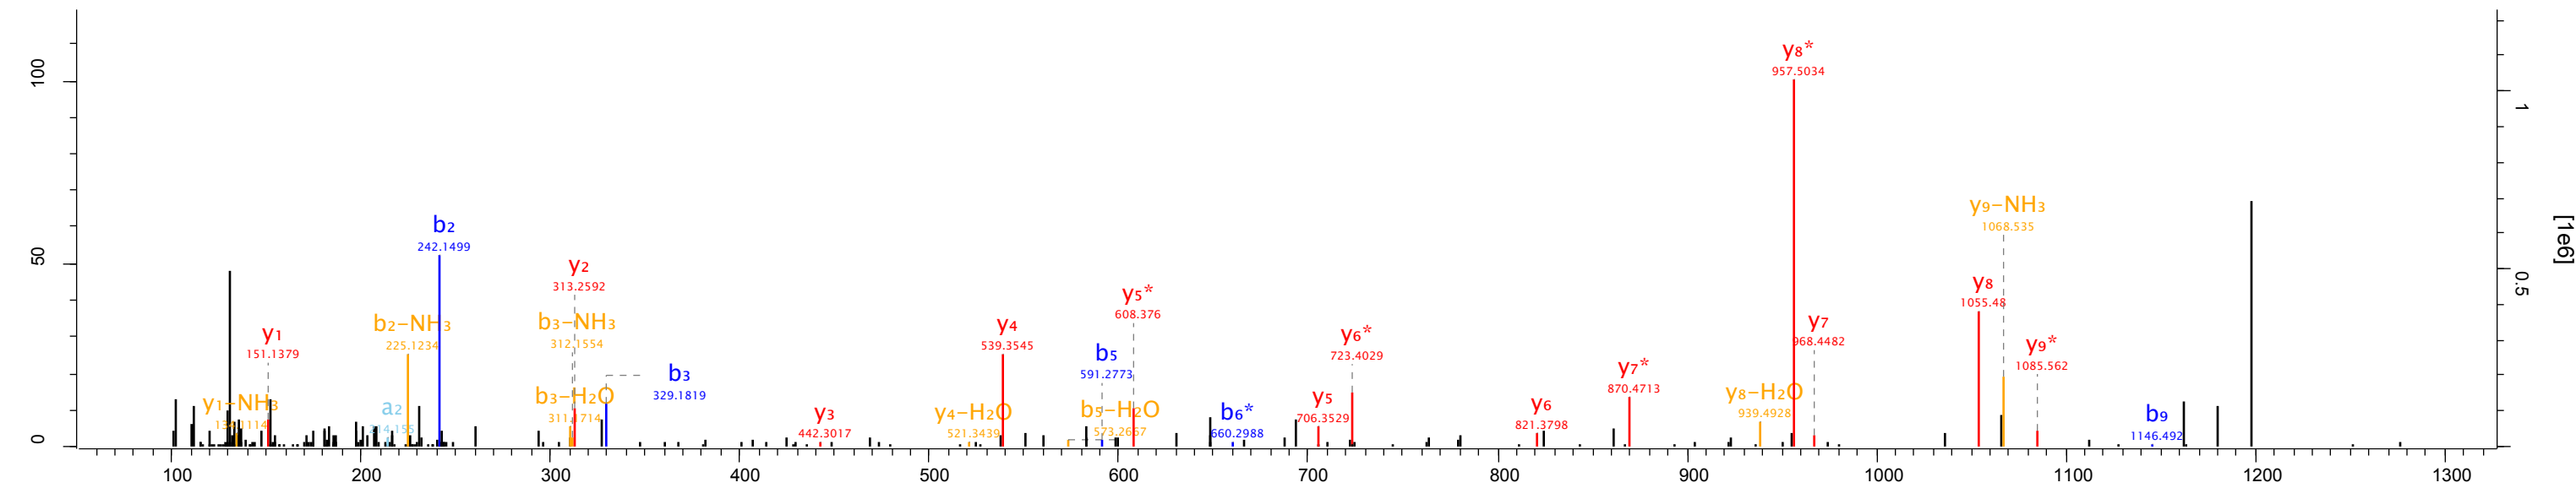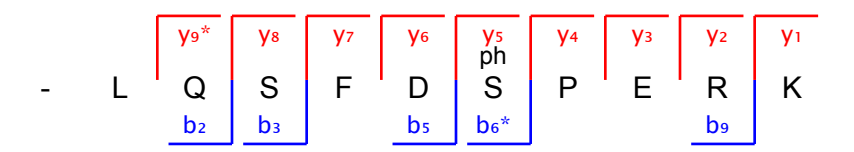

Q S F D S P E R K

Raw file 20171215\_MaS\_33SR\_LMH\_phospho\_03 Scan 5016 Method FTMS; HCD Score 50.12 m/z 657.81 Gene names SLAIN2

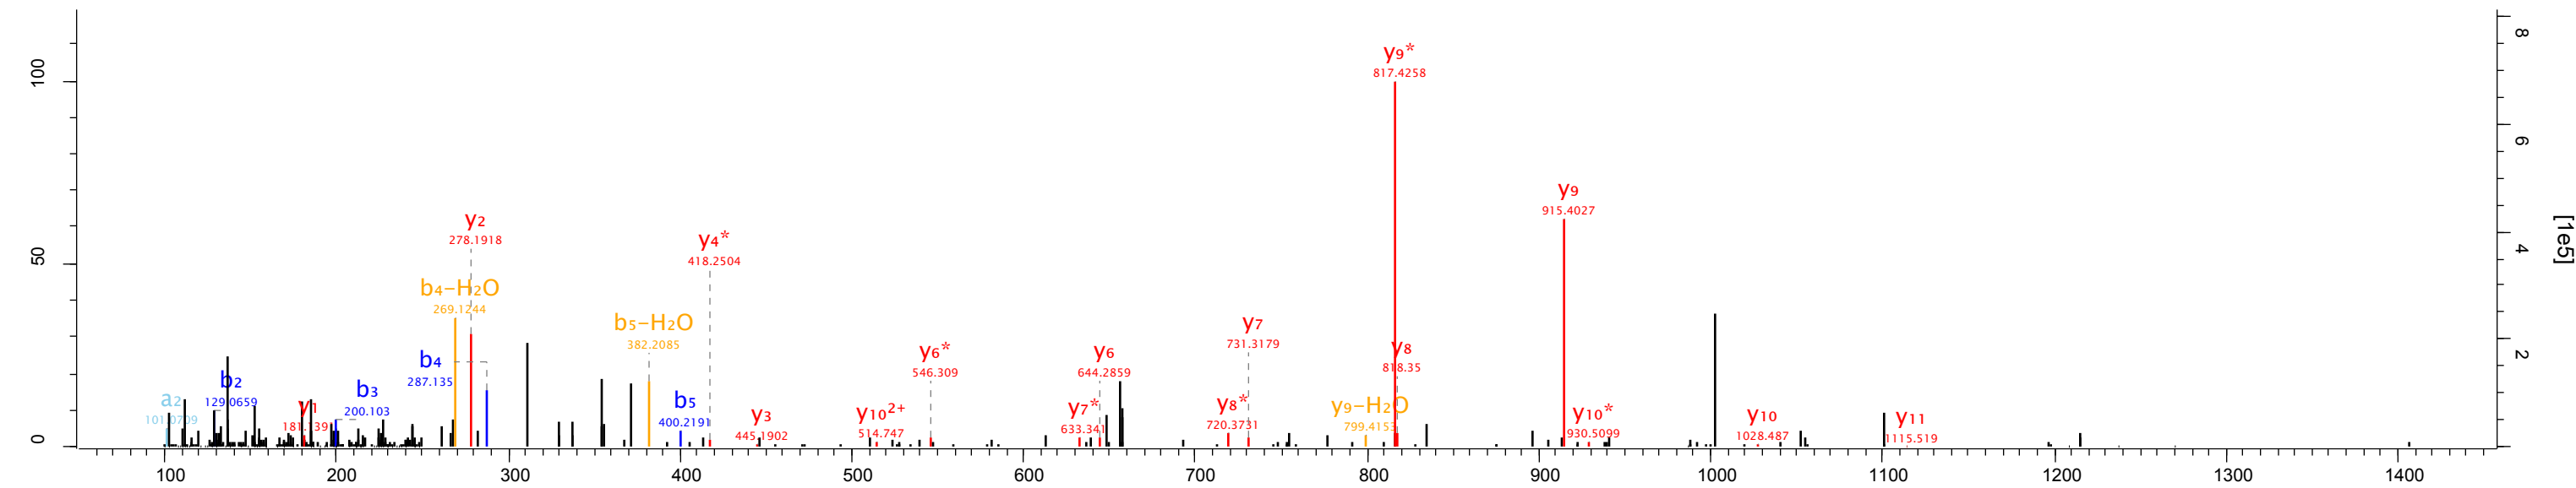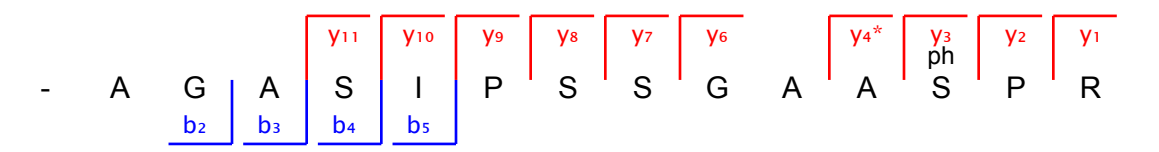

Raw file 20171215\_MaS\_33SR\_LMH\_phospho\_03 Scan 5366 Method FTMS; HCD Score 388.25 m/z 1057.97 Gene names ZMYM4

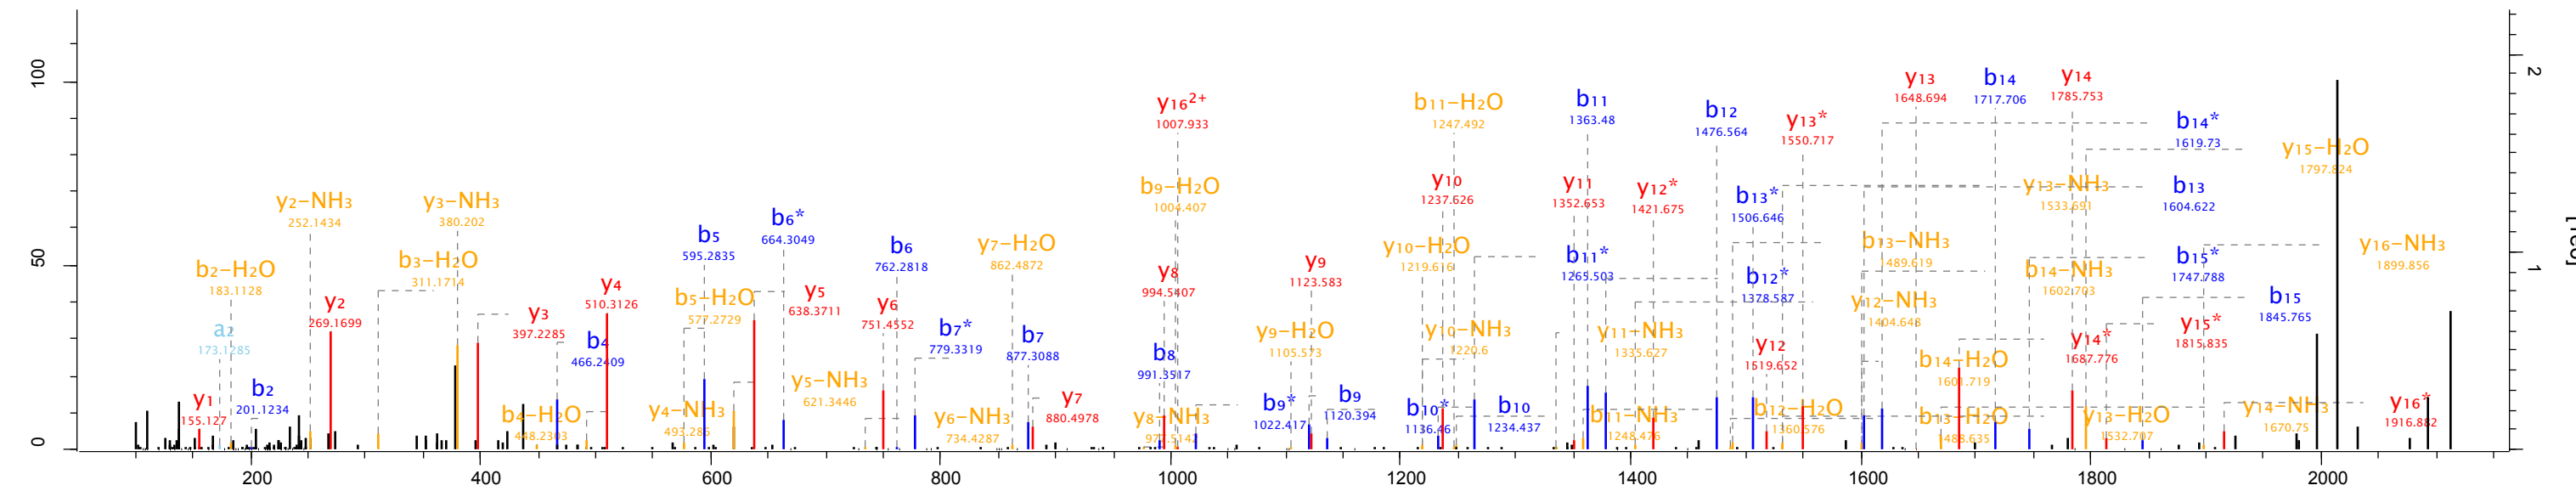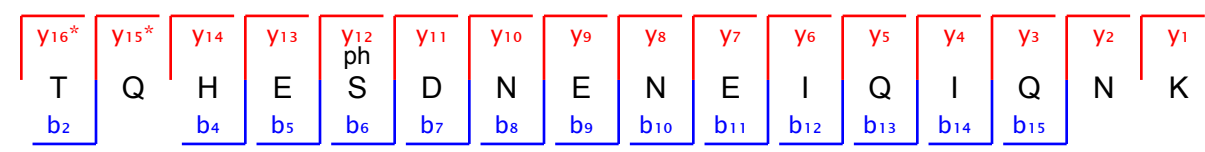

Raw file 20171215\_MaS\_33SR\_LMH\_phospho\_03 Scan 5456 Method FTMS; HCD Score 113.69 m/z 490.72 Gene names SGOL1

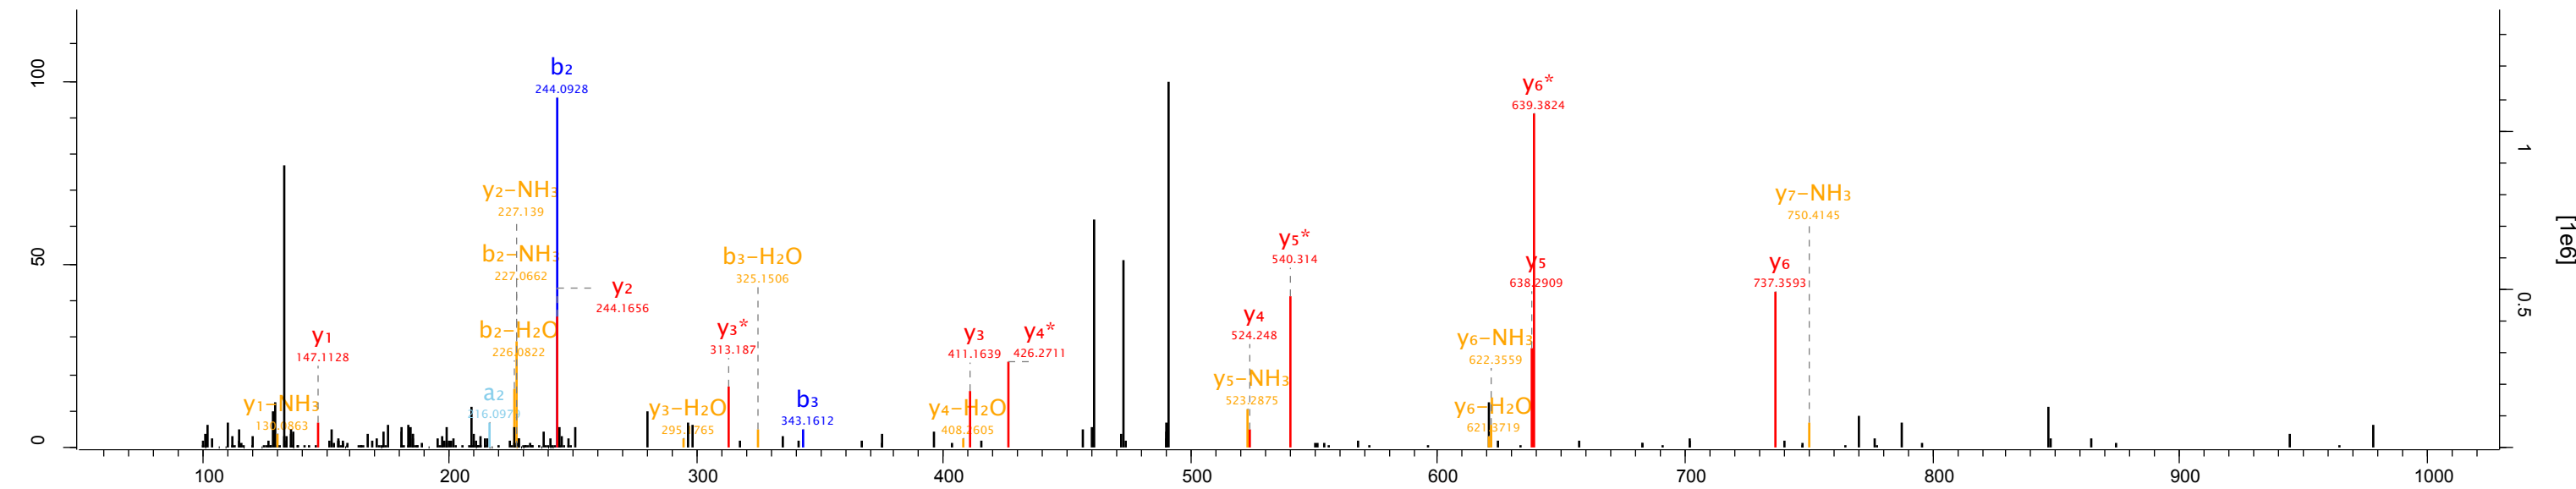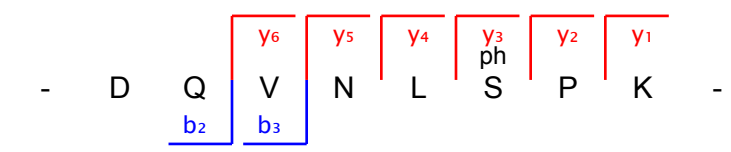

Raw file 20171215\_MaS\_33SR\_LMH\_phospho\_03 Scan 5596 Method FTMS; HCD Score 257.54 m/z 785.84 Gene names ALDOA

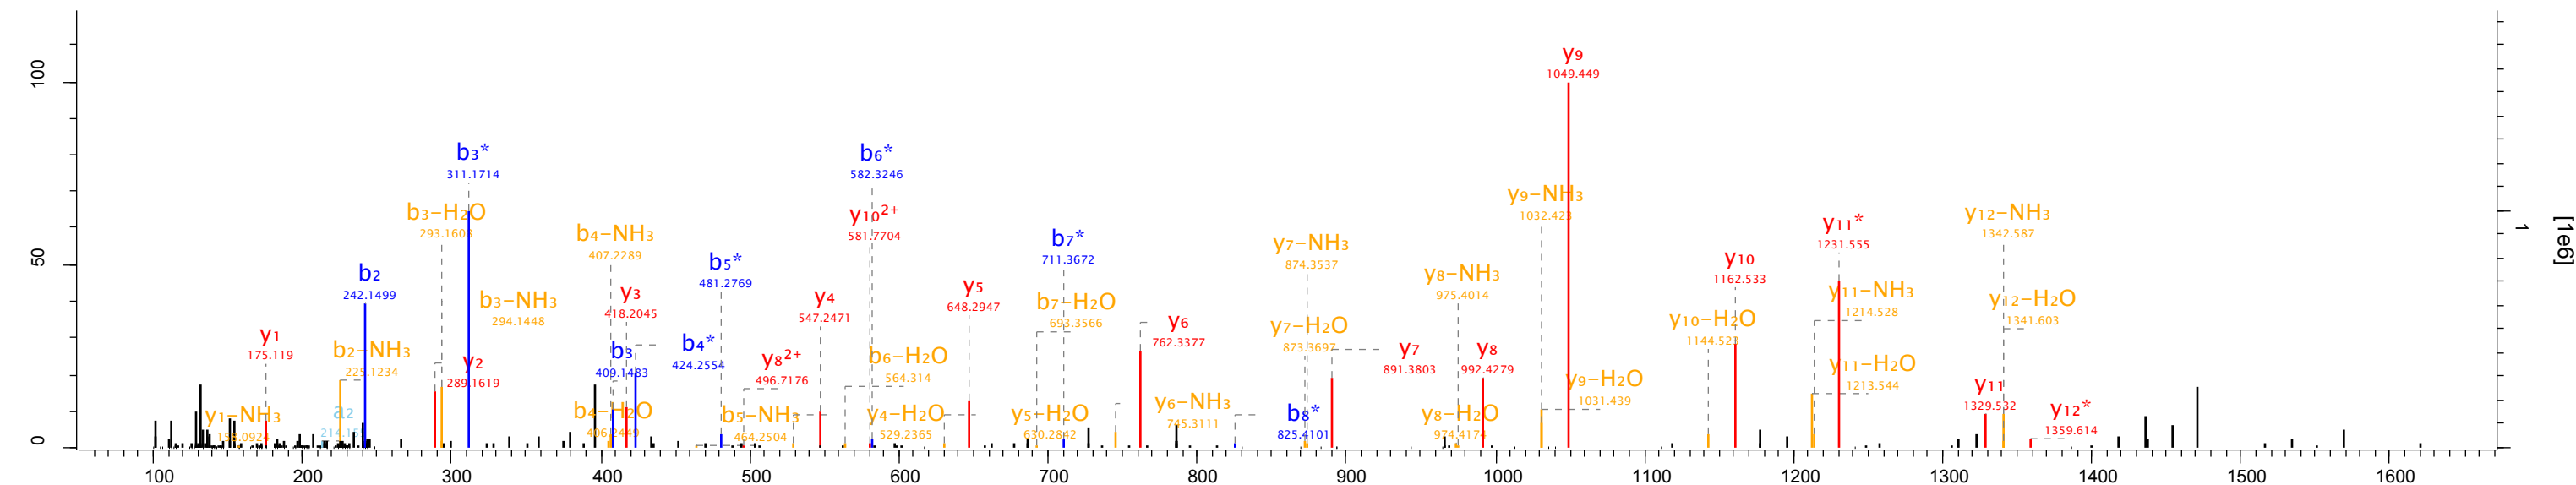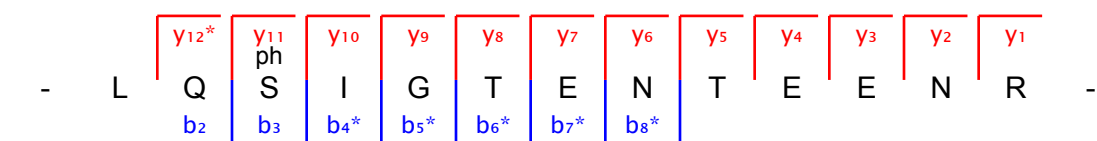

Raw file 20171215\_MaS\_33SR\_LMH\_phospho\_03 Scan 5656 Method FTMS; HCD Score 93.7 m/z 429.19 Gene names FRY

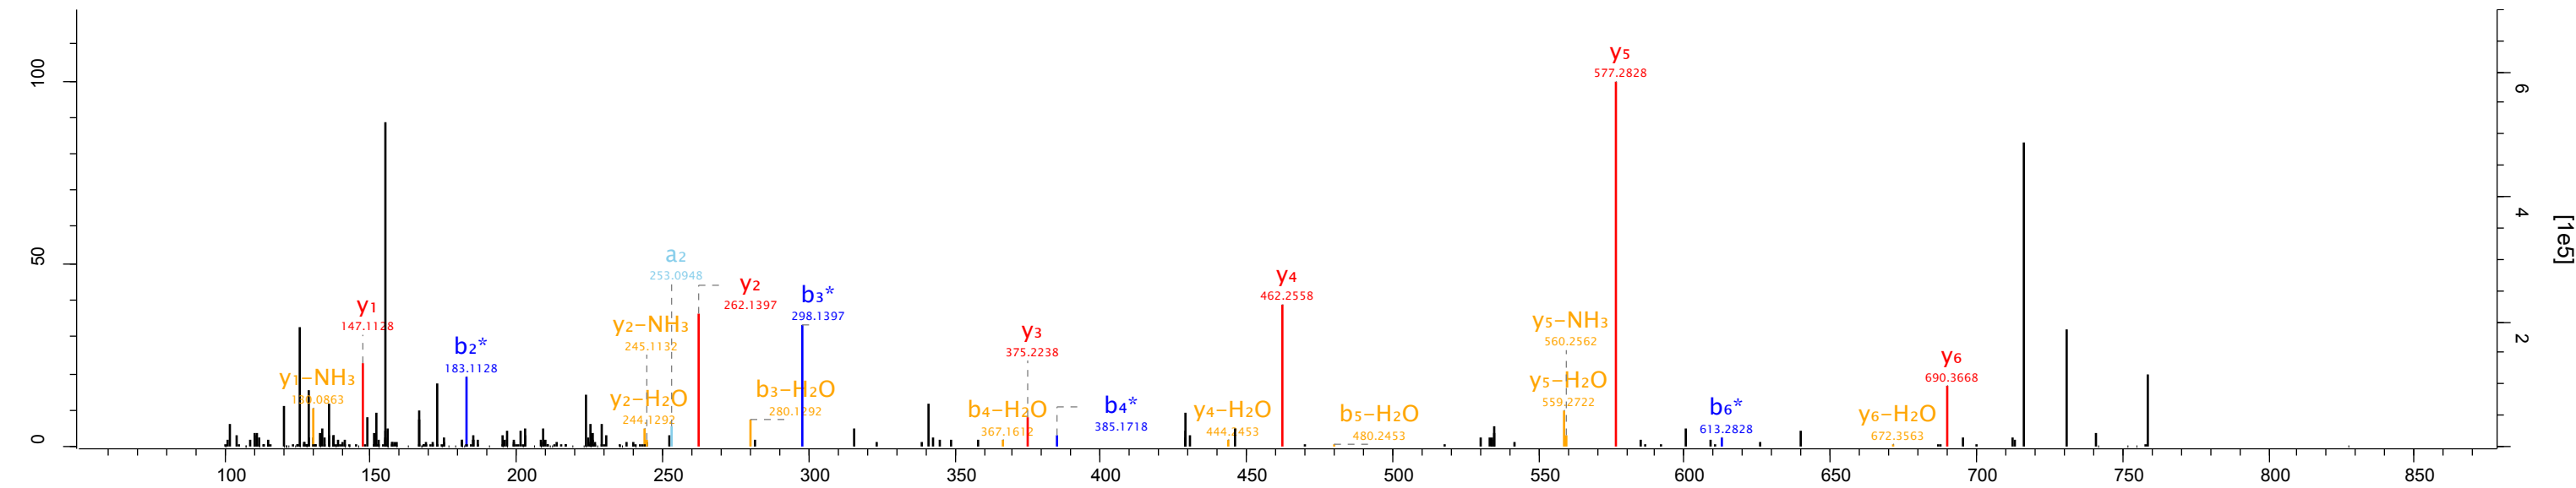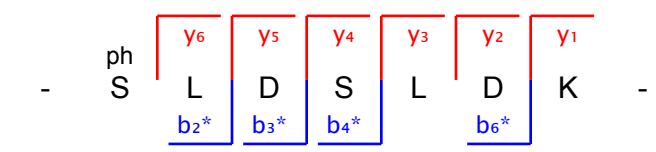

Raw file 20171215\_MaS\_33SR\_LMH\_phospho\_03 Scan 5896 Method FTMS; HCD Score 134.99 m/z 598.27 Gene names PUM2

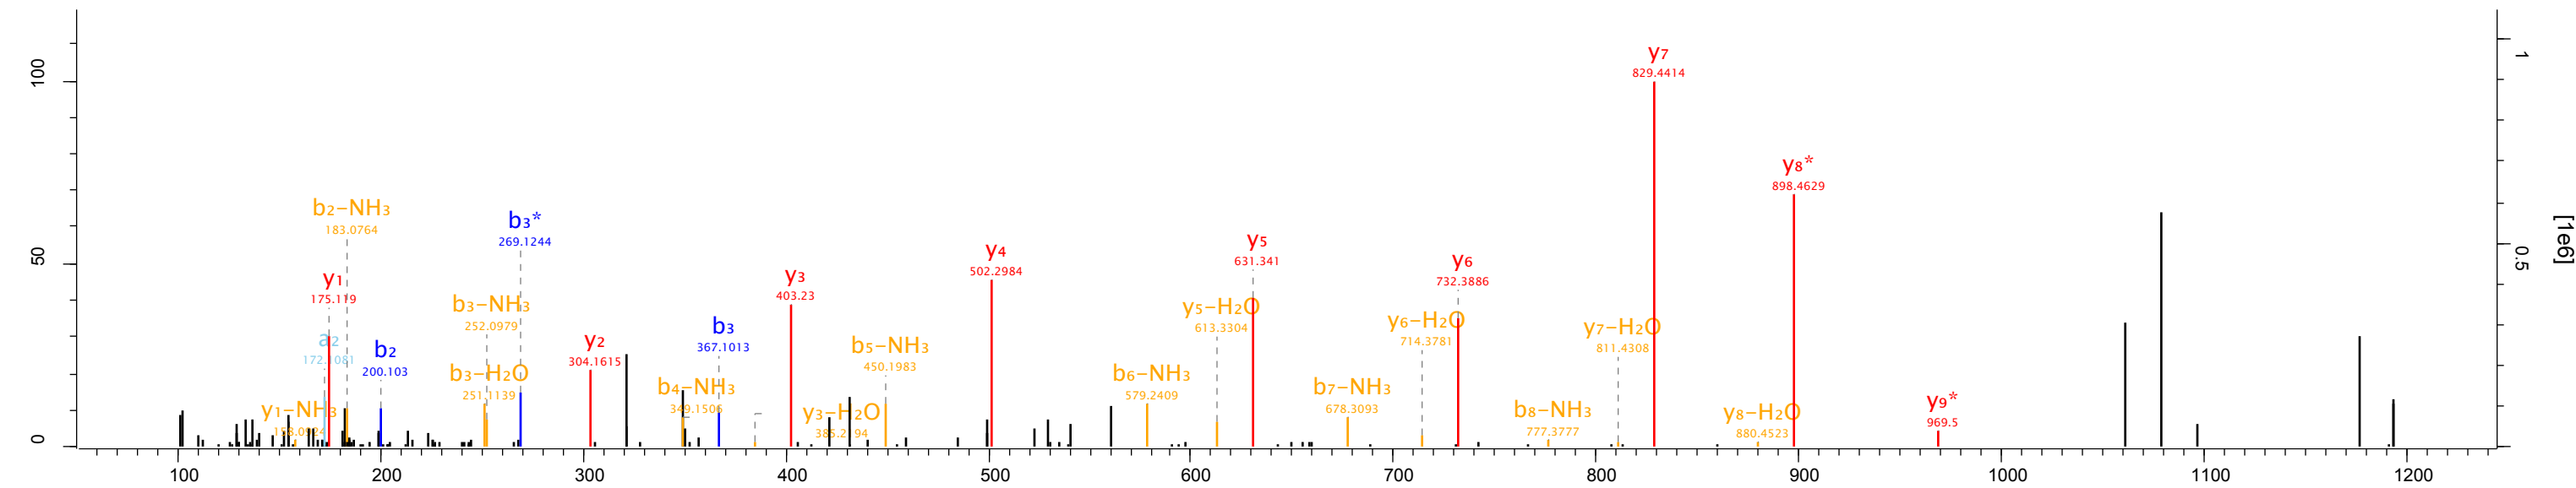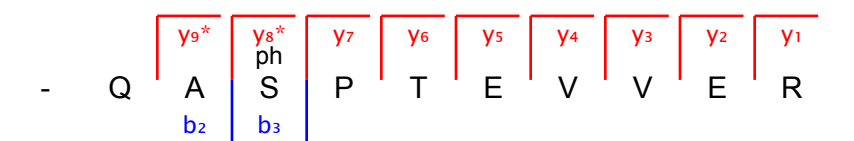



Raw file 20171215\_MaS\_33SR\_LMH\_phospho\_03 Scan 6036 Method FTMS; HCD Score 204.17 m/z 908.94 Gene names EFHD2

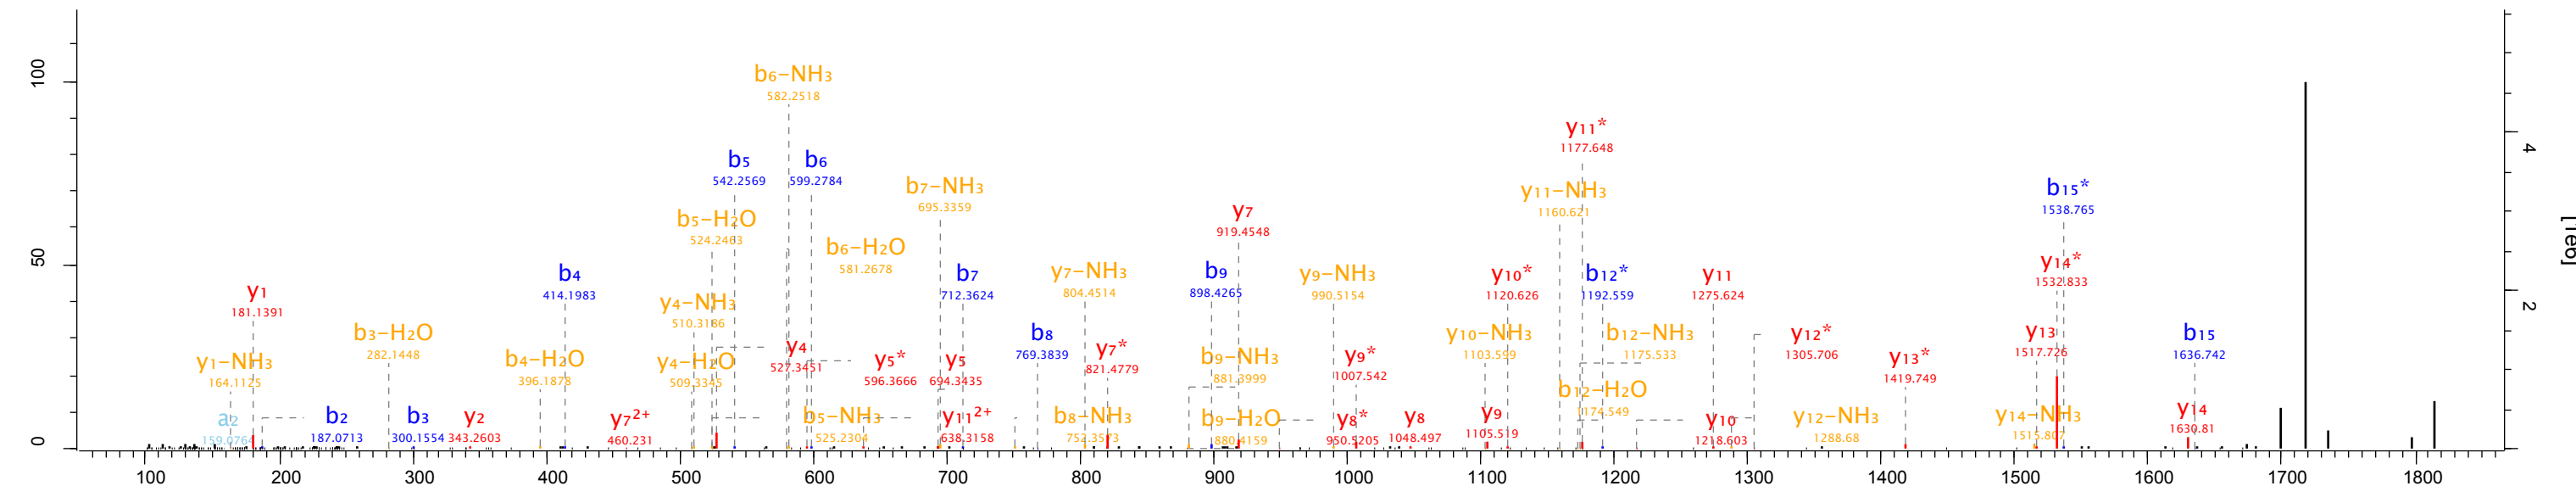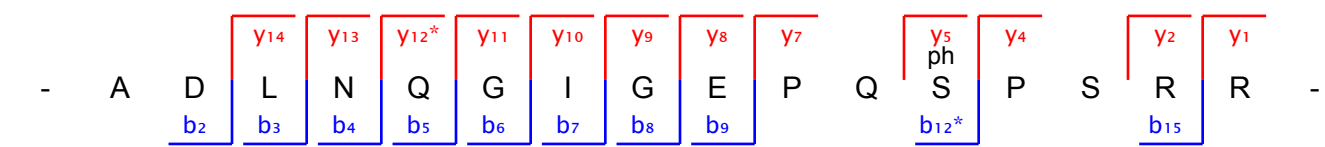

Raw file  
 20171215\_MaS\_33SR\_LMH\_phospho\_03  
 Scan 6096 Method FTMS; HCD Score 56.69 m/z 765.7 Gene names SLC16A1

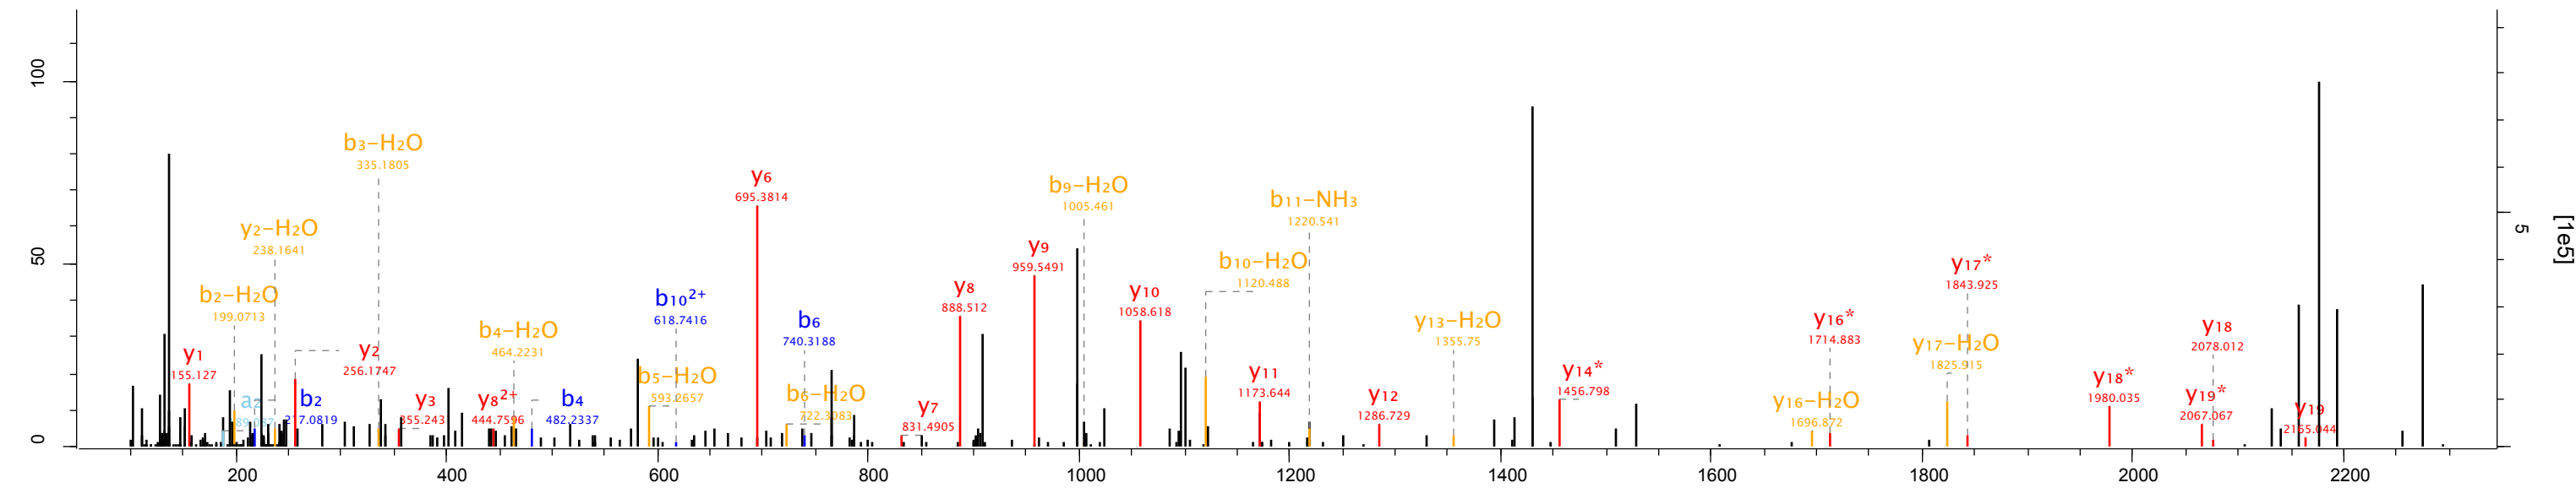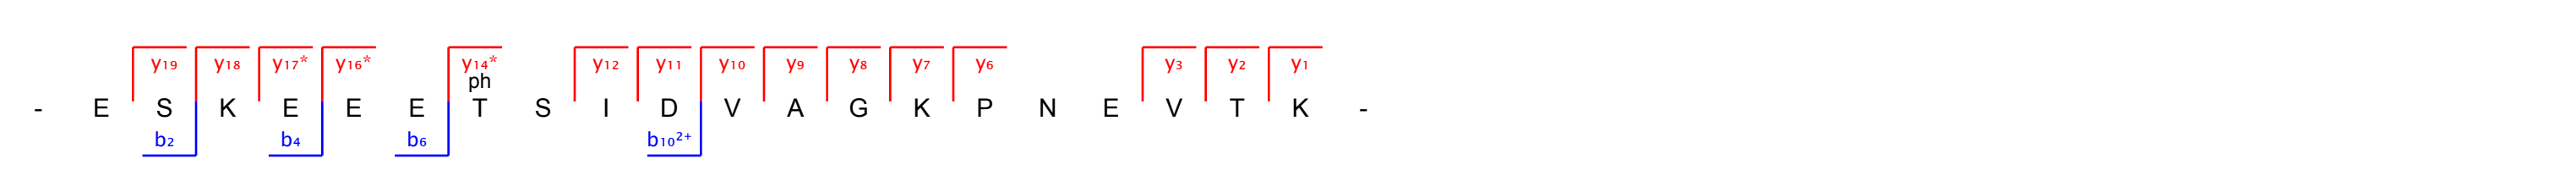

Raw file 20171215\_MaS\_33SR\_LMH\_phospho\_03 Scan 6316 Method FTMS; HCD Score 72.99 m/z 904.39 Gene names CLASP2

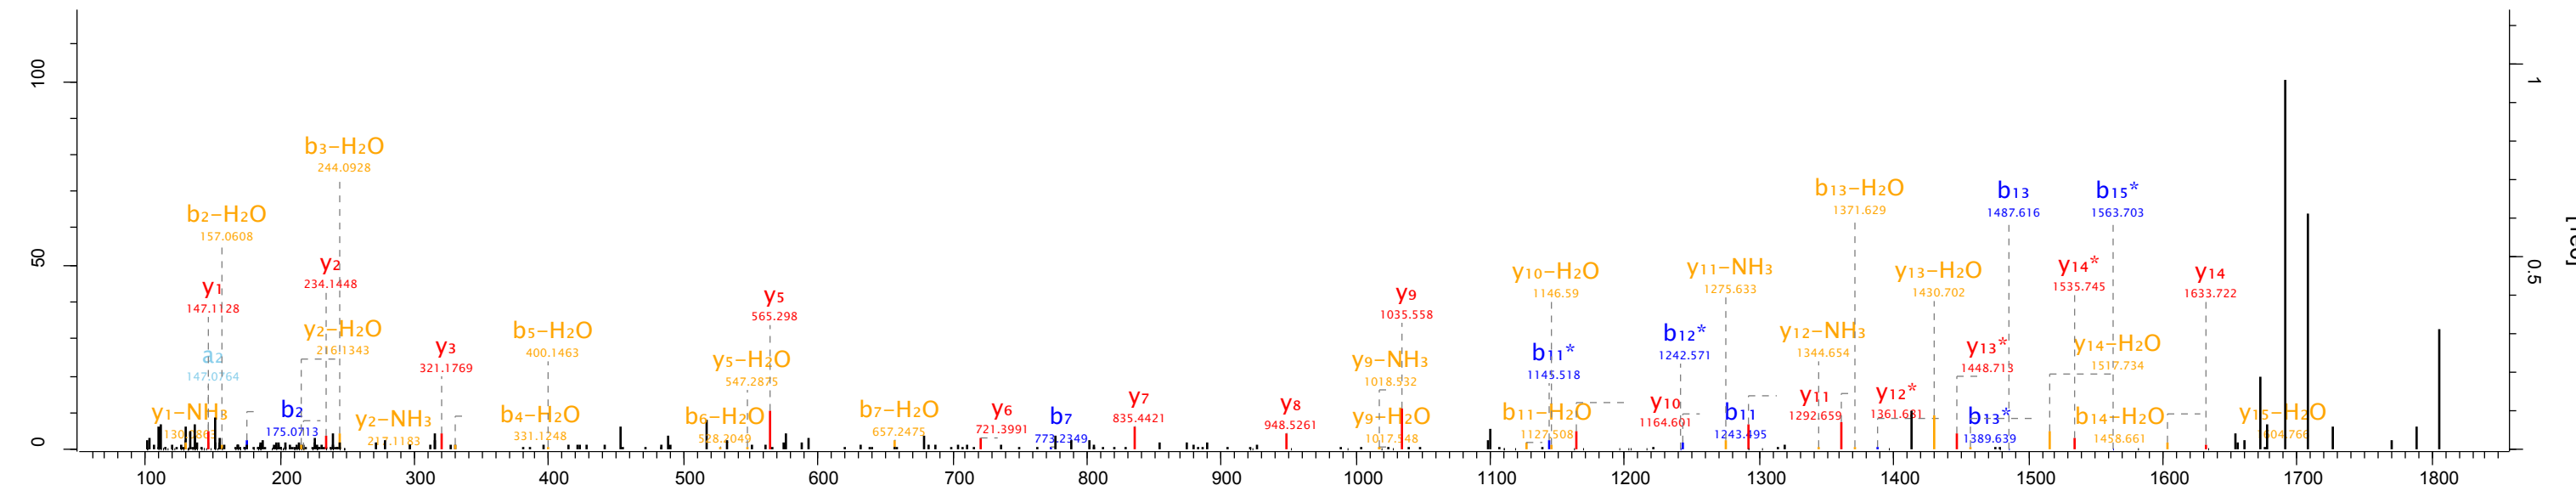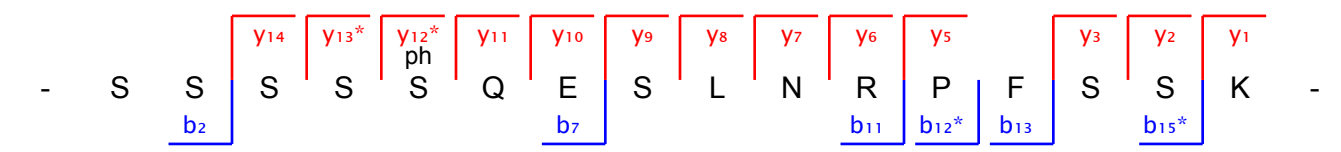

Raw file 20171215\_MaS\_33SR\_LMH\_phospho\_03 Scan 6446 Method FTMS; HCD Score 121.58 m/z 692.31 Gene names EEF1D

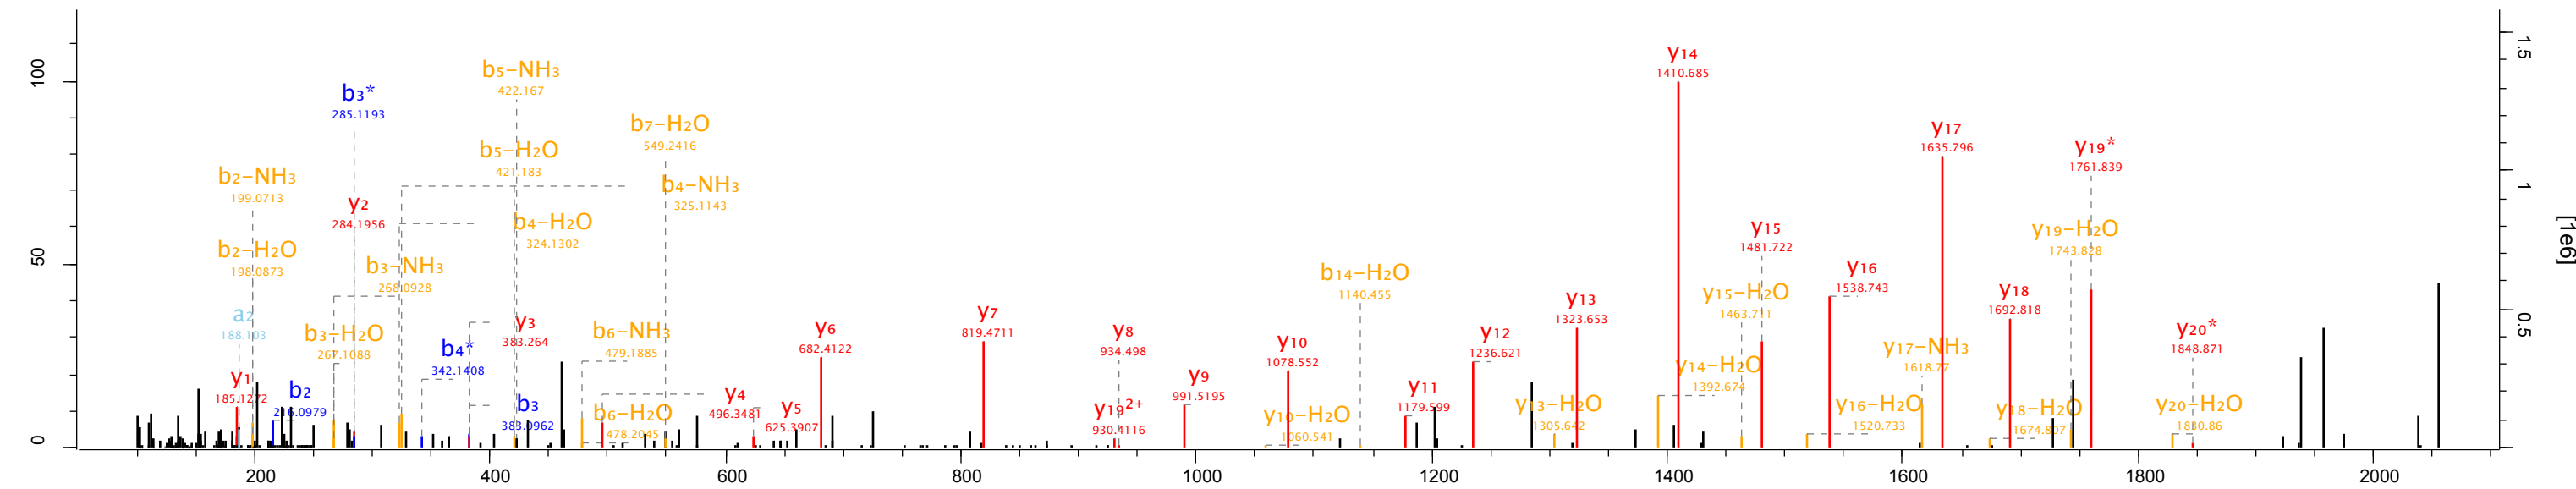

- Q S S G P G A S S G T S G D H G E L V V R -

b<sub>2</sub>
b<sub>3</sub>
b<sub>4</sub>\*

Raw file 20171215\_MaS\_33SR\_LMH\_phospho\_03 Scan 6756 Method FTMS; HCD Score 199.97 m/z 895.85 Gene names SYNPO

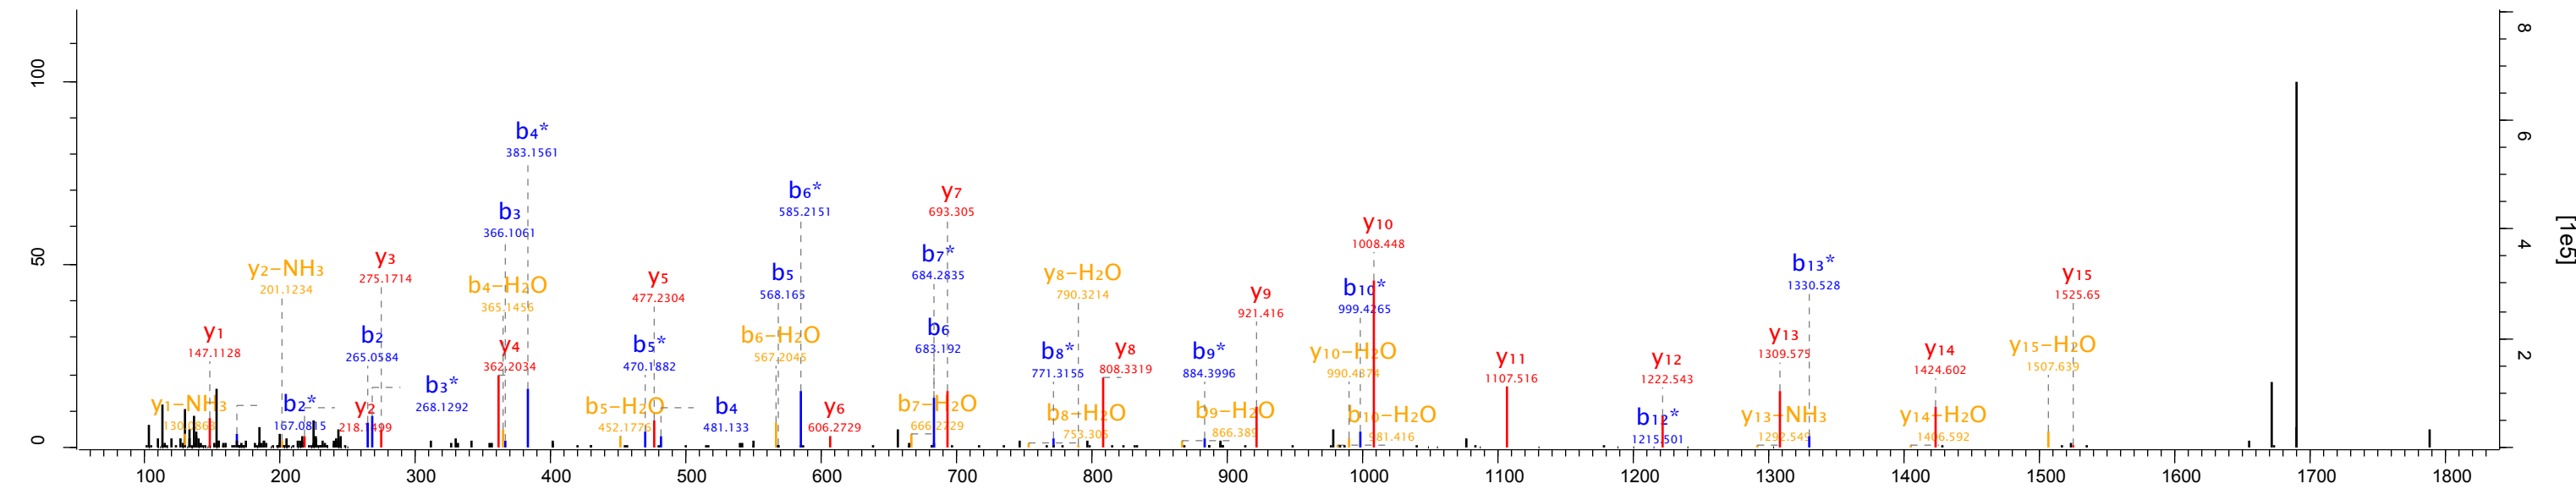

ph S  
 - P T D S D V S L D S E D S G A K -  
 b2 b3 b4 b5 b6 b7\* b8\* b9\* b10\* b12\* b13\*

Raw file 20171215\_MaS\_33SR\_LMH\_phospho\_03 Scan 6886 Method FTMS; HCD Score 198.49 m/z 818.37 Gene names OTUD4

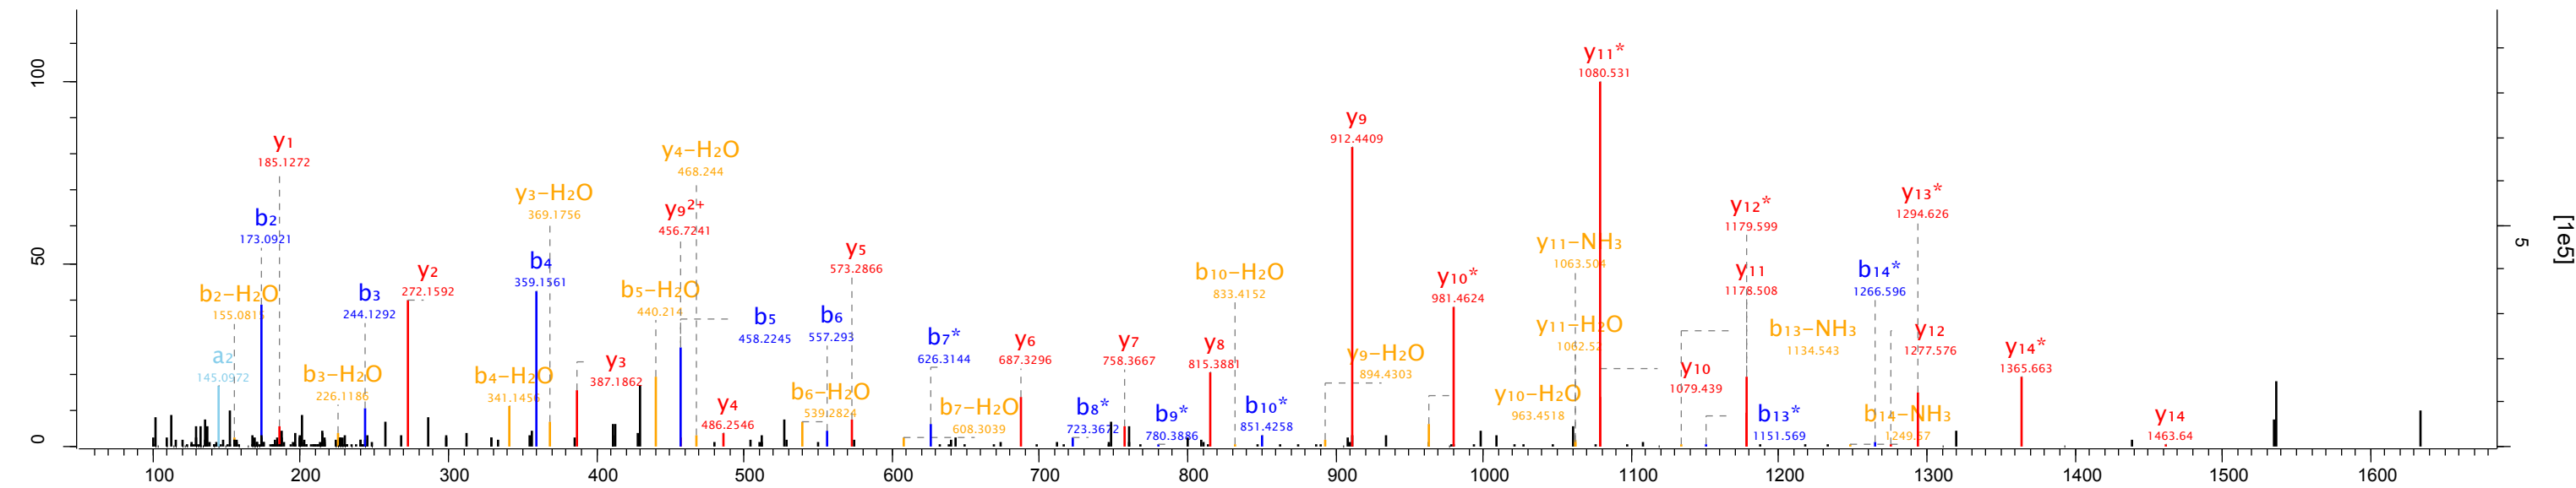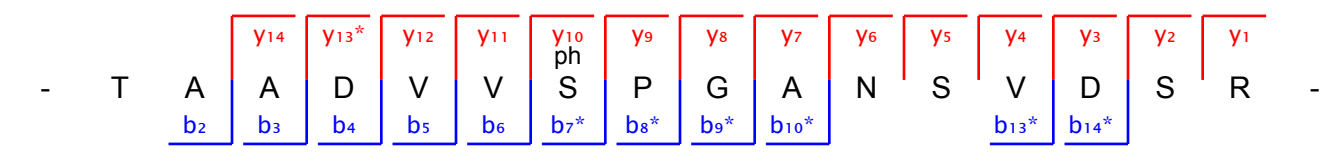

Raw file 20171215\_MaS\_33SR\_LMH\_phospho\_03 Scan 6936 Method FTMS; HCD Score 163.51 m/z 646.29 Gene names NDE1

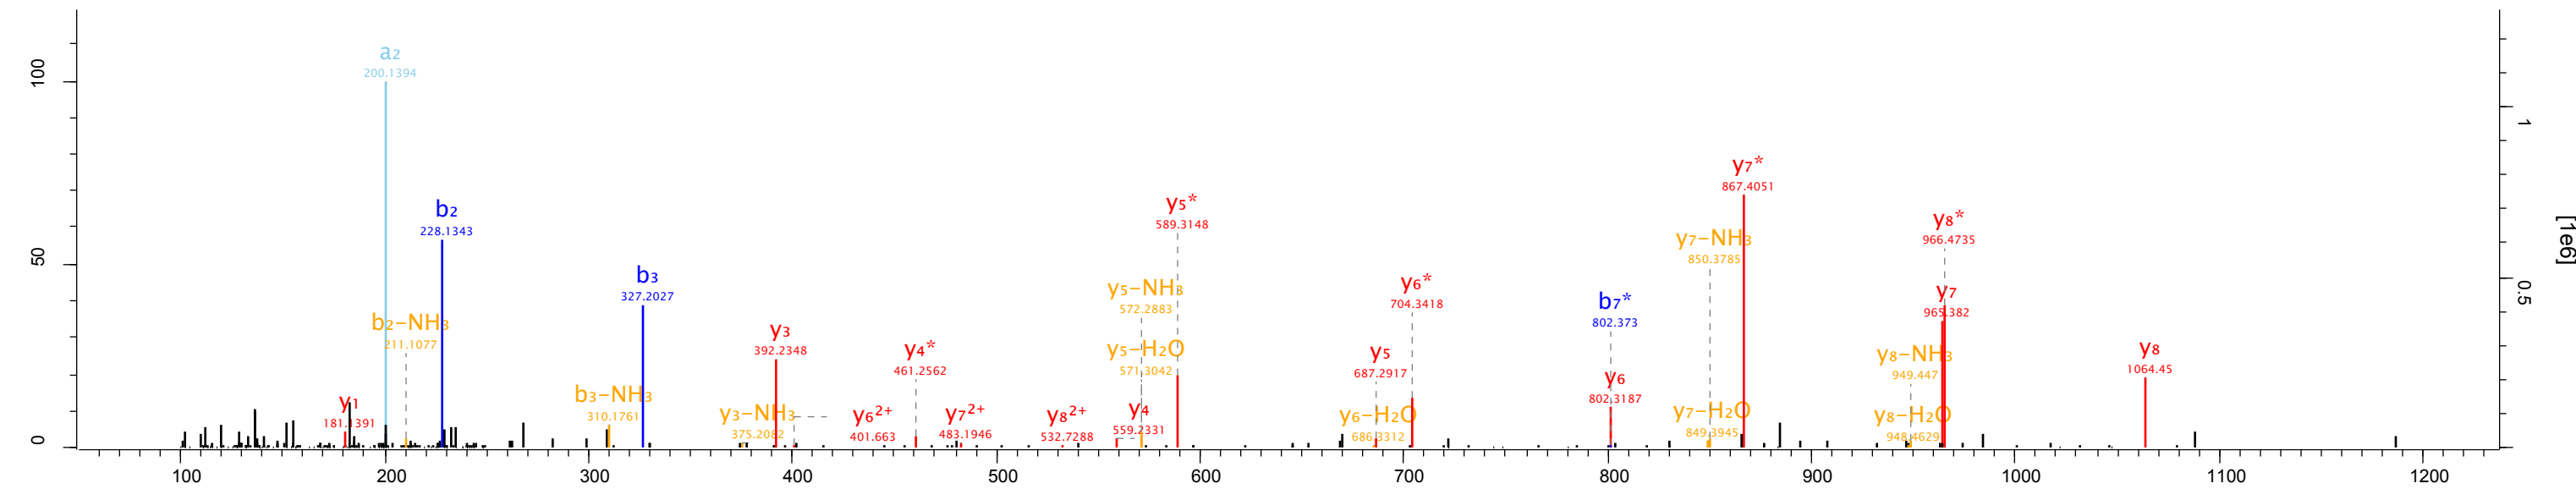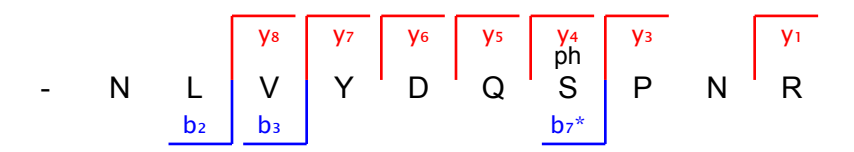

Raw file 20171215\_MaS\_33SR\_LMH\_phospho\_03 Scan 7496 Method FTMS; HCD Score 148.26 m/z 930.37 Gene names EEF1B2

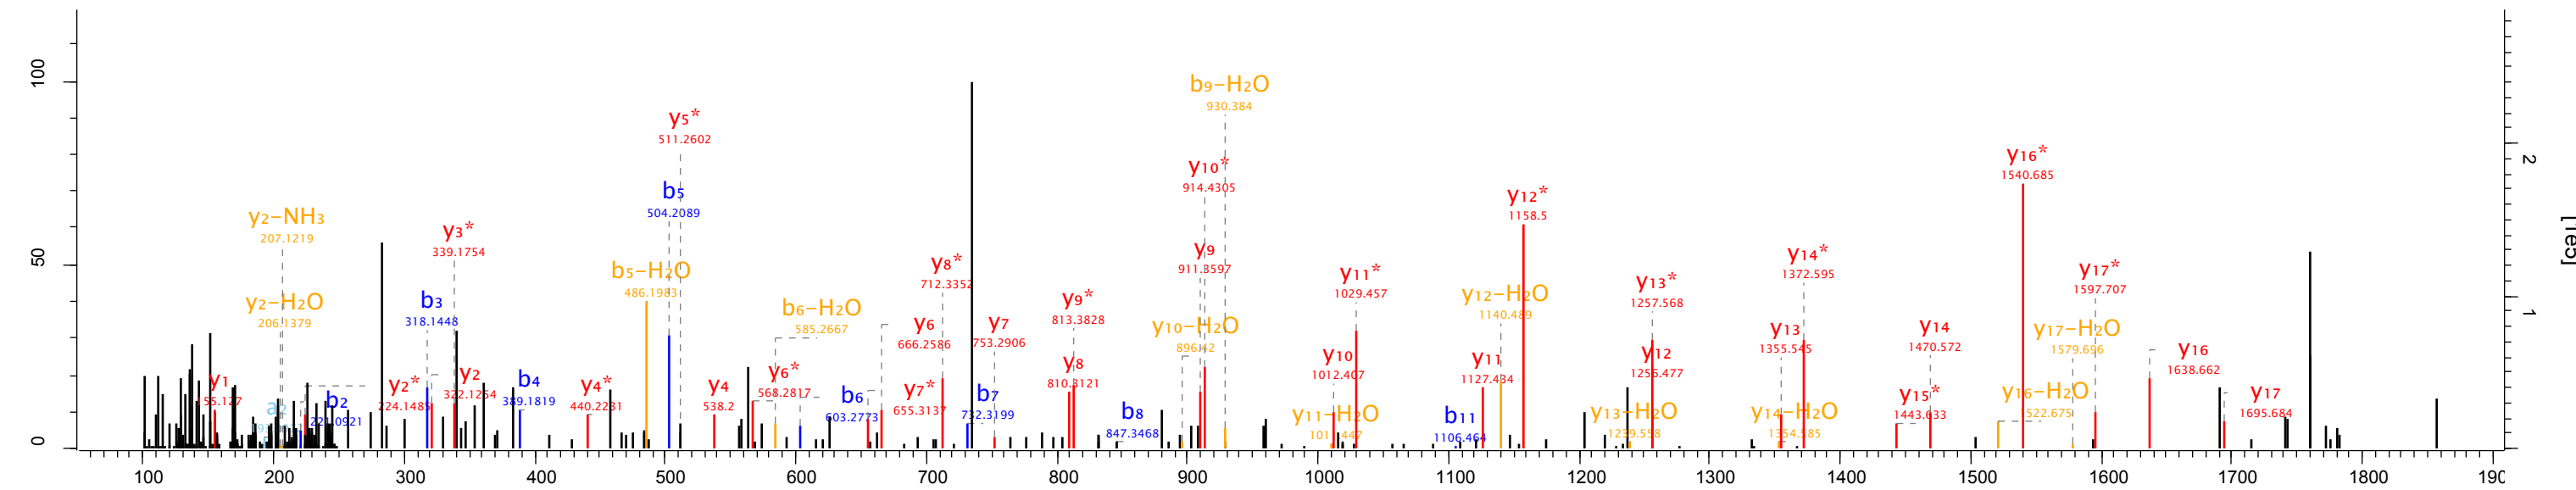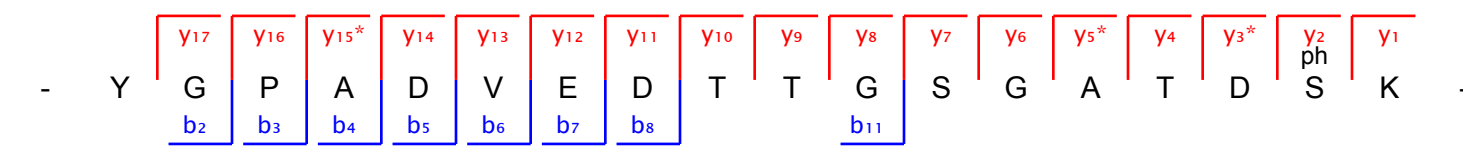



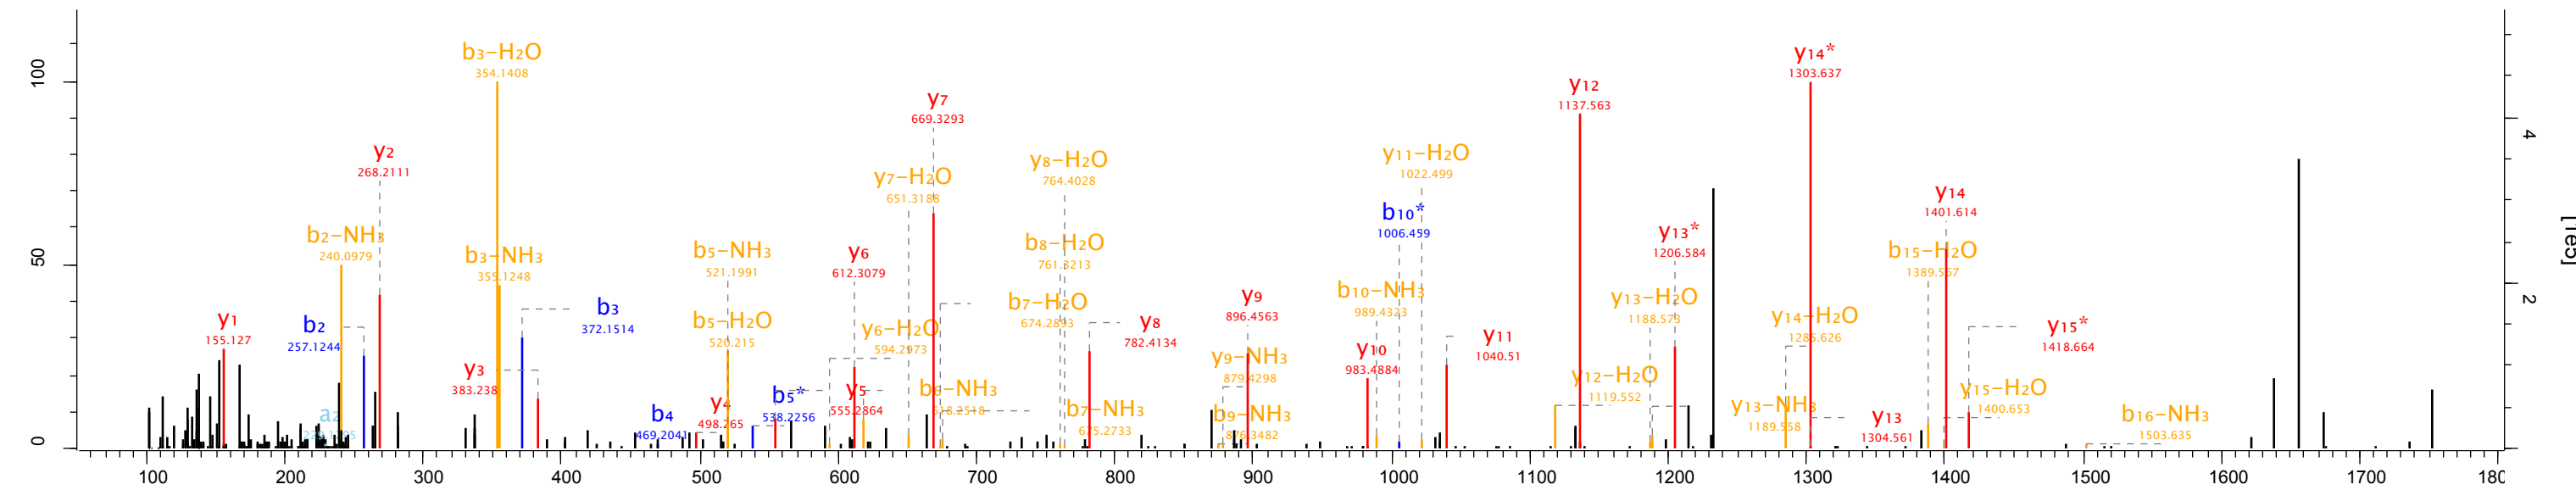

- Q Q D P S P G S N L G G G D D L K -

Fragmentation sites are indicated by brackets below the sequence:

- b2: Q-Q
- b3: Q-D
- b4: D-P
- b5\*: P-S
- b10\*: N-L

Peptide sequence: Q Q D P S P G S N L G G G D D L K

Raw file 20171215\_MaS\_33SR\_LMH\_phospho\_03 Scan 7916 Method FTMS; HCD Score 213.01 m/z 1144.93 Gene names HTATSF1

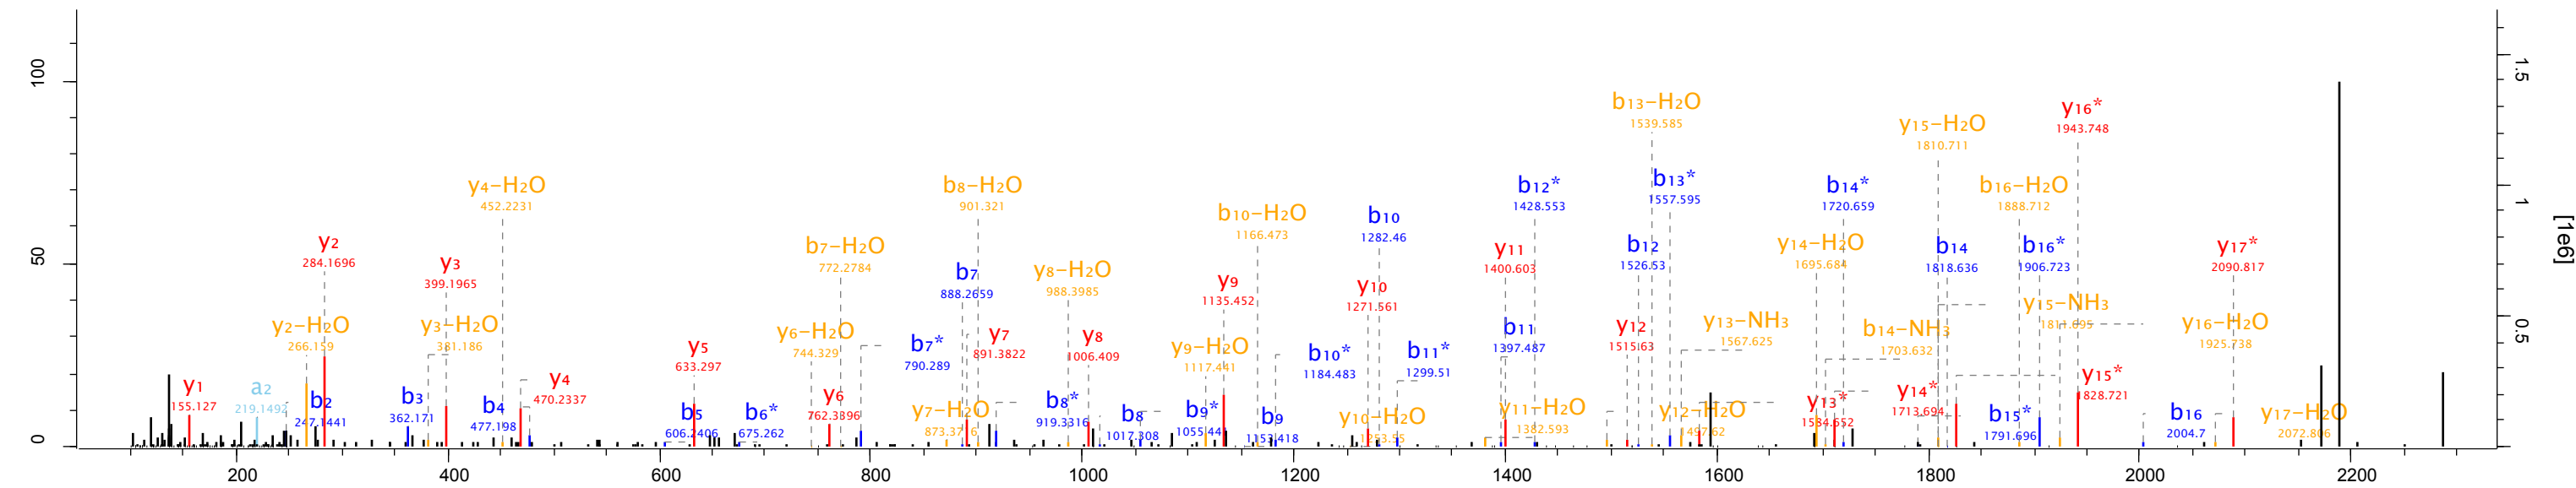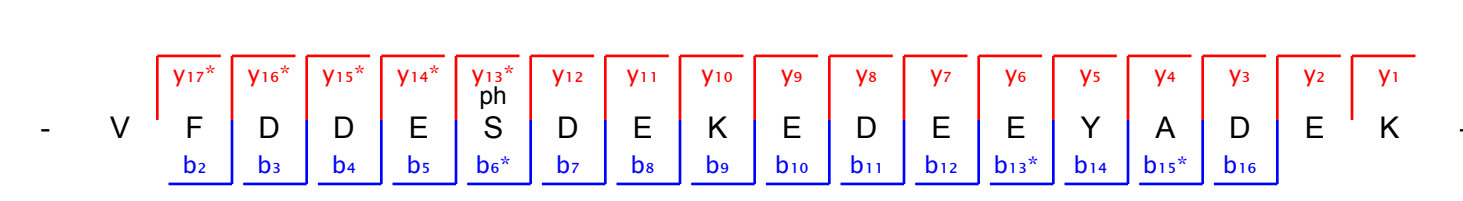

Raw file  
 20171215\_MaS\_33SR\_LMH\_phospho\_03  
 Scan 8226 Method FTMS; HCD Score 273.73 m/z 950.74 Gene names HTATSF1

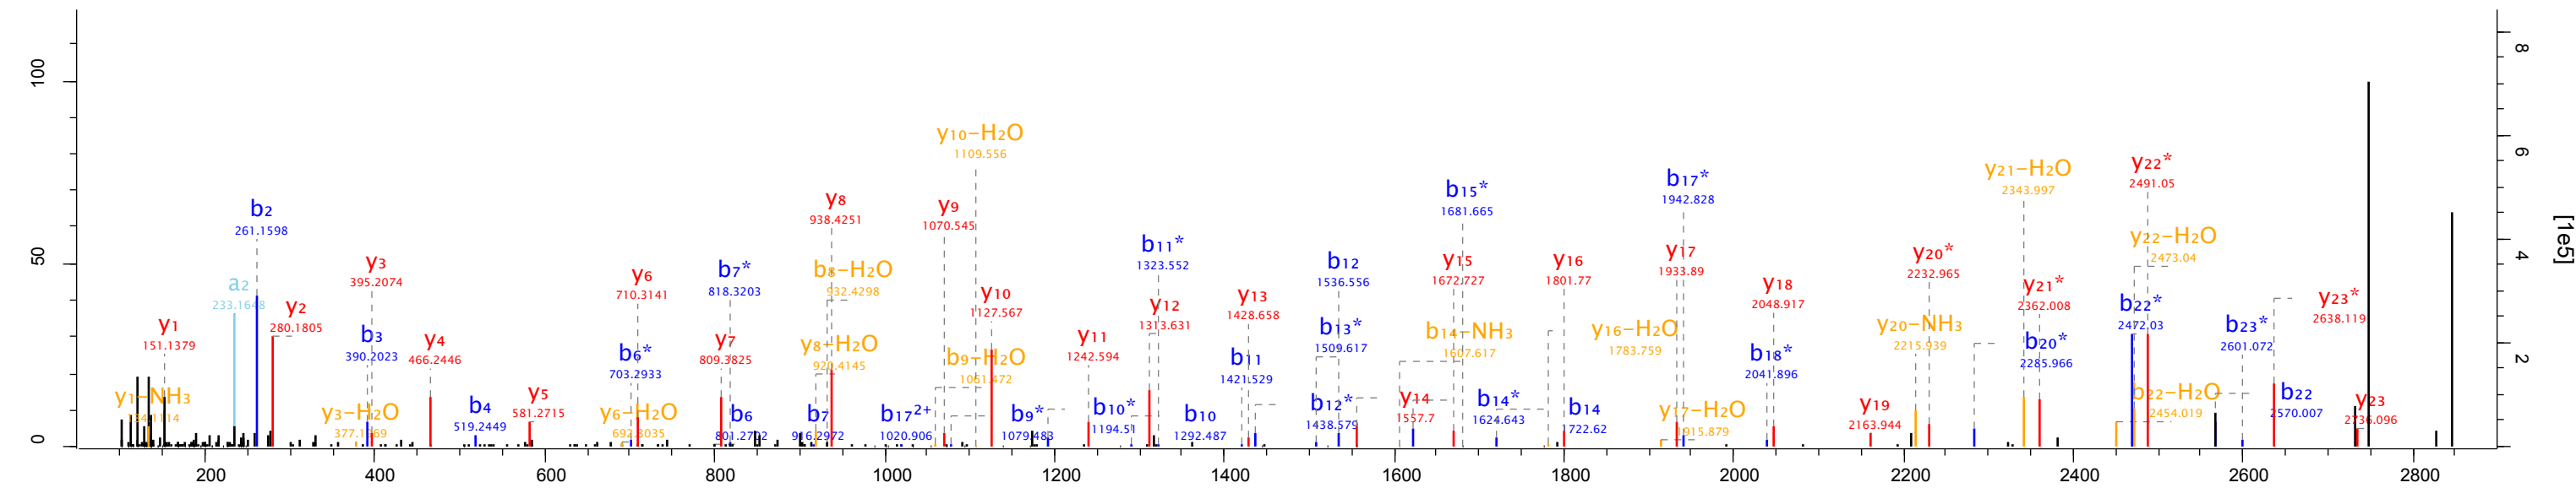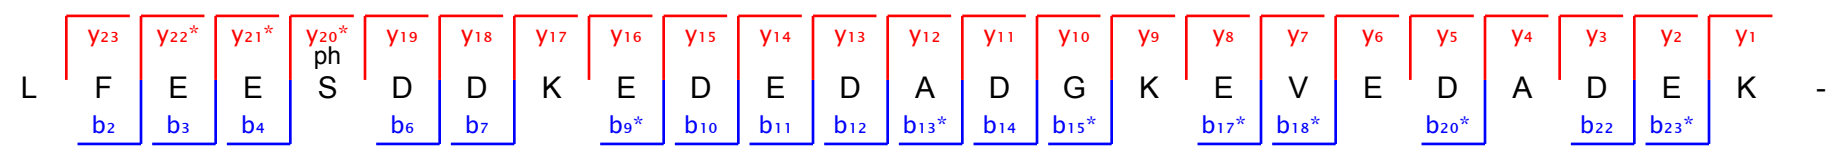

Raw file 20171215\_MaS\_33SR\_LMH\_phospho\_03 Scan 8386 Method FTMS; HCD Score 99.96 m/z 1136.94 Gene names EVA1B

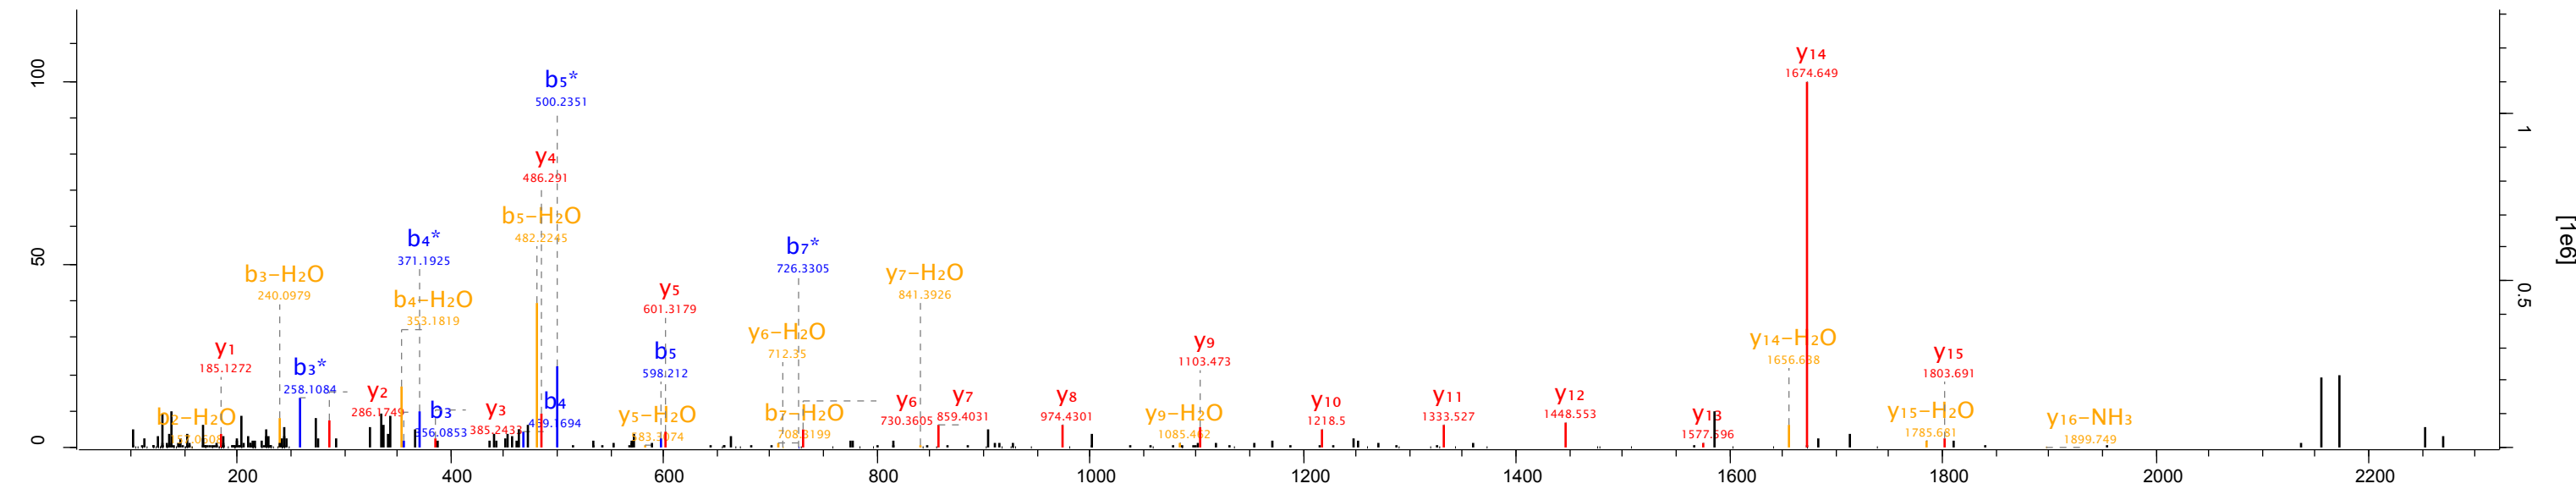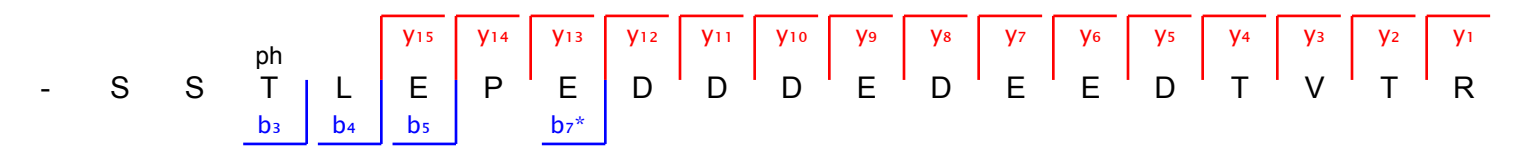

Raw file 20171215\_MaS\_33SR\_LMH\_phospho\_03 Scan 8586 Method FTMS; HCD Score 132.82 m/z 927.42 Gene names VPS51

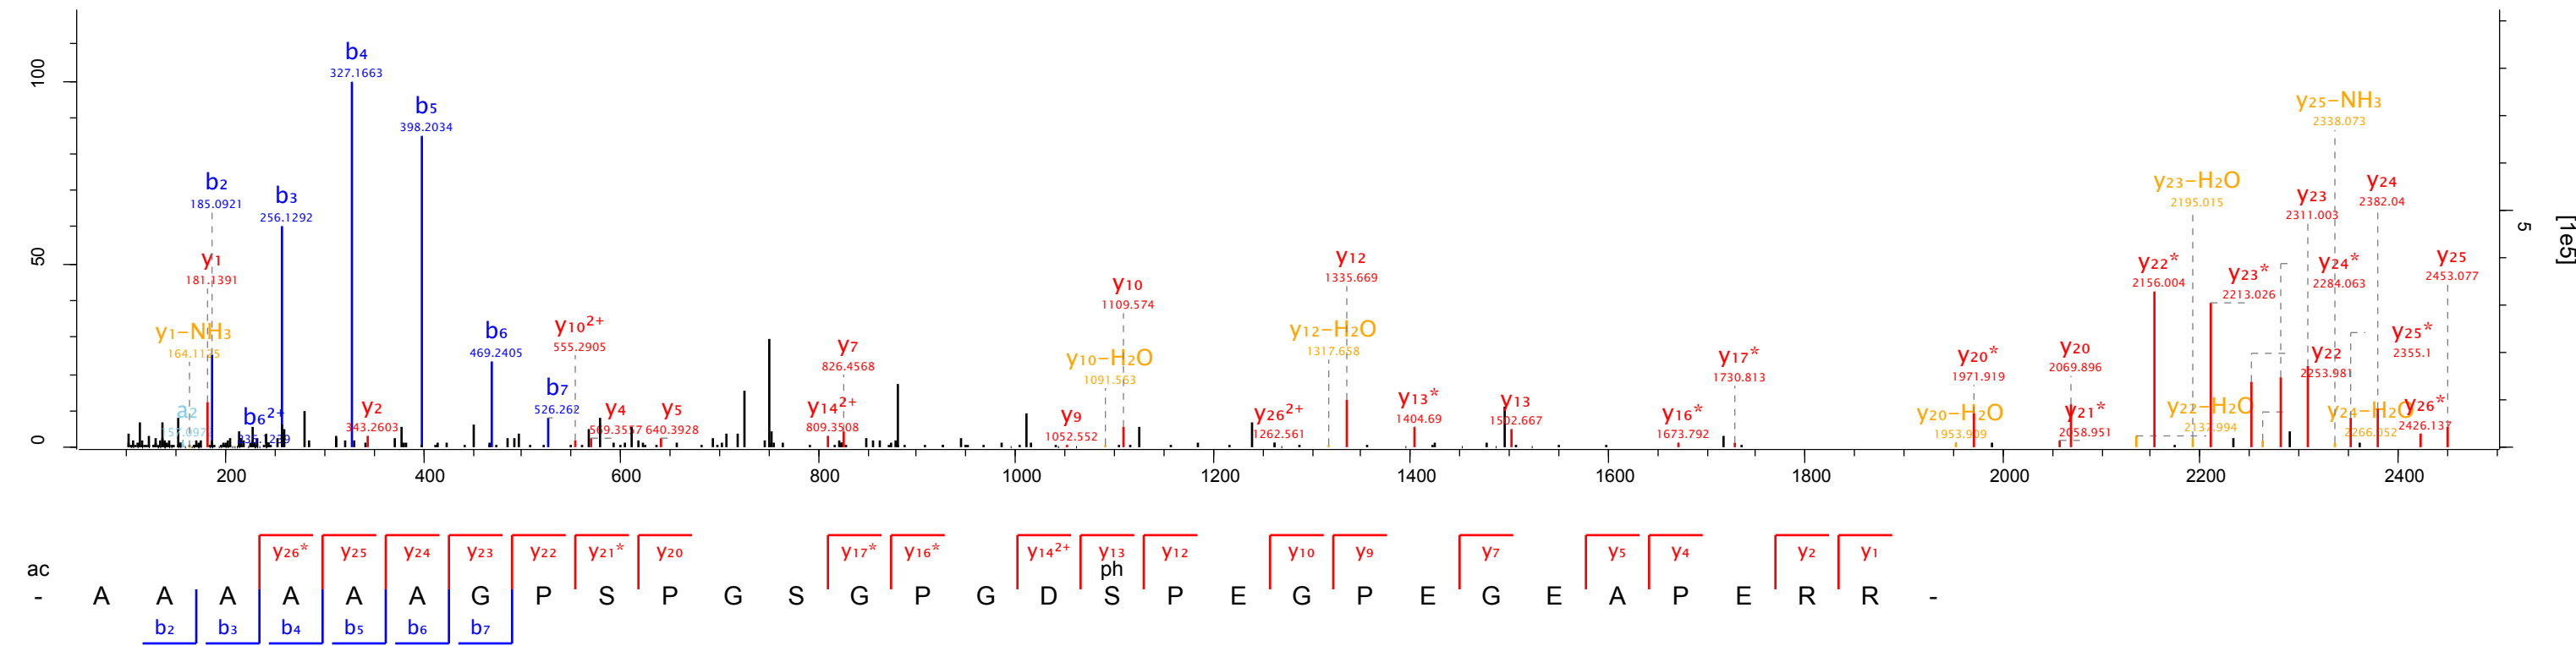

Raw file 20171215\_MaS\_33SR\_LMH\_phospho\_03 Scan 8786 Method FTMS; HCD Score 167.88 m/z 1012.92 Gene names SPAG9

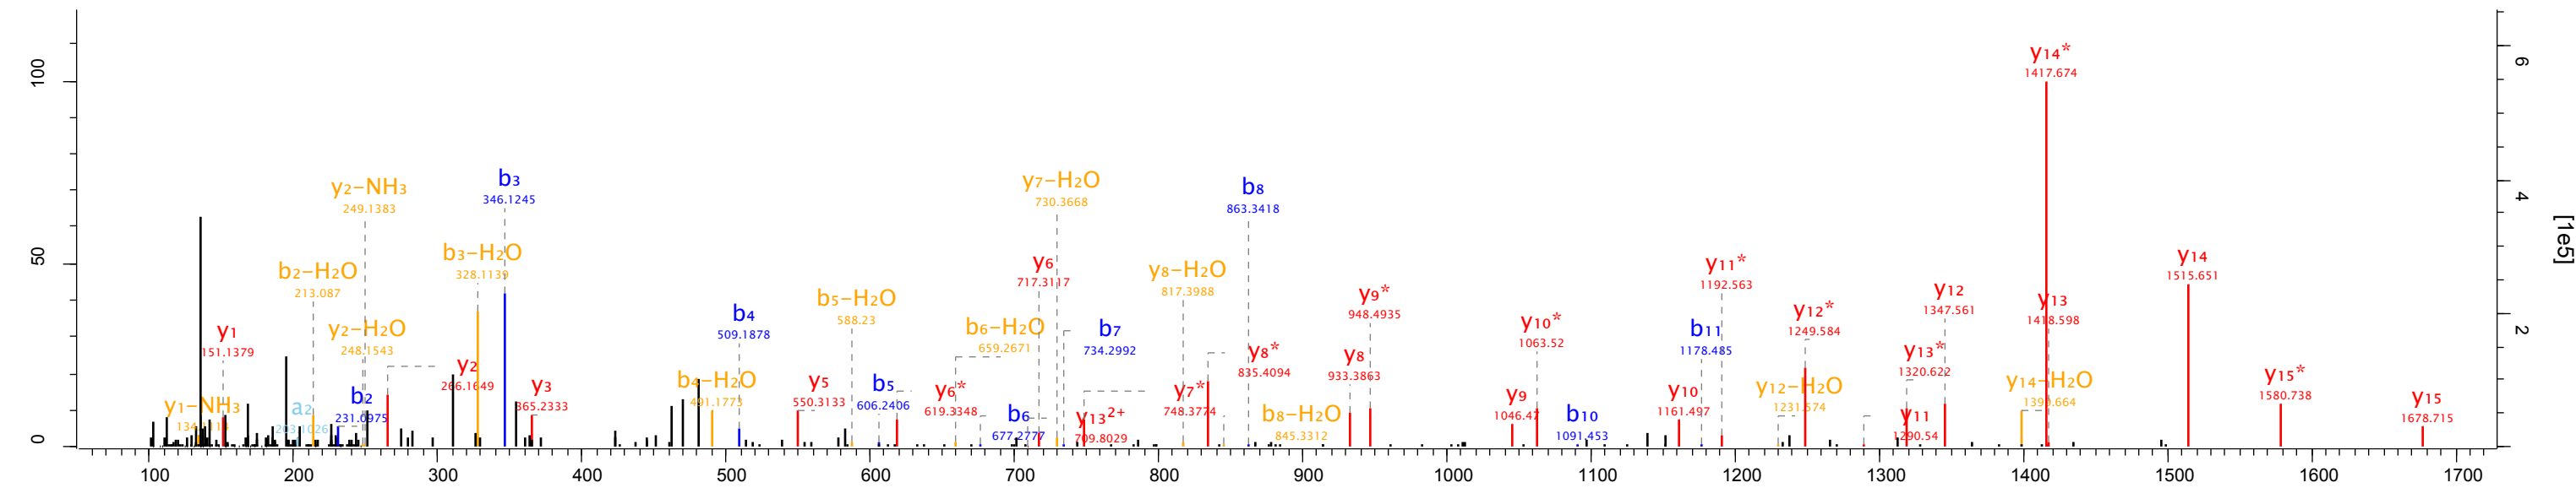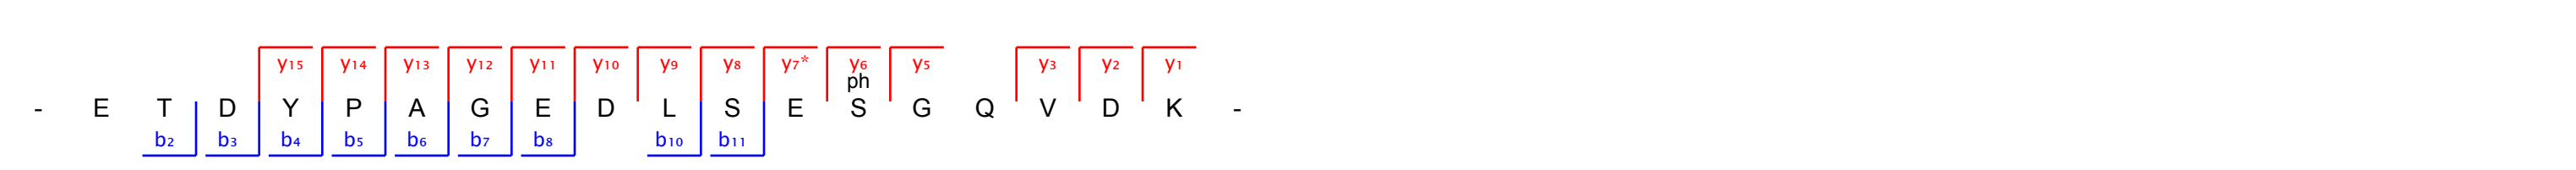

Raw file  
20171215\_MaS\_33SR\_LMH\_phospho\_03

Scan Method Score m/z Gene names  
9026 FTMS; HCD 290.35 1074.44 RPRD2

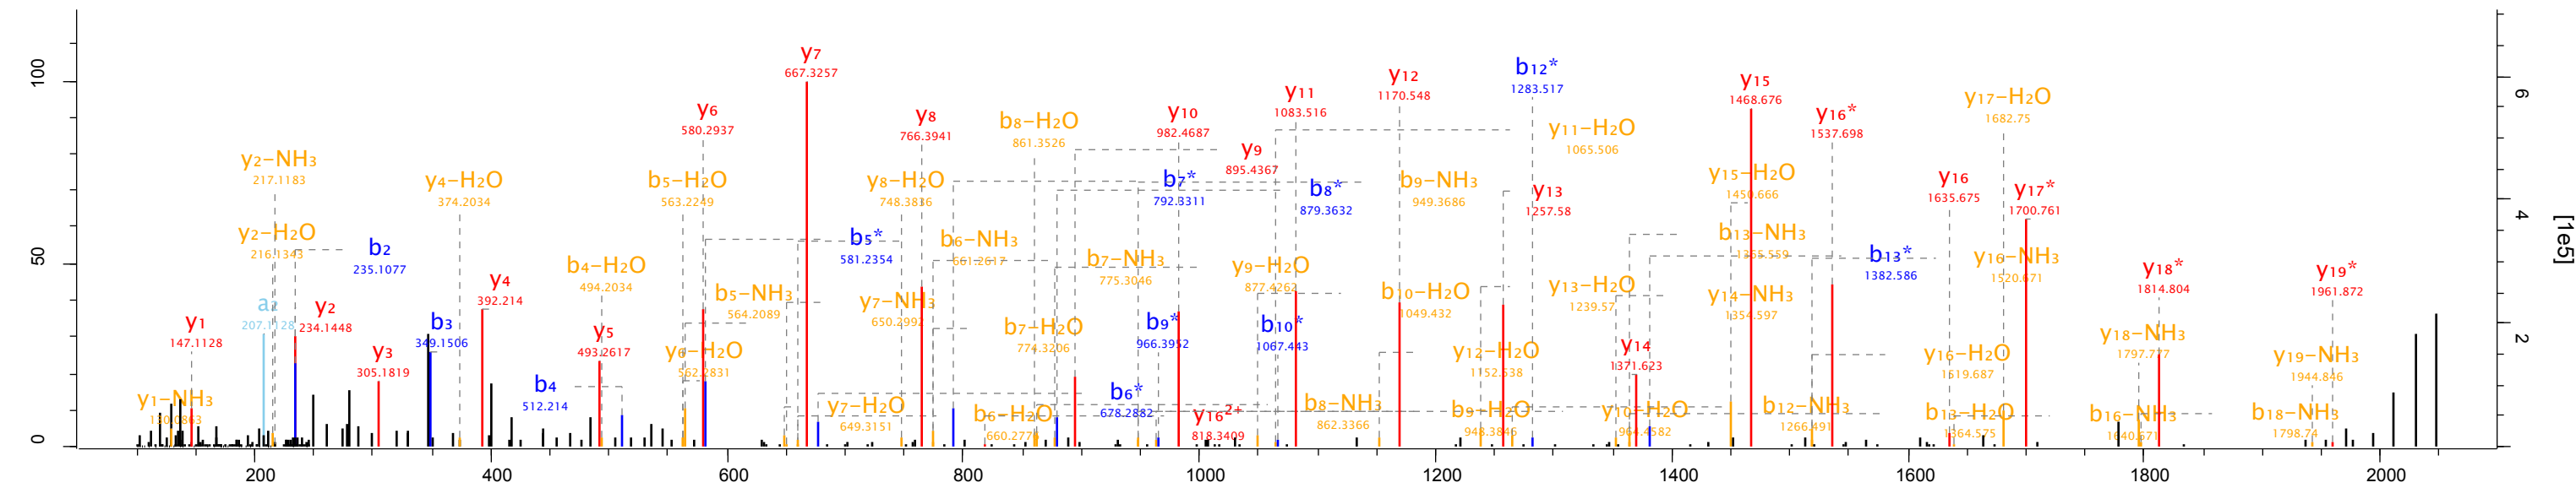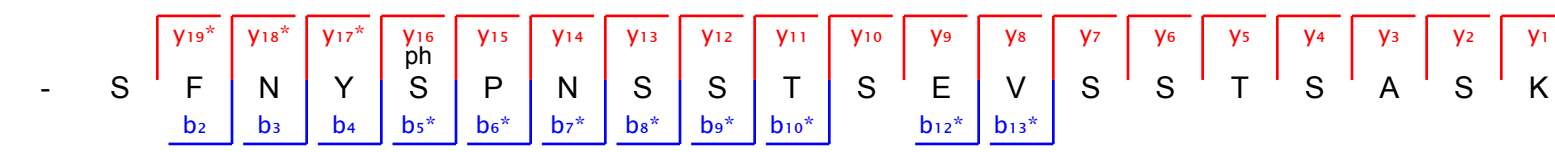

Raw file 20171215\_MaS\_33SR\_LMH\_phospho\_03 Scan 9196 Method FTMS; HCD Score 72.44 m/z 829.36 Gene names CRTCI

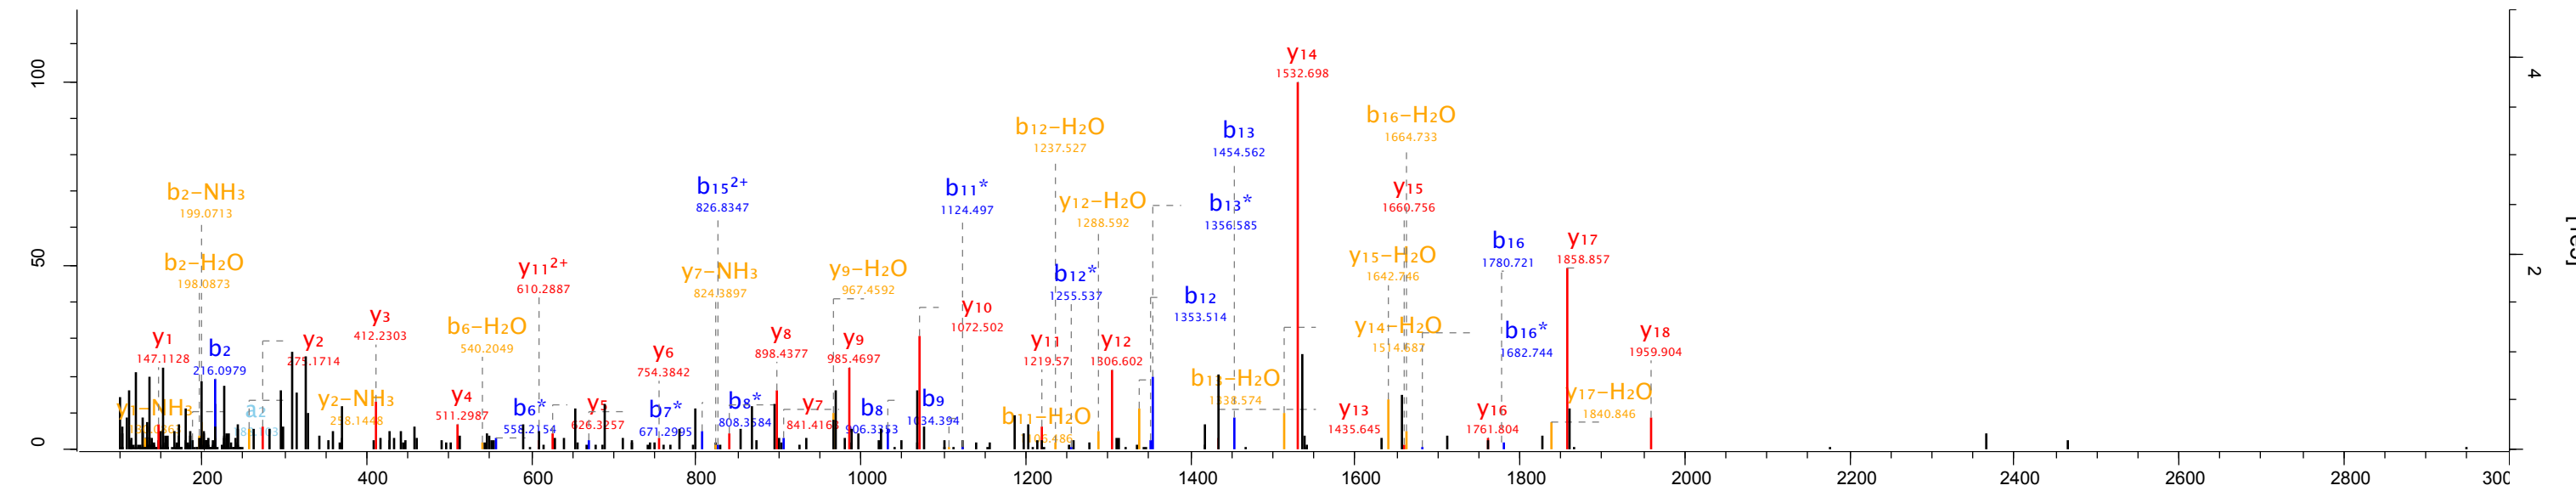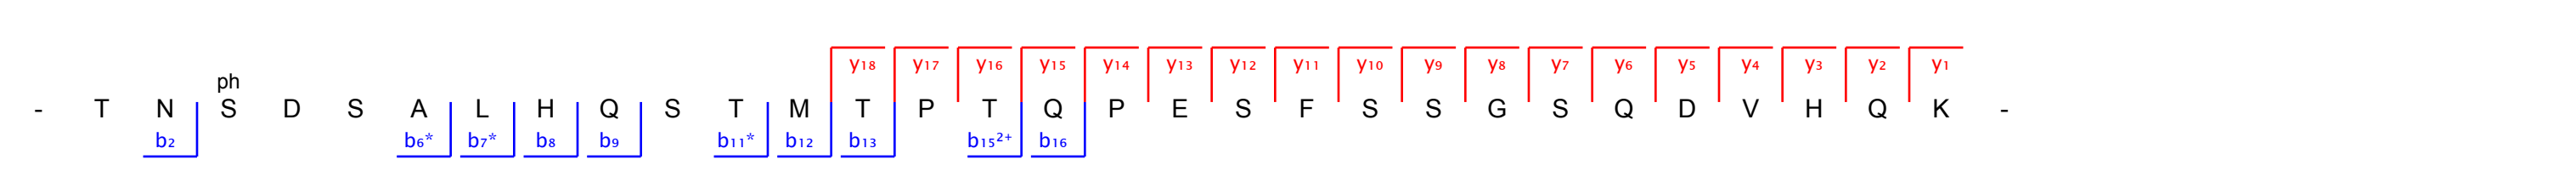



Raw file 20171215\_MaS\_33SR\_LMH\_phospho\_03 Scan 9256 Method FTMS; HCD Score 197 m/z 808.38 Gene names CHAMP1

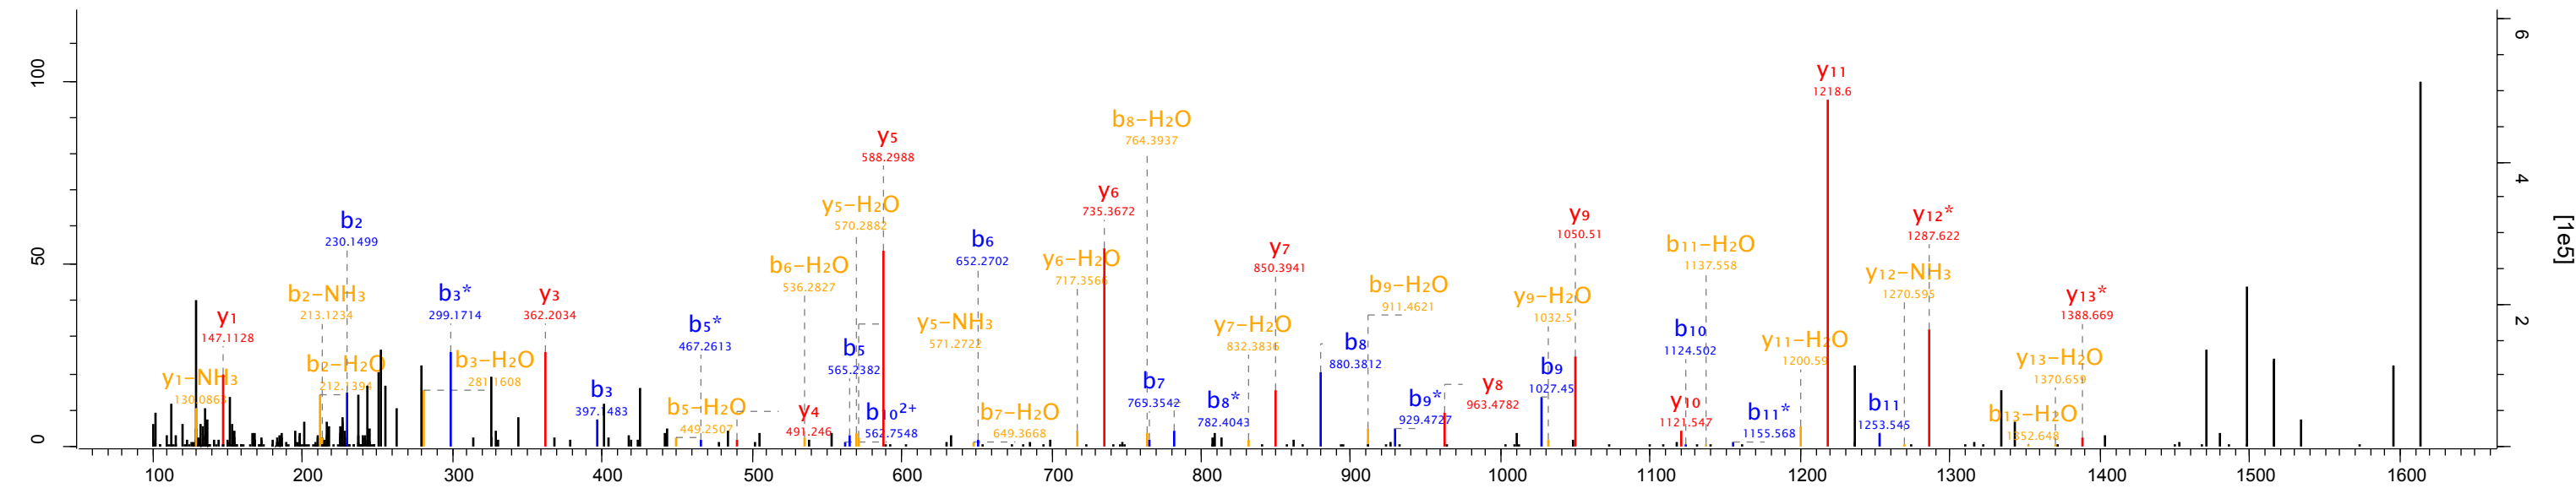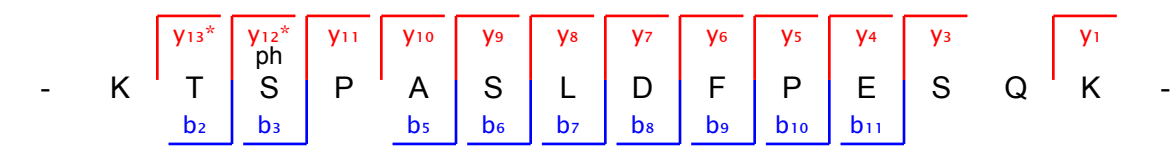

Raw file: 20171215\_MaS\_33SR\_LMH\_phospho\_03  
 Scan: 9336 Method: FTMS; HCD Score: 98.23 m/z: 801.34 Gene names: DPYSL3;DPYSL4

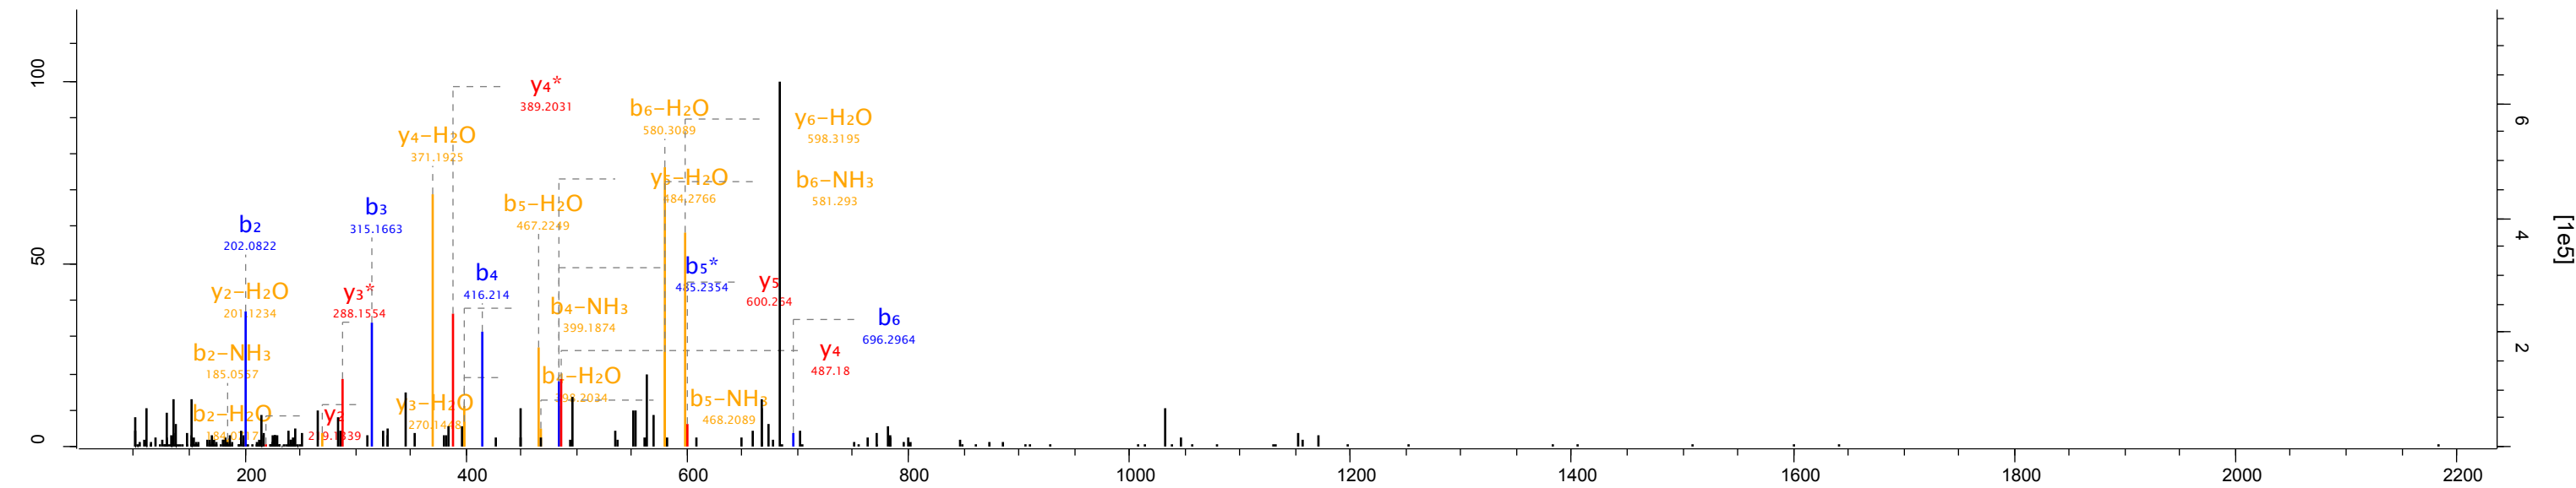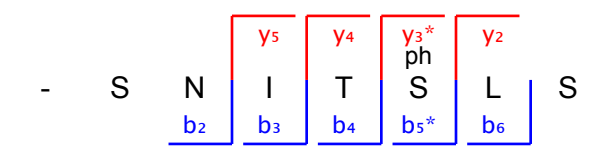

Raw file 20171215\_MaS\_33SR\_LMH\_phospho\_03 Scan 9506 Method FTMS; HCD Score 44.25 m/z 599.76 Gene names PWP1

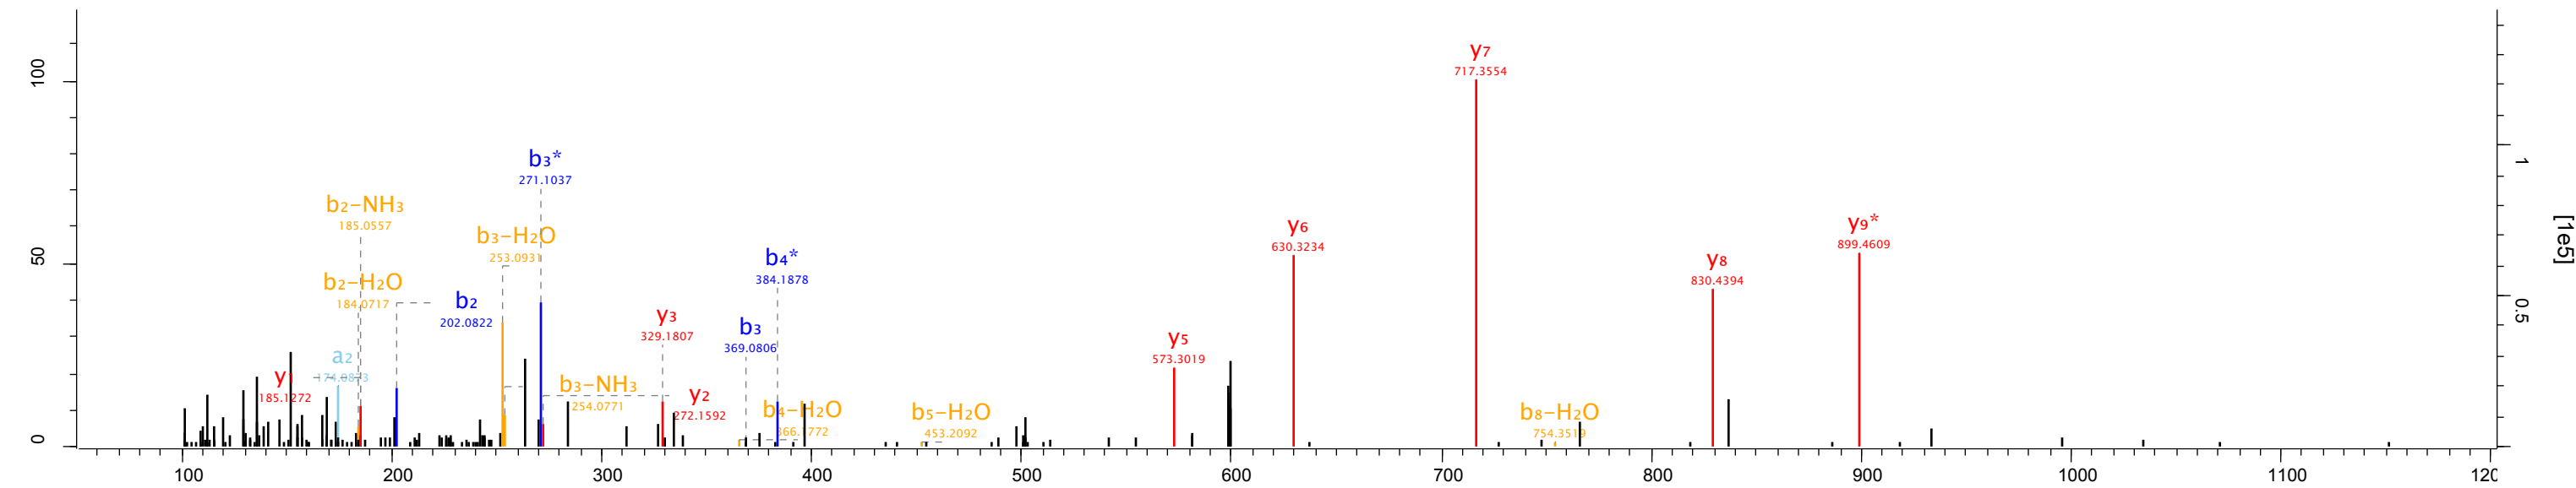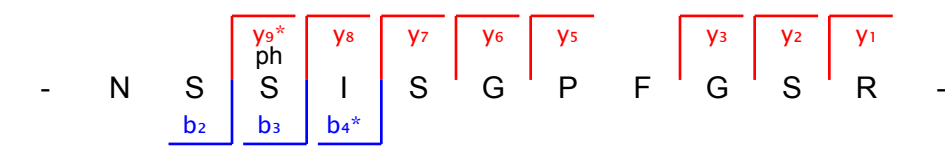

20171215\_MaS\_33SR\_LMH\_phospho\_03 9886 FTMS; HCD 52.97 724.34 PHRF1

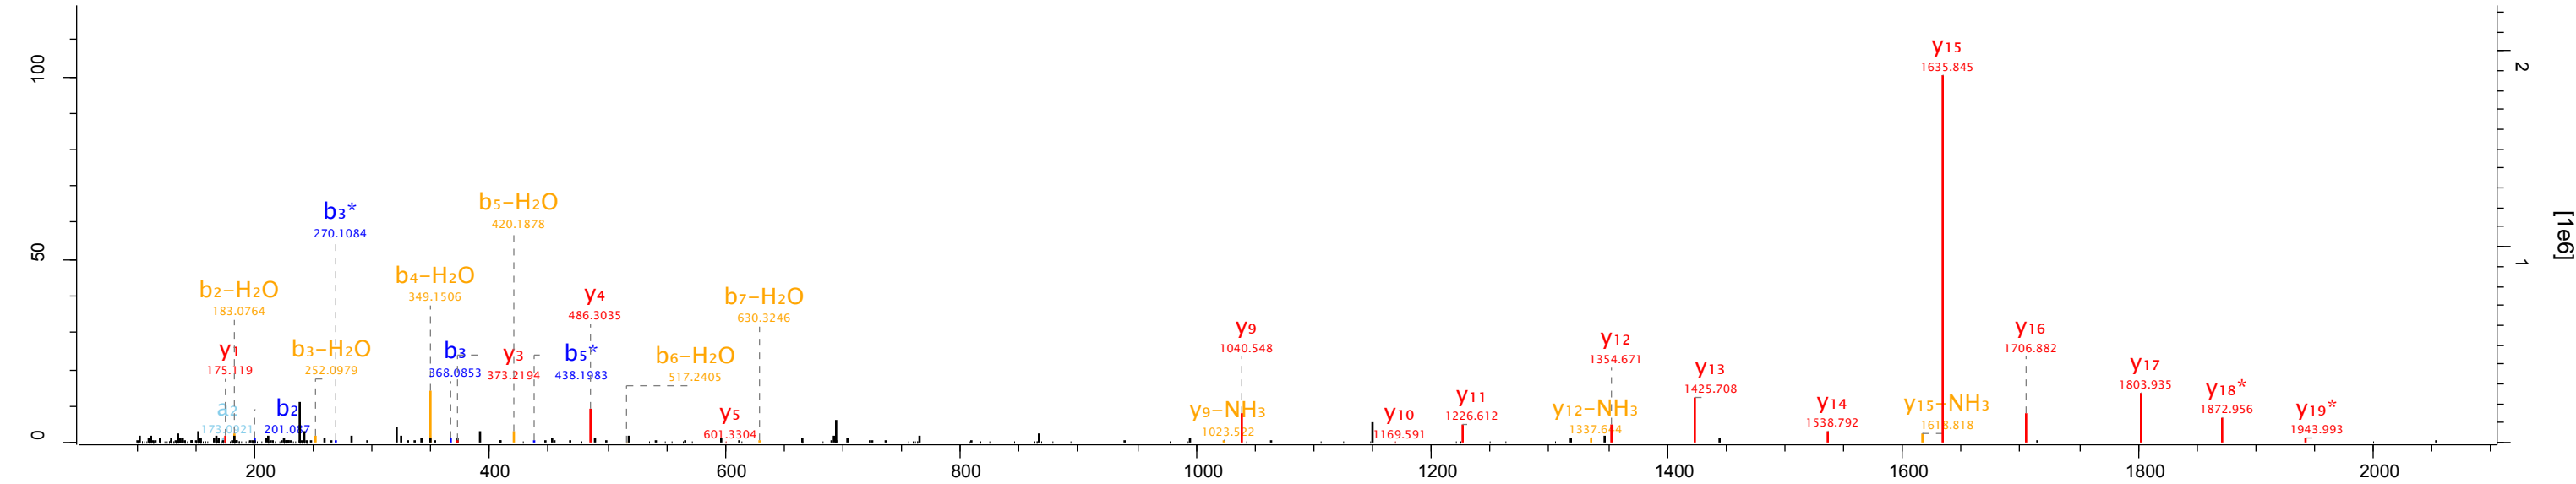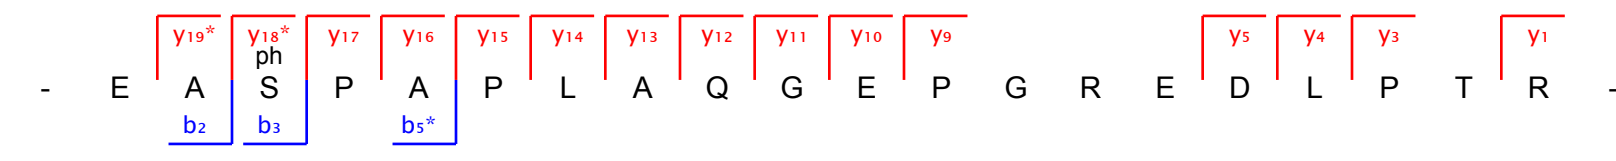

Raw file 20171215\_MaS\_33SR\_LMH\_phospho\_03 Scan 9966 Method FTMS; HCD Score 119.65 m/z 639.83 Gene names TOPBP1

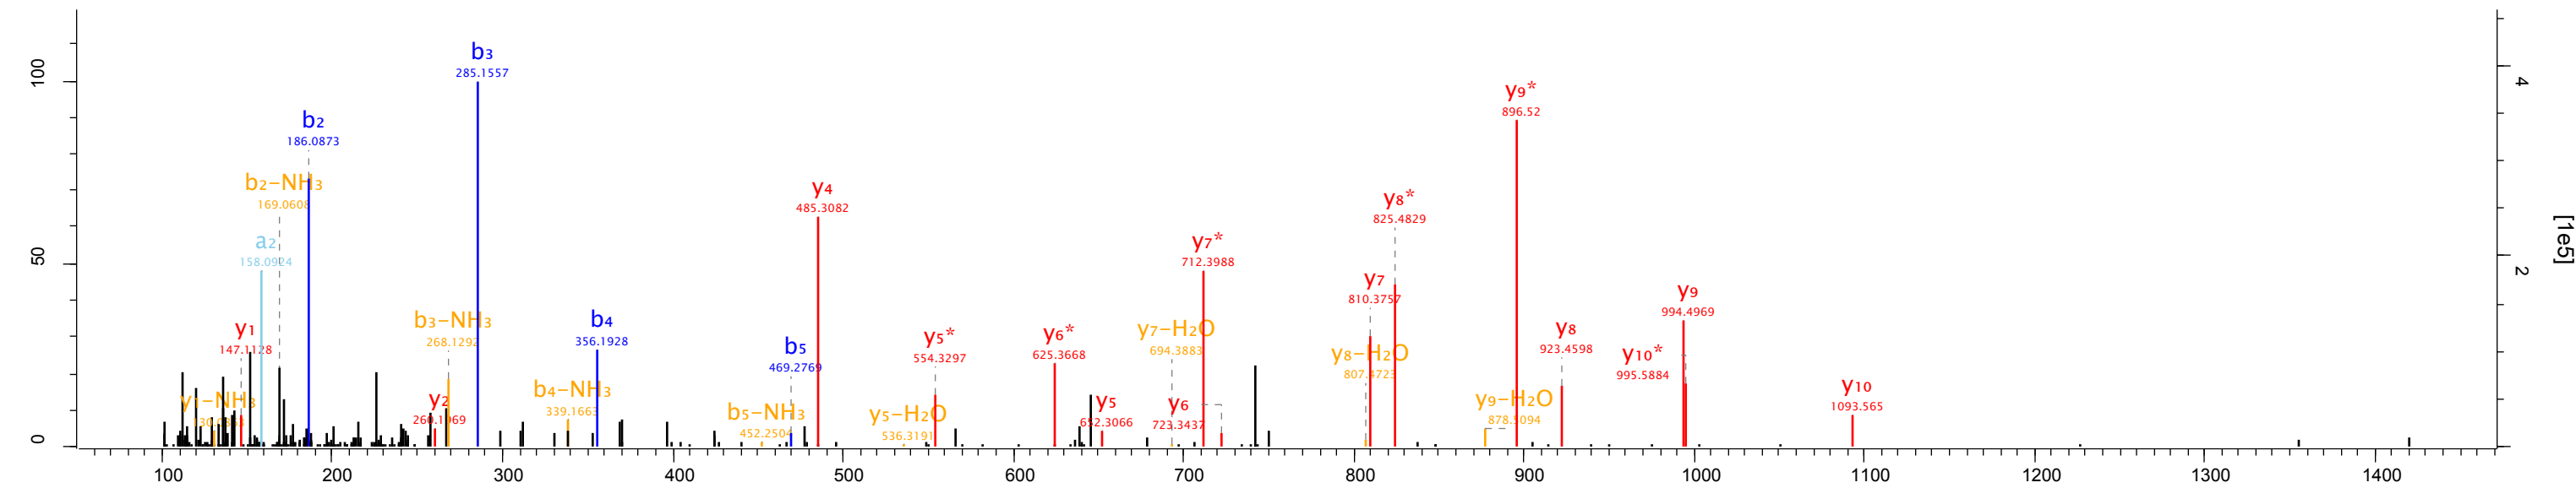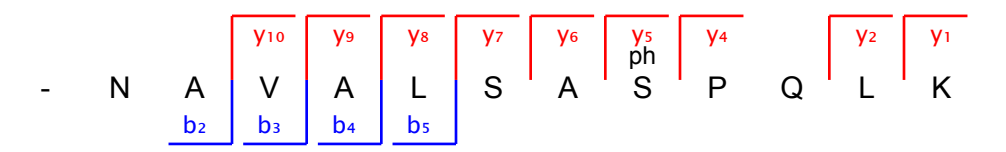

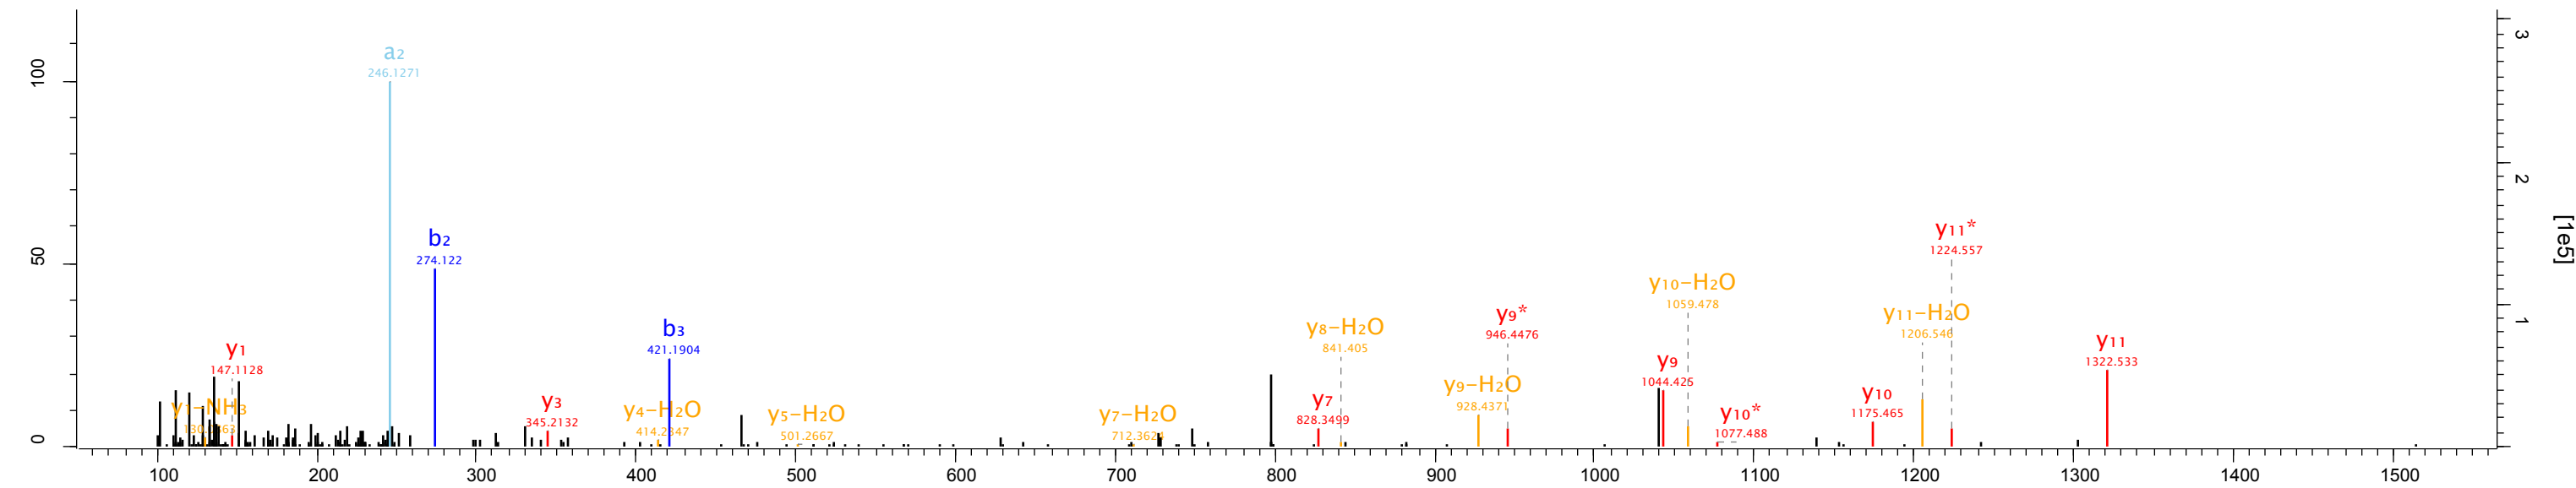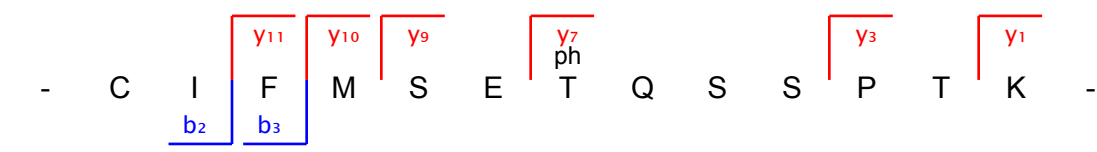

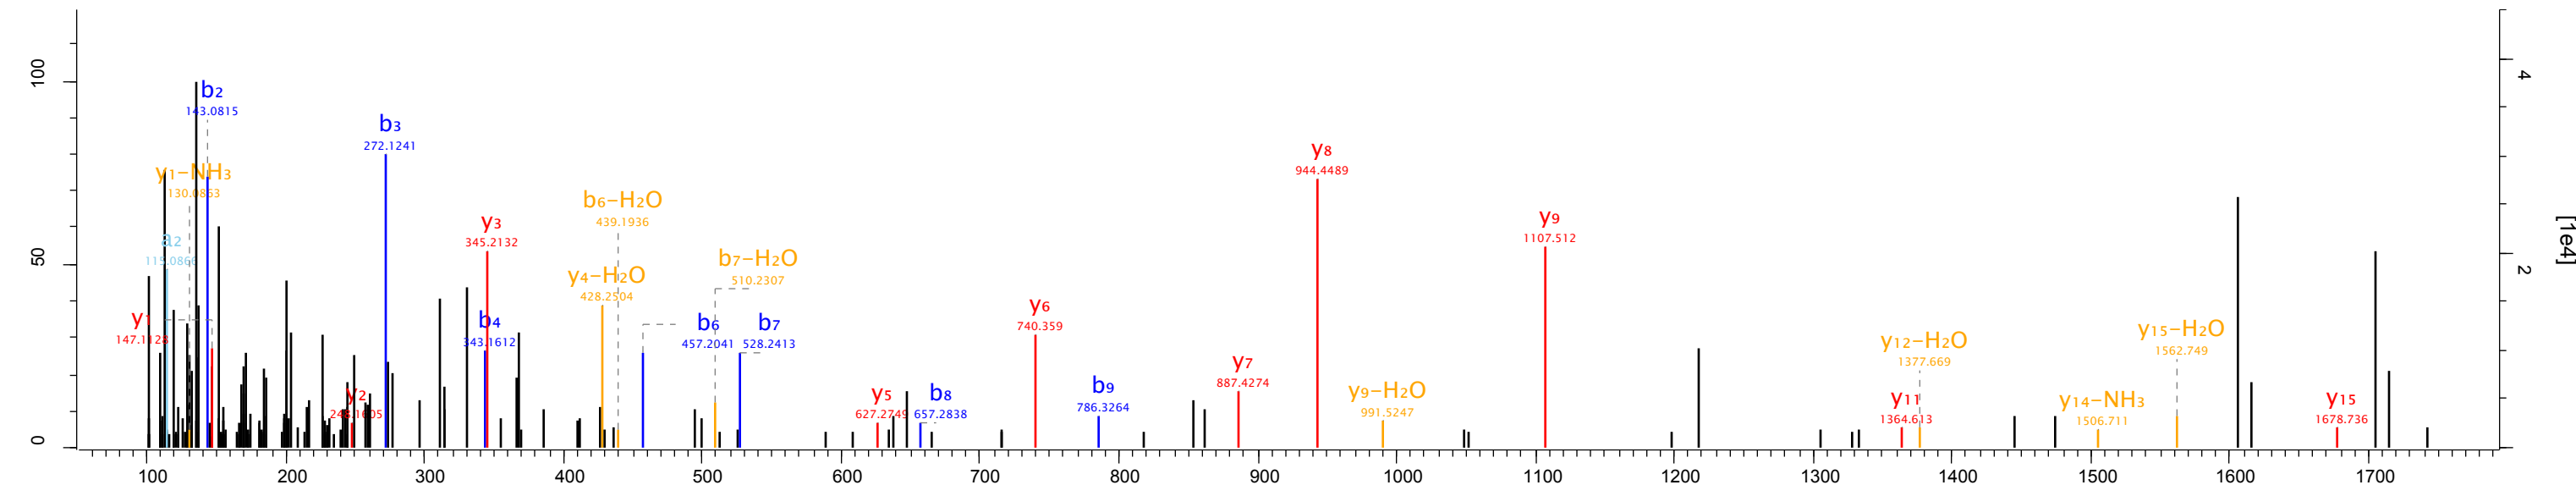

- A A E A G G A E E Q Y G F L T T P T K -

b<sub>2</sub> b<sub>3</sub> b<sub>4</sub> y<sub>15</sub> b<sub>6</sub> b<sub>7</sub> b<sub>8</sub> b<sub>9</sub> y<sub>11</sub> y<sub>9</sub> y<sub>8</sub> y<sub>7</sub> y<sub>6</sub> y<sub>5</sub><sub>ph</sub> y<sub>3</sub> y<sub>2</sub> y<sub>1</sub>

Raw file 20171215\_MaS\_33SR\_LMH\_phospho\_05 Scan 1956 Method FTMS; HCD Score 244.43 m/z 812.85 Gene names SPTBN1

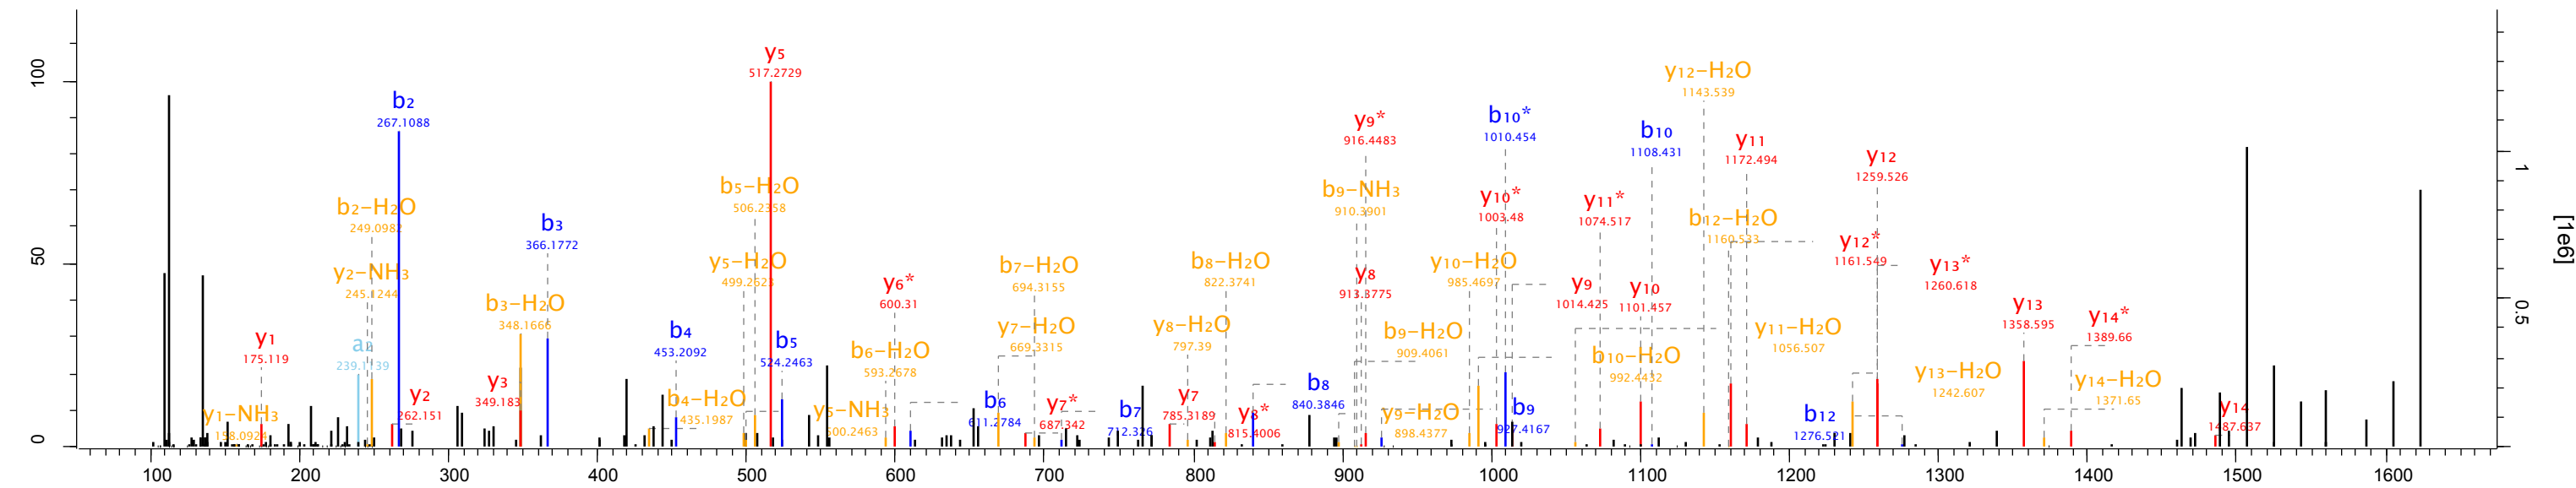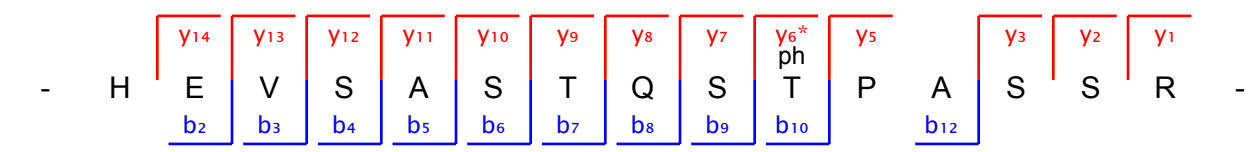



Raw file 20171215\_MaS\_33SR\_LMH\_phospho\_05 Scan 2236 Method FTMS; HCD Score 393.73 m/z 1065.45 Gene names HSP90AA1

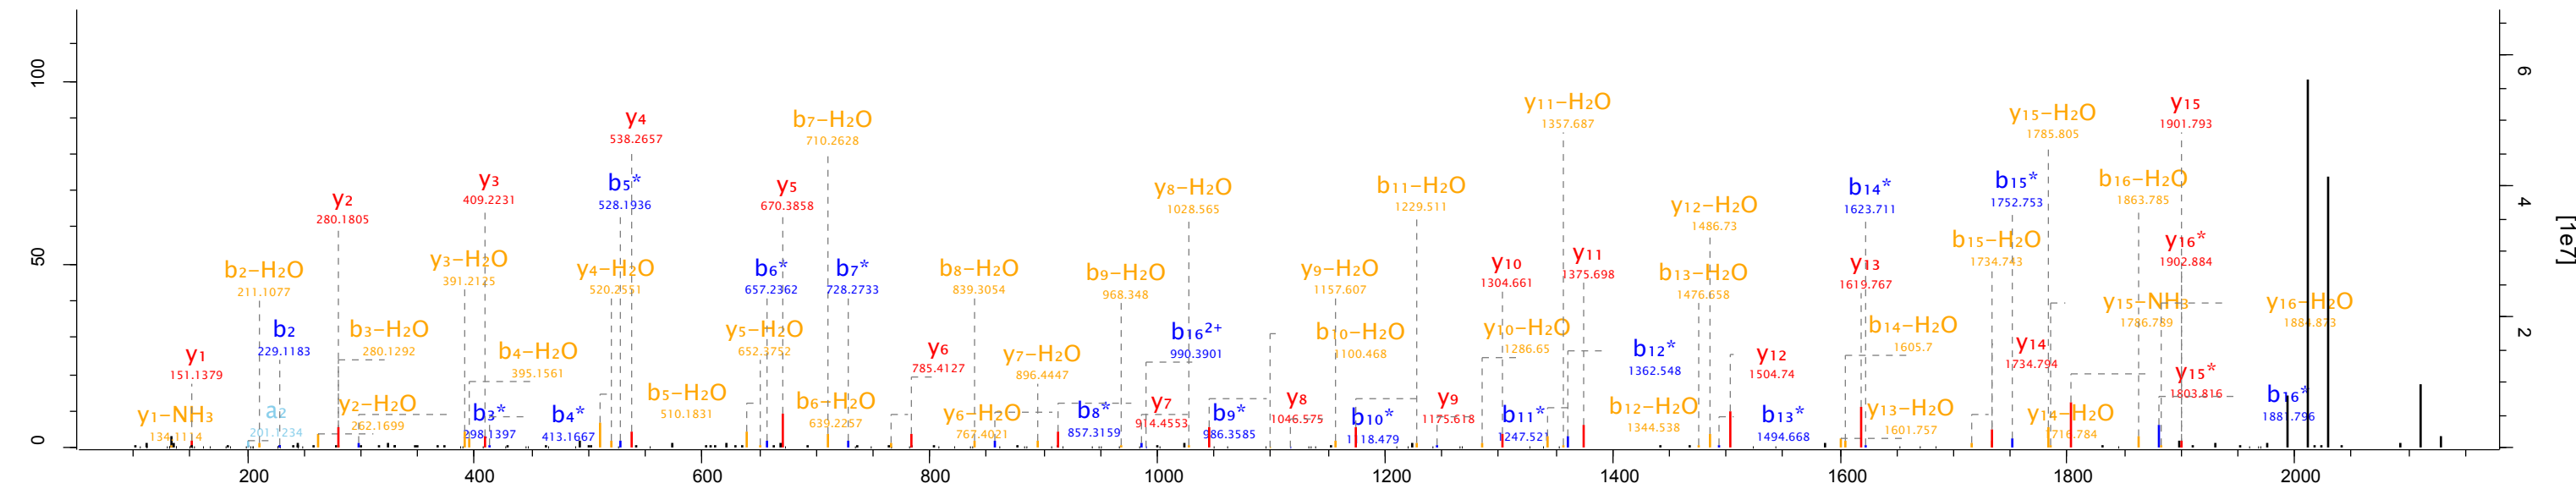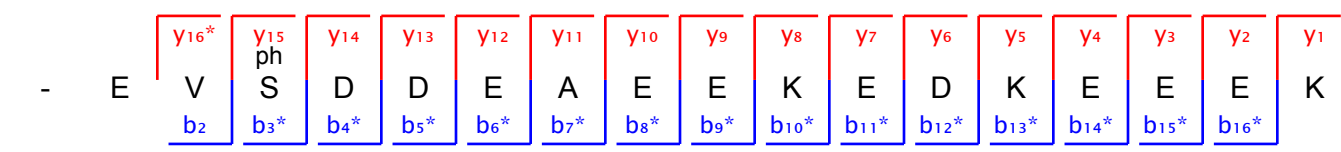

Raw file 20171215\_MaS\_33SR\_LMH\_phospho\_05 Scan 2306 Method FTMS; HCD Score 305.8 m/z 697.8 Gene names SRRM2

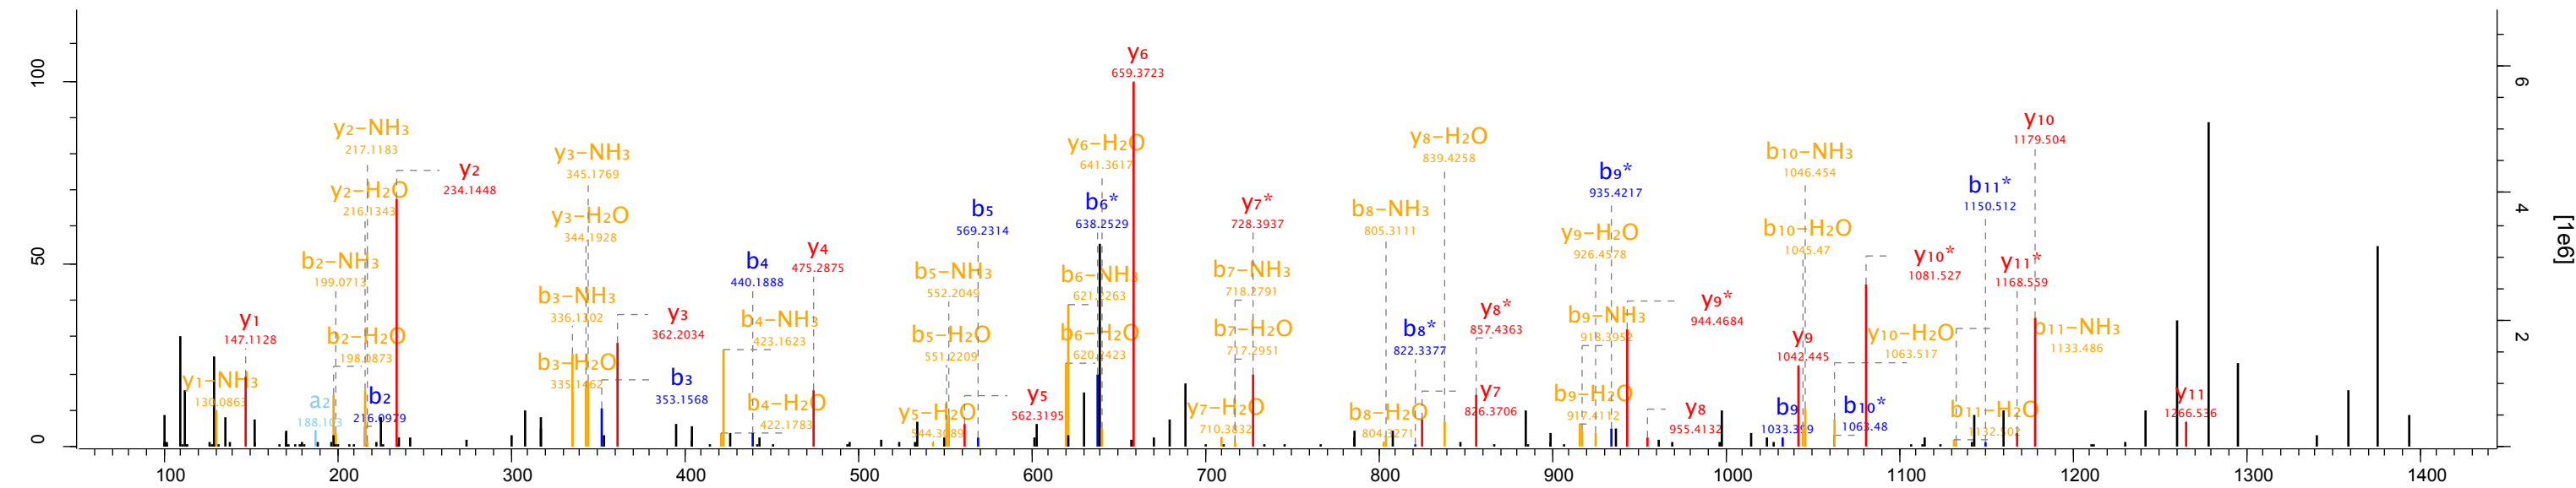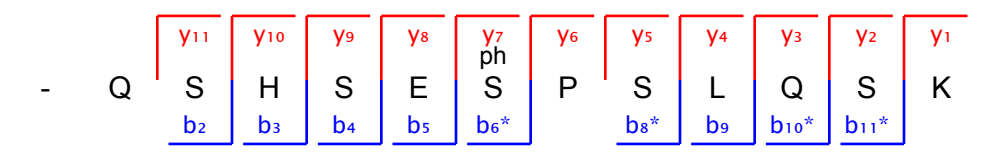

Raw file 20171215\_MaS\_33SR\_LMH\_phospho\_05 Scan 3156 Method FTMS; HCD Score 80.31 m/z 572.75 Gene names AKAP17A

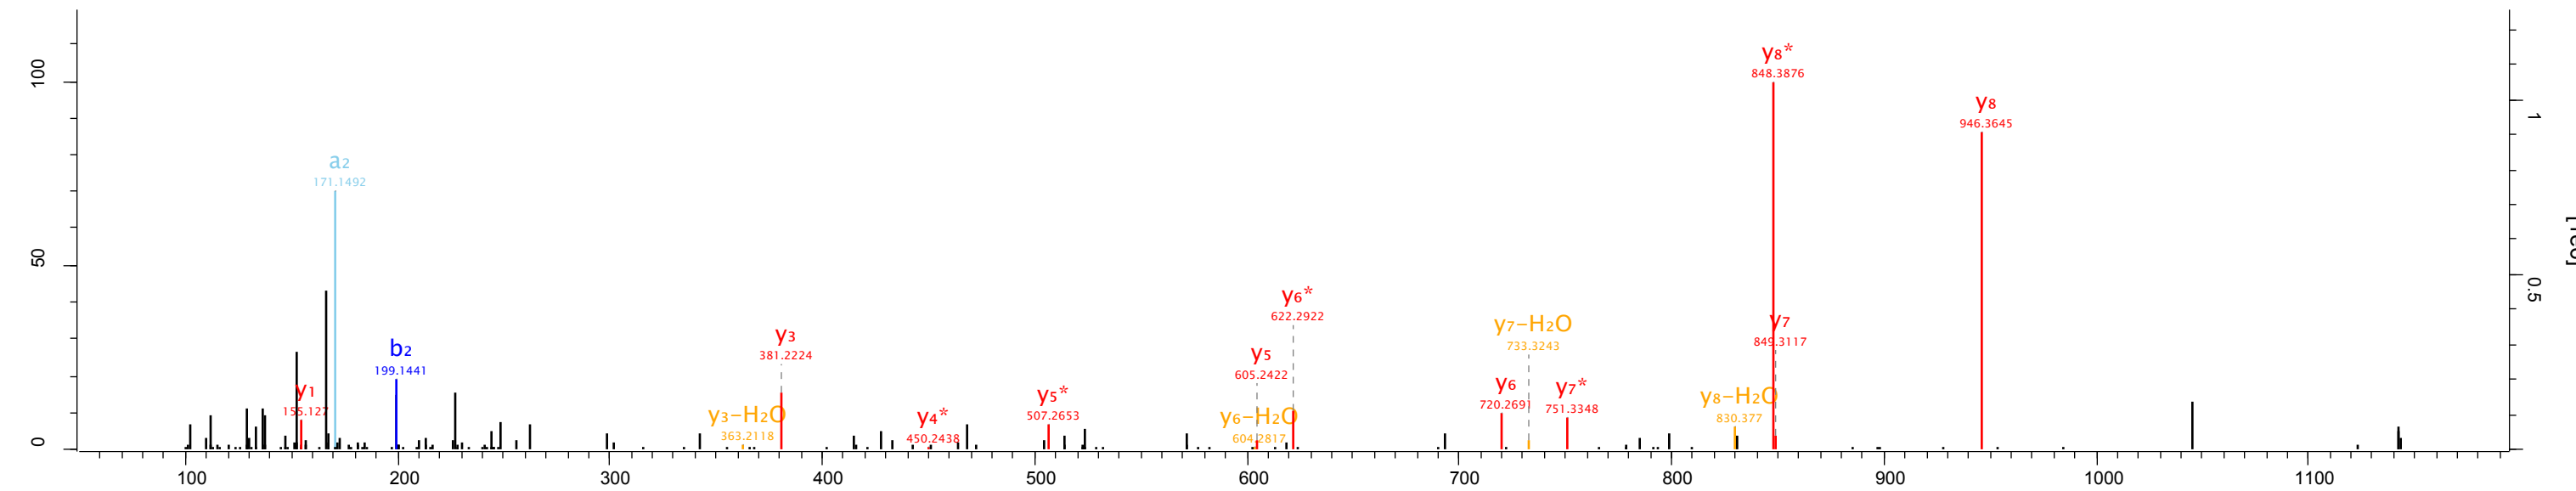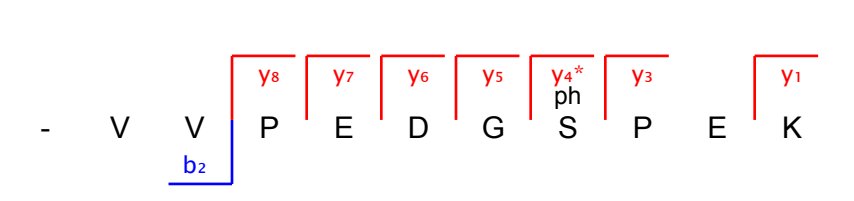

Raw file 20171215\_MaS\_33SR\_LMH\_phospho\_05 Scan 3416 Method FTMS; HCD Score 177.83 m/z 681.26 Gene names SRRT

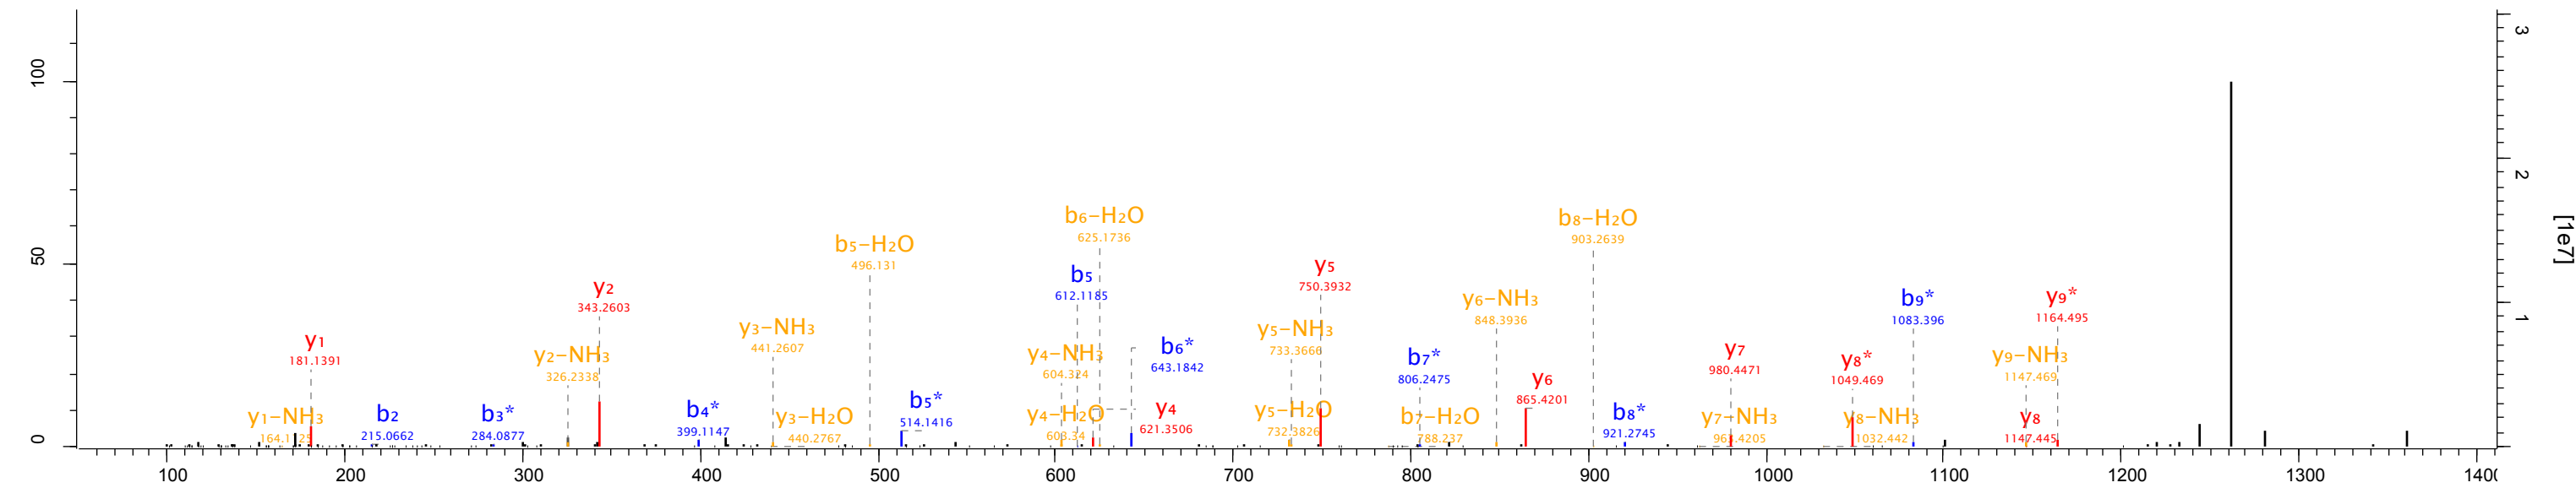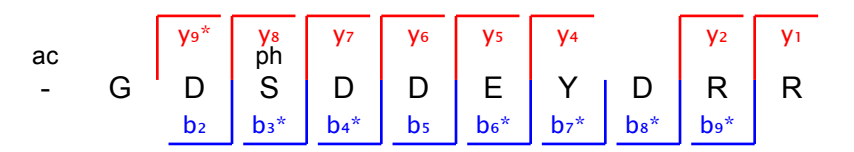

Raw file 20171215\_MaS\_33SR\_LMH\_phospho\_05 Scan 3746 Method FTMS; HCD Score 183.81 m/z 630.27 Gene names FNBP1

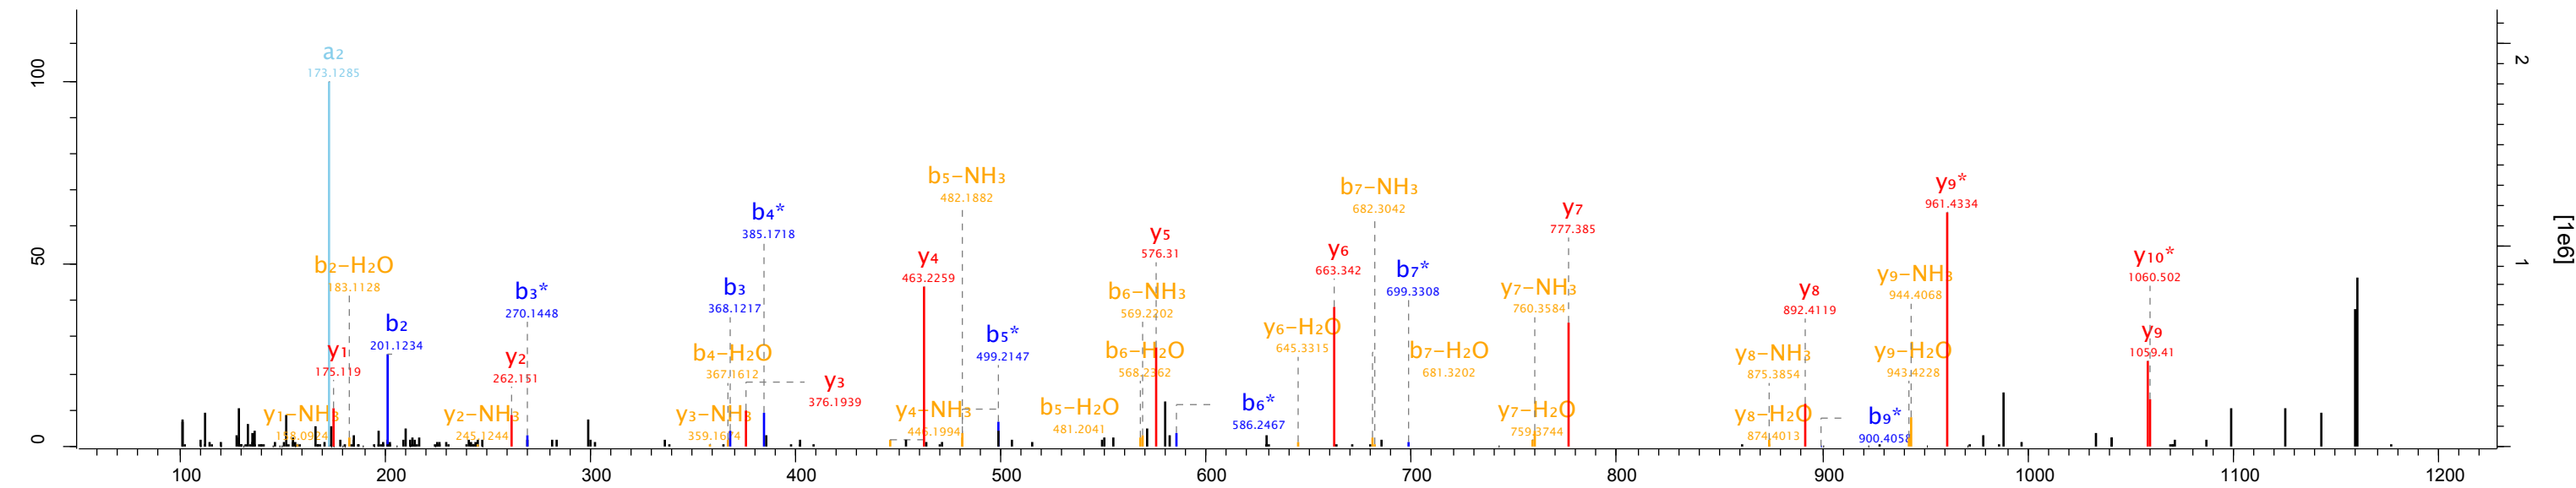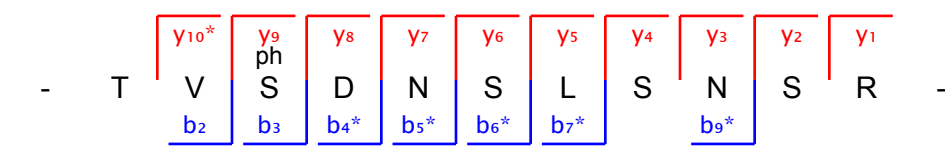

Raw file: 20171215\_MaS\_33SR\_LMH\_phospho\_05  
 Scan: 3836 Method: FTMS; HCD Score: 54.49 m/z: 510.24 Gene names: ARHGEF10

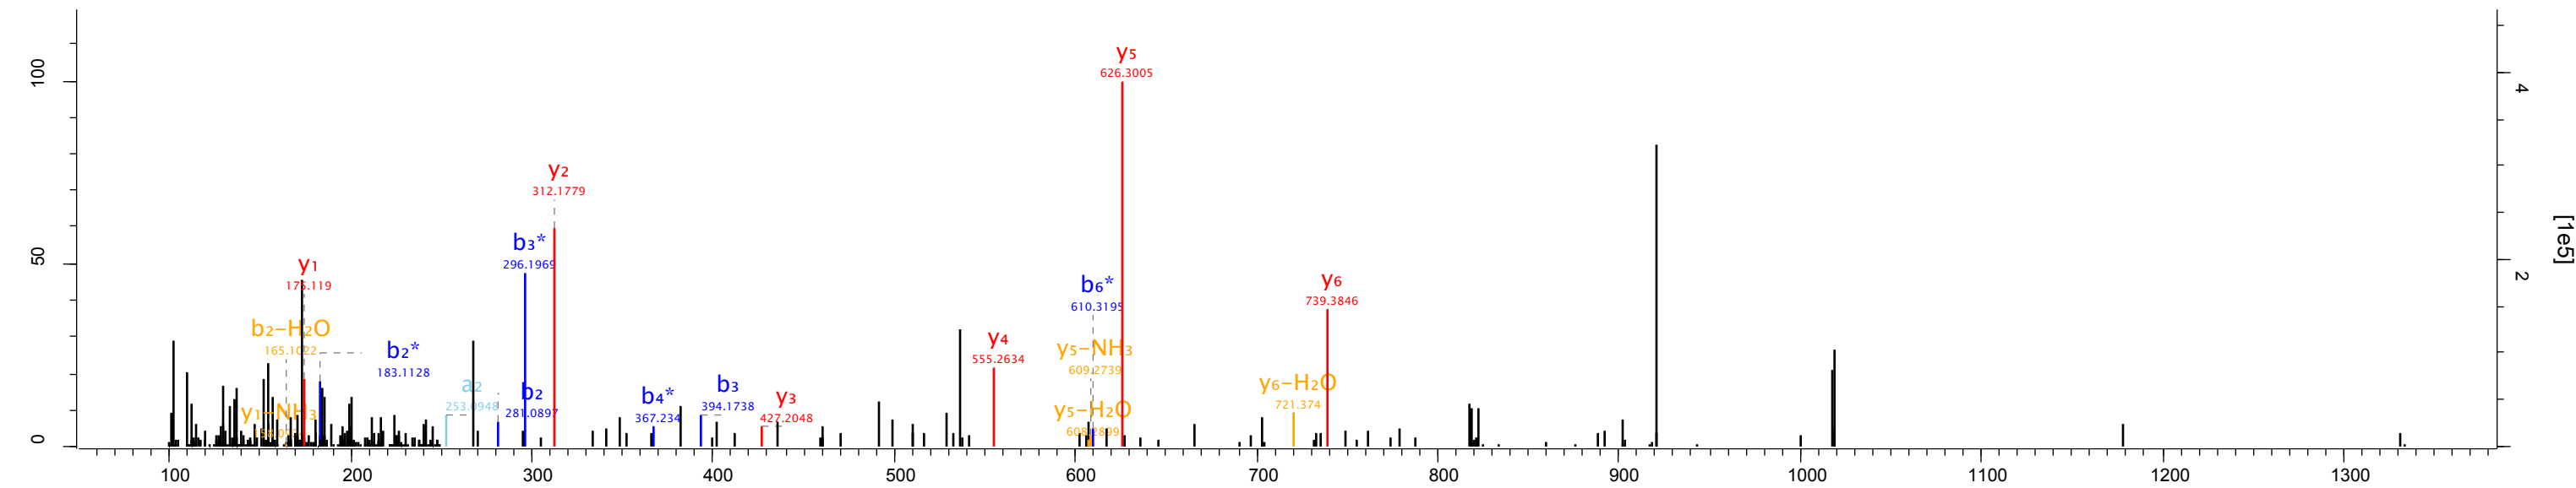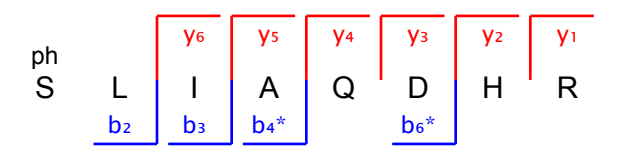

Raw file 20171215\_MaS\_33SR\_LMH\_phospho\_05 Scan 4186 Method FTMS; HCD Score 122.18 m/z 838.36 Gene names NAB2

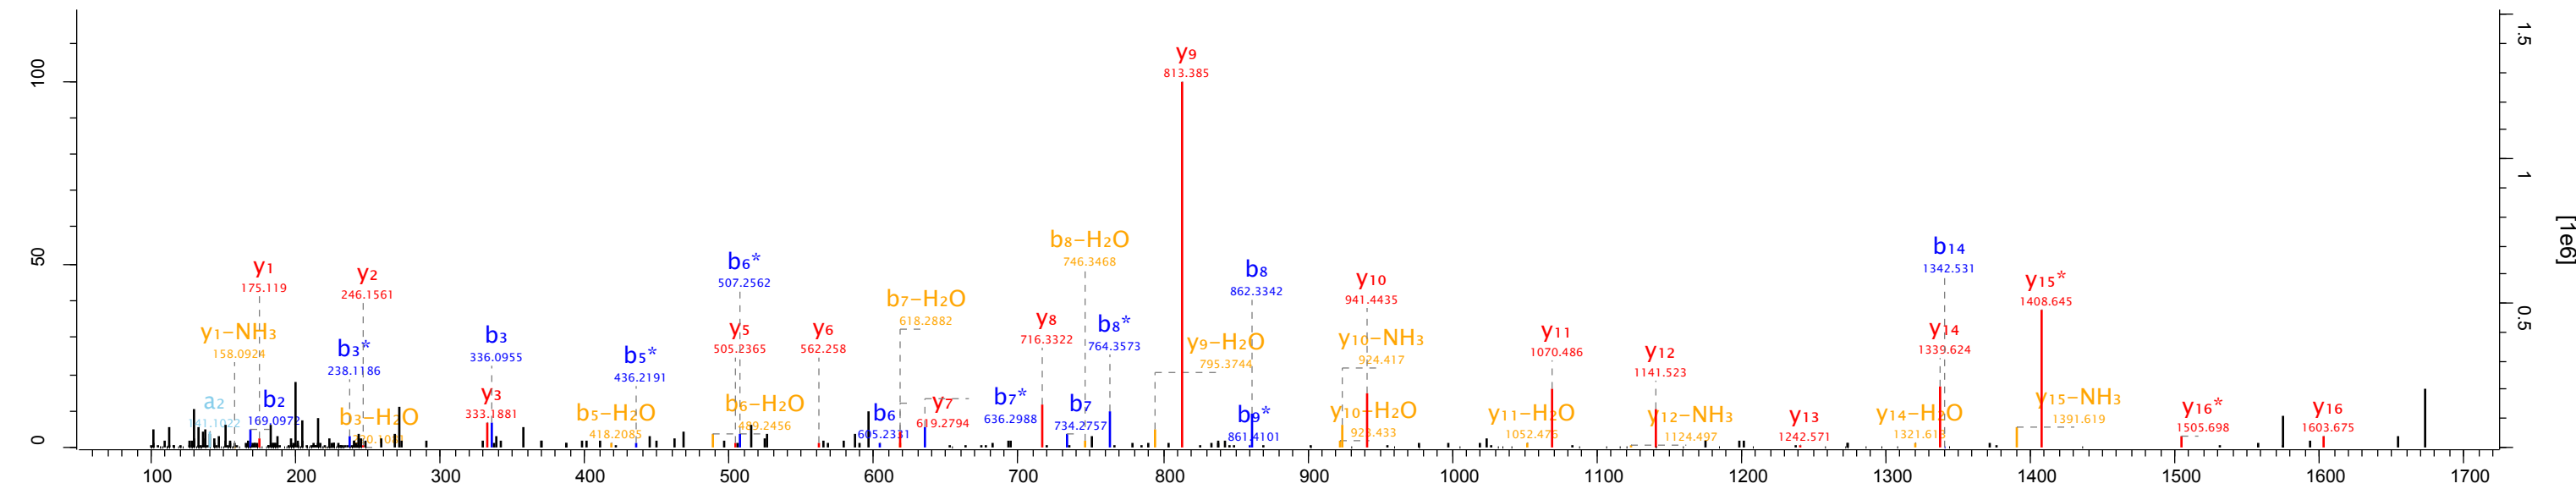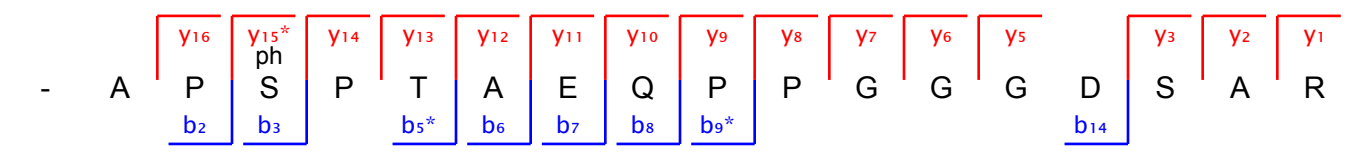

Raw file 20171215\_MaS\_33SR\_LMH\_phospho\_05 Scan 4196 Method FTMS; HCD Score 150.26 m/z 708.29 Gene names SLC39A6

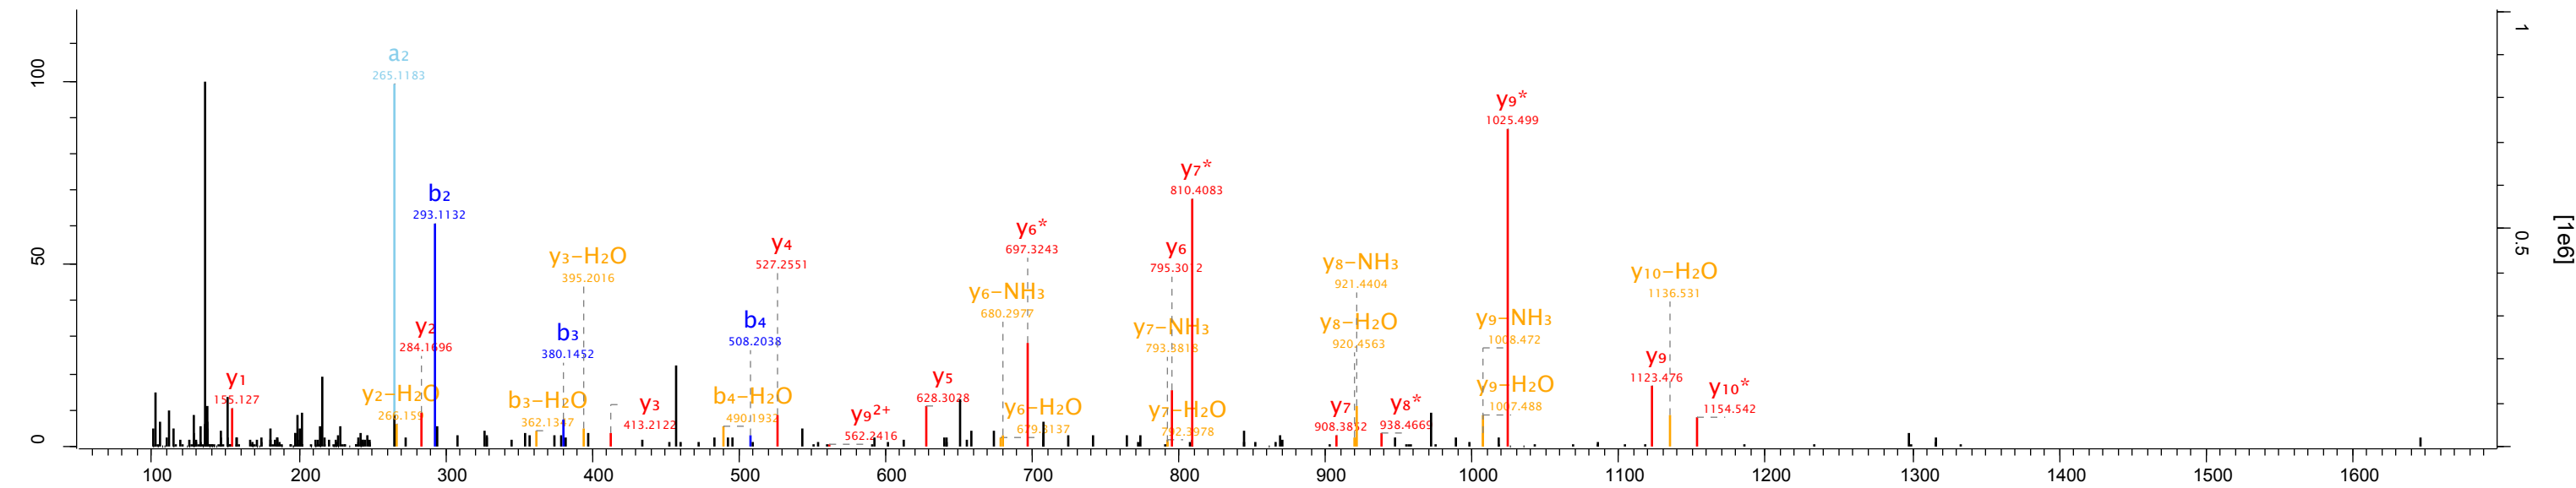

- Y E S Q L S T N E E K -  
 b2 b3 b4



Raw file 20171215\_MaS\_33SR\_LMH\_phospho\_05 Scan 5656 Method FTMS; HCD Score 189.55 m/z 829.38 Gene names ATXN2

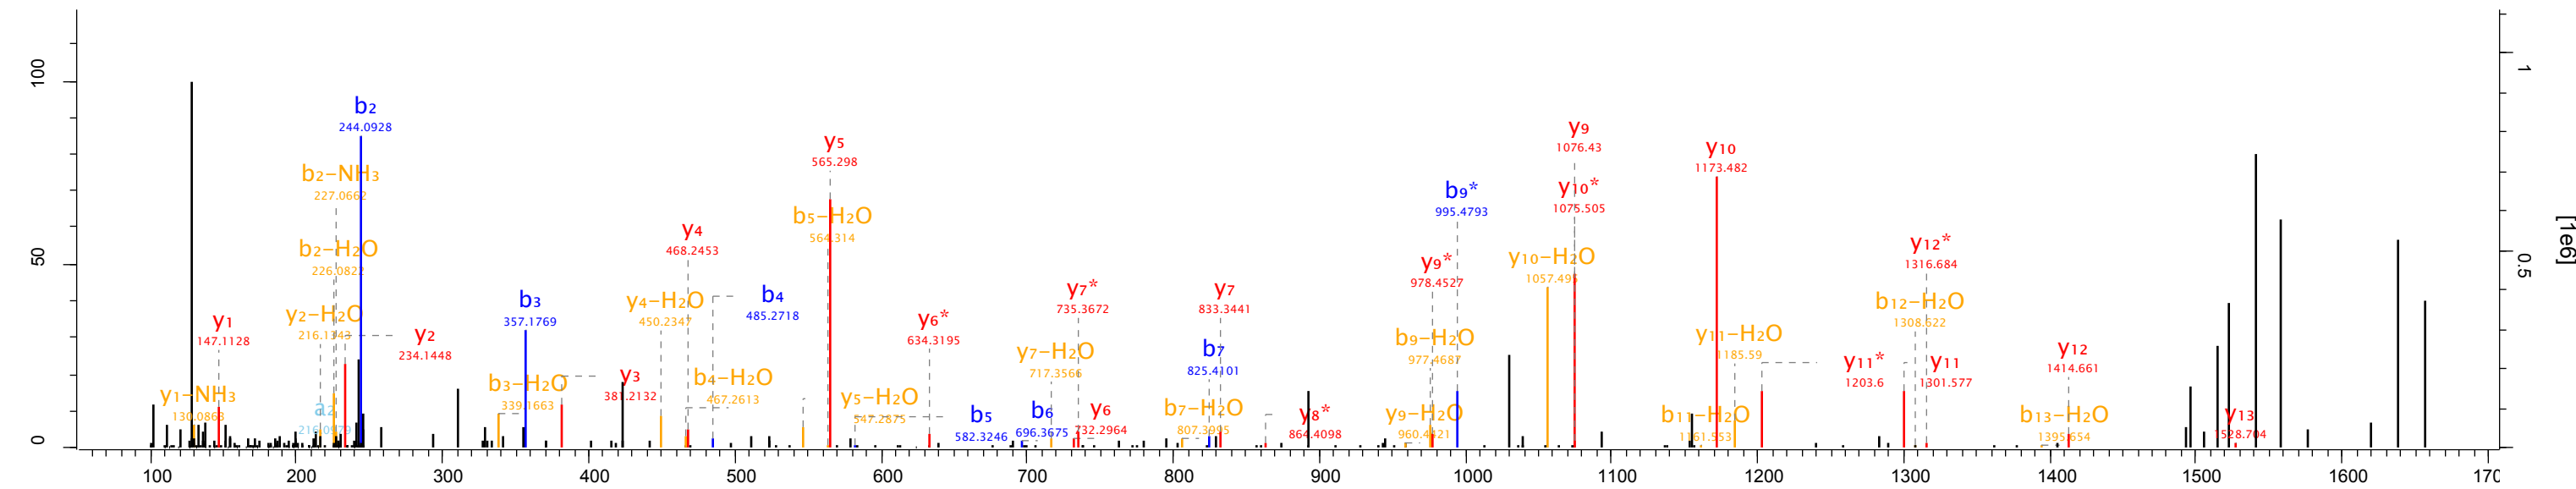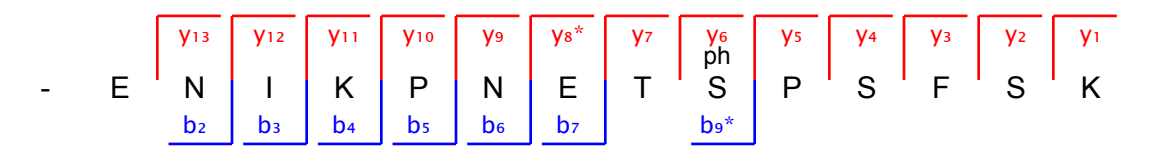

Raw file 20171215\_MaS\_33SR\_LMH\_phospho\_05 Scan 8286 Method FTMS; HCD Score 164.82 m/z 1005.97 Gene names NUMA1

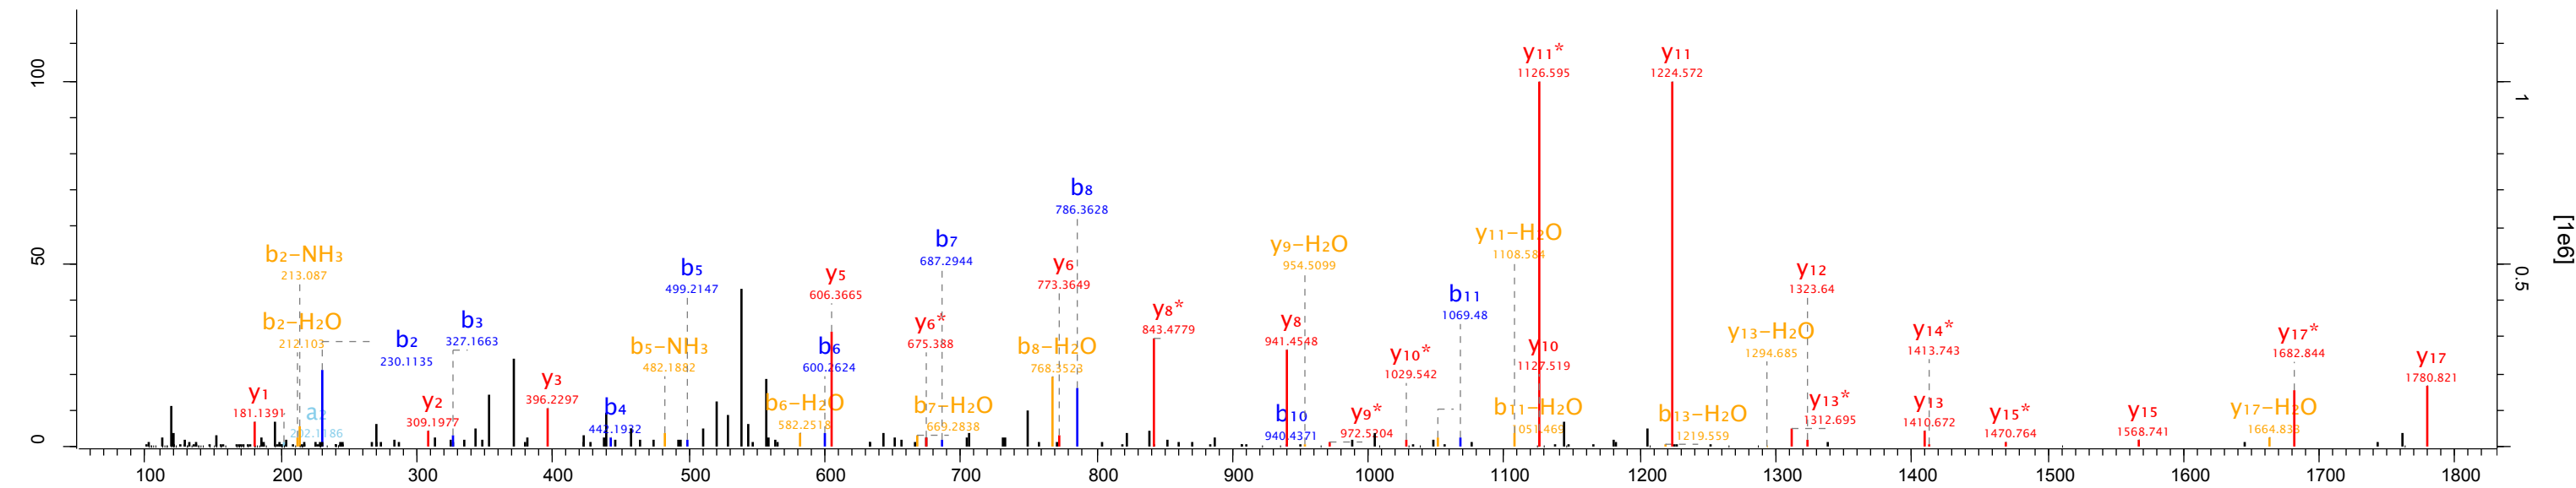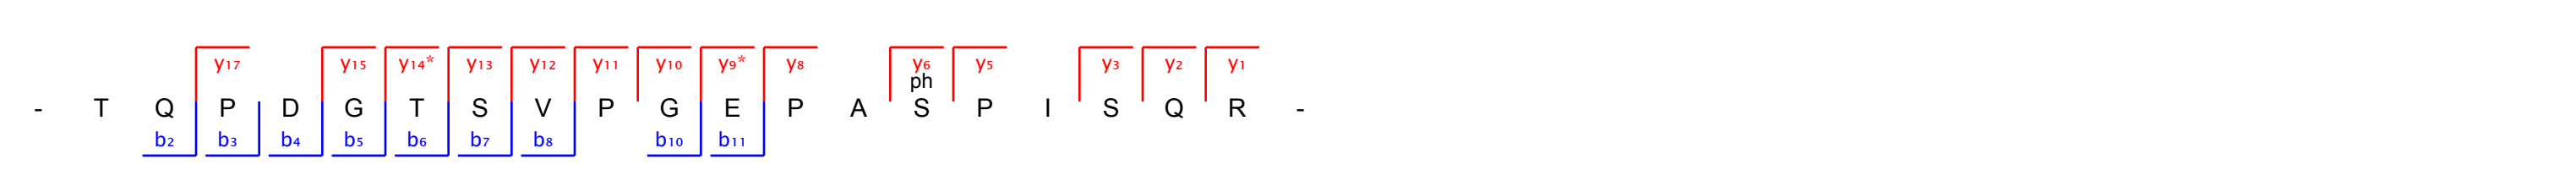

Raw file 20171215\_MaS\_33SR\_LMH\_phospho\_05 Scan 8776 Method FTMS; HCD Score 78.5 m/z 814.85 Gene names MAP1B

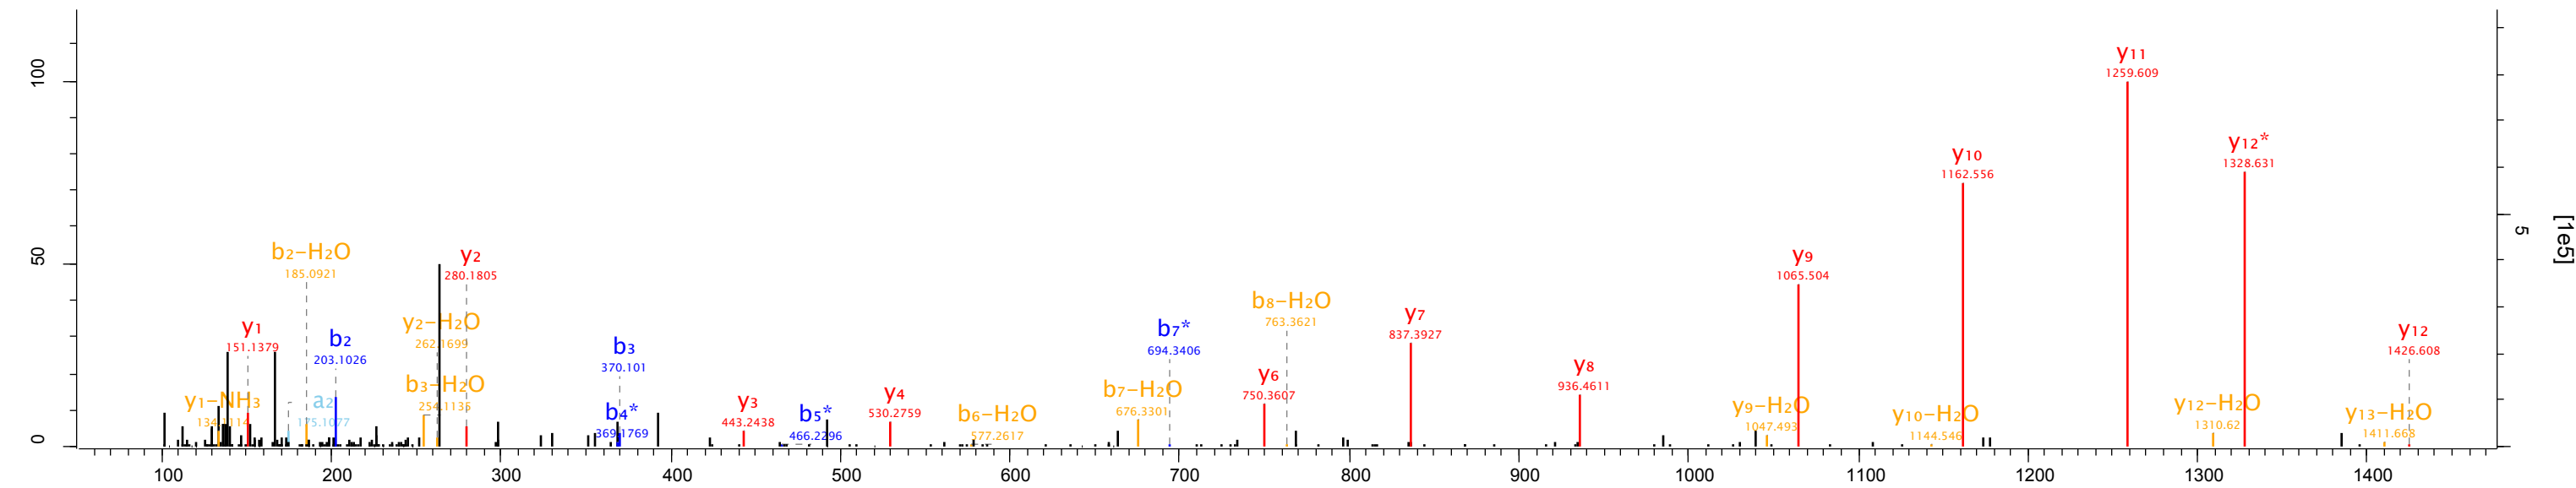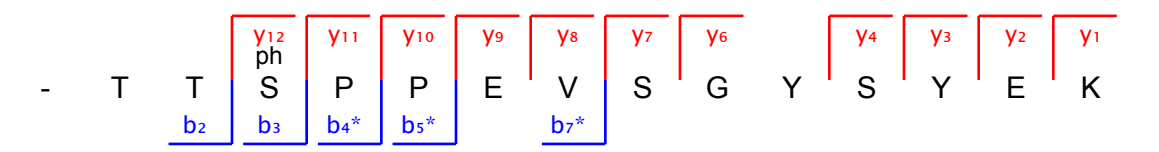

Raw file 20171215\_MaS\_33SR\_LMH\_phospho\_05 Scan 8956 Method FTMS; HCD Score 186.13 m/z 974.92 Gene names ZHX3

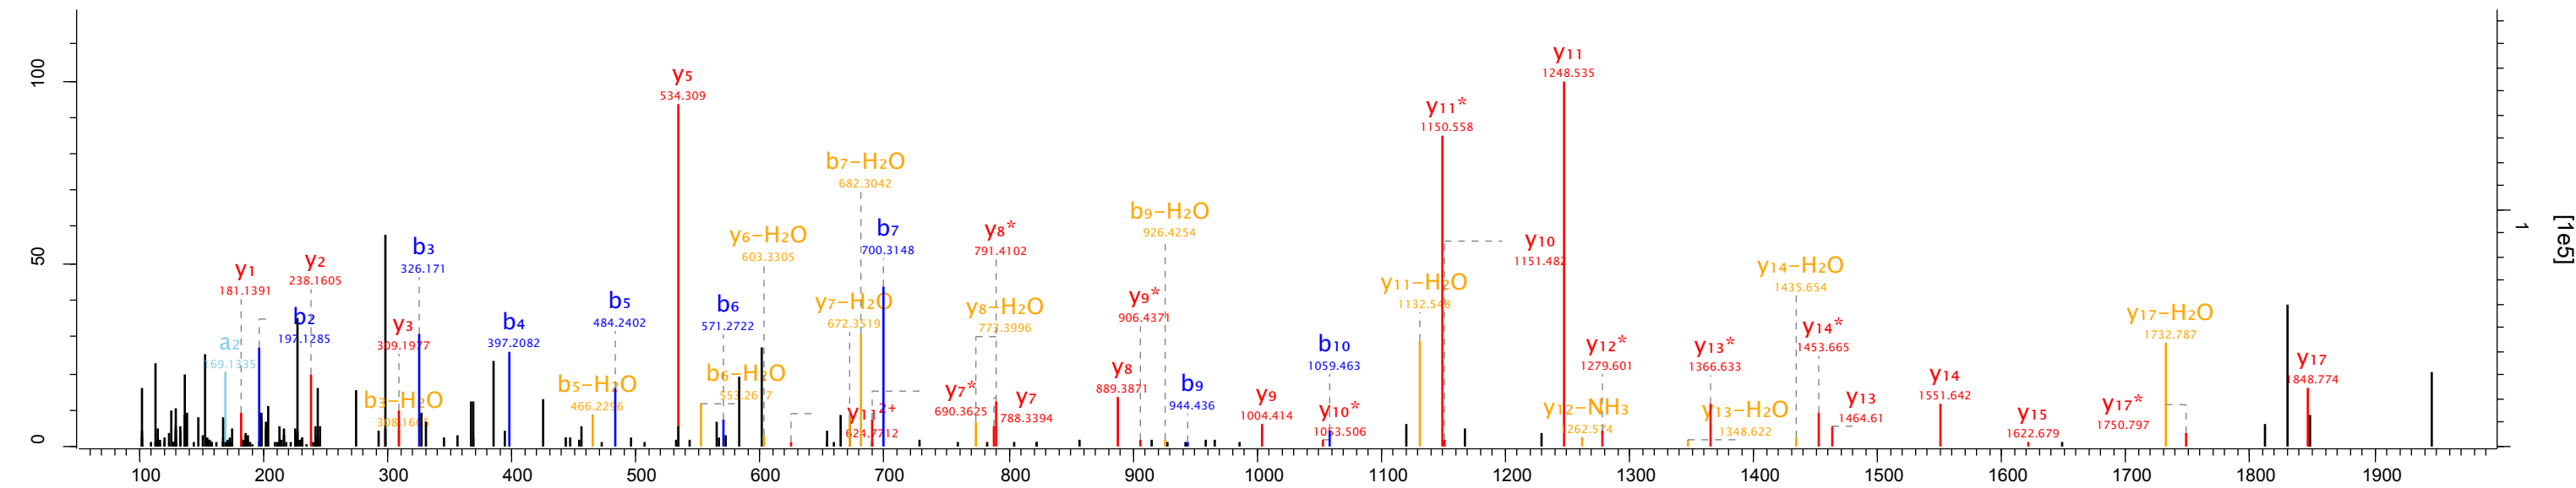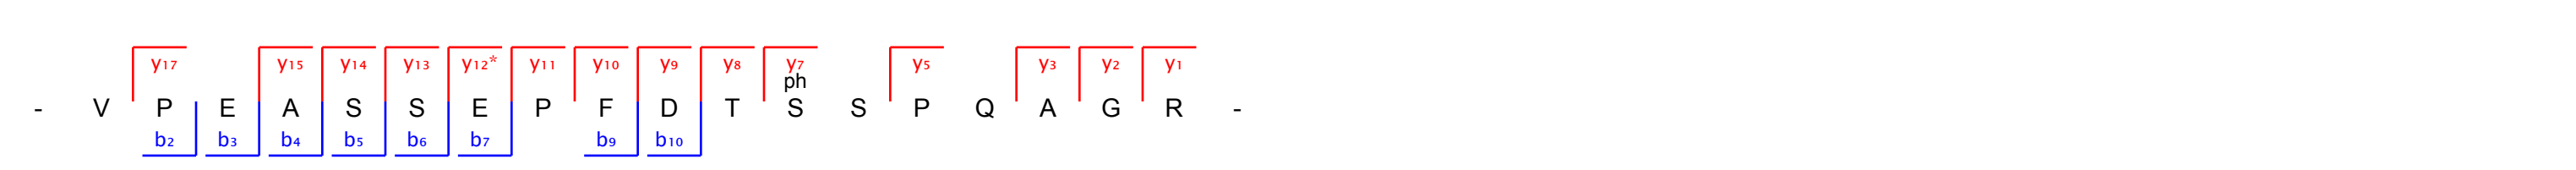

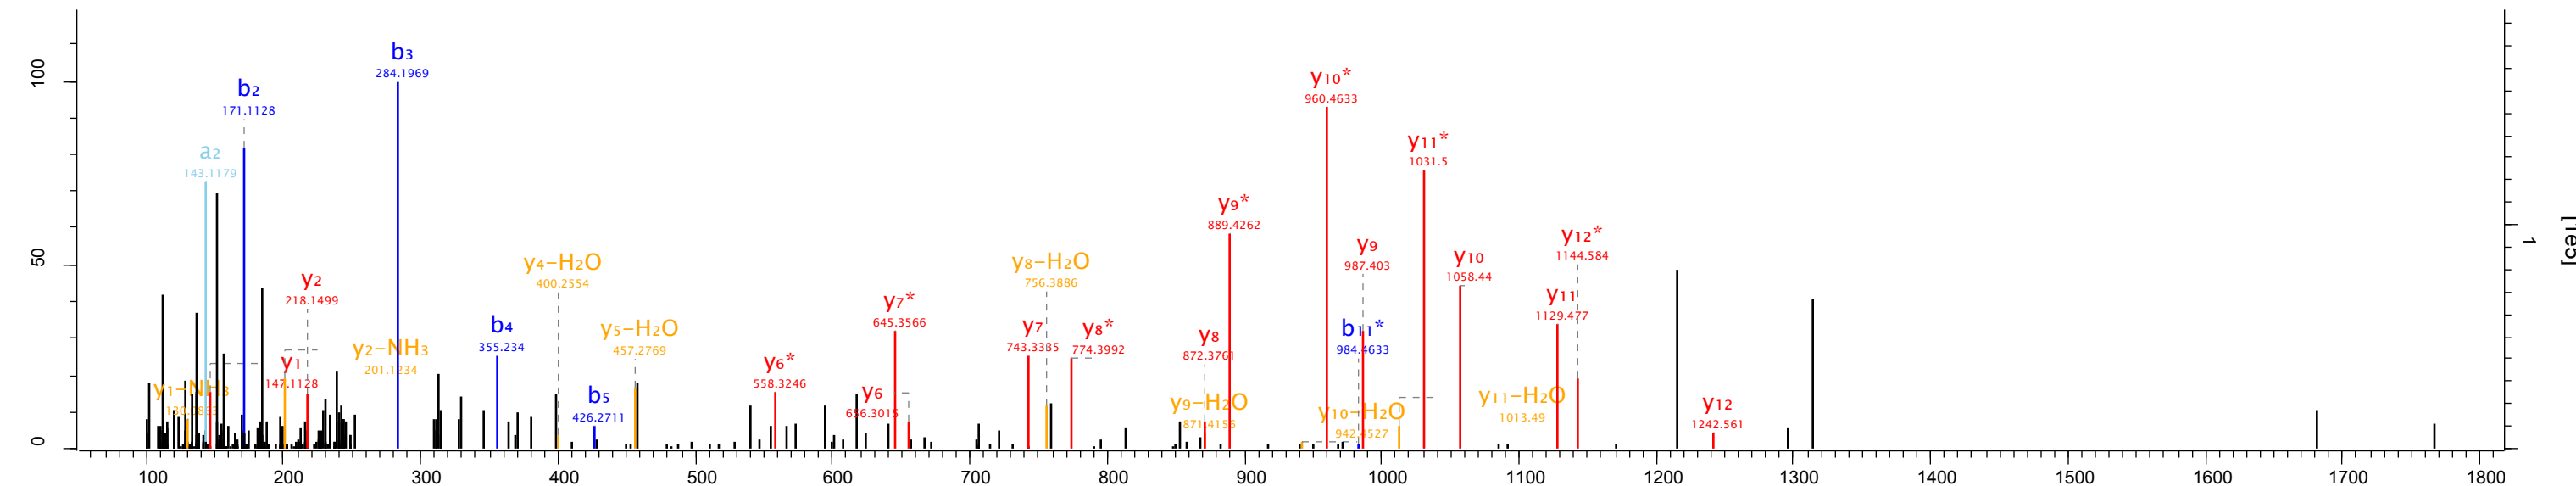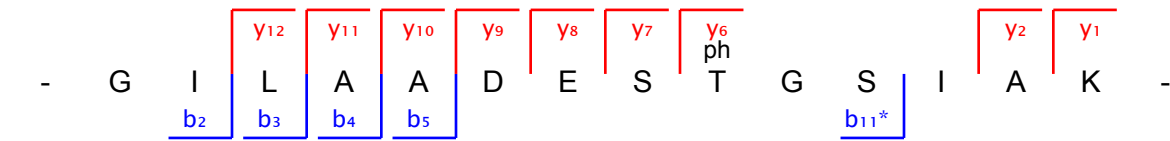

Raw file: 20171215\_MaS\_33SR\_LMH\_phospho\_06  
 Scan: 10026 Method: FTMS; HCD Score: 102.03 m/z: 594.83 Gene names: PNISR

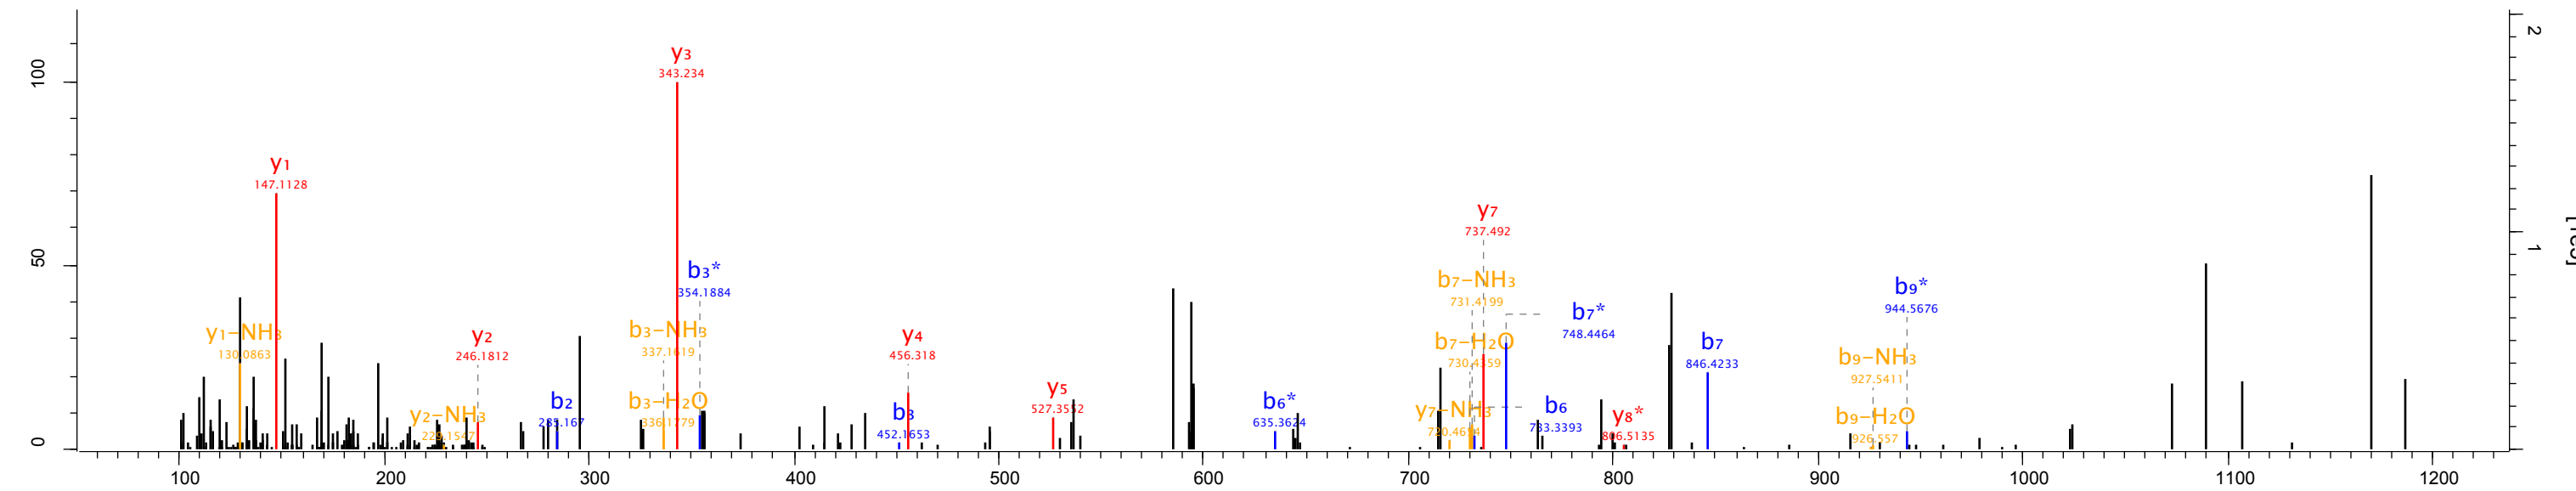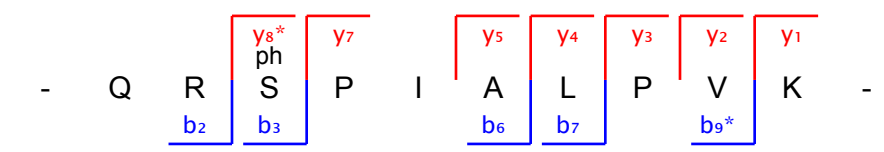

Raw file: 20171215\_MaS\_33SR\_LMH\_phospho\_06  
 Scan: 10196 Method: FTMS; HCD Score: 93.35 m/z: 552.71 Gene names: IMPDH2

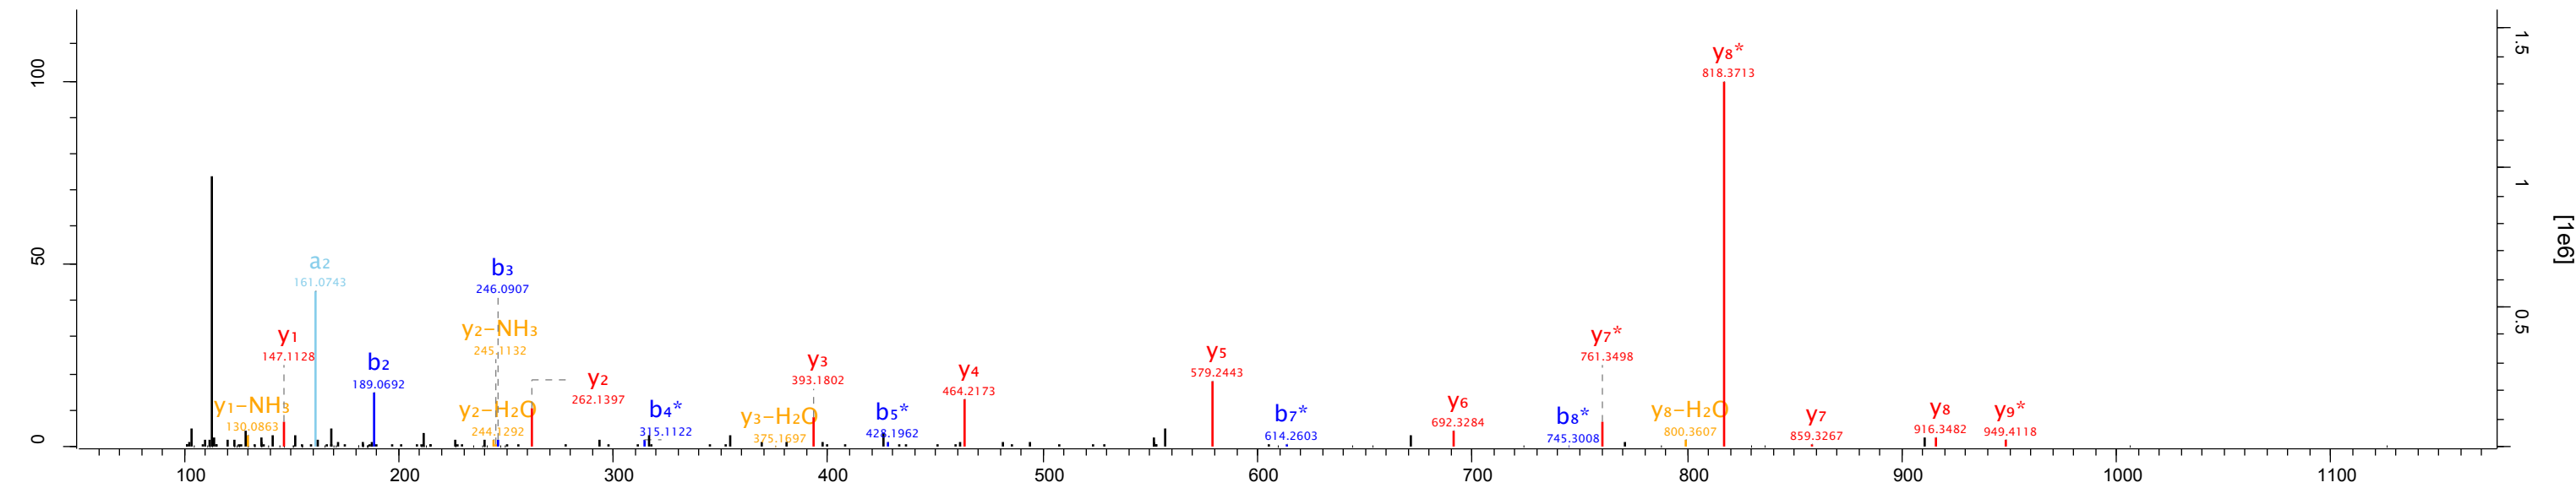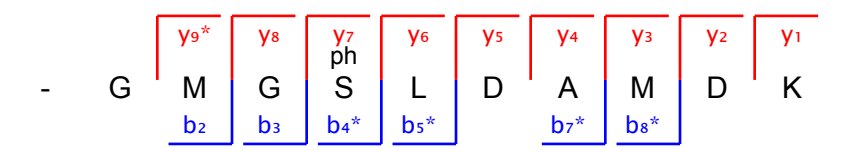

Raw file 20171215\_MaS\_33SR\_LMH\_phospho\_06 Scan 10306 Method FTMS; HCD Score 48.83 m/z 972.46 Gene names SOX6;ZNF385A

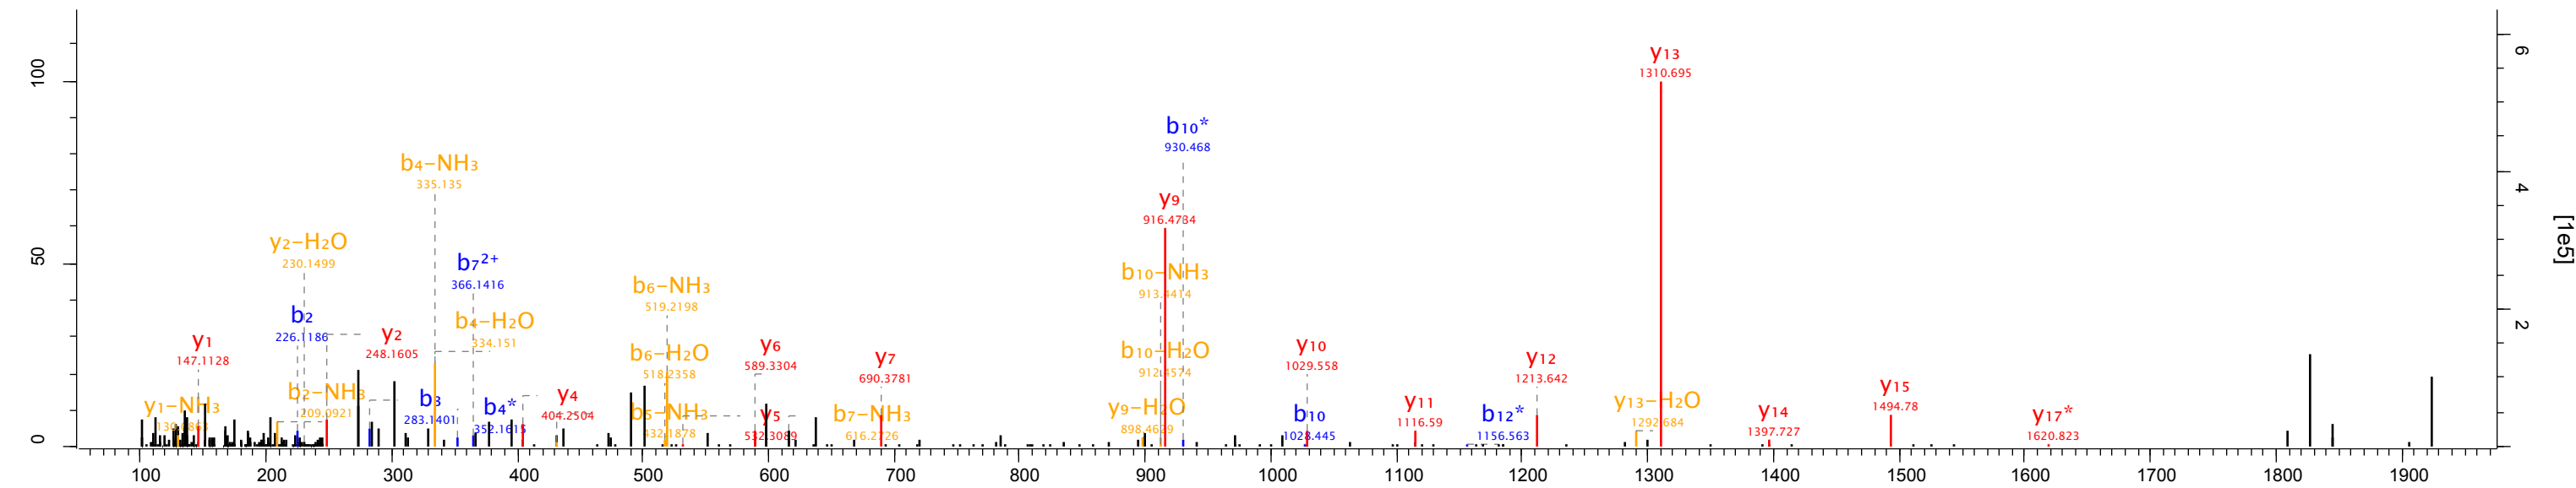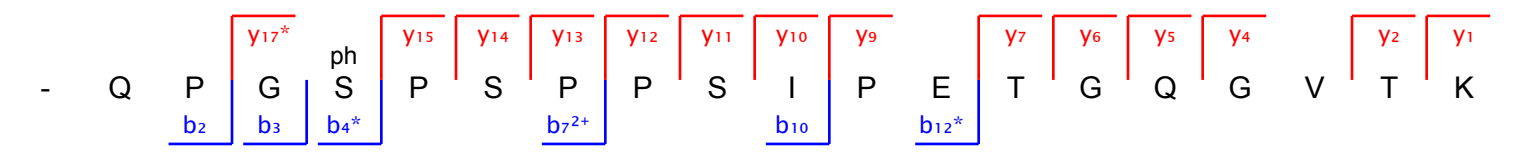



Raw file: 20171215\_MaS\_33SR\_LMH\_phospho\_06  
 Scan: 10346 Method: FTMS; HCD Score: 133.98 m/z: 627.28 Gene names: KIAA1429

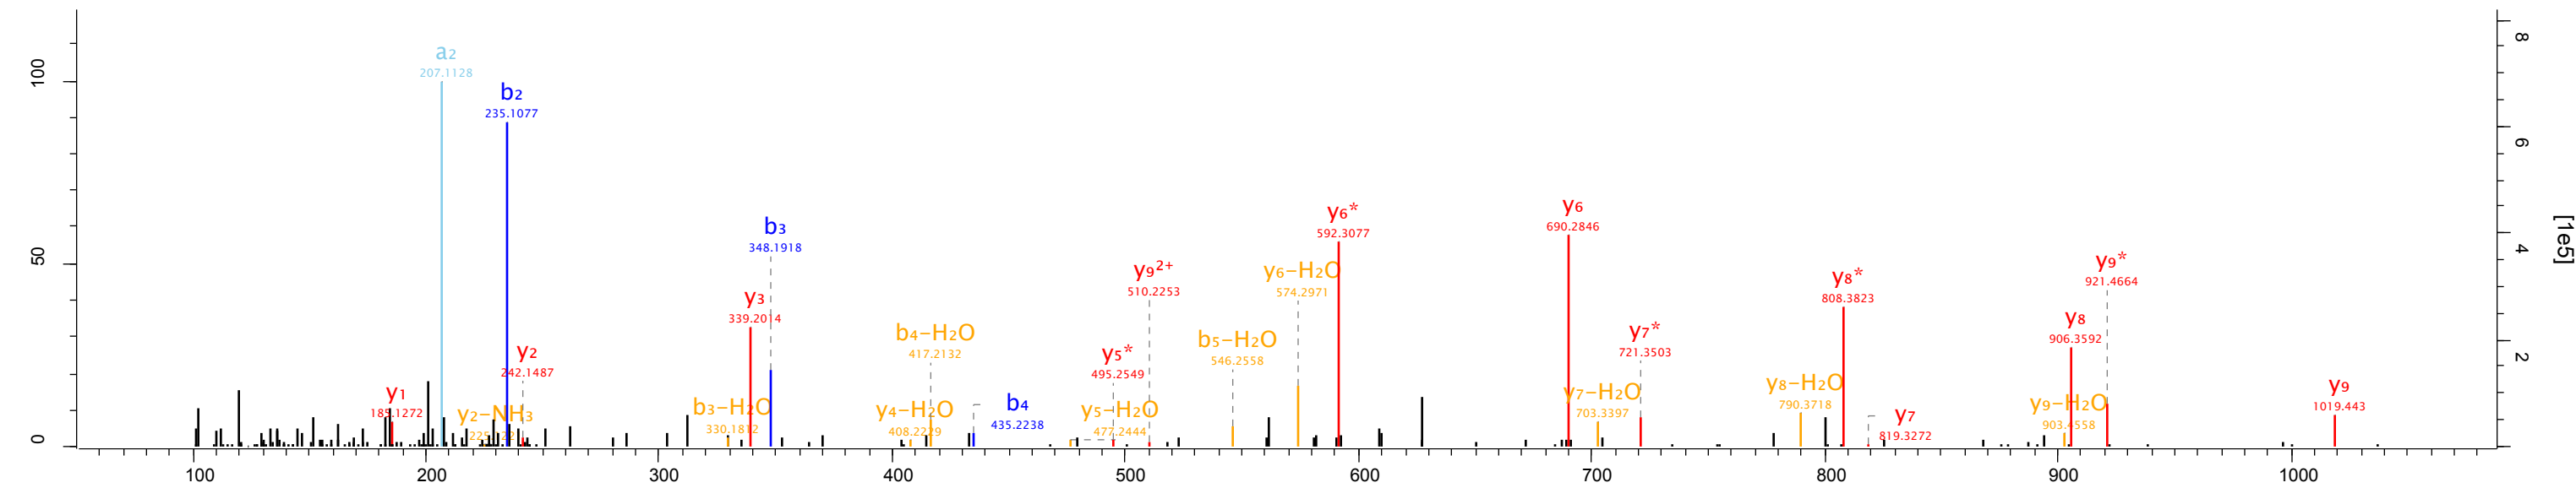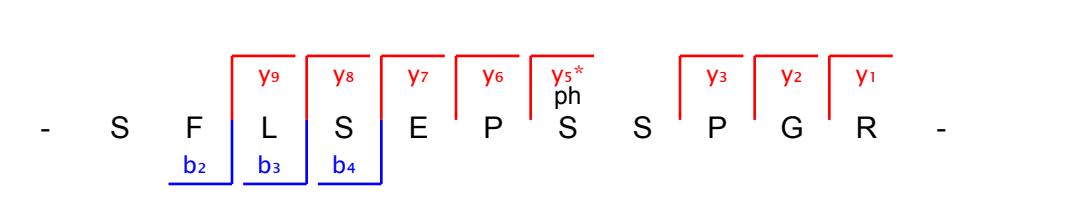

Raw file 20171215\_MaS\_33SR\_LMH\_phospho\_06 Scan 10486 Method FTMS; HCD Score 107.09 m/z 548.24 Gene names TBC1D4

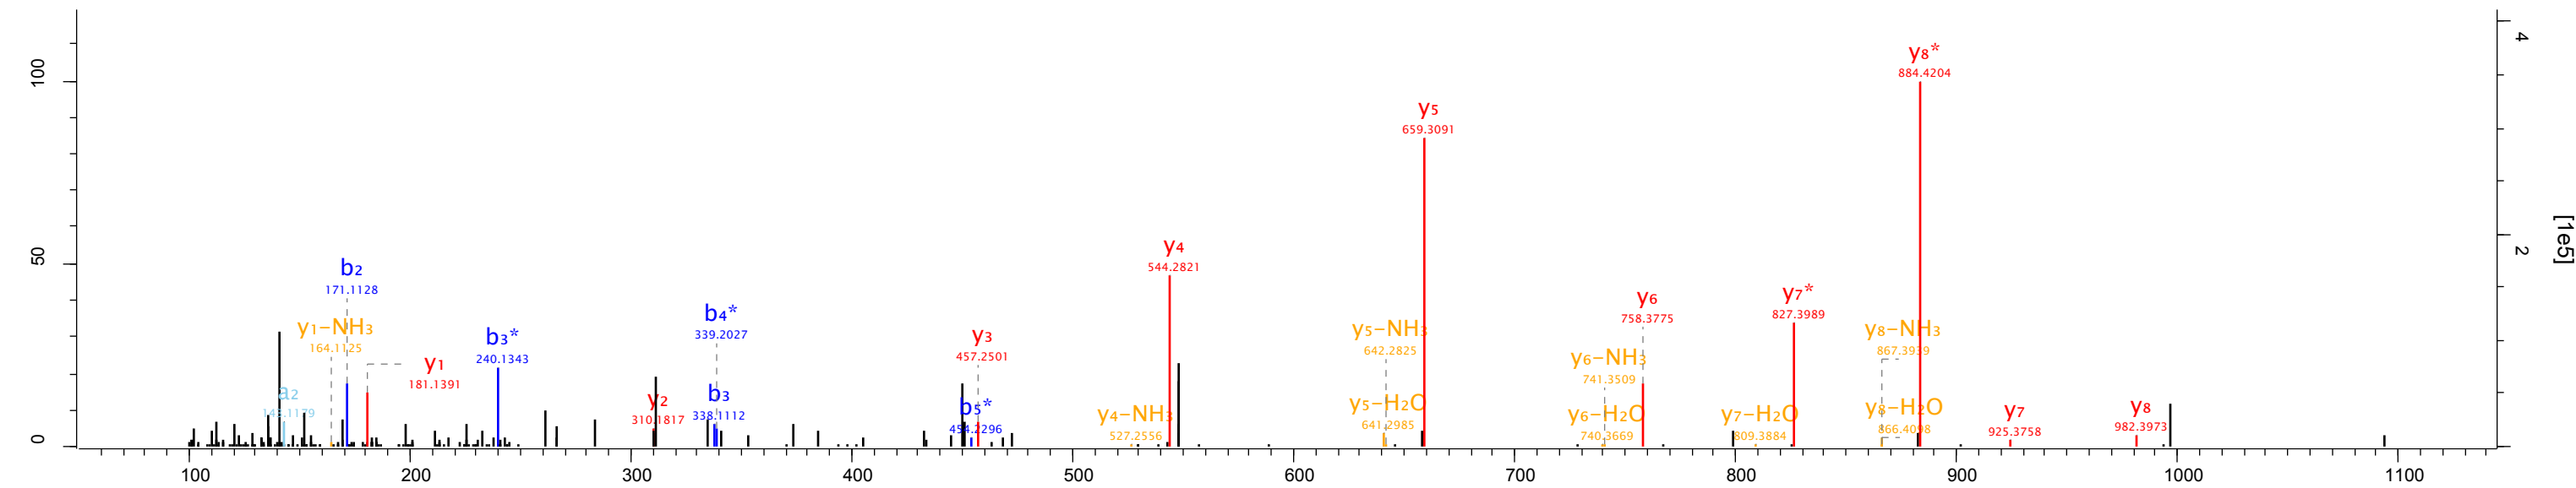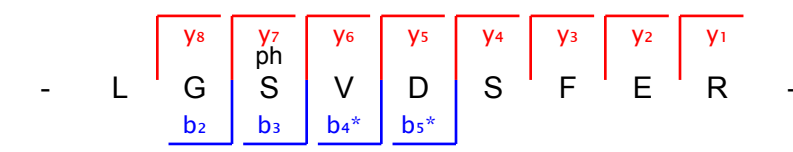

Raw file 20171215\_MaS\_33SR\_LMH\_phospho\_06 Scan 10506 Method FTMS; HCD Score 126.4 m/z 881.4 Gene names RPS3A

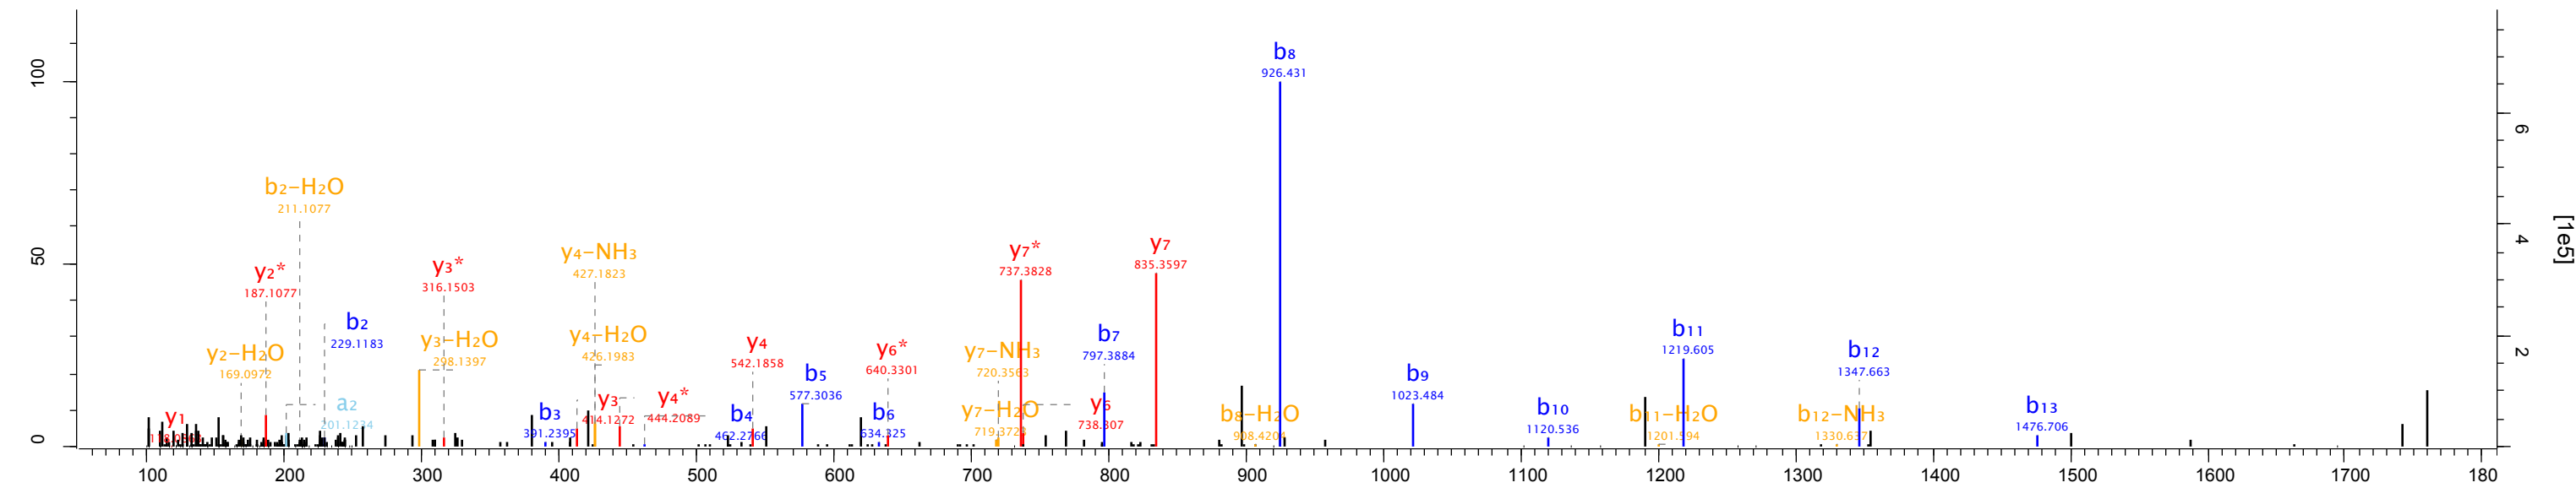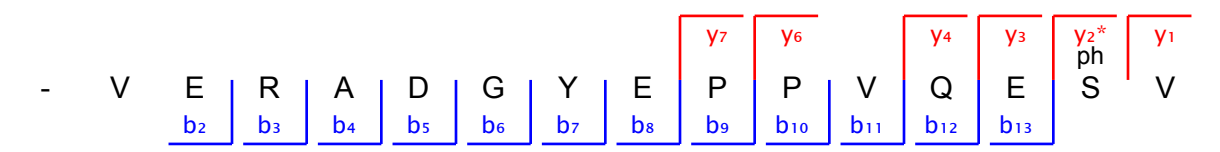

Raw file 20171215\_MaS\_33SR\_LMH\_phospho\_06 Scan 10606 Method FTMS; HCD Score 50.92 m/z 784.38 Gene names SCRIB

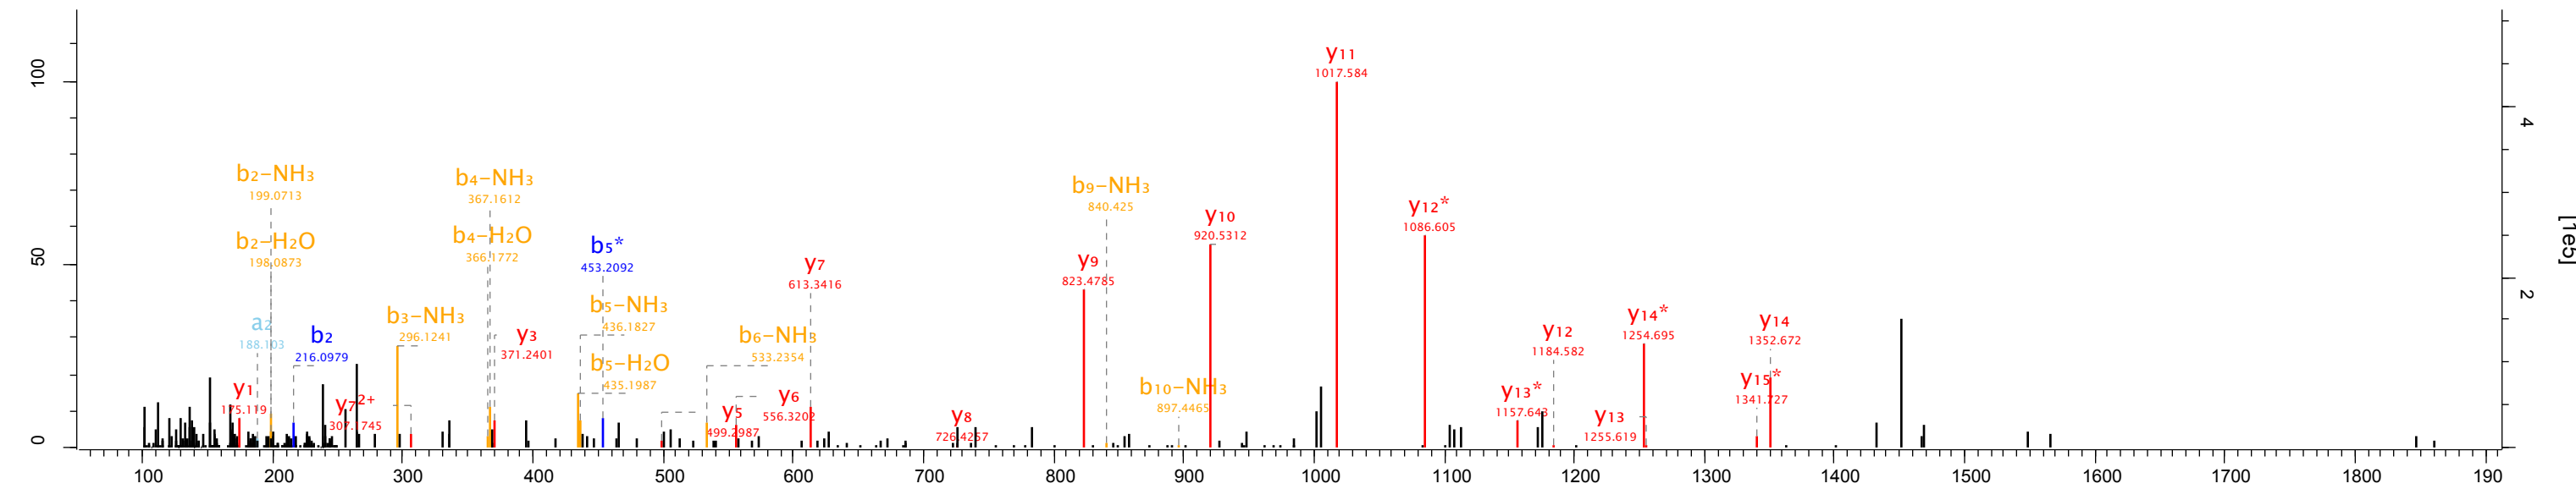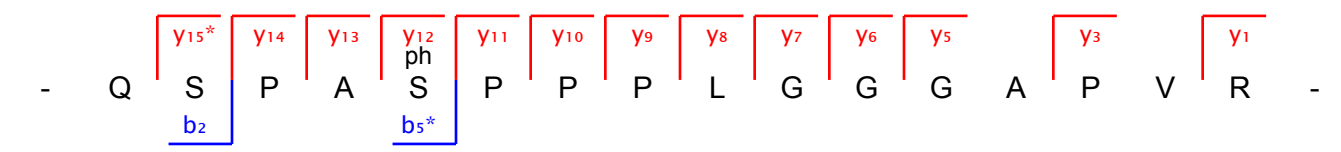

Raw file 20171215\_MaS\_33SR\_LMH\_phospho\_06 Scan 10746 Method FTMS; HCD Score 82.53 m/z 675.82 Gene names CHAMP1

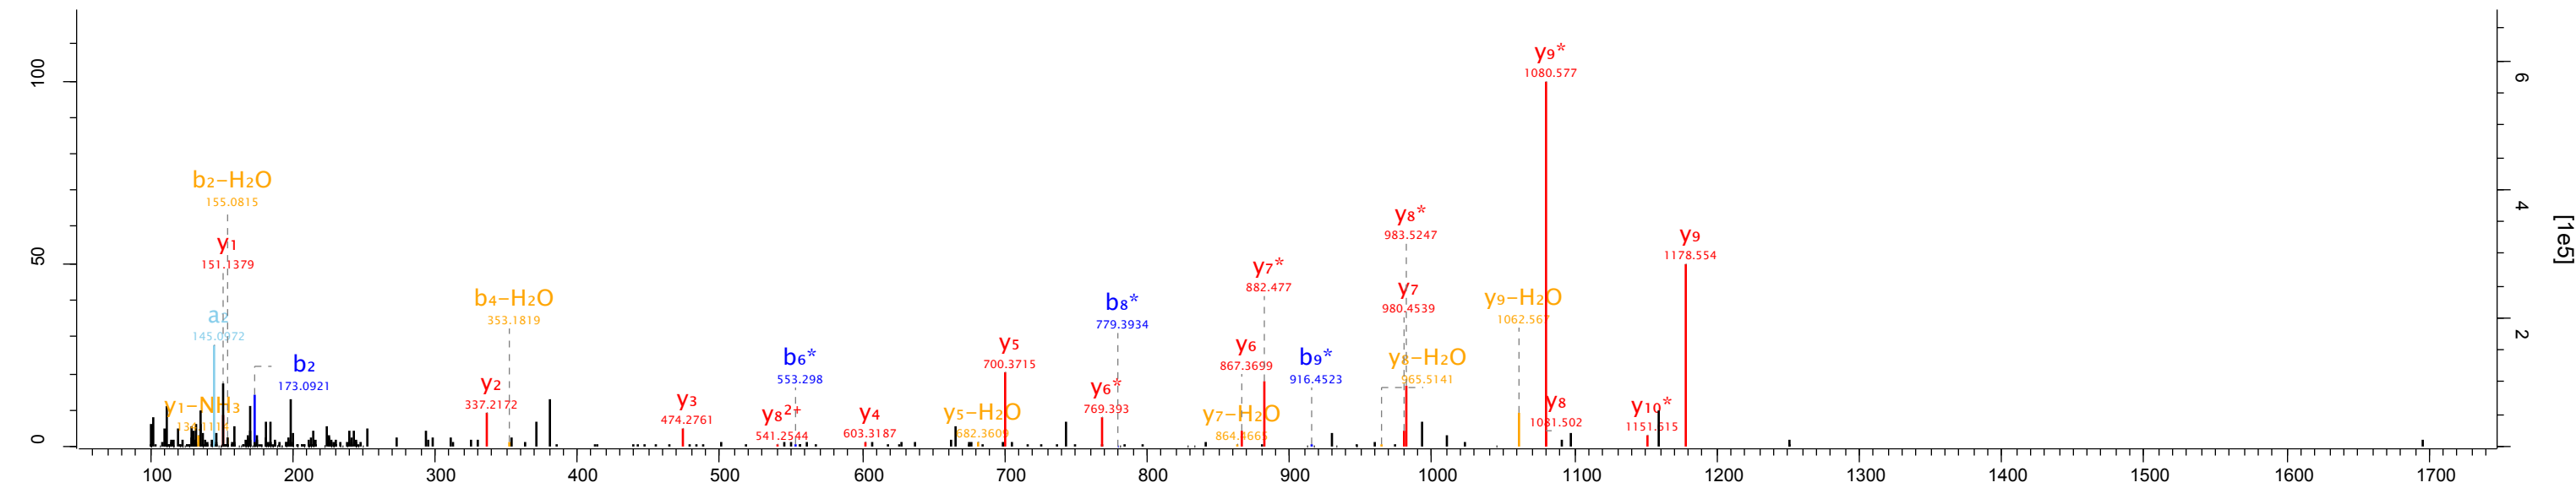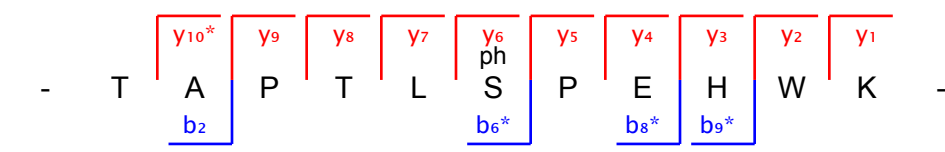

Raw file 20171215\_MaS\_33SR\_LMH\_phospho\_06 Scan 10756 Method FTMS; HCD Score 66.06 m/z 441.71 Gene names ZNF318

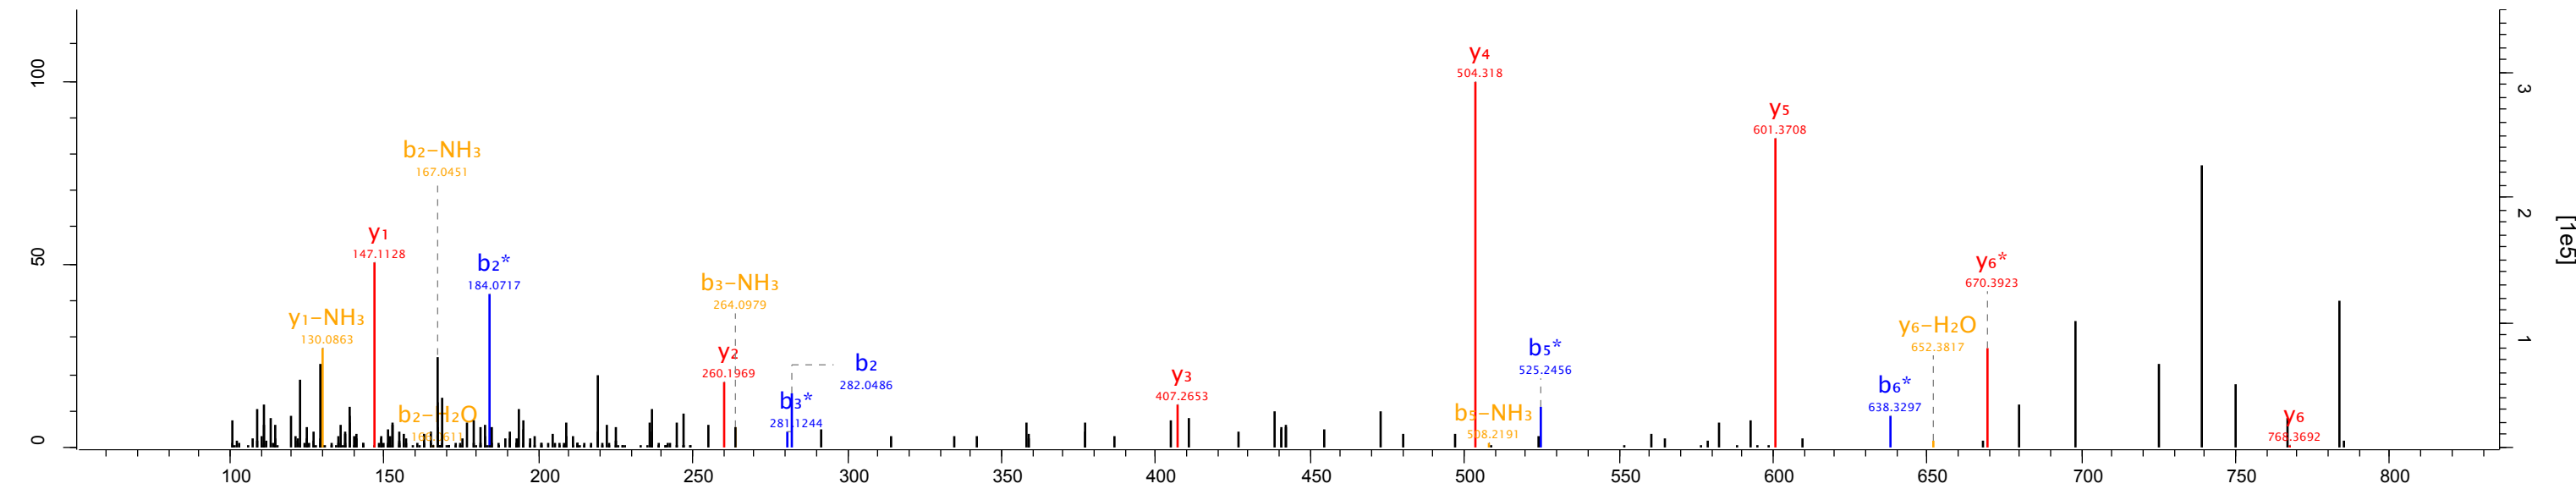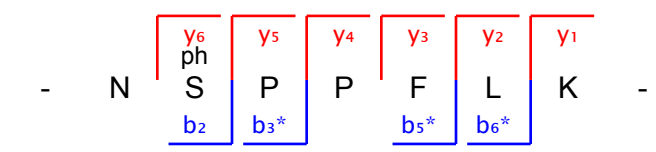

Raw file 20171215\_MaS\_33SR\_LMH\_phospho\_06 Scan 11066 Method FTMS; HCD Score 88.99 m/z 908.03 Gene names SF3A1

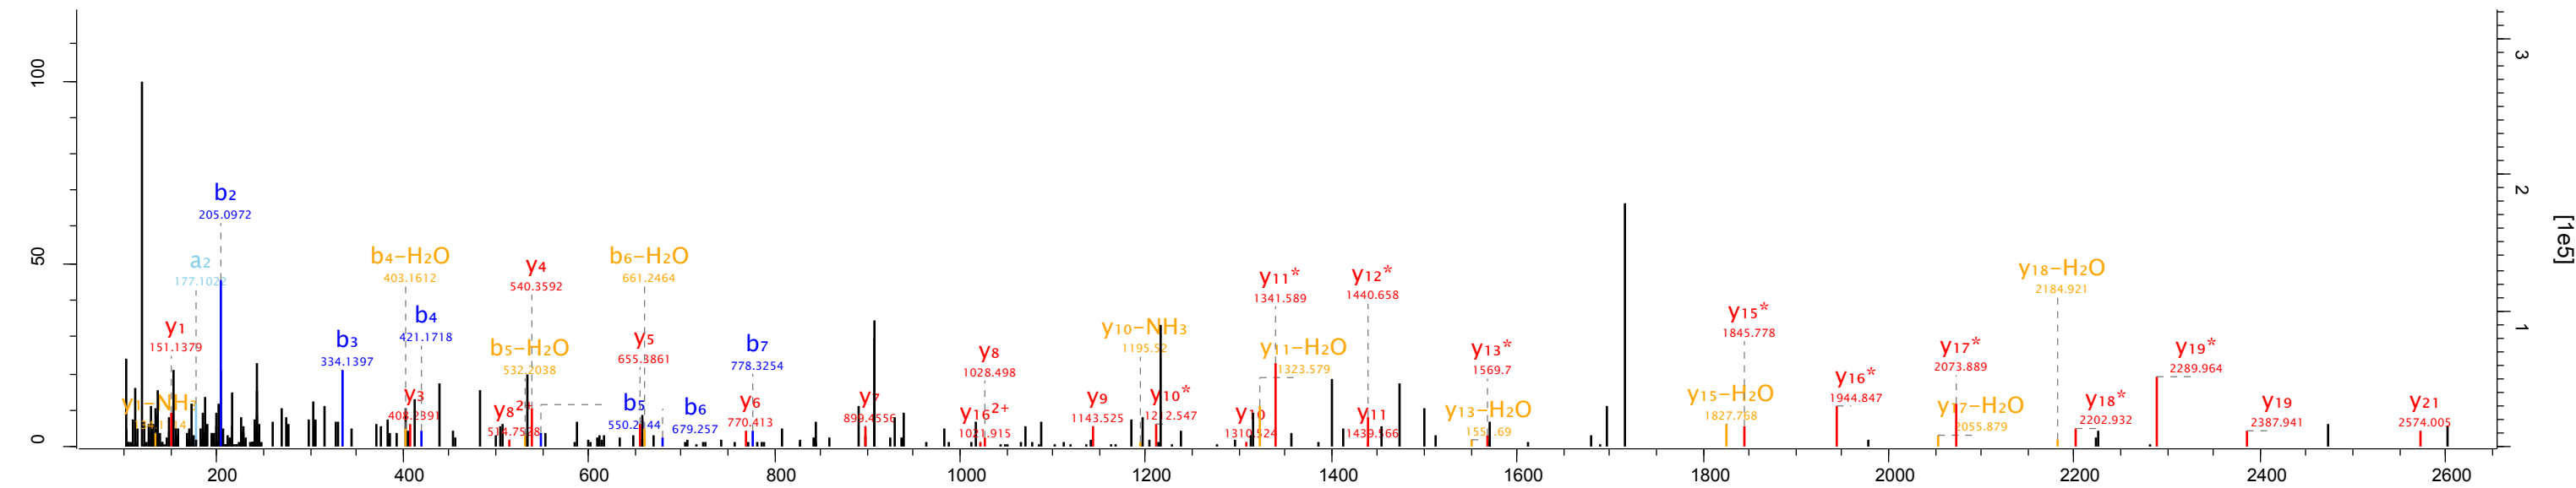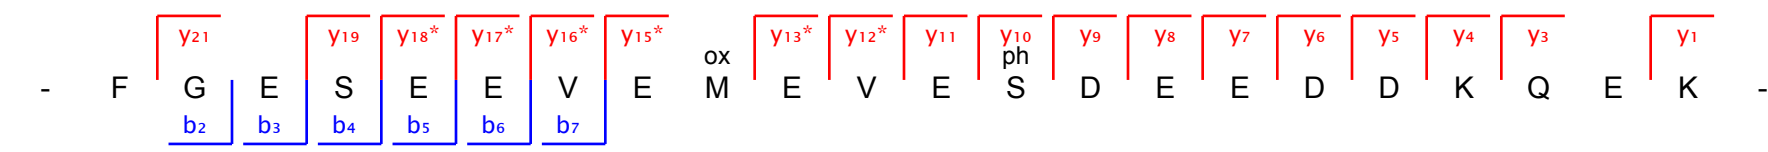

Raw file 20171215\_MaS\_33SR\_LMH\_phospho\_06 Scan 11156 Method FTMS; HCD Score 107.13 m/z 765.14 Gene names UNG

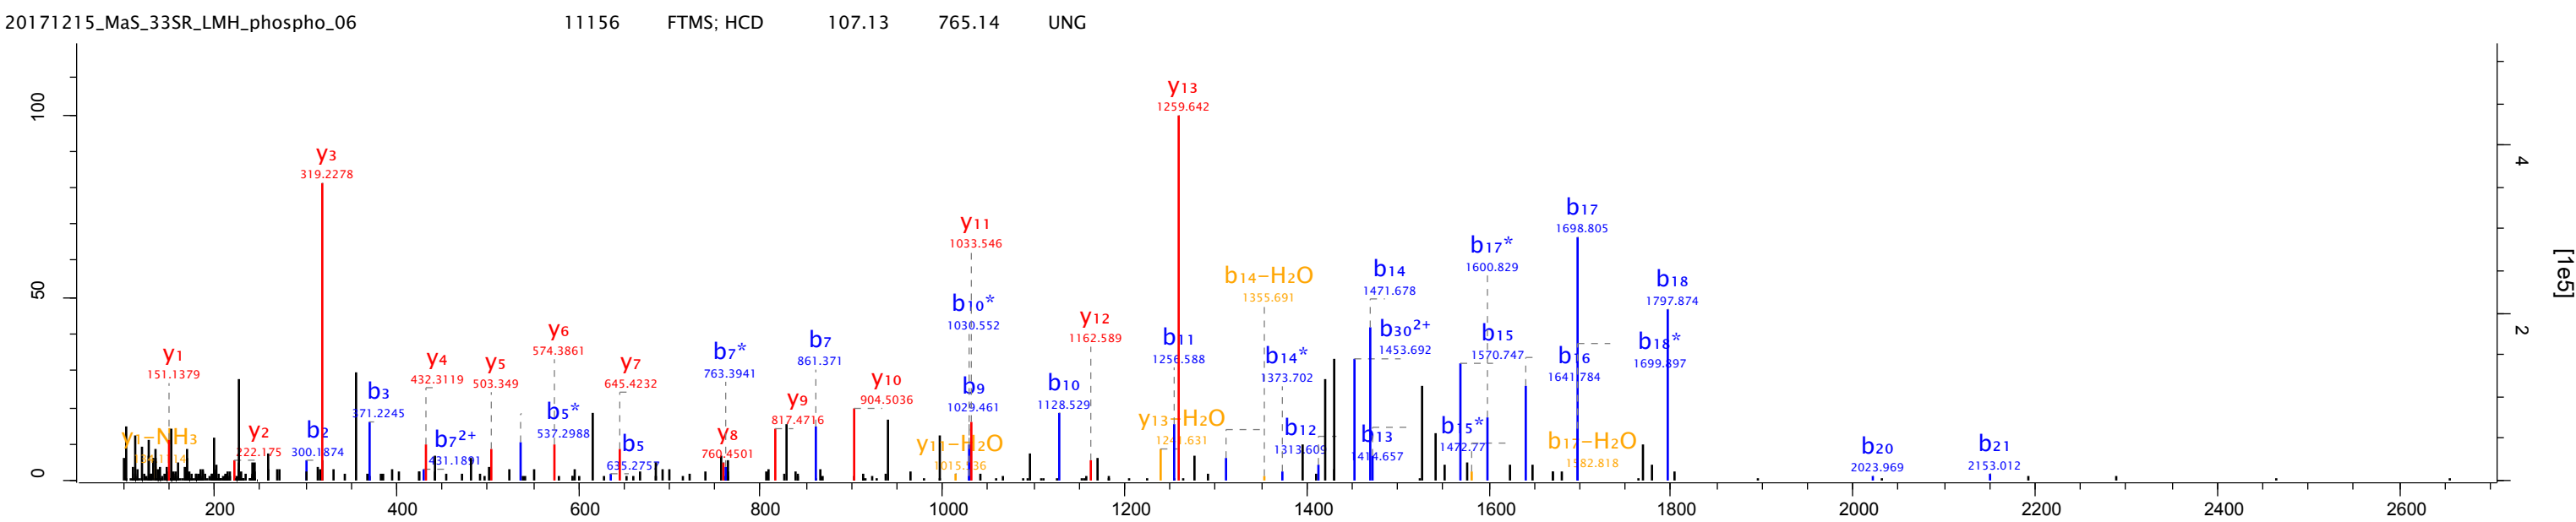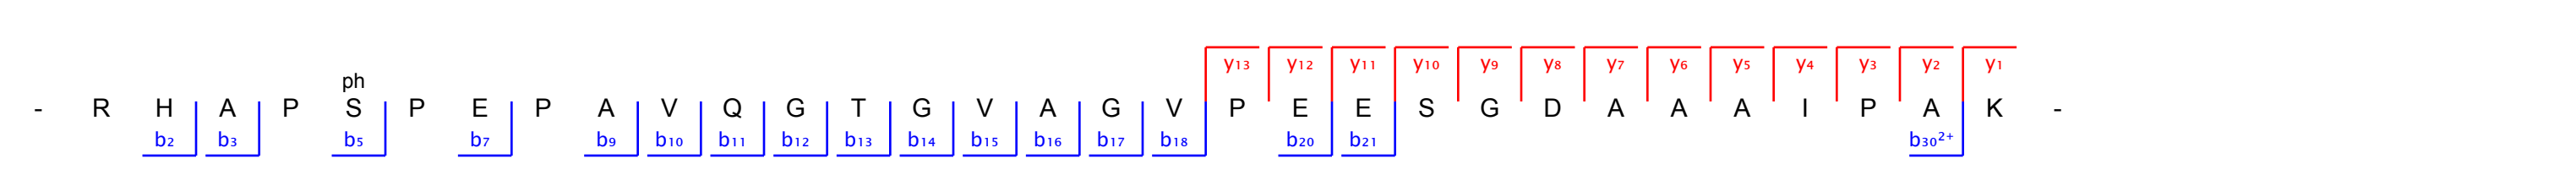



Raw file  
 20171215\_MaS\_33SR\_LMH\_phospho\_06  
 Scan 11216 Method FTMS; HCD Score 68.17 m/z 624.32 Gene names KLC2

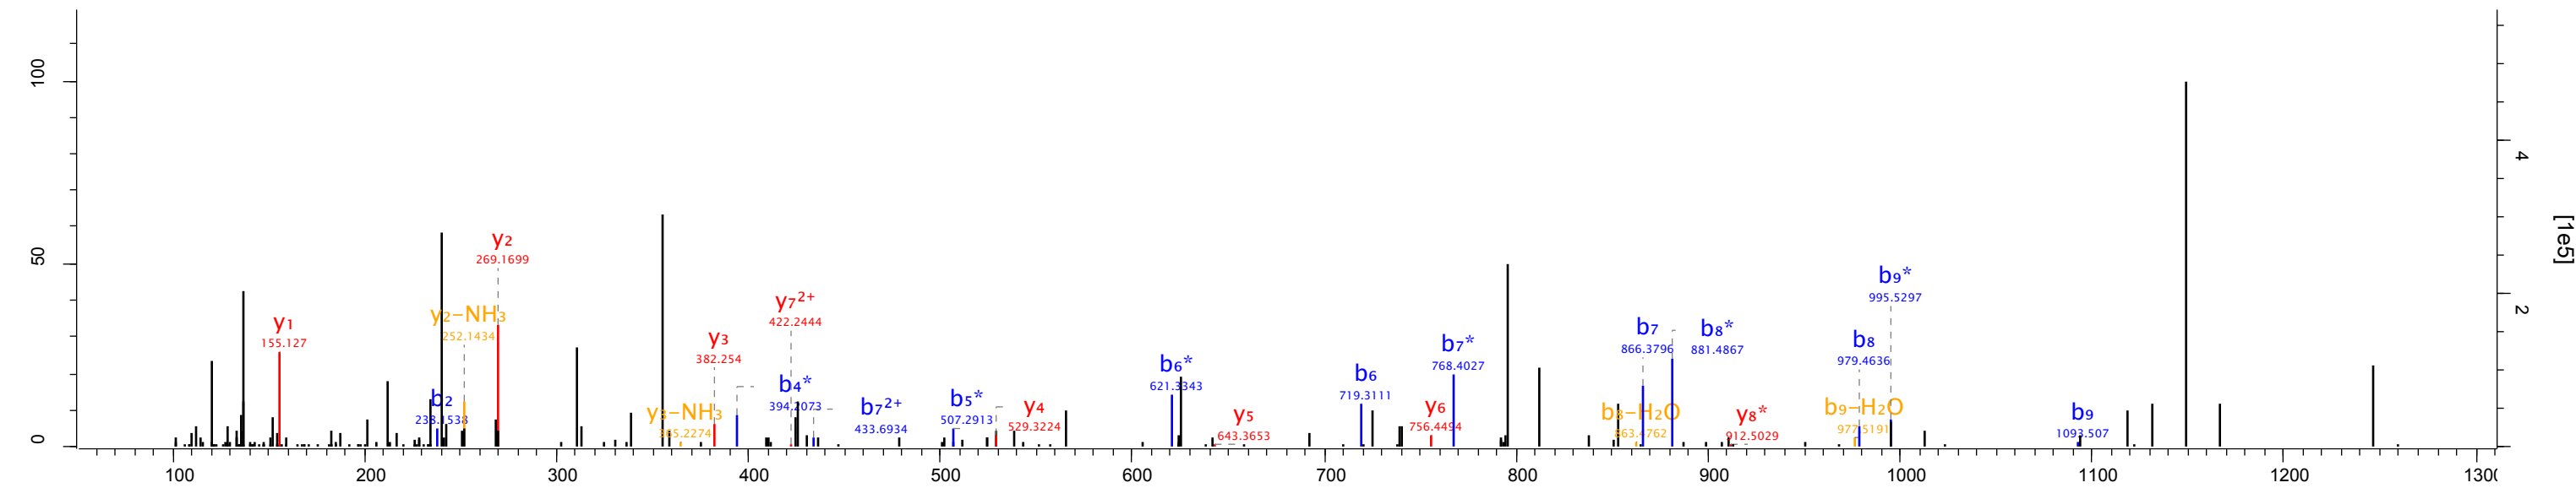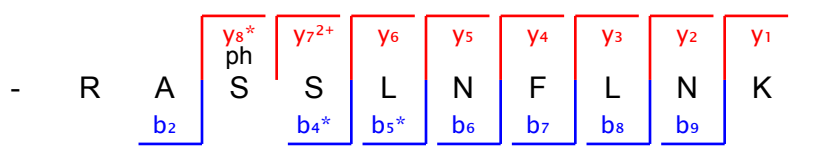

Raw file 20171215\_MaS\_33SR\_LMH\_phospho\_06 Scan 11306 Method FTMS; HCD Score 149 m/z 798.32 Gene names PIAS2

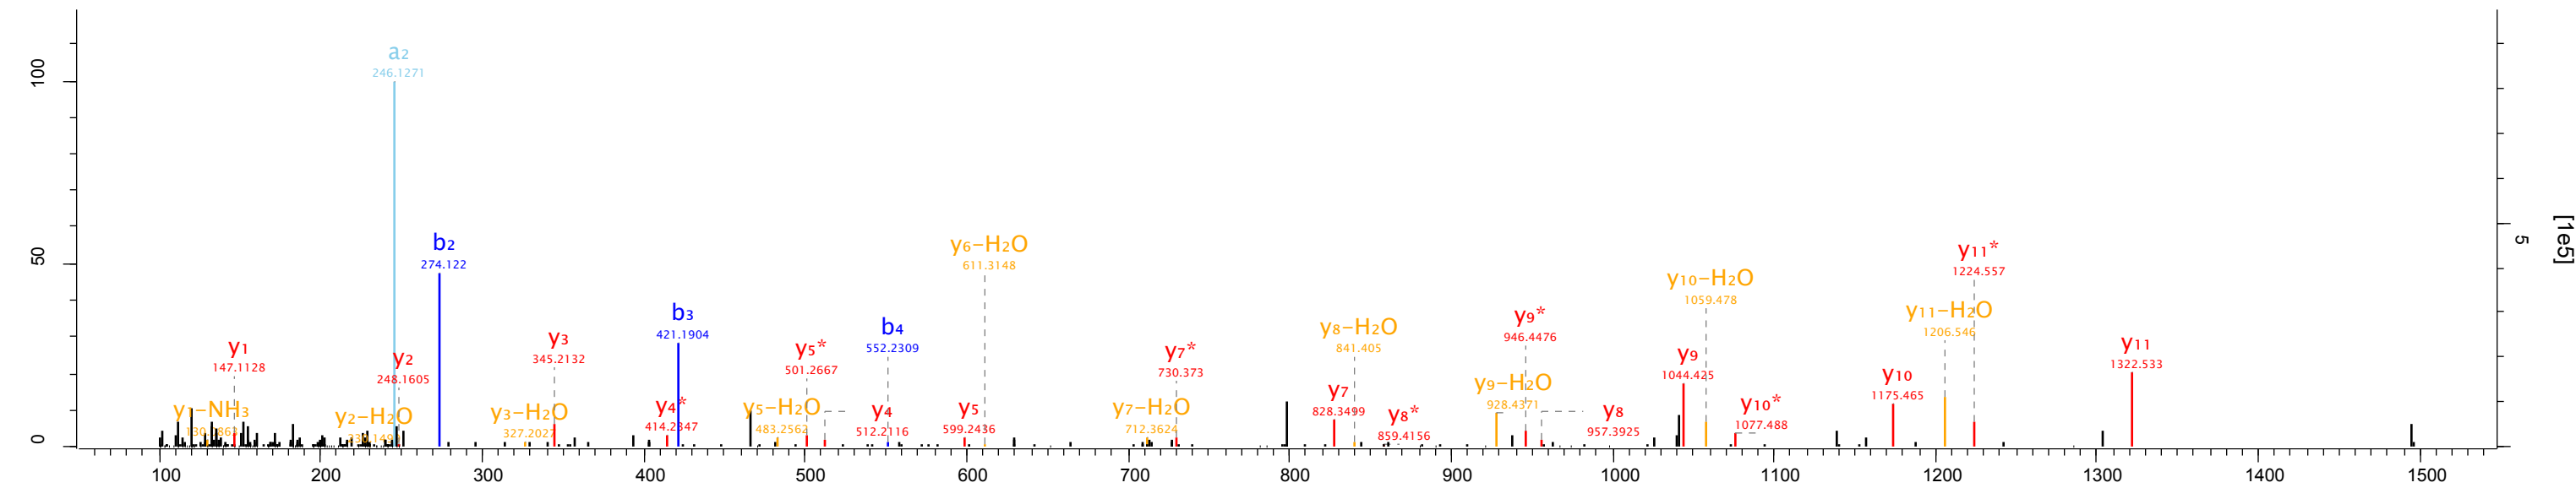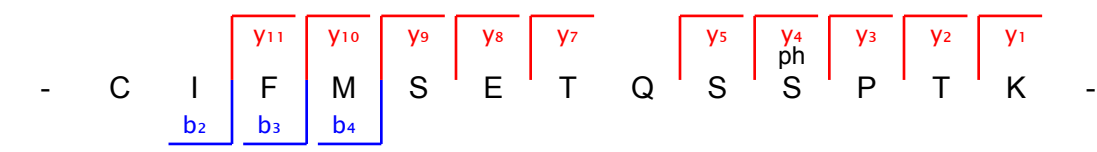

Raw file 20171215\_MaS\_33SR\_LMH\_phospho\_06 Scan 11586 Method FTMS; HCD Score 98.9 m/z 486.22 Gene names PKP2

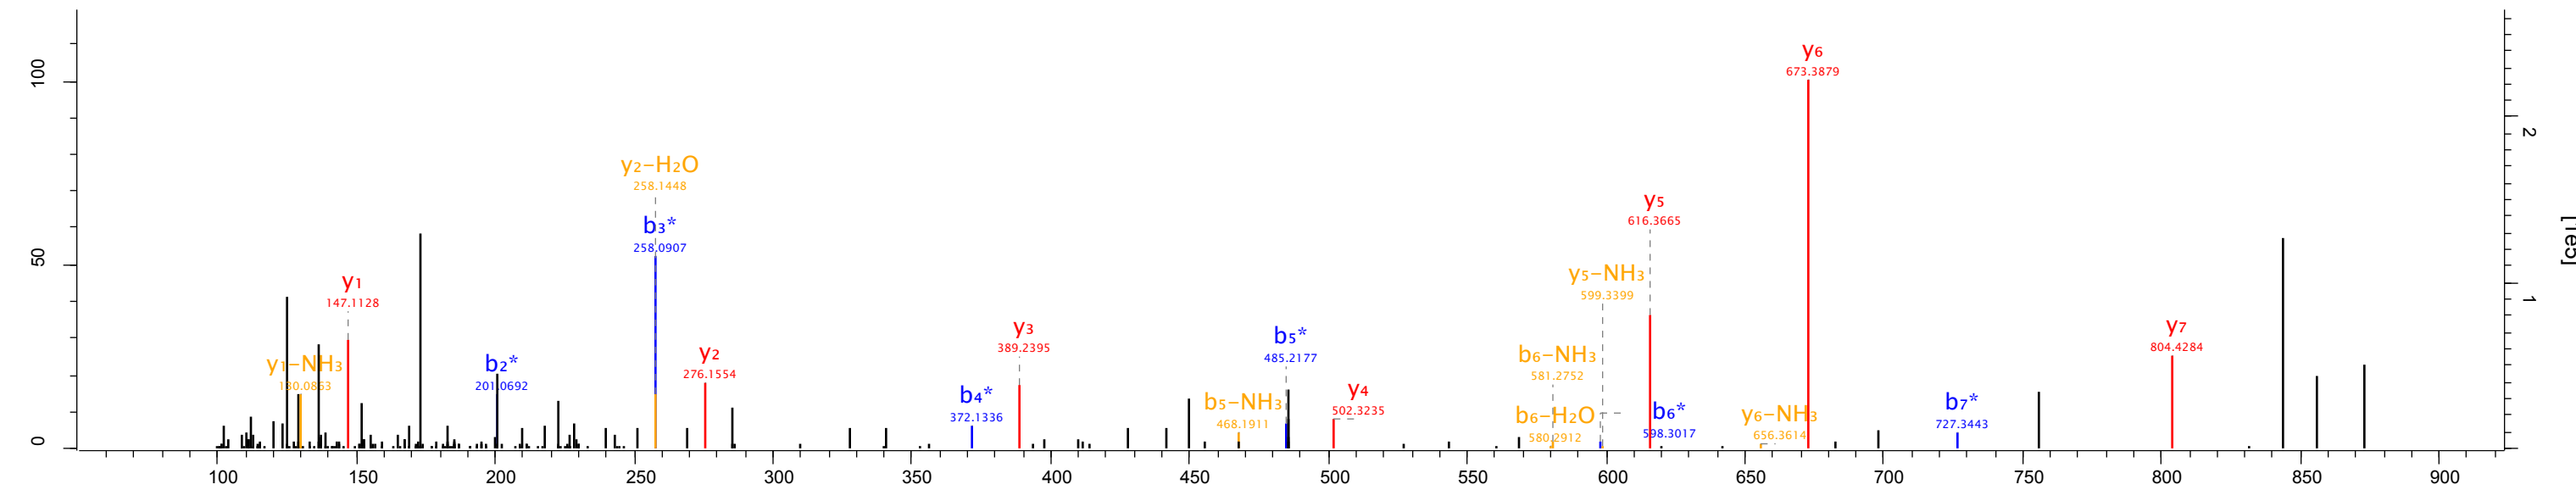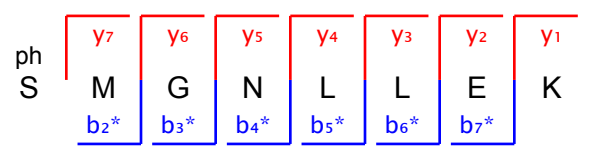

Raw file 20171215\_MaS\_33SR\_LMH\_phospho\_06 Scan 11636 Method FTMS; HCD Score 72.86 m/z 859.41 Gene names SSFA2

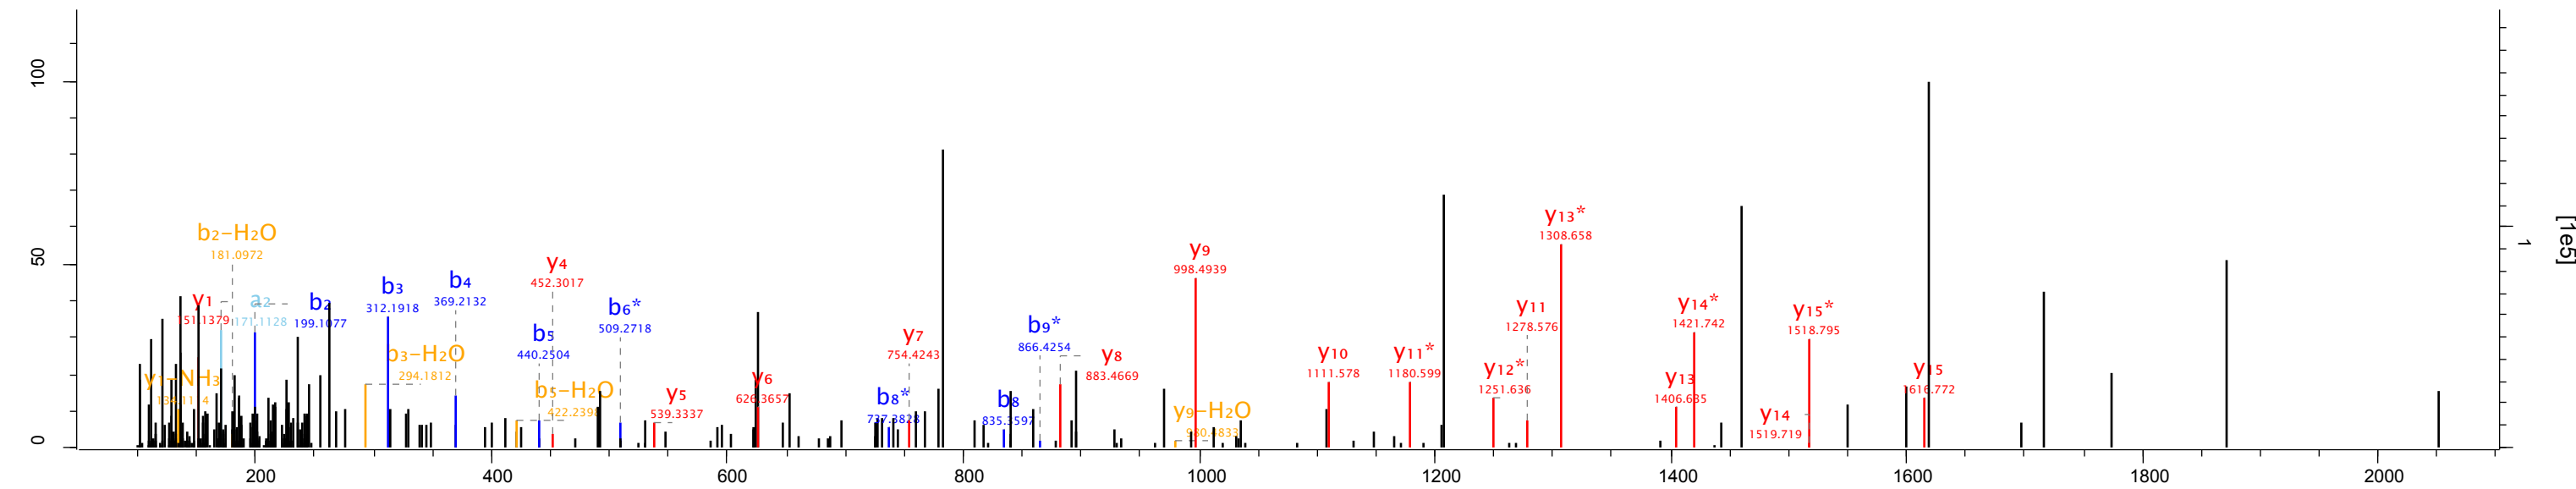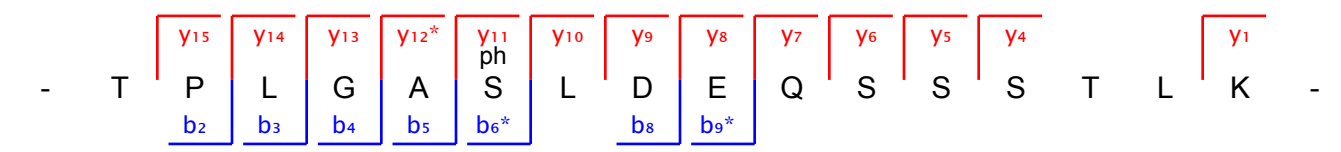

Raw file 20171215\_MaS\_33SR\_LMH\_phospho\_06 Scan 11716 Method FTMS; HCD Score 85.29 m/z 559.29 Gene names ZYX

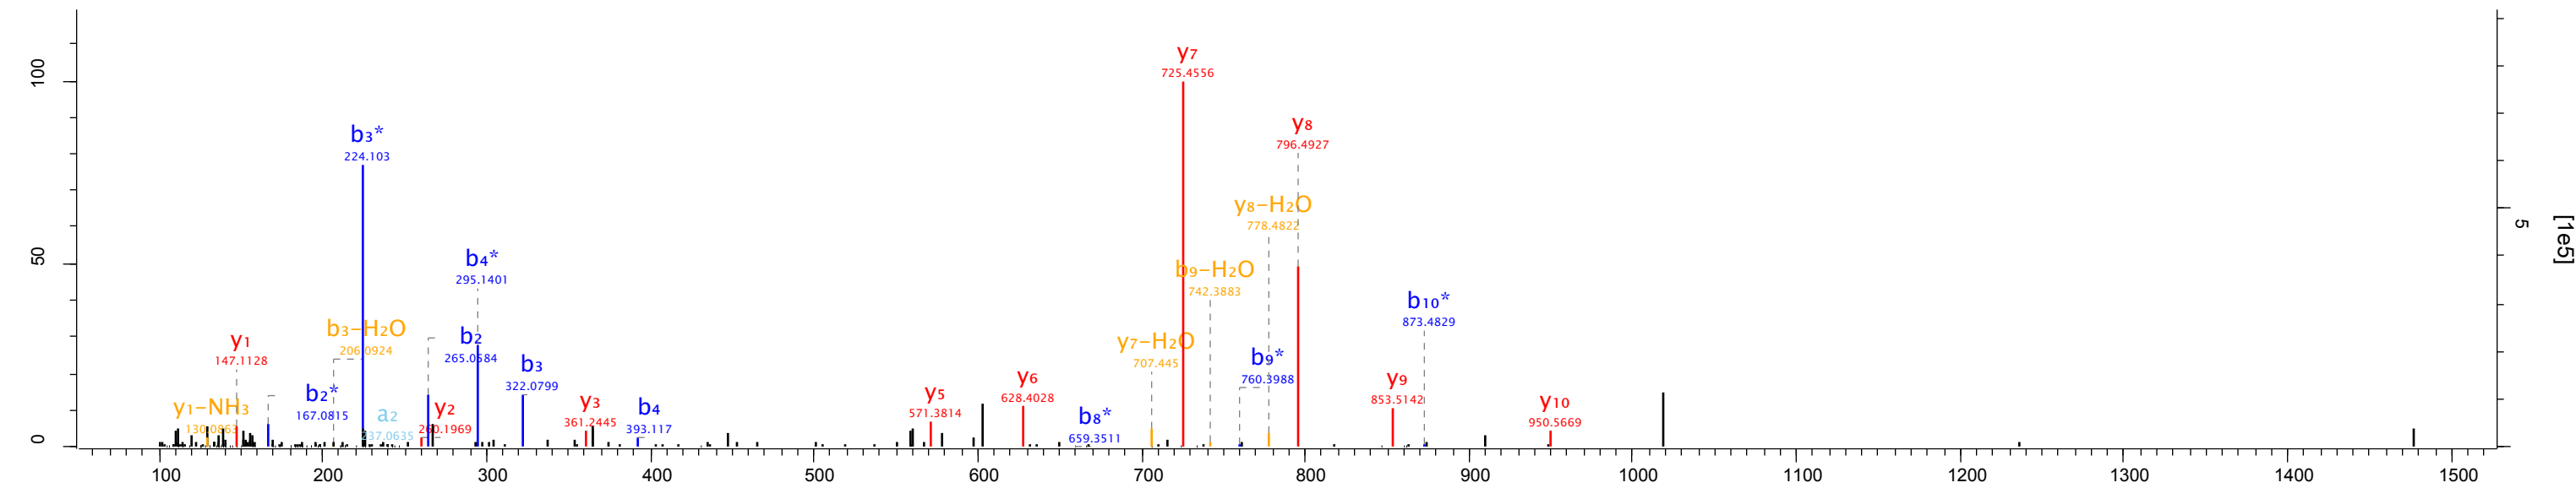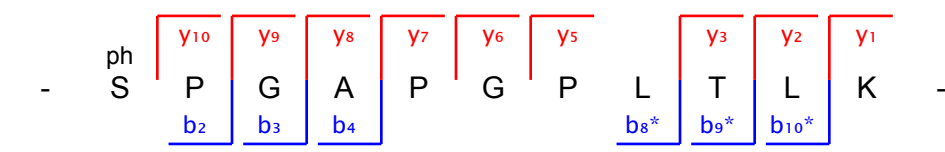

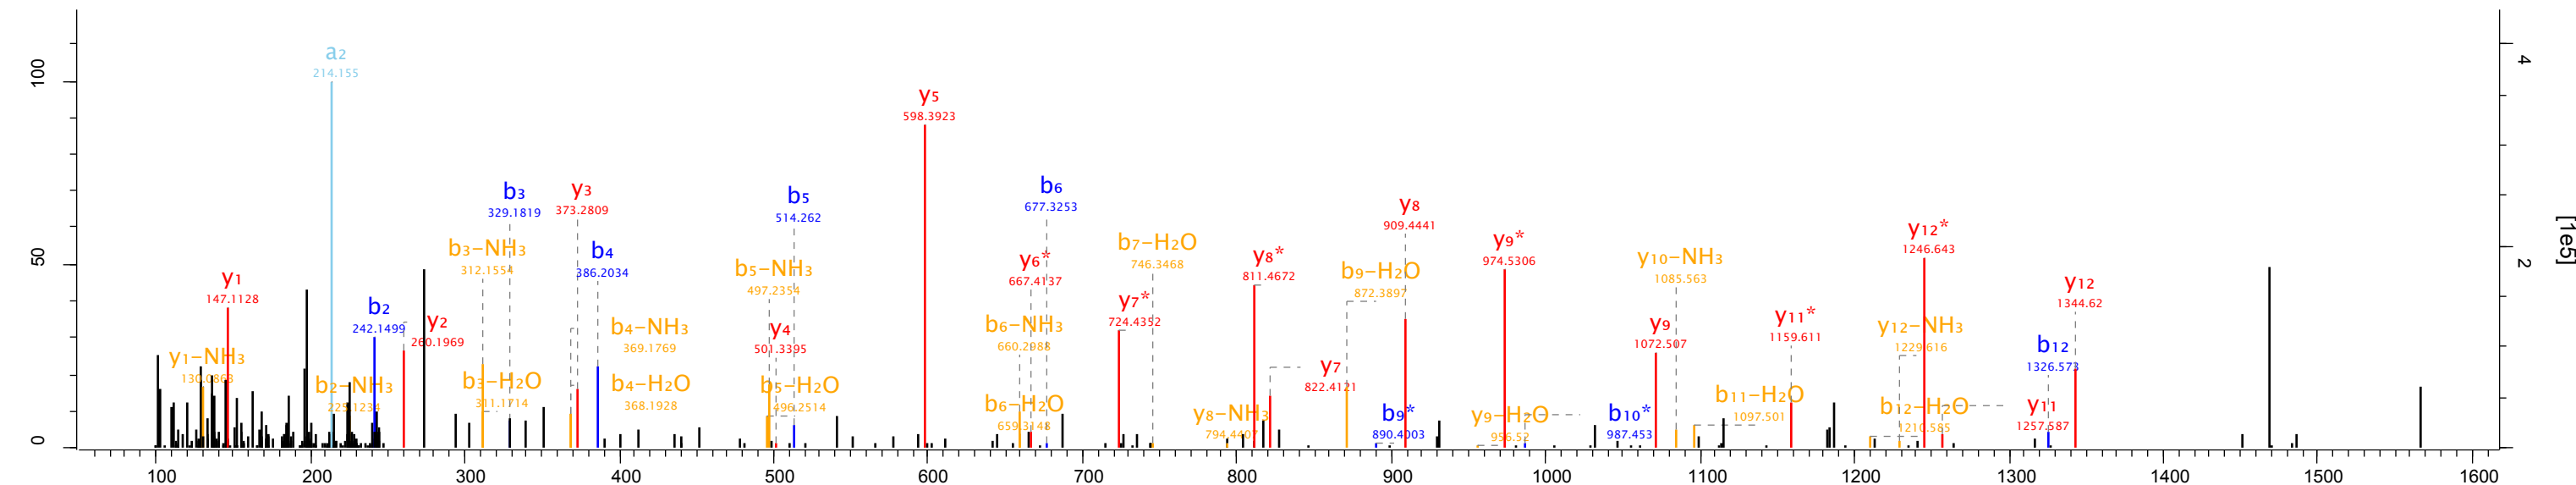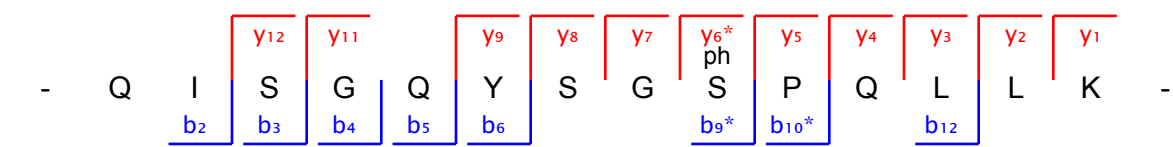

Raw file 20171215\_MaS\_33SR\_LMH\_phospho\_06 Scan 11776 Method FTMS; HCD Score 130.41 m/z 451.74 Gene names EPB41L1

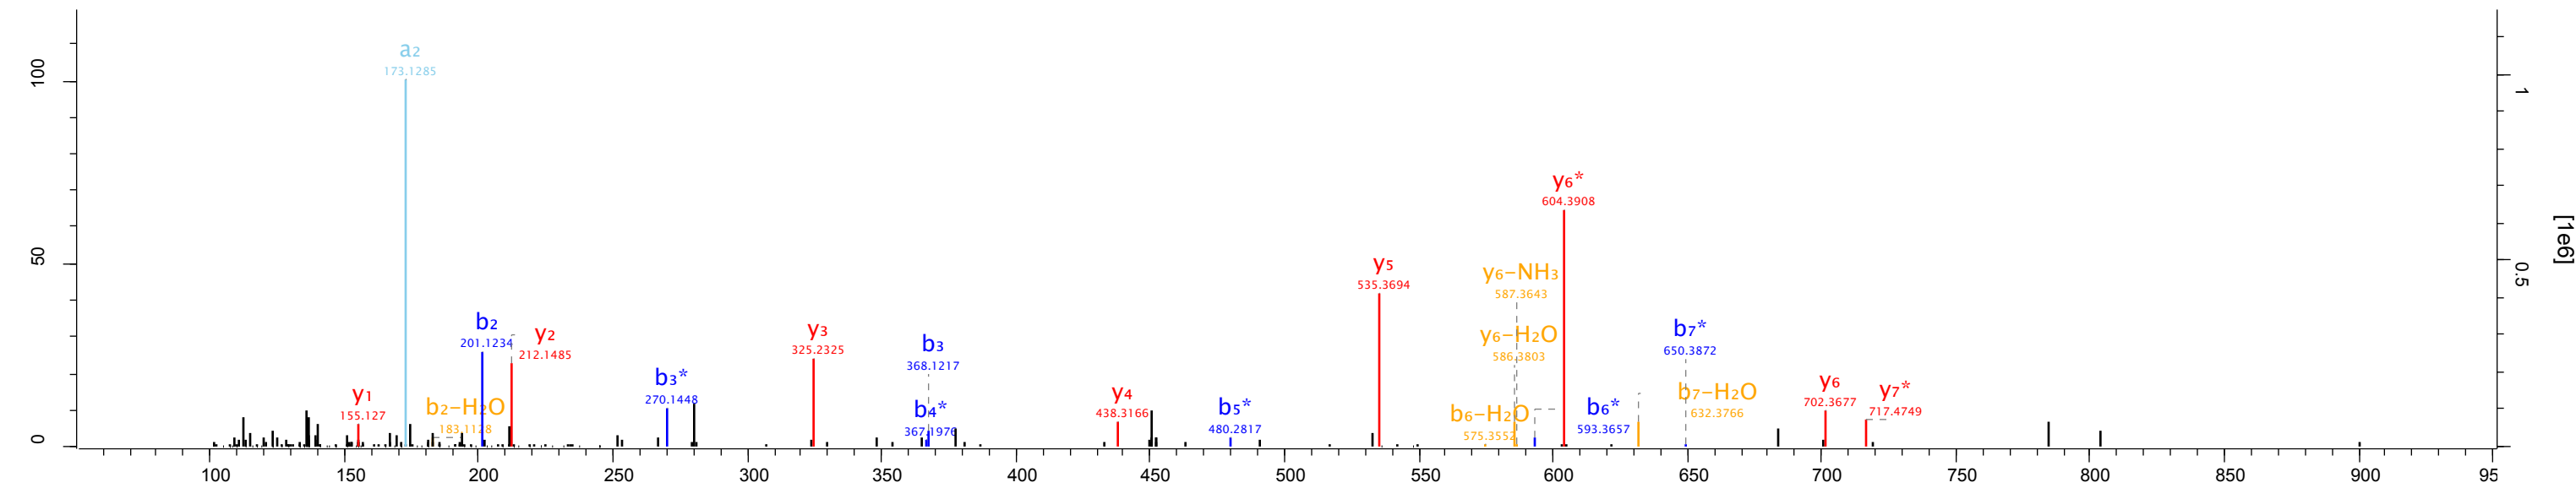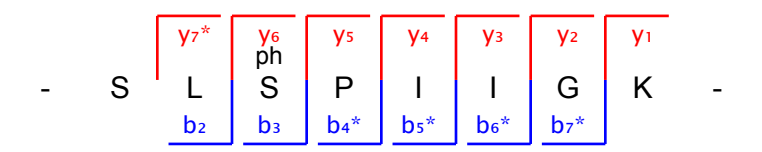

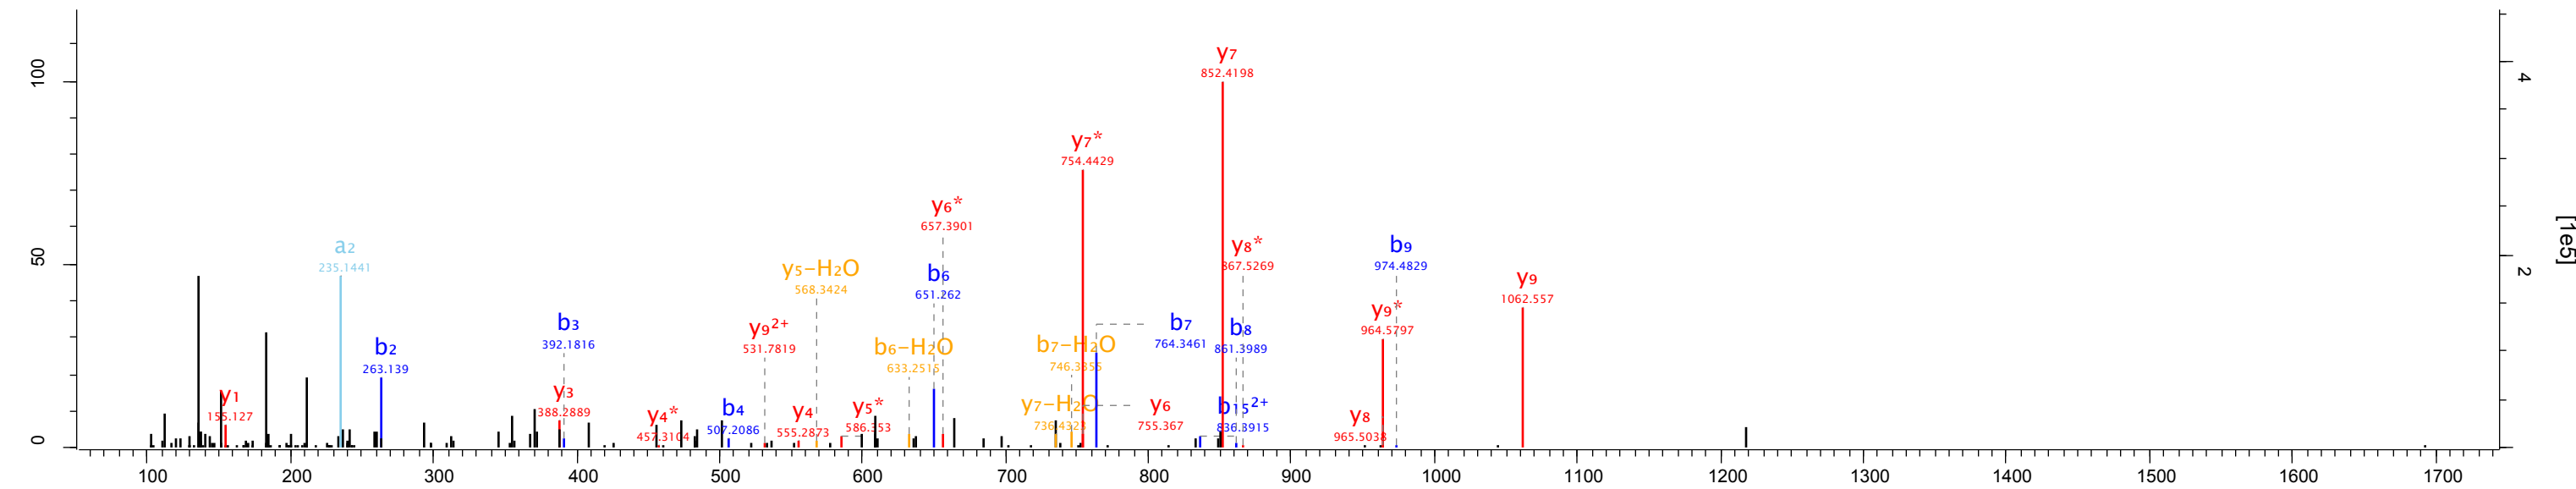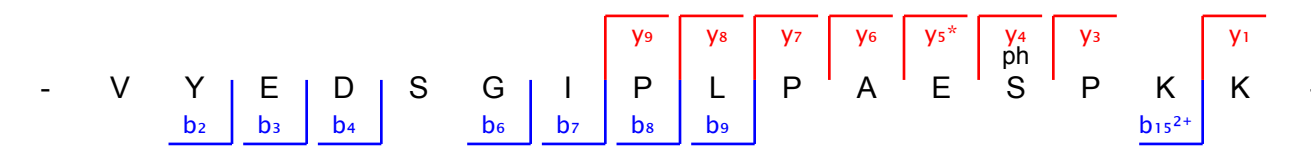



Raw file 20171215\_MaS\_33SR\_LMH\_phospho\_06 Scan 12356 Method FTMS; HCD Score 94.38 m/z 933.96 Gene names PTK2

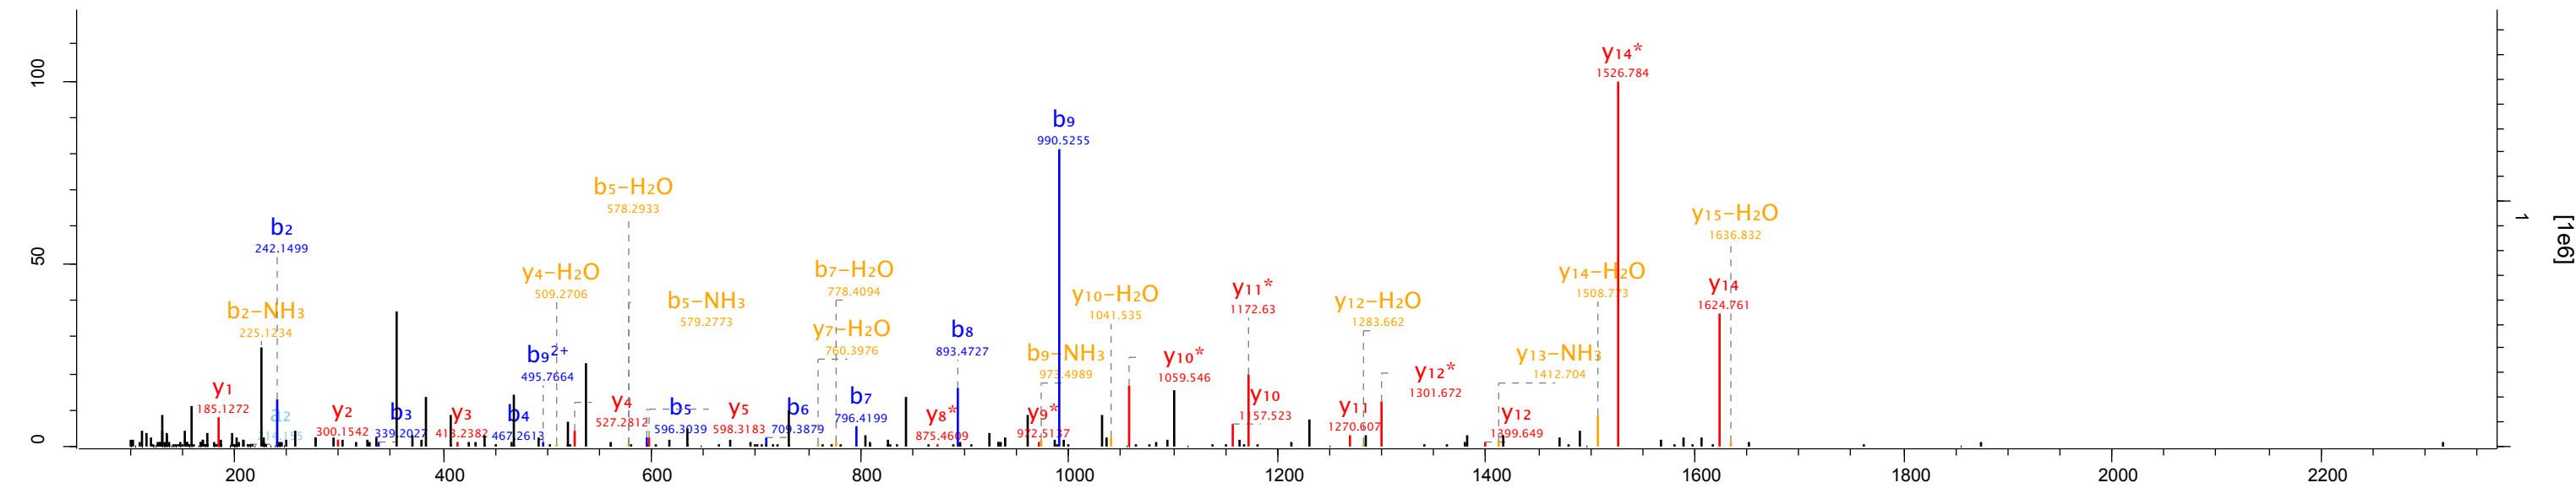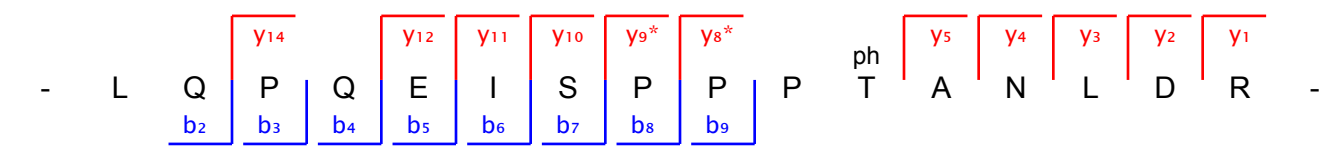

Raw file: 20171215\_MaS\_33SR\_LMH\_phospho\_06  
 Scan: 13406 Method: FTMS; HCD Score: 138.28 m/z: 896.39 Gene names: ZNF148

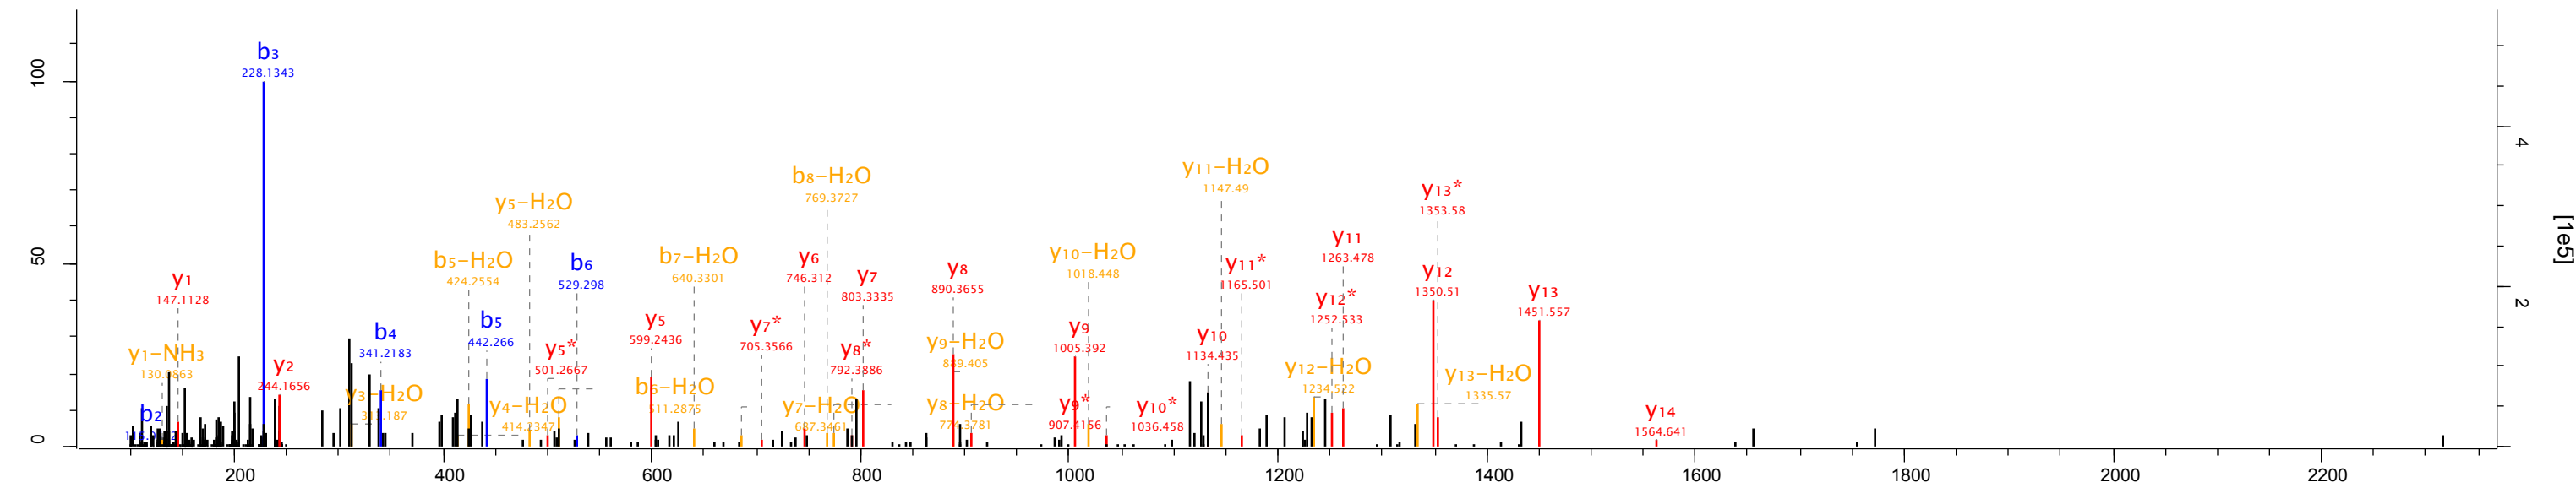

Sequence: - G G L L T S E E D S G F S T S P K -  
 Fragmentation sites: b2 (G-G), b3 (G-L), b4 (L-L), b5 (L-T), b6 (L-S), y1 (S-K), y2 (P-K), y5 (S-ph), y6 (F-S), y7 (G-F), y8 (S-G), y9 (D-S), y10 (E-S), y11 (E-E), y12 (S-E), y13 (T-L), y14 (L-L)

Raw file  
 20171215\_MaS\_33SR\_LMH\_phospho\_06  
 Scan 13436 Method FTMS; HCD Score 85.04 m/z 1176.21 Gene names SLC9A3R2

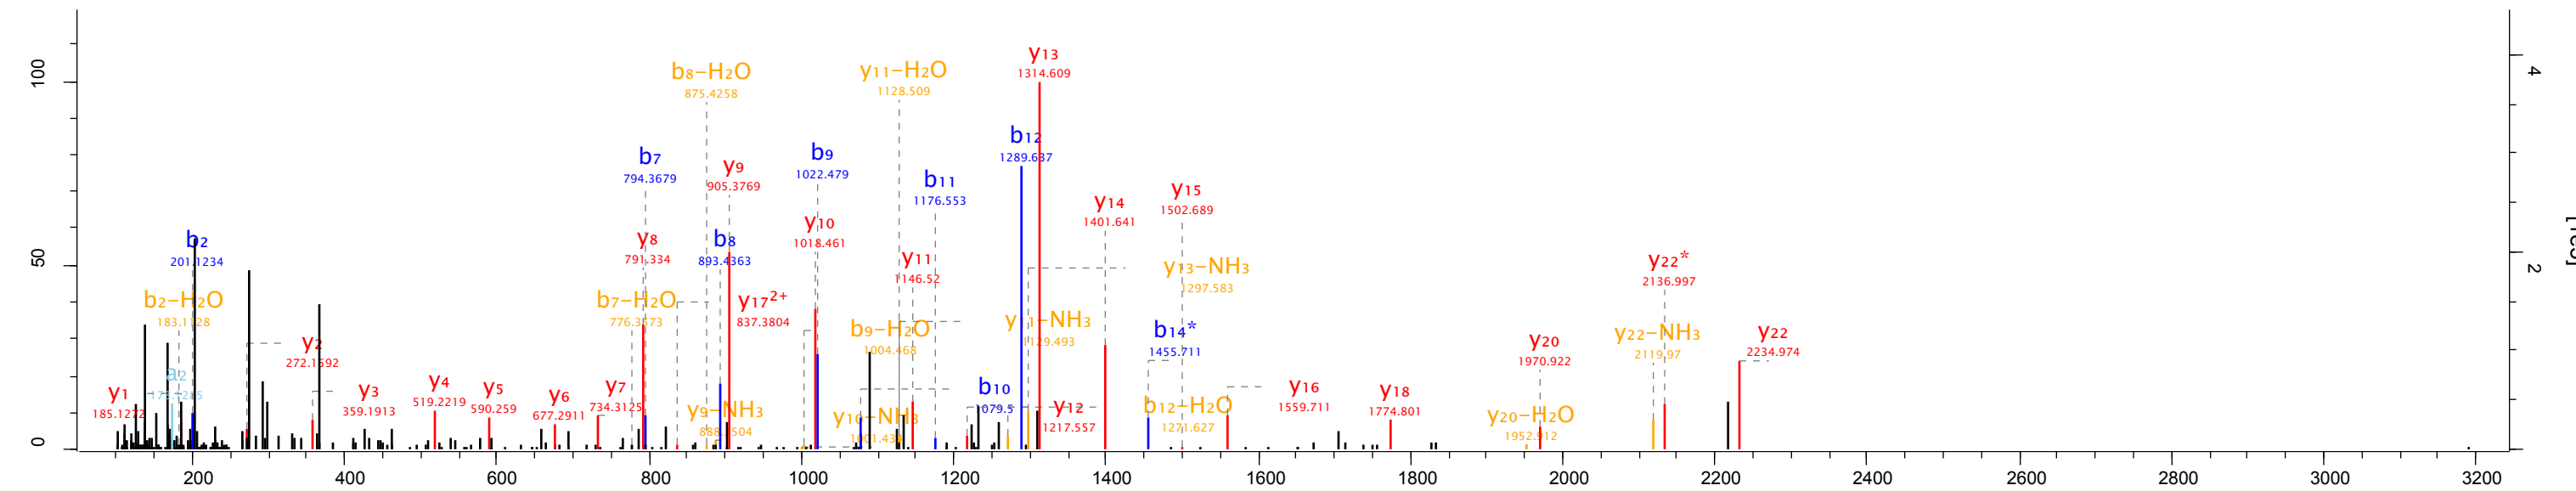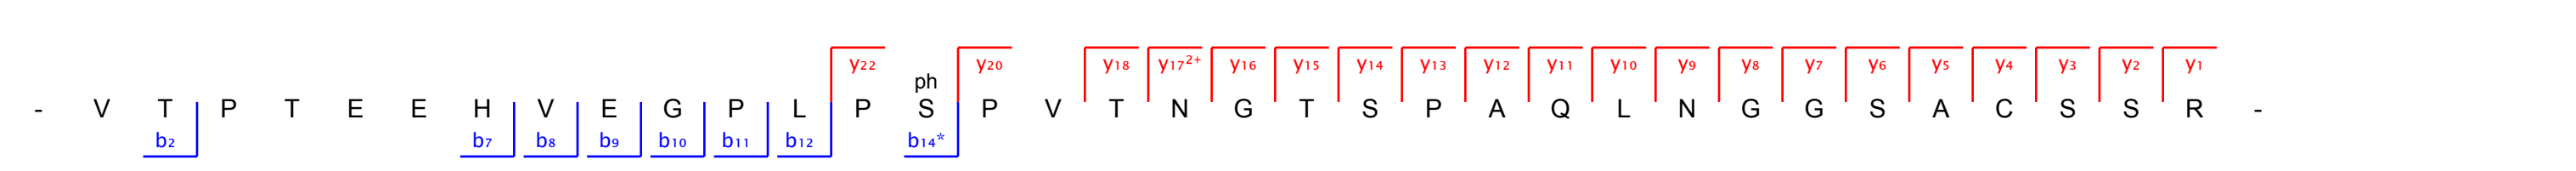

Raw file 20171215\_MaS\_33SR\_LMH\_phospho\_06 Scan 13516 Method FTMS; HCD Score 86.57 m/z 967.45 Gene names PDAP1

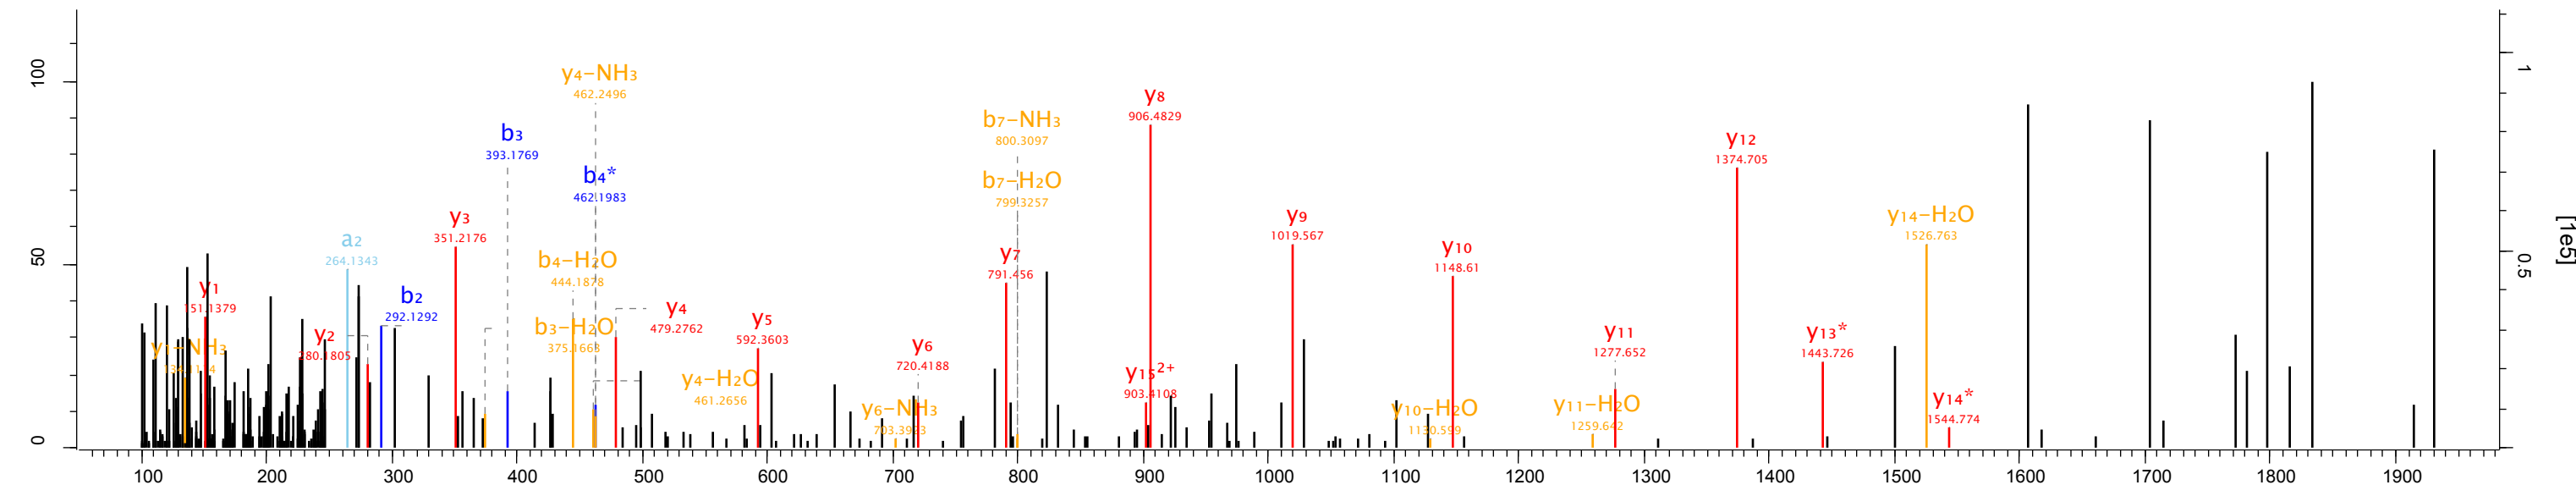

- Q Y T S P E E I D A Q L Q A E K -

Fragmentation mapping:

- Y15<sup>2+</sup> (b<sub>2</sub>)
- Y14\* (b<sub>3</sub>)
- Y13\* (b<sub>4</sub>\*)
- Y12
- Y11
- Y10
- Y9
- Y8
- Y7
- Y6
- Y5
- Y4
- Y3
- Y2
- Y1

Raw file: 20171215\_MaS\_33SR\_LMH\_phospho\_06  
 Scan: 13656 Method: FTMS; HCD Score: 75.02 m/z: 802.73 Gene names: LARP1

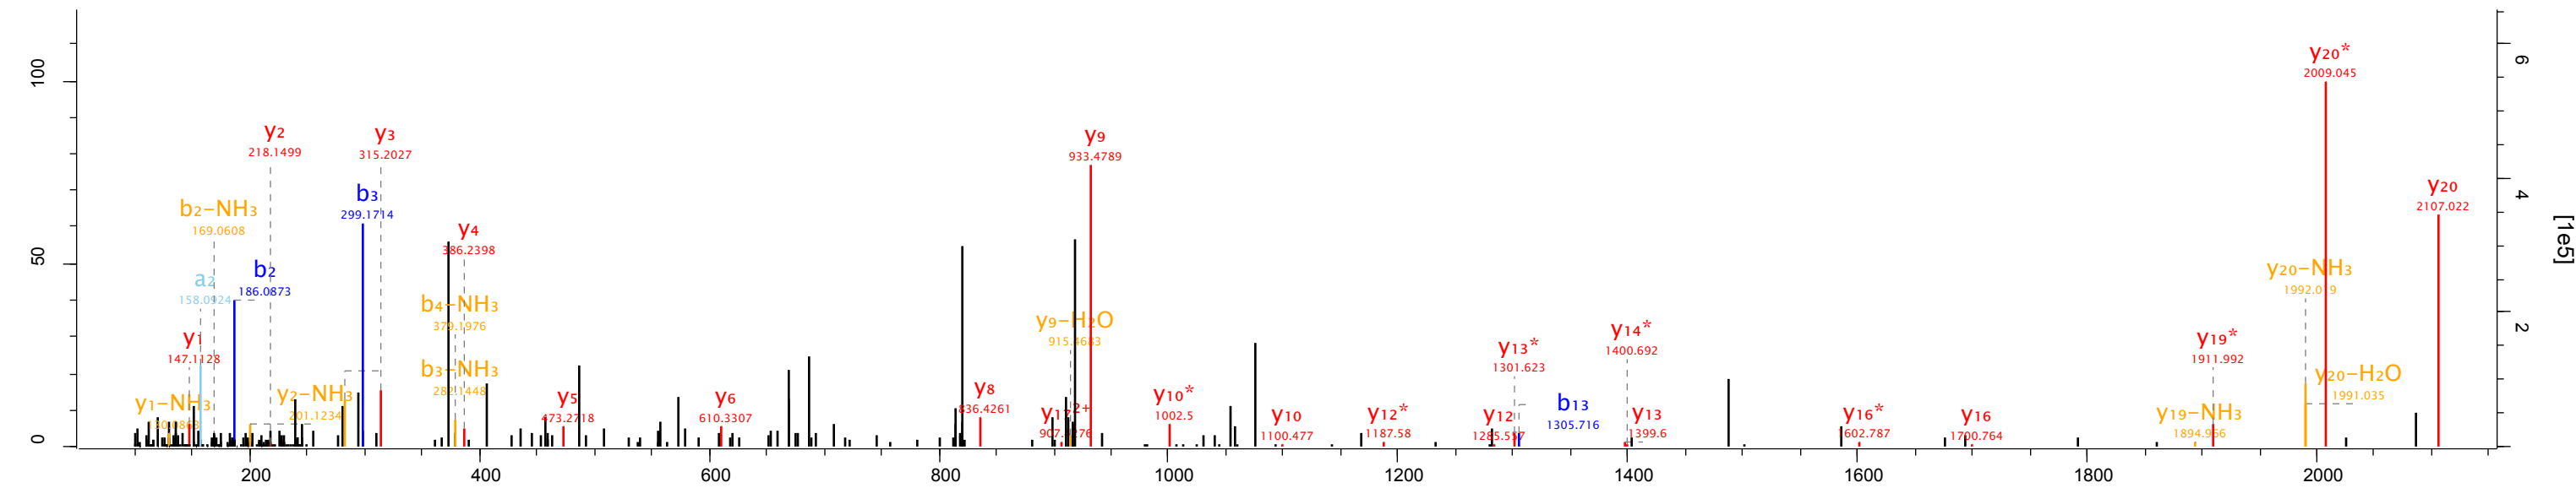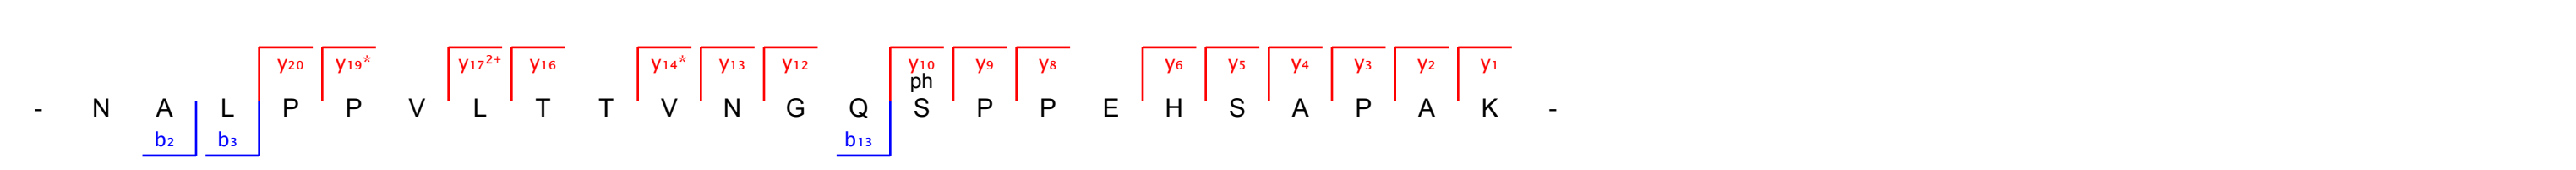

Raw file 20171215\_MaS\_33SR\_LMH\_phospho\_06 Scan 13676 Method FTMS; HCD Score 61.28 m/z 886.36 Gene names IRS2

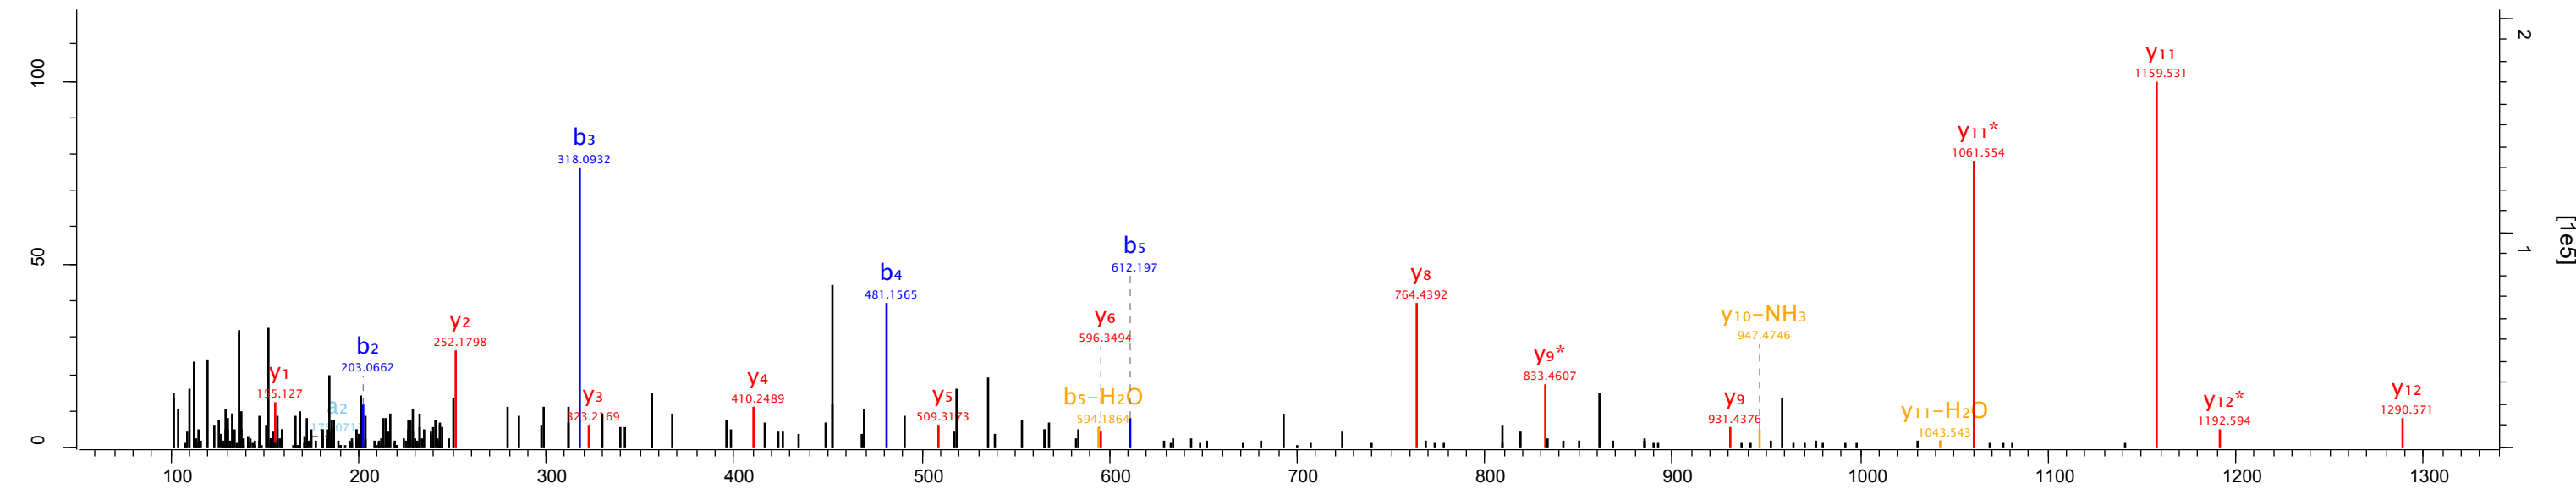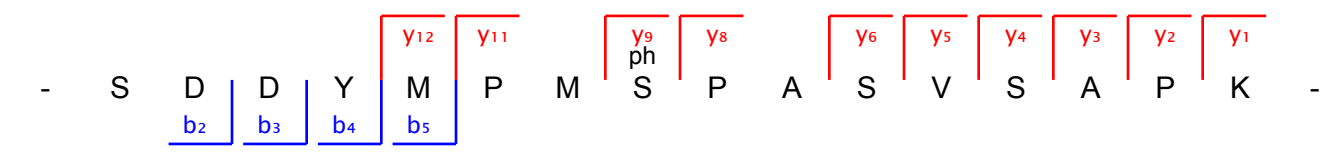

Raw file: 20171215\_MaS\_33SR\_LMH\_phospho\_06  
 Scan: 13906 Method: FTMS; HCD Score: 149.41 m/z: 998.45 Gene names: AKAP2

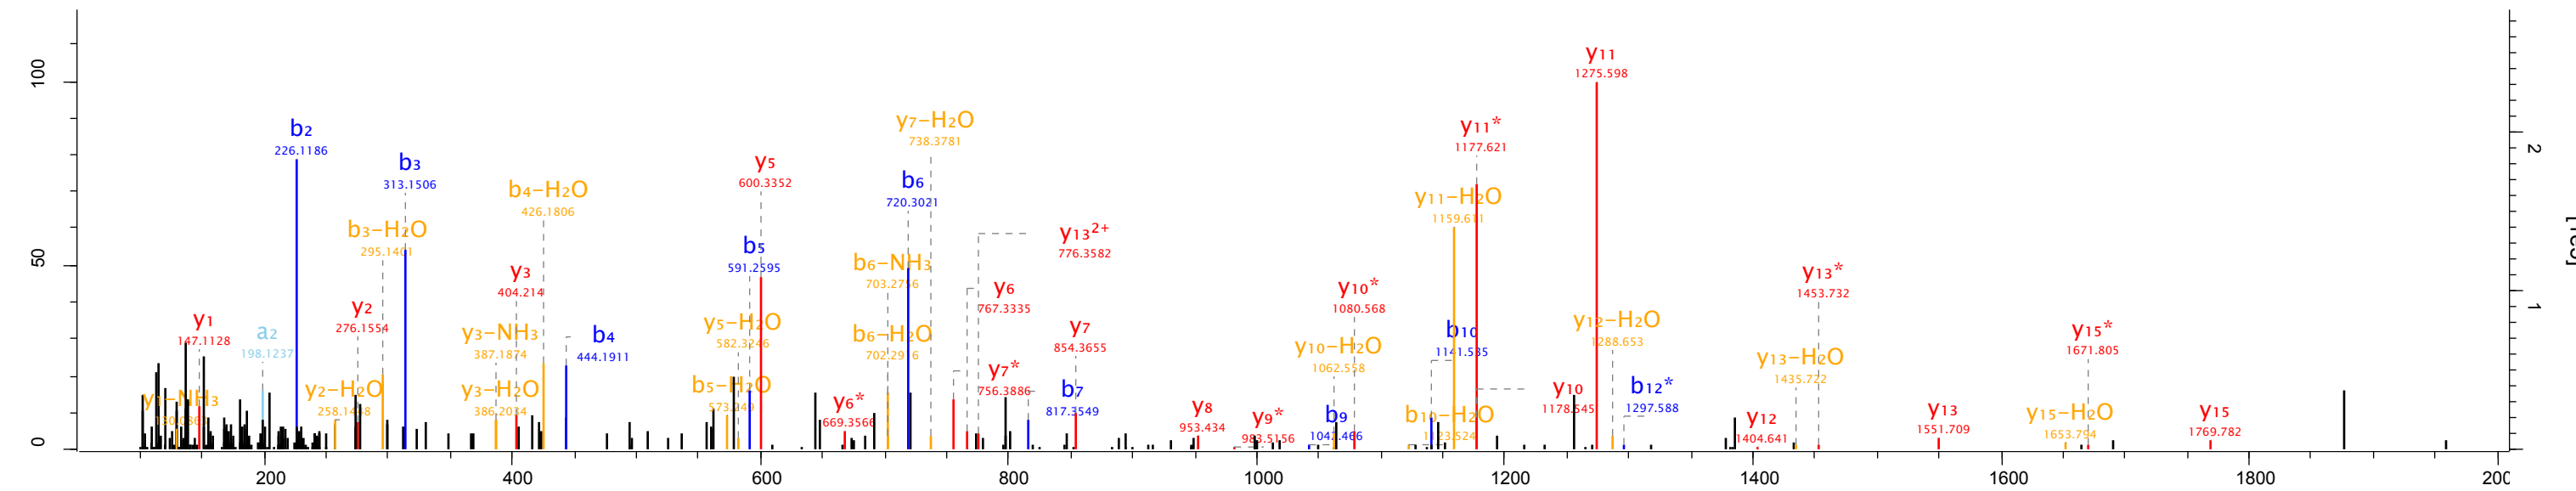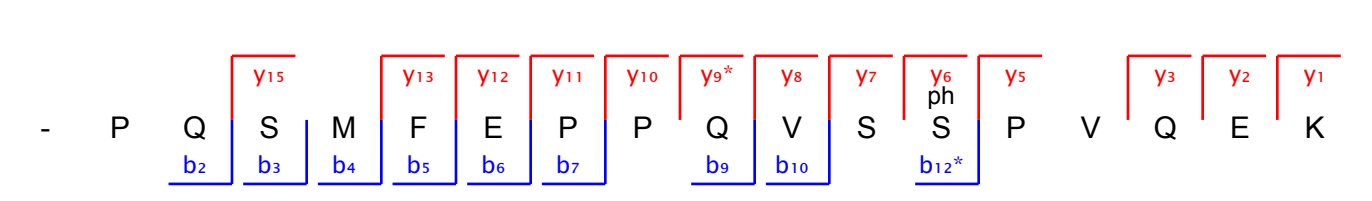

Raw file 20171215\_MaS\_33SR\_LMH\_phospho\_06 Scan 14226 Method FTMS; HCD Score 111.88 m/z 759.69 Gene names ZNF148

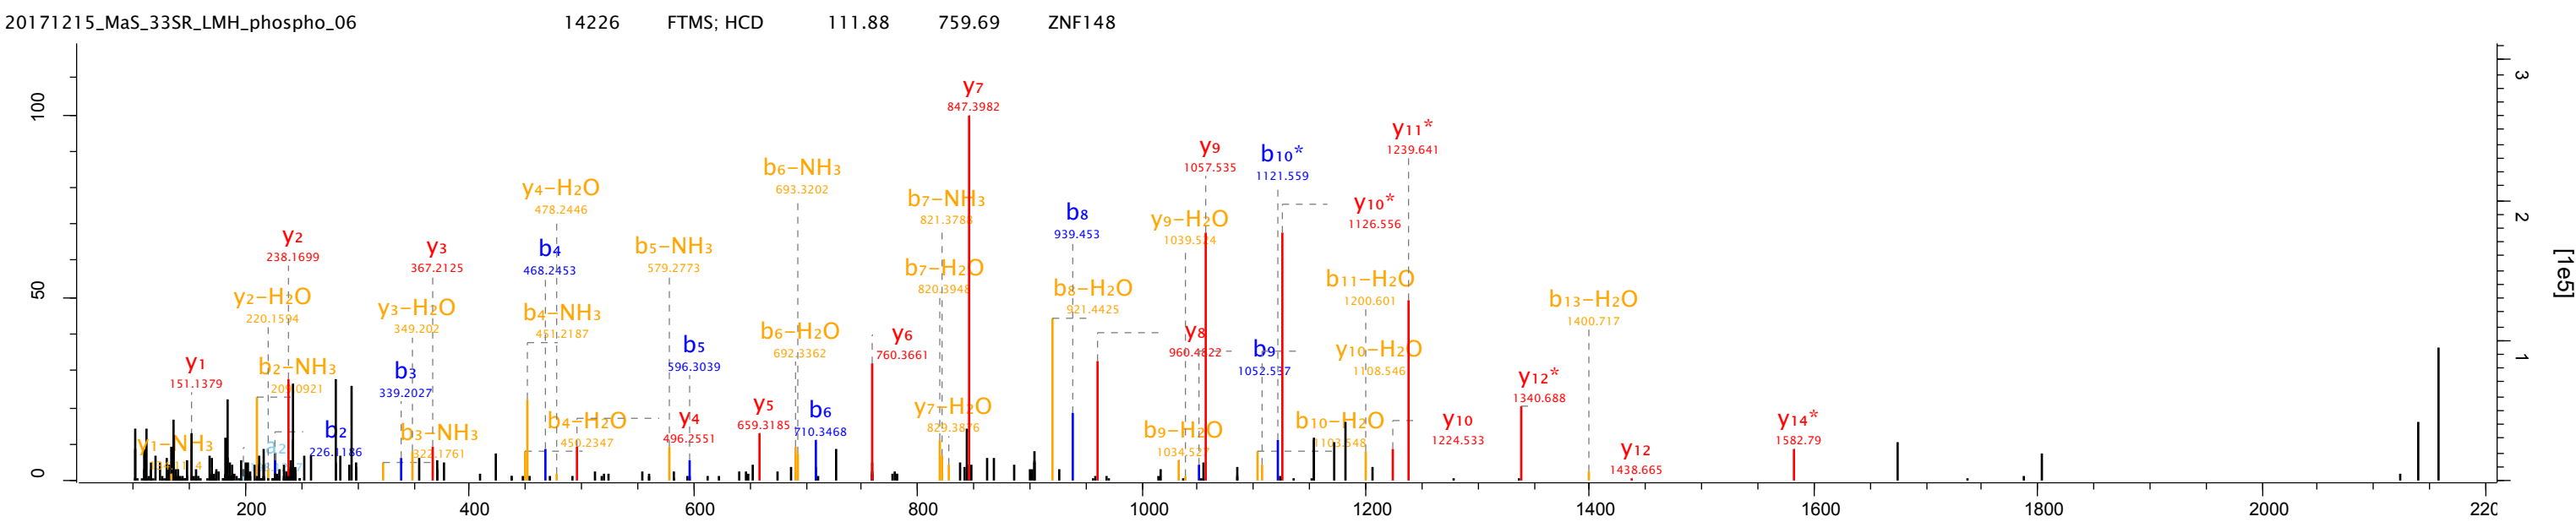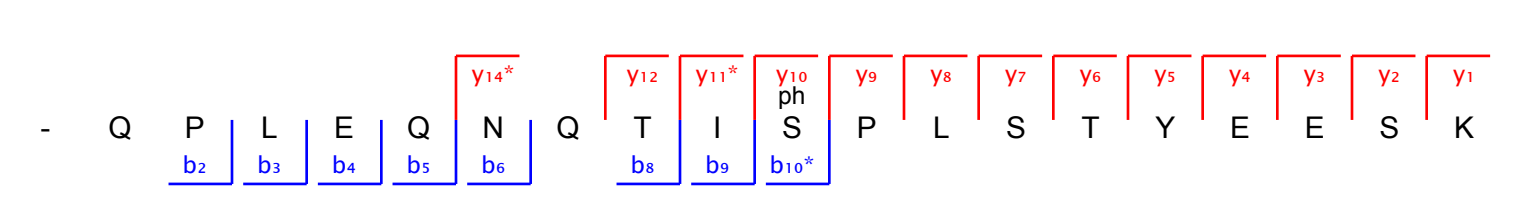



Raw file

20171215\_MaS\_33SR\_LMH\_phospho\_06

Scan 14386 Method FTMS; HCD Score 195.92 m/z 759.85 Gene names C6orf106

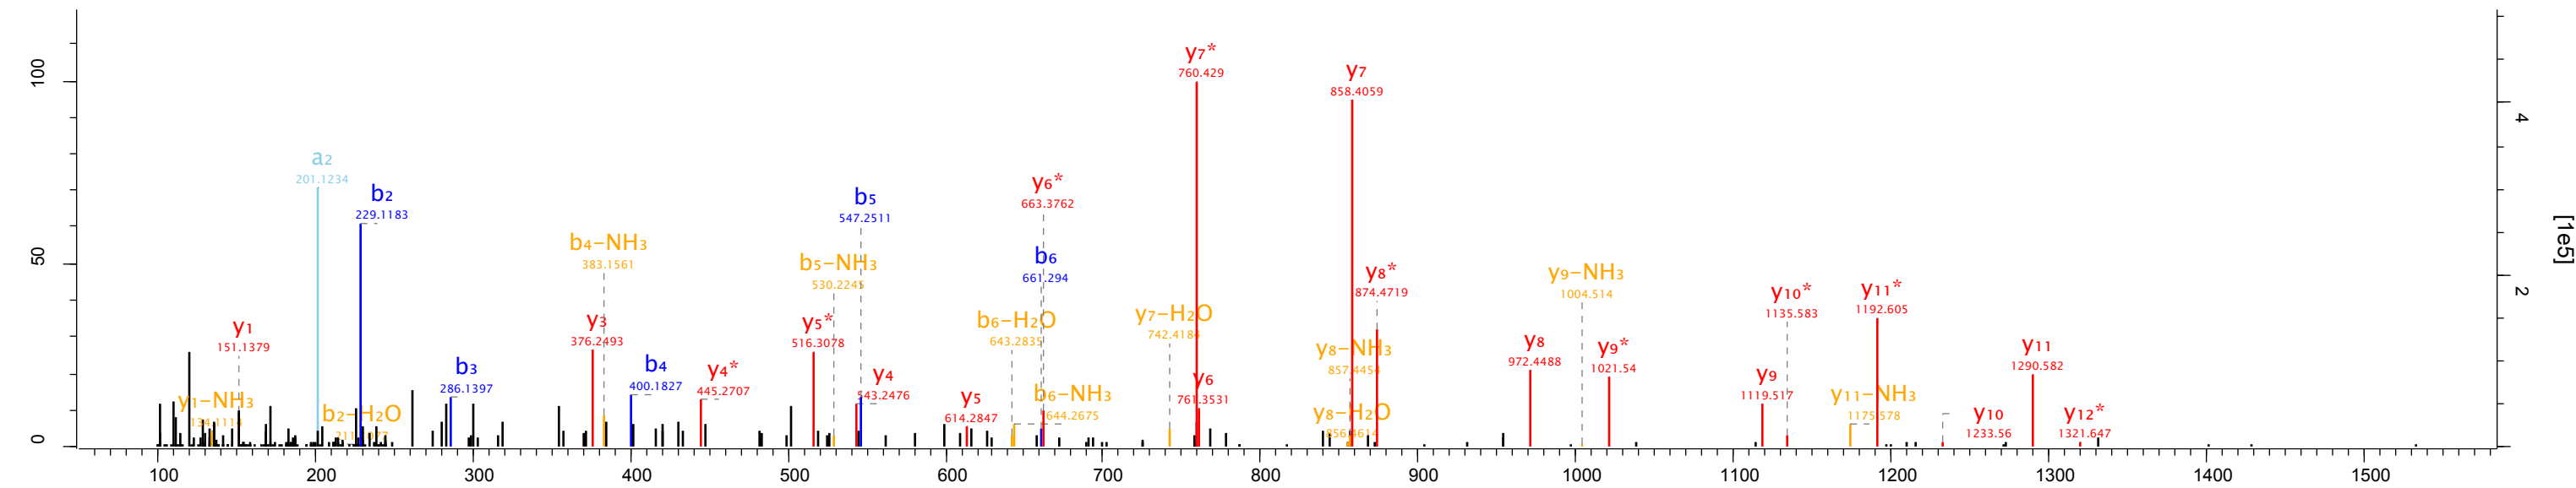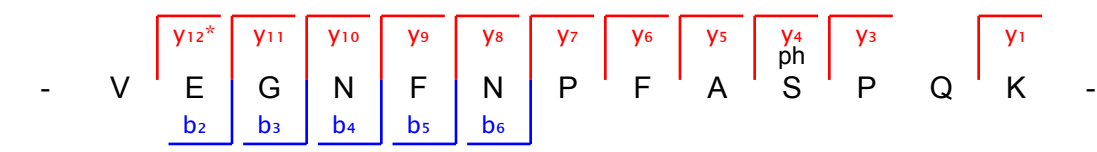

Raw file 20171215\_MaS\_33SR\_LMH\_phospho\_06 Scan 14486 Method FTMS; HCD Score 48.42 m/z 510.91 Gene names ARGLU1

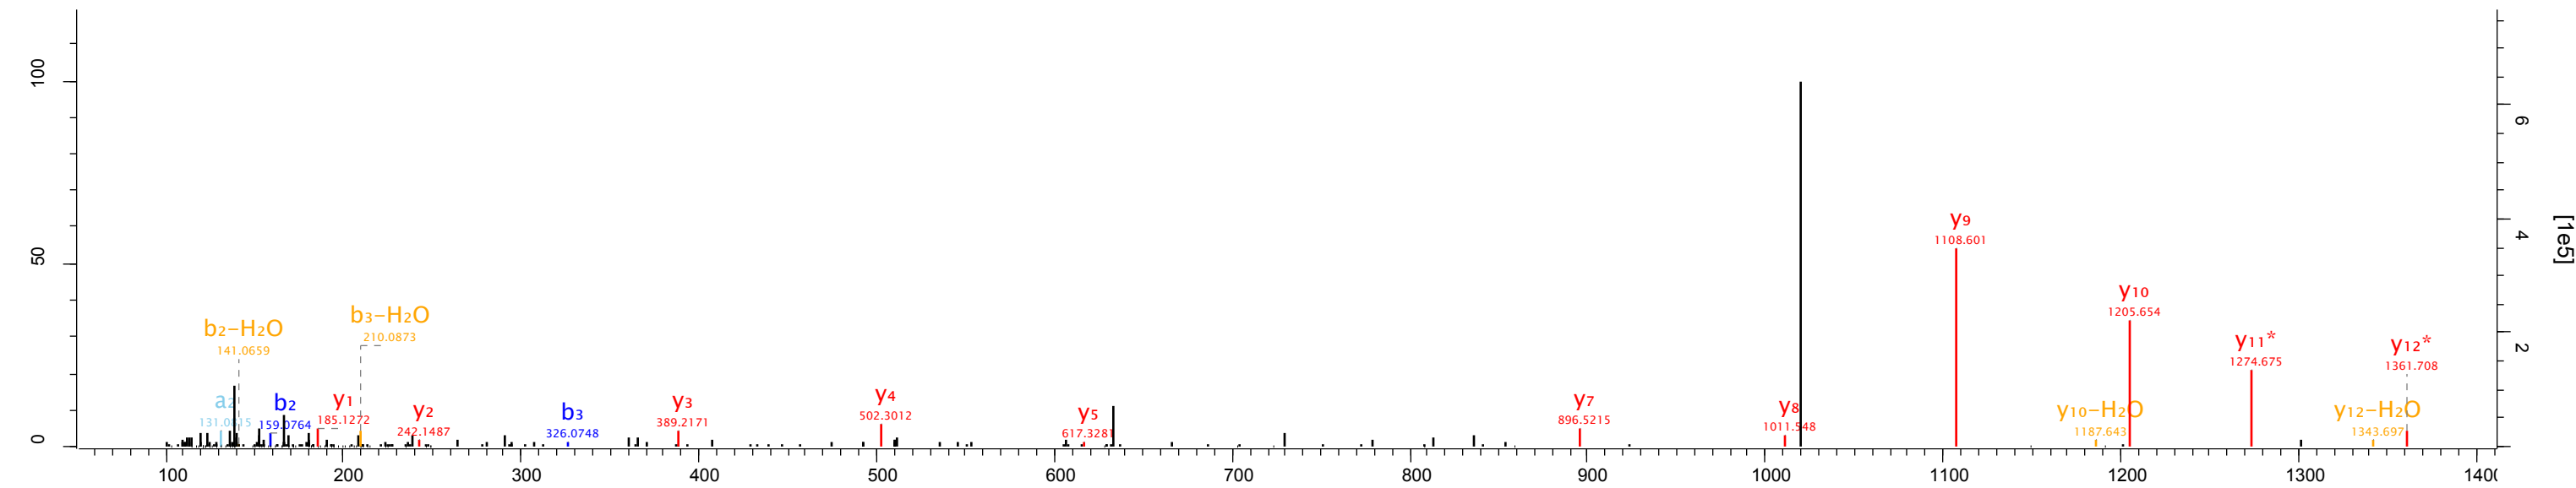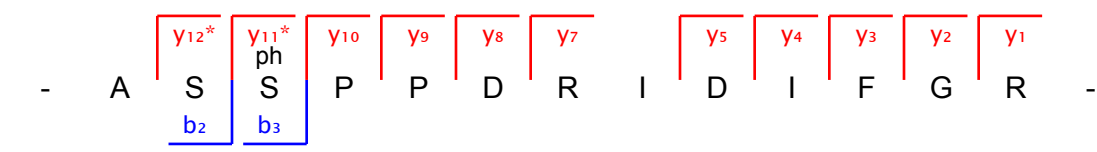

Raw file 20171215\_MaS\_33SR\_LMH\_phospho\_06 Scan 14596 Method FTMS; HCD Score 175.46 m/z 998.49 Gene names RAI1

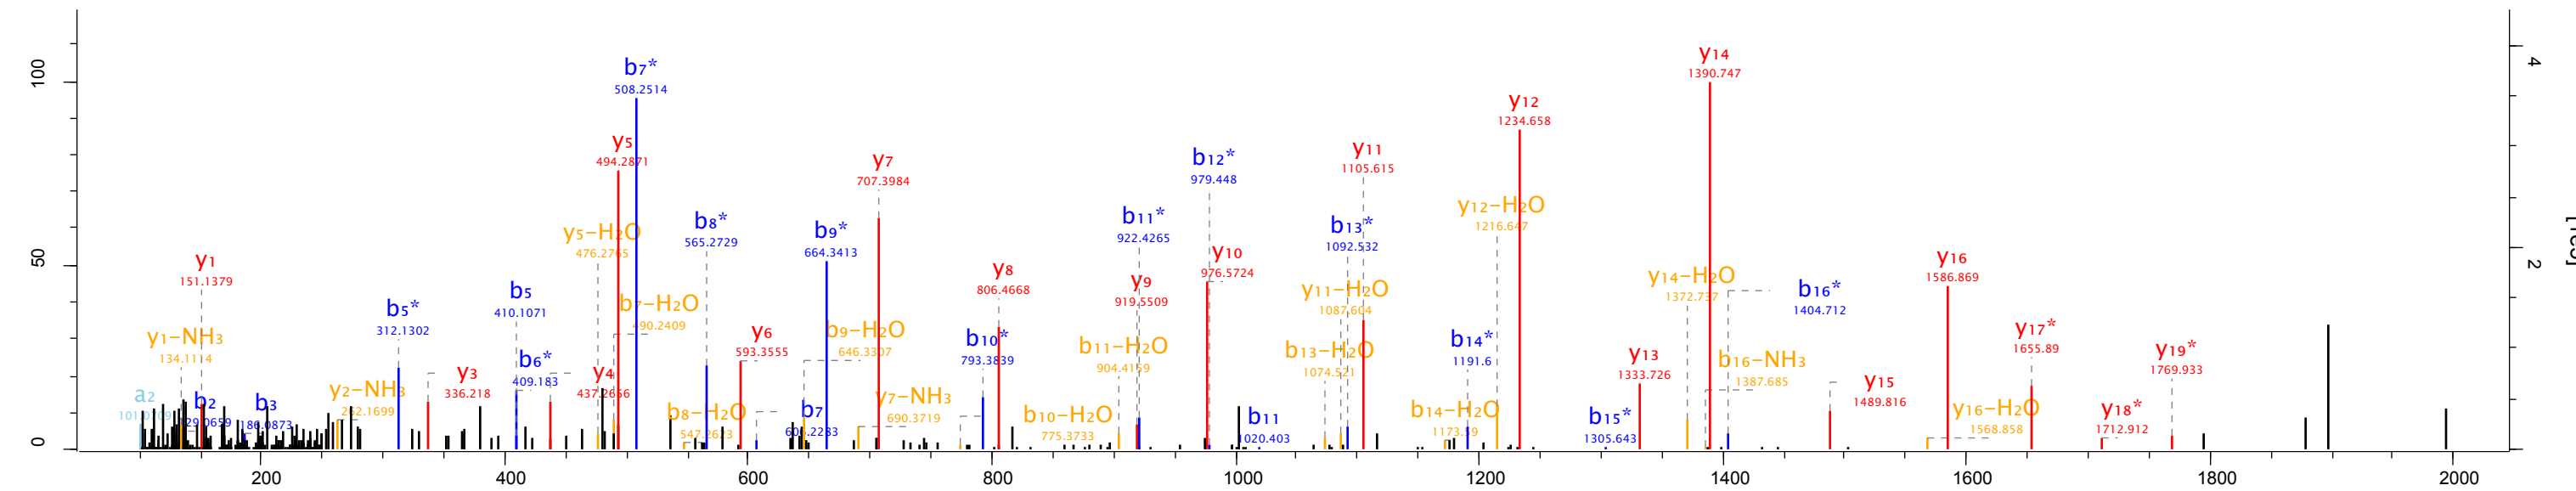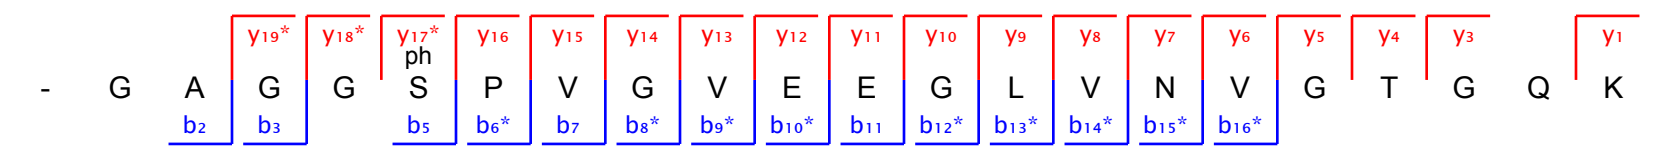

Raw file: 20171215\_MaS\_33SR\_LMH\_phospho\_06  
 Scan: 16216 Method: FTMS; HCD Score: 118.37 m/z: 683.34 Gene names: INPP5F

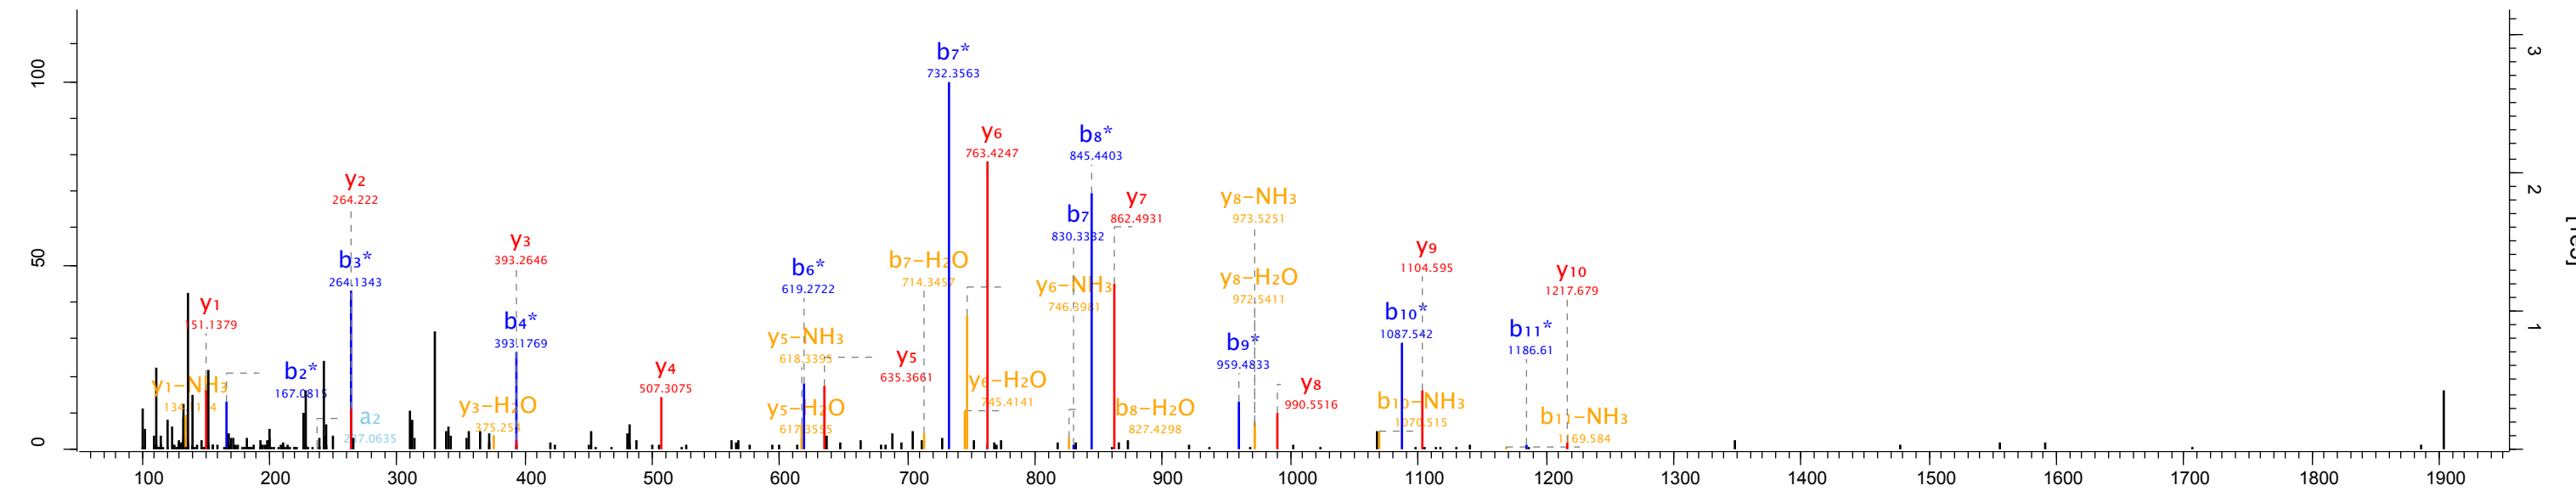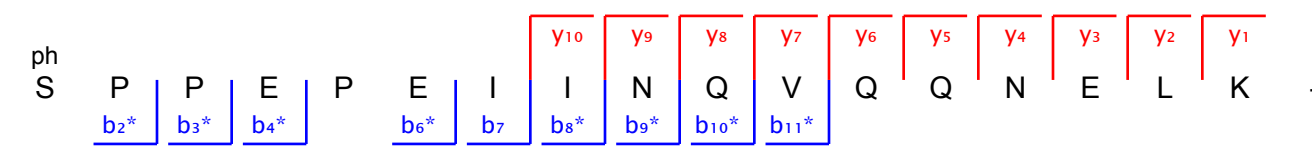

Raw file 20171215\_MaS\_33SR\_LMH\_phospho\_06 Scan 18296 Method FTMS; HCD Score 92.01 m/z 855.72 Gene names TP53BP1

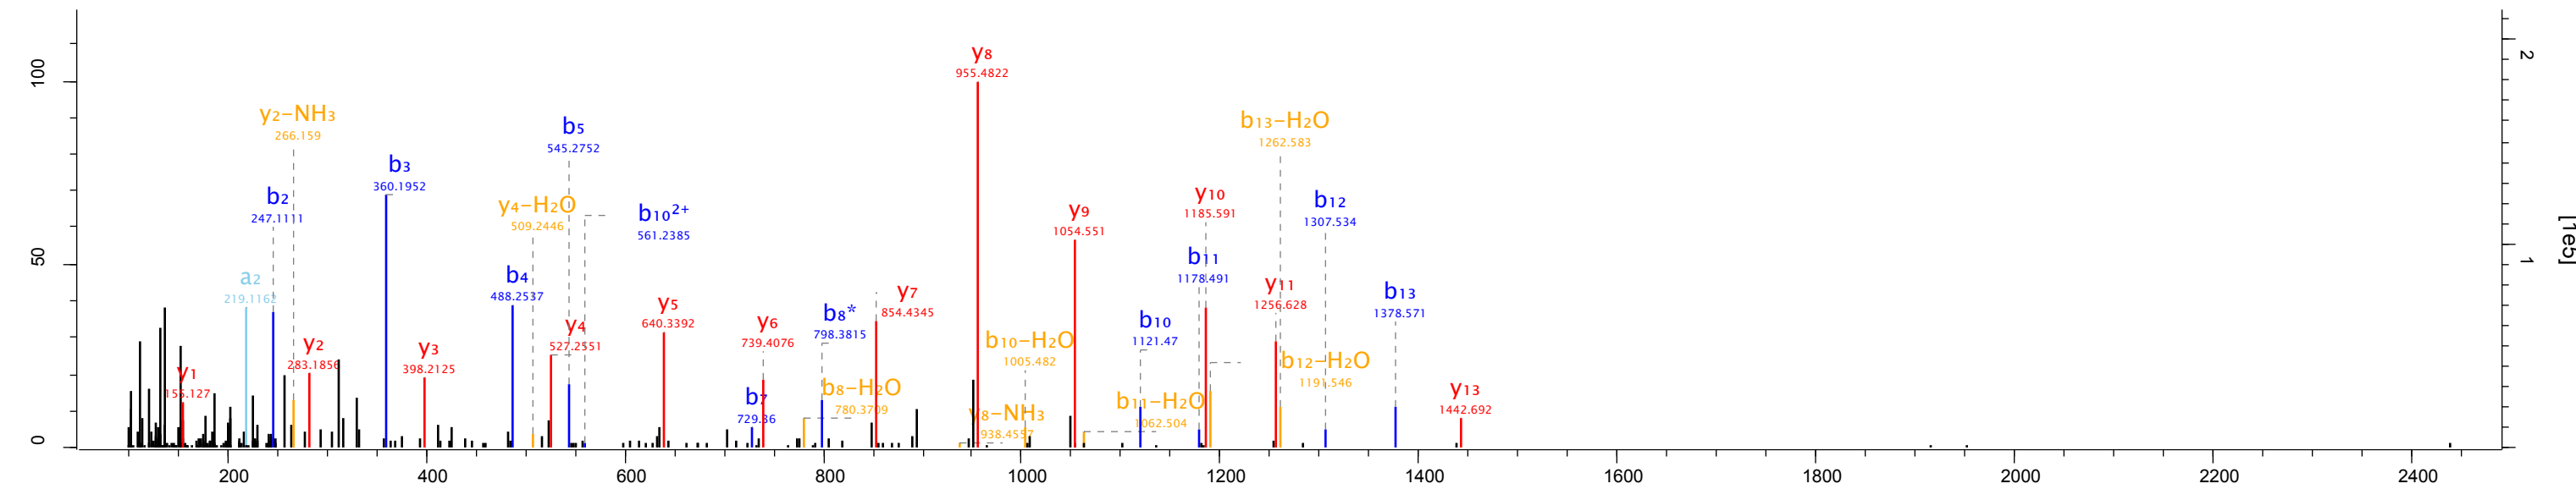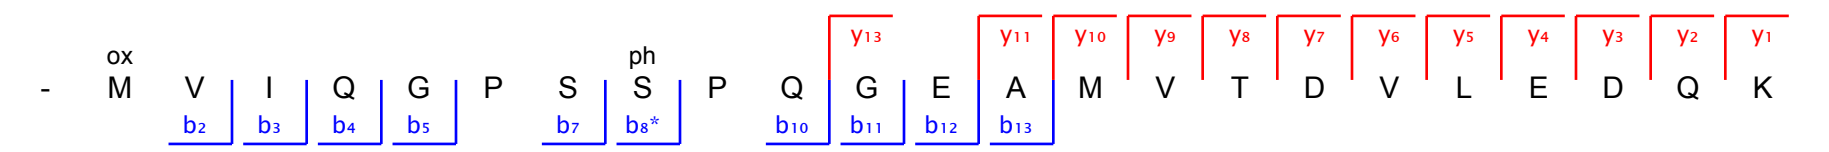

Raw file Scan Method Score m/z Gene names

20171215\_MaS\_33SR\_LMH\_phospho\_06 2236 FTMS; HCD 280.93 1013.34 HNRNPC

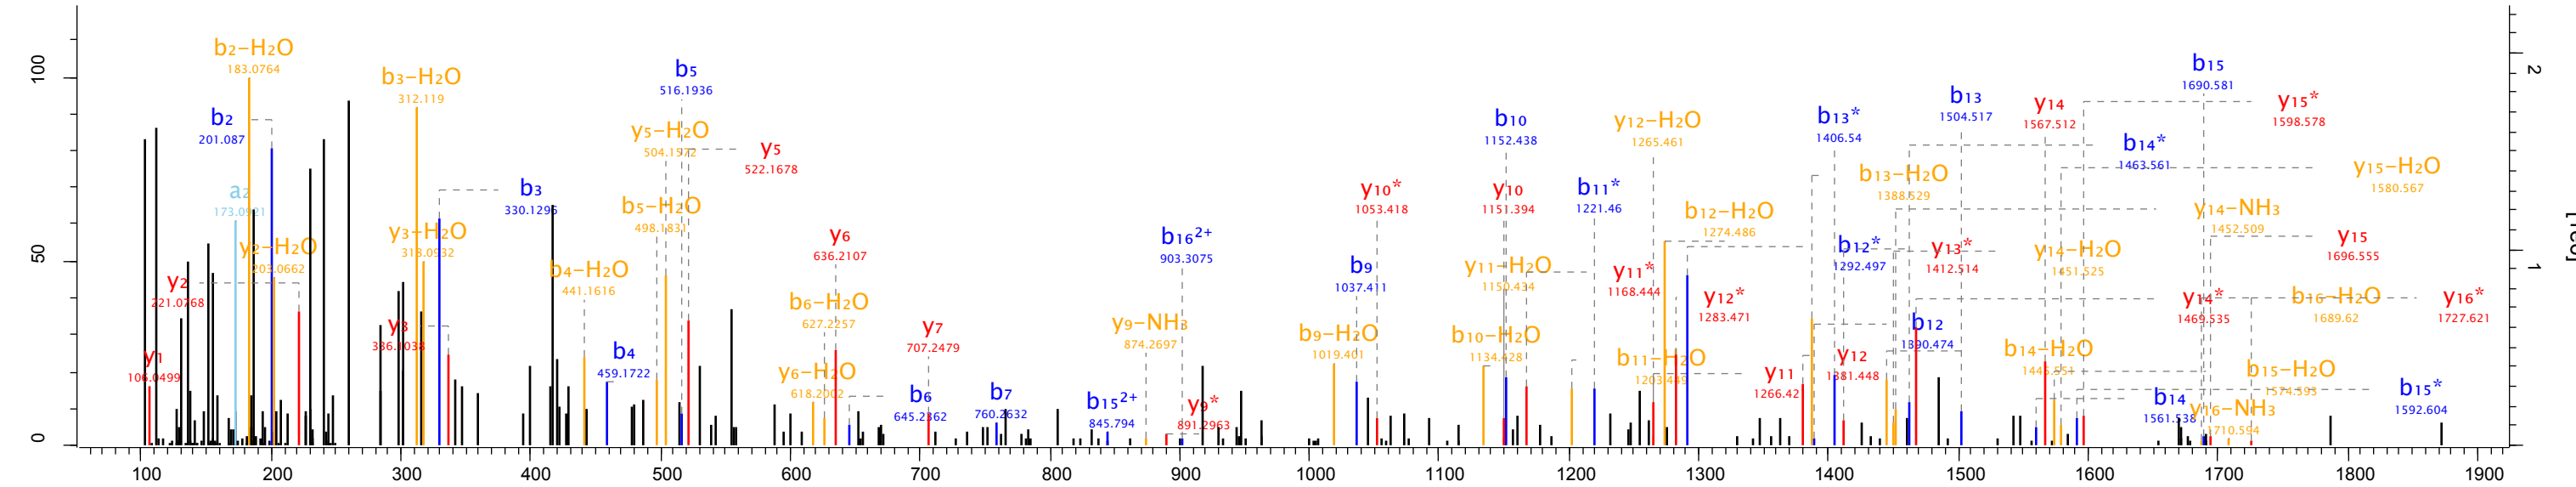

- E A E E G E D D R D S A N G E D D S -

b<sub>2</sub>
b<sub>3</sub>
b<sub>4</sub>
b<sub>5</sub>
b<sub>6</sub>
b<sub>7</sub>
b<sub>9</sub>
b<sub>10</sub>
b<sub>11</sub><sup>\*</sup>
b<sub>12</sub>
b<sub>13</sub>
b<sub>14</sub>
b<sub>15</sub>
b<sub>16</sub><sup>2+</sup>
y<sub>1</sub>
y<sub>2</sub>
y<sub>3</sub>
y<sub>5</sub>
y<sub>6</sub>
y<sub>7</sub>
y<sub>9</sub><sup>\*</sup>
y<sub>10</sub>
y<sub>11</sub>
y<sub>12</sub>
y<sub>13</sub><sup>\*</sup>
y<sub>14</sub>
y<sub>15</sub>
y<sub>16</sub><sup>\*</sup>

Raw file Scan Method Score m/z Gene names

20171215\_MaS\_33SR\_LMH\_phospho\_06 2526 FTMS; HCD 65.24 582.72 DDX5

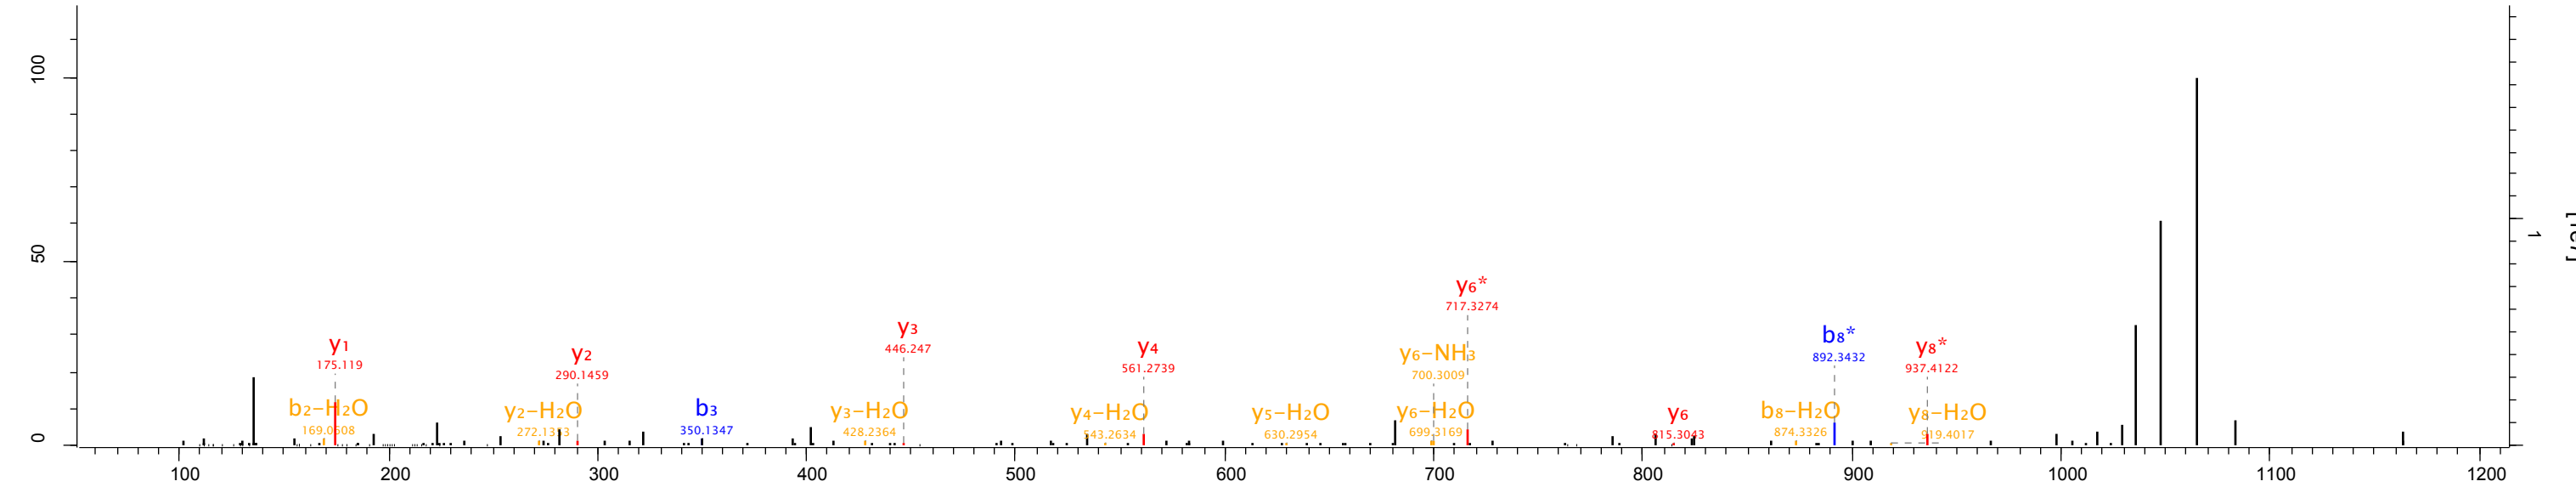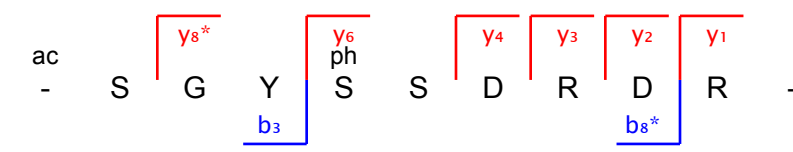

Raw file 20171215\_MaS\_33SR\_LMH\_phospho\_06 Scan 2536 Method FTMS; HCD Score 101.39 m/z 417.56 Gene names CIT

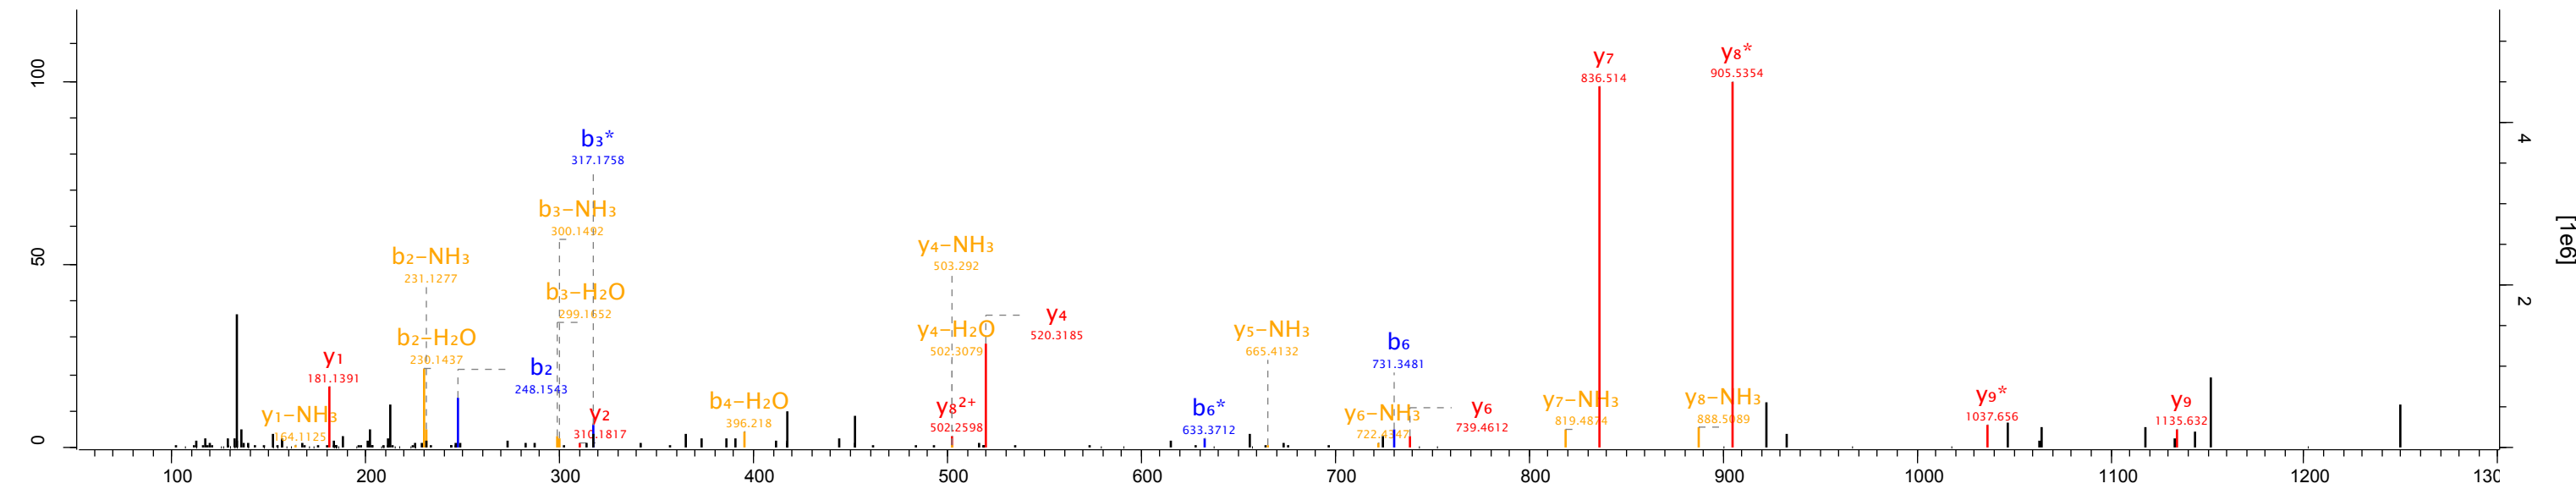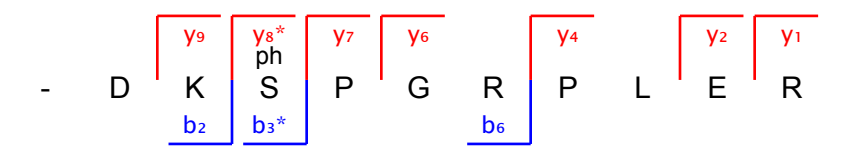



Raw file 20171215\_MaS\_33SR\_LMH\_phospho\_06 Scan 2576 Method FTMS; HCD Score 98.41 m/z 531.25 Gene names CXorf38

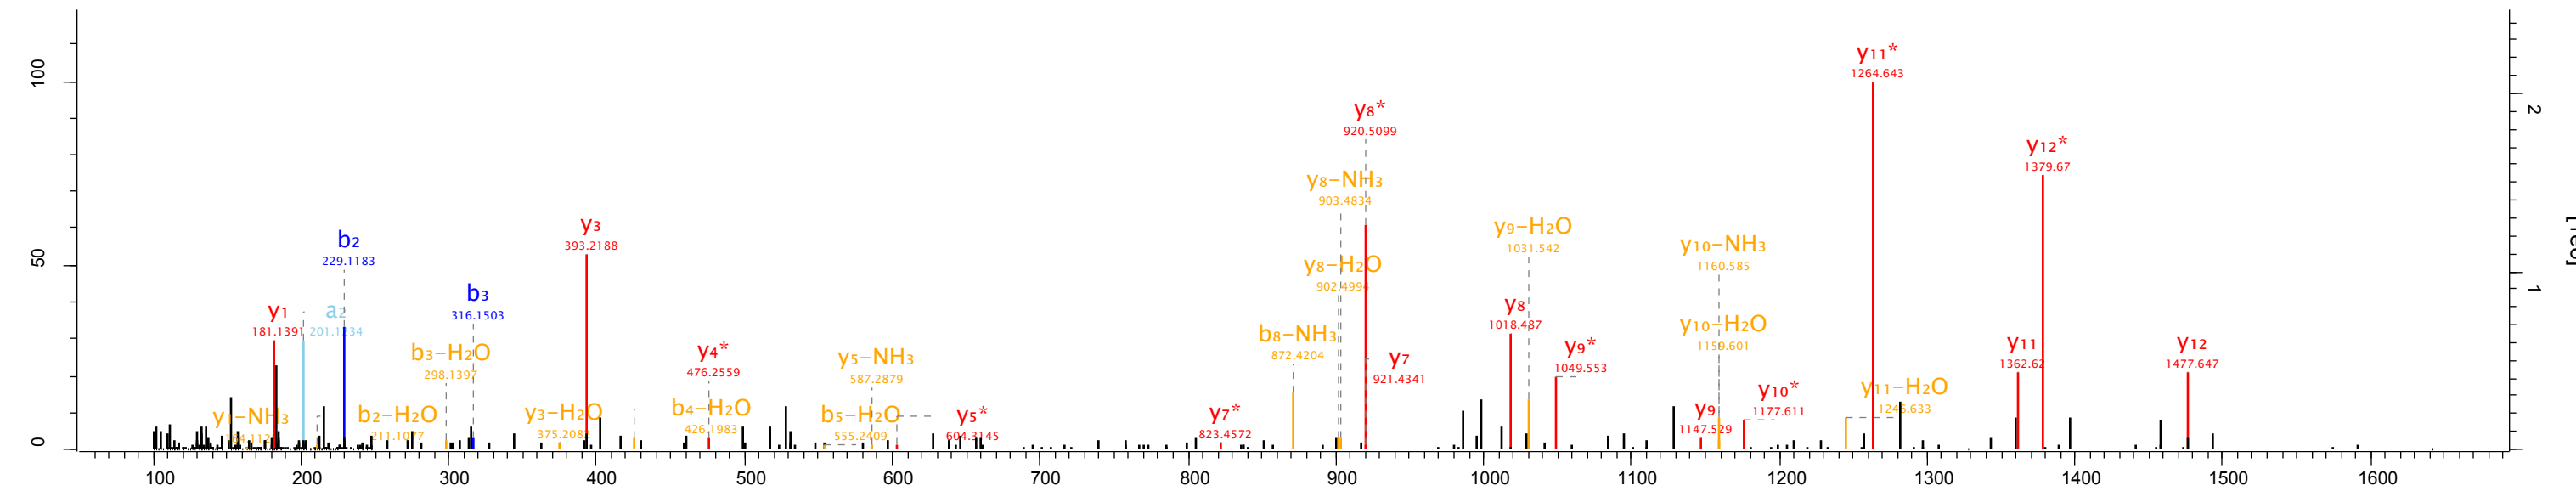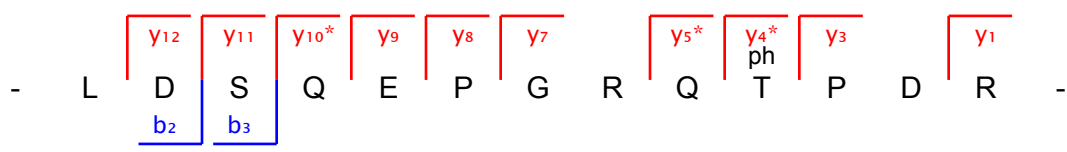

Raw file 20171215\_MaS\_33SR\_LMH\_phospho\_06 Scan 2746 Method FTMS; HCD Score 102.28 m/z 352.2 Gene names DSN1

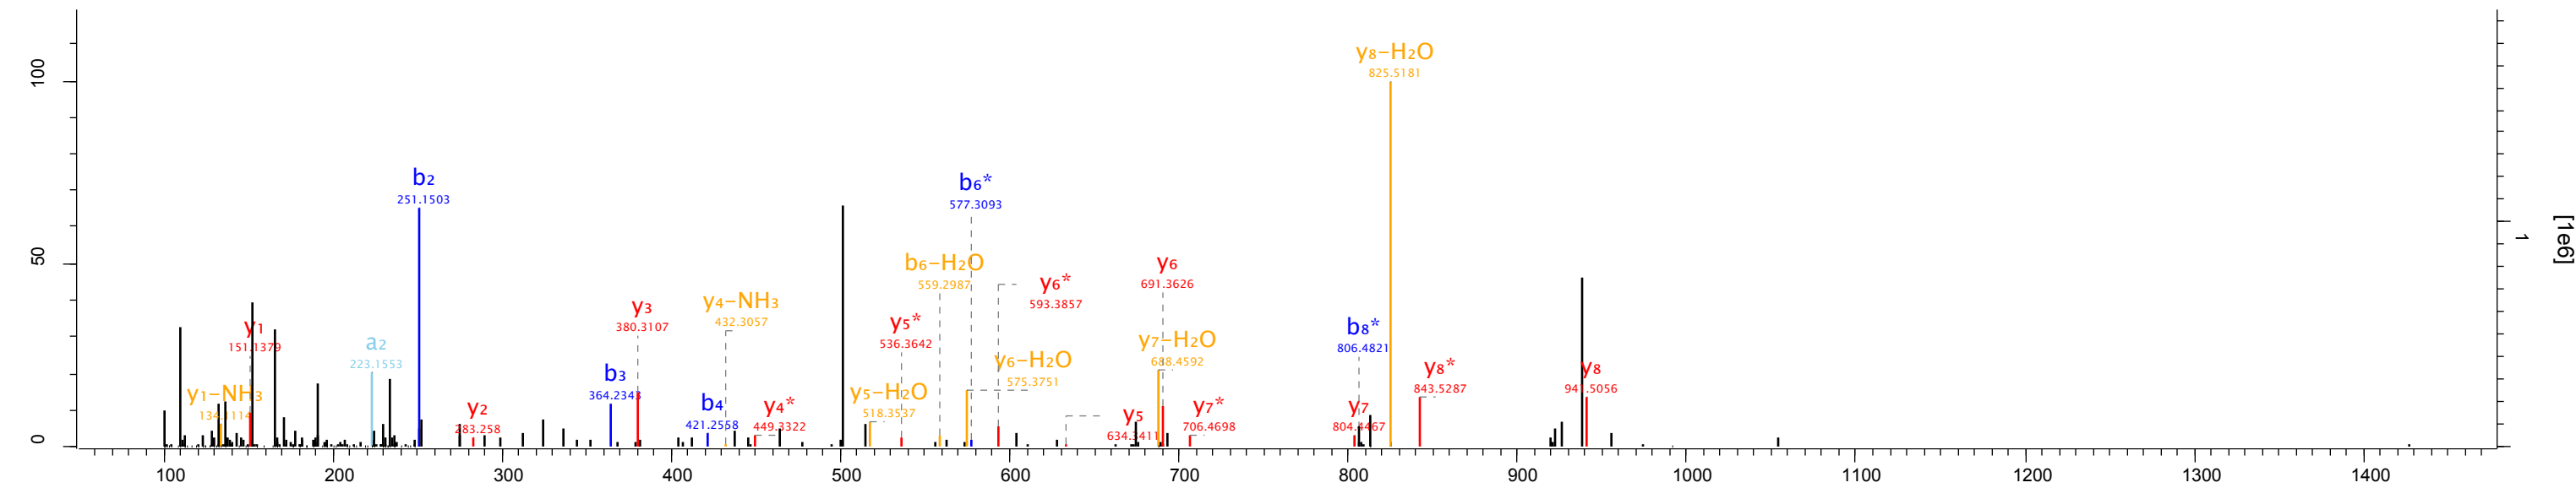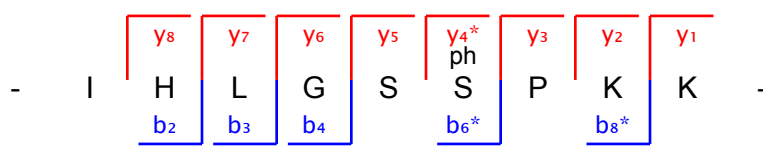

Raw file 20171215\_MaS\_33SR\_LMH\_phospho\_06 Scan 2766 Method FTMS; HCD Score 117.95 m/z 565.72 Gene names SRRM2

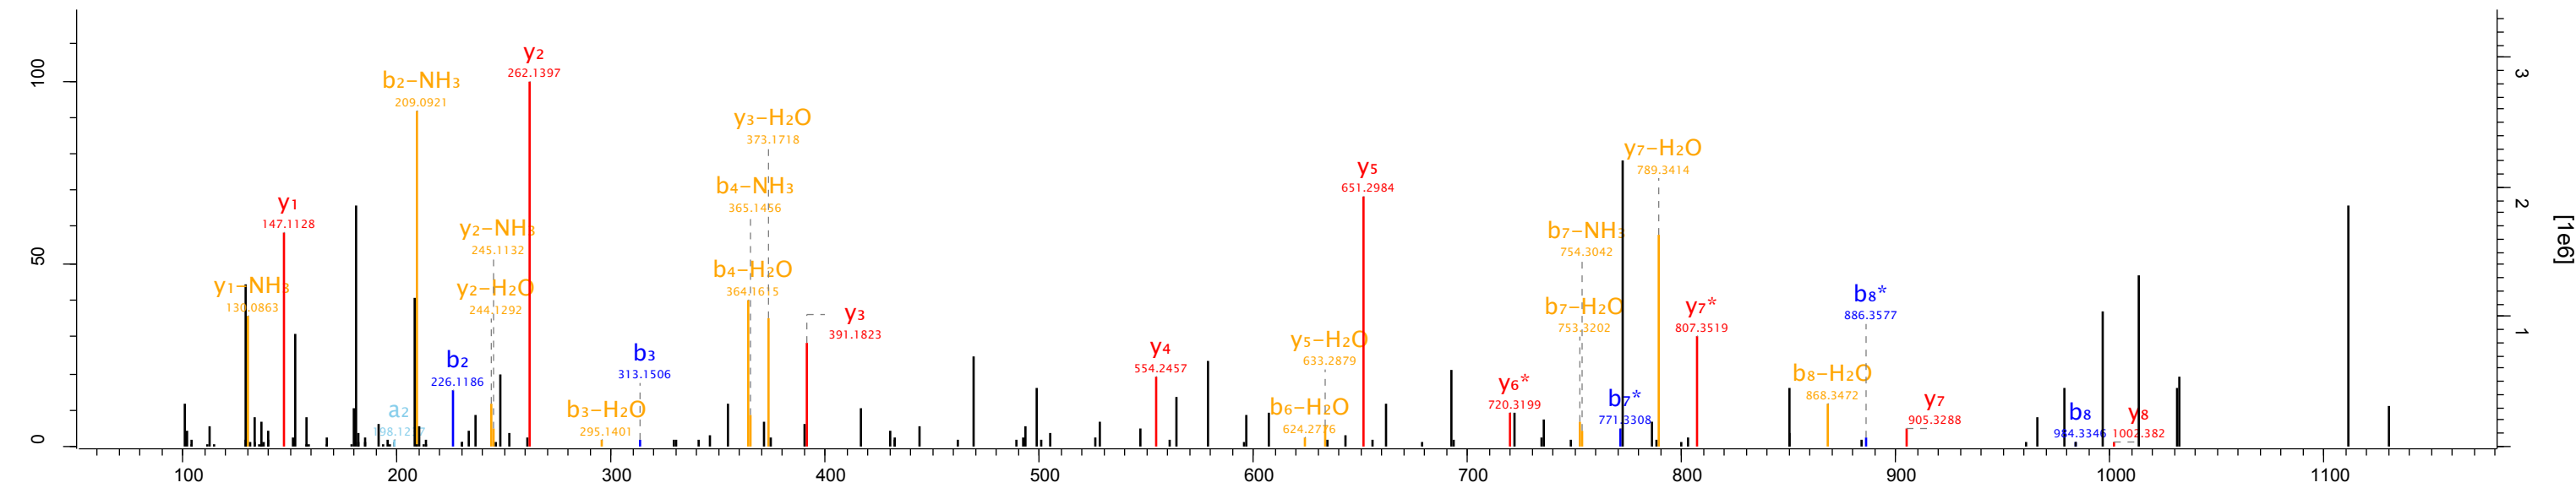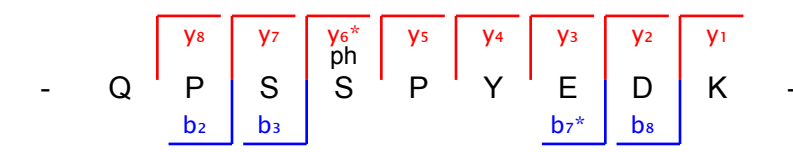

Raw file 20171215\_MaS\_33SR\_LMH\_phospho\_06 Scan 3856 Method FTMS; HCD Score 96.14 m/z 649.82 Gene names LARP4

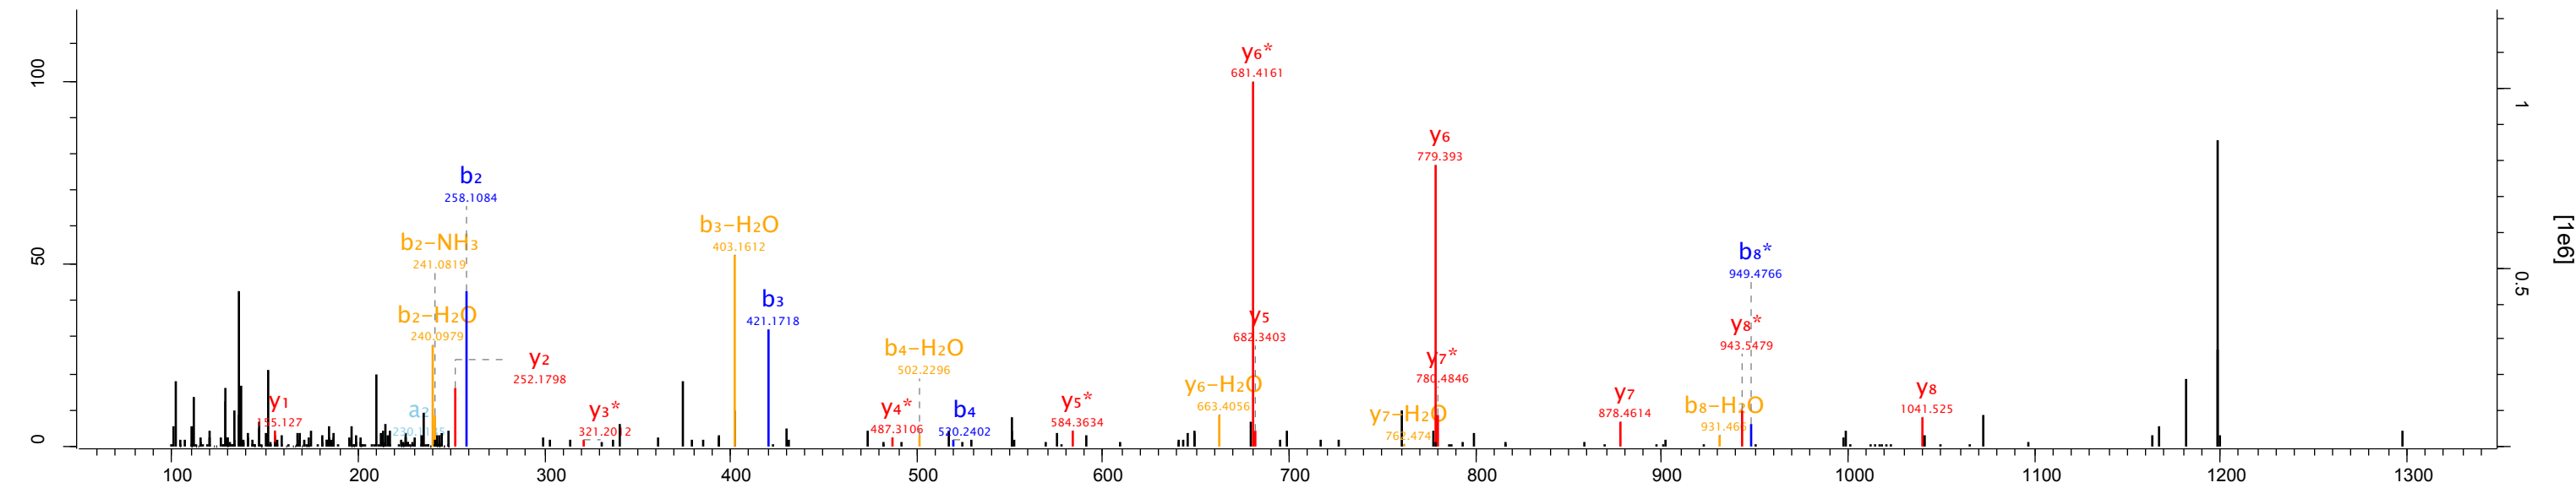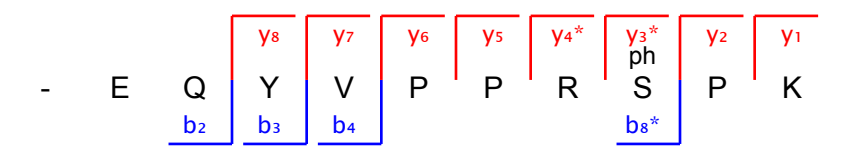

Raw file 20171215\_MaS\_33SR\_LMH\_phospho\_06 Scan 4016 Method FTMS; HCD Score 89.28 m/z 822.4 Gene names CHAF1B

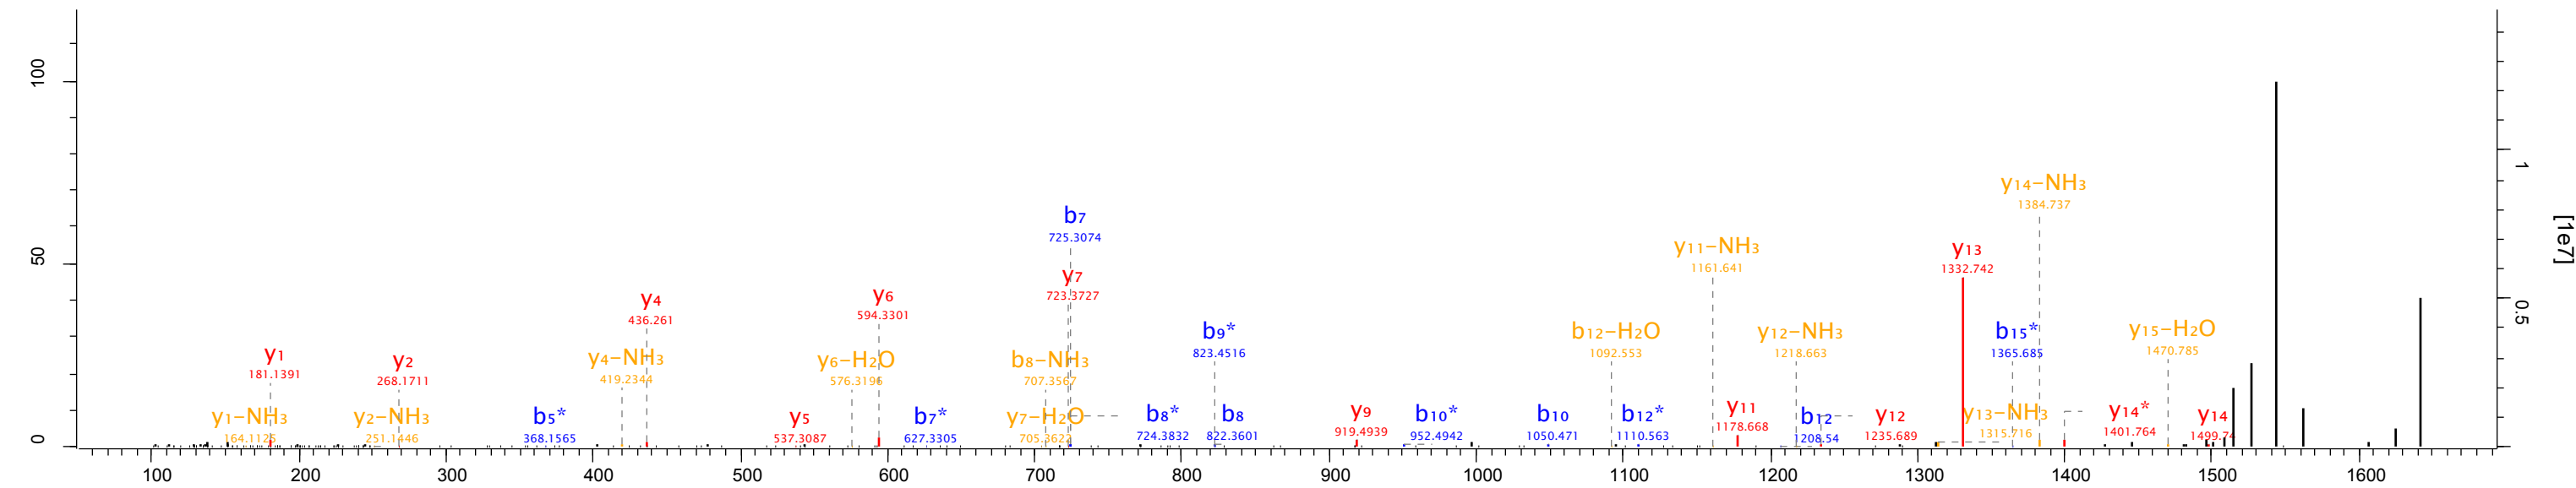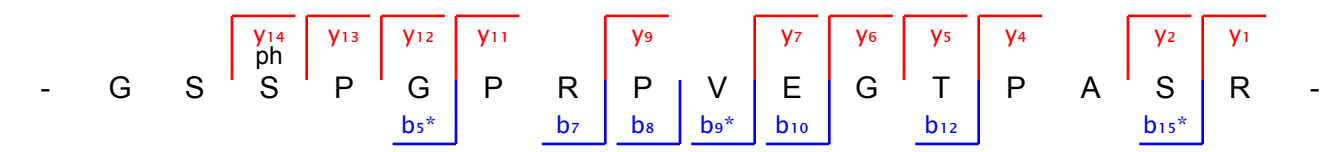

Raw file 20171215\_MaS\_33SR\_LMH\_phospho\_06 Scan 4036 Method FTMS; HCD Score 249.72 m/z 721.35 Gene names PDE1C

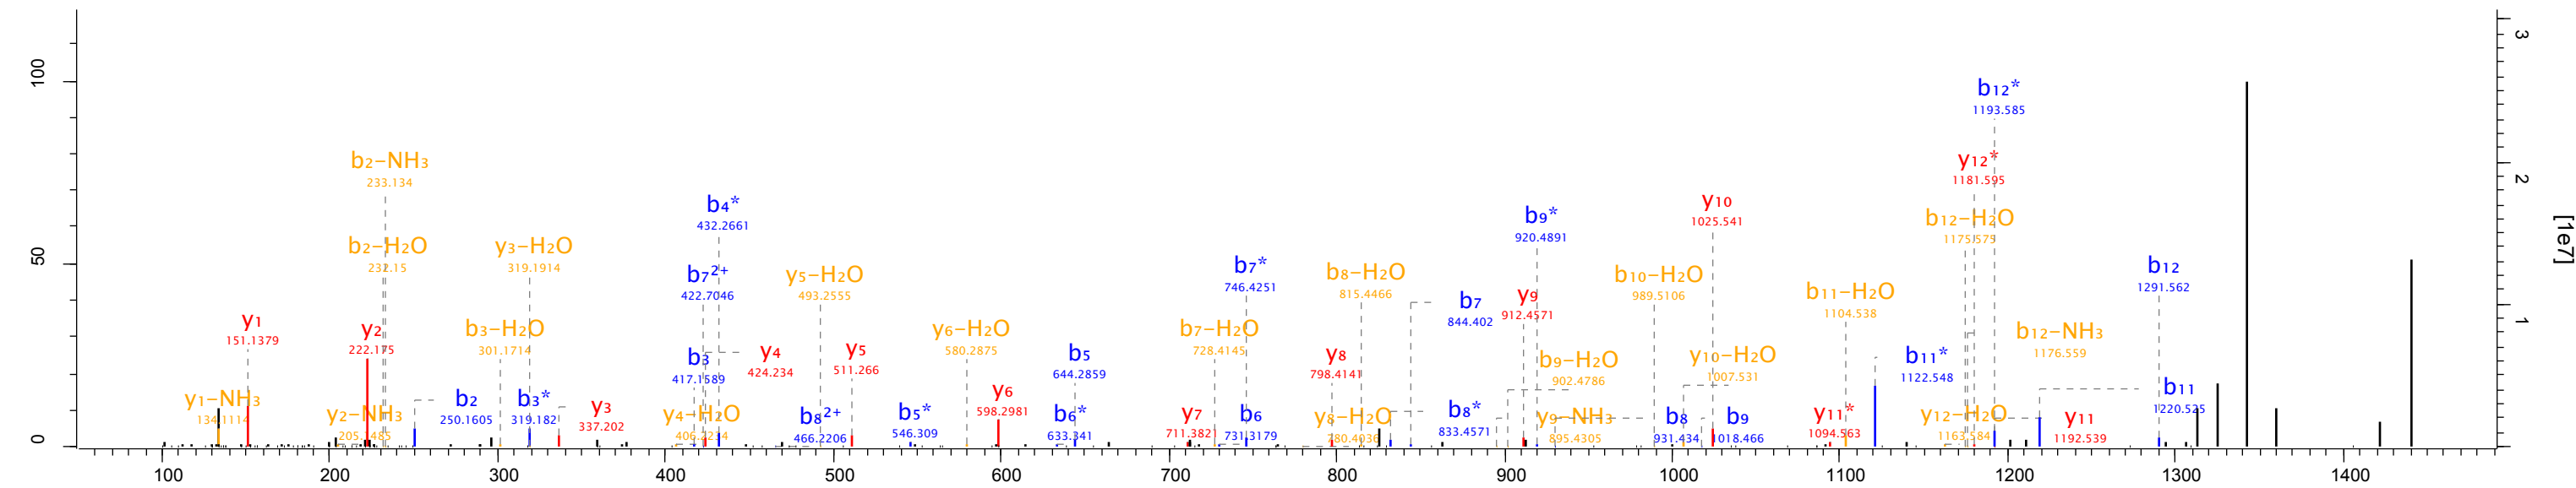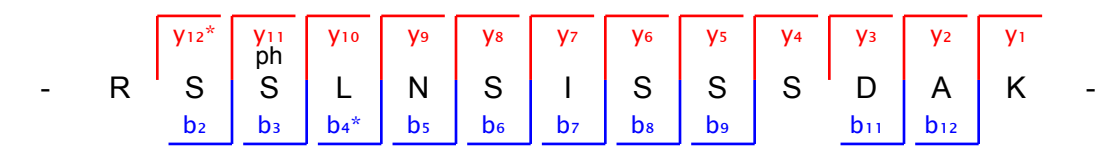

Raw file 20171215\_MaS\_33SR\_LMH\_phospho\_06 Scan 4406 Method FTMS; HCD Score 88.56 m/z 674.82 Gene names MCM2

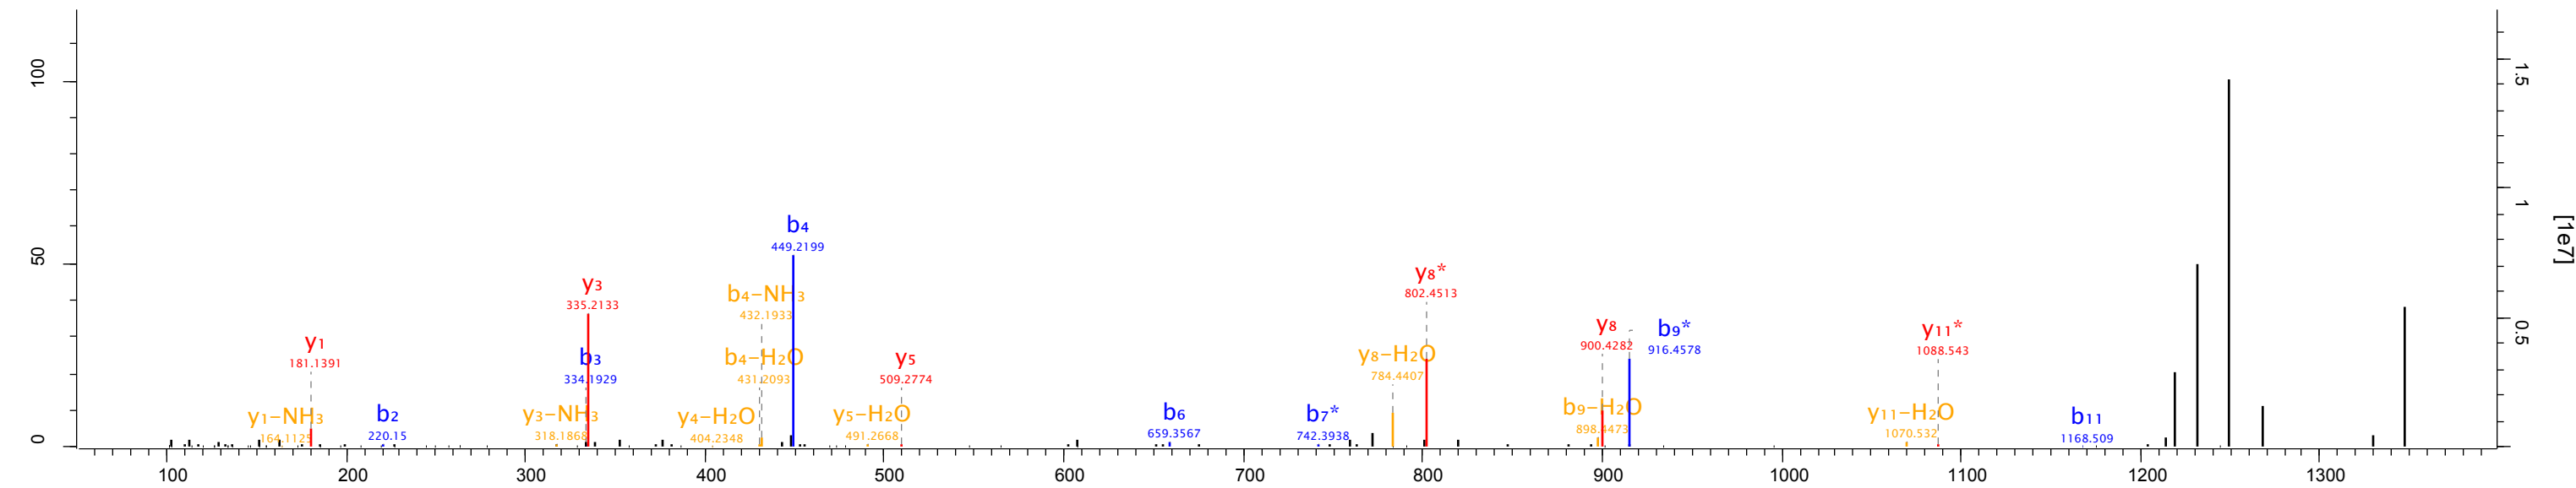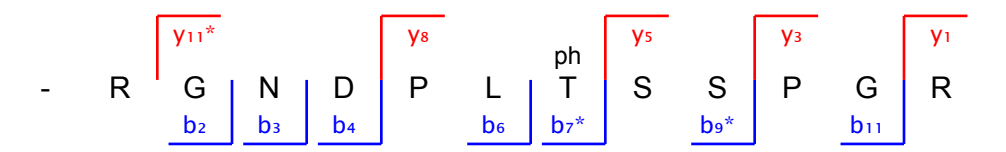

Raw file 20171215\_MaS\_33SR\_LMH\_phospho\_06 Scan 4426 Method FTMS; HCD Score 111.11 m/z 844.85 Gene names USP39

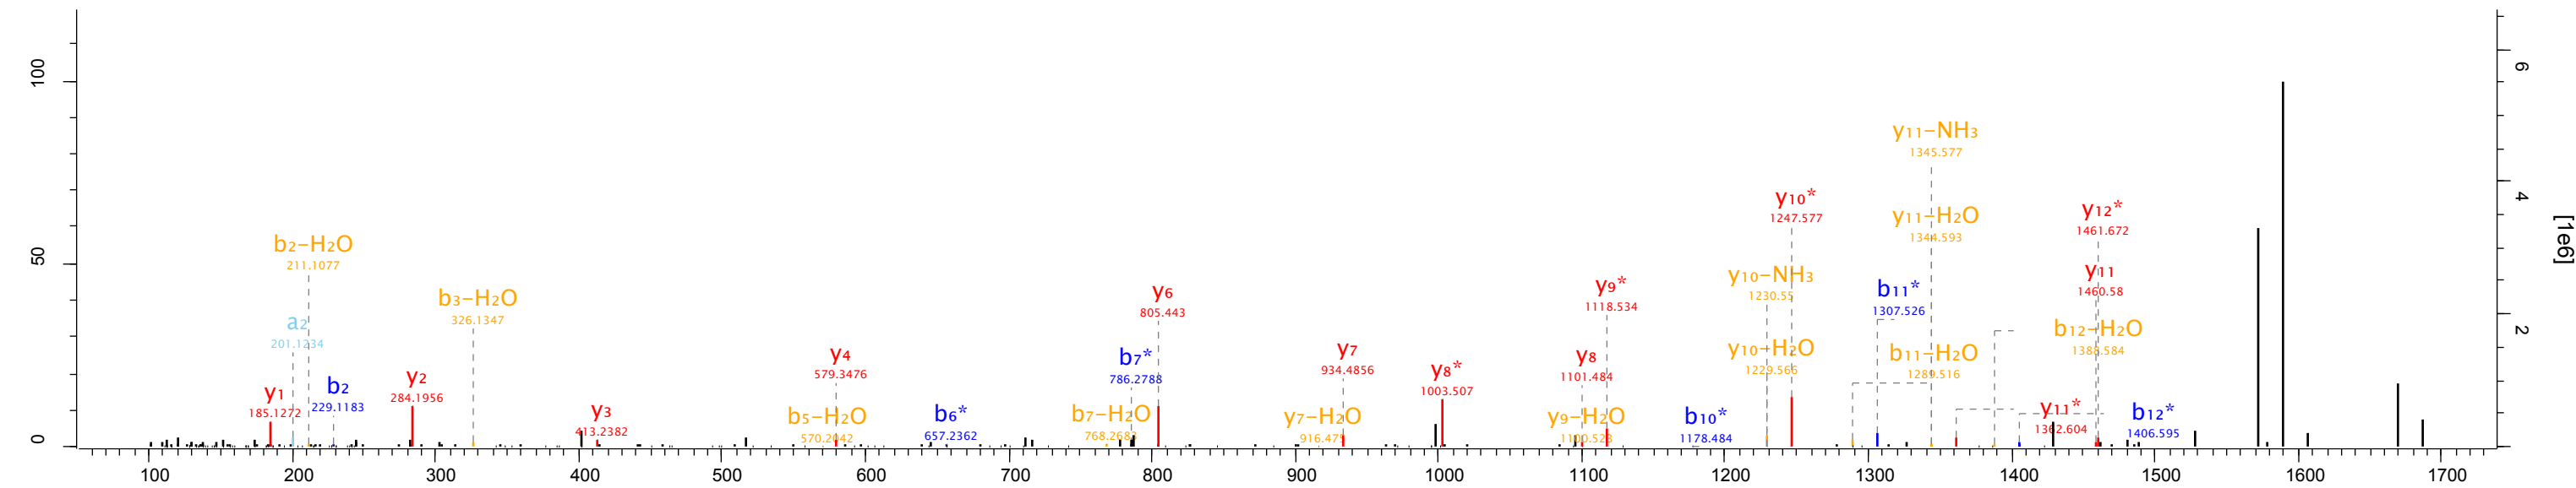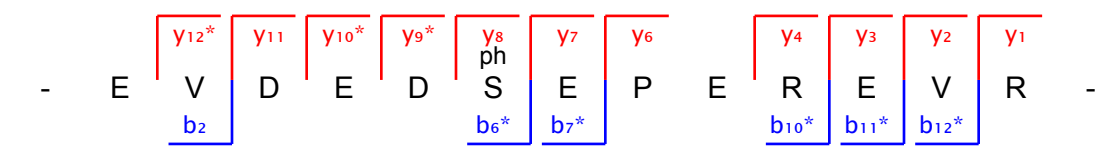



Raw file 20171215\_MaS\_33SR\_LMH\_phospho\_06 Scan 4696 Method FTMS; HCD Score 70.99 m/z 565.22 Gene names PRRC2A

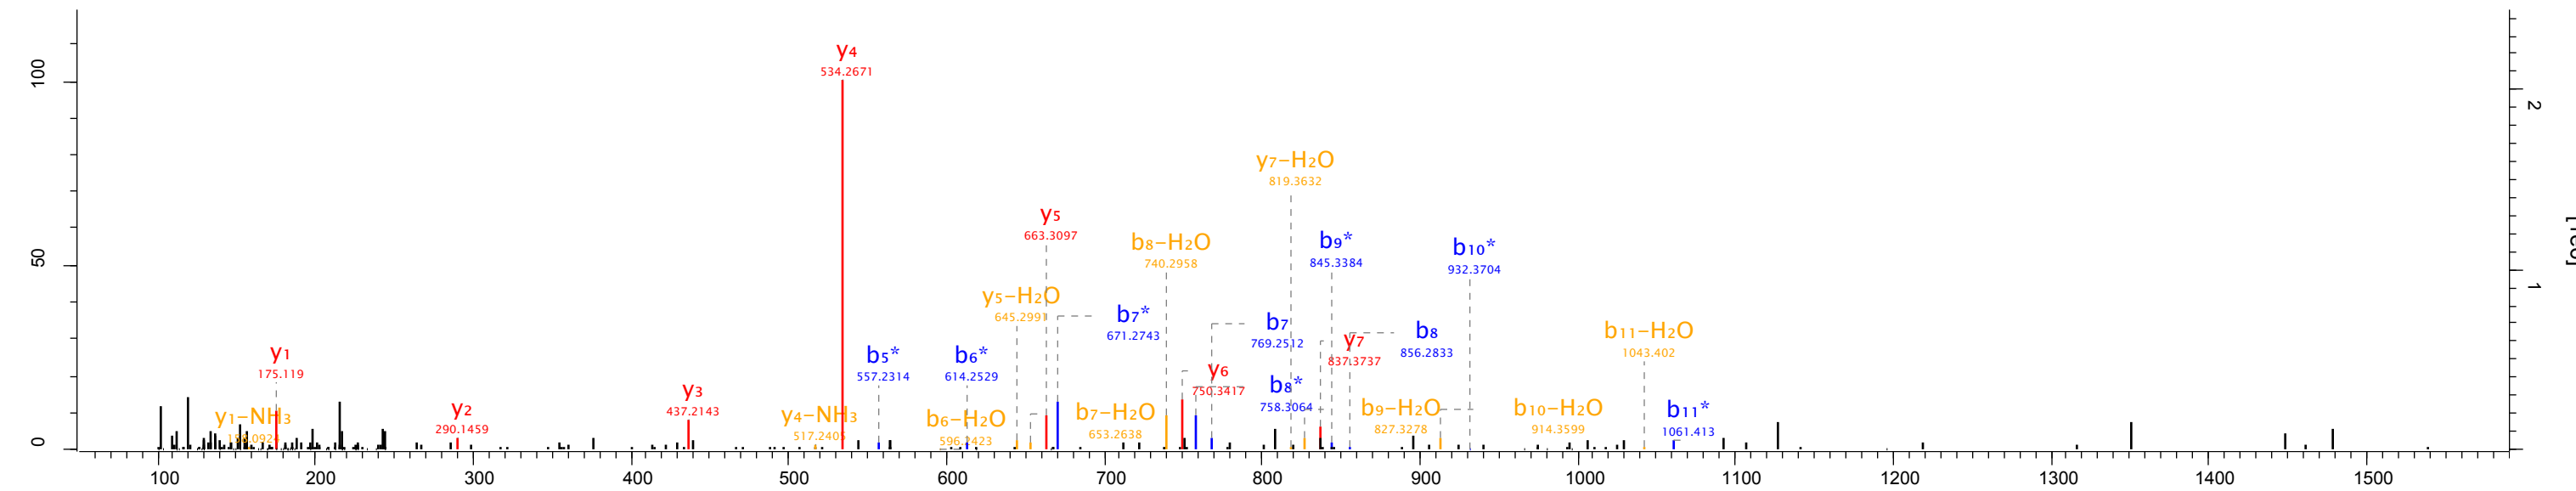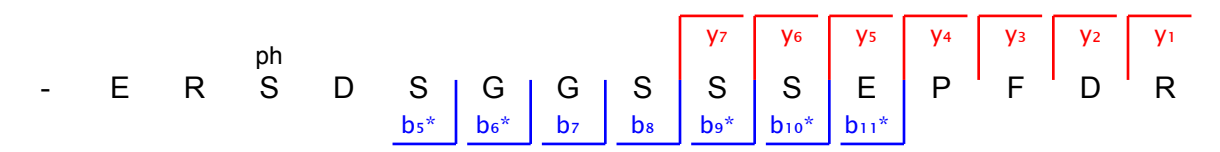

Raw file 20171215\_MaS\_33SR\_LMH\_phospho\_06 Scan 4856 Method FTMS; HCD Score 110.92 m/z 524.78 Gene names MSH6

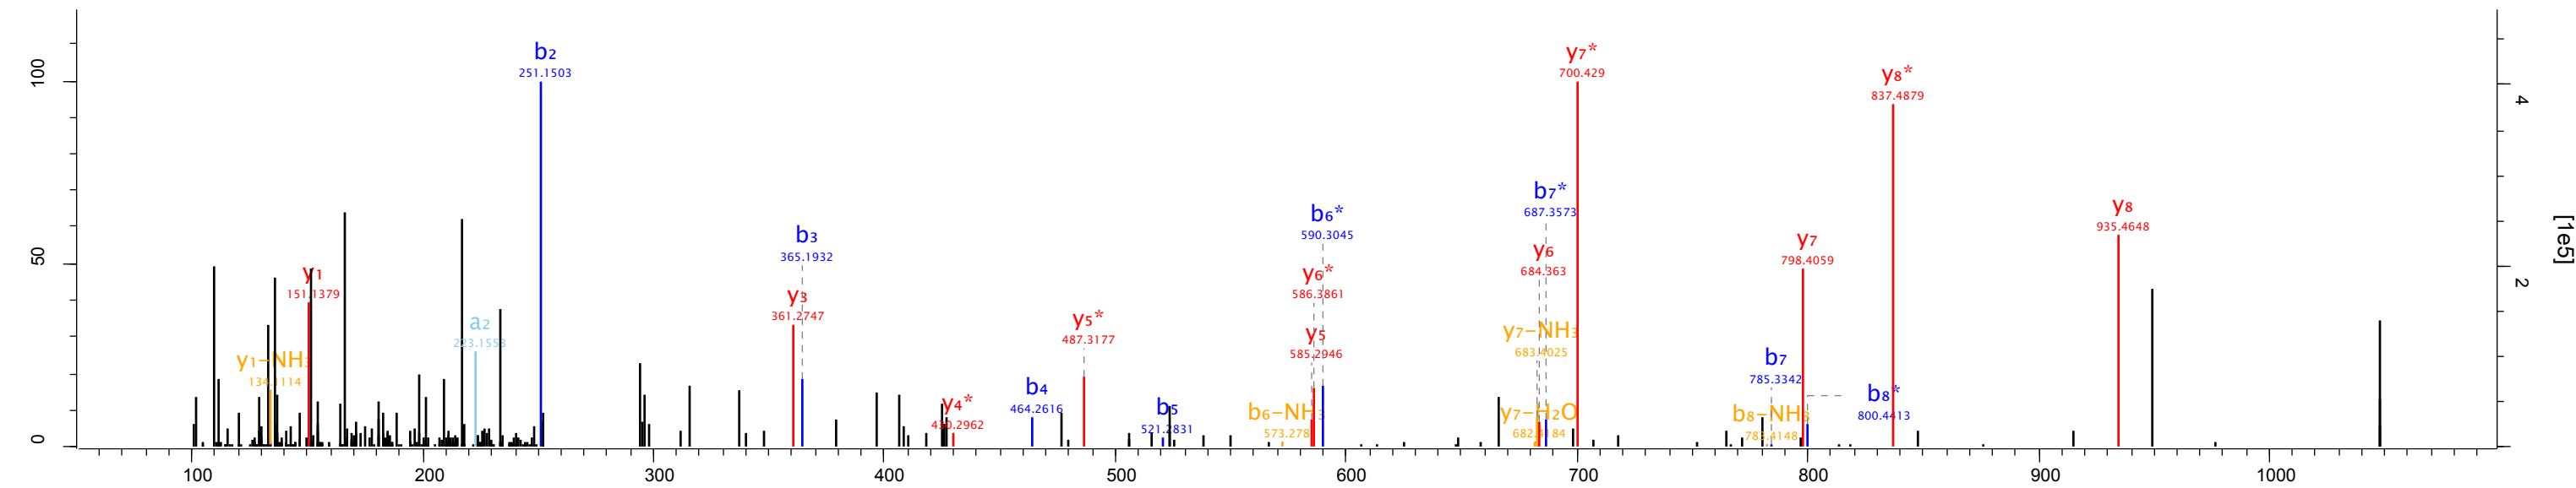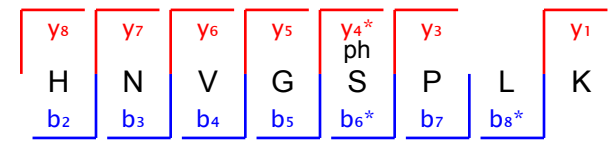

Raw file Scan Method Score m/z Gene names  
 20171215\_MaS\_33SR\_LMH\_phospho\_06 4886 FTMS; HCD 335.12 953.88 CAMSAP2

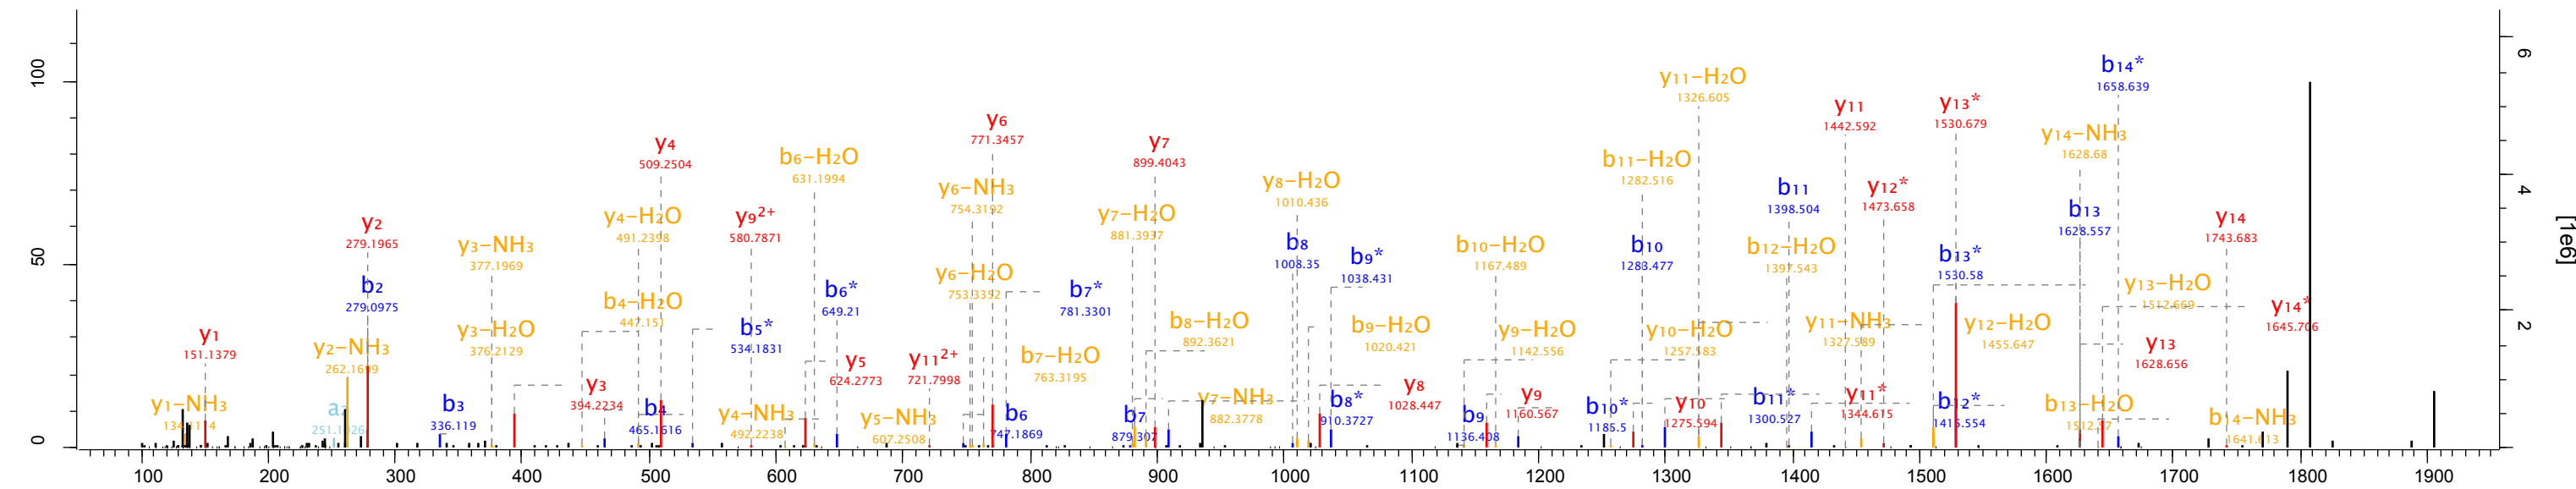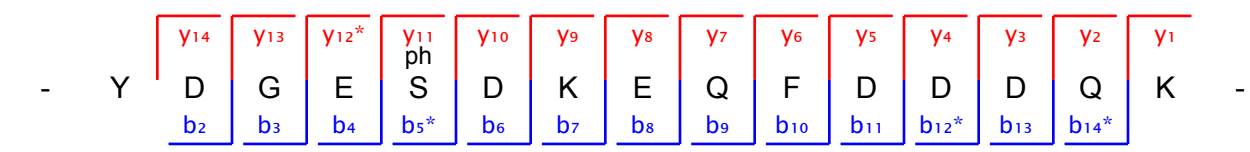

Raw file 20171215\_MaS\_33SR\_LMH\_phospho\_06 Scan 4906 Method FTMS; HCD Score 88 m/z 579.93 Gene names PARD3

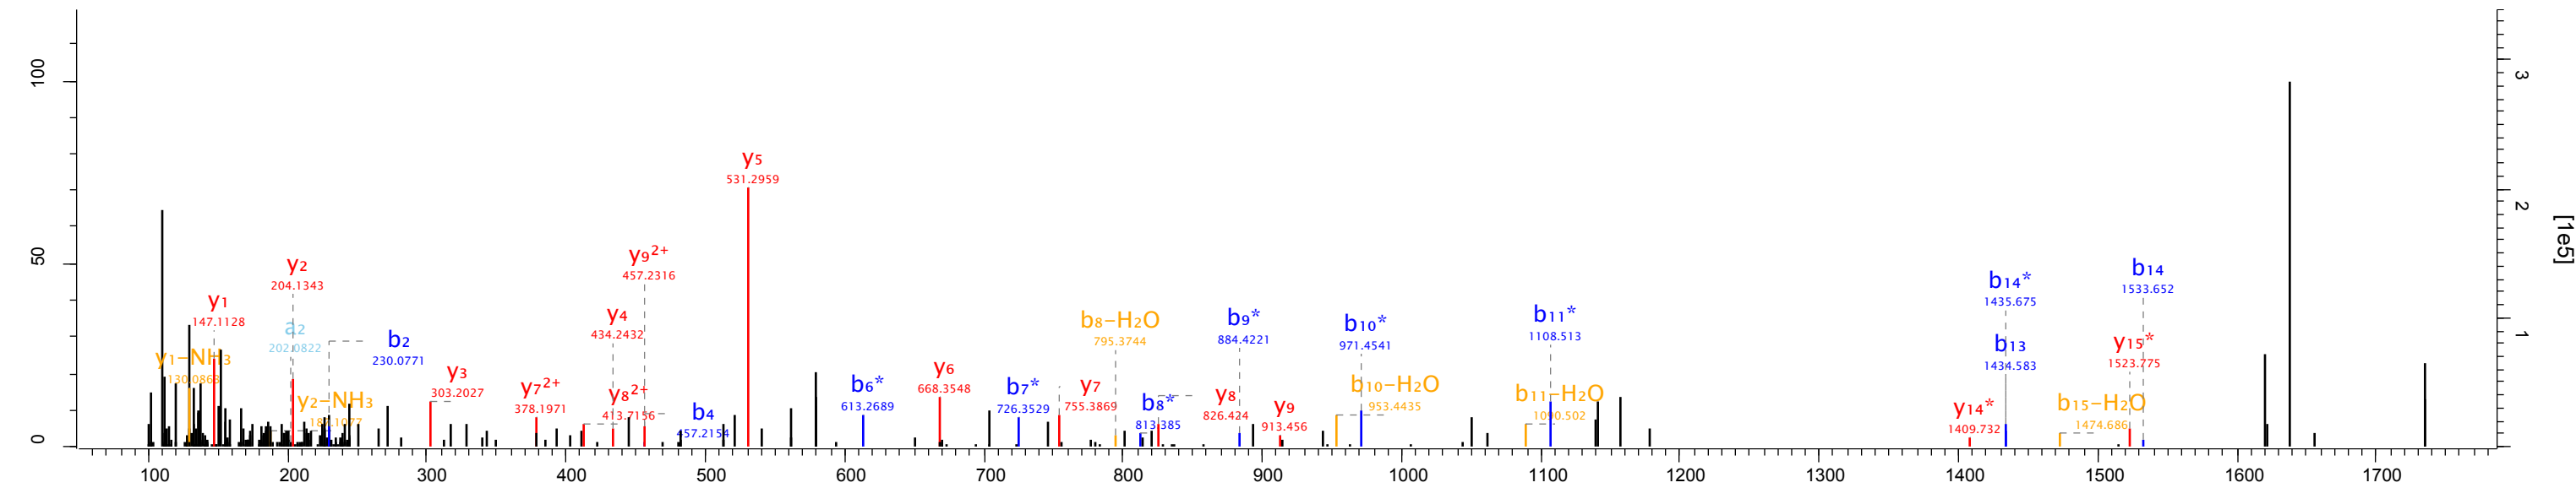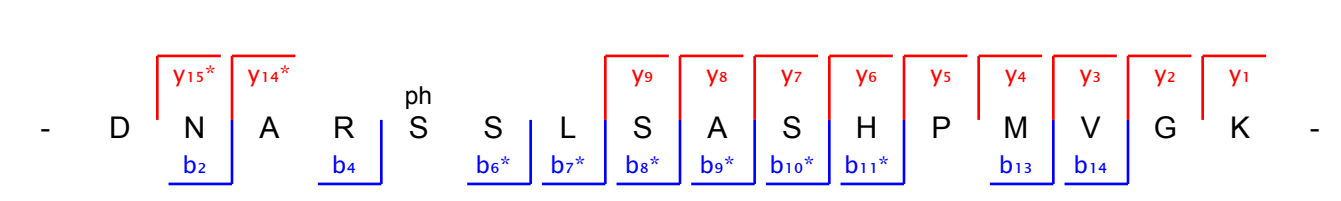

Raw file 20171215\_MaS\_33SR\_LMH\_phospho\_06 Scan 4936 Method FTMS; HCD Score 74.74 m/z 610.8 Gene names TCF7L2

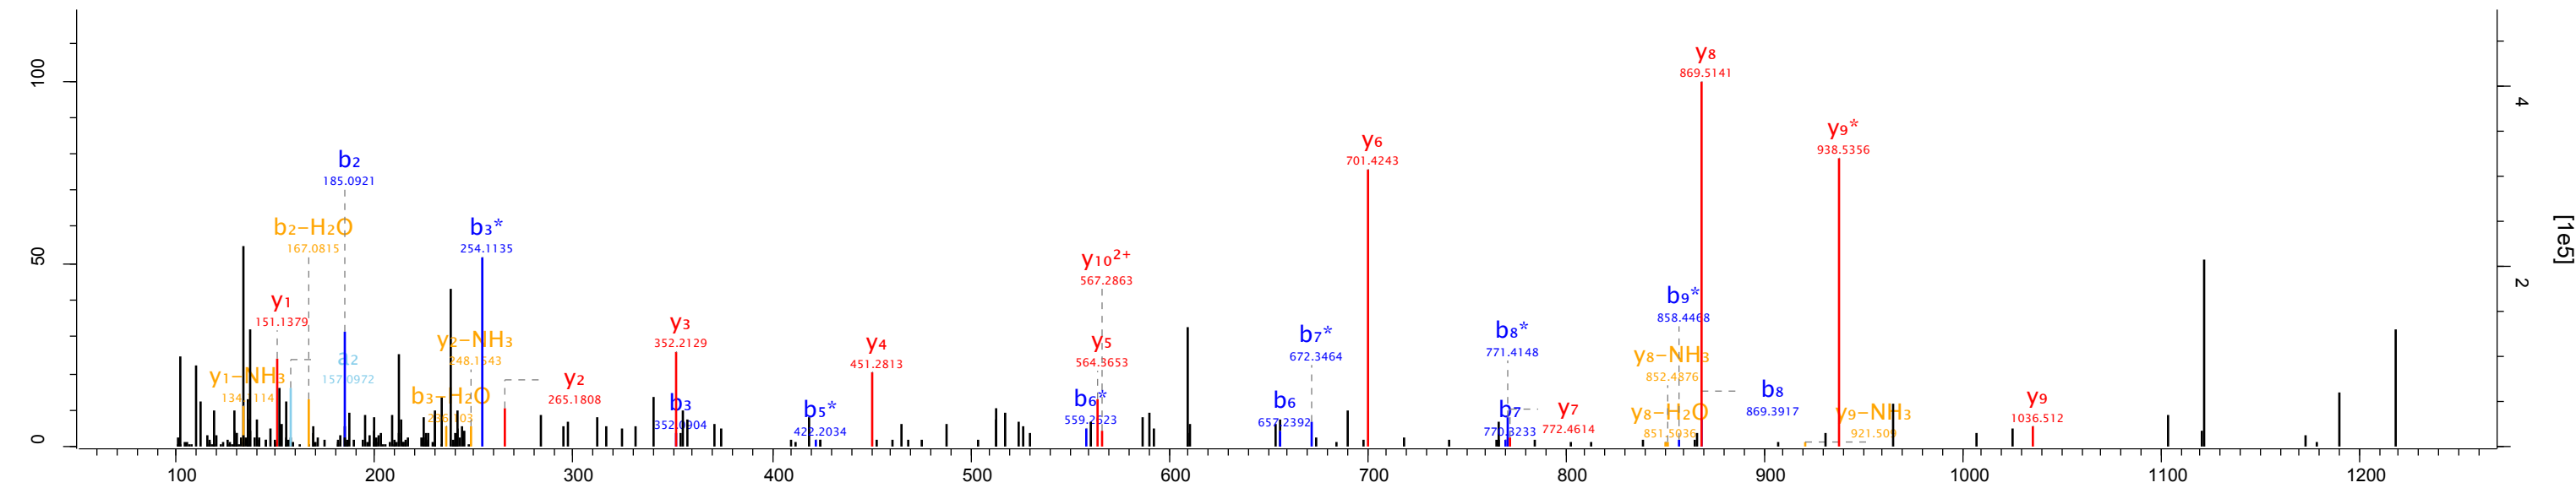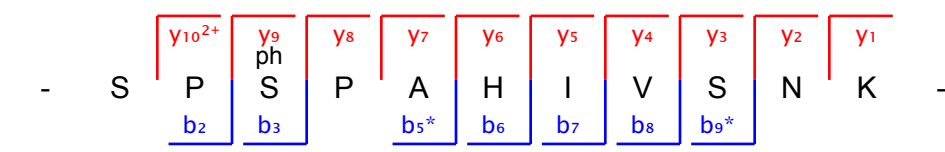

Raw file 20171215\_MaS\_33SR\_LMH\_phospho\_06 Scan 5196 Method FTMS; HCD Score 101.89 m/z 481.22 Gene names SASH1

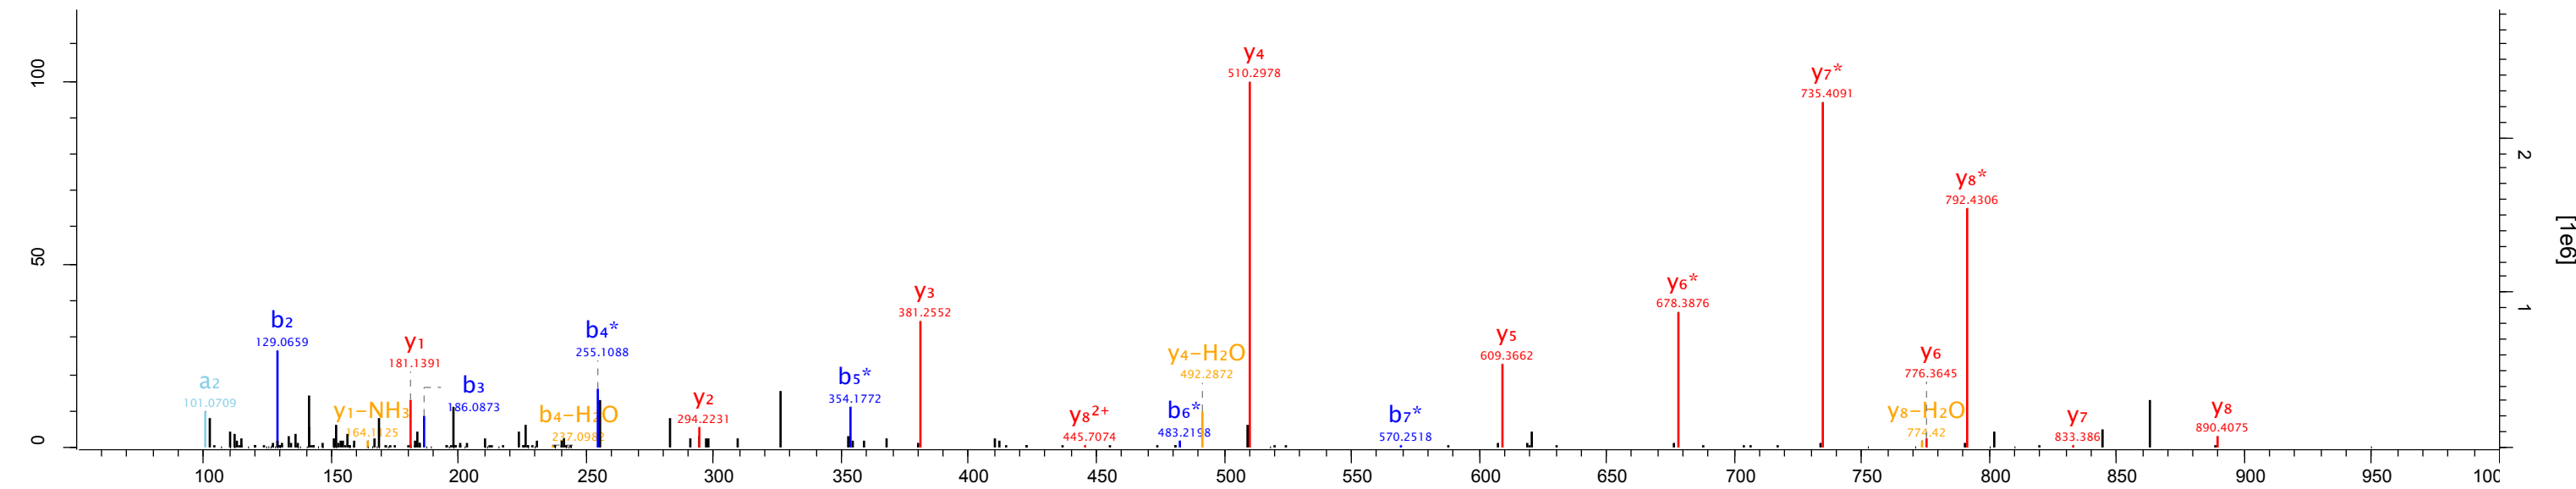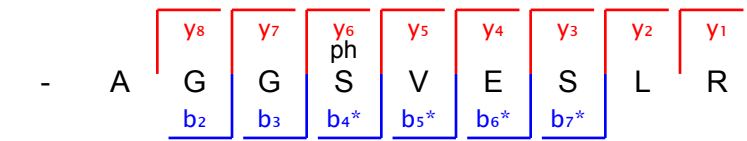

Raw file 20171215\_MaS\_33SR\_LMH\_phospho\_06 Scan 5546 Method FTMS; HCD Score 89.83 m/z 569.61 Gene names CIC

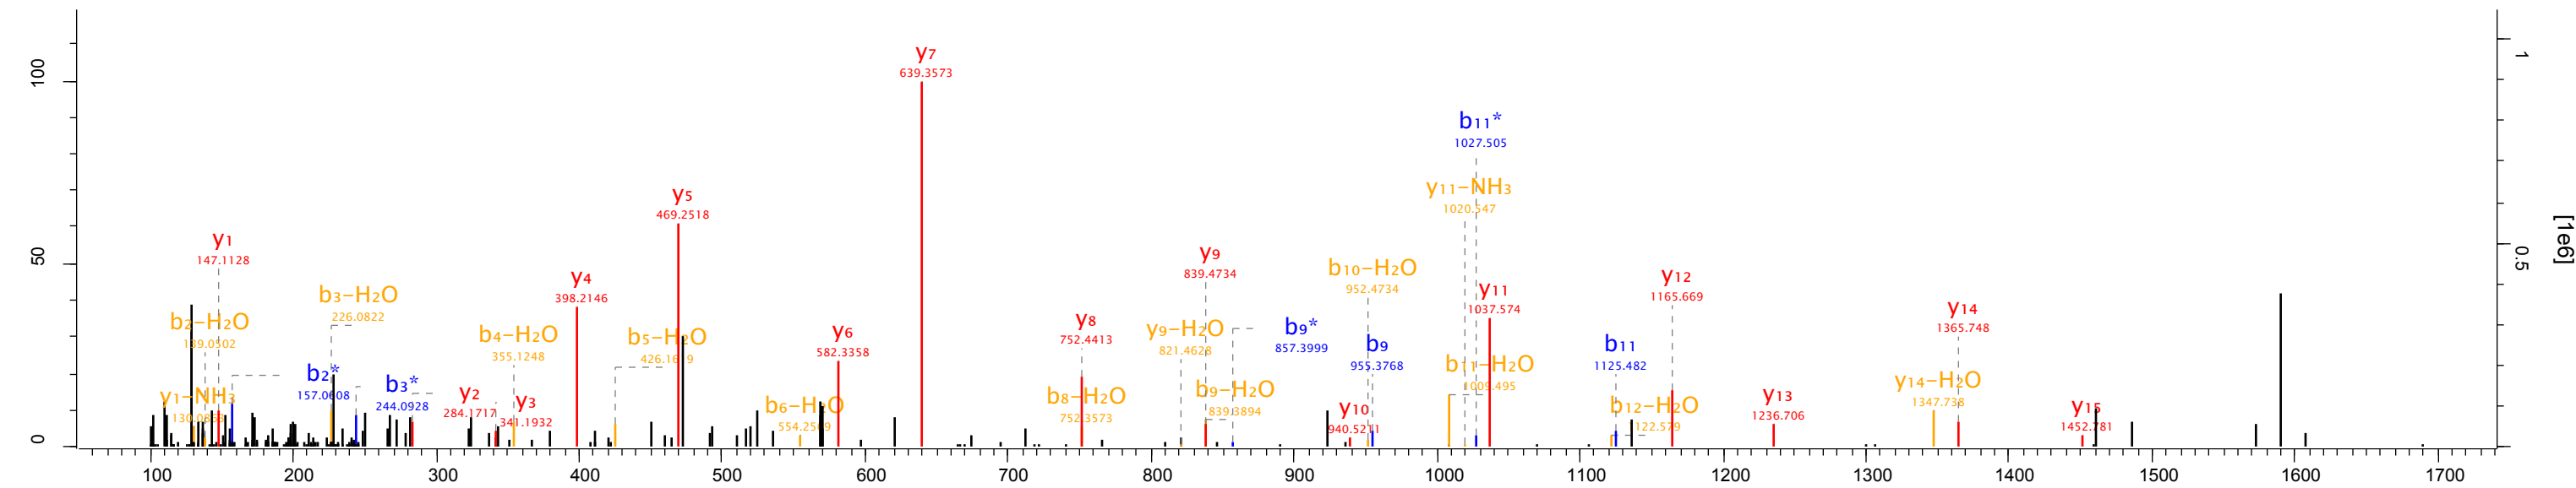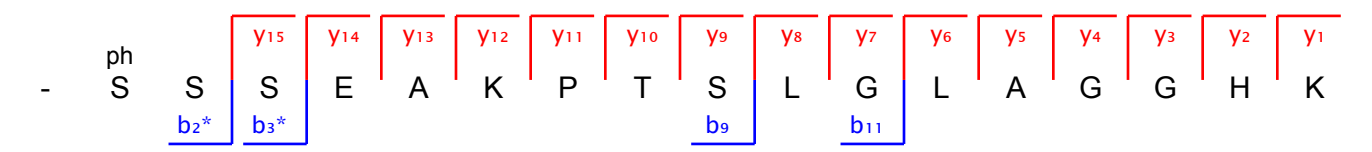

Raw file 20171215\_MaS\_33SR\_LMH\_phospho\_06 Scan 5556 Method FTMS; HCD Score 92.78 m/z 584.28 Gene names BAG3

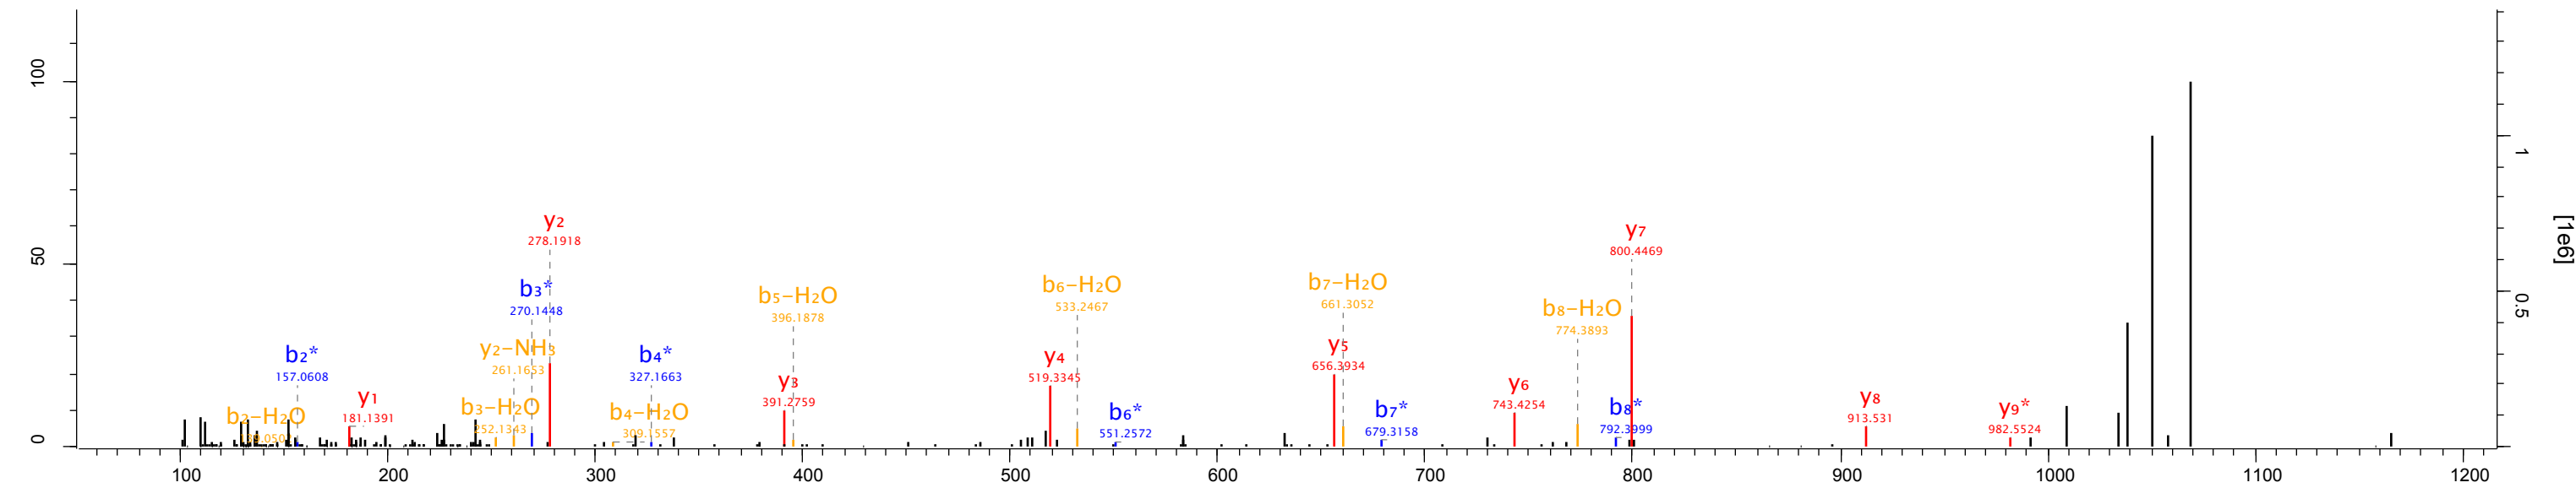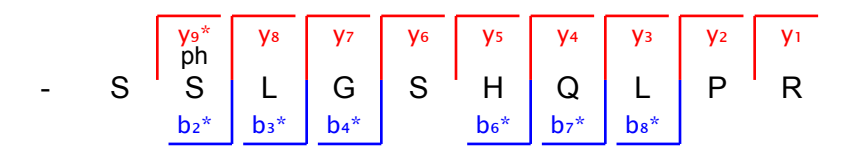



Raw file 20171215\_MaS\_33SR\_LMH\_phospho\_06 Scan 5606 Method FTMS; HCD Score 196.84 m/z 635.78 Gene names PALLD

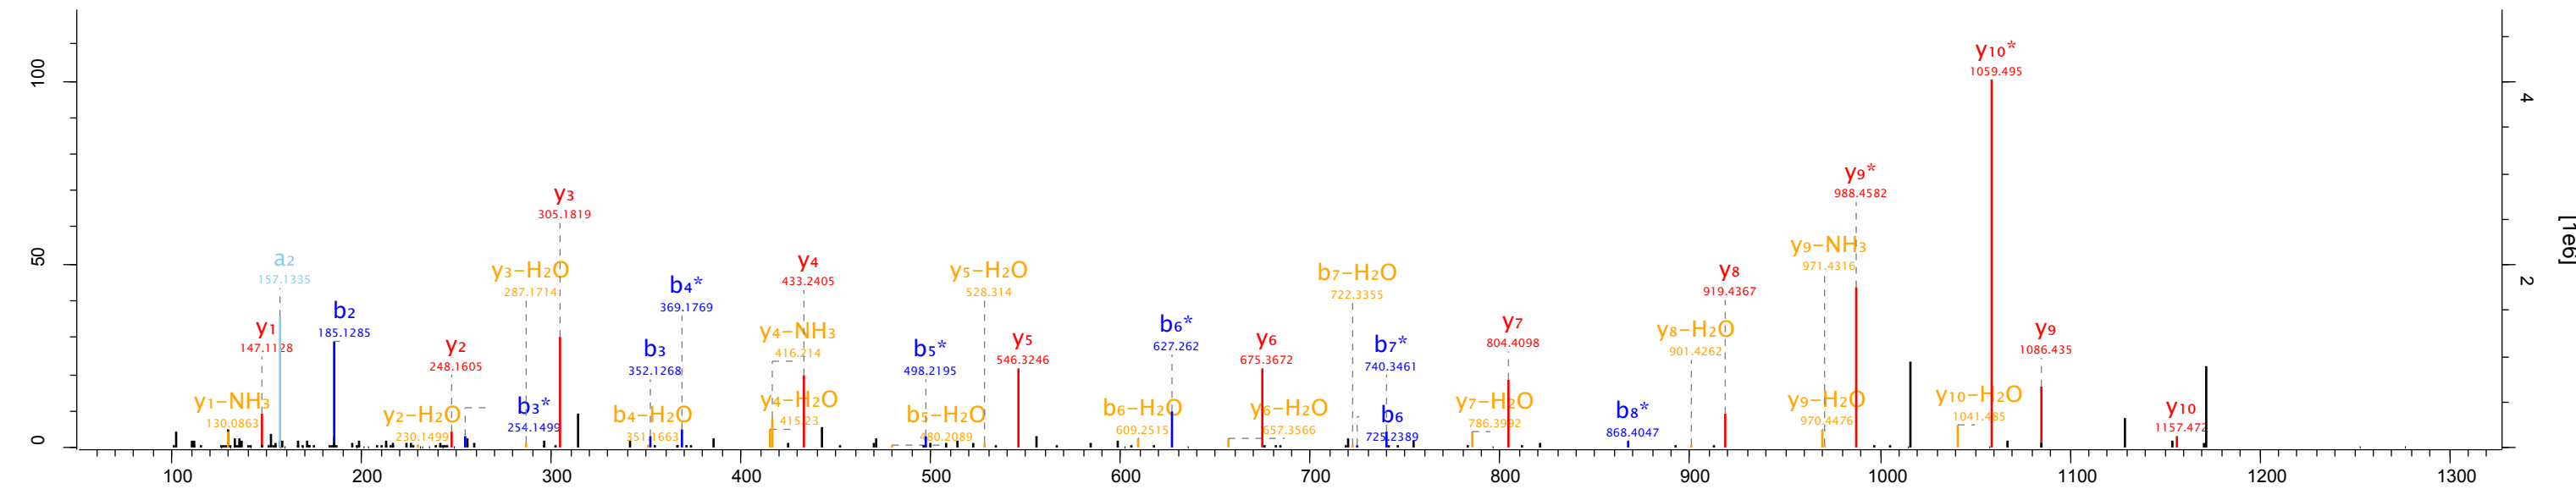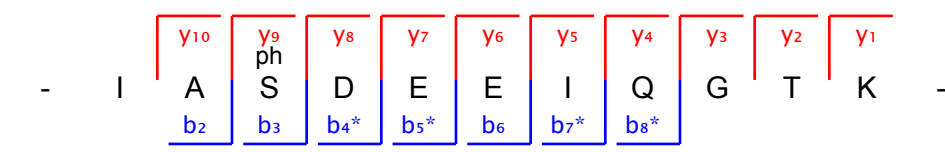

Raw file 20171215\_MaS\_33SR\_LMH\_phospho\_06 Scan 5776 Method FTMS; HCD Score 84.4 m/z 690.82 Gene names MIER2

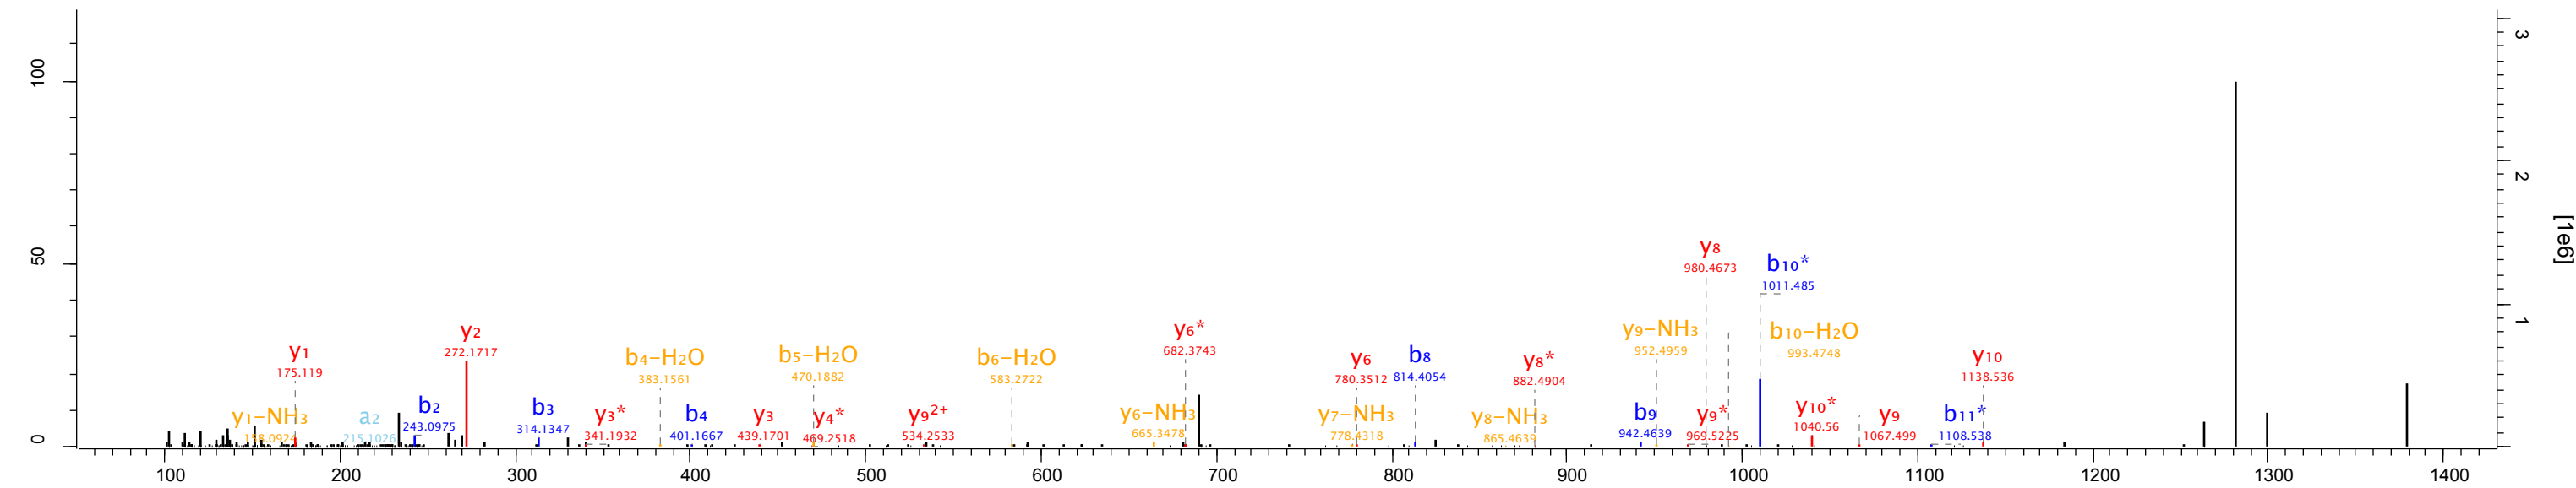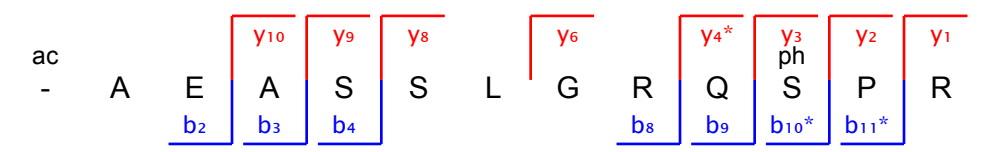

Raw file 20171215\_MaS\_33SR\_LMH\_phospho\_06 Scan 5796 Method FTMS; HCD Score 56.97 m/z 708.31 Gene names RPS3A

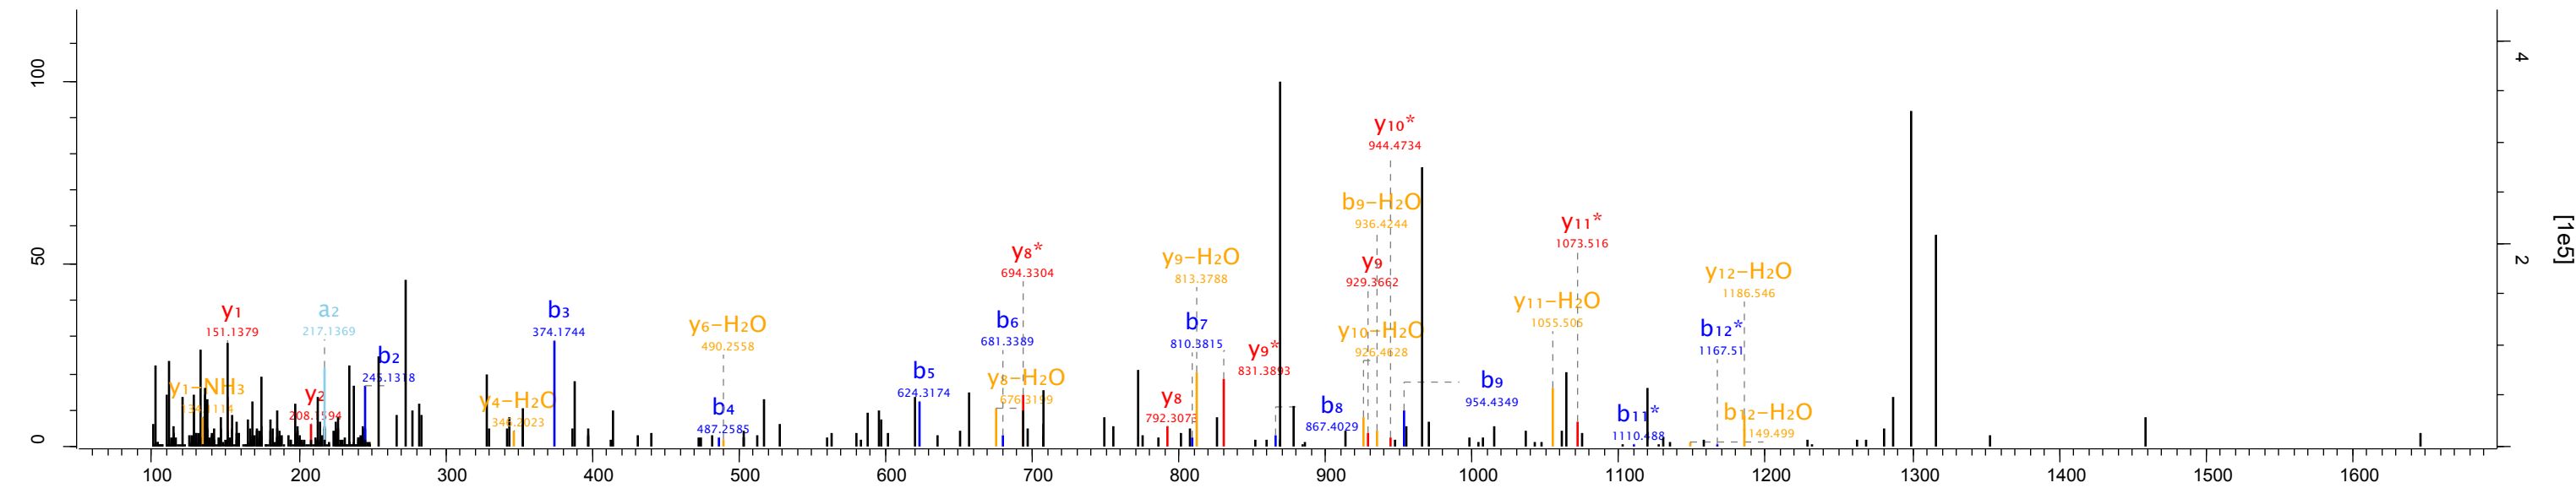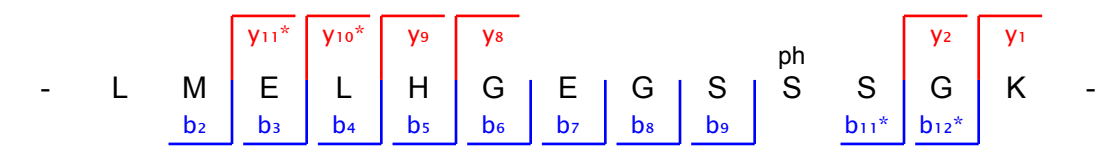

Raw file 20171215\_MaS\_33SR\_LMH\_phospho\_06 Scan 5816 Method FTMS; HCD Score 134.75 m/z 541.22 Gene names CAV1

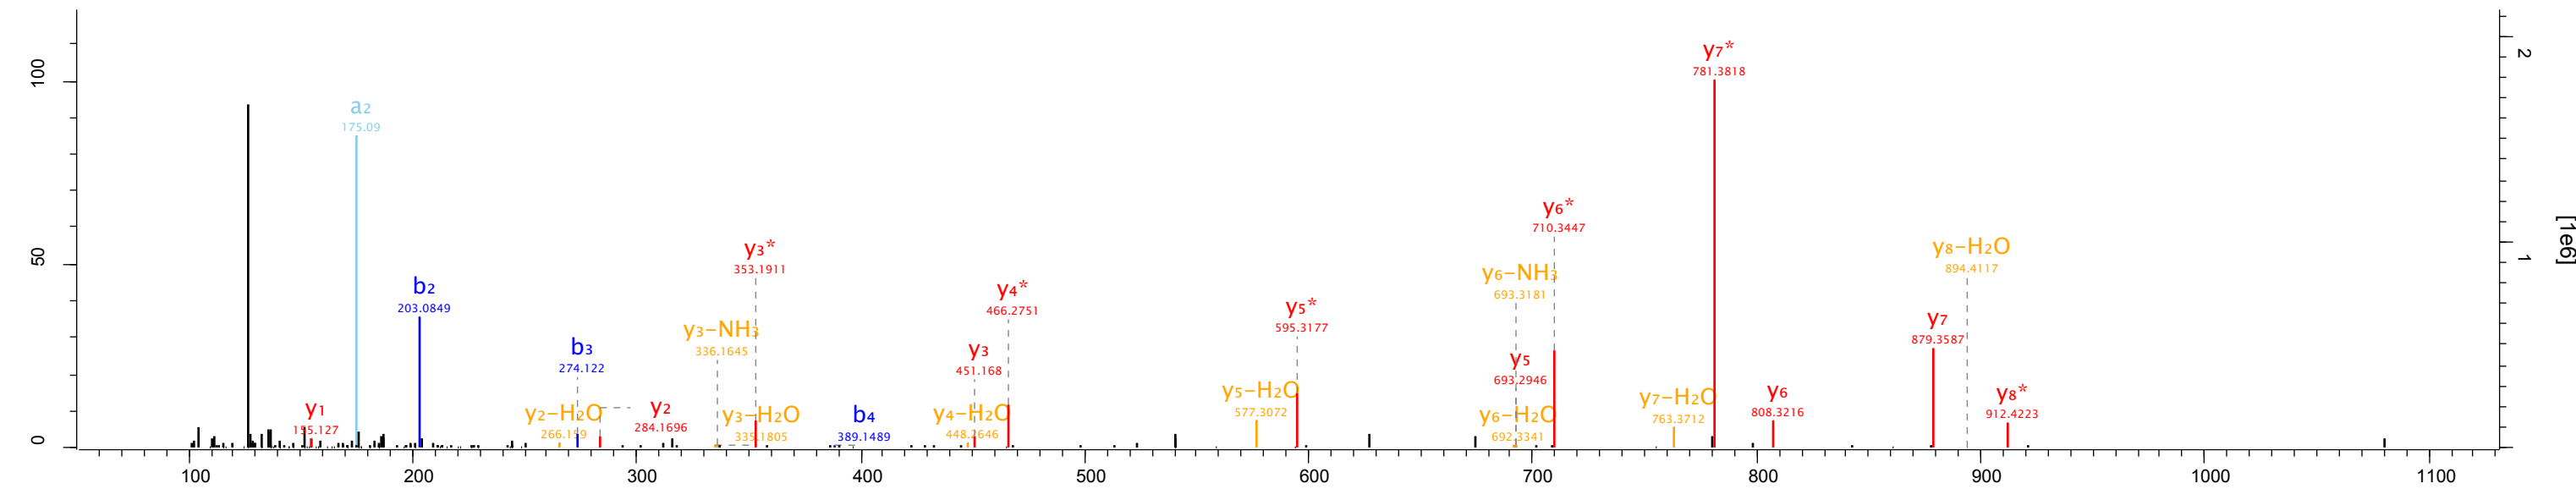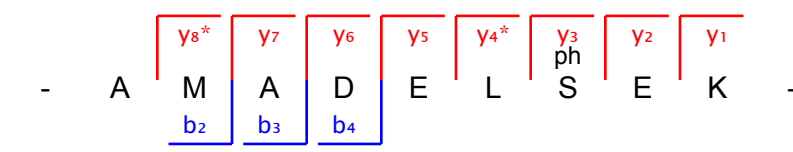

Raw file 20171215\_MaS\_33SR\_LMH\_phospho\_06 Scan 5886 Method FTMS; HCD Score 188.9 m/z 833.4 Gene names ATXN2

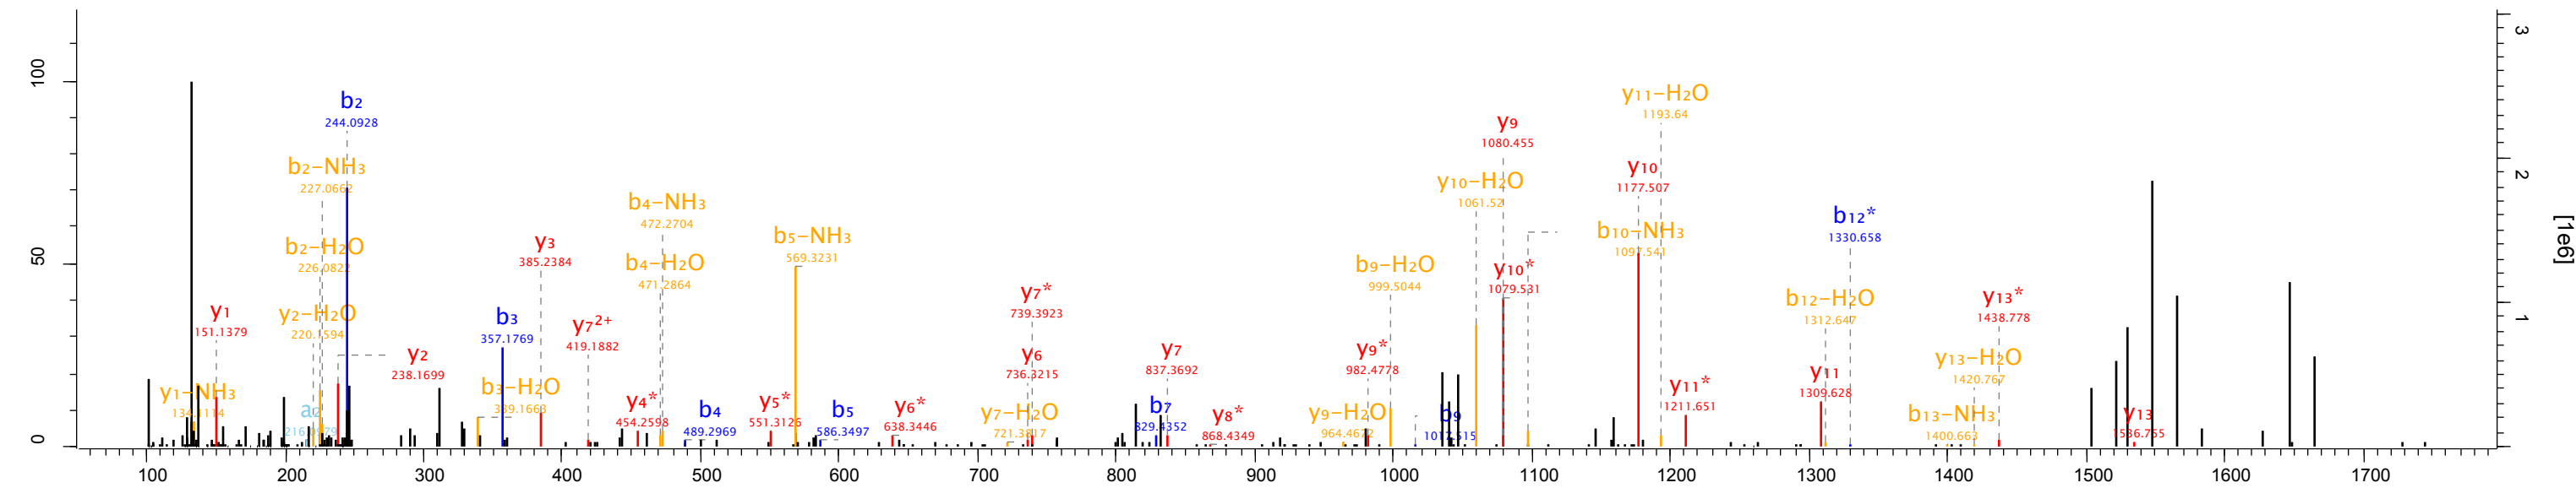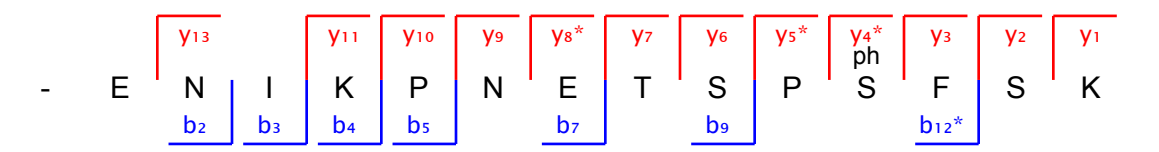

Raw file 20171215\_MaS\_33SR\_LMH\_phospho\_06 Scan 6286 Method FTMS; HCD Score 119.45 m/z 765.7 Gene names SLC16A1

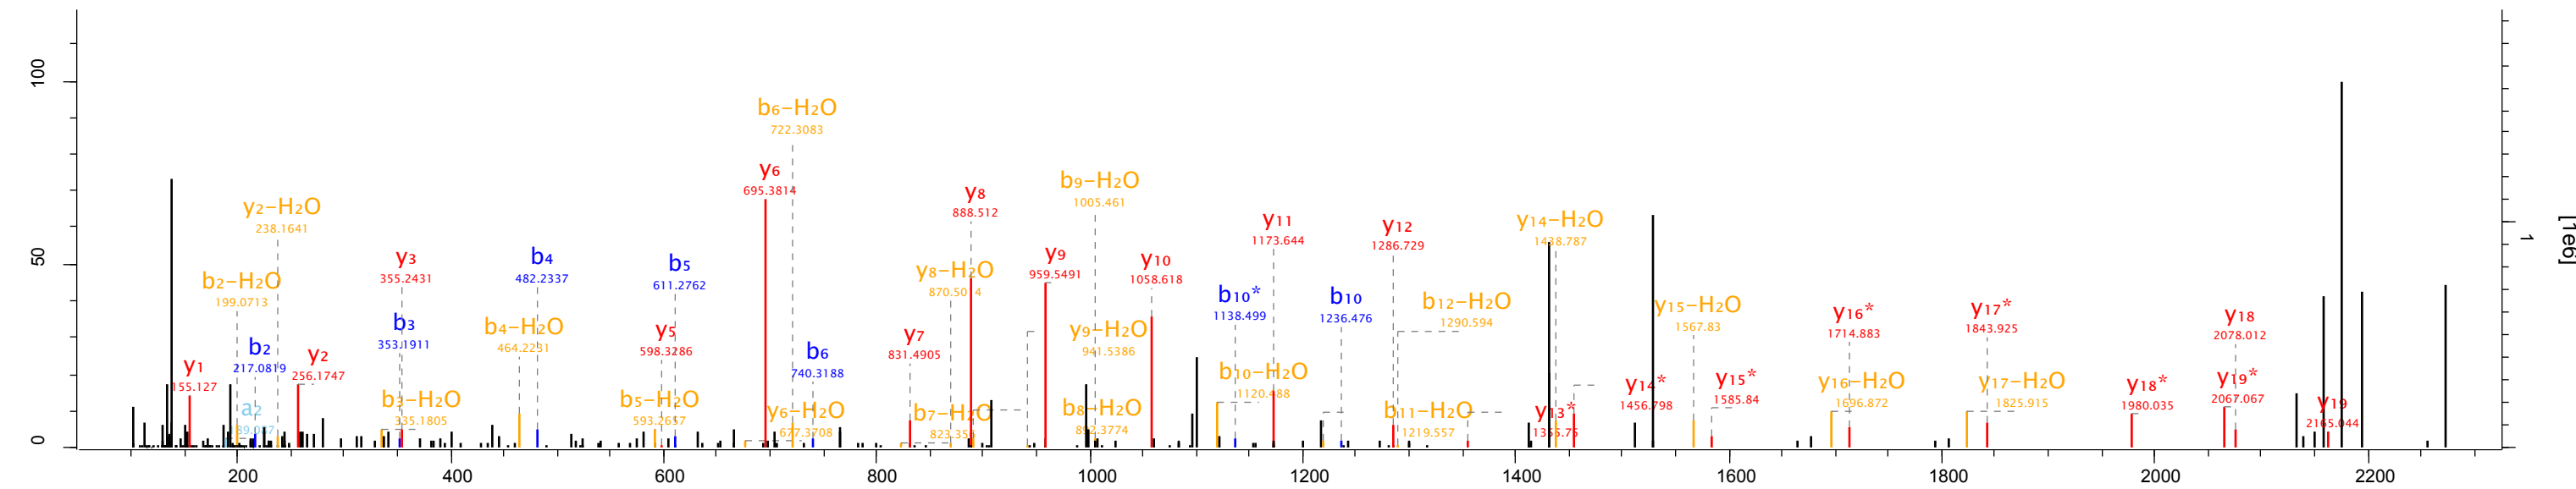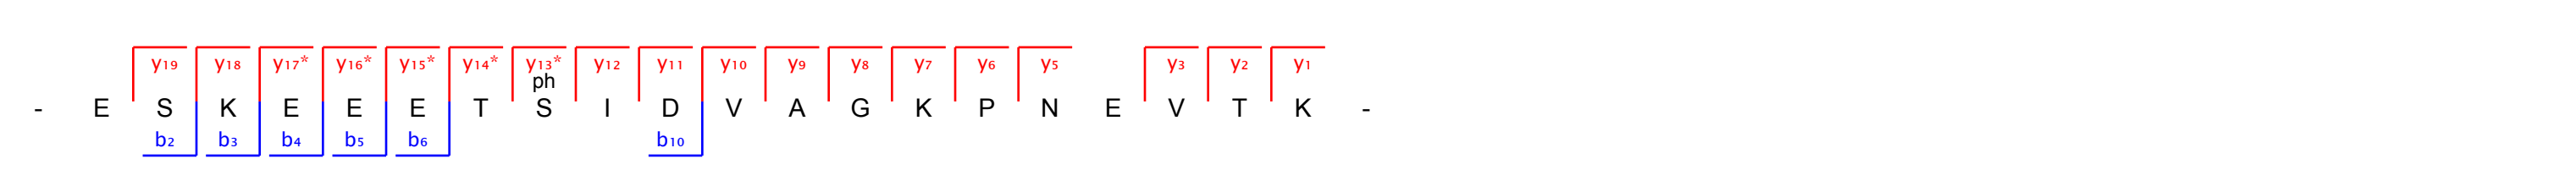

Raw file 20171215\_MaS\_33SR\_LMH\_phospho\_06 Scan 6316 Method FTMS; HCD Score 100.39 m/z 918.45 Gene names SAMD1

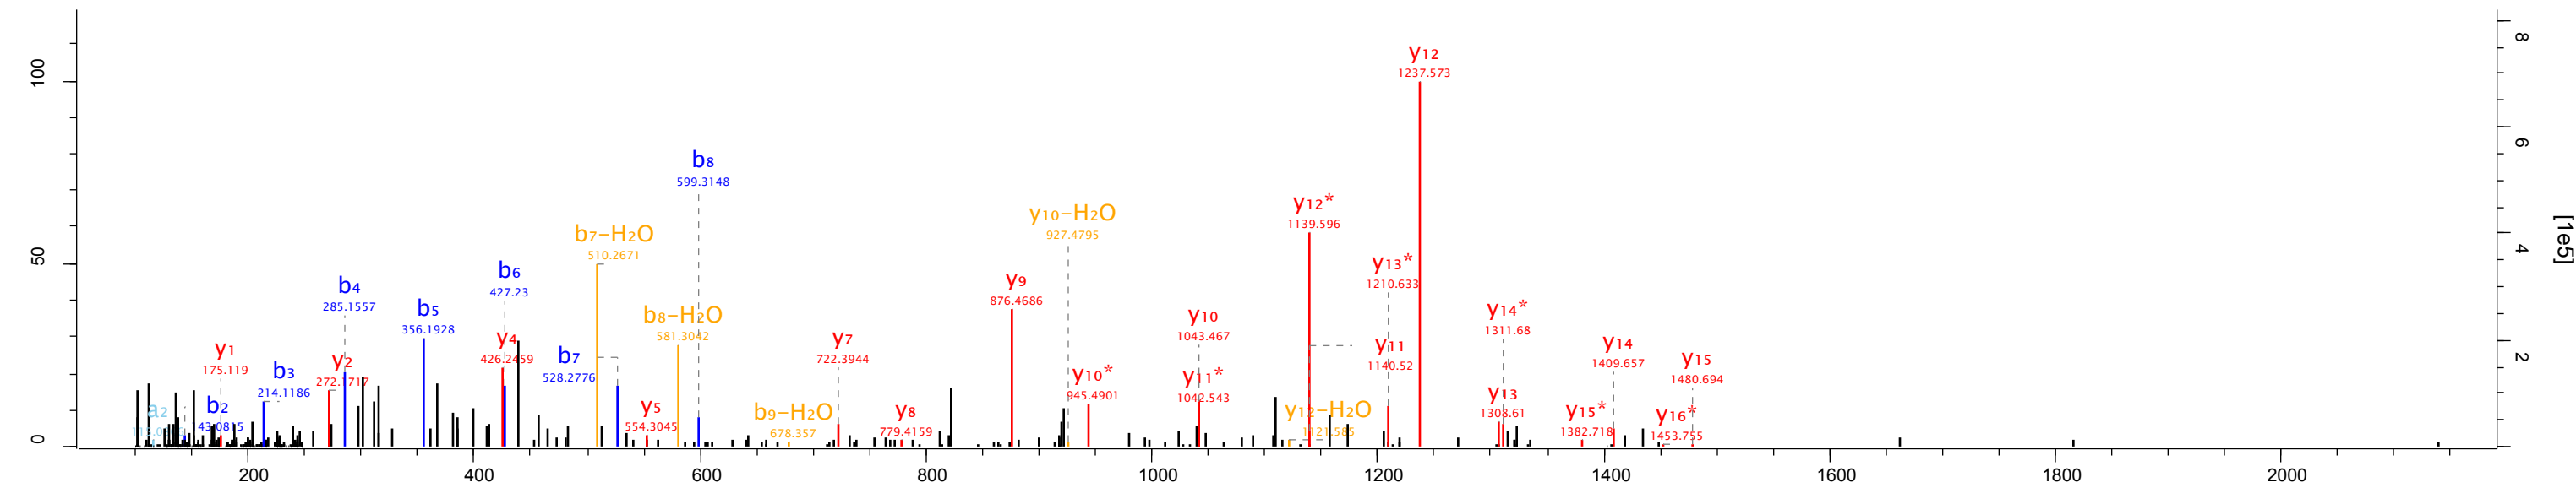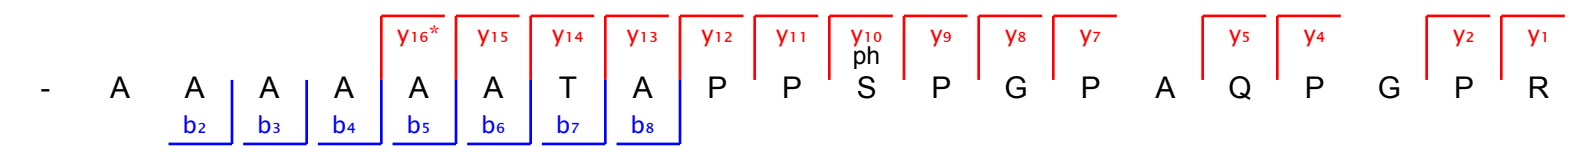

Raw file 20171215\_MaS\_33SR\_LMH\_phospho\_06 Scan 6456 Method FTMS; HCD Score 189.42 m/z 933.44 Gene names PCNP

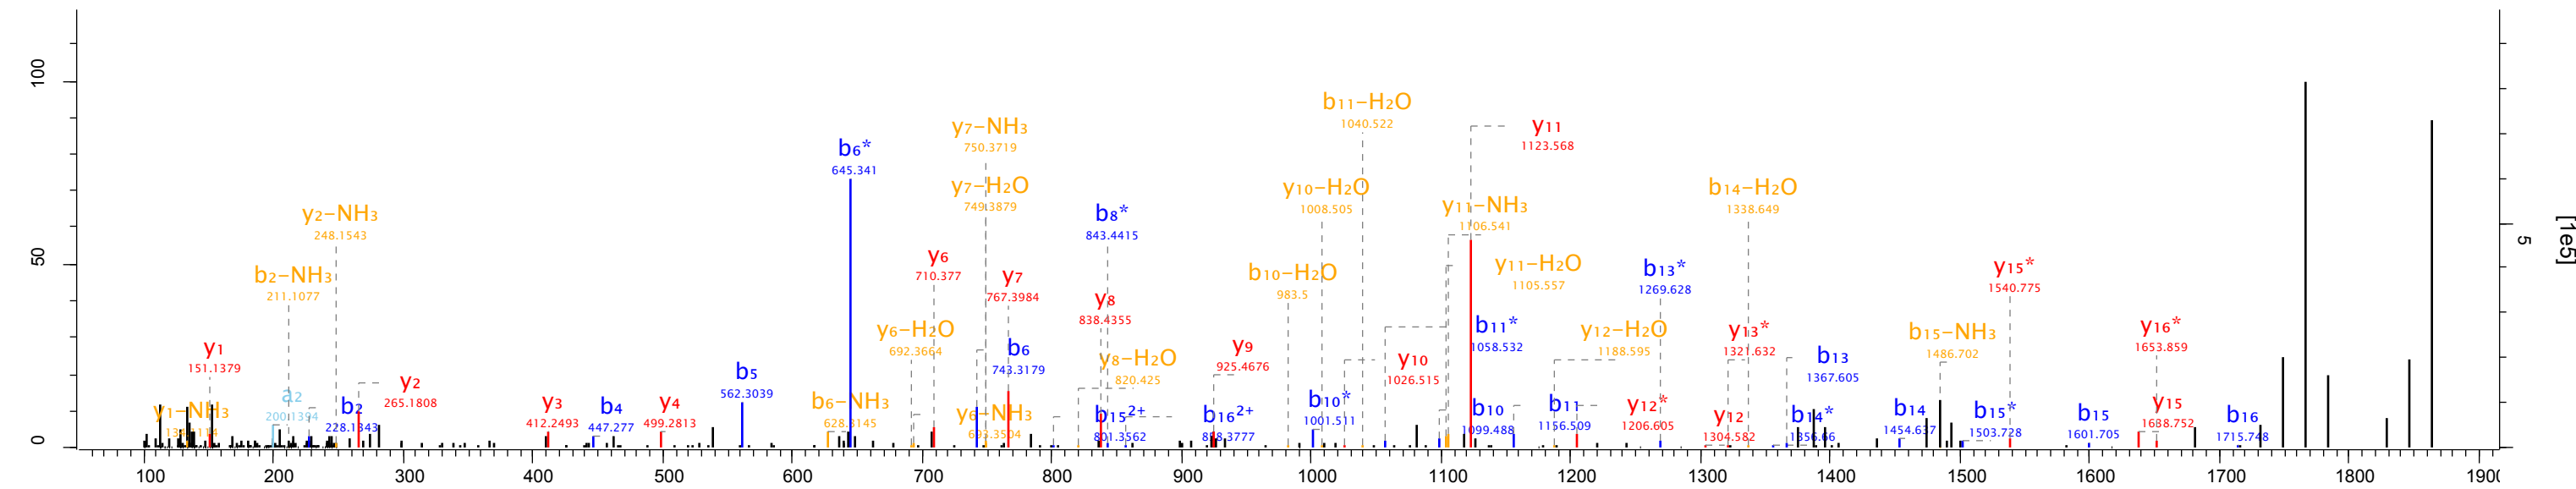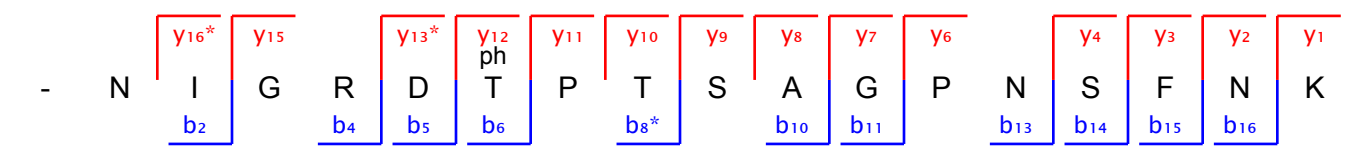



Raw file 20171215\_MaS\_33SR\_LMH\_phospho\_06 Scan 6746 Method FTMS; HCD Score 94.39 m/z 879.87 Gene names DOT1L

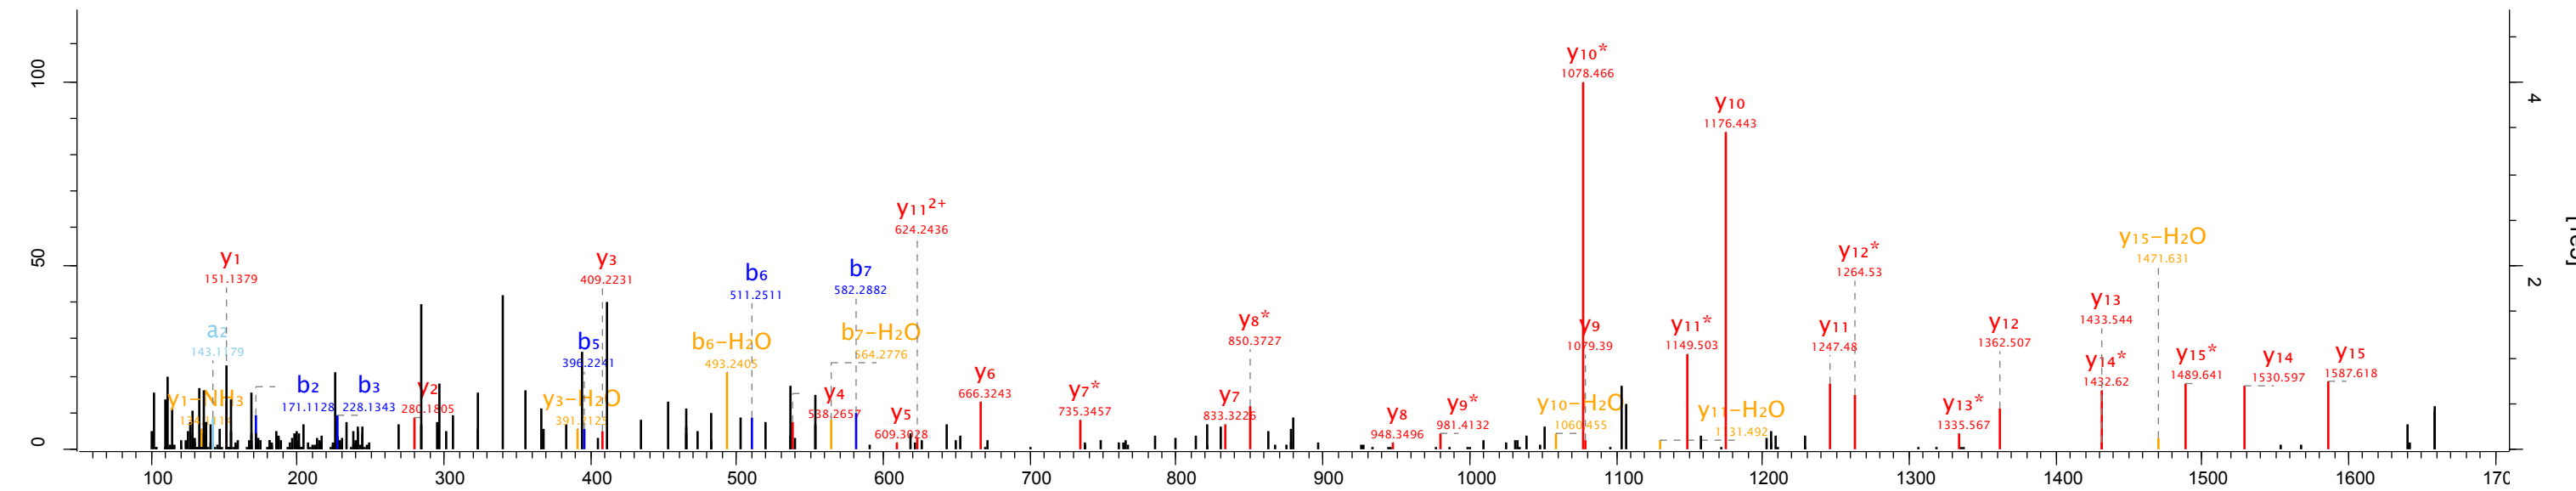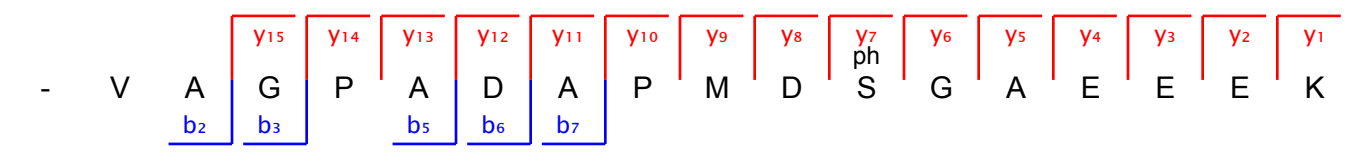

Raw file: 20171215\_MaS\_33SR\_LMH\_phospho\_06  
 Scan: 6766 Method: FTMS; HCD Score: 101.38 m/z: 544.72 Gene names: CCDC43;BAIAP2

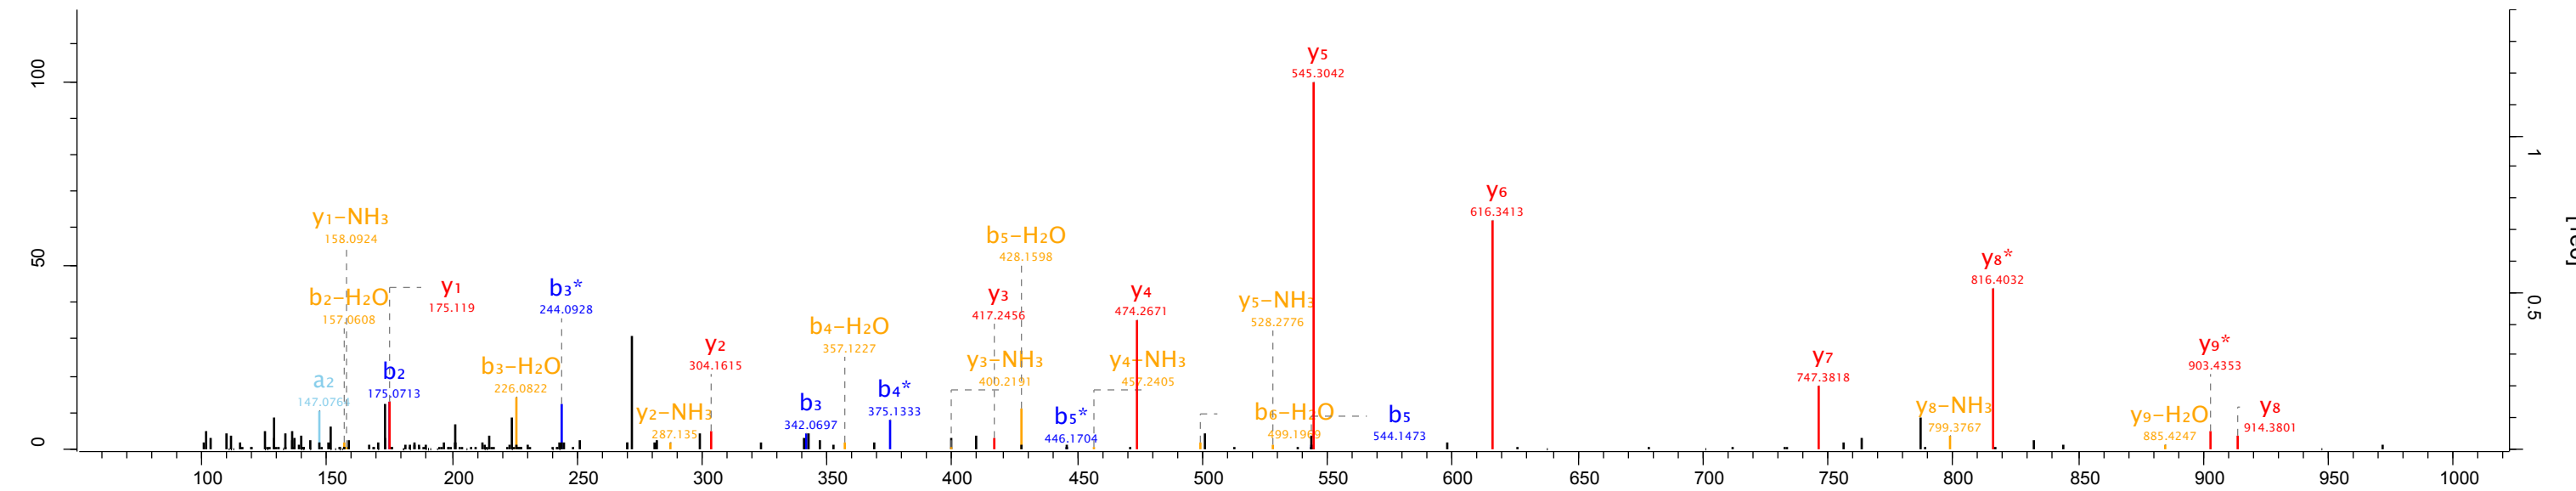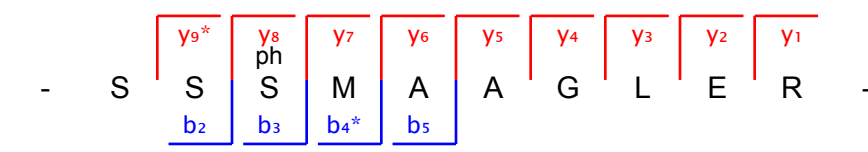

Raw file  
 20171215\_MaS\_33SR\_LMH\_phospho\_06  
 Scan 6806 Method FTMS; HCD Score 104.24 m/z 495.24 Gene names AHNAK

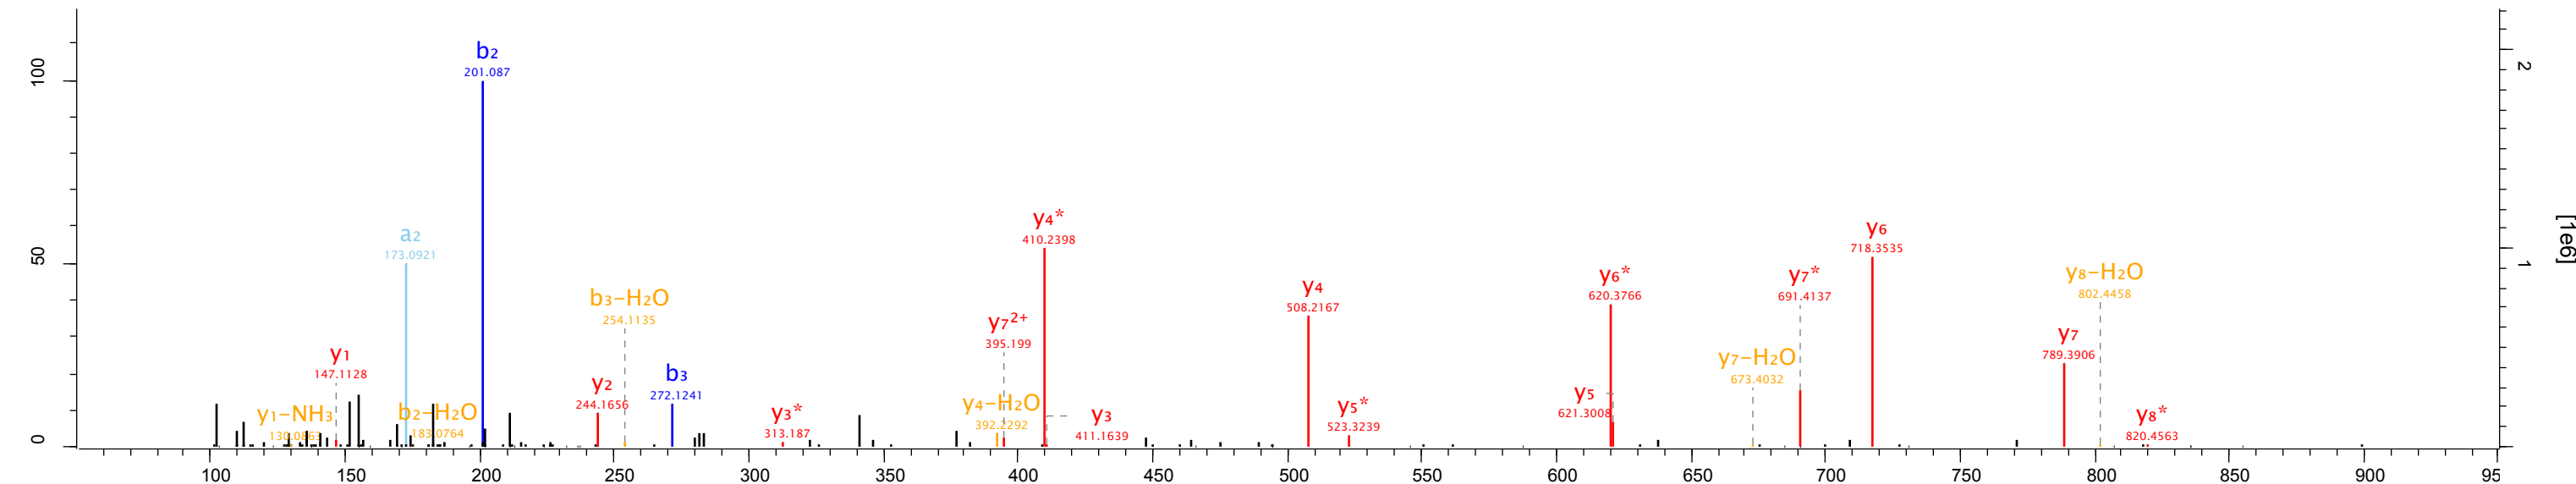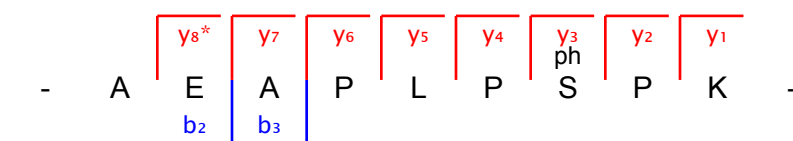

Raw file 20171215\_MaS\_33SR\_LMH\_phospho\_06 Scan 6966 Method FTMS; HCD Score 92.15 m/z 740.82 Gene names HECW2

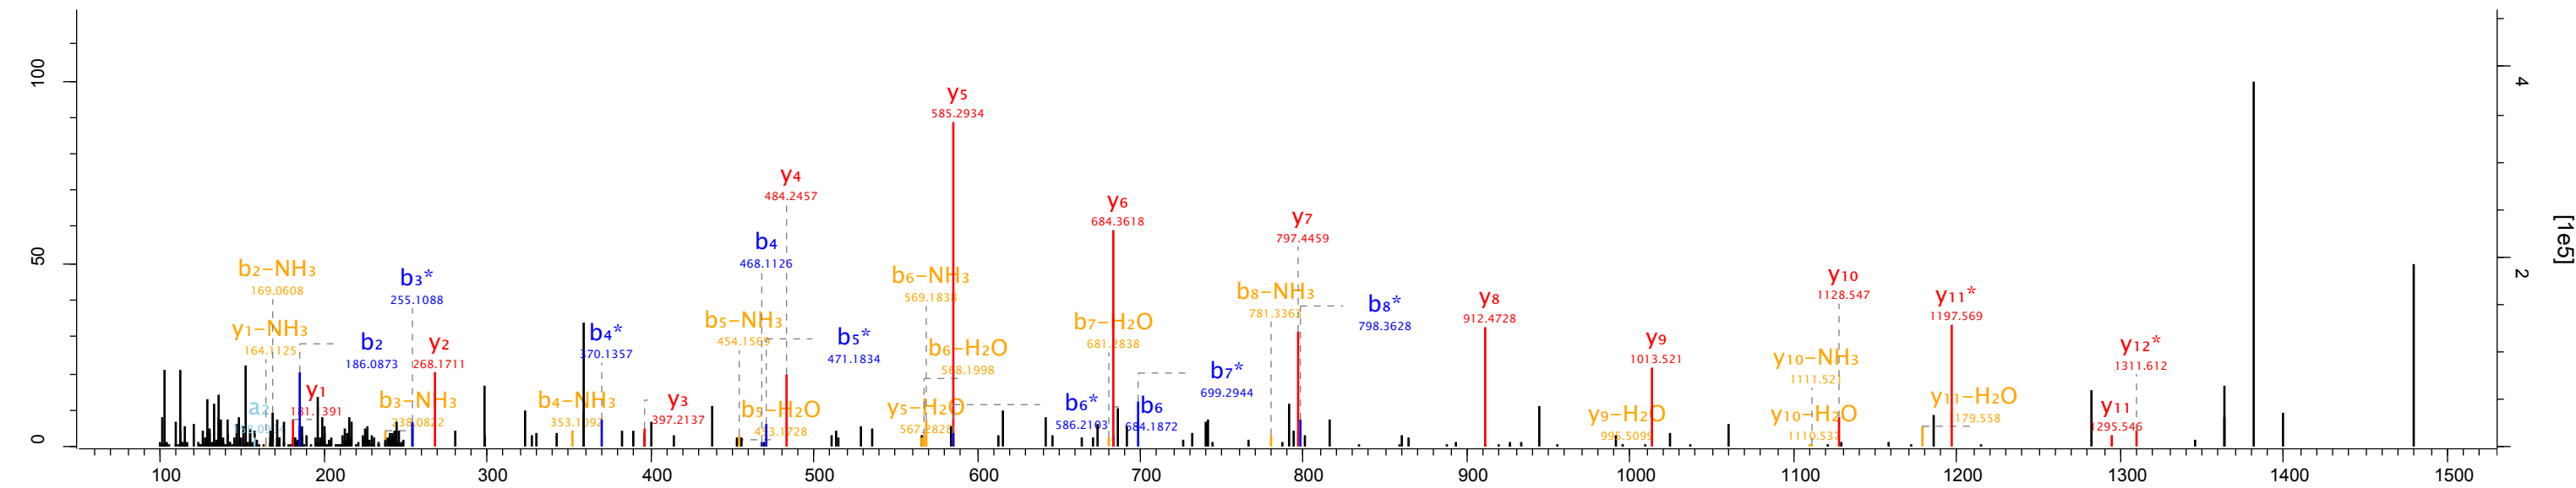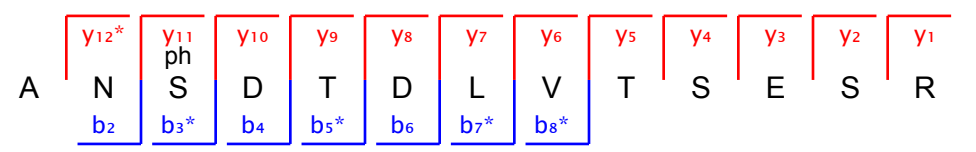

Raw file 20171215\_MaS\_33SR\_LMH\_phospho\_06 Scan 7036 Method FTMS; HCD Score 96.5 m/z 753.34 Gene names DENND4C

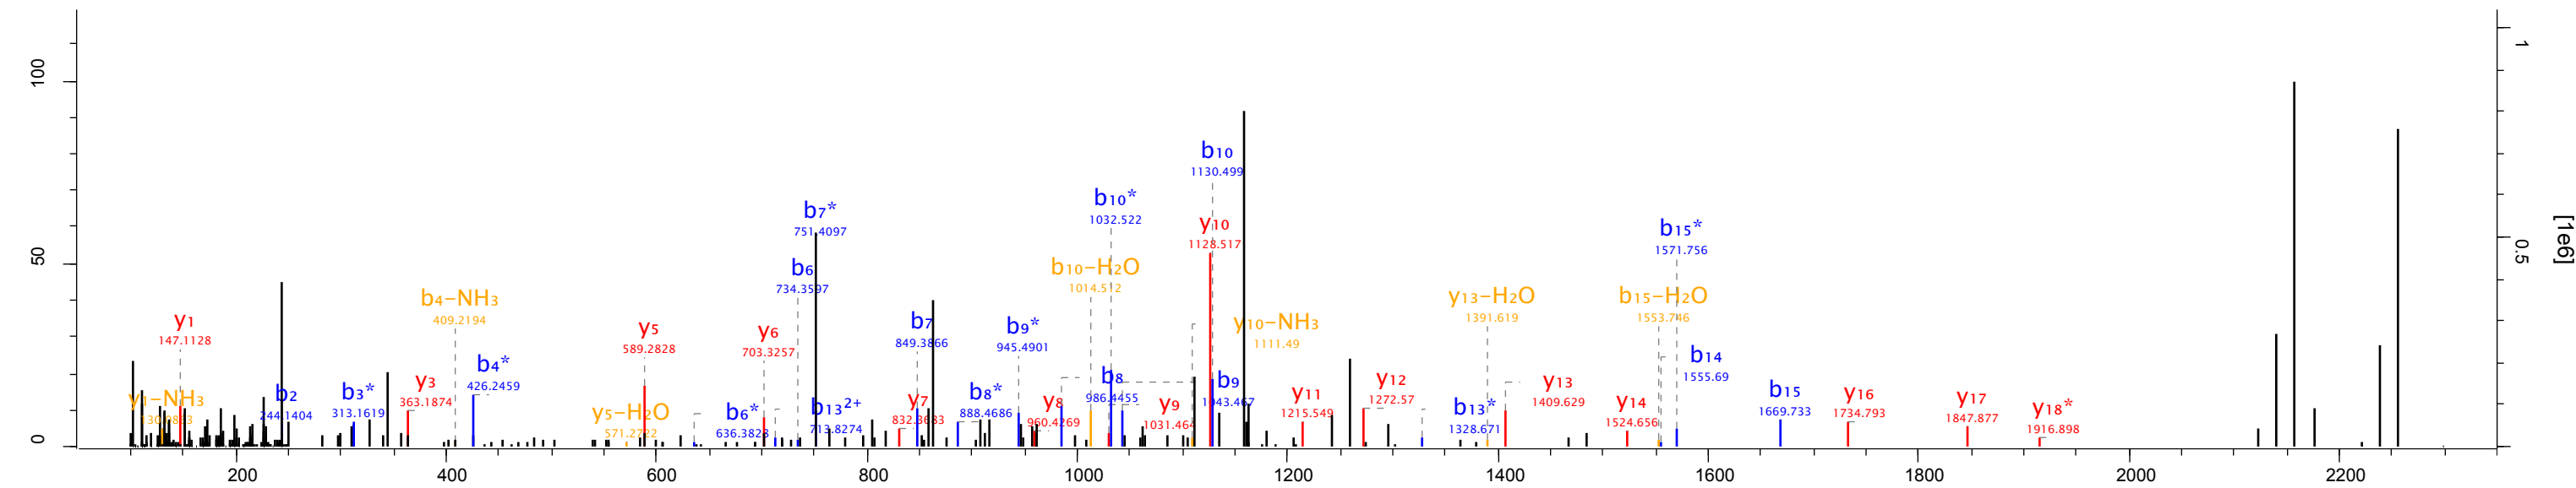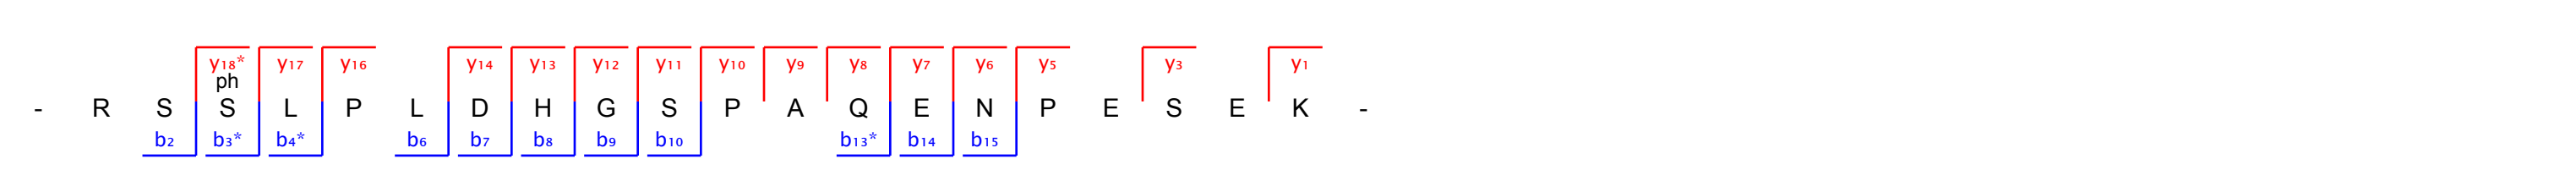

Raw file 20171215\_MaS\_33SR\_LMH\_phospho\_06 Scan 7086 Method FTMS; HCD Score 89.89 m/z 415.22 Gene names DEK

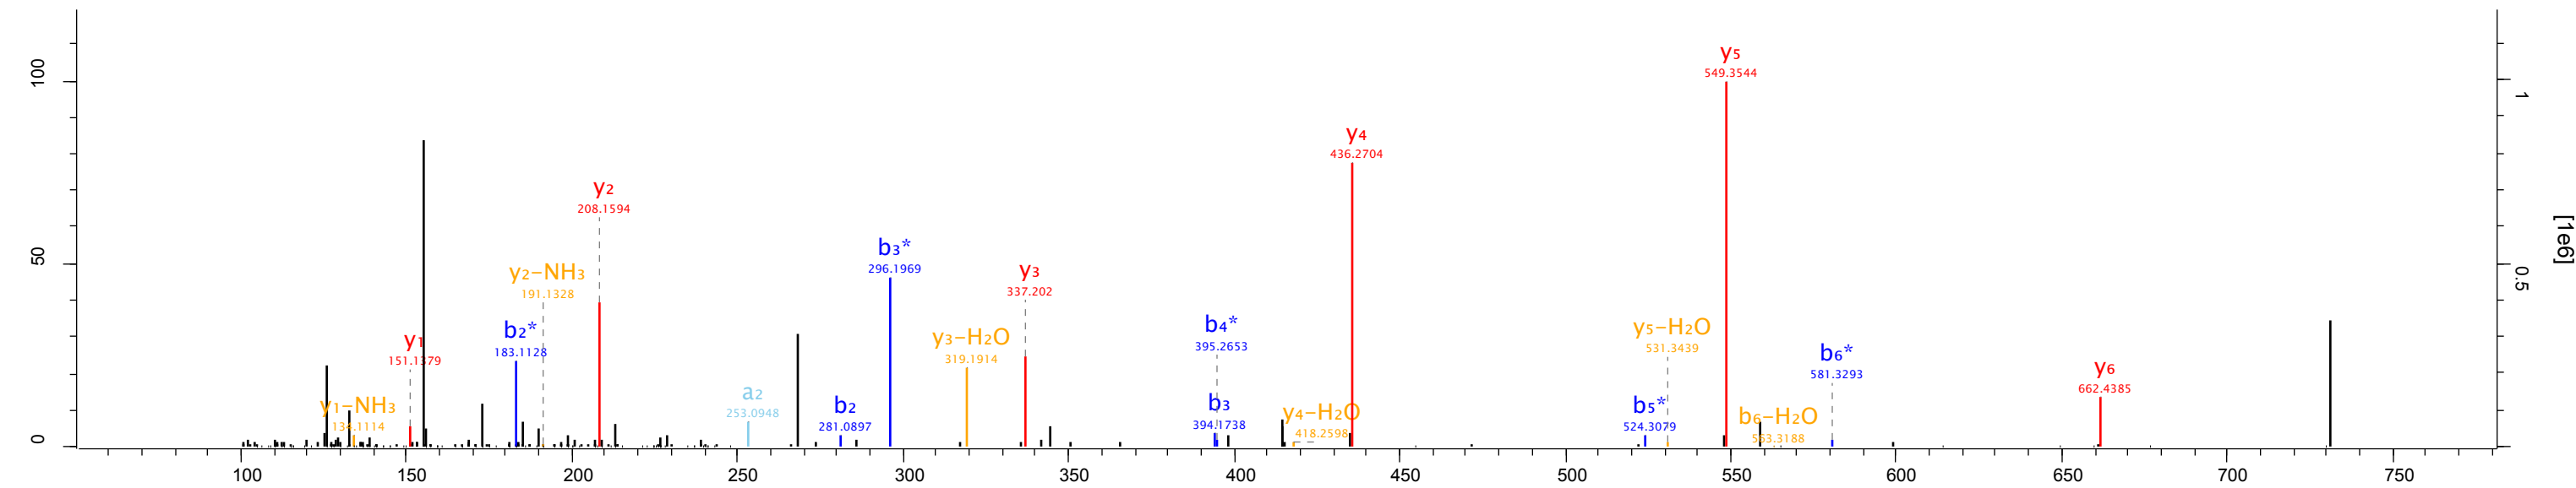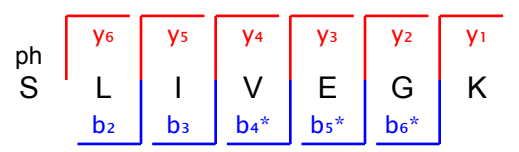

Raw file 20171215\_MaS\_33SR\_LMH\_phospho\_06 Scan 7106 Method FTMS; HCD Score 95.93 m/z 772.32 Gene names RBM8A

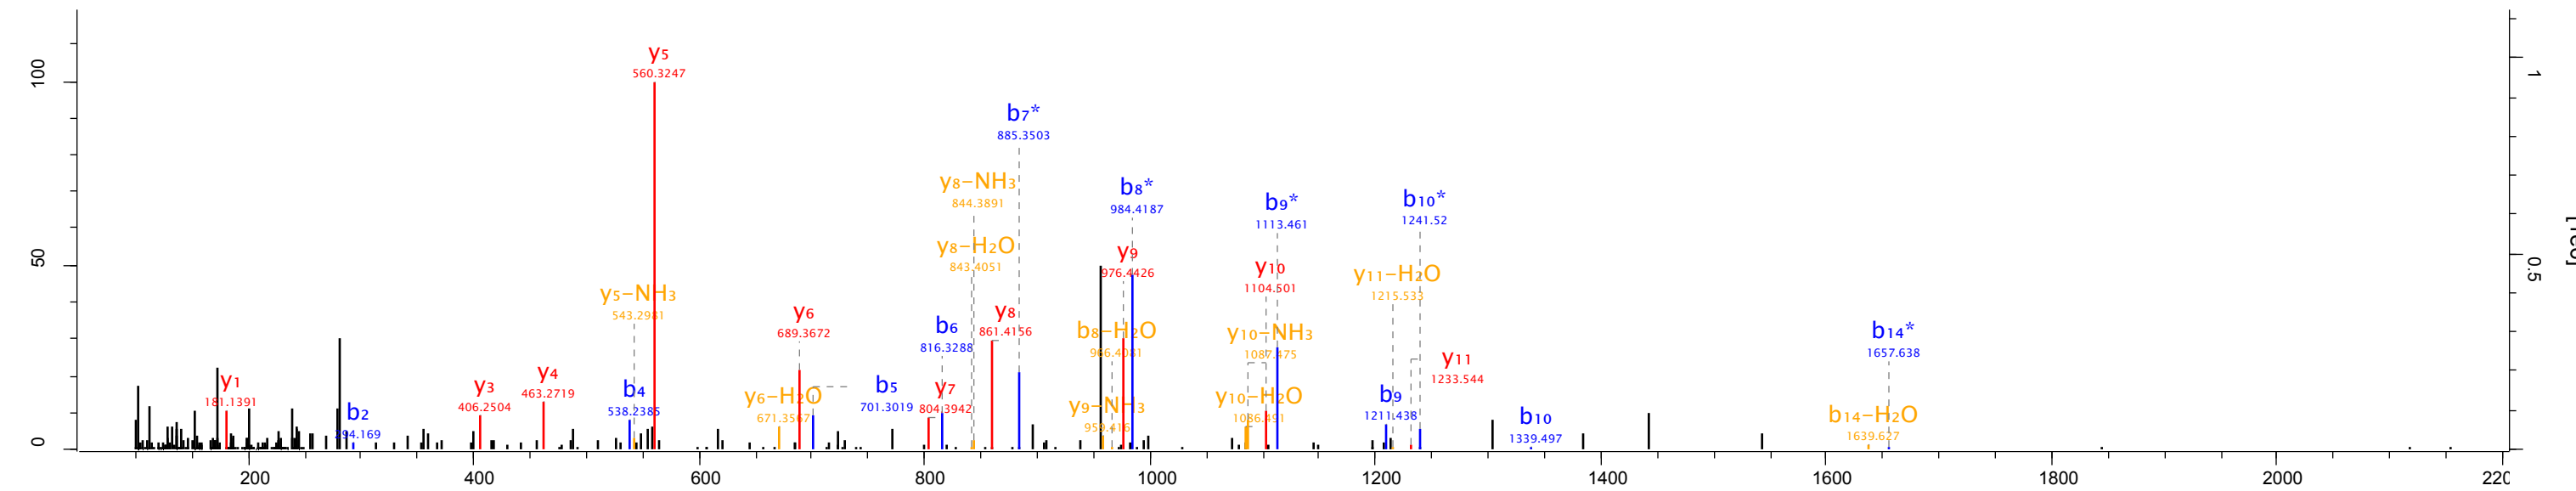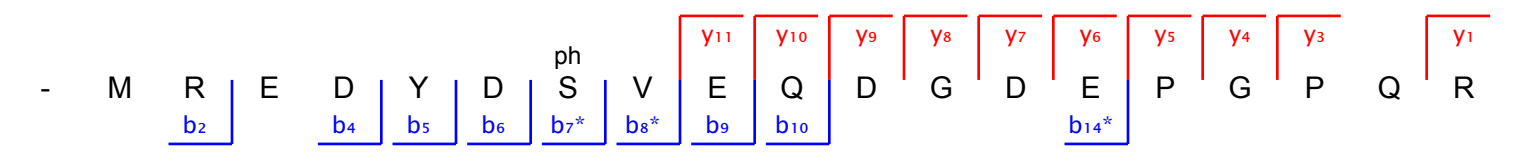

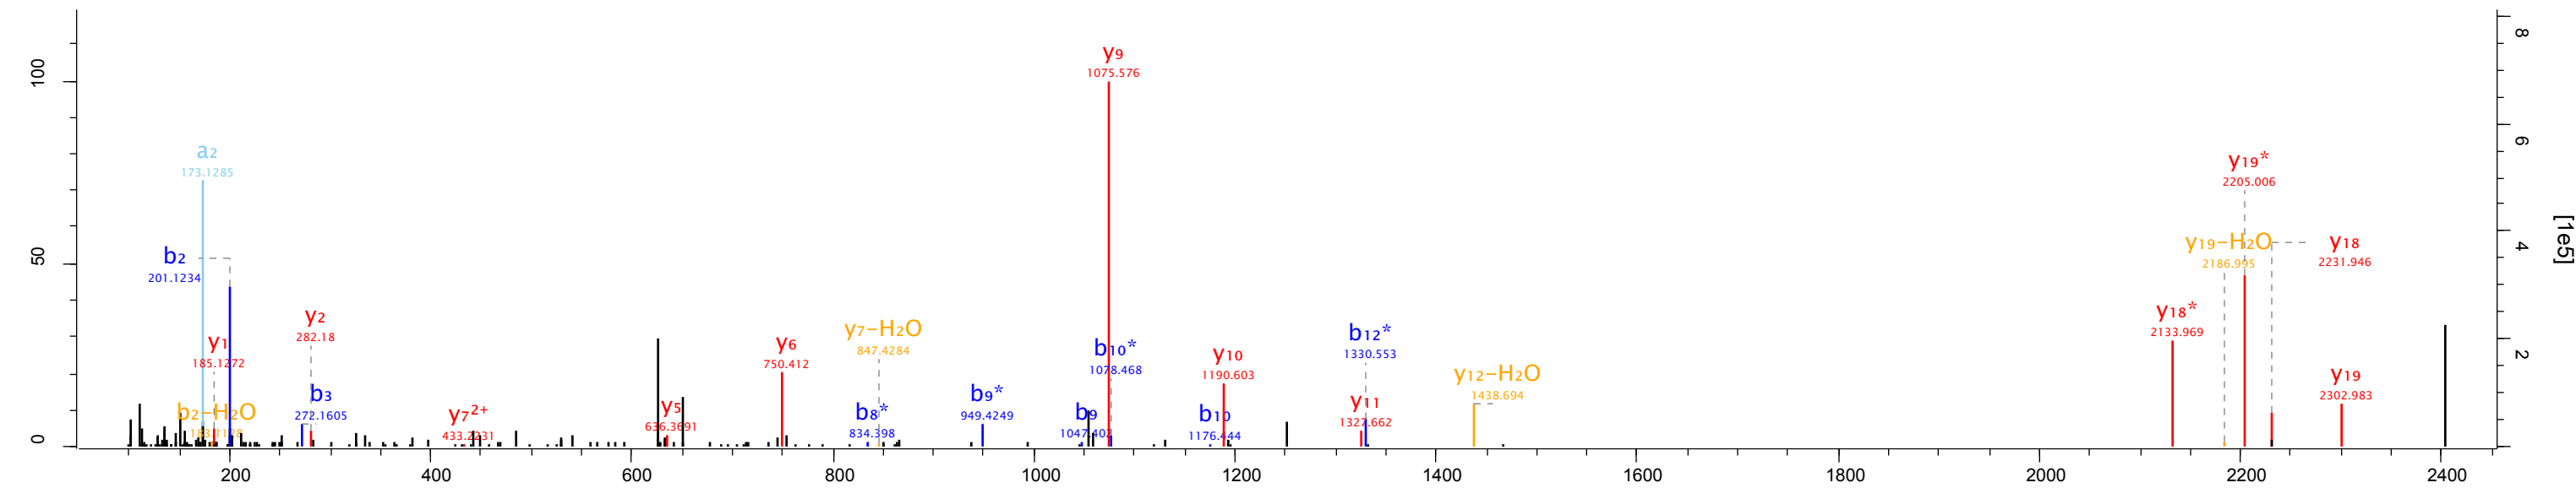

- S L A P D R S D D E H D P L D N T S R P R -

Fragmentation mapping (b and y ions) is shown below the sequence:

- b2 (L), b3 (A)
- b8\* (D), b9 (D), b10 (E)
- b12\* (D)
- y19 (A), y18 (P)
- y11 (H), y10 (D), y9 (P)
- y7^2+ (D), y6 (N), y5 (T)
- y2 (P), y1 (R)



Raw file: 20171215\_MaS\_33SR\_LMH\_phospho\_06  
 Scan: 7256 Method: FTMS; HCD Score: 124.6 m/z: 539.23 Gene names: ZBTB11

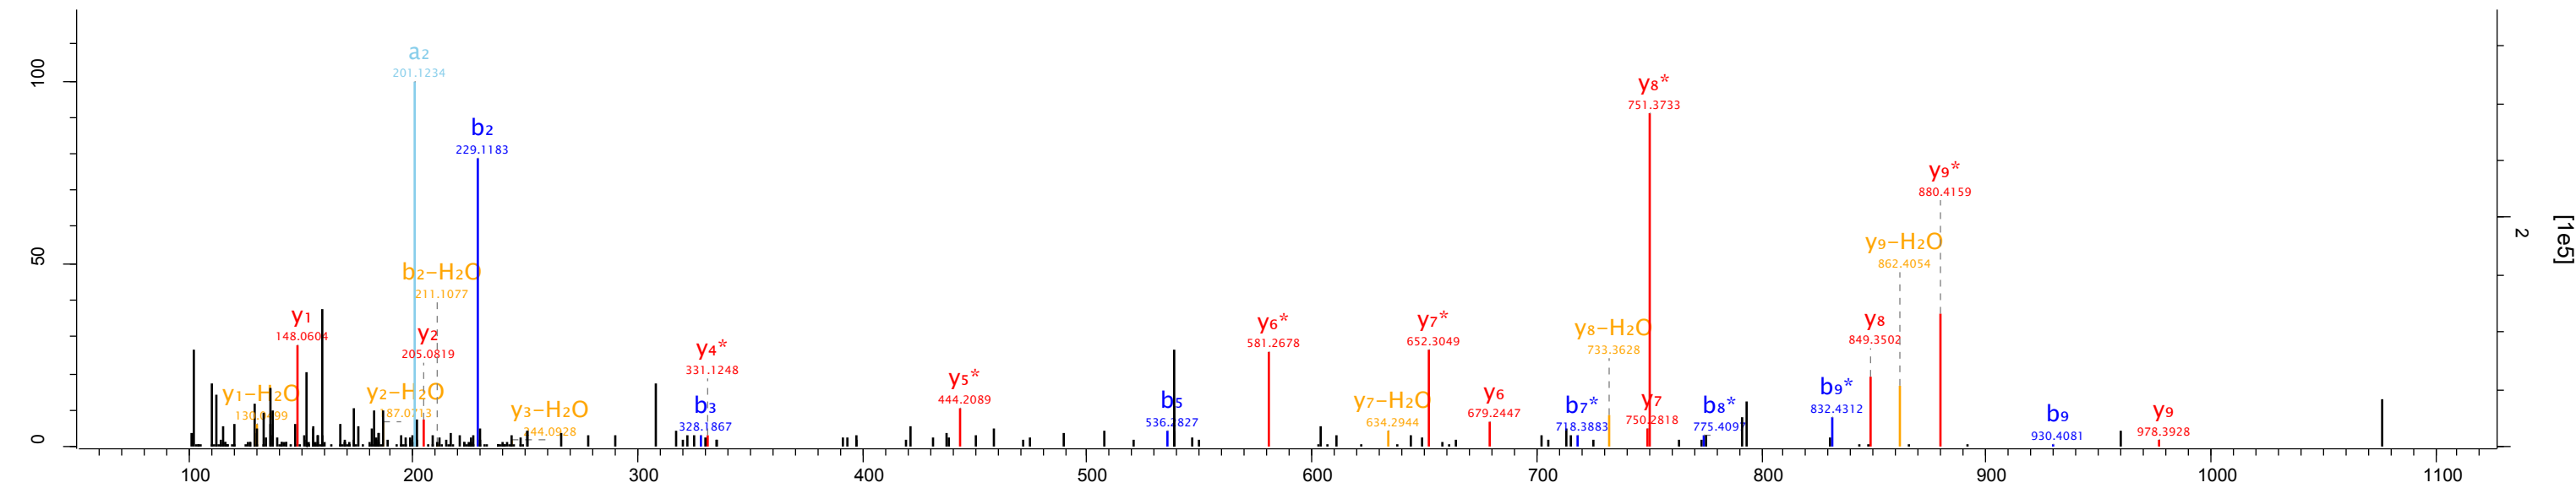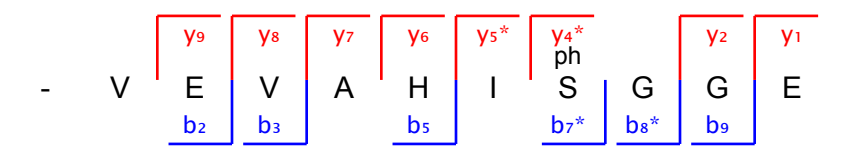

20171215\_MaS\_33SR\_LMH\_phospho\_06 7666 FTMS; HCD 103.21 1001.43 RAD23A

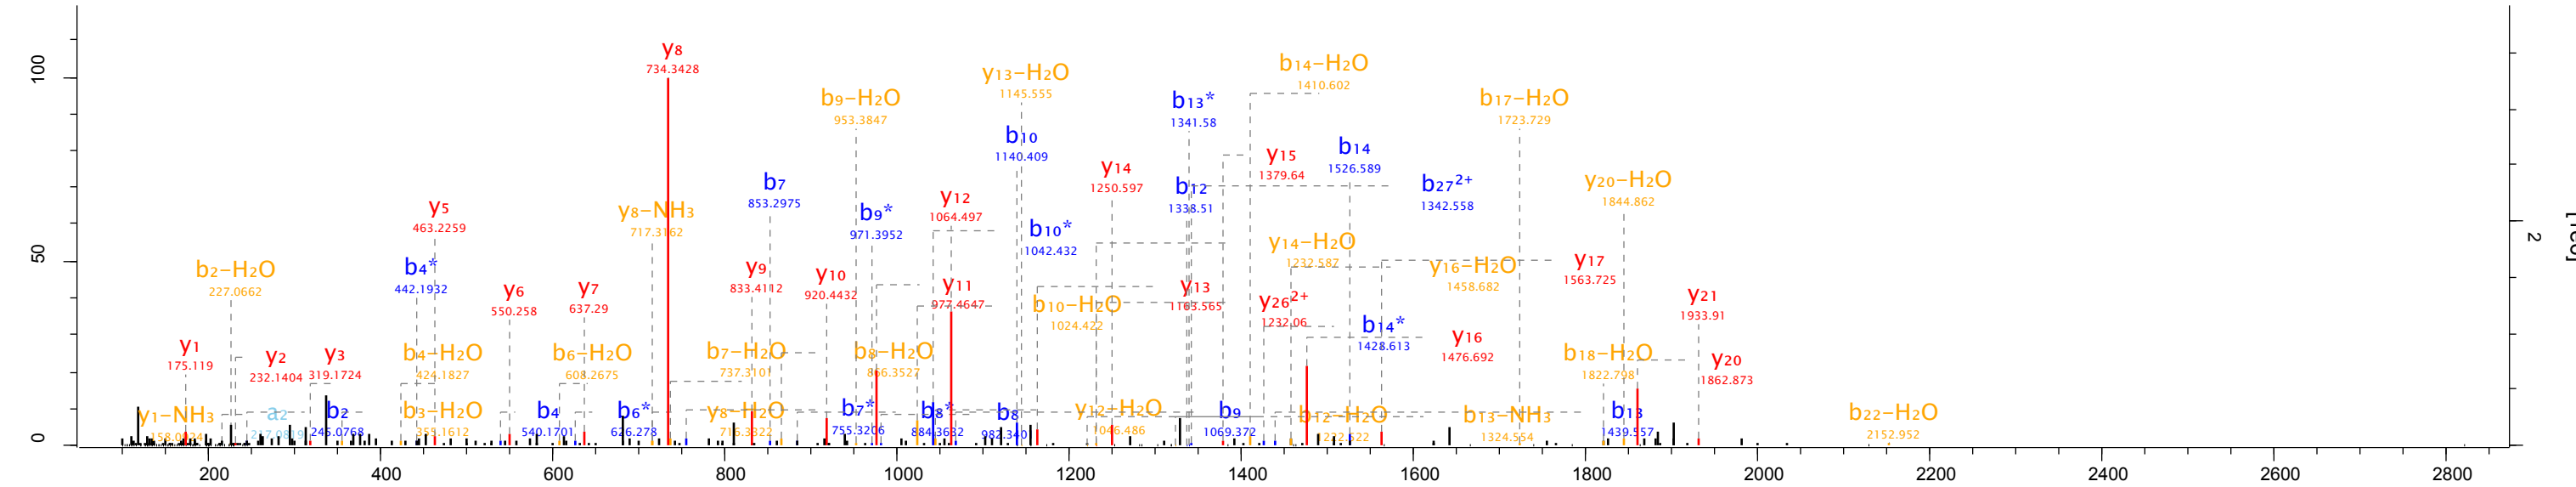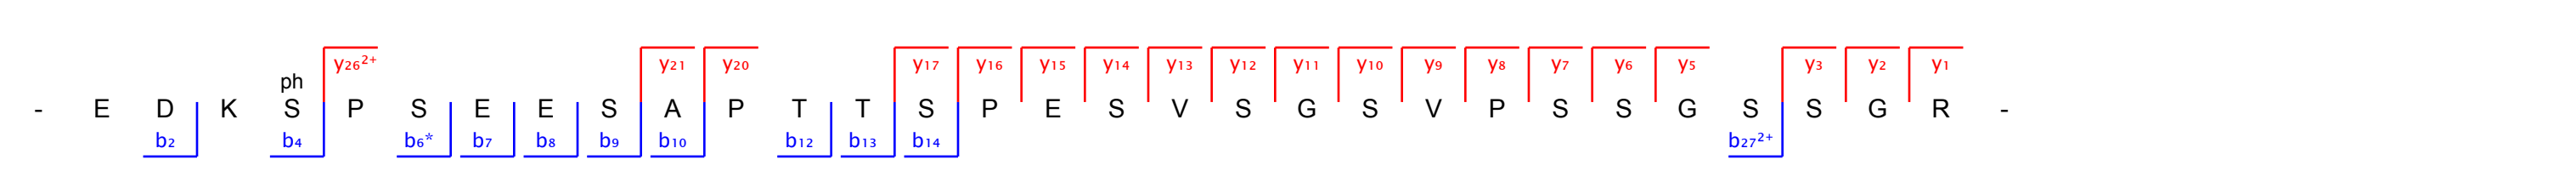

Raw file 20171215\_MaS\_33SR\_LMH\_phospho\_06 Scan 8056 Method FTMS; HCD Score 145.86 m/z 650.79 Gene names PANK2

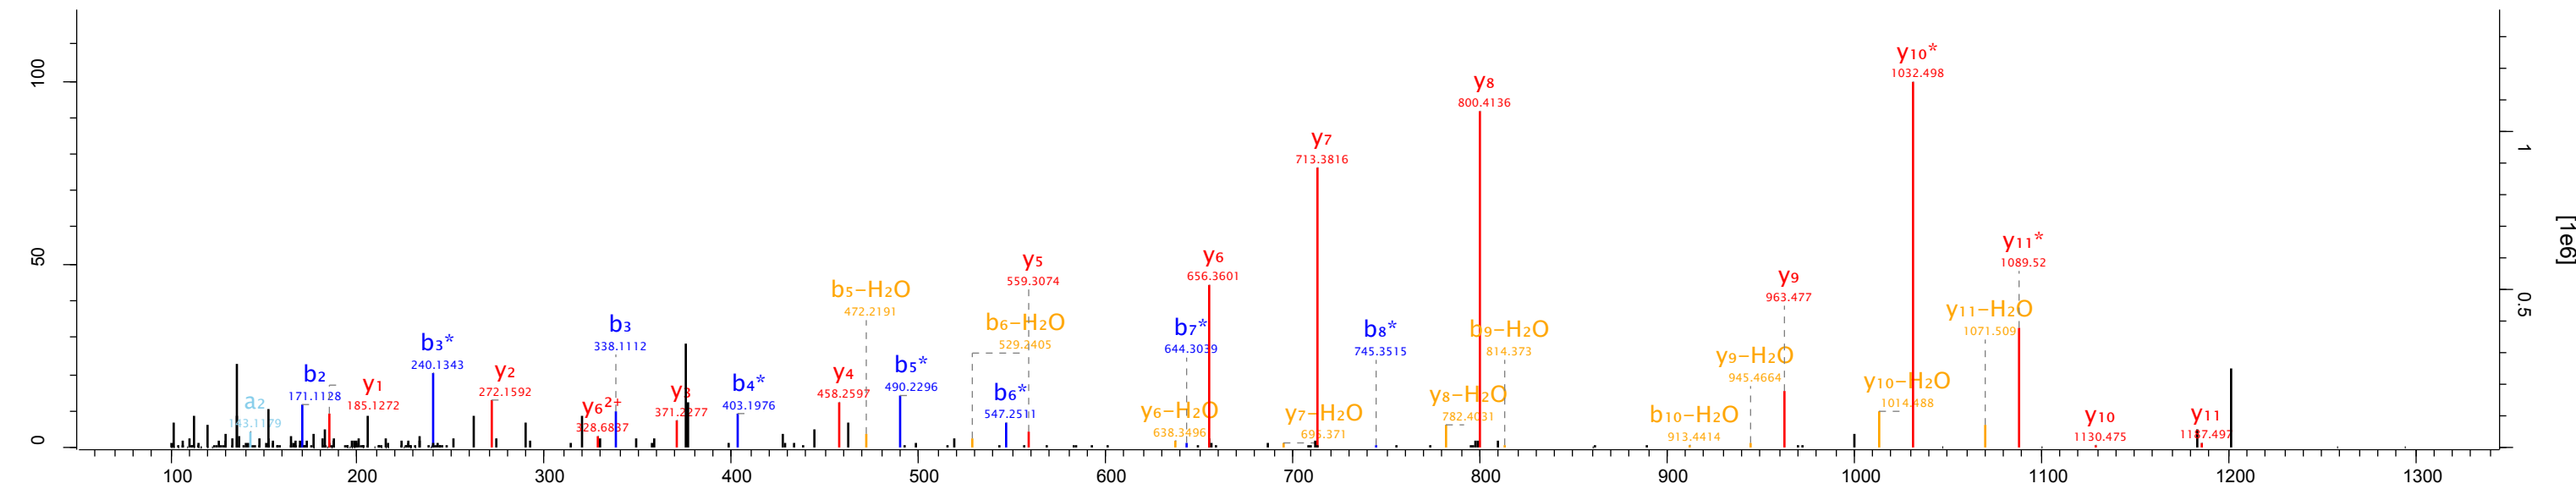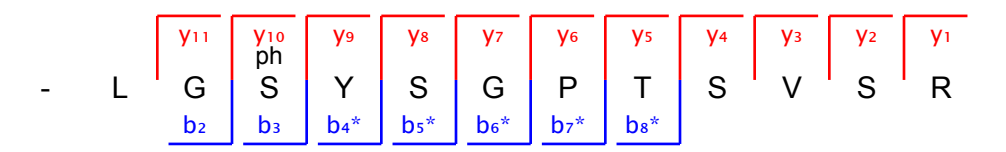

Raw file 20171215\_MaS\_33SR\_LMH\_phospho\_06 Scan 8656 Method FTMS; HCD Score 221.9 m/z 771.34 Gene names CPSF7

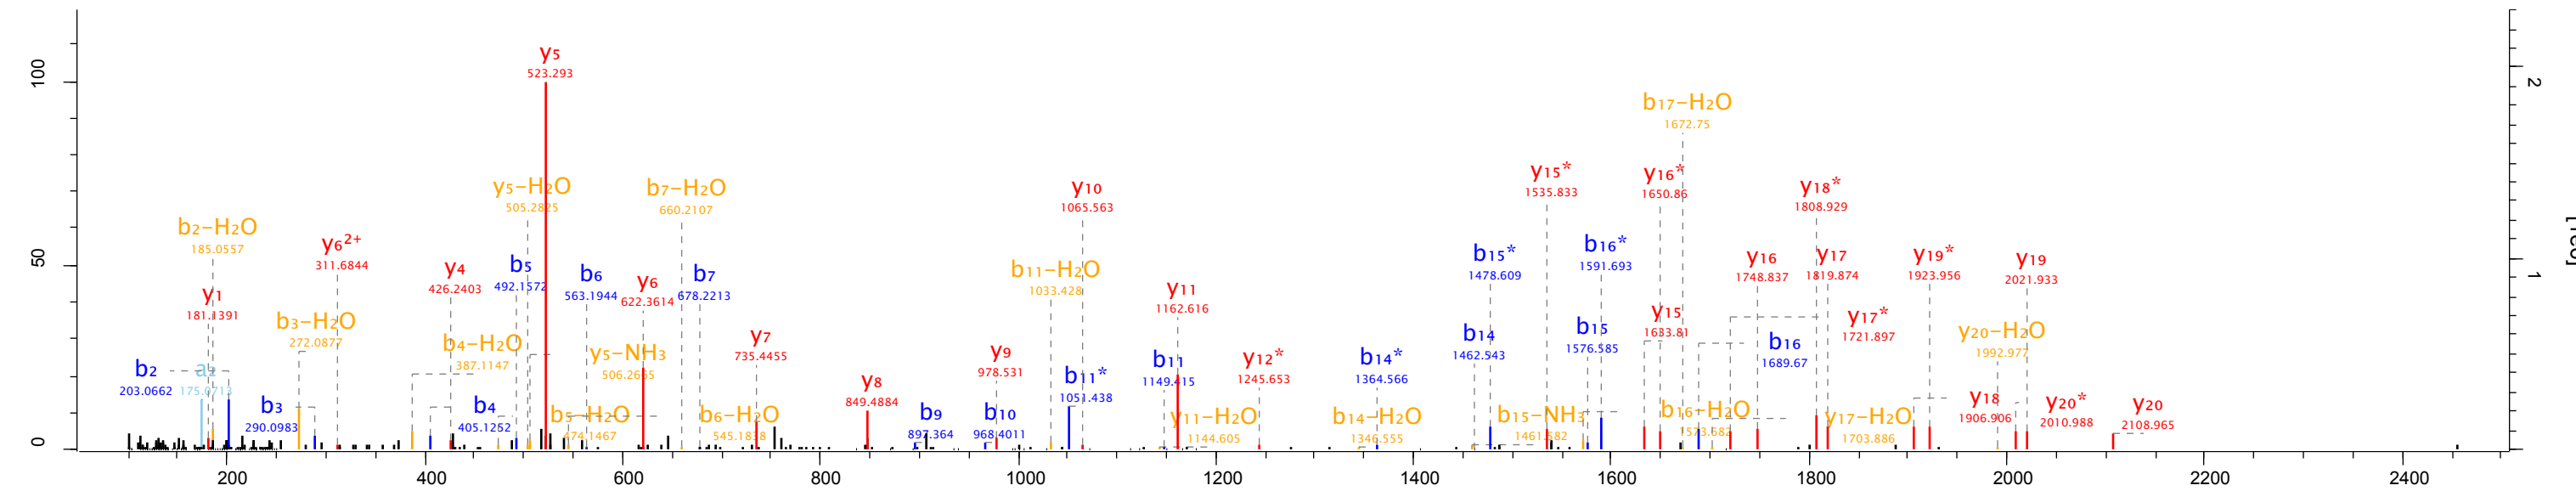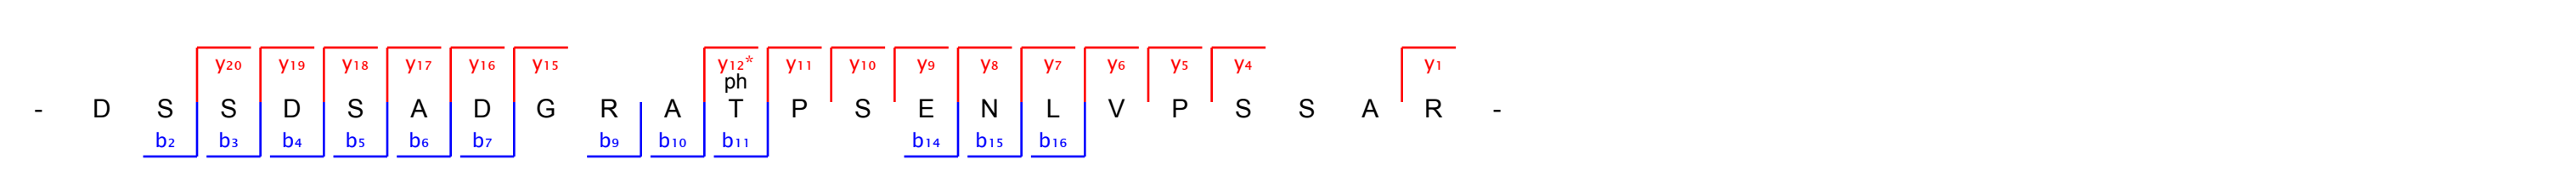

Raw file 20171215\_MaS\_33SR\_LMH\_phospho\_06 Scan 8706 Method FTMS; HCD Score 81.88 m/z 541.25 Gene names ZSCAN5A;ZSCAN5B

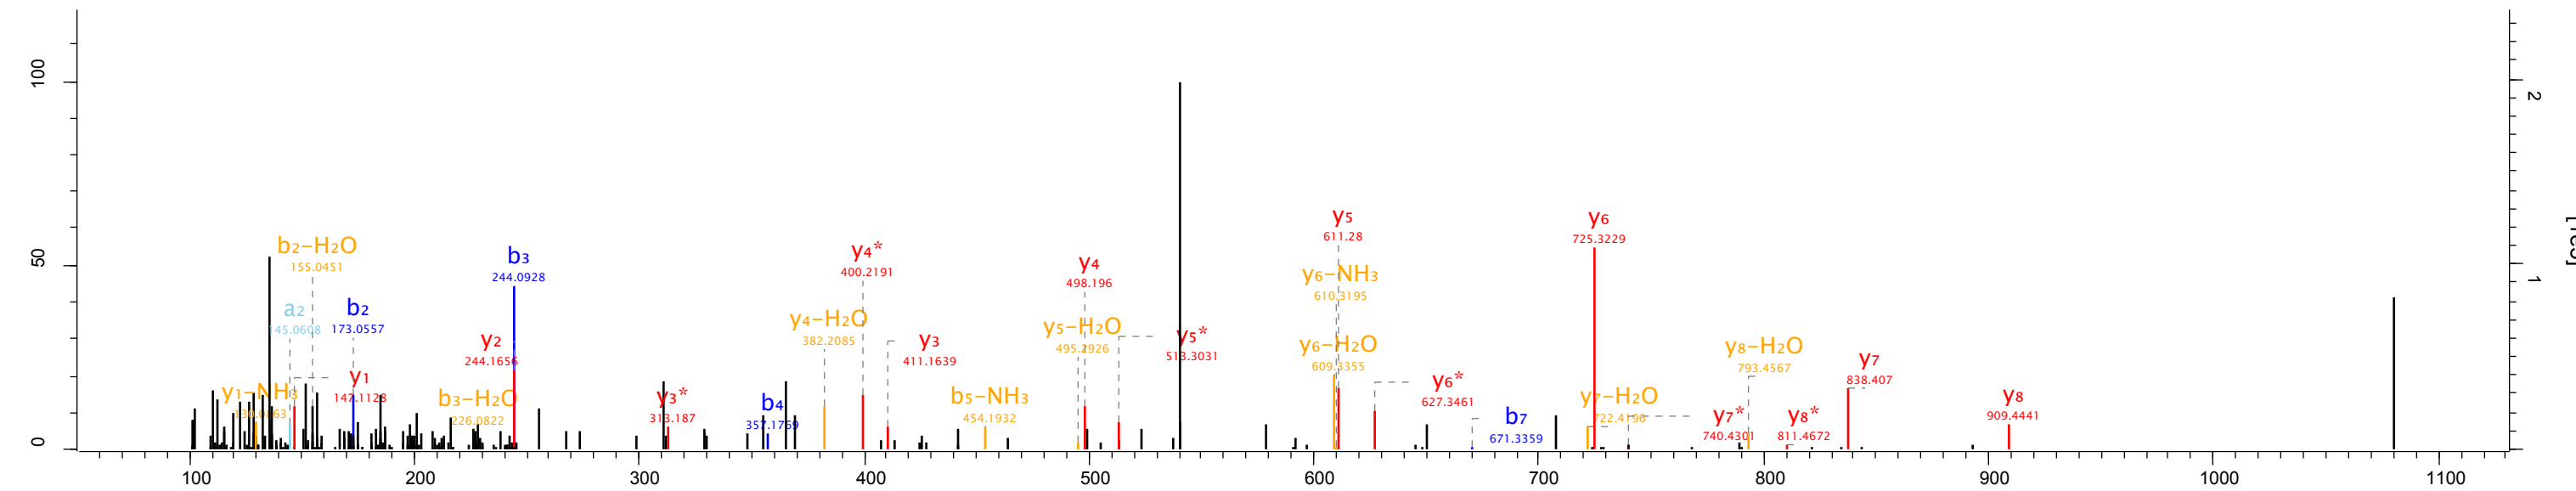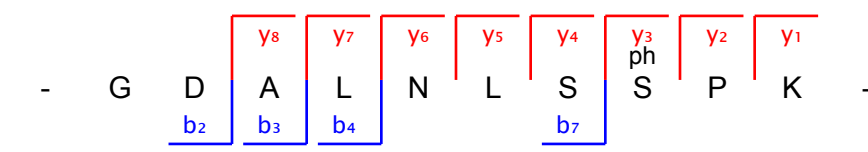

Raw file: 20171215\_MaS\_33SR\_LMH\_phospho\_06  
 Scan: 8796 Method: FTMS; HCD Score: 88.34 m/z: 572.75 Gene names: GPRC5A

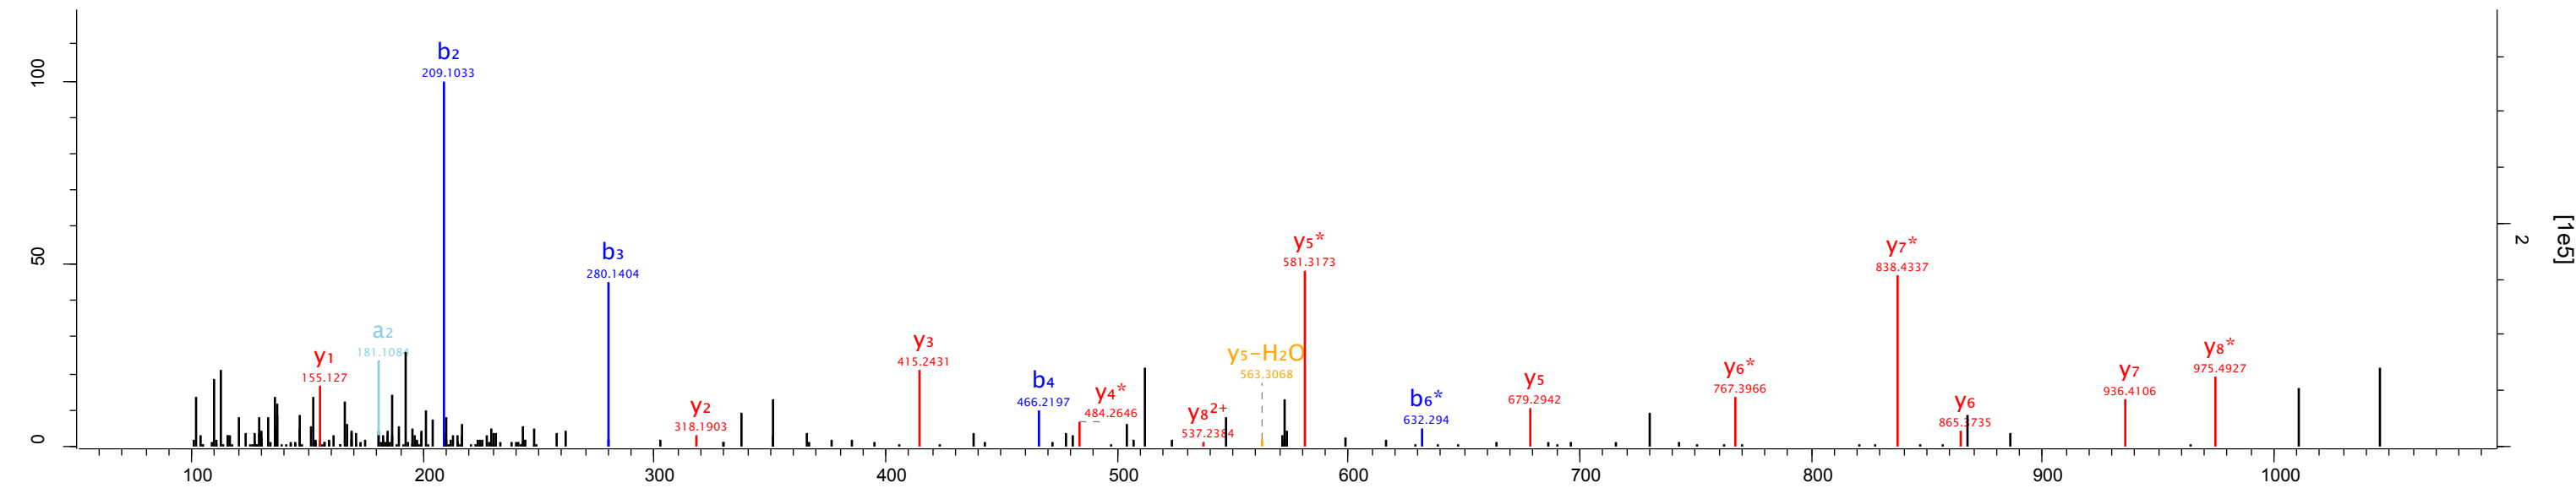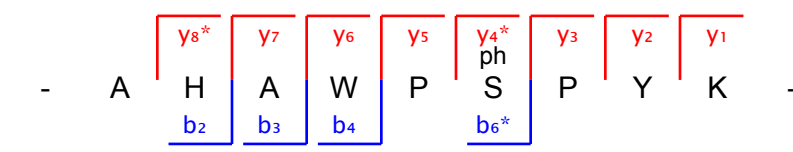

Raw file 20171215\_MaS\_33SR\_LMH\_phospho\_06 Scan 8866 Method FTMS; HCD Score 119.62 m/z 786.37 Gene names EIF4EBP1

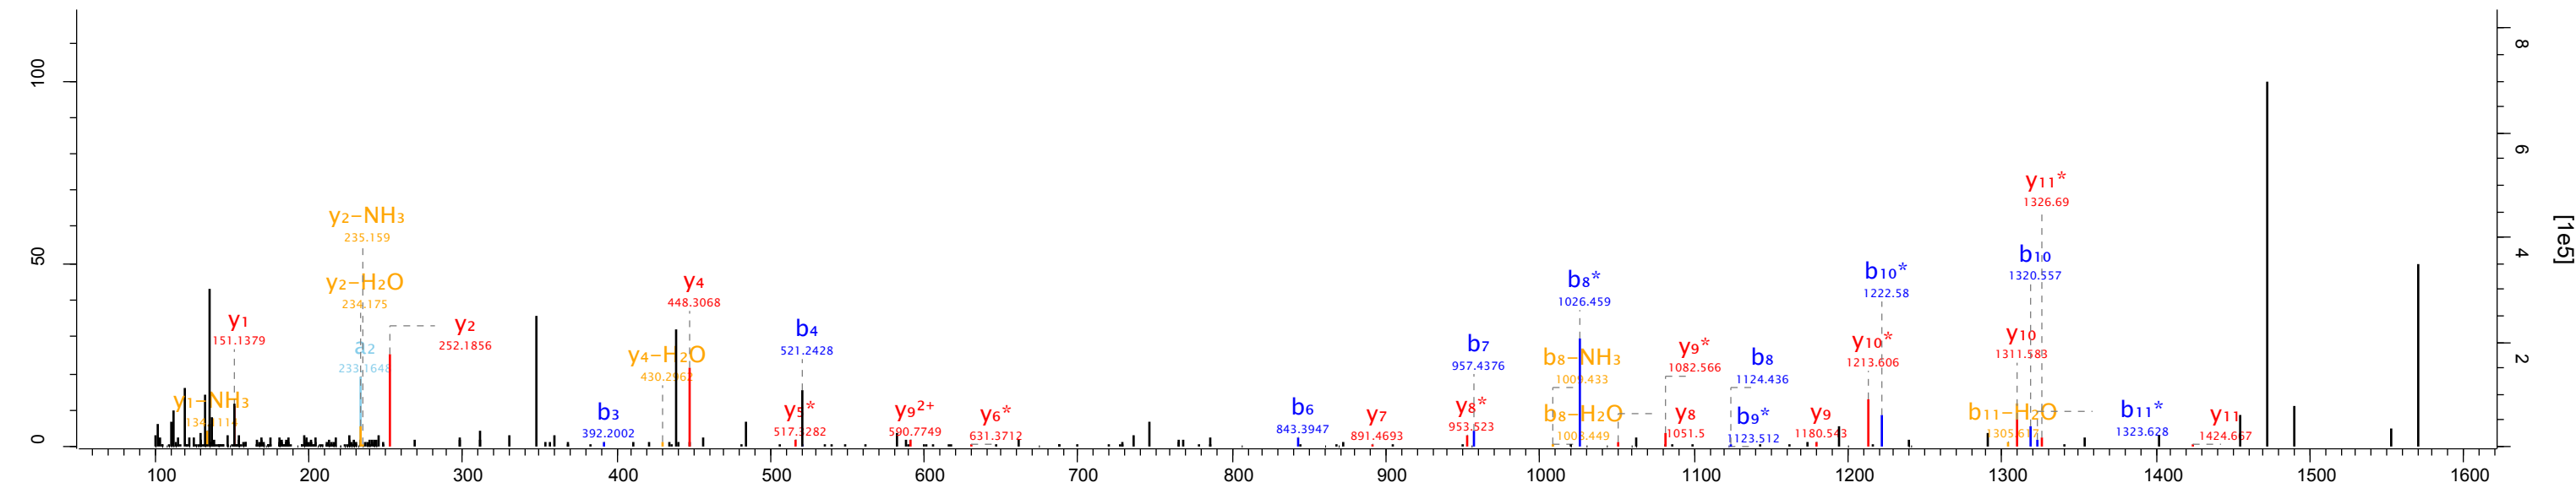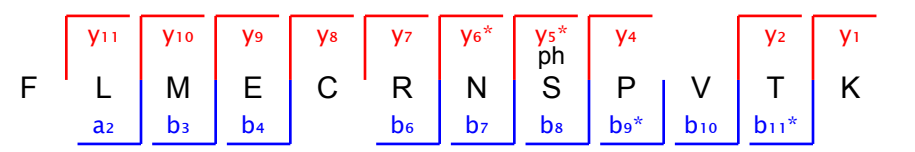

Raw file 20171215\_MaS\_33SR\_LMH\_phospho\_06 Scan 9756 Method FTMS; HCD Score 92.25 m/z 608.78 Gene names TBC1D5

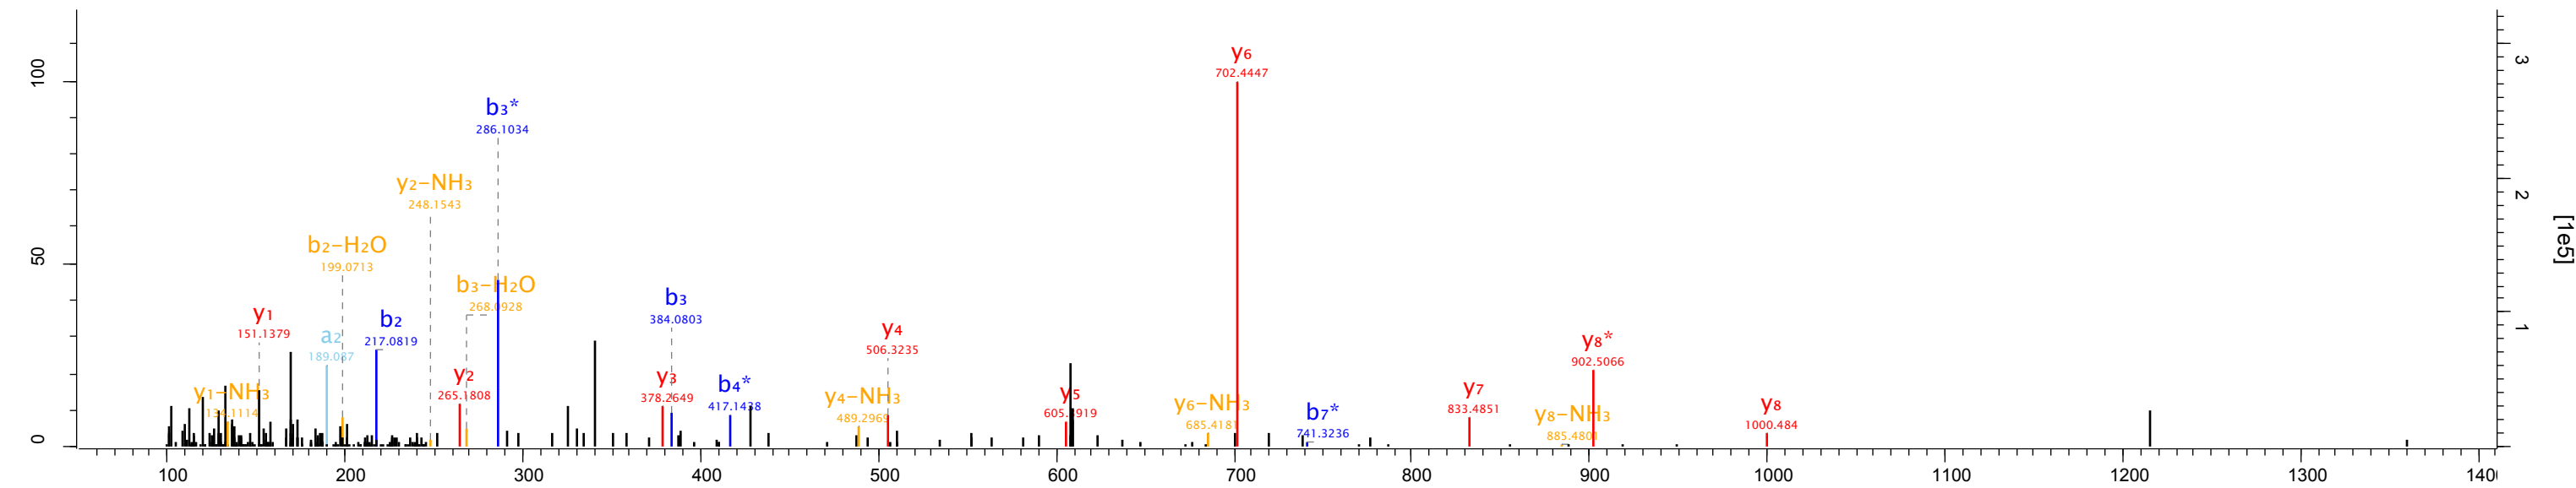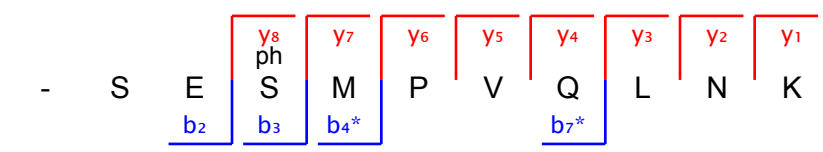



Raw file  
 20171215\_MaS\_33SR\_LMH\_phospho\_06  
 Scan 9866 Method FTMS; HCD Score 135.3 m/z 810.68 Gene names SON

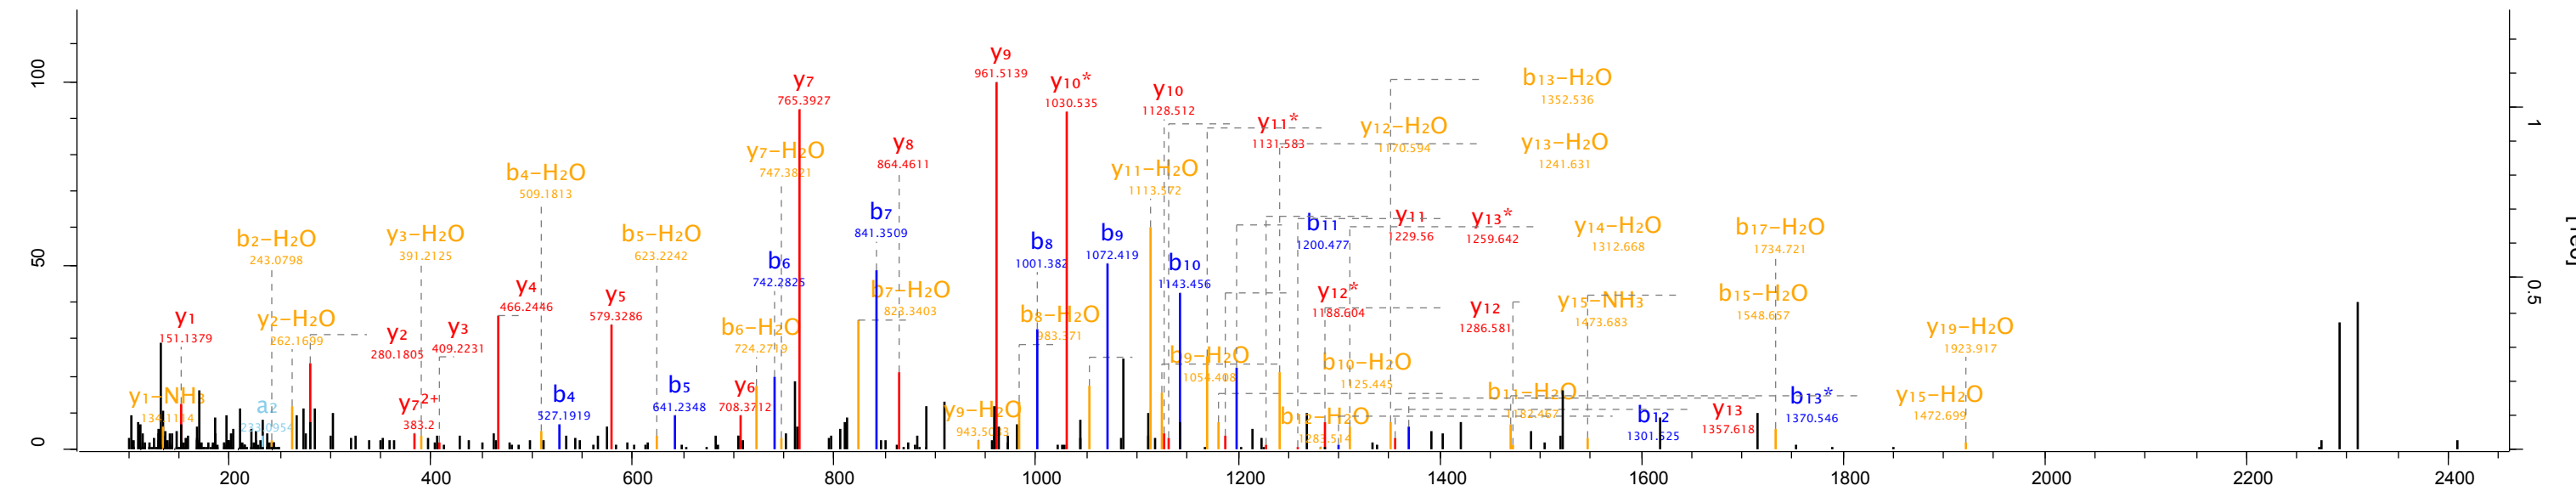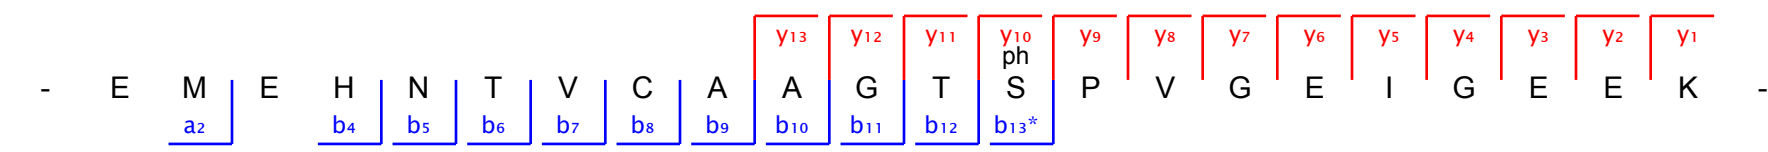

Raw file 20171215\_MaS\_33SR\_LMH\_phospho\_06 Scan 9956 Method FTMS; HCD Score 104.81 m/z 773.86 Gene names DUT

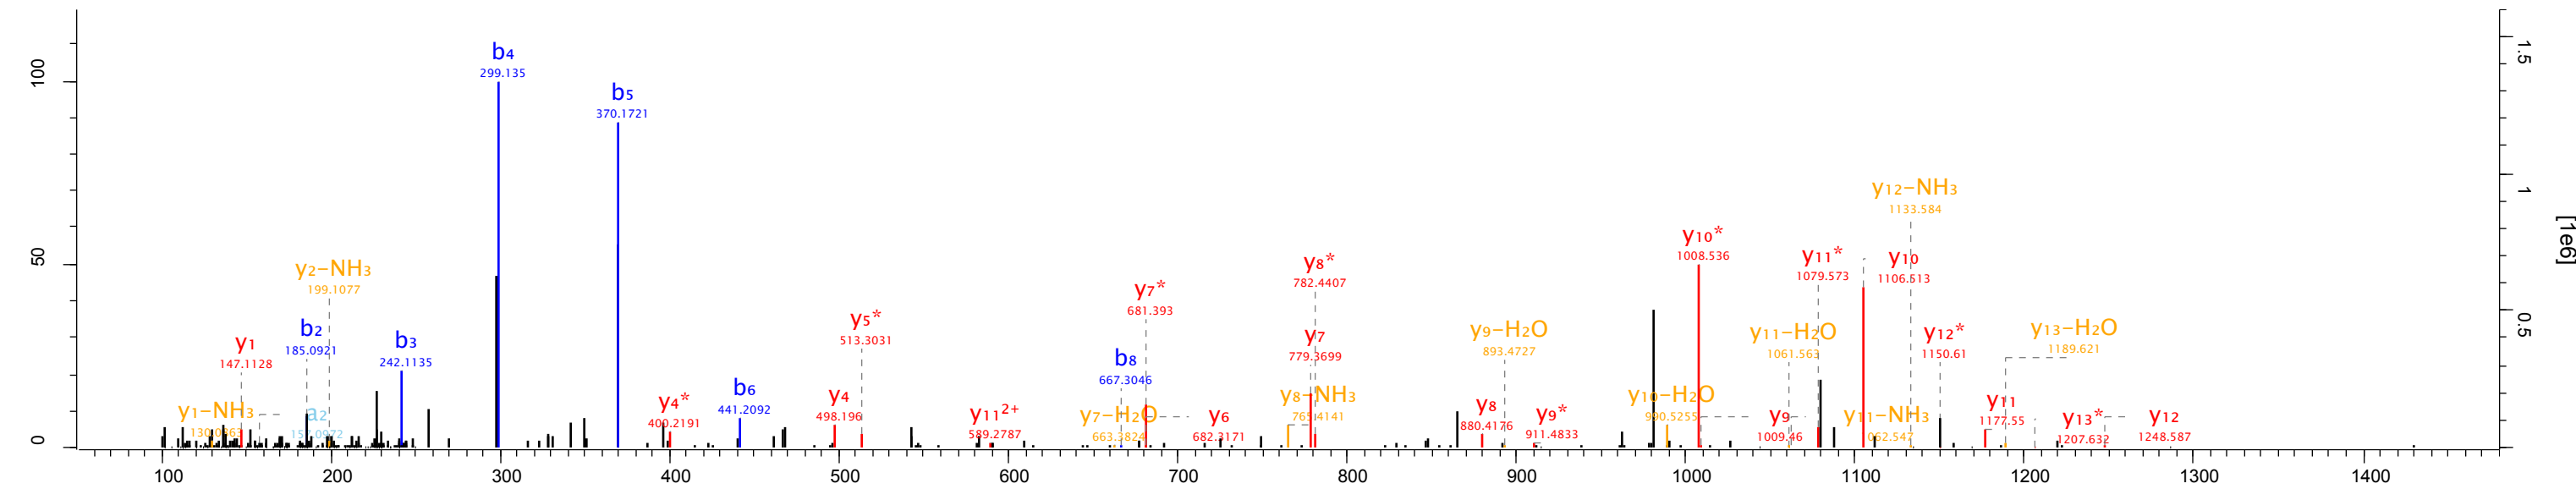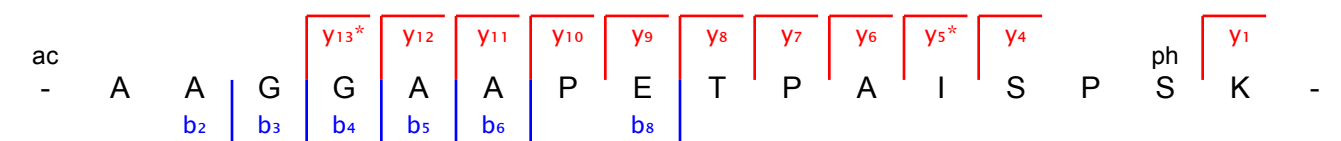

Raw file 20171215\_MaS\_33SR\_LMH\_phospho\_07 Scan 2696 Method FTMS; HCD Score 78.19 m/z 587.77 Gene names PACS1

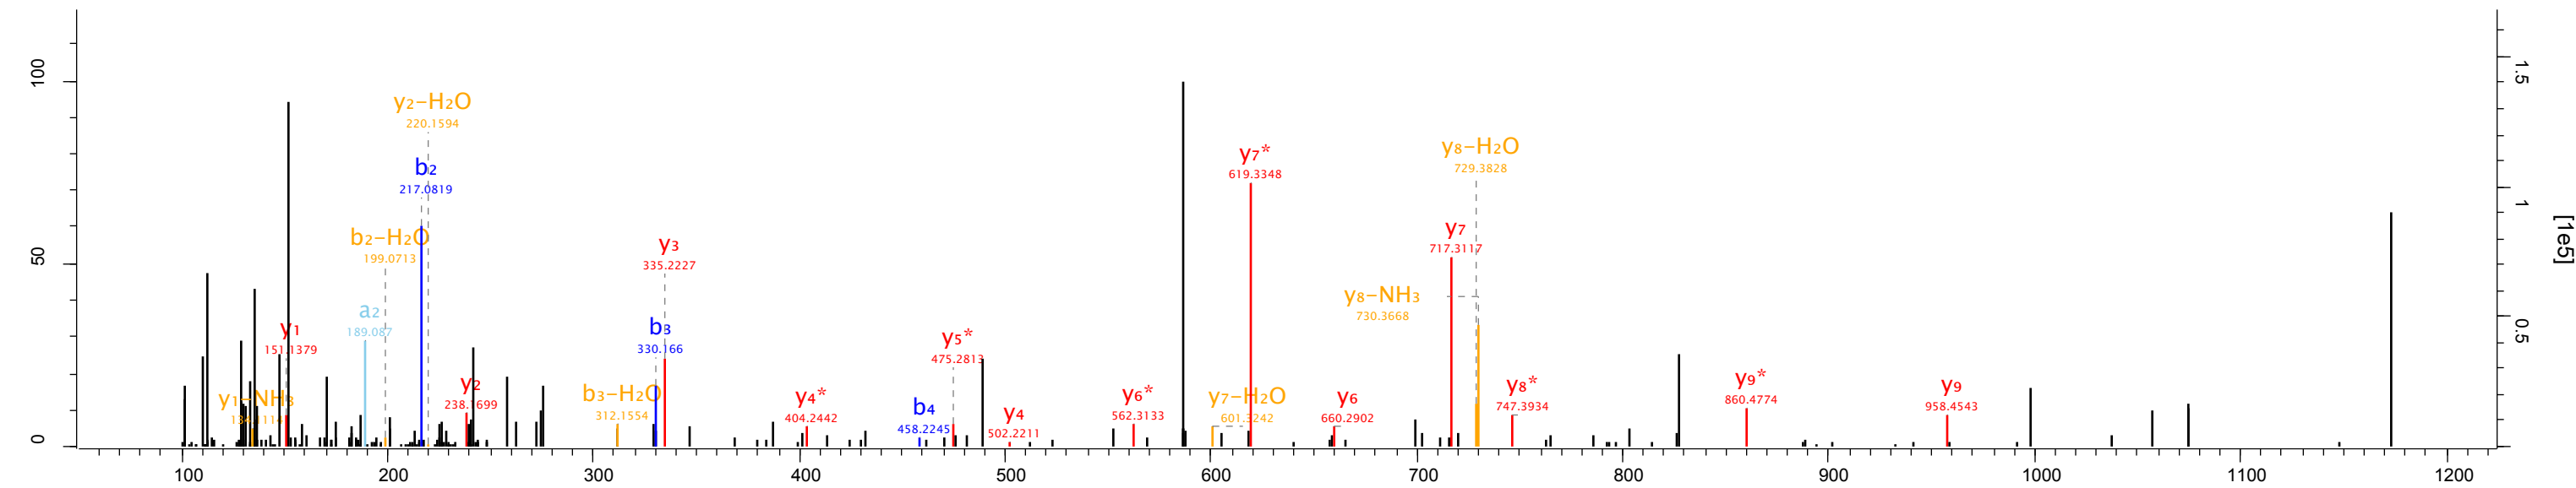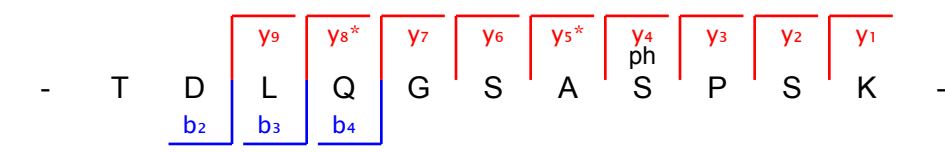

Raw file 20171215\_MaS\_33SR\_LMH\_phospho\_07 Scan 3276 Method FTMS; HCD Score 88.16 m/z 457.24 Gene names SPEN

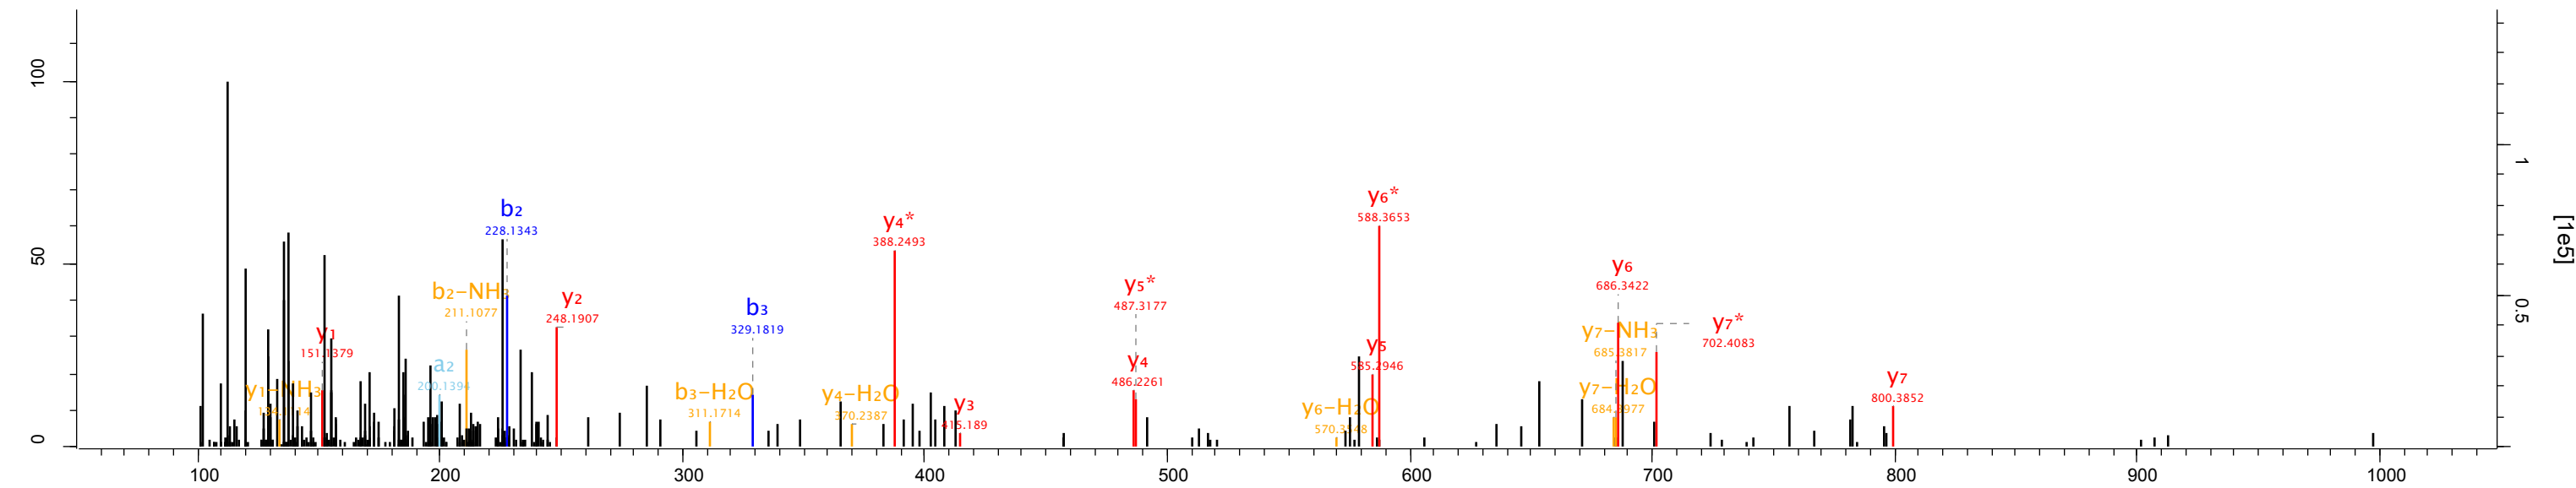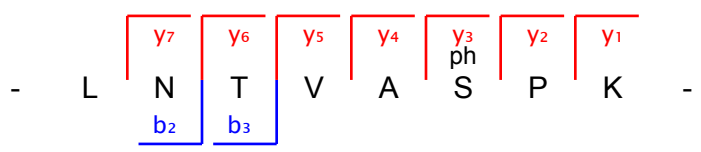

Raw file 20171215\_MaS\_33SR\_LMH\_phospho\_07 Scan 4066 Method FTMS; HCD Score 81.02 m/z 469.72 Gene names ZFP36

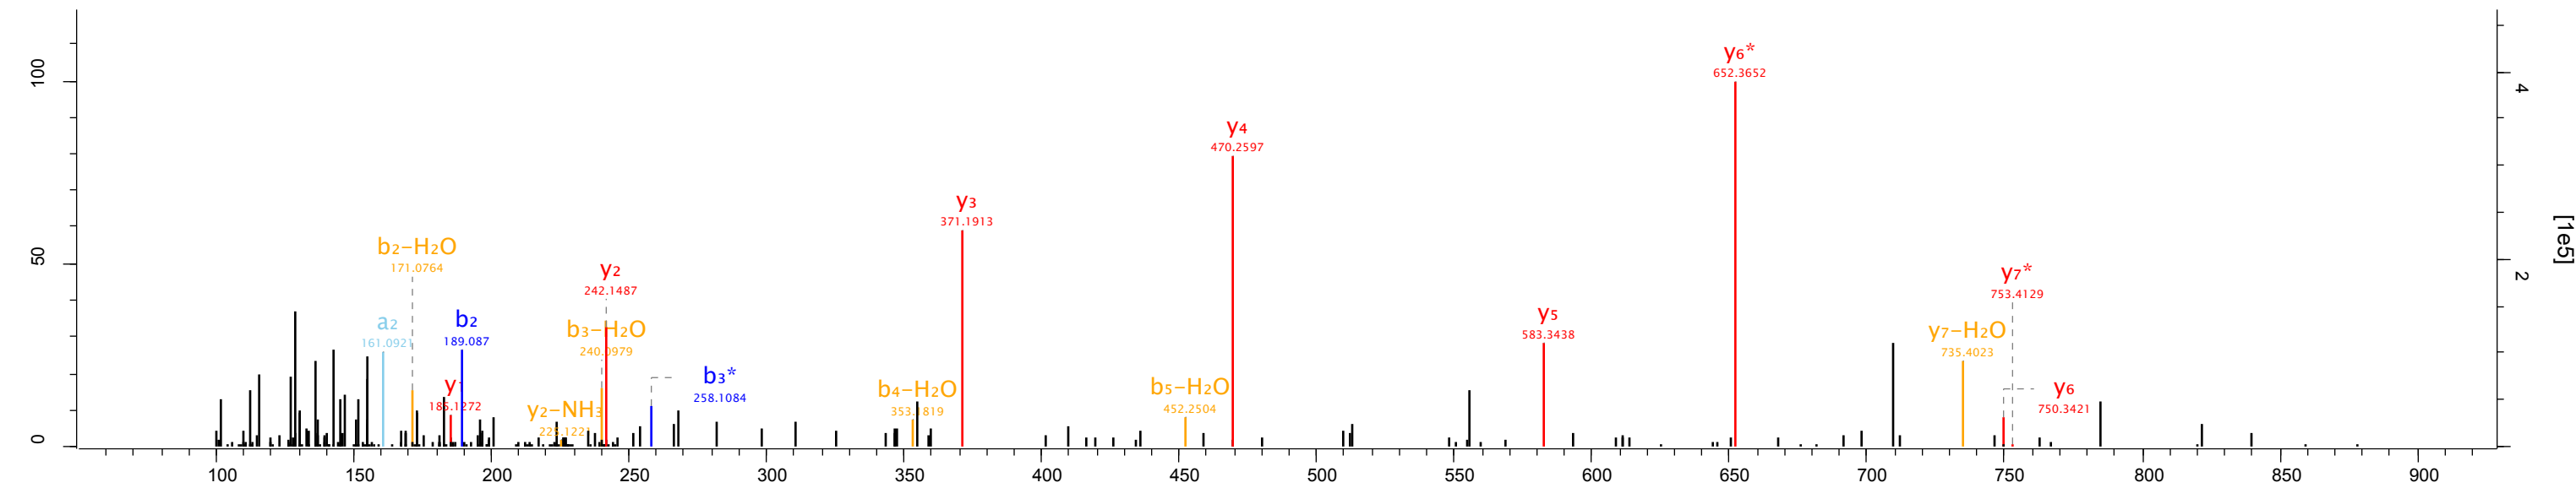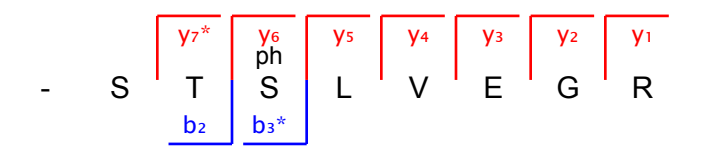

Raw file 20171215\_MaS\_33SR\_LMH\_phospho\_07 Scan 5666 Method FTMS; HCD Score 54.1 m/z 783.36 Gene names CRYBB1

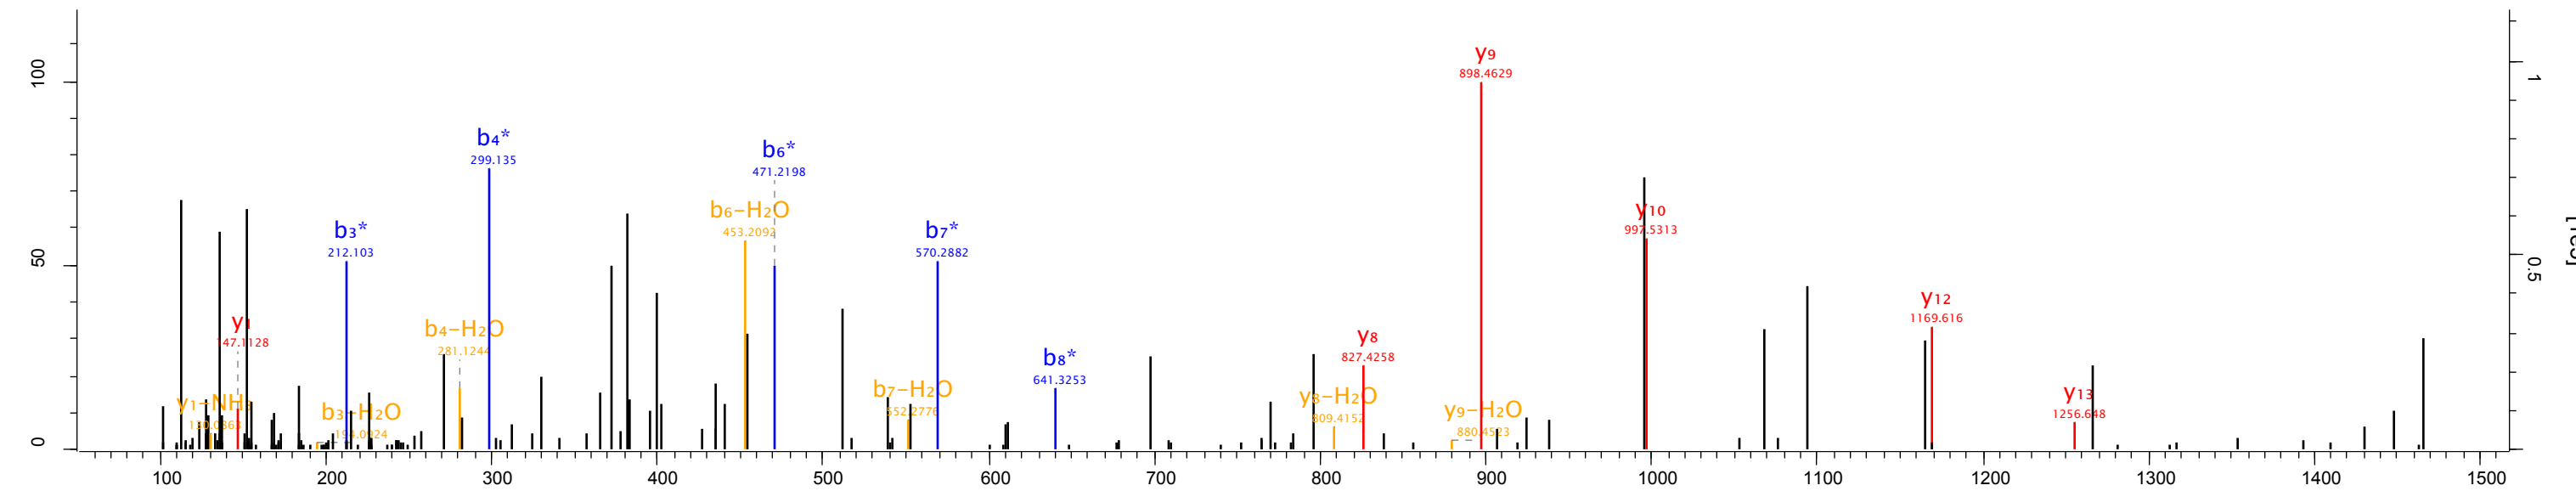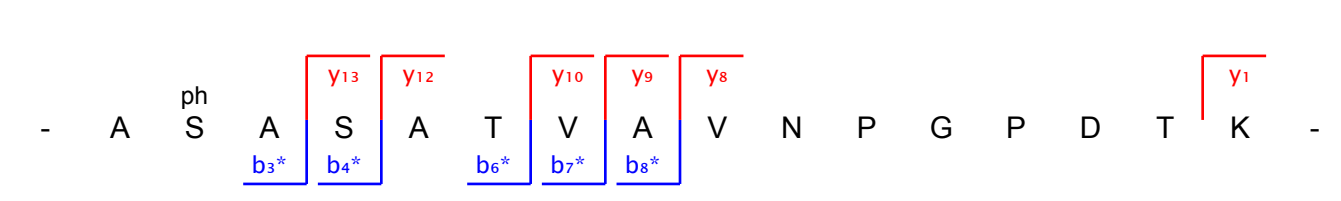

Raw file 20171215\_MaS\_33SR\_LMH\_phospho\_08 Scan 1906 Method FTMS; HCD Score 112.73 m/z 366.52 Gene names SRRM1

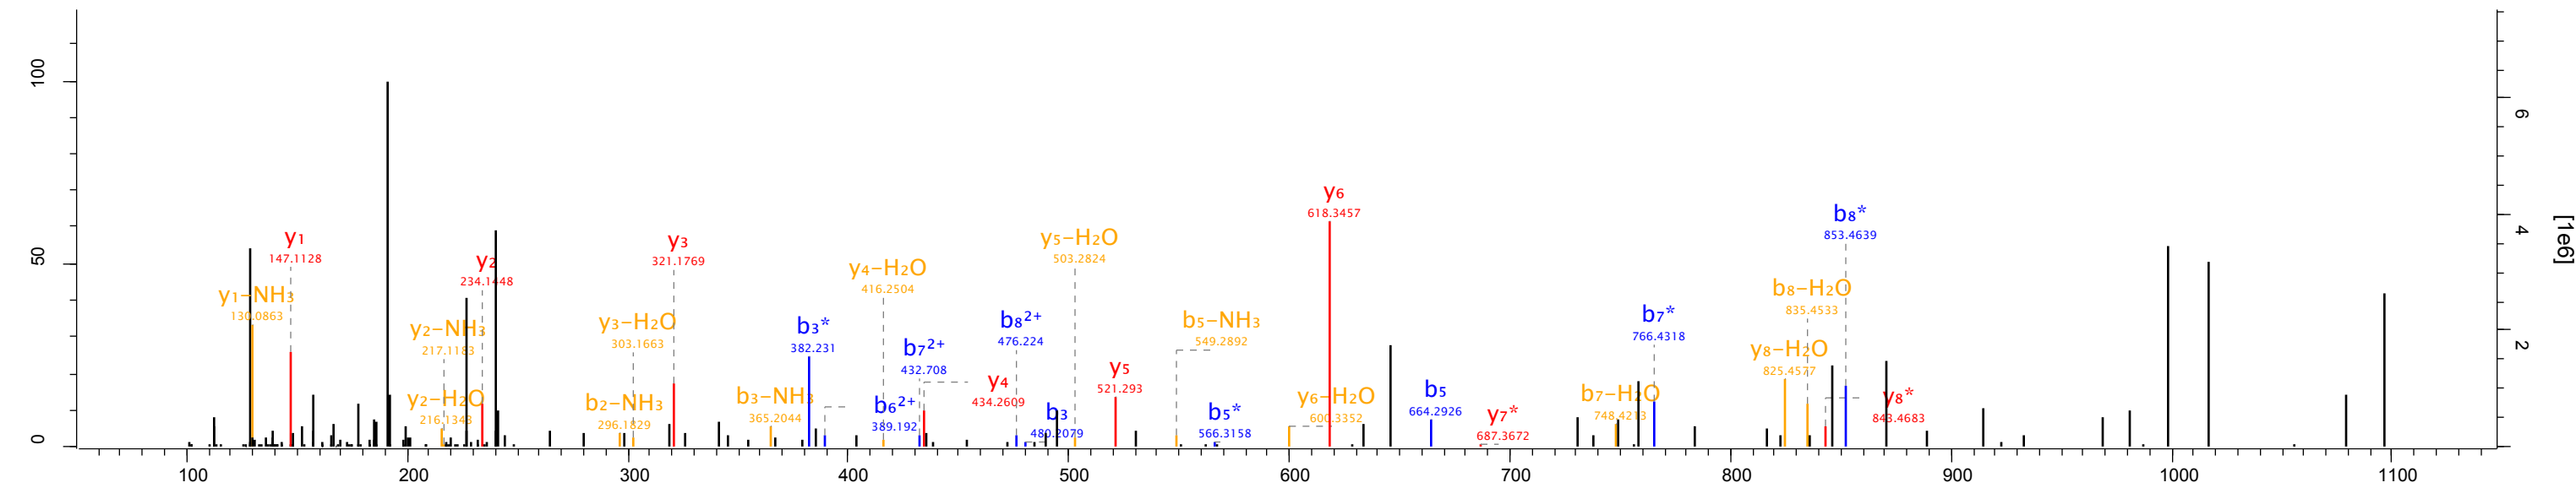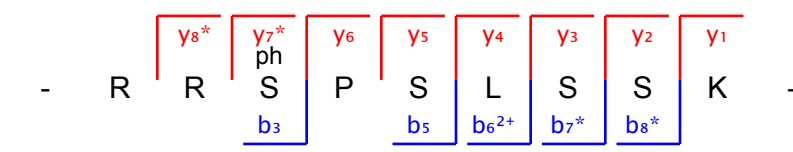

Raw file 20171215\_MaS\_33SR\_LMH\_phospho\_08 Scan 2226 Method FTMS; HCD Score 90.56 m/z 460.24 Gene names MAP1B

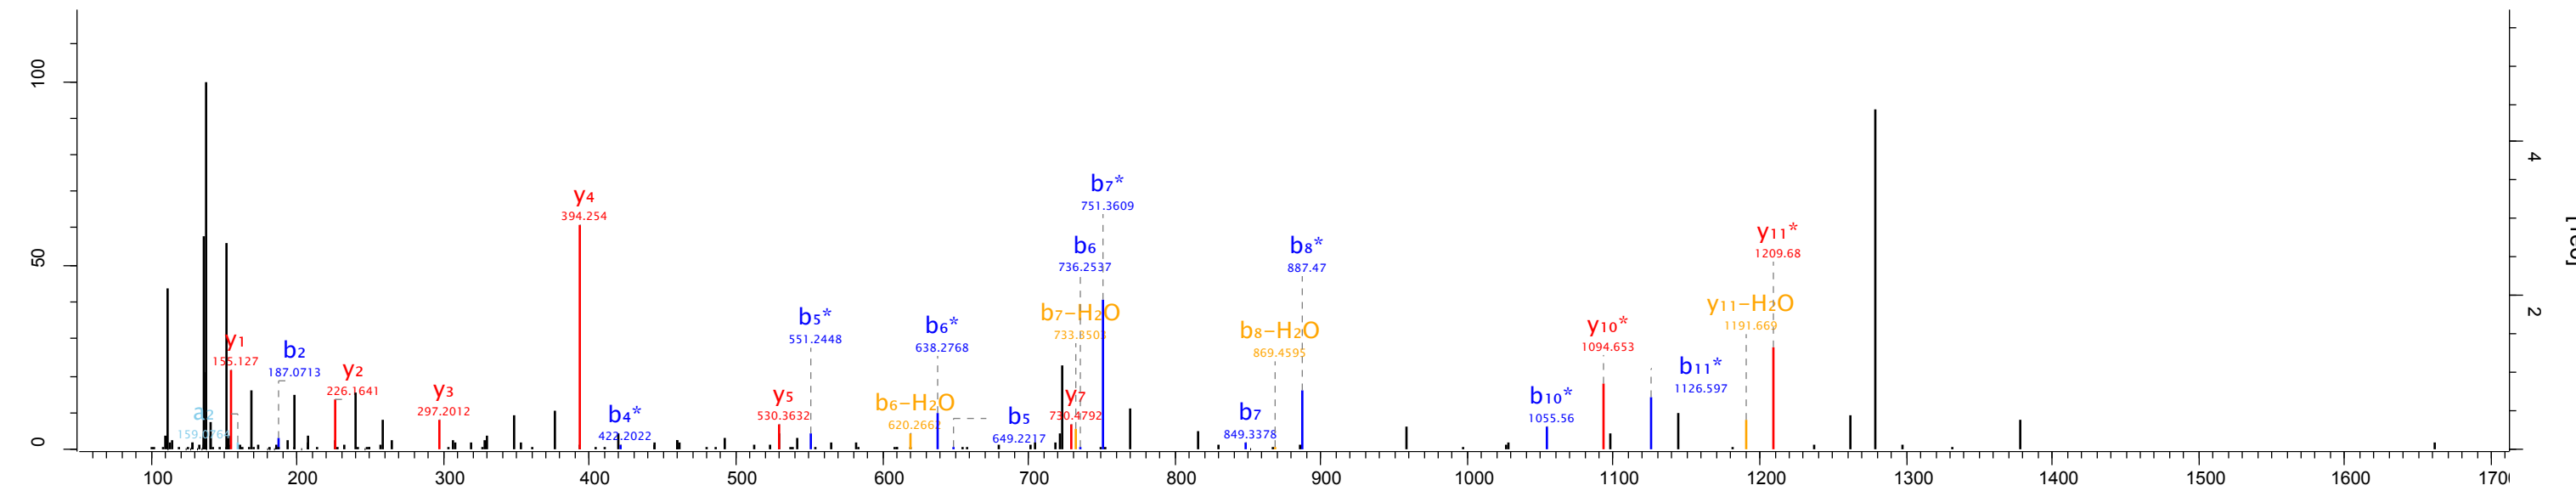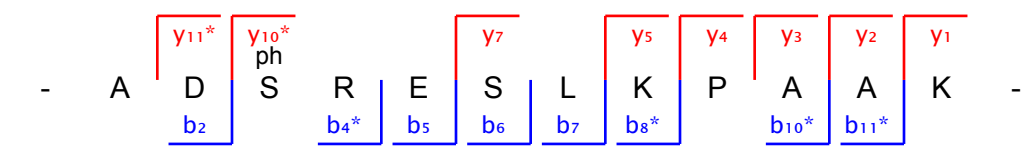



20171215\_MaS\_33SR\_LMH\_phospho\_08 2886 FTMS; HCD 88.71 420.87 MCM2

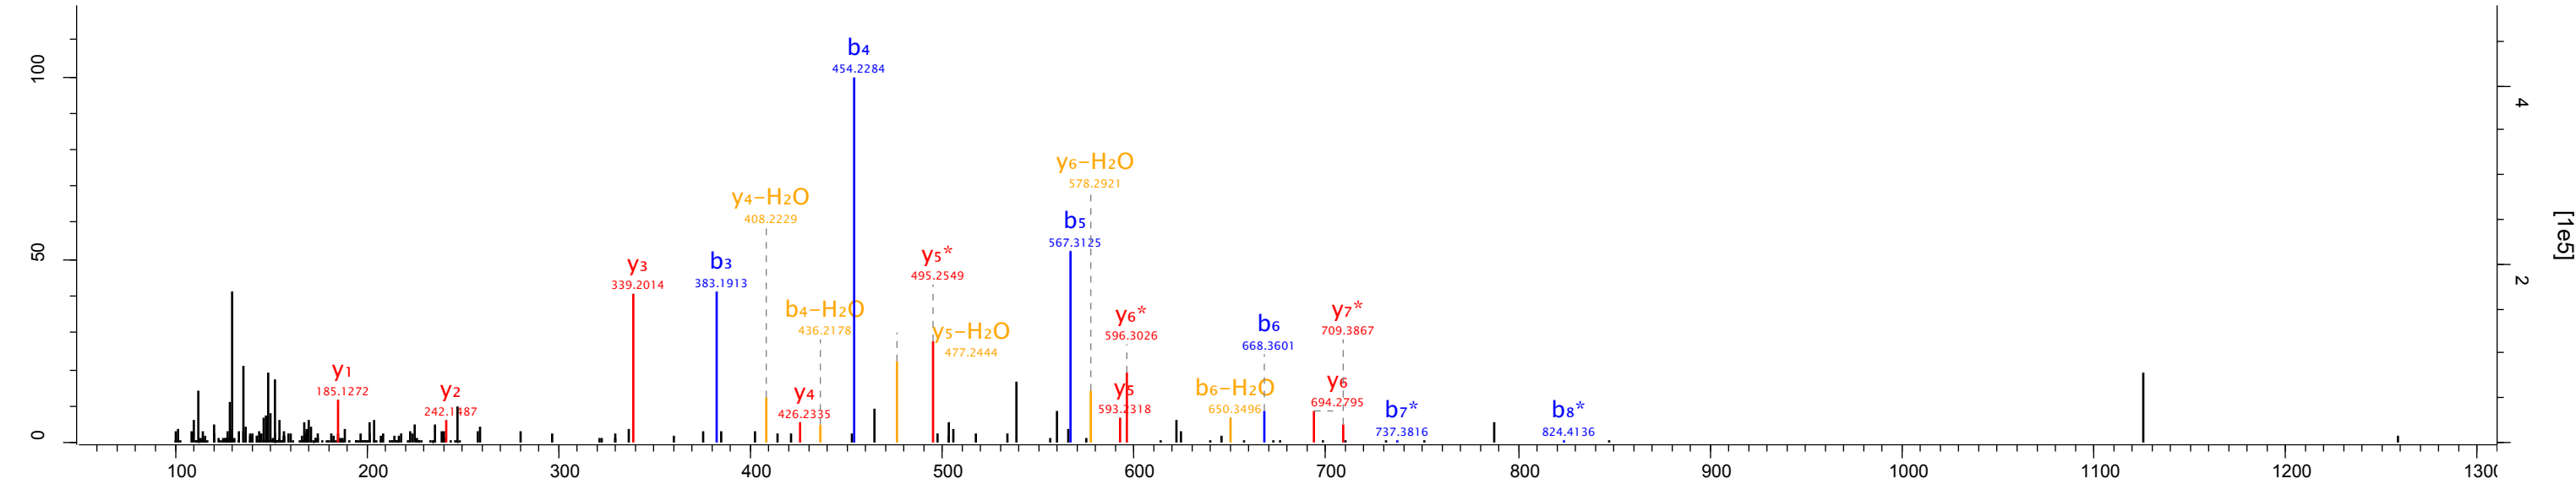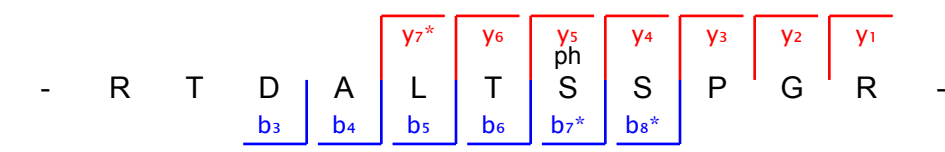

Raw file 20171215\_MaS\_33SR\_LMH\_phospho\_08 Scan 3486 Method FTMS; HCD Score 44.19 m/z 1377.51 Gene names DLG5

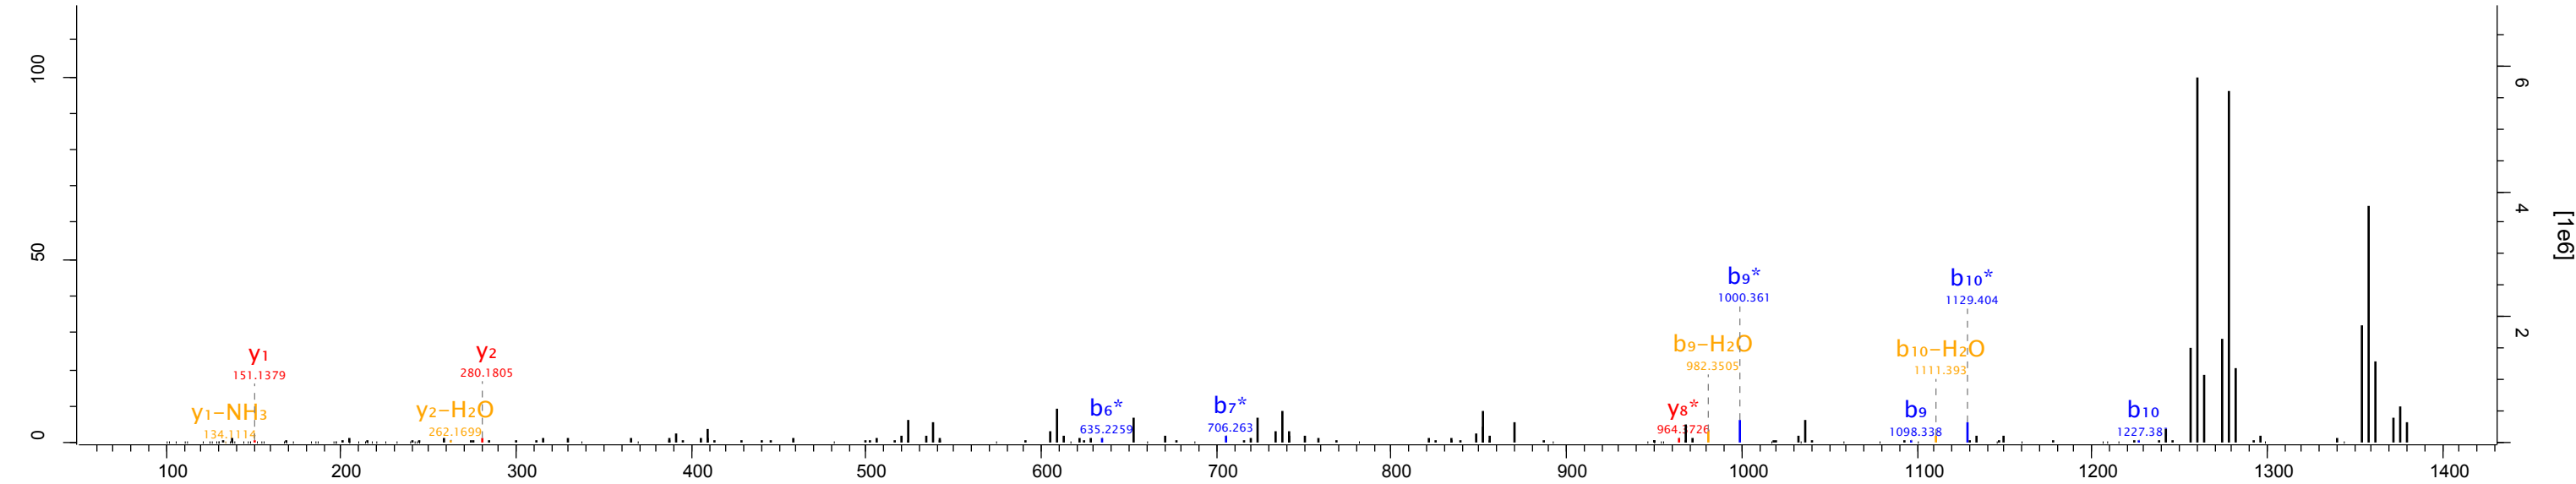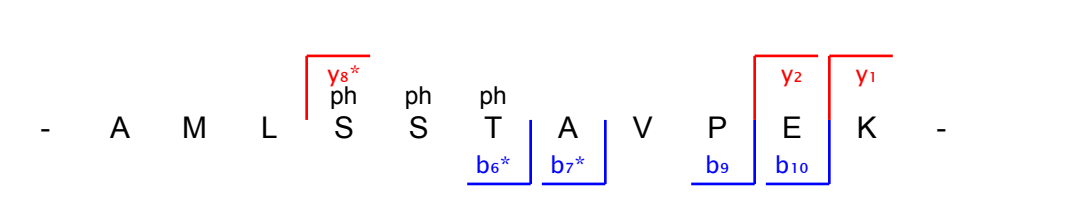

Raw file 20171215\_MaS\_33SR\_LMH\_phospho\_08 Scan 4106 Method FTMS; HCD Score 112.13 m/z 494.21 Gene names NPM1

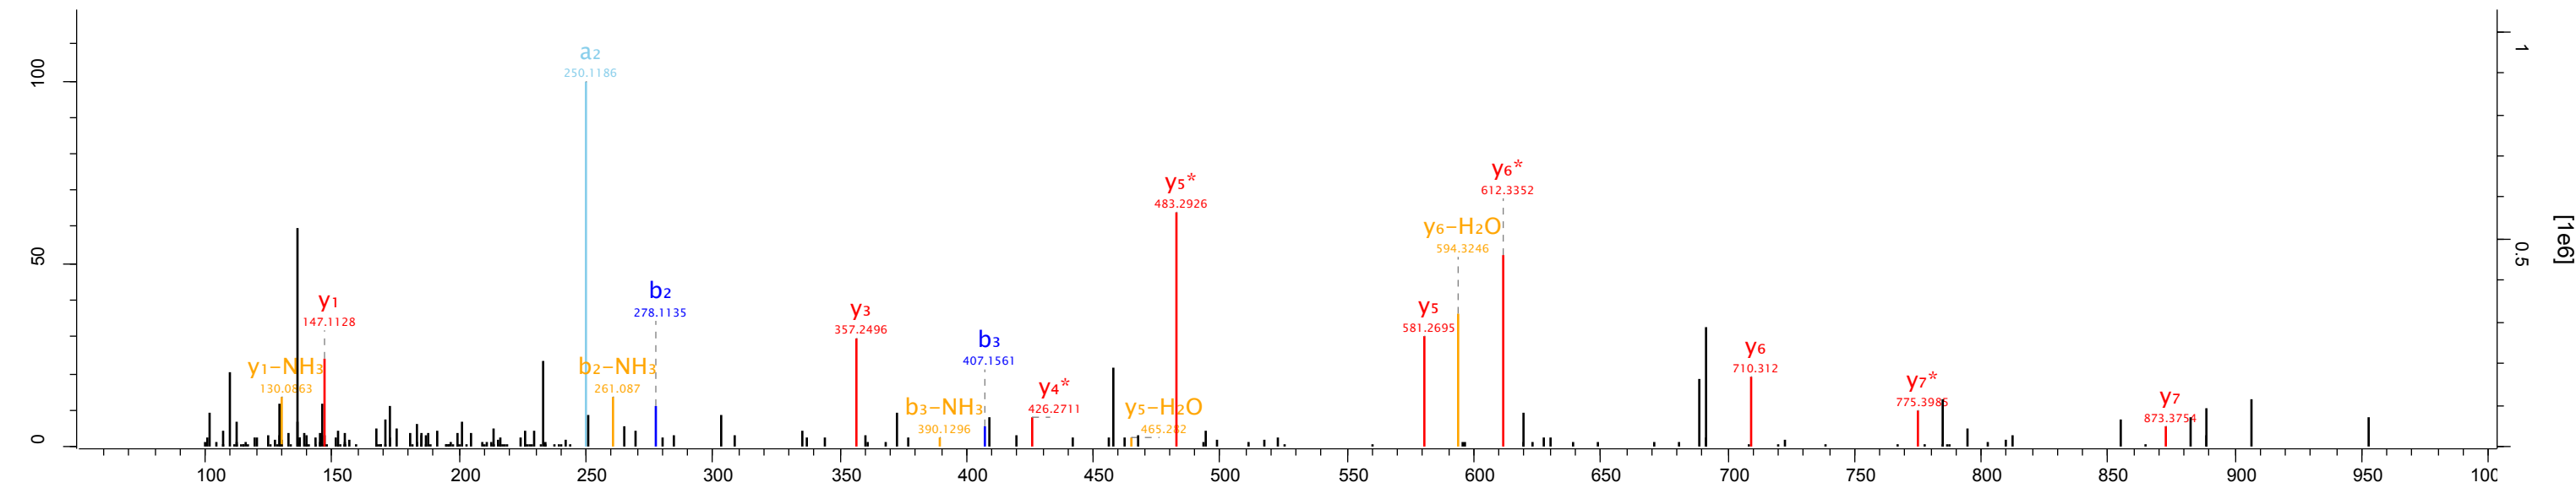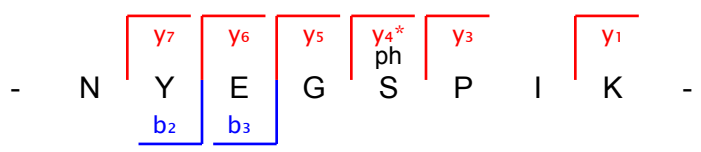

Raw file 20171215\_MaS\_33SR\_LMH\_phospho\_08 Scan 4256 Method FTMS; HCD Score 219.66 m/z 822.41 Gene names SEPT7;DKFZp586I031

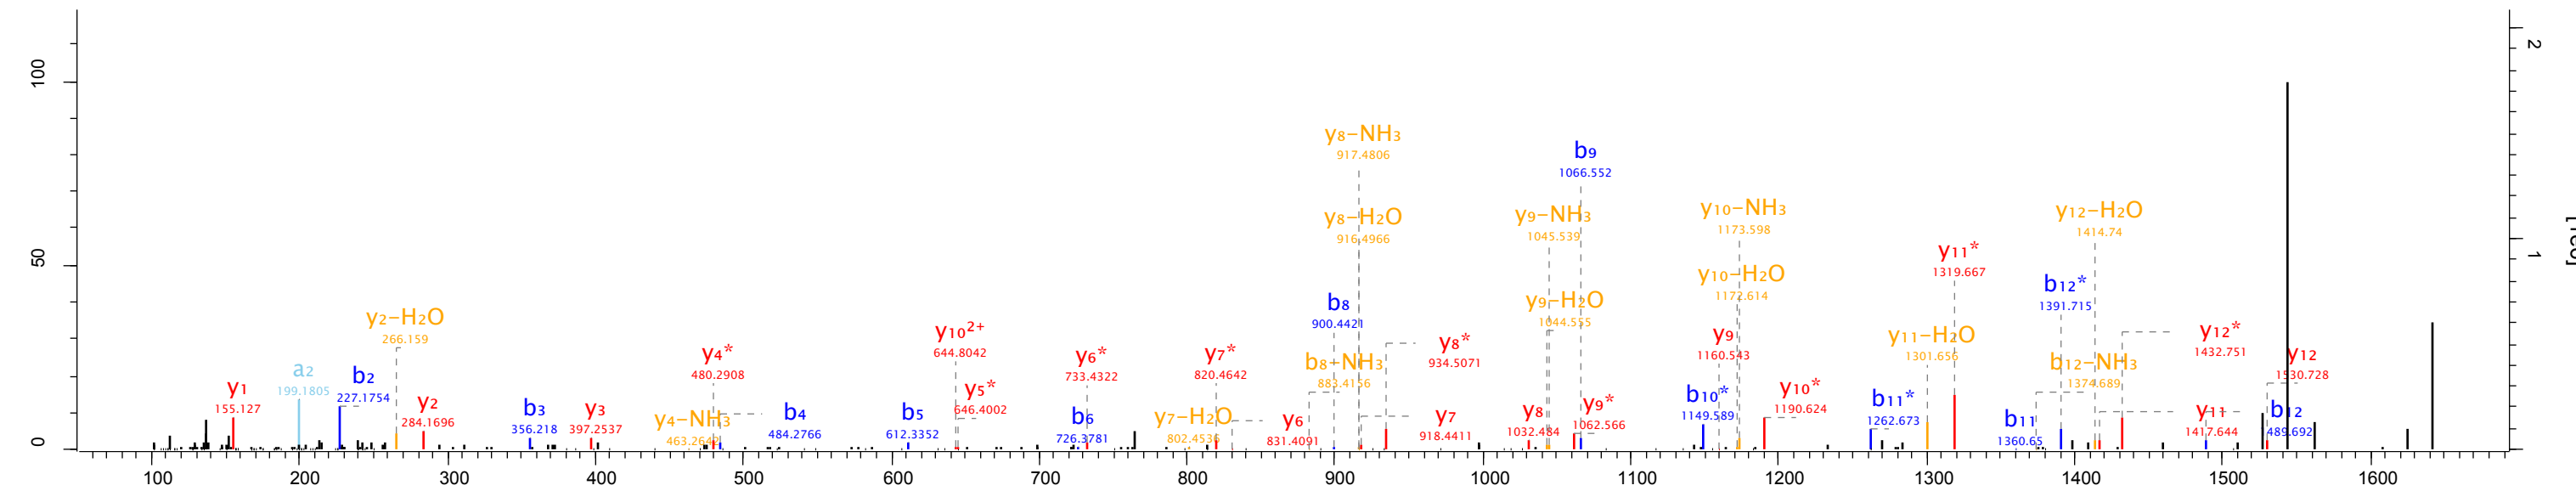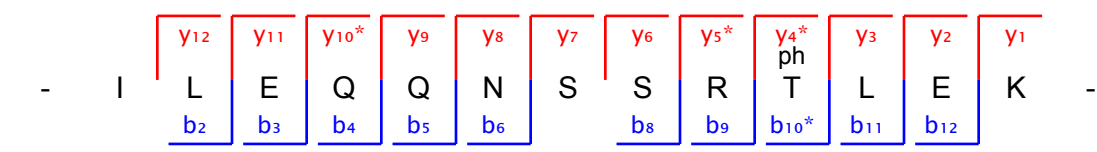

Raw file 20171215\_MaS\_33SR\_LMH\_phospho\_08 Scan 5216 Method FTMS; HCD Score 111.66 m/z 647.8 Gene names DAP

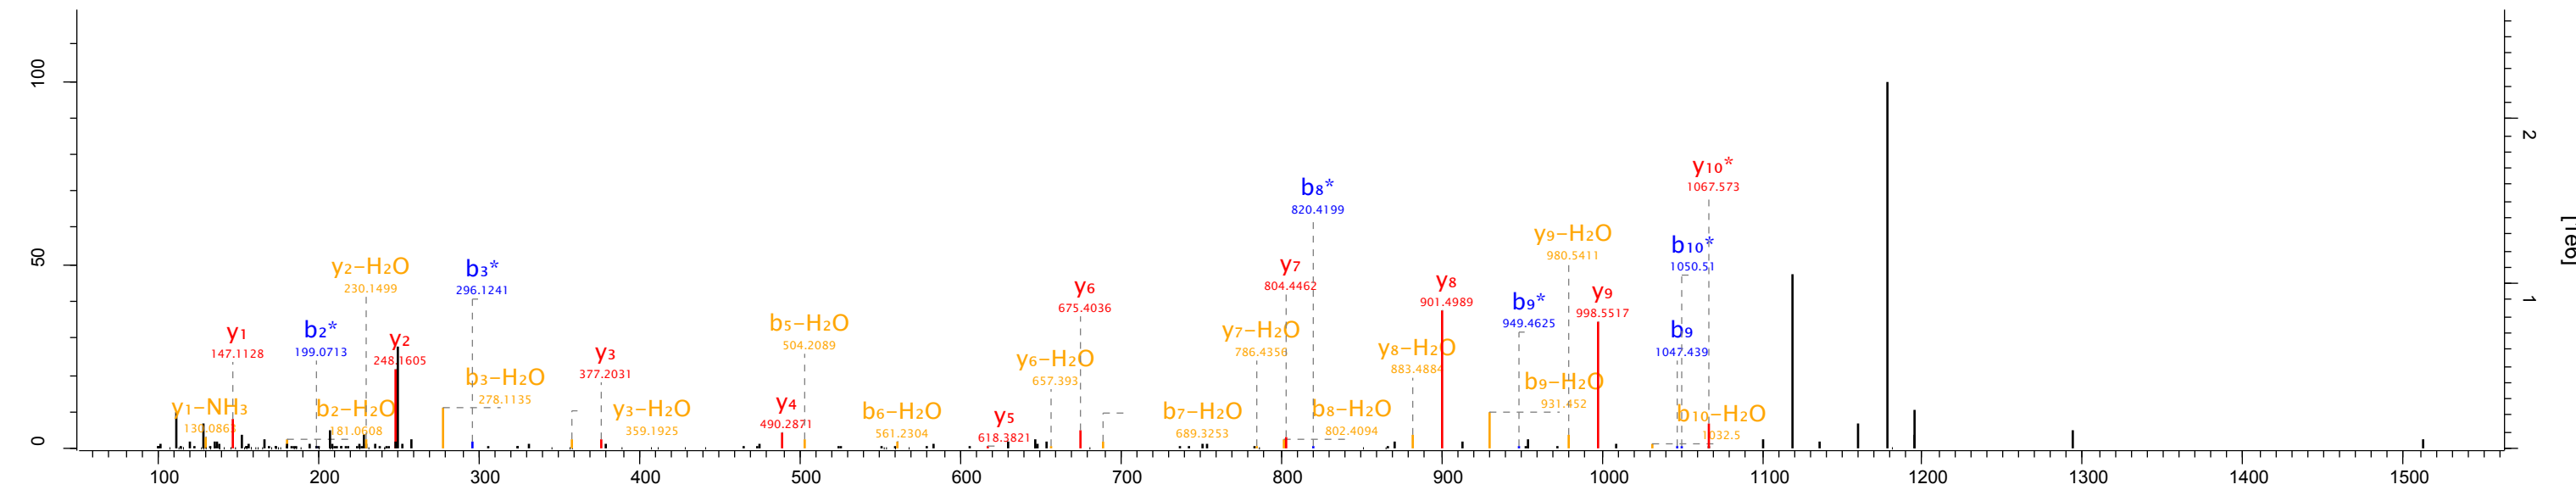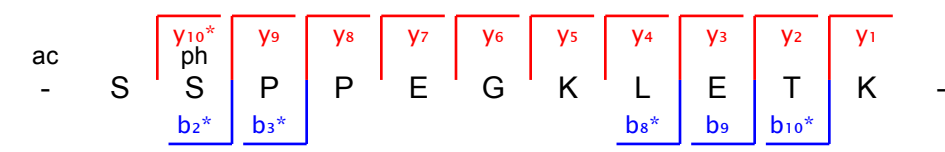

Raw file 20171215\_MaS\_33SR\_LMH\_phospho\_08 Scan 5606 Method FTMS; HCD Score 76.68 m/z 929.4 Gene names SPANXB1

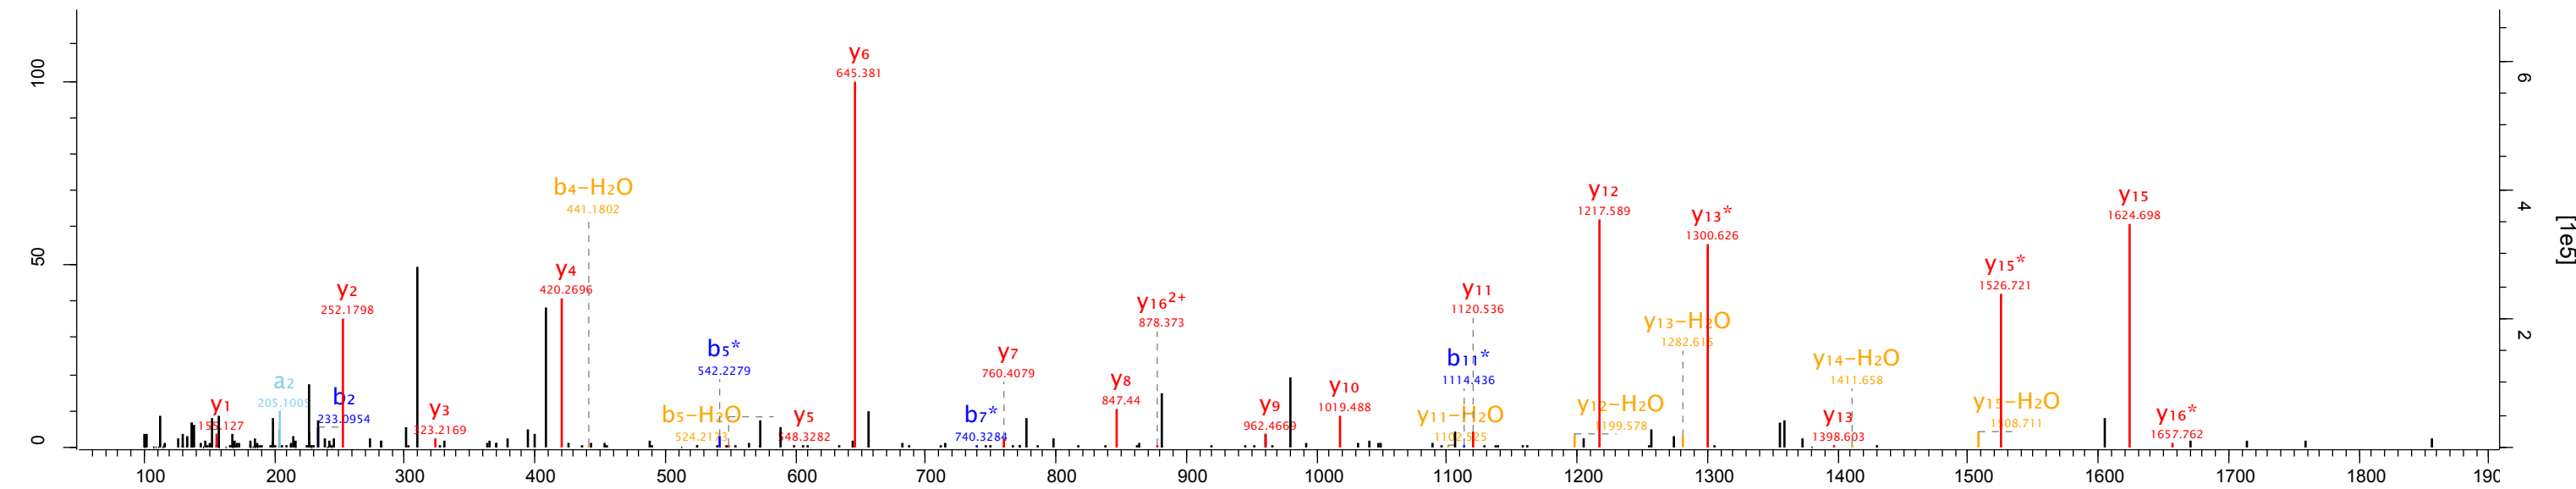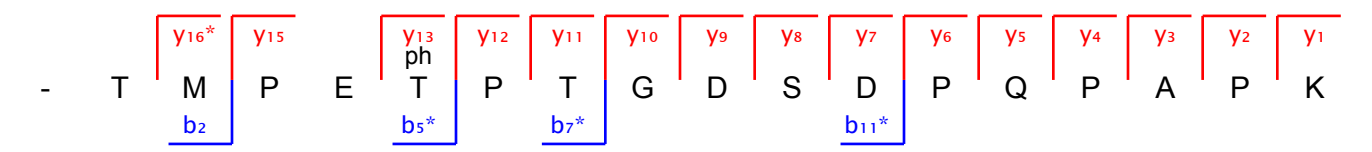

Raw file 20171215\_MaS\_33SR\_LMH\_phospho\_08 Scan 5796 Method FTMS; HCD Score 103.79 m/z 703.81 Gene names NRBP1

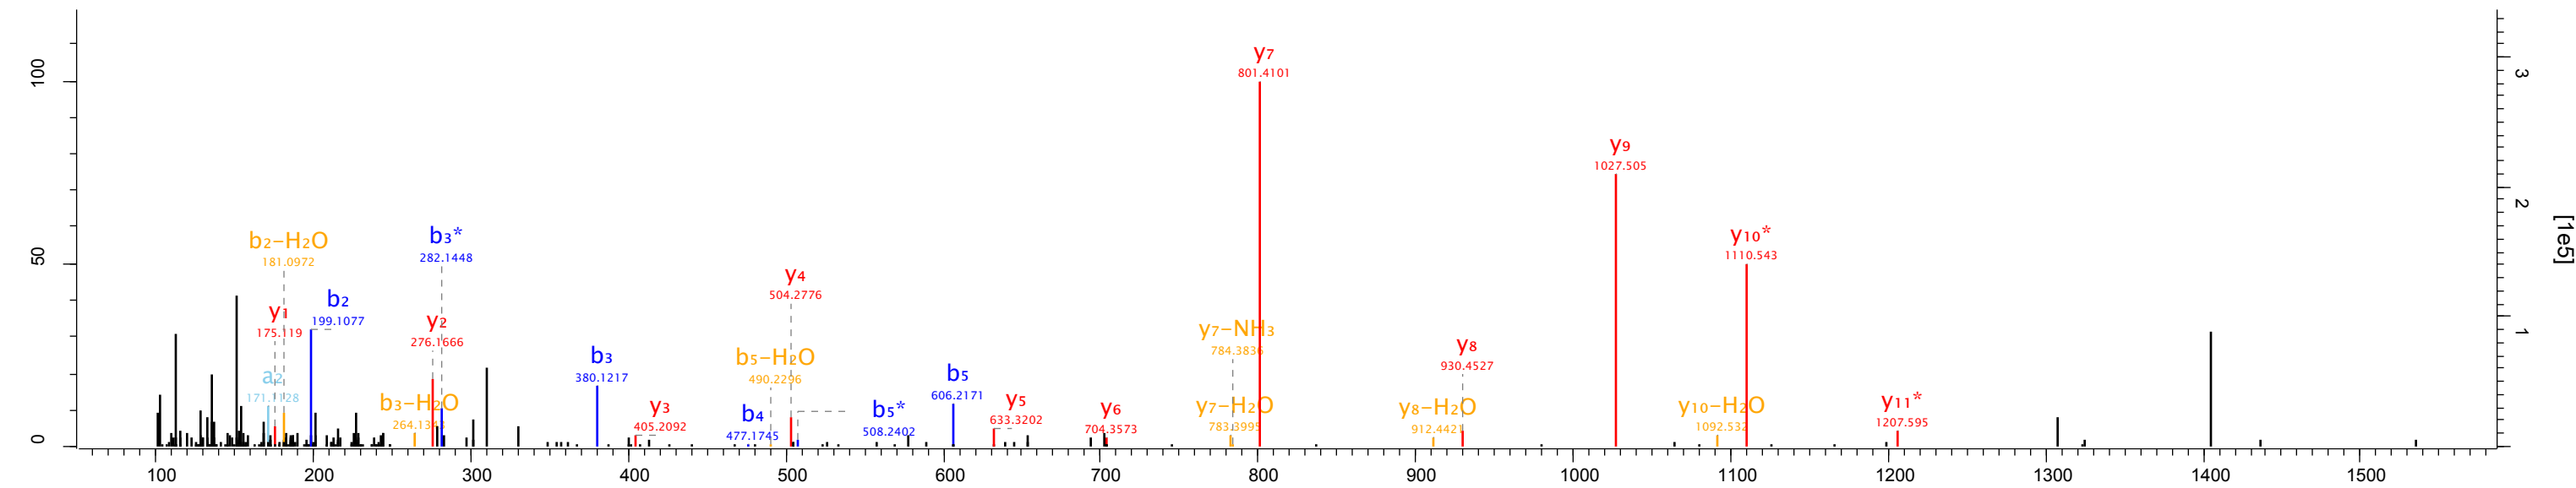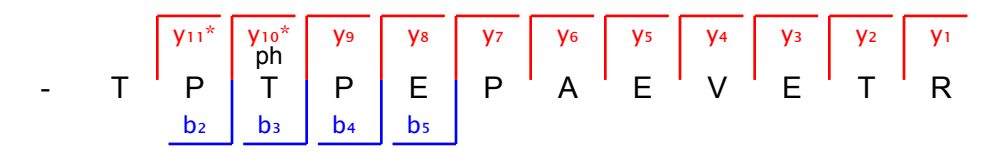

Raw file 20171215\_MaS\_33SR\_LMH\_phospho\_08 Scan 6076 Method FTMS; HCD Score 142.03 m/z 669.79 Gene names GMPS

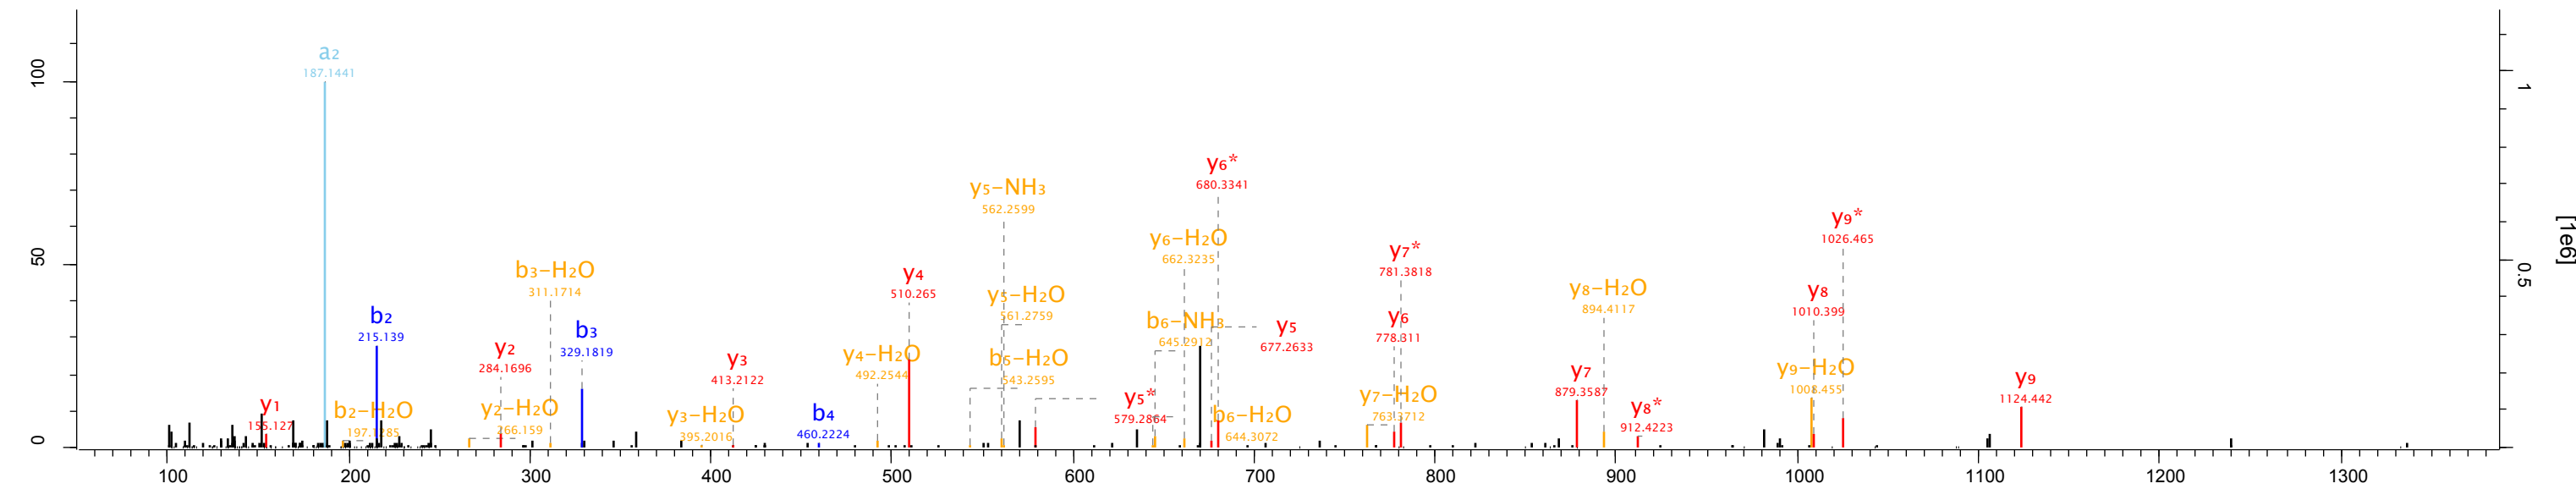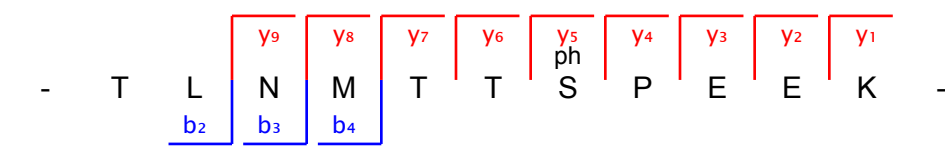



Raw file 20171215\_MaS\_33SR\_LMH\_phospho\_08 Scan 8396 Method FTMS; HCD Score 122.94 m/z 852.39 Gene names PPP1R18

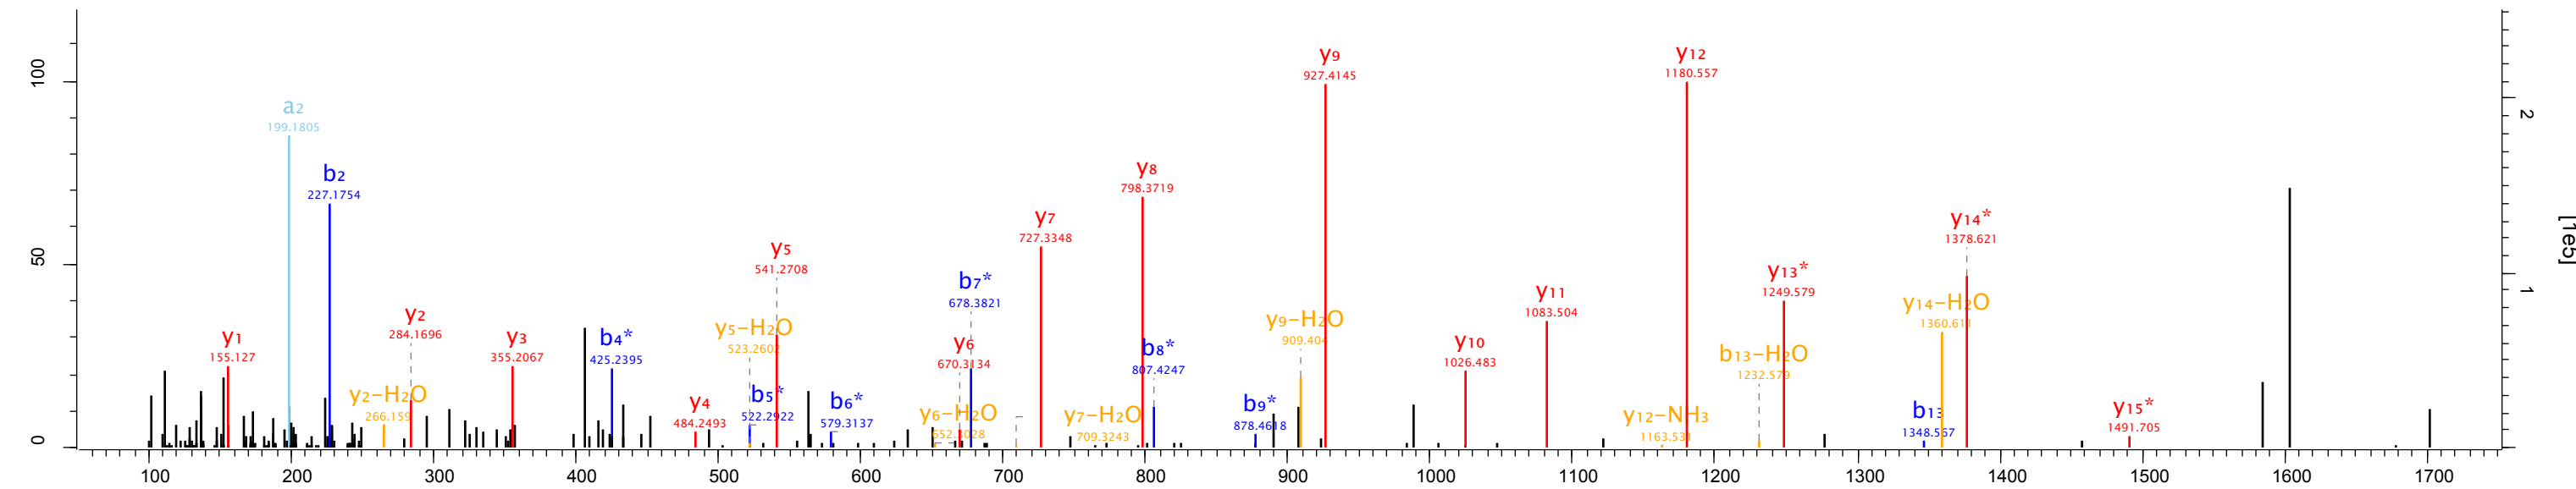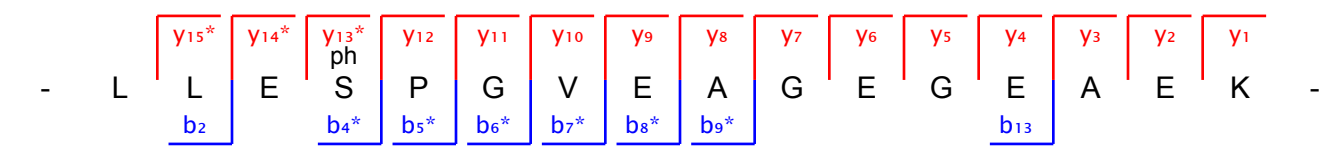



Raw file 20171215\_MaS\_33SR\_LMH\_phospho\_09 Scan 2116 Method FTMS; HCD Score 121.5 m/z 500.2 Gene names LMNA

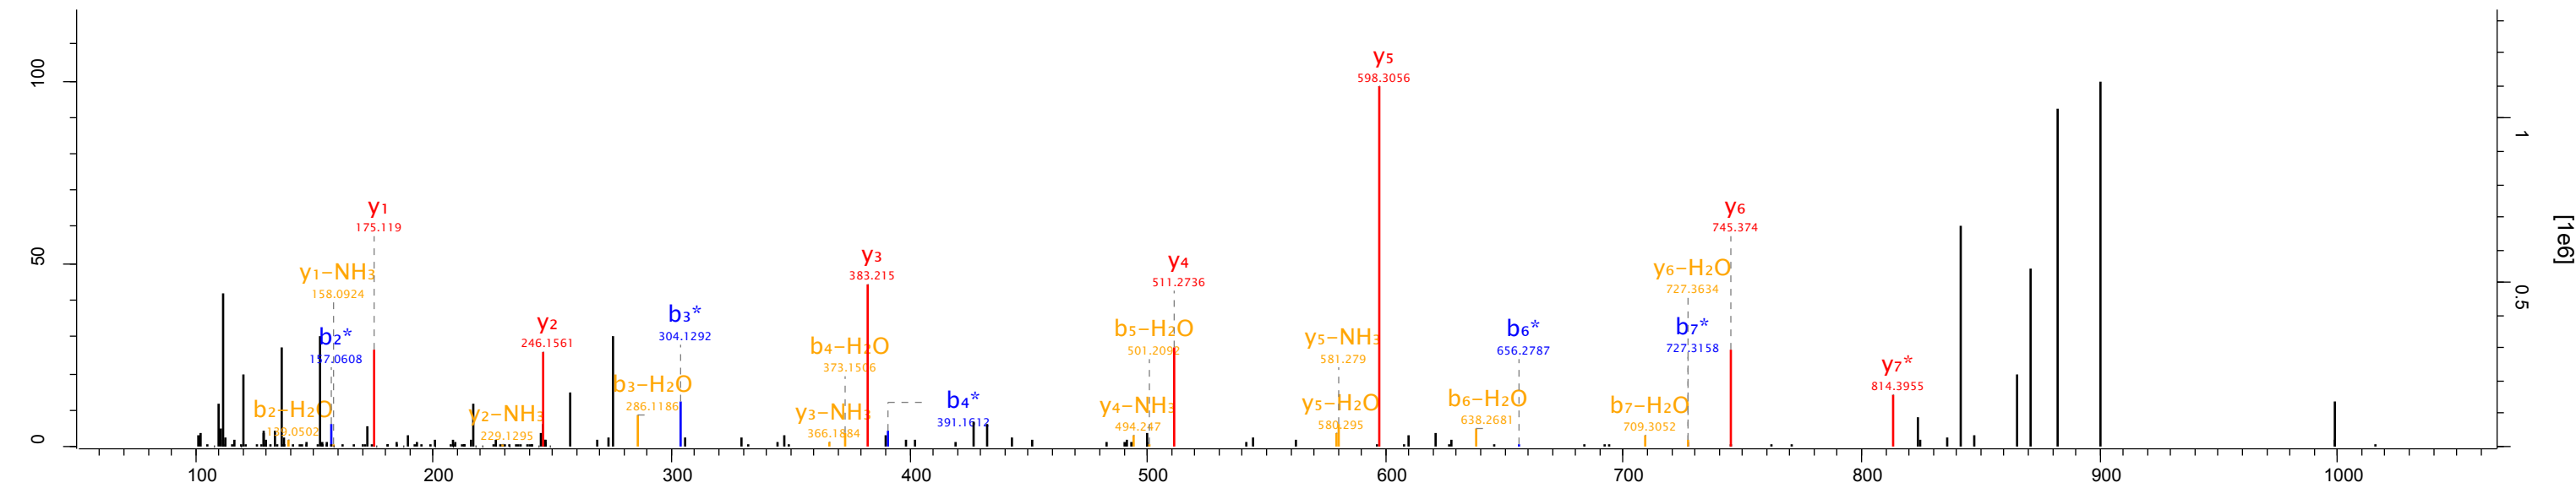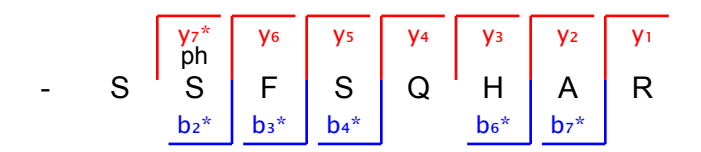

Raw file 20171215\_MaS\_33SR\_LMH\_phospho\_09 Scan 2156 Method FTMS; HCD Score 64.69 m/z 464.22 Gene names RBM27

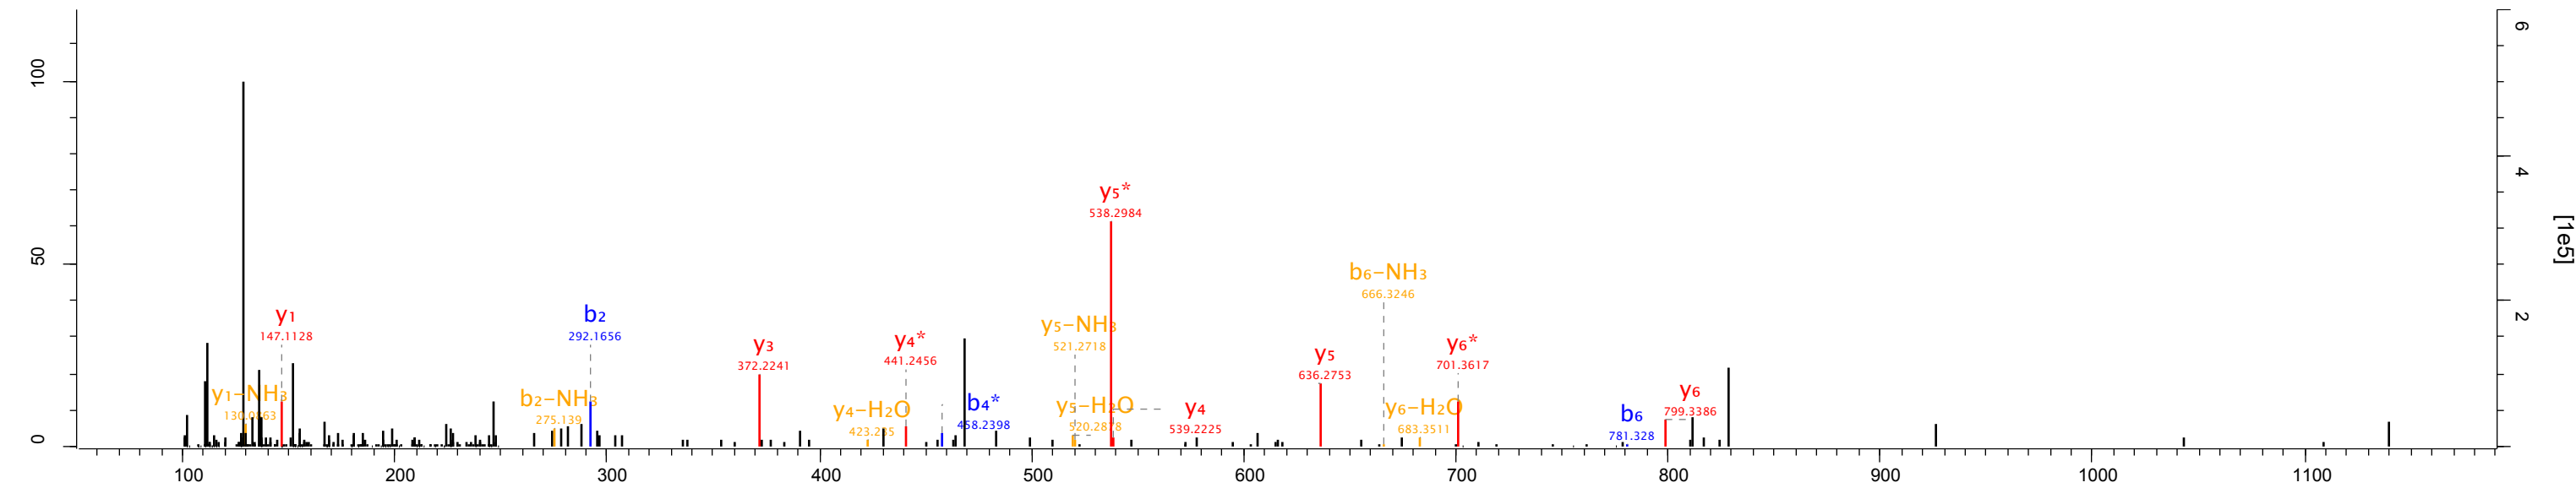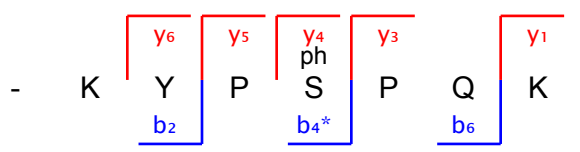

Raw file 20171215\_MaS\_33SR\_LMH\_phospho\_09 Scan 2726 Method FTMS; HCD Score 105.13 m/z 521.24 Gene names SORBS3

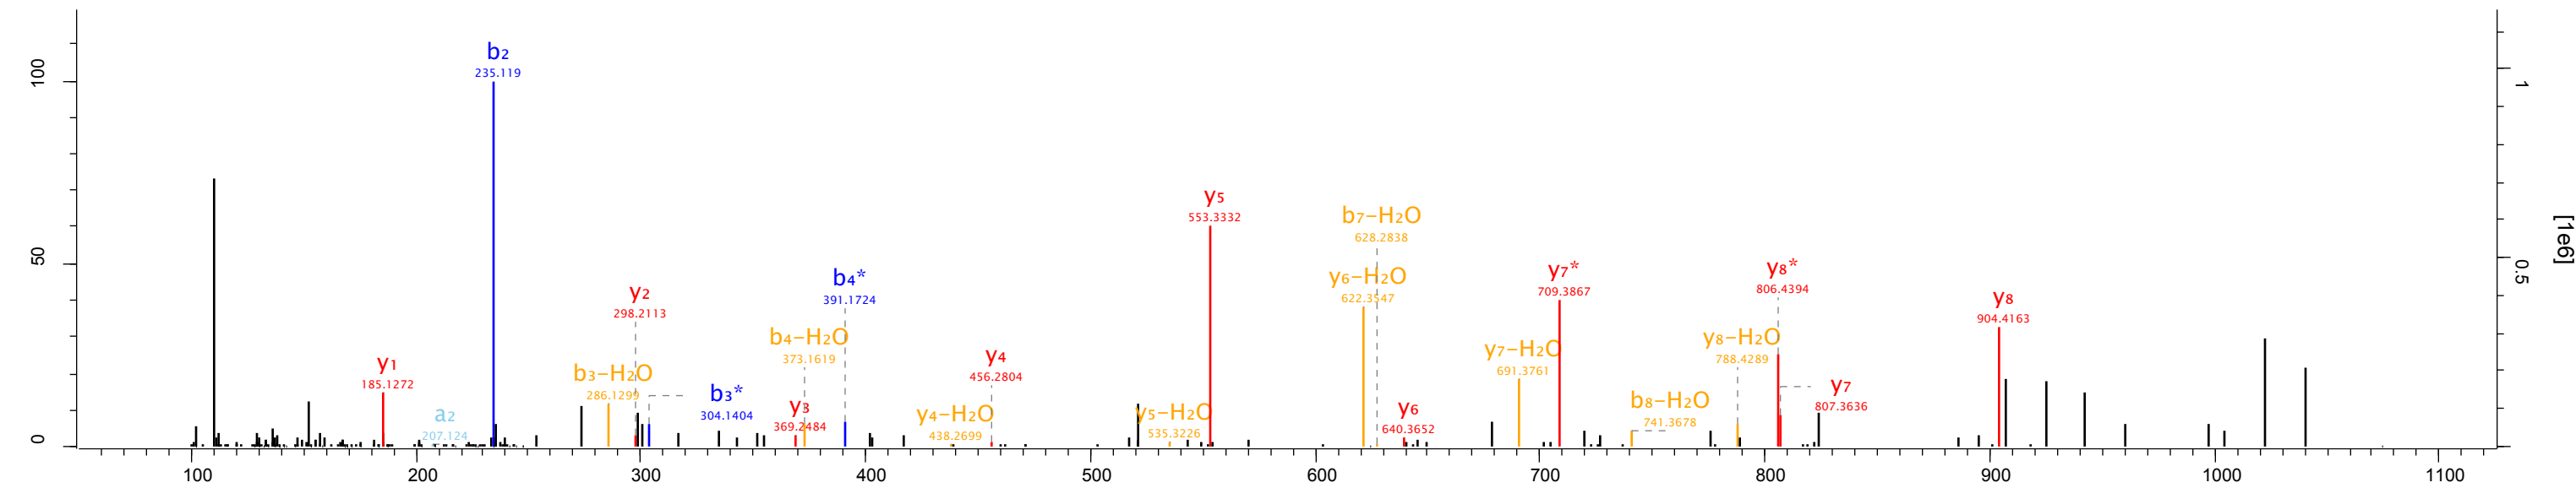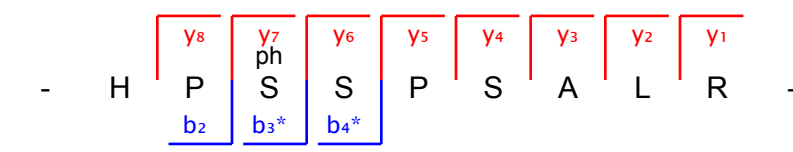

Raw file 20171215\_MaS\_33SR\_LMH\_phospho\_09 Scan 3556 Method FTMS; HCD Score 46.35 m/z 836.88 Gene names TJP2

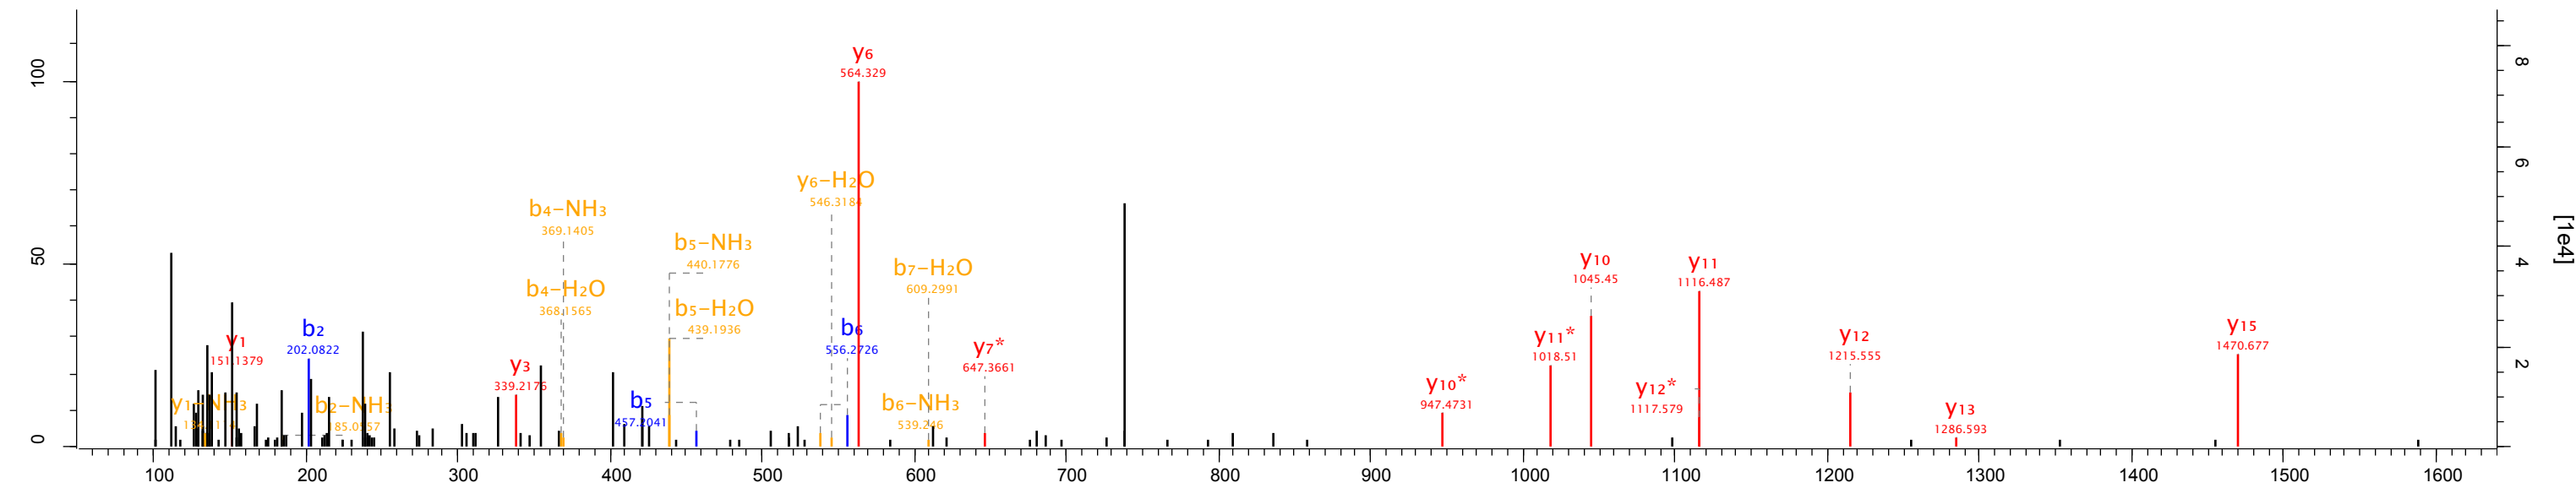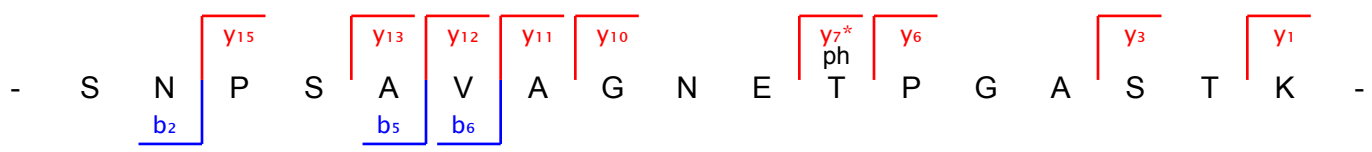

Raw file 20171215\_MaS\_33SR\_LMH\_phospho\_09 Scan 5166 Method FTMS; HCD Score 94.45 m/z 895.41 Gene names LIG1

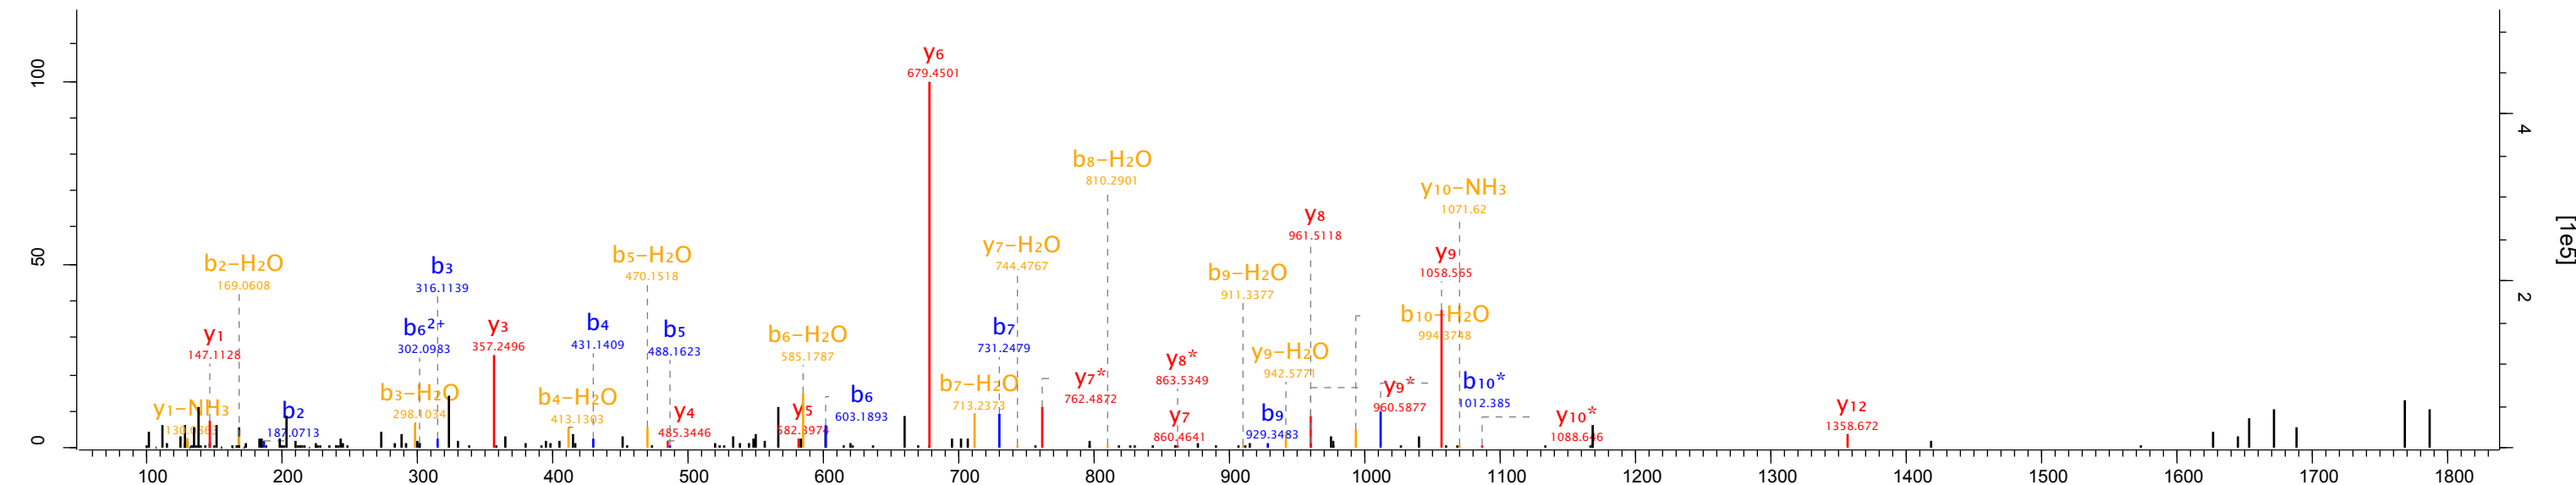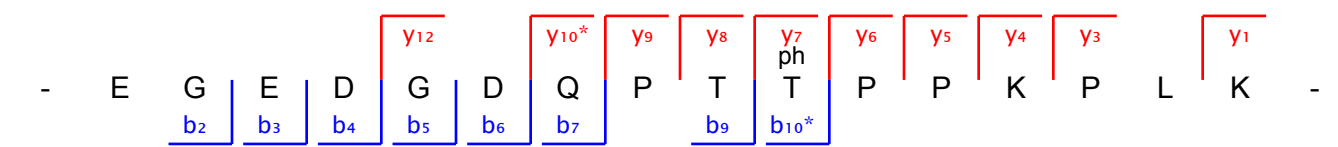

Raw file 20171215\_MaS\_33SR\_LMH\_phospho\_09 Scan 6506 Method FTMS; HCD Score 109.55 m/z 683.32 Gene names PHLDB2

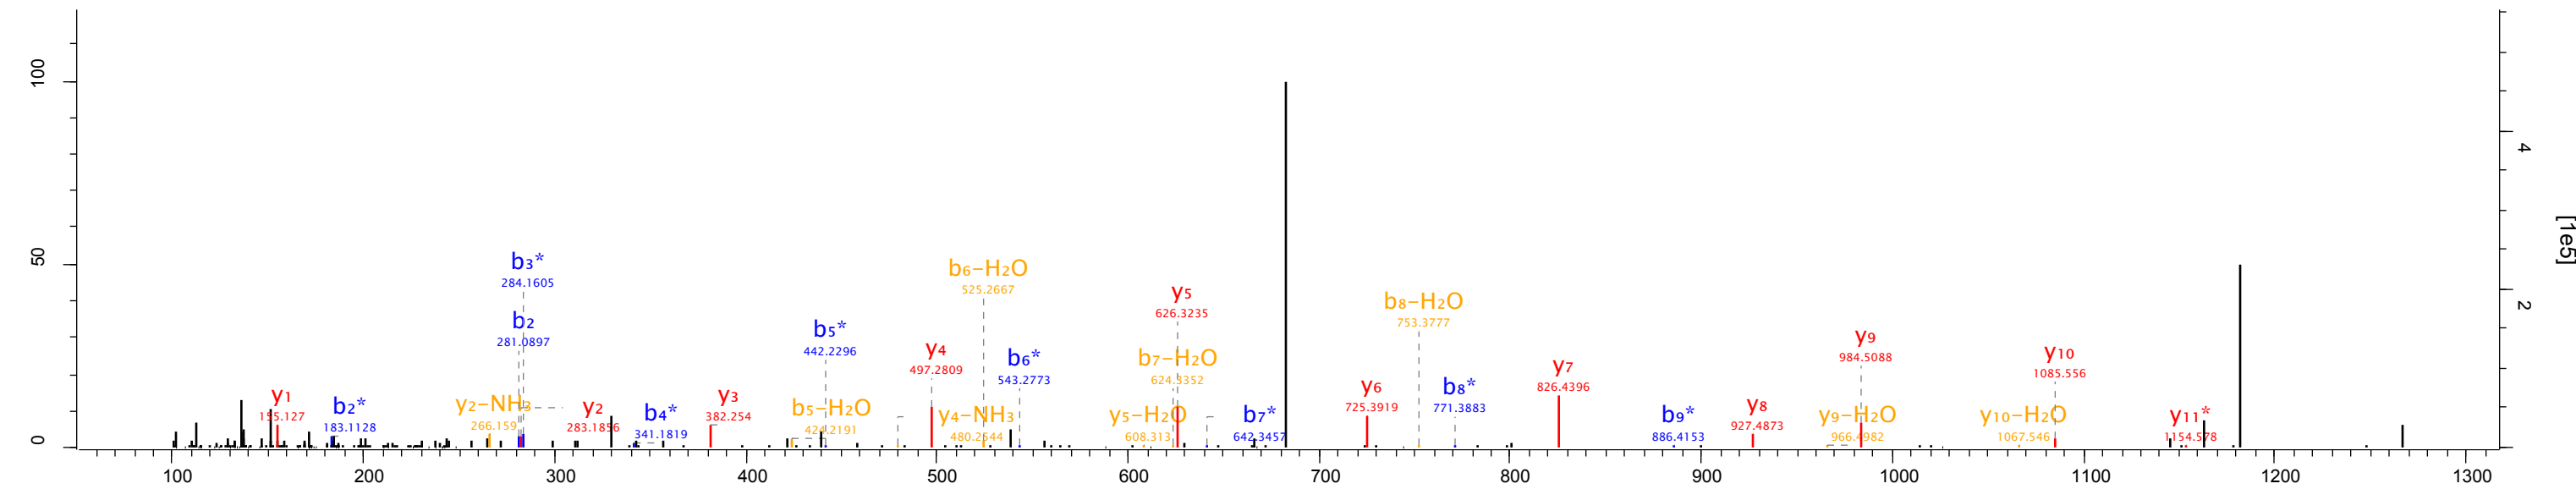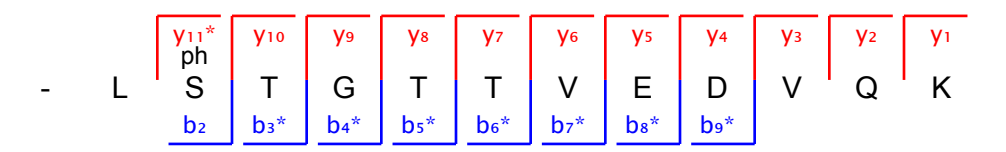



Raw file 20171215\_MaS\_33SR\_LMH\_phospho\_09 Scan 8496 Method FTMS; HCD Score 204.31 m/z 947.41 Gene names AKAP12

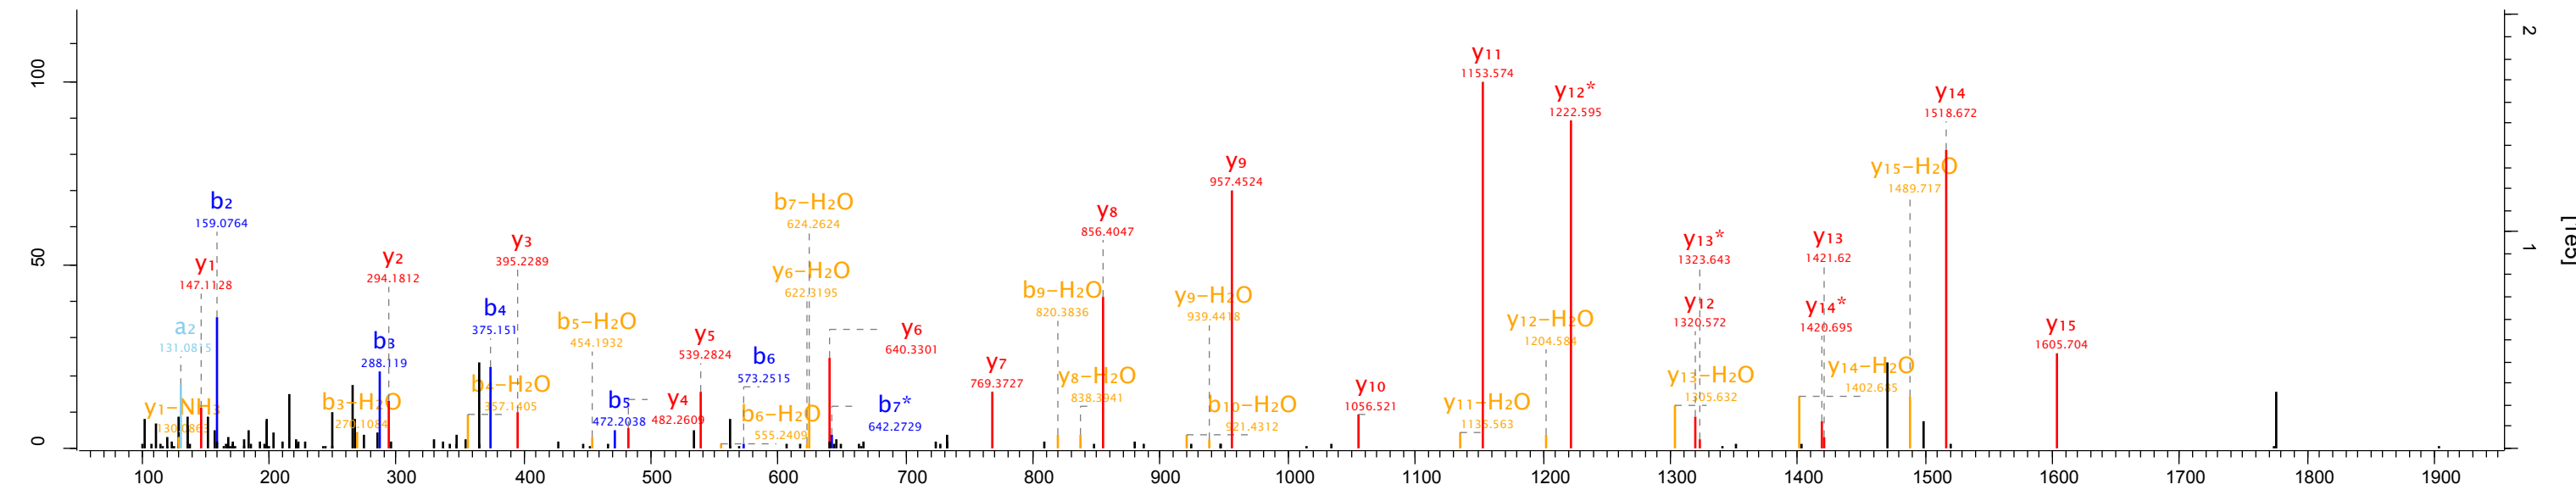

- S A E S P T S P V T S E T G S T F K -

b<sub>2</sub>
b<sub>3</sub>
b<sub>4</sub>
b<sub>5</sub>
b<sub>6</sub>
b<sub>7</sub>\*
y<sub>15</sub>
y<sub>14</sub>
y<sub>13</sub>
y<sub>12</sub>ph
y<sub>11</sub>
y<sub>10</sub>
y<sub>9</sub>
y<sub>8</sub>
y<sub>7</sub>
y<sub>6</sub>
y<sub>5</sub>
y<sub>4</sub>
y<sub>3</sub>
y<sub>2</sub>
y<sub>1</sub>

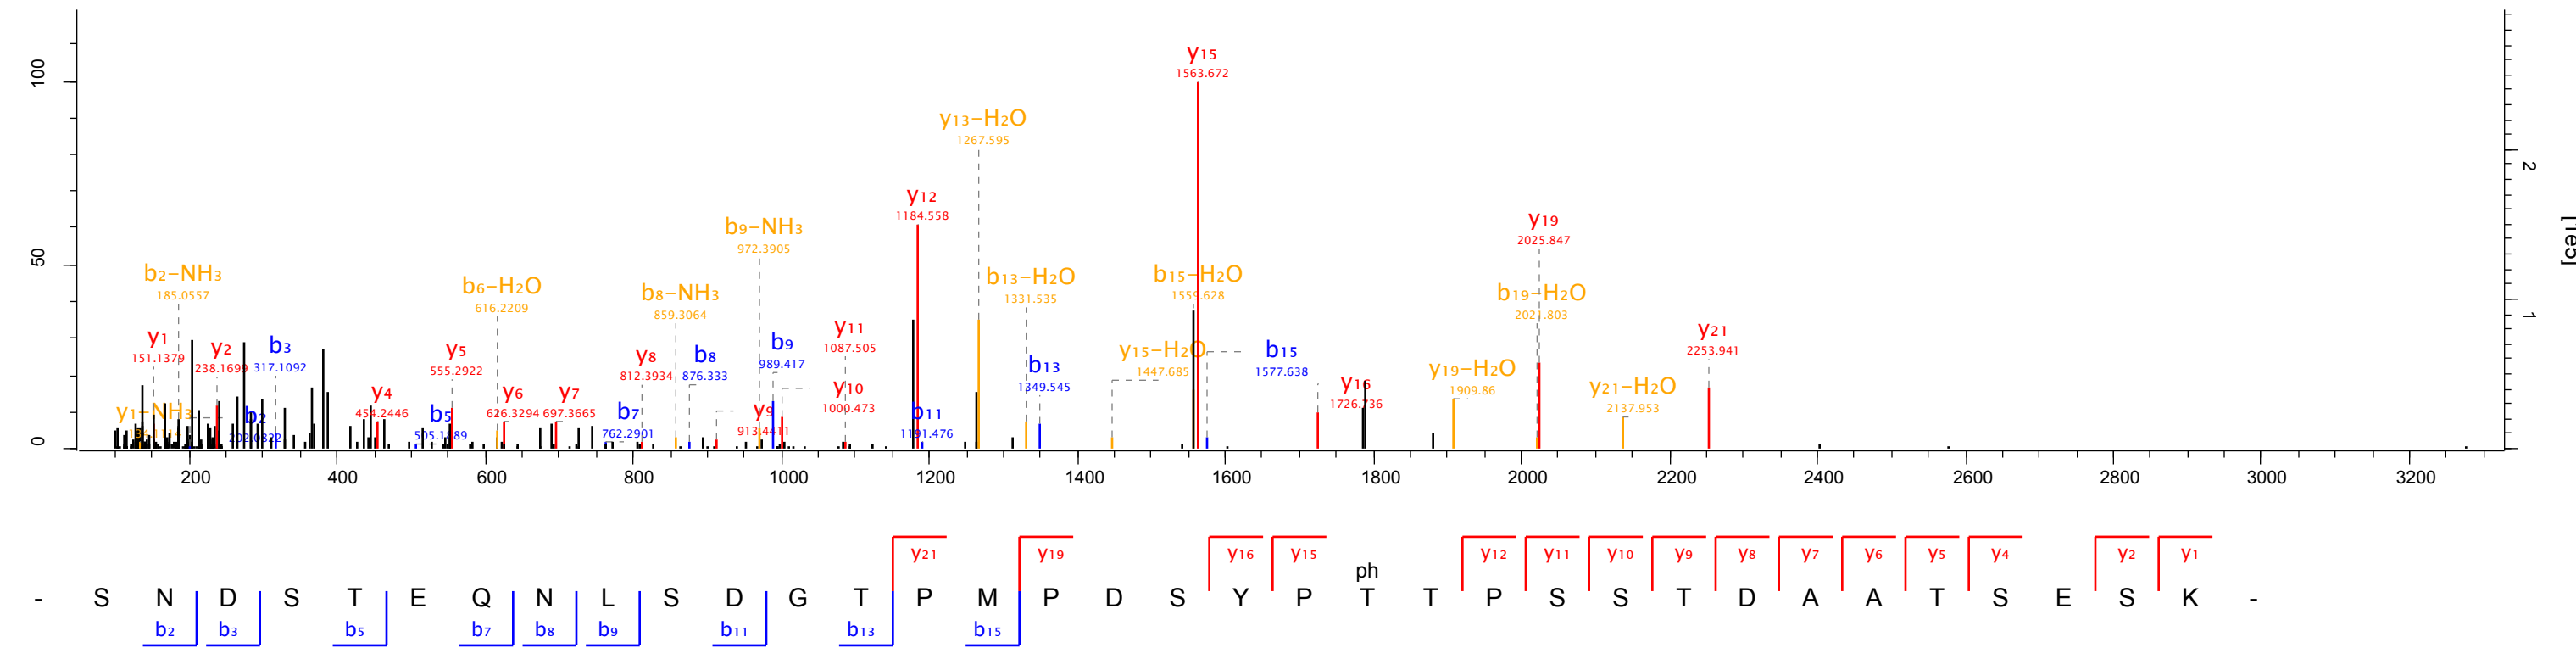

Raw file 20171215\_MaS\_33SR\_LMH\_phospho2\_01 Scan 12356 Method FTMS; HCD Score 139.77 m/z 662.8 Gene names CDC42EP4

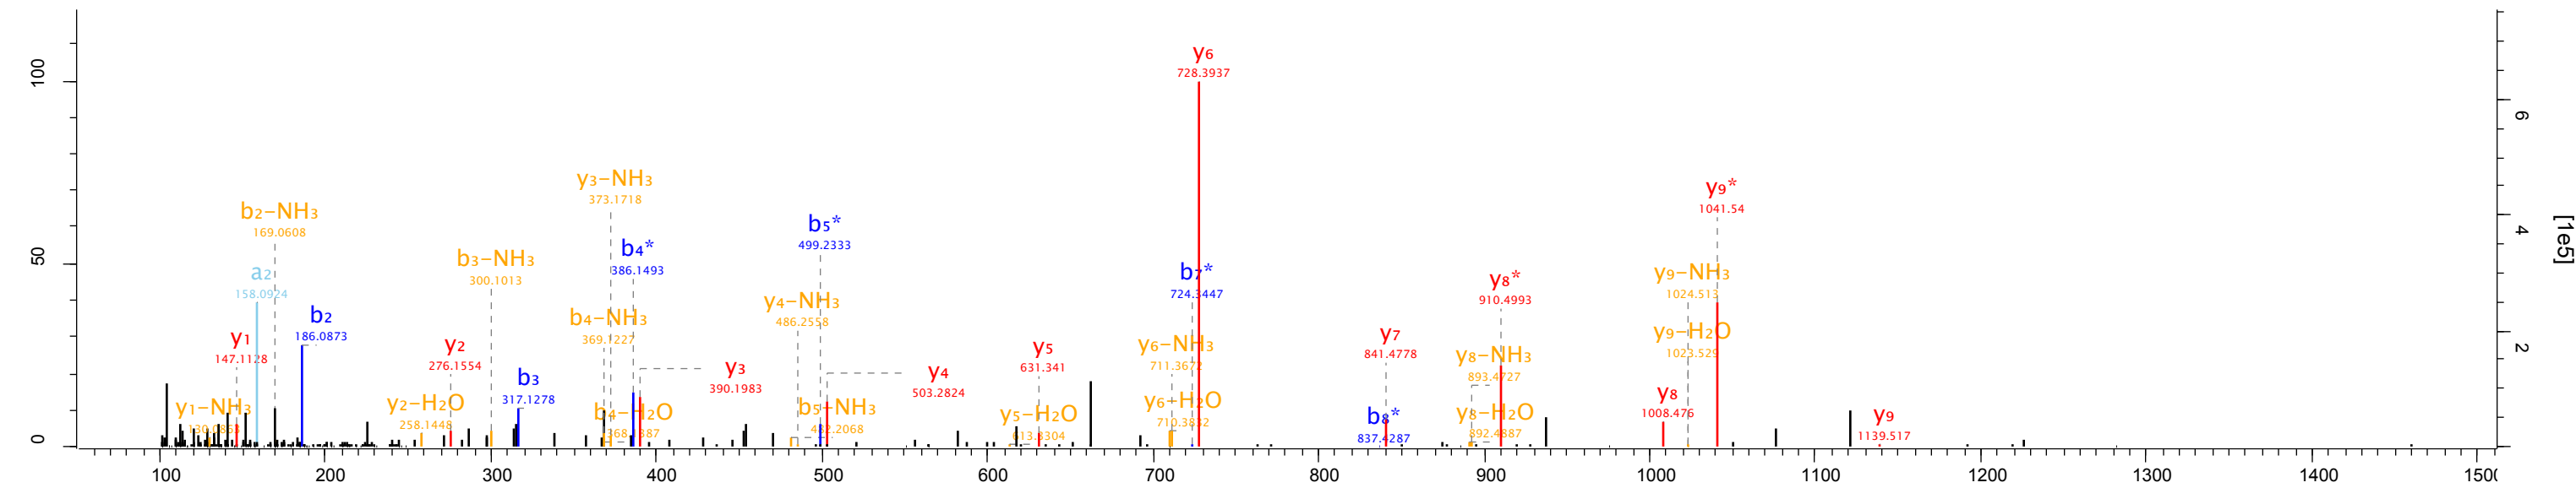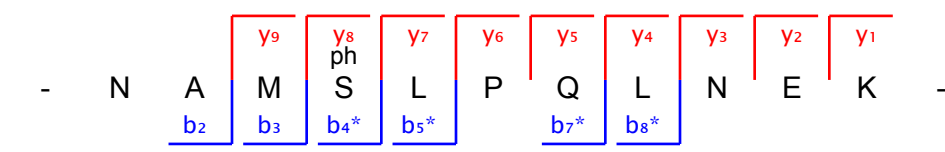

Raw file 20171215\_MaS\_33SR\_LMH\_phospho2\_01 Scan 12866 Method FTMS; HCD Score 106.56 m/z 918.05 Gene names MAGEA4

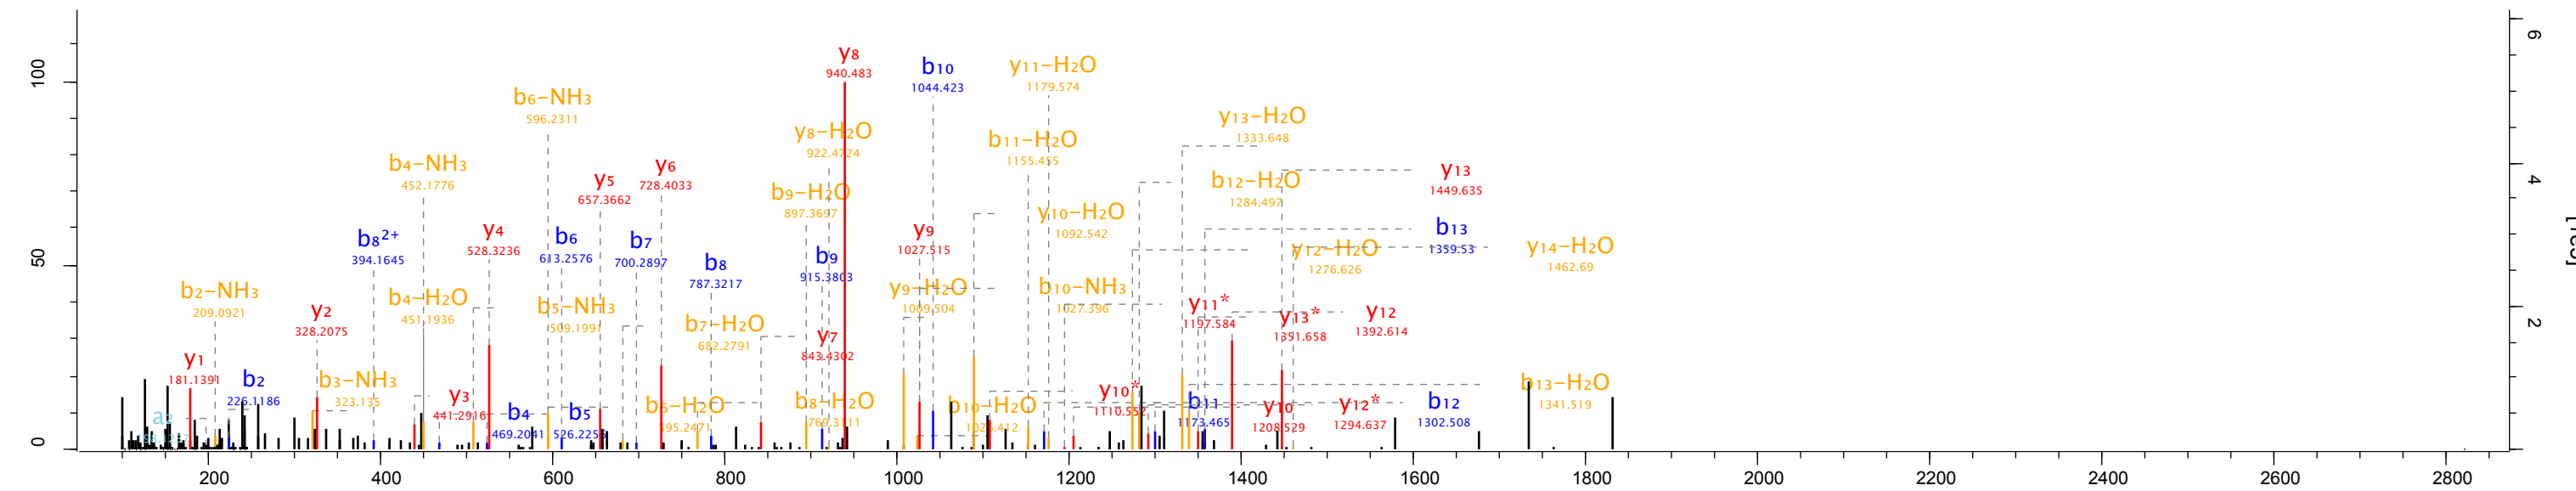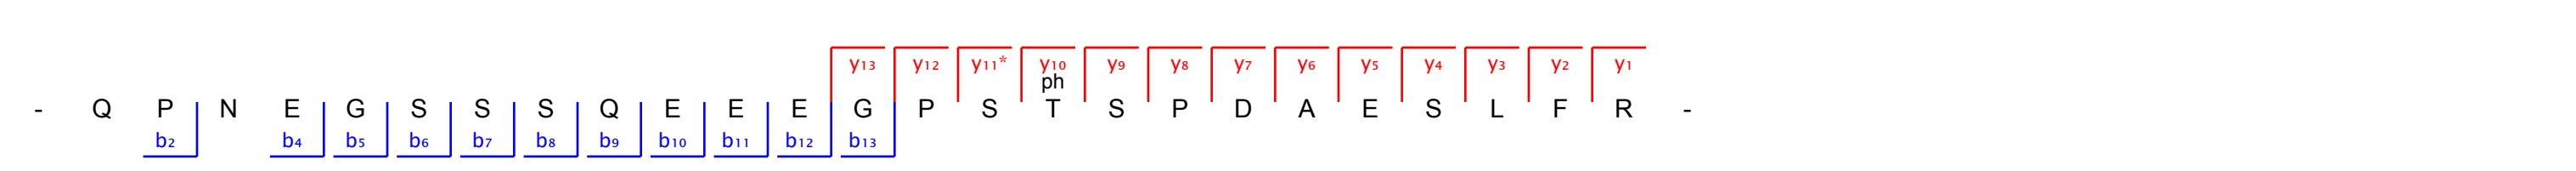

Raw file 20171215\_MaS\_33SR\_LMH\_phospho2\_01 Scan 1966 Method FTMS; HCD Score 178.1 m/z 515.23 Gene names LIMA1;TRMT1

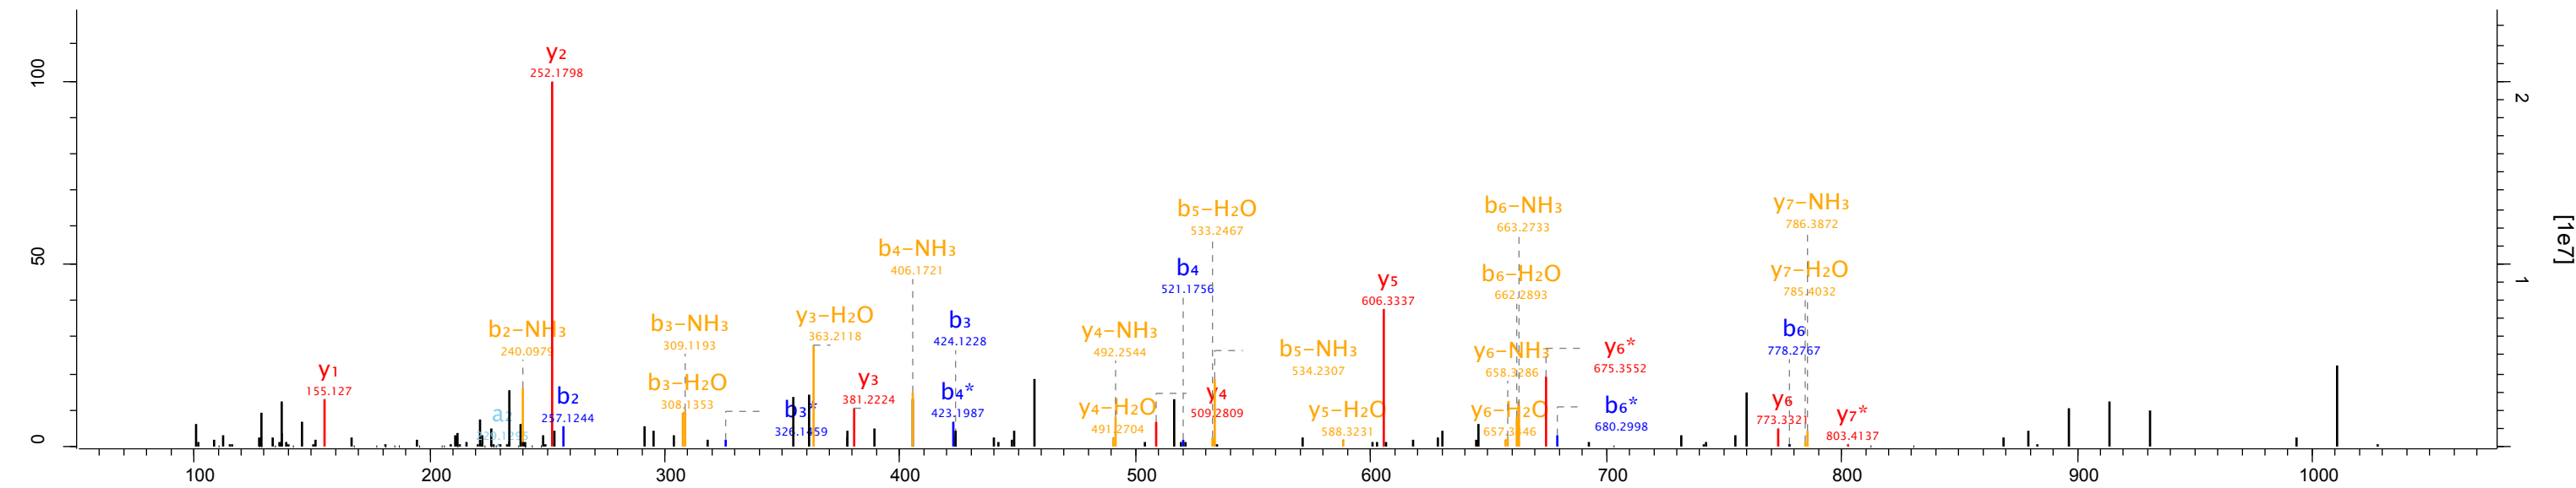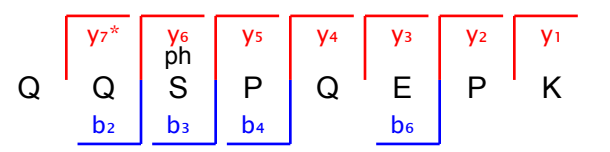

Raw file 20171215\_MaS\_33SR\_LMH\_phospho2\_01 Scan 2036 Method FTMS; HCD Score 252.38 m/z 757.79 Gene names SGTA

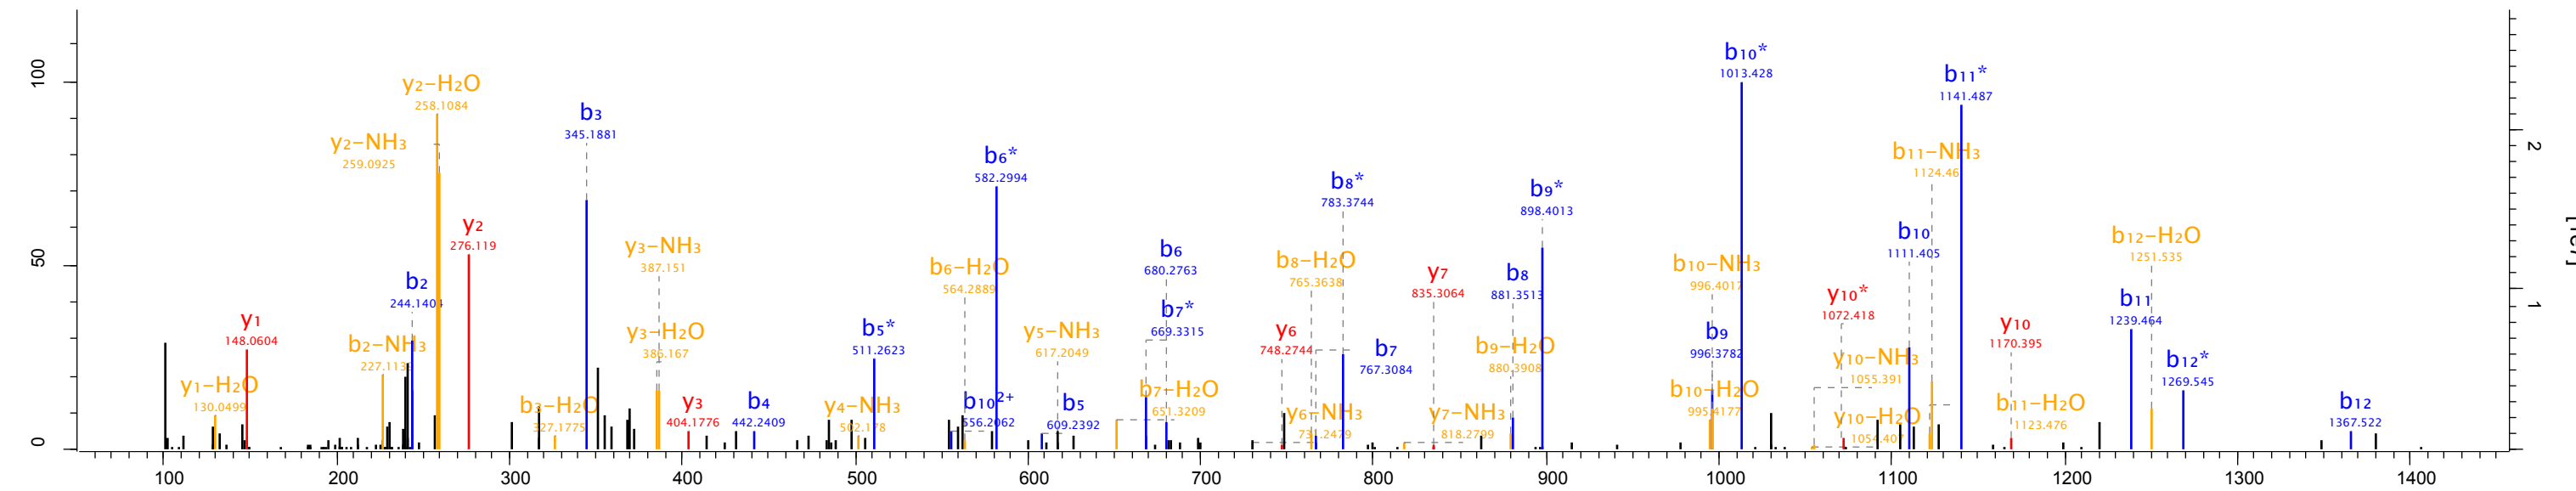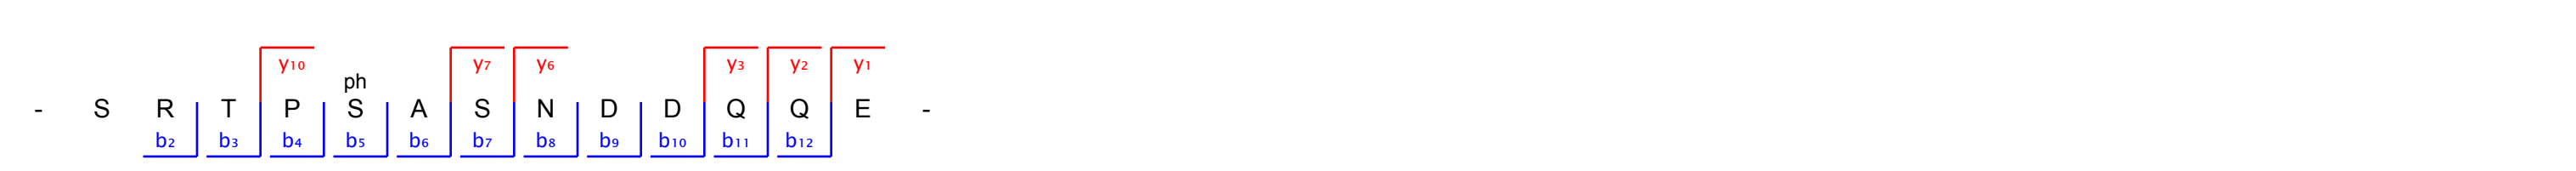

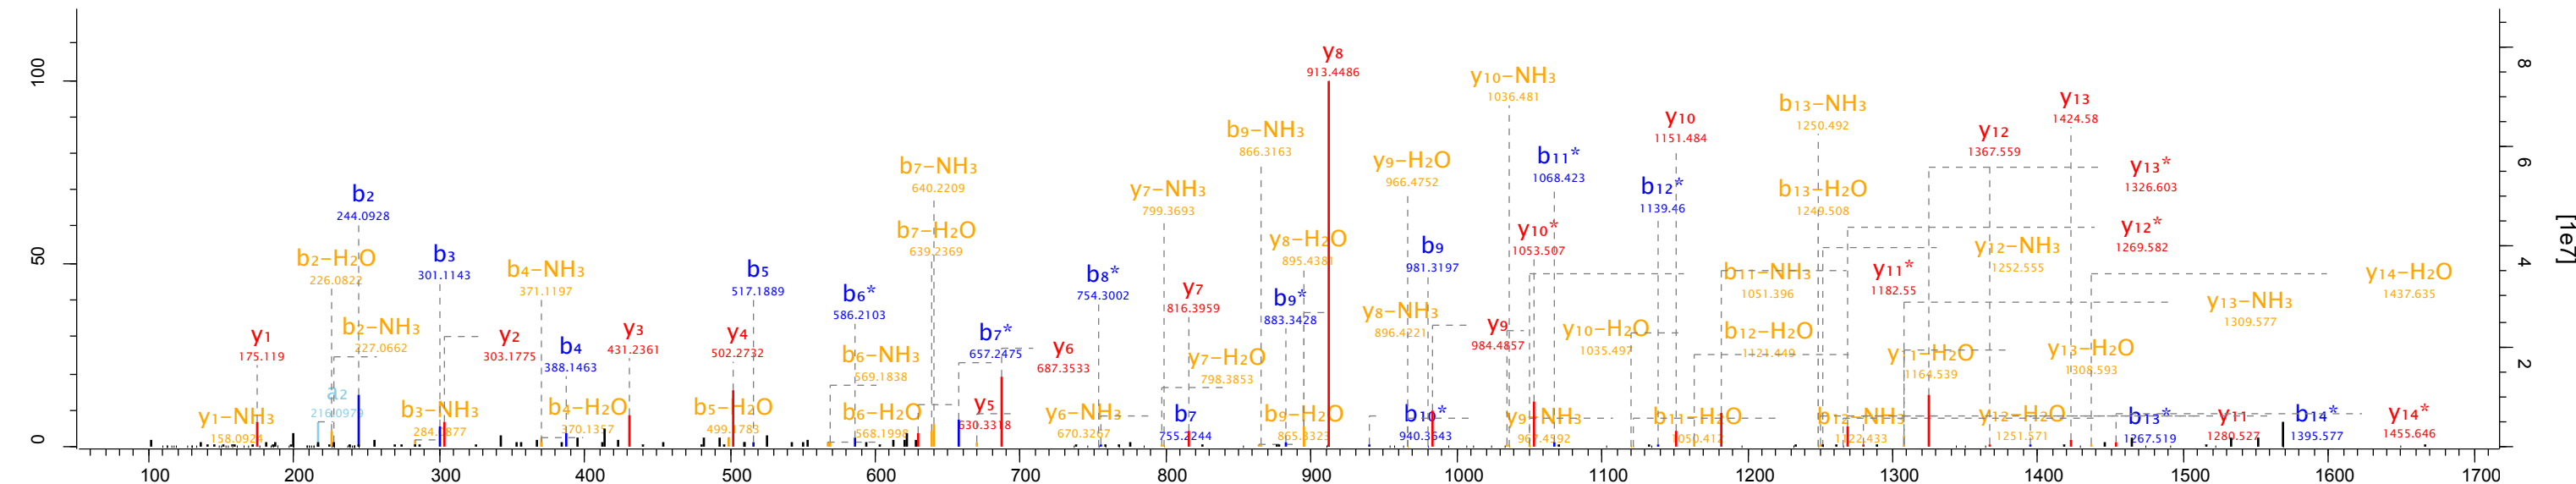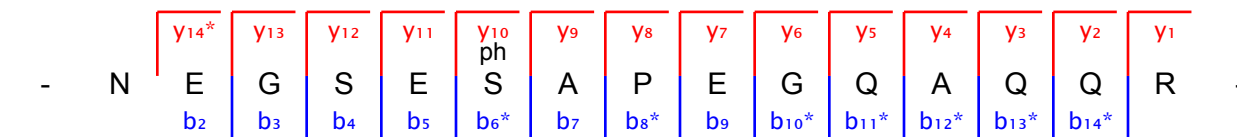

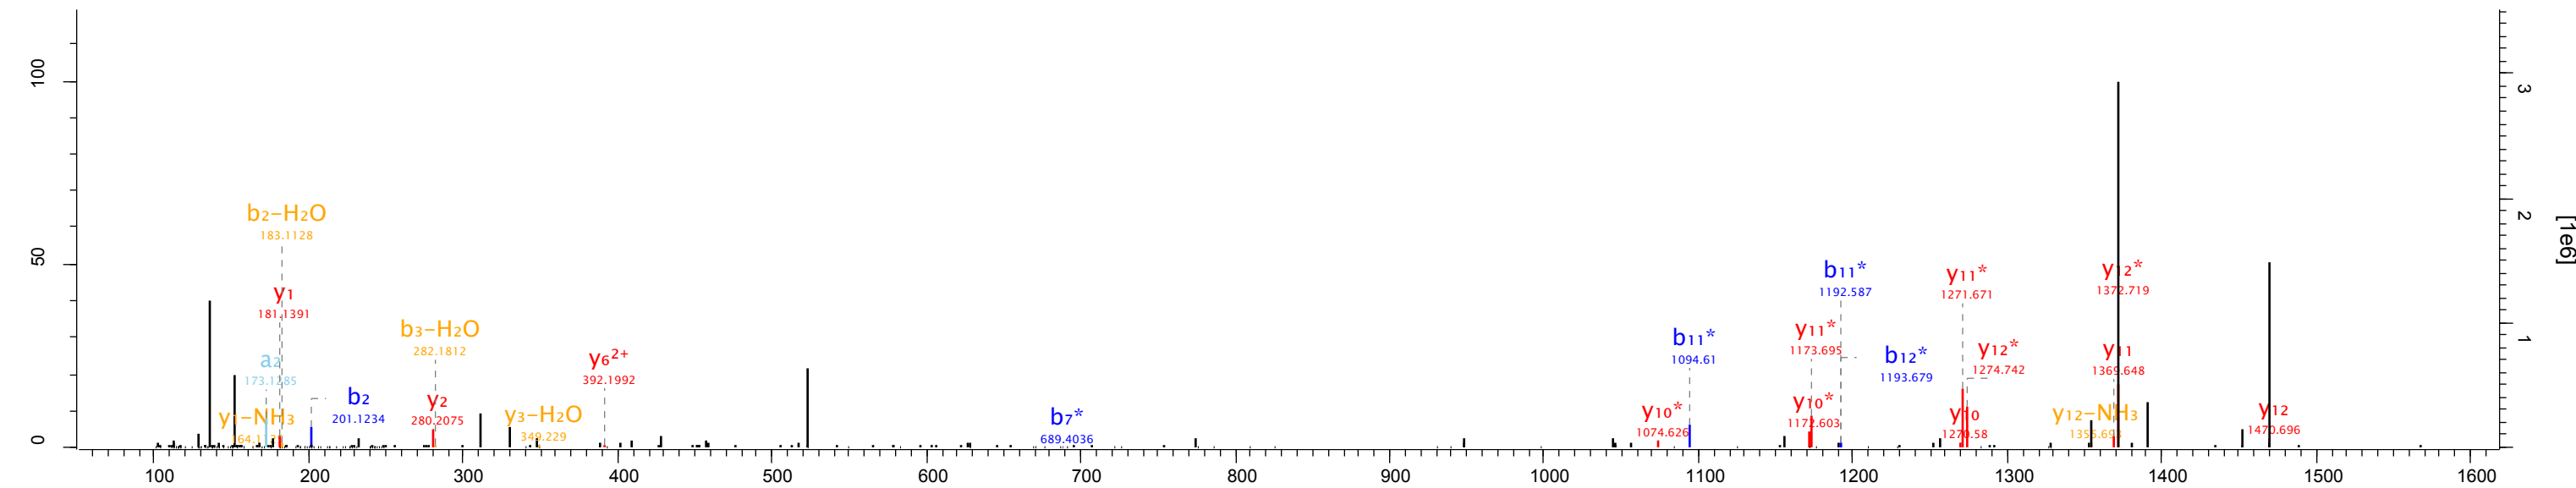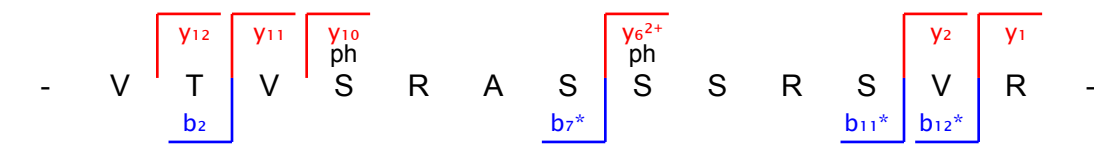



Raw file 20171215\_MaS\_33SR\_LMH\_phospho2\_01 Scan 3396 Method FTMS; HCD Score 230.23 m/z 584.74 Gene names ERRFI1

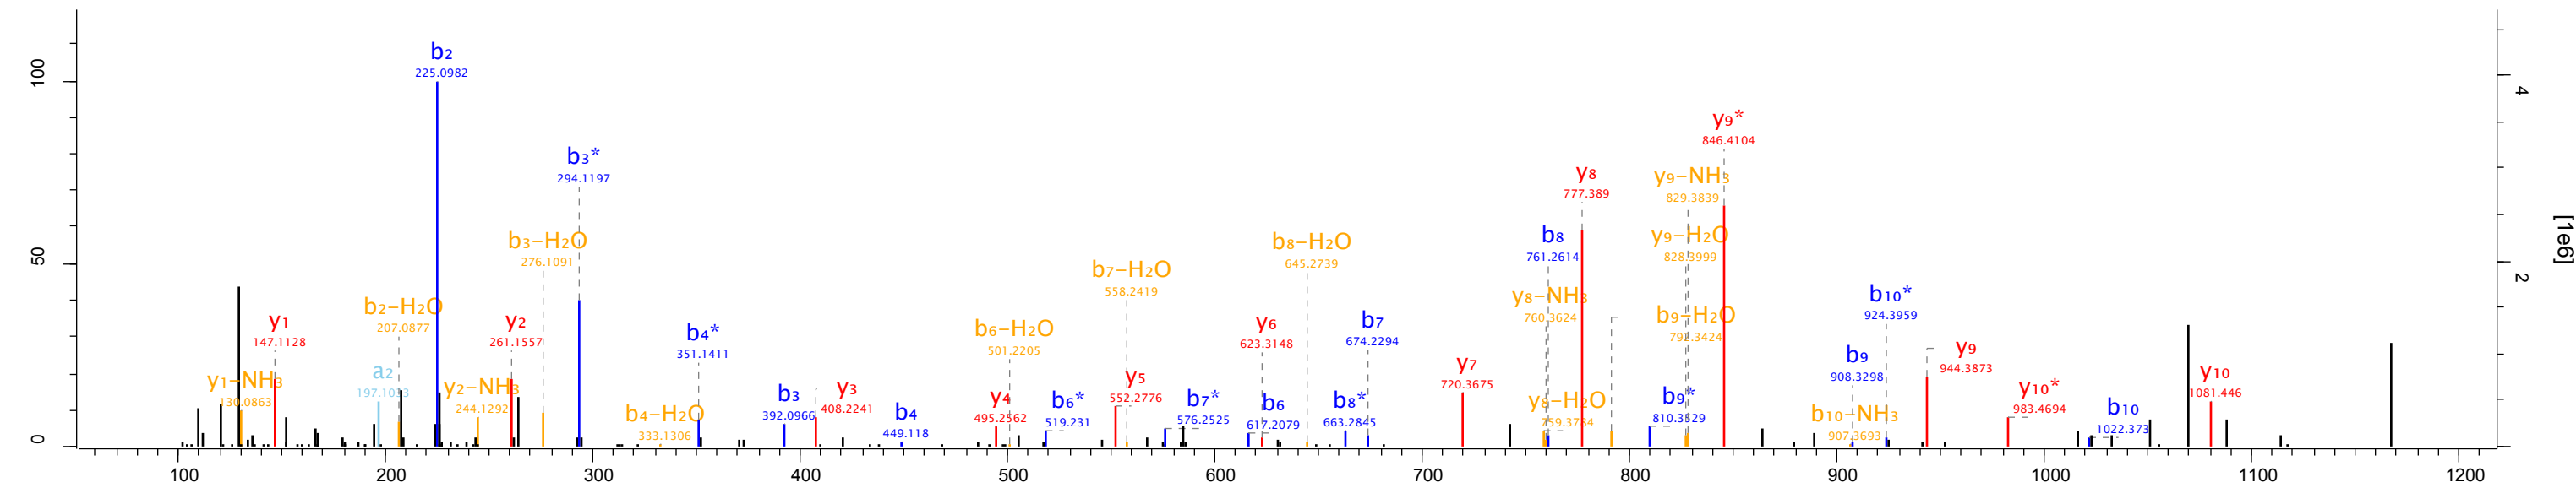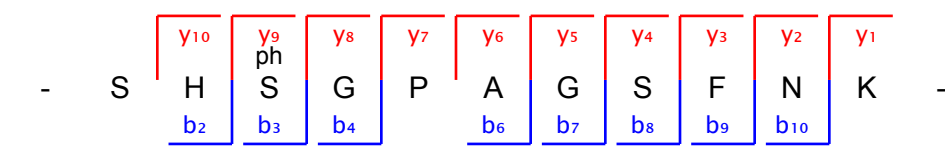

Raw file  
20171215\_MaS\_33SR\_LMH\_phospho2\_01

Scan Method Score m/z Gene names  
3426 FTMS; HCD 188.08 930.85 COPS3

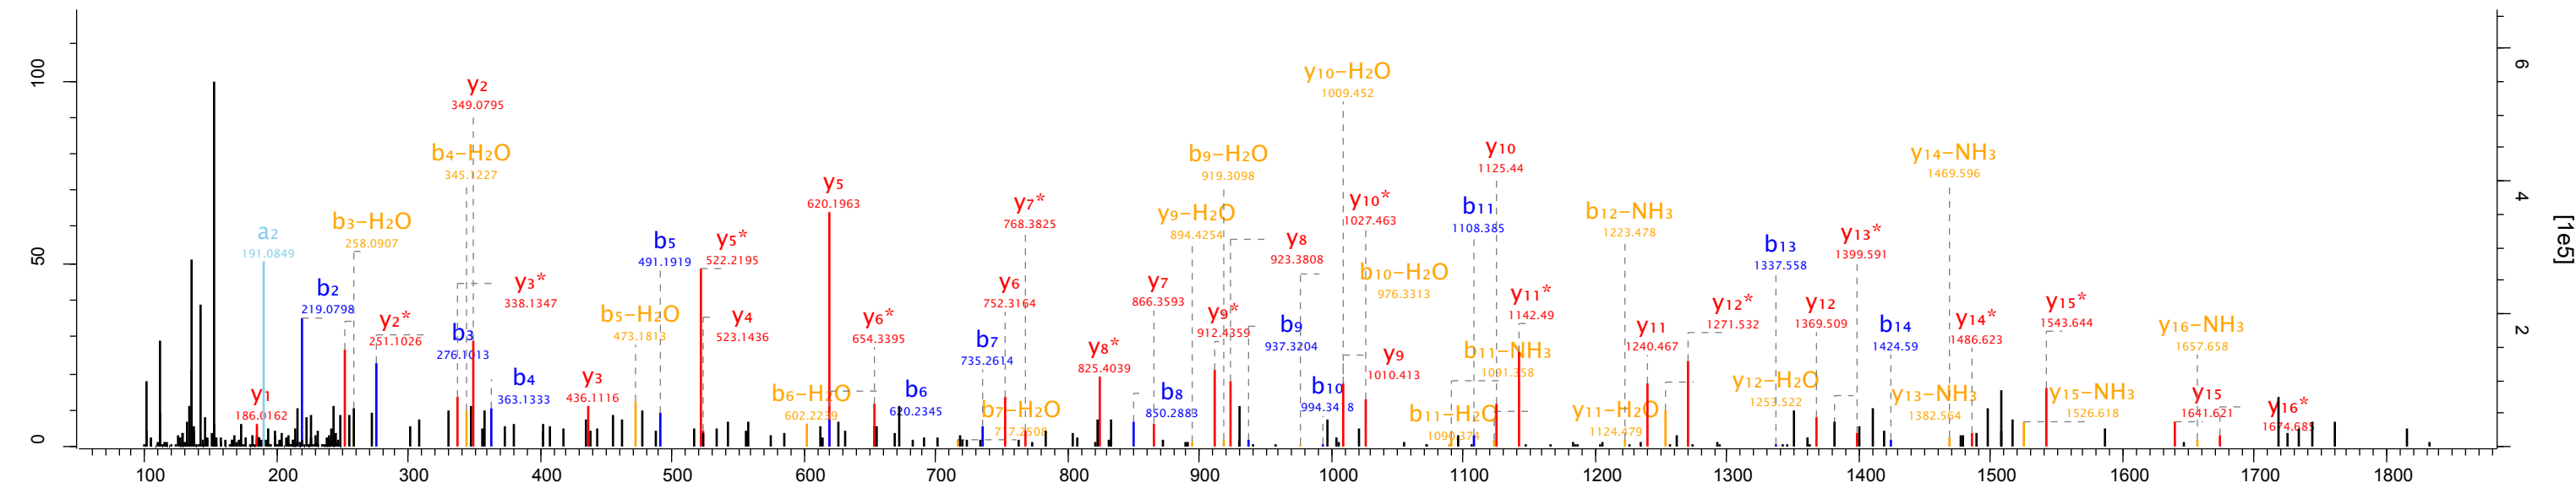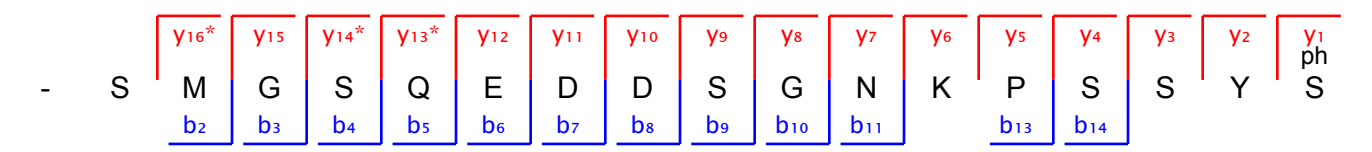

Raw file: 20171215\_MaS\_33SR\_LMH\_phospho2\_01  
 Scan: 3686 Method: FTMS; HCD Score: 362.68 m/z: 1057.42 Gene names: ARRB1

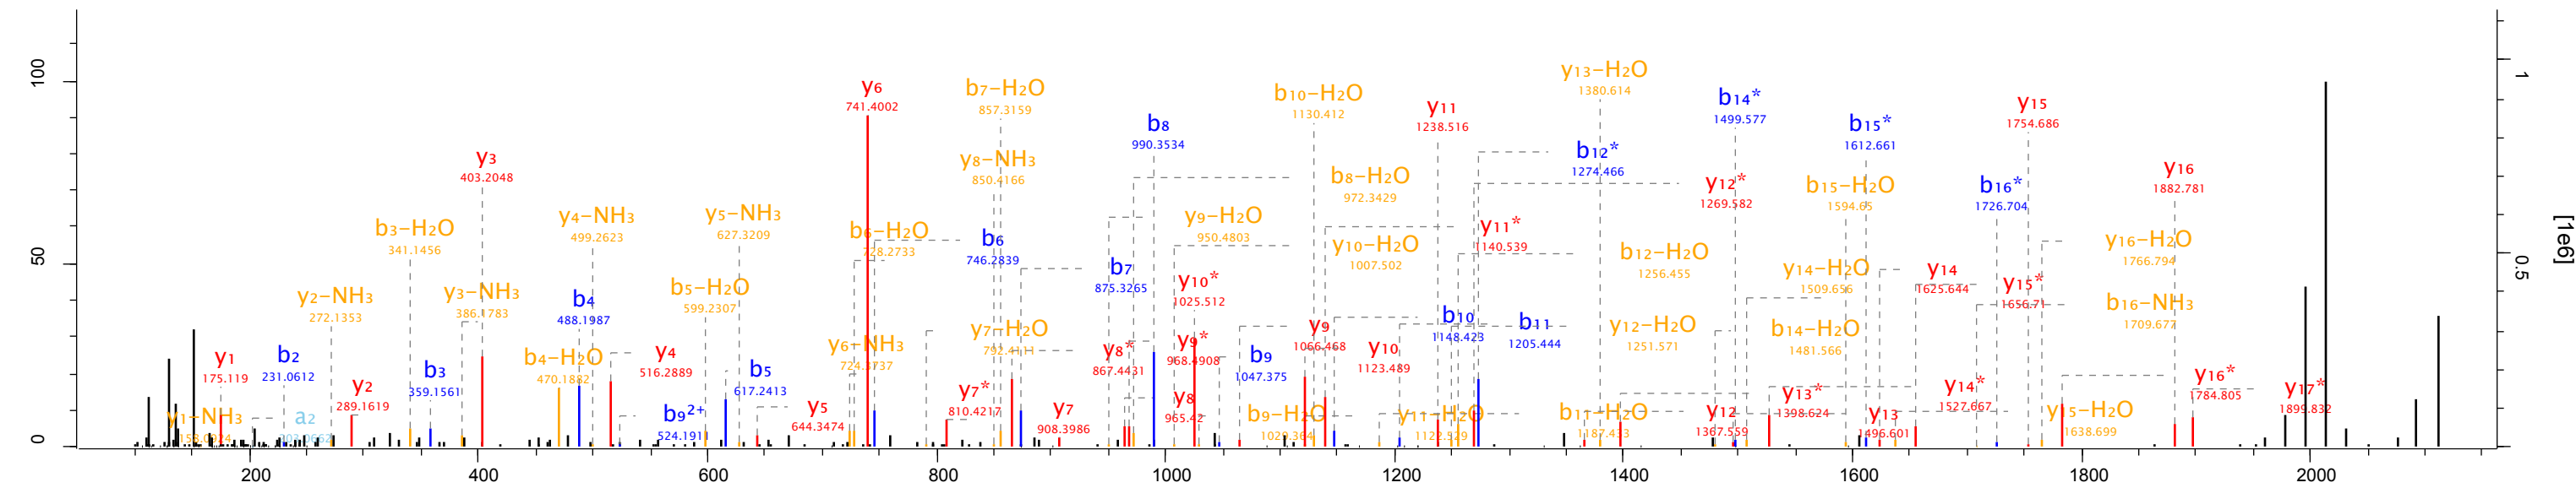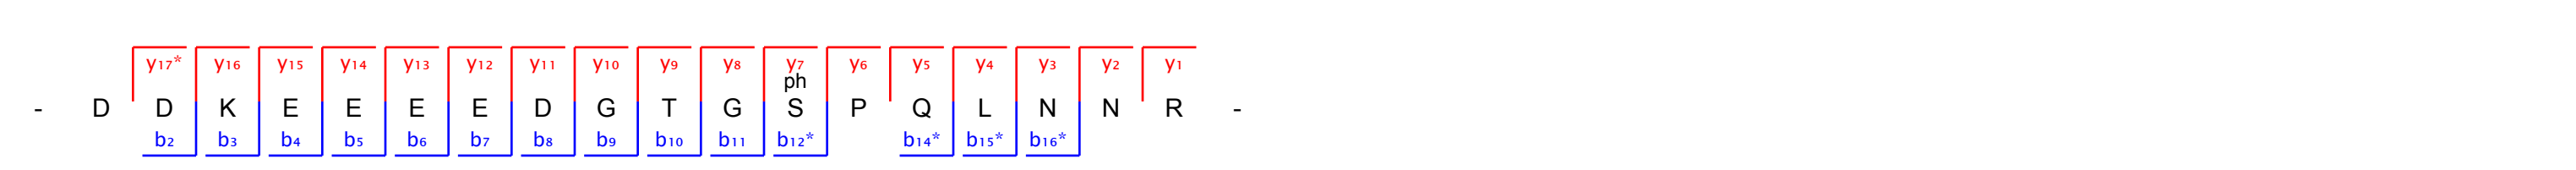

Raw file: 20171215\_MaS\_33SR\_LMH\_phospho2\_01  
 Scan: 3836 Method: FTMS; HCD Score: 87.21 m/z: 647.96 Gene names: RBM12B

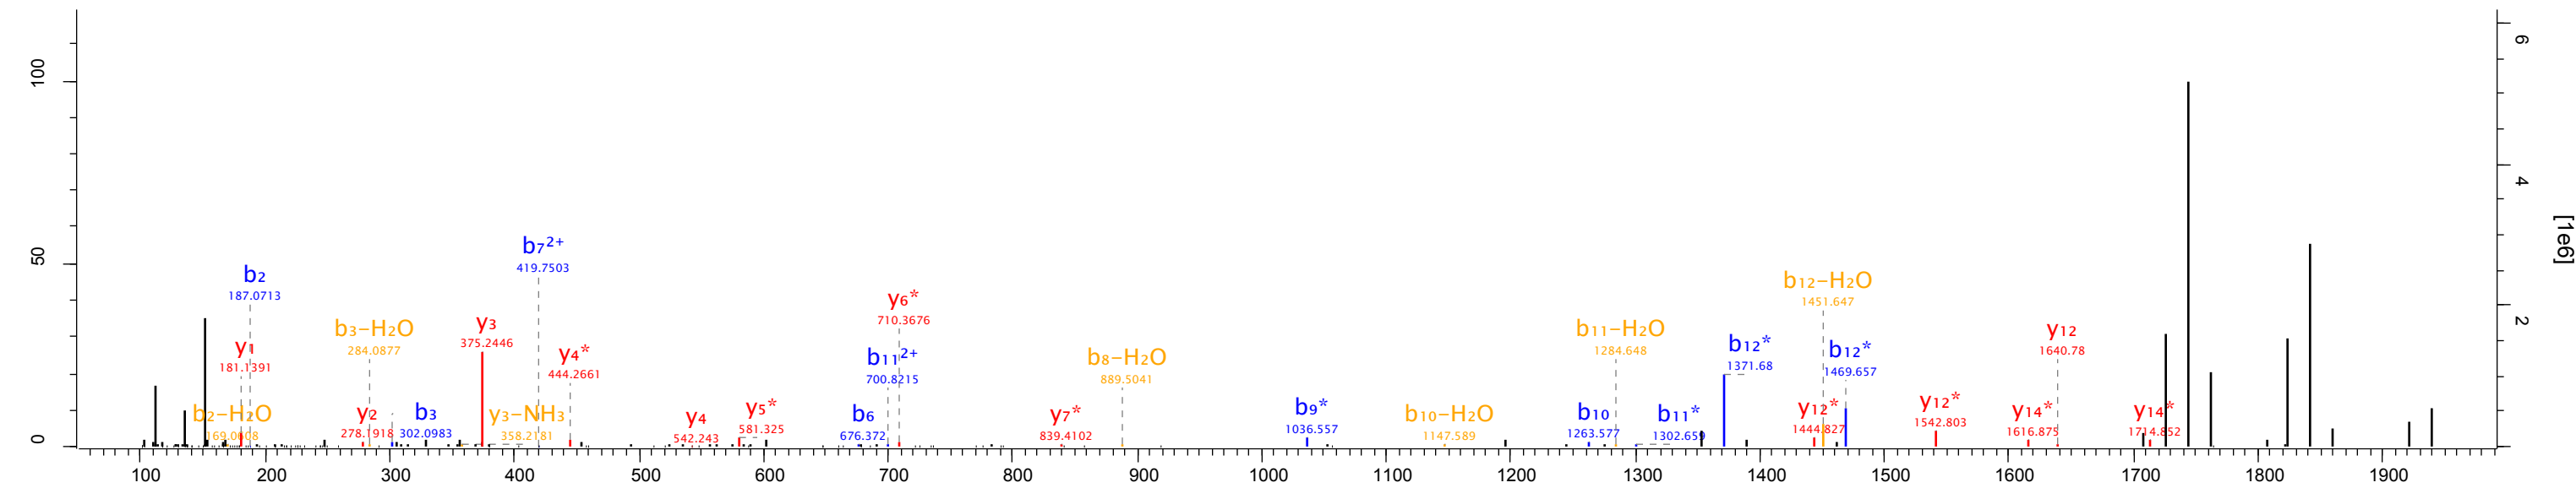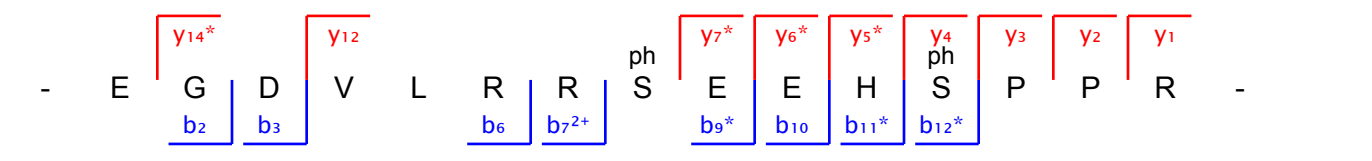

Raw file  
20171215\_MaS\_33SR\_LMH\_phospho2\_01

Scan 4186 Method FTMS; HCD Score 112.09 m/z 907.42 Gene names EP300

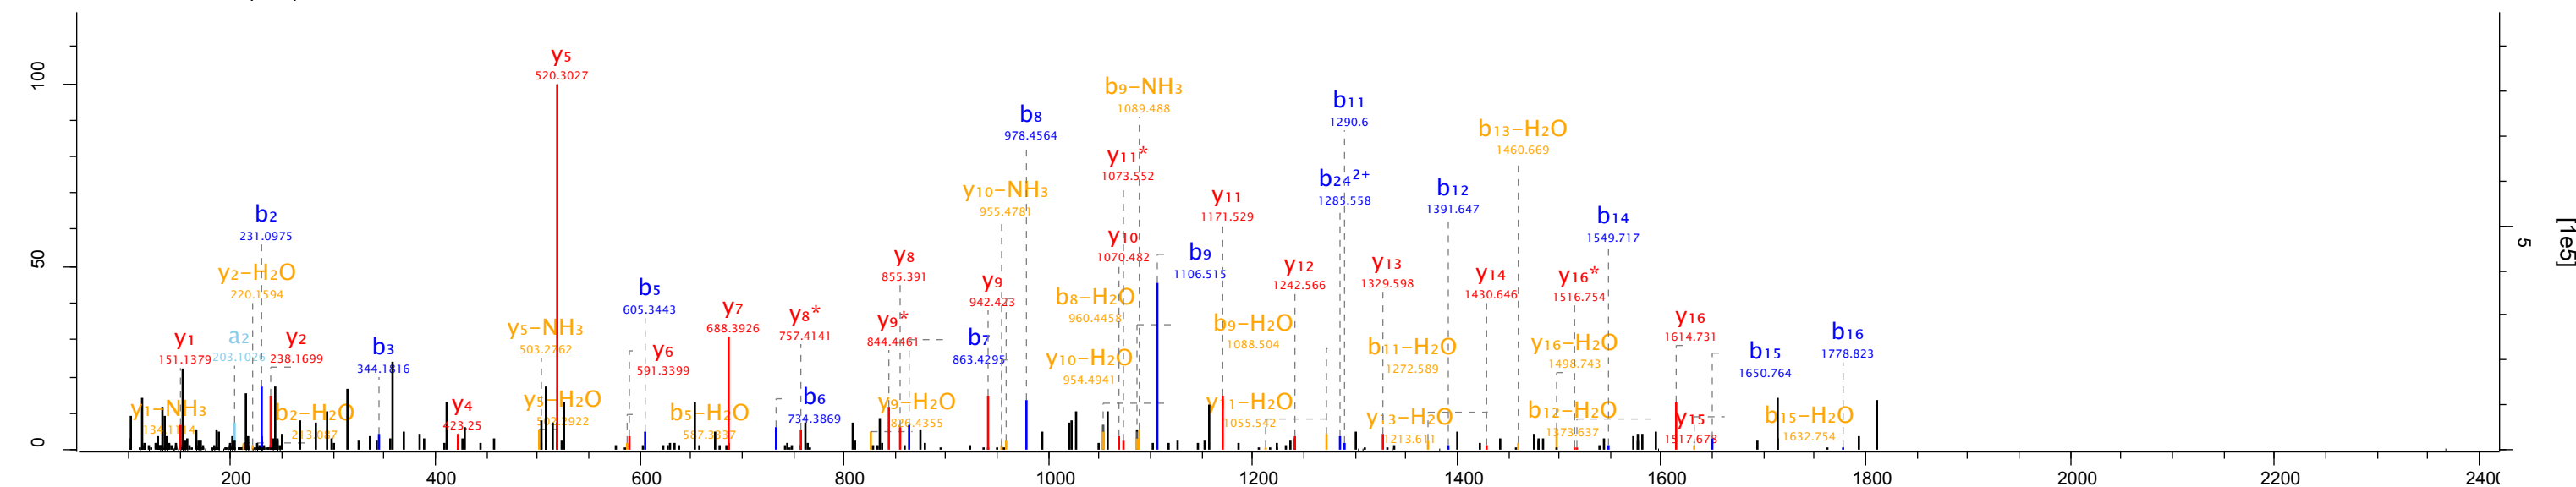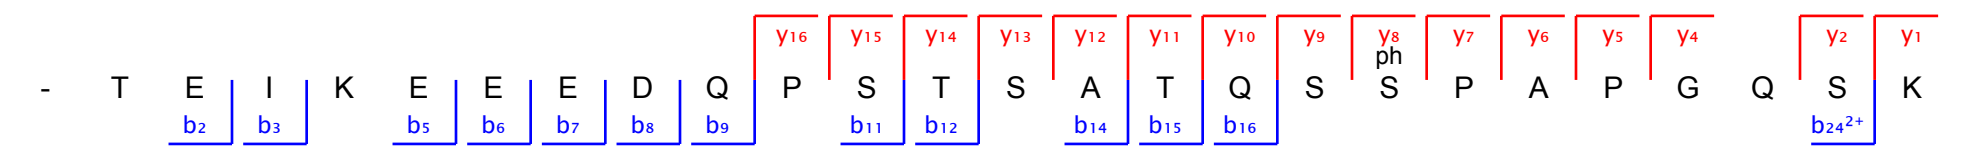

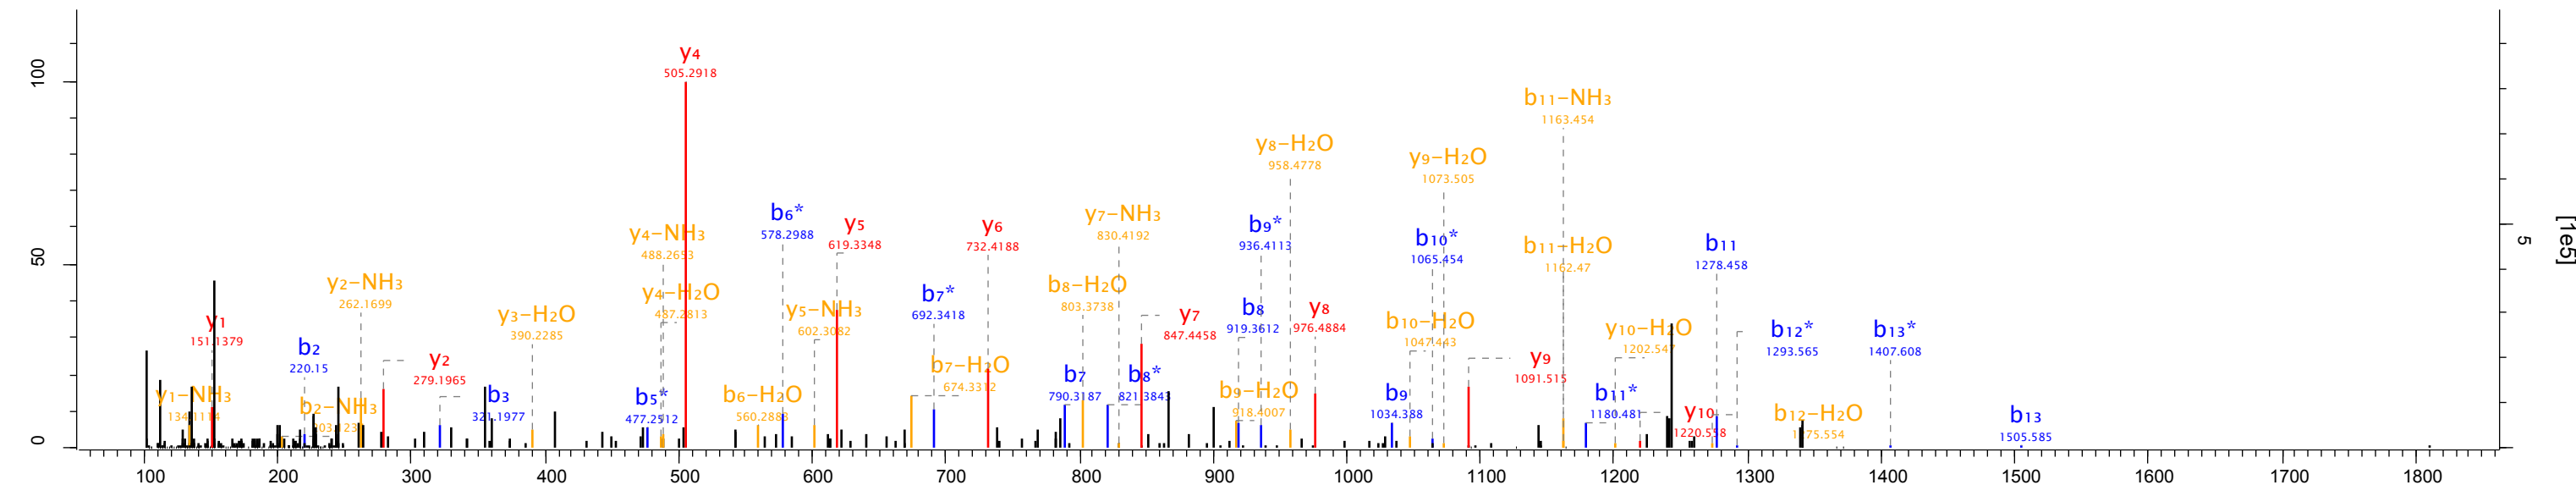

- G R T ph S S T N E D E D L N P E Q K -

b<sub>2</sub>
b<sub>3</sub>
b<sub>5</sub>\*
b<sub>6</sub>\*
b<sub>7</sub>
b<sub>8</sub>
b<sub>9</sub>
b<sub>10</sub>\*
b<sub>11</sub>
b<sub>12</sub>\*
b<sub>13</sub>
y<sub>10</sub>
y<sub>9</sub>
y<sub>8</sub>
y<sub>7</sub>
y<sub>6</sub>
y<sub>5</sub>
y<sub>4</sub>
y<sub>2</sub>
y<sub>1</sub>

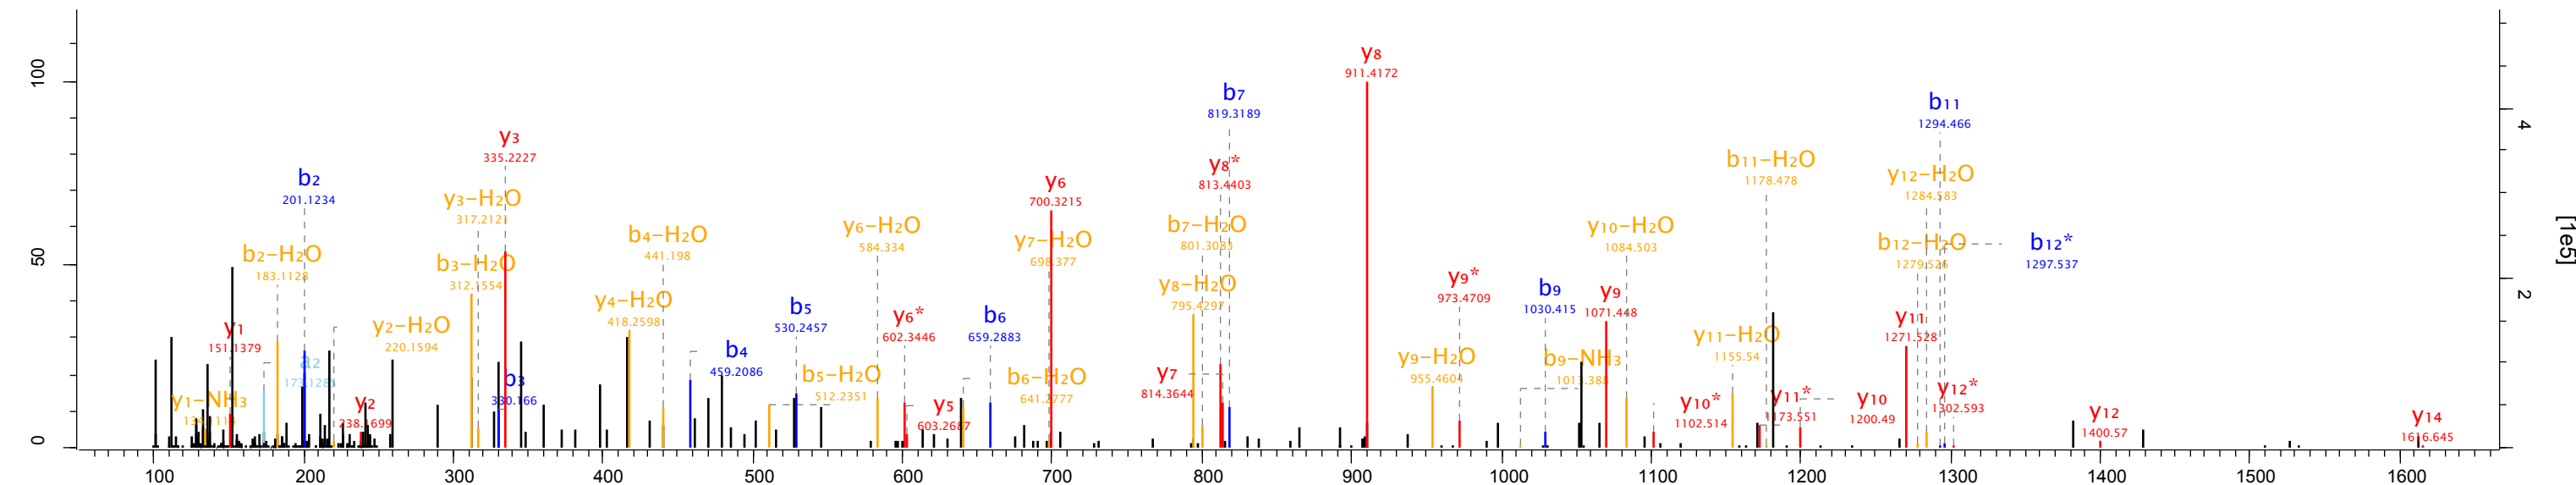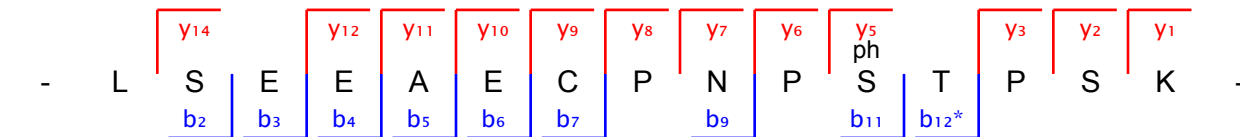

Raw file 20171215\_MaS\_33SR\_LMH\_phospho2\_01 Scan 4576 Method FTMS; HCD Score 141.75 m/z 661.21 Gene names KXD1

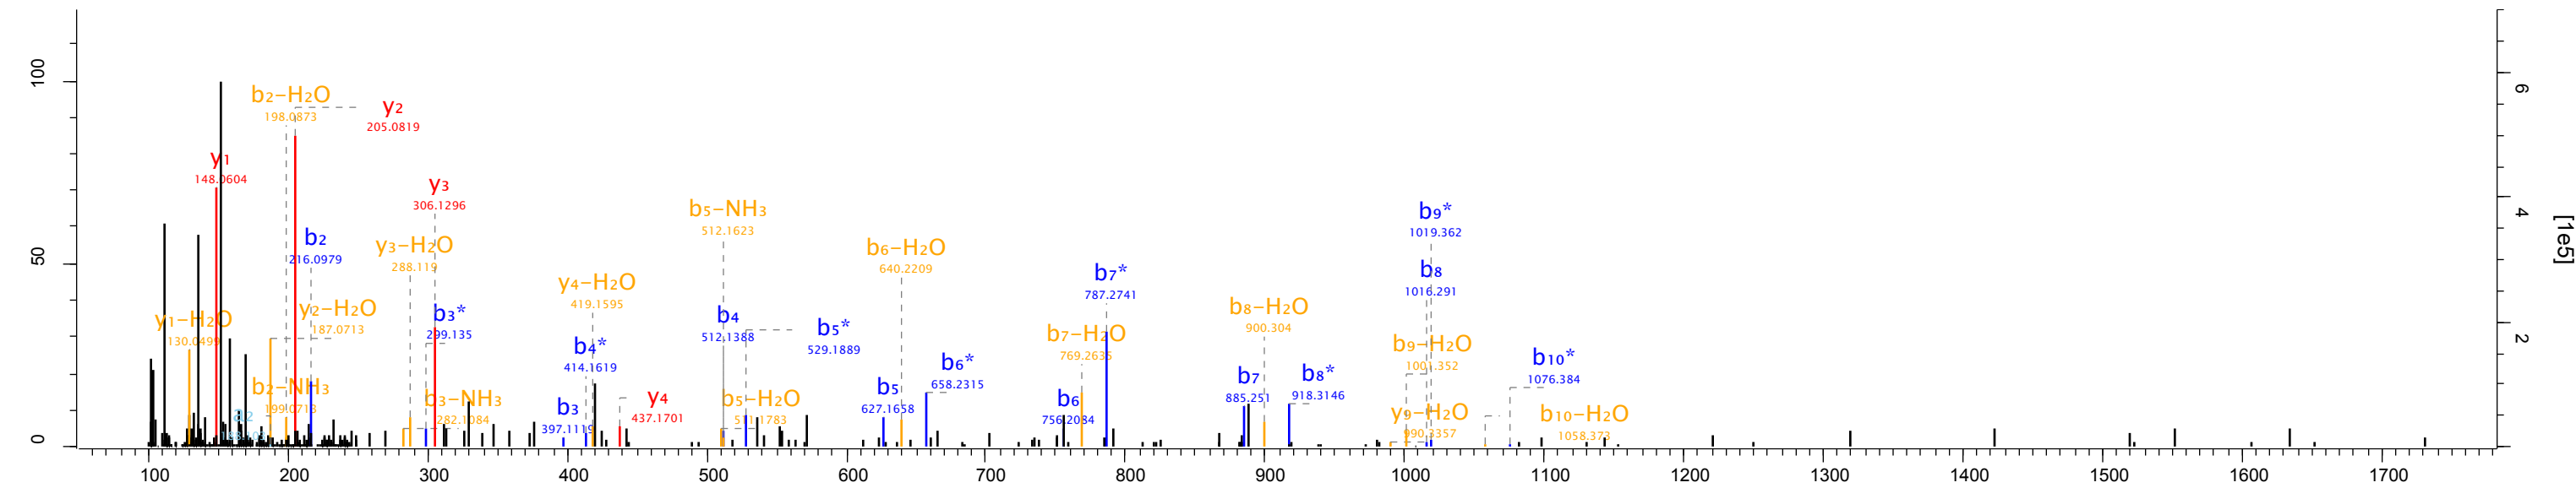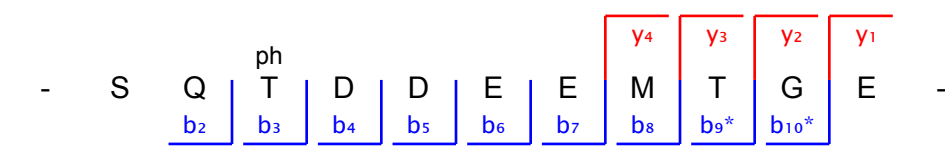



Raw file  
20171215\_MaS\_33SR\_LMH\_phospho2\_01

Scan Method Score m/z Gene names  
4706 FTMS; HCD 252.18 925.89 PXN

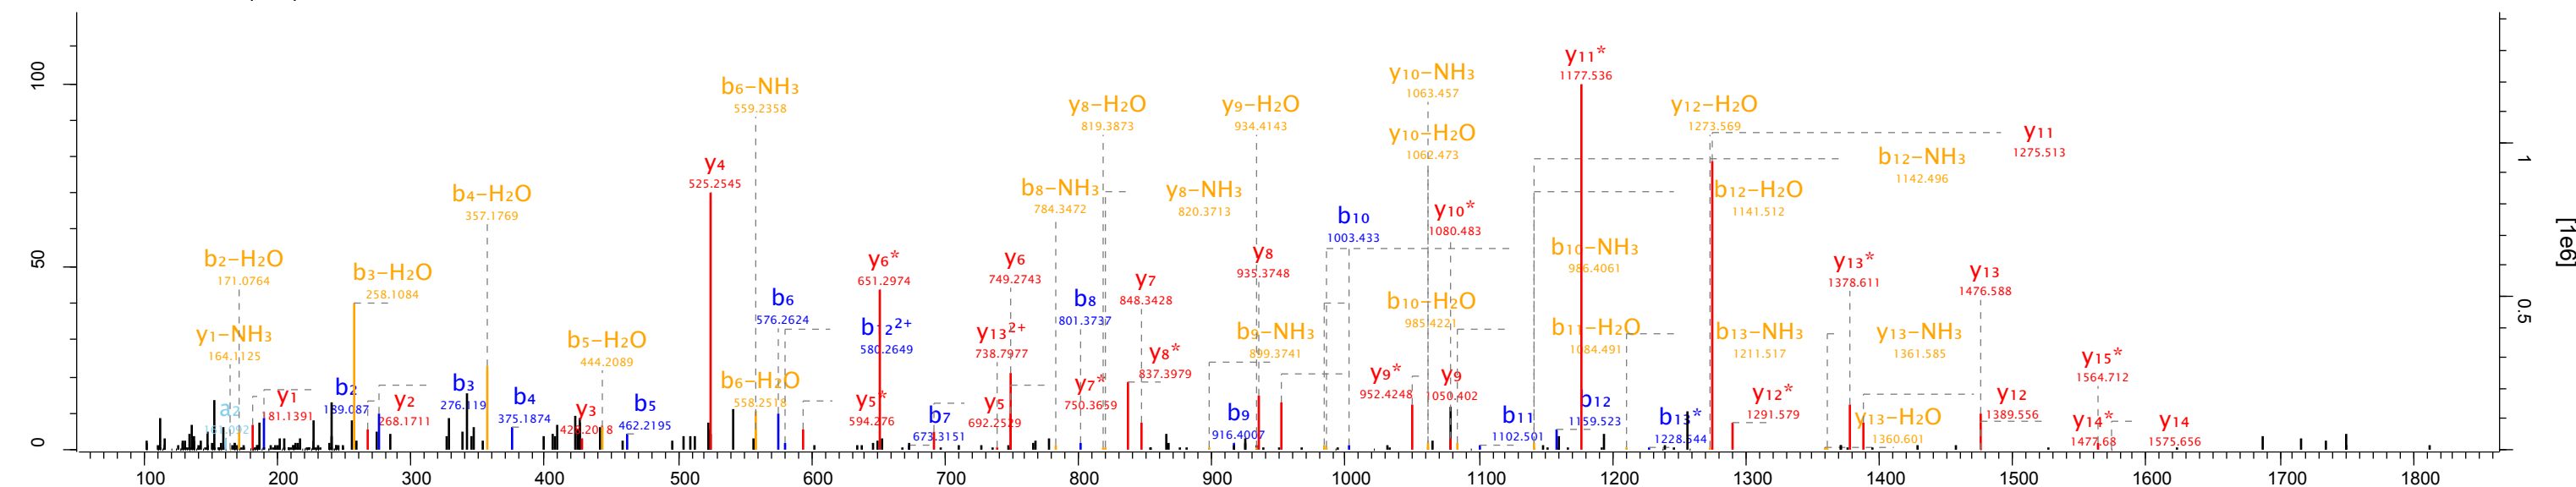

- T S S V S N P Q D S V G S P C S R -  
b<sub>2</sub> b<sub>3</sub> b<sub>4</sub> b<sub>5</sub> b<sub>6</sub> b<sub>7</sub> b<sub>8</sub> b<sub>9</sub> b<sub>10</sub> b<sub>11</sub> b<sub>12</sub> b<sub>13</sub>\* y<sub>15</sub>\* y<sub>14</sub> y<sub>13</sub> y<sub>12</sub> y<sub>11</sub> y<sub>10</sub>\* y<sub>9</sub> y<sub>8</sub> y<sub>7</sub> y<sub>6</sub> y<sub>5</sub> ph y<sub>4</sub> y<sub>3</sub> y<sub>2</sub> y<sub>1</sub>

Raw file 20171215\_MaS\_33SR\_LMH\_phospho2\_01 Scan 4796 Method FTMS; HCD Score 109.16 m/z 465.24 Gene names EIF4ENIF1

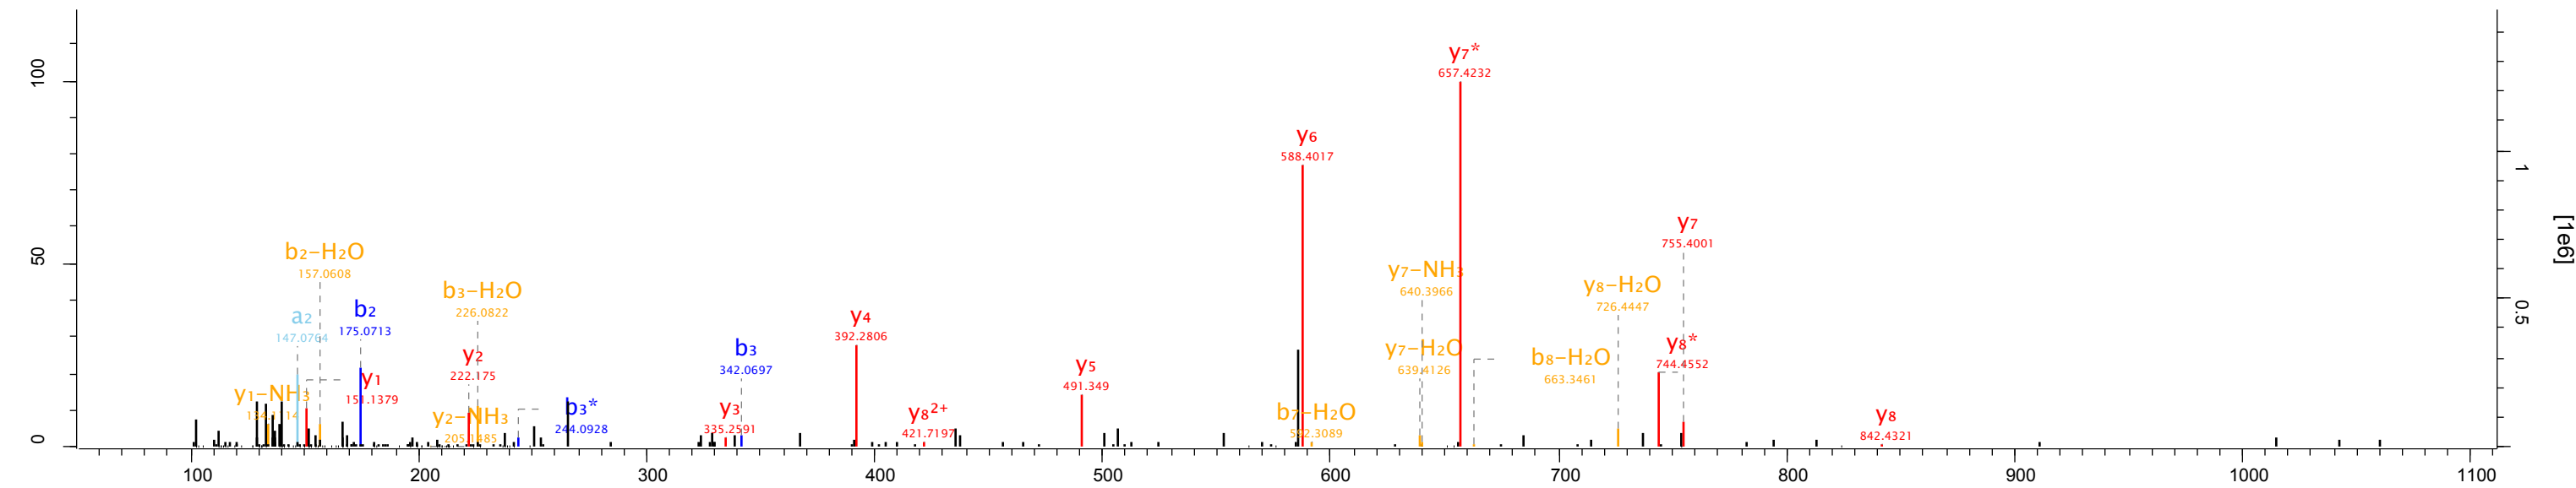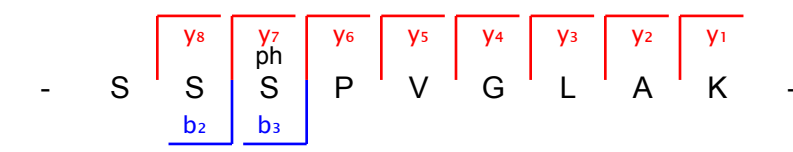

Raw file 20171215\_MaS\_33SR\_LMH\_phospho2\_01 Scan 5036 Method FTMS; HCD Score 158.52 m/z 749.65 Gene names SLC4A1AP

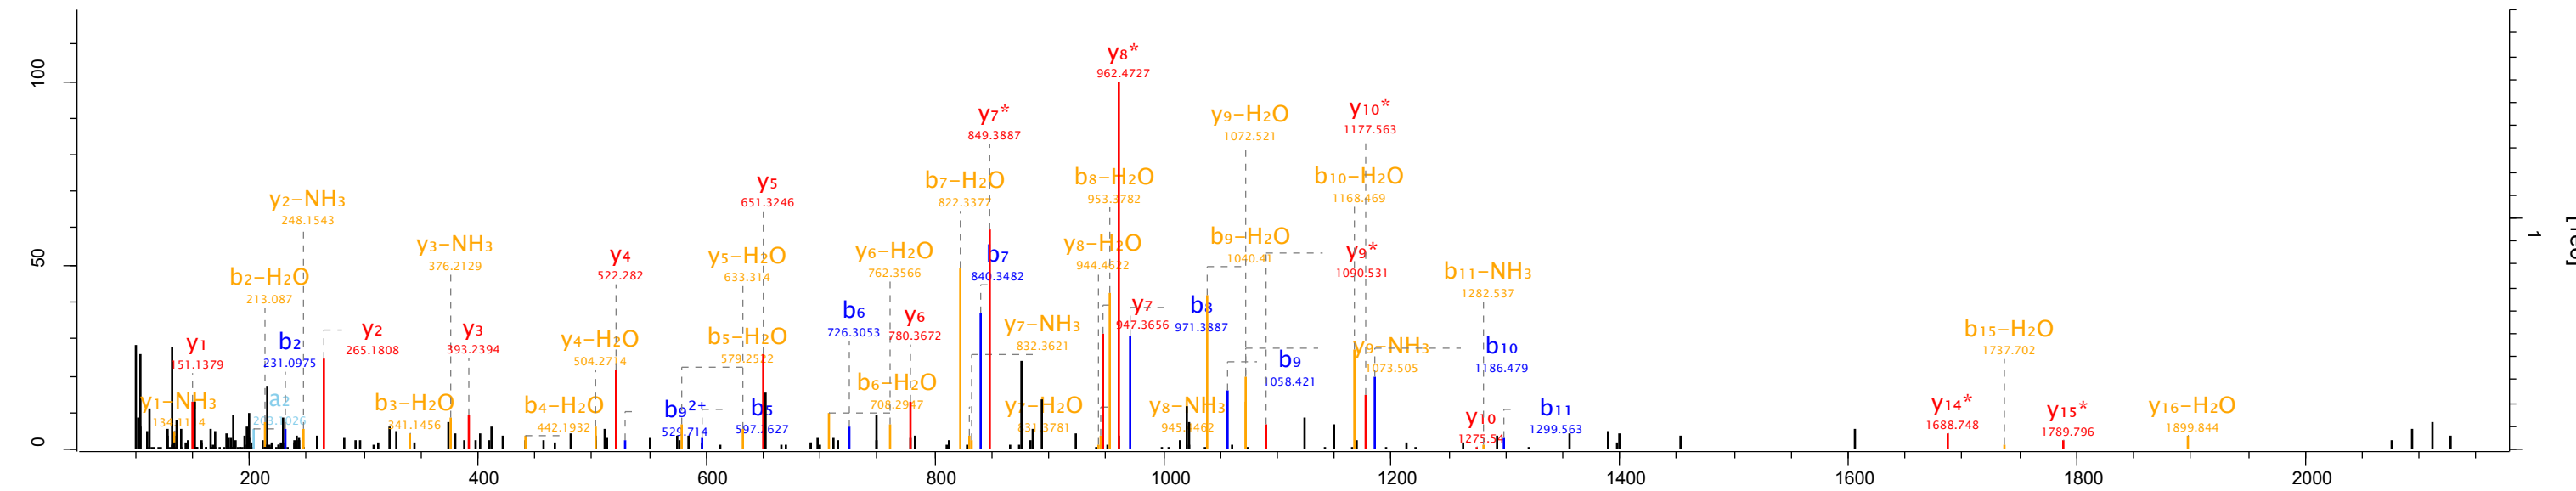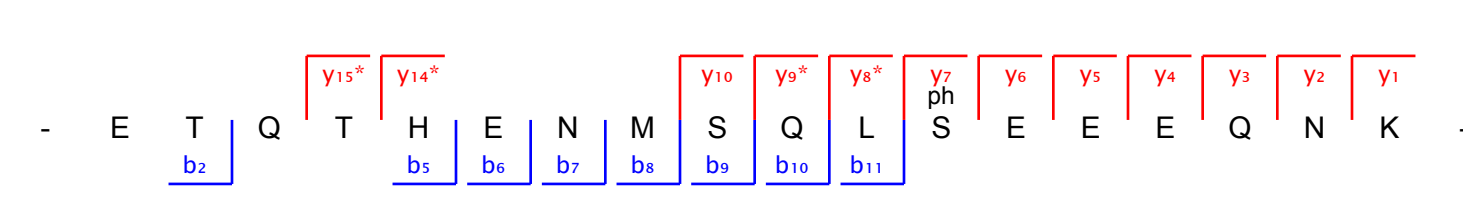

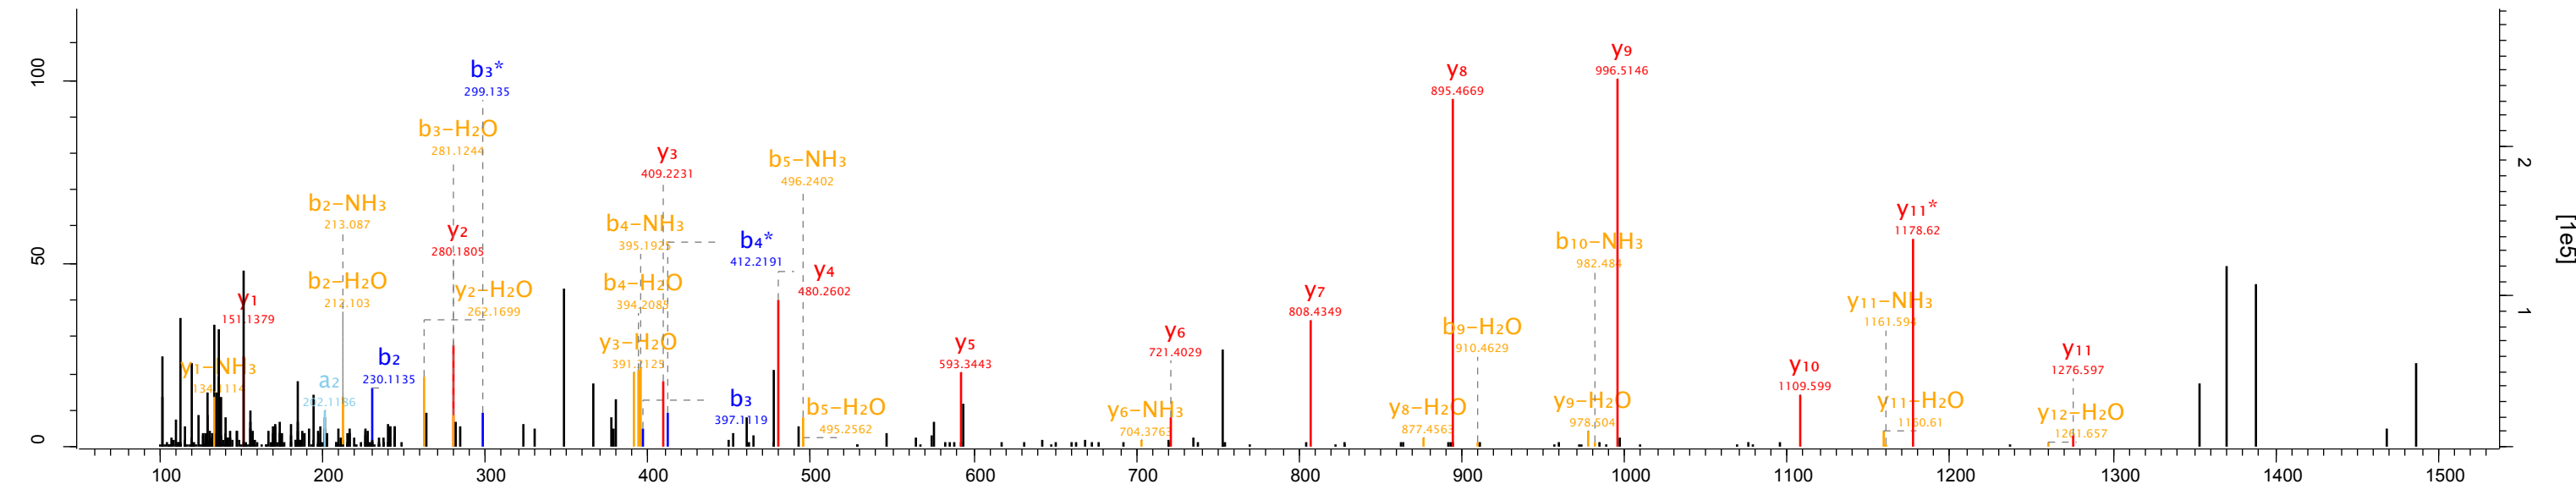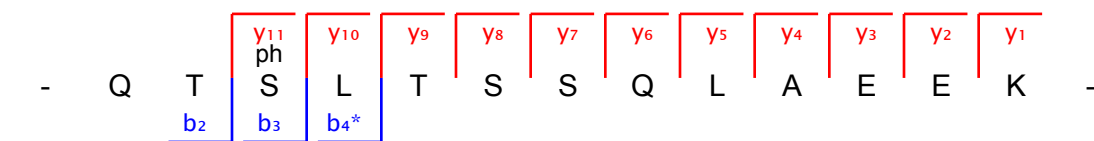

Raw file 20171215\_MaS\_33SR\_LMH\_phospho2\_01 Scan 7536 Method FTMS; HCD Score 65.58 m/z 949.67 Gene names GIGYF2

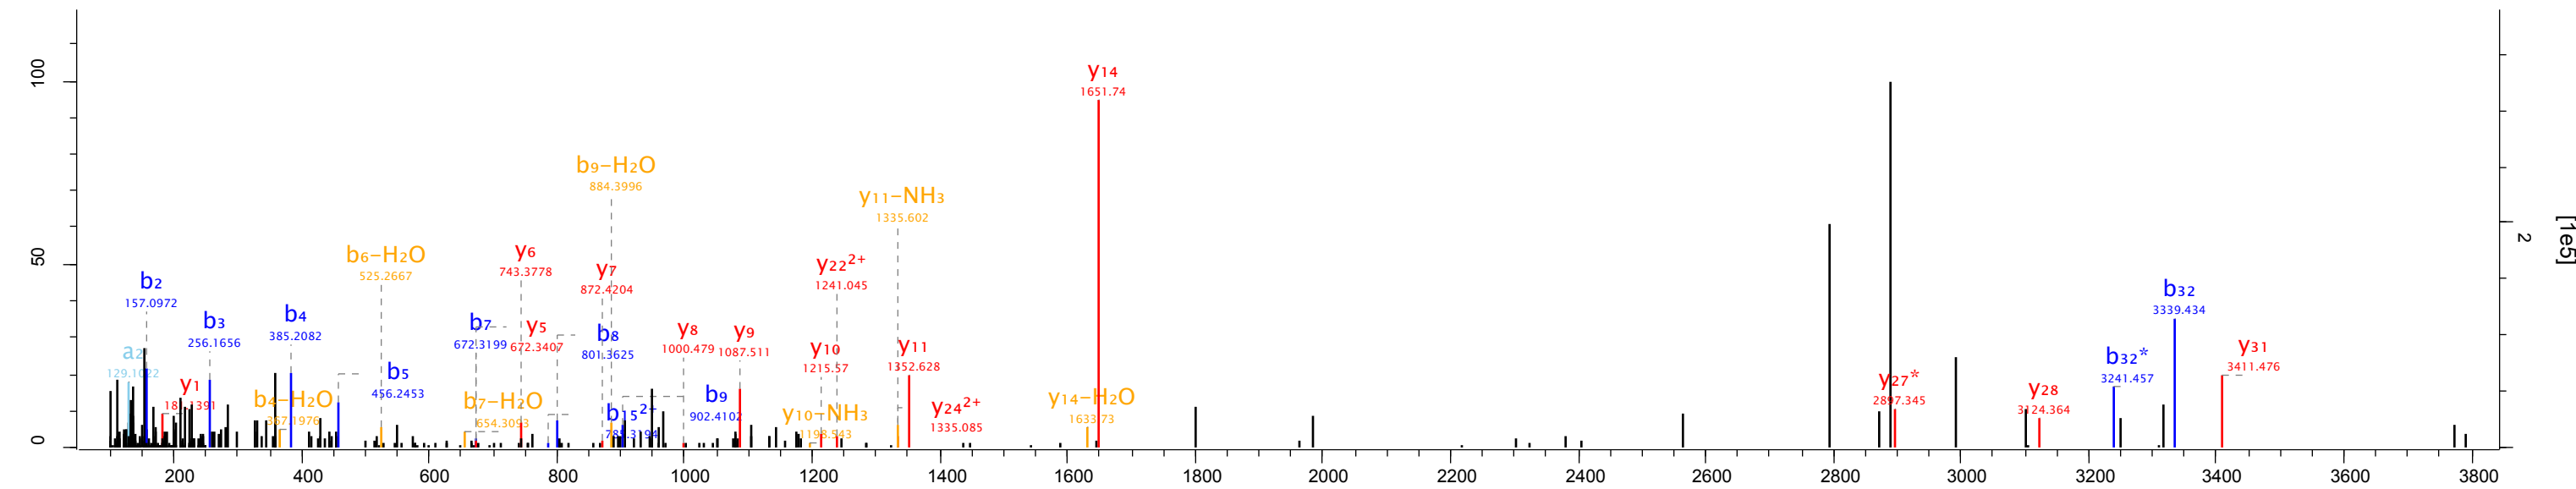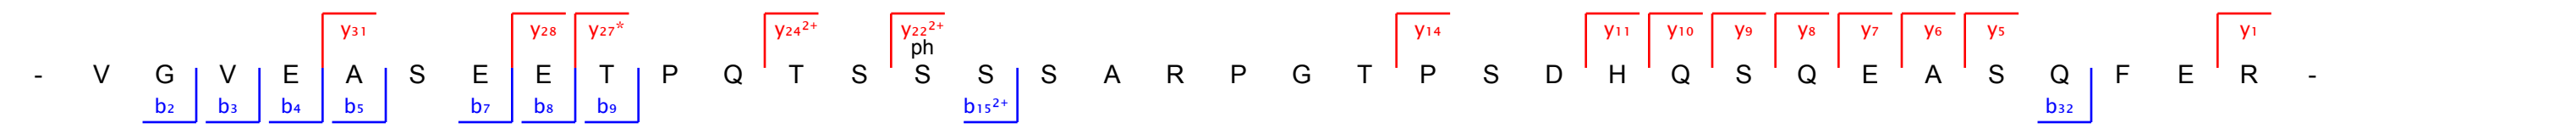

Raw file 20171215\_MaS\_33SR\_LMH\_phospho2\_01 Scan 7796 Method FTMS; HCD Score 111.65 m/z 1104.46 Gene names AKAP12

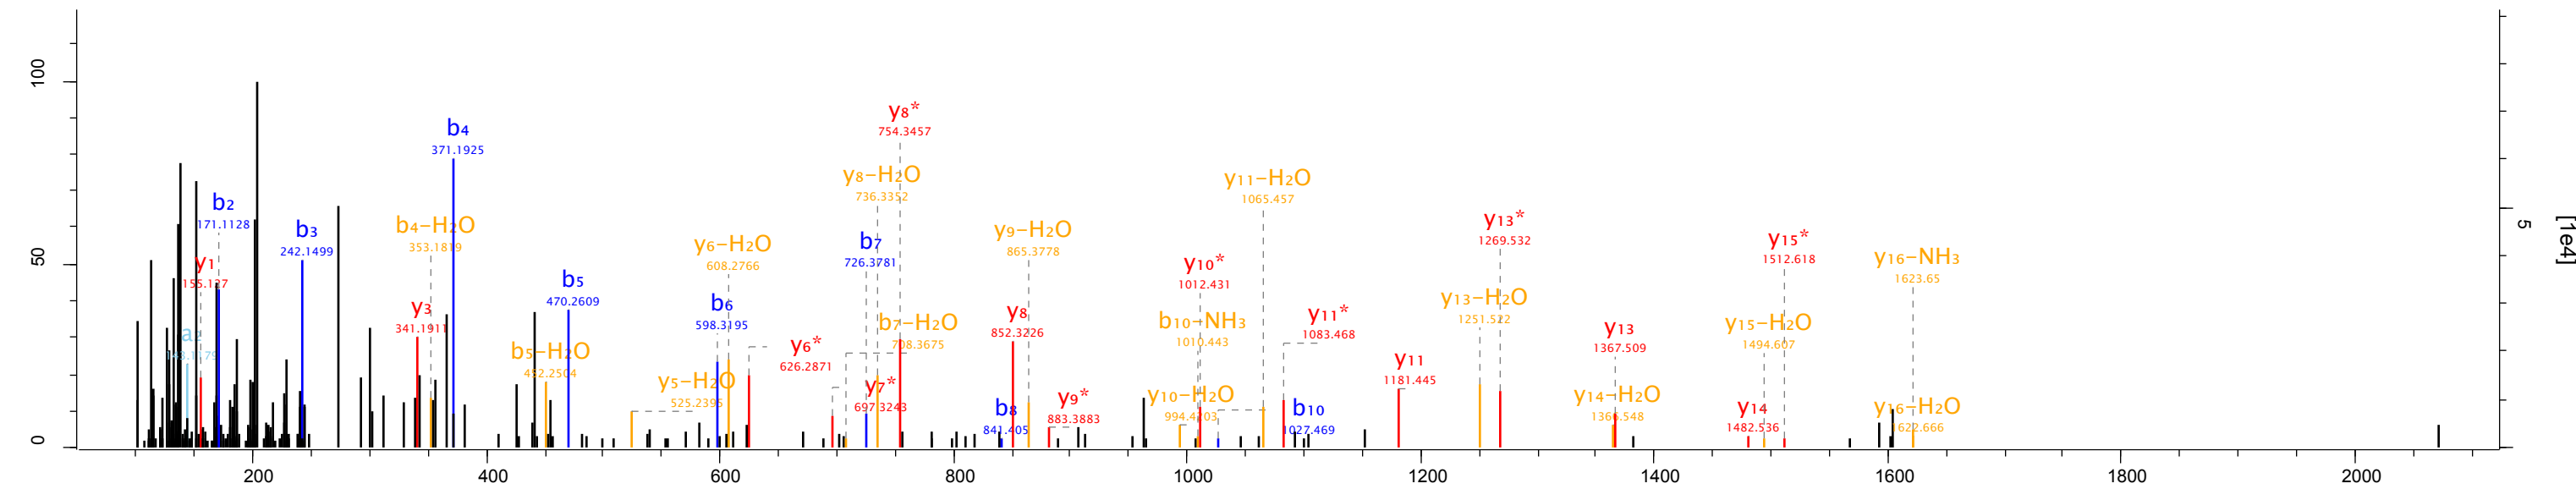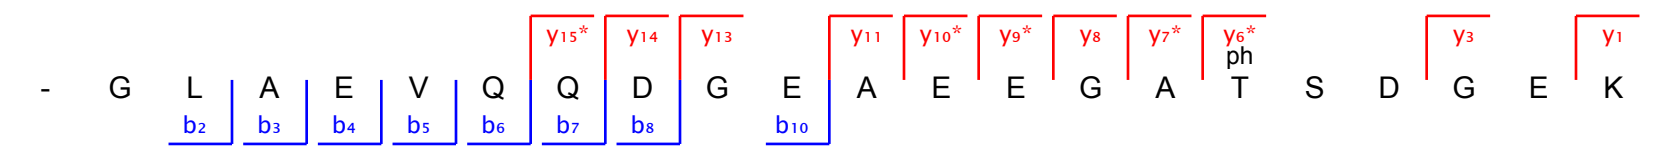

Raw file  
20171215\_MaS\_33SR\_LMH\_phospho2\_01

Scan 9516 Method FTMS; HCD Score 203.15 m/z 1038.13 Gene names PAGE2;PAGE2B

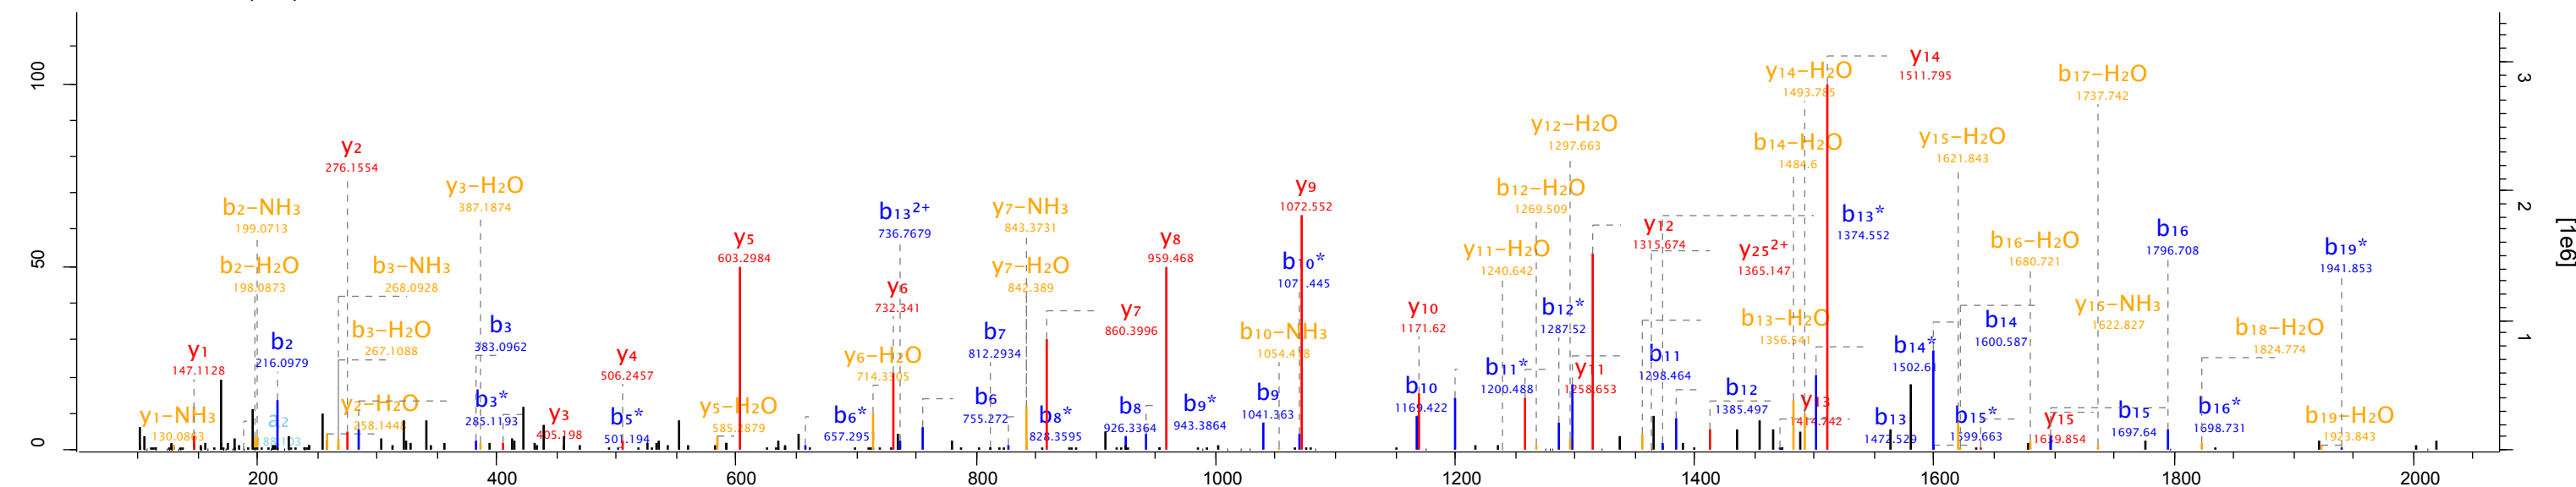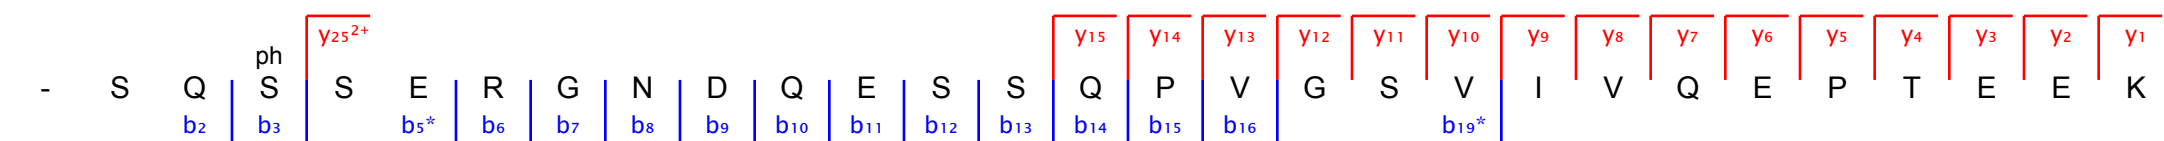

Raw file 20171215\_MaS\_33SR\_LMH\_phospho2\_01 Scan 9856 Method FTMS; HCD Score 112.17 m/z 770.86 Gene names LARP1

20171215\_MaS\_33SR\_LMH\_phospho2\_01

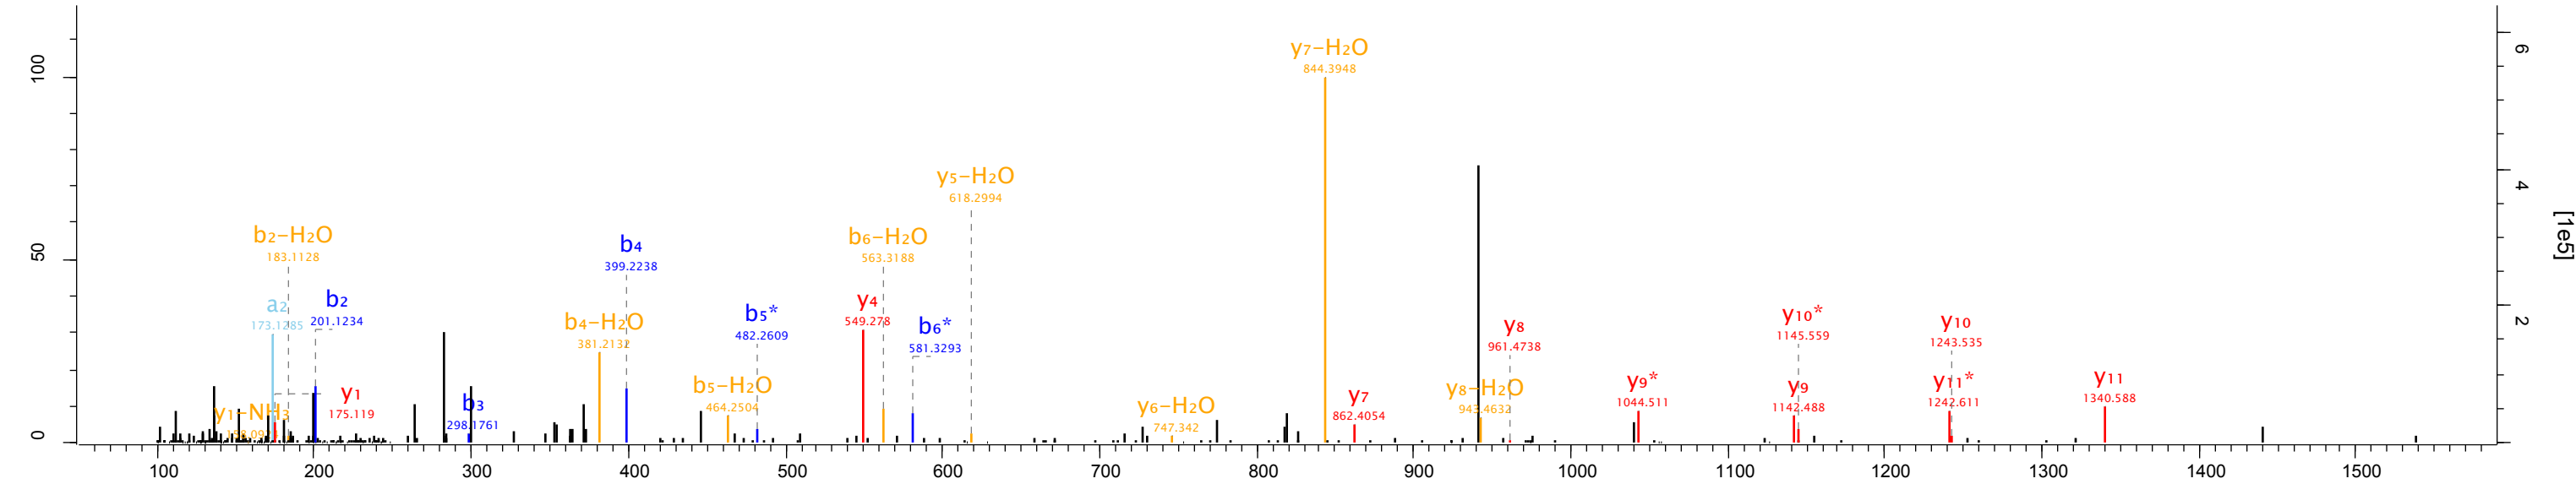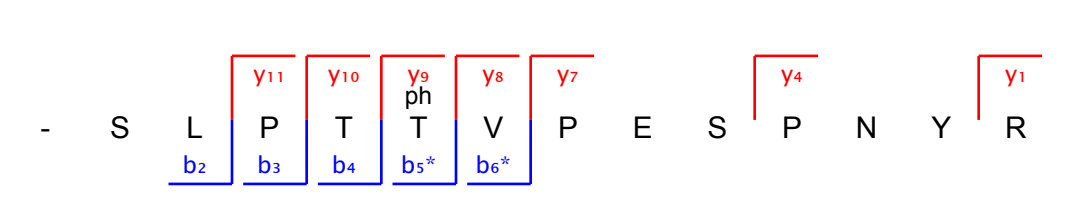



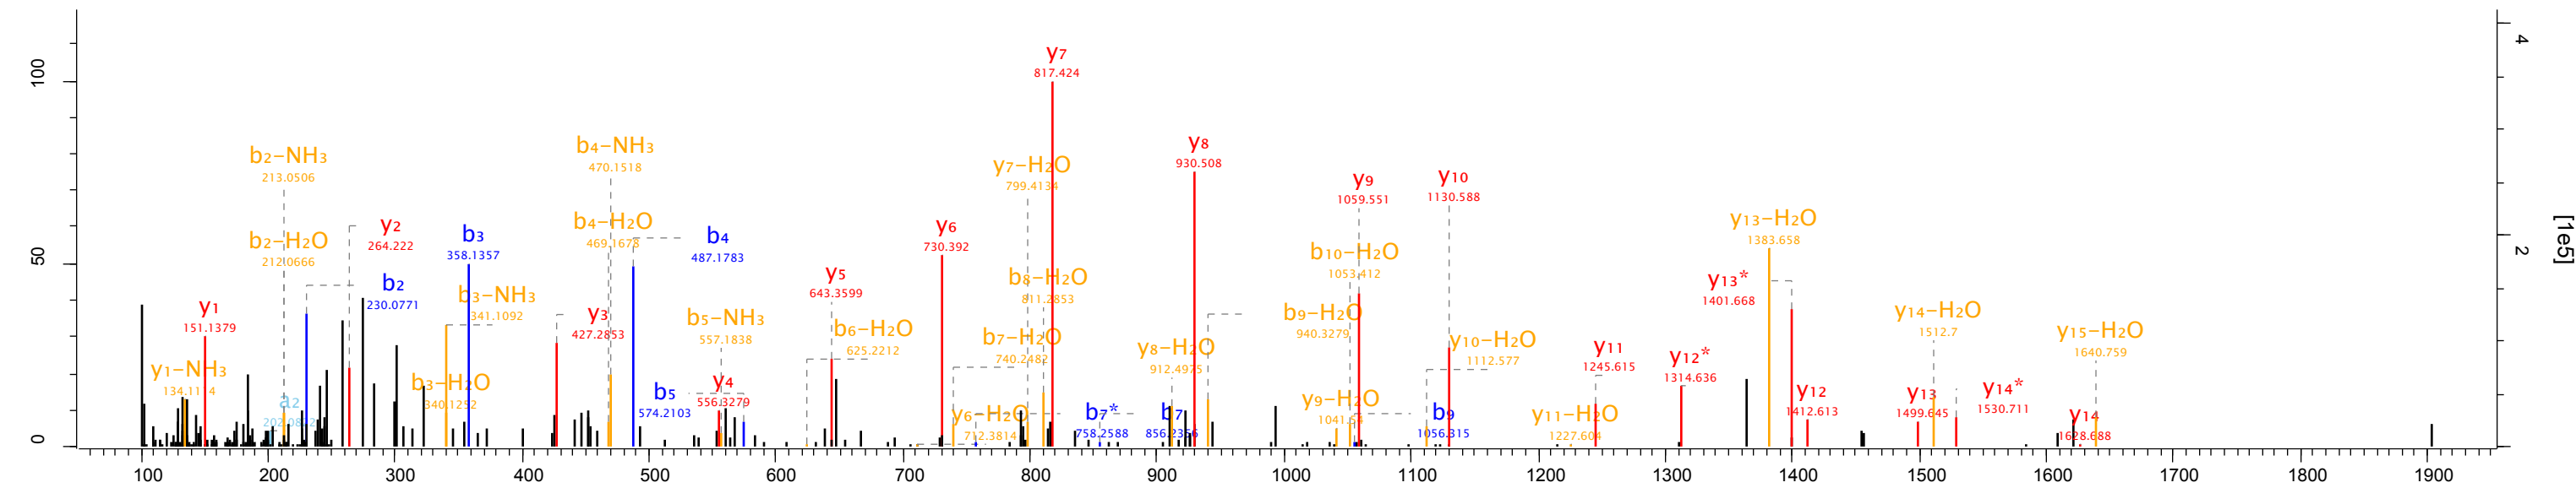

- D N Q E S S<sub>ph</sub> D A E L S S S E Y I K -

b<sub>2</sub> b<sub>3</sub> b<sub>4</sub> b<sub>5</sub> b<sub>7</sub> b<sub>9</sub>

y<sub>14</sub> y<sub>13</sub> y<sub>12</sub> y<sub>11</sub> y<sub>10</sub> y<sub>9</sub> y<sub>8</sub> y<sub>7</sub> y<sub>6</sub> y<sub>5</sub> y<sub>4</sub> y<sub>3</sub> y<sub>2</sub> y<sub>1</sub>



Raw file 20171215\_MaS\_33SR\_LMH\_phospho2\_02 Scan 11236 Method FTMS; HCD Score 98.82 m/z 810.84 Gene names LMNA

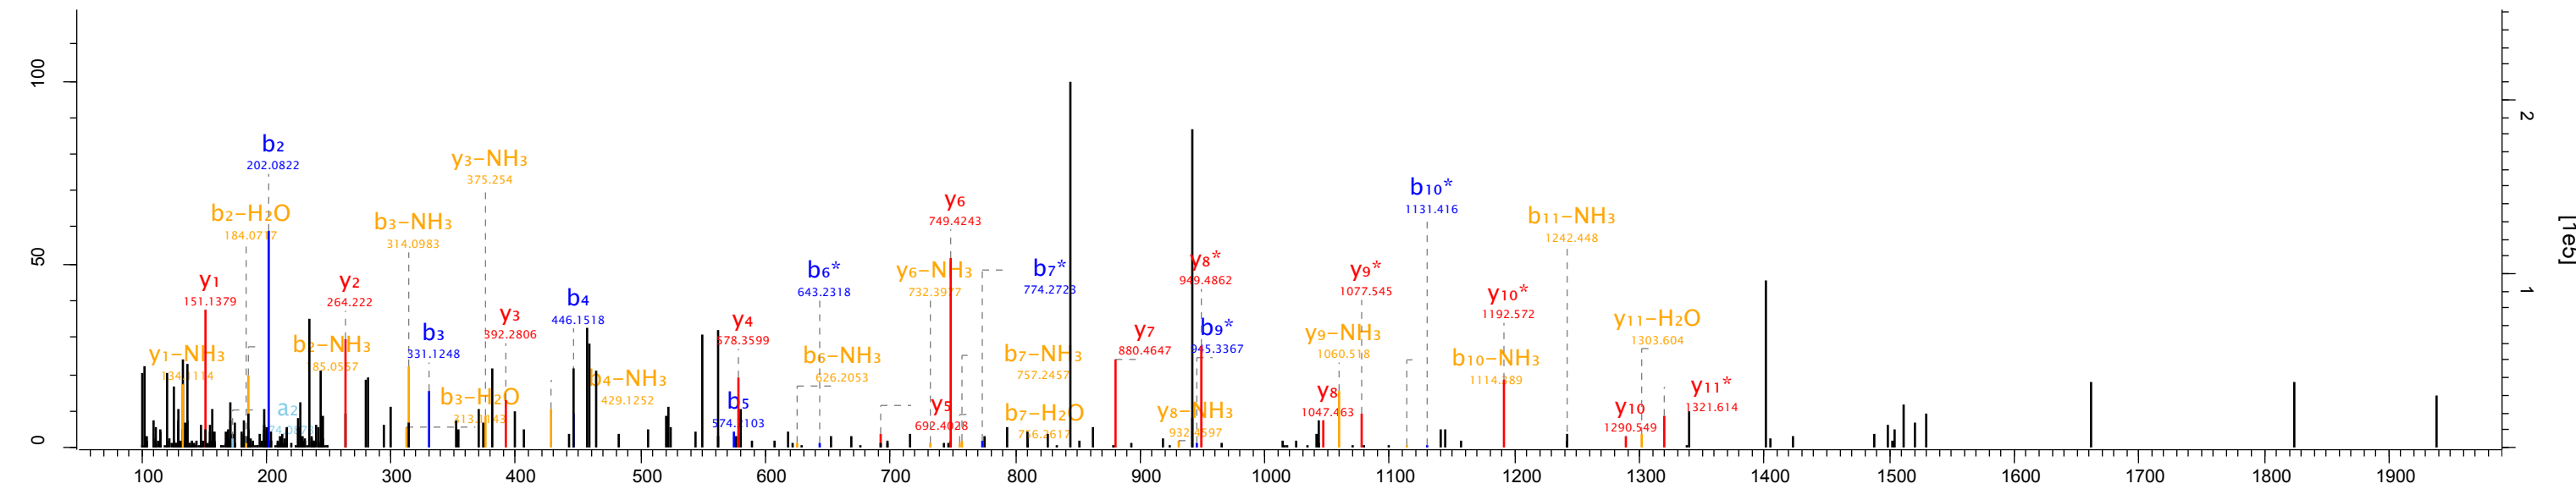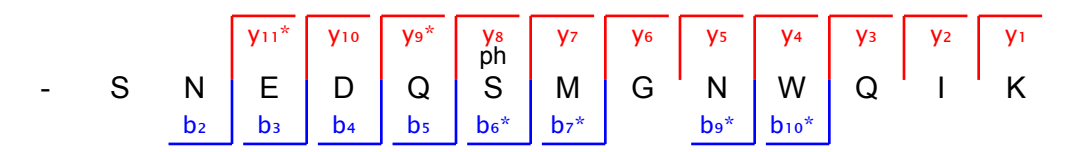

Raw file 20171215\_MaS\_33SR\_LMH\_phospho2\_02 Scan 11666 Method FTMS; HCD Score 177.6 m/z 825.91 Gene names PEA15

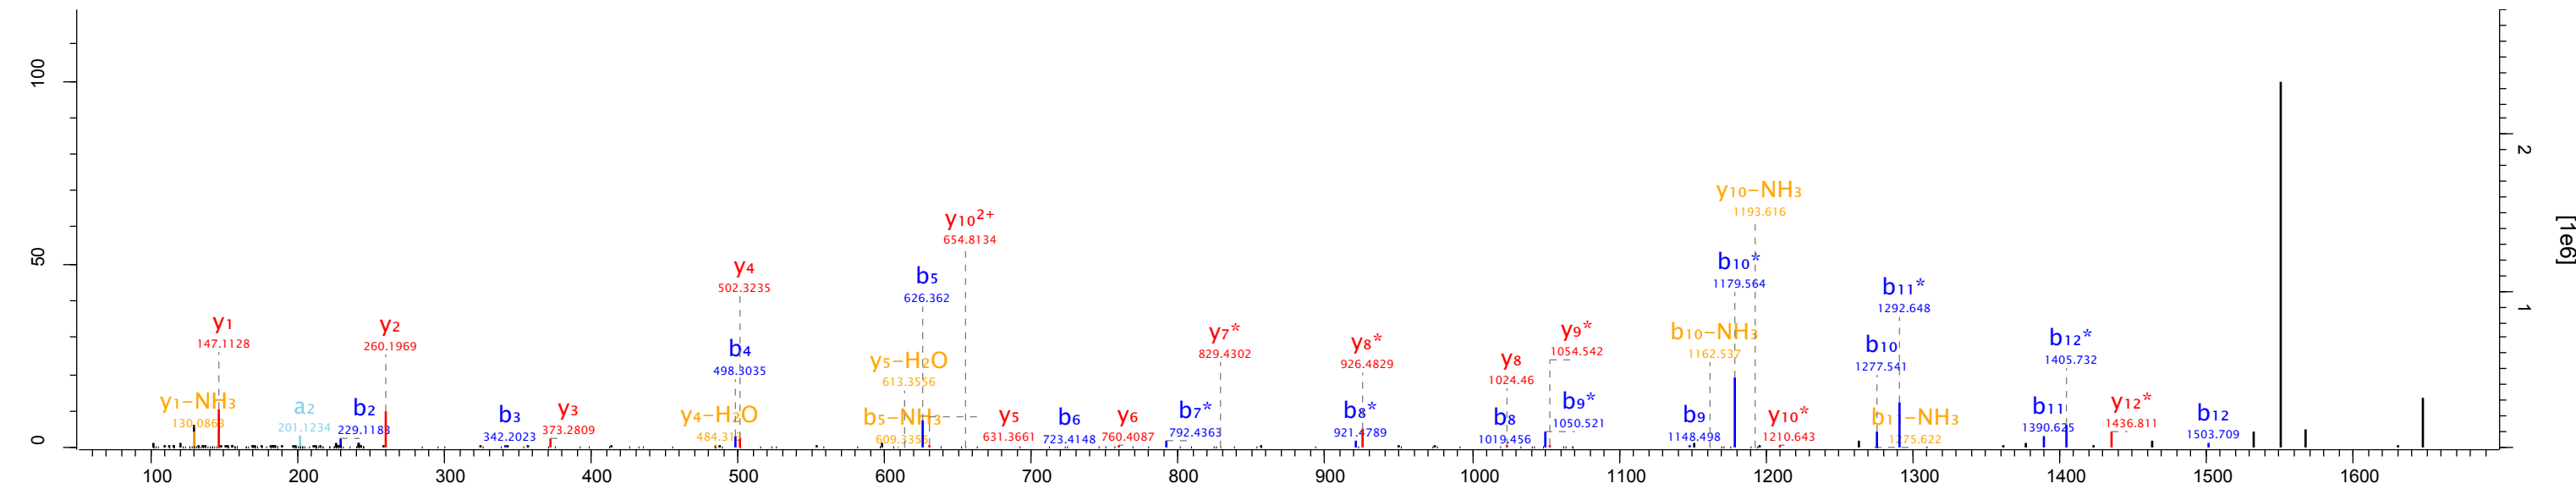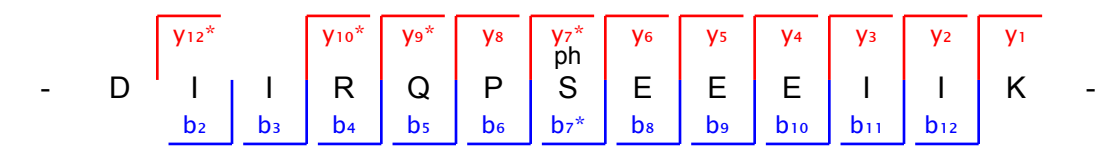

Raw file 20171215\_MaS\_33SR\_LMH\_phospho2\_02 Scan 12086 Method FTMS; HCD Score 128.87 m/z 947.46 Gene names TCOF1

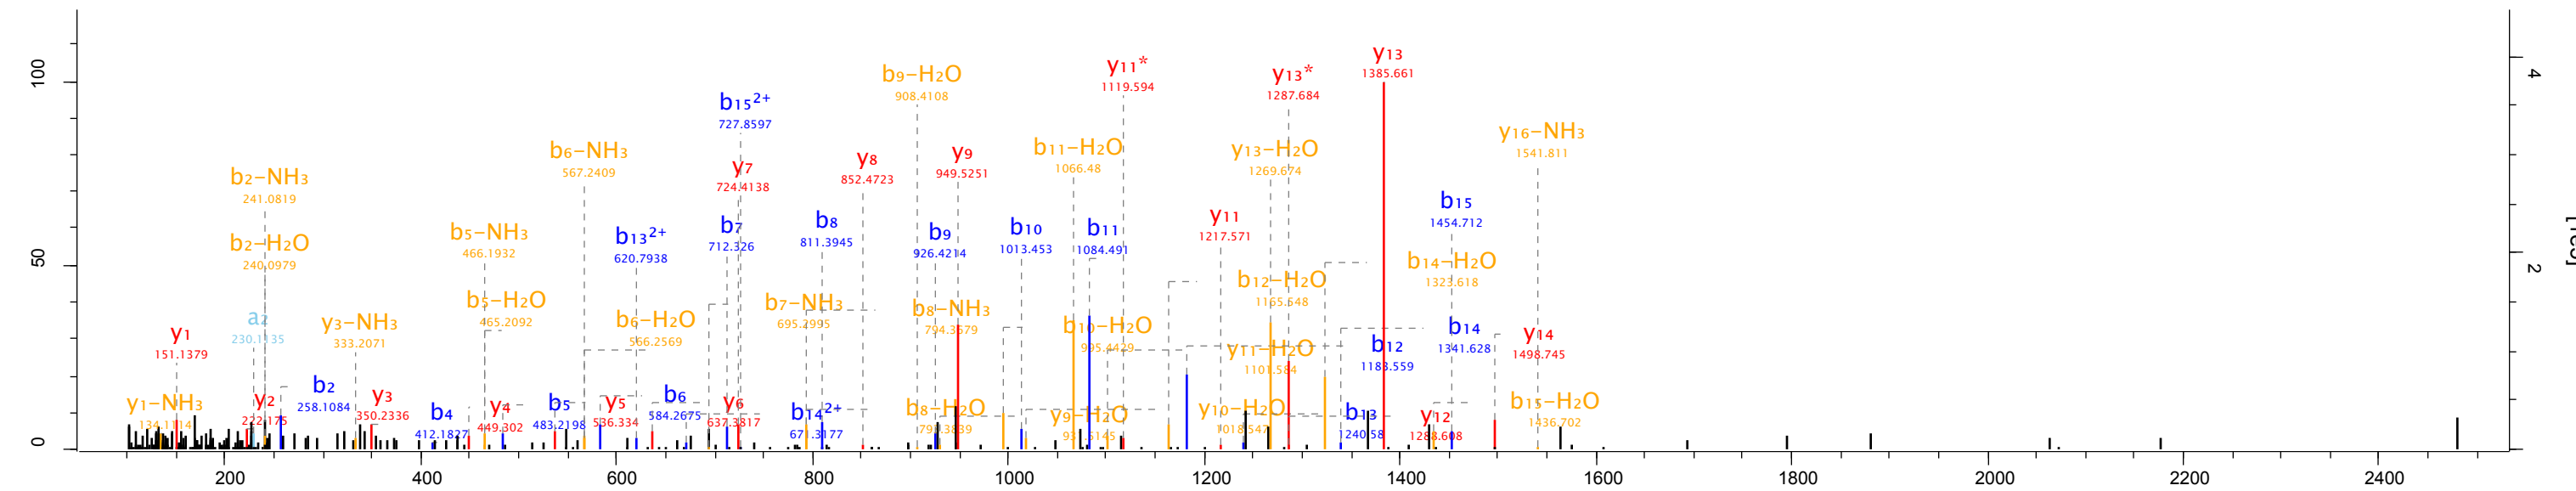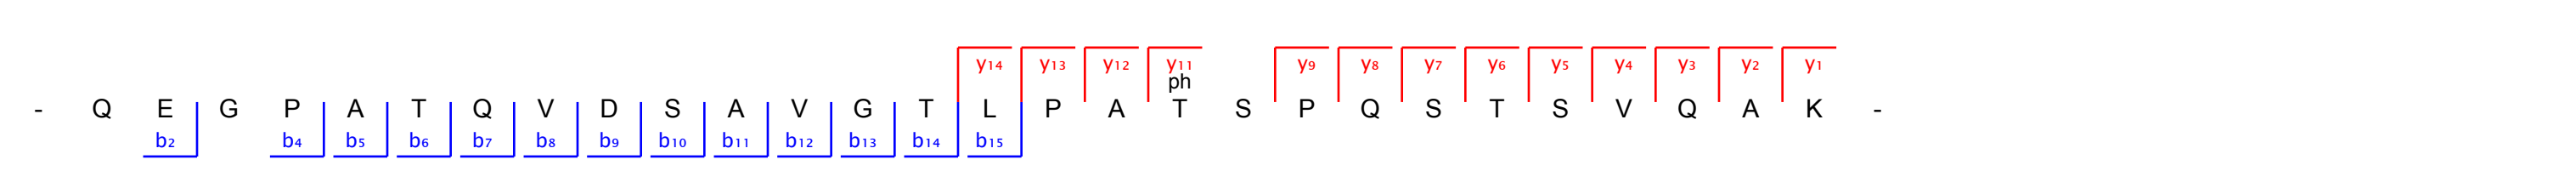

Raw file  
20171215\_MaS\_33SR\_LMH\_phospho2\_02

Scan 12266 Method FTMS; HCD Score 152.07 m/z 767.34 Gene names FUBP3

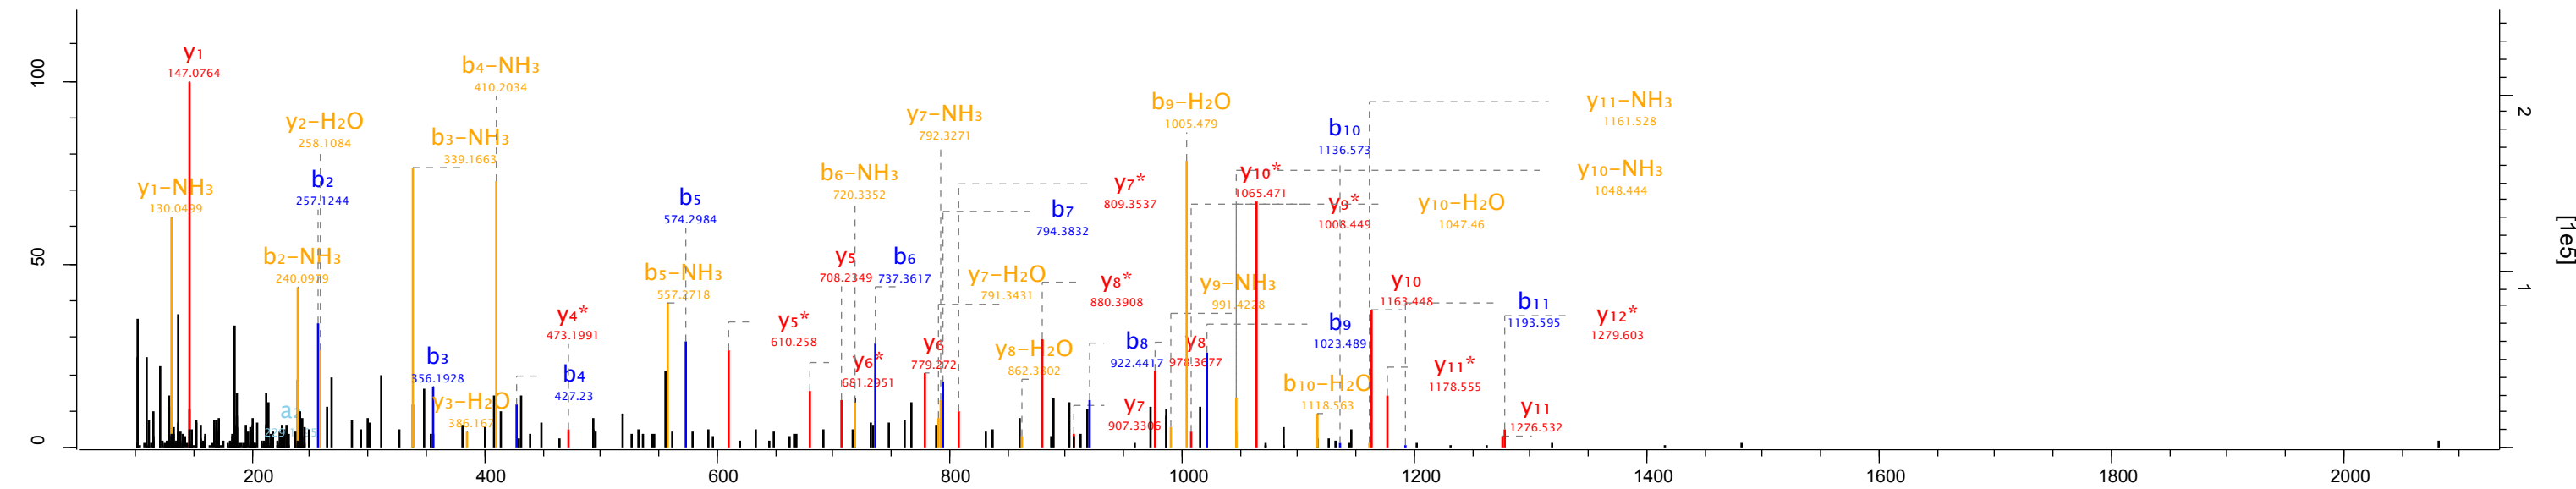

- Q Q V A F Y G Q T L G Q A Q A H S Q E Q -  
b2 b3 b4 b5 b6 b7 b8 b9 b10 b11 y12\* y11 y10 y9\* y8 y7 y6 y5 y4\*ph y1

Raw file 20171215\_MaS\_33SR\_LMH\_phospho2\_02 Scan 12356 Method FTMS; HCD Score 135.02 m/z 836.02 Gene names MXRA7

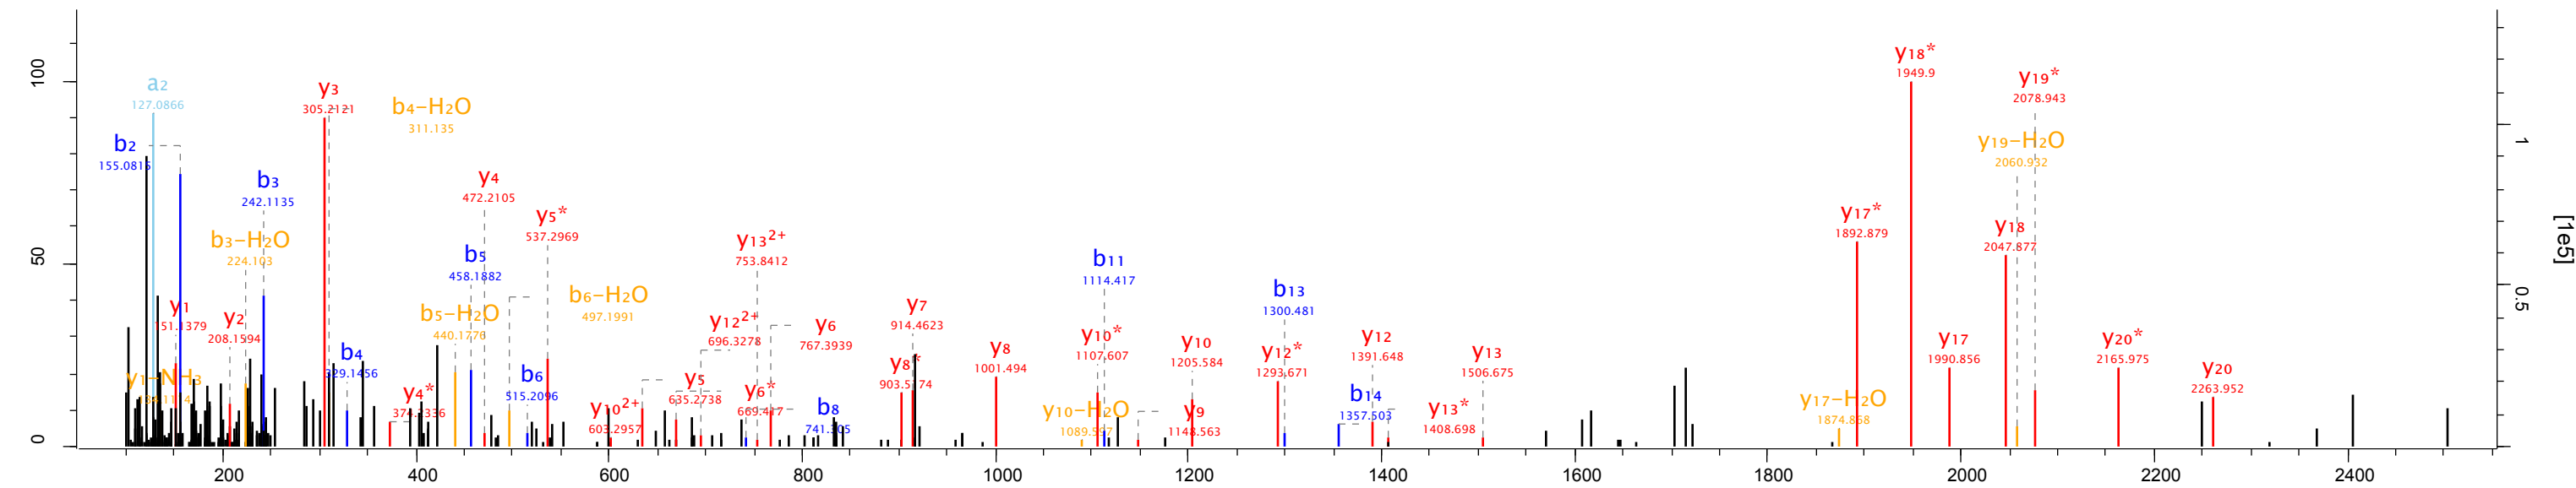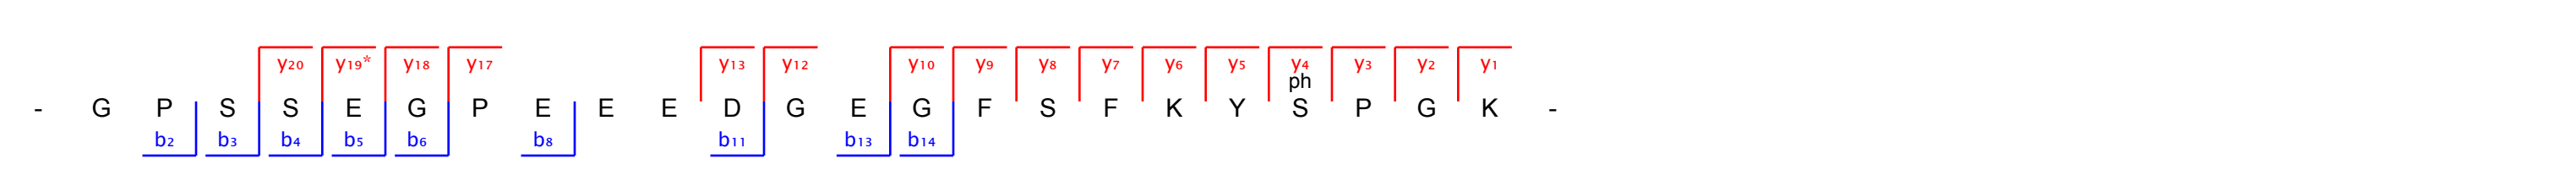

Raw file 20171215\_MaS\_33SR\_LMH\_phospho2\_02 Scan 12916 Method FTMS; HCD Score 71.69 m/z 828.37 Gene names GAREM

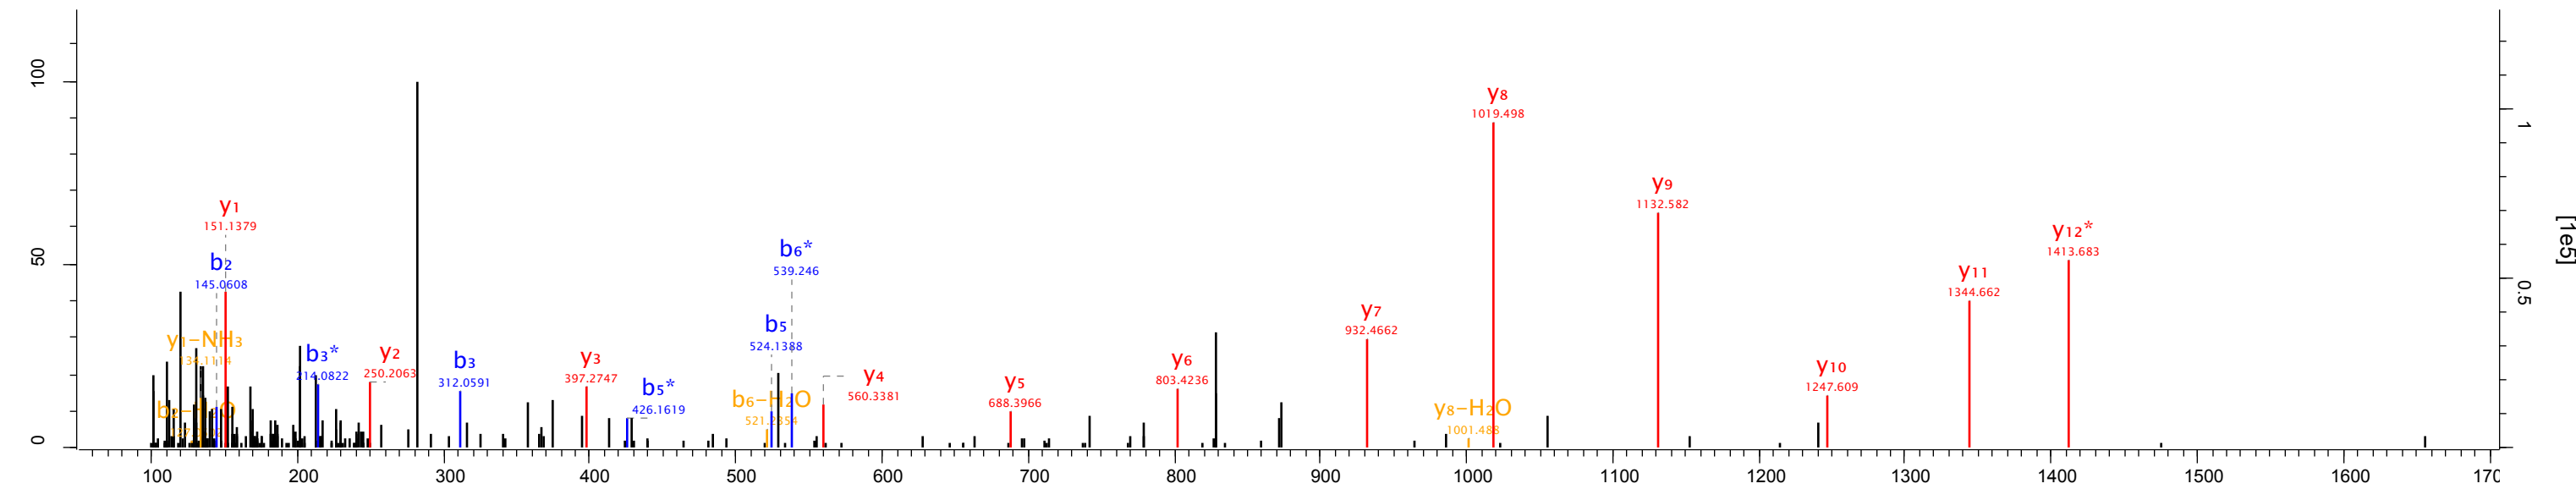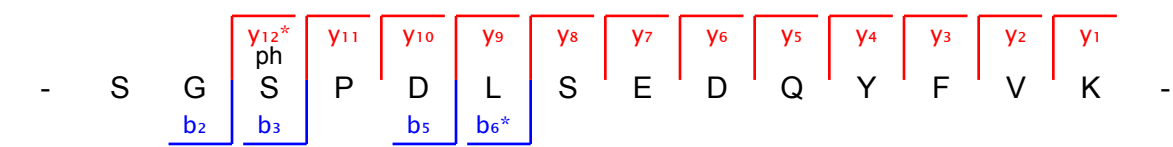



Raw file 20171215\_MaS\_33SR\_LMH\_phospho2\_02 Scan 13066 Method FTMS; HCD Score 123.29 m/z 1055.49 Gene names PDE1C

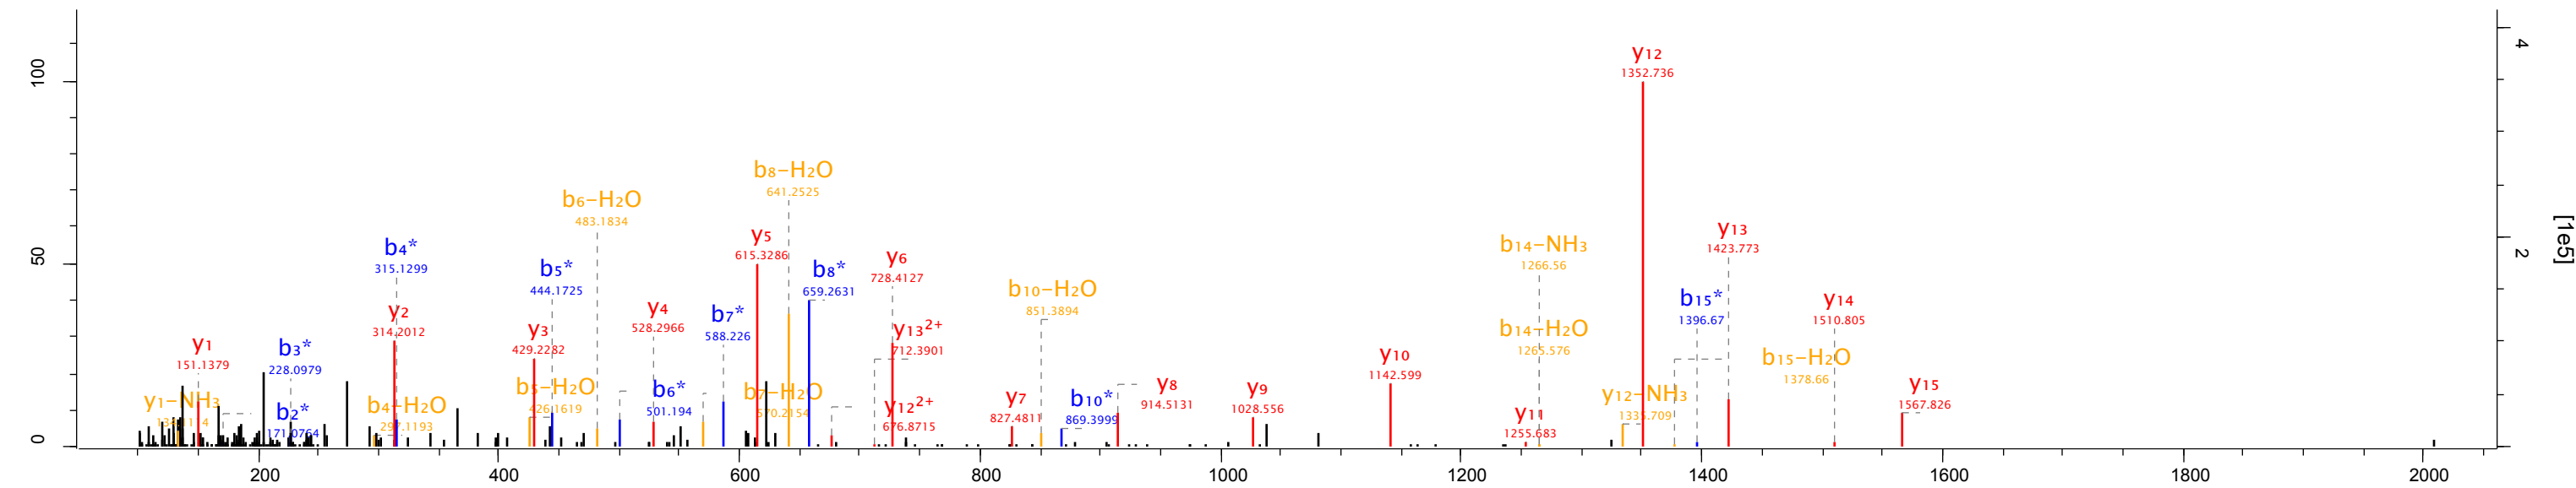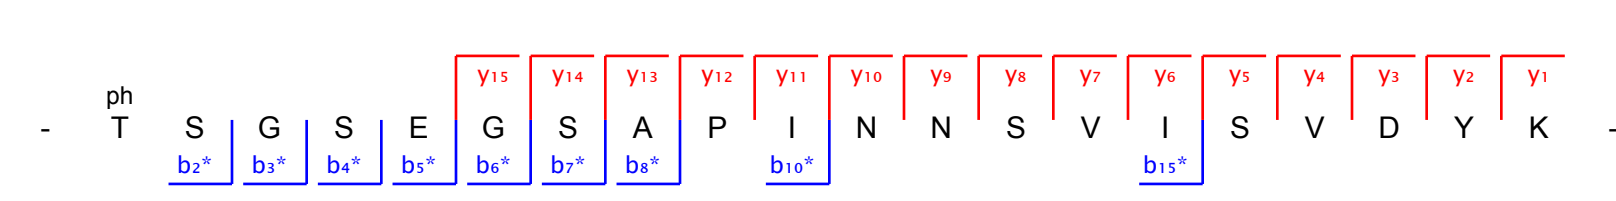

Raw file: 20171215\_MaS\_33SR\_LMH\_phospho2\_02  
 Scan: 15666 Method: FTMS; HCD Score: 147.51 m/z: 703.83 Gene names: STMN1

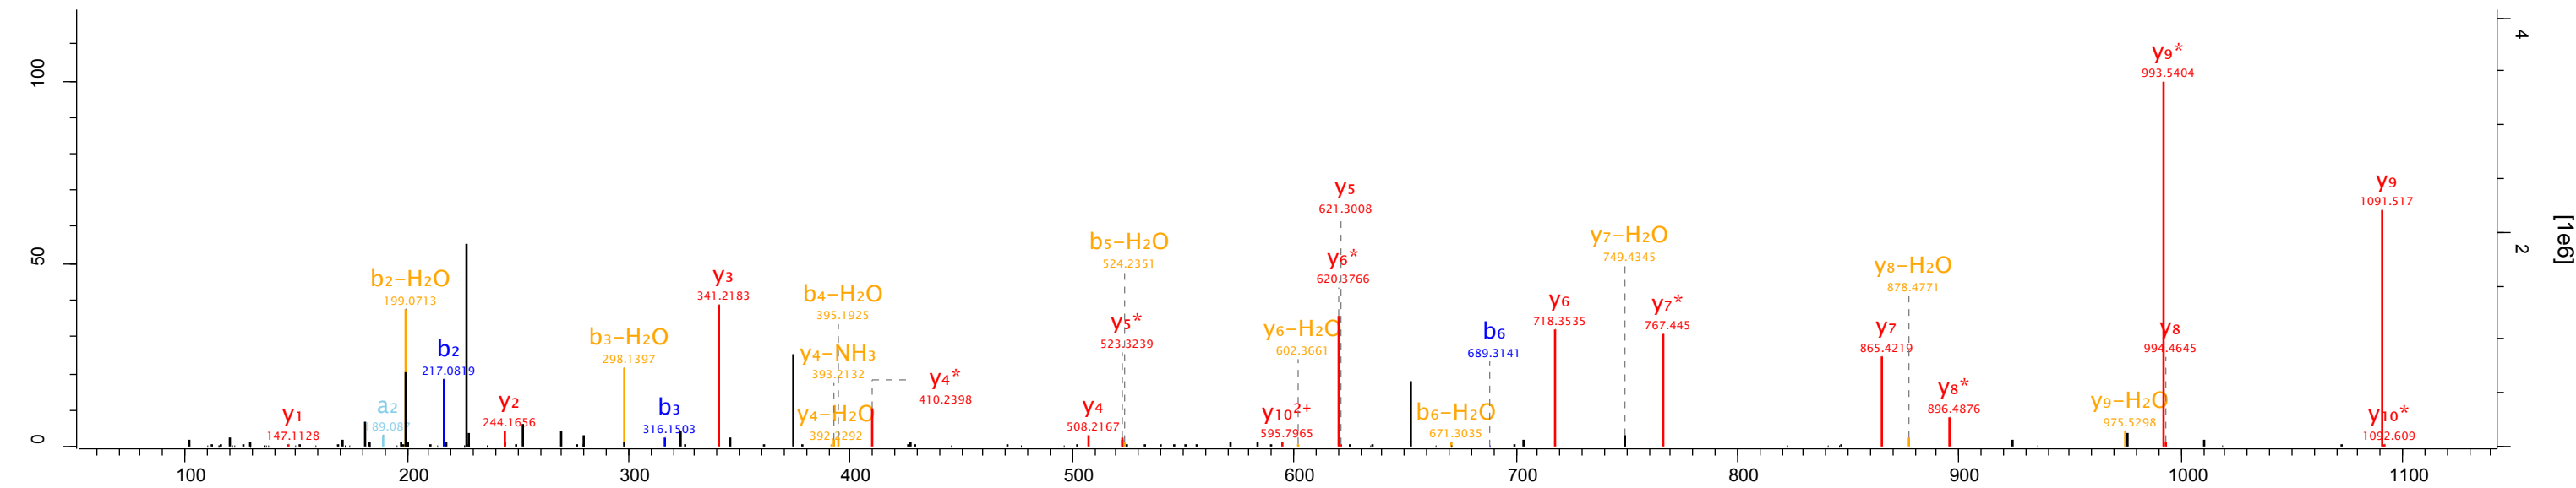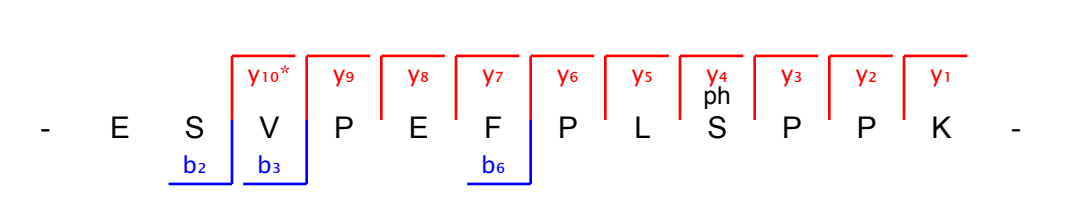

Raw file: 20171215\_MaS\_33SR\_LMH\_phospho2\_02  
 Scan: 2376 Method: FTMS; HCD Score: 273.01 m/z: 818.29 Gene names: VPS4B

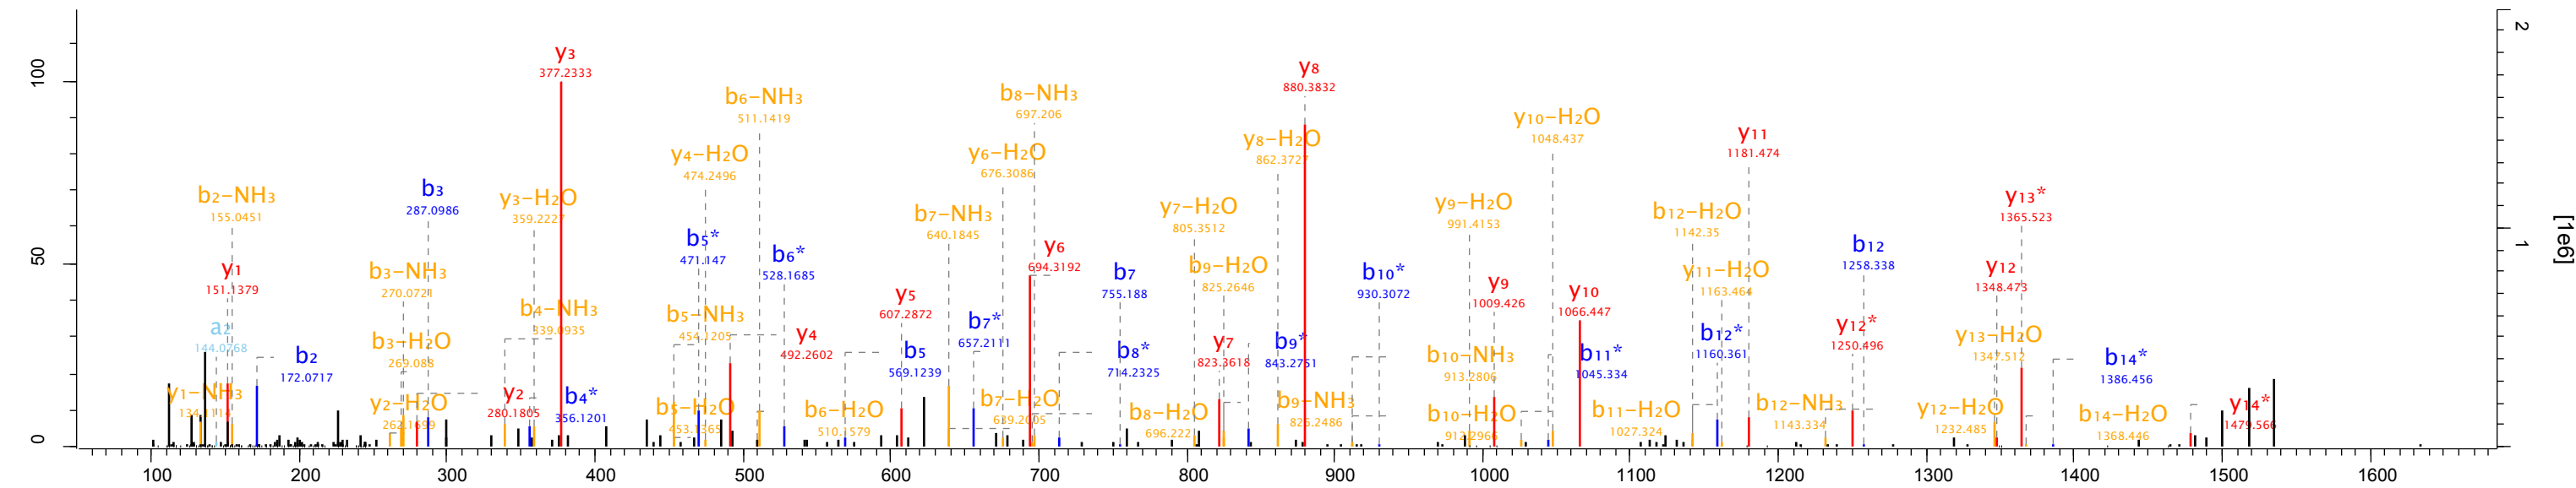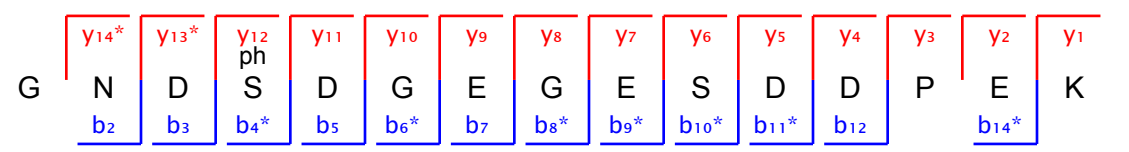

Raw file 20171215\_MaS\_33SR\_LMH\_phospho2\_02 Scan 2876 Method FTMS; HCD Score 114.31 m/z 578.76 Gene names PXN

20171215\_MaS\_33SR\_LMH\_phospho2\_02

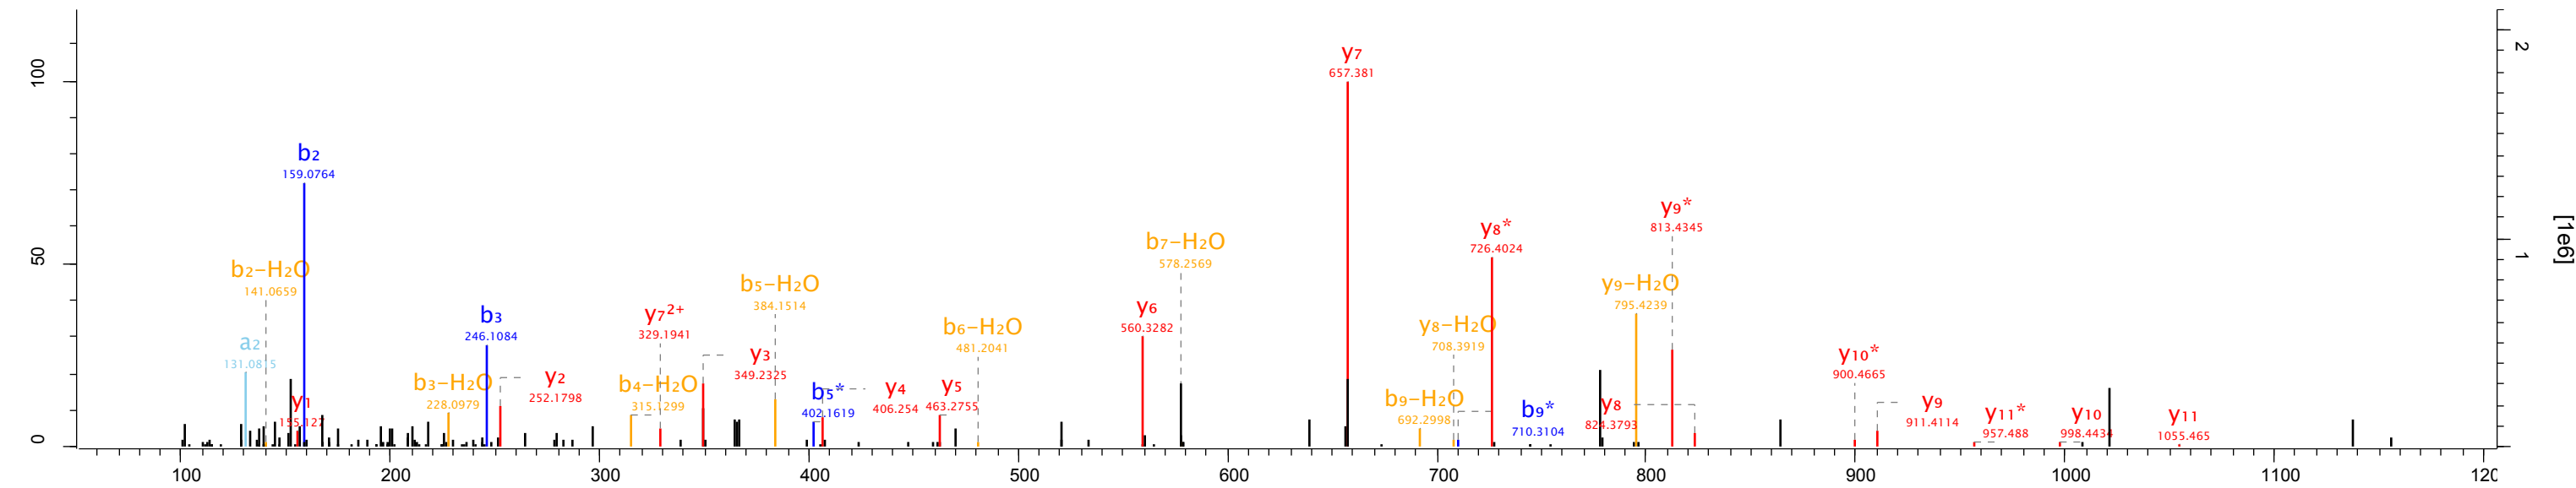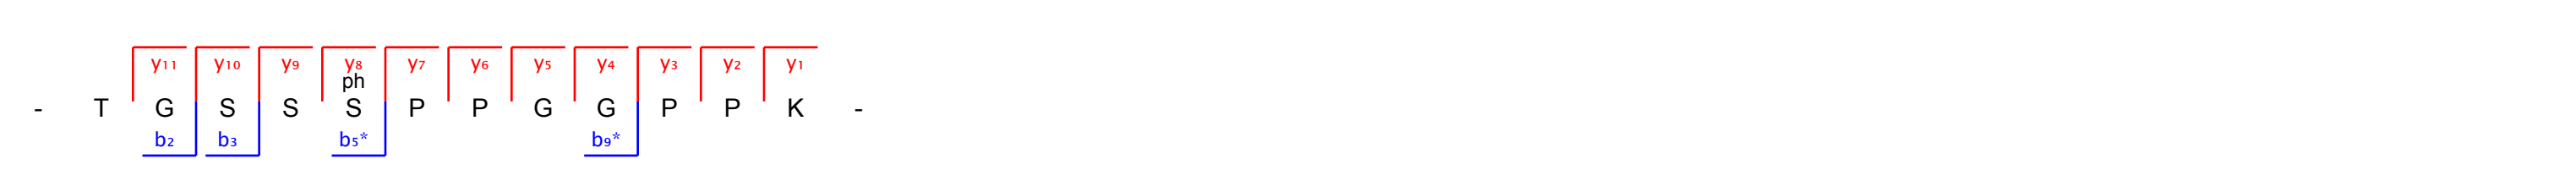

Raw file 20171215\_MaS\_33SR\_LMH\_phospho2\_02 Scan 3336 Method FTMS; HCD Score 52.73 m/z 450.7 Gene names CHML

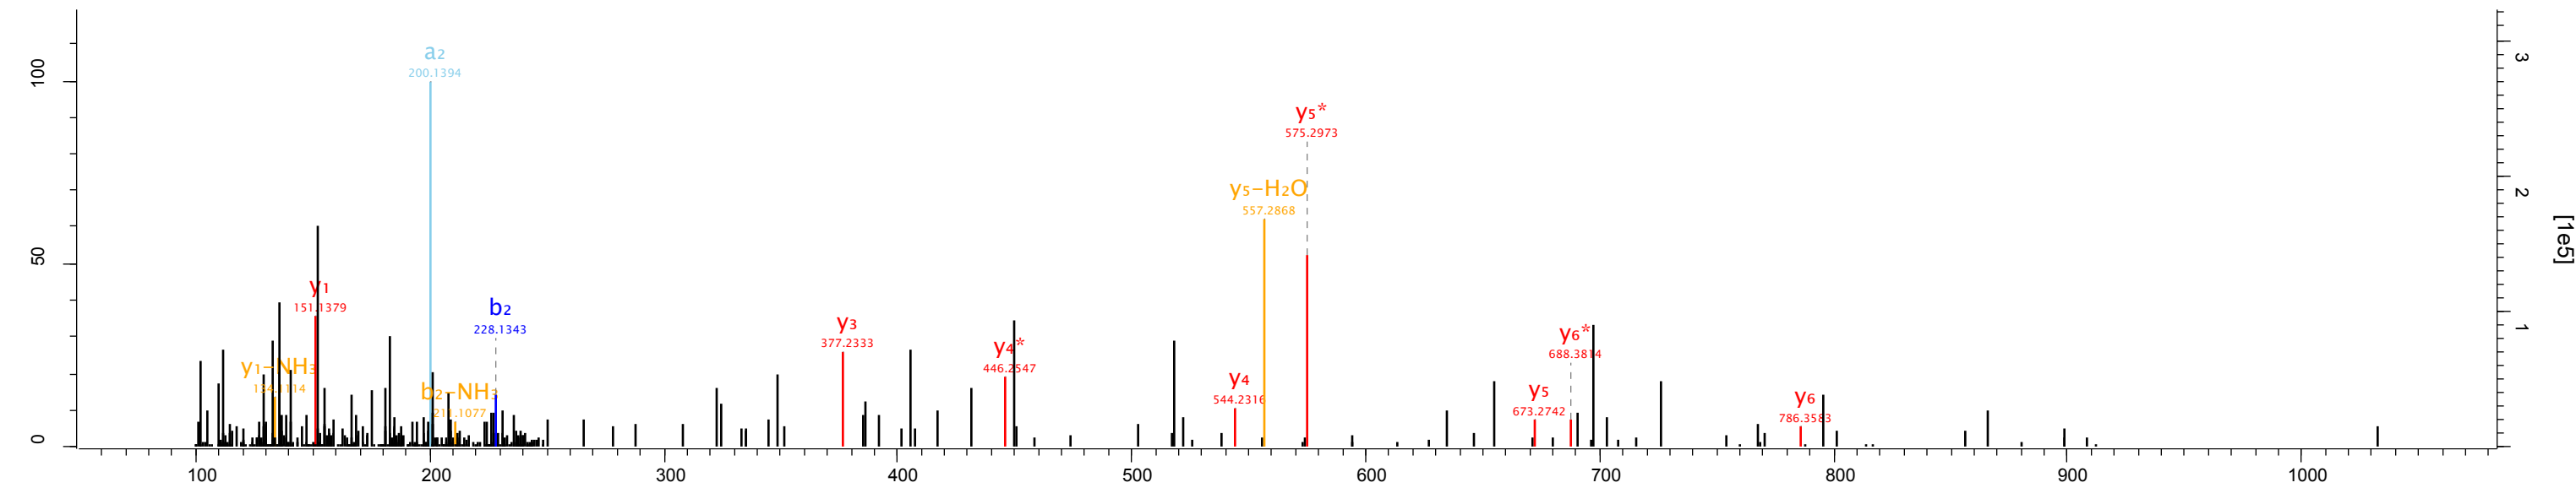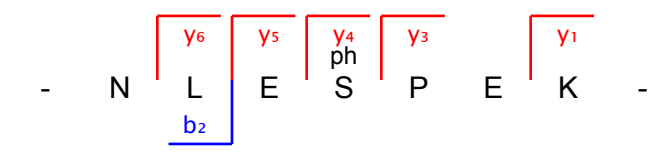

Raw file 20171215\_MaS\_33SR\_LMH\_phospho2\_02 Scan 3556 Method FTMS; HCD Score 40.5 m/z 422.72 Gene names CASQ2

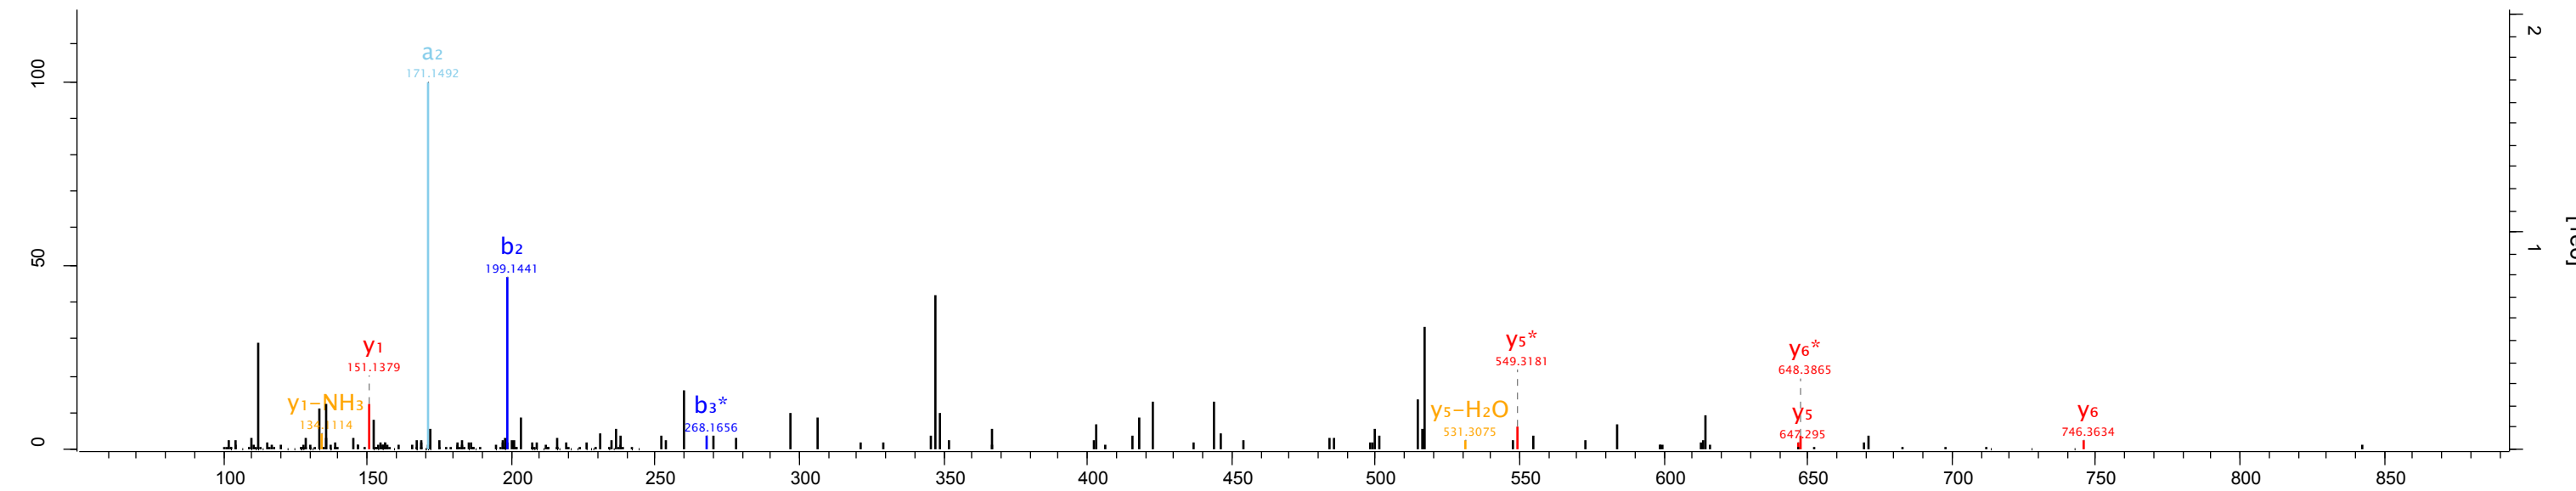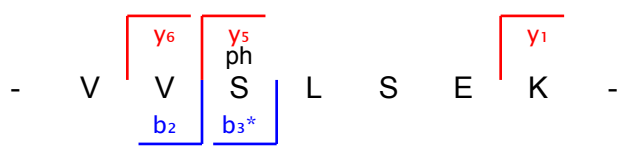

Raw file 20171215\_MaS\_33SR\_LMH\_phospho2\_02 Scan 3596 Method FTMS; HCD Score 83.2 m/z 520.75 Gene names FAM208B

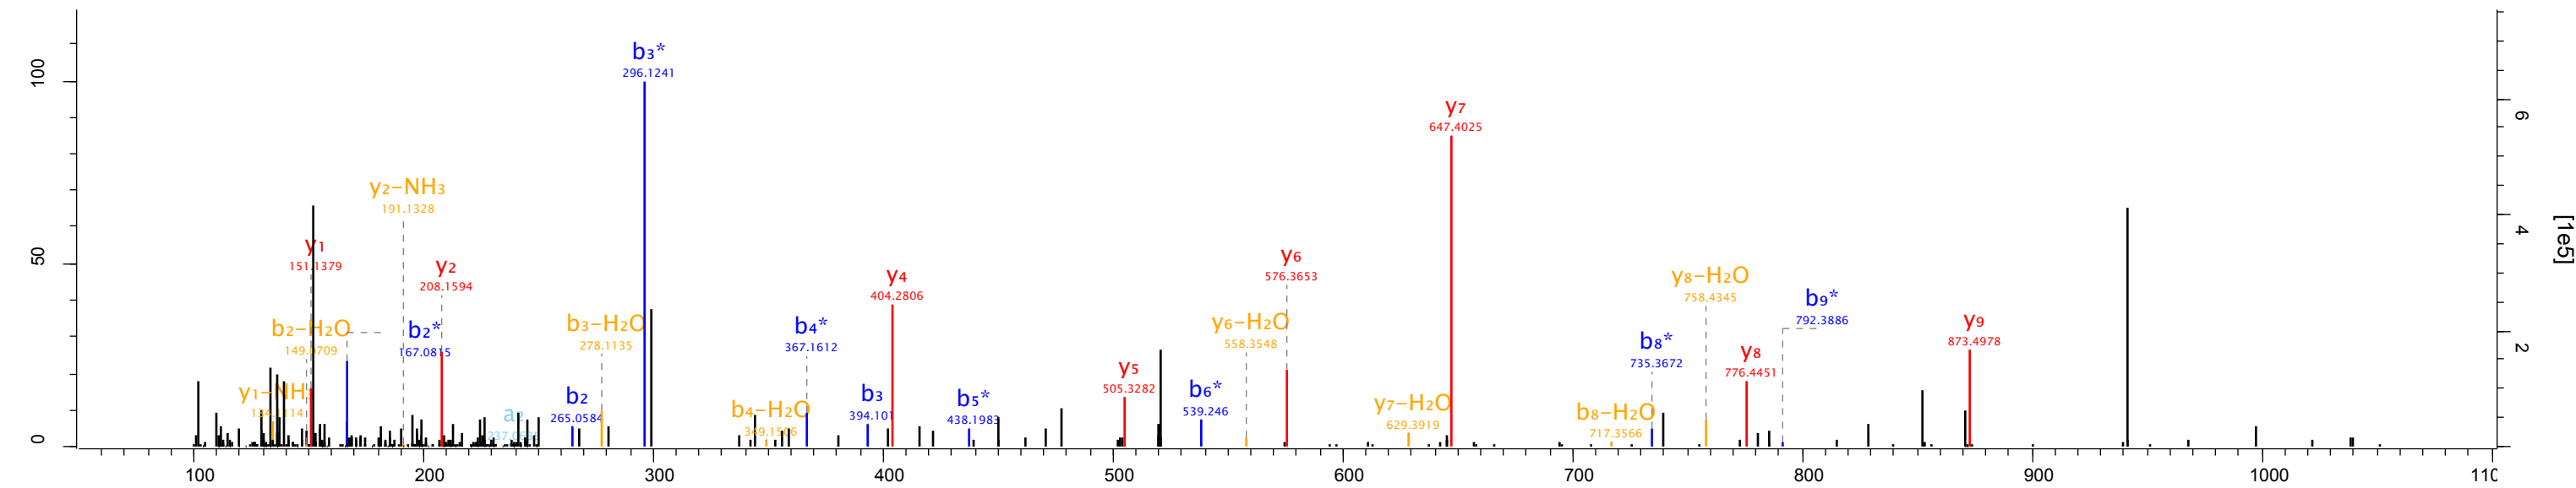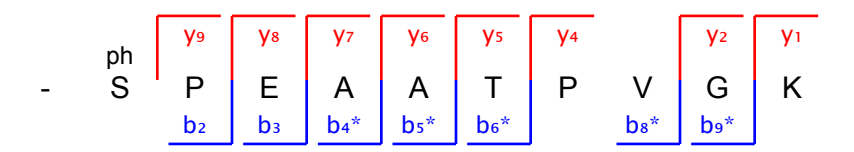

Raw file

20171215\_MaS\_33SR\_LMH\_phospho2\_02

| Scan | Method    | Score  | m/z    | Gene names |
|------|-----------|--------|--------|------------|
| 3736 | FTMS; HCD | 110.53 | 464.22 | RABGEF1    |

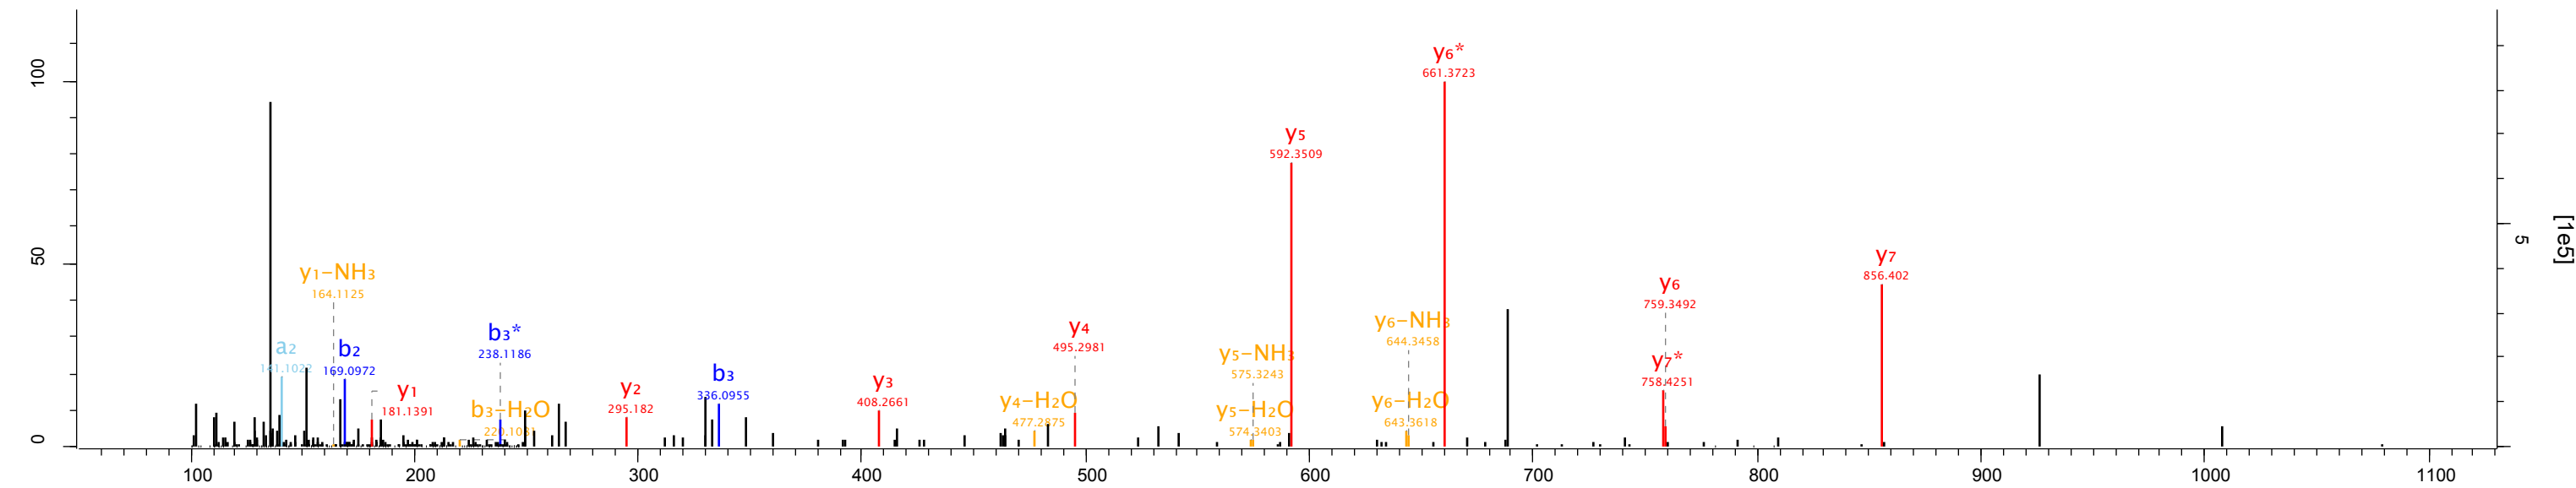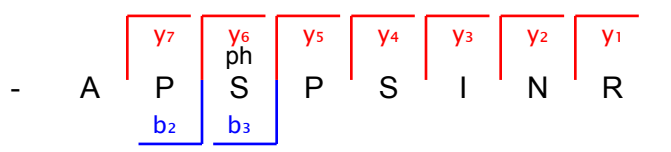



Raw file 20171215\_MaS\_33SR\_LMH\_phospho2\_02 Scan 3876 Method FTMS; HCD Score 112.73 m/z 519.24 Gene names ANKRD50

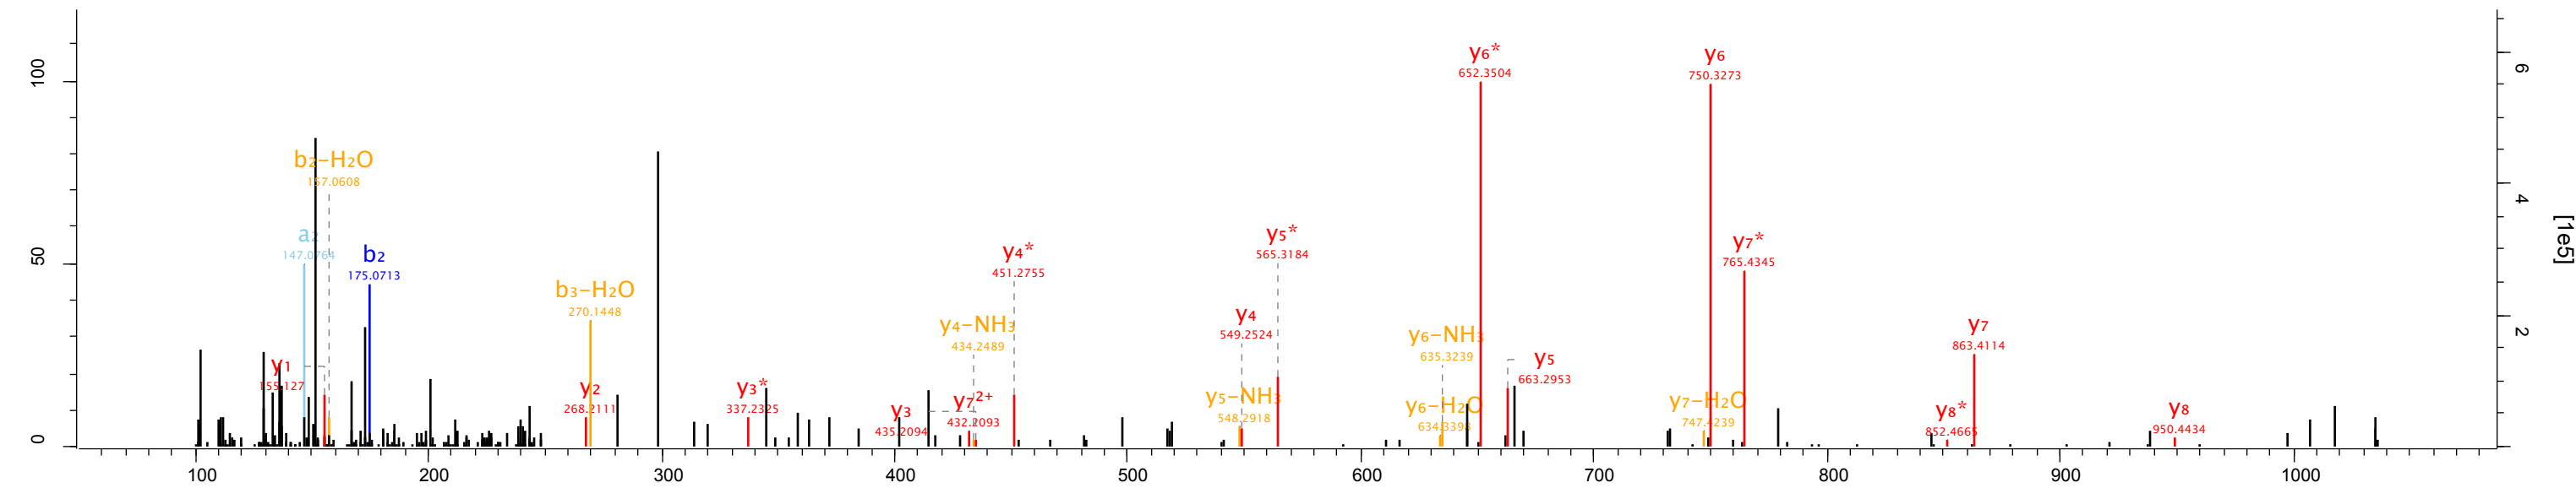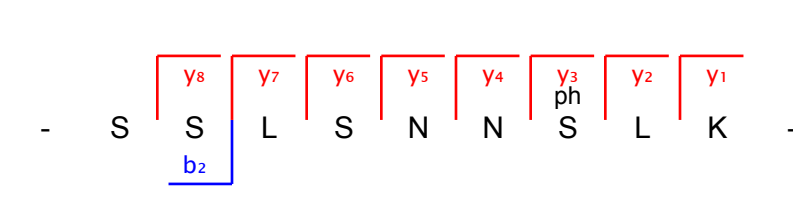

Raw file: 20171215\_MaS\_33SR\_LMH\_phospho2\_02  
 Scan: 4796 Method: FTMS; HCD Score: 194 m/z: 748.31 Gene names: CTNND1

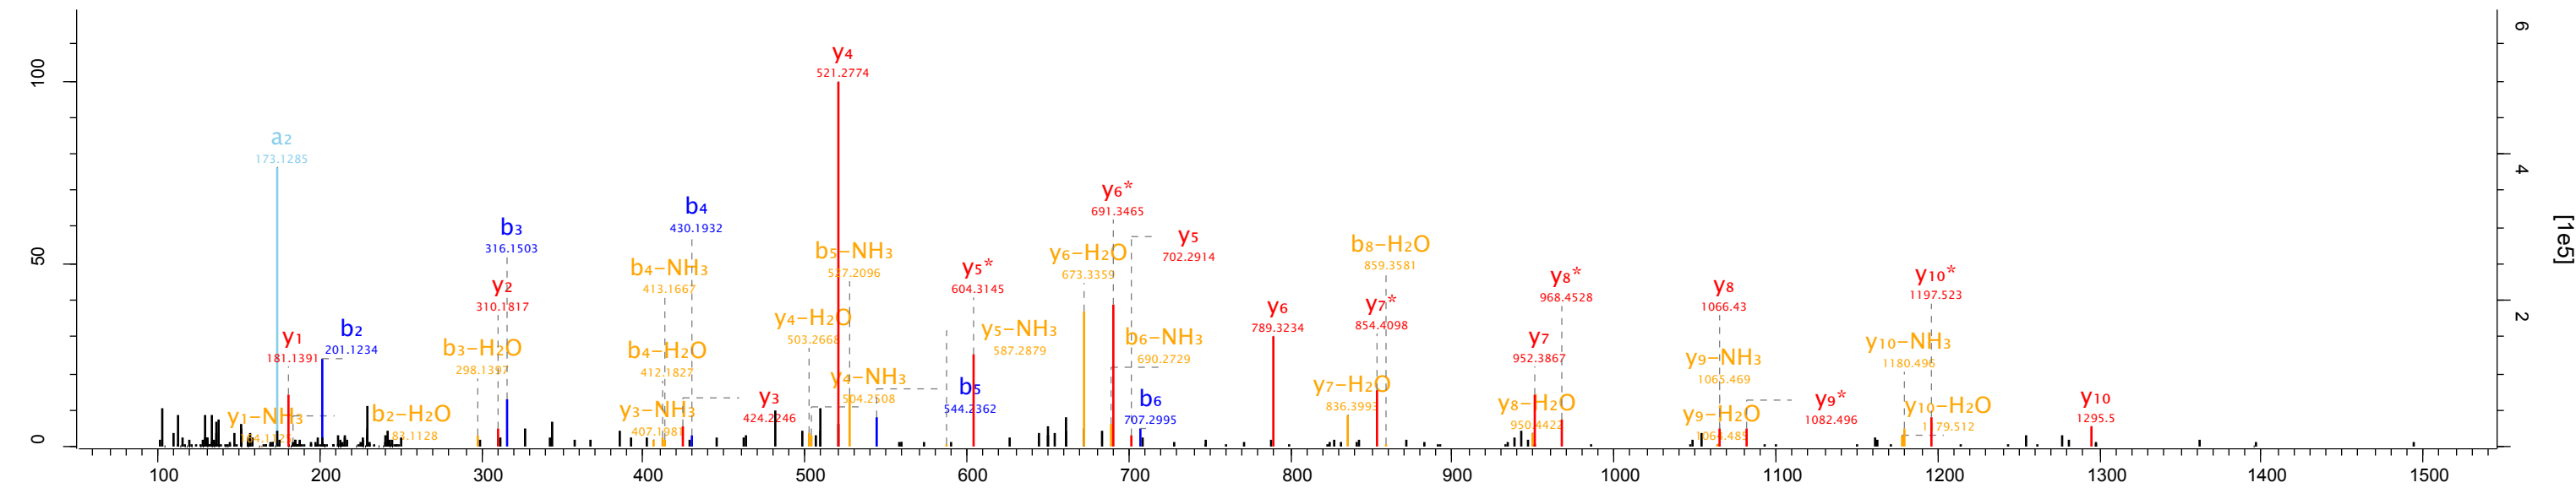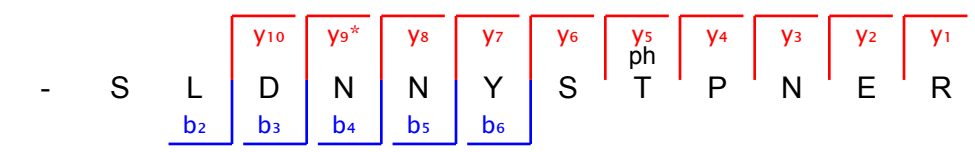

Raw file 20171215\_MaS\_33SR\_LMH\_phospho2\_02 Scan 4916 Method FTMS; HCD Score 219.35 m/z 747.86 Gene names CLASP1

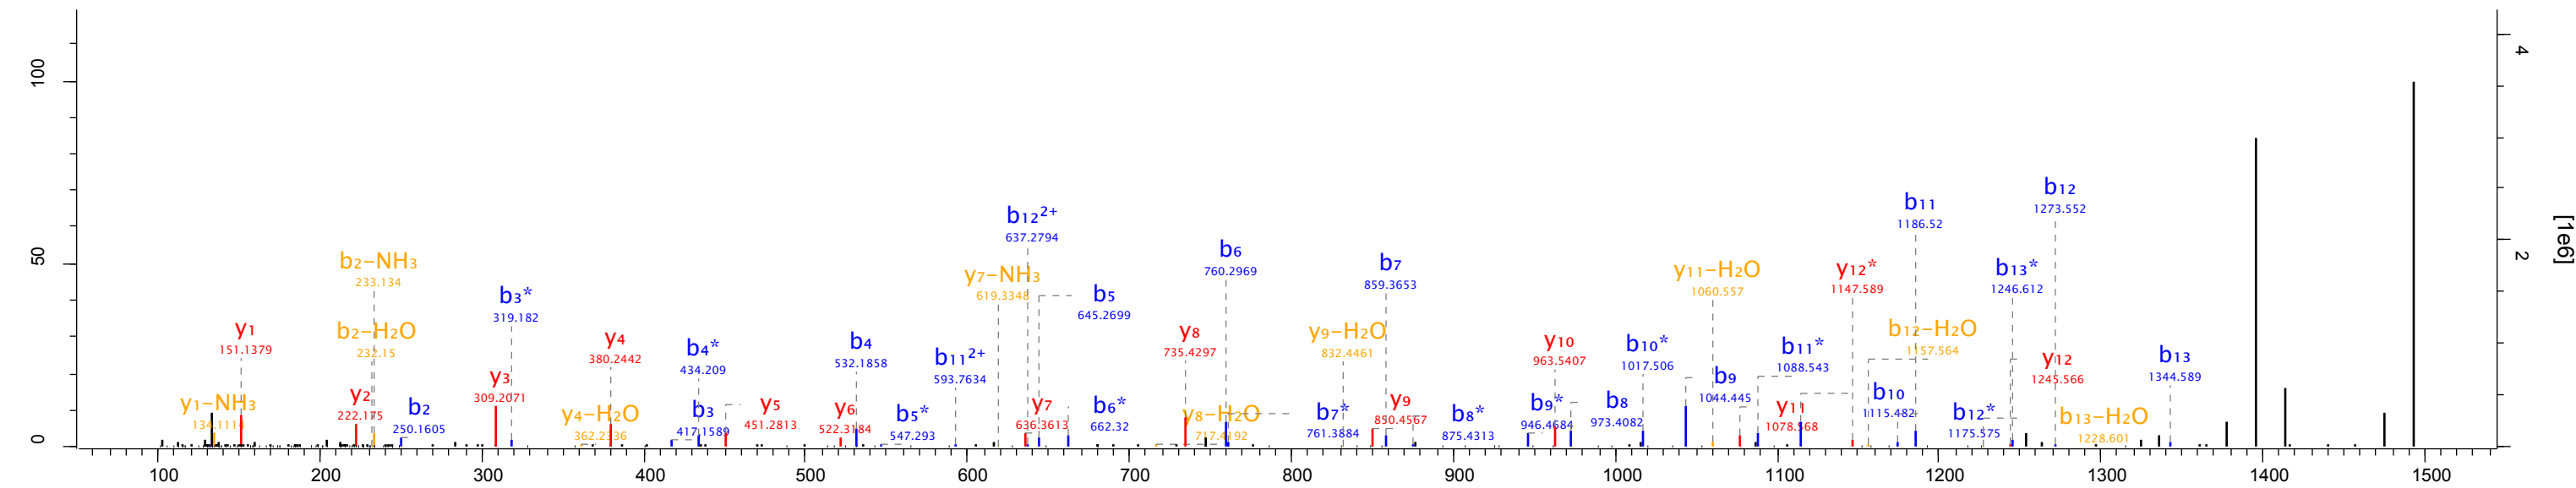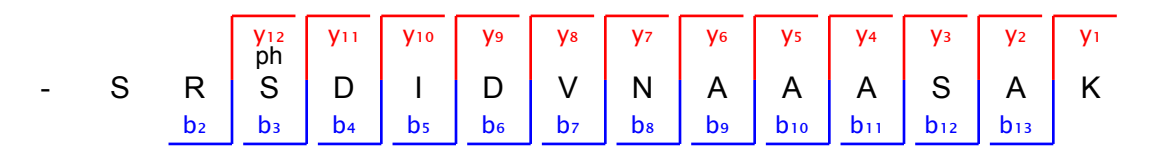

Raw file  
20171215\_MaS\_33SR\_LMH\_phospho2\_02

Scan 5066 Method FTMS; HCD Score 289.81 m/z 796.86 Gene names STK10

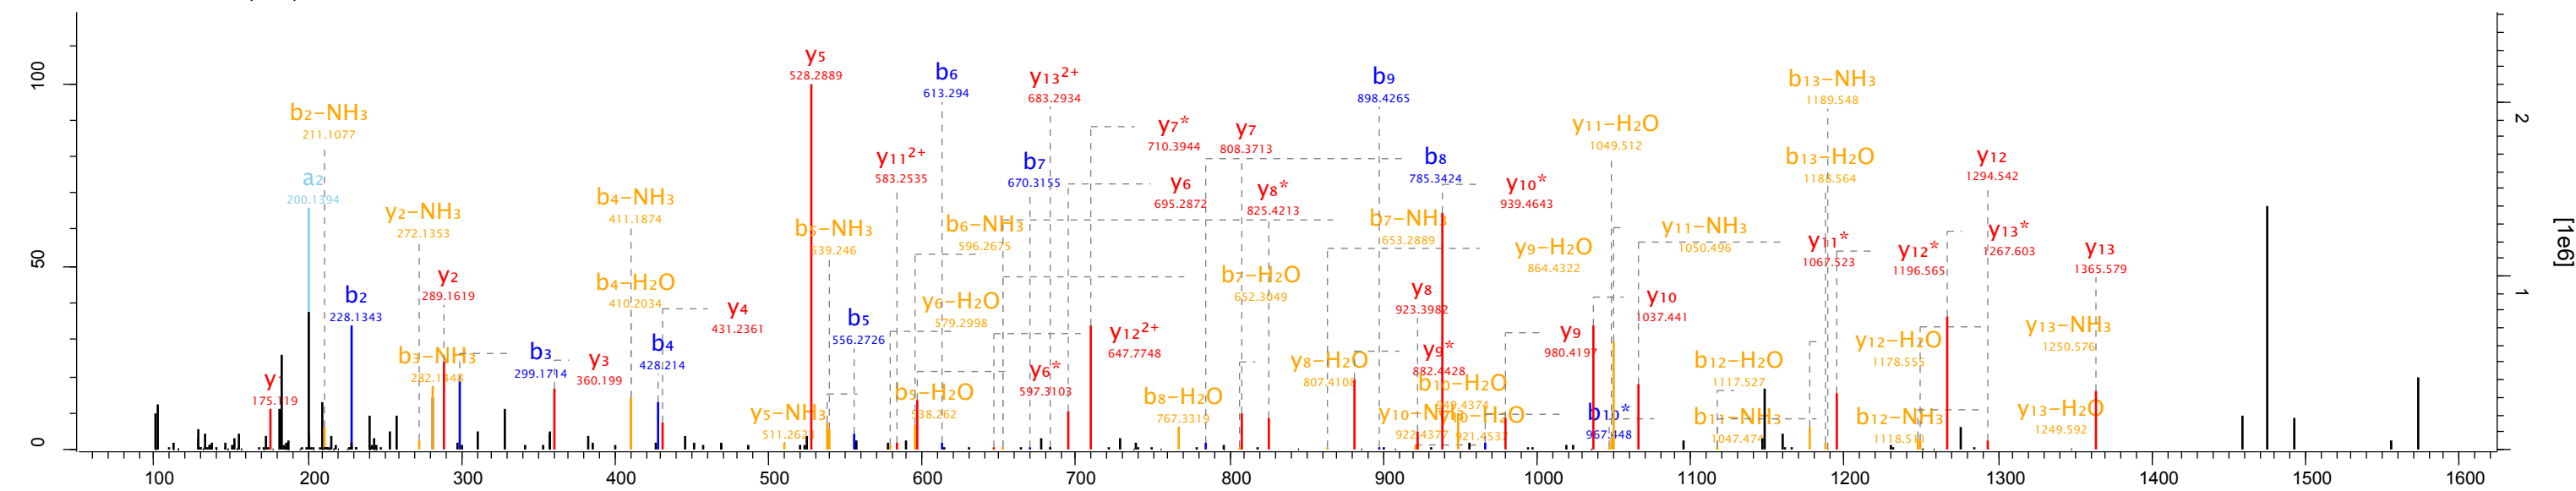

- Q V A E Q G G D L S P A A N R -

b<sub>2</sub>
b<sub>3</sub>
b<sub>4</sub>
b<sub>5</sub>
b<sub>6</sub>
b<sub>7</sub>
b<sub>8</sub>
b<sub>9</sub>
b<sub>10</sub>\*
y<sub>13</sub>
y<sub>12</sub>
y<sub>11</sub>\*
y<sub>10</sub>
y<sub>9</sub>
y<sub>8</sub>
y<sub>7</sub>
y<sub>6</sub>ph
y<sub>5</sub>
y<sub>4</sub>
y<sub>3</sub>
y<sub>2</sub>
y<sub>1</sub>

Raw file: 20171215\_MaS\_33SR\_LMH\_phospho2\_02  
 Scan: 6116 Method: FTMS; HCD Score: 60.06 m/z: 418.21 Gene names: S100A6

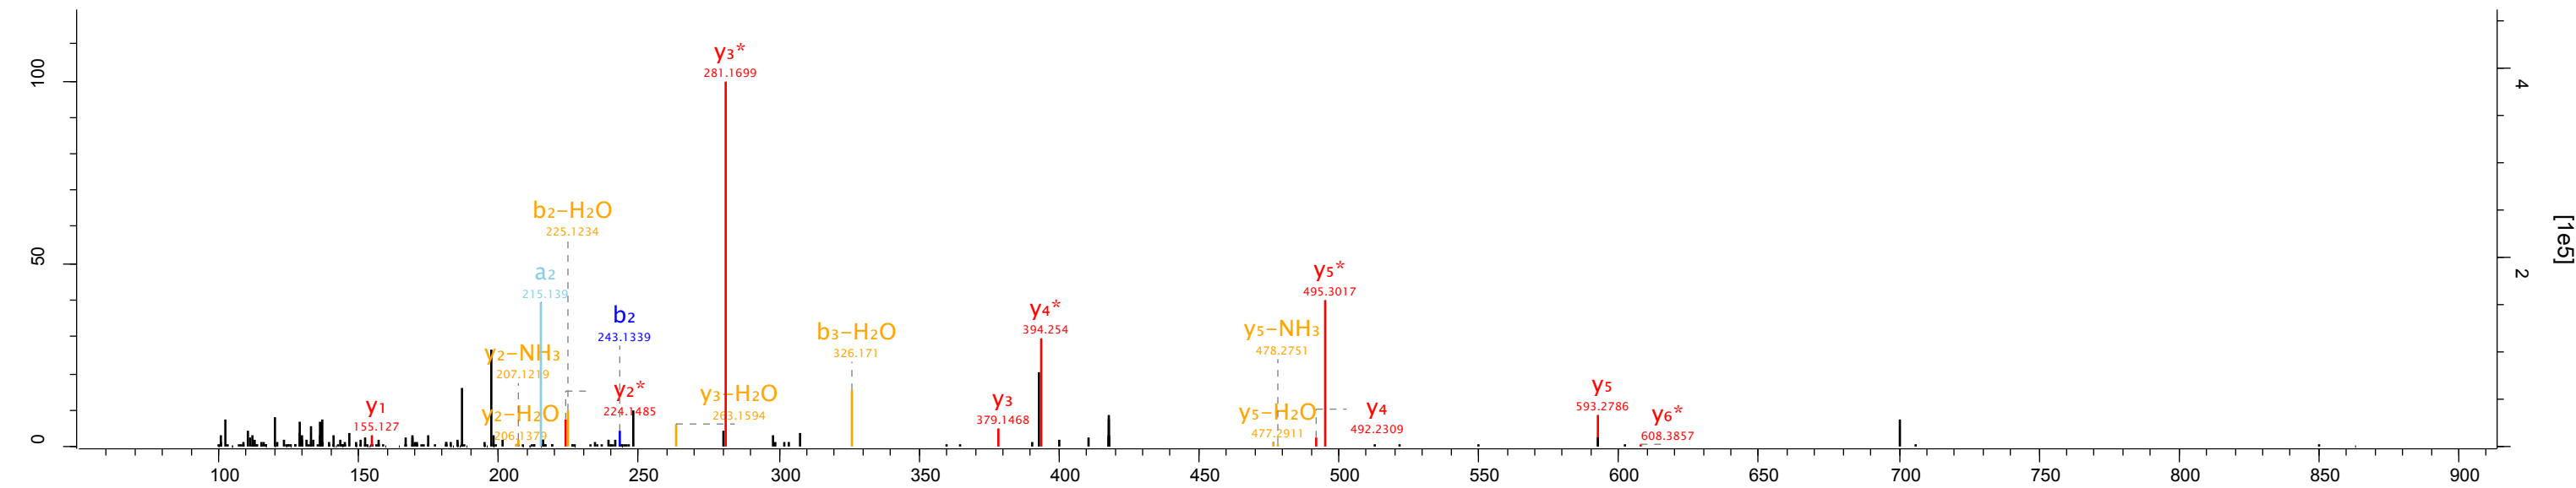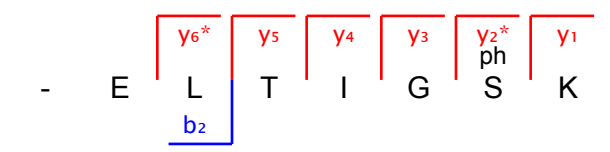

Raw file 20171215\_MaS\_33SR\_LMH\_phospho2\_02 Scan 6656 Method FTMS; HCD Score 96.23 m/z 854.86 Gene names SRSF1

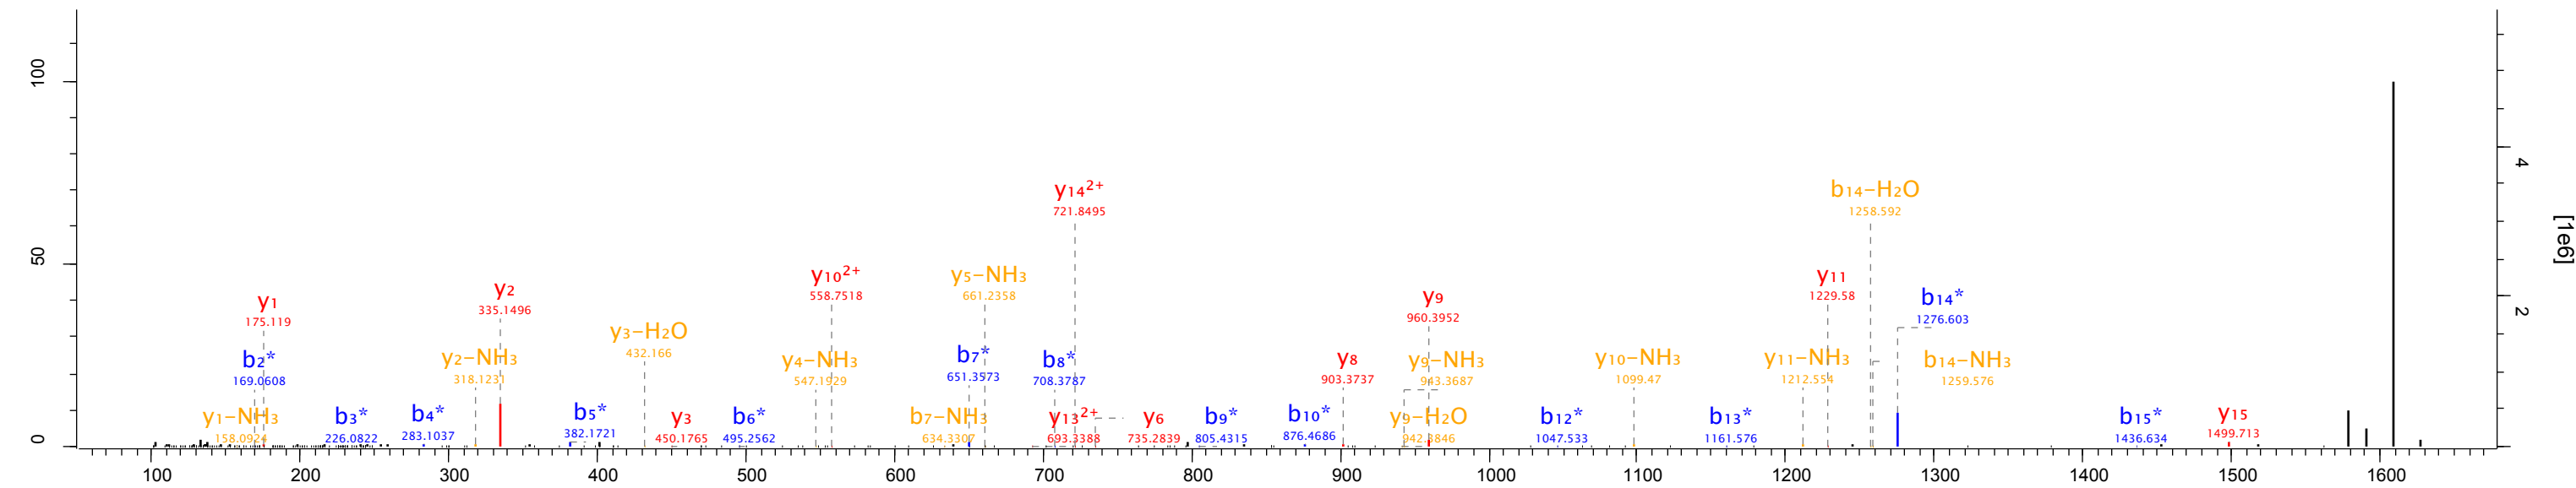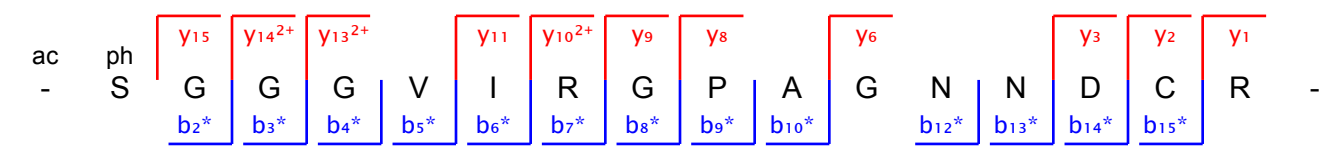

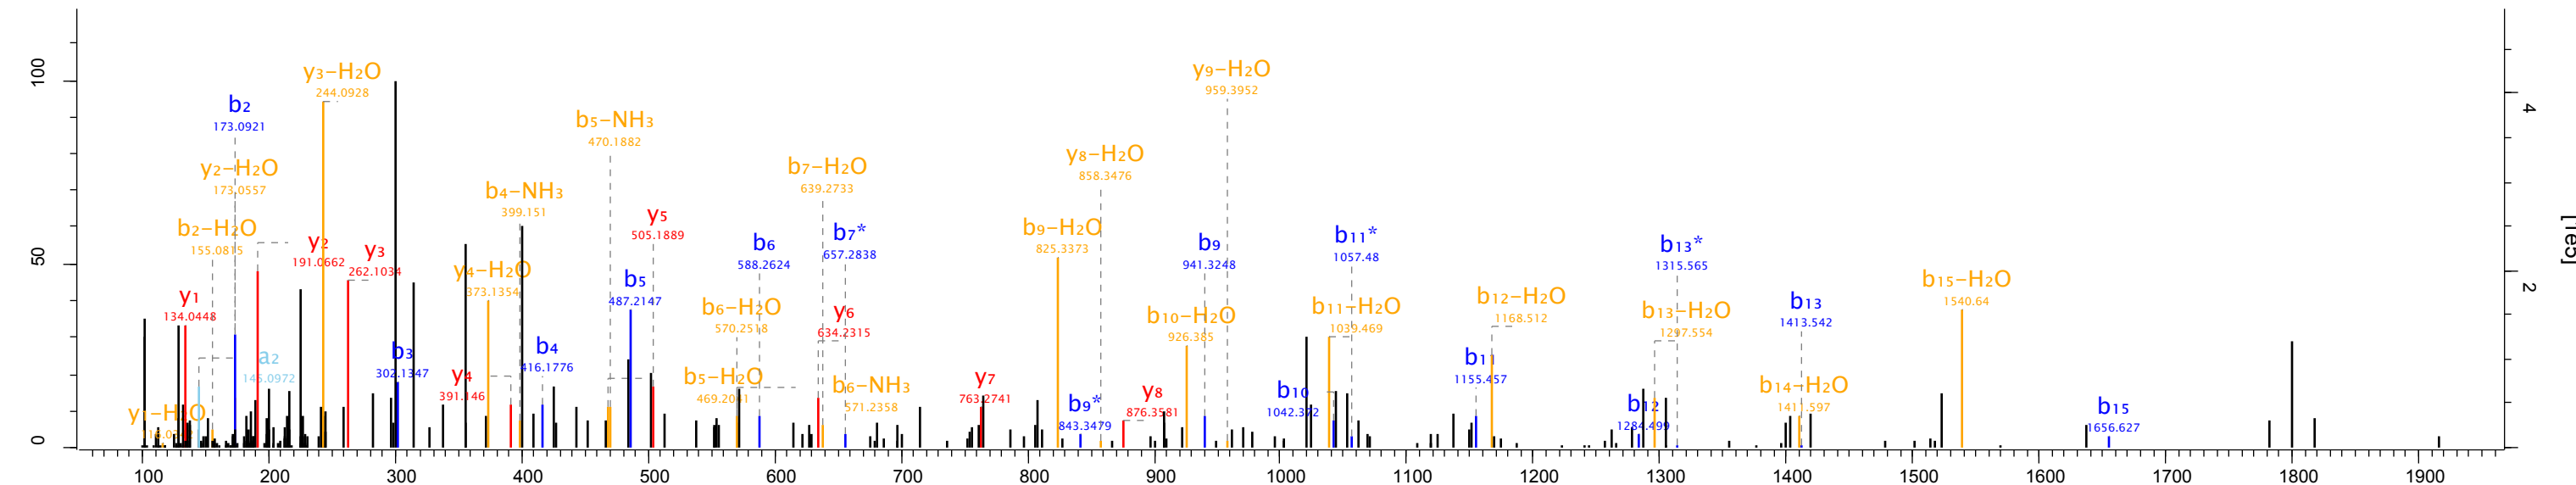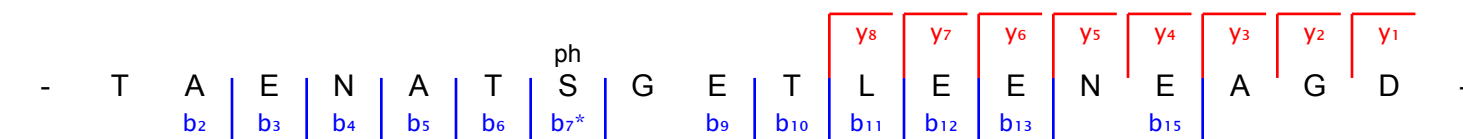

Raw file 20171215\_MaS\_33SR\_LMH\_phospho2\_02 Scan 6986 Method FTMS; HCD Score 103.4 m/z 631.97 Gene names XPO4

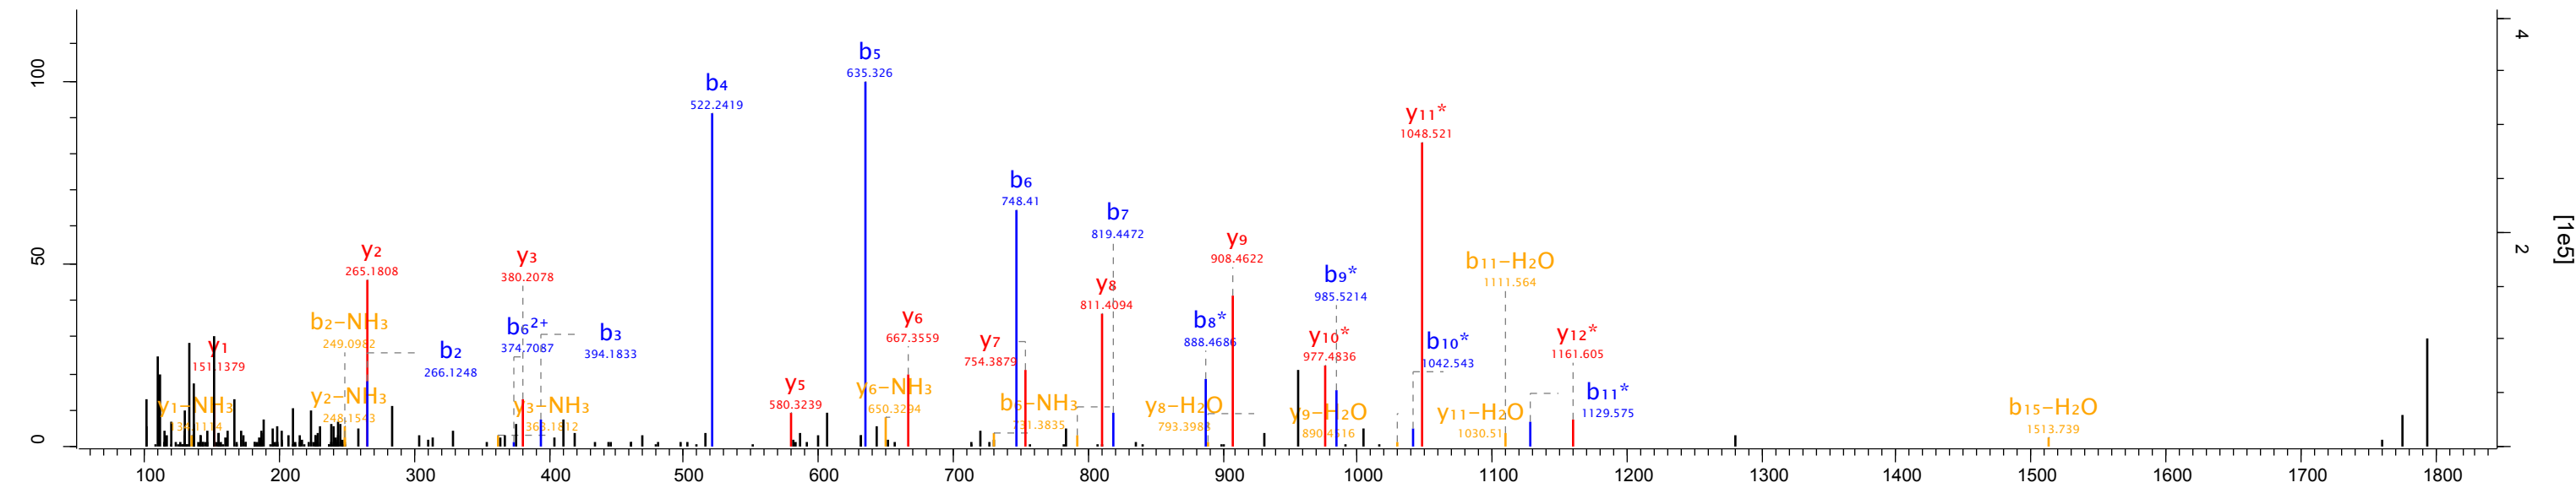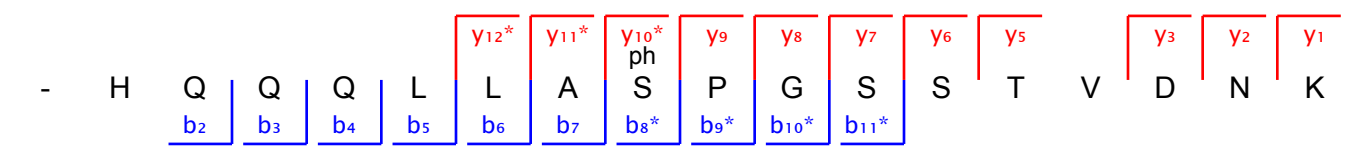



Raw file  
20171215\_MaS\_33SR\_LMH\_phospho2\_02

Scan 7336 Method FTMS; HCD Score 58.93 m/z 944.04 Gene names PHF10

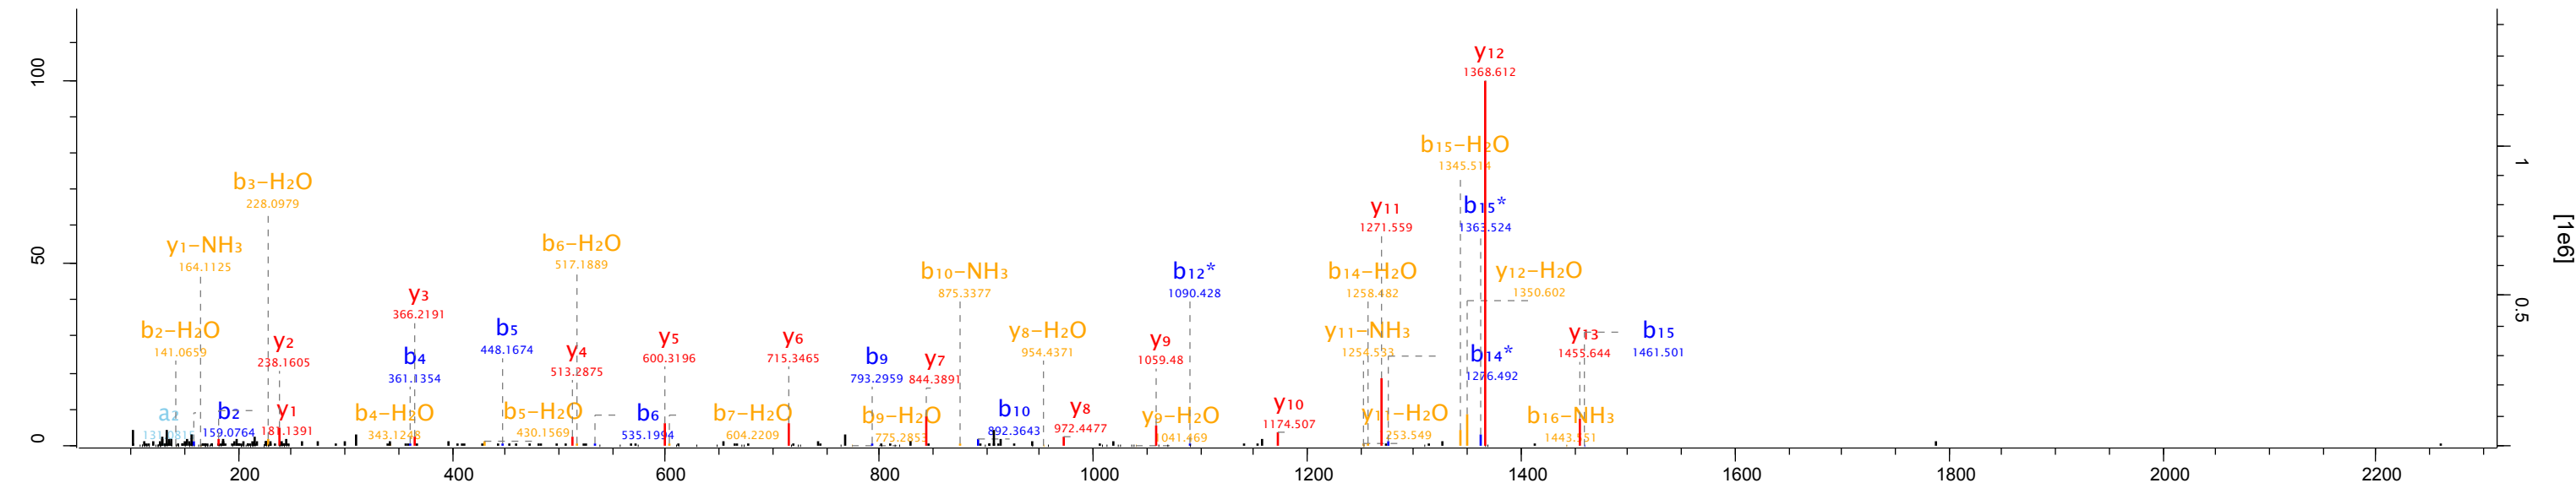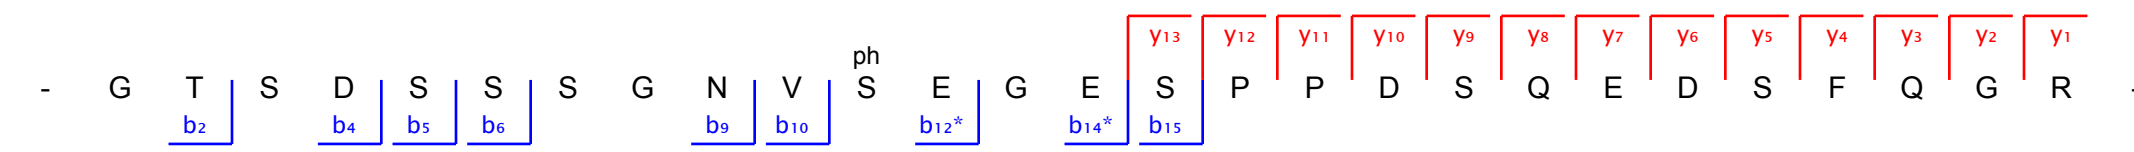

Raw file

20171215\_MaS\_33SR\_LMH\_phospho2\_02

| Scan | Method    | Score  | m/z | Gene names |
|------|-----------|--------|-----|------------|
| 7546 | FTMS; HCD | 106.28 | 836 | PRKAR2B    |

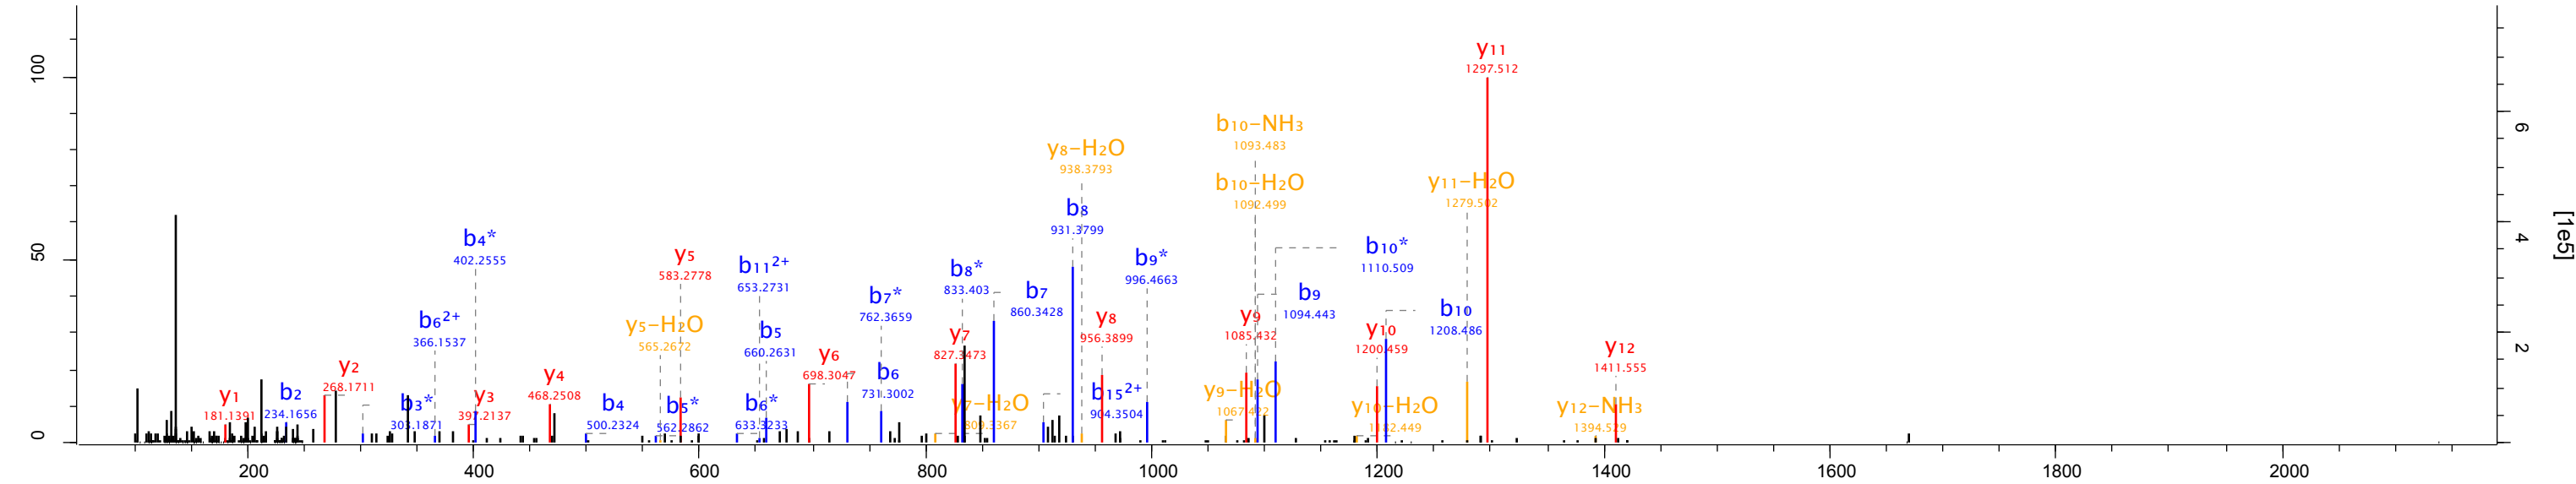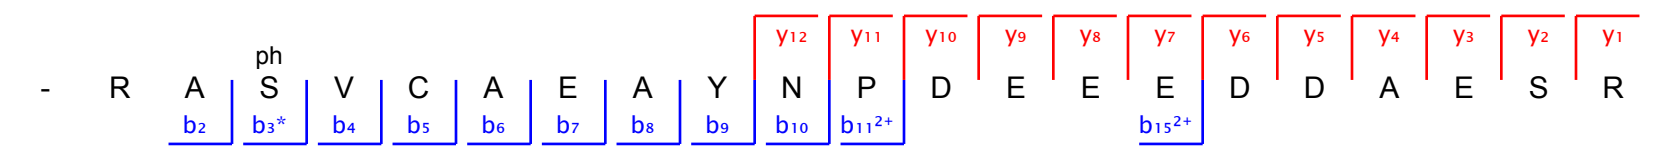

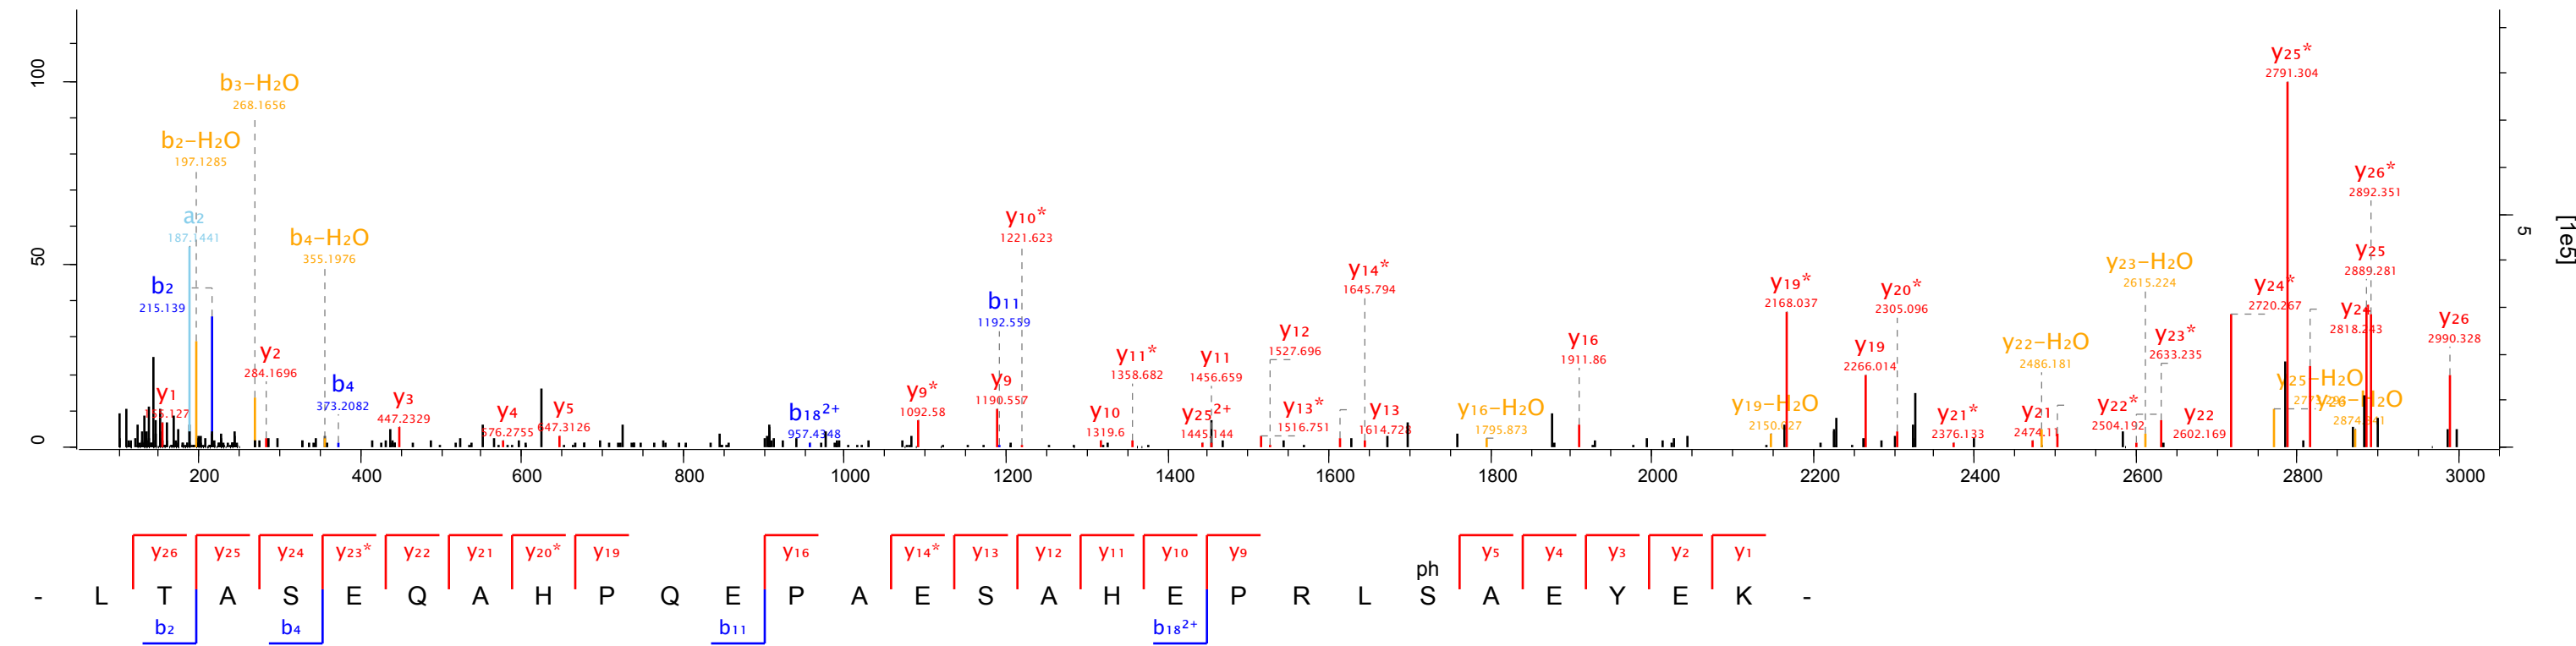

Raw file  
20171215\_MaS\_33SR\_LMH\_phospho2\_02

Scan 7706 Method FTMS; HCD Score 186.69 m/z 978.44 Gene names MAP1S

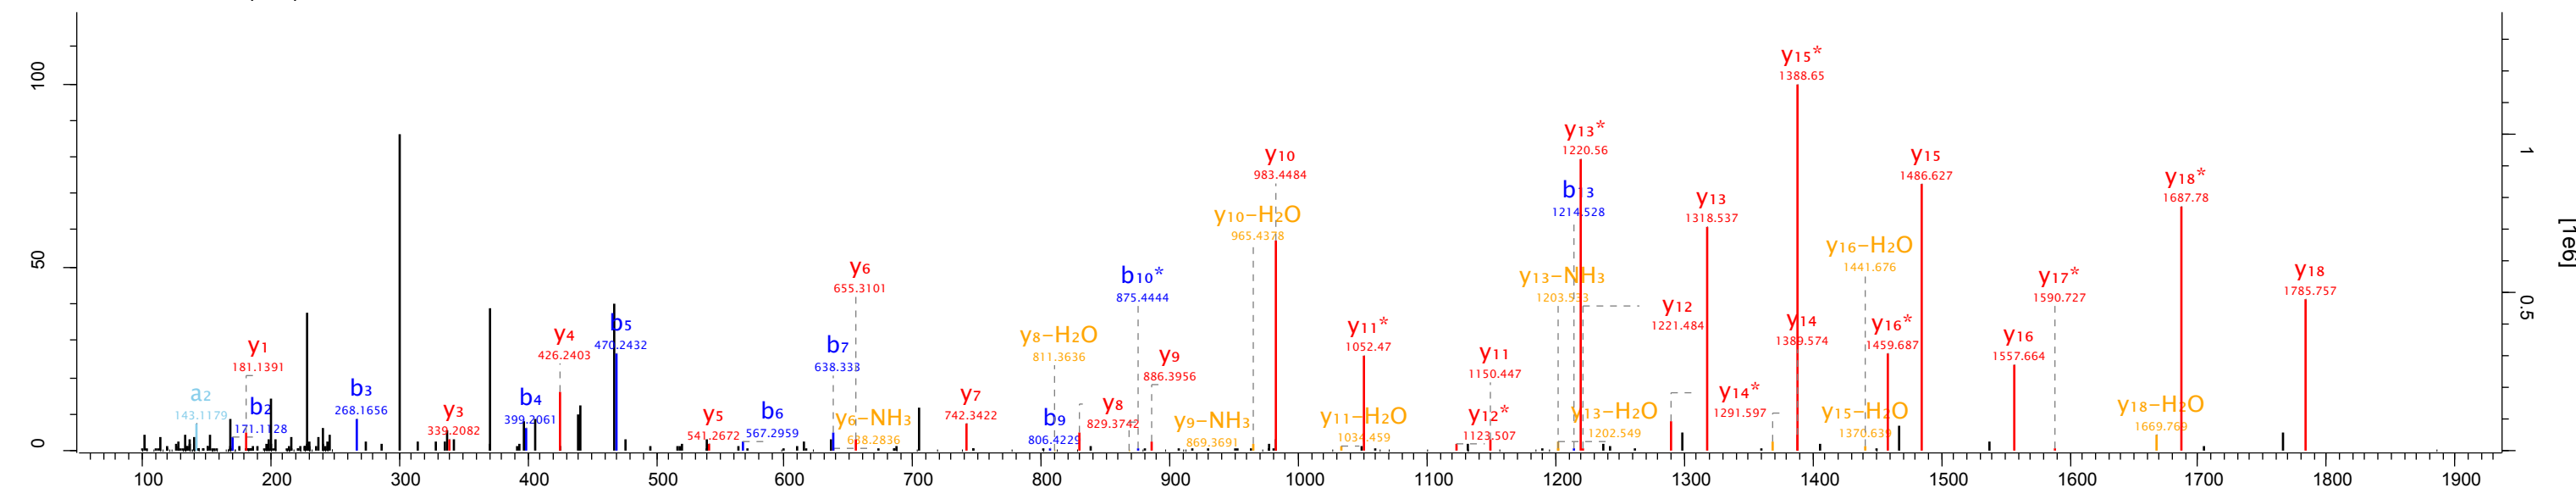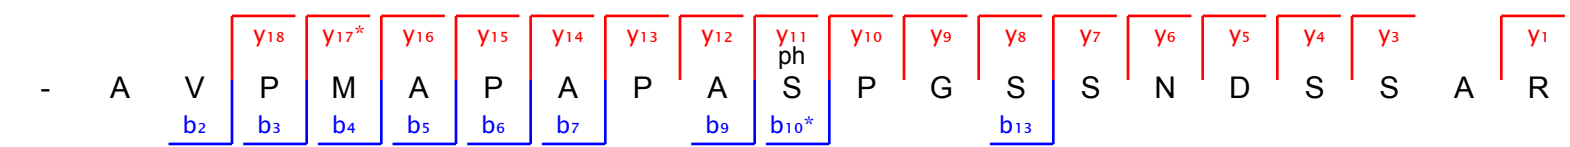

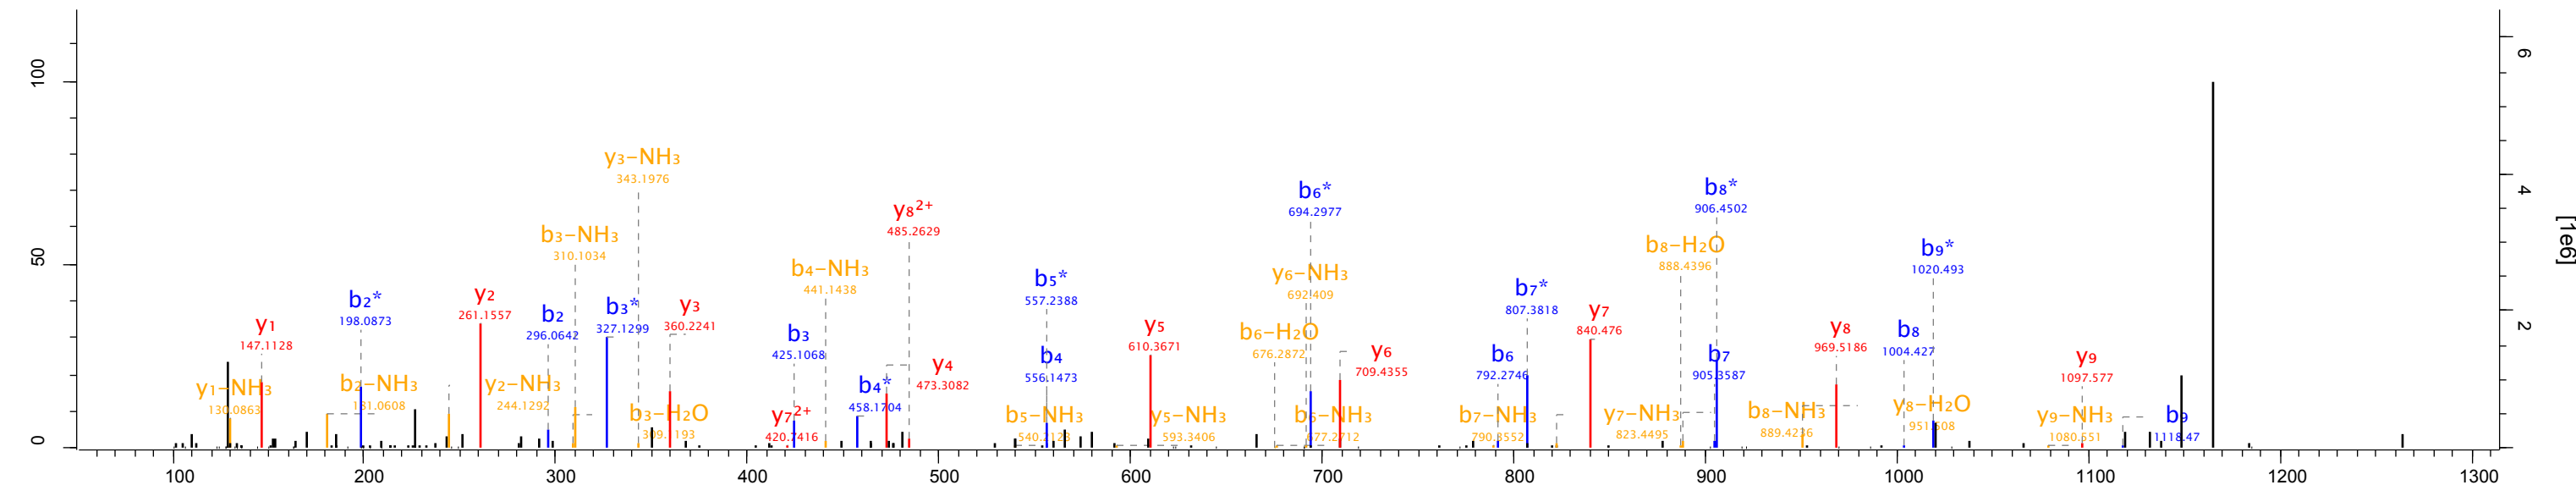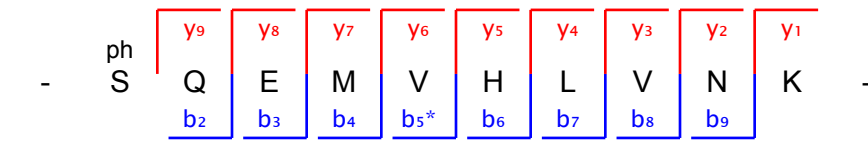

Raw file 20171215\_MaS\_33SR\_LMH\_phospho2\_02 Scan 8086 Method FTMS; HCD Score 86.41 m/z 633.31 Gene names MLK4

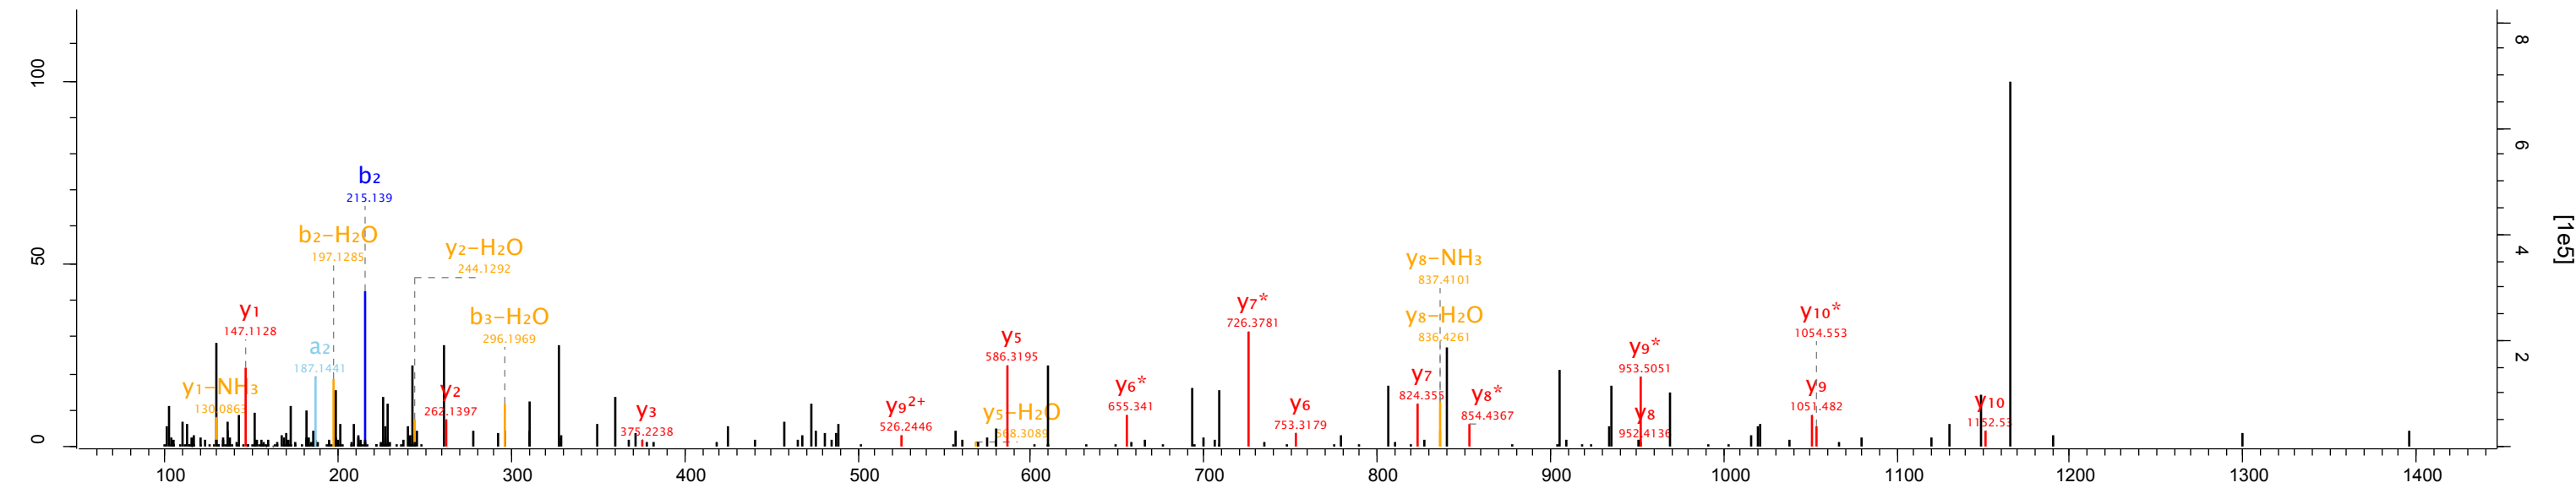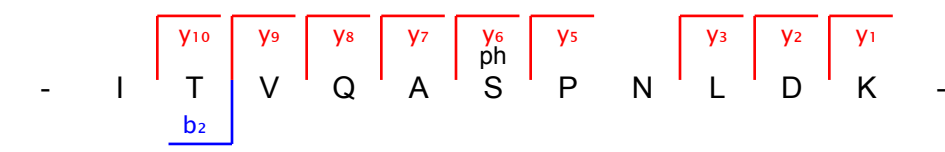

Raw file  
20171215\_MaS\_33SR\_LMH\_phospho2\_02

Scan 9816 Method FTMS; HCD Score 198.01 m/z 1123.82 Gene names HUWE1

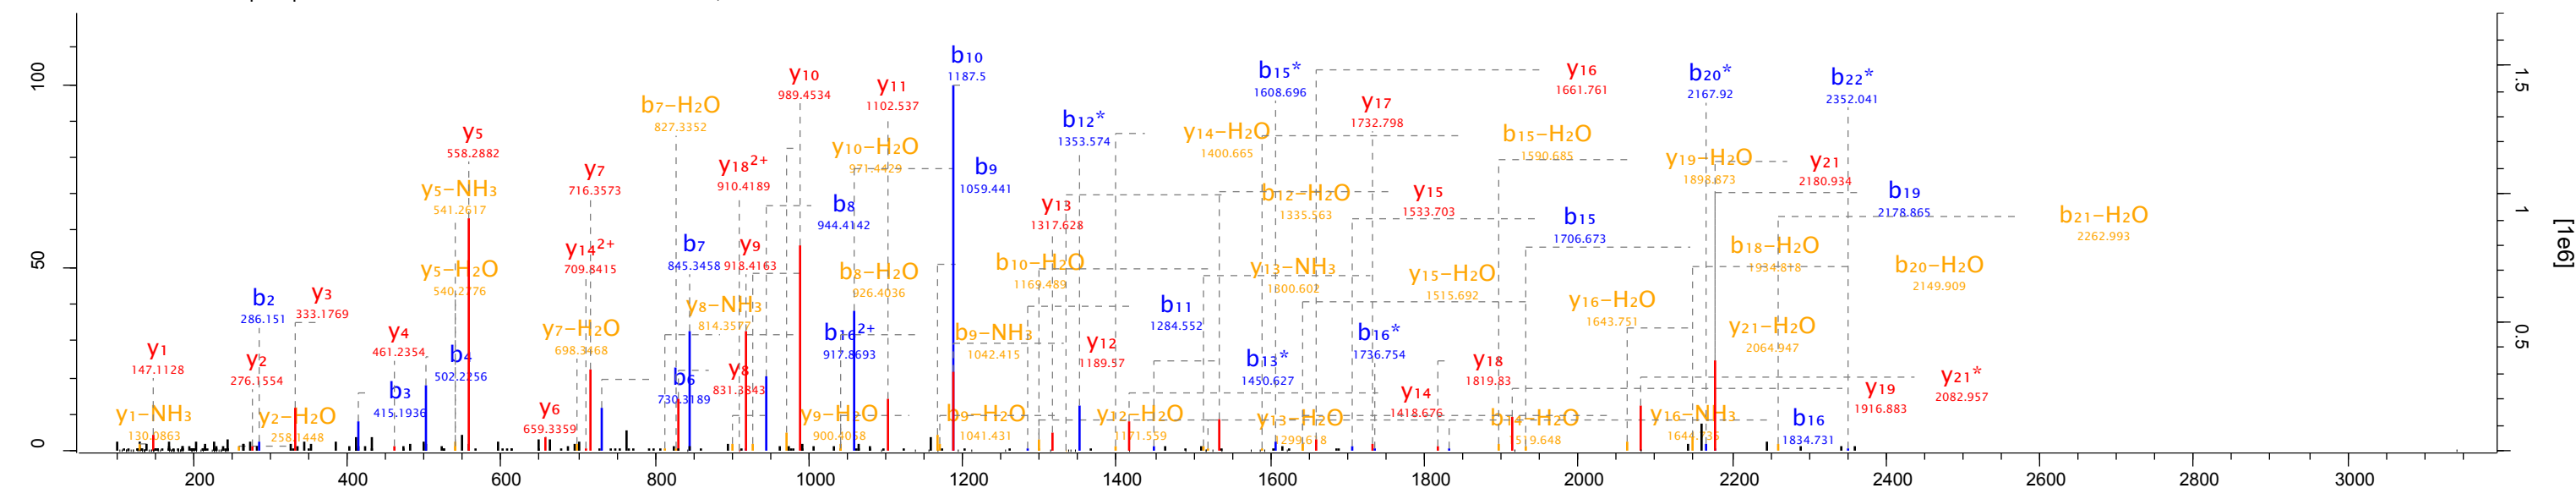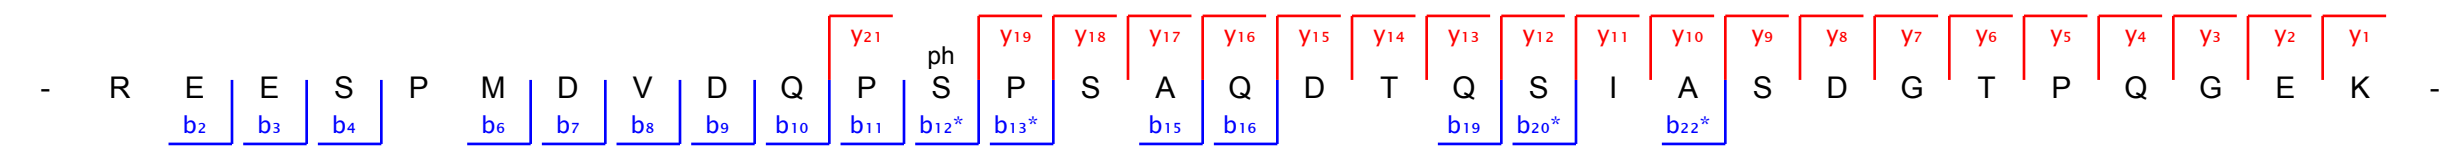

Raw file 20171215\_MaS\_33SR\_LMH\_phospho2\_03 Scan 10016 Method FTMS; HCD Score 257.11 m/z 990.95 Gene names RPTOR

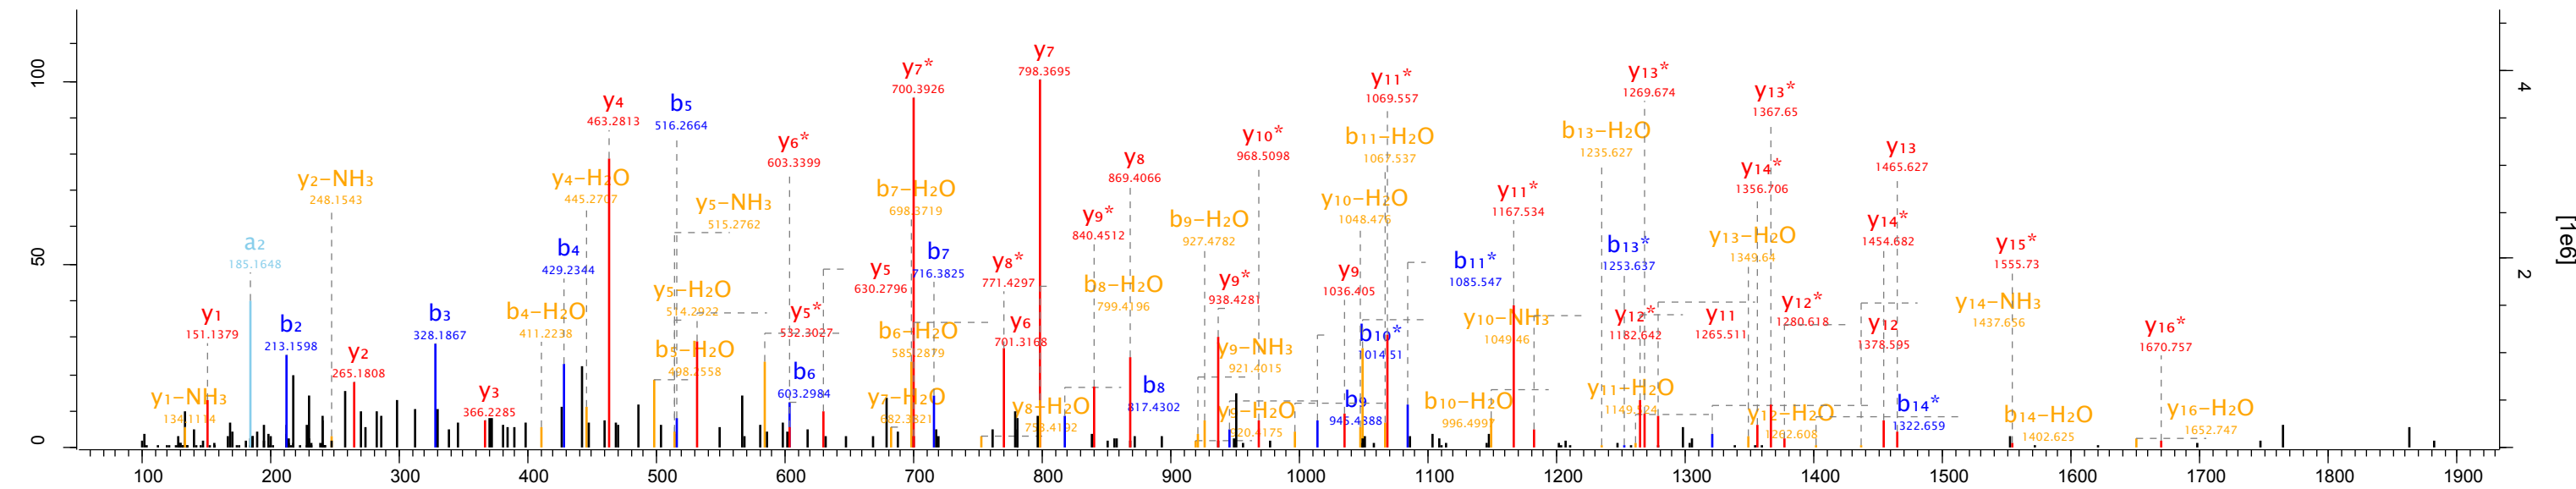

- V L D T S S L T Q y<sub>9</sub>ph S y<sub>8</sub> A P A Sph P T N K -

b<sub>2</sub> b<sub>3</sub> b<sub>4</sub> b<sub>5</sub> b<sub>6</sub> b<sub>7</sub> b<sub>8</sub> b<sub>9</sub> b<sub>10</sub>\* b<sub>11</sub>\* b<sub>13</sub>\* b<sub>14</sub>\*



Raw file 20171215\_MaS\_33SR\_LMH\_phospho2\_03 Scan 10076 Method FTMS; HCD Score 106.93 m/z 945.33 Gene names MDC1

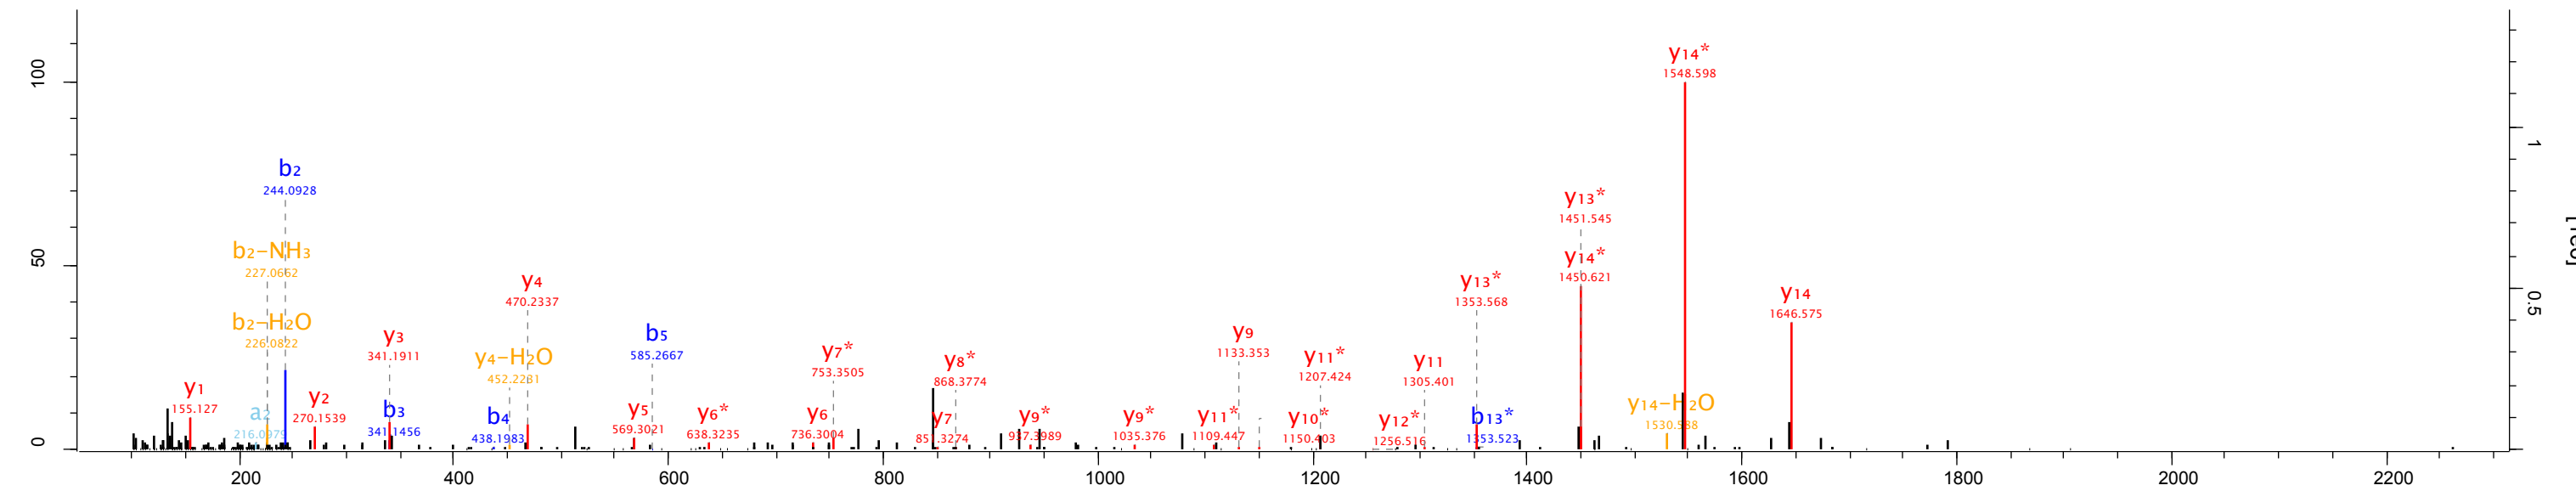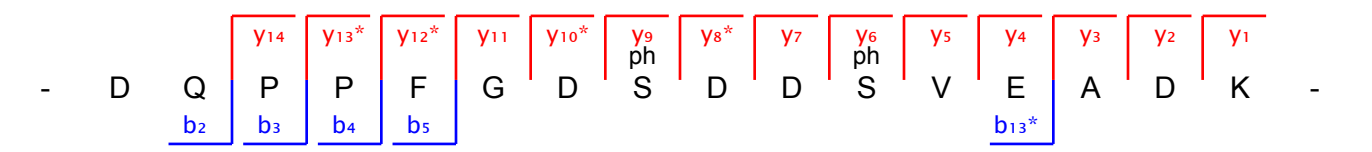

Raw file 20171215\_MaS\_33SR\_LMH\_phospho2\_03 Scan 10216 Method FTMS; HCD Score 69.07 m/z 925.77 Gene names UNC45A

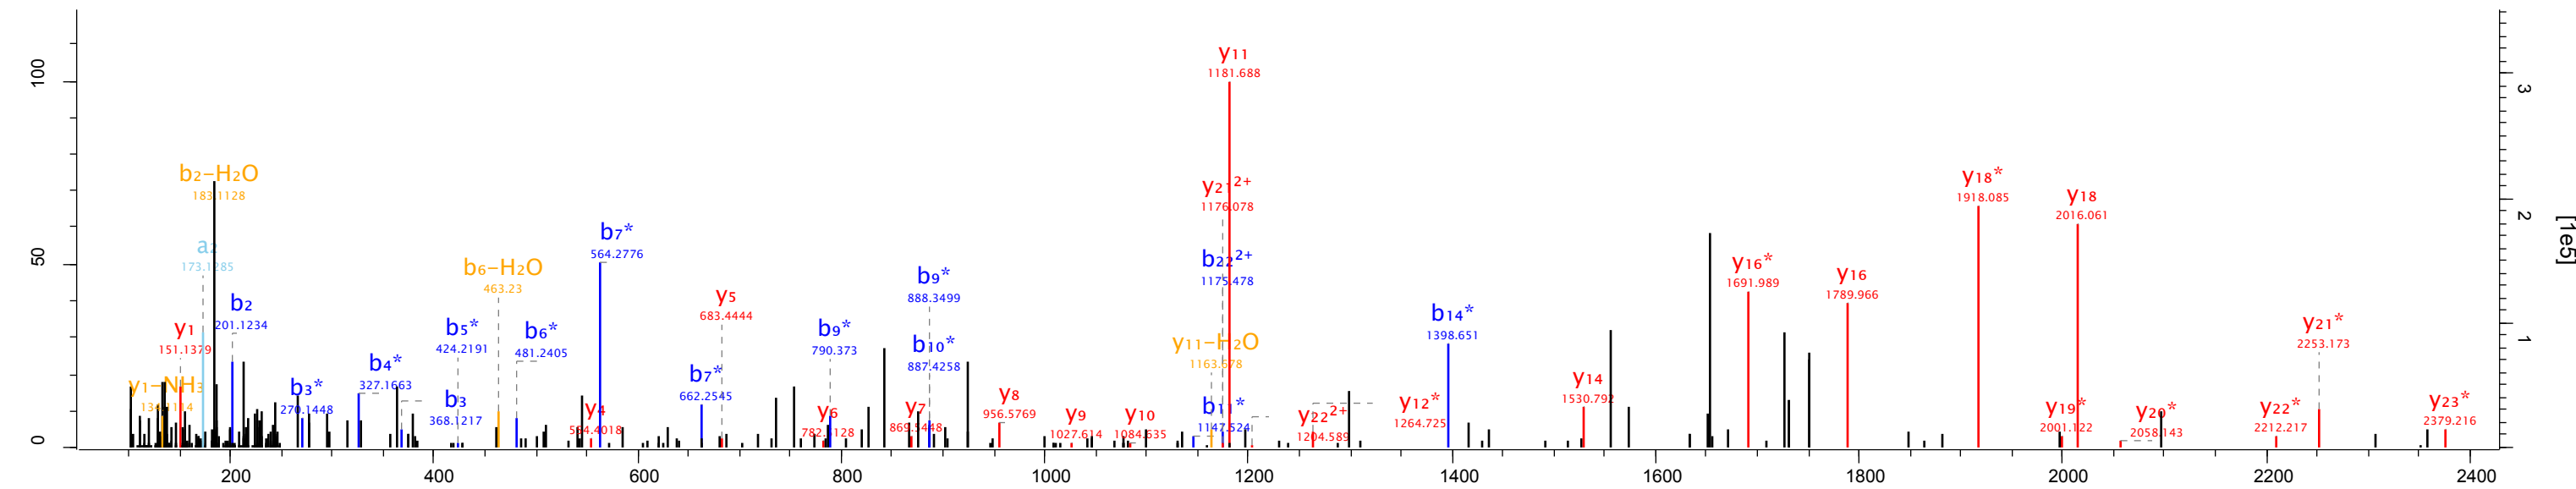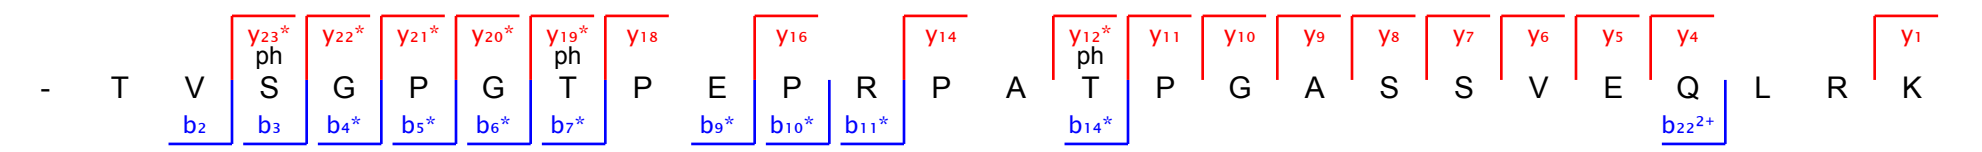

Raw file 20171215\_MaS\_33SR\_LMH\_phospho2\_03 Scan 10386 Method FTMS; HCD Score 76.24 m/z 947.41 Gene names HEXIM2

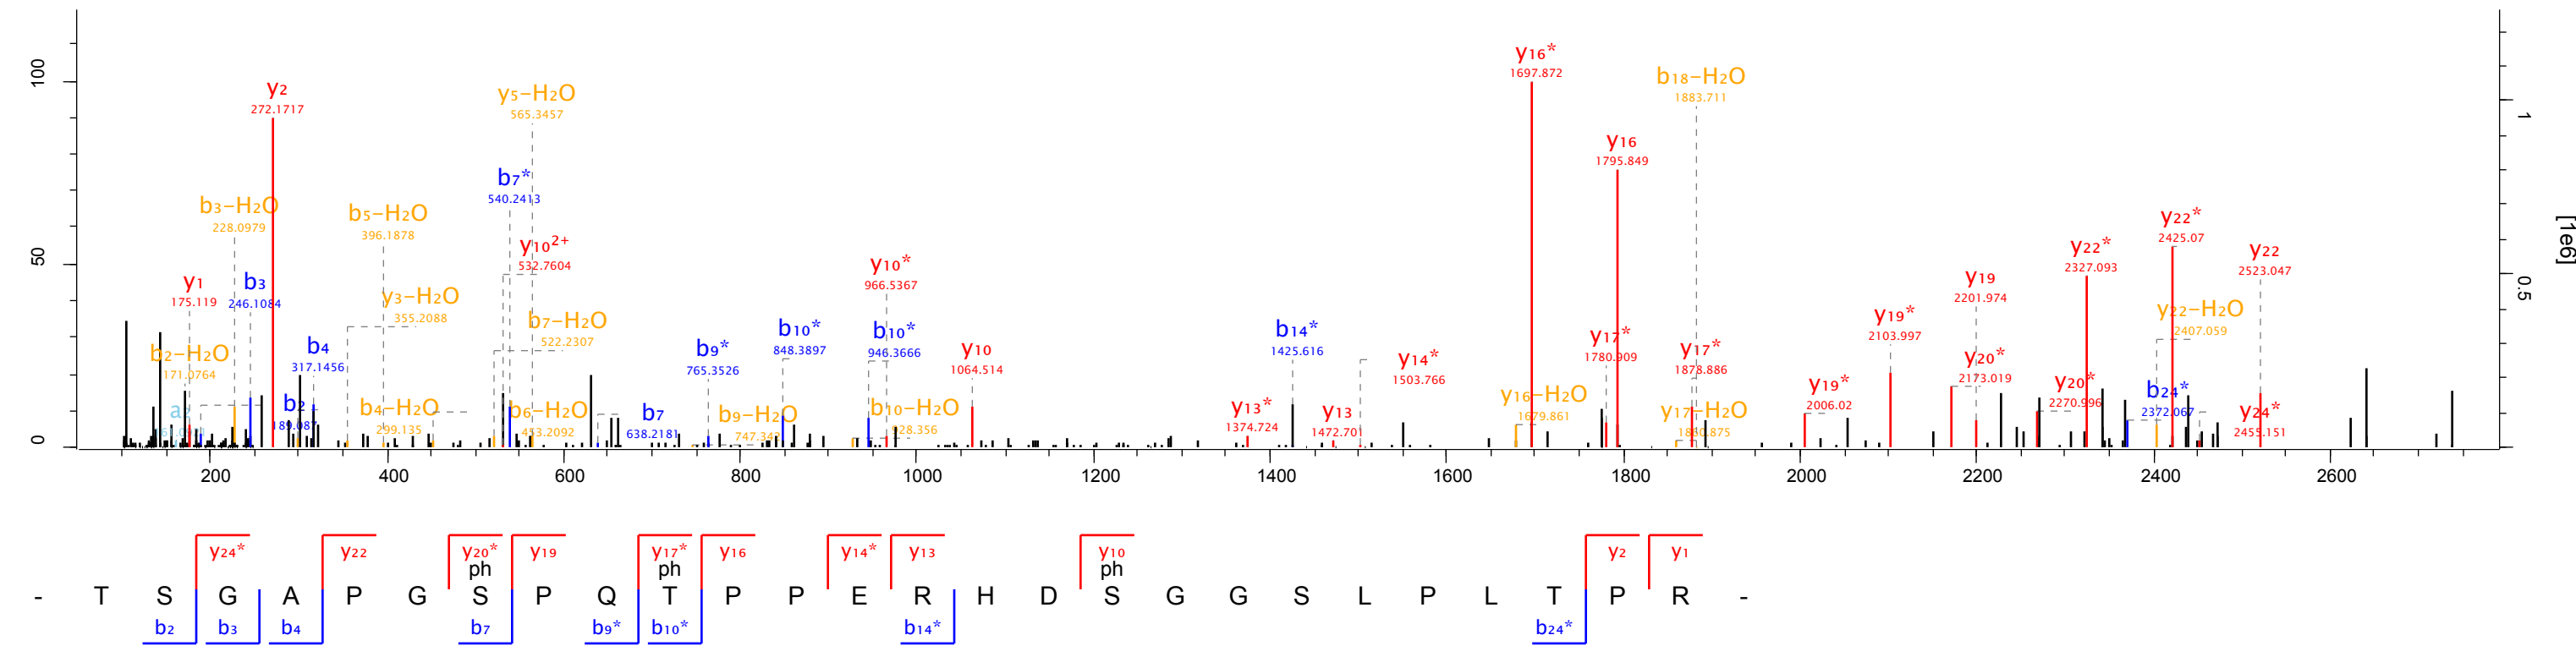

Raw file: 20171215\_MaS\_33SR\_LMH\_phospho2\_03  
 Scan: 10396 Method: FTMS; HCD Score: 144.57 m/z: 893.87 Gene names: ABLIM1

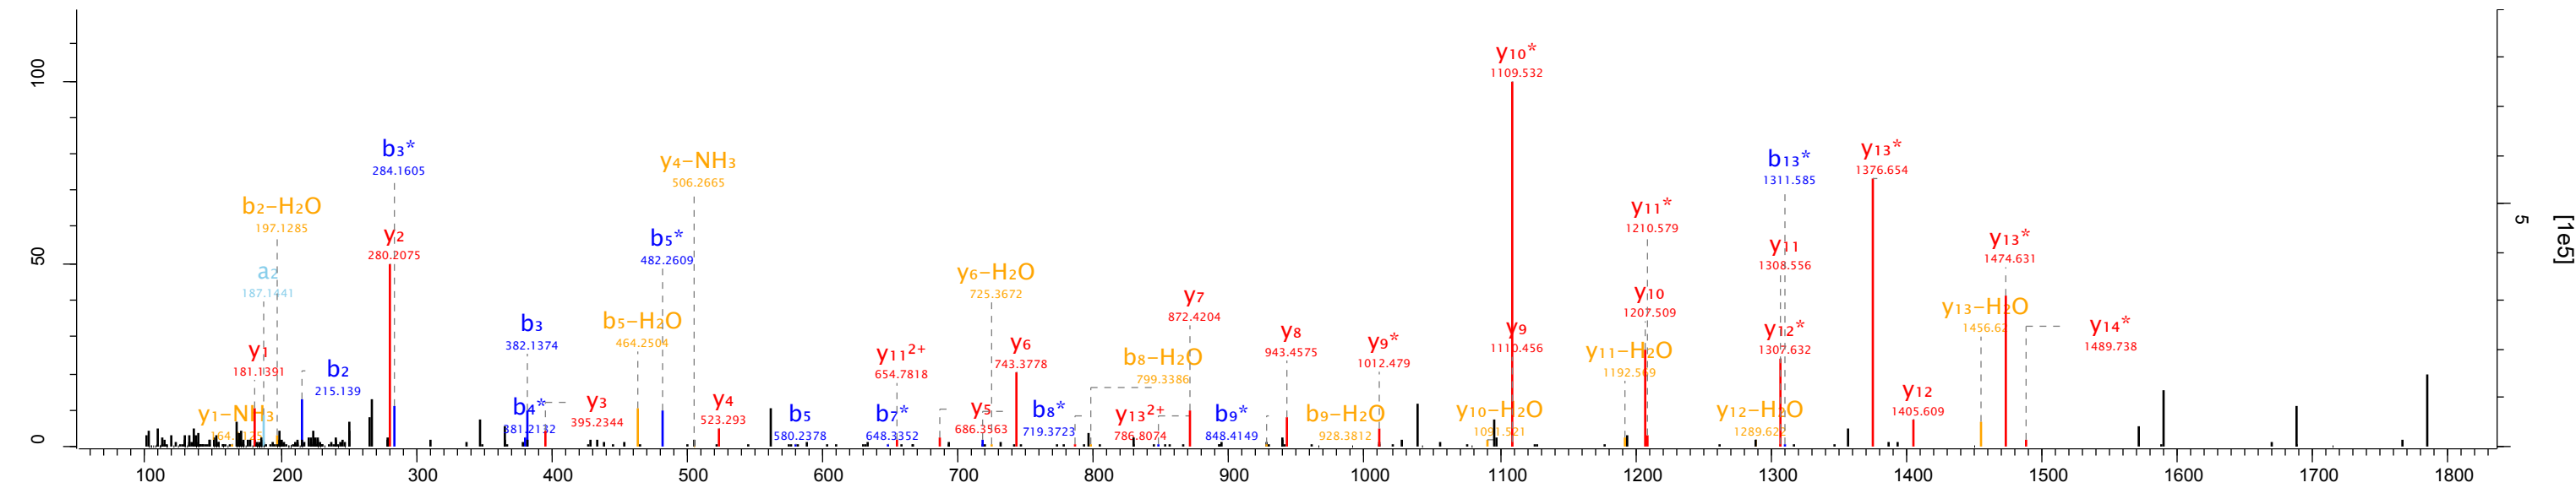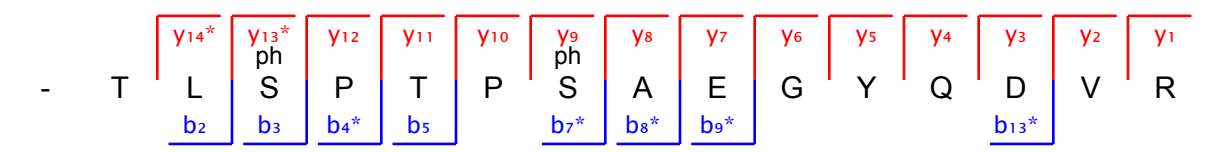

Raw file 20171215\_MaS\_33SR\_LMH\_phospho2\_03 Scan 11306 Method FTMS; HCD Score 123.58 m/z 894.84 Gene names GRIPAP1

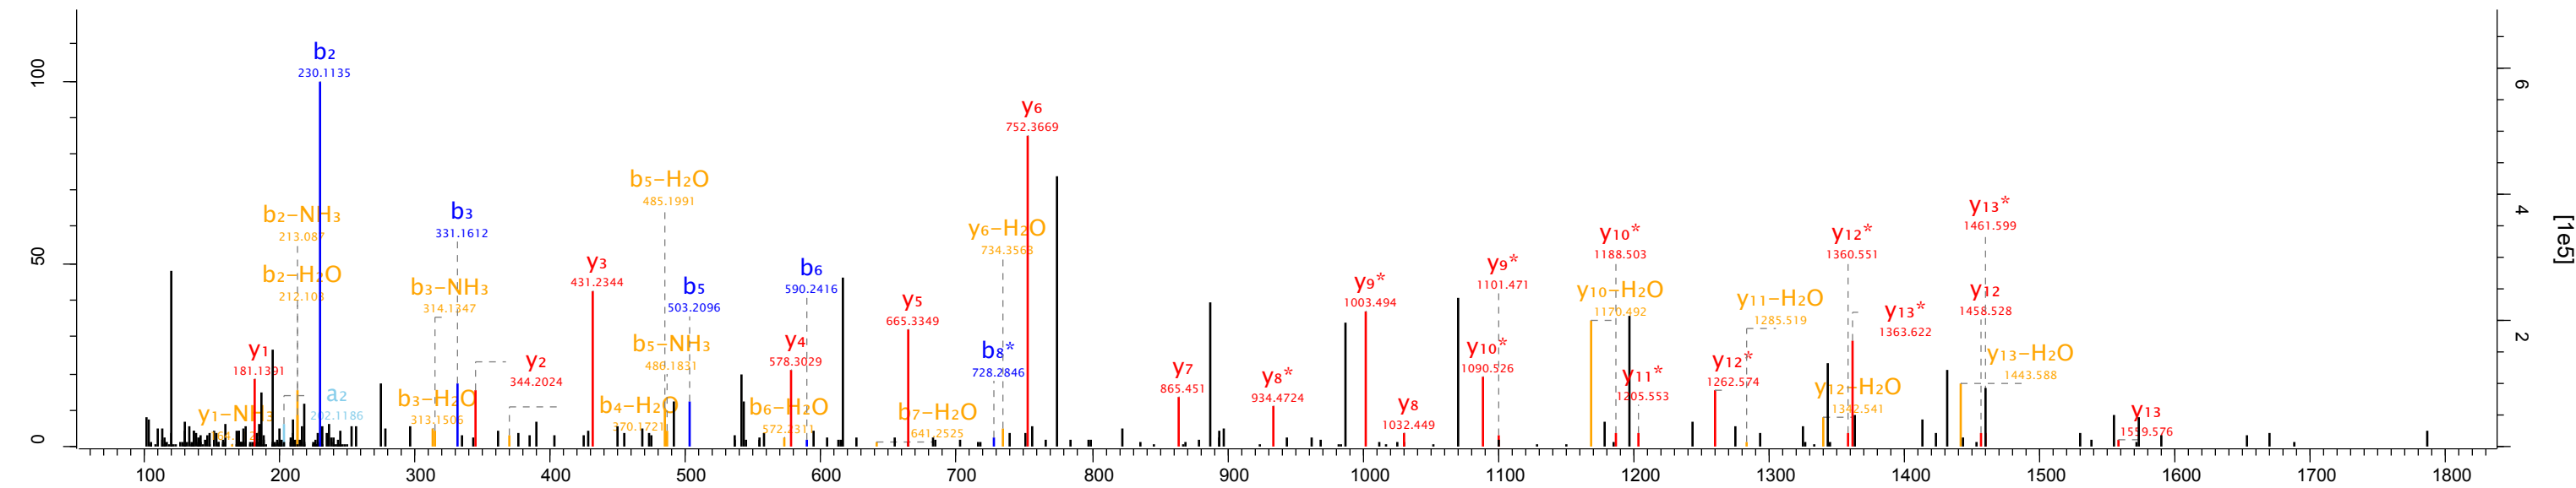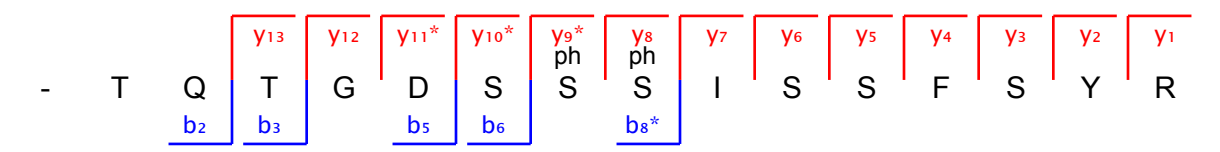

Raw file 20171215\_MaS\_33SR\_LMH\_phospho2\_03 Scan 11506 Method FTMS; HCD Score 190.48 m/z 698.01 Gene names C2orf49

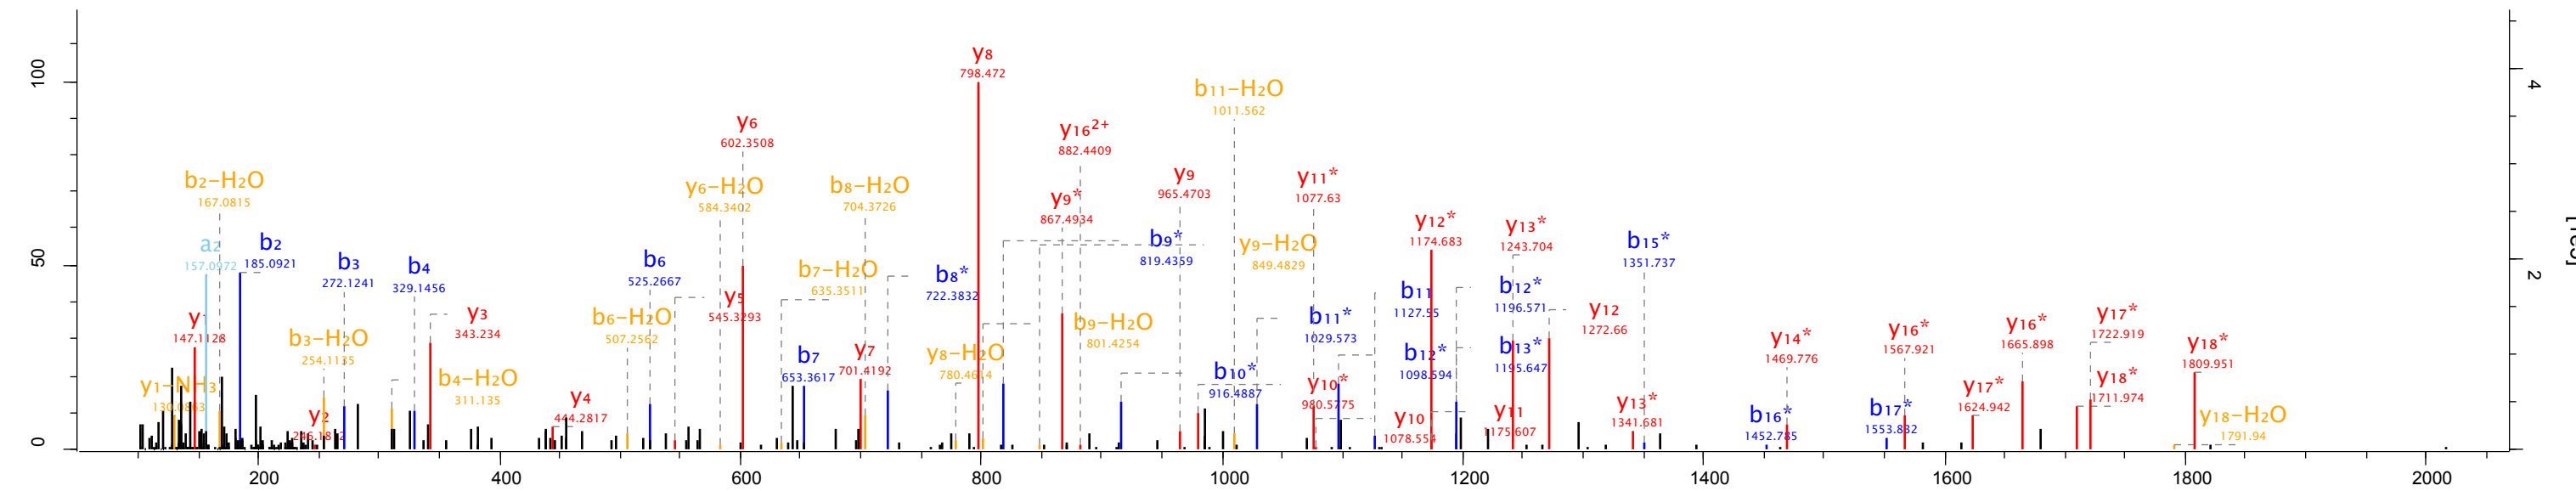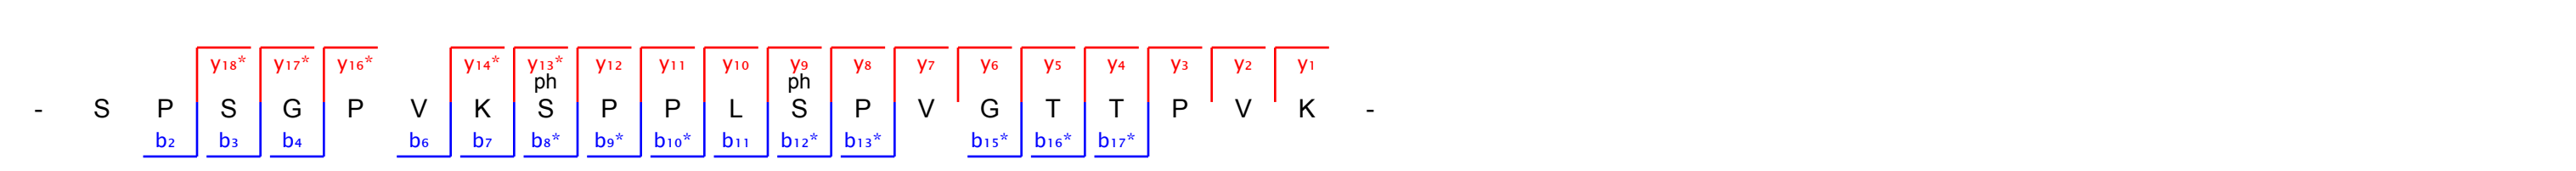

Raw file 20171215\_MaS\_33SR\_LMH\_phospho2\_03 Scan 11596 Method FTMS; HCD Score 185.96 m/z 1012.89 Gene names NAP1L4

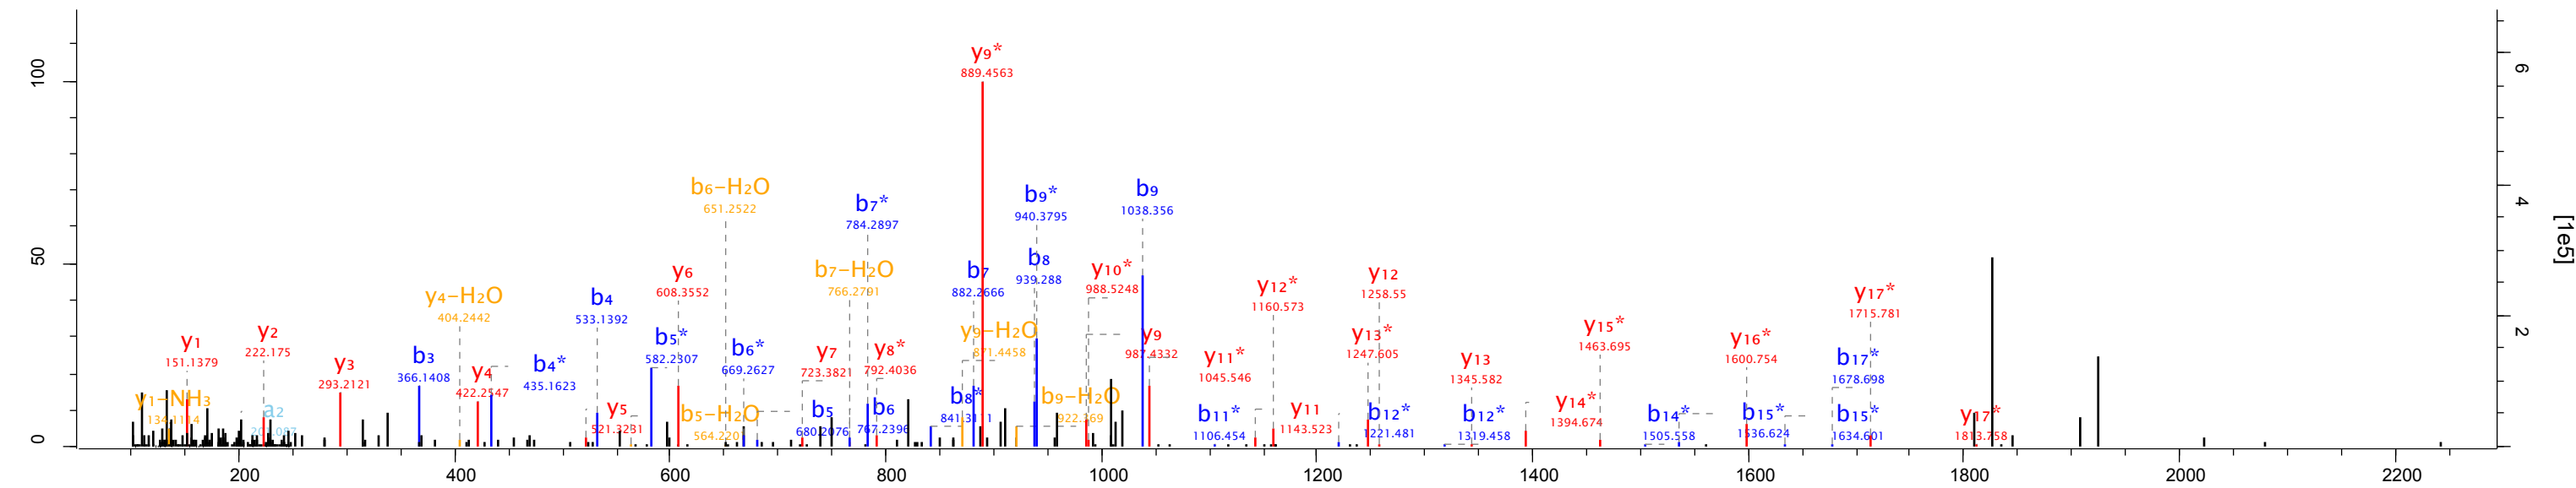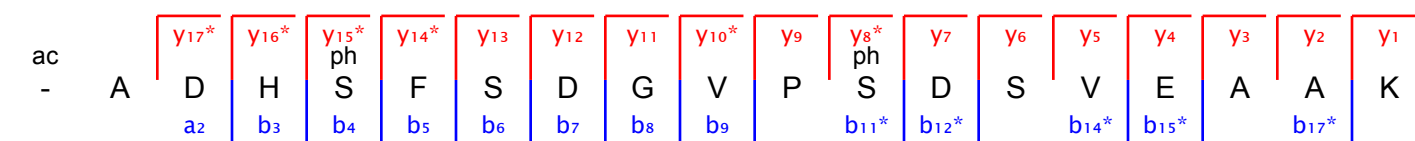

Raw file 20171215\_MaS\_33SR\_LMH\_phospho2\_03 Scan 11636 Method FTMS; HCD Score 395.48 m/z 1155.16 Gene names SERBP1

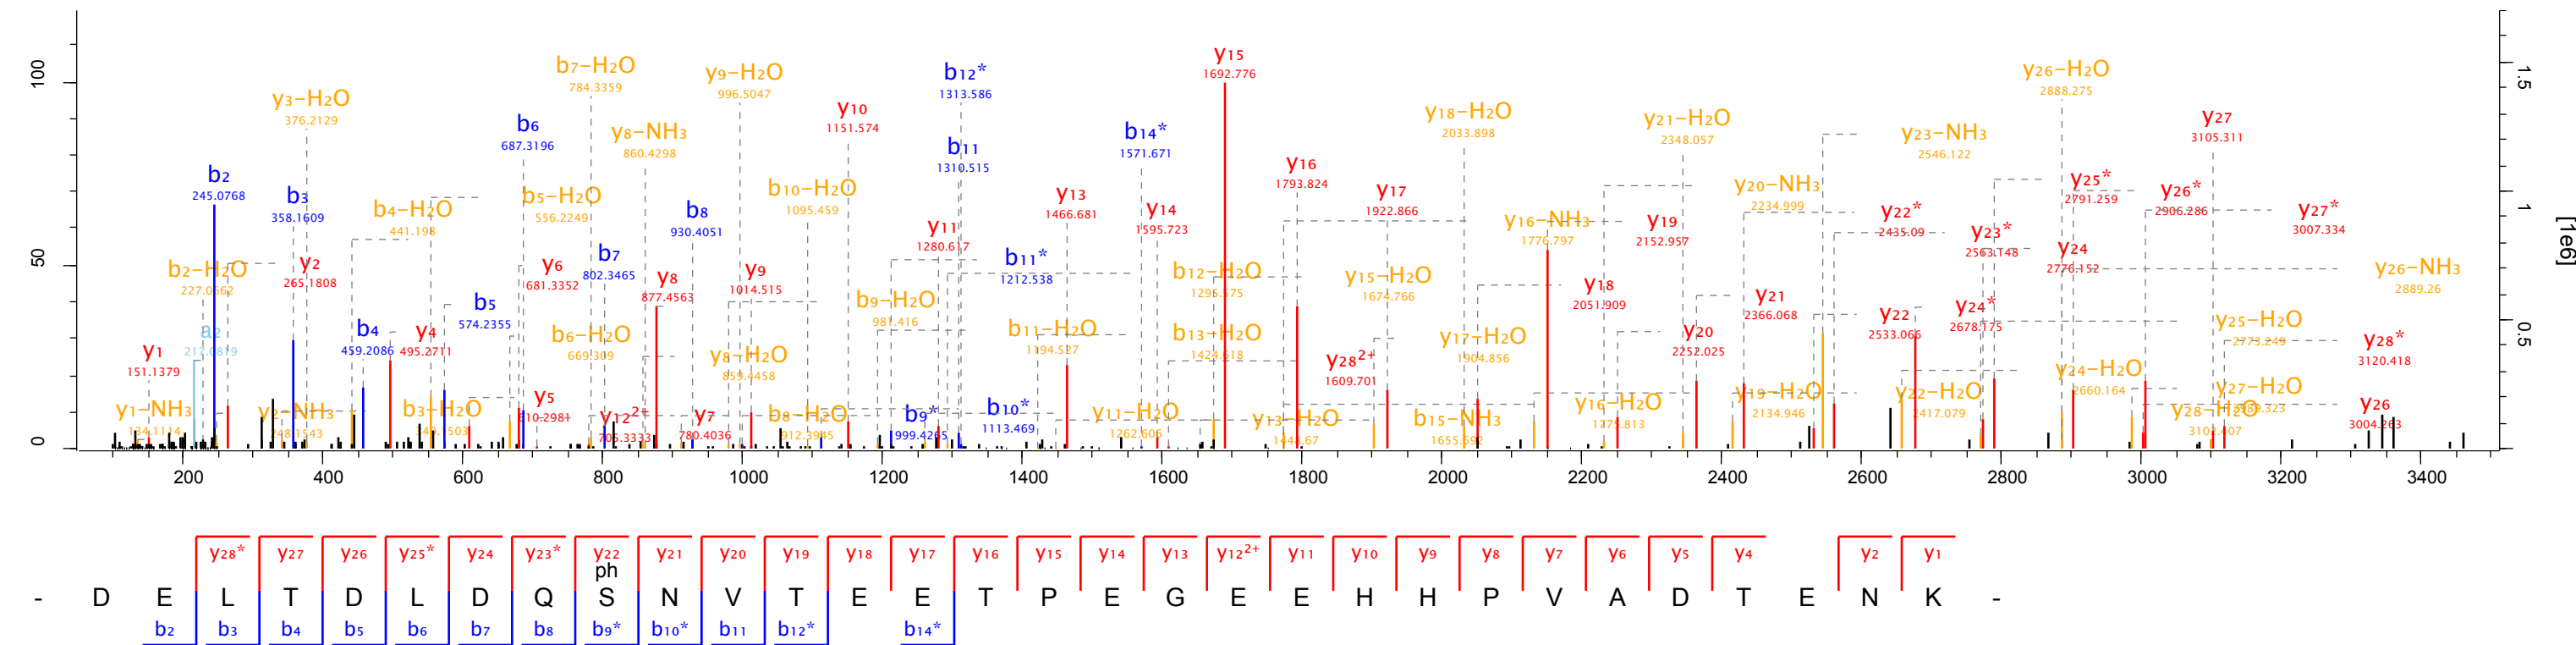



Raw file 20171215\_MaS\_33SR\_LMH\_phospho2\_03 Scan 11666 Method FTMS; HCD Score 58.08 m/z 769.82 Gene names ZNF106

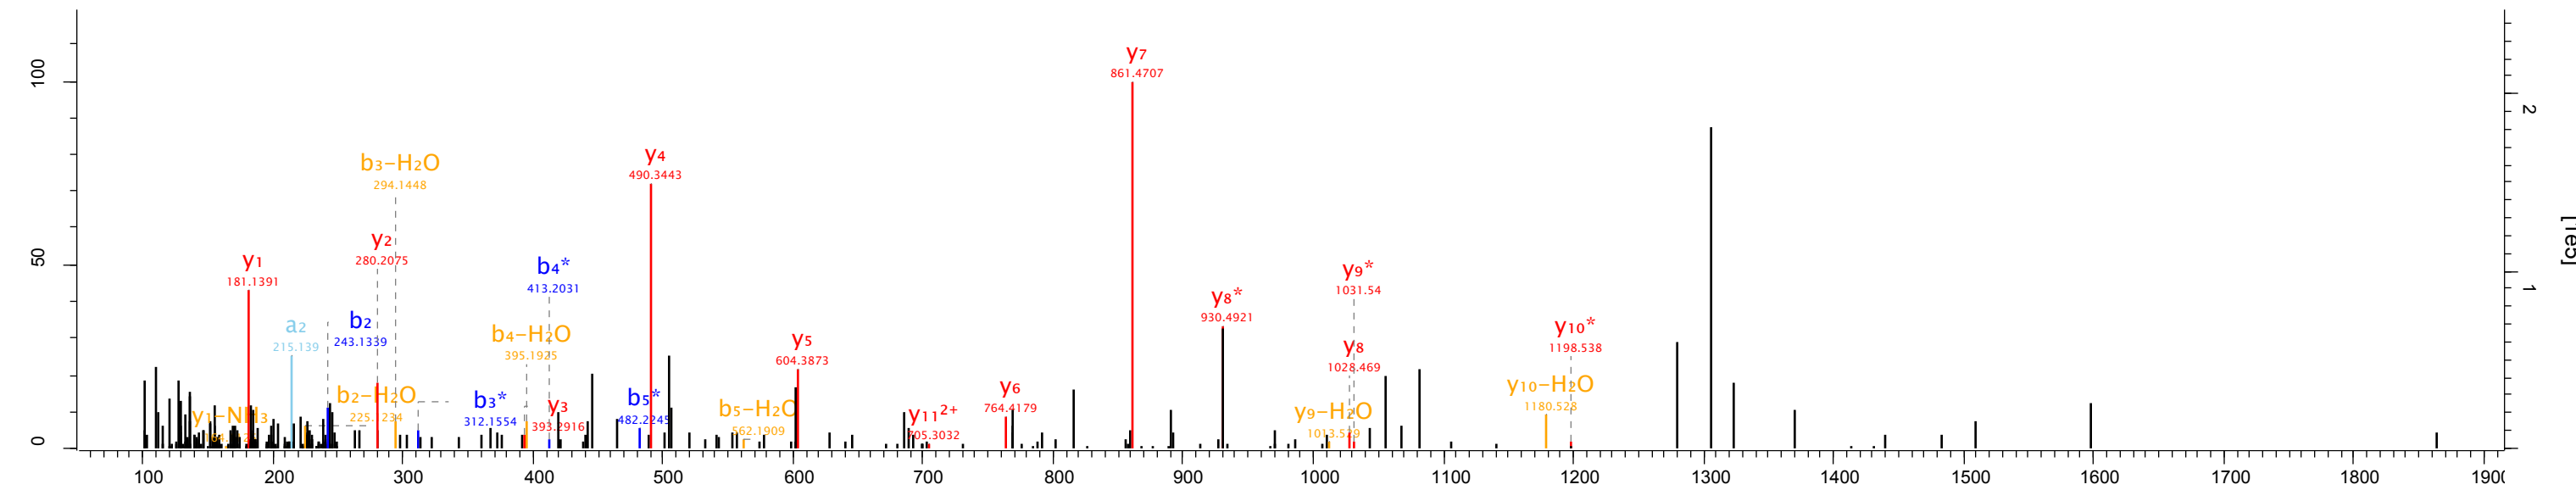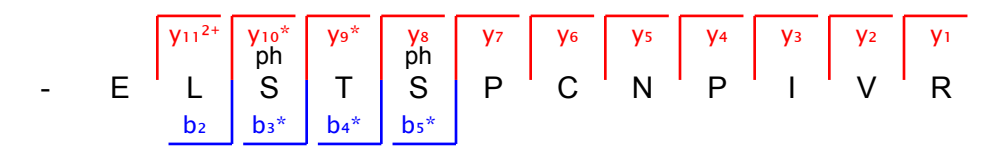

Raw file 20171215\_MaS\_33SR\_LMH\_phospho2\_03 Scan 11776 Method FTMS; HCD Score 64.96 m/z 855.89 Gene names BCL7C

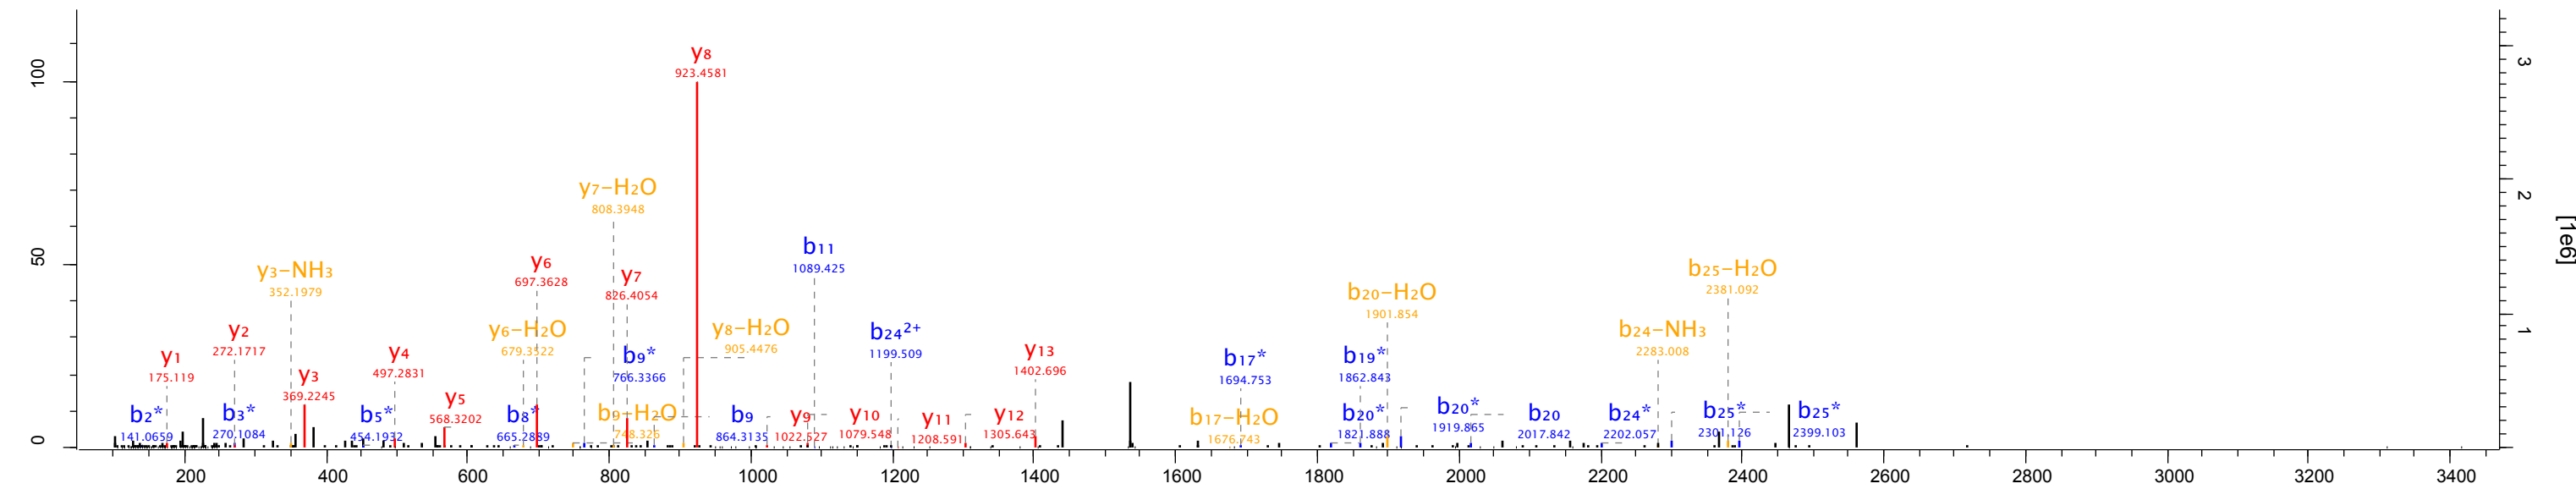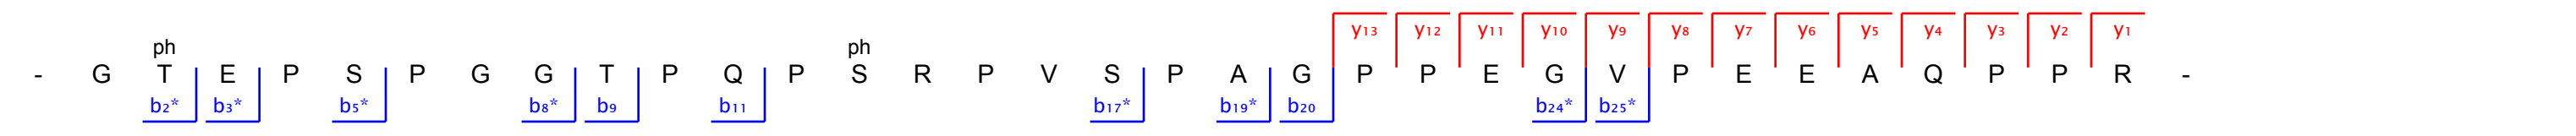

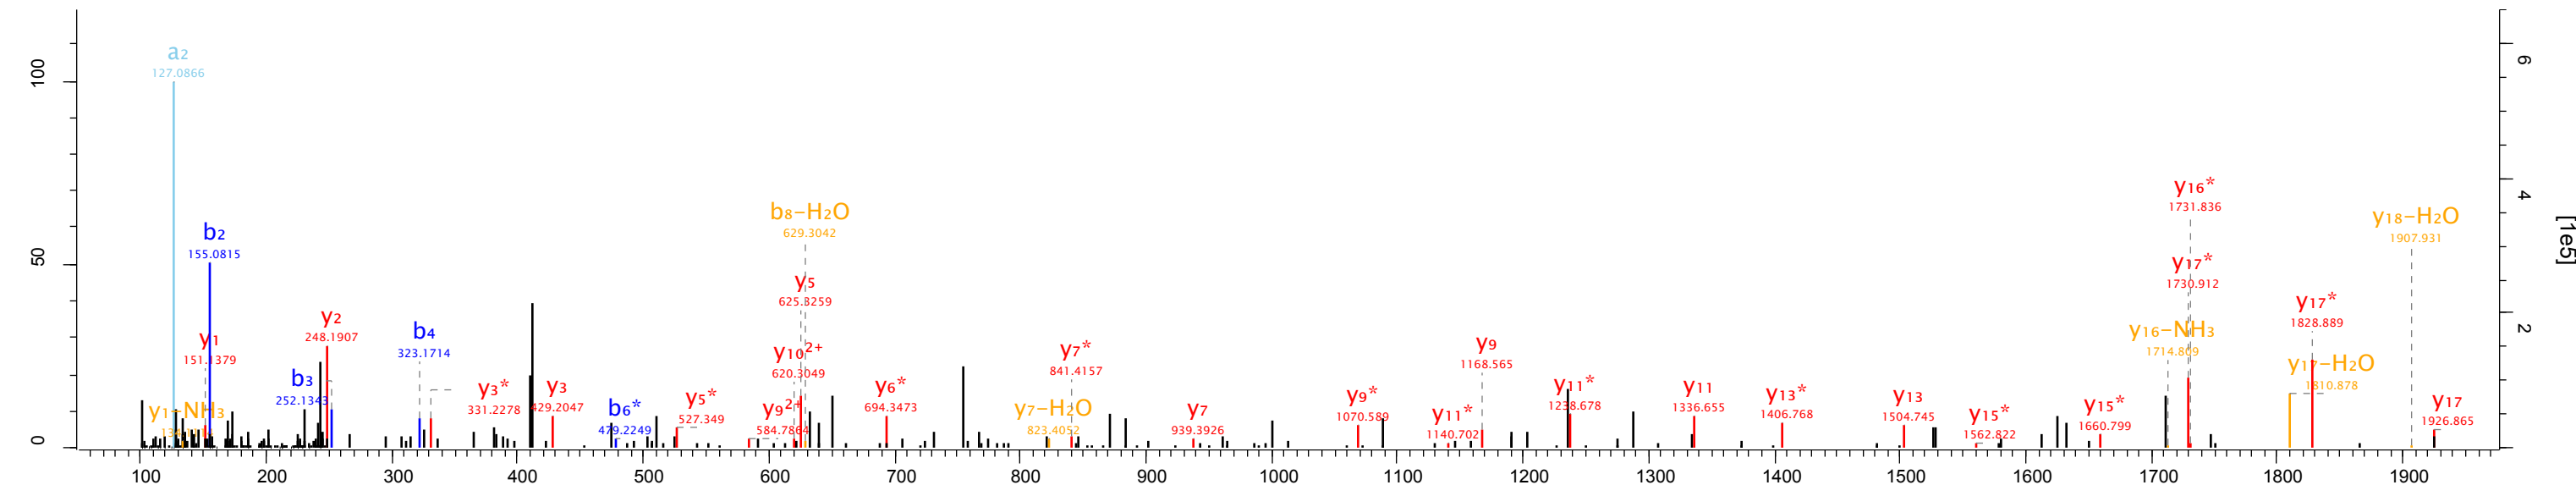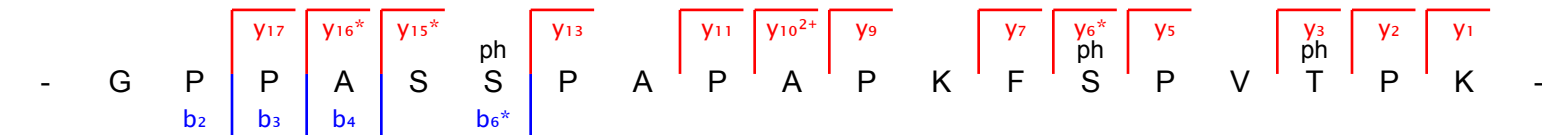

Raw file 20171215\_MaS\_33SR\_LMH\_phospho2\_03 Scan 11916 Method FTMS; HCD Score 172.49 m/z 1167.51 Gene names BCL7C

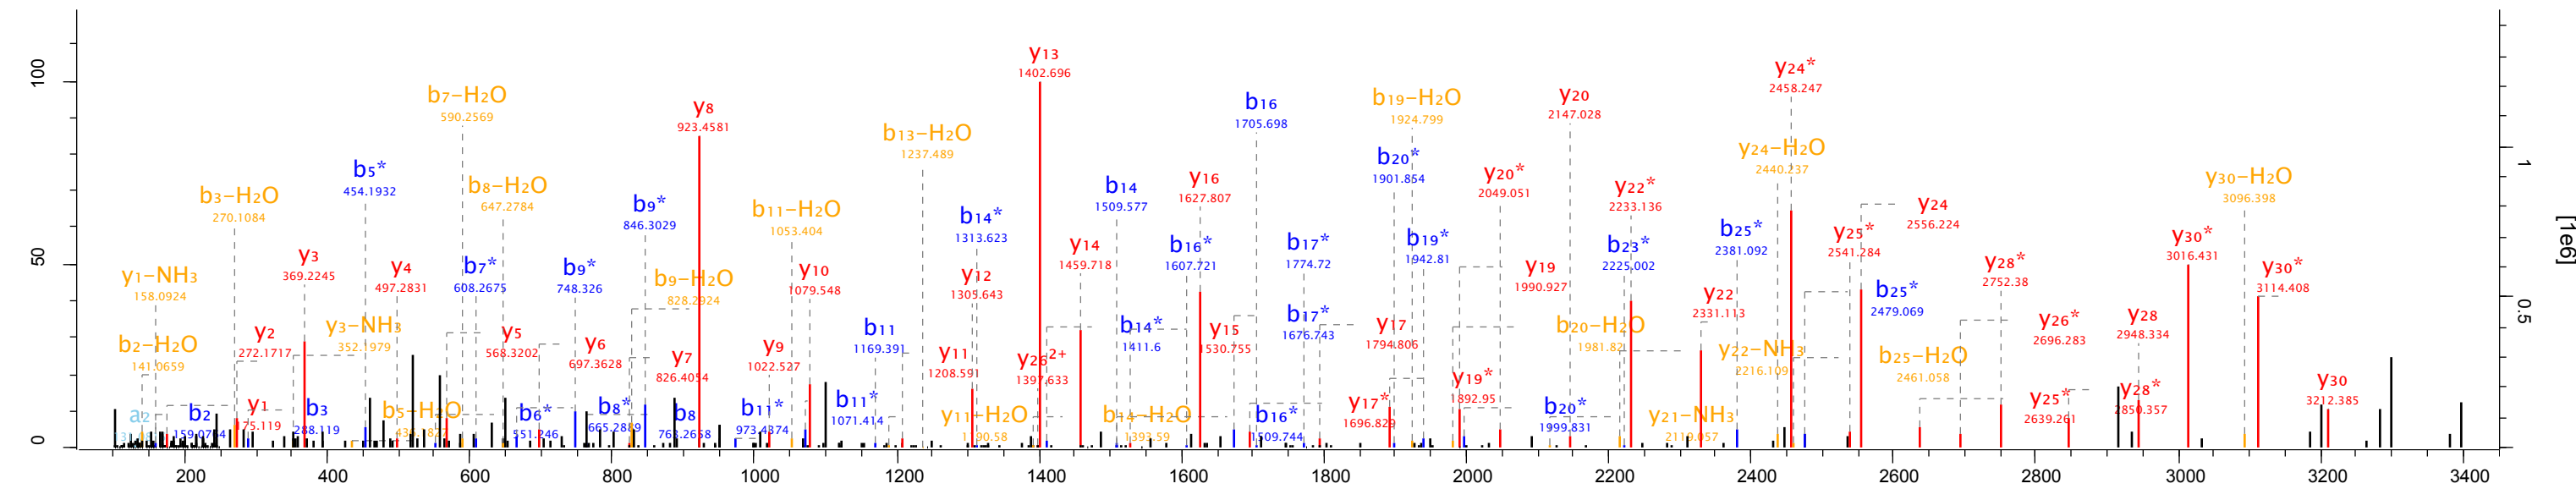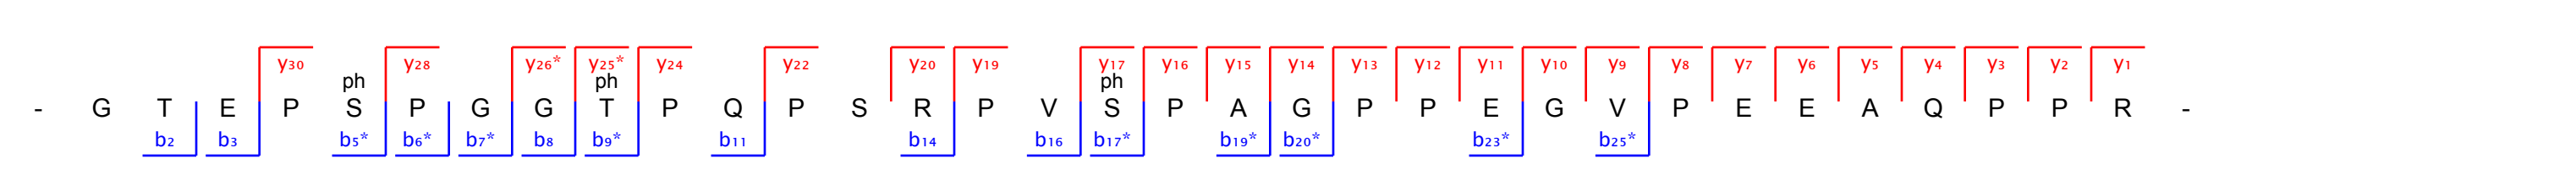

Raw file 20171215\_MaS\_33SR\_LMH\_phospho2\_03 Scan 12126 Method FTMS; HCD Score 113.98 m/z 882.13 Gene names KLHDC4

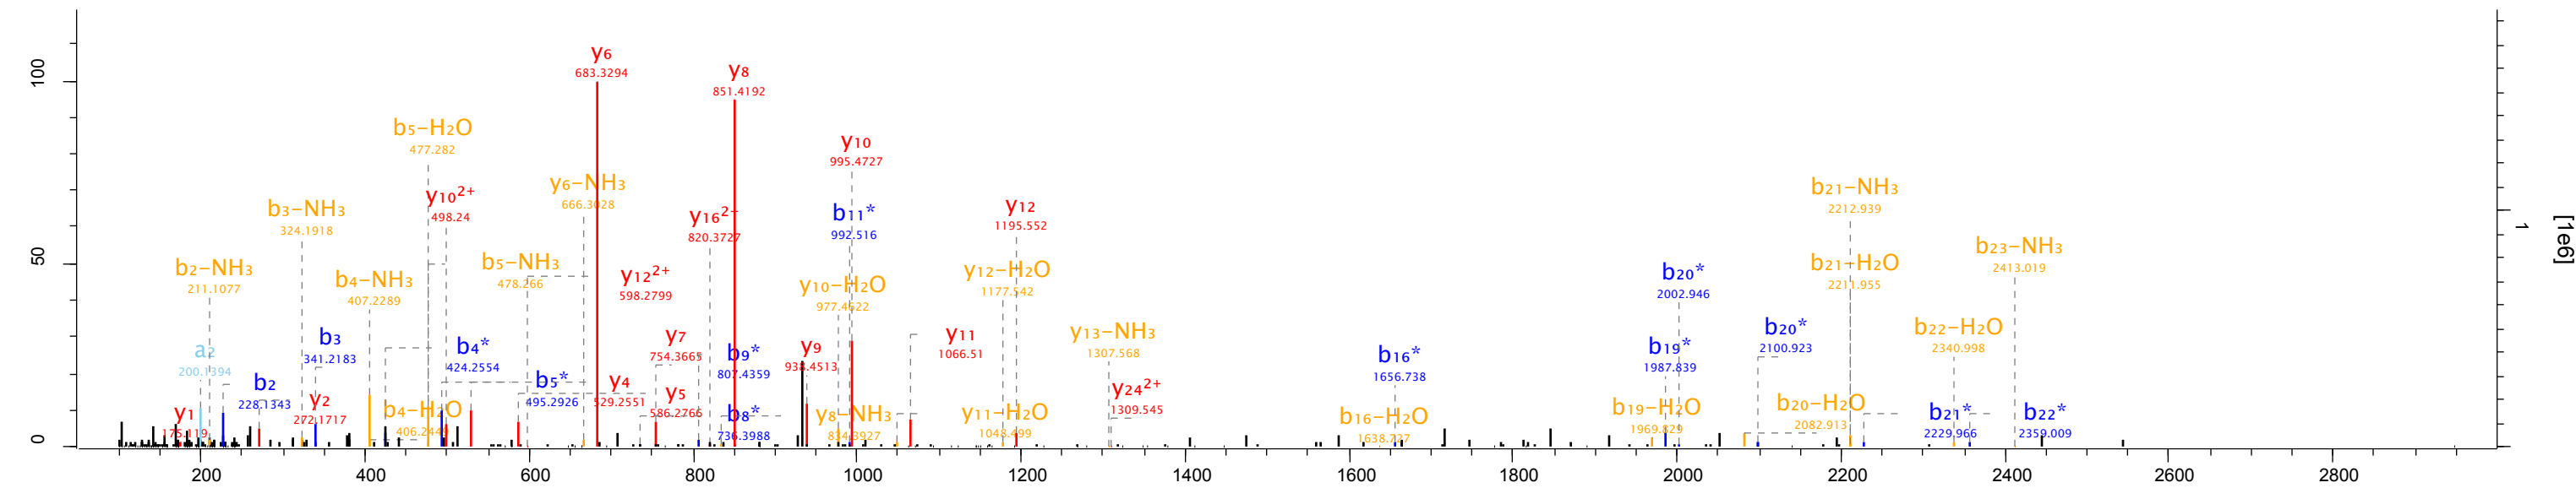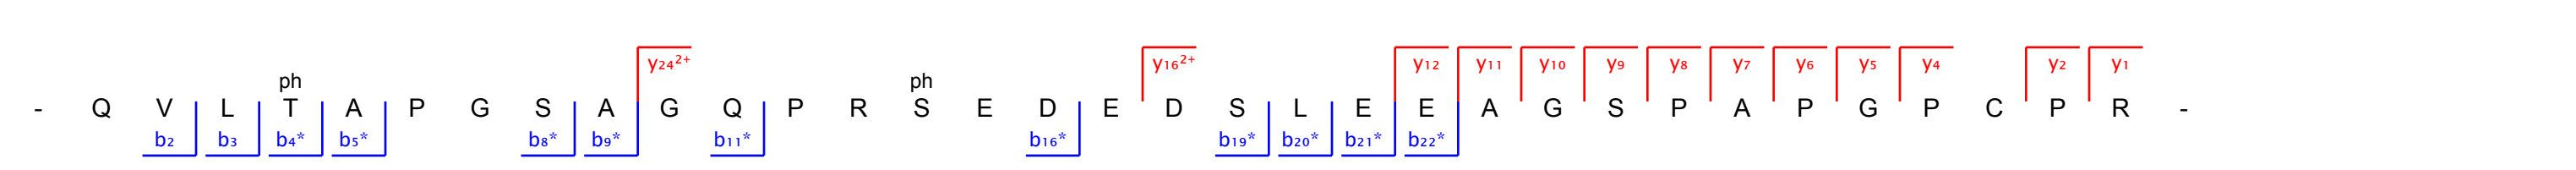

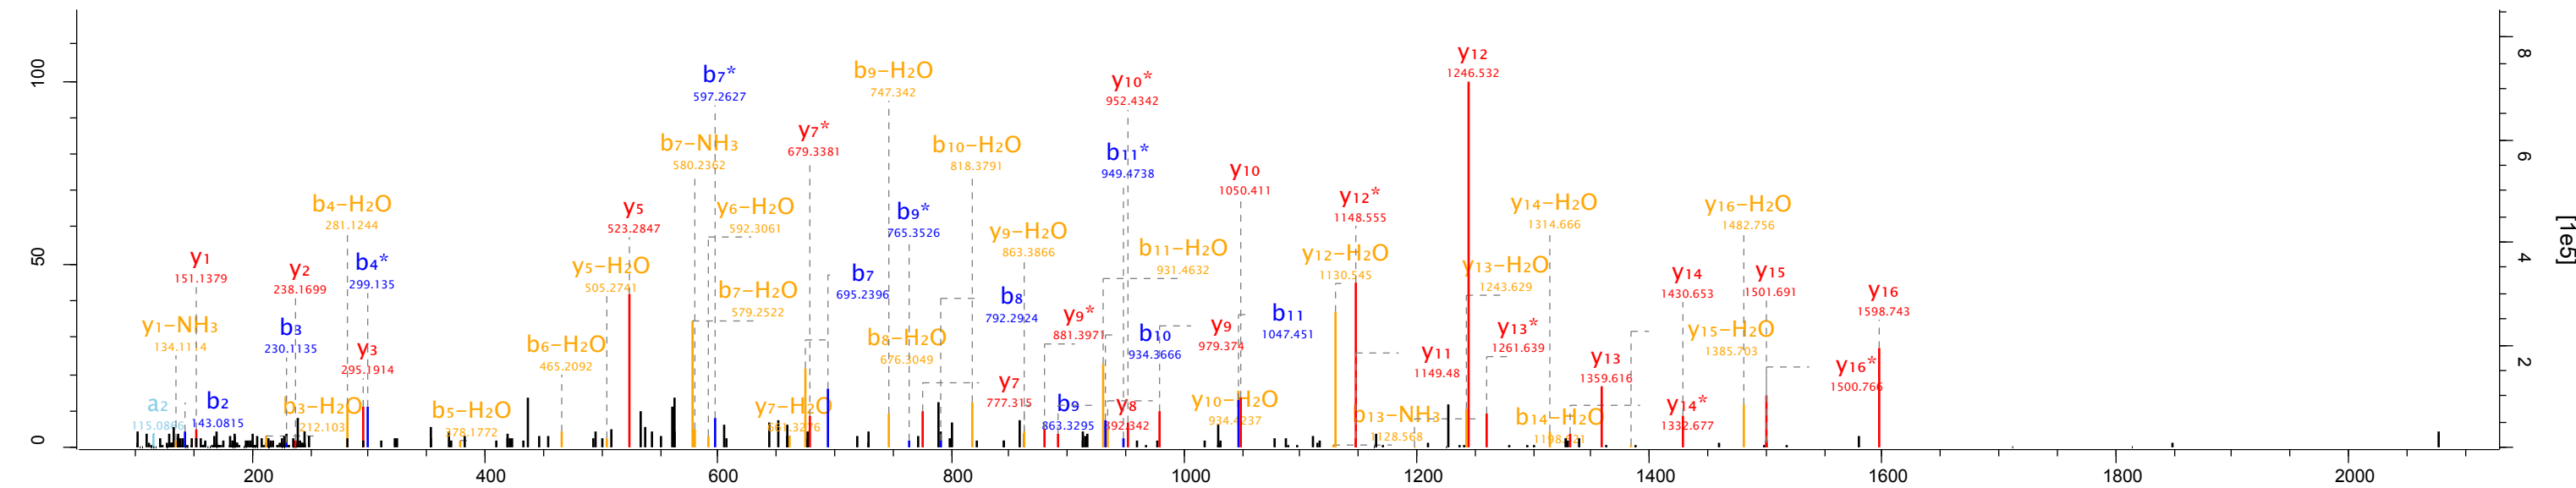

- A A S S P S N P A A L P V A S D S P M G S K -

Fragmentation labels (b and y ions) are shown below the corresponding amino acids:

- b<sub>2</sub> (under A)
- b<sub>3</sub> (under S)
- b<sub>4</sub><sup>\*</sup> (under S)
- b<sub>7</sub> (under N)
- b<sub>8</sub> (under P)
- b<sub>9</sub> (under A)
- b<sub>10</sub> (under A)
- b<sub>11</sub> (under L)
- y<sub>1</sub> (under K)
- y<sub>2</sub> (under S)
- y<sub>3</sub> (under G)
- y<sub>5</sub> (under P)
- y<sub>7</sub> (under S)
- y<sub>8</sub> (under D)
- y<sub>9</sub> (under S)
- y<sub>10</sub> (under A)
- y<sub>11</sub> (under V)
- y<sub>12</sub> (under P)
- y<sub>13</sub> (under L)
- y<sub>14</sub> (under A)
- y<sub>15</sub> (under A)
- y<sub>16</sub> (under P)

Raw file 20171215\_MaS\_33SR\_LMH\_phospho2\_03 Scan 12596 Method FTMS; HCD Score 181.85 m/z 864.36 Gene names OSBPL11

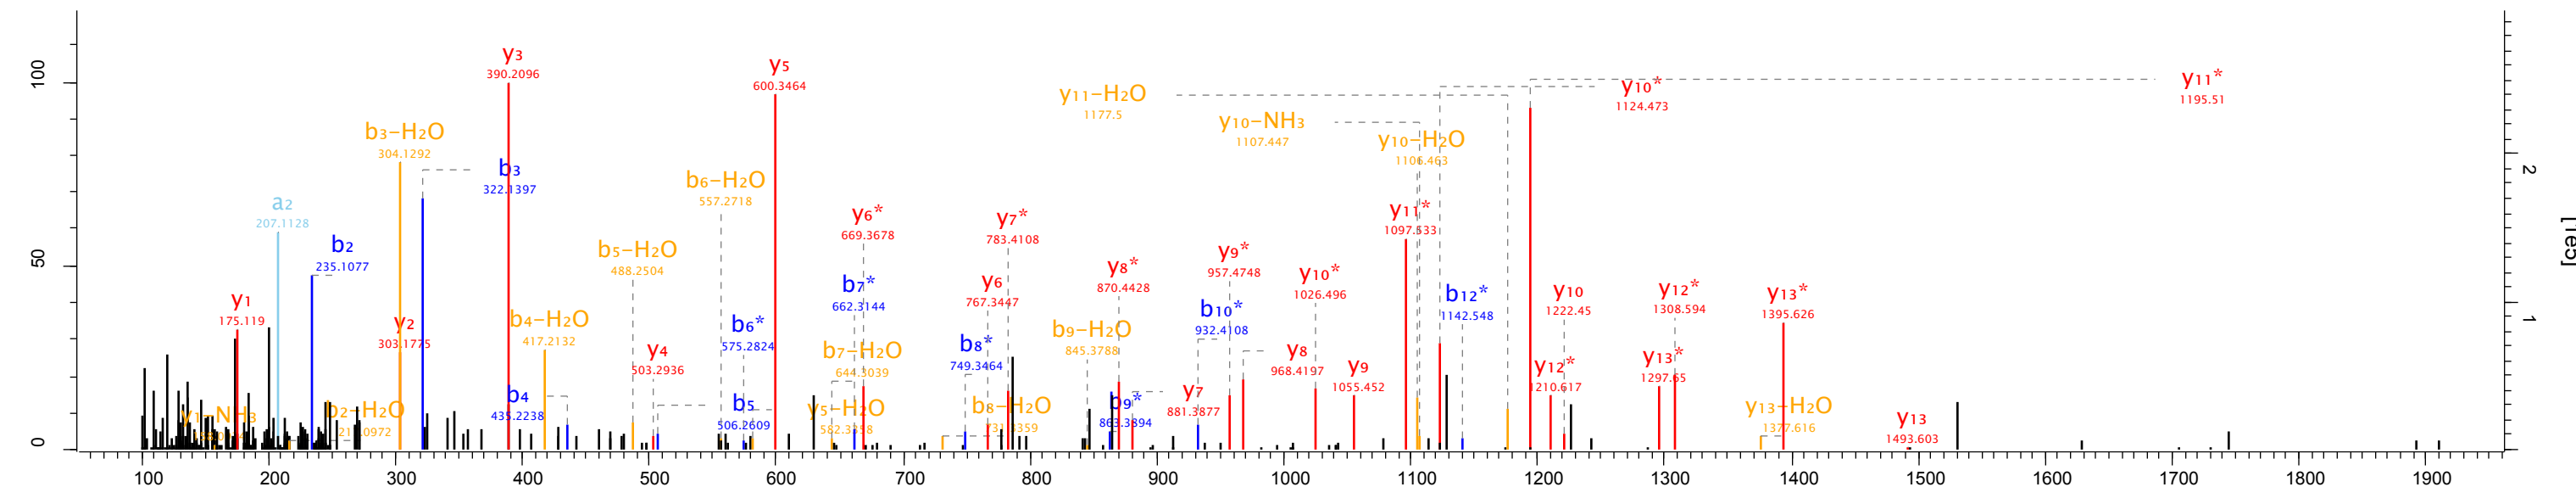

- S F S L A S S N S P I S Q R -

b2 b3 b4 b5 b6\* b7\* b8\* b9\* b10\* b12\*

y13 y12\* y11\* y10 ph y9 y8 y7 y6 ph y5 y4 y3 y2 y1

Raw file  
20171215\_MaS\_33SR\_LMH\_phospho2\_03

Scan 12676 Method FTMS; HCD Score 223.49 m/z 1175.51 Gene names OTUD5

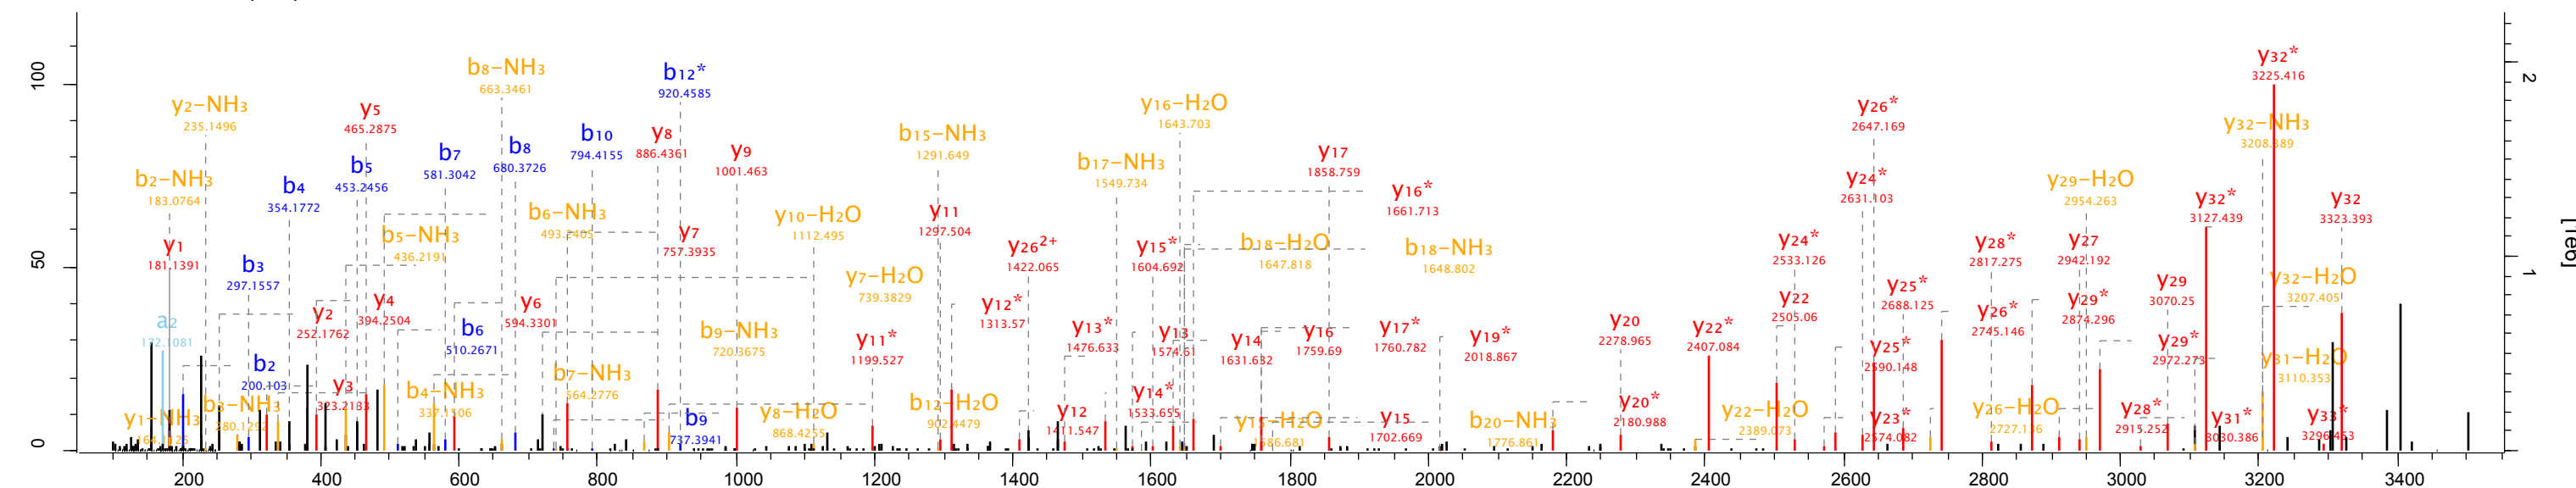

- Q A P G V G A V G G S P E R E E V G A G Y N S E D E Y E A A A A R -

b<sub>2</sub>
b<sub>3</sub>
b<sub>4</sub>
b<sub>5</sub>
b<sub>6</sub>
b<sub>7</sub>
b<sub>8</sub>
b<sub>9</sub>
b<sub>10</sub>
b<sub>12</sub><sup>\*</sup>
y<sub>33</sub><sup>\*</sup>
y<sub>32</sub>
y<sub>31</sub><sup>\*</sup>
y<sub>29</sub>
y<sub>28</sub><sup>\*</sup>
y<sub>27</sub>
y<sub>26</sub><sup>\*</sup>
y<sub>25</sub><sup>\*</sup>
y<sub>24</sub><sup>\*</sup>
y<sub>23</sub><sup>\*</sup>
y<sub>22</sub>
y<sub>20</sub>
y<sub>19</sub><sup>\*</sup>
y<sub>17</sub>
y<sub>16</sub>
y<sub>15</sub>
y<sub>14</sub>
y<sub>13</sub>
y<sub>12</sub>
y<sub>11</sub>
y<sub>9</sub>
y<sub>8</sub>
y<sub>7</sub>
y<sub>6</sub>
y<sub>5</sub>
y<sub>4</sub>
y<sub>3</sub>
y<sub>2</sub>
y<sub>1</sub>



Raw file

20171215\_MaS\_33SR\_LMH\_phospho2\_03

| Scan  | Method    | Score | m/z    | Gene names              |
|-------|-----------|-------|--------|-------------------------|
| 12806 | FTMS; HCD | 80.32 | 674.62 | SPECC1L-ADORA2A;SPECC1L |

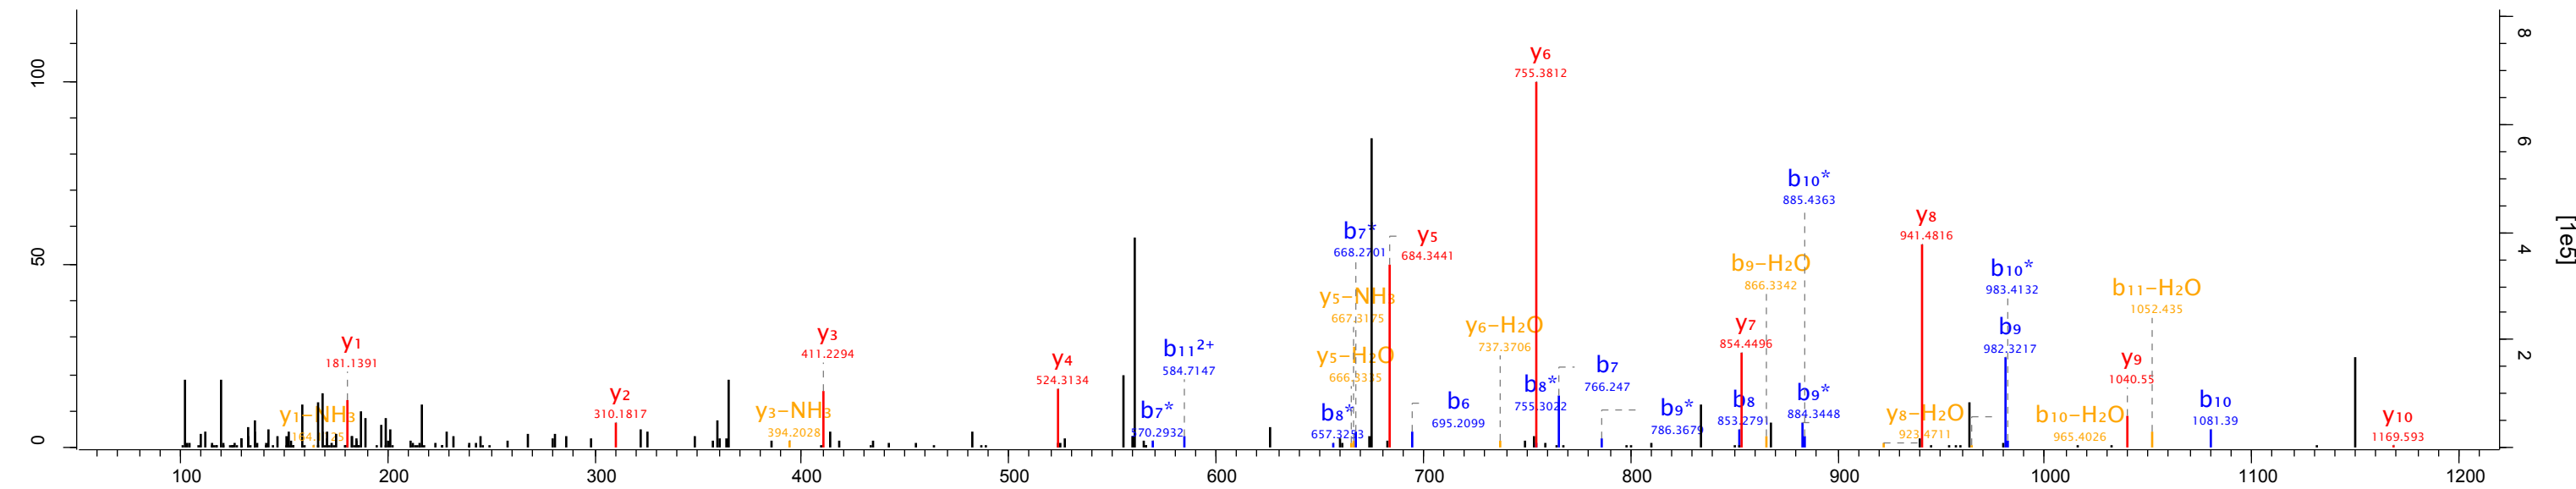

- K G S S G N A S E V S V A C L T E R -

b<sub>6</sub>
b<sub>7</sub>
b<sub>8</sub>
y<sub>10</sub>
y<sub>9</sub>
y<sub>8</sub>
y<sub>7</sub>
y<sub>6</sub>
y<sub>5</sub>
y<sub>4</sub>
y<sub>3</sub>
y<sub>2</sub>
y<sub>1</sub>

b<sub>9</sub>
b<sub>10</sub>
b<sub>11</sub><sup>2+</sup>

Raw file: 20171215\_MaS\_33SR\_LMH\_phospho2\_03  
 Scan: 12876 Method: FTMS; HCD Score: 417.99 m/z: 1140.97

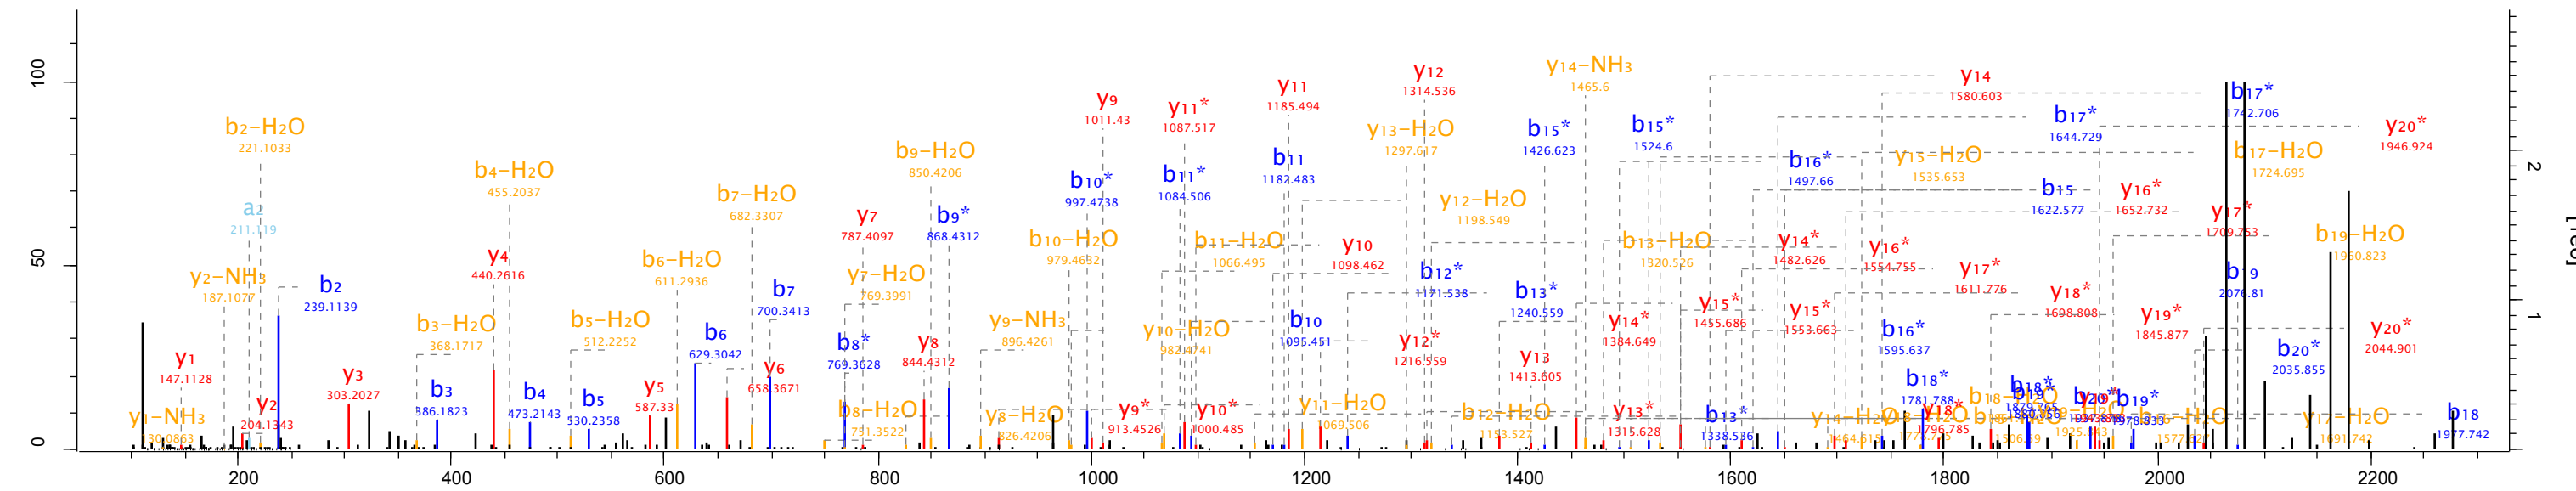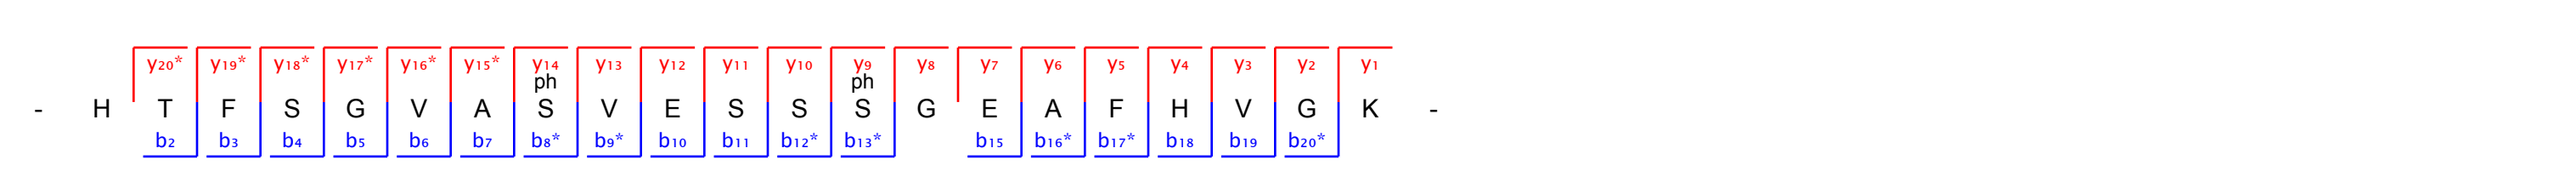

Raw file 20171215\_MaS\_33SR\_LMH\_phospho2\_03 Scan 13566 Method FTMS; HCD Score 185.43 m/z 954.72 Gene names PHF6

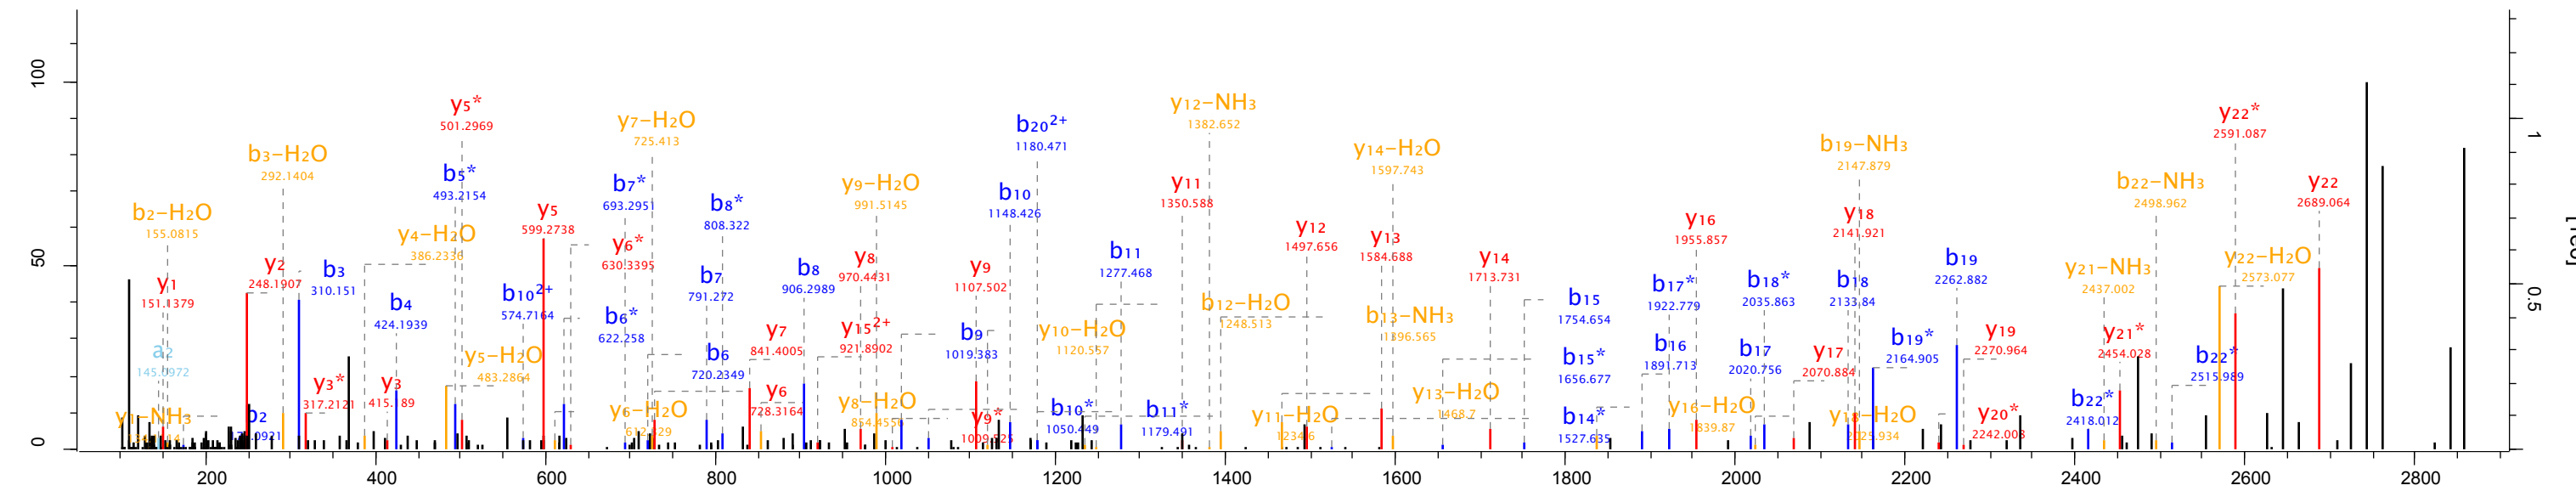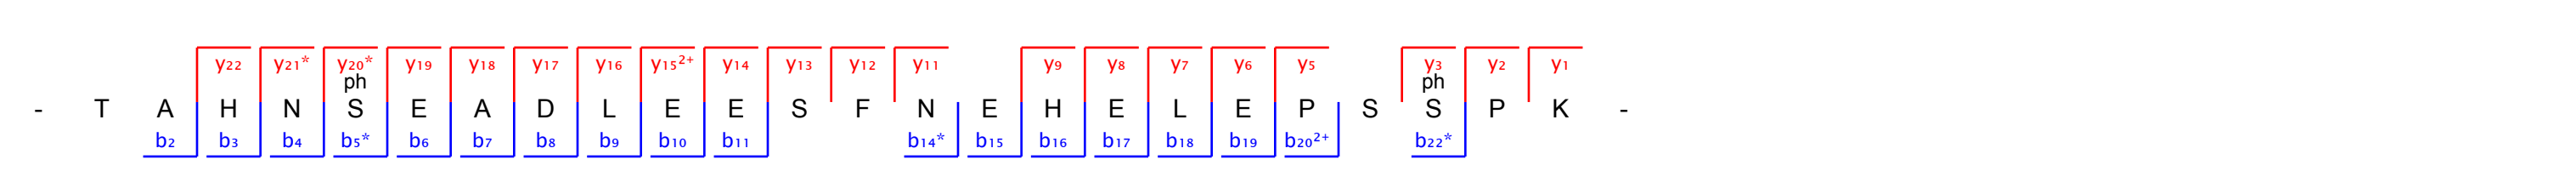

Raw file: 20171215\_MaS\_33SR\_LMH\_phospho2\_03  
 Scan: 13836 Method: FTMS; HCD Score: 377.56 m/z: 1140.97

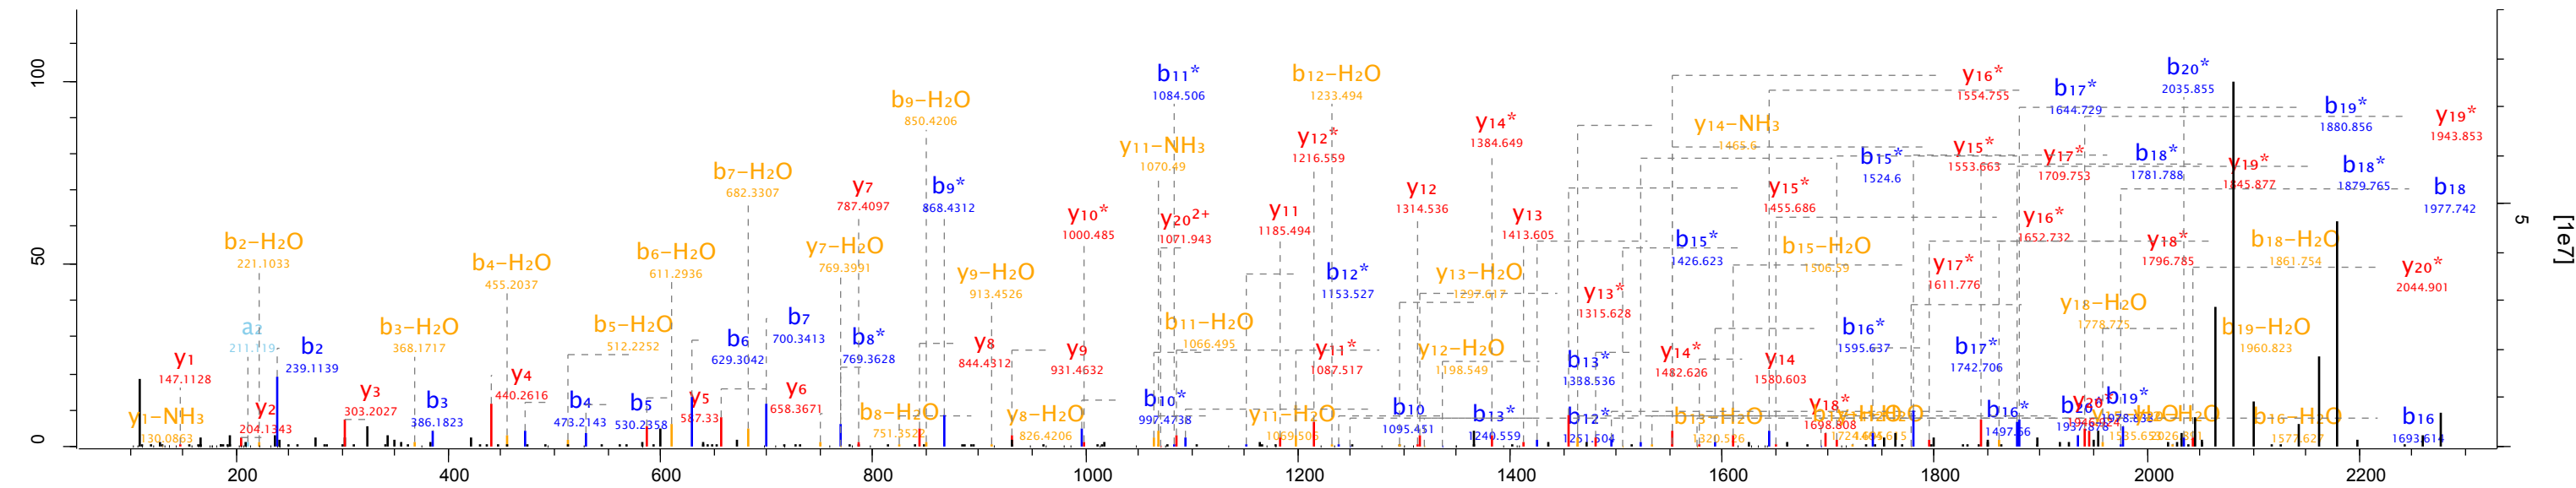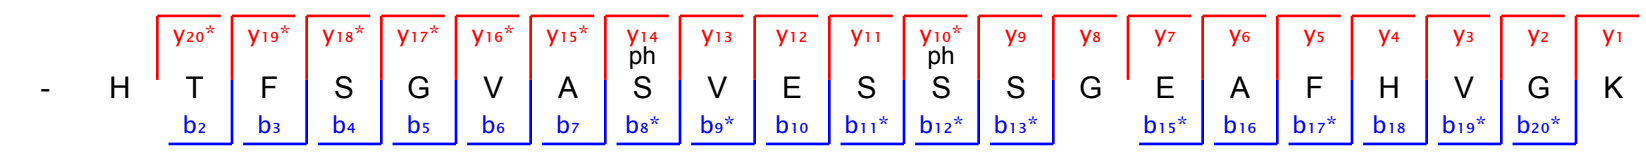

Raw file

20171215\_MaS\_33SR\_LMH\_phospho2\_03

| Scan  | Method    | Score | m/z     | Gene names |
|-------|-----------|-------|---------|------------|
| 13896 | FTMS; HCD | 44.99 | 1082.12 | NCOR2      |

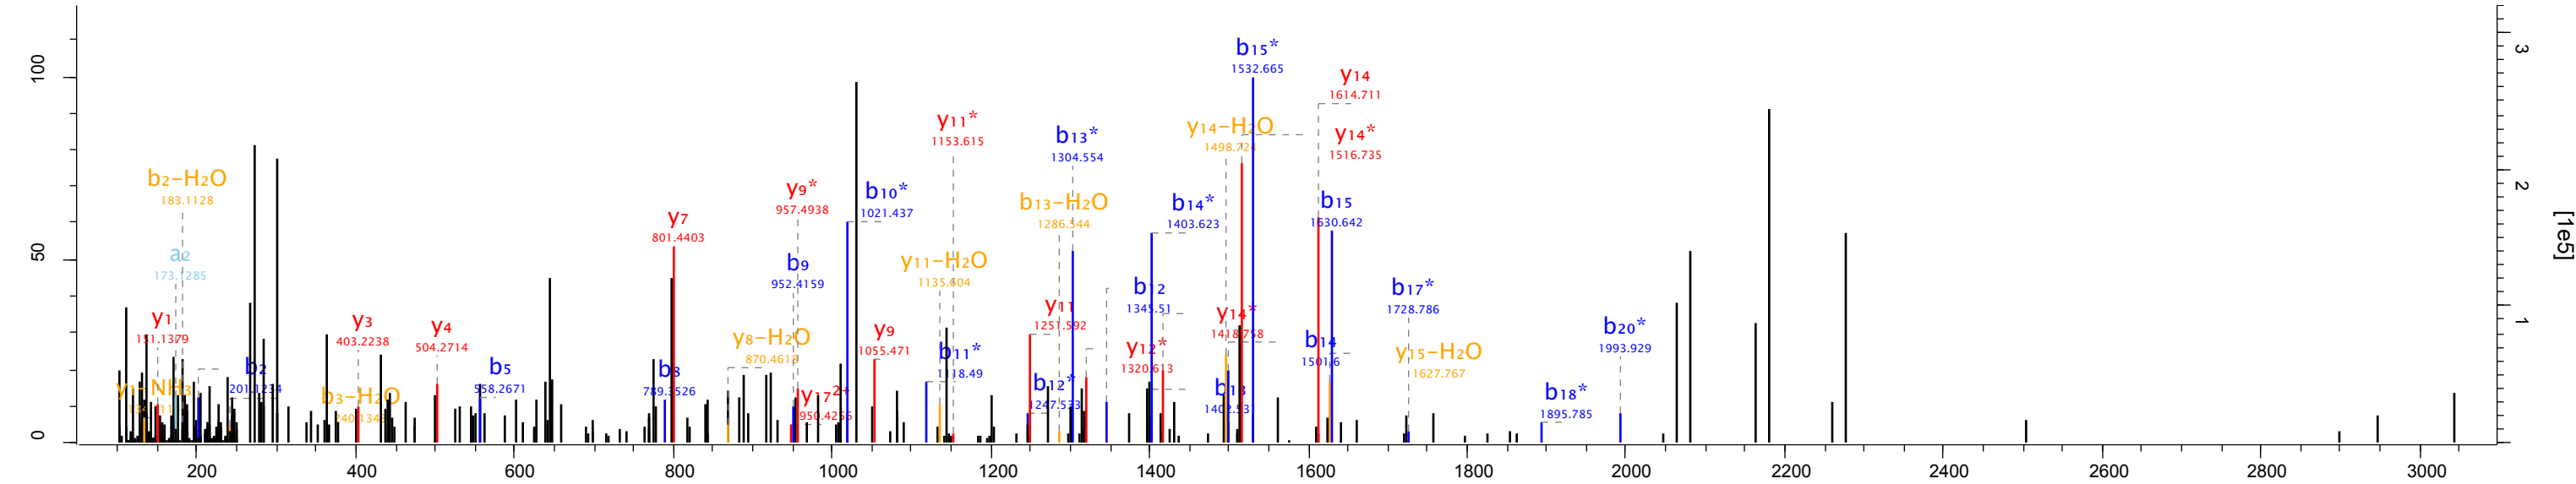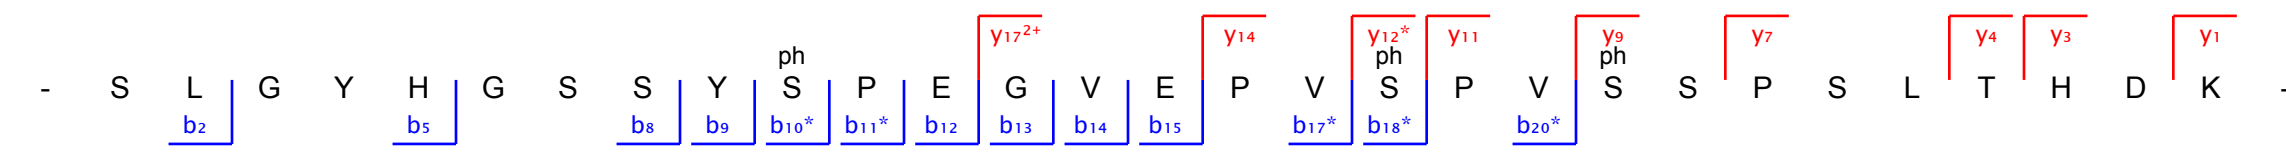

Raw file 20171215\_MaS\_33SR\_LMH\_phospho2\_03 Scan 14136 Method FTMS; HCD Score 203.06 m/z 1210.01 Gene names POLR2A

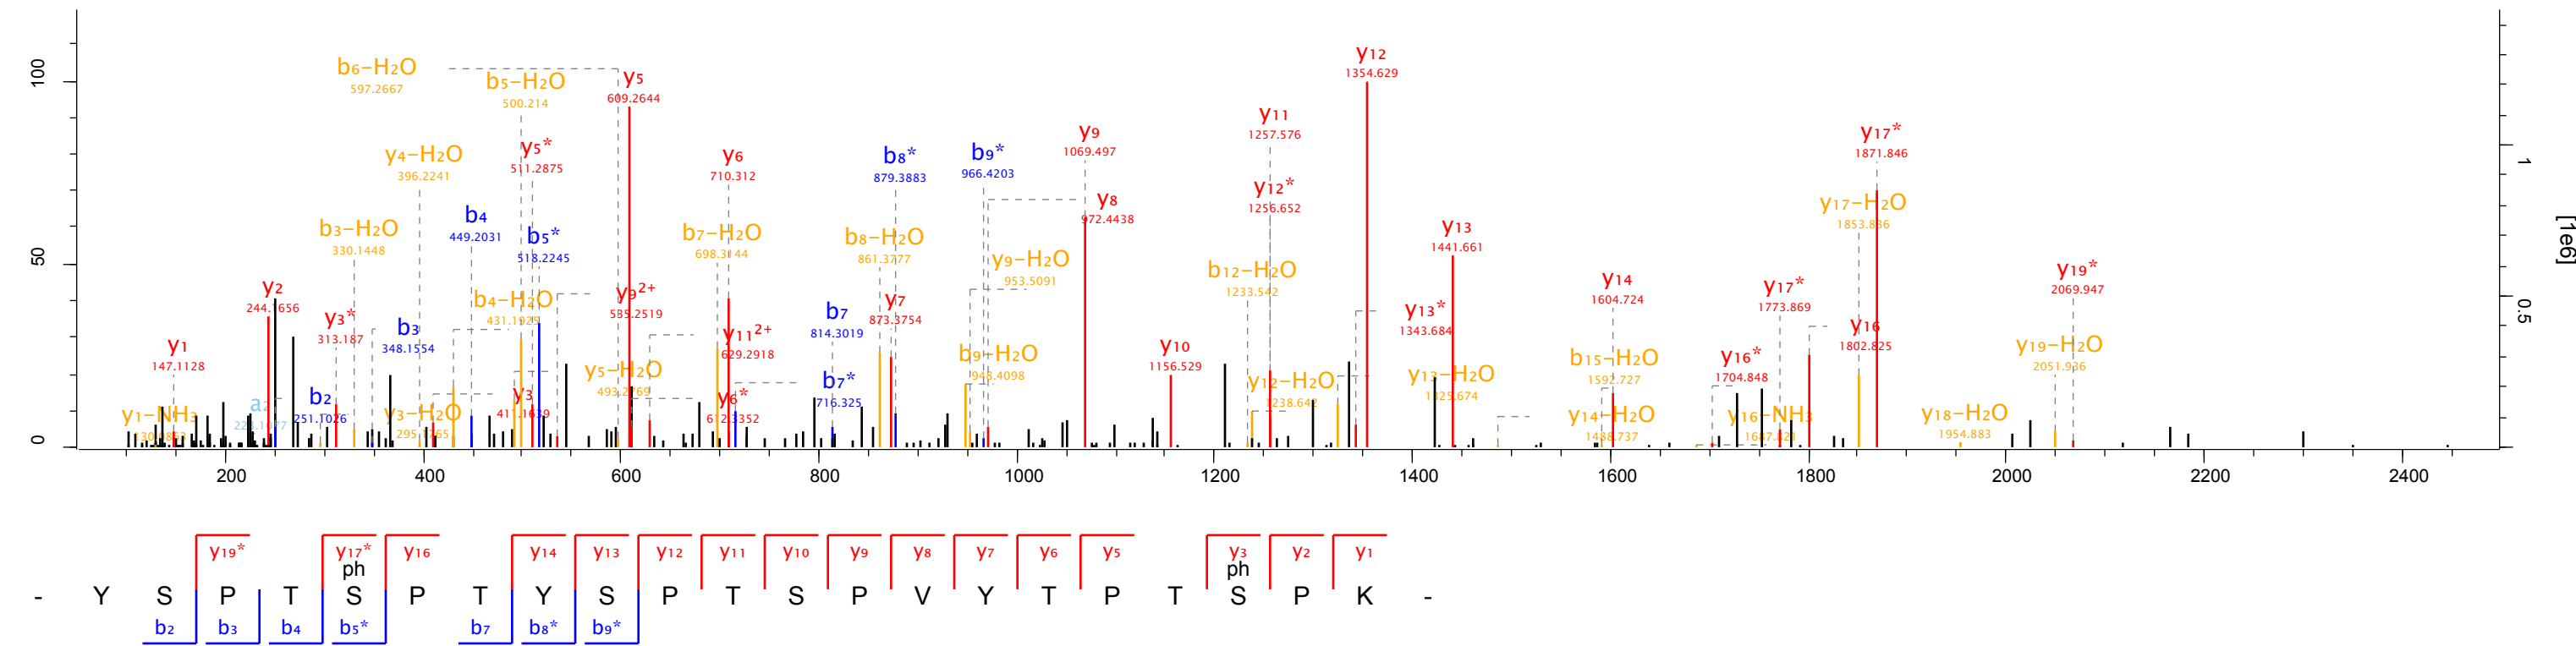

Raw file 20171215\_MaS\_33SR\_LMH\_phospho2\_03 Scan 14166 Method FTMS; HCD Score 199.87 m/z 723.64 Gene names PDXDC1

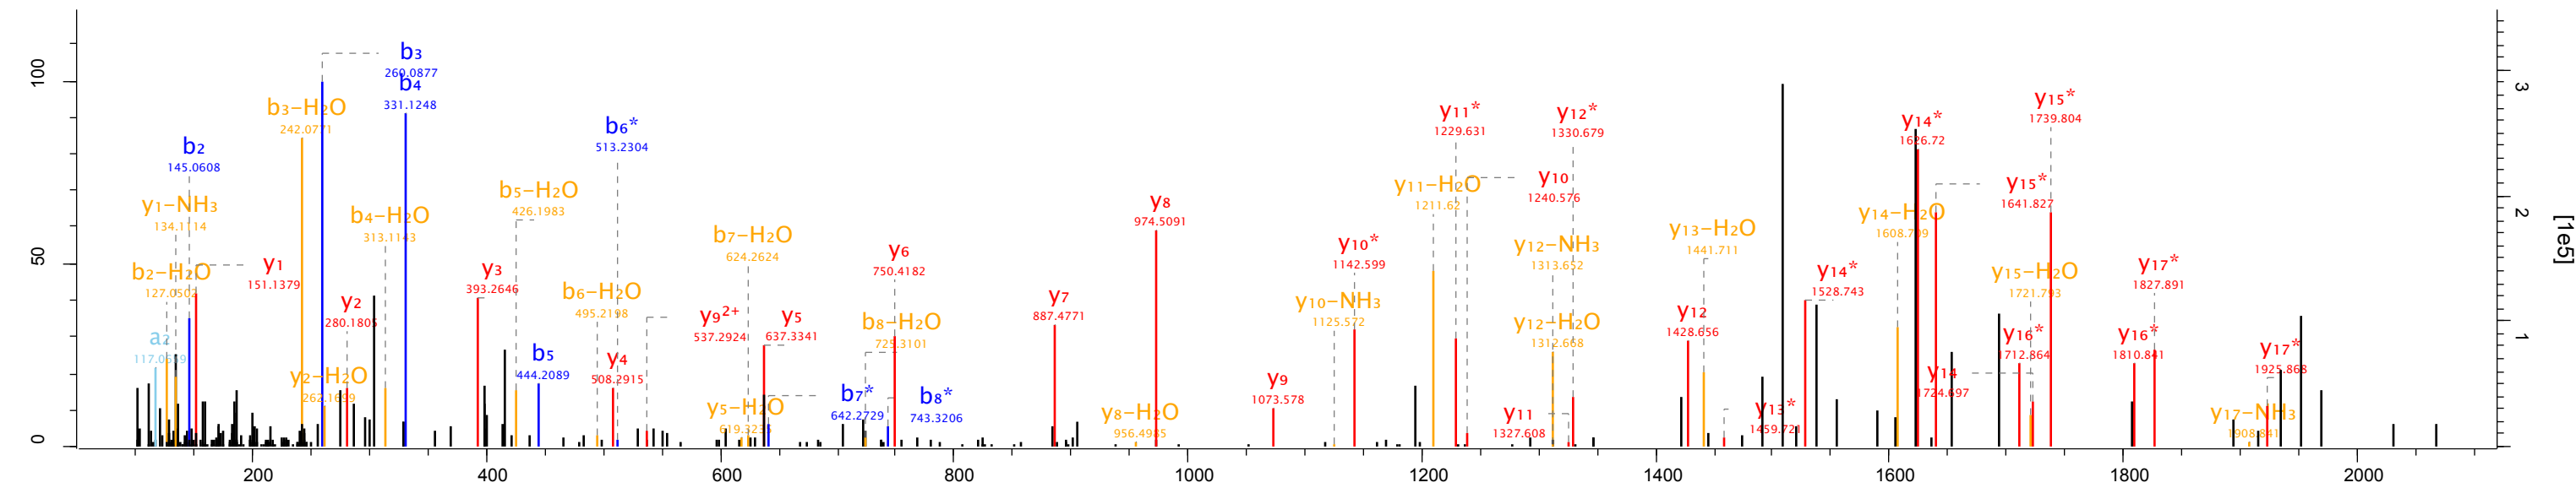

- G S D A L S E T S S V S H I E D L E K -

b<sub>2</sub>
b<sub>3</sub>
b<sub>4</sub>
b<sub>5</sub>
b<sub>6</sub><sup>\*</sup>
b<sub>7</sub><sup>\*</sup>
b<sub>8</sub><sup>\*</sup>
y<sub>17</sub><sup>\*</sup>
y<sub>16</sub><sup>\*</sup>
y<sub>15</sub><sup>\*</sup>
y<sub>14</sub><sup>ph</sup>
y<sub>13</sub><sup>\*</sup>
y<sub>12</sub>
y<sub>11</sub>
y<sub>10</sub><sup>ph</sup>
y<sub>9</sub>
y<sub>8</sub>
y<sub>7</sub>
y<sub>6</sub>
y<sub>5</sub>
y<sub>4</sub>
y<sub>3</sub>
y<sub>2</sub>
y<sub>1</sub>

Raw file 20171215\_MaS\_33SR\_LMH\_phospho2\_03 Scan 14286 Method FTMS; HCD Score 161.61 m/z 708.33 Gene names ATRX

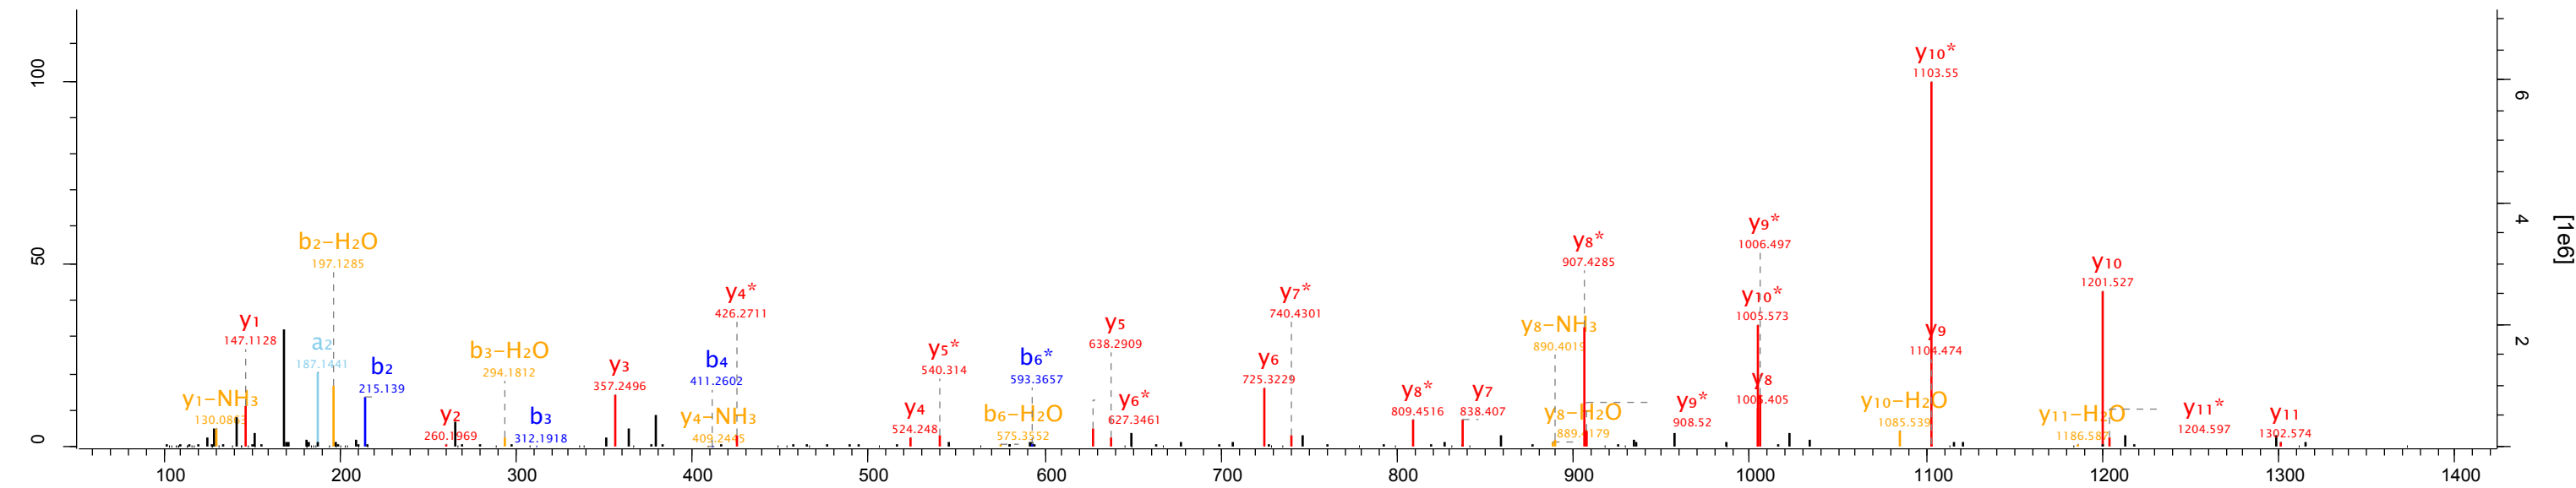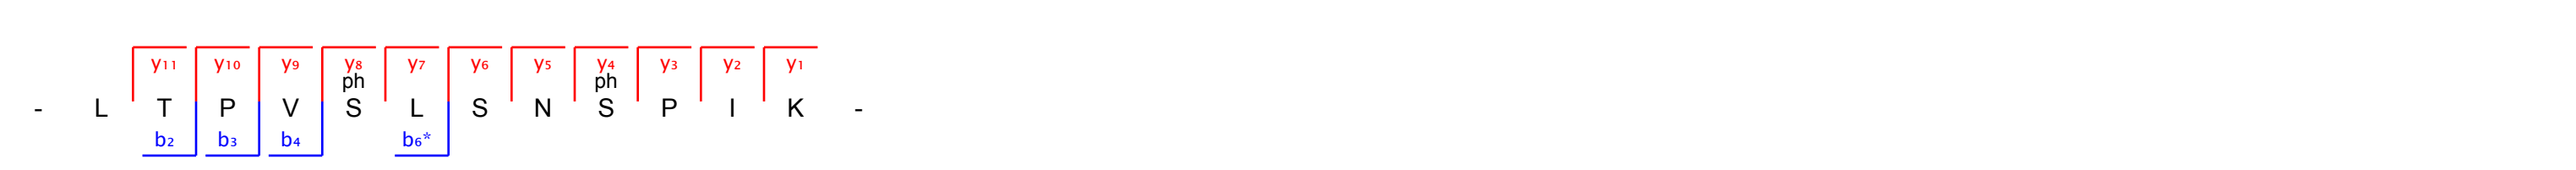



Raw file  
20171215\_MaS\_33SR\_LMH\_phospho2\_03

Scan 14476 Method FTMS; HCD Score 289.56 m/z 911.05 Gene names TMPO

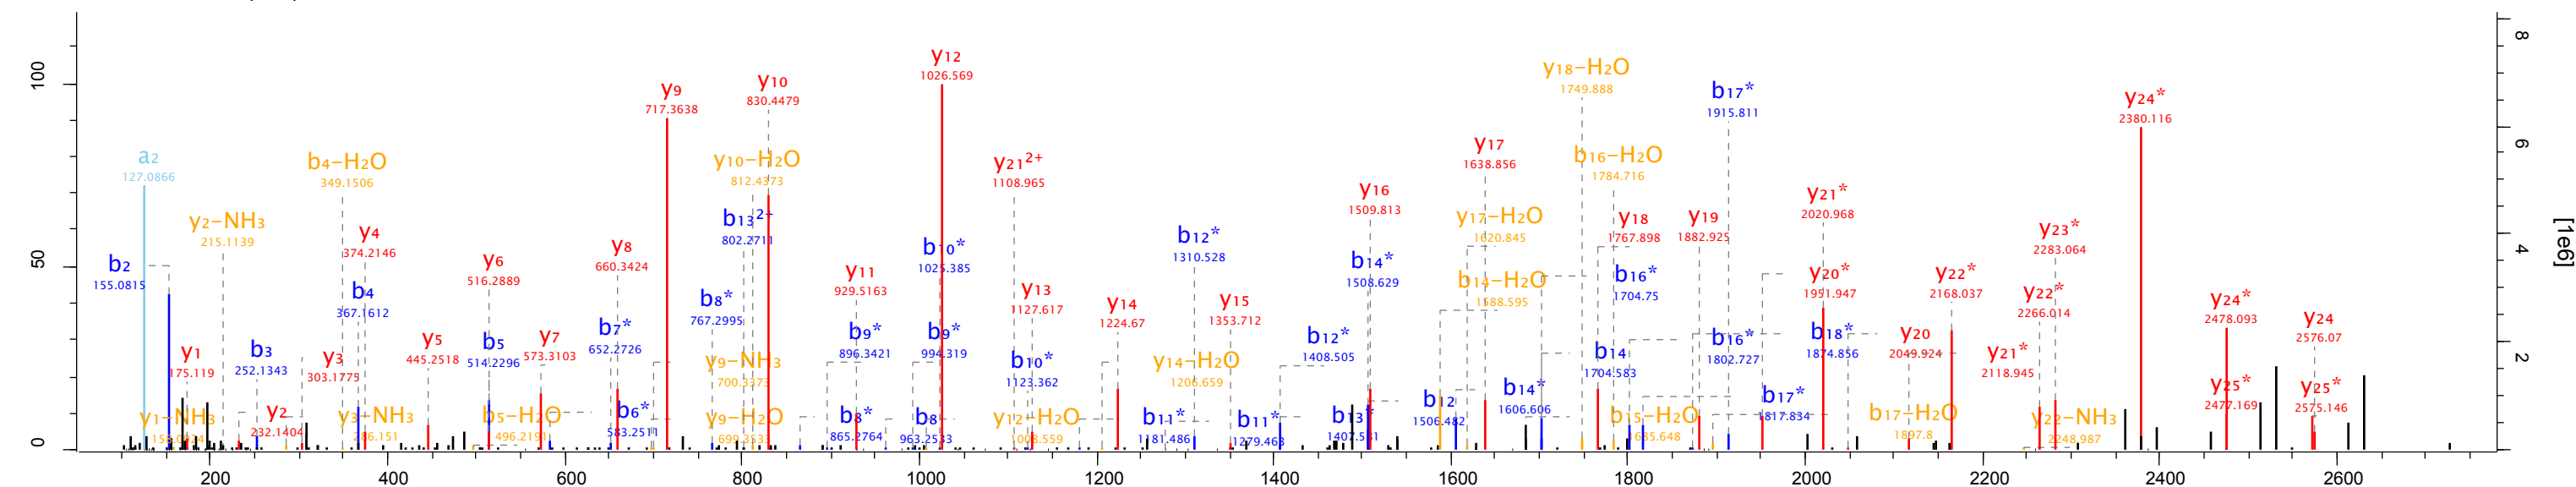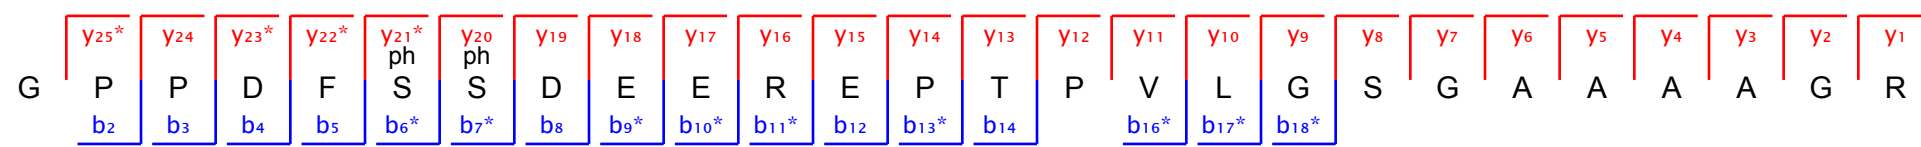

Raw file 20171215\_MaS\_33SR\_LMH\_phospho2\_03 Scan 14496 Method FTMS; HCD Score 207.18 m/z 849.73 Gene names MAP1B

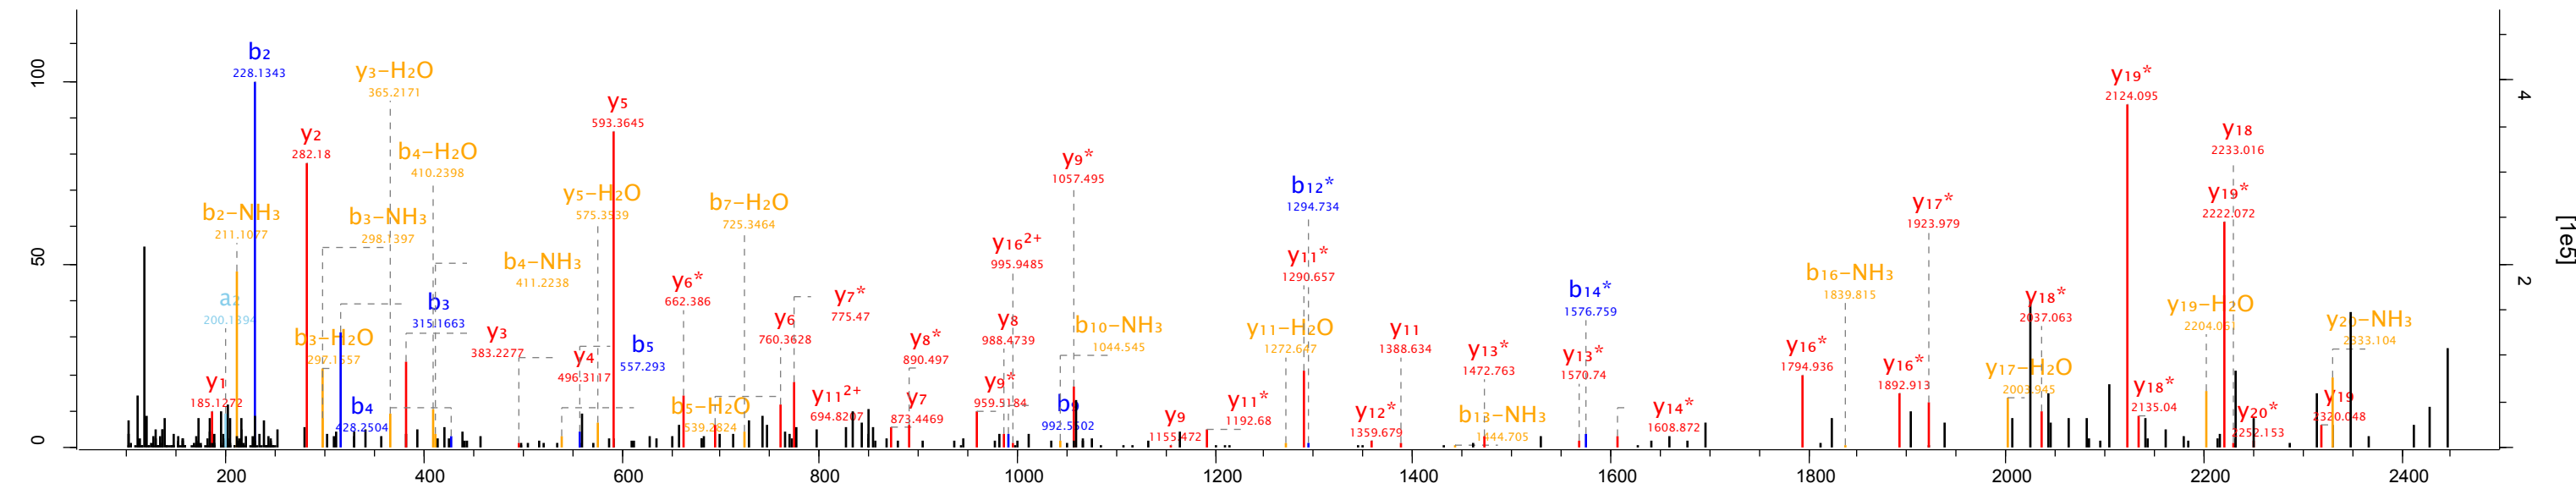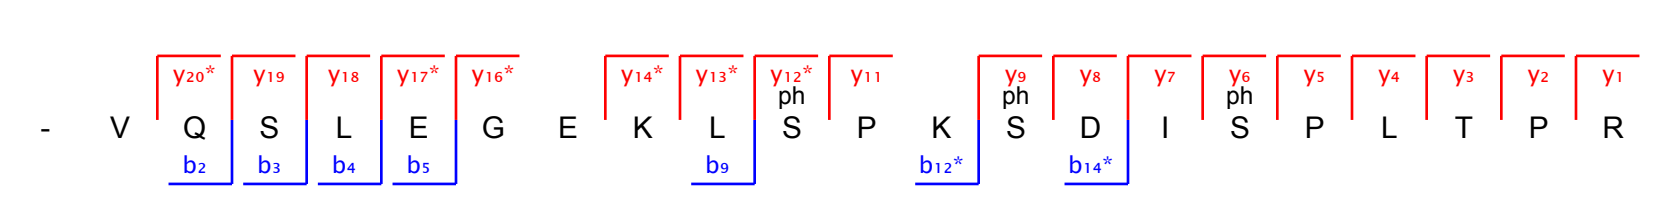

Raw file 20171215\_MaS\_33SR\_LMH\_phospho2\_03 Scan 14846 Method FTMS; HCD Score 124.18 m/z 716.34 Gene names AHCTF1

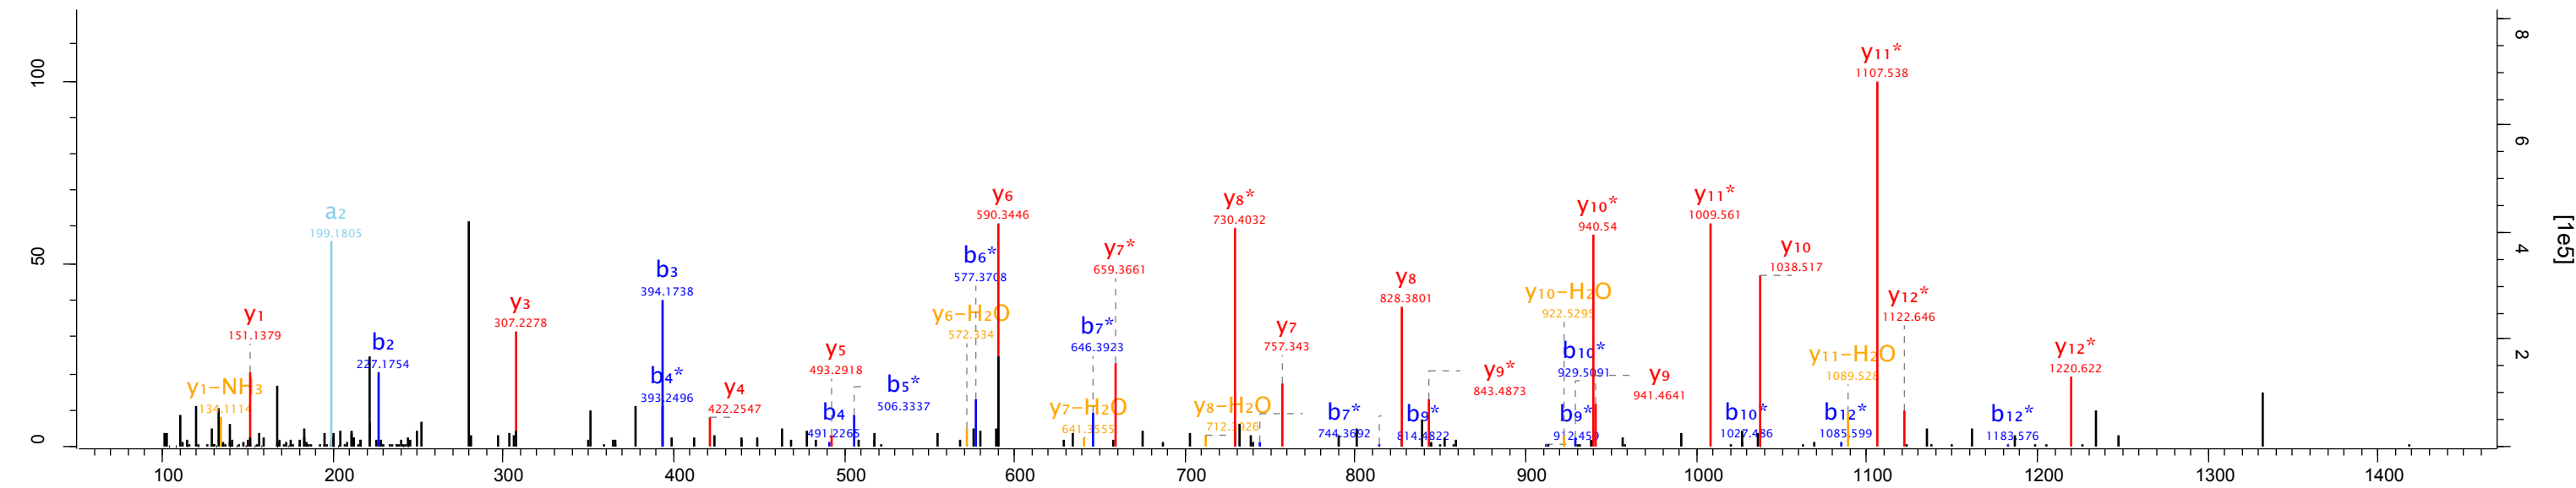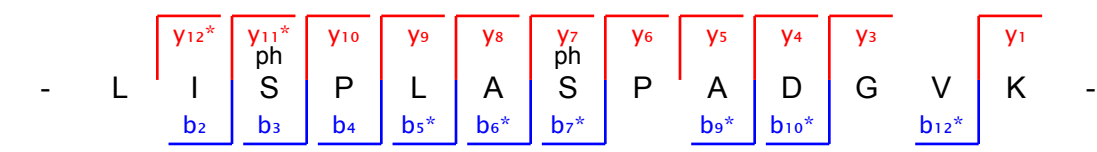

Raw file 20171215\_MaS\_33SR\_LMH\_phospho2\_03 Scan 14906 Method FTMS; HCD Score 71.49 m/z 706.95 Gene names PPID

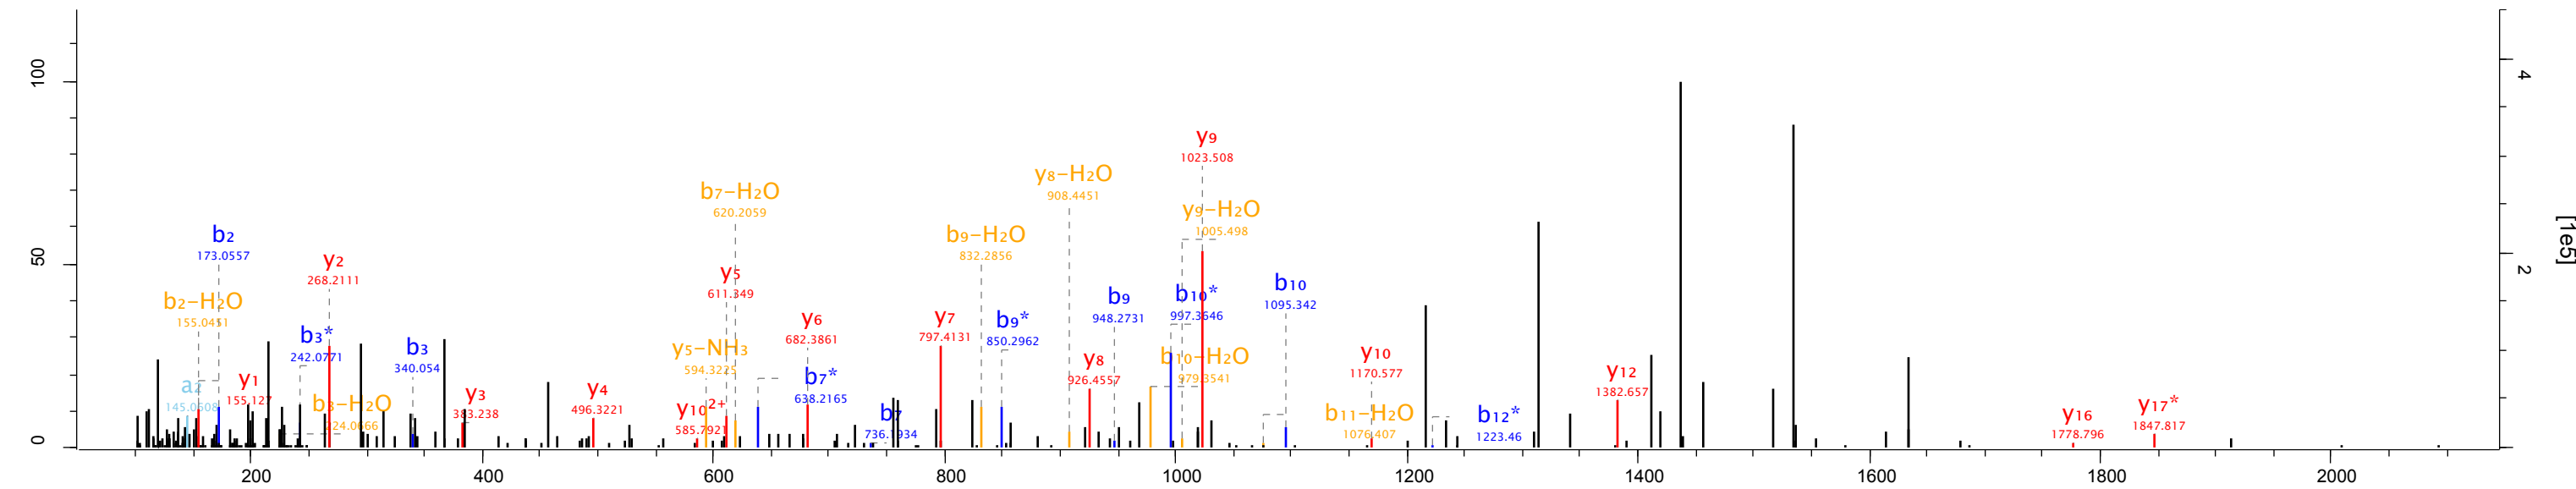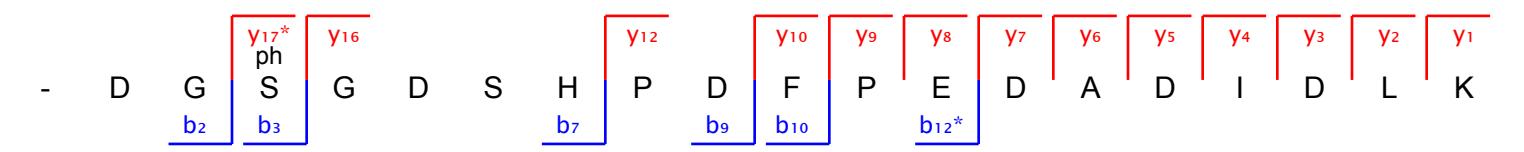

Raw file  
20171215\_MaS\_33SR\_LMH\_phospho2\_03

Scan 14946 Method FTMS; HCD Score 136.03 m/z 1289.07 Gene names NCOR1

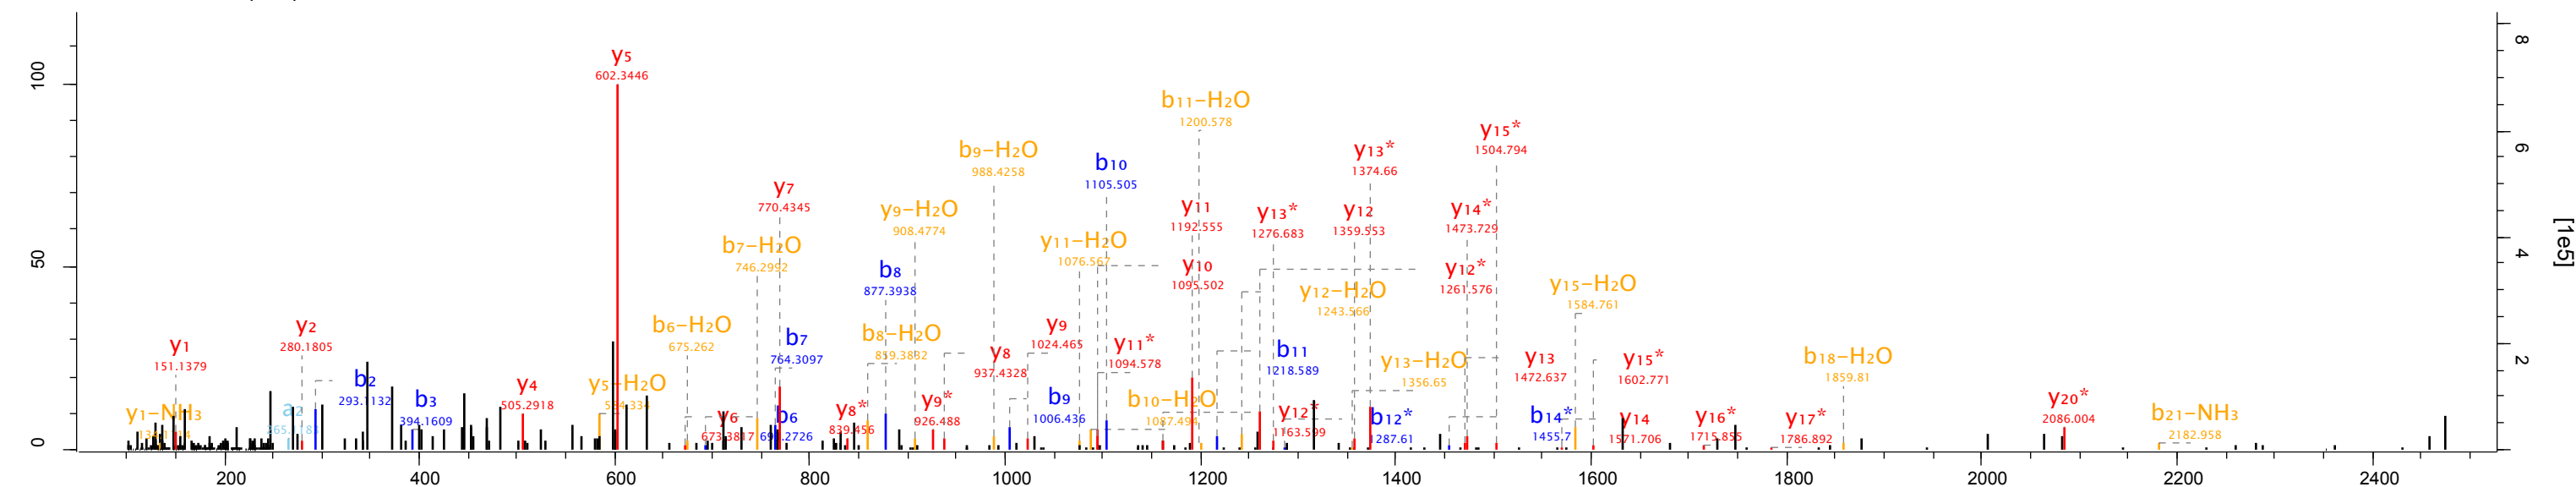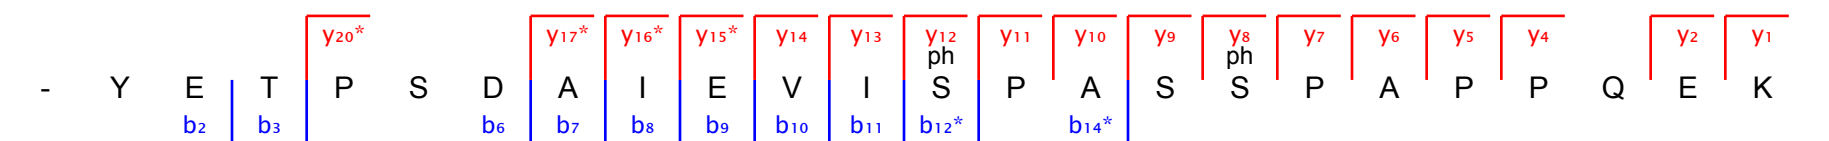

Raw file

20171215\_MaS\_33SR\_LMH\_phospho2\_03

| Scan  | Method    | Score | m/z    | Gene names |
|-------|-----------|-------|--------|------------|
| 15446 | FTMS; HCD | 45.38 | 534.72 | GYG2       |

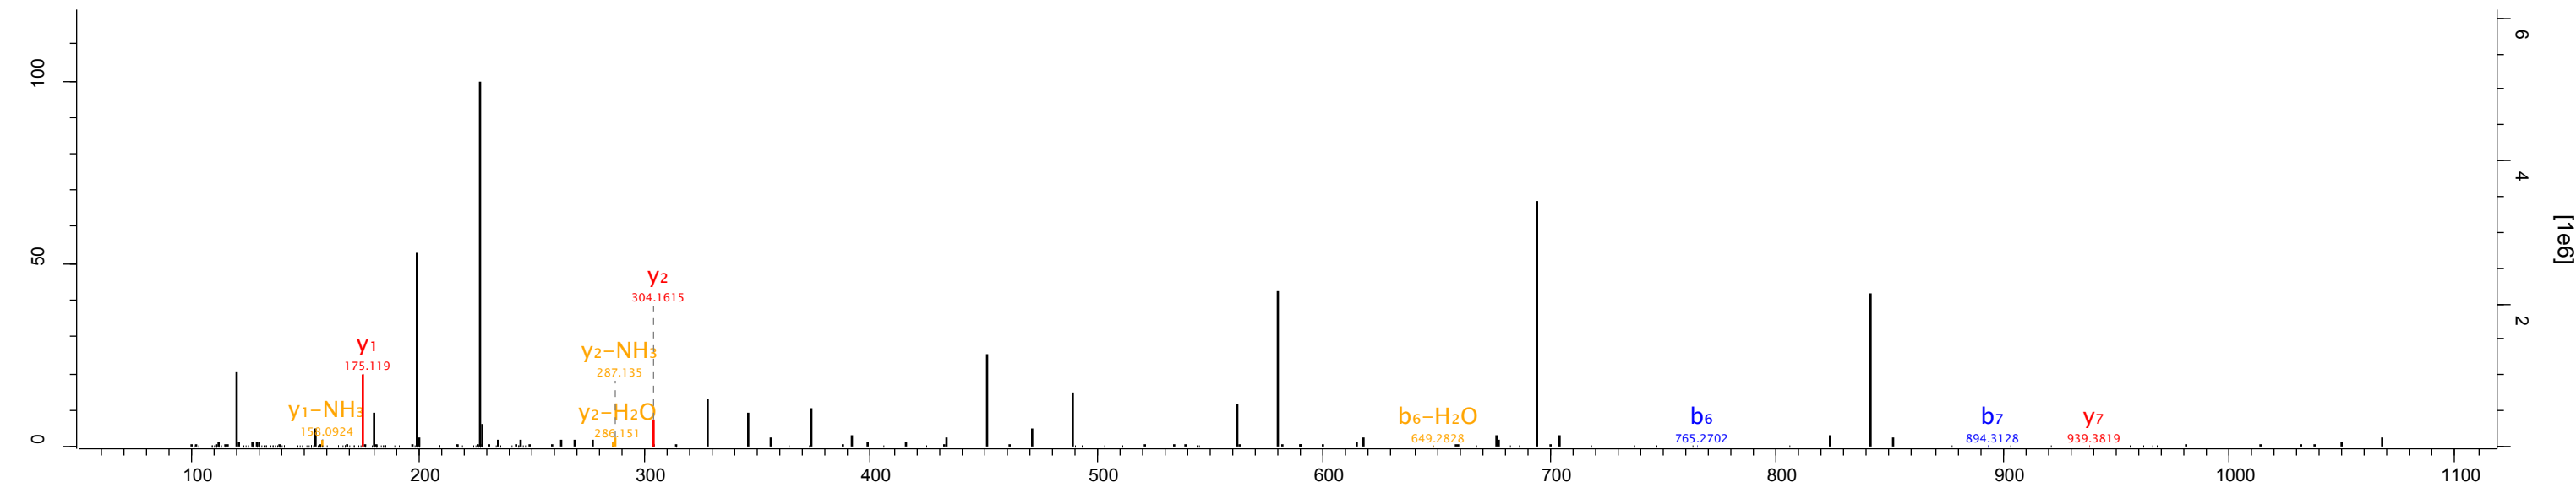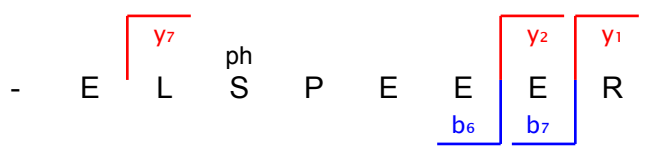

Raw file: 20171215\_MaS\_33SR\_LMH\_phospho2\_03  
 Scan: 15506 Method: FTMS; HCD Score: 112.39 m/z: 1041.46 Gene names: LRCH1

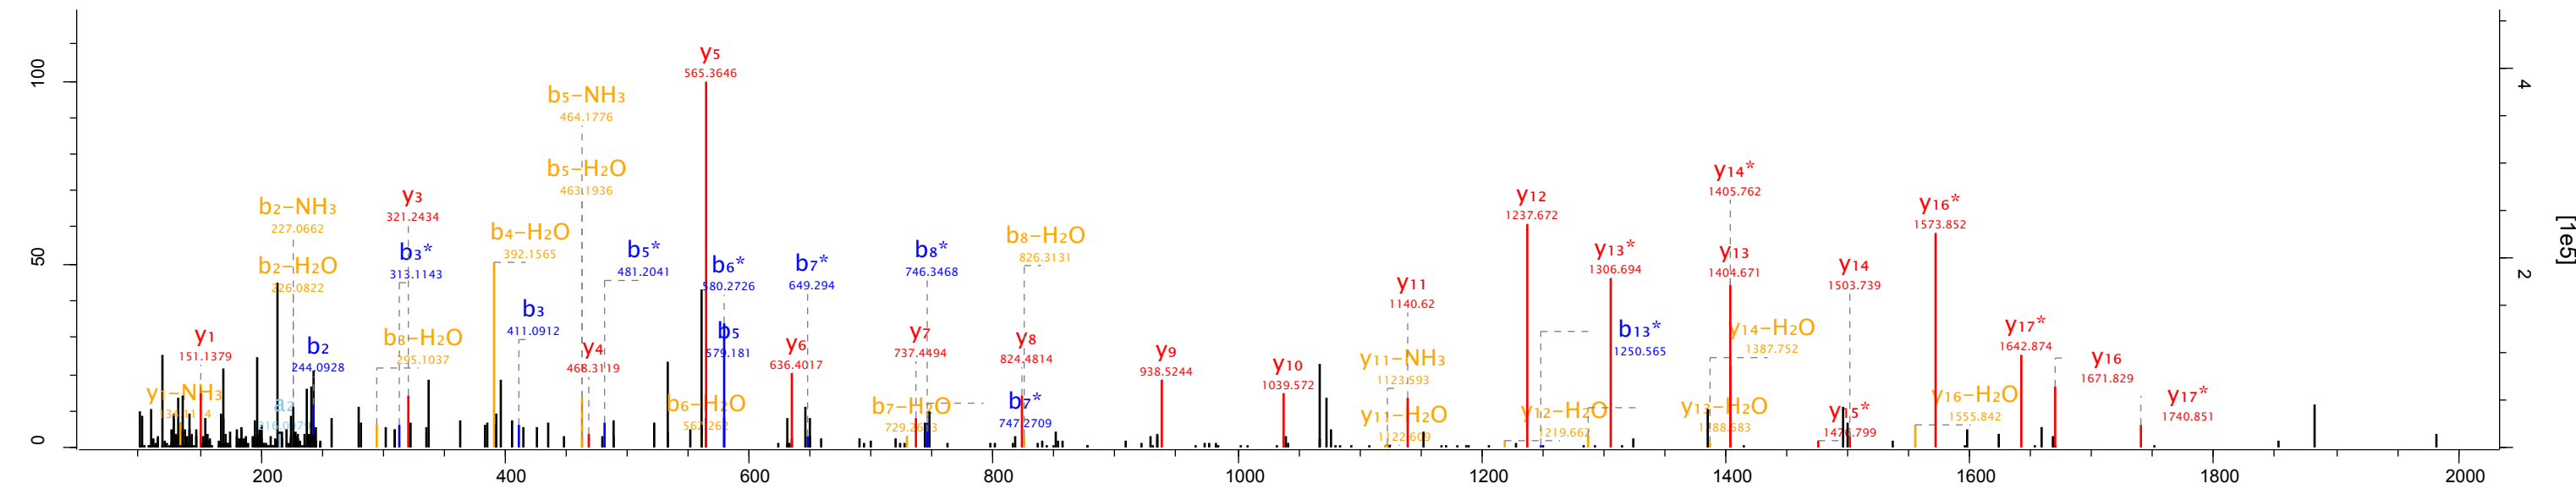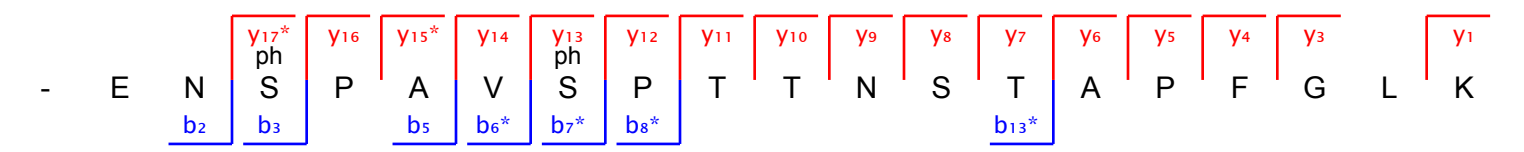

Raw file 20171215\_MaS\_33SR\_LMH\_phospho2\_03 Scan 15586 Method FTMS; HCD Score 140.36 m/z 953.42 Gene names RTN4

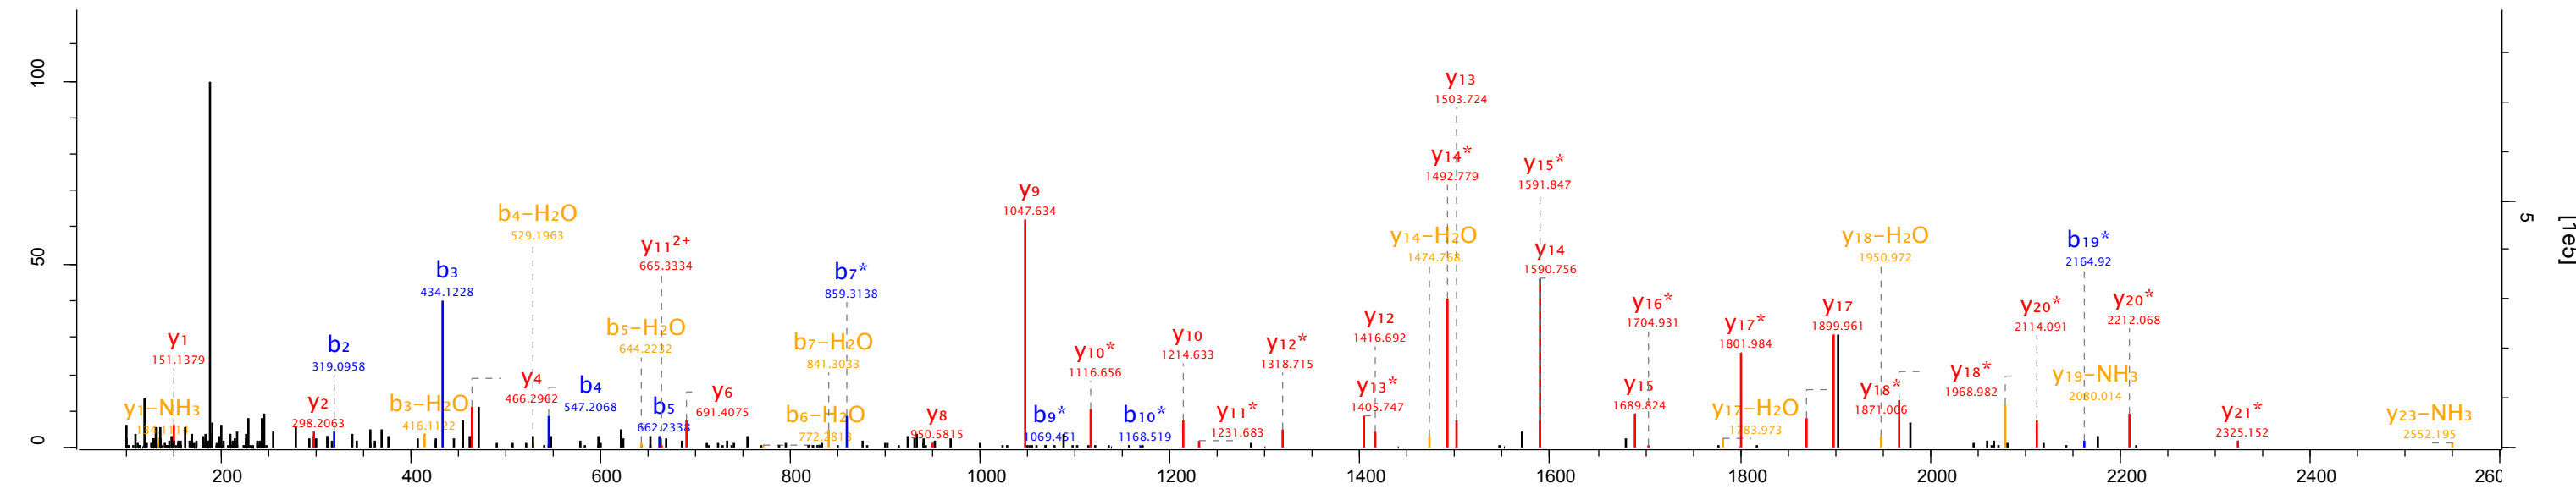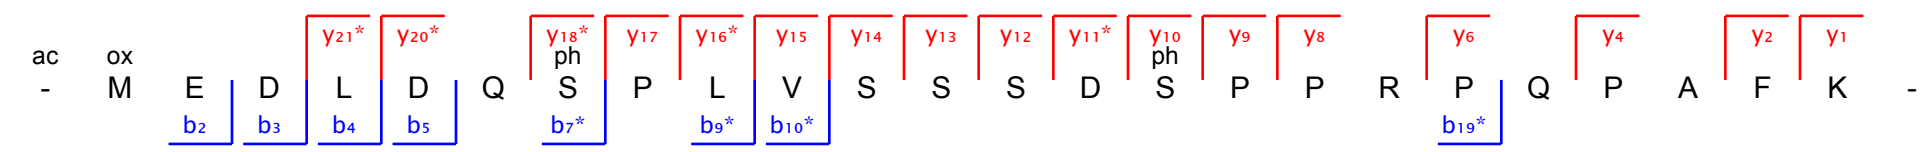



Raw file: 20171215\_MaS\_33SR\_LMH\_phospho2\_03  
 Scan: 15816 Method: FTMS; HCD Score: 149.82 m/z: 1510.65 Gene names: PACSIN2

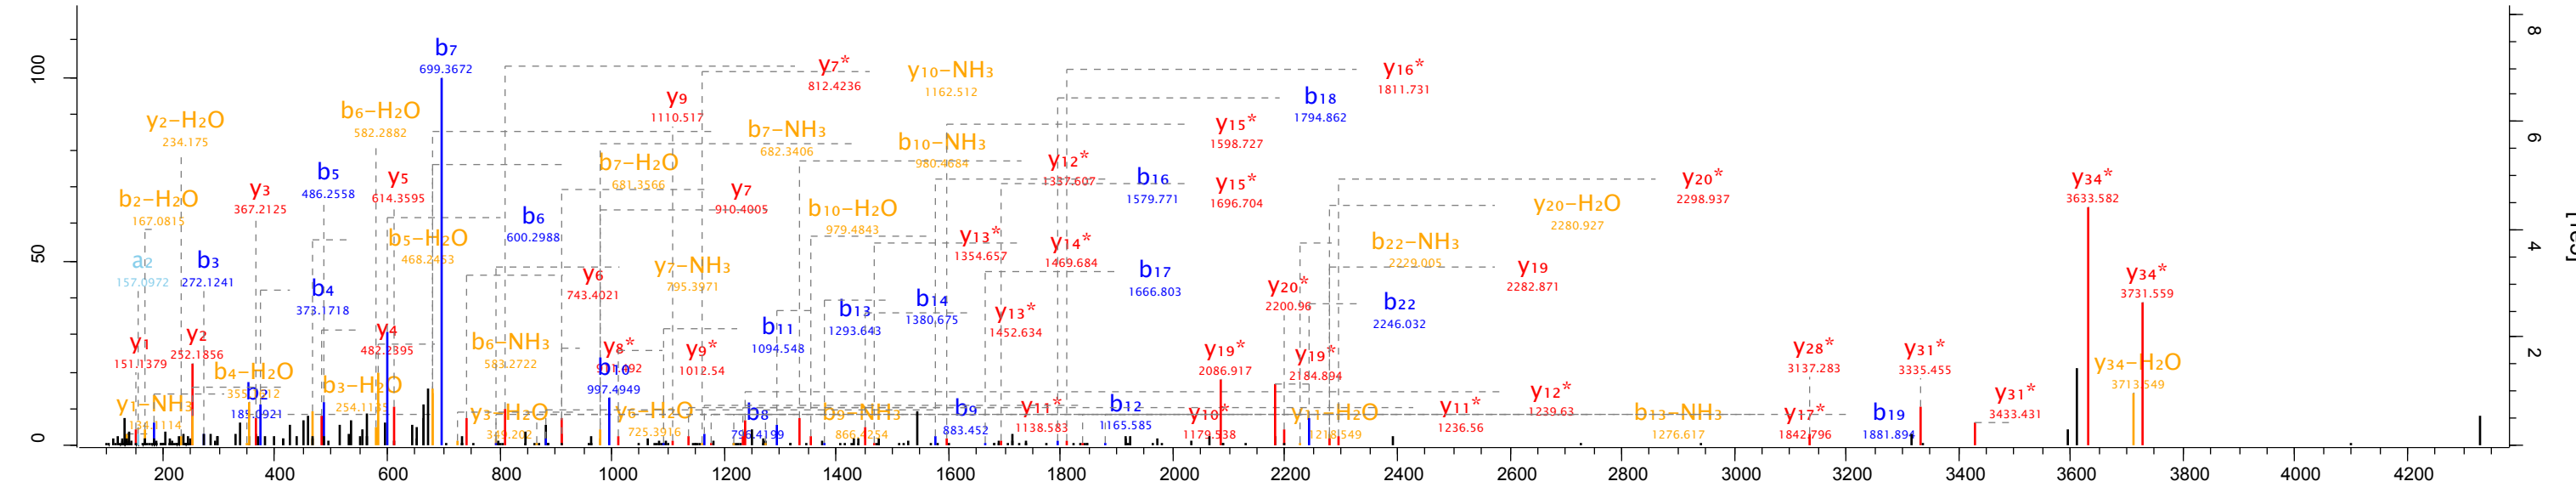

- P S S T L N V P S N P A Q S A Q S Q S S Y N P F E D E D D T G S T V S E K D  
 b<sub>2</sub> b<sub>3</sub> b<sub>4</sub> b<sub>5</sub> b<sub>6</sub> b<sub>7</sub> b<sub>8</sub> b<sub>9</sub> b<sub>10</sub> b<sub>11</sub> b<sub>12</sub> b<sub>13</sub> b<sub>14</sub> b<sub>16</sub> b<sub>17</sub> b<sub>18</sub> b<sub>19</sub> b<sub>22</sub>  
 y<sub>3</sub> y<sub>2</sub> y<sub>1</sub> y<sub>34</sub>\* y<sub>31</sub>\* y<sub>28</sub>\* y<sub>20</sub>\* y<sub>19</sub> y<sub>17</sub>\* y<sub>16</sub>\* y<sub>15</sub>\* y<sub>14</sub>\* y<sub>13</sub>\* y<sub>12</sub>\* y<sub>11</sub>\* y<sub>10</sub>\* y<sub>9</sub> y<sub>8</sub>\* y<sub>7</sub> y<sub>6</sub> y<sub>5</sub> y<sub>4</sub>  
 D T K -

Raw file 20171215\_MaS\_33SR\_LMH\_phospho2\_03 Scan 15896 Method FTMS; HCD Score 69.54 m/z 1032.09 Gene names NFIB

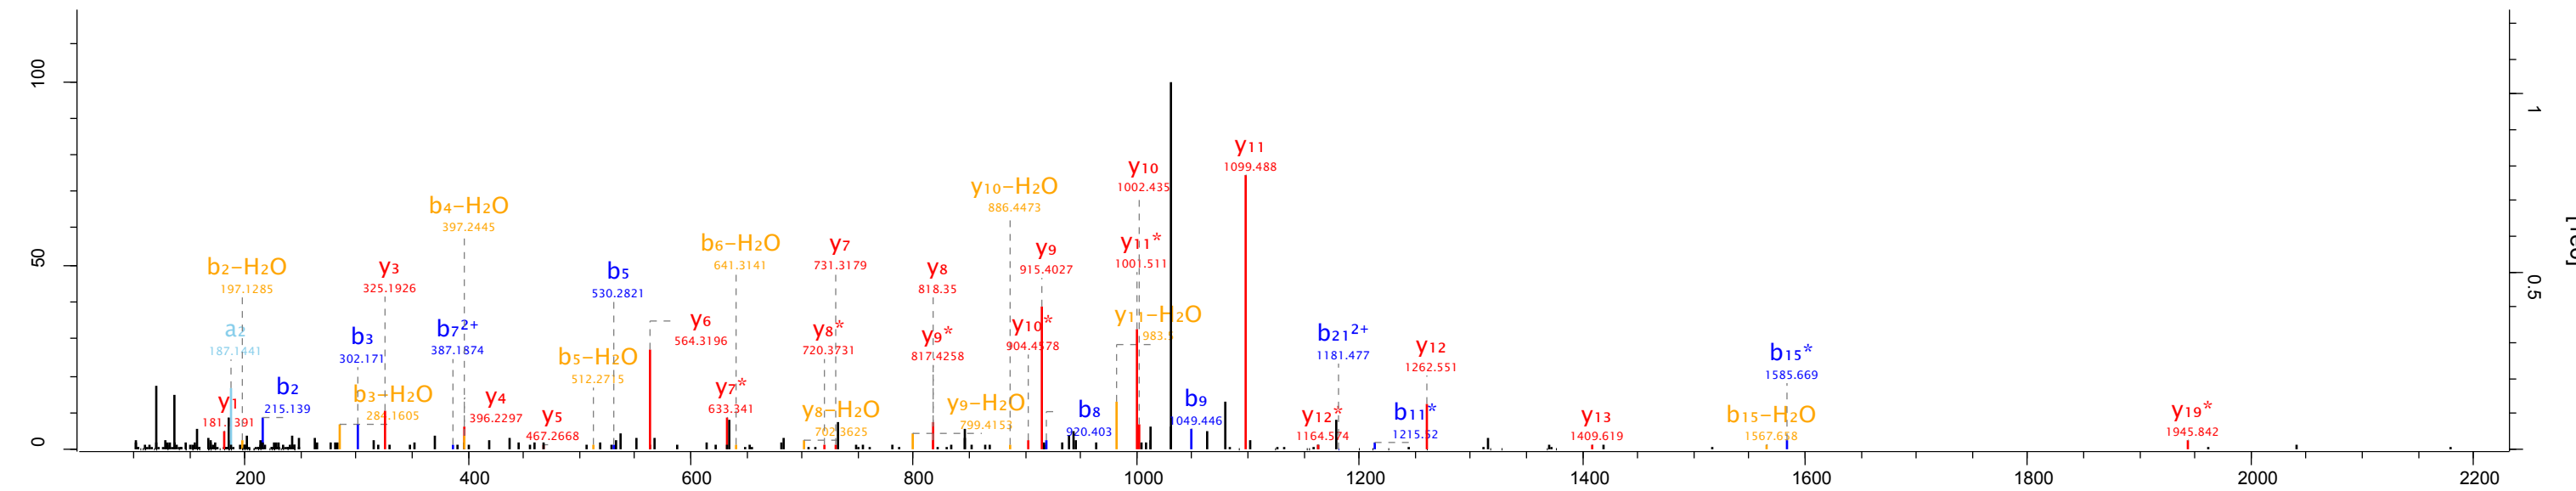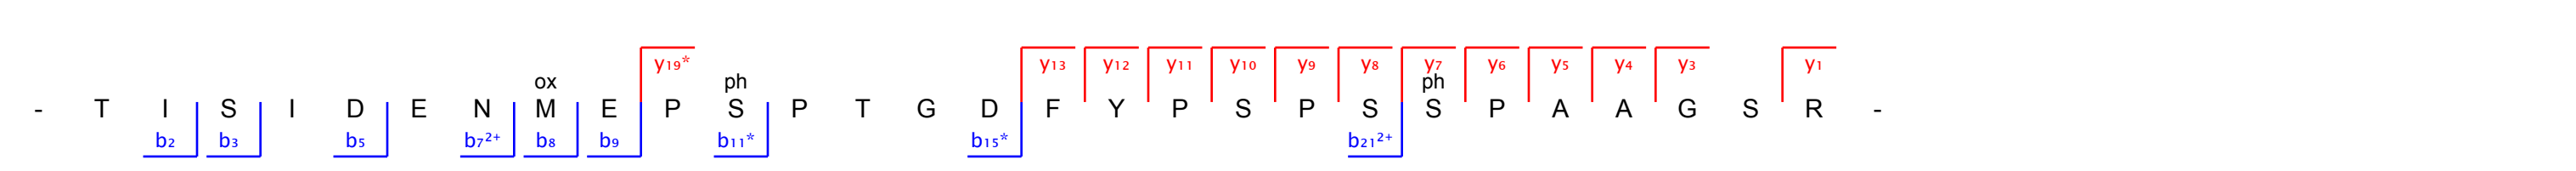

Raw file: 20171215\_MaS\_33SR\_LMH\_phospho2\_03  
 Scan: 15956 Method: FTMS; HCD Score: 162.61 m/z: 810.31 Gene names: FKBP15

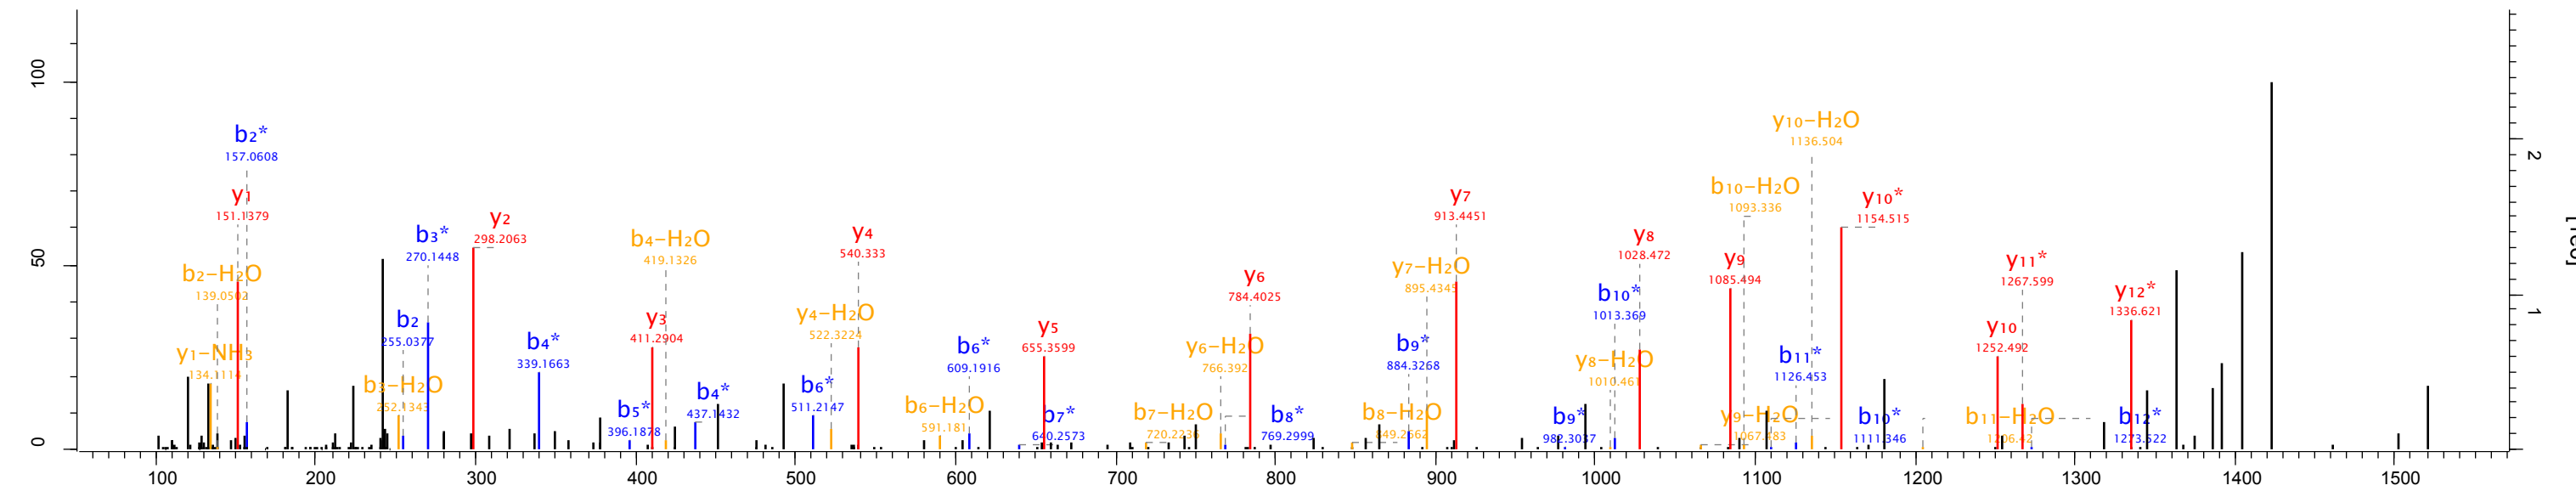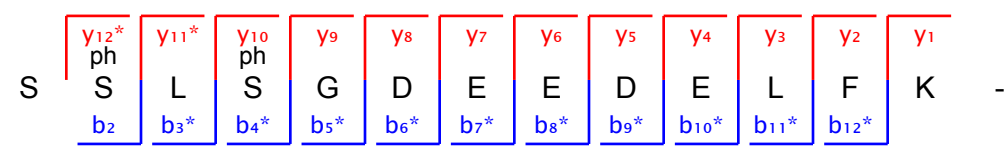



Raw file 20171215\_MaS\_33SR\_LMH\_phospho2\_03 Scan 16346 Method FTMS; HCD Score 105.57 m/z 1131.84 Gene names SMARCA4

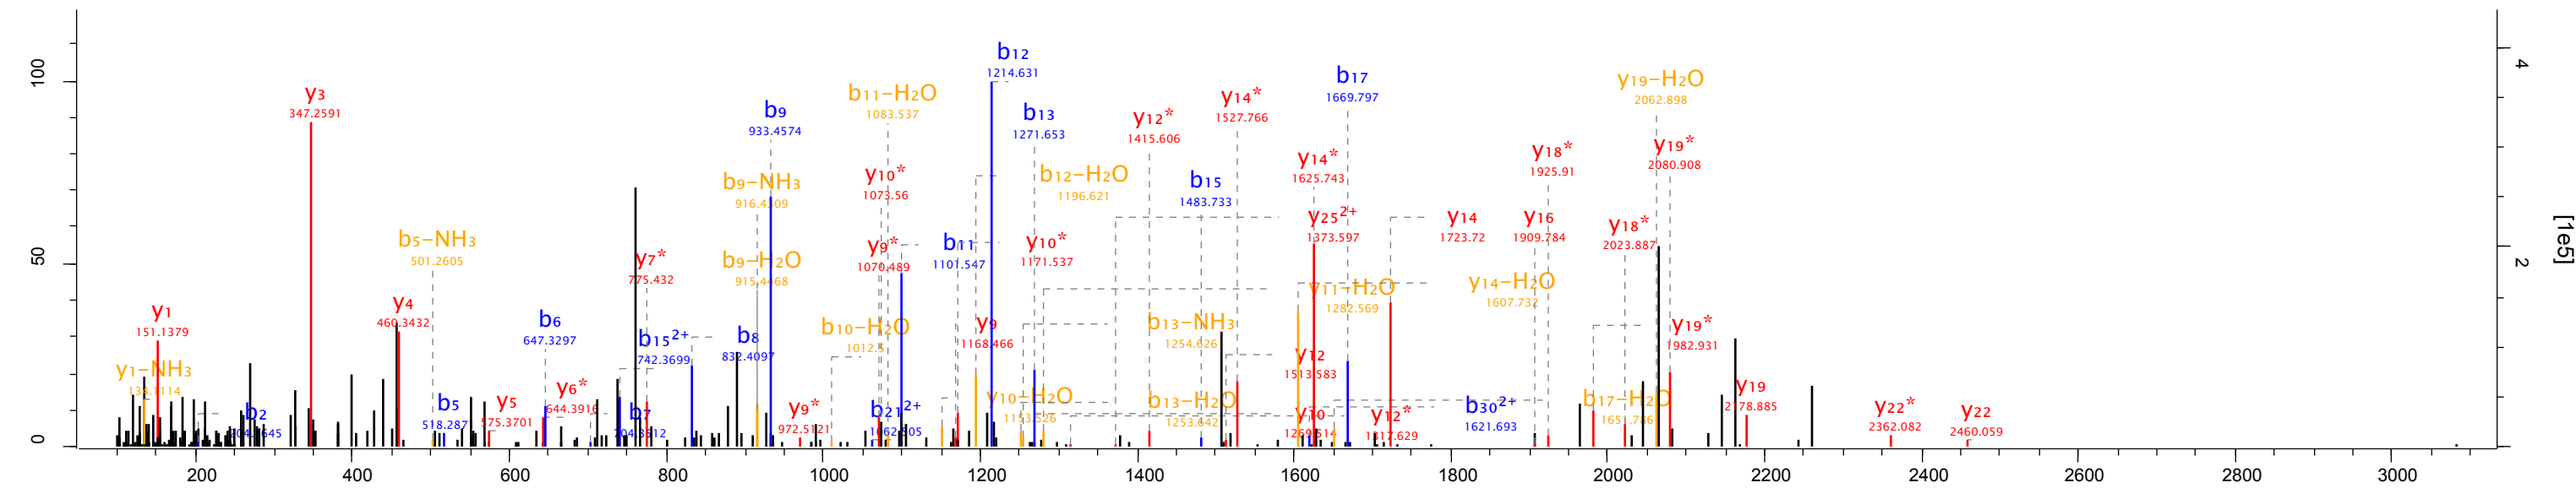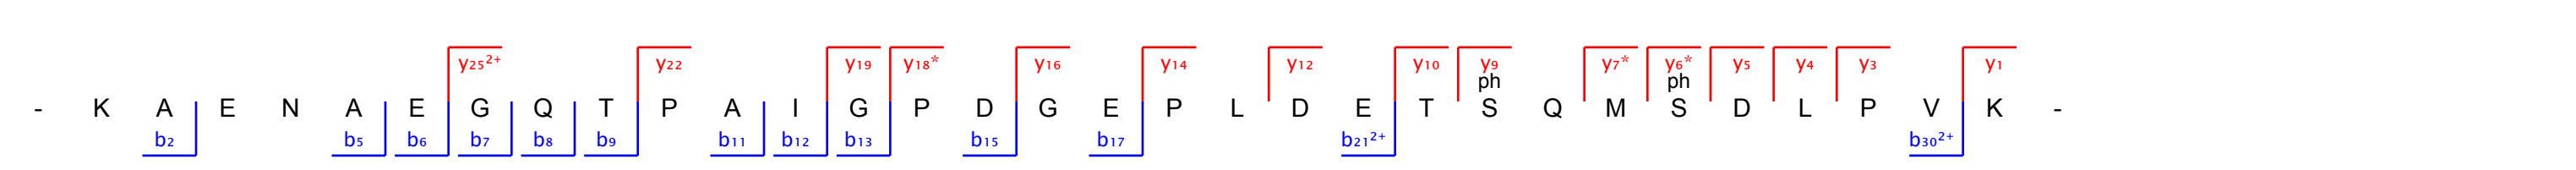

Raw file 20171215\_MaS\_33SR\_LMH\_phospho2\_03 Scan 16406 Method FTMS; HCD Score 173.26 m/z 686.28 Gene names MAP1B

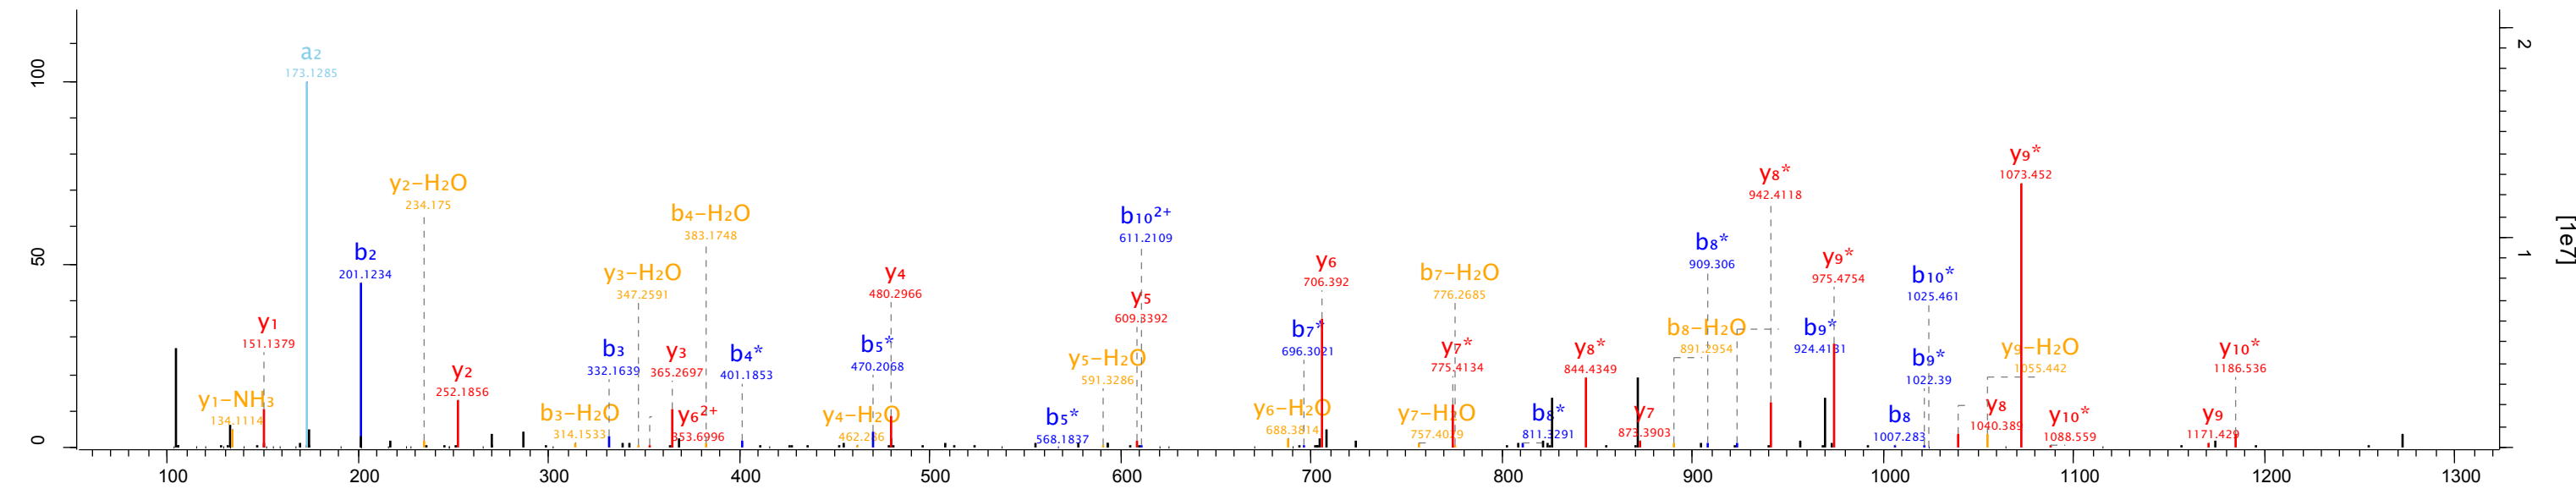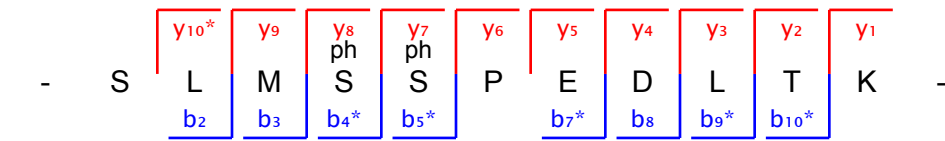

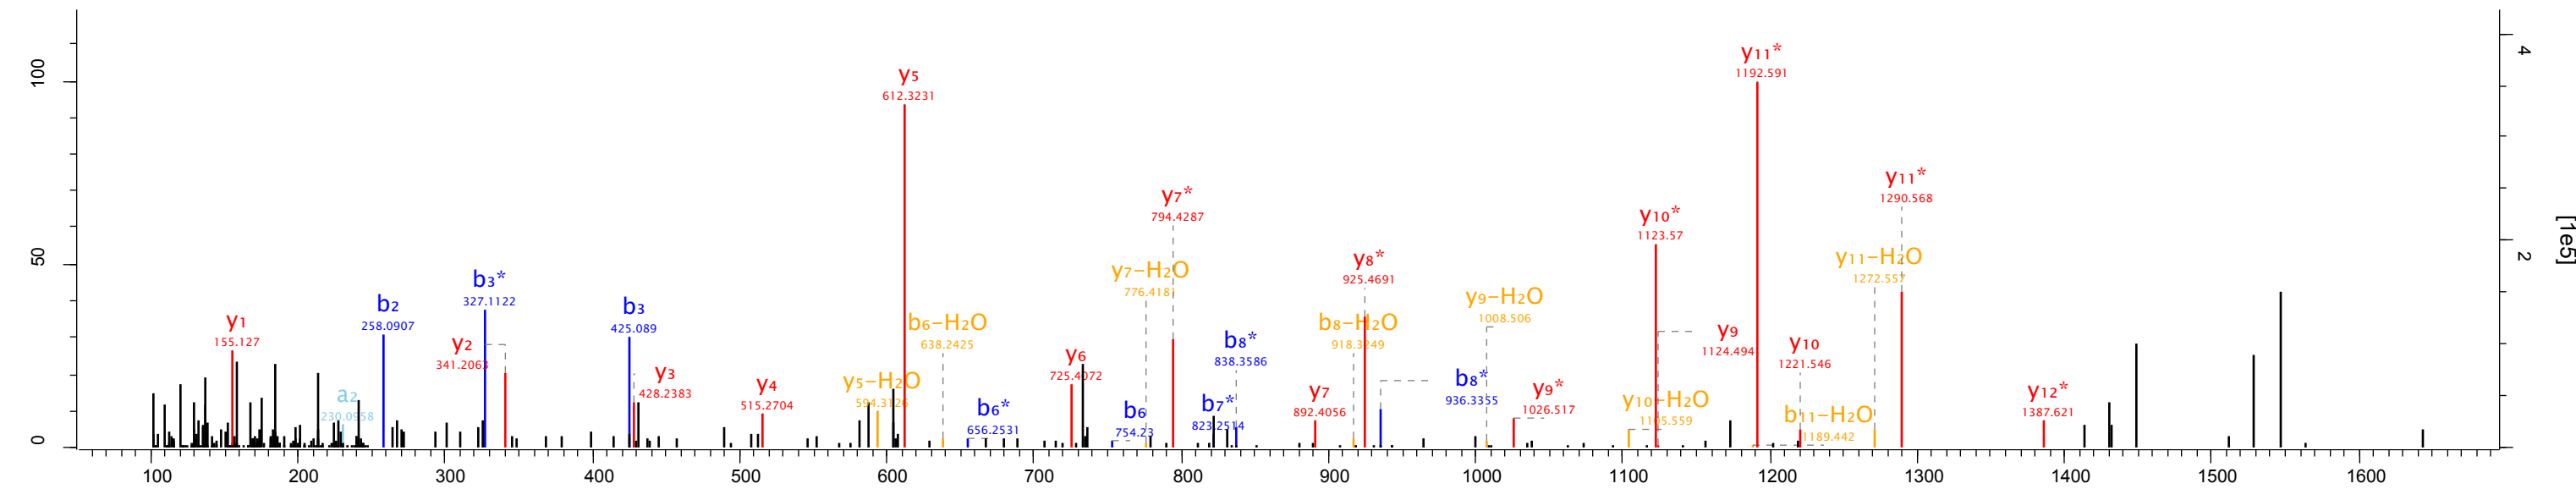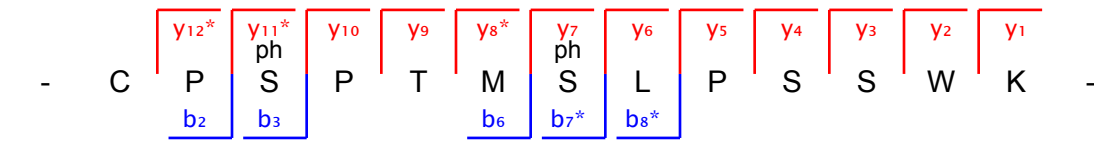

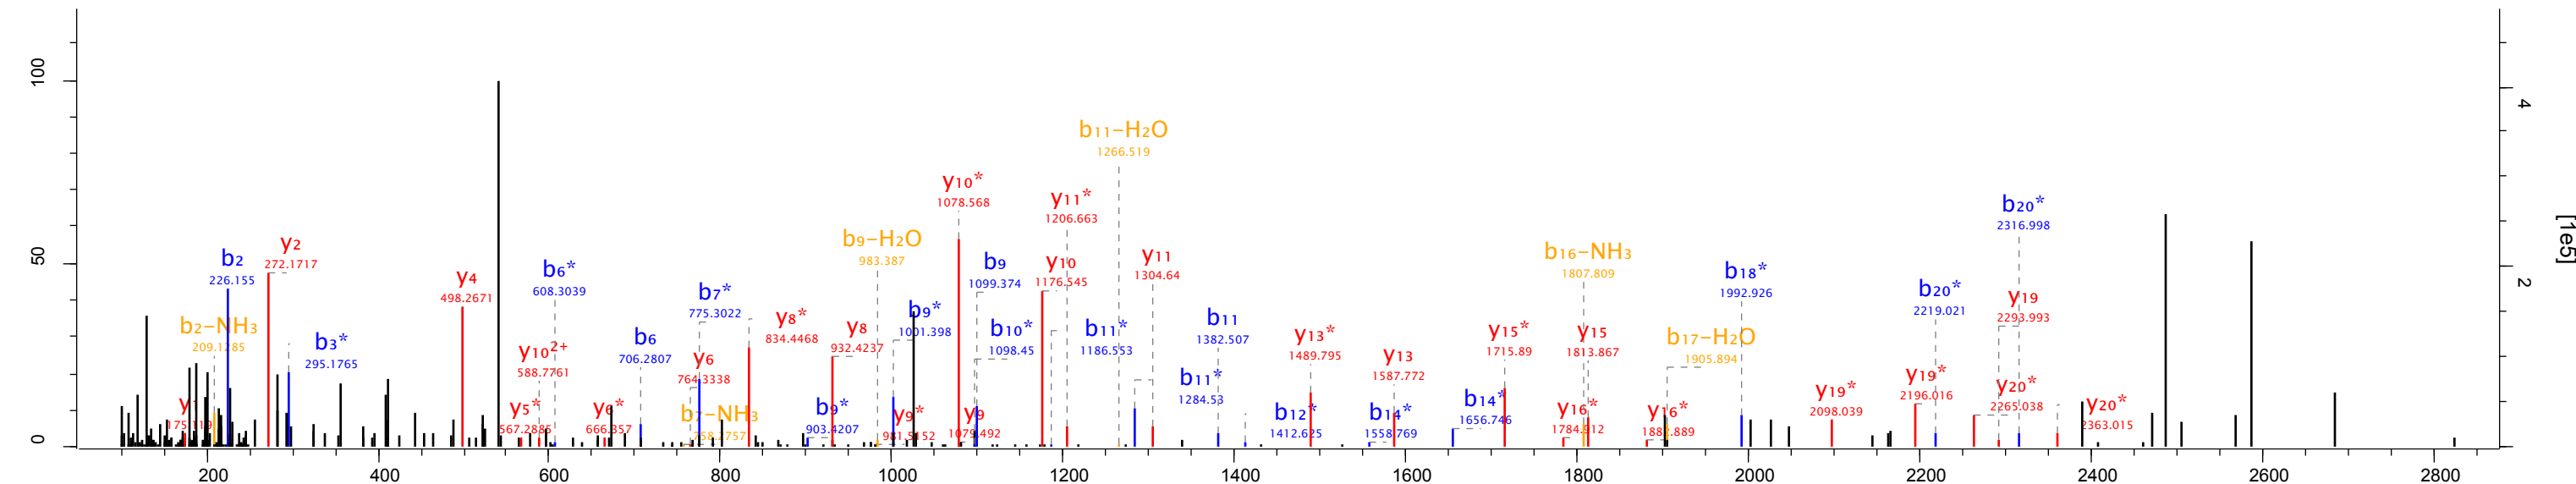

- K P S P S E S P E P W K P F P A V S P E P R -

b<sub>2</sub>
y<sub>20</sub>\*
ph
y<sub>19</sub>
y<sub>16</sub>\*
y<sub>15</sub>
y<sub>13</sub>
y<sub>11</sub>
y<sub>10</sub>
y<sub>9</sub>
y<sub>8</sub>
y<sub>6</sub>
y<sub>5</sub>\*
ph
y<sub>4</sub>
y<sub>2</sub>
y<sub>1</sub>

b<sub>3</sub>\*
b<sub>6</sub>
b<sub>7</sub>\*
b<sub>9</sub>
b<sub>10</sub>\*
b<sub>11</sub>
b<sub>12</sub>\*
b<sub>14</sub>\*
b<sub>18</sub>\*
b<sub>20</sub>\*



Raw file 20171215\_MaS\_33SR\_LMH\_phospho2\_03 Scan 17296 Method FTMS; HCD Score 141.59 m/z 795.7 Gene names GATAD2B

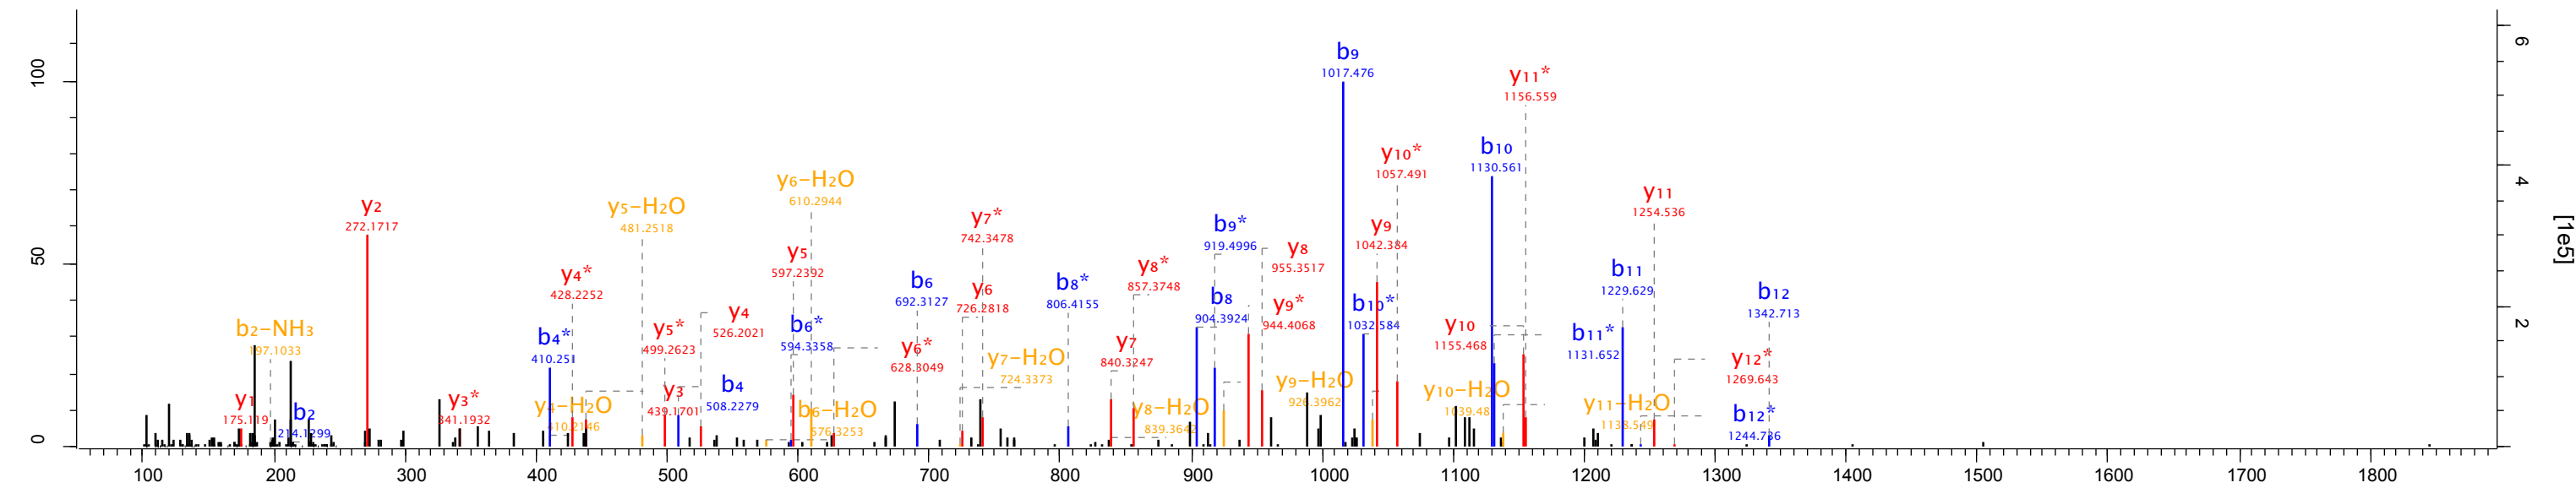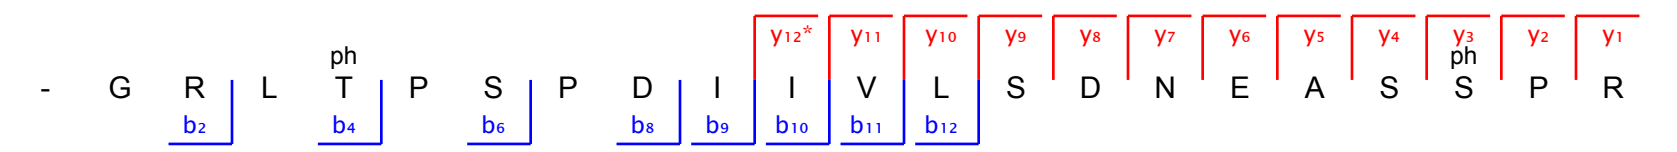

Raw file 20171215\_MaS\_33SR\_LMH\_phospho2\_03 Scan 17456 Method FTMS; HCD Score 73.23 m/z 943.73 Gene names MAP1B

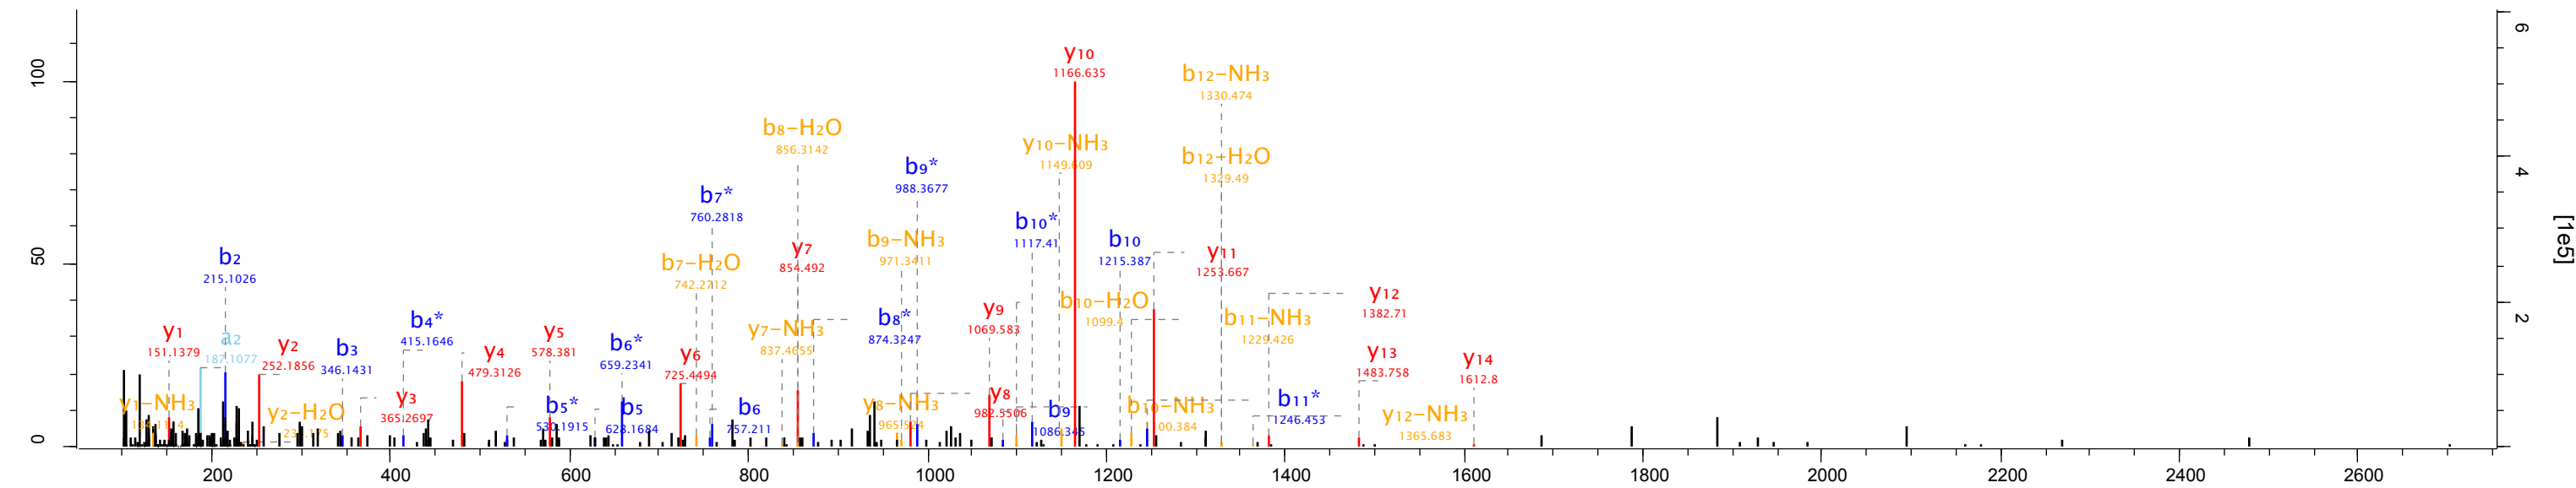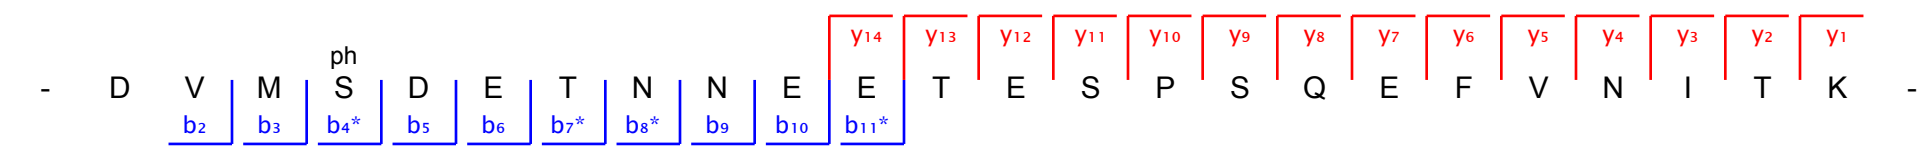

Raw file 20171215\_MaS\_33SR\_LMH\_phospho2\_03 Scan 17536 Method FTMS; HCD Score 171.85 m/z 720.32 Gene names ITPKB

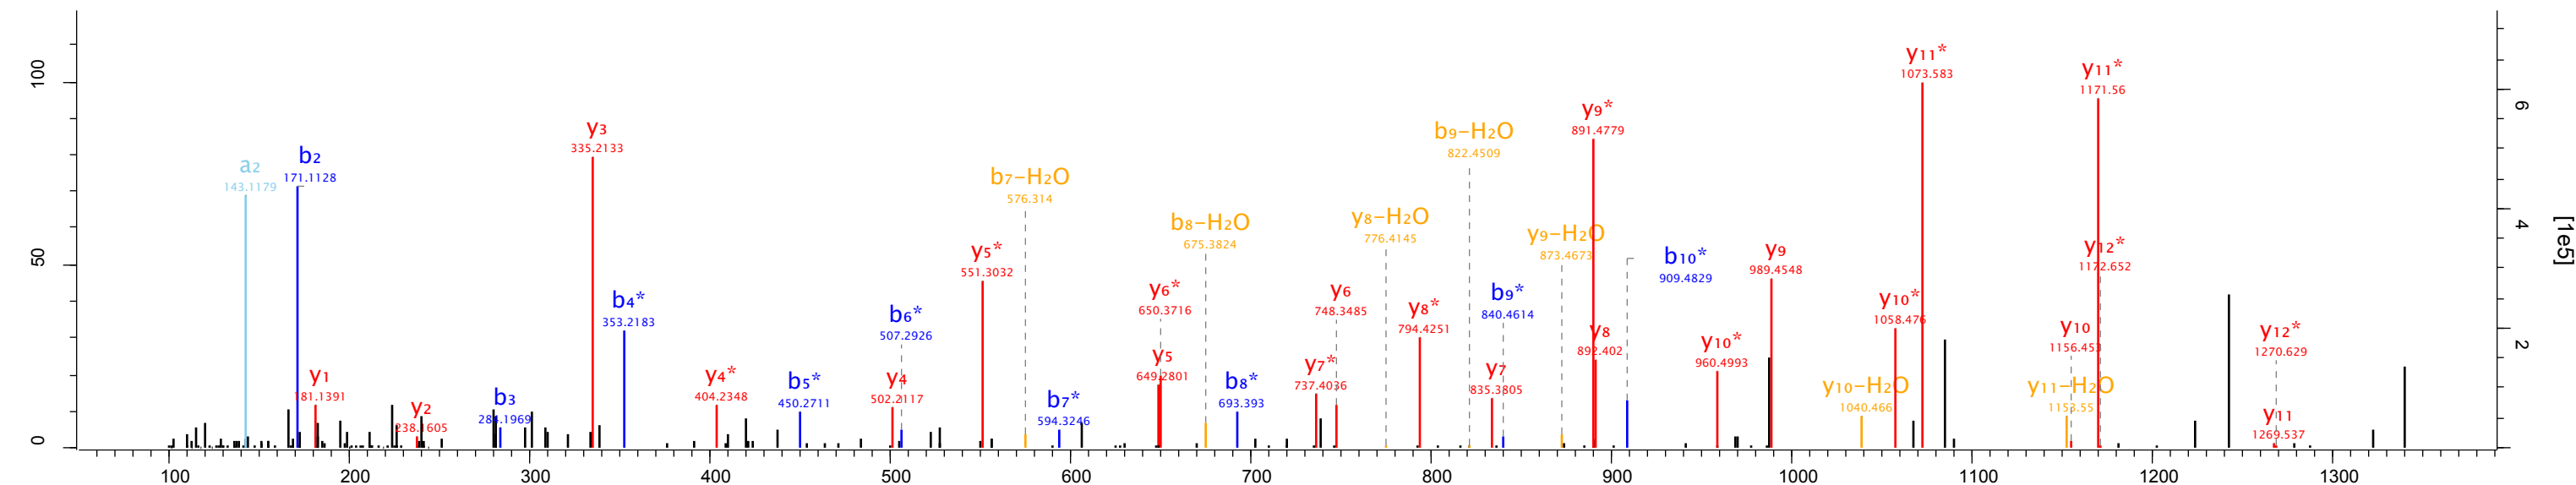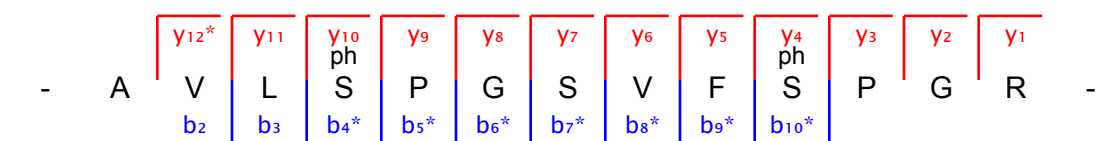

Raw file 20171215\_MaS\_33SR\_LMH\_phospho2\_03 Scan 17886 Method FTMS; HCD Score 237.01 m/z 1038.78 Gene names CCAR2

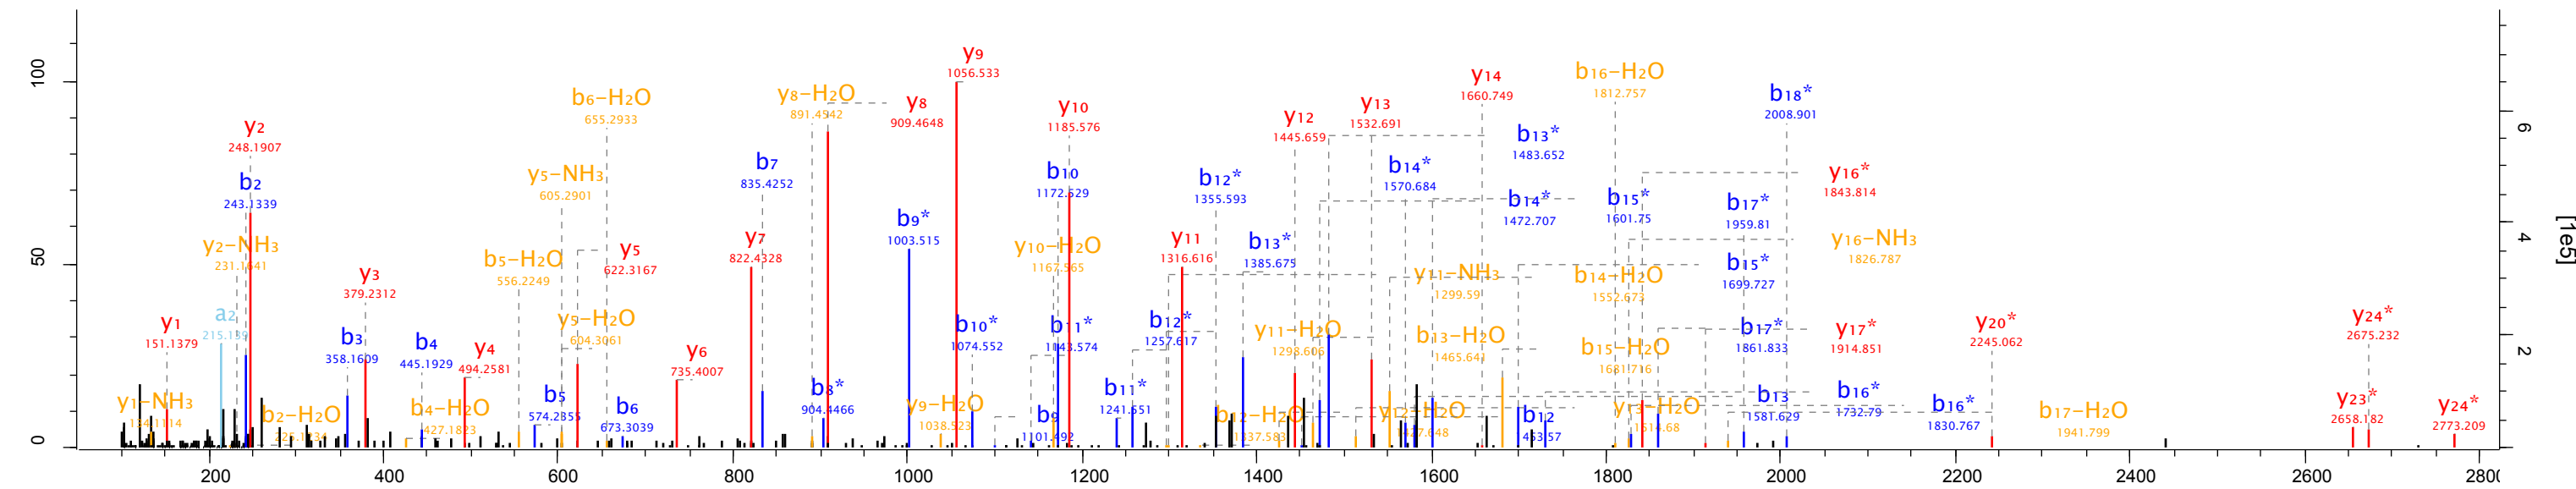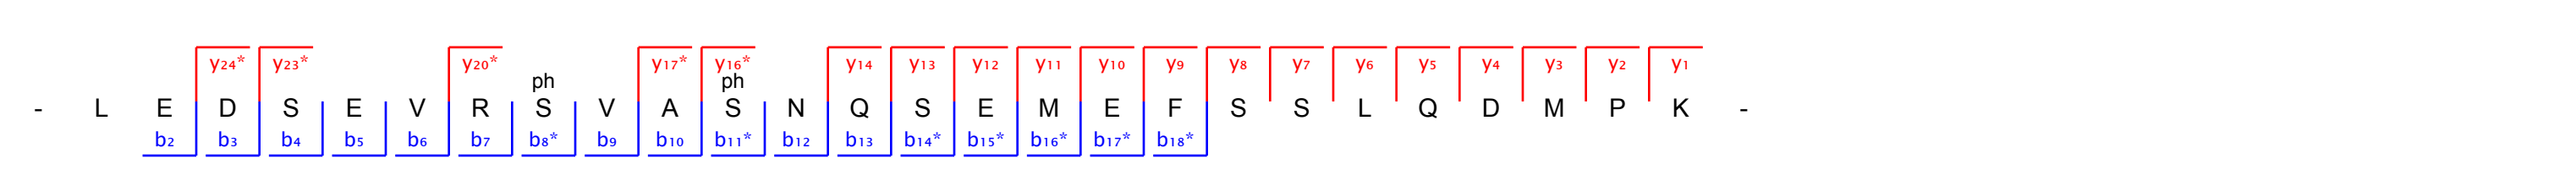

Raw file  
20171215\_MaS\_33SR\_LMH\_phospho2\_03

Scan 17956 Method FTMS; HCD Score 46.46 m/z 912.43 Gene names BRD2

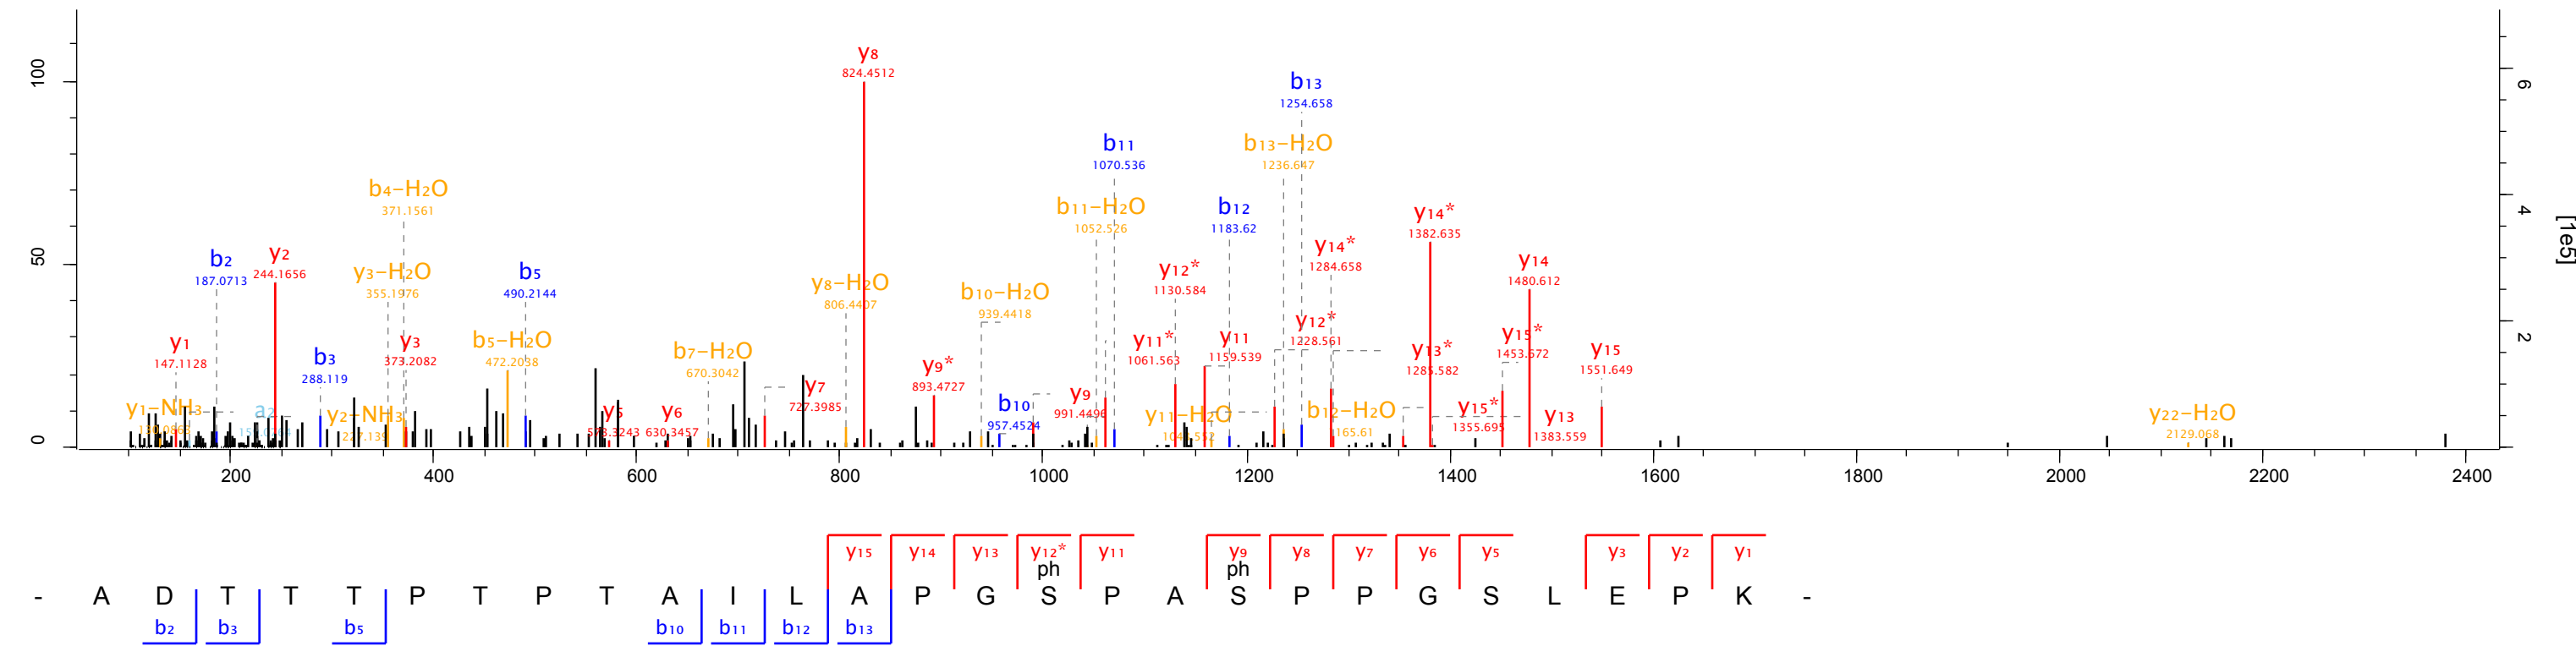

Raw file 20171215\_MaS\_33SR\_LMH\_phospho2\_03 Scan 17976 Method FTMS; HCD Score 115.72 m/z 864.04 Gene names CLSPN

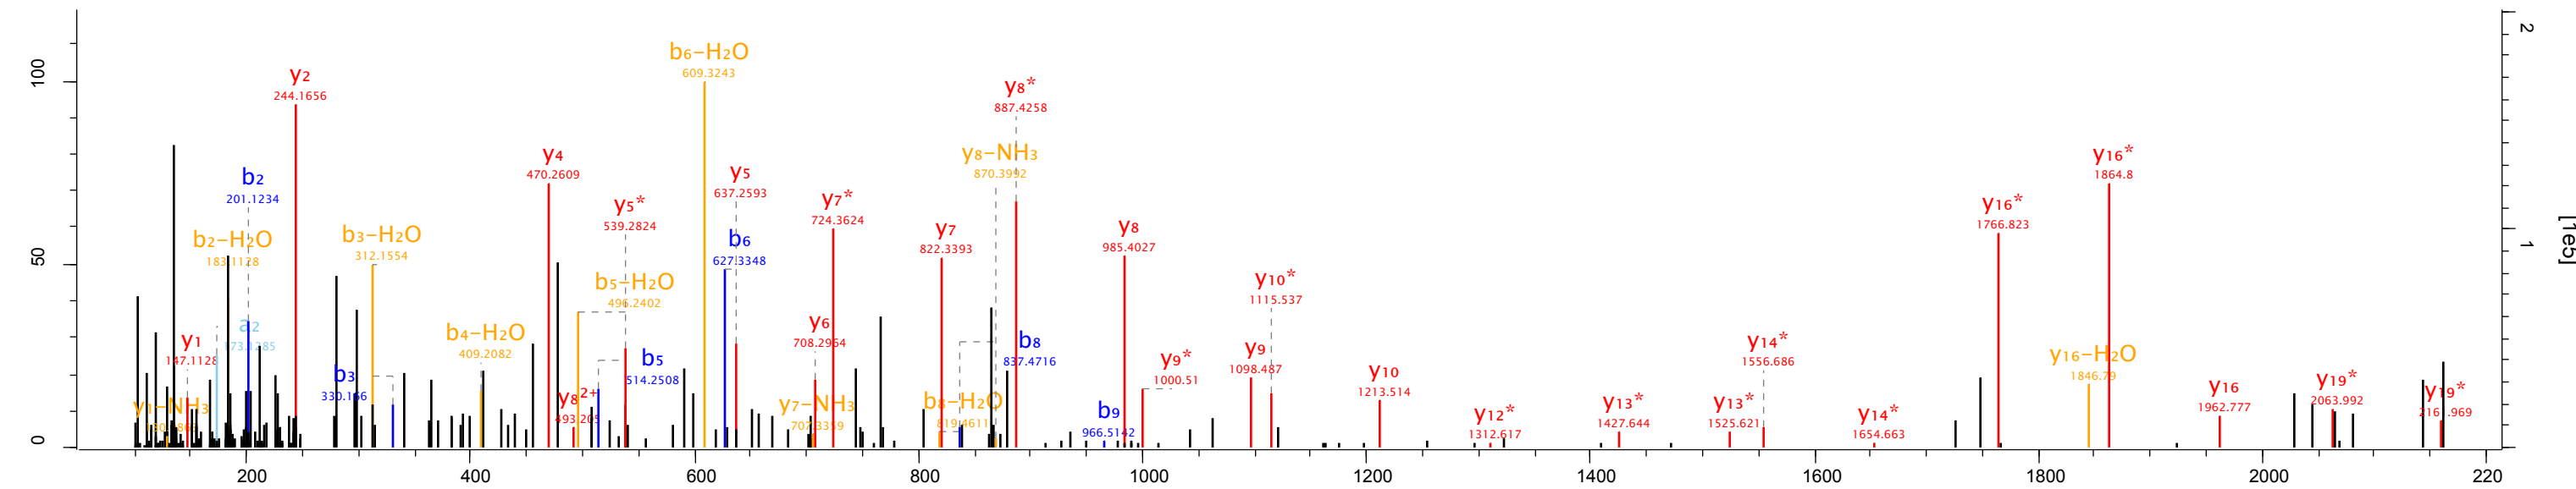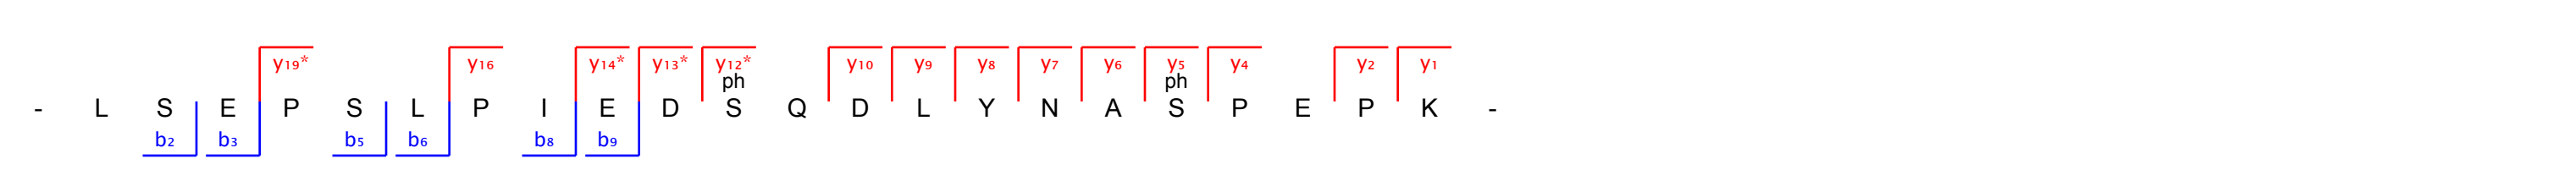

Raw file  
20171215\_MaS\_33SR\_LMH\_phospho2\_03

Scan 18056 Method FTMS; HCD Score 94.97 m/z 993.94 Gene names ZNF593

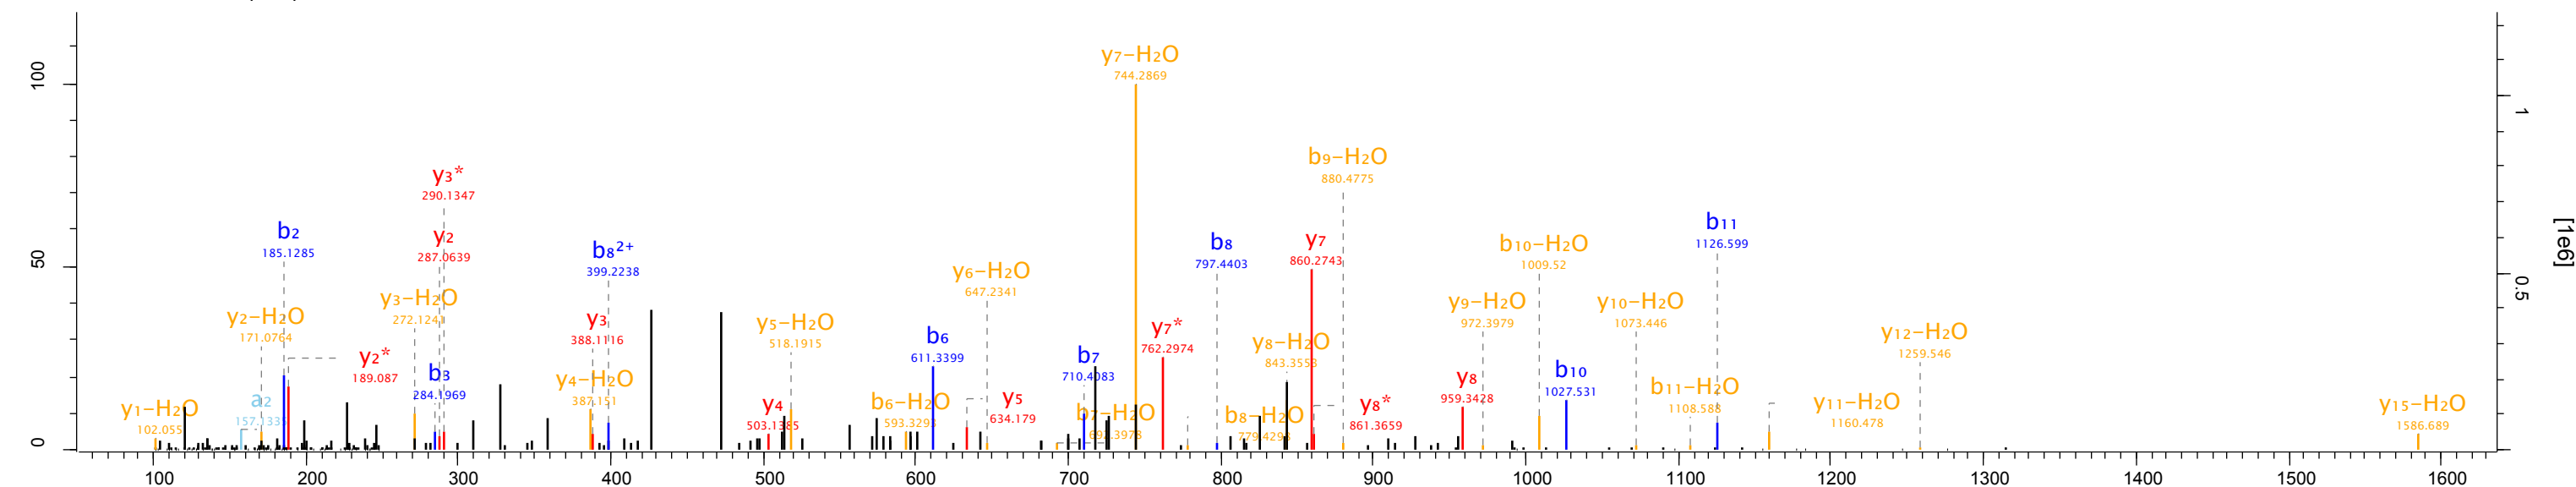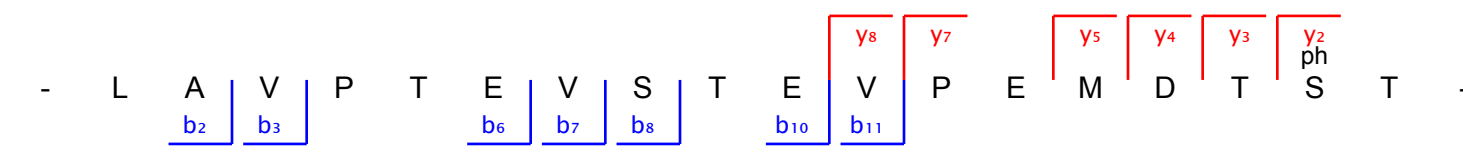

Raw file 20171215\_MaS\_33SR\_LMH\_phospho2\_03 Scan 18106 Method FTMS; HCD Score 124.7 m/z 1010.99 Gene names LUZP1

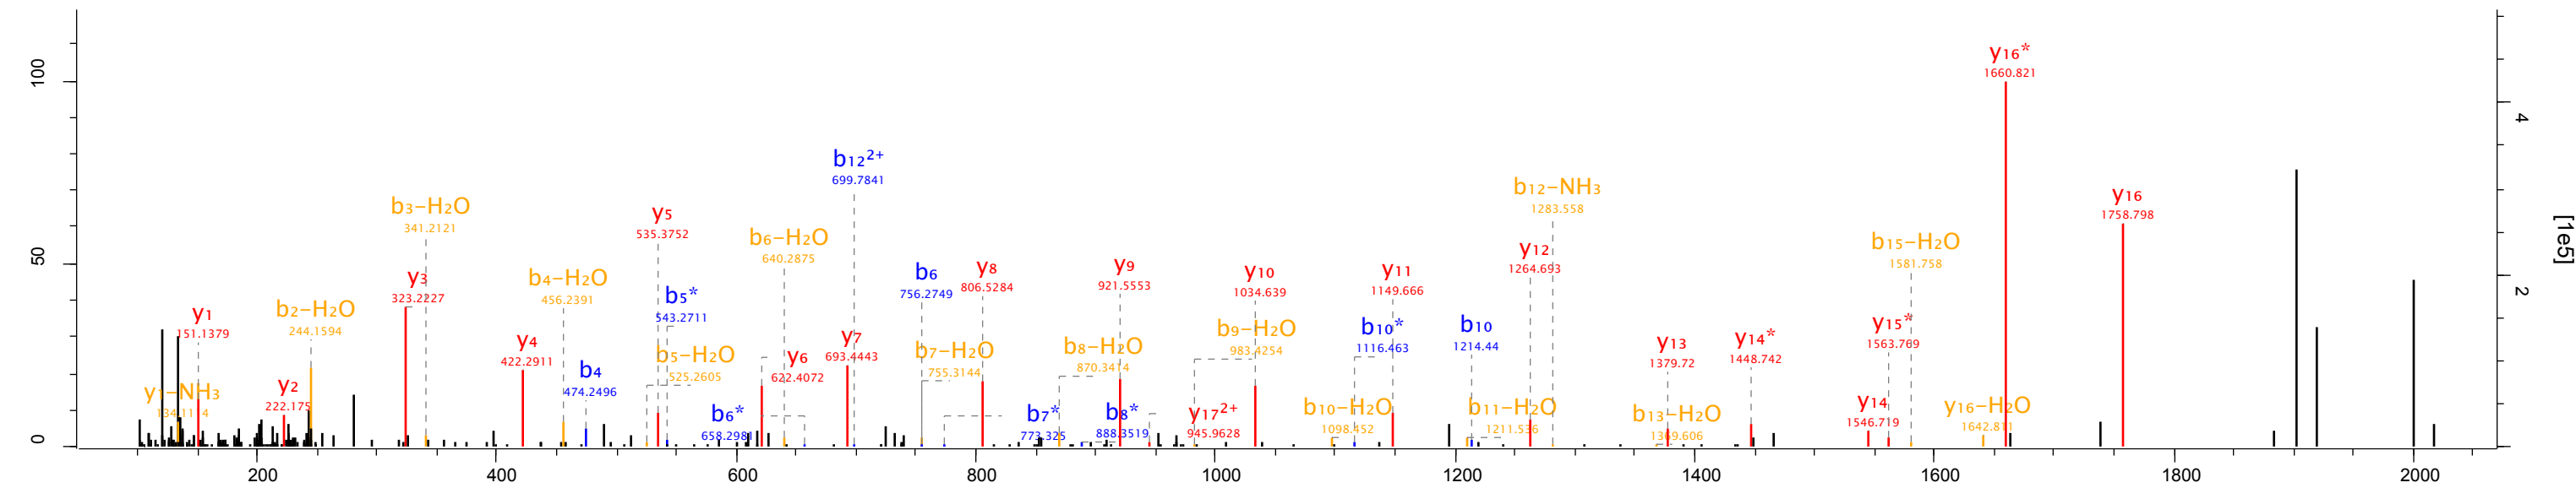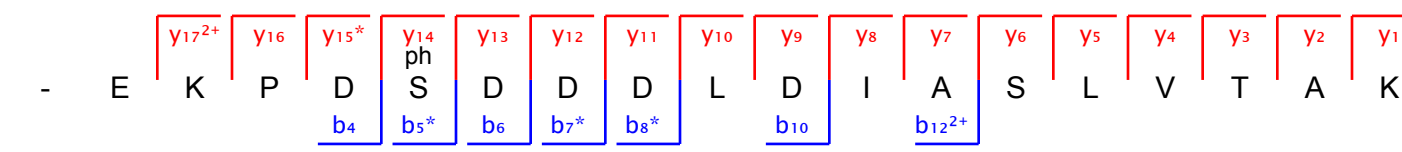



Raw file 20171215\_MaS\_33SR\_LMH\_phospho2\_03 Scan 18226 Method FTMS; HCD Score 83.06 m/z 924.77 Gene names SCAF11

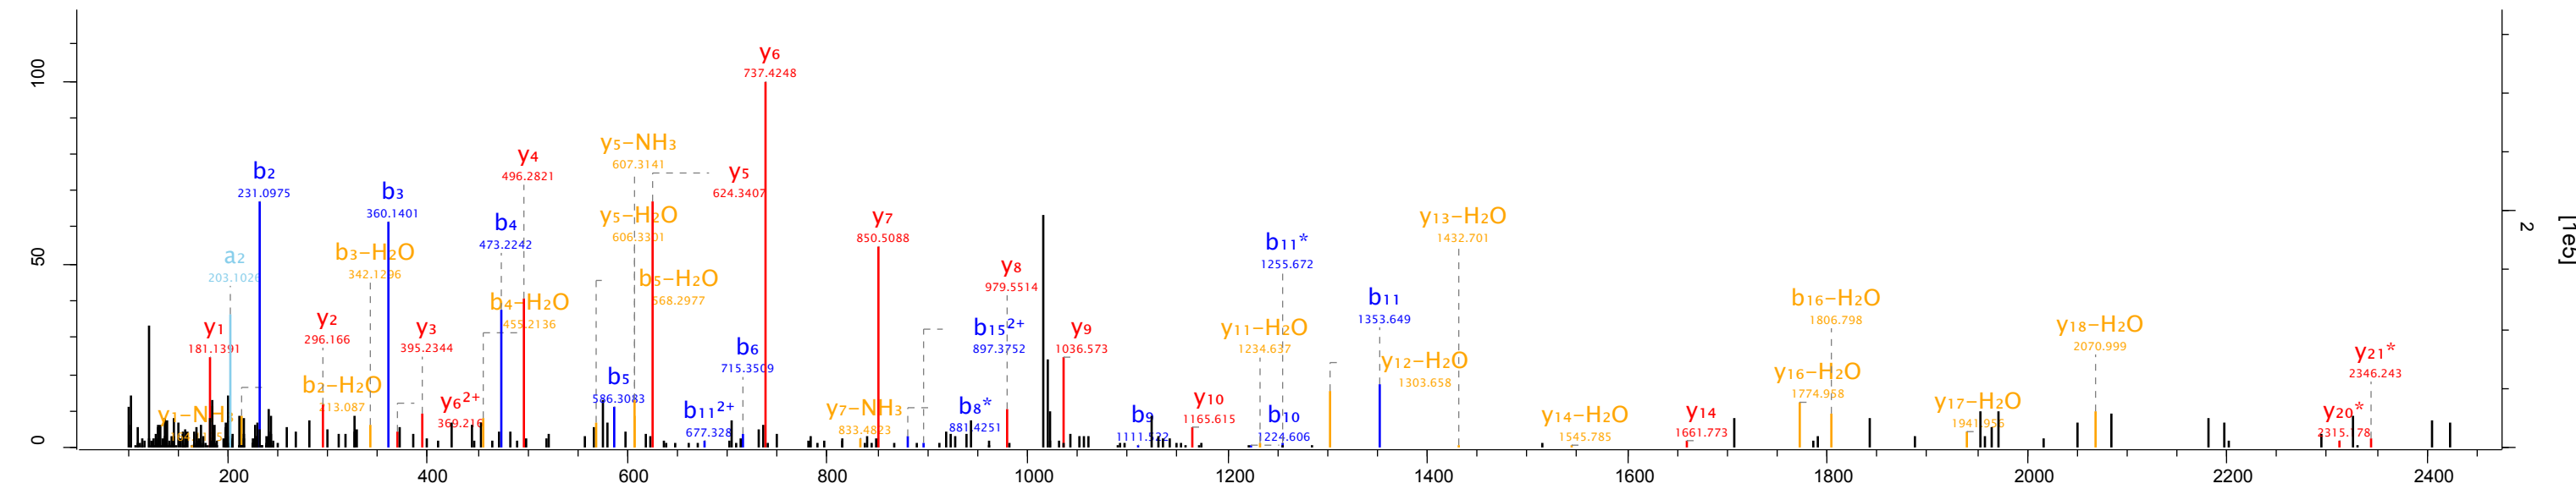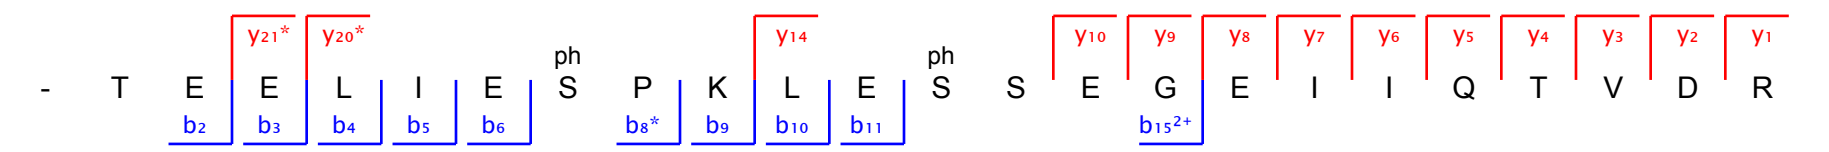

Raw file: 20171215\_MaS\_33SR\_LMH\_phospho2\_03  
 Scan: 18266 Method: FTMS; HCD Score: 188.9 m/z: 801.88 Gene names: SH3KBP1

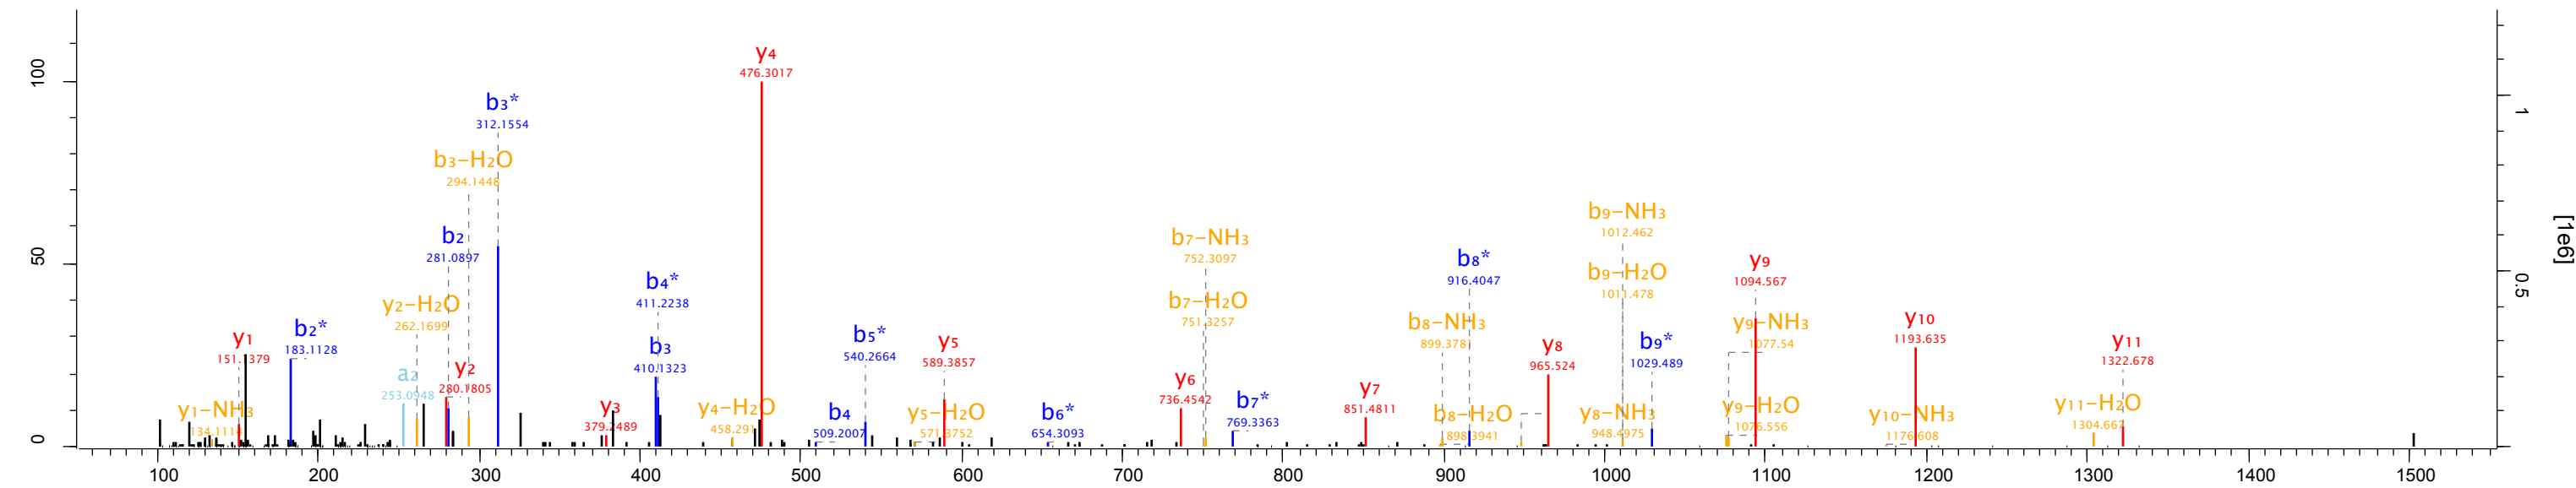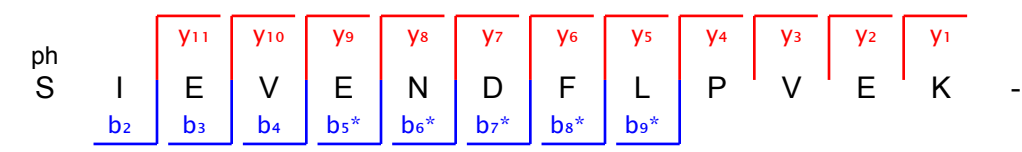

Raw file: 20171215\_MaS\_33SR\_LMH\_phospho2\_03  
 Scan: 18546 Method: FTMS; HCD Score: 72.44 m/z: 1493.98 Gene names: SAFB;SAFB2

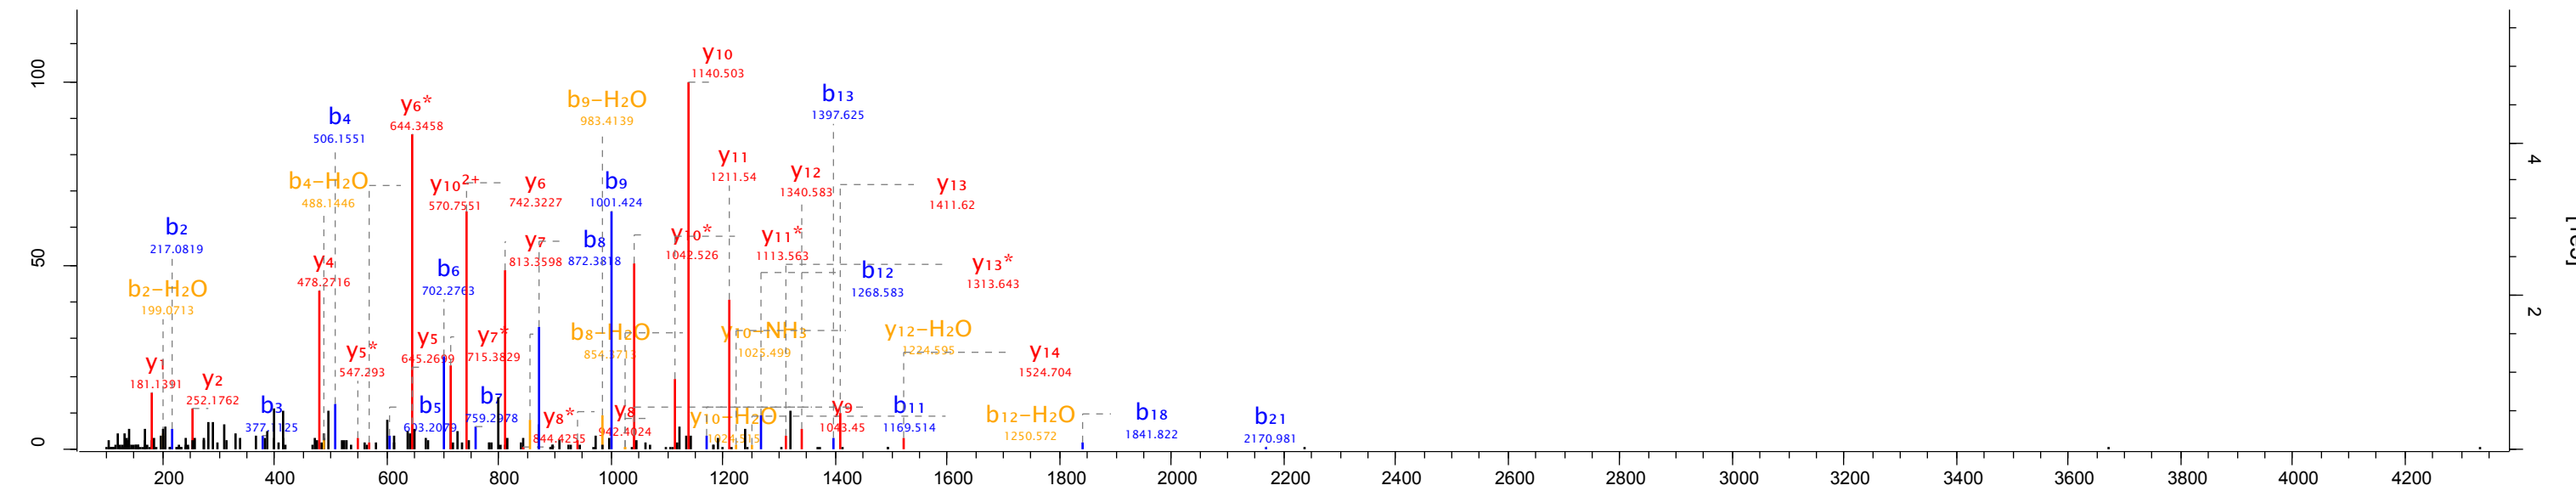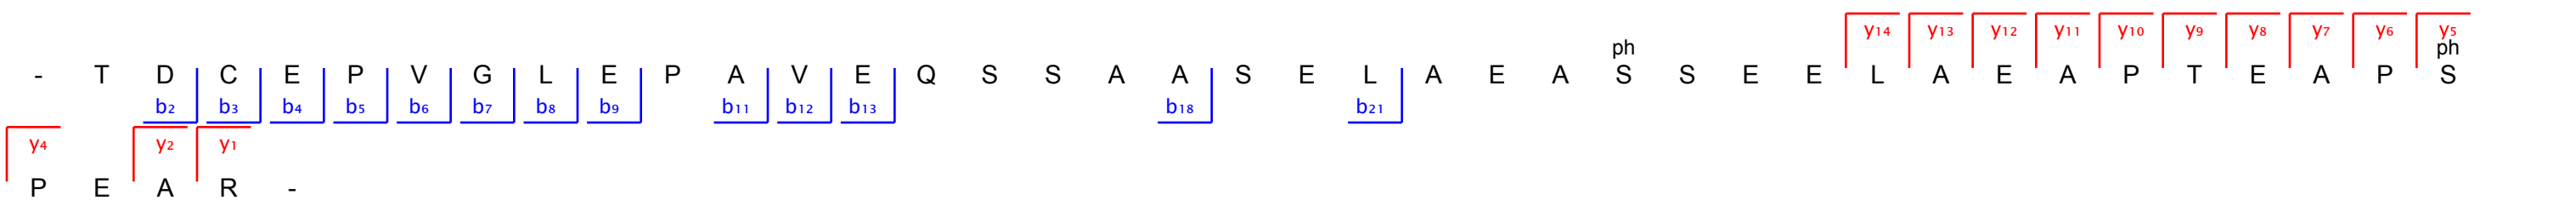

Raw file 20171215\_MaS\_33SR\_LMH\_phospho2\_03 Scan 18766 Method FTMS; HCD Score 211.35 m/z 971.42 Gene names NAA15

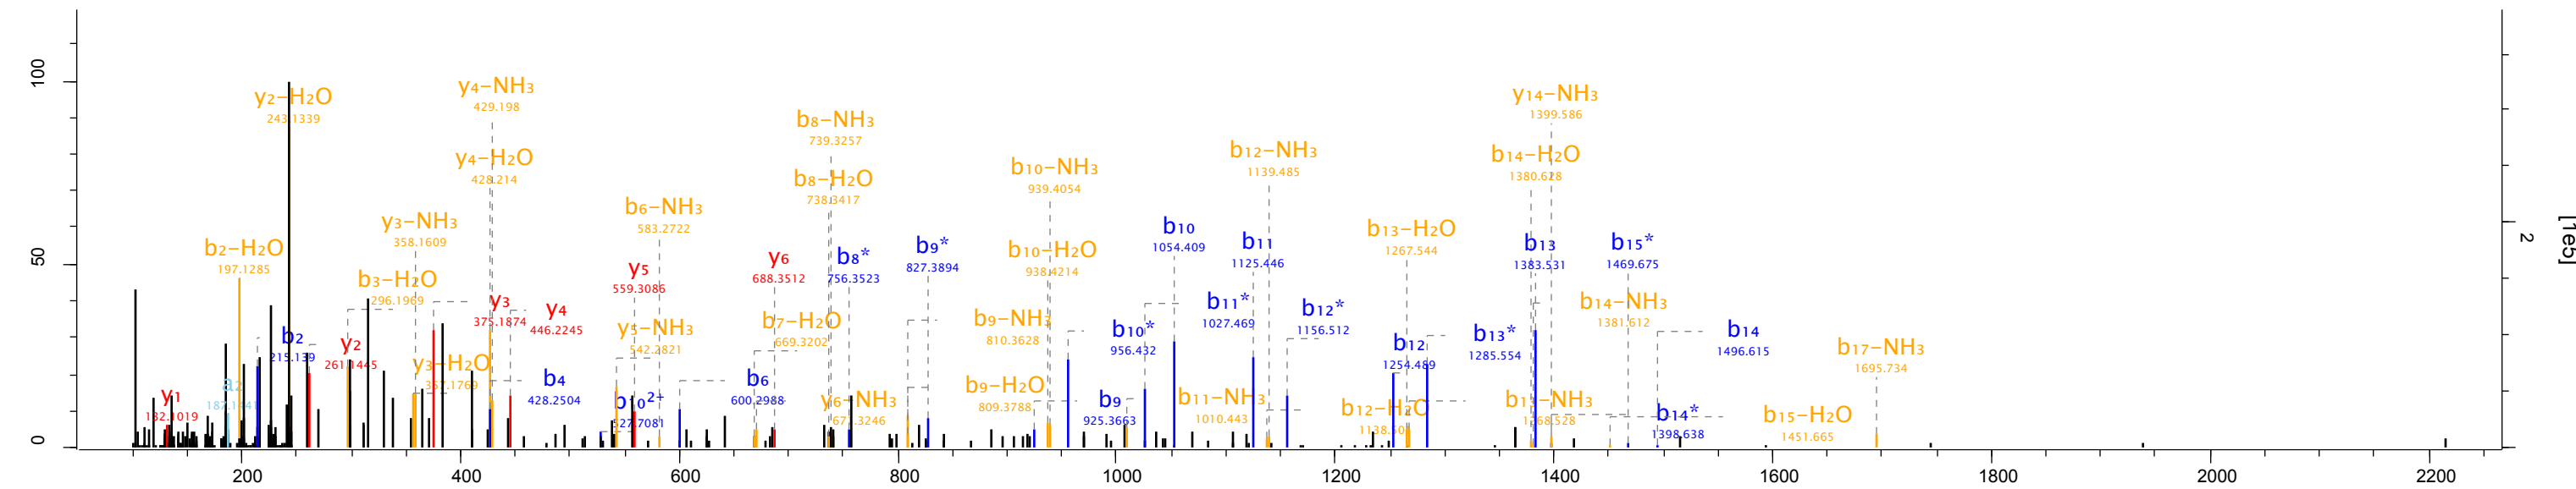

- I T V N G D S ph S A E A E E L A N E I -

Fragmentation sites are indicated by brackets below the sequence:

- b2: T
- b4: N
- b6: D
- b8\*: S
- b9: A
- b10: E
- b11: A
- b12: E
- b13: E
- b14: L
- b15\*: A

Raw file 20171215\_MaS\_33SR\_LMH\_phospho2\_03 Scan 19126 Method FTMS; HCD Score 226.75 m/z 1011.44 Gene names SMN1

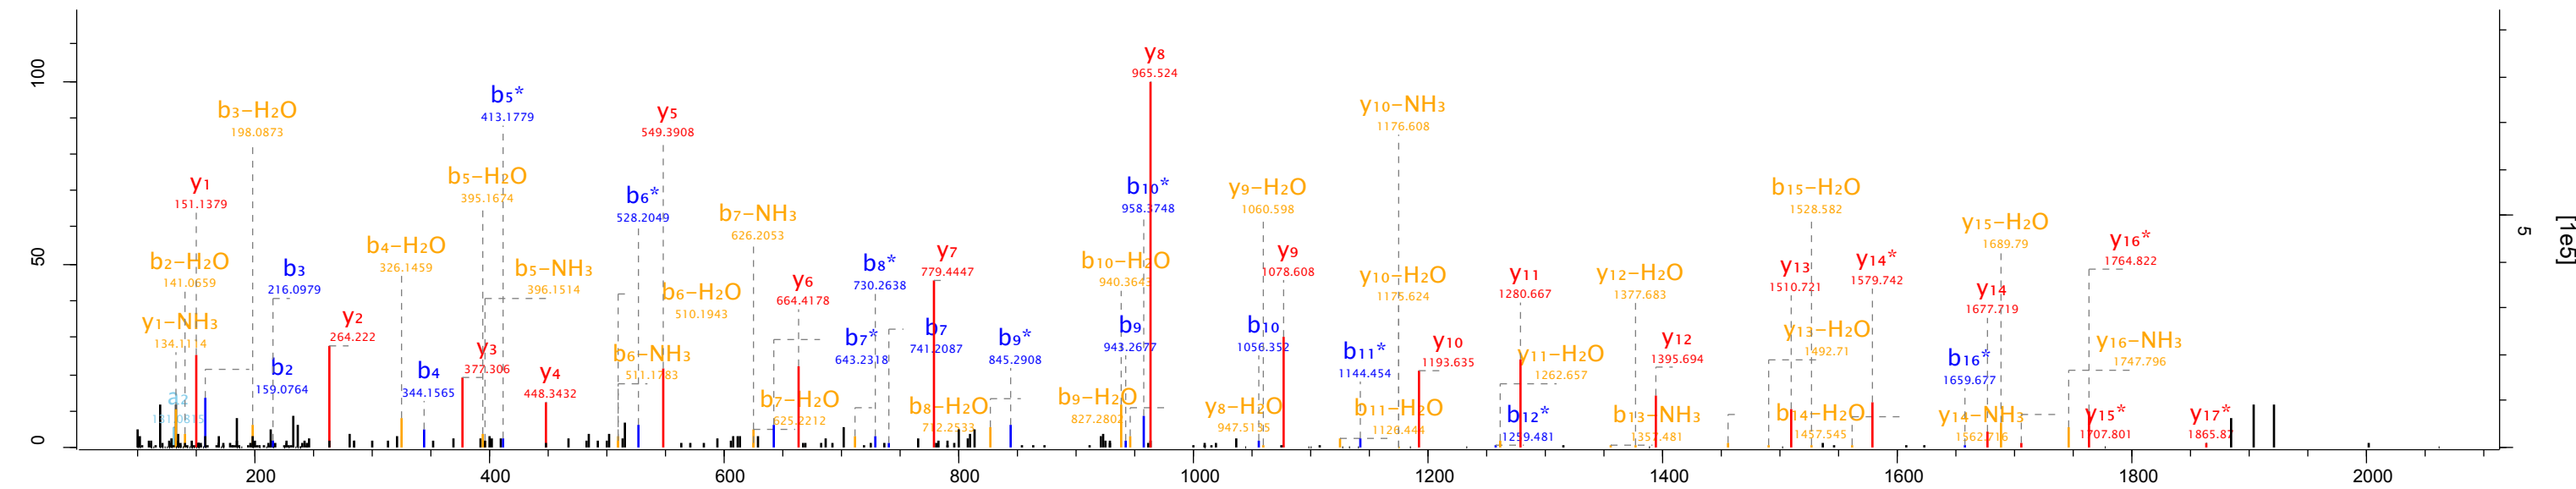

- G T G Q ph S D D S D I W D D T A L I K -

b<sub>2</sub>
b<sub>3</sub>
b<sub>4</sub>
b<sub>5</sub>\*
b<sub>6</sub>\*
b<sub>7</sub>
b<sub>8</sub>\*
b<sub>9</sub>
b<sub>10</sub>
b<sub>11</sub>\*
b<sub>12</sub>\*
b<sub>16</sub>\*

y<sub>1</sub>
y<sub>2</sub>
y<sub>3</sub>
y<sub>4</sub>
y<sub>5</sub>
y<sub>6</sub>
y<sub>7</sub>
y<sub>8</sub>
y<sub>9</sub>
y<sub>10</sub>
y<sub>11</sub>
y<sub>12</sub>
y<sub>13</sub>
y<sub>14</sub>
y<sub>15</sub>\*
y<sub>16</sub>\*
y<sub>17</sub>\*

Raw file 20171215\_MaS\_33SR\_LMH\_phospho2\_03 Scan 19826 Method FTMS; HCD Score 126.91 m/z 832.3 Gene names EIF2S2

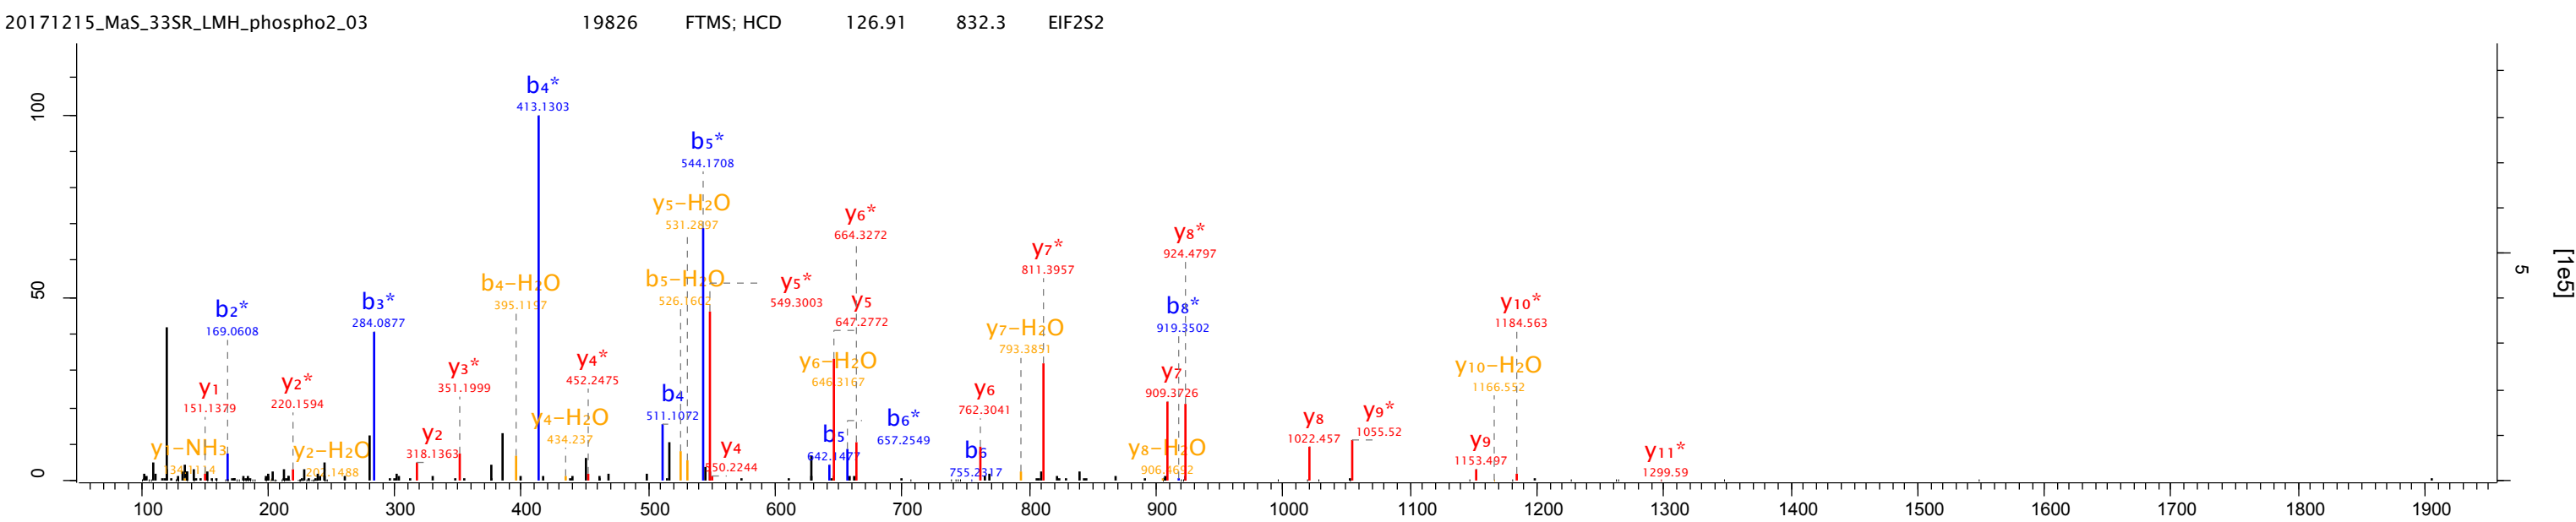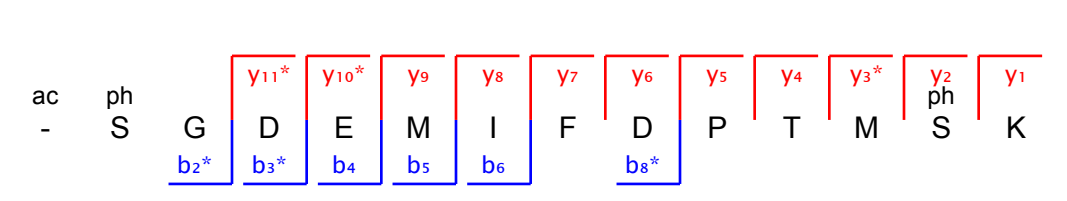

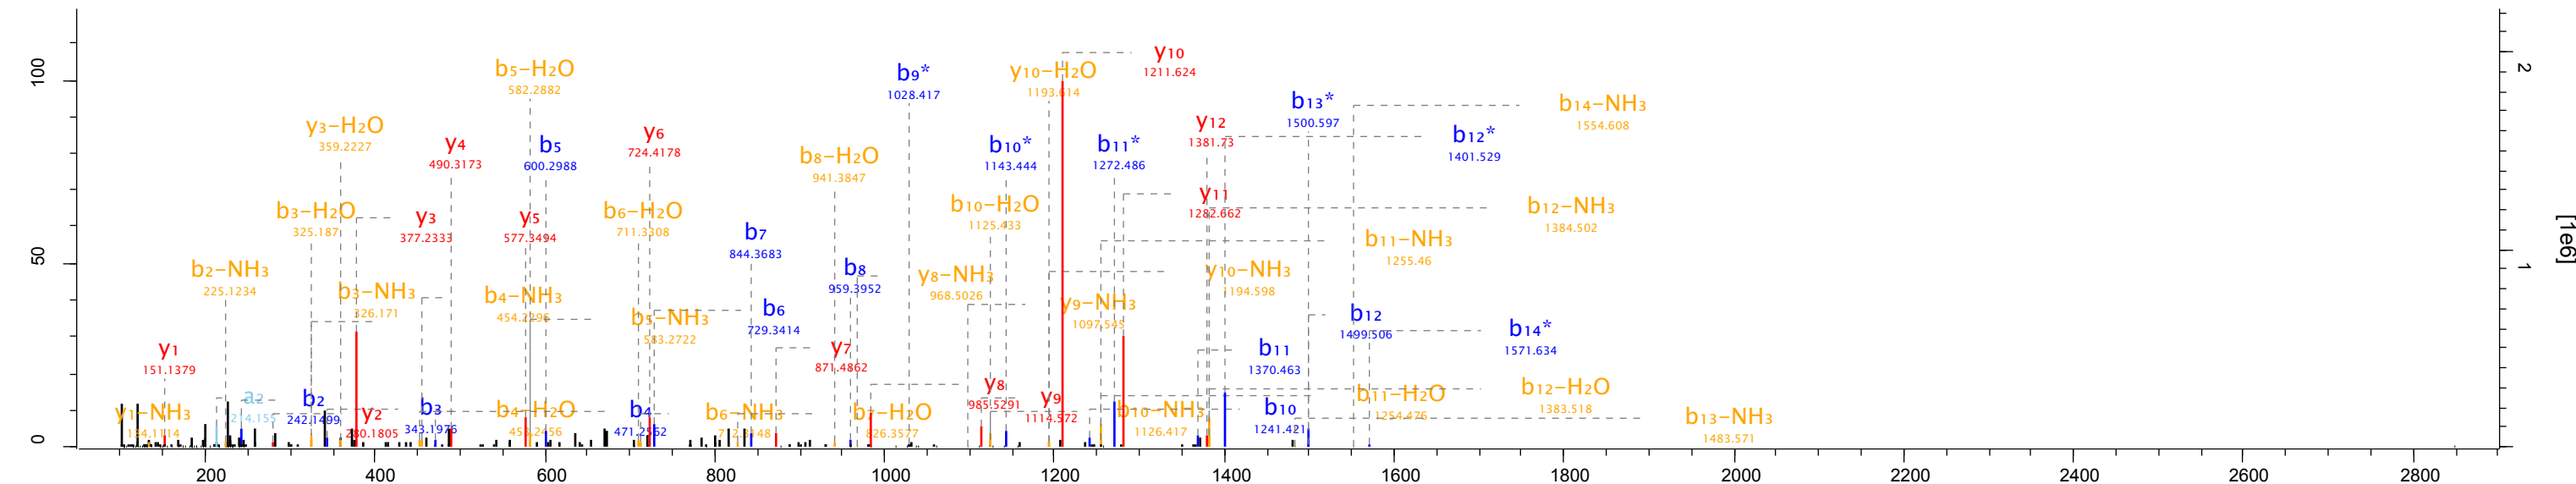

- Q I T Q E E D D S D E E V A P E N F F S L P E K -  
 b<sub>2</sub> b<sub>3</sub> b<sub>4</sub> b<sub>5</sub> b<sub>6</sub> b<sub>7</sub> b<sub>8</sub> b<sub>9</sub>\* b<sub>10</sub> b<sub>11</sub> b<sub>12</sub> b<sub>13</sub>\* b<sub>14</sub>\* y<sub>12</sub> y<sub>11</sub> y<sub>10</sub> y<sub>9</sub> y<sub>8</sub> y<sub>7</sub> y<sub>6</sub> y<sub>5</sub> y<sub>4</sub> y<sub>3</sub> y<sub>2</sub> y<sub>1</sub>

Raw file 20171215\_MaS\_33SR\_LMH\_phospho2\_03 Scan 3386 Method FTMS; HCD Score 141.41 m/z 865.35 Gene names SRSF8

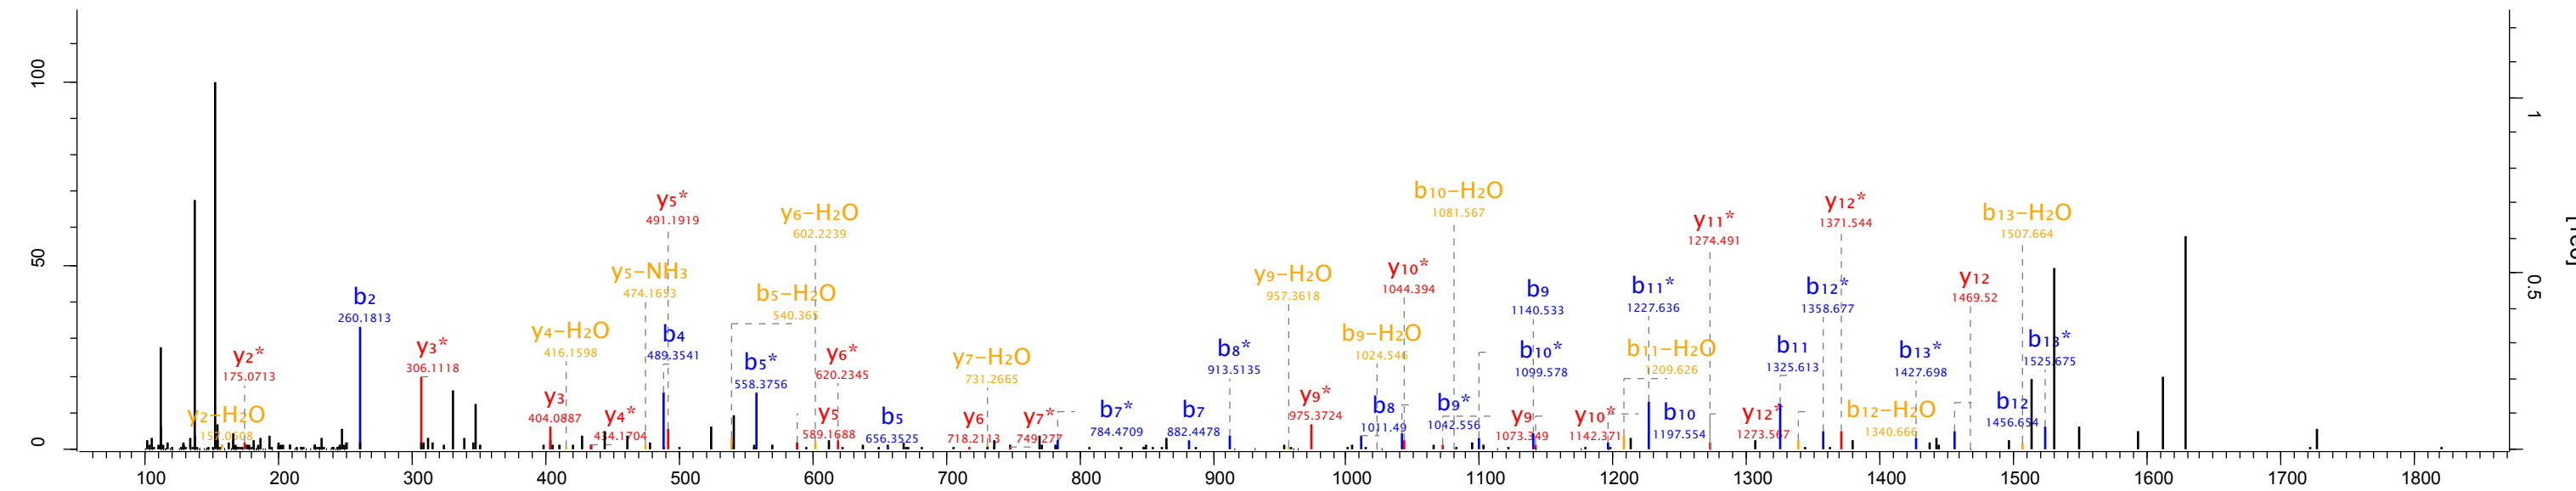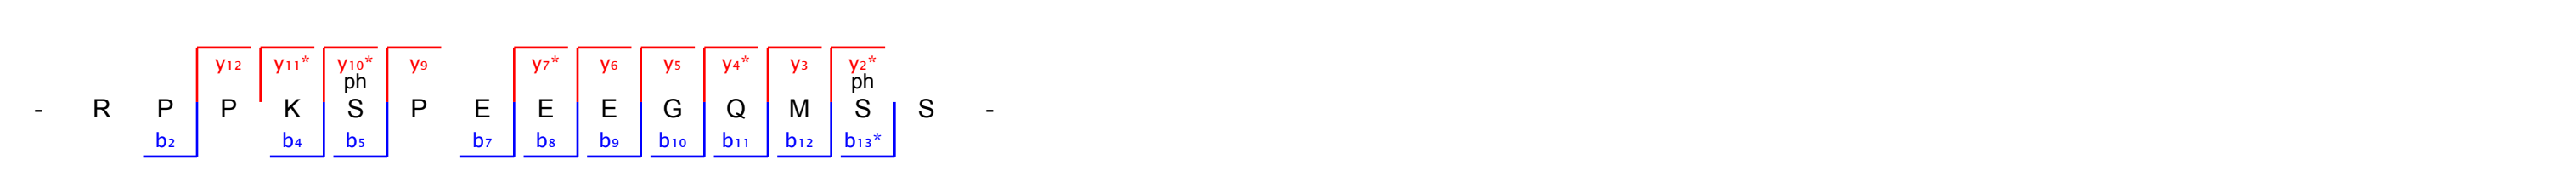



Raw file  
20171215\_MaS\_33SR\_LMH\_phospho2\_03

Scan 3426 Method FTMS; HCD Score 95.36 m/z 927.34 Gene names YBX1

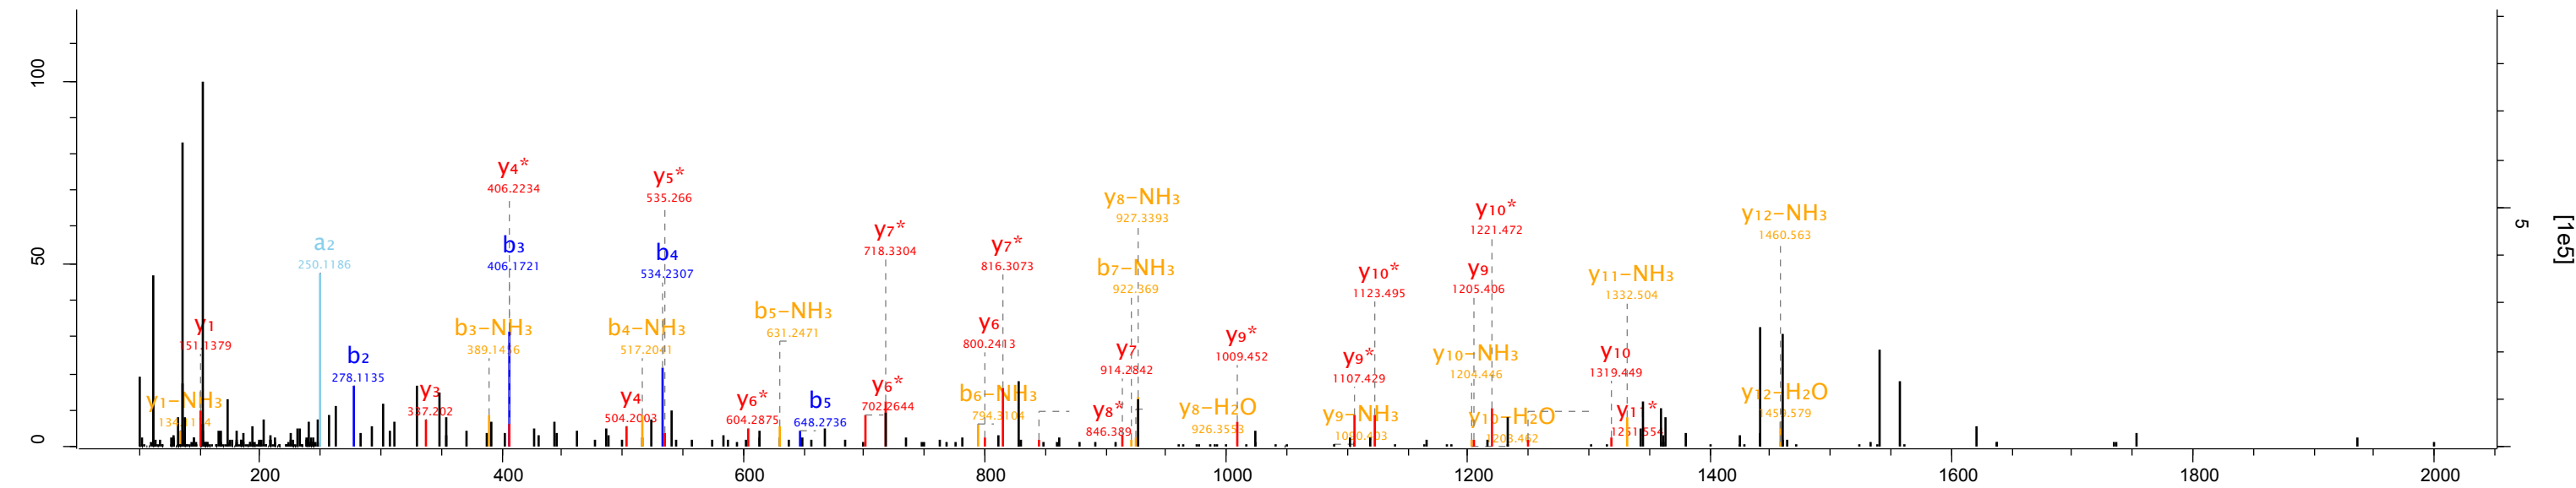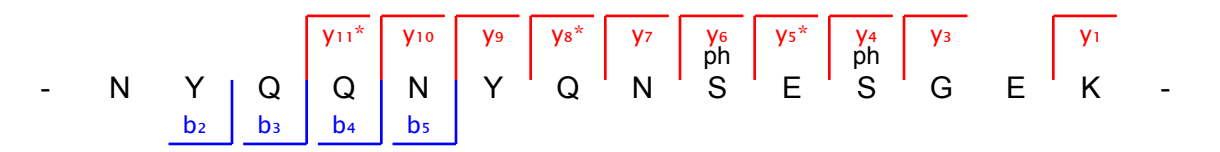

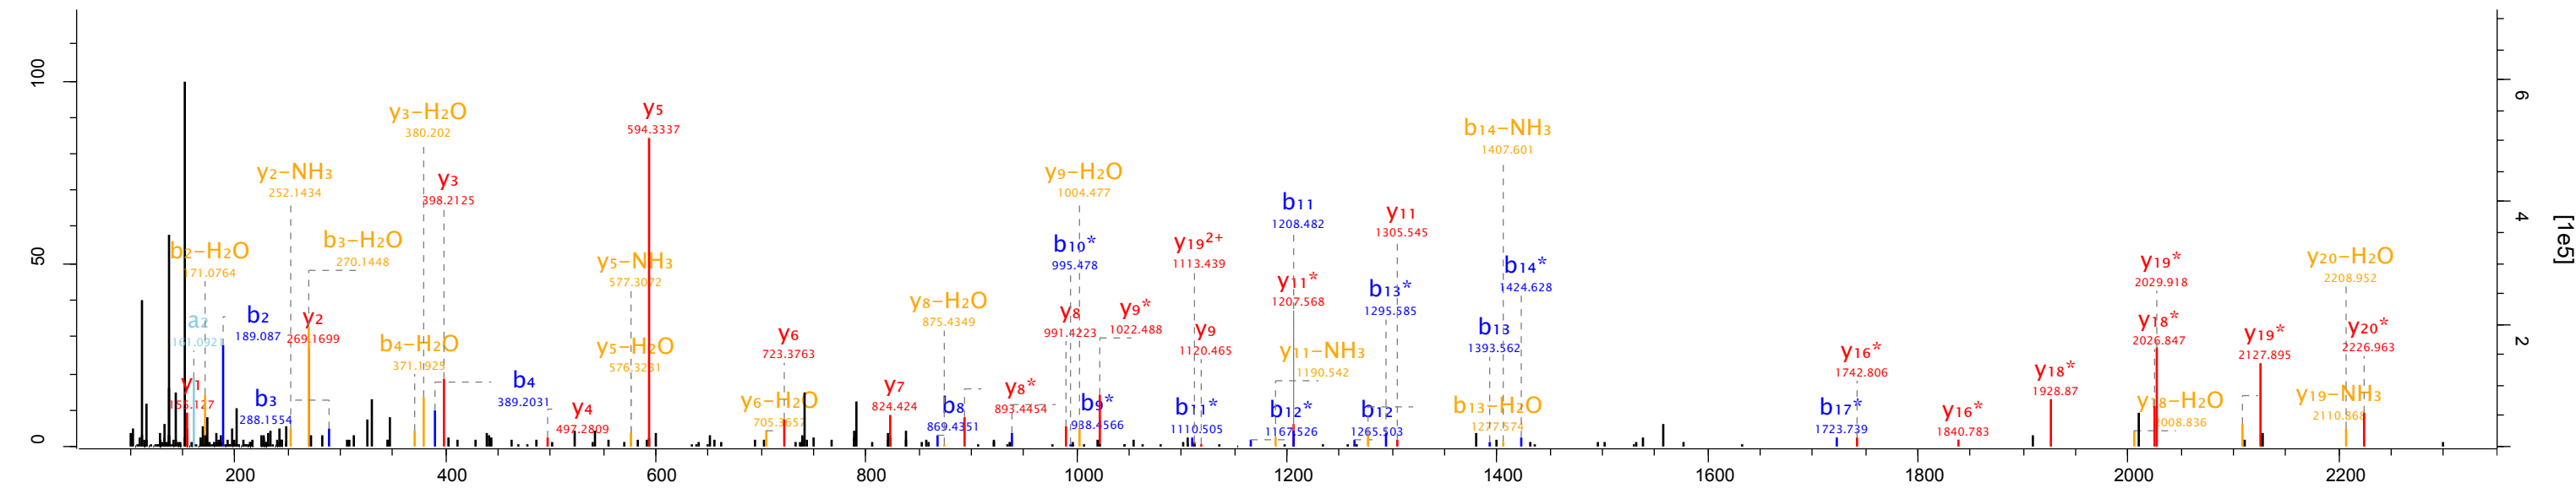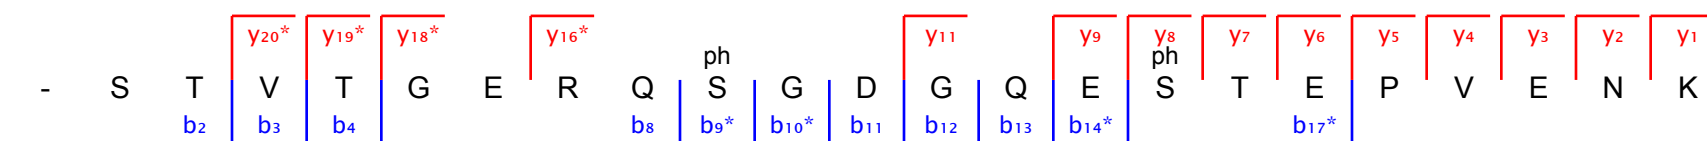

Raw file  
20171215\_MaS\_33SR\_LMH\_phospho2\_03

Scan 4066 Method FTMS; HCD Score 137.03 m/z 884.39 Gene names ADD1

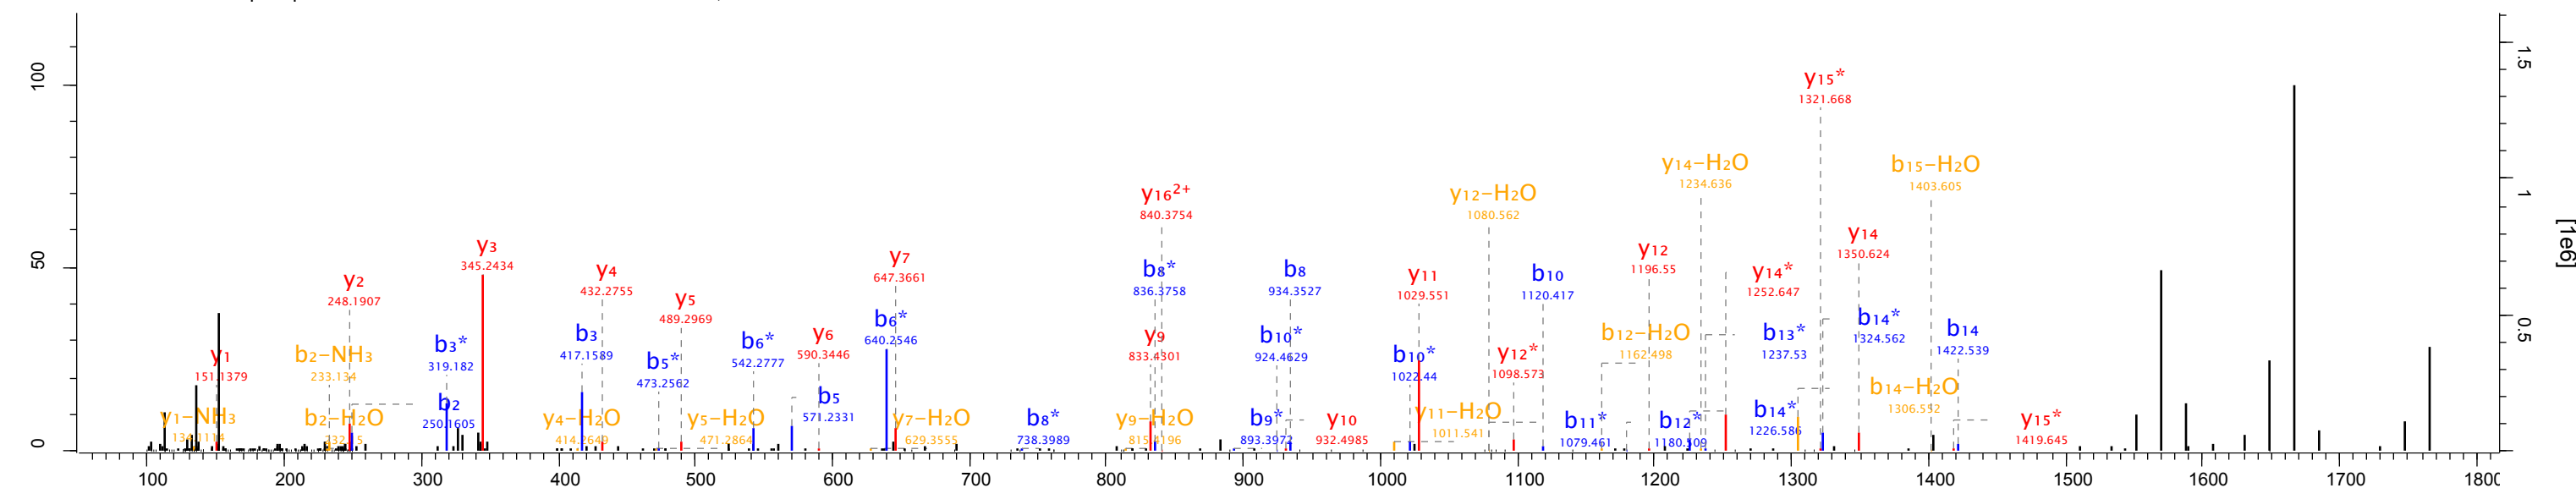

- S R S P G S P V G E G T G S P P K -

y<sub>16</sub><sup>2+</sup>
y<sub>15</sub><sup>\*</sup> ph
y<sub>14</sub>
y<sub>12</sub> ph
y<sub>11</sub>
y<sub>10</sub>
y<sub>9</sub>
y<sub>7</sub>
y<sub>6</sub>
y<sub>5</sub>
y<sub>4</sub>
y<sub>3</sub>
y<sub>2</sub>
y<sub>1</sub>

b<sub>2</sub>
b<sub>3</sub>
b<sub>5</sub>
b<sub>6</sub><sup>\*</sup>
b<sub>8</sub>
b<sub>9</sub><sup>\*</sup>
b<sub>10</sub>
b<sub>11</sub><sup>\*</sup>
b<sub>12</sub><sup>\*</sup>
b<sub>13</sub><sup>\*</sup>
b<sub>14</sub>

Raw file  
20171215\_MaS\_33SR\_LMH\_phospho2\_03

Scan 4706 Method FTMS; HCD Score 207.91 m/z 658.78 Gene names CEP95

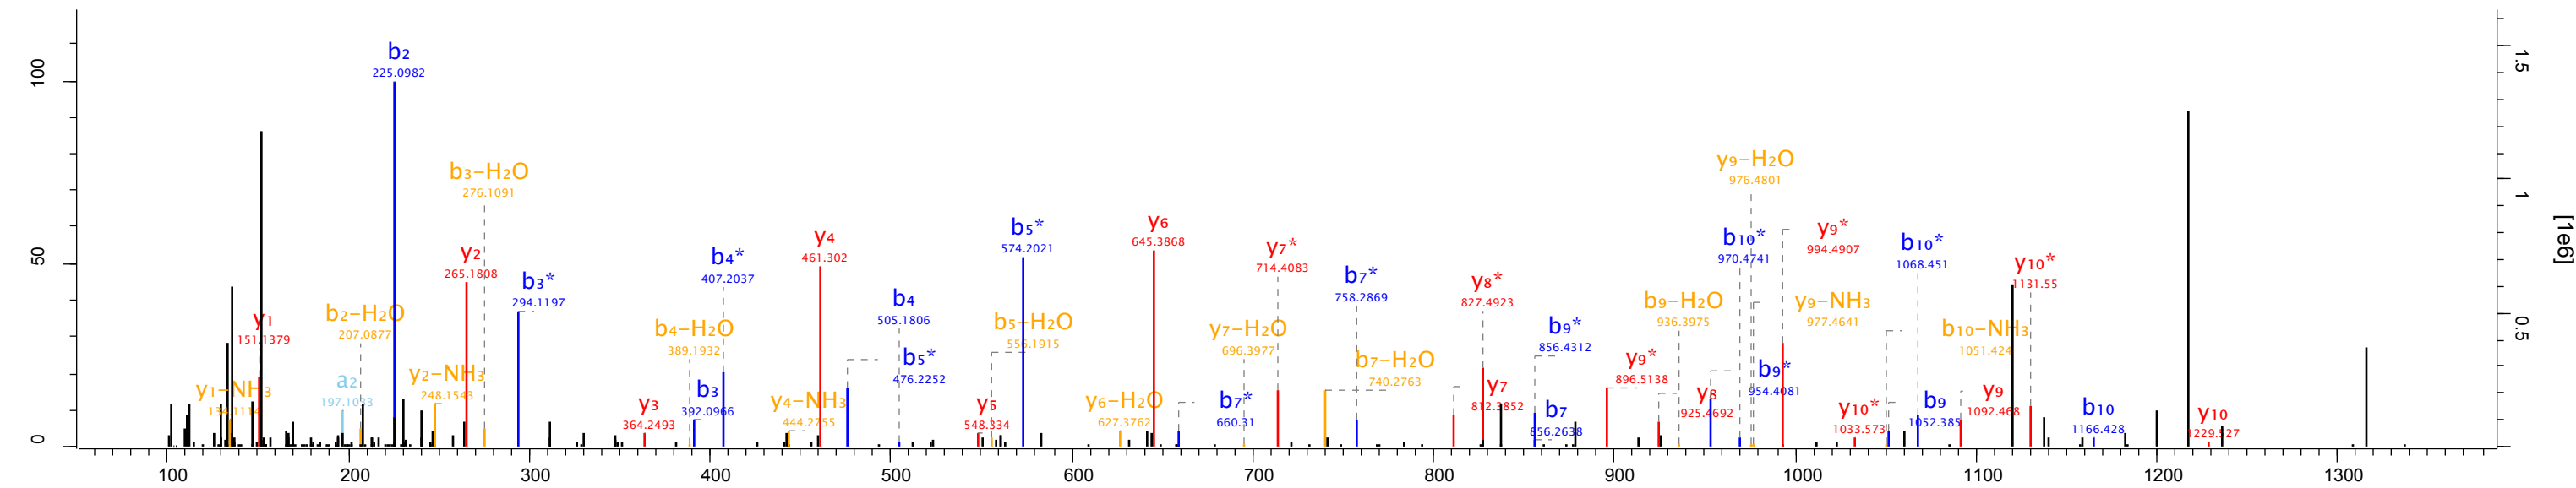

Raw file 20171215\_MaS\_33SR\_LMH\_phospho2\_03 Scan 4806 Method FTMS; HCD Score 46.5 m/z 637.65 Gene names EPB41L1

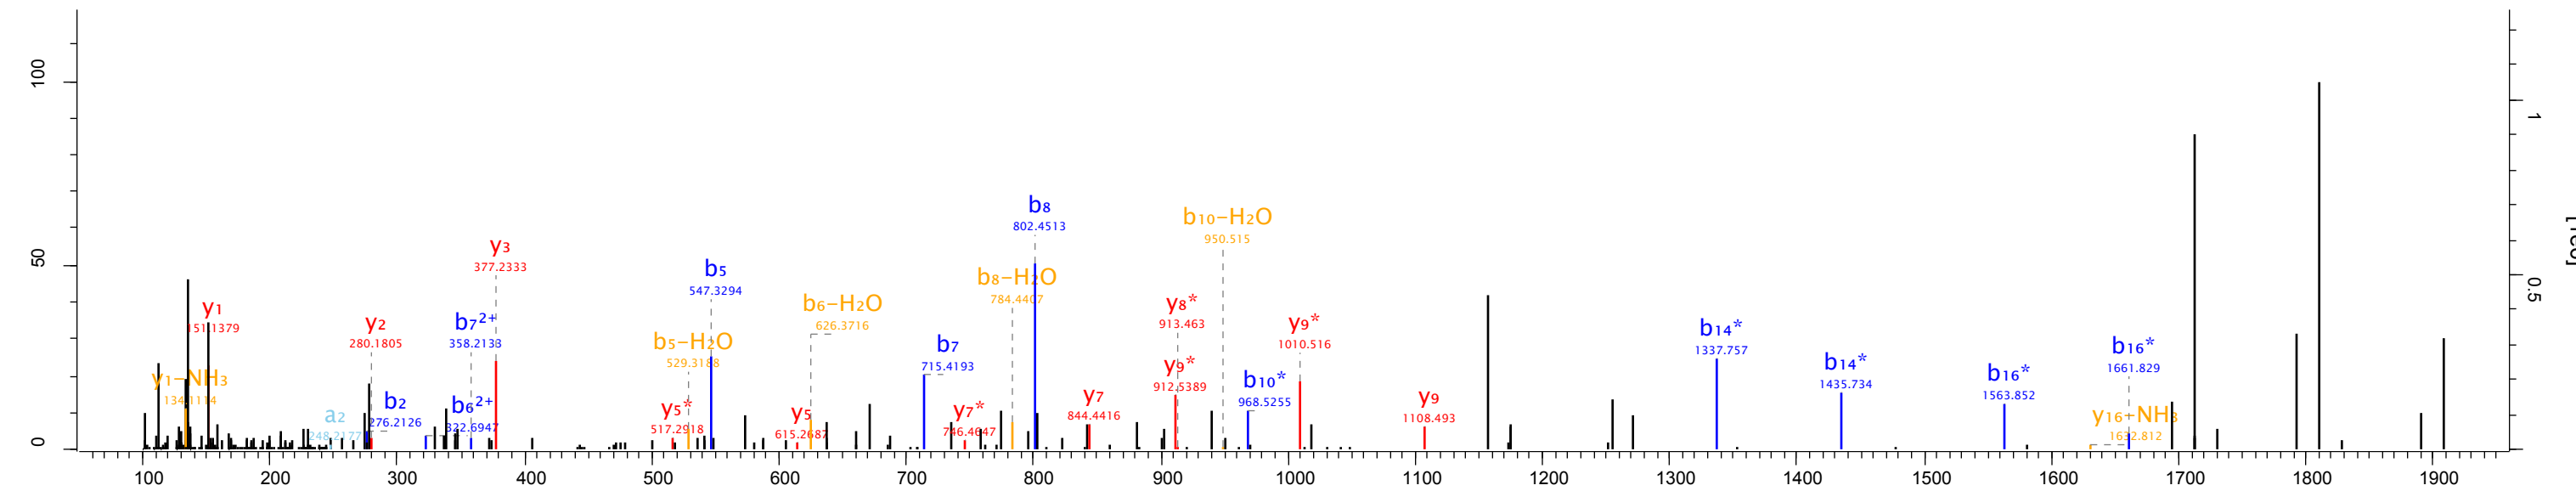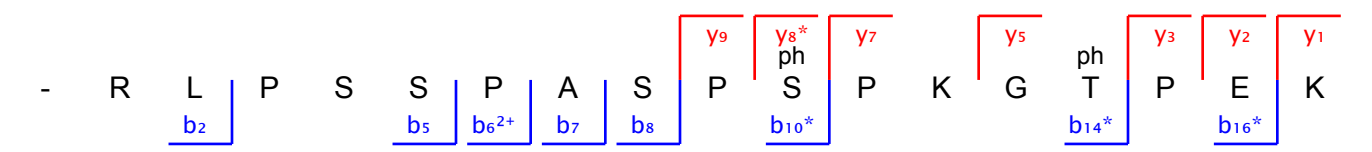

Raw file 20171215\_MaS\_33SR\_LMH\_phospho2\_03 Scan 4826 Method FTMS; HCD Score 48.52 m/z 596.24 Gene names DPF2

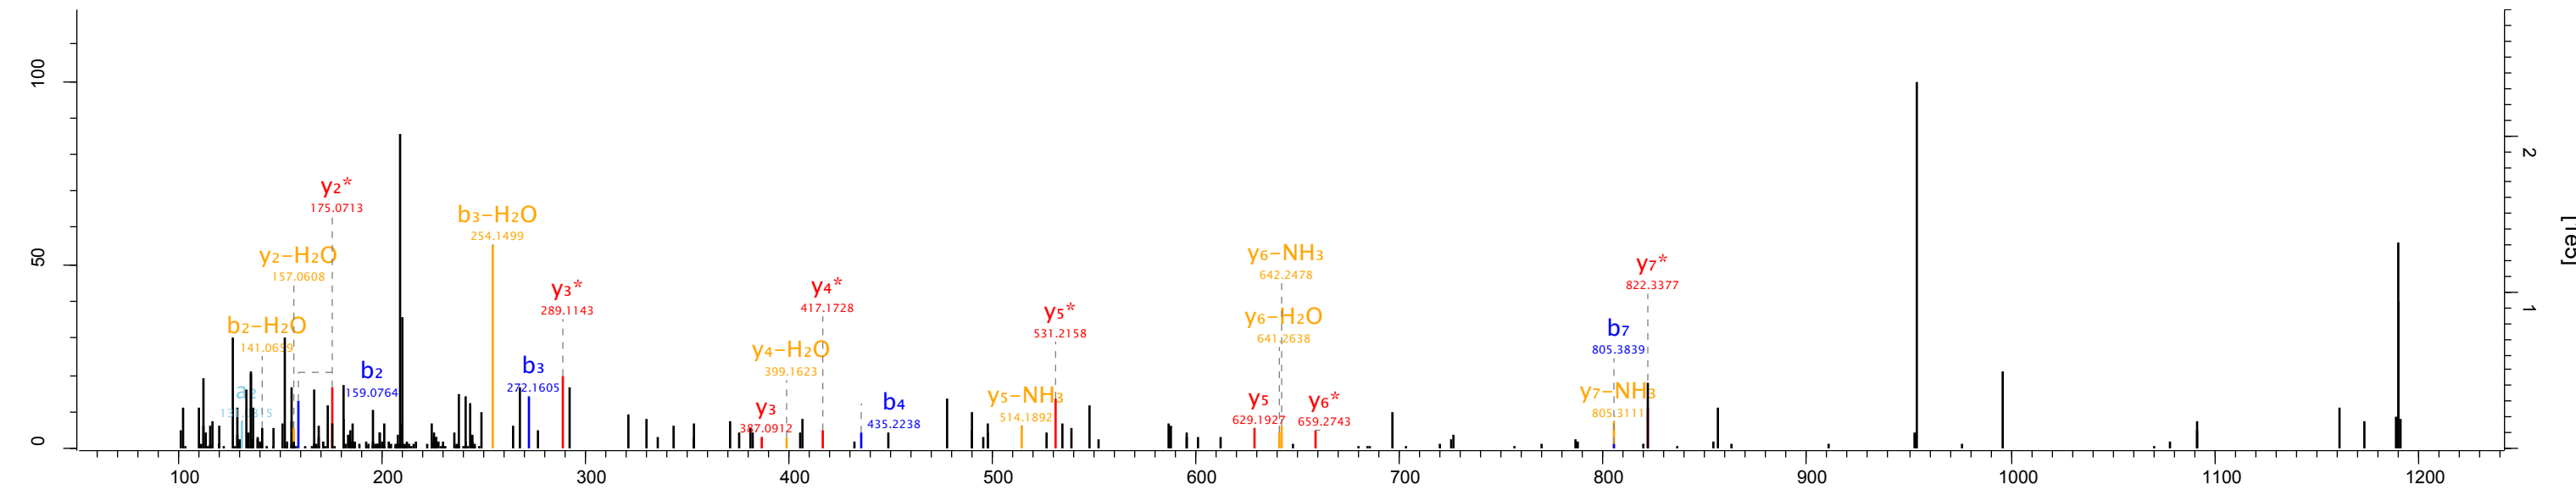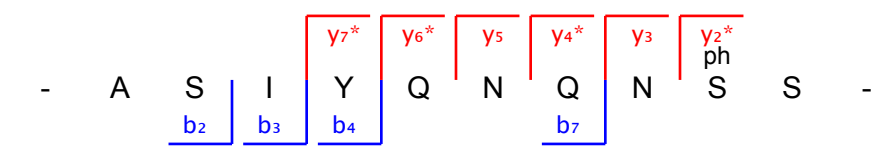

Raw file 20171215\_MaS\_33SR\_LMH\_phospho2\_03 Scan 4866 Method FTMS; HCD Score 346.78 m/z 1309.06 Gene names UBAP2L

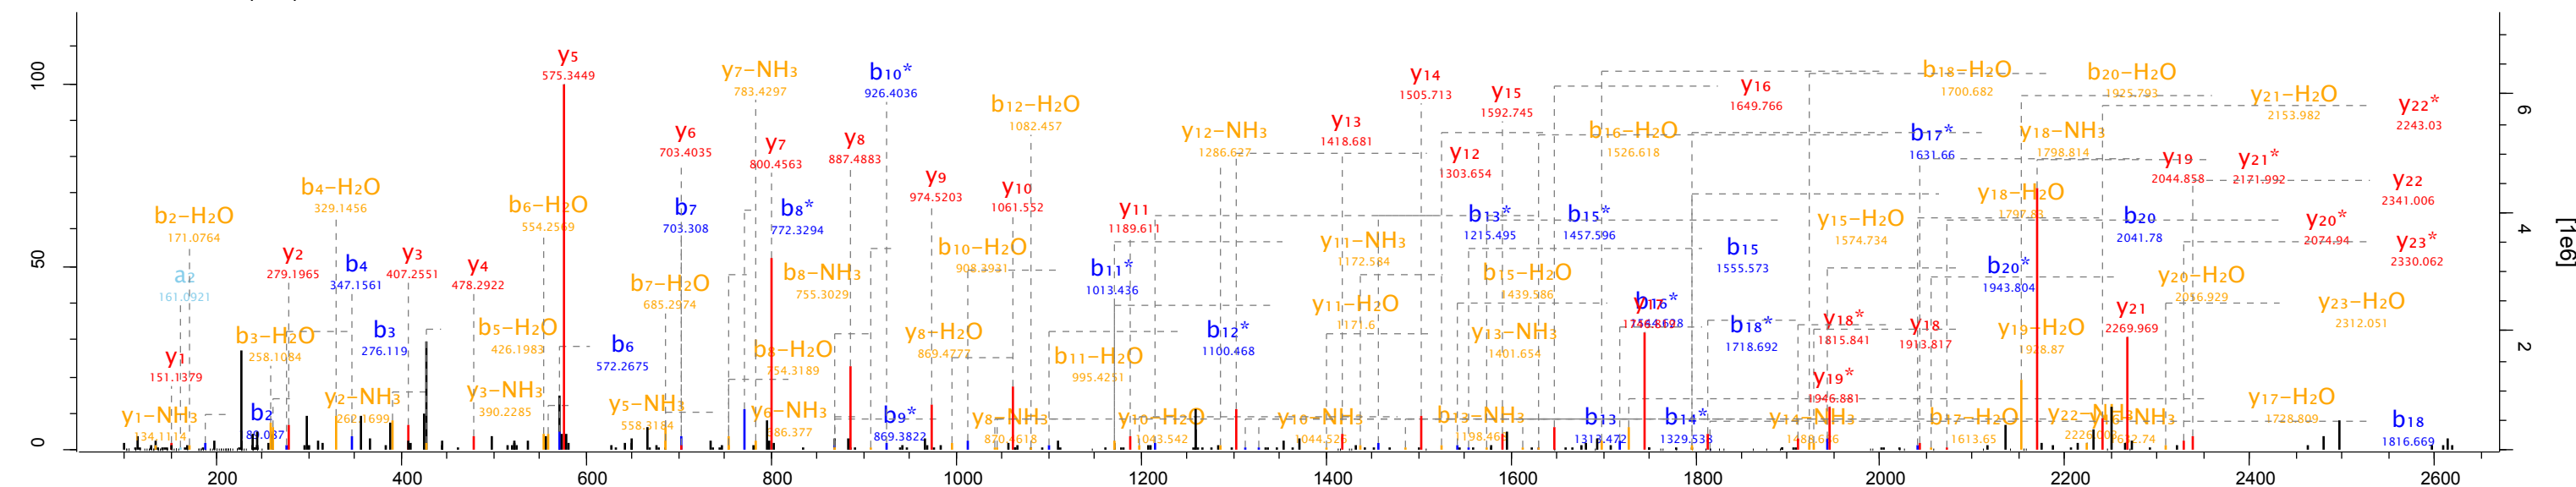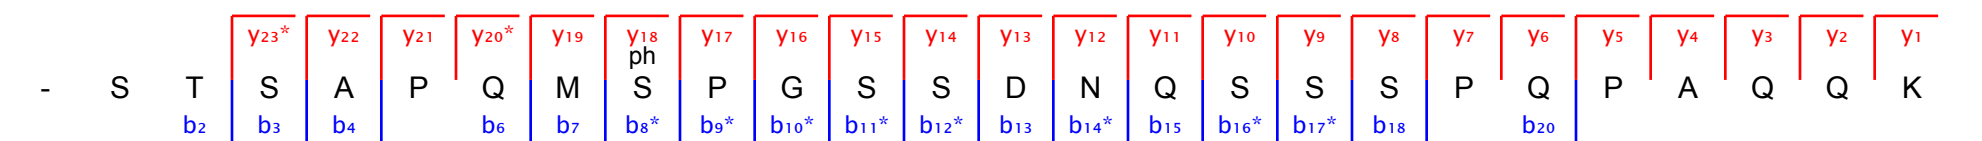

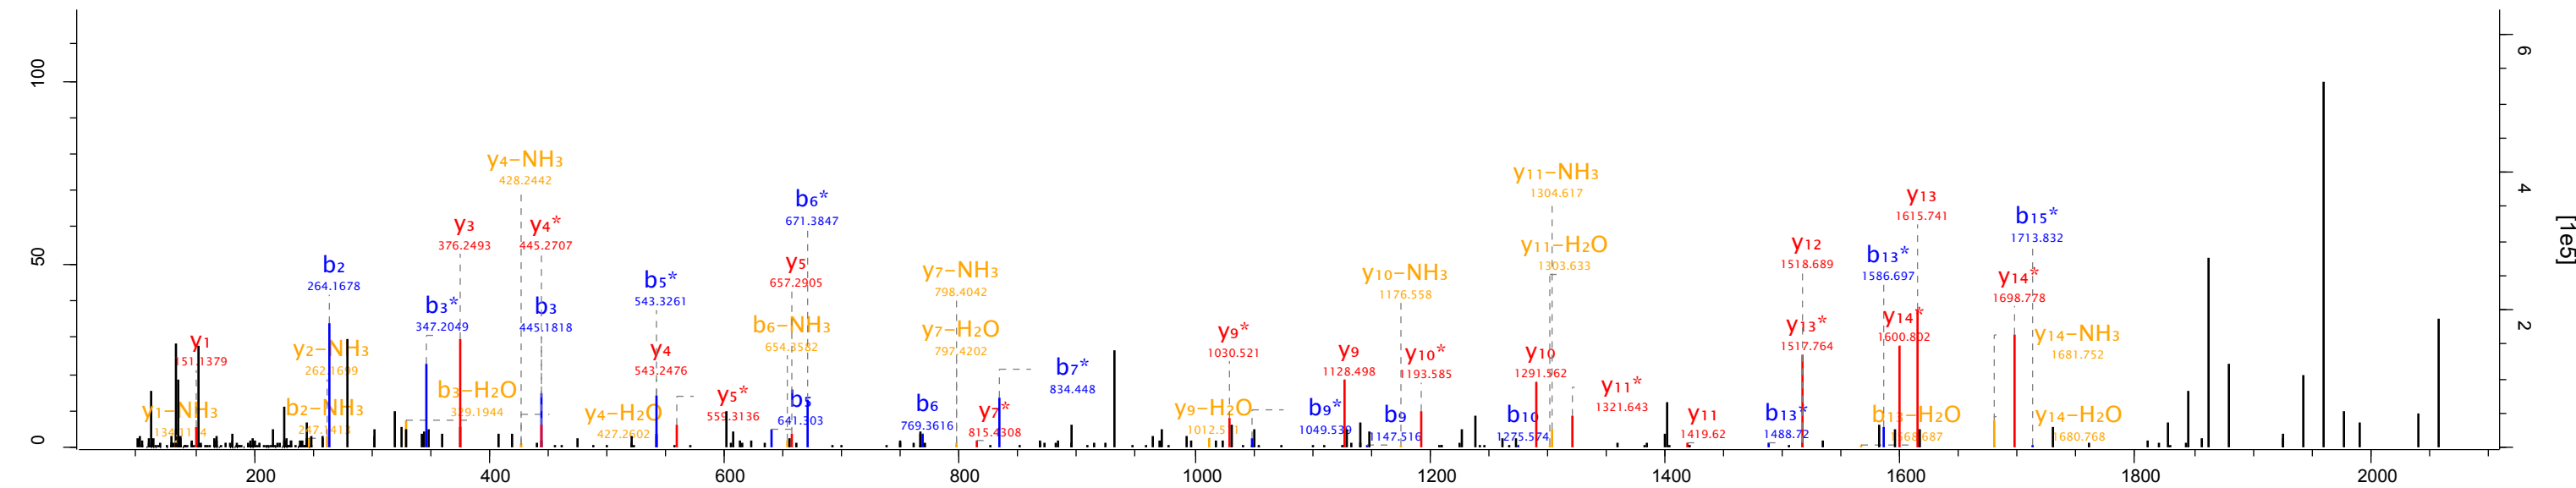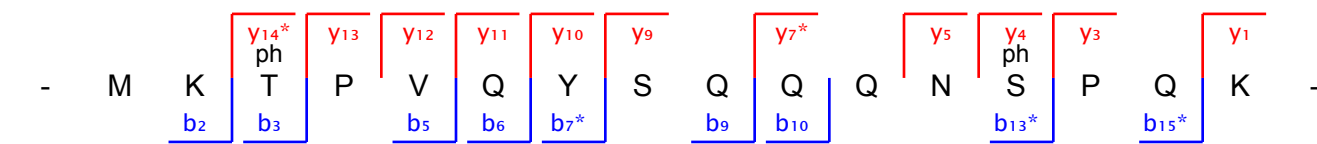



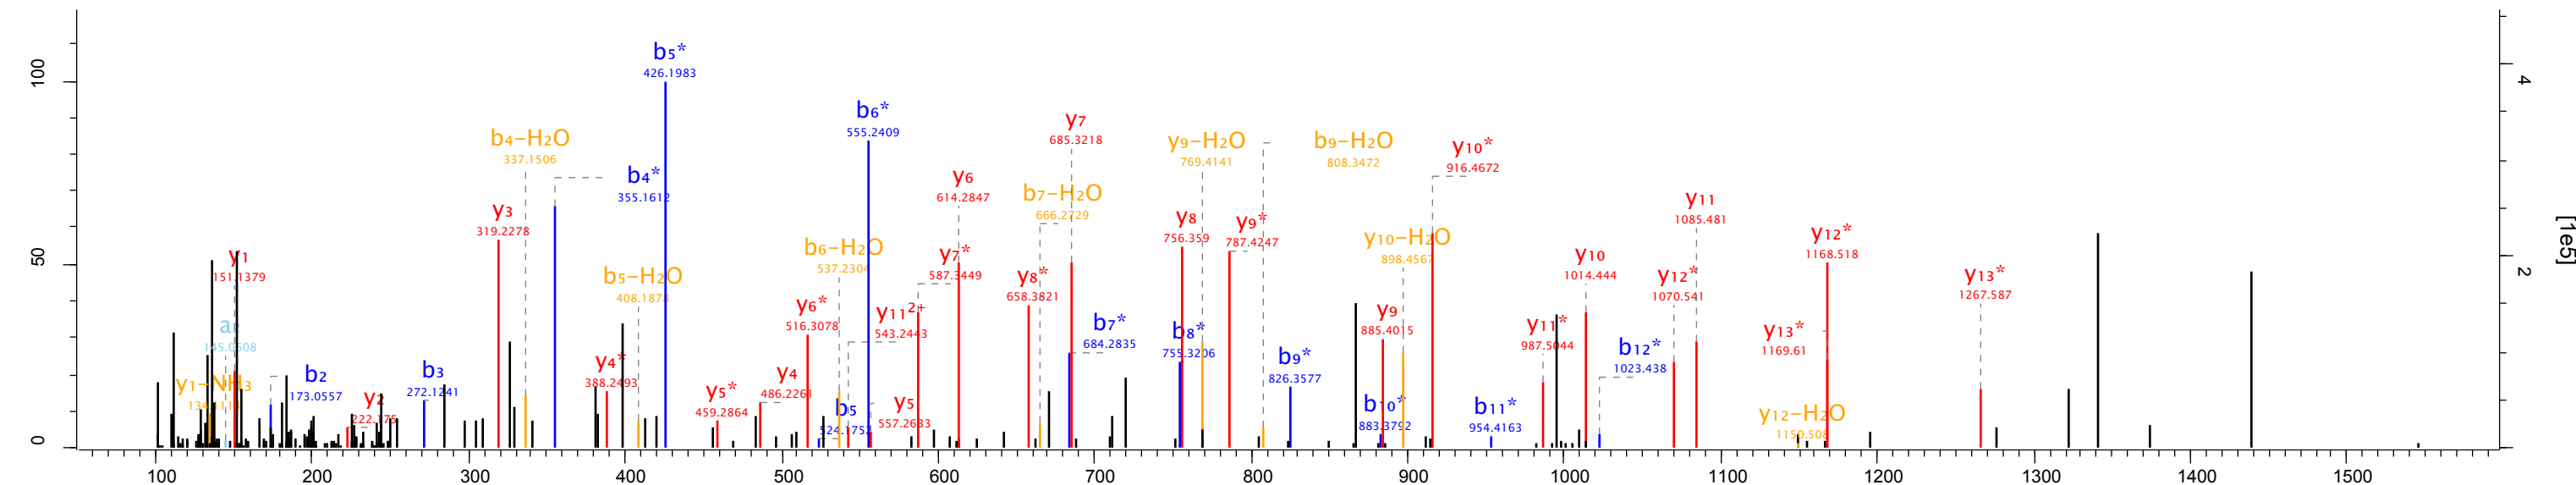

- G D V V T A E E A A G A S P A K -

b<sub>2</sub>
b<sub>3</sub>
b<sub>4</sub><sup>\*</sup>
b<sub>5</sub>
b<sub>6</sub><sup>\*</sup>
b<sub>7</sub><sup>\*</sup>
b<sub>8</sub><sup>\*</sup>
b<sub>9</sub><sup>\*</sup>
b<sub>10</sub><sup>\*</sup>
b<sub>11</sub><sup>\*</sup>
b<sub>12</sub><sup>\*</sup>
y<sub>13</sub><sup>\*</sup>
y<sub>12</sub><sup>\*</sup>
y<sub>11</sub>
y<sub>10</sub>
y<sub>9</sub>
y<sub>8</sub>
y<sub>7</sub>
y<sub>6</sub>
y<sub>5</sub>
y<sub>4</sub>
y<sub>3</sub>
y<sub>2</sub>
y<sub>1</sub>

Raw file 20171215\_MaS\_33SR\_LMH\_phospho2\_03 Scan 5906 Method FTMS; HCD Score 80.36 m/z 492.55 Gene names VCPIP1

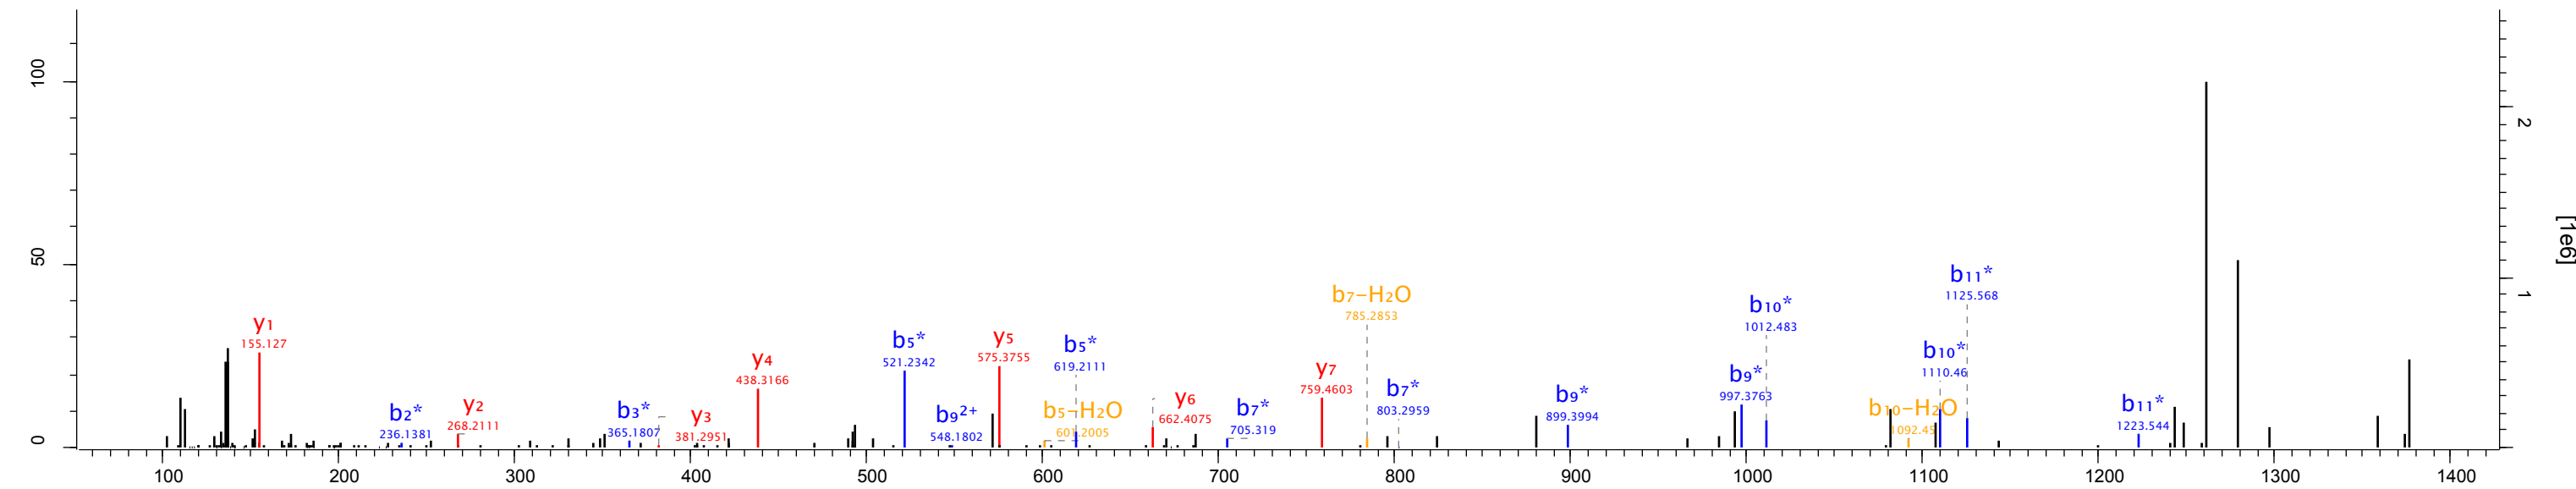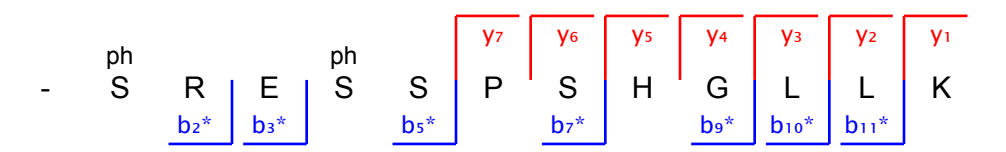

20171215\_MaS\_33SR\_LMH\_phospho2\_03 5956 FTMS; HCD 73.83 716.96 CDV3

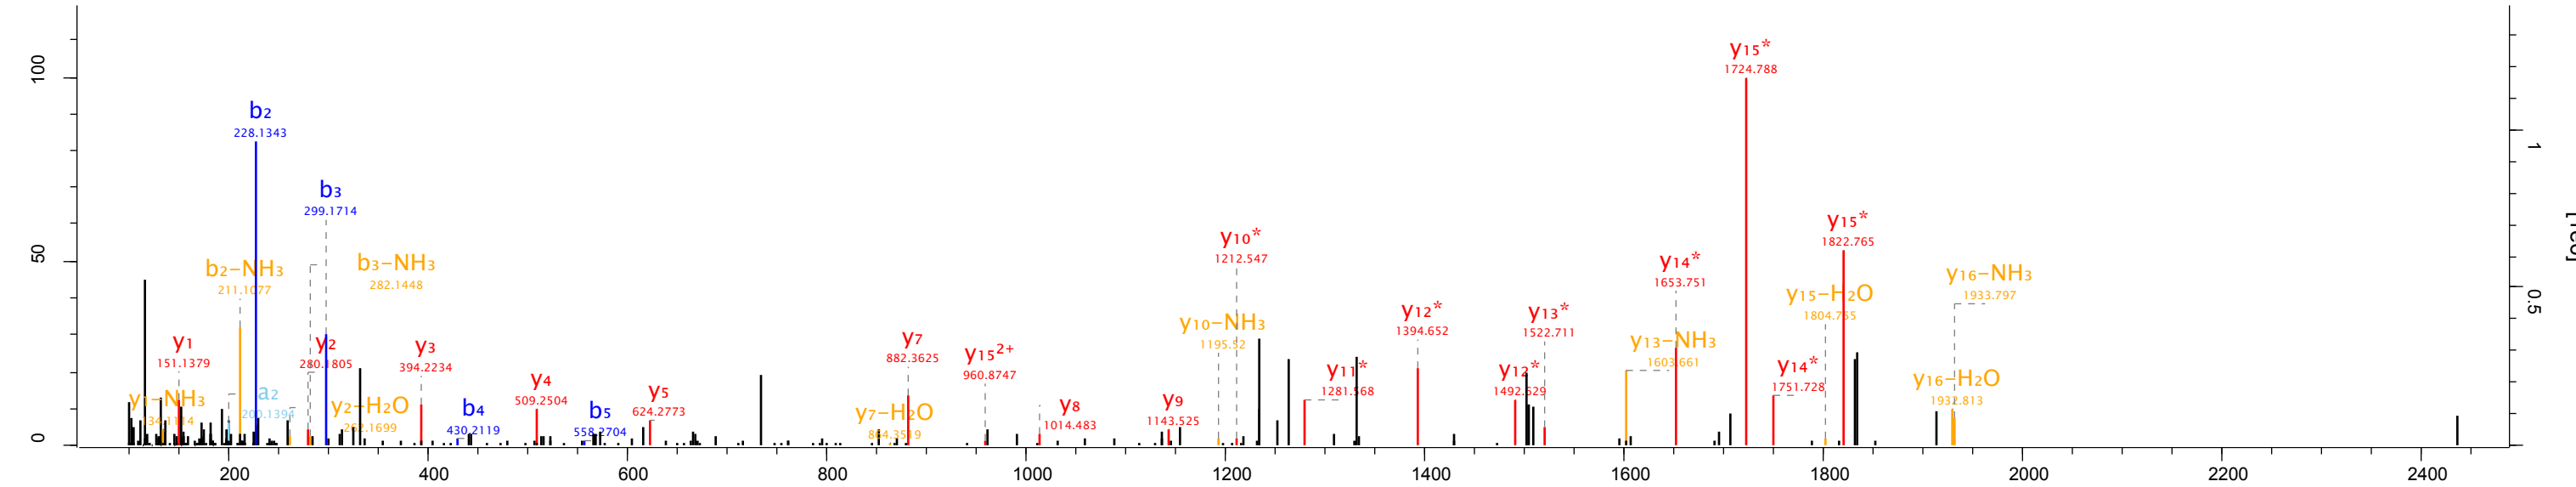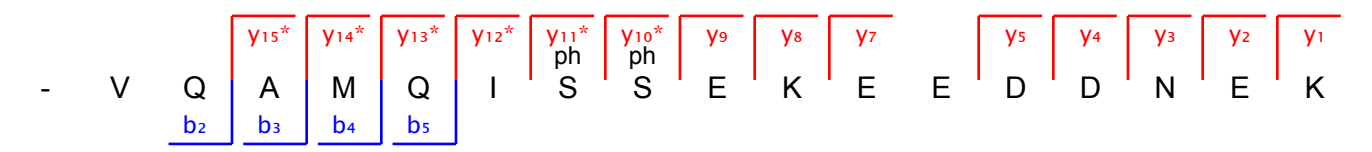

Raw file  
20171215\_MaS\_33SR\_LMH\_phospho2\_03

Scan 6036 Method FTMS; HCD Score 127.03 m/z 1014.95 Gene names ARHGEF11

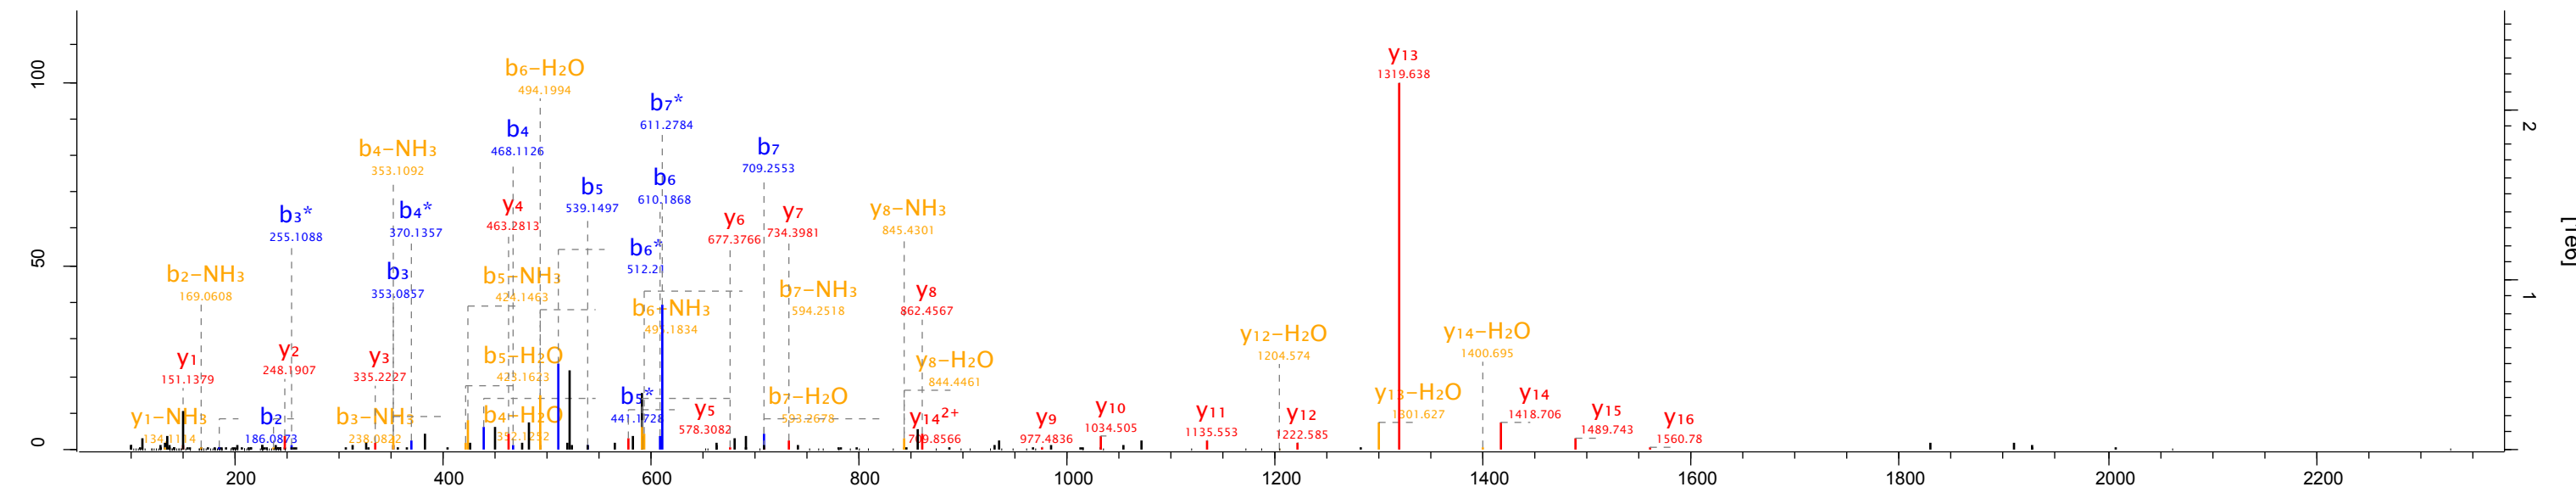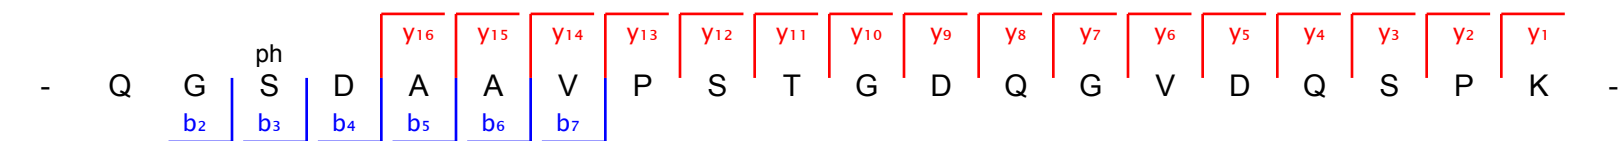

Raw file  
20171215\_MaS\_33SR\_LMH\_phospho2\_03

Scan: 6626  
Method: FTMS; HCD  
Score: 43.77  
m/z: 1334.52  
Gene names: AOC1

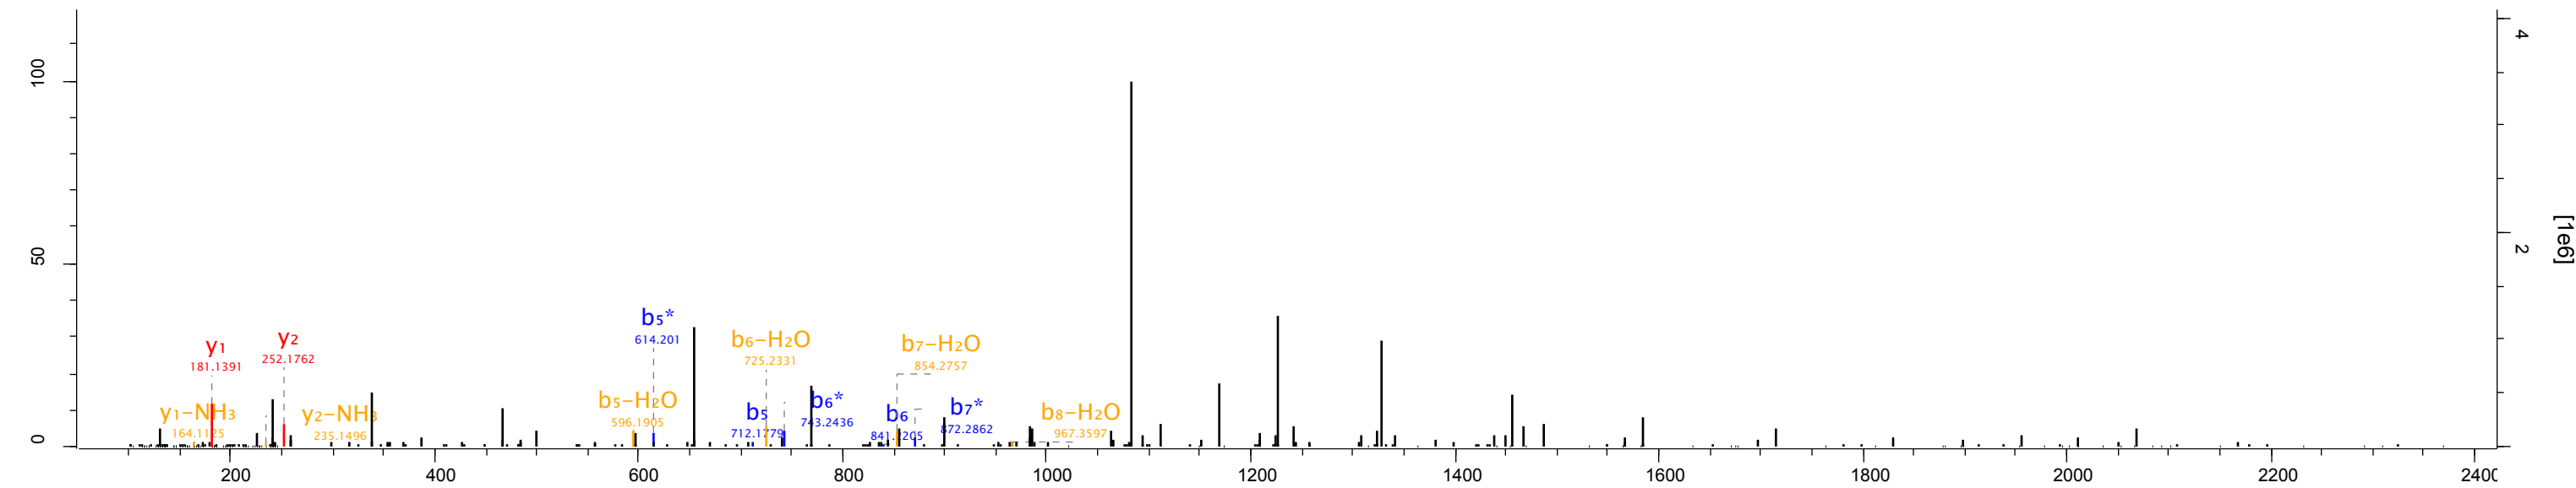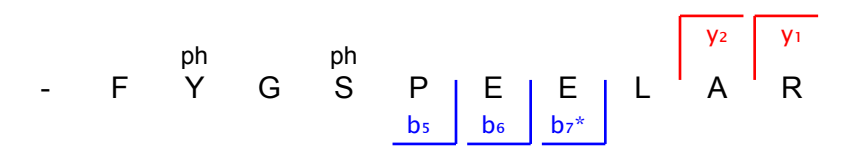

Raw file 20171215\_MaS\_33SR\_LMH\_phospho2\_03 Scan 6746 Method FTMS; HCD Score 121.1 m/z 720.01 Gene names RERE

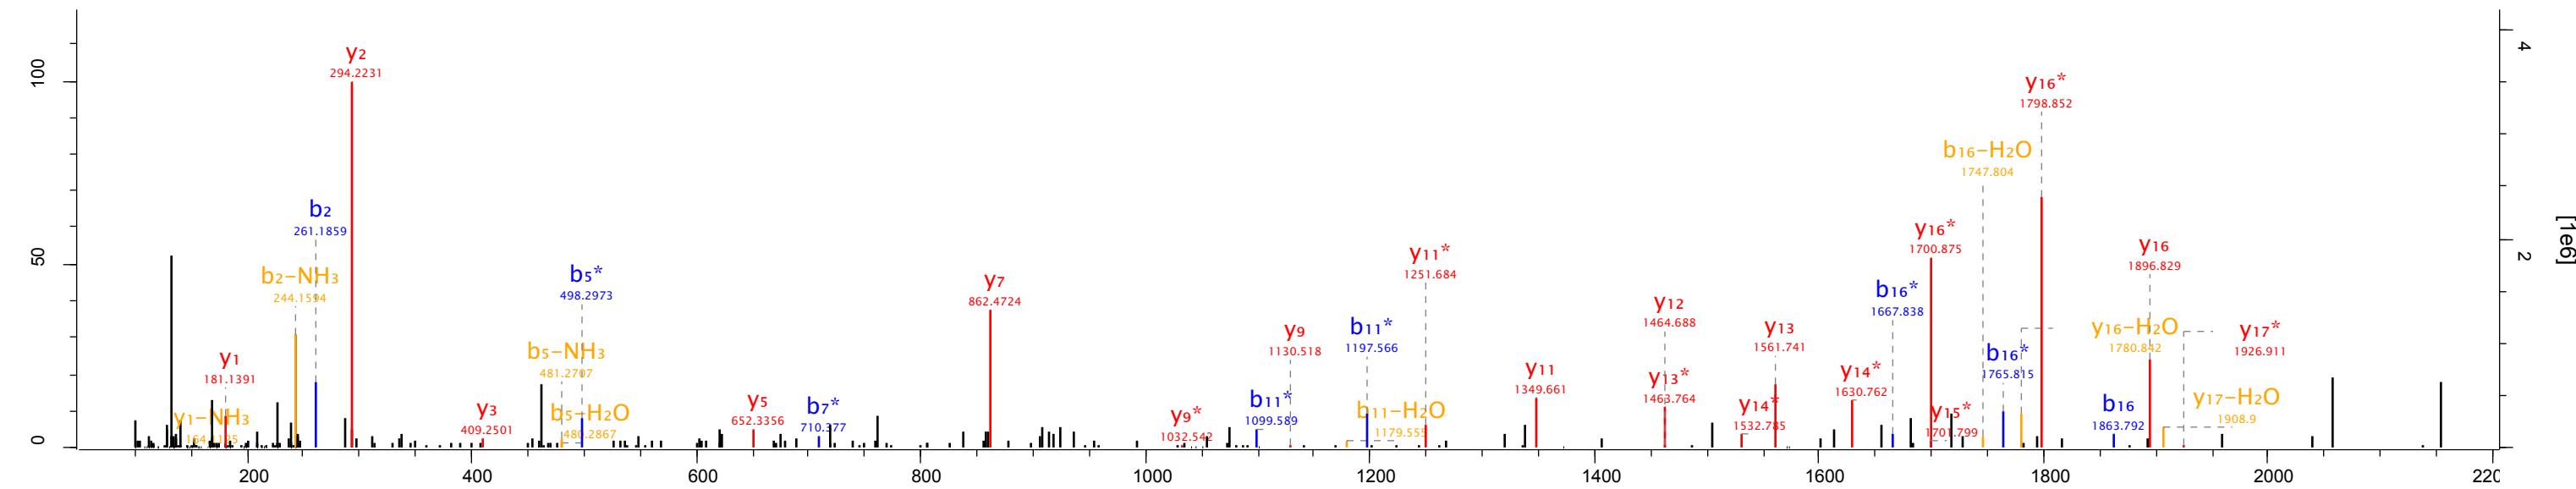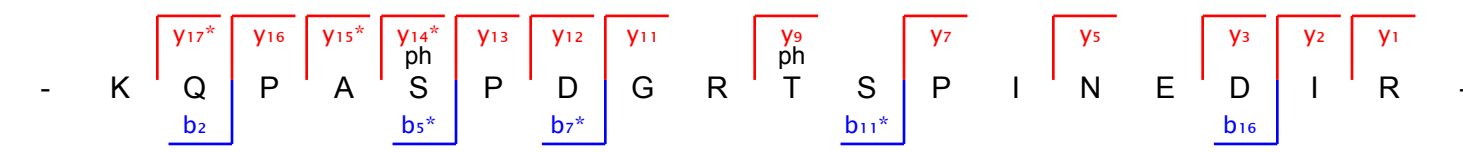

Raw file 20171215\_MaS\_33SR\_LMH\_phospho2\_03 Scan 6826 Method FTMS; HCD Score 149.52 m/z 768.3 Gene names GPSM1

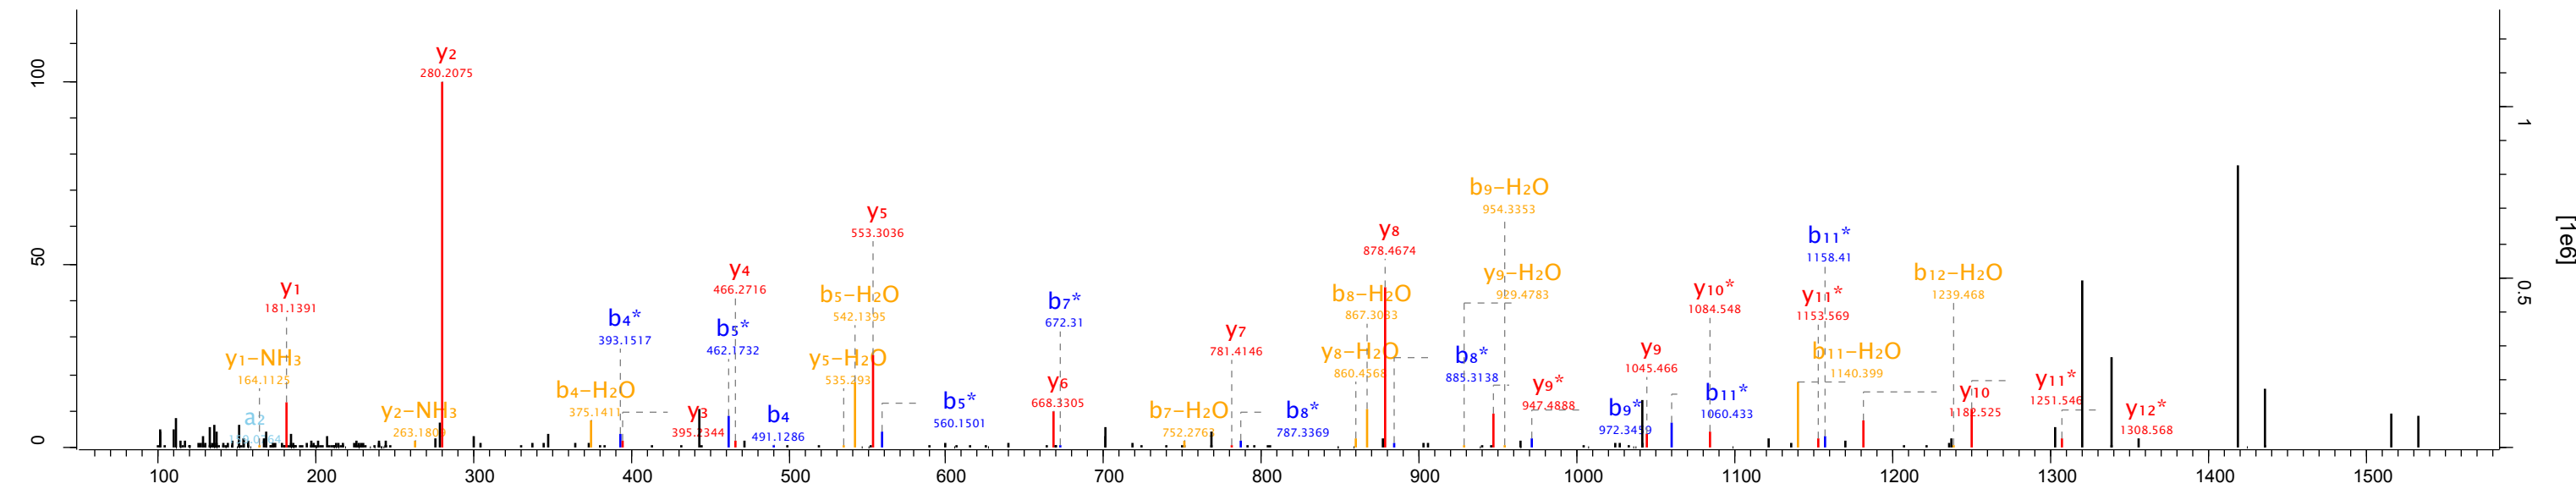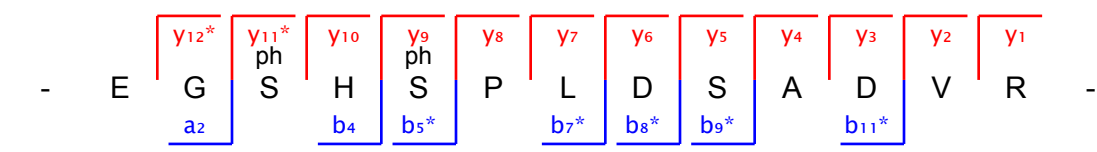

Raw file  
20171215\_MaS\_33SR\_LMH\_phospho2\_03

Scan 7036 Method FTMS; HCD Score 153.27 m/z 926.9 Gene names CASC3

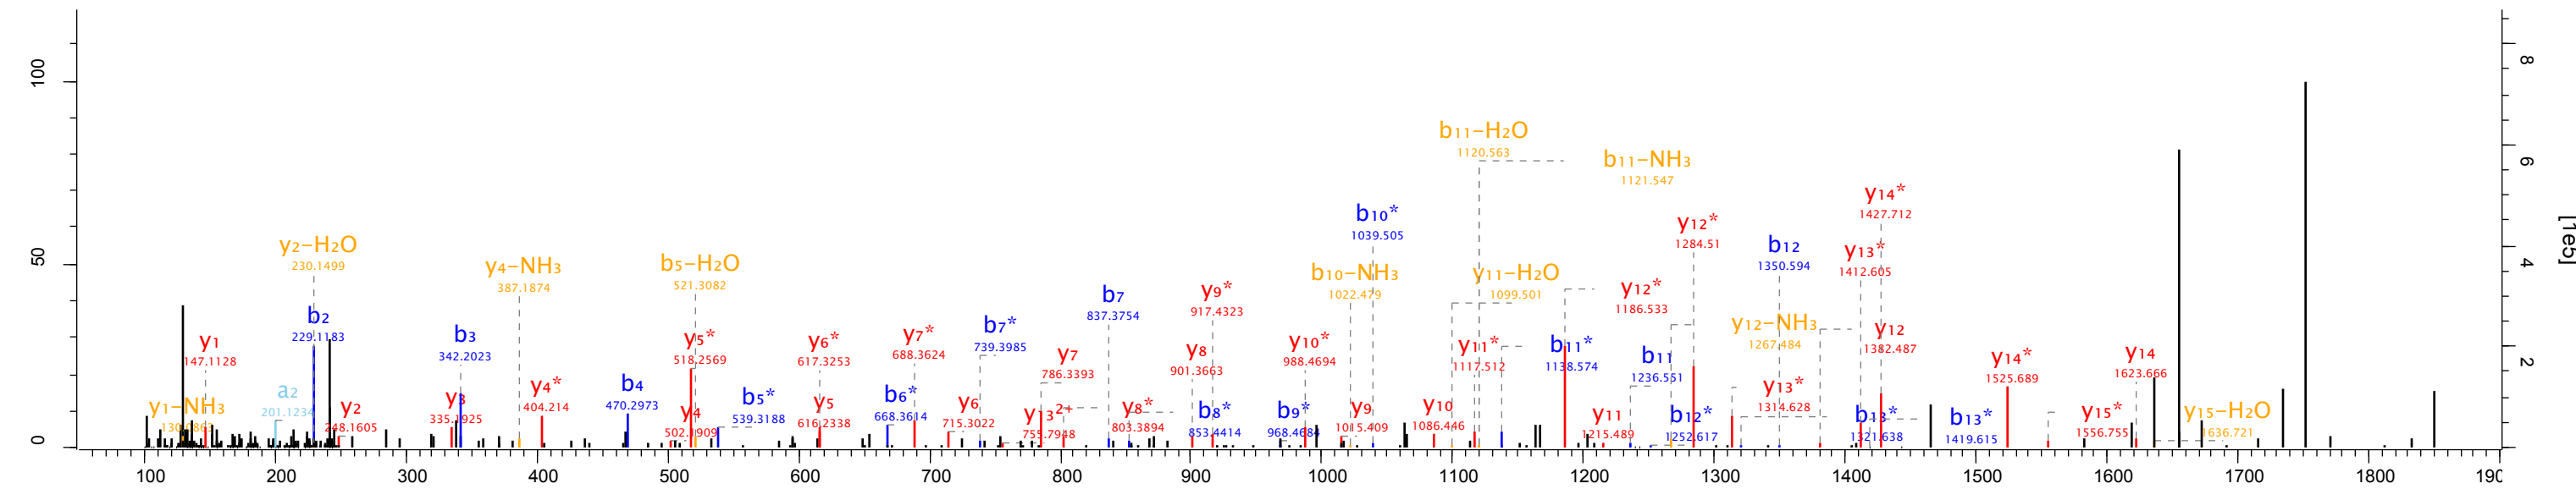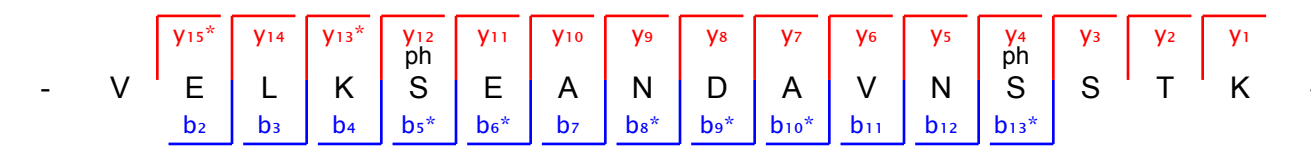



Raw file 20171215\_MaS\_33SR\_LMH\_phospho2\_03 Scan 7046 Method FTMS; HCD Score 282.33 m/z 1129.45 Gene names THUMPD1

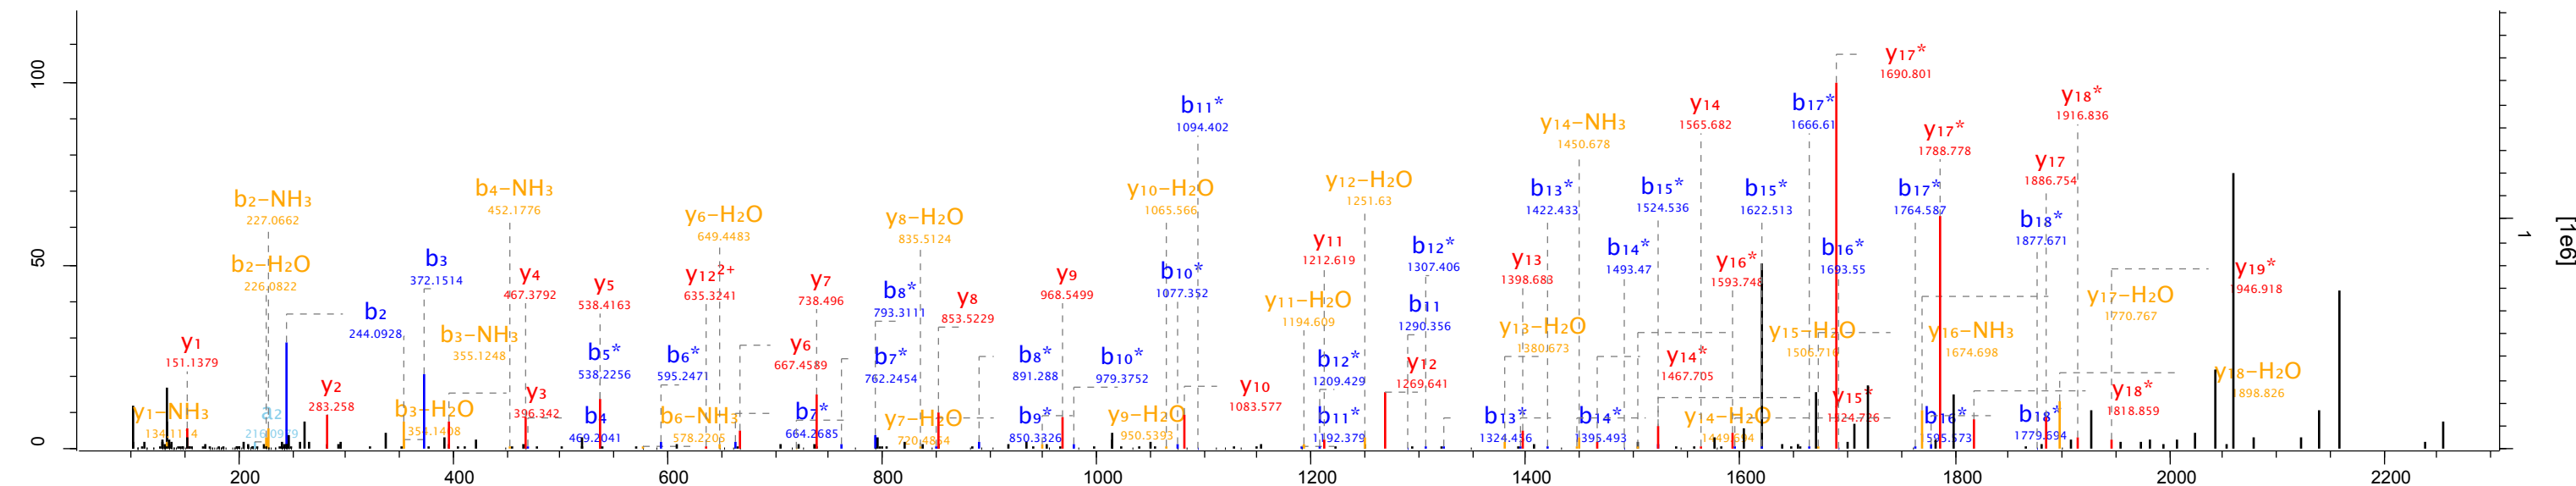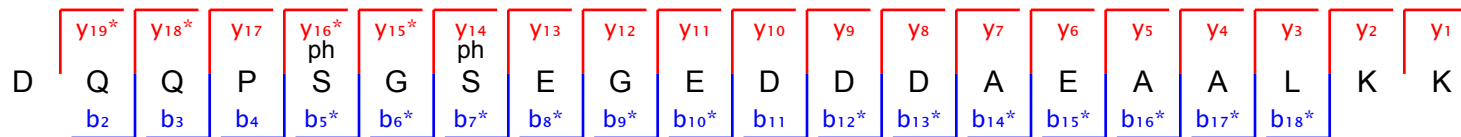

Raw file 20171215\_MaS\_33SR\_LMH\_phospho2\_03 Scan 7616 Method FTMS; HCD Score 275.21 m/z 1044.34 Gene names BCLAF1

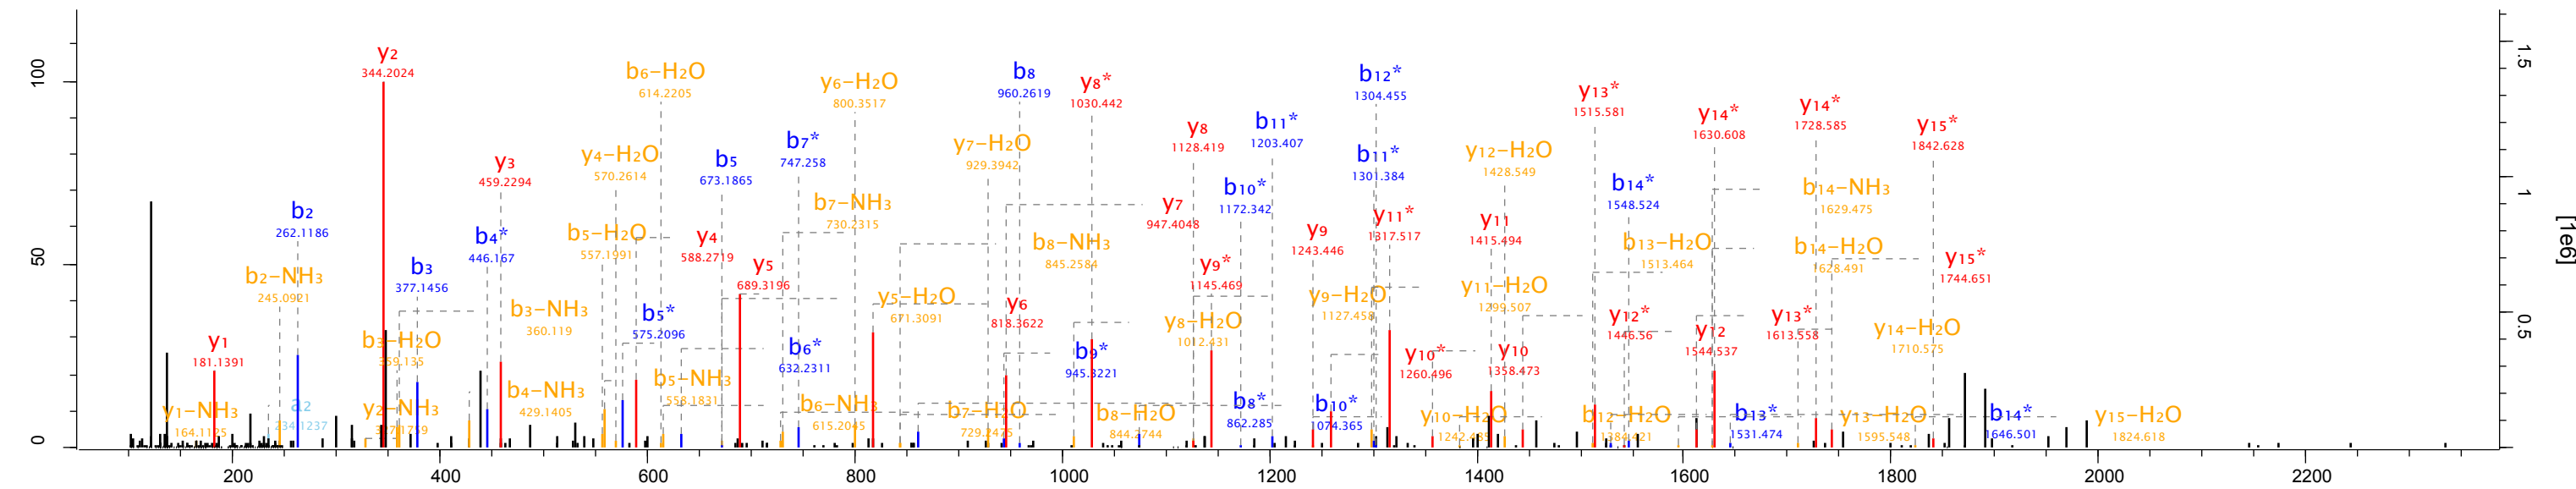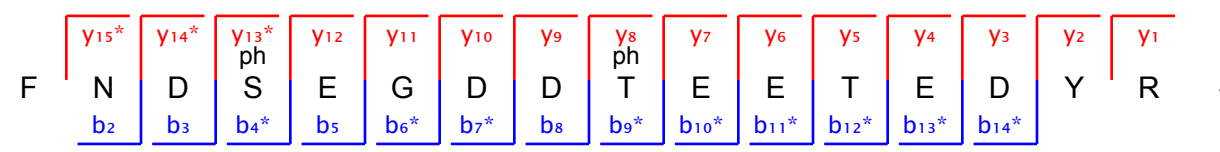

Raw file 20171215\_MaS\_33SR\_LMH\_phospho2\_03 Scan 7936 Method FTMS; HCD Score 69.22 m/z 519.71 Gene names SNX29

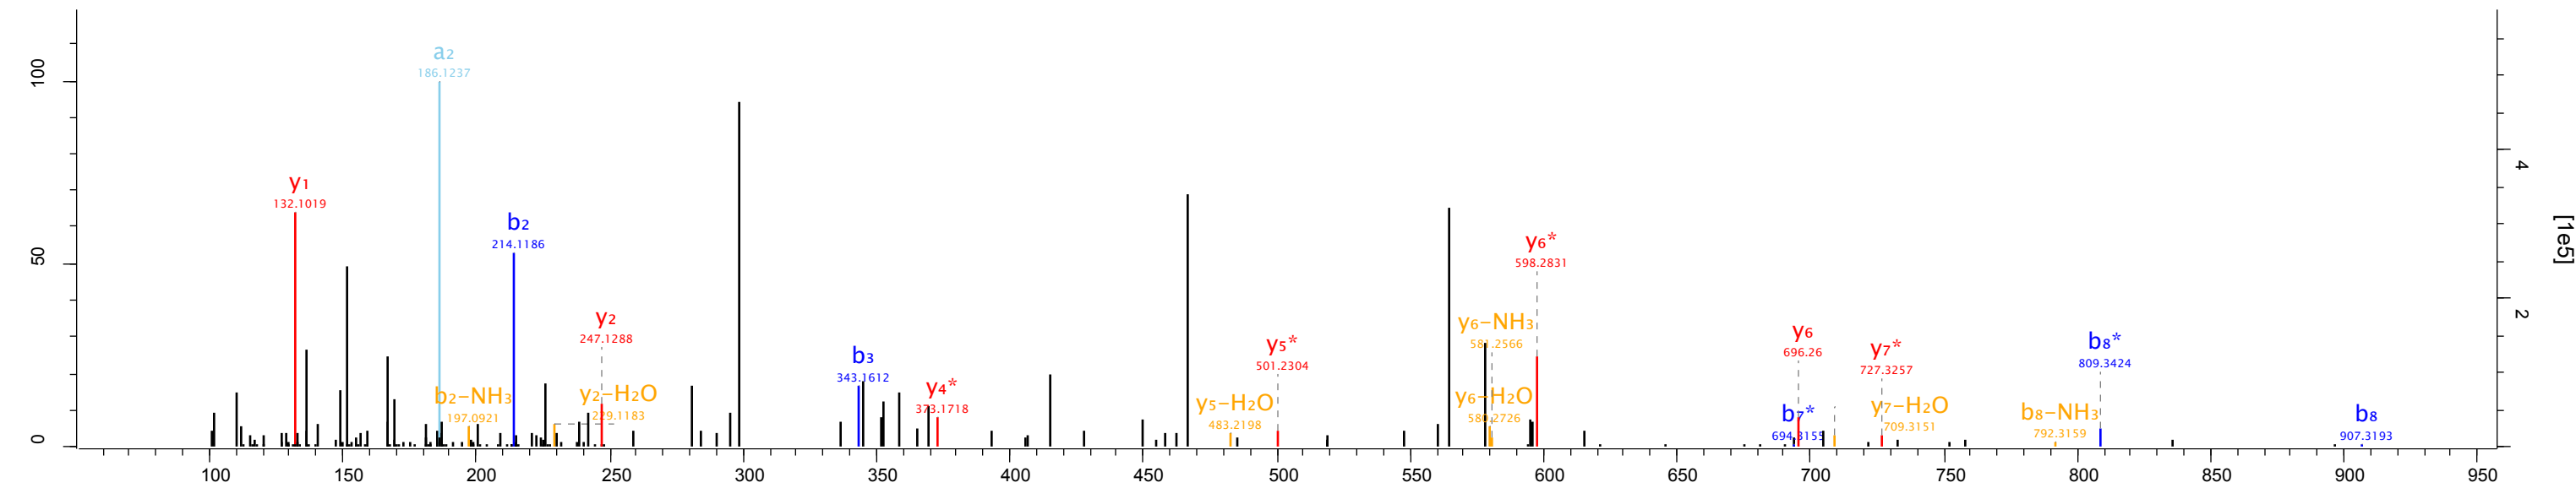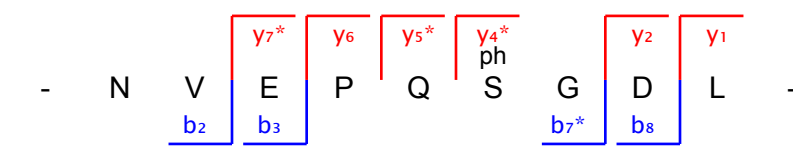

Raw file: 20171215\_MaS\_33SR\_LMH\_phospho2\_03  
 Scan: 7986 Method: FTMS; HCD Score: 40.14 m/z: 615.9 Gene names: SPEN

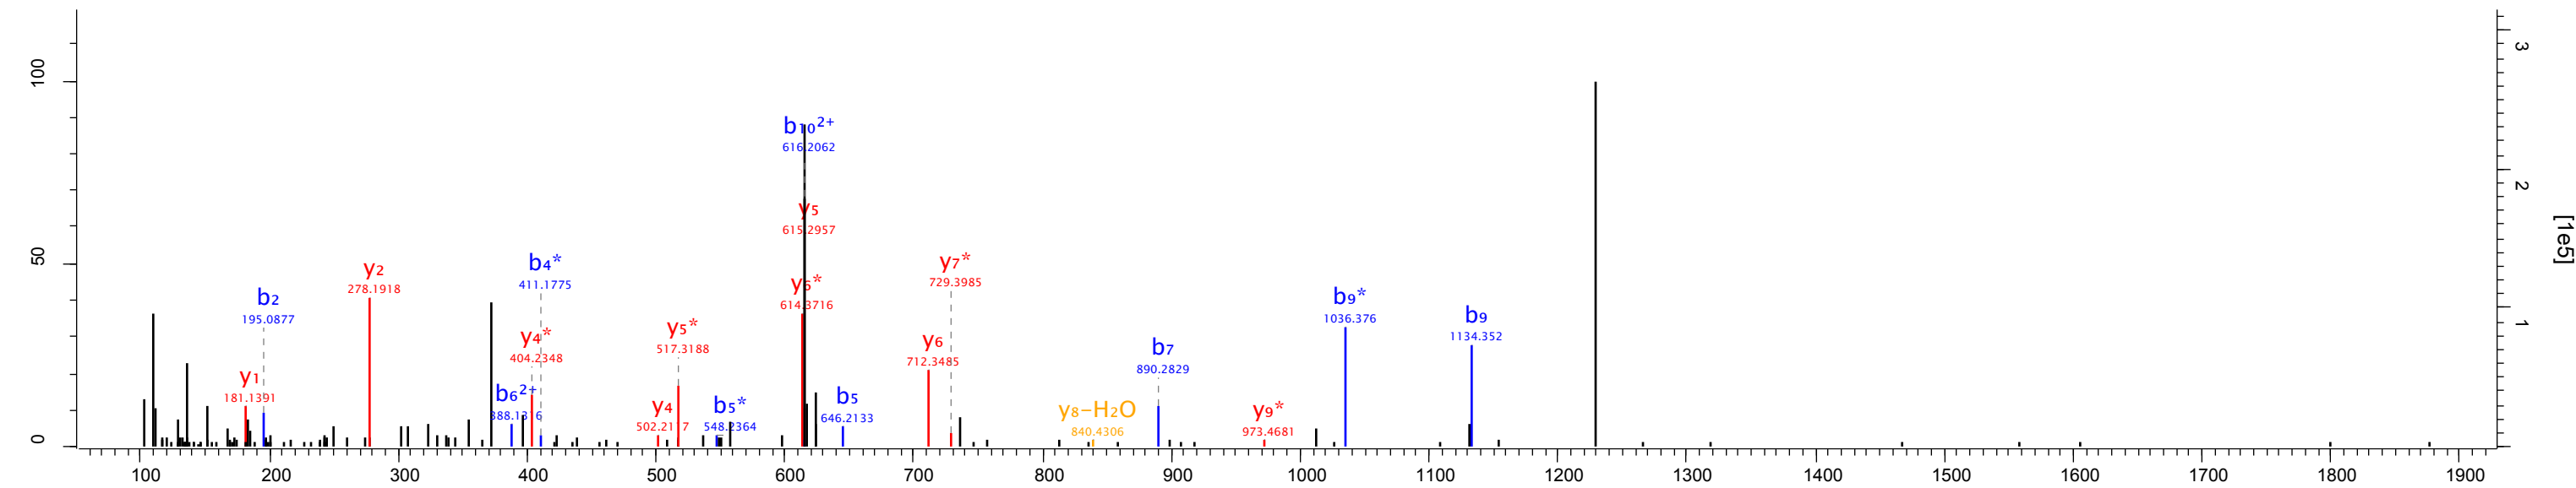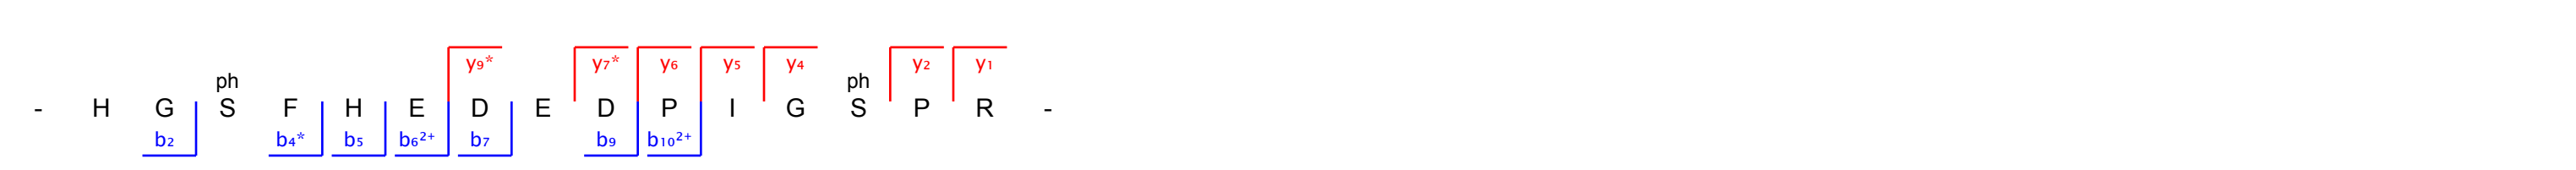

Raw file 20171215\_MaS\_33SR\_LMH\_phospho2\_03 Scan 8146 Method FTMS; HCD Score 42.28 m/z 786.02 Gene names PCYT1A

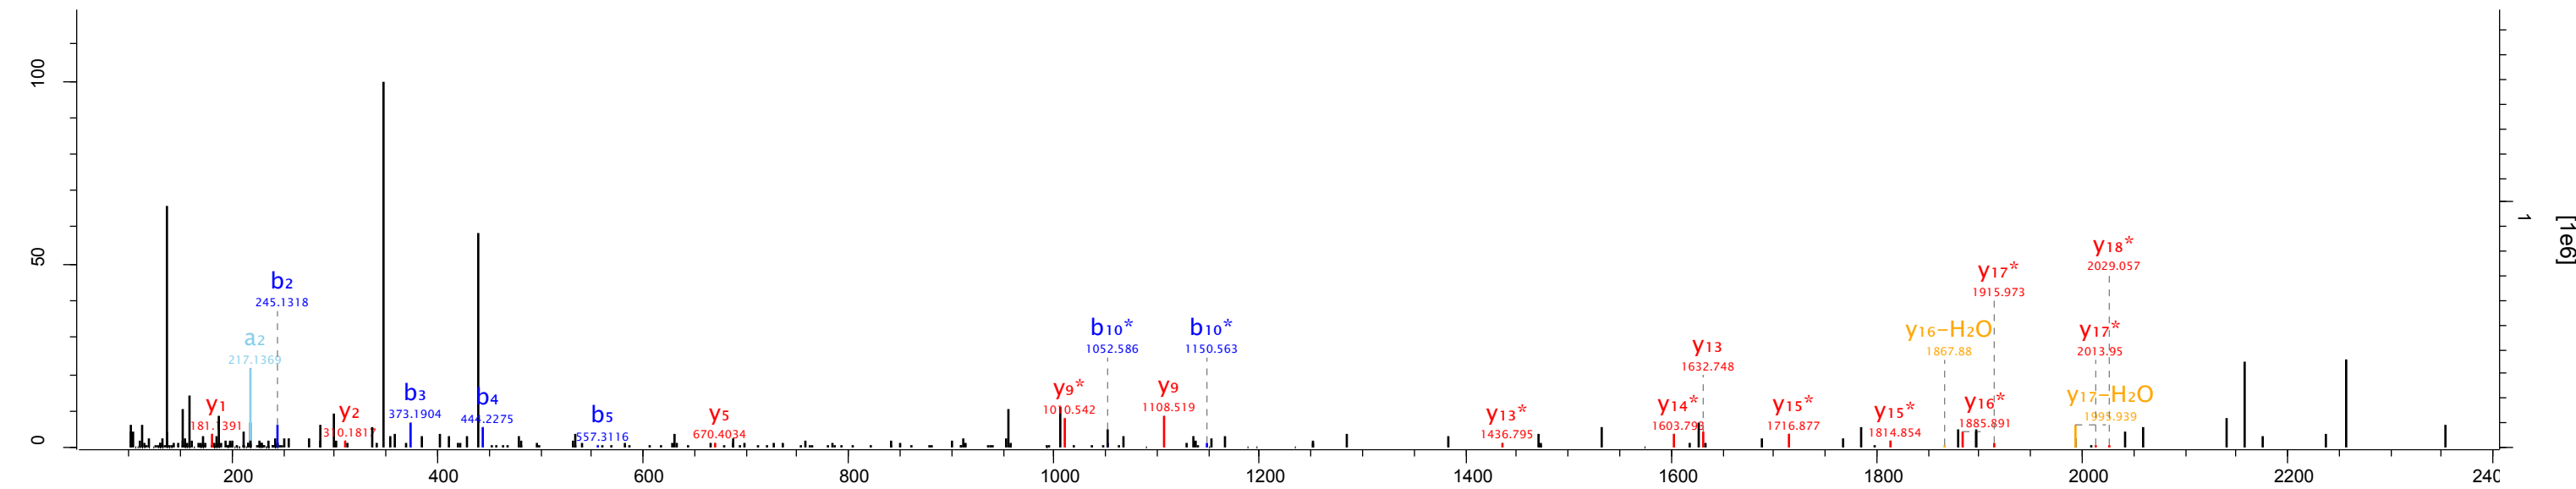

- M L Q A I S P K Q S P S S P T R E R -

b<sub>2</sub>
b<sub>3</sub>
b<sub>4</sub>
b<sub>5</sub>
b<sub>10</sub><sup>\*</sup>
y<sub>18</sub><sup>\*</sup>
y<sub>17</sub><sup>\*</sup>
y<sub>16</sub><sup>\*</sup>
y<sub>15</sub><sup>\*</sup>
y<sub>14</sub><sup>\*</sup>
y<sub>13</sub>
y<sub>9</sub>
y<sub>5</sub>
y<sub>2</sub>
y<sub>1</sub>

Raw file  
20171215\_MaS\_33SR\_LMH\_phospho2\_03

Scan 8246 Method FTMS; HCD Score 245.02 m/z 1161.45 Gene names ZFAND5

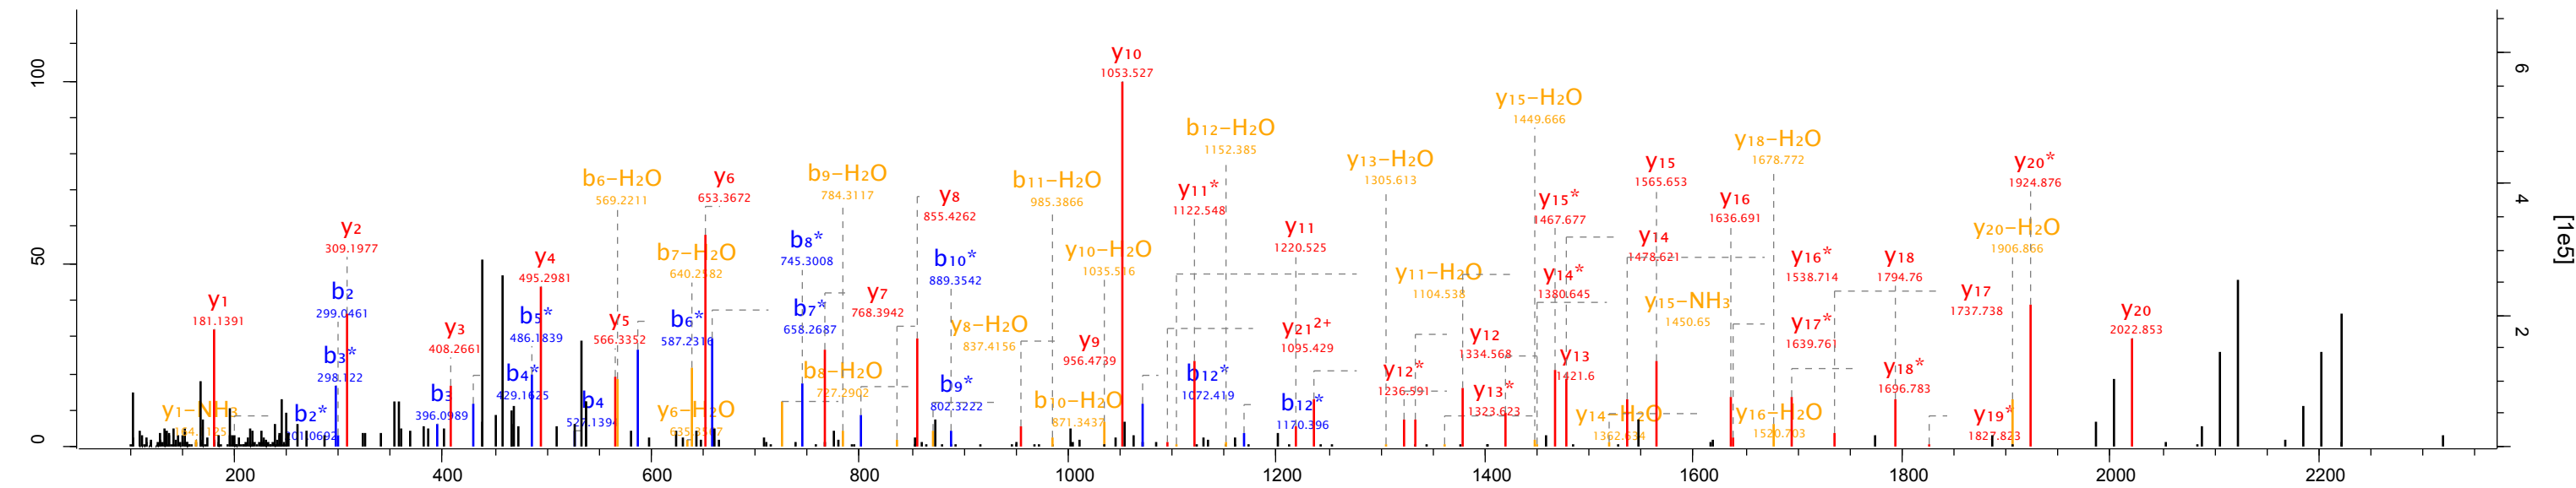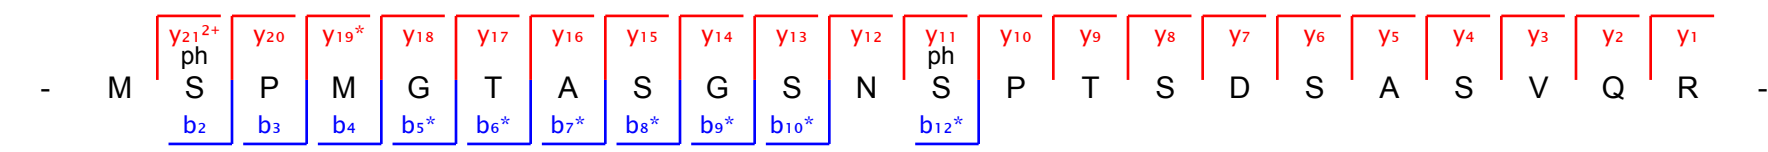

Raw file Scan Method Score m/z Gene names

20171215\_MaS\_33SR\_LMH\_phospho2\_03 8256 FTMS; HCD 55.43 787.64 ITGB4

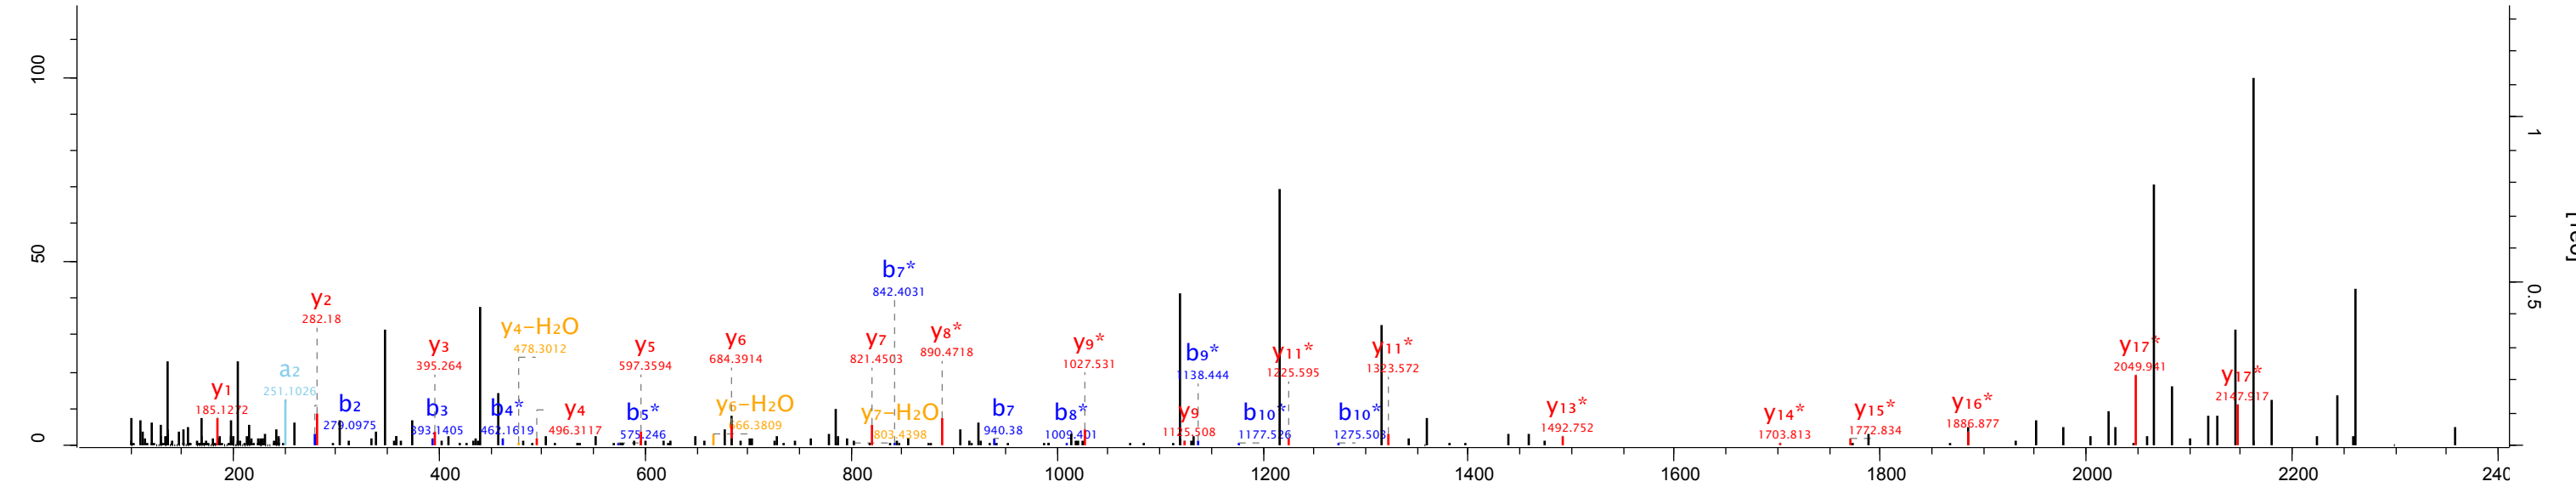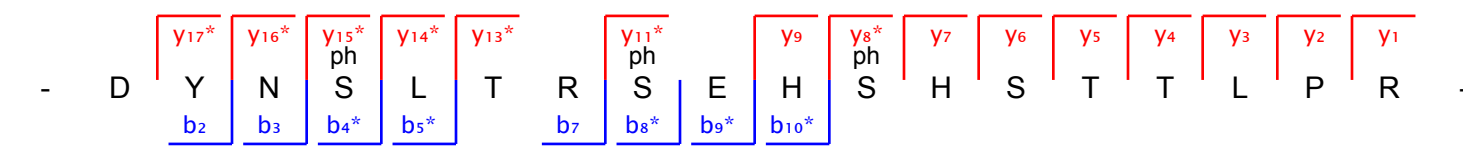

Raw file 20171215\_MaS\_33SR\_LMH\_phospho2\_03 Scan 8296 Method FTMS; HCD Score 164.94 m/z 1007.84 Gene names CCDC25

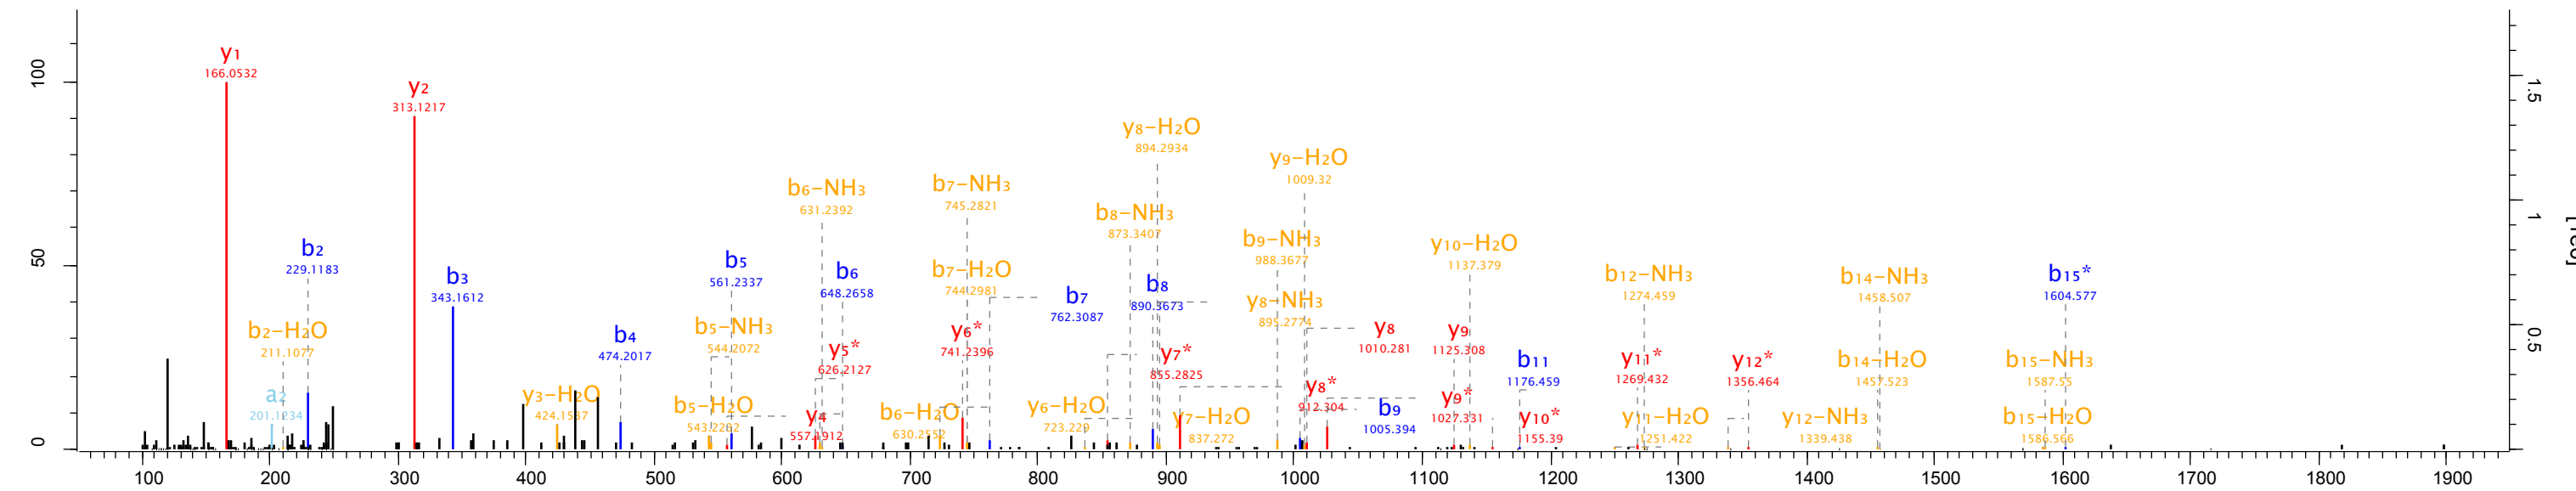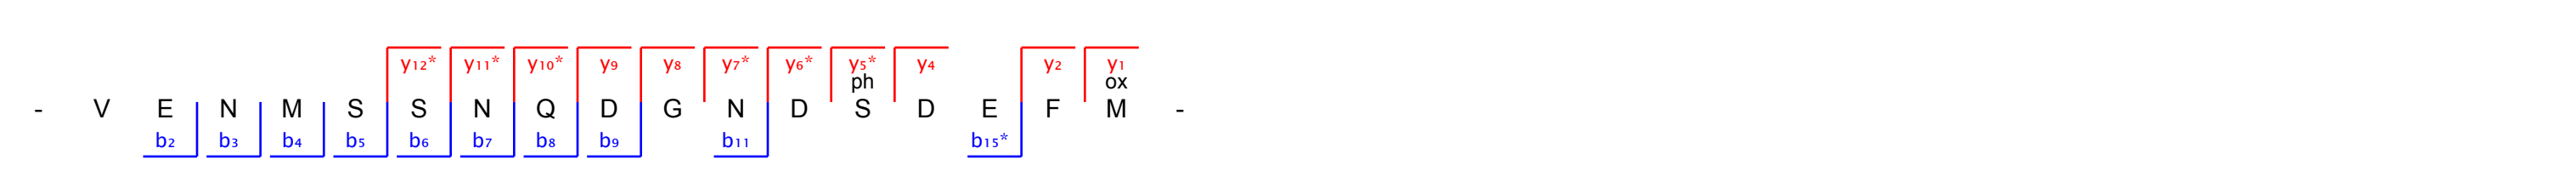



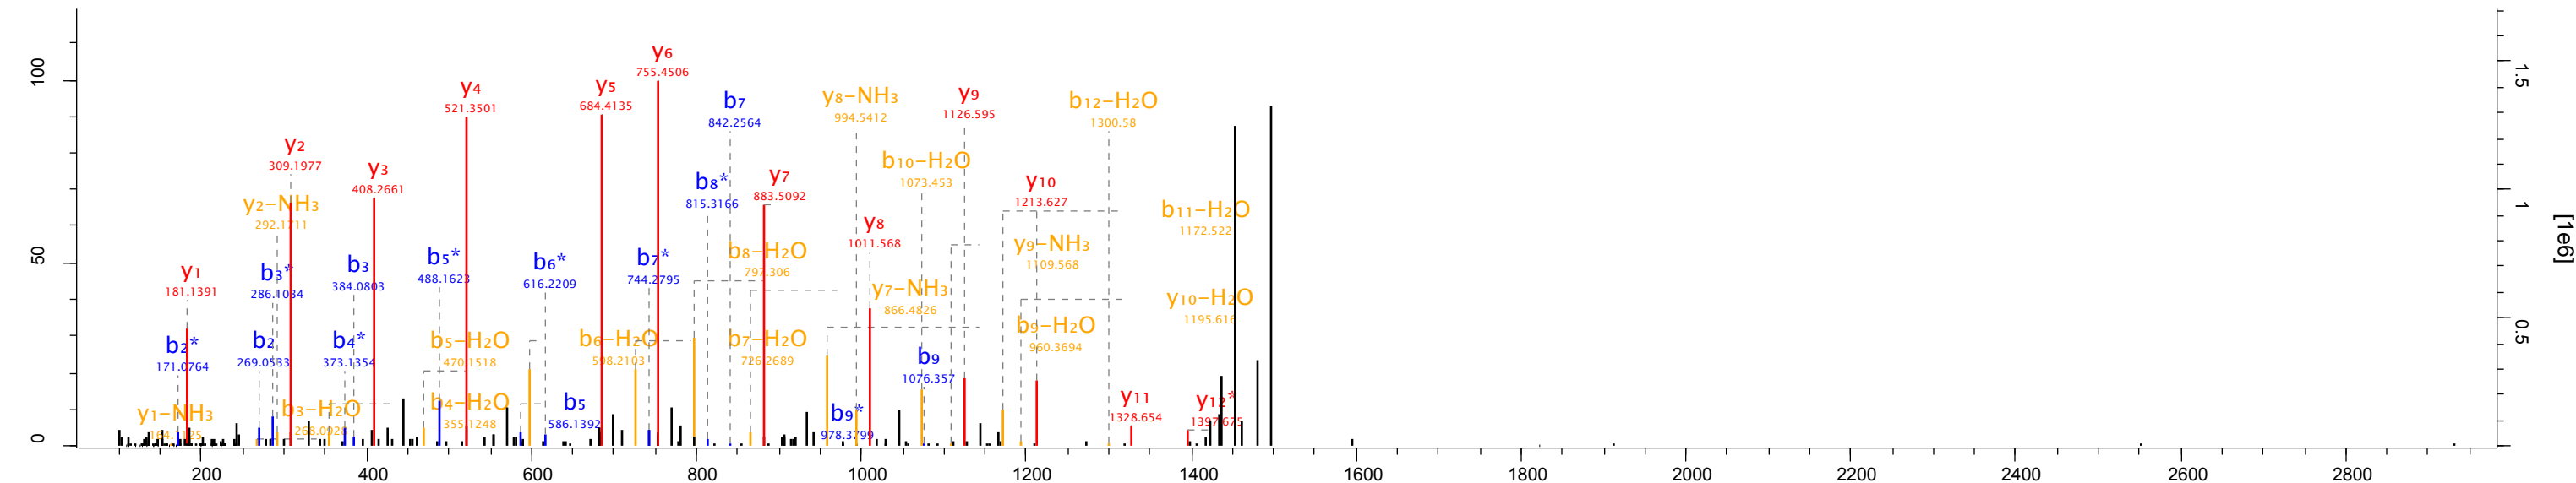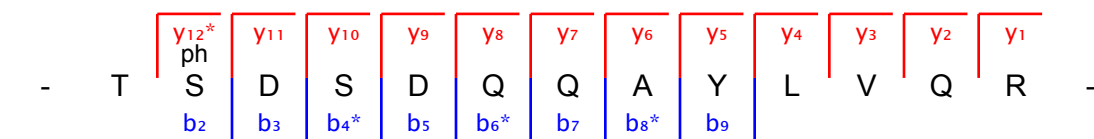

Raw file: 20171215\_MaS\_33SR\_LMH\_phospho2\_03  
 Scan: 8516 Method: FTMS; HCD Score: 105.6 m/z: 761.33 Gene names: KIAA1522

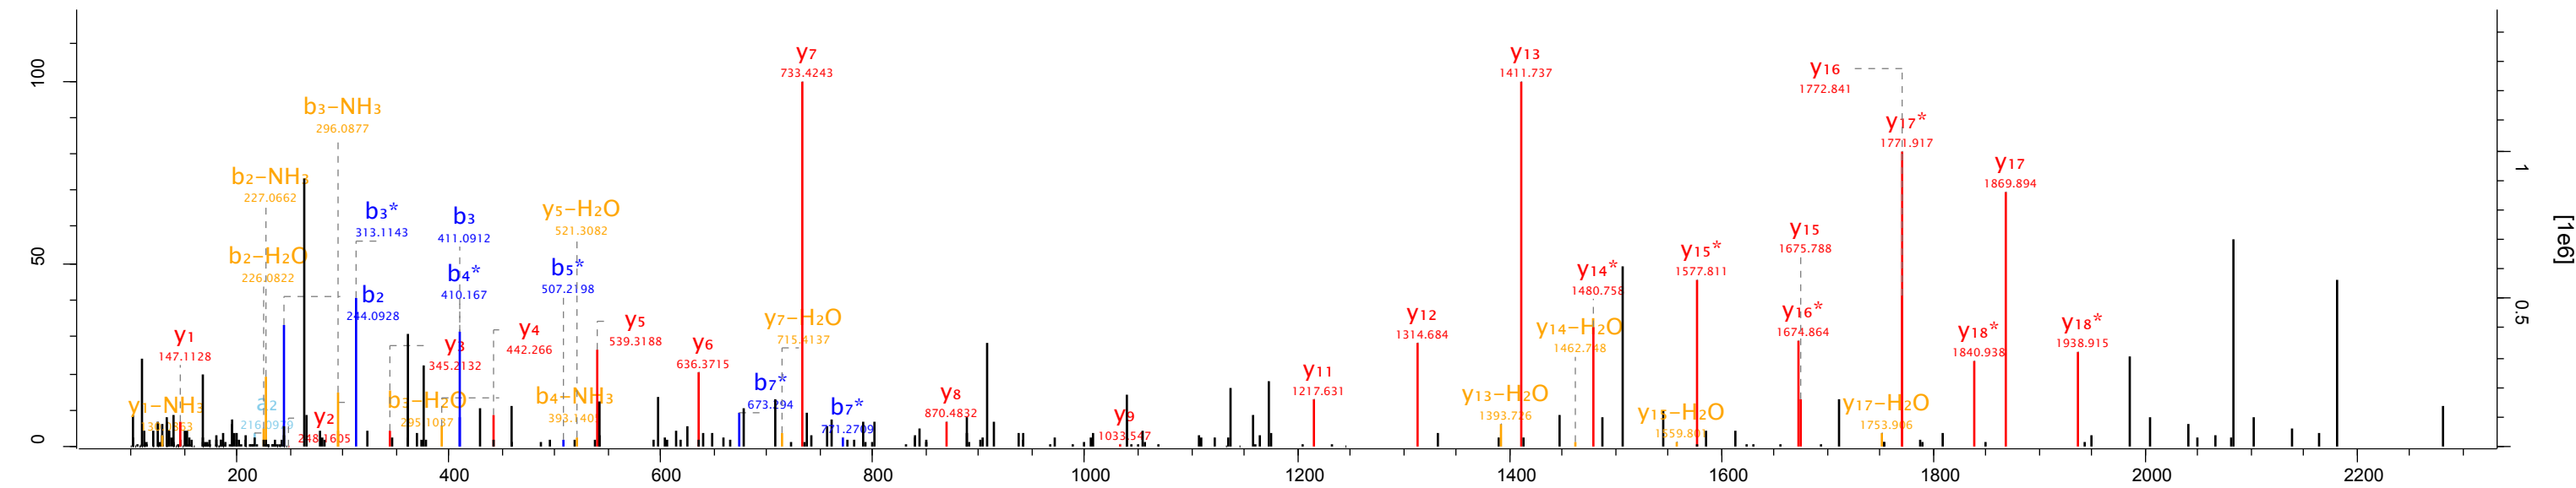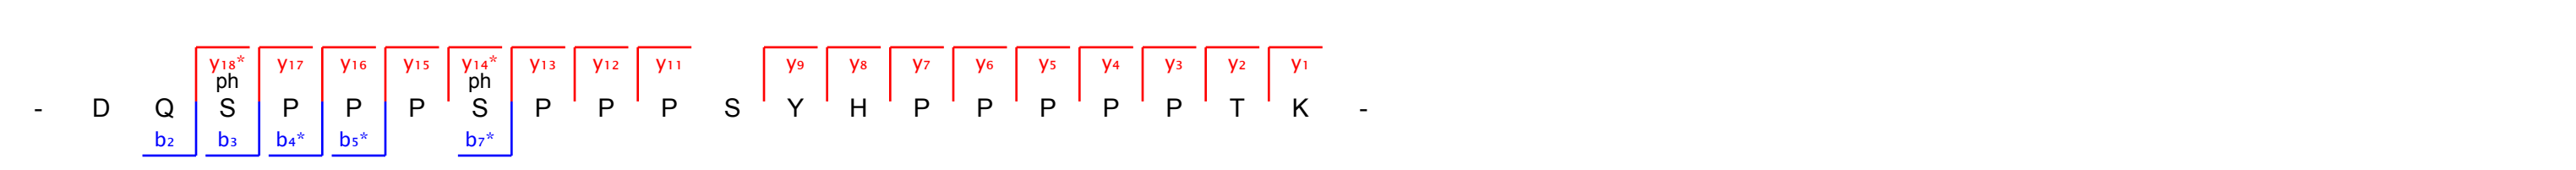

Raw file 20171215\_MaS\_33SR\_LMH\_phospho2\_03 Scan 8556 Method FTMS; HCD Score 252.9 m/z 812.8 Gene names GPATCH2

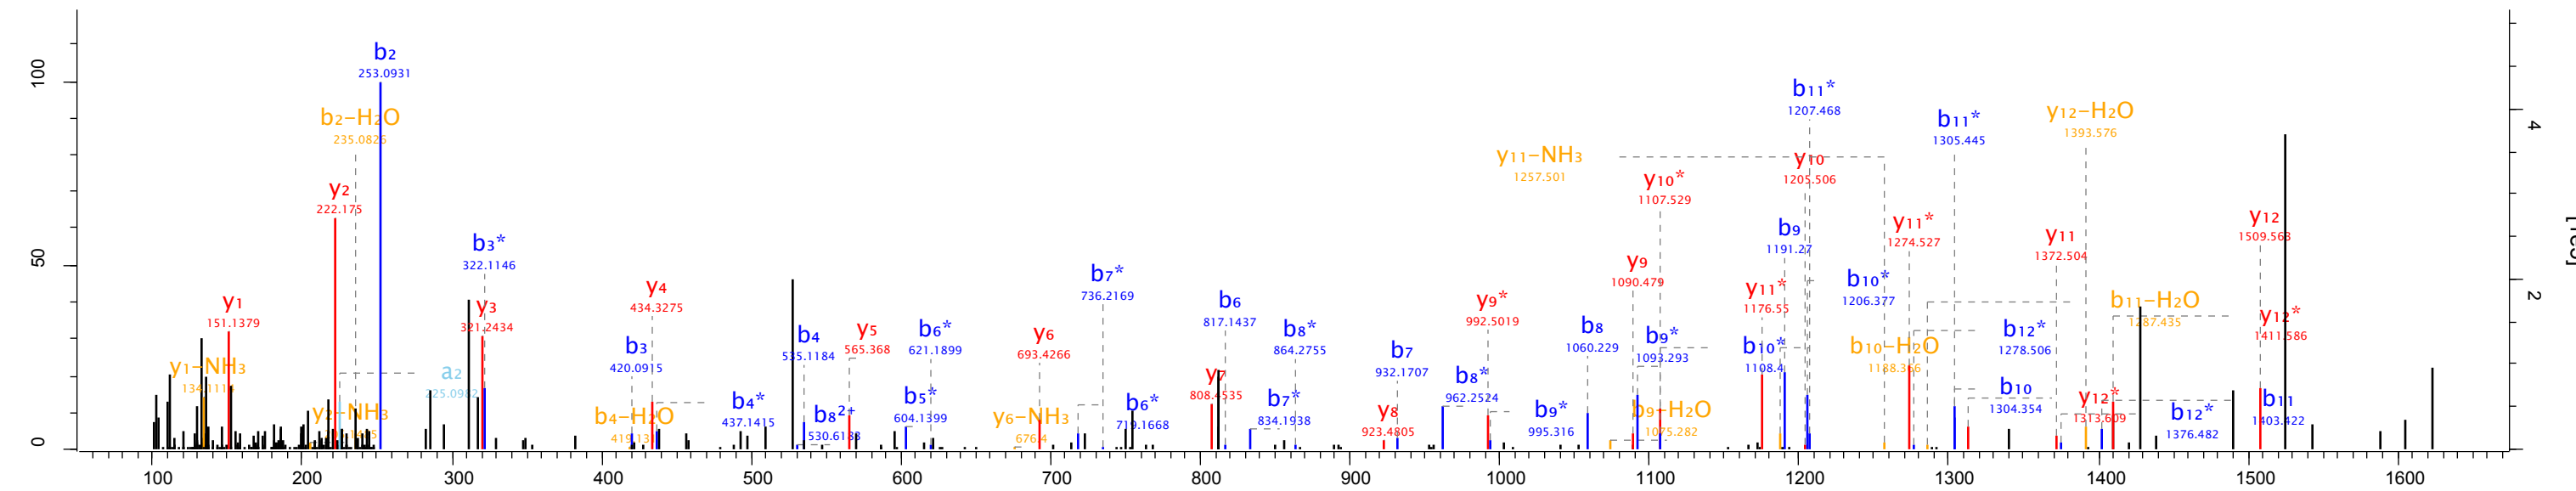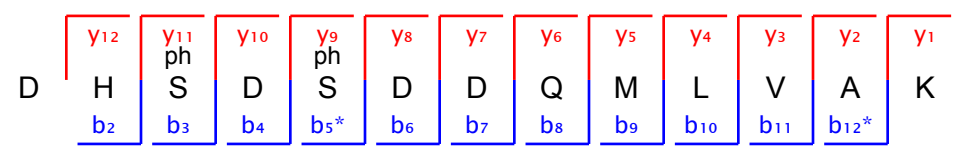

Raw file 20171215\_MaS\_33SR\_LMH\_phospho2\_03 Scan 8646 Method FTMS; HCD Score 64.16 m/z 798.65 Gene names PRRC2A

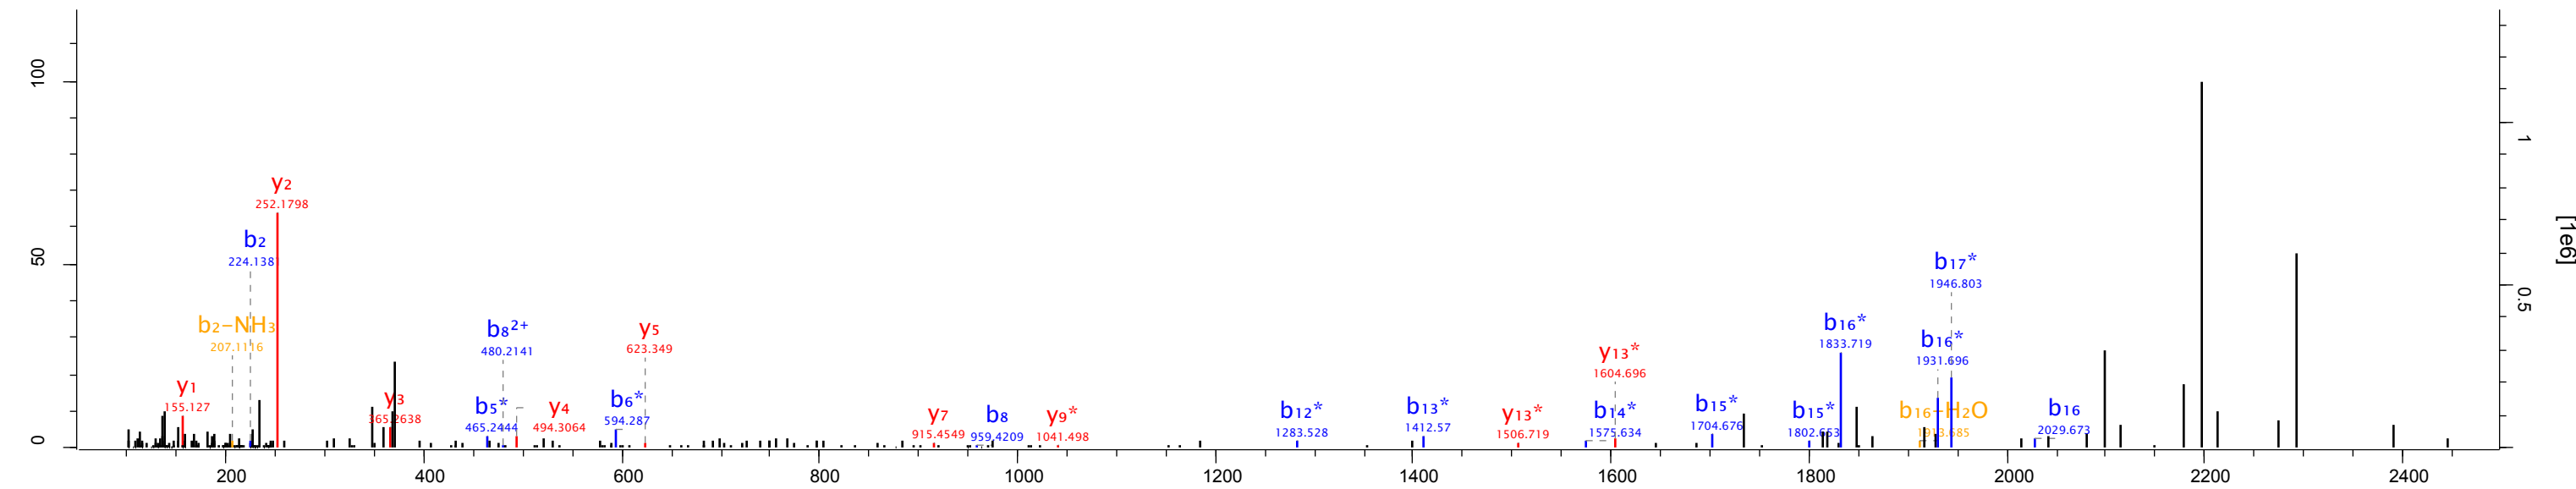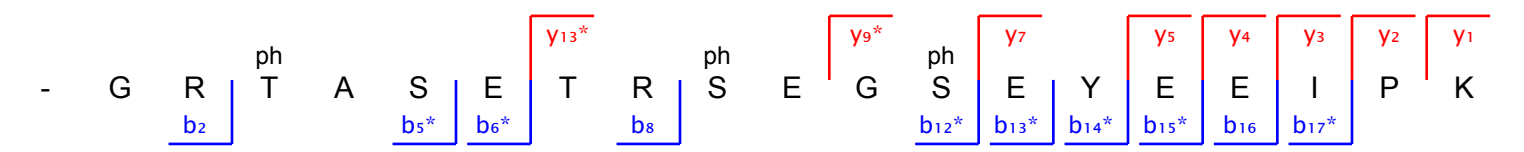

Raw file  
20171215\_MaS\_33SR\_LMH\_phospho2\_03

Scan 8756 Method FTMS; HCD Score 98.75 m/z 807.09 Gene names LEO1

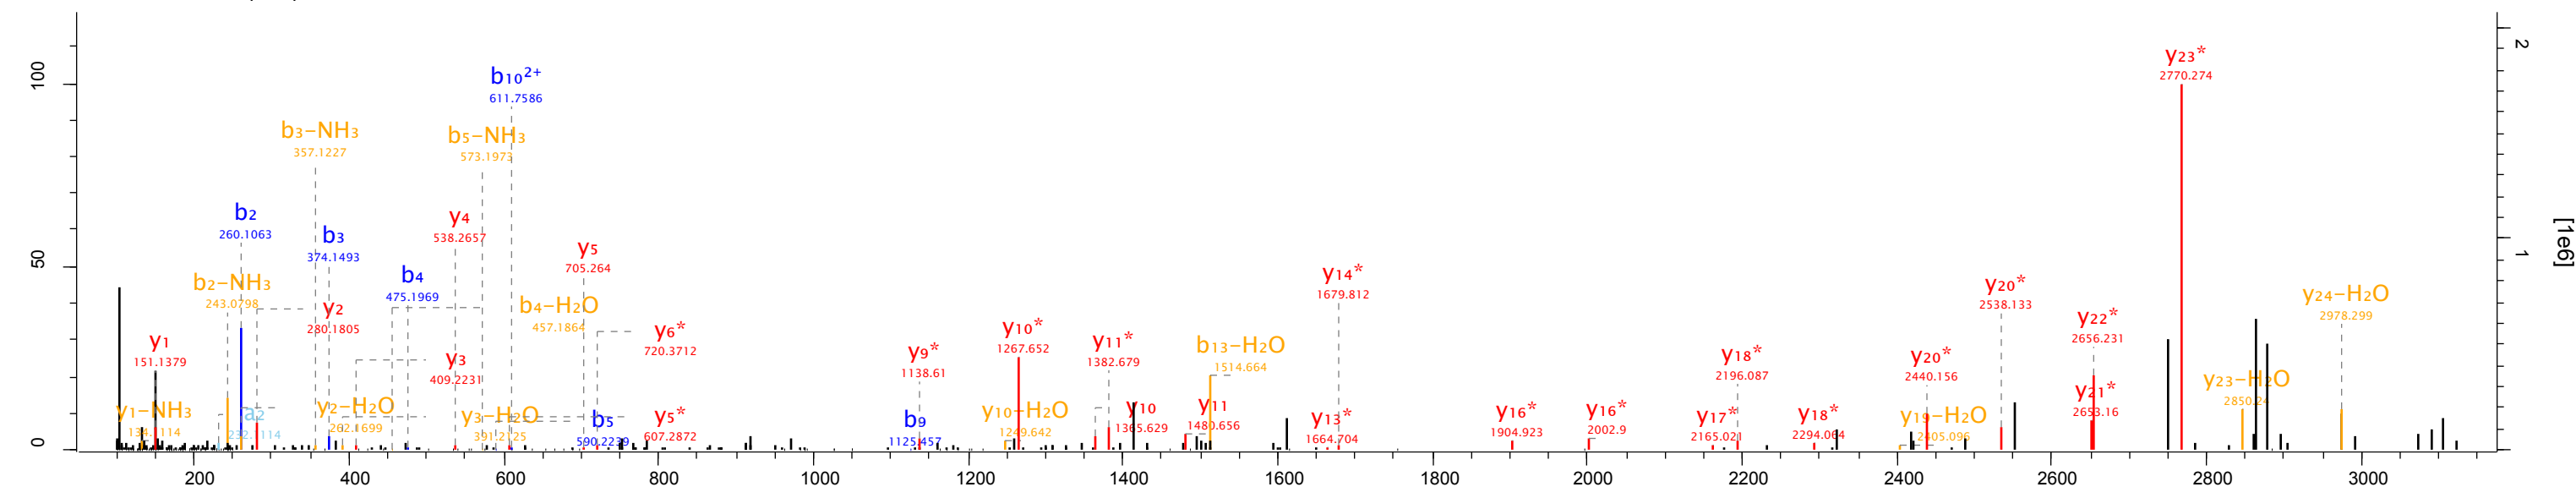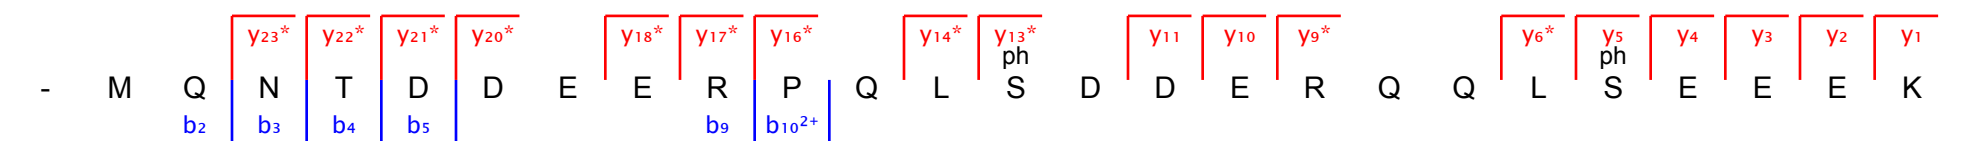

20171215\_MaS\_33SR\_LMH\_phospho2\_03 8946 FTMS; HCD 88.48 767.62 CTPS2

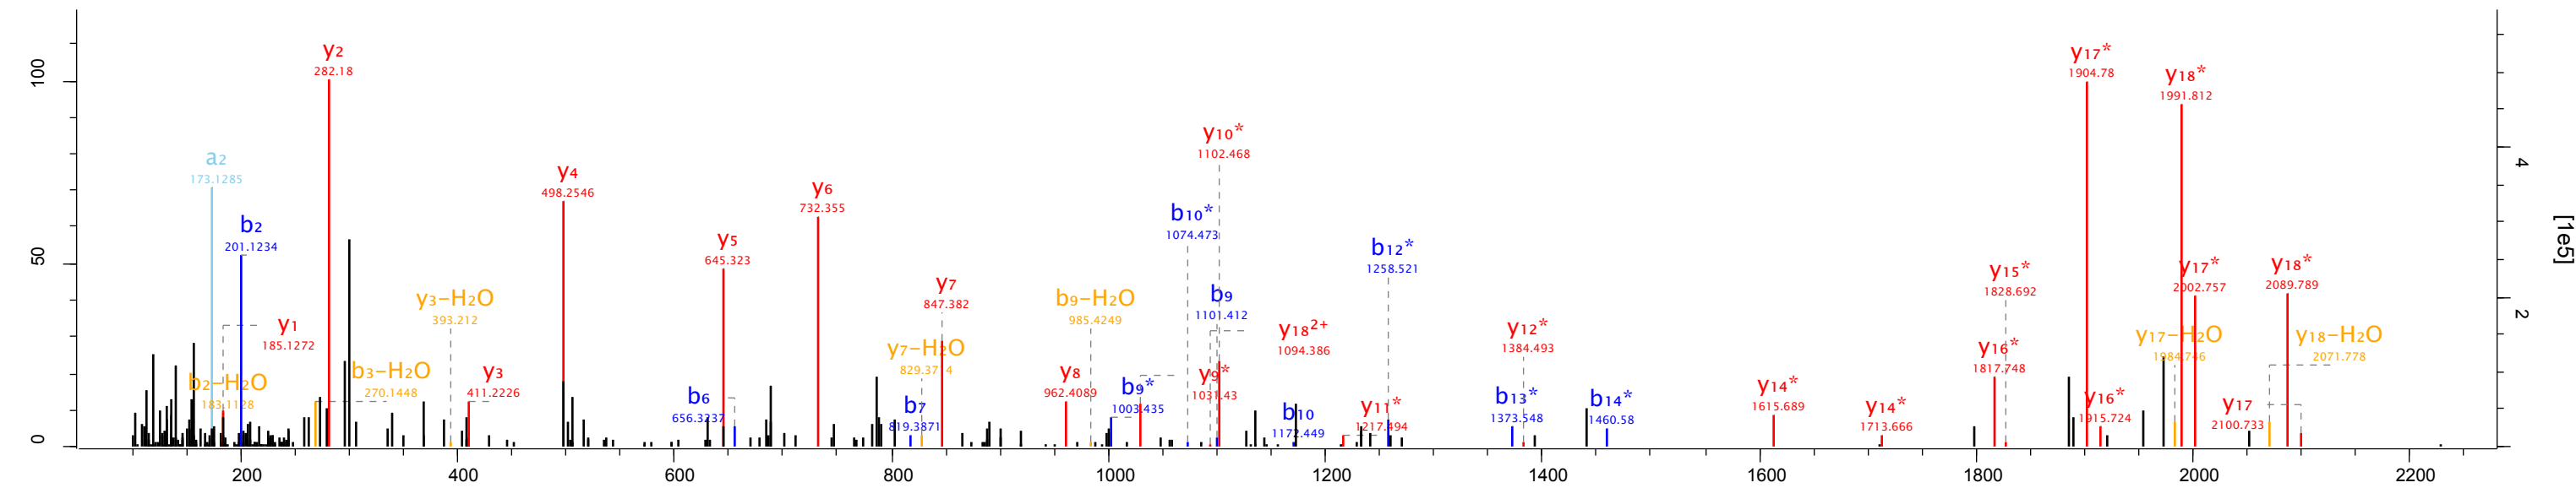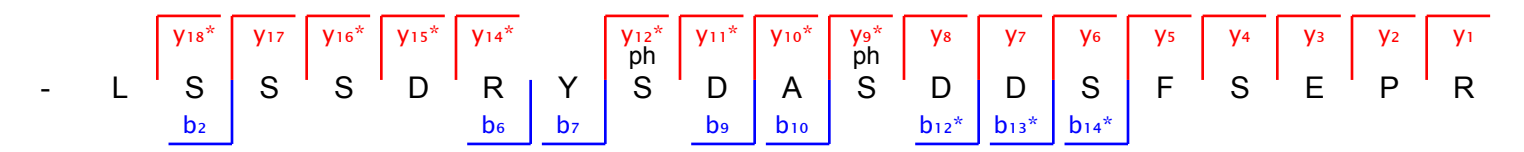

Raw file 20171215\_MaS\_33SR\_LMH\_phospho2\_03 Scan 8966 Method FTMS; HCD Score 110.62 m/z 1020.91 Gene names MAP1S

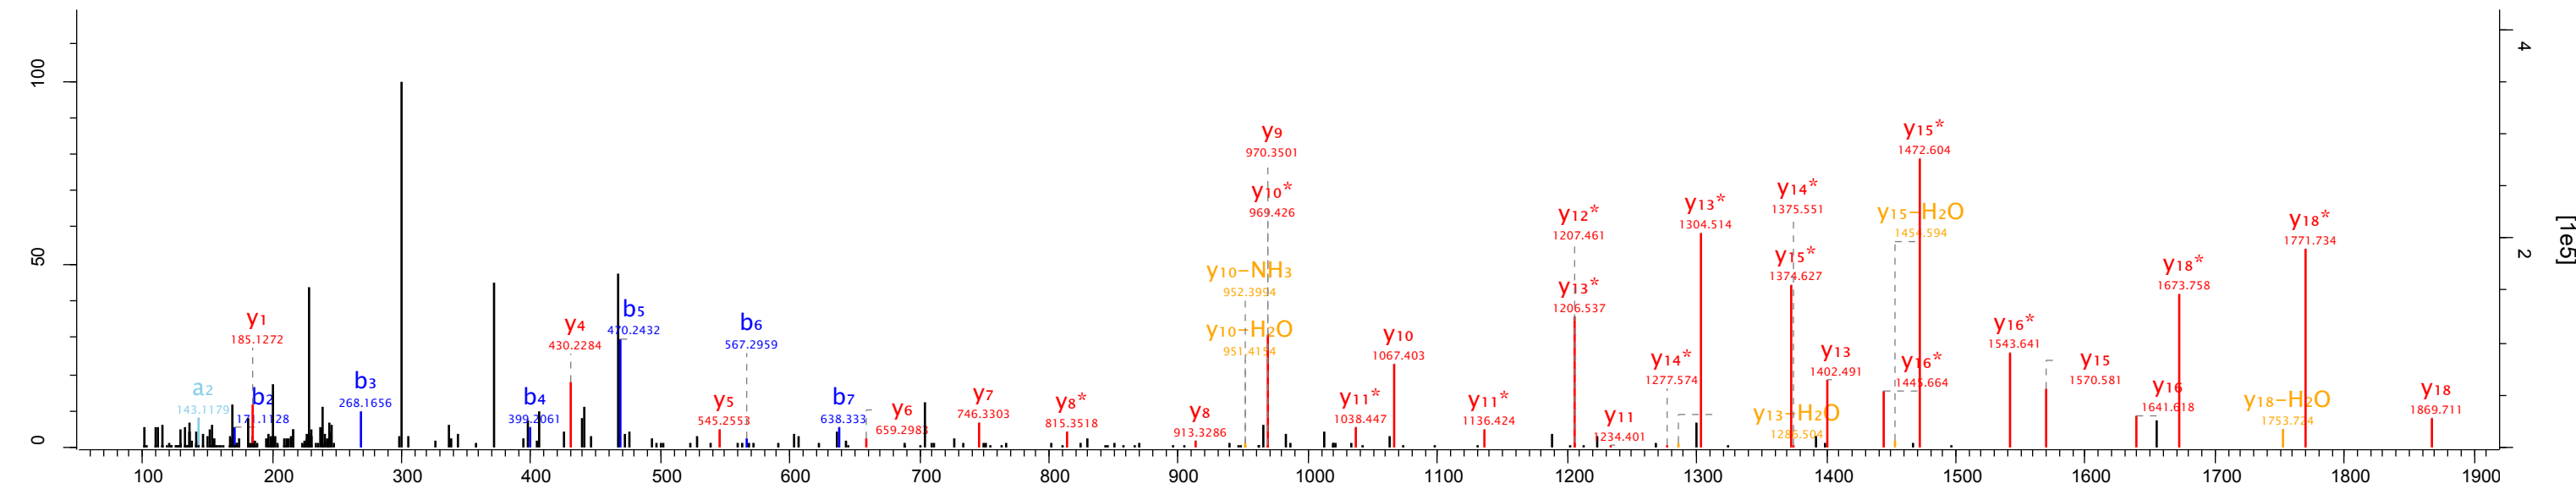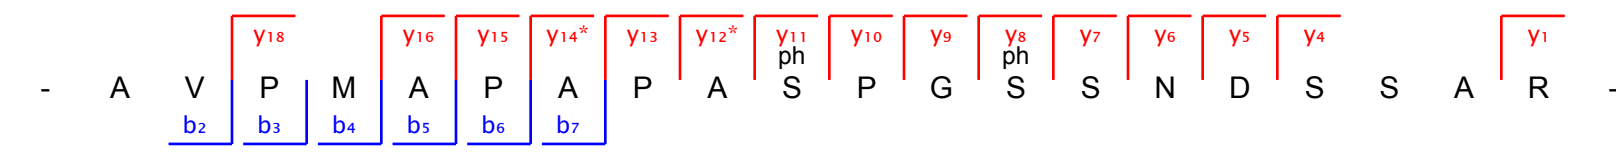

Raw file 20171215\_MaS\_33SR\_LMH\_phospho2\_03 Scan 9116 Method FTMS; HCD Score 69.03 m/z 635.95 Gene names ARHGAP1

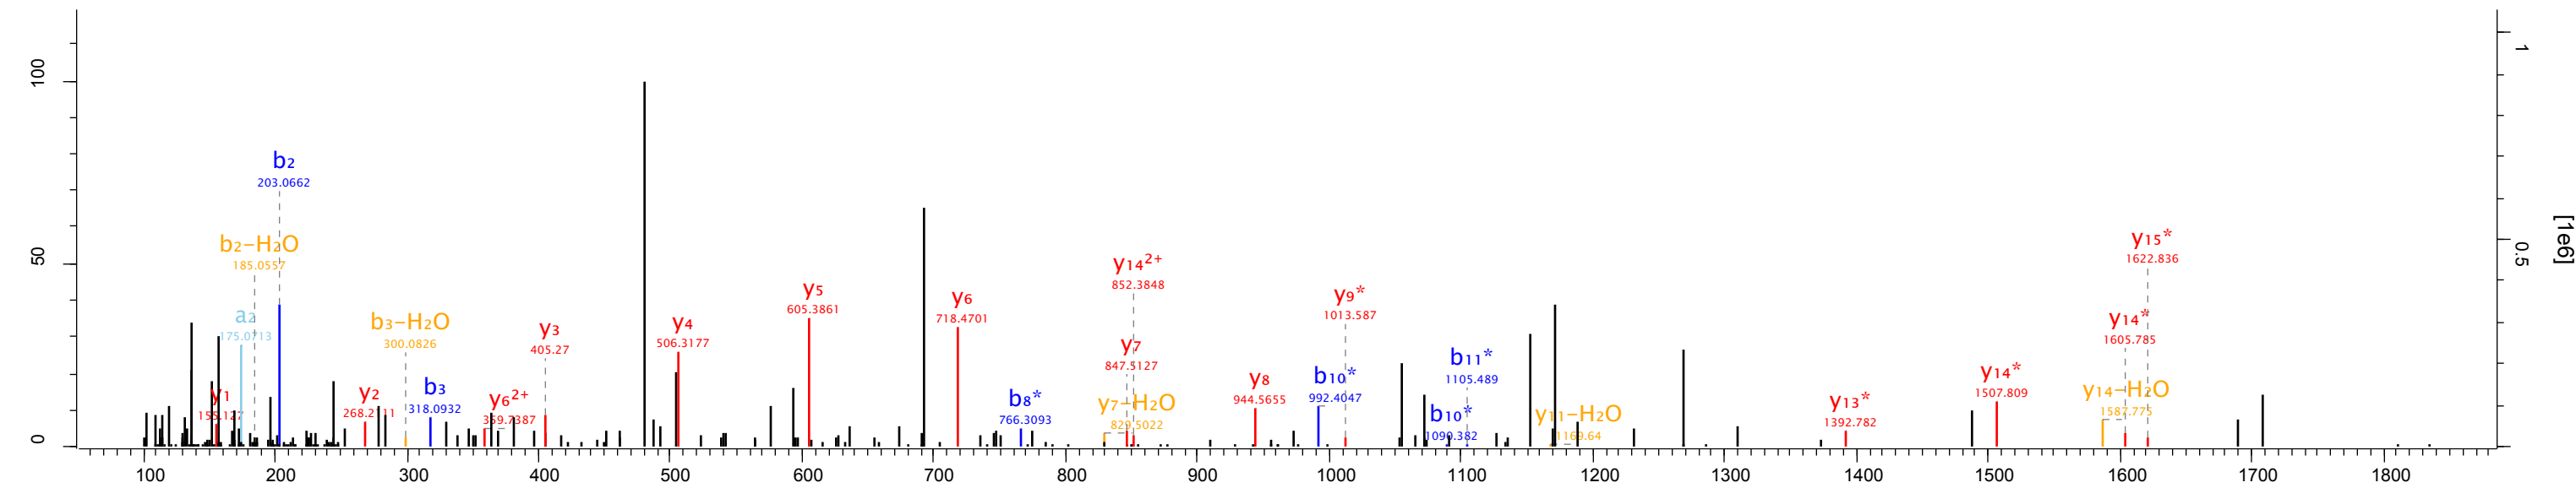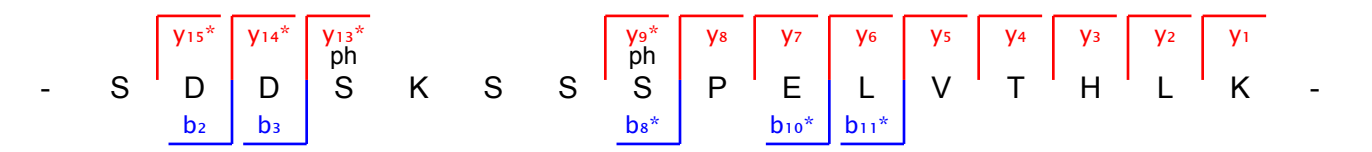



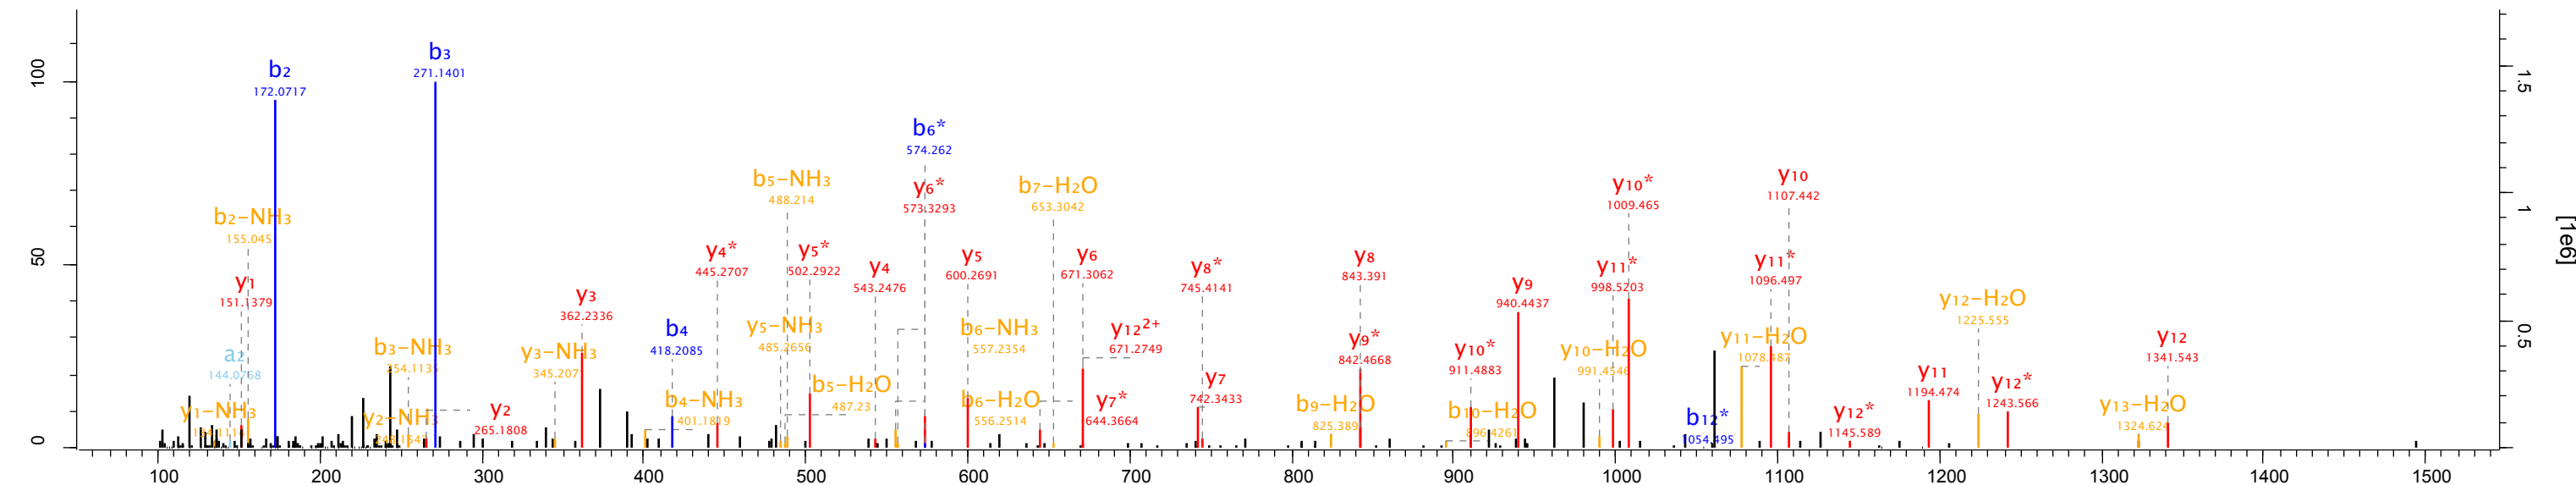

- G N V F S P T A A G T P N K -

b<sub>2</sub>
b<sub>3</sub>
b<sub>4</sub>
b<sub>6</sub><sup>\*</sup>
b<sub>12</sub><sup>\*</sup>
y<sub>12</sub>
y<sub>11</sub>
y<sub>10</sub><sup>ph</sup>
y<sub>9</sub>
y<sub>8</sub>
y<sub>7</sub>
y<sub>6</sub>
y<sub>5</sub>
y<sub>4</sub><sup>ph</sup>
y<sub>3</sub>
y<sub>2</sub>
y<sub>1</sub>

Raw file Scan Method Score m/z Gene names

20171215\_MaS\_33SR\_LMH\_phospho2\_03 9266 FTMS; HCD 68.21 761.32 ZNF768

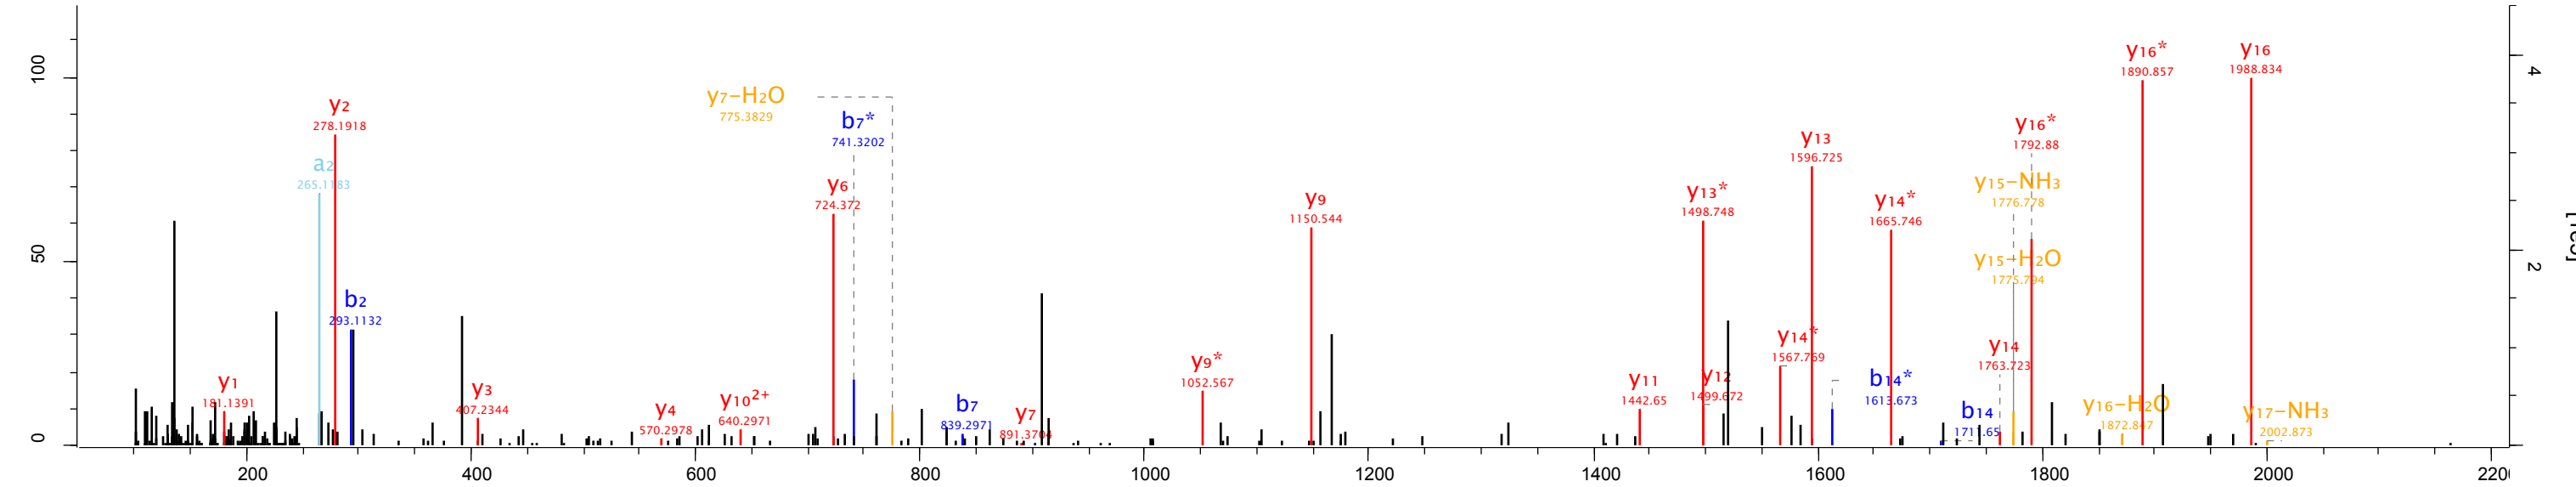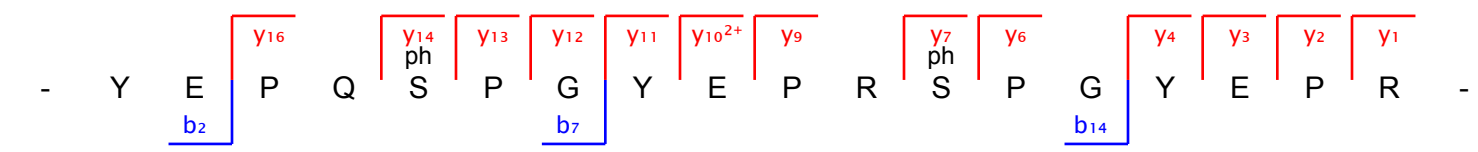

Raw file 20171215\_MaS\_33SR\_LMH\_phospho2\_03 Scan 9346 Method FTMS; HCD Score 105.53 m/z 745.67 Gene names CTNNA1;CTNNA2

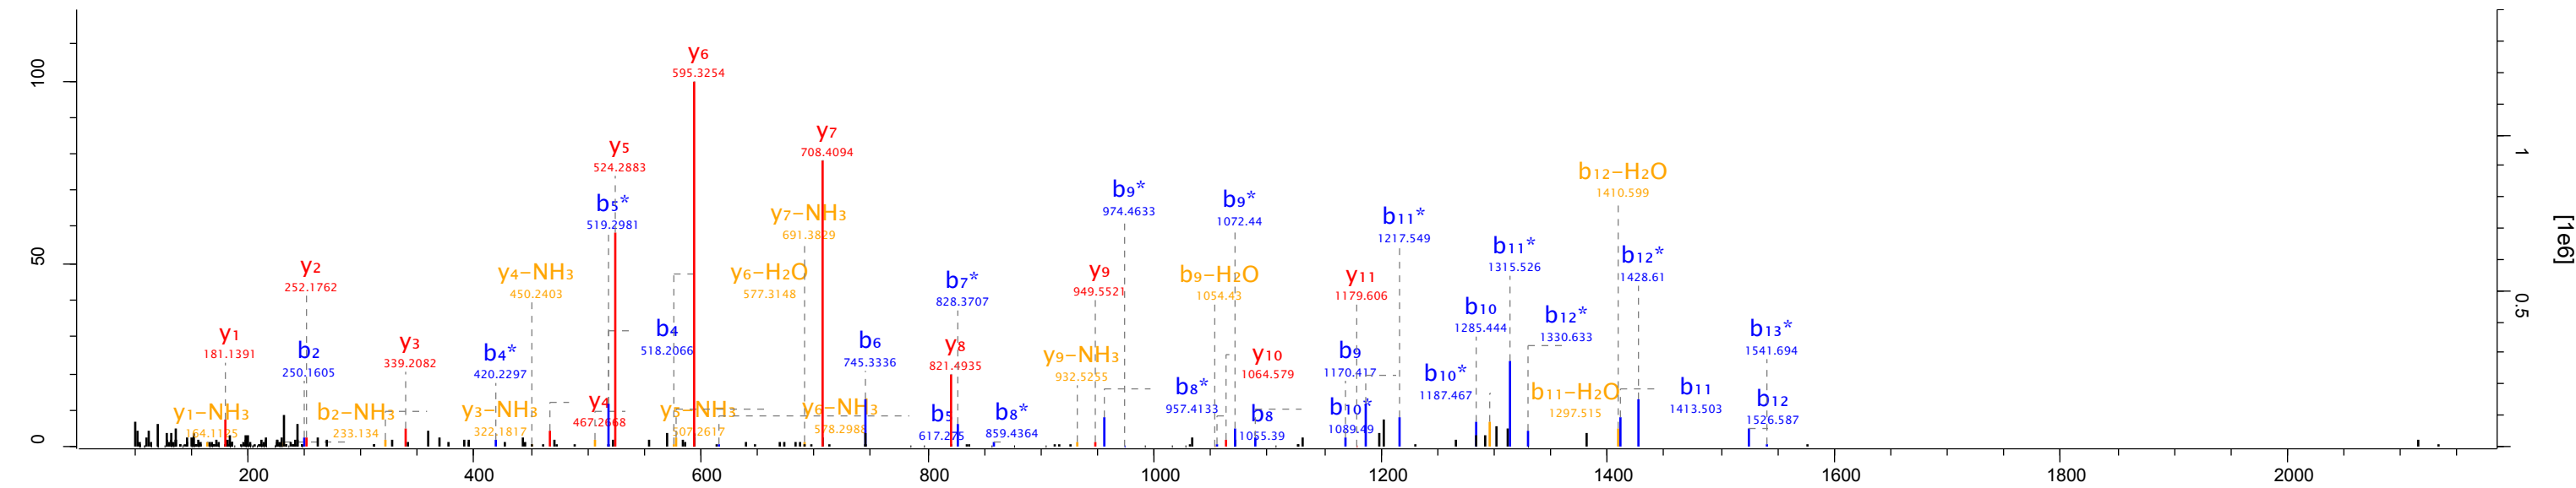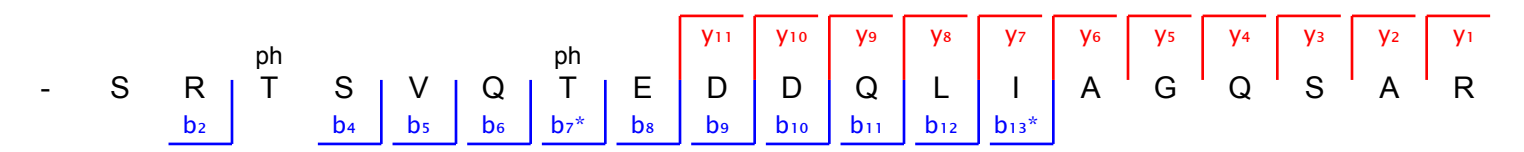

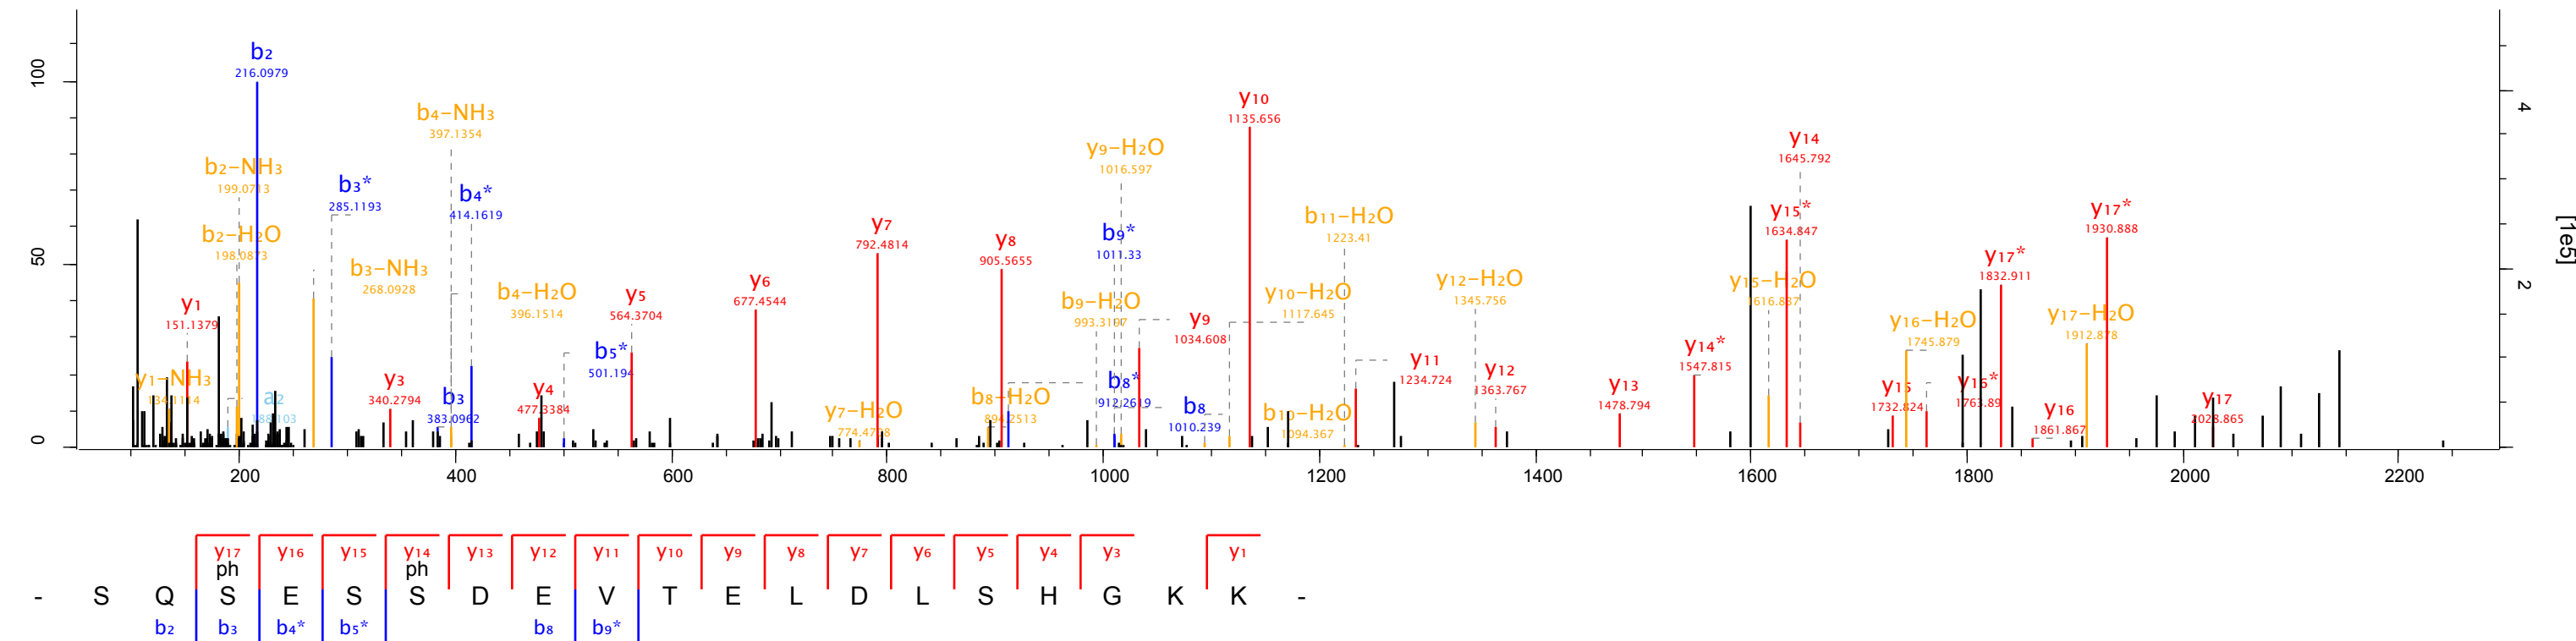

Raw file 20171215\_MaS\_33SR\_LMH\_phospho2\_03 Scan 9466 Method FTMS; HCD Score 105.9 m/z 846.74 Gene names PRKAR1A

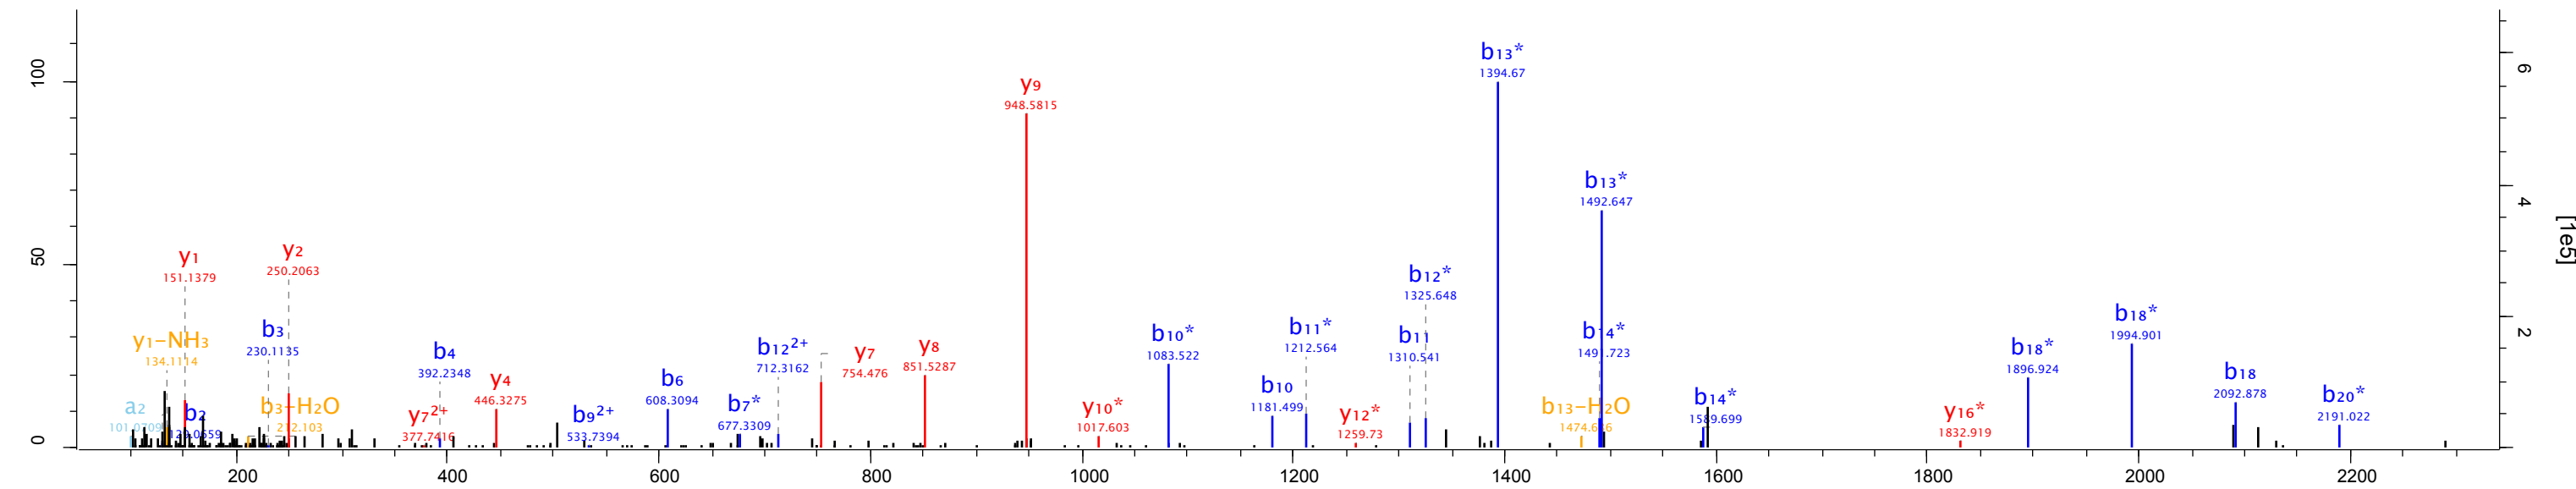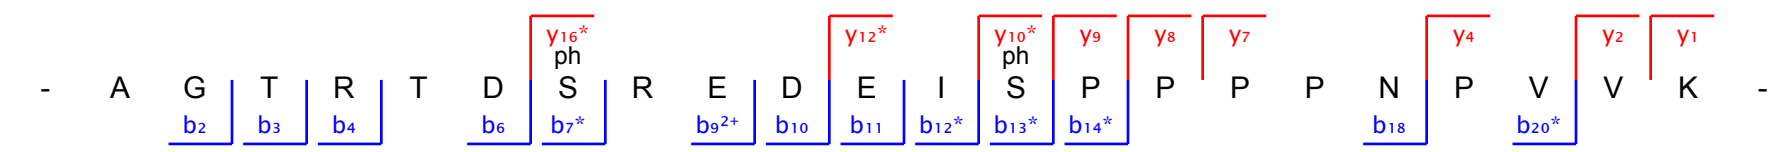

Raw file

20171215\_MaS\_33SR\_LMH\_phospho2\_03

| Scan | Method    | Score  | m/z    | Gene names |
|------|-----------|--------|--------|------------|
| 9486 | FTMS; HCD | 113.01 | 704.29 | ZC3H13     |

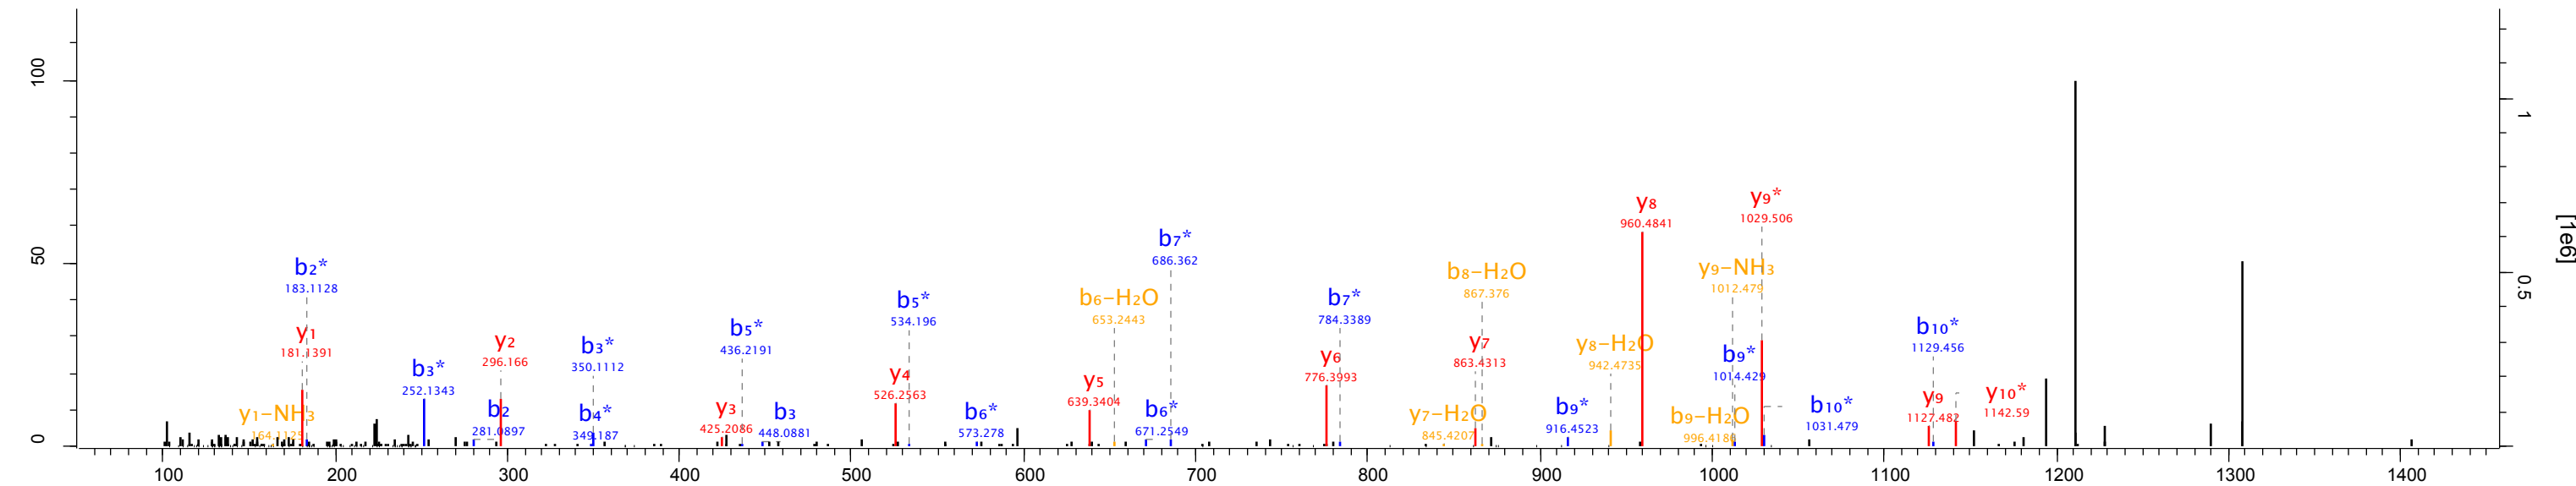

ph S -

|      |          |     |     |     |     |    |     |      |    |
|------|----------|-----|-----|-----|-----|----|-----|------|----|
| y10* | y9<br>ph | y8  | y7  | y6  | y5  | y4 | y3  | y2   | y1 |
| L    | S        | P   | S   | H   | L   | T  | E   | D    | R  |
| b2   | b3       | b4* | b5* | b6* | b7* |    | b9* | b10* |    |

-

Raw file 20171215\_MaS\_33SR\_LMH\_phospho2\_03 Scan 9526 Method FTMS; HCD Score 126.21 m/z 704.24 Gene names PCYT1A

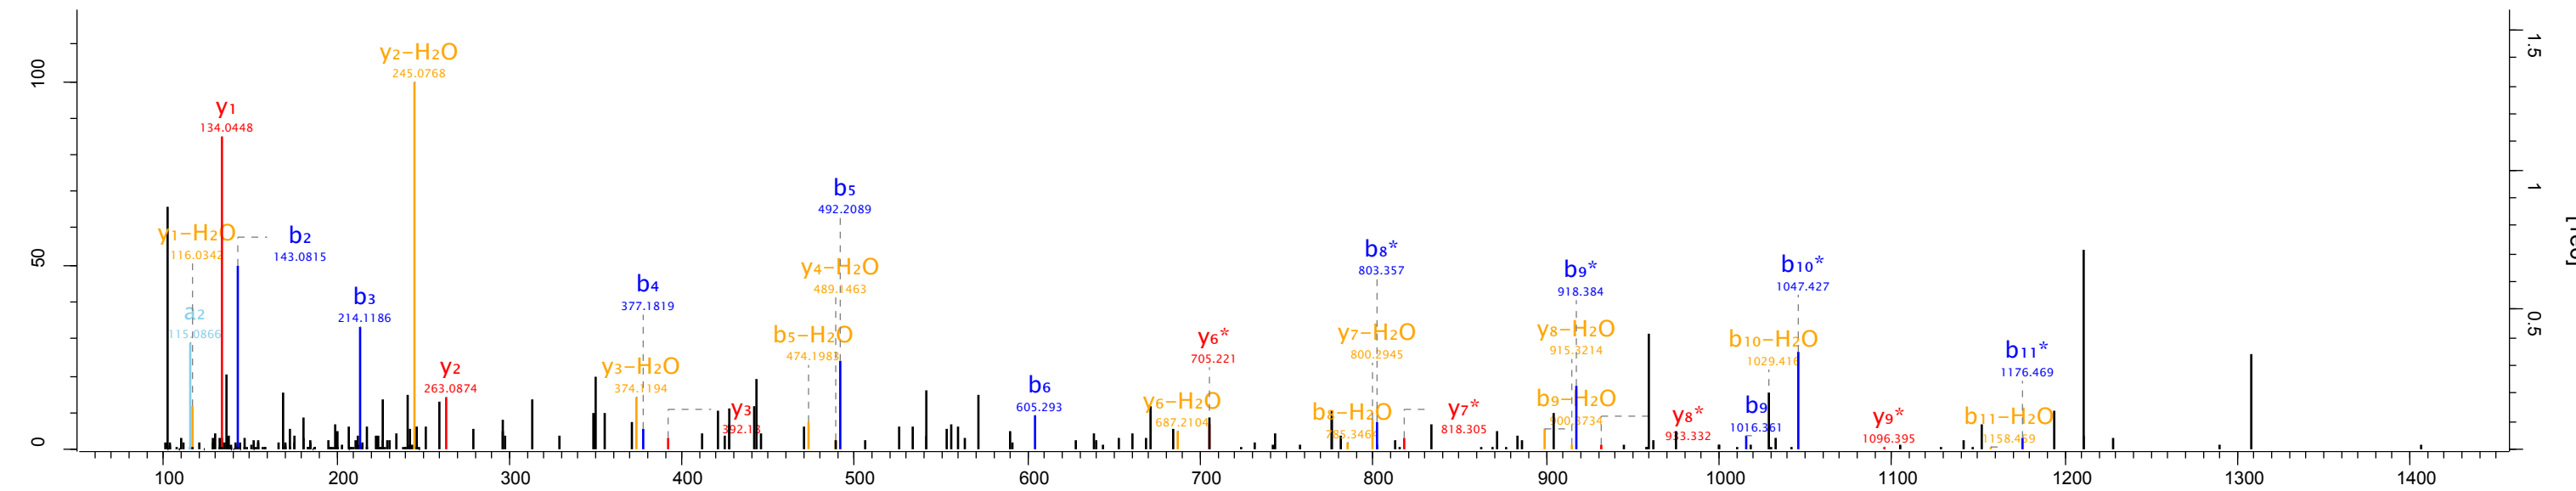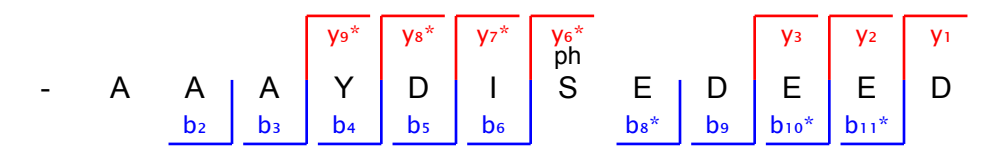

Raw file  
20171215\_MaS\_33SR\_LMH\_phospho2\_03

Scan 9696 Method FTMS; HCD Score 123.71 m/z 939.92 Gene names SMG1

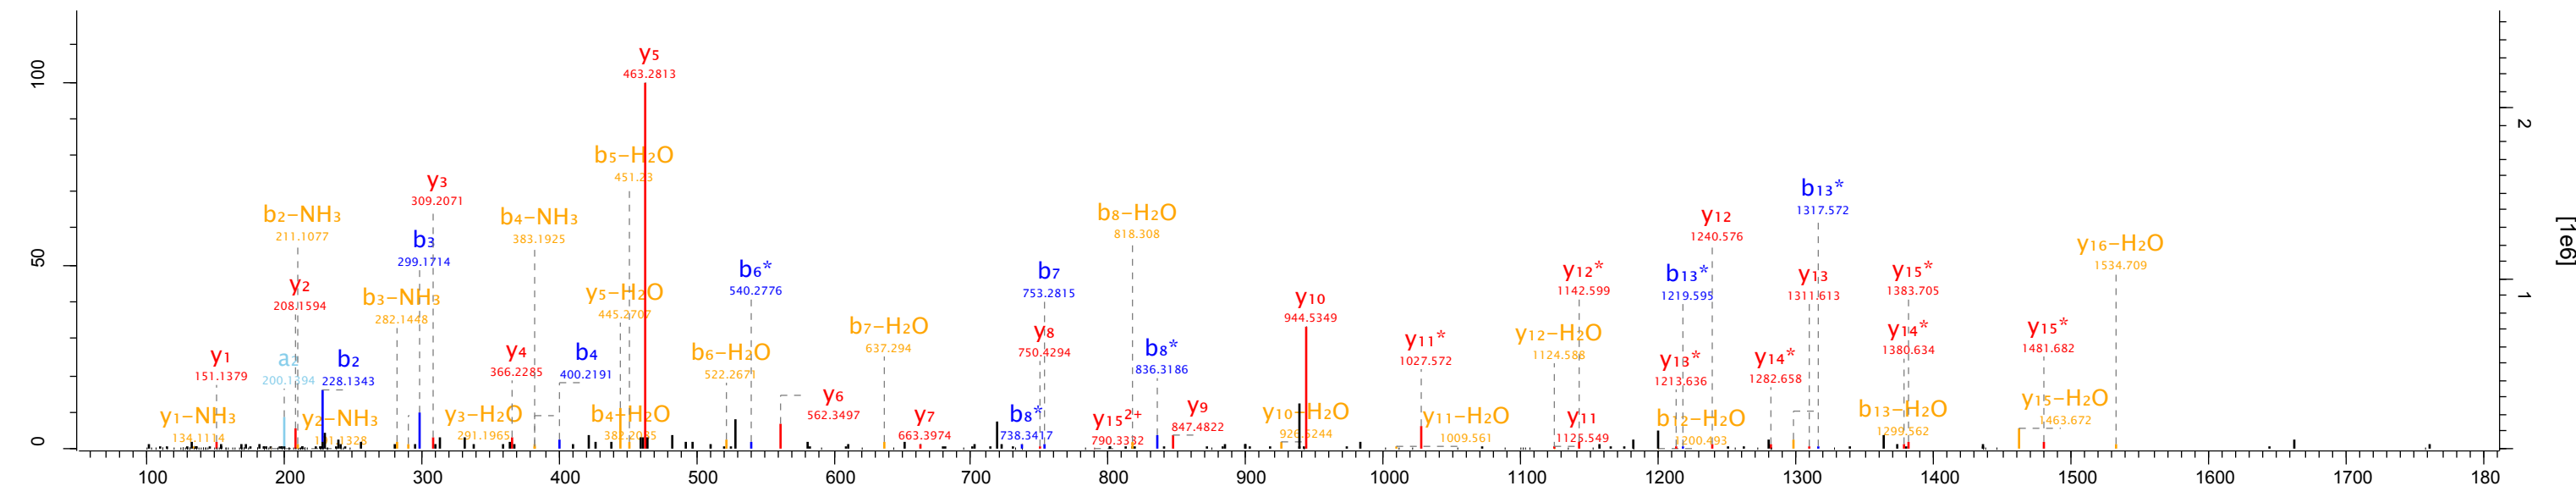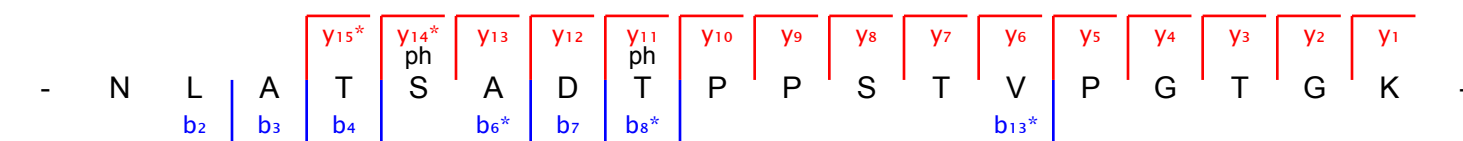



20171215\_MaS\_33SR\_LMH\_phospho2\_03 9776 FTMS; HCD 136.83 786.33 PLEC

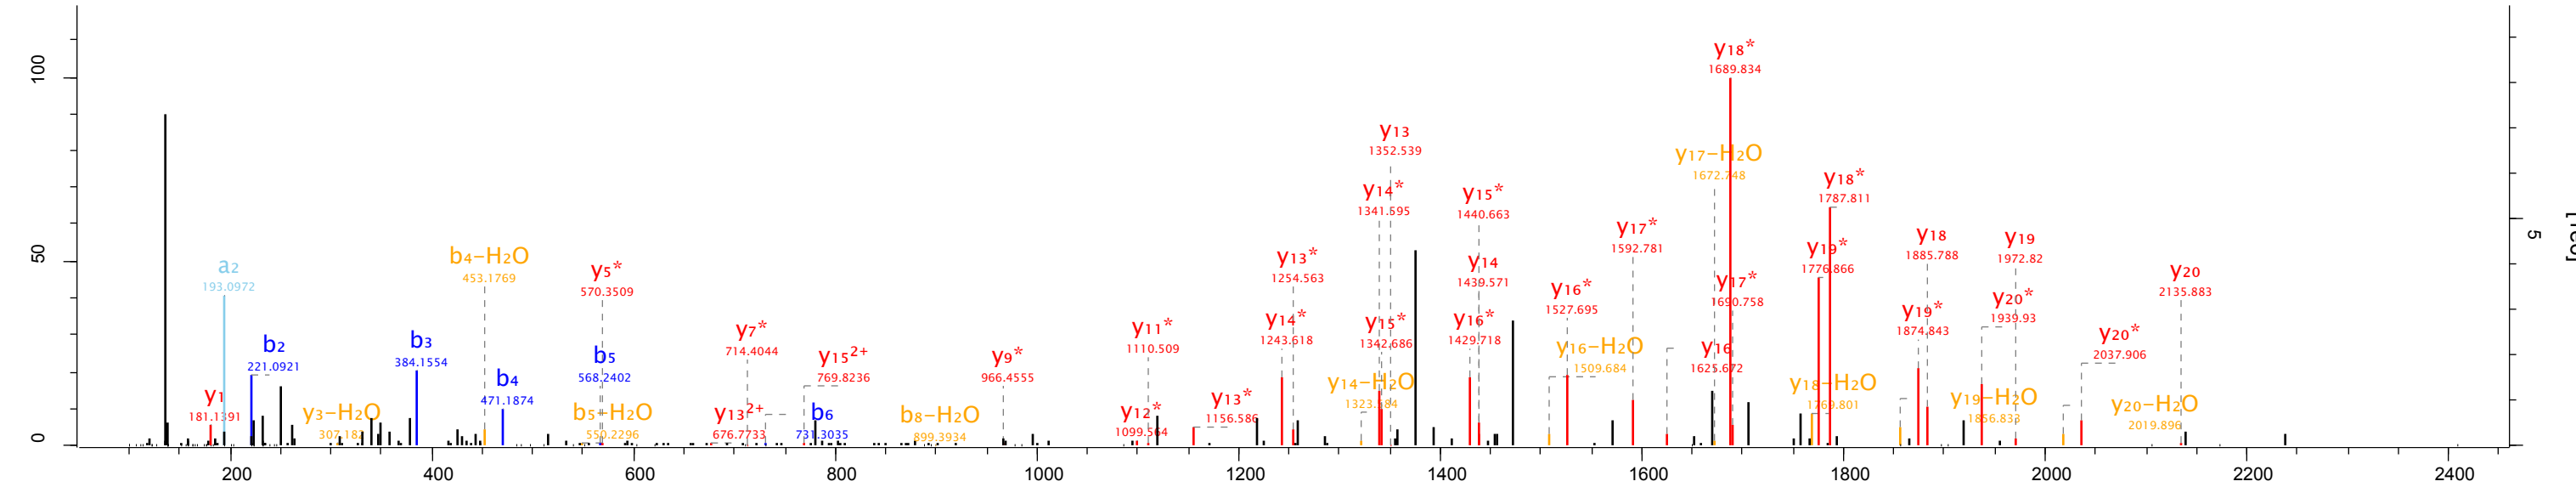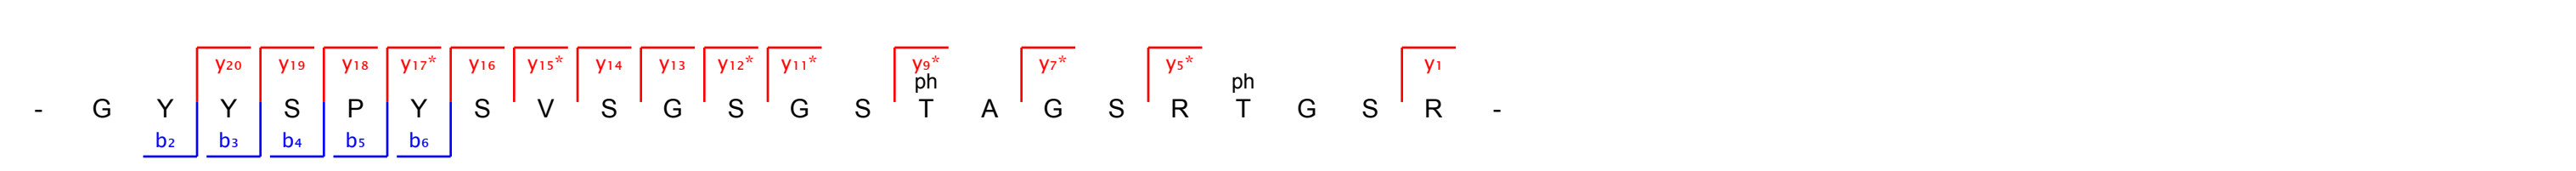

Raw file  
20171215\_MaS\_33SR\_LMH\_phospho2\_03

Scan 9826 Method FTMS; HCD Score 127.29 m/z 675.26 Gene names KLC2

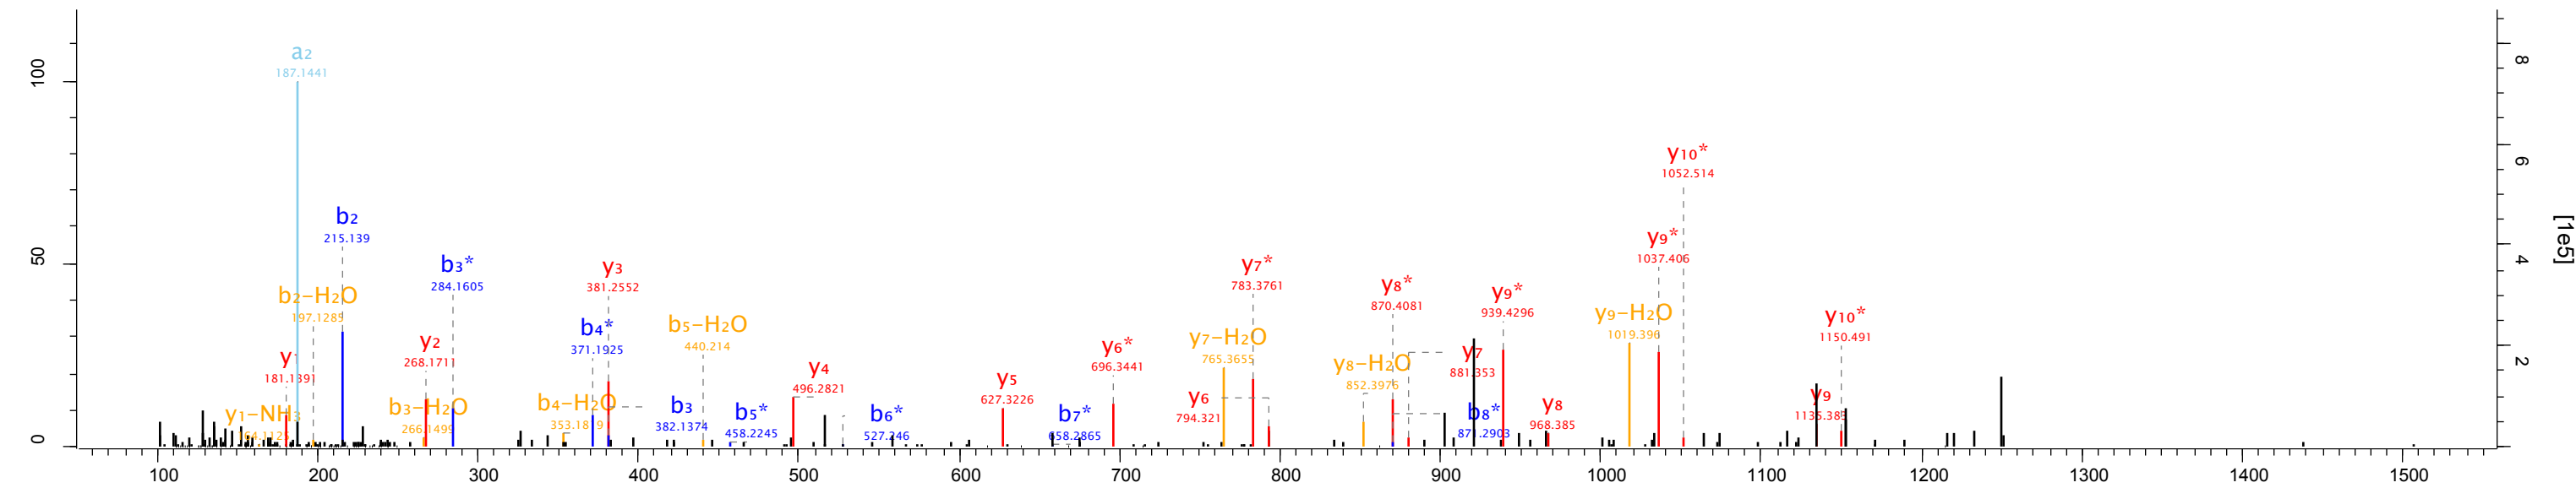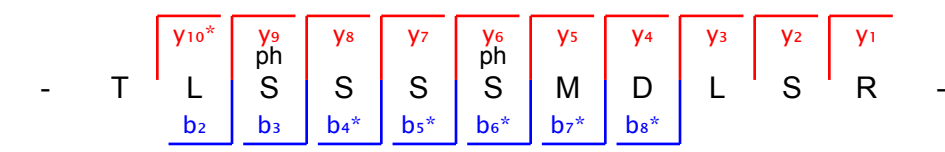

Raw file 20171215\_MaS\_33SR\_LMH\_phospho2\_03 Scan 9926 Method FTMS; HCD Score 246.03 m/z 788.34 Gene names MAP1B

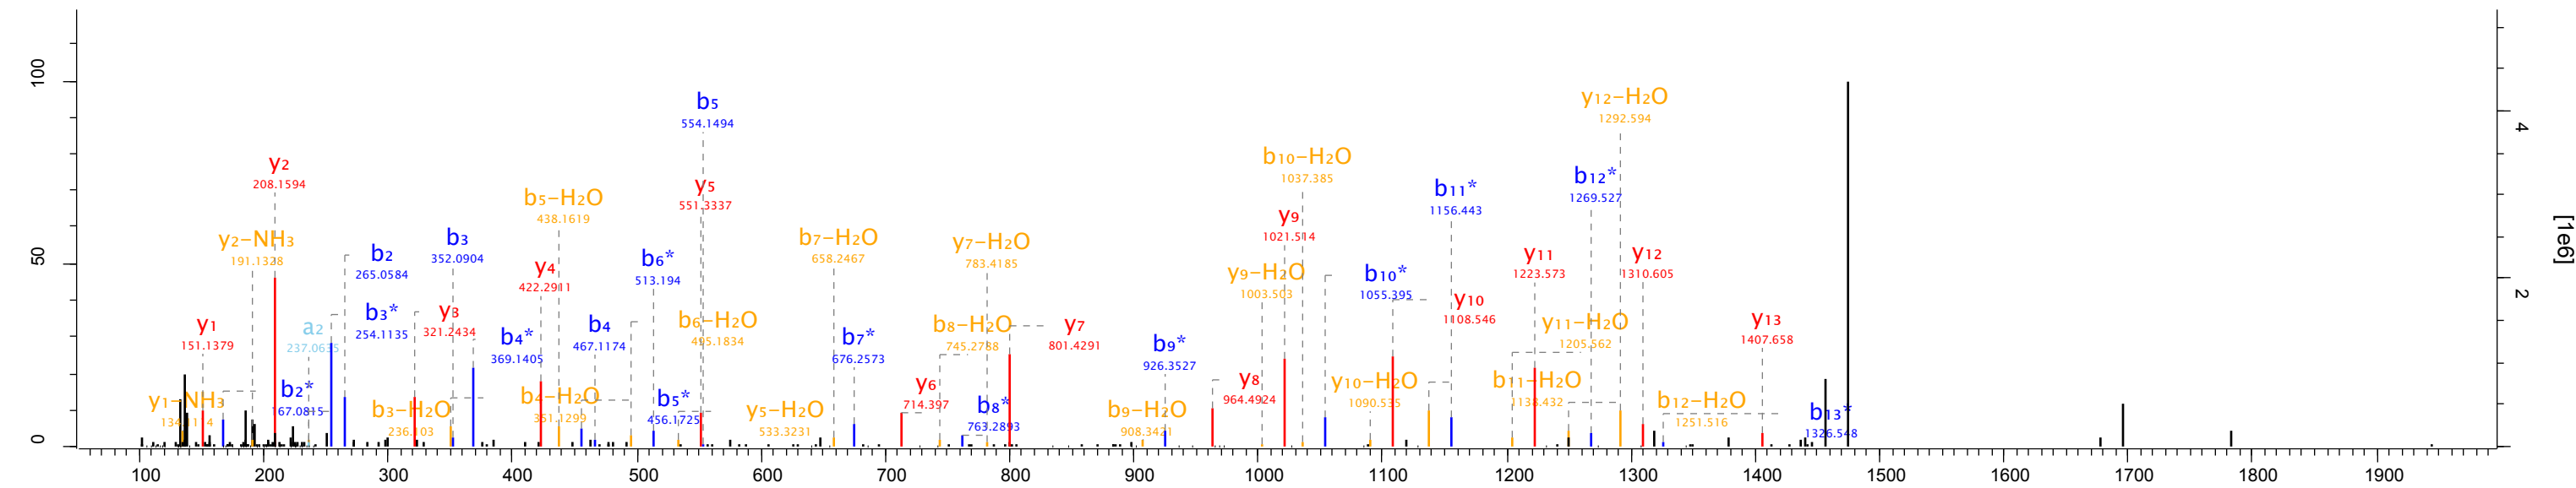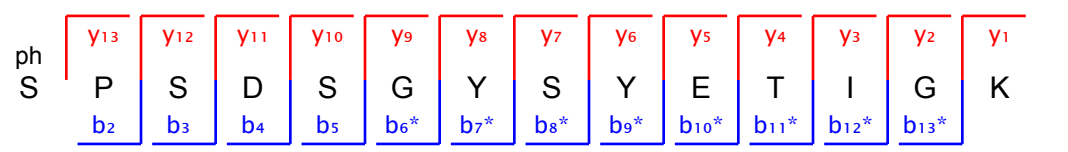

Raw file 20171215\_MaS\_33SR\_LMH\_phospho2\_04 Scan 10956 Method FTMS; HCD Score 116.38 m/z 974.76 Gene names UBE4B

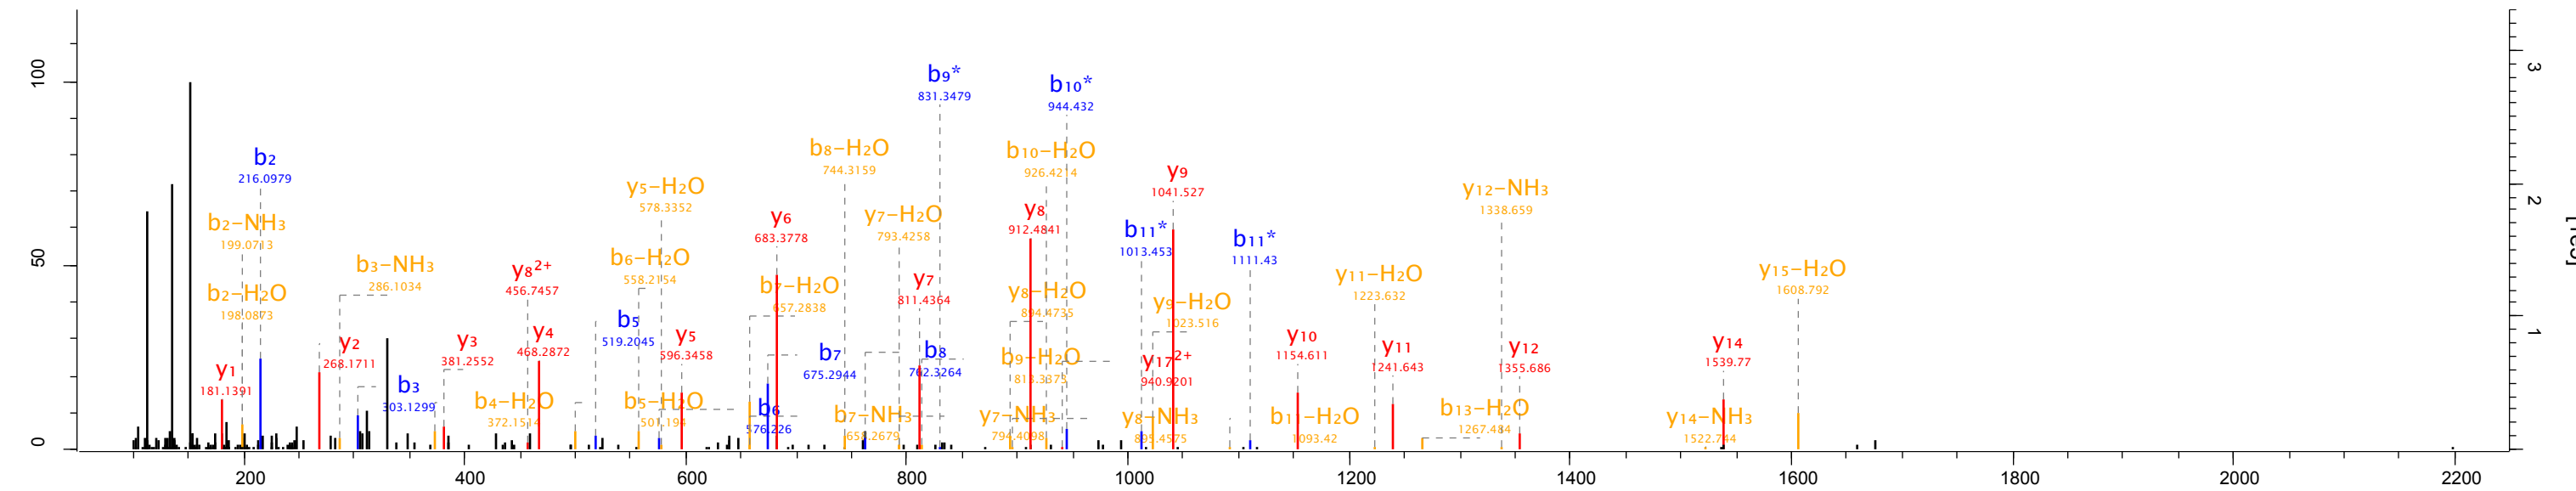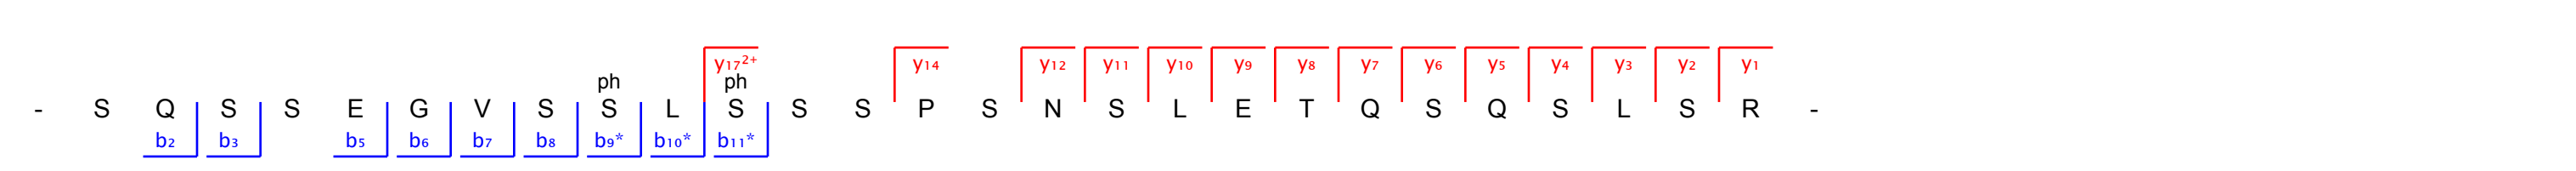

Raw file 20171215\_MaS\_33SR\_LMH\_phospho2\_04 Scan 11156 Method FTMS; HCD Score 56.78 m/z 847.03 Gene names C2CD5

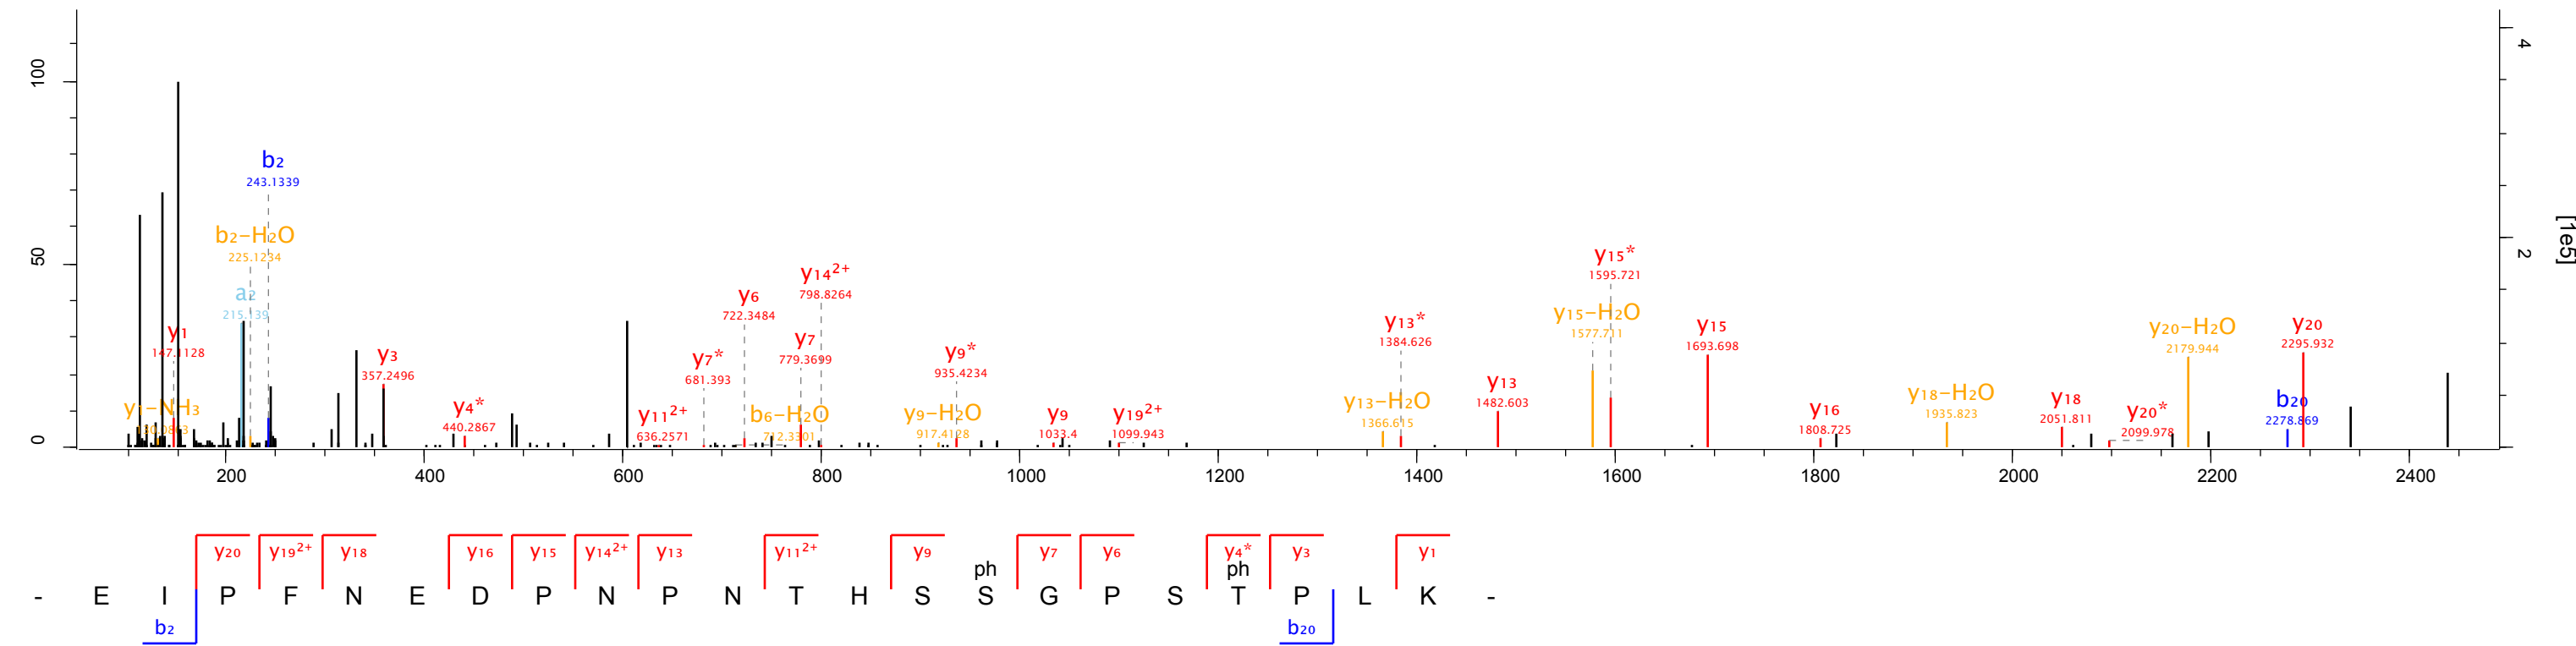

Raw file: 20171215\_MaS\_33SR\_LMH\_phospho2\_04  
 Scan: 12126 Method: FTMS; HCD Score: 41.25 m/z: 1249.5 Gene names: POLR2A

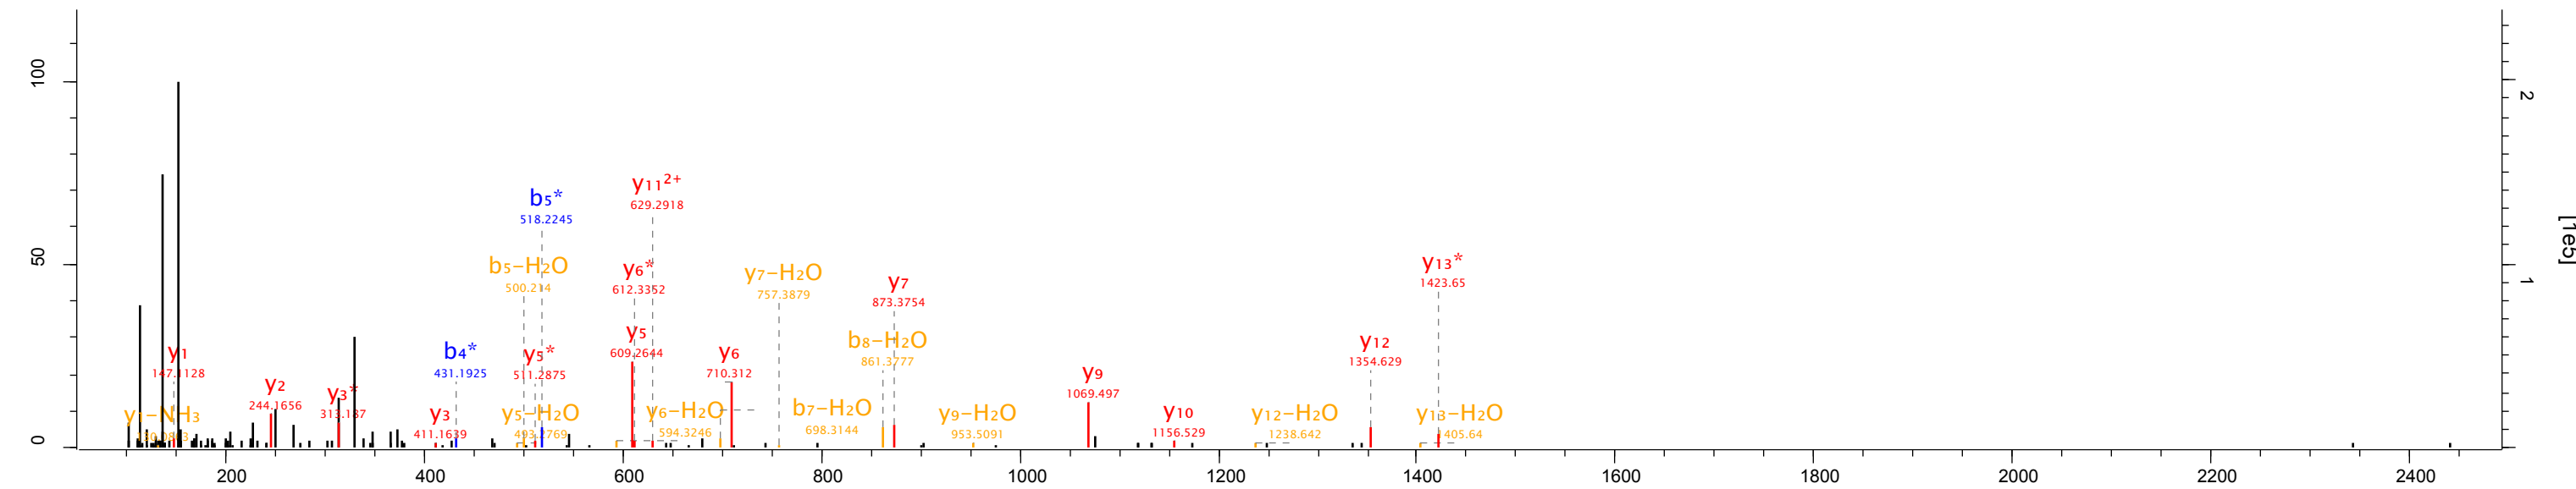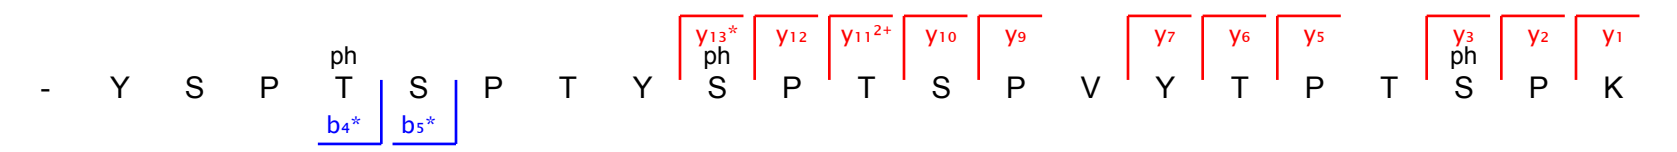

Raw file: 20171215\_MaS\_33SR\_LMH\_phospho2\_04  
 Scan: 21266 Method: FTMS; HCD Score: 225.2 m/z: 1055.35 Gene names: RPLP2;RPLP1

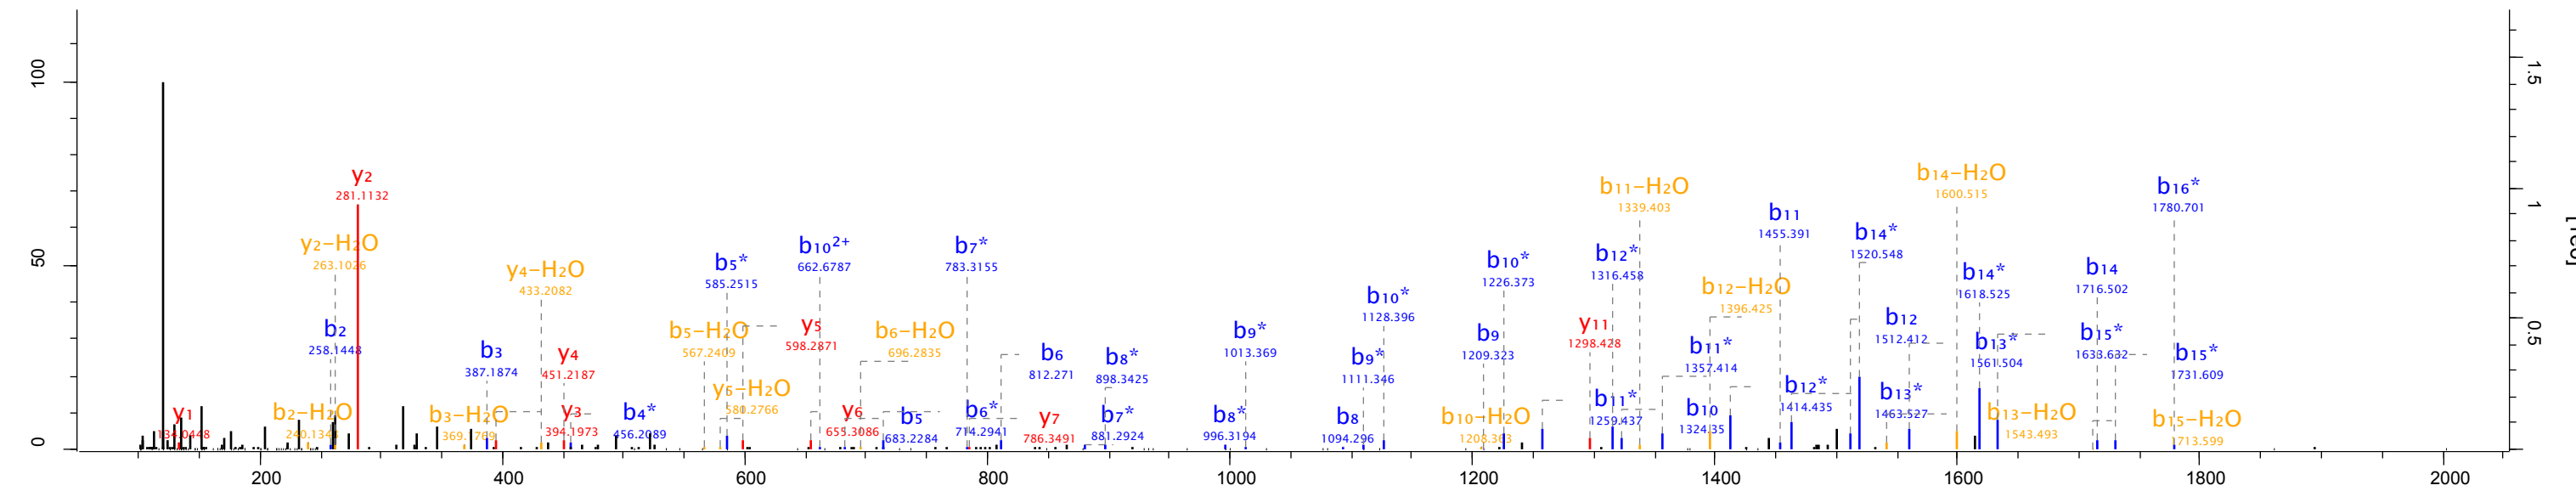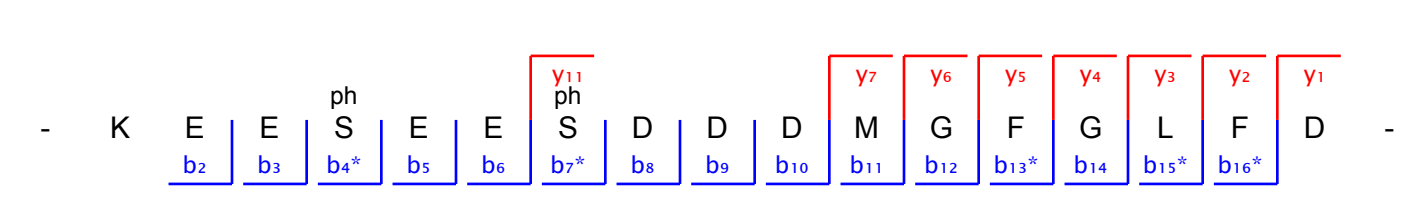

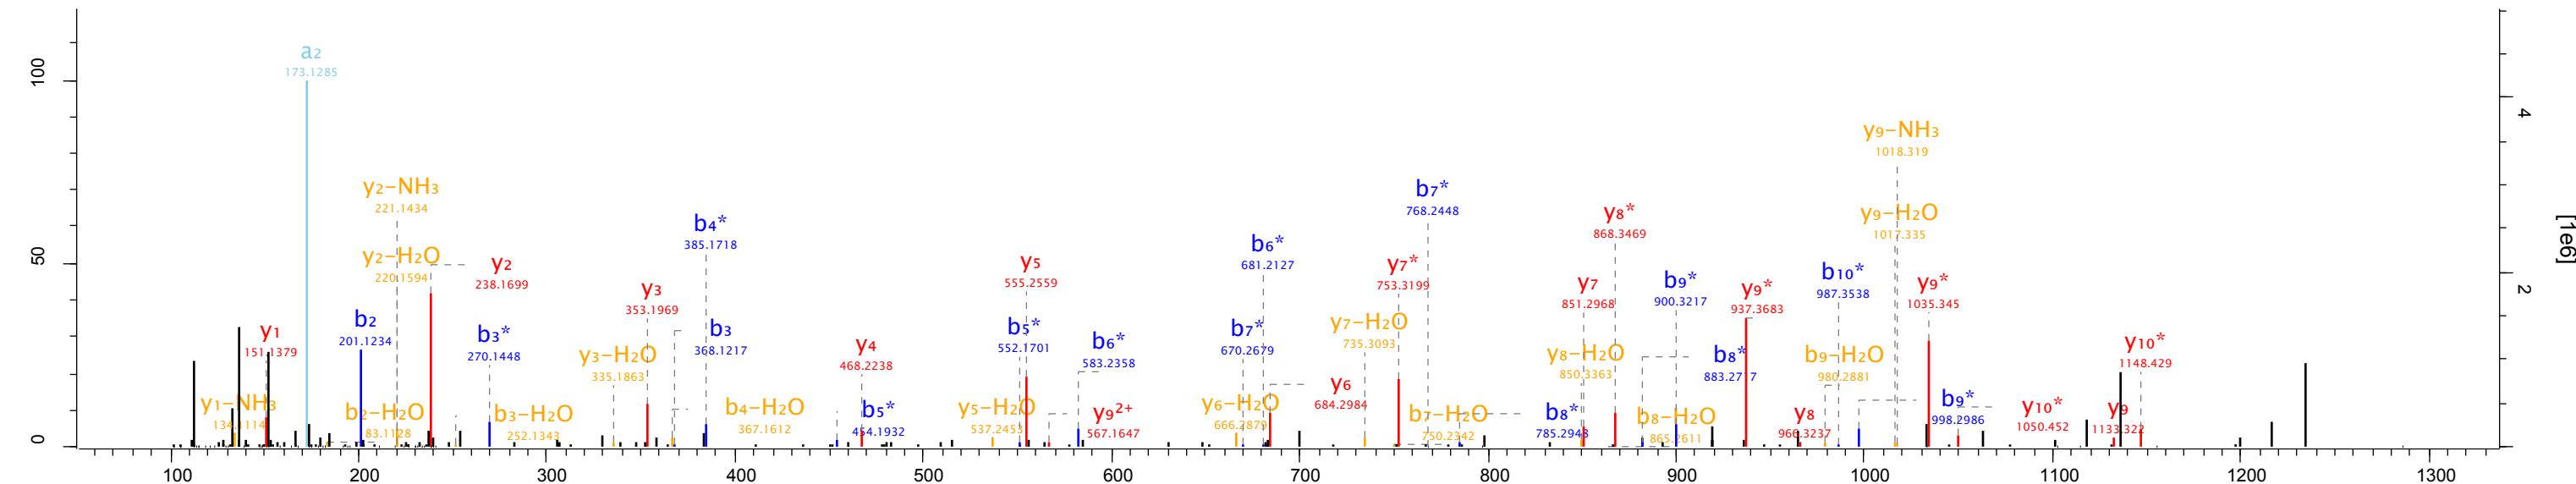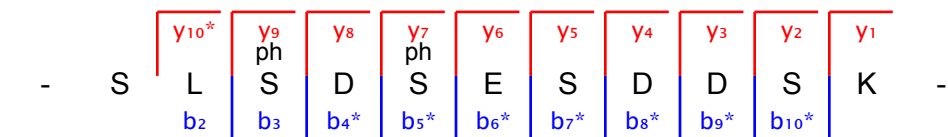



Raw file 20171215\_MaS\_33SR\_LMH\_phospho2\_04 Scan 2836 Method FTMS; HCD Score 247.44 m/z 744.25 Gene names IWS1

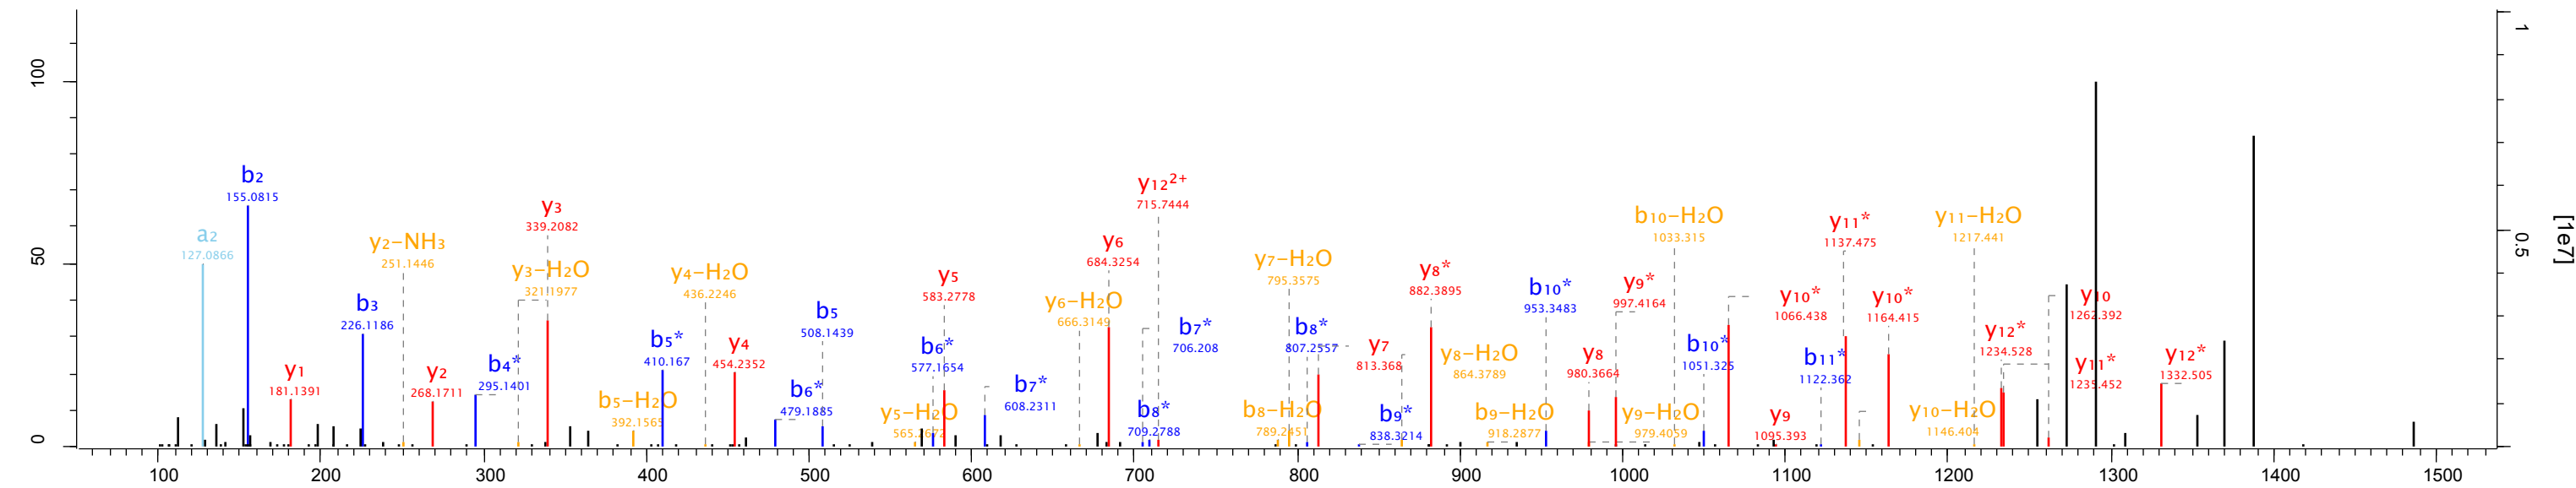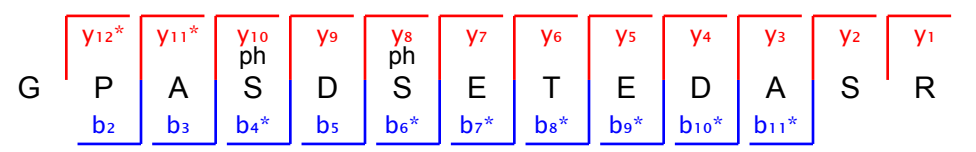

Raw file 20171215\_MaS\_33SR\_LMH\_phospho2\_04 Scan 3036 Method FTMS; HCD Score 89.23 m/z 714.75 Gene names MICAL3

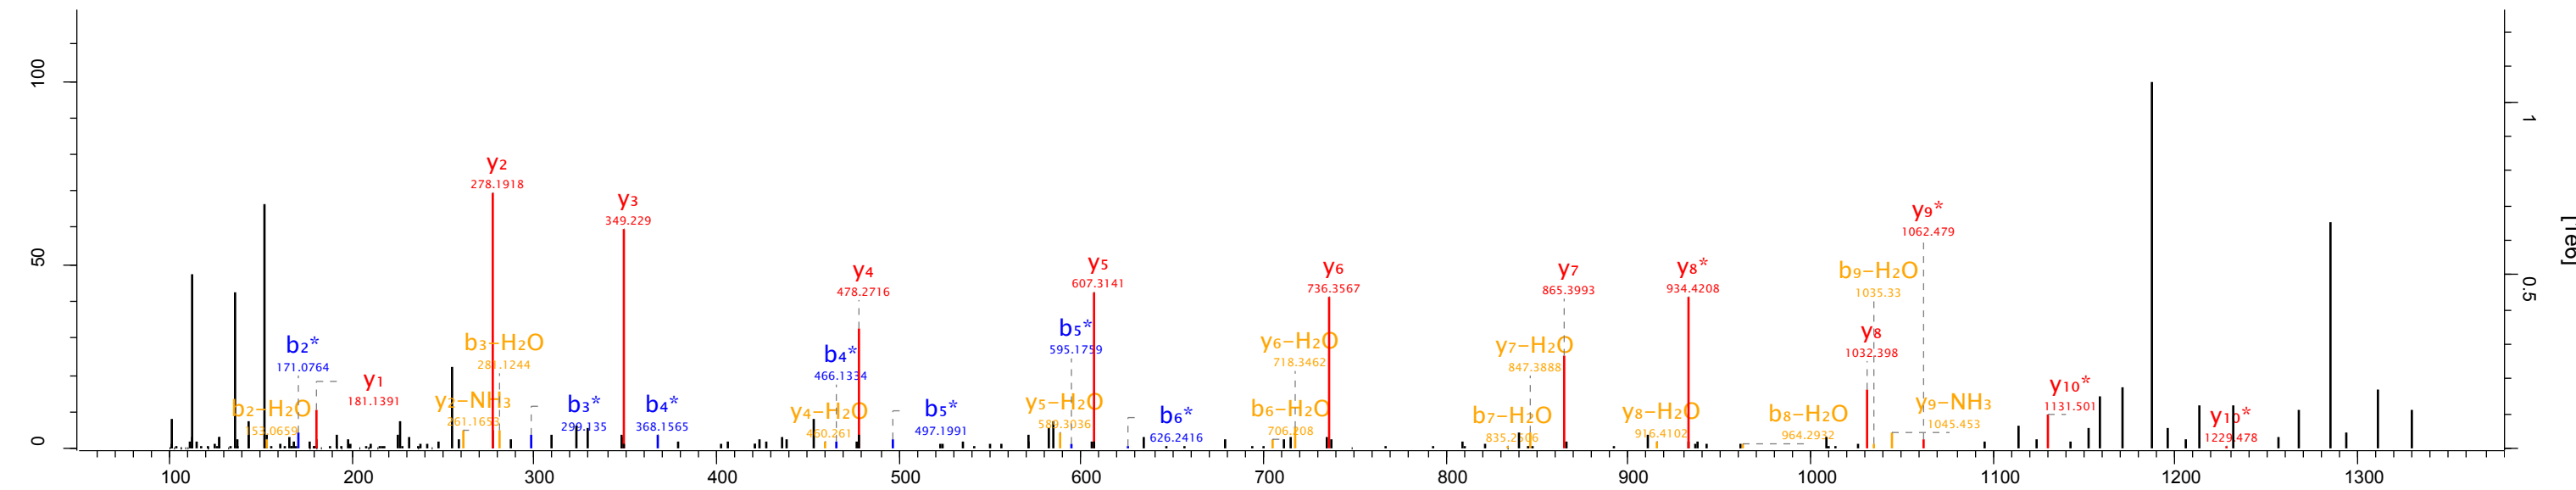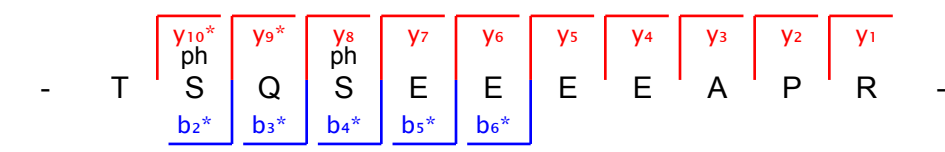

Raw file 20171215\_MaS\_33SR\_LMH\_phospho2\_04 Scan 3186 Method FTMS; HCD Score 133.98 m/z 550.76 Gene names CDC42EP4

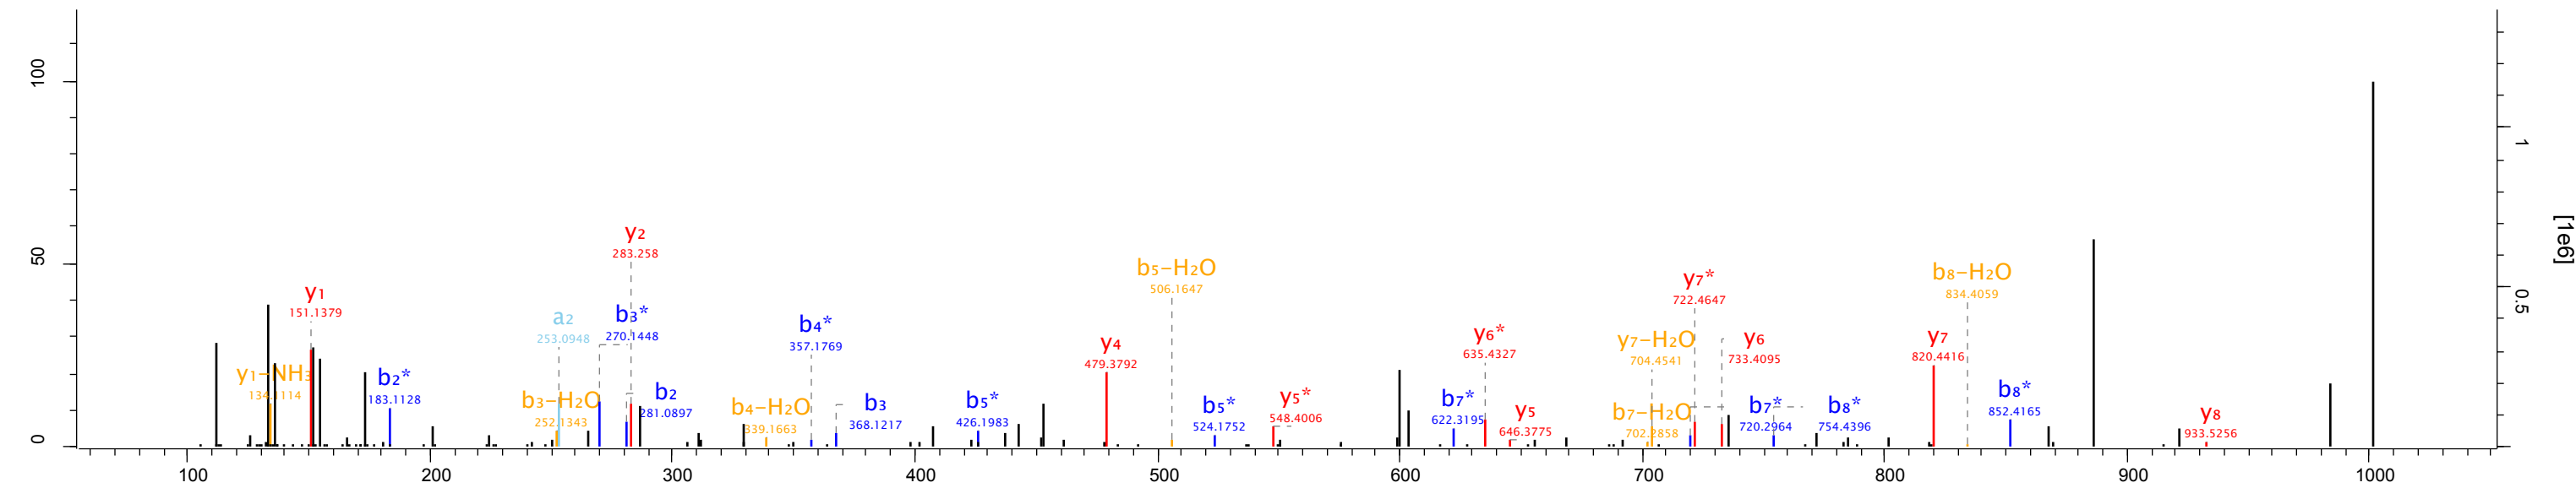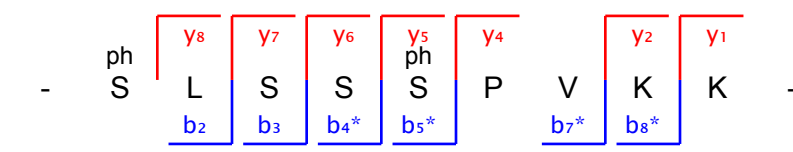

Raw file: 20171215\_MaS\_33SR\_LMH\_phospho2\_04  
 Scan: 3716 Method: FTMS; HCD Score: 82.36 m/z: 856.84 Gene names: HMGA1;C2orf81

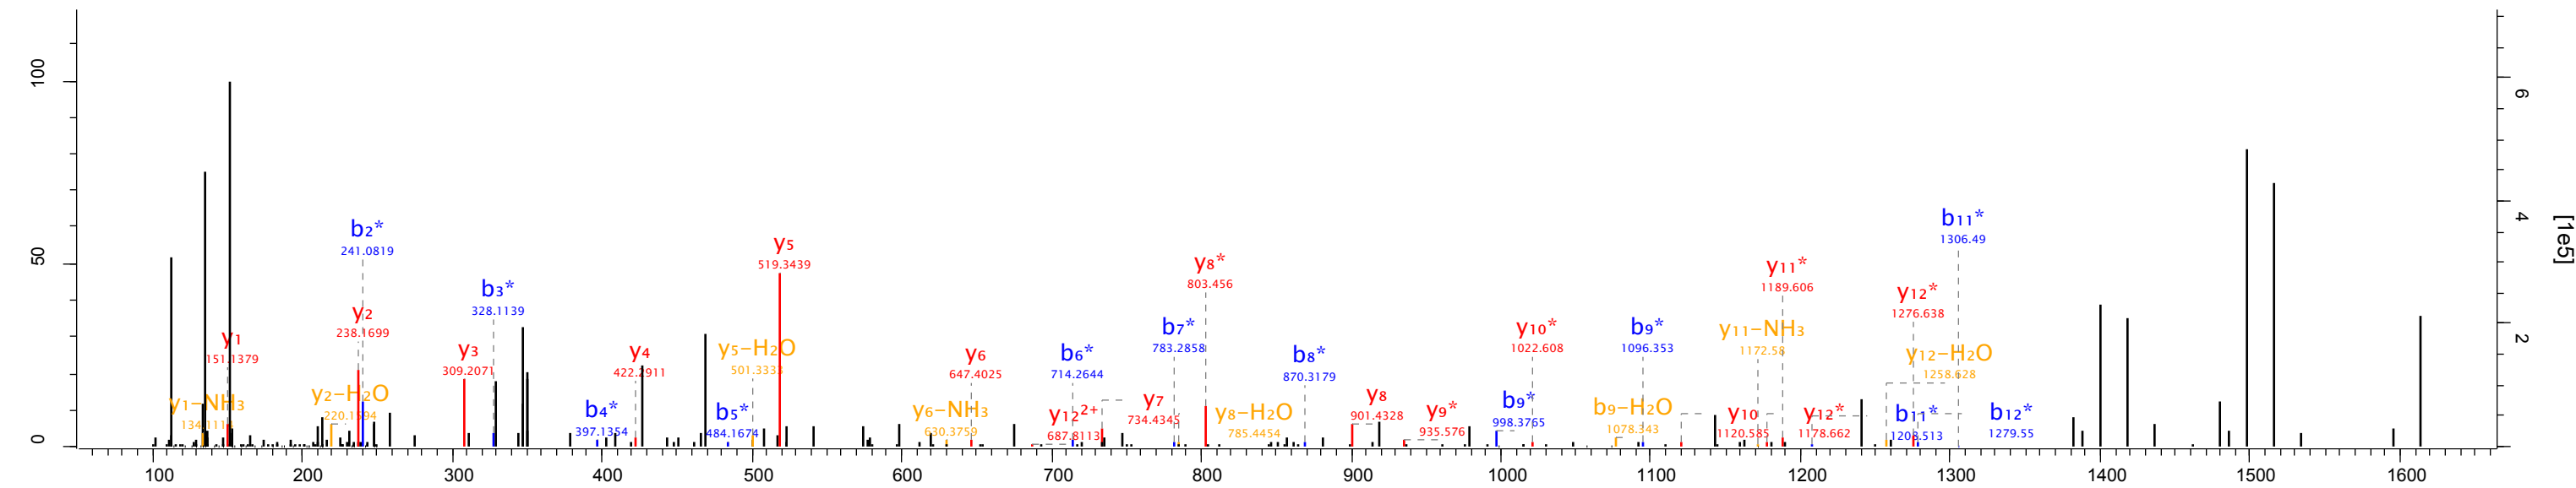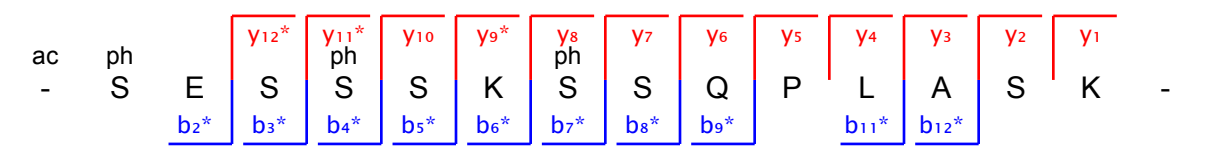

Raw file 20171215\_MaS\_33SR\_LMH\_phospho2\_04 Scan 5236 Method FTMS; HCD Score 73.13 m/z 885.35 Gene names ADD2

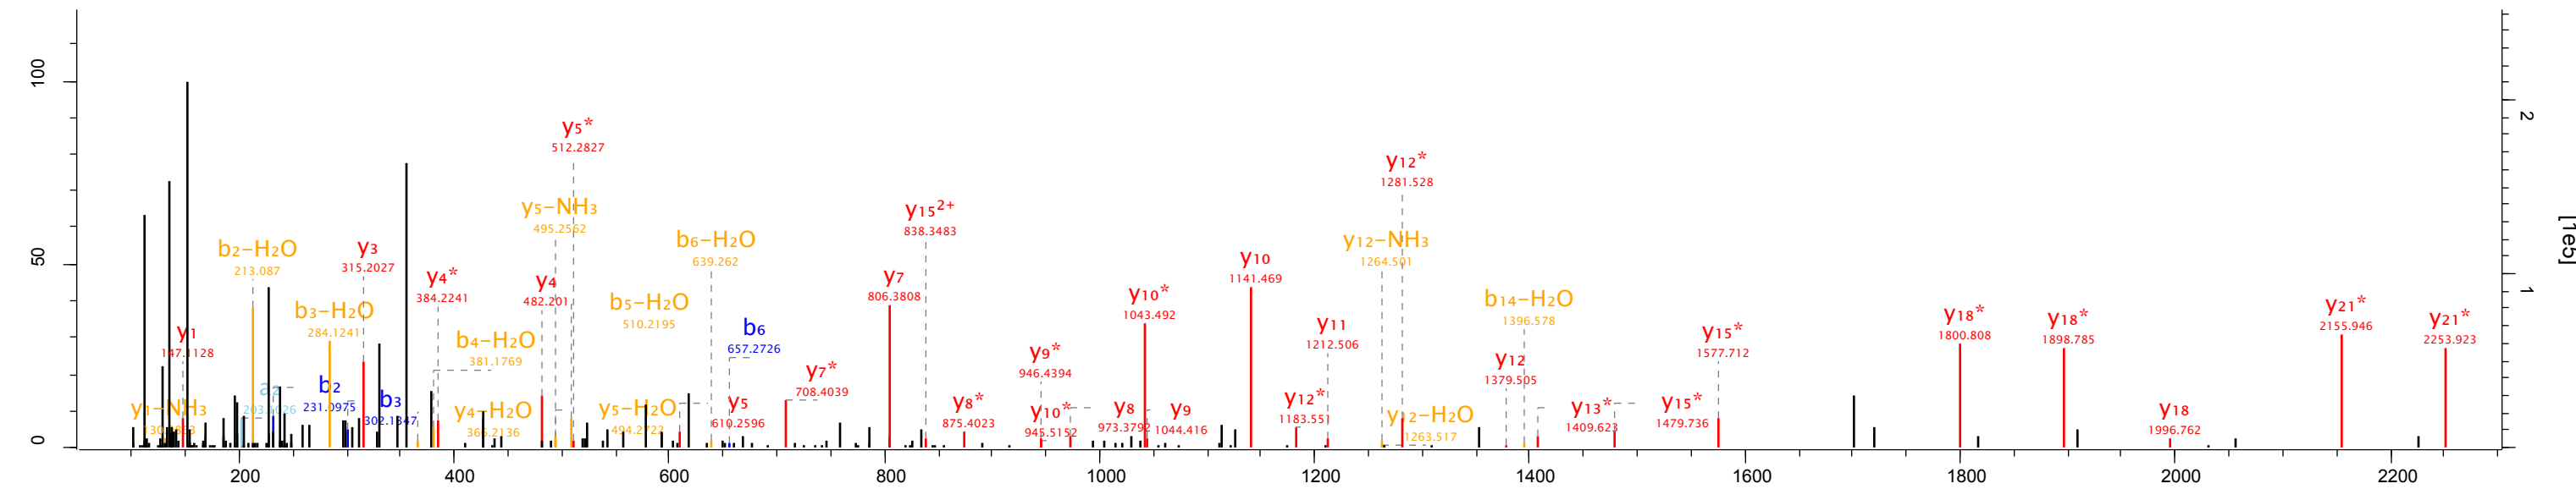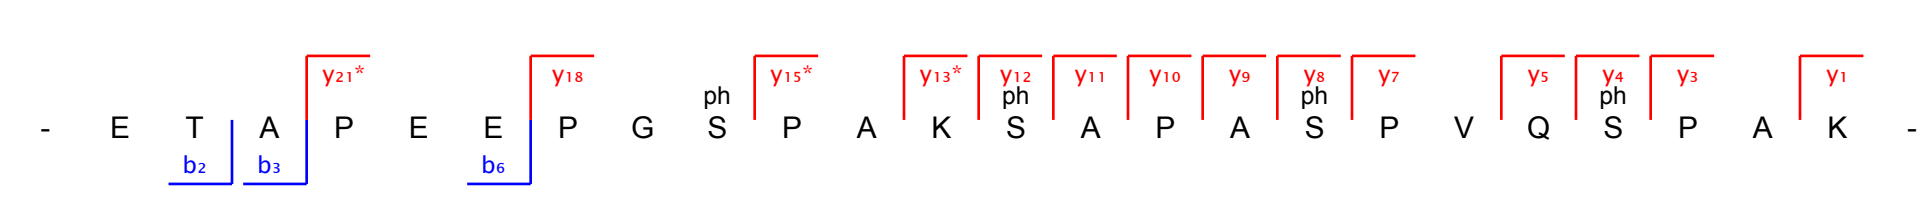

Raw file 20171215\_MaS\_33SR\_LMH\_phospho2\_04 Scan 5346 Method FTMS; HCD Score 244.05 m/z 1027.87 Gene names LEO1

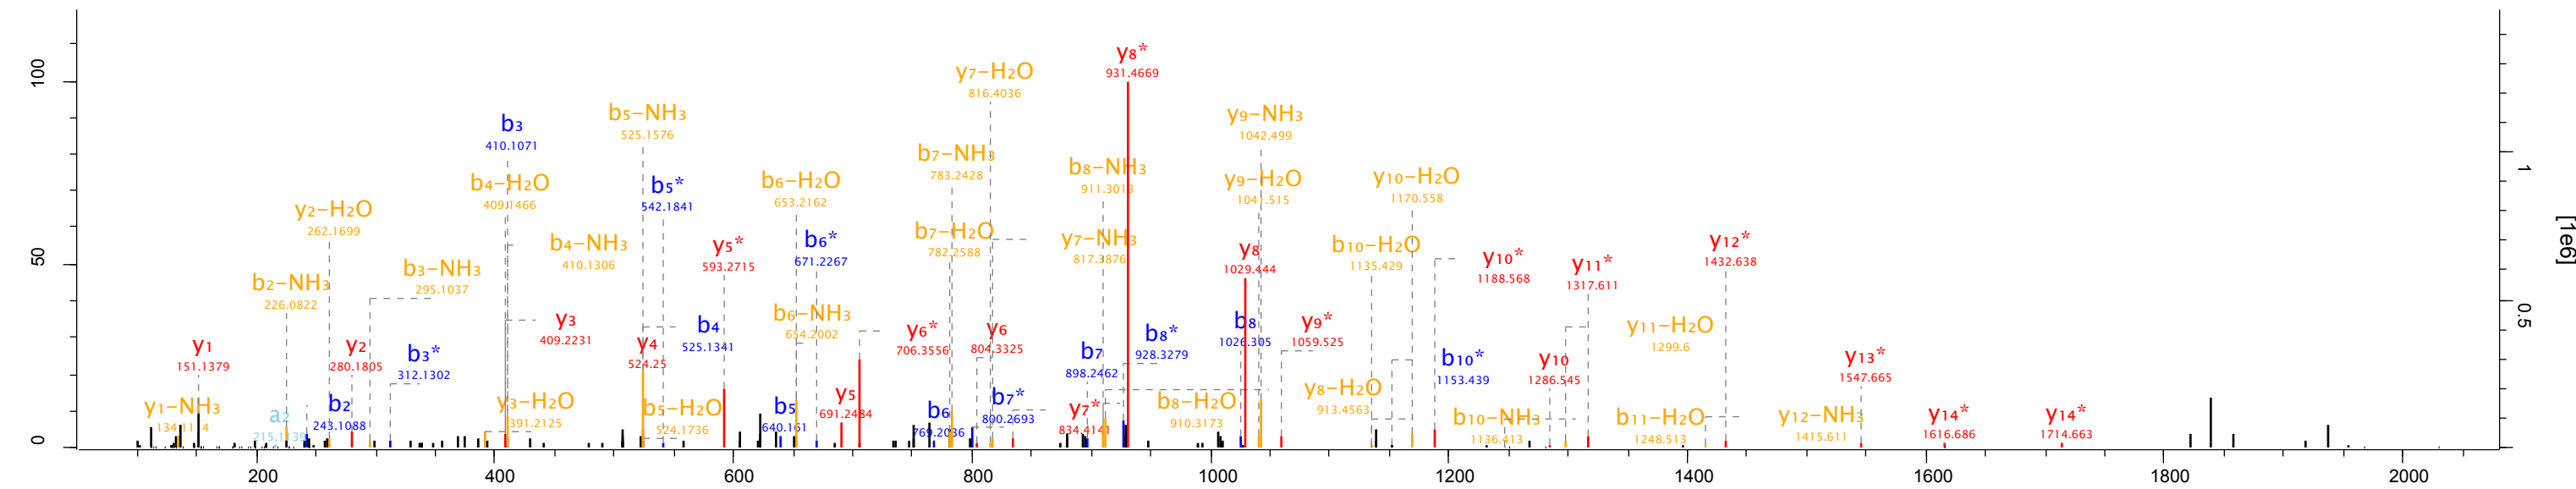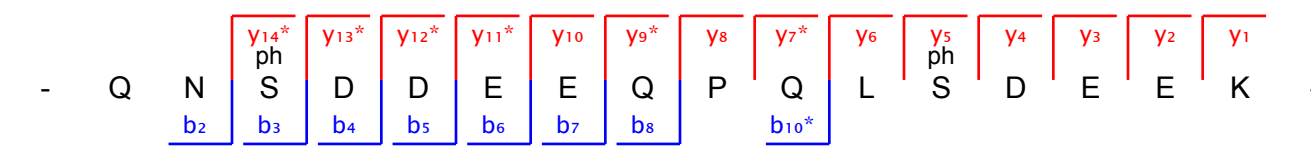

Raw file 20171215\_MaS\_33SR\_LMH\_phospho2\_04 Scan 5396 Method FTMS; HCD Score 176.85 m/z 759.3 Gene names CEP170

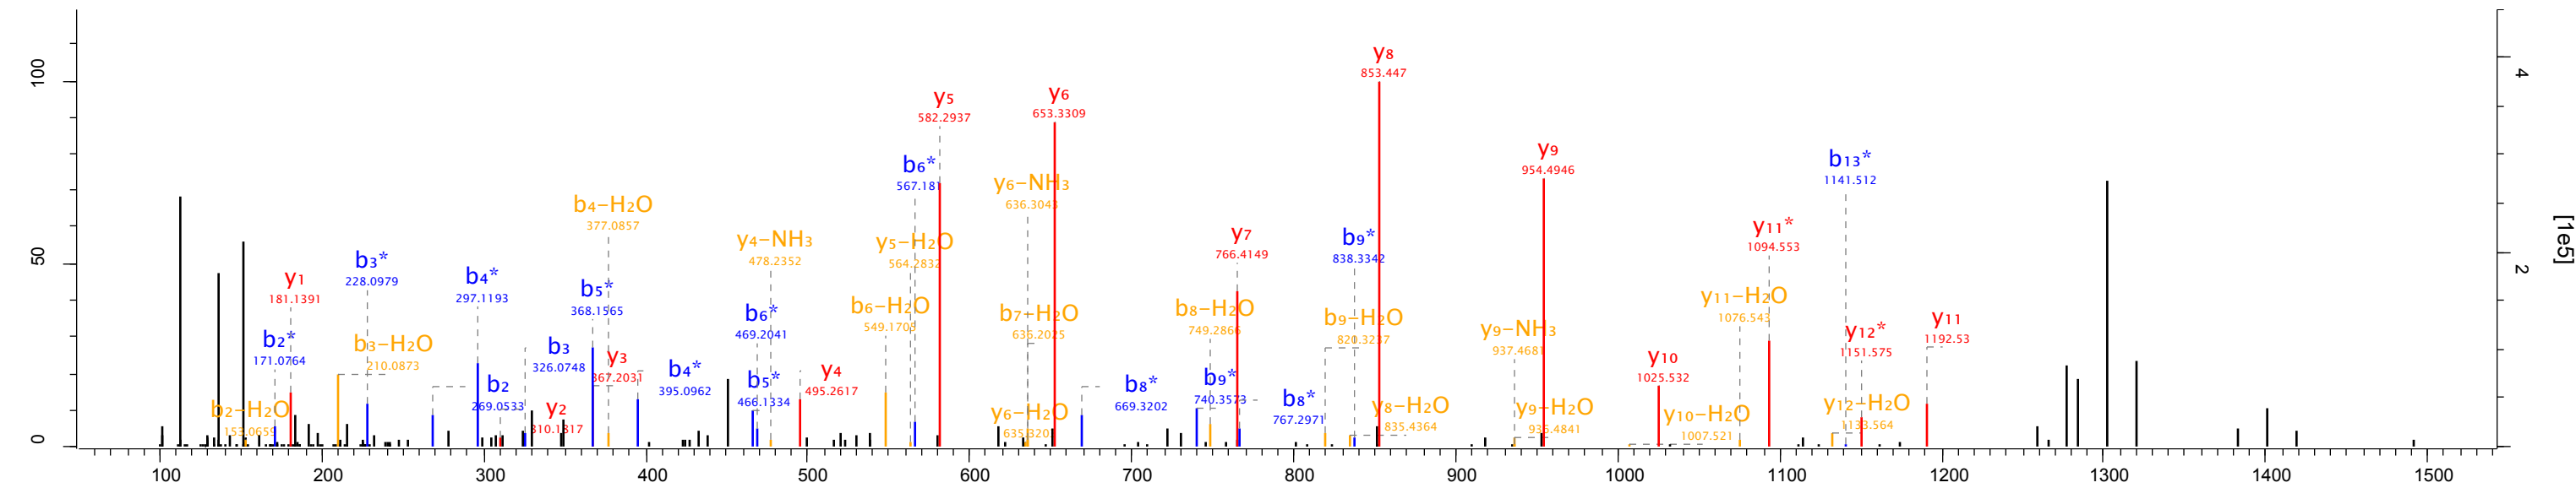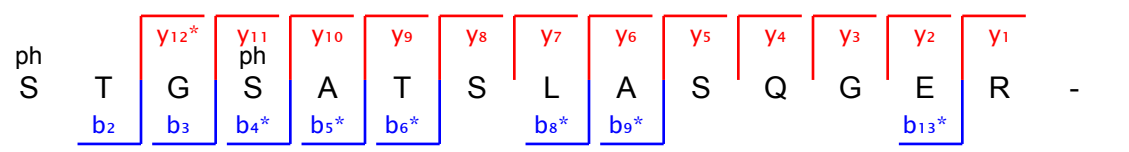

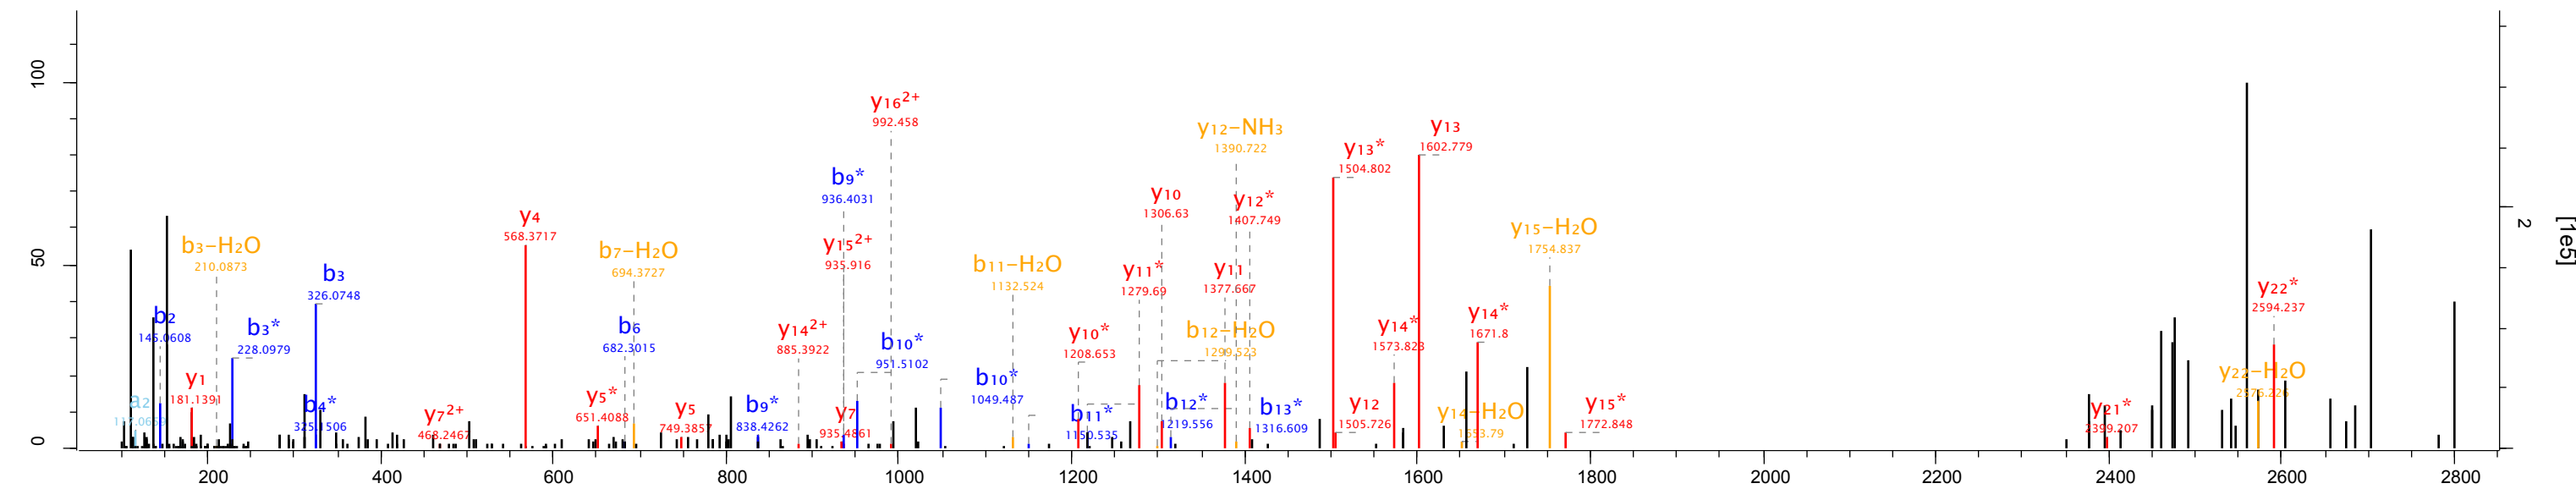

- S G T P P R Q G S I T S P Q A N E Q S V T P Q R R -  
 b<sub>2</sub> b<sub>3</sub> b<sub>4</sub>\* b<sub>6</sub> y<sub>22</sub>\* y<sub>21</sub>\* y<sub>16</sub><sup>2+</sup> y<sub>15</sub>\* y<sub>14</sub>\* ph y<sub>13</sub> y<sub>12</sub> y<sub>11</sub> y<sub>10</sub> y<sub>7</sub> y<sub>5</sub> ph y<sub>4</sub> y<sub>1</sub>  
 b<sub>9</sub>\* b<sub>10</sub>\* b<sub>11</sub>\* b<sub>12</sub>\* b<sub>13</sub>\*



Raw file 20171215\_MaS\_33SR\_LMH\_phospho2\_04 Scan 5846 Method FTMS; HCD Score 191.53 m/z 1032.43 Gene names LARP1

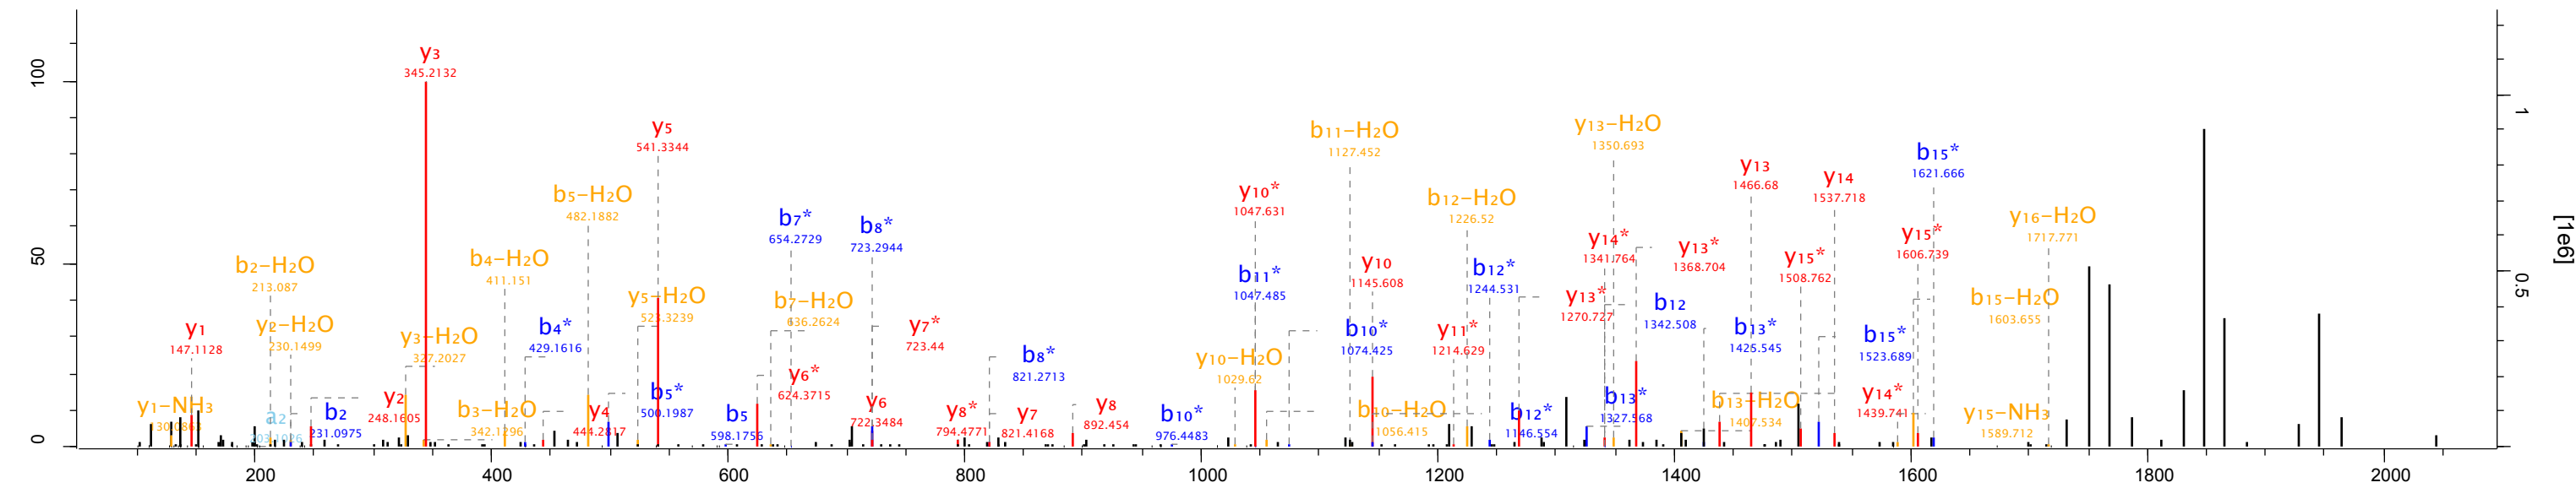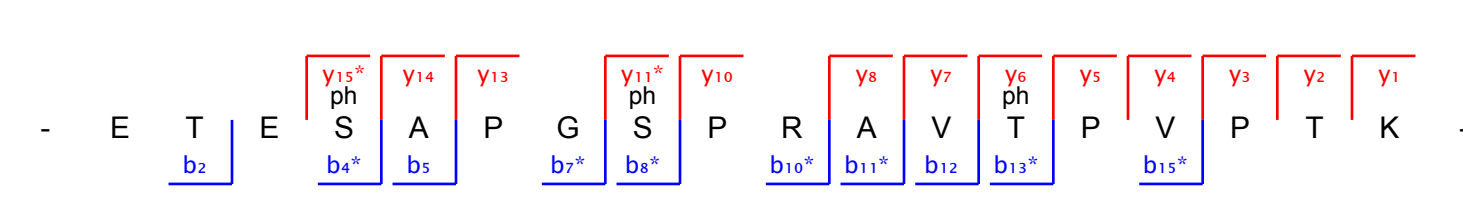

Raw file  
20171215\_MaS\_33SR\_LMH\_phospho2\_04

Scan 6086 Method FTMS; HCD Score 316.28 m/z 890.85 Gene names SRRM2

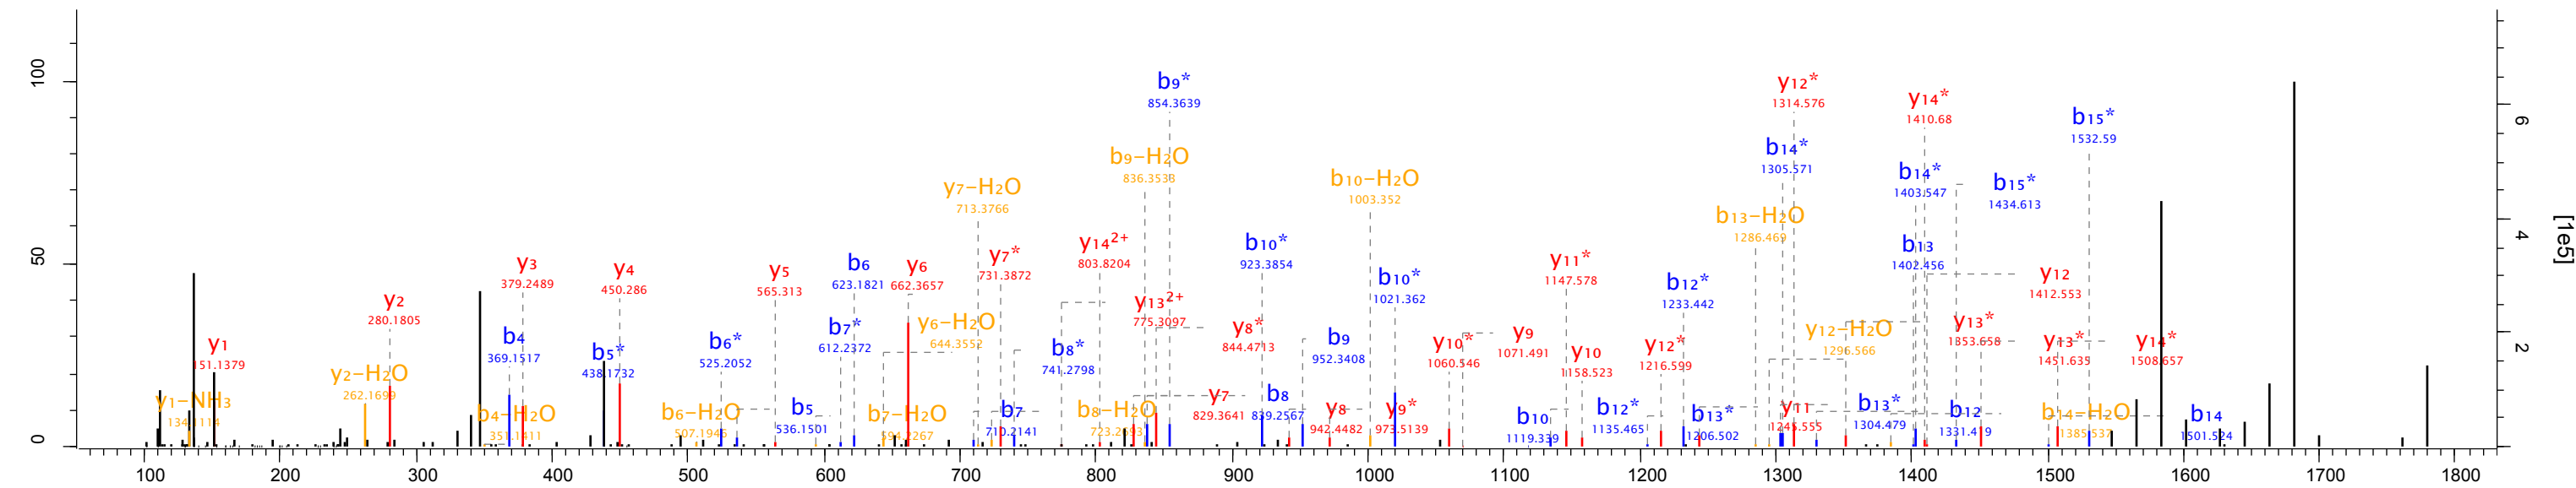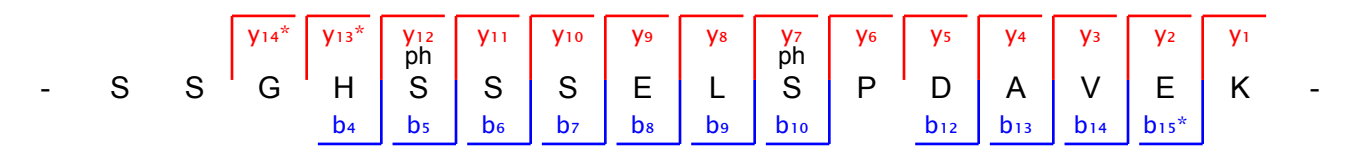

Raw file 20171215\_MaS\_33SR\_LMH\_phospho2\_04 Scan 8486 Method FTMS; HCD Score 58.33 m/z 1006.86 Gene names EPS8

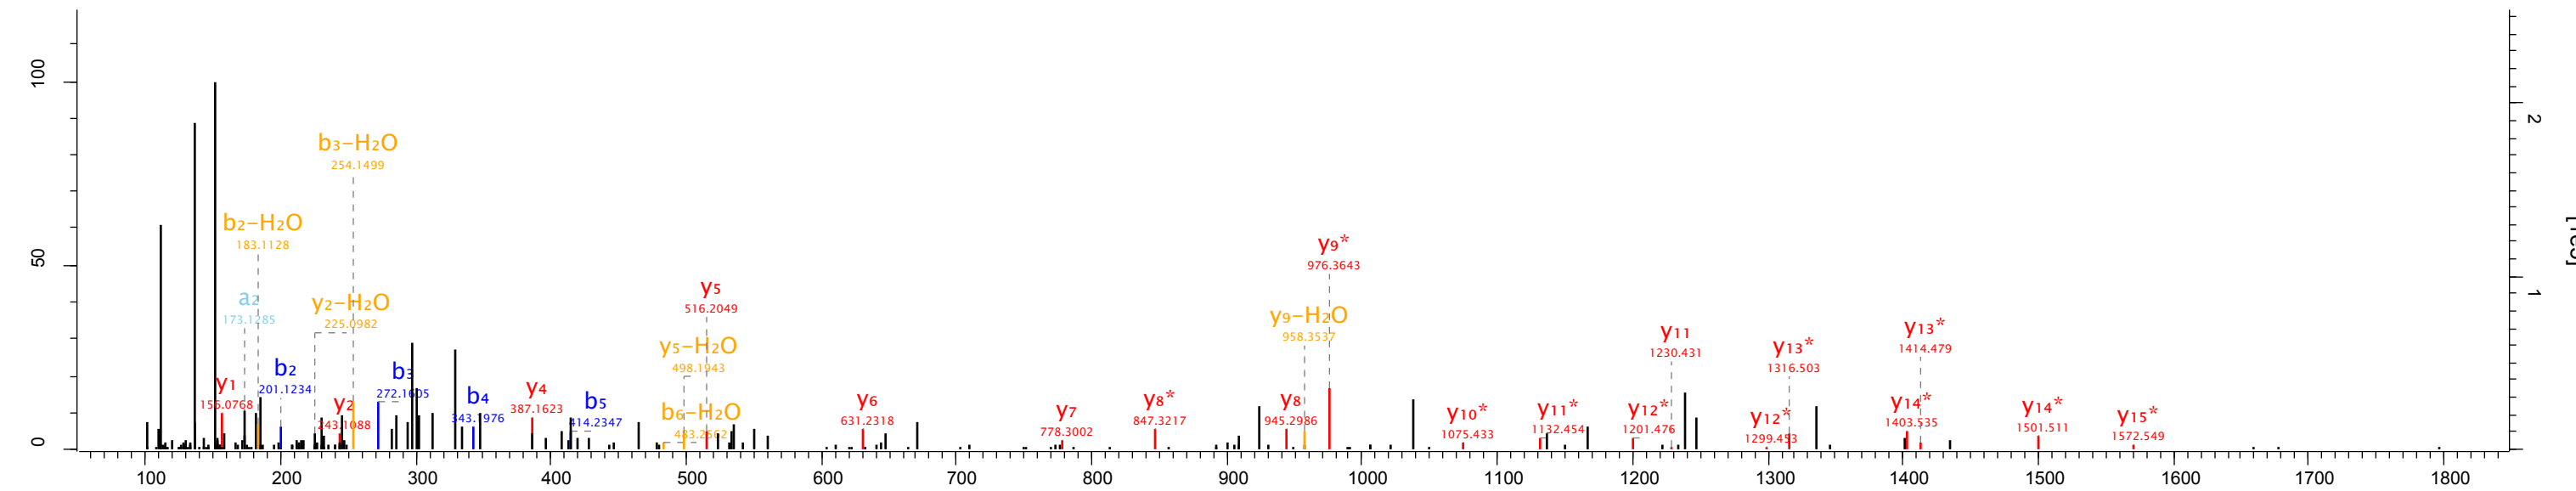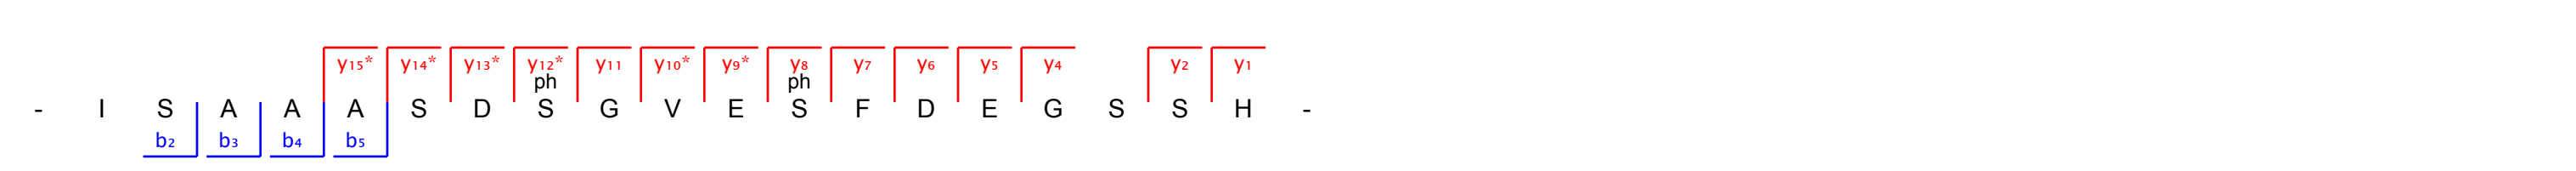

Raw file 20171215\_MaS\_33SR\_LMH\_phospho2\_05 Scan 10506 Method FTMS; HCD Score 90.98 m/z 727.35 Gene names C2orf49

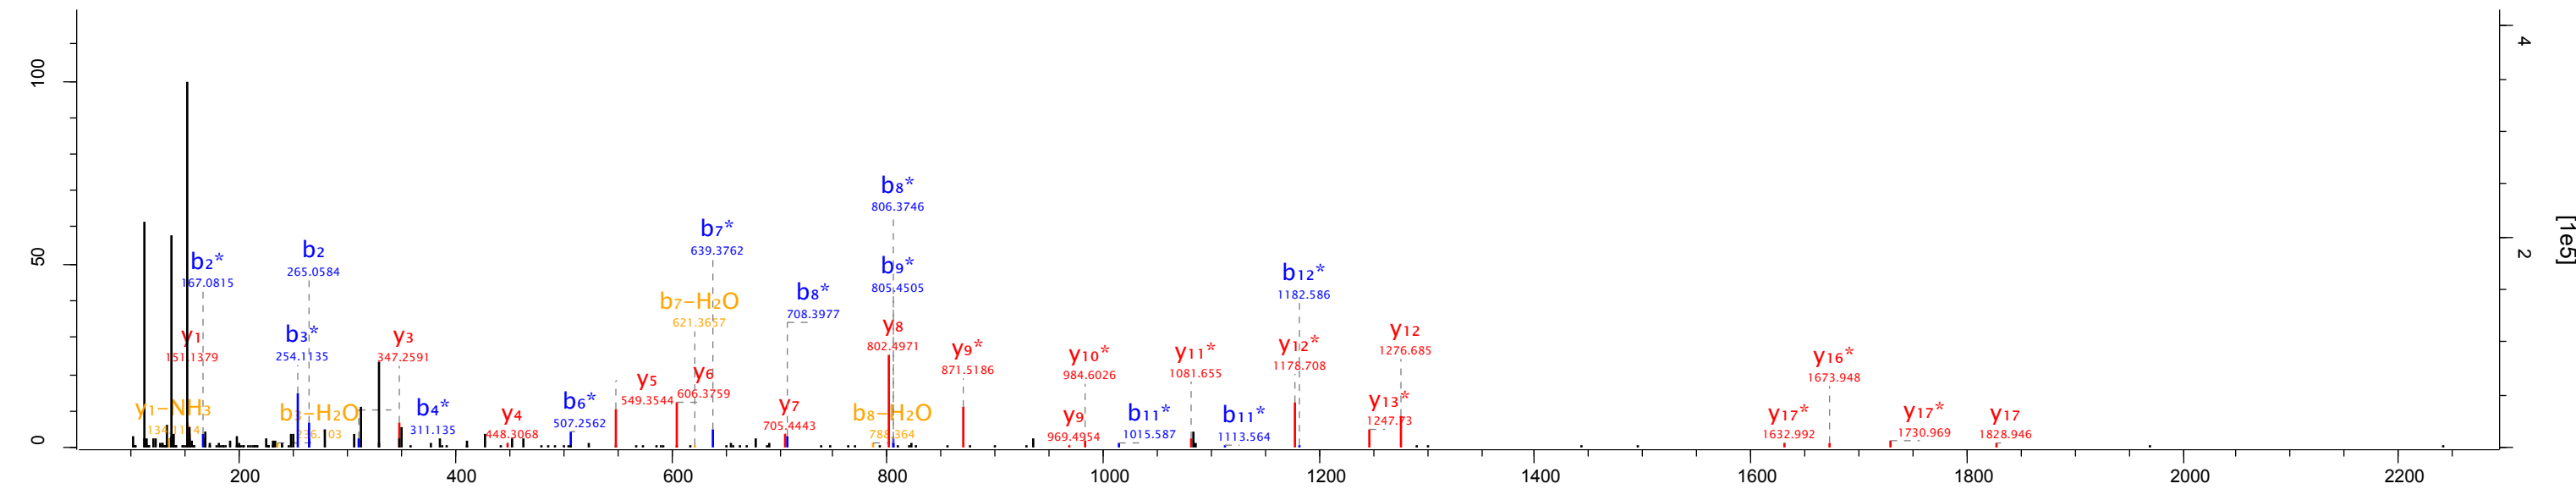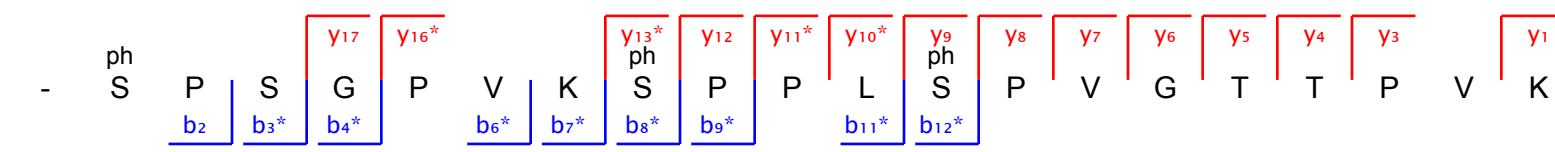

Raw file 20171215\_MaS\_33SR\_LMH\_phospho2\_05 Scan 12136 Method FTMS; HCD Score 49.04 m/z 907.35 Gene names FTSJ3

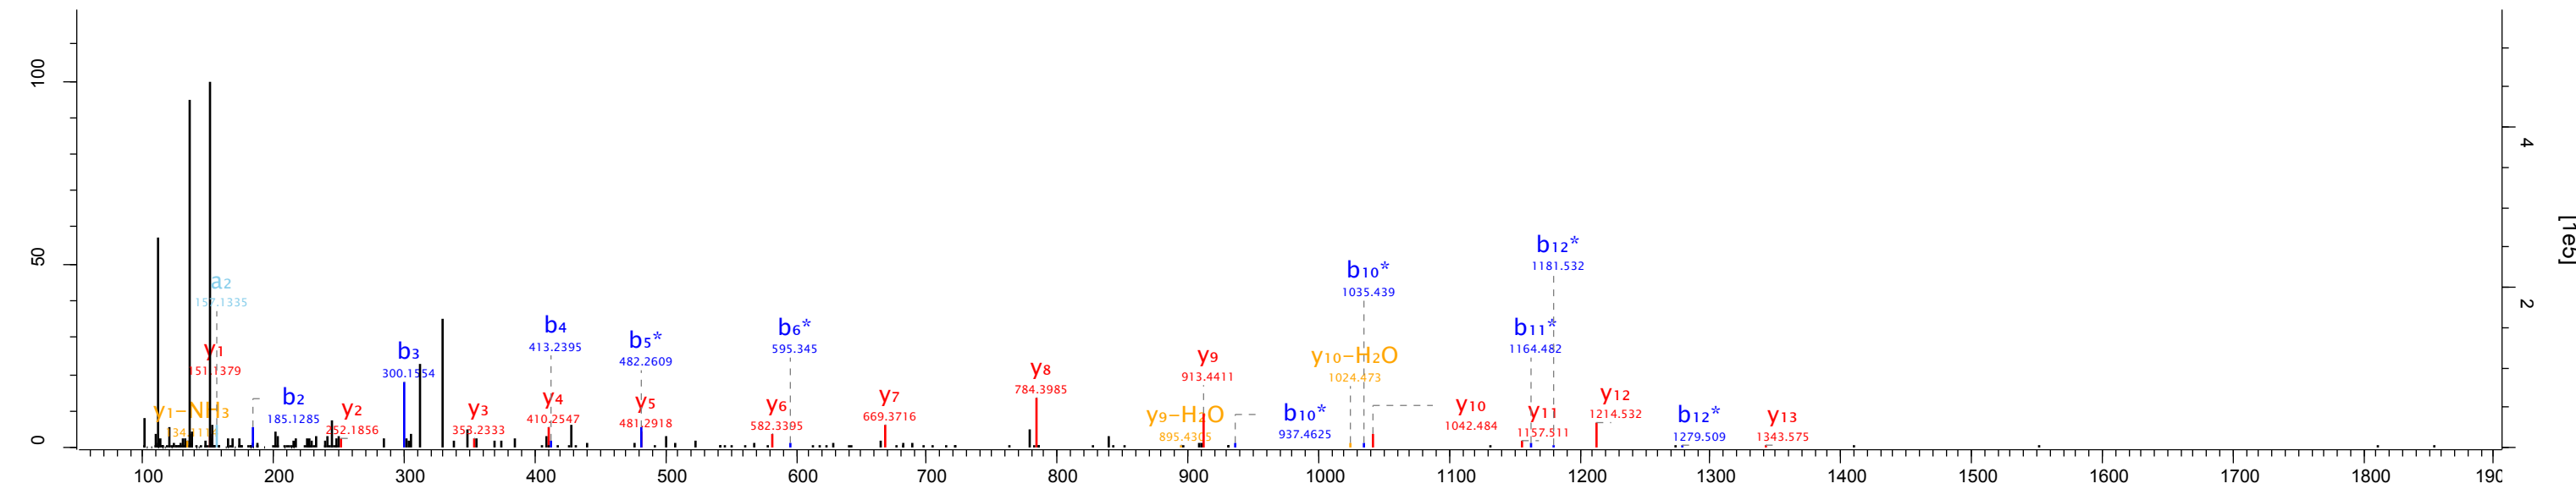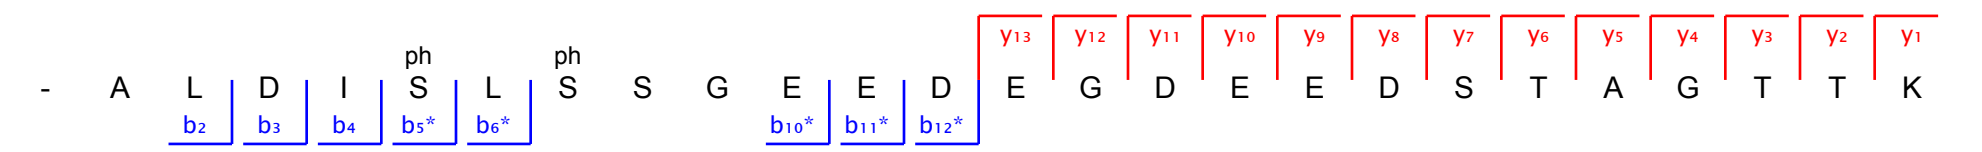

Raw file: 20171215\_MaS\_33SR\_LMH\_phospho2\_05  
 Scan: 3726 Method: FTMS; HCD Score: 109.22 m/z: 592.22 Gene names: PHLDB2

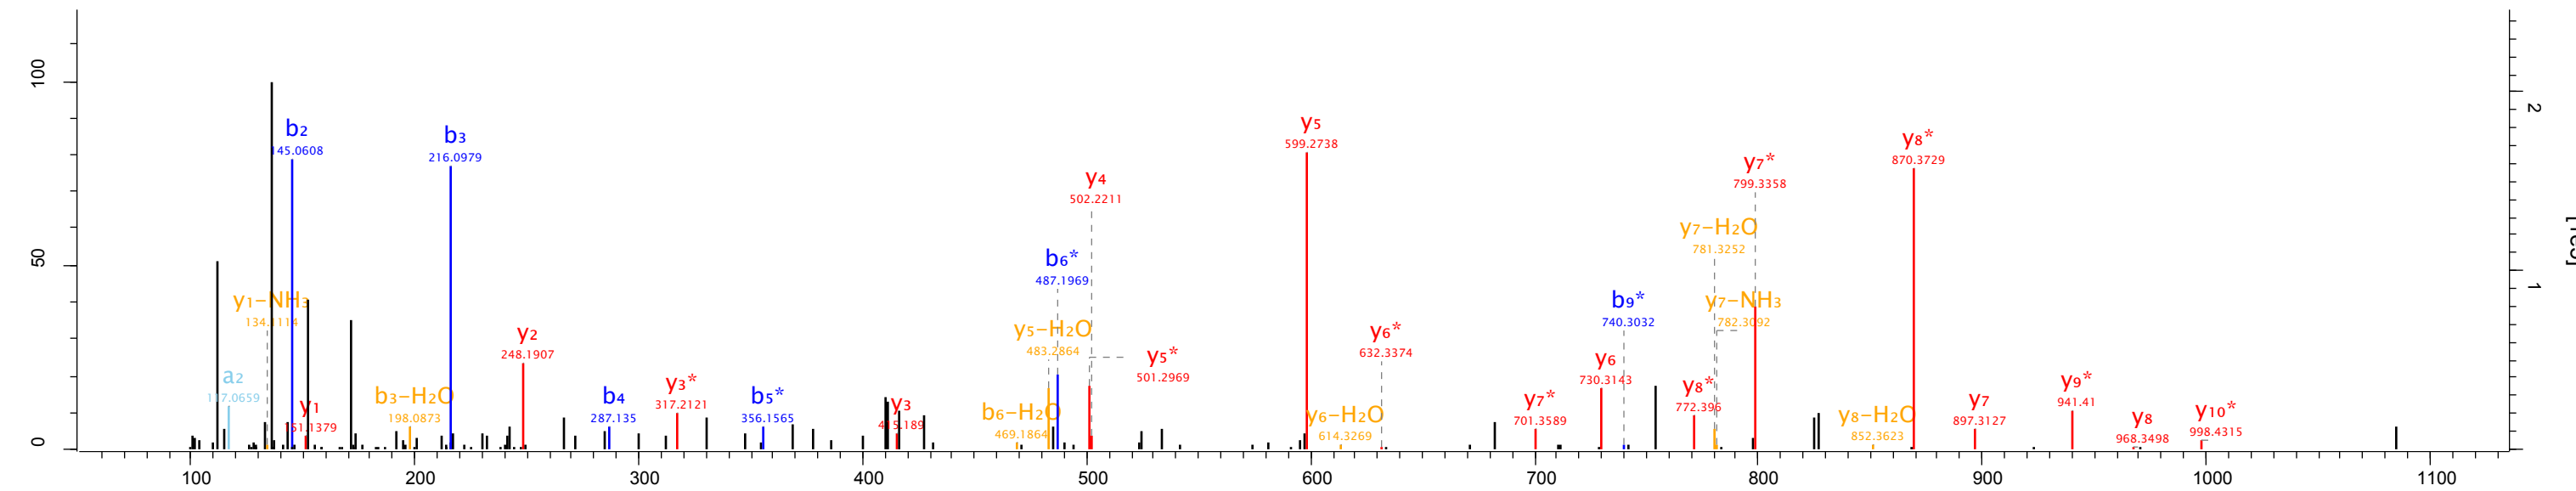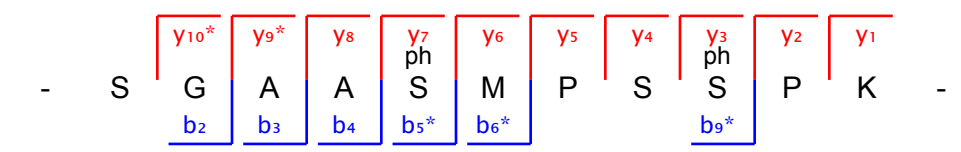

Raw file: 20171215\_MaS\_33SR\_LMH\_phospho2\_05  
 Scan: 4126 Method: FTMS; HCD Score: 161.55 m/z: 902.78 Gene names: LEO1

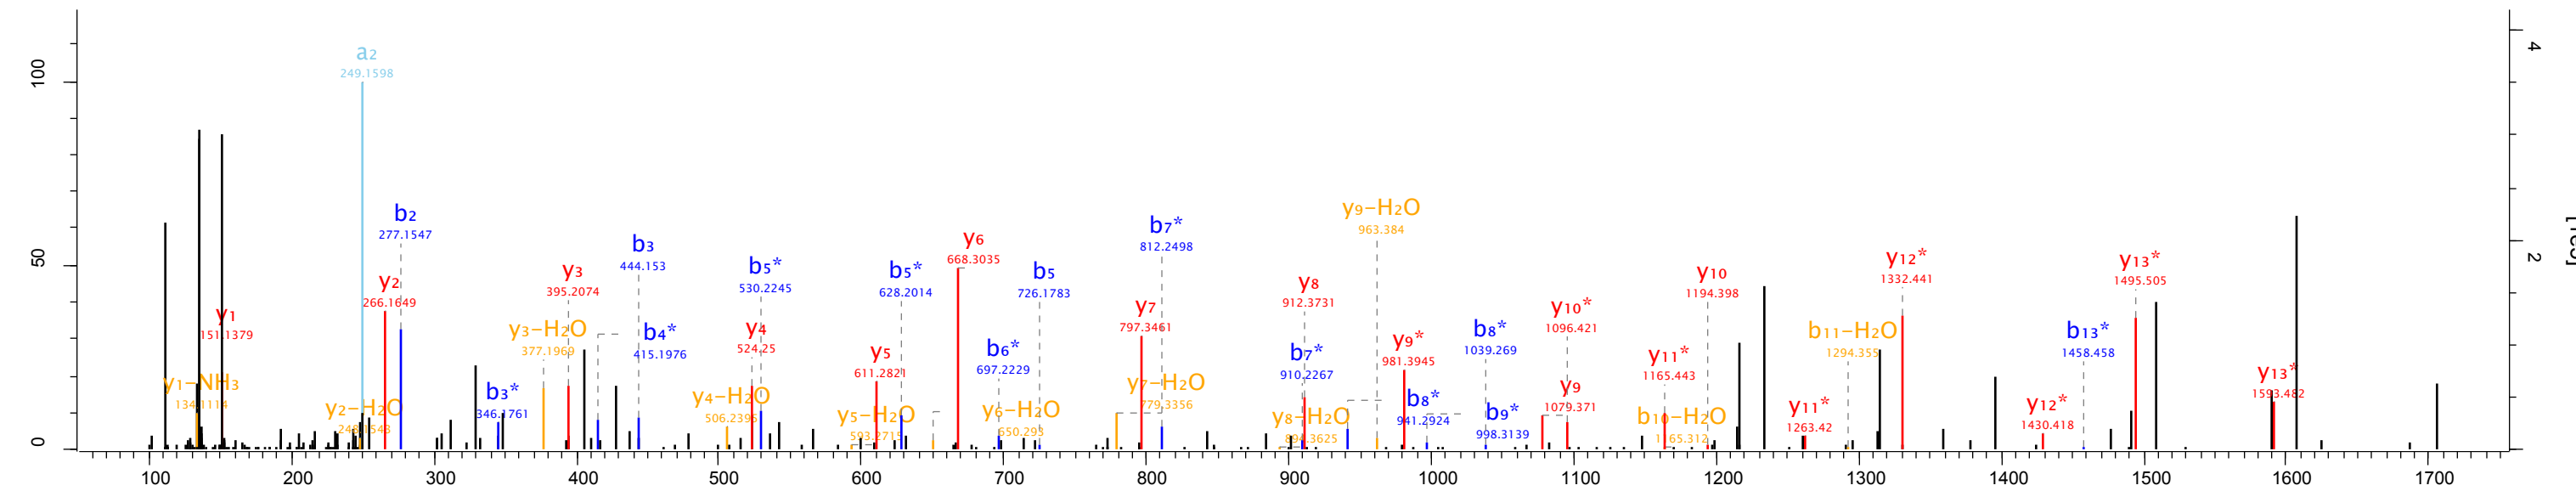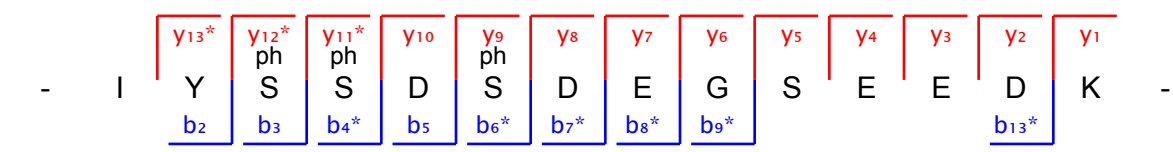

Raw file: 20171215\_MaS\_33SR\_LMH\_phospho2\_05  
 Scan: 4636 Method: FTMS; HCD Score: 85.4 m/z: 926.02 Gene names: UBAP2L

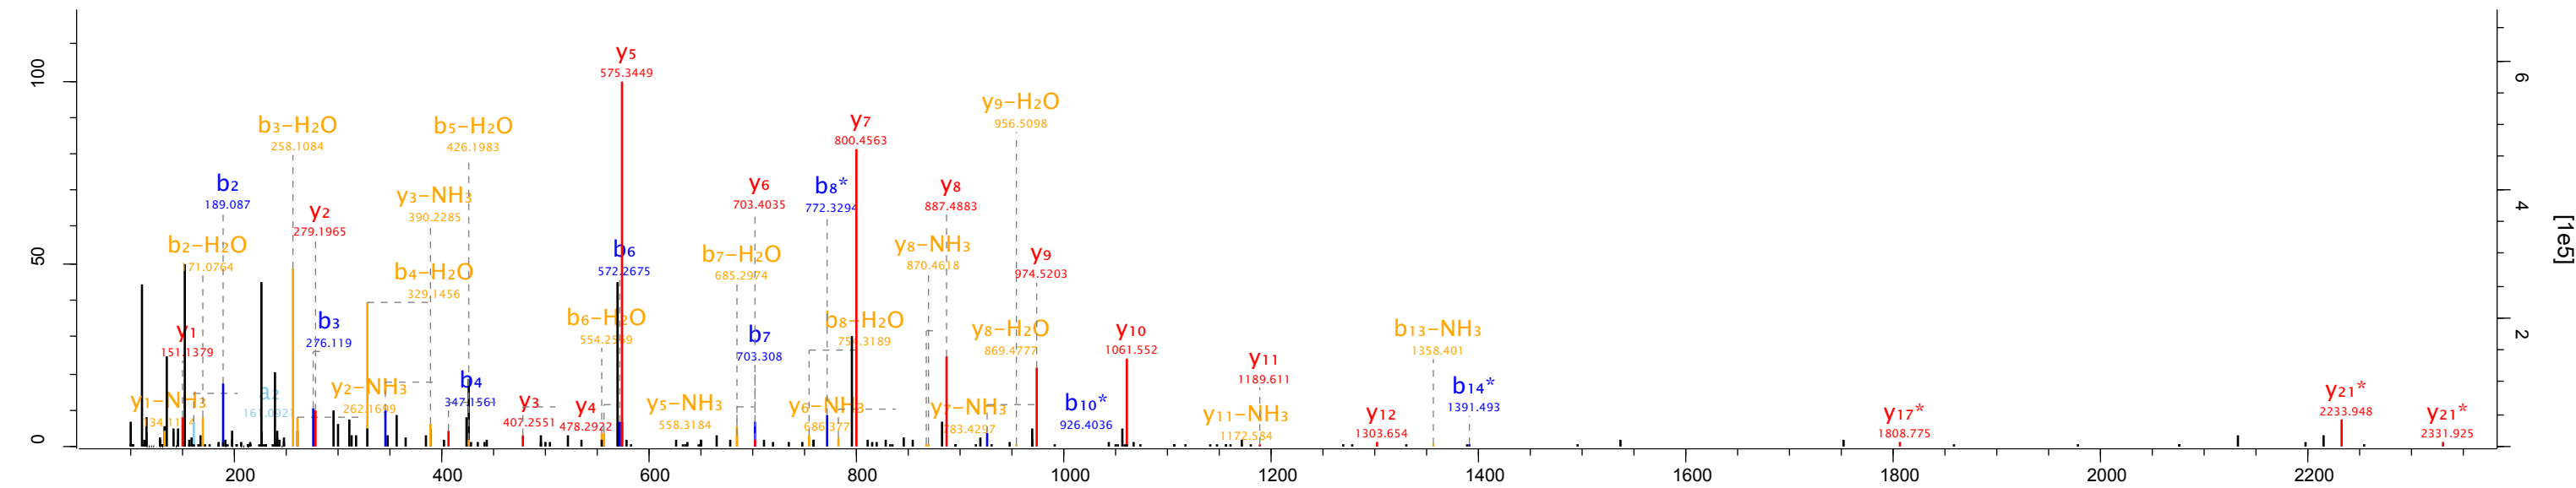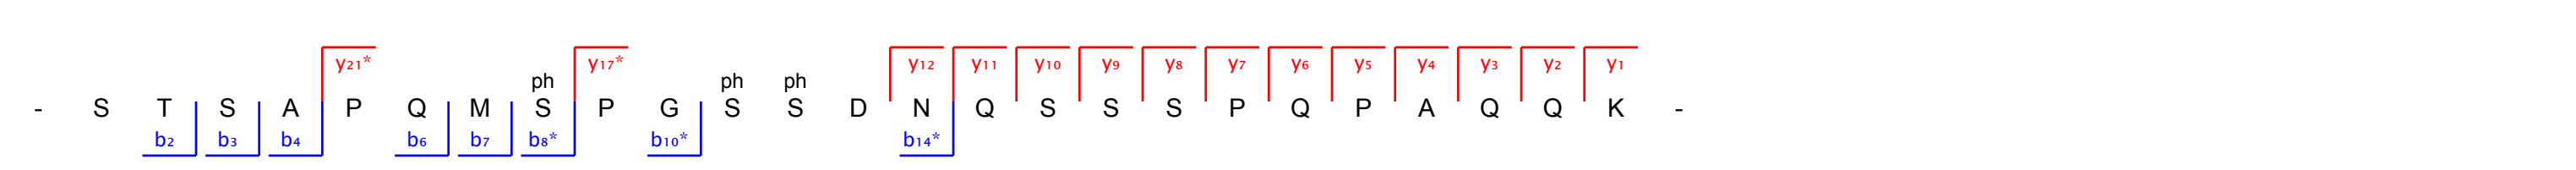



Raw file  
20171215\_MaS\_33SR\_LMH\_phospho2\_05

Scan 4786 Method FTMS; HCD Score 165.17 m/z 739.93 Gene names SUDS3

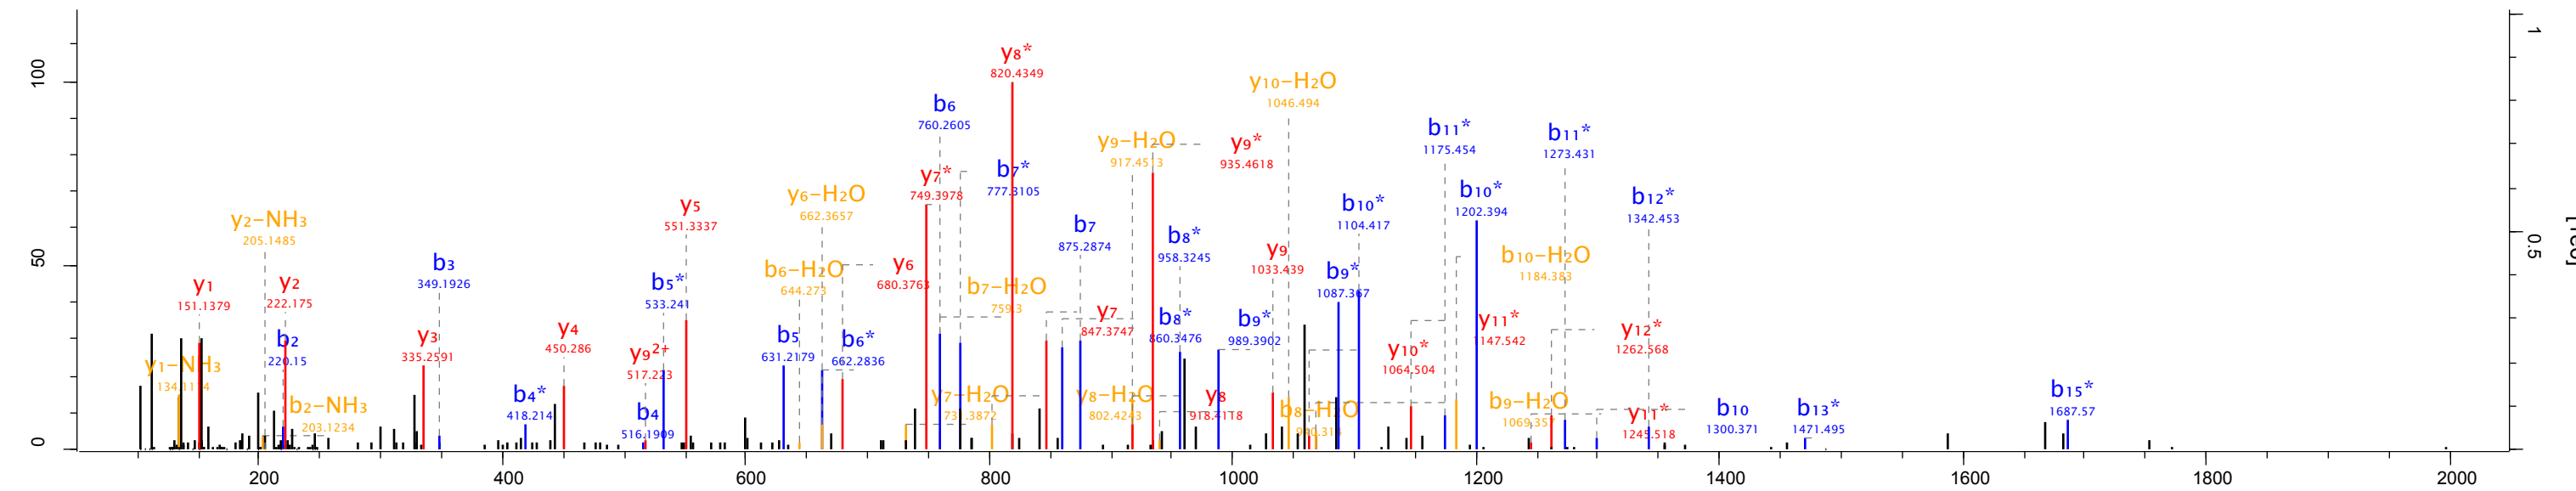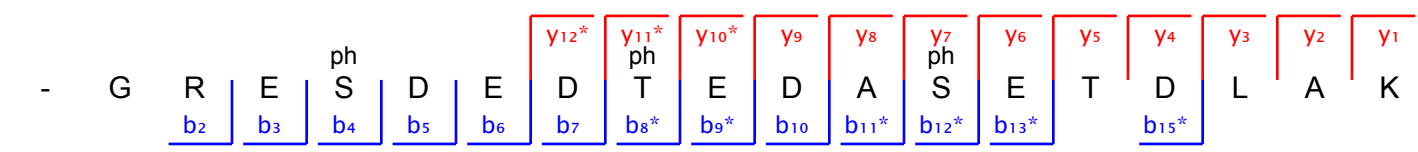

Raw file  
20171215\_MaS\_33SR\_LMH\_phospho2\_05

Scan 6826 Method FTMS; HCD Score 210.66 m/z 857.76 Gene names PUS1

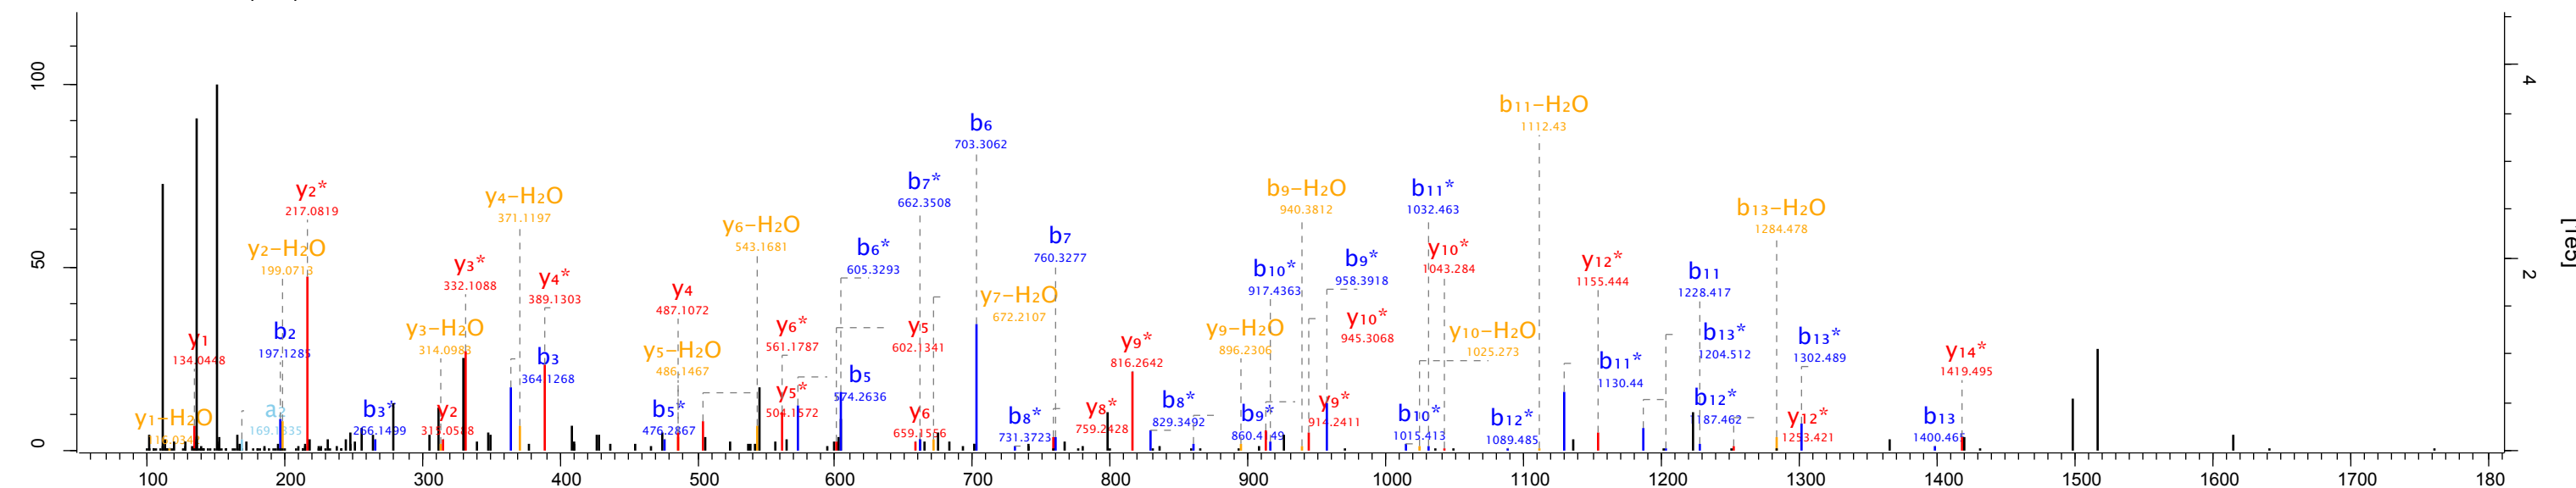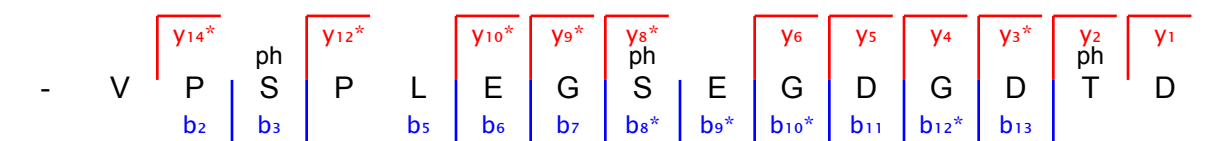

Raw file 20171215\_MaS\_33SR\_LMH\_phospho2\_05 Scan 7516 Method FTMS; HCD Score 143.88 m/z 1160.08 Gene names NES

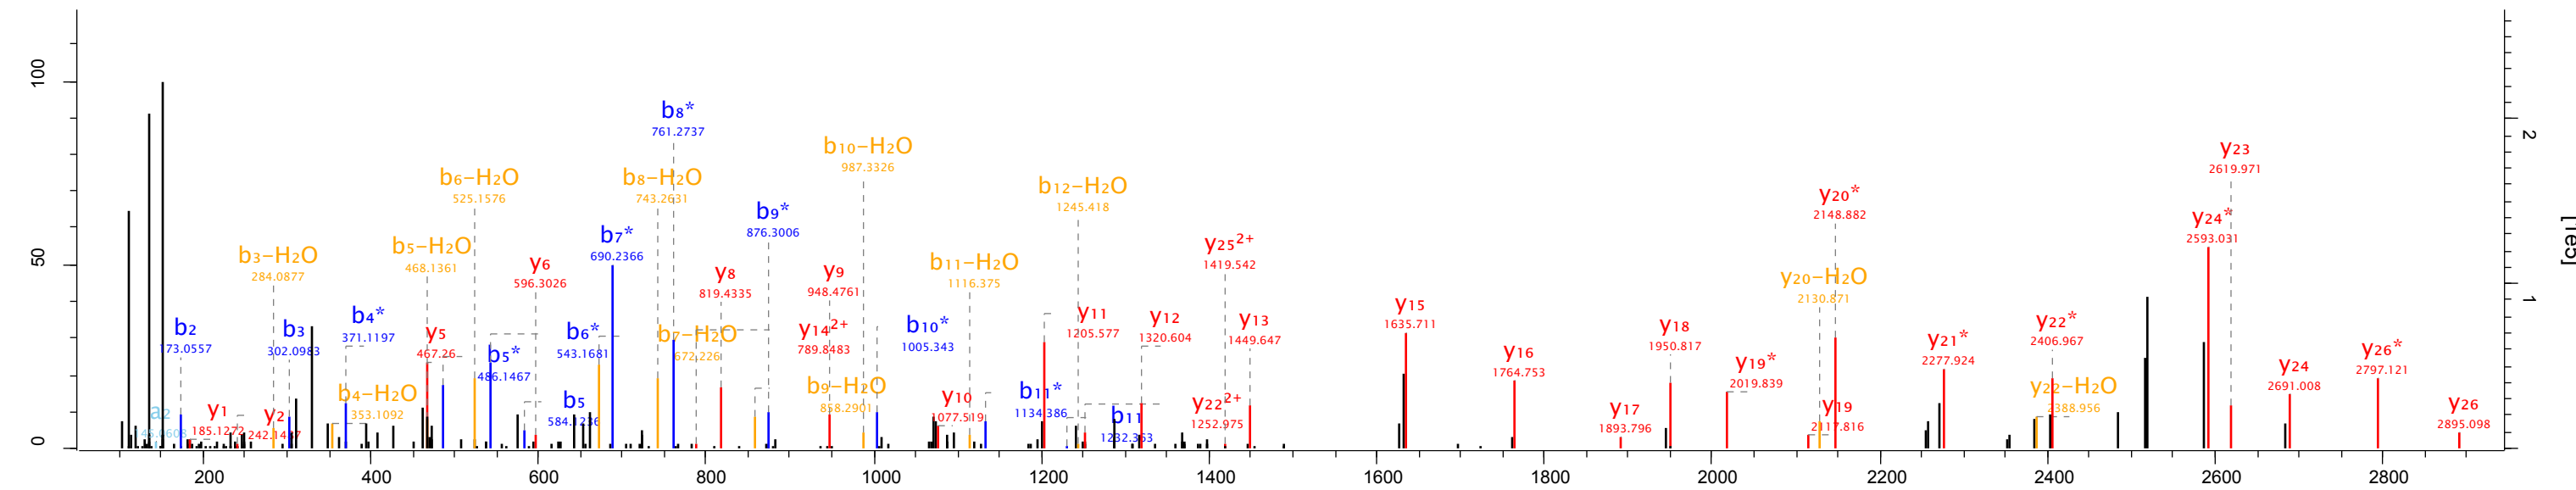

- D G E S D G F A D E E E S G E E G E E D Q E E G R E P G A G R -

b<sub>2</sub>
b<sub>3</sub>
b<sub>4</sub><sup>\*</sup>
b<sub>5</sub>
b<sub>6</sub><sup>\*</sup>
b<sub>7</sub><sup>\*</sup>
b<sub>8</sub><sup>\*</sup>
b<sub>9</sub><sup>\*</sup>
b<sub>10</sub><sup>\*</sup>
b<sub>11</sub><sup>\*</sup>
y<sub>26</sub>
y<sub>25</sub><sup>2+</sup>
y<sub>24</sub>
y<sub>23</sub>
y<sub>22</sub><sup>\*</sup>
y<sub>21</sub><sup>\*</sup>
y<sub>20</sub><sup>\*</sup>
y<sub>19</sub>
y<sub>18</sub>
y<sub>17</sub>
y<sub>16</sub>
y<sub>15</sub>
y<sub>14</sub><sup>2+</sup>
y<sub>13</sub>
y<sub>12</sub>
y<sub>11</sub>
y<sub>10</sub>
y<sub>9</sub>
y<sub>8</sub>
y<sub>6</sub>
y<sub>5</sub>
y<sub>2</sub>
y<sub>1</sub>

Raw file 20171215\_MaS\_33SR\_LMH\_phospho2\_05 Scan 7876 Method FTMS; HCD Score 53.56 m/z 748.27 Gene names AFAP1

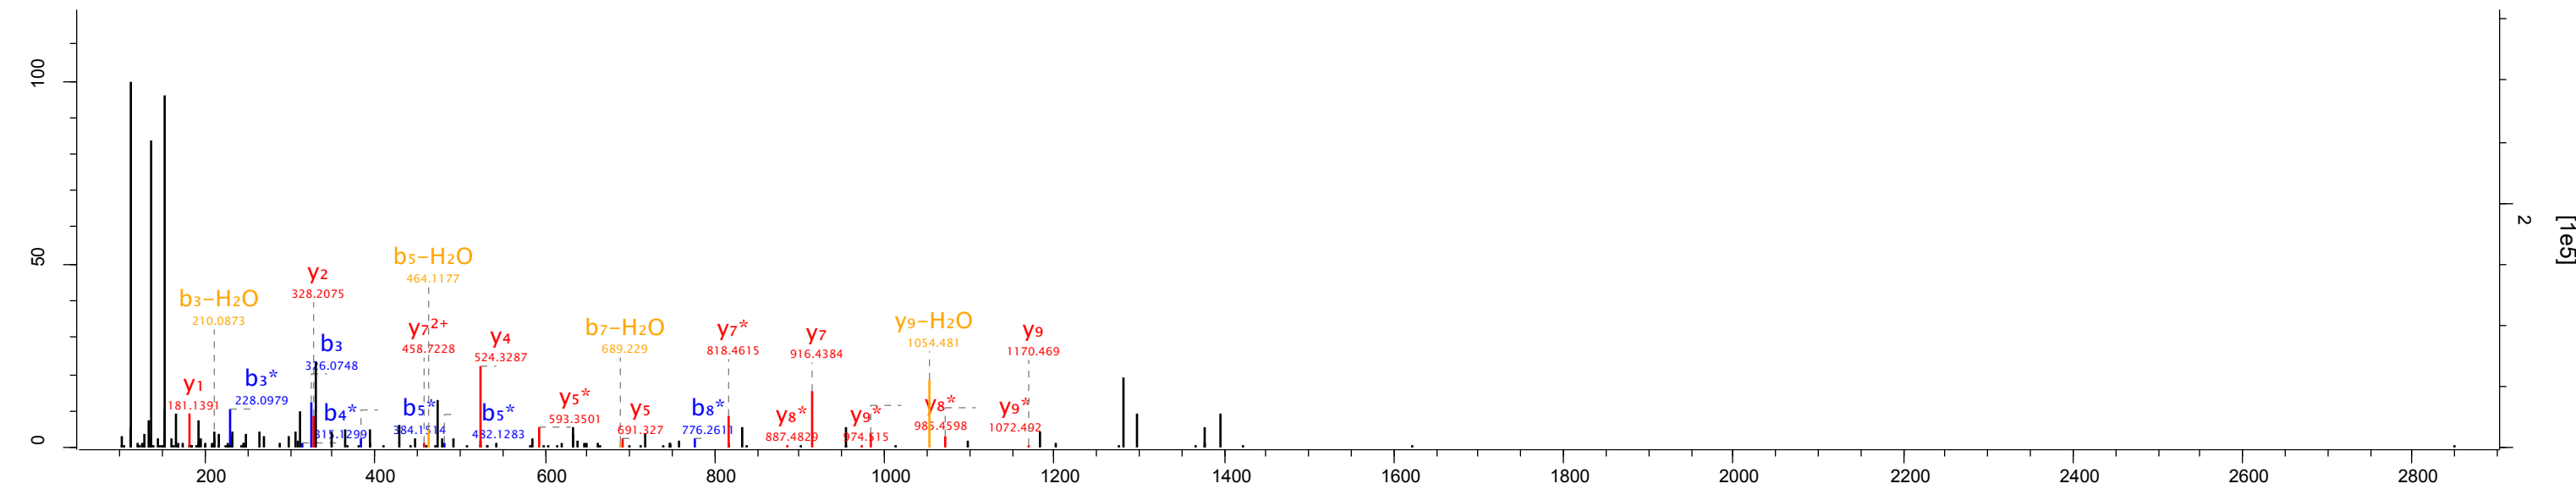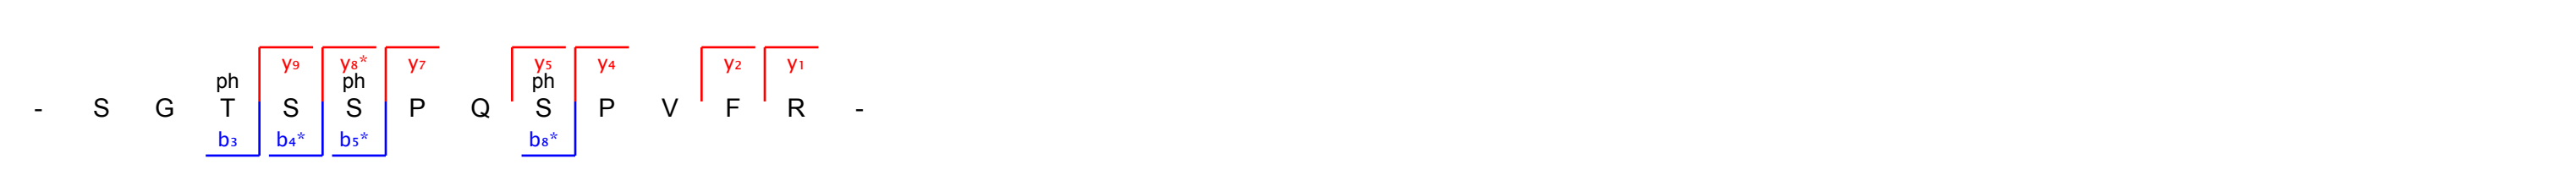

Raw file 20171215\_MaS\_33SR\_LMH\_phospho2\_05 Scan 9056 Method FTMS; HCD Score 89.3 m/z 1046.96 Gene names BAIAP2L1

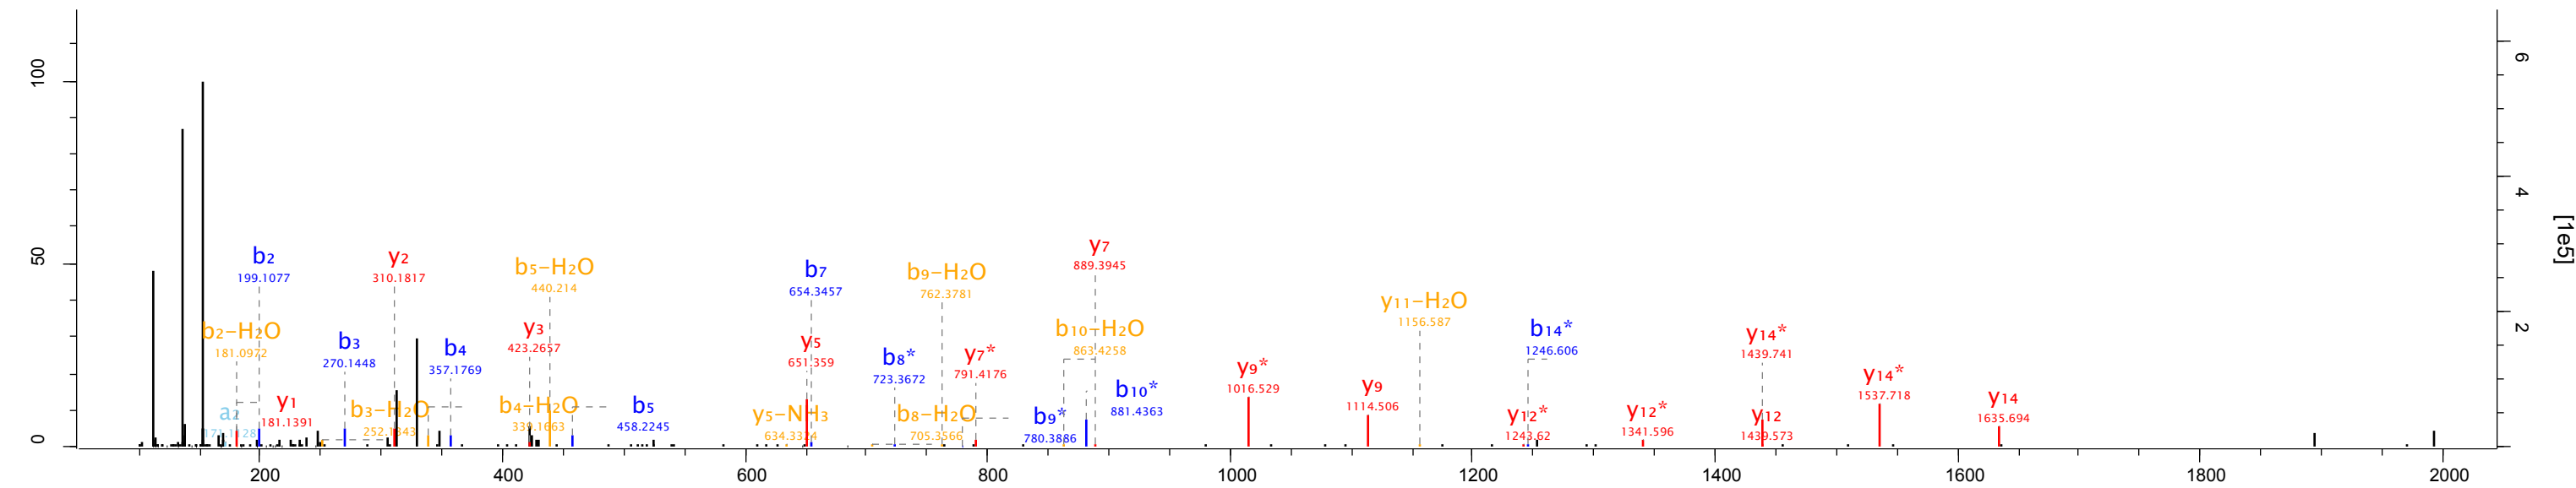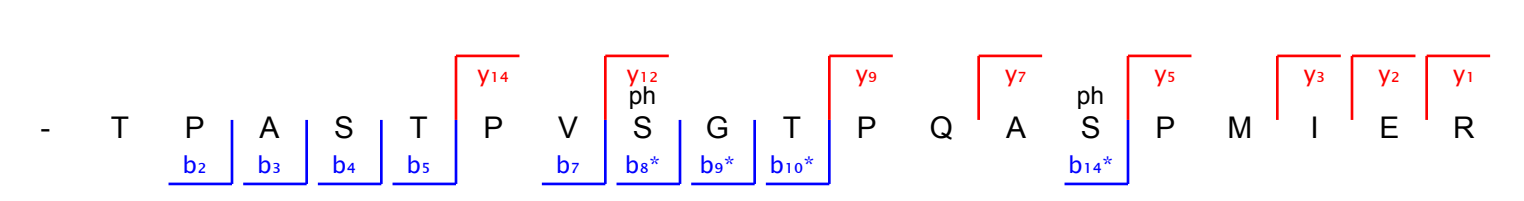

Raw file  
20171215\_MaS\_33SR\_LMH\_phospho2\_05

Scan 9156 Method FTMS; HCD Score 50.49 m/z 1017.12 Gene names INCENP

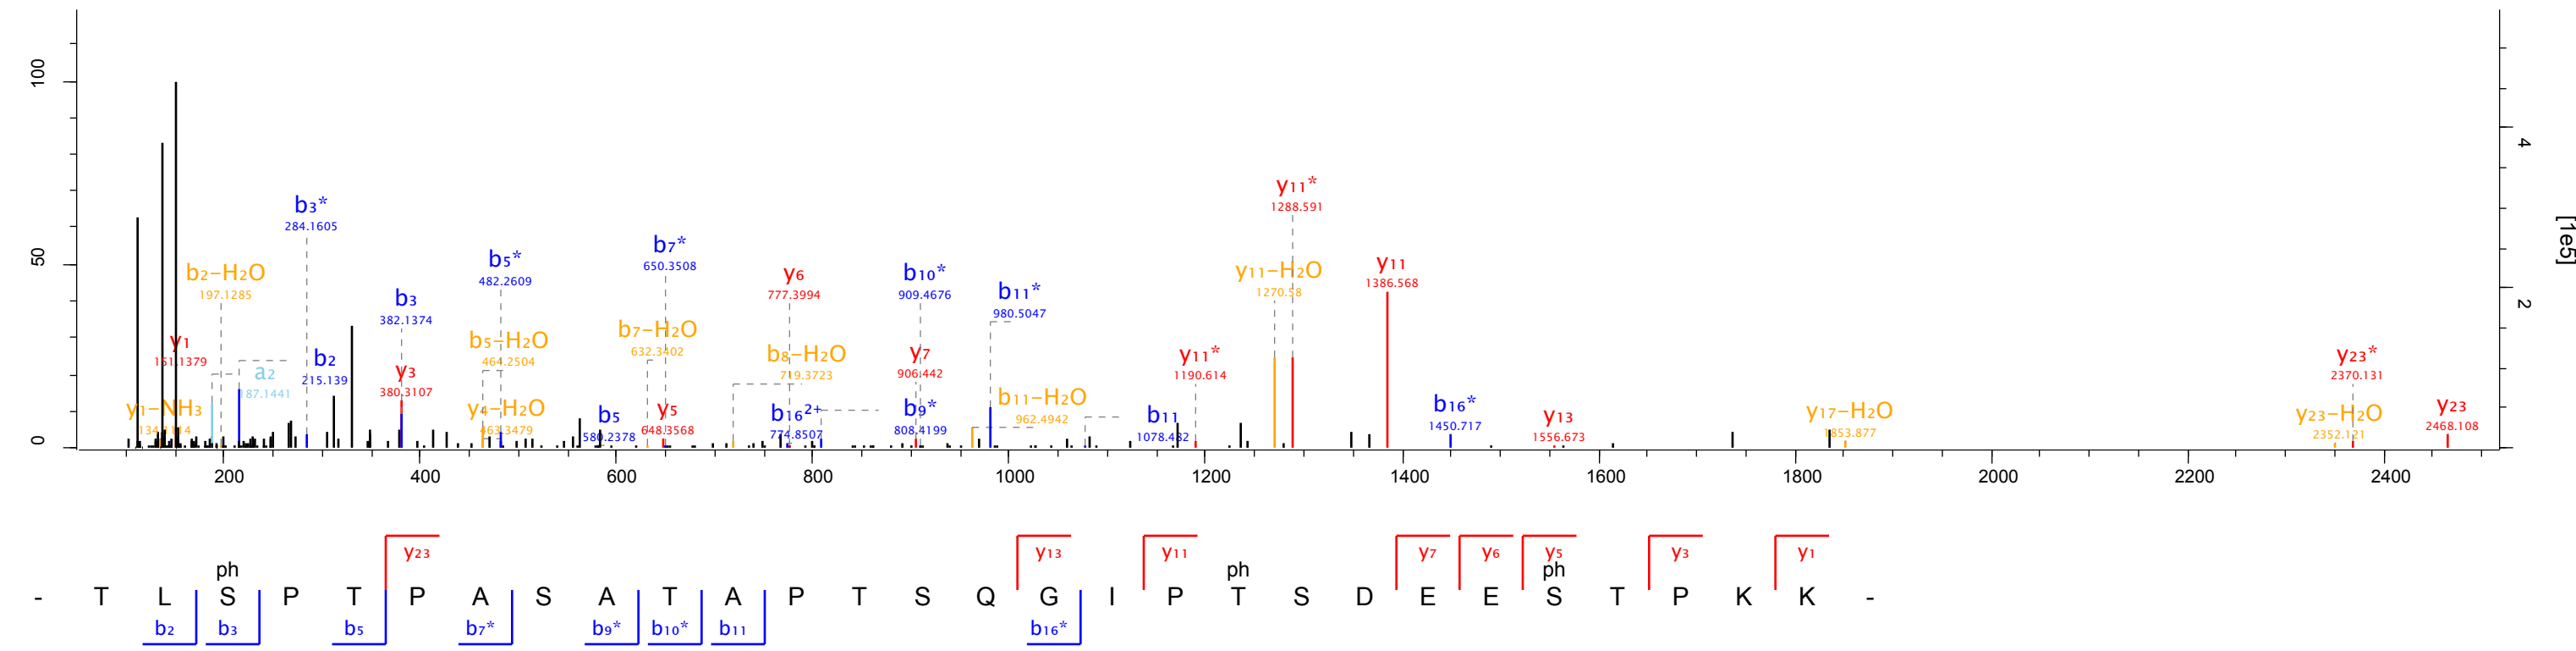

Raw file 20171215\_MaS\_33SR\_LMH\_phospho2\_05 Scan 9936 Method FTMS; HCD Score 131.82 m/z 731.32 Gene names GPR56

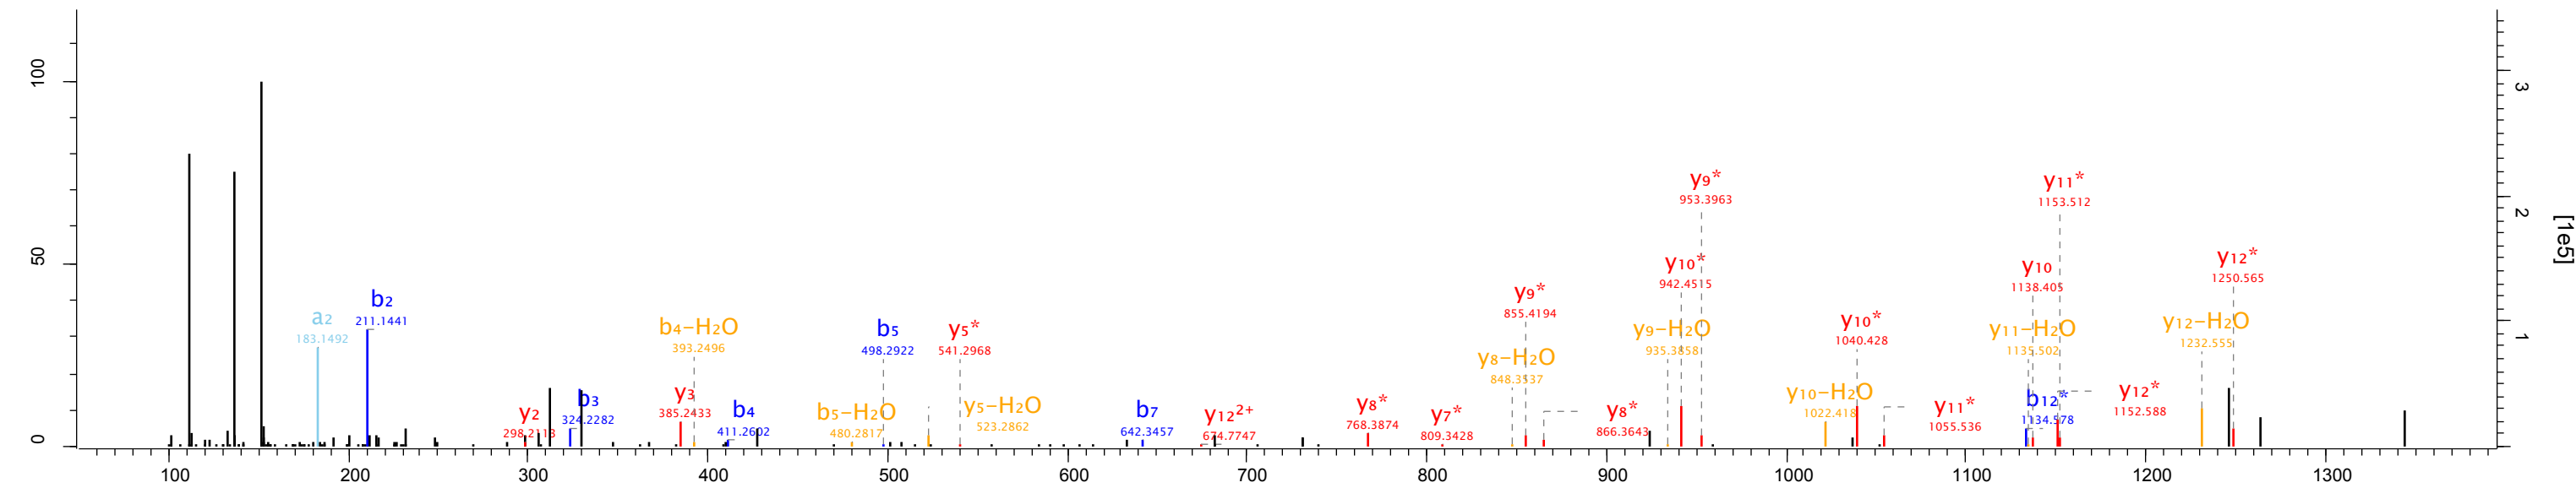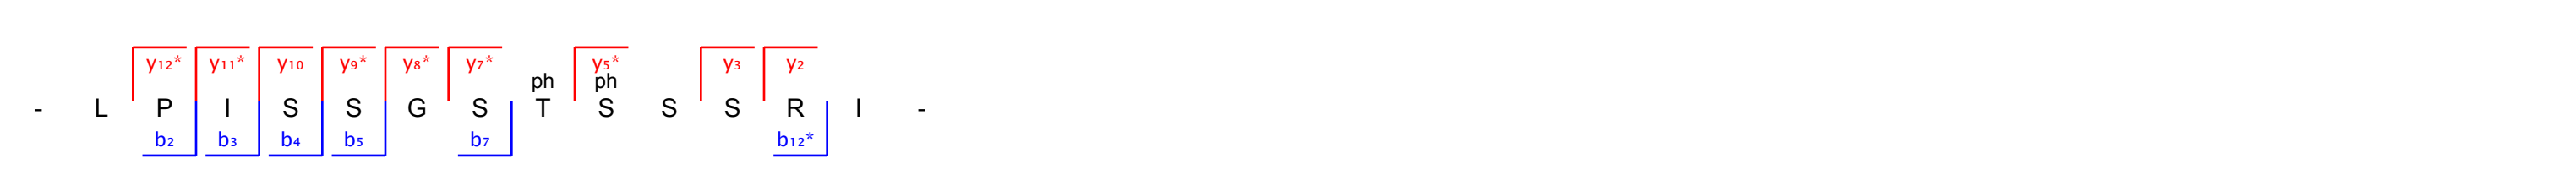

Raw file 20171215\_MaS\_33SR\_LMH\_phospho2\_06 Scan 13186 Method FTMS; HCD Score 123.55 m/z 850.38 Gene names RRAGC;RRAGD

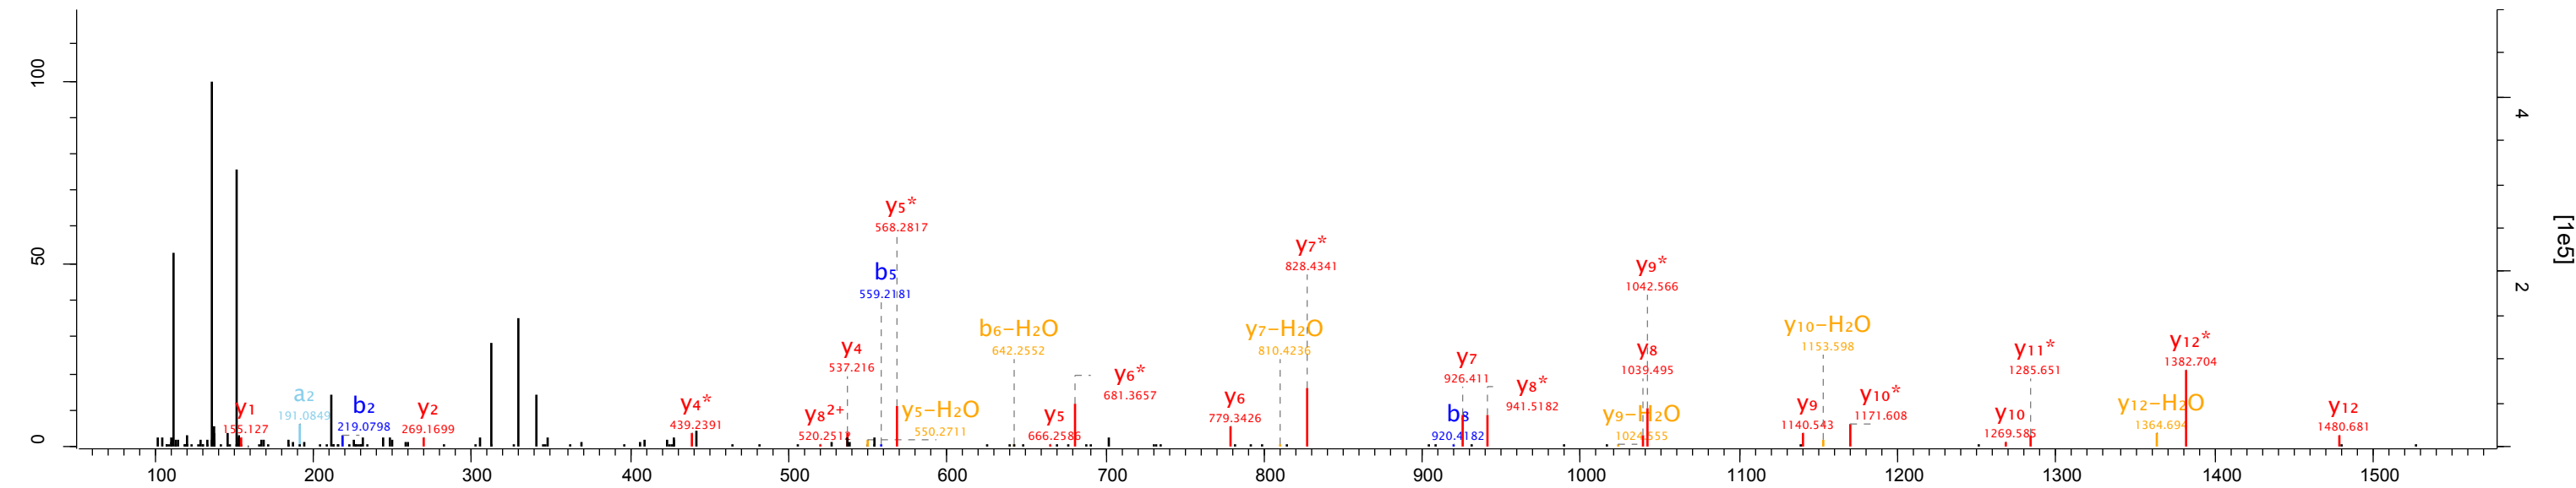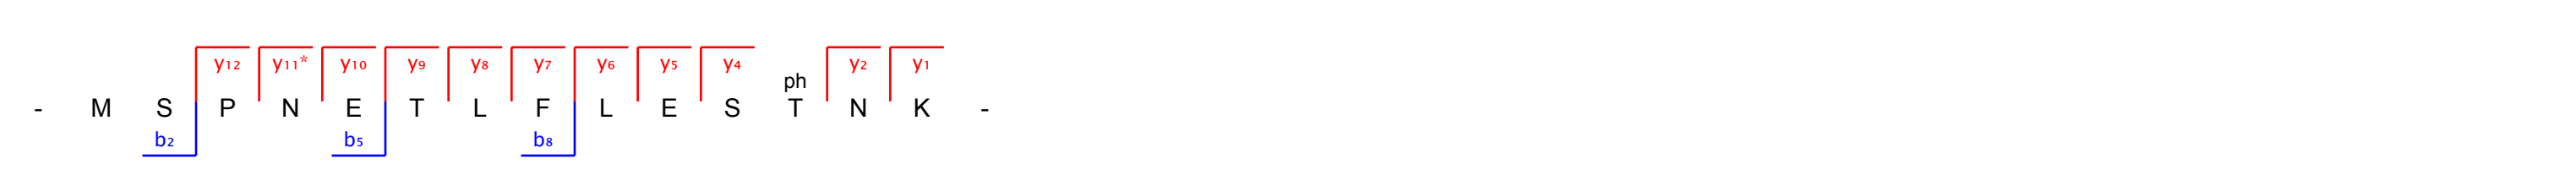



Raw file  
20171215\_MaS\_33SR\_LMH\_phospho2\_06

Scan 2146 Method FTMS; HCD Score 125.39 m/z 774.66 Gene names RNASEH1

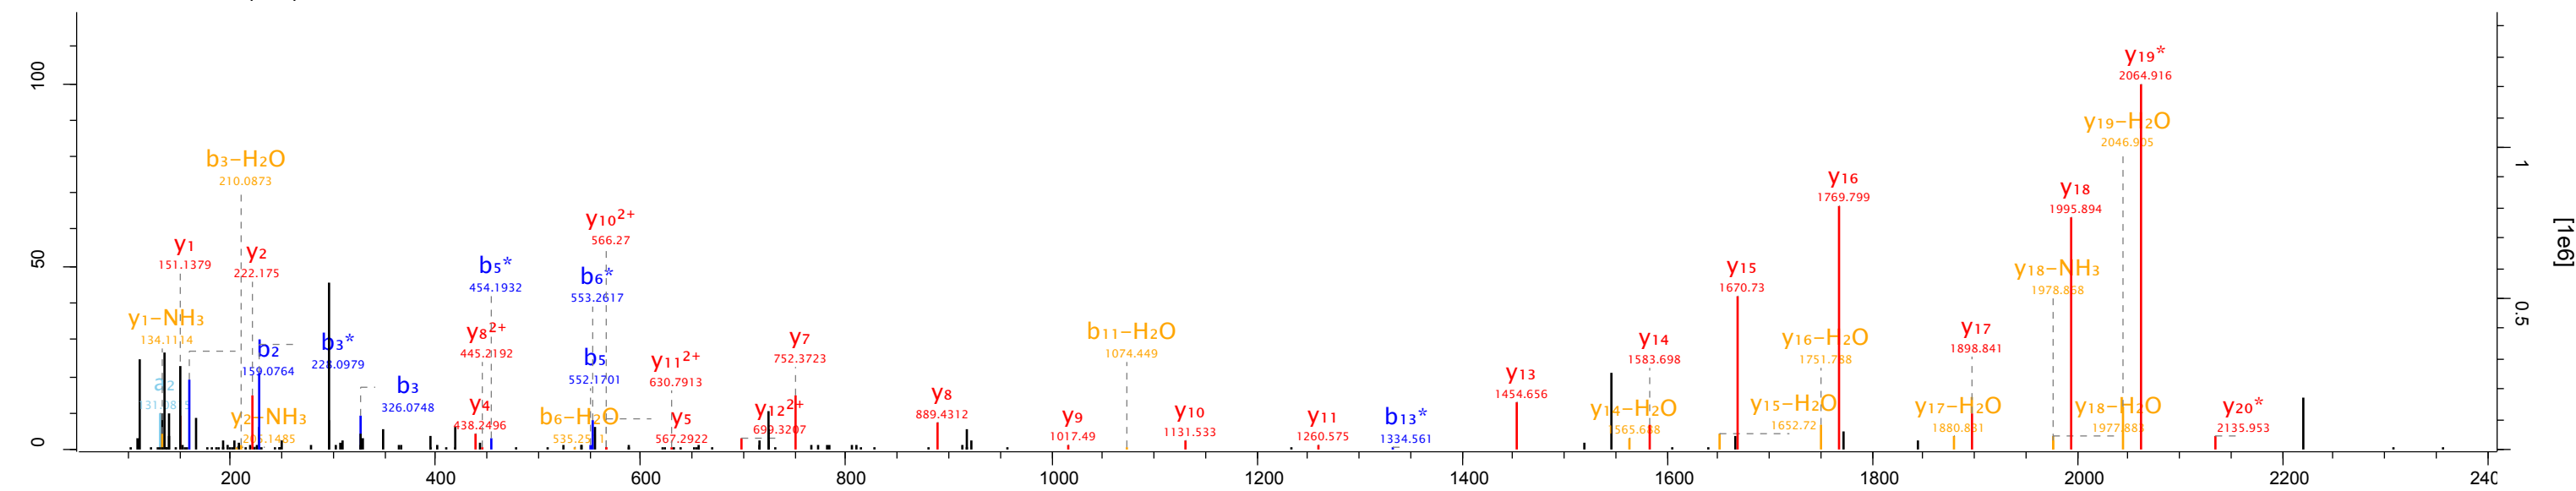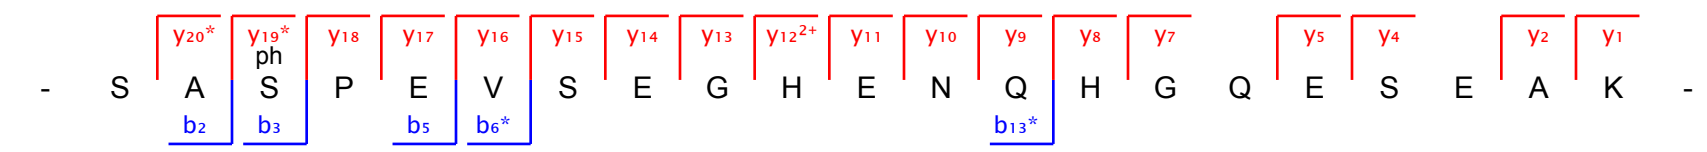

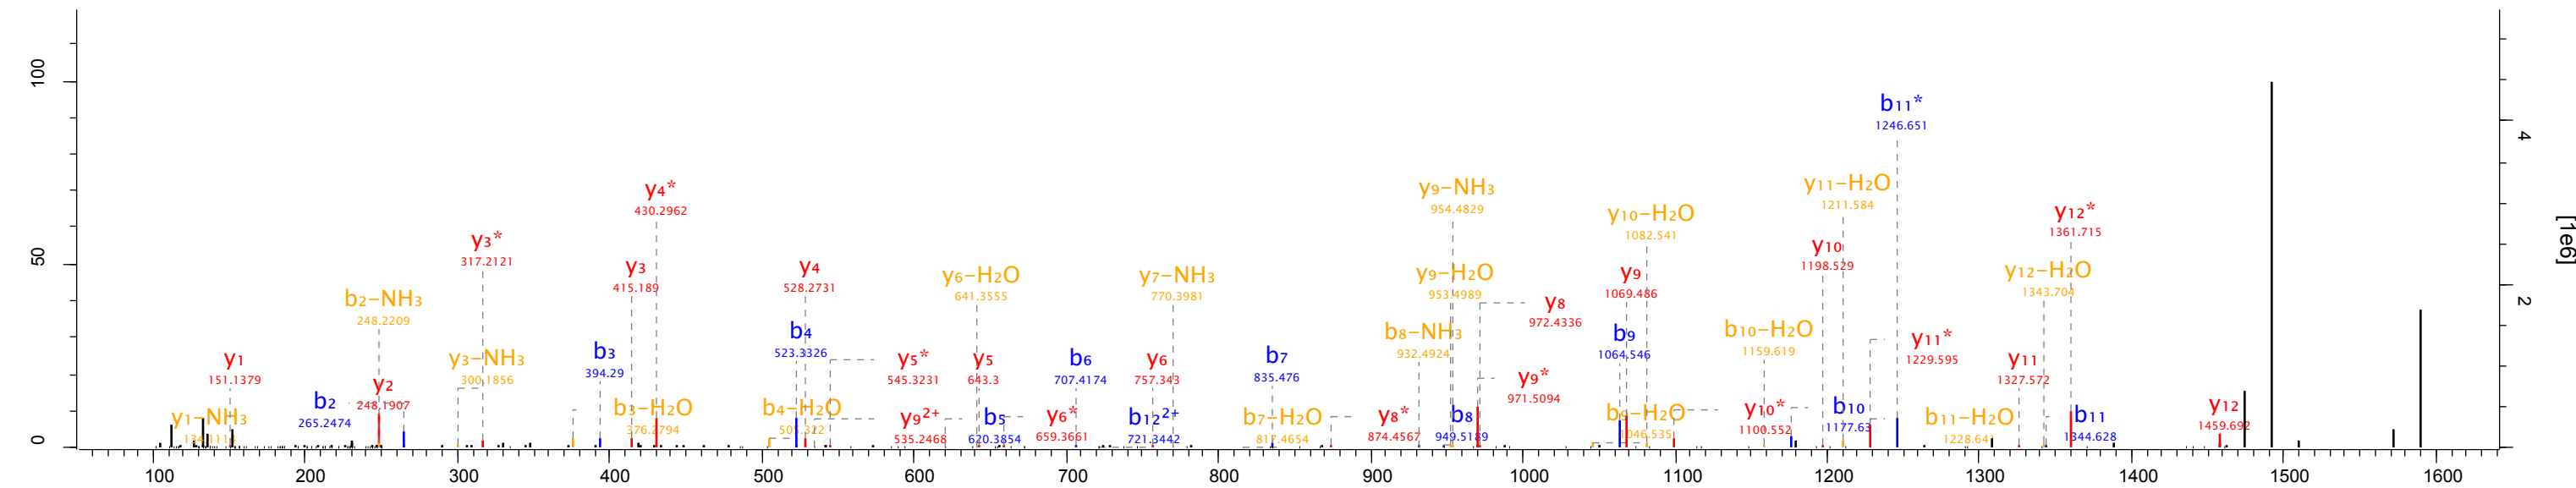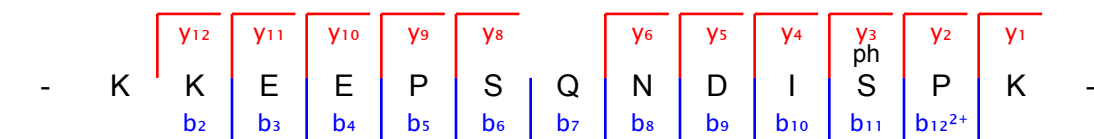

Raw file 20171215\_MaS\_33SR\_LMH\_phospho2\_06 Scan 2926 Method FTMS; HCD Score 130.1 m/z 532.25 Gene names MAP2K2

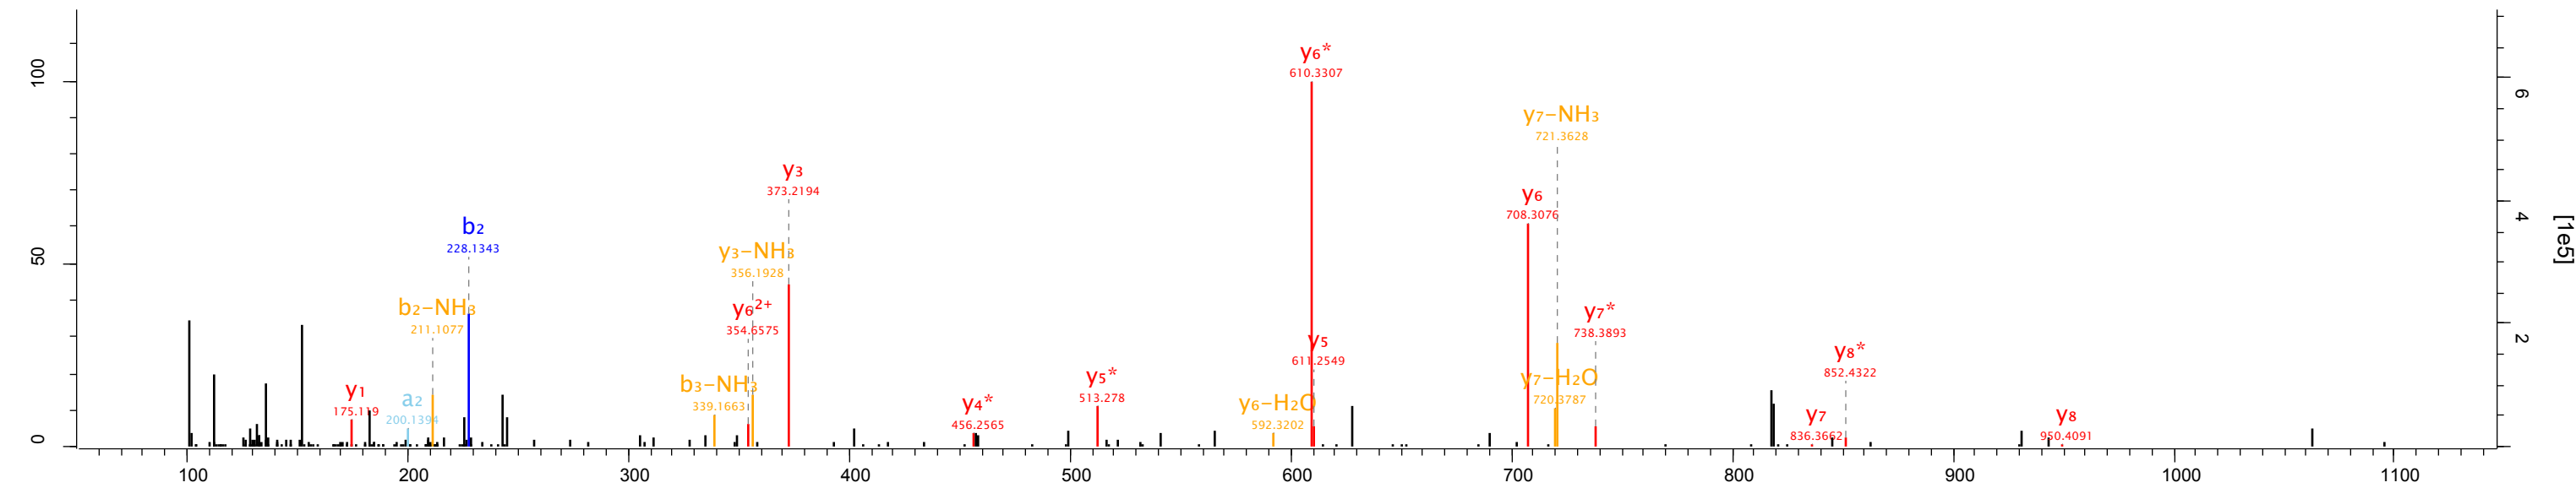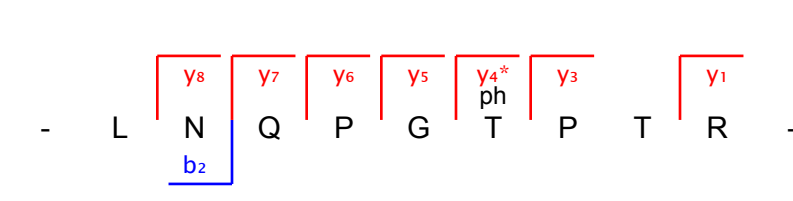

Raw file 20171215\_MaS\_33SR\_LMH\_phospho2\_06 Scan 4206 Method FTMS; HCD Score 86.9 m/z 400.22 Gene names ANKRD17

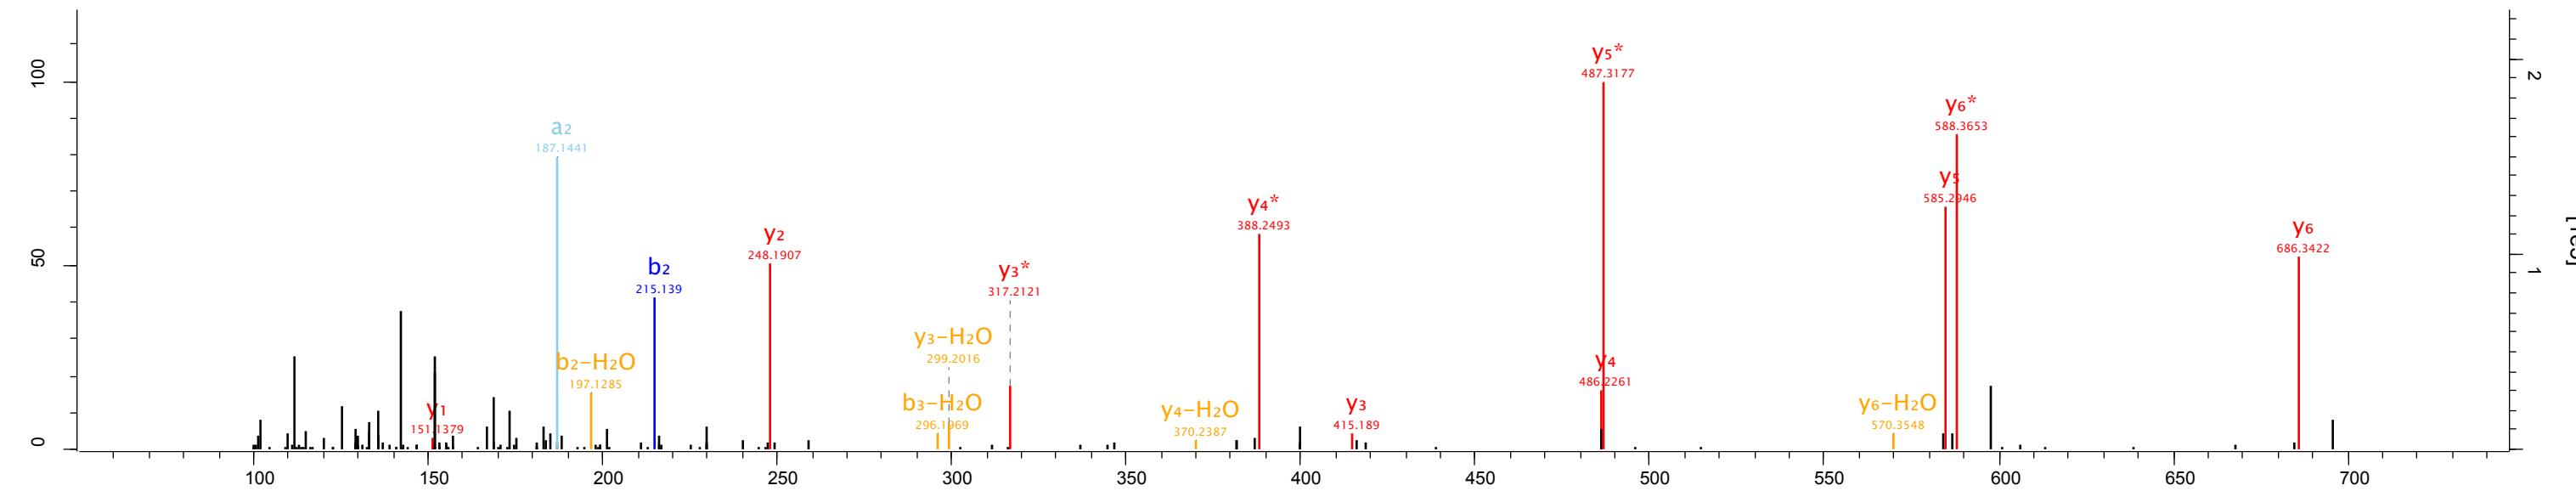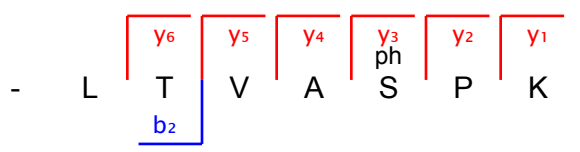

Raw file: 20171215\_MaS\_33SR\_LMH\_phospho2\_06  
 Scan: 6476 Method: FTMS; HCD Score: 63.41 m/z: 829.36 Gene names: INTS10

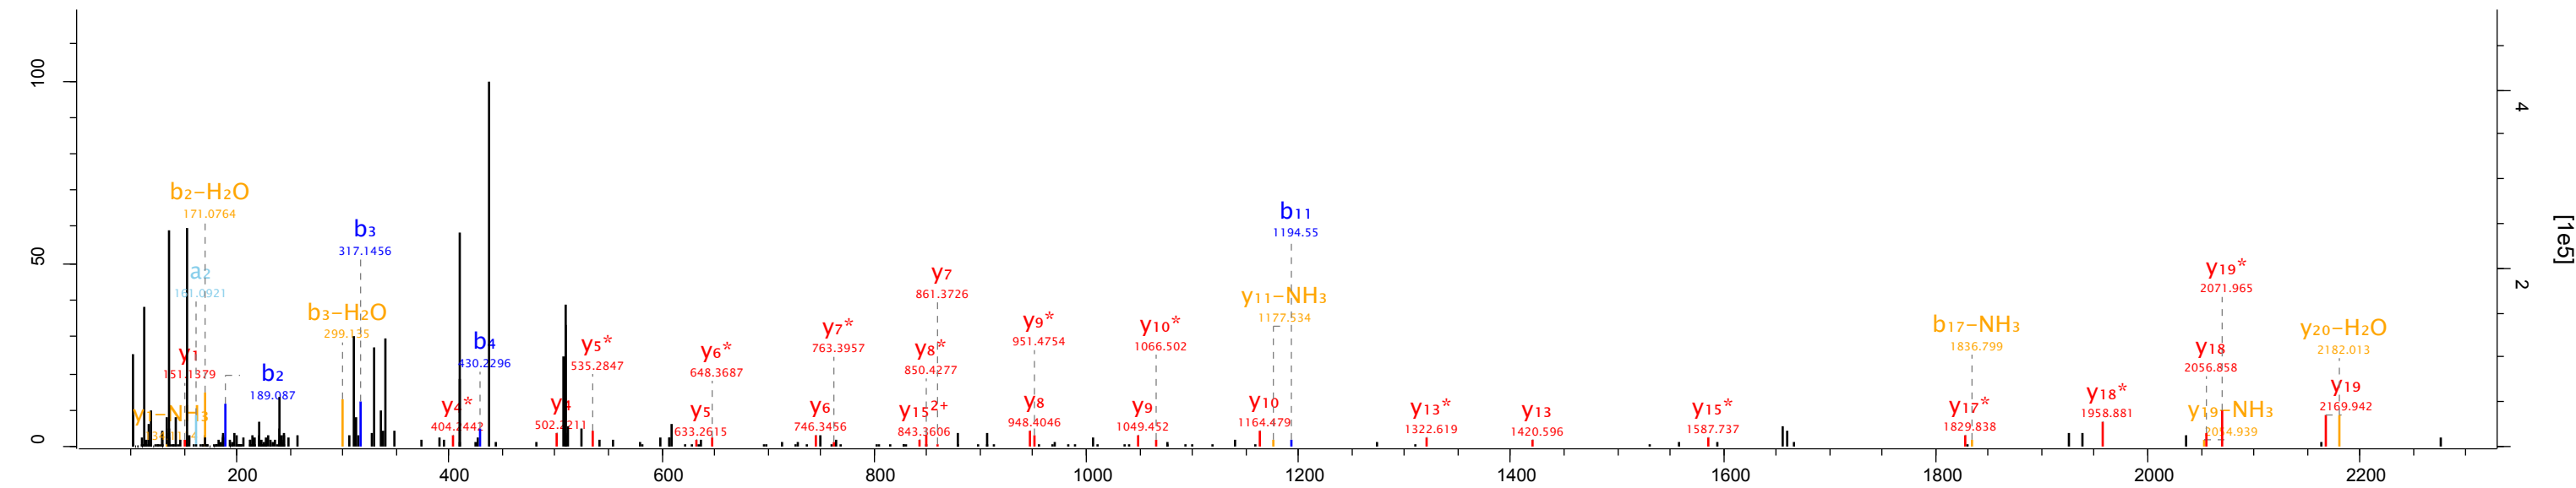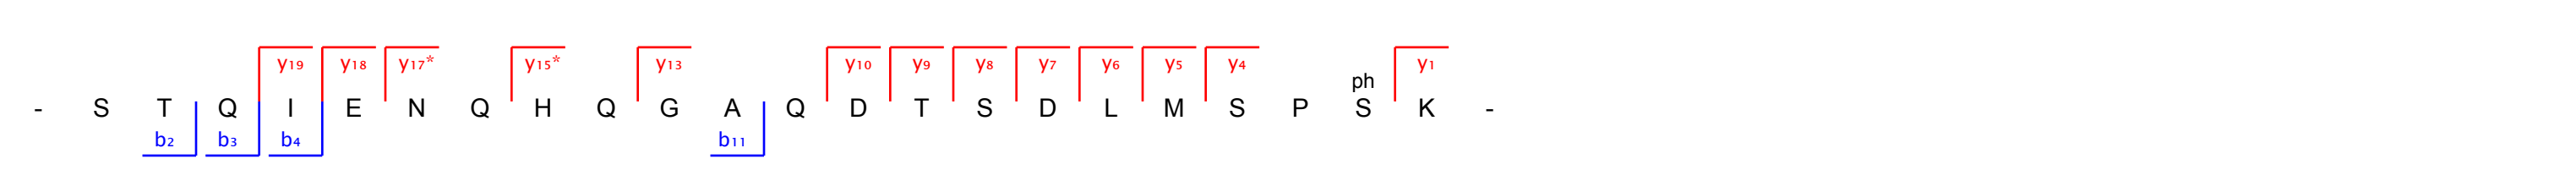

Raw file 20171215\_MaS\_33SR\_LMH\_phospho2\_08 Scan 2056 Method FTMS; HCD Score 98.37 m/z 557.28 Gene names ZC3H18

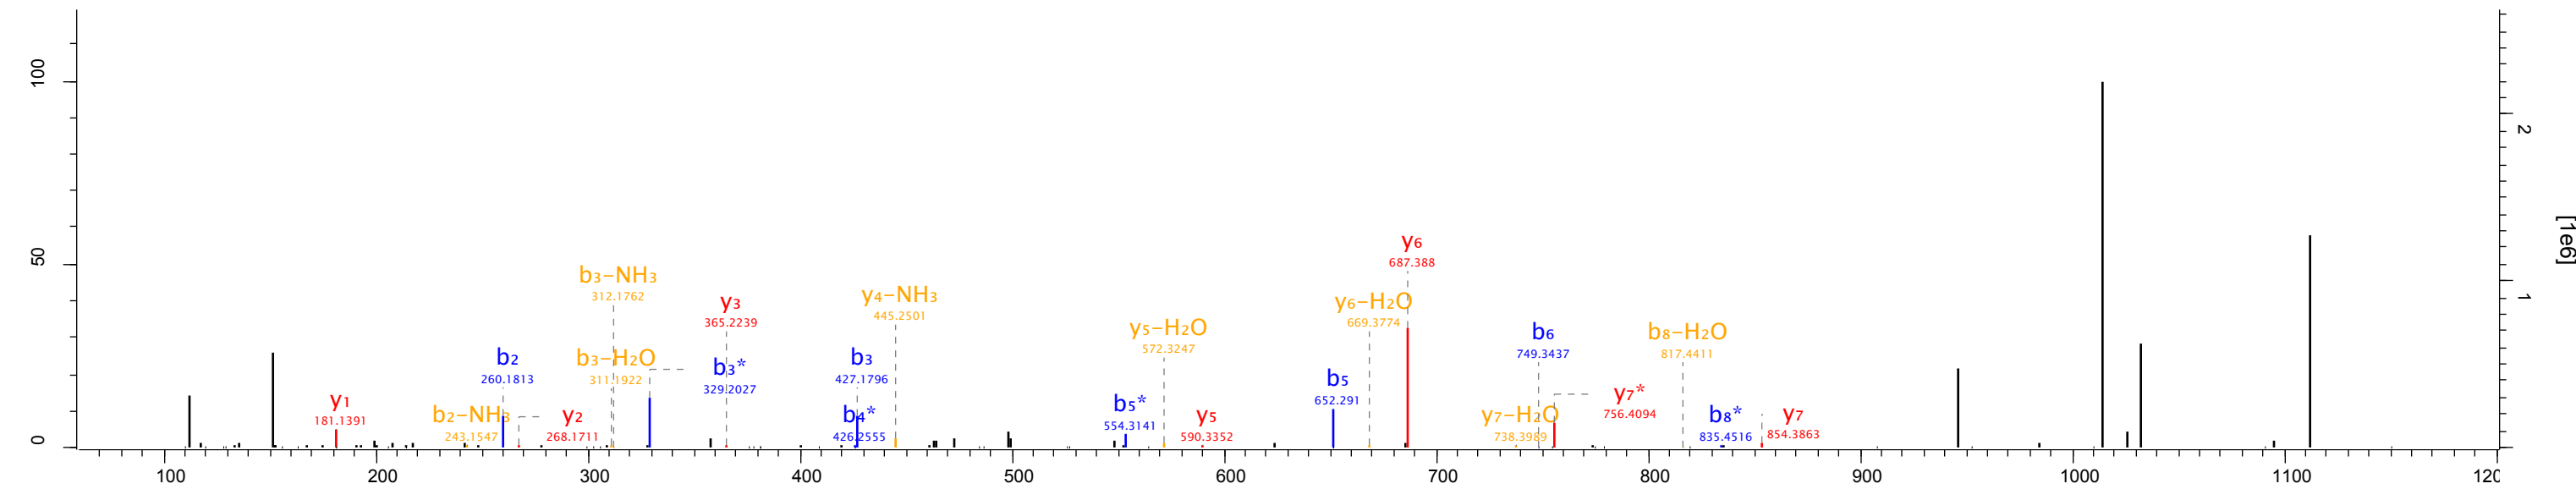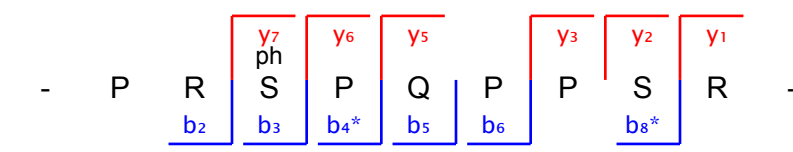

Raw file 20171215\_MaS\_33SR\_LMH\_phospho2\_08 Scan 2336 Method FTMS; HCD Score 274.79 m/z 773.3 Gene names AHSG

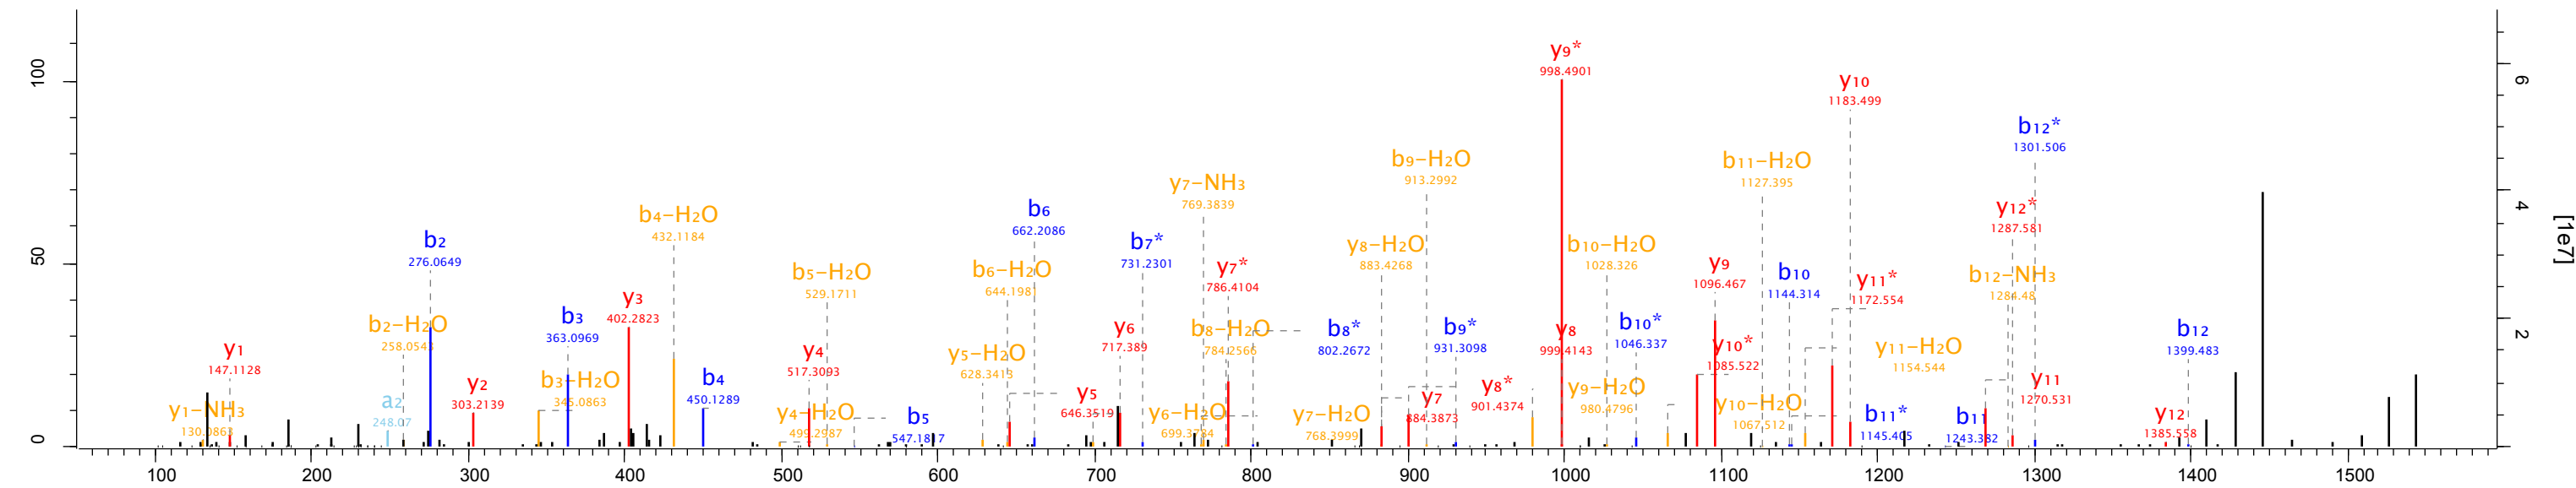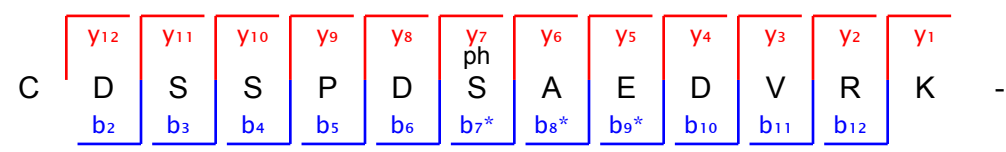

20171215\_MaS\_33SR\_LMH\_phospho2\_08

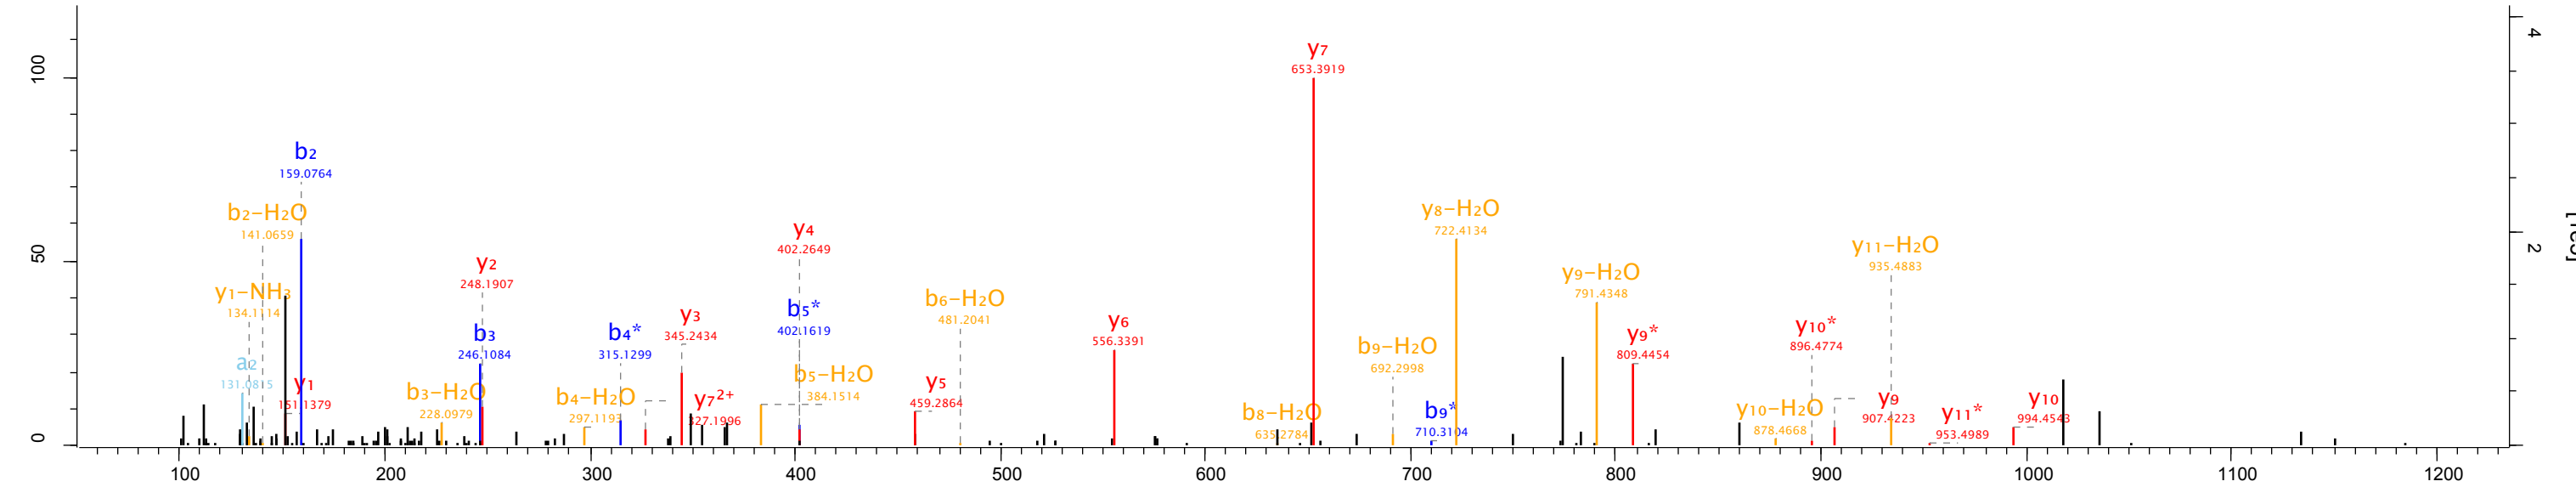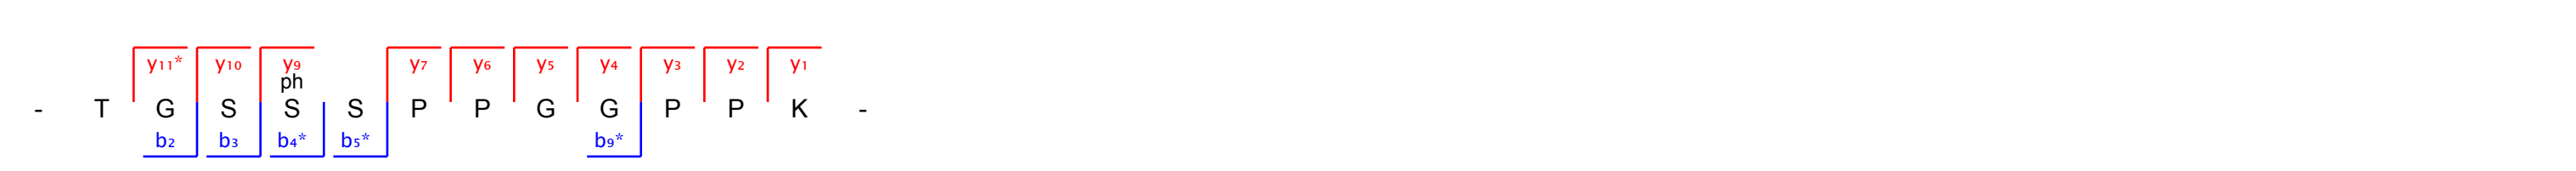



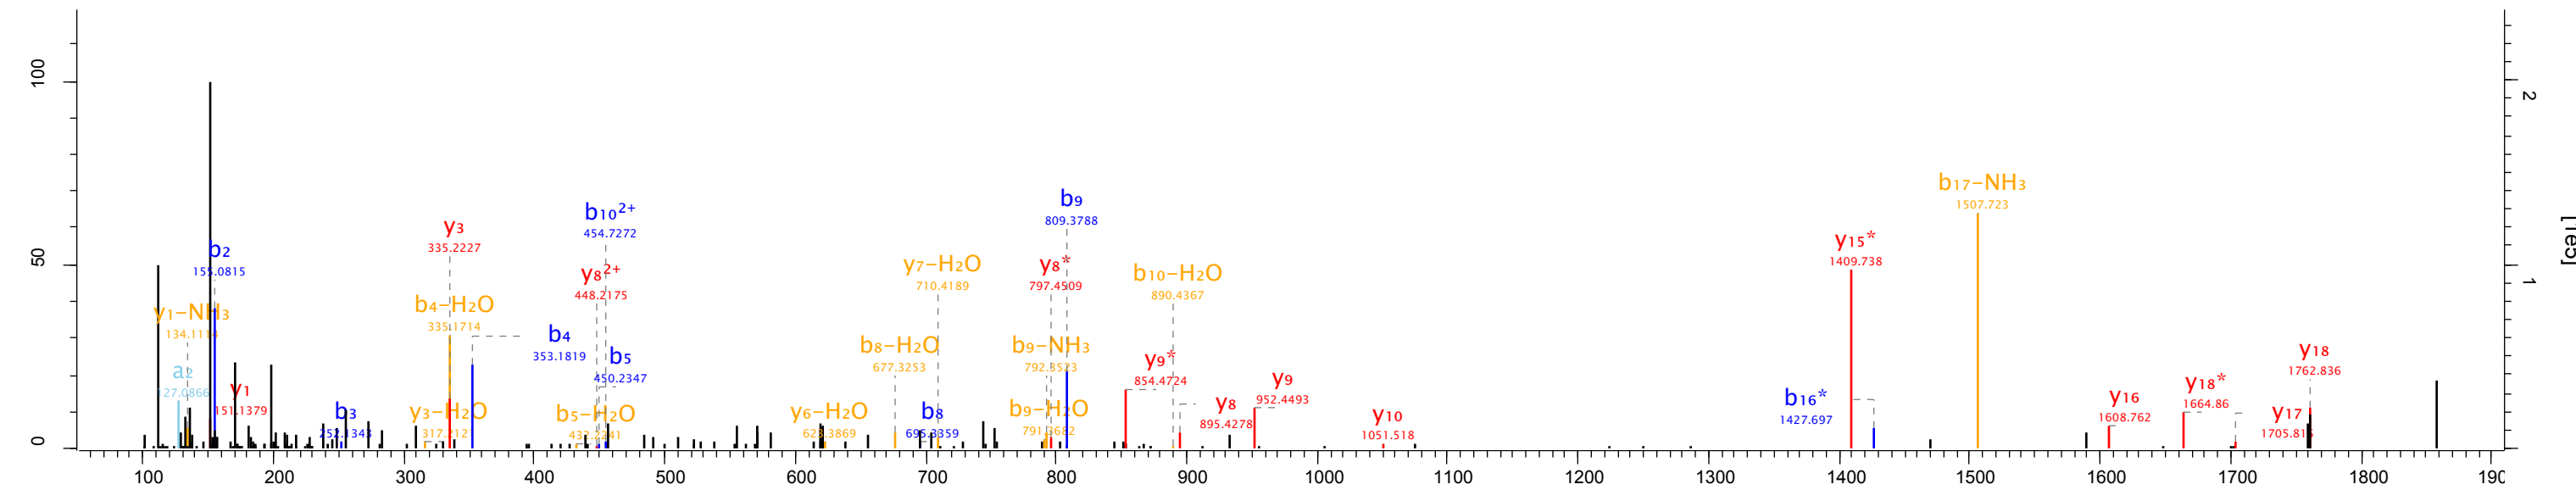

- P G P T P S G T N V G S S G R S P S K -

b<sub>2</sub>
b<sub>3</sub>
b<sub>4</sub>
b<sub>5</sub>
b<sub>8</sub>
b<sub>9</sub>
b<sub>10</sub><sup>2+</sup>
b<sub>16</sub><sup>\*</sup>
y<sub>18</sub>
y<sub>17</sub>
y<sub>16</sub>
y<sub>15</sub><sup>\*</sup>
y<sub>10</sub>
y<sub>9</sub>
y<sub>8</sub><sub>ph</sub>
y<sub>3</sub>
y<sub>1</sub>

Raw file 20171215\_MaS\_33SR\_LMH\_phospho2\_08 Scan 3306 Method FTMS; HCD Score 72.89 m/z 433.22 Gene names PRPF38A

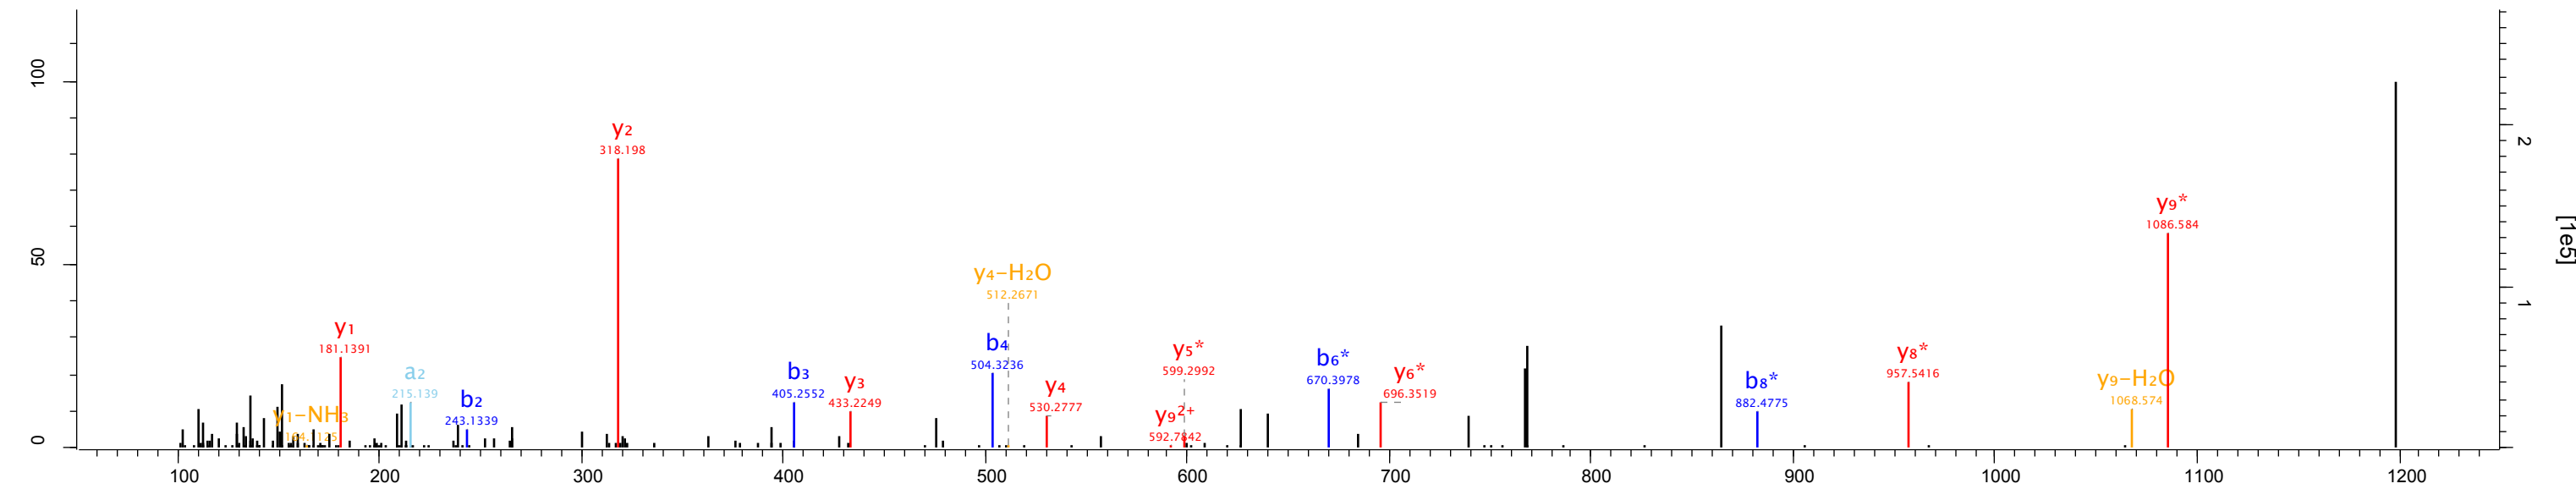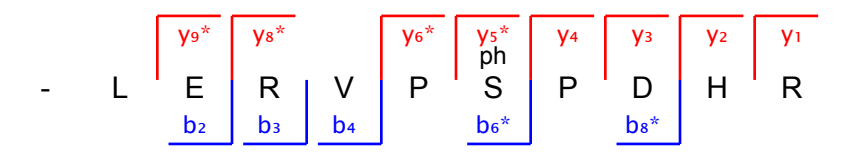

Raw file 20171215\_MaS\_33SR\_LMH\_phospho2\_08 Scan 3406 Method FTMS; HCD Score 56.09 m/z 557.77 Gene names NASP

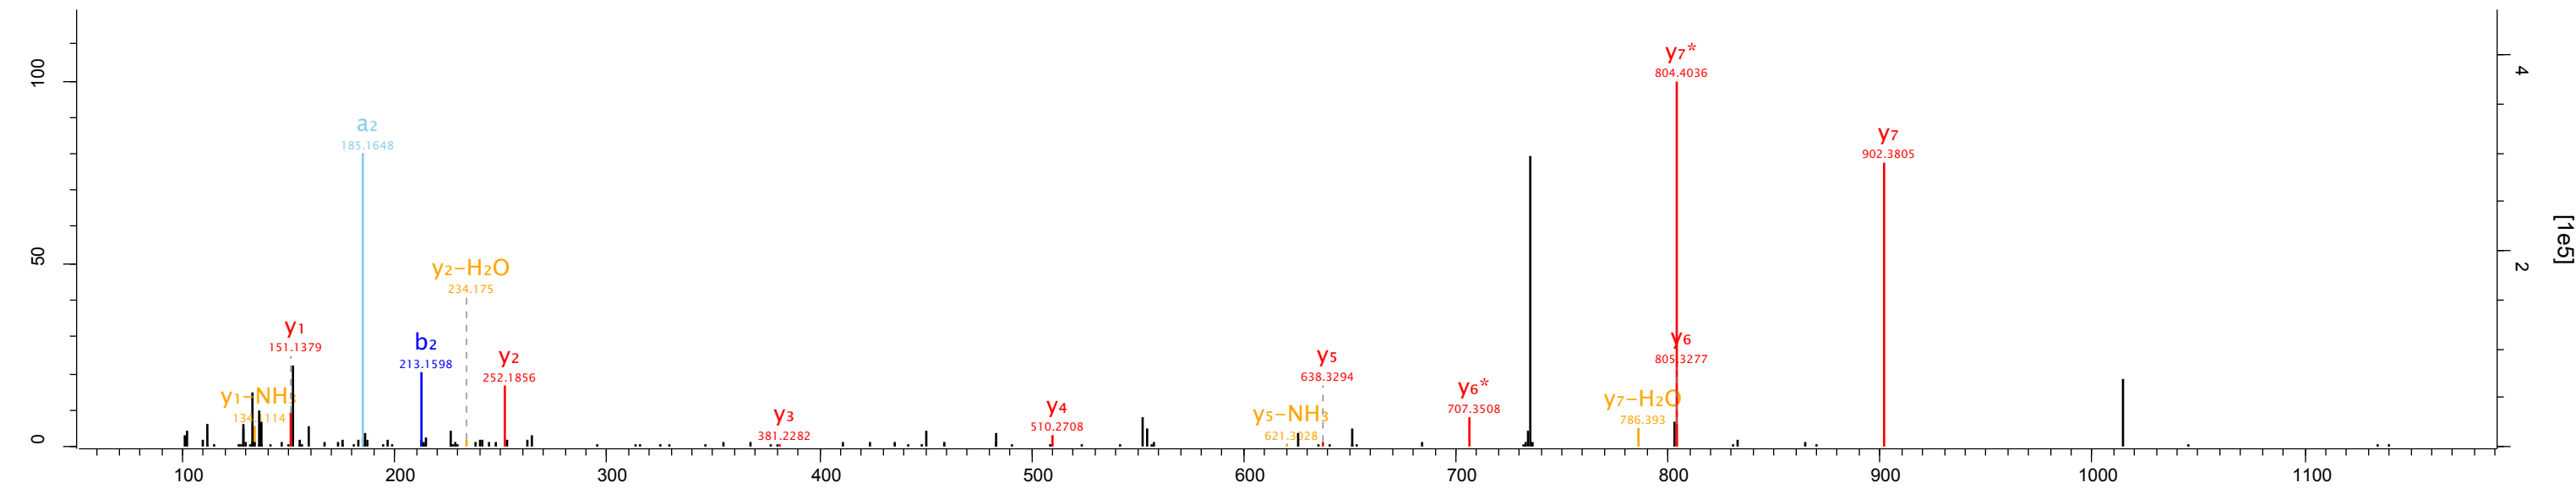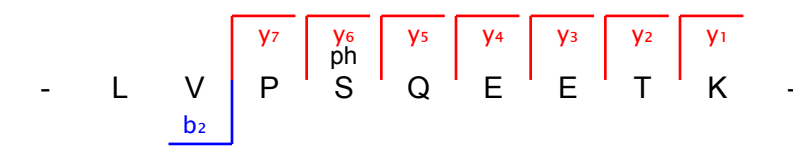

Raw file 20171215\_MaS\_33SR\_LMH\_phospho2\_08 Scan 4006 Method FTMS; HCD Score 107.06 m/z 597.76 Gene names ATXN2L

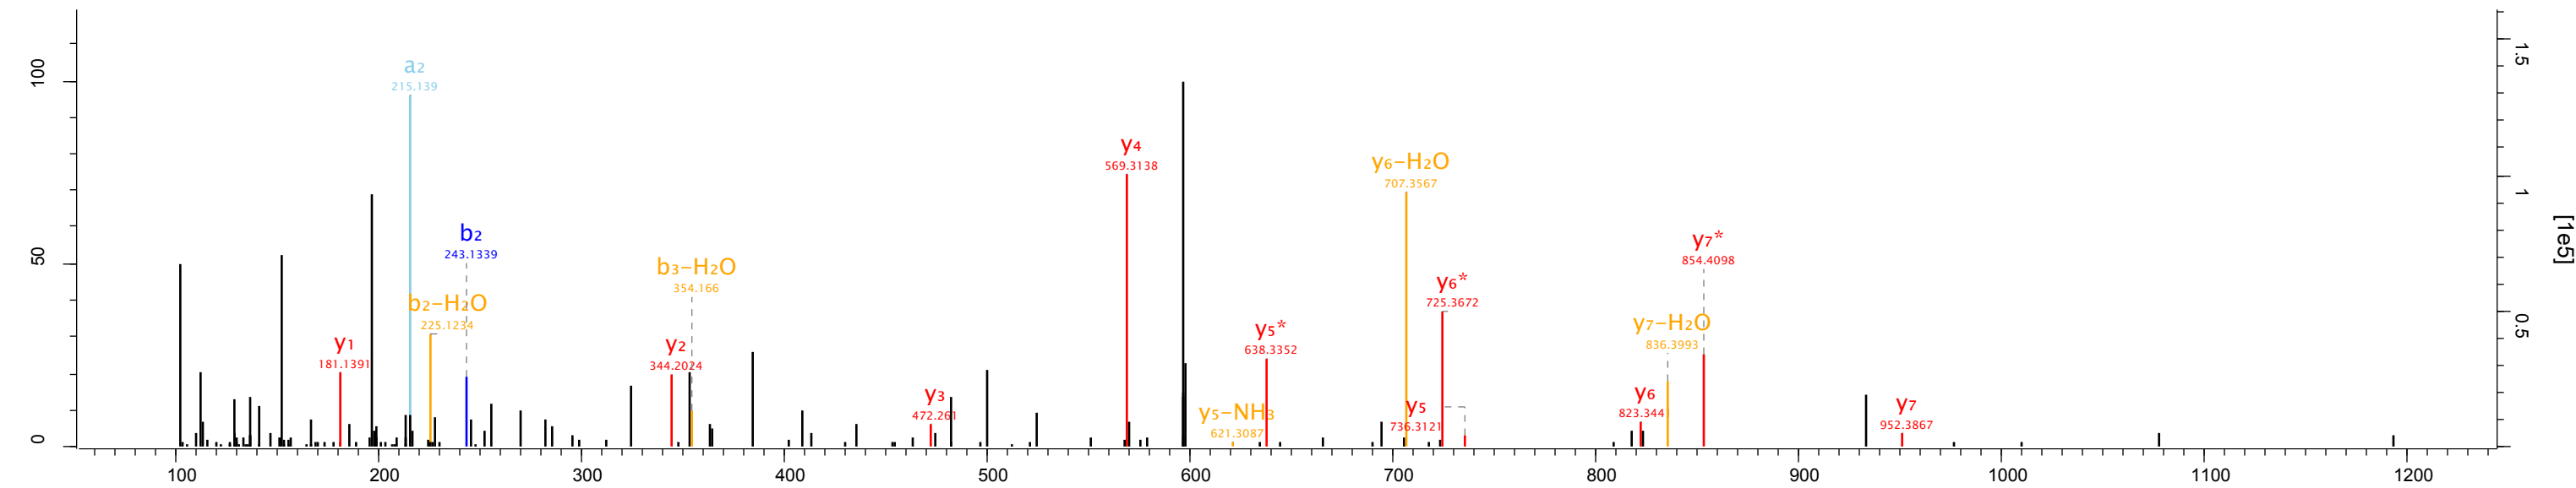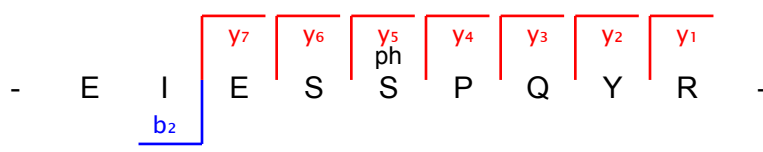

Raw file

20171215\_MaS\_33SR\_LMH\_phospho2\_08

| Scan | Method    | Score | m/z    | Gene names |
|------|-----------|-------|--------|------------|
| 4046 | FTMS; HCD | 88.09 | 569.73 | MACF1      |

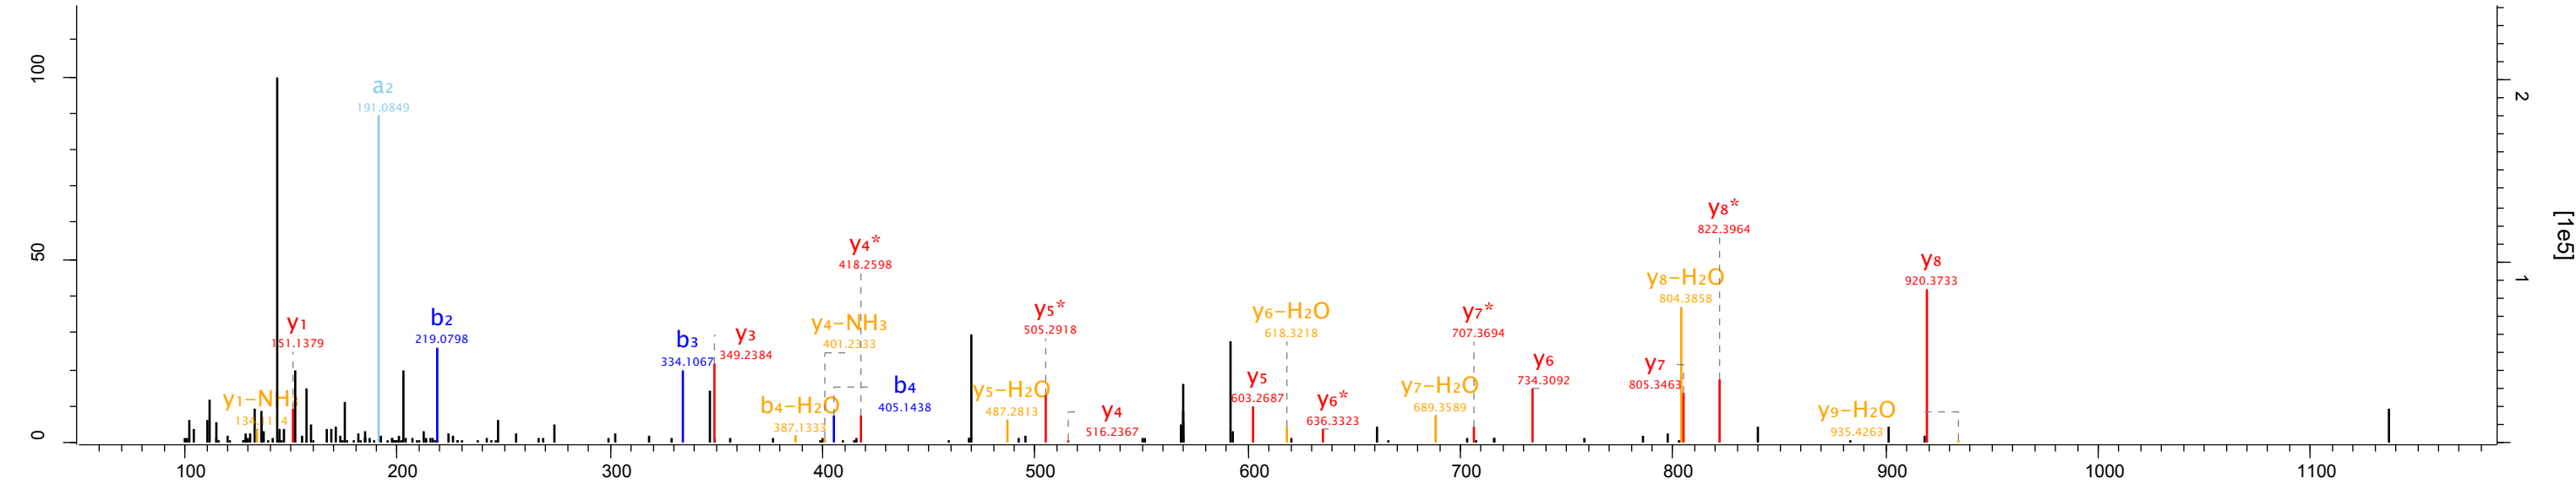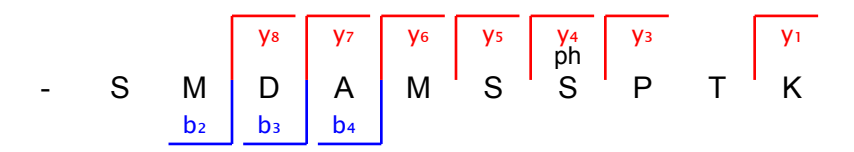

Raw file 20171215\_MaS\_33SR\_LMH\_phospho2\_08 Scan 4136 Method FTMS; HCD Score 113.65 m/z 637.79 Gene names TRIM2

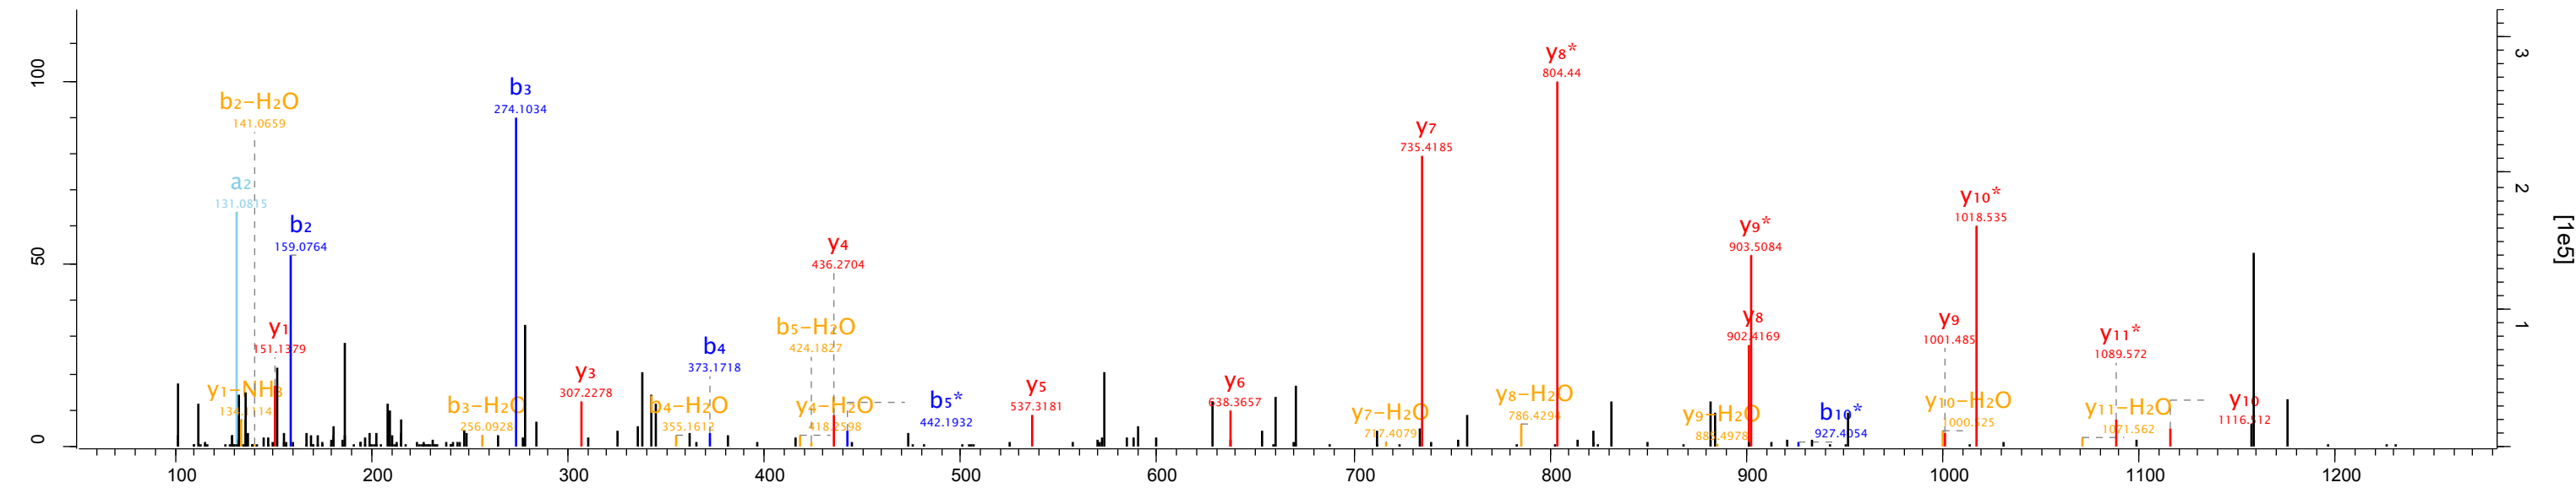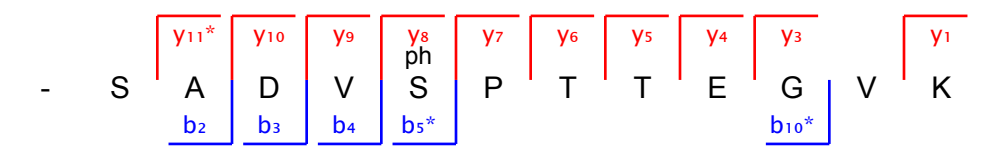

Raw file: 20171215\_MaS\_33SR\_LMH\_phospho2\_08  
 Scan: 4186 Method: FTMS; HCD Score: 46.25 m/z: 505.9 Gene names: RBMX

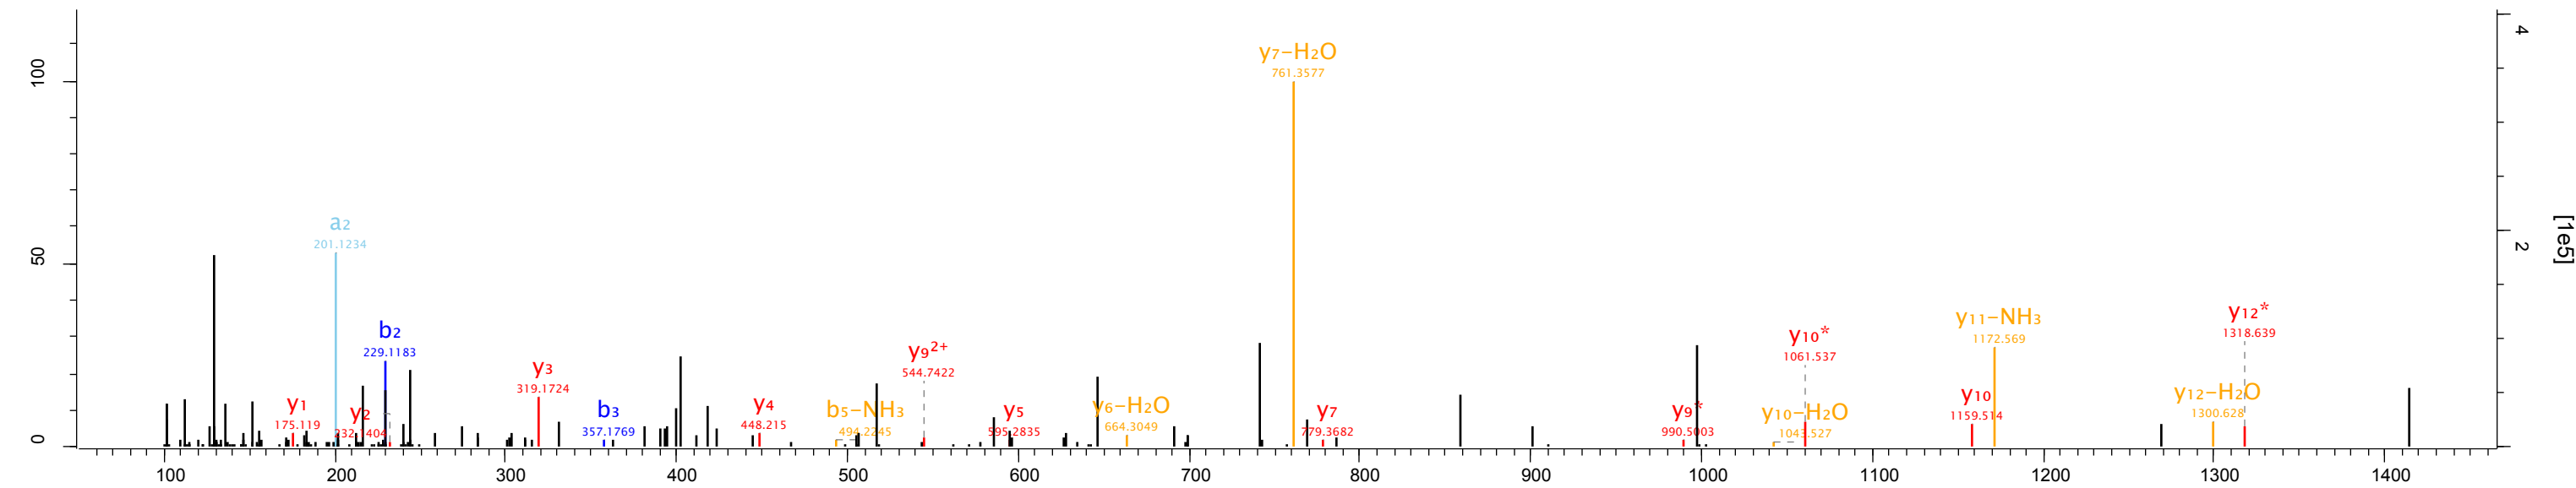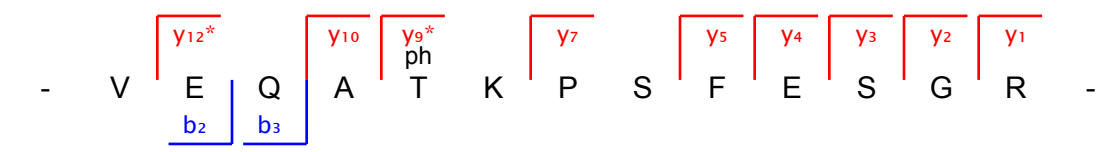

Raw file 20171215\_MaS\_33SR\_LMH\_phospho2\_08 Scan 4836 Method FTMS; HCD Score 68 m/z 559.76 Gene names ICE1

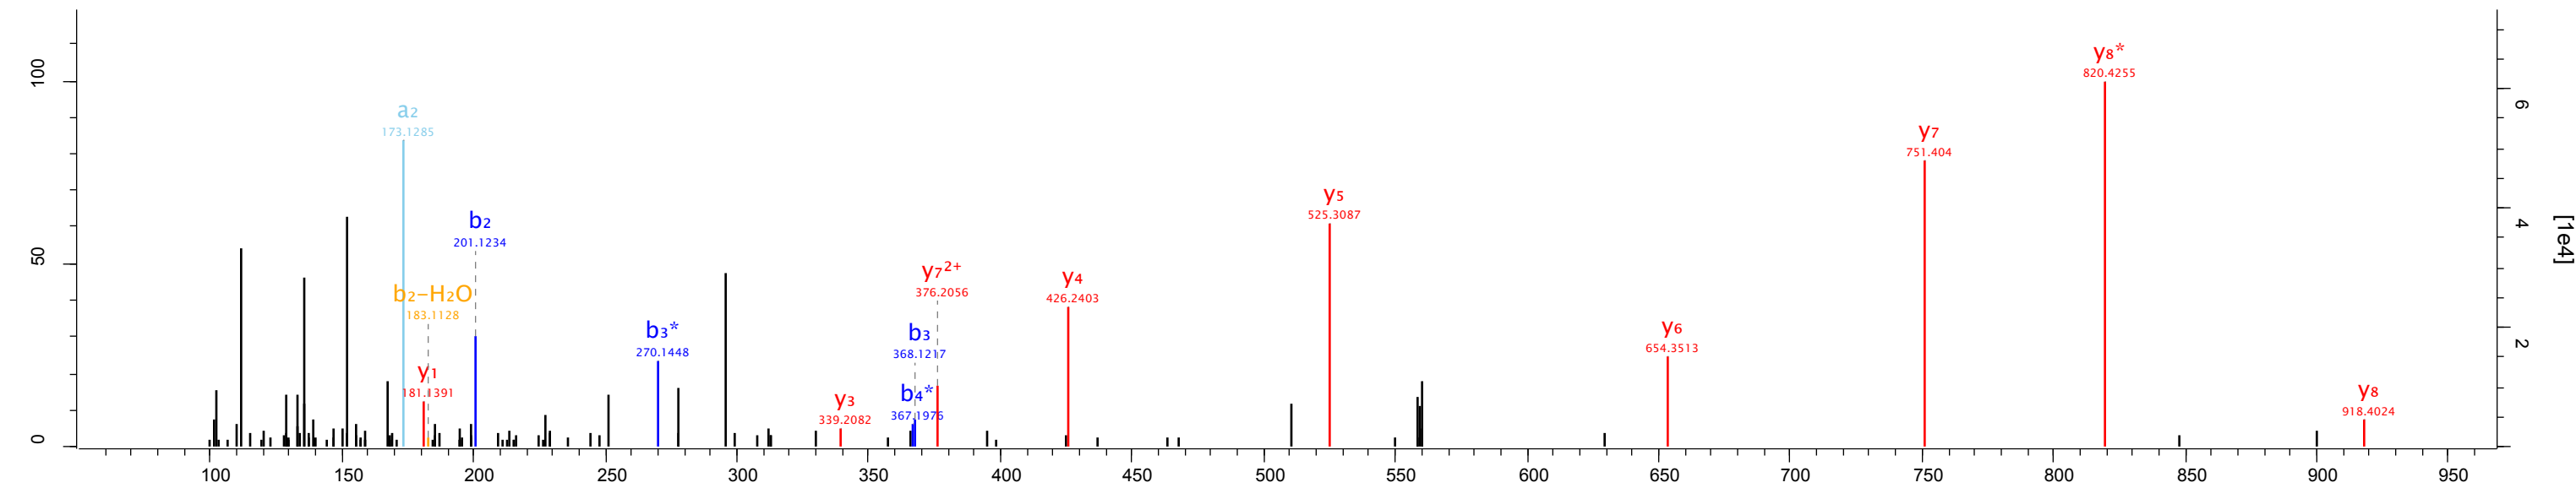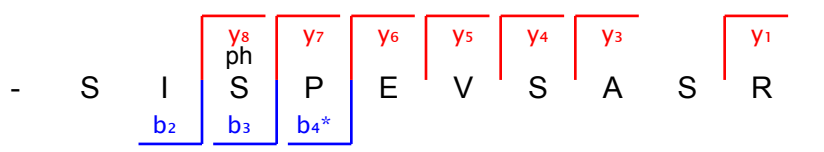



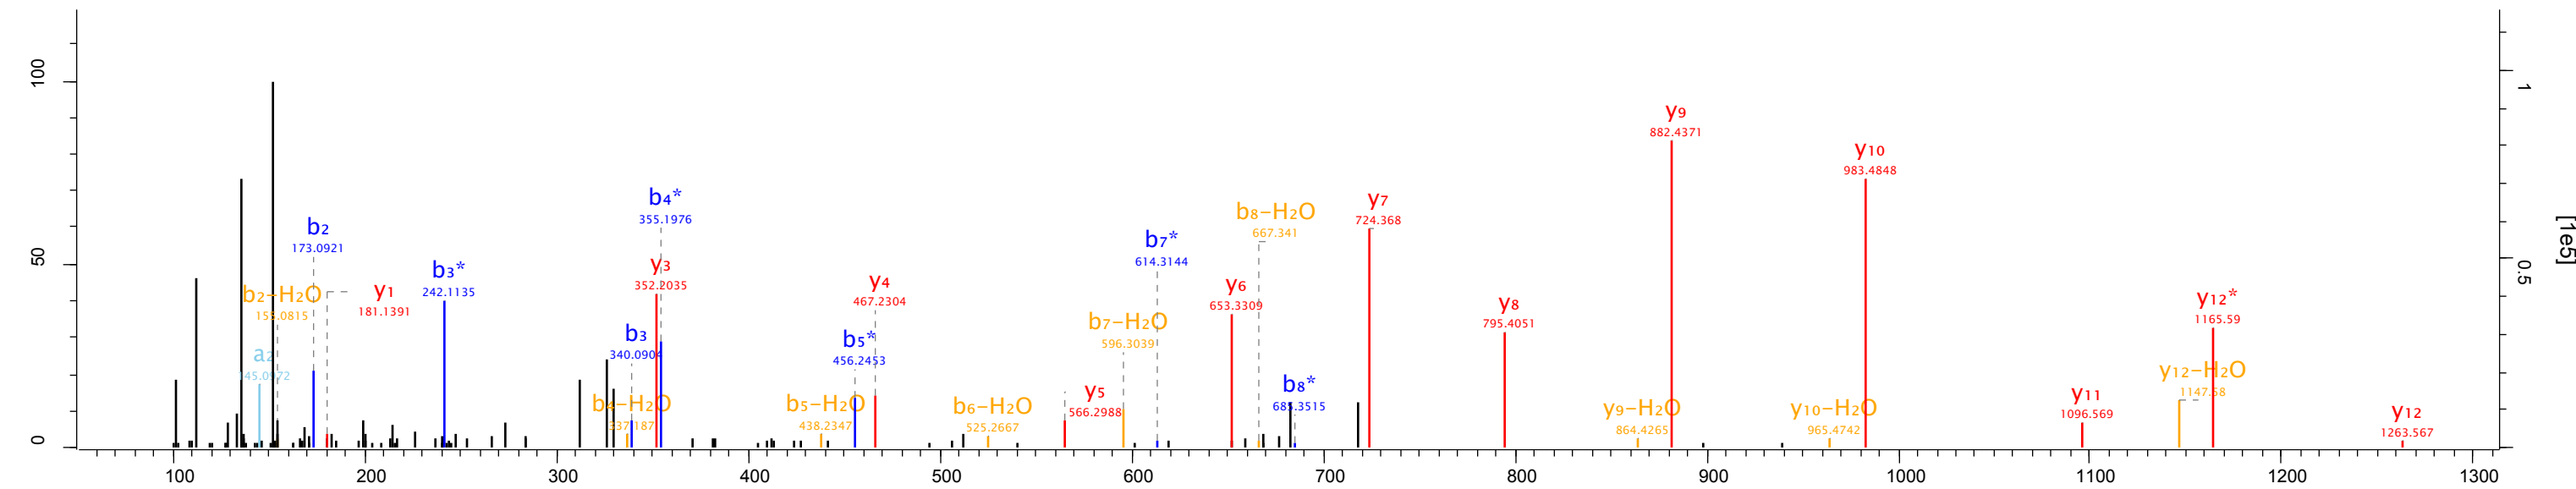

- T A A S V D G N R -

b<sub>2</sub>
y<sub>12</sub>ph  
b<sub>3</sub>
y<sub>11</sub>  
b<sub>4</sub>\*
y<sub>10</sub>  
b<sub>5</sub>\*
y<sub>9</sub>
y<sub>8</sub>  
b<sub>7</sub>\*
y<sub>7</sub>  
b<sub>8</sub>\*
y<sub>6</sub>
y<sub>5</sub>
y<sub>4</sub>
y<sub>3</sub>
y<sub>1</sub>

Raw file 20171215\_MaS\_33SR\_LMH\_phospho2\_08  
 Scan 6436 Method FTMS; HCD Score 104.67 m/z 928.38 Gene names EEF1B2

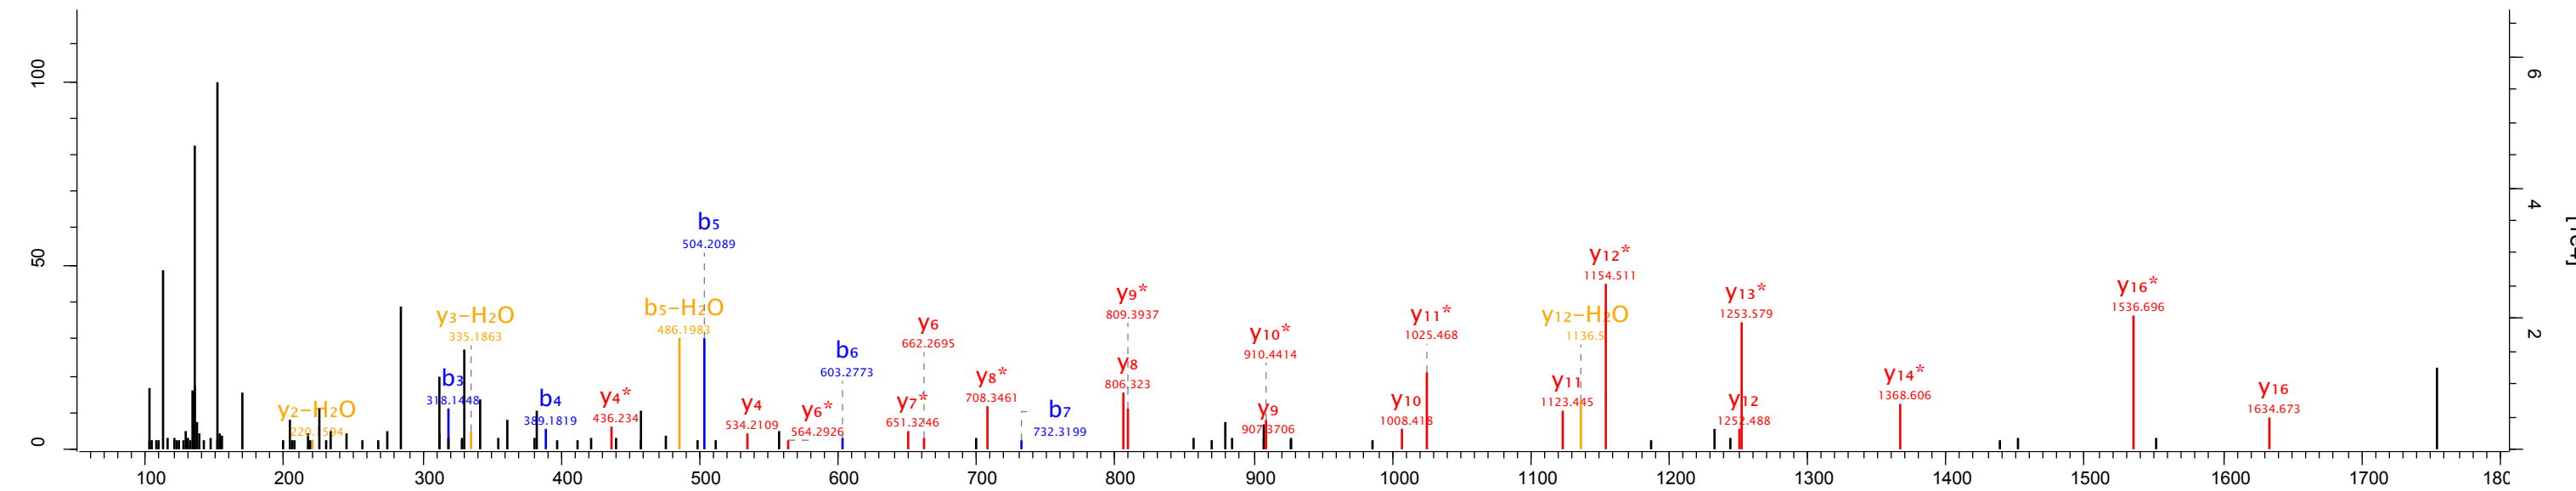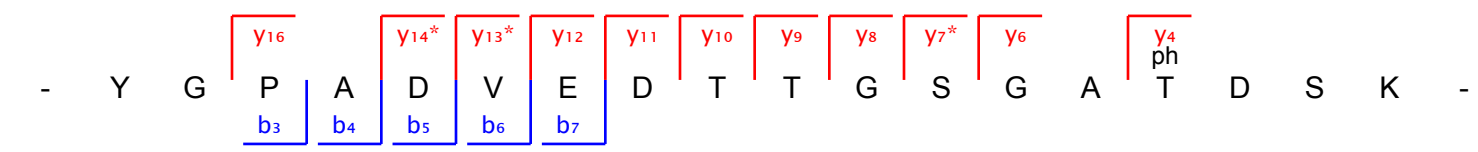

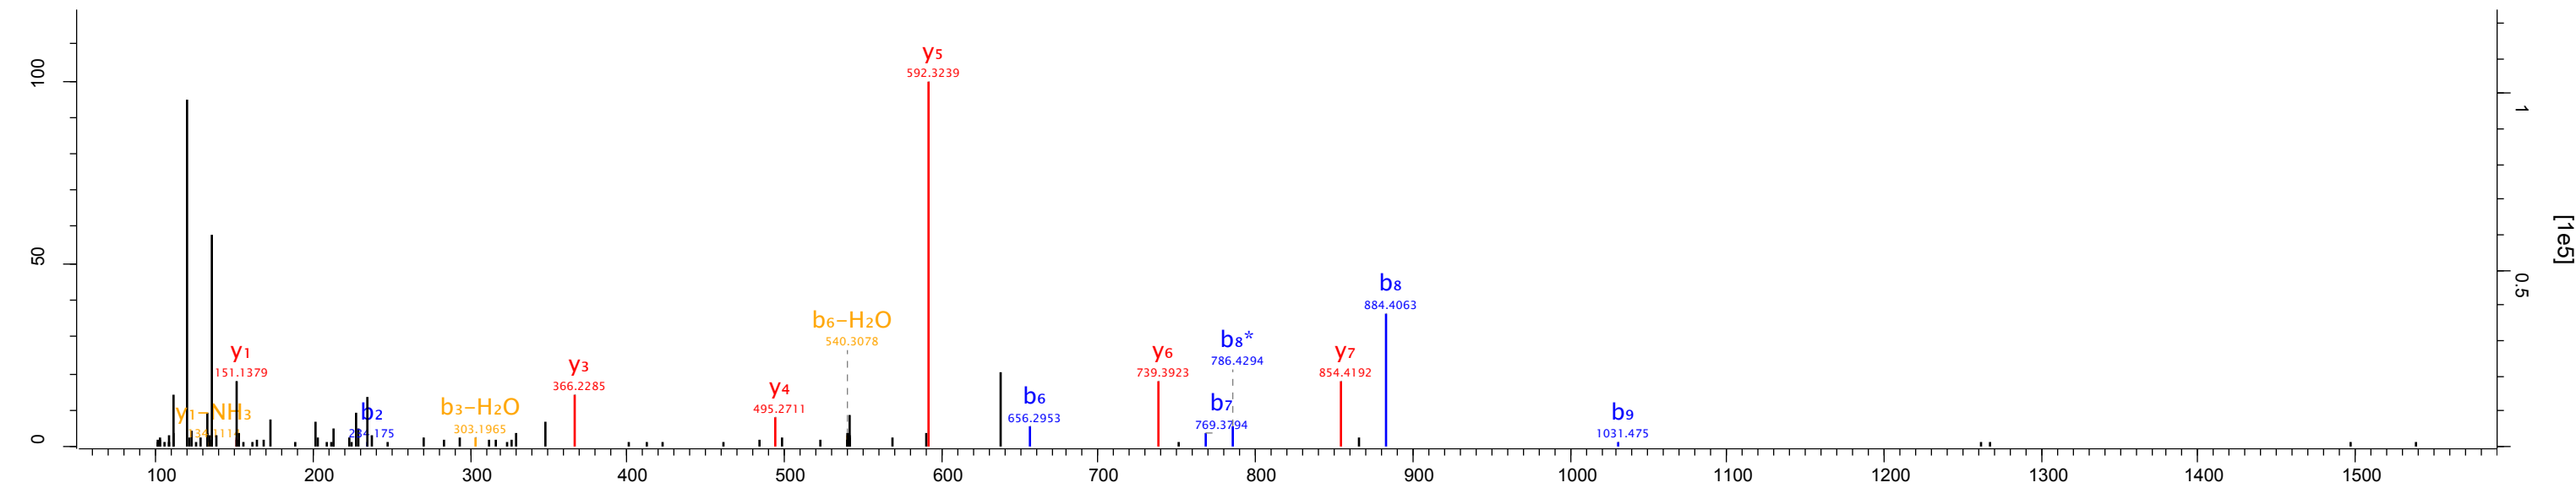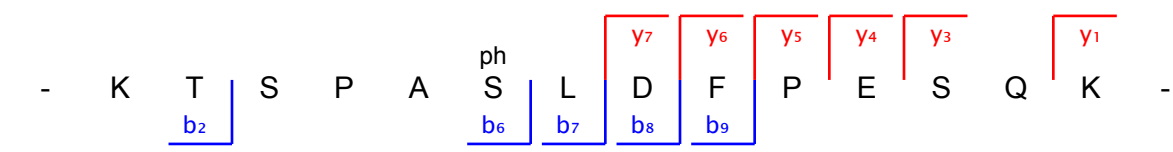

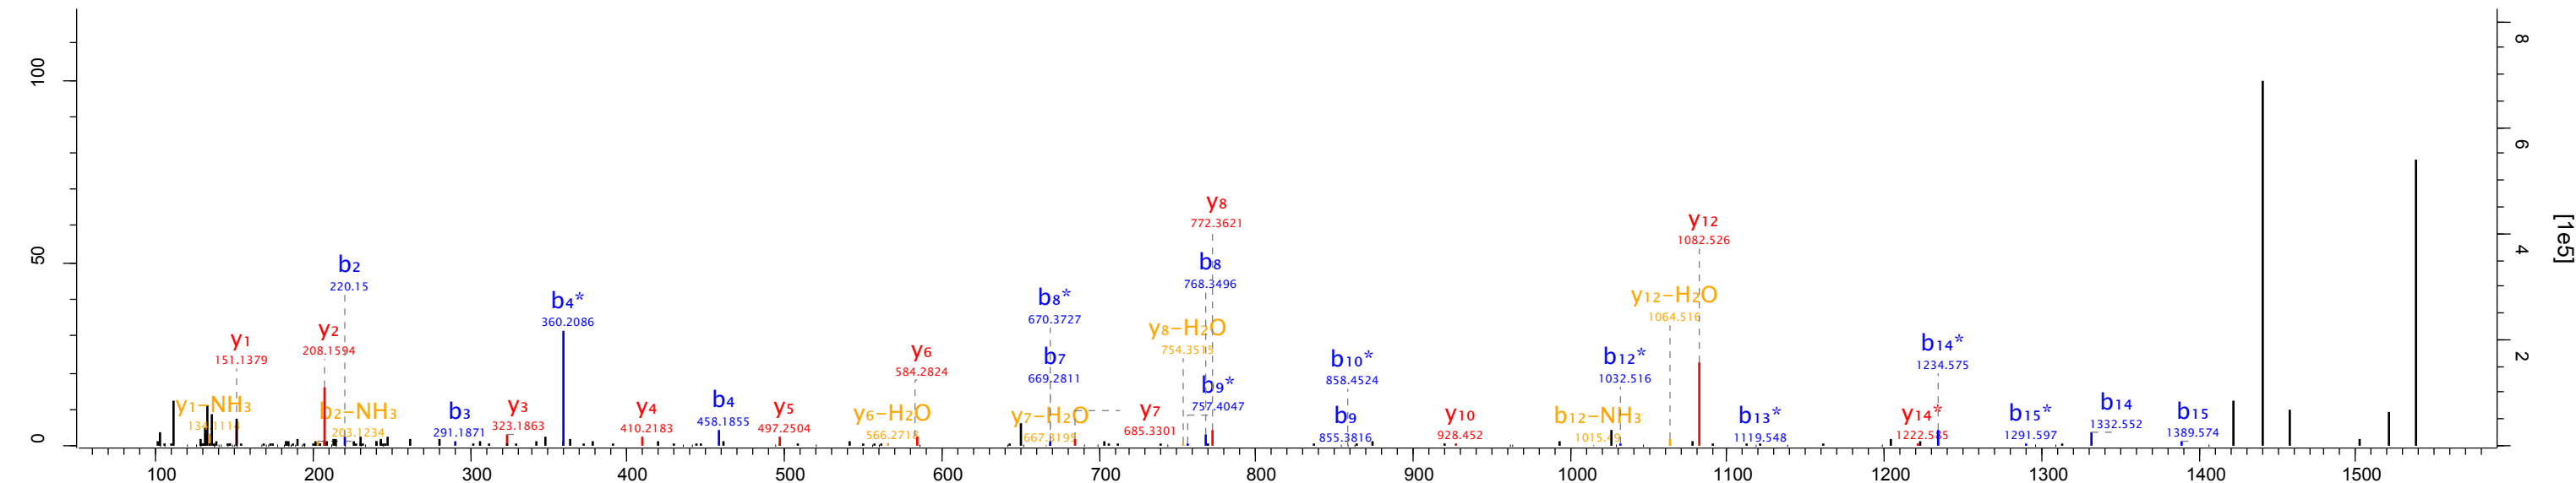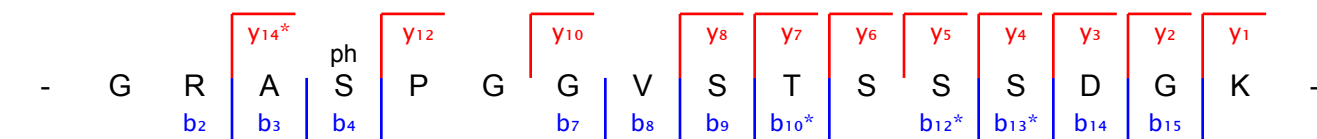

Raw file: 20171215\_MaS\_33SR\_LMH\_phospho2\_09  
 Scan: 2526 Method: FTMS; HCD Score: 113.28 m/z: 702.31 Gene names: SOGA1

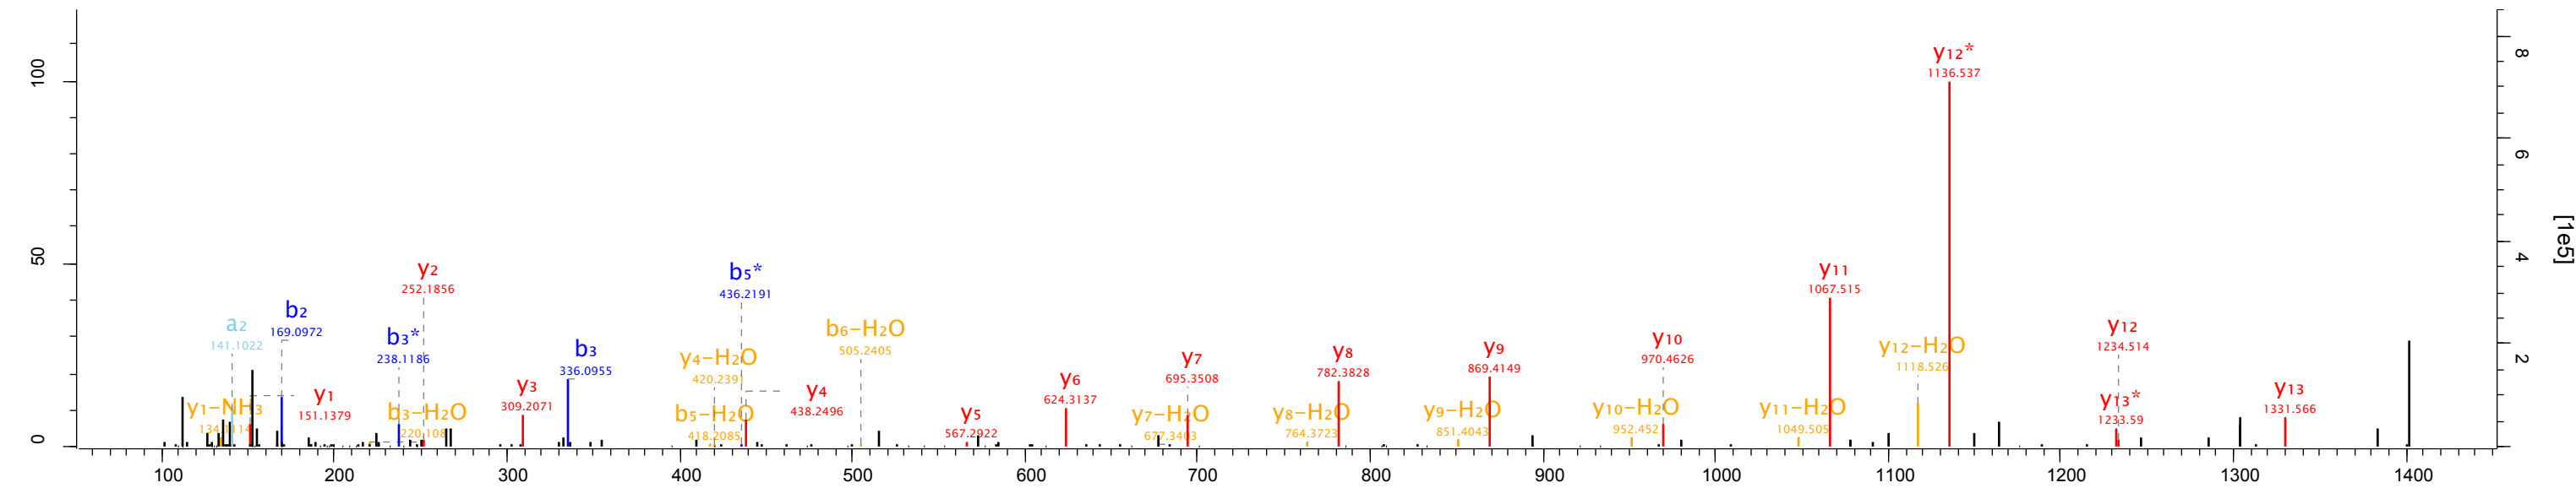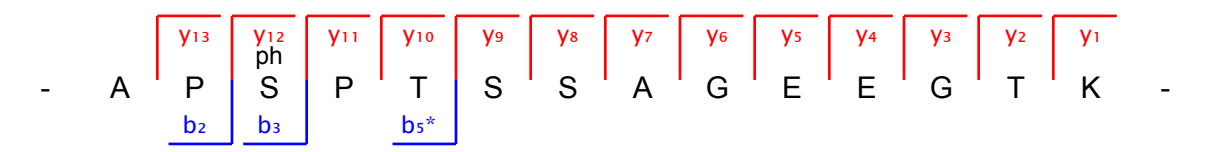

Raw file 20171215\_MaS\_33SR\_LMH\_phospho2\_09 Scan 3176 Method FTMS; HCD Score 64.06 m/z 408.21 Gene names CALD1

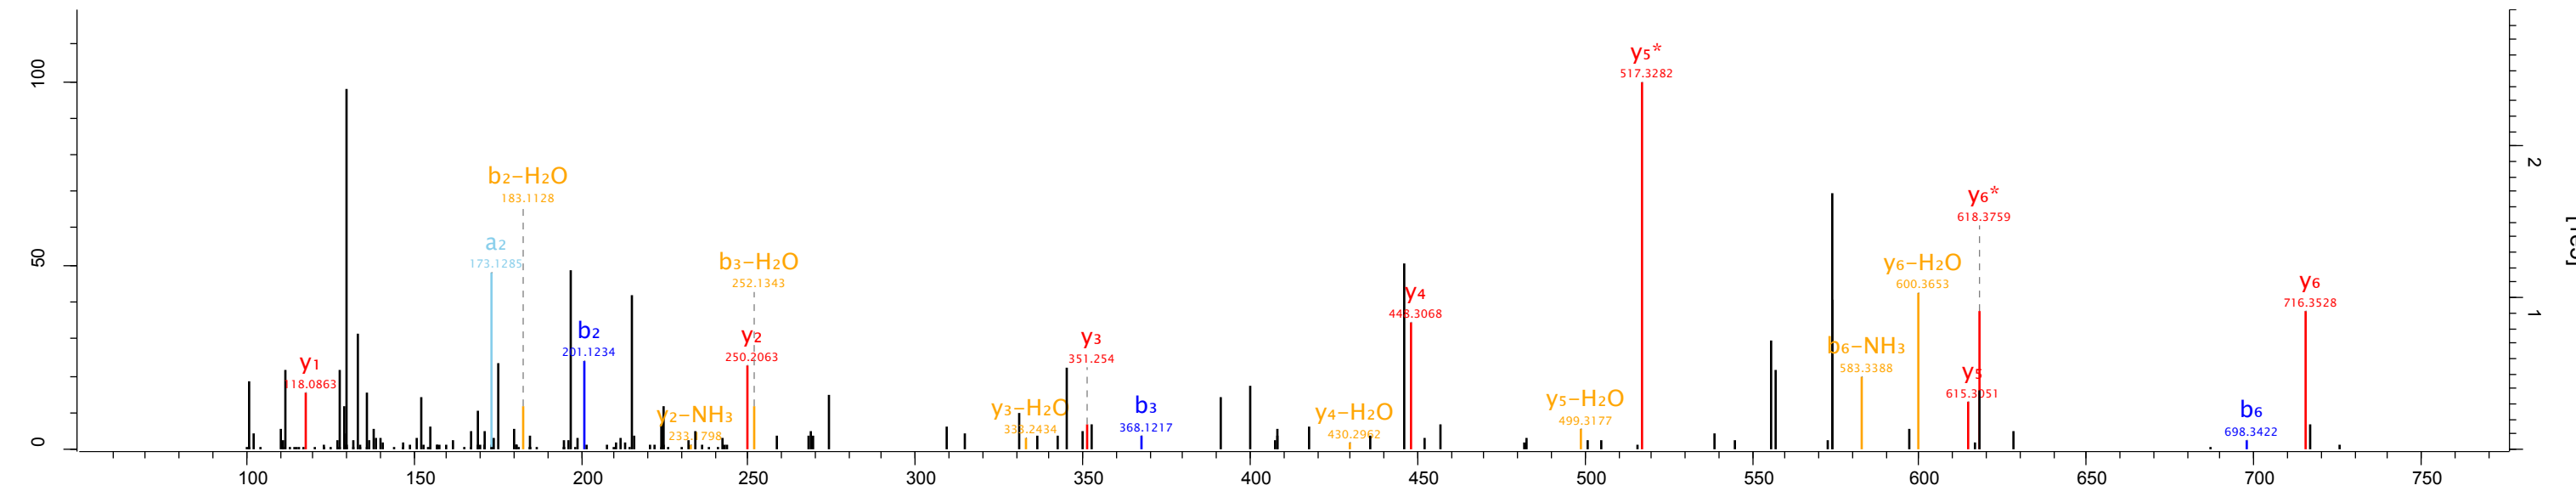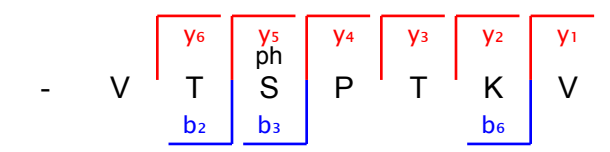

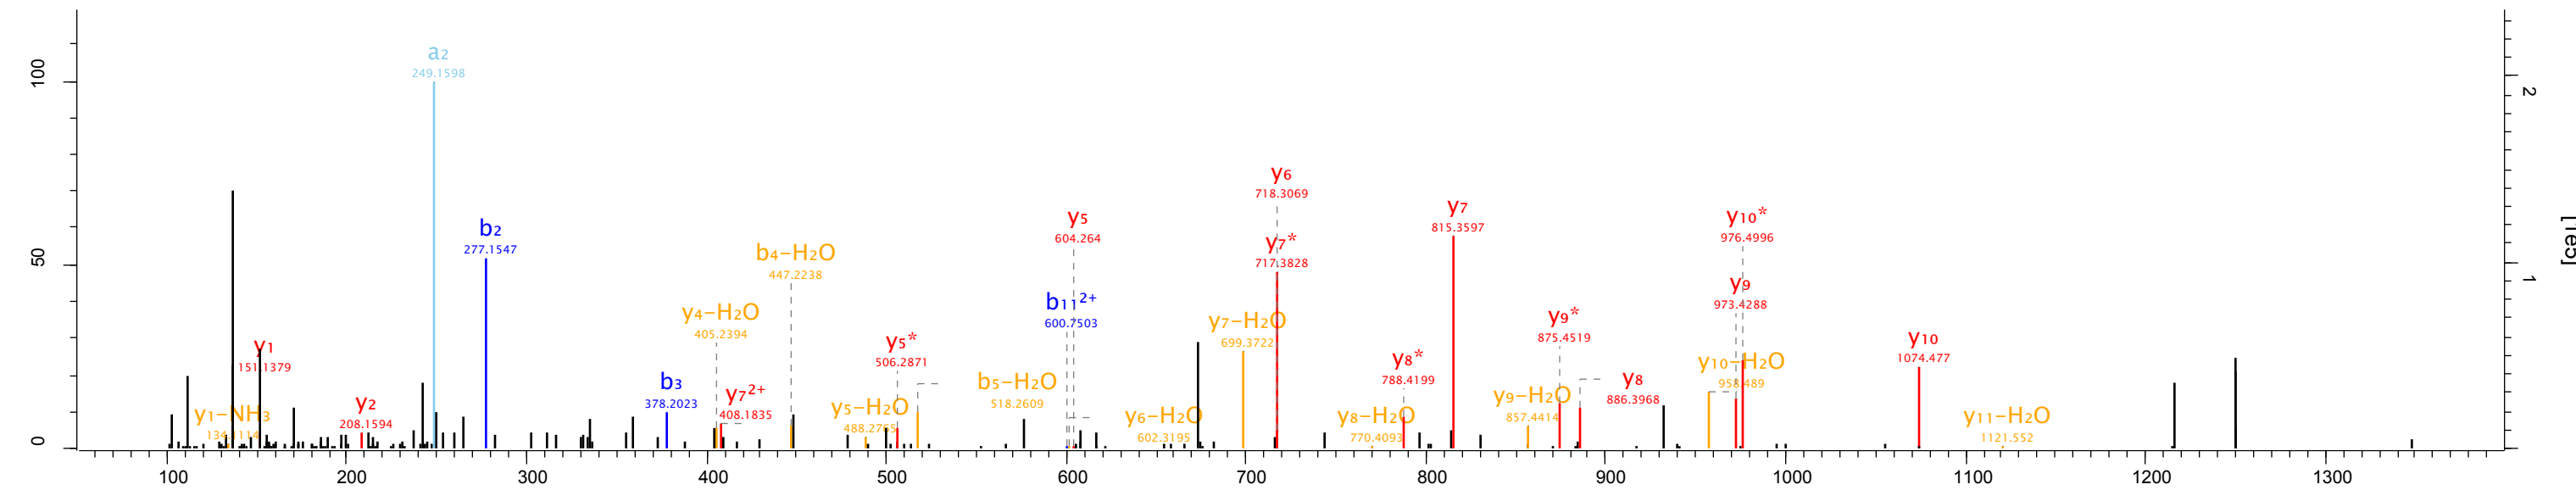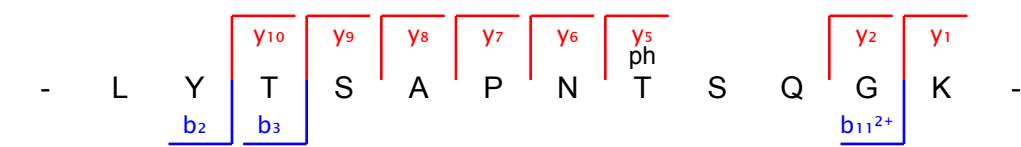

Raw file 20171215\_MaS\_33SR\_LMH\_phospho2\_09 Scan 4566 Method FTMS; HCD Score 114.63 m/z 707.82 Gene names USP1

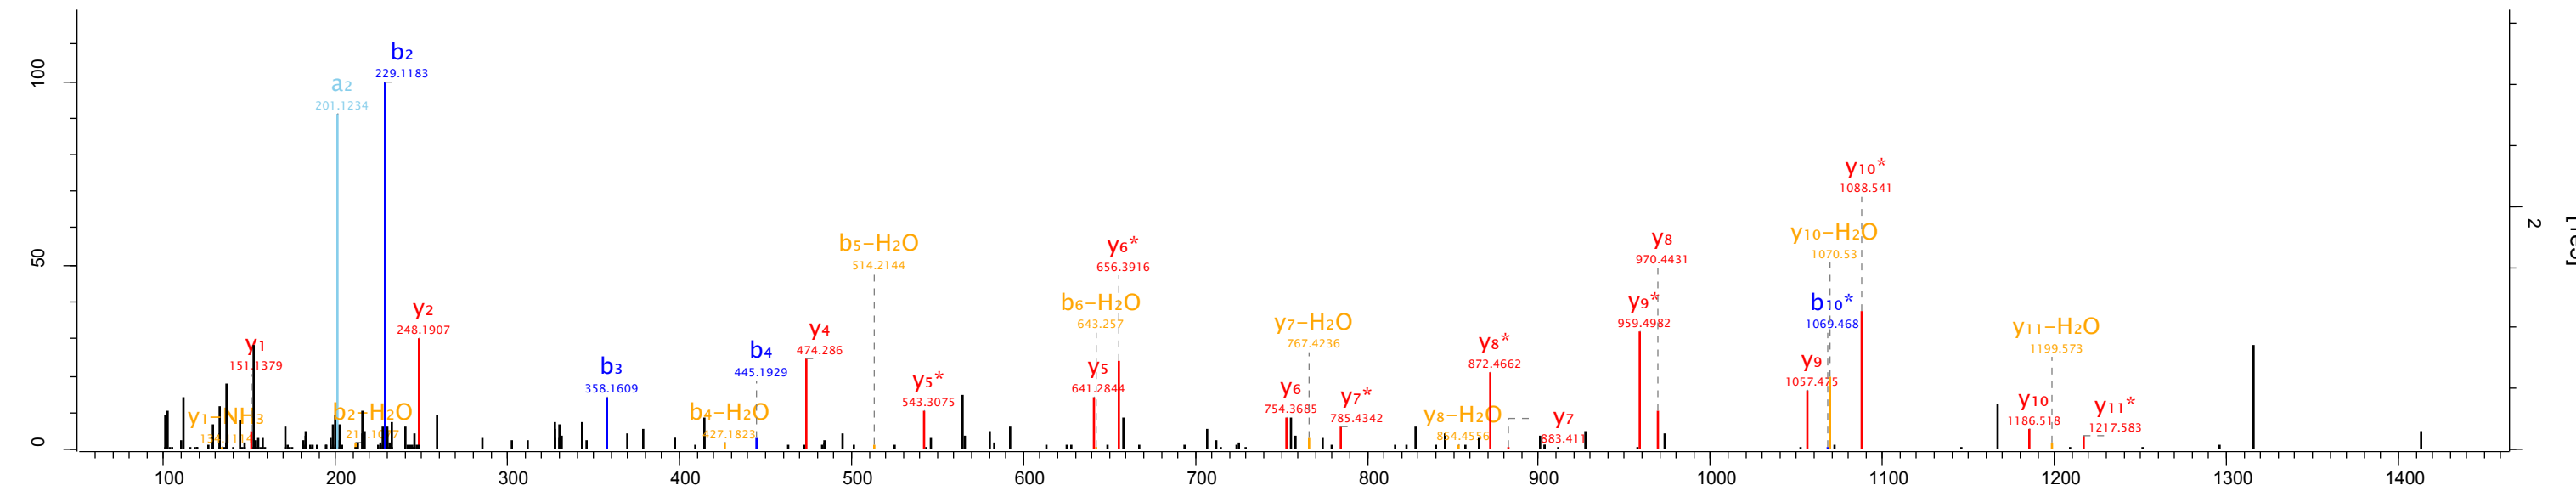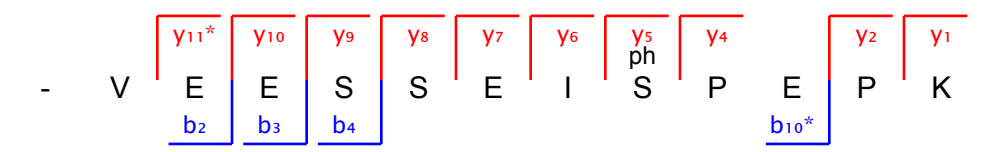



Raw file 20171215\_MaS\_33SR\_LMH\_phospho2\_09 Scan 4826 Method FTMS; HCD Score 40.97 m/z 750.36 Gene names DYNC1L12

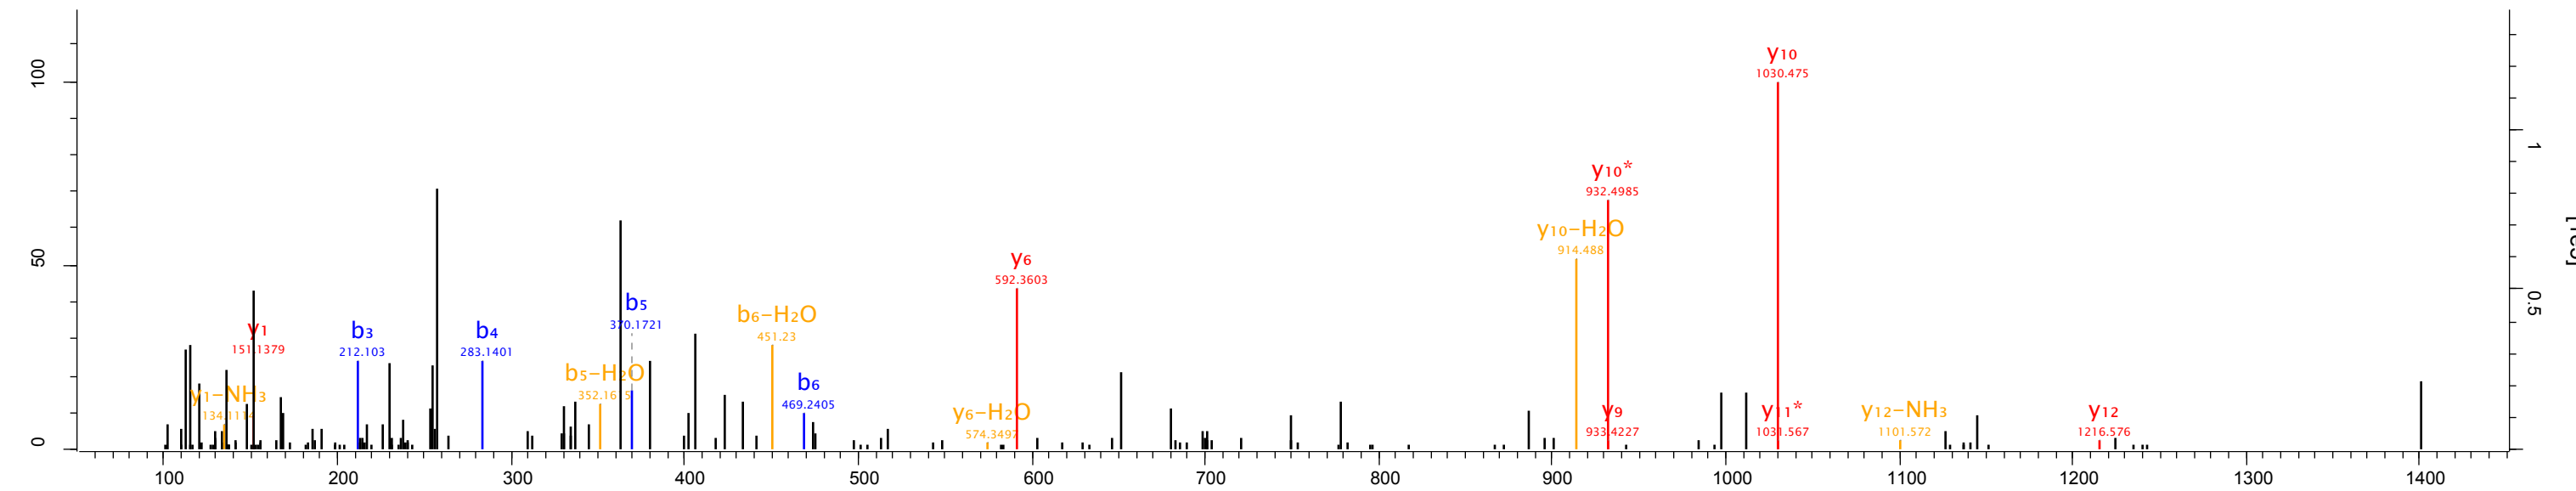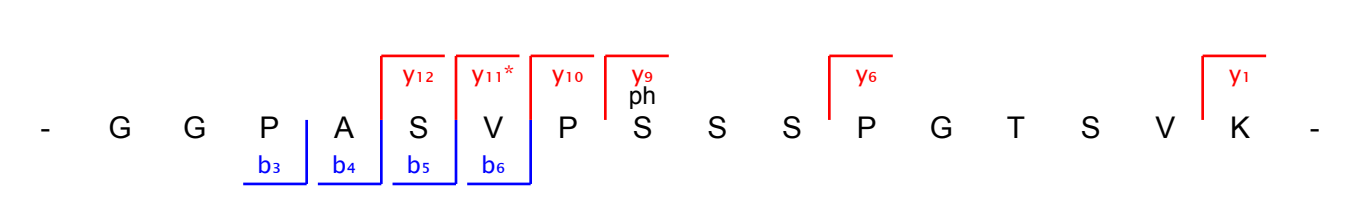

Raw file: 20171215\_MaS\_33SR\_LMH\_proteome\_01  
 Scan: 111066 Method: FTMS; HCD Score: 57.69 m/z: 943.76 Gene names: TUBA1B;TUBA4A;TUBA1A;TUBA3C;TUBA3E

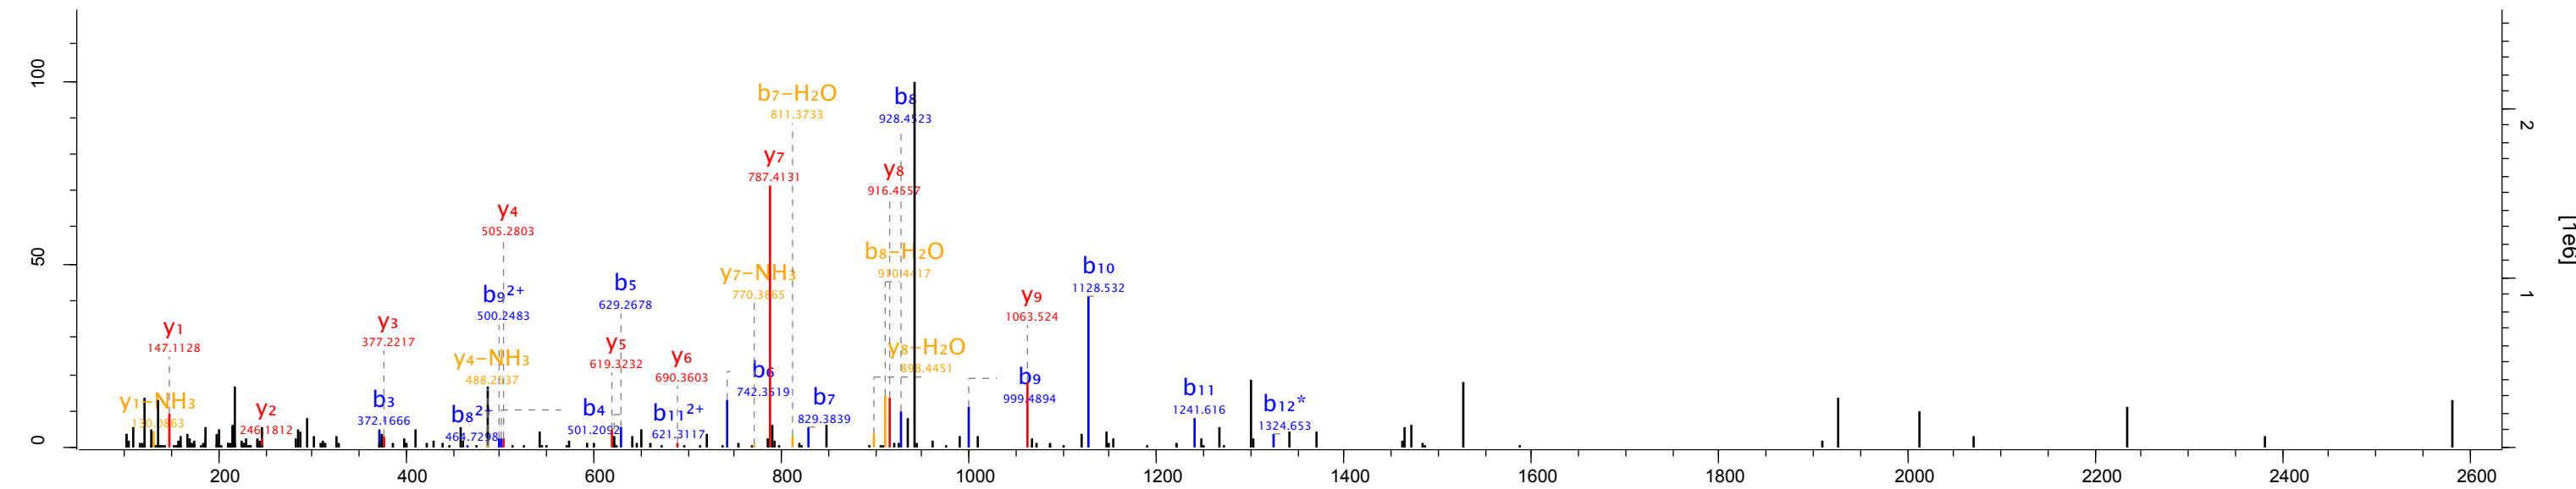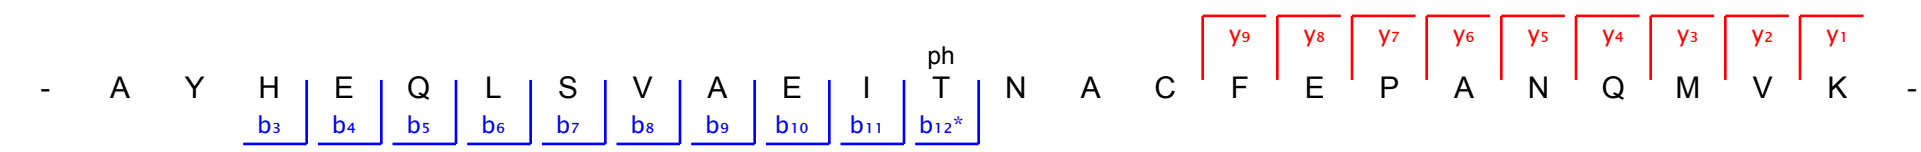

Raw file 20171215\_MaS\_33SR\_LMH\_proteome\_01 Scan 121096 Method FTMS; HCD Score 40.43 m/z 918.13 Gene names SRRT

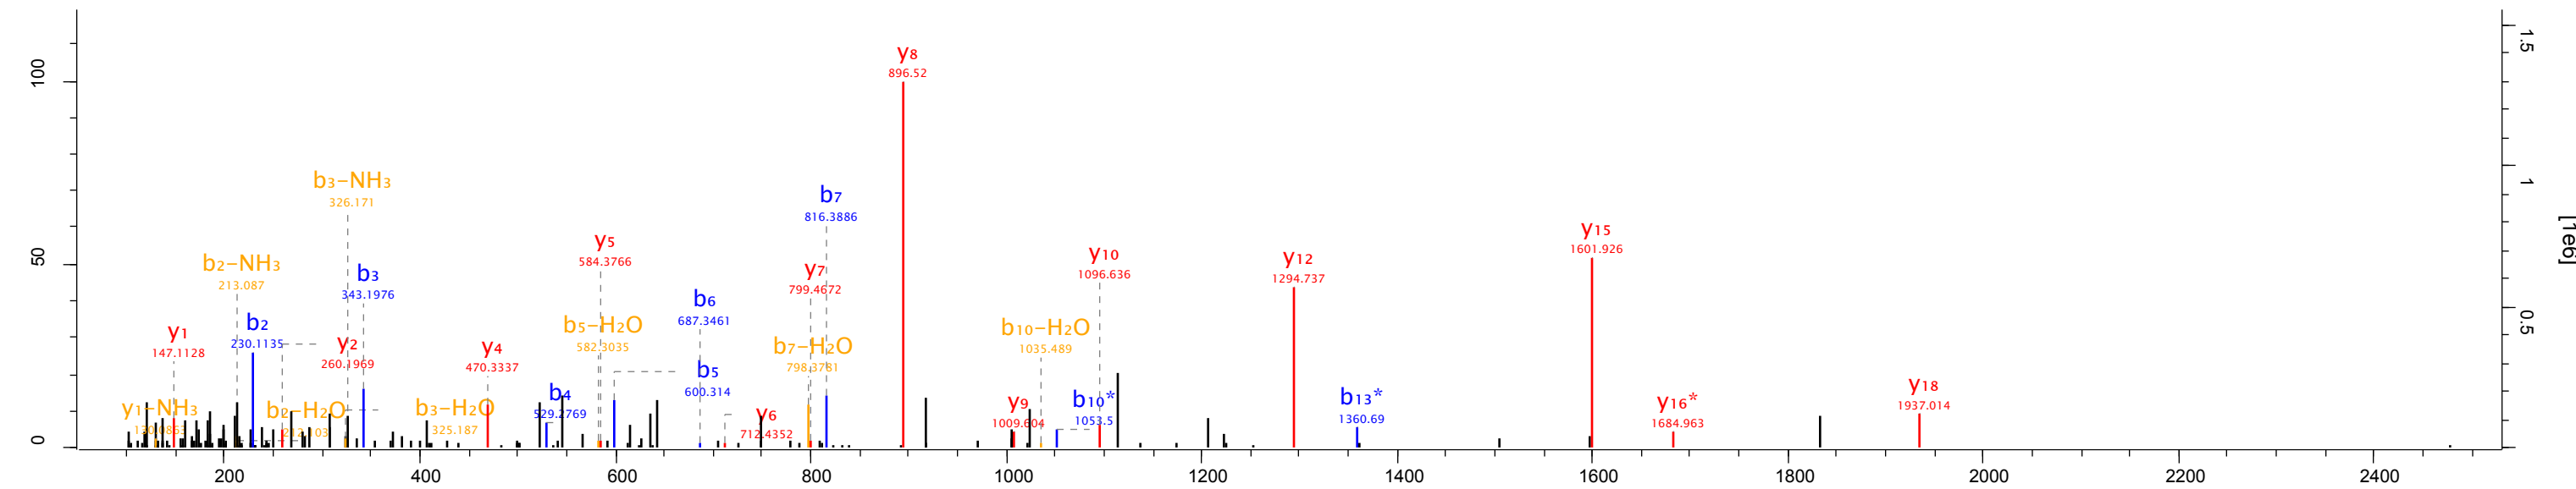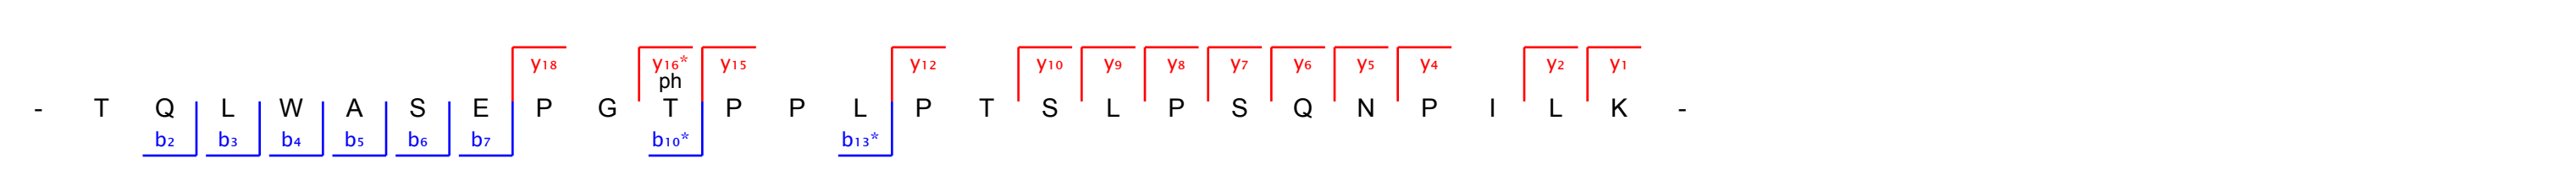

Raw file

20171215\_MaS\_33SR\_LMH\_proteome\_01

Scan 15086 Method FTMS; HCD Score 41.4 m/z 692.33 Gene names C8G

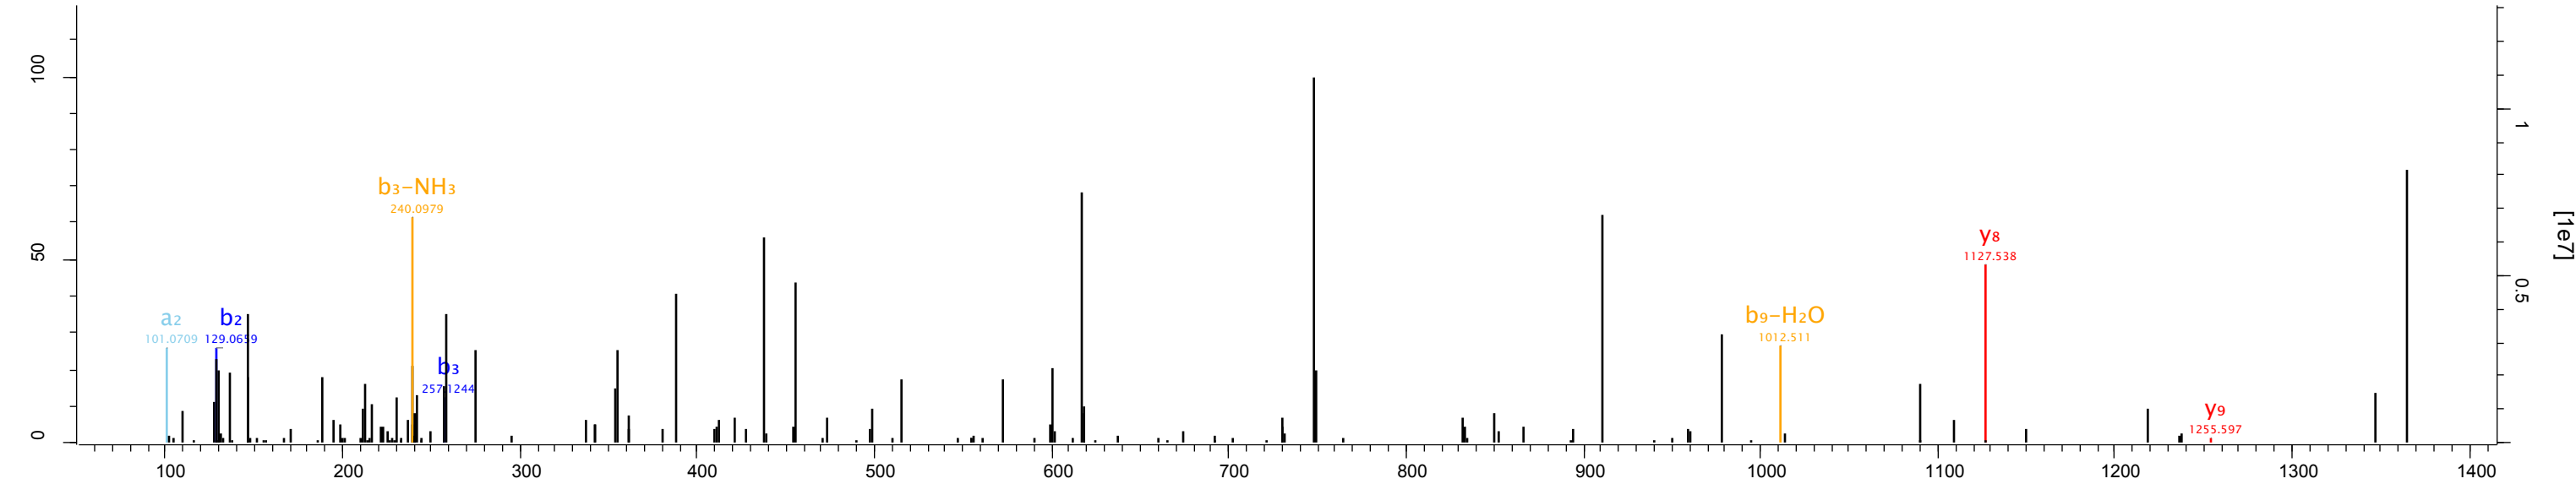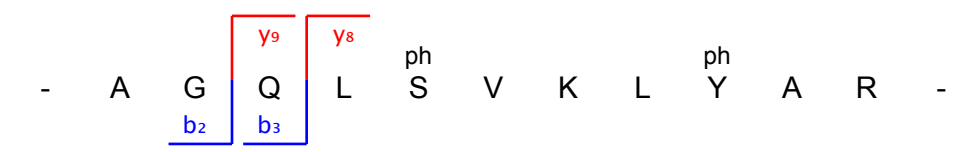

Raw file

20171215\_MaS\_33SR\_LMH\_proteome\_01

Scan 24176 Method FTMS; HCD Score 43.77 m/z 560.32 Gene names ORC1

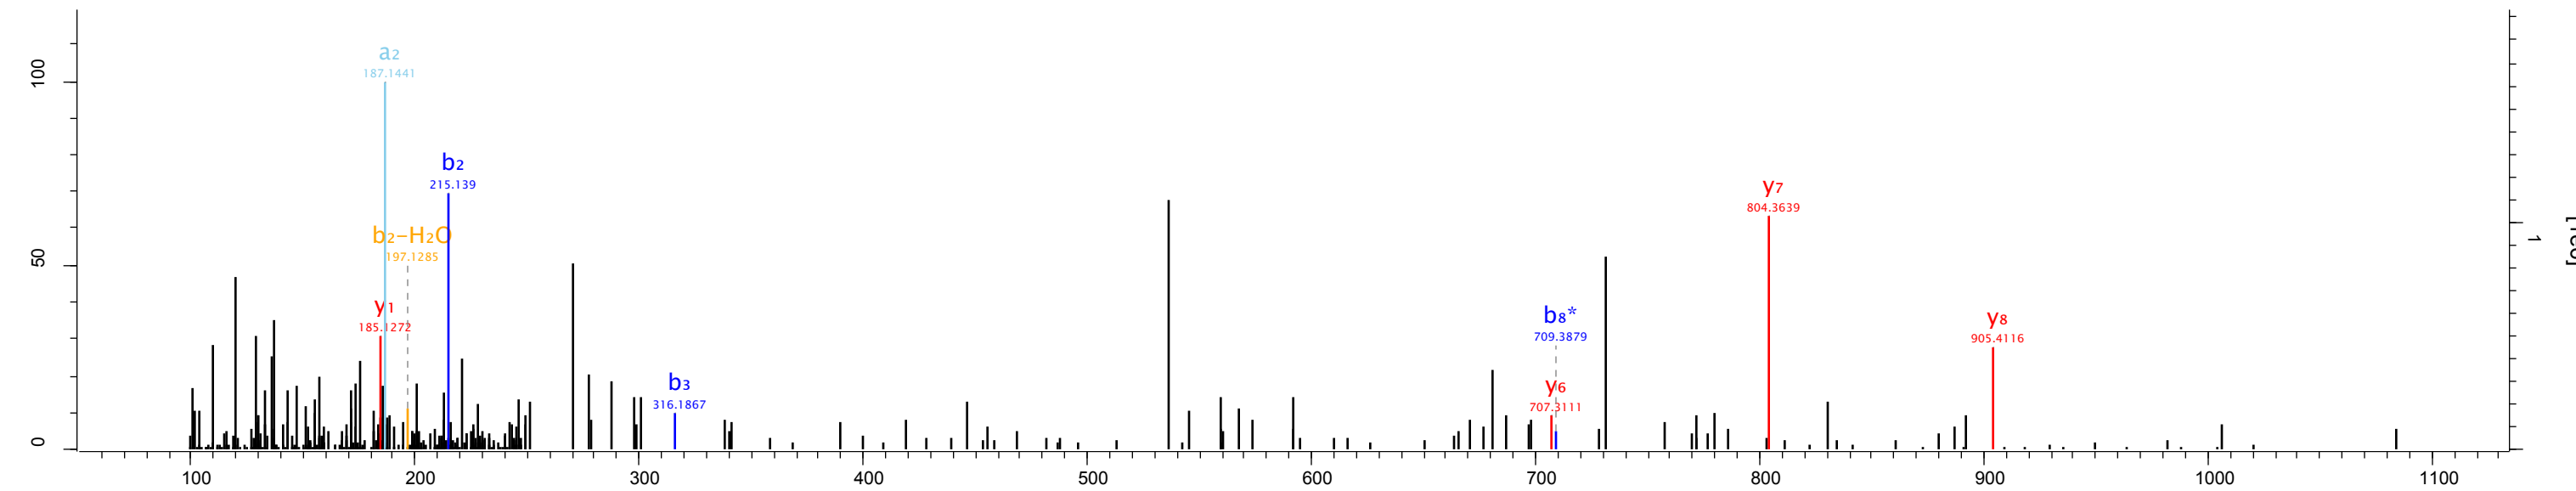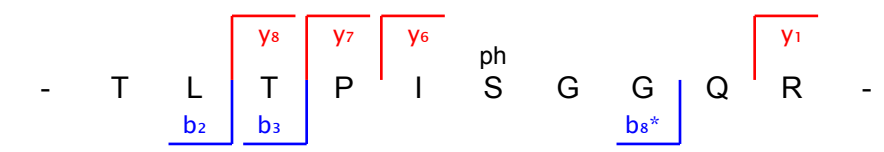

Raw file 20171215\_MaS\_33SR\_LMH\_proteome\_01 Scan 26806 Method FTMS; HCD Score 41.68 m/z 817.4 Gene names ANKRD42

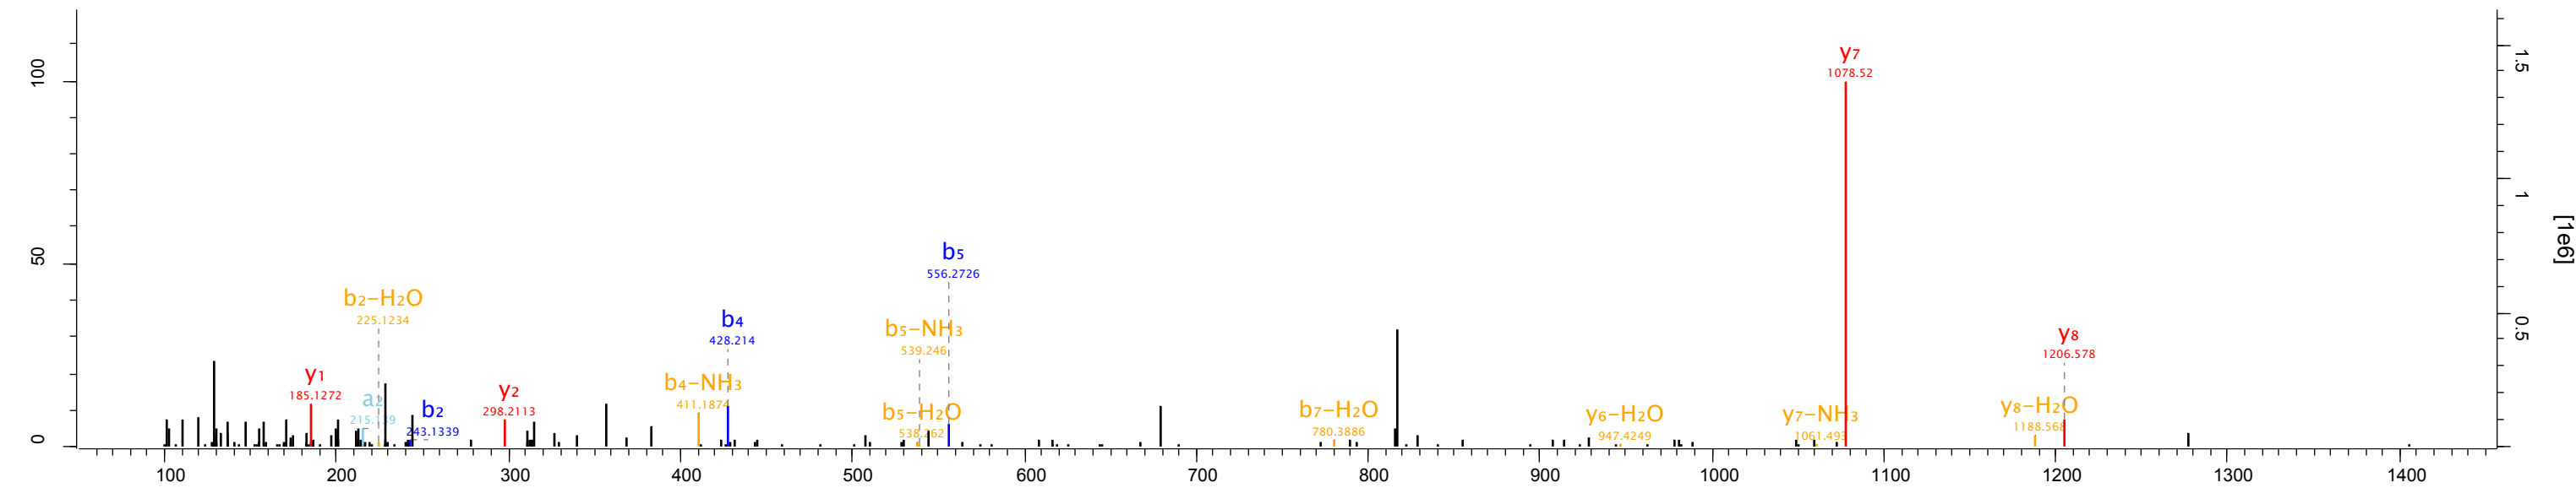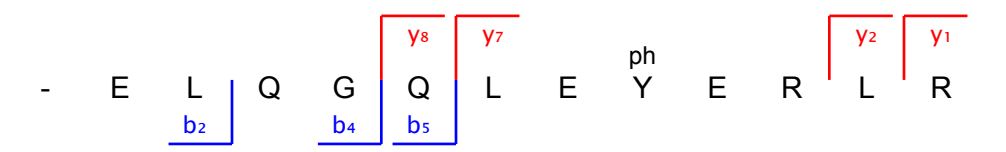

Raw file 20171215\_MaS\_33SR\_LMH\_proteome\_01 Scan 5436 Method FTMS; HCD Score 47.44 m/z 971.5 Gene names ZNF732

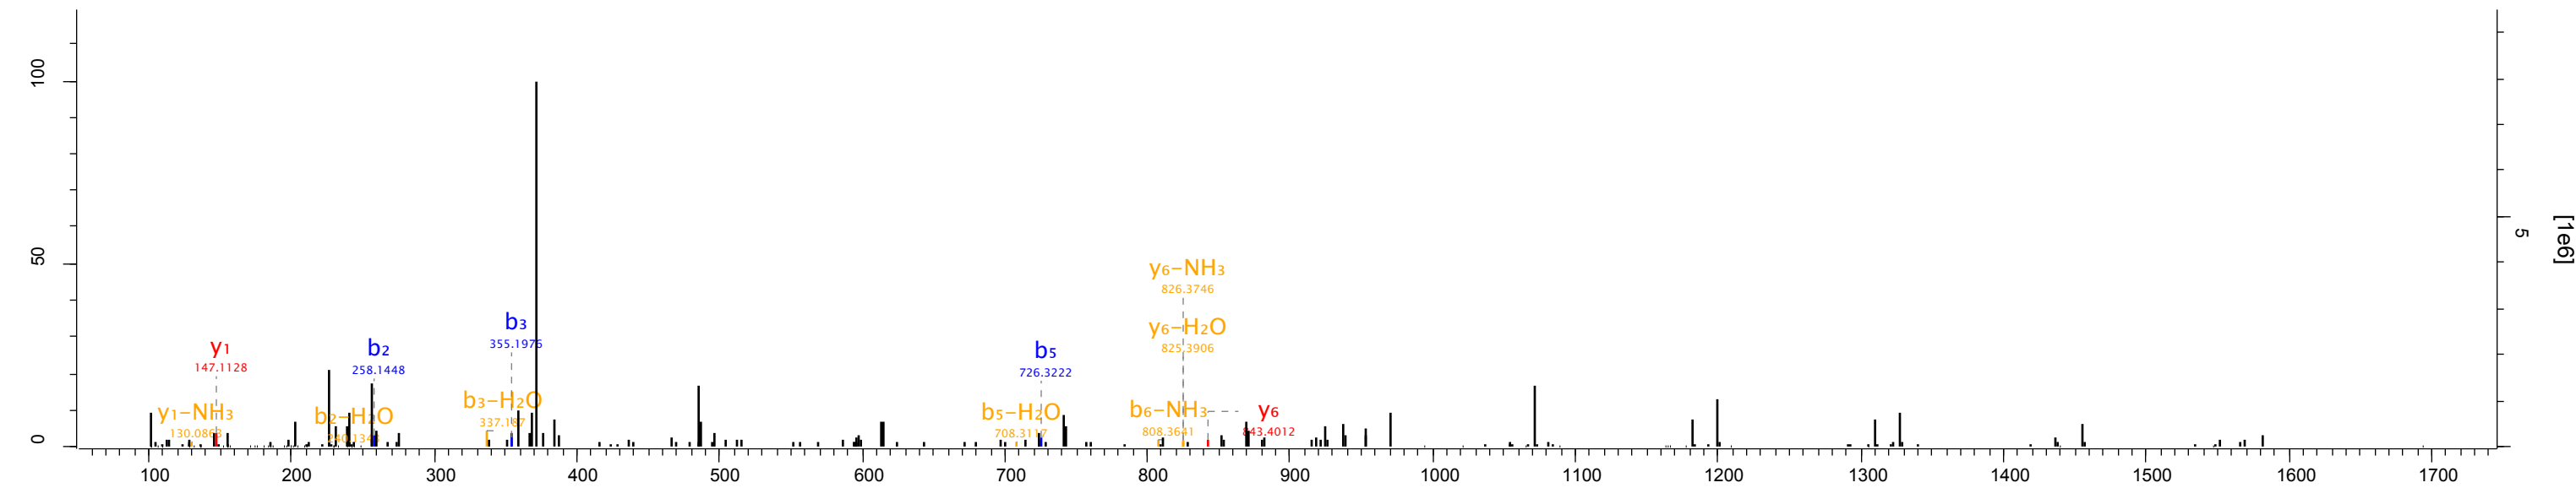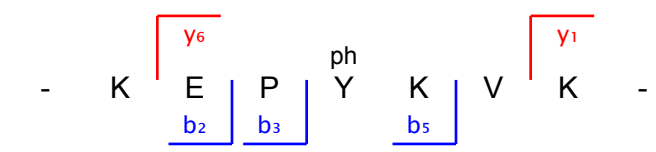

Raw file  
20171215\_MaS\_33SR\_LMH\_proteome\_01

Scan 62356 Method FTMS; HCD Score 42.08 m/z 729.37

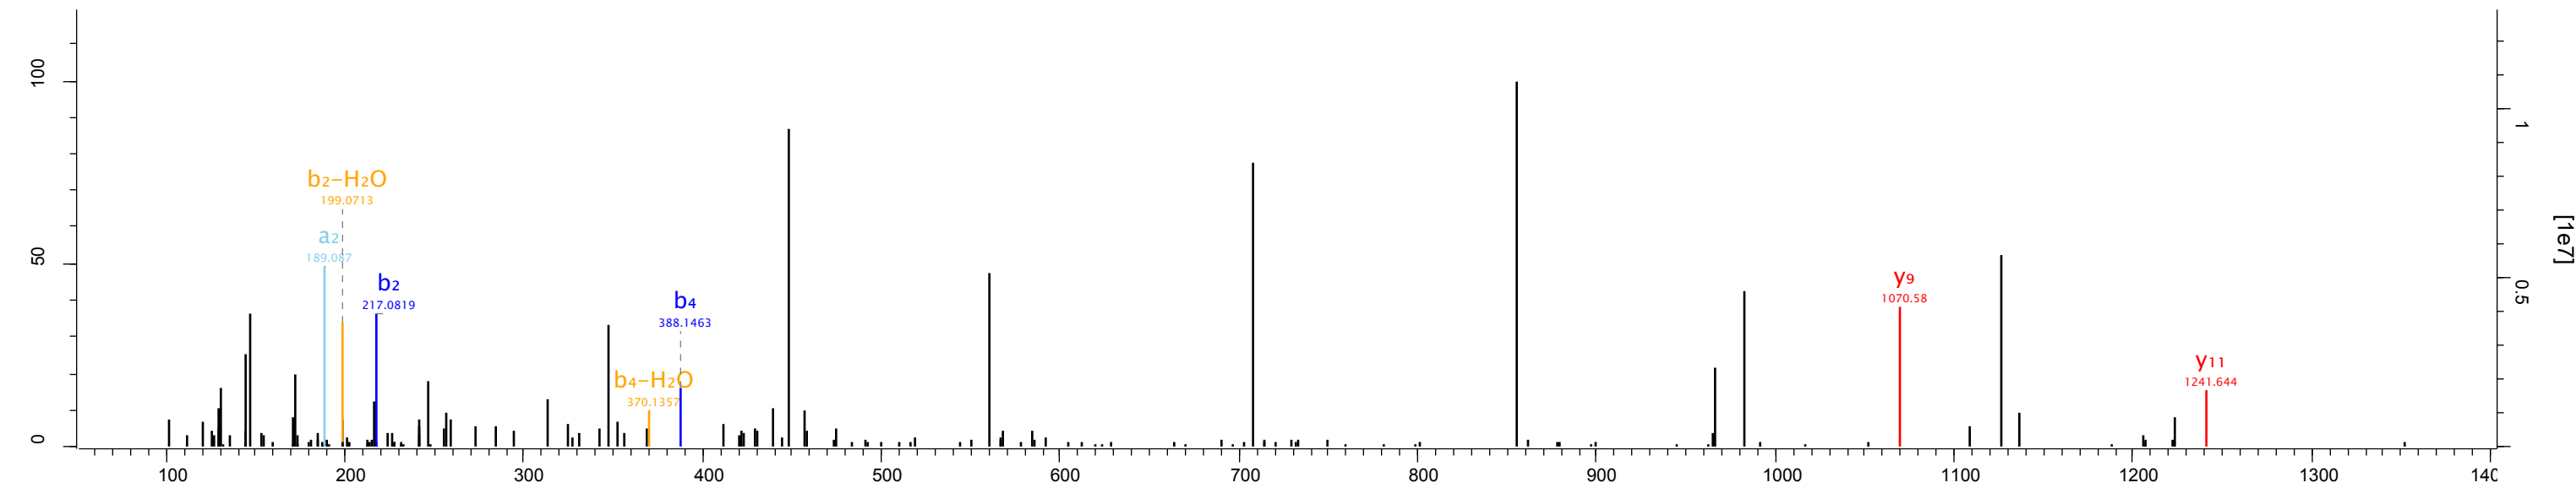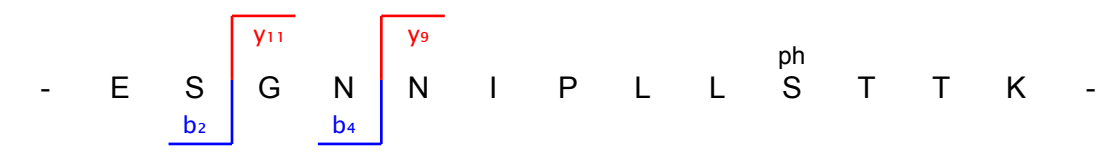



Raw file 20171215\_MaS\_33SR\_LMH\_proteome\_02 Scan 105476 Method FTMS; HCD Score 68.37 m/z 573.57

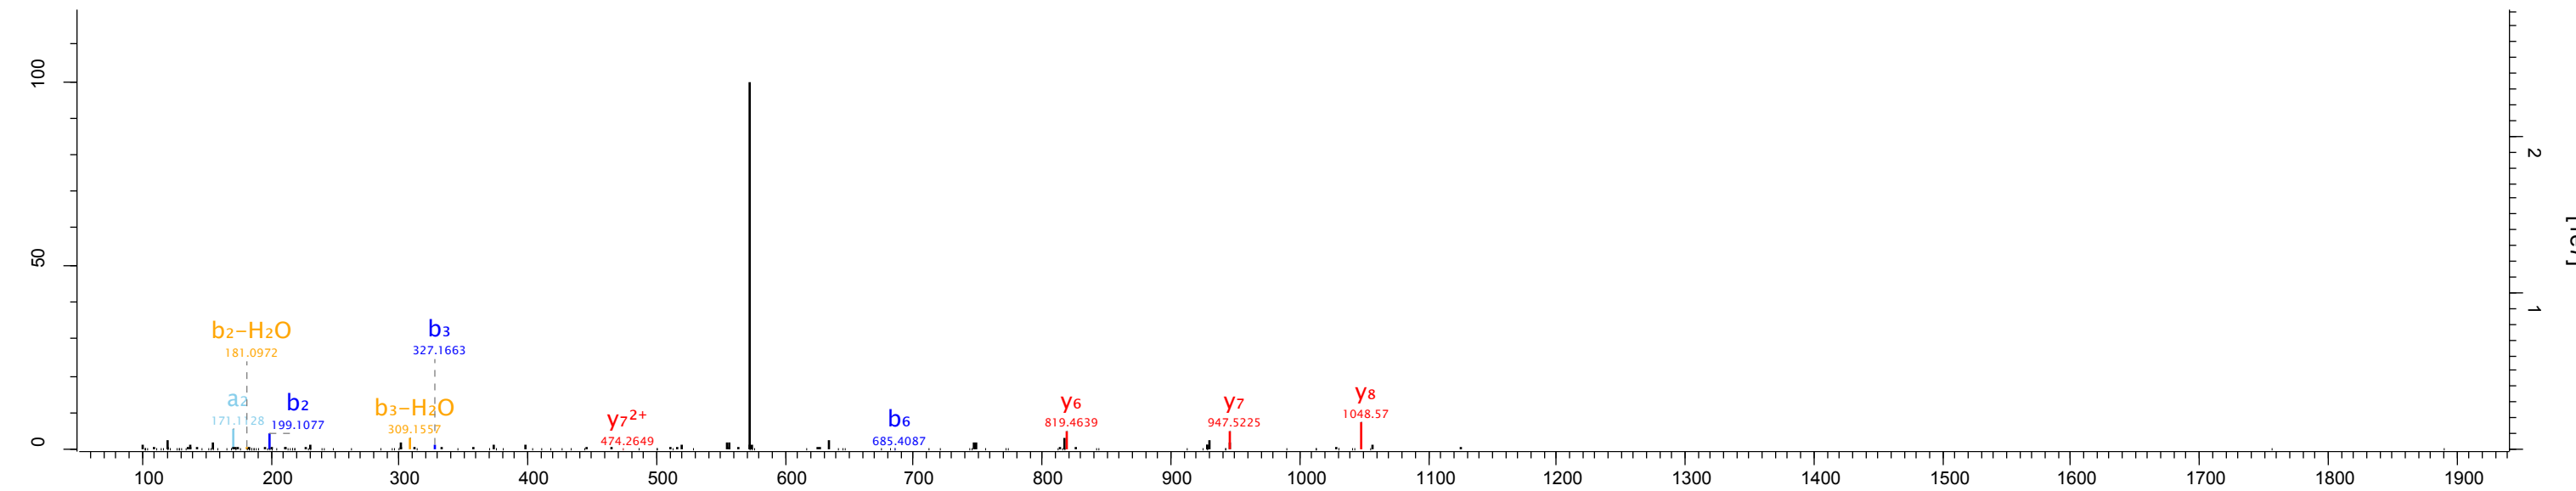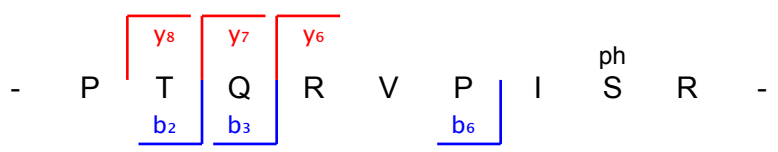

Raw file: 20171215\_MaS\_33SR\_LMH\_proteome\_02  
 Scan: 19946 Method: FTMS; HCD Score: 71.45 m/z: 638.32 Gene names: TRHDE

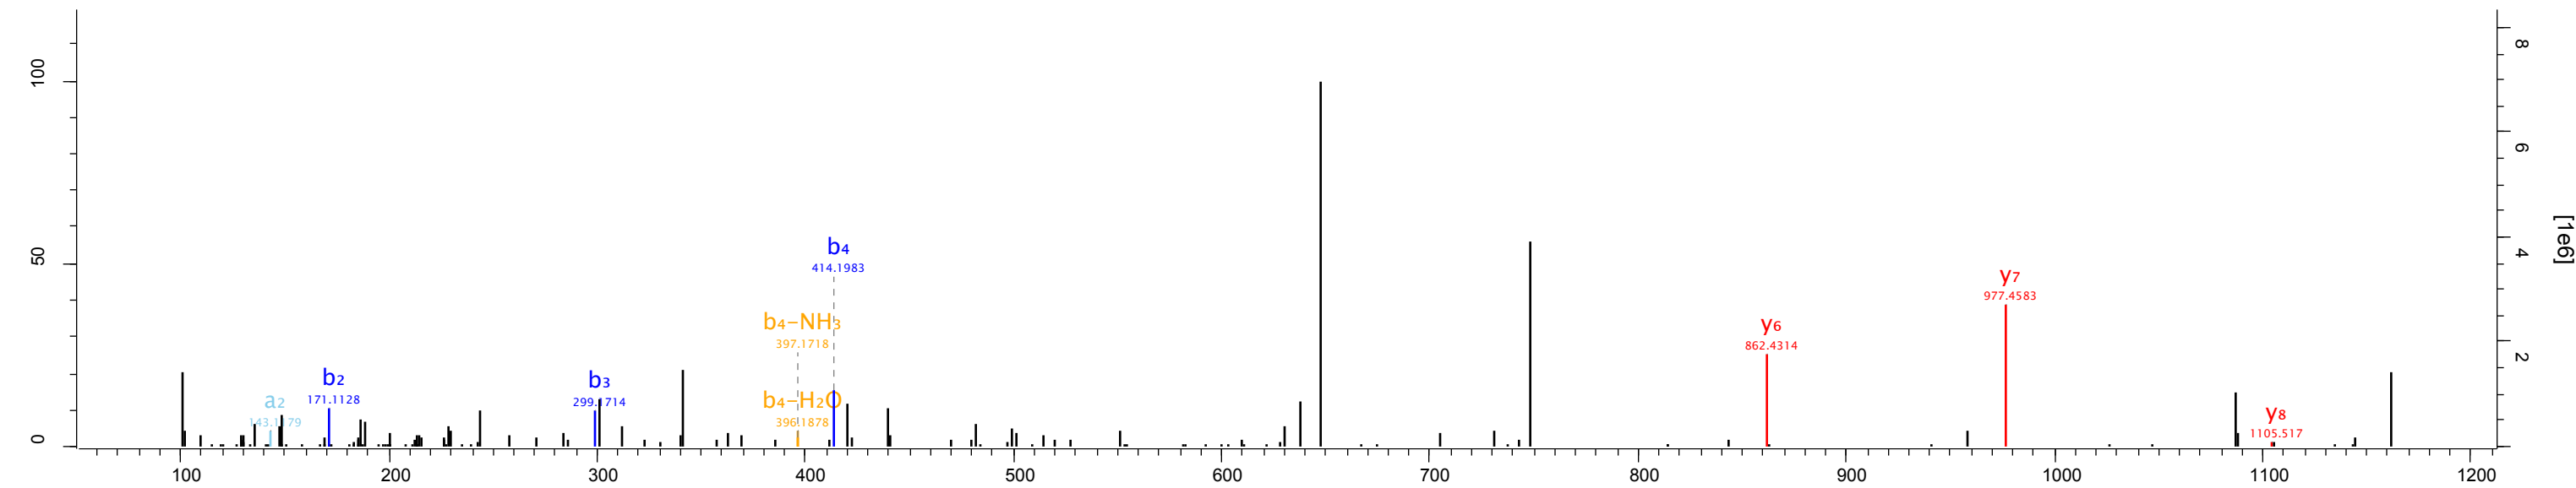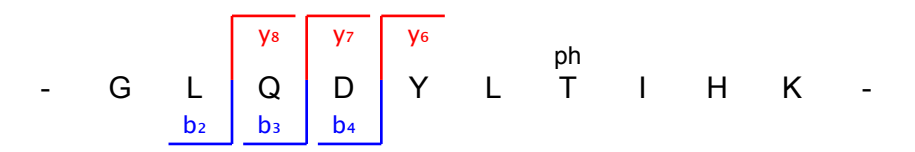

Raw file 20171215\_MaS\_33SR\_LMH\_proteome\_02 Scan 3496 Method FTMS; HCD Score 68.19 m/z 811.02

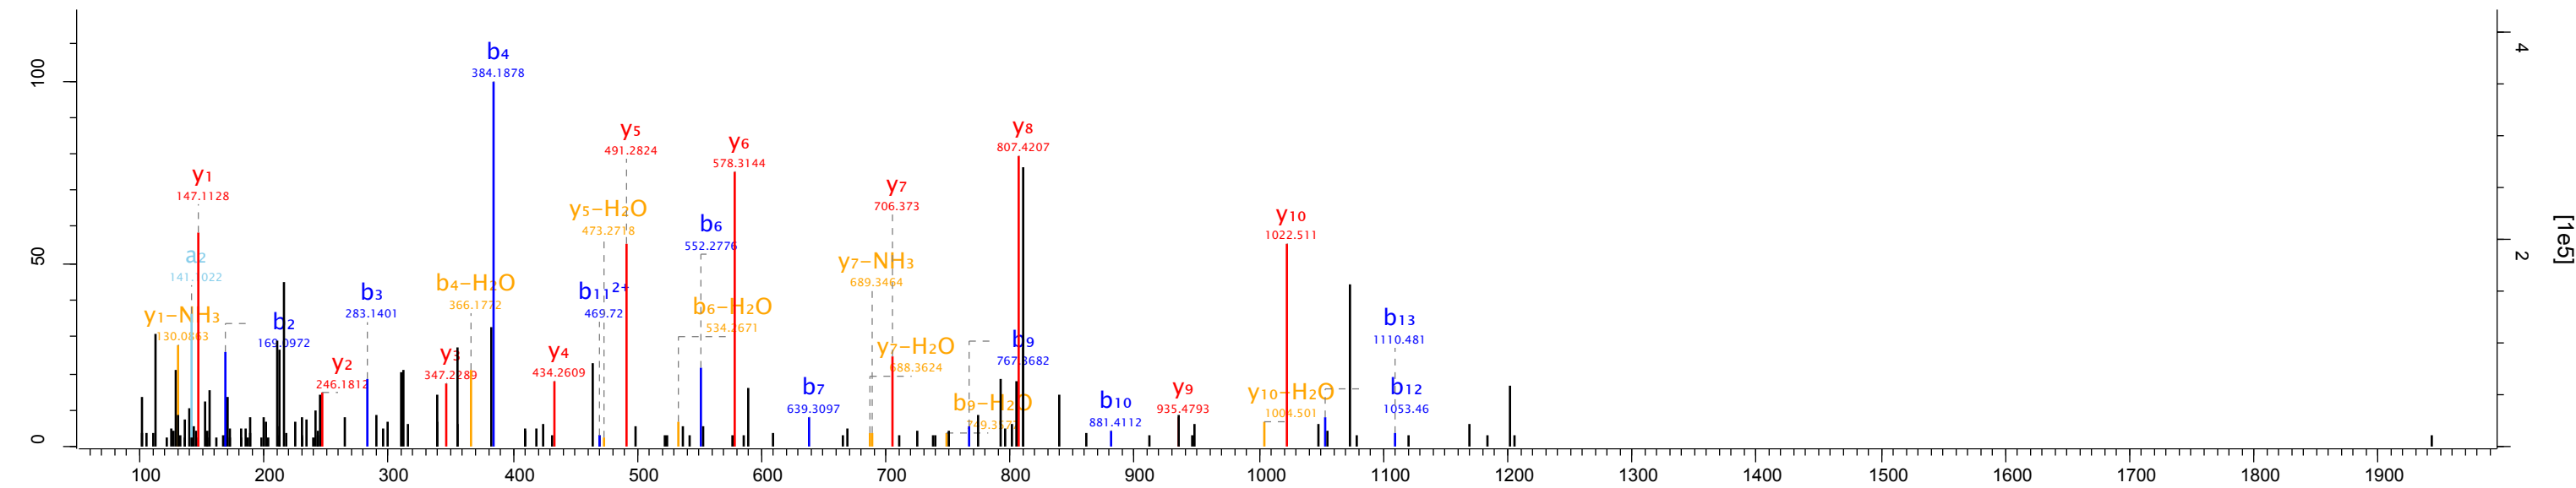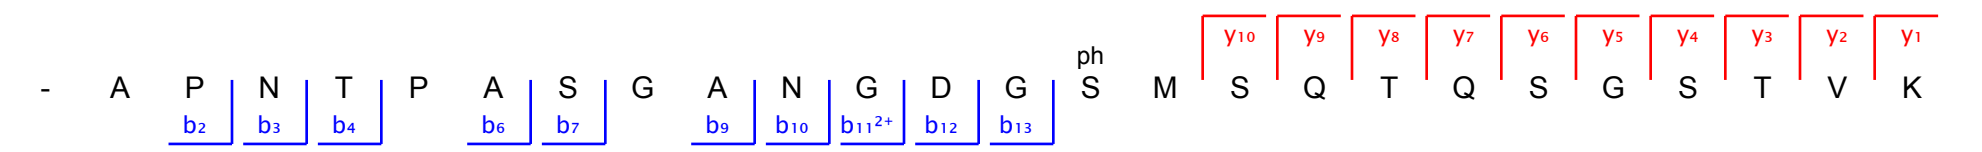

Raw file 20171215\_MaS\_33SR\_LMH\_proteome\_02 Scan 49416 Method FTMS; HCD Score 41.58 m/z 751.83

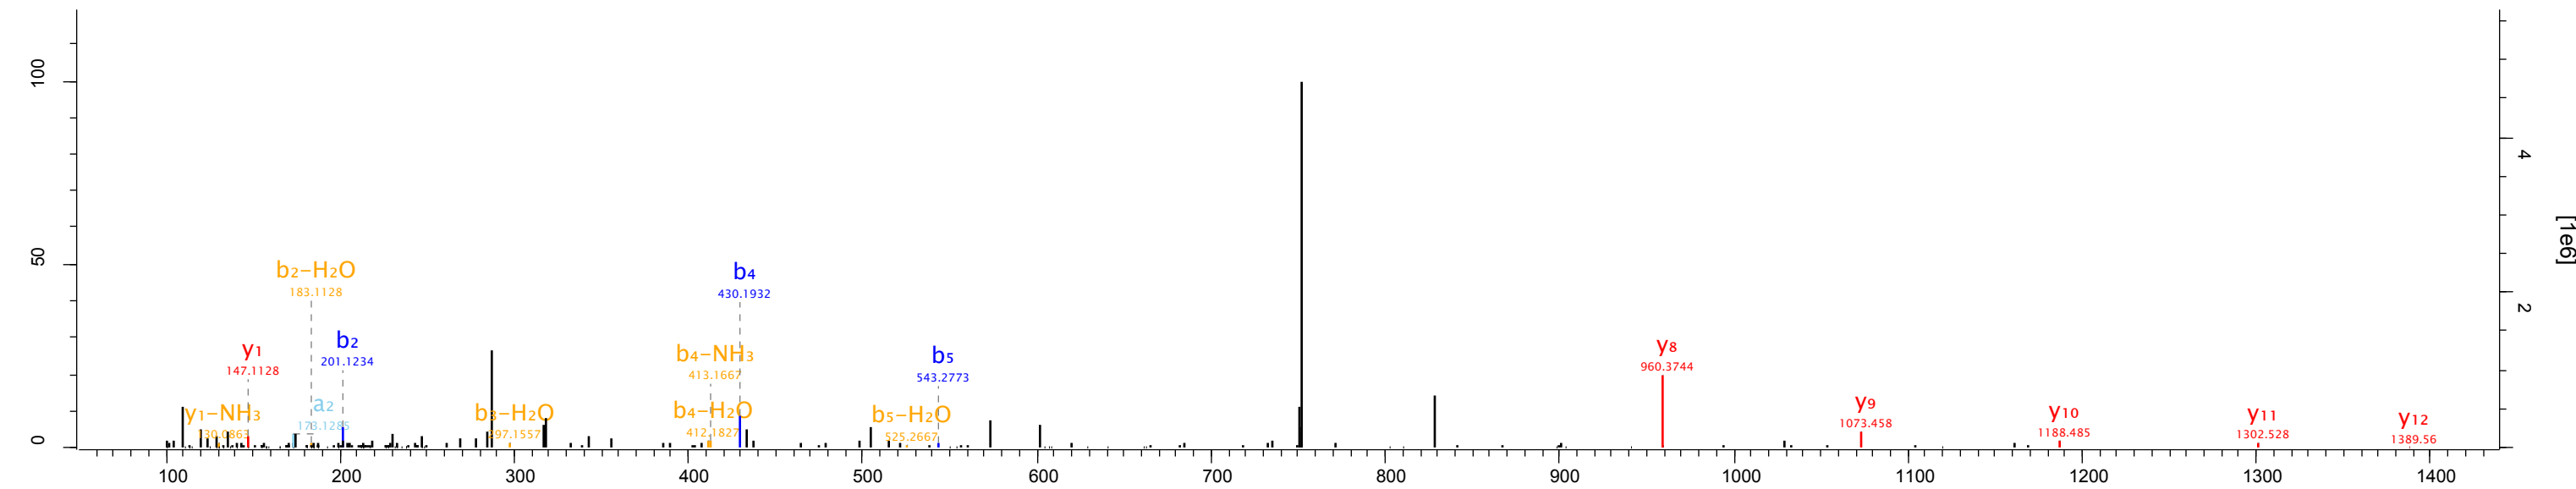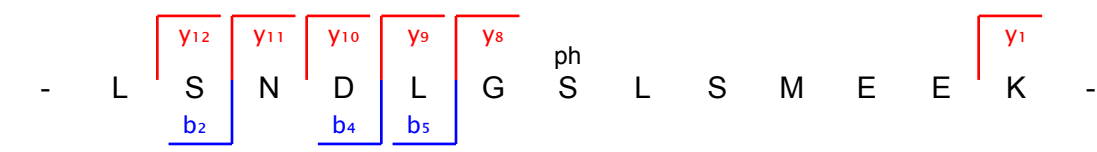

Raw file 20171215\_MaS\_33SR\_LMH\_proteome\_02 Scan 7166 Method FTMS; HCD Score 42 m/z 853.37

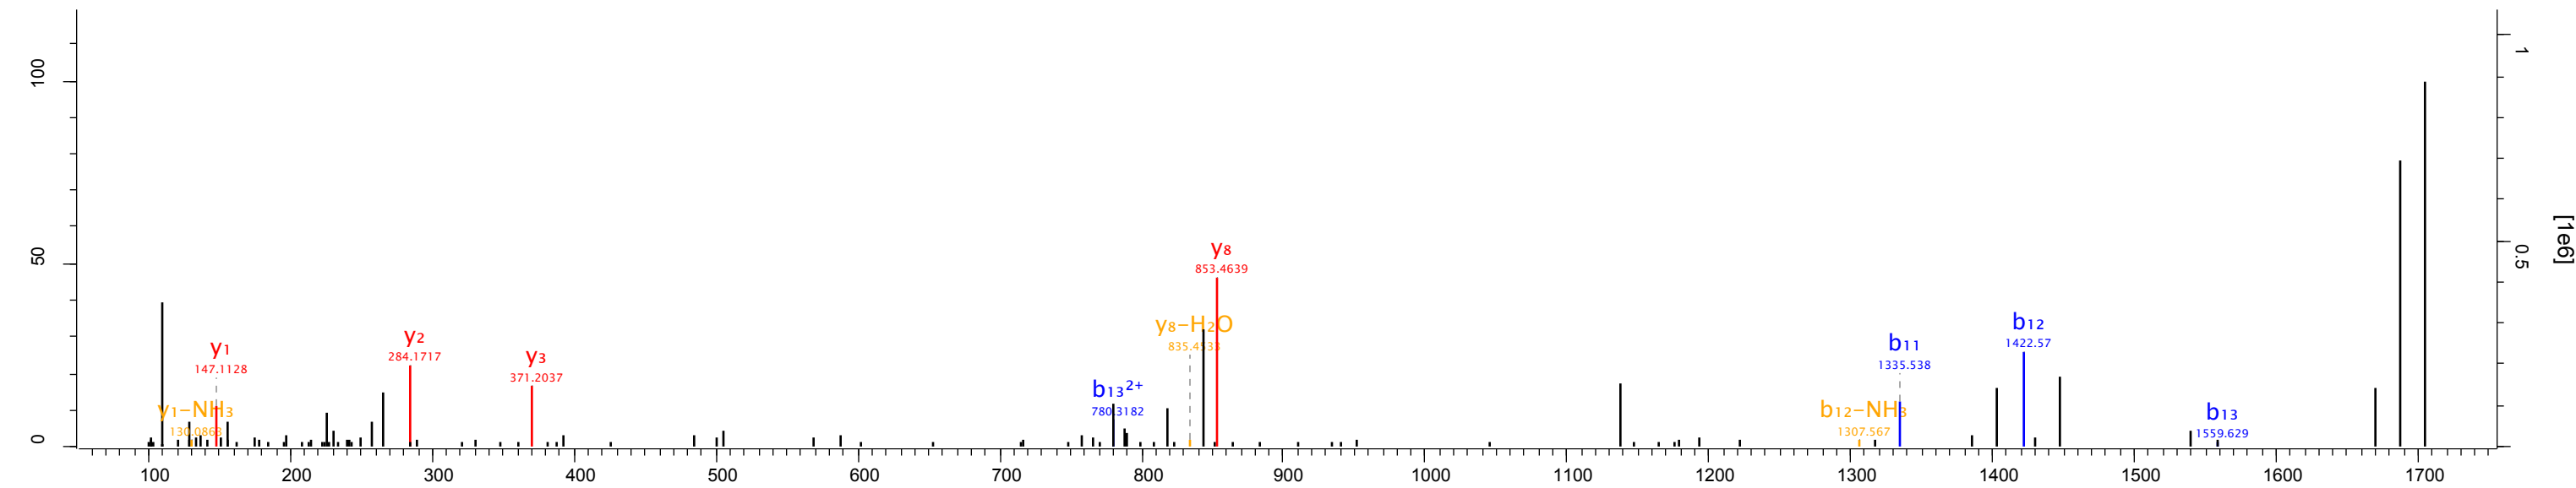

- L S S E Y L A S R A P S H K -

Fragmentation labels above the sequence:

- $y_8$  above A
- $y_3$  above S
- $y_2$  above H
- $y_1$  above K

Fragmentation labels below the sequence:

- $b_{11}$  below P
- $b_{12}$  below S
- $b_{13}$  below H

Raw file 20171215\_MaS\_33SR\_LMH\_proteome\_02 Scan 79686 Method FTMS; HCD Score 56.26 m/z 538.81

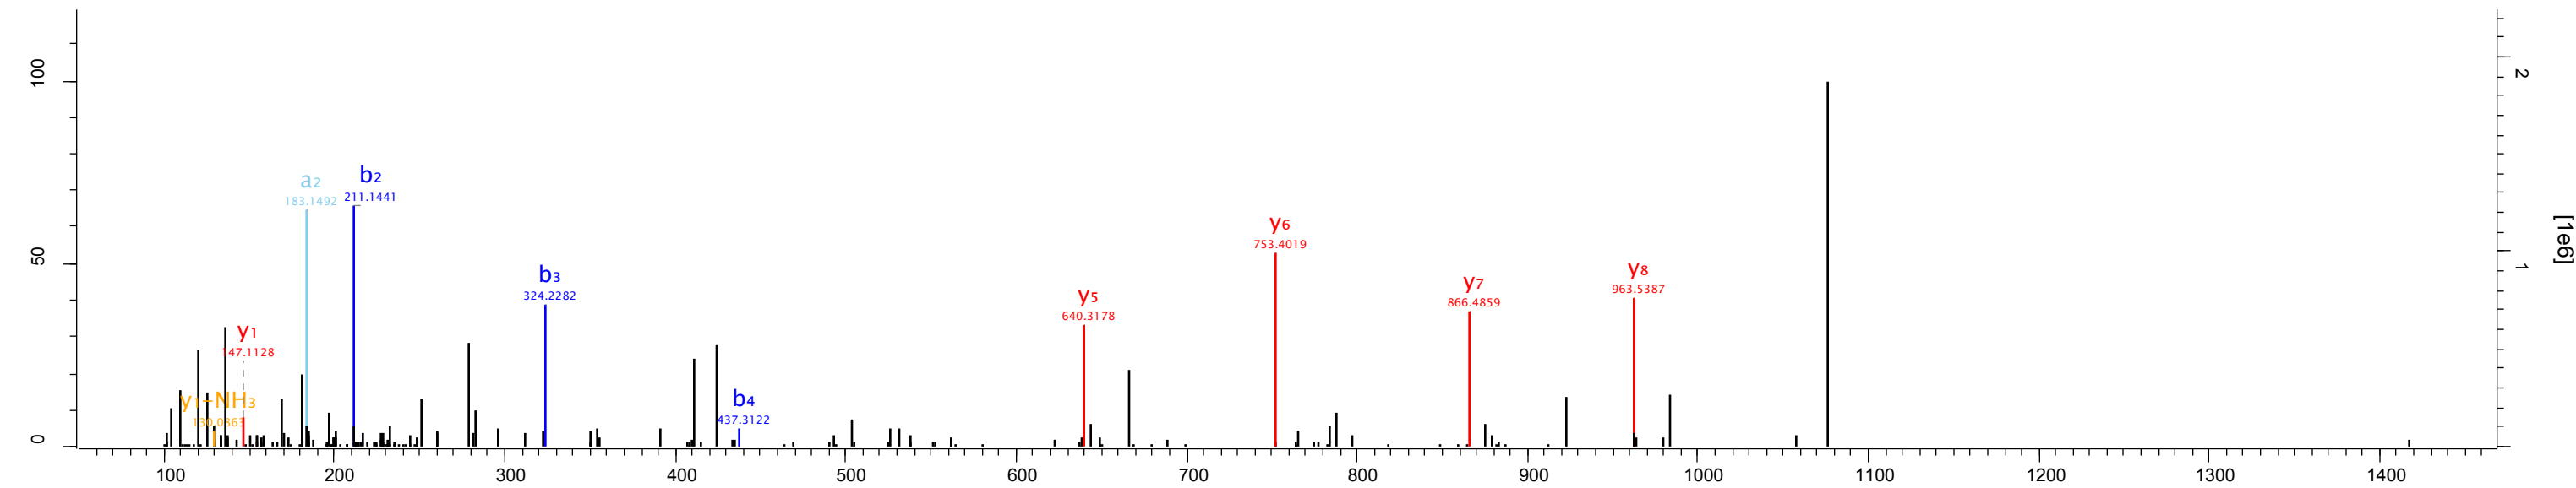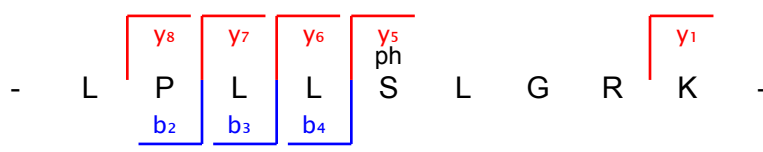

Raw file 20171215\_MaS\_33SR\_LMH\_phospho\_01 Scan 10007 Method FTMS; HCD Score 117.97 m/z 772.78 Gene names BRD1

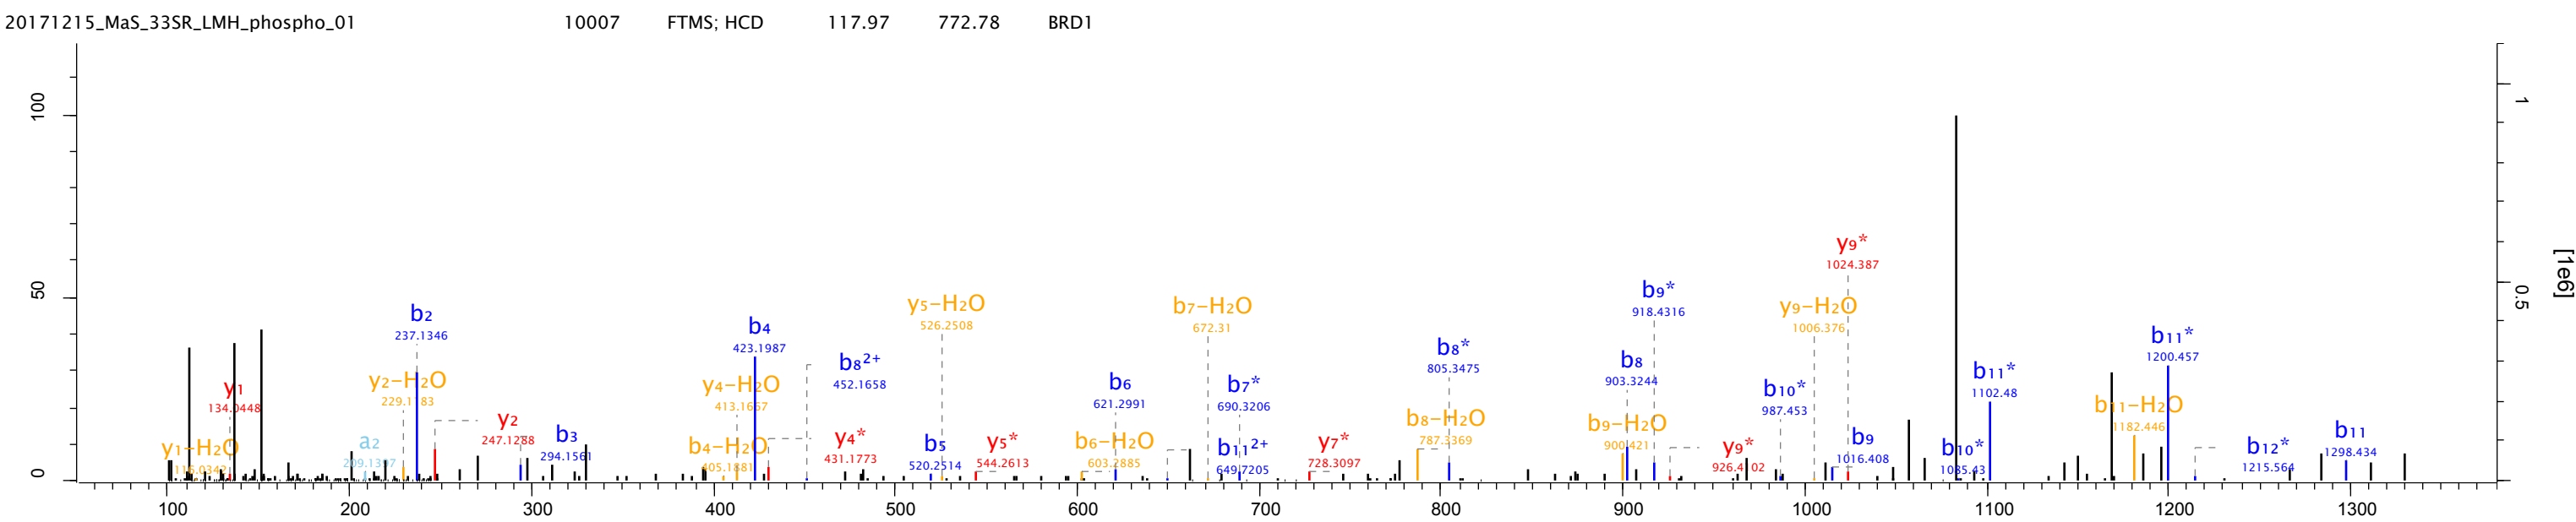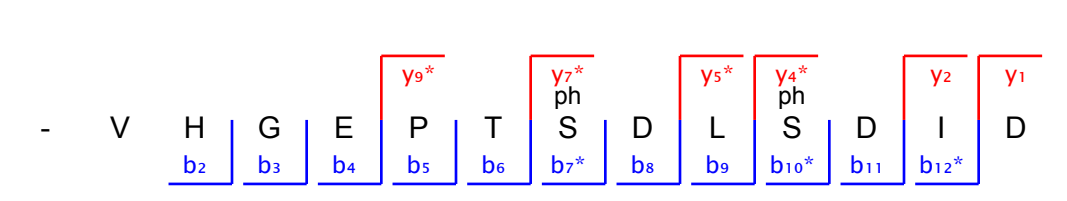

Raw file 20171215\_MaS\_33SR\_LMH\_phospho\_01 Scan 2207 Method FTMS; HCD Score 146.68 m/z 860.71 Gene names NUCKS1

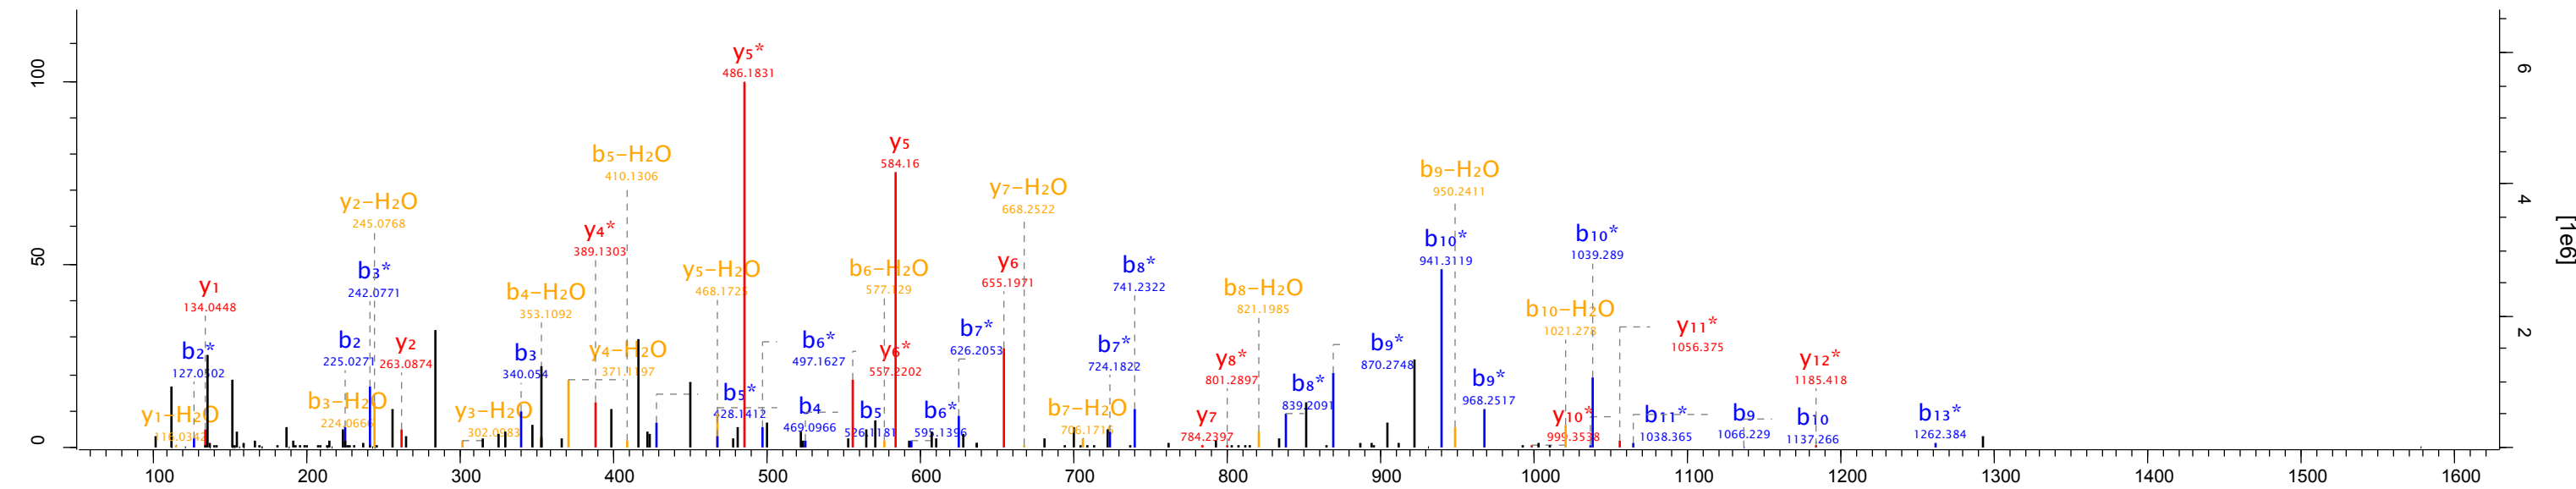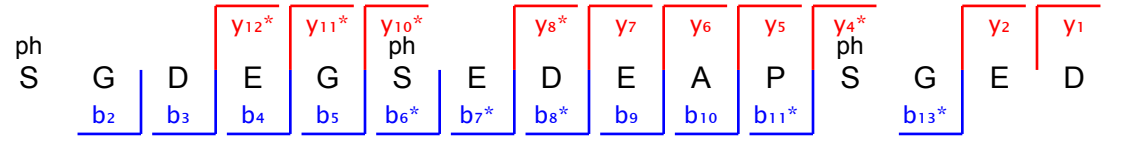



Raw file Scan Method Score m/z Gene names

20171215\_MaS\_33SR\_LMH\_phospho\_01 2827 FTMS; HCD 122.72 1011.38 SRRM1

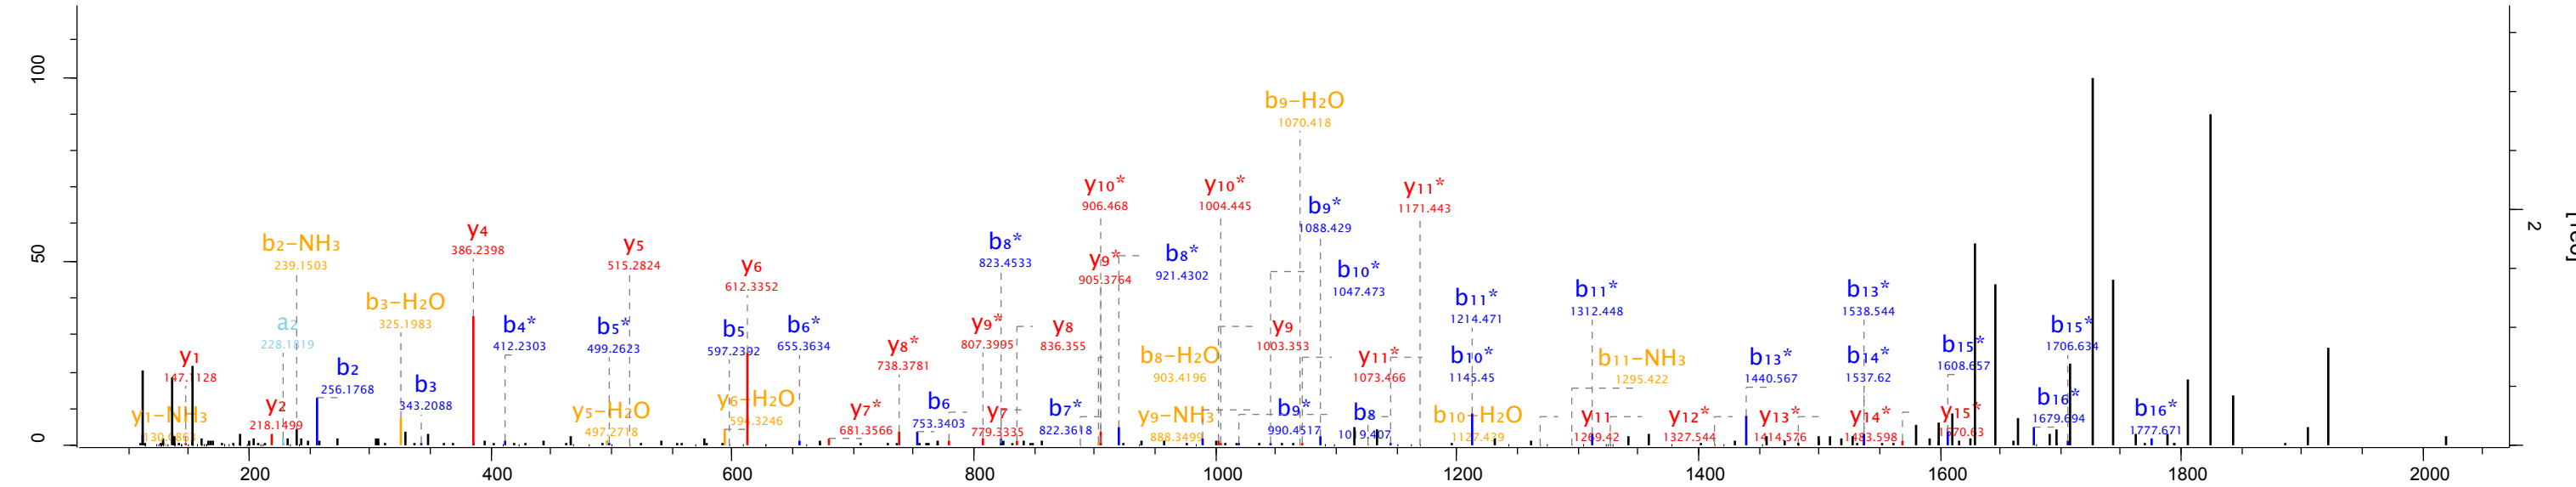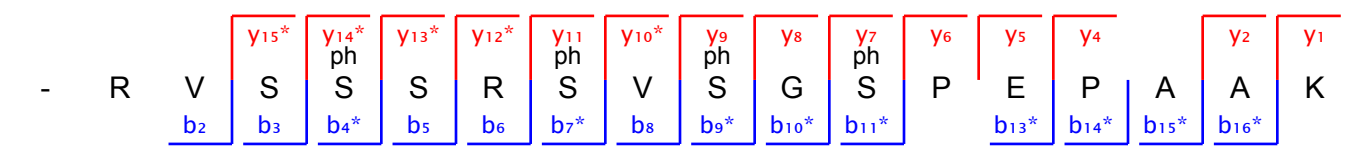

Raw file 20171215\_MaS\_33SR\_LMH\_phospho\_01 Scan 3047 Method FTMS; HCD Score 110.48 m/z 751.25 Gene names IWS1

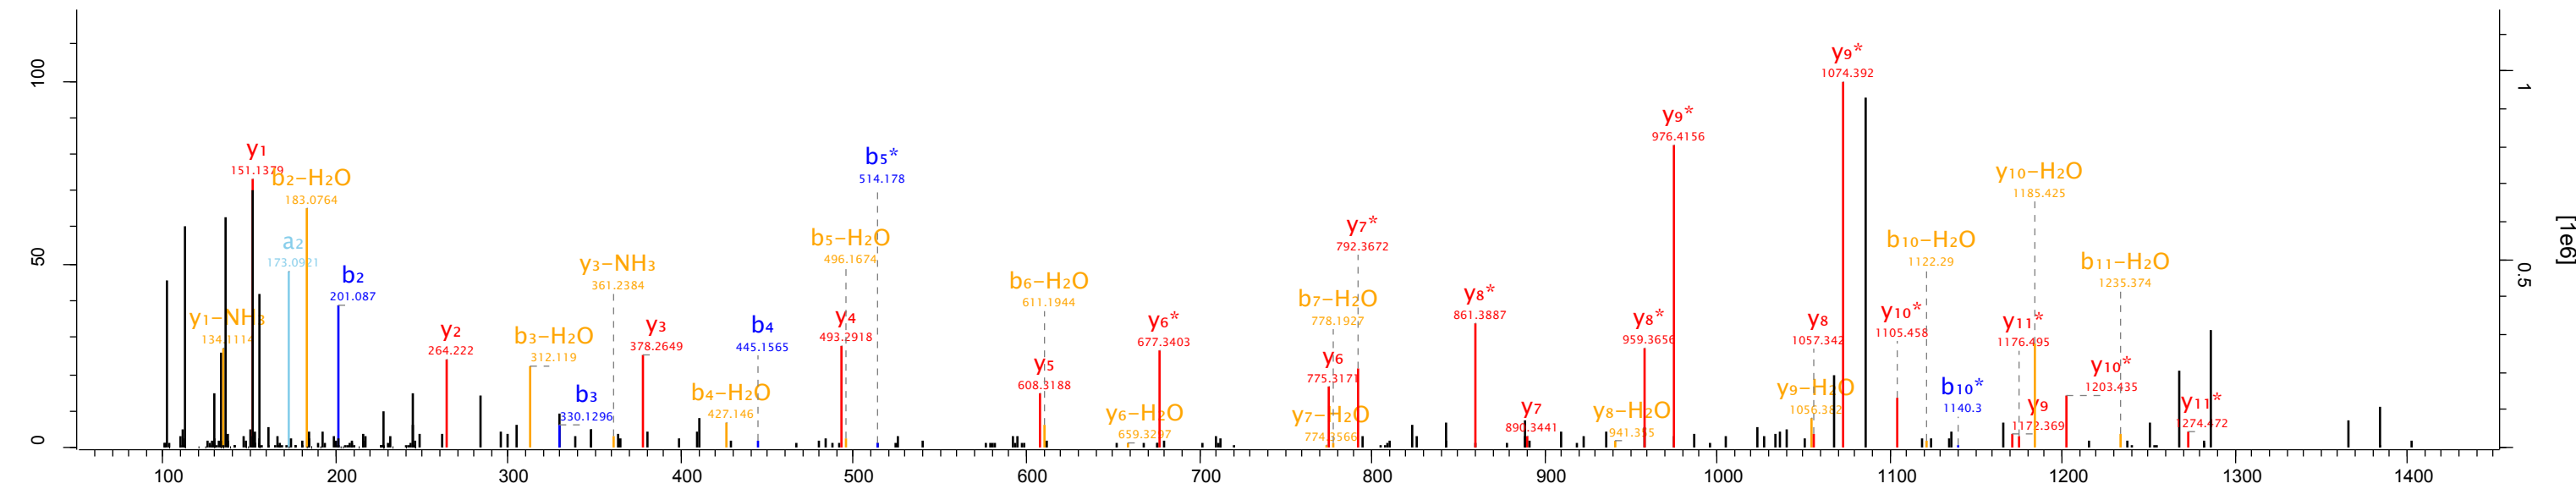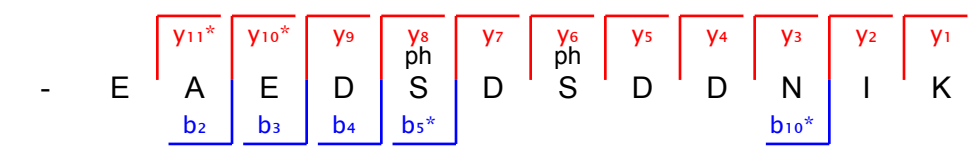

Raw file 20171215\_MaS\_33SR\_LMH\_phospho\_01 Scan 3077 Method FTMS; HCD Score 117.41 m/z 539.23 Gene names SRRM2

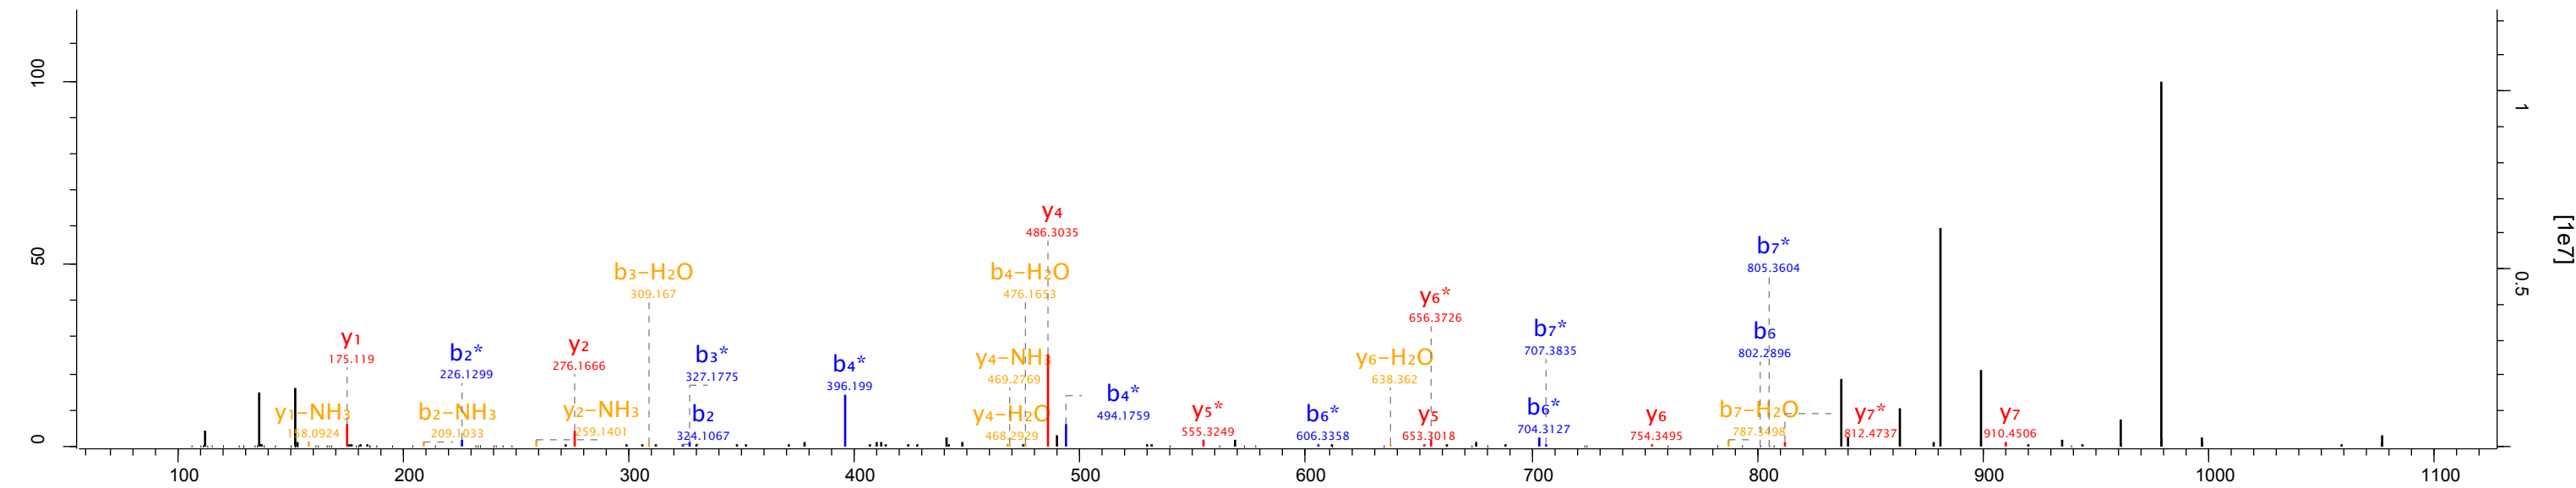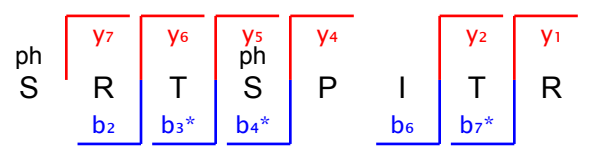

Raw file 20171215\_MaS\_33SR\_LMH\_phospho\_01 Scan 3117 Method FTMS; HCD Score 74.41 m/z 960.87 Gene names NUP214

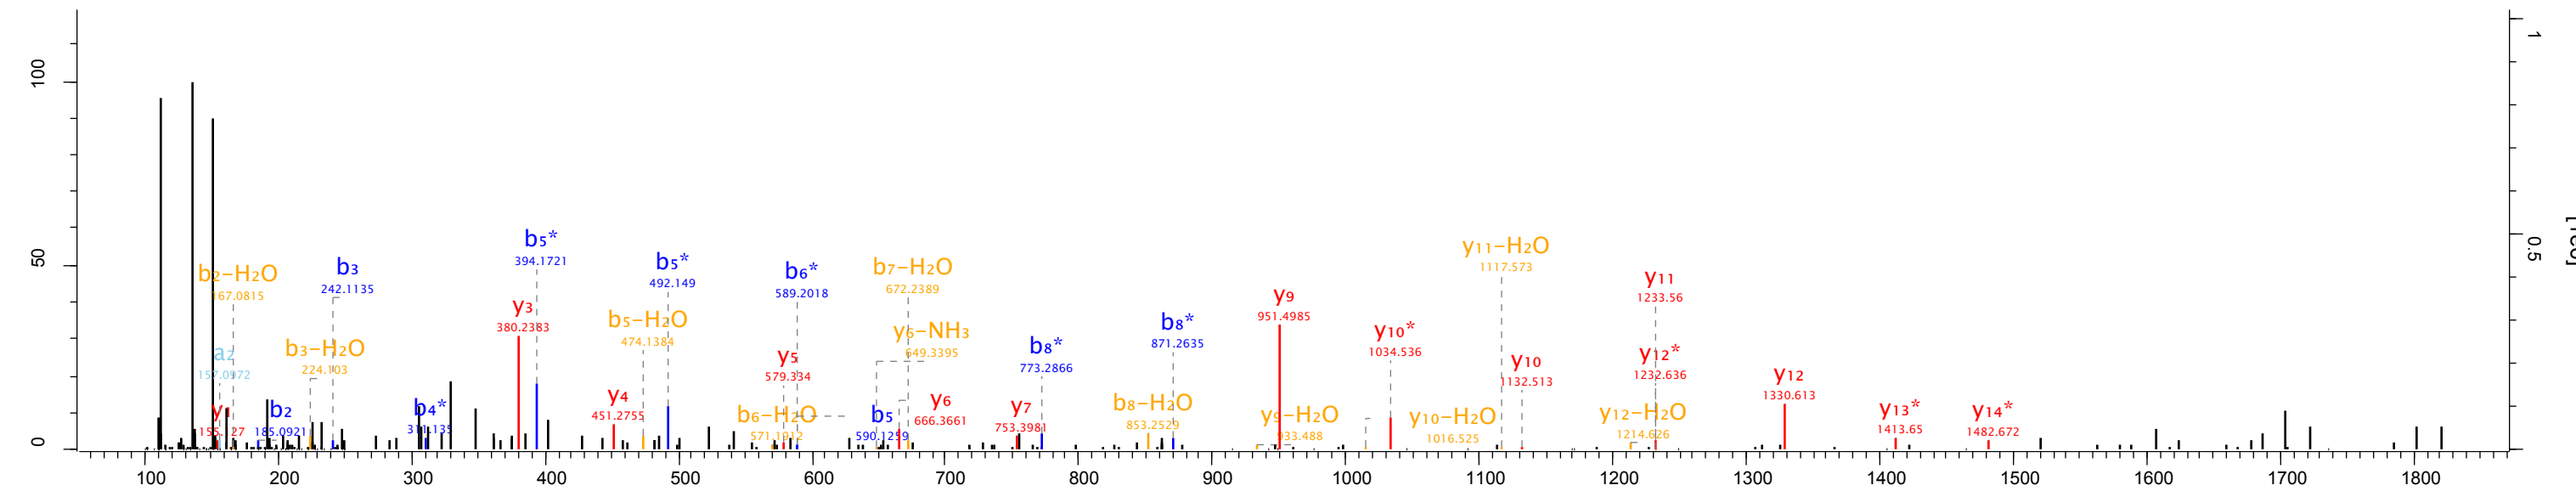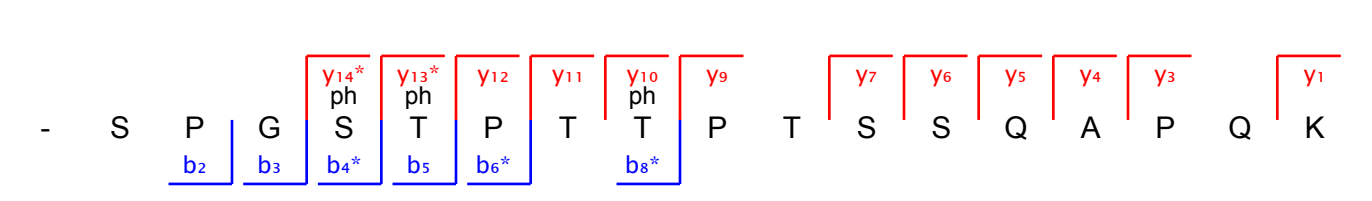

Raw file 20171215\_MaS\_33SR\_LMH\_phospho\_01 Scan 3307 Method FTMS; HCD Score 226 m/z 783.31 Gene names SRRM2

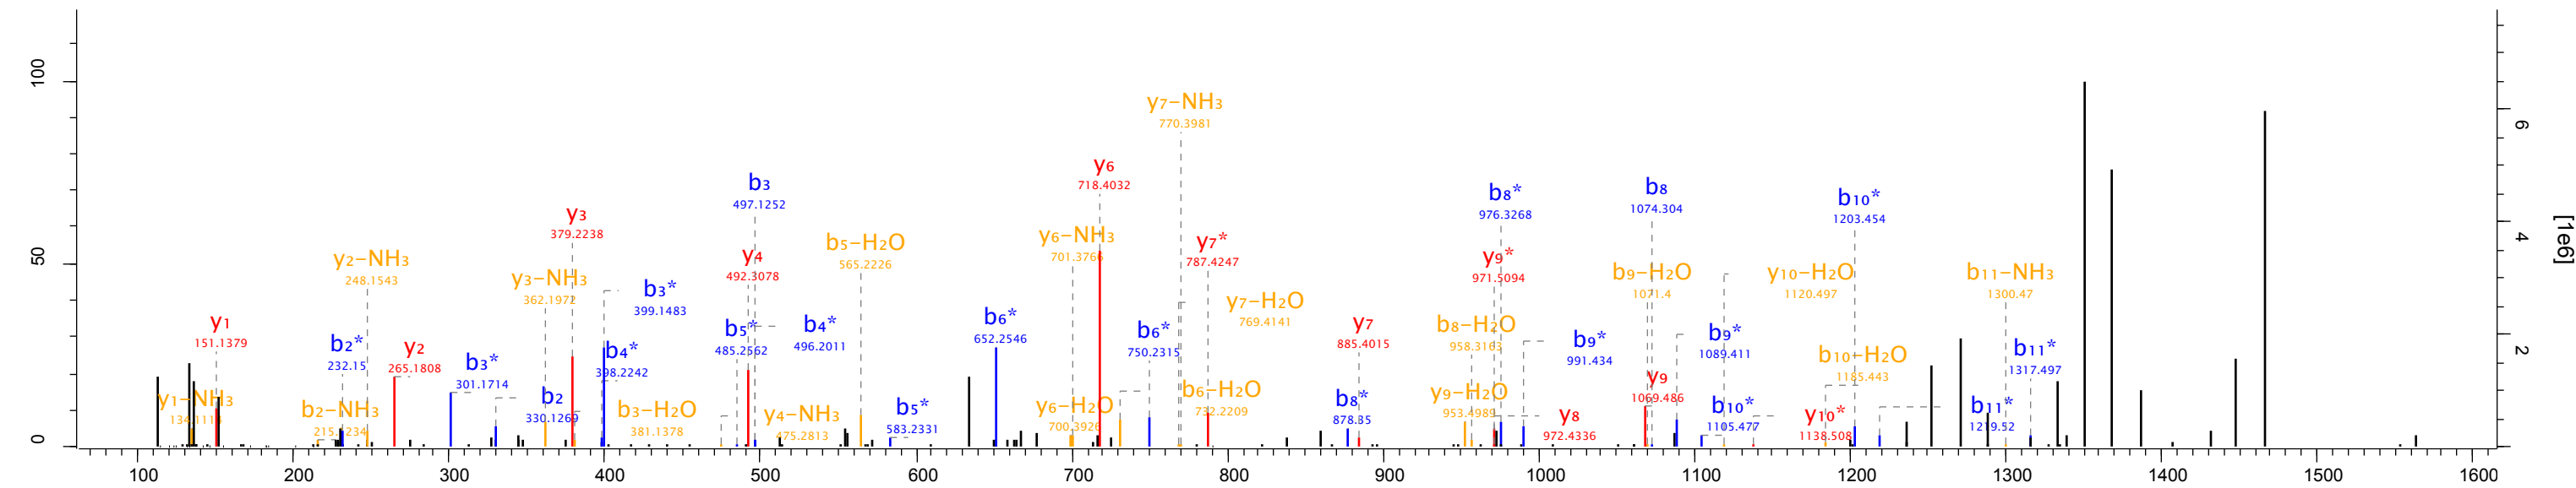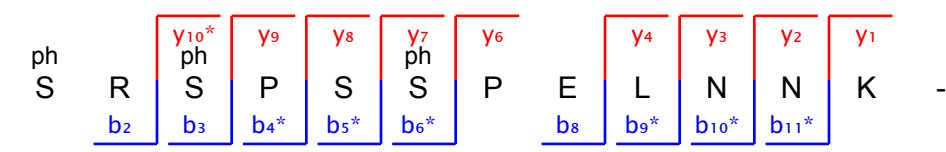

Raw file 20171215\_MaS\_33SR\_LMH\_phospho\_01 Scan 3447 Method FTMS; HCD Score 164.22 m/z 727.23 Gene names TRA2B

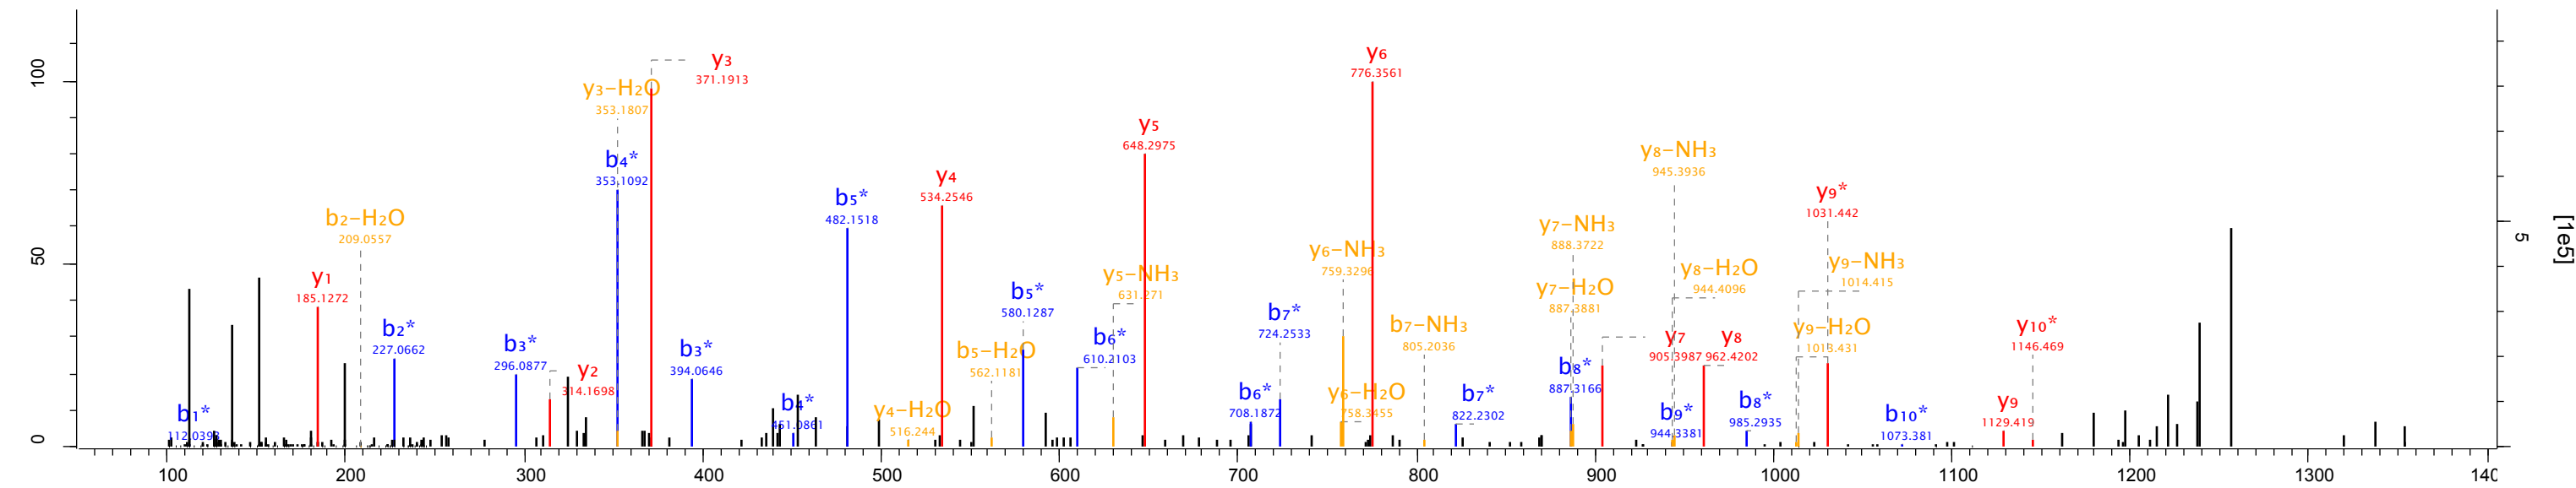

ac - ph S **y<sub>10</sub>\*** **y<sub>9</sub>** **y<sub>8</sub>** **y<sub>7</sub>** **y<sub>6</sub>** **y<sub>5</sub>** **y<sub>4</sub>** **y<sub>3</sub>** **y<sub>2</sub>** **y<sub>1</sub>**  
 S D S G E Q N Y G E R -  
 b<sub>1</sub>\* b<sub>2</sub>\* b<sub>3</sub>\* b<sub>4</sub>\* b<sub>5</sub>\* b<sub>6</sub>\* b<sub>7</sub>\* b<sub>8</sub>\* b<sub>9</sub>\* b<sub>10</sub>\*

Raw file 20171215\_MaS\_33SR\_LMH\_phospho\_01 Scan 4547 Method FTMS; HCD Score 42.38 m/z 717.28 Gene names SPTBN1

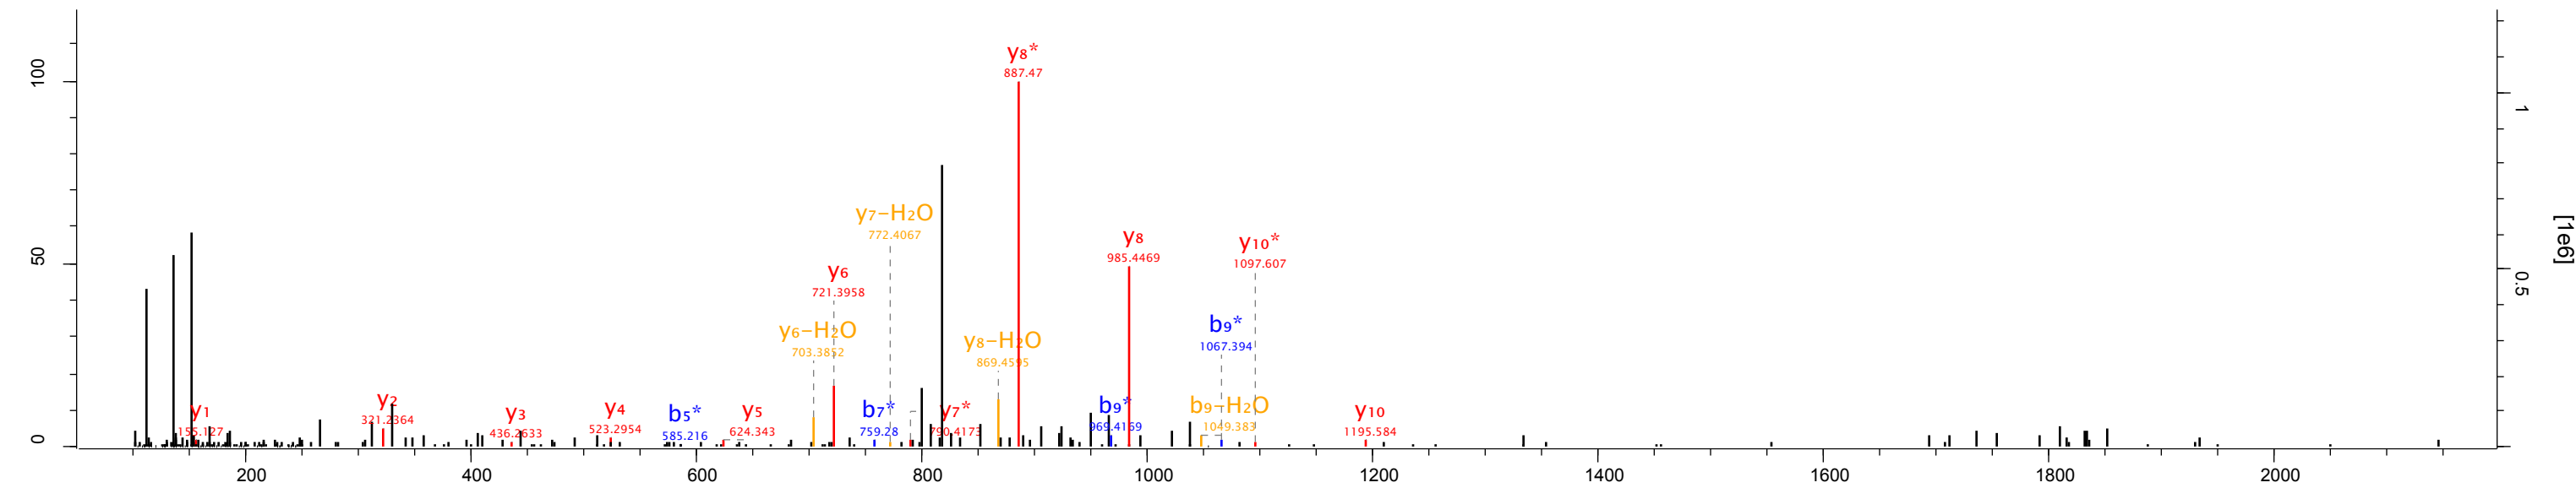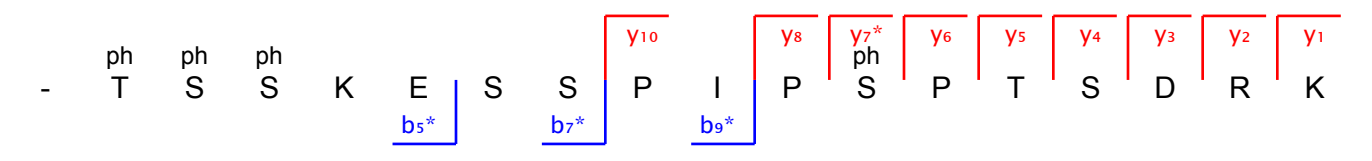

Raw file 20171215\_MaS\_33SR\_LMH\_phospho\_01 Scan 4867 Method FTMS; HCD Score 83.13 m/z 871.27 Gene names SSRP1

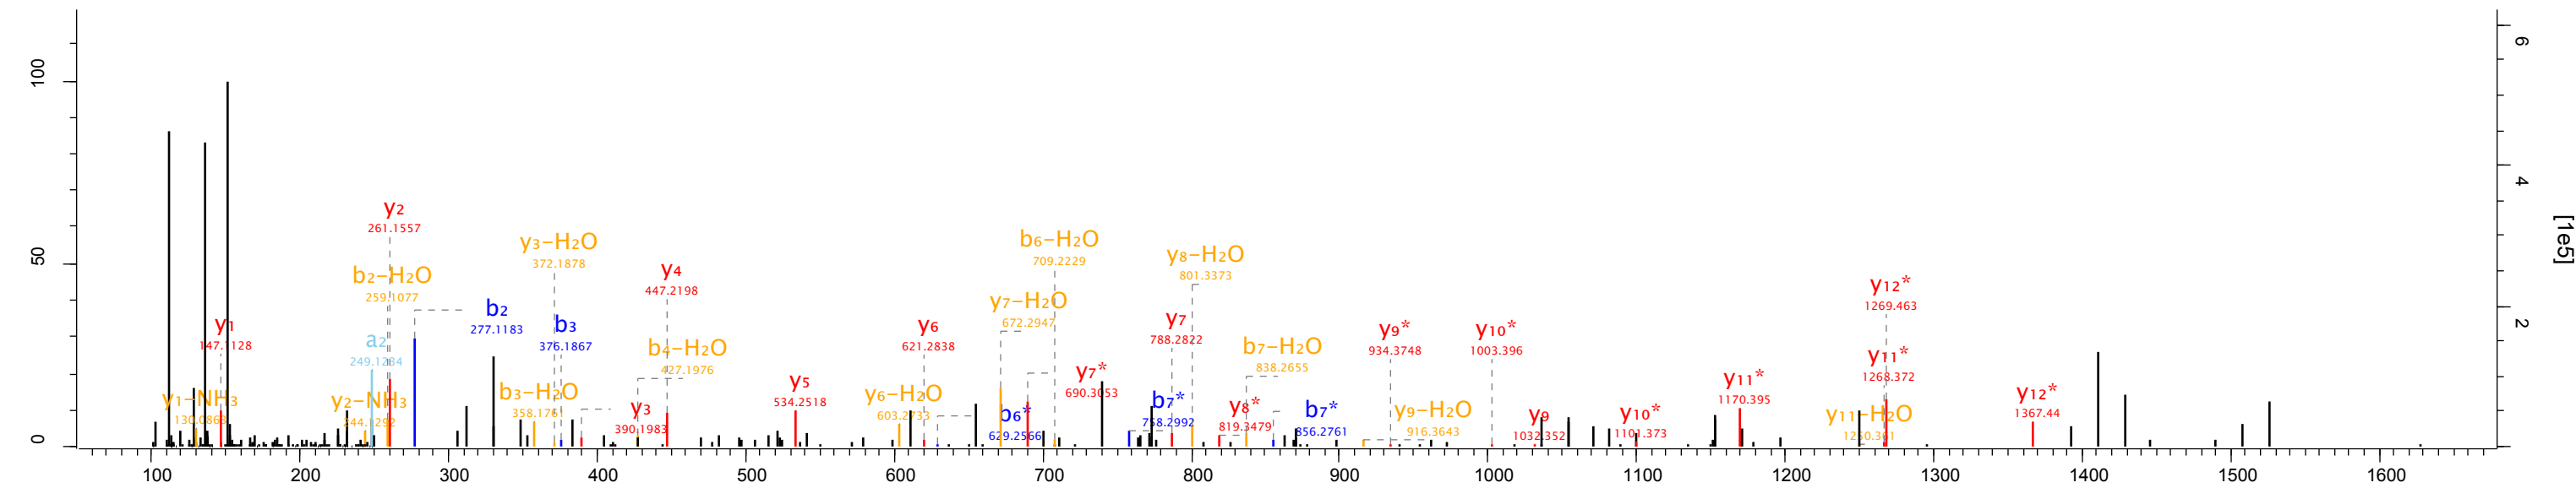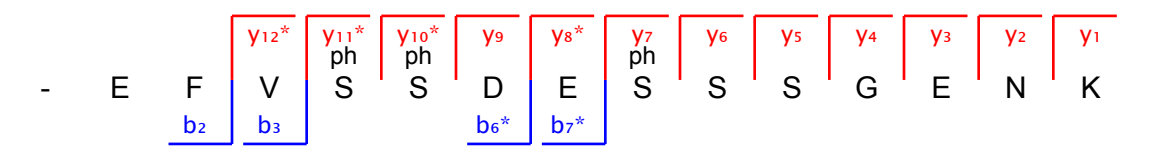



Raw file 20171215\_MaS\_33SR\_LMH\_phospho\_01 Scan 5467 Method FTMS; HCD Score 211.78 m/z 939.39 Gene names IRF2BPL

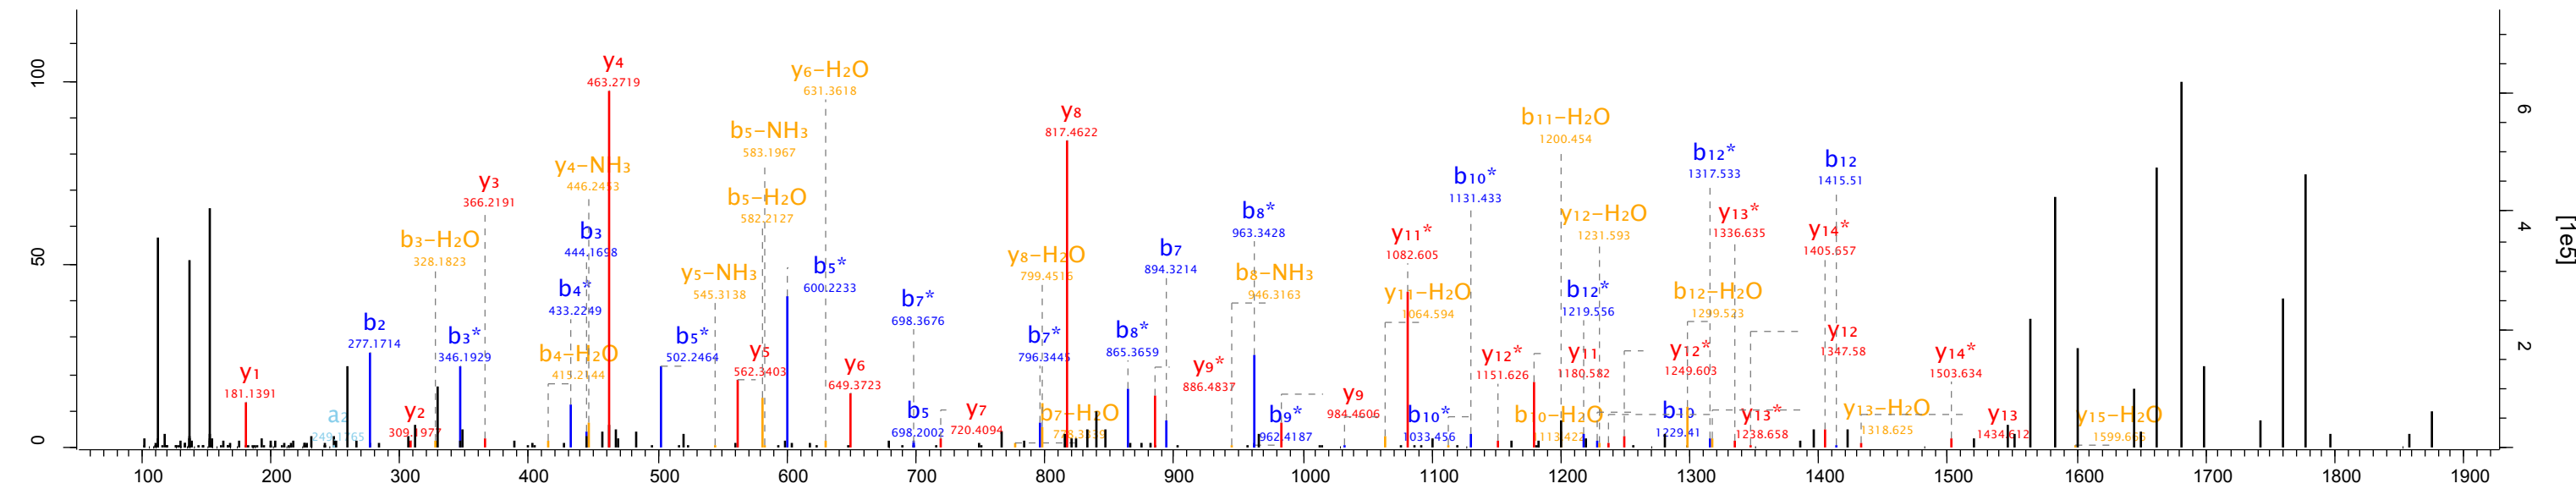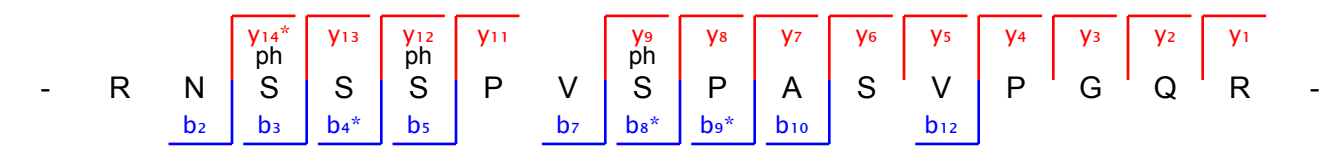

Raw file 20171215\_MaS\_33SR\_LMH\_phospho\_01 Scan 5987 Method FTMS; HCD Score 101.3 m/z 855.81 Gene names IRS2

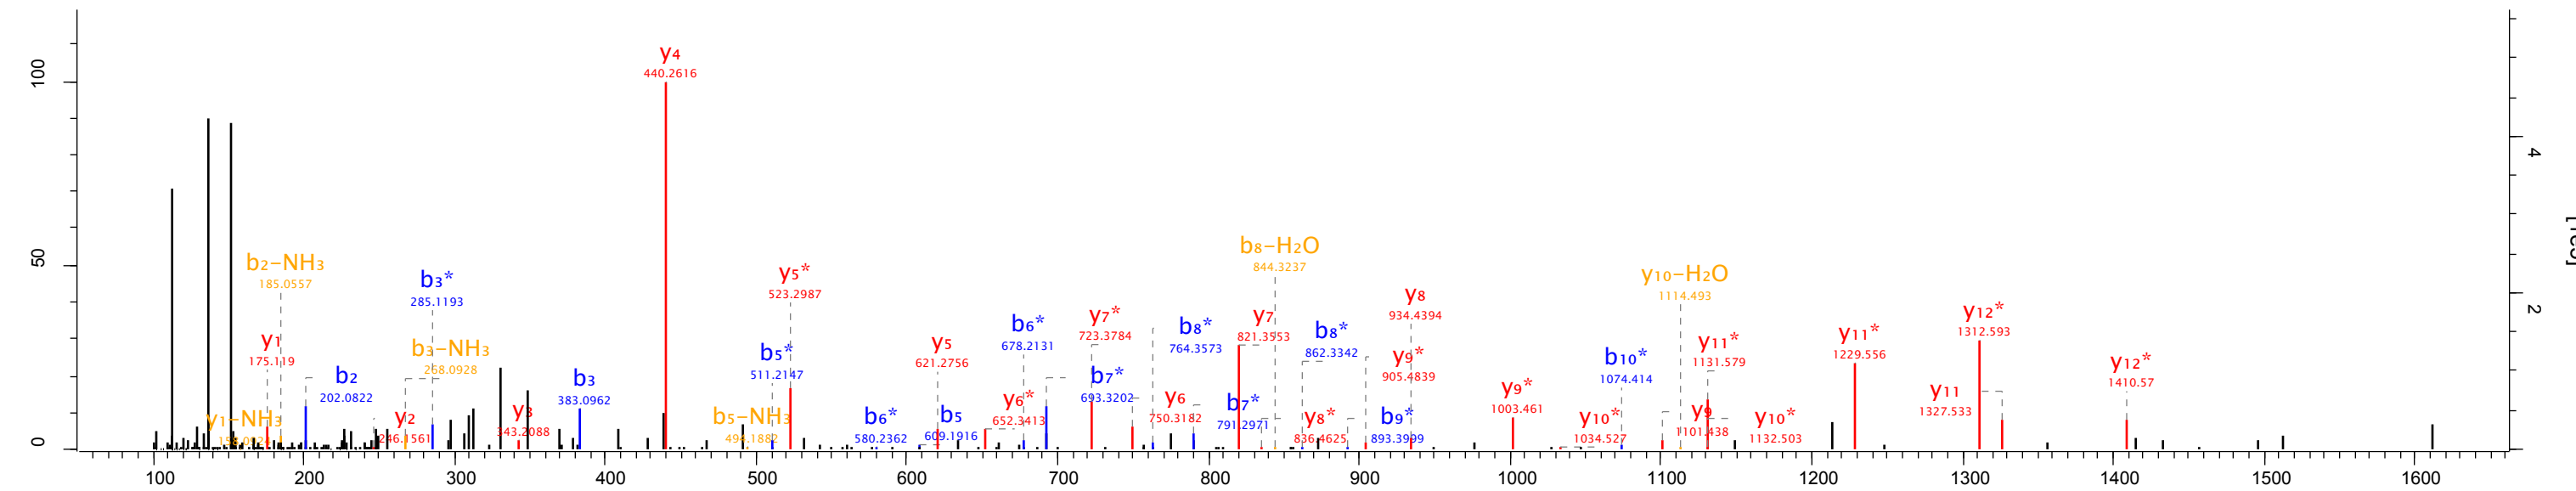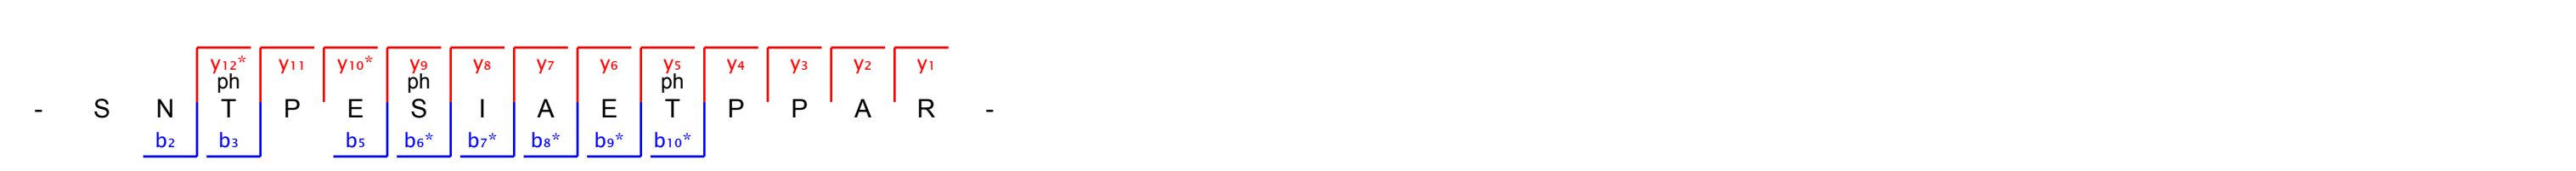

Raw file 20171215\_MaS\_33SR\_LMH\_phospho\_01 Scan 6427 Method FTMS; HCD Score 73.28 m/z 655.25 Gene names AAK1

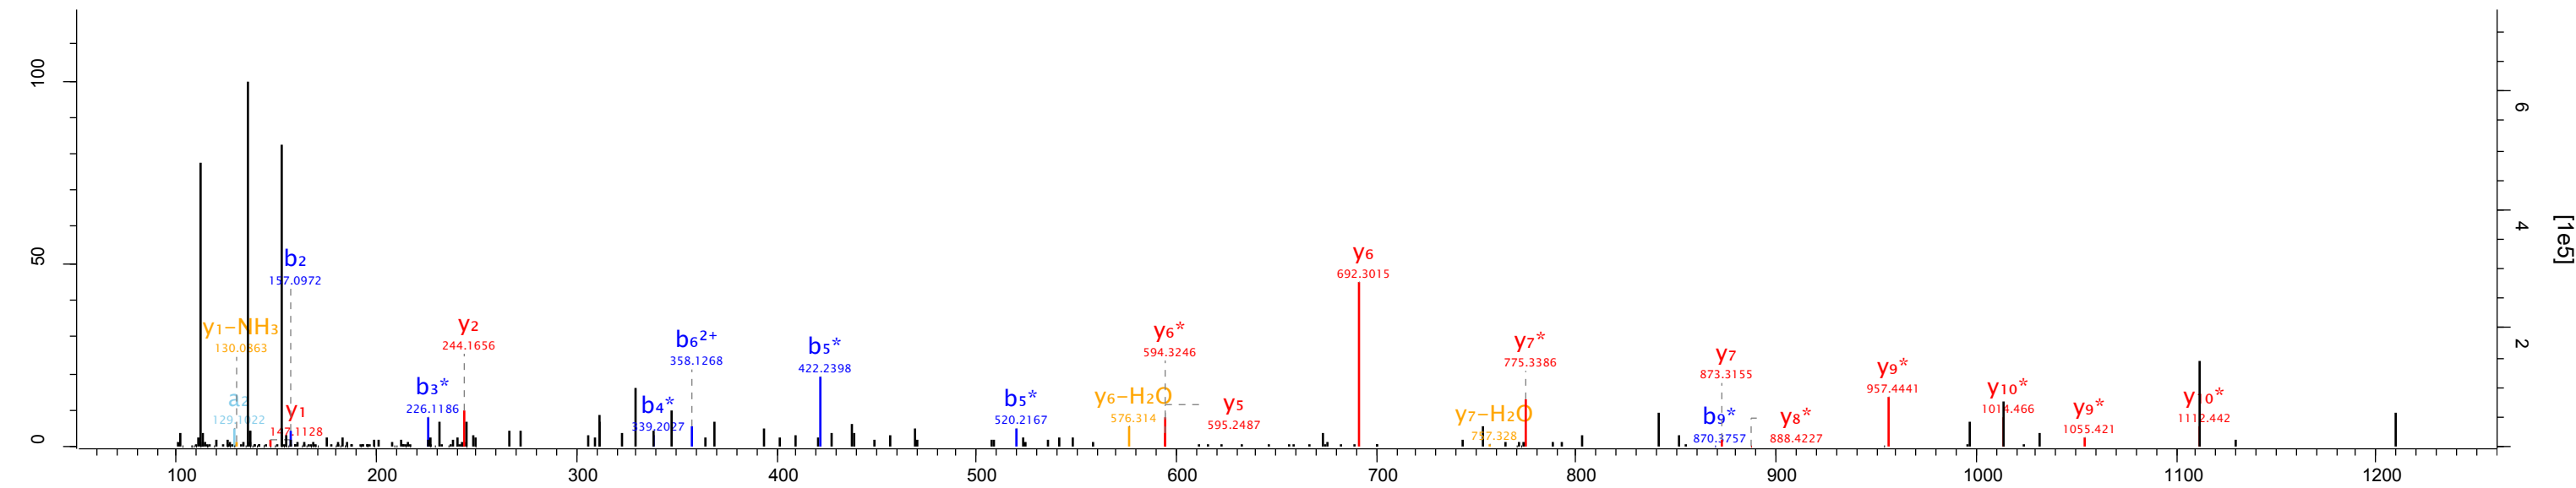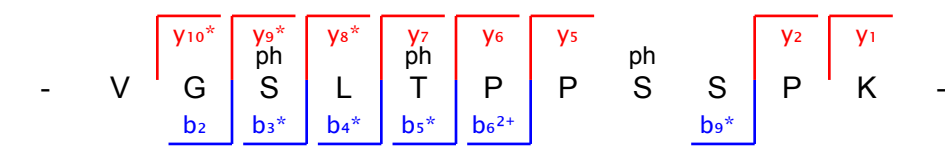

Raw file 20171215\_MaS\_33SR\_LMH\_phospho\_01 Scan 6707 Method FTMS; HCD Score 103.46 m/z 530.24 Gene names SRRM2

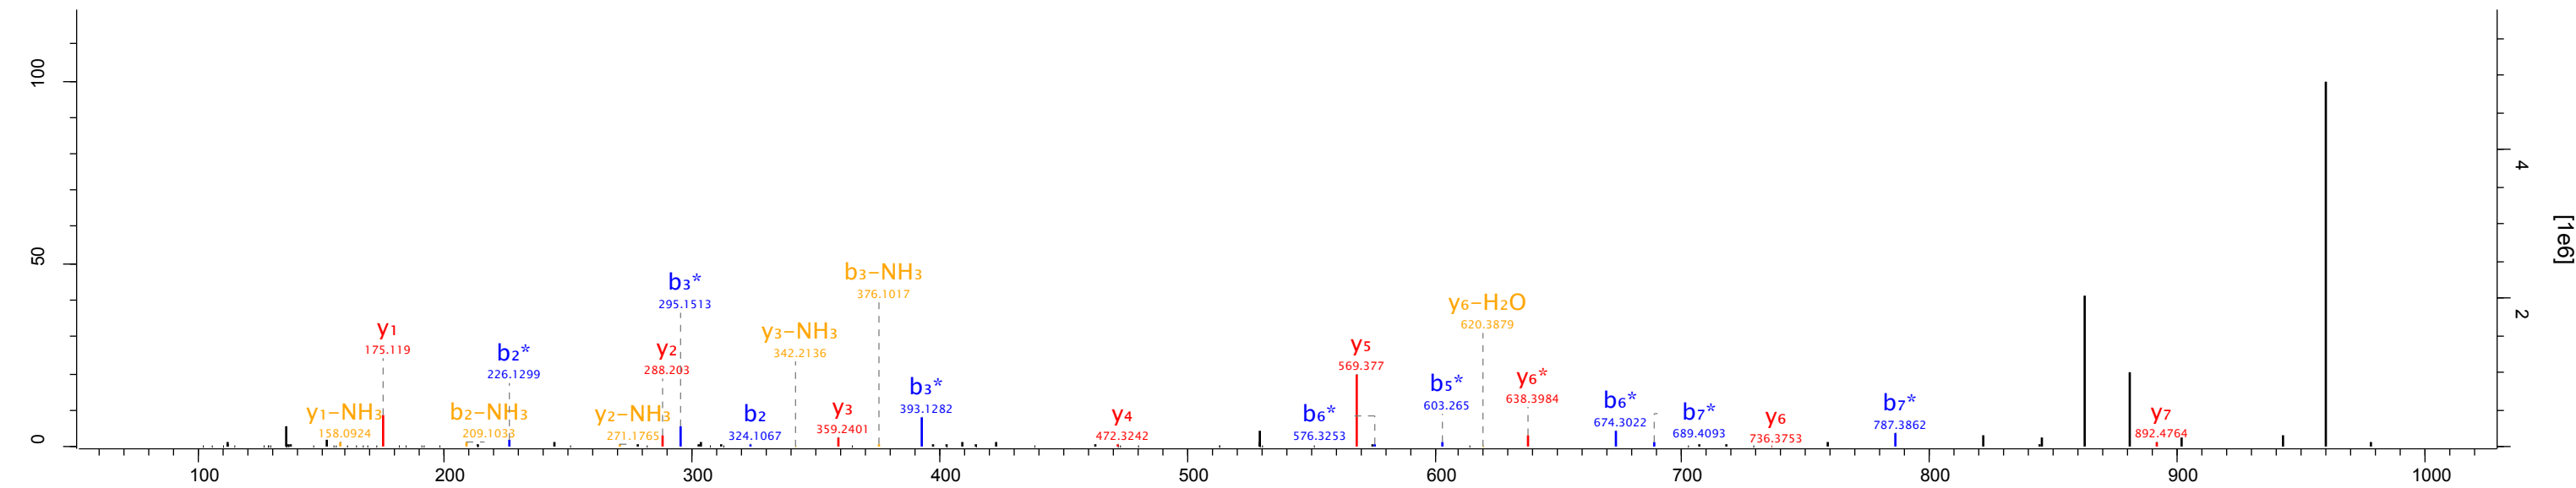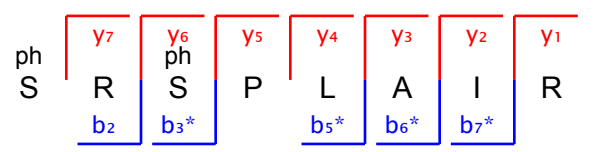

Raw file 20171215\_MaS\_33SR\_LMH\_phospho\_01 Scan 8317 Method FTMS; HCD Score 98.42 m/z 657.75 Gene names ITGB4

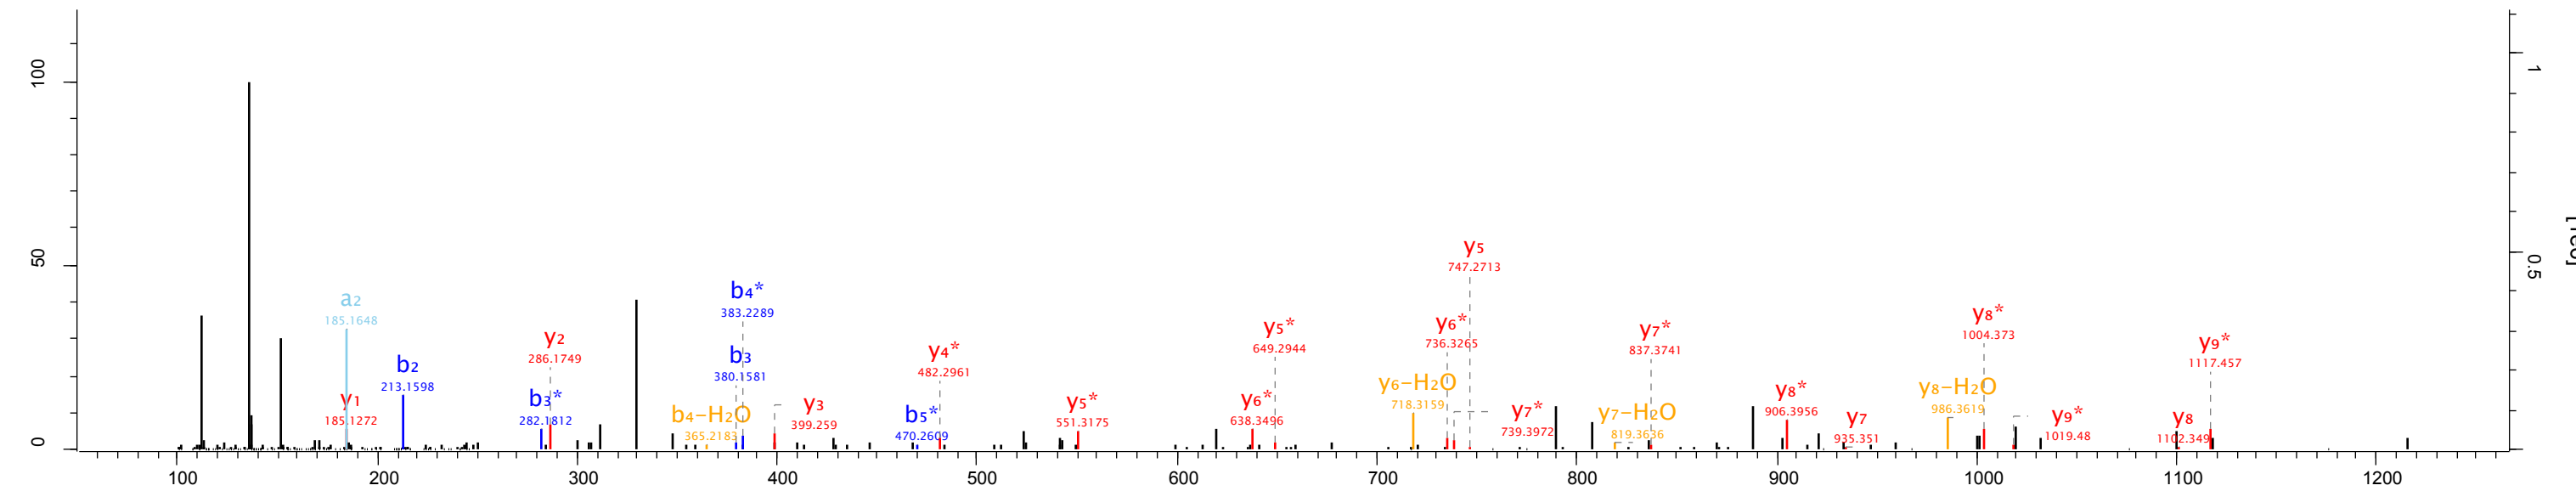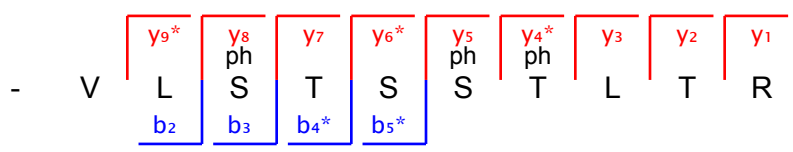

Raw file 20171215\_MaS\_33SR\_LMH\_phospho\_01 Scan 8777 Method FTMS; HCD Score 94.02 m/z 761.76 Gene names PPP4R1

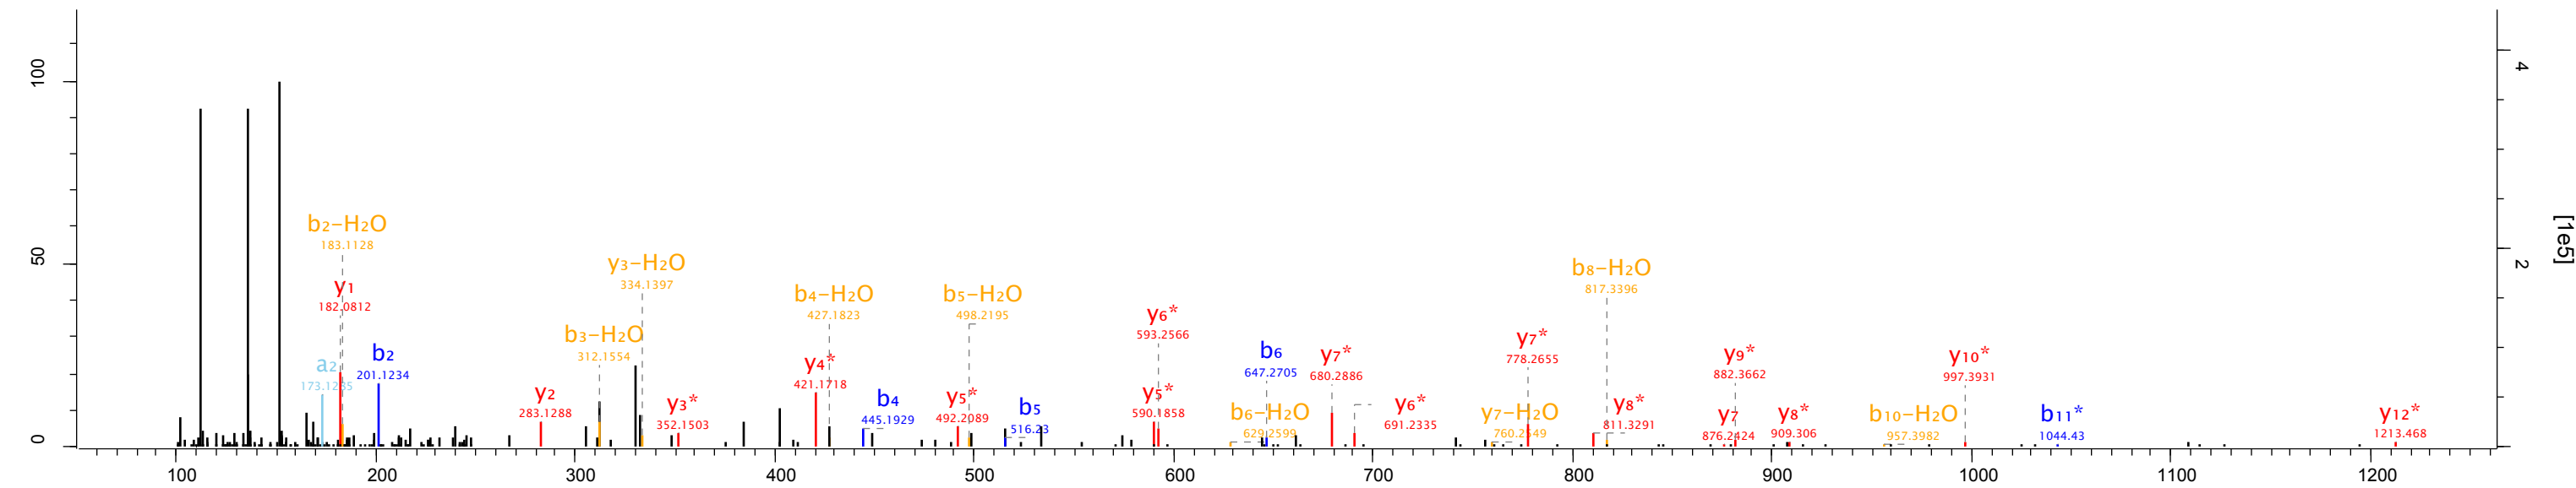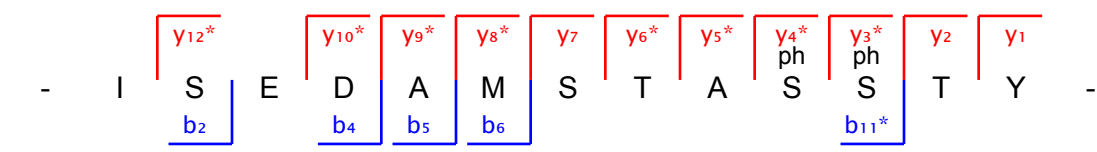

Raw file 20171215\_MaS\_33SR\_LMH\_phospho\_01 Scan 8937 Method FTMS; HCD Score 64.84 m/z 647.26 Gene names SRRM2

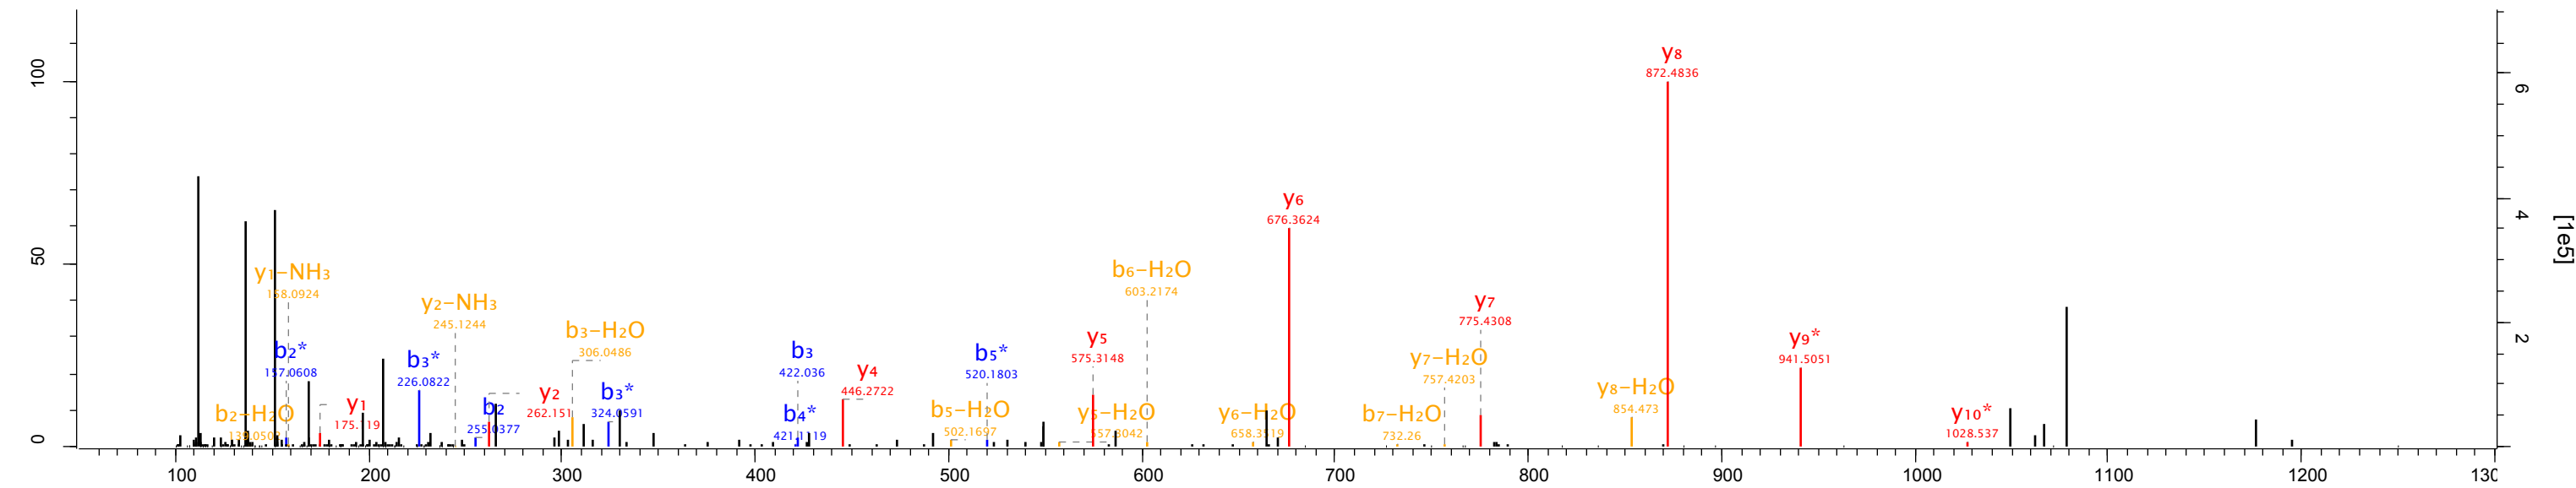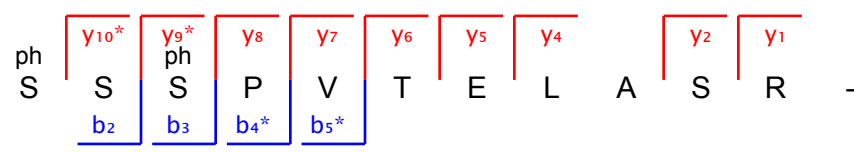

Raw file 20171215\_MaS\_33SR\_LMH\_phospho\_01 Scan 9537 Method FTMS; HCD Score 42.92 m/z 840.33 Gene names POLR2A

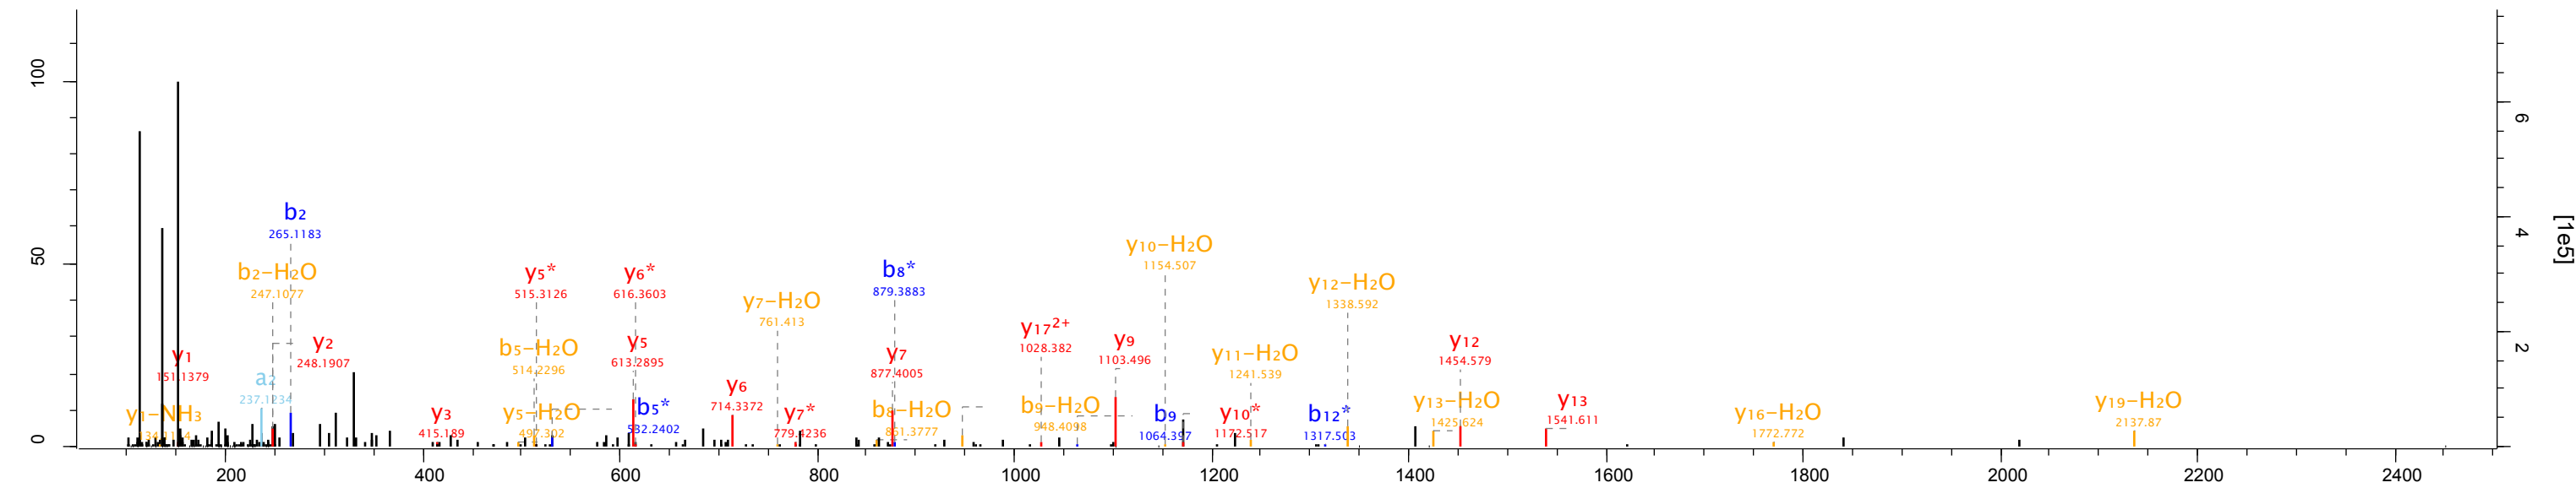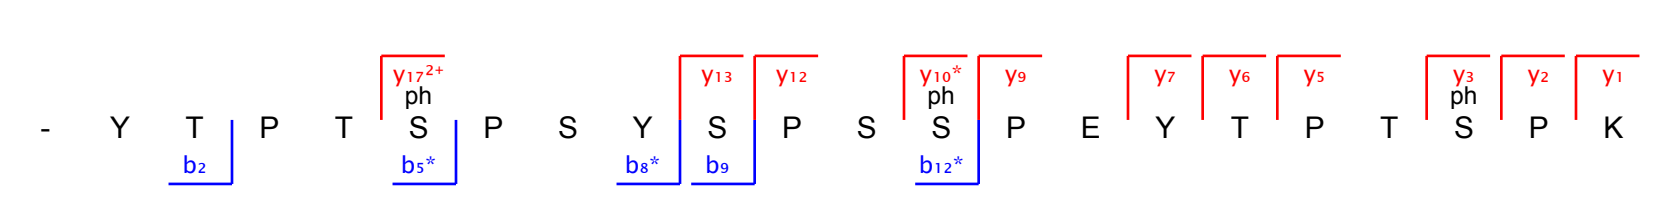



Raw file  
20171215\_MaS\_33SR\_LMH\_phospho\_02

Scan 10047 Method FTMS; HCD Score 107.92 m/z 825.91 Gene names RB1

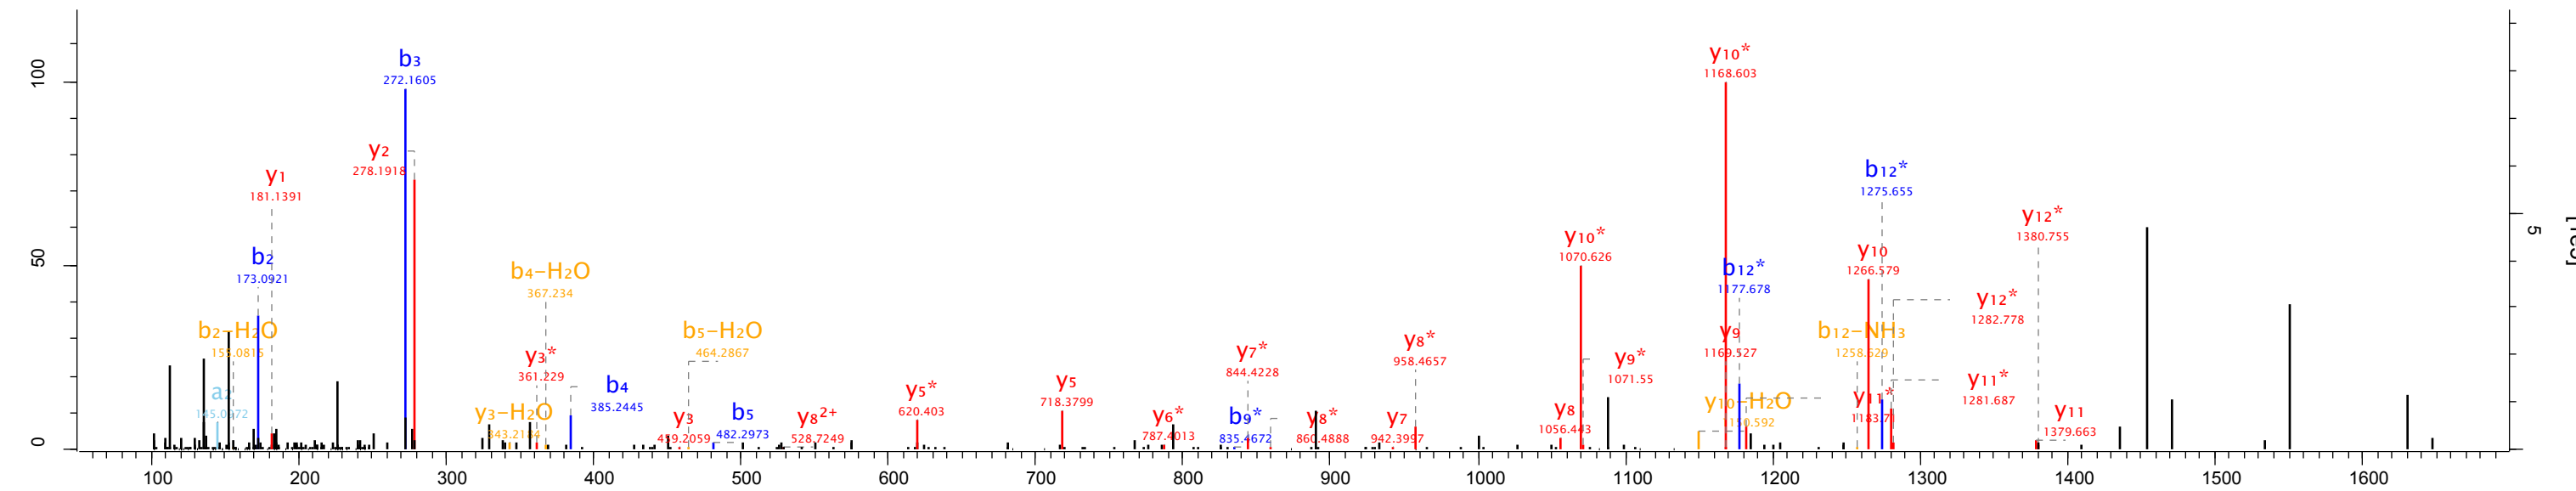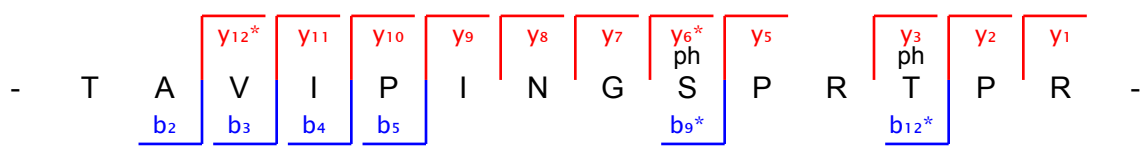

Raw file 20171215\_MaS\_33SR\_LMH\_phospho\_02 Scan 10397 Method FTMS; HCD Score 114.2 m/z 745.97 Gene names PHF14

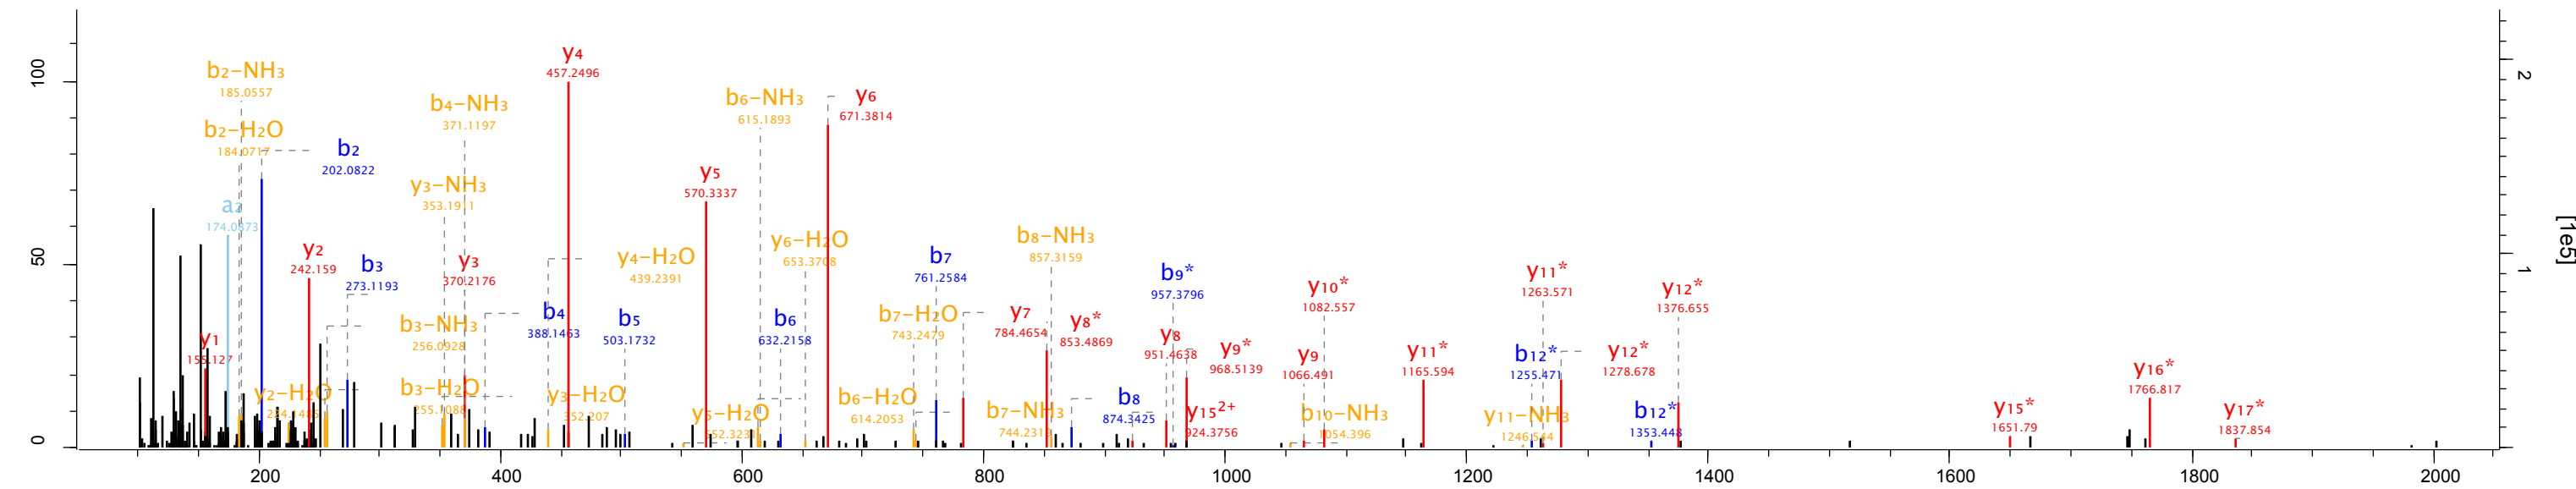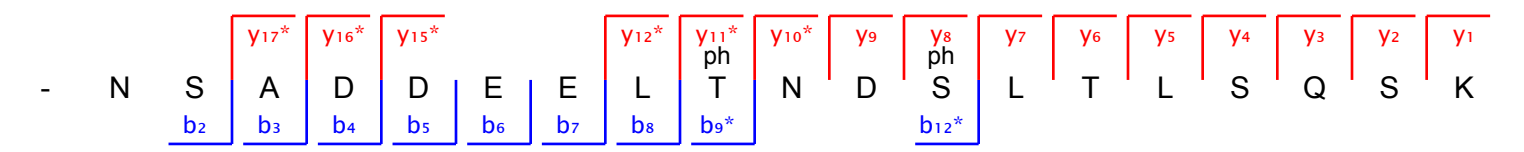

Raw file 20171215\_MaS\_33SR\_LMH\_phospho\_02 Scan 10877 Method FTMS; HCD Score 140.56 m/z 931.86 Gene names ATRX

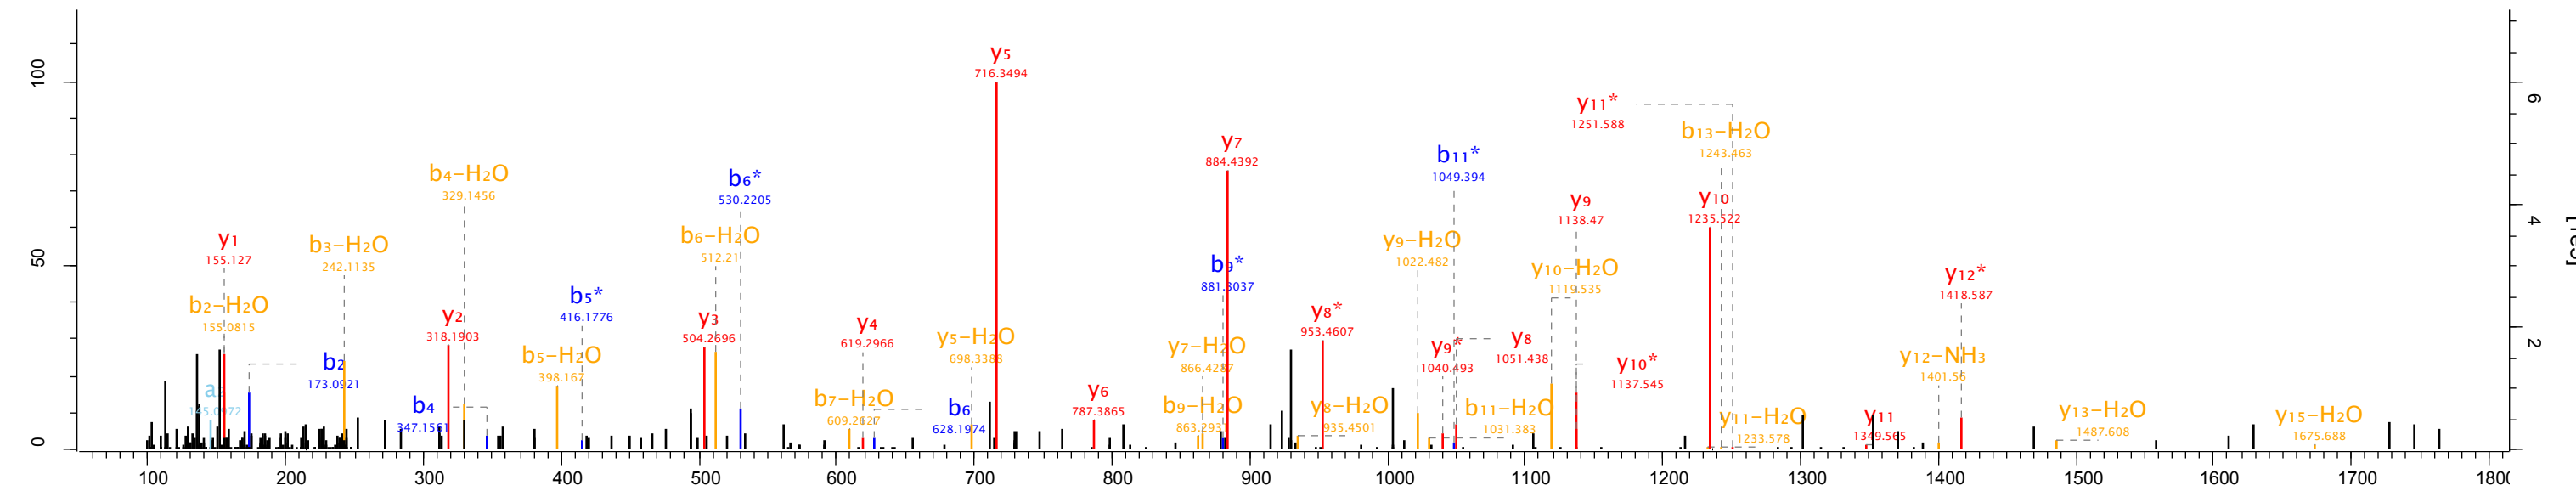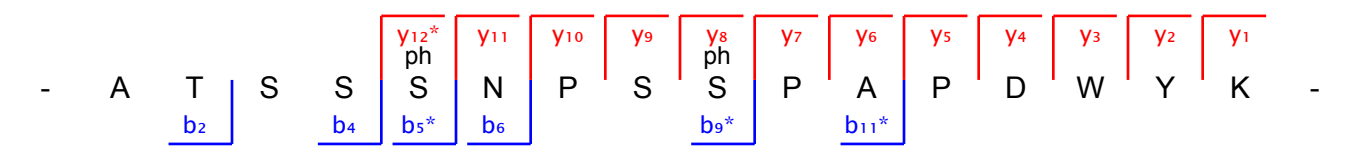

Raw file: 20171215\_MaS\_33SR\_LMH\_phospho\_02  
 Scan: 11117 Method: FTMS; HCD Score: 227.51 m/z: 1028.45 Gene names: RMDN3

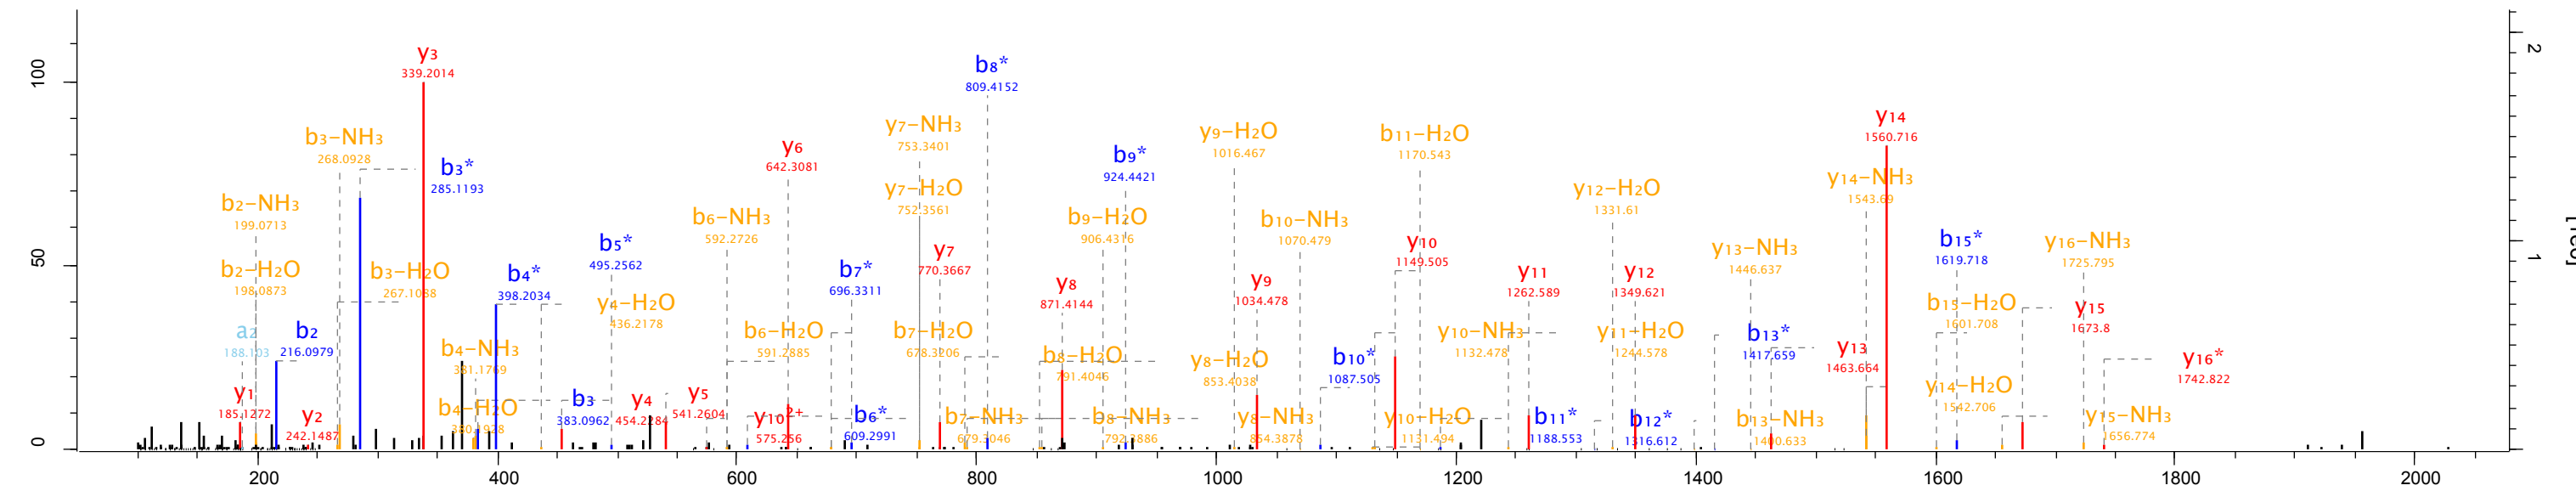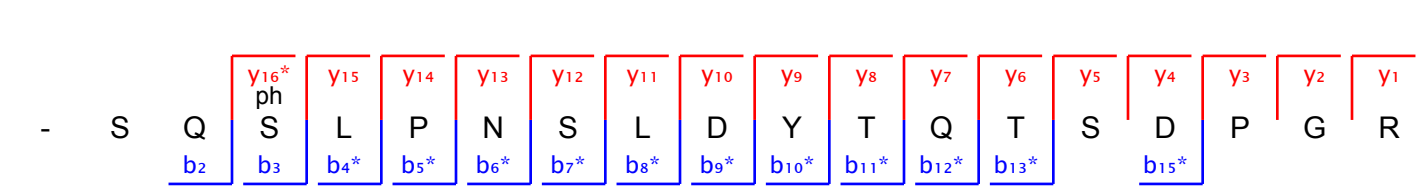

Raw file: 20171215\_MaS\_33SR\_LMH\_phospho\_02  
 Scan: 11987 Method: FTMS; HCD Score: 174.39 m/z: 653.79 Gene names: CTNND1

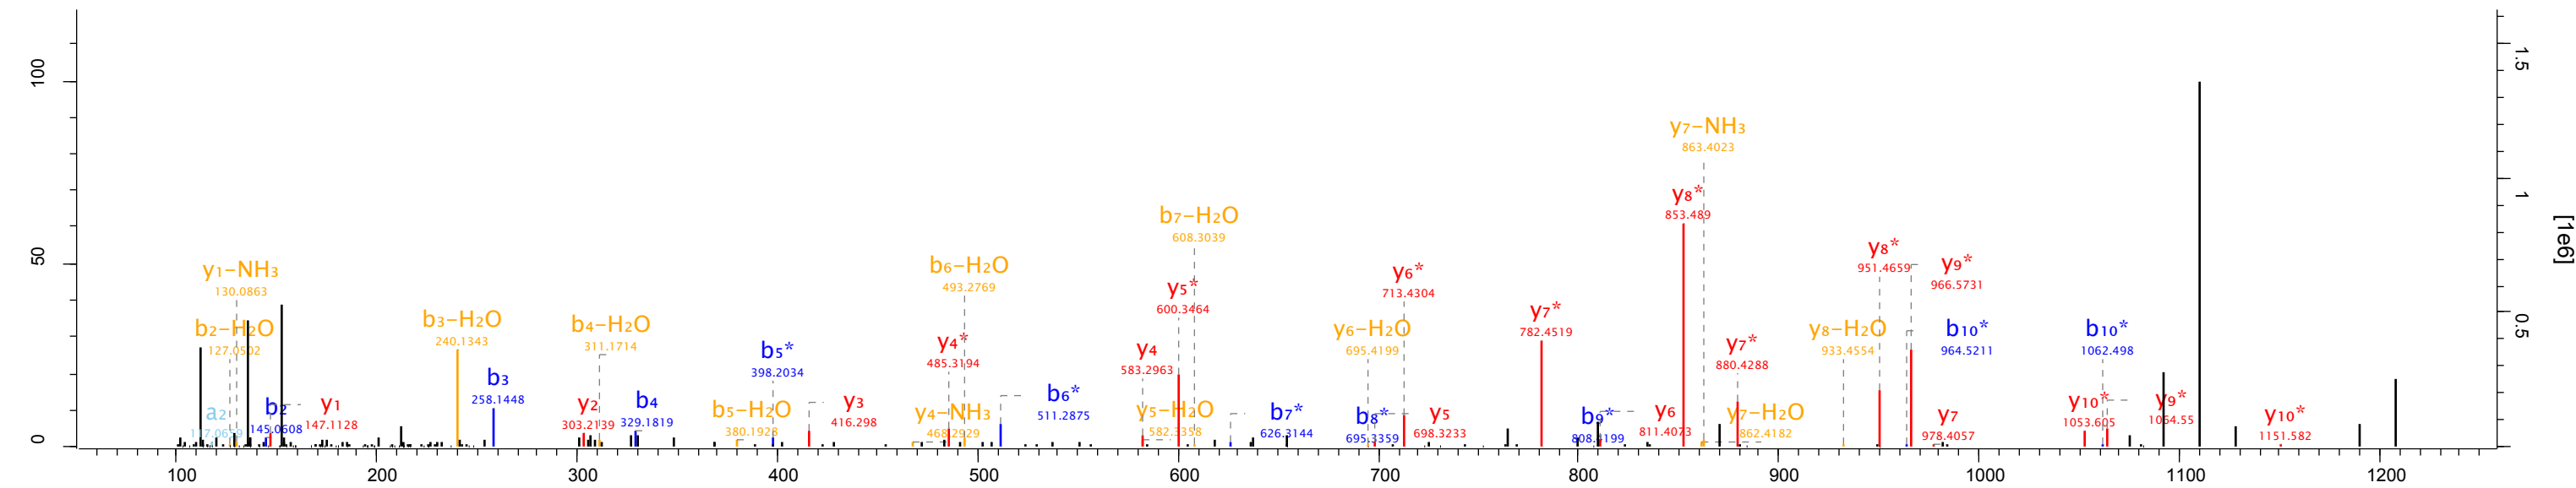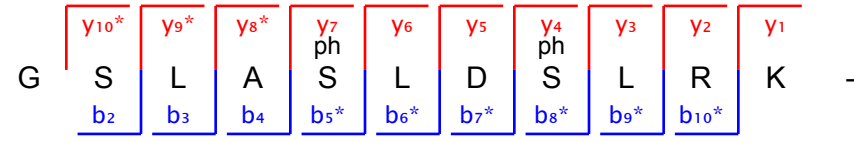

Raw file 20171215\_MaS\_33SR\_LMH\_phospho\_02 Scan 12427 Method FTMS; HCD Score 73.27 m/z 526.71 Gene names SON

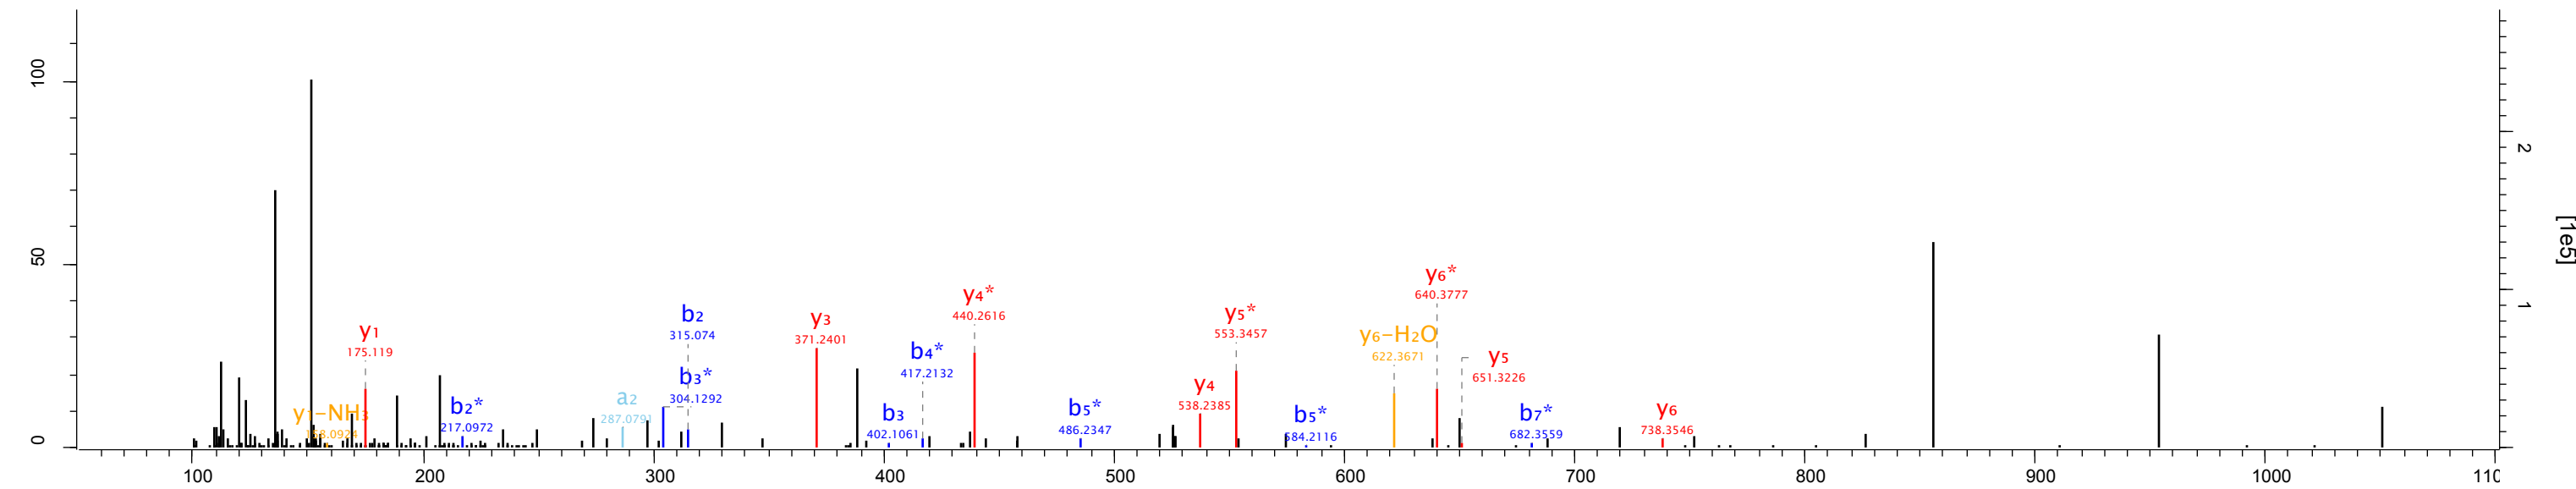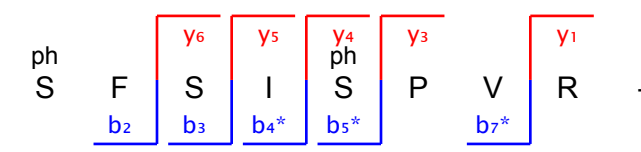

Raw file 20171215\_MaS\_33SR\_LMH\_phospho\_02 Scan 12667 Method FTMS; HCD Score 76.89 m/z 960.91 Gene names VPS13D

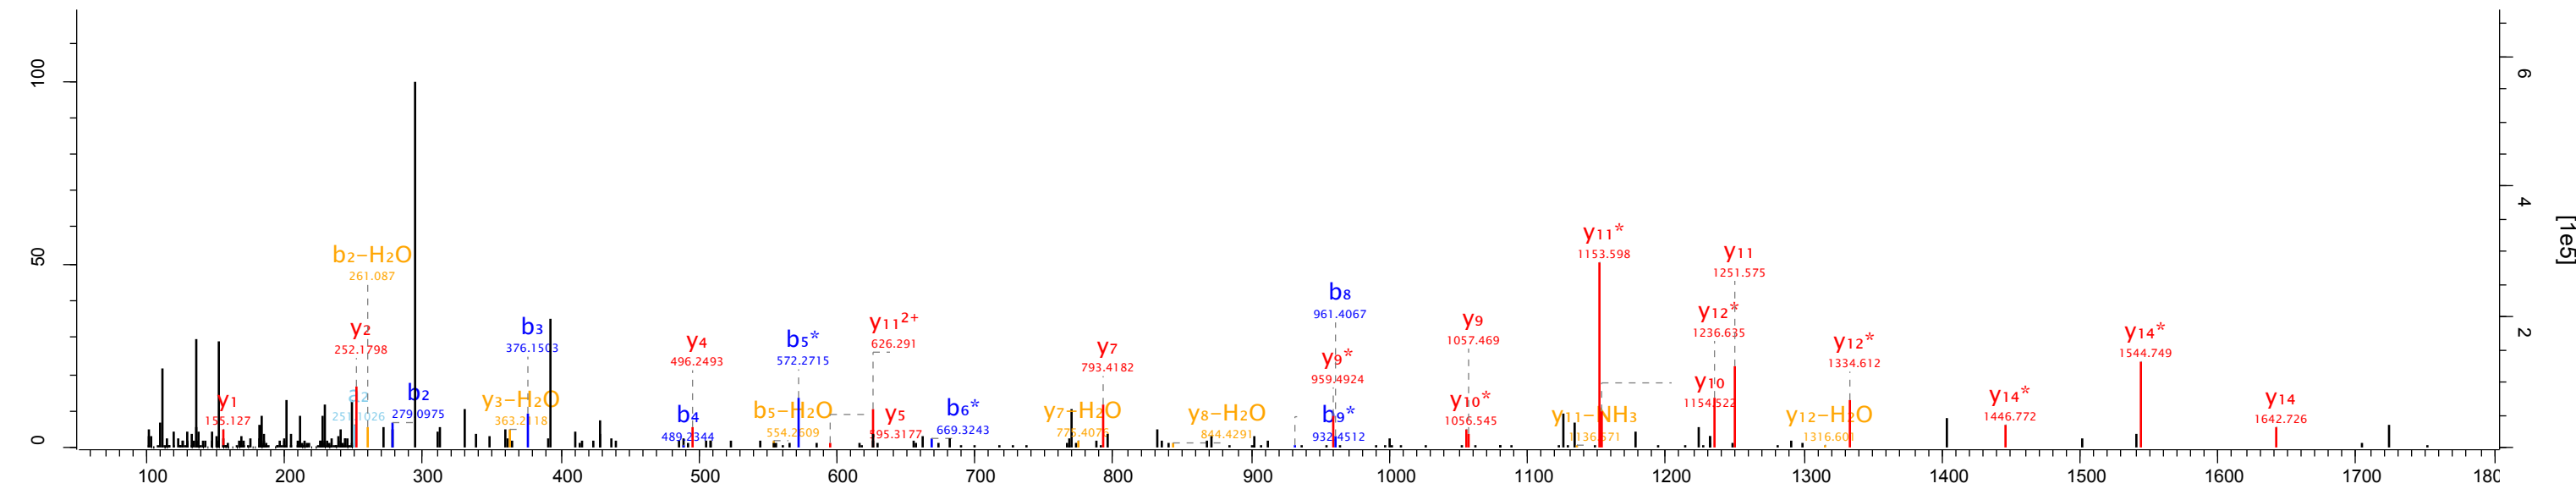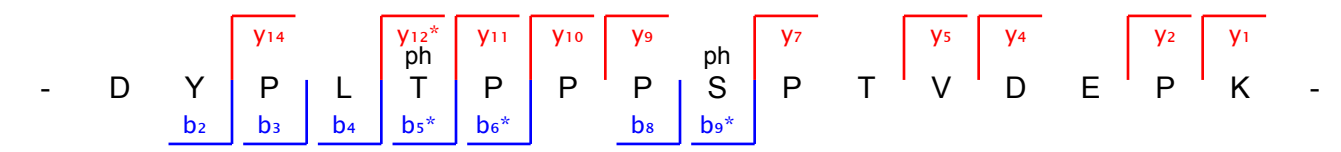

Raw file 20171215\_MaS\_33SR\_LMH\_phospho\_02 Scan 12767 Method FTMS; HCD Score 77.18 m/z 619.77 Gene names AHNAK

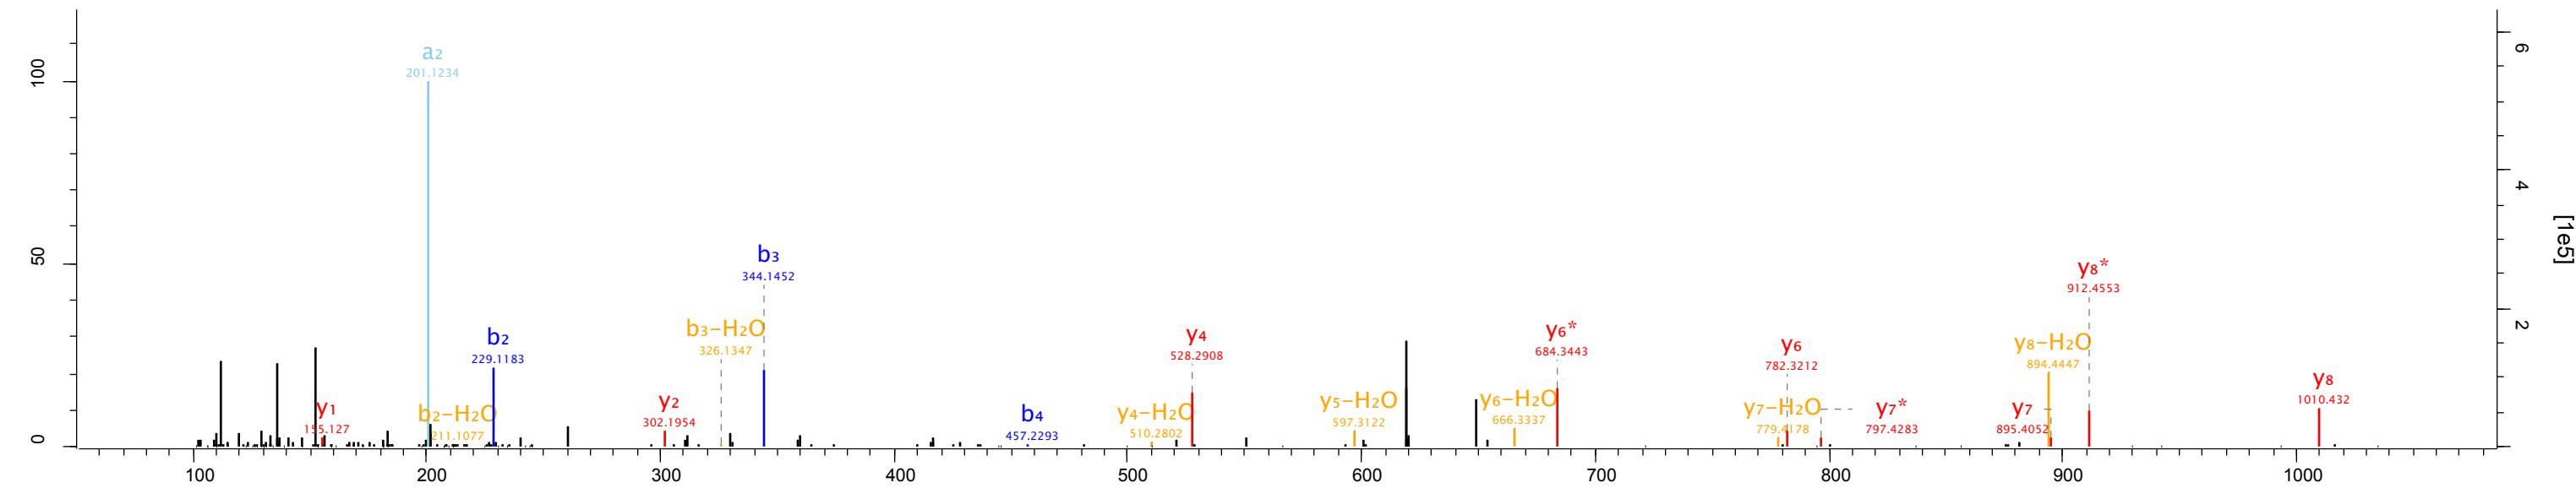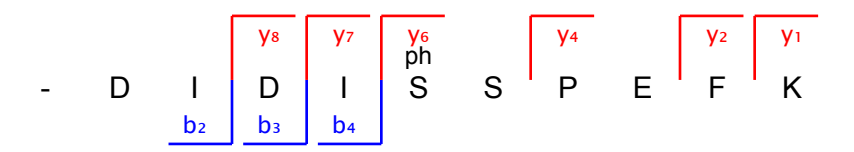



Raw file: 20171215\_MaS\_33SR\_LMH\_phospho\_02  
 Scan: 12847 Method: FTMS; HCD Score: 170.59 m/z: 1032.42 Gene names: MAP1B

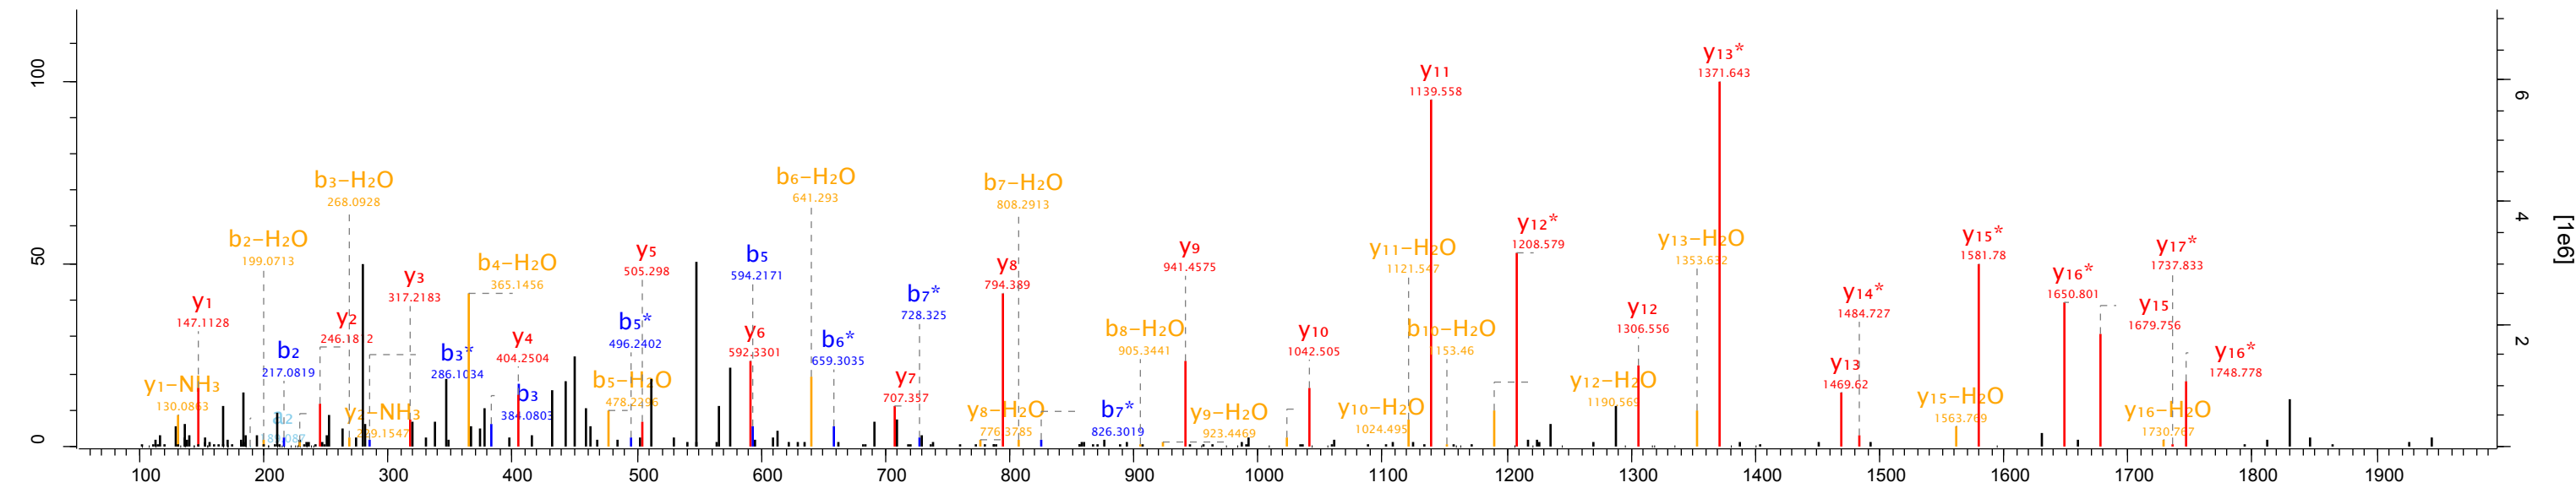

- E S S P L Y S P T F S D S T S A V K -

b<sub>2</sub>
b<sub>3</sub>
b<sub>5</sub>
b<sub>6</sub><sup>\*</sup>
b<sub>7</sub><sup>\*</sup>
y<sub>17</sub><sup>\*</sup>
y<sub>16</sub><sup>\*</sup>
y<sub>15</sub>
y<sub>14</sub><sup>\*</sup>
y<sub>13</sub>
y<sub>12</sub>
y<sub>11</sub>
y<sub>10</sub>
y<sub>9</sub>
y<sub>8</sub>
y<sub>7</sub>
y<sub>6</sub>
y<sub>5</sub>
y<sub>4</sub>
y<sub>3</sub>
y<sub>2</sub>
y<sub>1</sub>

Raw file: 20171215\_MaS\_33SR\_LMH\_phospho\_02  
 Scan: 13057 Method: FTMS; HCD Score: 286.82 m/z: 1373.56 Gene names: MAGEA4

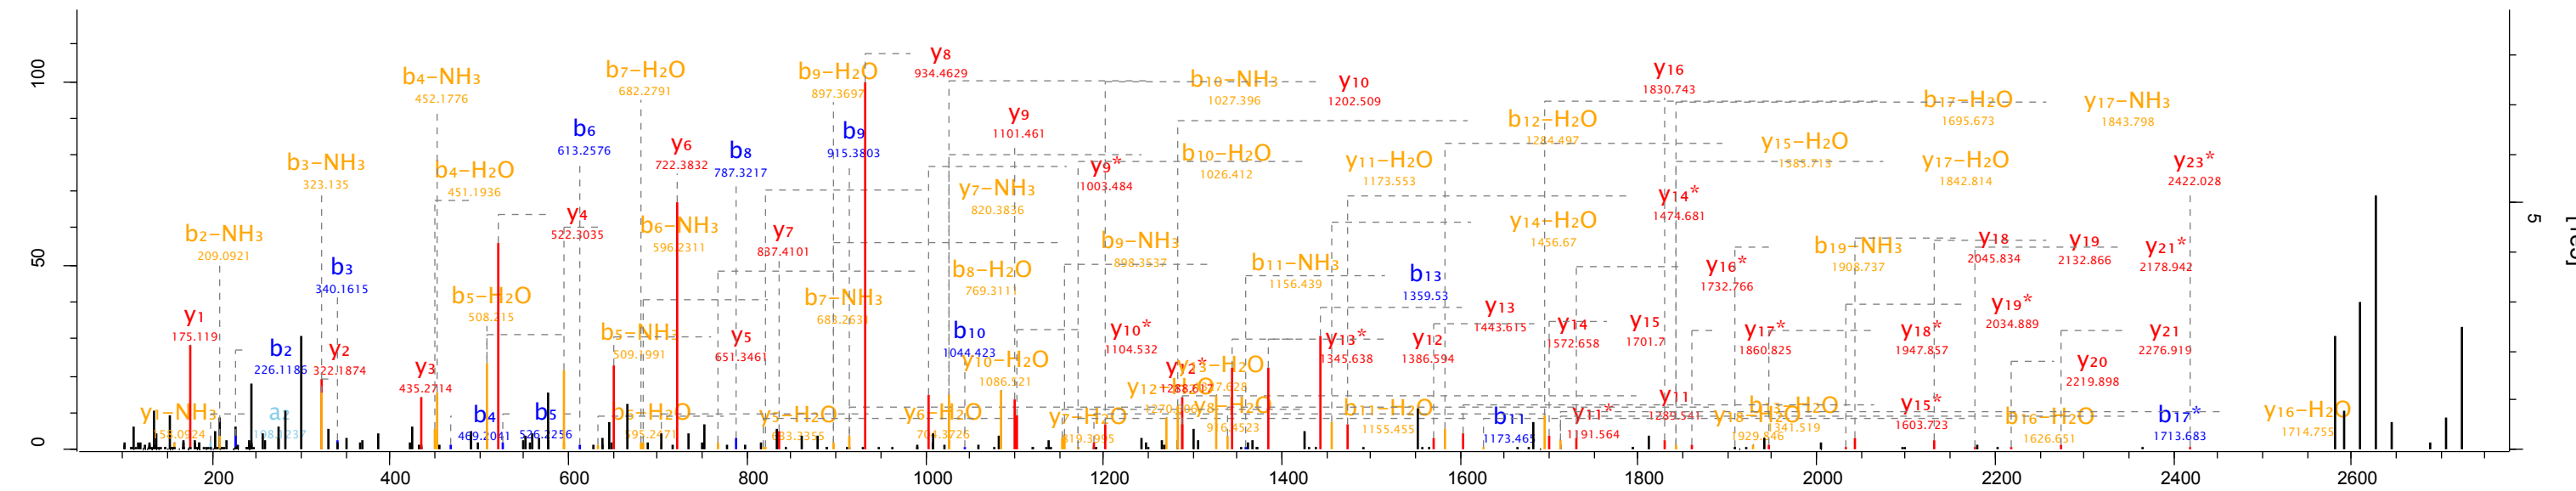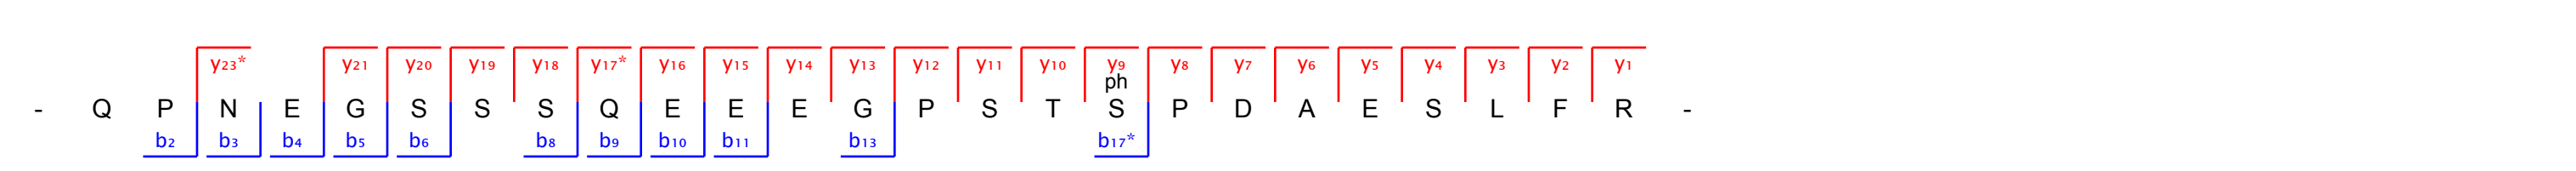

Raw file 20171215\_MaS\_33SR\_LMH\_phospho\_02 Scan 14087 Method FTMS; HCD Score 138.78 m/z 1150.87 Gene names SIRT1

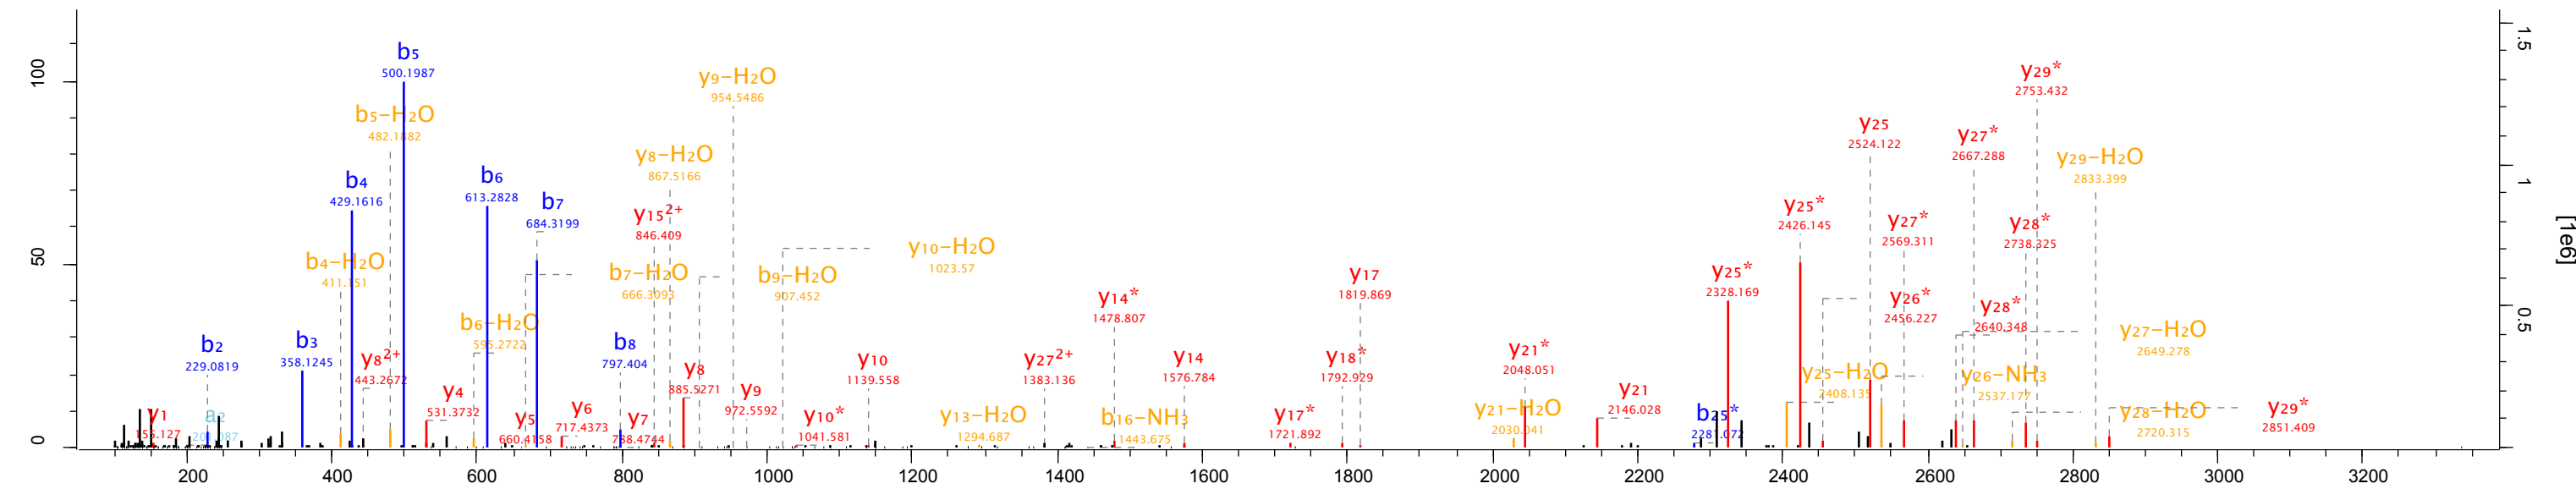

ac - A D E A A L A L Q P G G S P S A A G A D R E A A S S P A G E P L R K -

Fragmentation sites are indicated by brackets below the sequence:

- Blue brackets: b<sub>2</sub> (D), b<sub>3</sub> (E), b<sub>4</sub> (A), b<sub>5</sub> (A), b<sub>6</sub> (L), b<sub>7</sub> (A), b<sub>8</sub> (L), b<sub>25</sub><sup>\*</sup> (S)
- Red brackets: y<sub>29</sub><sup>\*</sup> (L), y<sub>28</sub><sup>\*</sup> (A), y<sub>27</sub><sup>\*</sup> (L), y<sub>26</sub><sup>\*</sup> (Q), y<sub>25</sub> (P), y<sub>21</sub> (P), y<sub>18</sub><sup>\*</sup> (A), y<sub>17</sub> (G), y<sub>15</sub><sup>2+</sup> (D), y<sub>14</sub> (R), y<sub>10</sub> (S), y<sub>9</sub> (S), y<sub>8</sub> (P), y<sub>7</sub> (A), y<sub>6</sub> (G), y<sub>5</sub> (E), y<sub>4</sub> (P), y<sub>1</sub> (K)

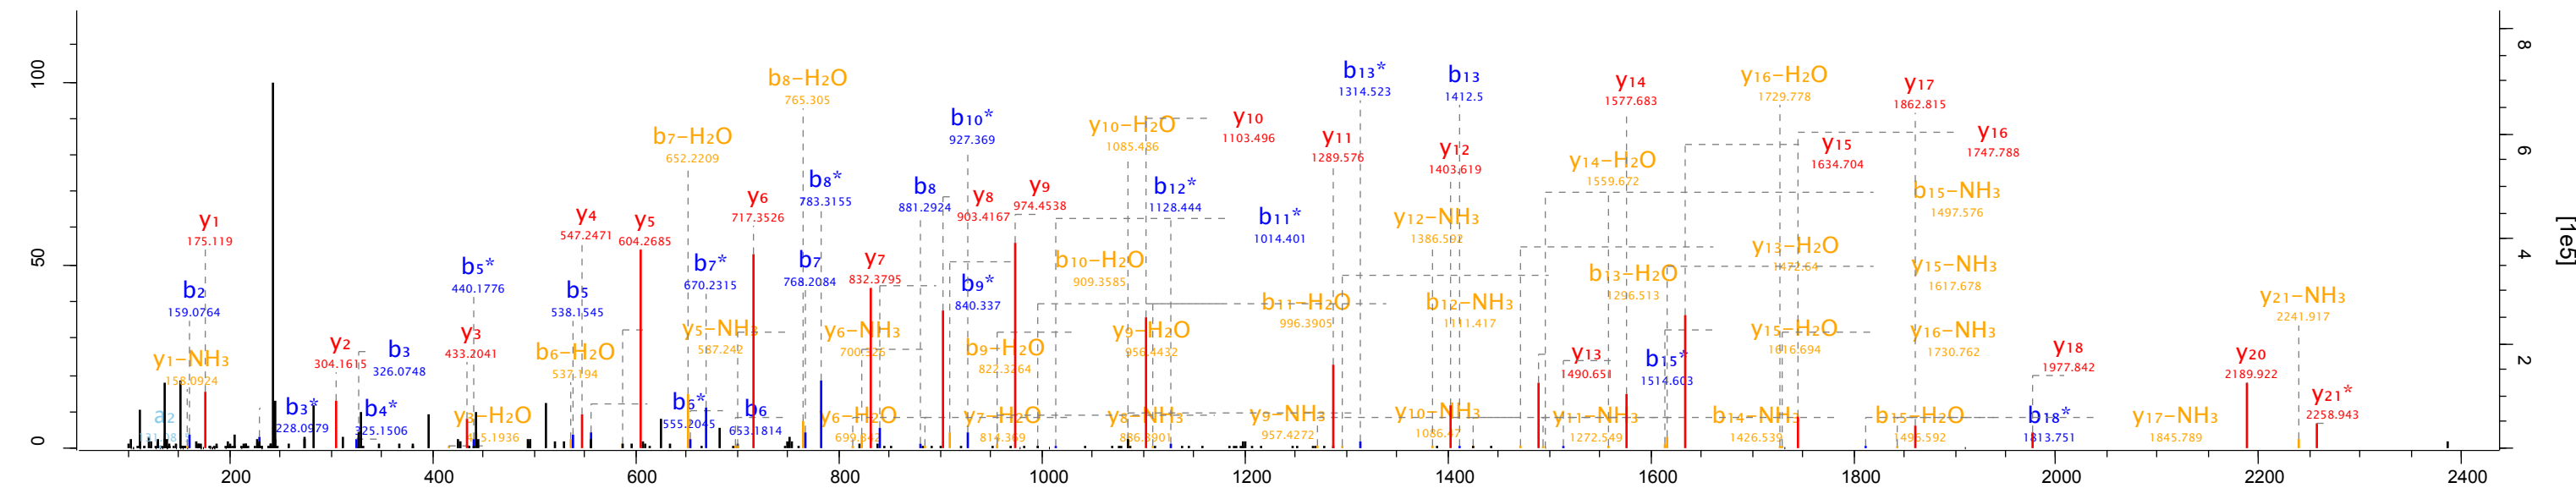

- S A S P D D D L G S S N W E A A D L G N E E R -

b<sub>2</sub>
b<sub>3</sub>
b<sub>4</sub><sup>\*</sup>
b<sub>5</sub>
b<sub>6</sub>
b<sub>7</sub>
b<sub>8</sub>
b<sub>9</sub><sup>\*</sup>
b<sub>10</sub><sup>\*</sup>
b<sub>11</sub><sup>\*</sup>
b<sub>12</sub><sup>\*</sup>
b<sub>13</sub>
b<sub>15</sub><sup>\*</sup>
b<sub>18</sub><sup>\*</sup>

y<sub>21</sub><sup>\*</sup>
y<sub>20</sub>
y<sub>18</sub>
y<sub>17</sub>
y<sub>16</sub>
y<sub>15</sub>
y<sub>14</sub>
y<sub>13</sub>
y<sub>12</sub>
y<sub>11</sub>
y<sub>10</sub>
y<sub>9</sub>
y<sub>8</sub>
y<sub>7</sub>
y<sub>6</sub>
y<sub>5</sub>
y<sub>4</sub>
y<sub>3</sub>
y<sub>2</sub>
y<sub>1</sub>

Raw file 20171215\_MaS\_33SR\_LMH\_phospho\_02 Scan 14427 Method FTMS; HCD Score 194.06 m/z 958.09 Gene names SEC31A

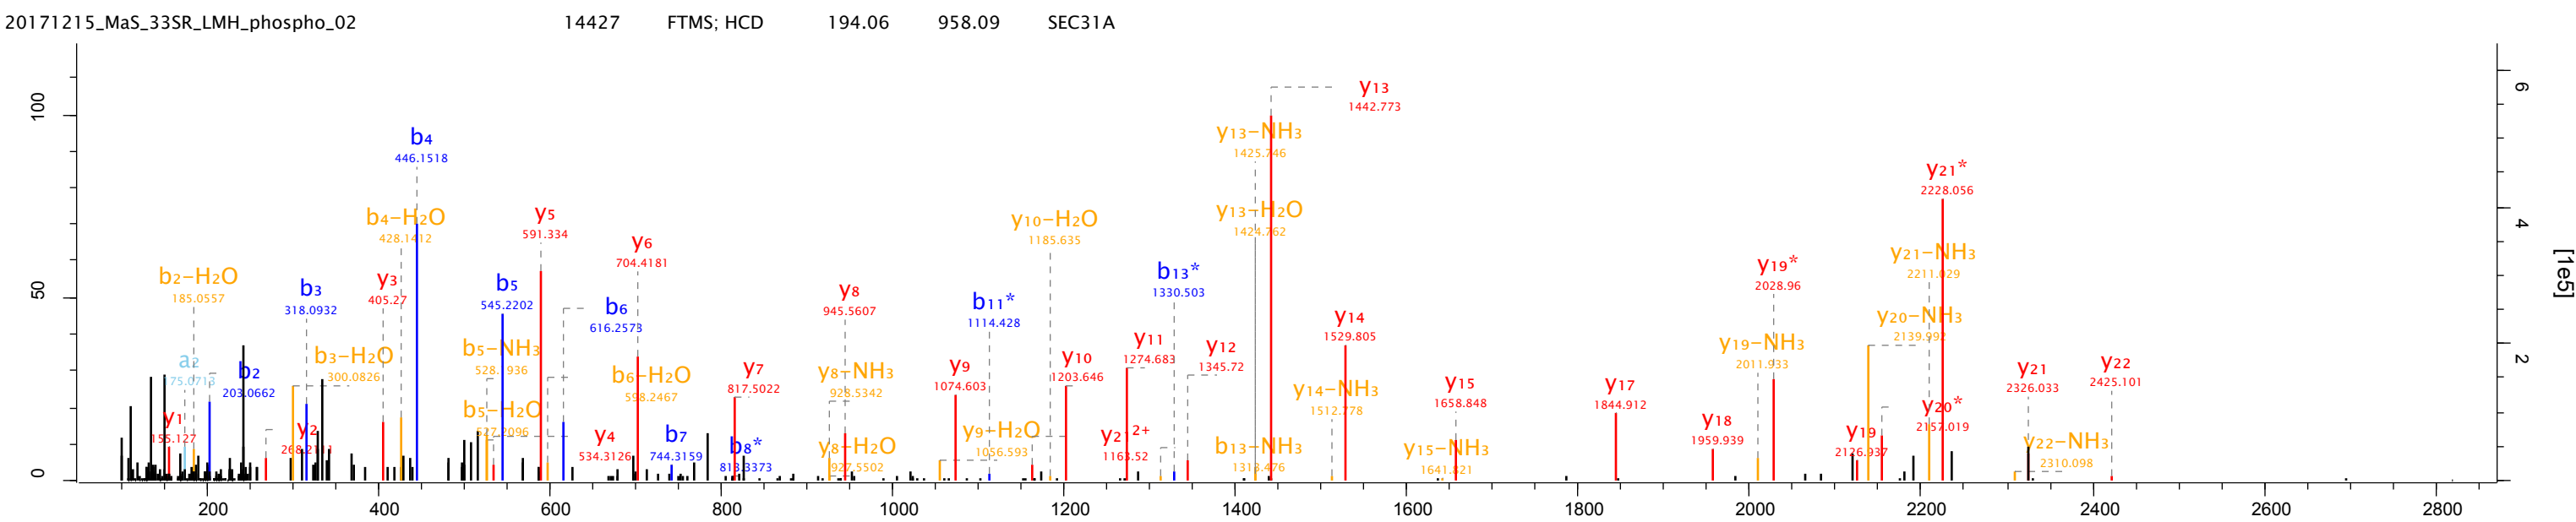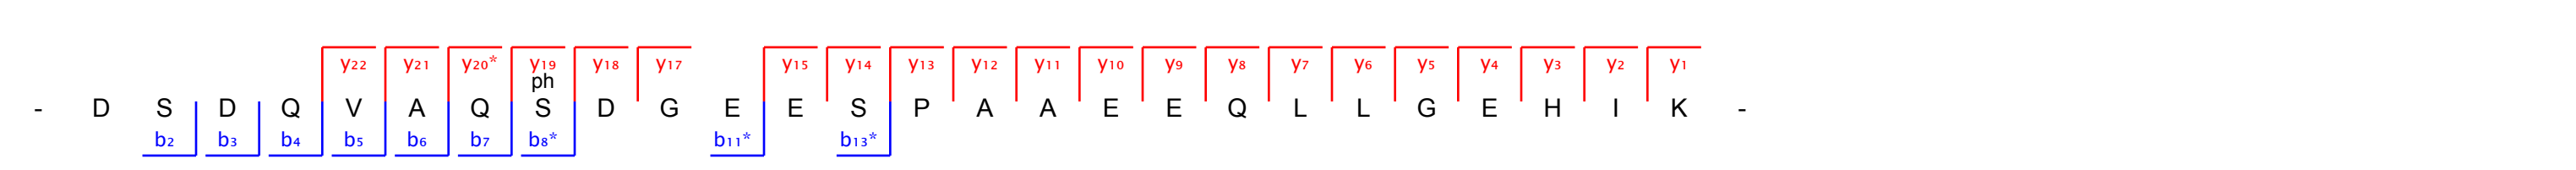

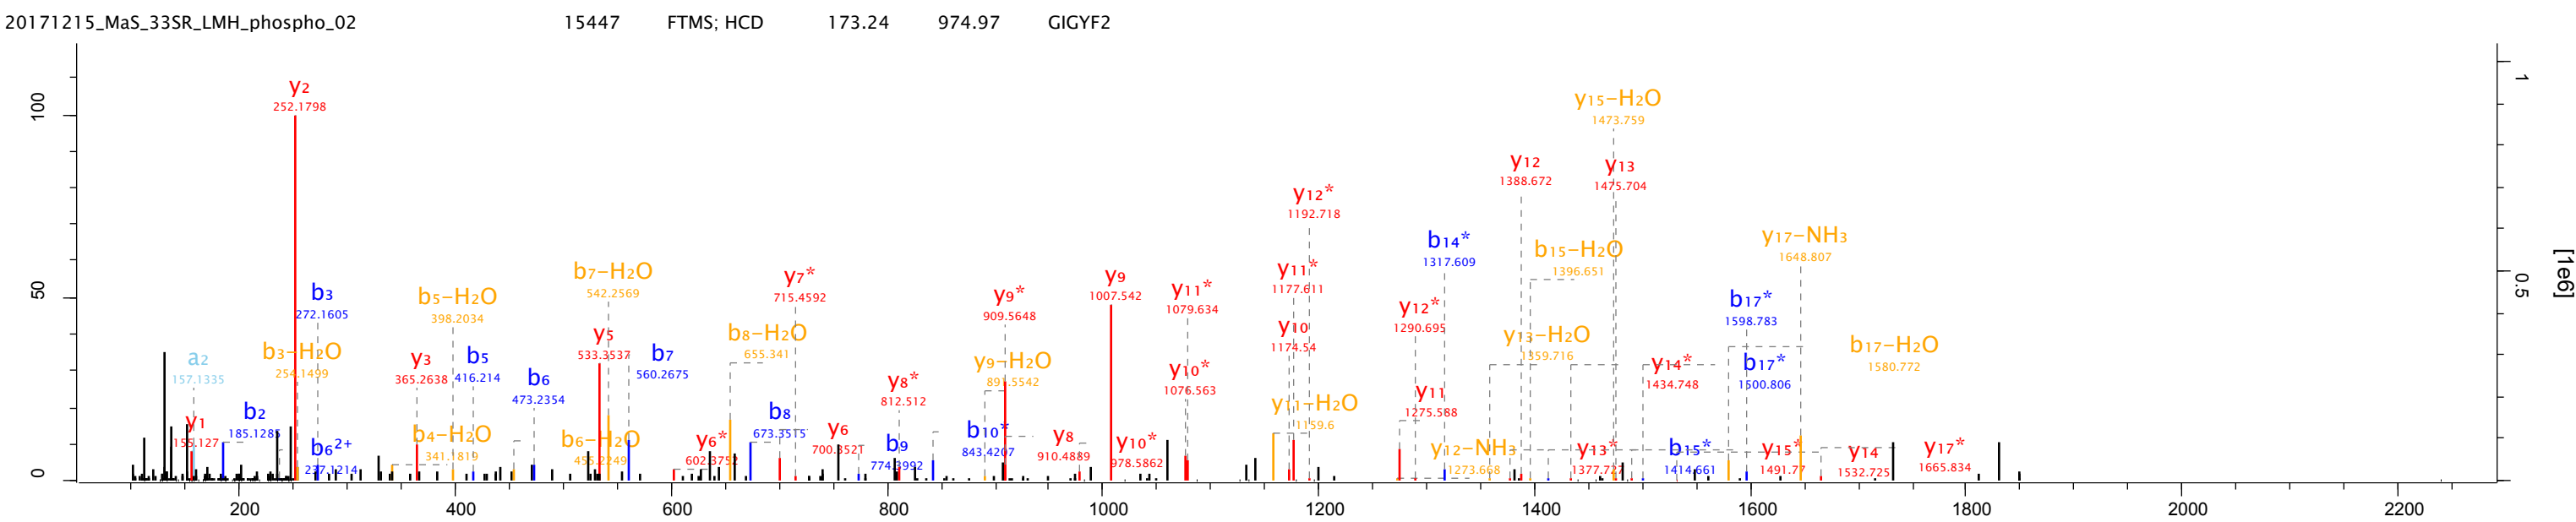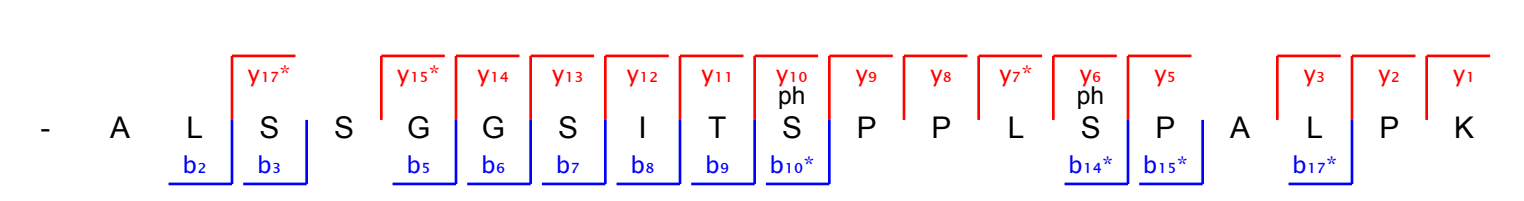

Raw file 20171215\_MaS\_33SR\_LMH\_phospho\_02 Scan 17427 Method FTMS; HCD Score 95.24 m/z 814.84 Gene names TRMT112

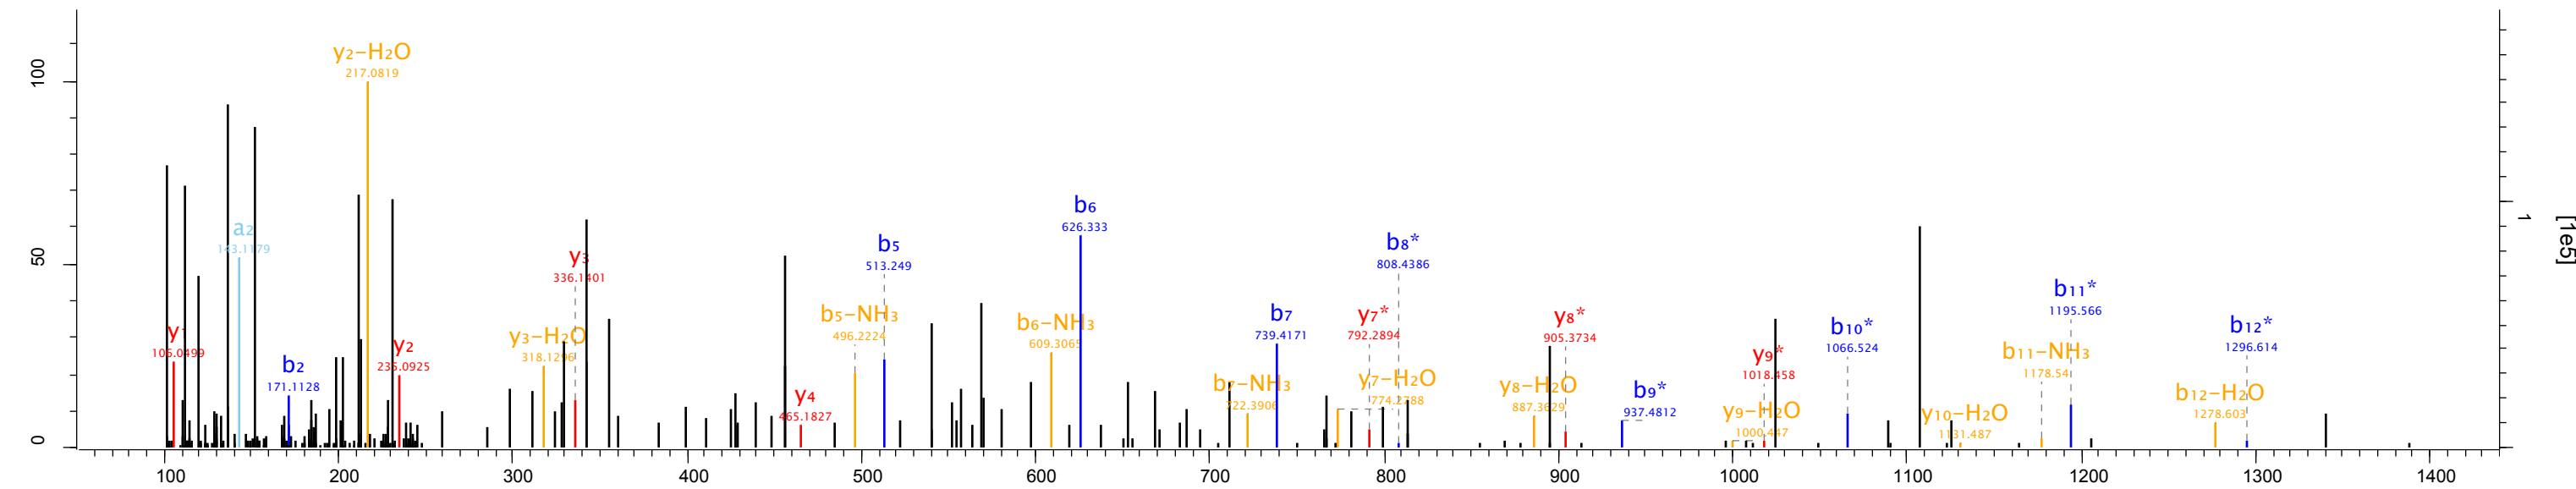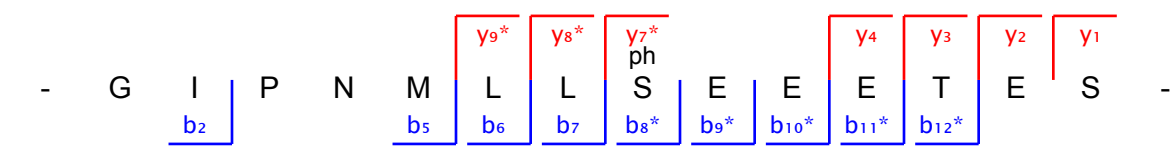

Raw file 20171215\_MaS\_33SR\_LMH\_phospho\_02 Scan 17567 Method FTMS; HCD Score 171.56 m/z 808.31 Gene names SRSF9

20171215\_MaS\_33SR\_LMH\_phospho\_02

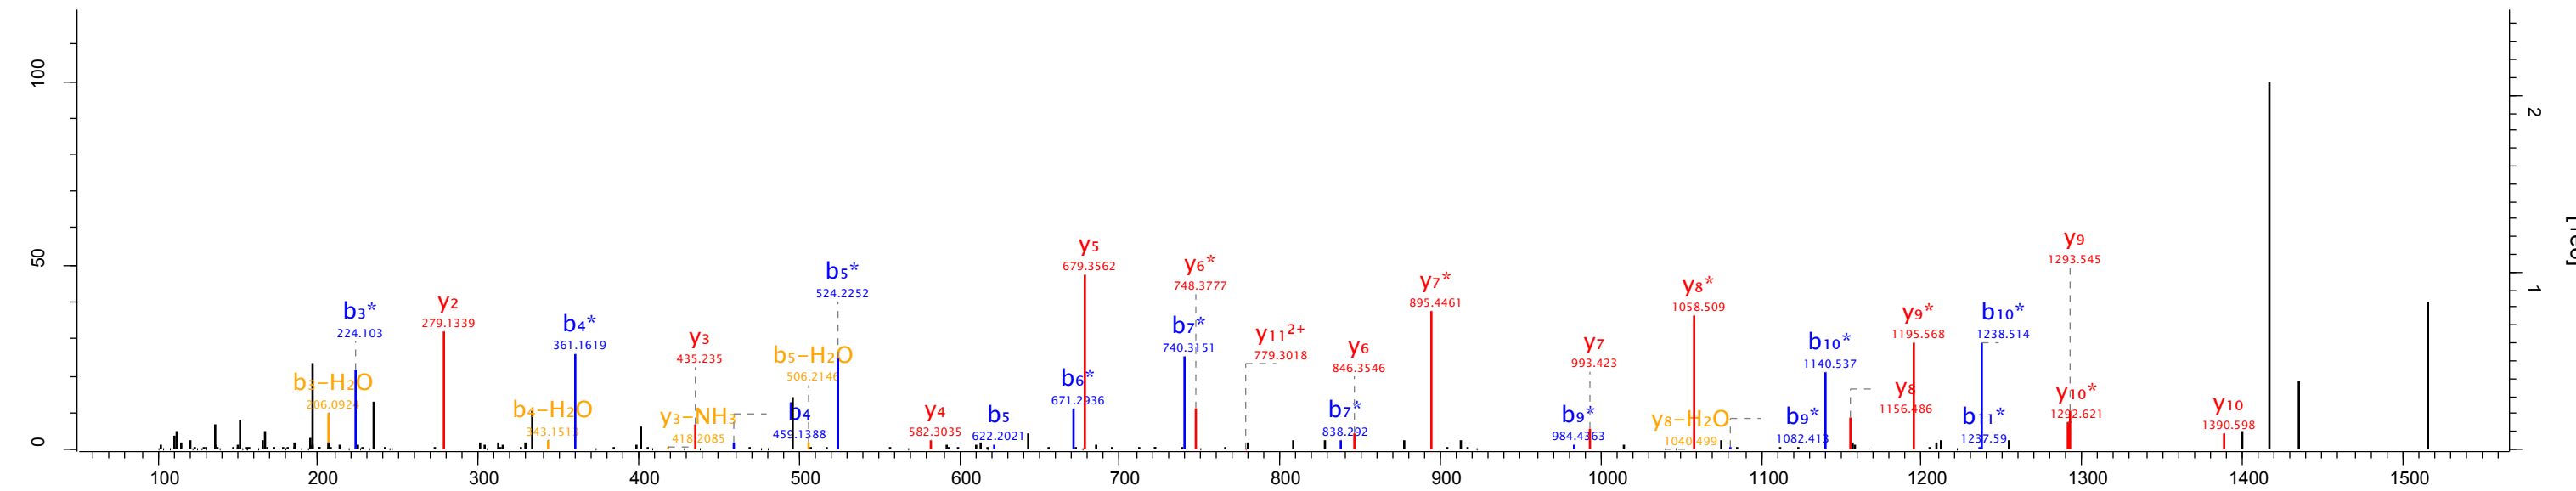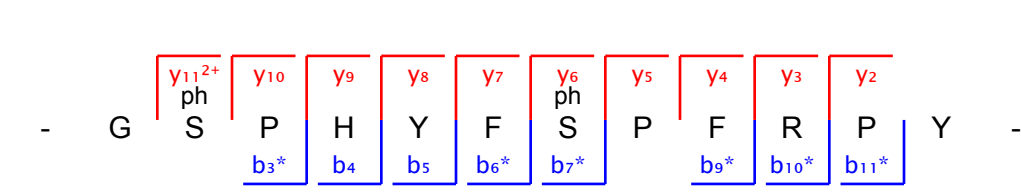



Raw file  
20171215\_MaS\_33SR\_LMH\_phospho\_02

Scan 1997 Method FTMS; HCD Score 198.98 m/z 786.29 Gene names ADD1

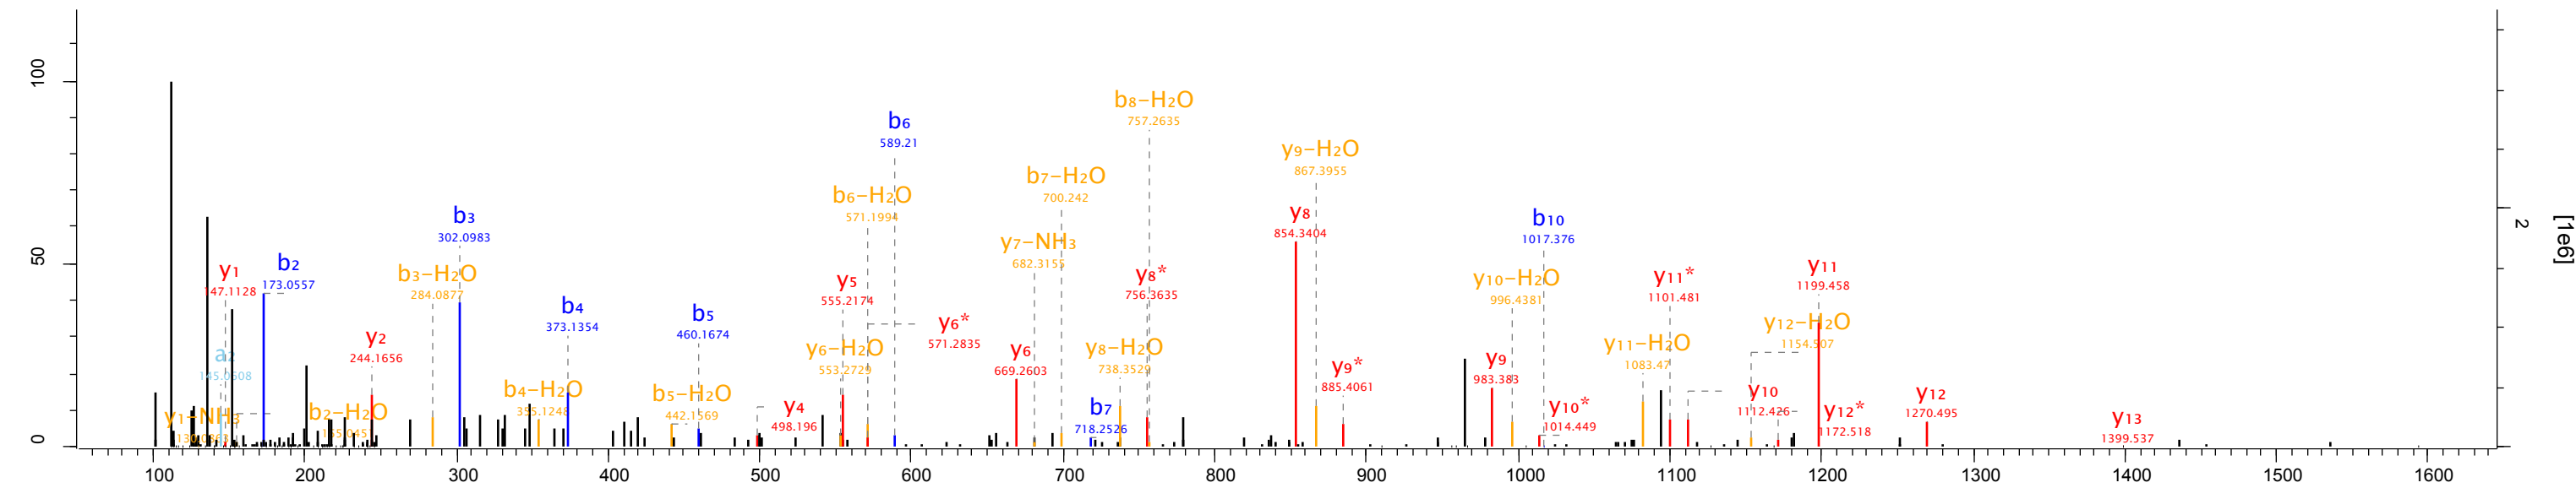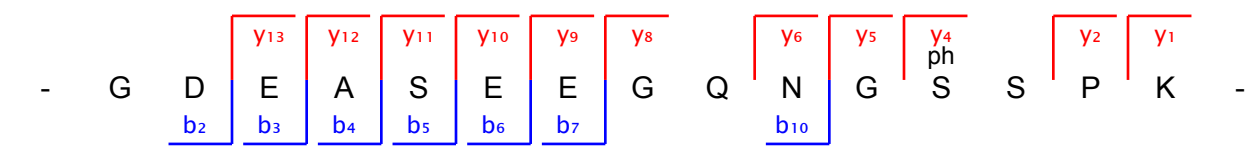

Raw file: 20171215\_MaS\_33SR\_LMH\_phospho\_02  
 Scan: 2467 Method: FTMS; HCD Score: 88.39 m/z: 349.16 Gene names: SON

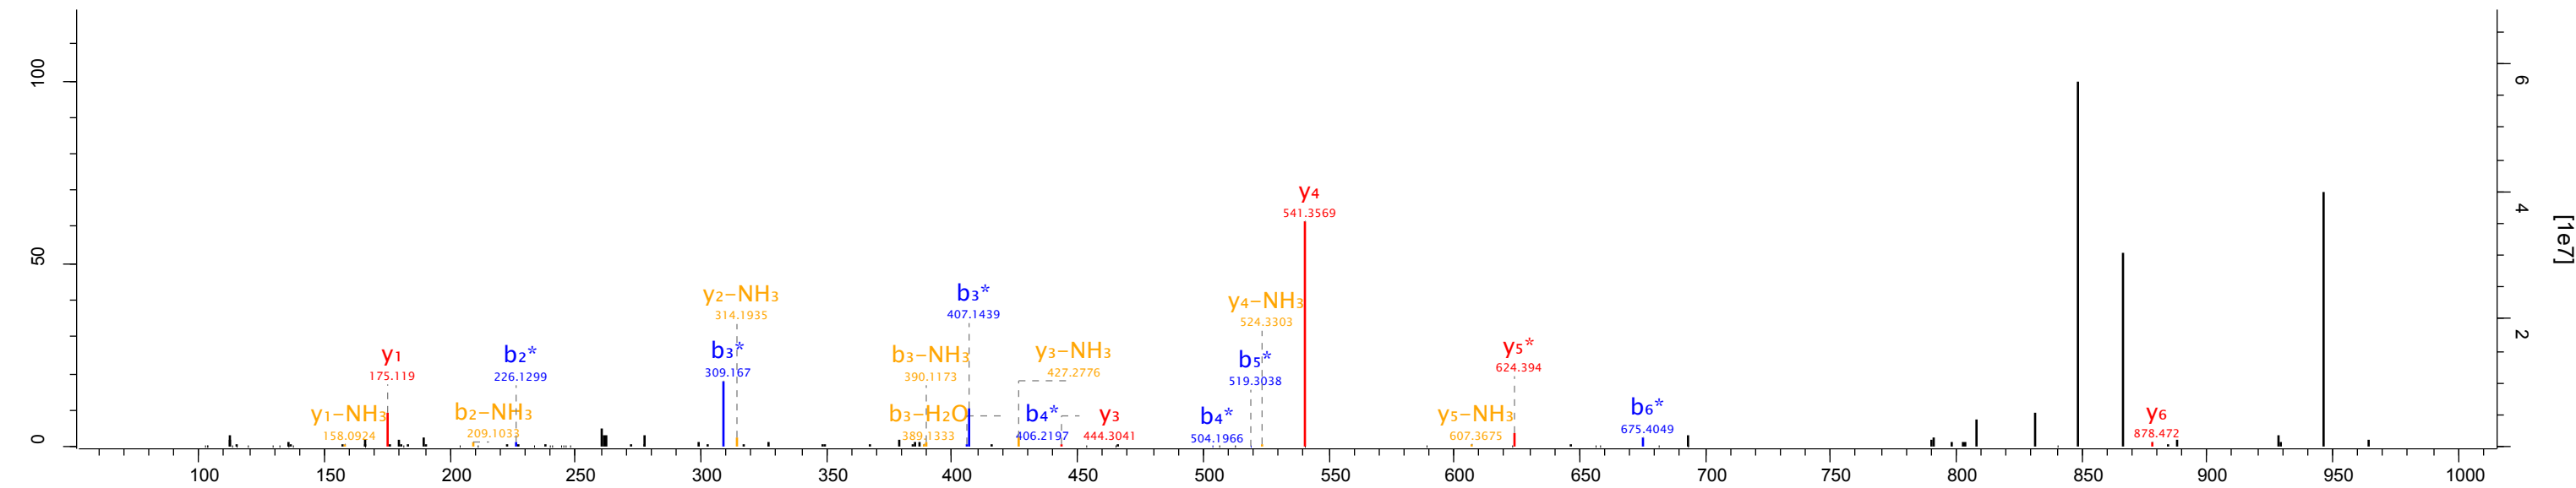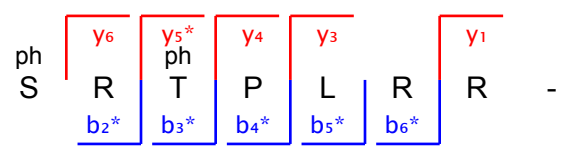

Raw file 20171215\_MaS\_33SR\_LMH\_phospho\_02 Scan 2497 Method FTMS; HCD Score 72.57 m/z 772.32 Gene names ERC1

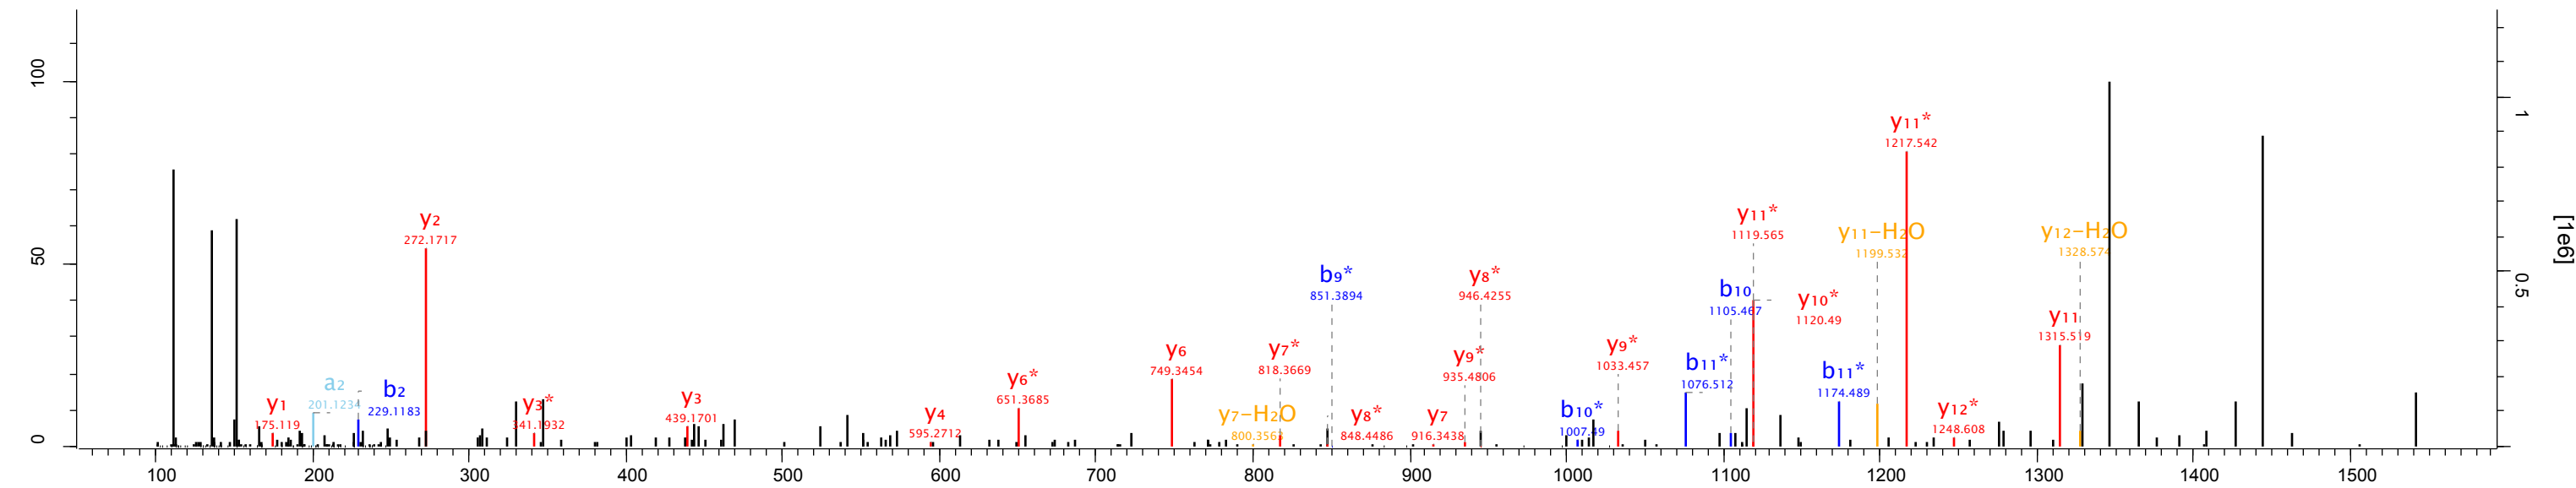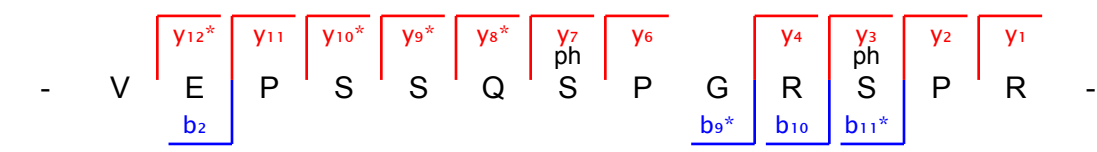

Raw file 20171215\_MaS\_33SR\_LMH\_phospho\_02 Scan 2507 Method FTMS; HCD Score 102.39 m/z 607.25 Gene names PARVA

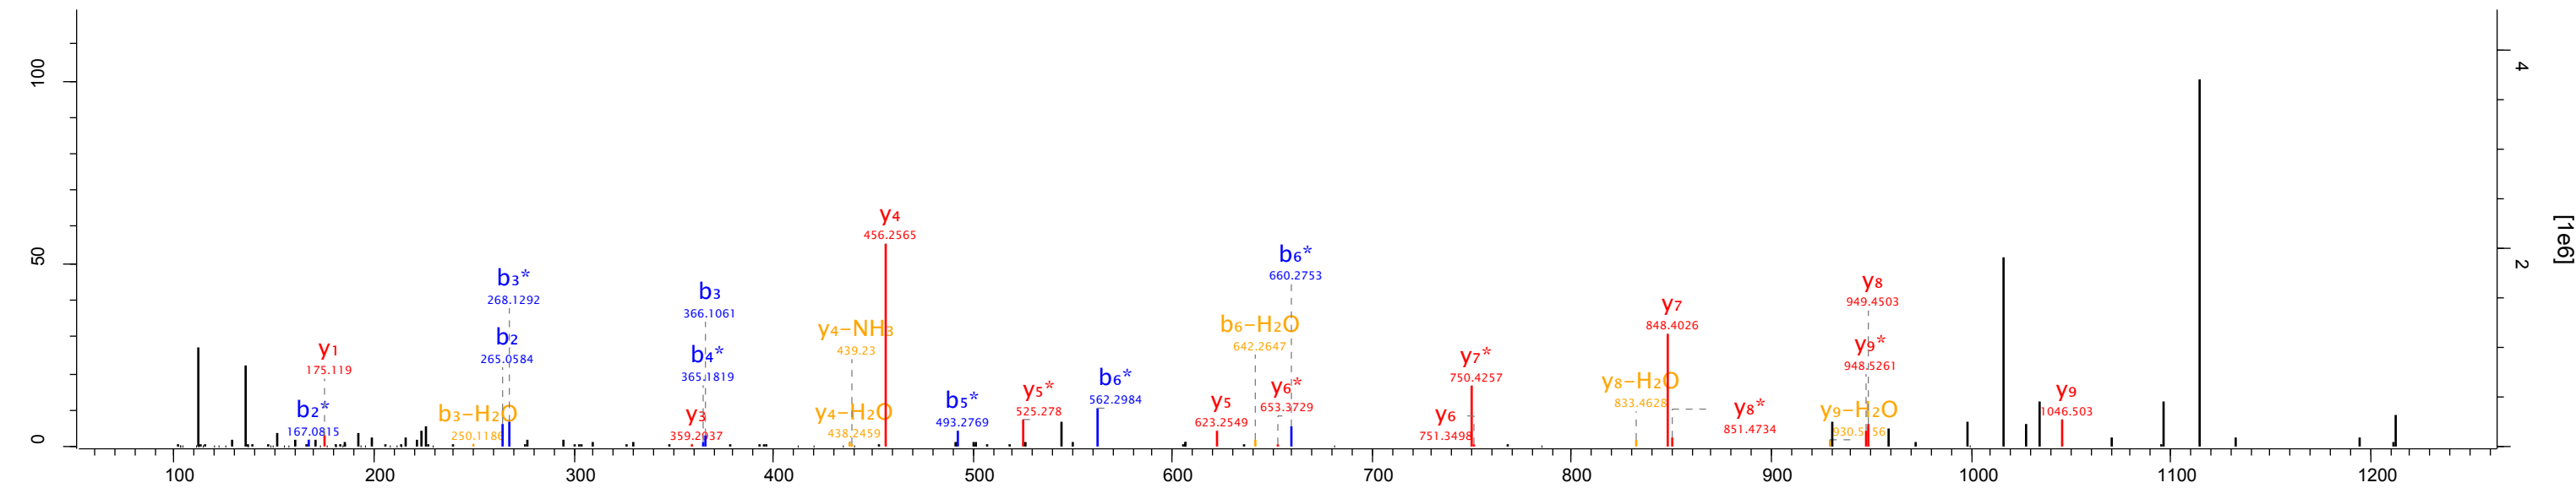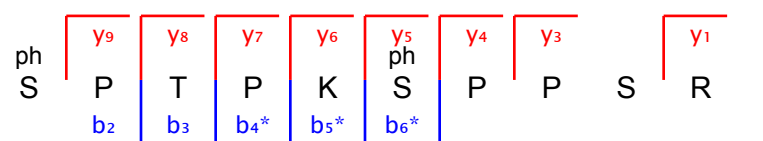

Raw file 20171215\_MaS\_33SR\_LMH\_phospho\_02 Scan 3237 Method FTMS; HCD Score 119.62 m/z 635.73 Gene names BUD13

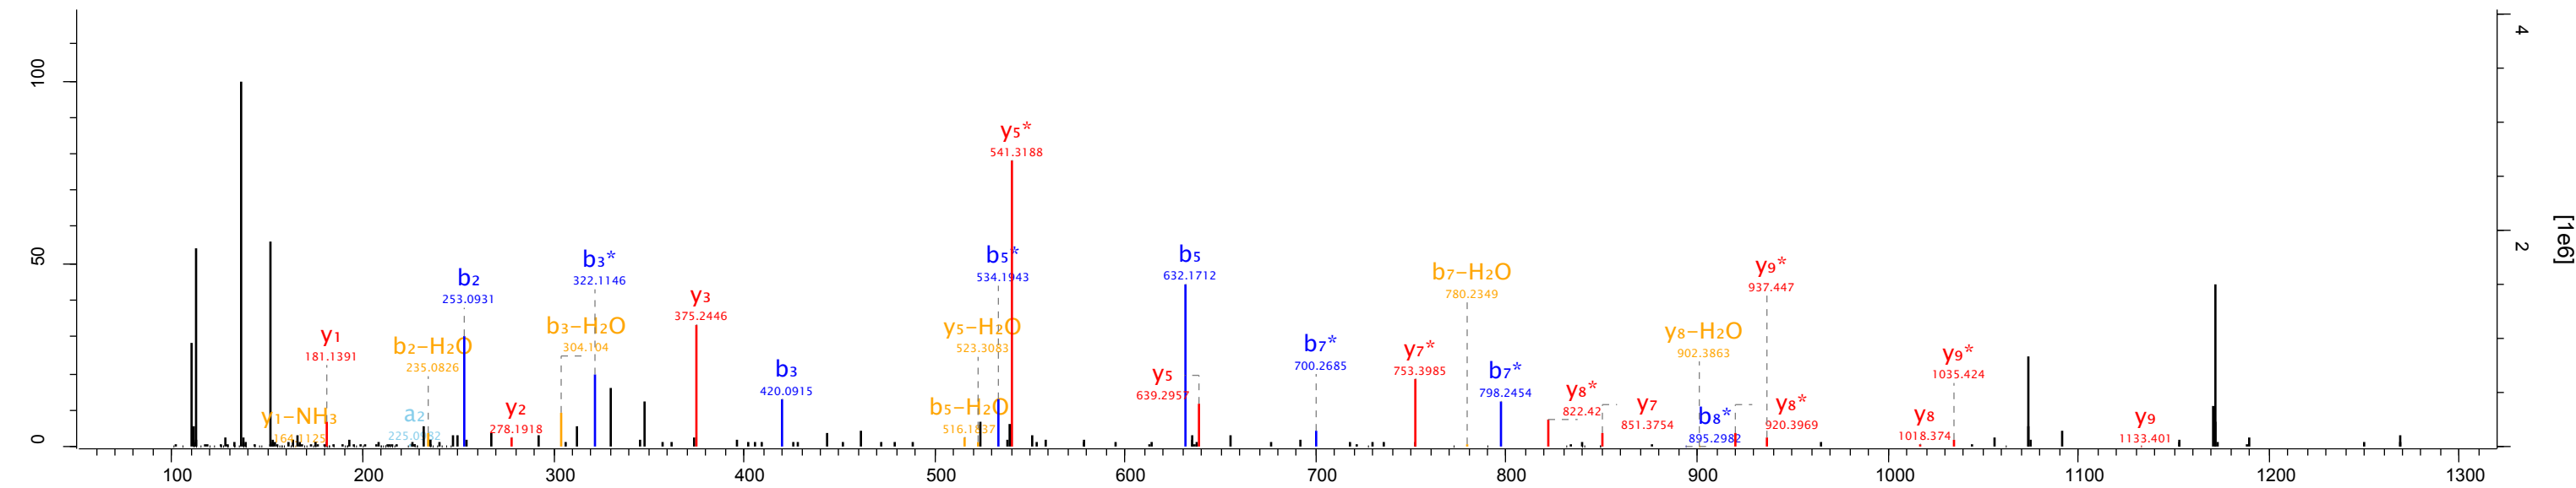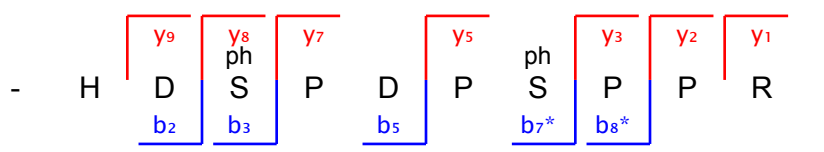

Raw file 20171215\_MaS\_33SR\_LMH\_phospho\_02 Scan 3517 Method FTMS; HCD Score 45.88 m/z 744.81 Gene names TAF6

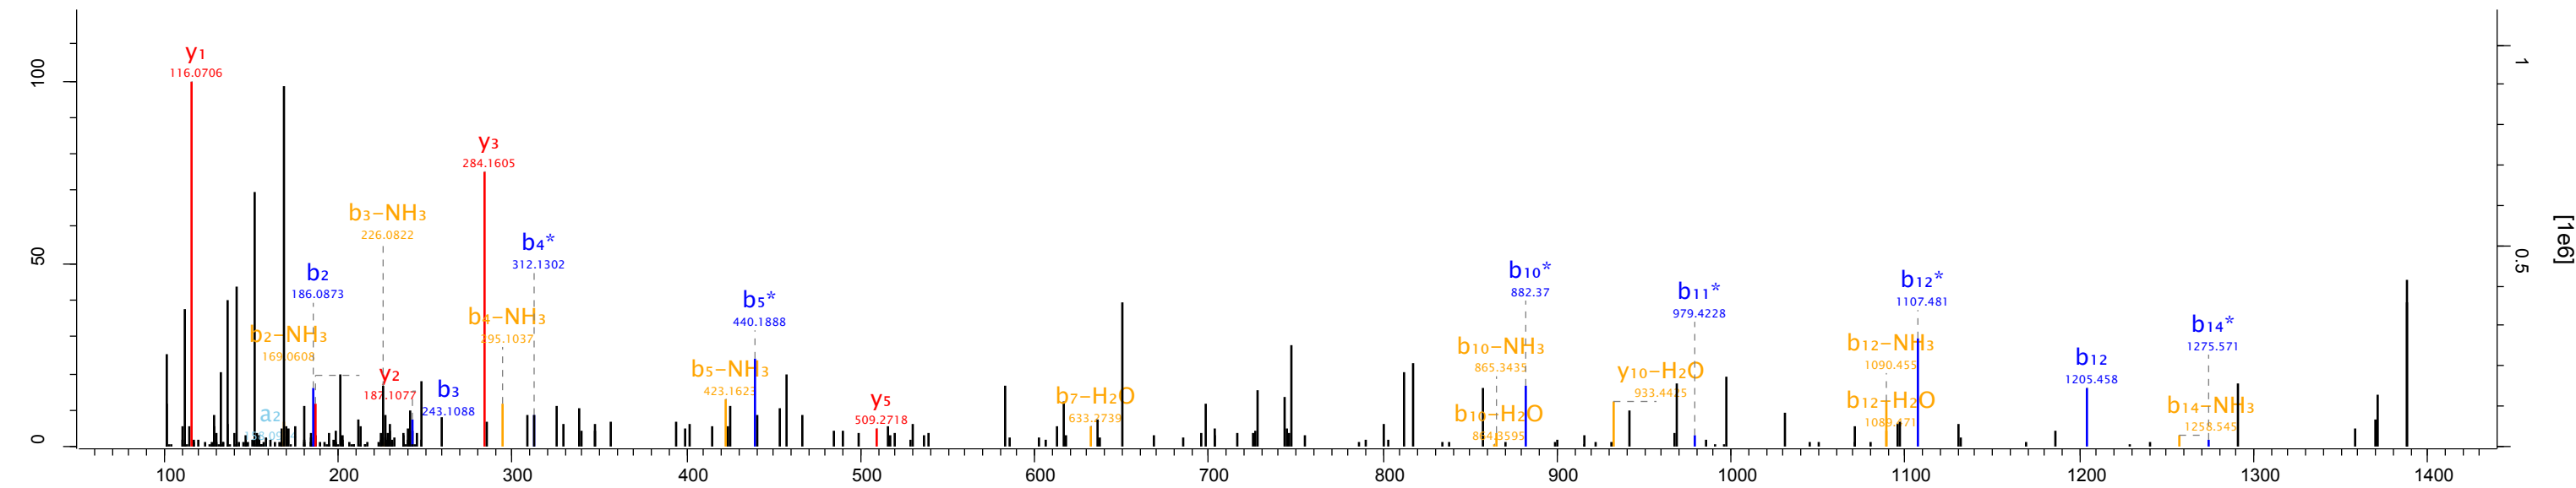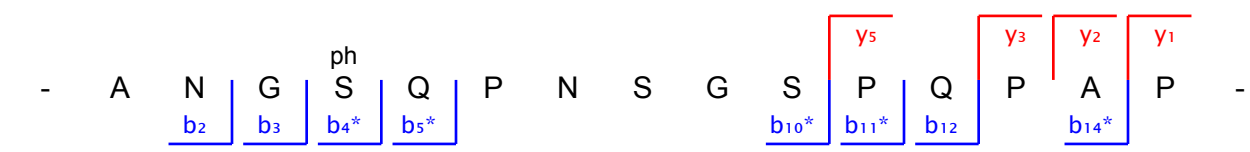

Raw file 20171215\_MaS\_33SR\_LMH\_phospho\_02 Scan 3747 Method FTMS; HCD Score 129.42 m/z 715.98 Gene names PI4K2A

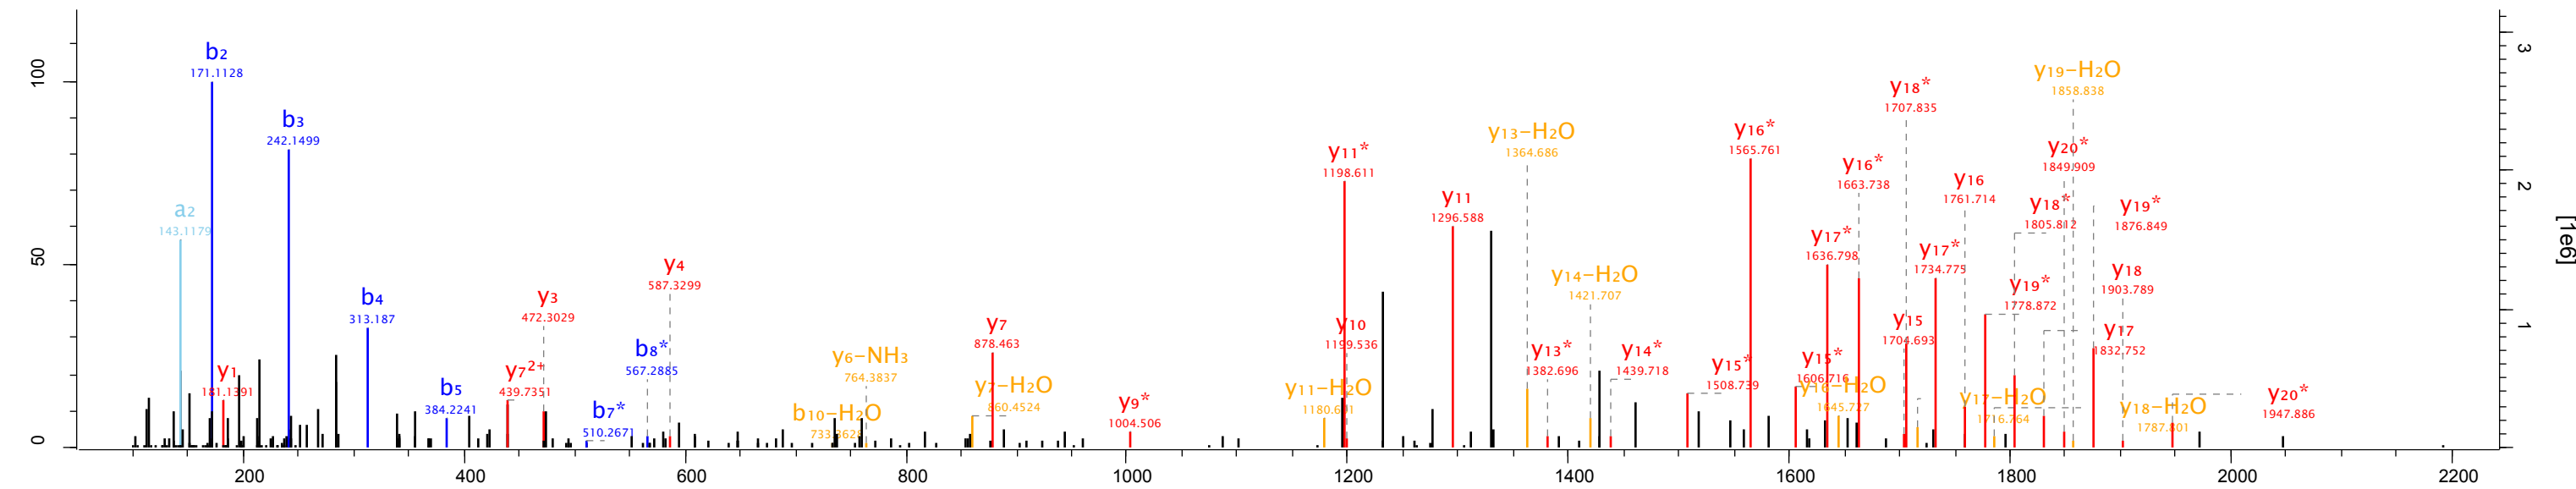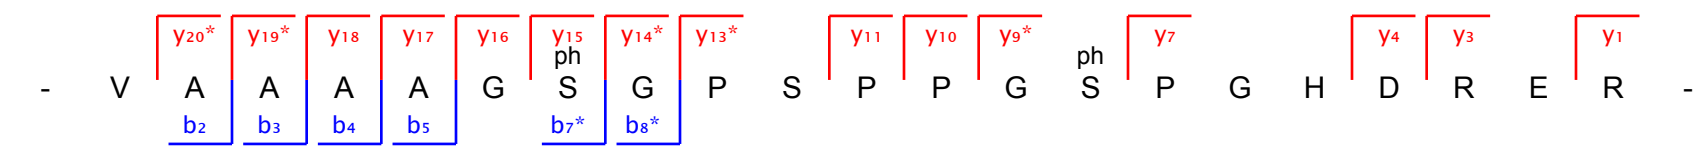

Raw file 20171215\_MaS\_33SR\_LMH\_phospho\_02 Scan 3777 Method FTMS; HCD Score 450.39 m/z 1216.47 Gene names NUDC

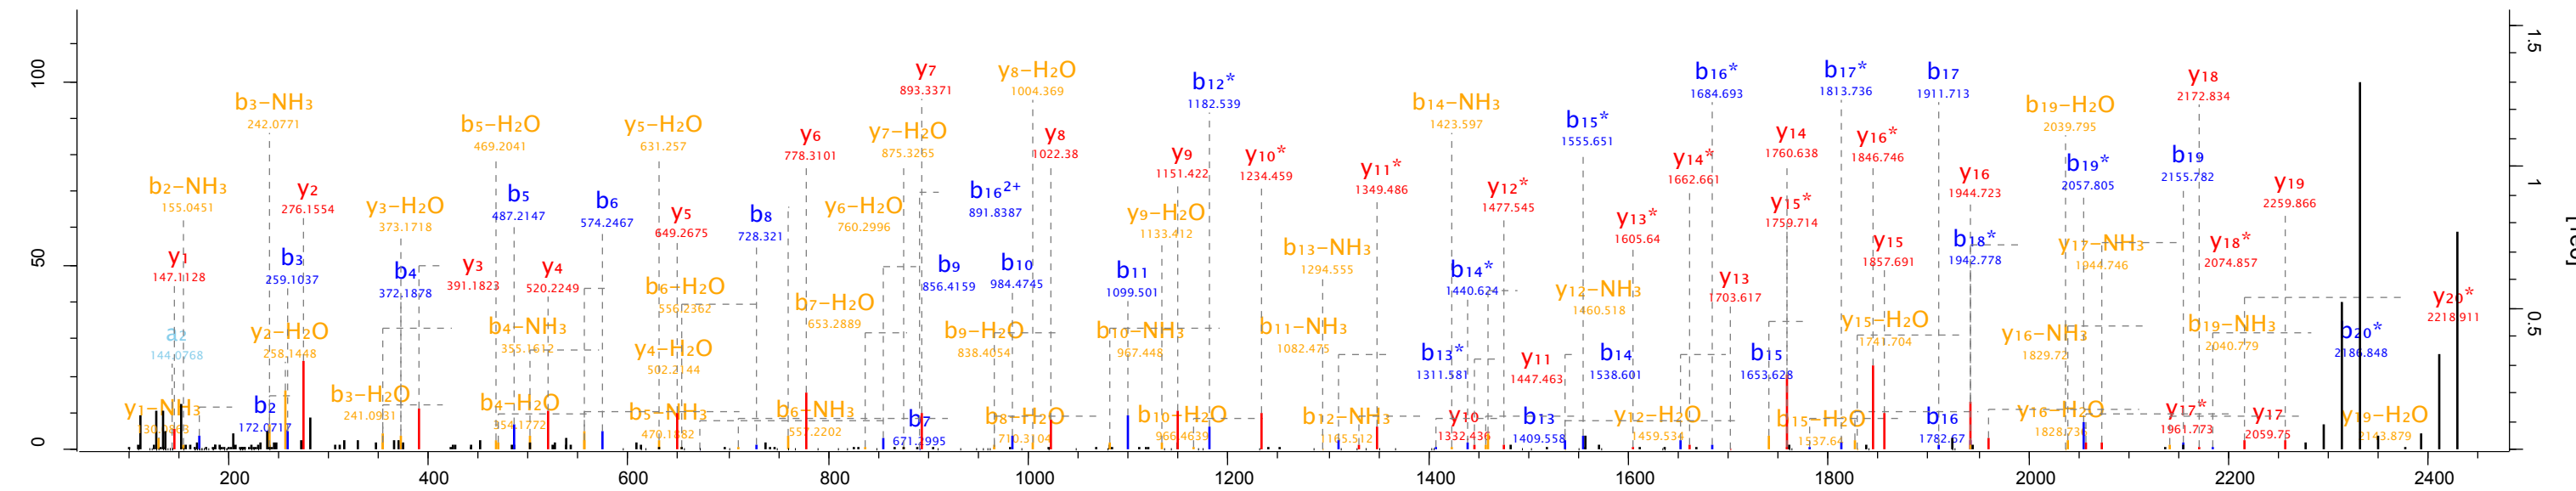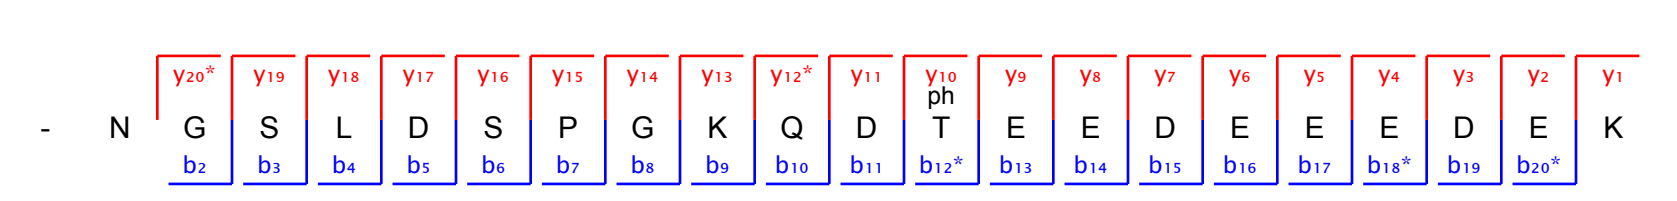



Raw file 20171215\_MaS\_33SR\_LMH\_phospho\_02 Scan 3787 Method FTMS; HCD Score 179.14 m/z 727.79 Gene names PHIP

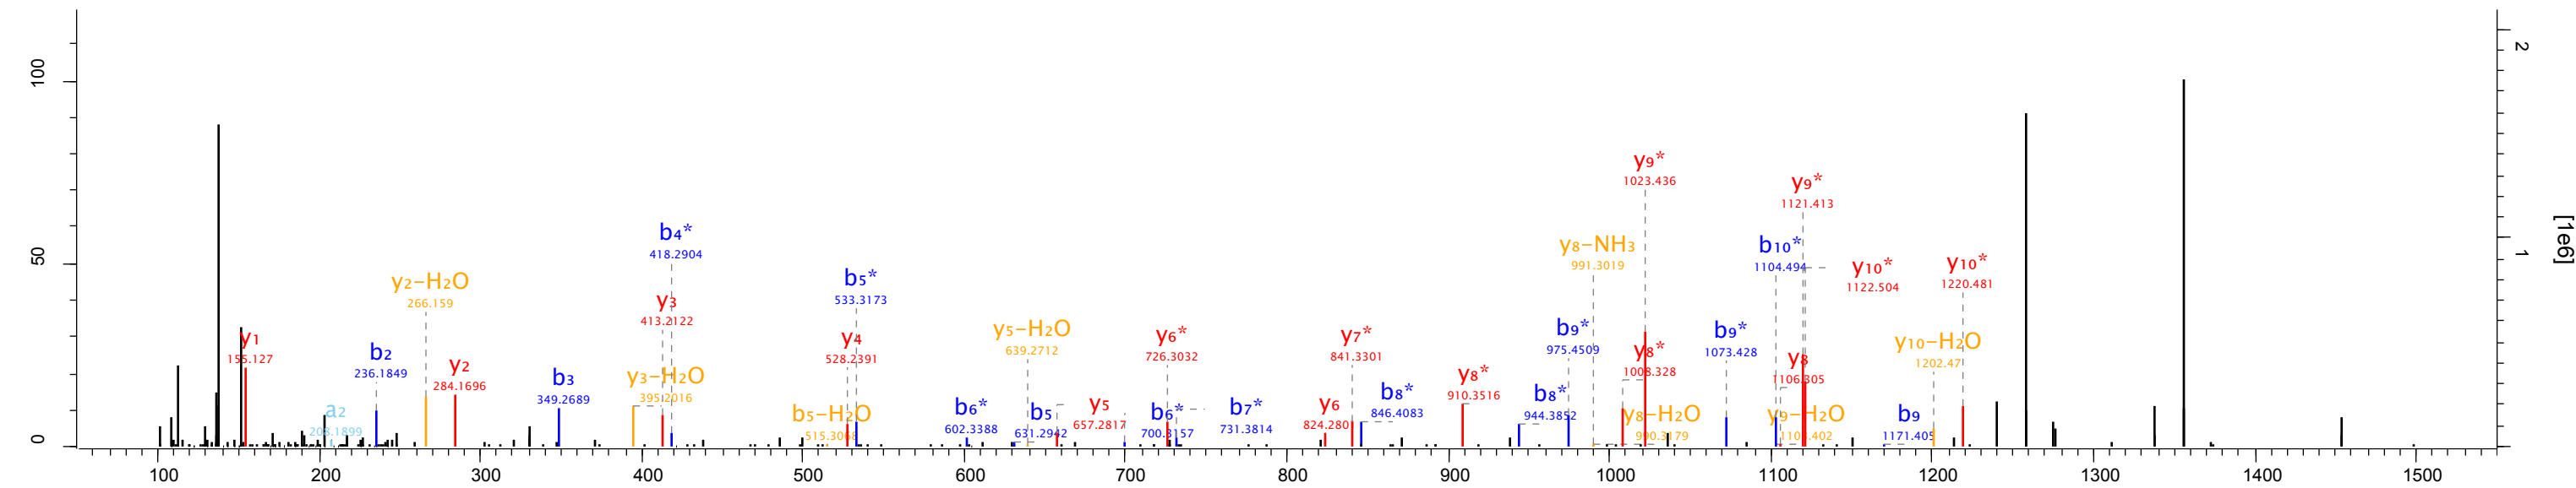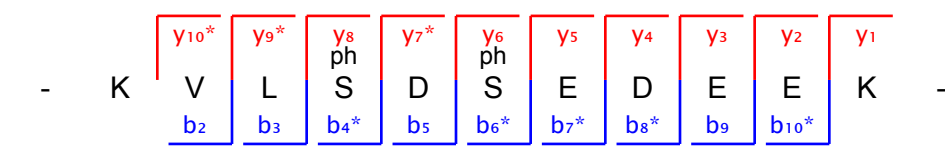

Raw file 20171215\_MaS\_33SR\_LMH\_phospho\_02 Scan 3947 Method FTMS; HCD Score 73.67 m/z 393.51 Gene names SON

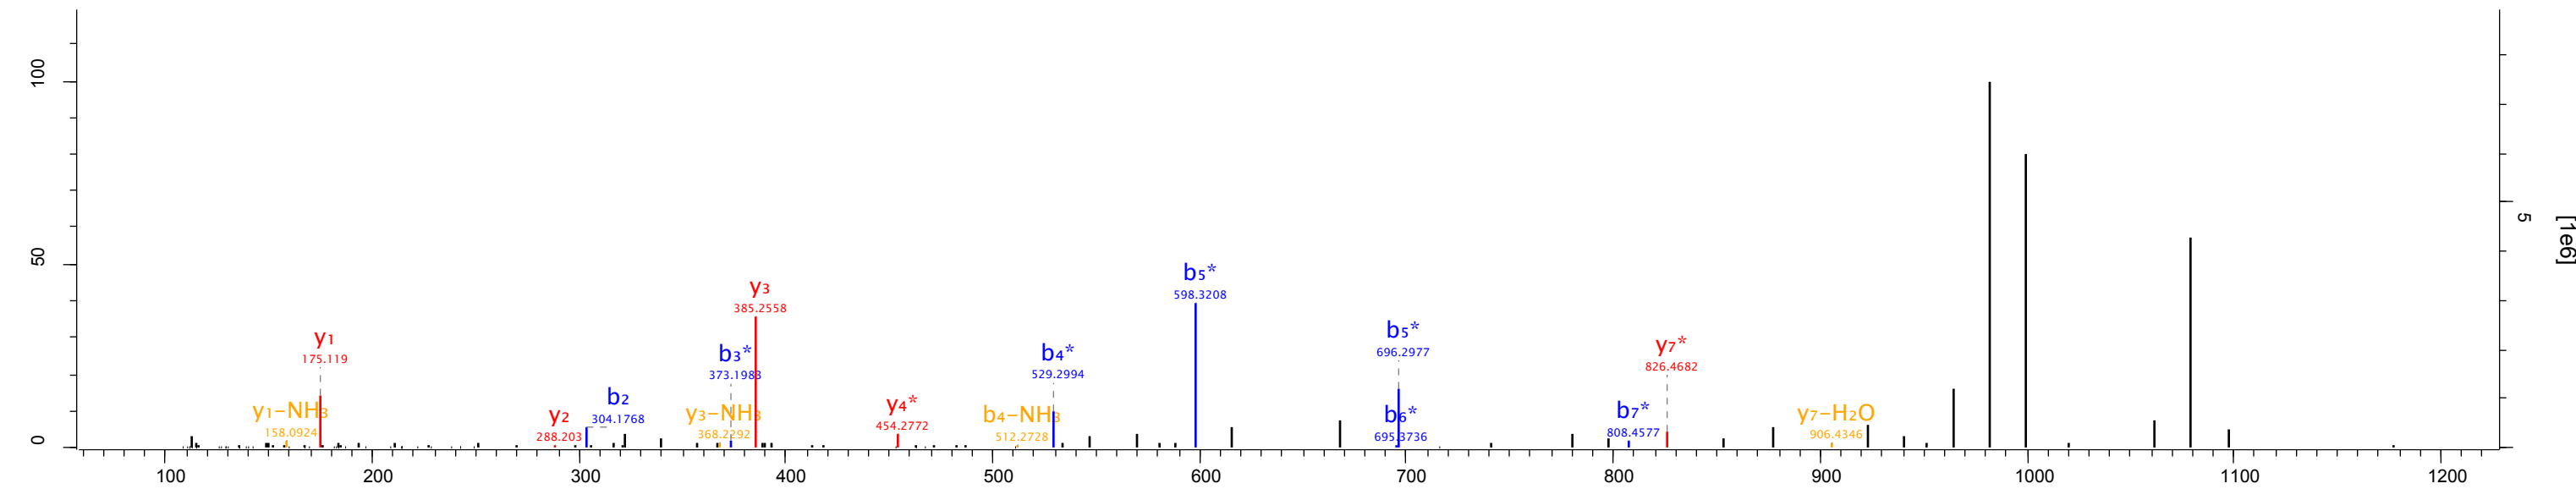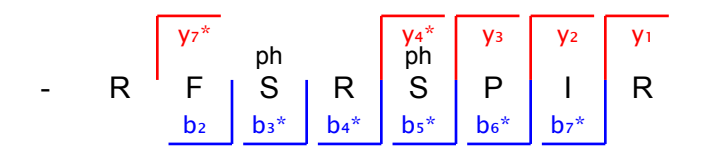

Raw file 20171215\_MaS\_33SR\_LMH\_phospho\_02 Scan 3997 Method FTMS; HCD Score 42.25 m/z 713.94 Gene names CWC22

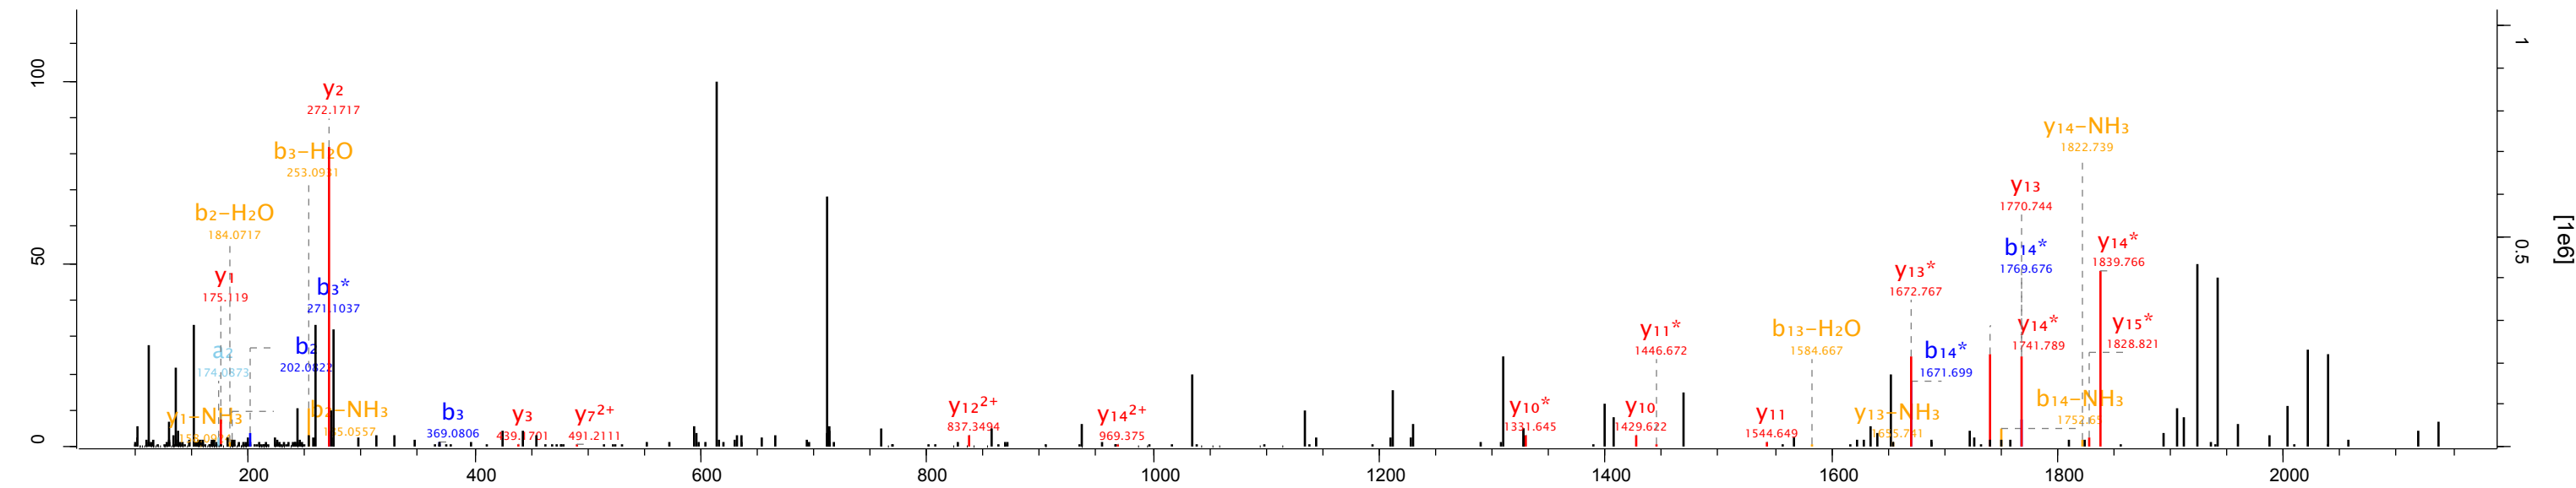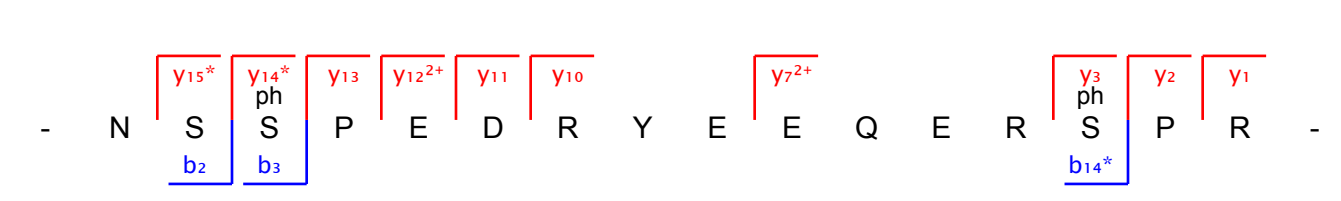

Raw file: 20171215\_MaS\_33SR\_LMH\_phospho\_02  
 Scan: 4067 Method: FTMS; HCD Score: 157.33 m/z: 636.74 Gene names: TRA2A;TRA2B

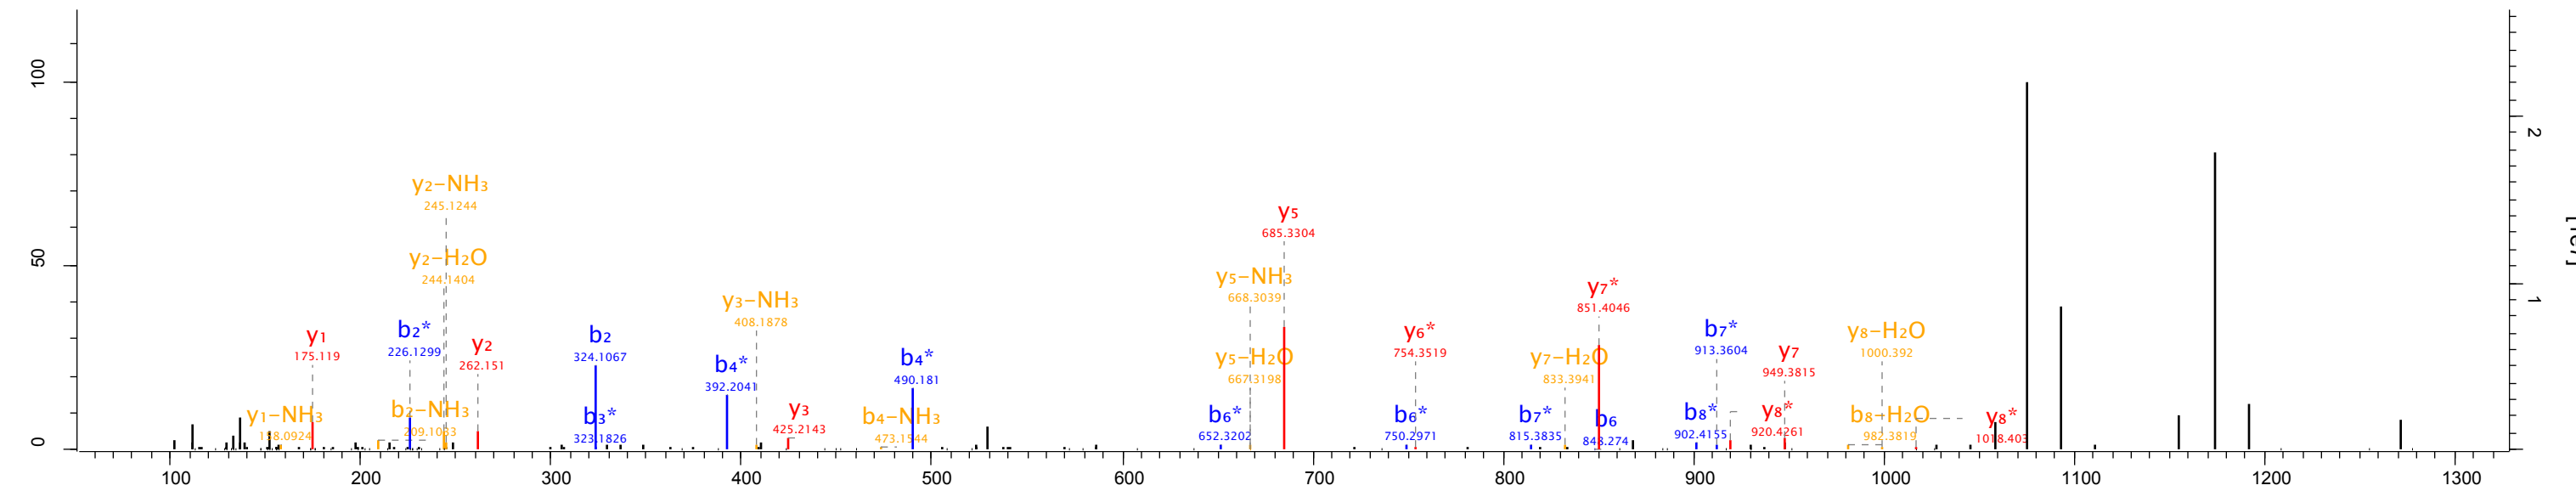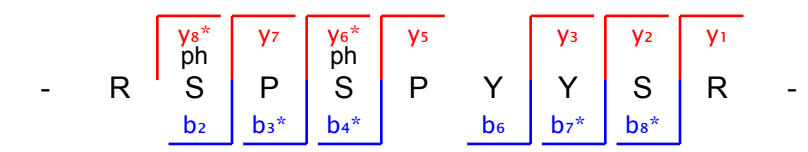

Raw file 20171215\_MaS\_33SR\_LMH\_phospho\_02 Scan 4157 Method FTMS; HCD Score 79.47 m/z 701.25 Gene names IWS1

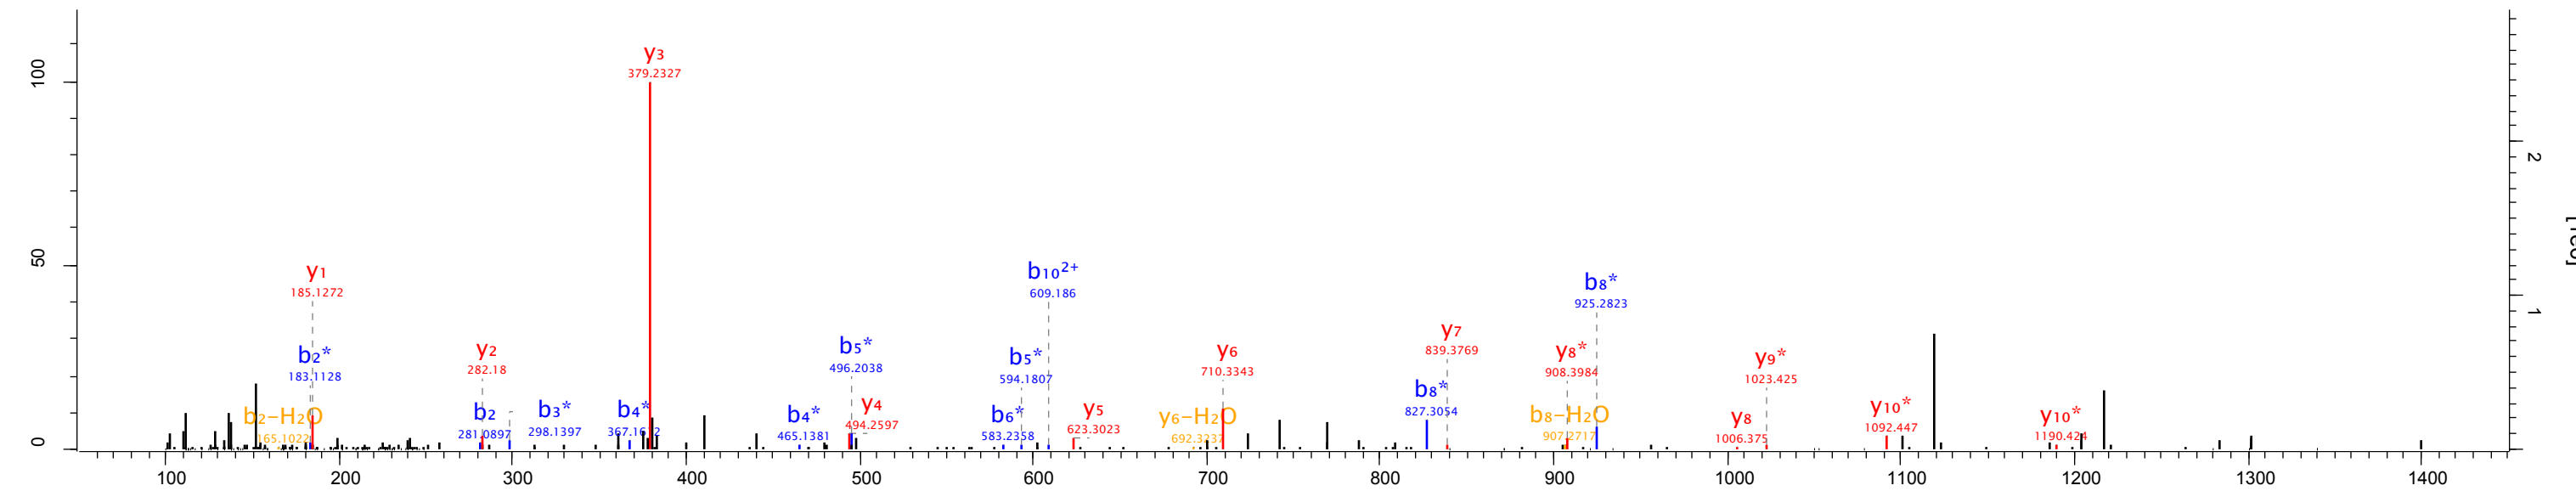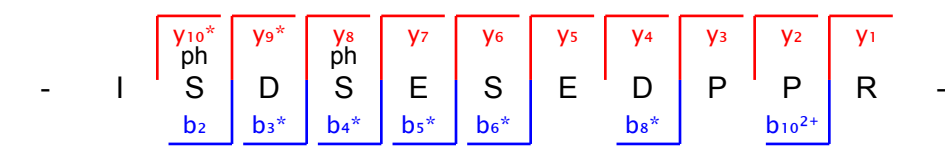

Raw file 20171215\_MaS\_33SR\_LMH\_phospho\_02 Scan 4307 Method FTMS; HCD Score 92.79 m/z 546.7 Gene names PCBP2

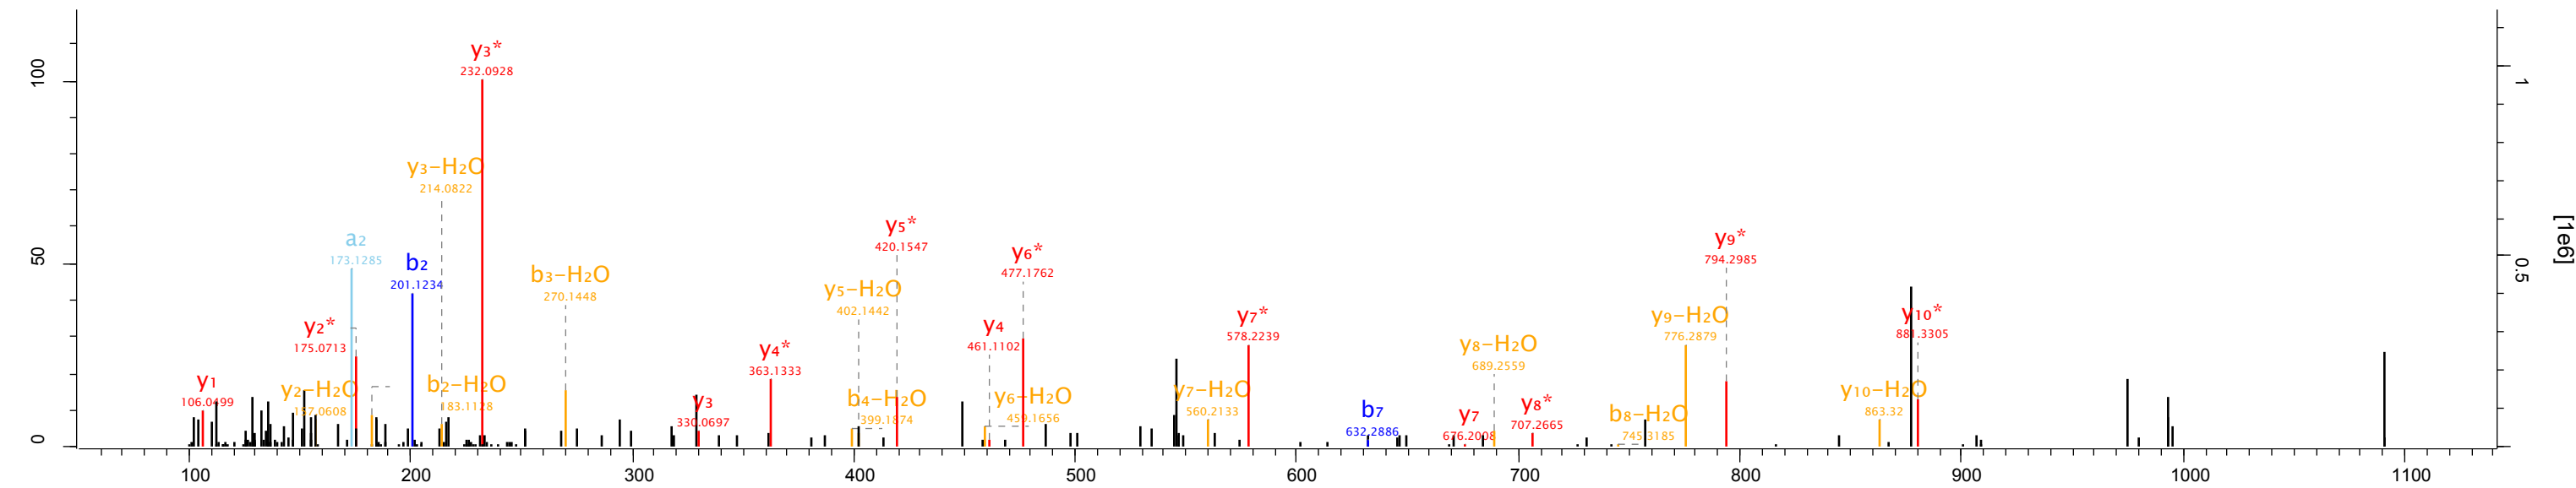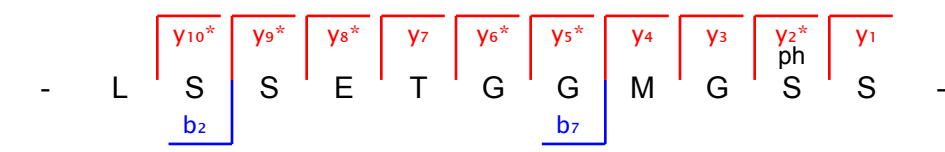

Raw file 20171215\_MaS\_33SR\_LMH\_phospho\_02 Scan 5137 Method FTMS; HCD Score 240.13 m/z 924.81 Gene names XRN2

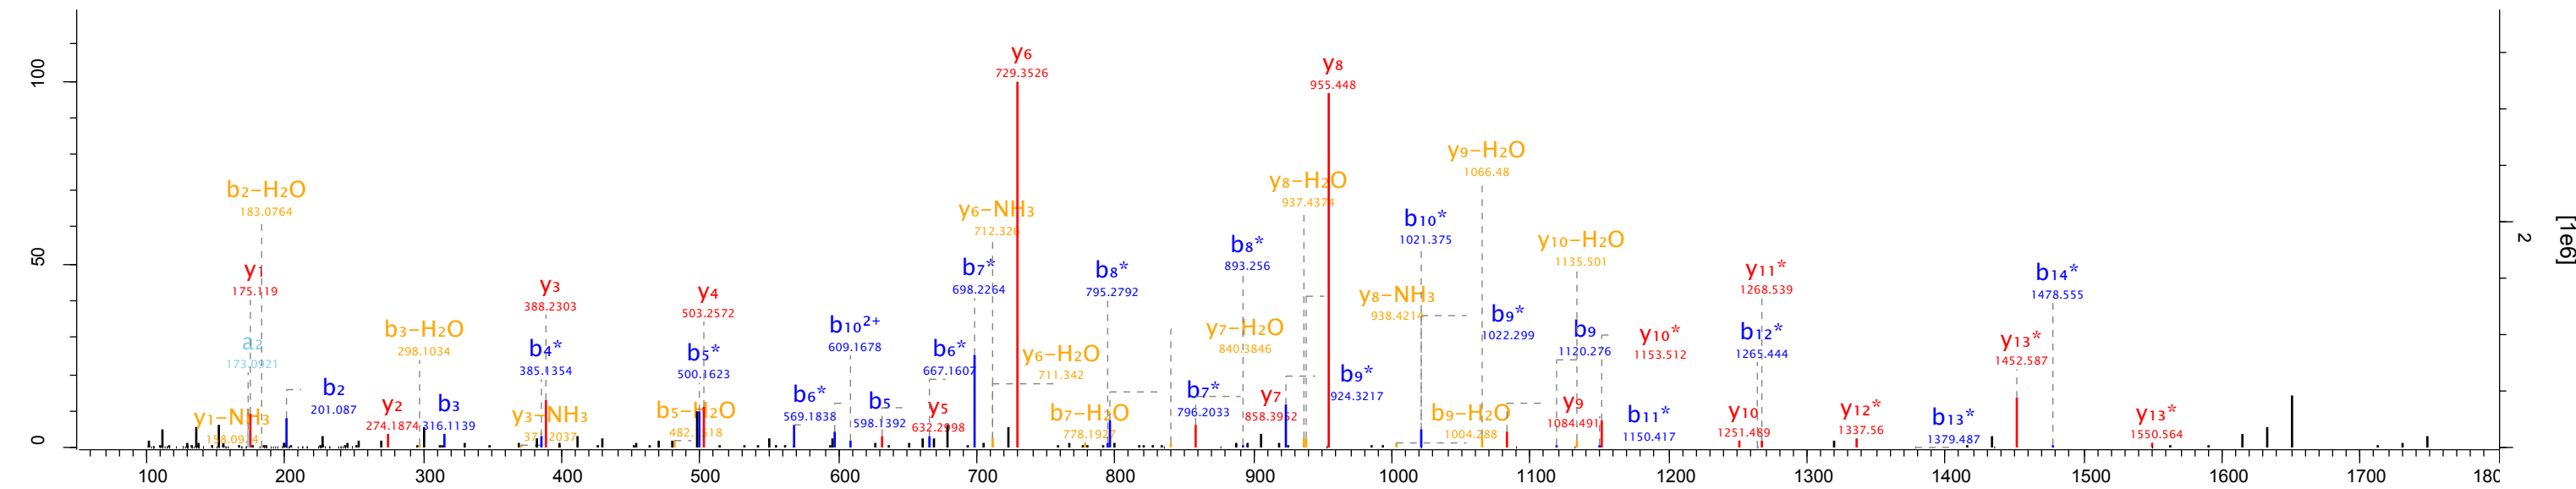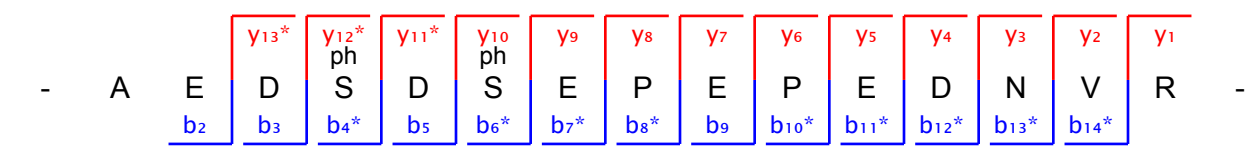

Raw file  
20171215\_MaS\_33SR\_LMH\_phospho\_02

Scan 5507 Method FTMS; HCD Score 201.61 m/z 838.32 Gene names SF3B1

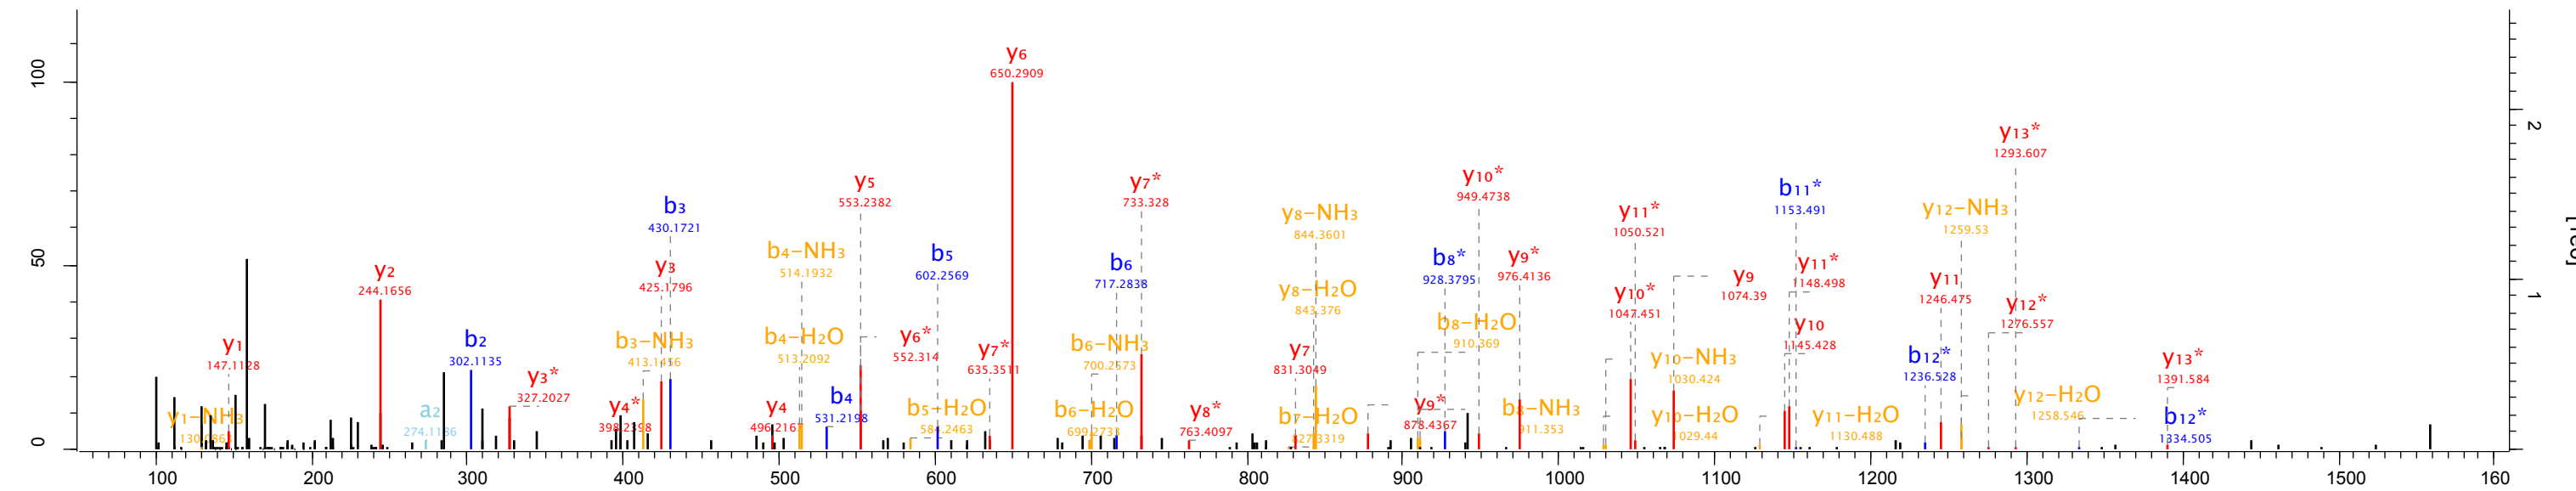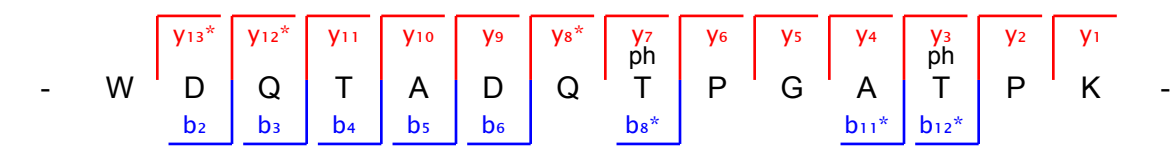



Raw file 20171215\_MaS\_33SR\_LMH\_phospho\_02 Scan 6117 Method FTMS; HCD Score 44.44 m/z 588.21 Gene names PDHA1;PDHA2

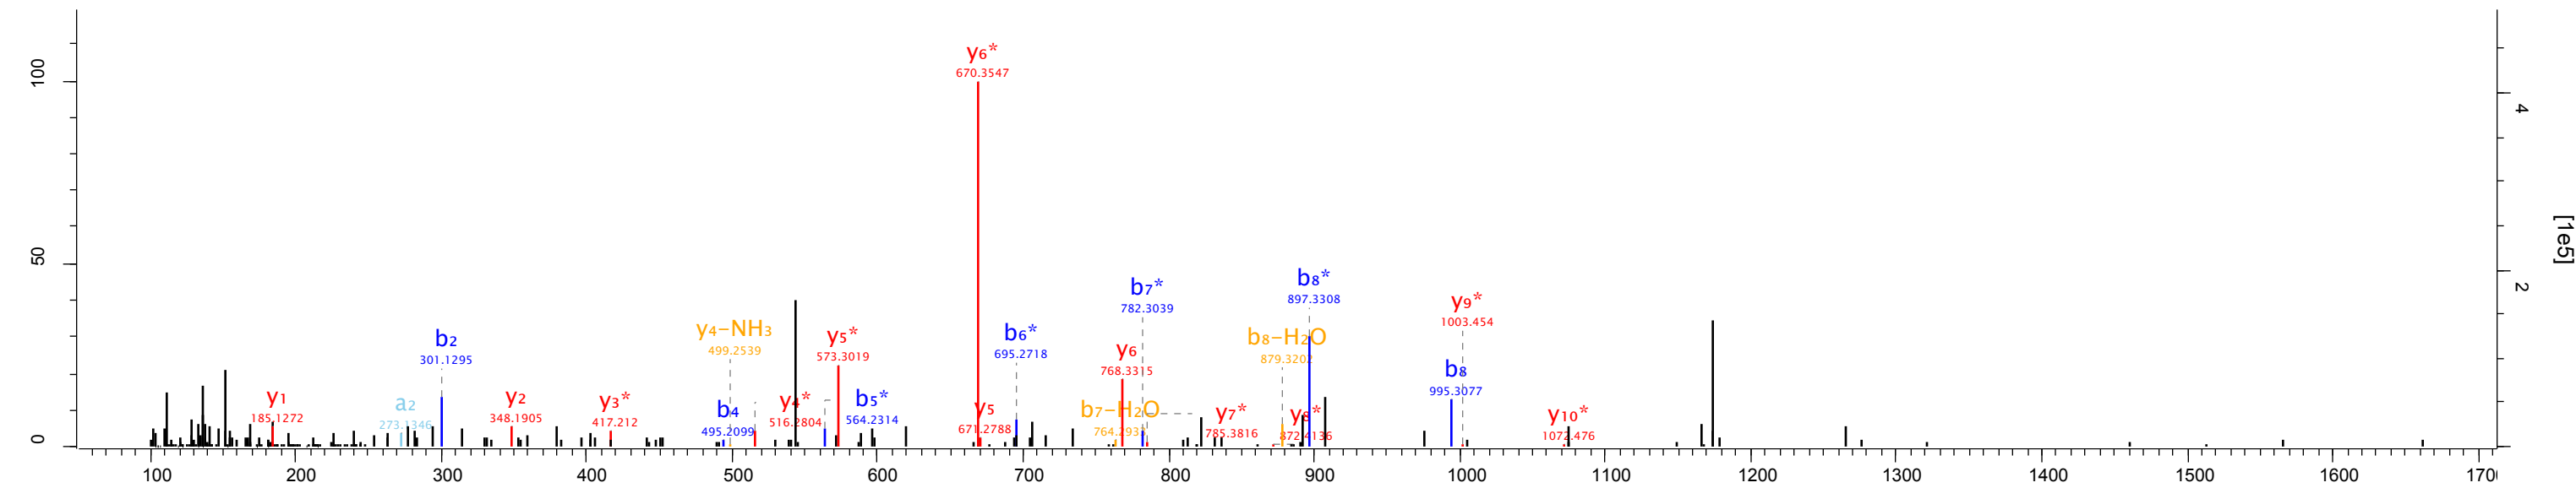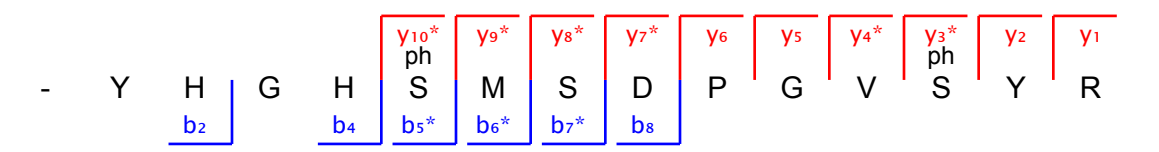

Raw file 20171215\_MaS\_33SR\_LMH\_phospho\_02 Scan 6297 Method FTMS; HCD Score 158.61 m/z 1197.5 Gene names MAP7D1

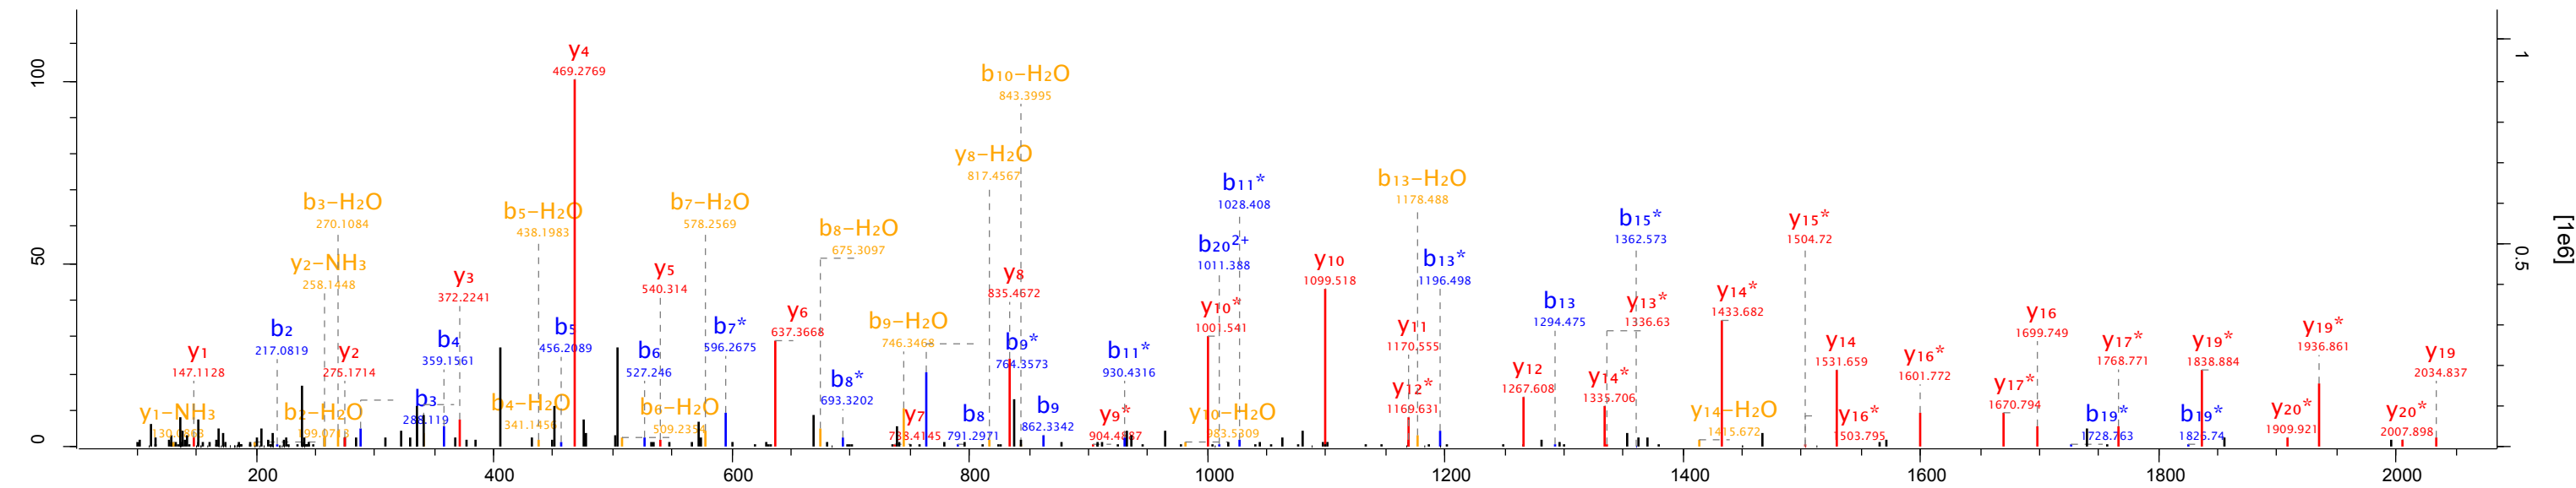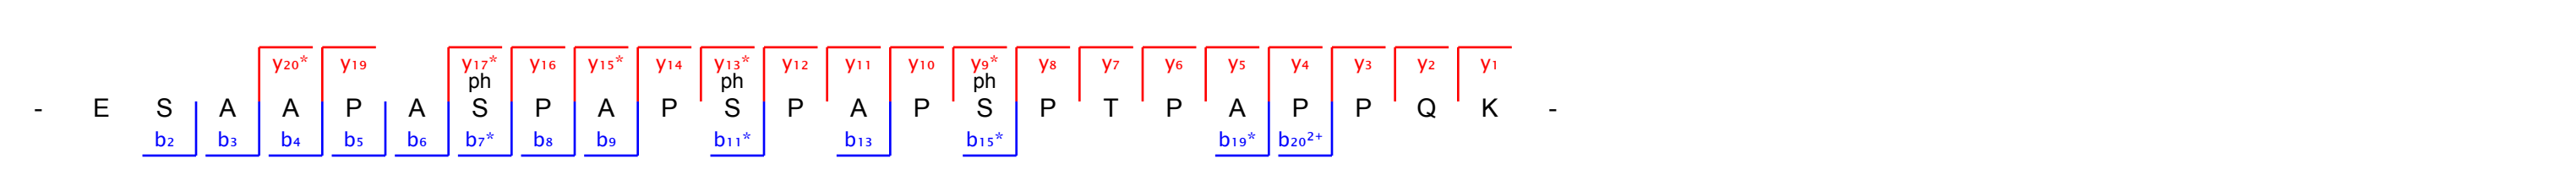

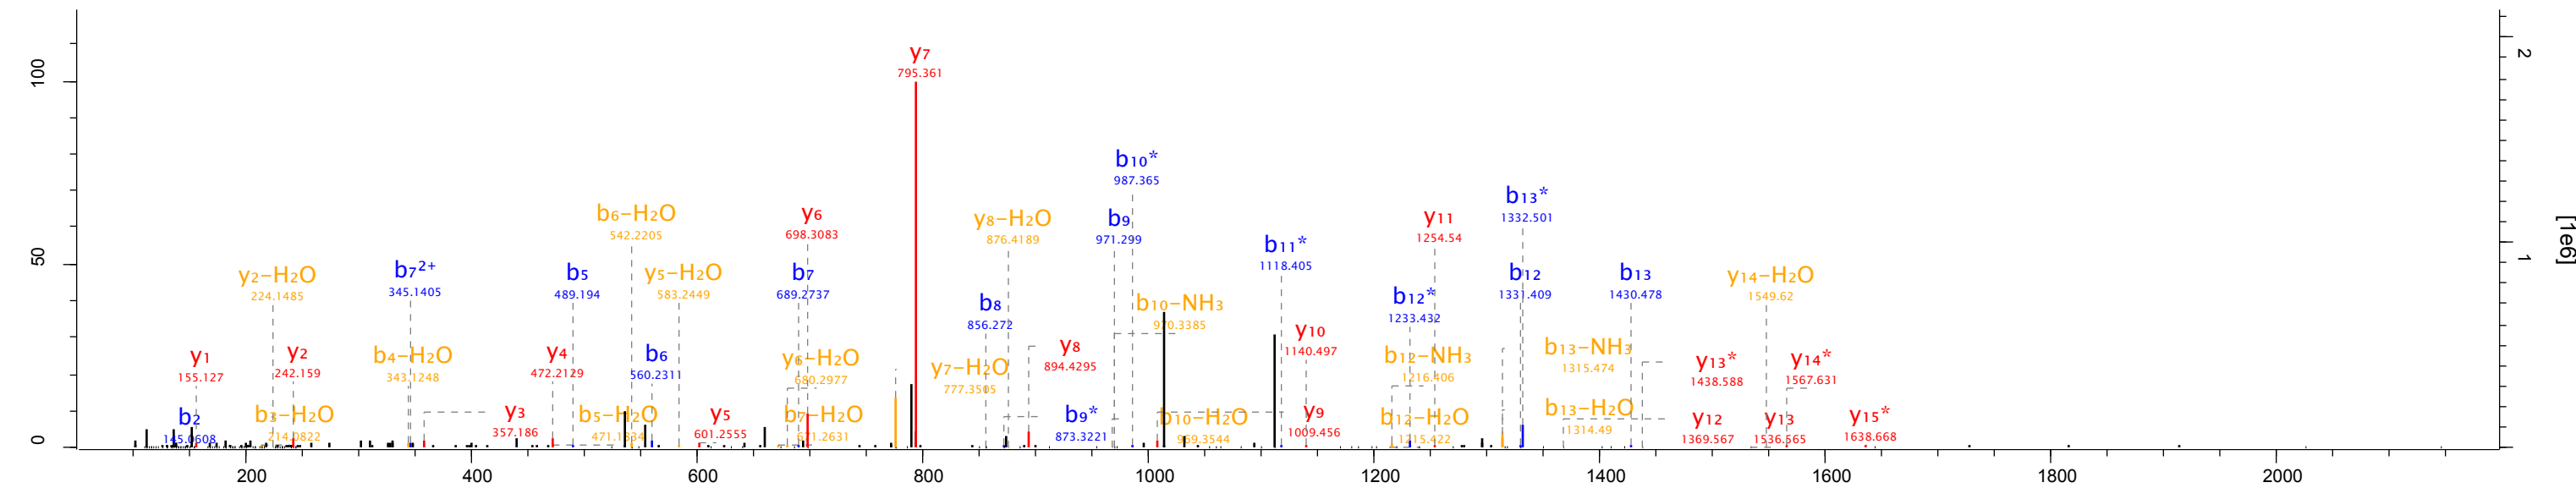

- G S S E Q A E S D N M D V P P E D D S K -

b<sub>2</sub>
b<sub>5</sub>
b<sub>6</sub>
b<sub>7</sub>
b<sub>8</sub>
b<sub>9</sub>
b<sub>10</sub>\*
b<sub>11</sub>\*
b<sub>12</sub>
b<sub>13</sub>
y<sub>15</sub>\*
y<sub>14</sub>\*
y<sub>13</sub>ph
y<sub>12</sub>
y<sub>11</sub>
y<sub>10</sub>
y<sub>9</sub>
y<sub>8</sub>
y<sub>7</sub>
y<sub>6</sub>
y<sub>5</sub>
y<sub>4</sub>
y<sub>3</sub>
y<sub>2</sub>
y<sub>1</sub>

Raw file 20171215\_MaS\_33SR\_LMH\_phospho\_02 Scan 6937 Method FTMS; HCD Score 69.07 m/z 840.85 Gene names PCM1

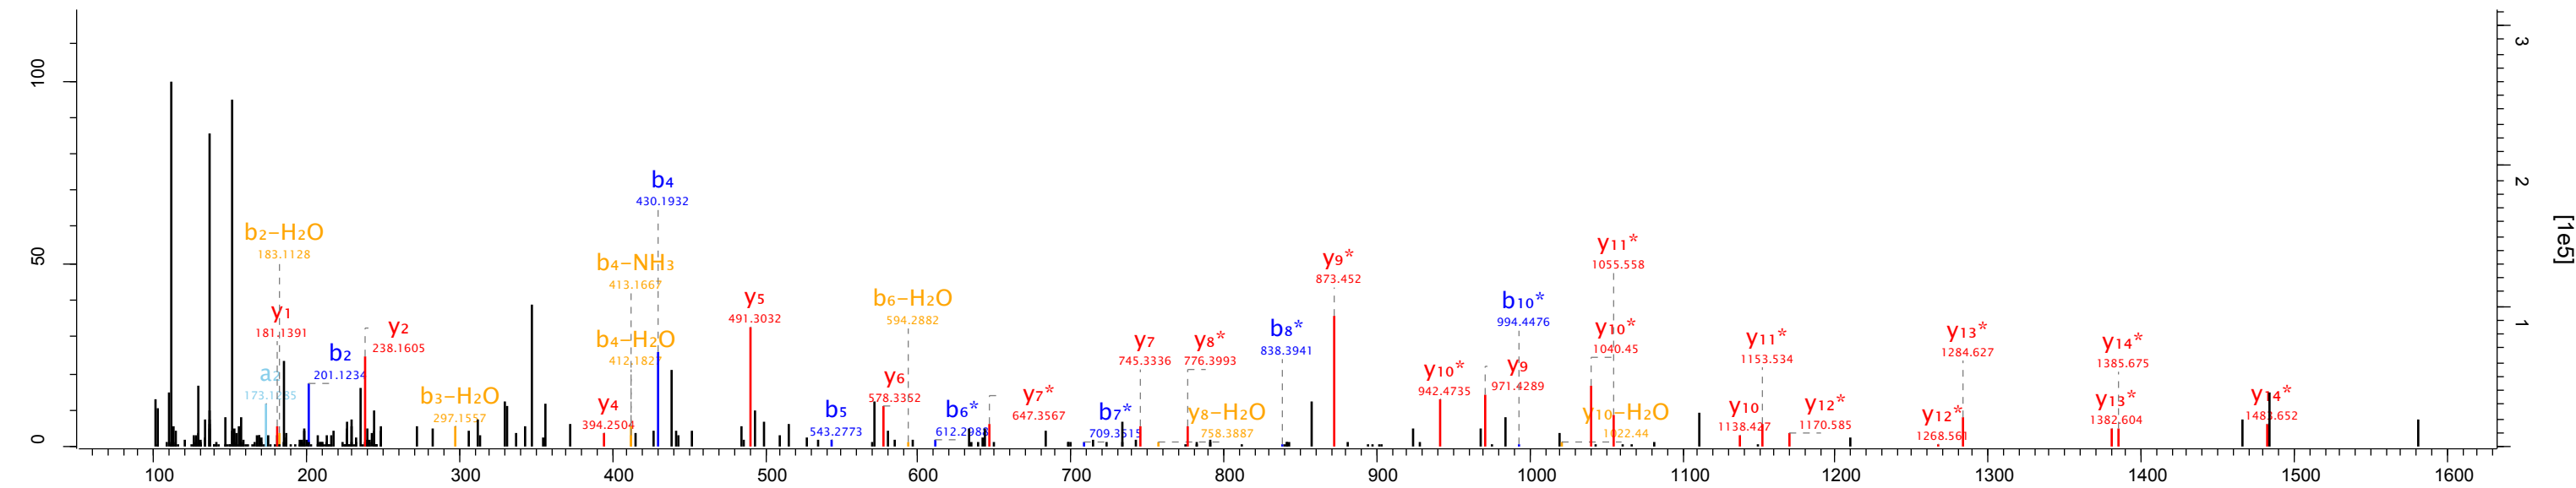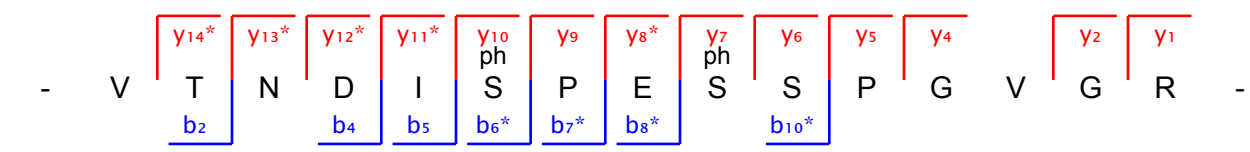

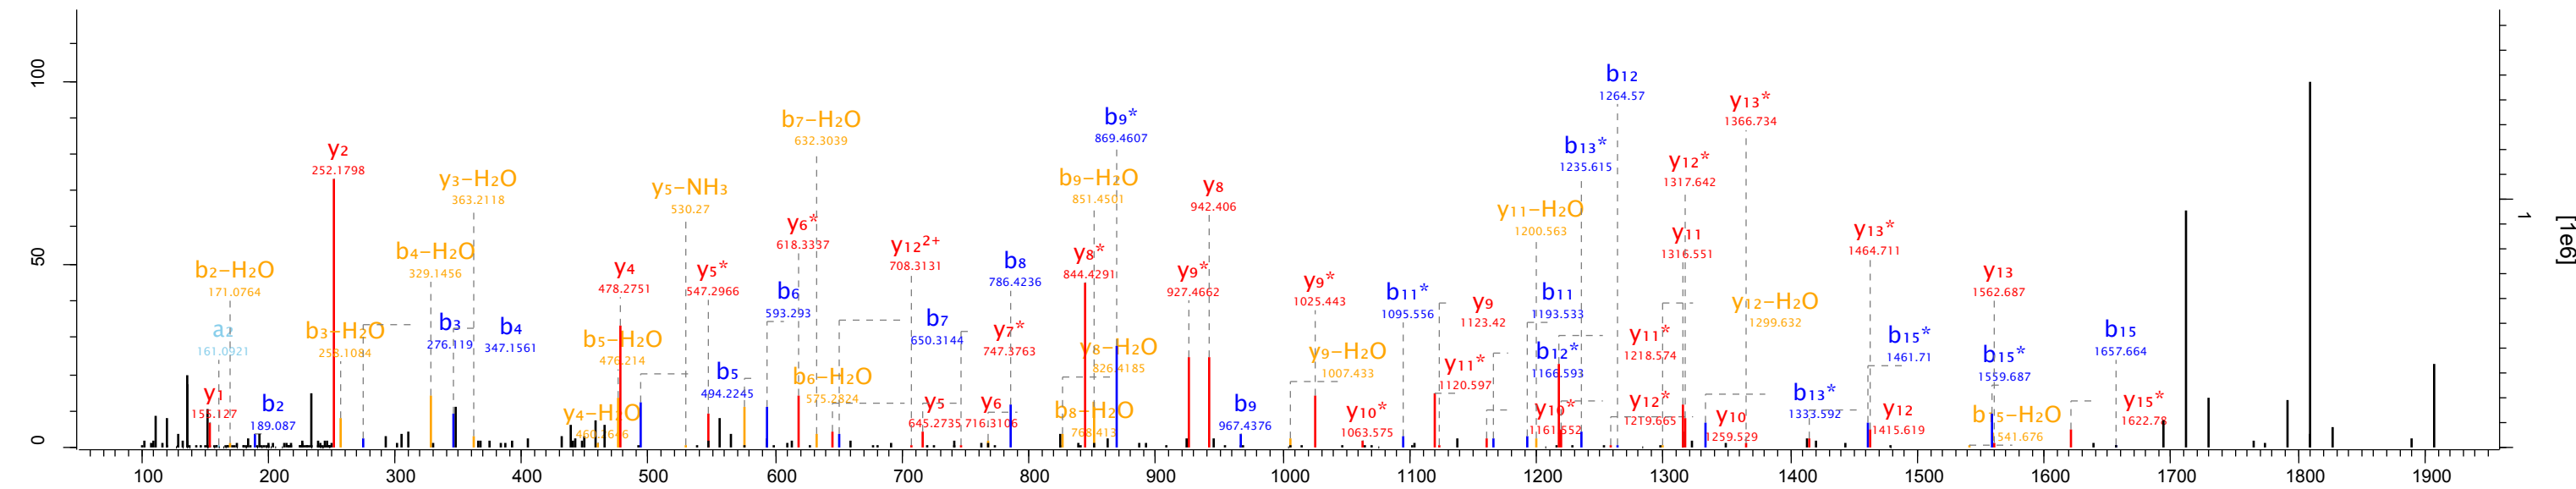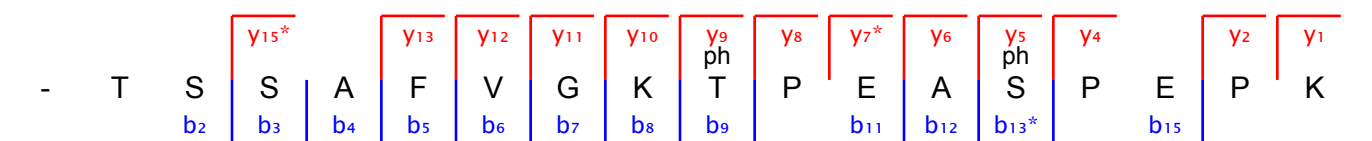

Raw file 20171215\_MaS\_33SR\_LMH\_phospho\_02 Scan 7287 Method FTMS; HCD Score 140.49 m/z 615.26 Gene names AAK1

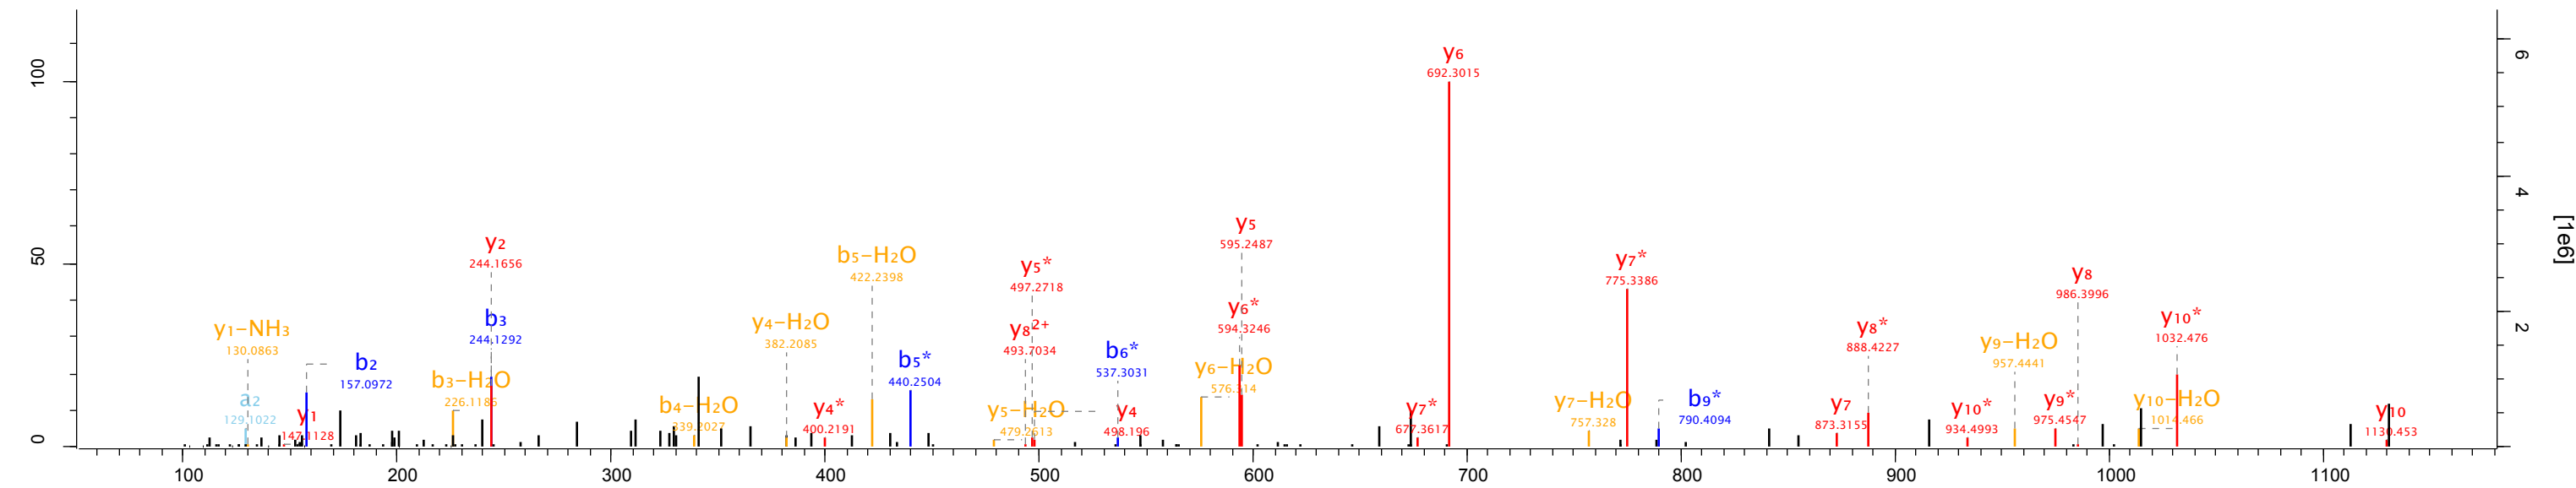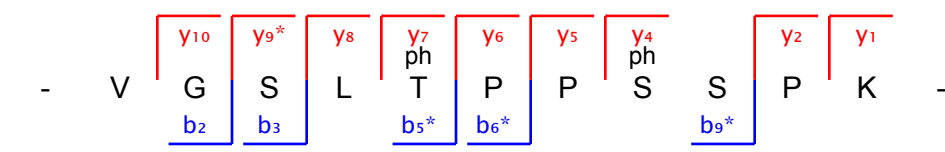

Raw file 20171215\_MaS\_33SR\_LMH\_phospho\_02 Scan 8177 Method FTMS; HCD Score 197.67 m/z 927.35 Gene names SNRNP200

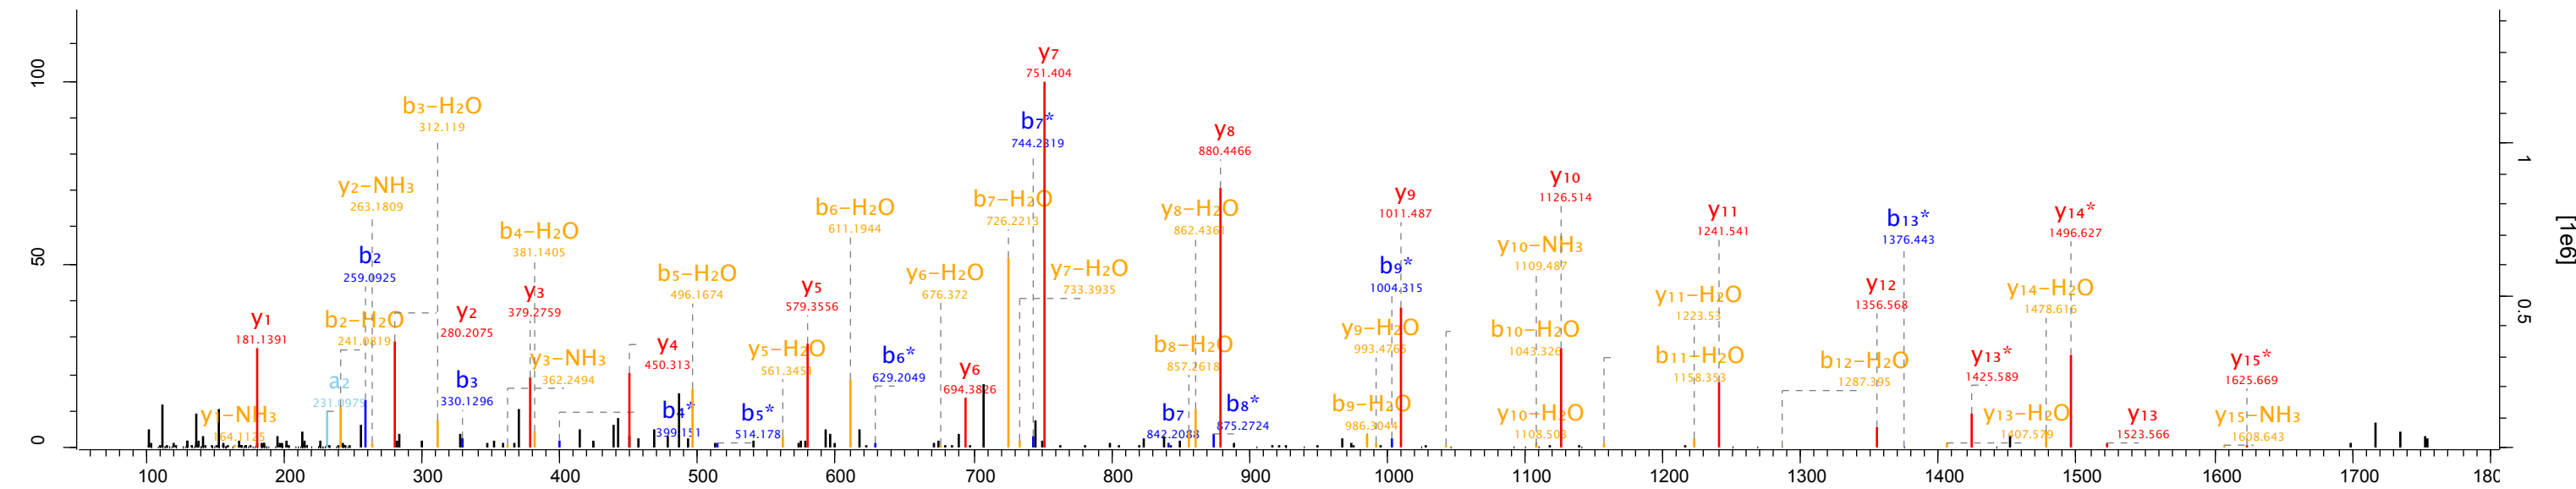

- E E A S D D D M E G D E A V V R -  
 b<sub>2</sub> b<sub>3</sub> b<sub>4</sub><sup>\*</sup> b<sub>5</sub><sup>\*</sup> b<sub>6</sub><sup>\*</sup> b<sub>7</sub> b<sub>8</sub><sup>\*</sup> b<sub>9</sub><sup>\*</sup> b<sub>13</sub><sup>\*</sup>

Raw file 20171215\_MaS\_33SR\_LMH\_phospho\_02 Scan 9007 Method FTMS; HCD Score 189.68 m/z 1360.27 Gene names HSPH1

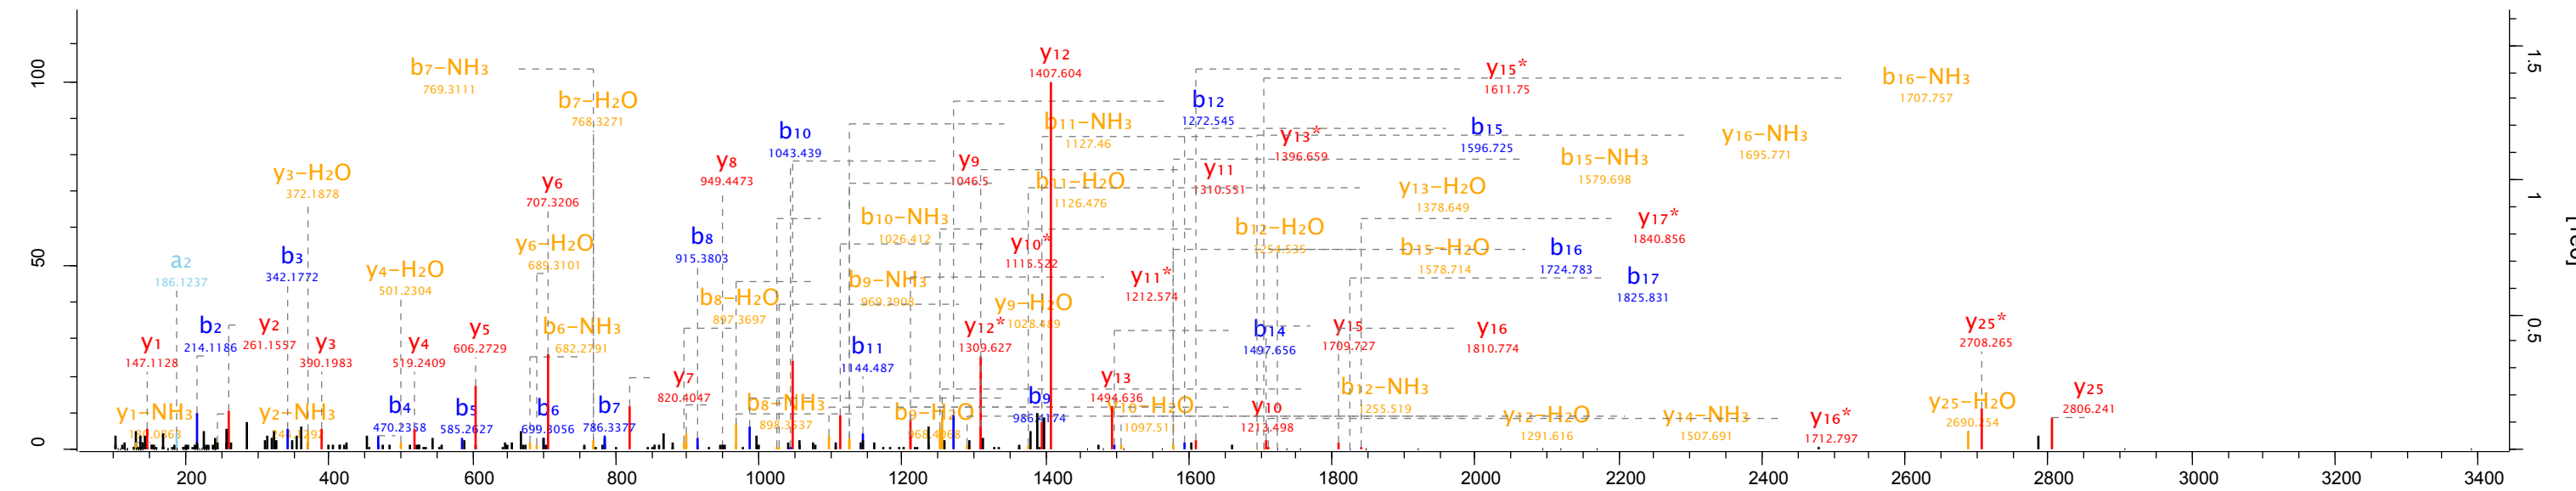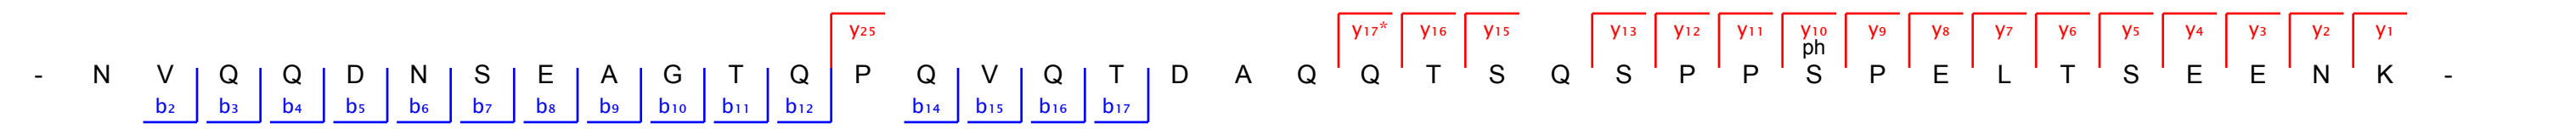



Raw file 20171215\_MaS\_33SR\_LMH\_phospho\_02 Scan 9357 Method FTMS; HCD Score 213.14 m/z 1026.4 Gene names PRRC2B

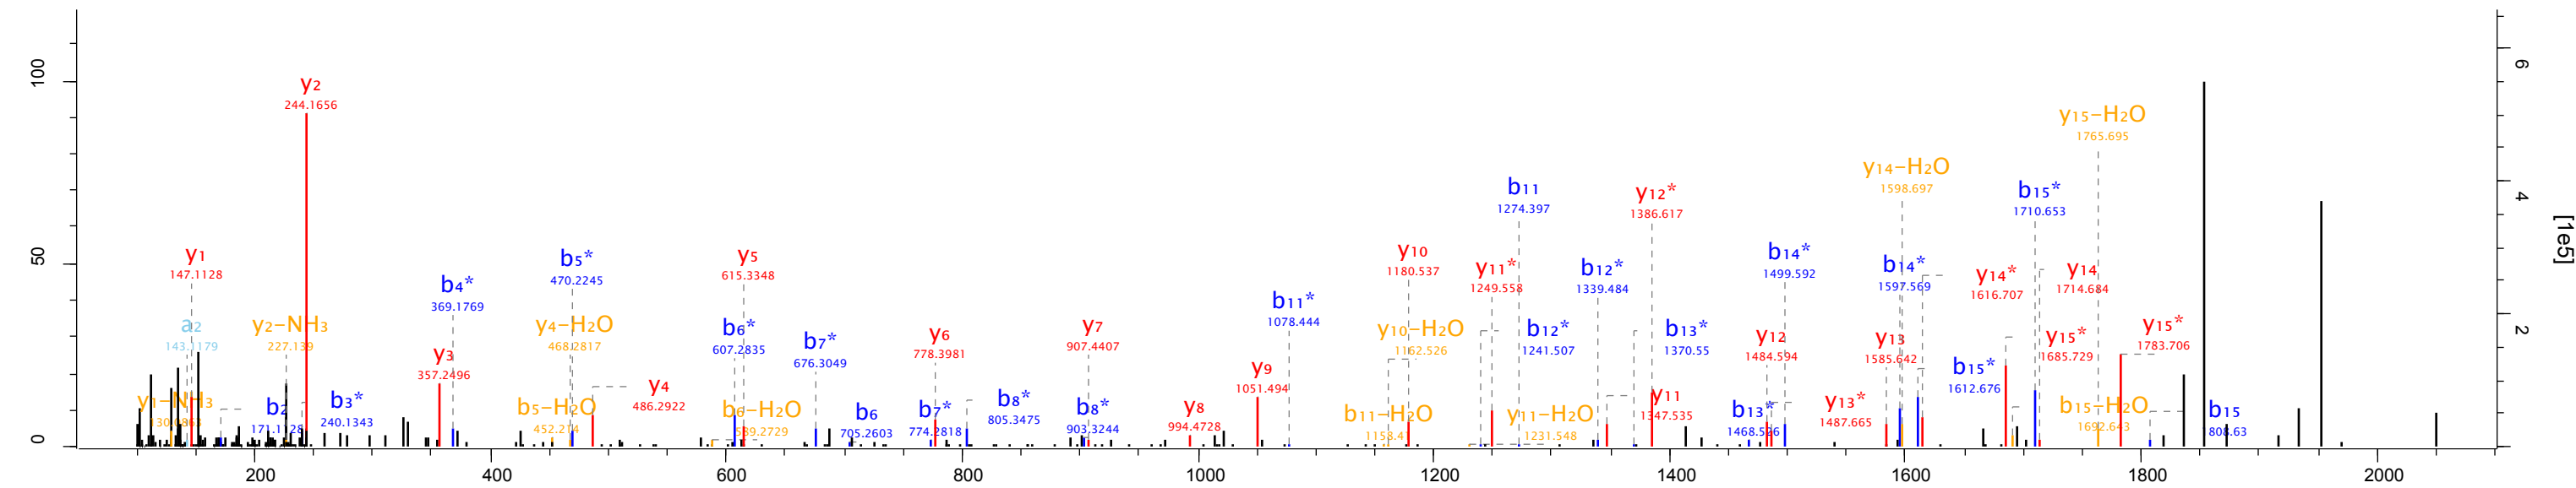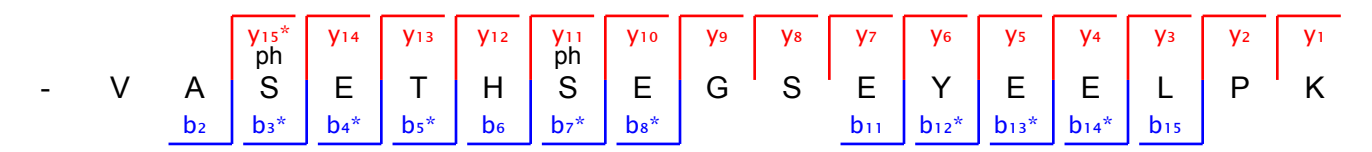

Raw file 20171215\_MaS\_33SR\_LMH\_phospho\_02 Scan 9657 Method FTMS; HCD Score 137.53 m/z 1236.18 Gene names MARCKSL1

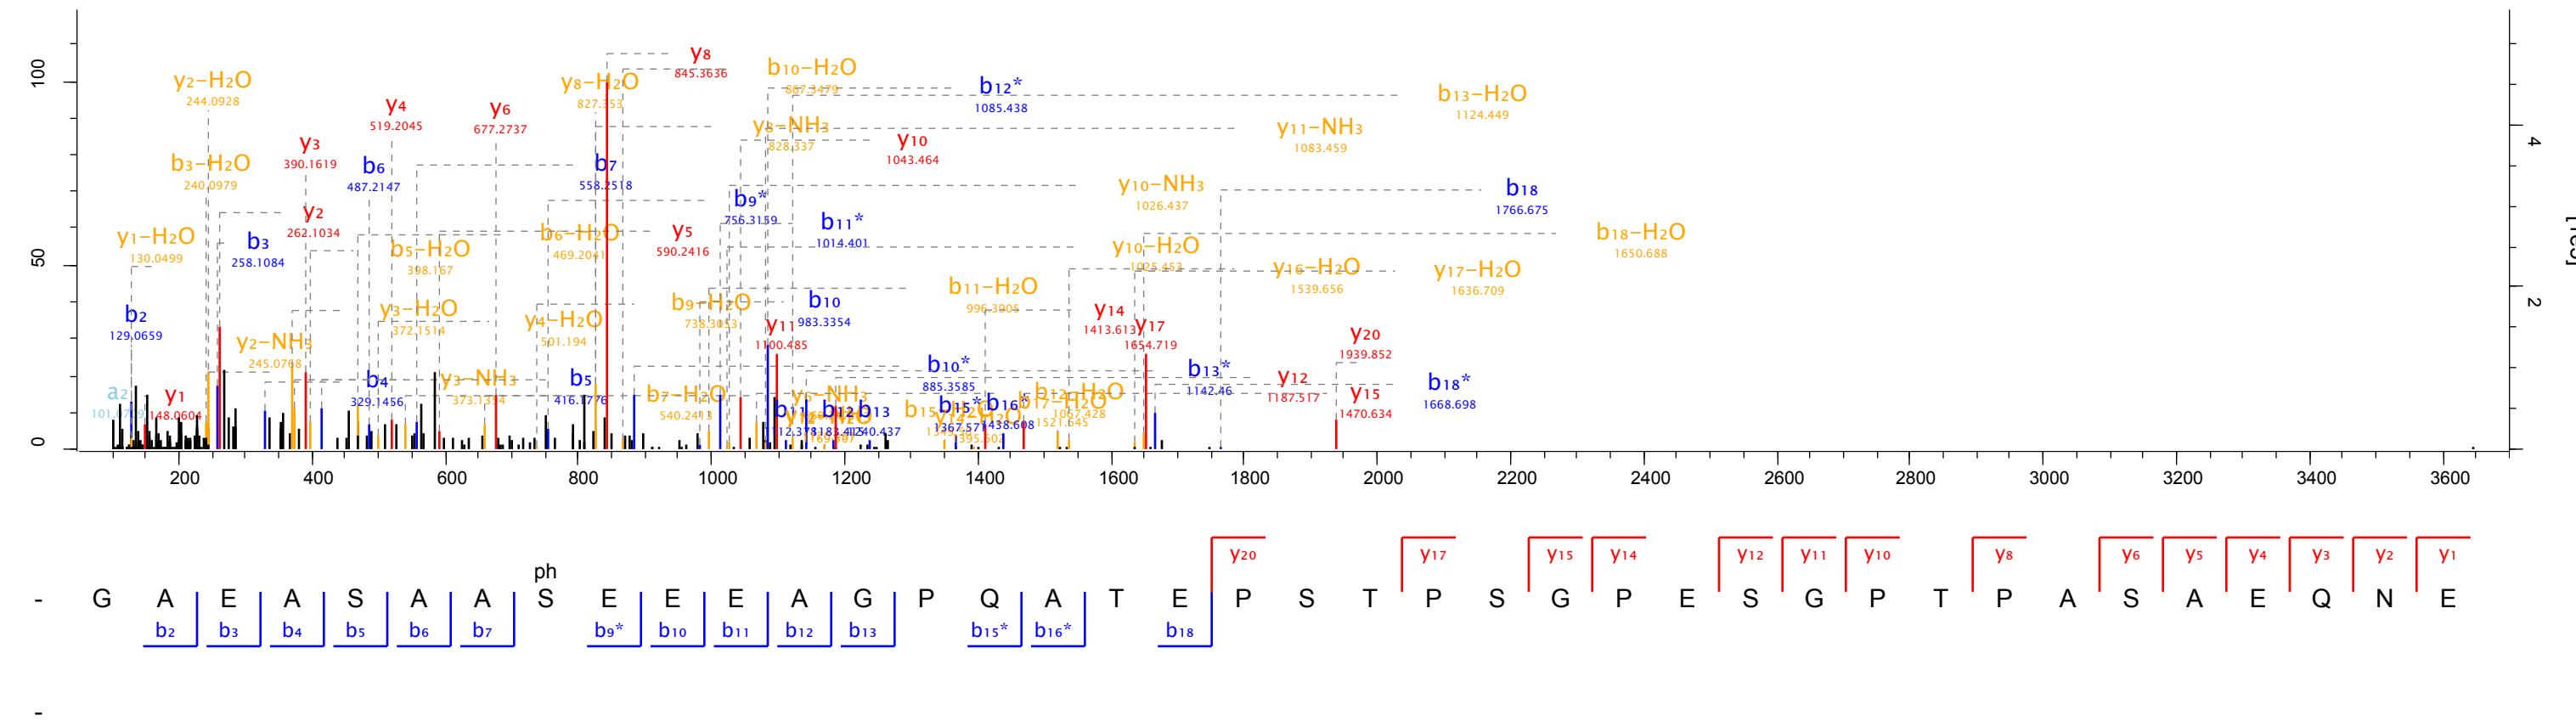

Raw file 20171215\_MaS\_33SR\_LMH\_phospho\_02 Scan 9877 Method FTMS; HCD Score 119.51 m/z 723.78 Gene names PSEN2

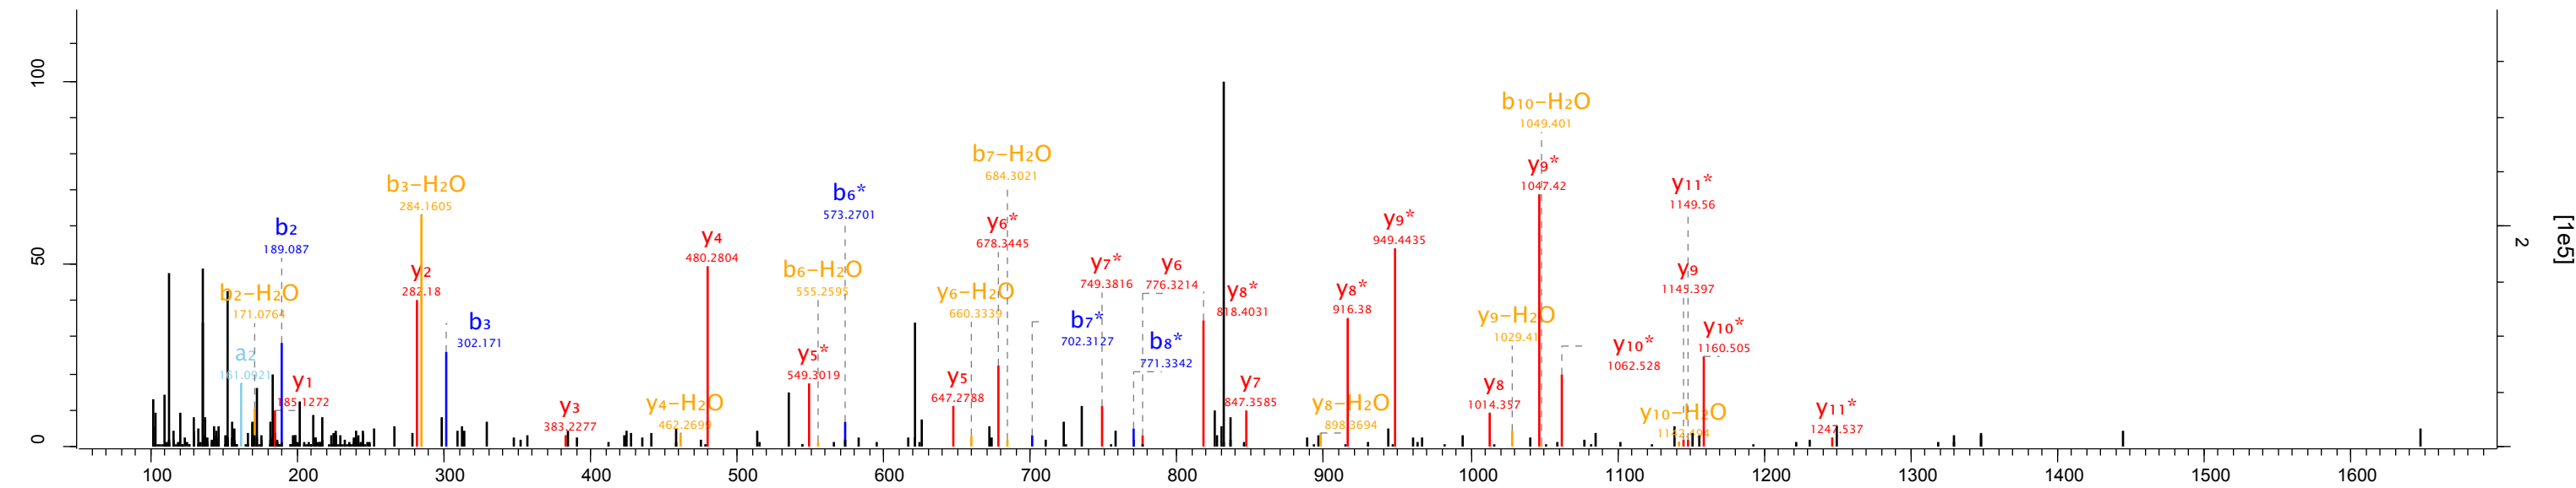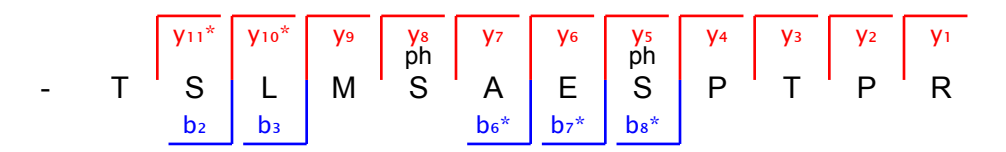

Raw file 20171215\_MaS\_33SR\_LMH\_phospho\_03 Scan 10197 Method FTMS; HCD Score 200.95 m/z 1048.98 Gene names ARHGEF12

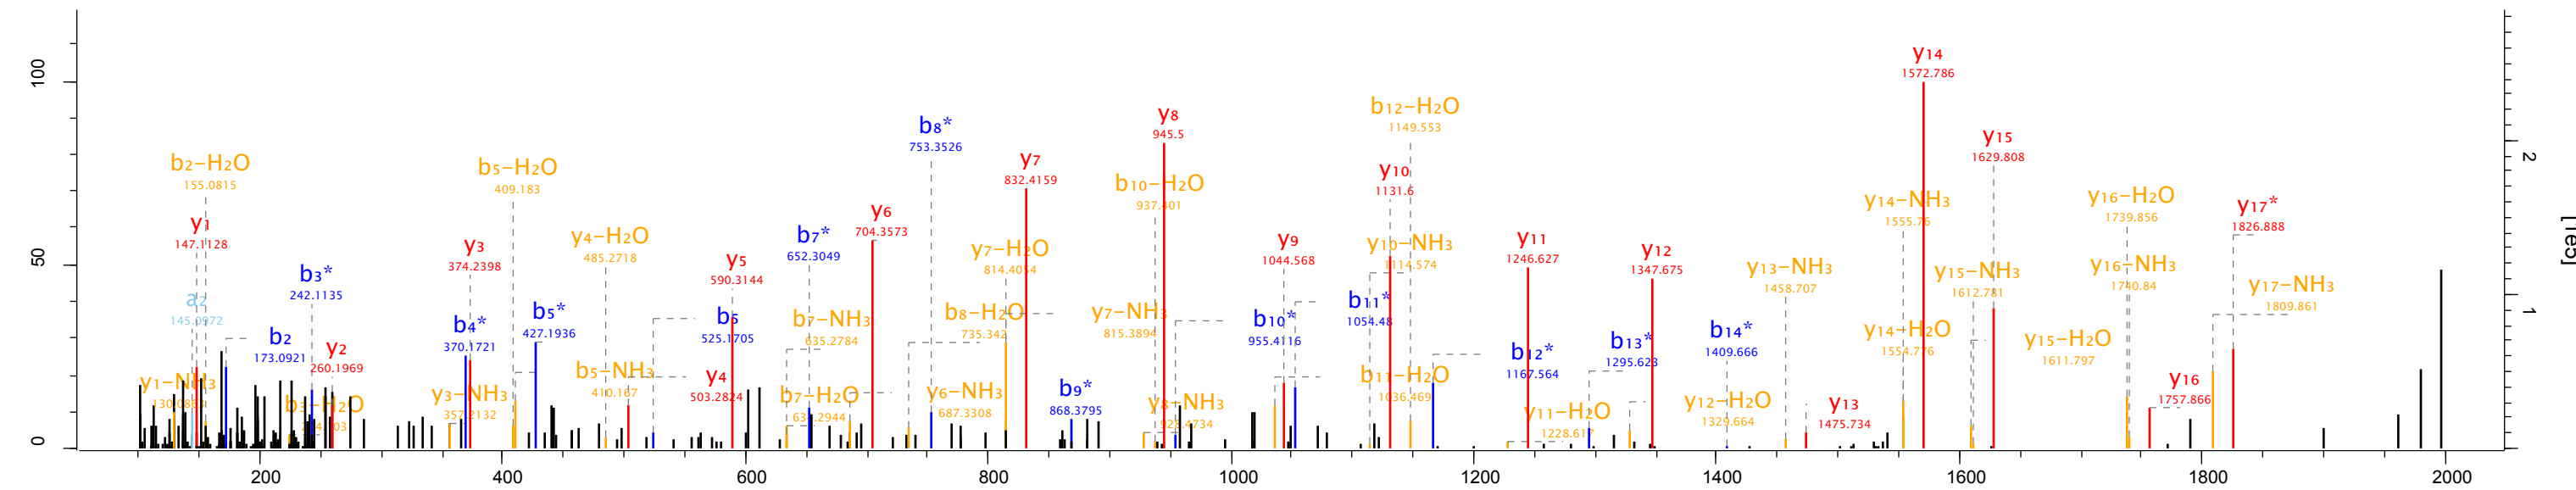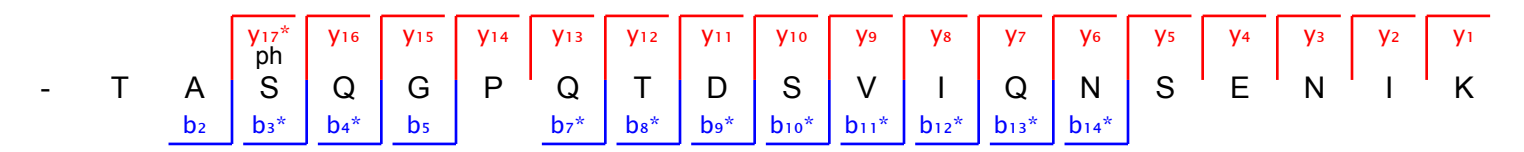

Raw file 20171215\_MaS\_33SR\_LMH\_phospho\_03 Scan 10297 Method FTMS; HCD Score 113.43 m/z 966.94 Gene names AMOTL2

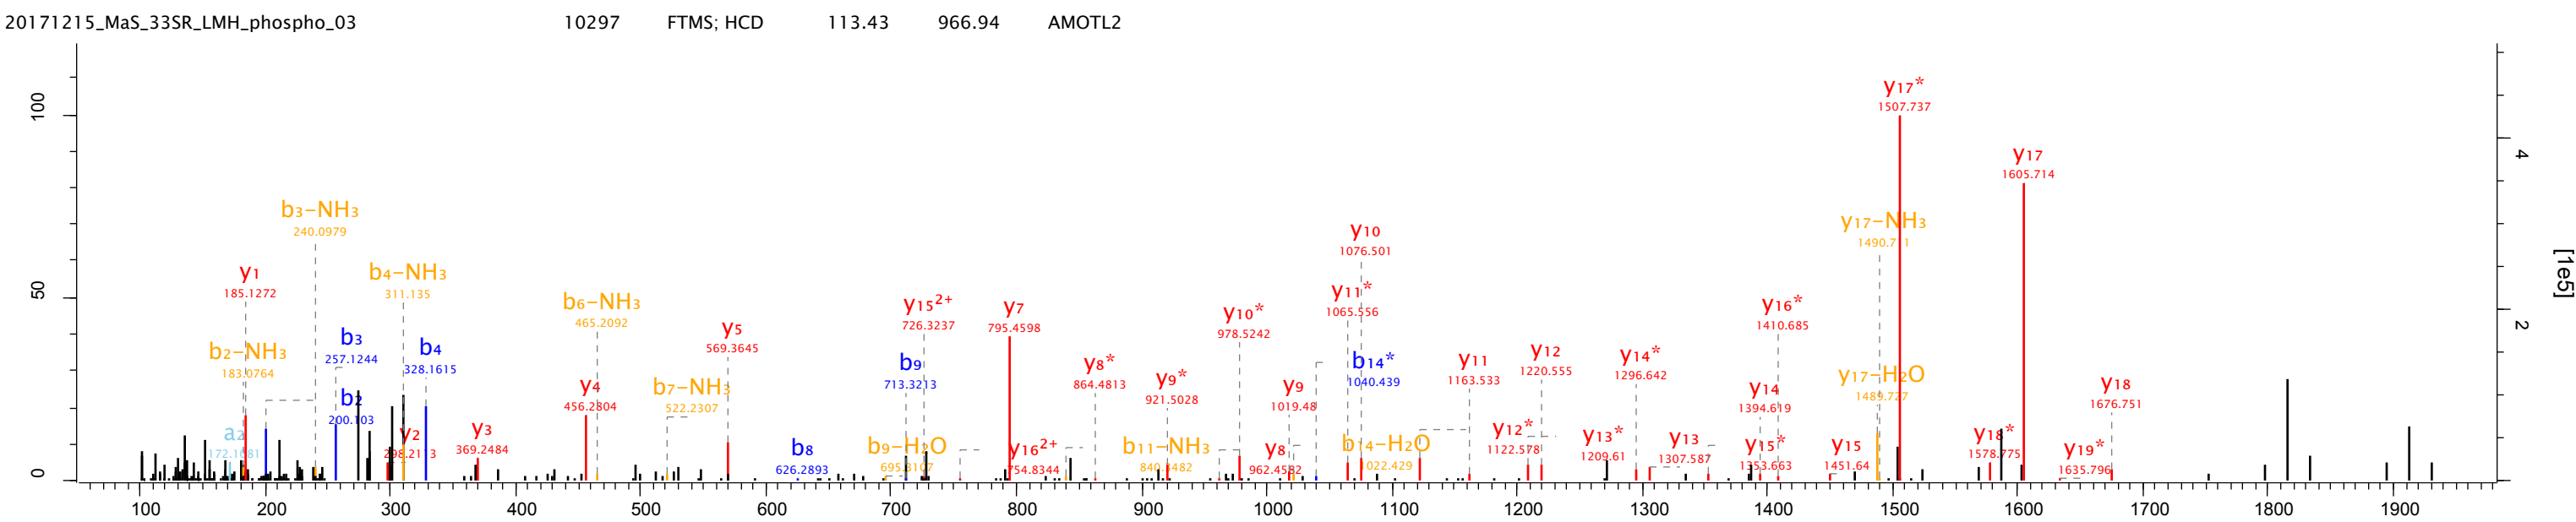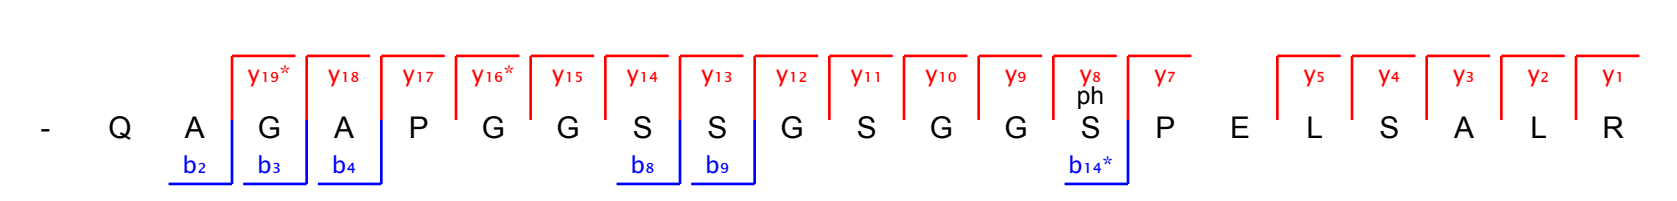

Raw file 20171215\_MaS\_33SR\_LMH\_phospho\_03 Scan 10757 Method FTMS; HCD Score 332.17 m/z 976.44 Gene names TNC

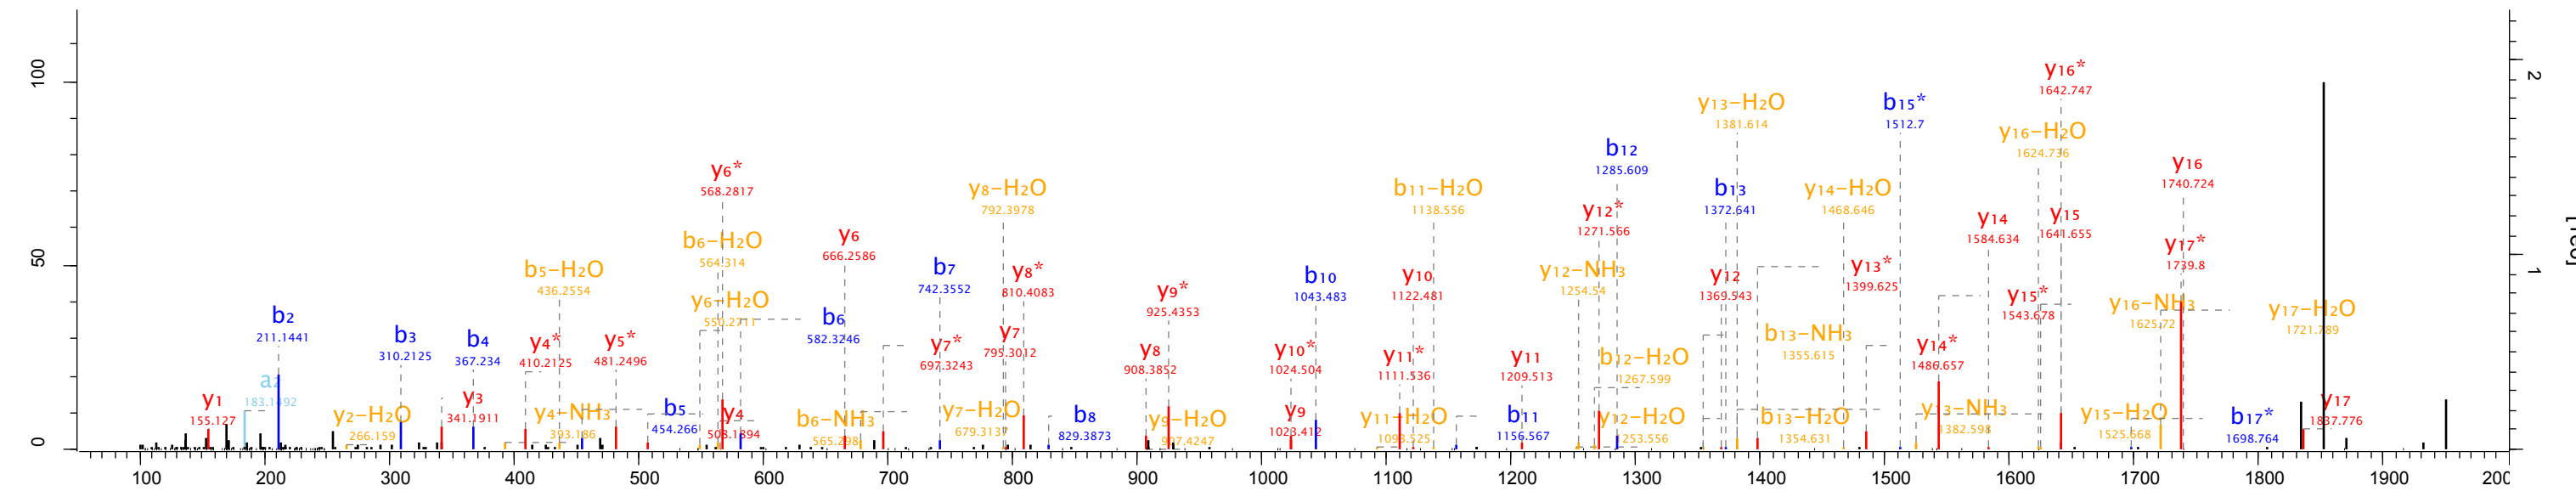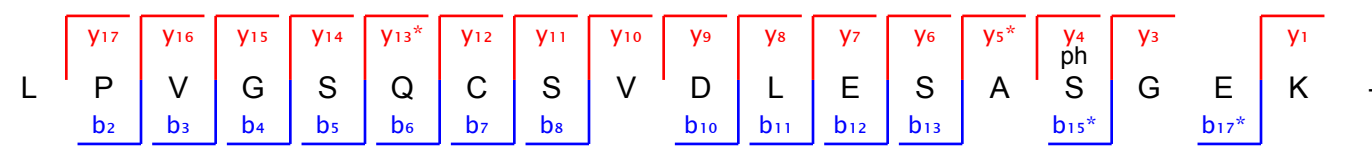

Raw file 20171215\_MaS\_33SR\_LMH\_phospho\_03 Scan 11137 Method FTMS; HCD Score 97.07 m/z 744.33 Gene names CHAMP1

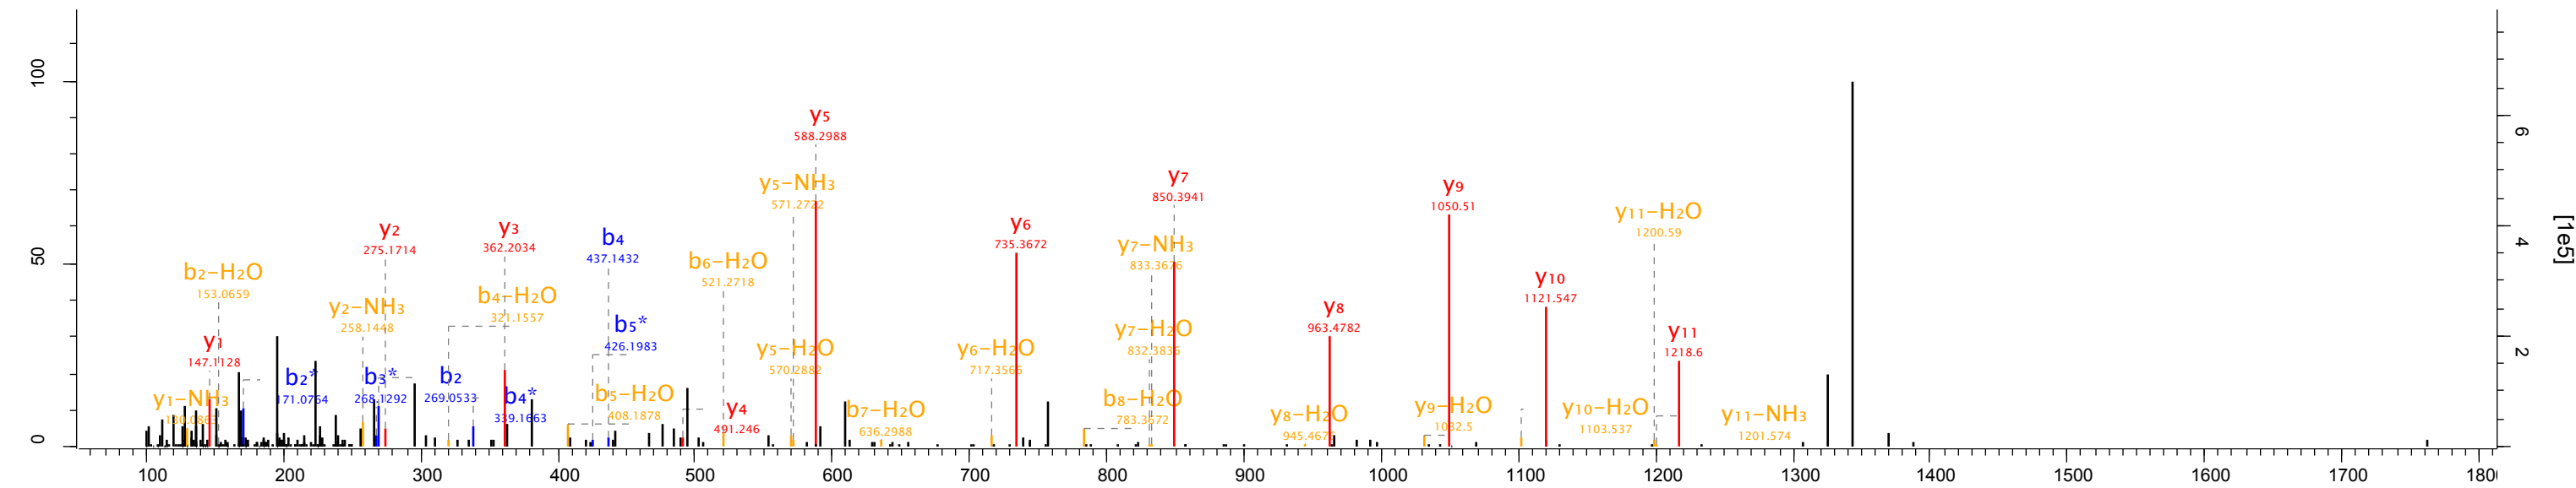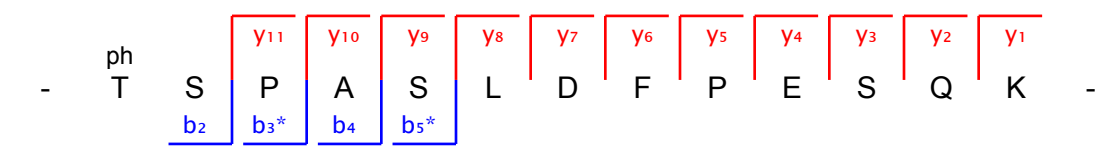

Raw file 20171215\_MaS\_33SR\_LMH\_phospho\_03 Scan 11237 Method FTMS; HCD Score 101.75 m/z 738.3 Gene names LUZP1

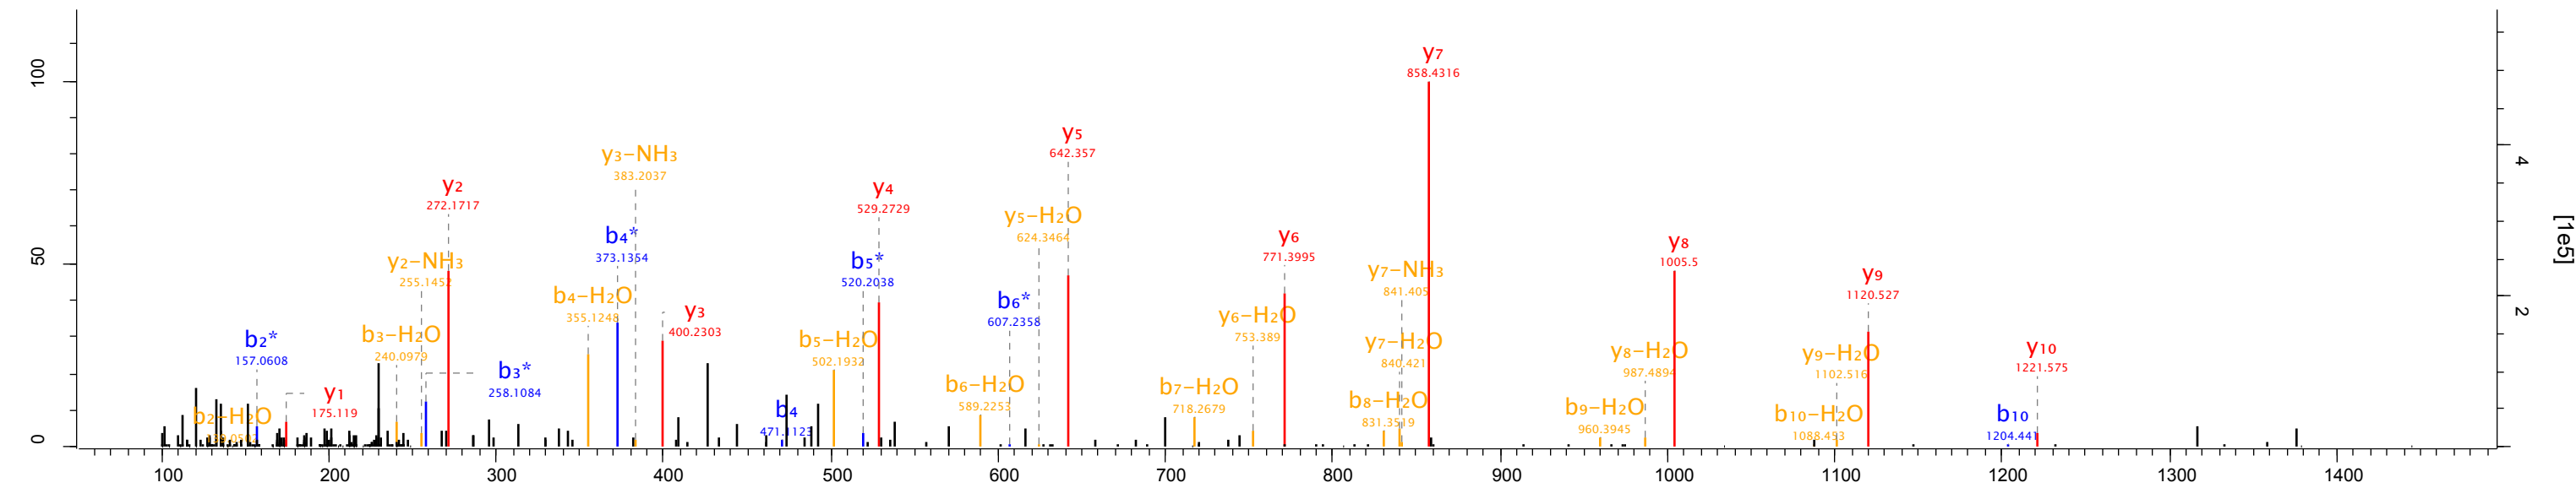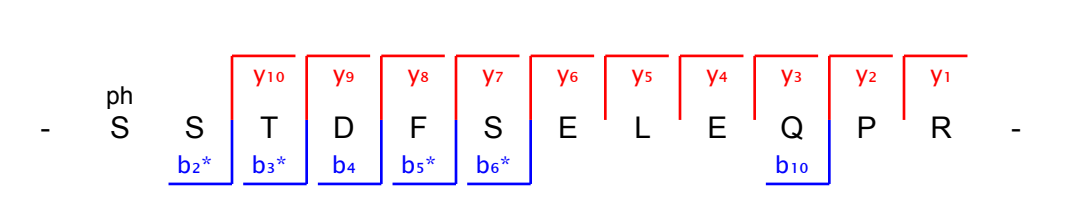



20171215\_MaS\_33SR\_LMH\_phospho\_03 11797 FTMS; HCD 172.85 651.33 TFDP1

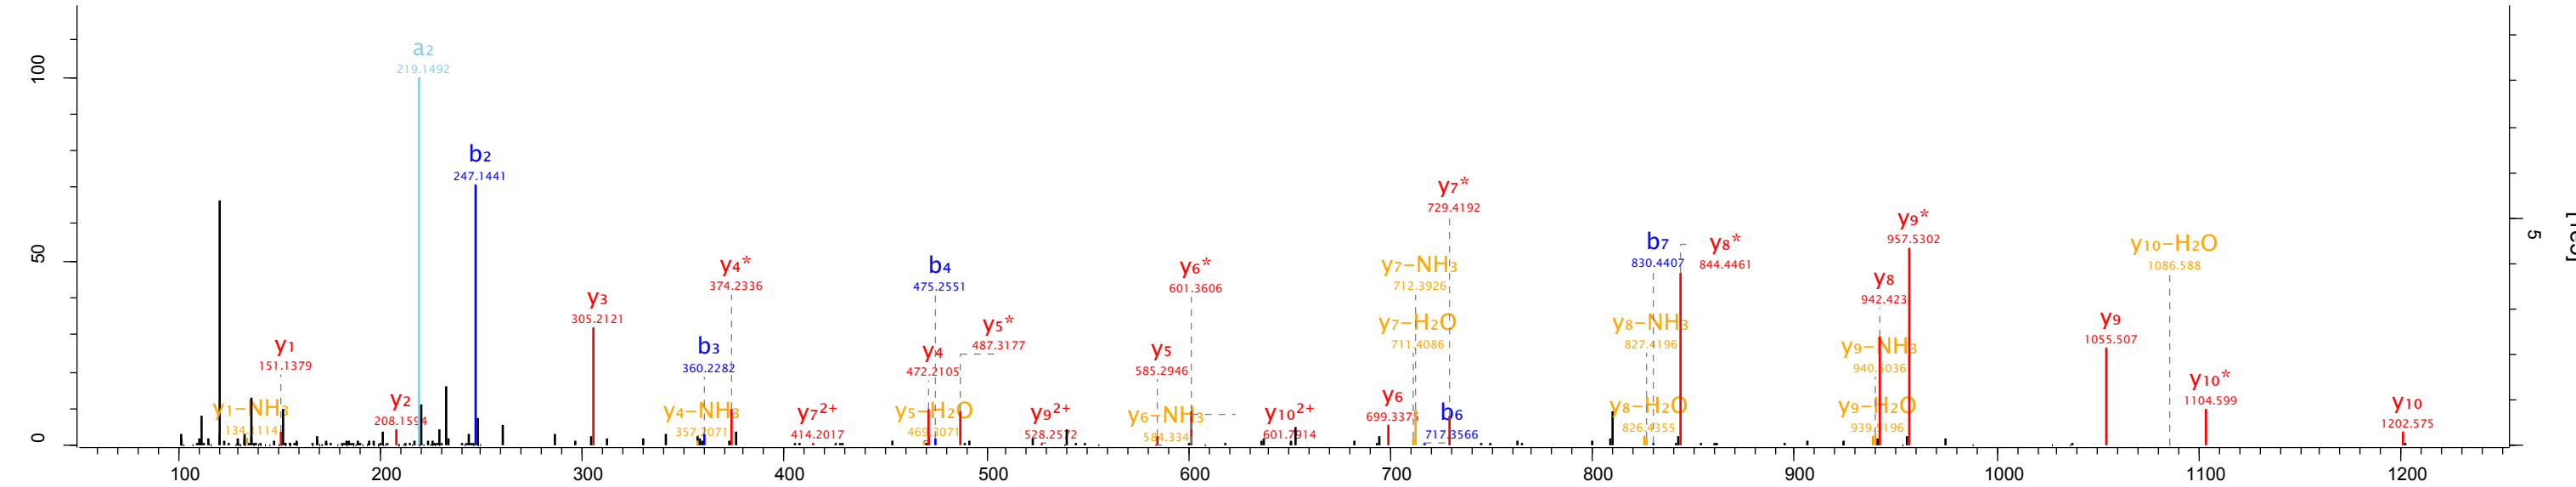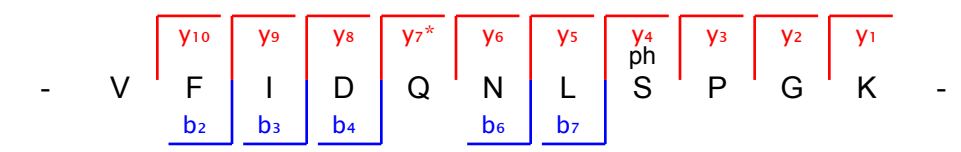

Raw file 20171215\_MaS\_33SR\_LMH\_phospho\_03 Scan 11837 Method FTMS; HCD Score 186.01 m/z 1072.93 Gene names RAPGEF6

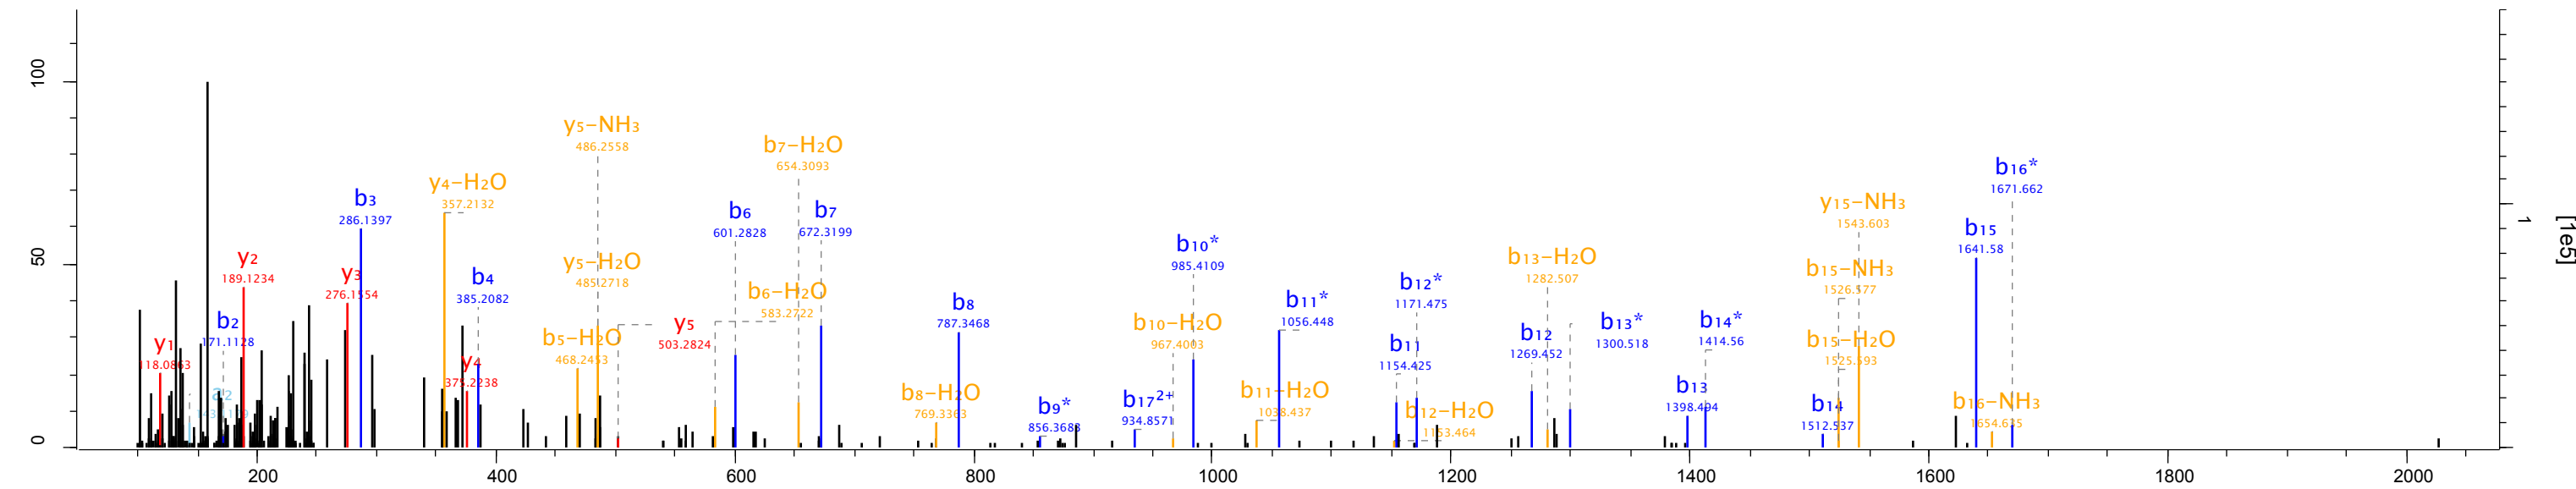

- L G D V T D A D S E A D E N E Q V S A V -

b<sub>2</sub>
b<sub>3</sub>
b<sub>4</sub>
b<sub>6</sub>
b<sub>7</sub>
b<sub>8</sub>
b<sub>9</sub>\*
b<sub>10</sub>\*
b<sub>11</sub>
b<sub>12</sub>
b<sub>13</sub>
b<sub>14</sub>
b<sub>15</sub>
b<sub>16</sub>\*
b<sub>17</sub><sup>2+</sup>
y<sub>5</sub>
y<sub>4</sub>
y<sub>3</sub>
y<sub>2</sub>
y<sub>1</sub>

Raw file: 20171215\_MaS\_33SR\_LMH\_phospho\_03  
 Scan: 11867 Method: FTMS; HCD Score: 134.03 m/z: 948.43 Gene names: UBE4B

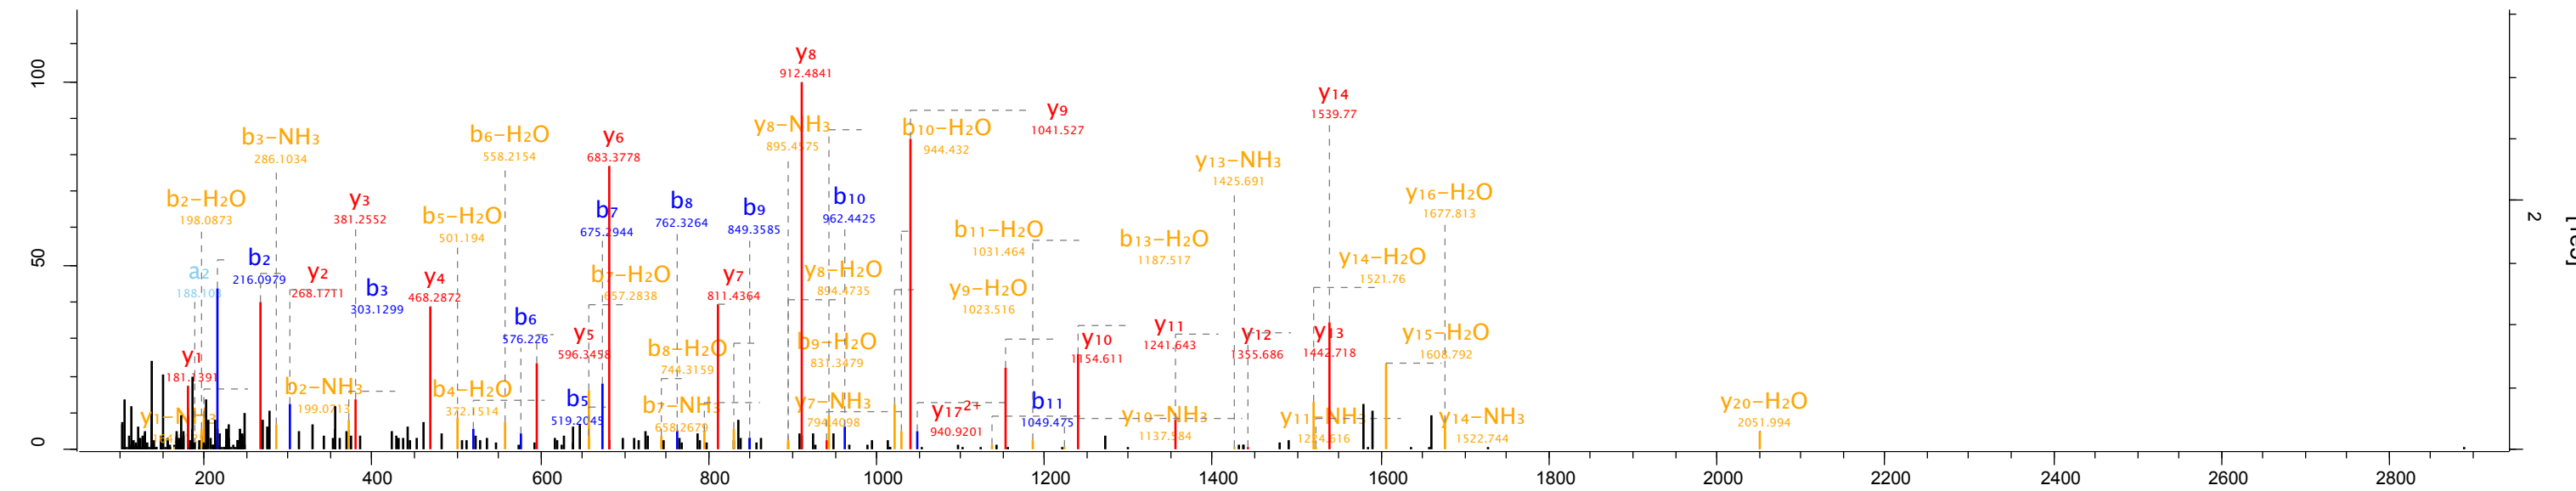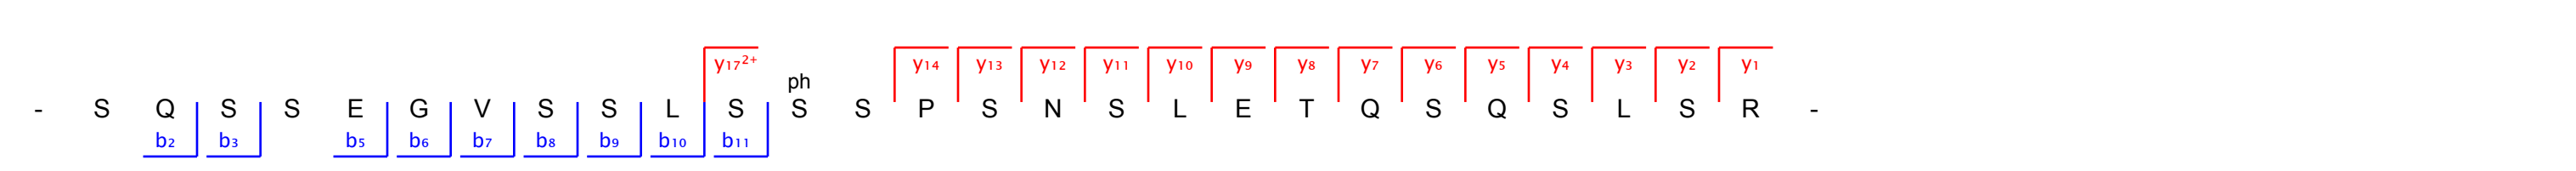

Raw file: 20171215\_MaS\_33SR\_LMH\_phospho\_03  
 Scan: 12267 Method: FTMS; HCD Score: 181.82 m/z: 1064.97 Gene names: TOP2A

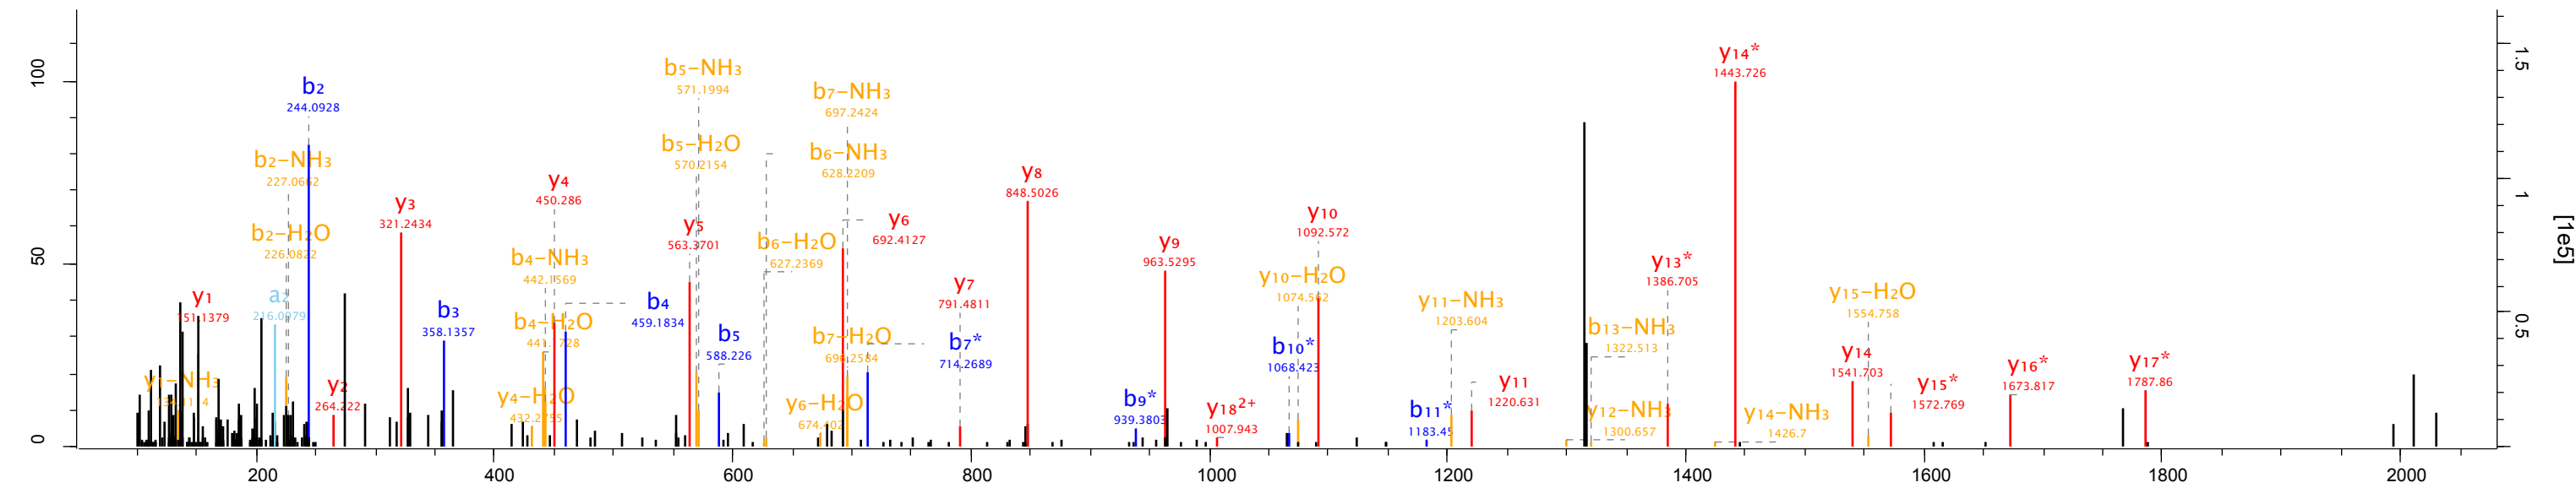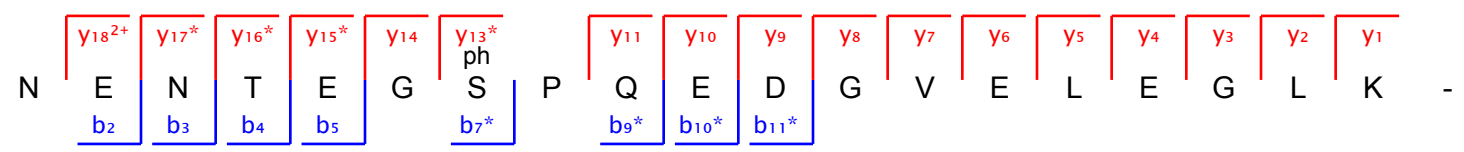

Raw file: 20171215\_MaS\_33SR\_LMH\_phospho\_03  
 Scan: 12477 Method: FTMS; HCD Score: 145.23 m/z: 544.28 Gene names: BCLAF1

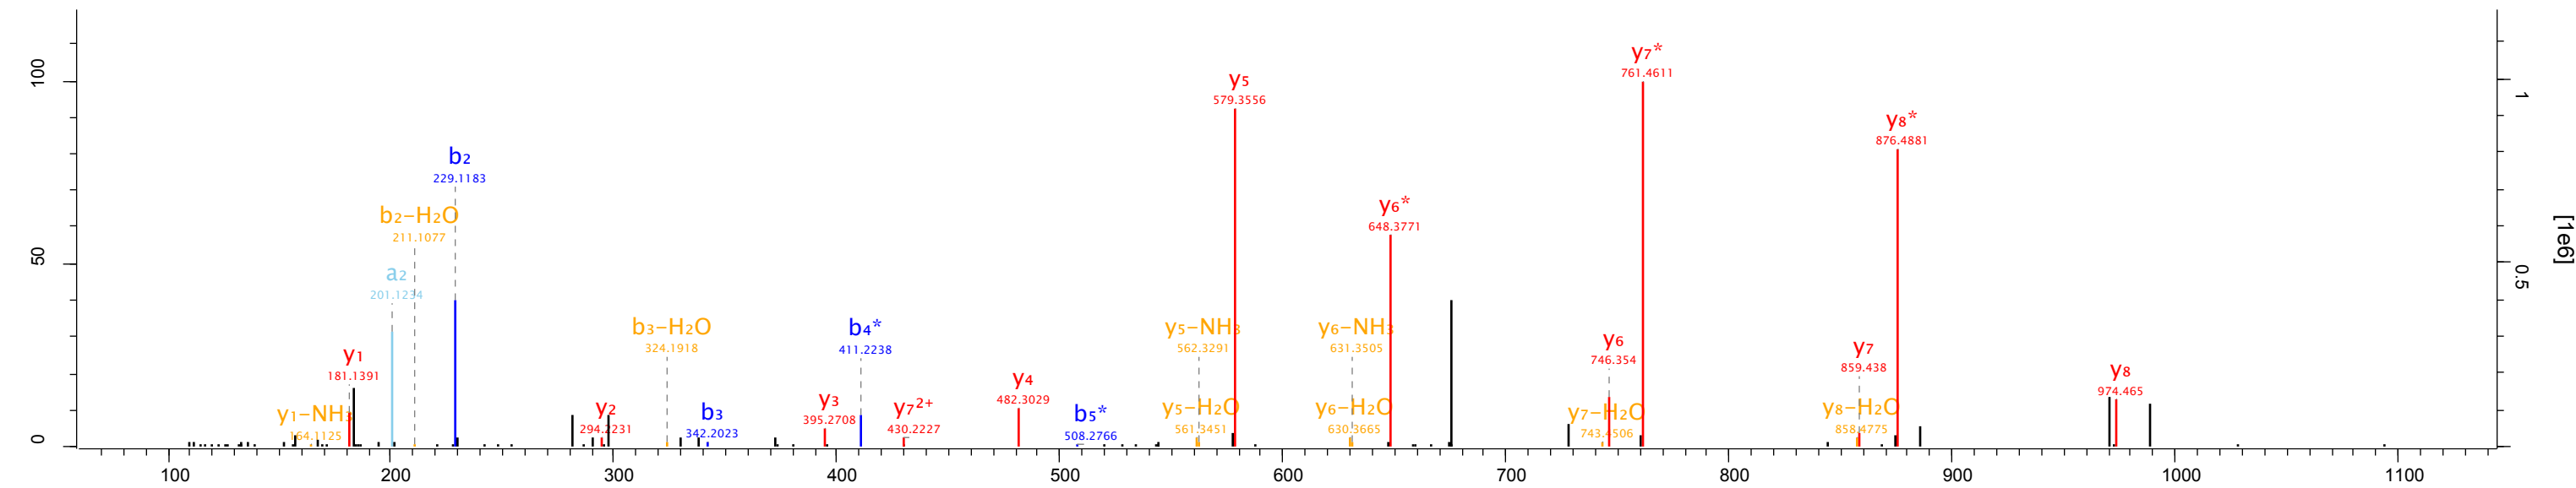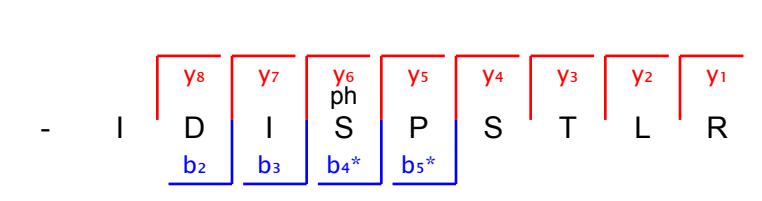

Raw file 20171215\_MaS\_33SR\_LMH\_phospho\_03 Scan 12487 Method FTMS; HCD Score 44.6 m/z 1287.49 Gene names BRD3

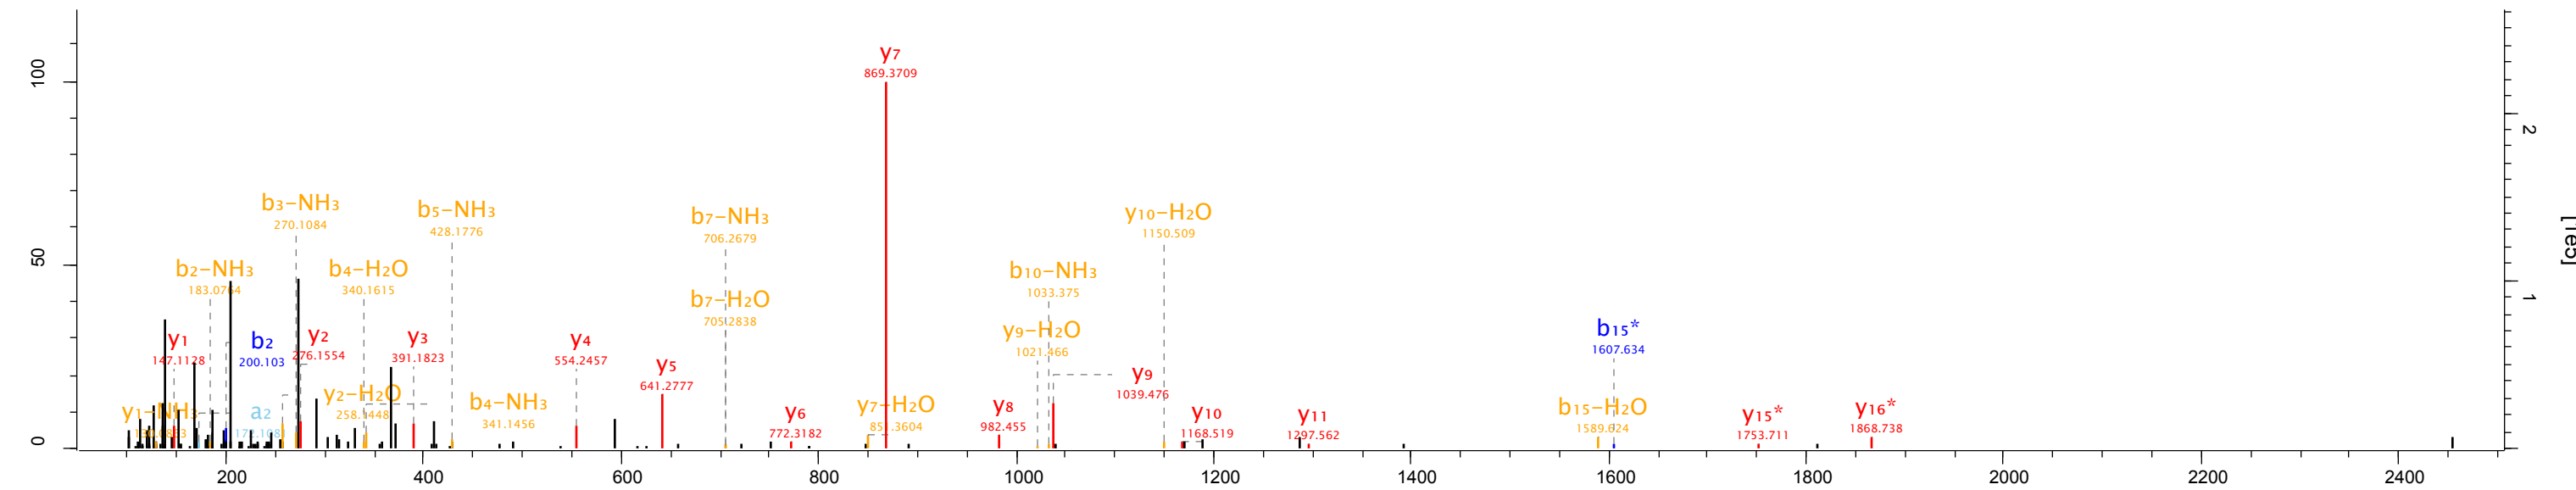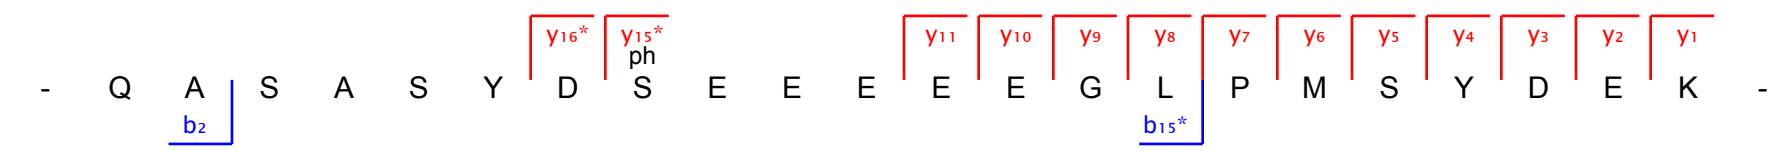

Raw file 20171215\_MaS\_33SR\_LMH\_phospho\_03 Scan 12527 Method FTMS; HCD Score 194.08 m/z 1006.41 Gene names SEPT2

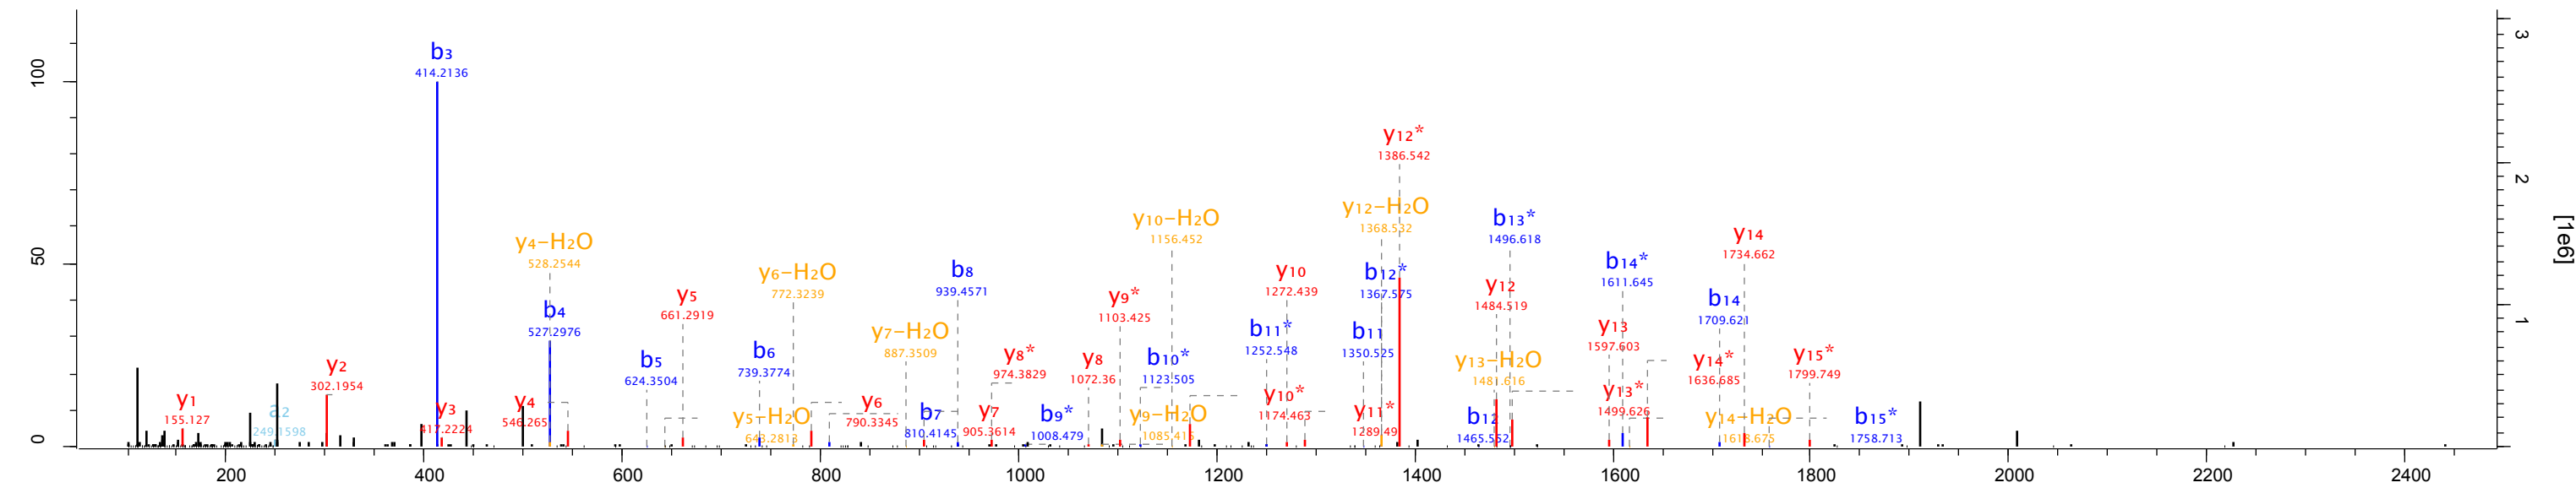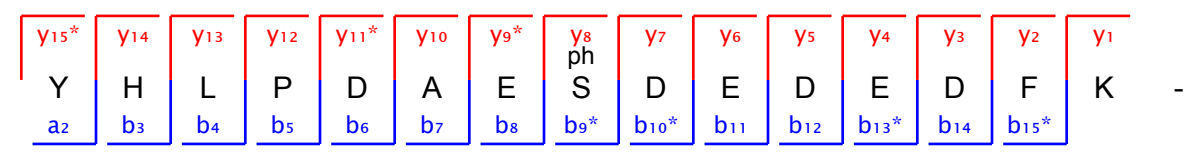

Raw file 20171215\_MaS\_33SR\_LMH\_phospho\_03 Scan 12787 Method FTMS; HCD Score 192.6 m/z 848.39 Gene names CEP55

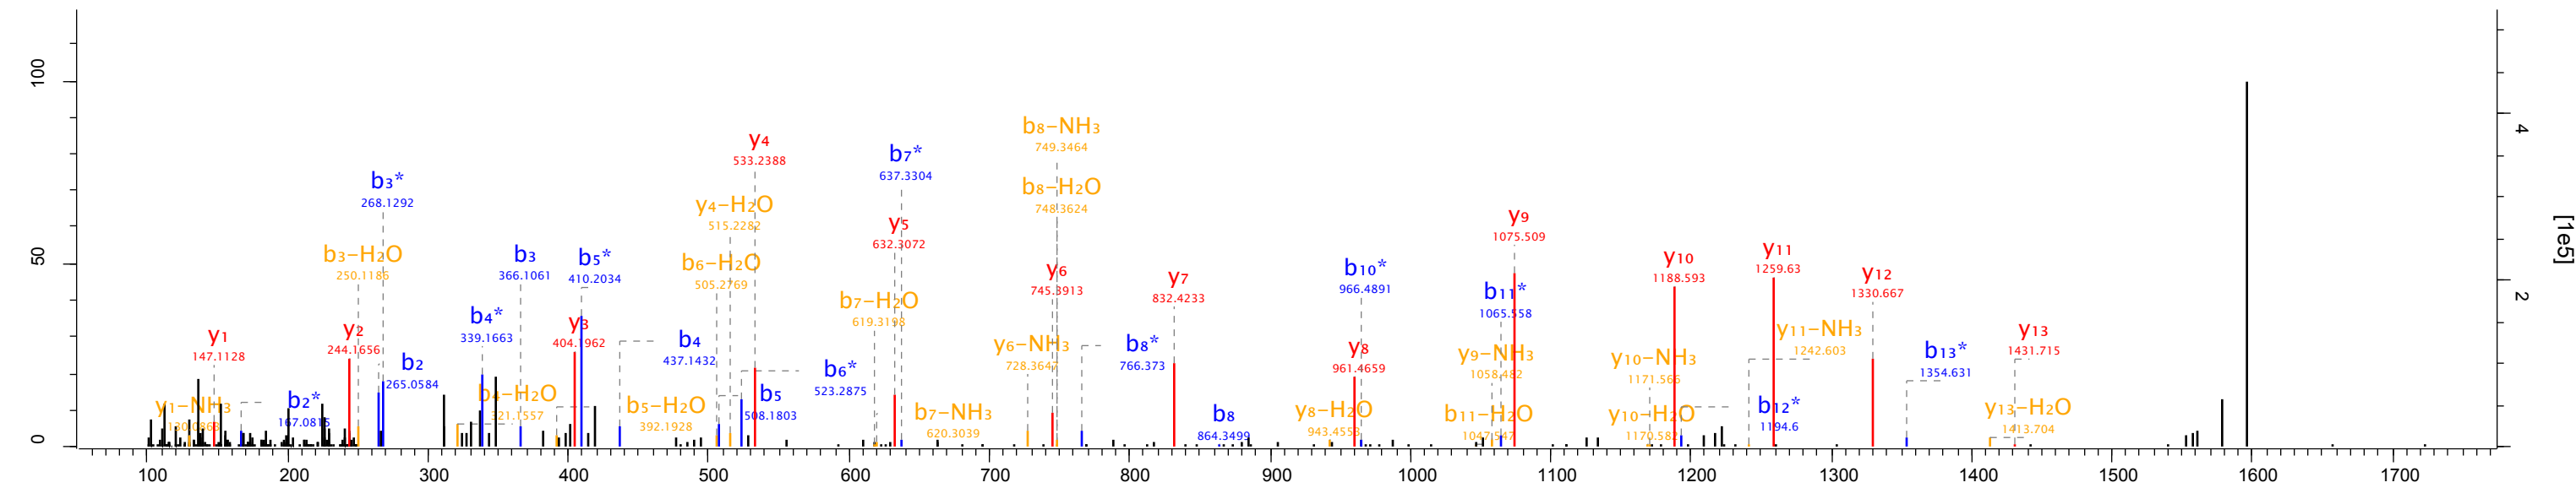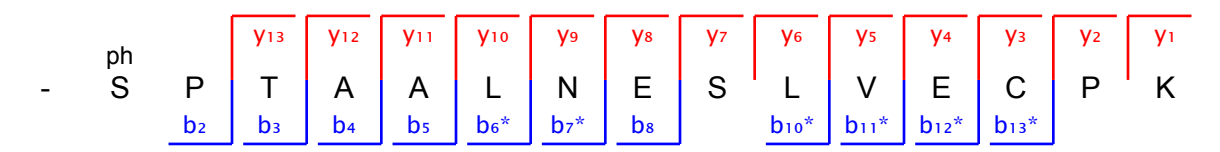



Raw file 20171215\_MaS\_33SR\_LMH\_phospho\_03 Scan 12897 Method FTMS; HCD Score 132.74 m/z 929.4 Gene names PCM1

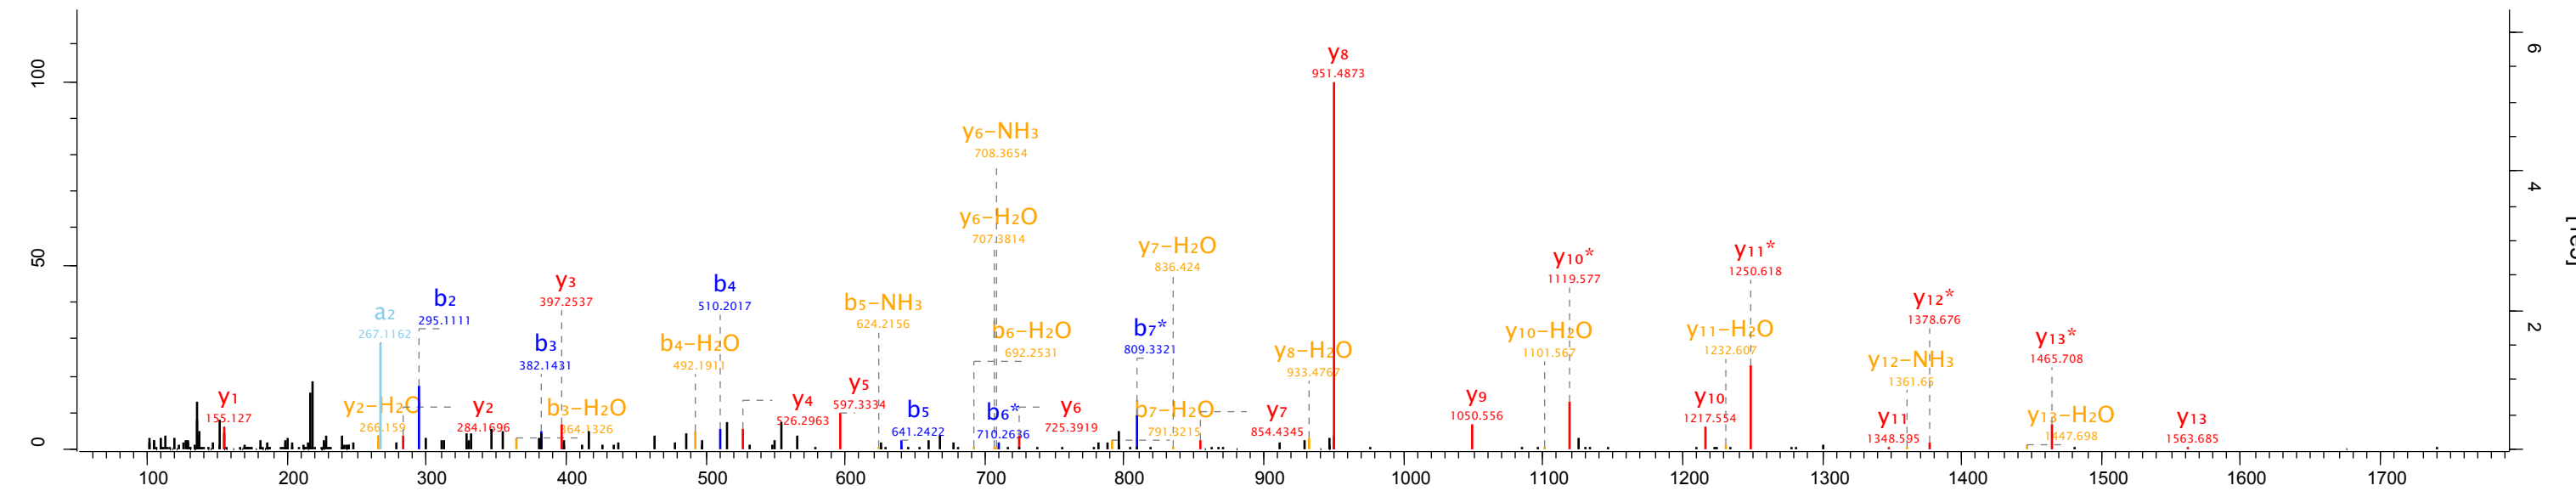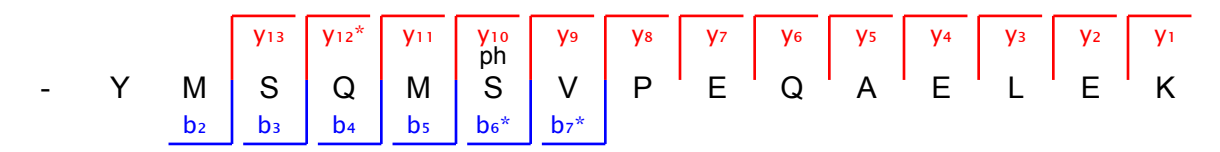

Raw file: 20171215\_MaS\_33SR\_LMH\_phospho\_03  
 Scan: 13017 Method: FTMS; HCD Score: 118.76 m/z: 911.41 Gene names: TP53BP1

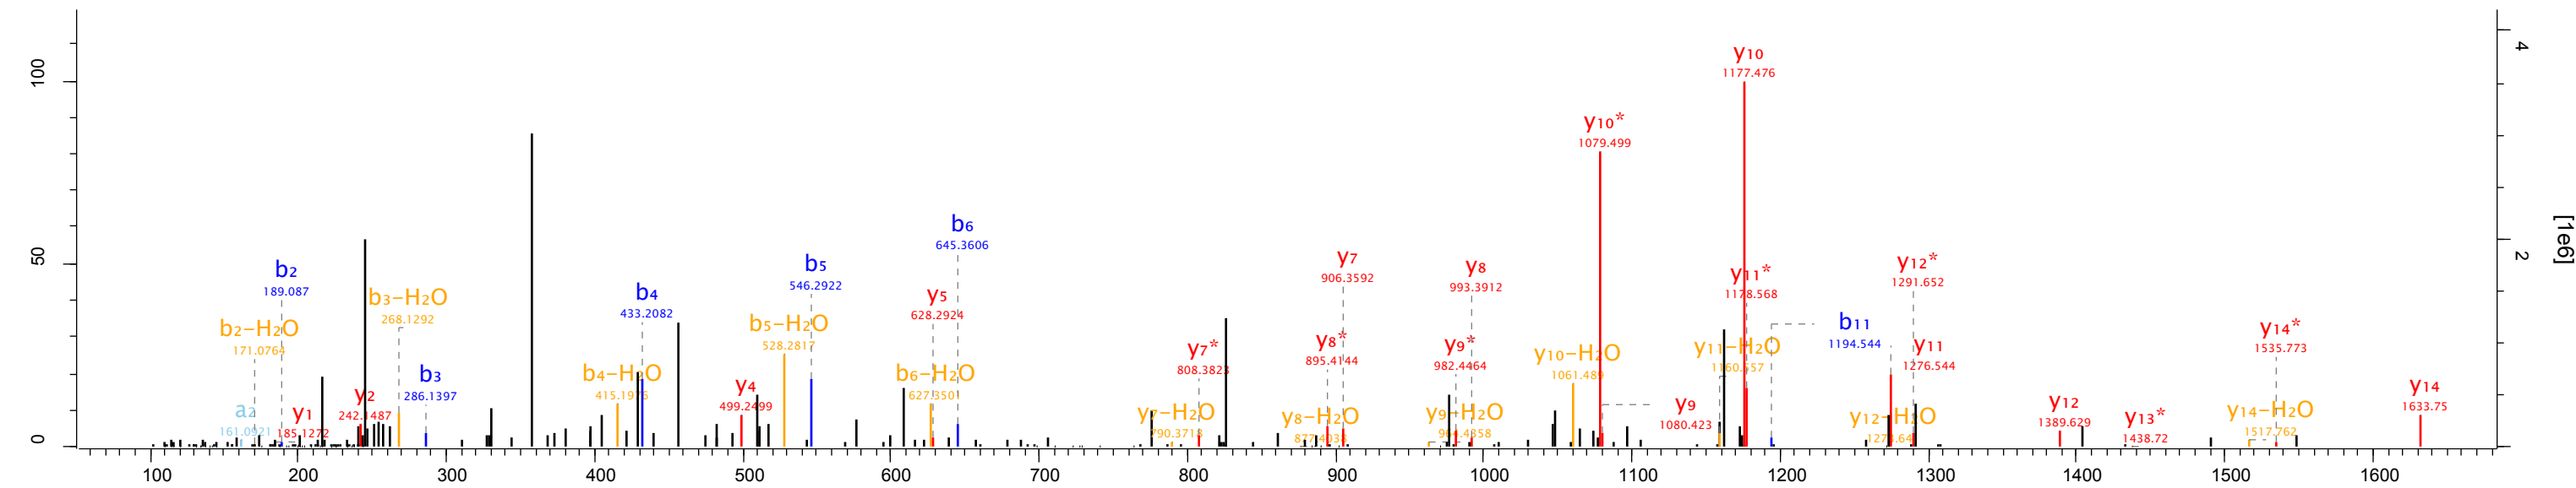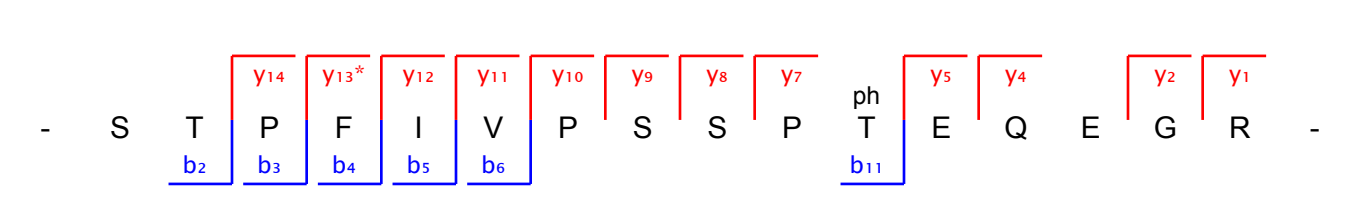

Raw file: 20171215\_MaS\_33SR\_LMH\_phospho\_03  
 Scan: 13037 Method: FTMS; HCD Score: 44.39 m/z: 821.37 Gene names: SIX4

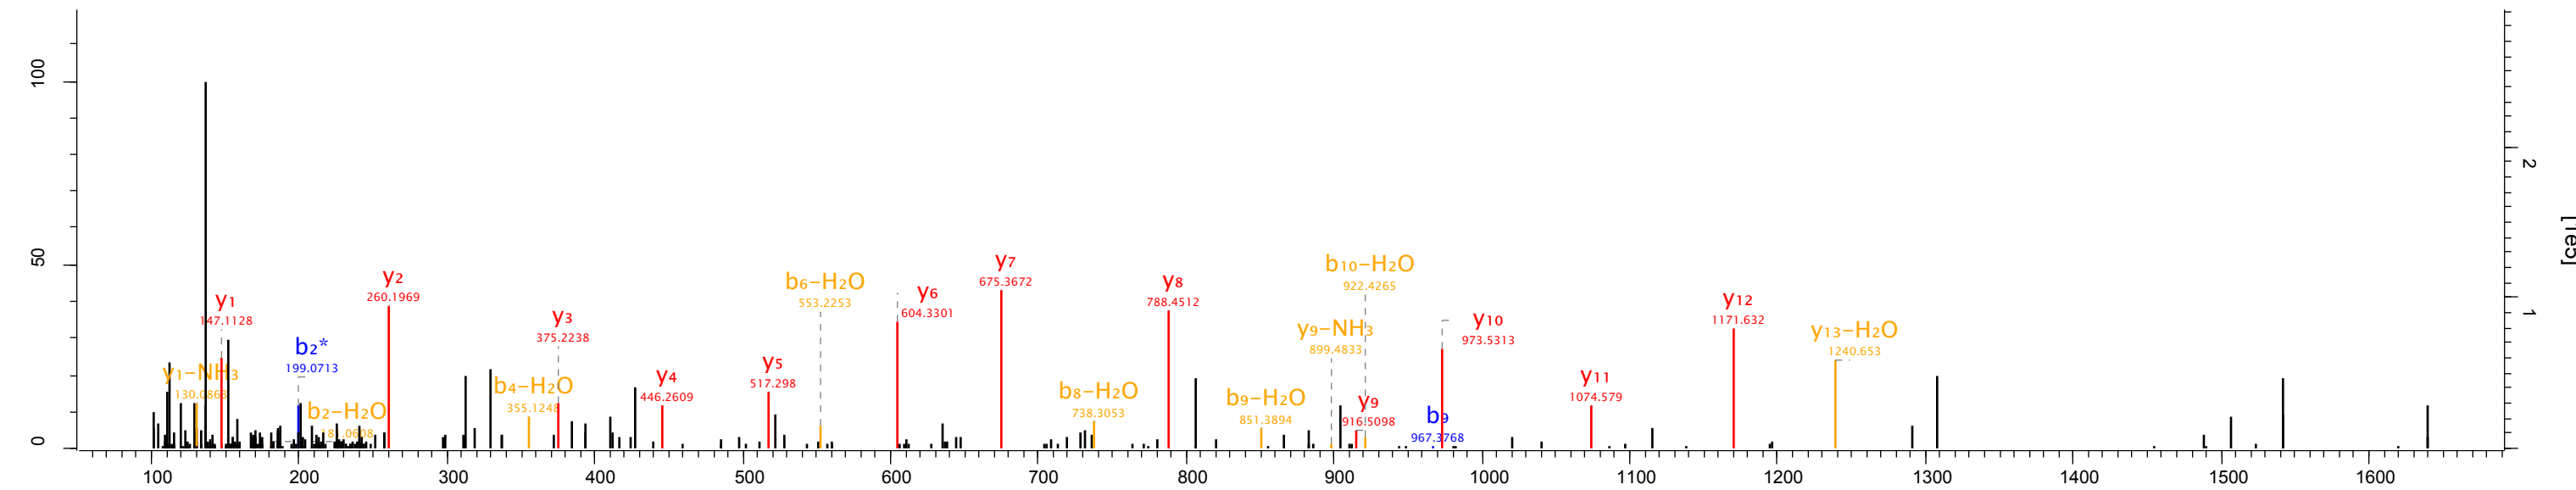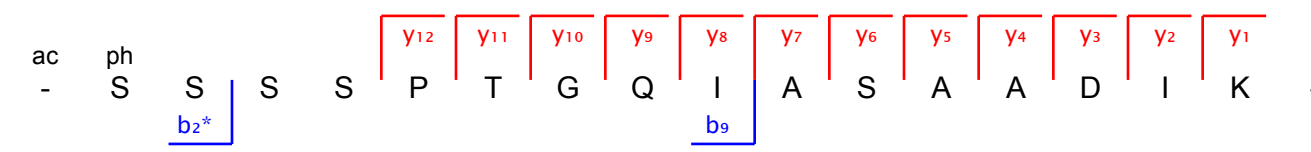

Raw file: 20171215\_MaS\_33SR\_LMH\_phospho\_03  
 Scan: 13787 Method: FTMS; HCD Score: 239.1 m/z: 893.92 Gene names: STK24

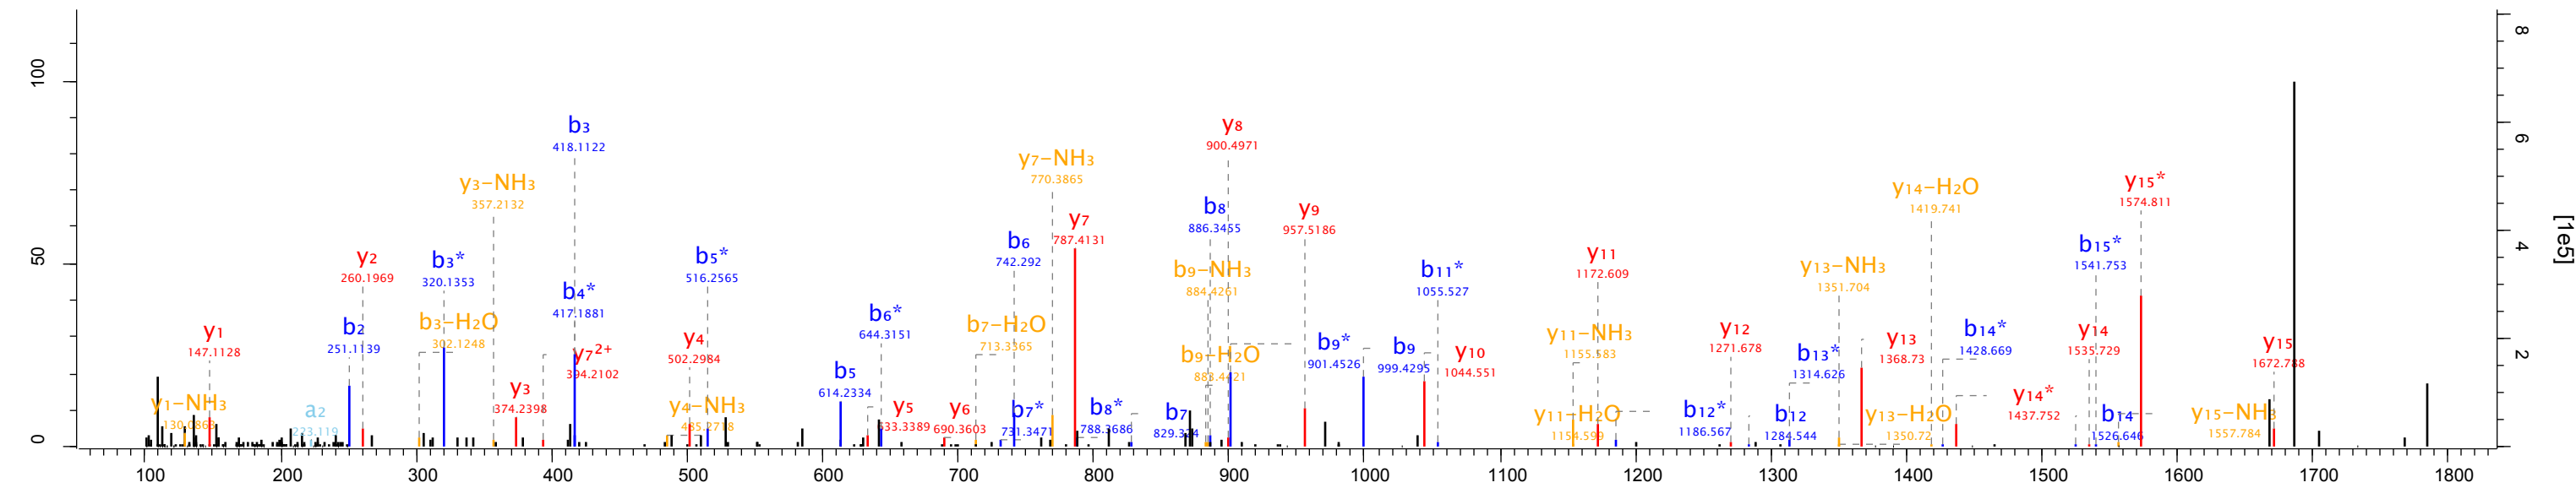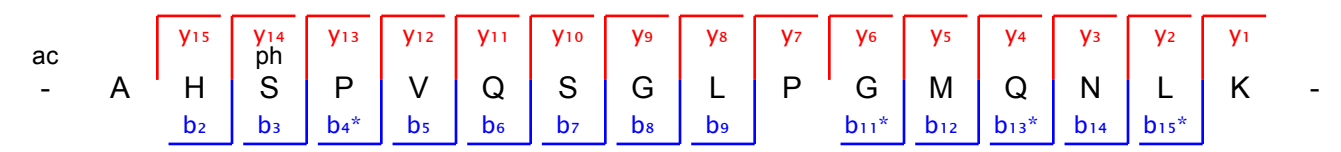

Raw file 20171215\_MaS\_33SR\_LMH\_phospho\_03 Scan 13857 Method FTMS; HCD Score 85.74 m/z 853.39 Gene names FTSJ3

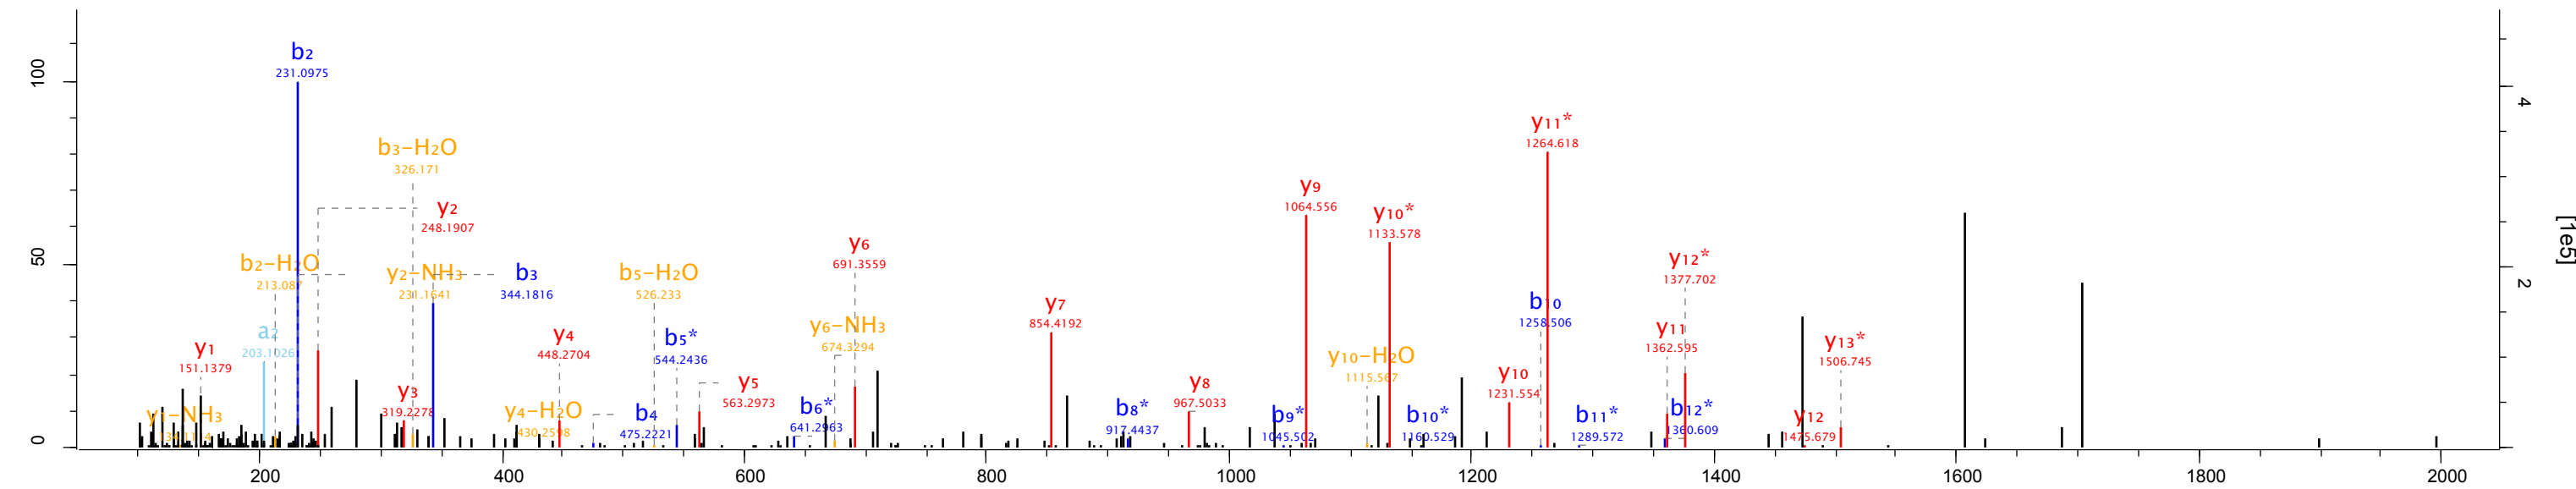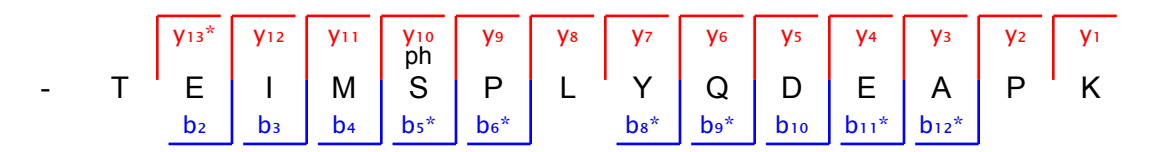

Raw file: 20171215\_MaS\_33SR\_LMH\_phospho\_03  
 Scan: 13927 Method: FTMS; HCD Score: 198.84 m/z: 1057.43 Gene names: PPID

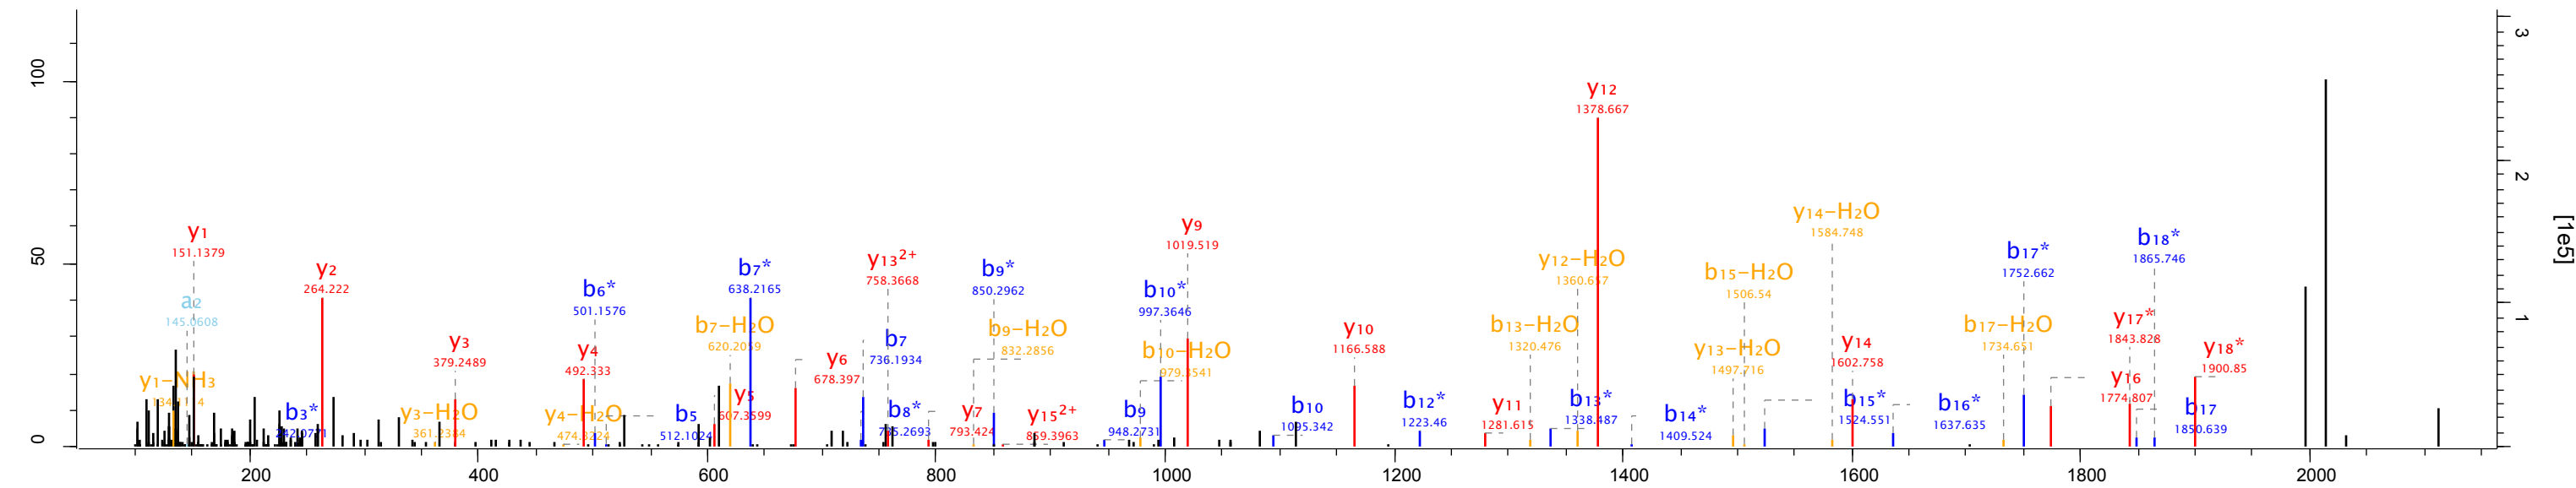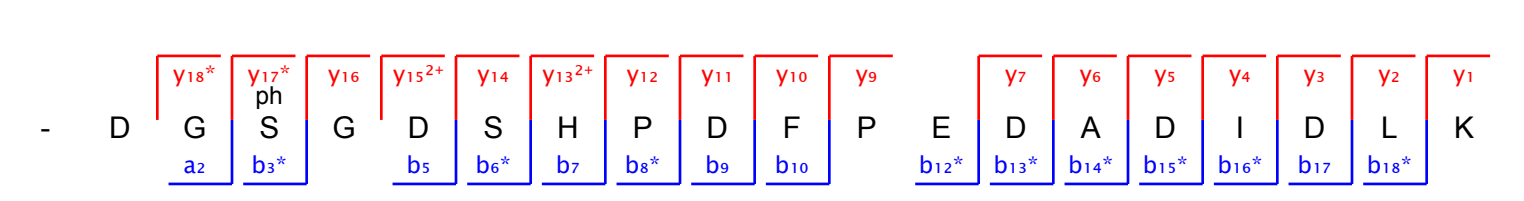

Raw file 20171215\_MaS\_33SR\_LMH\_phospho\_03 Scan 14077 Method FTMS; HCD Score 76.49 m/z 940.9 Gene names PRKCD

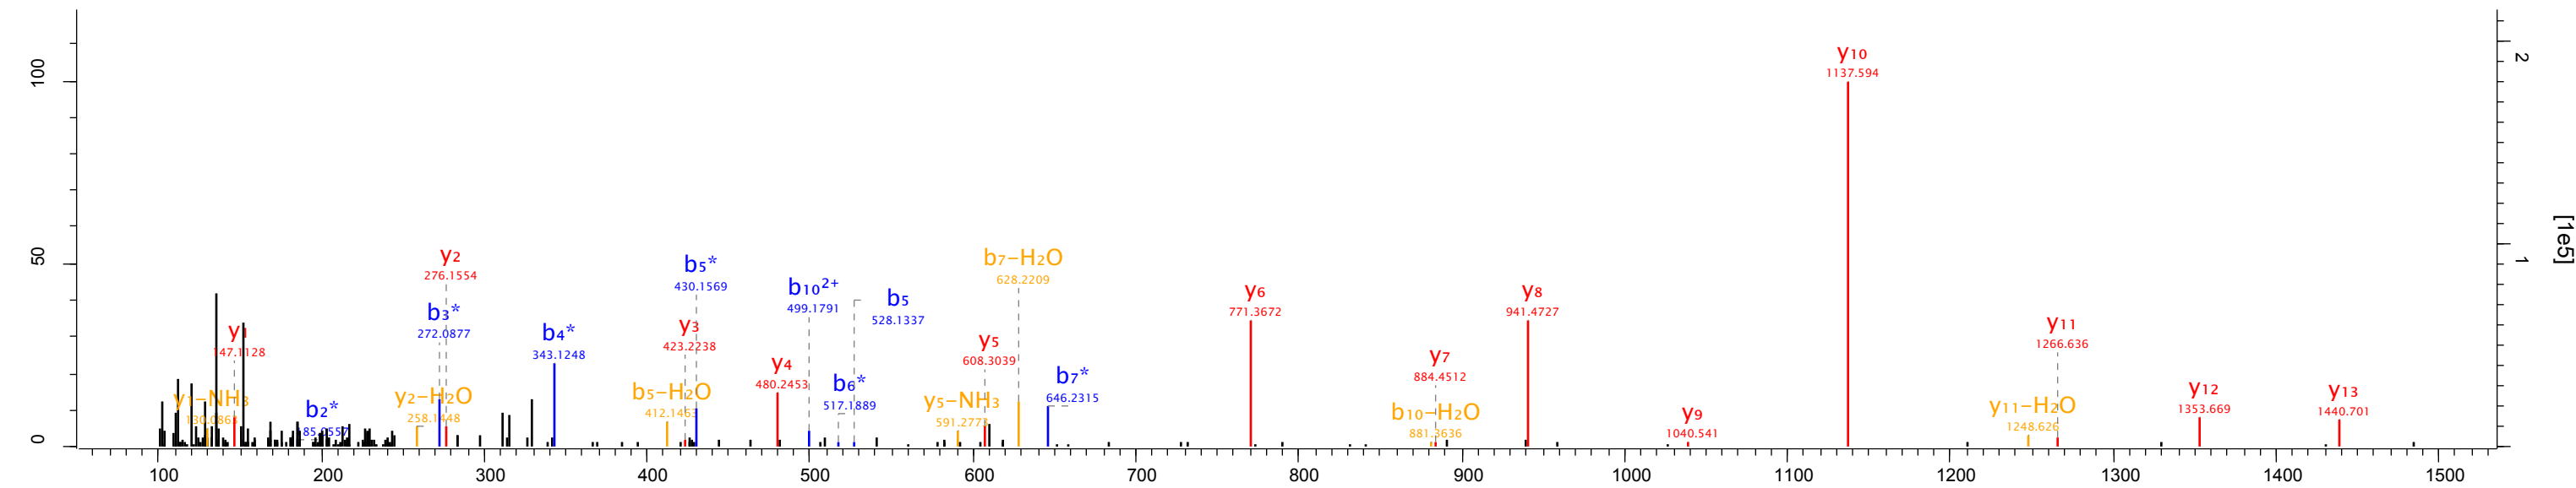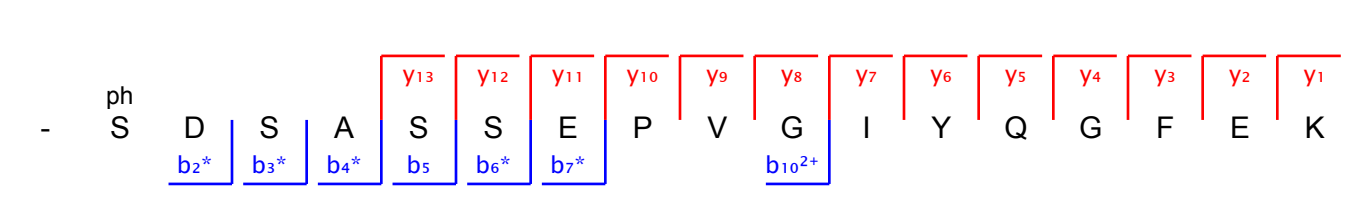

Raw file 20171215\_MaS\_33SR\_LMH\_phospho\_03 Scan 14277 Method FTMS; HCD Score 241.8 m/z 725.34 Gene names PPP1R12A

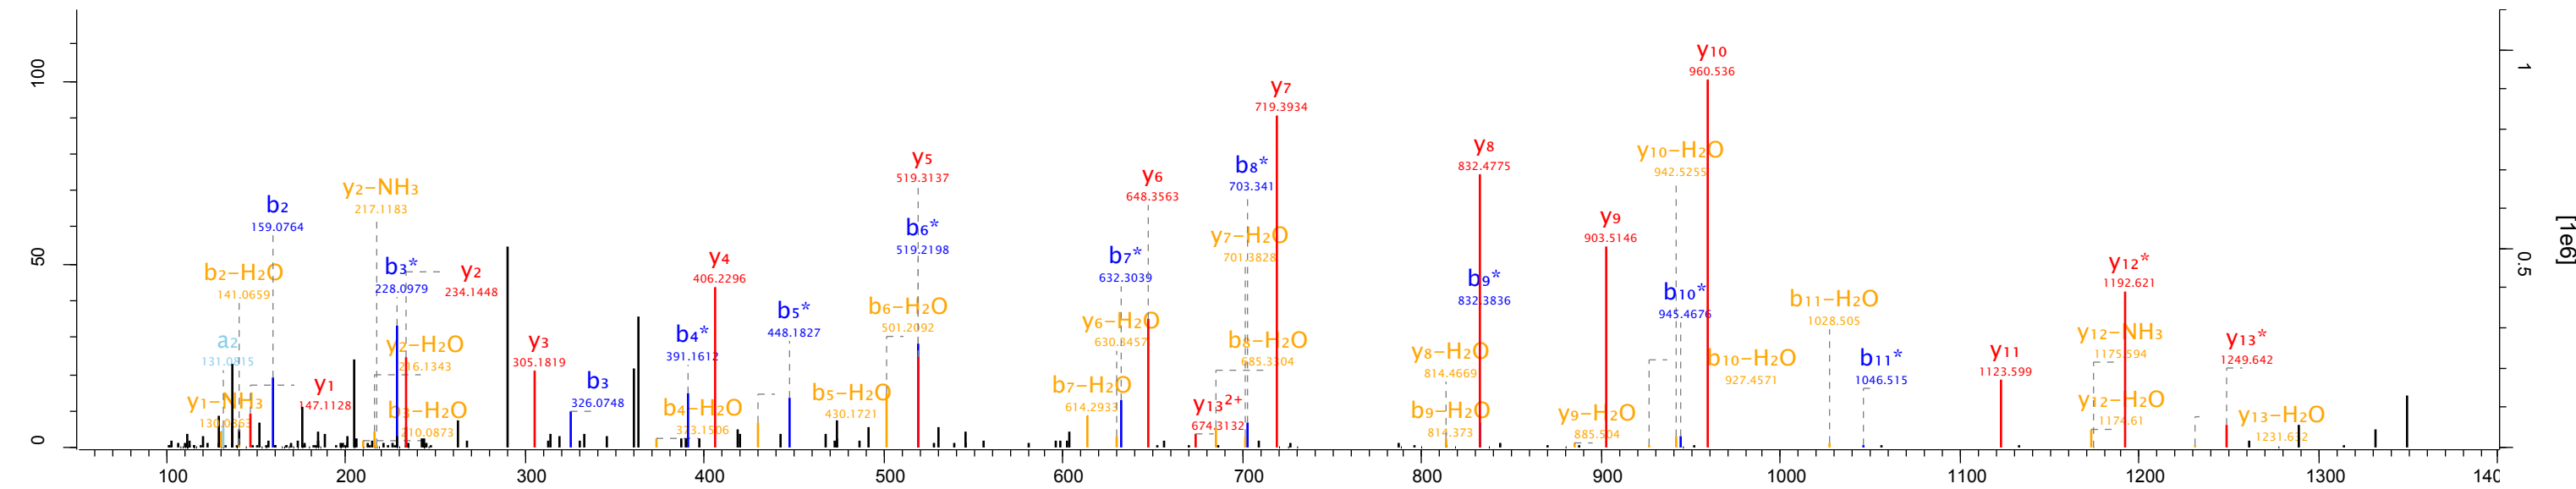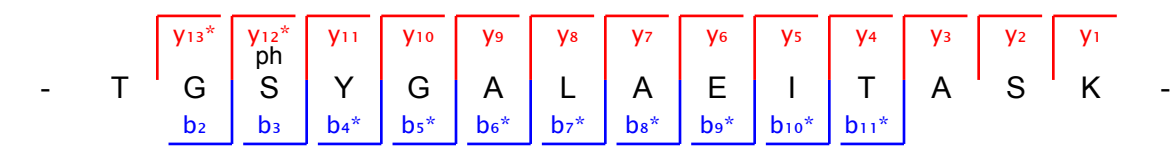



Raw file: 20171215\_MaS\_33SR\_LMH\_phospho\_03  
 Scan: 14727 Method: FTMS; HCD Score: 114.31 m/z: 712.83 Gene names: RB1CC1

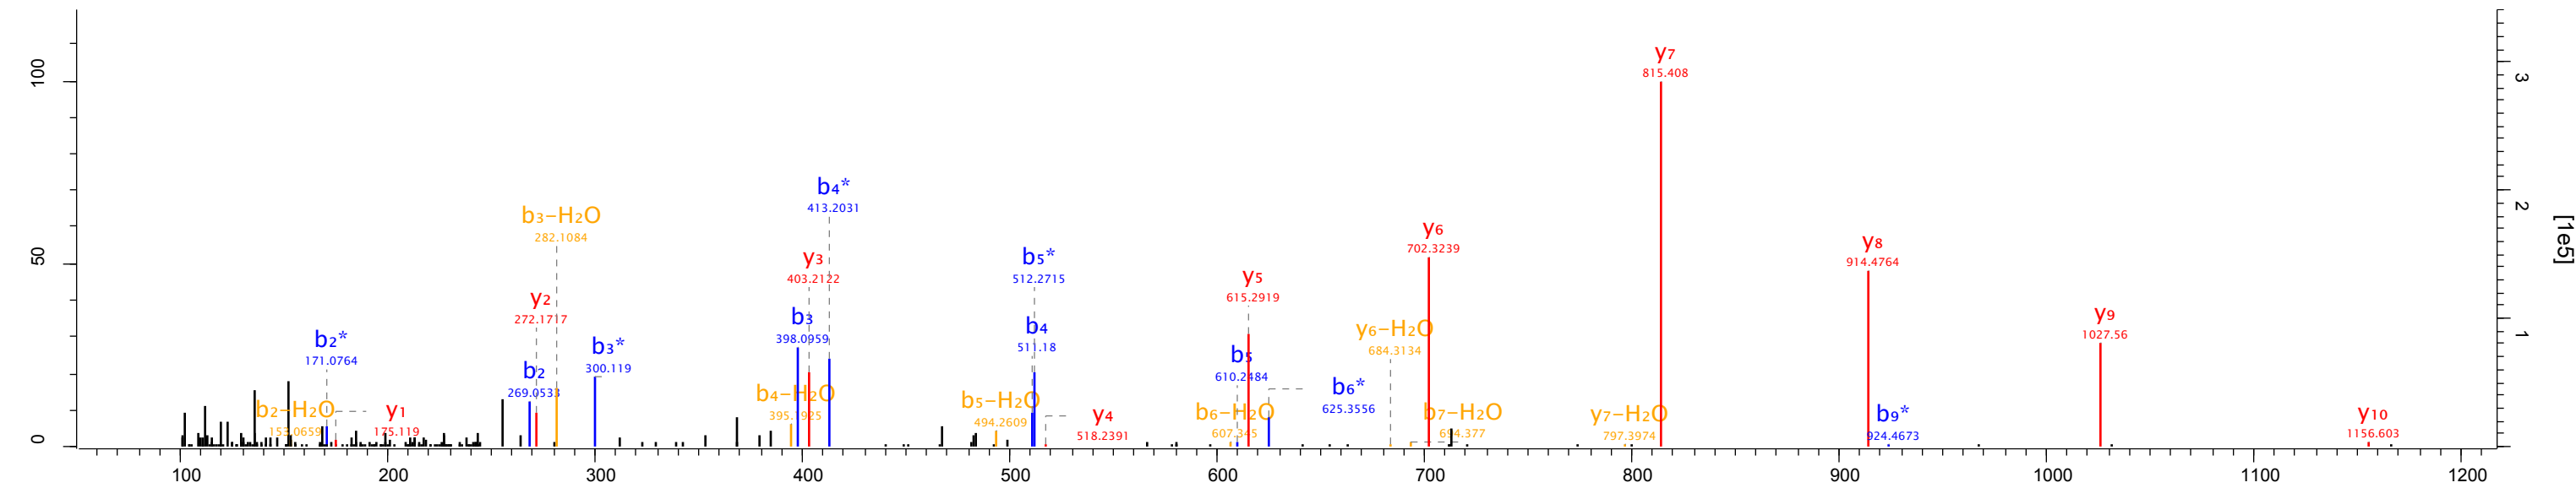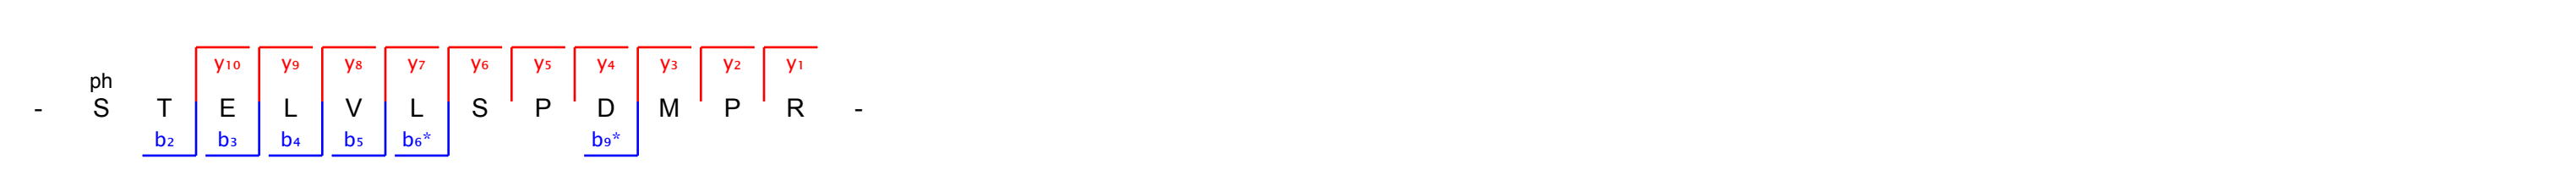

Raw file 20171215\_MaS\_33SR\_LMH\_phospho\_03 Scan 14987 Method FTMS; HCD Score 116.6 m/z 920.41 Gene names MICALL1

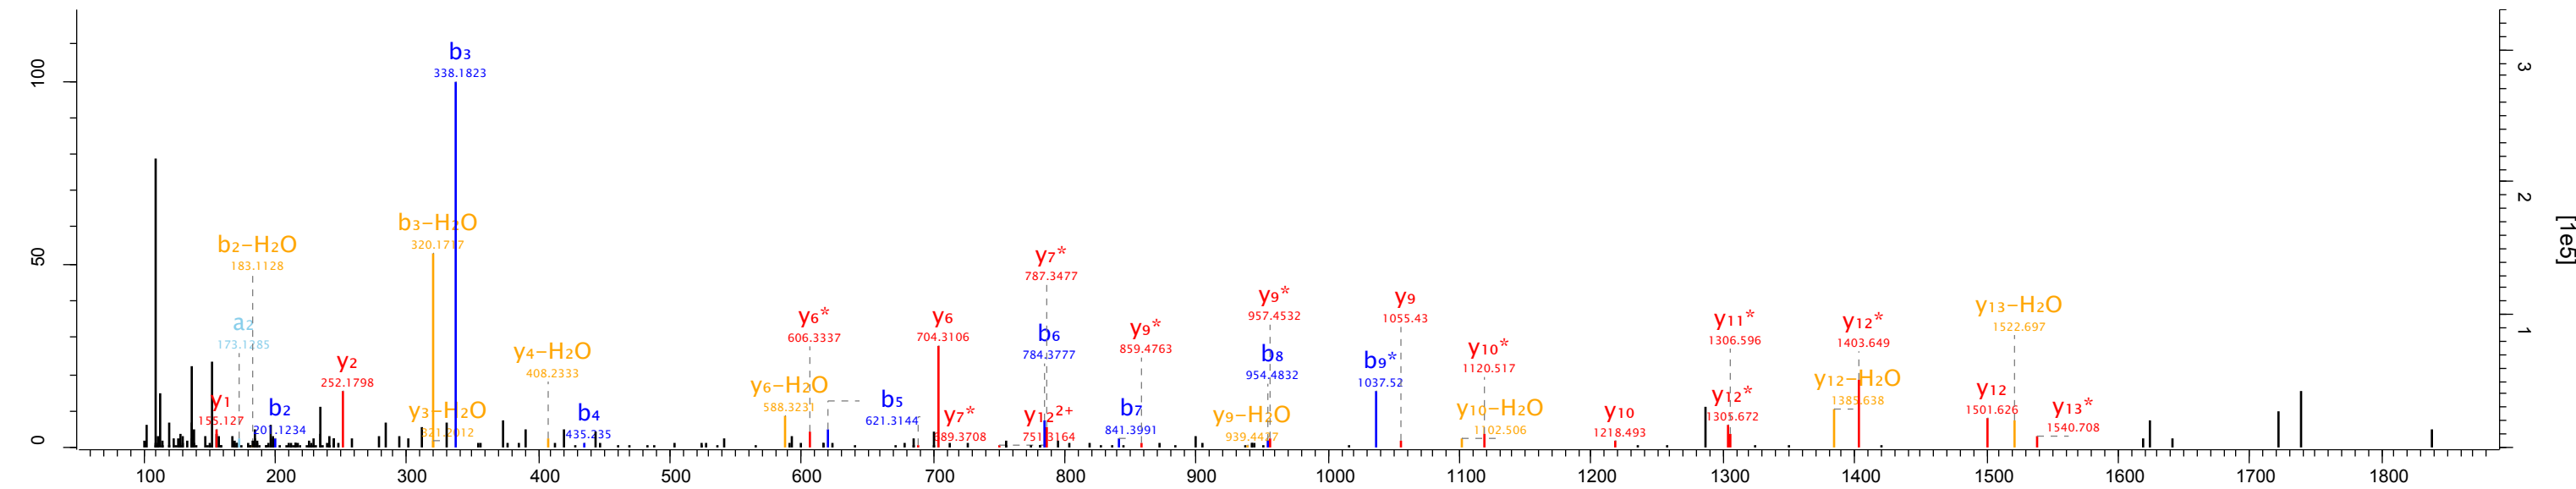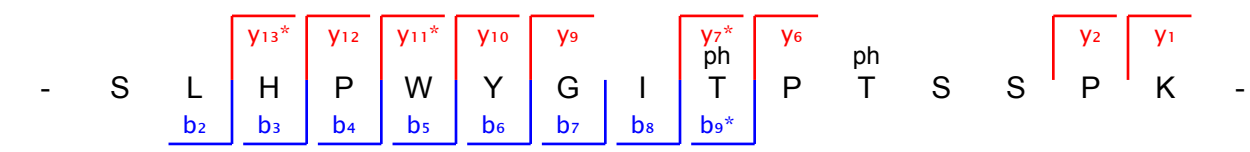

20171215\_MaS\_33SR\_LMH\_phospho\_03 16727 FTMS; HCD 205.63 960.95 RSL1D1

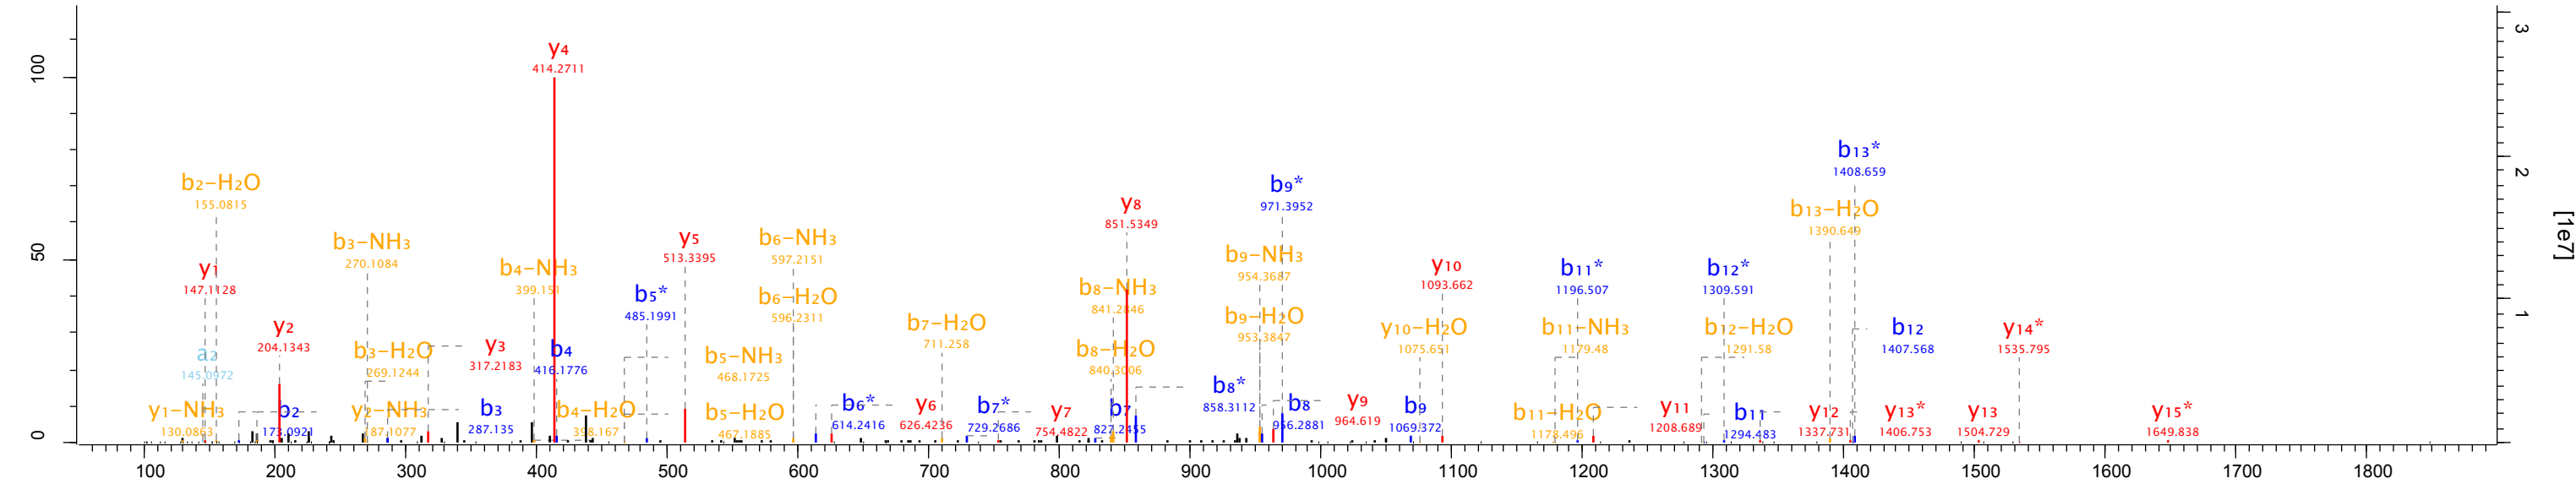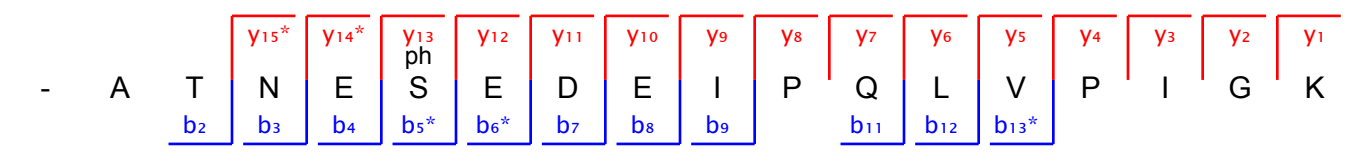

Raw file 20171215\_MaS\_33SR\_LMH\_phospho\_03 Scan 16797 Method FTMS; HCD Score 107.78 m/z 1046.45 Gene names PRKAB2

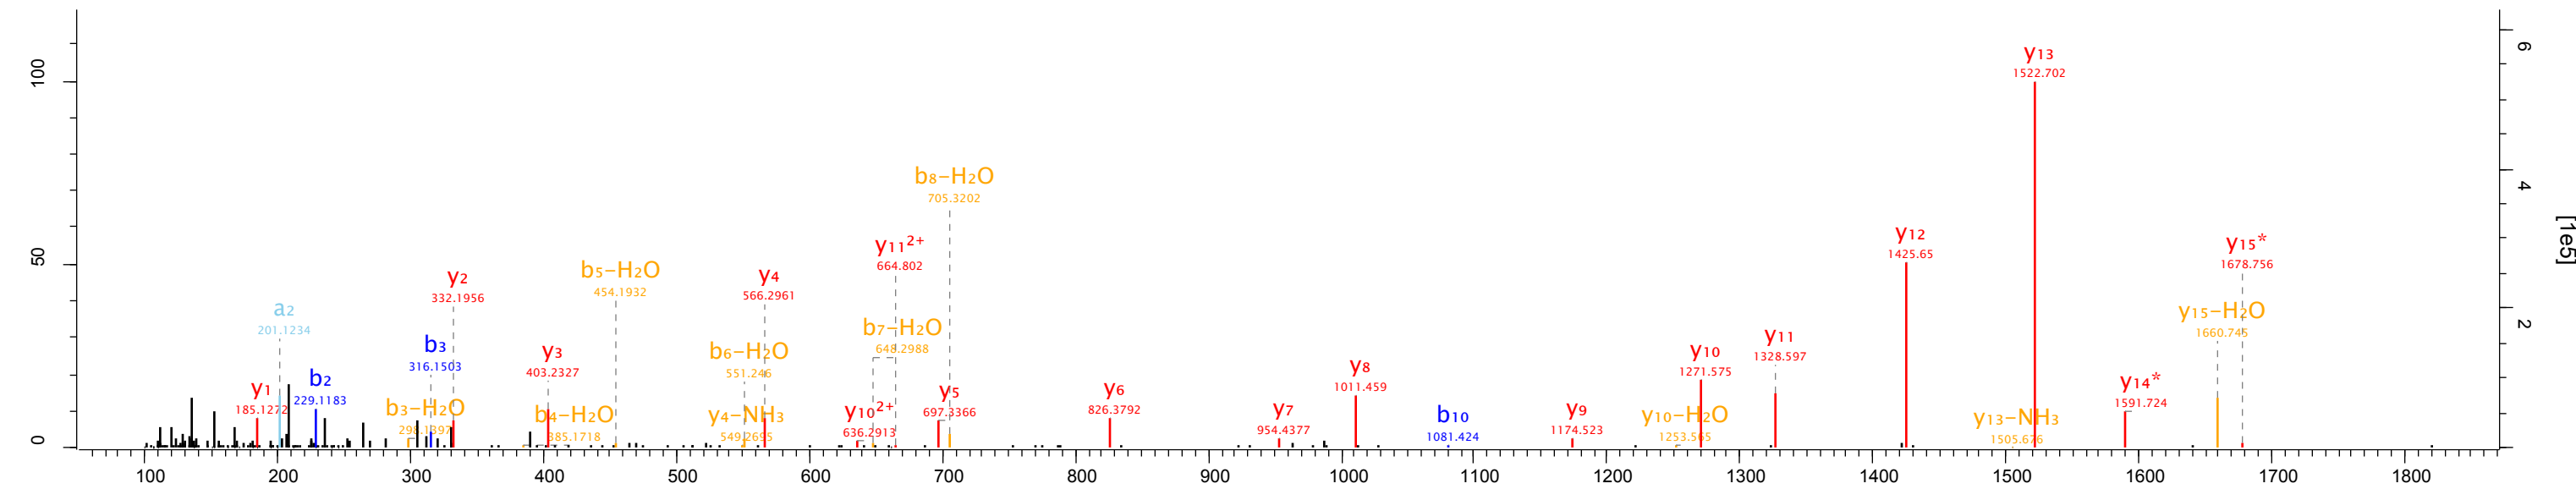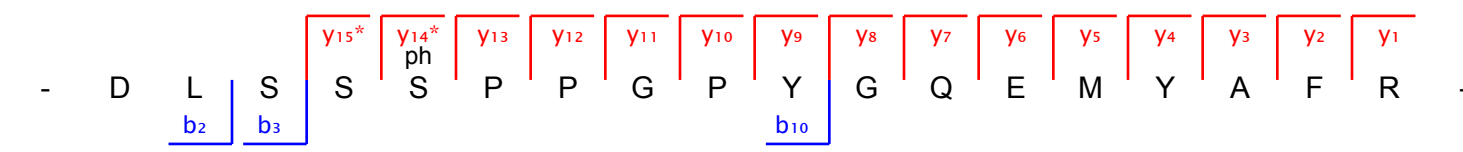

Raw file 20171215\_MaS\_33SR\_LMH\_phospho\_03 Scan 18687 Method FTMS; HCD Score 128.88 m/z 1014.96 Gene names PAGR1

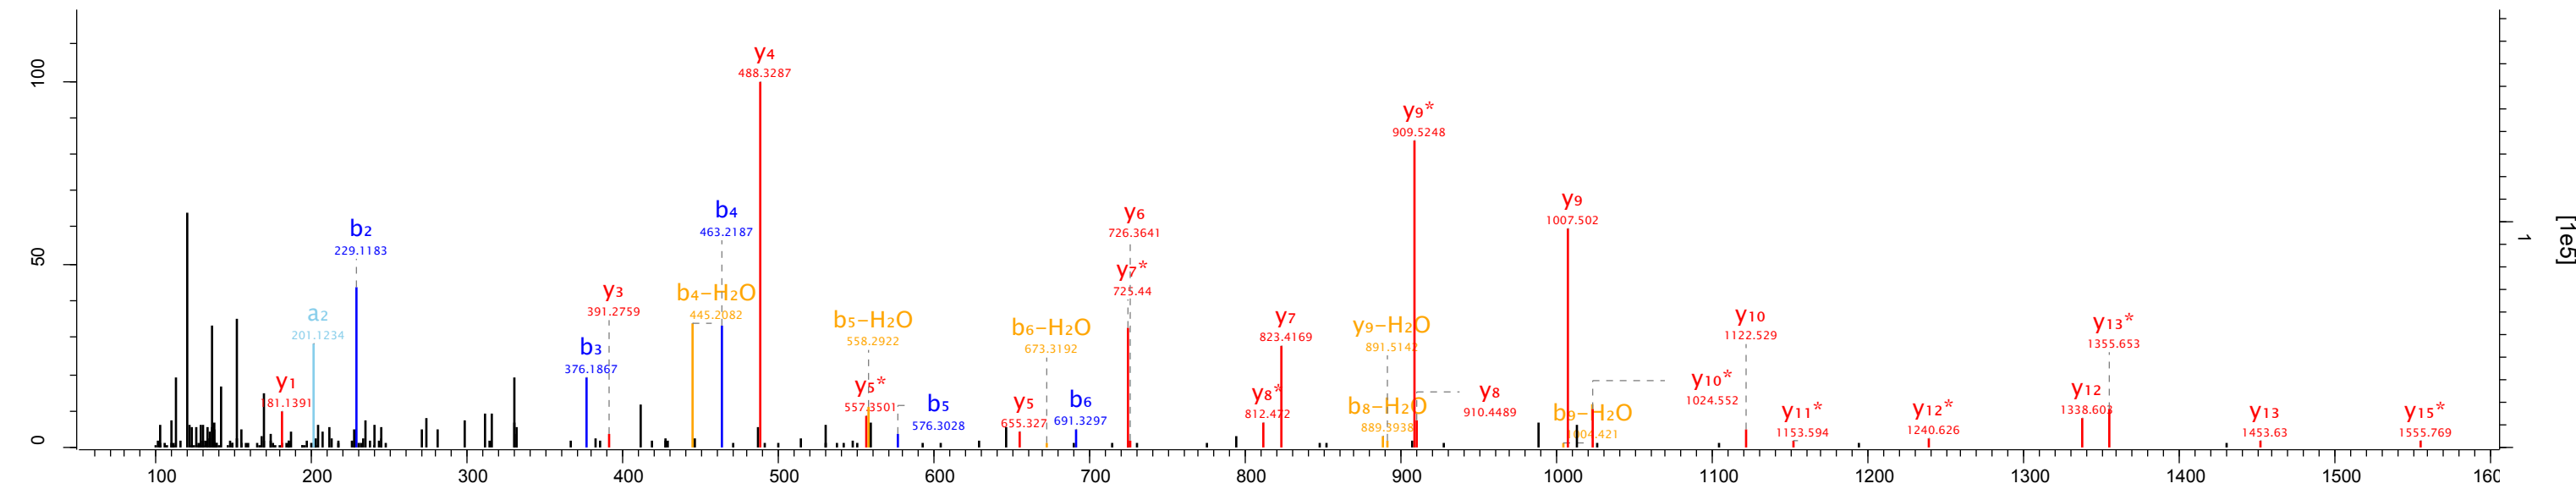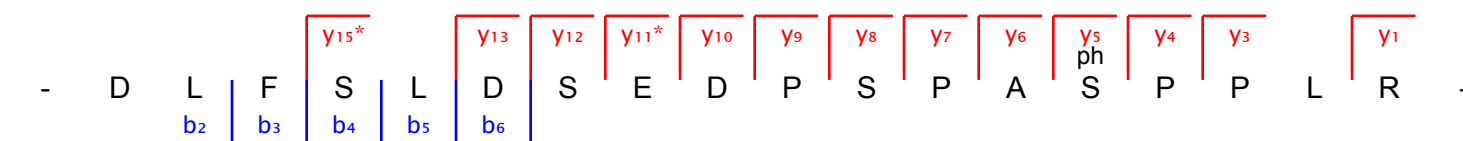

Raw file 20171215\_MaS\_33SR\_LMH\_phospho\_03 Scan 1947 Method FTMS; HCD Score 85.5 m/z 561.26 Gene names PHACTR4

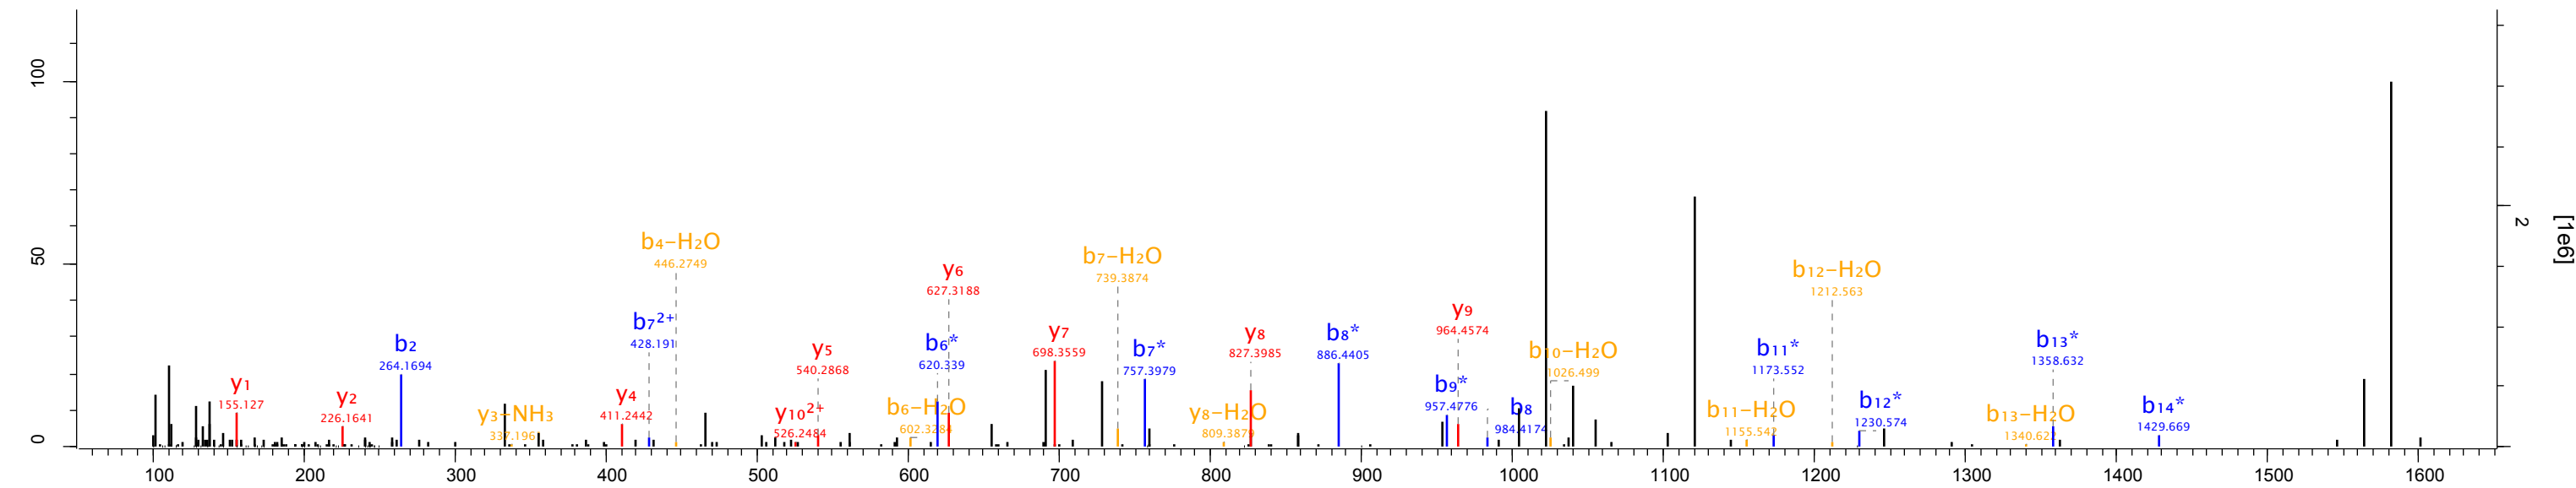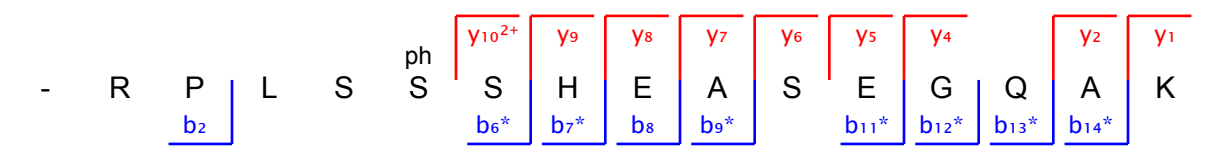

Raw file 20171215\_MaS\_33SR\_LMH\_phospho\_03 Scan 2077 Method FTMS; HCD Score 205.12 m/z 755.97 Gene names SMC3

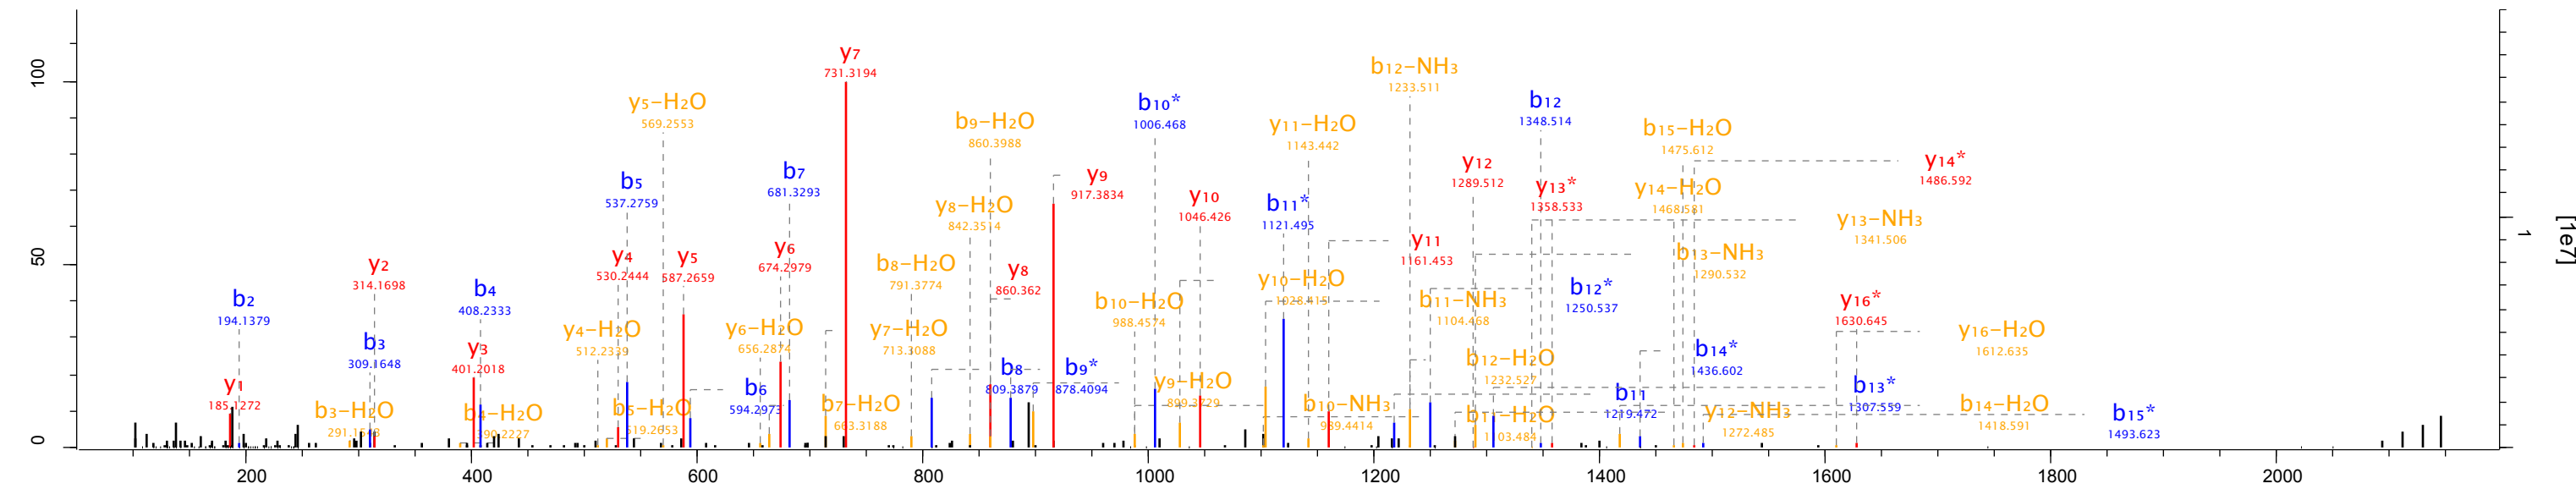

- K G D V E G S Q S Q D E G E G S G E S E R -

b<sub>2</sub>
b<sub>3</sub>
b<sub>4</sub>
b<sub>5</sub>
b<sub>6</sub>
b<sub>7</sub>
b<sub>8</sub>
b<sub>9</sub>\*
b<sub>10</sub>\*
b<sub>11</sub>
b<sub>12</sub>
b<sub>13</sub>\*
b<sub>14</sub>\*
b<sub>15</sub>\*

y<sub>16</sub>\*
y<sub>14</sub>\*
y<sub>13</sub>\*
y<sub>12</sub>
y<sub>11</sub>
y<sub>10</sub>
y<sub>9</sub>
y<sub>8</sub>
y<sub>7</sub>
y<sub>6</sub>
y<sub>5</sub>
y<sub>4</sub>
y<sub>3</sub>
y<sub>2</sub>
y<sub>1</sub>

Raw file 20171215\_MaS\_33SR\_LMH\_phospho\_03 Scan 2167 Method FTMS; HCD Score 207.17 m/z 830.31 Gene names DDX54

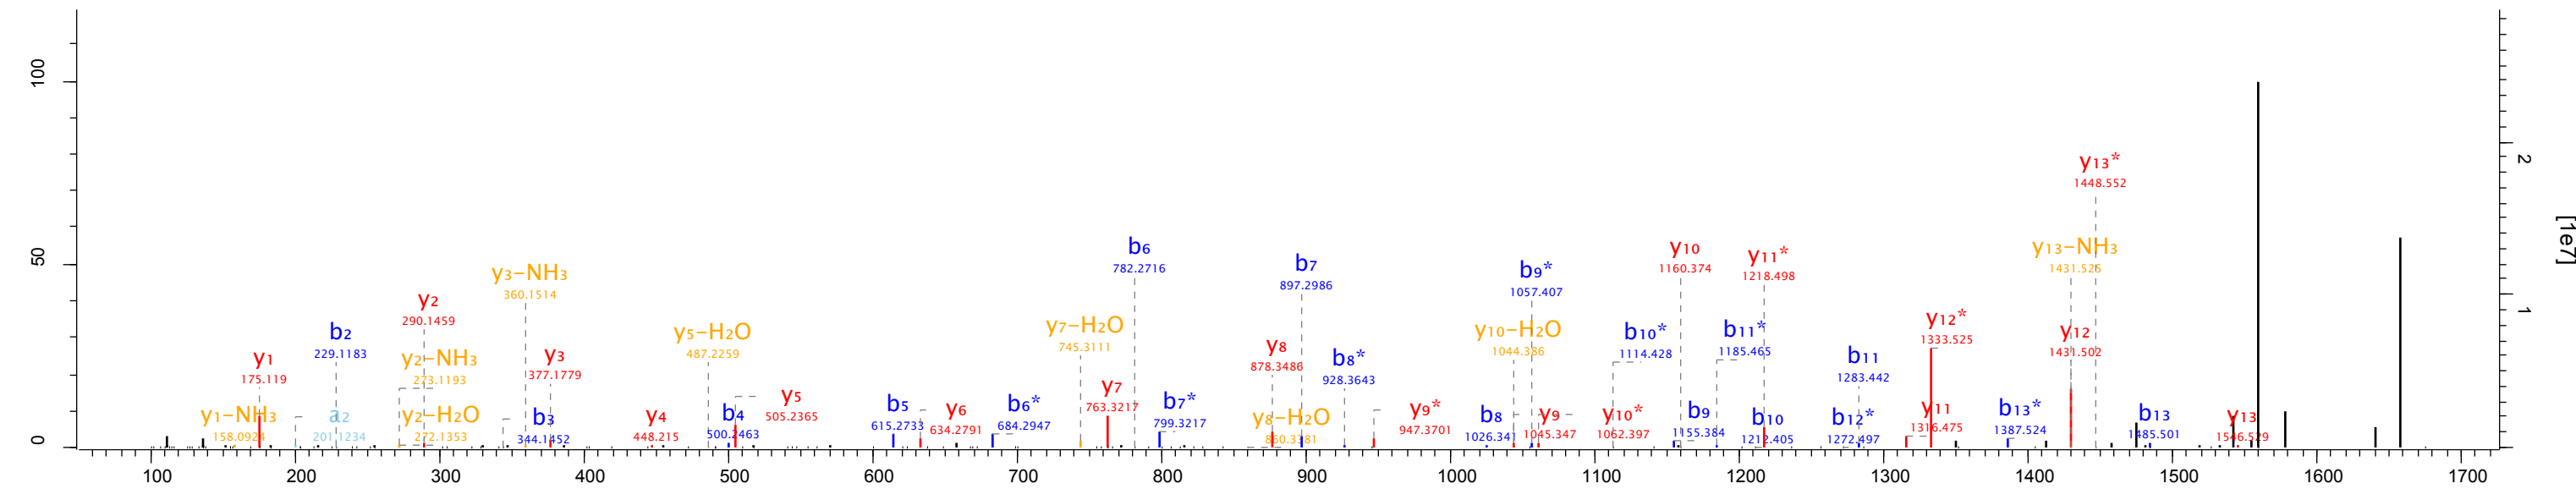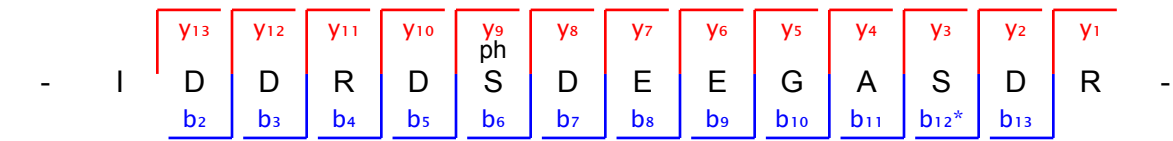



Raw file 20171215\_MaS\_33SR\_LMH\_phospho\_03 Scan 2257 Method FTMS; HCD Score 147.75 m/z 741.32 Gene names CDC42BPB

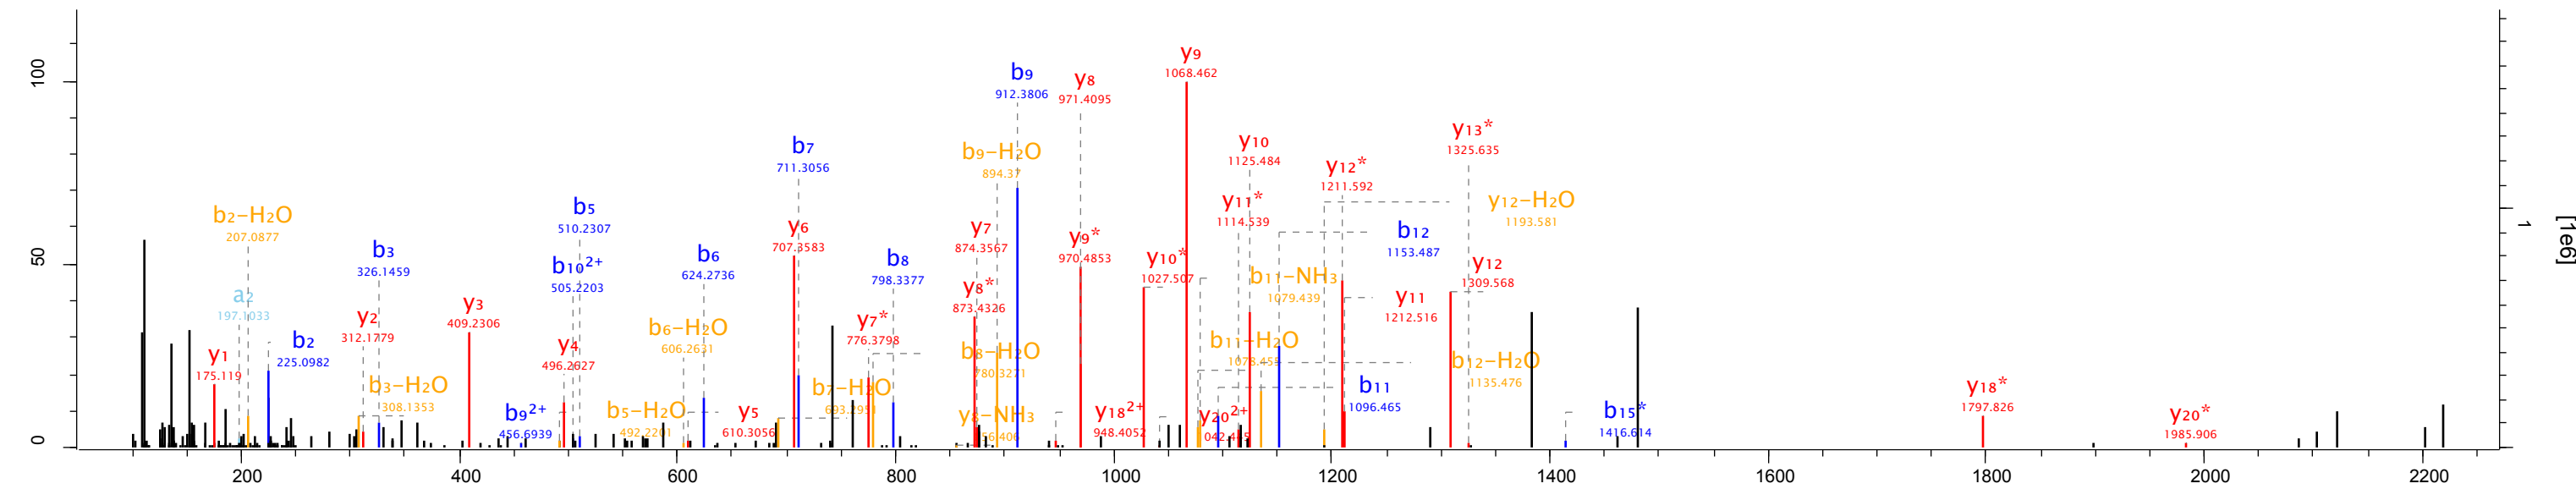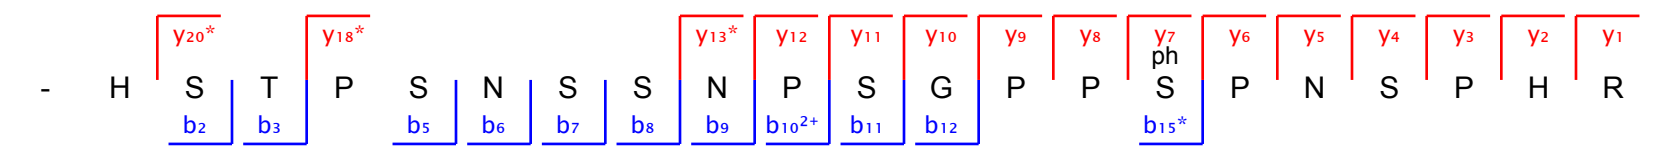

Raw file 20171215\_MaS\_33SR\_LMH\_phospho\_03 Scan 2297 Method FTMS; HCD Score 52.58 m/z 406.2 Gene names PTPN12

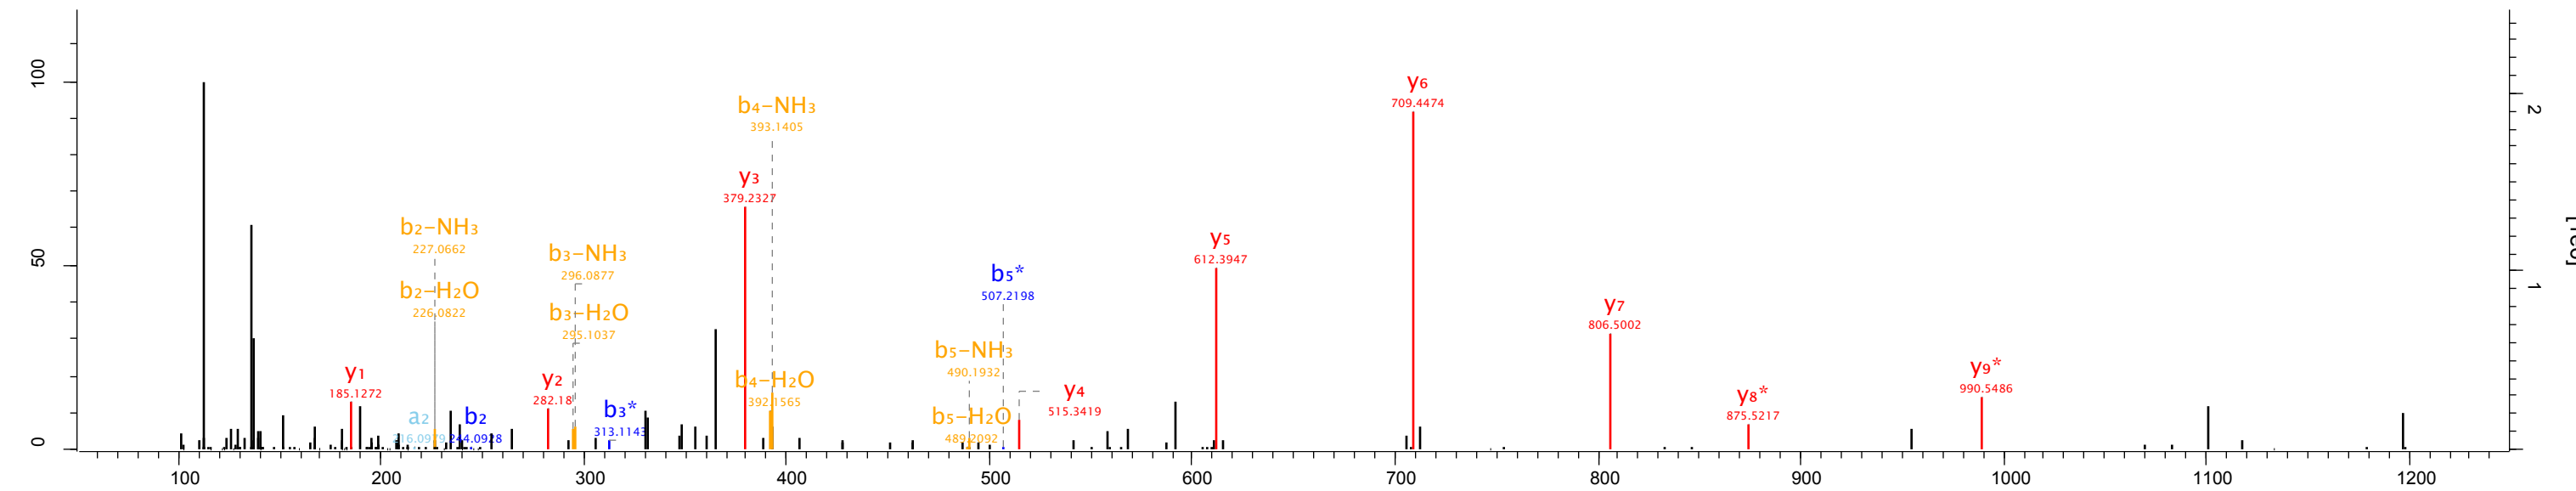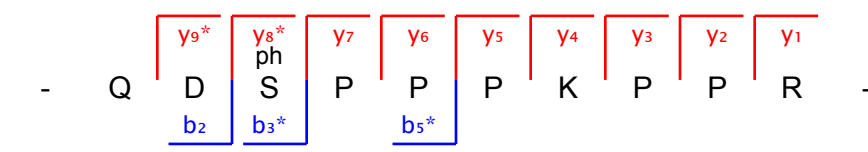

Raw file 20171215\_MaS\_33SR\_LMH\_phospho\_03 Scan 2387 Method FTMS; HCD Score 86.46 m/z 385.85 Gene names RBBP5

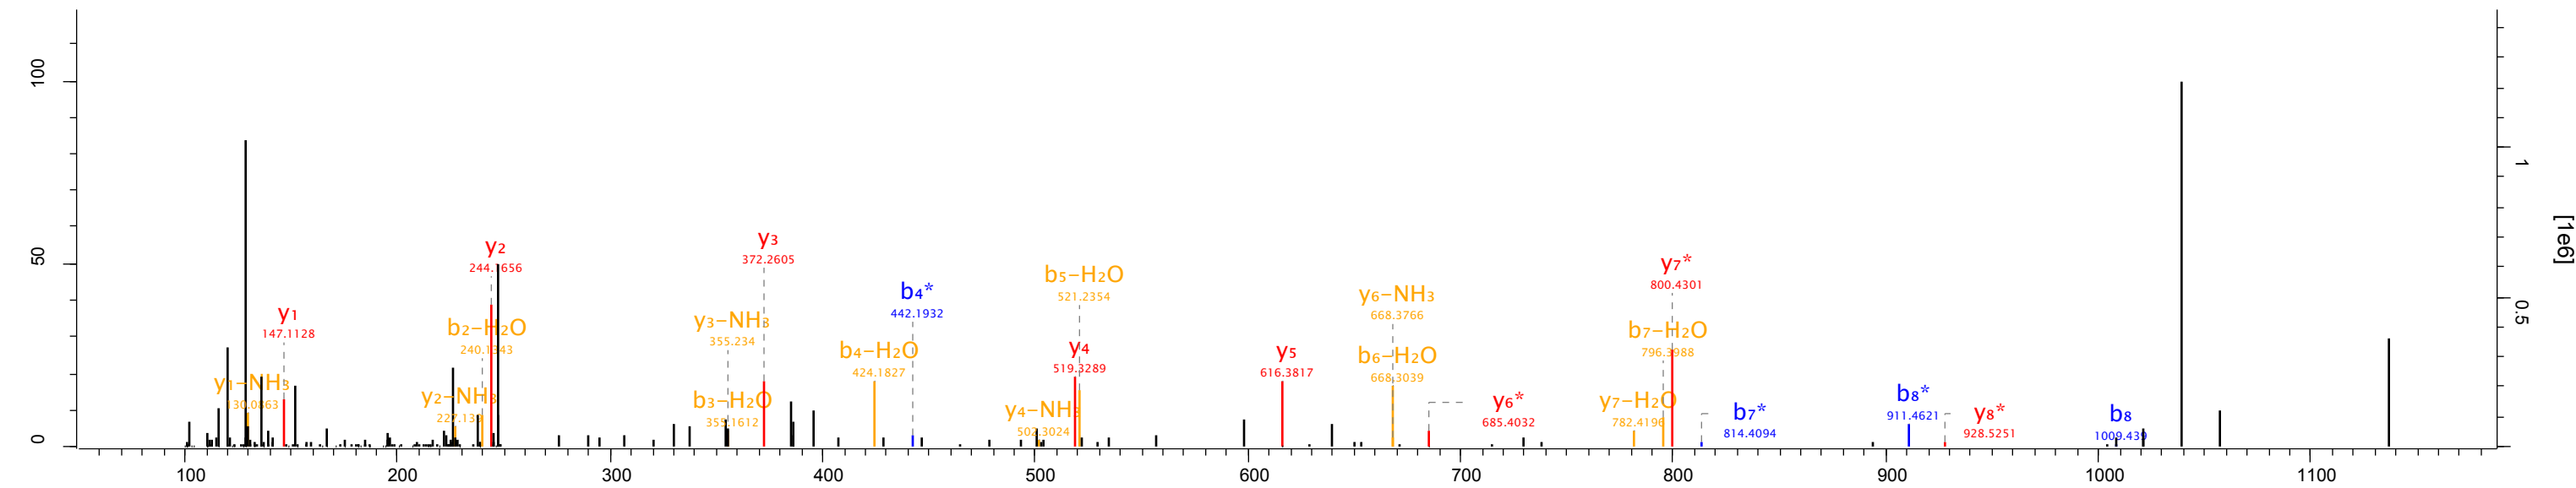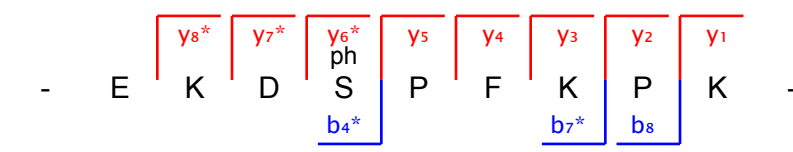

Raw file 20171215\_MaS\_33SR\_LMH\_phospho\_03 Scan 2497 Method FTMS; HCD Score 65.89 m/z 618.59 Gene names DIDO1

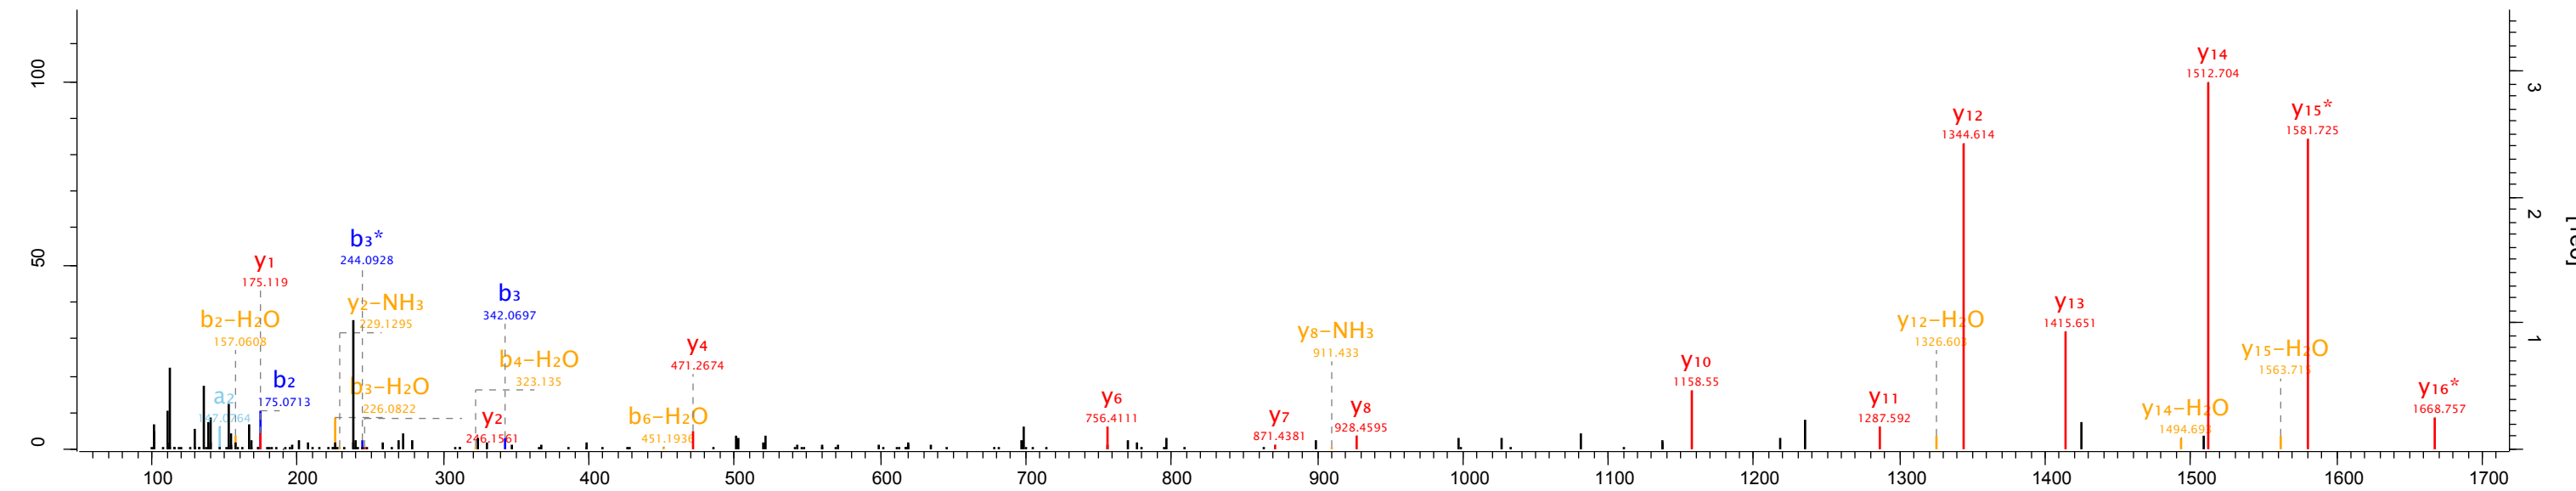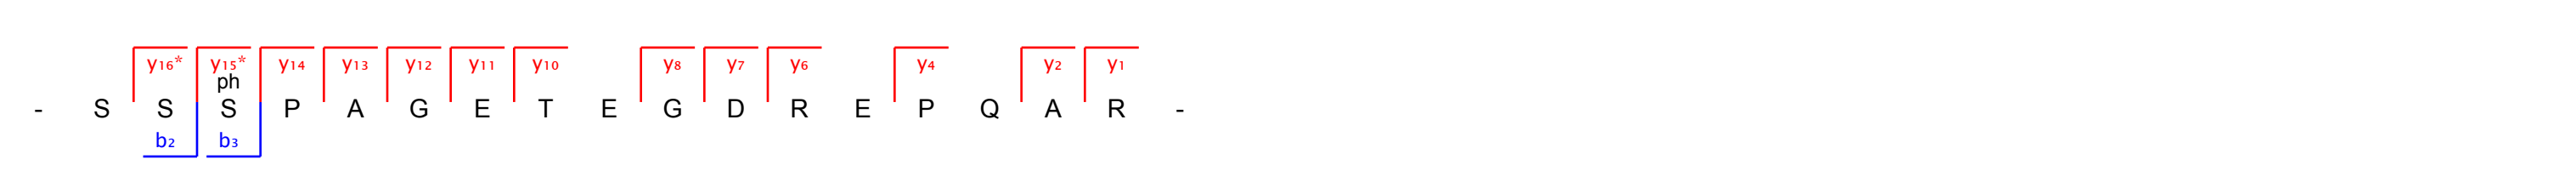

Raw file 20171215\_MaS\_33SR\_LMH\_phospho\_03 Scan 2737 Method FTMS; HCD Score 134.49 m/z 551.2 Gene names HTATSF1

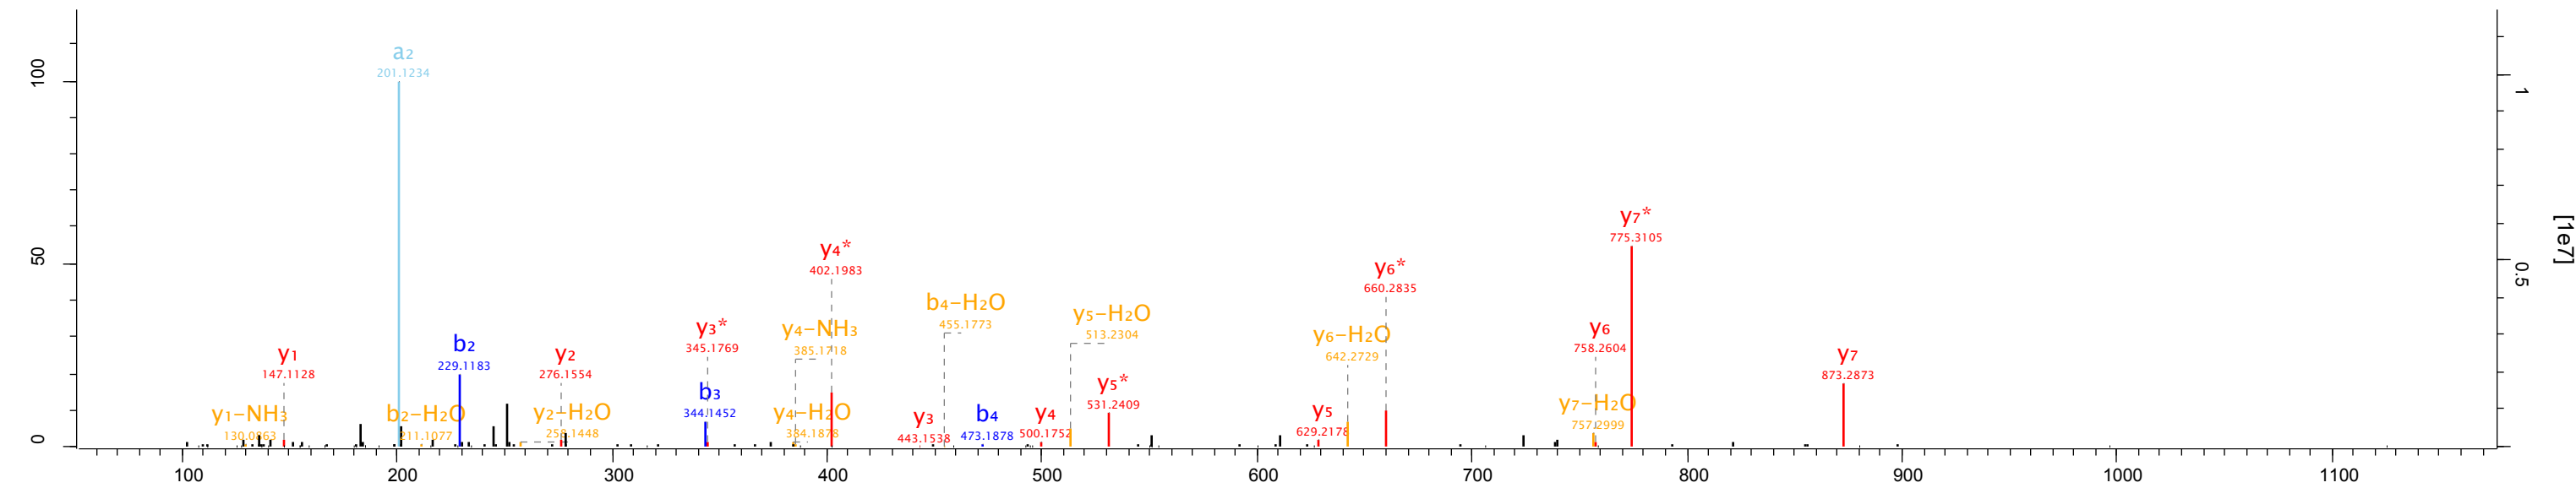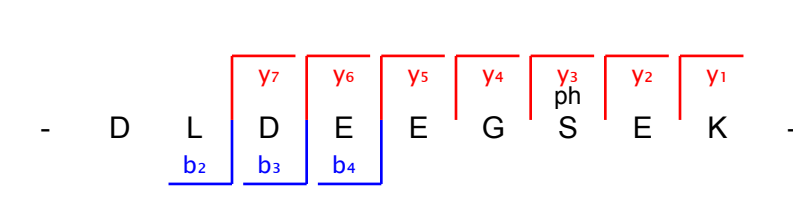

Raw file 20171215\_MaS\_33SR\_LMH\_phospho\_03 Scan 2967 Method FTMS; HCD Score 83.86 m/z 496.18 Gene names ZFP36L2

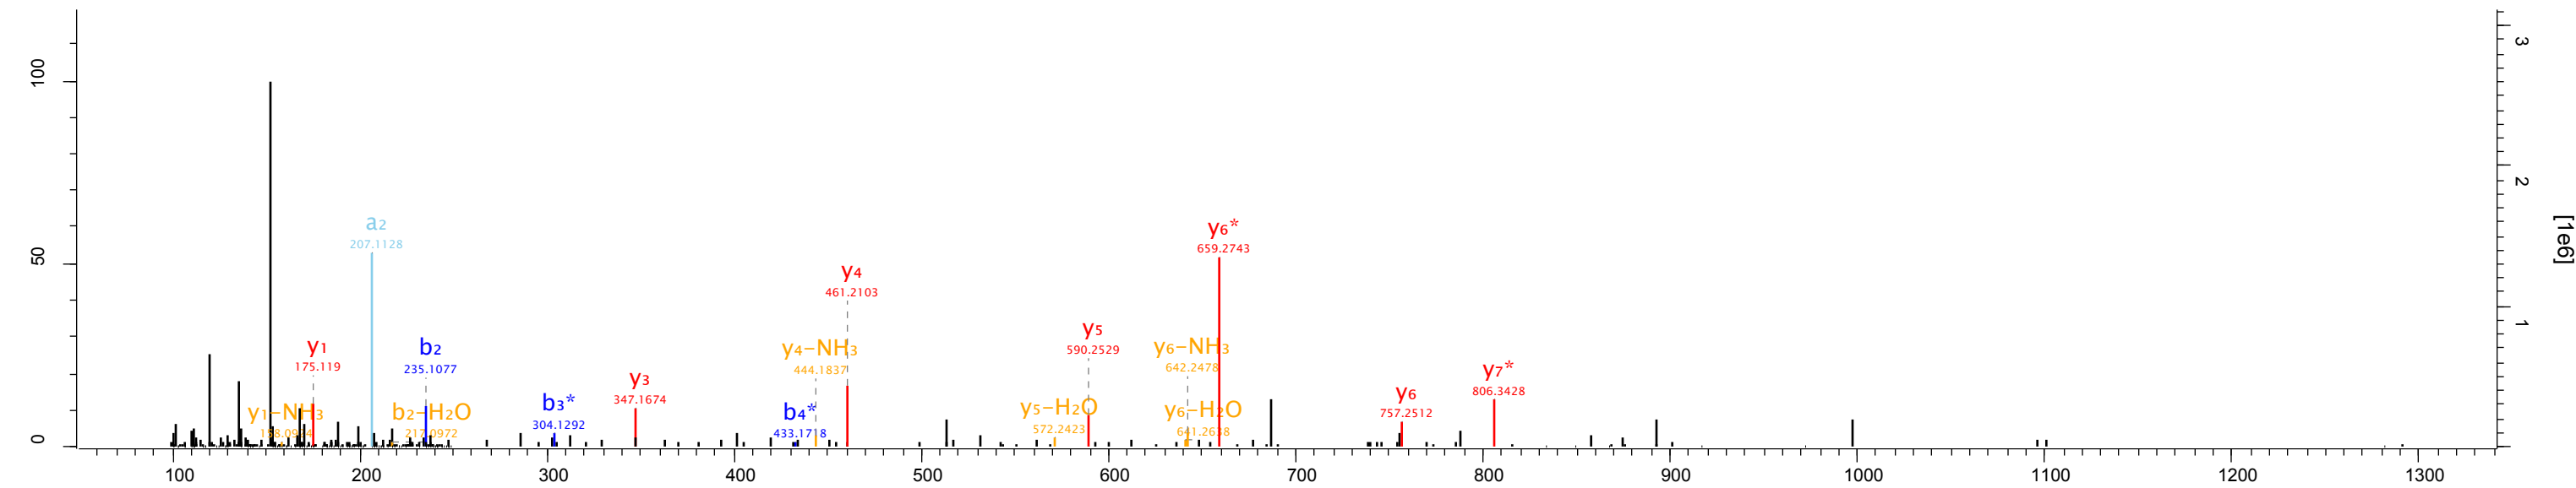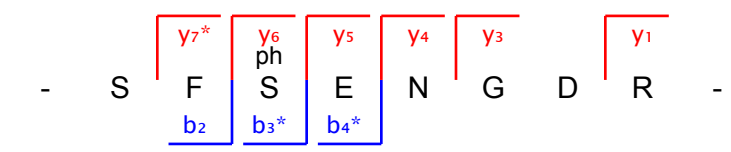

Raw file 20171215\_MaS\_33SR\_LMH\_phospho\_03 Scan 3137 Method FTMS; HCD Score 175.98 m/z 642.26 Gene names SORBS2

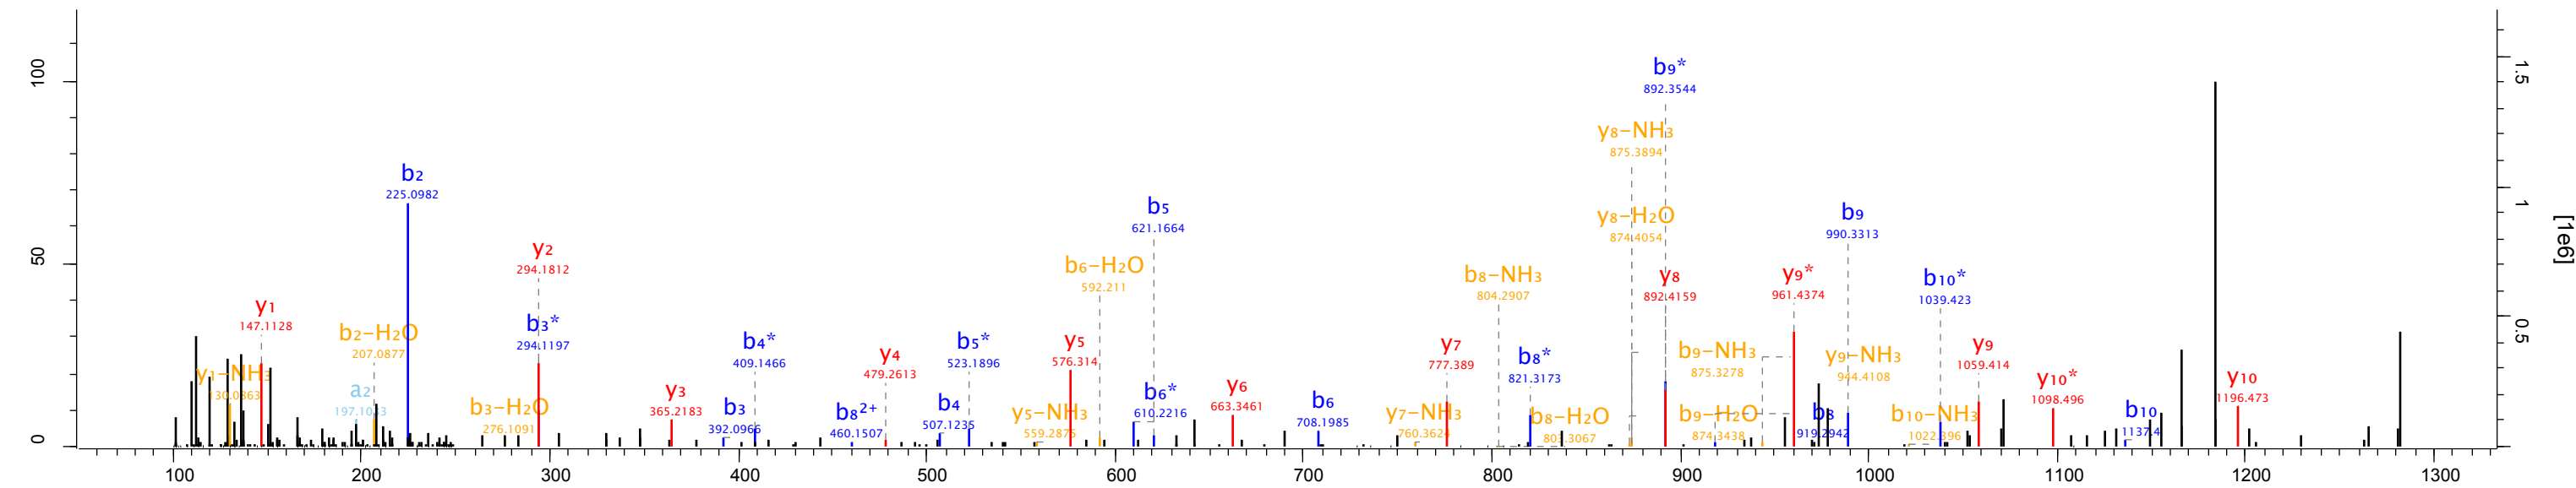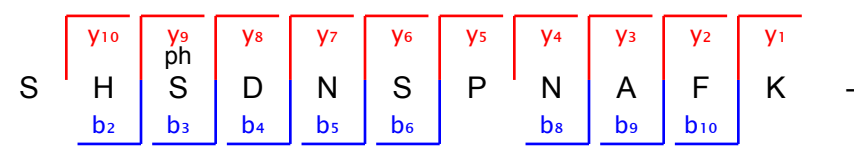

Raw file 20171215\_MaS\_33SR\_LMH\_phospho\_03 Scan 3397 Method FTMS; HCD Score 108.66 m/z 580.25 Gene names PDCD4

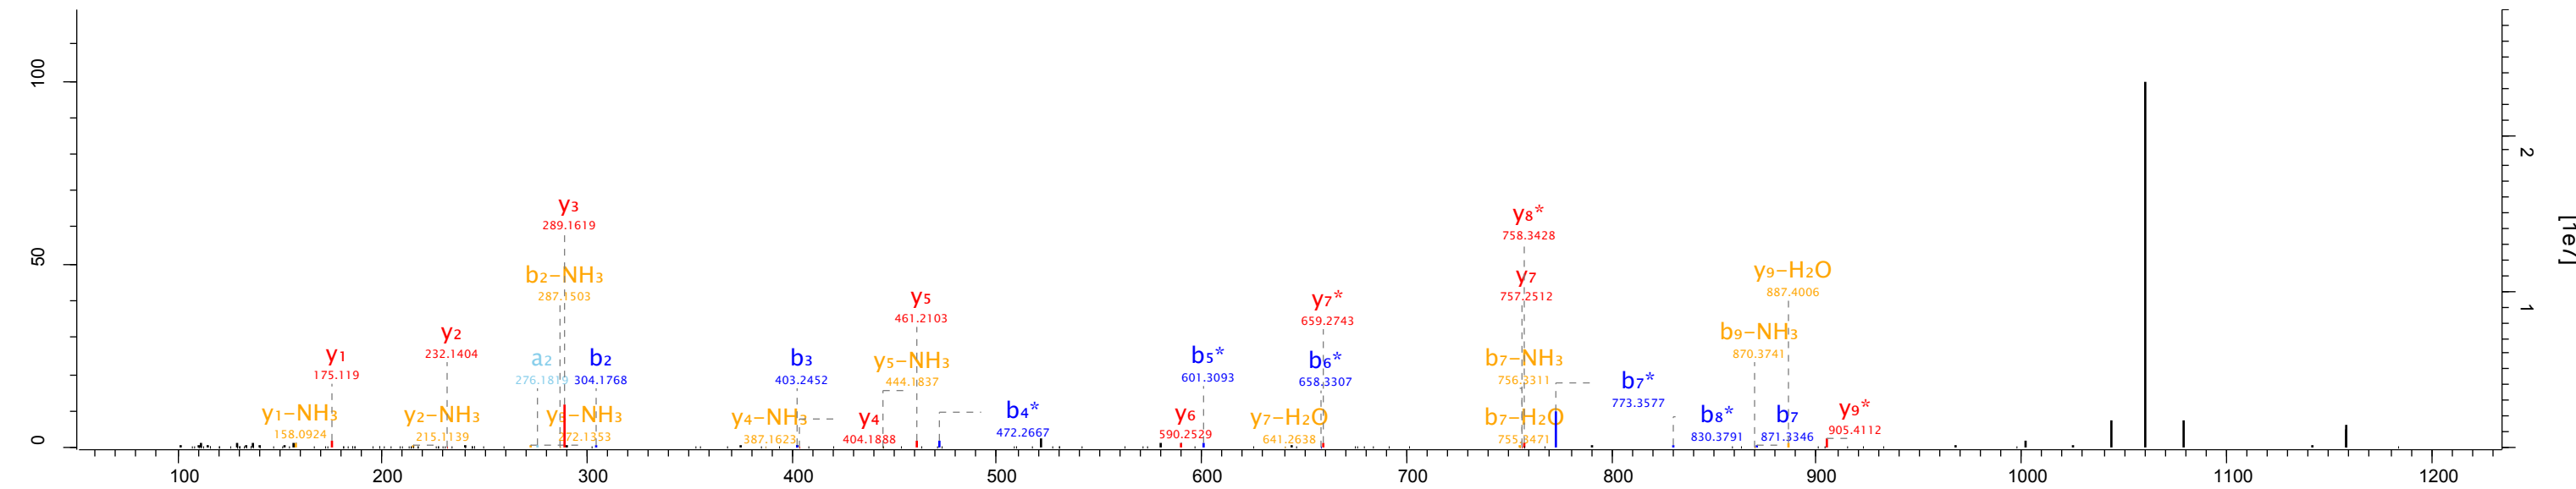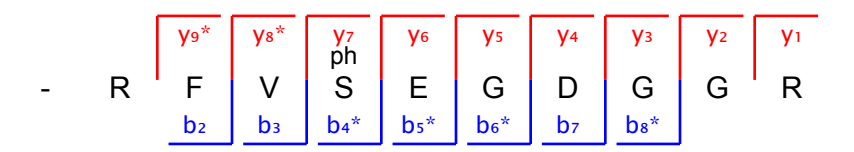



Raw file 20171215\_MaS\_33SR\_LMH\_phospho\_03 Scan 3627 Method FTMS; HCD Score 111.12 m/z 419.87 Gene names DPYSL3

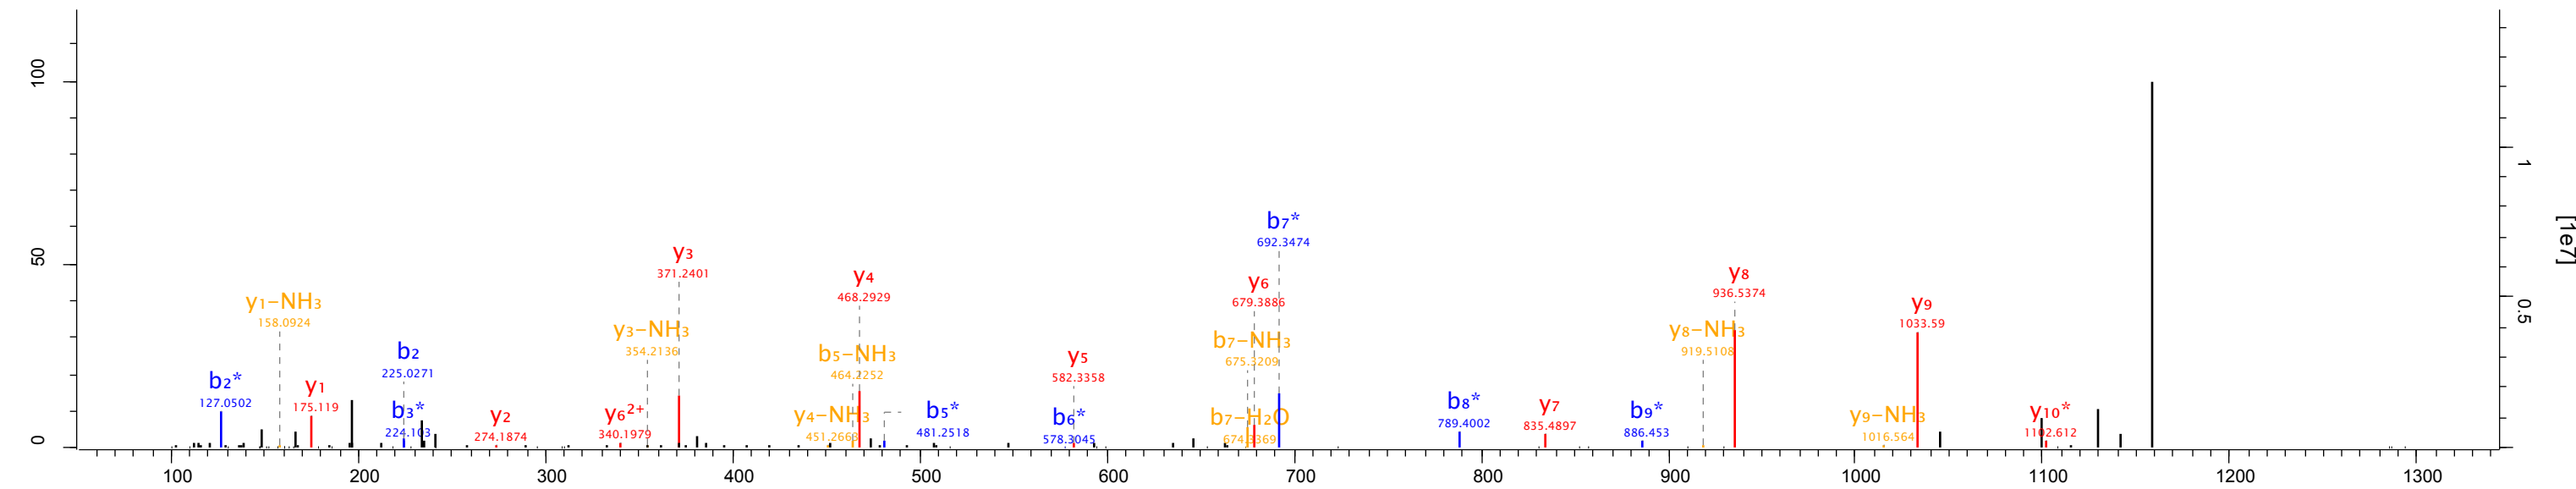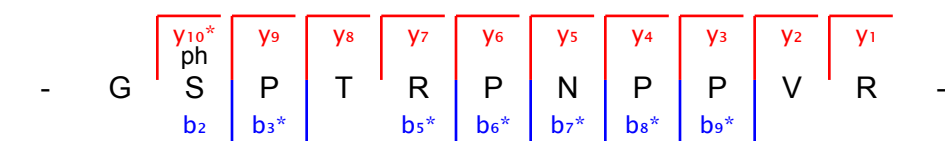

Raw file

20171215\_MaS\_33SR\_LMH\_phospho\_03

| Scan | Method    | Score | m/z    | Gene names |
|------|-----------|-------|--------|------------|
| 3697 | FTMS; HCD | 68.41 | 593.77 | BOD1L1     |

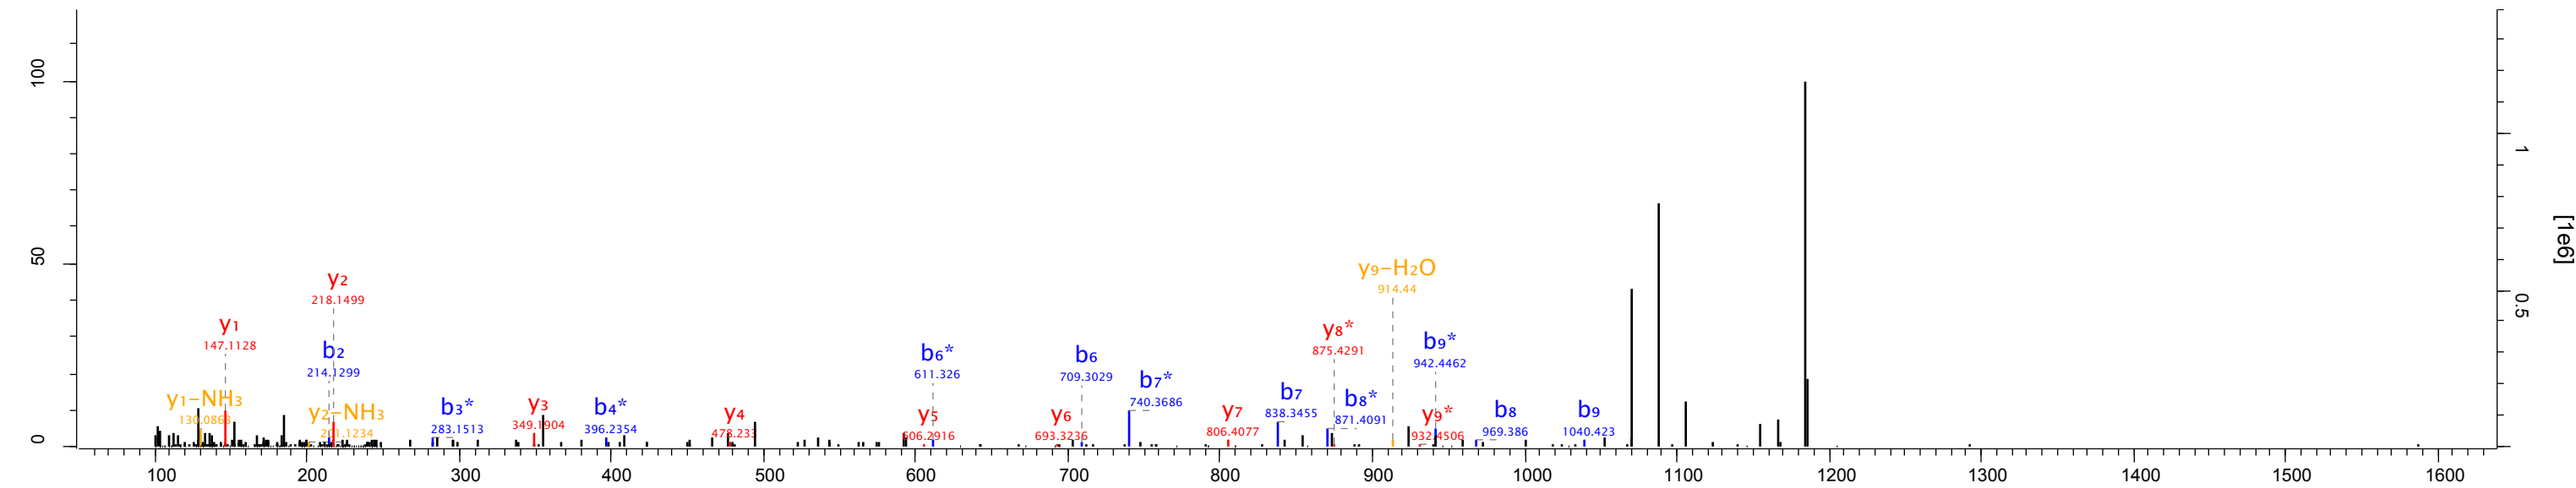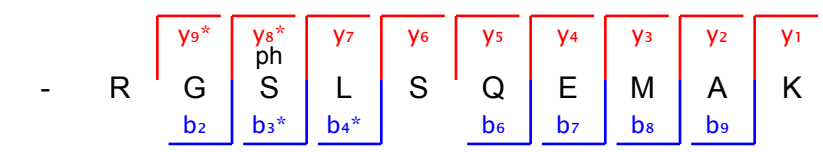

Raw file 20171215\_MaS\_33SR\_LMH\_phospho\_03 Scan 3717 Method FTMS; HCD Score 361.83 m/z 942.82 Gene names SUPT6H

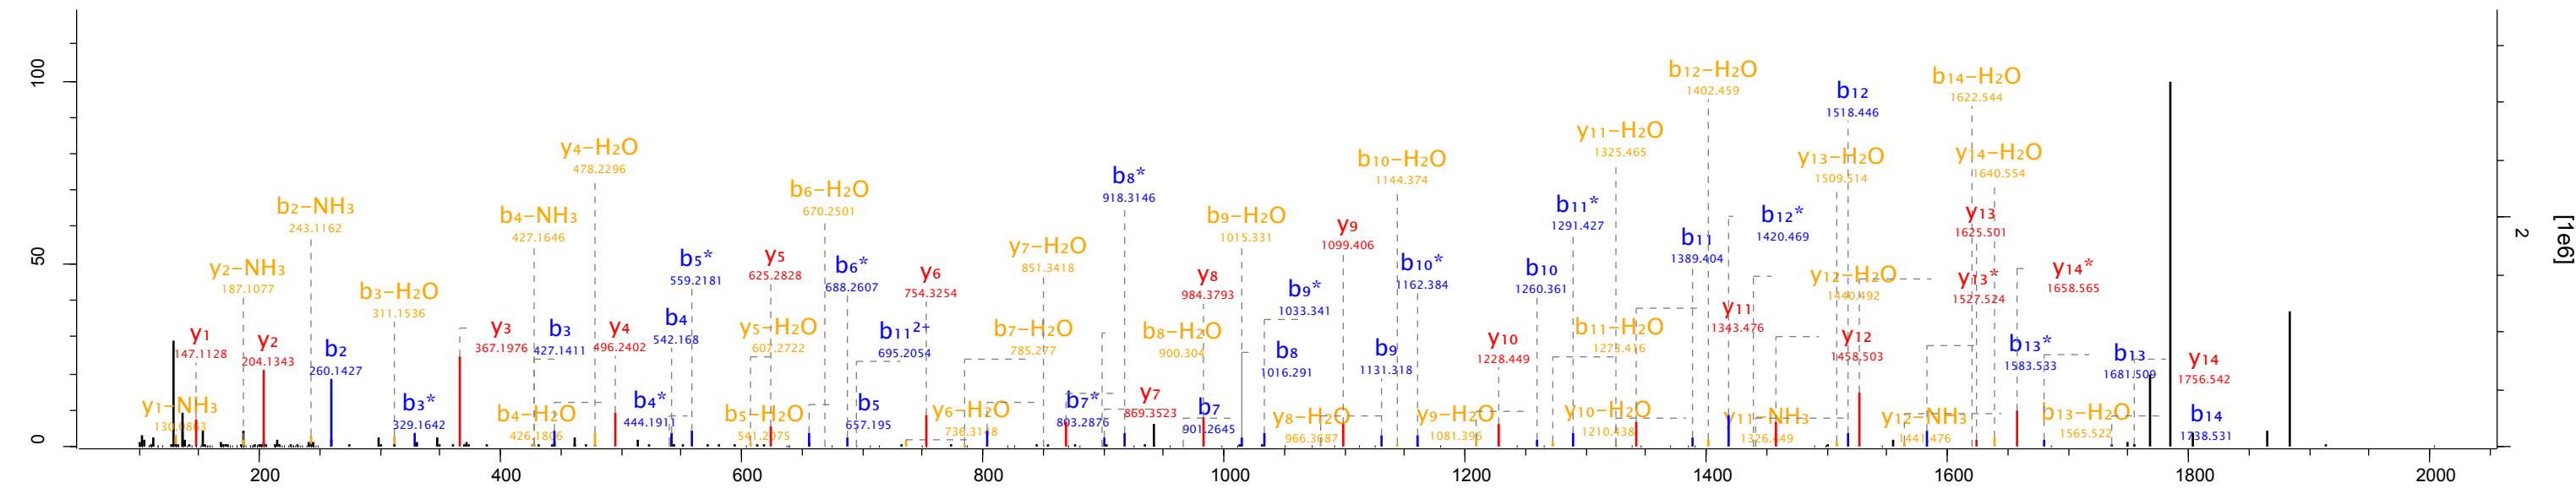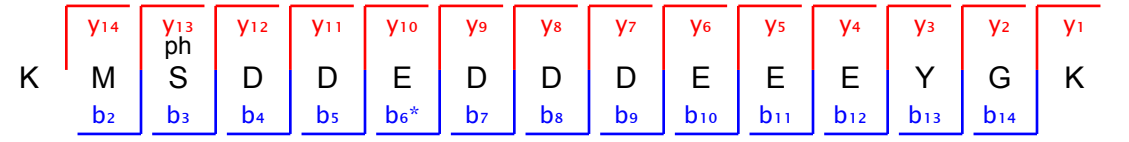

Raw file 20171215\_MaS\_33SR\_LMH\_phospho\_03 Scan 4027 Method FTMS; HCD Score 102.29 m/z 662.96 Gene names C12orf45

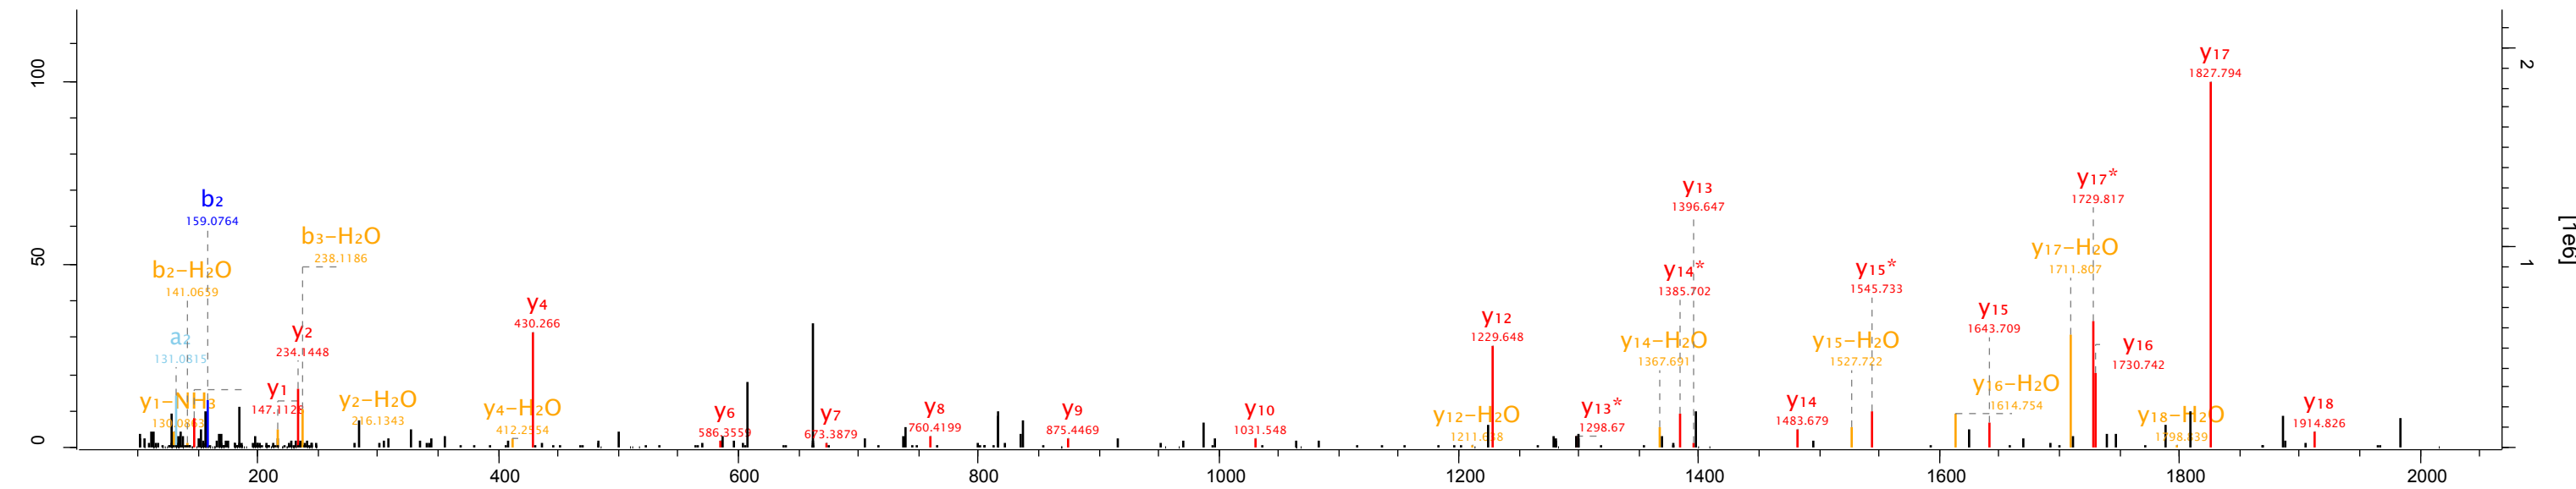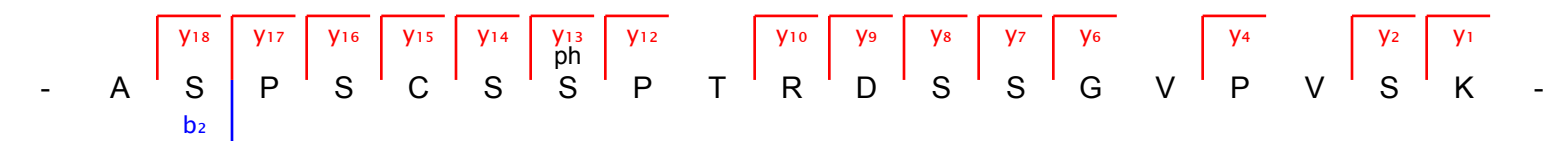

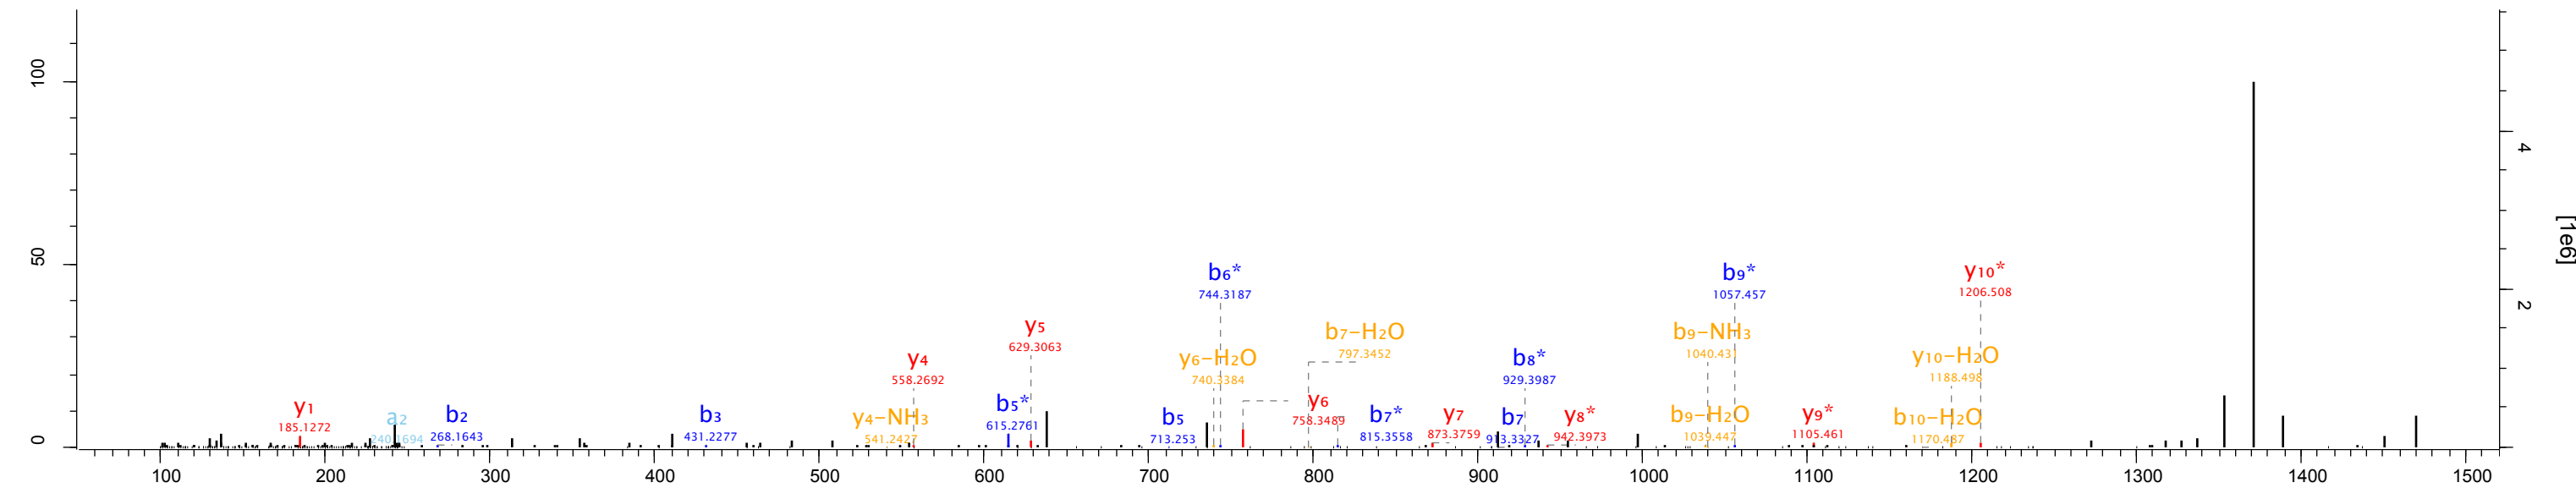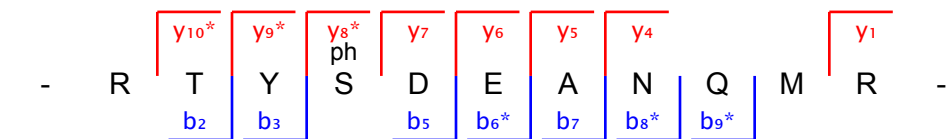

Raw file 20171215\_MaS\_33SR\_LMH\_phospho\_03 Scan 4407 Method FTMS; HCD Score 93.72 m/z 540.28 Gene names CCNL2

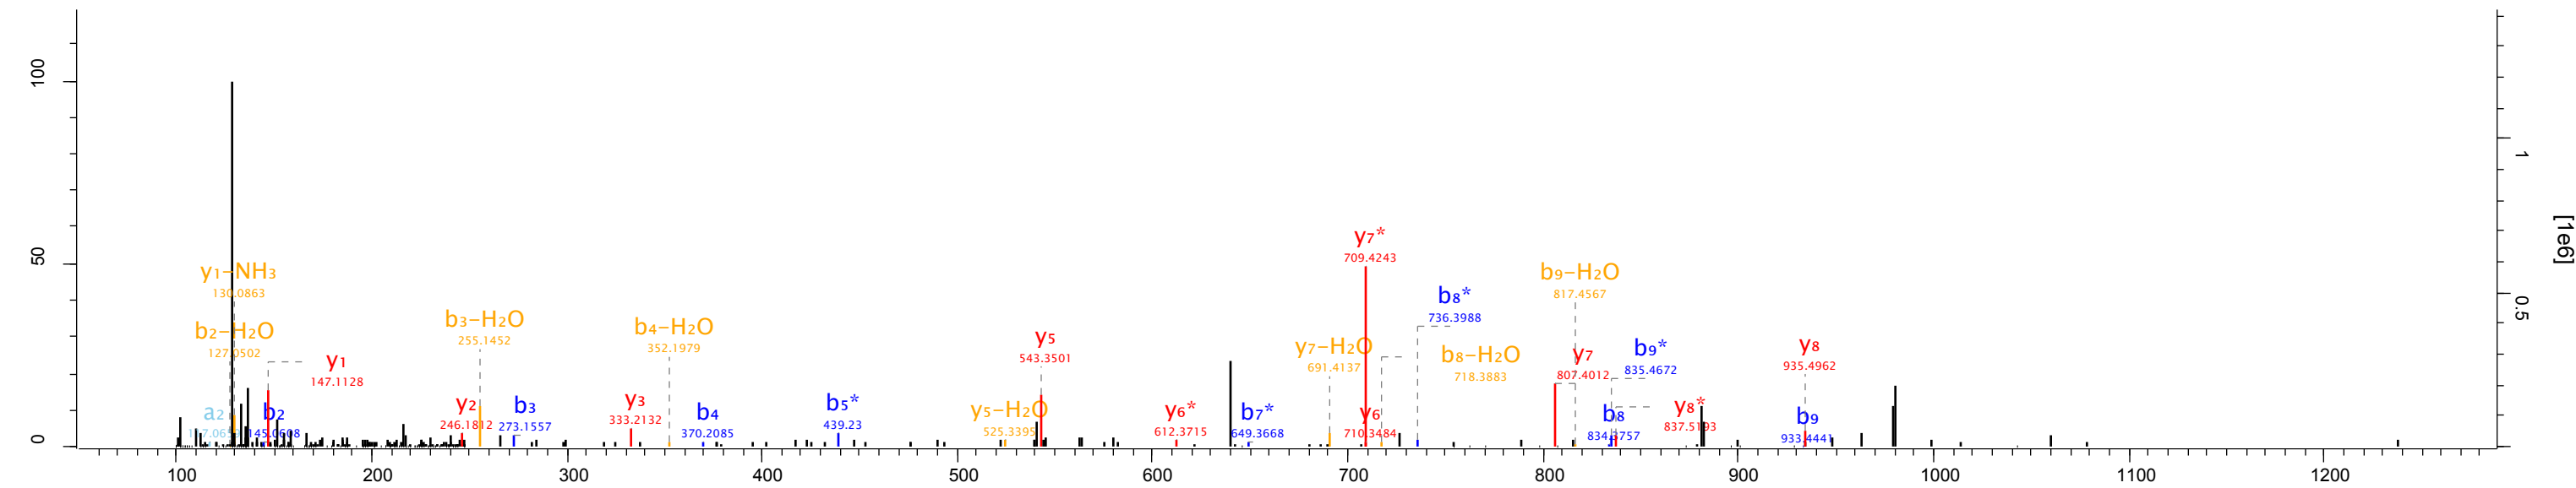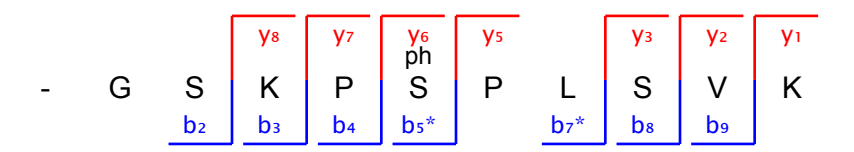

Raw file 20171215\_MaS\_33SR\_LMH\_phospho\_03 Scan 4657 Method FTMS; HCD Score 255.3 m/z 918.62 Gene names UBE2E3

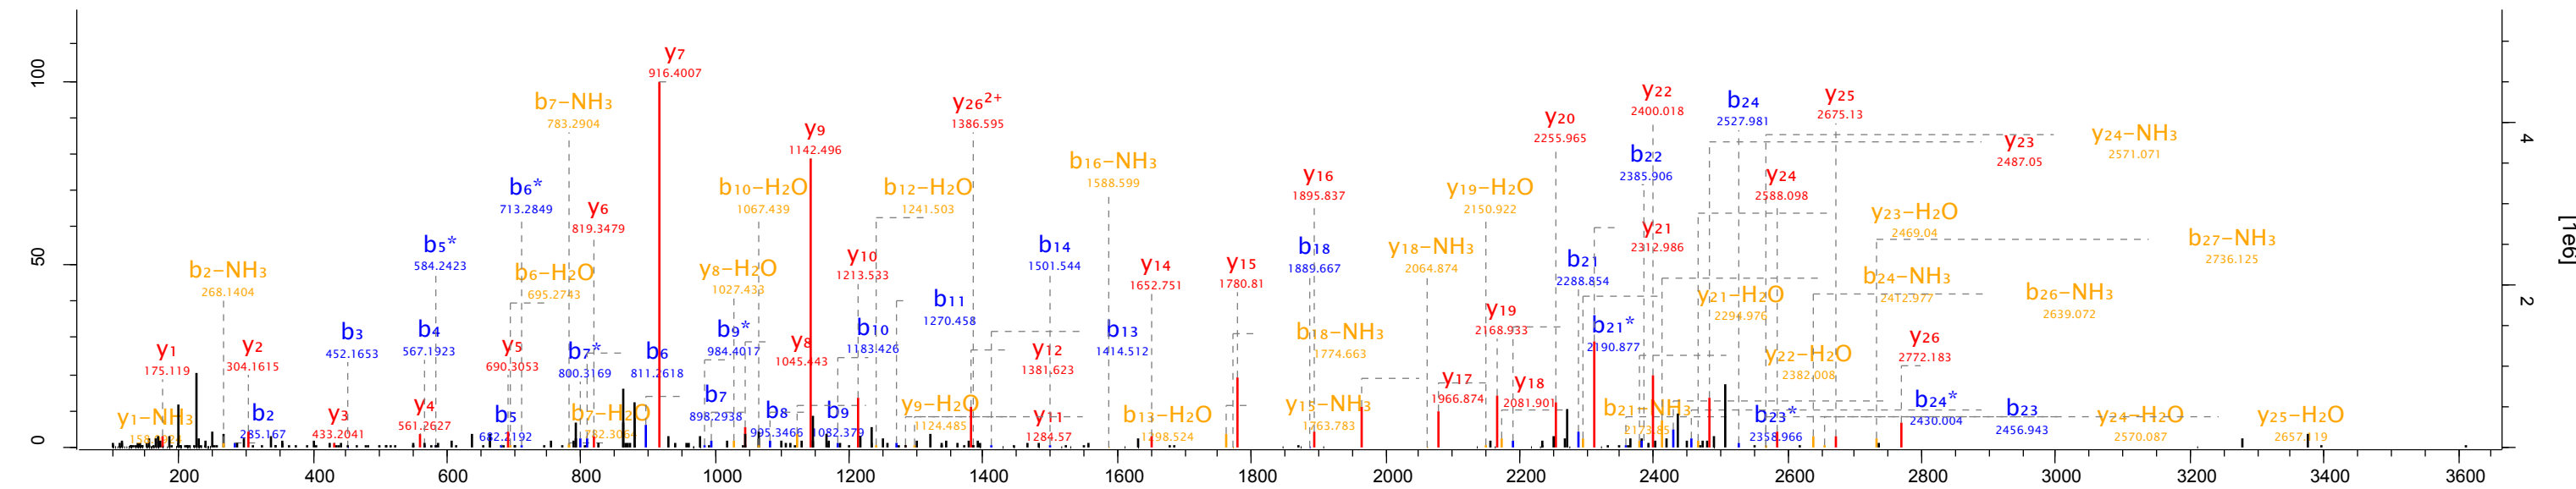

- Q R S D D E S P S T S S G S S D A D Q R D P A A P E P E E Q E E R -

ph

b2 b3 b4 b5 b6 b7 b8 b9 b10 b11 b13 b14 b18 b21 b22 b23 b24

y1 y2 y3 y4 y5 y6 y7 y8 y9 y10 y11 y12 y13 y14 y15 y16 y17 y18 y19 y20 y21 y22 y23 y24 y25 y26 y27 y28 y29 y30 y31 y32 y33 y34 y35 y36 y37 y38 y39 y40 y41 y42 y43 y44 y45 y46 y47 y48 y49 y50 y51 y52 y53 y54 y55 y56 y57 y58 y59 y60 y61 y62 y63 y64 y65 y66 y67 y68 y69 y70 y71 y72 y73 y74 y75 y76 y77 y78 y79 y80 y81 y82 y83 y84 y85 y86 y87 y88 y89 y90 y91 y92 y93 y94 y95 y96 y97 y98 y99 y100

Raw file 20171215\_MaS\_33SR\_LMH\_phospho\_03 Scan 4747 Method FTMS; HCD Score 93.63 m/z 656.96 Gene names ARID1A

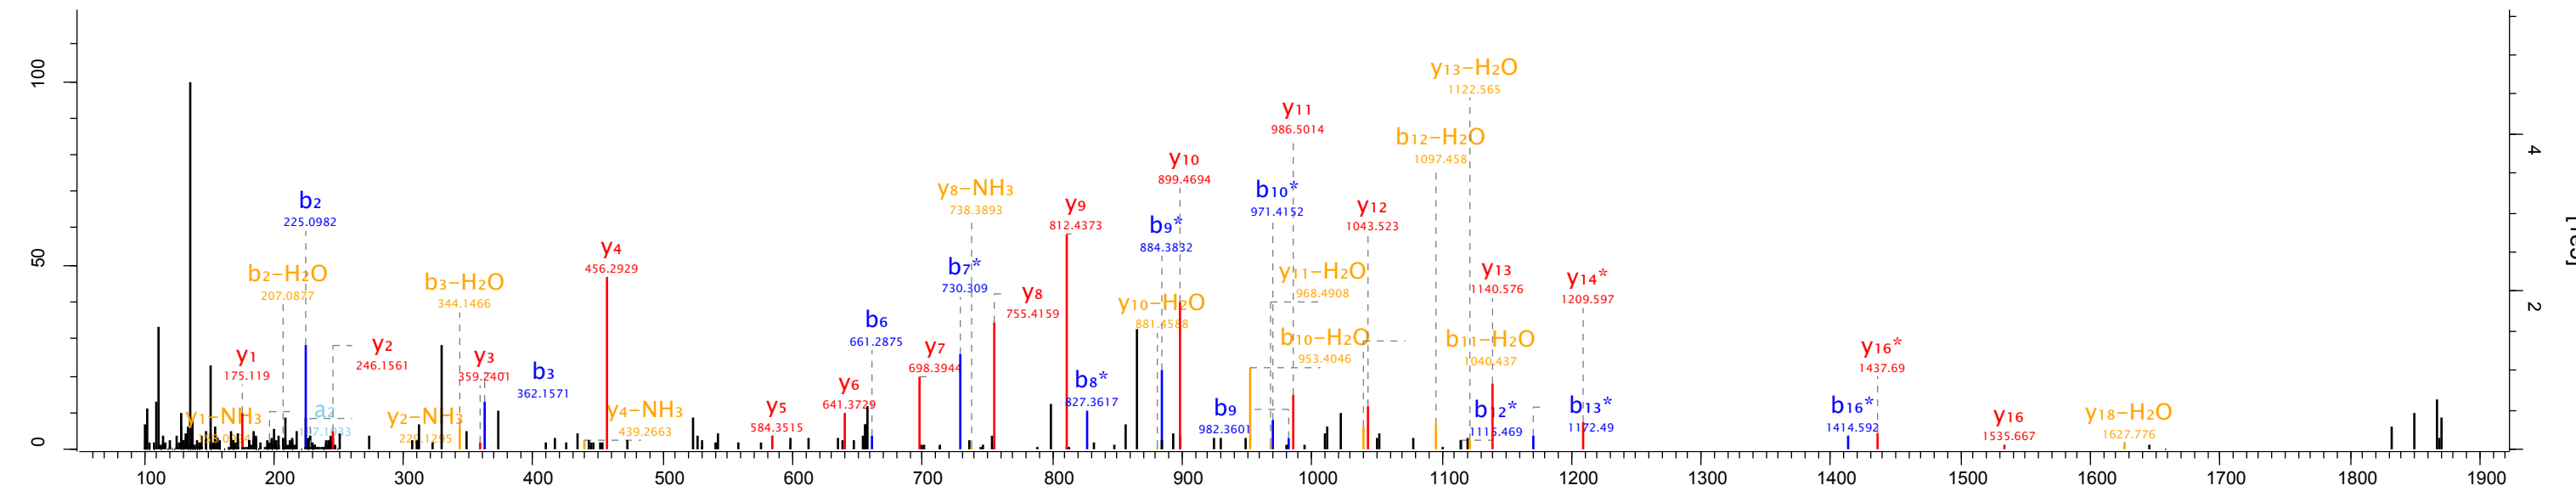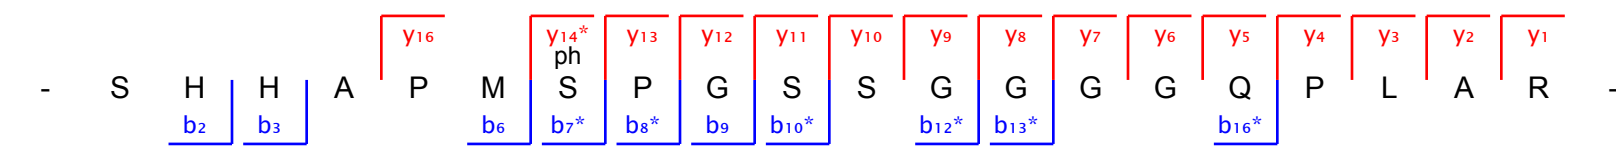



Raw file 20171215\_MaS\_33SR\_LMH\_phospho\_03 Scan 4767 Method FTMS; HCD Score 157.86 m/z 662.76 Gene names NFIB

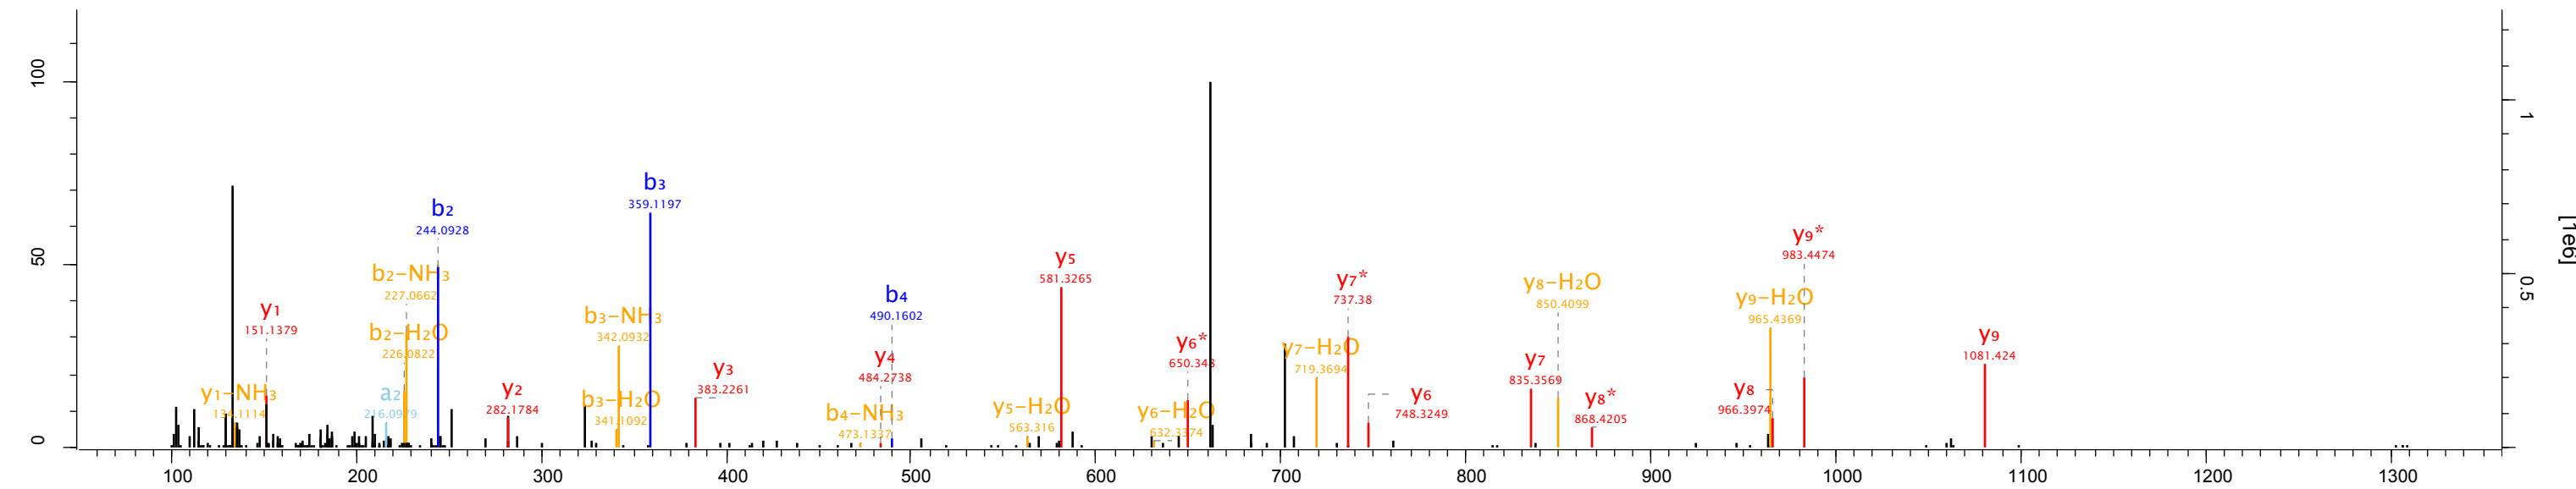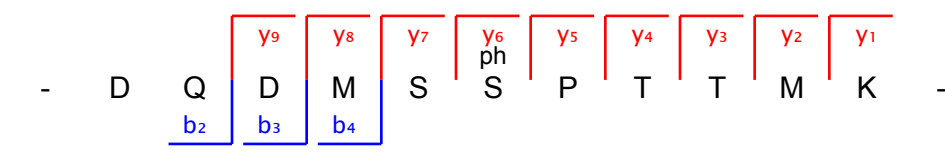

Raw file 20171215\_MaS\_33SR\_LMH\_phospho\_03 Scan 4817 Method FTMS; HCD Score 76.32 m/z 656.77 Gene names TNKS1BP1

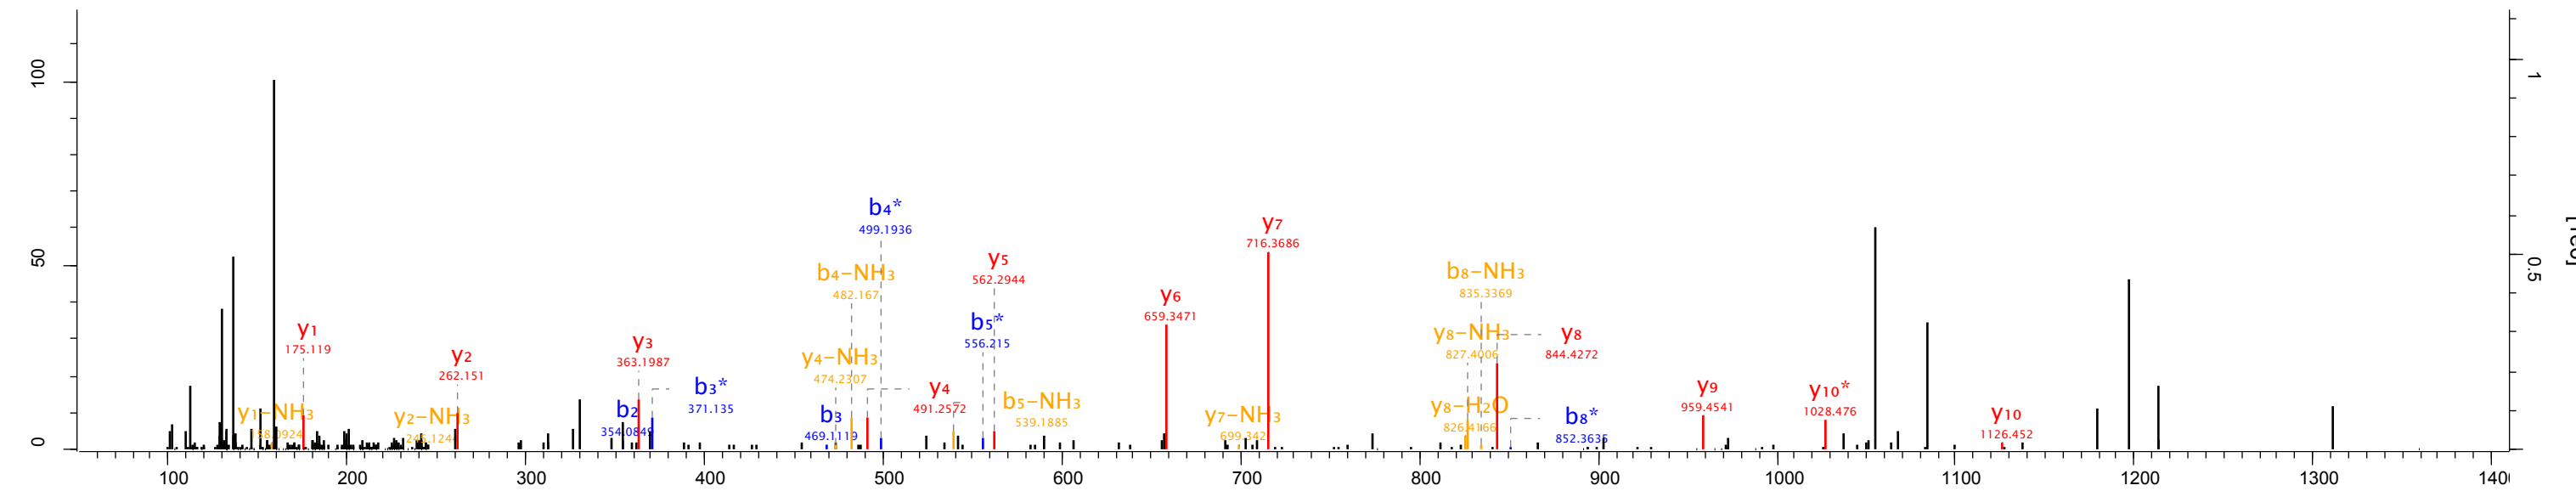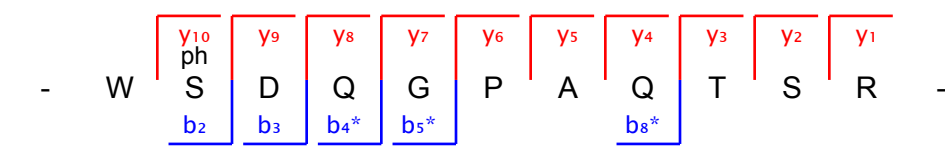

Raw file: 20171215\_MaS\_33SR\_LMH\_phospho\_03  
 Scan: 4857    Method: FTMS; HCD    Score: 49.99    m/z: 564.27    Gene names: MEOX2

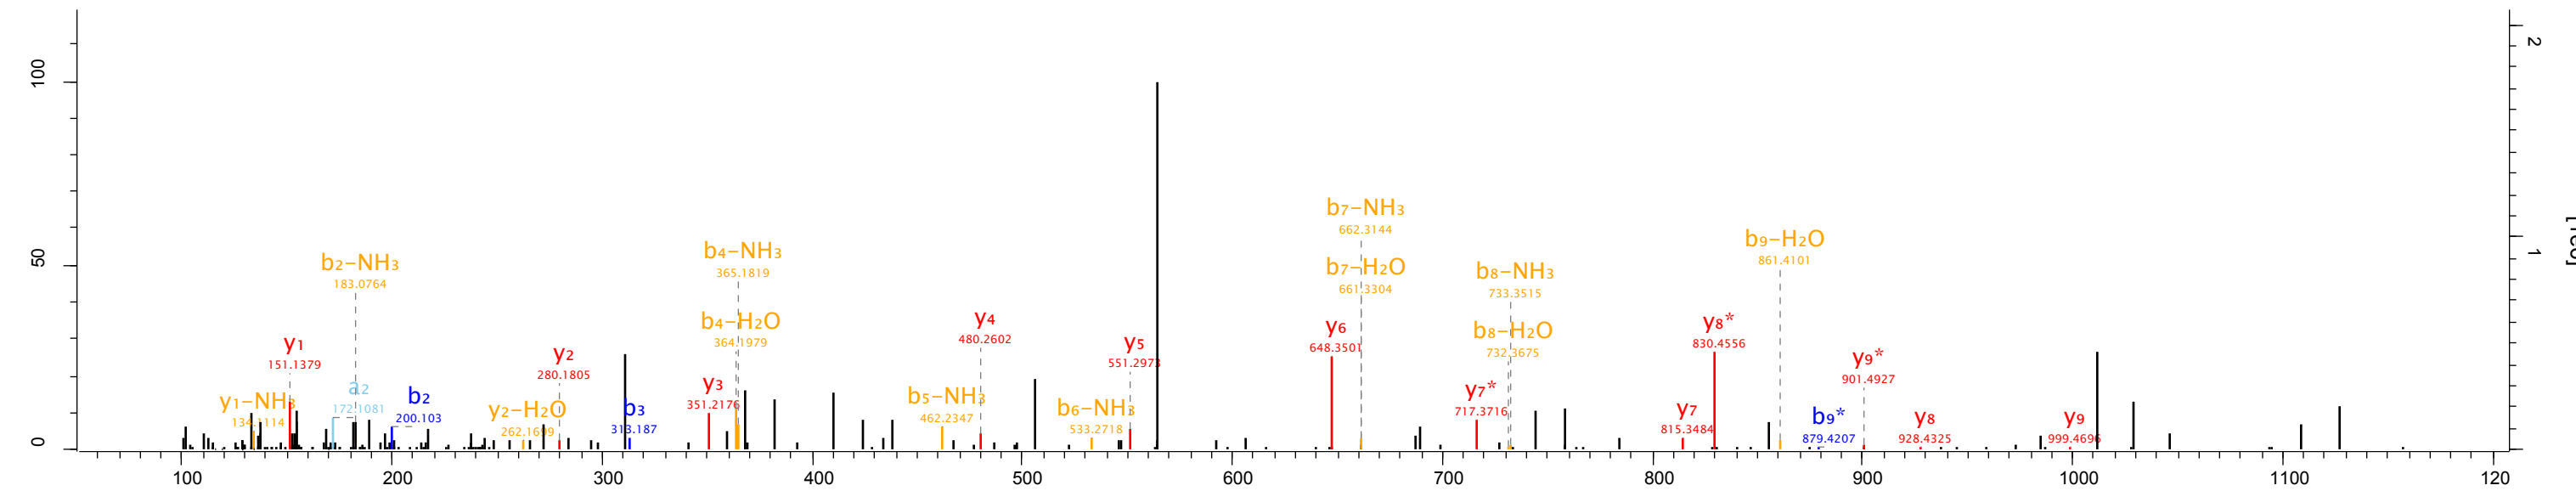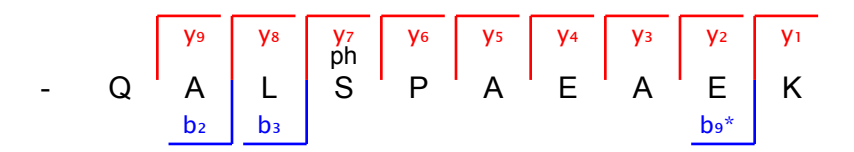

Raw file: 20171215\_MaS\_33SR\_LMH\_phospho\_03  
 Scan: 4937 Method: FTMS; HCD Score: 99.41 m/z: 800.36 Gene names: ZYX

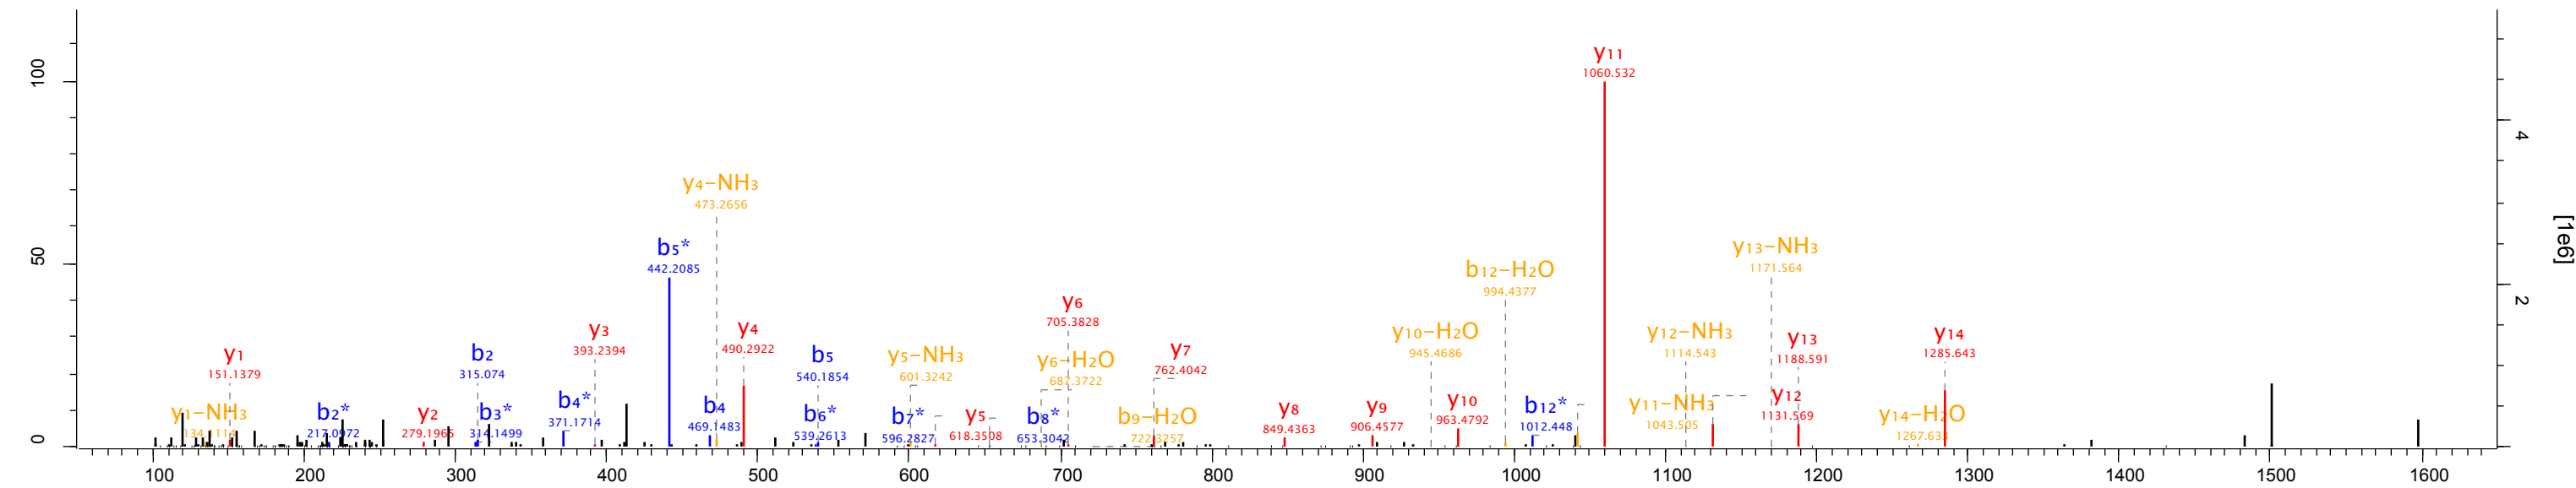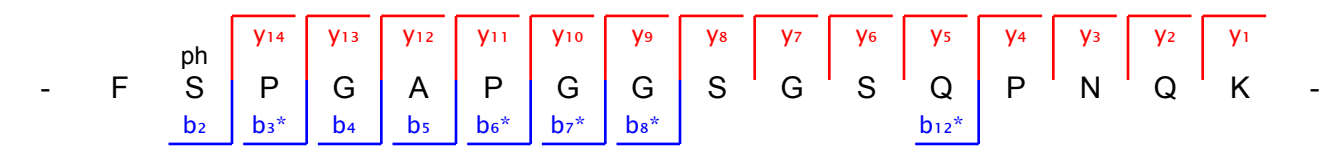

Raw file 20171215\_MaS\_33SR\_LMH\_phospho\_03 Scan 5347 Method FTMS; HCD Score 113.47 m/z 745.35 Gene names WNK4

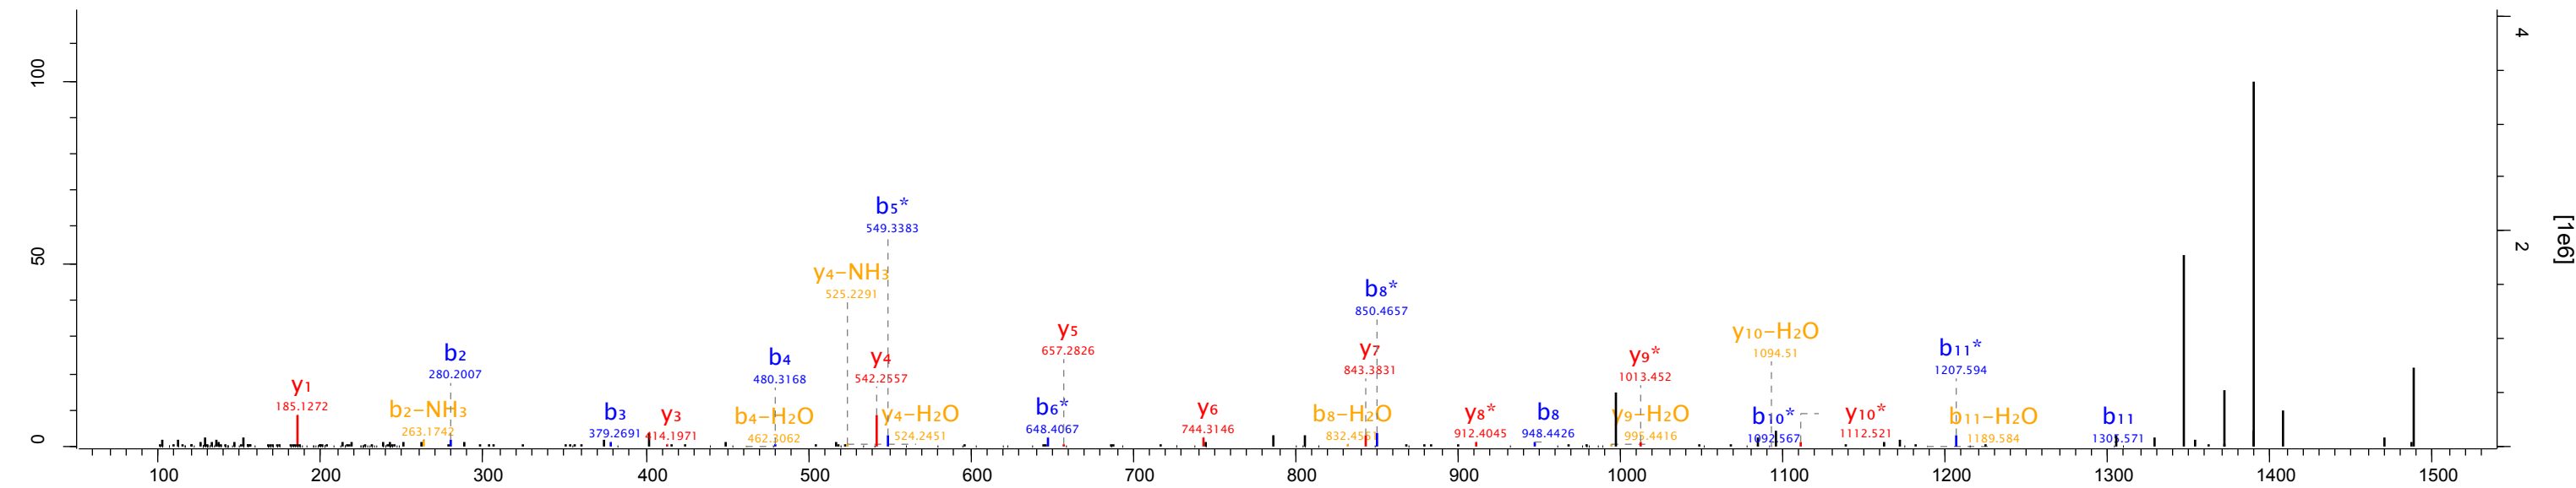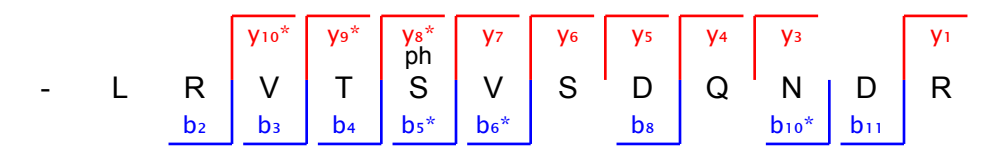

Raw file 20171215\_MaS\_33SR\_LMH\_phospho\_03 Scan 5447 Method FTMS; HCD Score 122.56 m/z 617.8

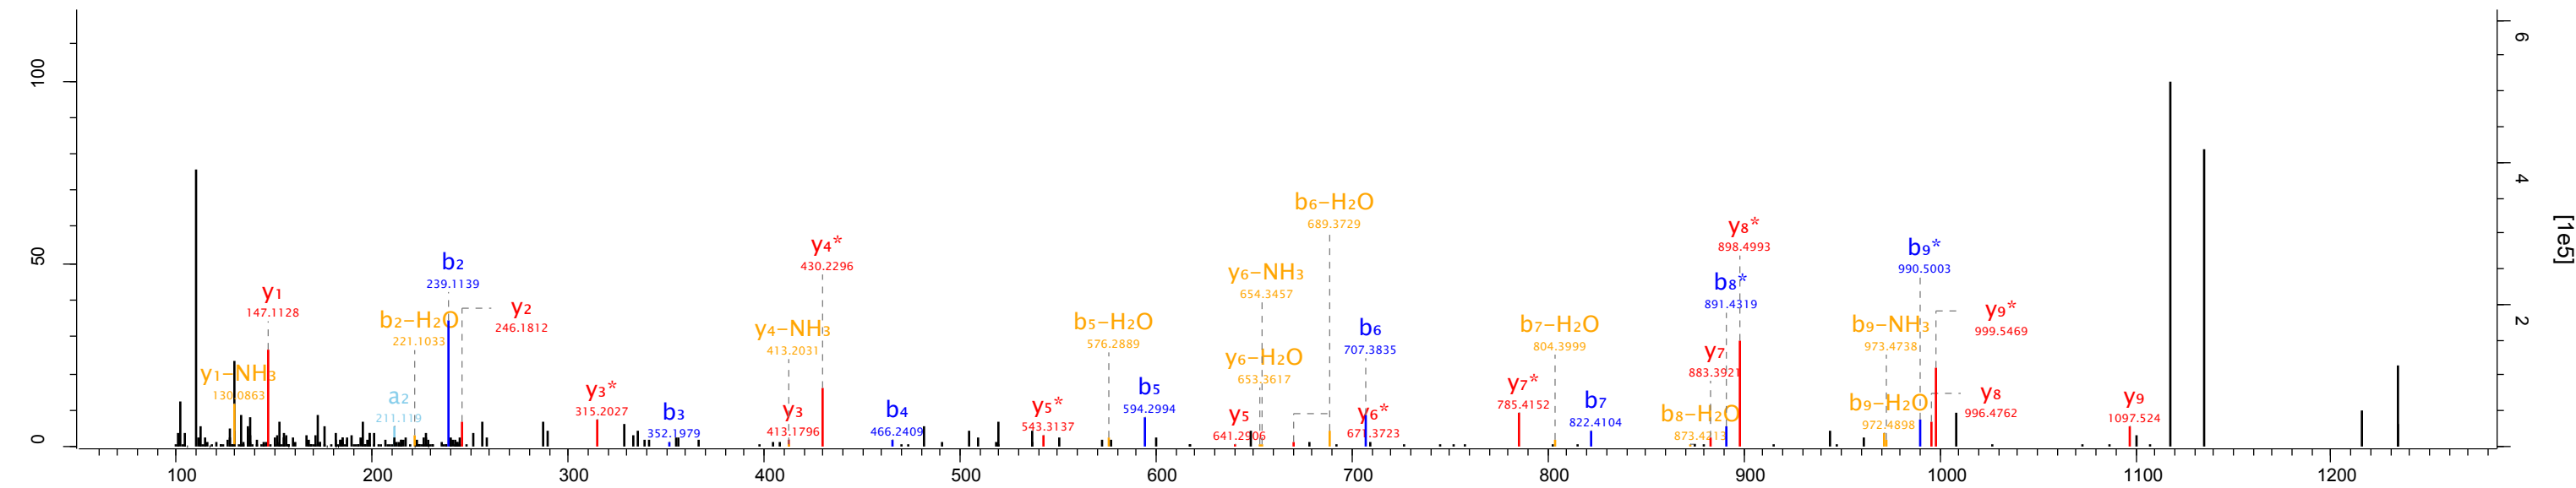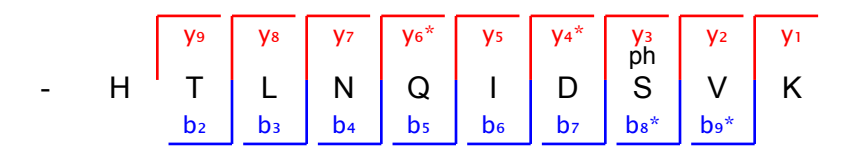

Raw file 20171215\_MaS\_33SR\_LMH\_phospho\_03 Scan 5667 Method FTMS; HCD Score 169.52 m/z 633.27 Gene names ANKS1A

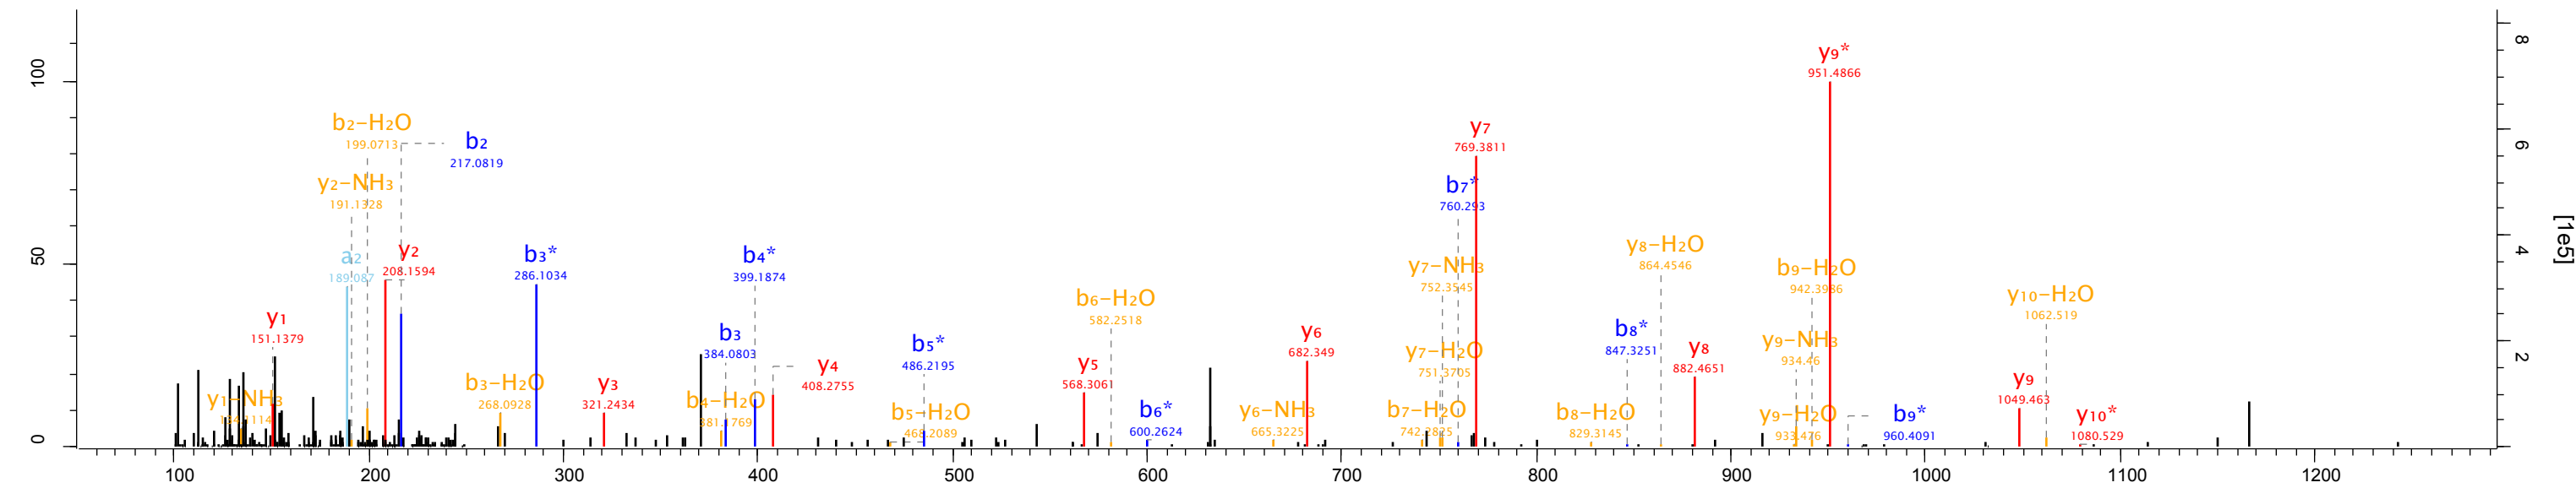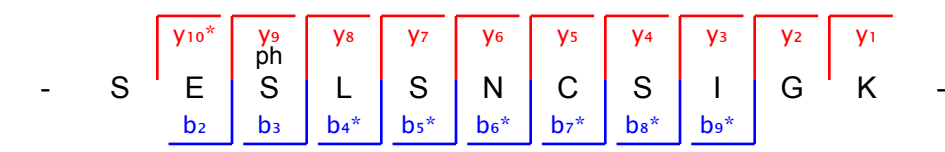

Raw file 20171215\_MaS\_33SR\_LMH\_phospho\_03 Scan 5767 Method FTMS; HCD Score 133.25 m/z 767.79 Gene names ADRM1

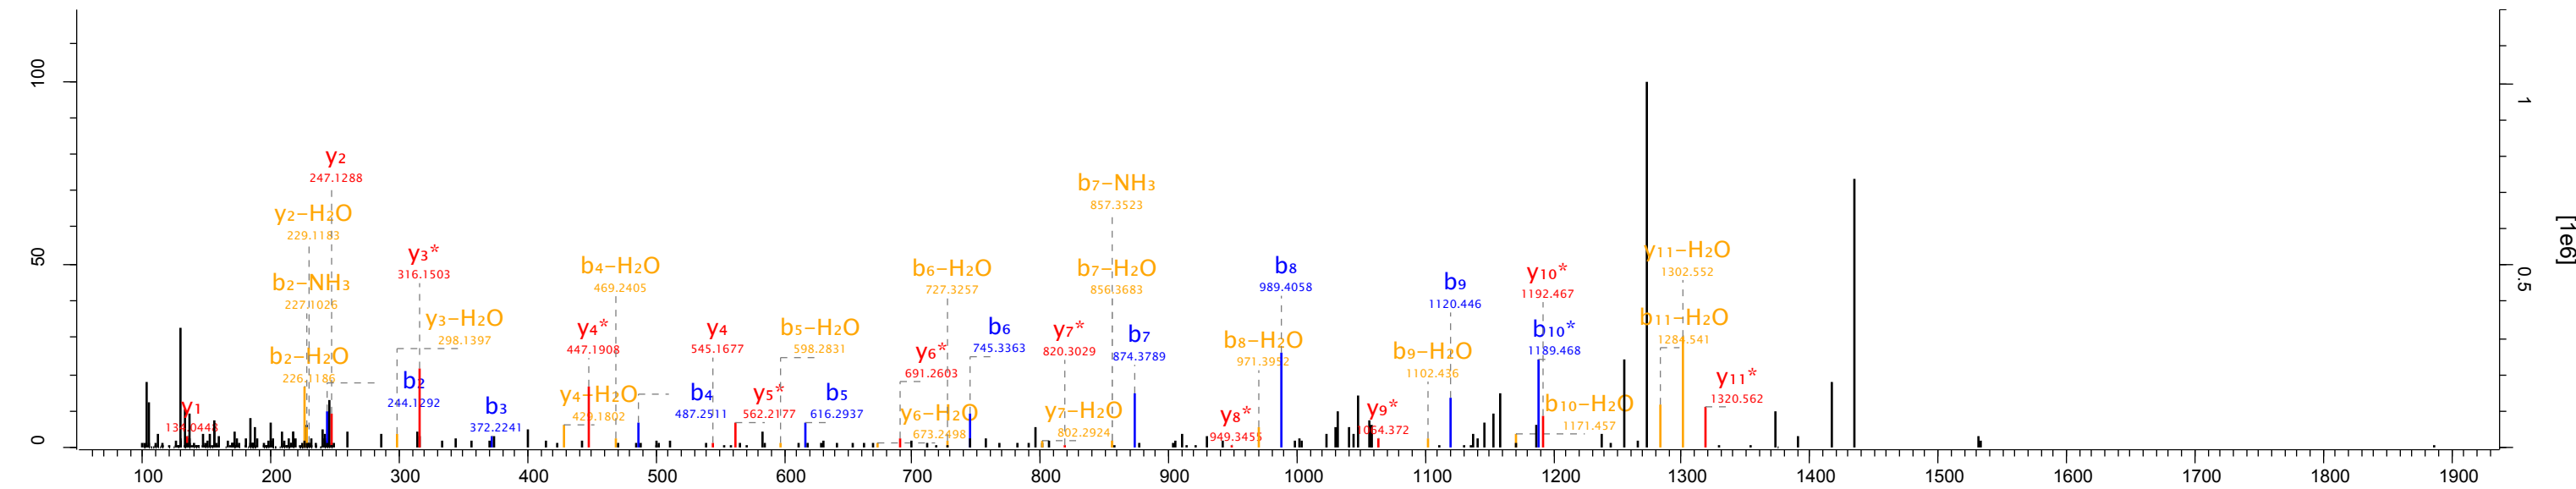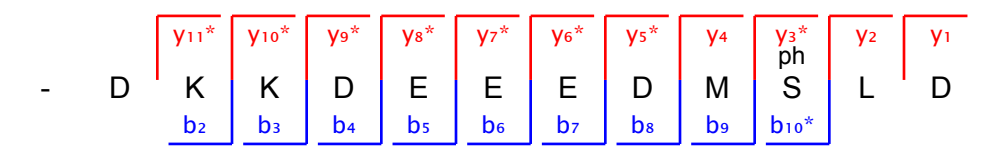



Raw file 20171215\_MaS\_33SR\_LMH\_phospho\_03 Scan 6047 Method FTMS; HCD Score 109.14 m/z 728.83 Gene names NCOA5

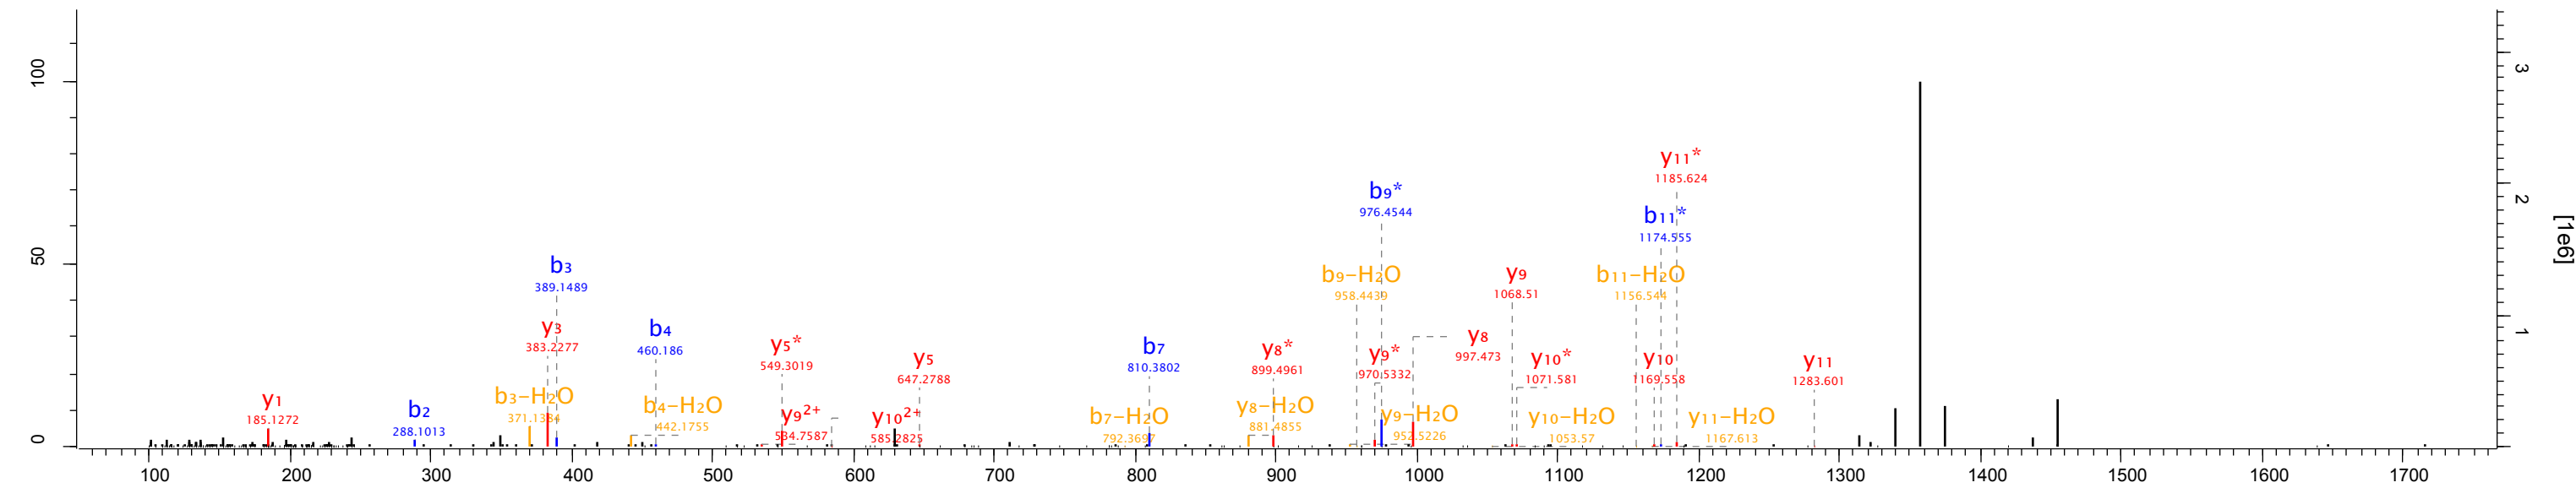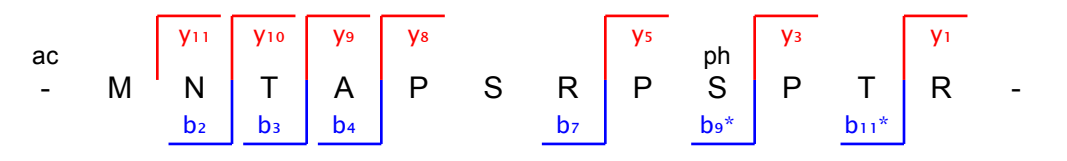

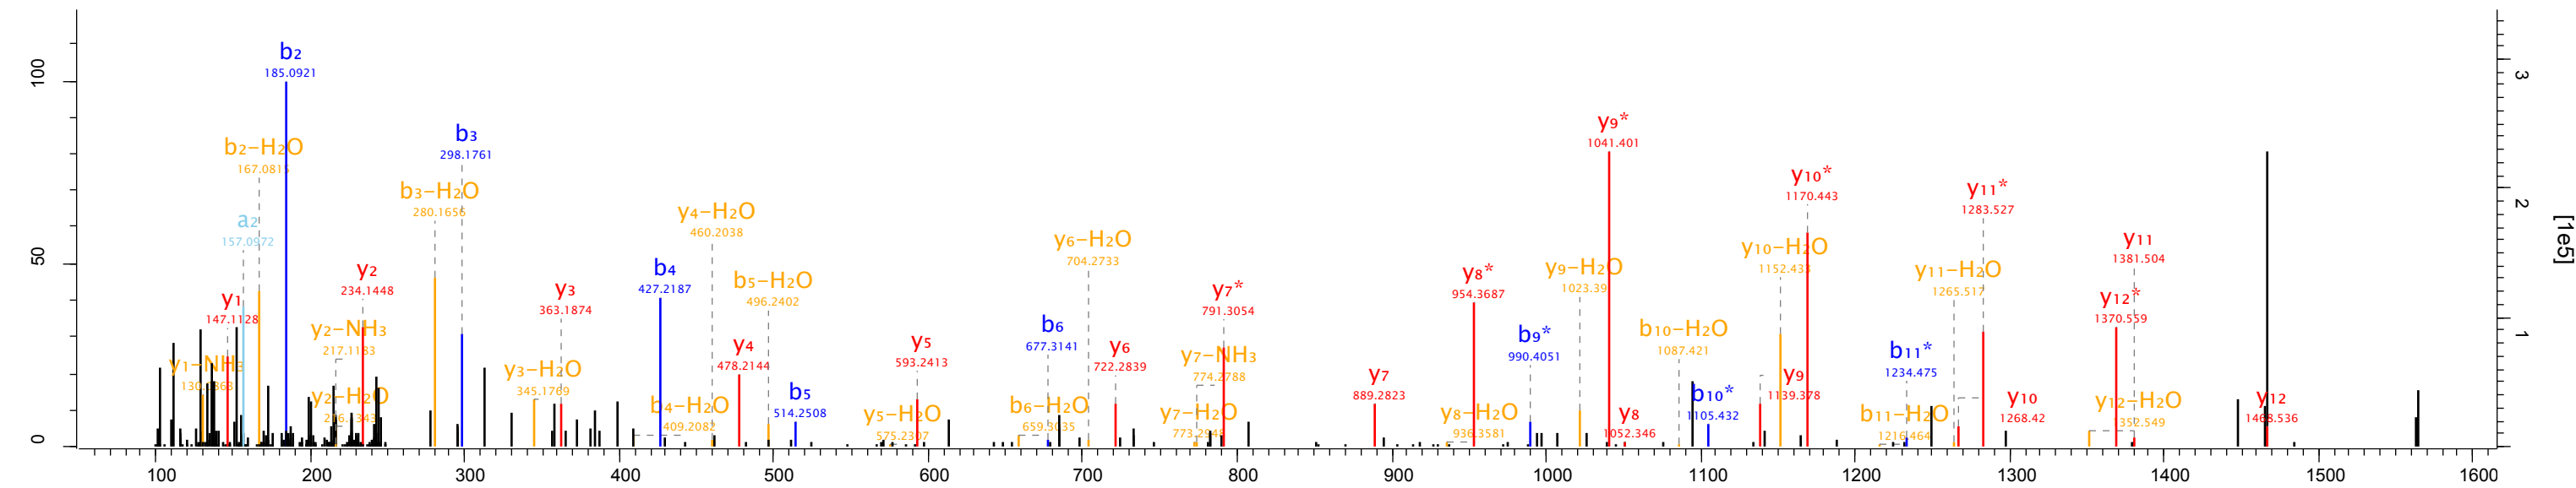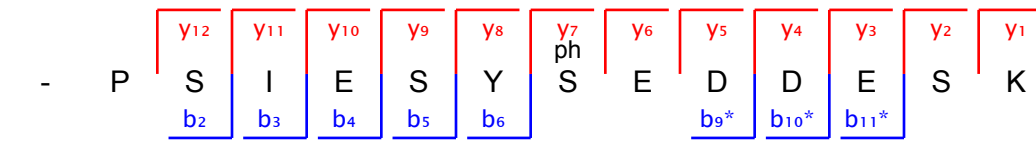

Raw file 20171215\_MaS\_33SR\_LMH\_phospho\_03 Scan 6187 Method FTMS; HCD Score 166.21 m/z 865.89 Gene names FAM21A;FAM21C

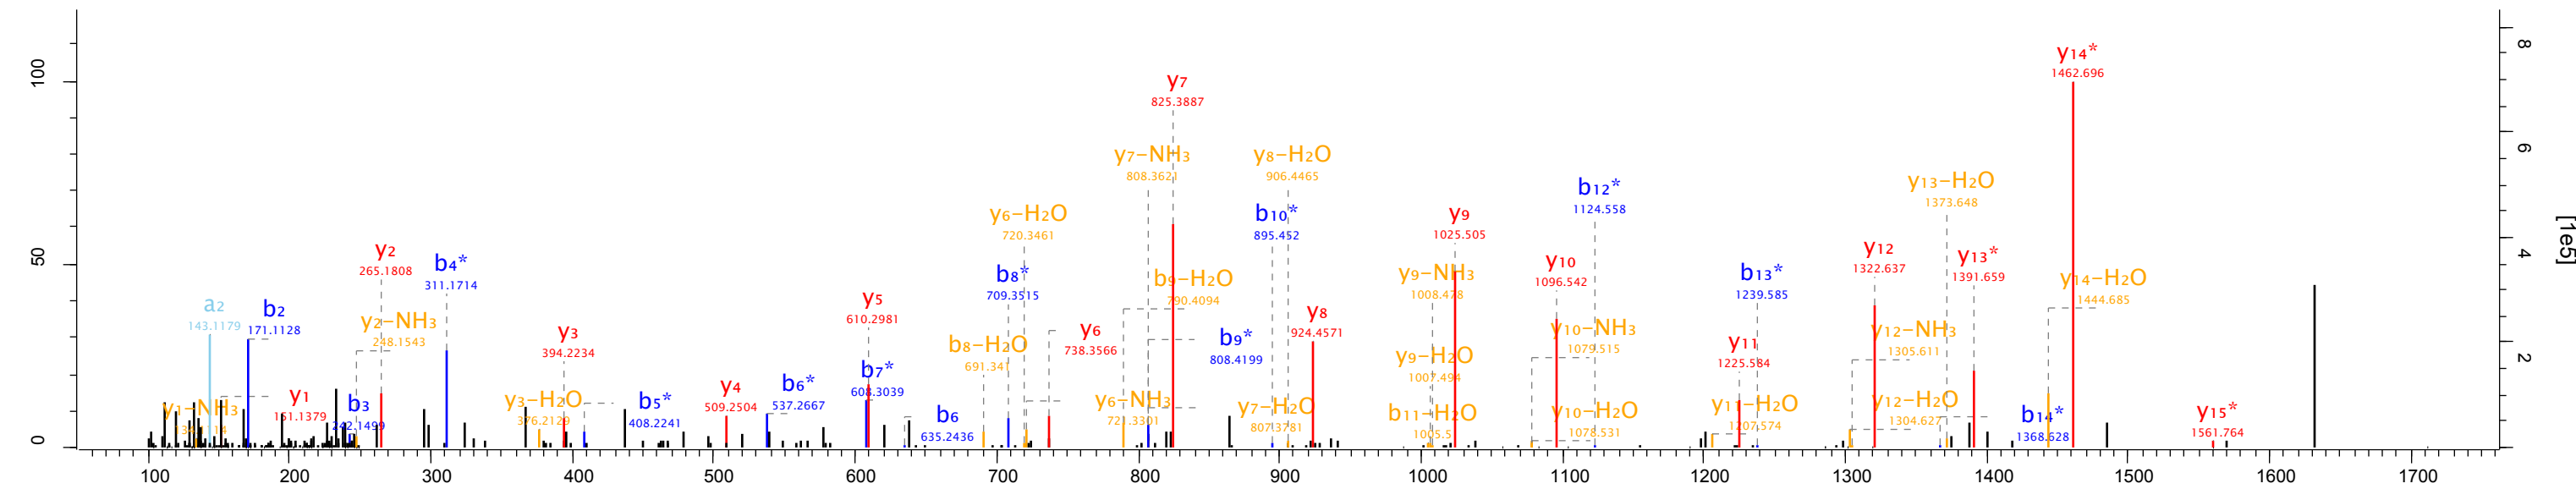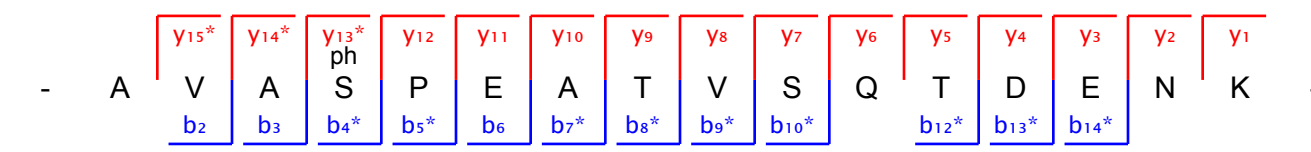

Raw file 20171215\_MaS\_33SR\_LMH\_phospho\_03 Scan 6317 Method FTMS; HCD Score 132.32 m/z 507.2 Gene names SAP30BP

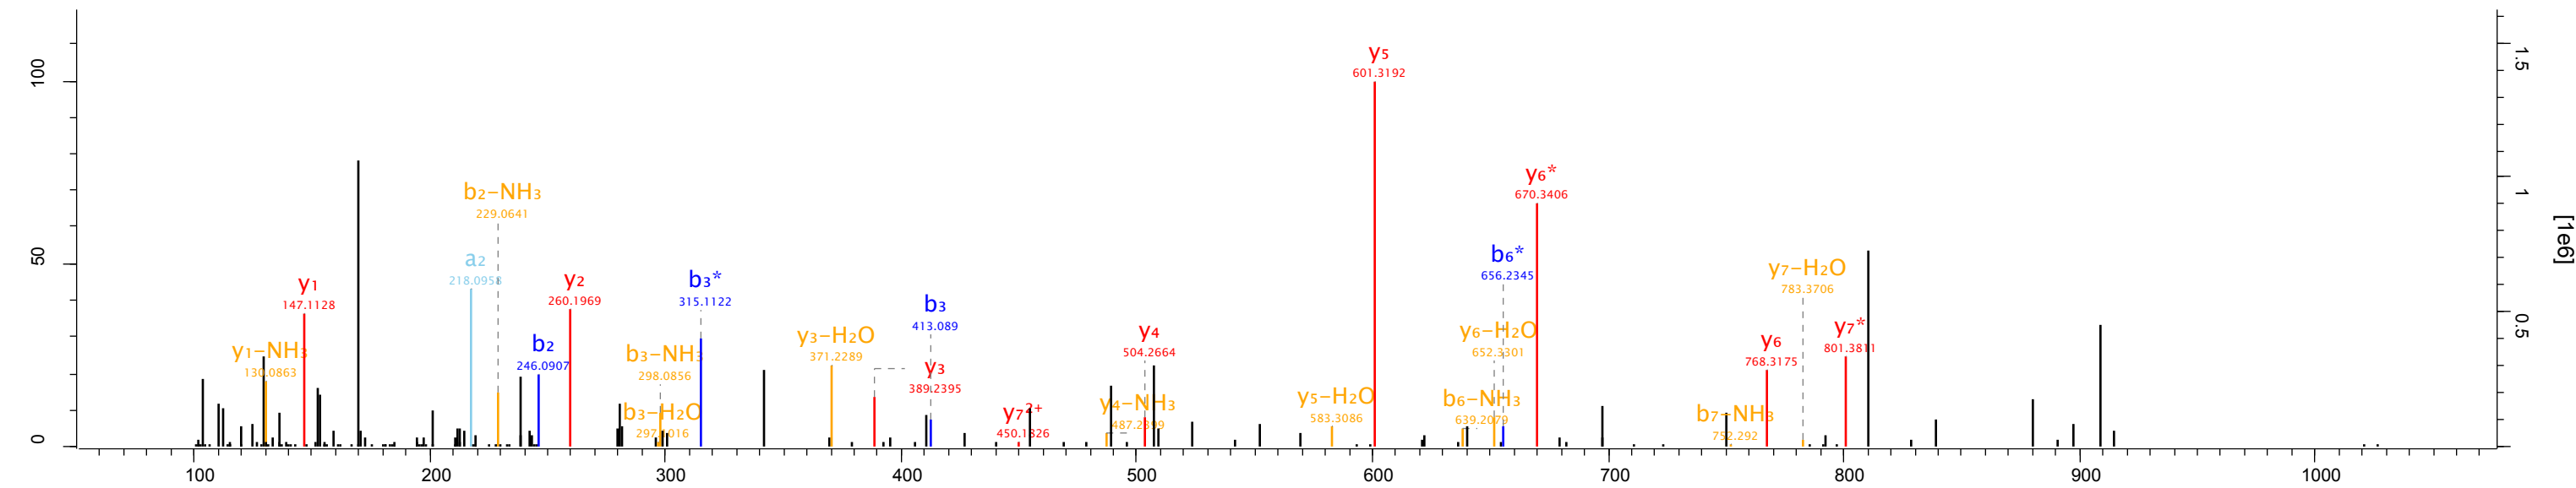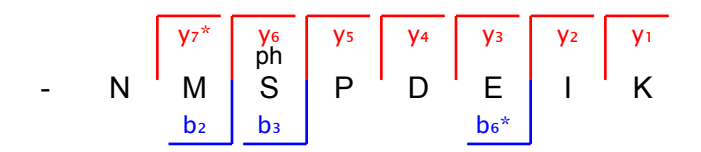

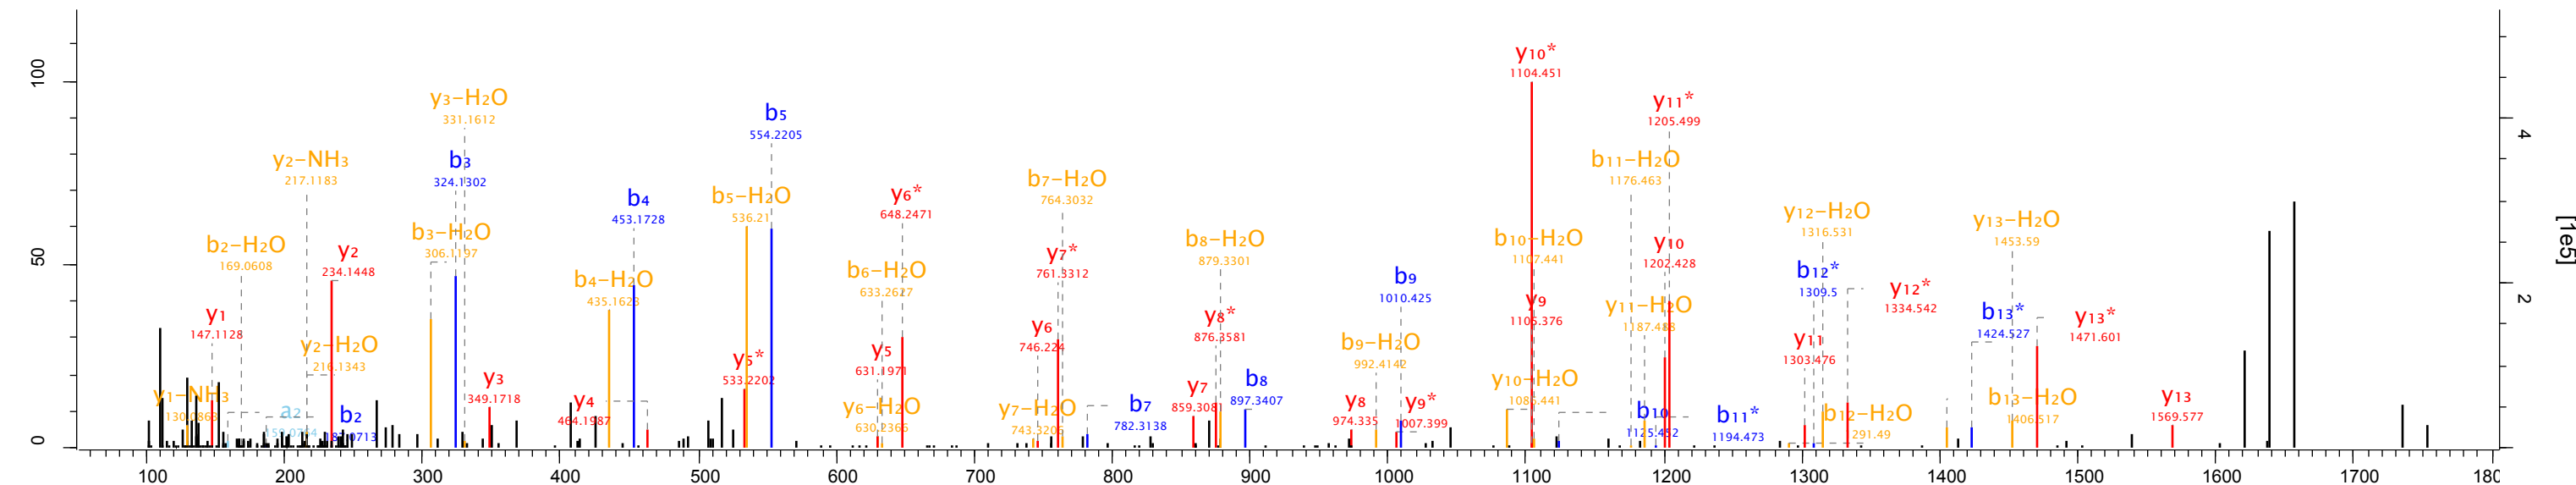

- E G H E T P M D I D S D D S K -

Fragmentation scheme showing b and y ions for the peptide sequence: E G H E T P M D I D S D D S K. The b ions (blue) are b<sub>2</sub> through b<sub>13</sub>\*, and the y ions (red) are y<sub>1</sub> through y<sub>13</sub>. The y<sub>5</sub> ion is labeled 'ph'.

Raw file 20171215\_MaS\_33SR\_LMH\_phospho\_03 Scan 6497 Method FTMS; HCD Score 221.51 m/z 915.37 Gene names ATRX

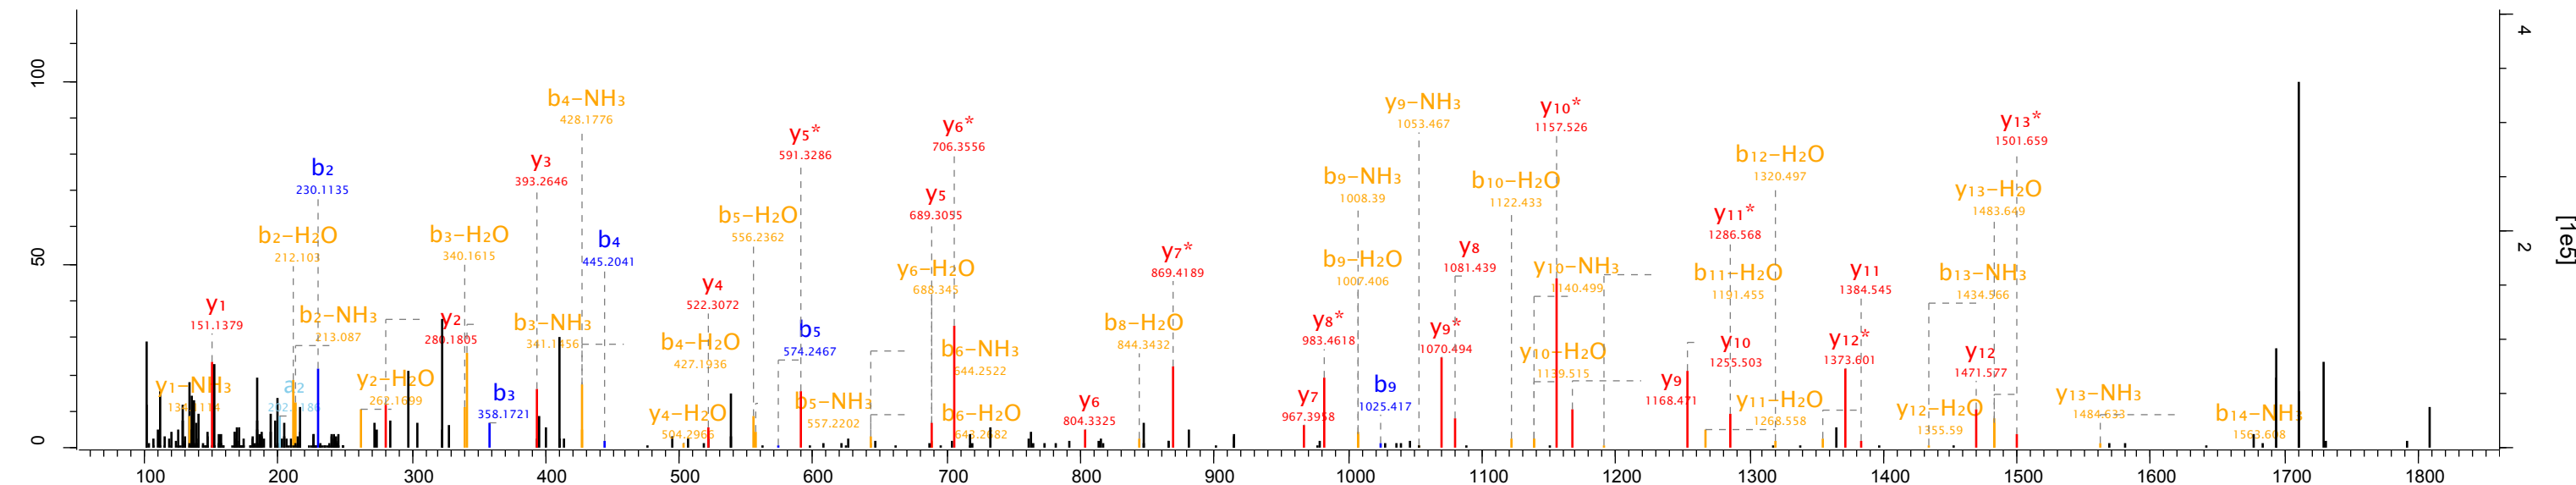

- Q T Q S E S S N Y D S E L E K -

b<sub>2</sub>
b<sub>3</sub>
b<sub>4</sub>
b<sub>5</sub>
y<sub>13</sub>\*
y<sub>12</sub>
y<sub>11</sub>
y<sub>10</sub>
y<sub>9</sub>
y<sub>8</sub>
y<sub>7</sub>
y<sub>6</sub>
y<sub>5</sub>  
ph
y<sub>4</sub>
y<sub>3</sub>
y<sub>2</sub>
y<sub>1</sub>

Raw file 20171215\_MaS\_33SR\_LMH\_phospho\_03 Scan 6797 Method FTMS; HCD Score 178.84 m/z 667.78 Gene names LARP7

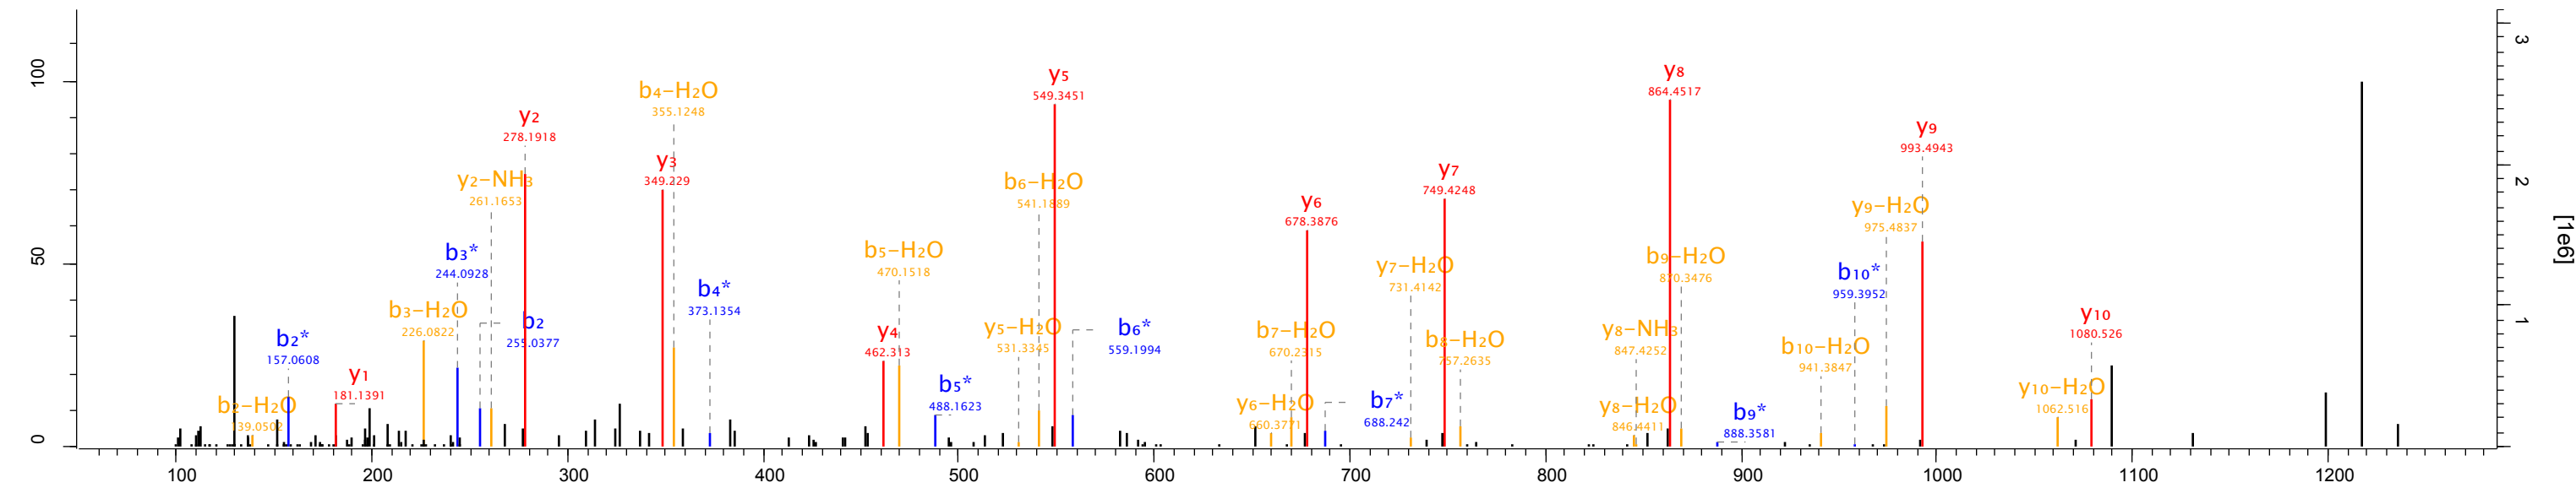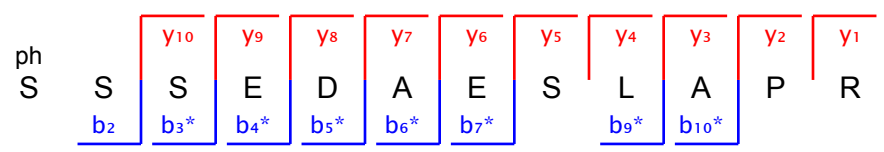

Raw file  
20171215\_MaS\_33SR\_LMH\_phospho\_03

Scan Method Score m/z Gene names  
6827 FTMS; HCD 273.52 826.32 TCP1

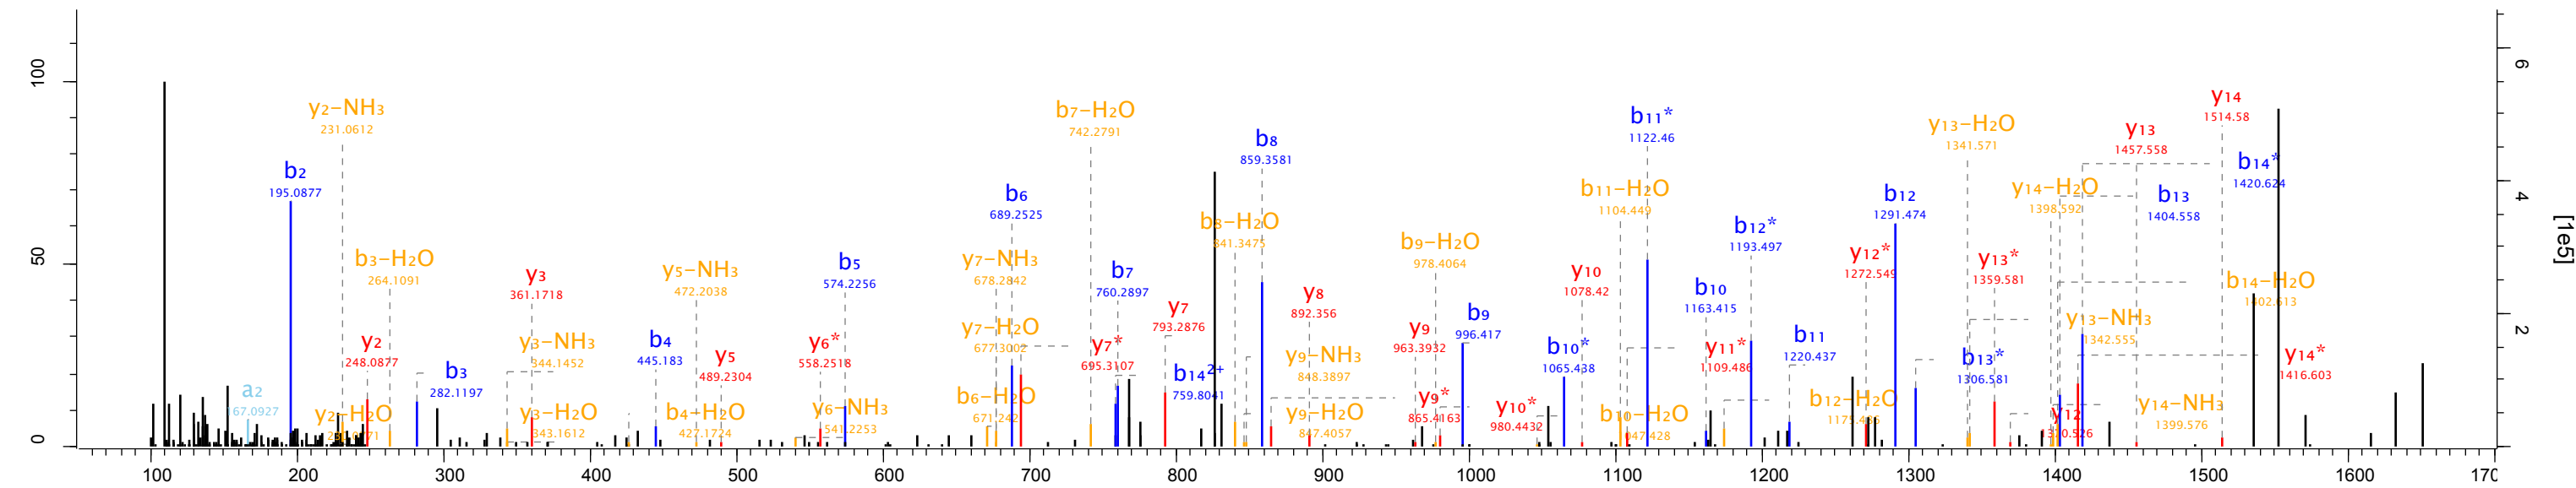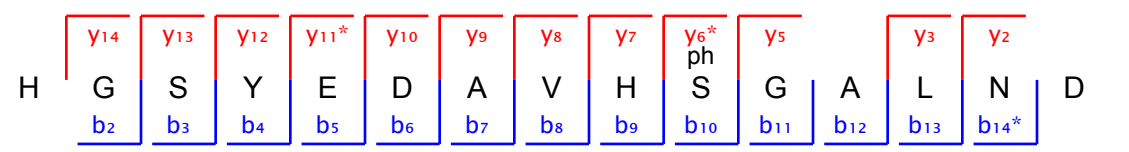



Raw file 20171215\_MaS\_33SR\_LMH\_phospho\_03 Scan 7077 Method FTMS; HCD Score 122.39 m/z 555.25 Gene names CCDC43;BAIAP2

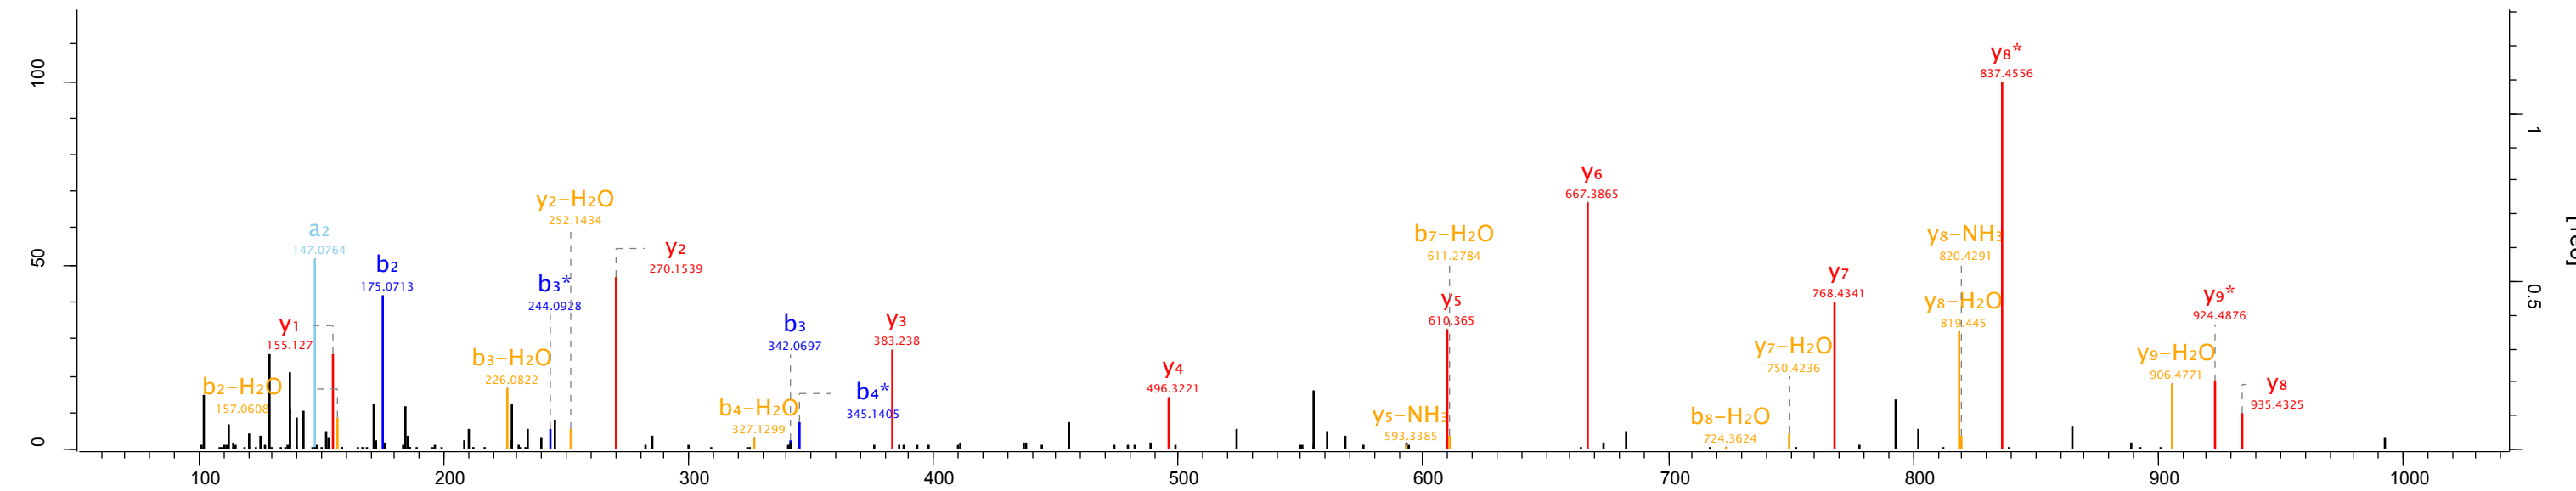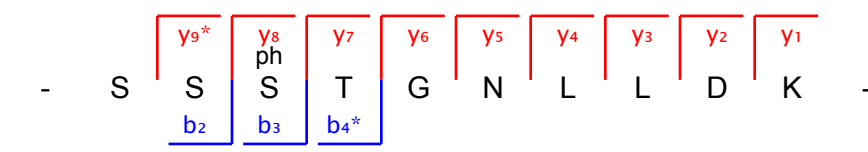

Raw file 20171215\_MaS\_33SR\_LMH\_phospho\_03 Scan 7357 Method FTMS; HCD Score 201.3 m/z 642.27 Gene names EXOSC9

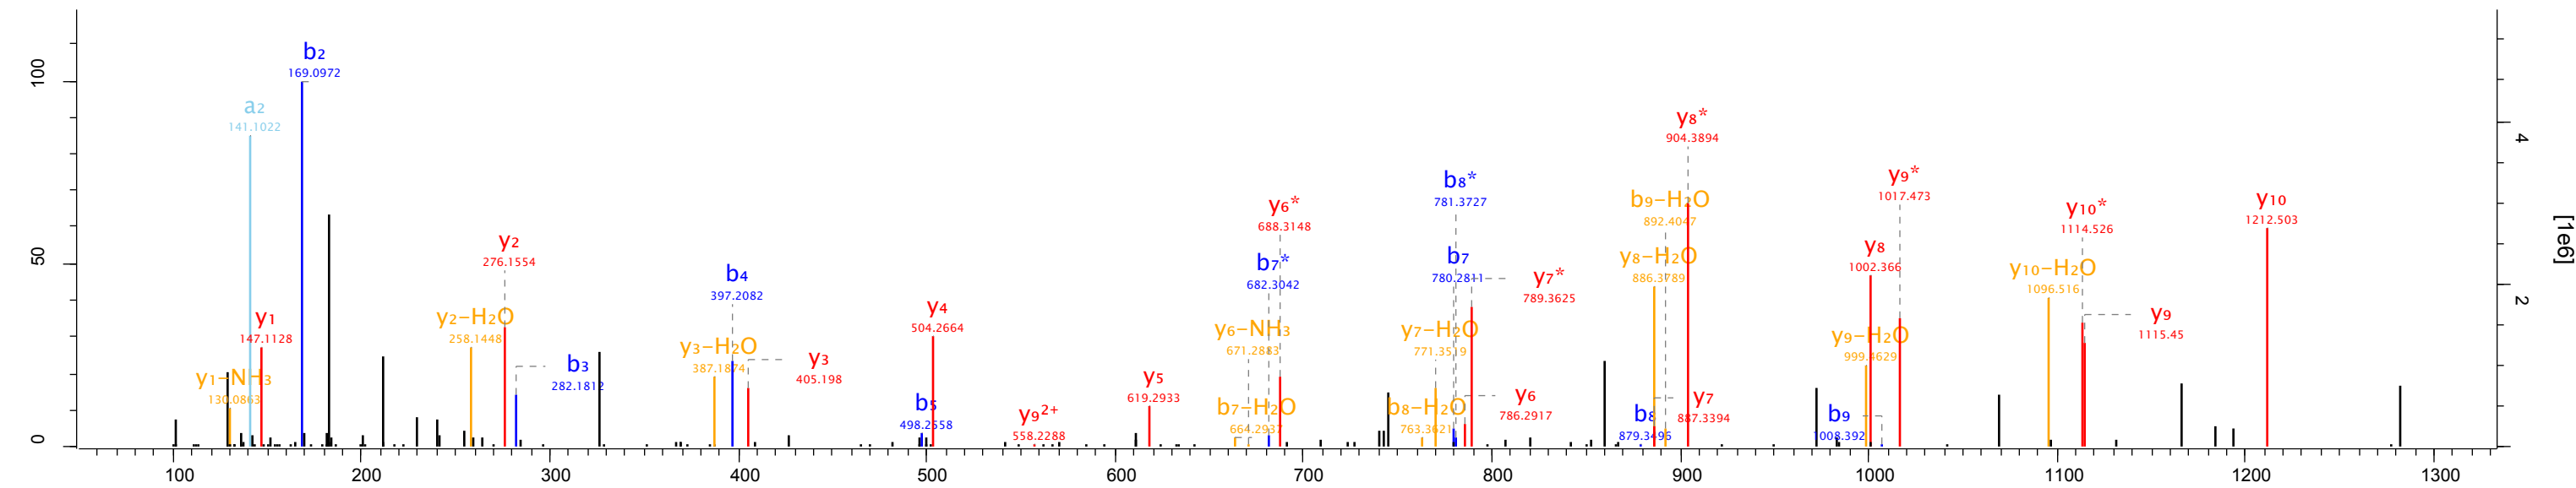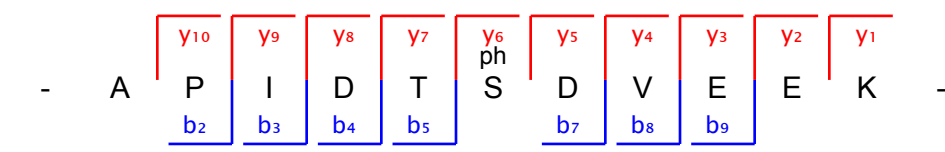

Raw file 20171215\_MaS\_33SR\_LMH\_phospho\_03 Scan 7477 Method FTMS; HCD Score 152.01 m/z 815.35 Gene names ARFGEF2

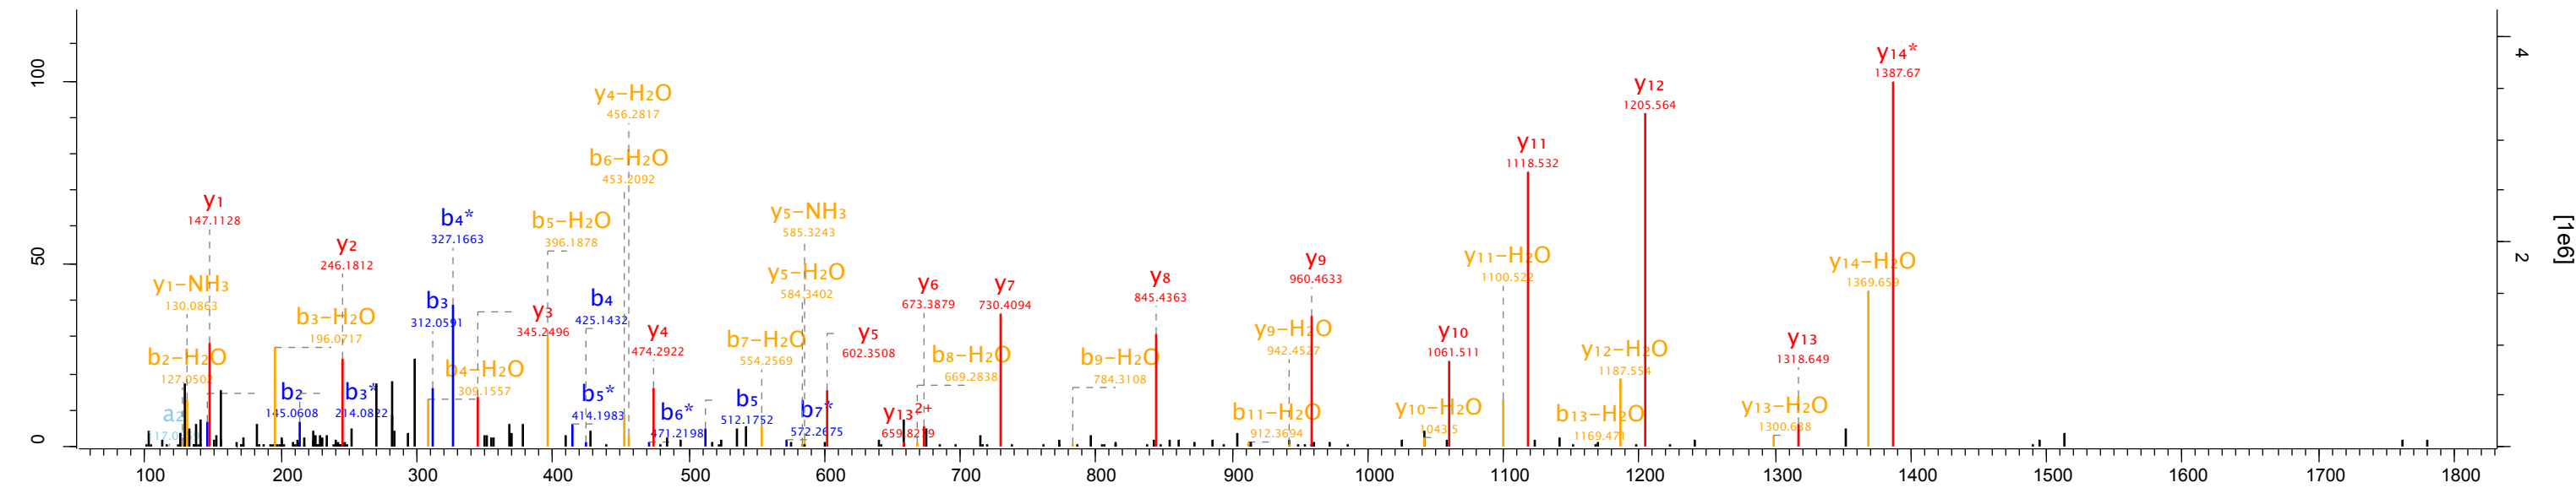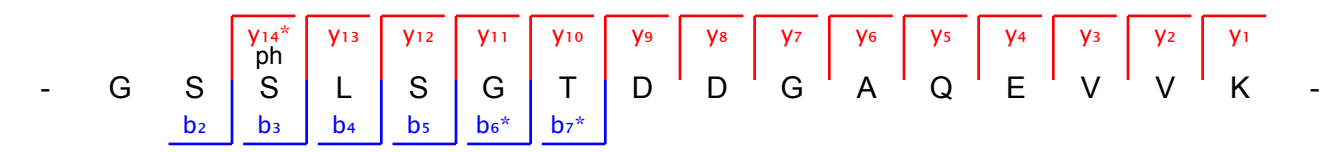

Raw file 20171215\_MaS\_33SR\_LMH\_phospho\_03 Scan 7507 Method FTMS; HCD Score 184.31 m/z 671.8 Gene names HUWE1

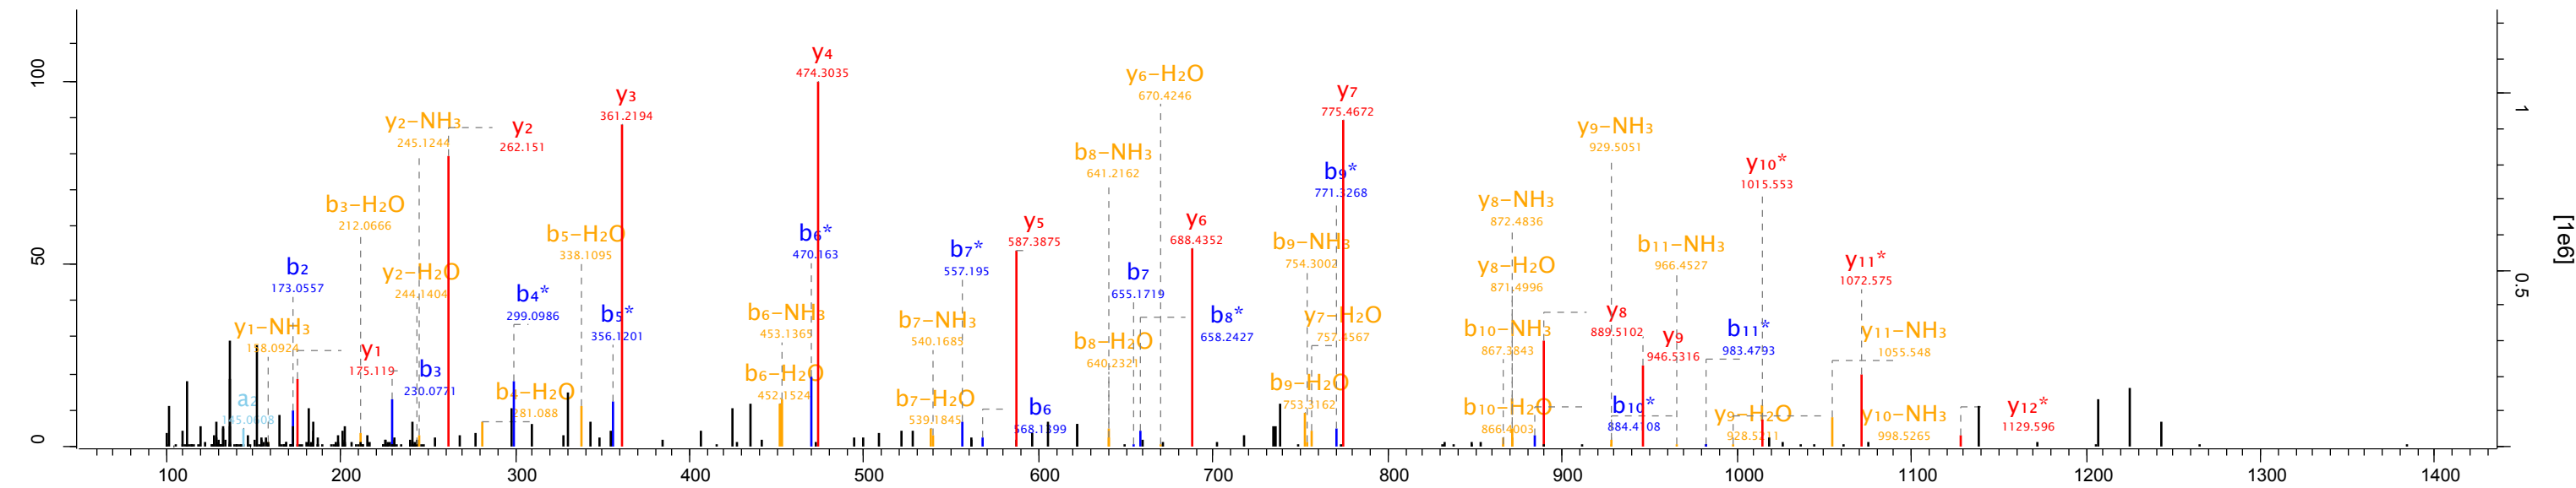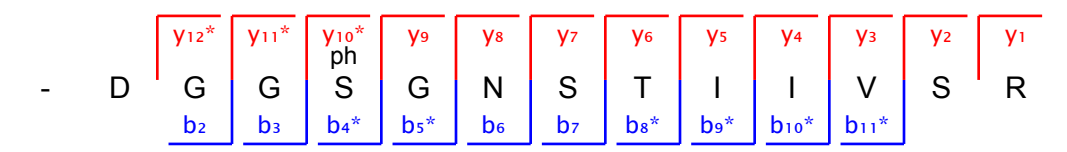

Raw file 20171215\_MaS\_33SR\_LMH\_phospho\_03 Scan 7567 Method FTMS; HCD Score 255.32 m/z 1052.5 Gene names HIST1H1B

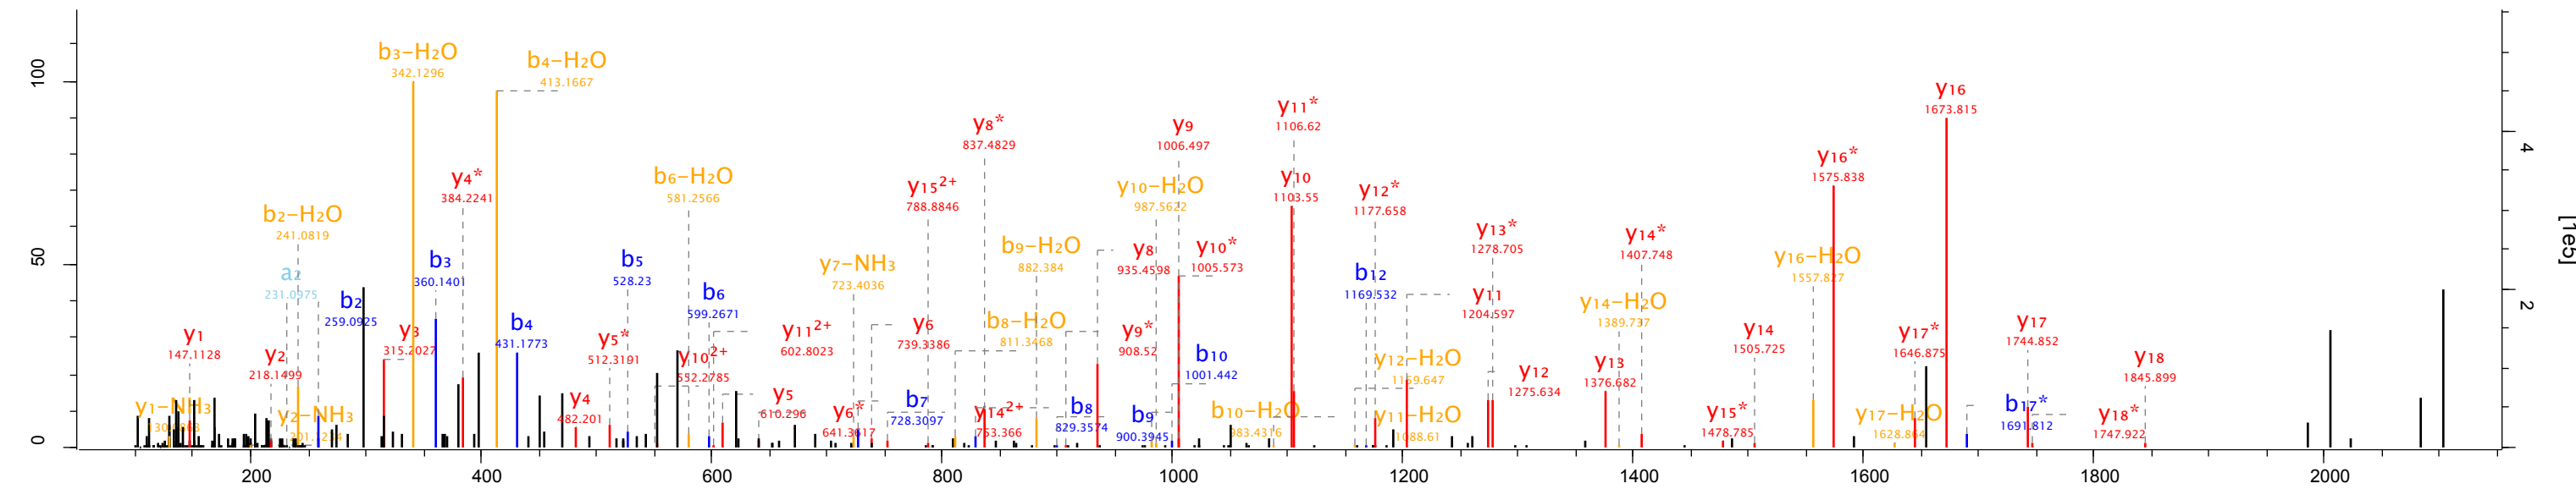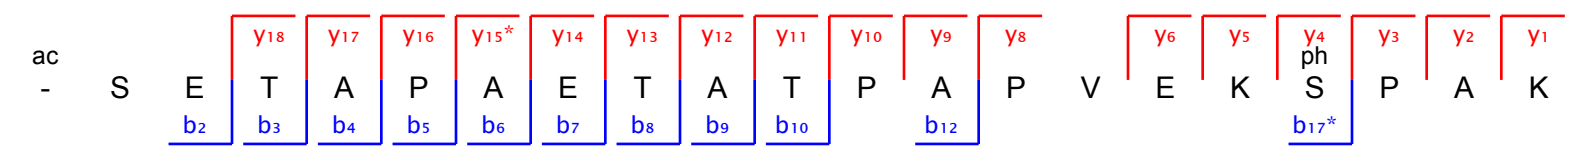

Raw file 20171215\_MaS\_33SR\_LMH\_phospho\_03 Scan 7577 Method FTMS; HCD Score 55.66 m/z 634.31 Gene names MED26

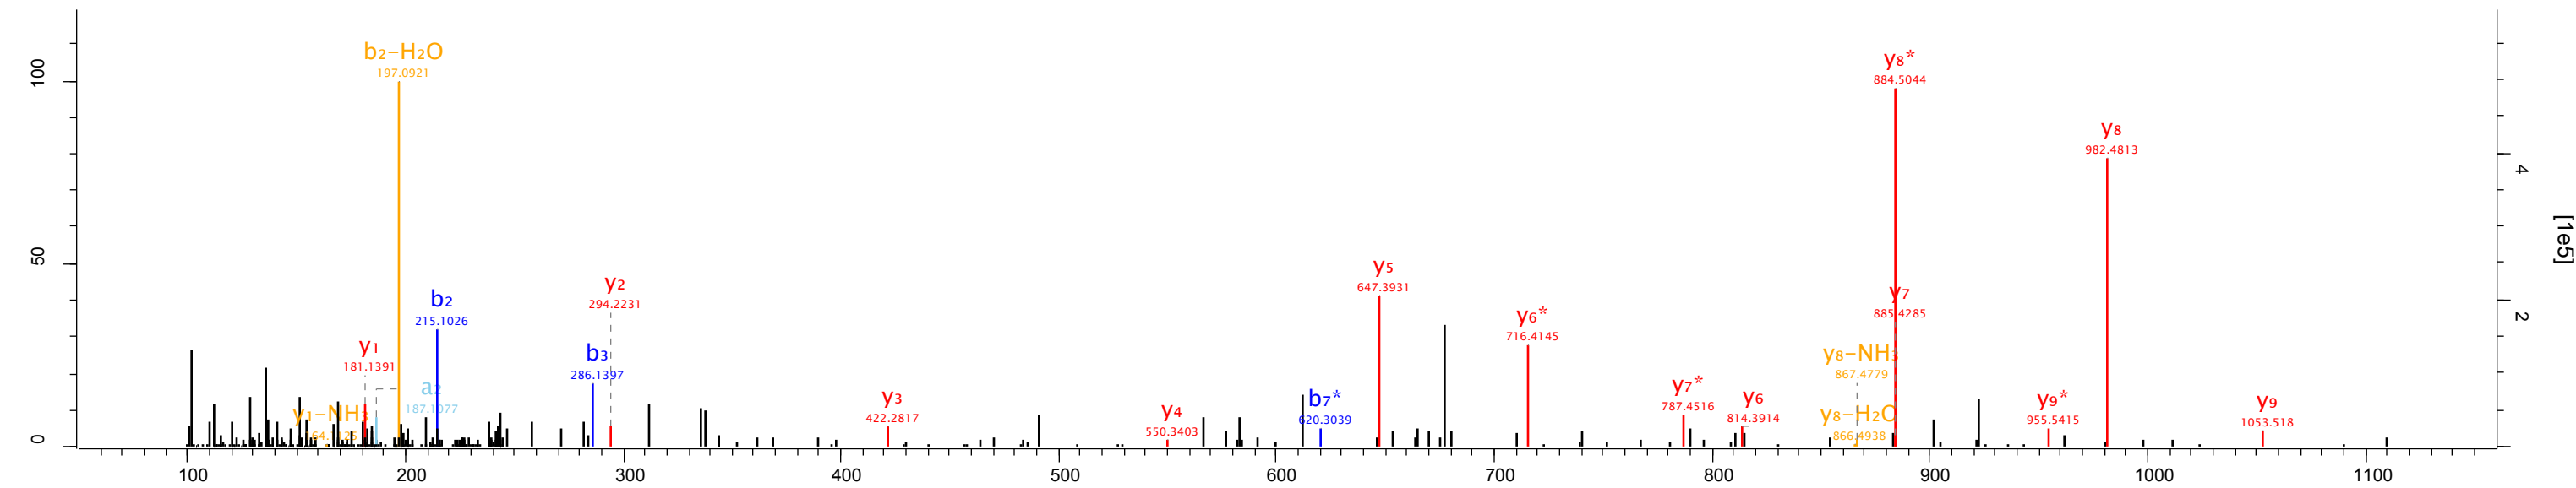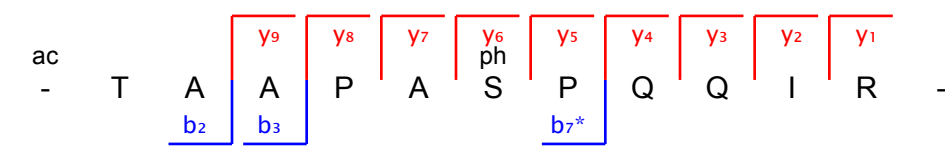

Raw file 20171215\_MaS\_33SR\_LMH\_phospho\_03 Scan 7657 Method FTMS; HCD Score 57.1 m/z 787.37 Gene names RPP25

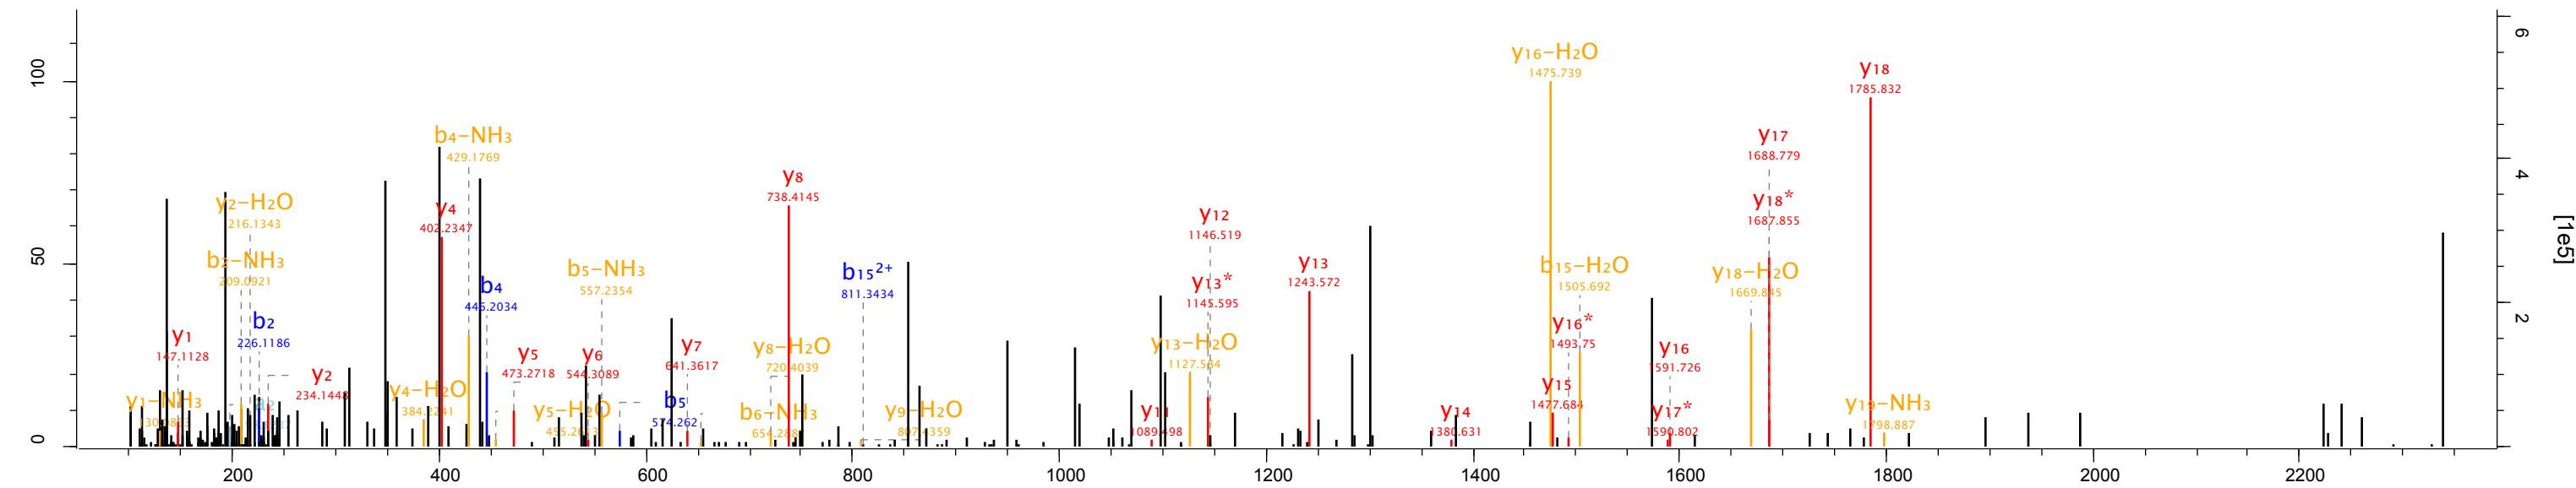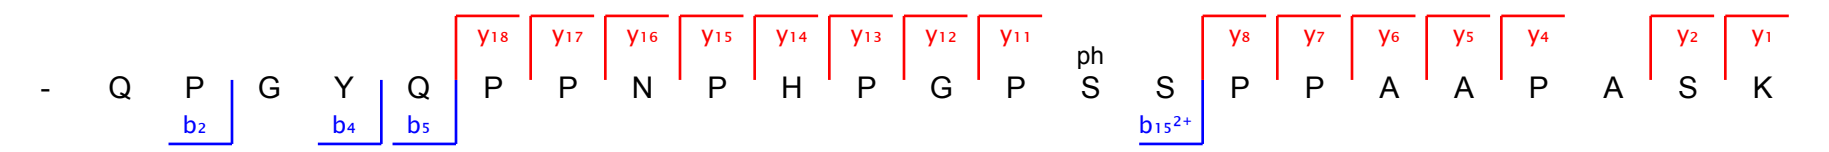

Raw file 20171215\_MaS\_33SR\_LMH\_phospho\_03 Scan 7707 Method FTMS; HCD Score 85.84 m/z 605.8 Gene names CHAMP1

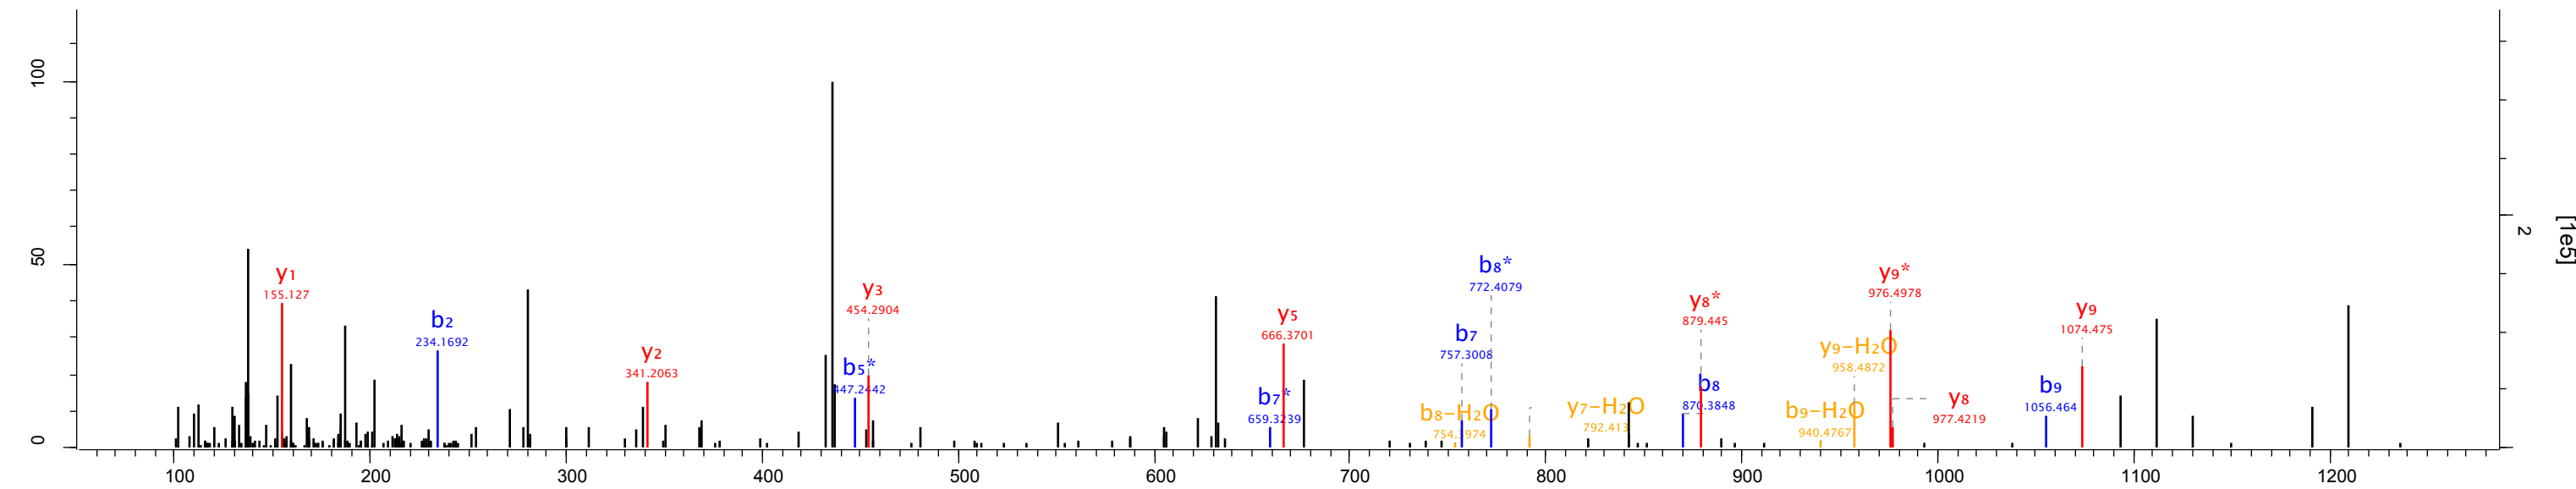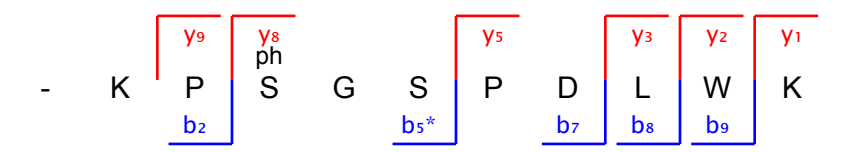



Raw file 20171215\_MaS\_33SR\_LMH\_phospho\_03 Scan 7757 Method FTMS; HCD Score 85.68 m/z 432.22 Gene names PRRC2A

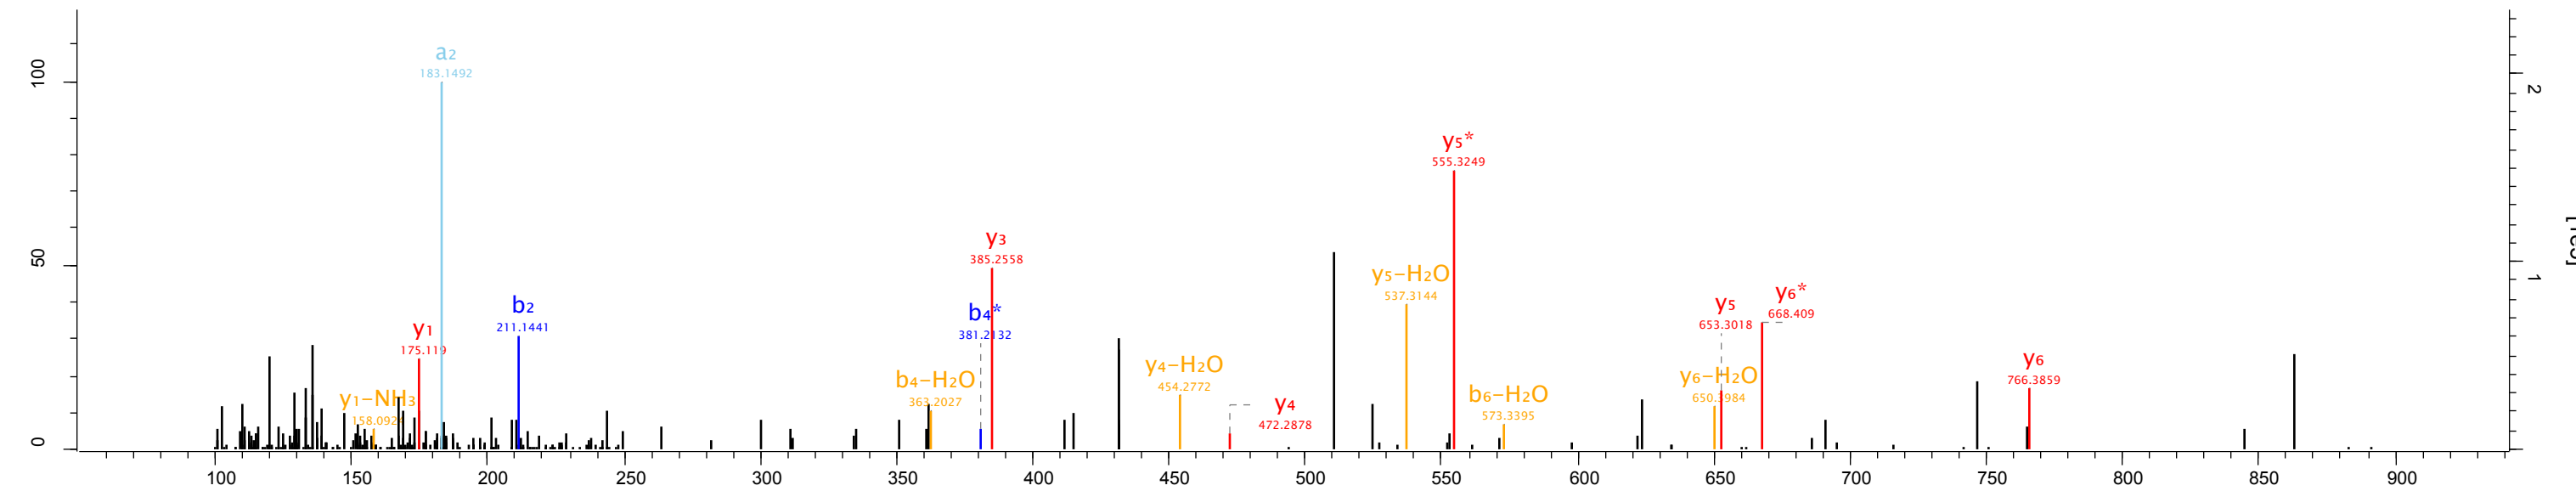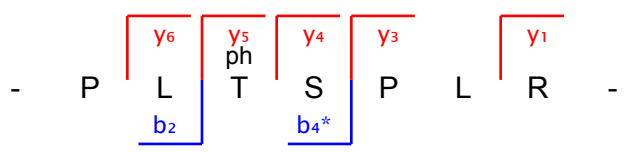

Raw file 20171215\_MaS\_33SR\_LMH\_phospho\_03 Scan 7767 Method FTMS; HCD Score 64.65 m/z 452.21 Gene names C1orf226

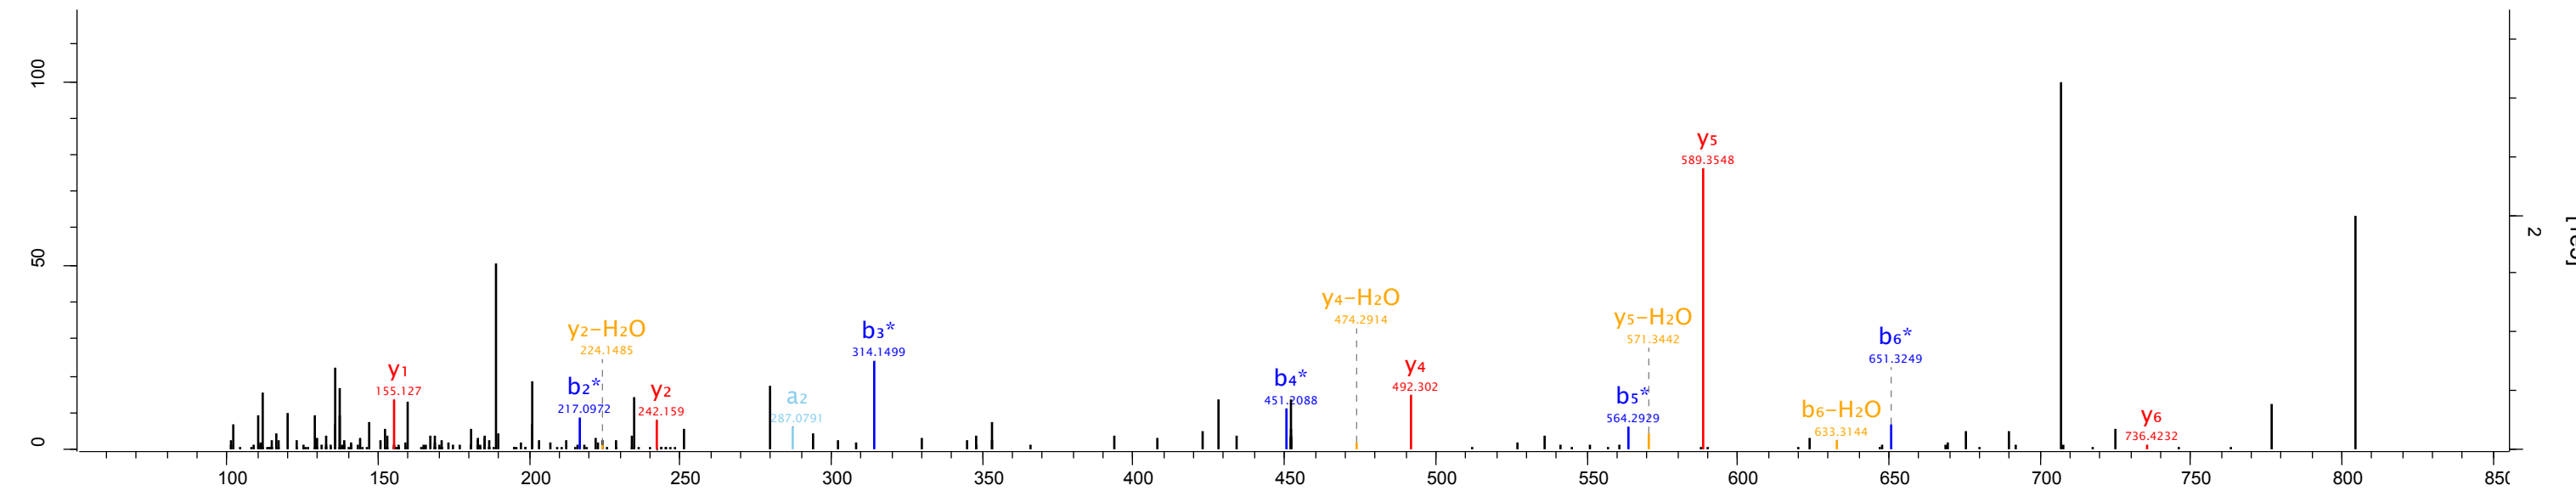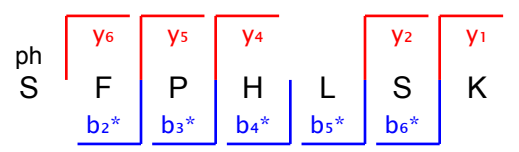

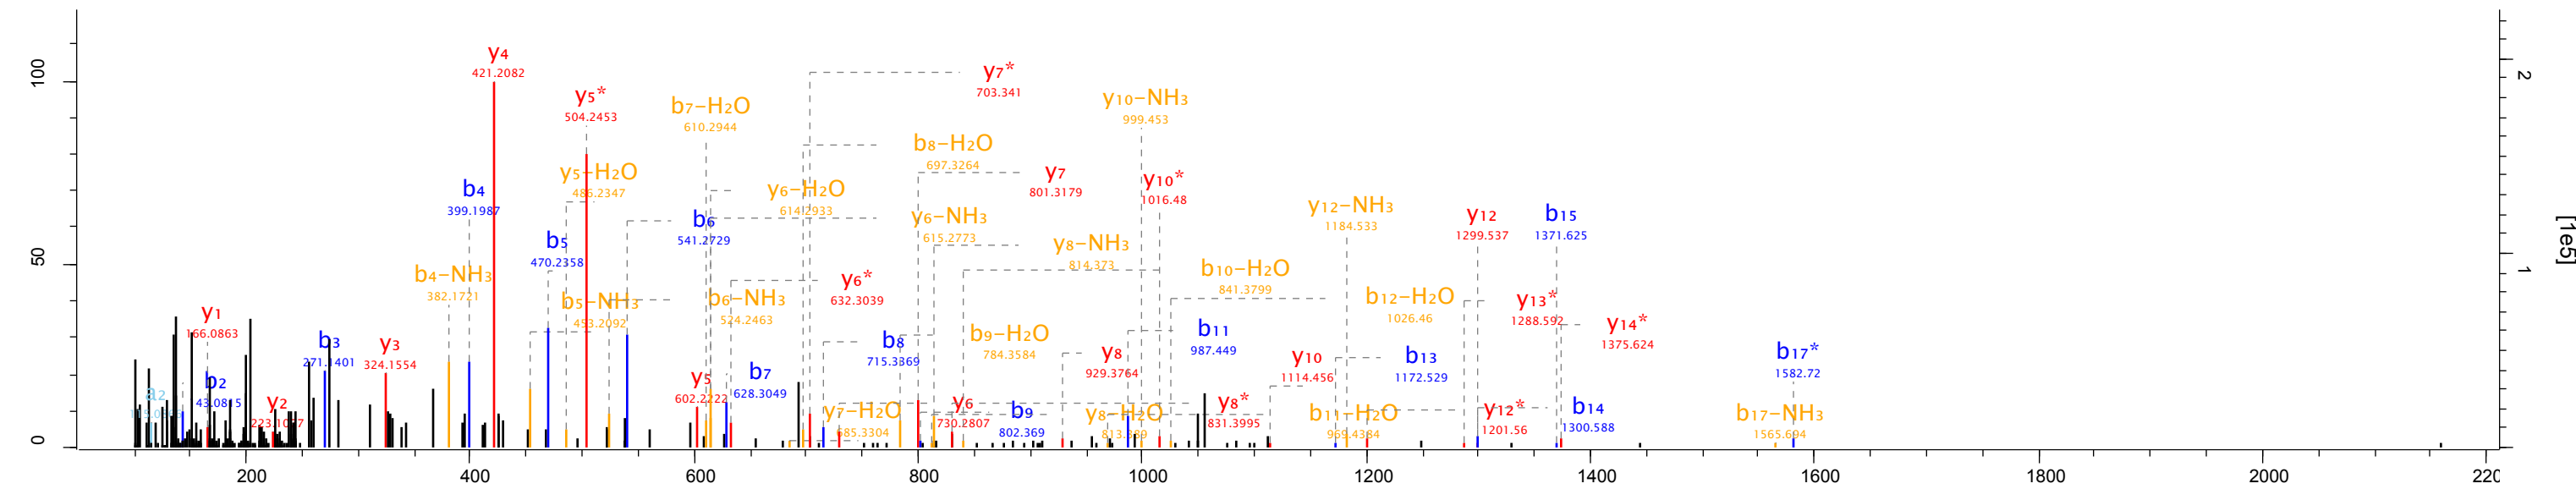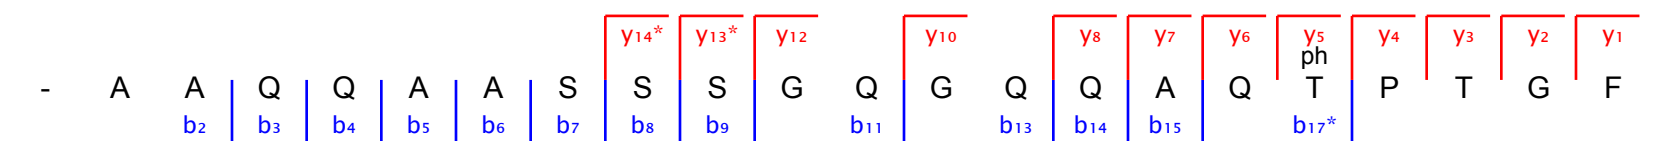

Raw file 20171215\_MaS\_33SR\_LMH\_phospho\_03 Scan 8007 Method FTMS; HCD Score 147.26 m/z 726.32 Gene names PGRMC2

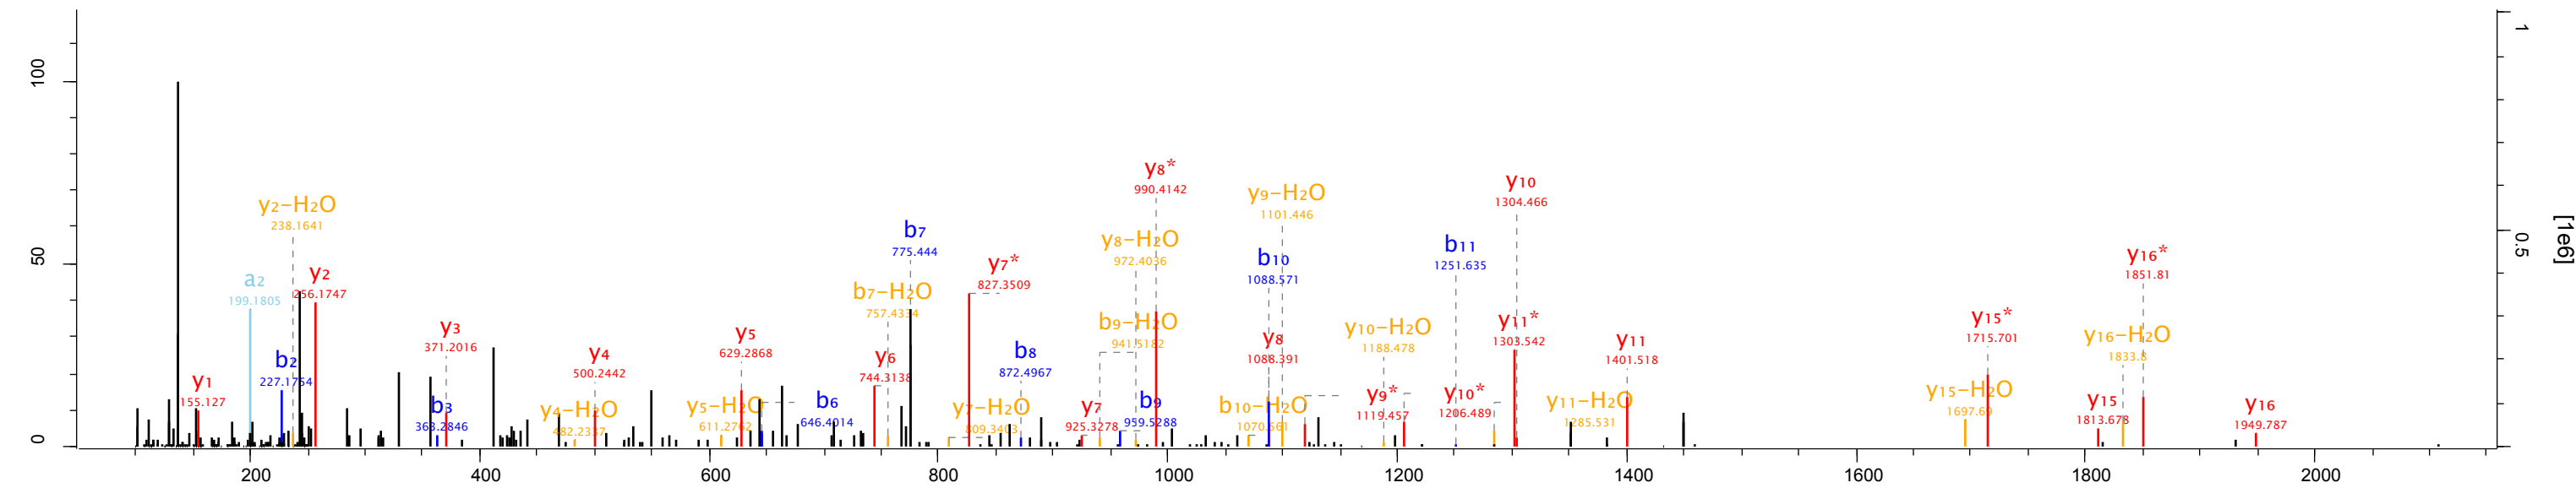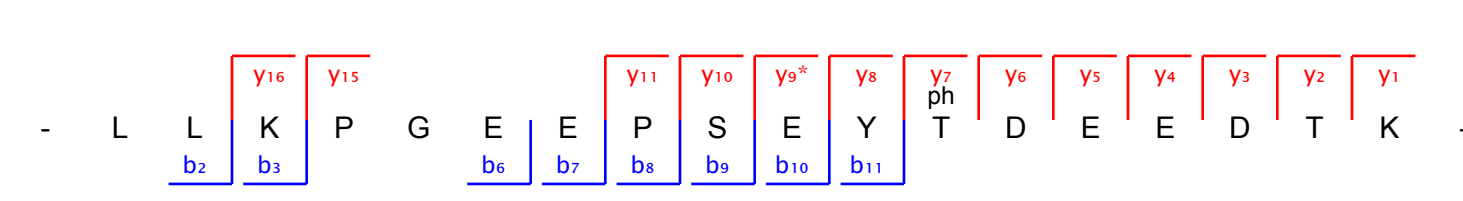

Raw file 20171215\_MaS\_33SR\_LMH\_phospho\_03 Scan 8217 Method FTMS; HCD Score 102.63 m/z 678.32 Gene names C11orf84

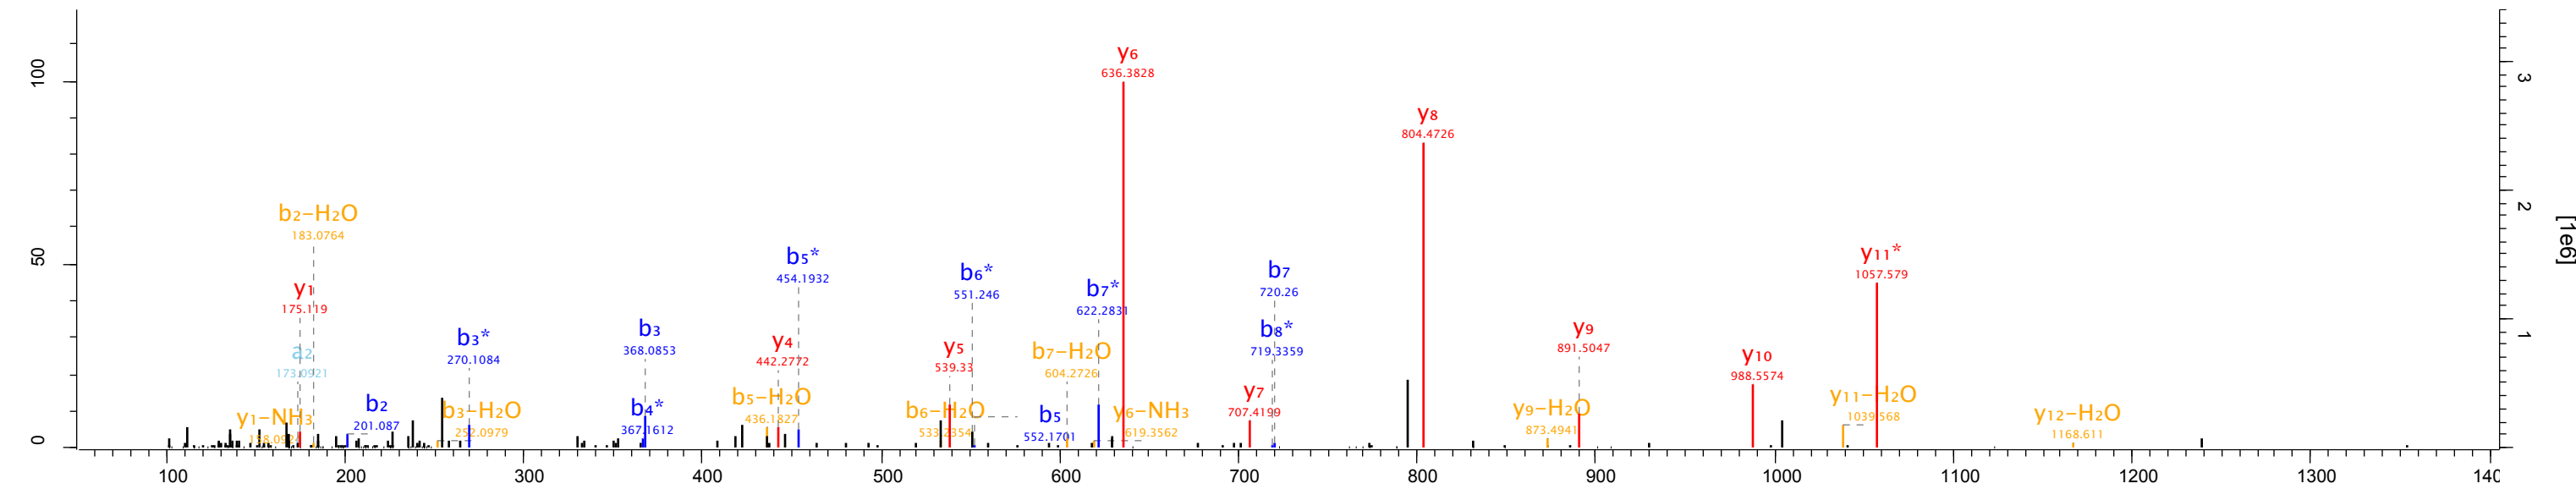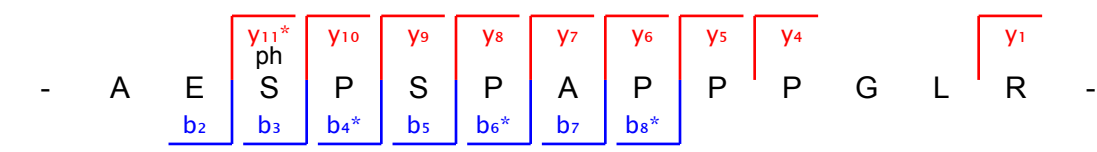

Raw file 20171215\_MaS\_33SR\_LMH\_phospho\_03 Scan 8527 Method FTMS; HCD Score 106.86 m/z 877.9 Gene names FOXK2

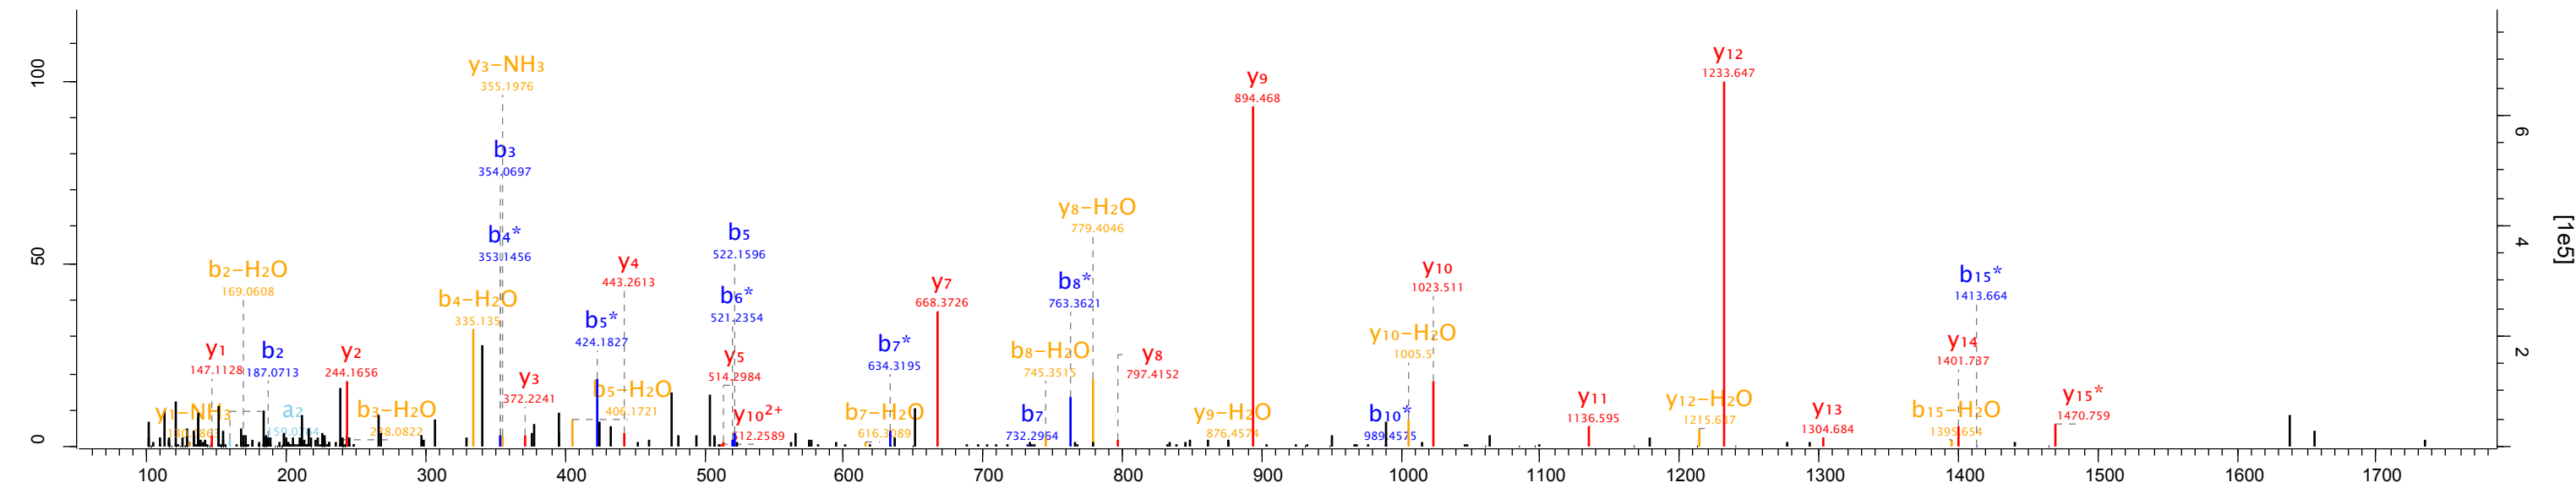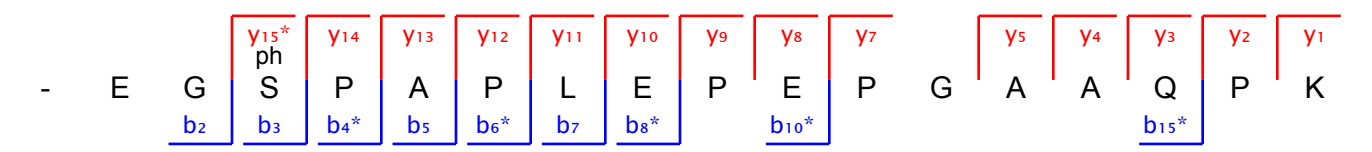

Raw file 20171215\_MaS\_33SR\_LMH\_phospho\_03 Scan 8597 Method FTMS; HCD Score 58.8 m/z 984.89 Gene names NUDT11;NUDT10

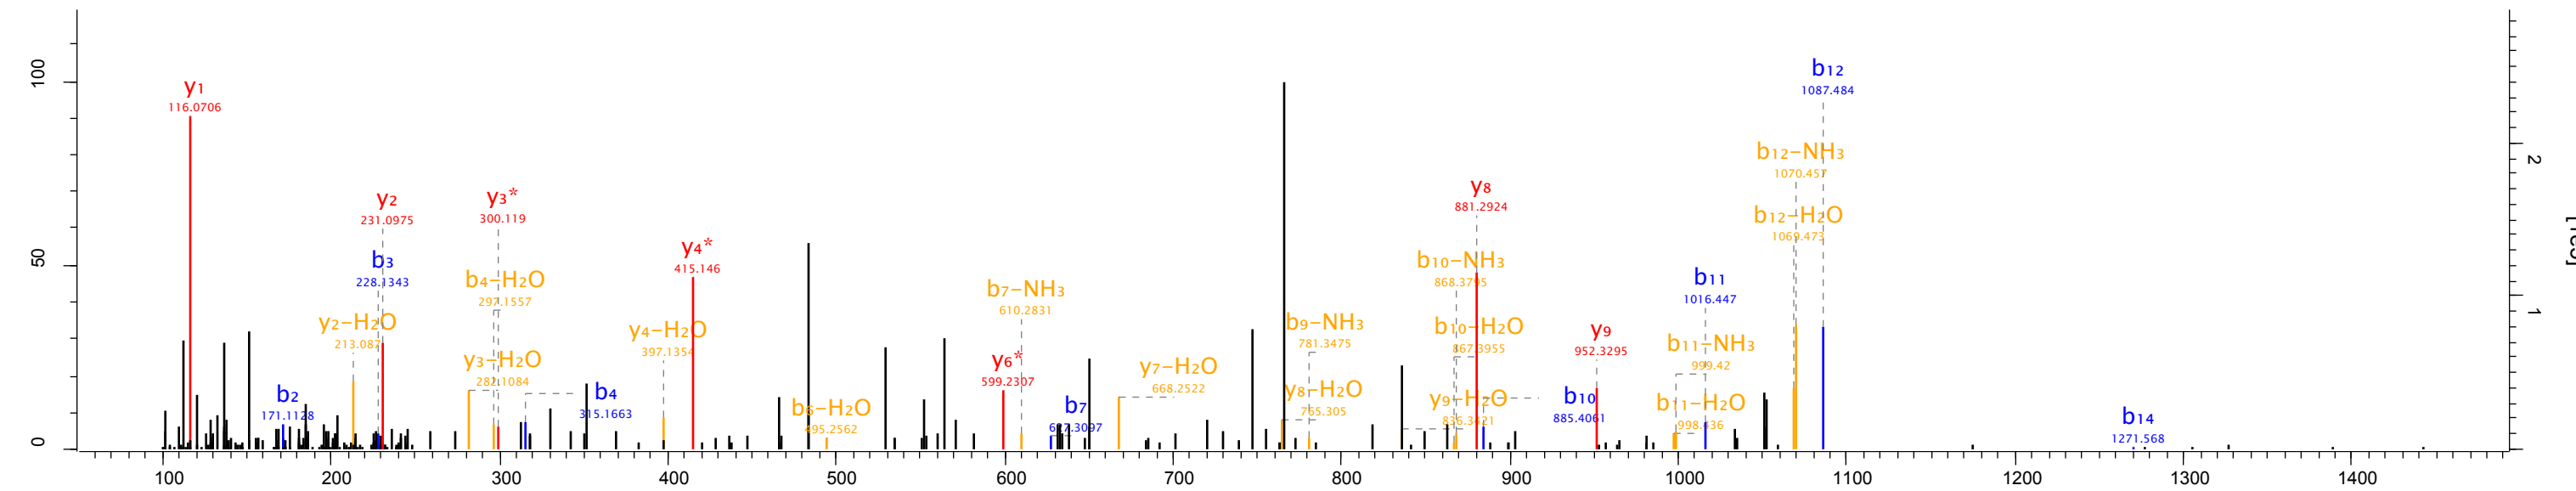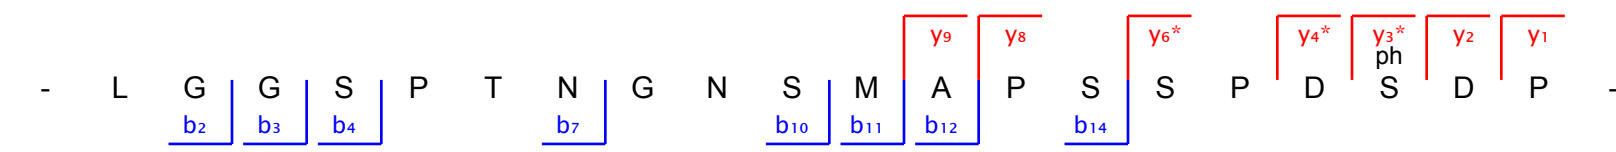

Raw file 20171215\_MaS\_33SR\_LMH\_phospho\_03 Scan 8637 Method FTMS; HCD Score 114.55 m/z 925.86 Gene names KDM4A

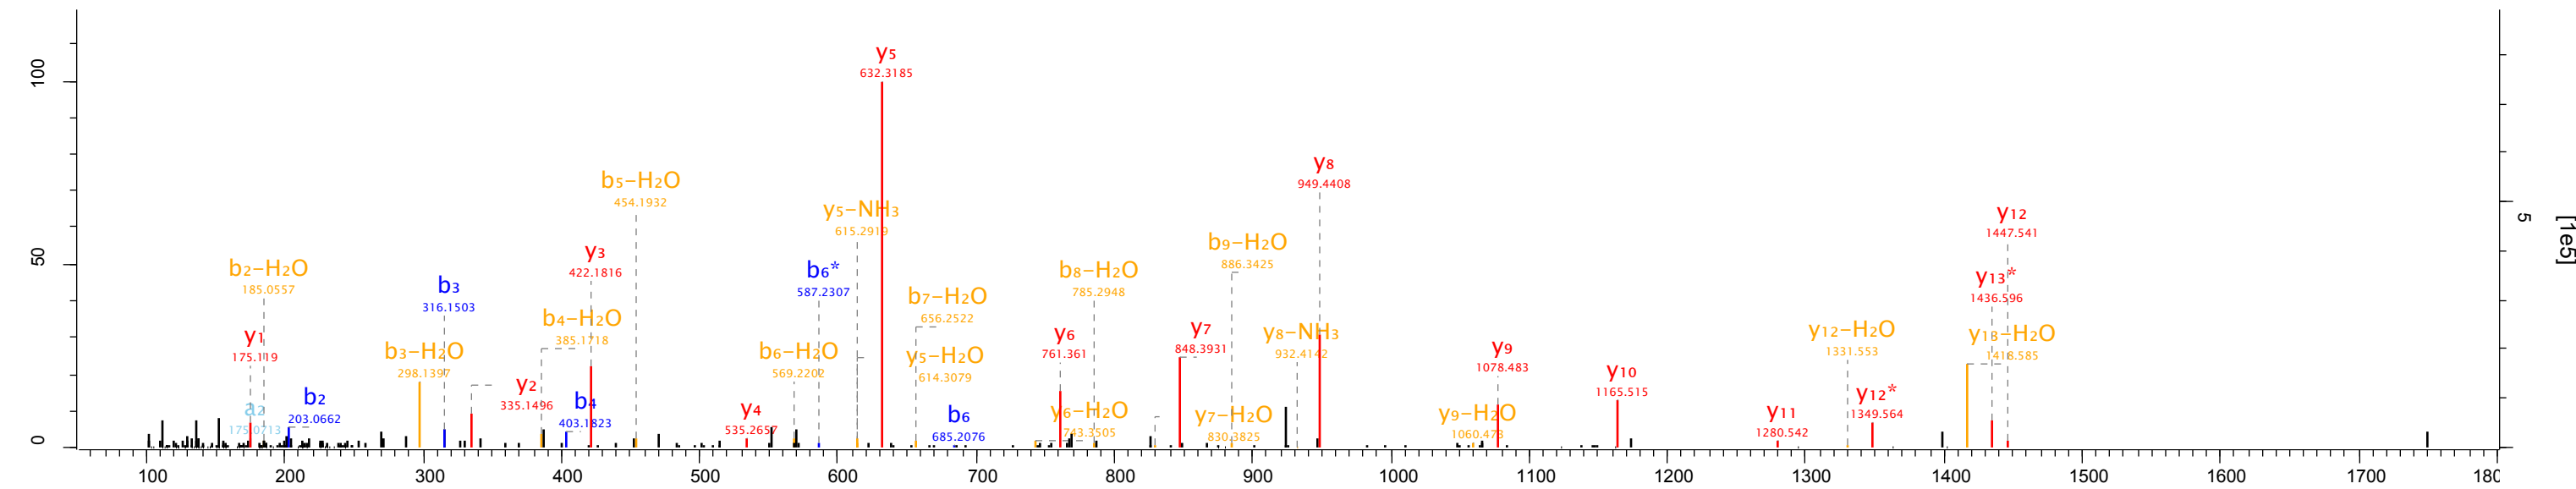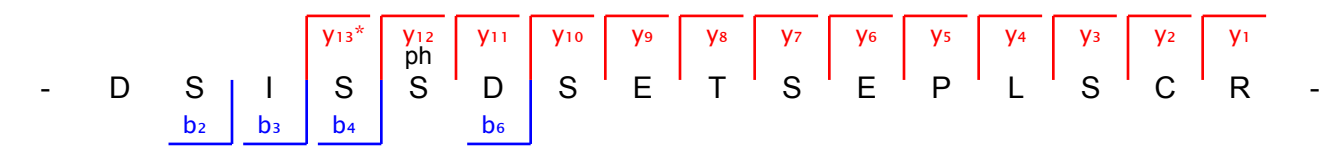



Raw file 20171215\_MaS\_33SR\_LMH\_phospho\_03 Scan 8687 Method FTMS; HCD Score 178.89 m/z 1189.2 Gene names TXLNA

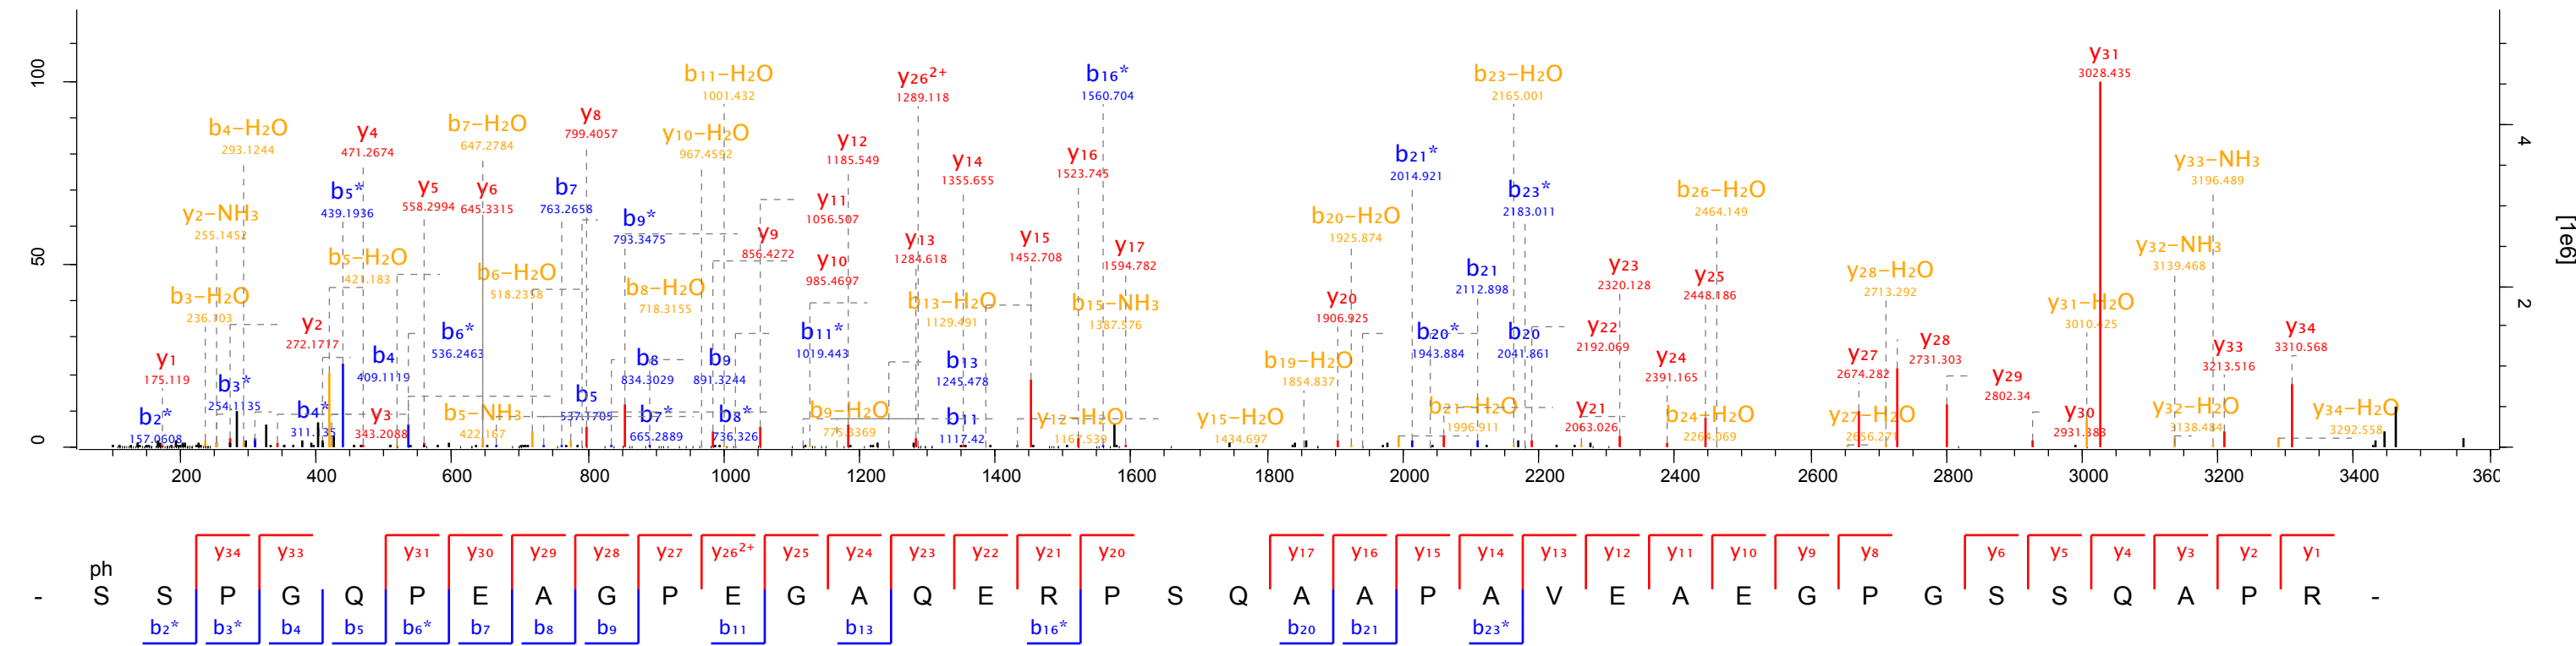

Raw file 20171215\_MaS\_33SR\_LMH\_phospho\_03 Scan 8737 Method FTMS; HCD Score 221.6 m/z 853.39 Gene names SOX5

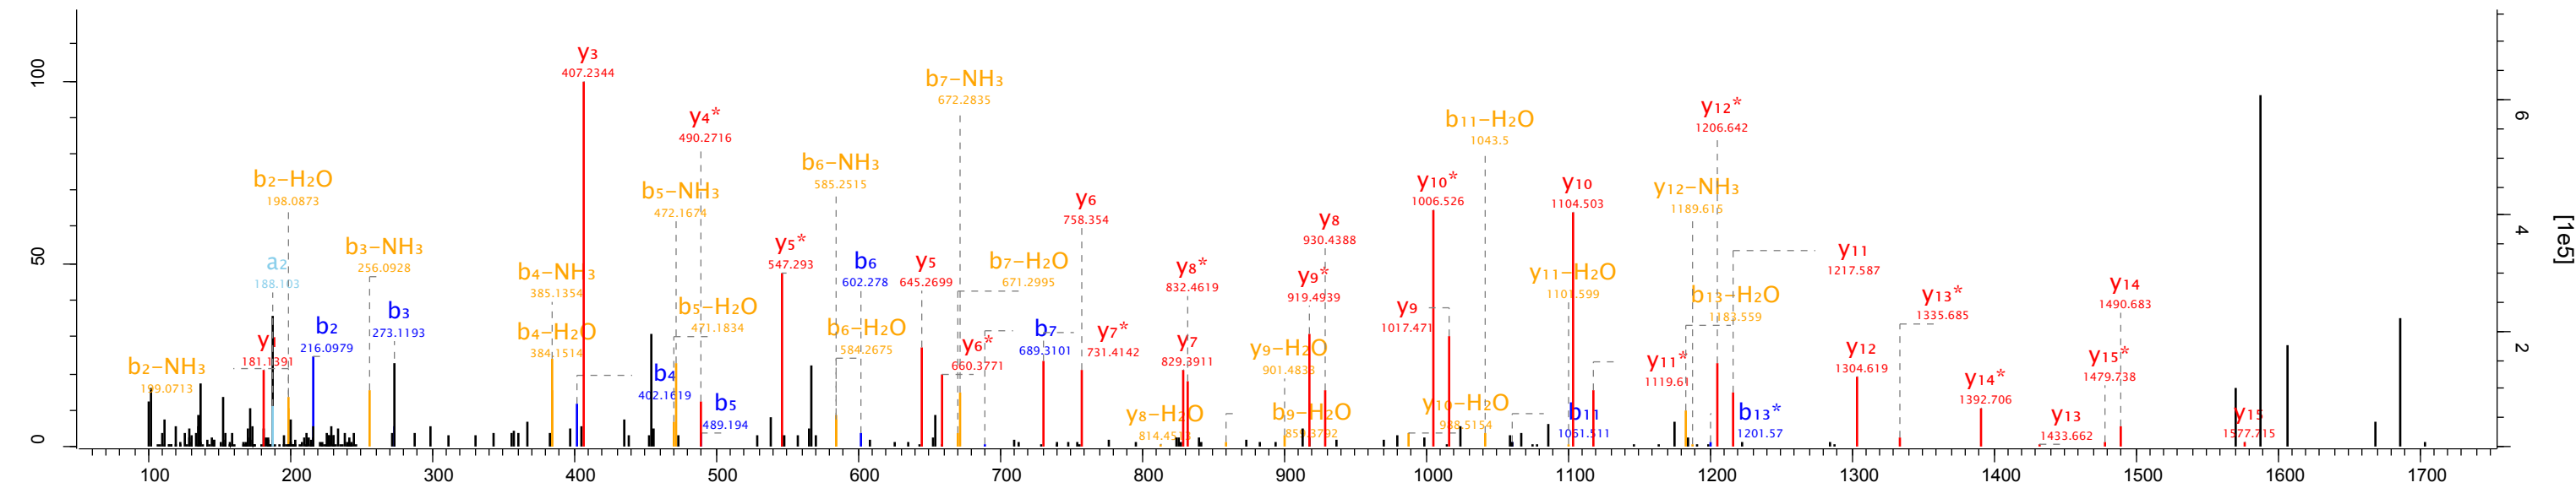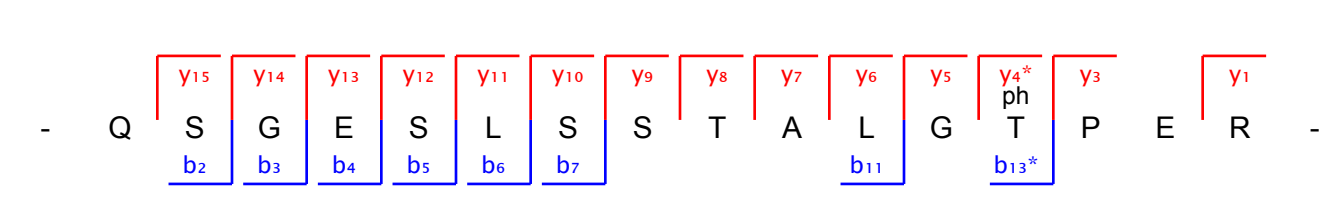

Raw file 20171215\_MaS\_33SR\_LMH\_phospho\_03 Scan 8827 Method FTMS; HCD Score 90.01 m/z 563.77 Gene names BCOR

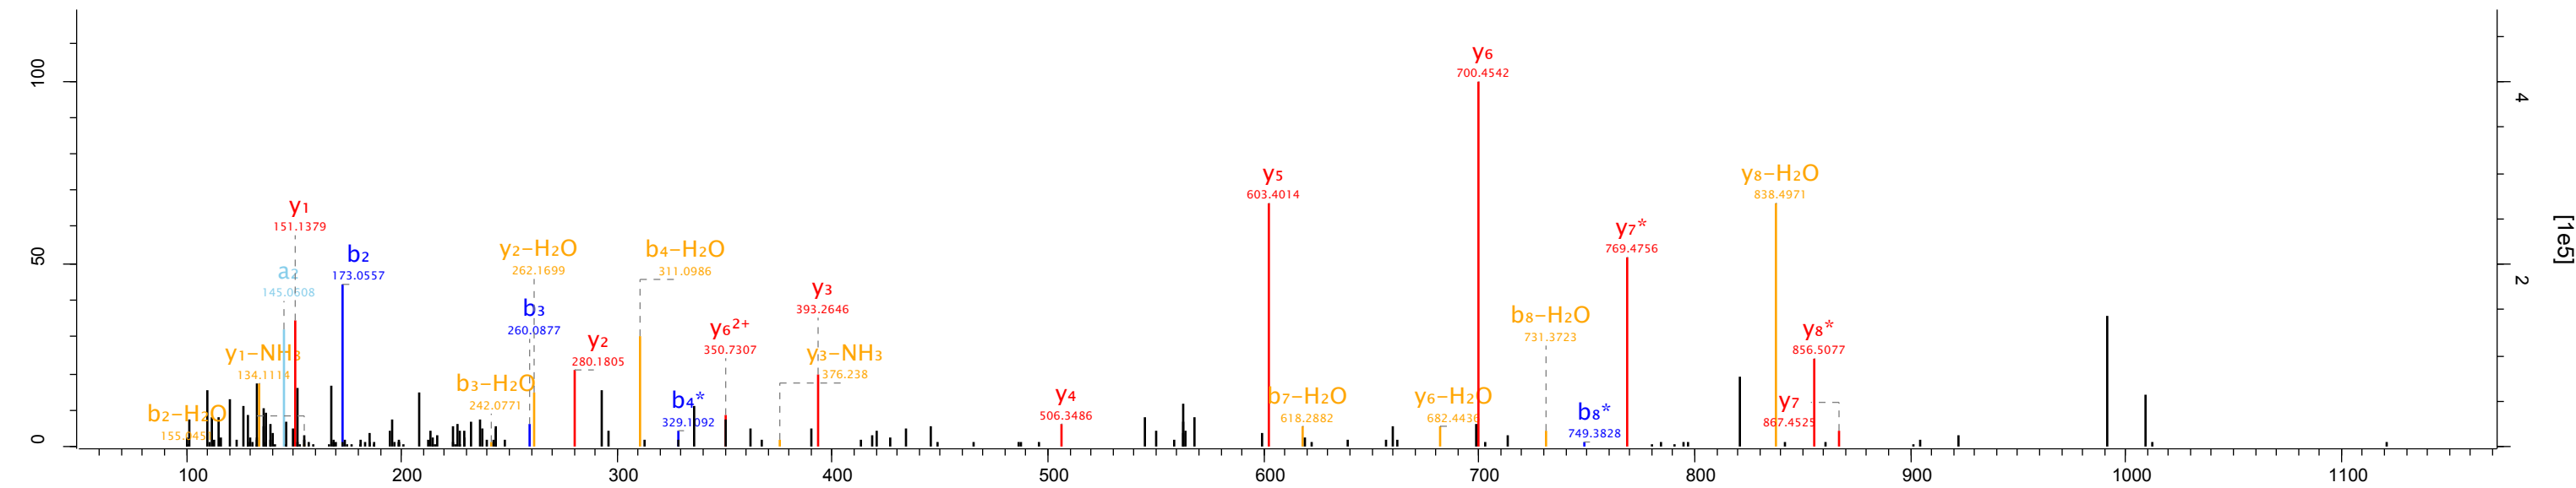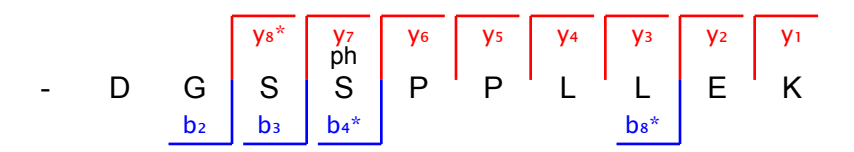

Raw file 20171215\_MaS\_33SR\_LMH\_phospho\_03 Scan 8867 Method FTMS; HCD Score 93.65 m/z 408.19 Gene names FAM83B

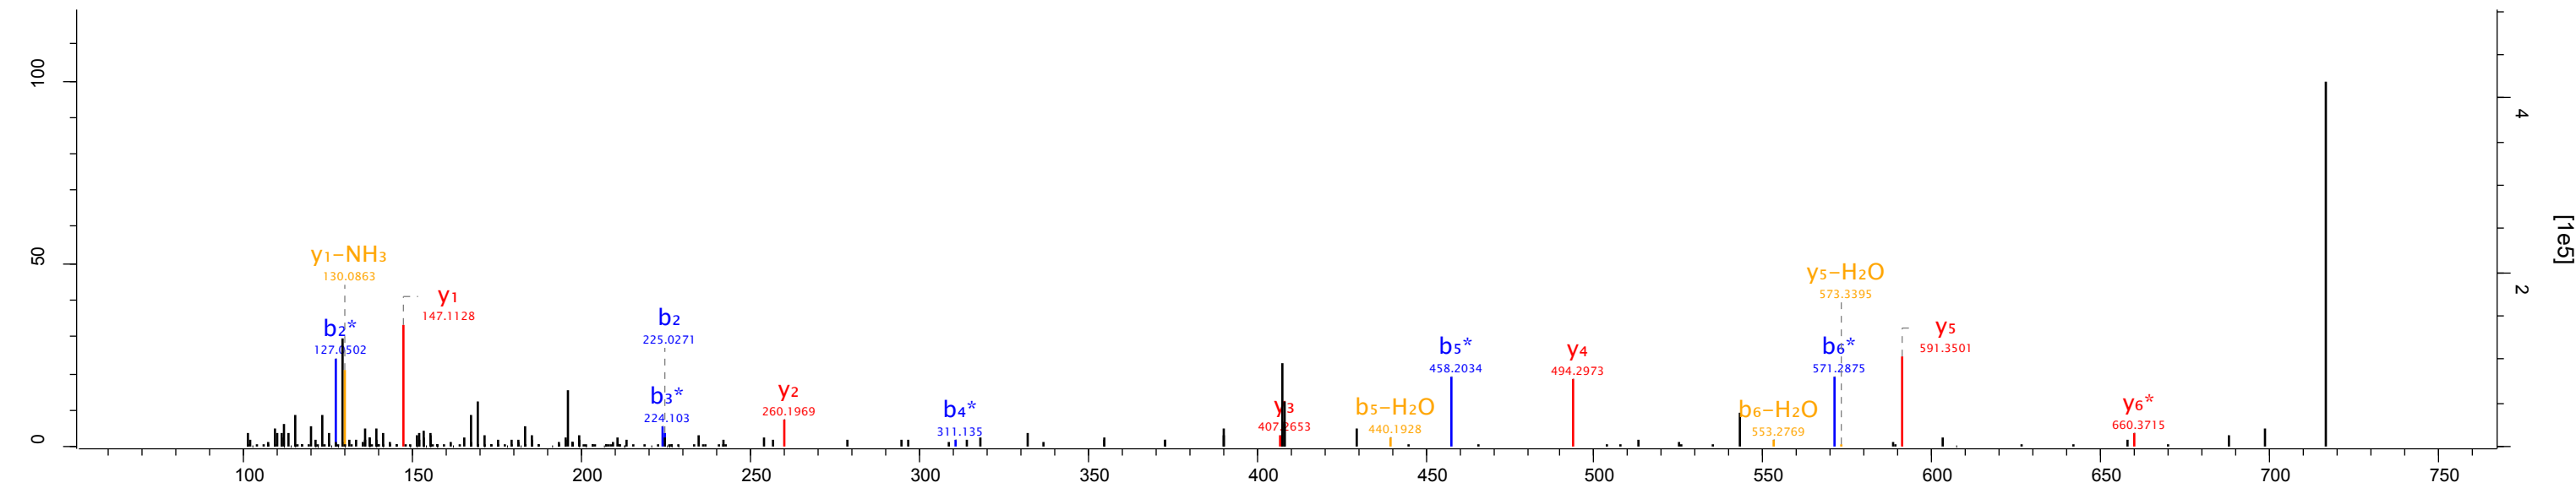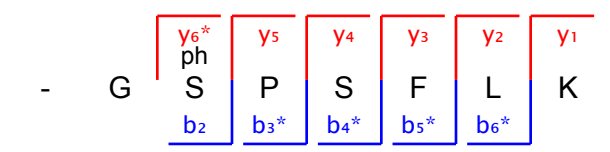

Raw file 20171215\_MaS\_33SR\_LMH\_phospho\_03 Scan 9047 Method FTMS; HCD Score 77.18 m/z 663.29 Gene names MAPK14

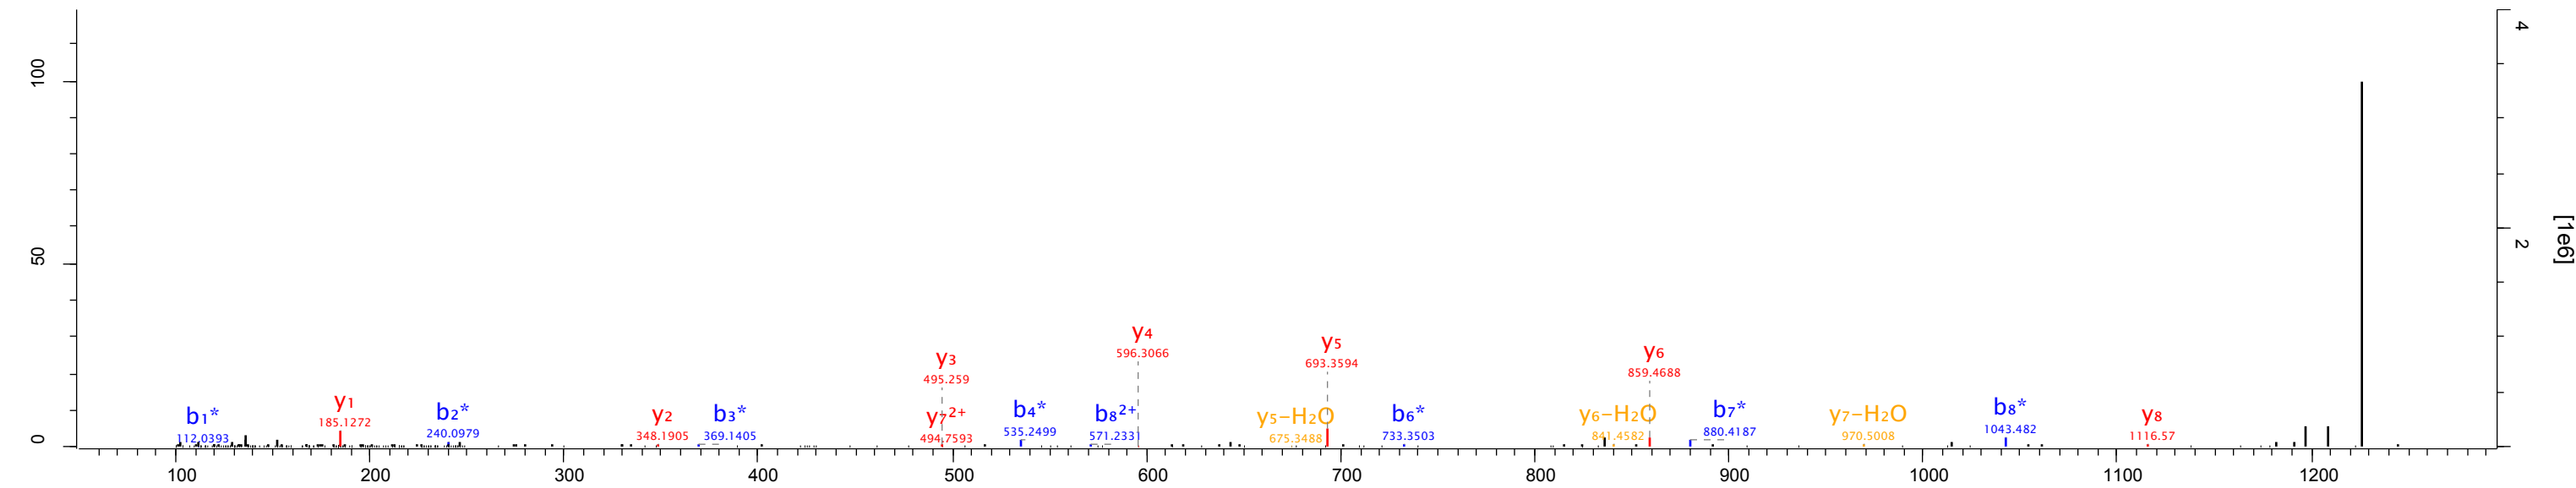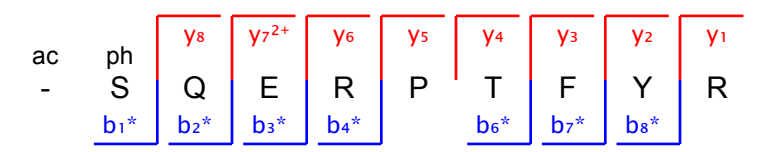

Raw file 20171215\_MaS\_33SR\_LMH\_phospho\_03 Scan 9177 Method FTMS; HCD Score 78.32 m/z 540.75 Gene names NCOR1

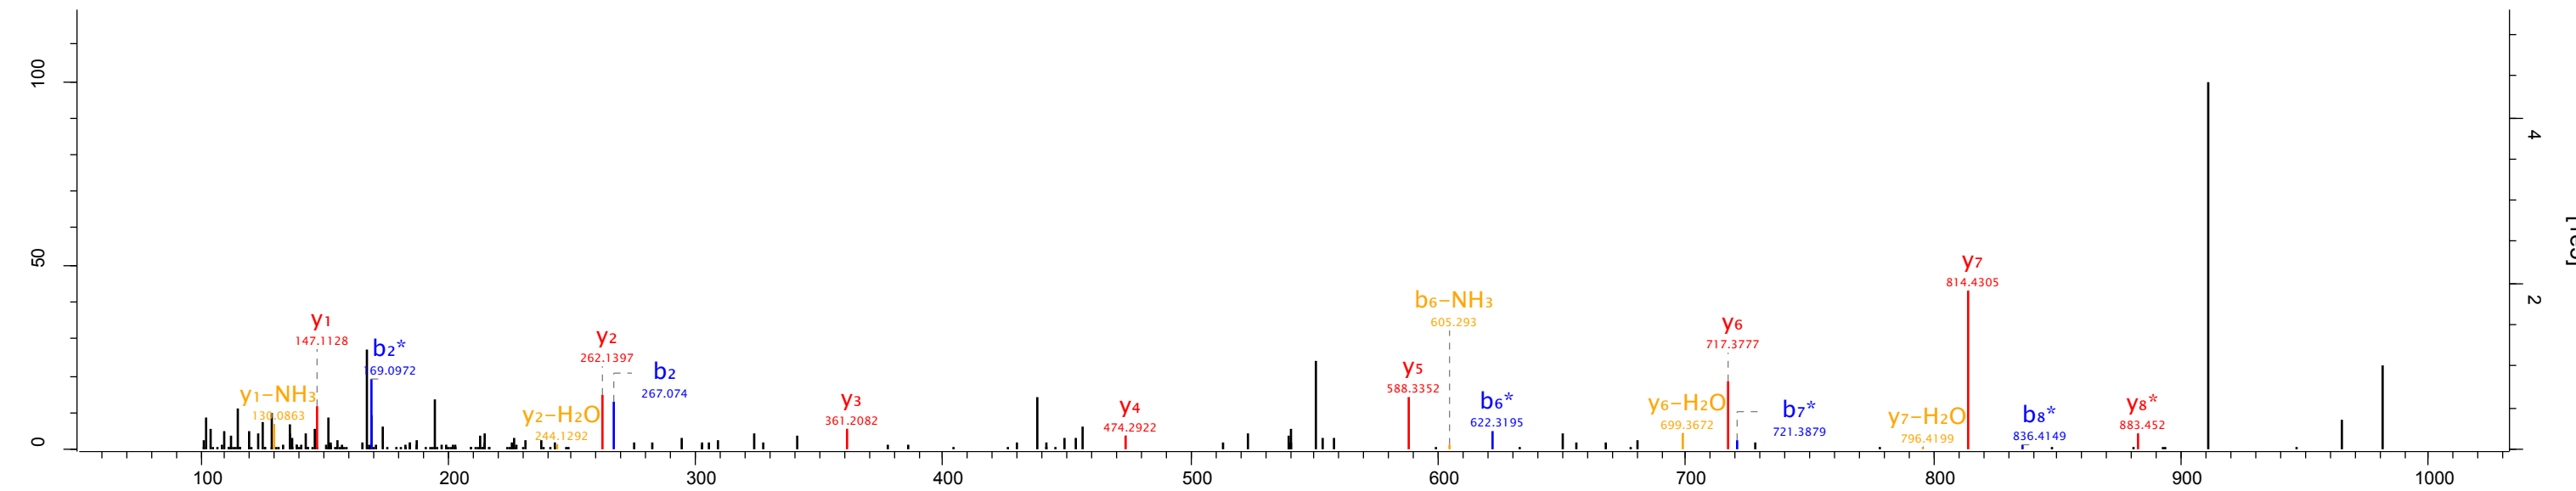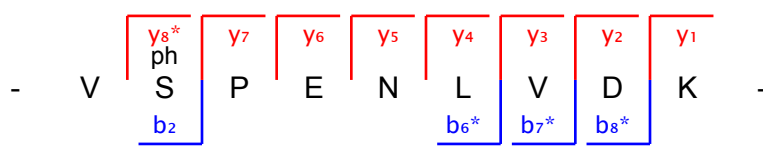

Raw file 20171215\_MaS\_33SR\_LMH\_phospho\_03 Scan 9217 Method FTMS; HCD Score 120.9 m/z 529.25 Gene names HMG20A

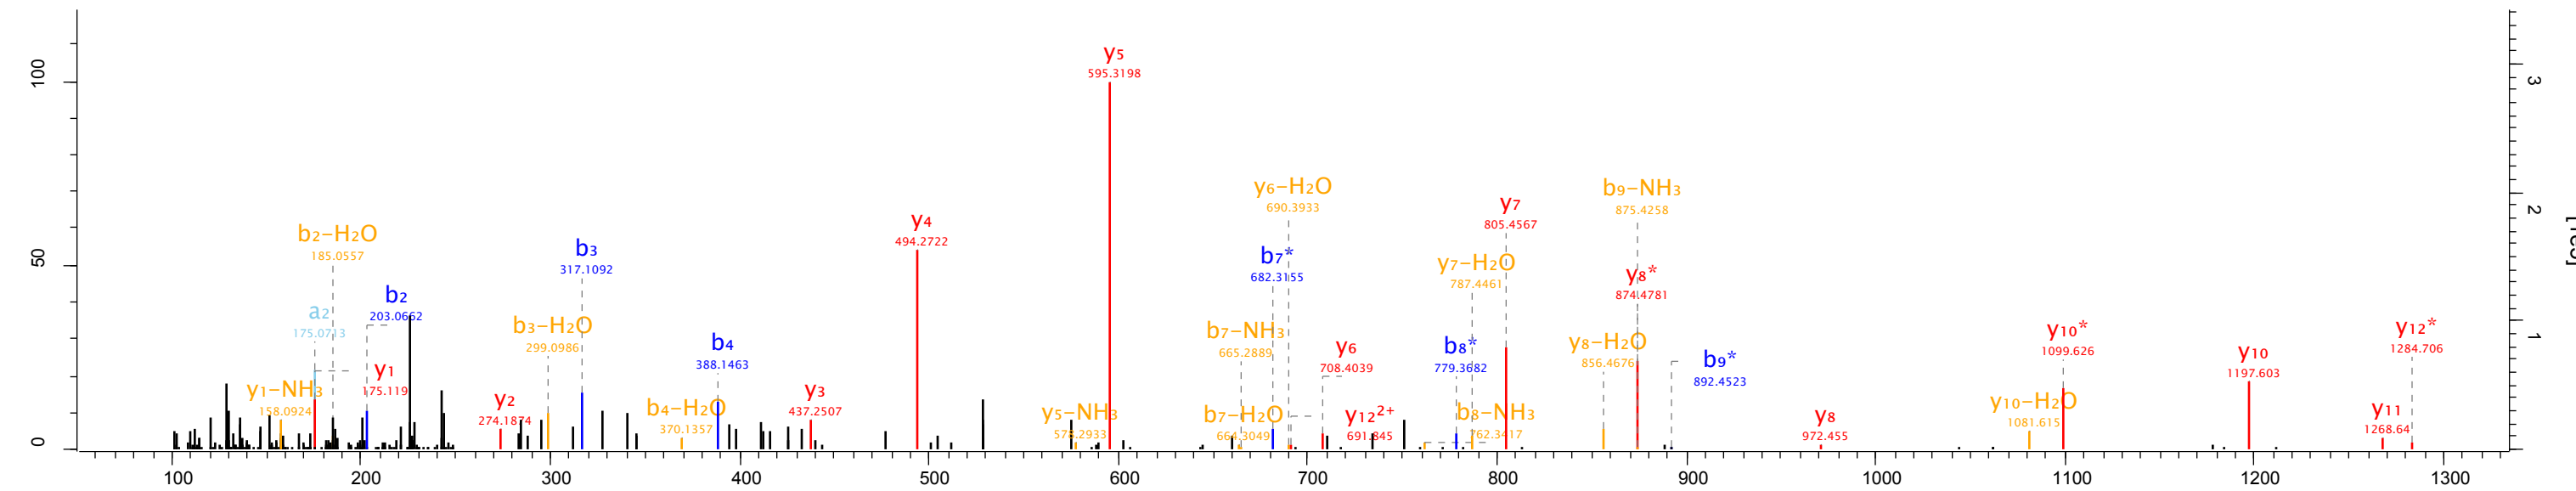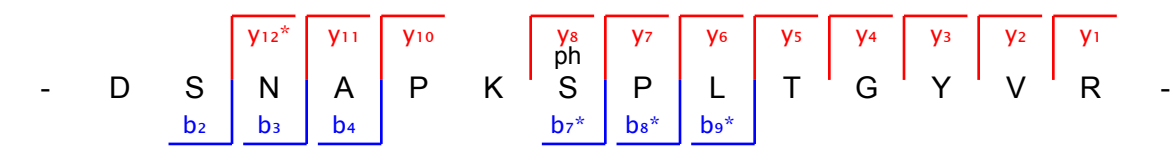

Raw file 20171215\_MaS\_33SR\_LMH\_phospho\_03 Scan 9327 Method FTMS; HCD Score 126.9 m/z 946.4 Gene names SNAP23

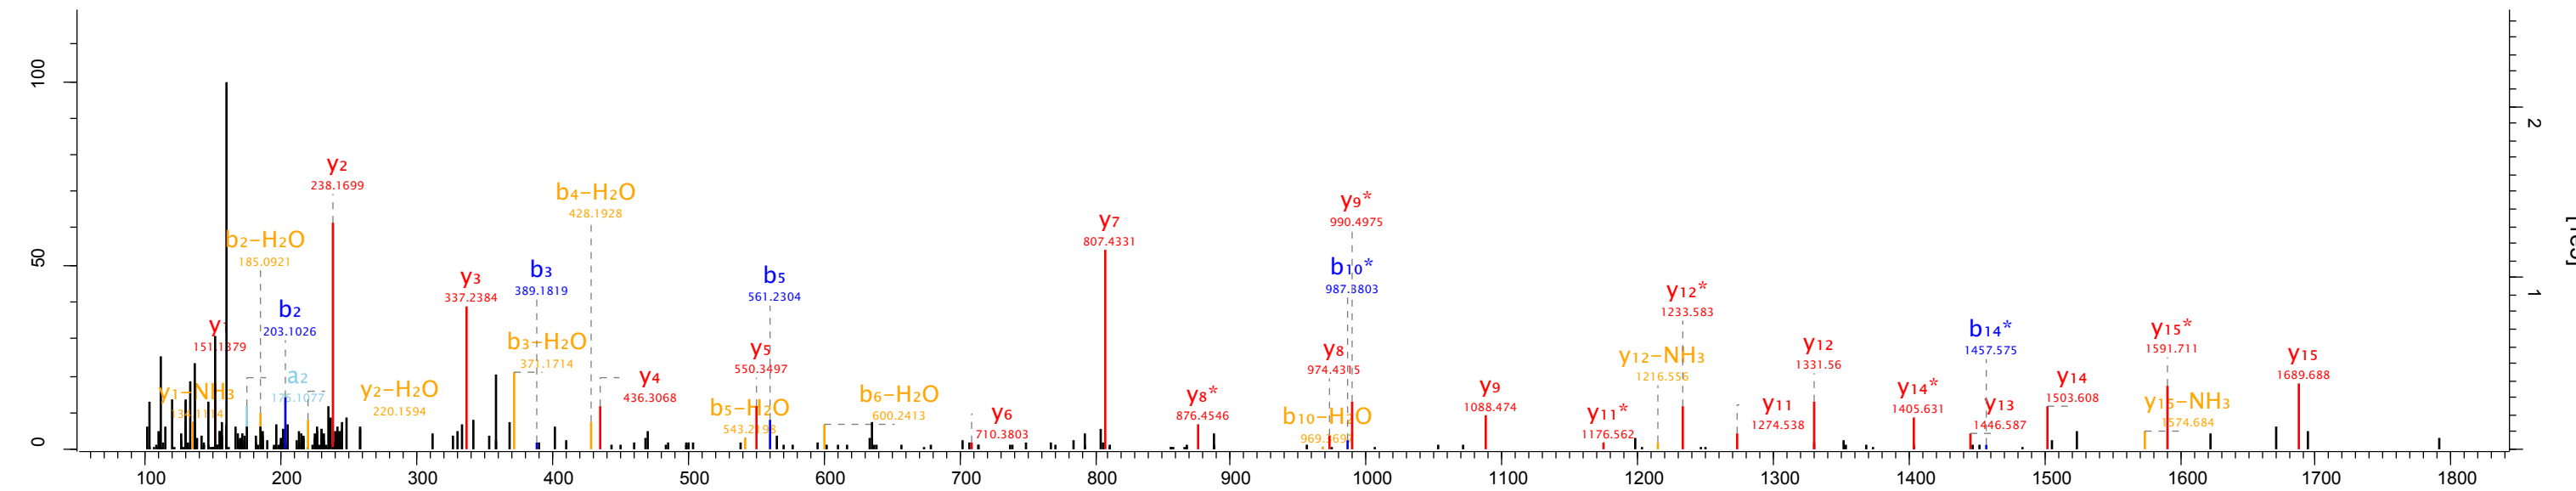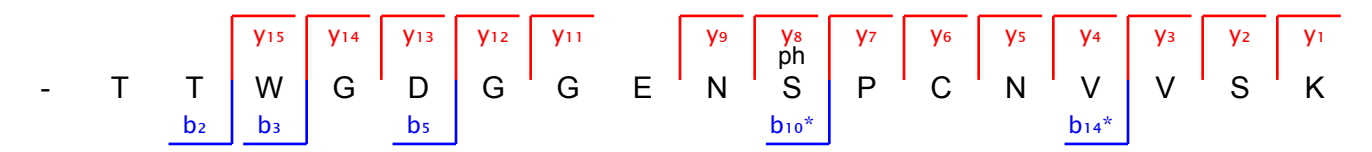



Raw file 20171215\_MaS\_33SR\_LMH\_phospho\_03 Scan 9467 Method FTMS; HCD Score 127.14 m/z 911.4 Gene names TJP2

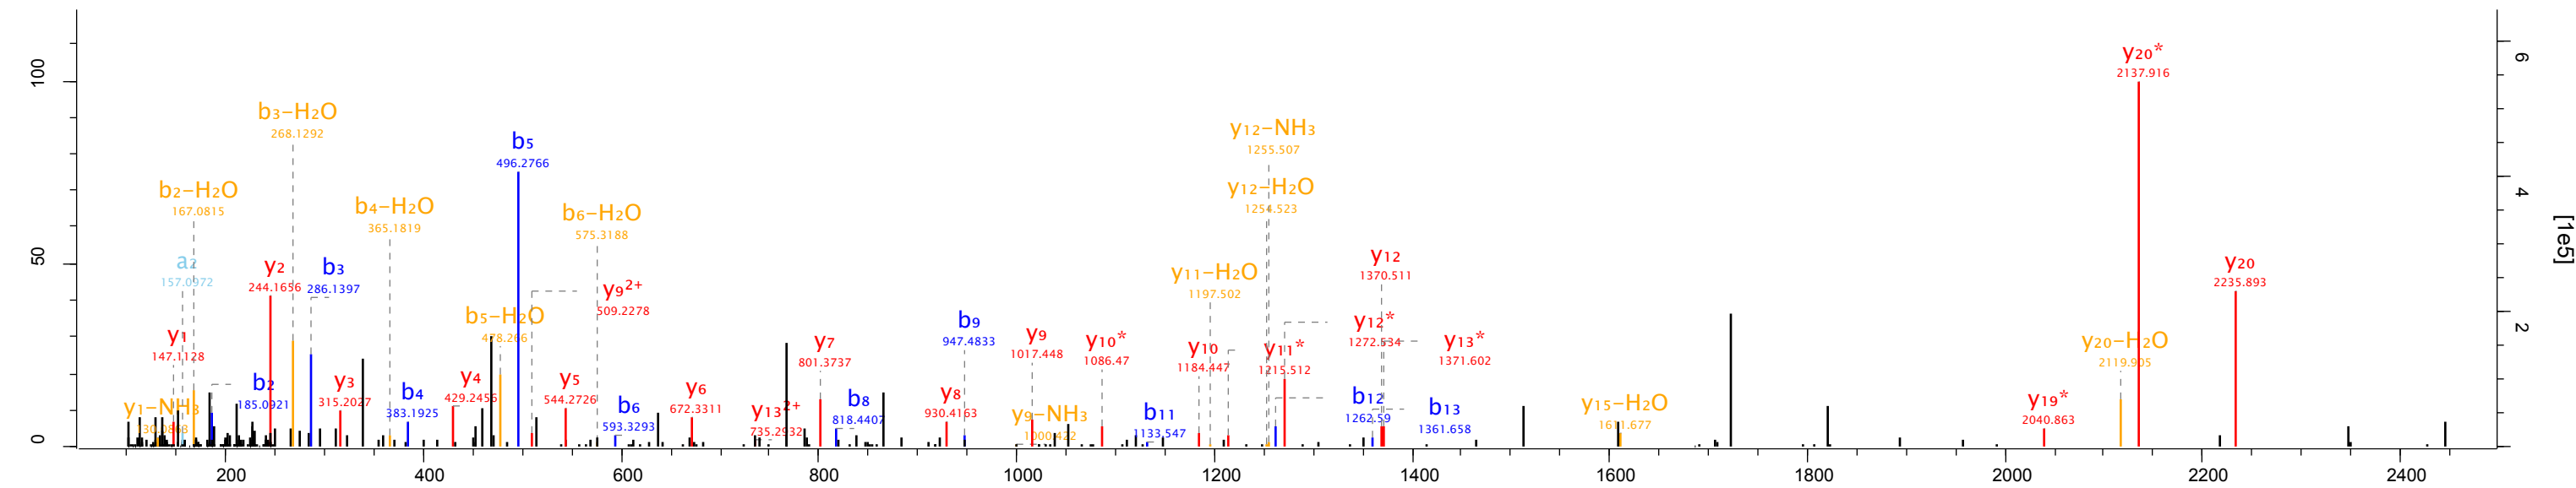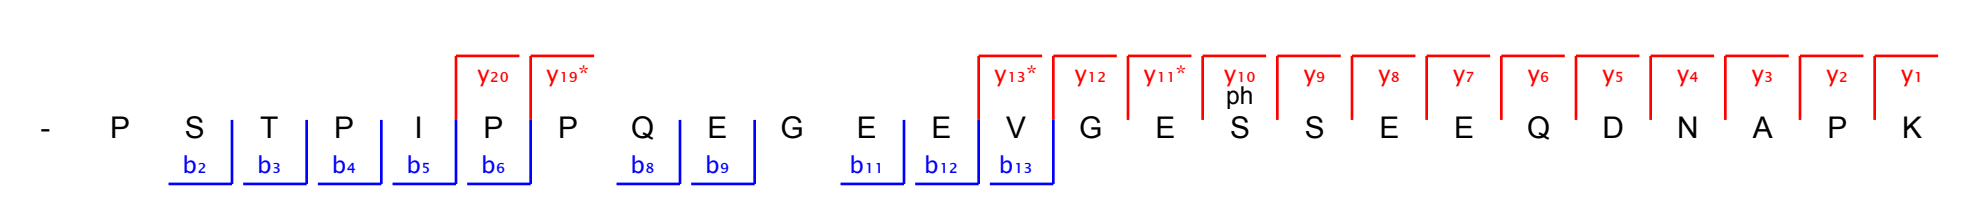

Raw file 20171215\_MaS\_33SR\_LMH\_phospho\_03 Scan 9757 Method FTMS; HCD Score 109.1 m/z 748.85 Gene names ULK1

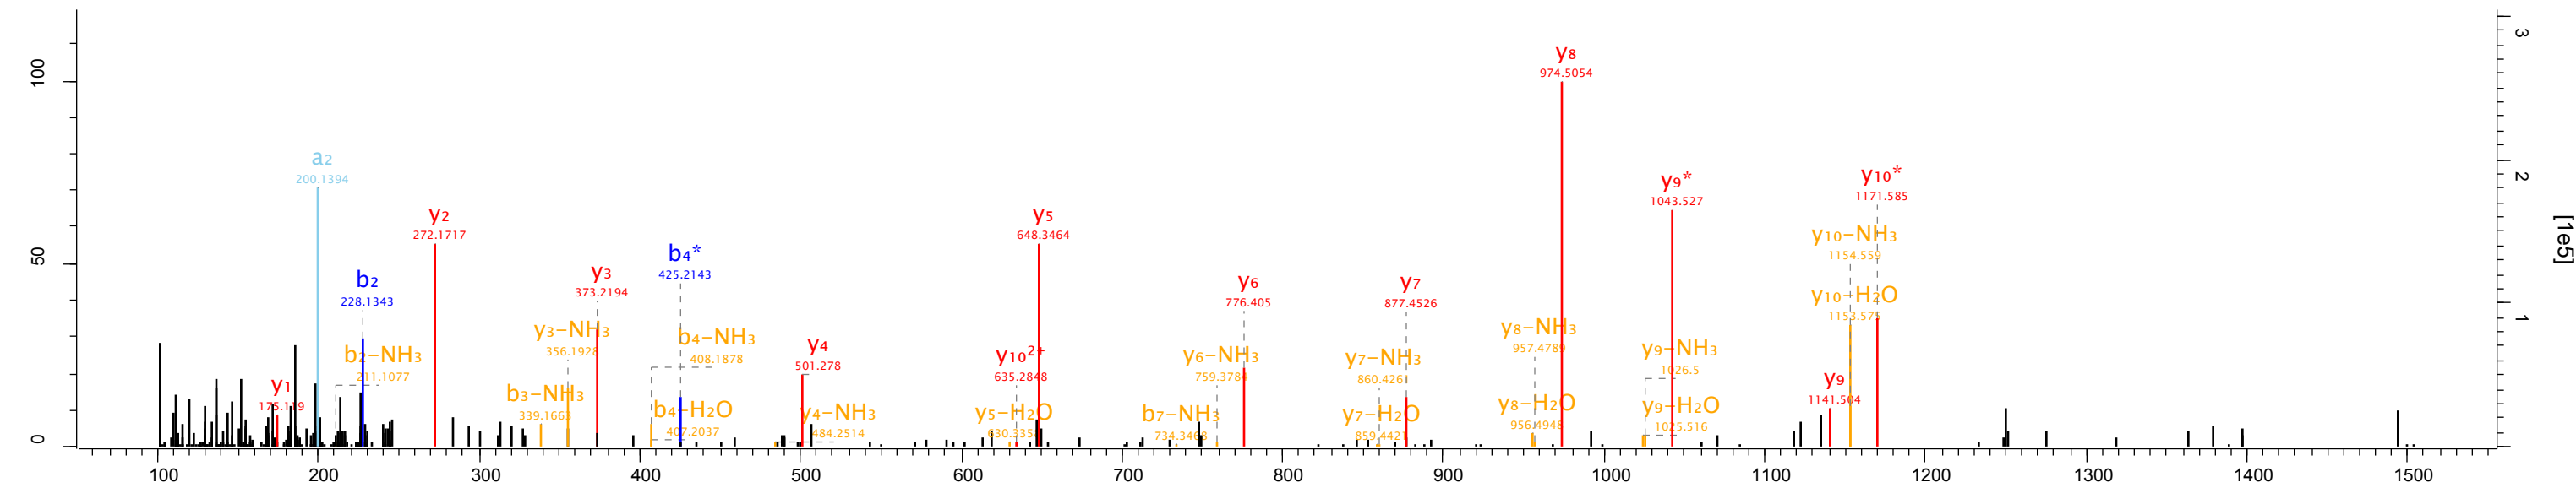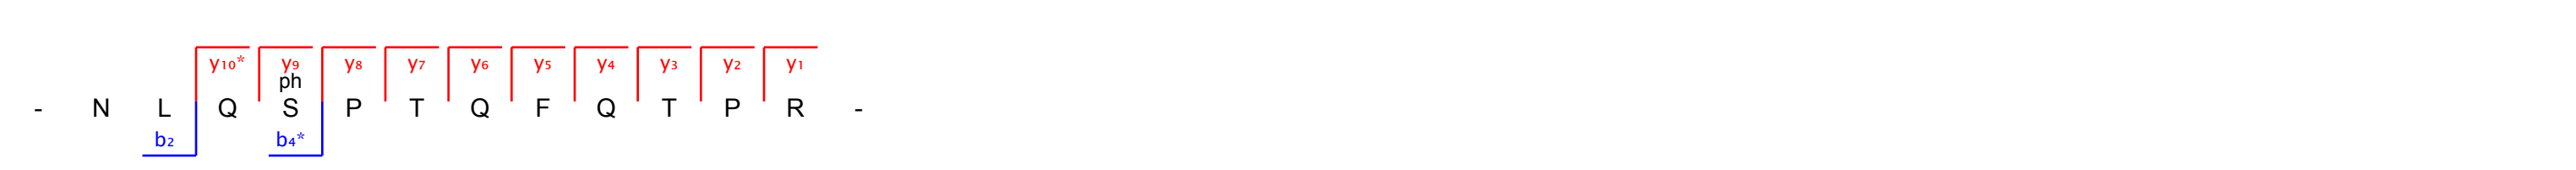

Raw file 20171215\_MaS\_33SR\_LMH\_phospho\_05 Scan 10477 Method FTMS; HCD Score 122.53 m/z 1325.07 Gene names DDX47

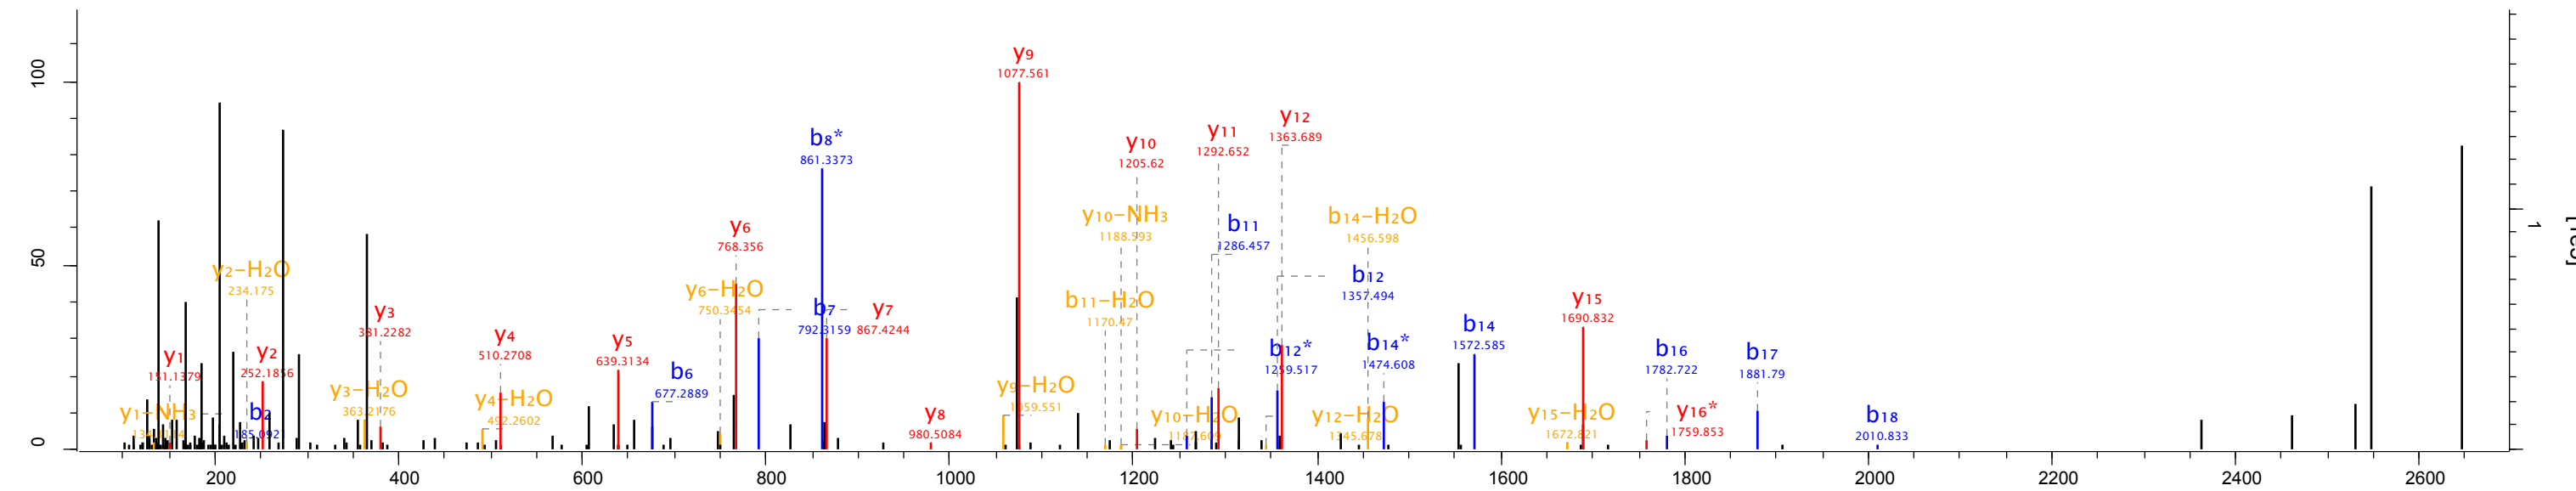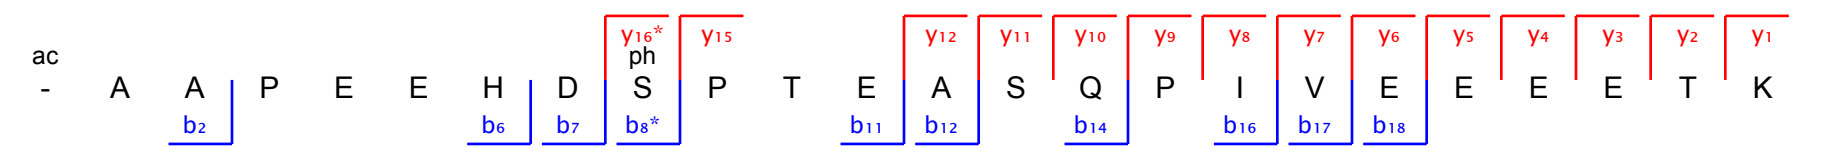

Raw file 20171215\_MaS\_33SR\_LMH\_phospho\_05 Scan 12537 Method FTMS; HCD Score 42.86 m/z 690.99 Gene names USP8

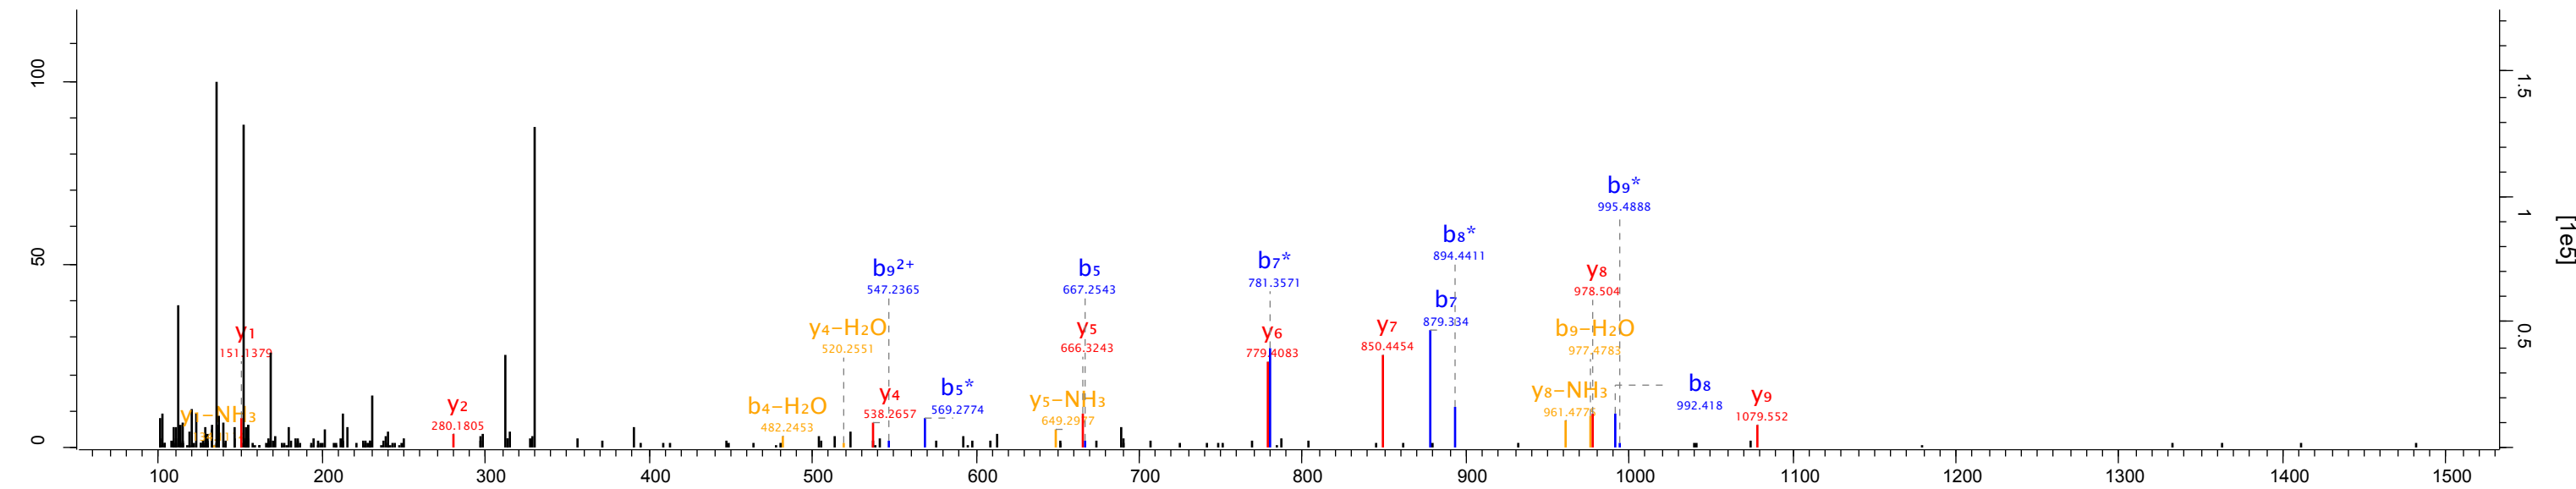

- R S Y S ph S P D I T Q A I Q E E E K -

Labels below the sequence: b5 (under S), b7 (under D), b8 (under I), b9\* (under T), y9 (above T), y8 (above Q), y7 (above A), y6 (above I), y5 (above Q), y4 (above E), y2 (above E), y1 (above K).

Raw file 20171215\_MaS\_33SR\_LMH\_phospho\_05 Scan 12947 Method FTMS; HCD Score 40.1 m/z 847.38 Gene names PLCG1

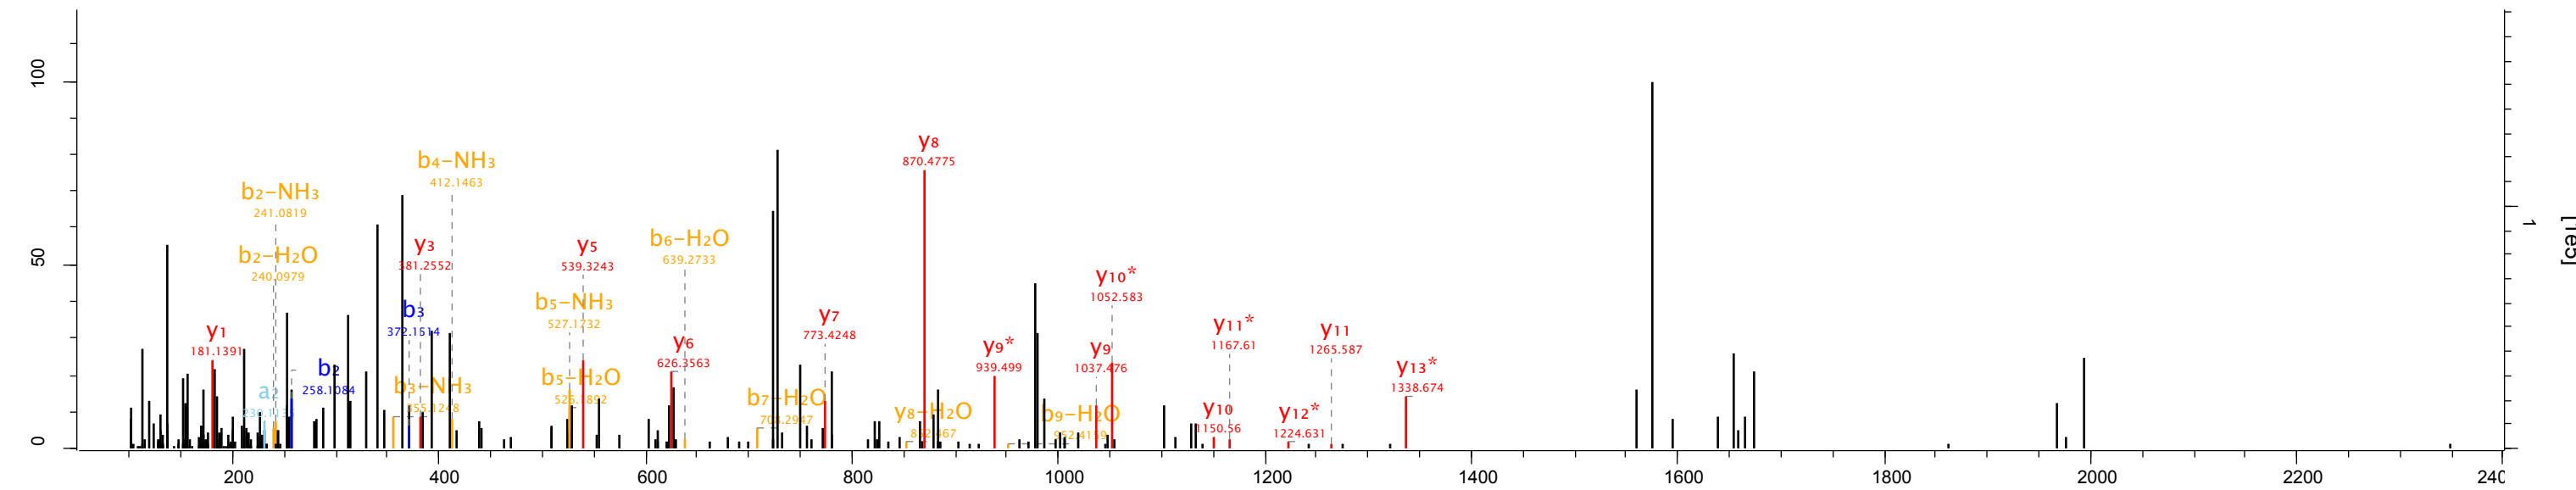

- Q E N G D L S P F S G T S L R -

Fragmentation mapping:

- Red brackets above the sequence indicate y-ion fragments: y13\* (N-G), y12\* (G-D), y11 (D-L), y10 (L-S), y9-ph (S-P), y8 (P-F), y7 (F-S), y6 (S-G), y5 (G-T), y3 (T-S), y1 (S-L).
- Blue brackets below the sequence indicate b-ion fragments: b2 (E-N), b3 (N-G).

Raw file 20171215\_MaS\_33SR\_LMH\_phospho\_05 Scan 2007 Method FTMS; HCD Score 42.38 m/z 820.32 Gene names RBM15

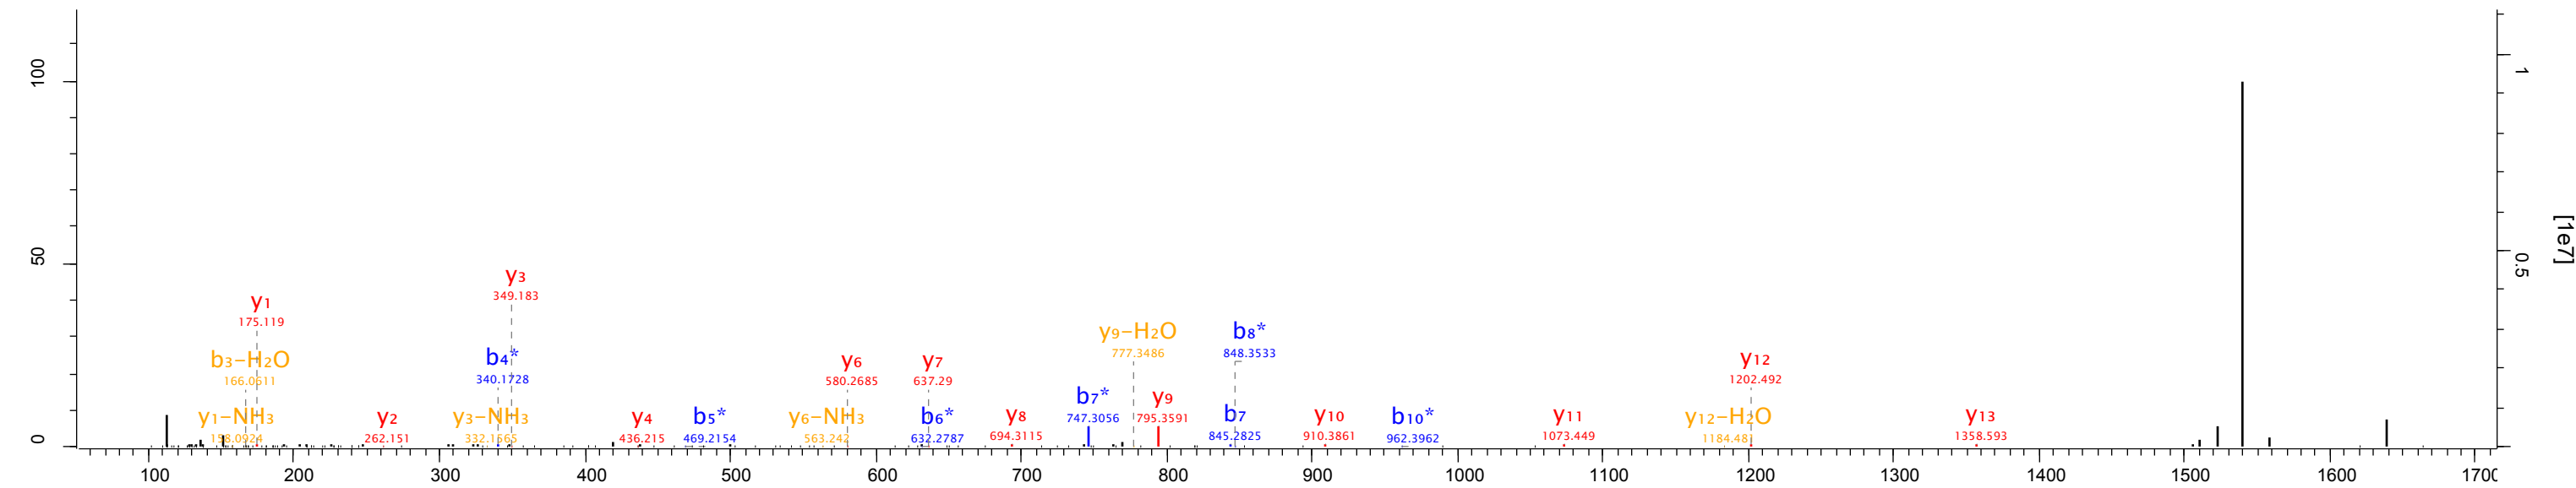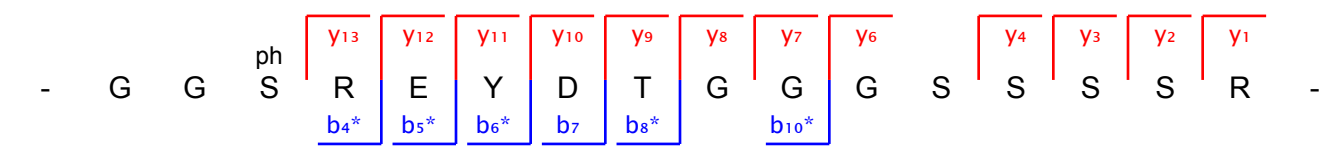

Raw file Scan Method Score m/z Gene names

20171215\_MaS\_33SR\_LMH\_phospho\_05 2197 FTMS; HCD 41.54 496.56 DBR1

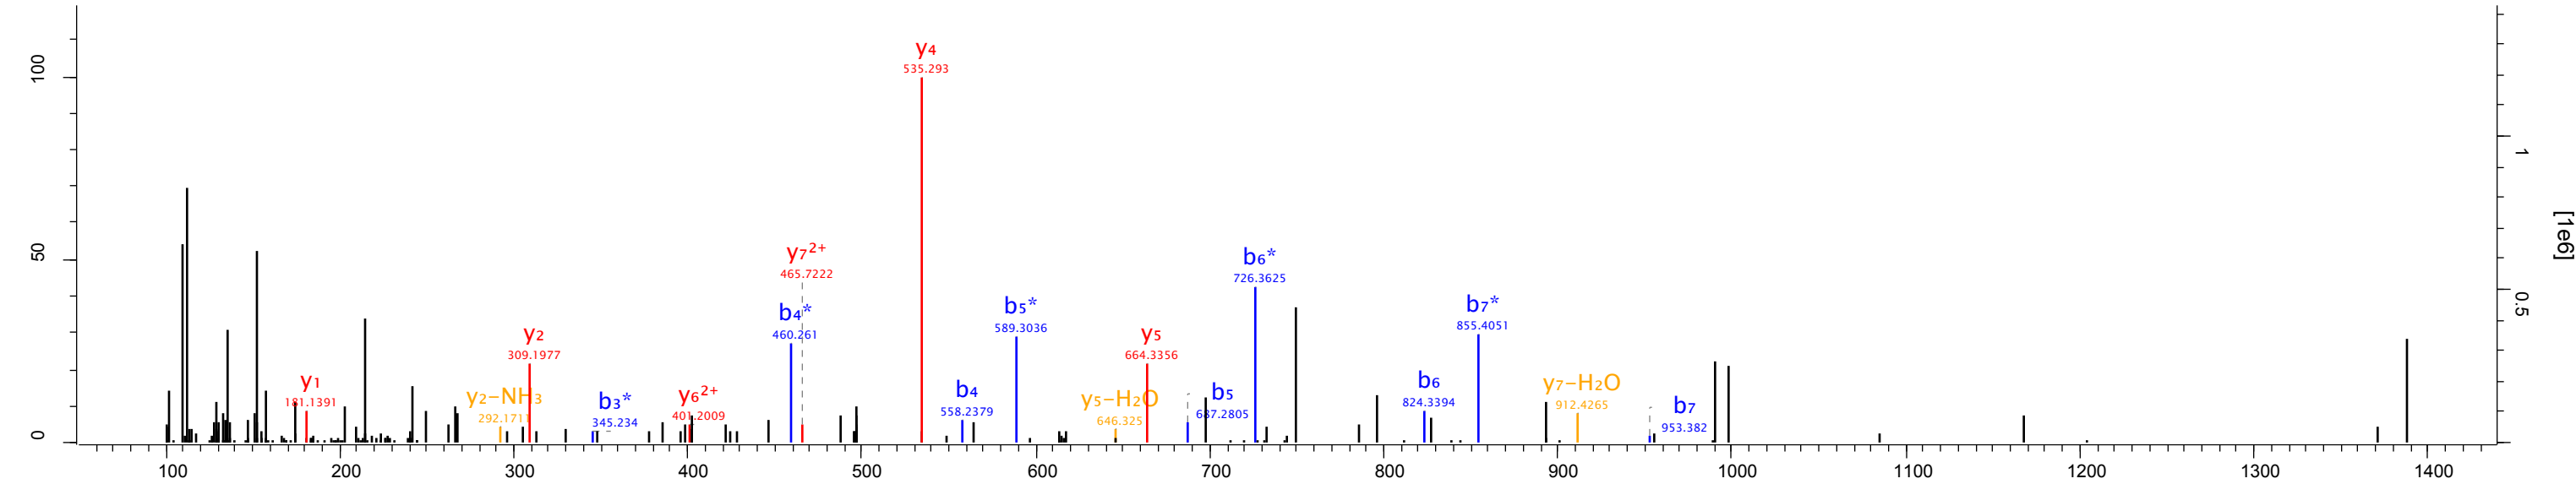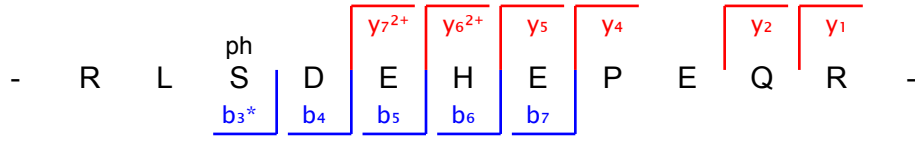

Raw file 20171215\_MaS\_33SR\_LMH\_phospho\_05 Scan 2357 Method FTMS; HCD Score 150.23 m/z 916.84 Gene names KRI1

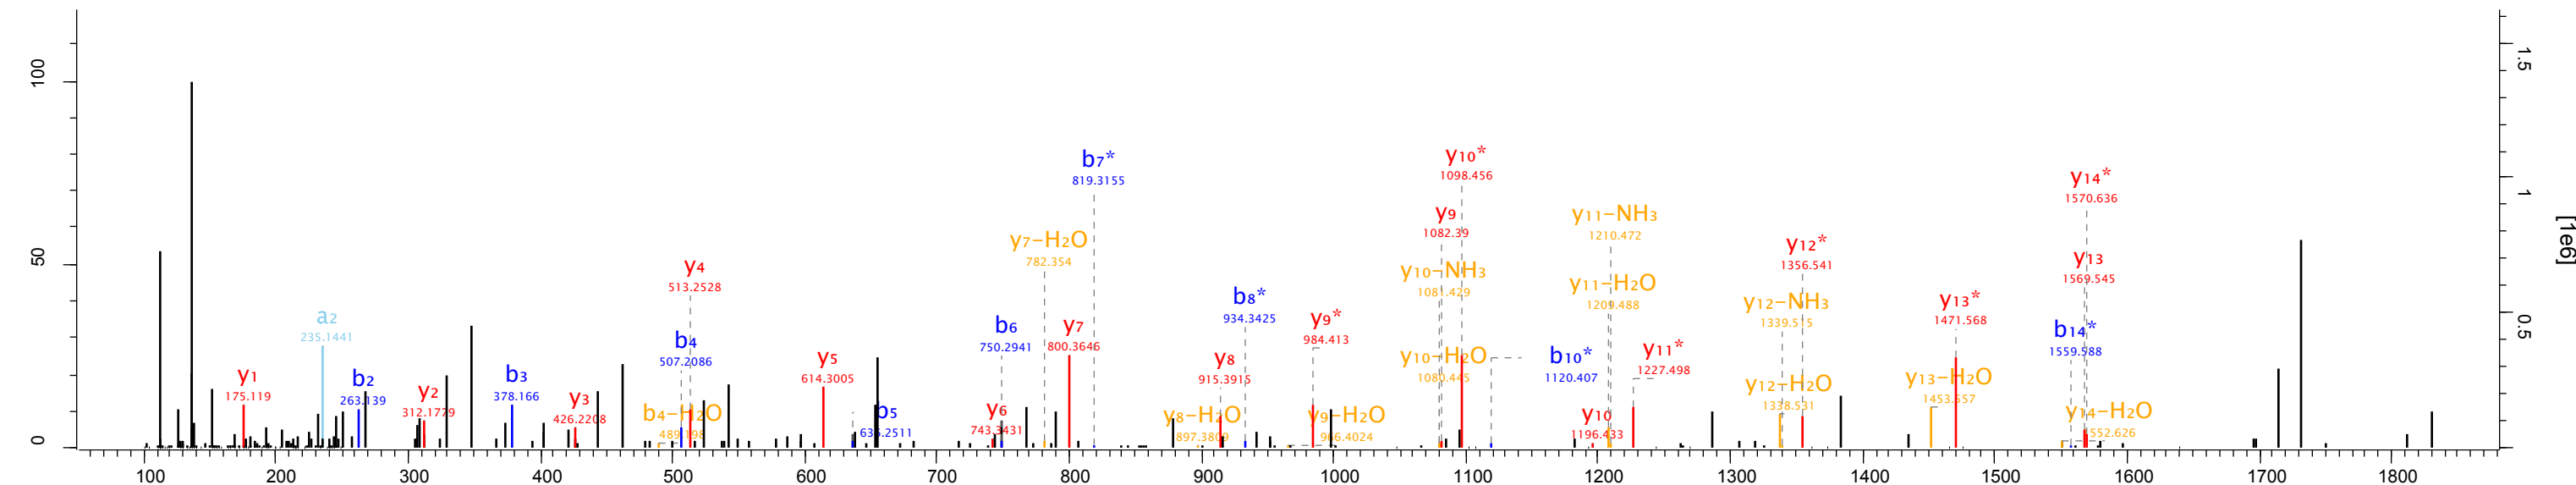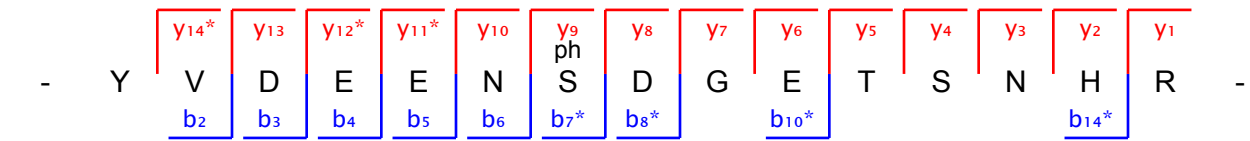



Raw file 20171215\_MaS\_33SR\_LMH\_phospho\_05 Scan 2637 Method FTMS; HCD Score 164.82 m/z 912.9 Gene names RBMX2

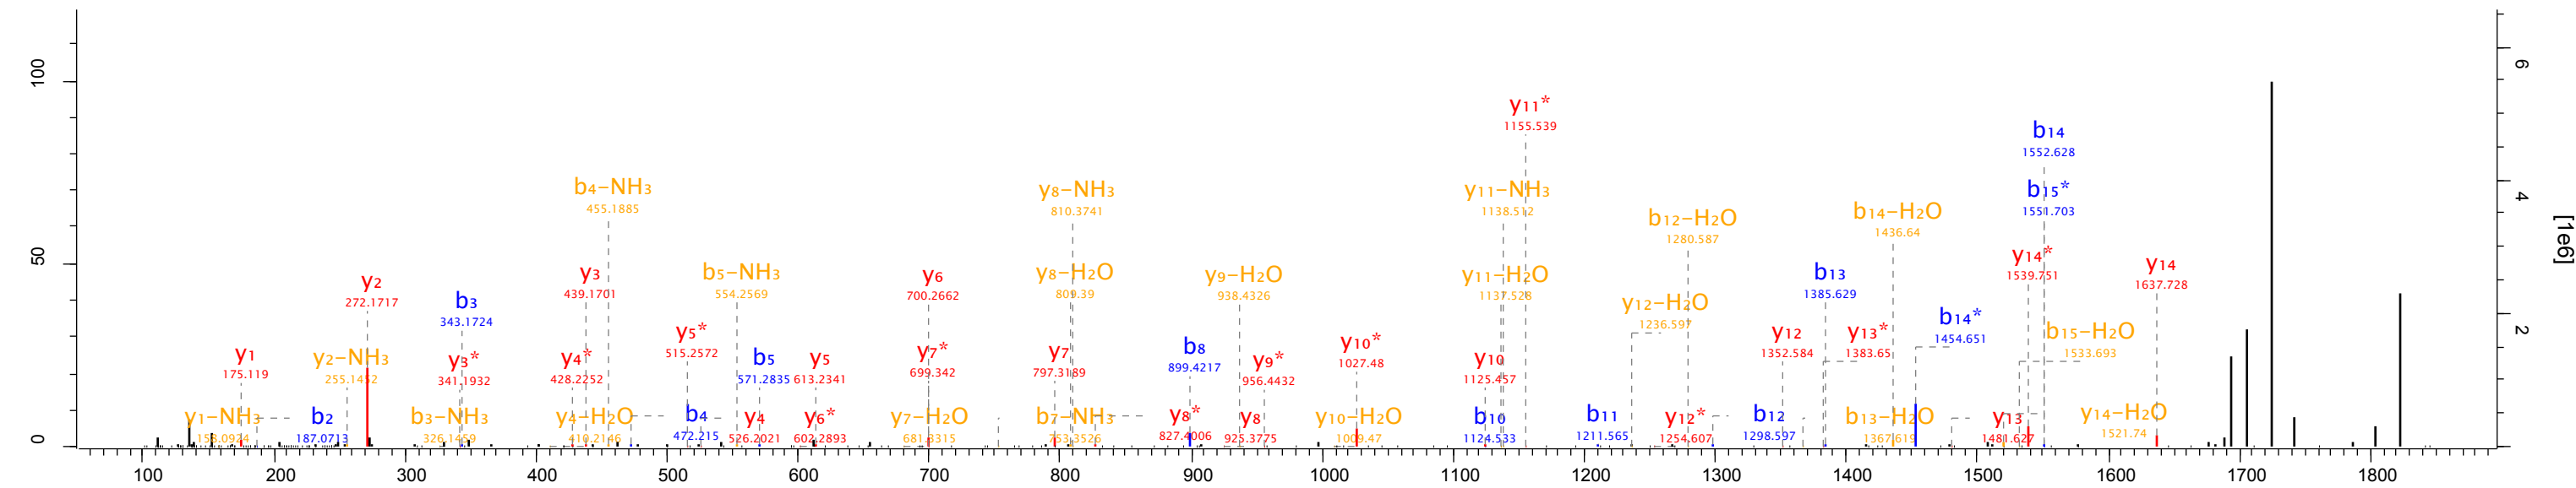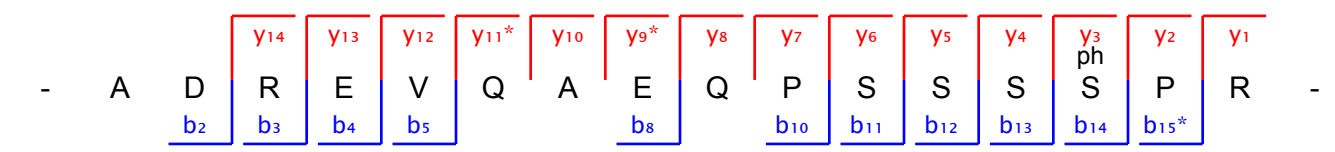

Raw file 20171215\_MaS\_33SR\_LMH\_phospho\_05 Scan 2967 Method FTMS; HCD Score 92.26 m/z 545.59 Gene names RSRC2

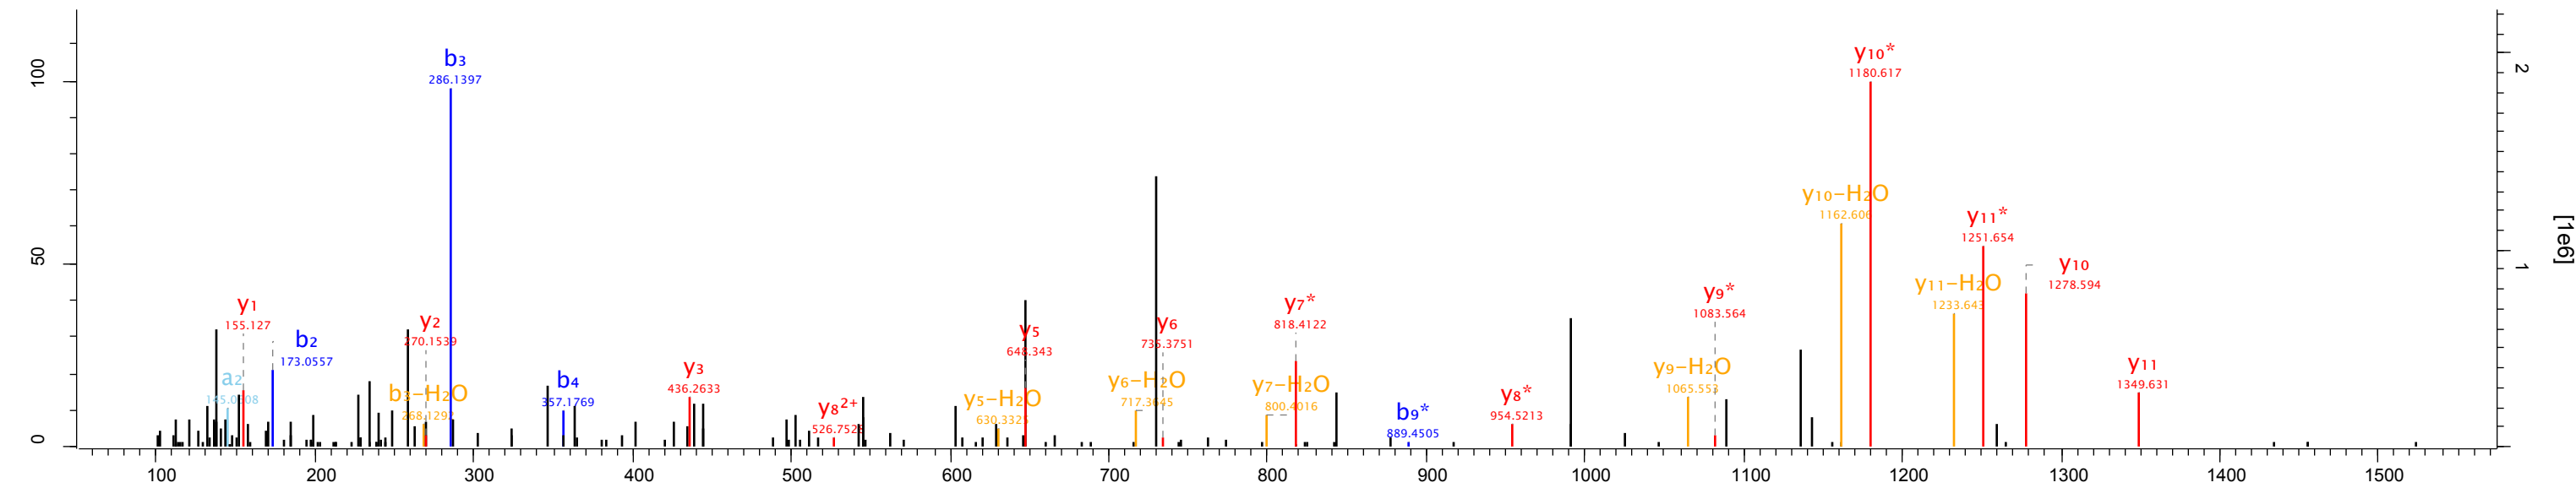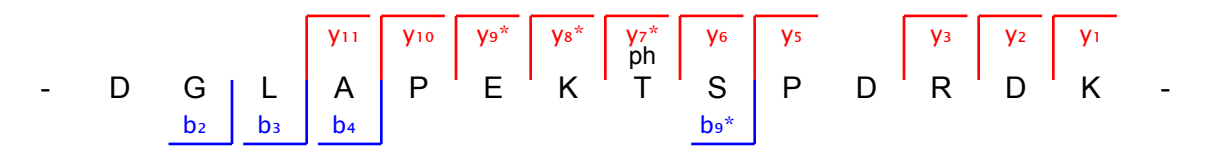

Raw file 20171215\_MaS\_33SR\_LMH\_phospho\_05 Scan 3007 Method FTMS; HCD Score 137.62 m/z 637.28 Gene names LIMCH1

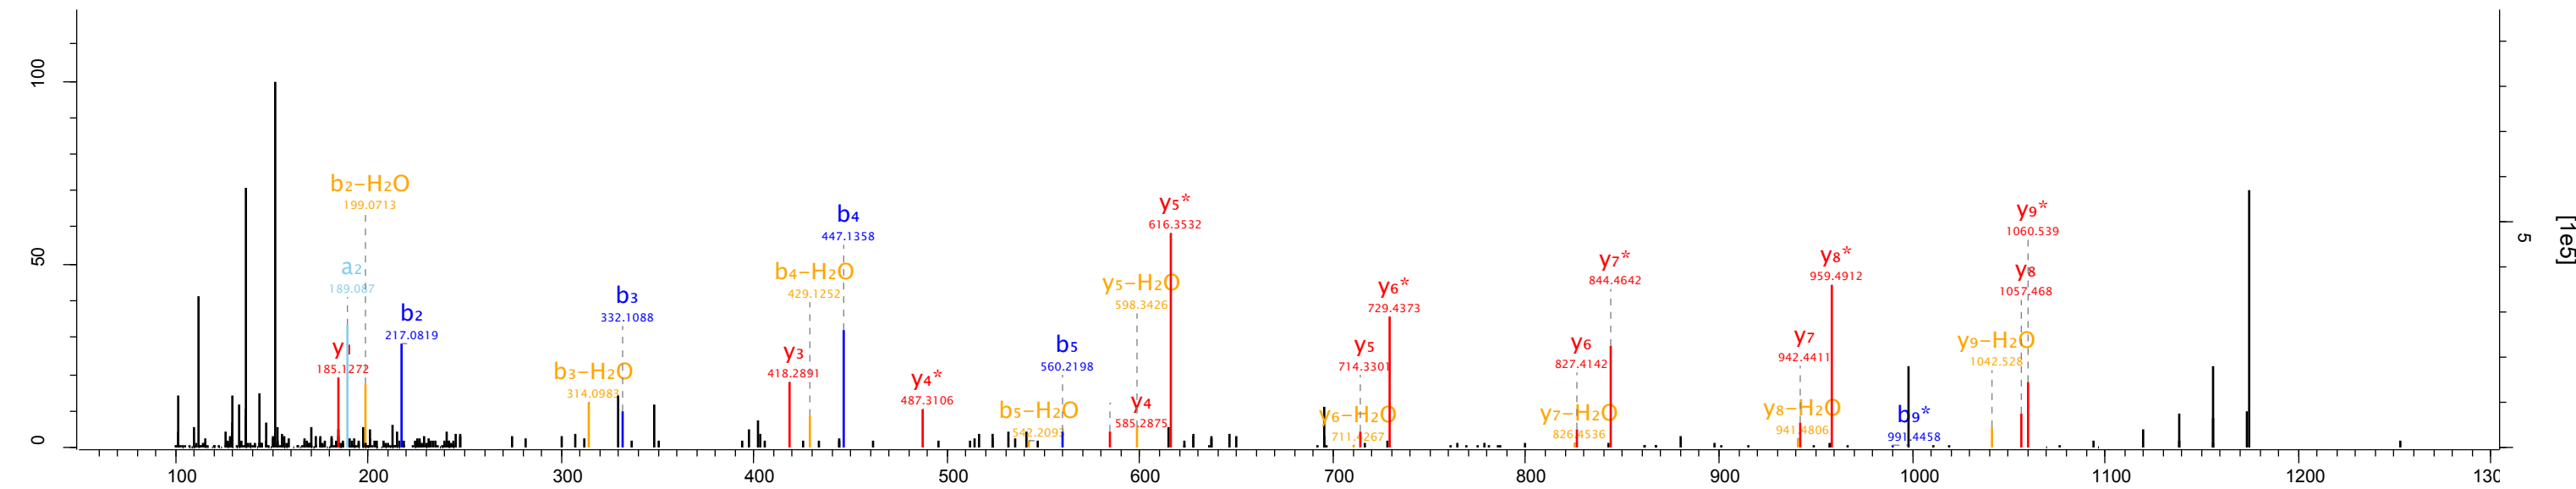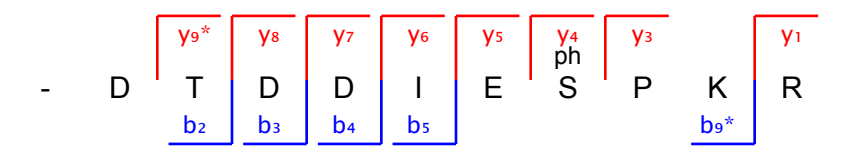

Raw file 20171215\_MaS\_33SR\_LMH\_phospho\_05 Scan 3717 Method FTMS; HCD Score 84.86 m/z 613.78 Gene names GNG12

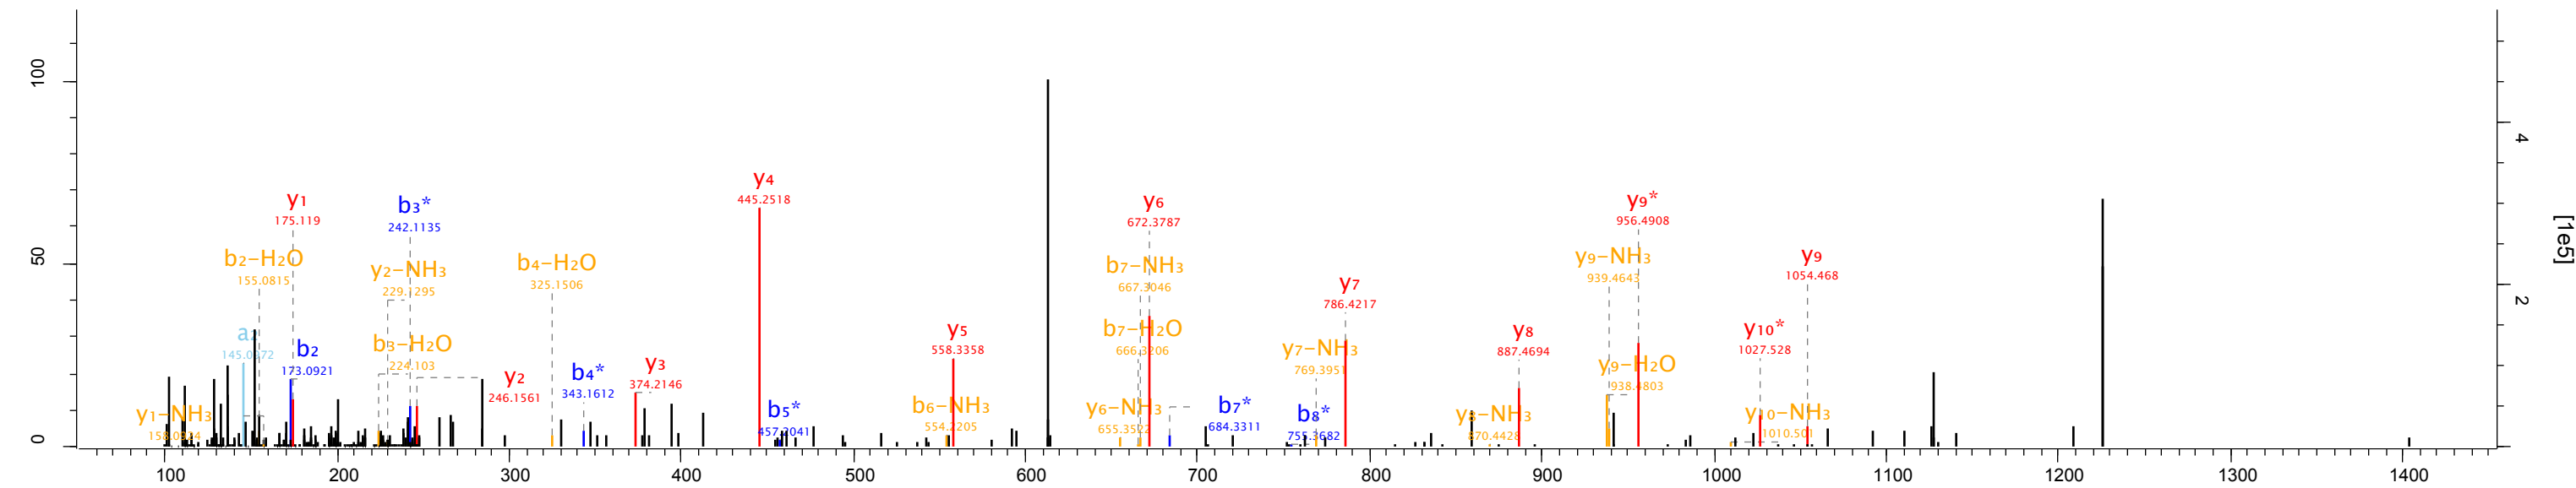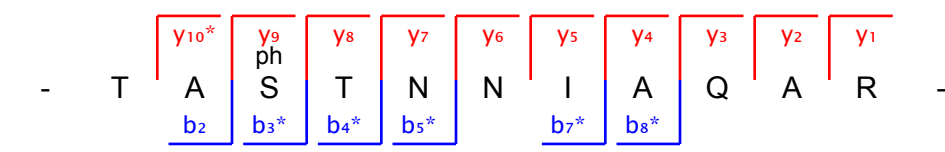

Raw file 20171215\_MaS\_33SR\_LMH\_phospho\_05 Scan 3957 Method FTMS; HCD Score 42.19 m/z 486.9 Gene names CRELD2

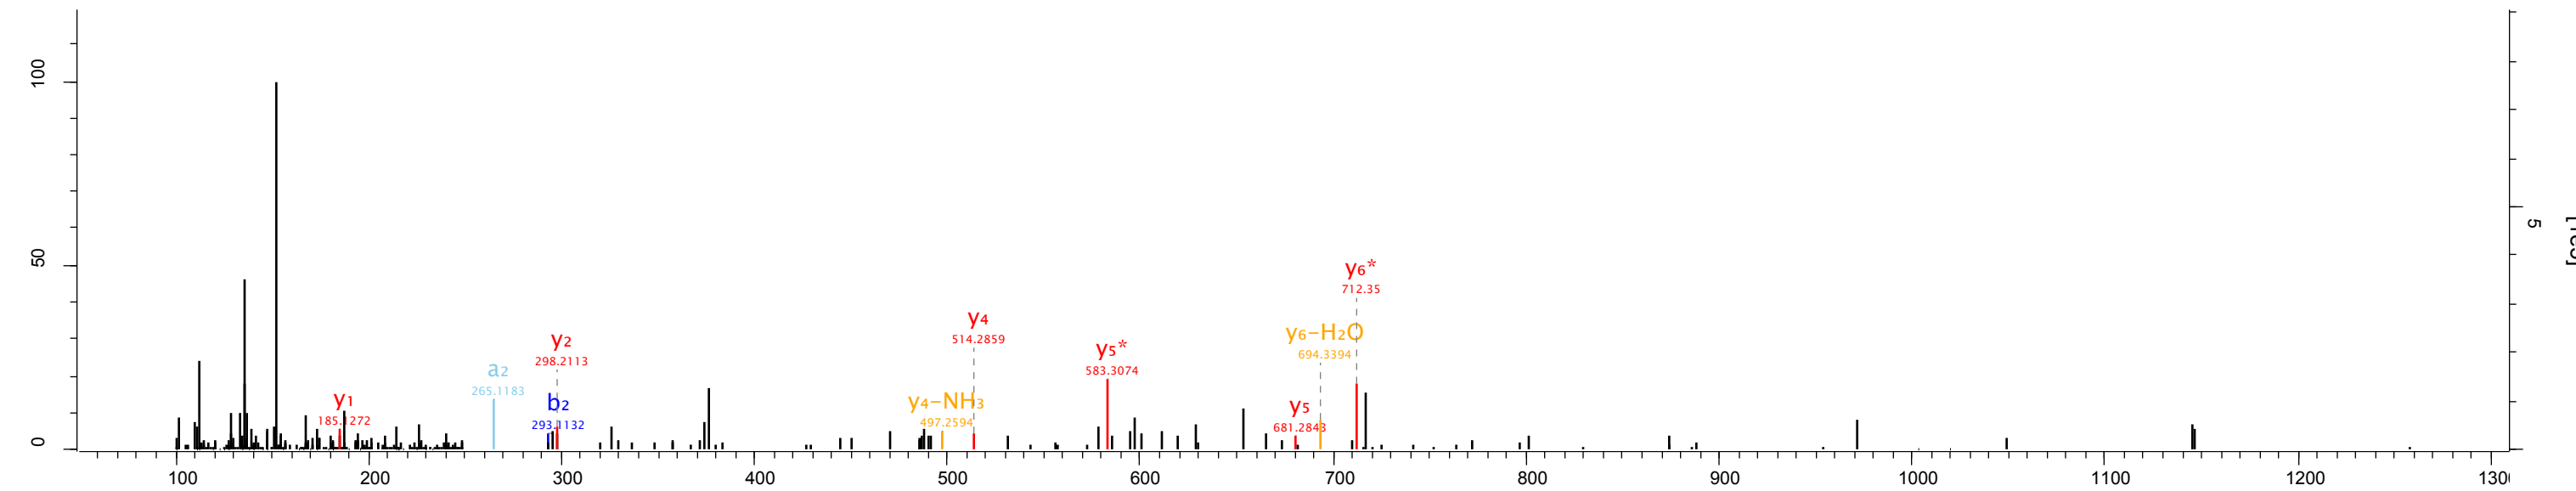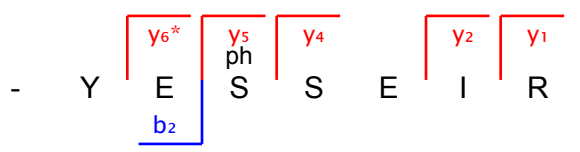

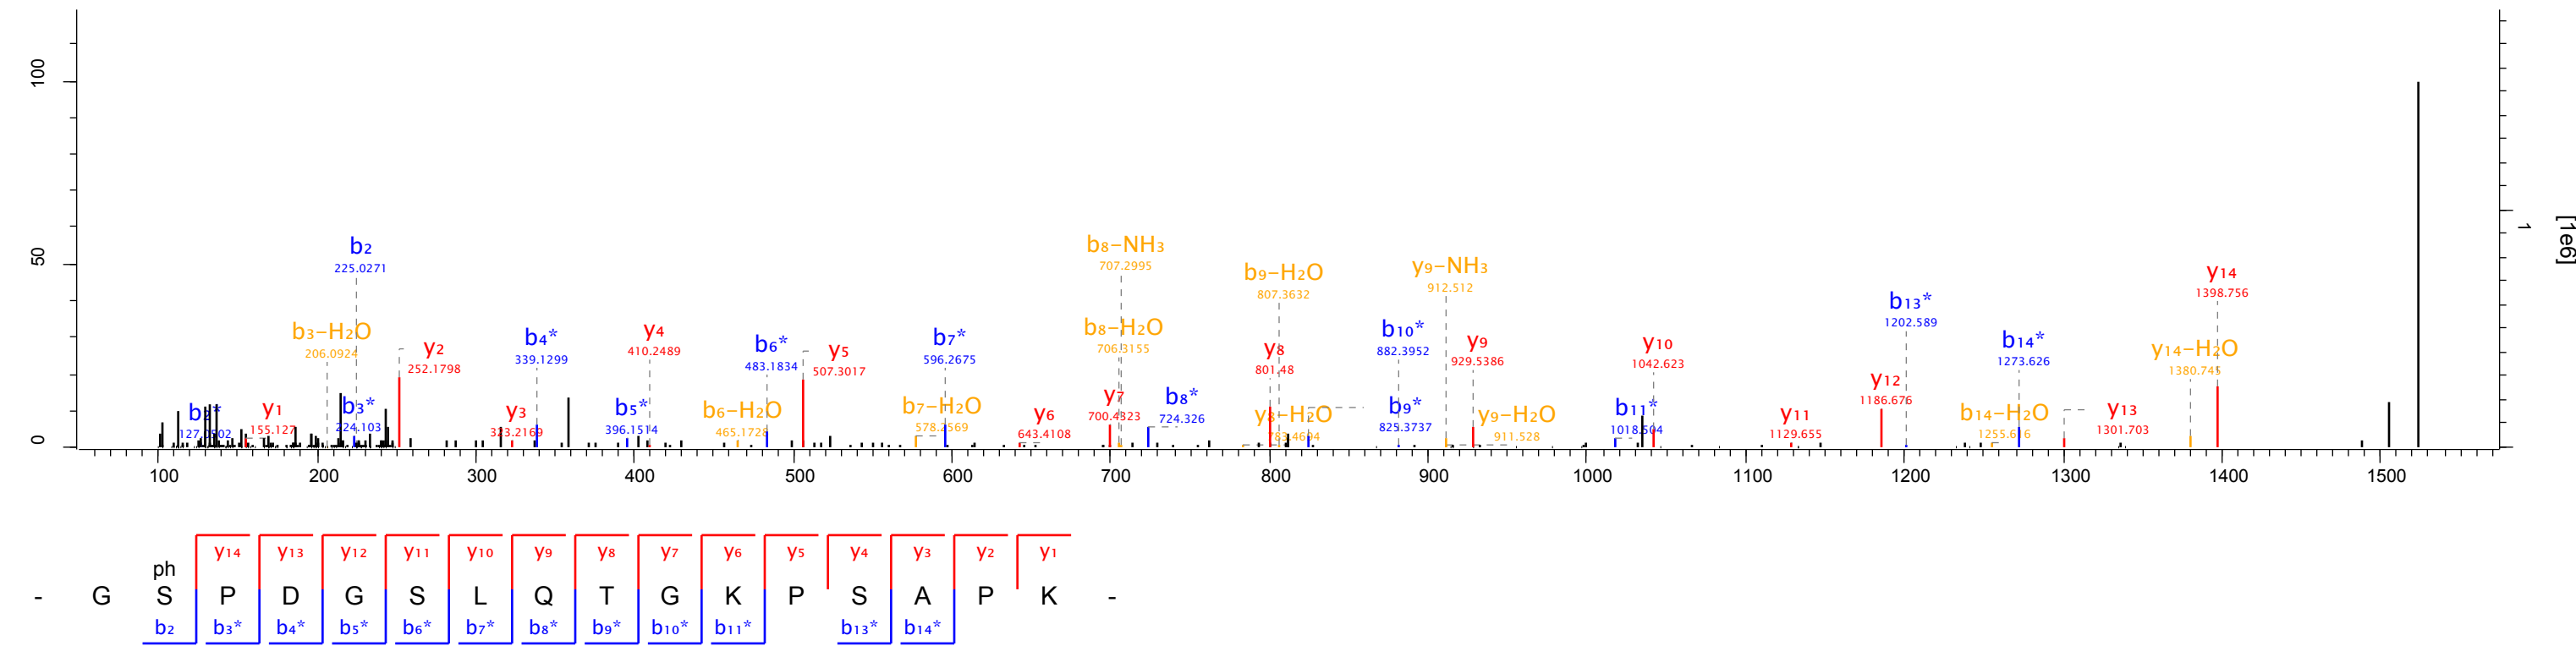

Raw file 20171215\_MaS\_33SR\_LMH\_phospho\_05 Scan 4047 Method FTMS; HCD Score 113.22 m/z 541.26 Gene names SRRM1

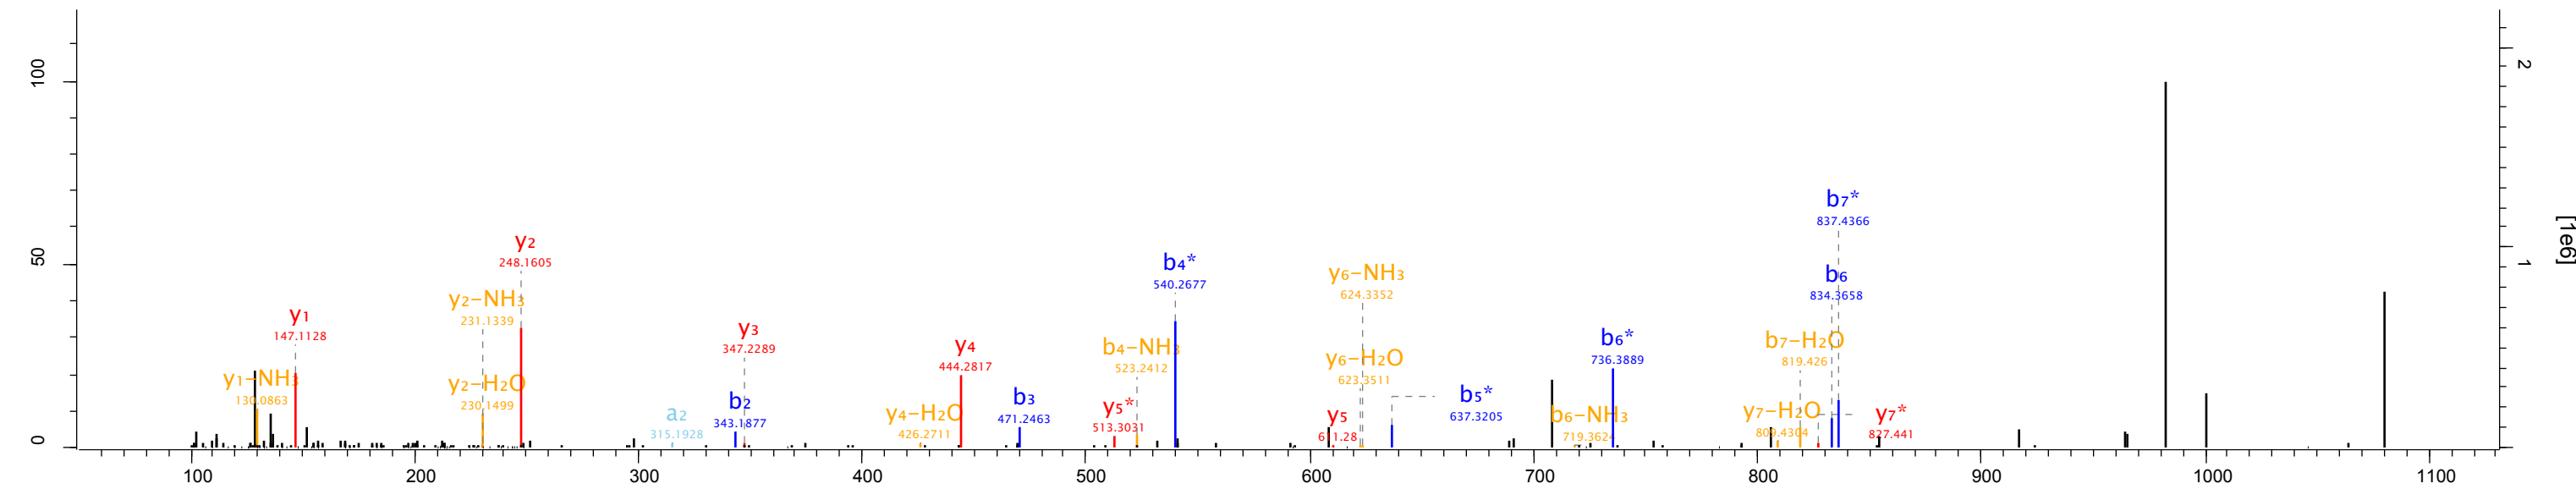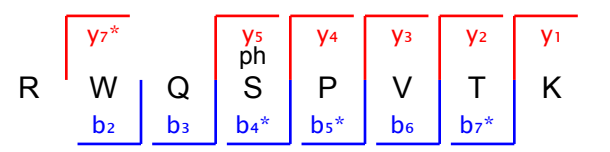

Raw file 20171215\_MaS\_33SR\_LMH\_phospho\_05 Scan 4077 Method FTMS; HCD Score 228.25 m/z 718.32 Gene names OGFR

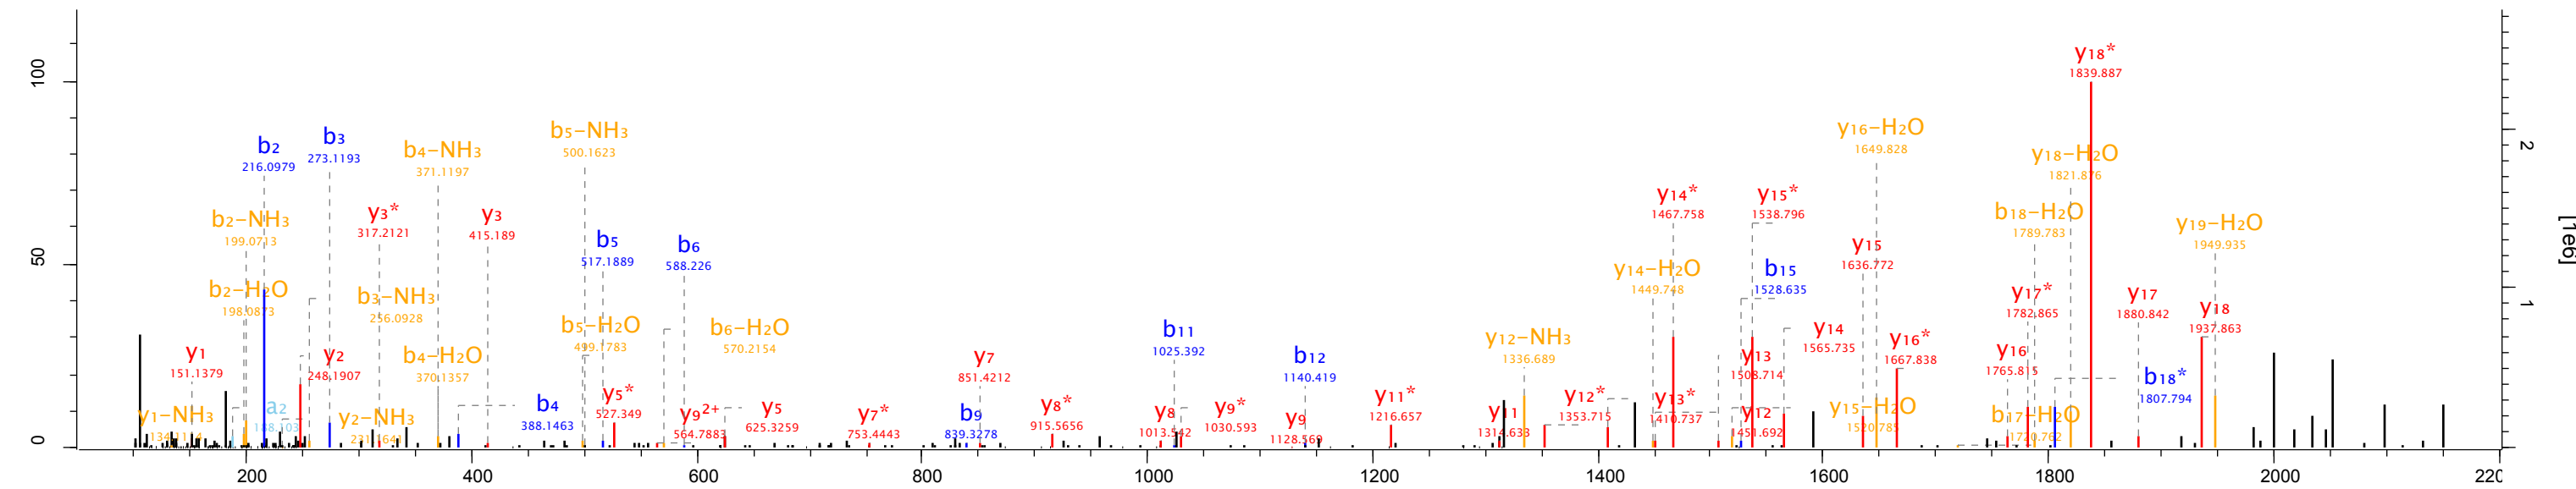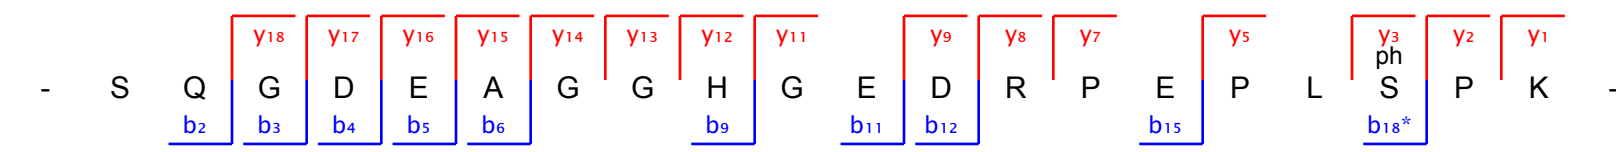



Raw file 20171215\_MaS\_33SR\_LMH\_phospho\_05 Scan 4657 Method FTMS; HCD Score 82.77 m/z 498.74 Gene names SOX10

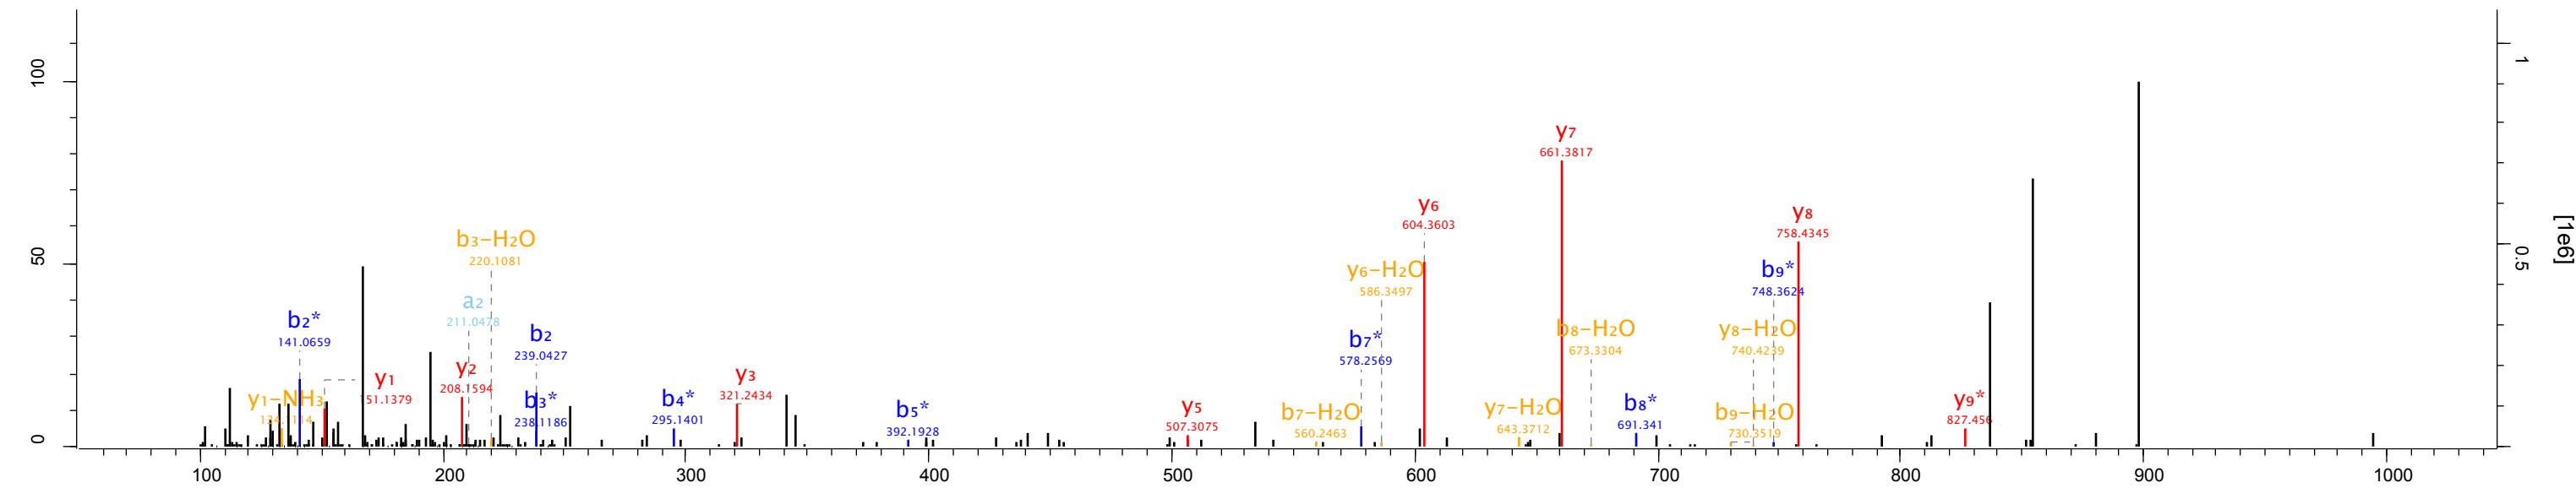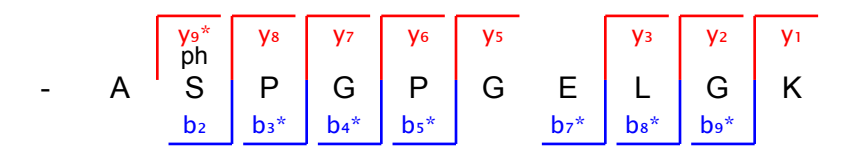

Raw file 20171215\_MaS\_33SR\_LMH\_phospho\_05 Scan 4697 Method FTMS; HCD Score 124.92 m/z 466.18 Gene names TJP2

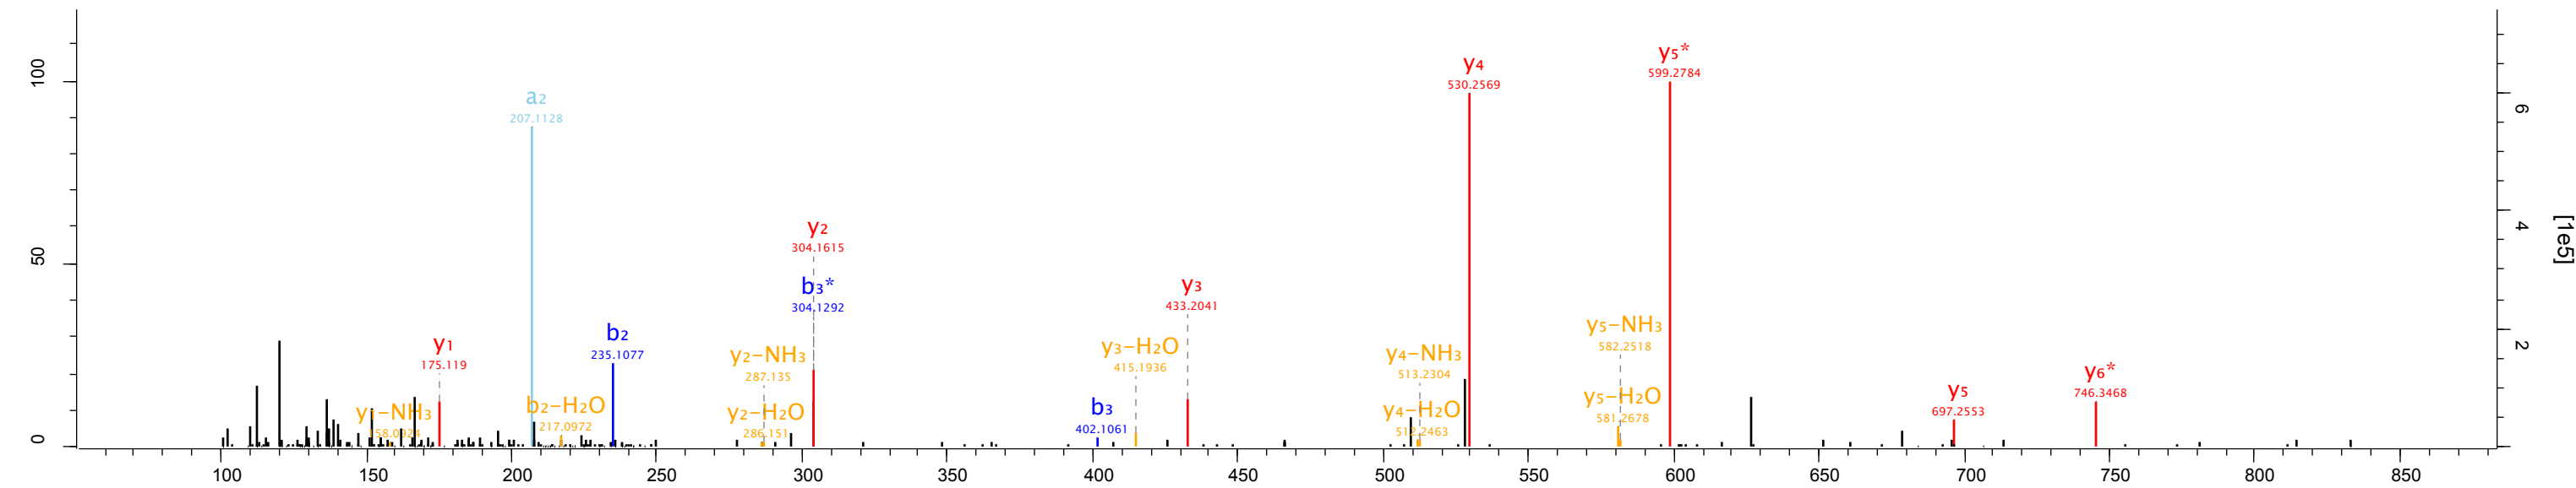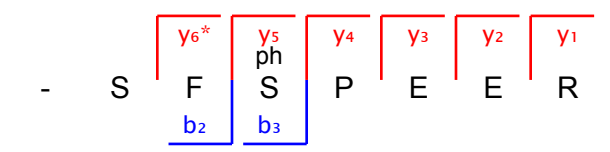

Raw file 20171215\_MaS\_33SR\_LMH\_phospho\_05 Scan 5097 Method FTMS; HCD Score 134.68 m/z 590.76 Gene names BAZ2A

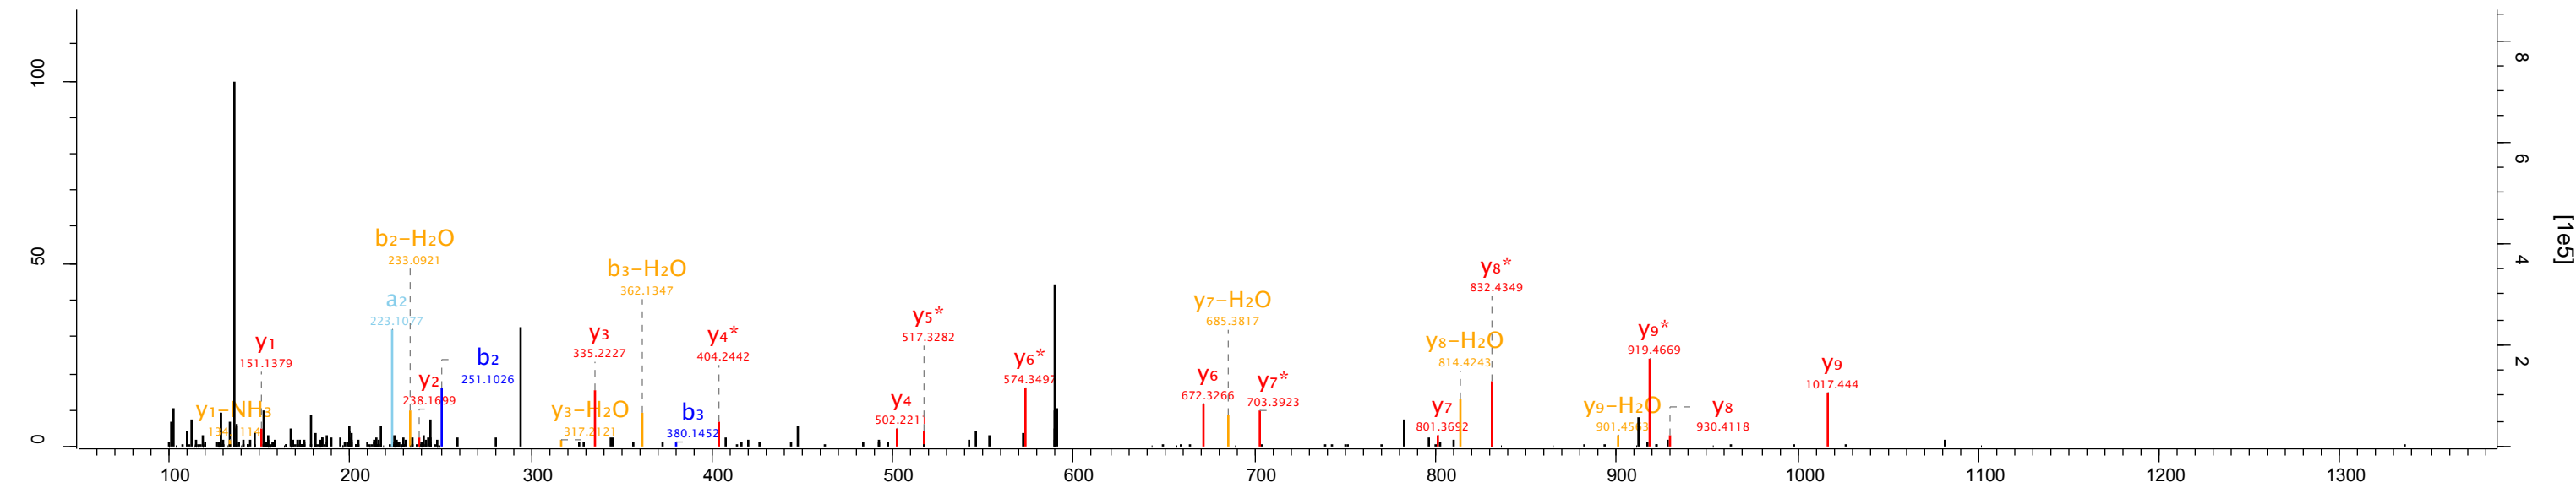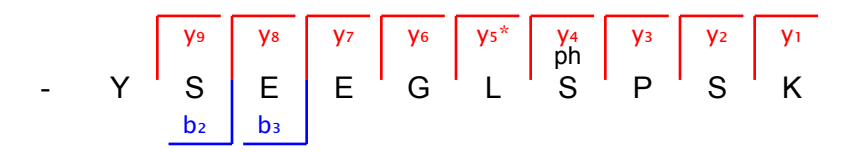

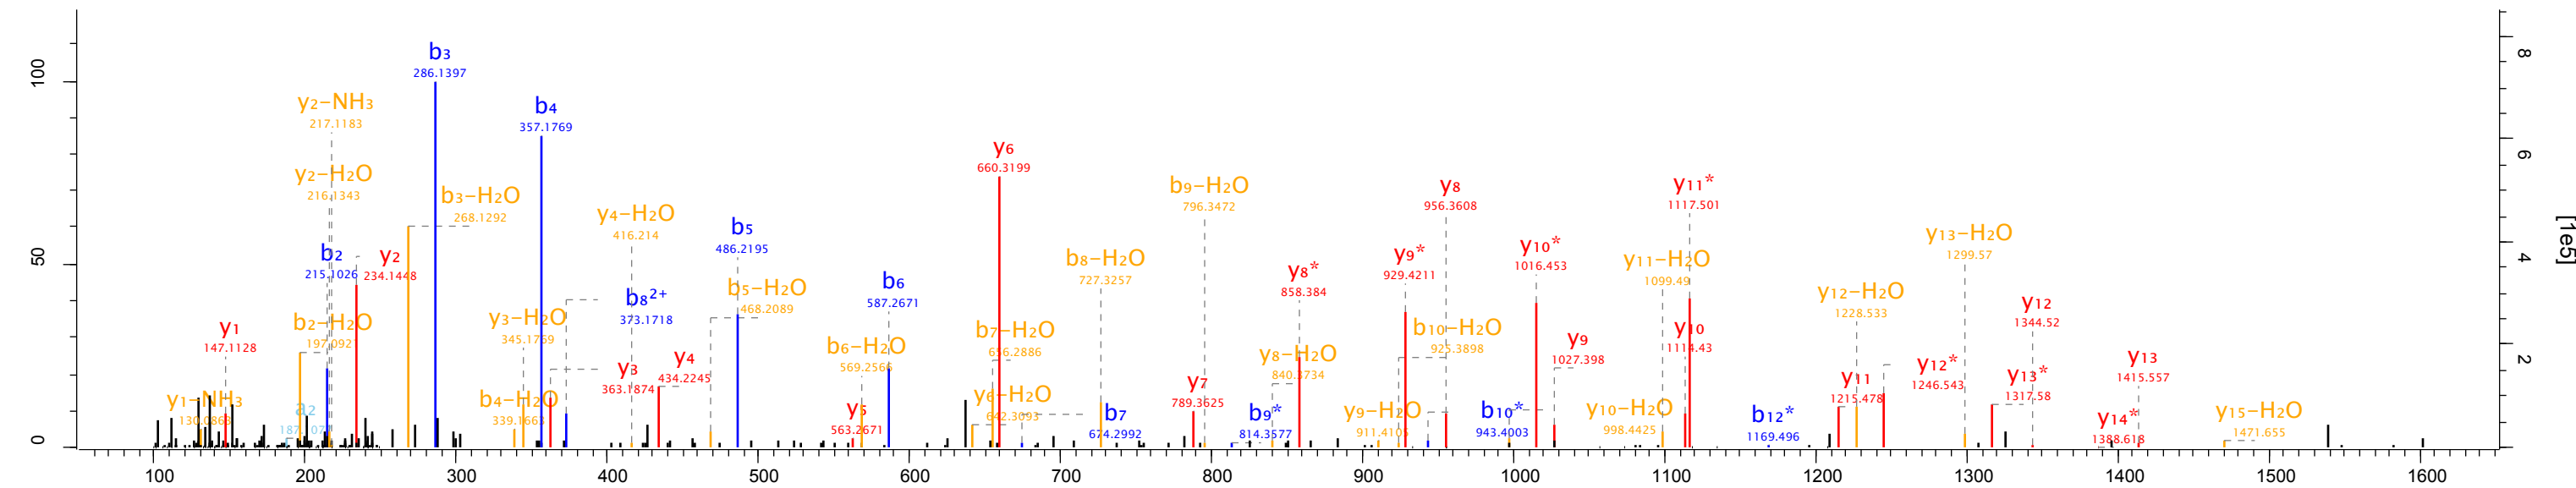

ac

-

A T A A E T S A S E P E A E S K -

b<sub>2</sub> b<sub>3</sub> b<sub>4</sub> b<sub>5</sub> b<sub>6</sub> b<sub>7</sub> b<sub>8</sub><sup>2+</sup> b<sub>9</sub><sup>\*</sup> b<sub>10</sub><sup>\*</sup> b<sub>12</sub><sup>\*</sup>

y<sub>14</sub><sup>\*</sup> y<sub>13</sub> y<sub>12</sub> y<sub>11</sub> y<sub>10</sub> y<sub>9</sub> y<sub>8</sub> ph y<sub>7</sub> y<sub>6</sub> y<sub>5</sub> y<sub>4</sub> y<sub>3</sub> y<sub>2</sub> y<sub>1</sub>

Raw file 20171215\_MaS\_33SR\_LMH\_phospho\_05 Scan 5387 Method FTMS; HCD Score 88.09 m/z 584.29 Gene names NFKB2

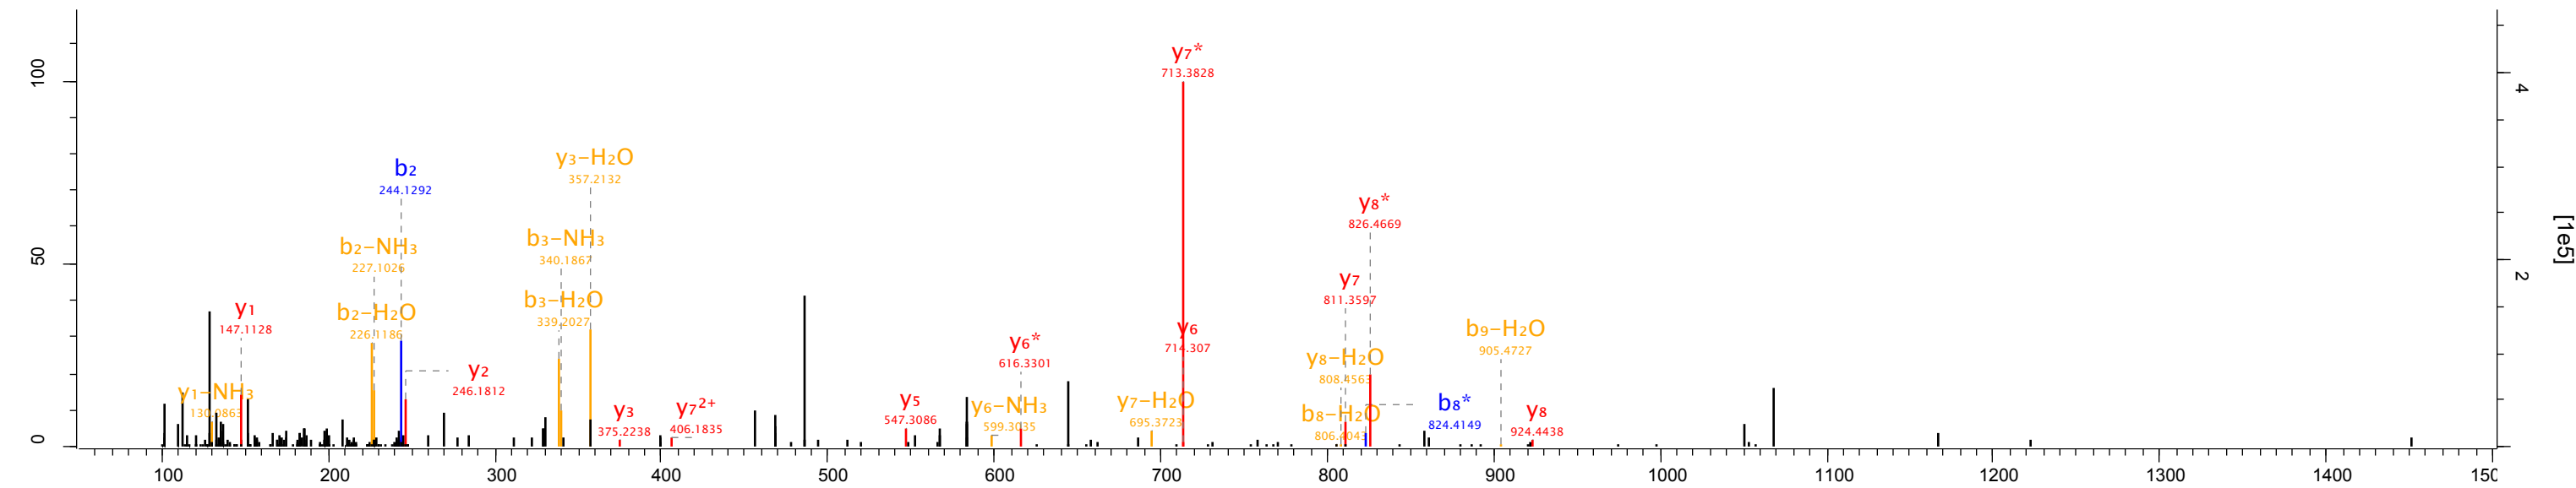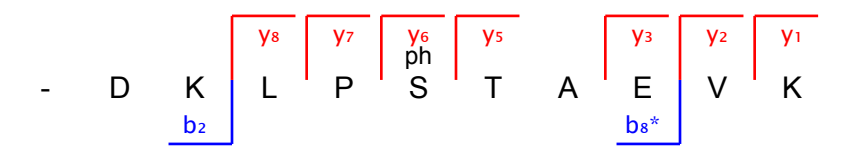

Raw file 20171215\_MaS\_33SR\_LMH\_phospho\_05 Scan 6097 Method FTMS; HCD Score 97.73 m/z 483.24 Gene names C16orf72

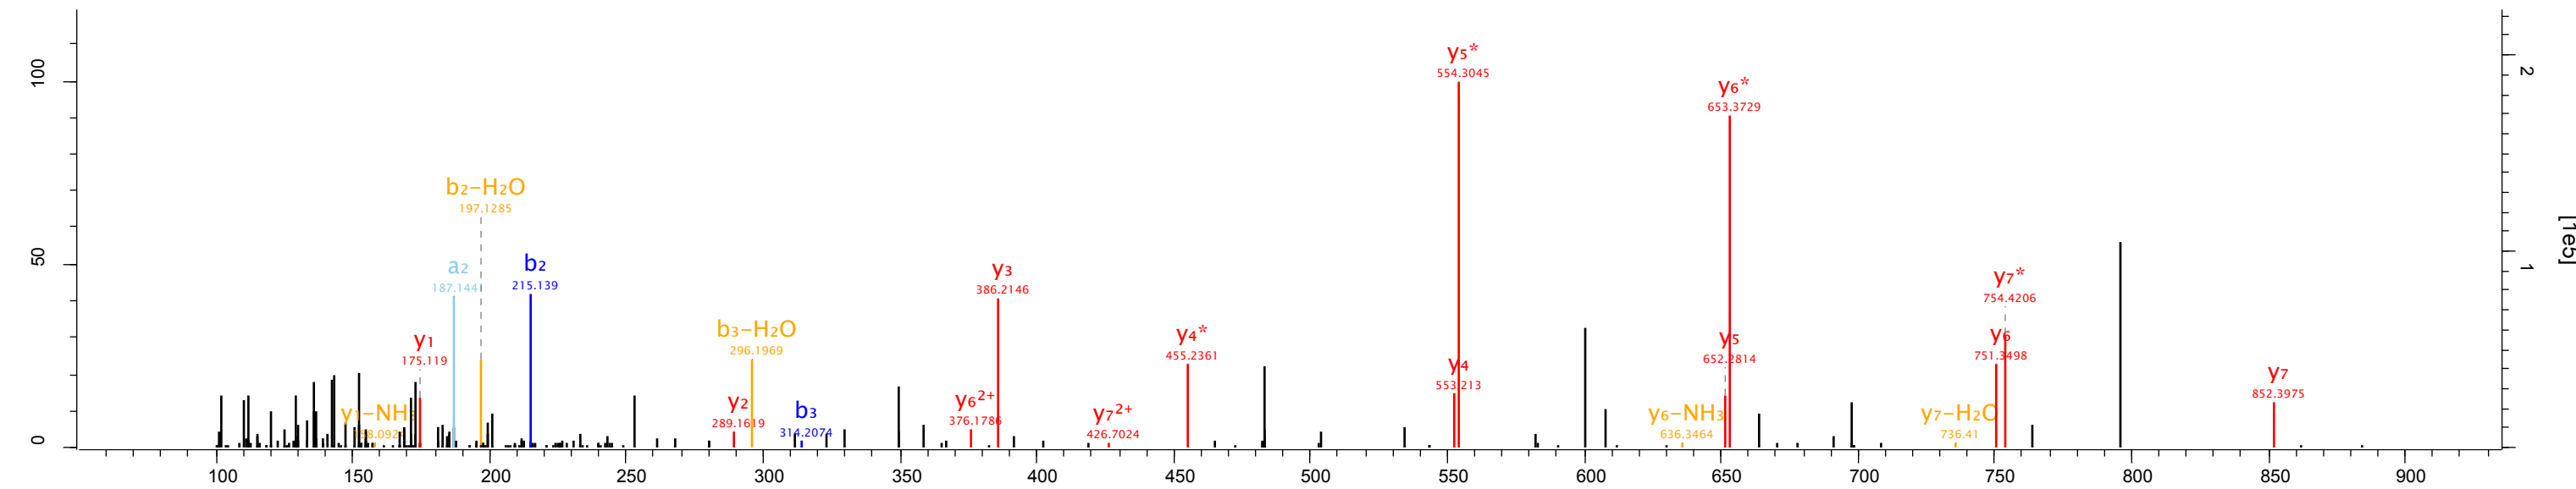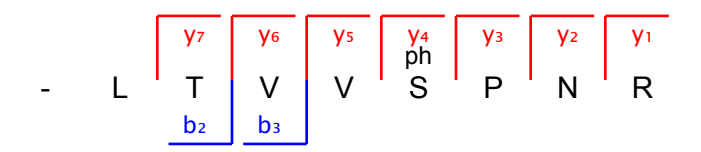

Raw file 20171215\_MaS\_33SR\_LMH\_phospho\_05 Scan 6257 Method FTMS; HCD Score 212.46 m/z 632.3 Gene names USP24

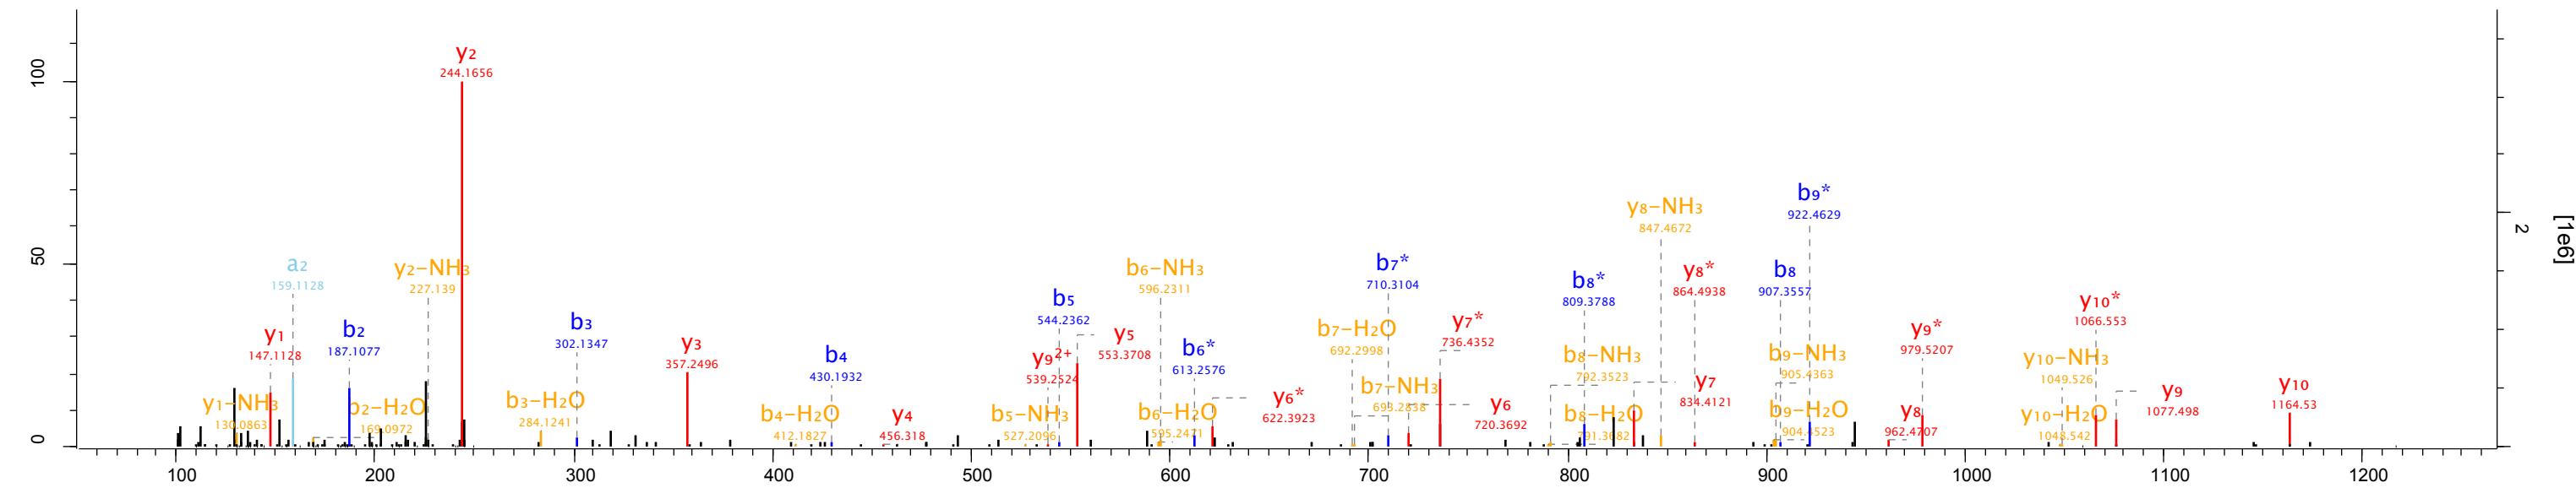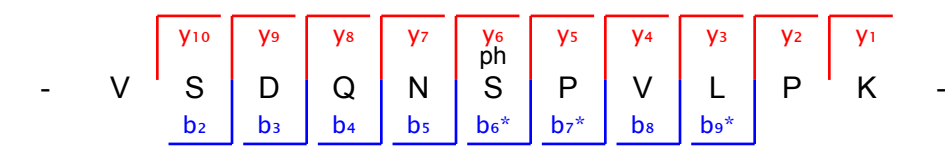

Raw file 20171215\_MaS\_33SR\_LMH\_phospho\_05 Scan 6957 Method FTMS; HCD Score 81.68 m/z 585.76 Gene names PRRC2C

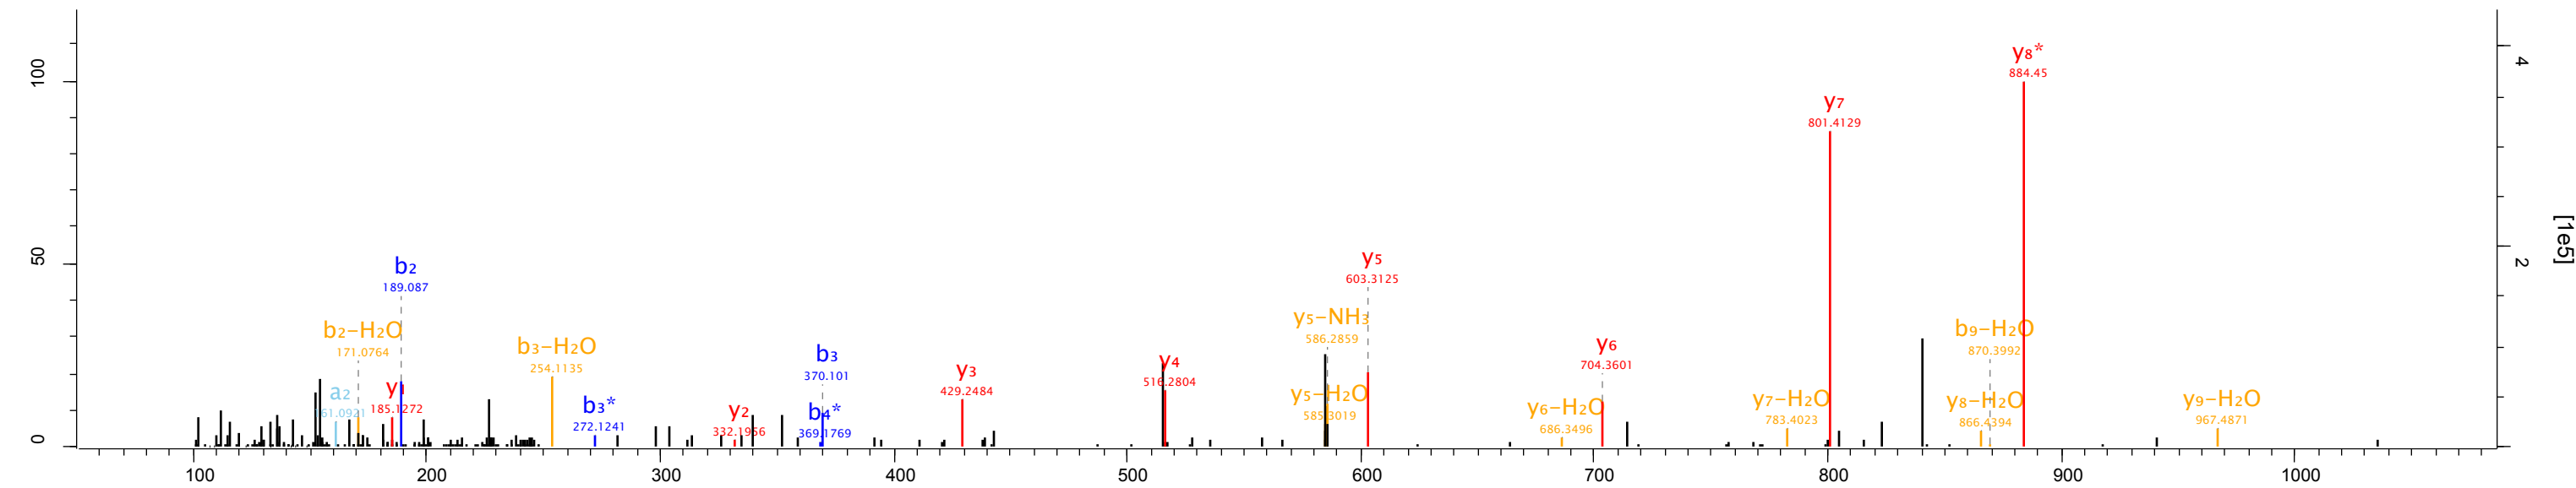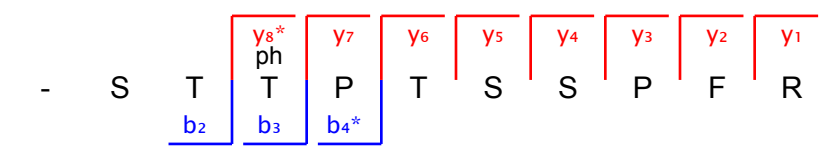



Raw file 20171215\_MaS\_33SR\_LMH\_phospho\_05 Scan 7737 Method FTMS; HCD Score 132.79 m/z 645.76 Gene names DTX3L

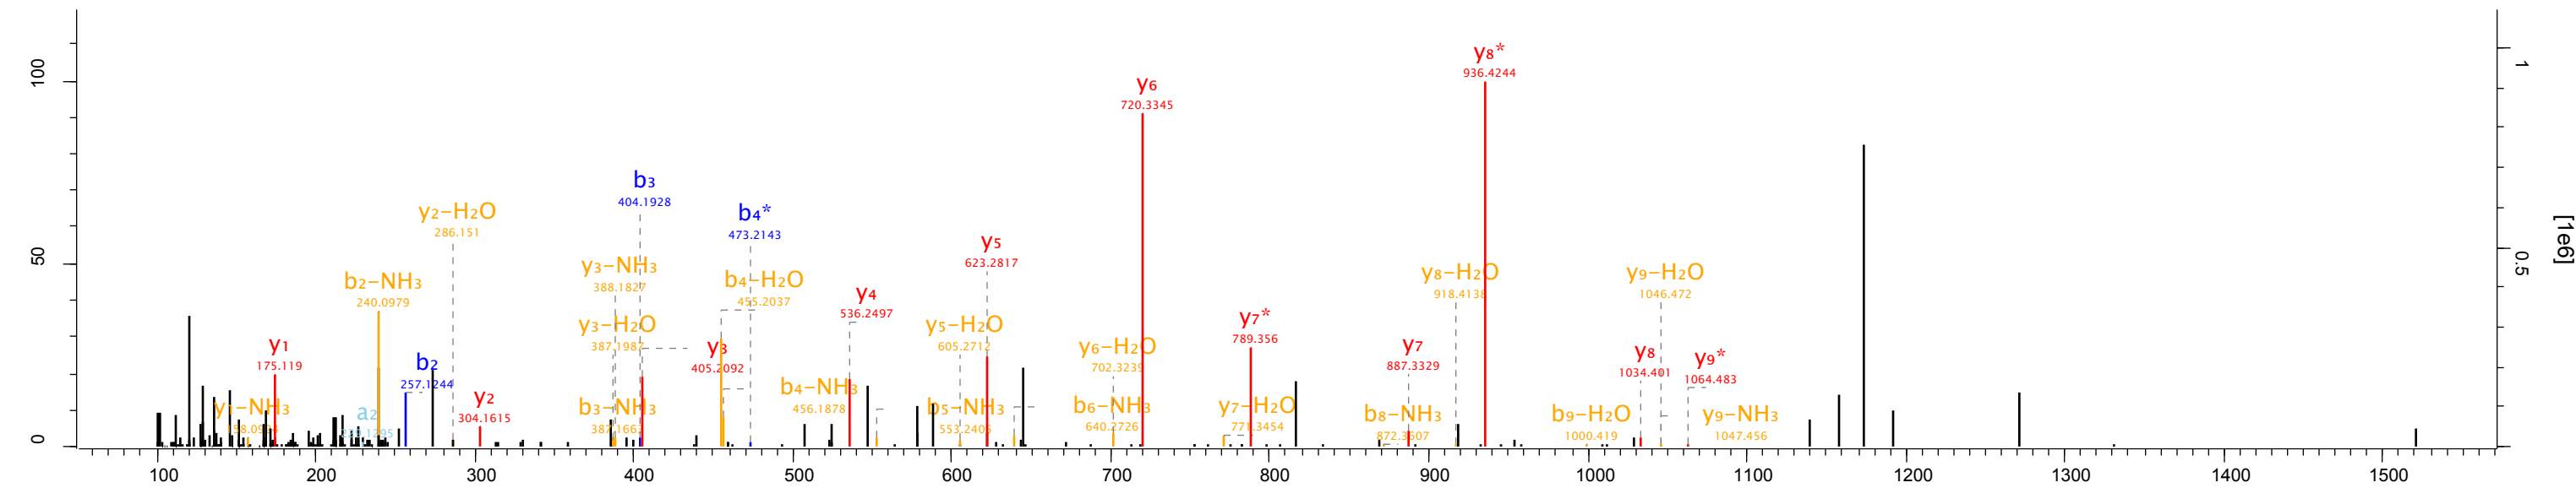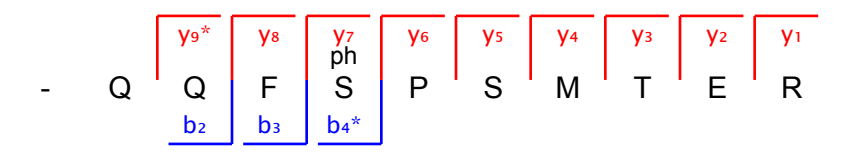

Raw file 20171215\_MaS\_33SR\_LMH\_phospho\_05 Scan 8297 Method FTMS; HCD Score 212.65 m/z 909.93 Gene names RRP15

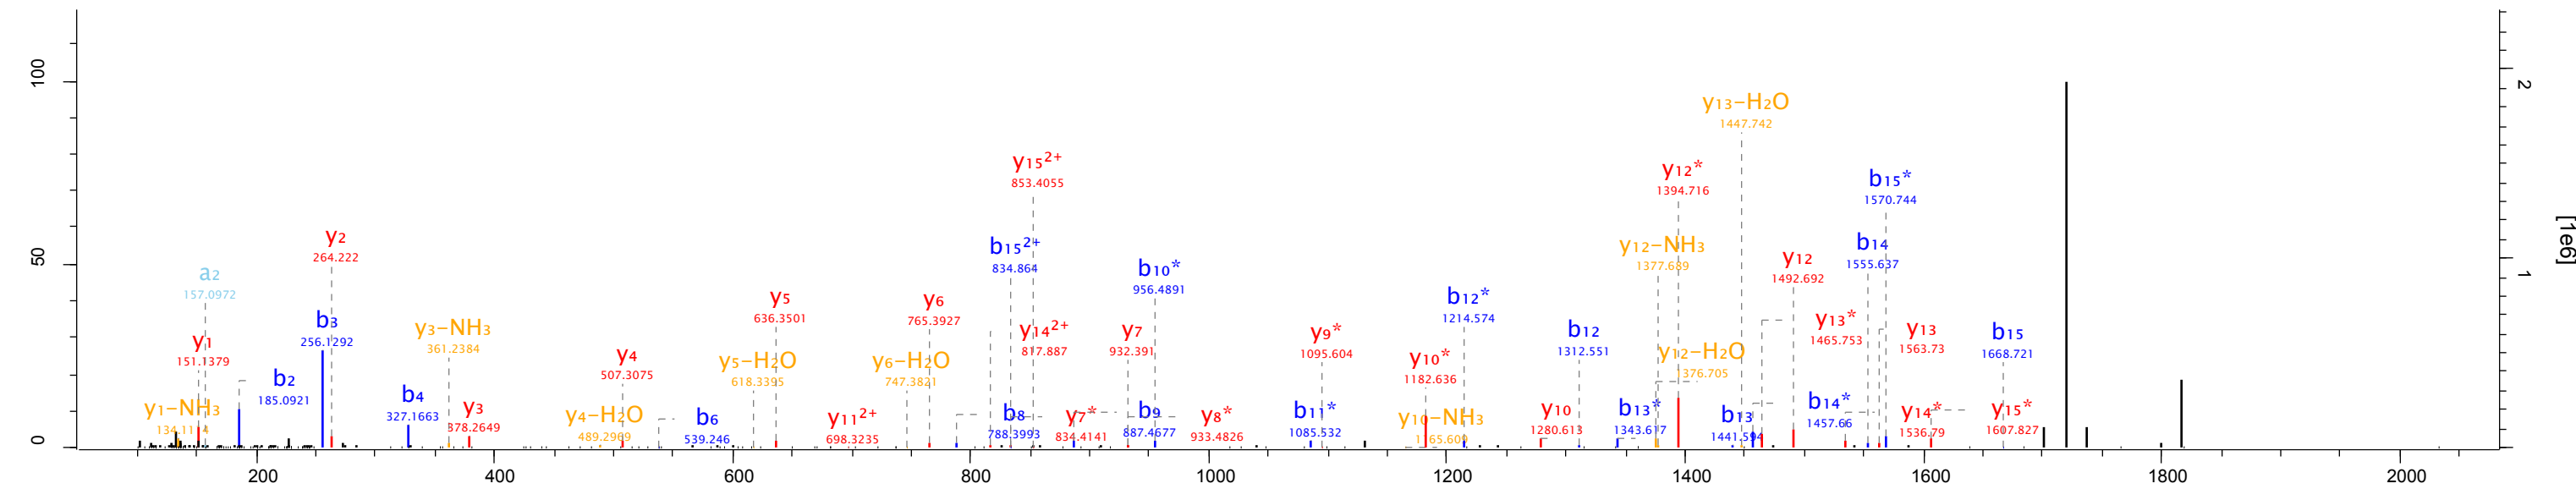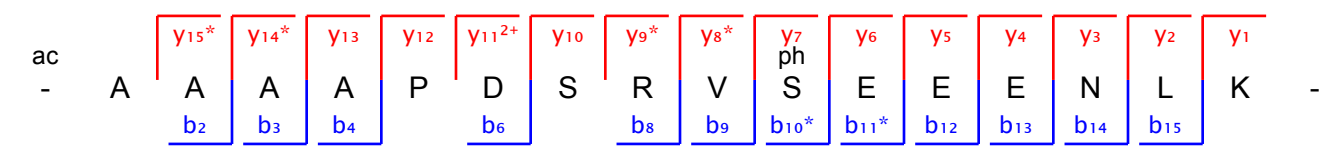

Raw file 20171215\_MaS\_33SR\_LMH\_phospho\_05 Scan 9137 Method FTMS; HCD Score 130.2 m/z 620.8 Gene names NBN

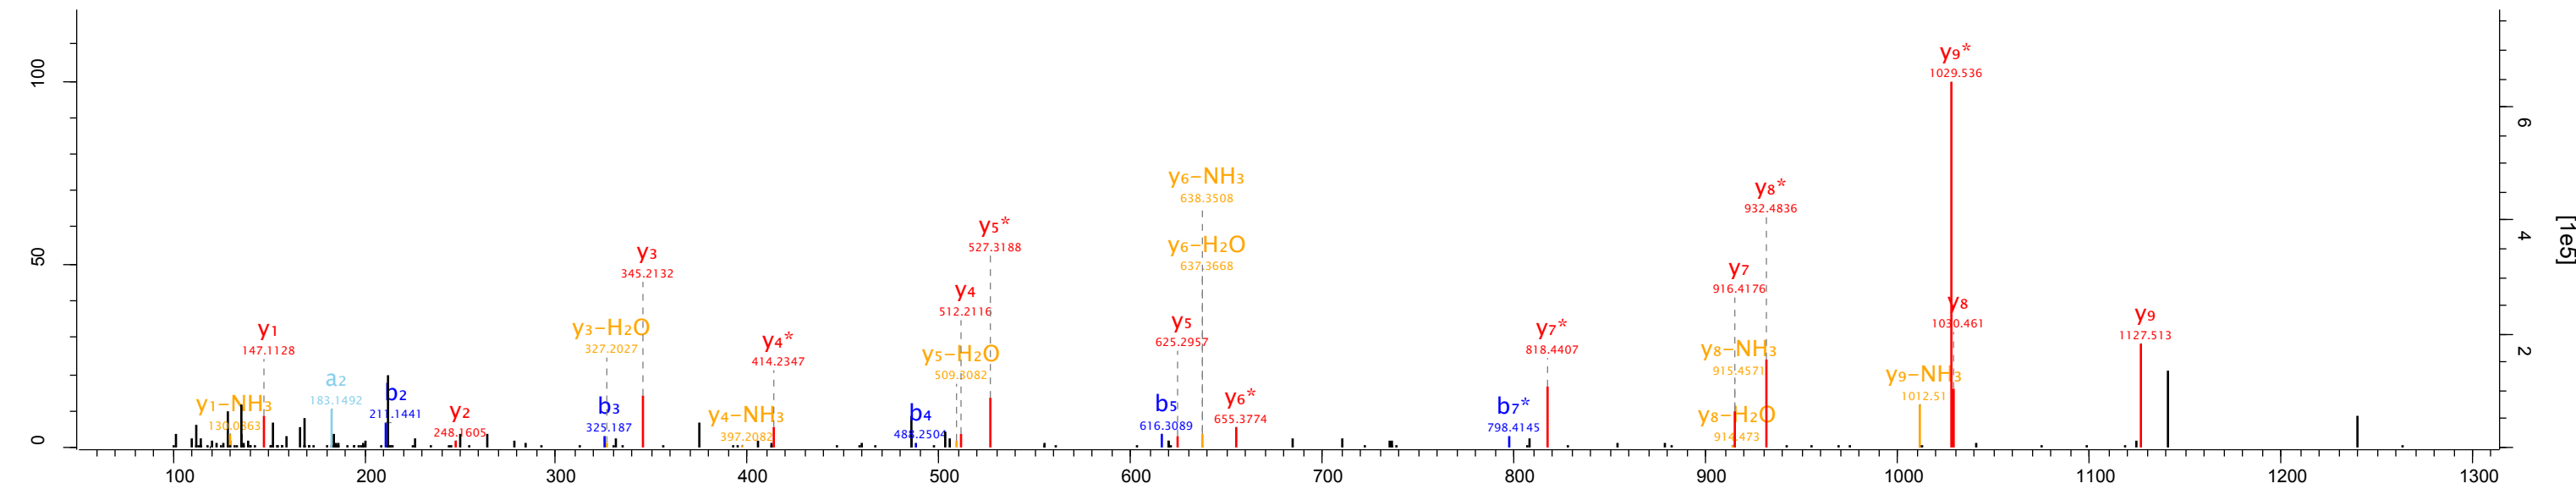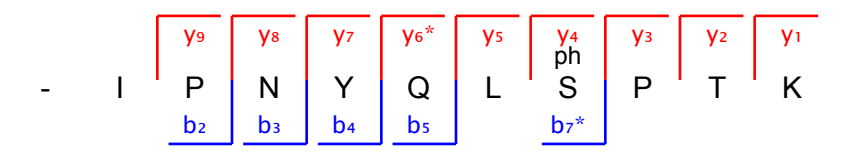

- I P N Y Q L S P T K -

Raw file 20171215\_MaS\_33SR\_LMH\_phospho\_05 Scan 9277 Method FTMS; HCD Score 168.92 m/z 1134.49 Gene names DOCK7

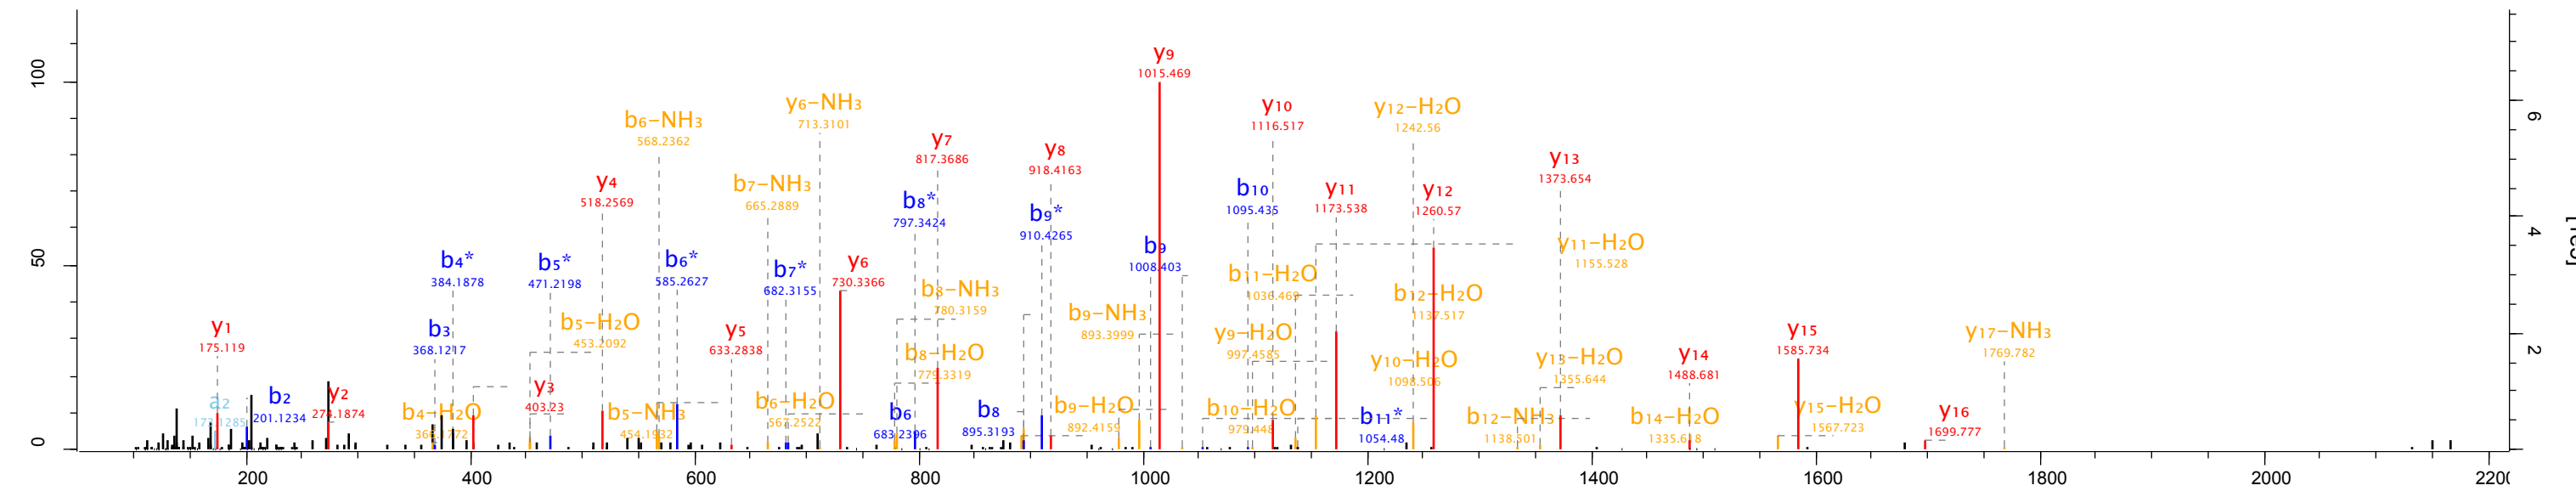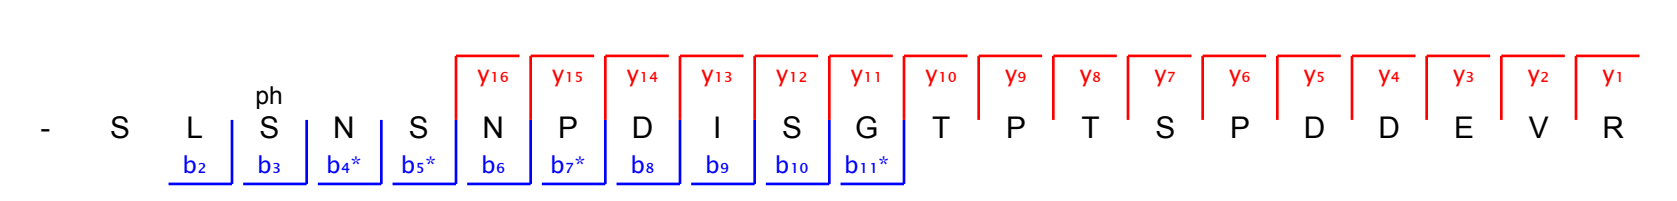

Raw file 20171215\_MaS\_33SR\_LMH\_phospho\_06 Scan 10097 Method FTMS; HCD Score 124.33 m/z 469.24 Gene names CCNL1

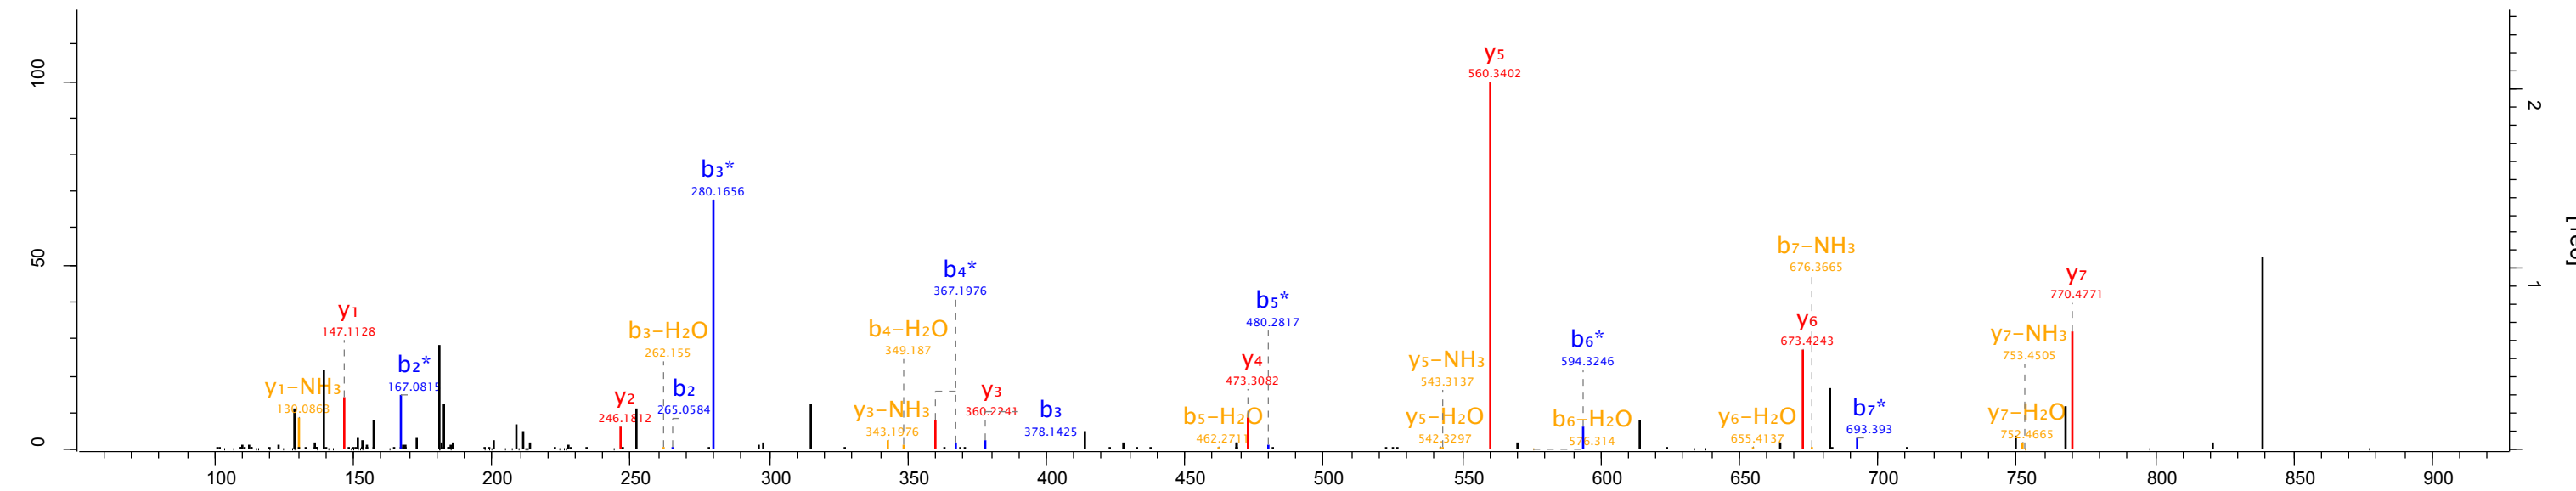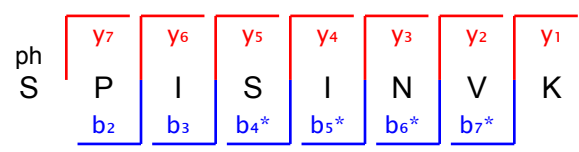

Raw file 20171215\_MaS\_33SR\_LMH\_phospho\_06 Scan 10107 Method FTMS; HCD Score 112.94 m/z 521.26 Gene names SURF6

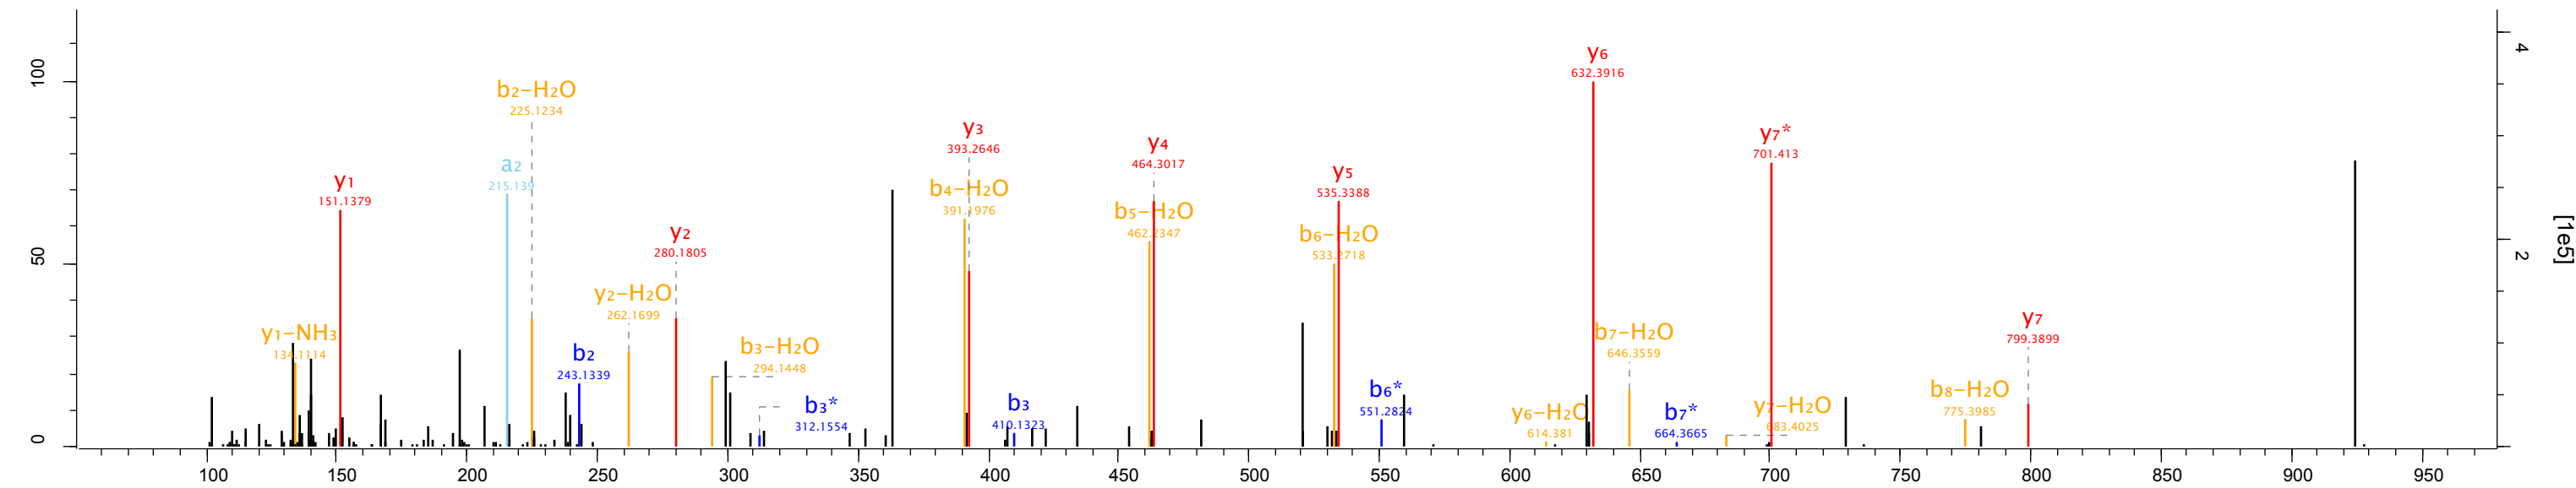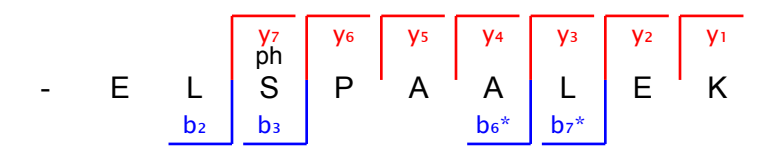

Raw file 20171215\_MaS\_33SR\_LMH\_phospho\_06 Scan 10507 Method FTMS; HCD Score 76.68 m/z 409.21 Gene names TPX2

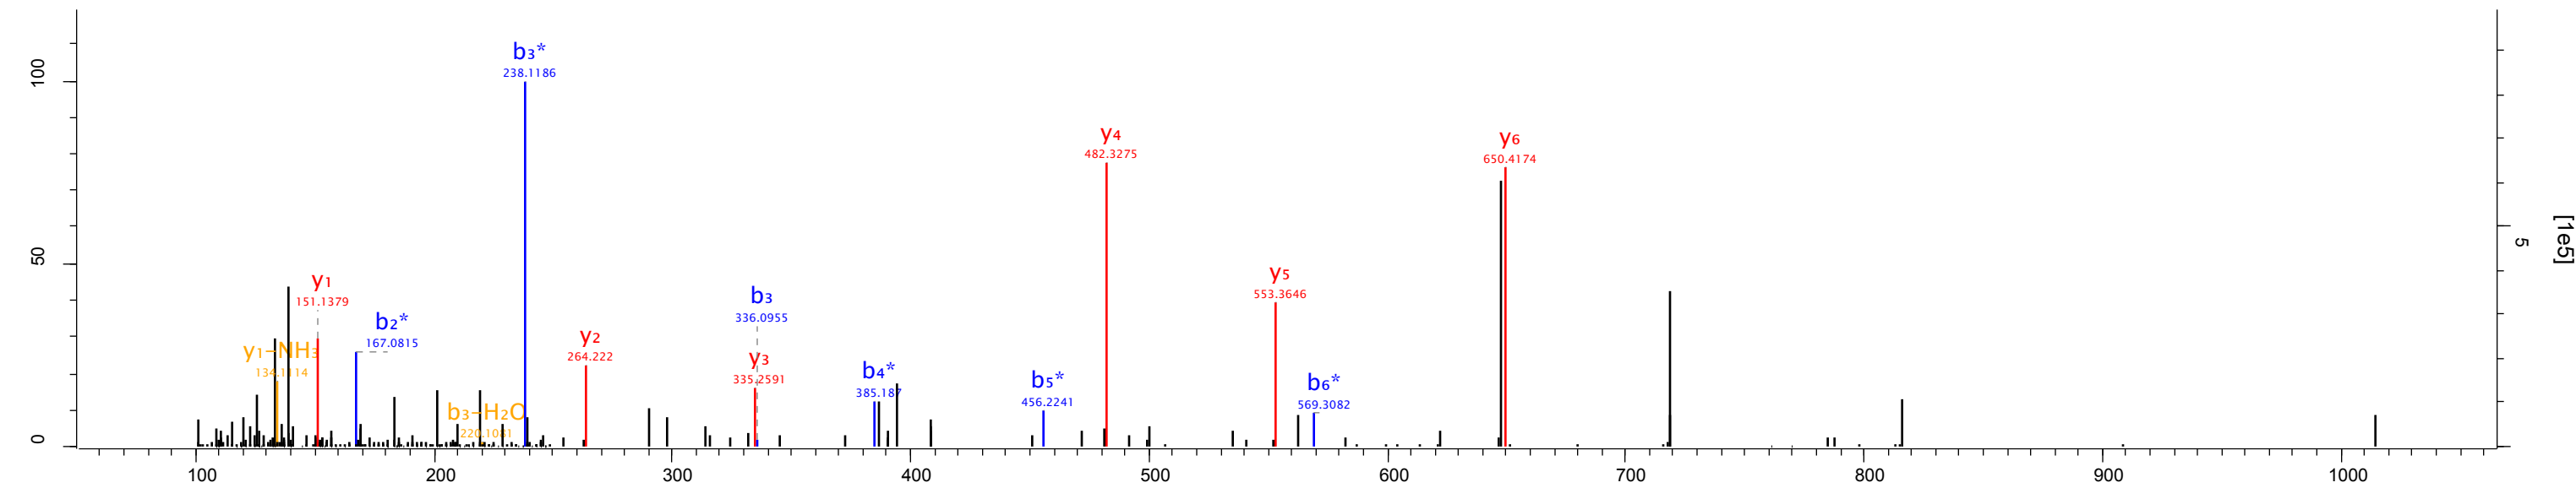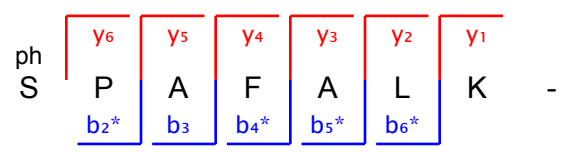

Raw file 20171215\_MaS\_33SR\_LMH\_phospho\_06 Scan 10587 Method FTMS; HCD Score 436.7 m/z 973.4 Gene names SRRM1

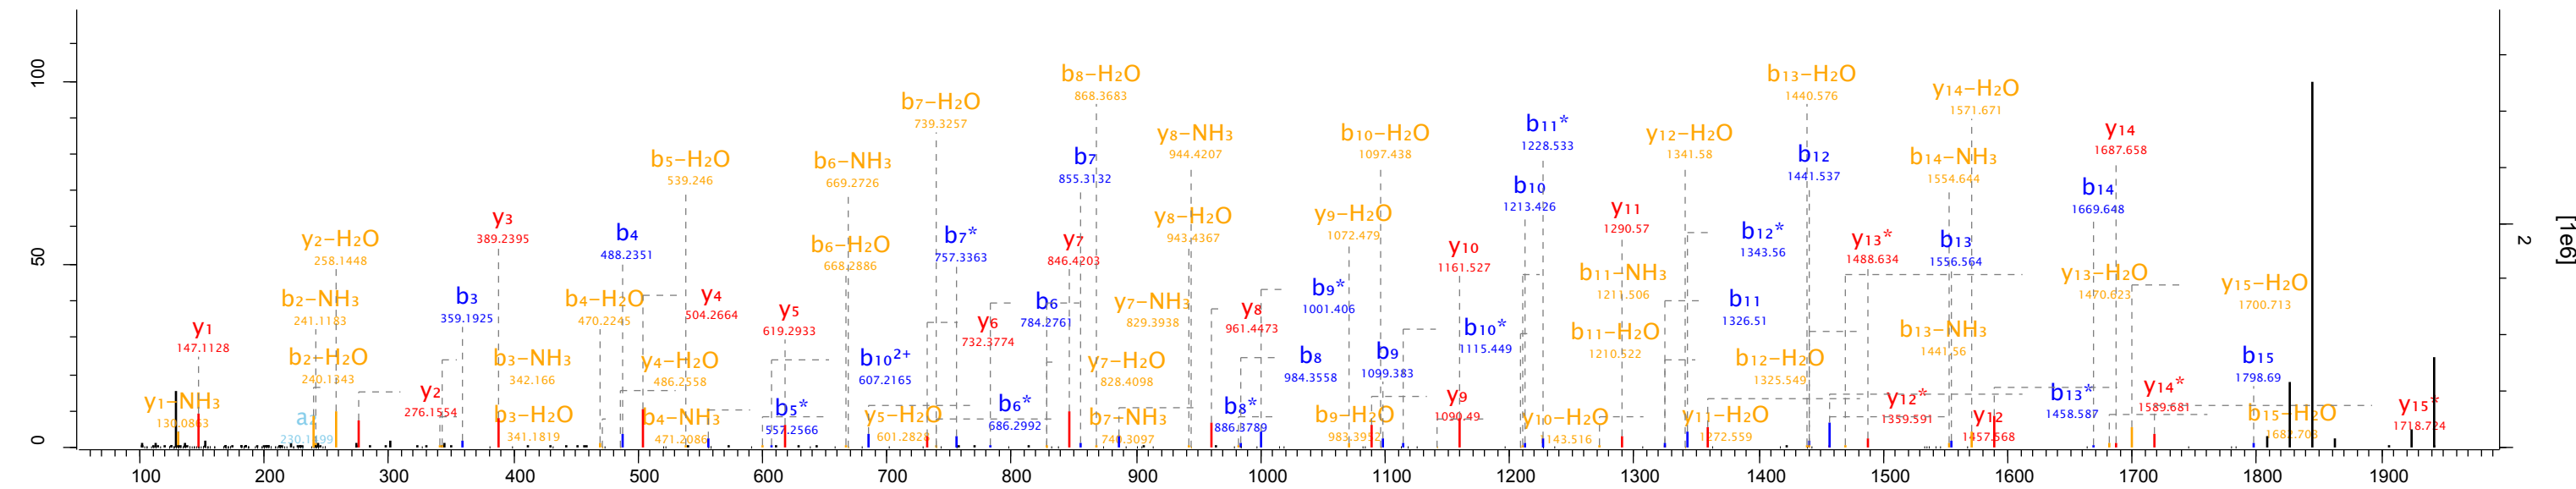

- K E T E S E A E D N L D D L E K -

y15\*
y14
y13\*
y12<sub>ph</sub>
y11
y10
y9
y8
y7
y6
y5
y4
y3
y2
y1

a<sub>2</sub>
b<sub>3</sub>
b<sub>4</sub>
b<sub>5</sub>\*
b<sub>6</sub>
b<sub>7</sub>
b<sub>8</sub>
b<sub>9</sub>
b<sub>10</sub>
b<sub>11</sub>
b<sub>12</sub>
b<sub>13</sub>
b<sub>14</sub>
b<sub>15</sub>





Raw file 20171215\_MaS\_33SR\_LMH\_phospho\_06 Scan 11227 Method FTMS; HCD Score 62.32 m/z 888.38 Gene names PRRC2B

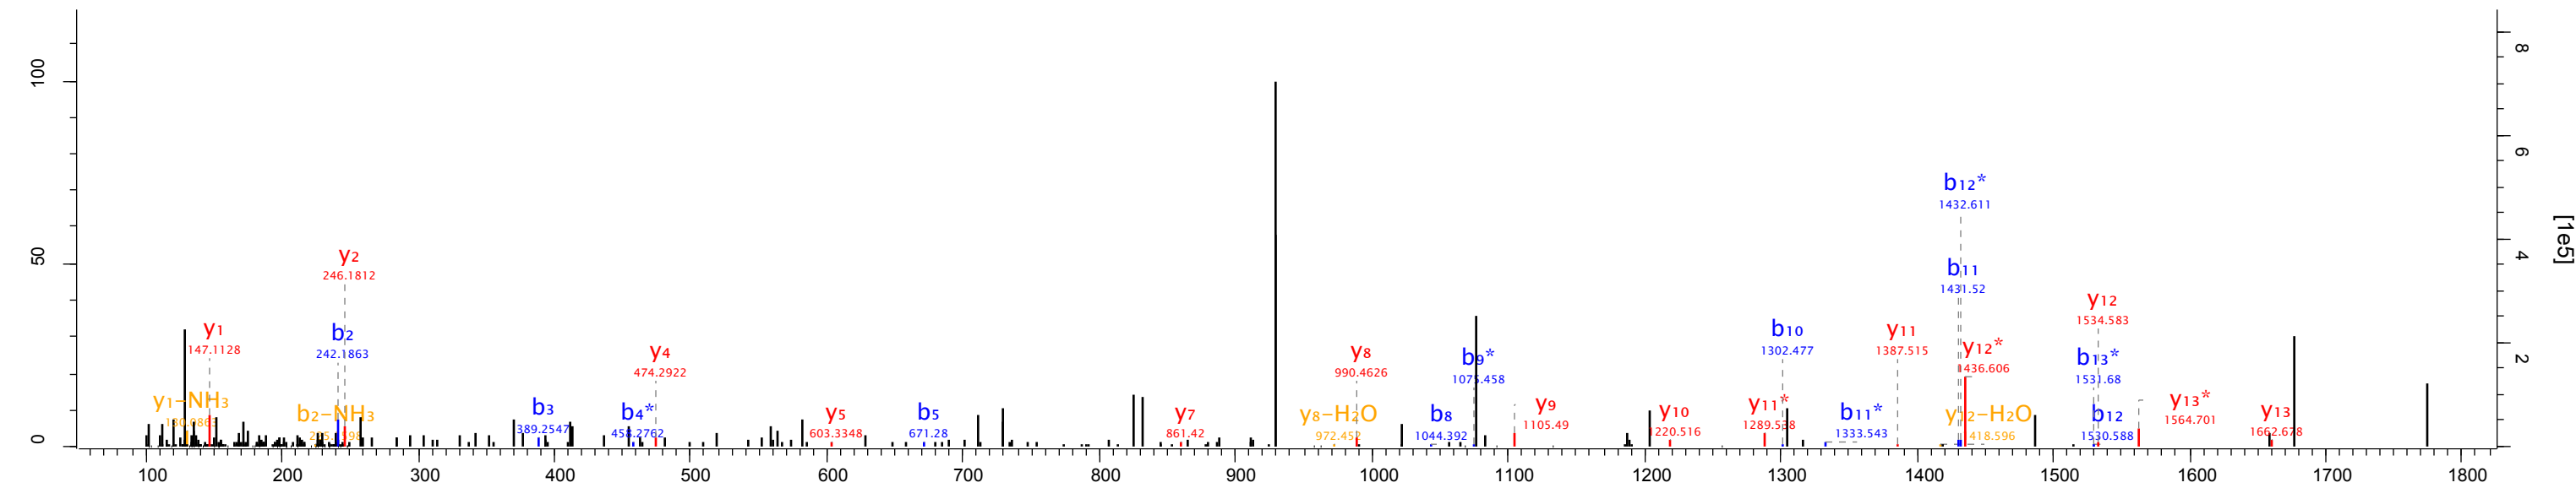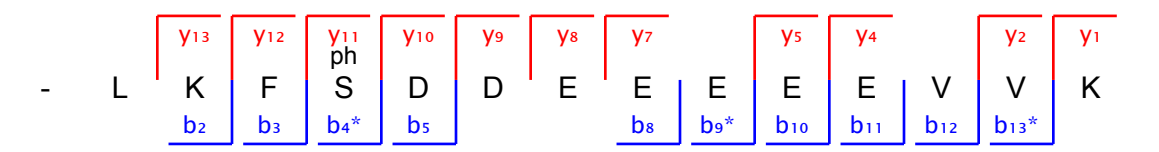

Raw file 20171215\_MaS\_33SR\_LMH\_phospho\_06 Scan 11627 Method FTMS; HCD Score 61.99 m/z 657.28 Gene names TOP1

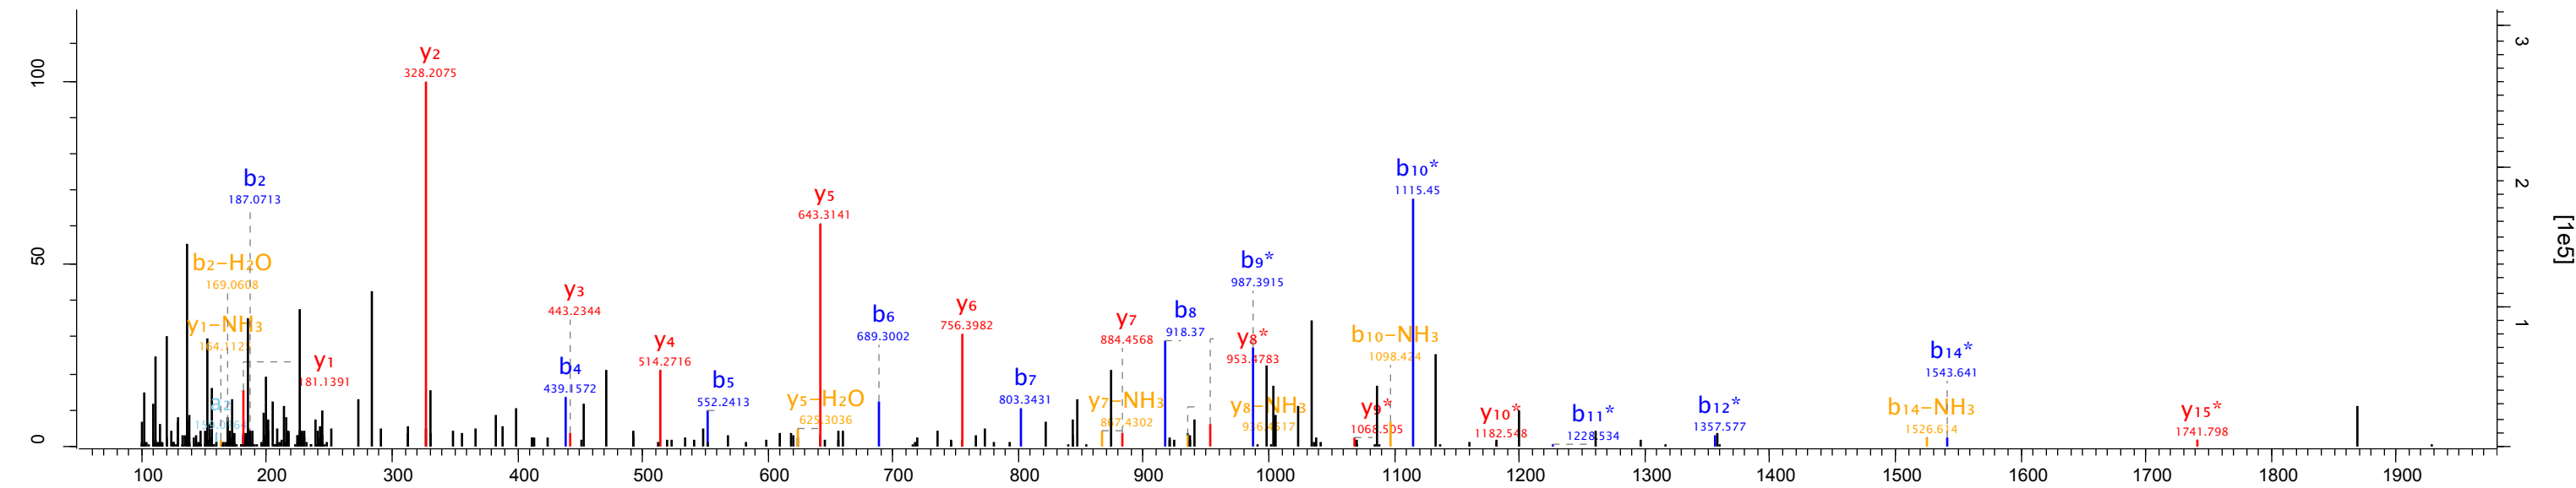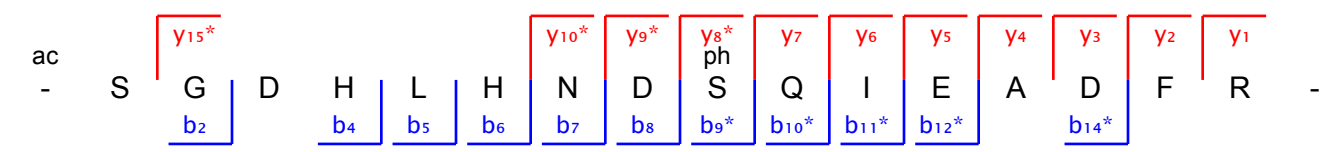

Raw file 20171215\_MaS\_33SR\_LMH\_phospho\_06 Scan 12107 Method FTMS; HCD Score 140.57 m/z 961.43 Gene names SPATA22;EPS15L1

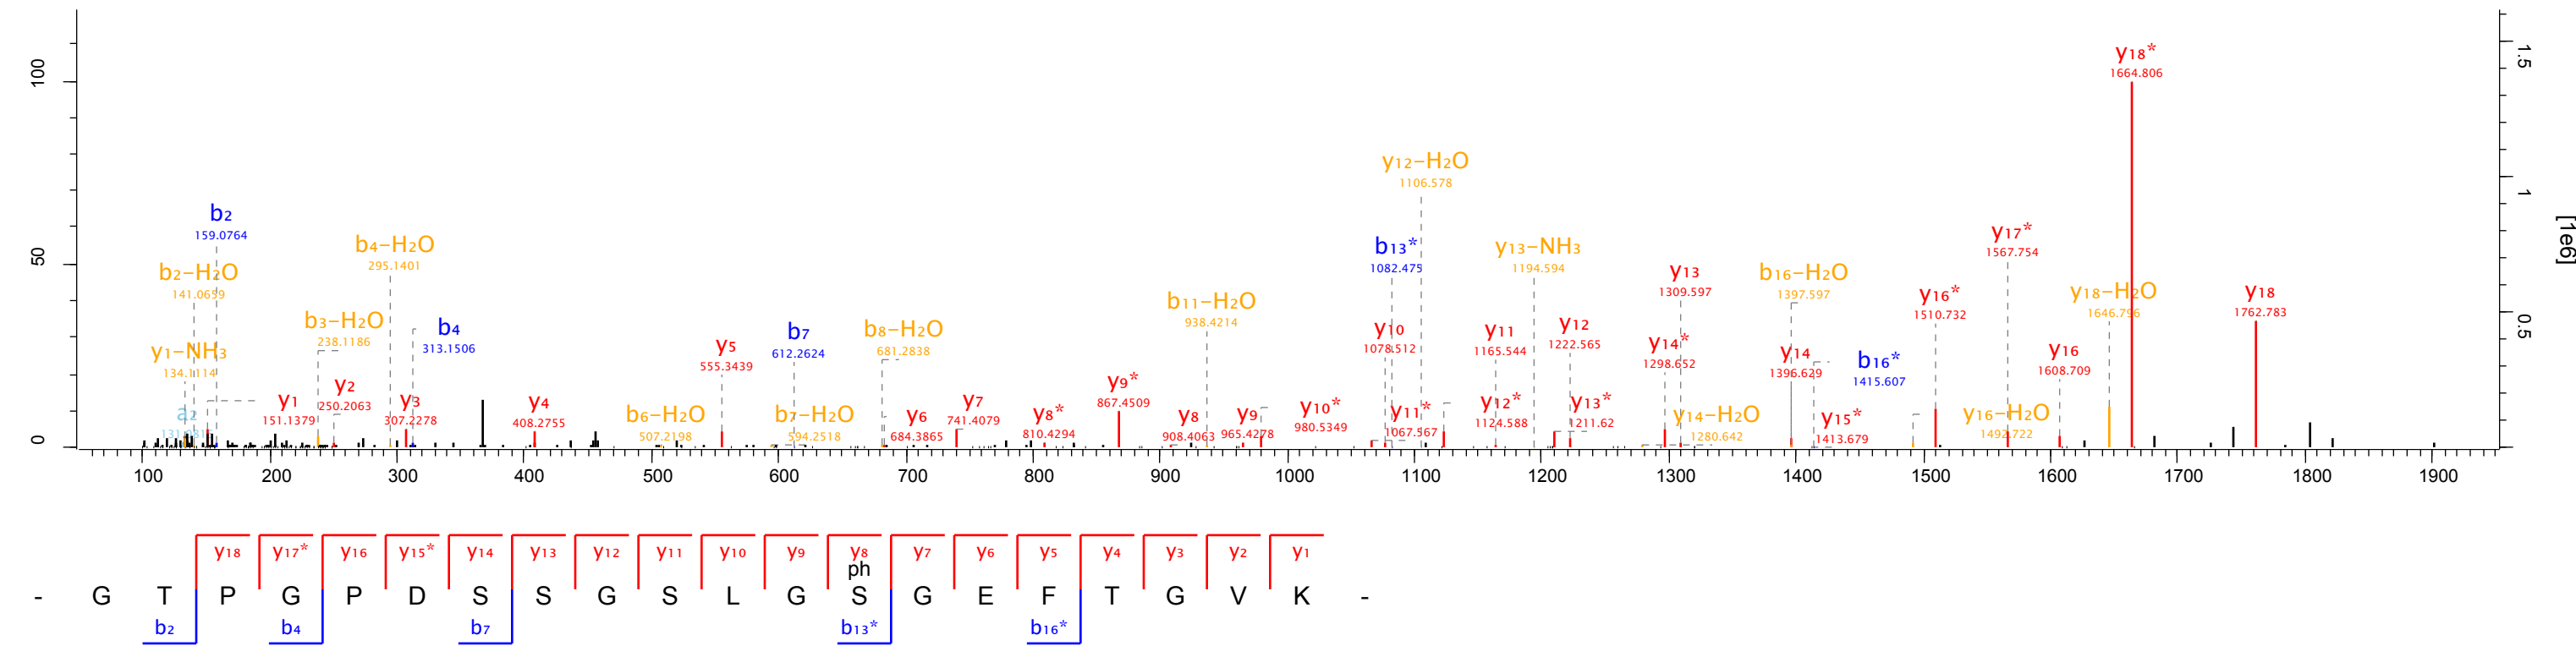

Raw file 20171215\_MaS\_33SR\_LMH\_phospho\_06 Scan 12117 Method FTMS; HCD Score 165.25 m/z 1411.95 Gene names LRRFIP1

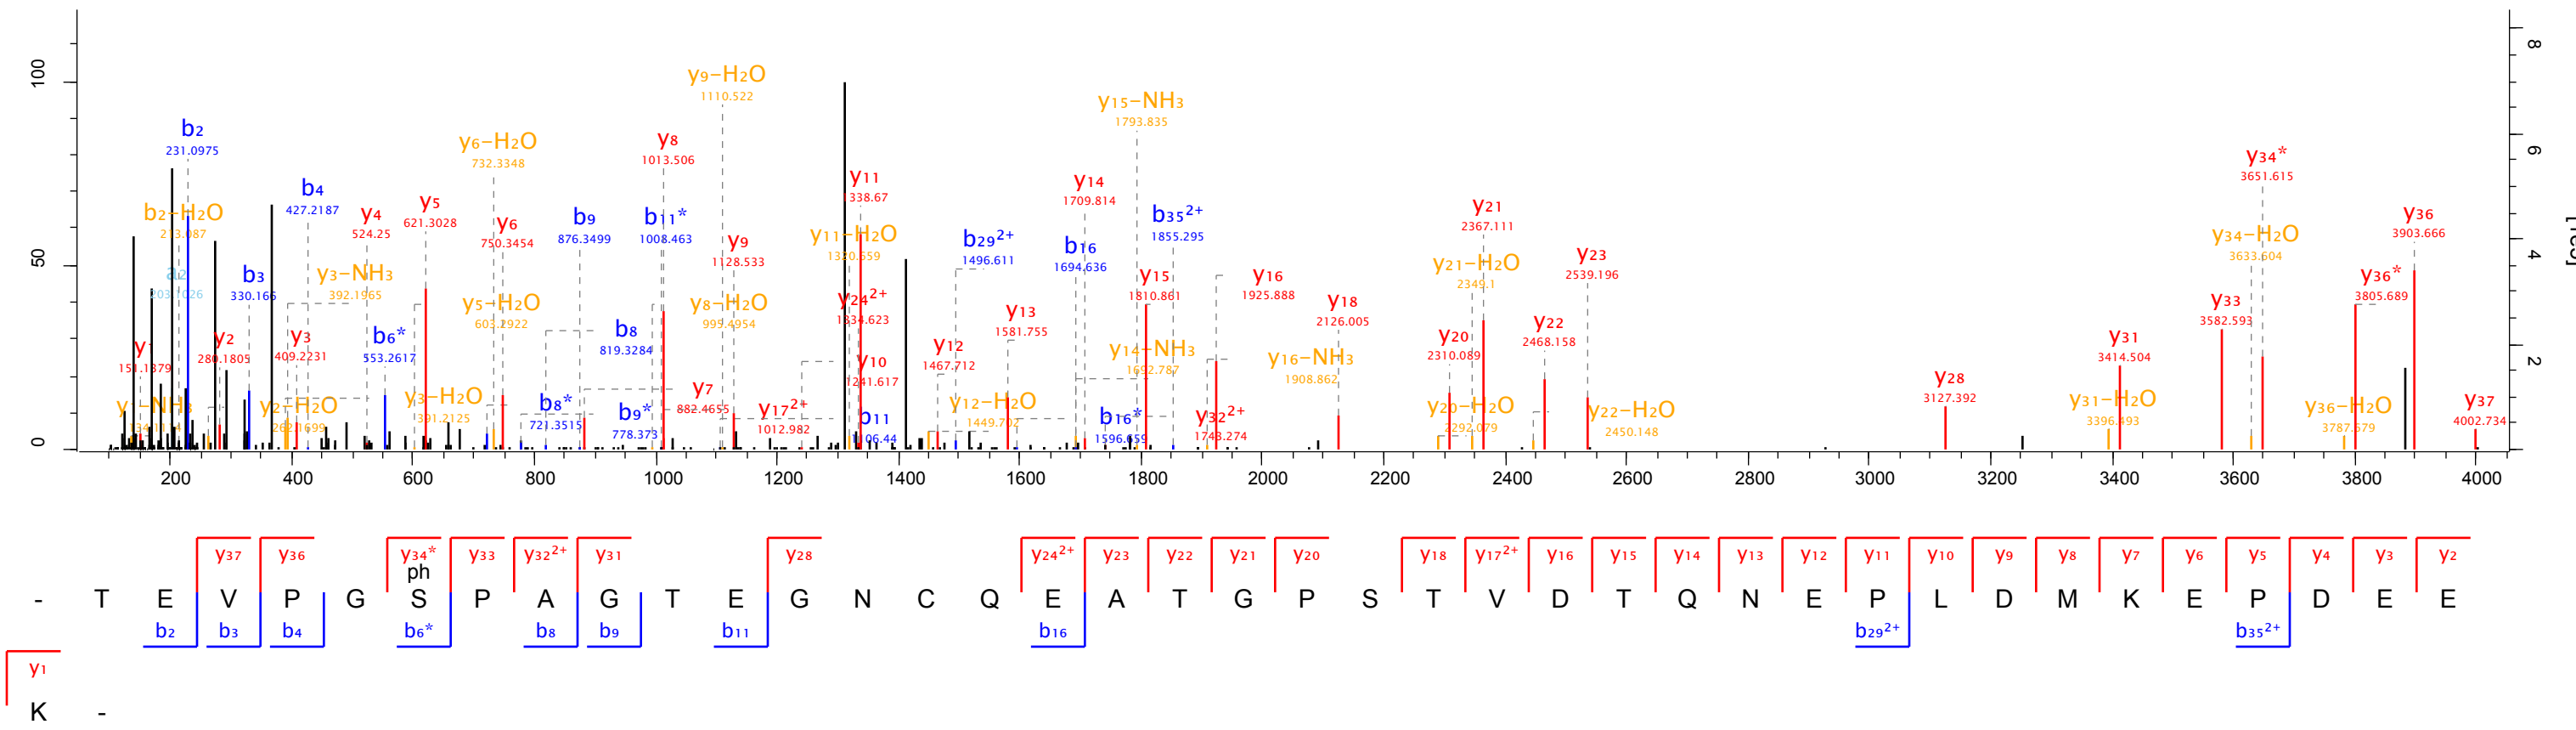

Raw file 20171215\_MaS\_33SR\_LMH\_phospho\_06 Scan 12547 Method FTMS; HCD Score 99.09 m/z 715.84 Gene names DCUN1D5

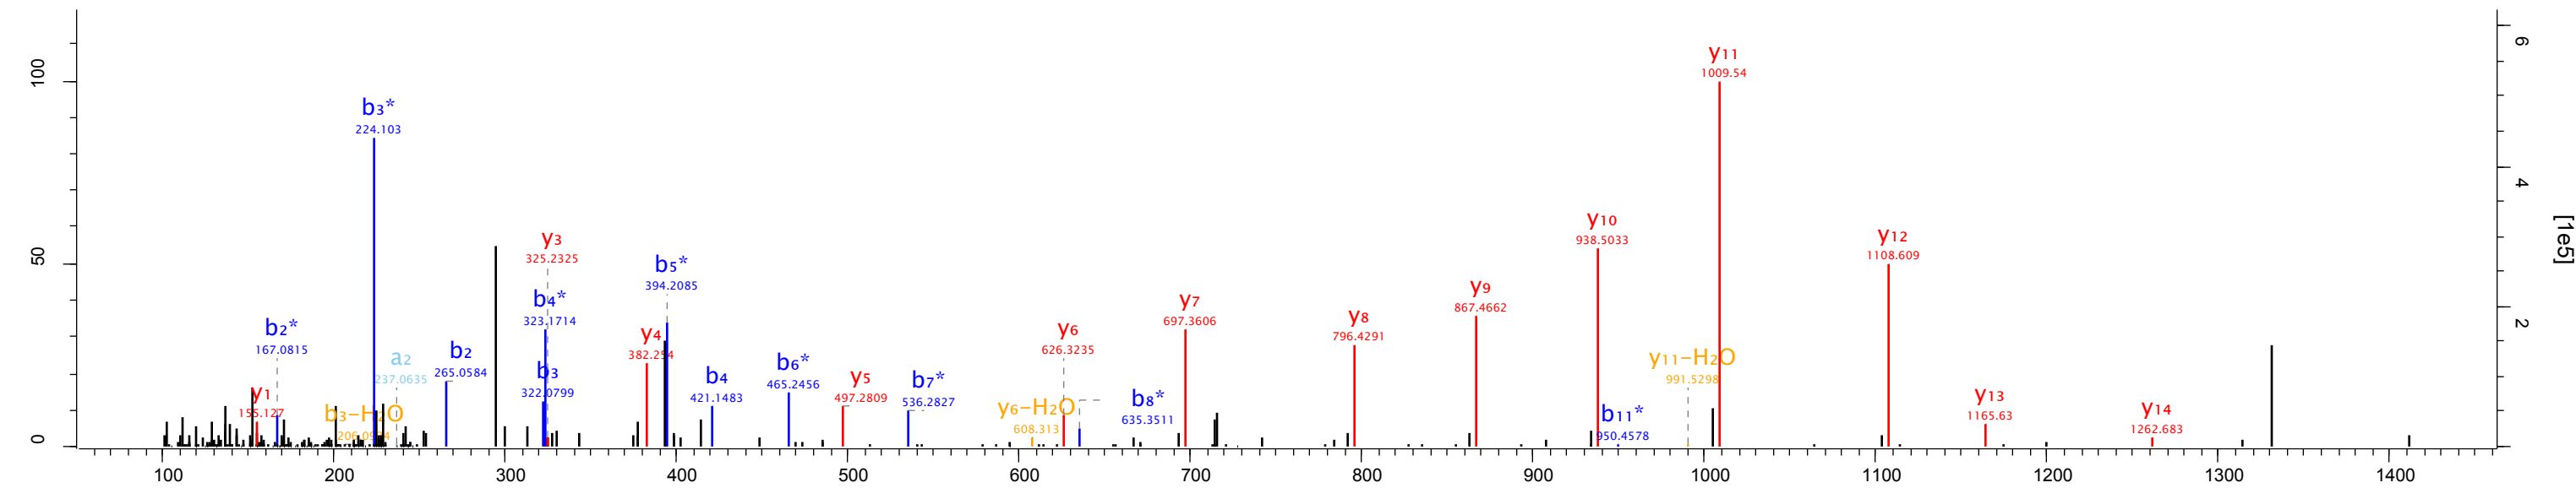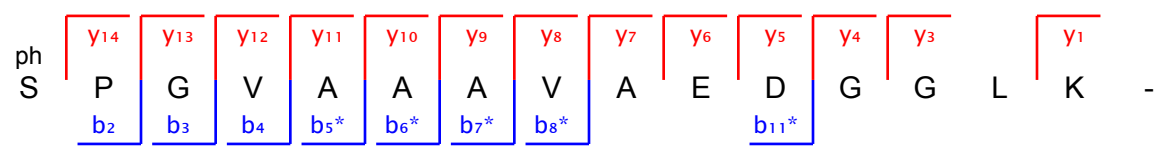

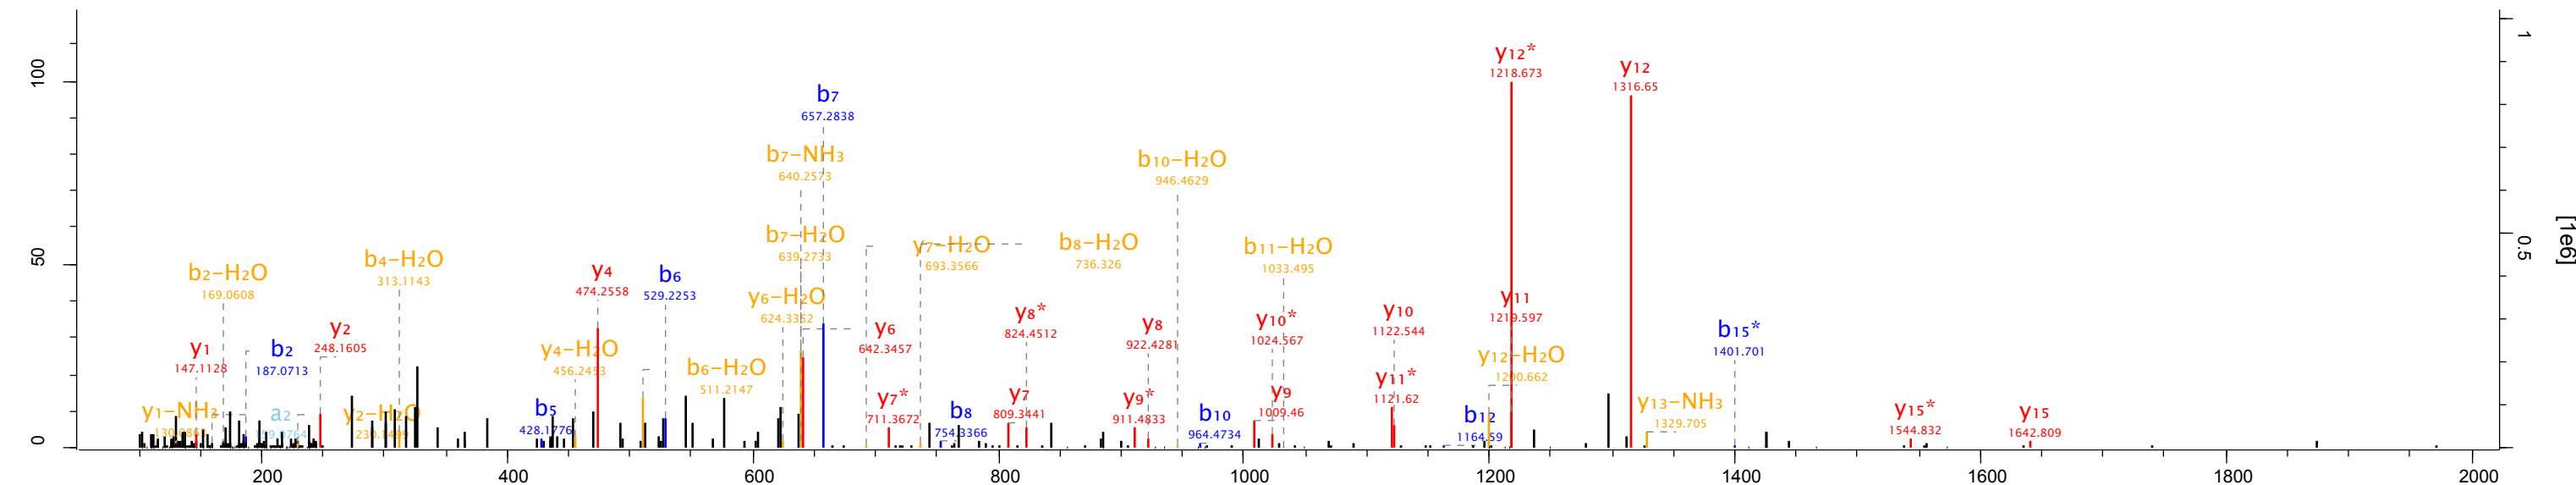

- A D S G P T Q P P L S L S P A P E T K -

b<sub>2</sub>
b<sub>5</sub>
b<sub>6</sub>
b<sub>7</sub>
b<sub>8</sub>
b<sub>10</sub>
b<sub>12</sub>
b<sub>15</sub>\*
y<sub>15</sub>
y<sub>12</sub>
y<sub>11</sub>
y<sub>10</sub>
y<sub>9</sub>
y<sub>8</sub>
y<sub>7</sub><sub>ph</sub>
y<sub>6</sub>
y<sub>4</sub>
y<sub>2</sub>
y<sub>1</sub>

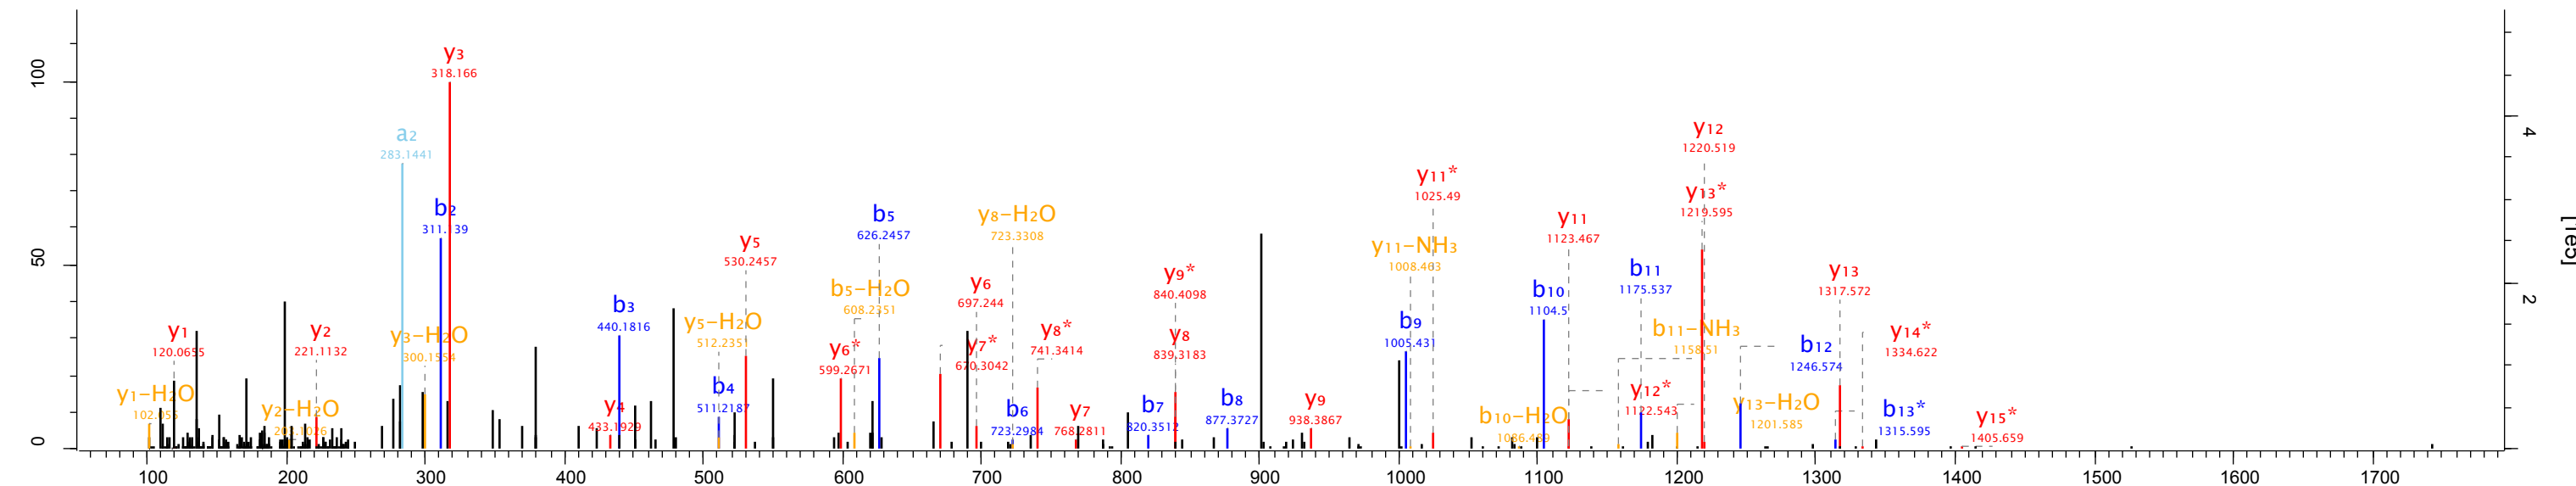

- Y F E A D P P G Q V A A S P D P T T -  
 b<sub>2</sub> b<sub>3</sub> b<sub>4</sub> b<sub>5</sub> b<sub>6</sub> b<sub>7</sub> b<sub>8</sub> b<sub>9</sub> b<sub>10</sub> b<sub>11</sub> b<sub>12</sub> b<sub>13</sub>\* y<sub>15</sub>\* y<sub>14</sub>\* y<sub>13</sub> y<sub>12</sub> y<sub>11</sub> y<sub>9</sub> y<sub>8</sub> y<sub>7</sub> y<sub>6</sub> y<sub>5</sub> y<sub>4</sub> y<sub>3</sub> y<sub>2</sub> y<sub>1</sub>





Raw file 20171215\_MaS\_33SR\_LMH\_phospho\_06 Scan 13607 Method FTMS; HCD Score 174.62 m/z 684.32 Gene names NIPBL

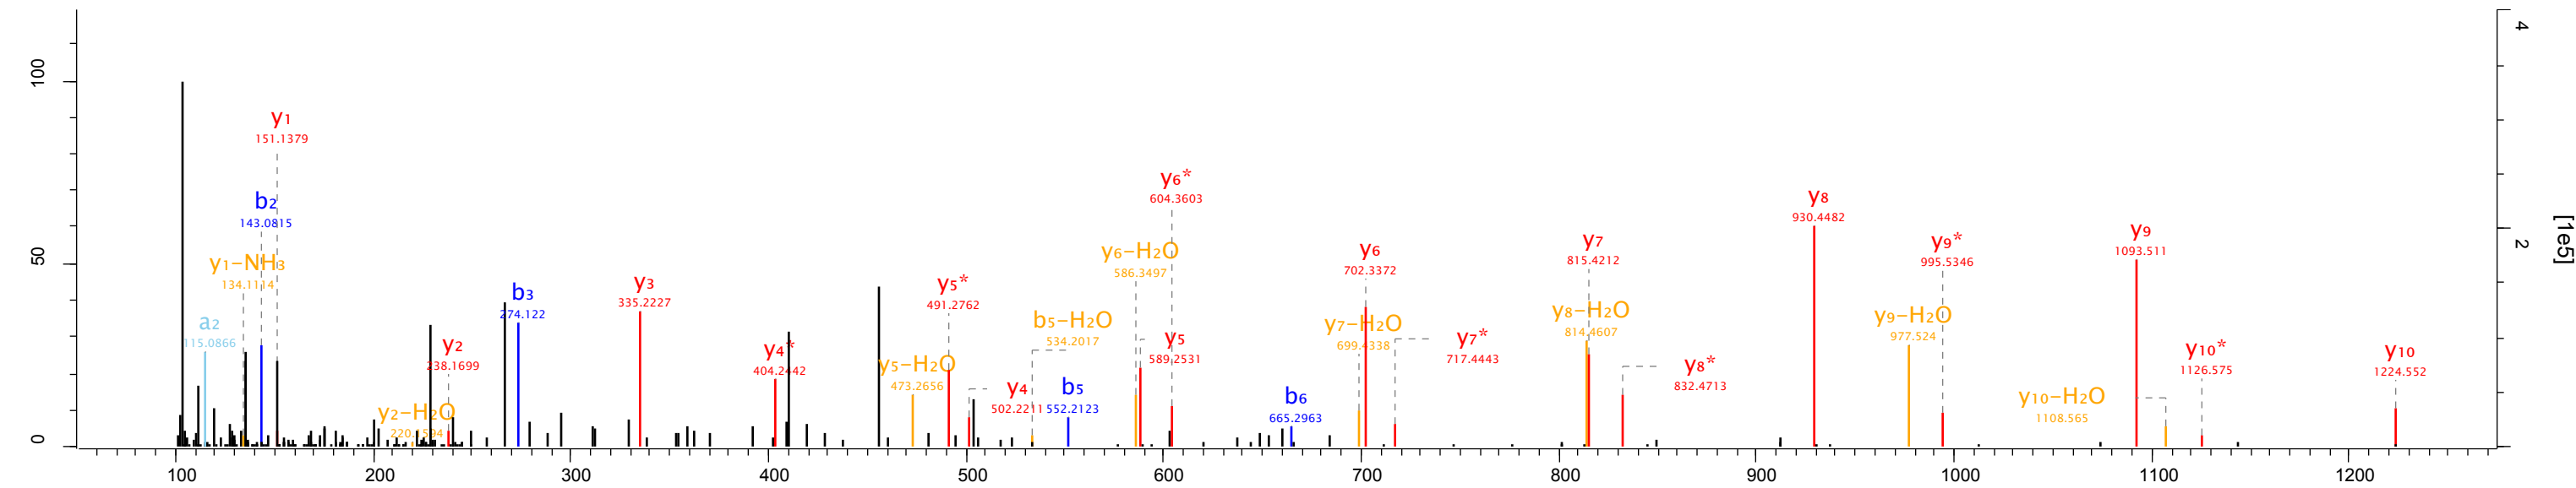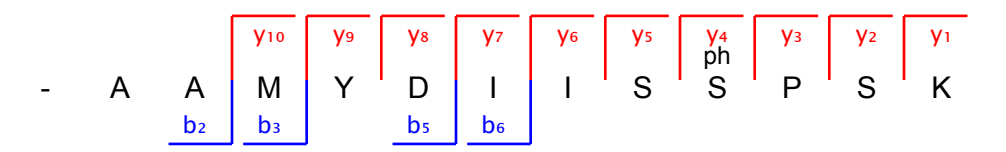

Raw file 20171215\_MaS\_33SR\_LMH\_phospho\_06 Scan 13697 Method FTMS; HCD Score 144.27 m/z 695.3 Gene names DDX1

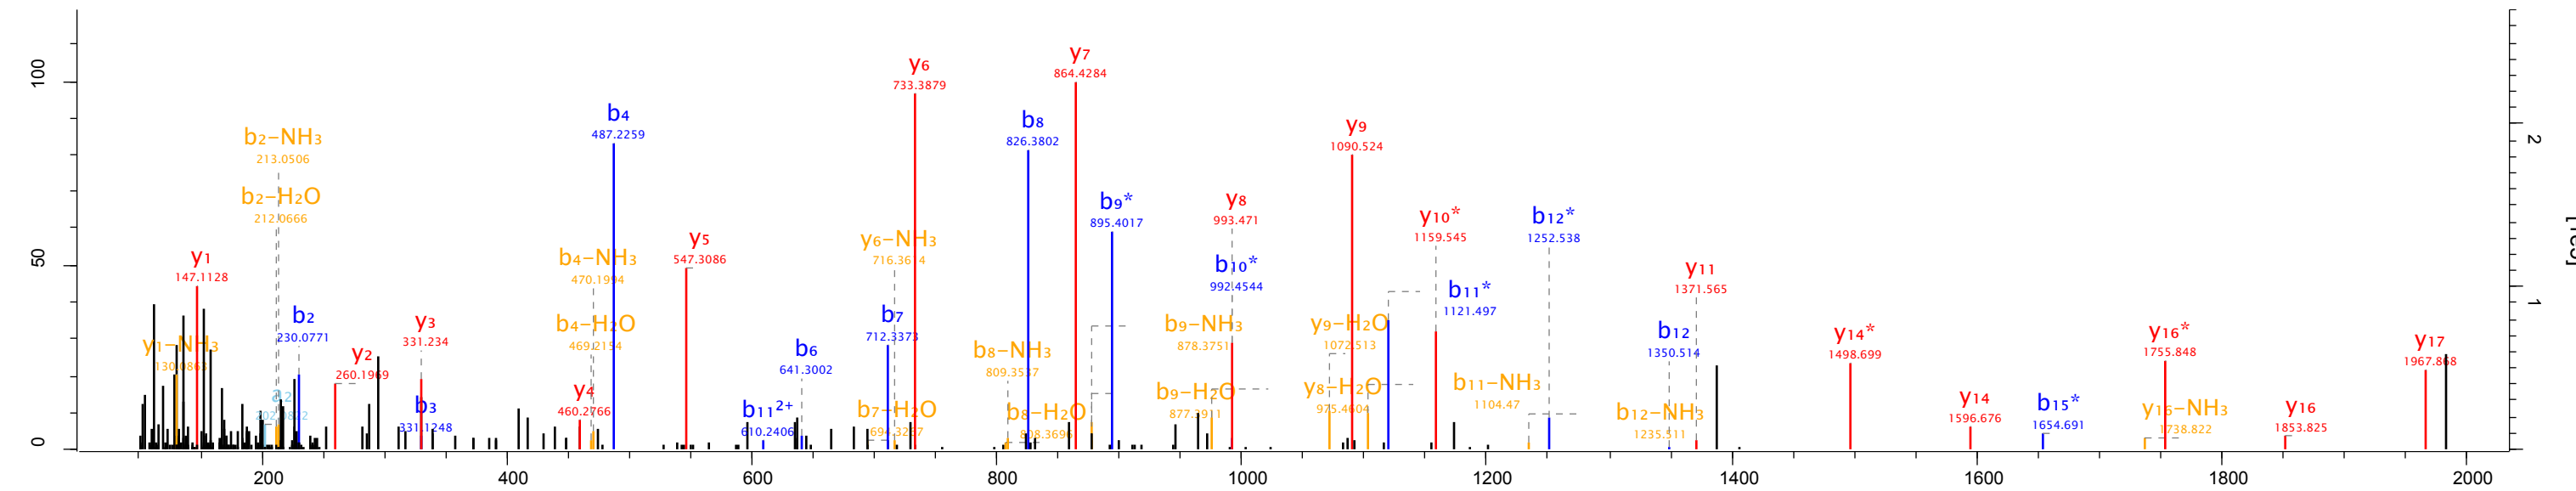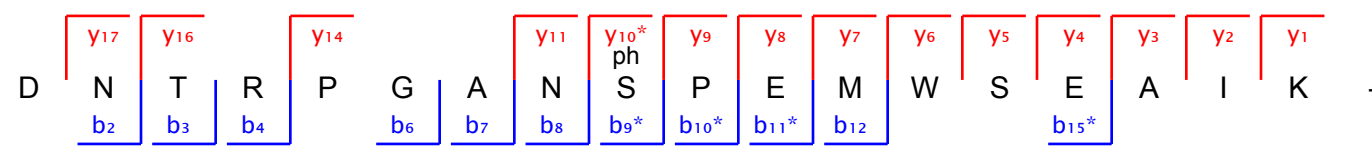

Raw file 20171215\_MaS\_33SR\_LMH\_phospho\_06 Scan 13957 Method FTMS; HCD Score 59.73 m/z 806.3 Gene names EIF2S2

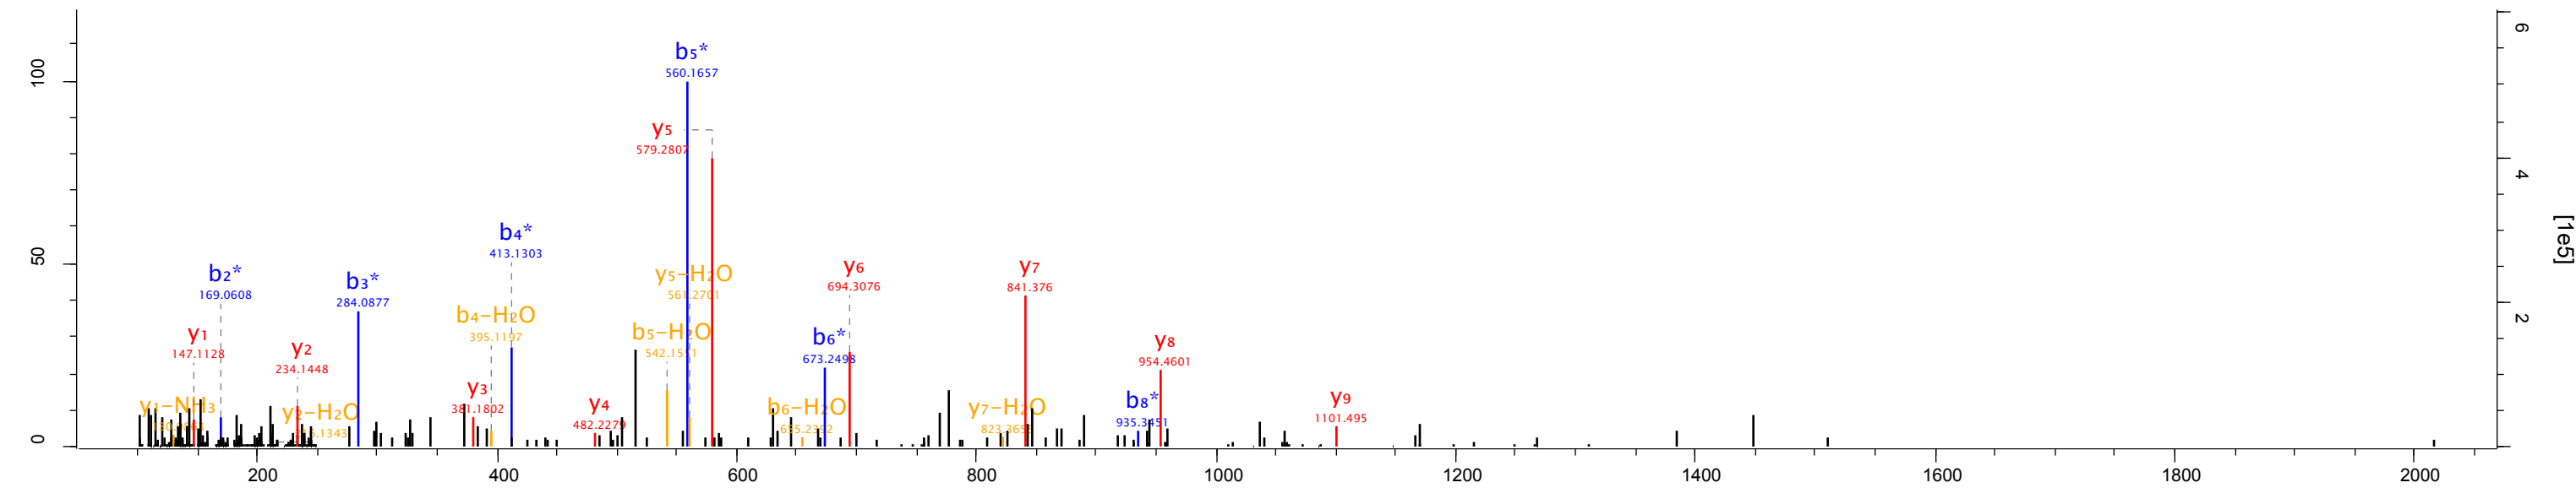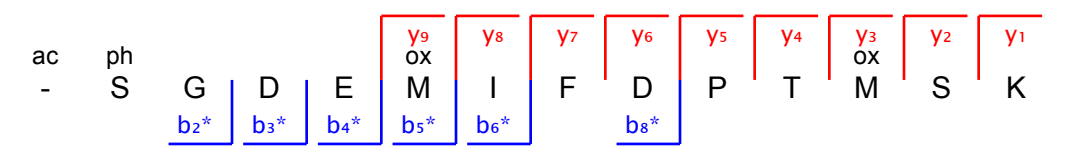

Raw file 20171215\_MaS\_33SR\_LMH\_phospho\_06 Scan 14127 Method FTMS; HCD Score 85.47 m/z 820.35 Gene names SPRED2

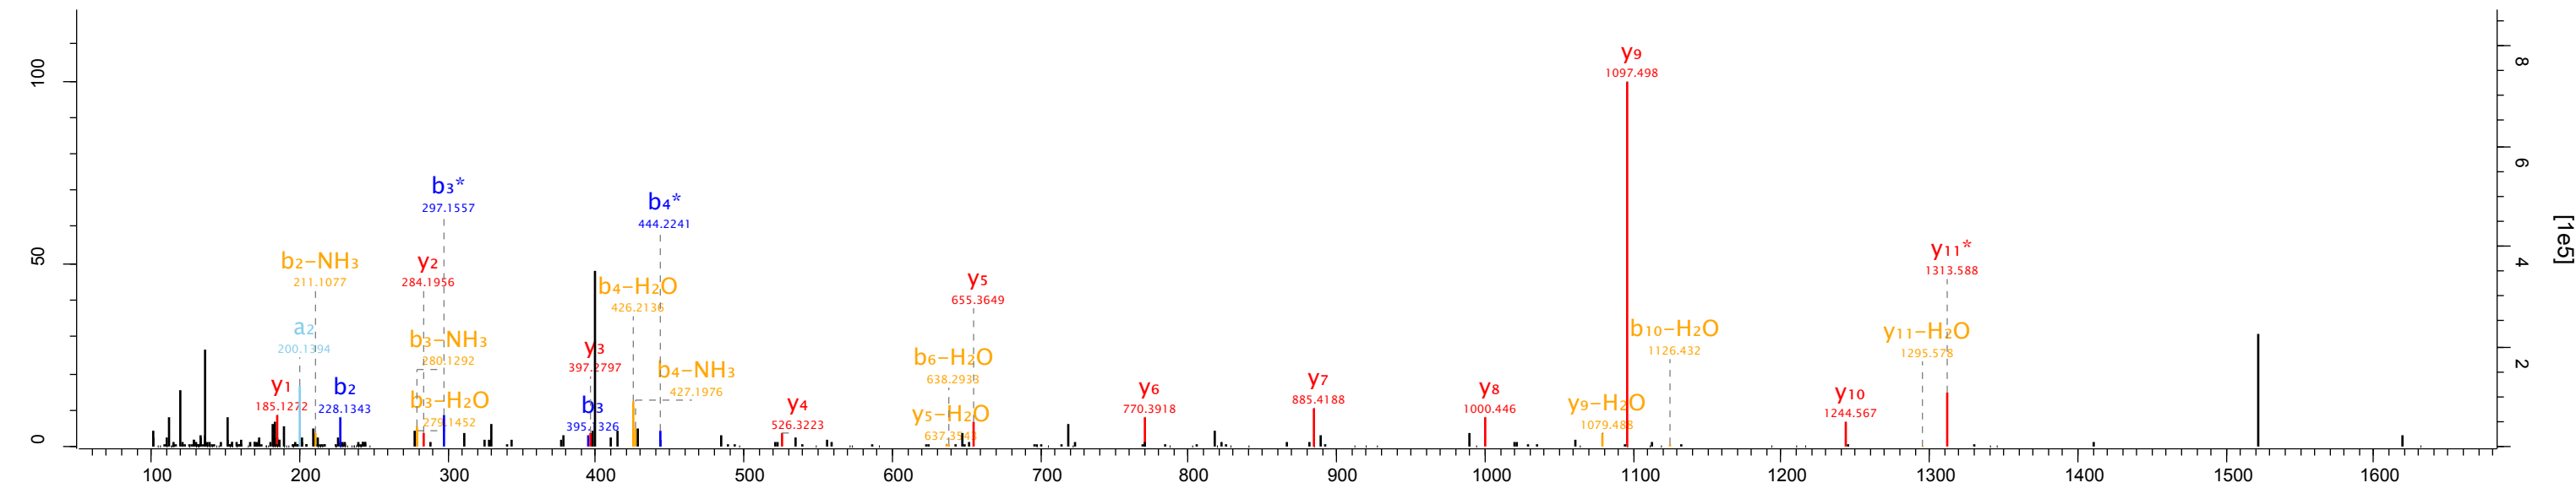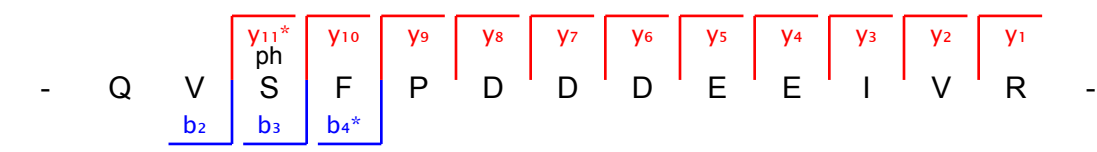

Raw file 20171215\_MaS\_33SR\_LMH\_phospho\_06 Scan 14277 Method FTMS; HCD Score 53.6 m/z 1029.43 Gene names USP47

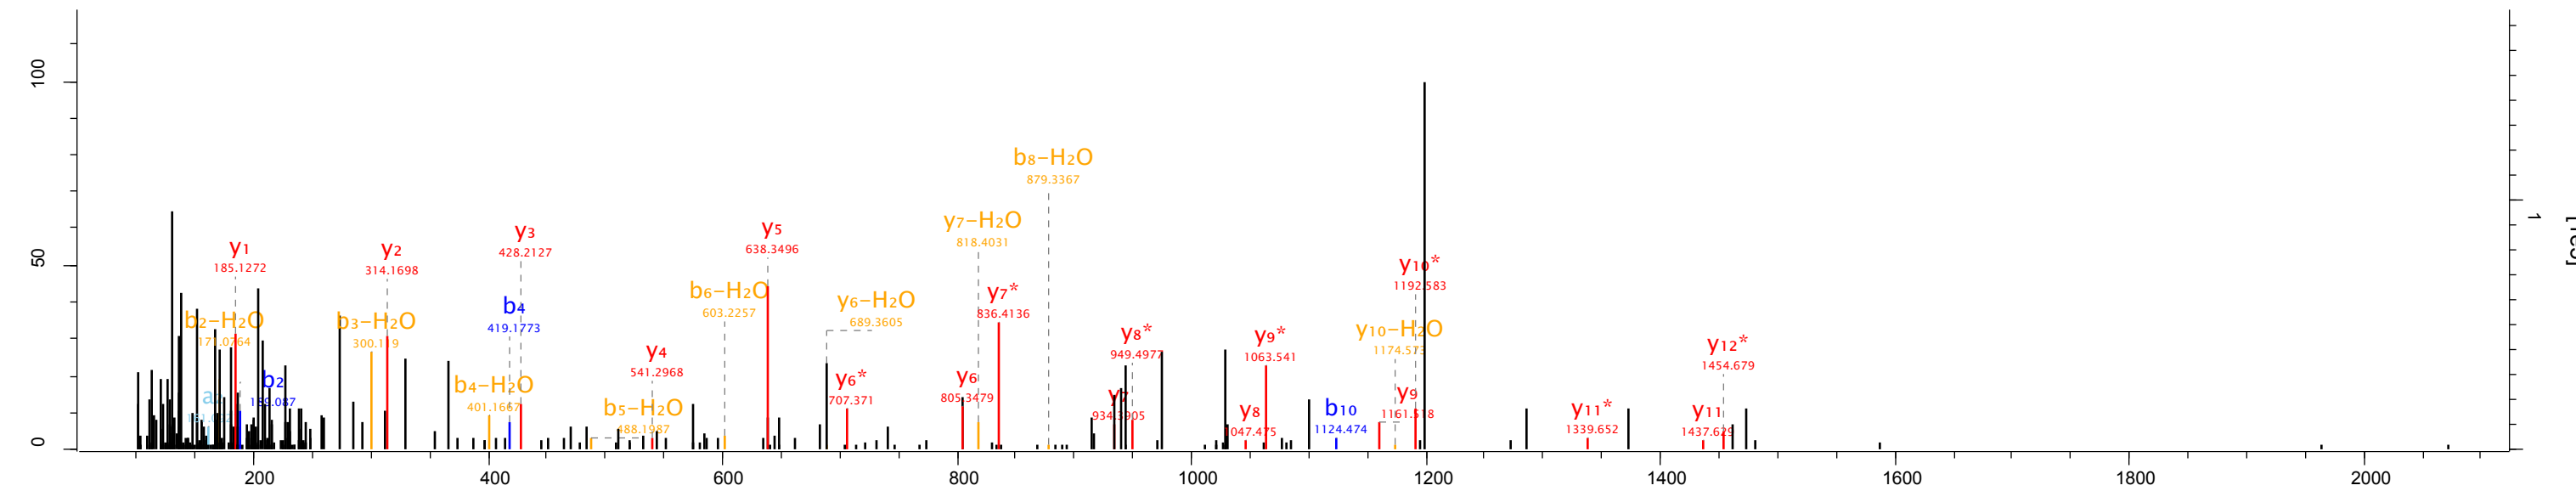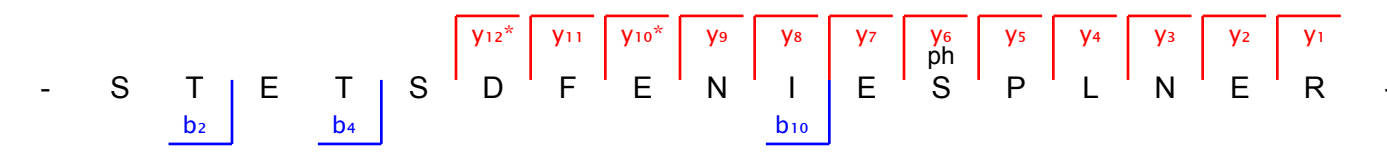

Raw file: 20171215\_MaS\_33SR\_LMH\_phospho\_06  
 Scan: 14777 Method: FTMS; HCD Score: 143.39 m/z: 825.04 Gene names: AKAP2

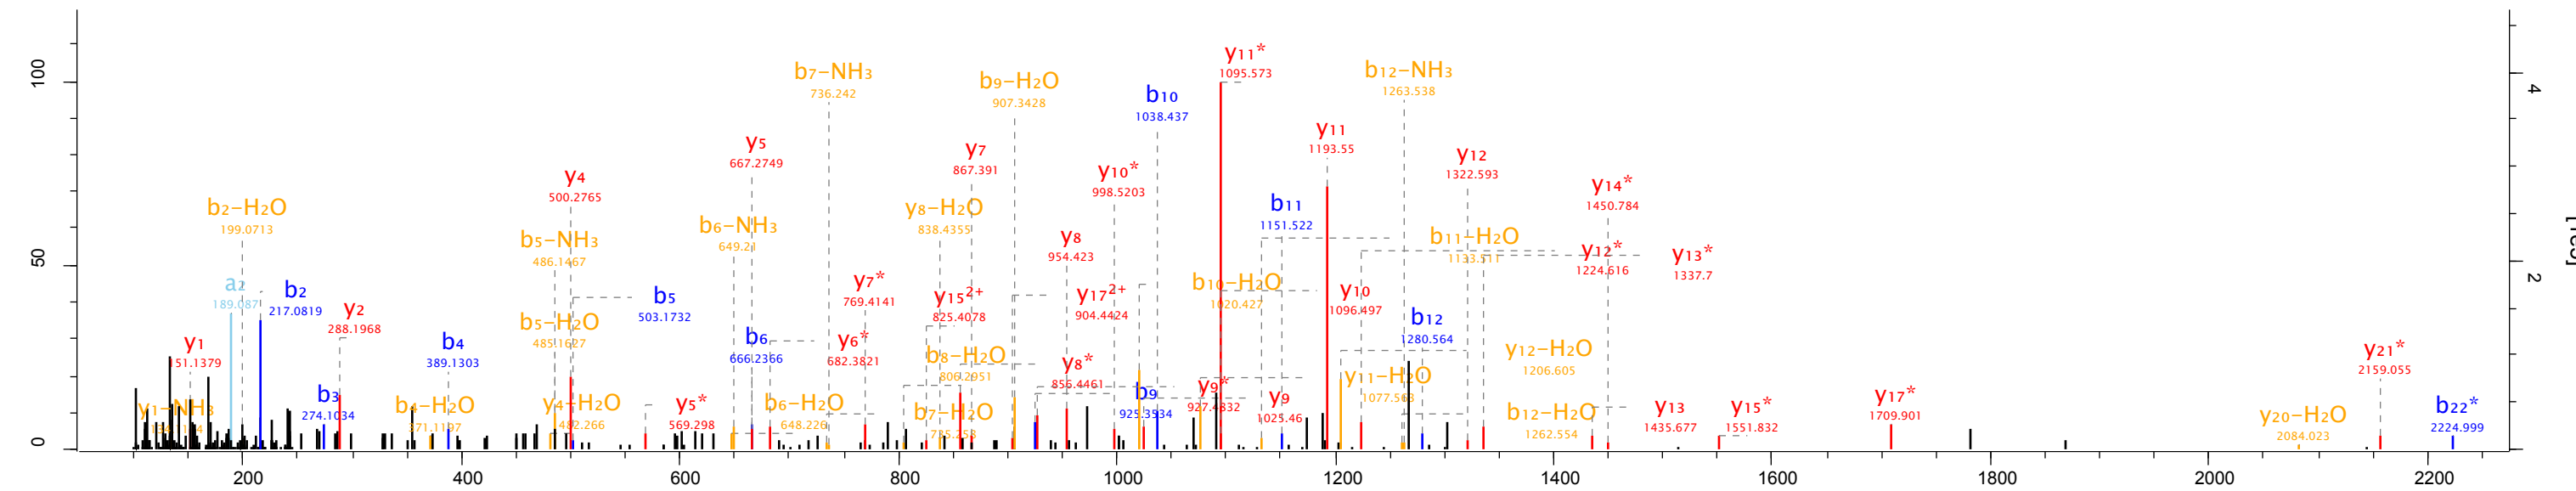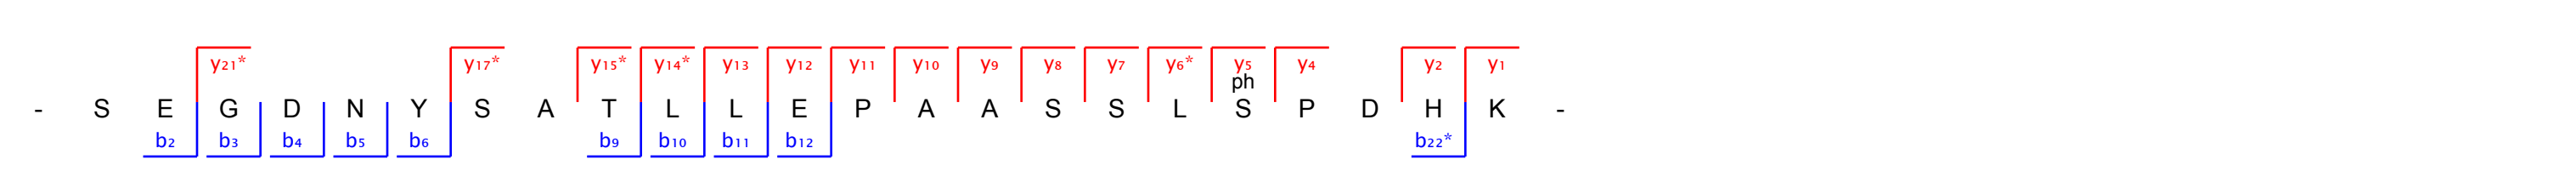

Raw file 20171215\_MaS\_33SR\_LMH\_phospho\_06 Scan 15547 Method FTMS; HCD Score 128.72 m/z 794.88 Gene names KIAA0368;ECM29

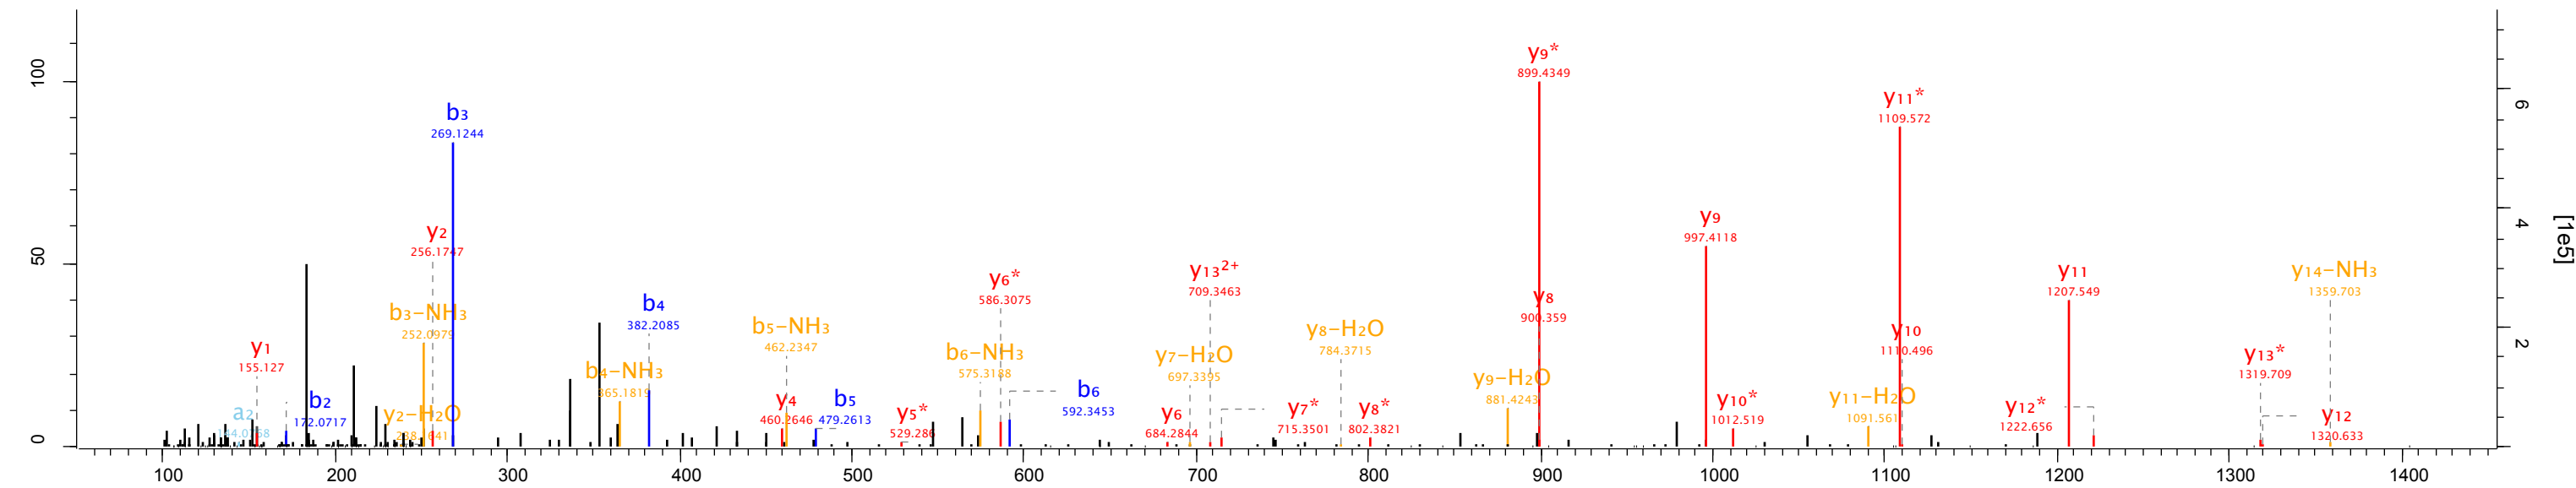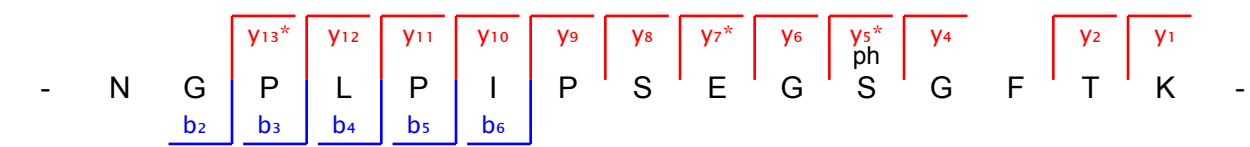





Raw file 20171215\_MaS\_33SR\_LMH\_phospho\_06 Scan 16107 Method FTMS; HCD Score 70.96 m/z 939.97

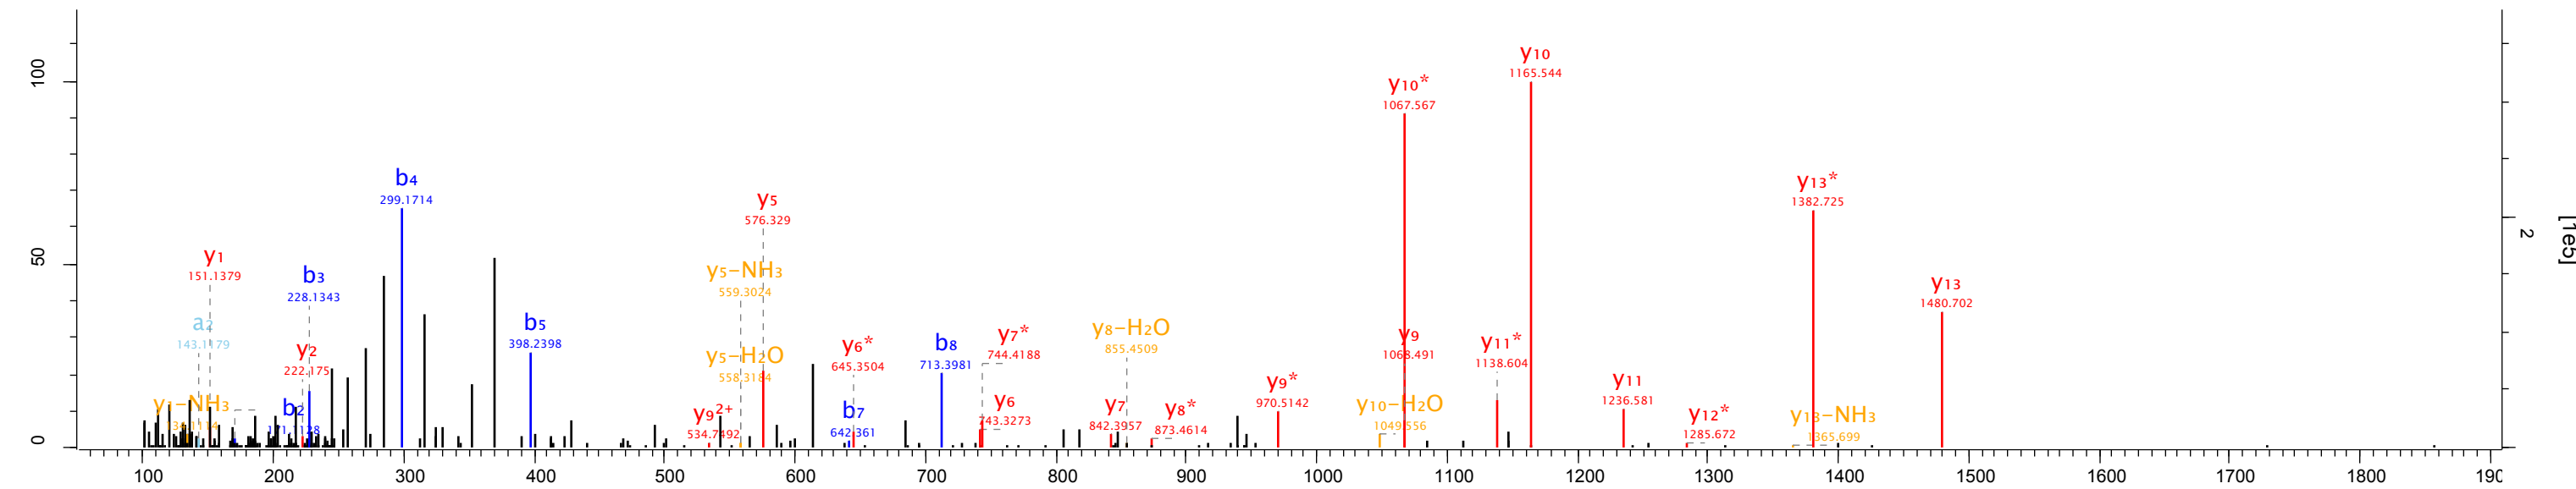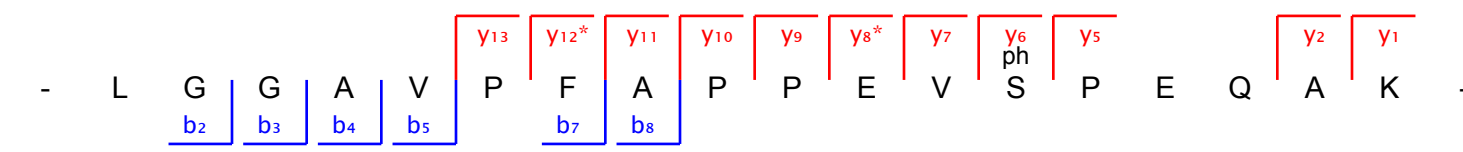

Raw file 20171215\_MaS\_33SR\_LMH\_phospho\_06 Scan 16327 Method FTMS; HCD Score 105.78 m/z 1217.22 Gene names TRIM28

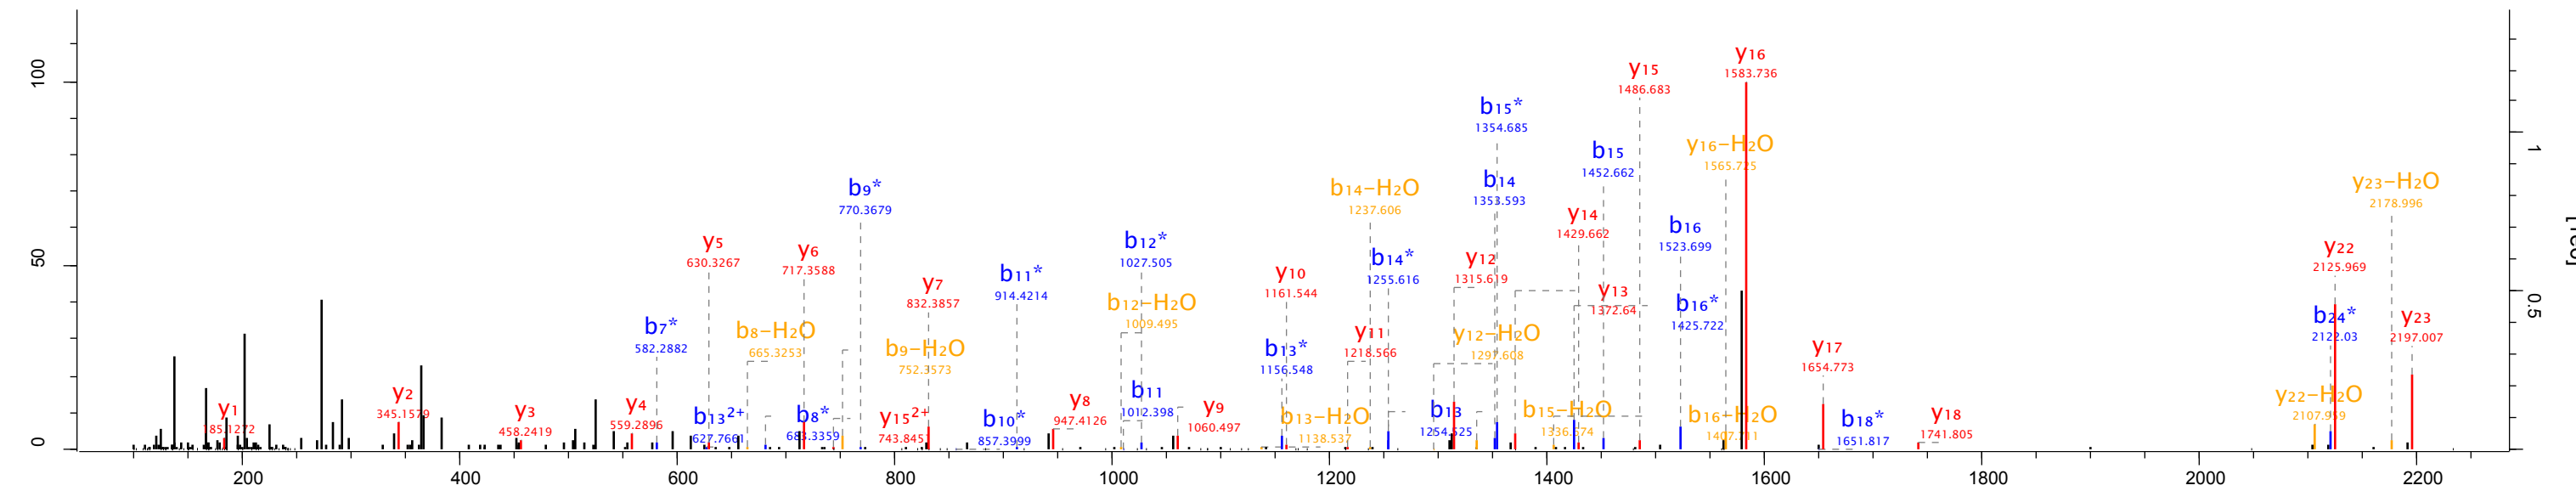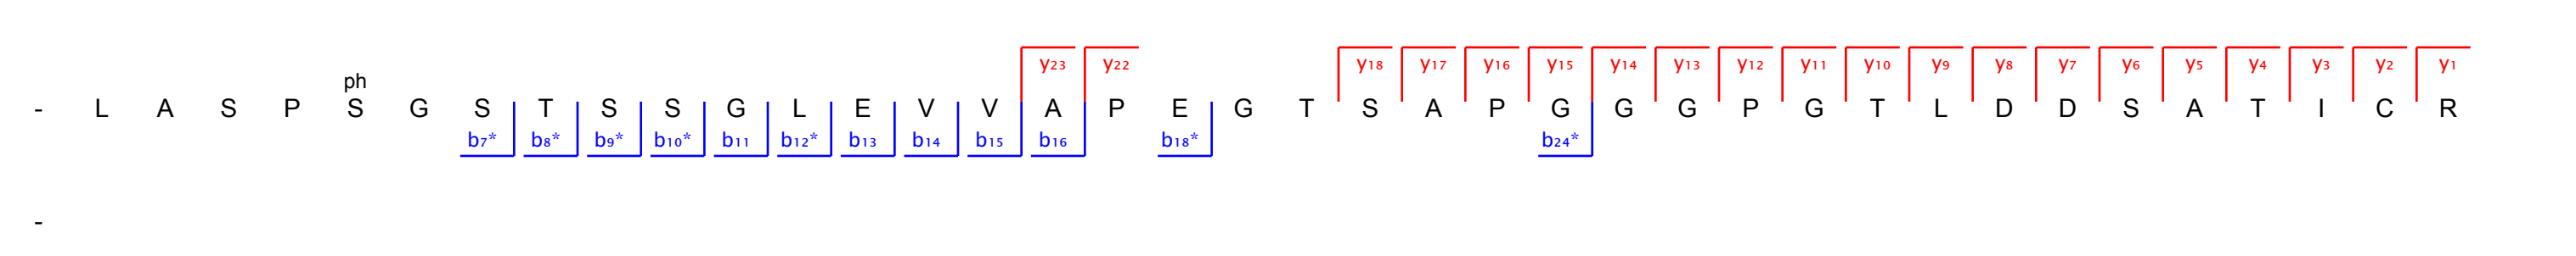

Raw file 20171215\_MaS\_33SR\_LMH\_phospho\_06 Scan 1677 Method FTMS; HCD Score 129.38 m/z 699.77 Gene names ANP32B

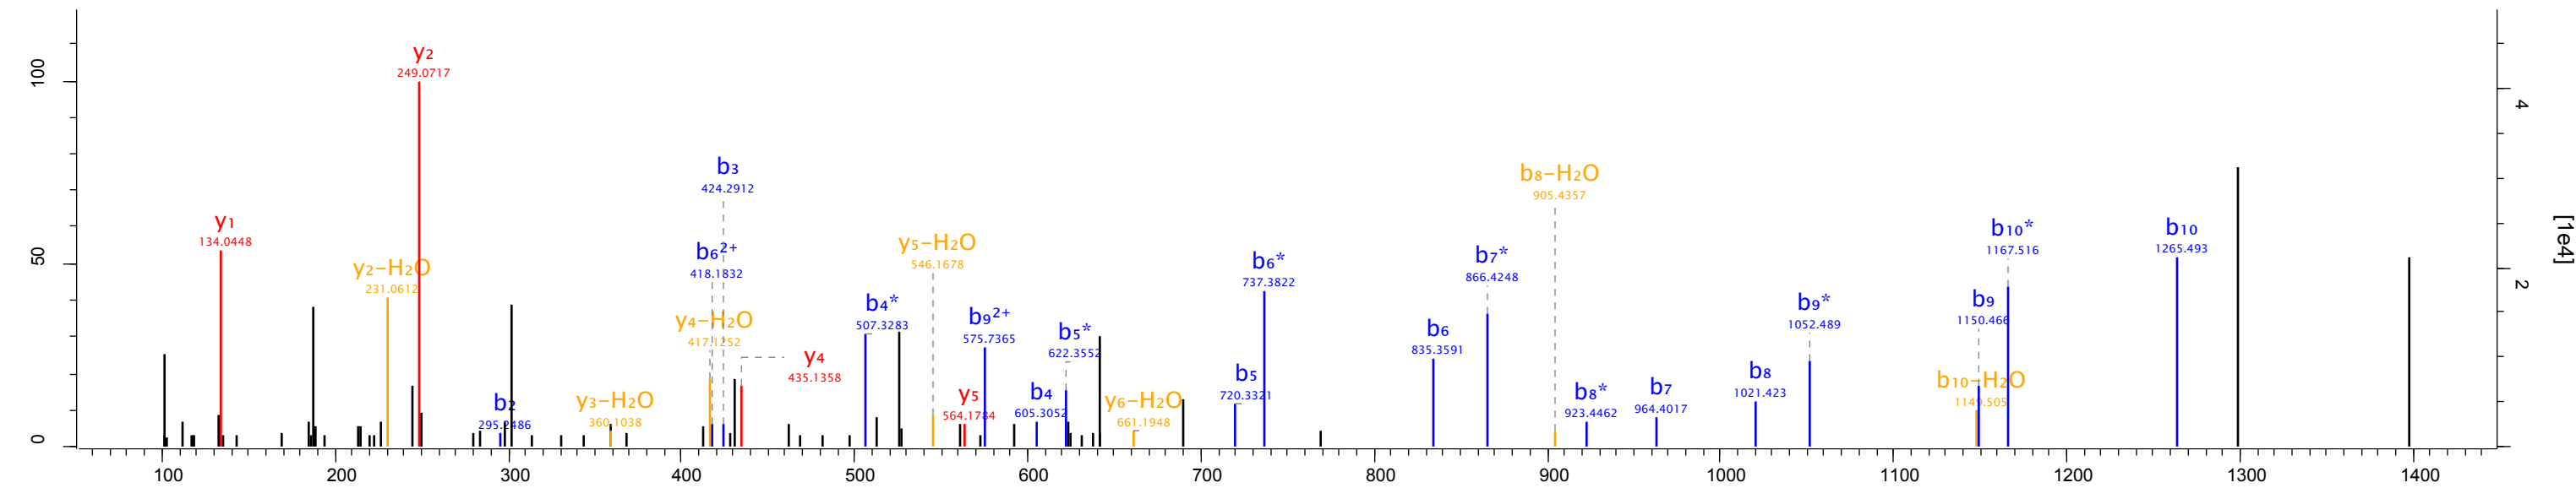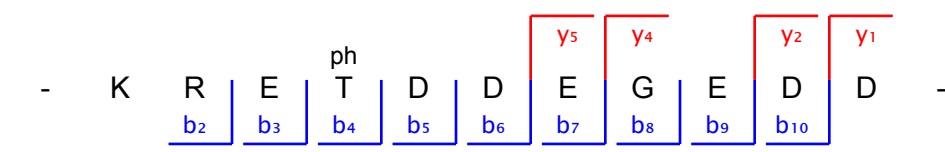

Raw file

20171215\_MaS\_33SR\_LMH\_phospho\_06

| Scan  | Method    | Score | m/z    | Gene names |
|-------|-----------|-------|--------|------------|
| 16797 | FTMS; HCD | 48.61 | 776.35 | PABPN1     |

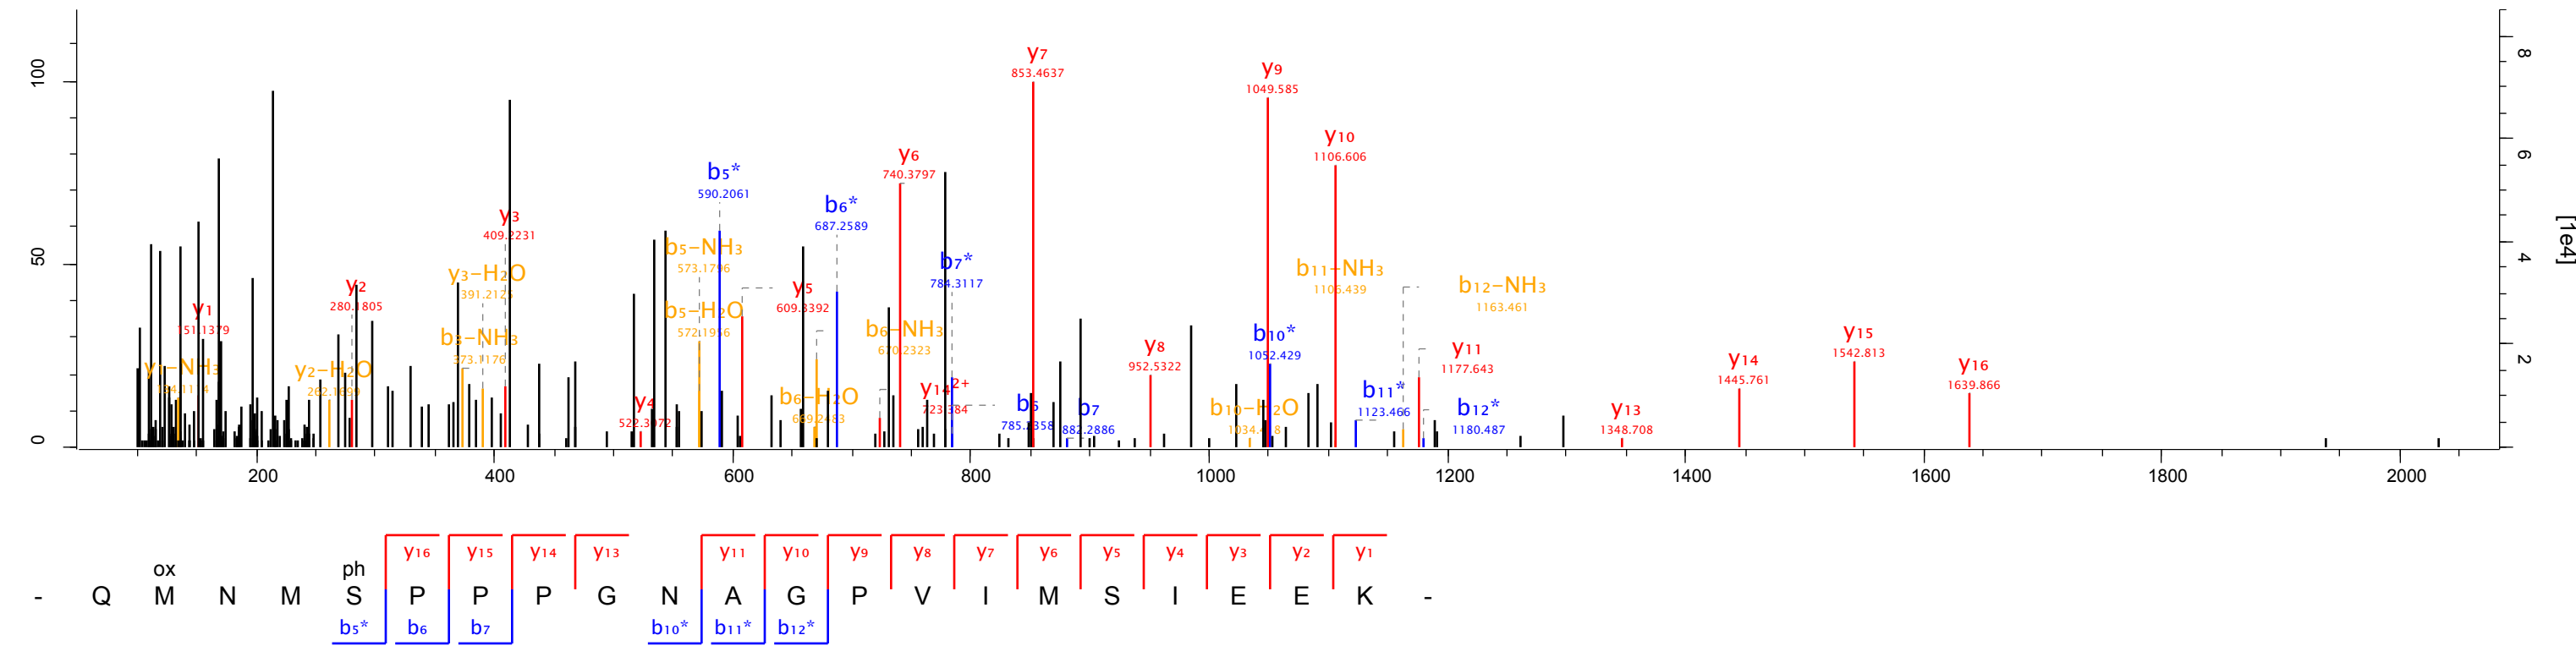

Raw file

20171215\_MaS\_33SR\_LMH\_phospho\_06

Scan 17047 Method FTMS; HCD Score 74.87 m/z 961.12 Gene names PELP1

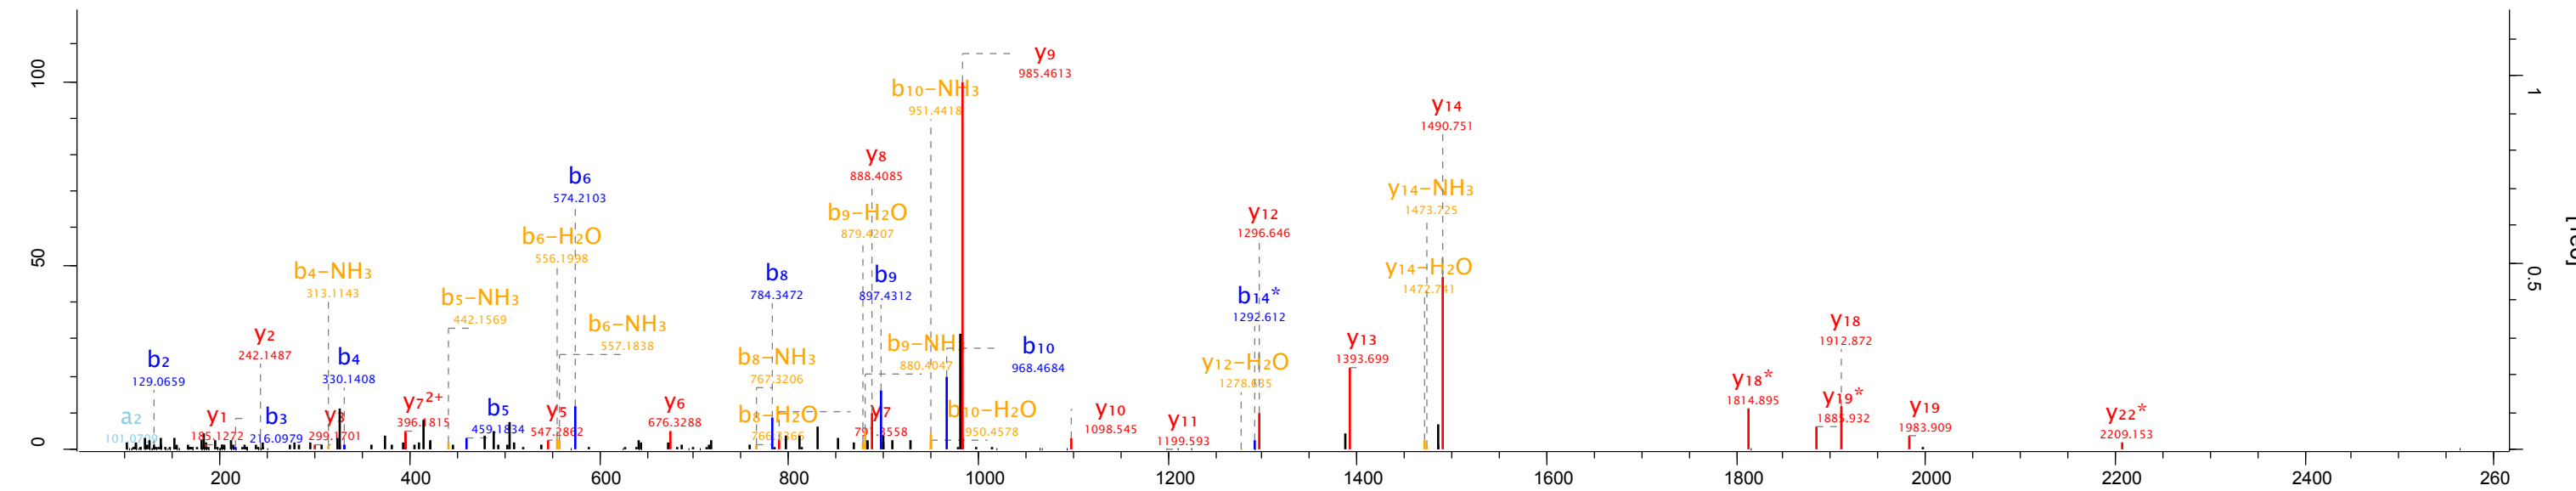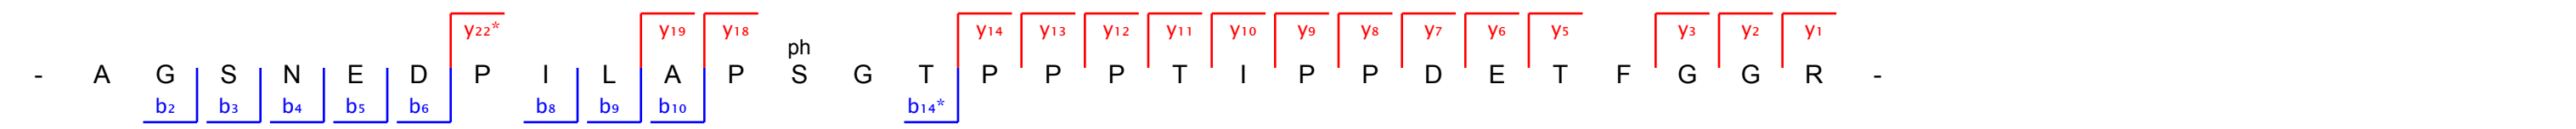

Raw file 20171215\_MaS\_33SR\_LMH\_phospho\_06 Scan 18197 Method FTMS; HCD Score 141.1 m/z 780.4 Gene names JUN

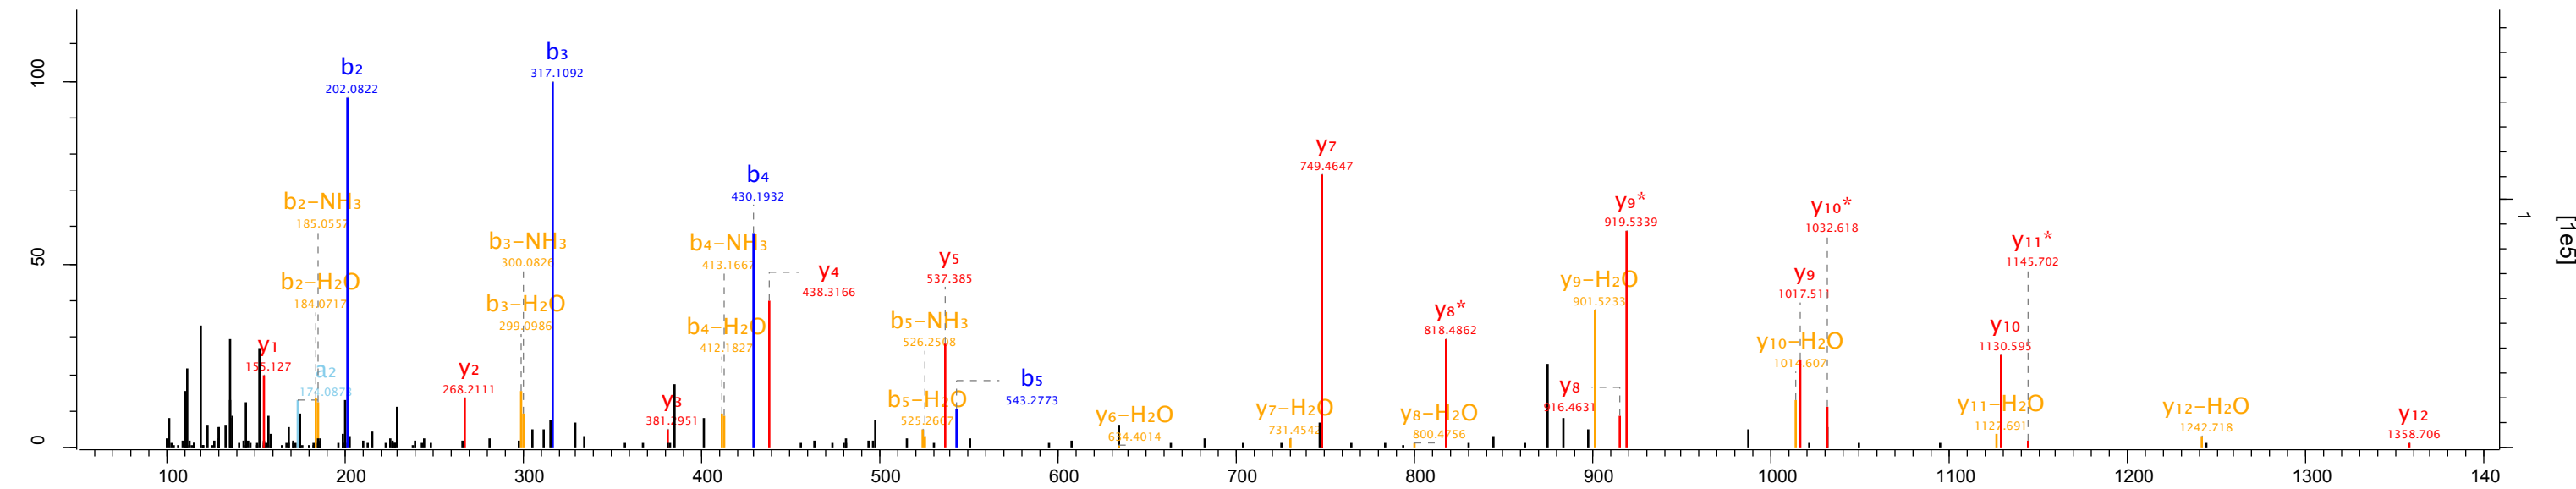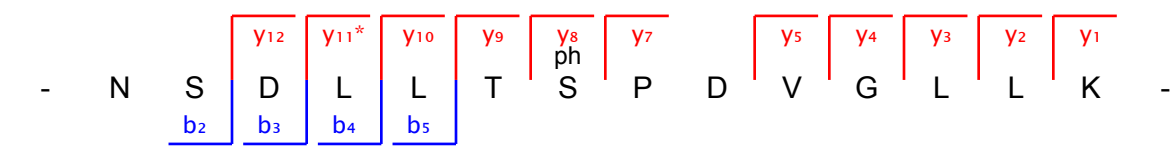

Raw file: 20171215\_MaS\_33SR\_LMH\_phospho\_06  
 Scan: 2567 Method: FTMS; HCD Score: 85.5 m/z: 799.89 Gene names: CAST

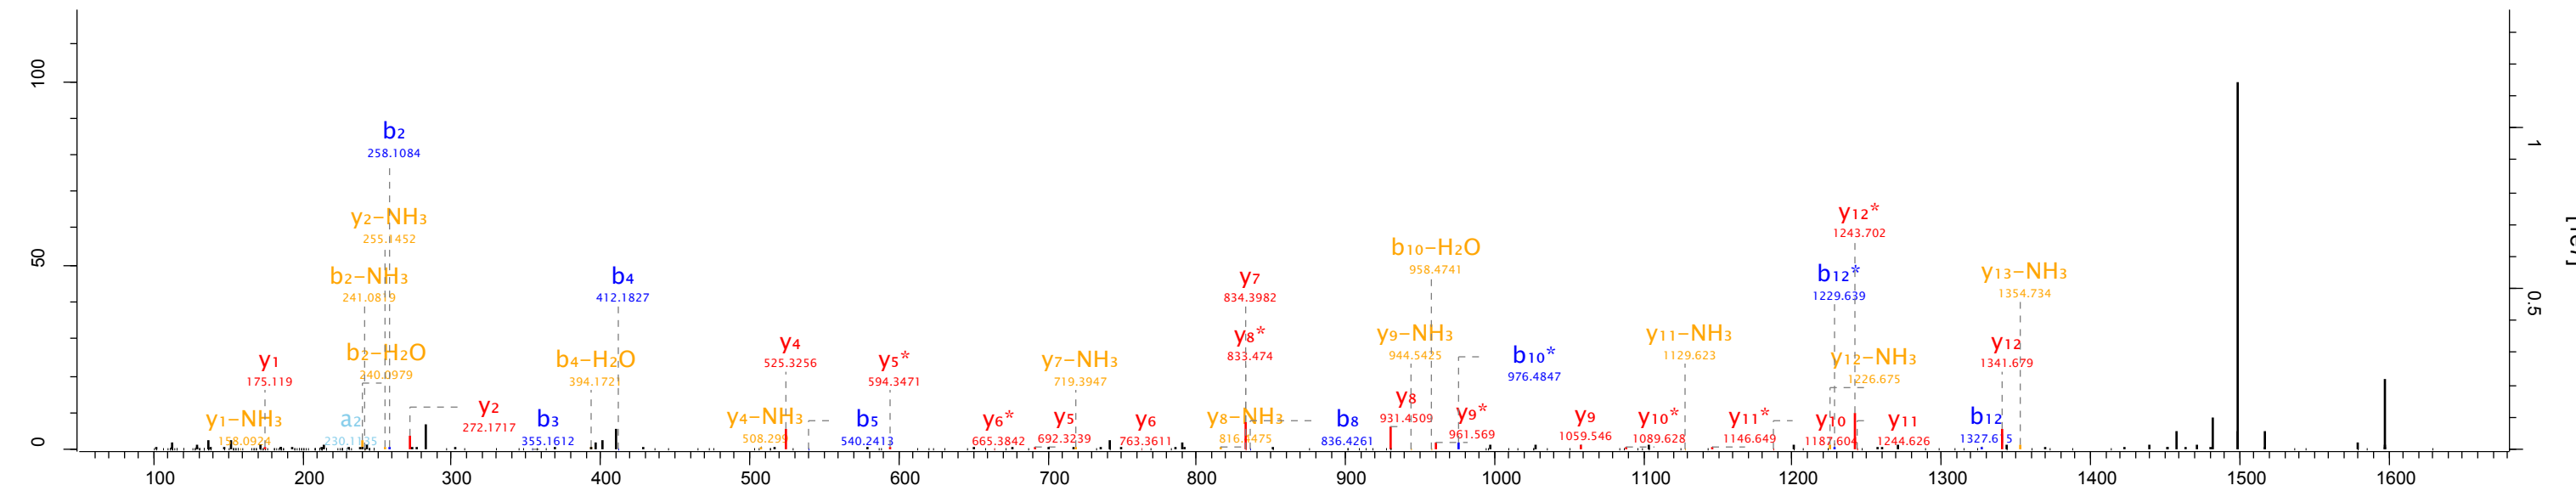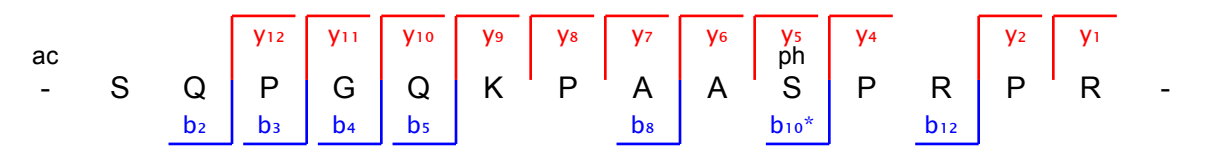



Raw file 20171215\_MaS\_33SR\_LMH\_phospho\_06 Scan 2847 Method FTMS; HCD Score 68.34 m/z 450.73 Gene names PPFIBP1

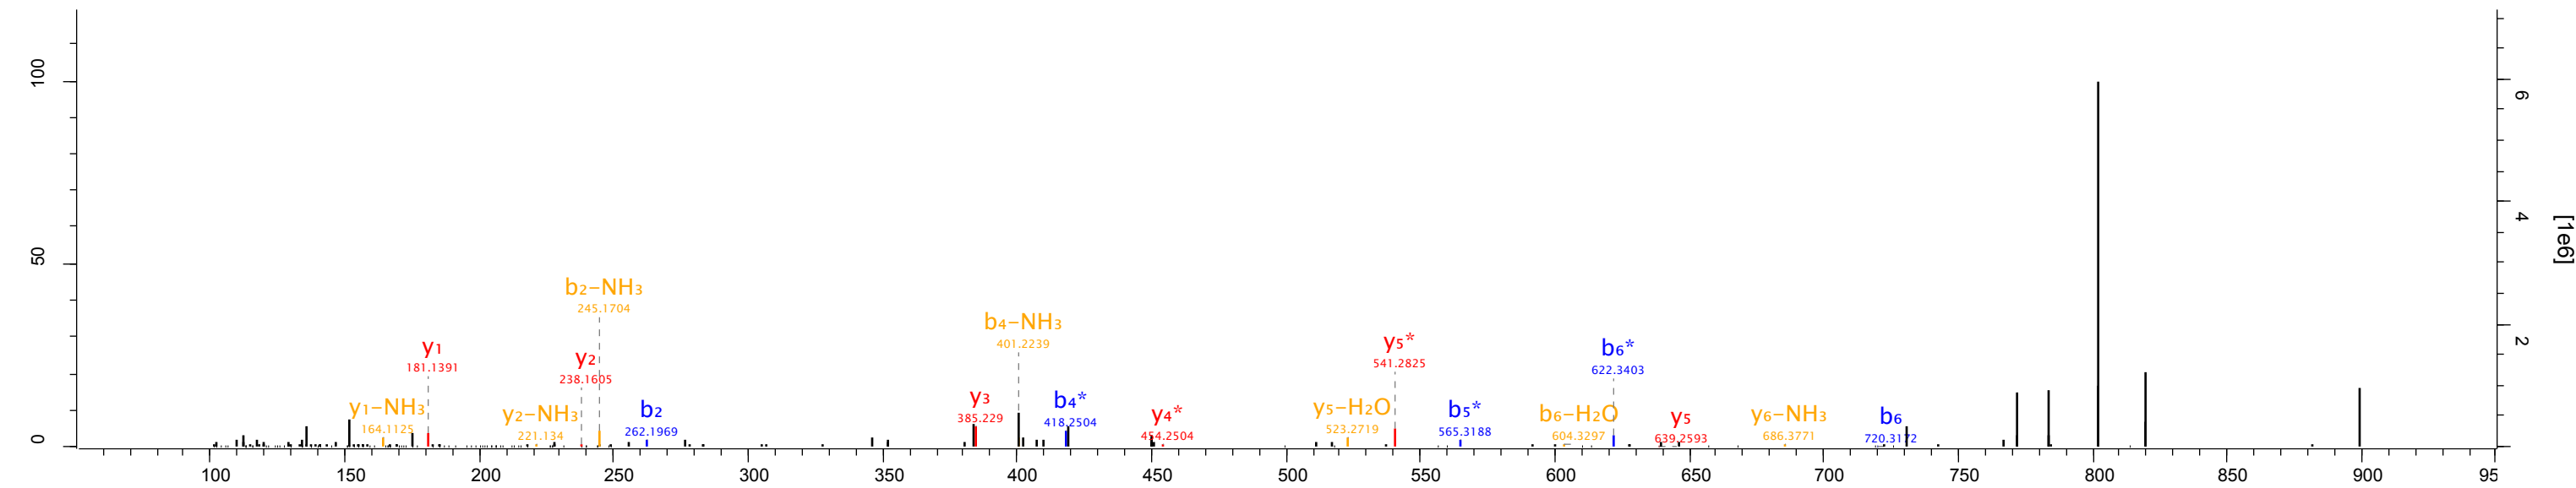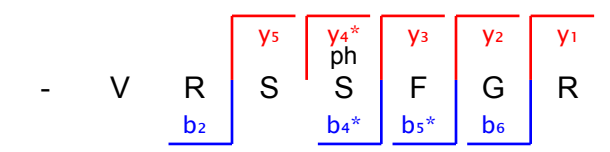

Raw file 20171215\_MaS\_33SR\_LMH\_phospho\_06 Scan 3057 Method FTMS; HCD Score 152.28 m/z 939.43 Gene names IRF2BP1

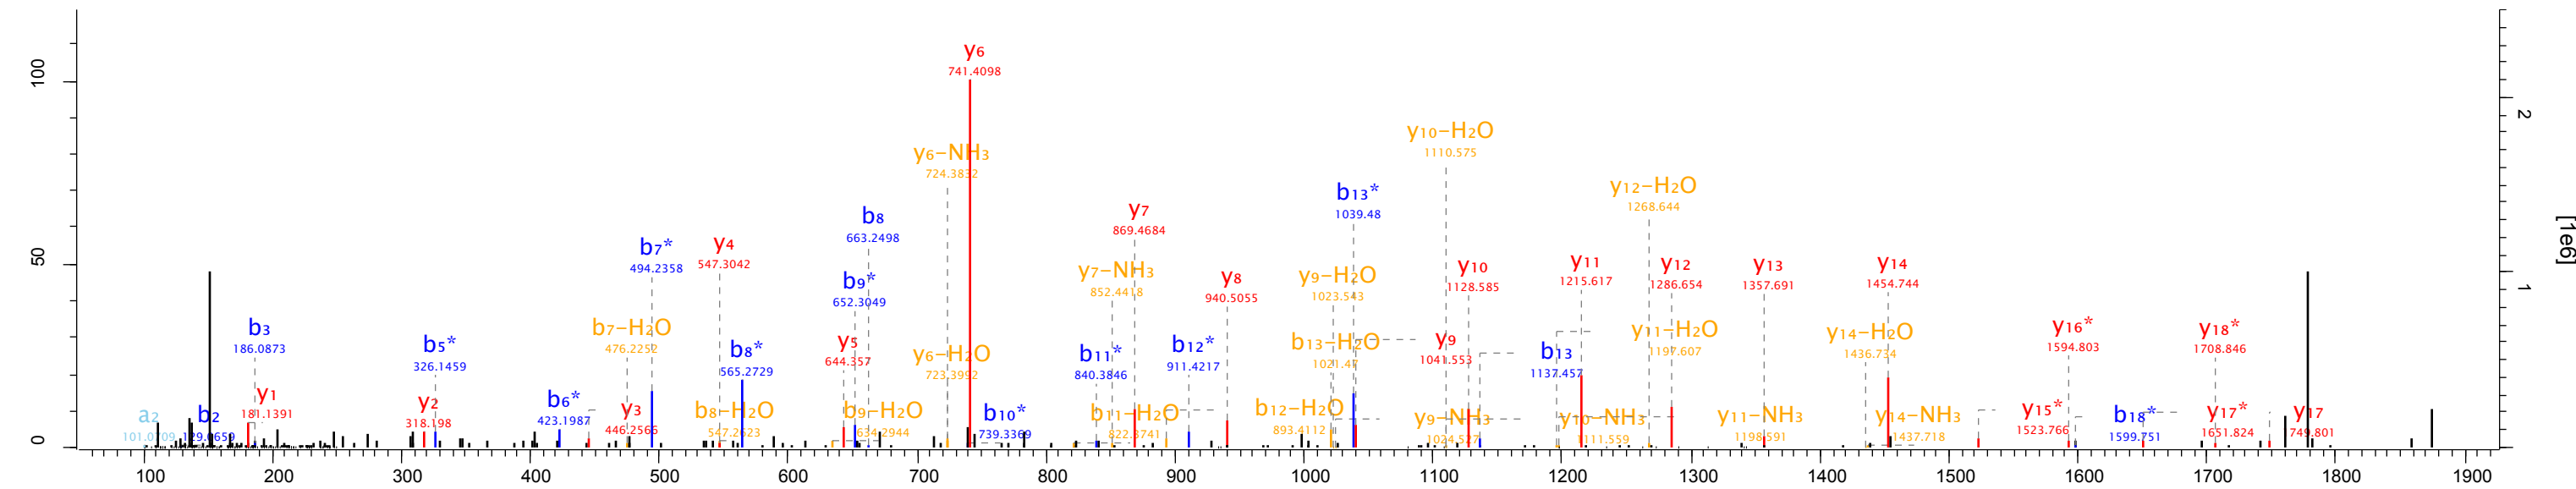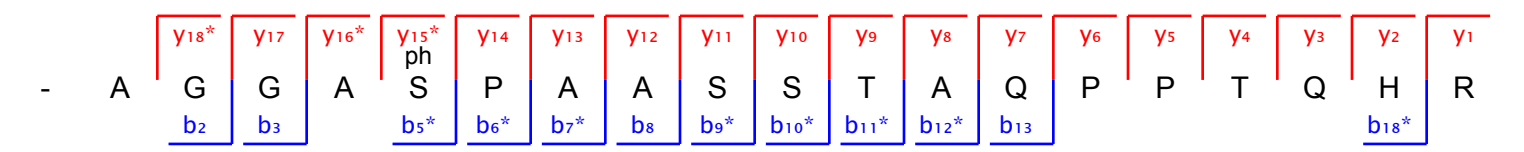

Raw file 20171215\_MaS\_33SR\_LMH\_phospho\_06 Scan 3077 Method FTMS; HCD Score 99.28 m/z 532.25 Gene names MAP2K2

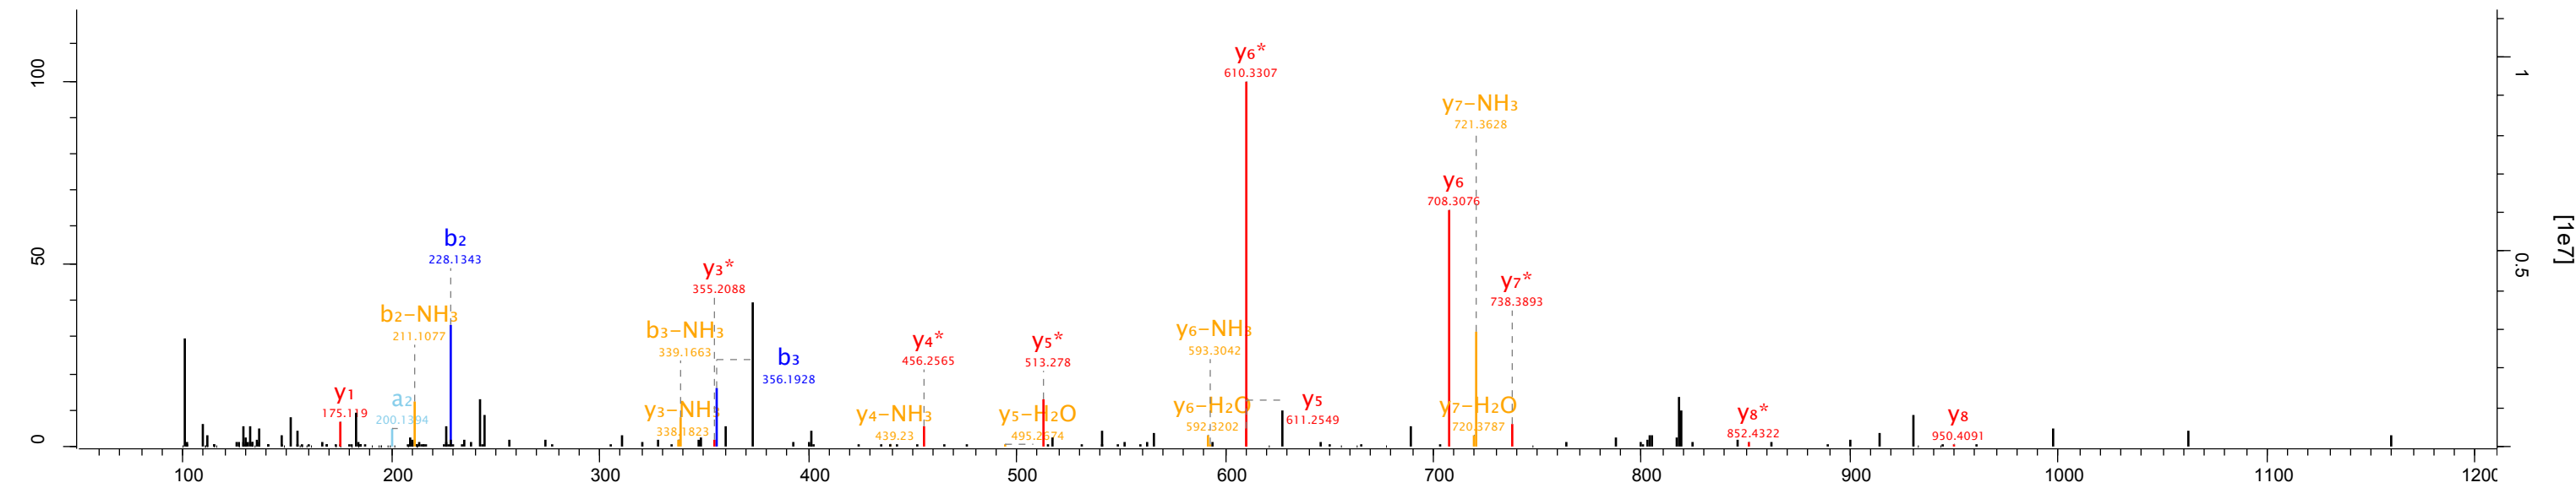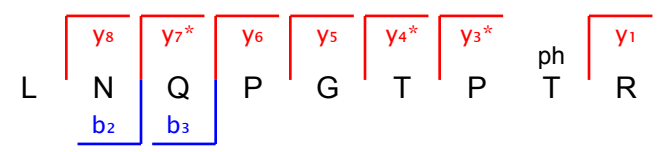

Raw file 20171215\_MaS\_33SR\_LMH\_phospho\_06 Scan 3137 Method FTMS; HCD Score 111.07 m/z 437.55 Gene names SLC9A3R2

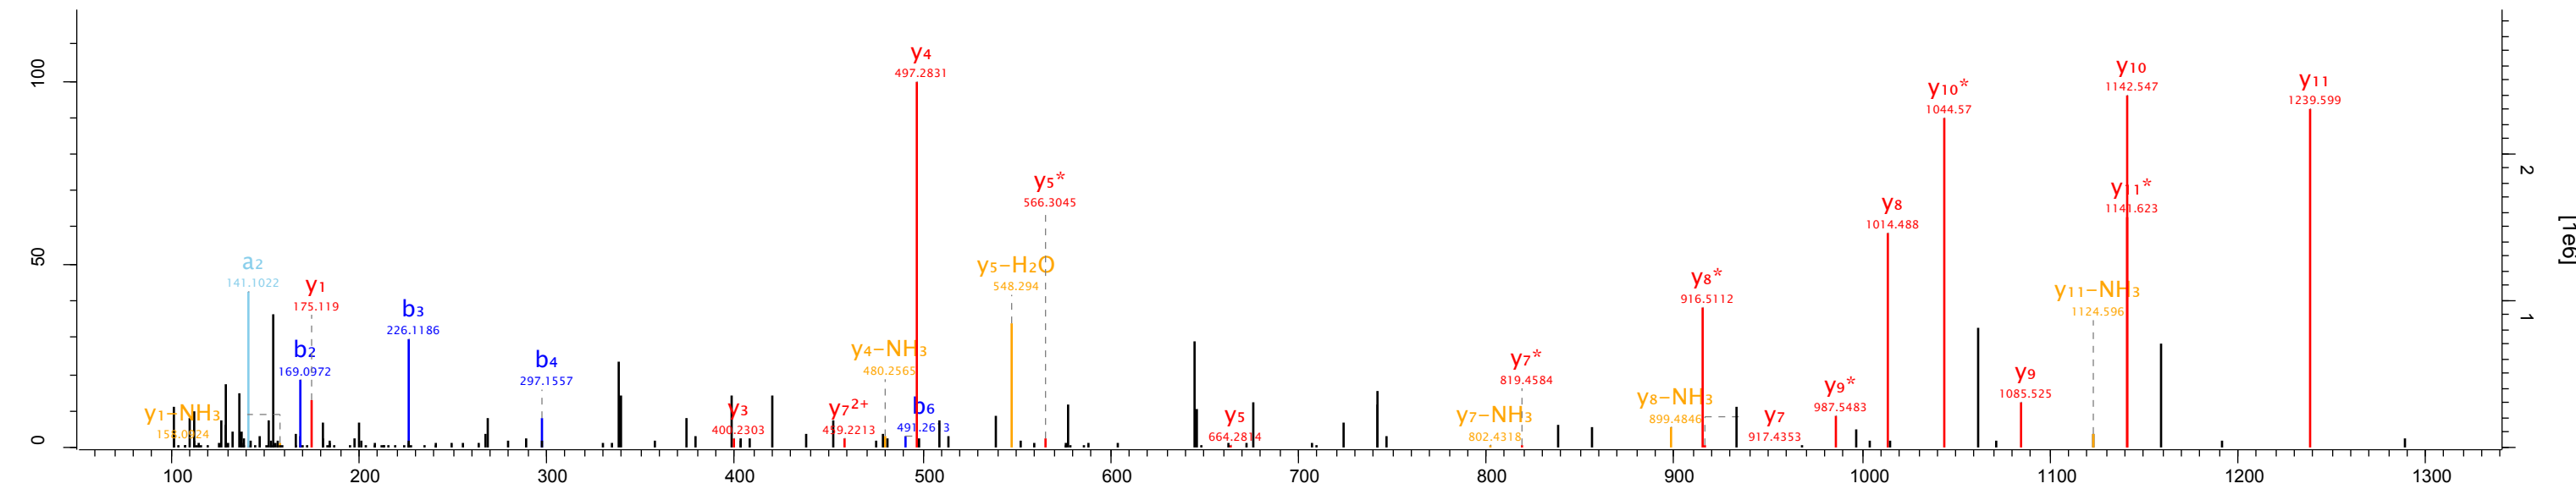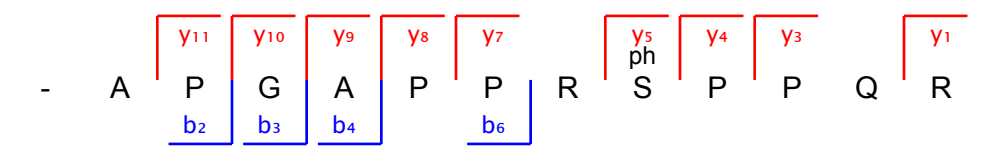

Raw file 20171215\_MaS\_33SR\_LMH\_phospho\_06 Scan 3607 Method FTMS; HCD Score 278.64 m/z 849.35 Gene names SFSWAP

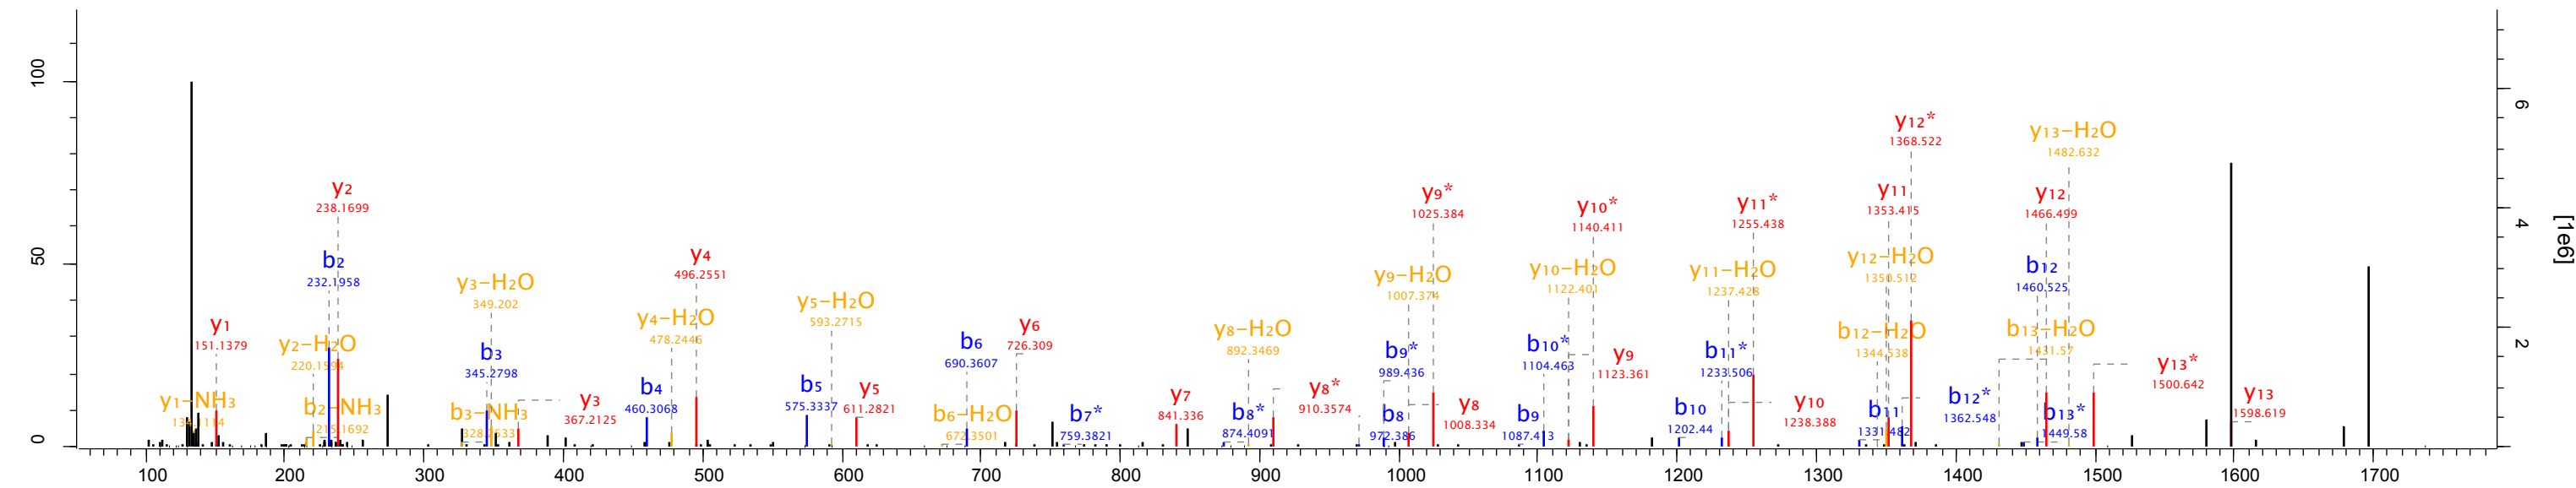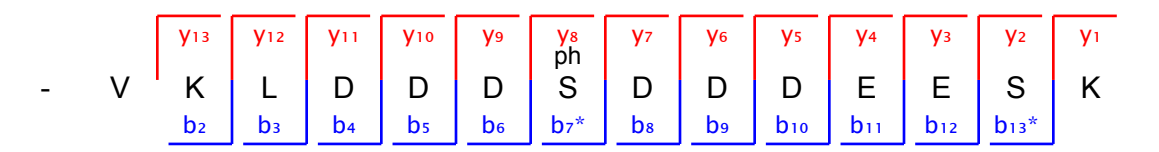

Raw file 20171215\_MaS\_33SR\_LMH\_phospho\_06 Scan 3687 Method FTMS; HCD Score 131.25 m/z 904.42 Gene names MYO9B

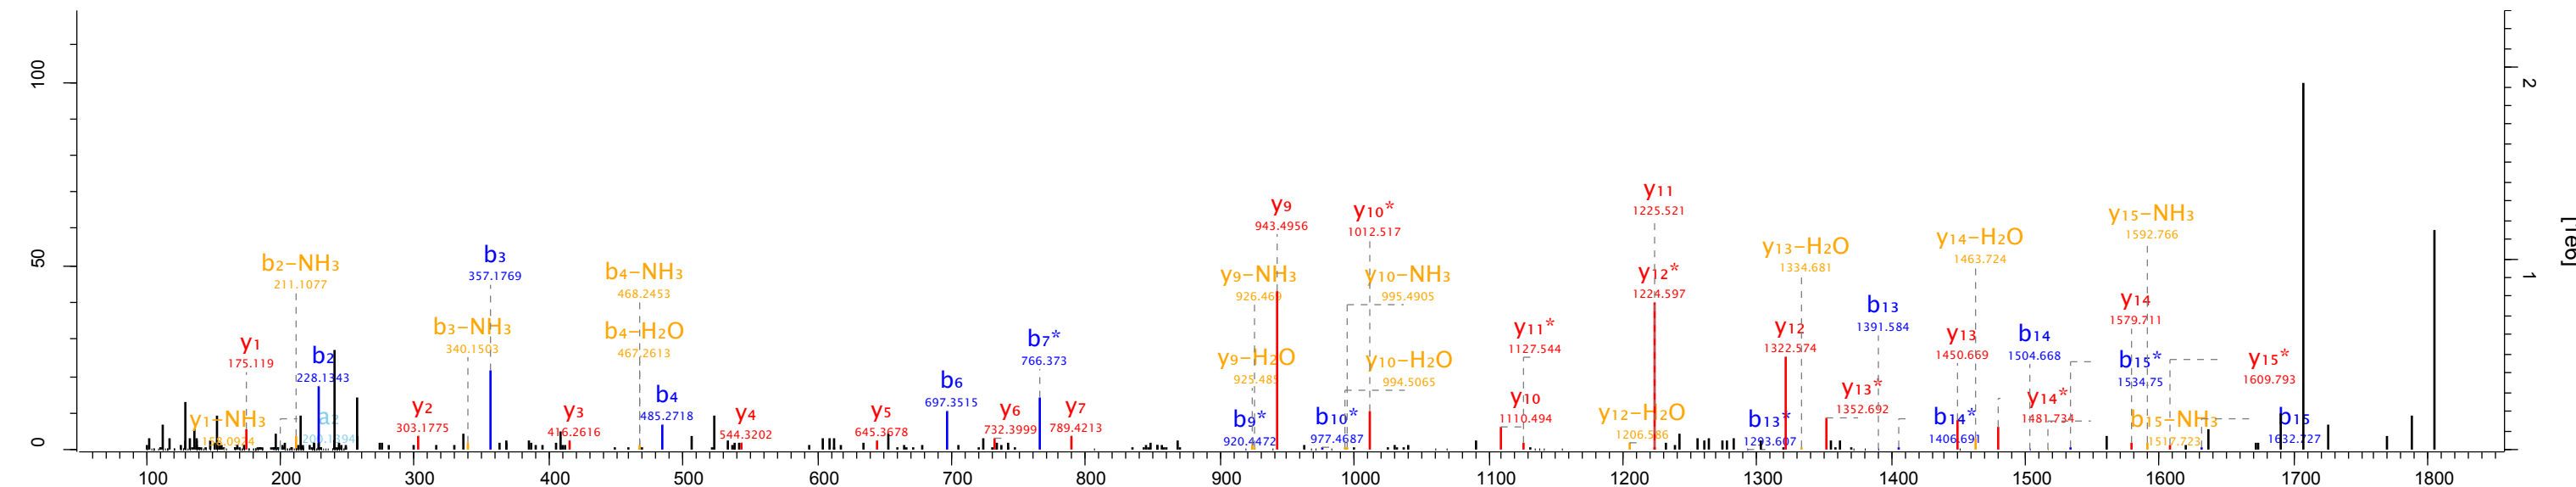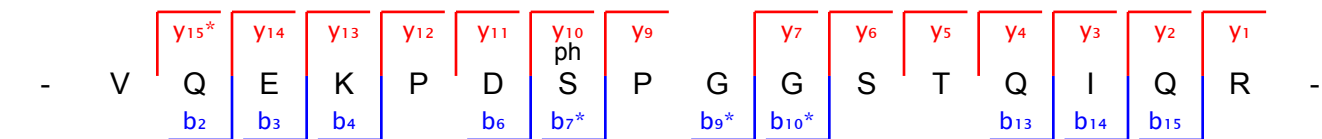

Raw file 20171215\_MaS\_33SR\_LMH\_phospho\_06 Scan 3967 Method FTMS; HCD Score 238.72 m/z 958.4 Gene names DKC1

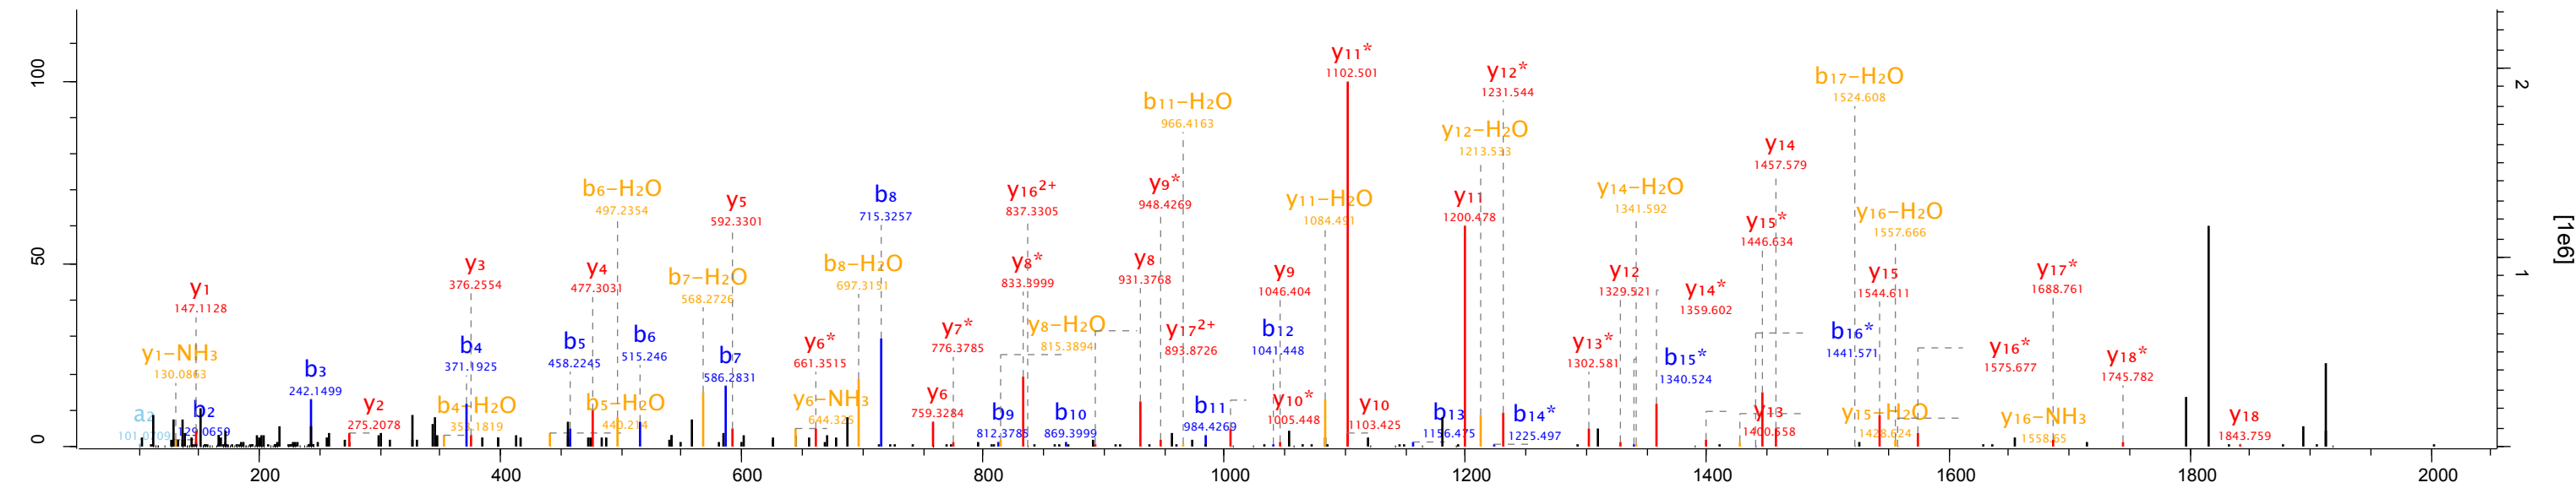

- A G L E S G A E P G D G D S D T T K K -

b<sub>2</sub> b<sub>3</sub> b<sub>4</sub> b<sub>5</sub> b<sub>6</sub> b<sub>7</sub> b<sub>8</sub> b<sub>9</sub> b<sub>10</sub> b<sub>11</sub> b<sub>12</sub> b<sub>13</sub> b<sub>14</sub>\* b<sub>15</sub>\* b<sub>16</sub>\*

y<sub>18</sub> y<sub>17</sub>\* y<sub>16</sub>\* y<sub>15</sub> y<sub>14</sub> y<sub>13</sub> y<sub>12</sub> y<sub>11</sub> y<sub>10</sub> y<sub>9</sub> y<sub>8</sub> y<sub>7</sub>\* y<sub>6</sub> ph y<sub>5</sub> y<sub>4</sub> y<sub>3</sub> y<sub>2</sub> y<sub>1</sub>

Raw file 20171215\_MaS\_33SR\_LMH\_phospho\_06 Scan 3997 Method FTMS; HCD Score 243.97 m/z 754.01 Gene names C18orf25;ARKL1

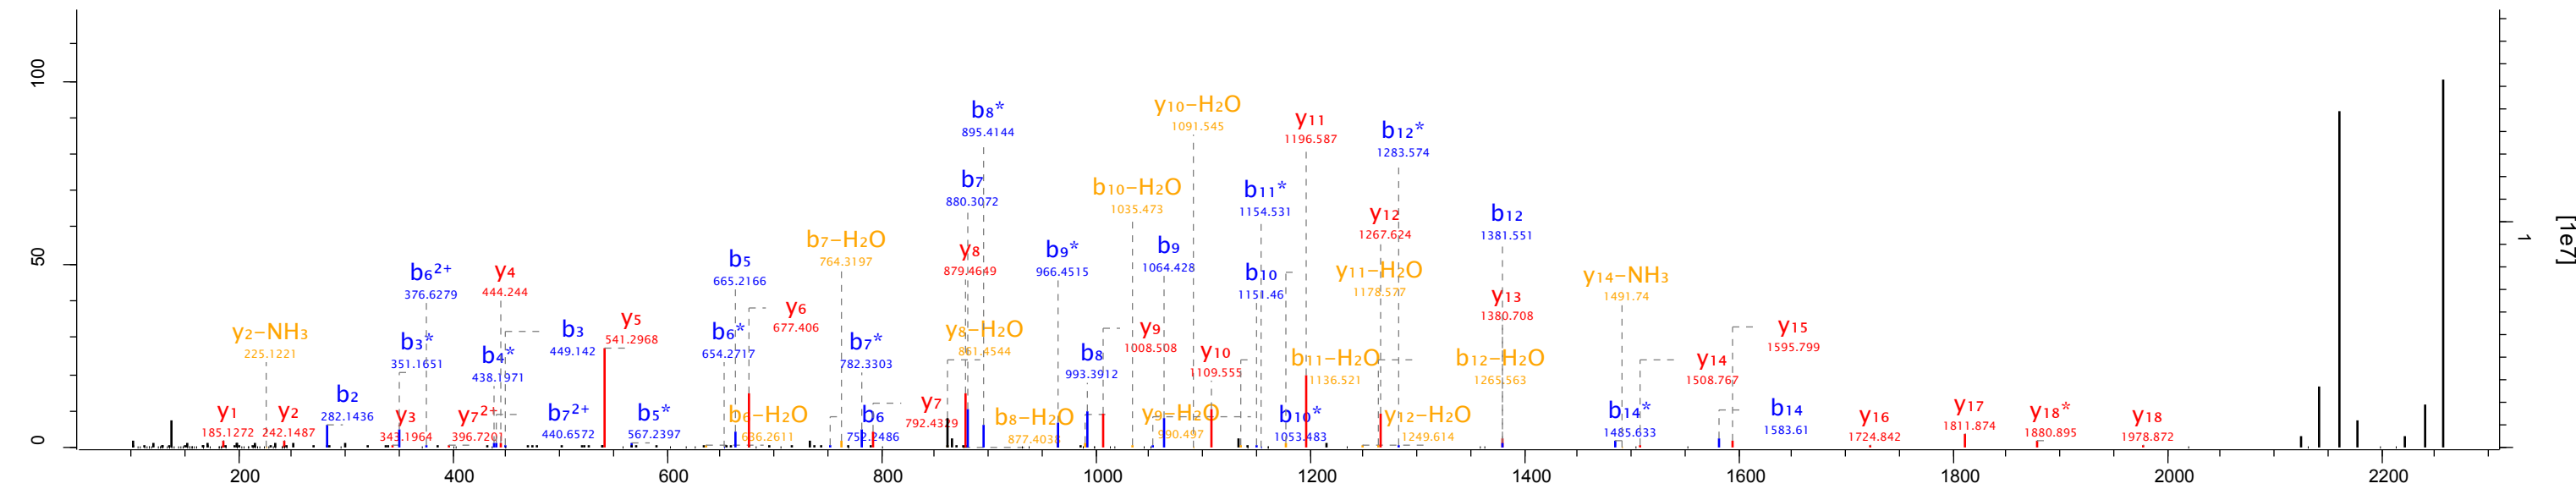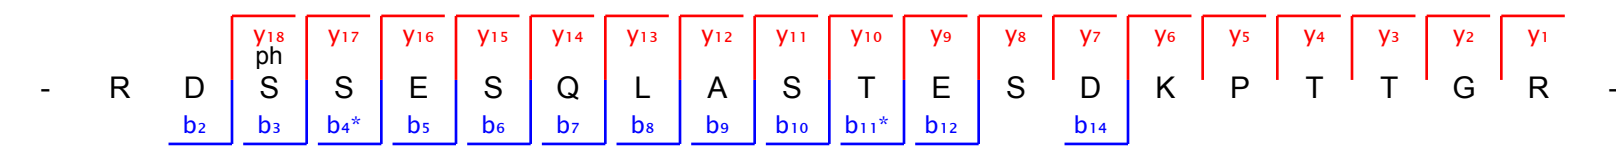



Raw file 20171215\_MaS\_33SR\_LMH\_phospho\_06 Scan 4167 Method FTMS; HCD Score 178.56 m/z 760.35 Gene names DDX21

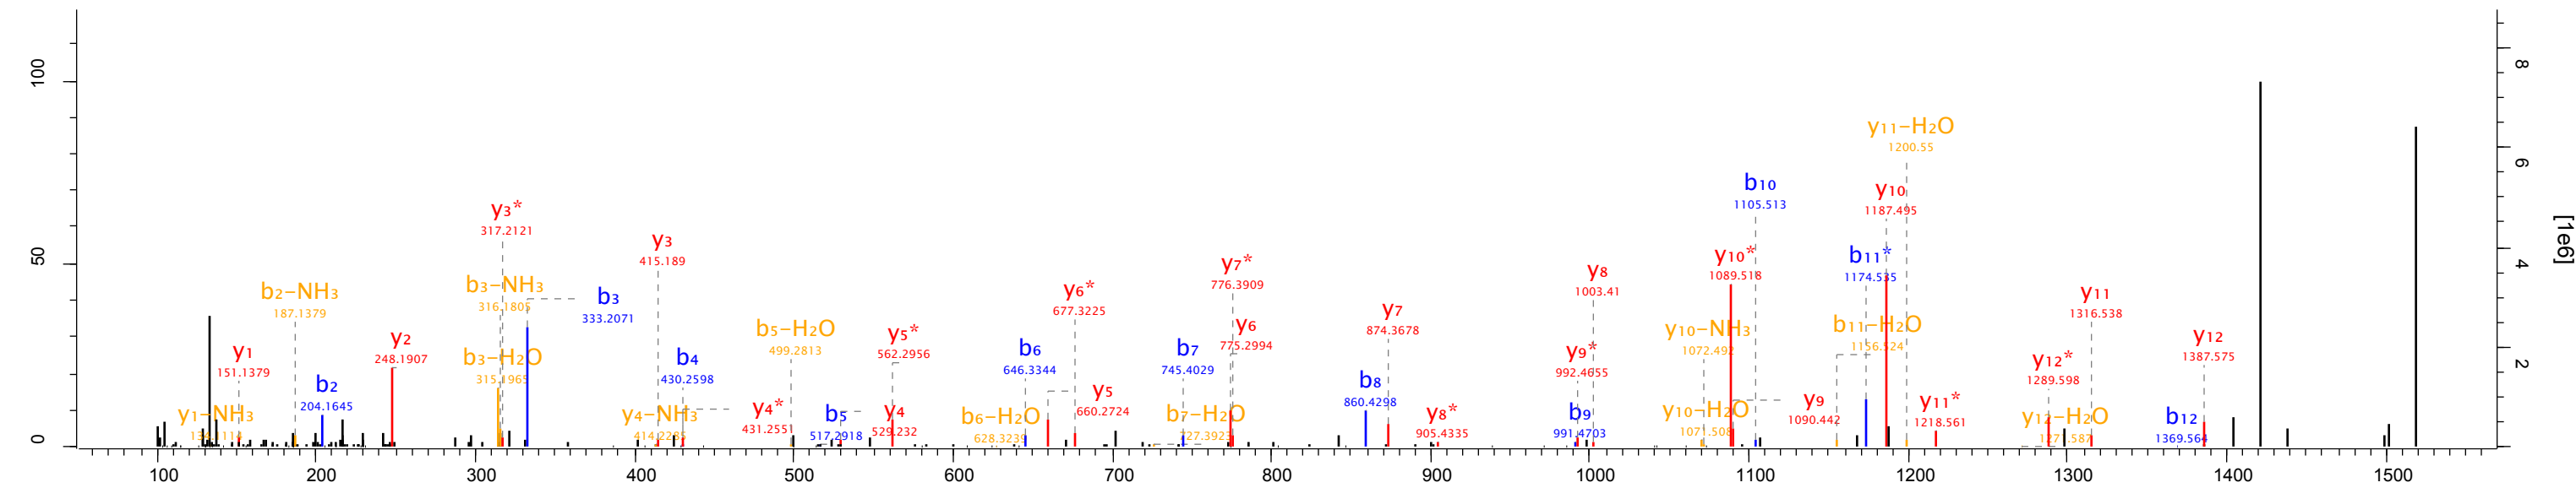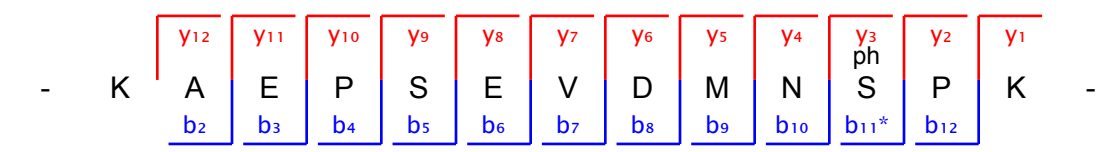

Raw file 20171215\_MaS\_33SR\_LMH\_phospho\_06 Scan 4197 Method FTMS; HCD Score 64.8 m/z 436.87 Gene names HDGFRP2

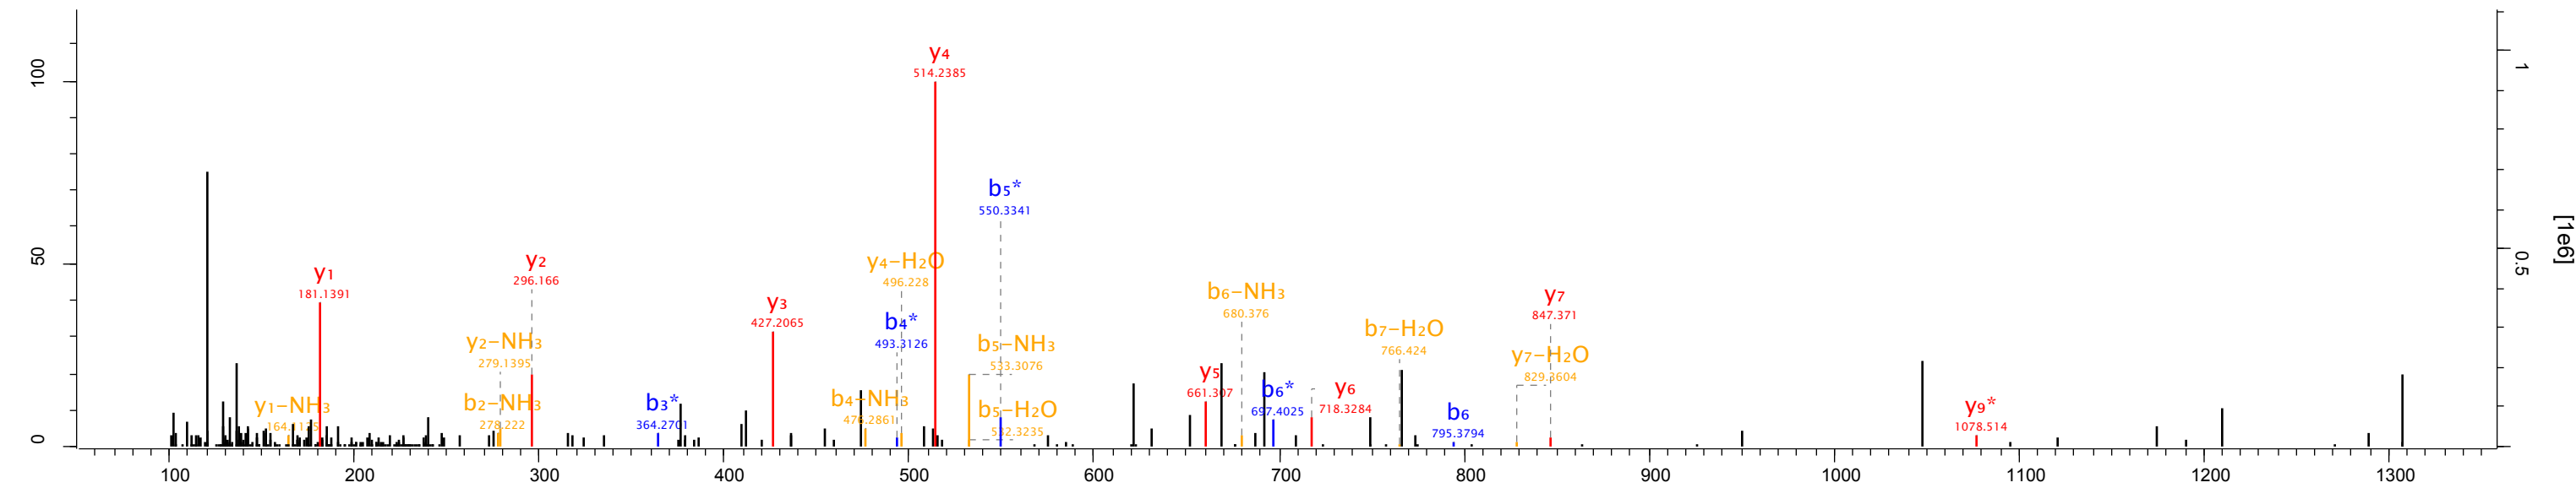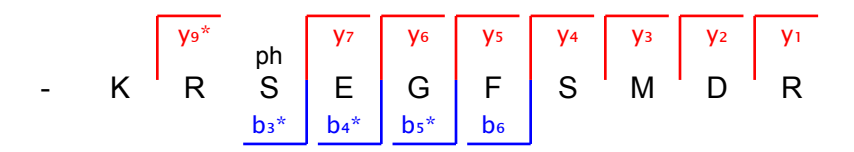

Raw file 20171215\_MaS\_33SR\_LMH\_phospho\_06 Scan 4207 Method FTMS; HCD Score 61.11 m/z 613.79 Gene names RAI14

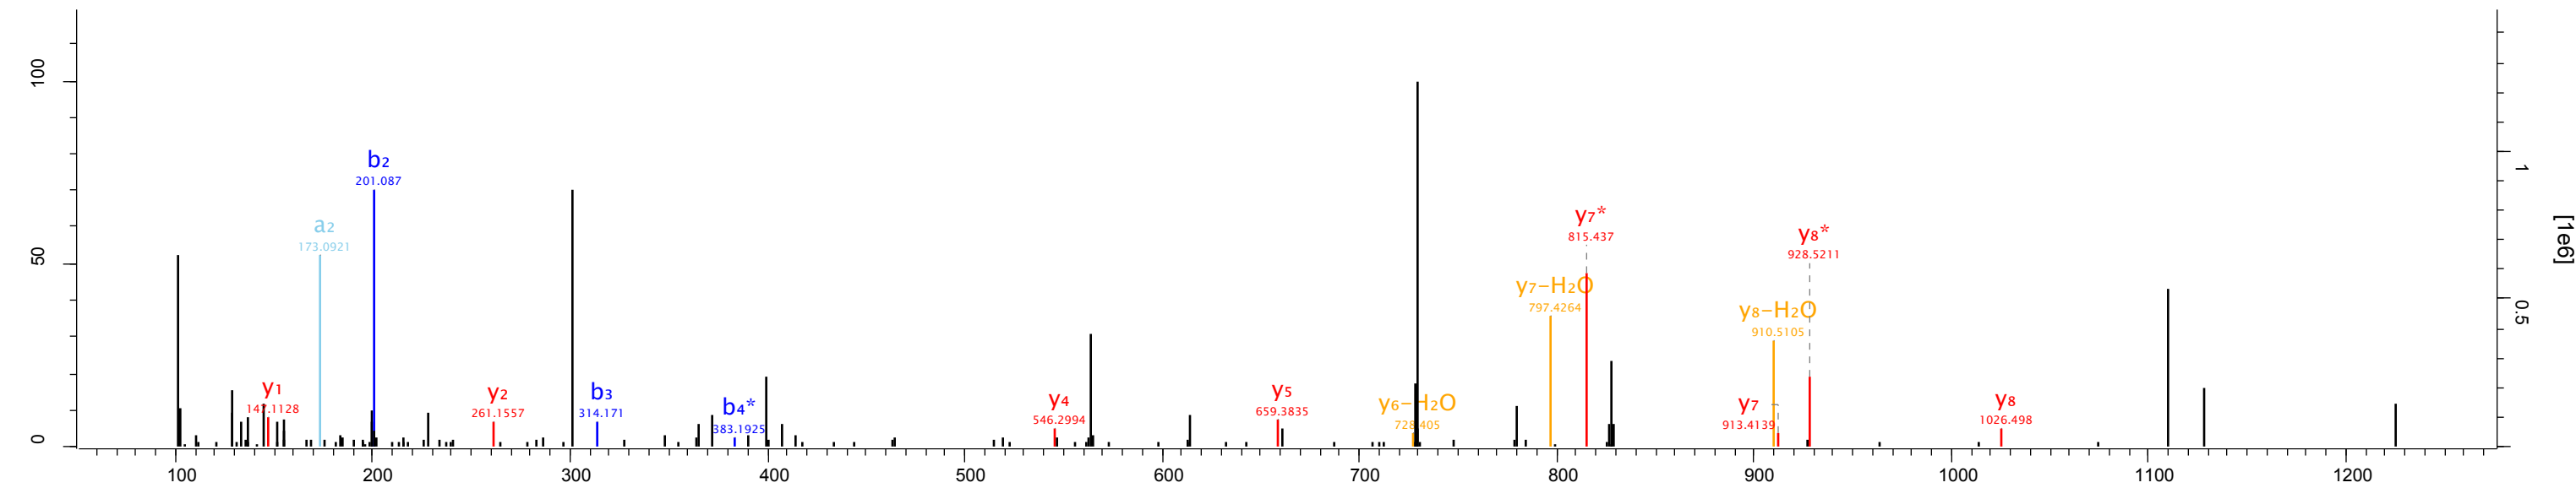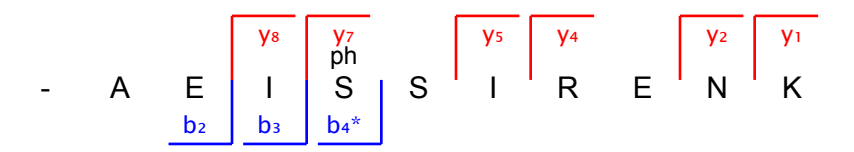

Raw file 20171215\_MaS\_33SR\_LMH\_phospho\_06 Scan Method Score m/z Gene names  
 4217 FTMS; HCD 79.43 998.96 C12orf45

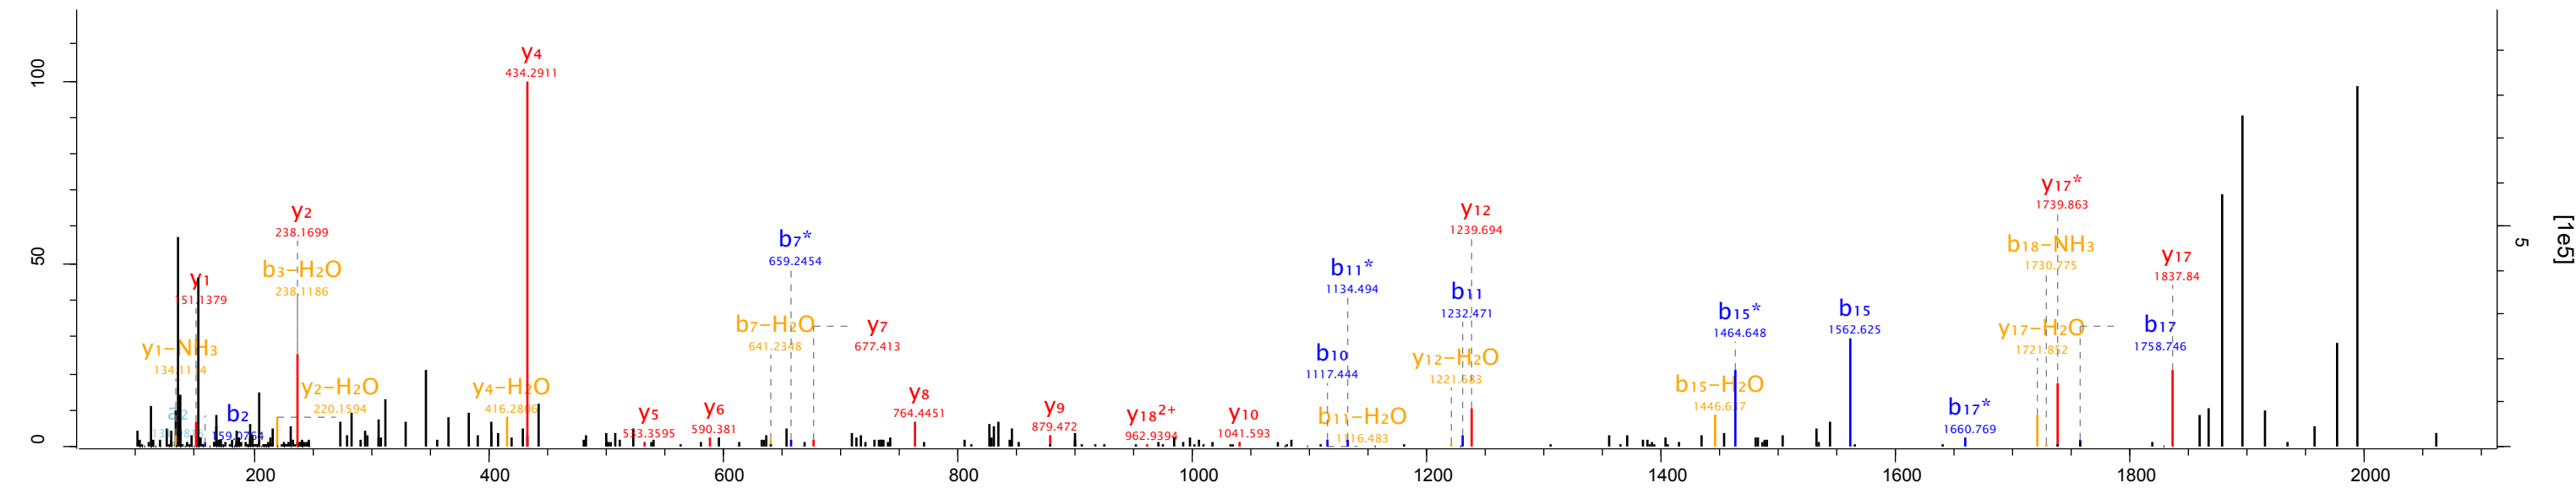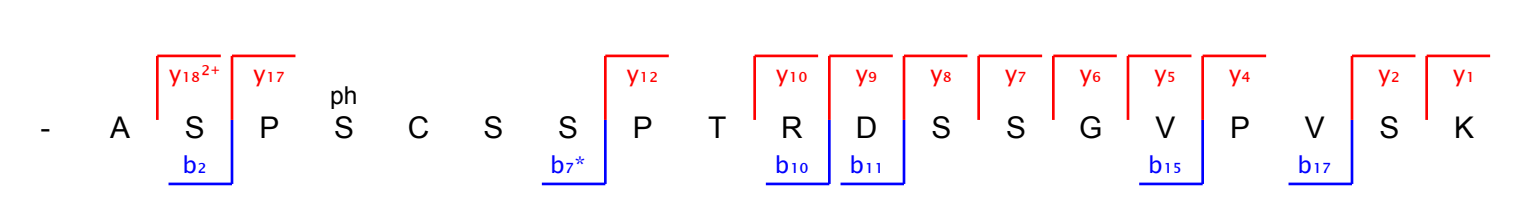

Raw file

20171215\_MaS\_33SR\_LMH\_phospho\_06

| Scan | Method    | Score | m/z    | Gene names |
|------|-----------|-------|--------|------------|
| 4237 | FTMS; HCD | 115.8 | 468.56 | RPRD1B     |

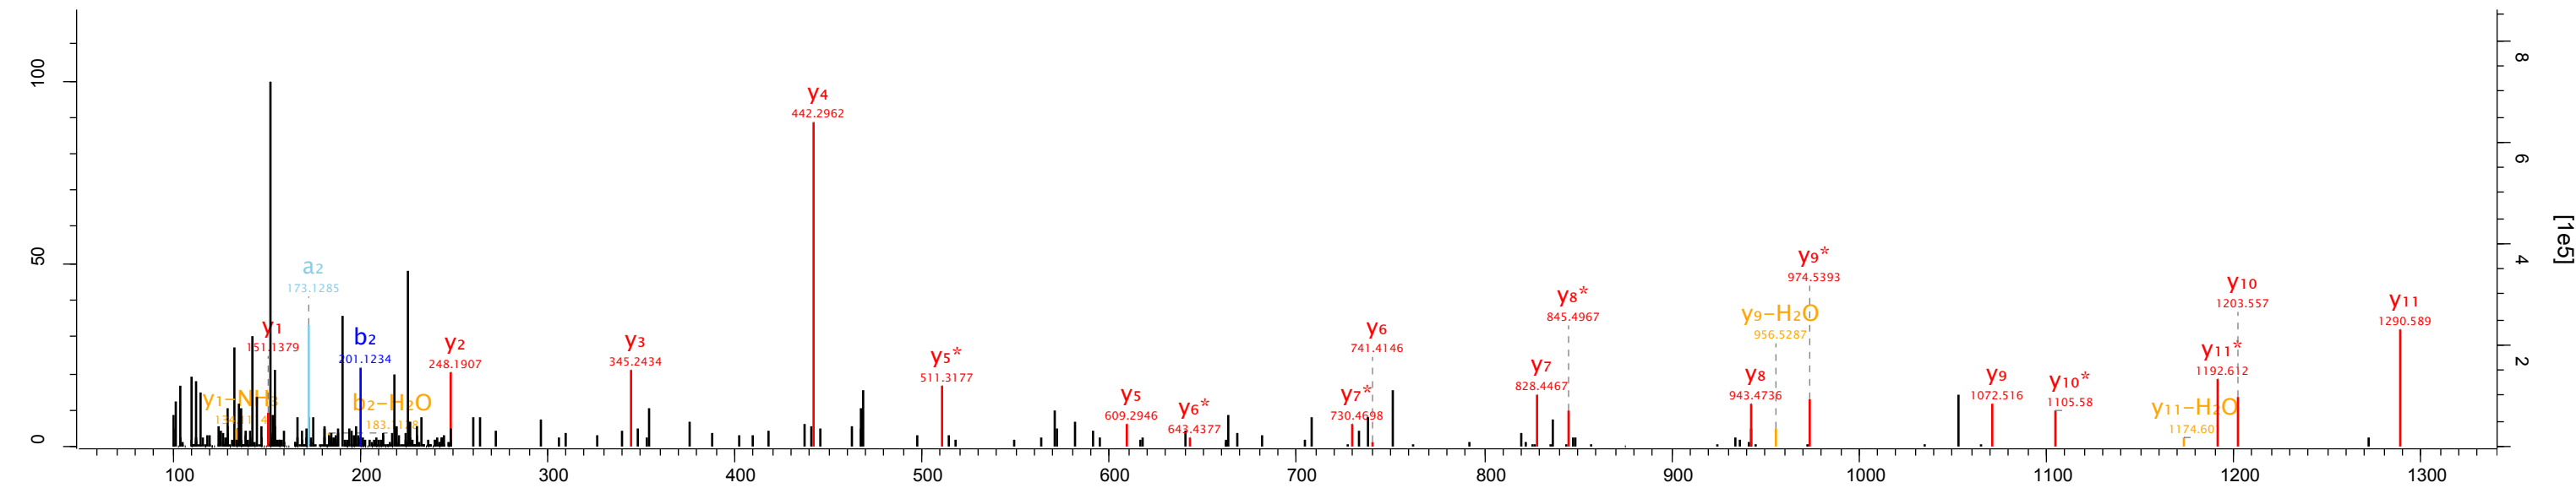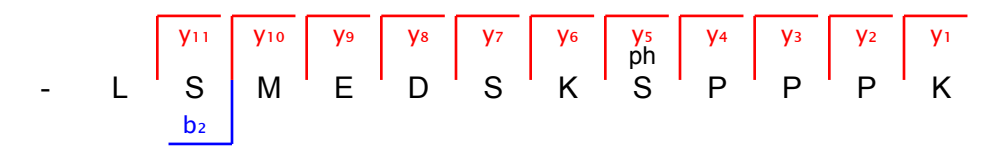

Raw file 20171215\_MaS\_33SR\_LMH\_phospho\_06 Scan 4377 Method FTMS; HCD Score 92.05 m/z 400.19 Gene names RTKN

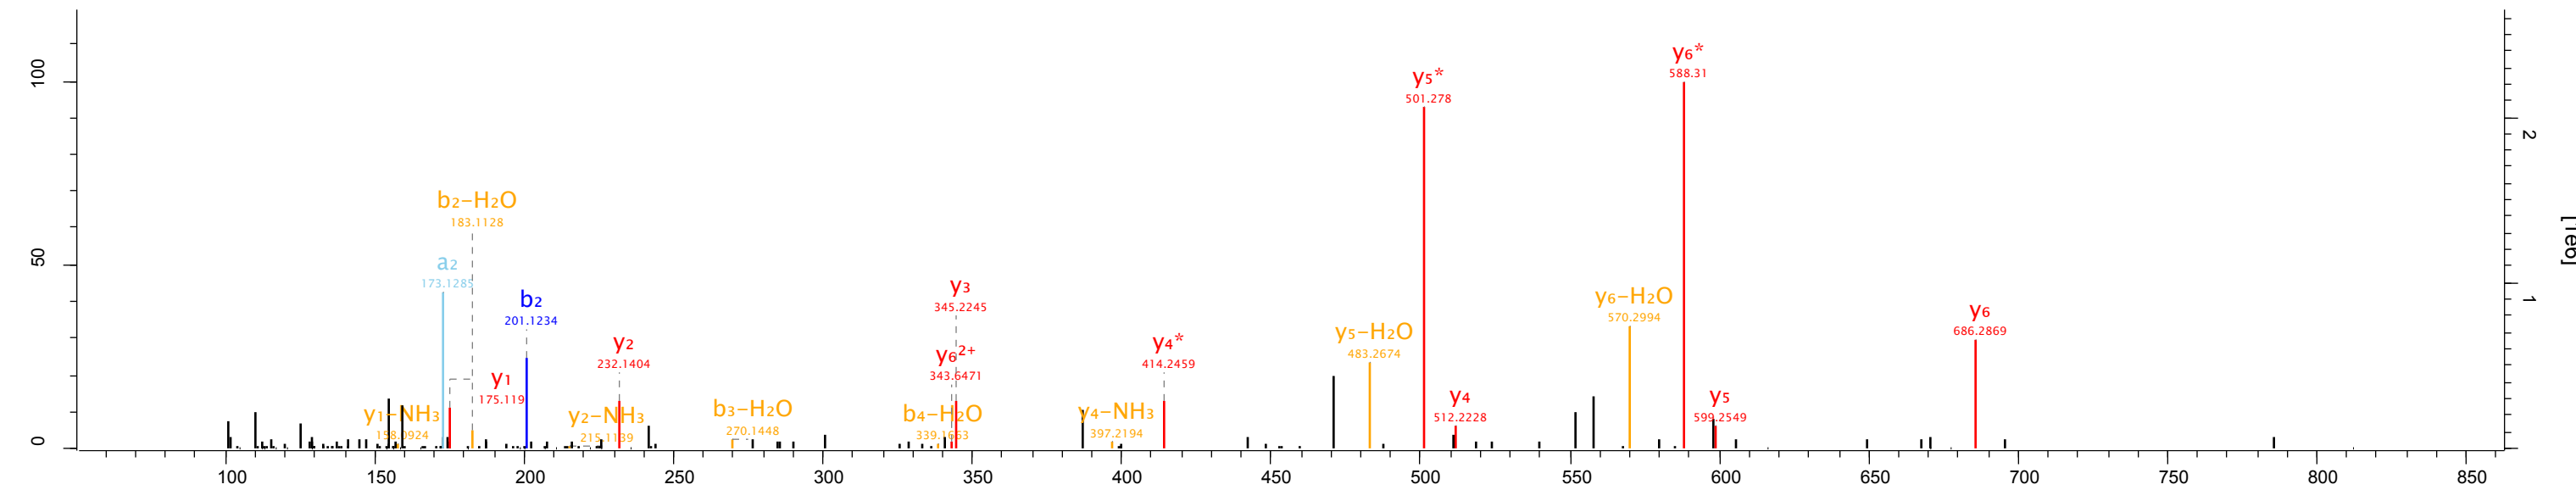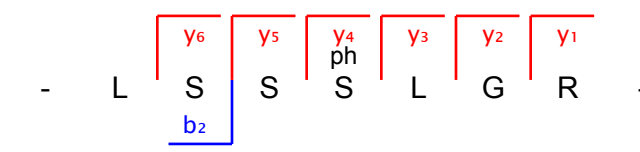

Raw file 20171215\_MaS\_33SR\_LMH\_phospho\_06 Scan 4407 Method FTMS; HCD Score 346.78 m/z 1125.93 Gene names SSB

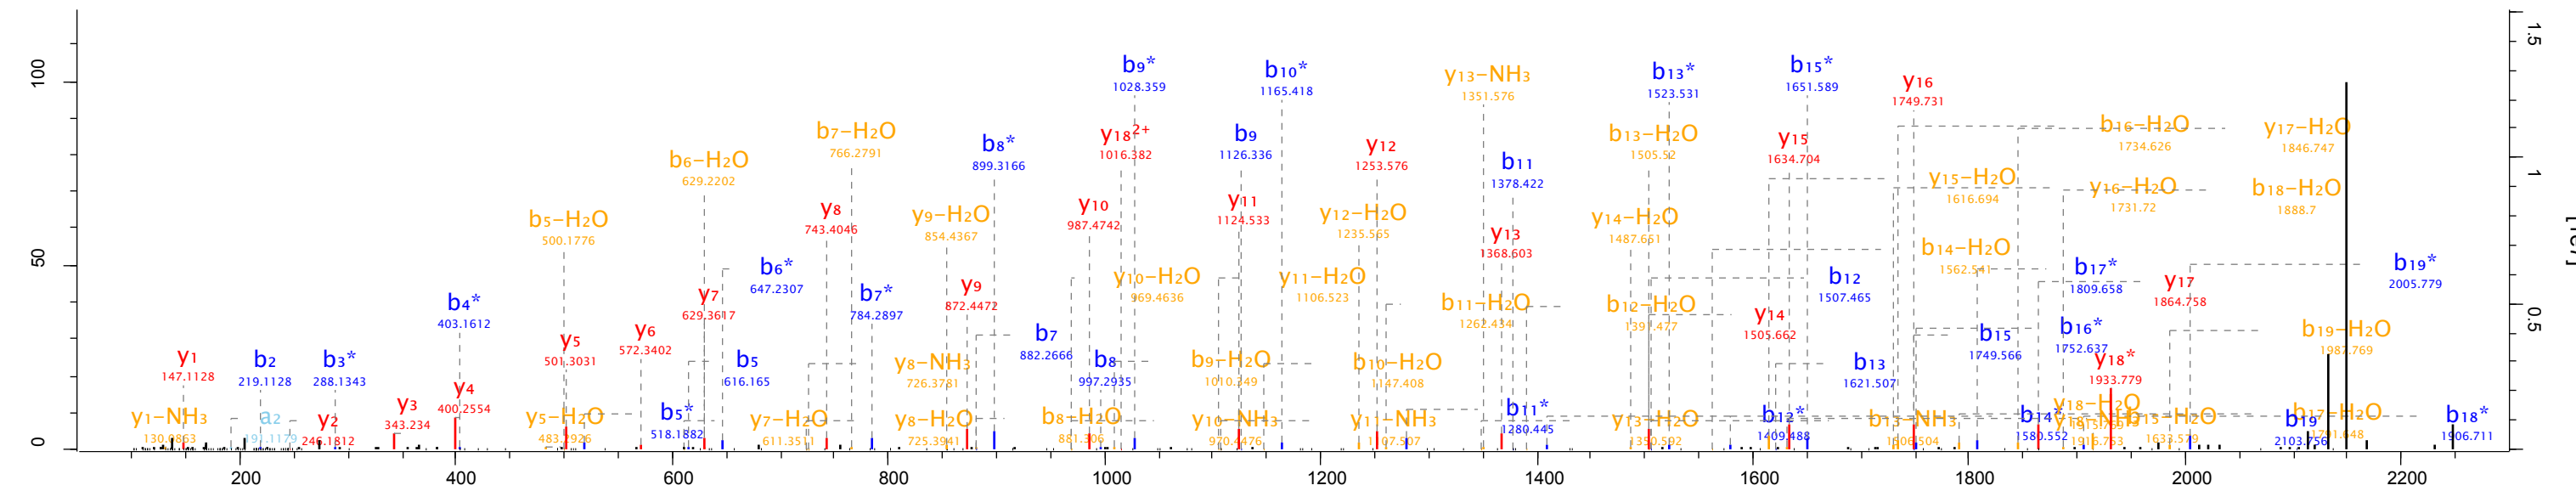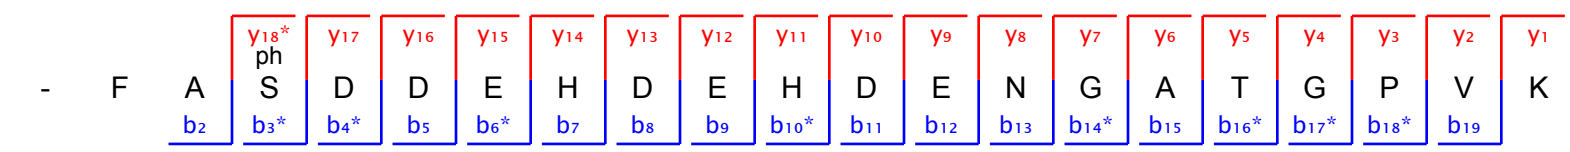

Raw file 20171215\_MaS\_33SR\_LMH\_phospho\_06 Scan 5157 Method FTMS; HCD Score 122.49 m/z 739.37 Gene names PPFIBP1

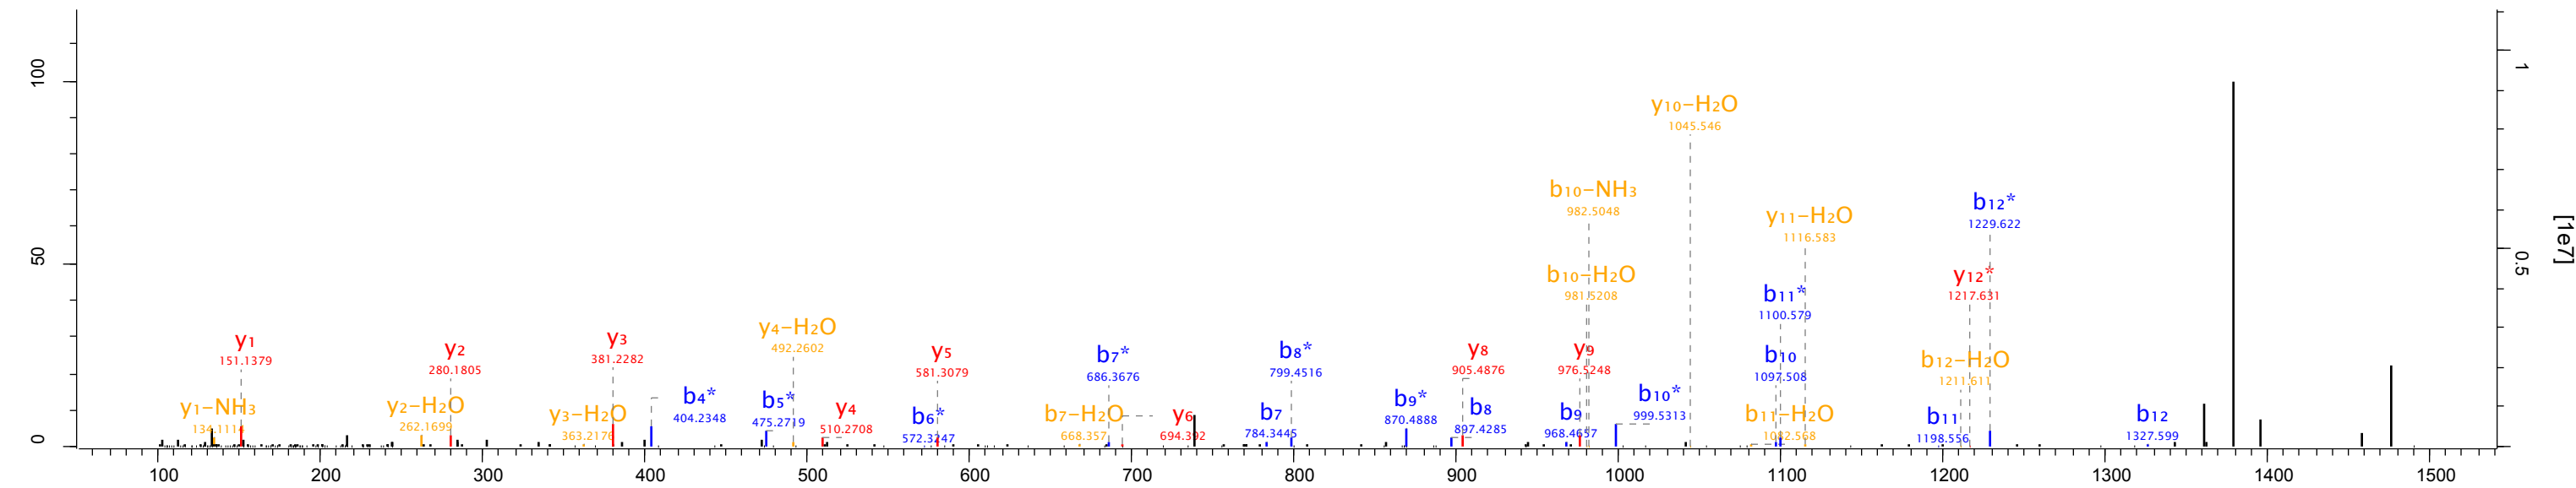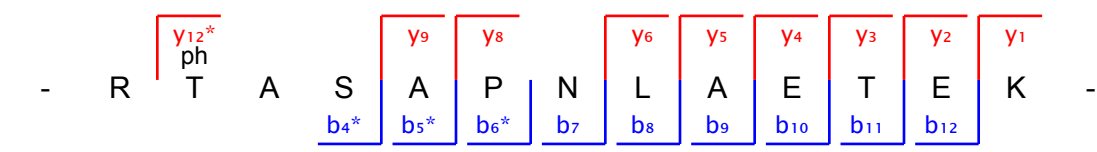



Raw file 20171215\_MaS\_33SR\_LMH\_phospho\_06 Scan 5197 Method FTMS; HCD Score 112.43 m/z 771.36 Gene names TOPORS

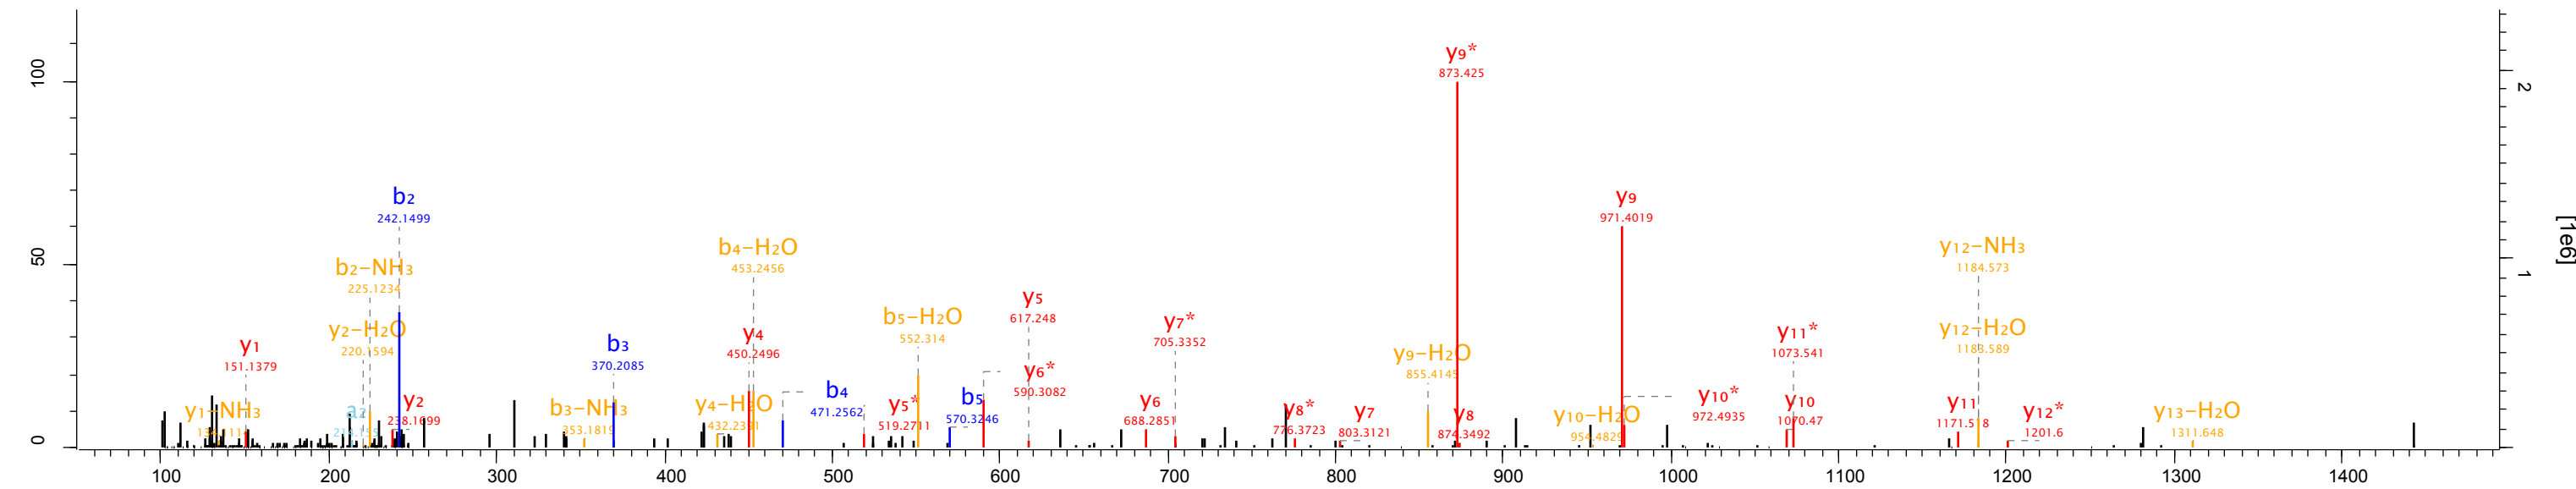

- L Q Q Q T V P A D A S<sub>ph</sub> P D S K -

Fragmentation mapping (b and y ions):

- b2: L-Q
- b3: L-Q-Q
- b4: L-Q-Q-T
- b5: L-Q-Q-T-V
- y1: V-P
- y2: P-A
- y3: A-D
- y4: D-A
- y5: A-S<sub>ph</sub>
- y6: S<sub>ph</sub>-P
- y7: P-D
- y8: D-S
- y9: S-K
- y10: K-

Raw file 20171215\_MaS\_33SR\_LMH\_phospho\_06 Scan 5277 Method FTMS; HCD Score 52.17 m/z 804.87 Gene names EIF6

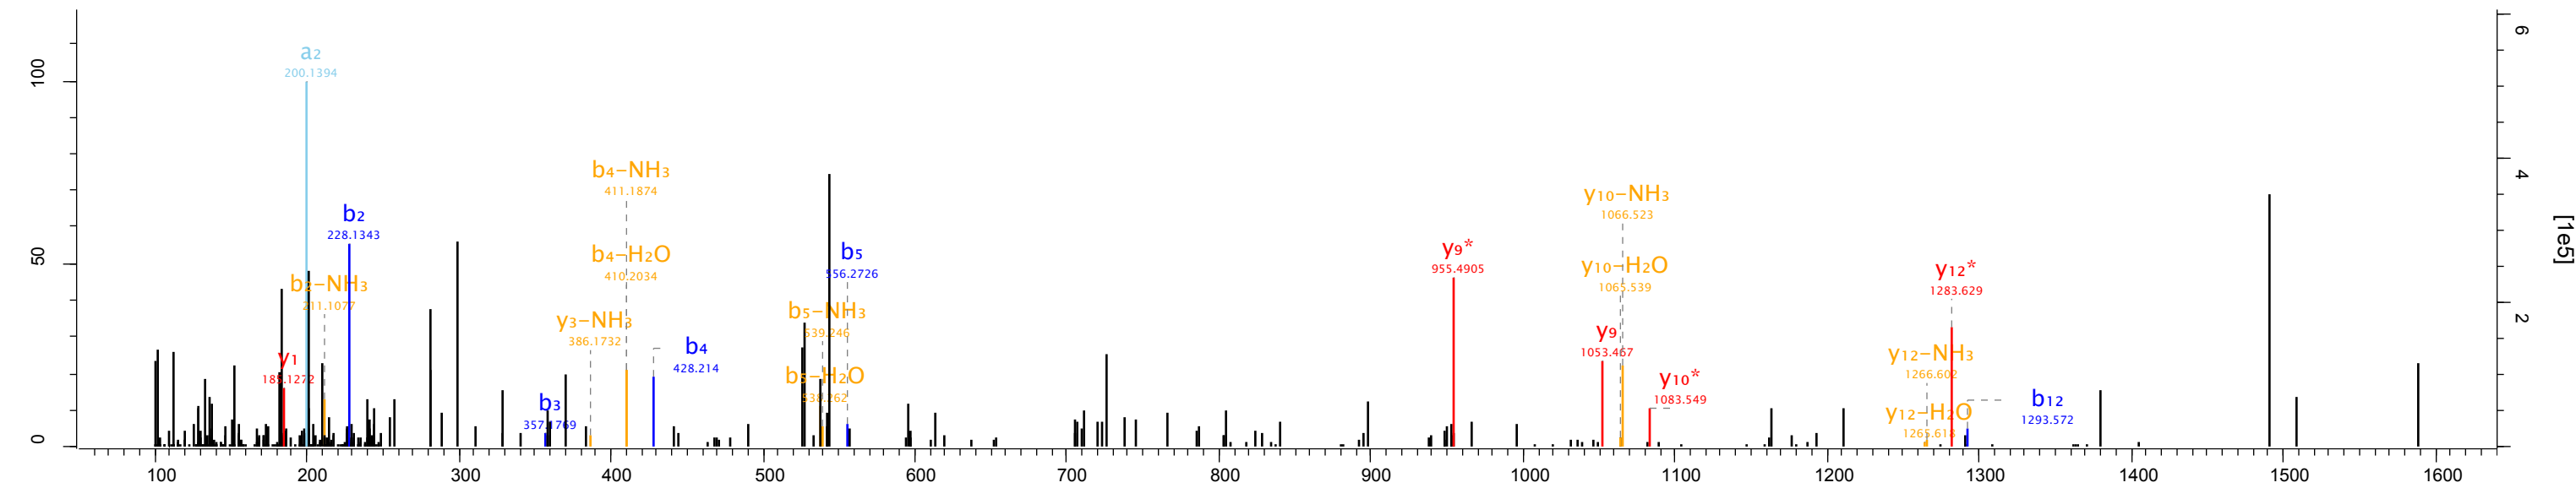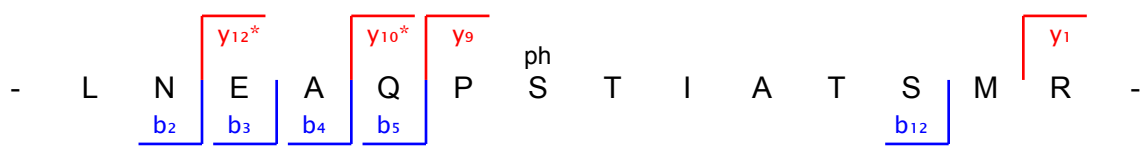

Raw file 20171215\_MaS\_33SR\_LMH\_phospho\_06 Scan 5287 Method FTMS; HCD Score 242.36 m/z 863.87 Gene names SPECC1L-ADORA2A;SPECC1L

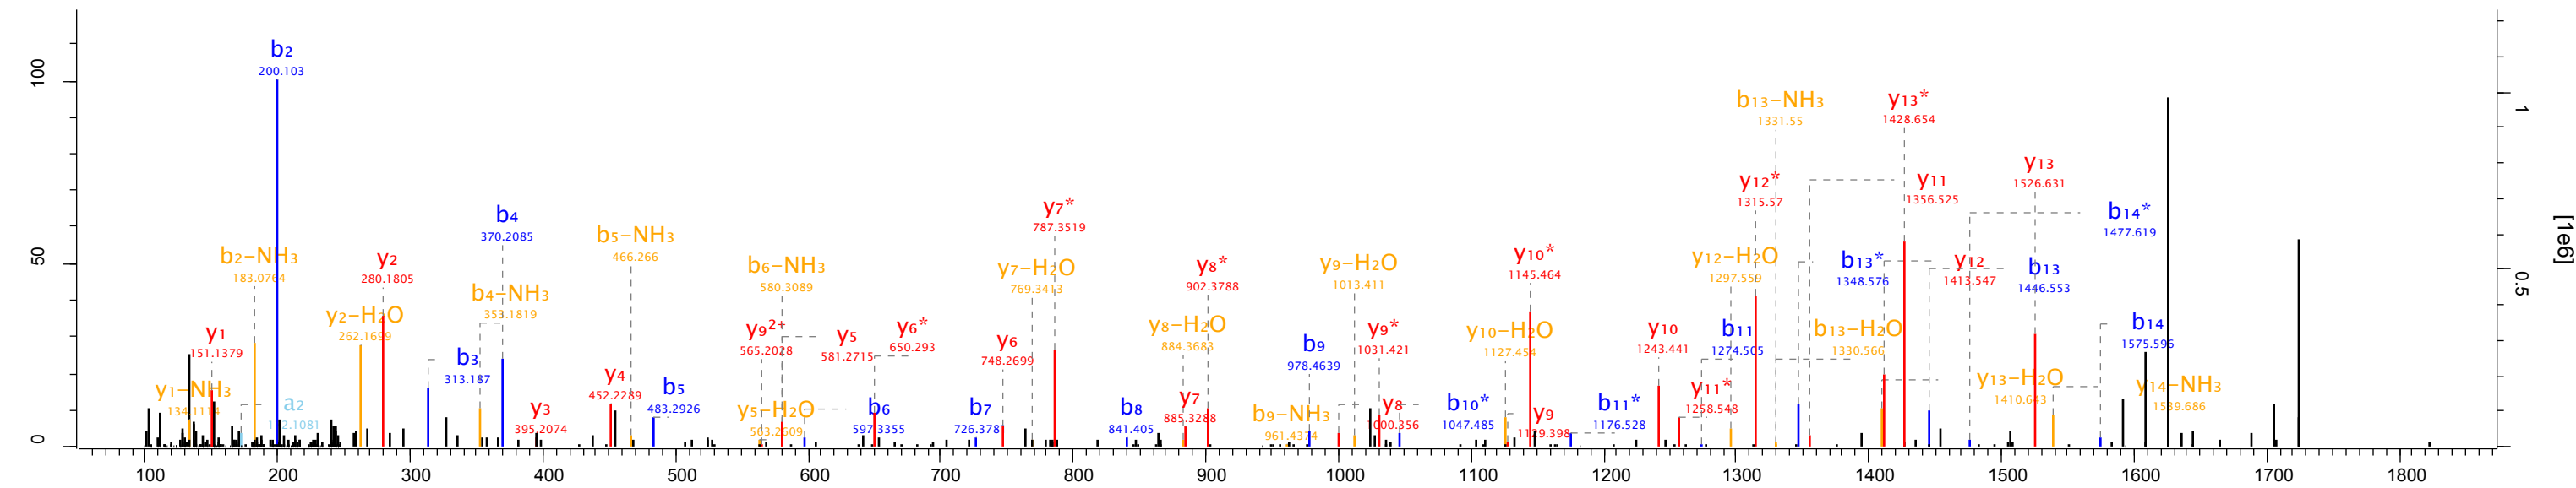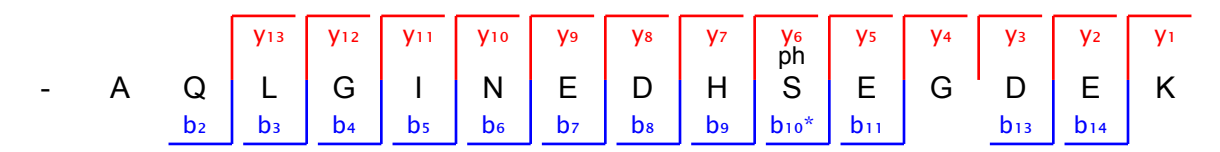

Raw file 20171215\_MaS\_33SR\_LMH\_phospho\_06 Scan 5647 Method FTMS; HCD Score 150.36 m/z 690.32 Gene names HSP90AA2

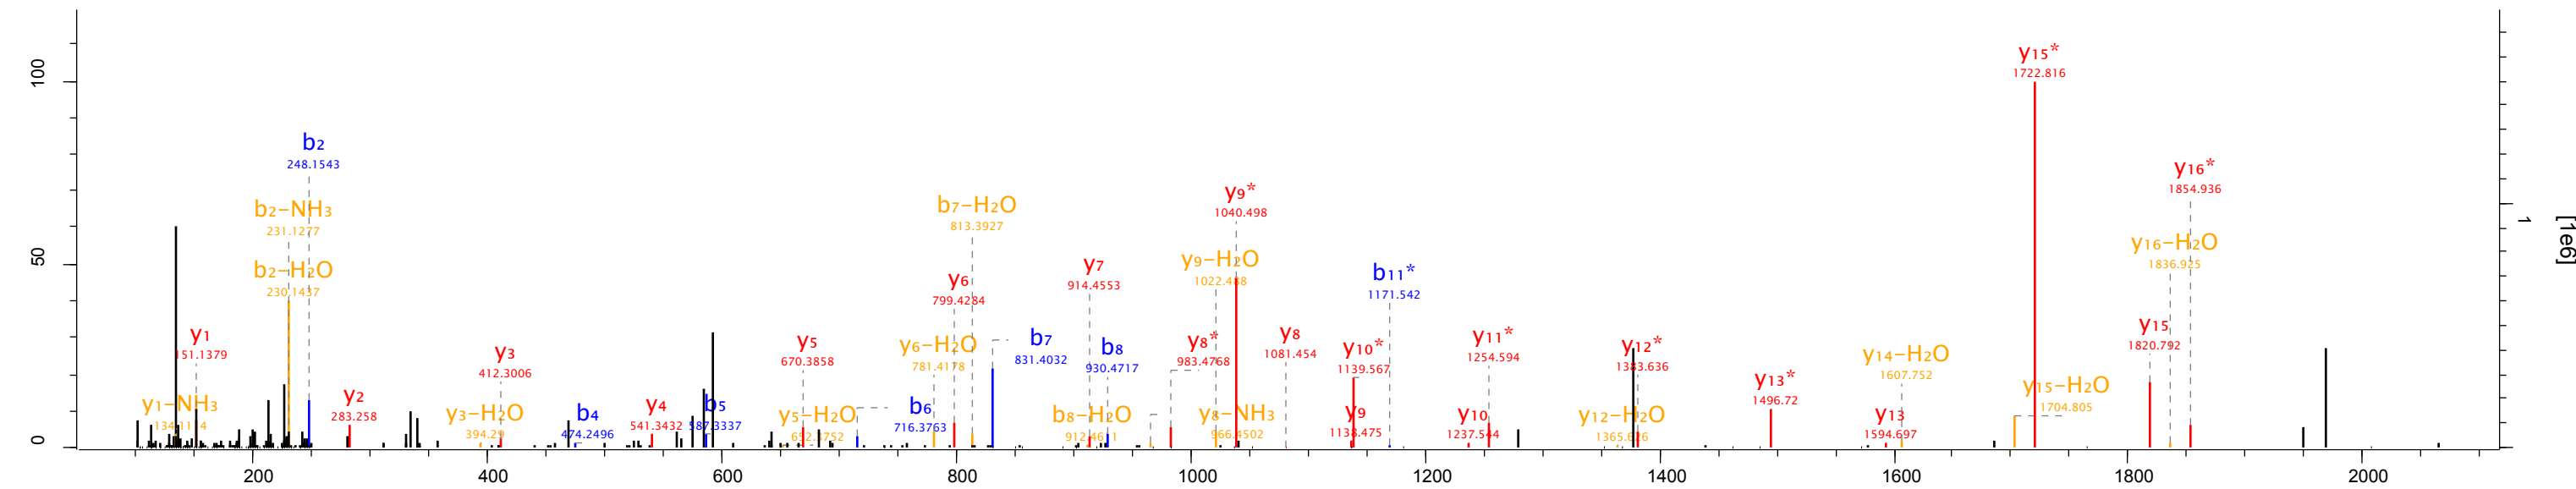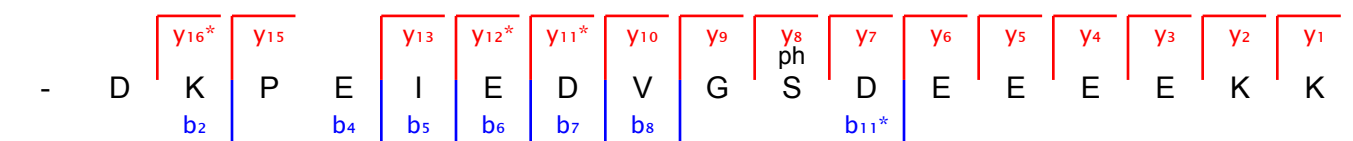

Raw file 20171215\_MaS\_33SR\_LMH\_phospho\_06 Scan 5677 Method FTMS; HCD Score 110.38 m/z 493.22 Gene names RPL30

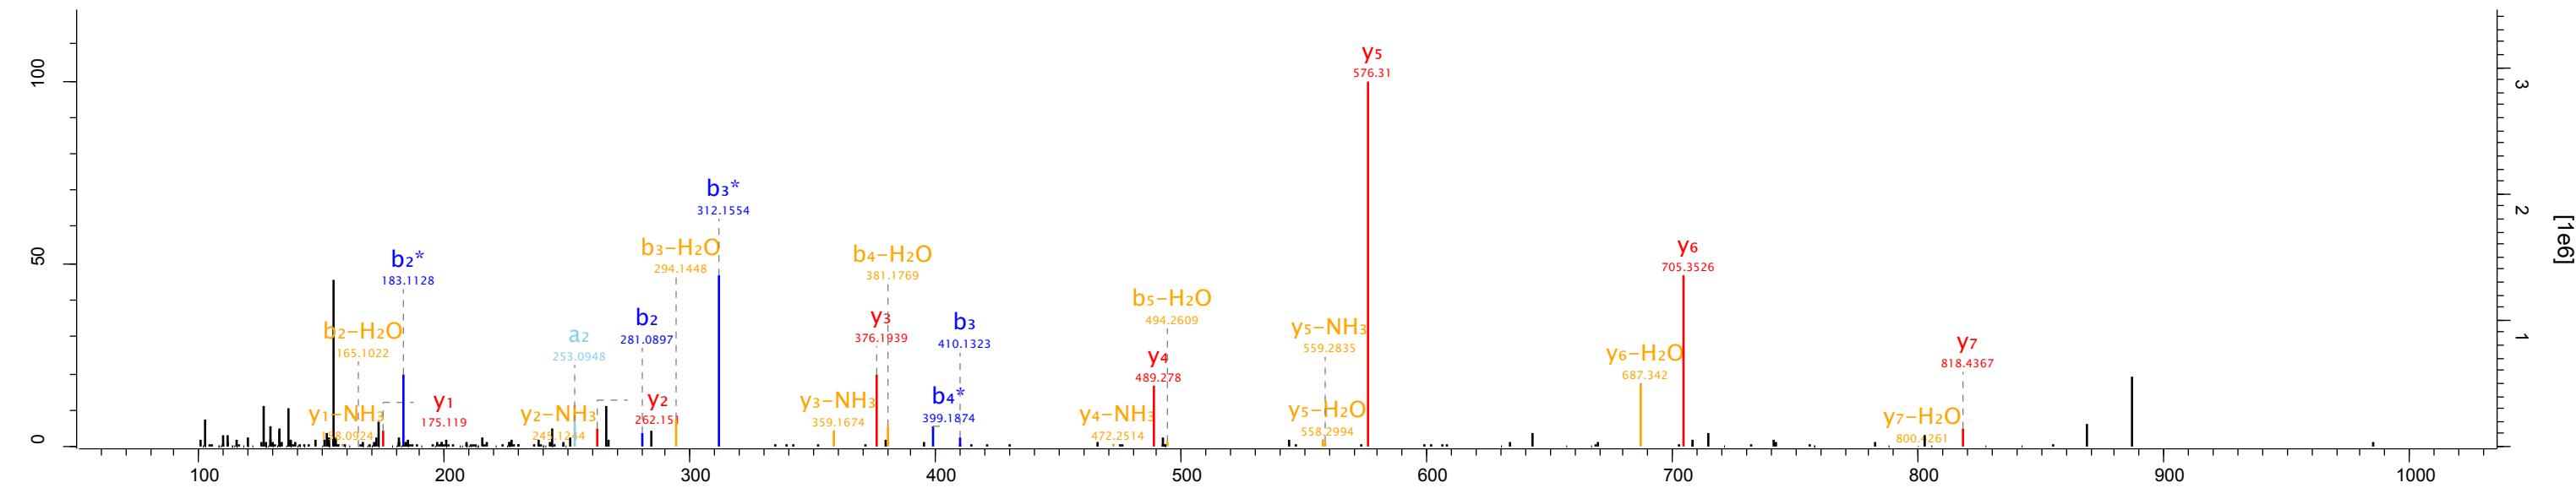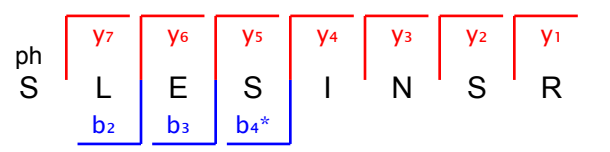

Raw file 20171215\_MaS\_33SR\_LMH\_phospho\_06 Scan 5857 Method FTMS; HCD Score 52.18 m/z 586.92 Gene names RBMX

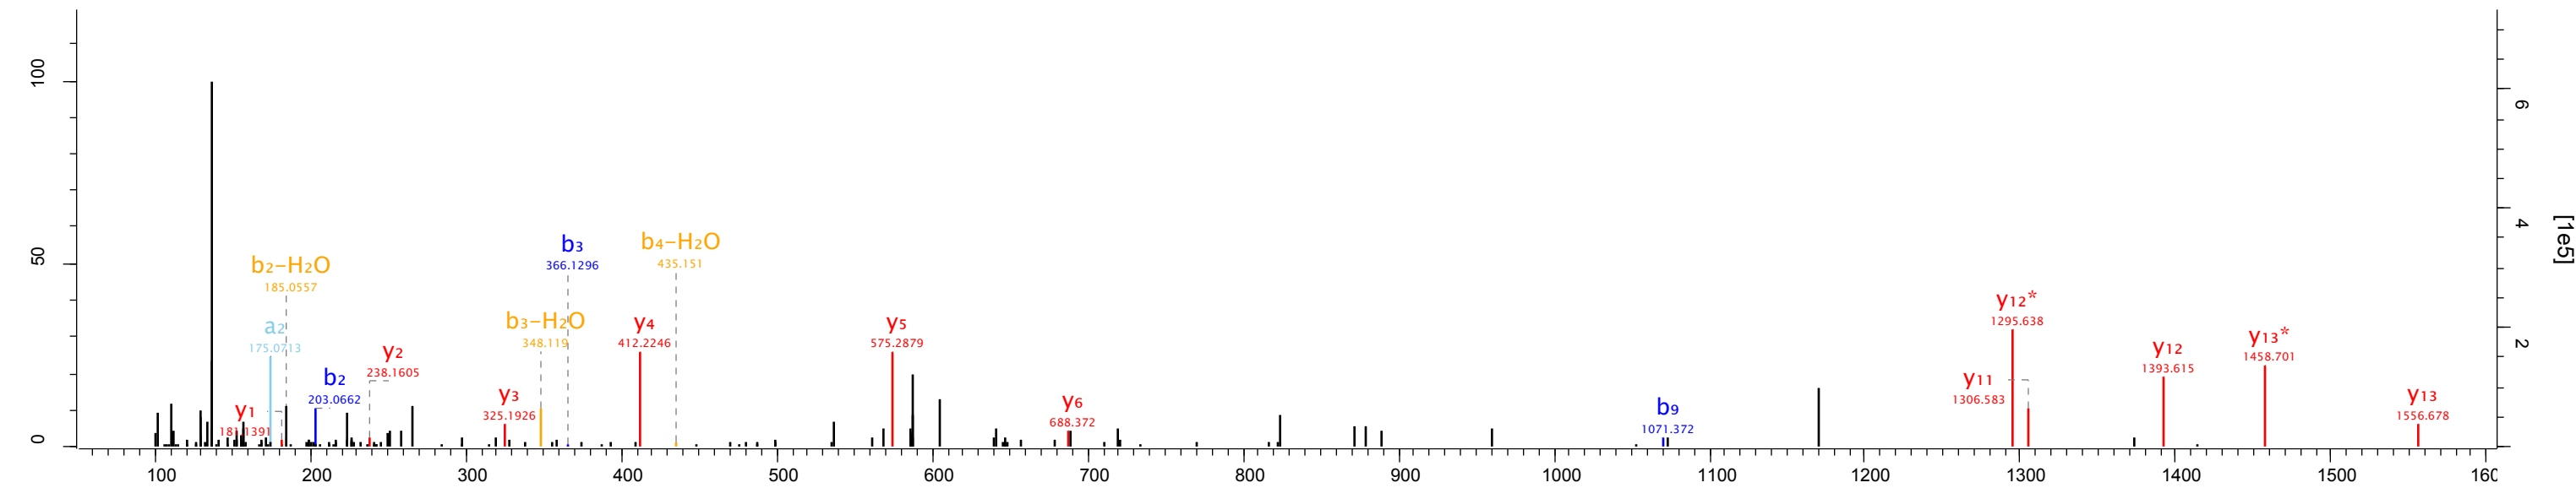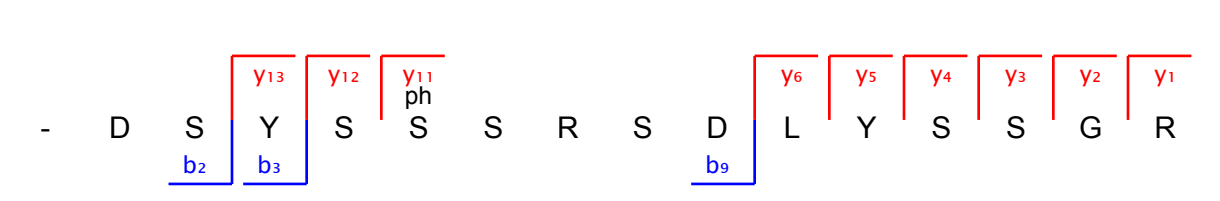

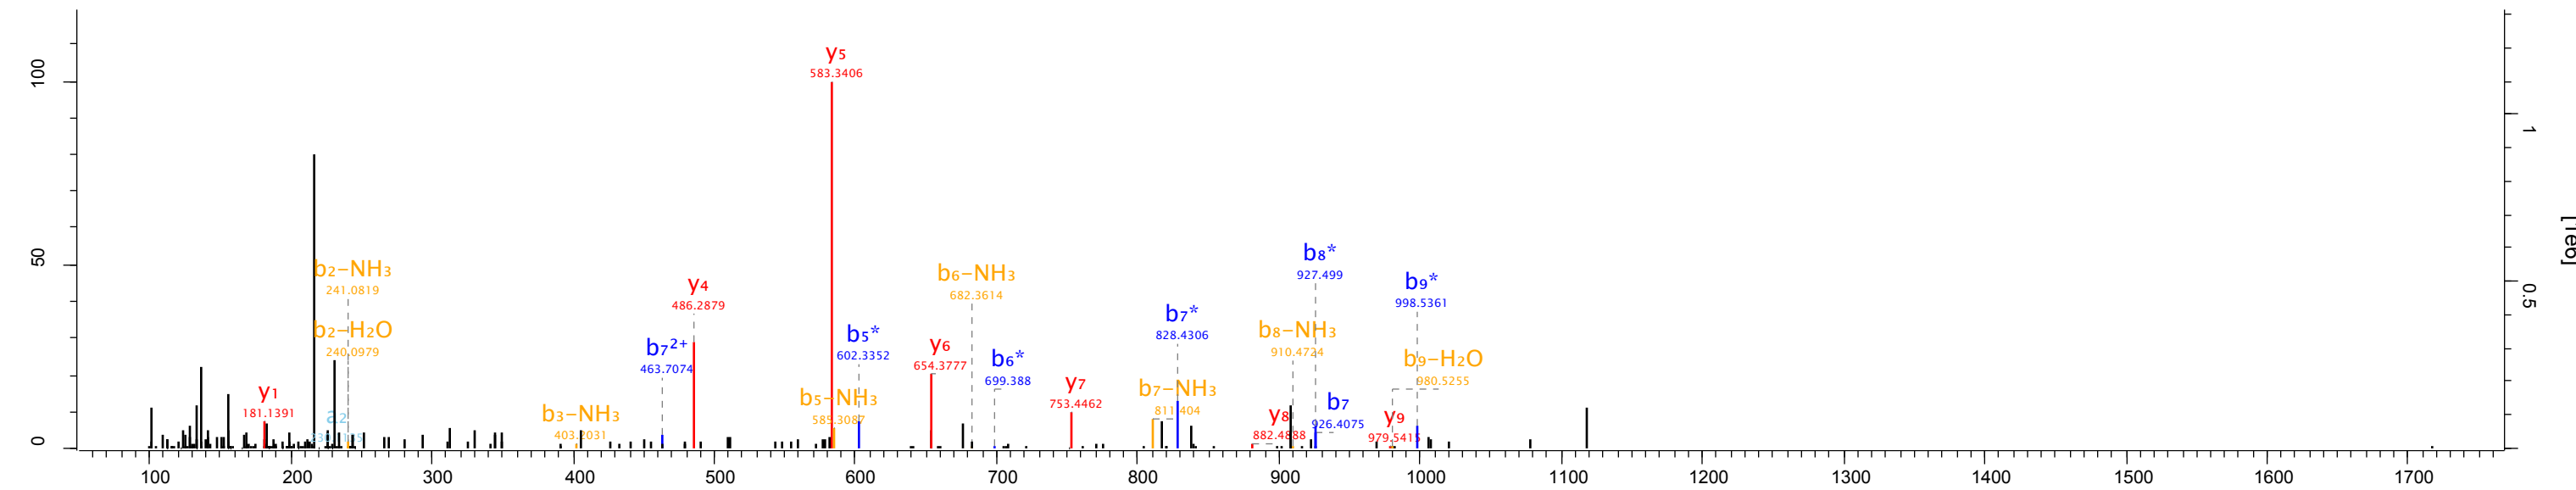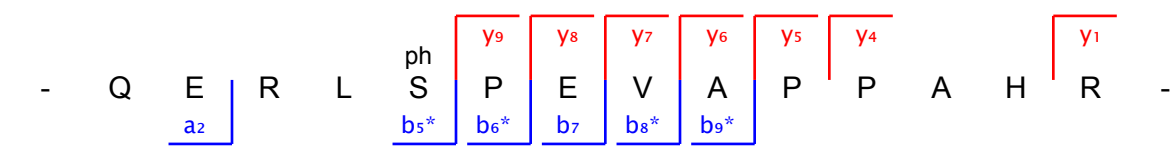

Raw file 20171215\_MaS\_33SR\_LMH\_phospho\_06 Scan 6817 Method FTMS; HCD Score 52.06 m/z 889.42 Gene names ZBTB7A

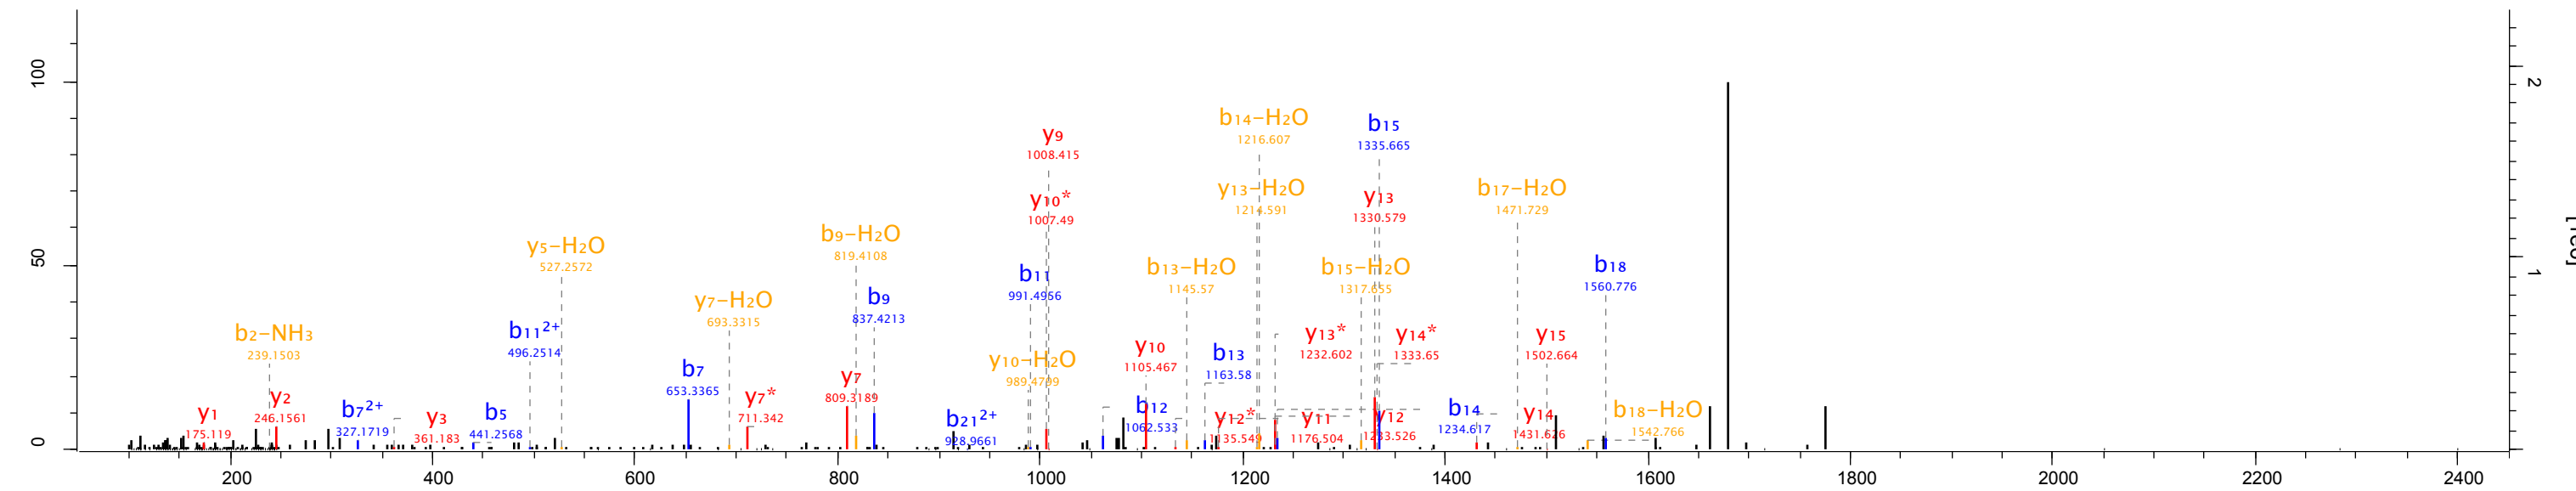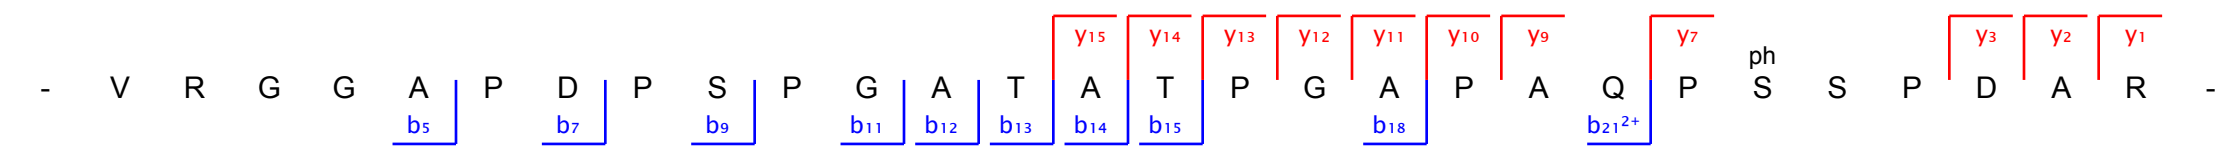



Raw file 20171215\_MaS\_33SR\_LMH\_phospho\_06 Scan 7097 Method FTMS; HCD Score 50.09 m/z 581.3 Gene names PLEKHA4

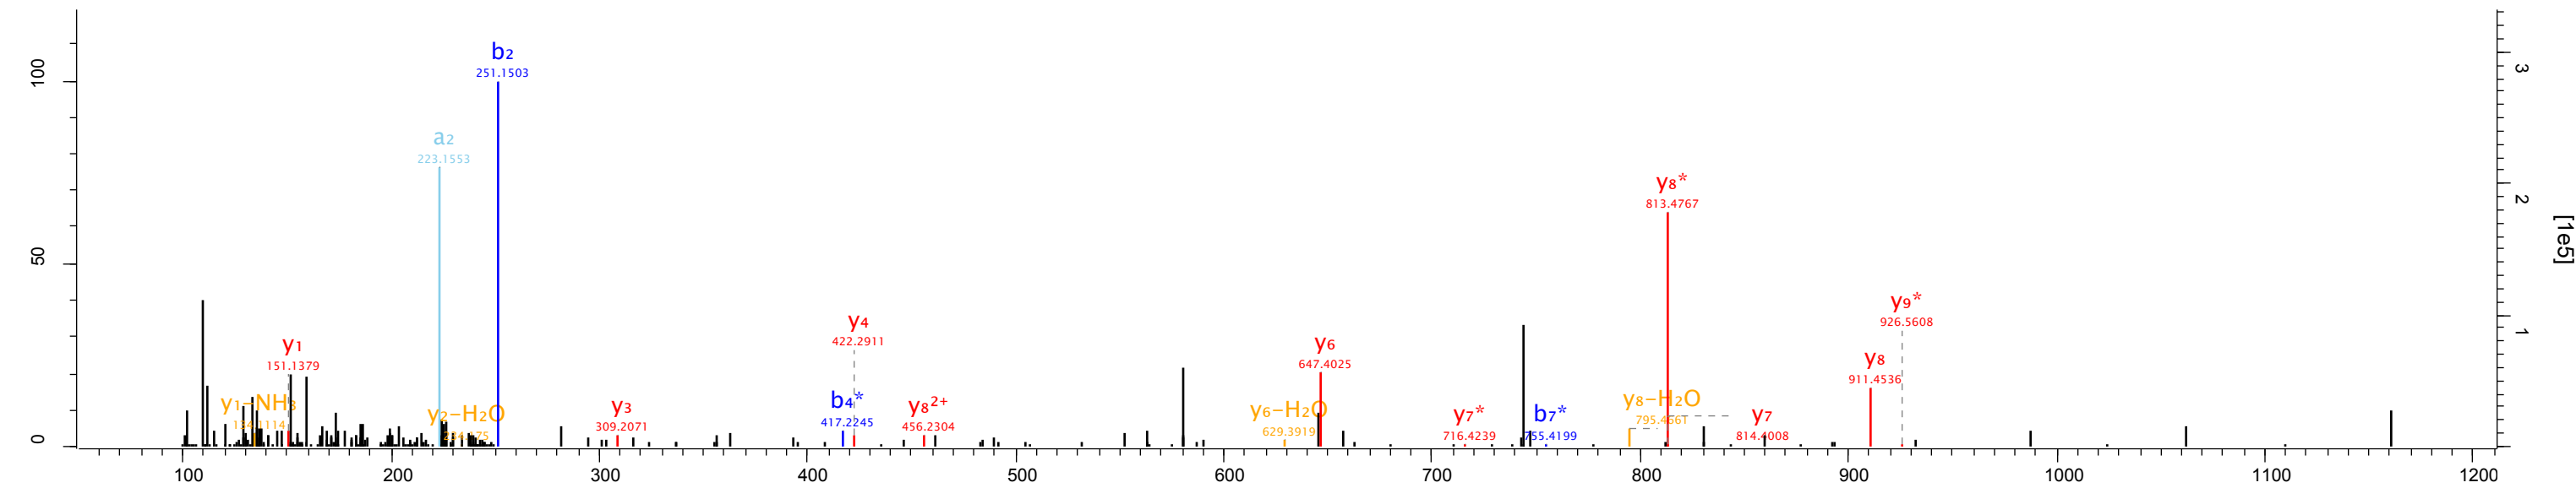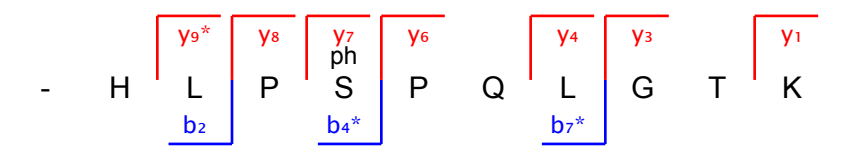

20171215\_MaS\_33SR\_LMH\_phospho\_06

7397 FTMS; HCD 222.01 1118.96 FXR2

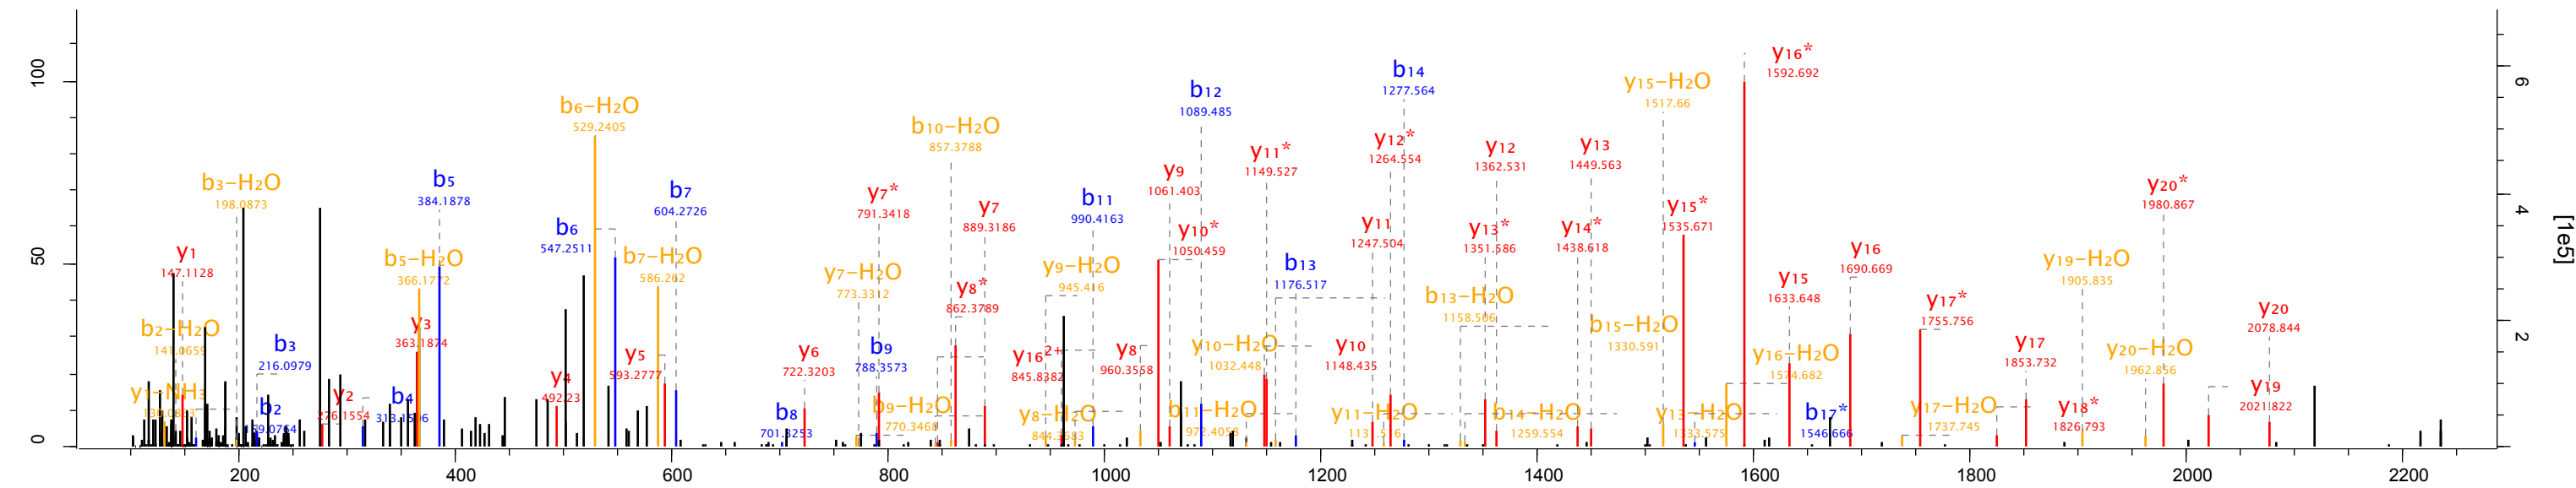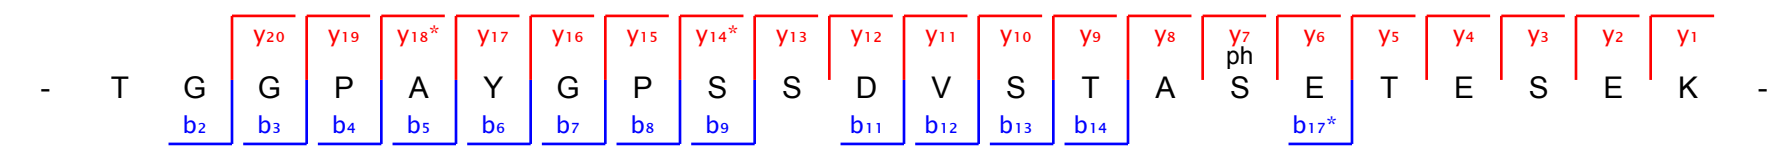

Raw file 20171215\_MaS\_33SR\_LMH\_phospho\_06 Scan 7567 Method FTMS; HCD Score 82.26 m/z 483.71 Gene names RBMX

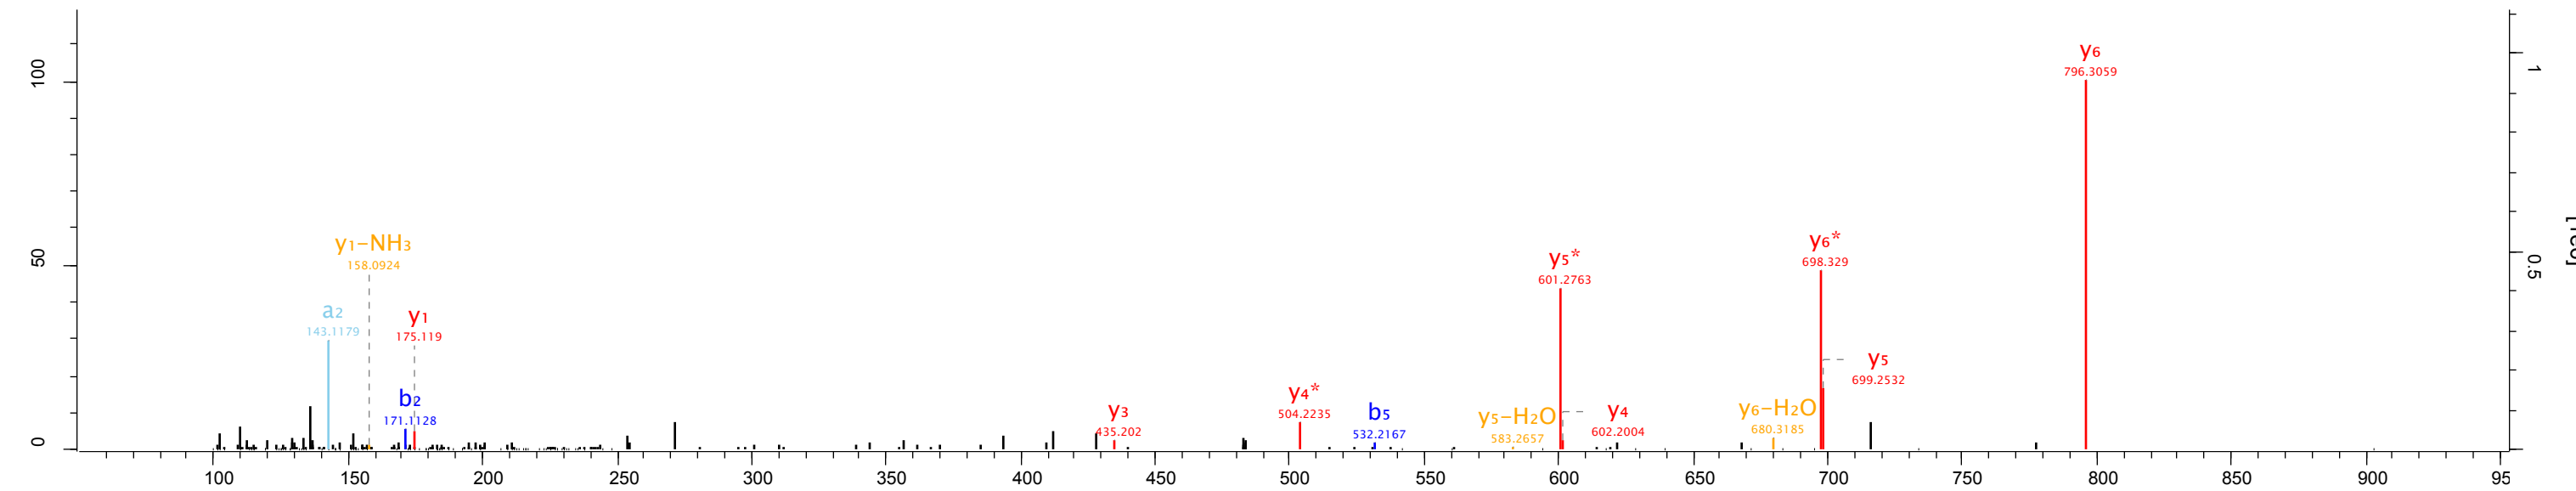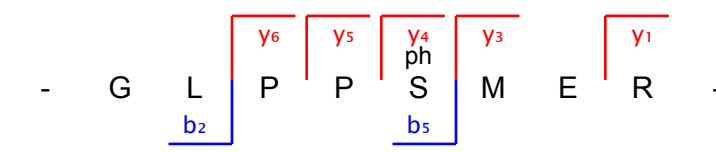

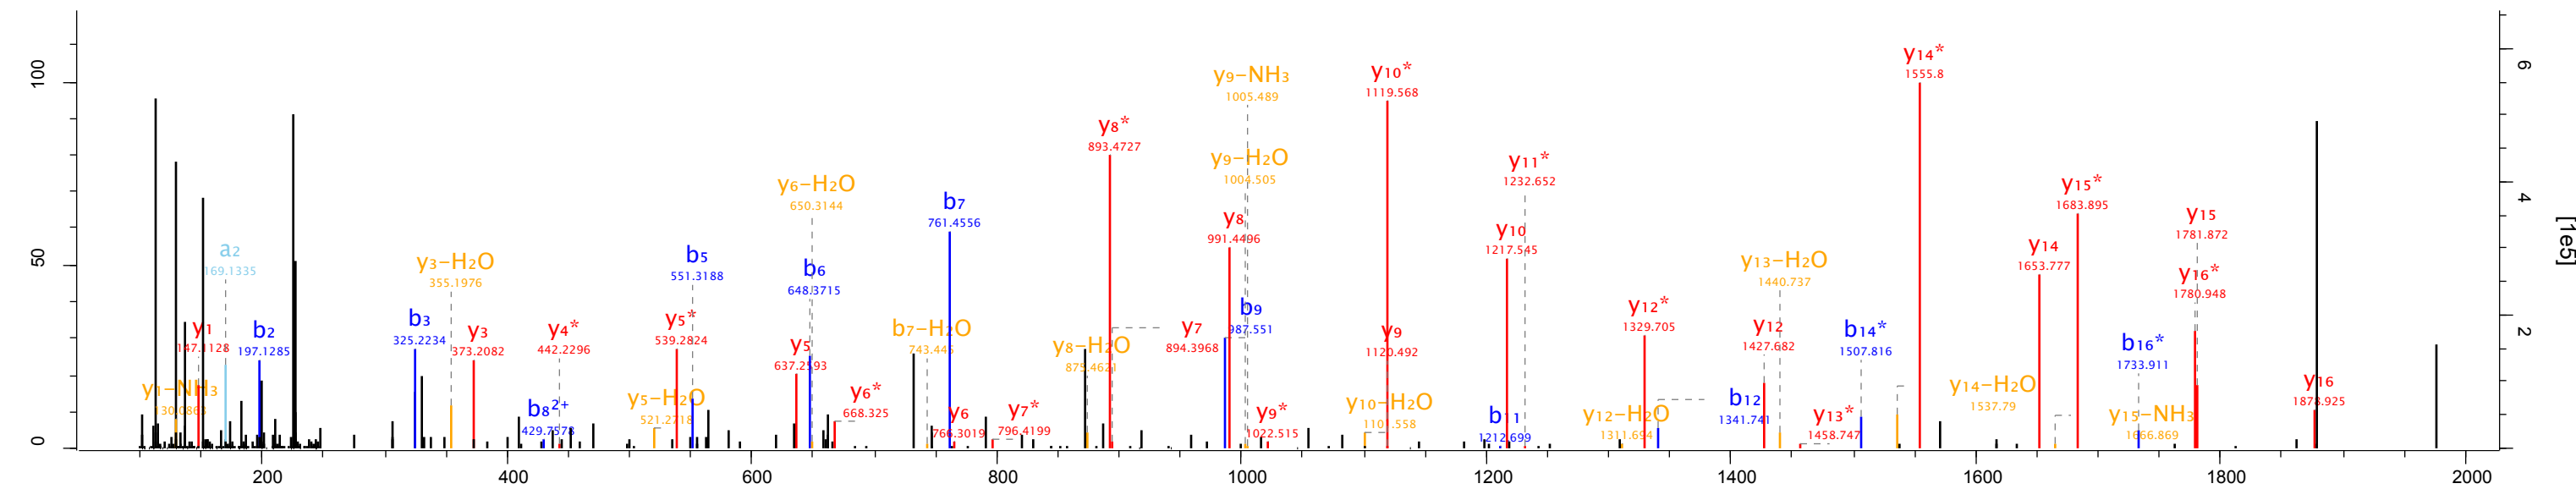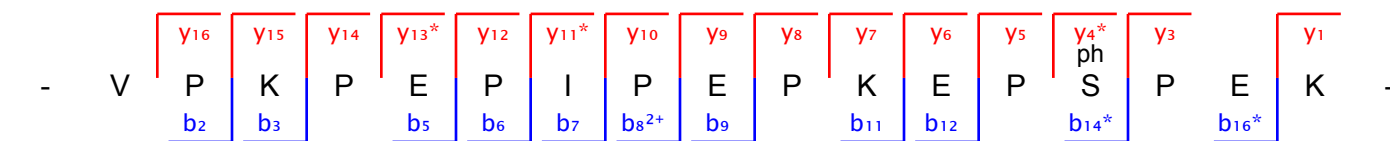

Raw file 20171215\_MaS\_33SR\_LMH\_phospho\_06 Scan 8257 Method FTMS; HCD Score 76.44 m/z 696.64 Gene names MYO18A

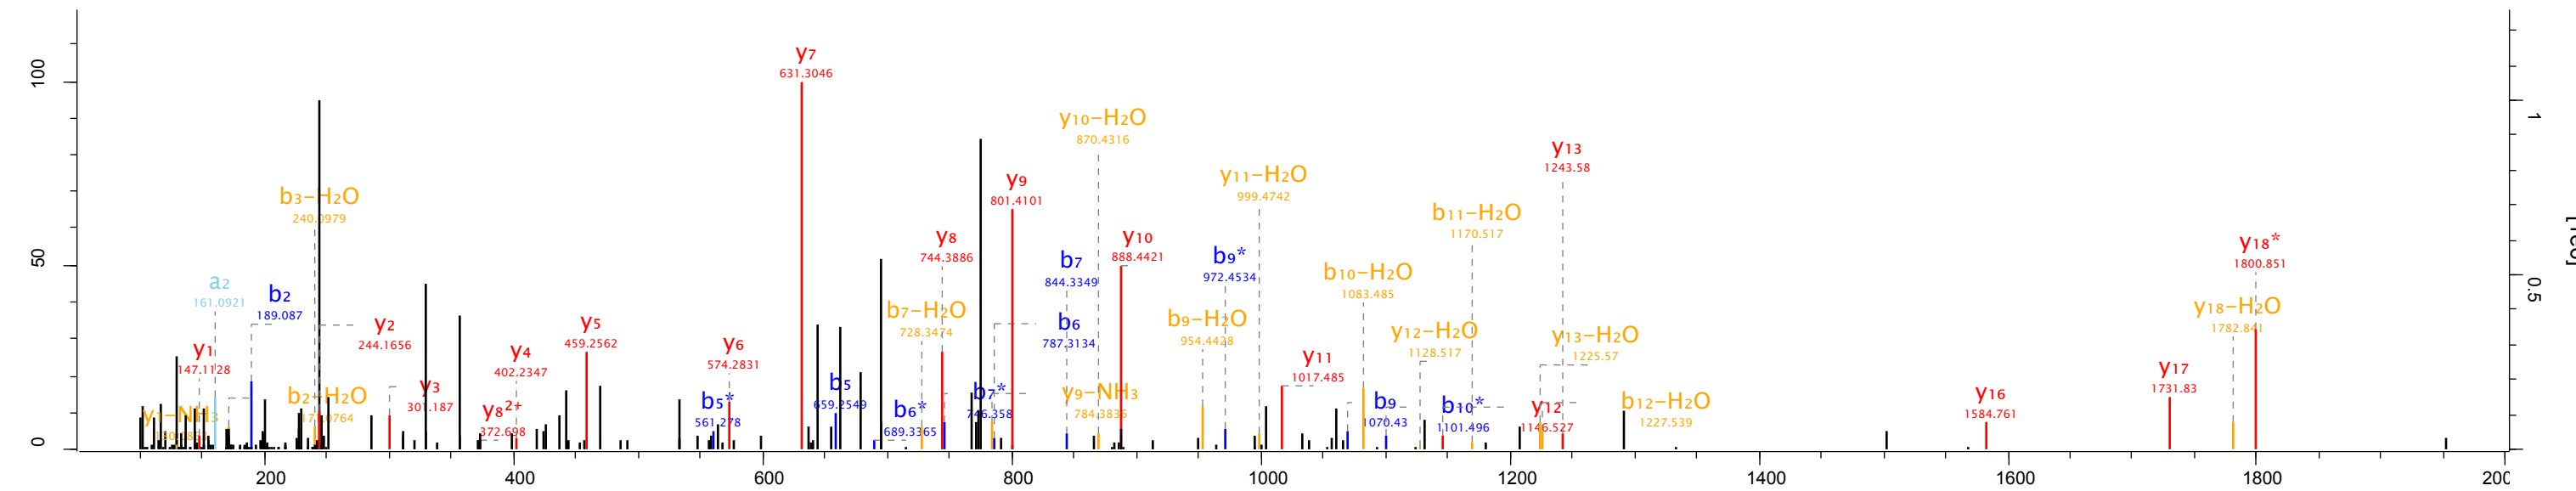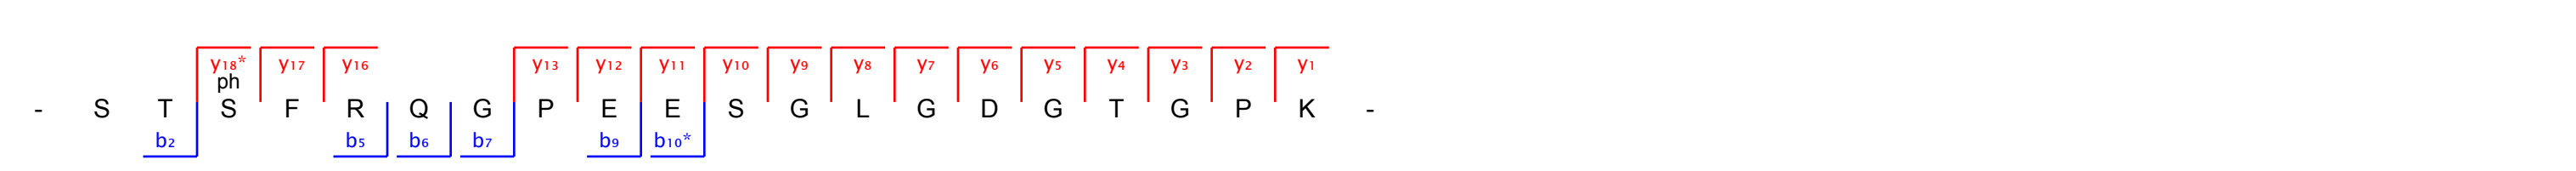

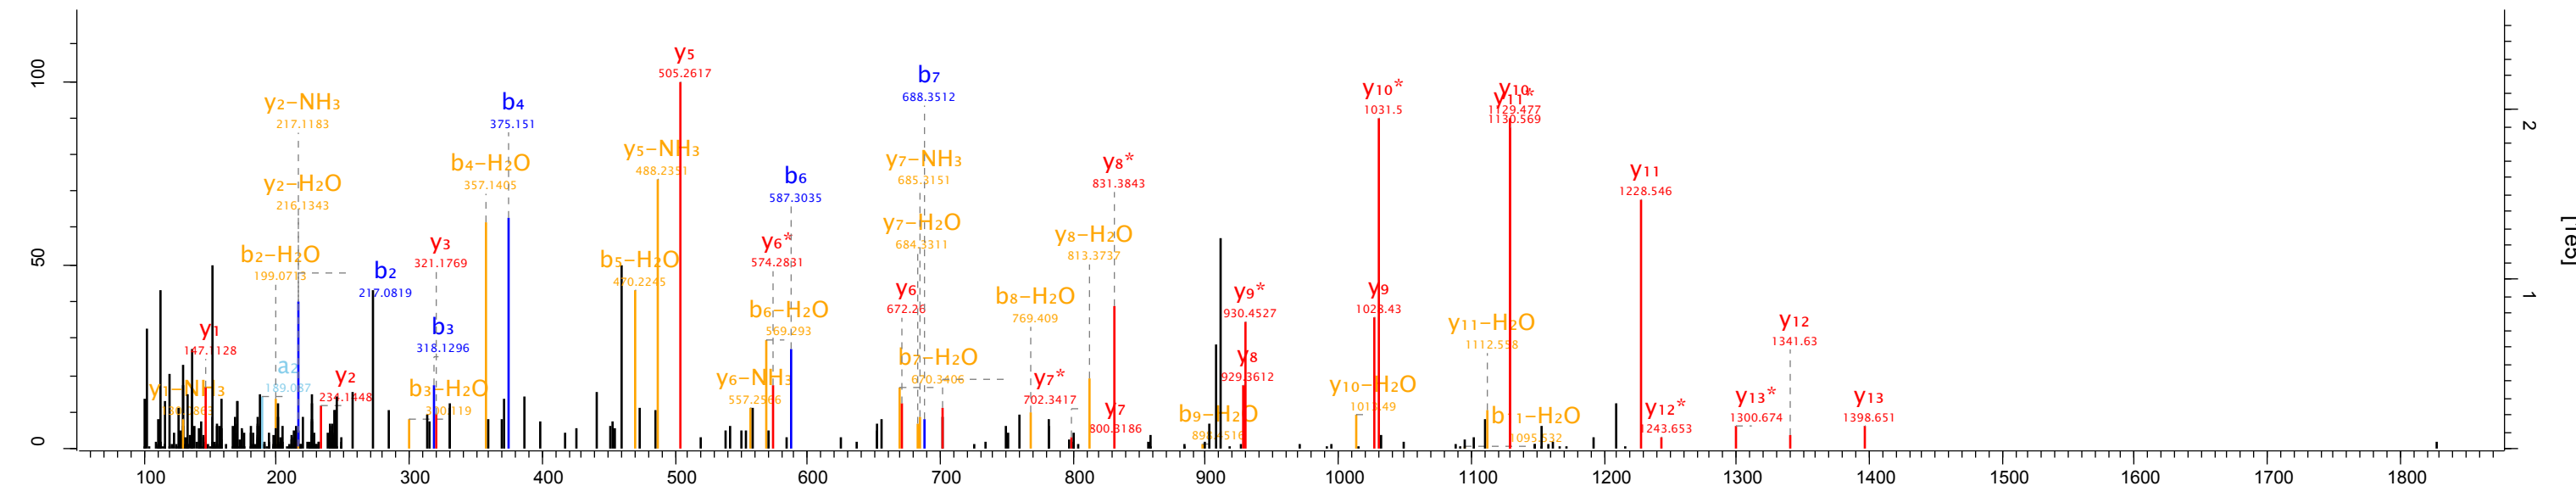

- T D T G I V T V E Q S P S S S K -

b<sub>2</sub>
b<sub>3</sub>
b<sub>4</sub>
b<sub>6</sub>
b<sub>7</sub>
y<sub>13</sub>
y<sub>12</sub>
y<sub>11</sub>
y<sub>10</sub>
y<sub>9</sub>
y<sub>8</sub>
y<sub>7</sub>
y<sub>6</sub>  
ph
y<sub>5</sub>
y<sub>3</sub>
y<sub>2</sub>
y<sub>1</sub>

Raw file 20171215\_MaS\_33SR\_LMH\_phospho\_06 Scan 8417 Method FTMS; HCD Score 74.59 m/z 695.29 Gene names SPEG

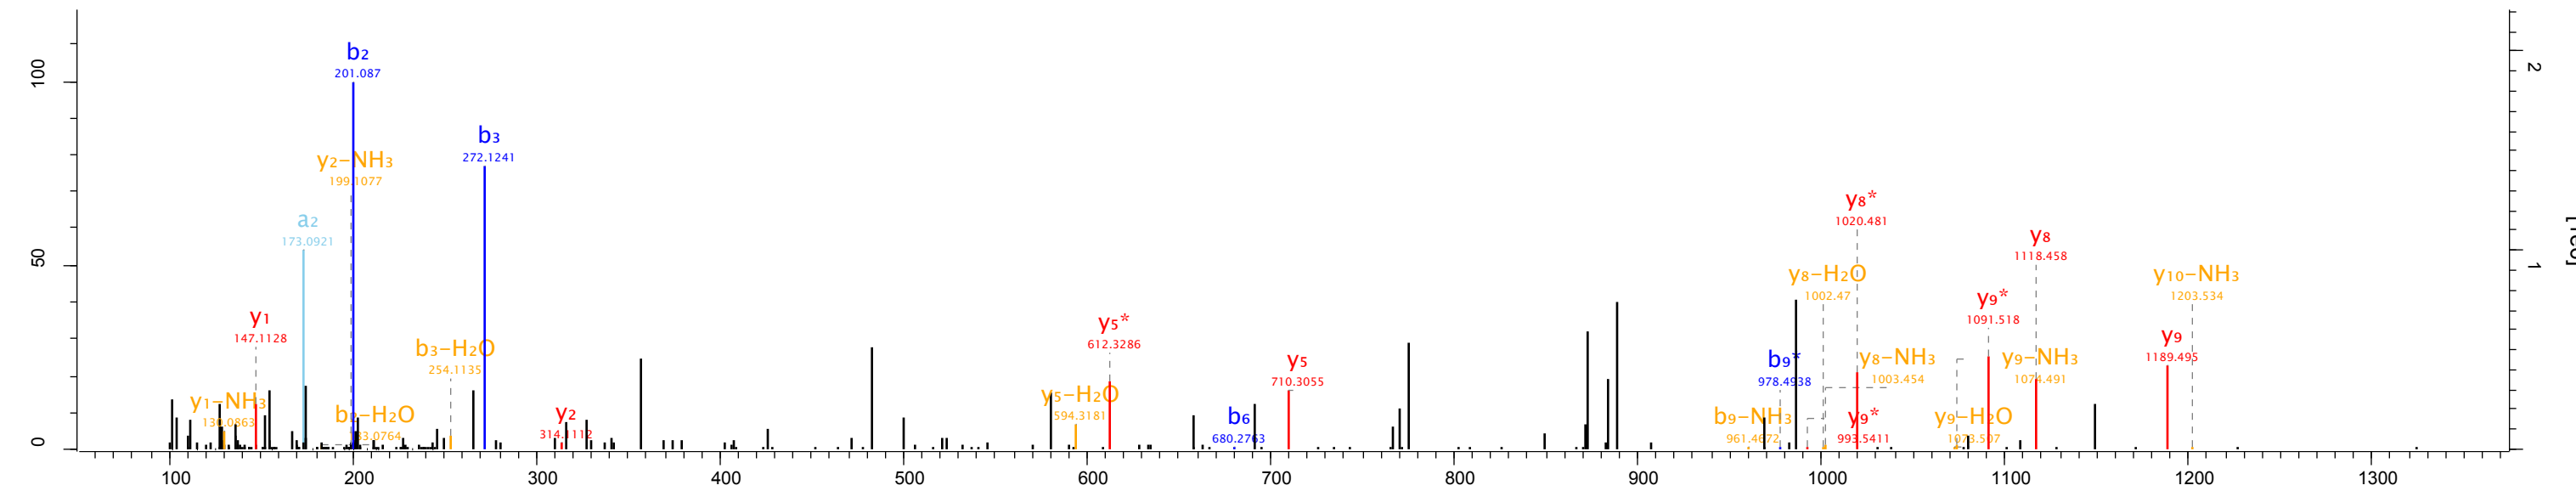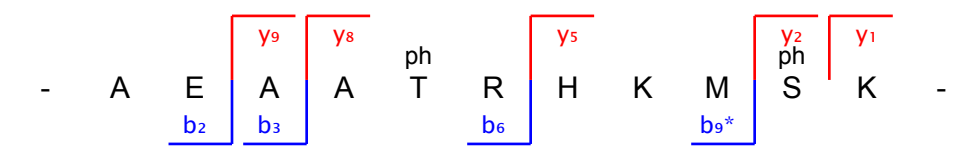

Raw file: 20171215\_MaS\_33SR\_LMH\_phospho\_06  
 Scan: 8587 Method: FTMS; HCD Score: 162.32 m/z: 928.94 Gene names: IRF2BP2

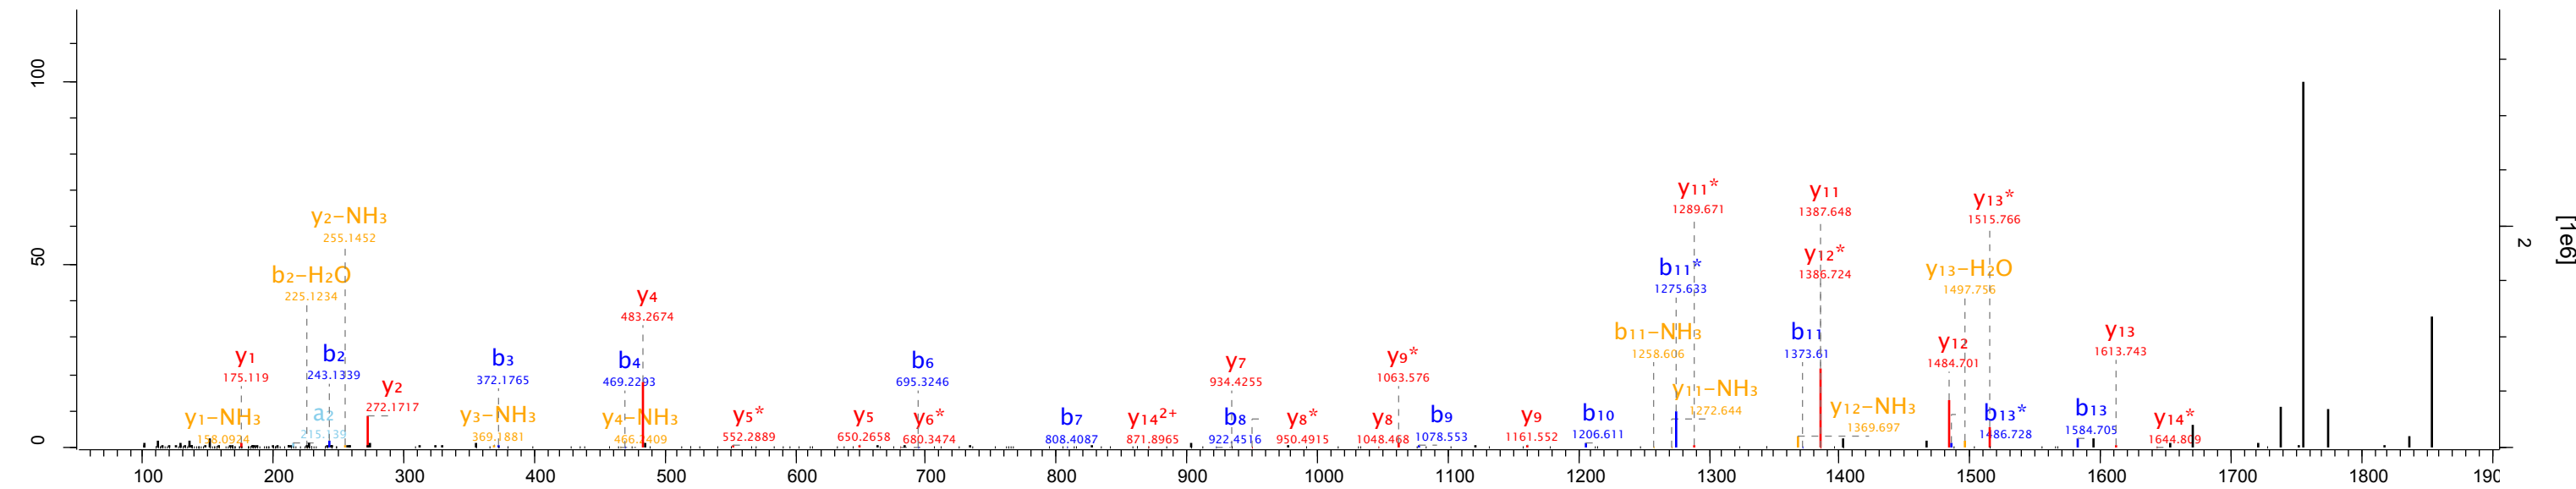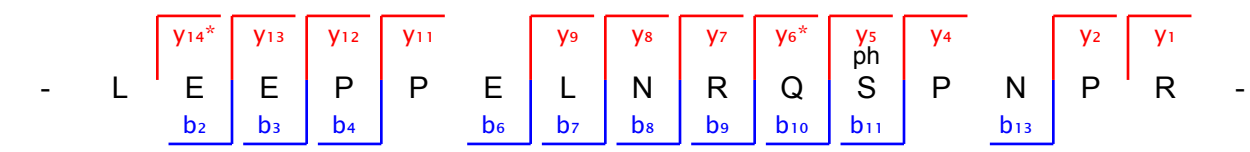



Raw file 20171215\_MaS\_33SR\_LMH\_phospho\_06 Scan 8597 Method FTMS; HCD Score 70.45 m/z 639.97 Gene names SRRM2

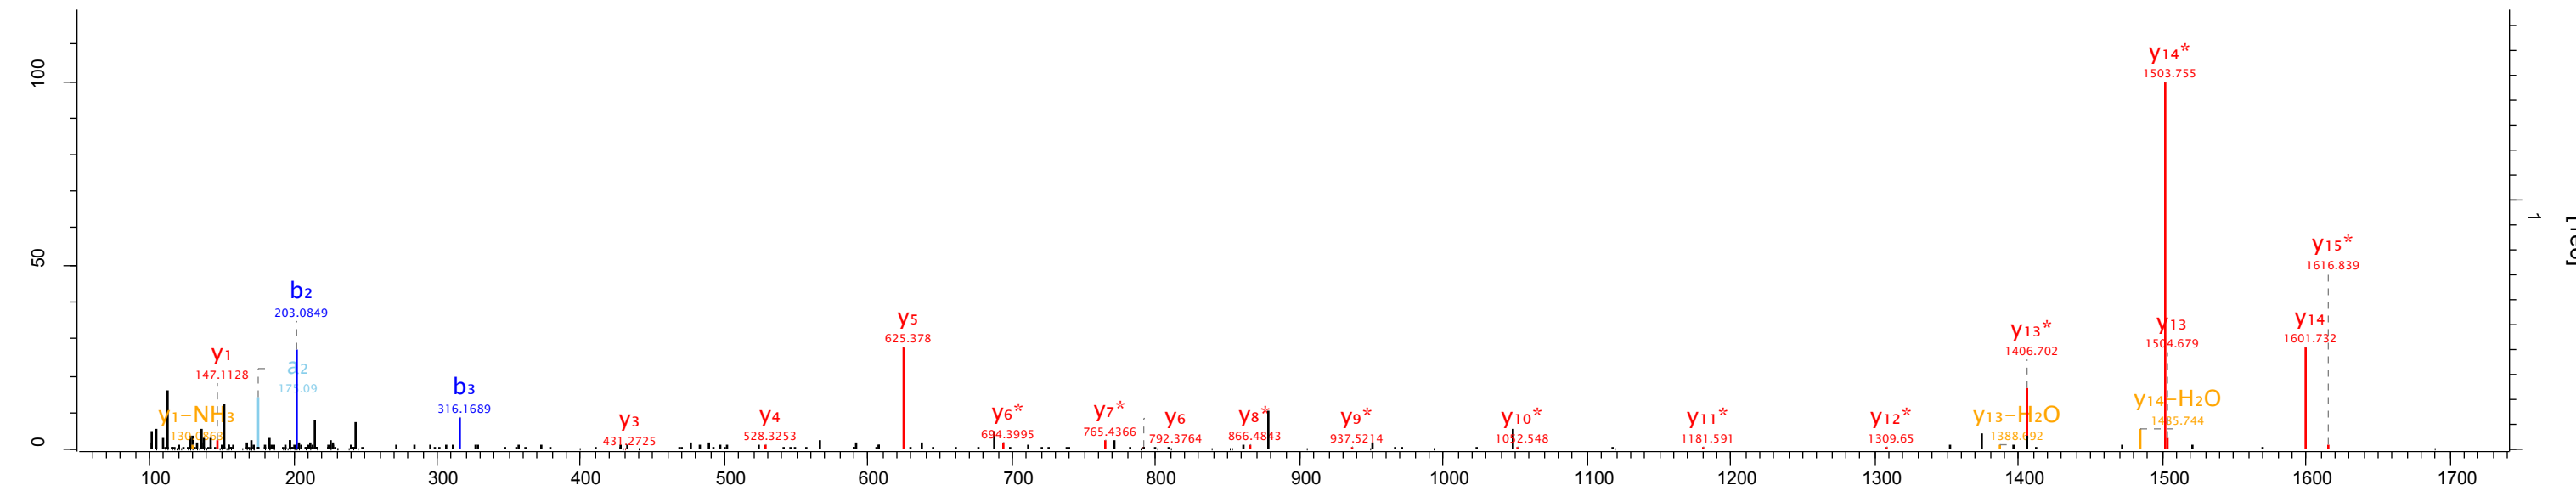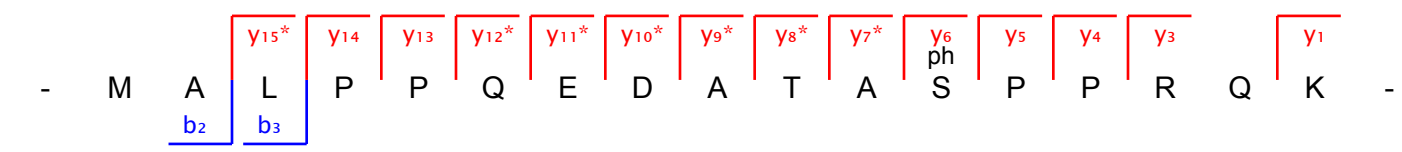

Raw file 20171215\_MaS\_33SR\_LMH\_phospho\_06 Scan 9287 Method FTMS; HCD Score 106.35 m/z 485.24 Gene names LIMCH1

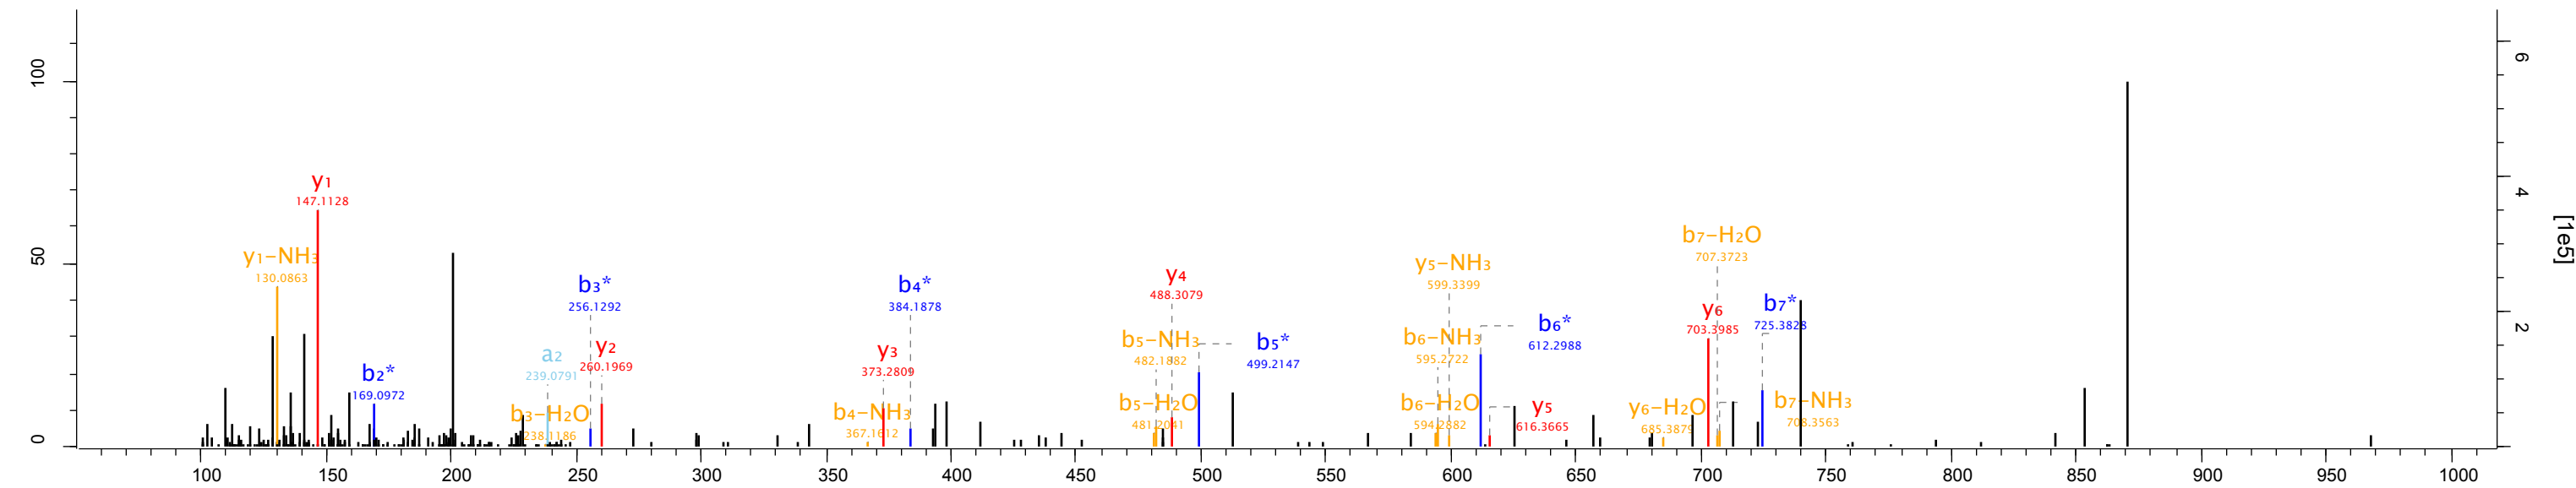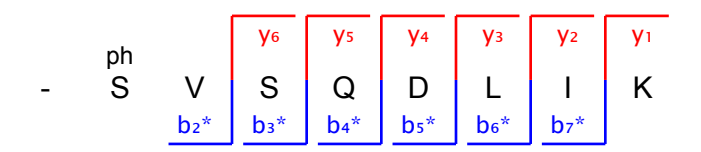

Raw file 20171215\_MaS\_33SR\_LMH\_phospho\_06 Scan 9437 Method FTMS; HCD Score 188.12 m/z 746.82 Gene names SIPA1L1

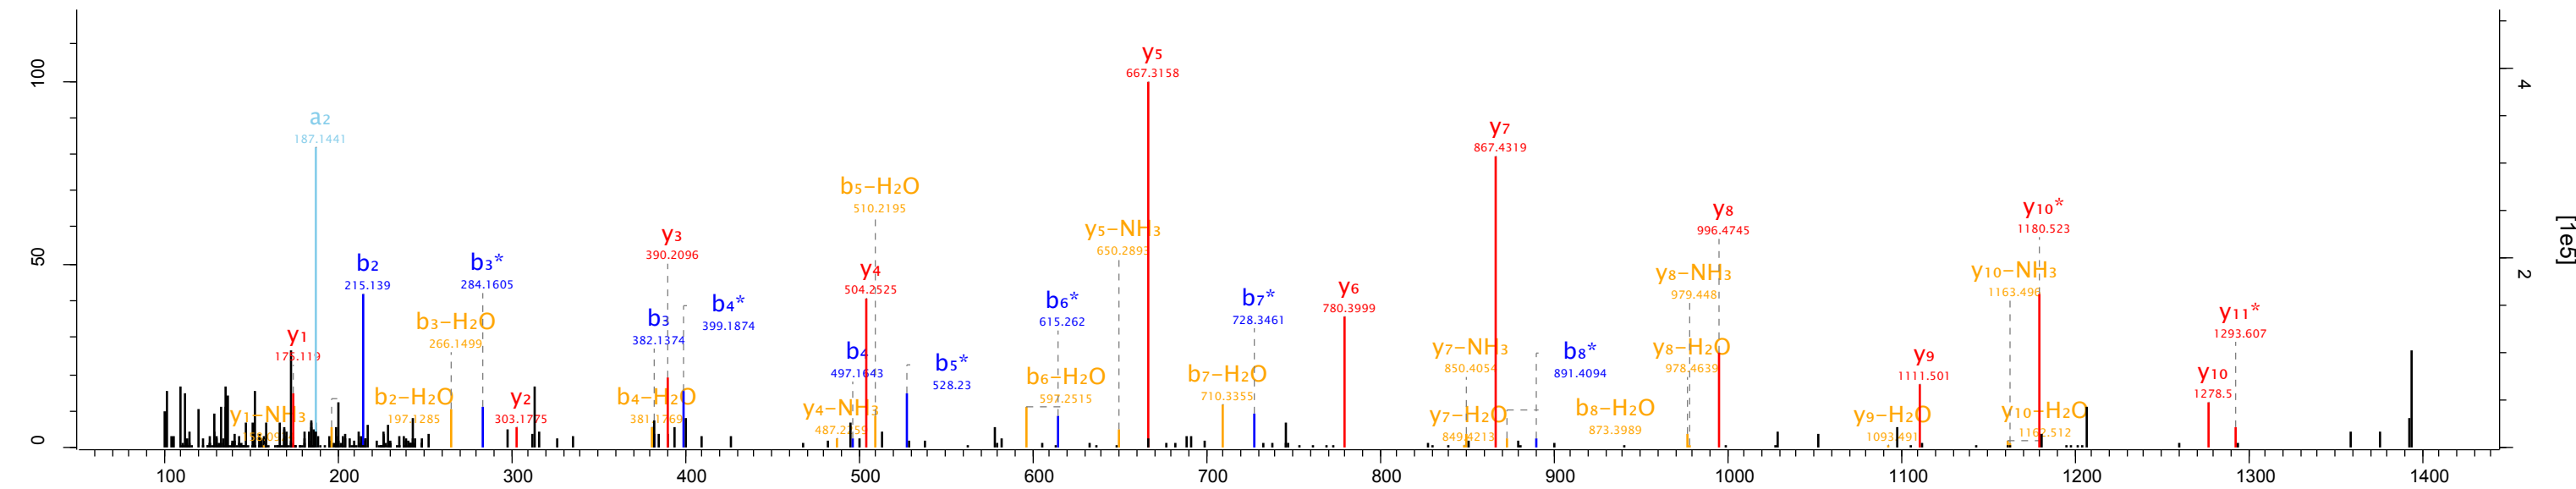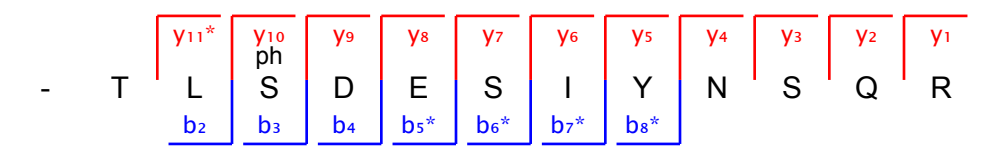

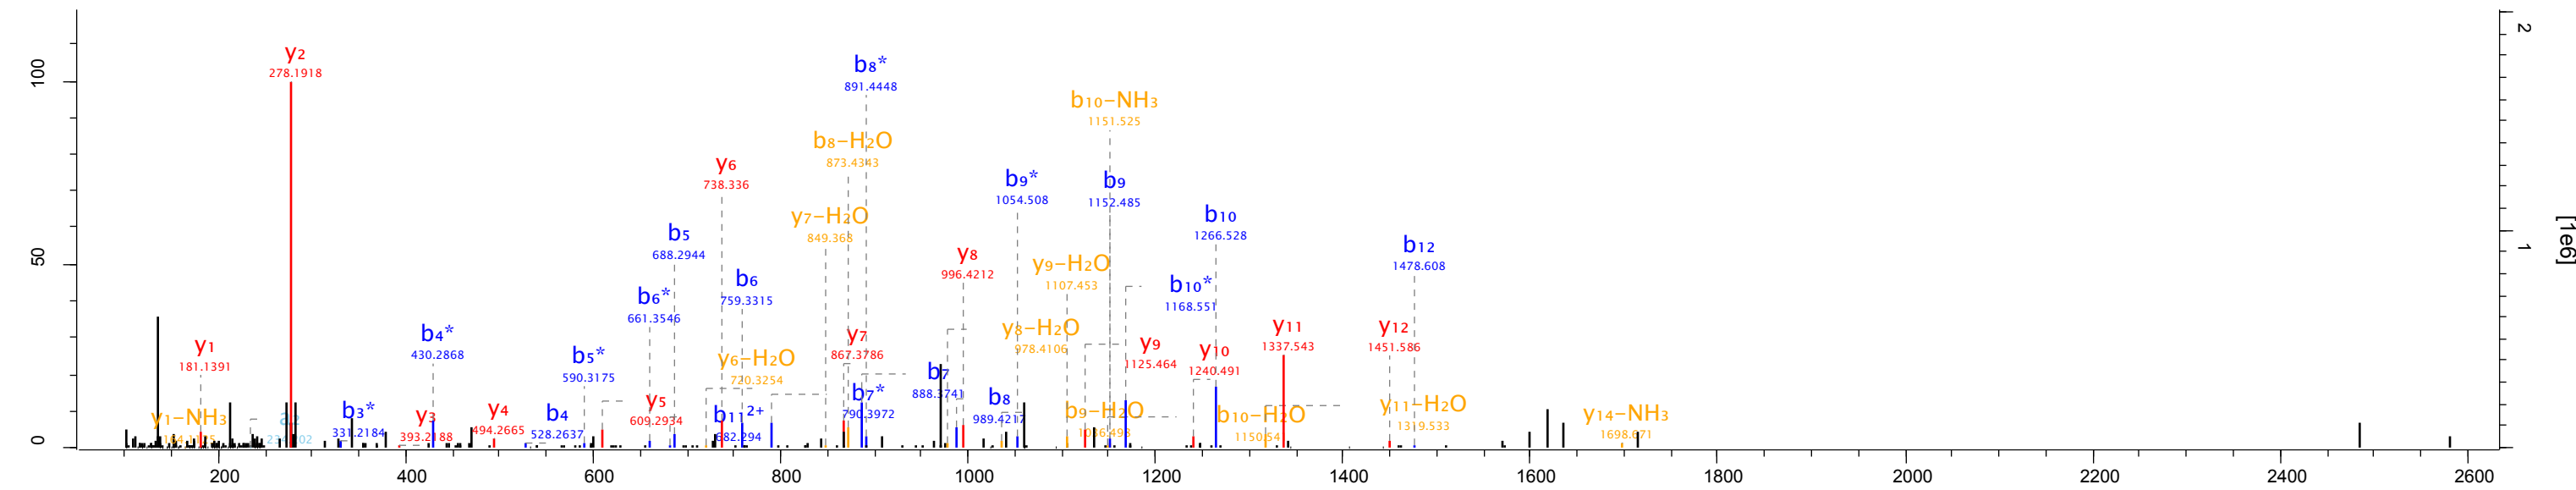

- R V S<sup>ph</sup> V C A E T Y N P D E E E E D T D P R -

a<sub>2</sub>
b<sub>3</sub><sup>\*</sup>
b<sub>4</sub>
b<sub>5</sub>
b<sub>6</sub>
b<sub>7</sub>
b<sub>8</sub>
b<sub>9</sub>
b<sub>10</sub>
b<sub>11</sub><sup>2+</sup>
b<sub>12</sub>

y<sub>12</sub>
y<sub>11</sub>
y<sub>10</sub>
y<sub>9</sub>
y<sub>8</sub>
y<sub>7</sub>
y<sub>6</sub>
y<sub>5</sub>
y<sub>4</sub>
y<sub>3</sub>
y<sub>2</sub>
y<sub>1</sub>



Raw file 20171215\_MaS\_33SR\_LMH\_phospho\_06 Scan 9777 Method FTMS; HCD Score 133.16 m/z 635.28 Gene names KLC2

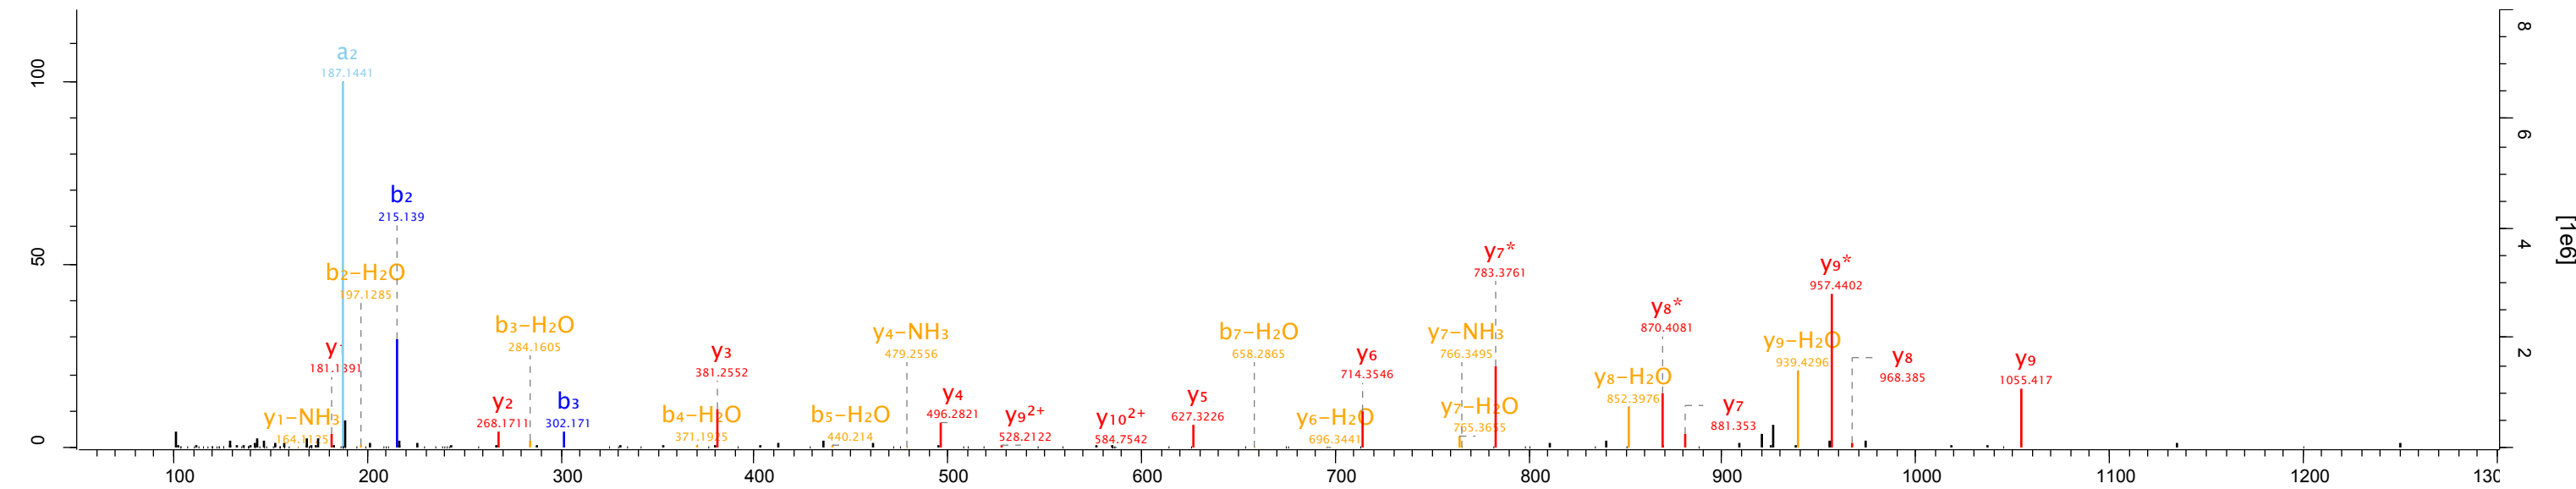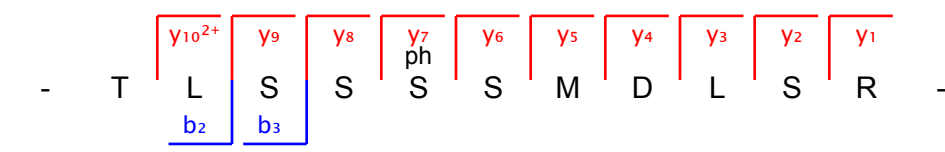

Raw file 20171215\_MaS\_33SR\_LMH\_phospho\_06 Scan 9837 Method FTMS; HCD Score 84.65 m/z 675.02 Gene names FLYWCH2

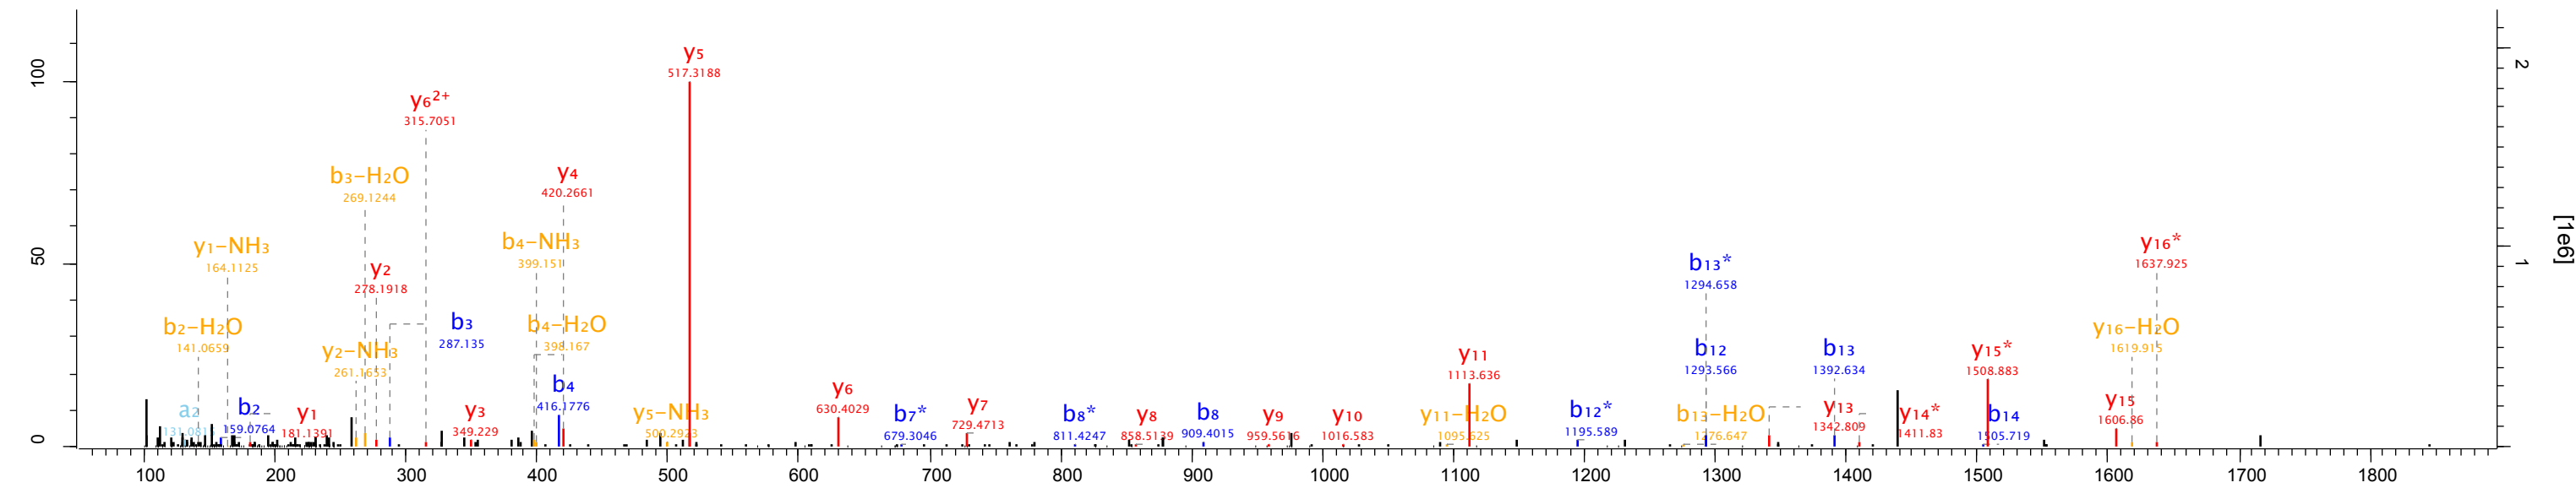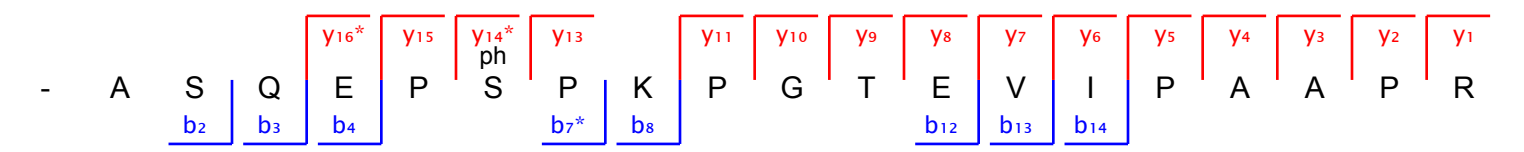

Raw file 20171215\_MaS\_33SR\_LMH\_phospho\_07 Scan 2007 Method FTMS; HCD Score 152.59 m/z 624.79 Gene names CHAMP1

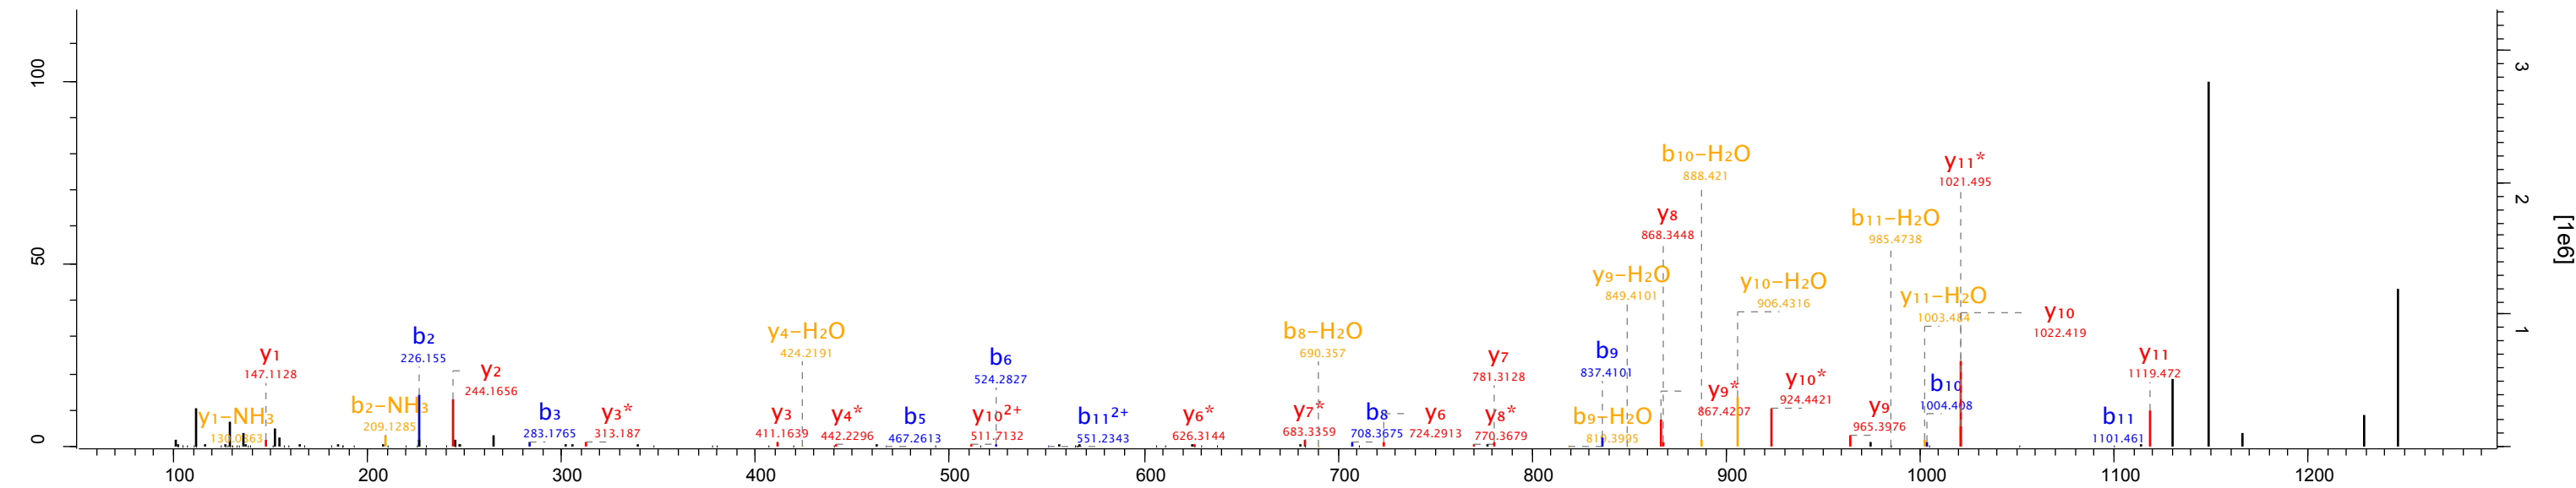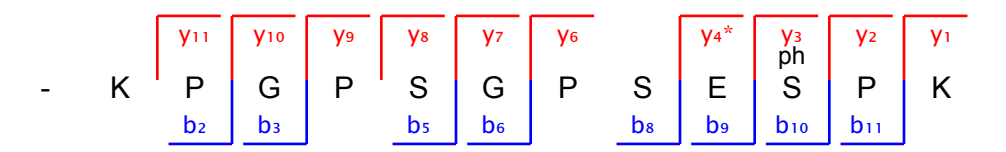



Raw file 20171215\_MaS\_33SR\_LMH\_phospho\_07 Scan 2997 Method FTMS; HCD Score 56.09 m/z 432.87

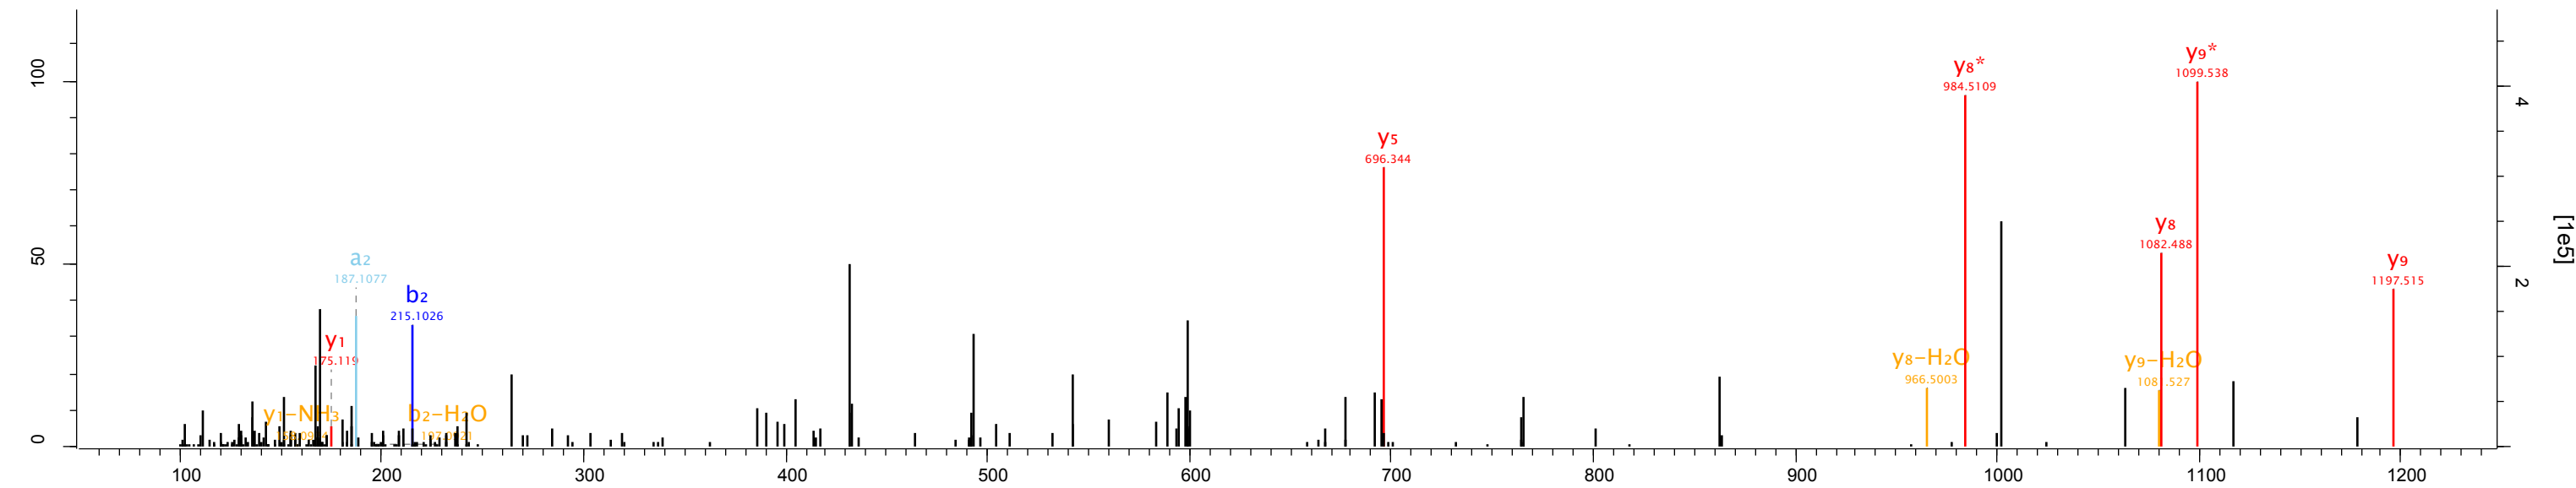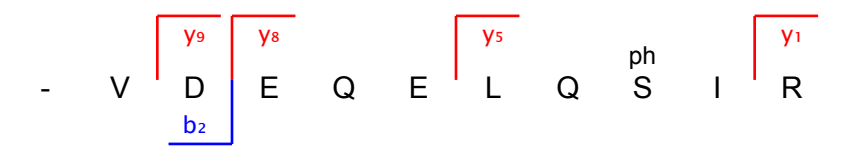

Raw file

20171215\_MaS\_33SR\_LMH\_phospho\_07

| Scan | Method    | Score  | m/z    | Gene names |
|------|-----------|--------|--------|------------|
| 3097 | FTMS; HCD | 109.69 | 576.76 | RBM39      |

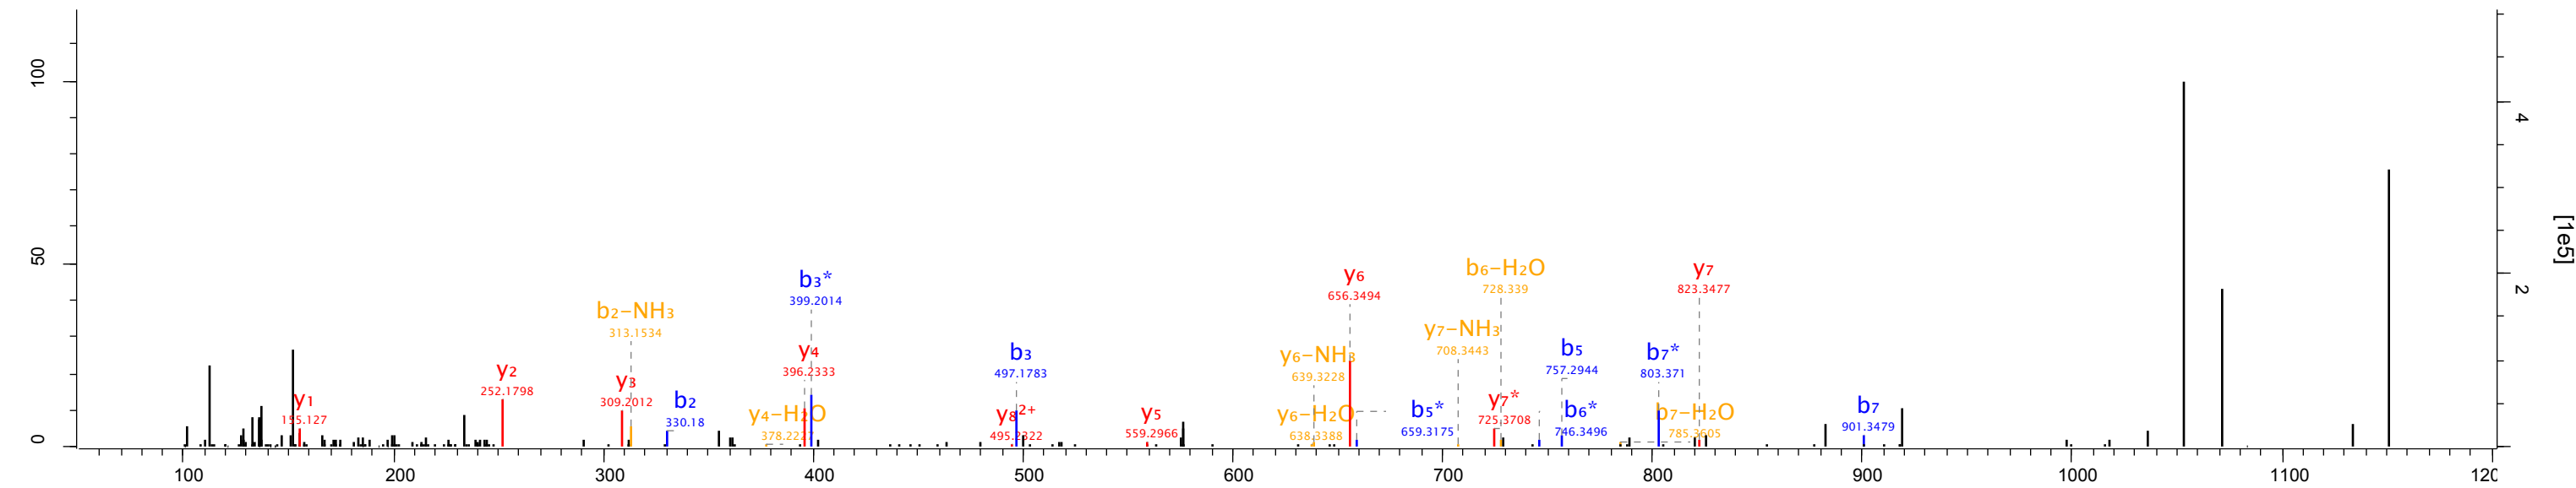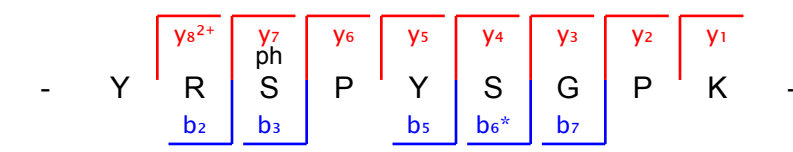

Raw file 20171215\_MaS\_33SR\_LMH\_phospho\_07 Scan 3167 Method FTMS; HCD Score 48.53 m/z 693.28 Gene names SAMD15

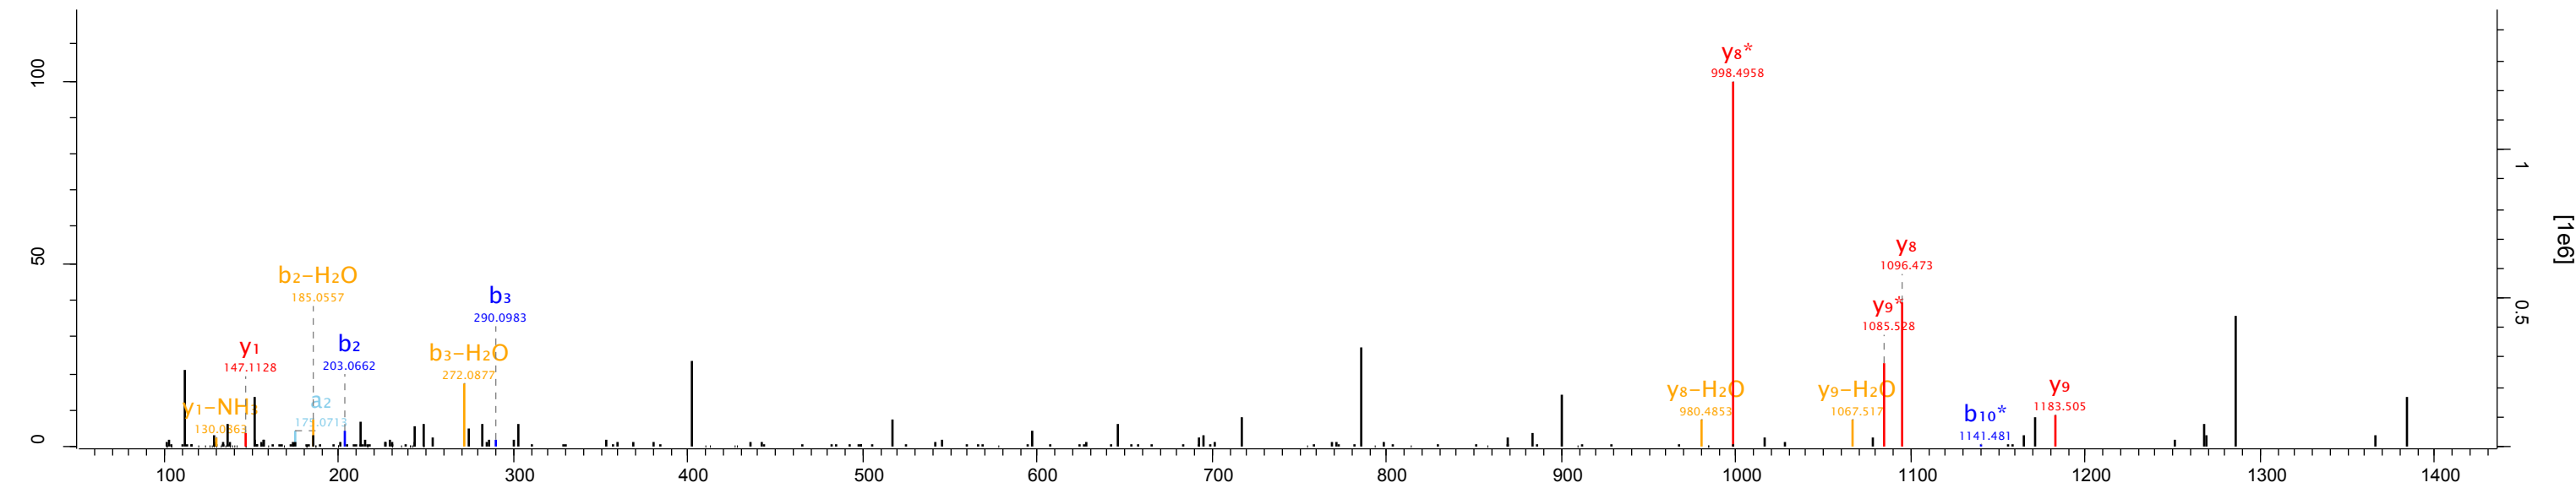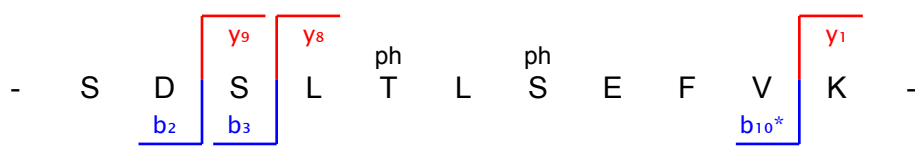

Raw file 20171215\_MaS\_33SR\_LMH\_phospho\_07 Scan 3317 Method FTMS; HCD Score 74.85 m/z 426.7 Gene names AFAP1L1

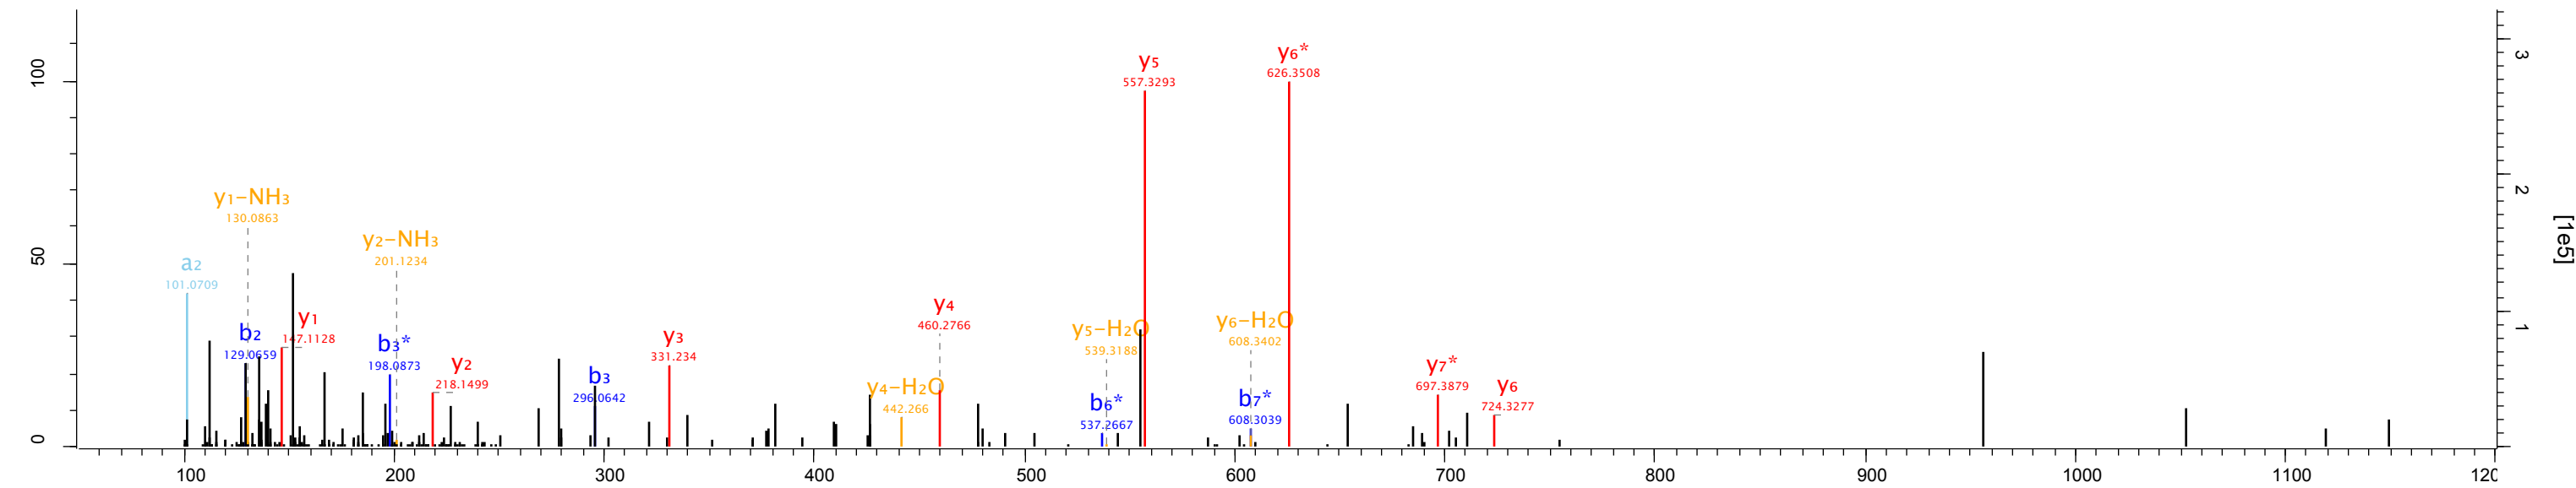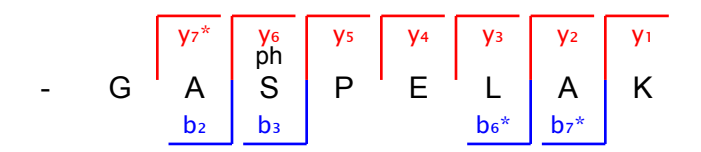

Raw file 20171215\_MaS\_33SR\_LMH\_phospho\_07 Scan 4377 Method FTMS; HCD Score 55.54 m/z 737.85 Gene names MCC

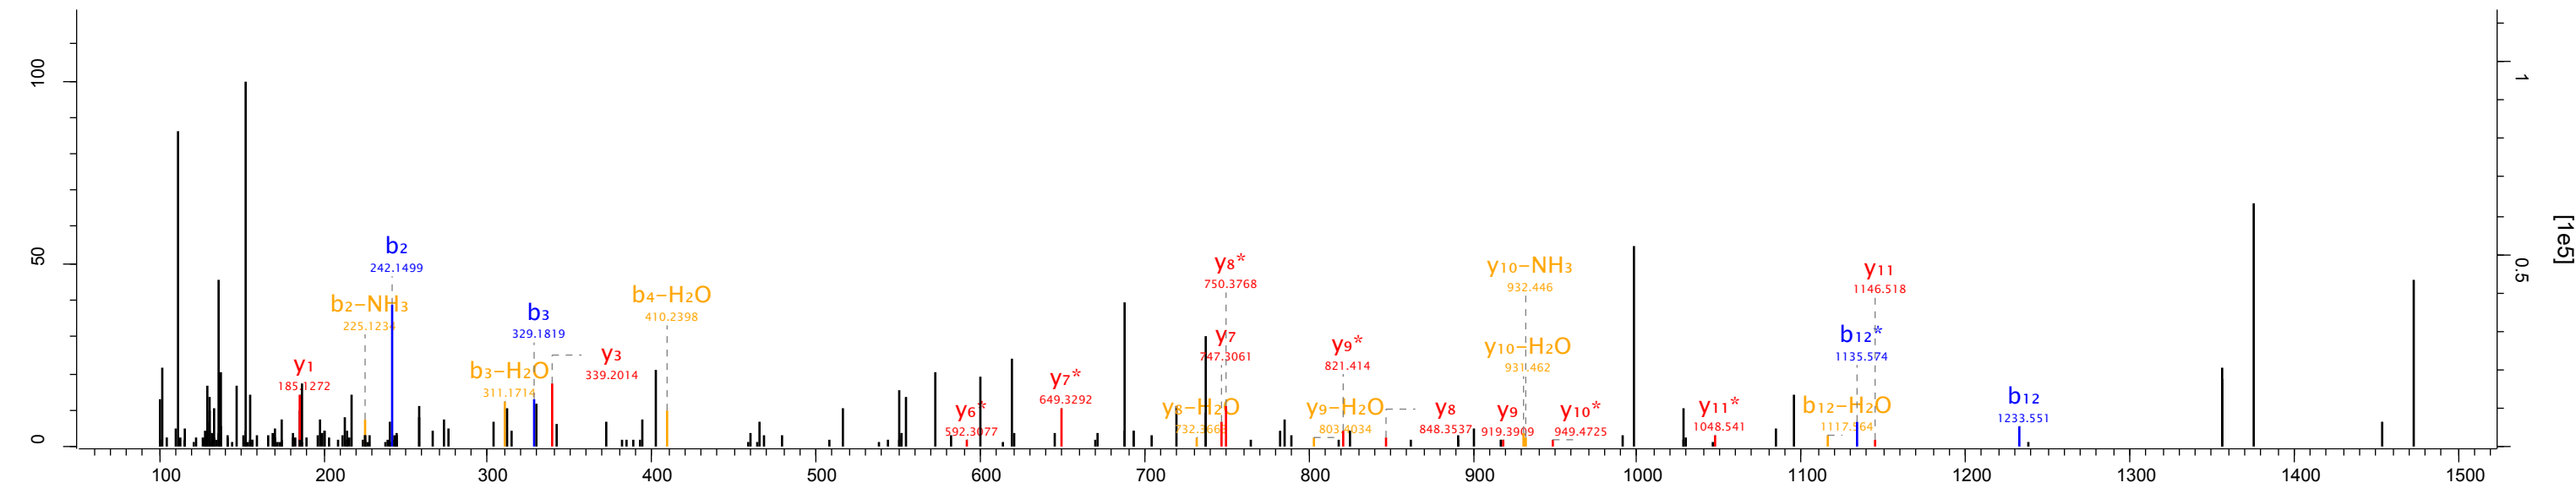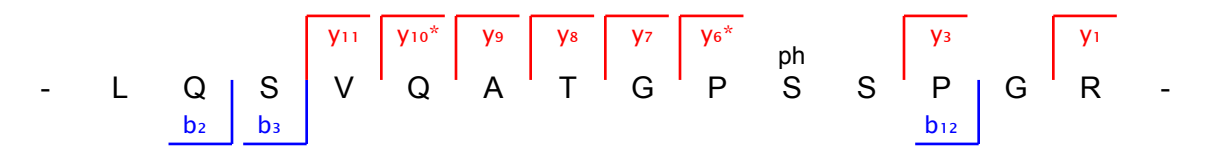

Raw file 20171215\_MaS\_33SR\_LMH\_phospho\_07 Scan 4767 Method FTMS; HCD Score 70.94 m/z 495.23 Gene names SORBS2

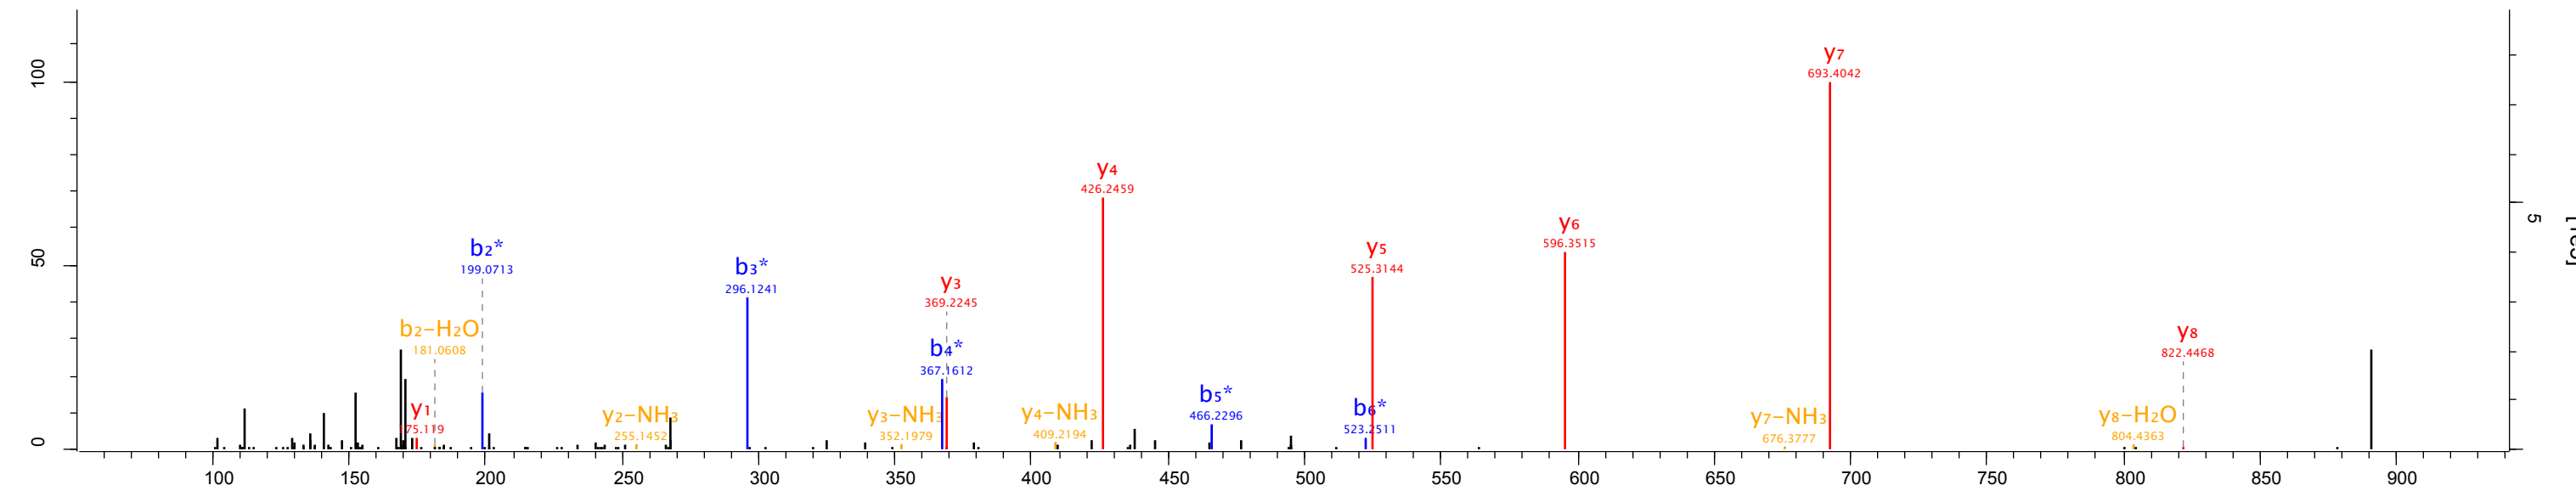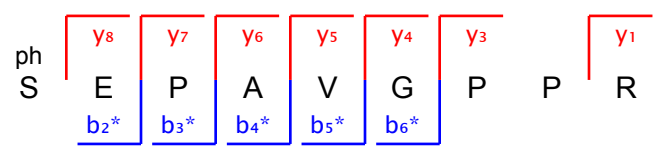

Raw file 20171215\_MaS\_33SR\_LMH\_phospho\_07 Scan 5037 Method FTMS; HCD Score 52.73 m/z 728.32 Gene names MYLK

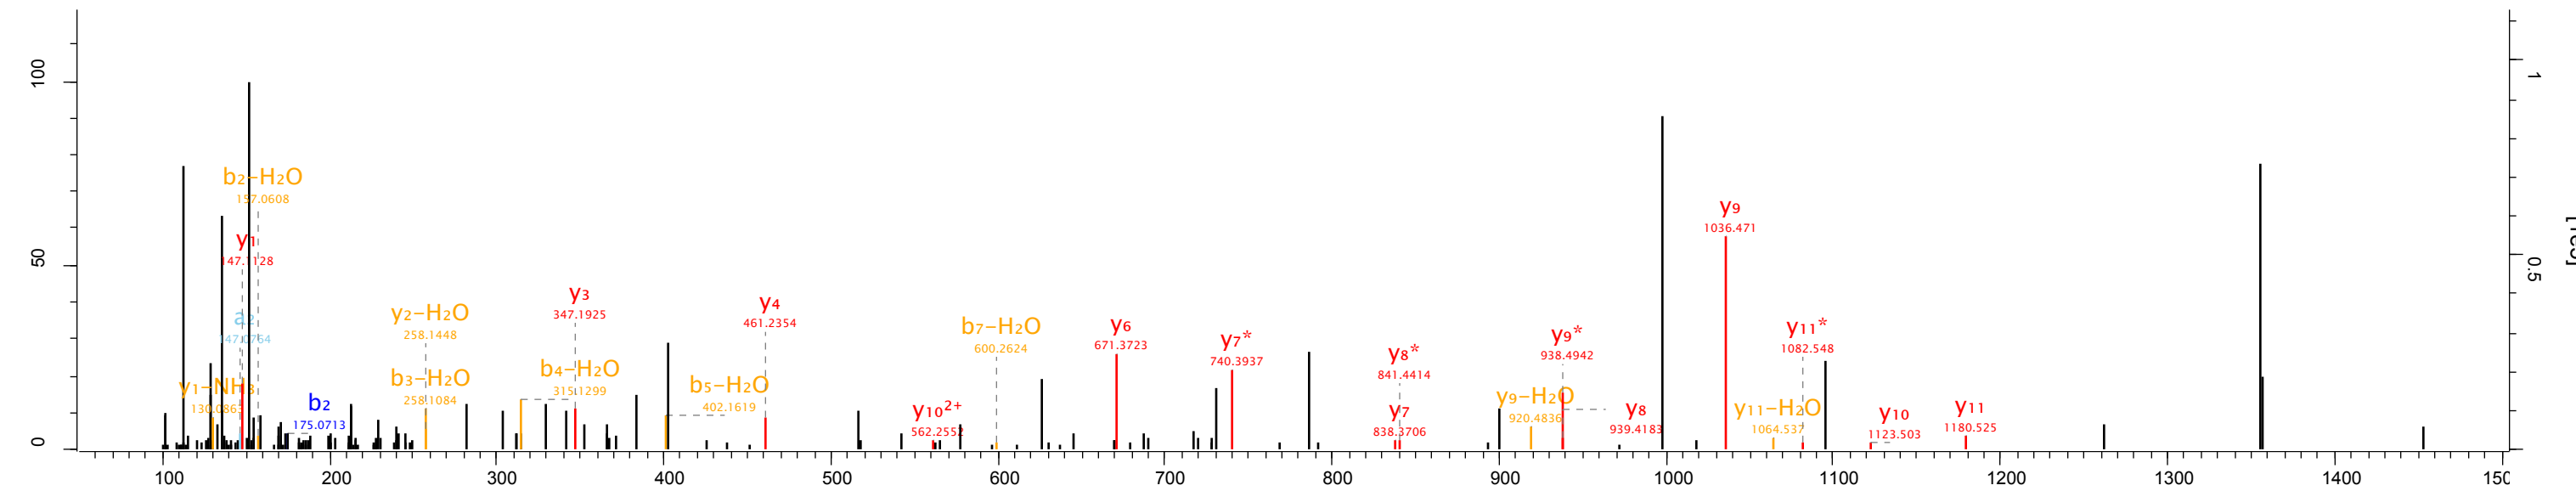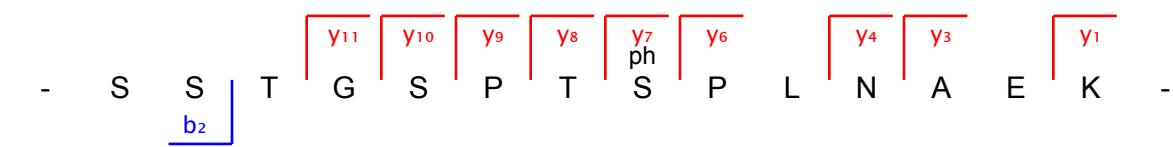

Raw file Scan Method Score m/z Gene names

20171215\_MaS\_33SR\_LMH\_phospho\_07 5767 FTMS; HCD 54.56 980.95 EYA3

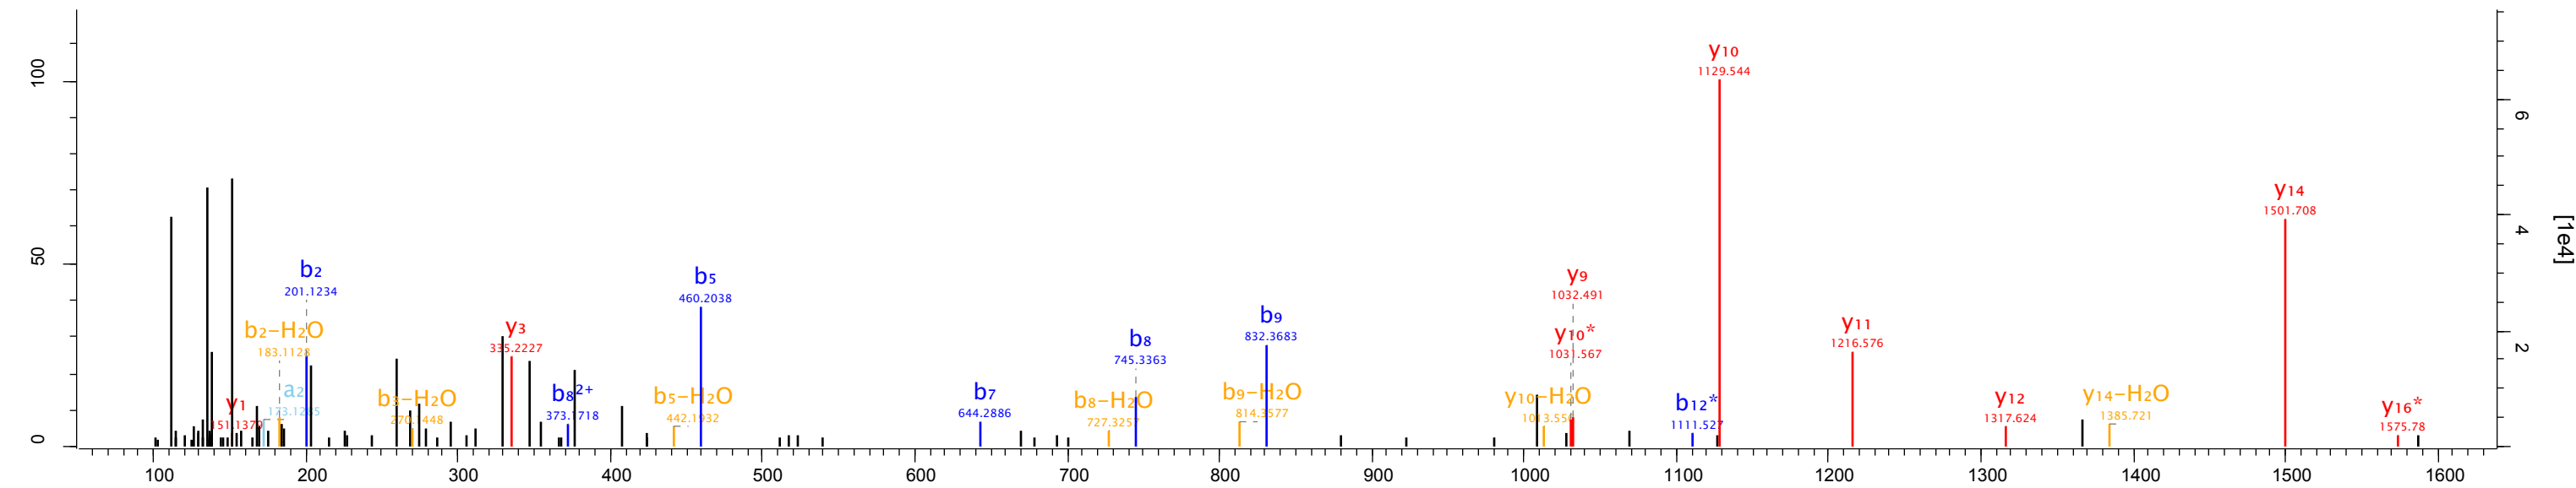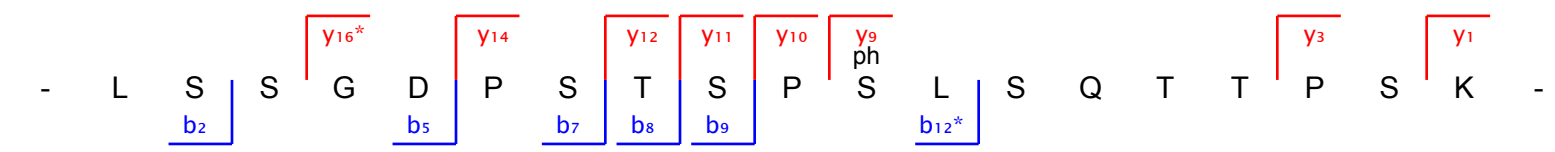



Raw file

20171215\_MaS\_33SR\_LMH\_phospho\_08

| Scan  | Method    | Score | m/z    | Gene names |
|-------|-----------|-------|--------|------------|
| 15097 | FTMS; HCD | 40.28 | 723.36 | OXCT1      |

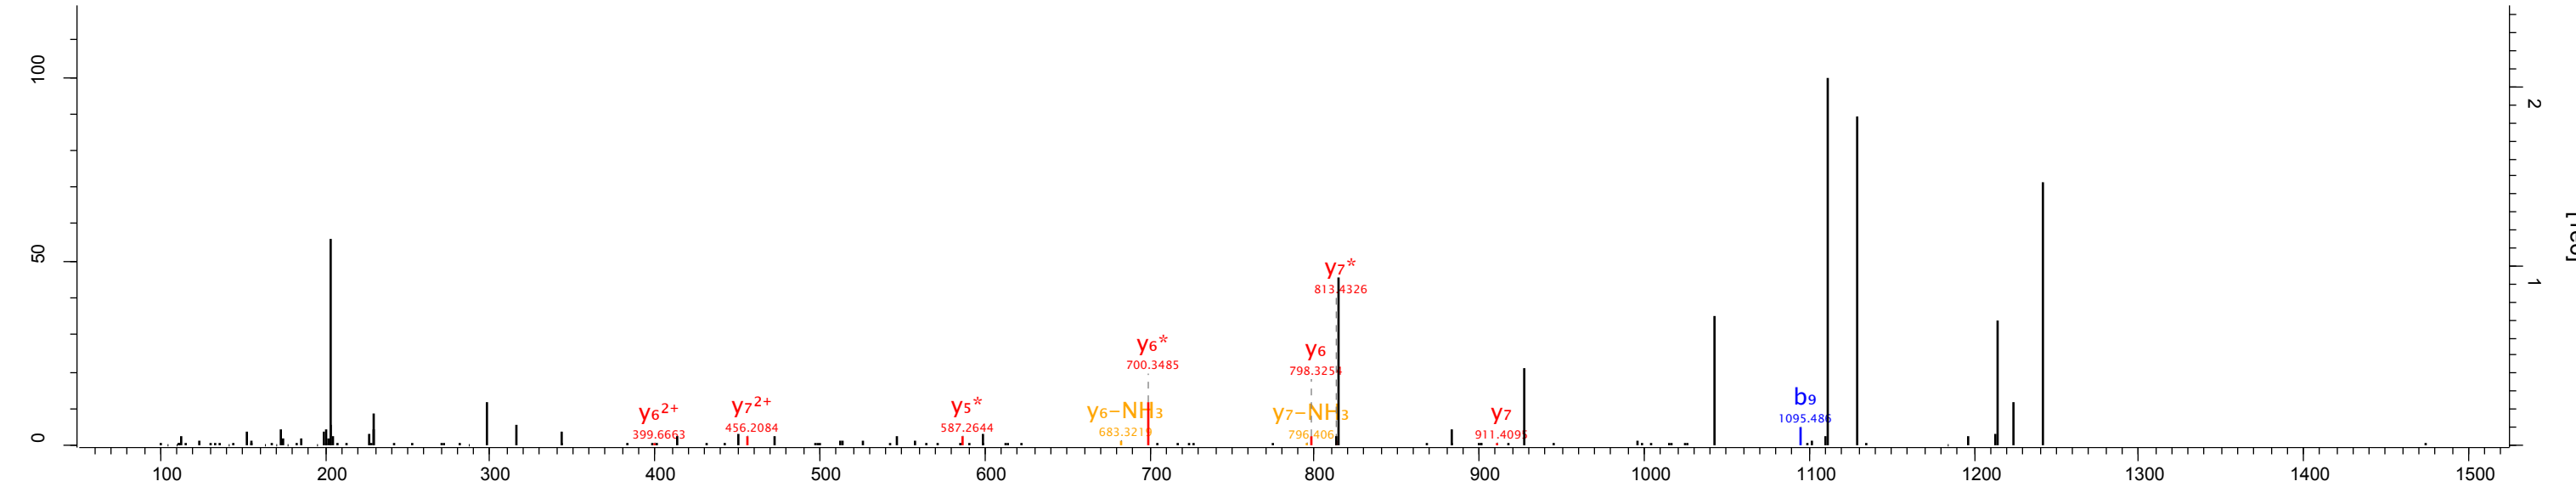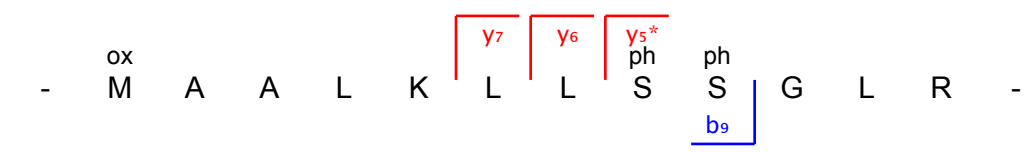

Raw file 20171215\_MaS\_33SR\_LMH\_phospho\_08 Scan 1987 Method FTMS; HCD Score 117.4 m/z 637.29 Gene names NKAP

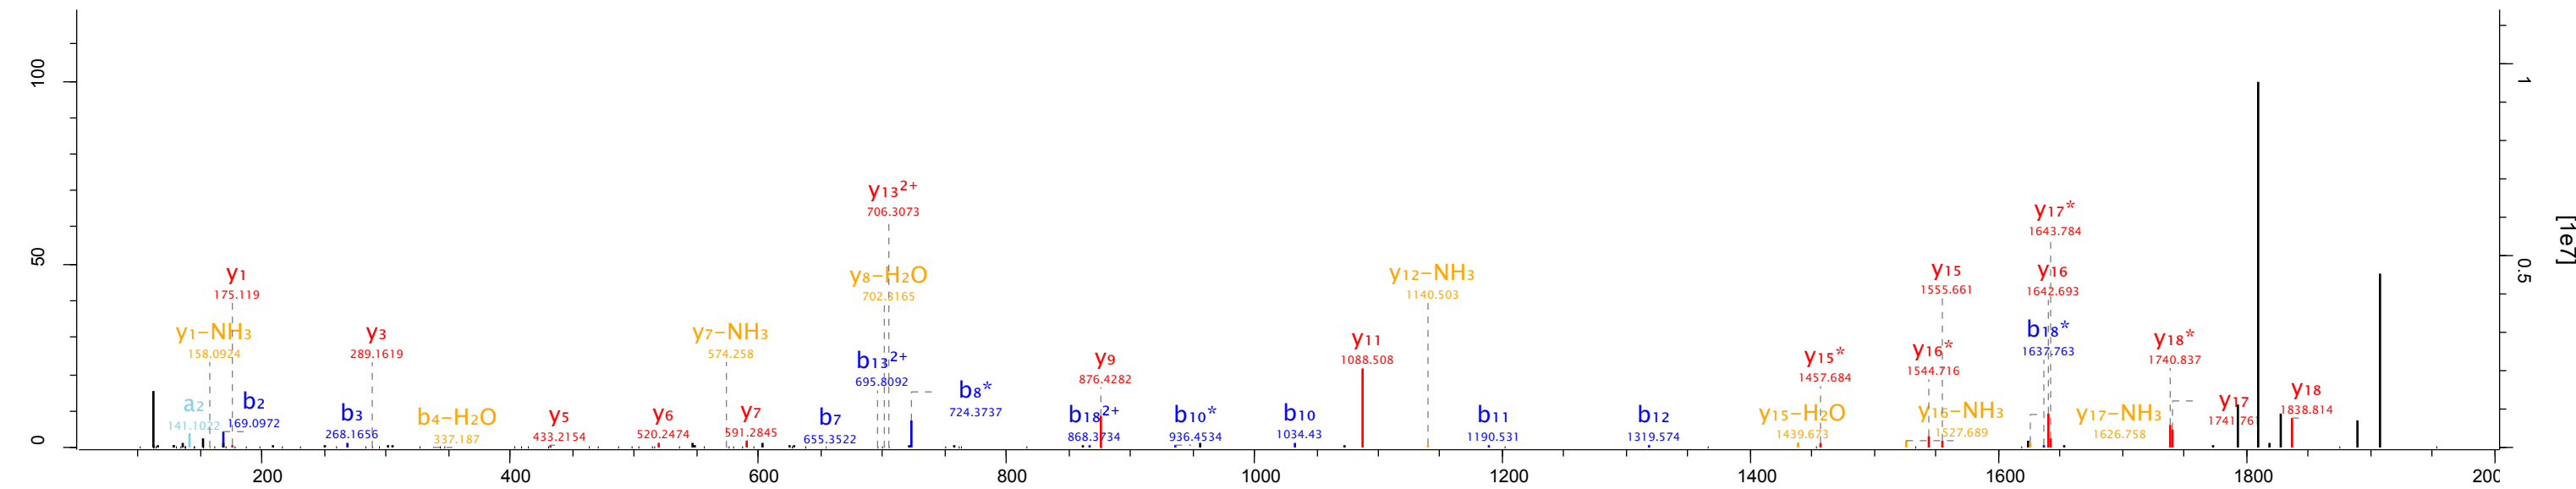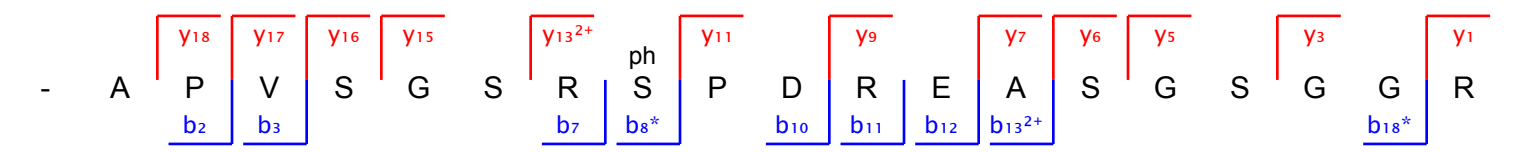

Raw file

20171215\_MaS\_33SR\_LMH\_phospho\_08

| Scan | Method    | Score  | m/z    | Gene names |
|------|-----------|--------|--------|------------|
| 2177 | FTMS; HCD | 140.14 | 523.73 | CHAF1A     |

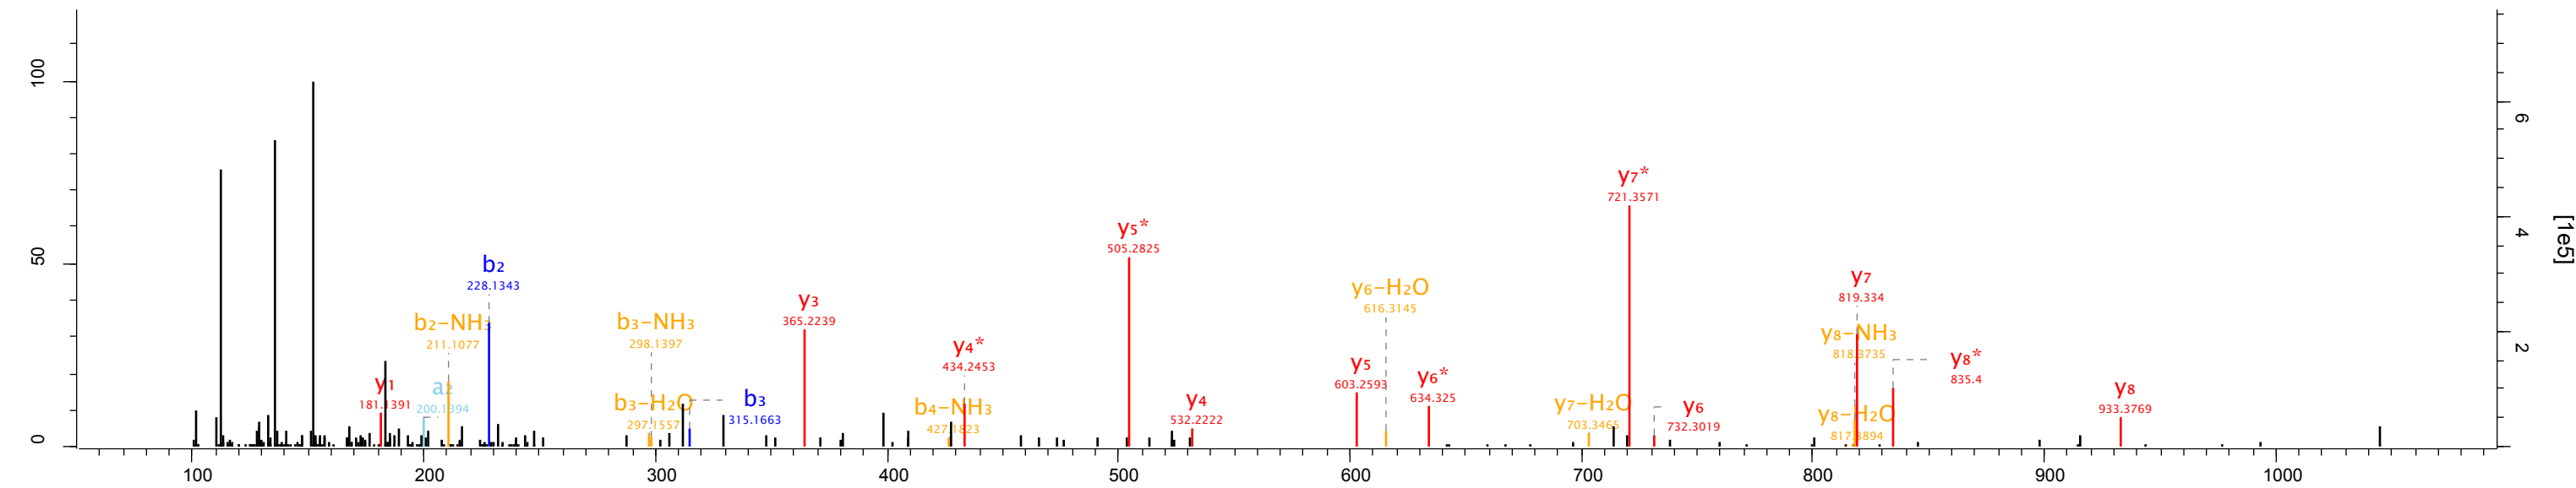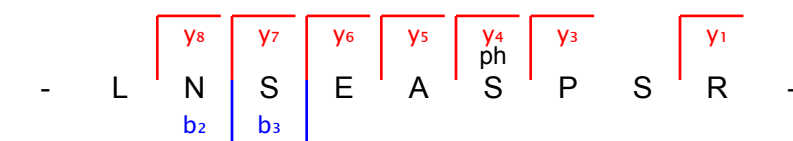

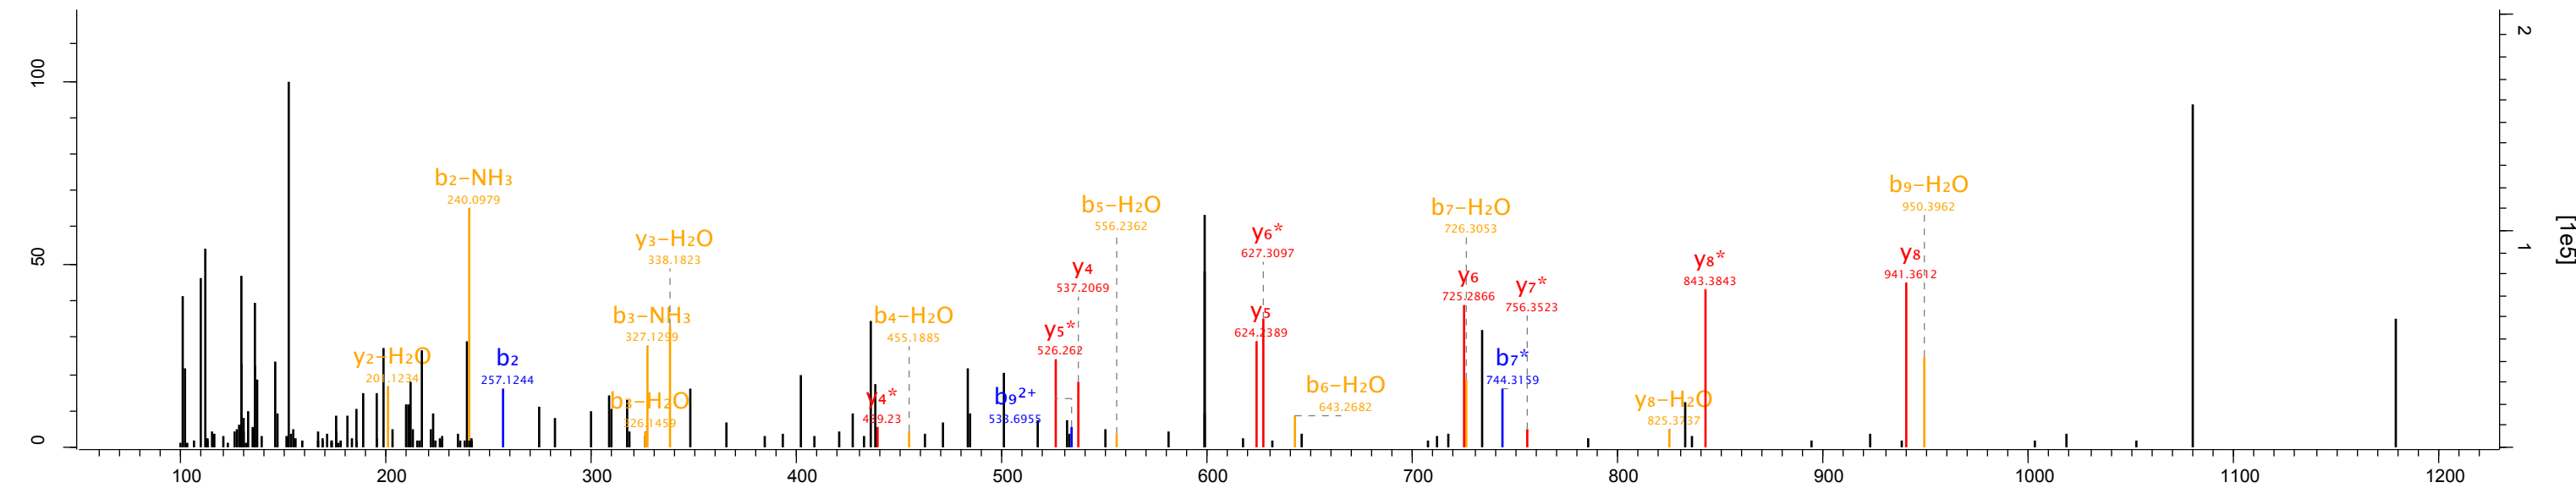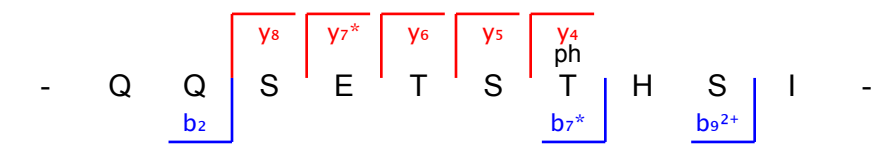

Raw file: 20171215\_MaS\_33SR\_LMH\_phospho\_08  
 Scan: 3437 Method: FTMS; HCD Score: 60.36 m/z: 541.77 Gene names: EIF3A

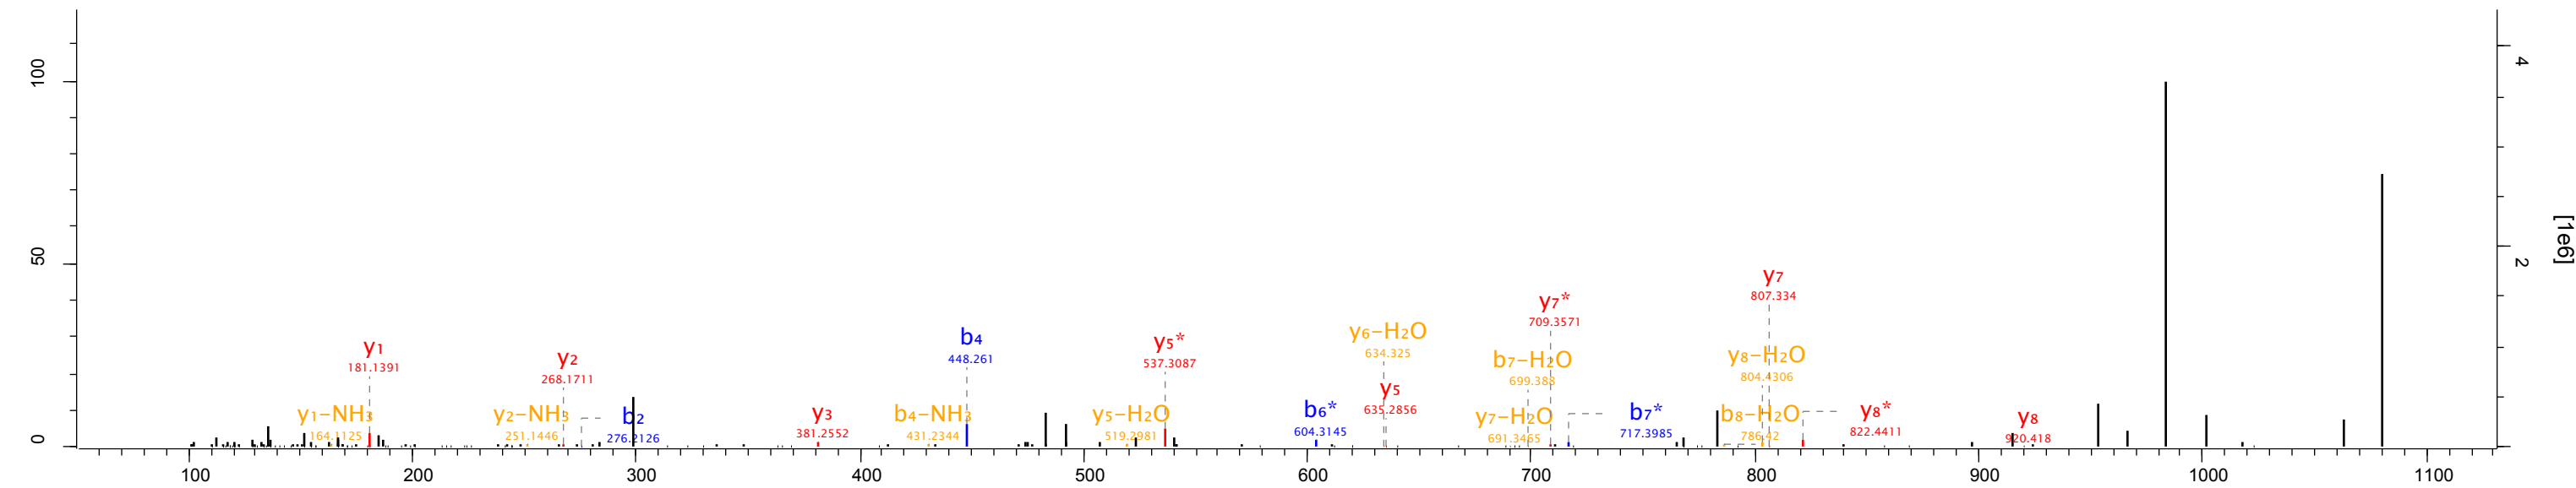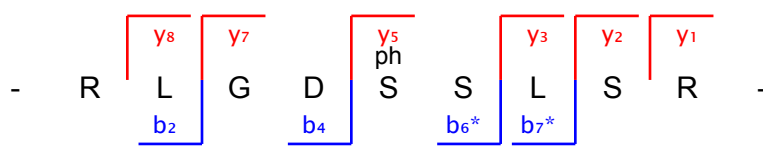

Raw file 20171215\_MaS\_33SR\_LMH\_phospho\_08 Scan 3837 Method FTMS; HCD Score 57.53 m/z 580.27 Gene names RIN1

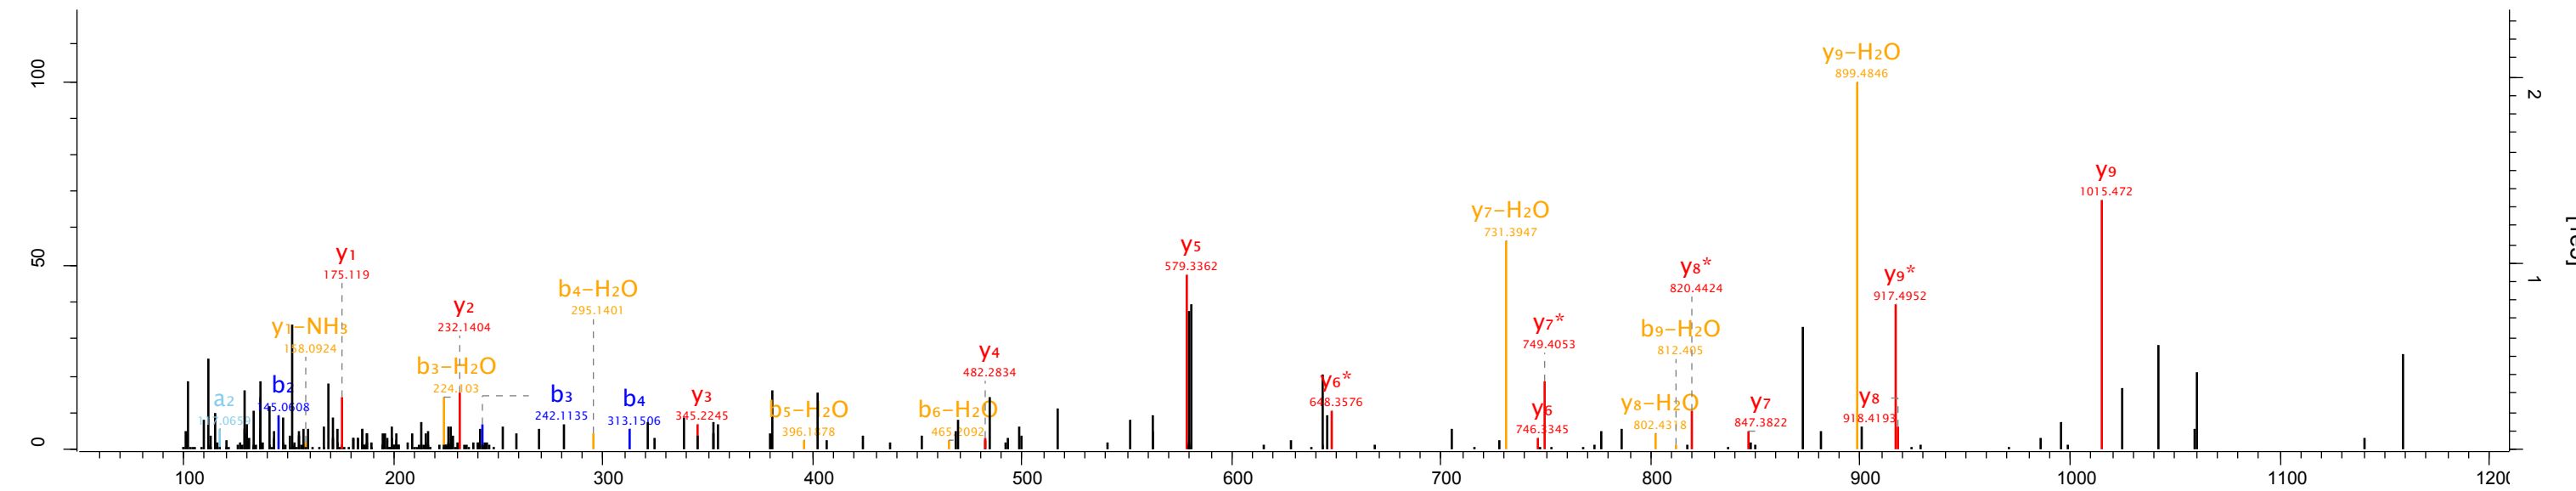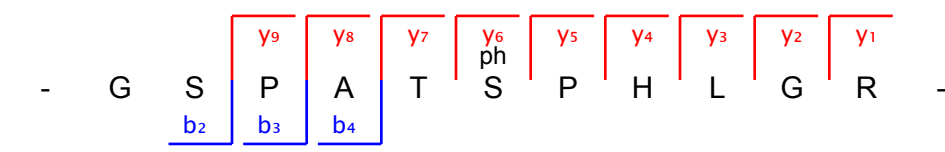

Raw file 20171215\_MaS\_33SR\_LMH\_phospho\_08 Scan 4217 Method FTMS; HCD Score 119.62 m/z 603.29 Gene names PHLDB2

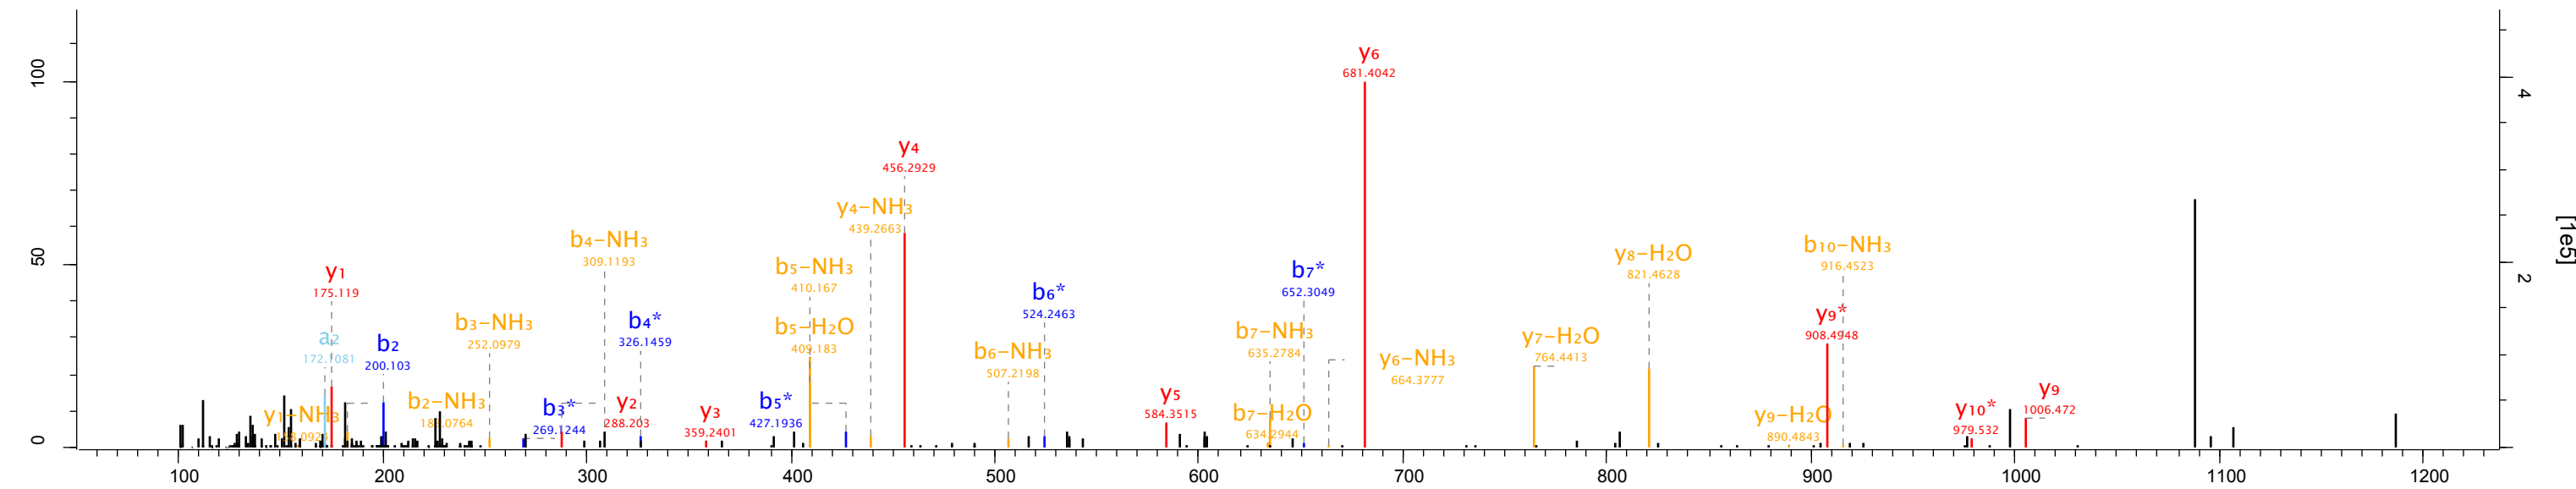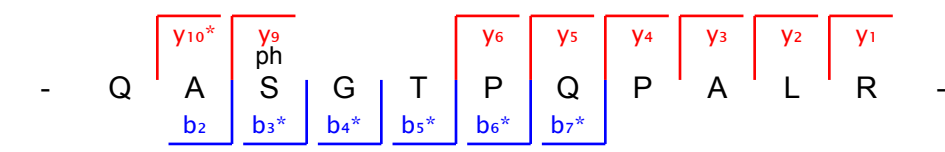

Raw file 20171215\_MaS\_33SR\_LMH\_phospho\_08 Scan 4987 Method FTMS; HCD Score 66.96 m/z 476.2

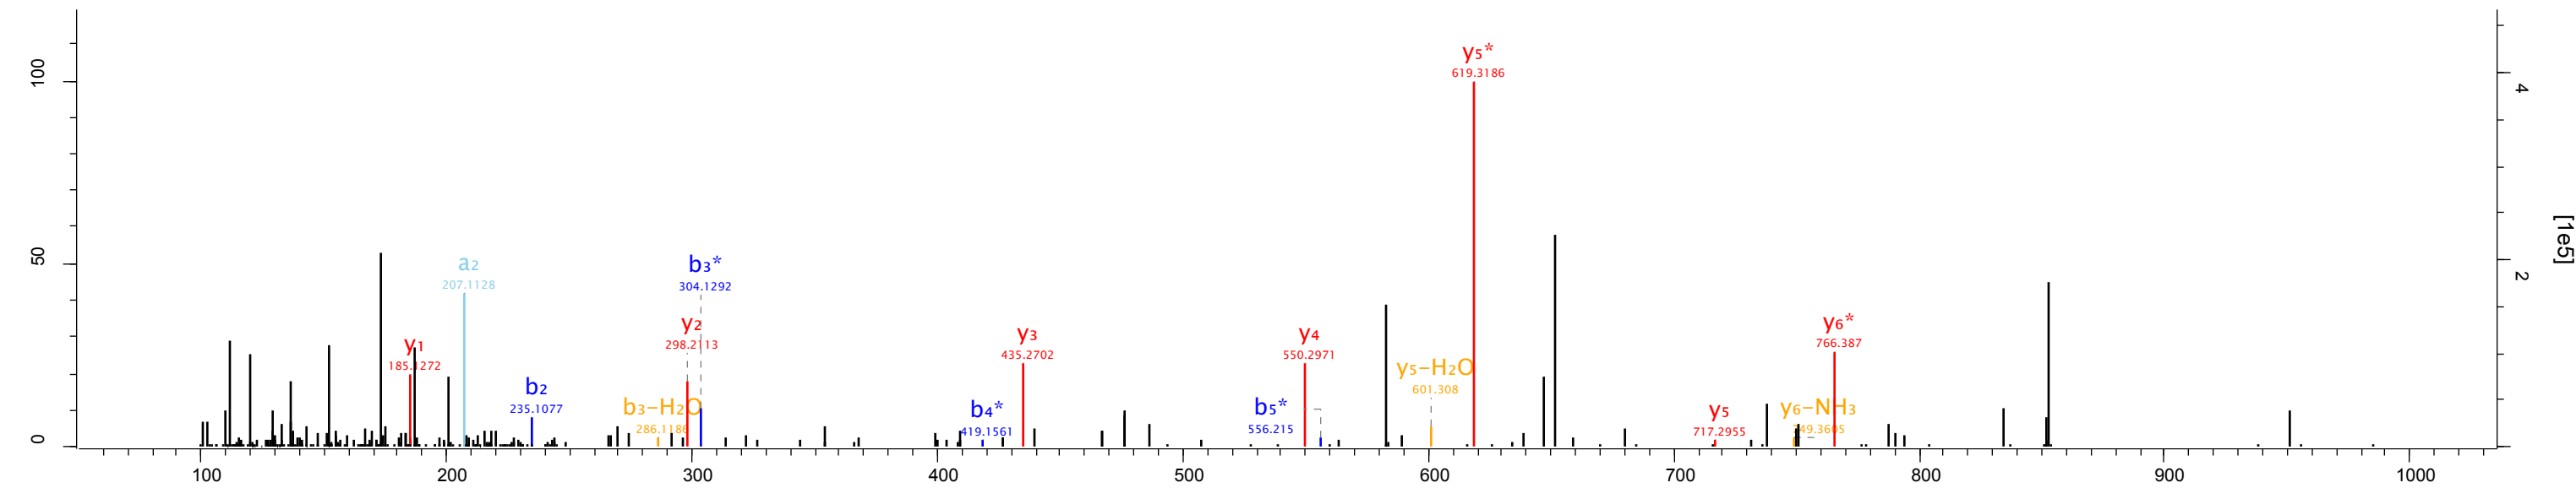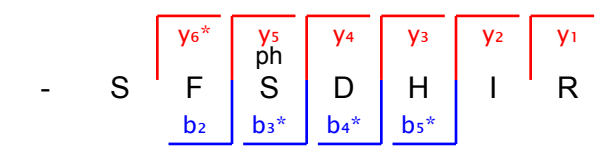



Raw file 20171215\_MaS\_33SR\_LMH\_phospho\_08 Scan 6087 Method FTMS; HCD Score 41.7 m/z 632.31 Gene names TBC1D10B

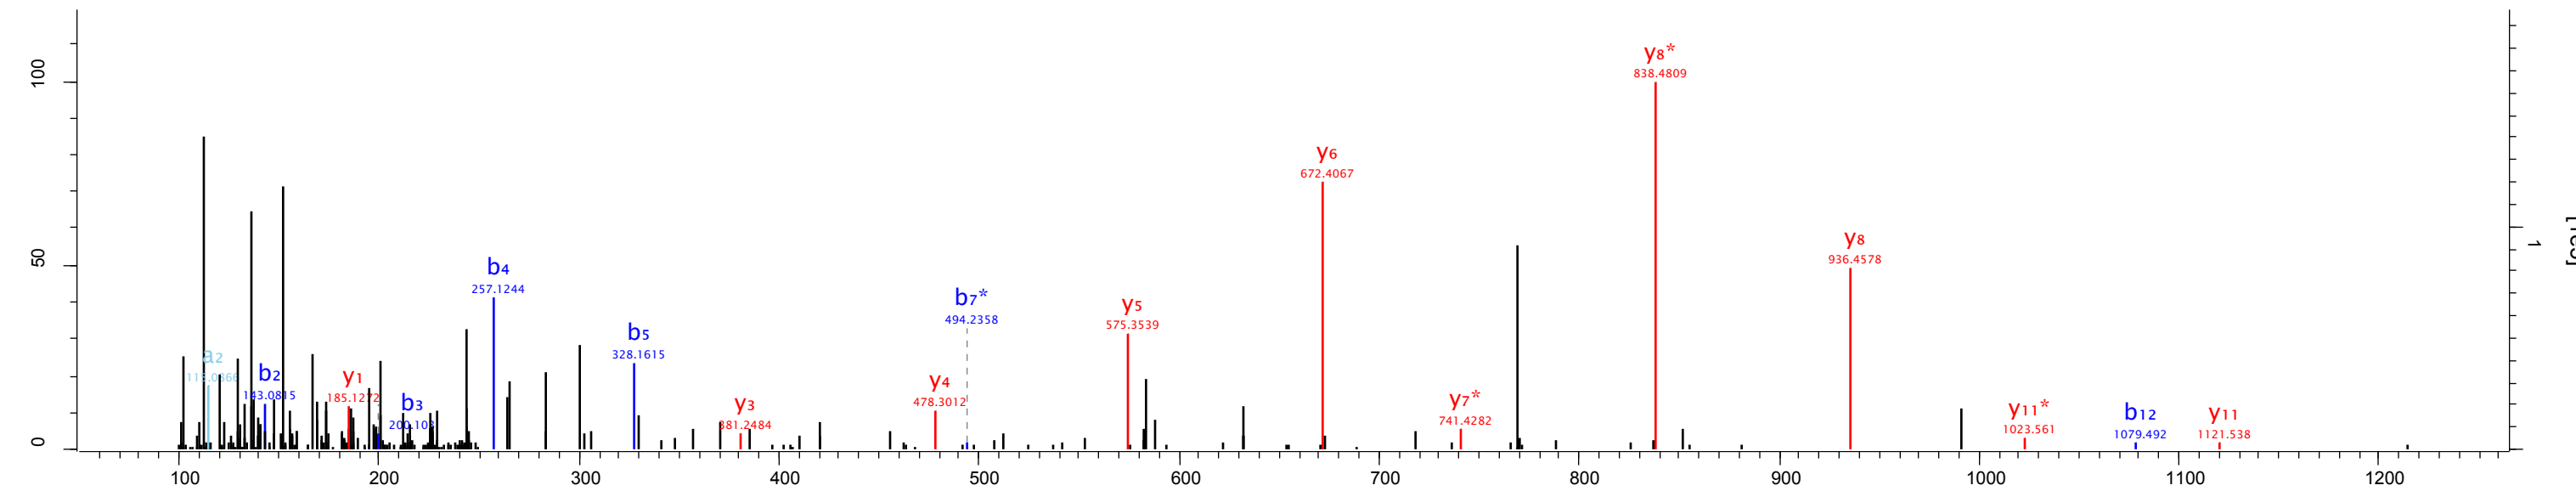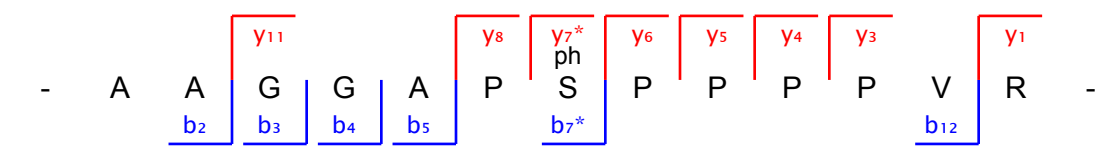

Raw file 20171215\_MaS\_33SR\_LMH\_phospho\_08 Scan 6307 Method FTMS; HCD Score 85.8 m/z 846.87 Gene names SLK

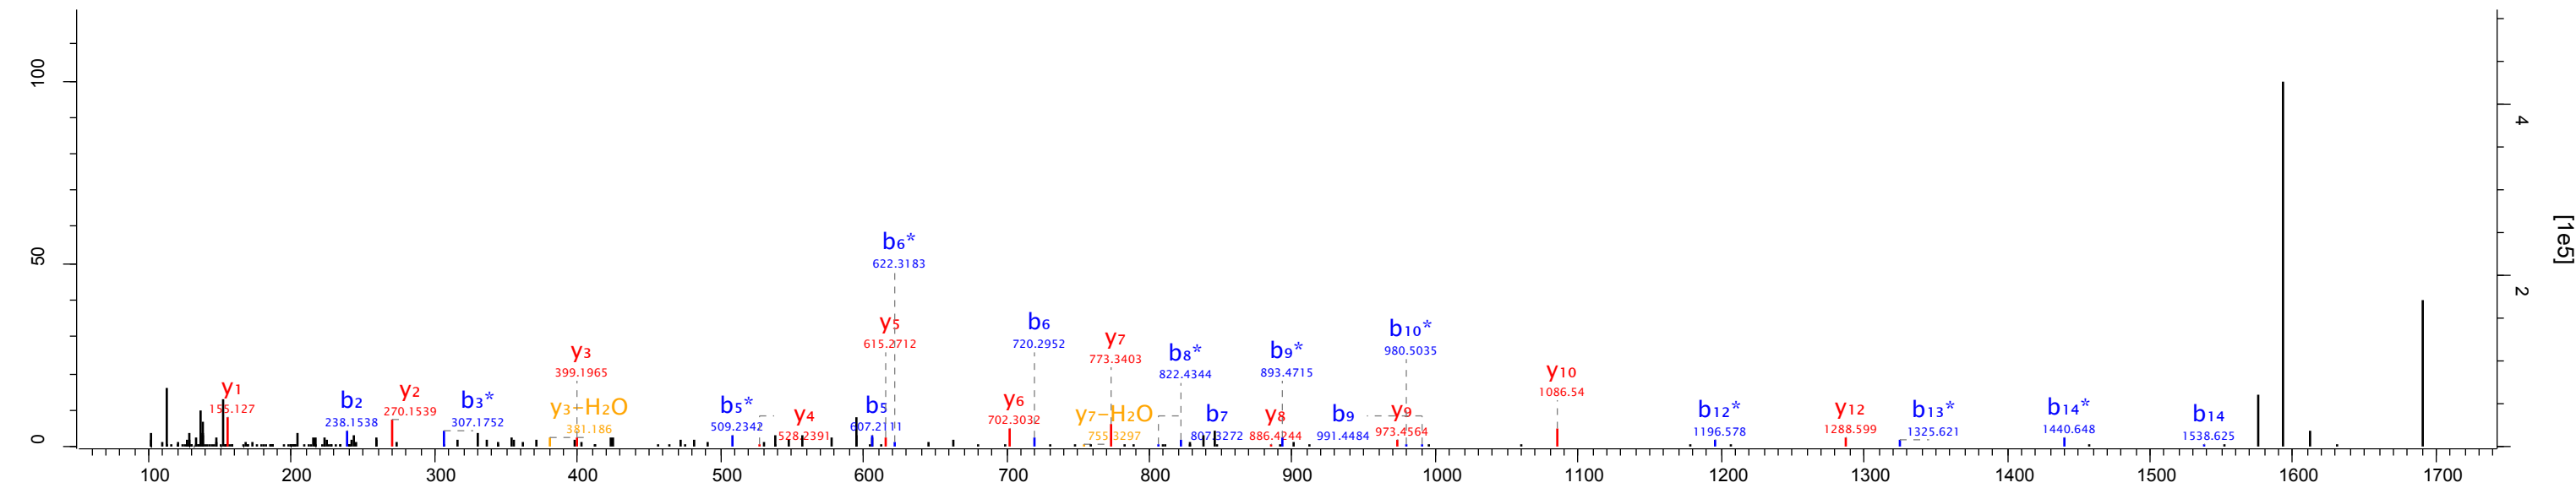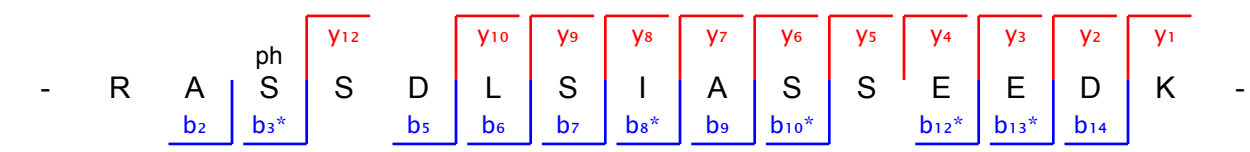

Raw file 20171215\_MaS\_33SR\_LMH\_phospho\_08 Scan 6977 Method FTMS; HCD Score 81.02 m/z 461.24 Gene names AKAP1

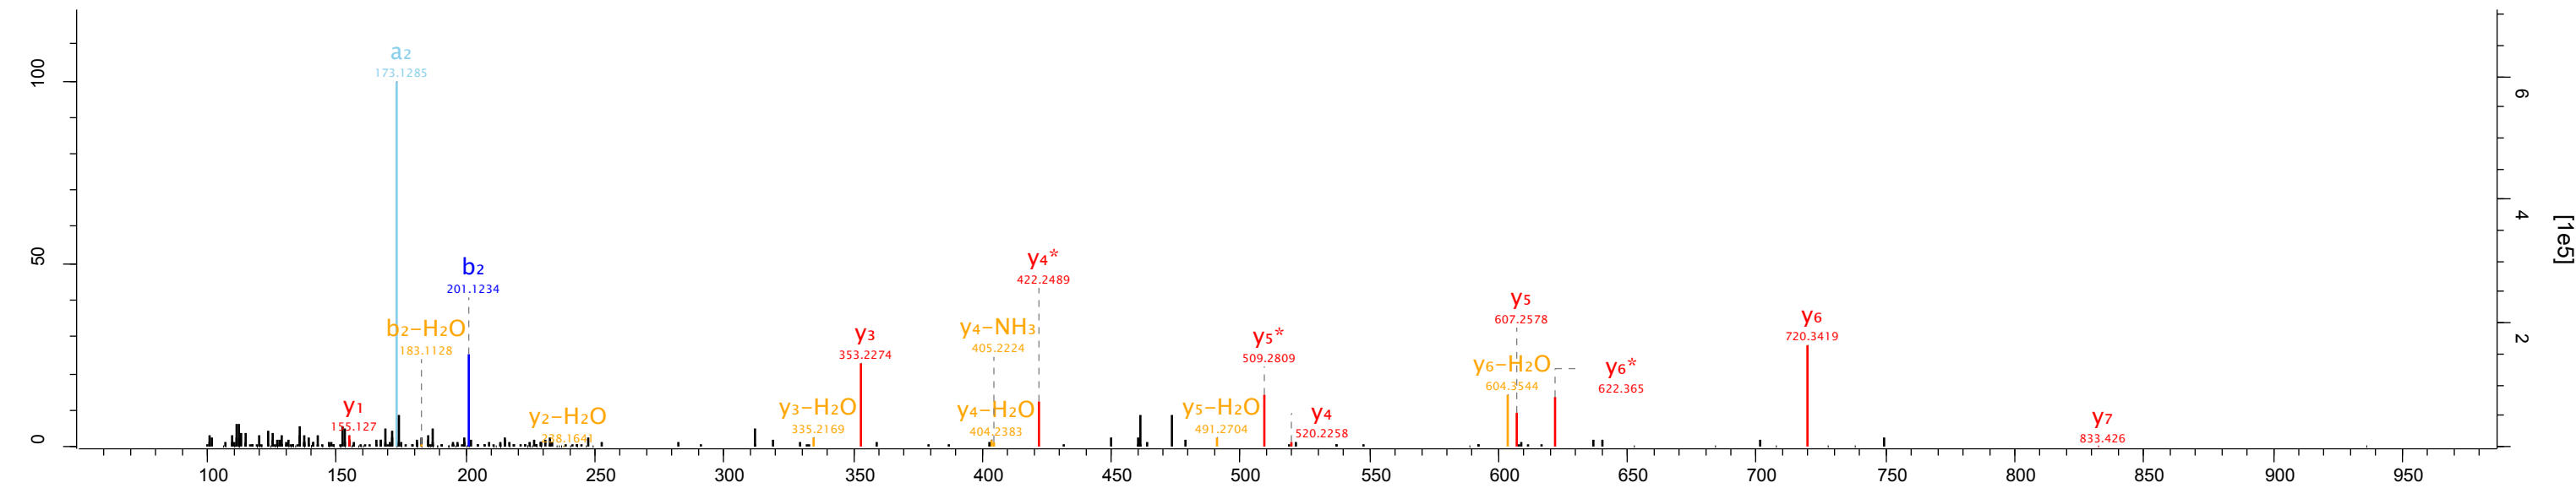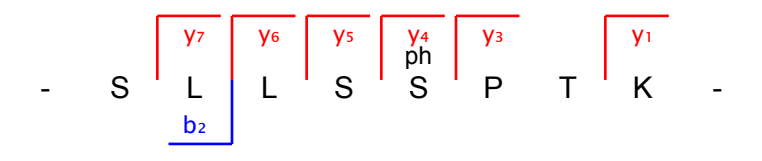

Raw file 20171215\_MaS\_33SR\_LMH\_phospho\_08 Scan 8477 Method FTMS; HCD Score 48.22 m/z 994.94 Gene names MXRA5

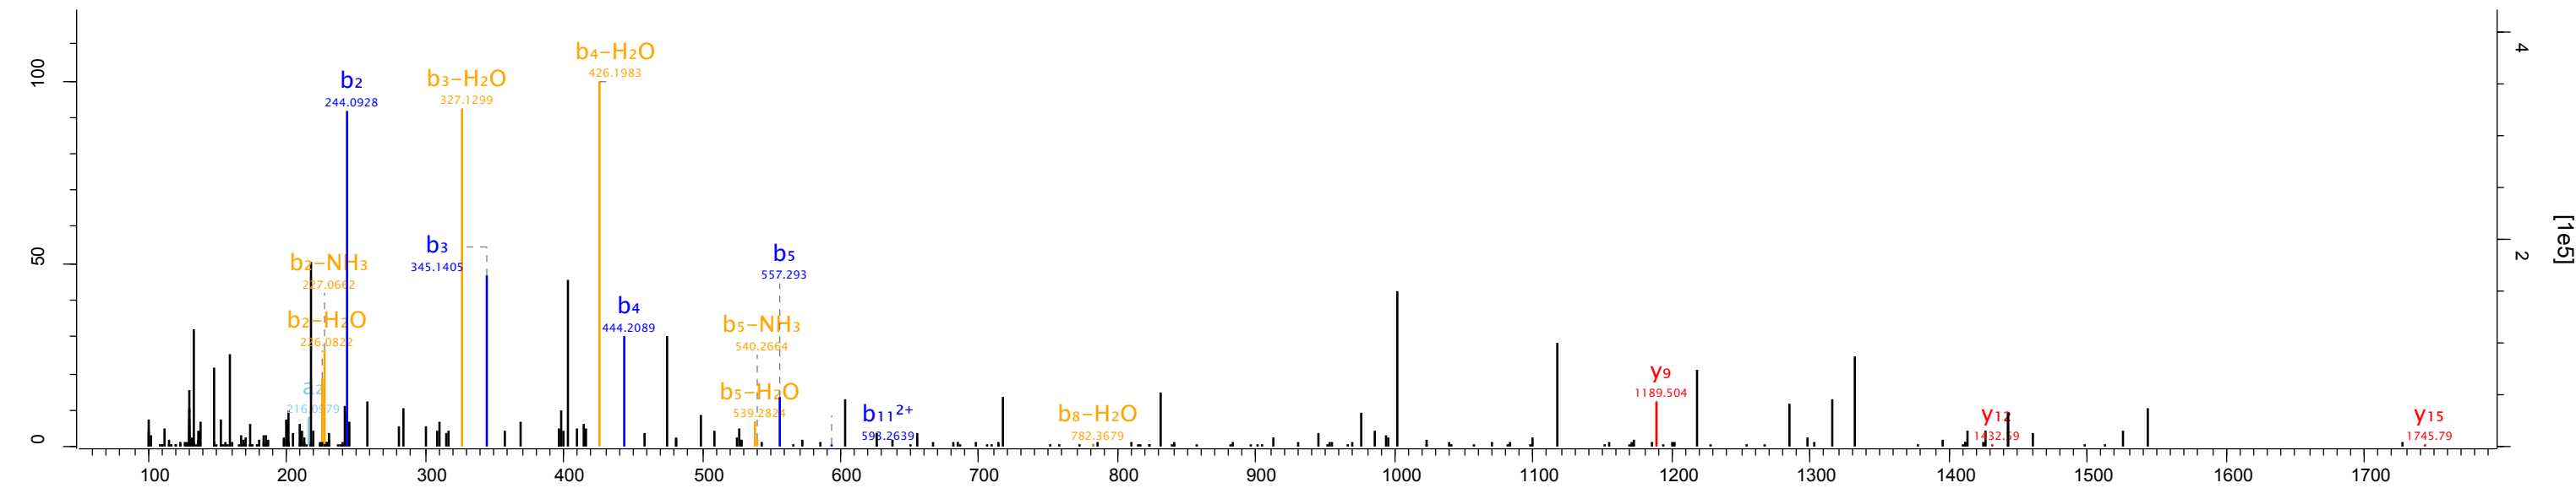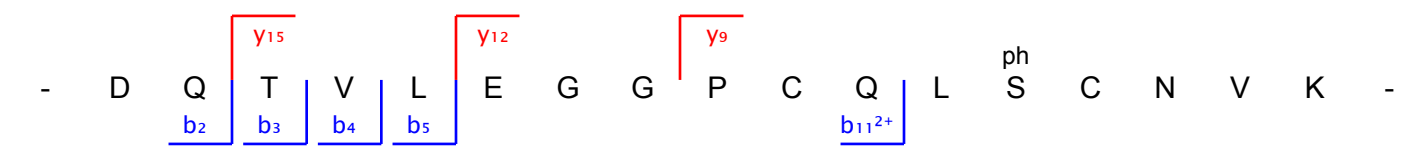

Raw file 20171215\_MaS\_33SR\_LMH\_phospho\_08 Scan 8847 Method FTMS; HCD Score 151.49 m/z 683.82 Gene names TRAFD1

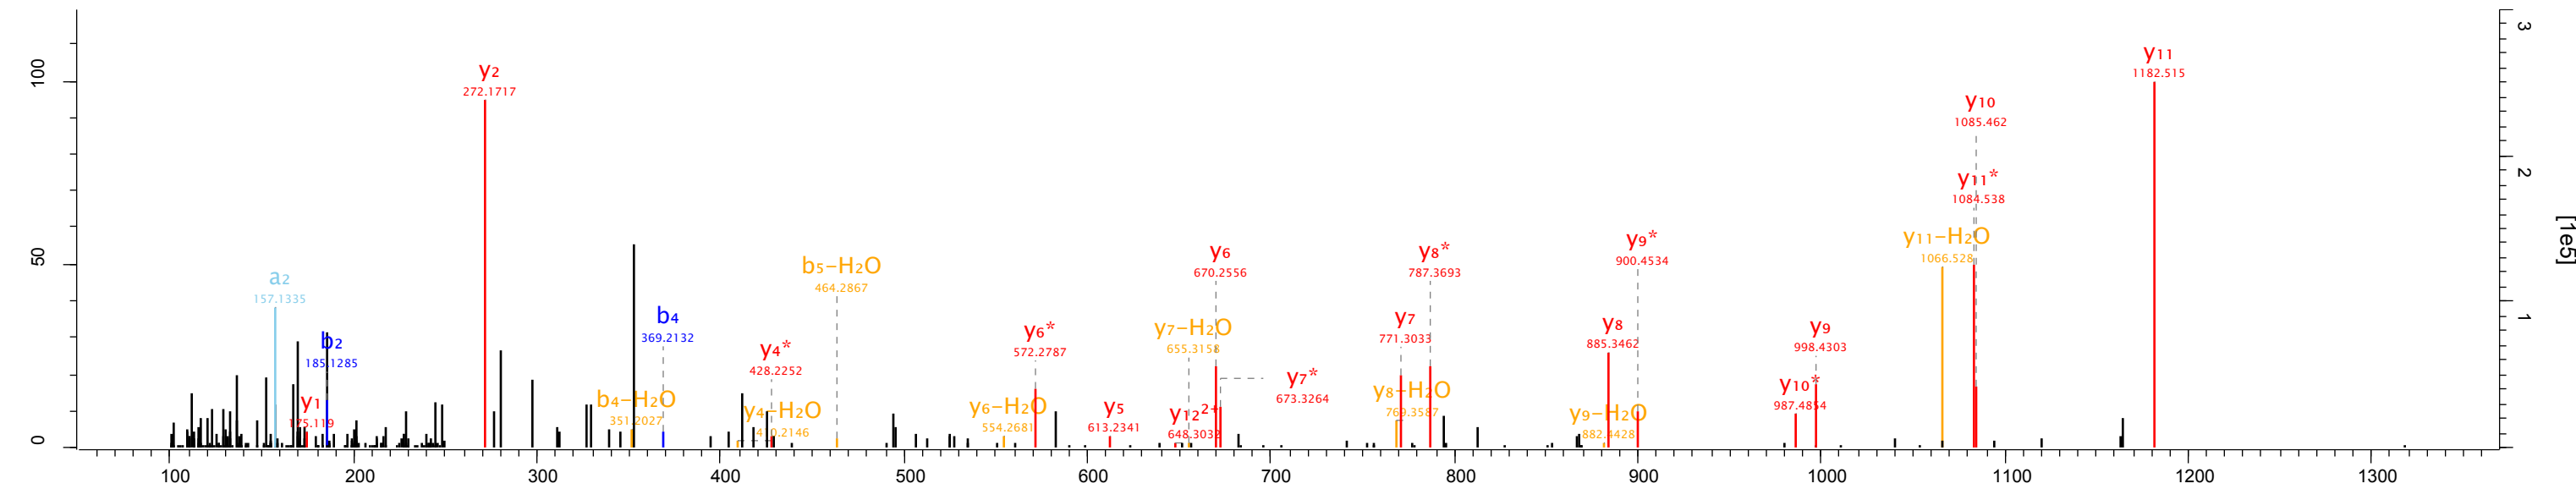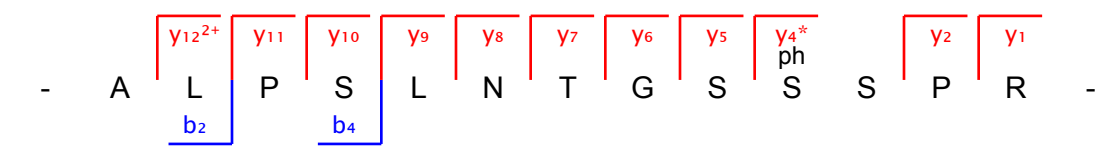

Raw file 20171215\_MaS\_33SR\_LMH\_phospho\_08 Scan 8977 Method FTMS; HCD Score 186.68 m/z 932.38 Gene names PLEC

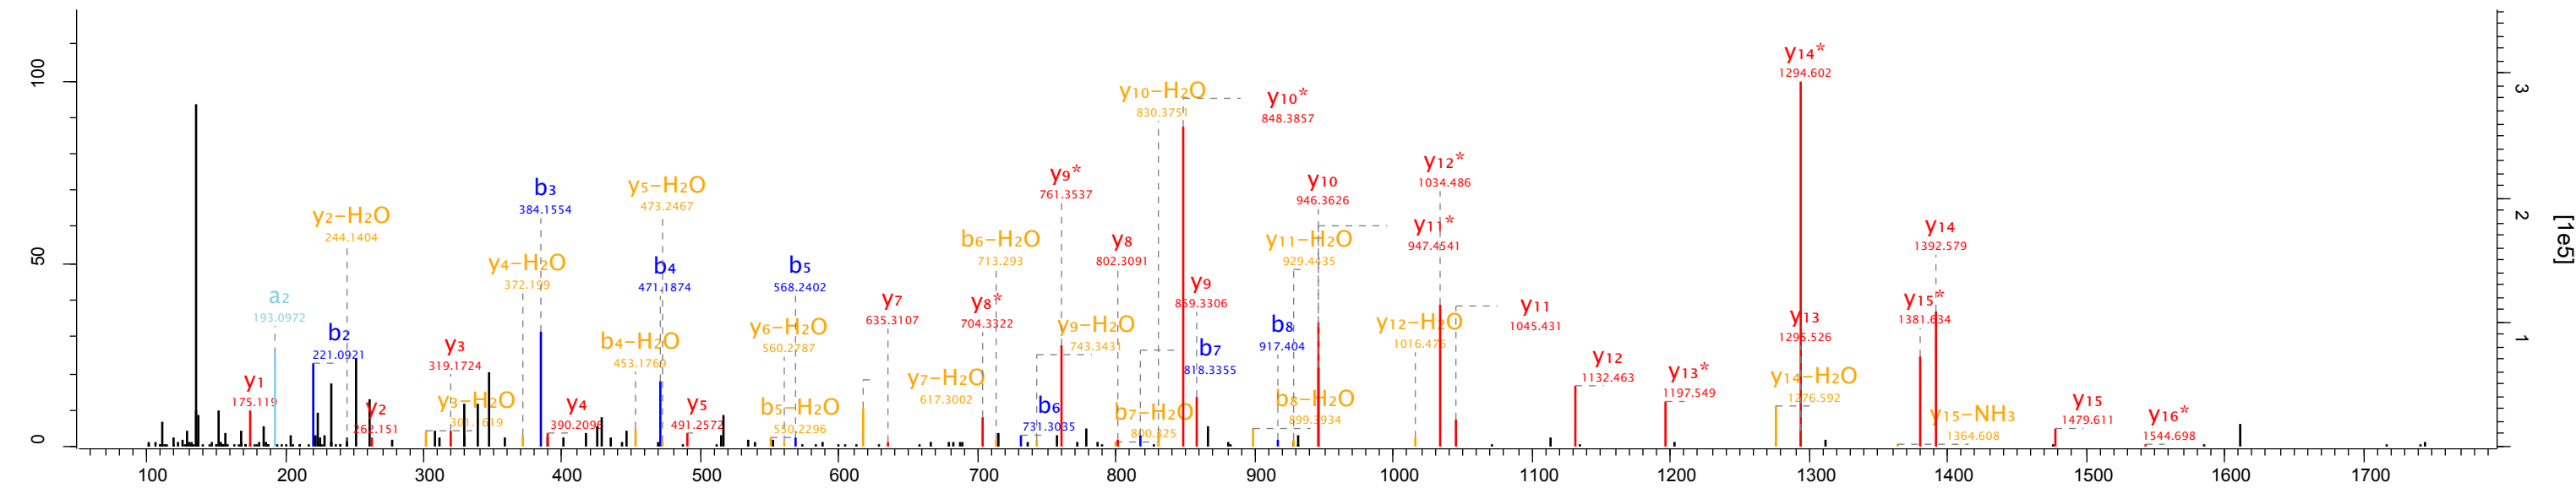

- G Y Y Y S P Y S V S G S G S T A G S R -

Fragmentation scheme showing b and y ions for the peptide sequence: Y Y Y S P Y S V S G S G S T A G S R. The b ions are labeled b2 through b8, and the y ions are labeled y1 through y16\*.

Raw file 20171215\_MaS\_33SR\_LMH\_phospho\_08 Scan 9687 Method FTMS; HCD Score 162.59 m/z 757.85 Gene names VIM

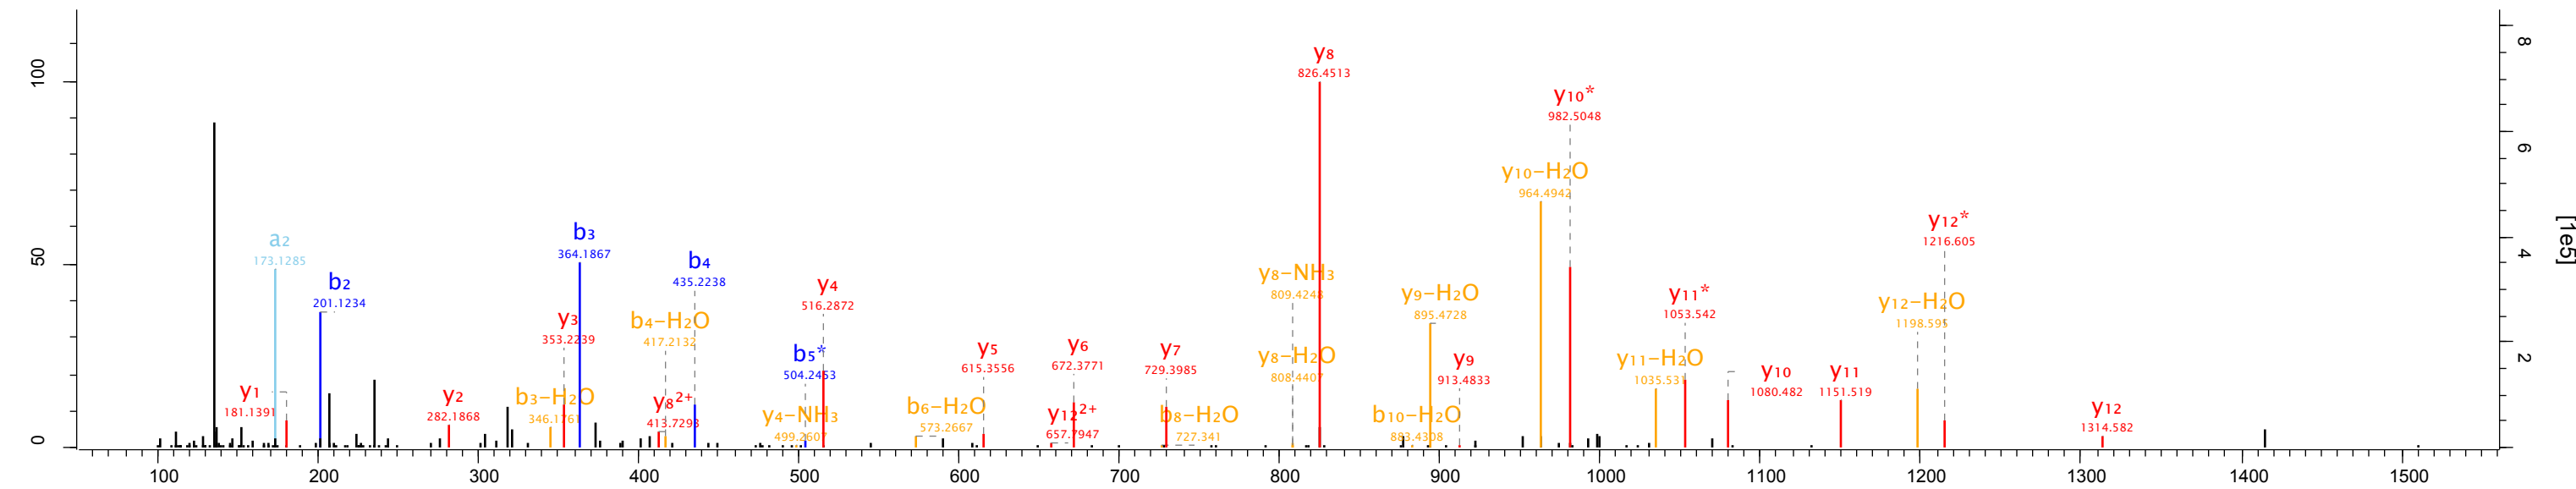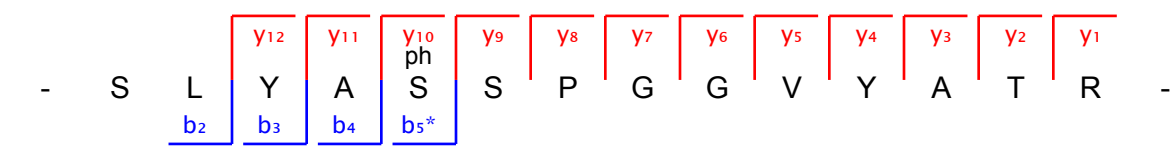

Raw file 20171215\_MaS\_33SR\_LMH\_phospho\_09 Scan 2337 Method FTMS; HCD Score 214.44 m/z 685.63 Gene names HTATSF1

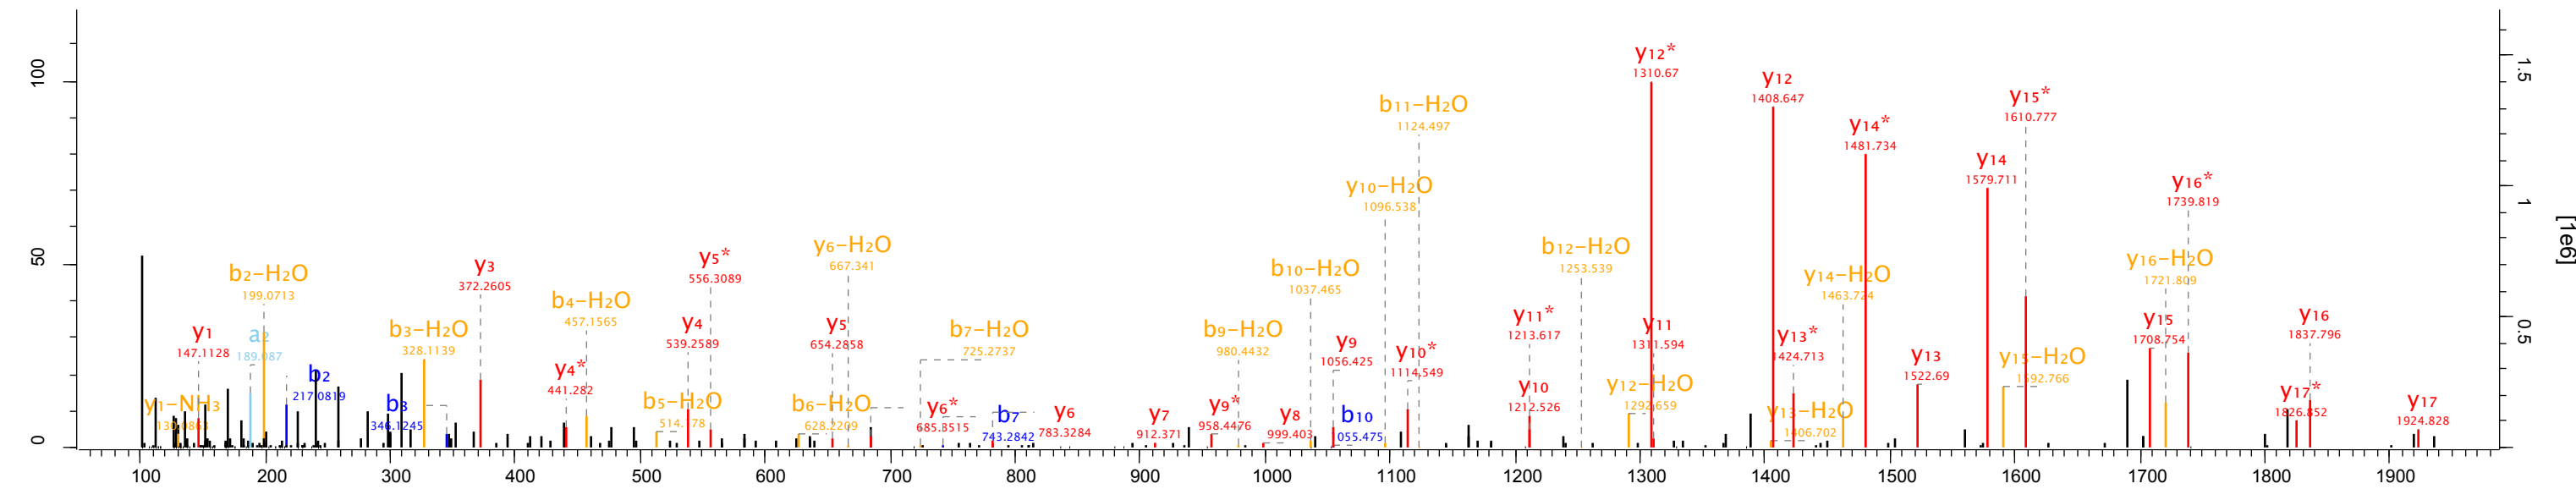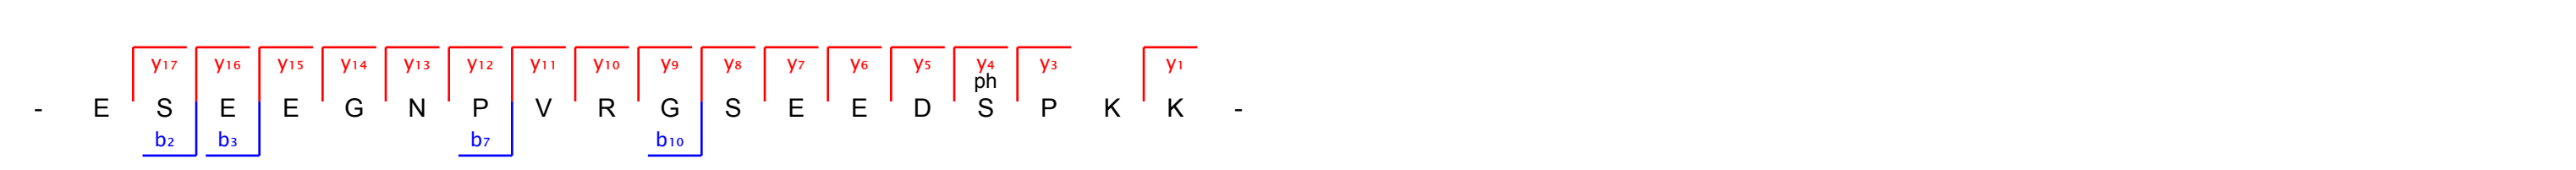



Raw file 20171215\_MaS\_33SR\_LMH\_phospho\_09 Scan 2537 Method FTMS; HCD Score 44.35 m/z 363.19

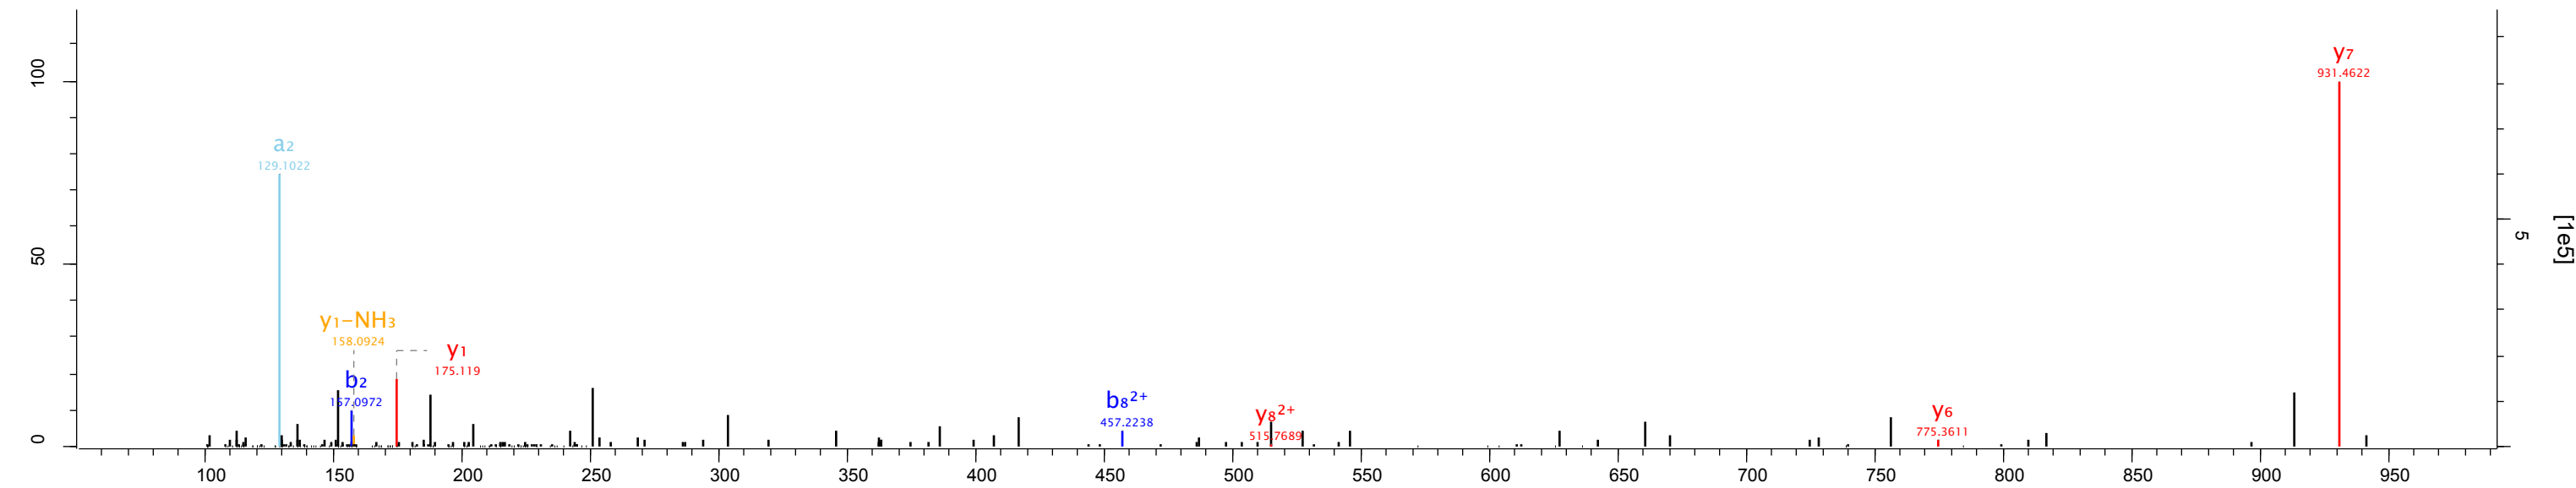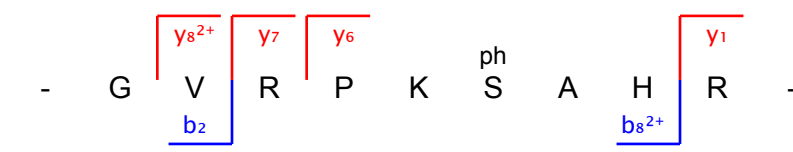

Raw file 20171215\_MaS\_33SR\_LMH\_phospho\_09 Scan 3077 Method FTMS; HCD Score 72.73 m/z 467.2 Gene names IRS2

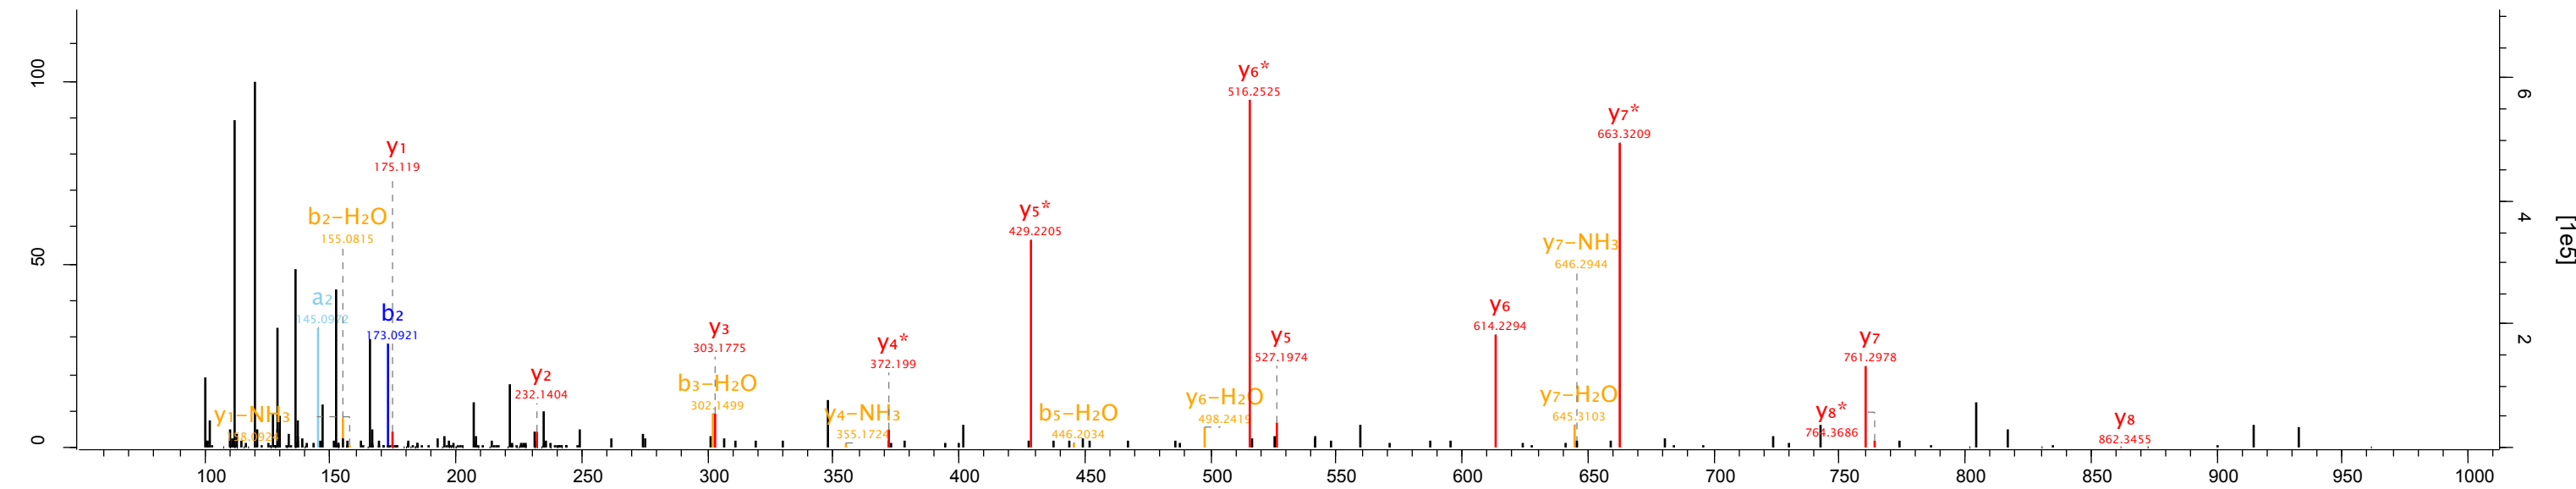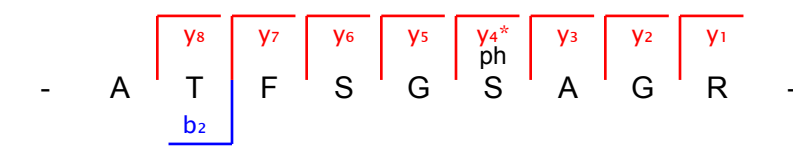

Raw file 20171215\_MaS\_33SR\_LMH\_phospho\_09 Scan 3147 Method FTMS; HCD Score 96.76 m/z 479.72 Gene names AKAP12

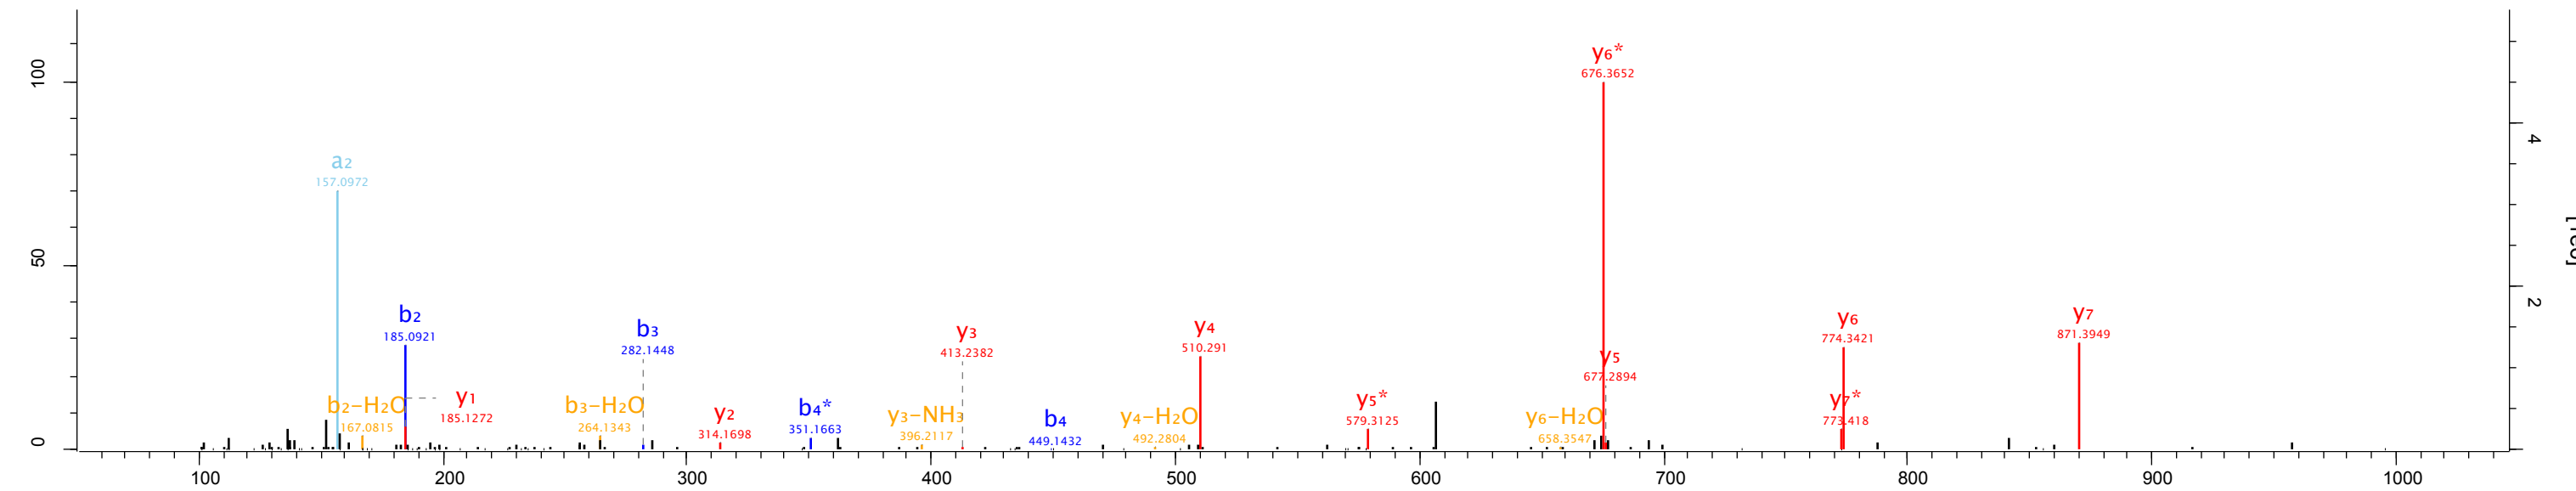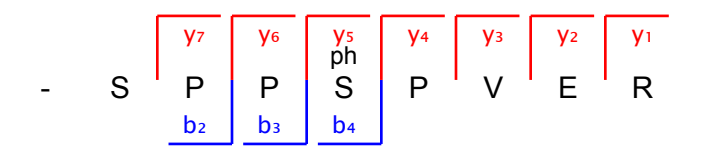

Raw file 20171215\_MaS\_33SR\_LMH\_phospho\_09 Scan 3957 Method FTMS; HCD Score 120.37 m/z 636.3 Gene names RNF219

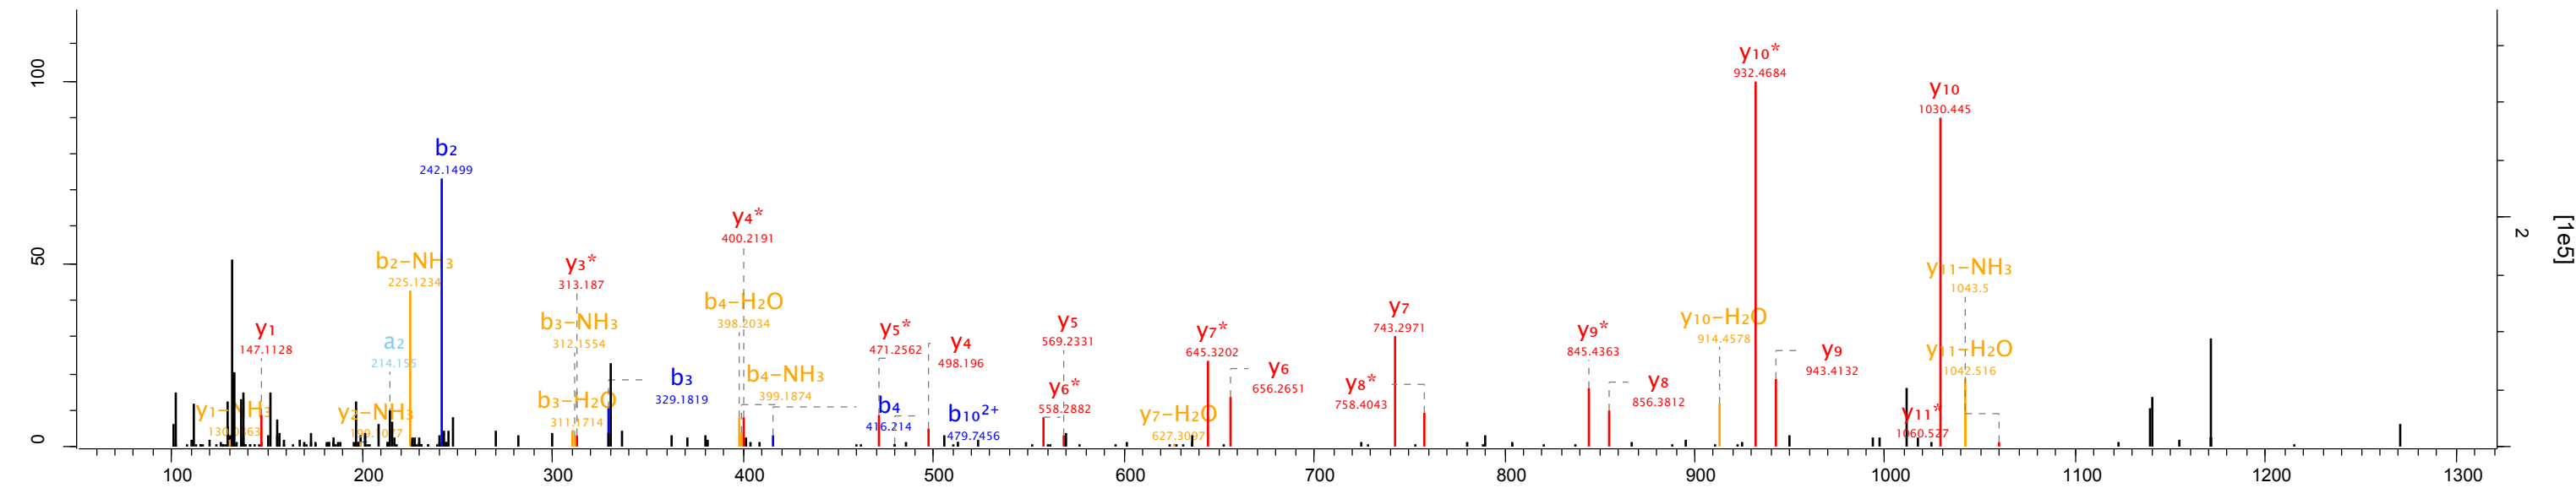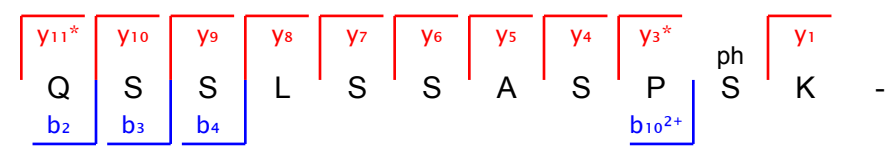

Raw file 20171215\_MaS\_33SR\_LMH\_phospho\_09 Scan 4817 Method FTMS; HCD Score 51.03 m/z 615.28 Gene names USP1

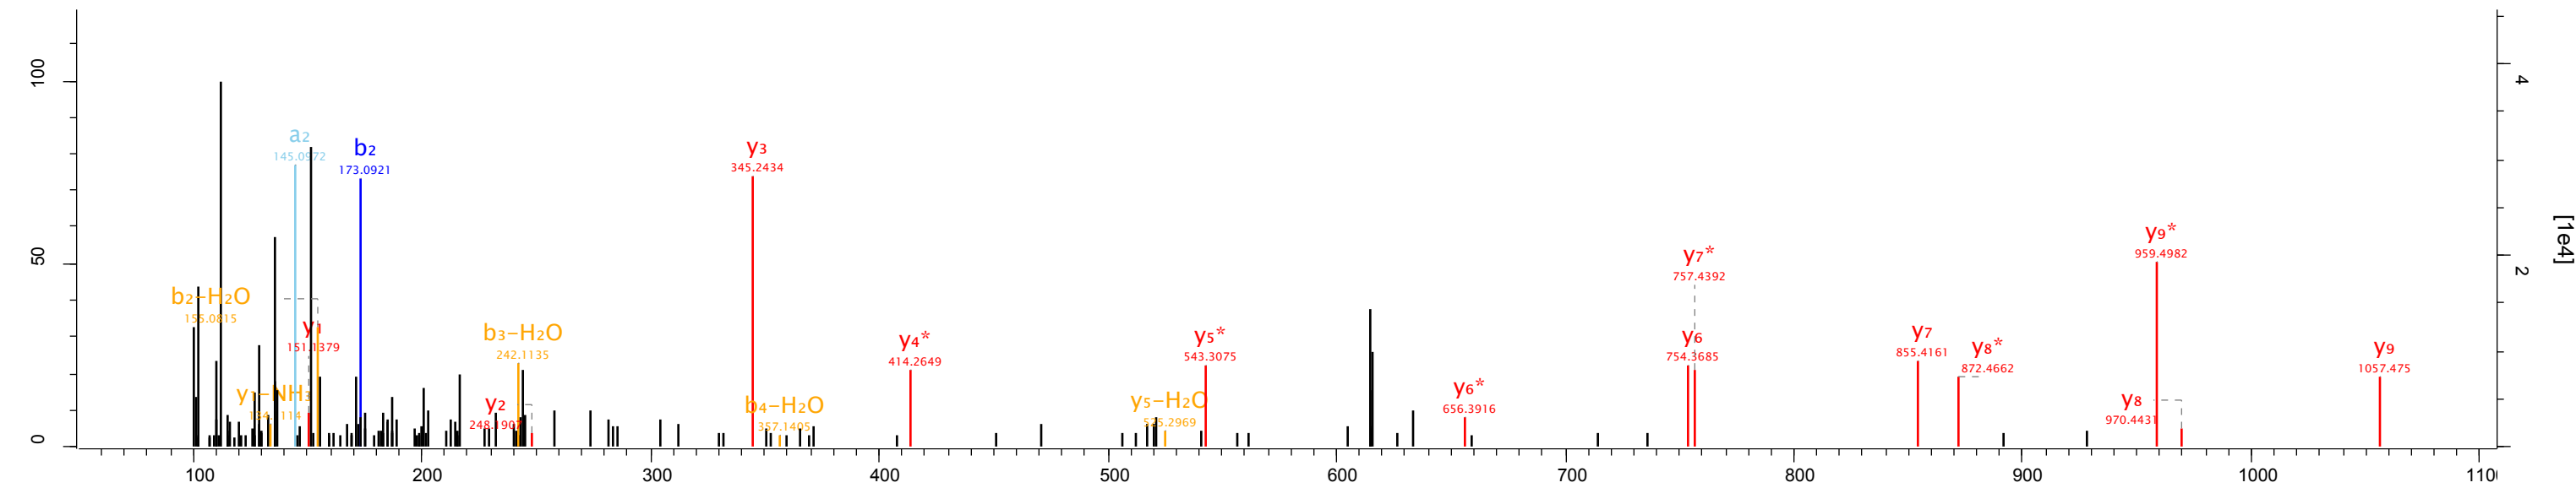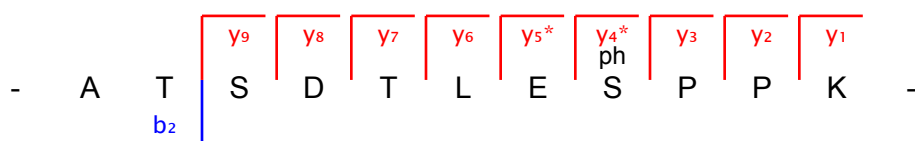

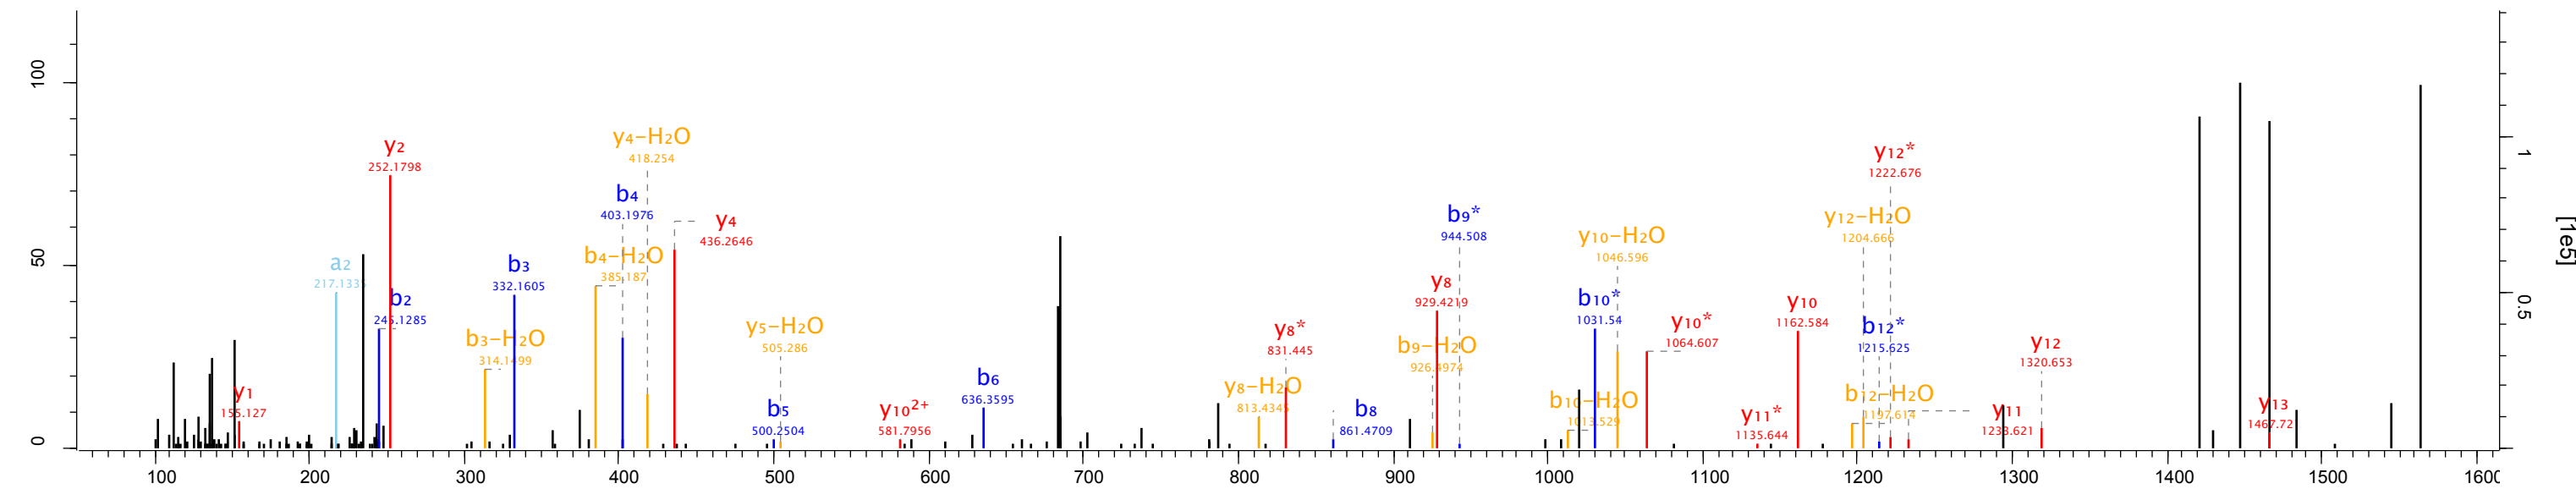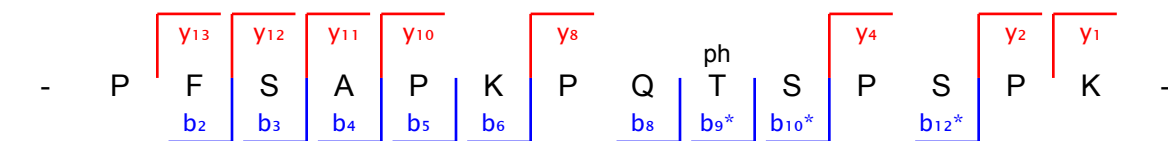

Raw file 20171215\_MaS\_33SR\_LMH\_phospho\_09 Scan 6517 Method FTMS; HCD Score 86.29 m/z 630.77 Gene names DDX20

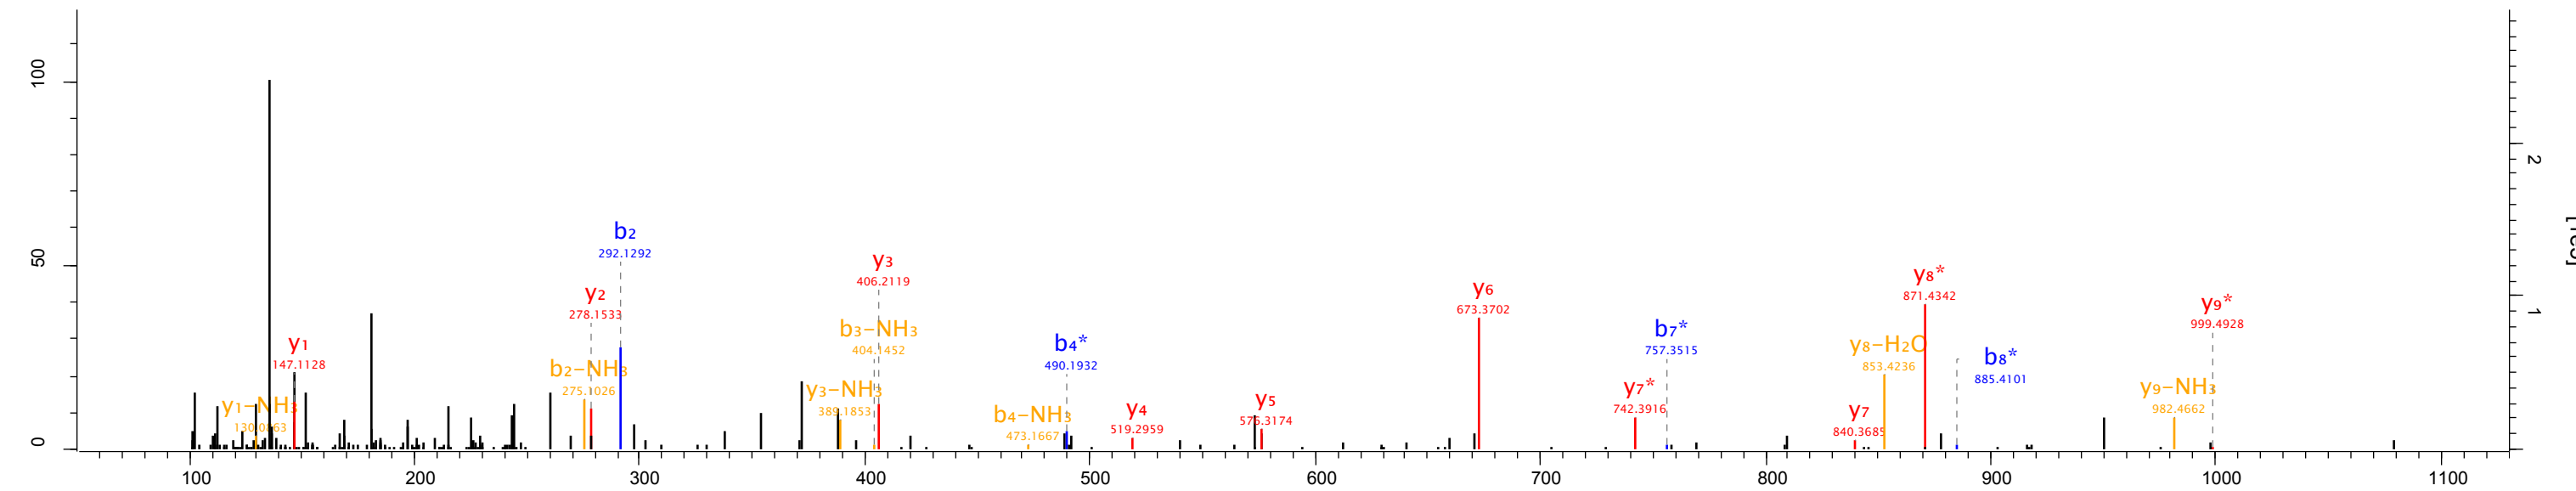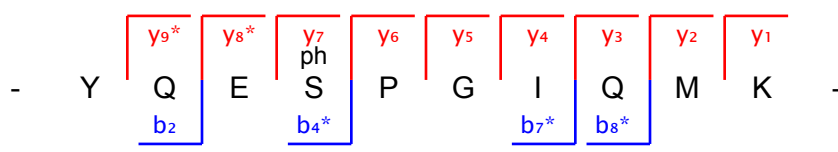

Raw file 20171215\_MaS\_33SR\_LMH\_phospho\_09 Scan 6677 Method FTMS; HCD Score 45.28 m/z 621.77 Gene names C2CD5

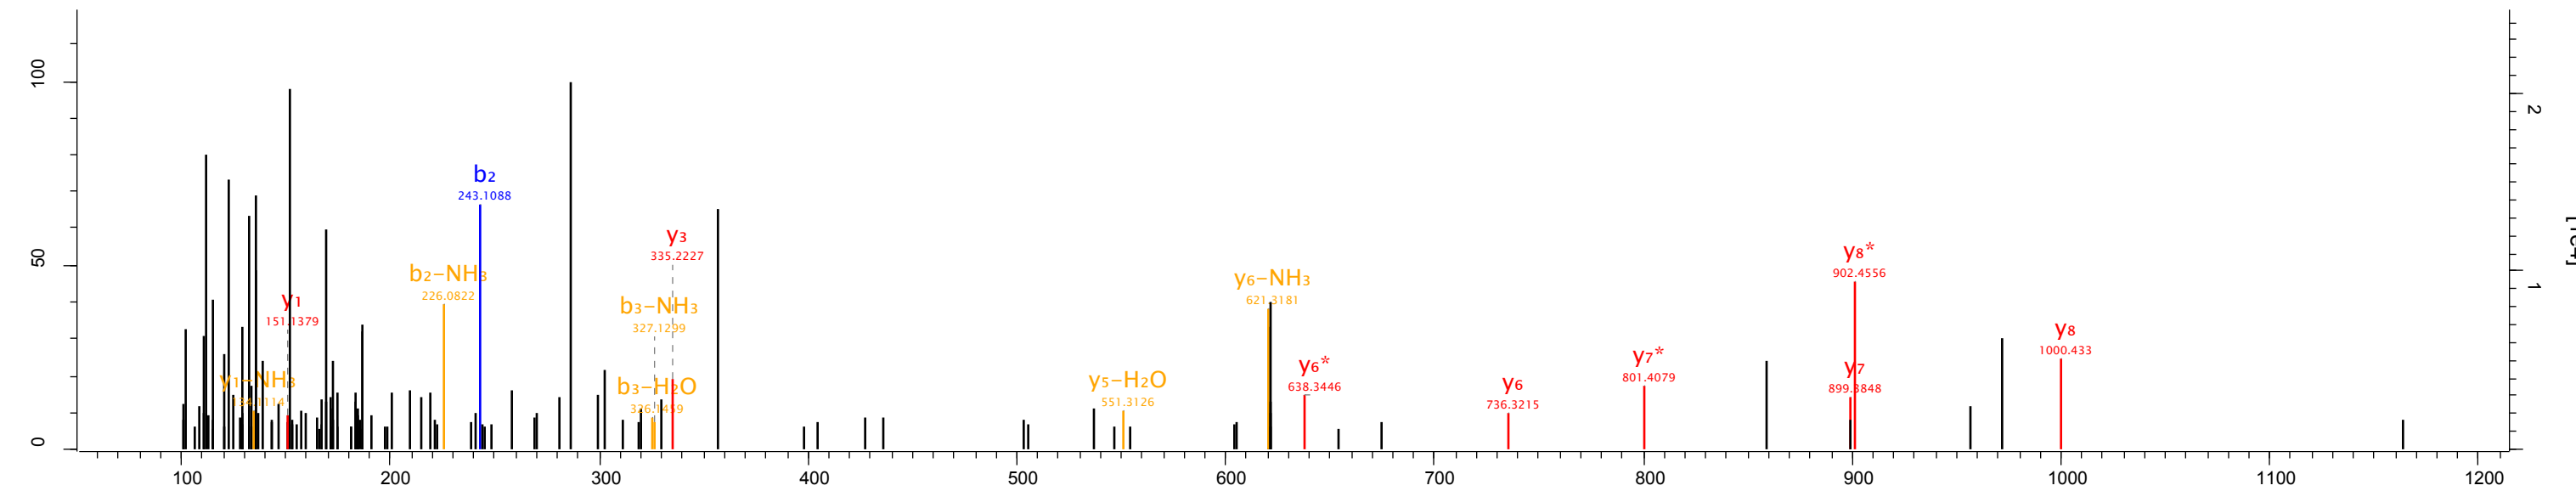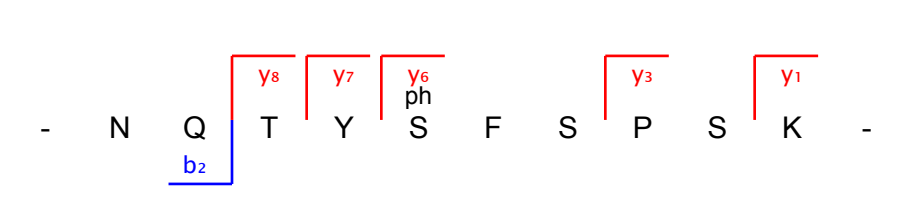



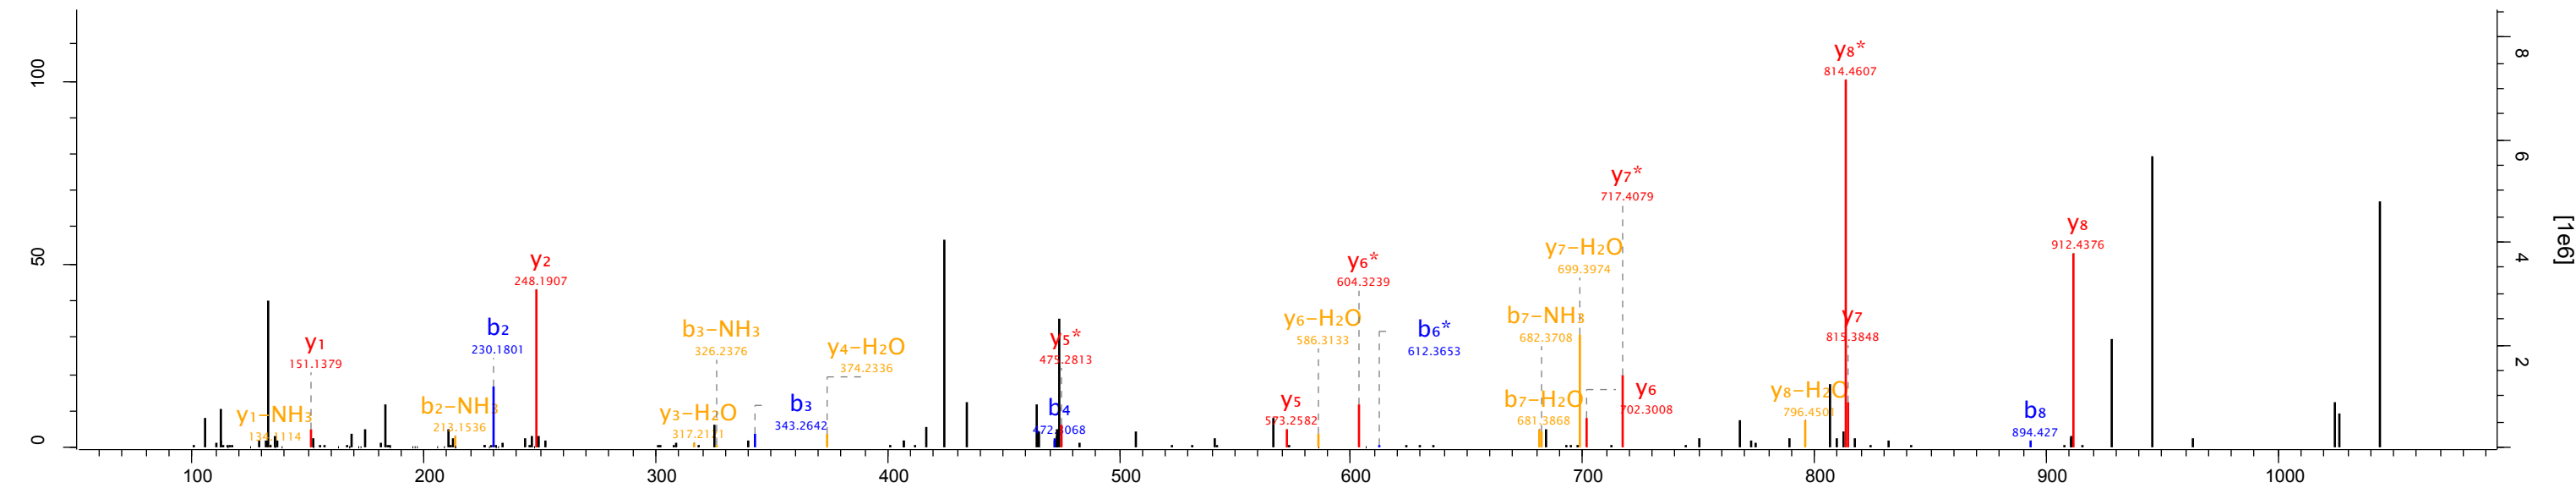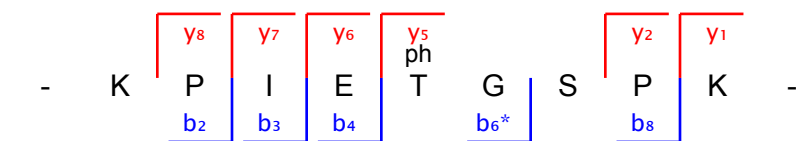

Raw file 20171215\_MaS\_33SR\_LMH\_phospho2\_01 Scan 2697 Method FTMS; HCD Score 60.49 m/z 853.77 Gene names DIS3L2

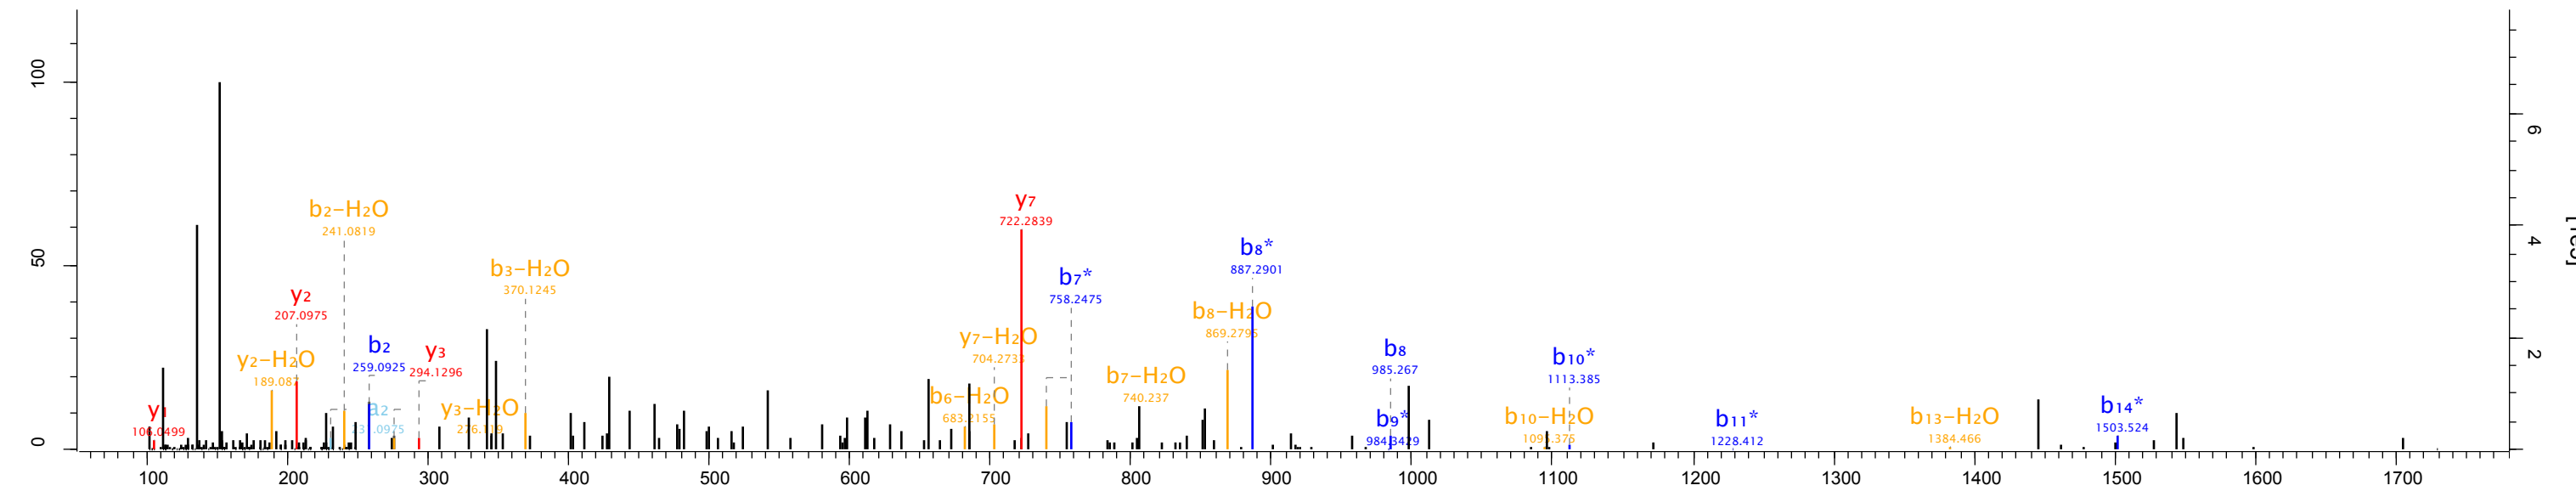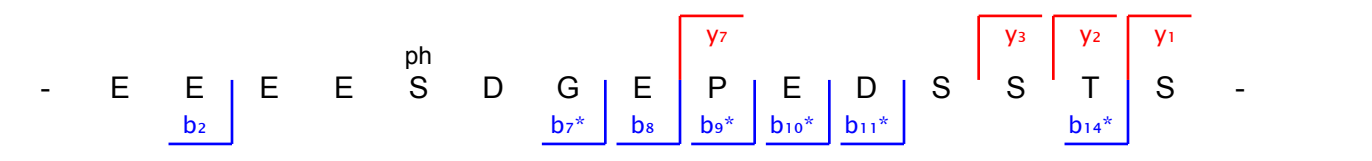

Raw file

20171215\_MaS\_33SR\_LMH\_phospho2\_01

| Scan | Method    | Score | m/z    | Gene names |
|------|-----------|-------|--------|------------|
| 2957 | FTMS; HCD | 82.35 | 609.94 | CLASP1     |

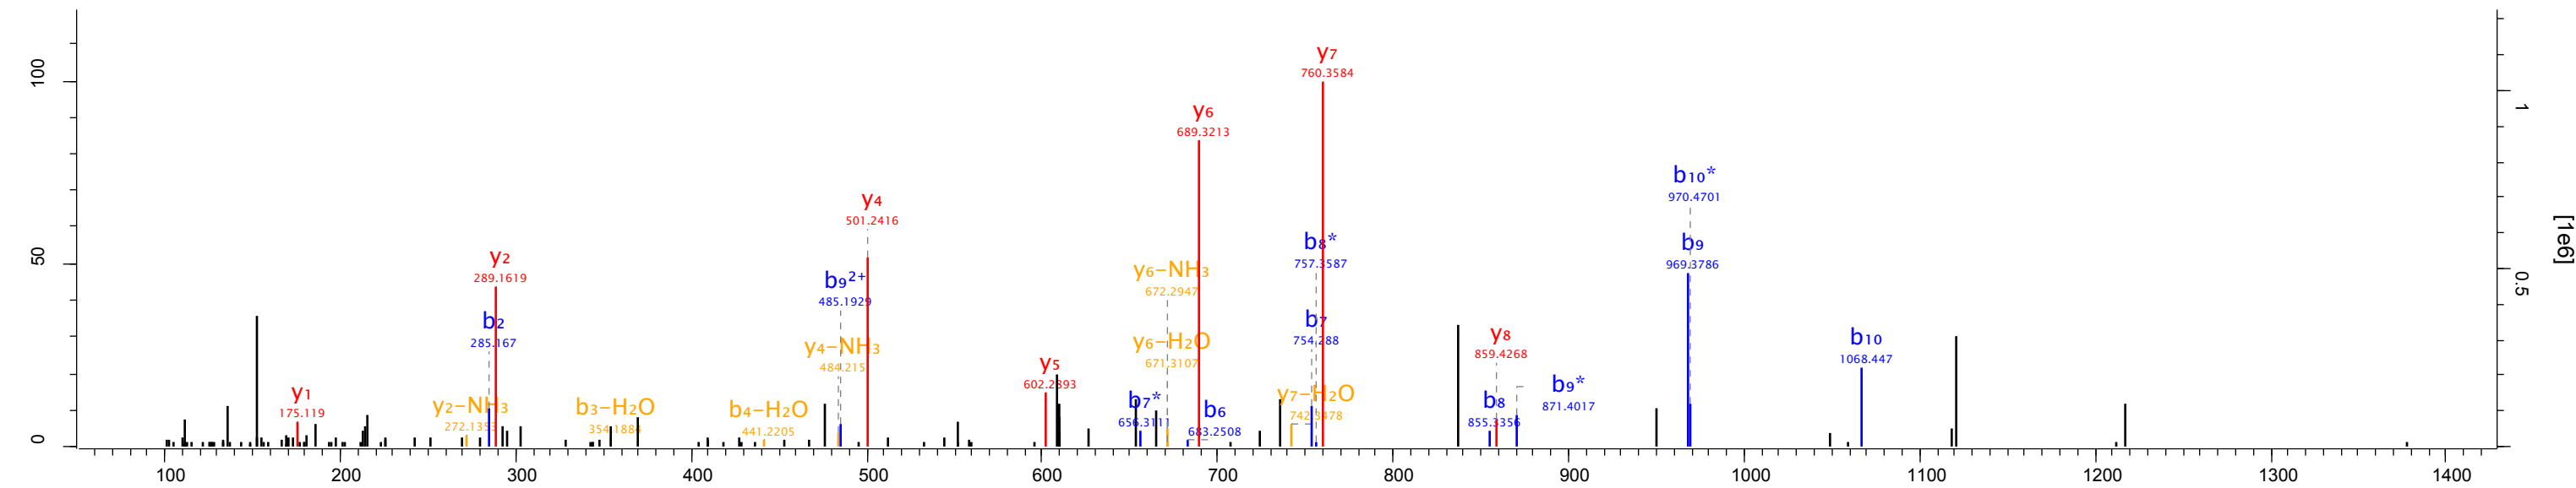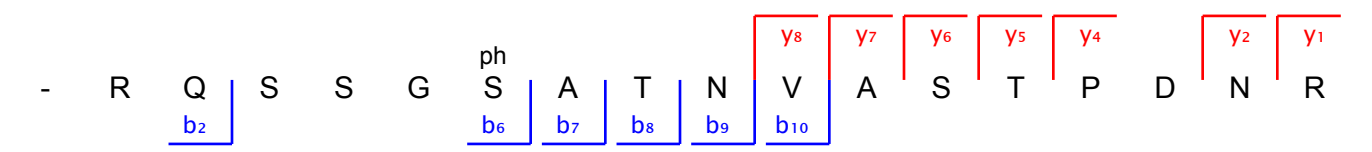

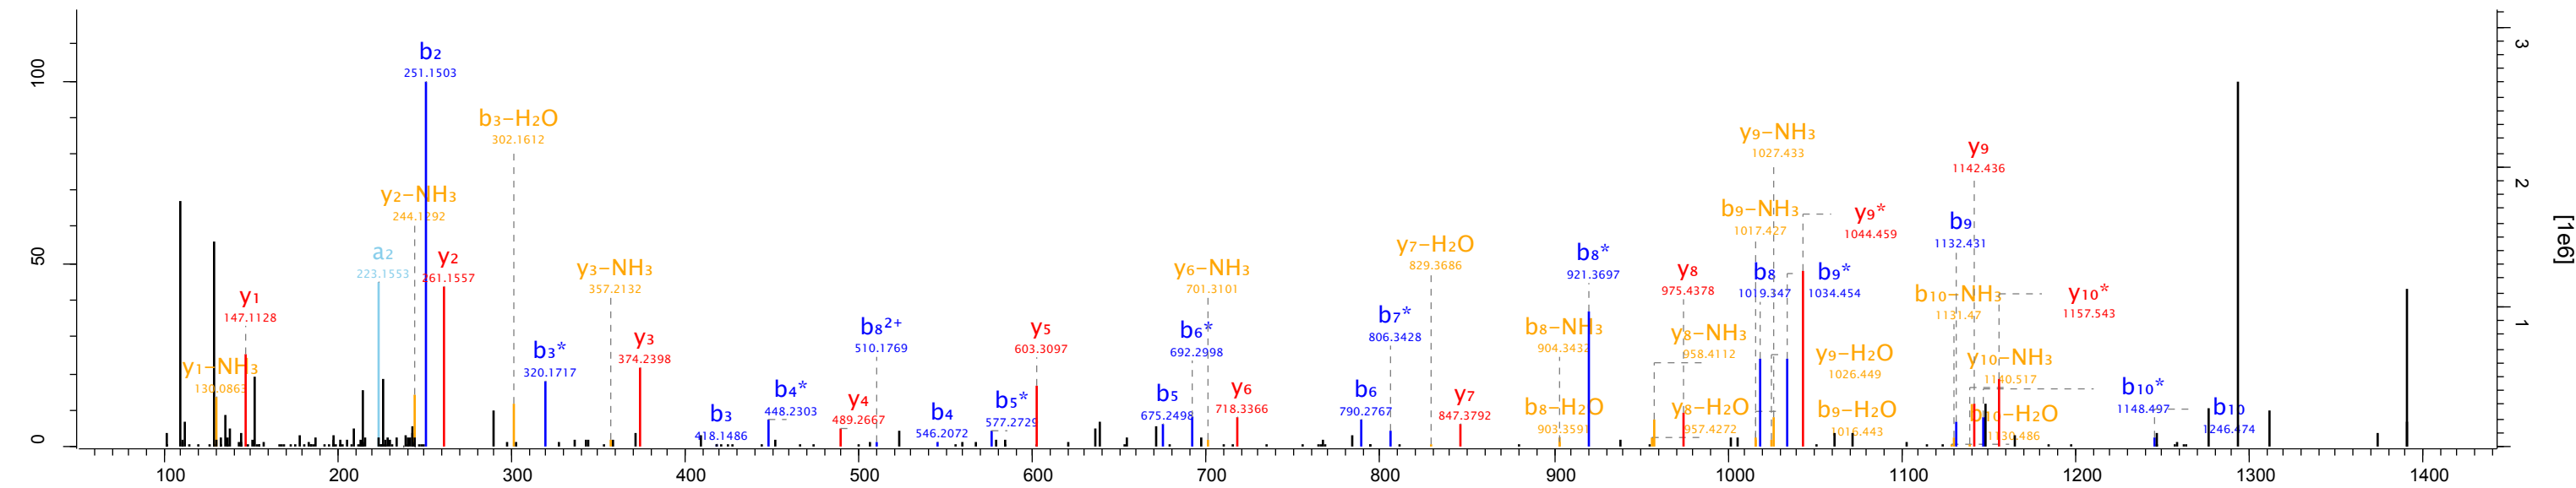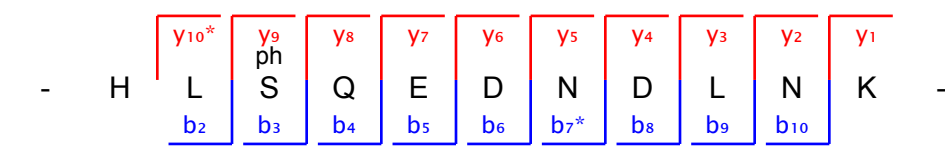

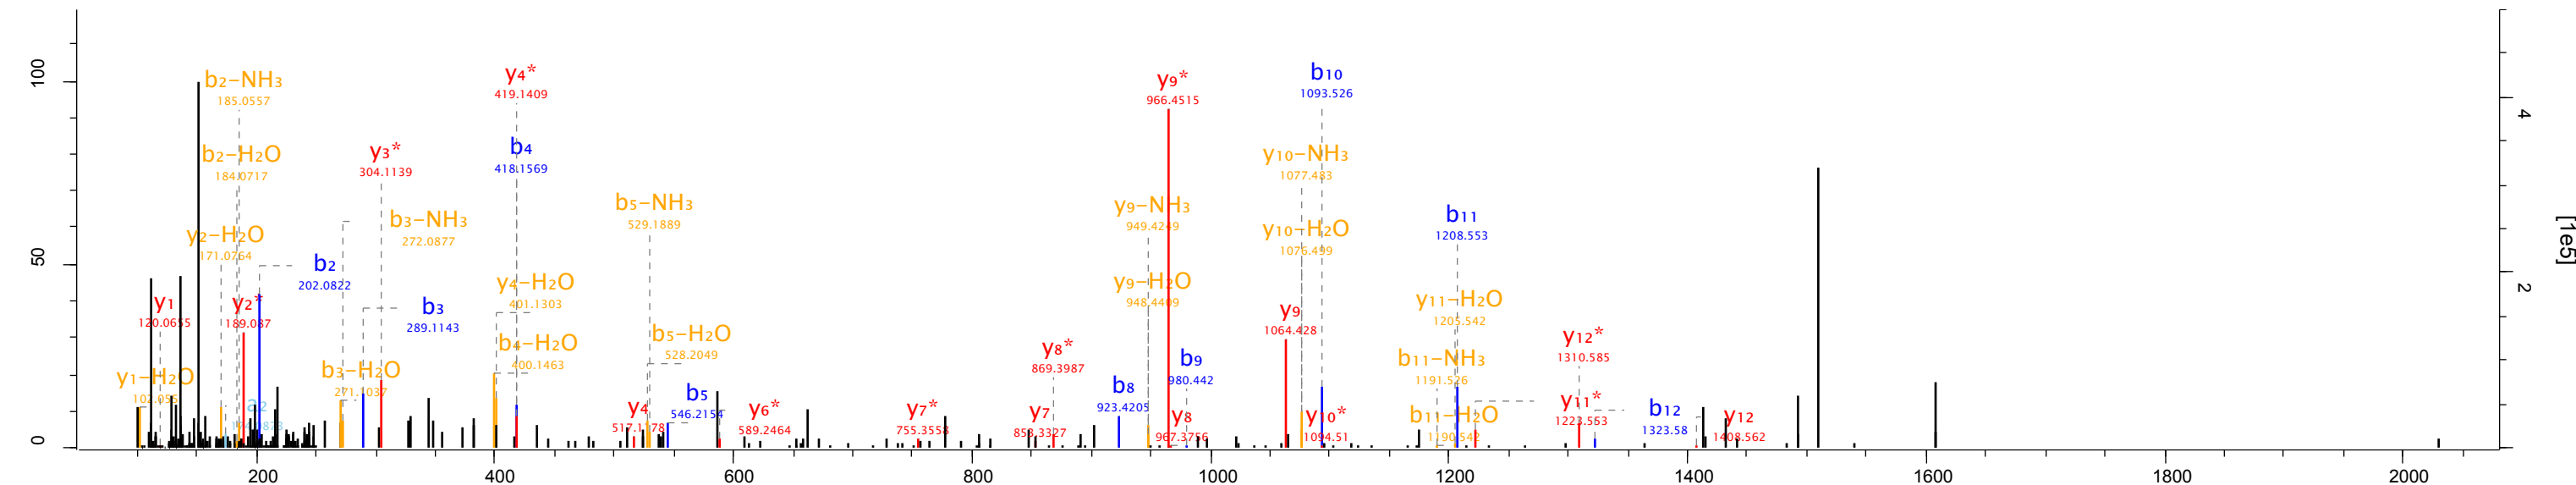

- S N S E Q P N R G L D D S T -

b<sub>2</sub>
b<sub>3</sub>
b<sub>4</sub>
b<sub>5</sub>
b<sub>8</sub>
b<sub>9</sub>
b<sub>10</sub>
b<sub>11</sub>
b<sub>12</sub>

y<sub>12</sub>
y<sub>11</sub>\*
y<sub>10</sub>\*
y<sub>9</sub>
y<sub>8</sub>
y<sub>7</sub>
y<sub>6</sub>\*
y<sub>4</sub>
y<sub>3</sub>\*
y<sub>2</sub>\*
y<sub>1</sub>

ph  
S

Raw file 20171215\_MaS\_33SR\_LMH\_phospho2\_01 Scan 3797 Method FTMS; HCD Score 272.06 m/z 876.4 Gene names NUP214

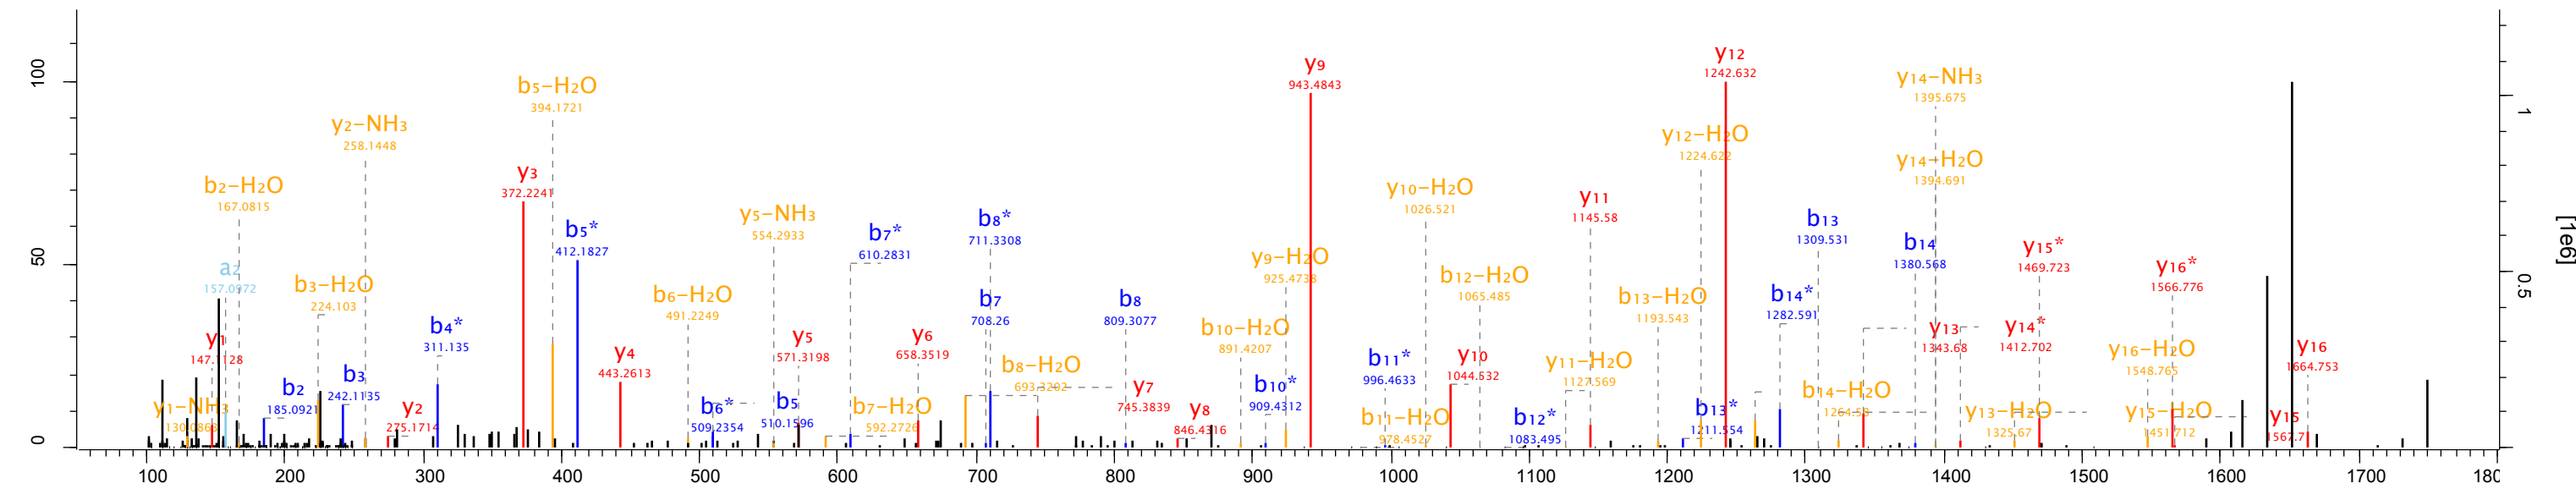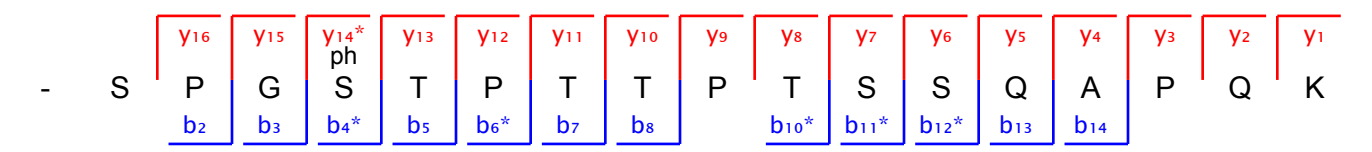

Raw file Scan Method Score m/z Gene names

20171215\_MaS\_33SR\_LMH\_phospho2\_01 5197 FTMS; HCD 59.98 838.86 SH3BP5

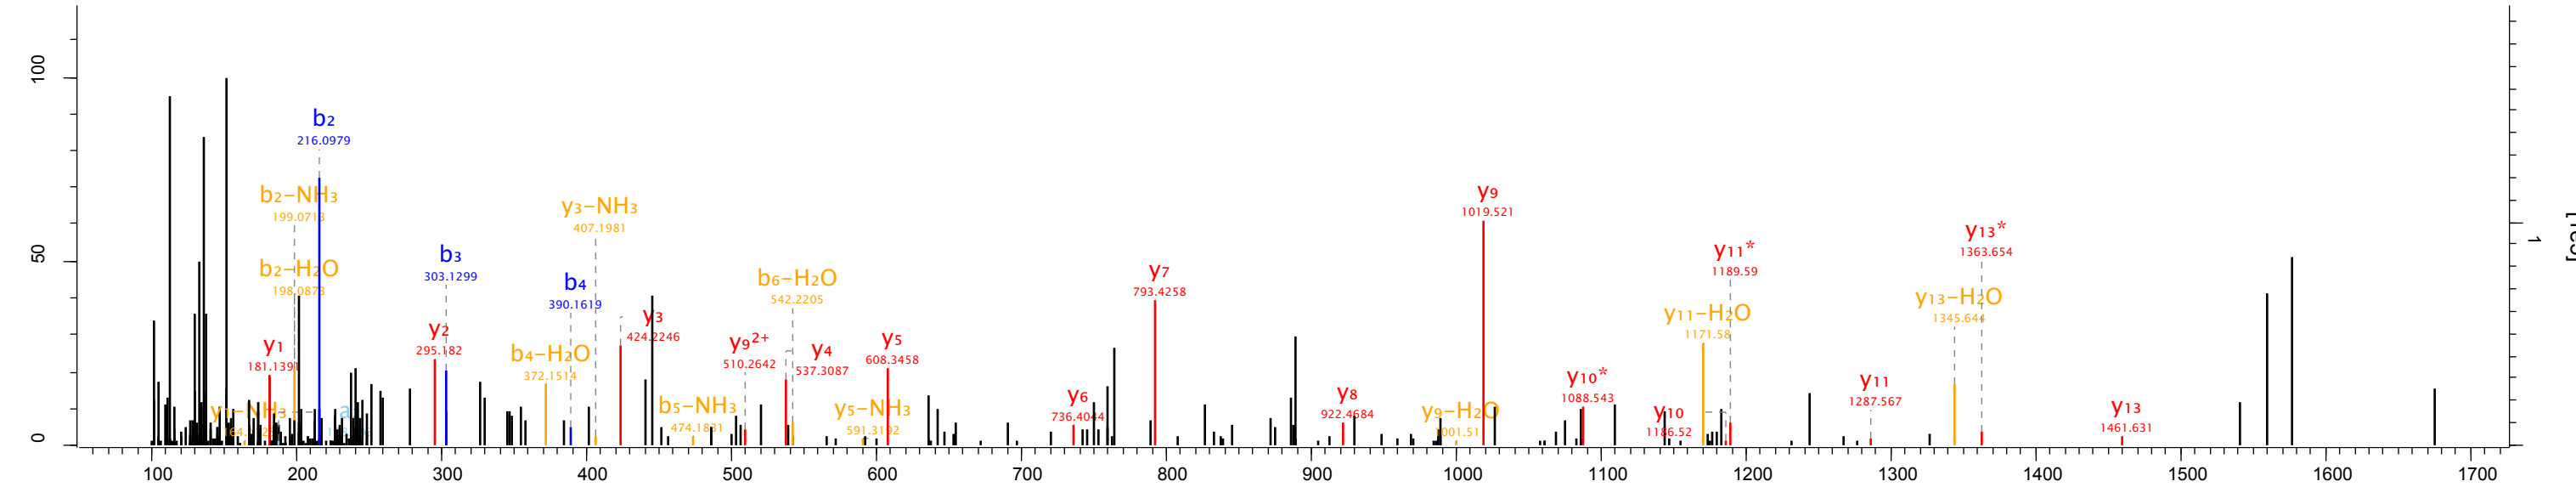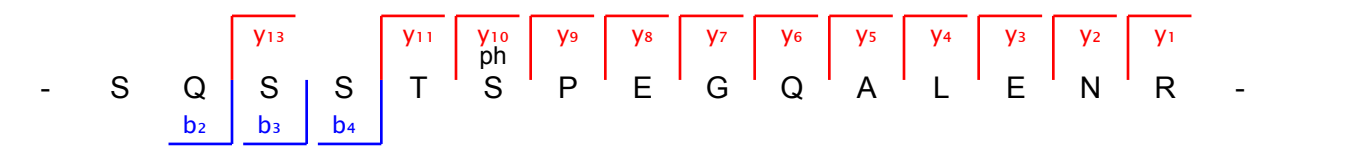

Raw file

20171215\_MaS\_33SR\_LMH\_phospho2\_01

| Scan | Method    | Score | m/z    | Gene names |
|------|-----------|-------|--------|------------|
| 5357 | FTMS; HCD | 50.4  | 750.36 | DYNC1L12   |

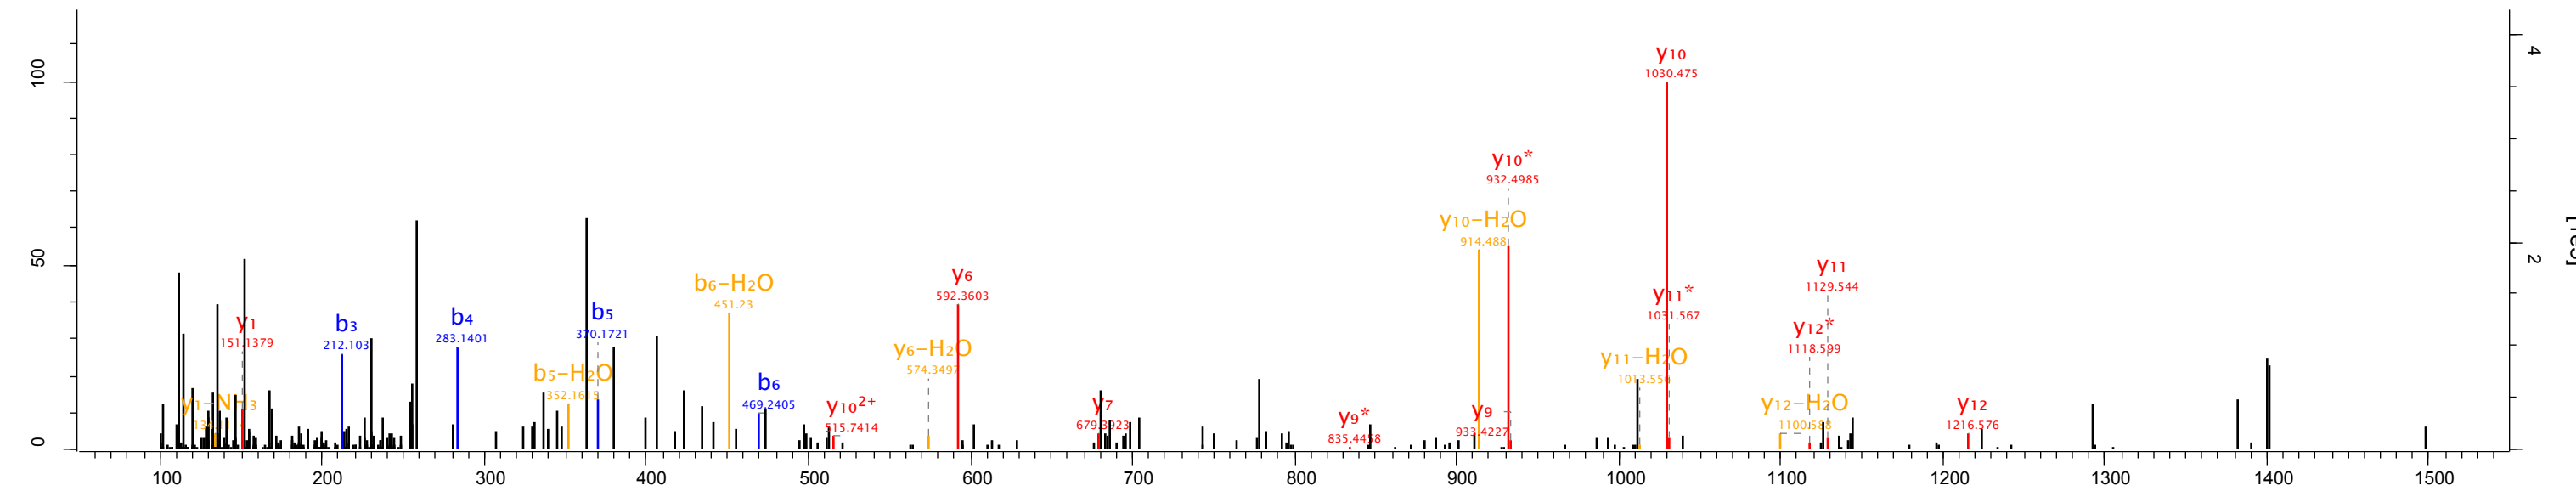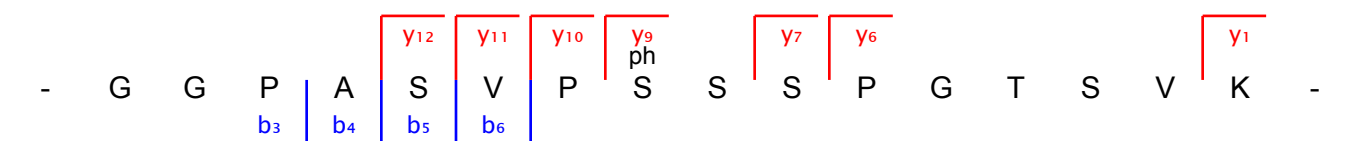



Raw file: 20171215\_MaS\_33SR\_LMH\_phospho2\_01  
 Scan: 6507 Method: FTMS; HCD Score: 188.39 m/z: 661.31 Gene names: PPA2

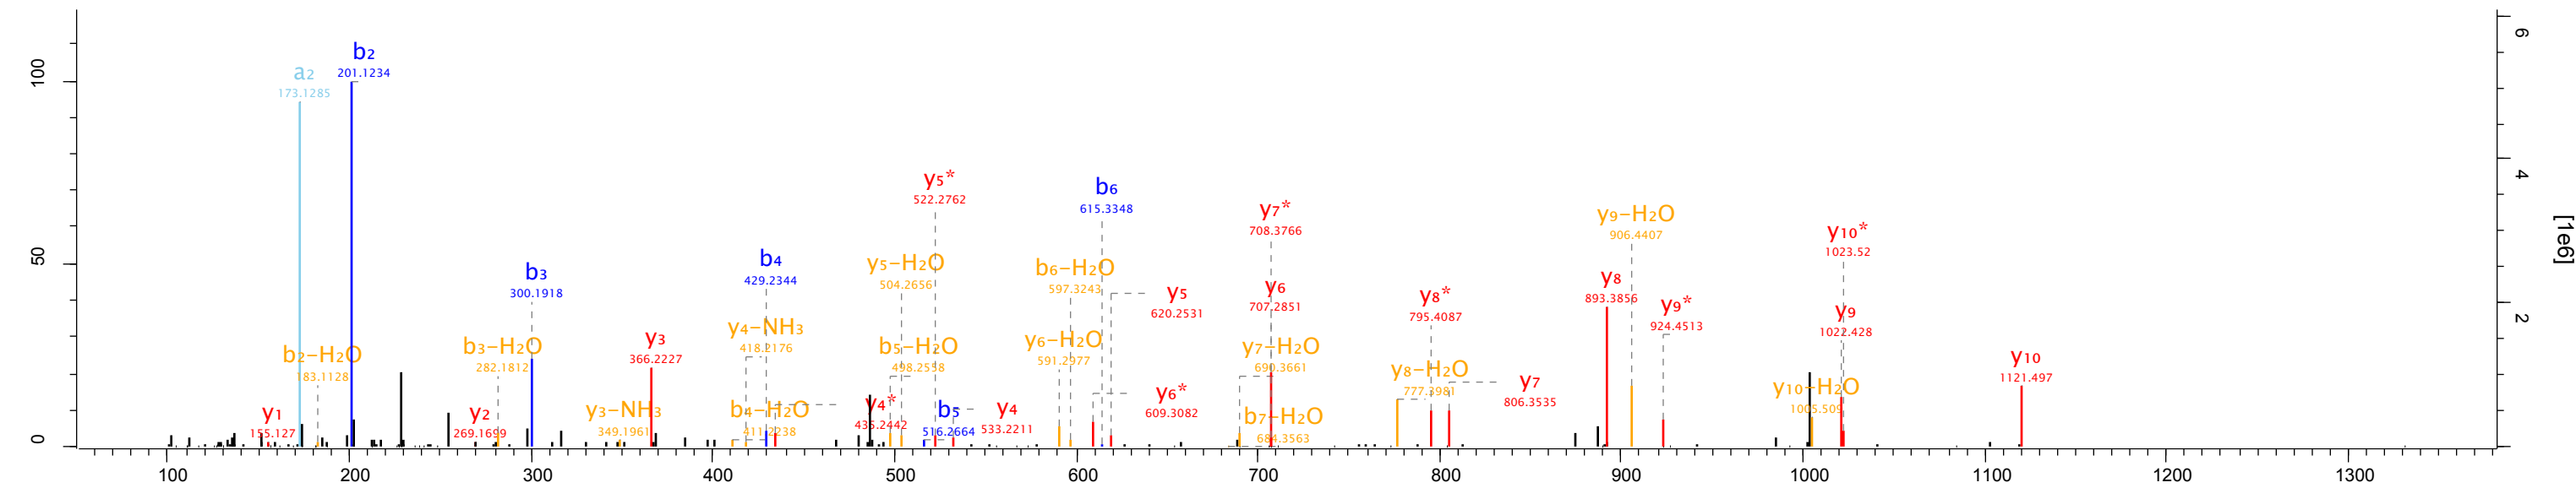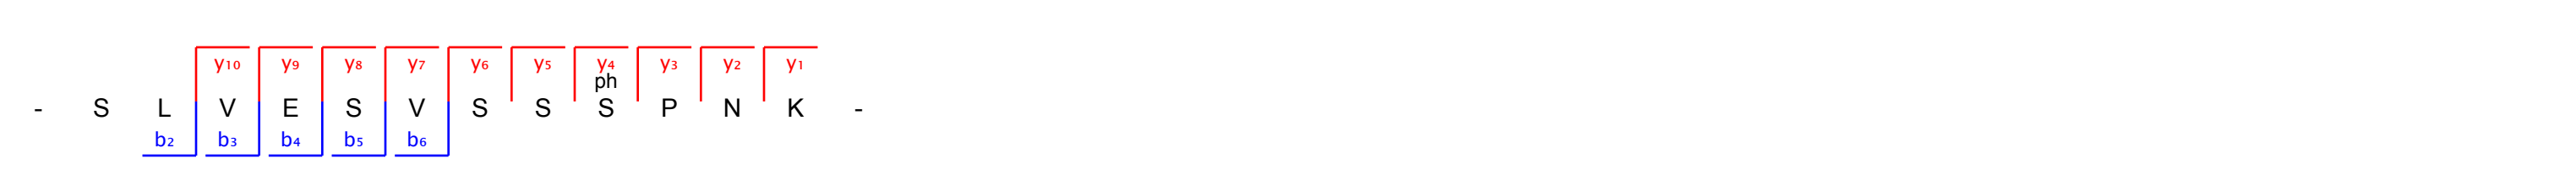

Raw file 20171215\_MaS\_33SR\_LMH\_phospho2\_01 Scan 7537 Method FTMS; HCD Score 130.01 m/z 923.92 Gene names FRMD4B

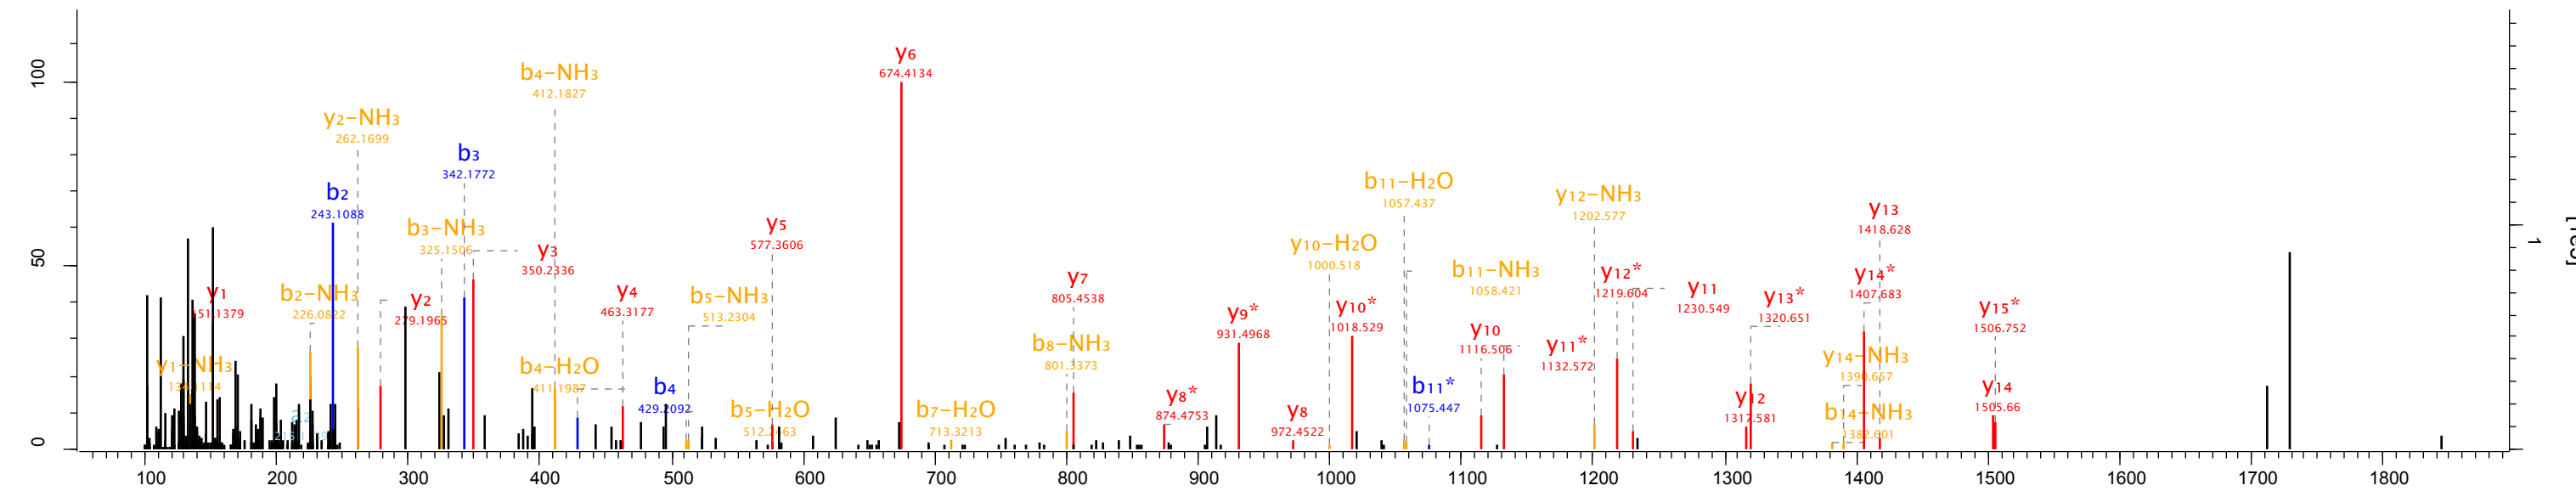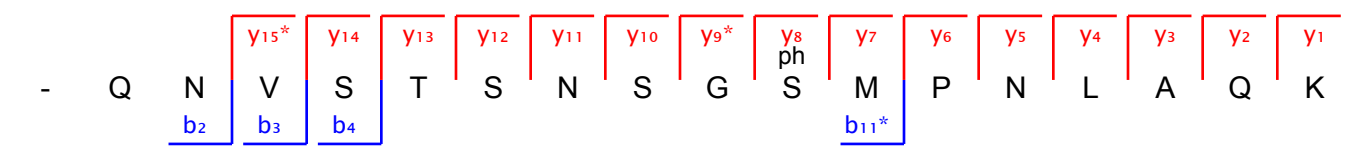

Raw file 20171215\_MaS\_33SR\_LMH\_phospho2\_01 Scan 8917 Method FTMS; HCD Score 57.53 m/z 1195.16 Gene names ILF3

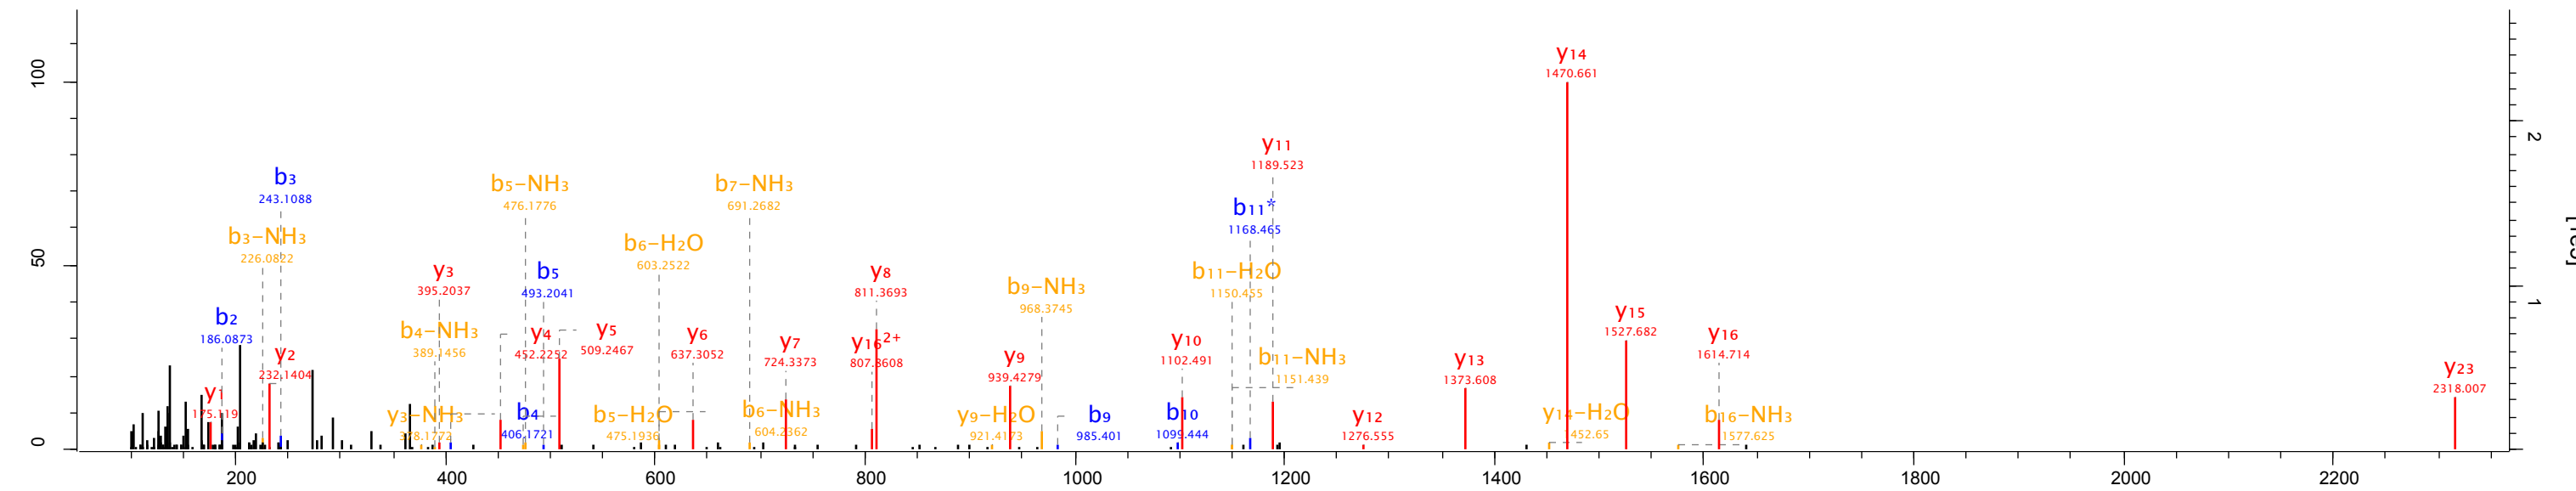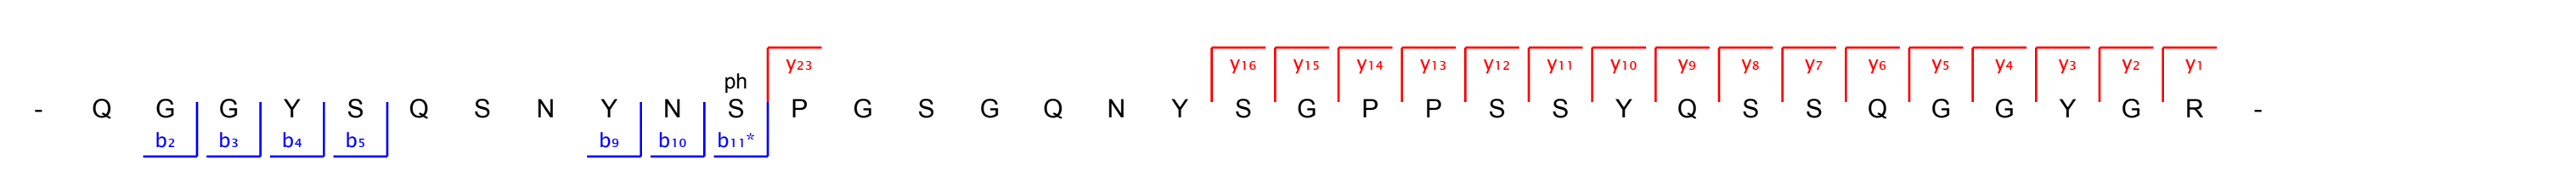

Raw file: 20171215\_MaS\_33SR\_LMH\_phospho2\_01  
 Scan: 8937 Method: FTMS; HCD Score: 93.57 m/z: 1314.25 Gene names: SCAF11

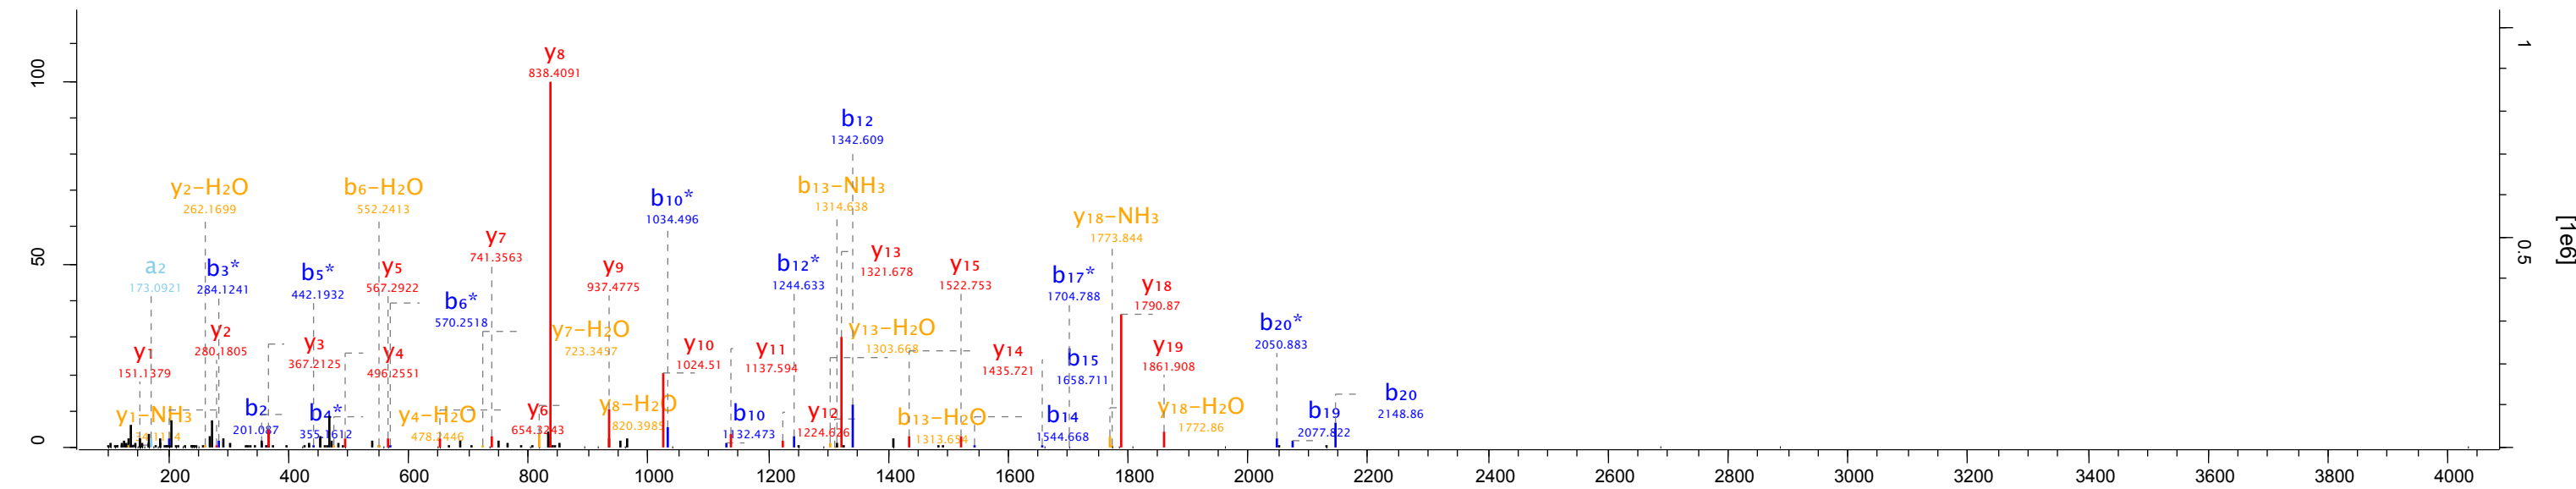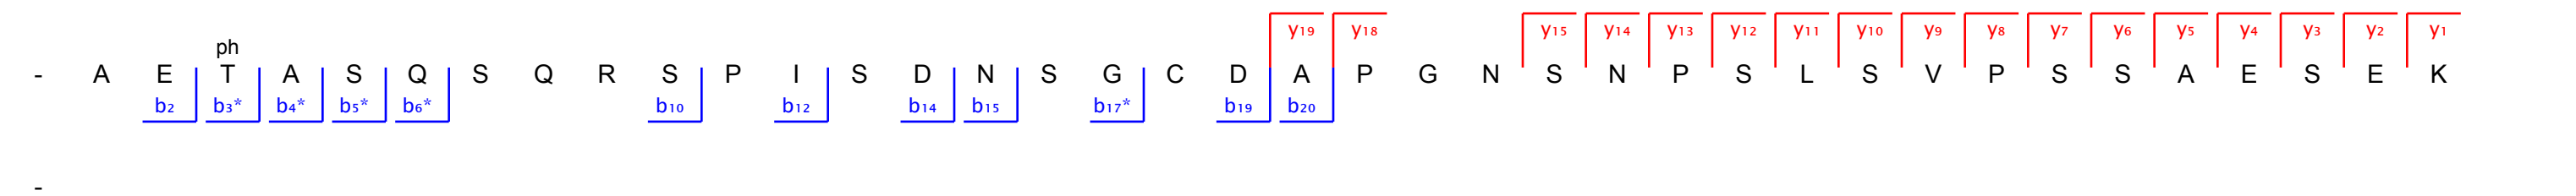

Raw file 20171215\_MaS\_33SR\_LMH\_phospho2\_02 Scan 10117 Method FTMS; HCD Score 61.42 m/z 652.81 Gene names BRCA1

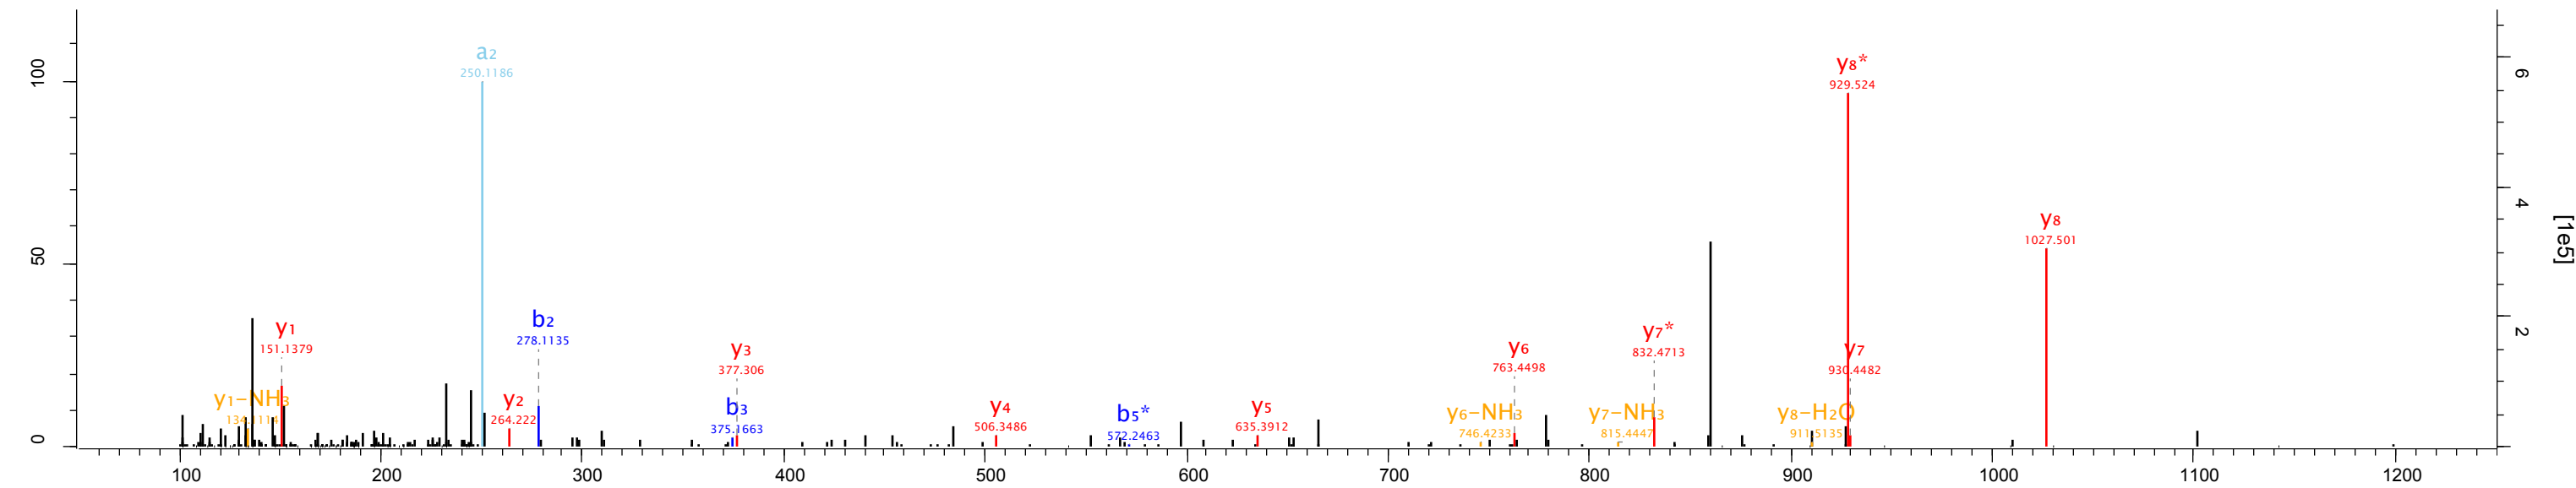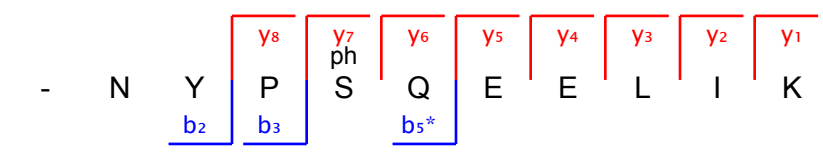

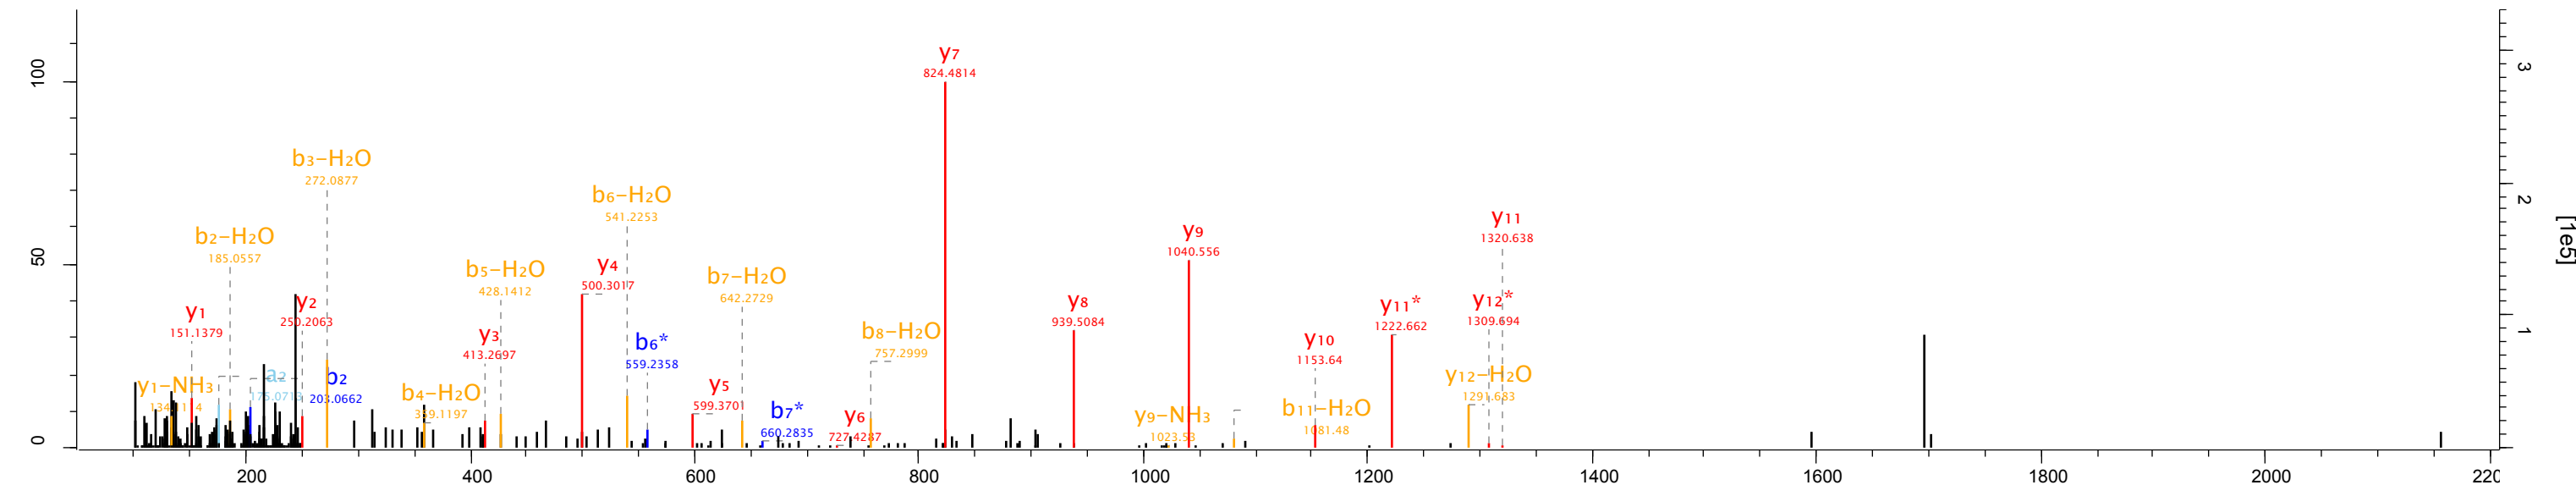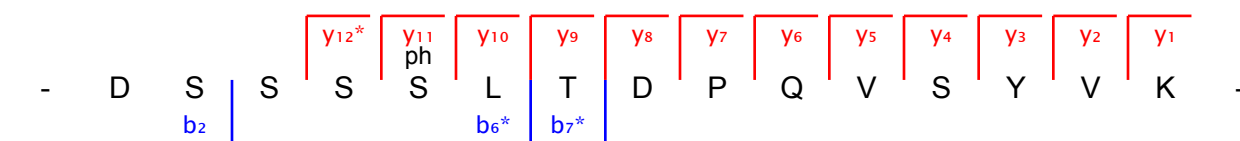

Raw file 20171215\_MaS\_33SR\_LMH\_phospho2\_02 Scan 10497 Method FTMS; HCD Score 135.43 m/z 810.39 Gene names CDCA8

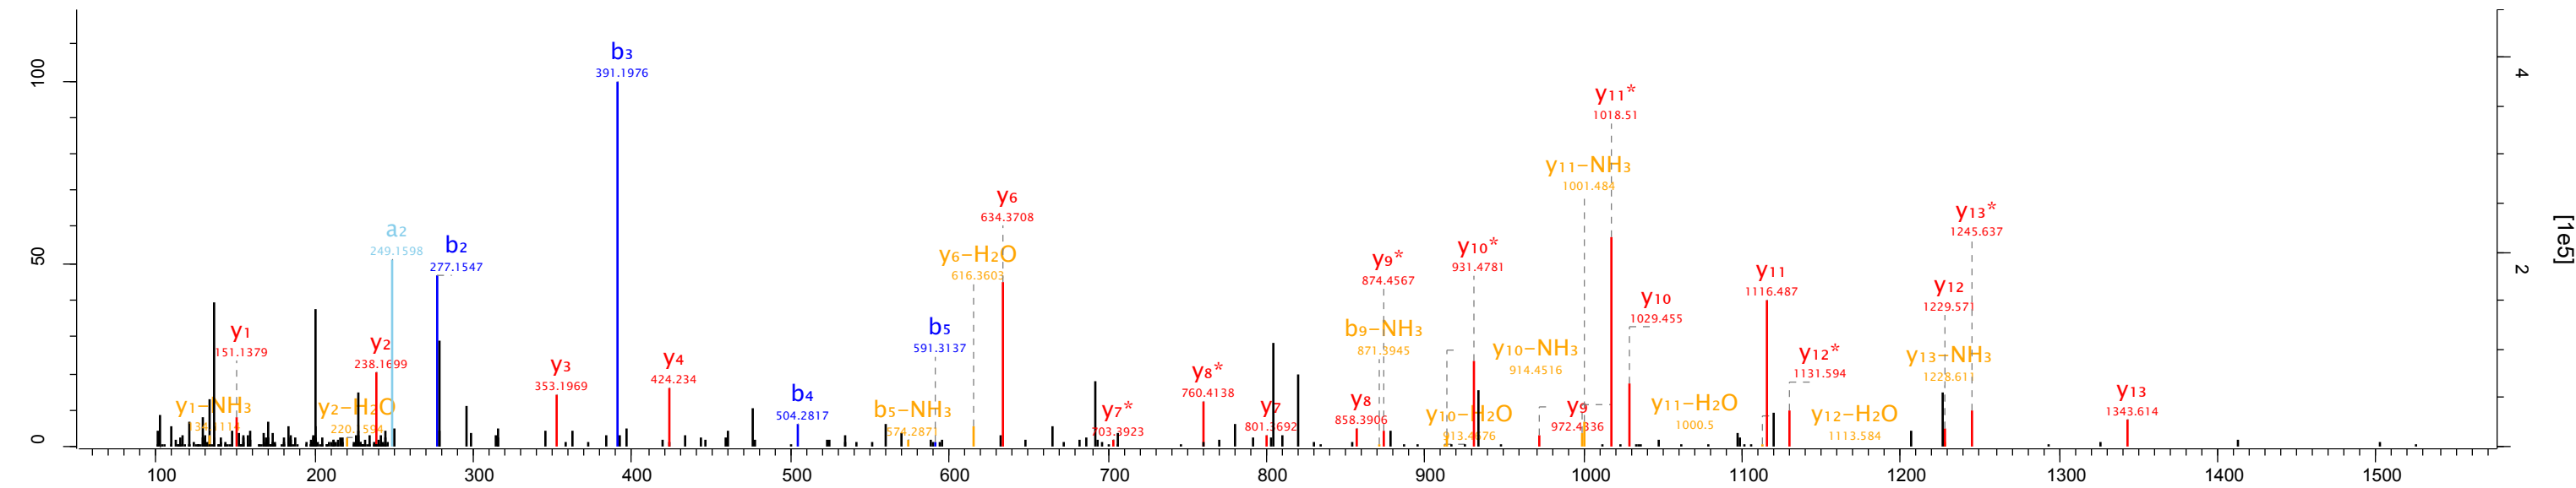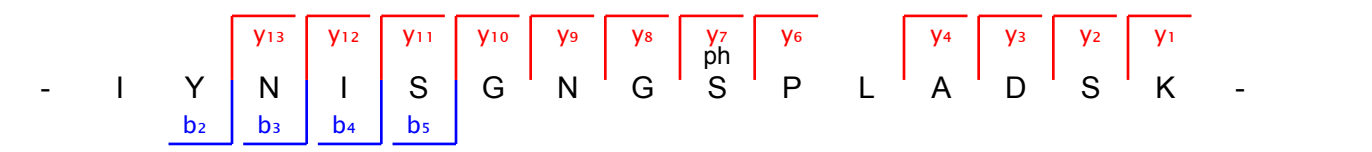

Raw file 20171215\_MaS\_33SR\_LMH\_phospho2\_02 Scan 10947 Method FTMS; HCD Score 192.58 m/z 969.41 Gene names ATXN7L3

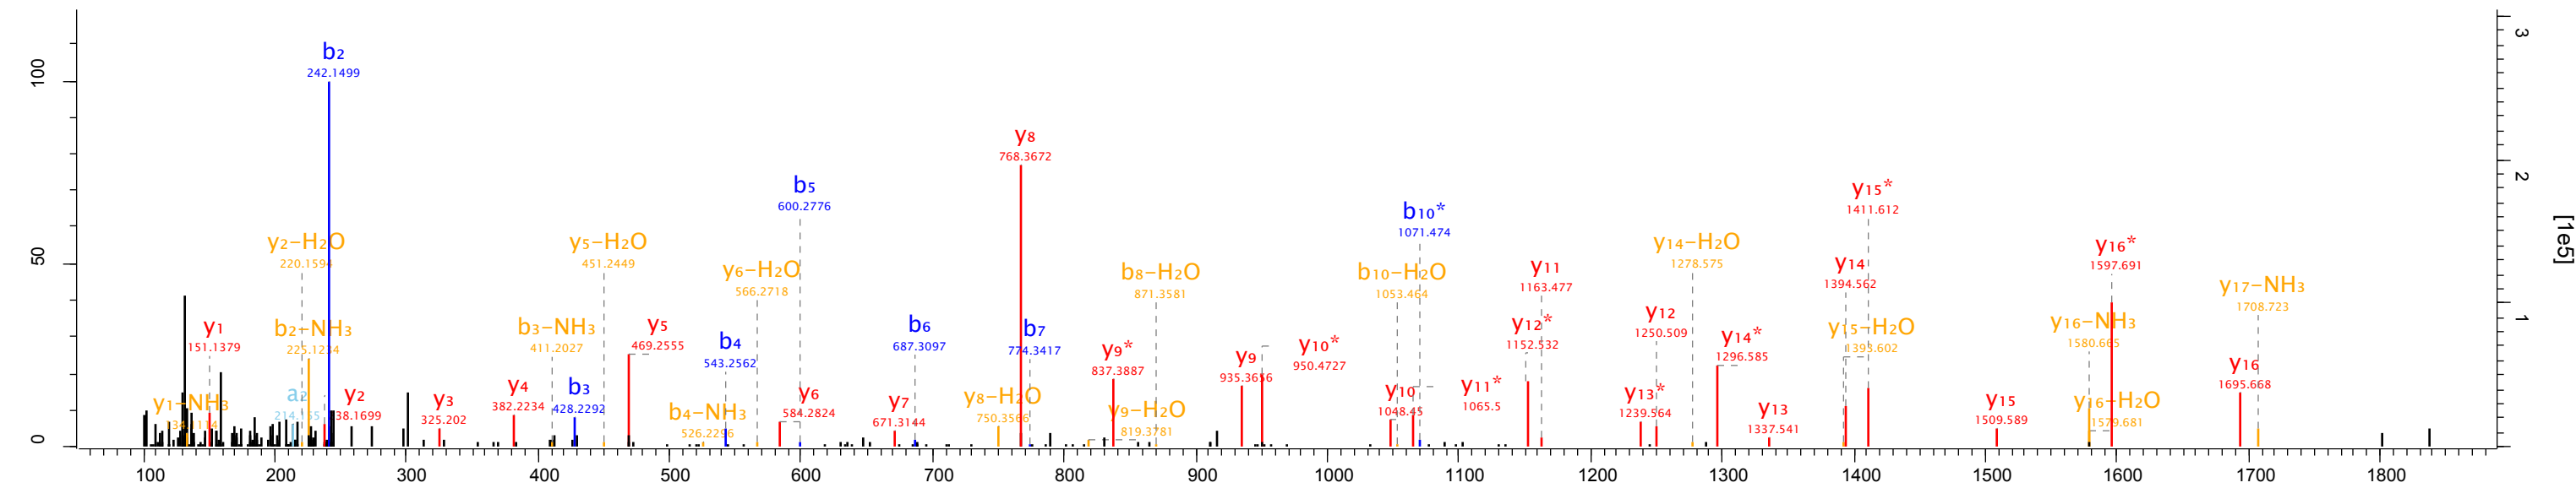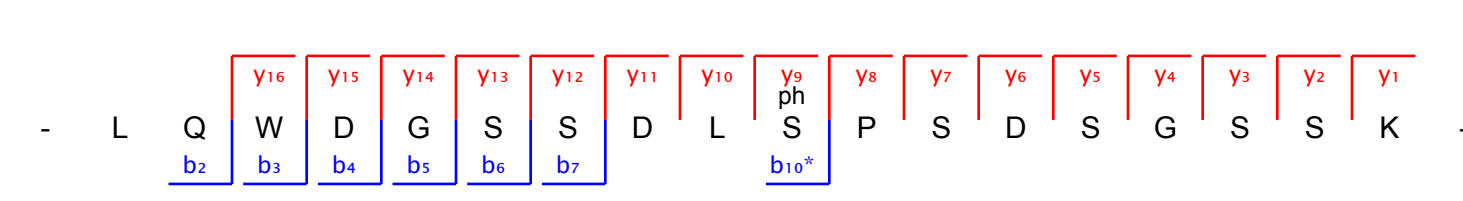



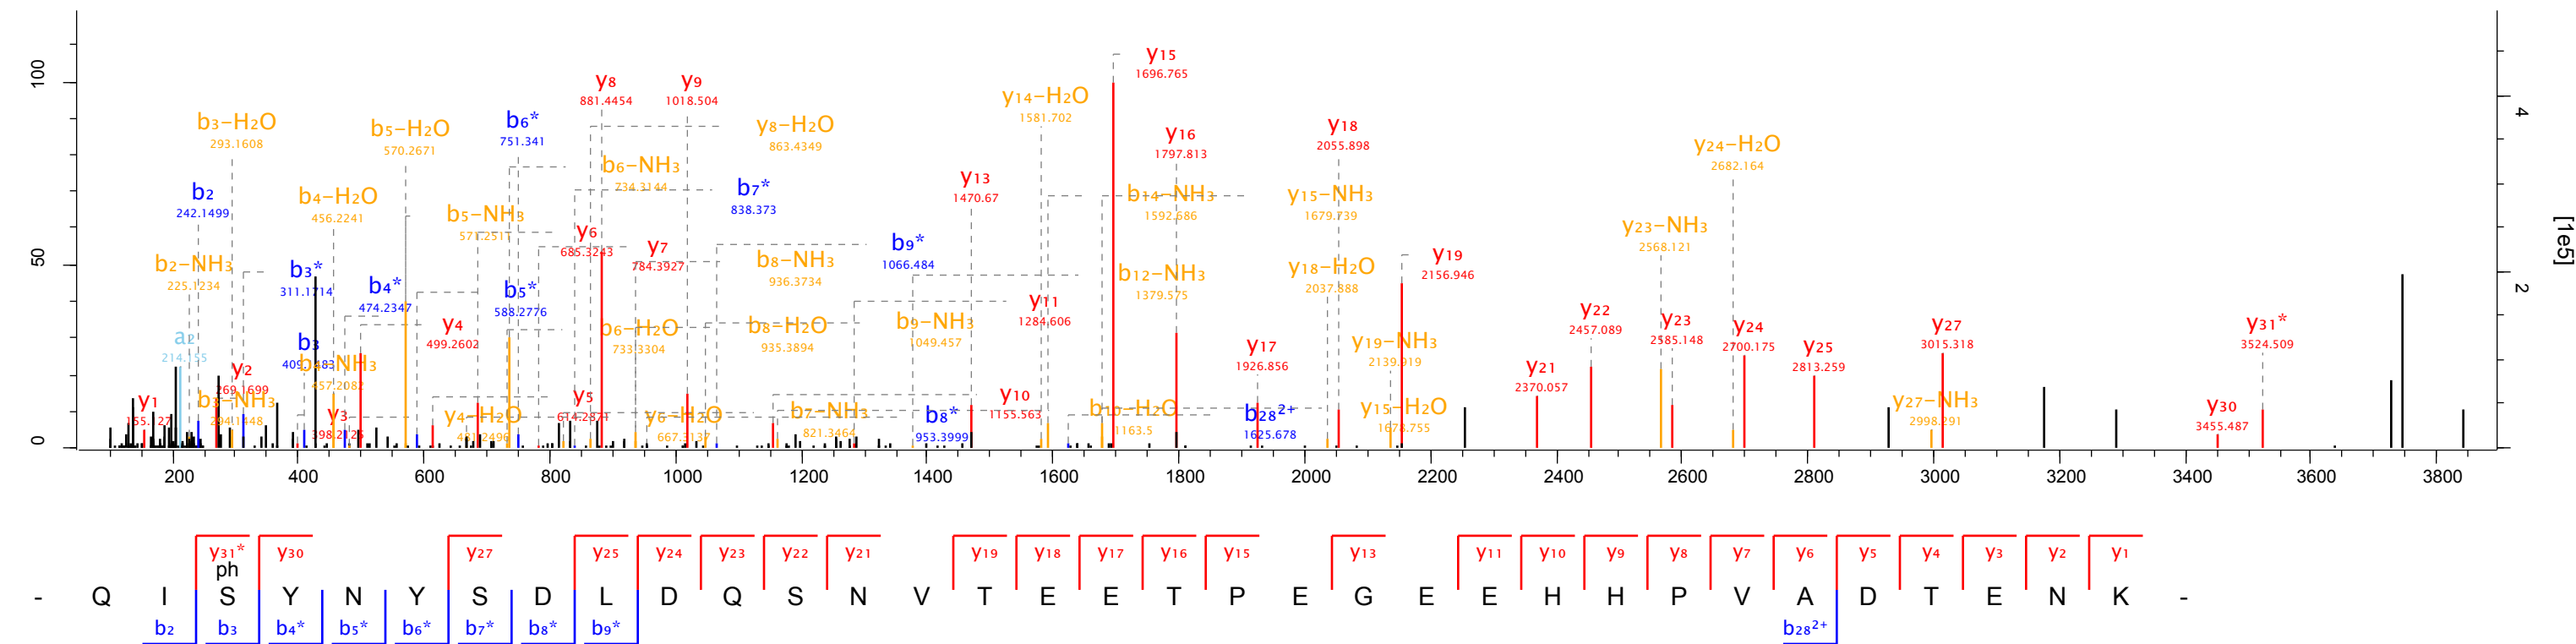

Raw file 20171215\_MaS\_33SR\_LMH\_phospho2\_02 Scan 11597 Method FTMS; HCD Score 61.11 m/z 572.77 Gene names LYSMD2

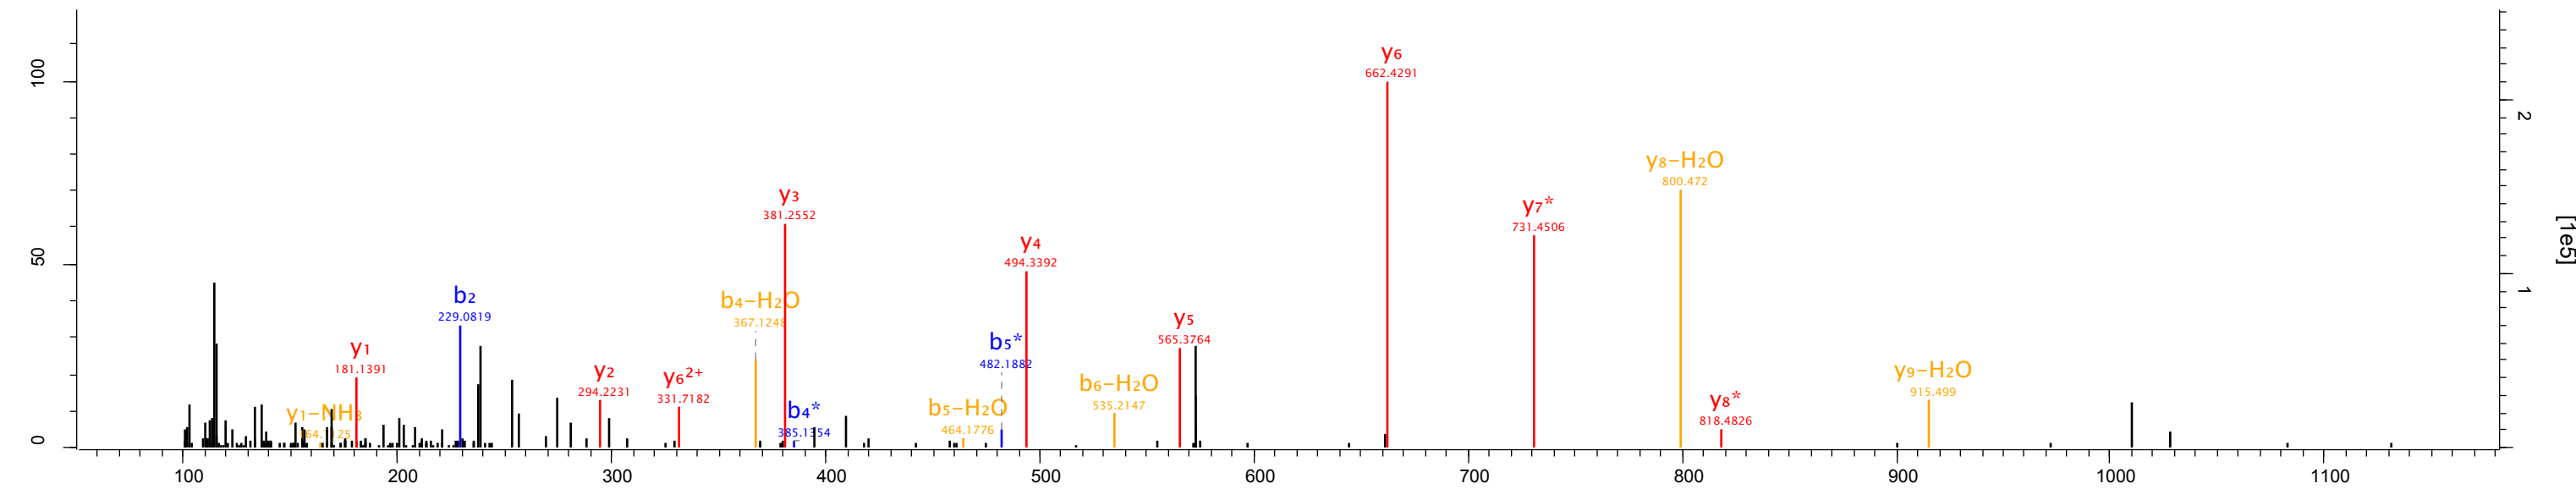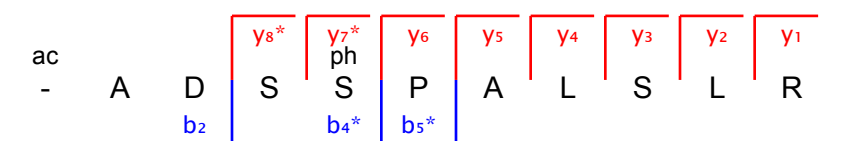

Raw file 20171215\_MaS\_33SR\_LMH\_phospho2\_02 Scan 11787 Method FTMS; HCD Score 146.63 m/z 928.07 Gene names PHF6

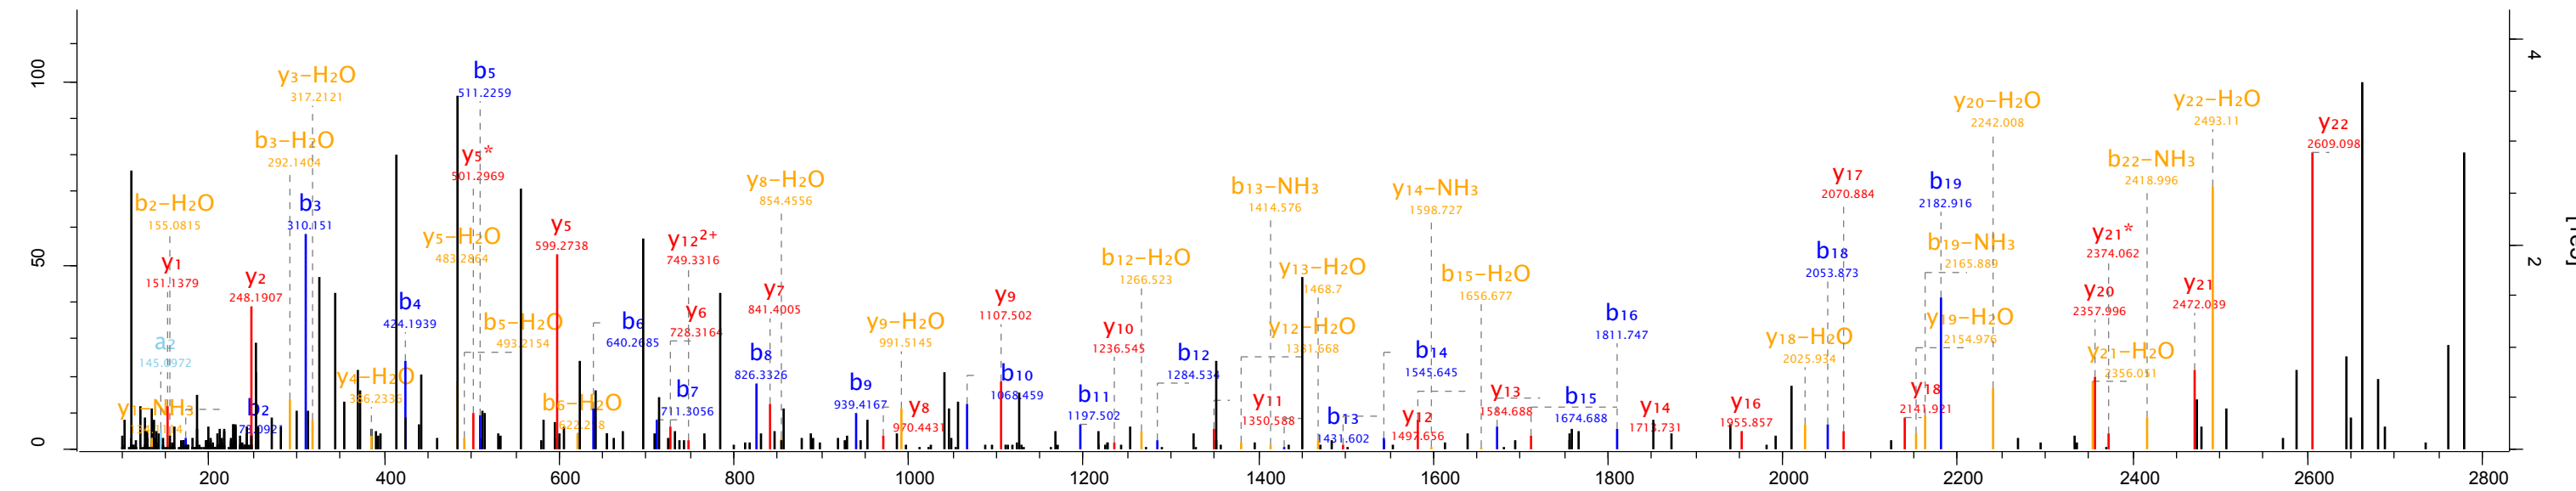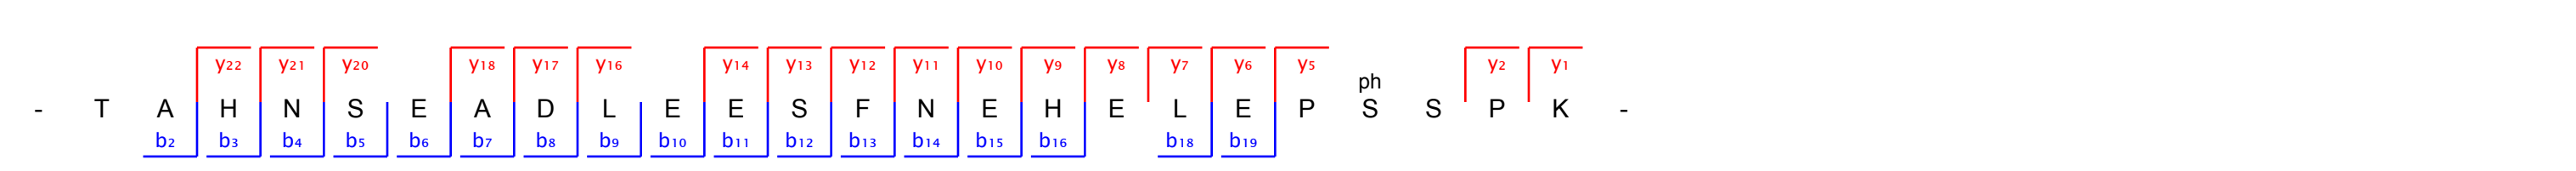

Raw file 20171215\_MaS\_33SR\_LMH\_phospho2\_02 Scan 11977 Method FTMS; HCD Score 108.57 m/z 416.2 Gene names MARCKSL1

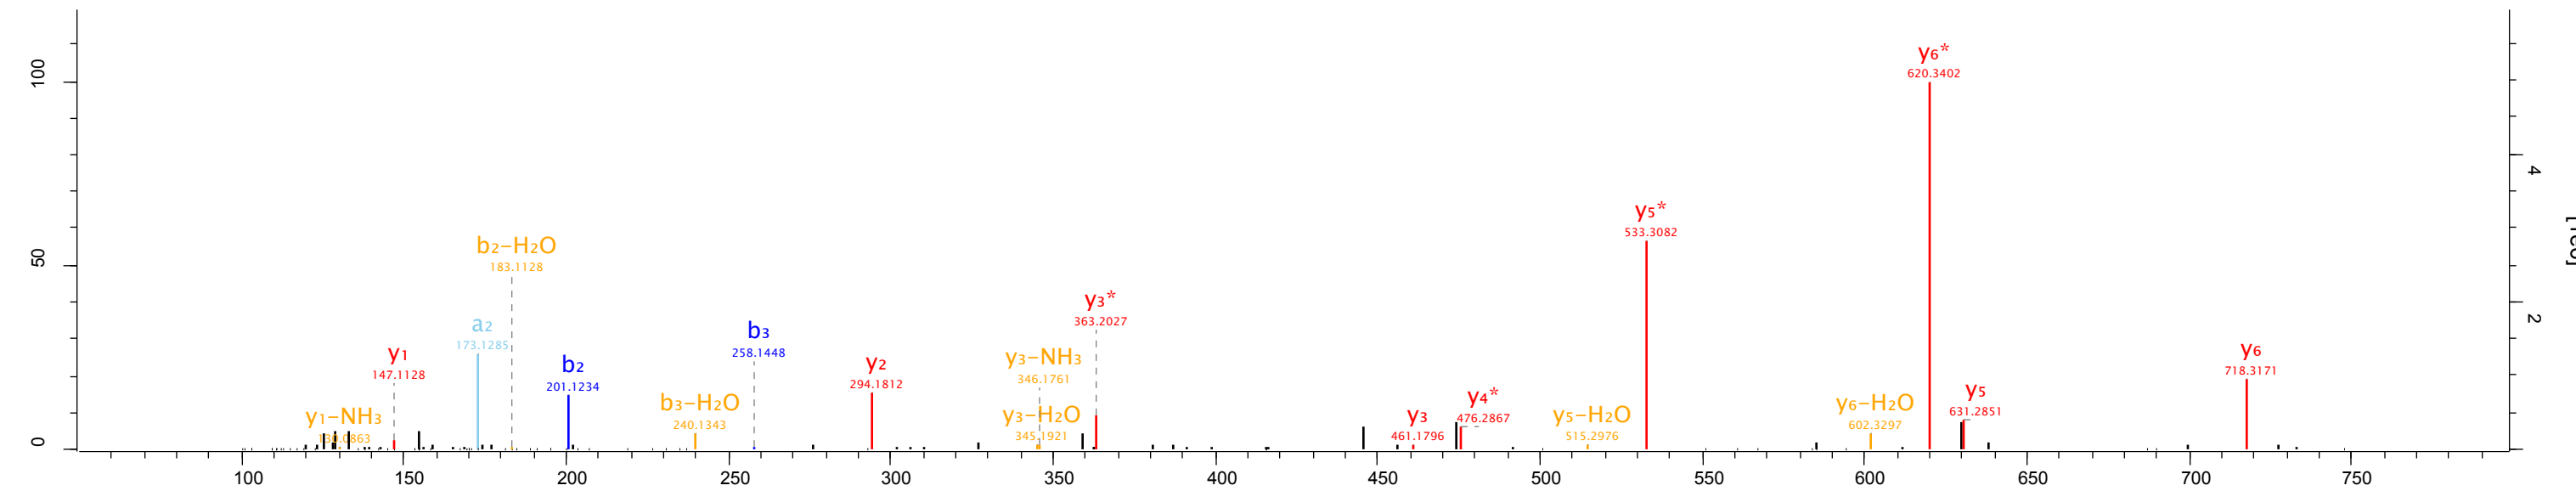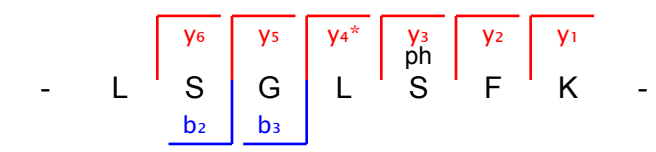

Raw file 20171215\_MaS\_33SR\_LMH\_phospho2\_02 Scan 12087 Method FTMS; HCD Score 148.52 m/z 604.27 Gene names ZMYND8

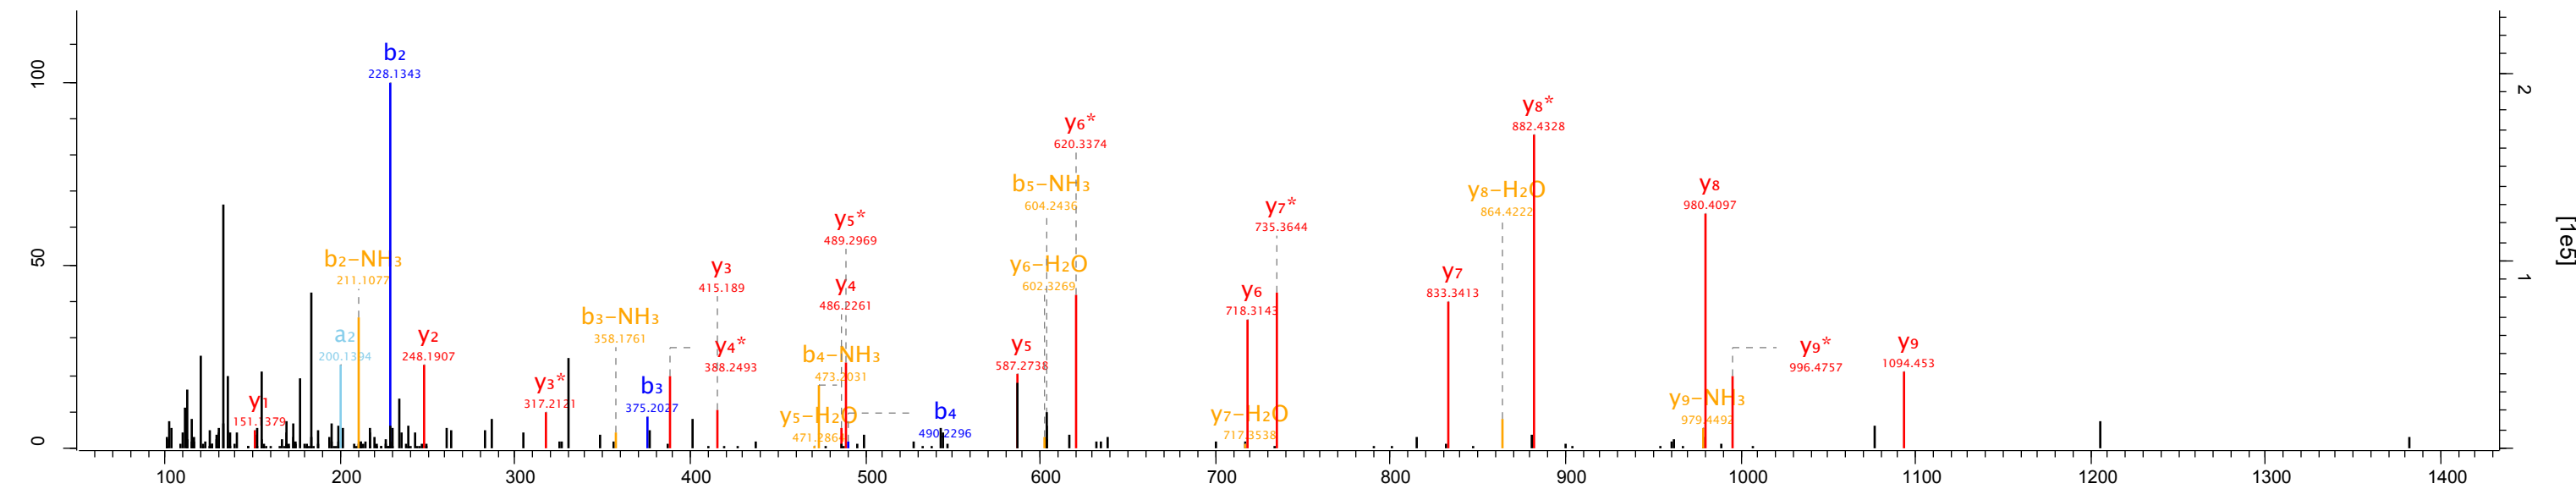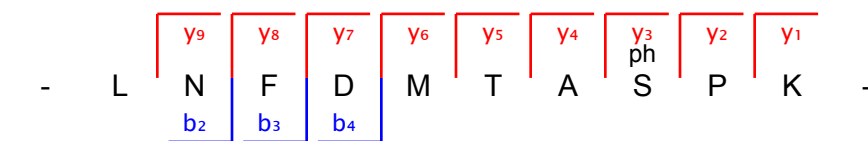

Raw file 20171215\_MaS\_33SR\_LMH\_phospho2\_02 Scan 12197 Method FTMS; HCD Score 128.82 m/z 950.84 Gene names RPL22L1

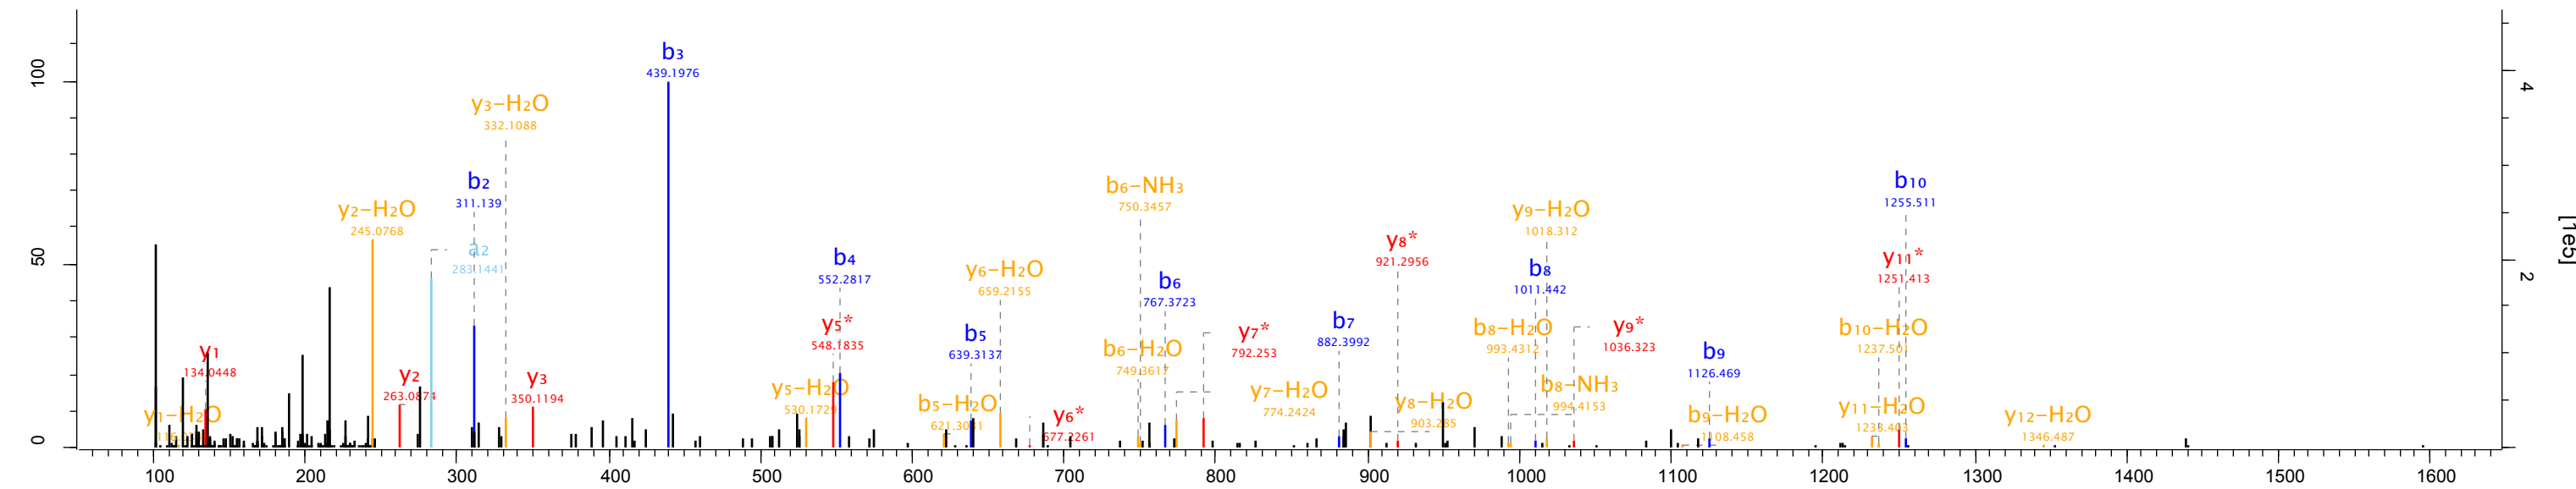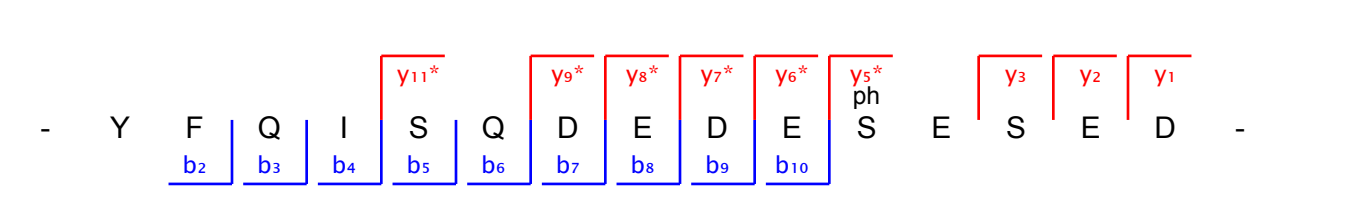

Raw file 20171215\_MaS\_33SR\_LMH\_phospho2\_02 Scan 13127 Method FTMS; HCD Score 103.92 m/z 946.1 Gene names MACF1

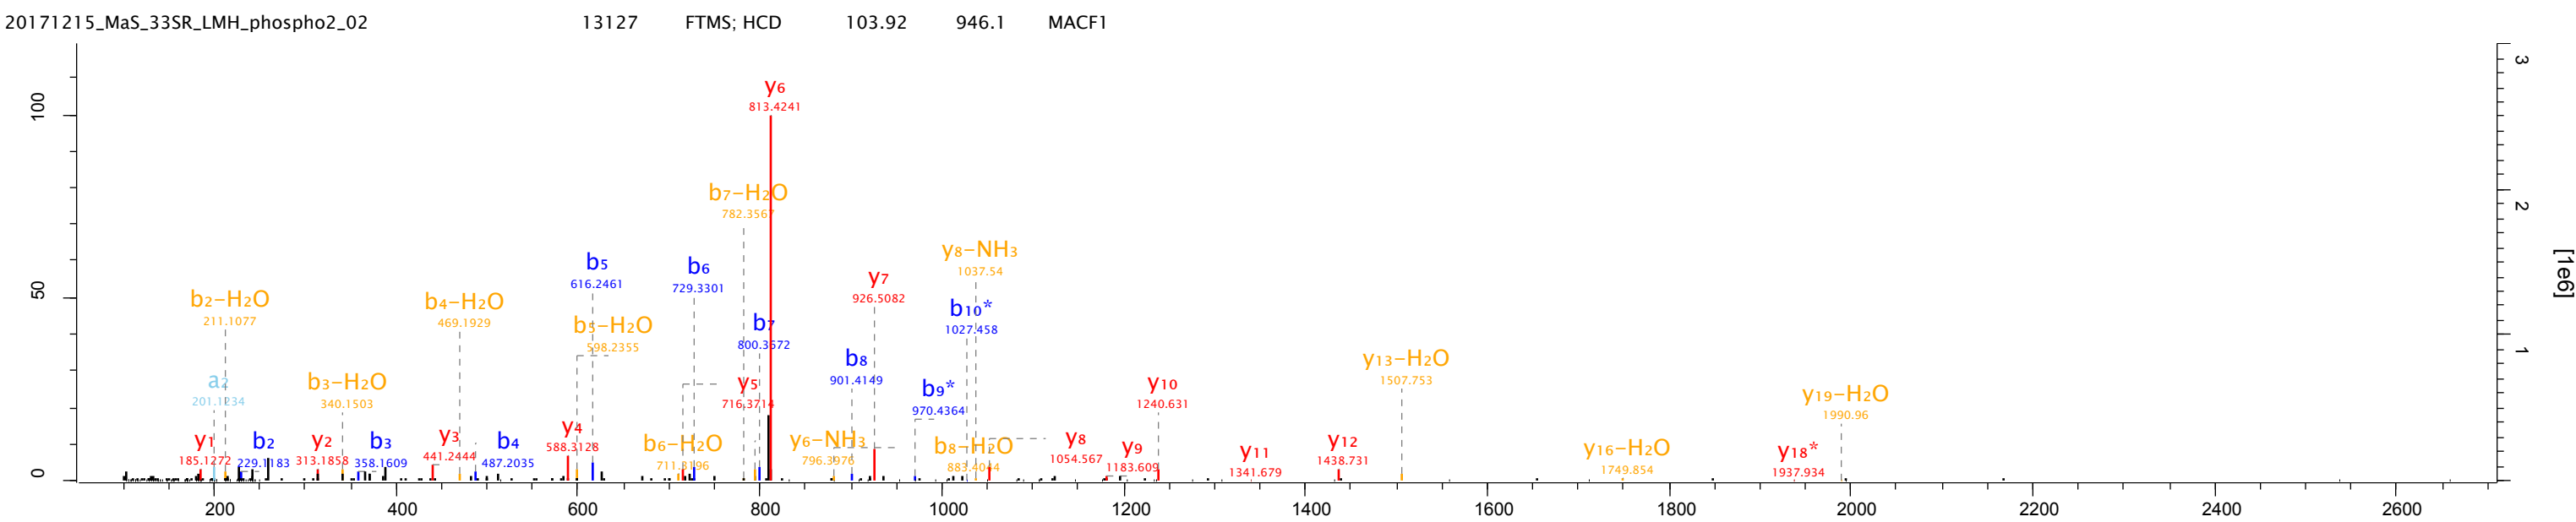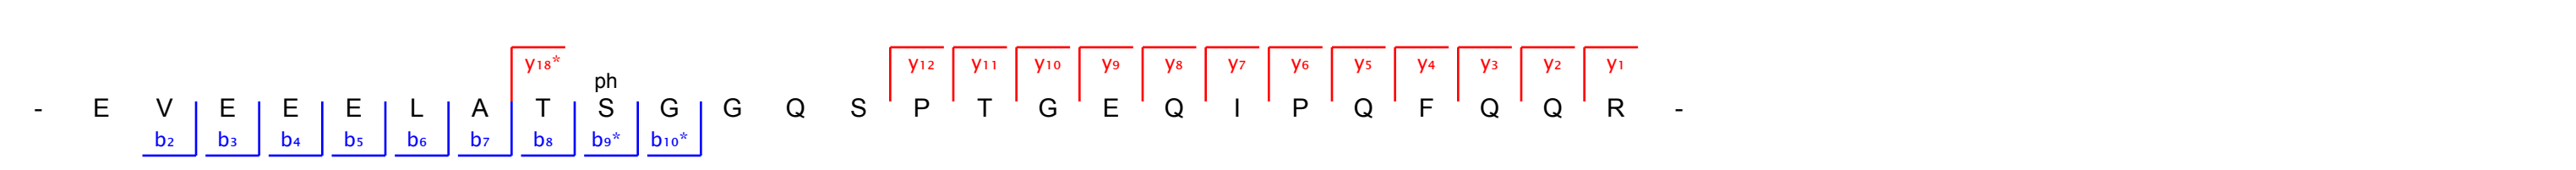

Raw file 20171215\_MaS\_33SR\_LMH\_phospho2\_02 Scan 13427 Method FTMS; HCD Score 99.86 m/z 467.73 Gene names PTPN12

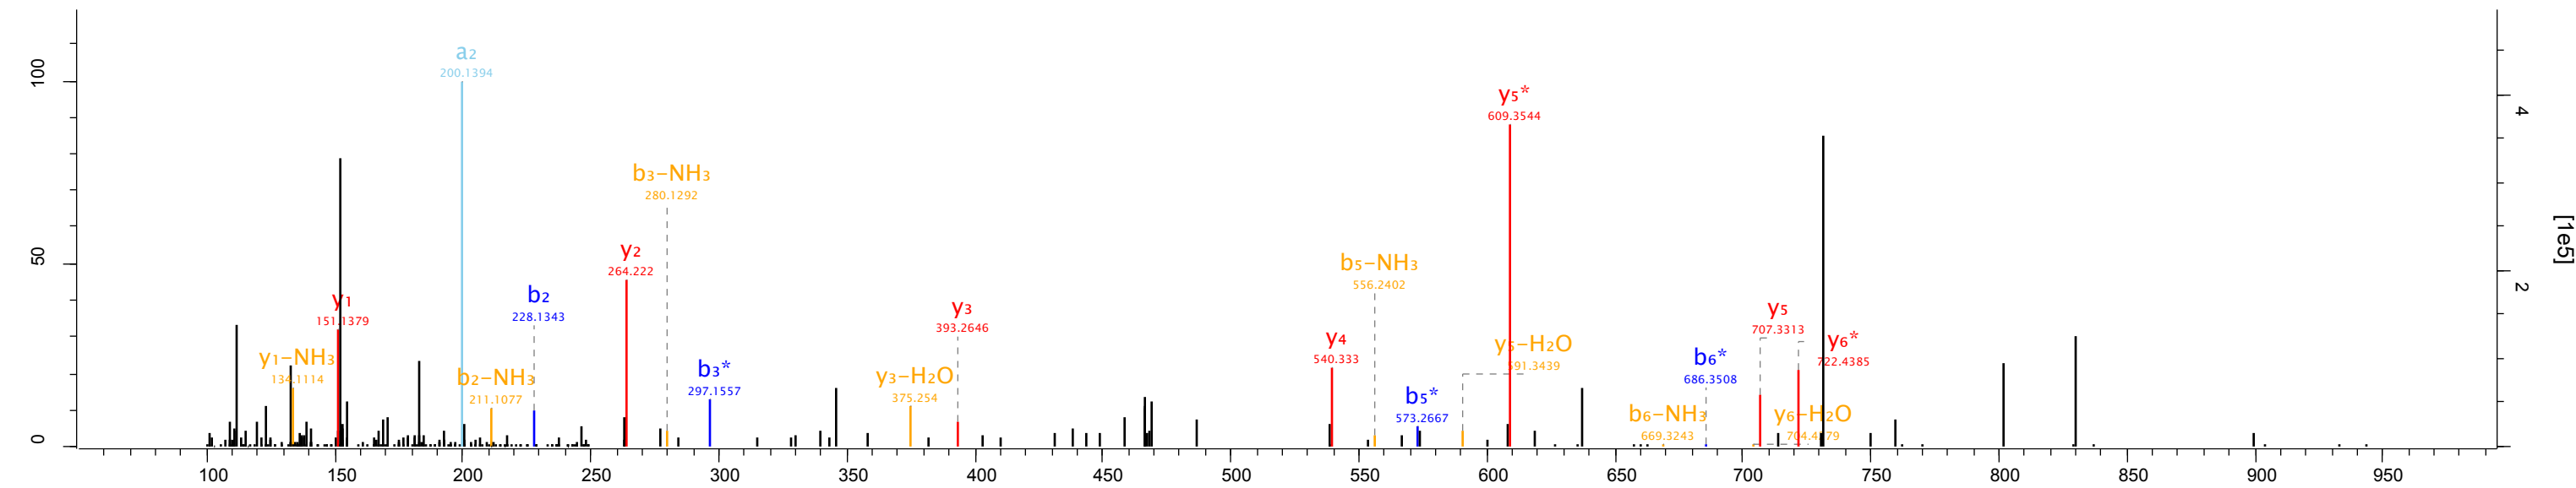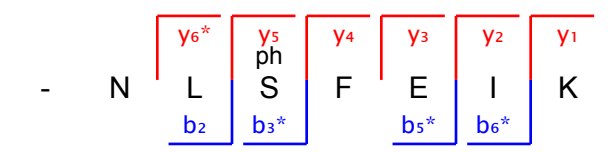



Raw file: 20171215\_MaS\_33SR\_LMH\_phospho2\_02  
 Scan: 13607 Method: FTMS; HCD Score: 218.25 m/z: 945.93 Gene names: ABCC2

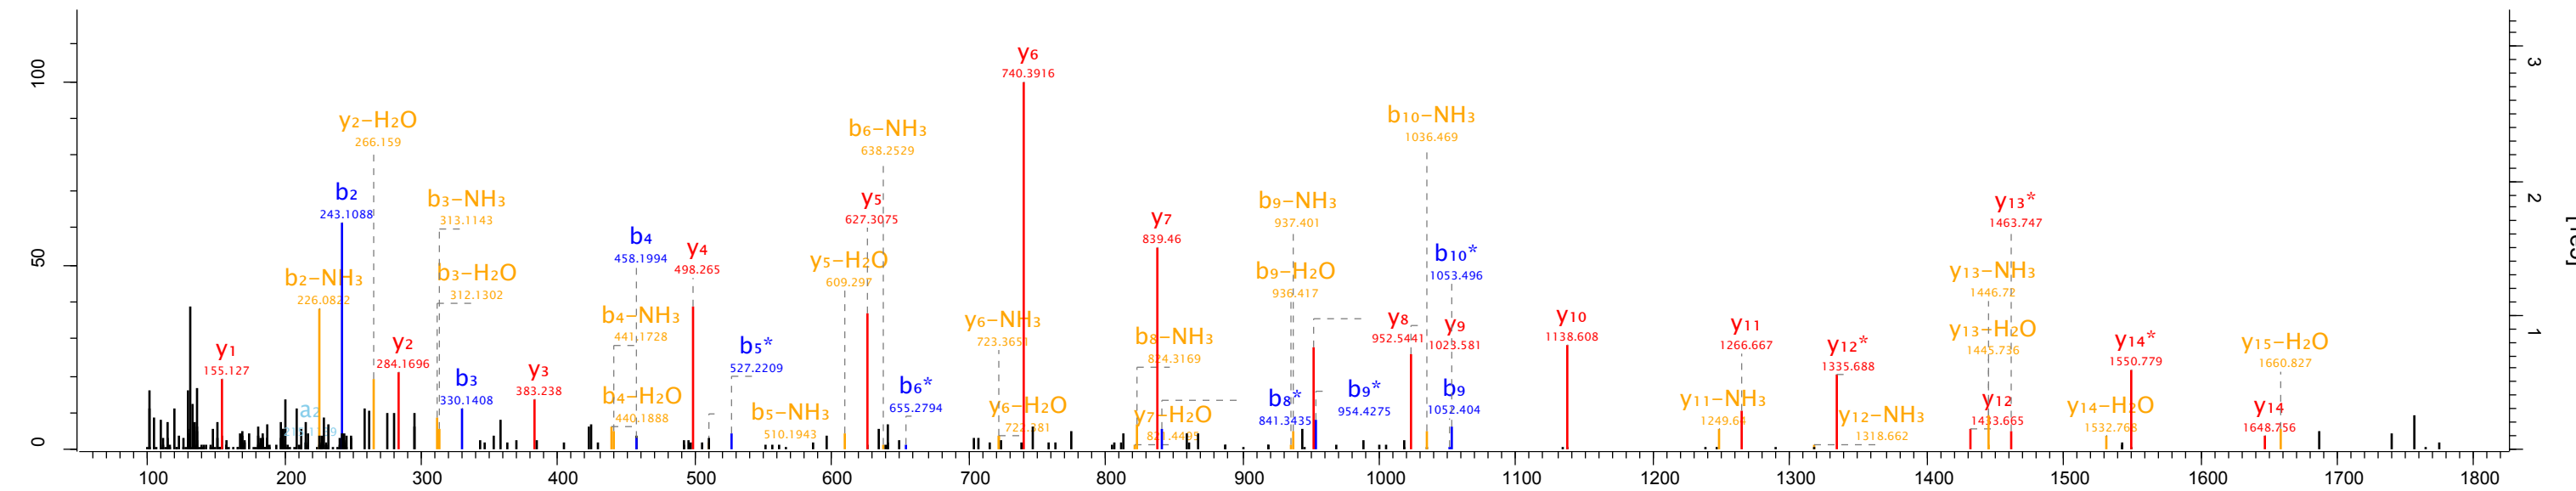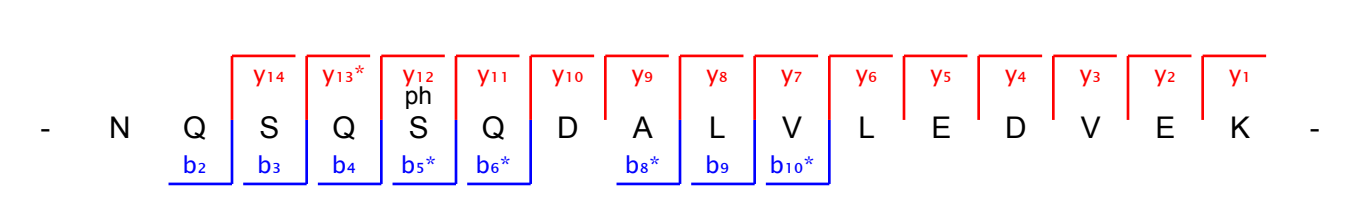

Raw file 20171215\_MaS\_33SR\_LMH\_phospho2\_02 Scan 14427 Method FTMS; HCD Score 278.52 m/z 1064.02 Gene names CD3EAP

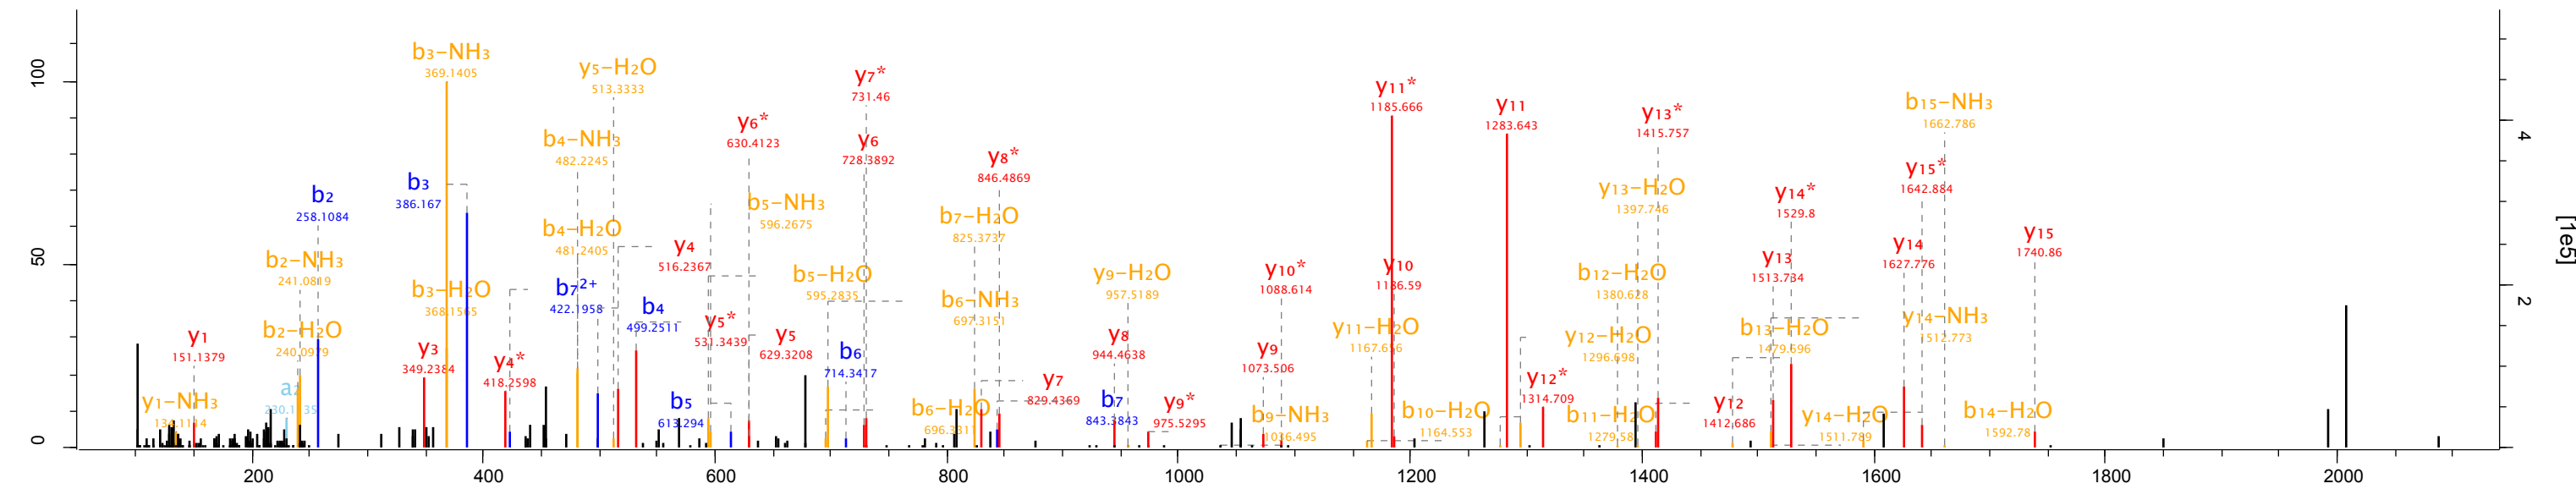

- Q E Q I N T E P L E D T V L S P T K -

Peptide sequence: Q E Q I N T E P L E D T V L S P T K

Fragmentation sites (b and y ions) are indicated by brackets below the sequence:

- b<sub>2</sub> (E)
- b<sub>3</sub> (EQ)
- b<sub>4</sub> (EQI)
- b<sub>5</sub> (EQIN)
- b<sub>6</sub> (EQINT)
- b<sub>7</sub> (EQINTE)
- y<sub>1</sub> (K)
- y<sub>3</sub> (SP)
- y<sub>4</sub> (SPL)
- y<sub>5</sub> (SPLD)
- y<sub>6</sub> (SPLDT)
- y<sub>7</sub> (SPLDTE)
- y<sub>8</sub> (SPLDTEV)
- y<sub>9</sub> (SPLDTEVL)
- y<sub>10</sub> (SPLDTEVLS)
- y<sub>11</sub> (SPLDTEVLSPT)
- y<sub>12</sub> (SPLDTEVLSPTK)
- y<sub>13</sub> (SPLDTEVLSPTK)
- y<sub>14</sub> (SPLDTEVLSPTK)
- y<sub>15</sub> (SPLDTEVLSPTK)

20171215\_MaS\_33SR\_LMH\_phospho2\_02 1947 FTMS; HCD 160.76 703.82 CBX8

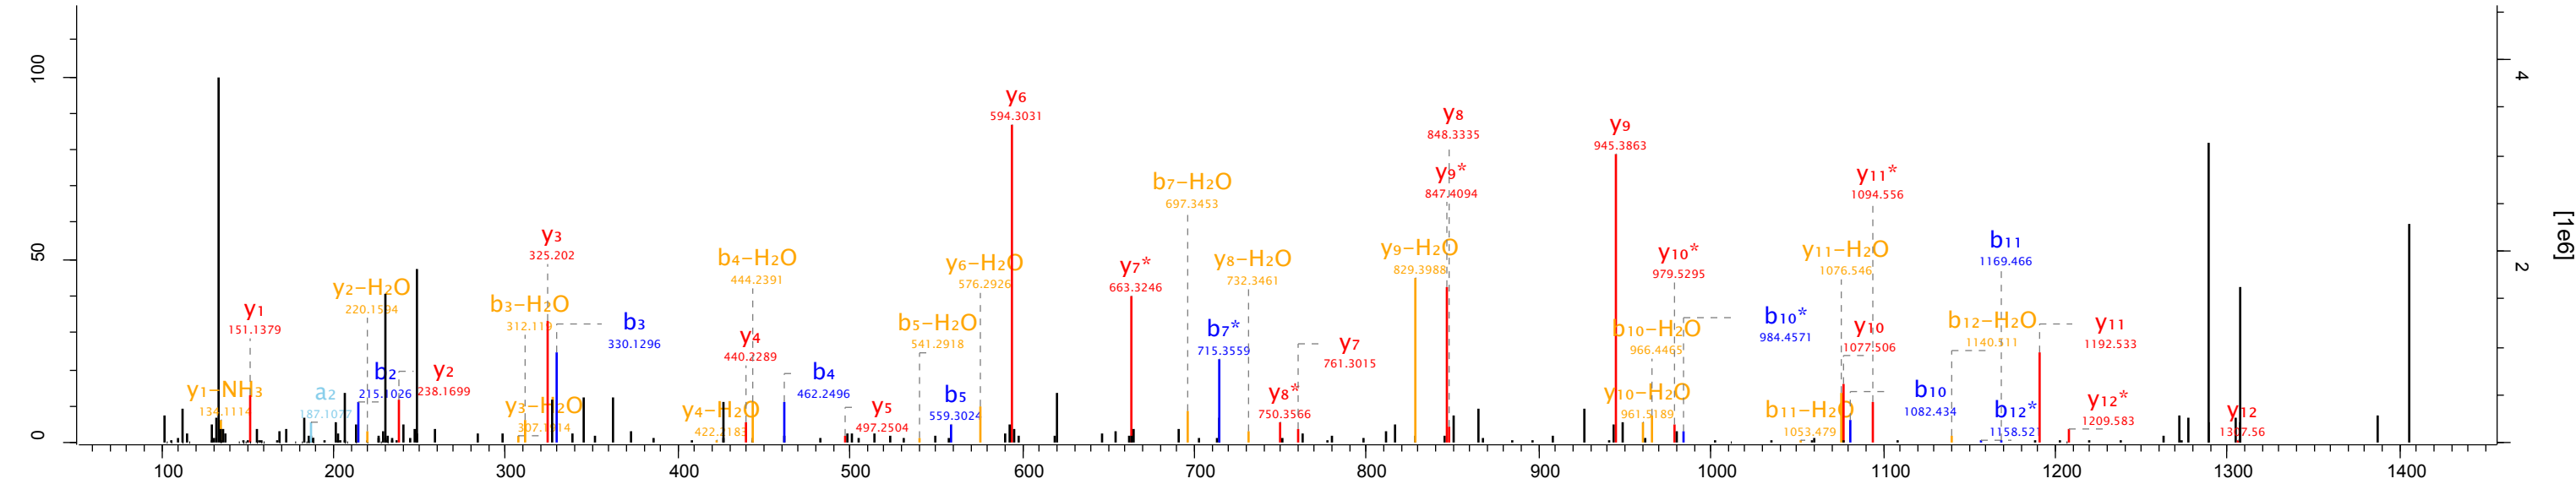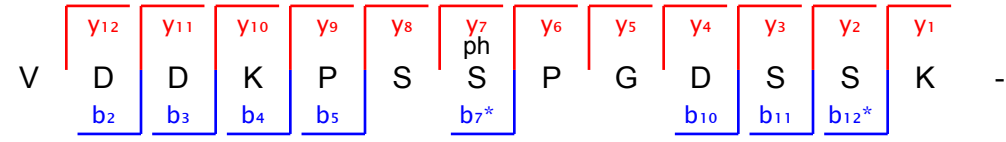

Raw file 20171215\_MaS\_33SR\_LMH\_phospho2\_02 Scan 2347 Method FTMS; HCD Score 65.16 m/z 847.86 Gene names NAA10

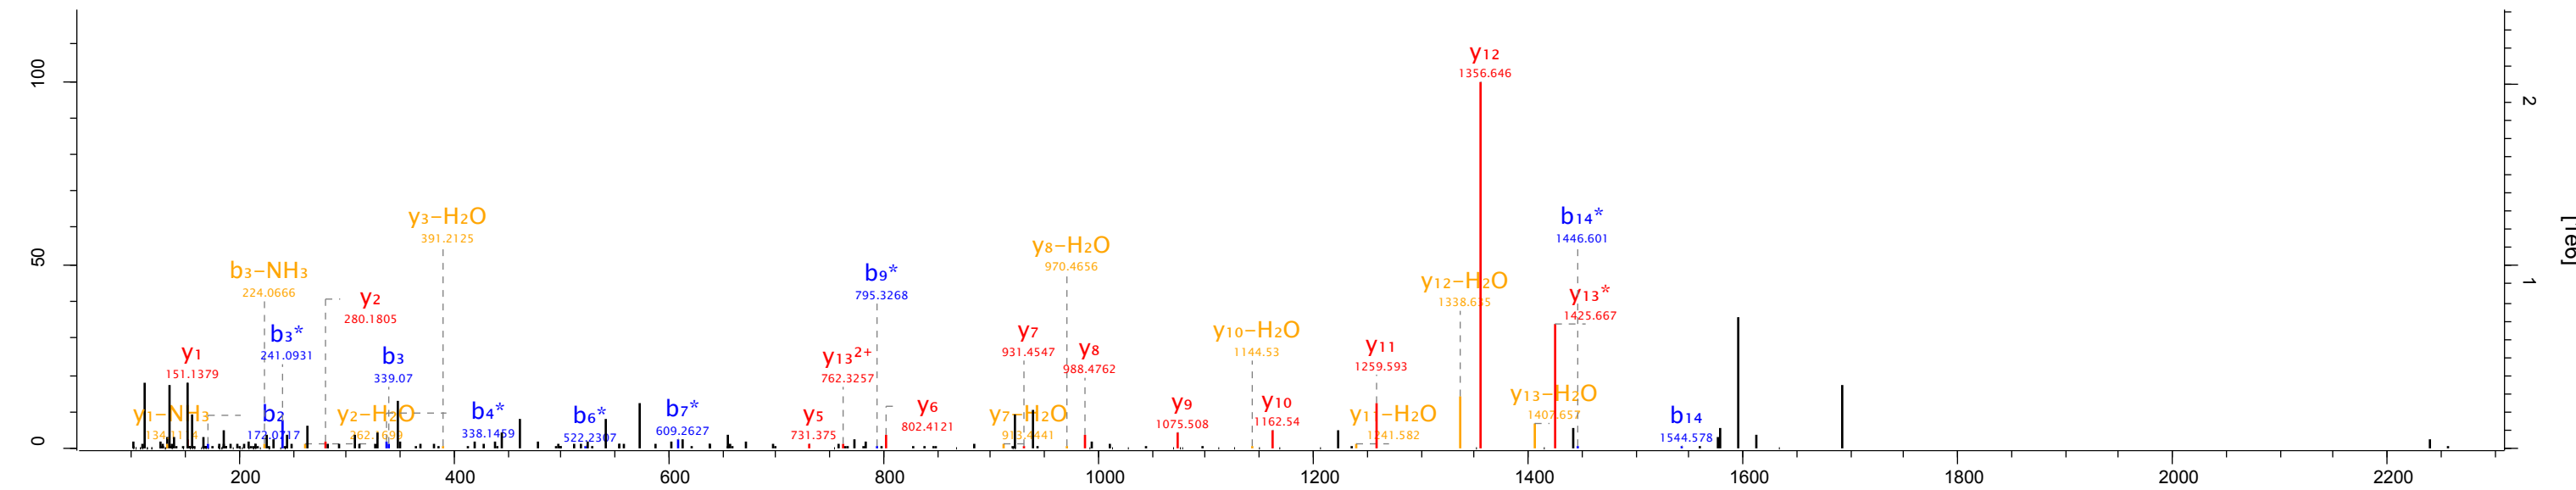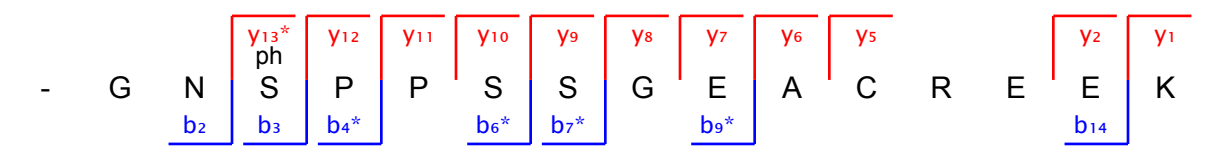

Raw file  
20171215\_MaS\_33SR\_LMH\_phospho2\_02

Scan 2357 Method FTMS; HCD Score 184.21 m/z 868.34 Gene names DNAJC17

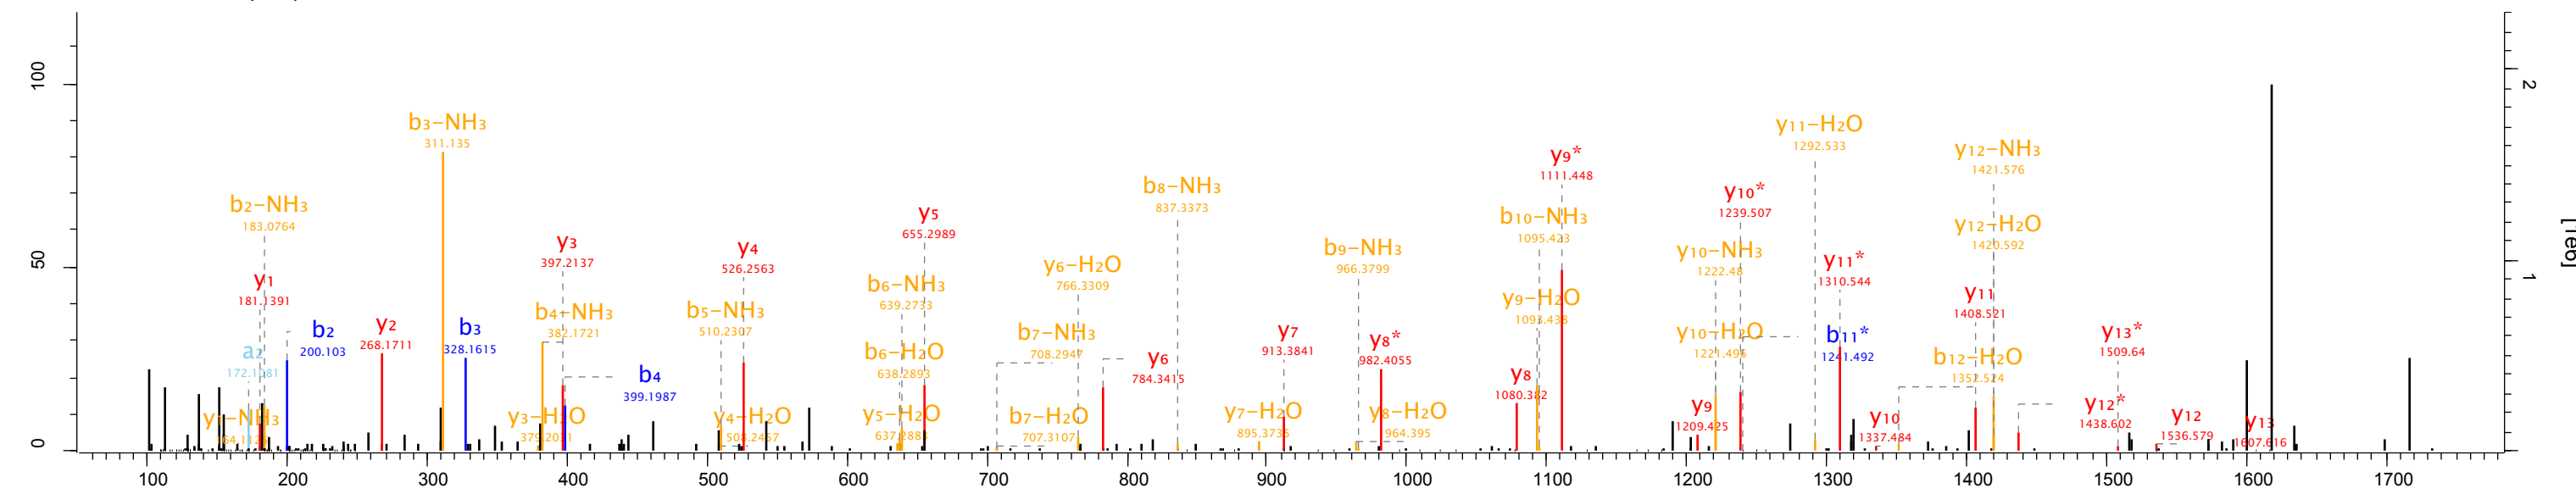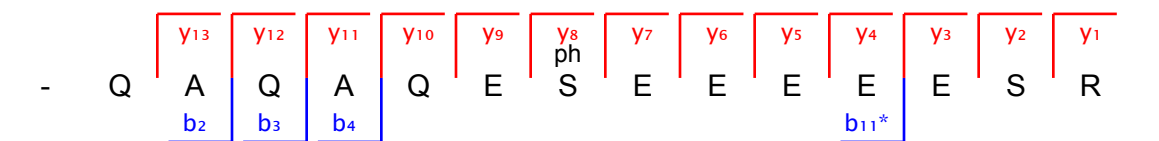

Raw file 20171215\_MaS\_33SR\_LMH\_phospho2\_02 Scan 2947 Method FTMS; HCD Score 117.28 m/z 457.22 Gene names NCOA3

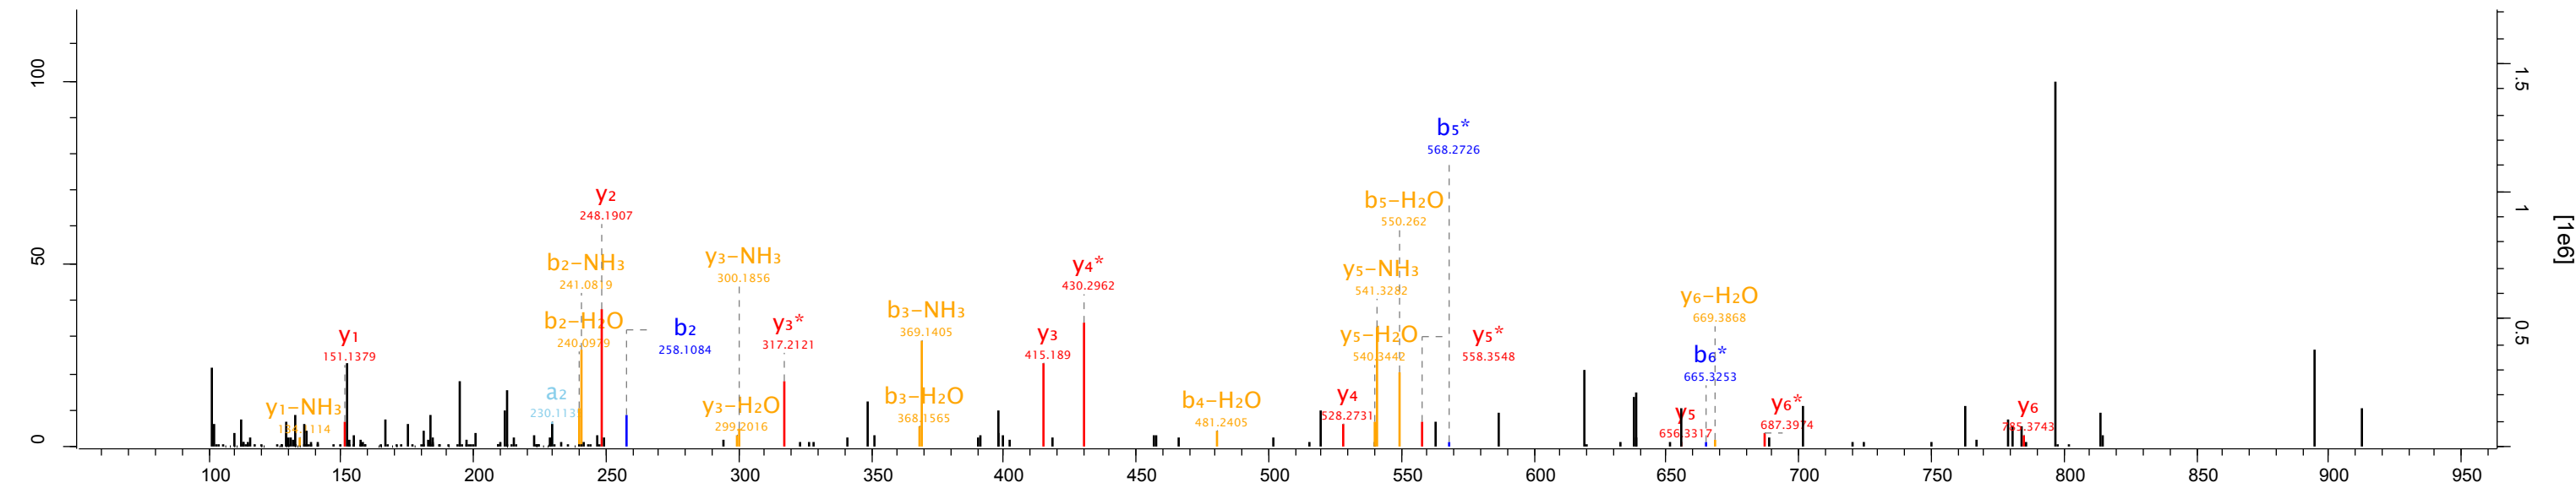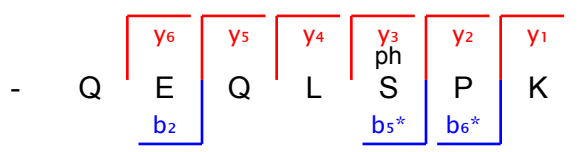

Raw file  
20171215\_MaS\_33SR\_LMH\_phospho2\_02

Scan 3537 Method FTMS; HCD Score 172.32 m/z 737.84 Gene names CD2BP2

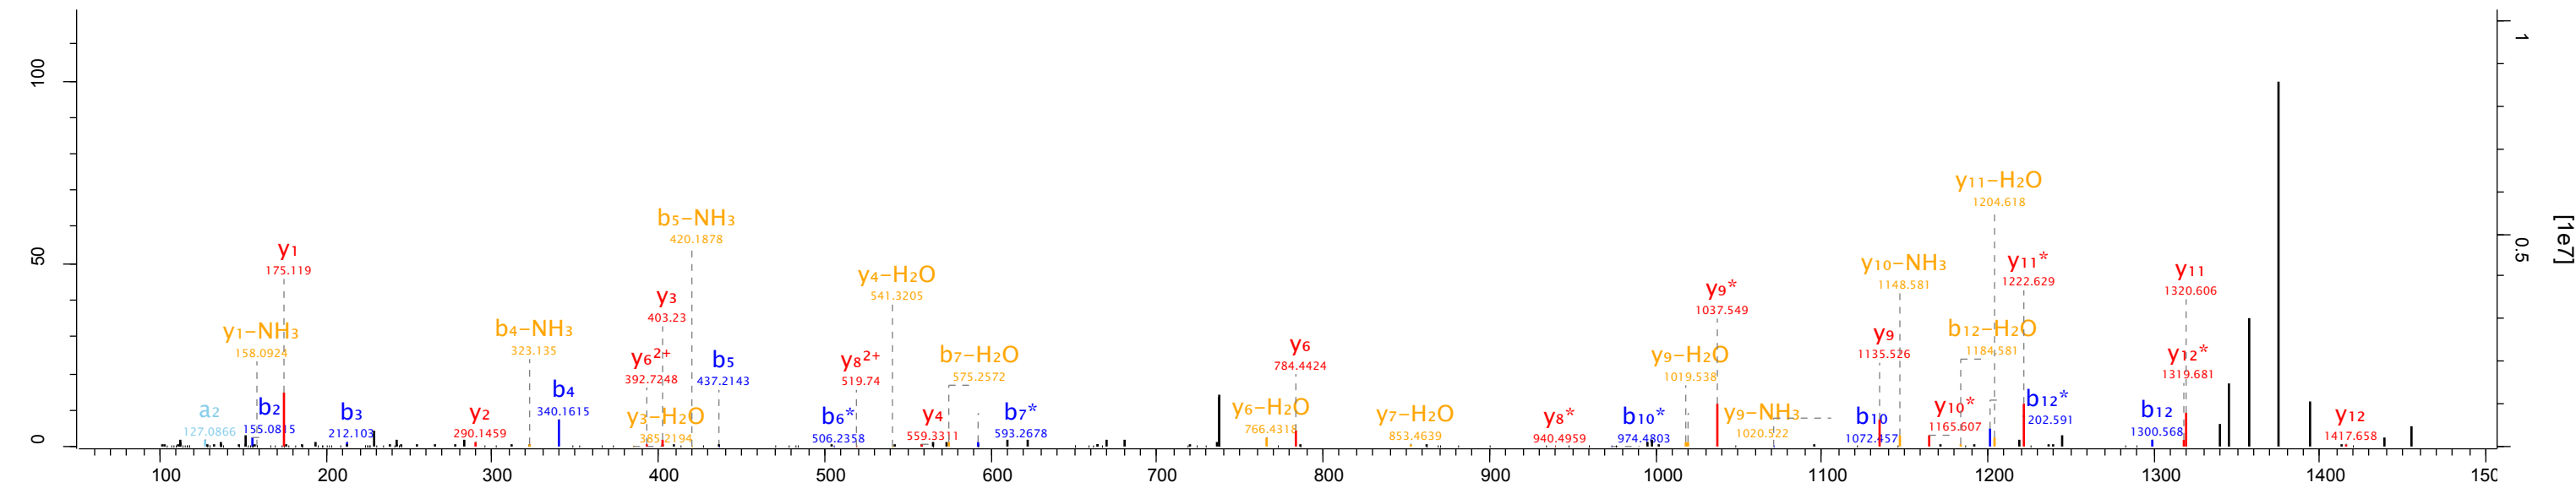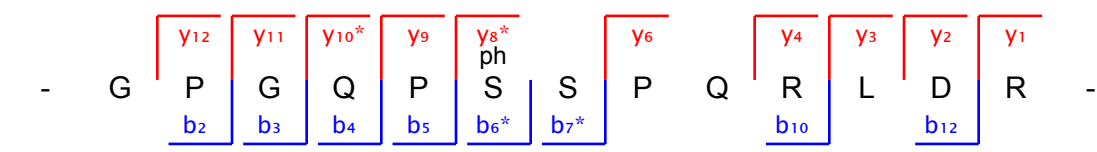

Raw file: 20171215\_MaS\_33SR\_LMH\_phospho2\_02  
 Scan: 3917 Method: FTMS; HCD Score: 175.88 m/z: 612.29 Gene names: AKAP2

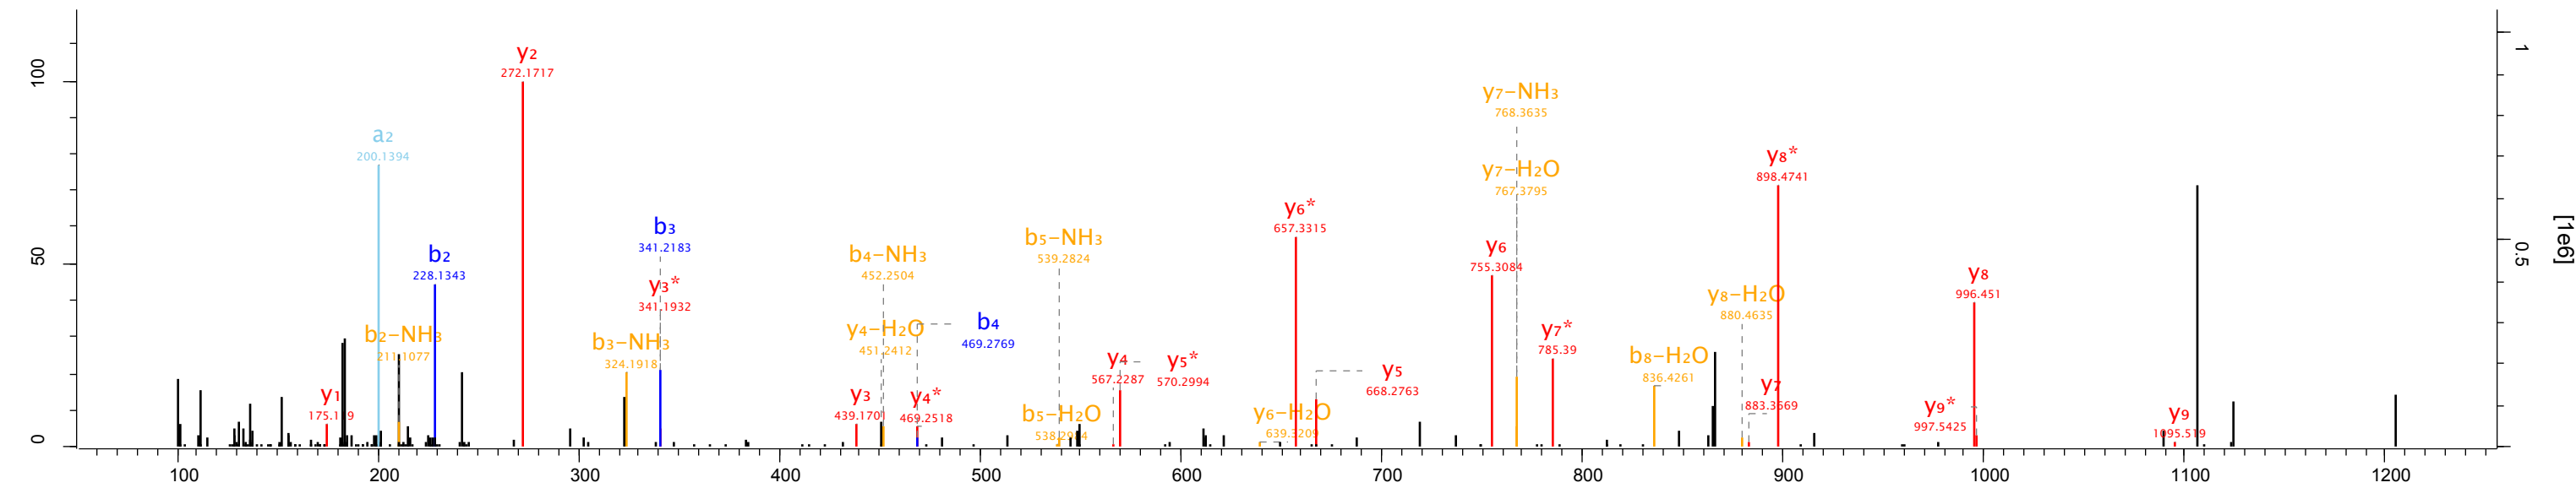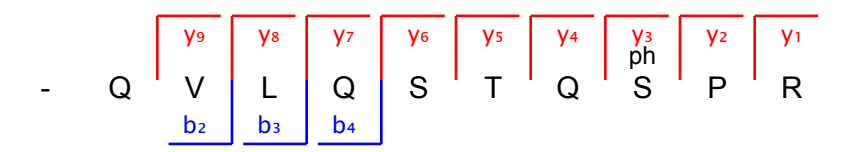



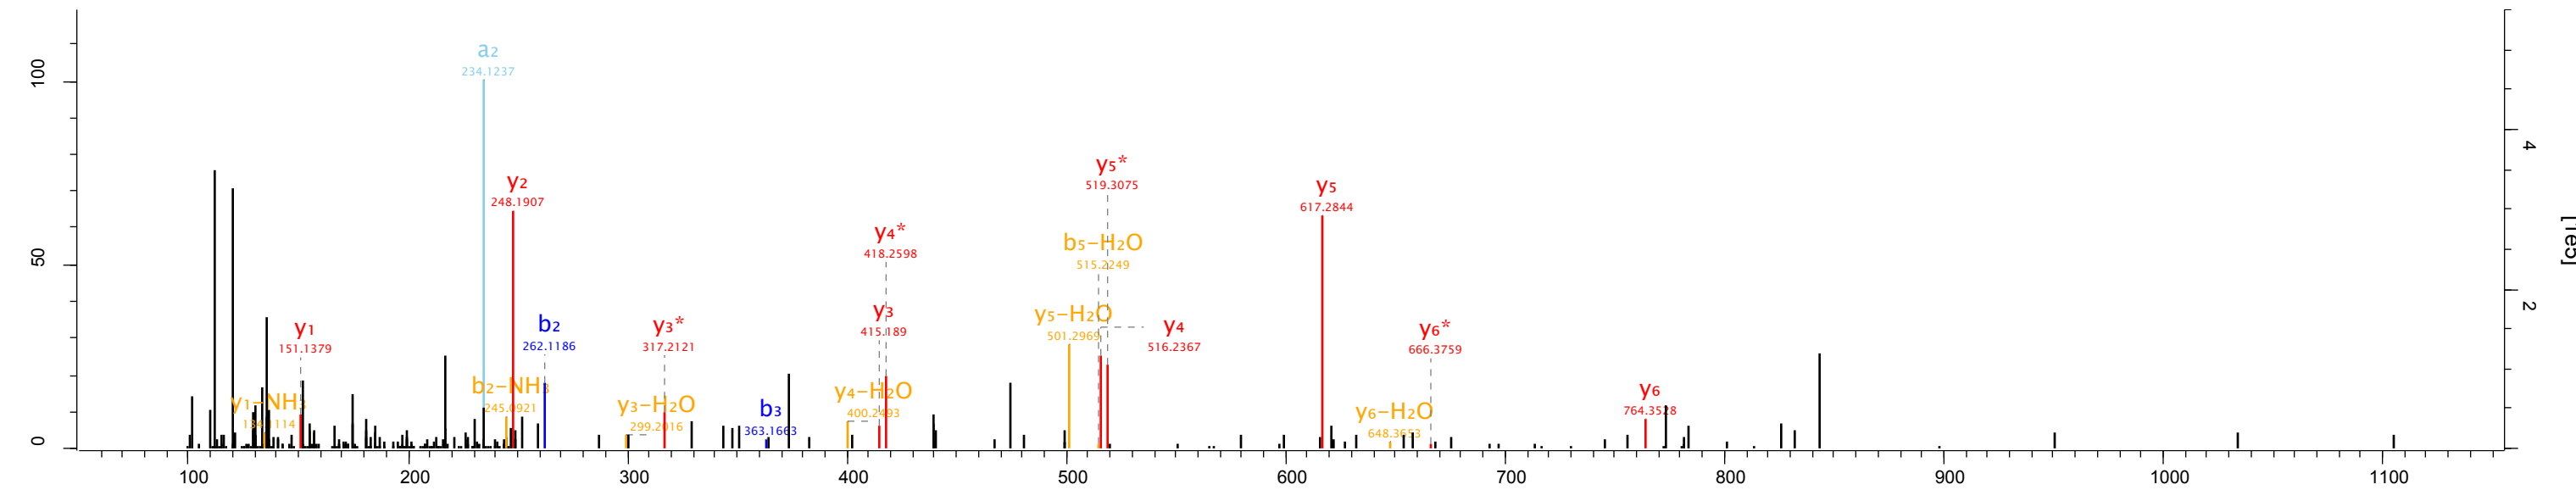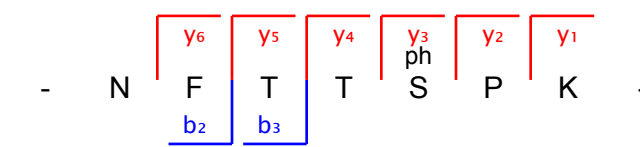

Raw file  
20171215\_MaS\_33SR\_LMH\_phospho2\_02

Scan 4017 Method FTMS; HCD Score 160.12 m/z 844.36 Gene names YAF2

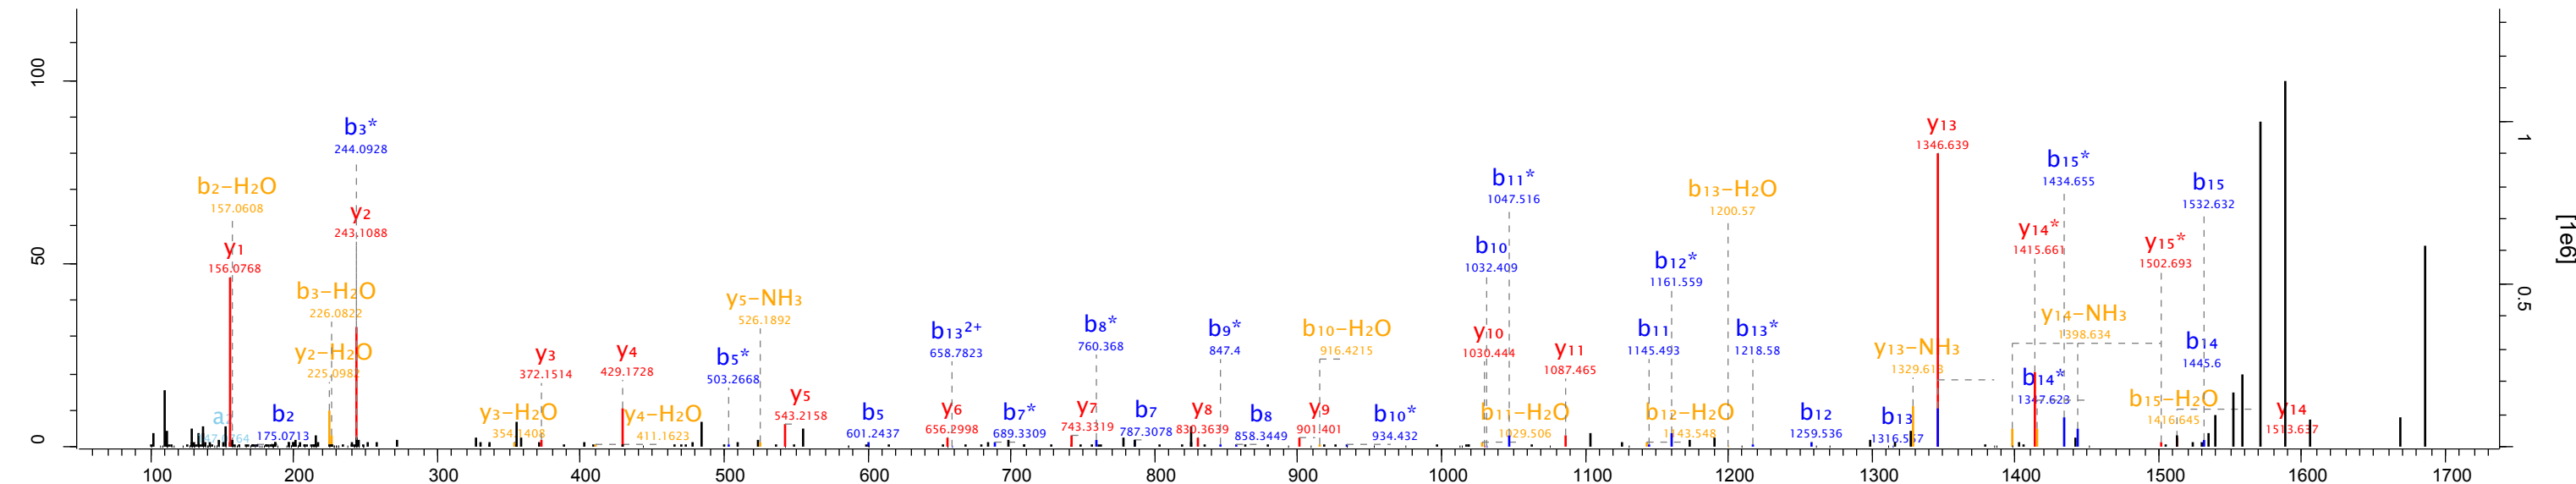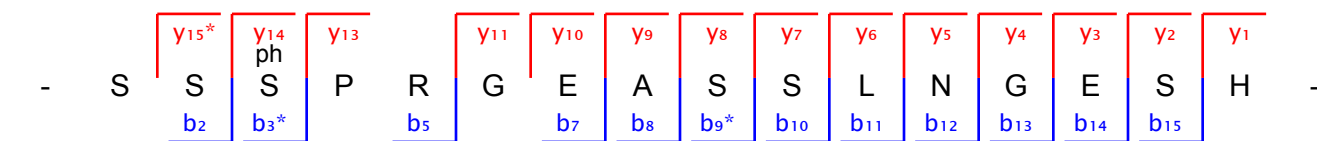

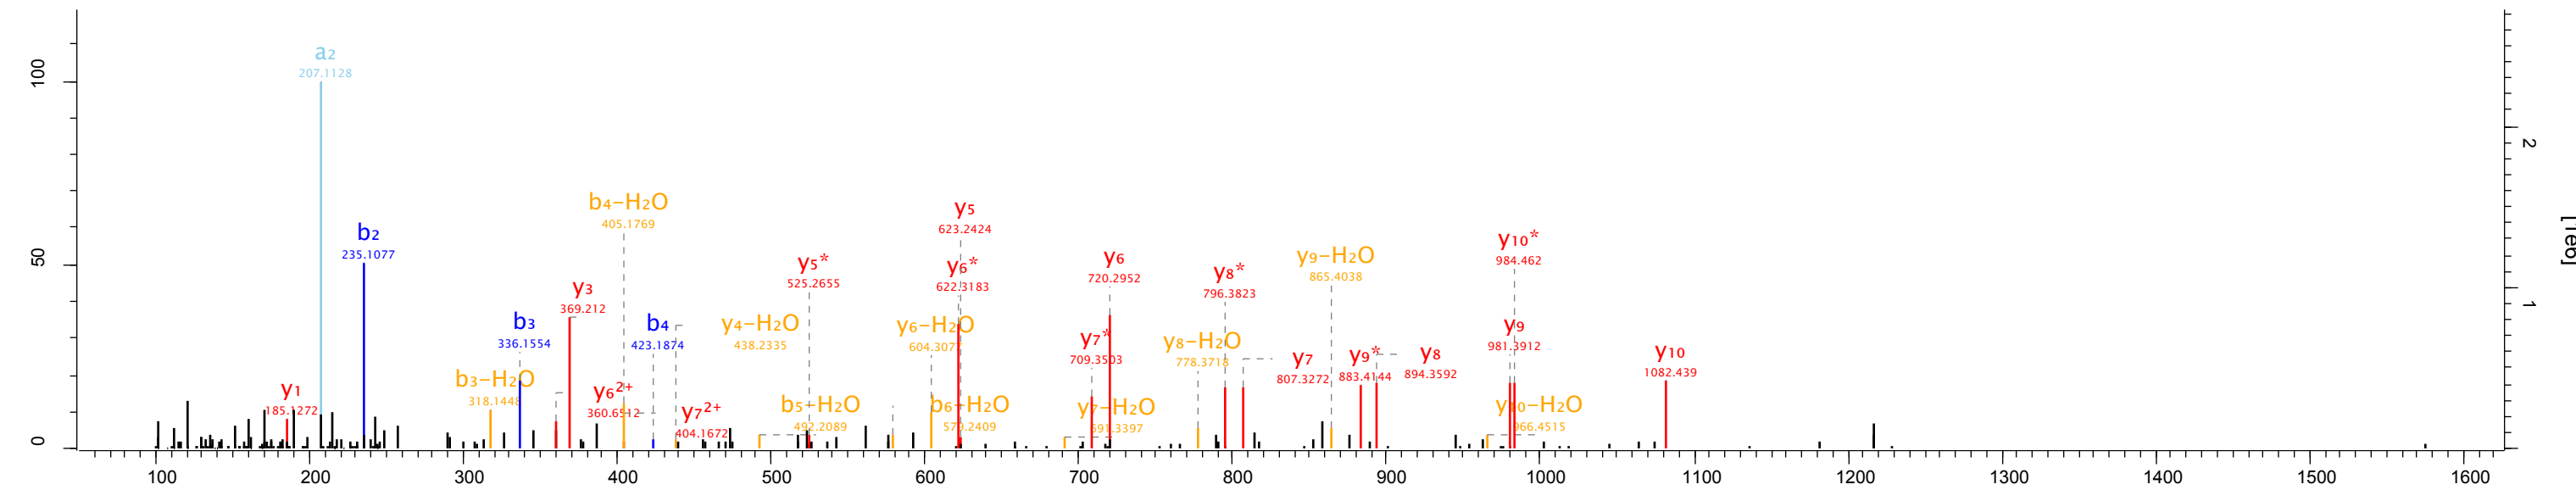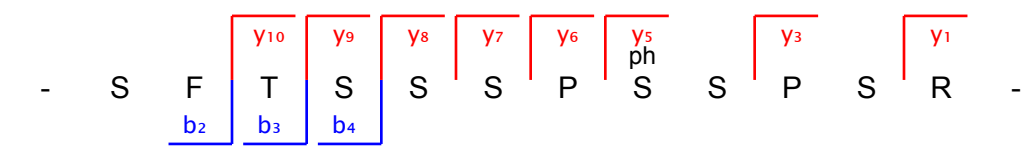

Raw file 20171215\_MaS\_33SR\_LMH\_phospho2\_02 Scan 4087 Method FTMS; HCD Score 61.11 m/z 529.74 Gene names GLCCI1

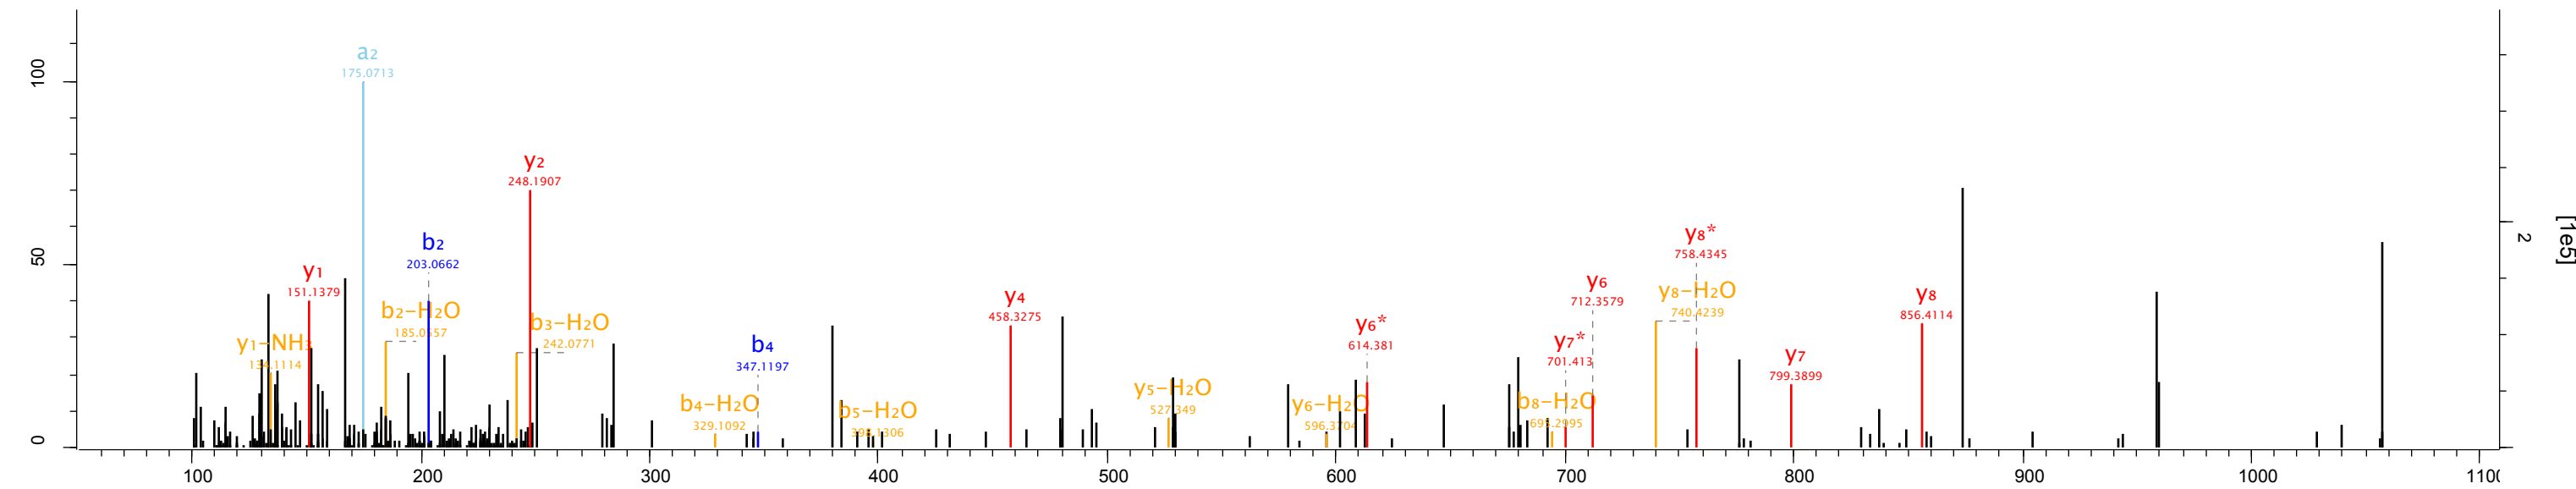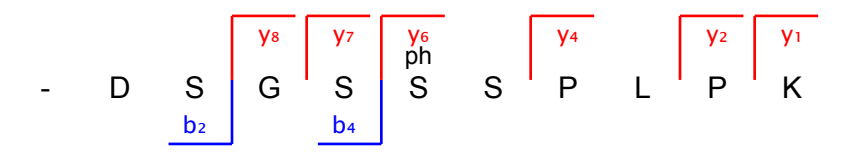

Raw file 20171215\_MaS\_33SR\_LMH\_phospho2\_02 Scan 4267 Method FTMS; HCD Score 147.75 m/z 498.2 Gene names REPS1

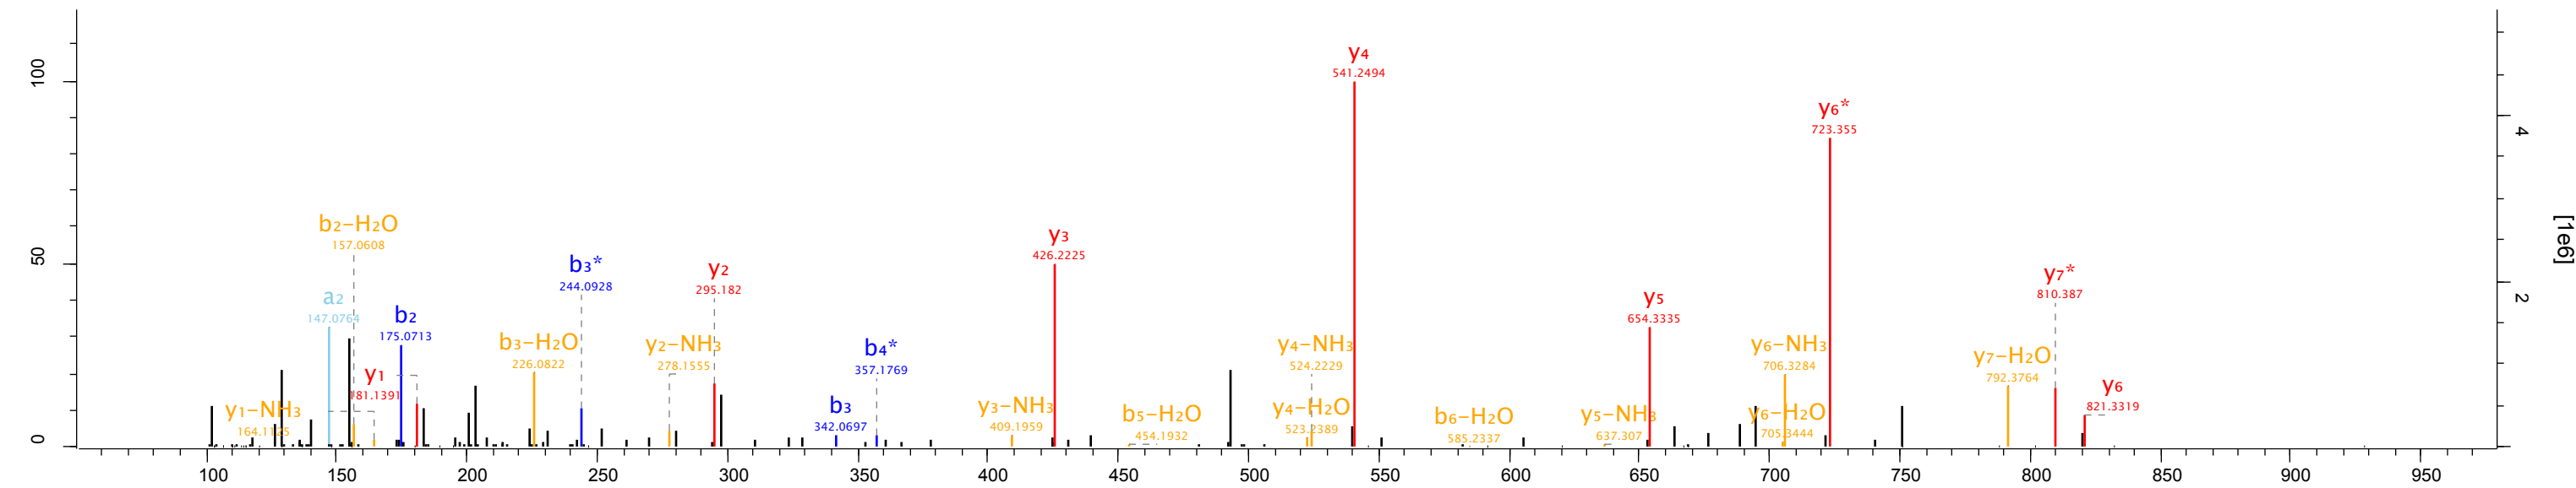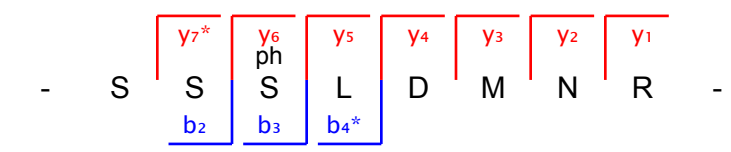

Raw file: 20171215\_MaS\_33SR\_LMH\_phospho2\_02  
 Scan: 4297 Method: FTMS; HCD Score: 196.71 m/z: 824.33 Gene names: DDX24

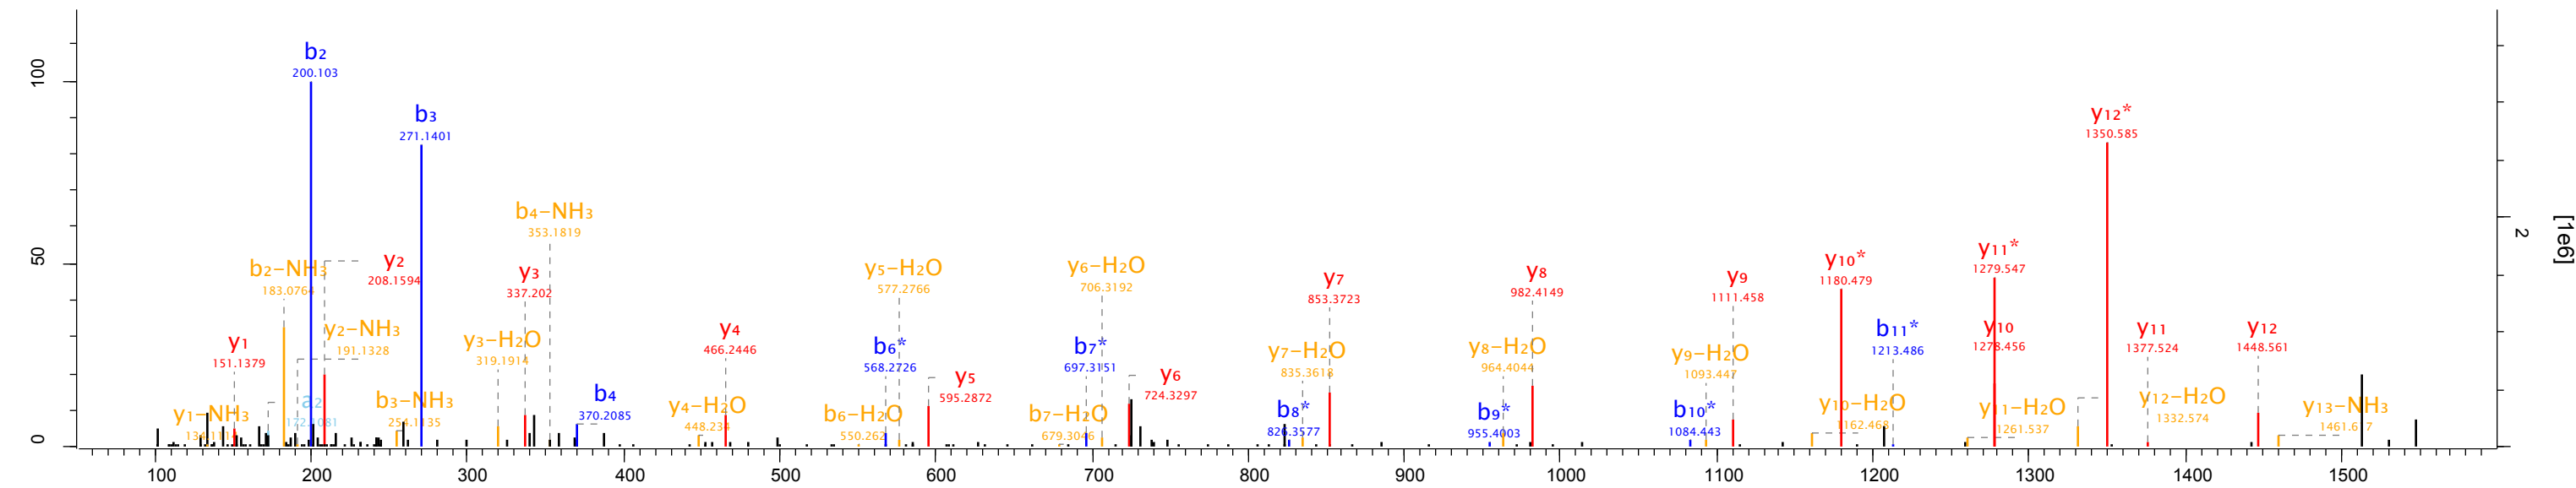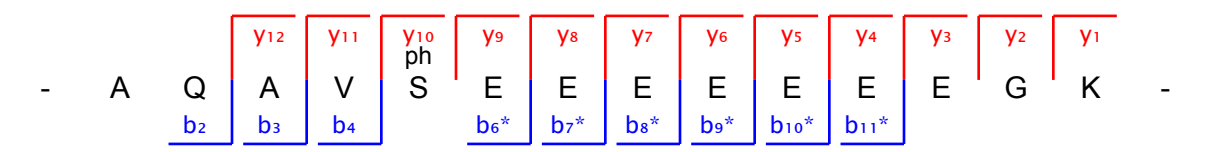

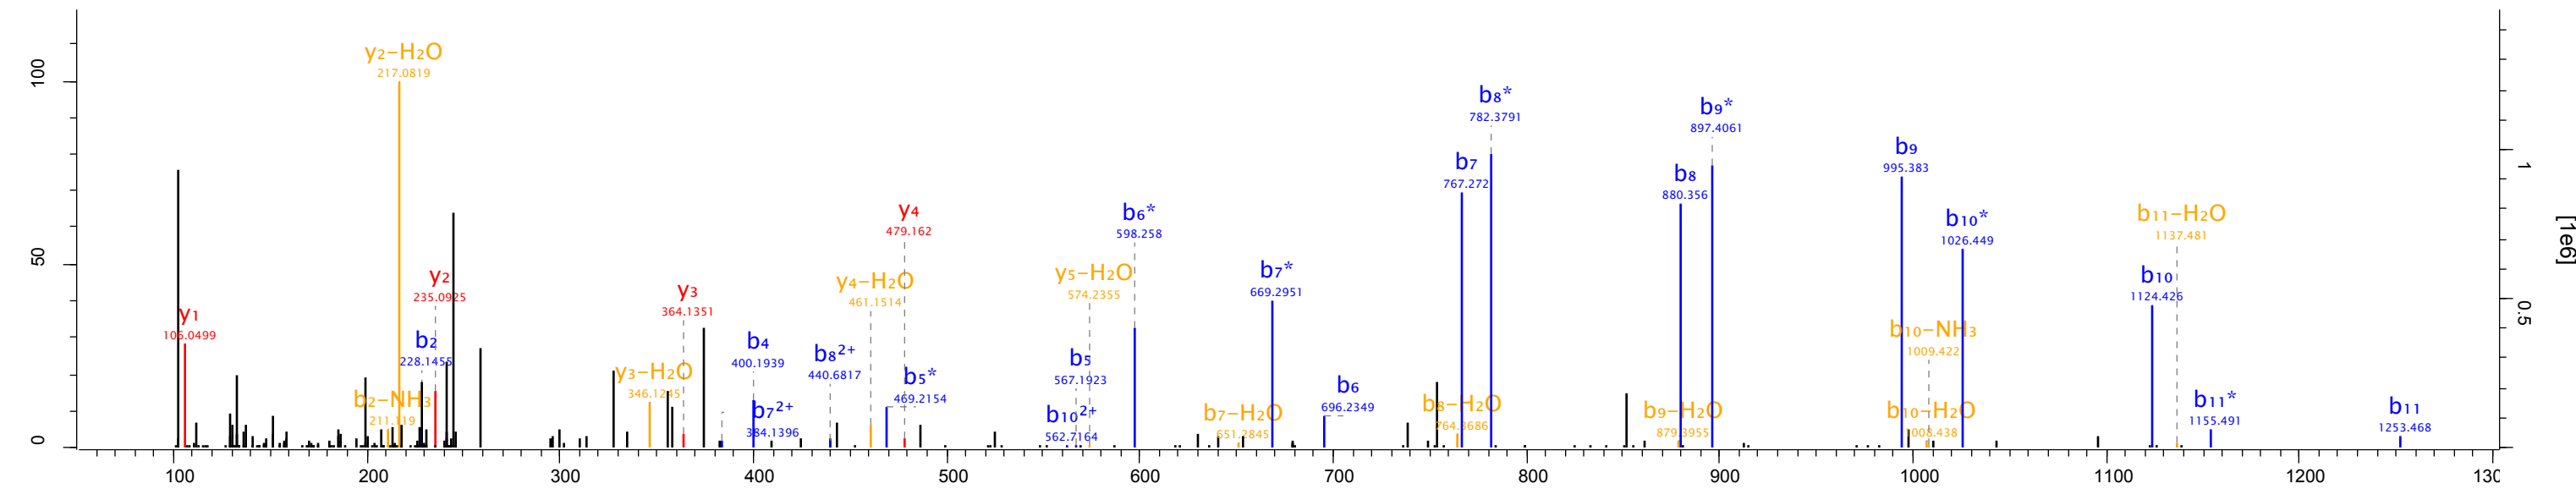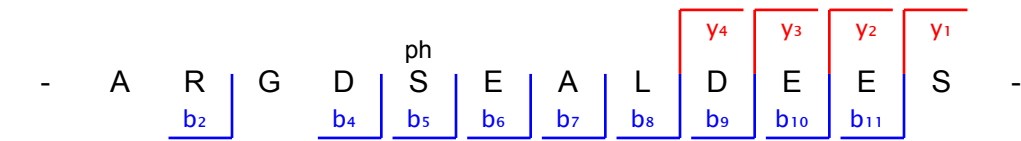

20171215\_MaS\_33SR\_LMH\_phospho2\_02

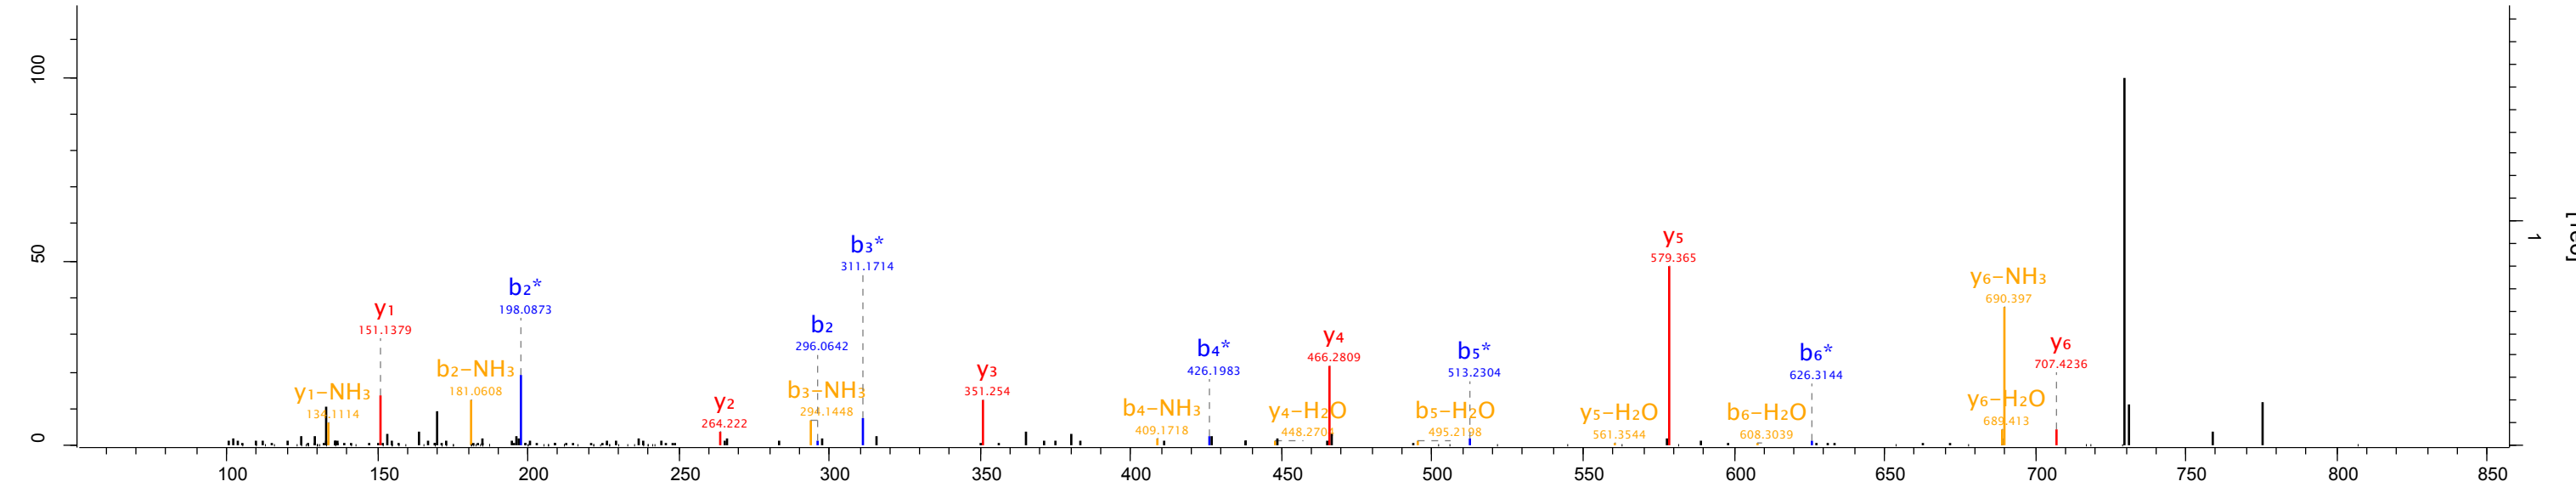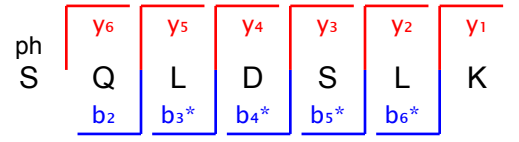



Raw file 20171215\_MaS\_33SR\_LMH\_phospho2\_02 Scan 5977 Method FTMS; HCD Score 69.81 m/z 414.21 Gene names DENND4C

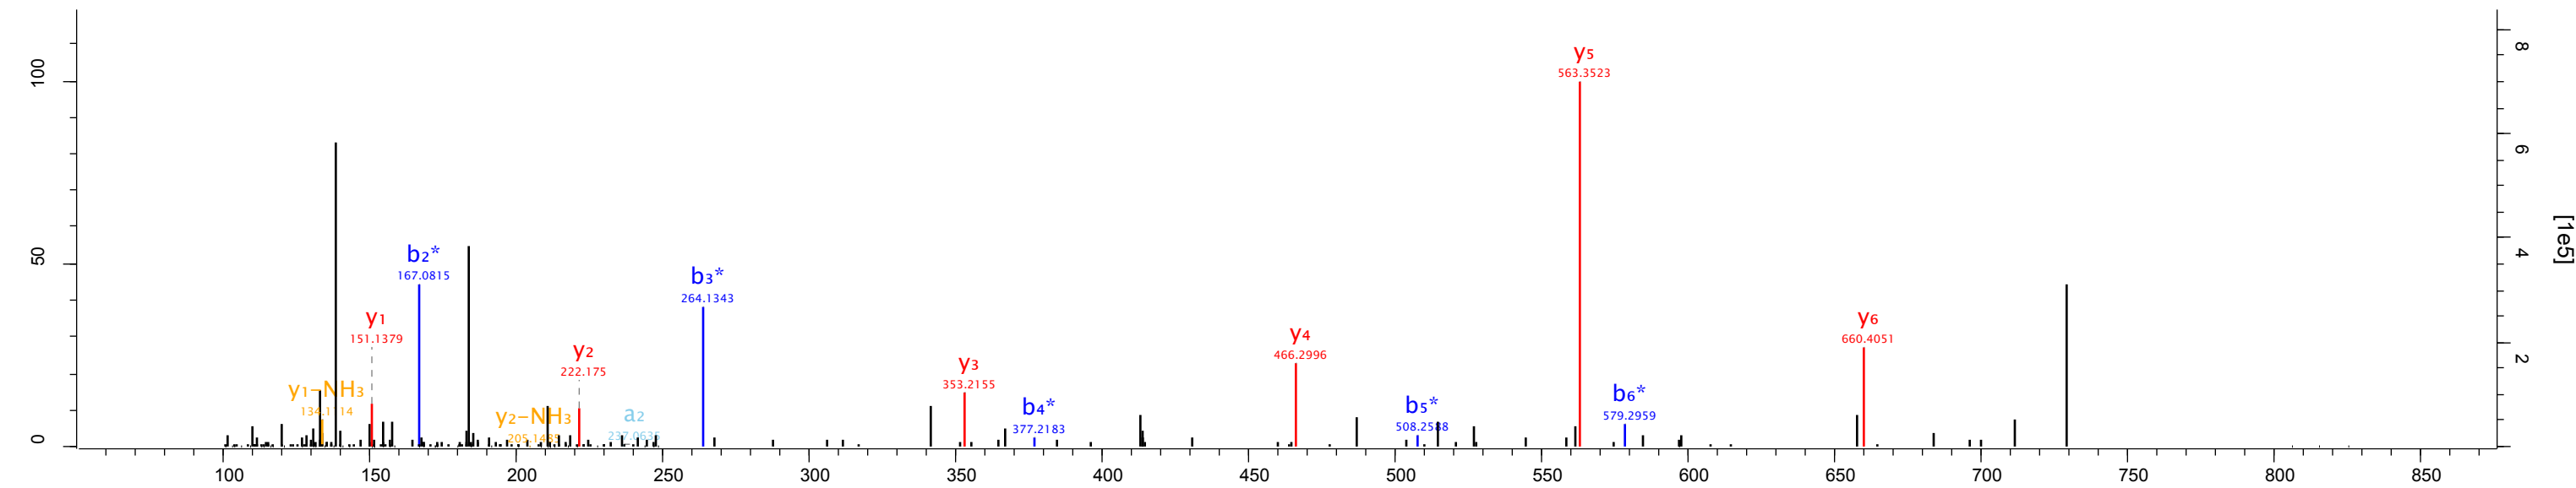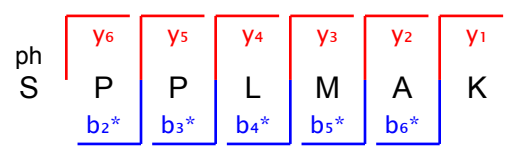

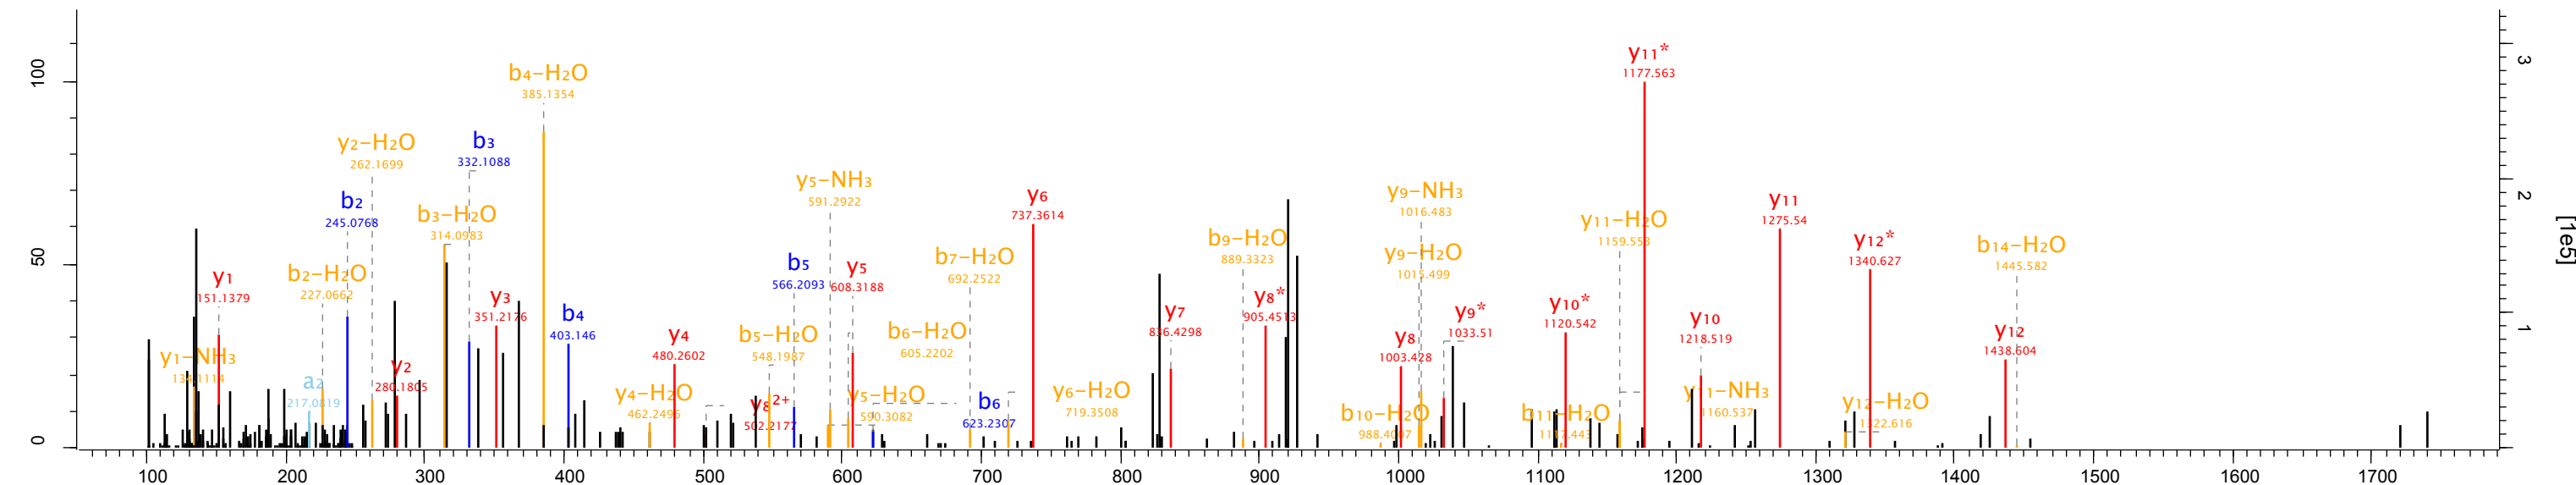

- E D S A Y G S Q S<sub>ph</sub> V E Q E A E K -

Fragmentation labels below the sequence:

- b<sub>2</sub> (under D)
- b<sub>3</sub> (under S)
- b<sub>4</sub> (under A)
- b<sub>5</sub> (under Y)
- b<sub>6</sub> (under G)
- y<sub>12</sub> (under Y)
- y<sub>11</sub> (under G)
- y<sub>10</sub> (under S)
- y<sub>9</sub>\* (under Q)
- y<sub>8</sub> (under S<sub>ph</sub>)
- y<sub>7</sub> (under V)
- y<sub>6</sub> (under E)
- y<sub>5</sub> (under Q)
- y<sub>4</sub> (under E)
- y<sub>3</sub> (under A)
- y<sub>2</sub> (under E)
- y<sub>1</sub> (under K)

Raw file 20171215\_MaS\_33SR\_LMH\_phospho2\_02 Scan 6127 Method FTMS; HCD Score 192.5 m/z 1152.48 Gene names CLUH

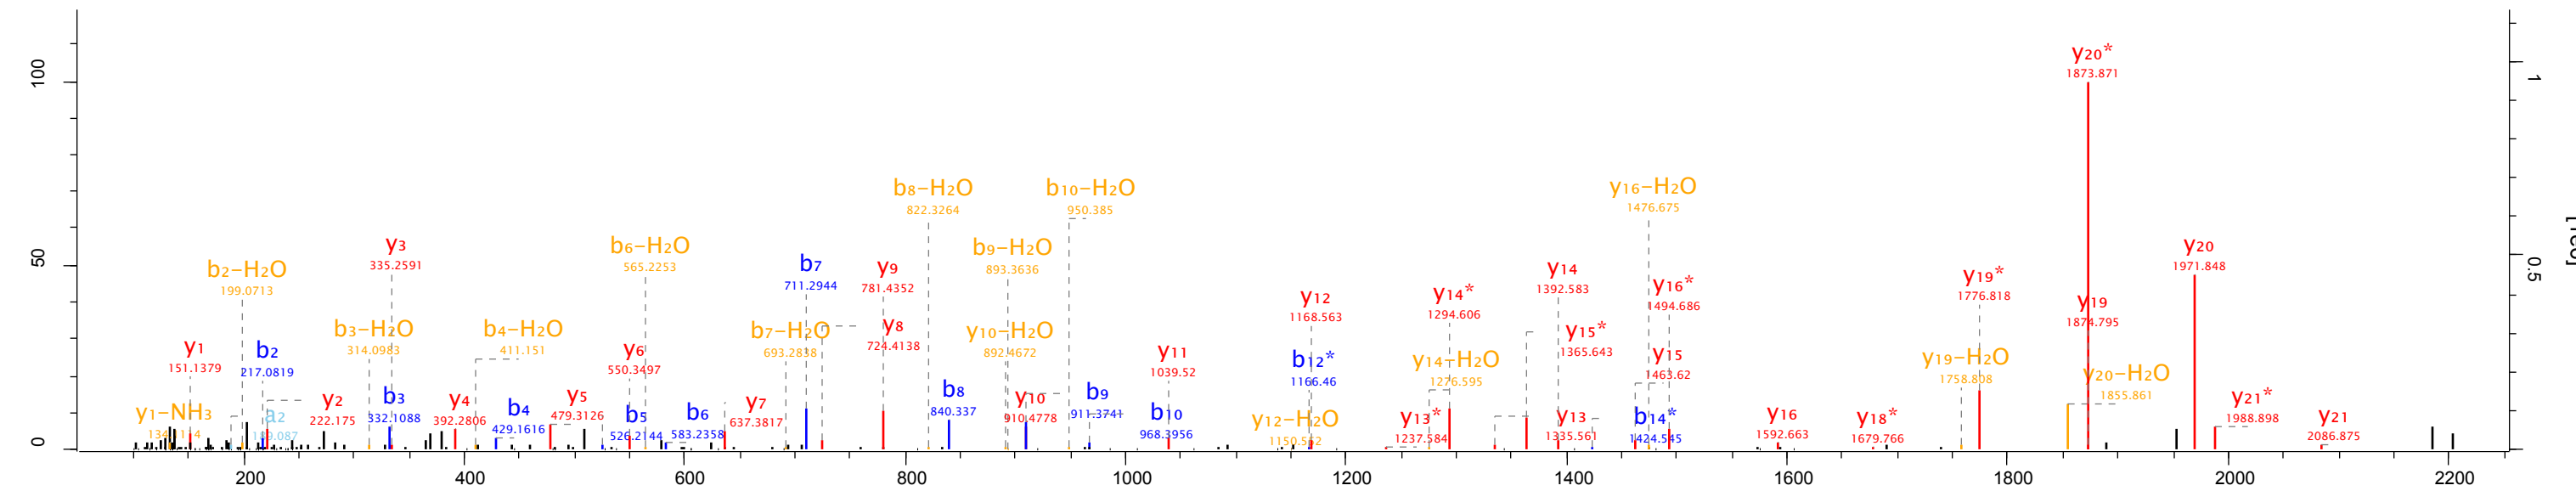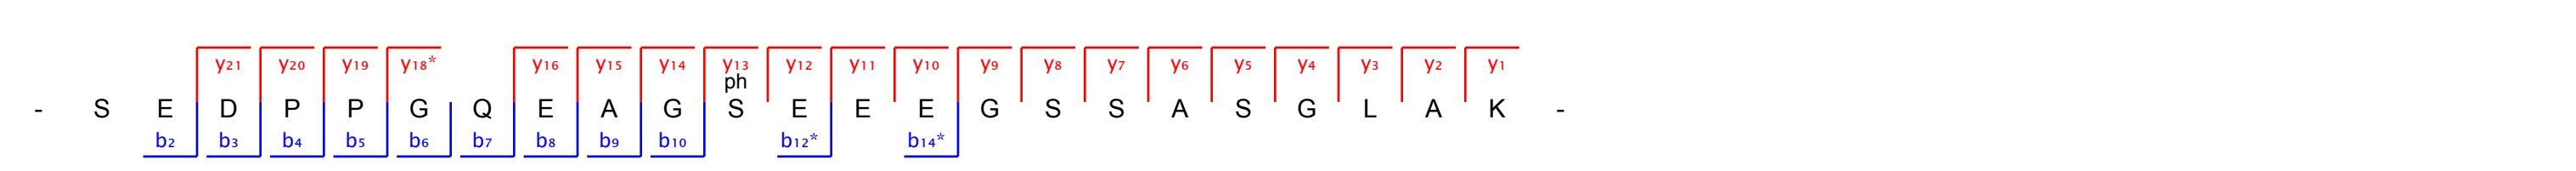

Raw file: 20171215\_MaS\_33SR\_LMH\_phospho2\_02  
 Scan: 6137 Method: FTMS; HCD Score: 125.83 m/z: 449.21 Gene names: PIK3C2A

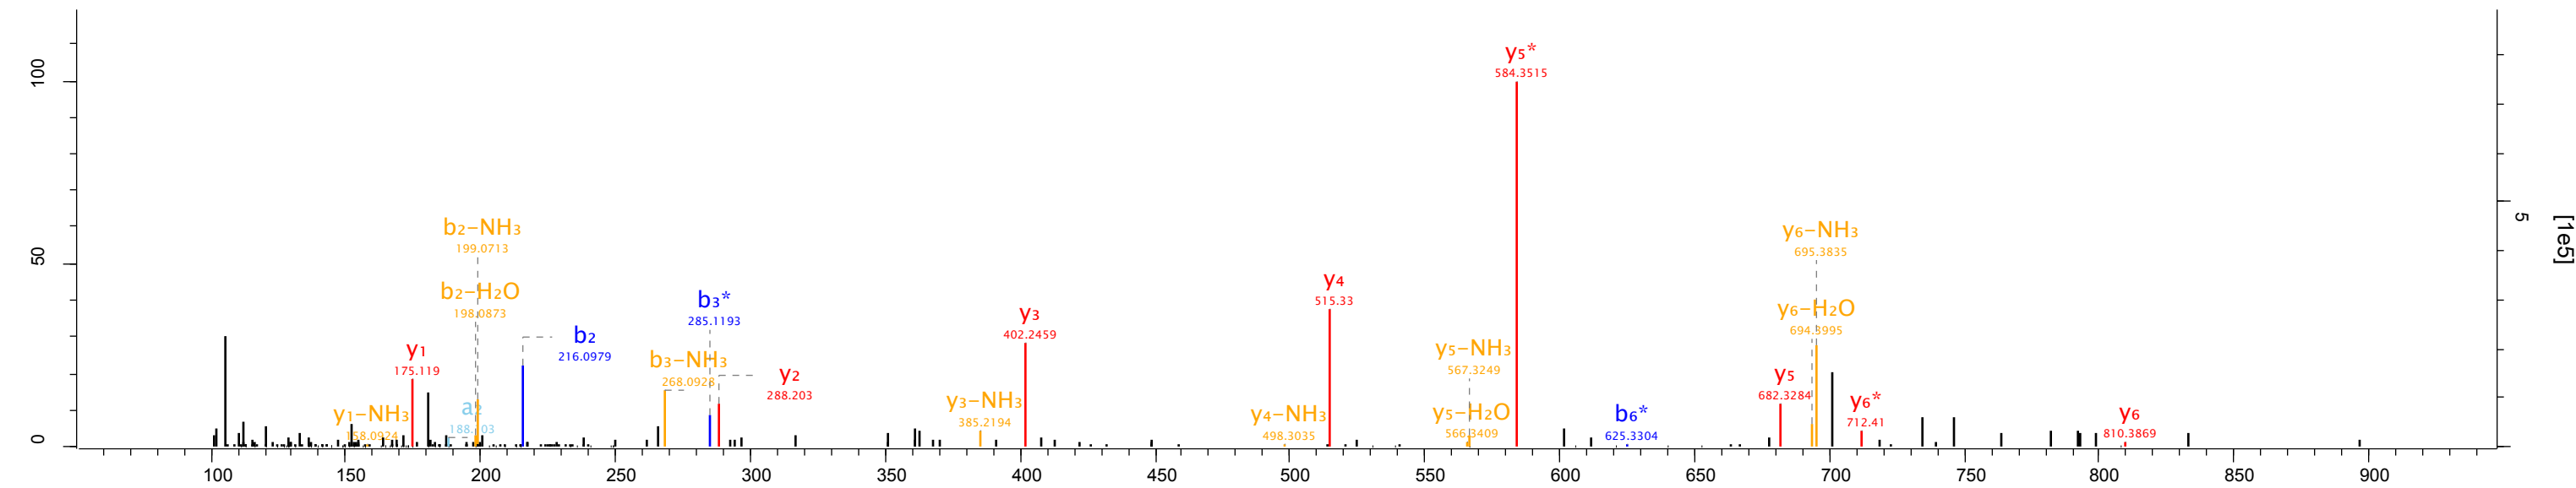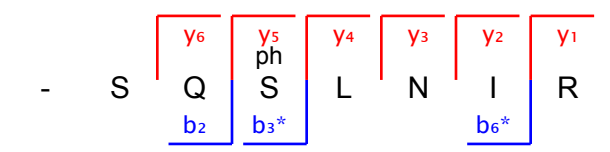

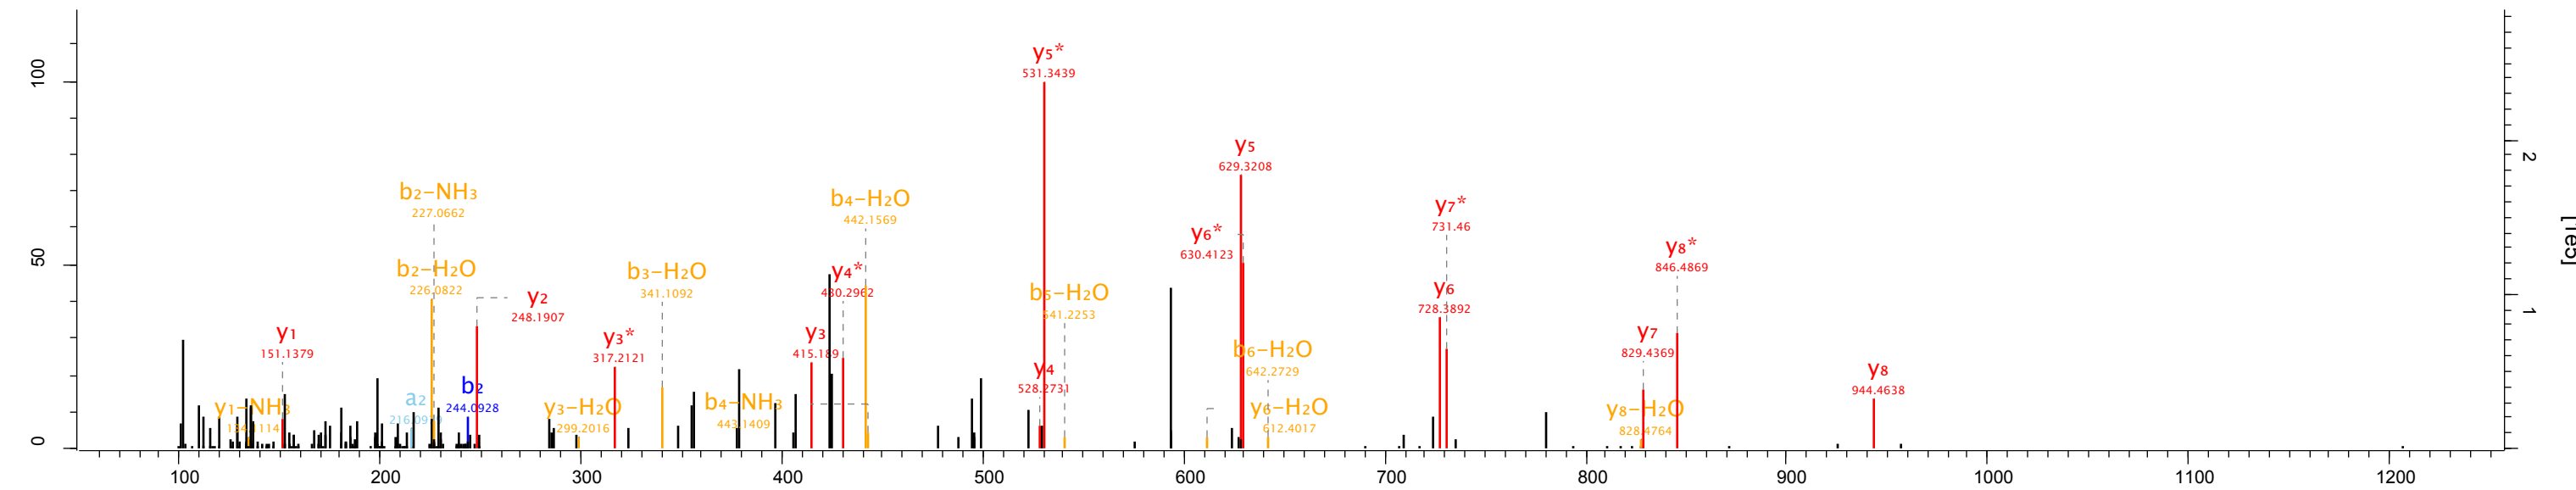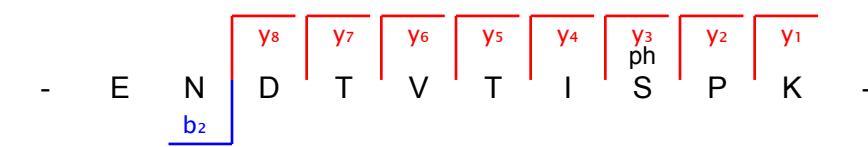

Raw file: 20171215\_MaS\_33SR\_LMH\_phospho2\_02  
 Scan: 6467 Method: FTMS; HCD Score: 84.82 m/z: 502.23 Gene names: GIGYF1

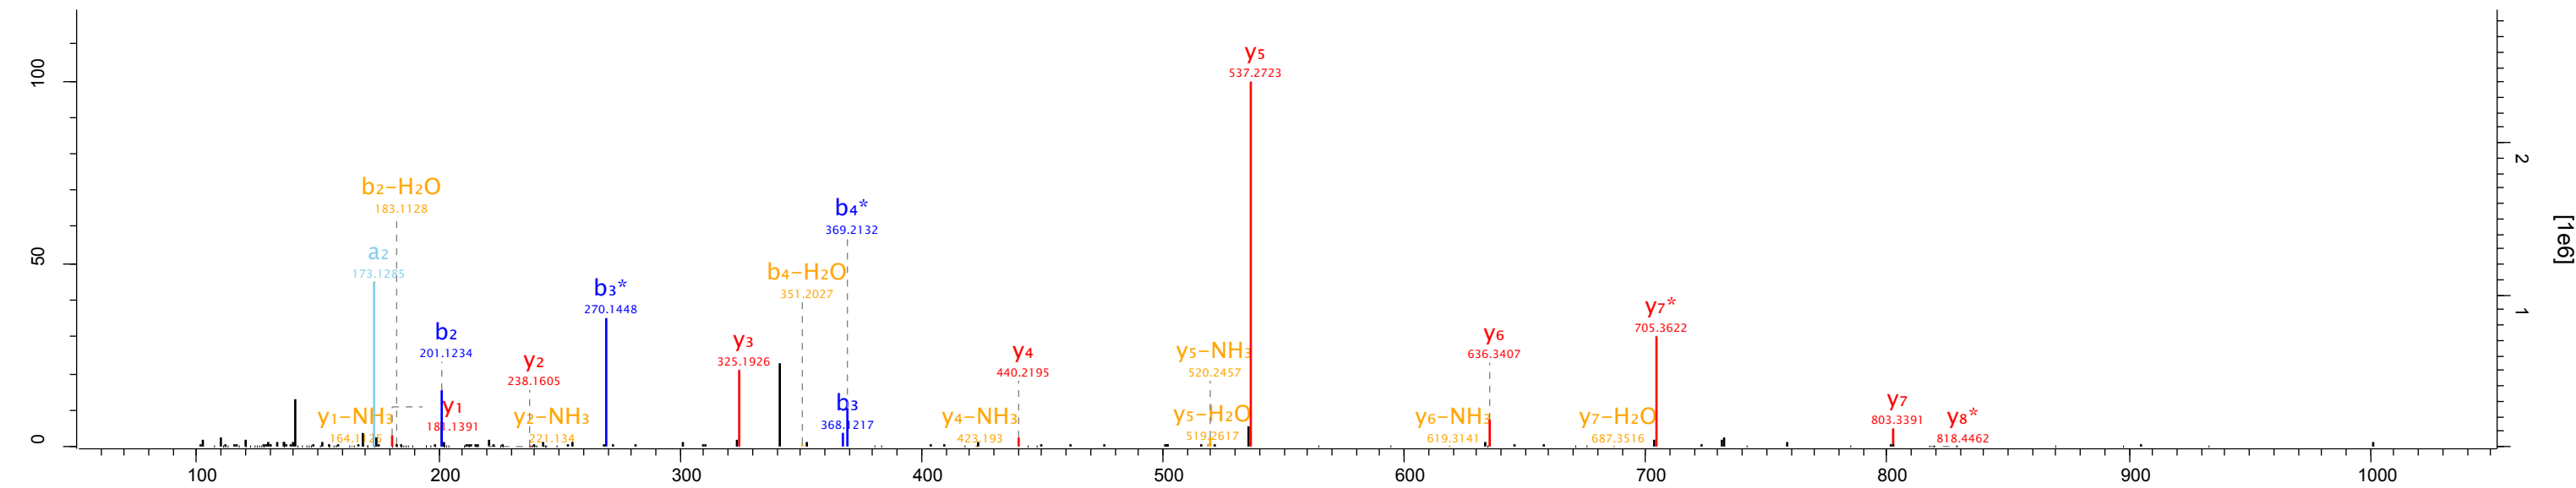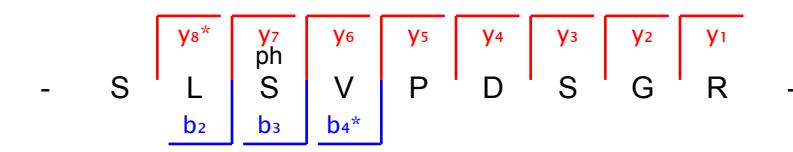

Raw file 20171215\_MaS\_33SR\_LMH\_phospho2\_02 Scan 6587 Method FTMS; HCD Score 120.87 m/z 439.21 Gene names KLC2

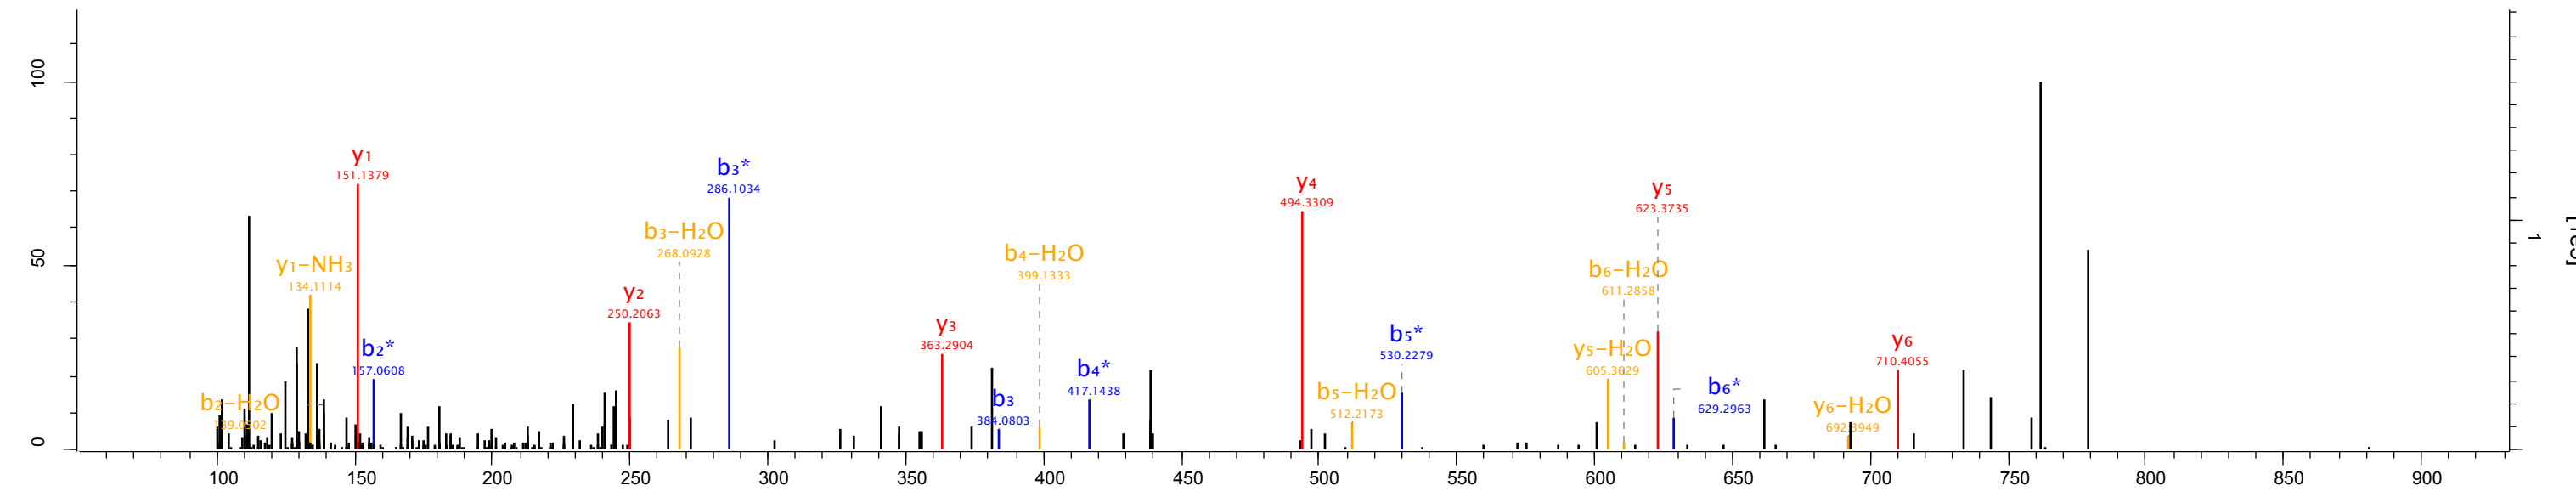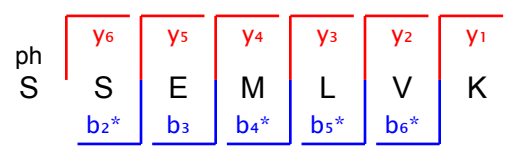

Raw file 20171215\_MaS\_33SR\_LMH\_phospho2\_02 Scan 7237 Method FTMS; HCD Score 50.46 m/z 1002.1 Gene names RAD23A

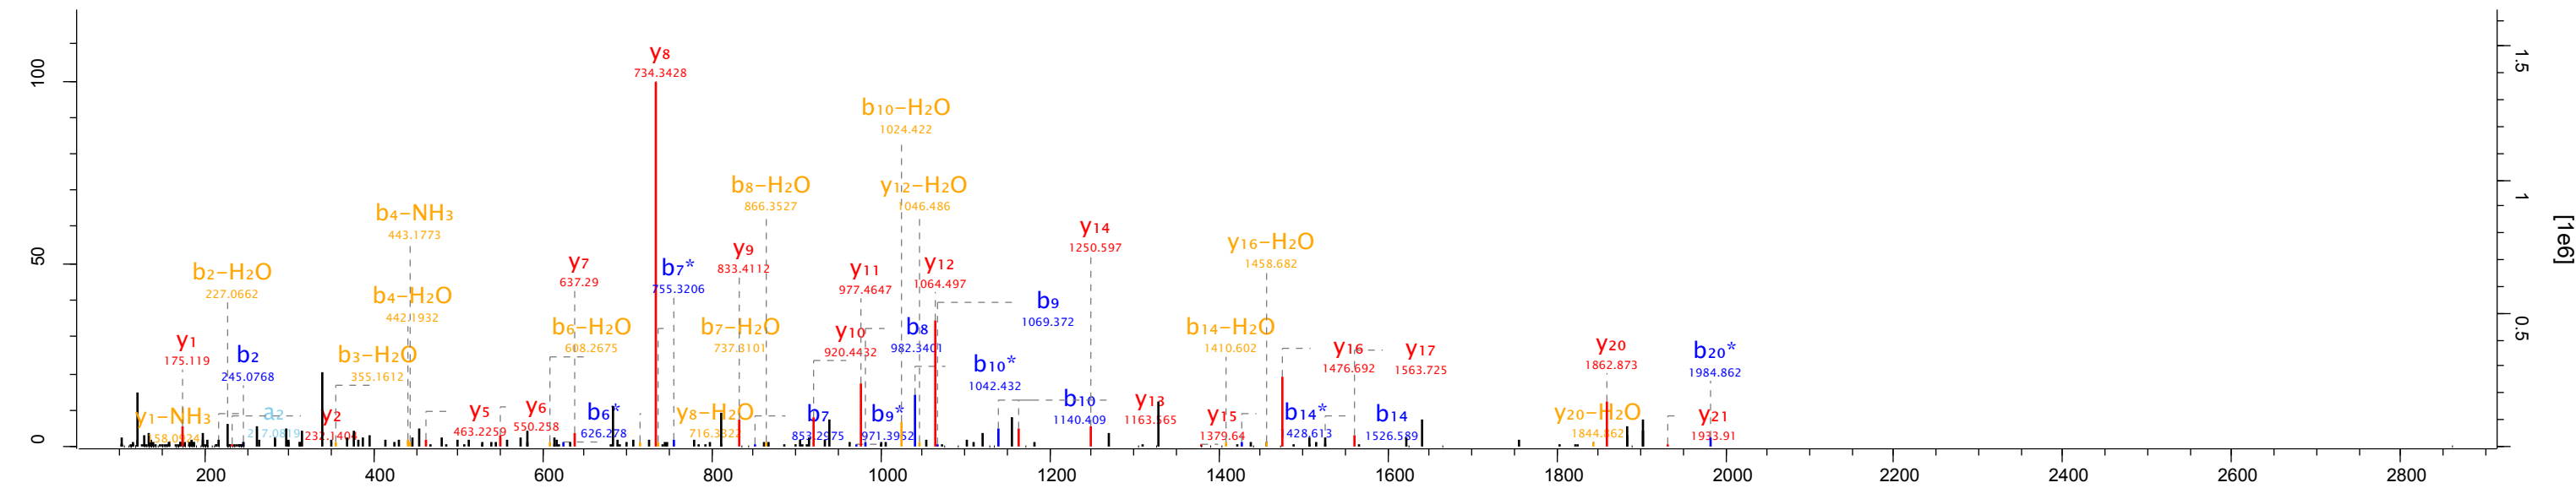

- E D K S P S E E S A P T T S P E S V S G S V P S S G S S G R -

Fragmentation mapping (b and y ions) is shown below the sequence:

- b<sub>2</sub> (D)
- b<sub>6</sub><sup>\*</sup> (S)
- b<sub>7</sub> (E)
- b<sub>8</sub> (E)
- b<sub>9</sub> (S)
- b<sub>10</sub> (A)
- b<sub>14</sub> (S)
- b<sub>20</sub><sup>\*</sup> (G)
- y<sub>1</sub> (R)
- y<sub>2</sub> (G)
- y<sub>5</sub> (G)
- y<sub>6</sub> (S)
- y<sub>7</sub> (S)
- y<sub>8</sub> (P)
- y<sub>9</sub> (V)
- y<sub>10</sub> (S)
- y<sub>11</sub> (G)
- y<sub>12</sub> (S)
- y<sub>13</sub> (V)
- y<sub>14</sub> (S)
- y<sub>15</sub> (E)
- y<sub>16</sub> (P)
- y<sub>17</sub> (S)
- y<sub>20</sub> (P)
- y<sub>21</sub> (A)



Raw file  
20171215\_MaS\_33SR\_LMH\_phospho2\_02

Scan 8037 Method FTMS; HCD Score 171.39 m/z 658.67 Gene names THRAP3

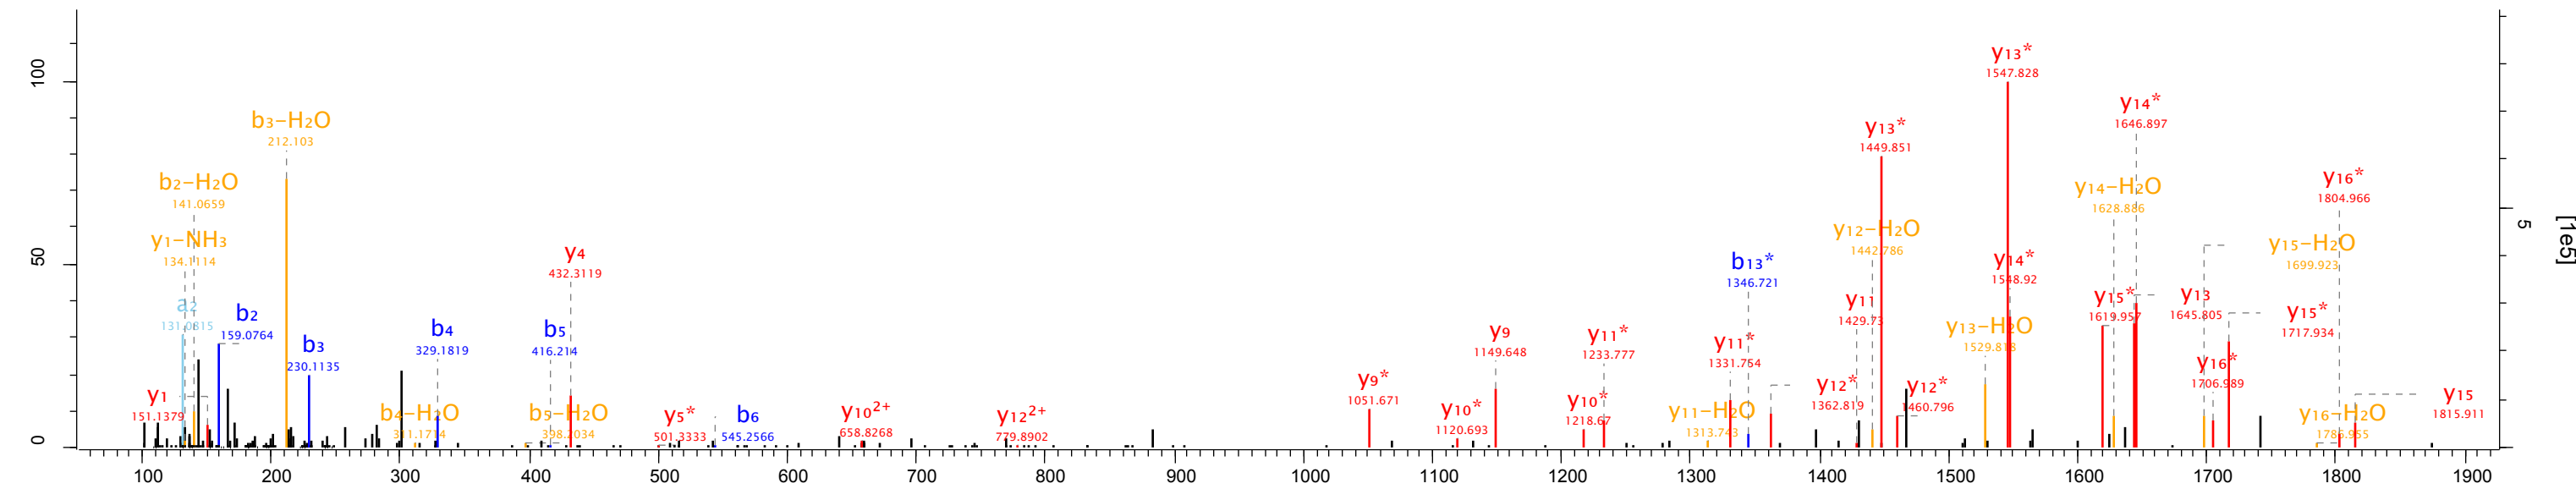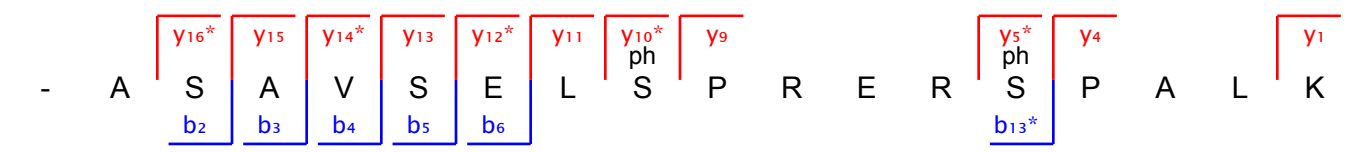

Raw file  
20171215\_MaS\_33SR\_LMH\_phospho2\_02

Scan 8397 Method FTMS; HCD Score 228.86 m/z 932.41 Gene names HDLBP

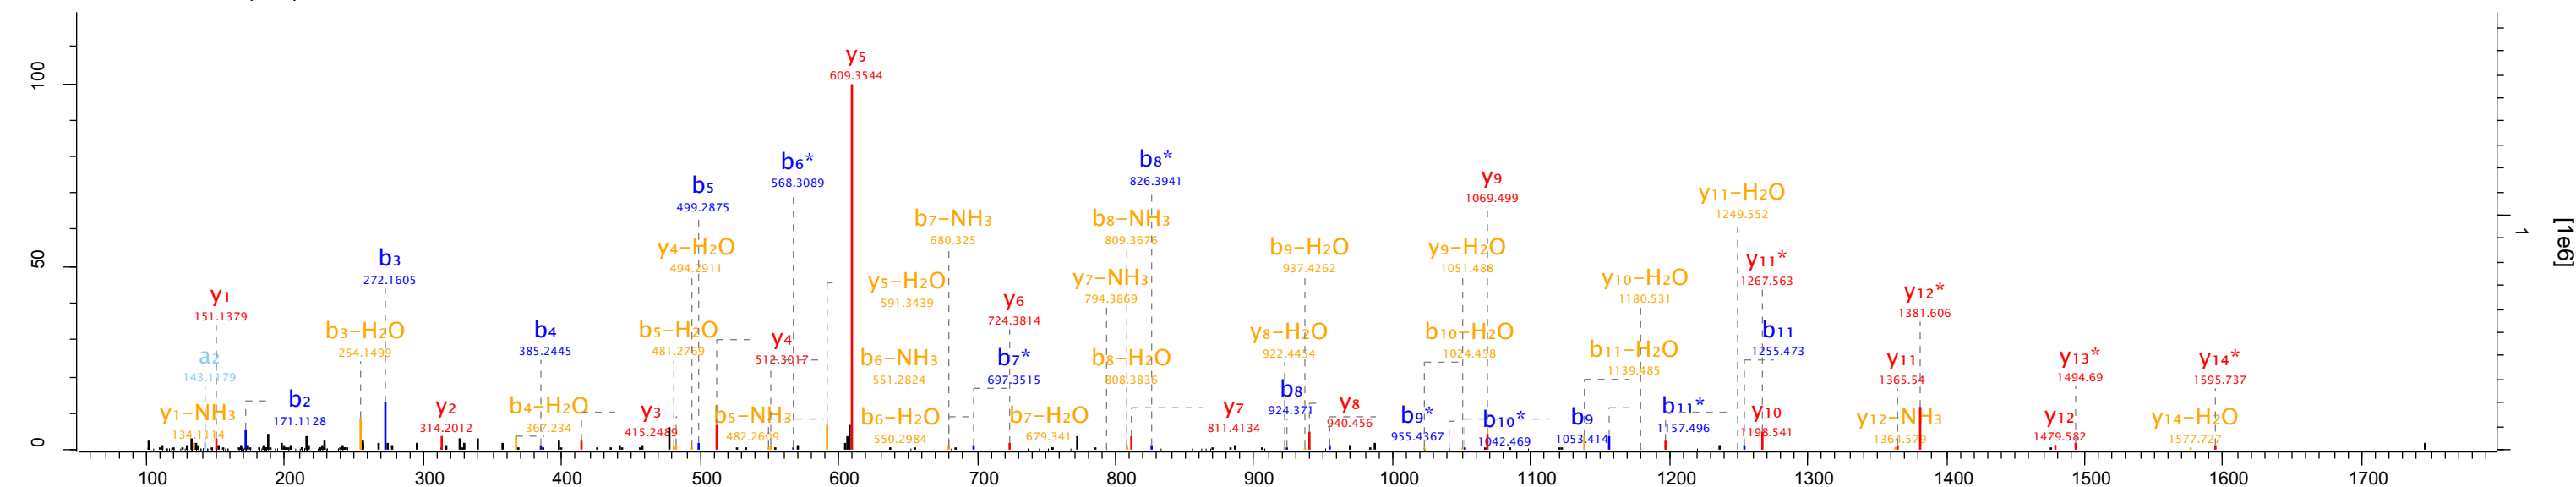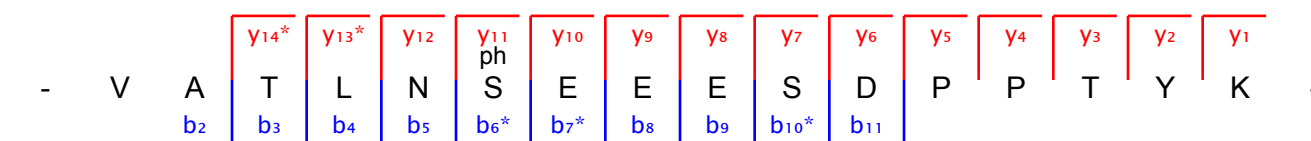

Raw file 20171215\_MaS\_33SR\_LMH\_phospho2\_02 Scan 8517 Method FTMS; HCD Score 98.34 m/z 574.27 Gene names RASSF8

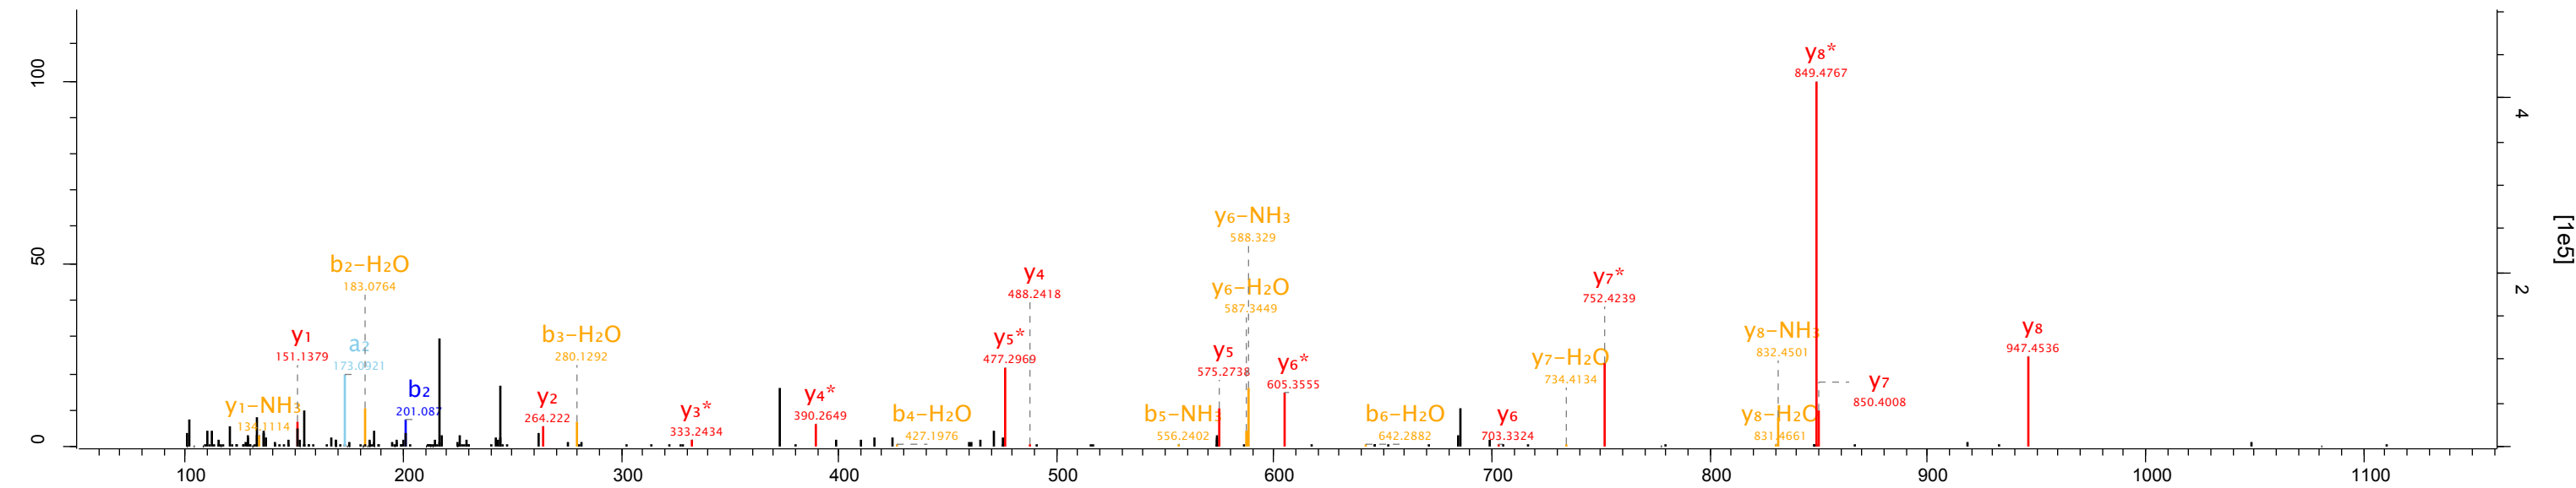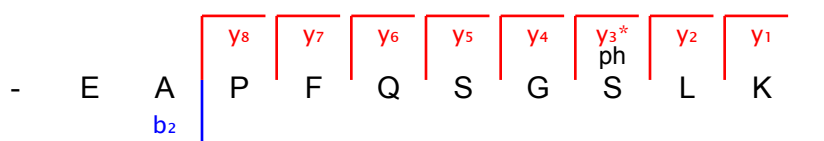

Raw file  
20171215\_MaS\_33SR\_LMH\_phospho2\_02

Scan 9097 Method FTMS; HCD Score 42.71 m/z 576.59

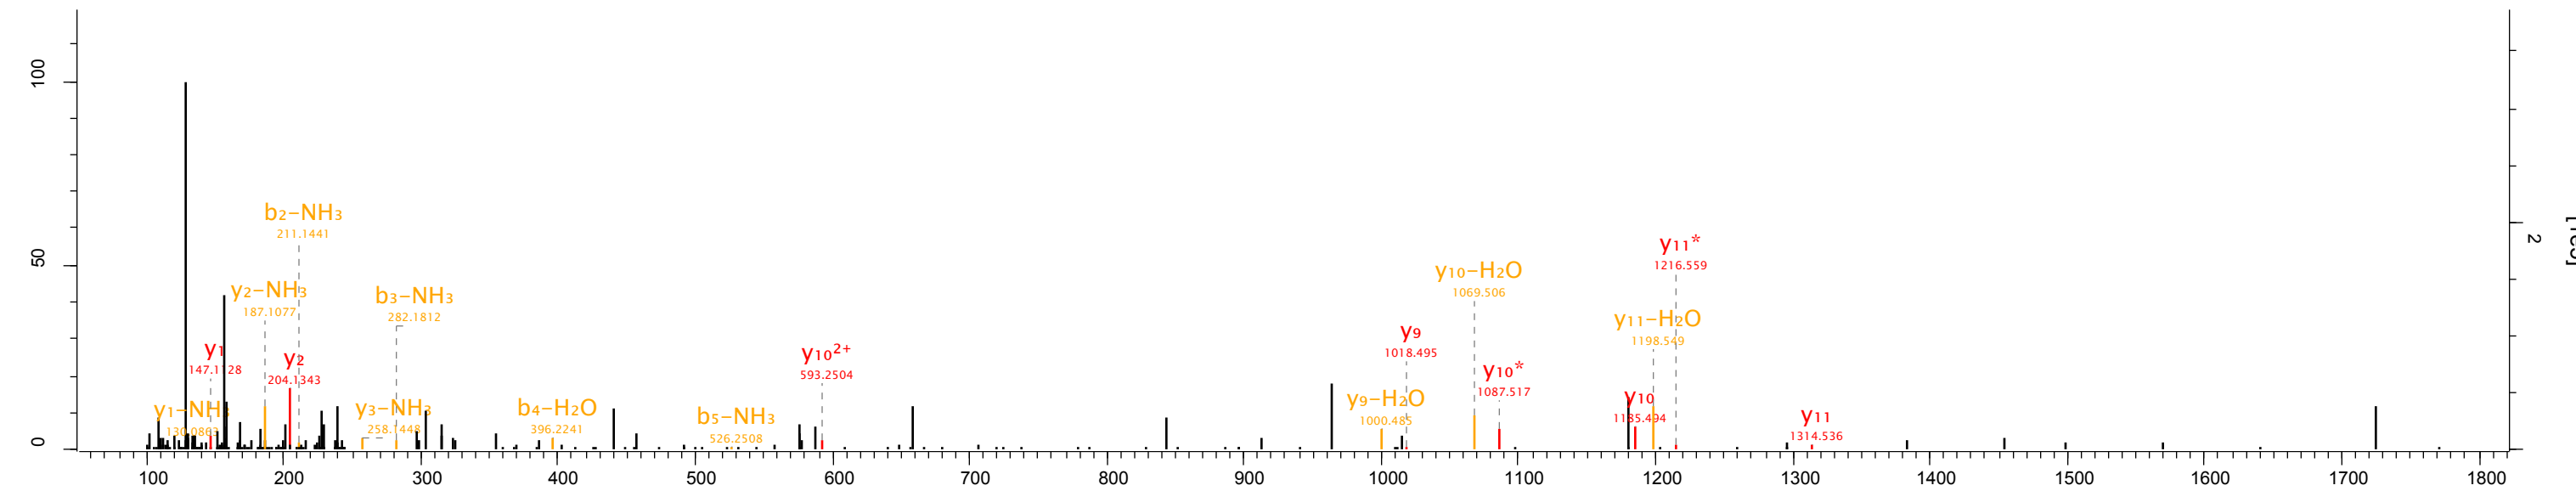

- K V A D E S Y S D L Q H A G K -

Red brackets above the sequence indicate fragmentation sites: y11 (E), y10 ph (S), y9 (Y), y2 (G), and y1 (K).

Raw file 20171215\_MaS\_33SR\_LMH\_phospho2\_02 Scan 9197 Method FTMS; HCD Score 135.08 m/z 720.82 Gene names MOCOS

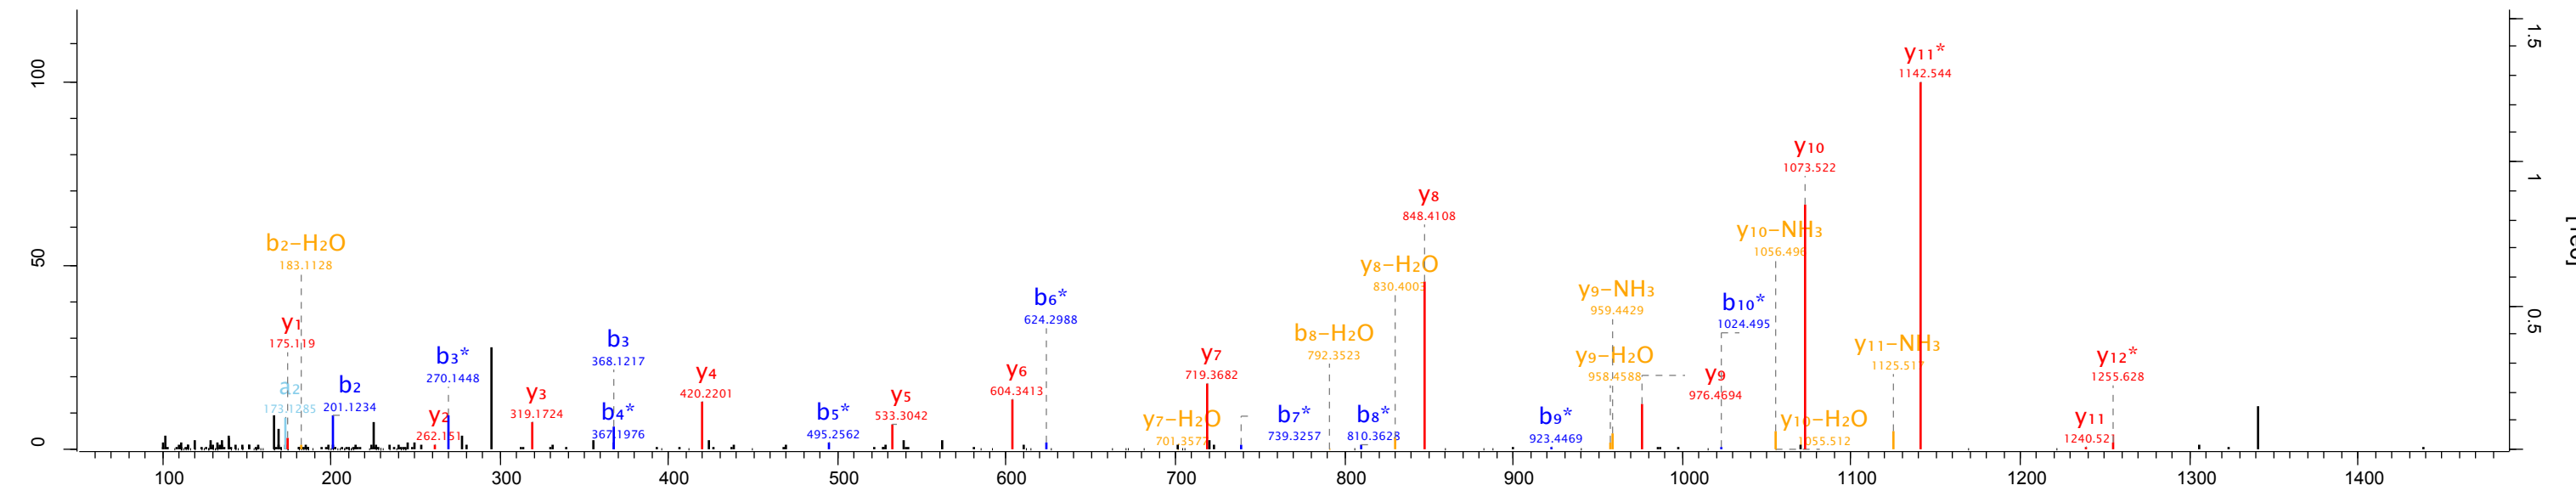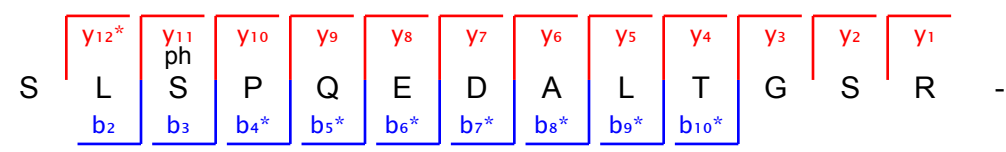

Raw file: 20171215\_MaS\_33SR\_LMH\_phospho2\_02  
 Scan: 9277 Method: FTMS; HCD Score: 147.7 m/z: 642.75 Gene names: HSPA1A

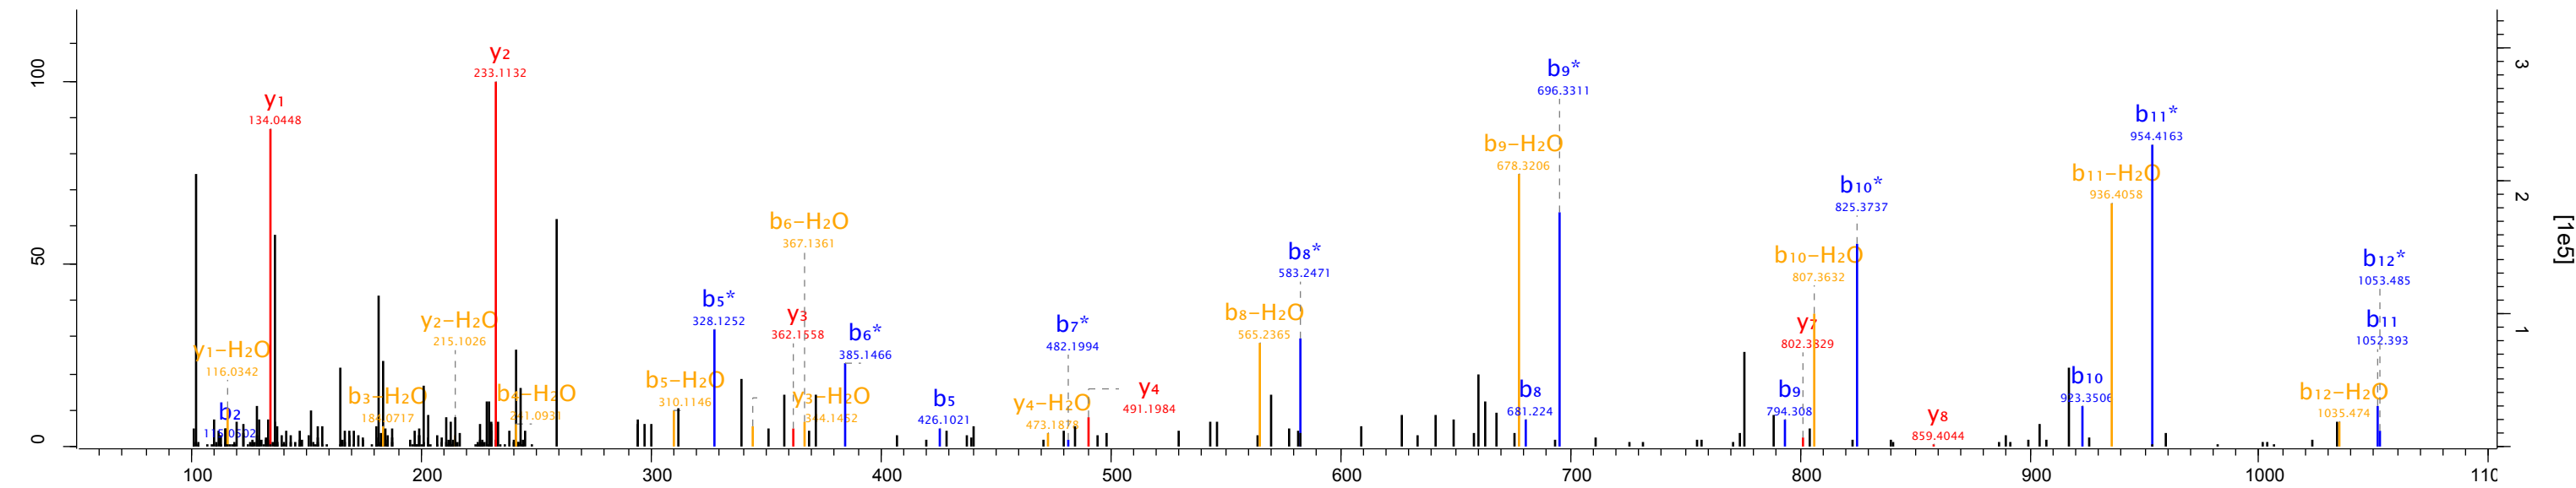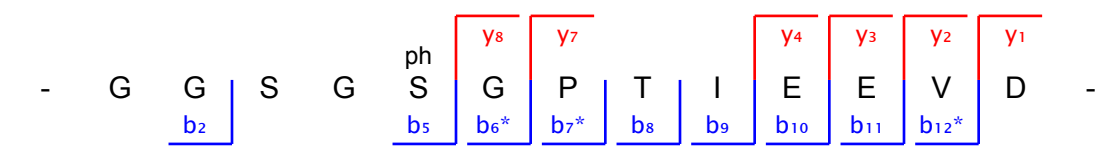

Raw file 20171215\_MaS\_33SR\_LMH\_phospho2\_02 Scan 9487 Method FTMS; HCD Score 150.14 m/z 753.34 Gene names AHNAK2

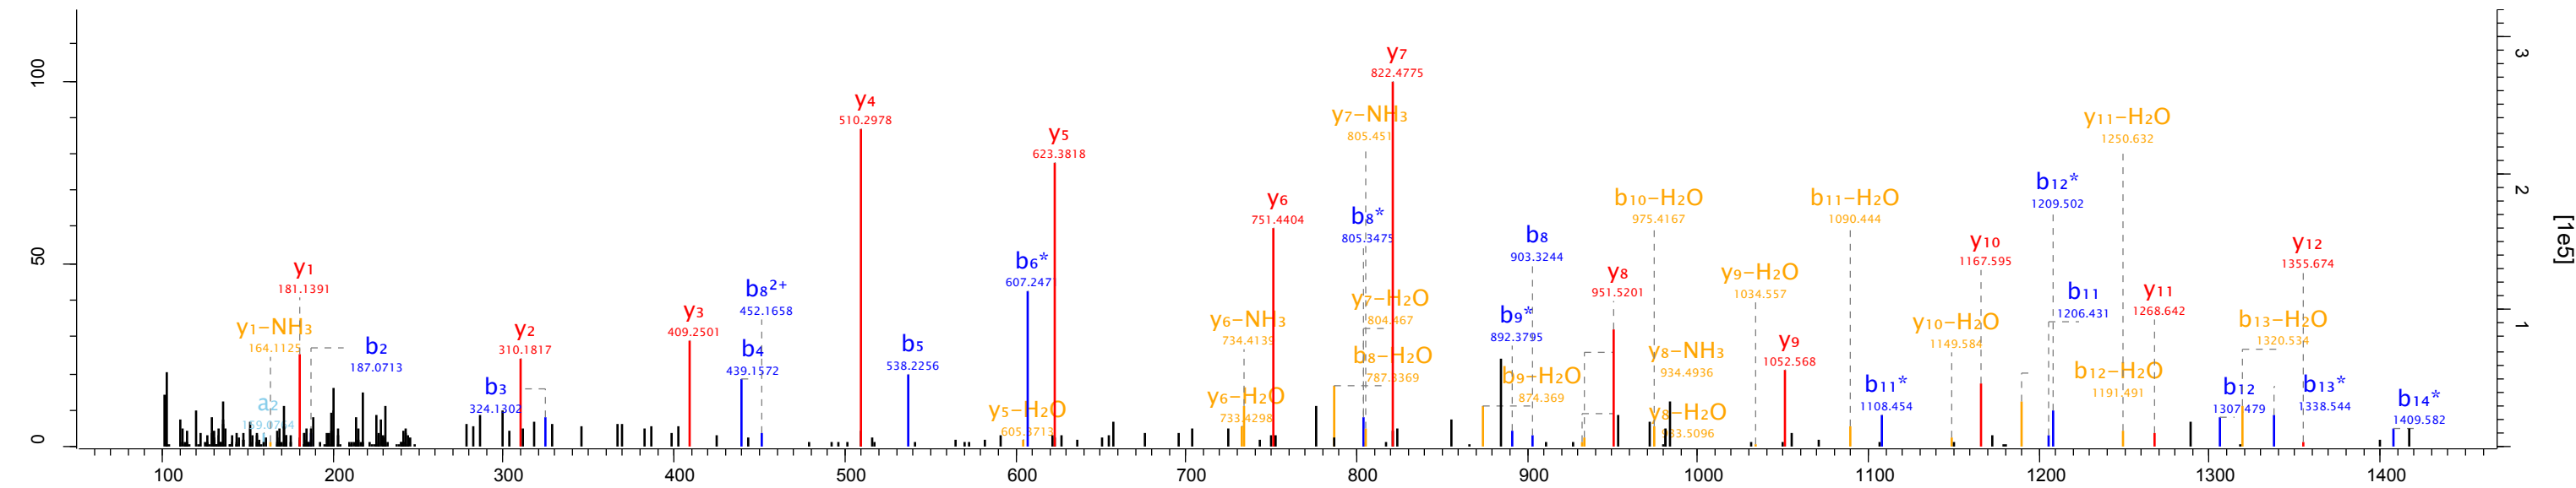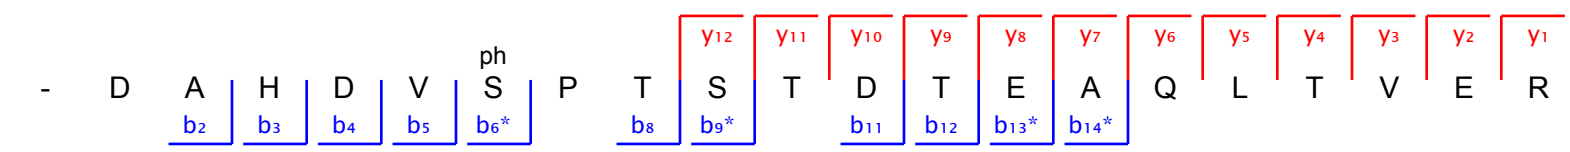

Raw file 20171215\_MaS\_33SR\_LMH\_phospho2\_02 Scan 9557 Method FTMS; HCD Score 125.36 m/z 644.76 Gene names RBM7

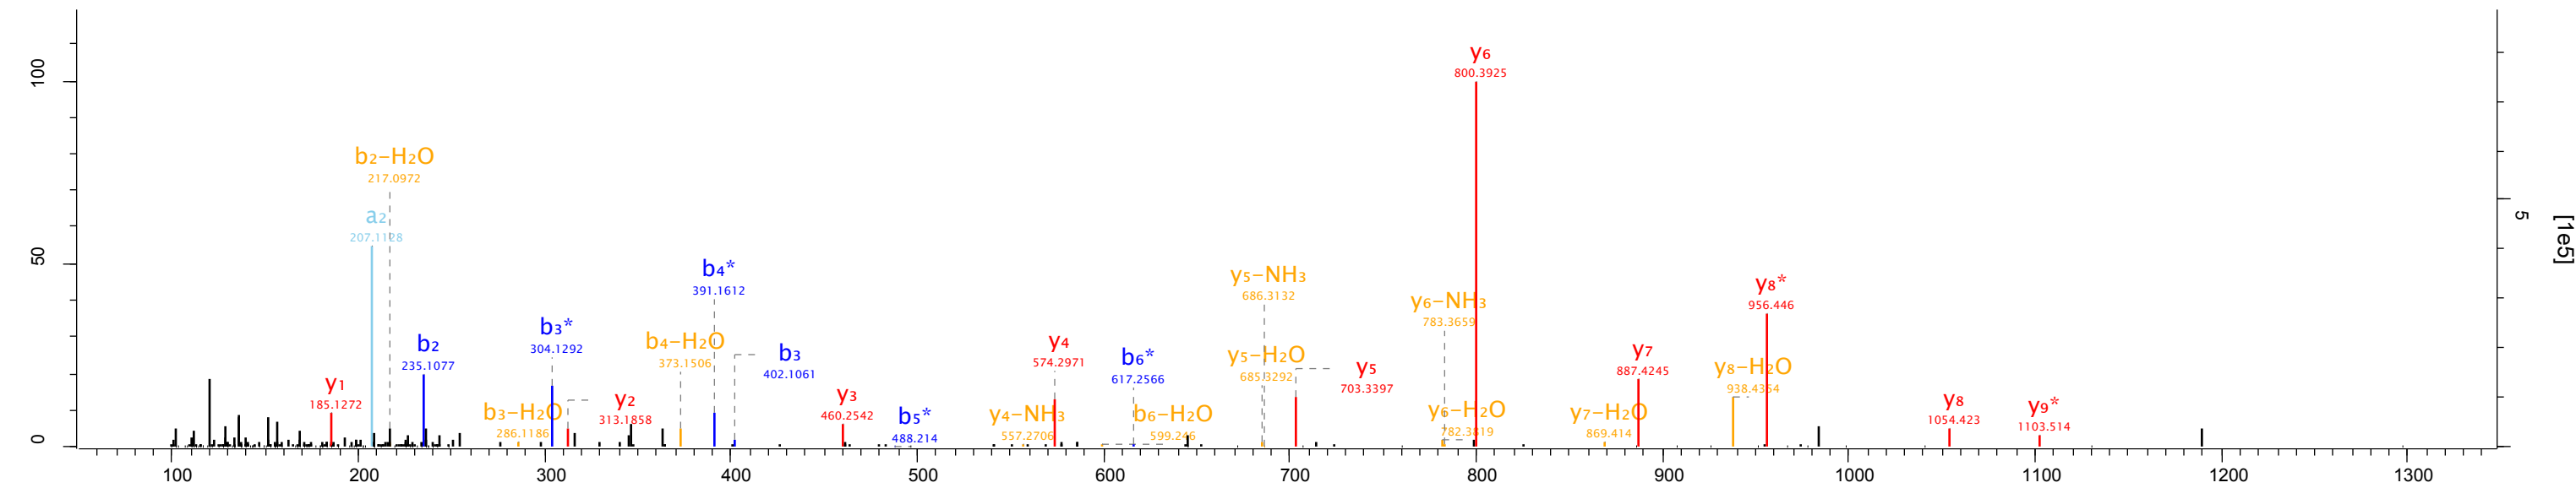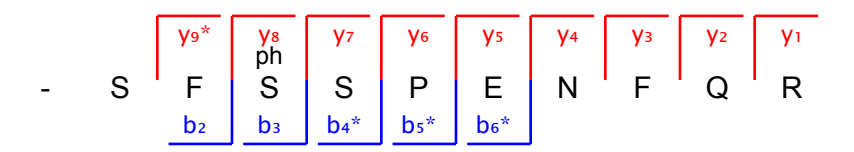



Raw file 20171215\_MaS\_33SR\_LMH\_phospho2\_03 Scan 10127 Method FTMS; HCD Score 64.97 m/z 1122.8 Gene names OGFR

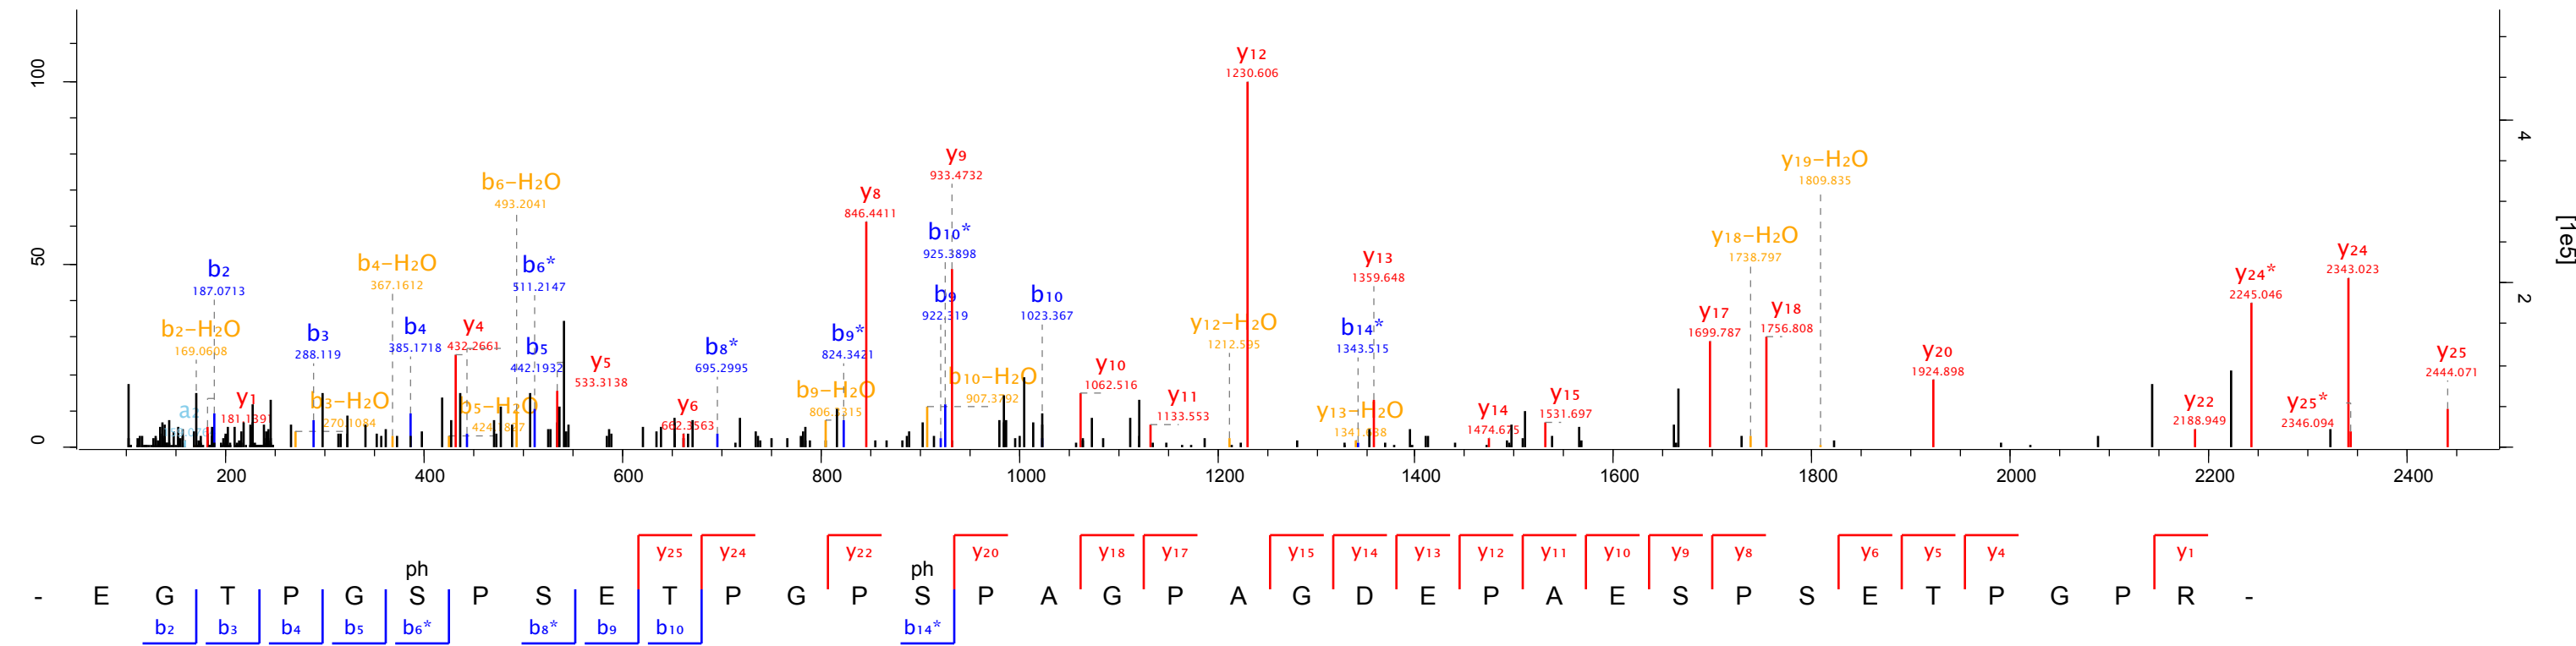

Raw file: 20171215\_MaS\_33SR\_LMH\_phospho2\_03  
 Scan: 10287 Method: FTMS; HCD Score: 102.61 m/z: 763.86 Gene names: PATL1

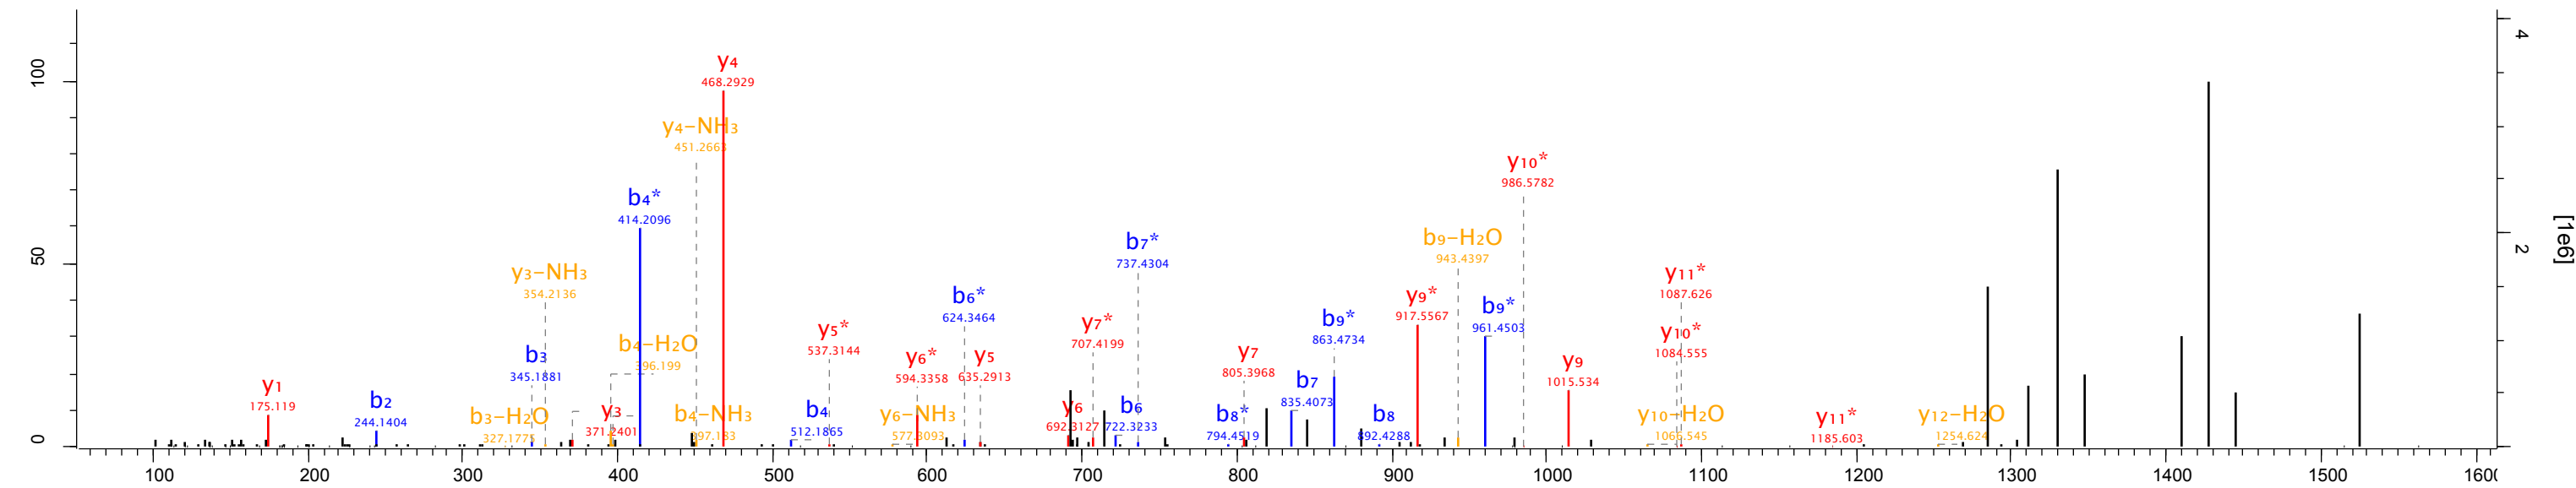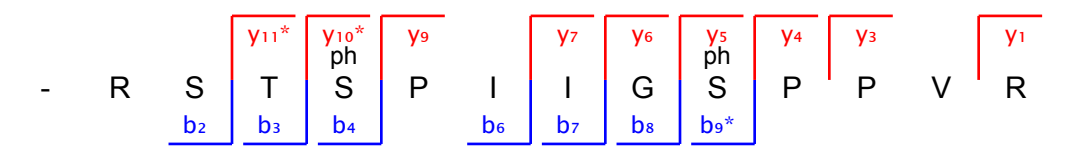

Raw file: 20171215\_MaS\_33SR\_LMH\_phospho2\_03  
 Scan: 10457 Method: FTMS; HCD Score: 228.2 m/z: 1038.47 Gene names: PAGE2;PAGE2B

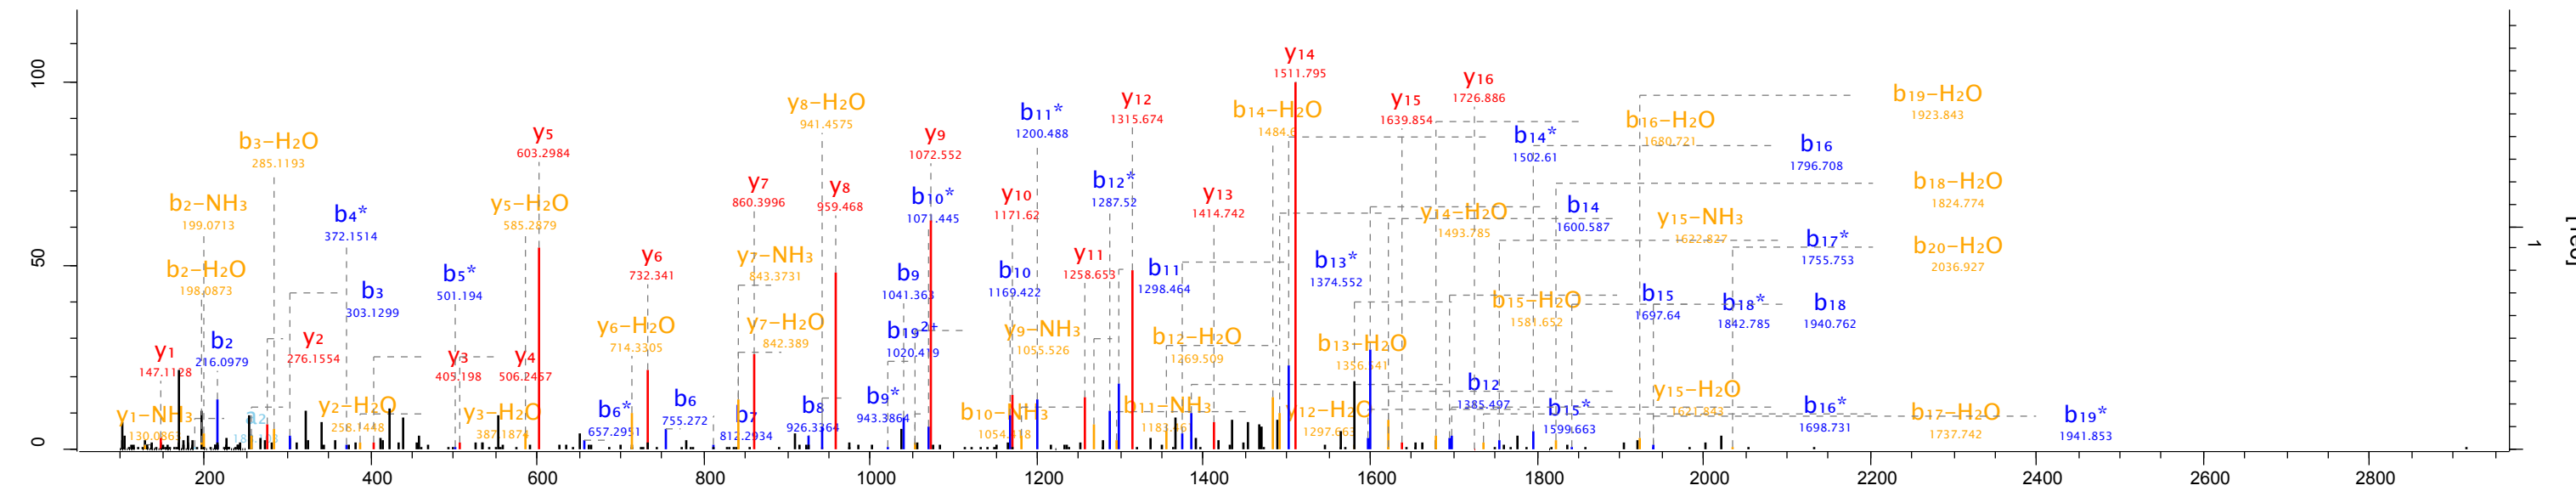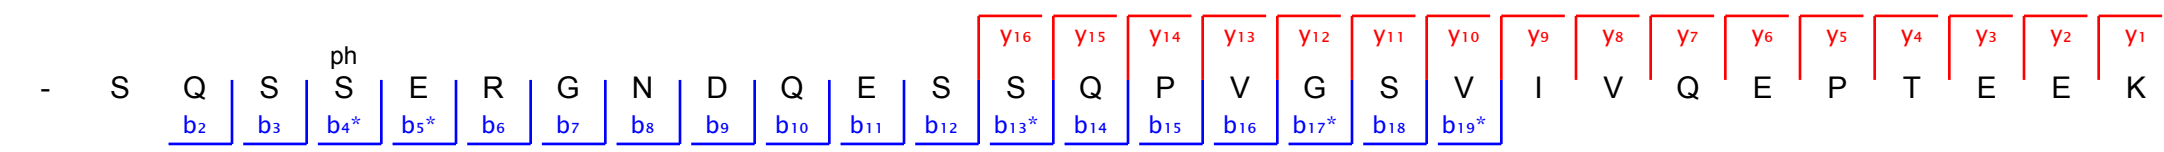

Raw file 20171215\_MaS\_33SR\_LMH\_phospho2\_03 Scan 10487 Method FTMS; HCD Score 268.36 m/z 1121.43 Gene names UTP14A

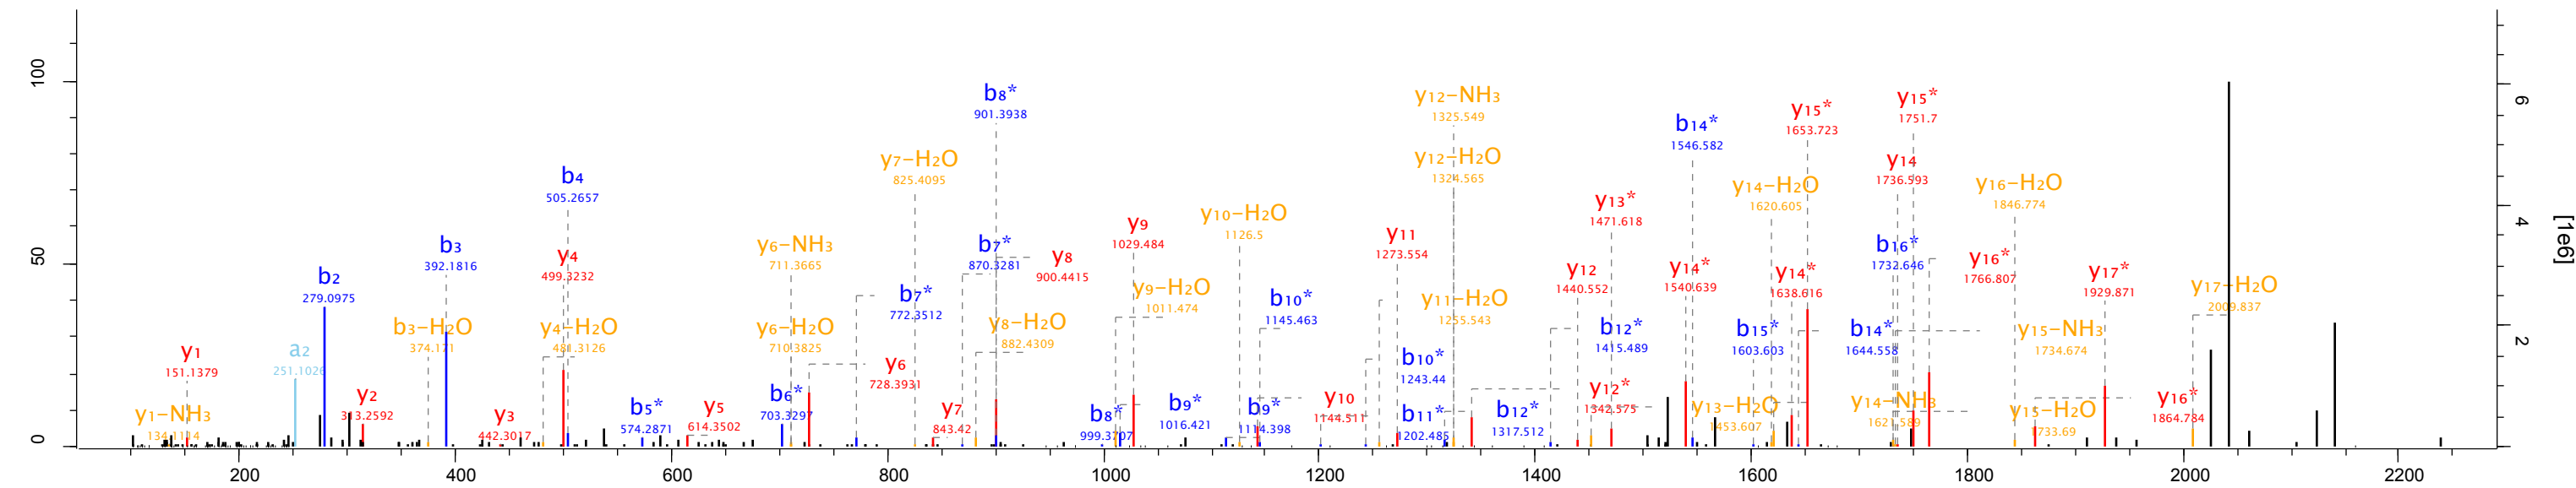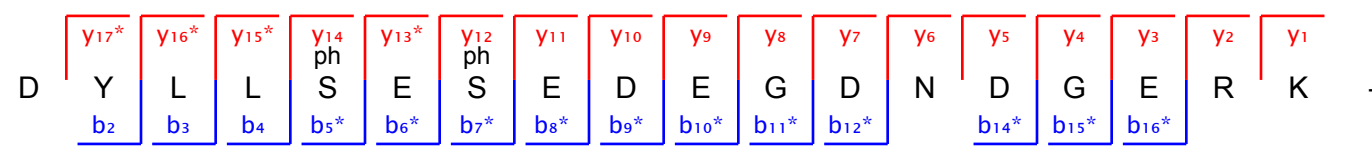

Raw file 20171215\_MaS\_33SR\_LMH\_phospho2\_03 Scan 10647 Method FTMS; HCD Score 263.9 m/z 1059.9 Gene names NOL8

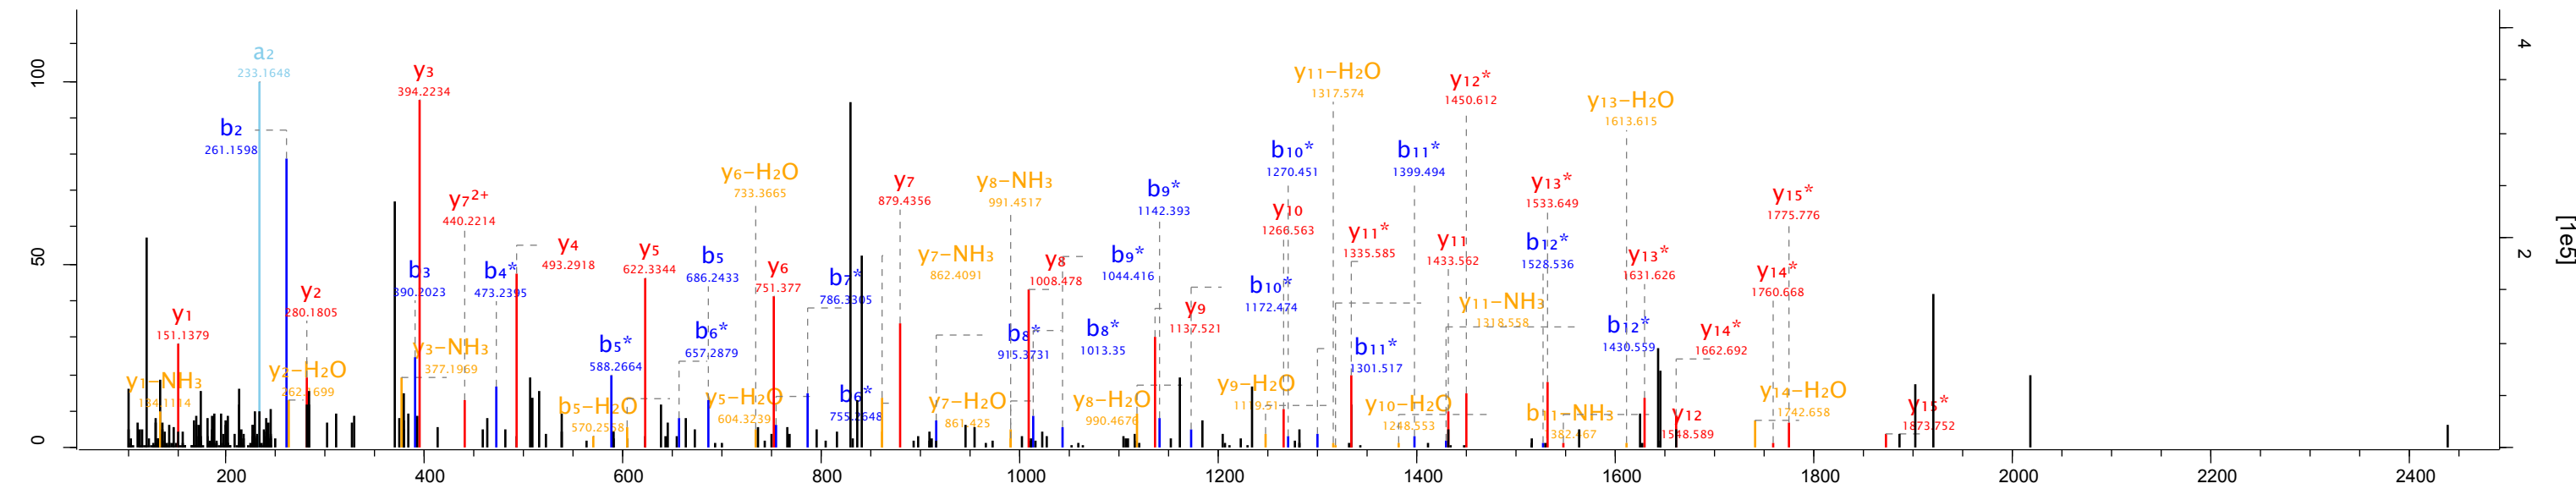

F L E T D S E E E Q E E V N E K

y15\*
y14\*
y13\*
y12
y11
y10
y9
y8
y7
y6
y5
y4
y3
y2
y1

b2
b3
b4\*
b5
b6\*
b7\*
b8\*
b9\*
b10\*
b11\*
b12\*

Raw file 20171215\_MaS\_33SR\_LMH\_phospho2\_03 Scan 10657 Method FTMS; HCD Score 147.26 m/z 1024.39 Gene names RRP9

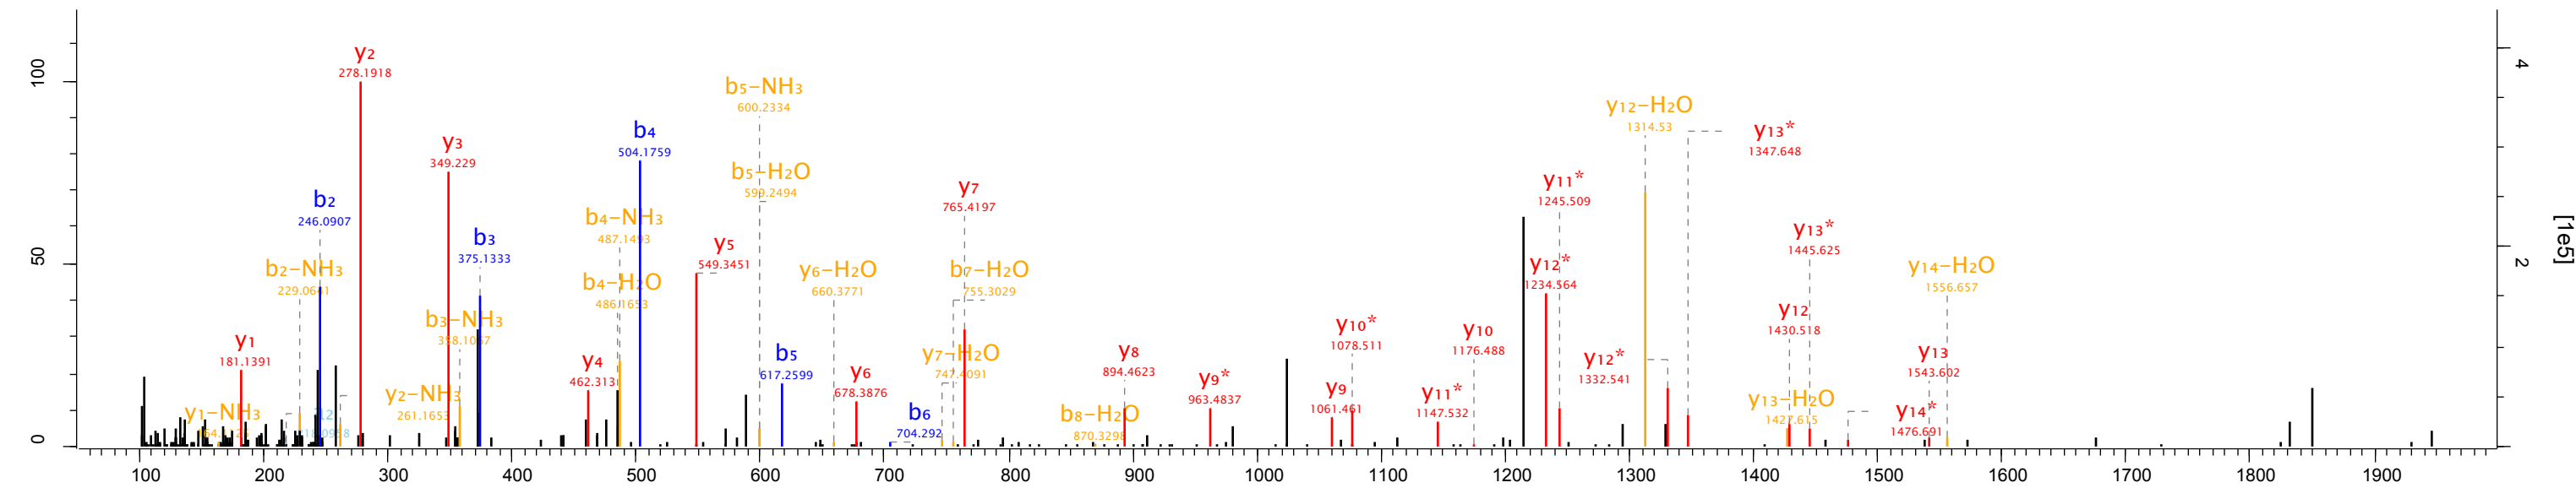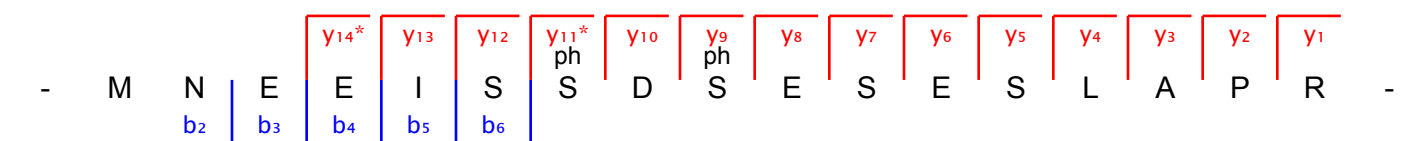

Raw file 20171215\_MaS\_33SR\_LMH\_phospho2\_03 Scan 10787 Method FTMS; HCD Score 261.49 m/z 736.63 Gene names FIP1L1

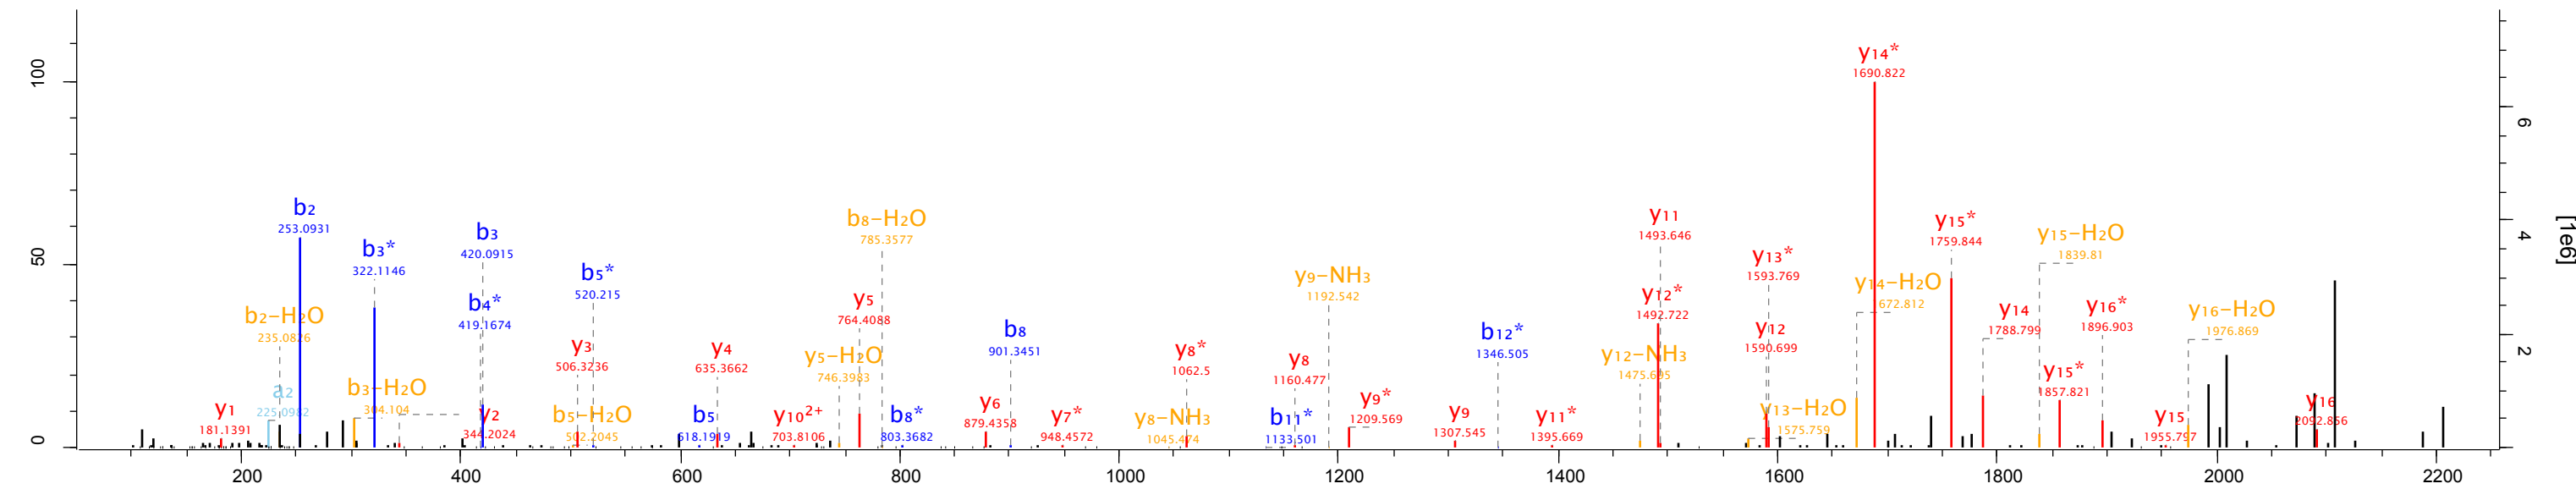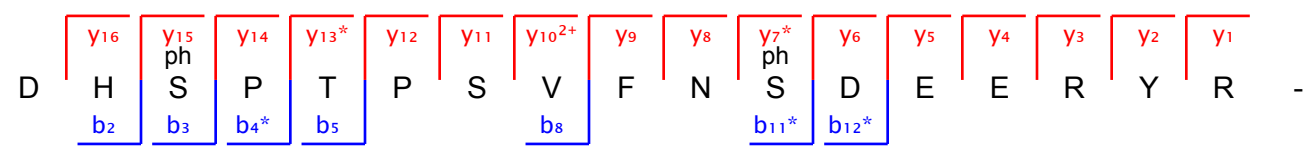

Raw file: 20171215\_MaS\_33SR\_LMH\_phospho2\_03  
 Scan: 10817 Method: FTMS; HCD Score: 192.62 m/z: 958.4 Gene names: PLEC

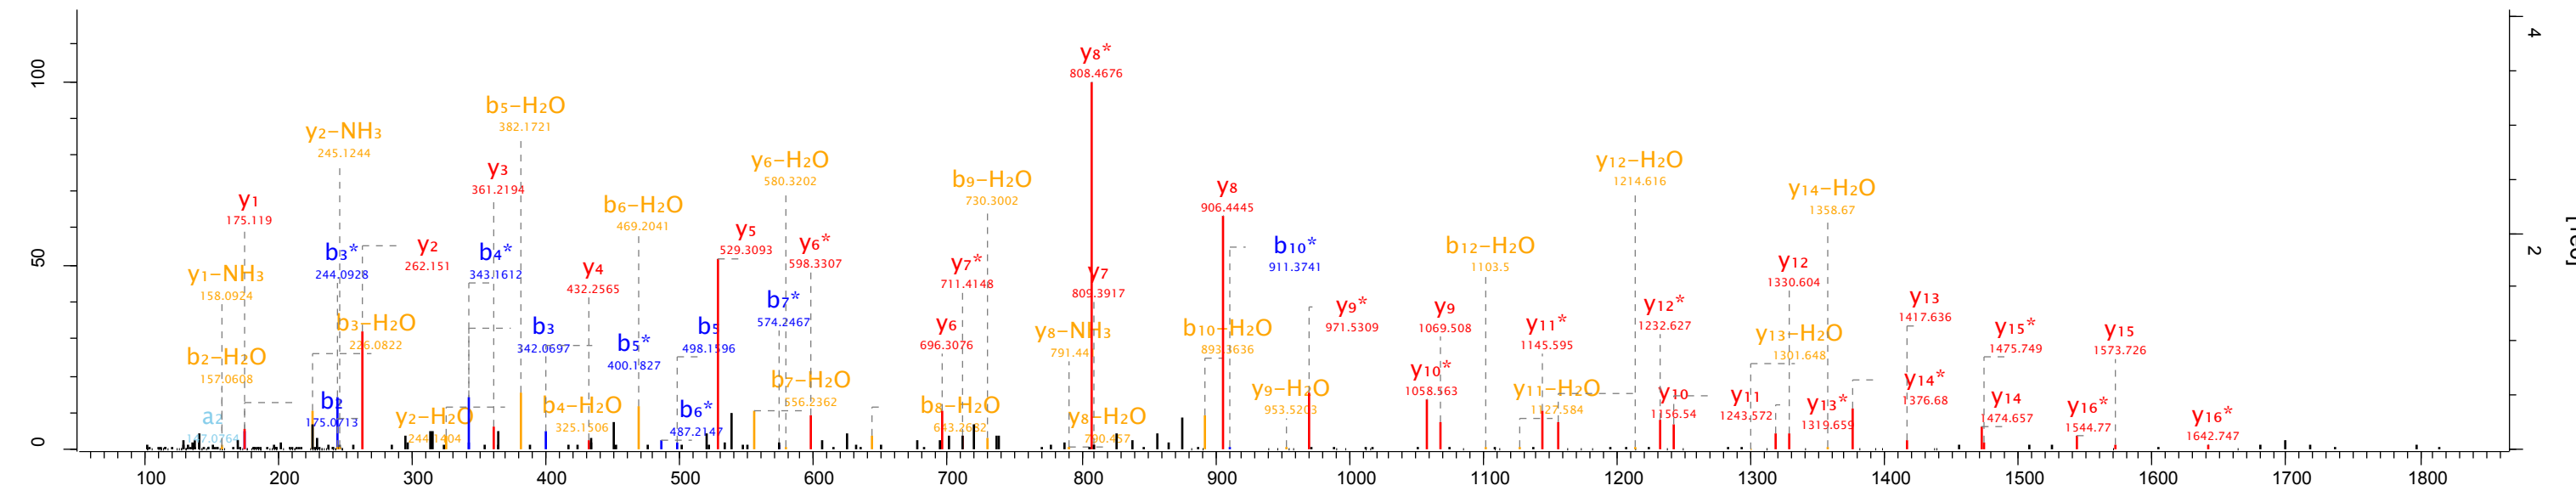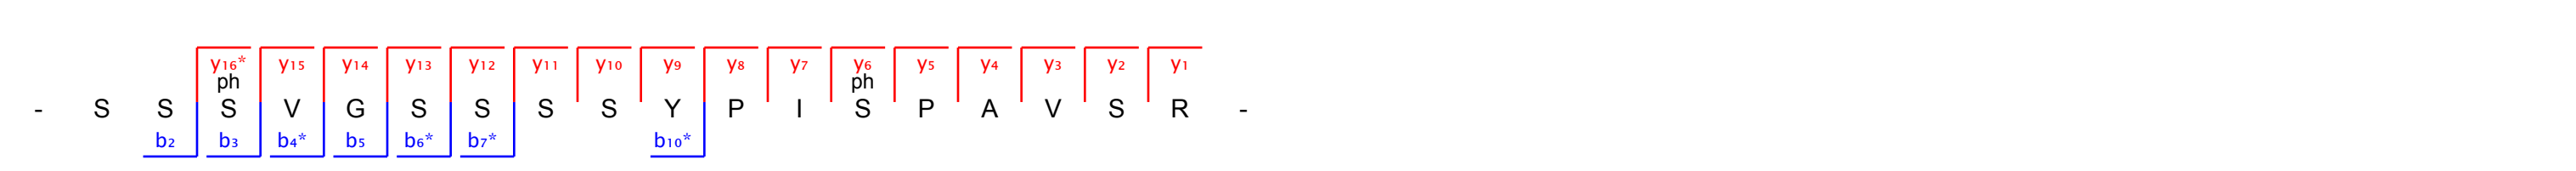



Raw file  
20171215\_MaS\_33SR\_LMH\_phospho2\_03

Scan 10867 Method FTMS; HCD Score 198.22 m/z 647.97 Gene names USP15

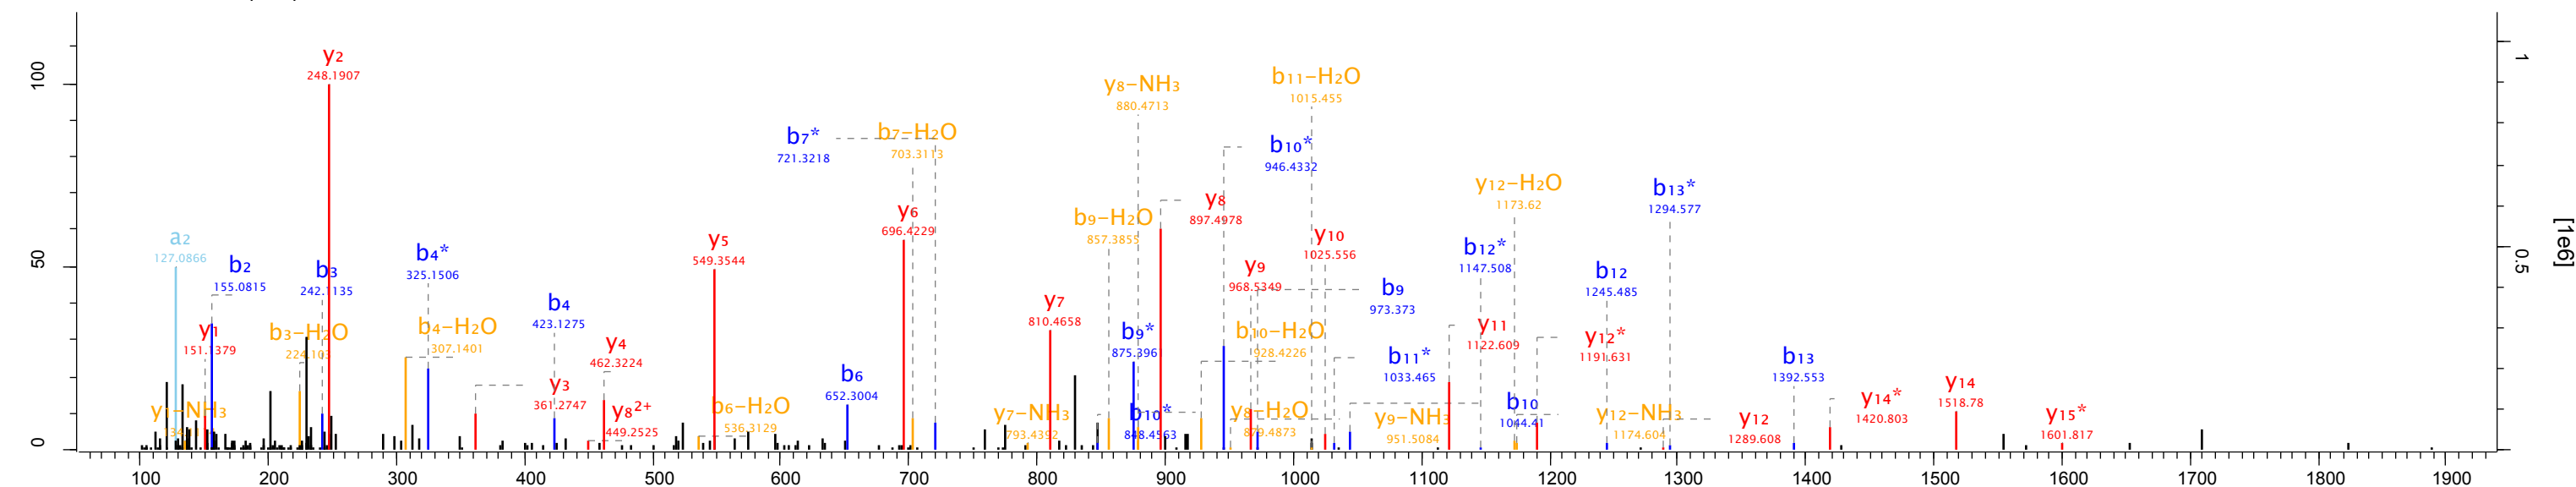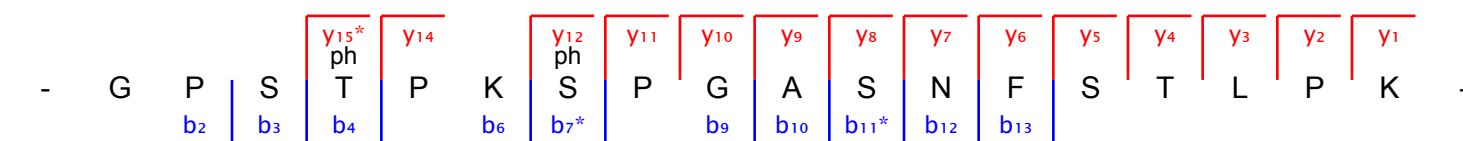

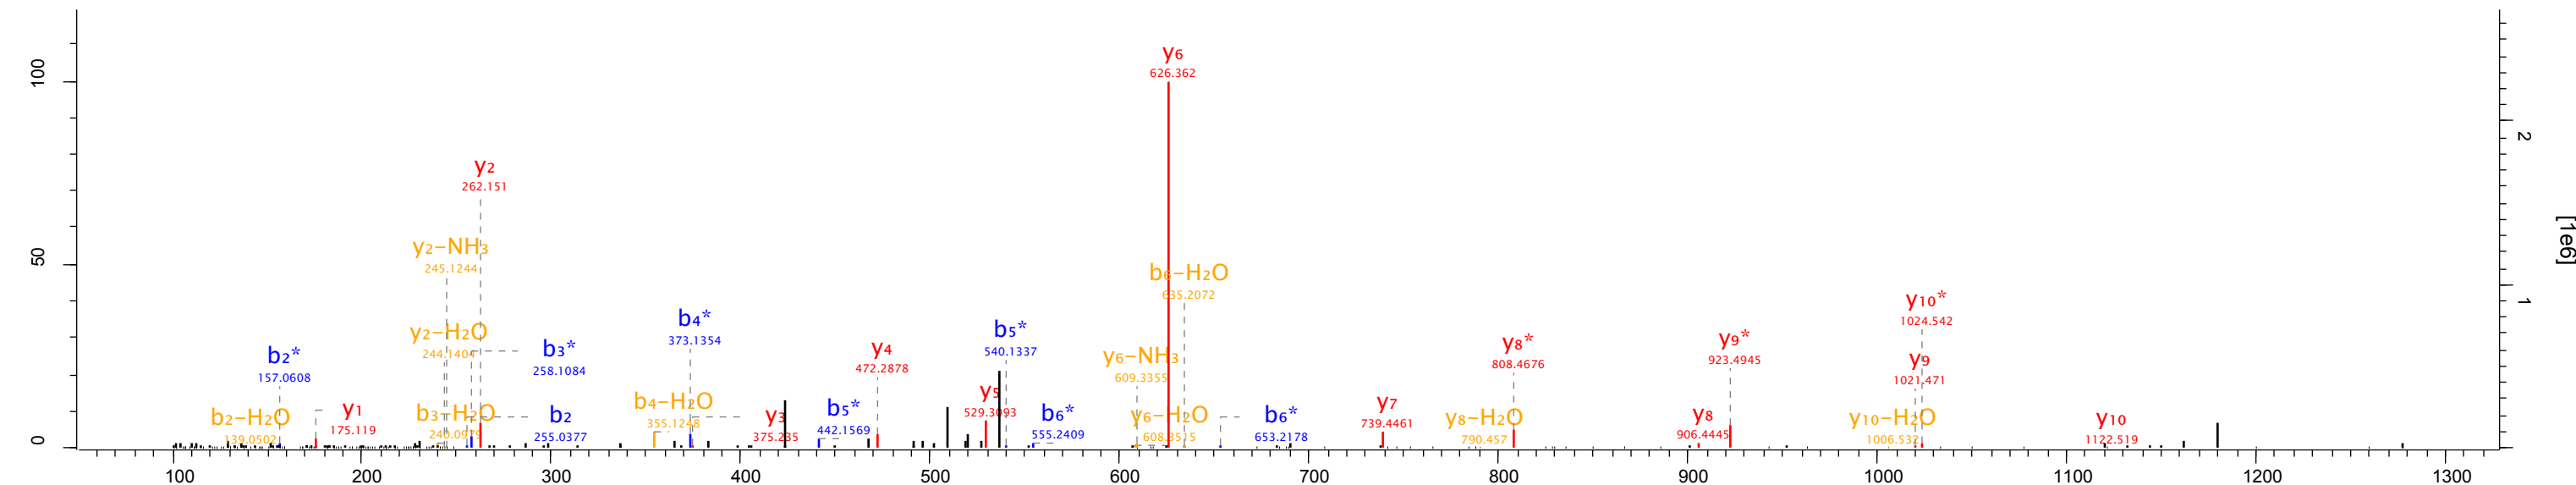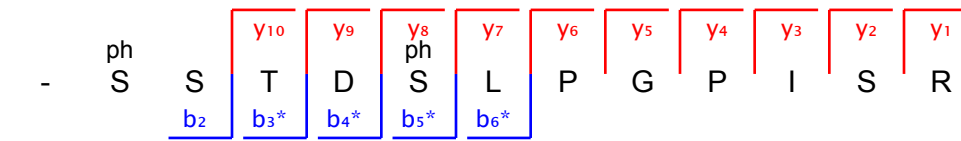

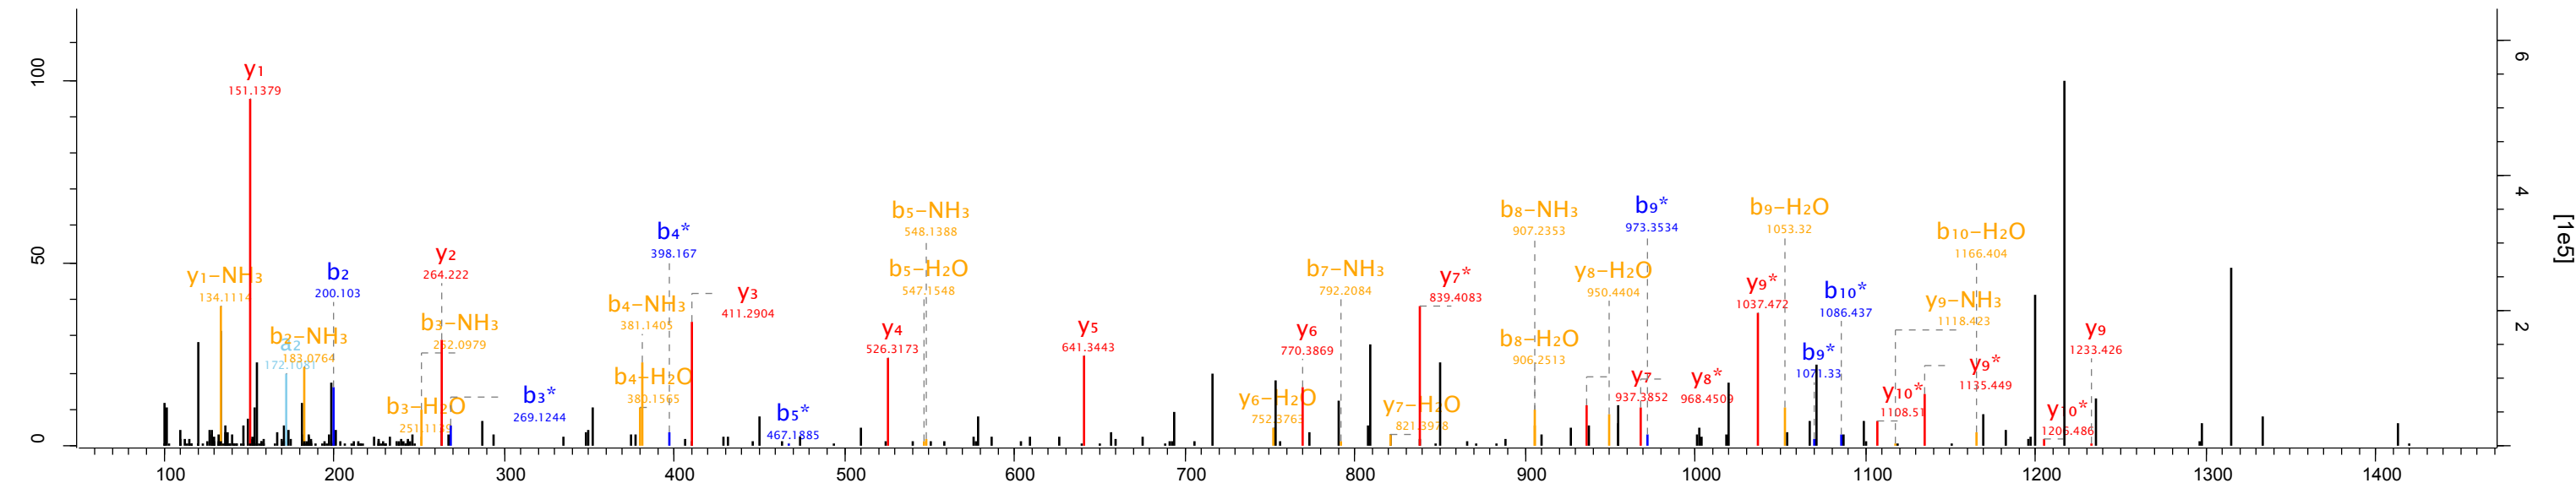

- Q -  
 A S E S E D D F I K -  
 b<sub>2</sub> b<sub>3</sub>\* b<sub>4</sub>\* b<sub>5</sub>\* b<sub>9</sub>\* b<sub>10</sub>\*

Raw file 20171215\_MaS\_33SR\_LMH\_phospho2\_03 Scan 11177 Method FTMS; HCD Score 75.81 m/z 812.33 Gene names POLR2A

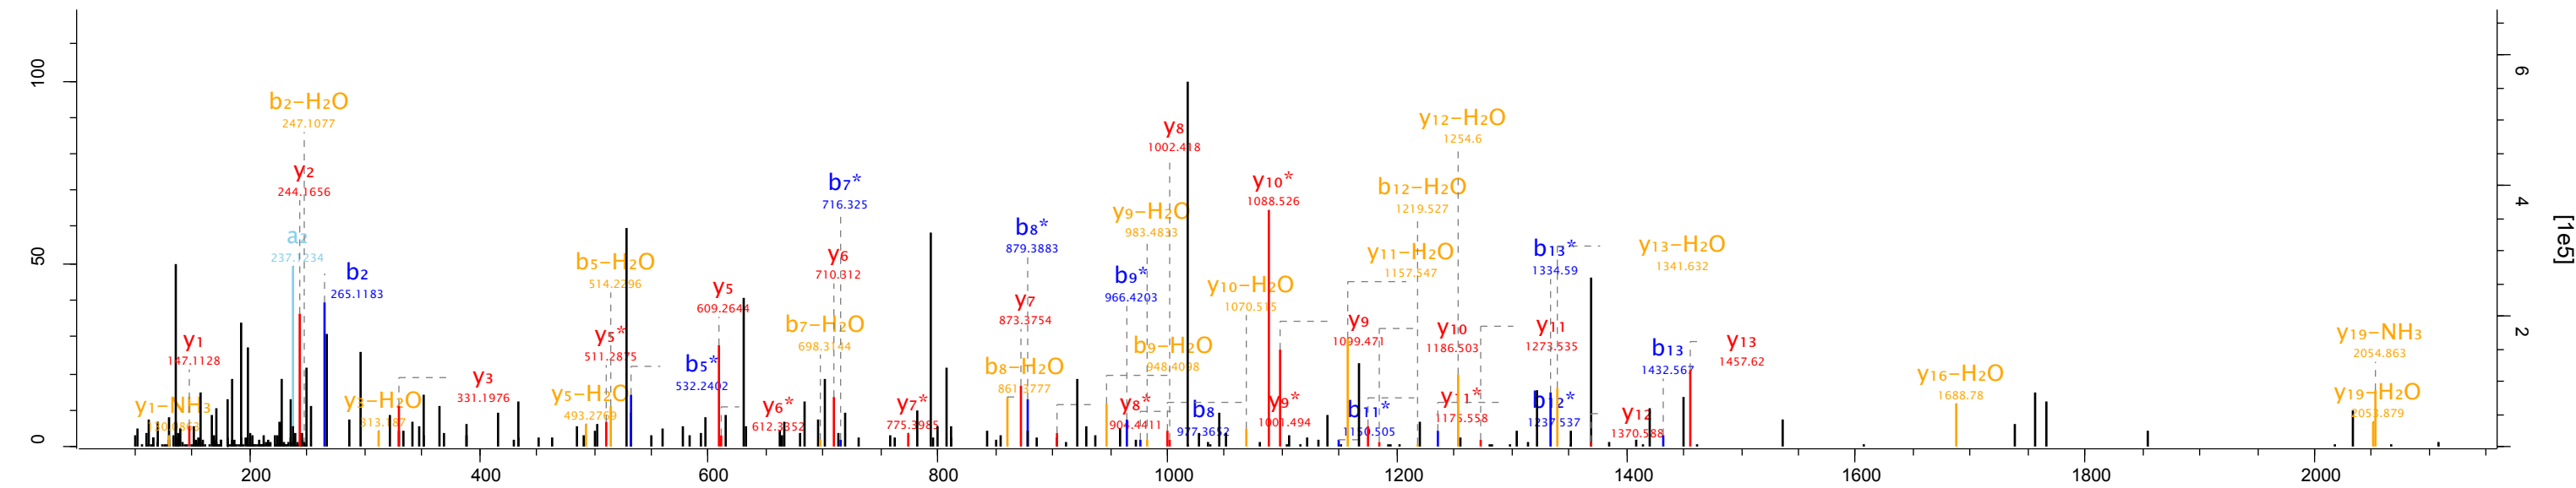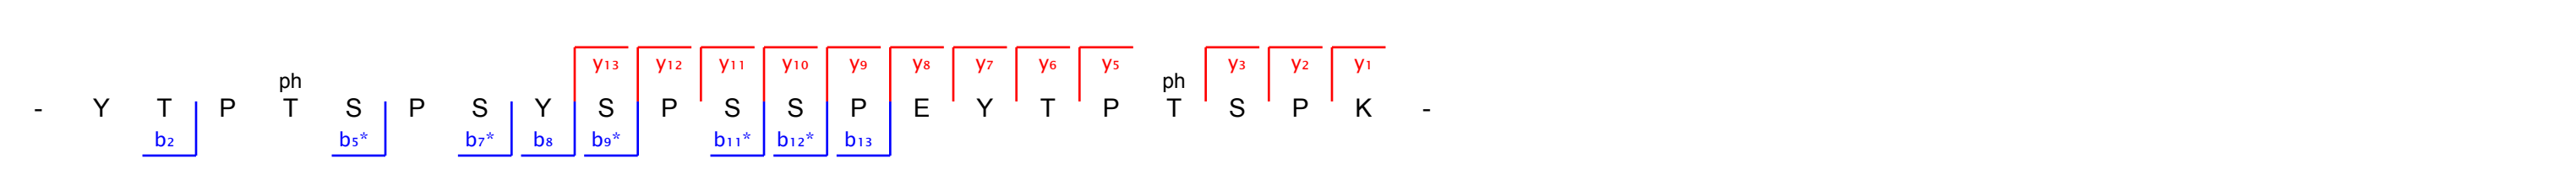

Raw file 20171215\_MaS\_33SR\_LMH\_phospho2\_03 Scan 11247 Method FTMS; HCD Score 228.35 m/z 1271 Gene names MAP1B

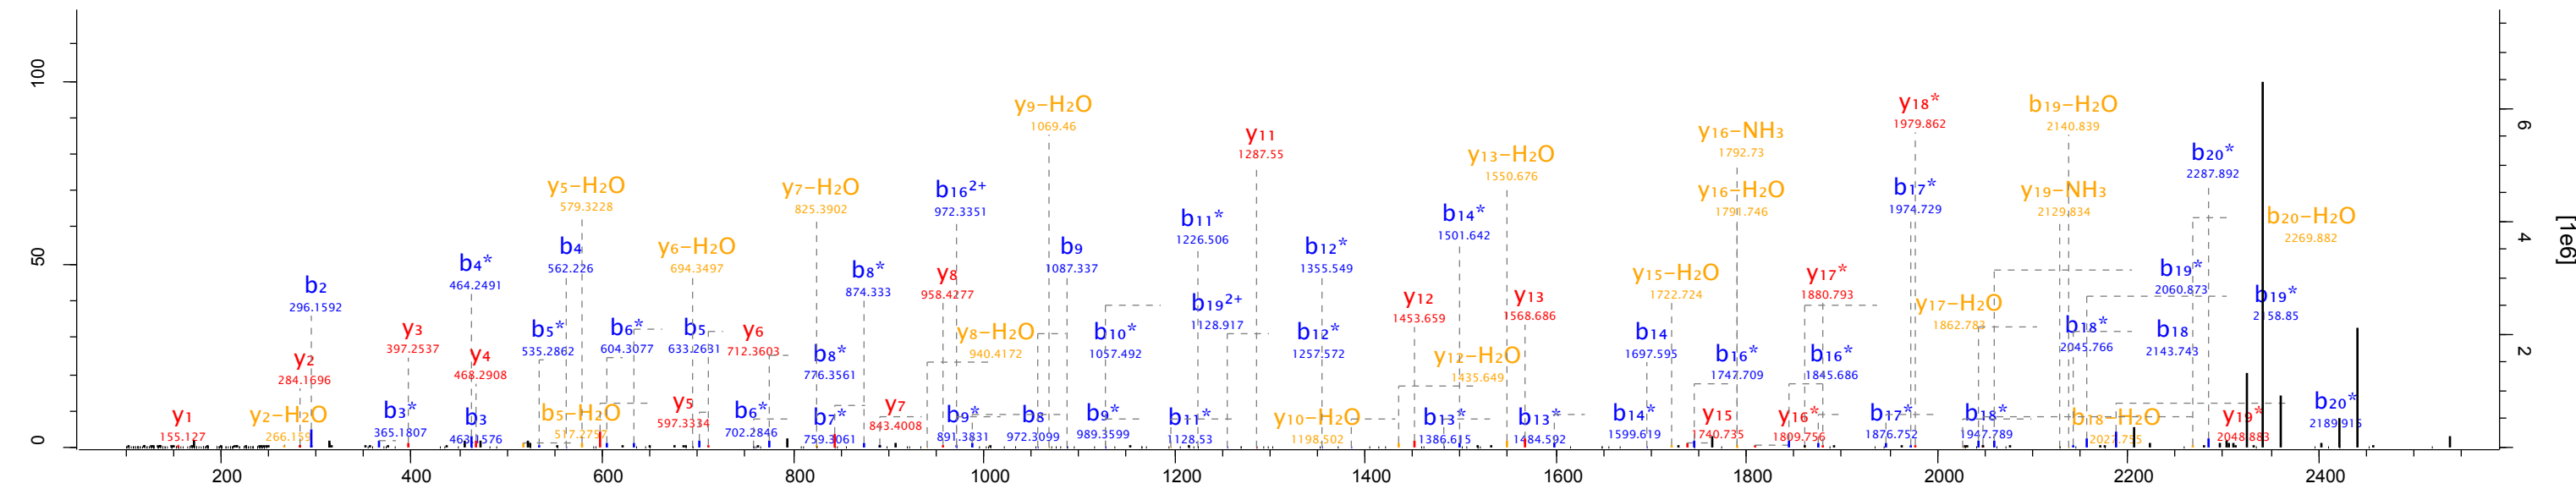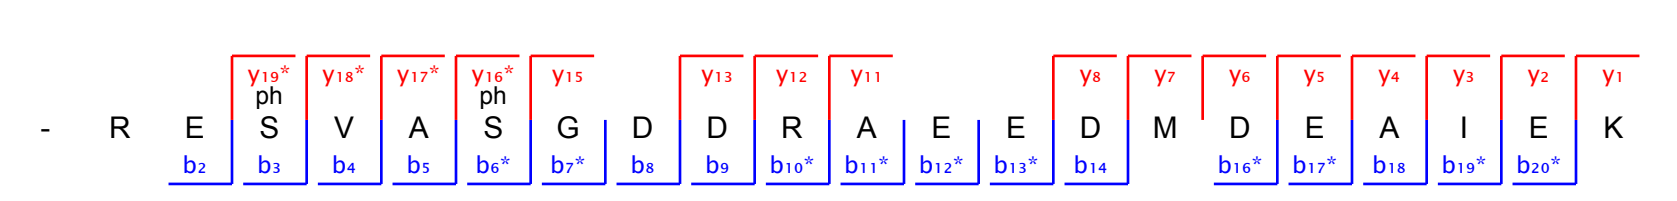

Raw file: 20171215\_MaS\_33SR\_LMH\_phospho2\_03  
 Scan: 11287 Method: FTMS; HCD Score: 133.61 m/z: 700.99 Gene names: VIM

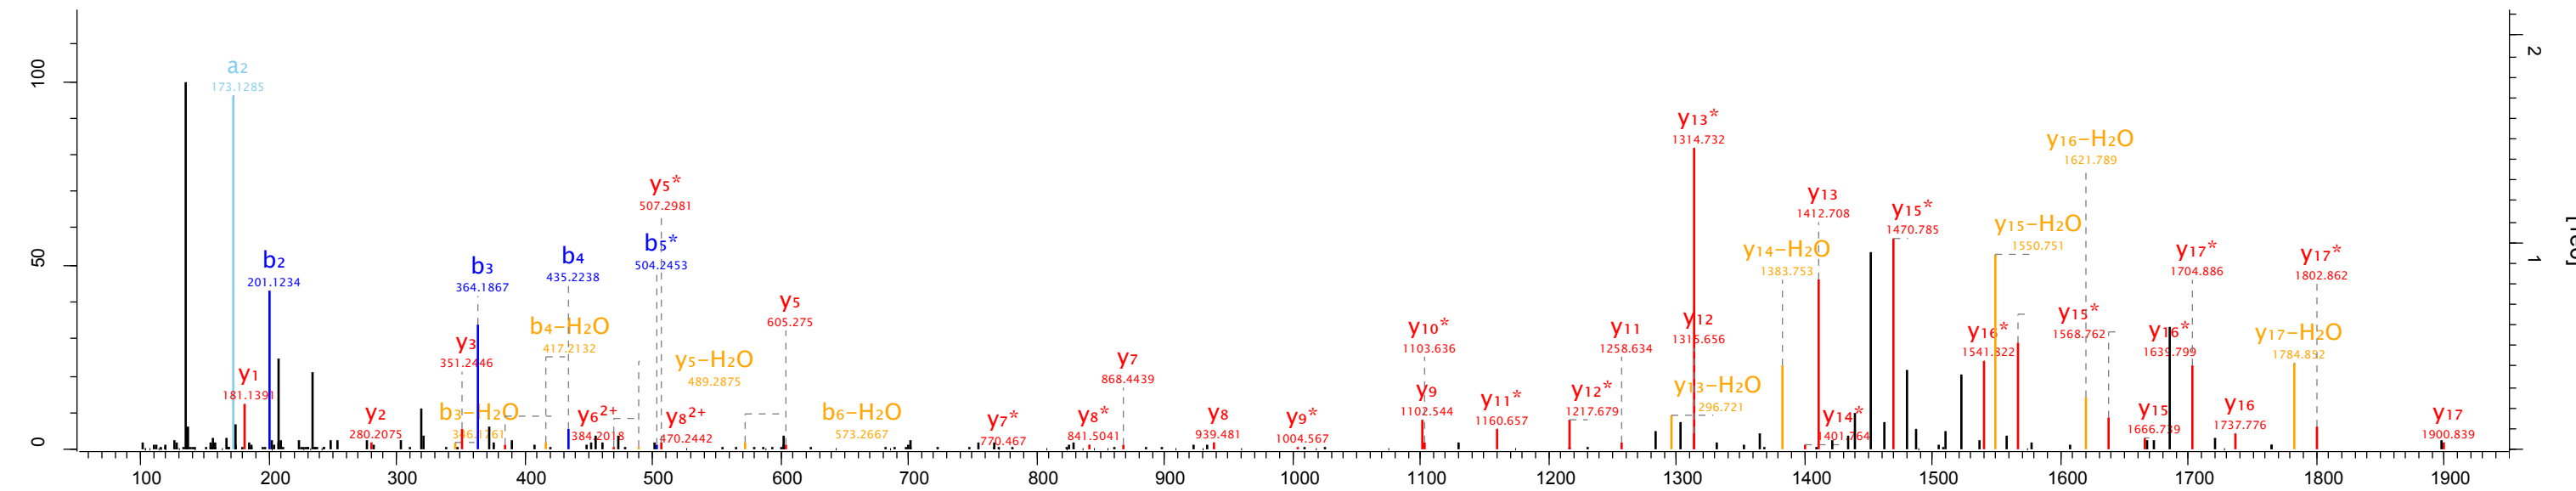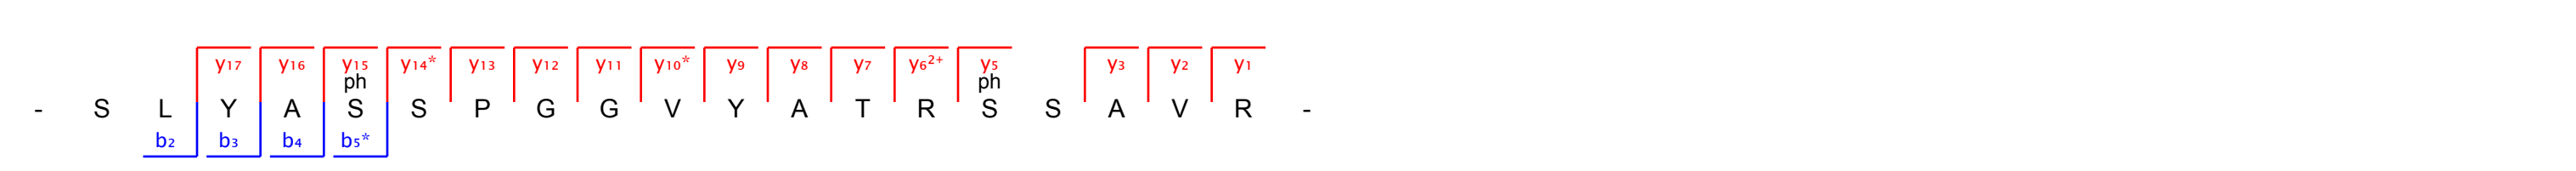

Raw file: 20171215\_MaS\_33SR\_LMH\_phospho2\_03  
 Scan: 11457 Method: FTMS; HCD Score: 126.97 m/z: 638.29 Gene names: SVIL

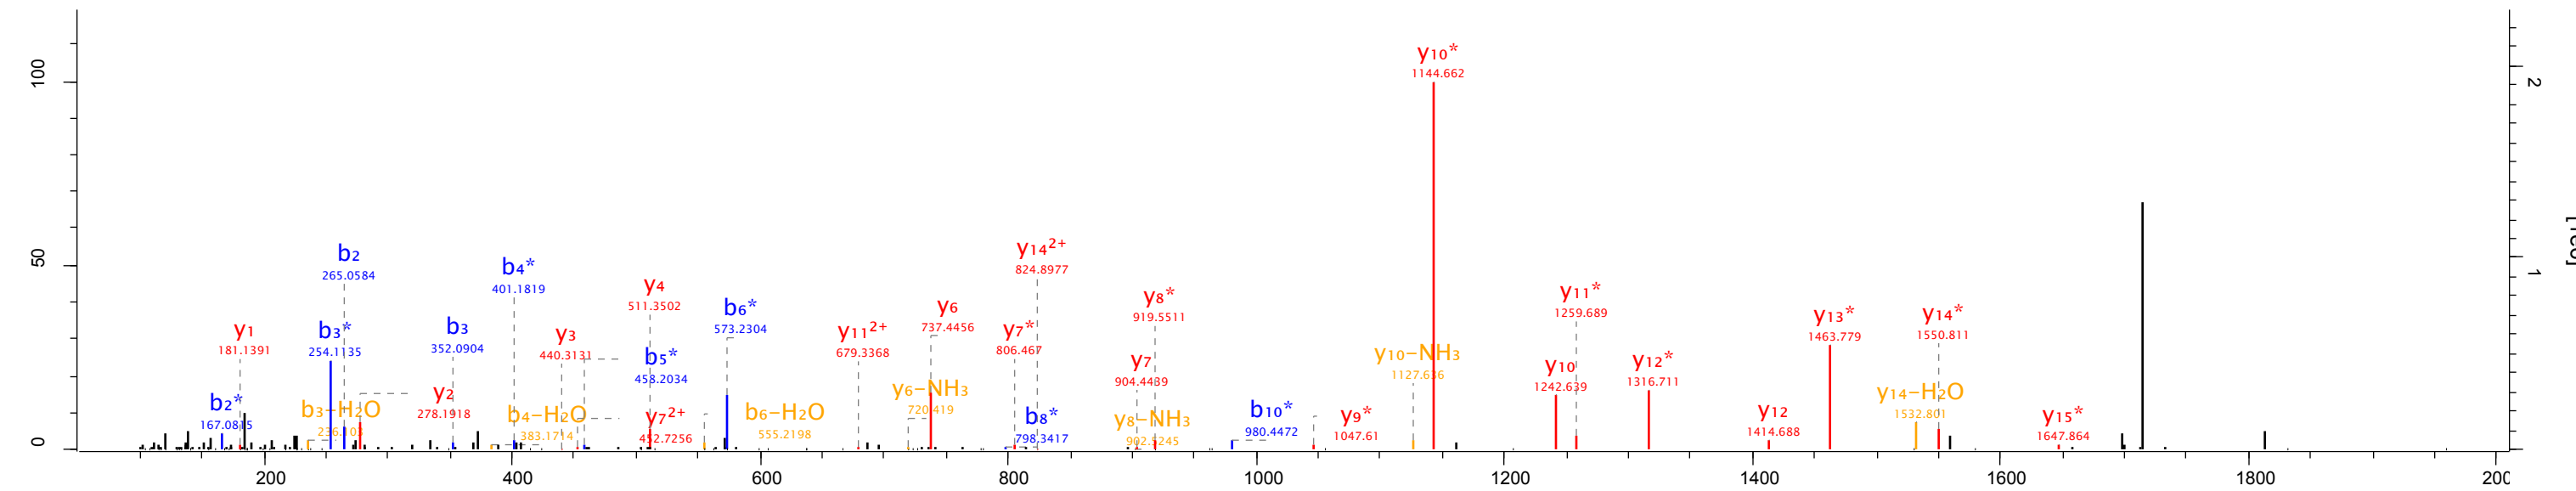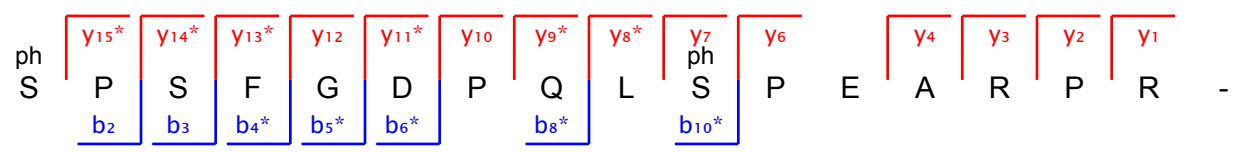

Raw file 20171215\_MaS\_33SR\_LMH\_phospho2\_03 Scan 11577 Method FTMS; HCD Score 150.5 m/z 910.91 Gene names ELF2

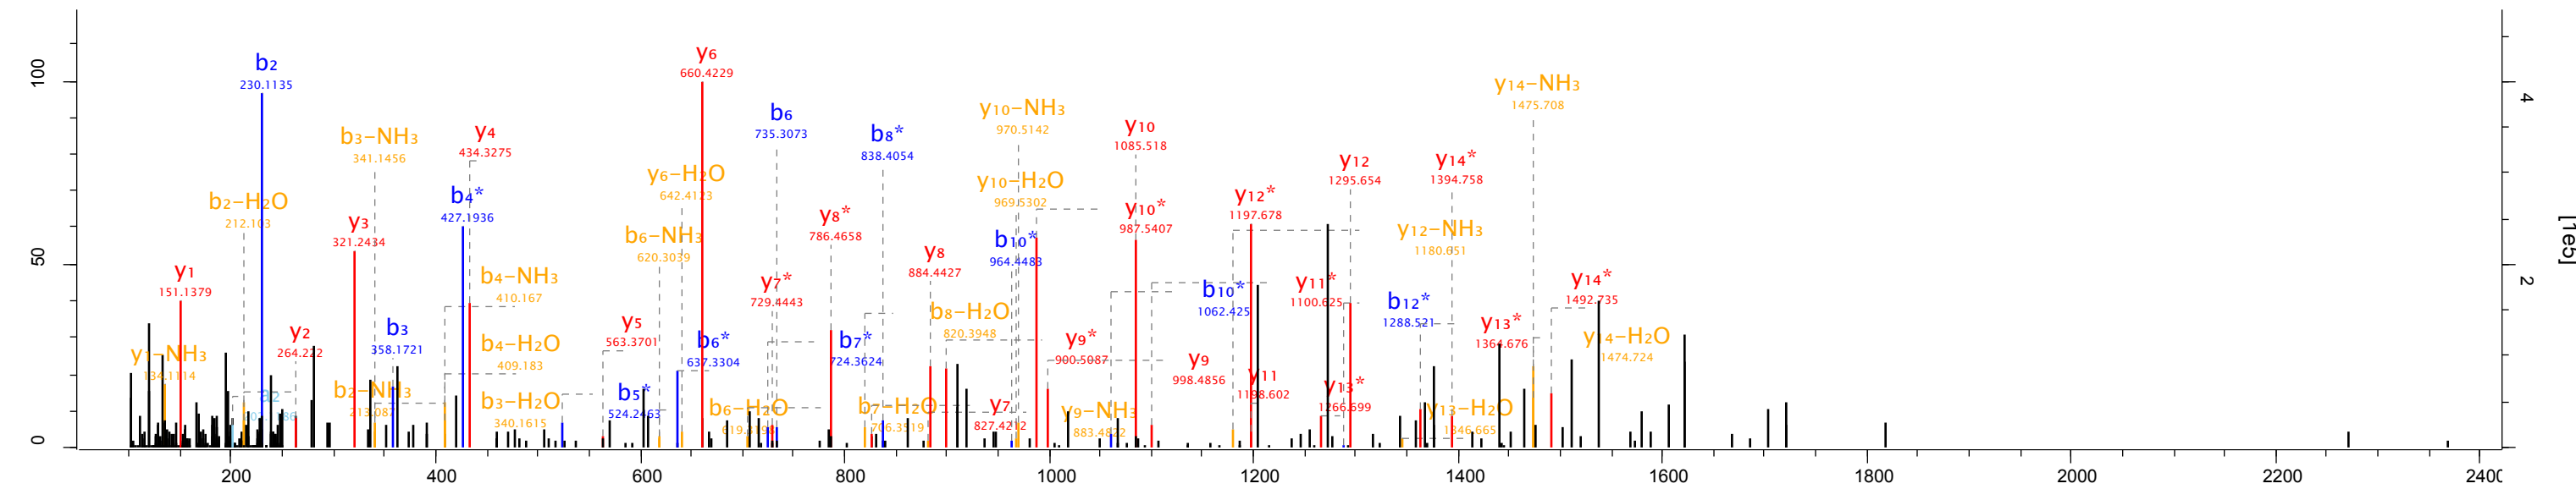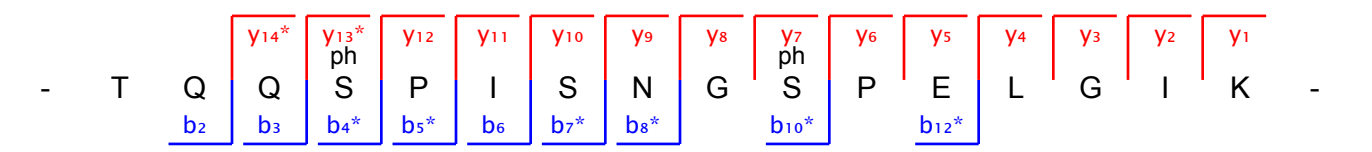



Raw file 20171215\_MaS\_33SR\_LMH\_phospho2\_03 Scan 11617 Method FTMS; HCD Score 190.31 m/z 846.83 Gene names LIG1

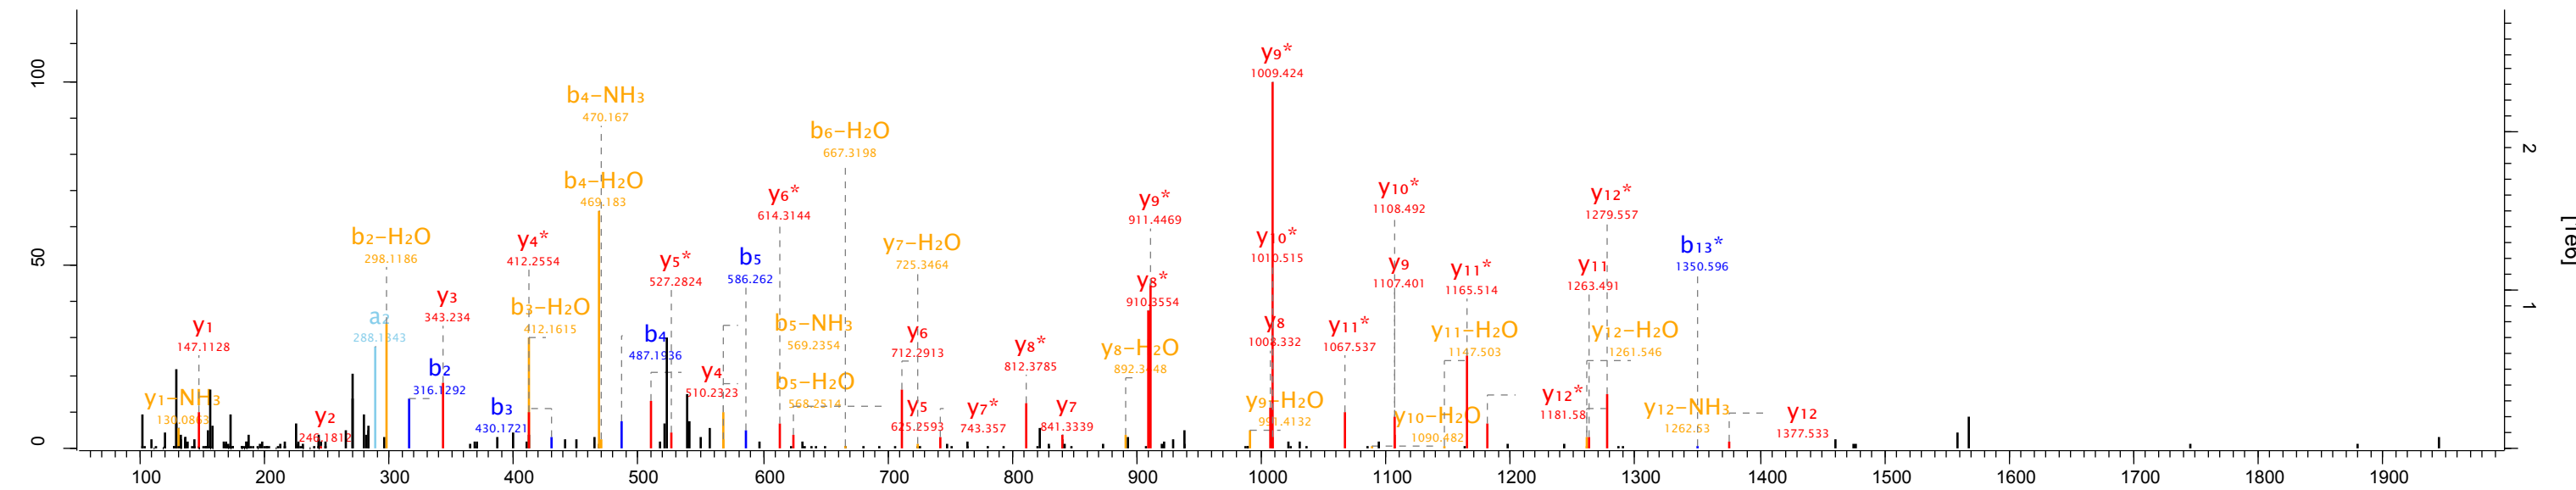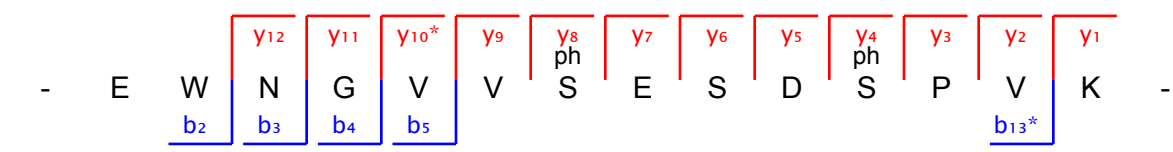

Raw file 20171215\_MaS\_33SR\_LMH\_phospho2\_03 Scan 11727 Method FTMS; HCD Score 286.58 m/z 1140.85 Gene names BCL7C

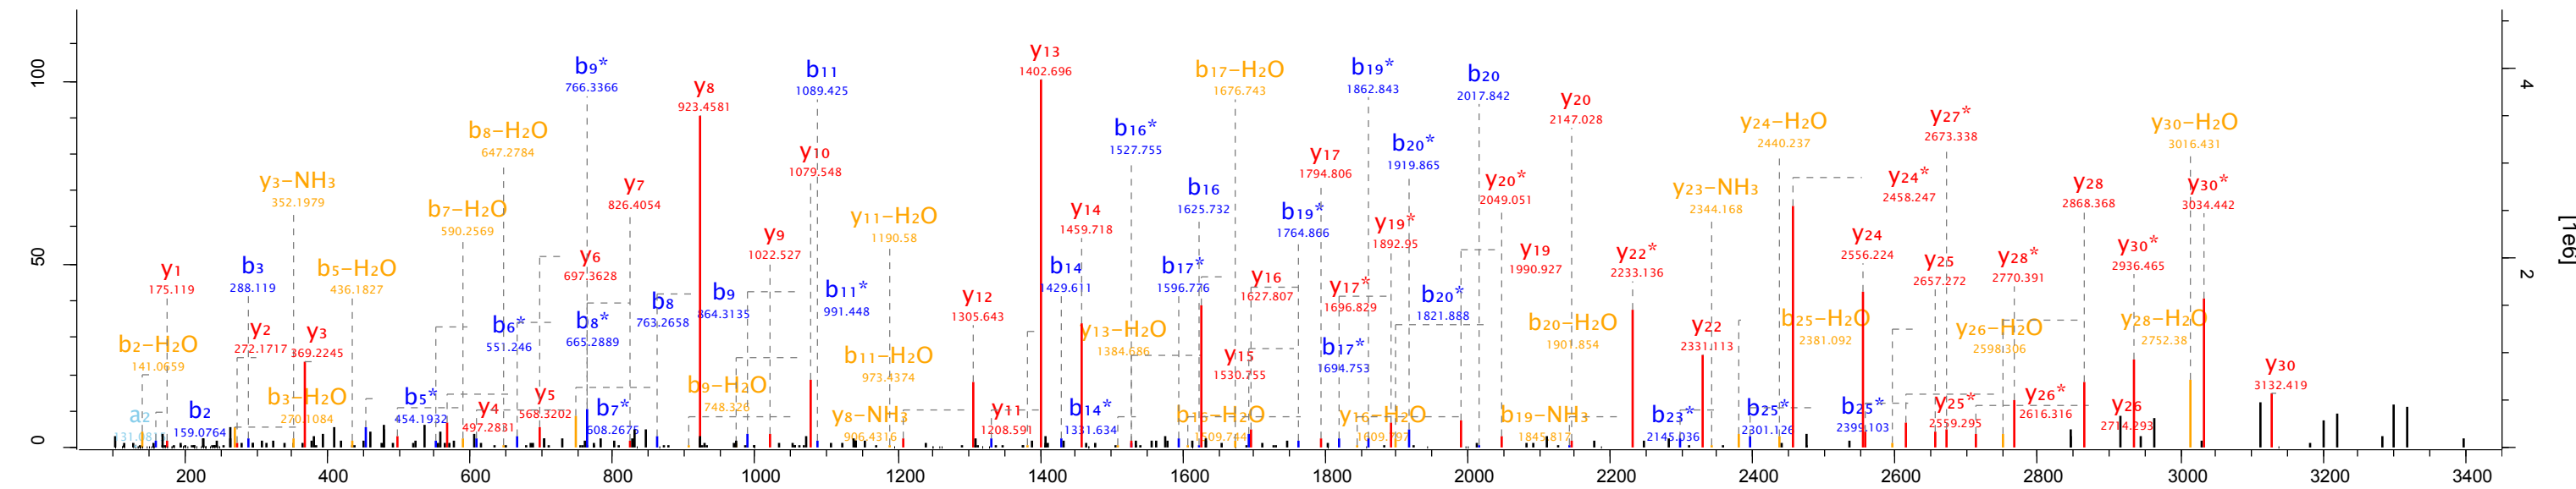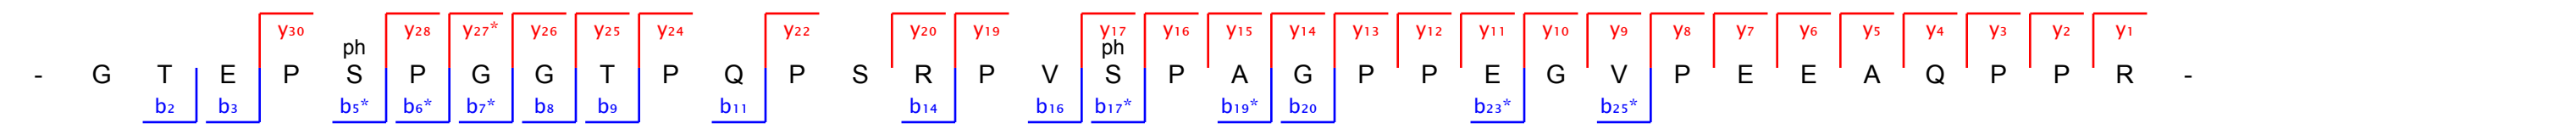

Raw file 20171215\_MaS\_33SR\_LMH\_phospho2\_03 Scan 11757 Method FTMS; HCD Score 173.25 m/z 988.91 Gene names AKAP12

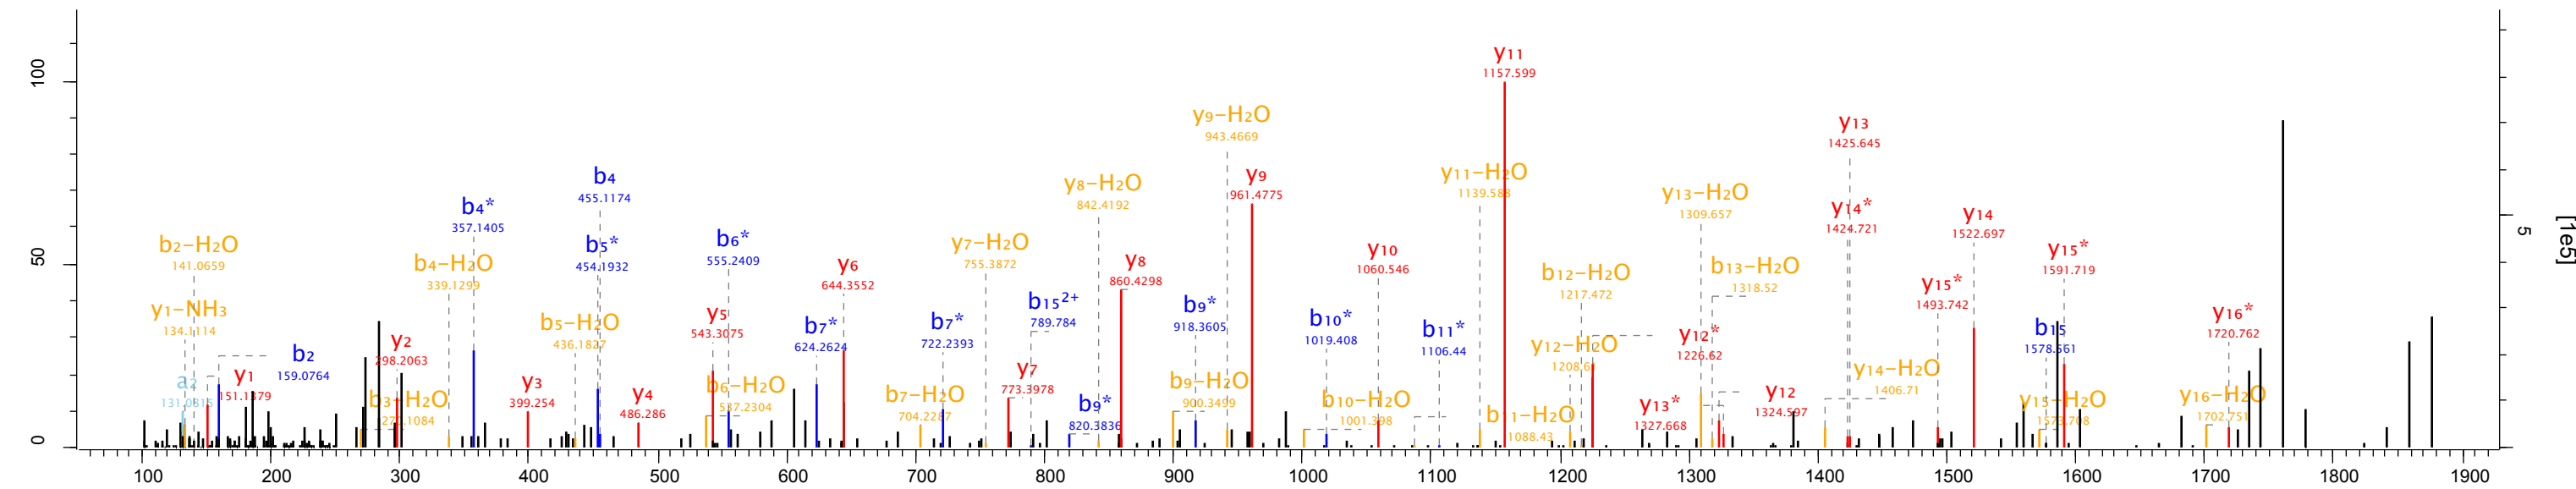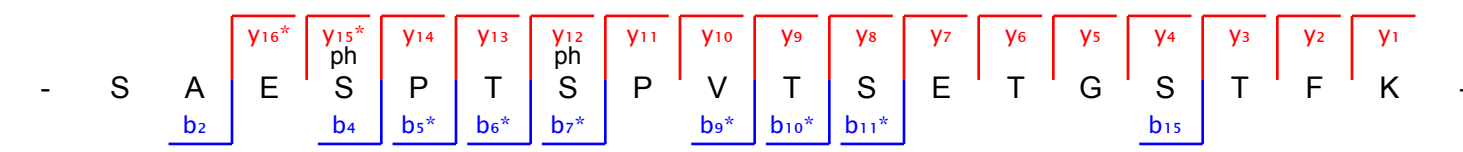

Raw file 20171215\_MaS\_33SR\_LMH\_phospho2\_03 Scan 11767 Method FTMS; HCD Score 232.37 m/z 1153.99 Gene names OSBP

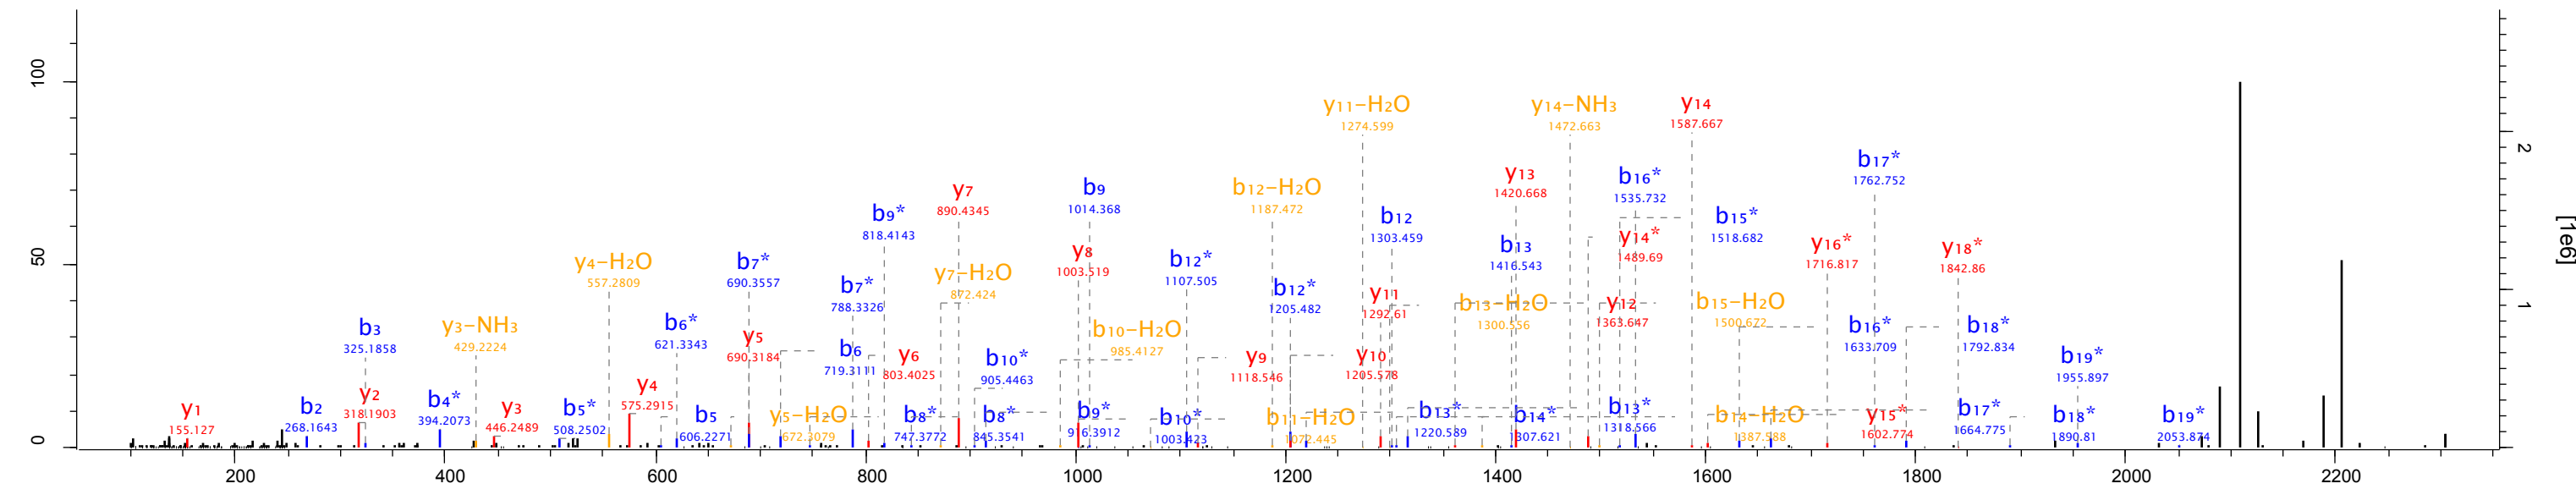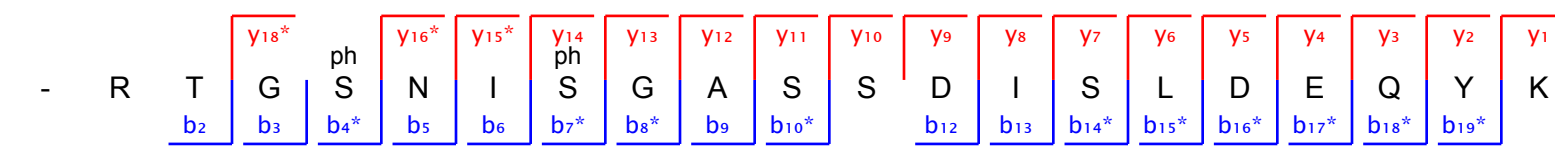

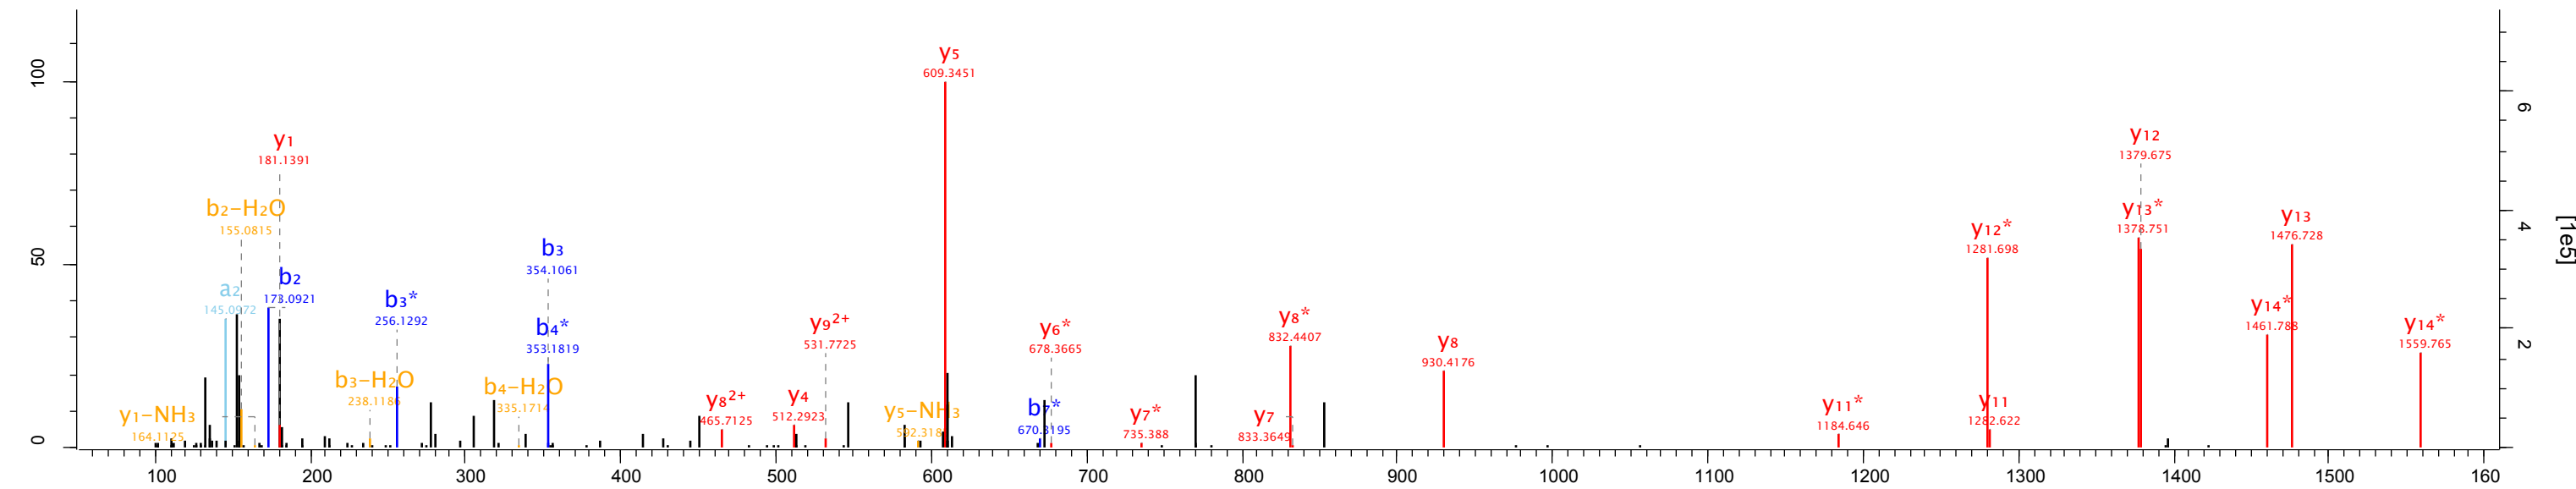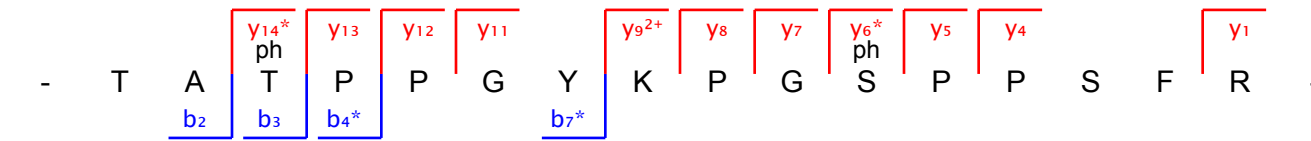

Raw file: 20171215\_MaS\_33SR\_LMH\_phospho2\_03  
 Scan: 12007 Method: FTMS; HCD Score: 156.51 m/z: 759.32 Gene names: FAM21A;FAM21C

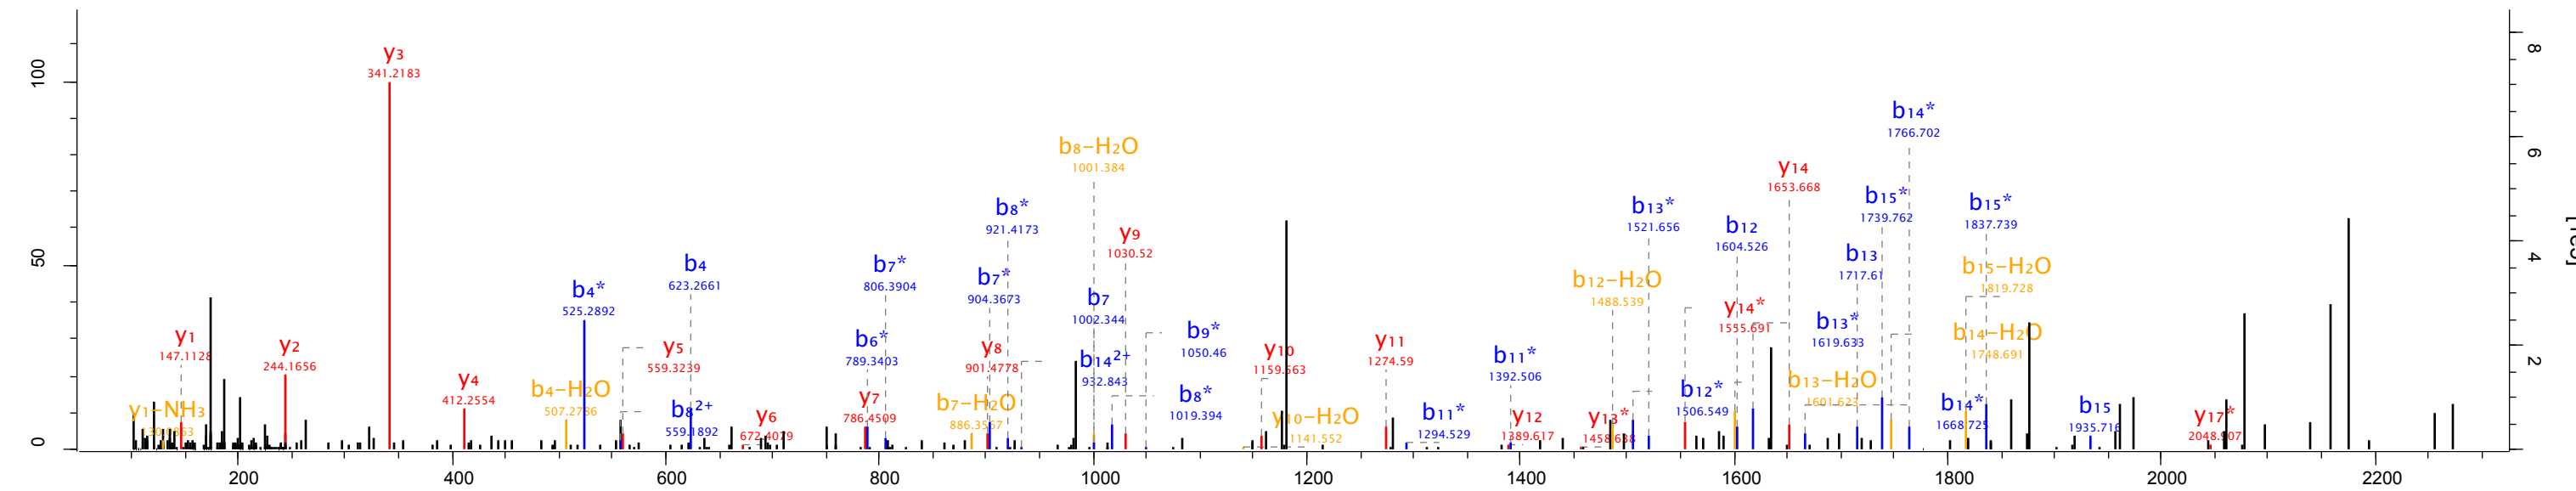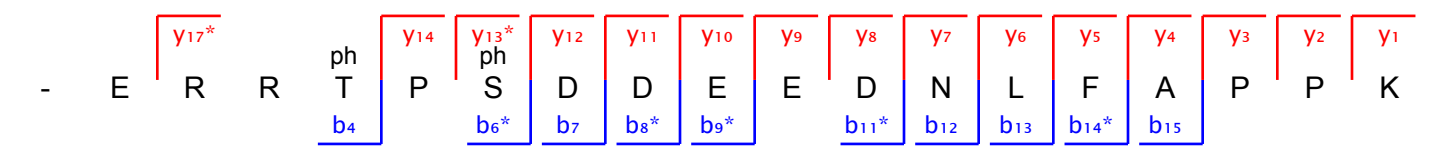

Raw file: 20171215\_MaS\_33SR\_LMH\_phospho2\_03  
 Scan: 12197 Method: FTMS; HCD Score: 250.24 m/z: 1144.49 Gene names: PRRC2C

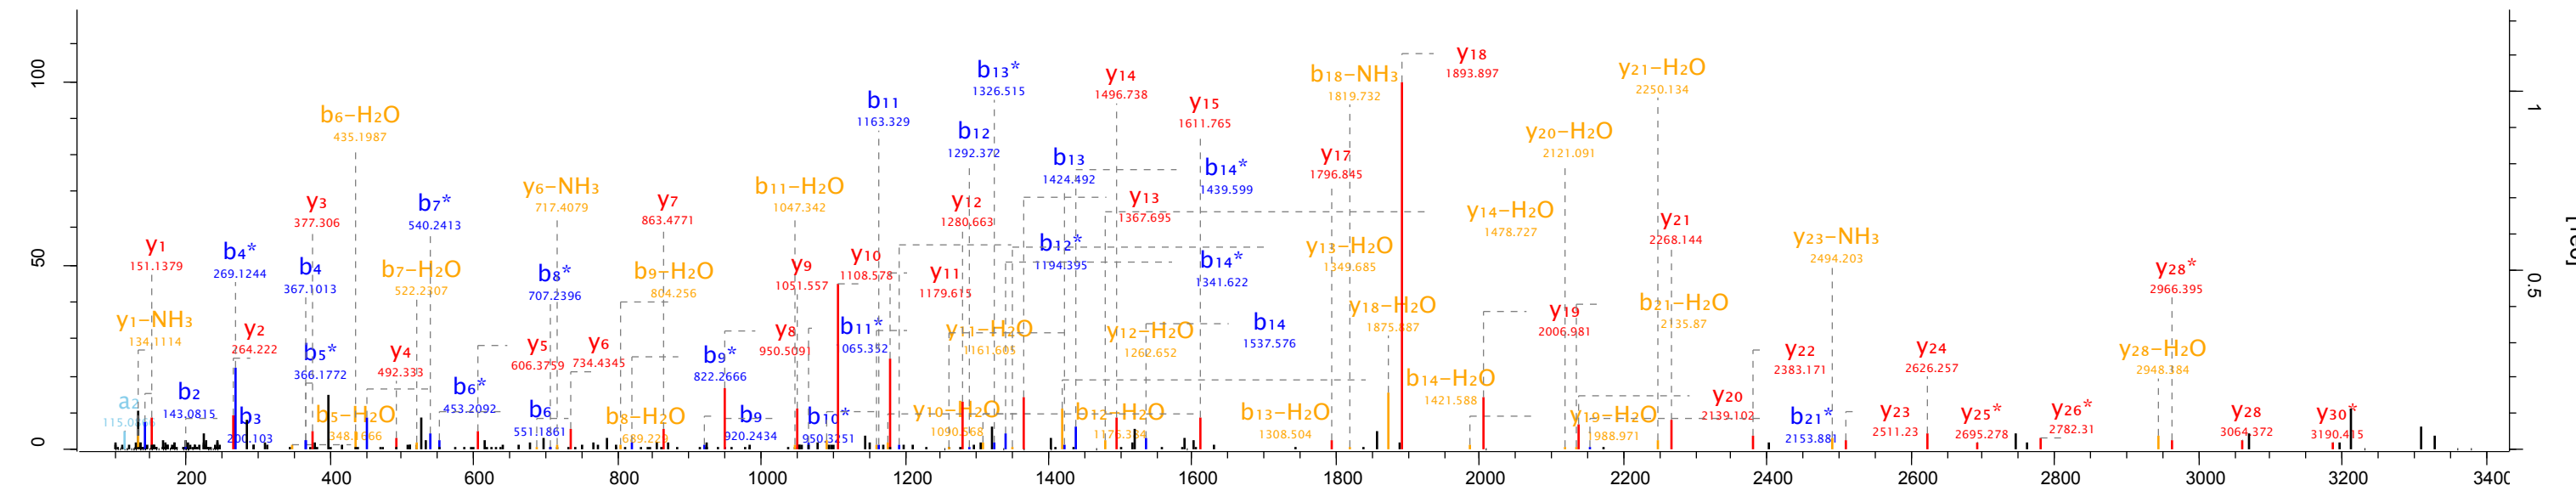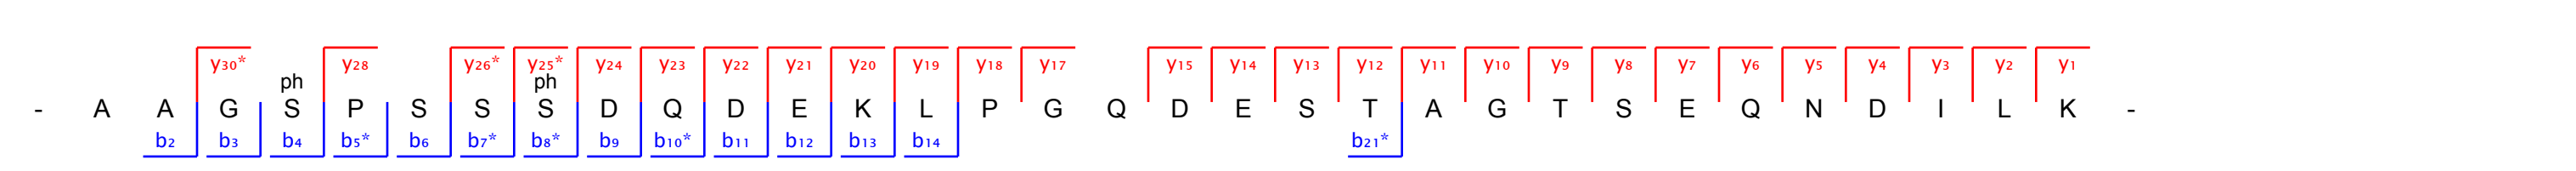

Raw file 20171215\_MaS\_33SR\_LMH\_phospho2\_03 Scan 12397 Method FTMS; HCD Score 139.51 m/z 985.34 Gene names CTDPI

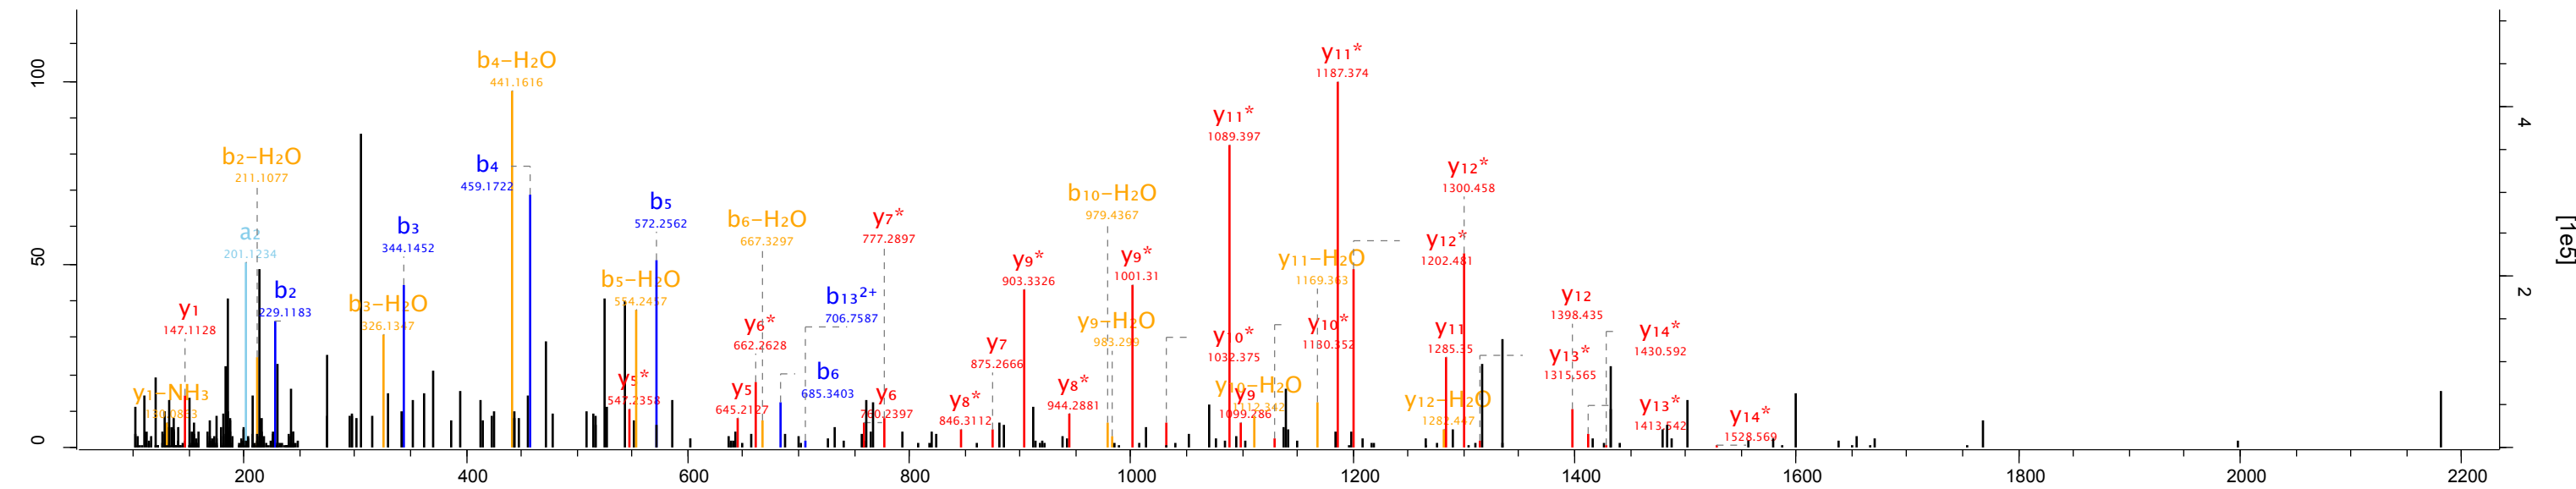

- E V D D I L G E G S D D S D S E K -  
 b2 b3 b4 b5 b6 b13<sup>2+</sup> y14\* y13\* y12 y11 y10\* y9 y8\*<sub>ph</sub> y7 y6 y5



Raw file 20171215\_MaS\_33SR\_LMH\_phospho2\_03 Scan 12437 Method FTMS; HCD Score 238.86 m/z 1236.08 Gene names TACC2

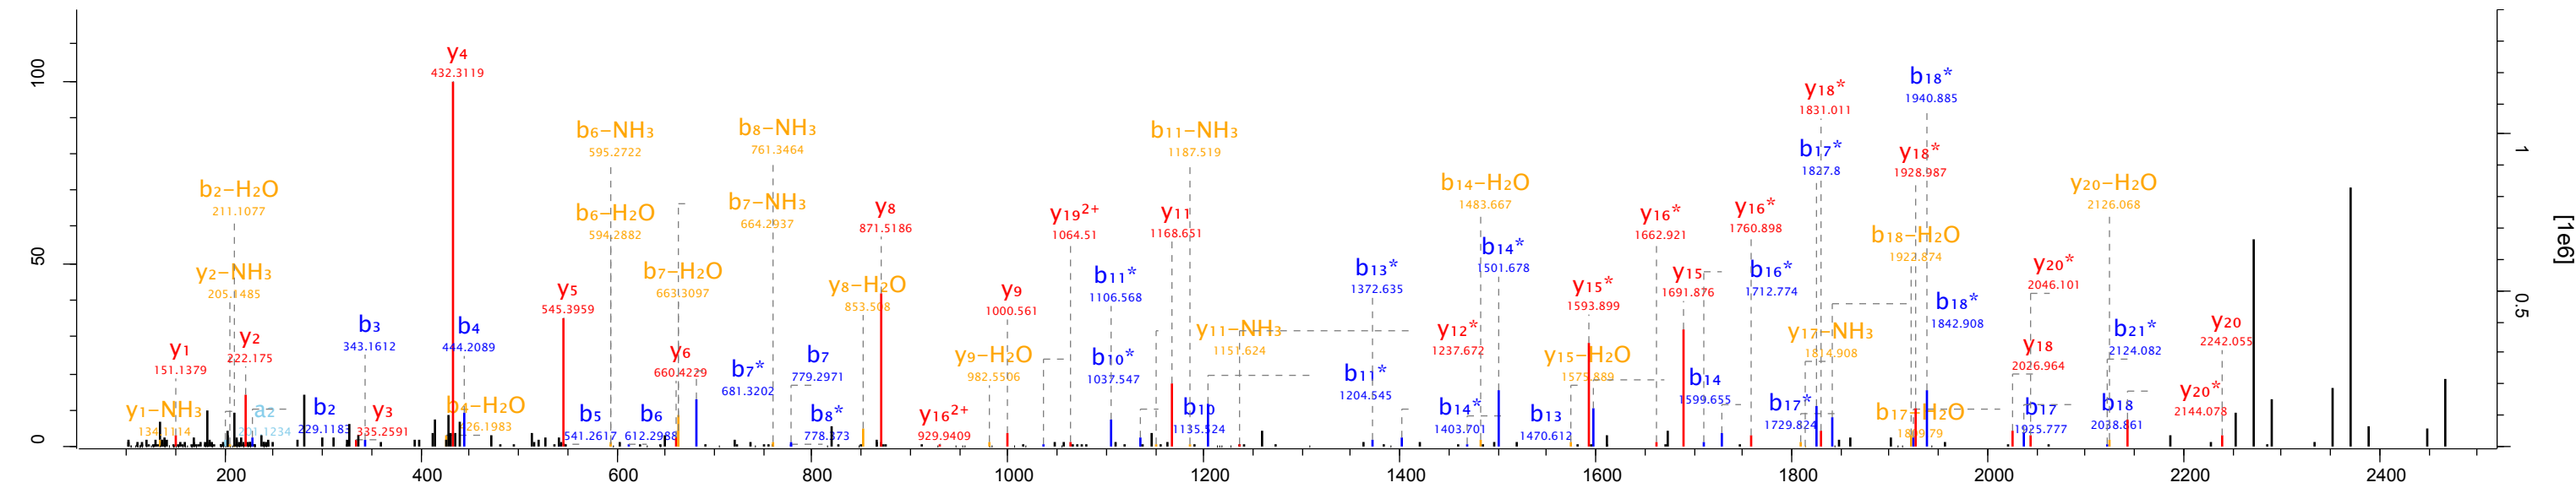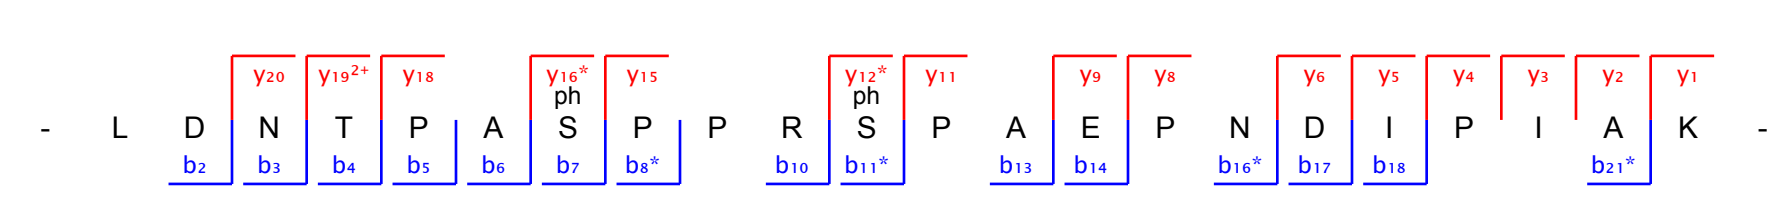

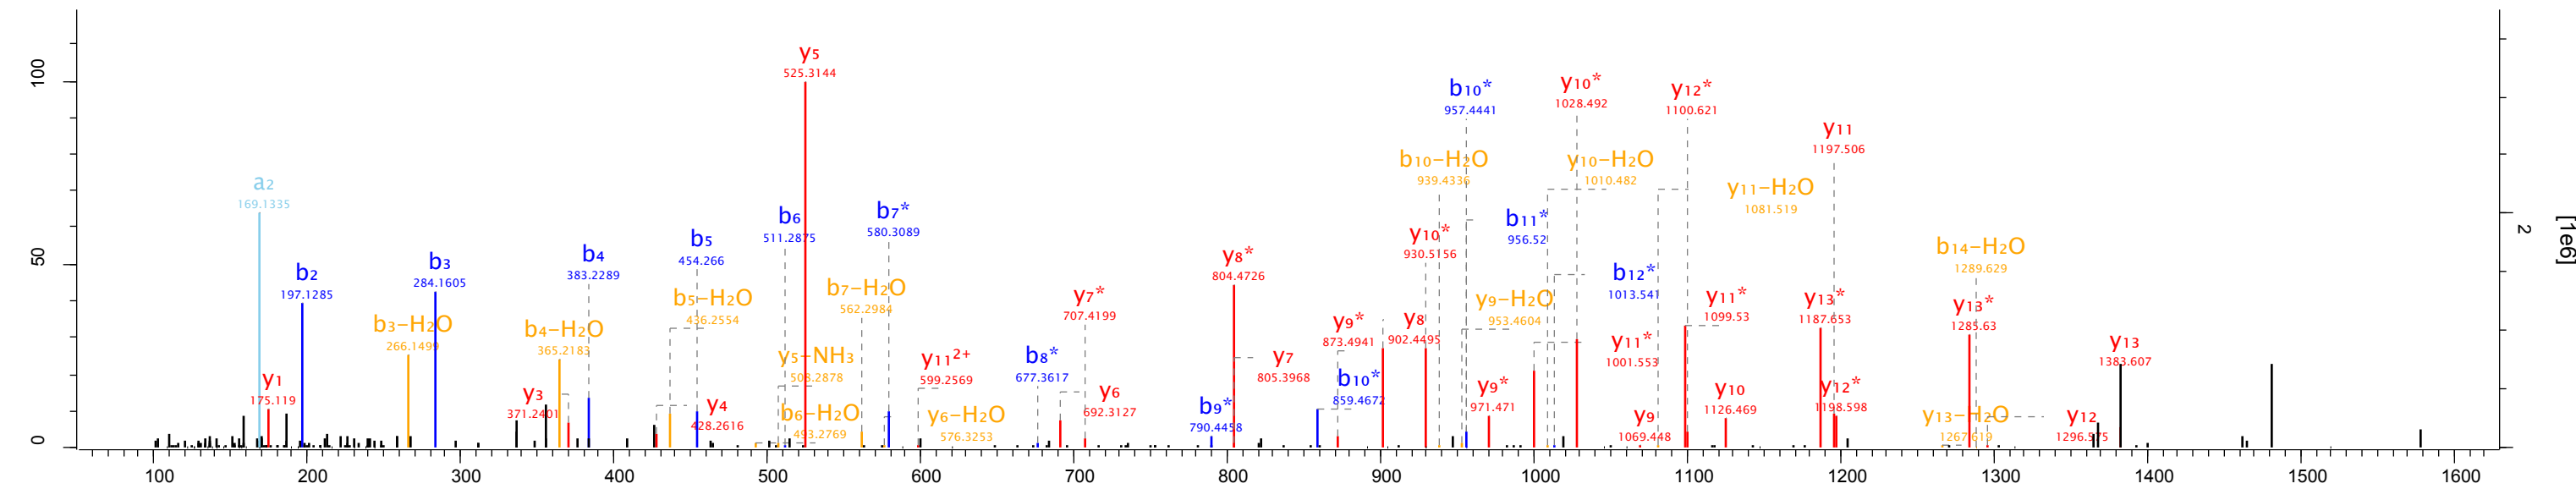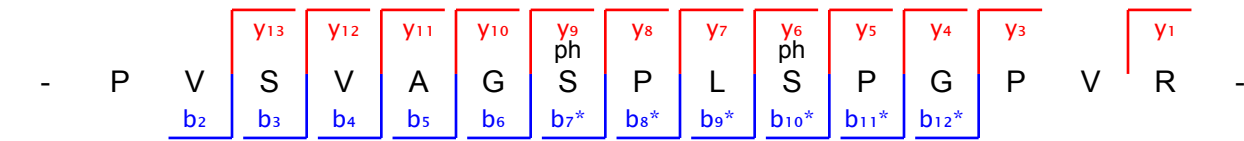

Raw file: 20171215\_MaS\_33SR\_LMH\_phospho2\_03  
 Scan: 12487 Method: FTMS; HCD Score: 205.32 m/z: 1196.51 Gene names: PFAFH1B2

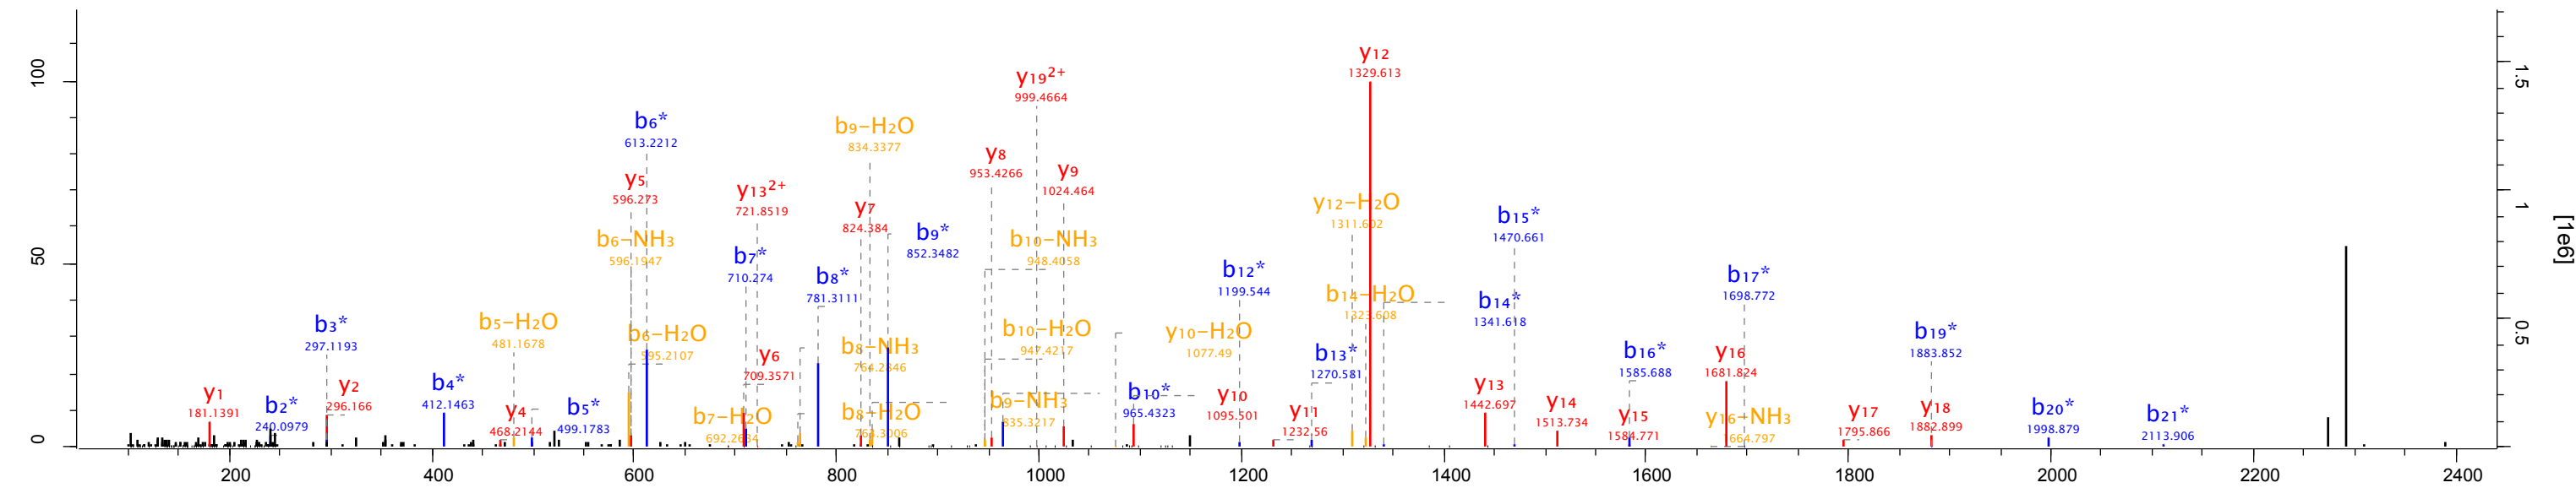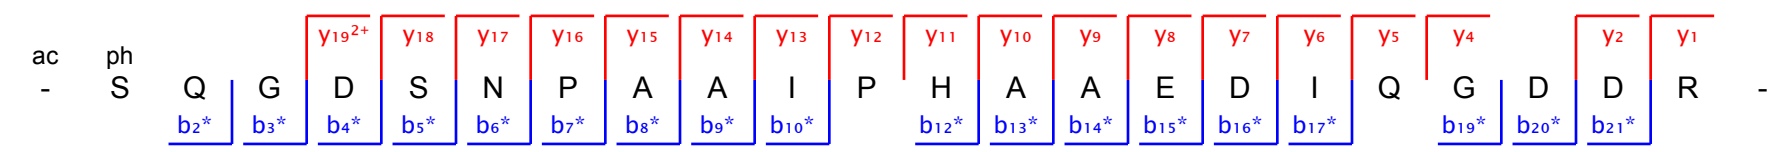

Raw file: 20171215\_MaS\_33SR\_LMH\_phospho2\_03  
 Scan: 12517 Method: FTMS; HCD Score: 155.4 m/z: 1026.93 Gene names: UNK

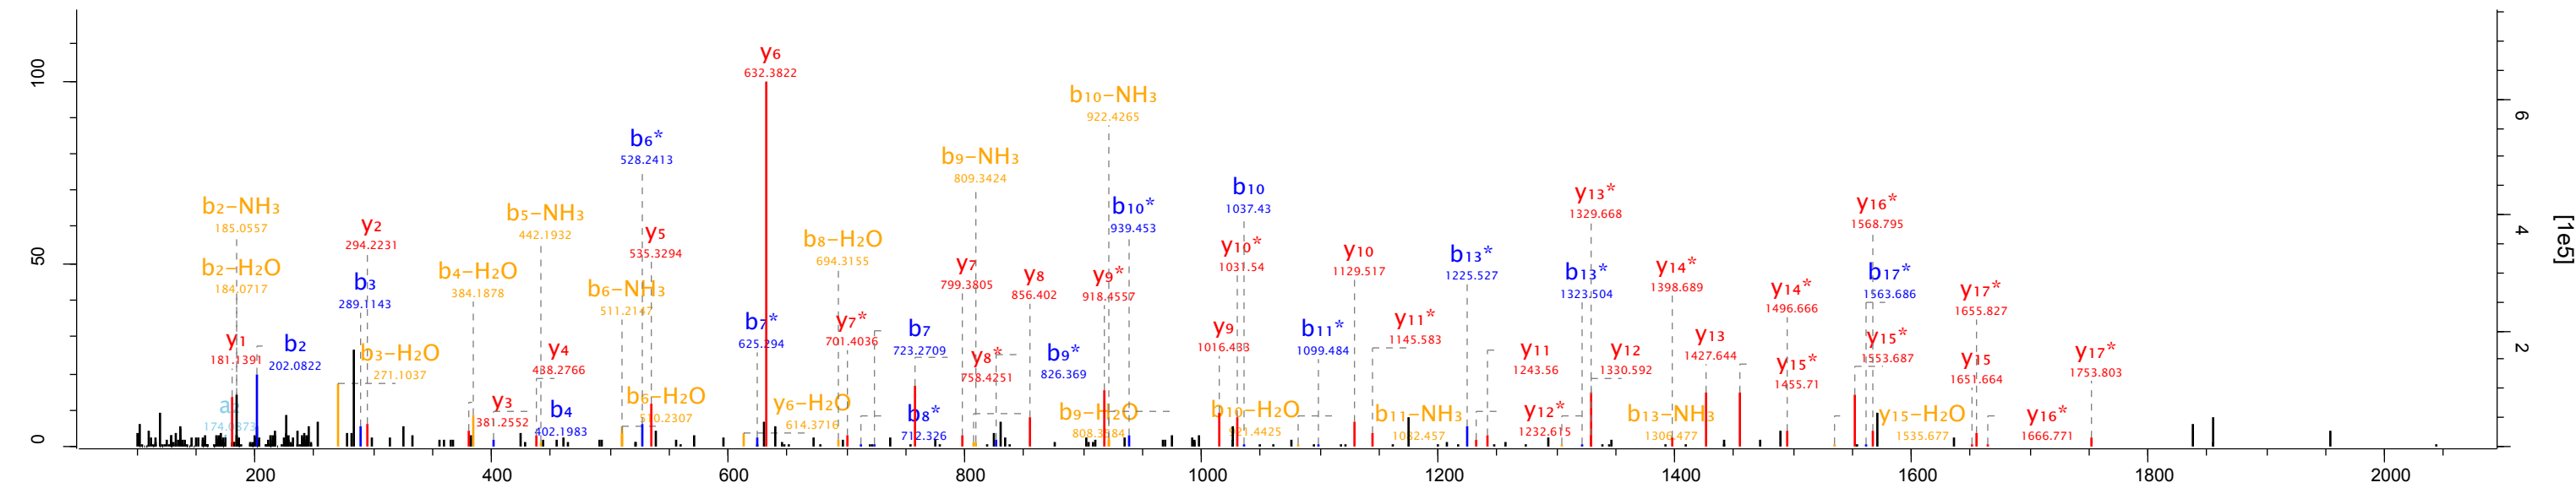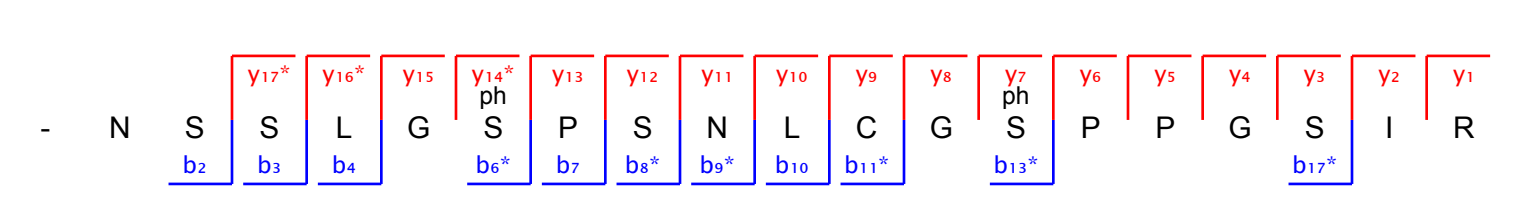

Raw file  
20171215\_MaS\_33SR\_LMH\_phospho2\_03

Scan 12557 Method FTMS; HCD Score 234.02 m/z 904.37 Gene names RALY

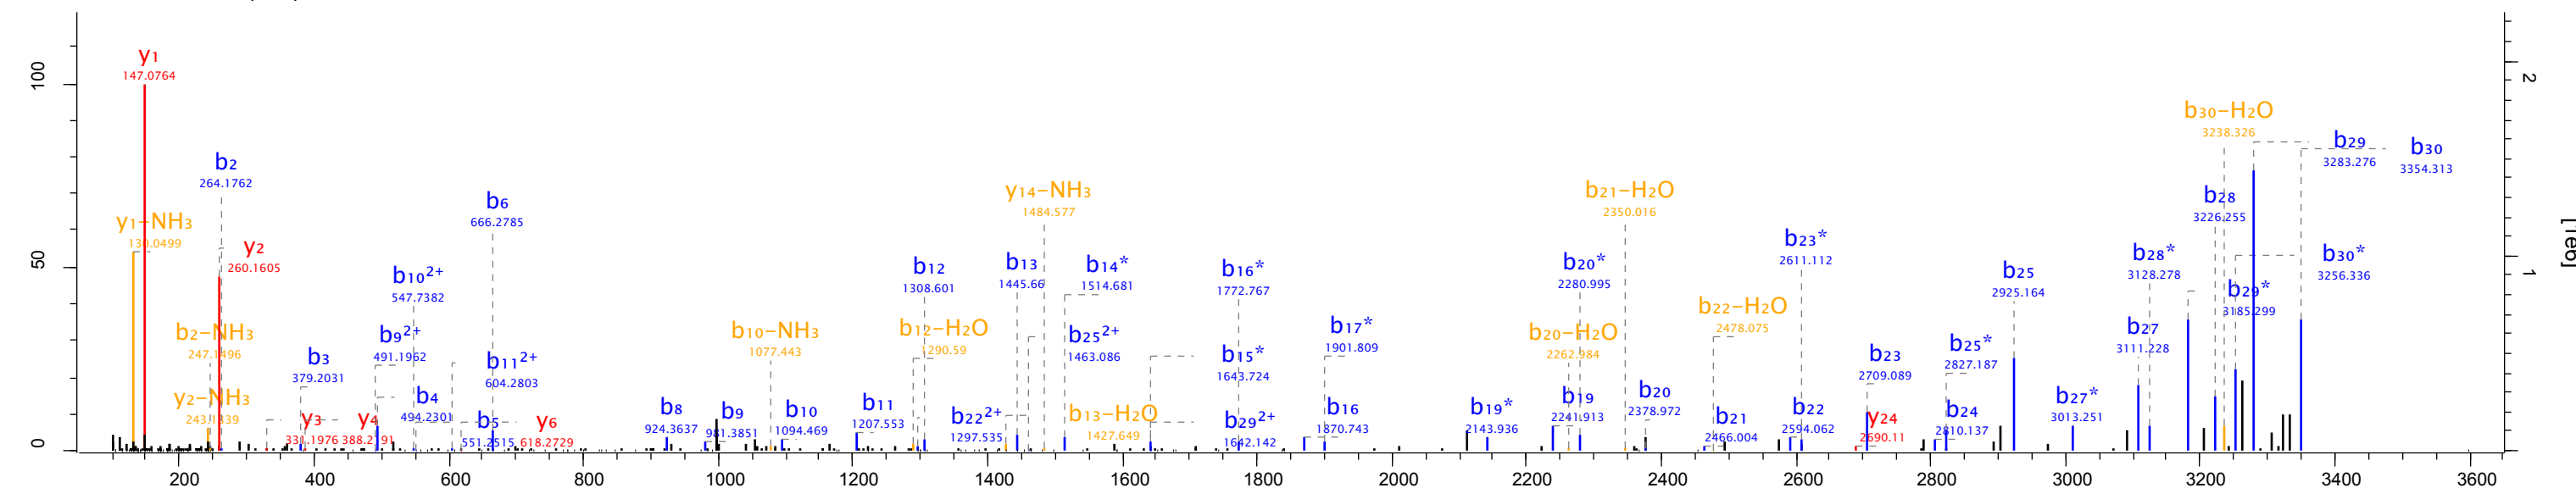

- T R D D G D E E G L L T H S E E E L E H S Q D T D A D D G A L Q -

Fragmentation mapping: b2 (R), b3 (D), b4 (D), b5 (G), b6 (D), b8 (E), b9 (G), b10 (L), b11 (L), b12 (T), b13 (H), b14\* (S), b15\* (E), b16 (E), b17\* (E), b19 (E), b20 (H), b21 (S), b22 (Q), b23 (D), b24 (T), b25 (D), b27 (A), b28 (D), b29 (G), b30 (A), y24 (E), y4 (G), y3 (A), y2 (L), y1 (Q).

Raw file: 20171215\_MaS\_33SR\_LMH\_phospho2\_03  
 Scan: 12587 Method: FTMS; HCD Score: 81.82 m/z: 1001.43 Gene names: PNKP

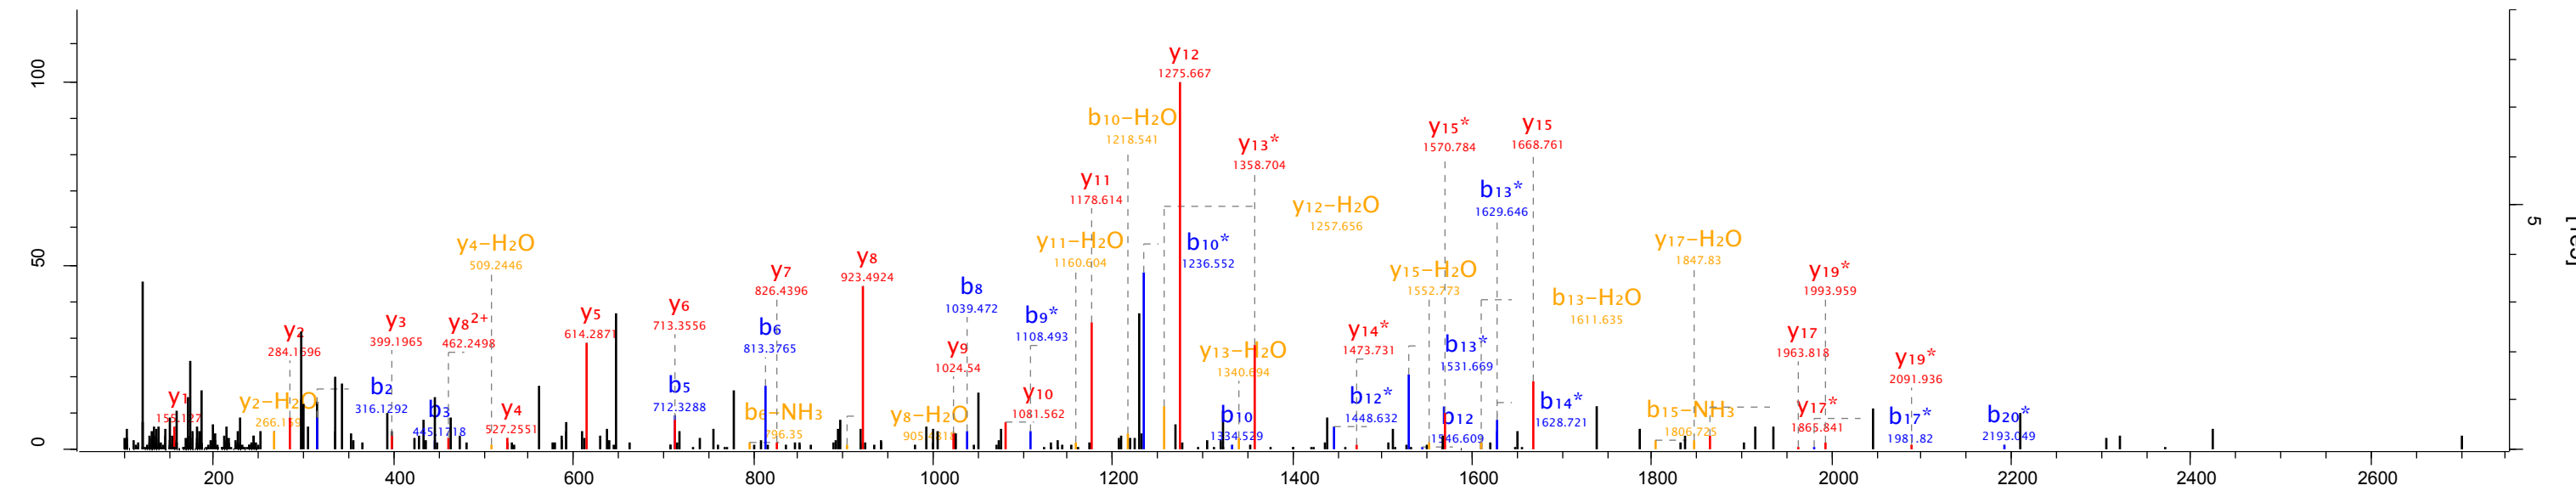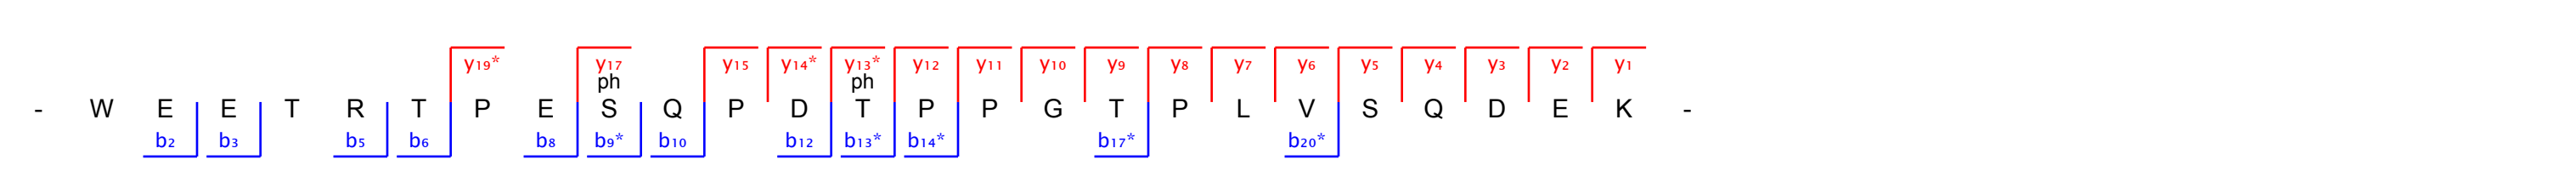

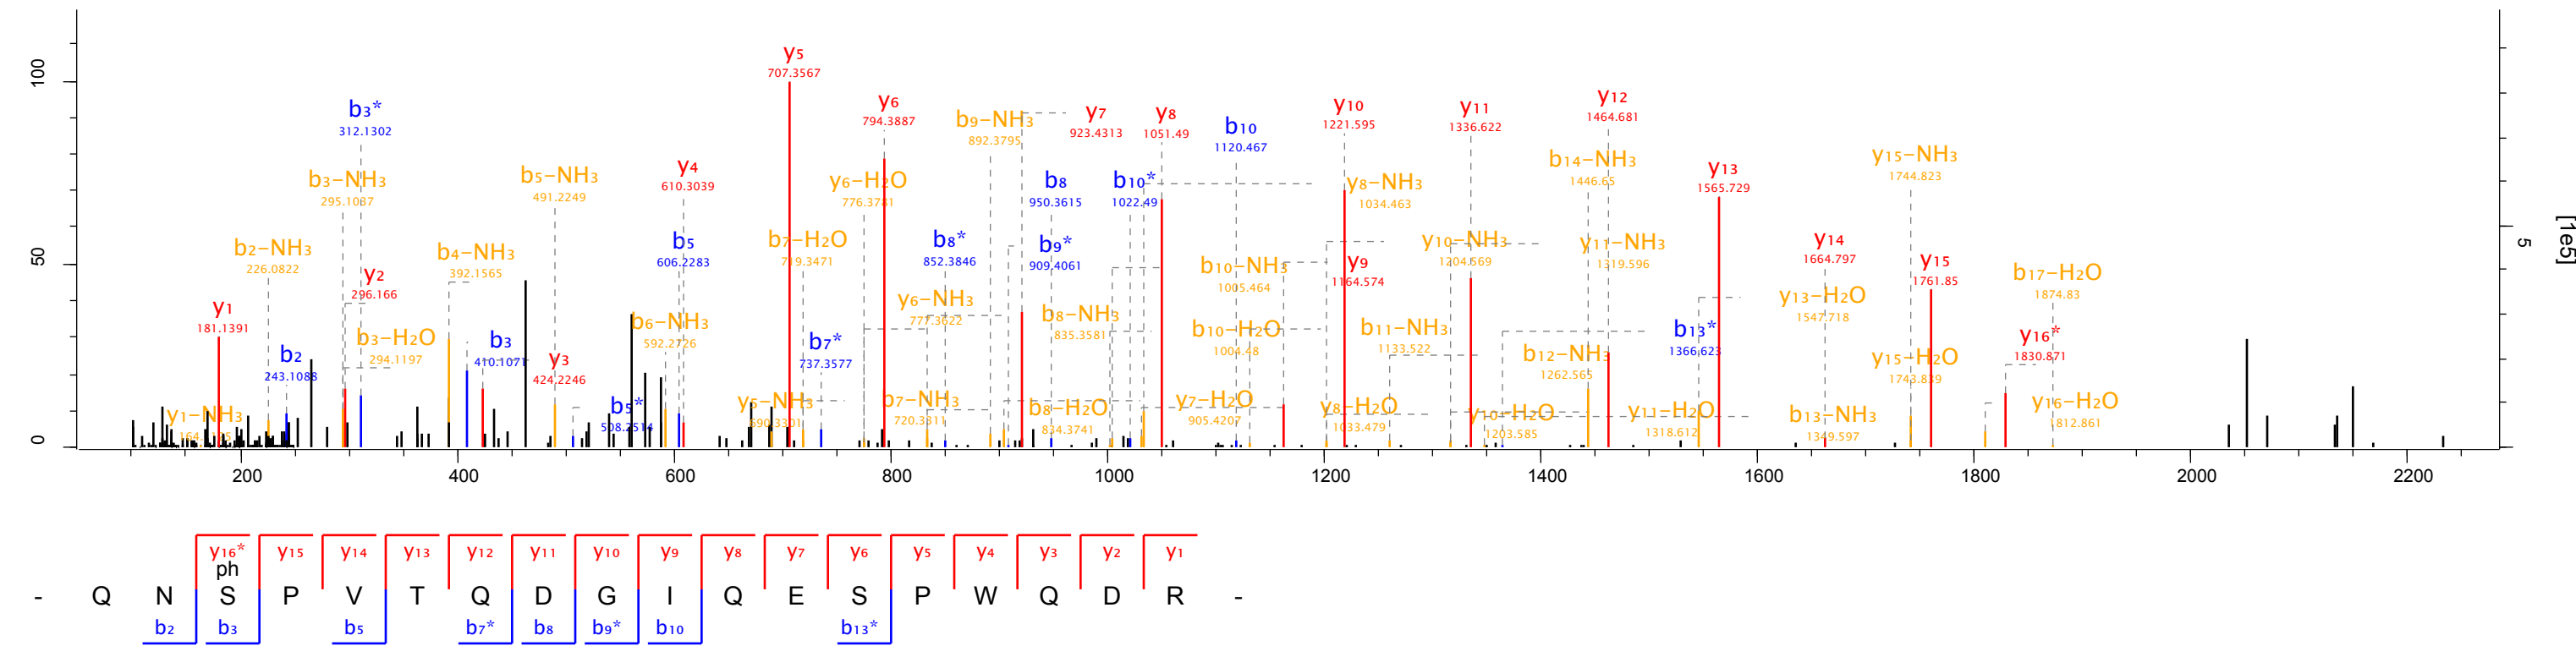

Raw file 20171215\_MaS\_33SR\_LMH\_phospho2\_03 Scan 12687 Method FTMS; HCD Score 71.99 m/z 873.74 Gene names ARAF

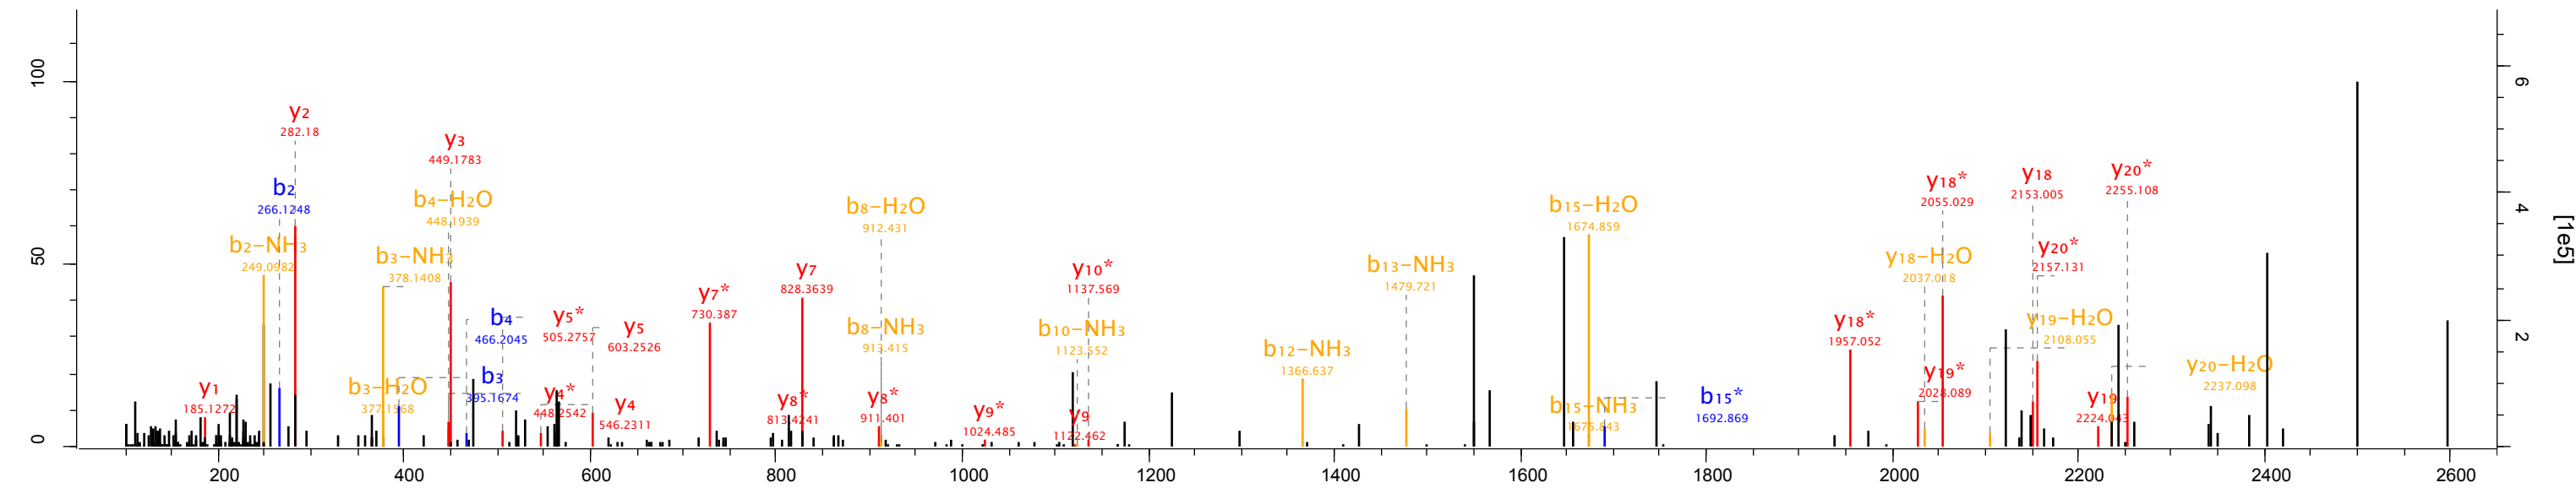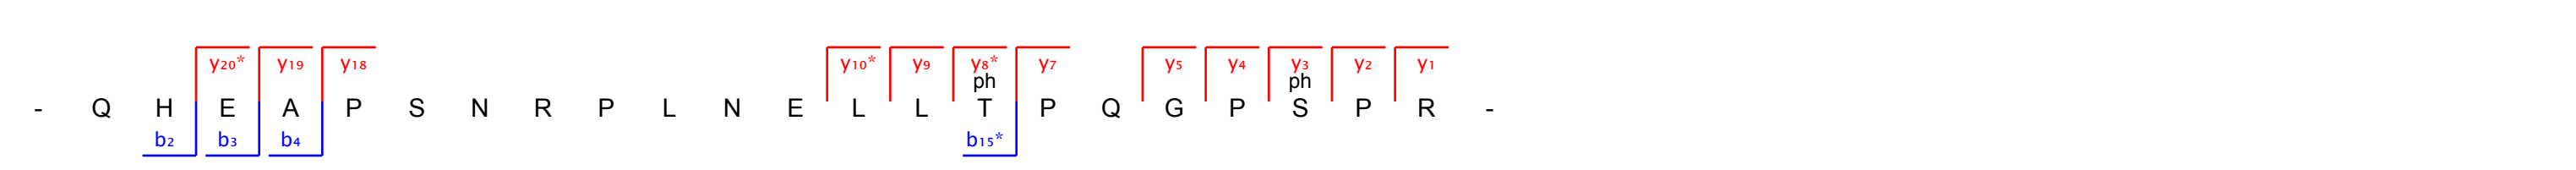



Raw file: 20171215\_MaS\_33SR\_LMH\_phospho2\_03  
 Scan: 12847 Method: FTMS; HCD Score: 146.17 m/z: 648.01 Gene names: THRAP3

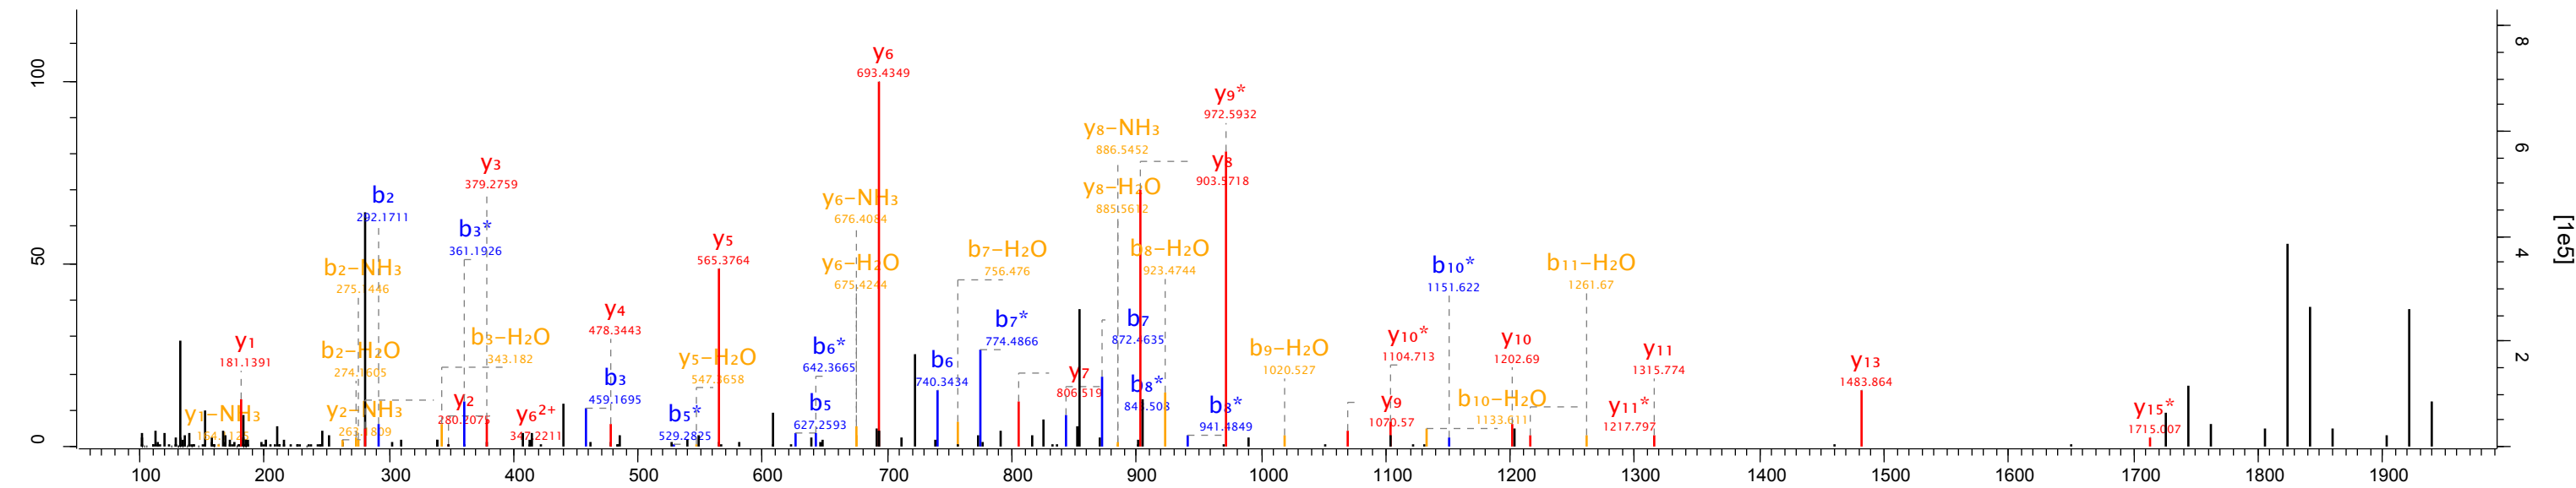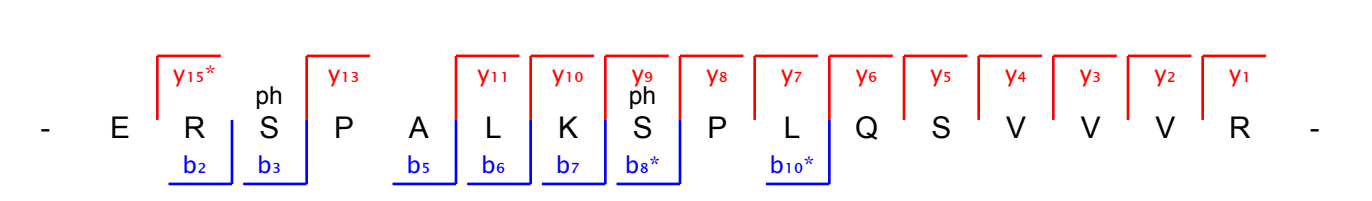

Raw file  
20171215\_MaS\_33SR\_LMH\_phospho2\_03

Scan 12897 Method FTMS; HCD Score 359.18 m/z 1326.54 Gene names PRKAR2A

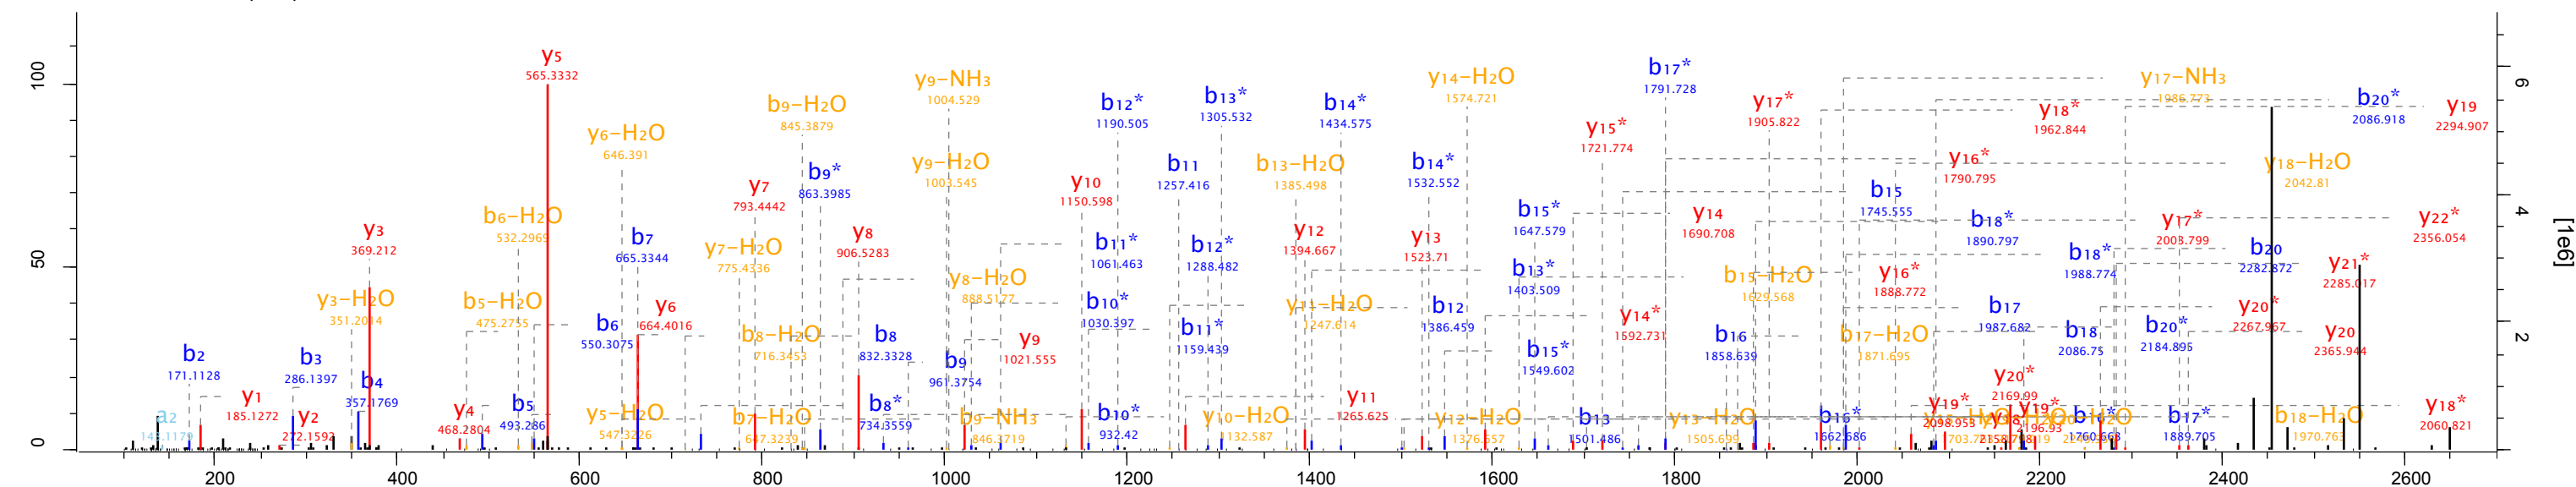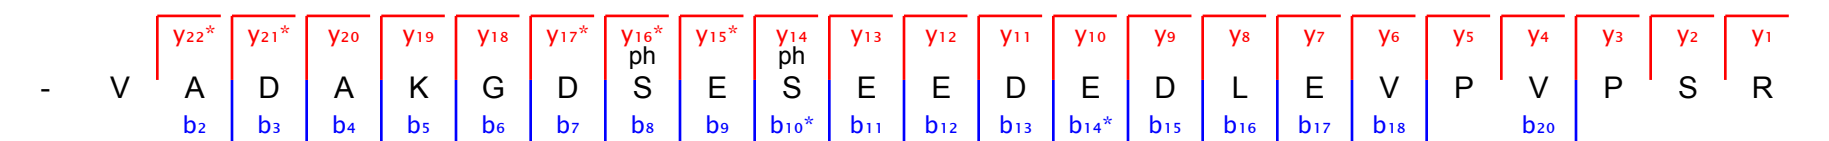

Raw file 20171215\_MaS\_33SR\_LMH\_phospho2\_03 Scan 13237 Method FTMS; HCD Score 215.08 m/z 1190.86 Gene names MIER1

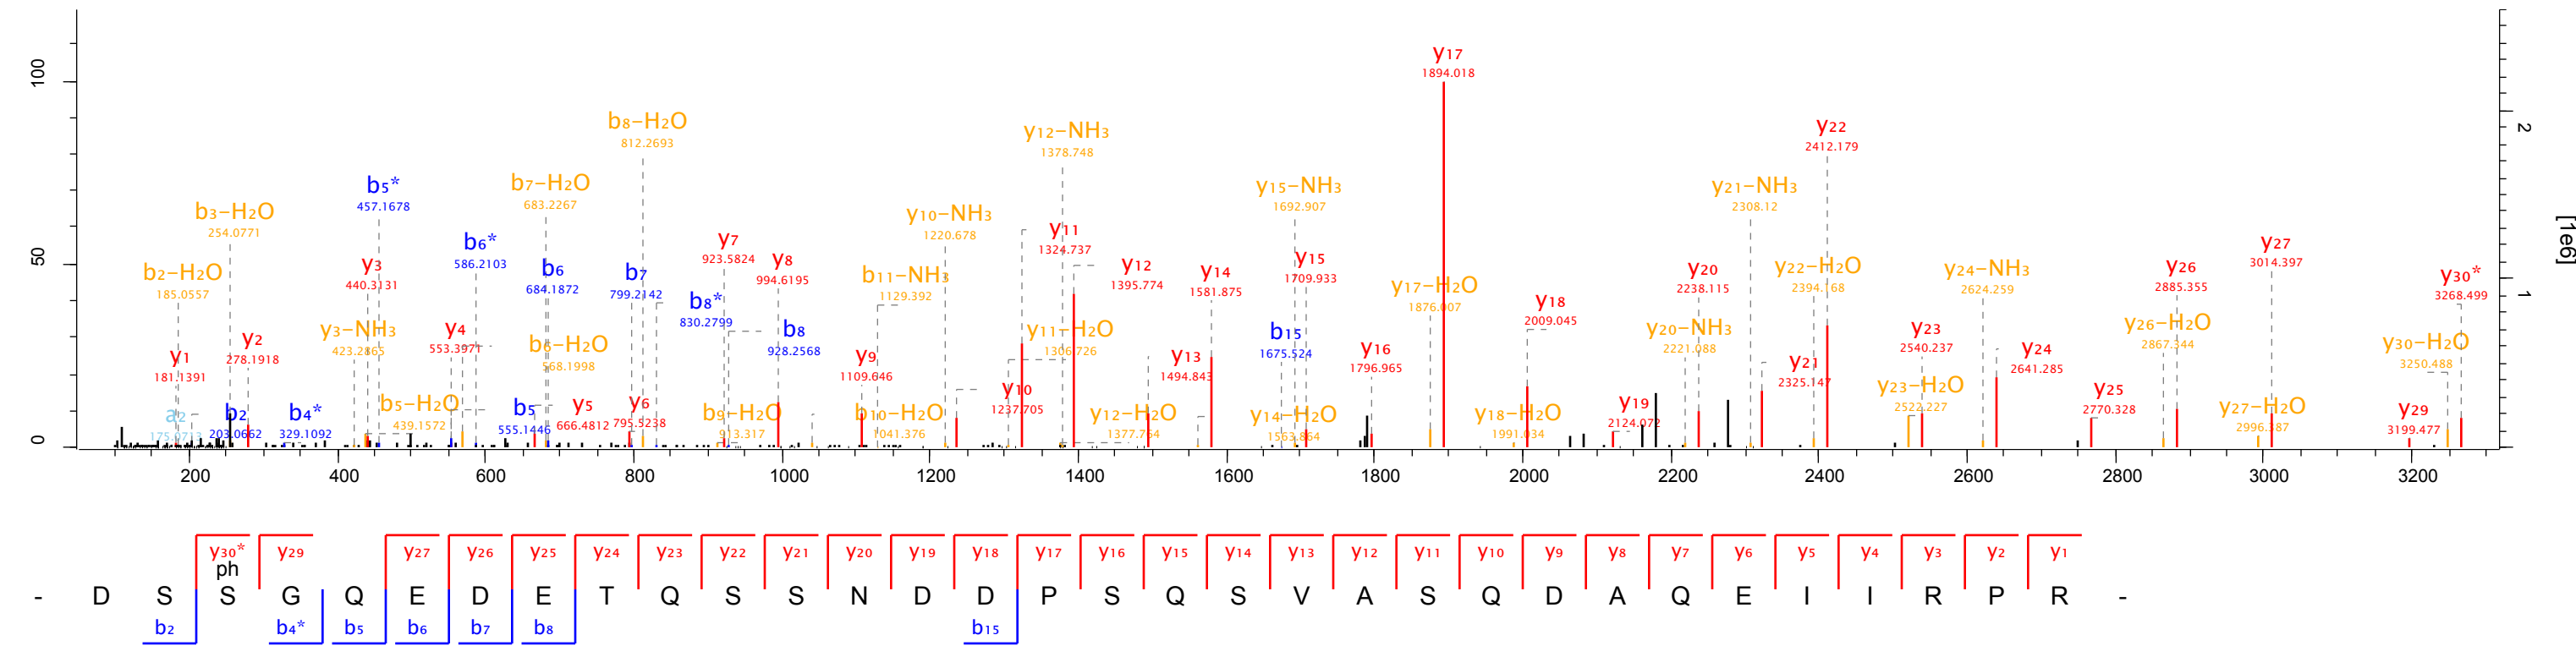

Raw file 20171215\_MaS\_33SR\_LMH\_phospho2\_03 Scan 13327 Method FTMS; HCD Score 98.63 m/z 828.03 Gene names SF3B1

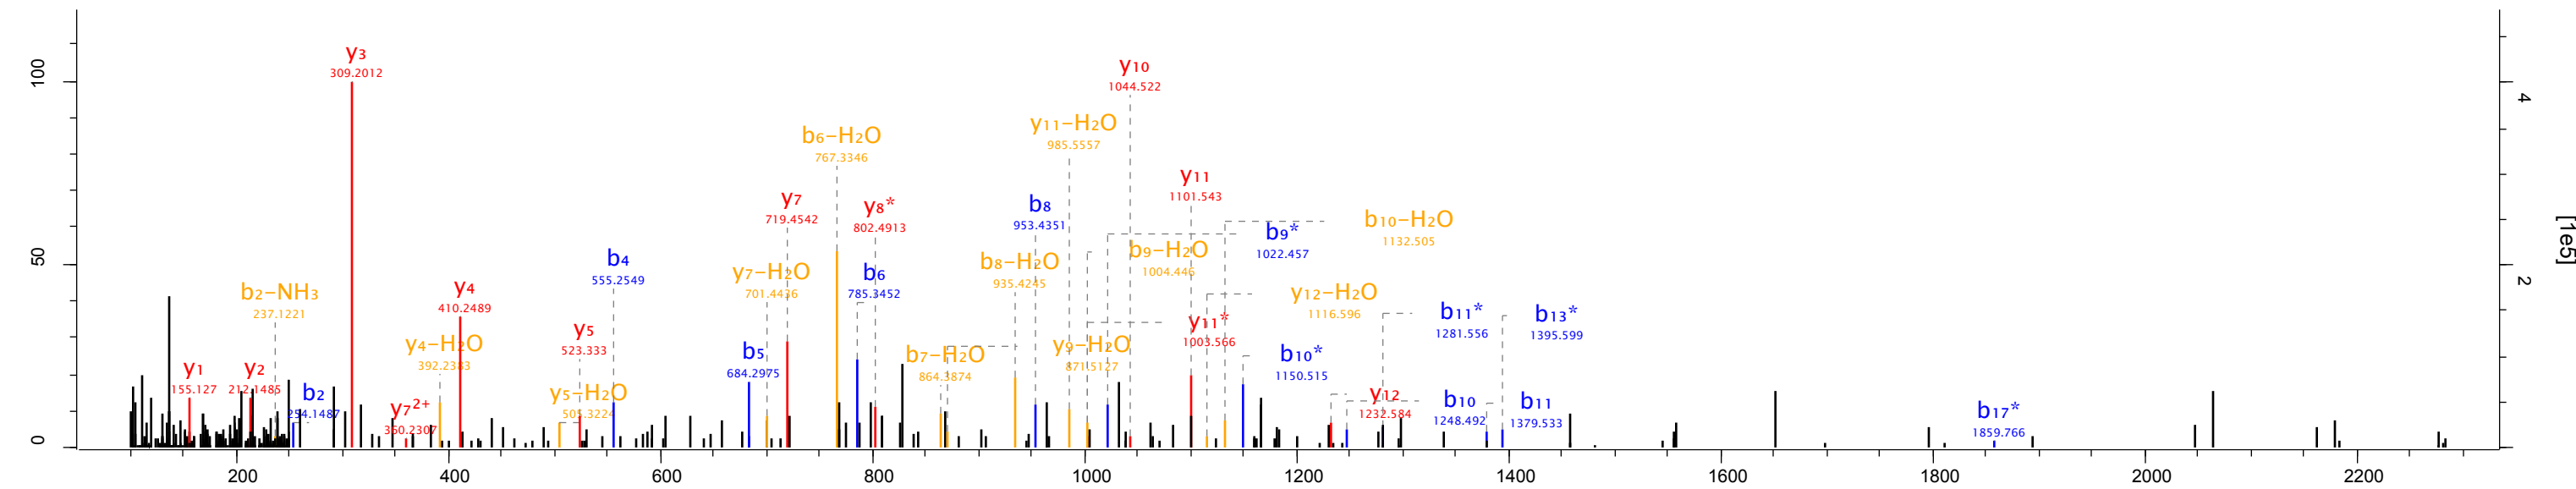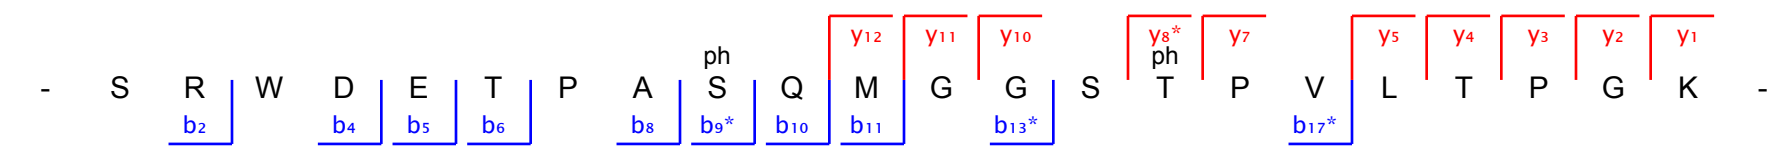

Raw file 20171215\_MaS\_33SR\_LMH\_phospho2\_03 Scan 13527 Method FTMS; HCD Score 144.44 m/z 811.68 Gene names CHD3

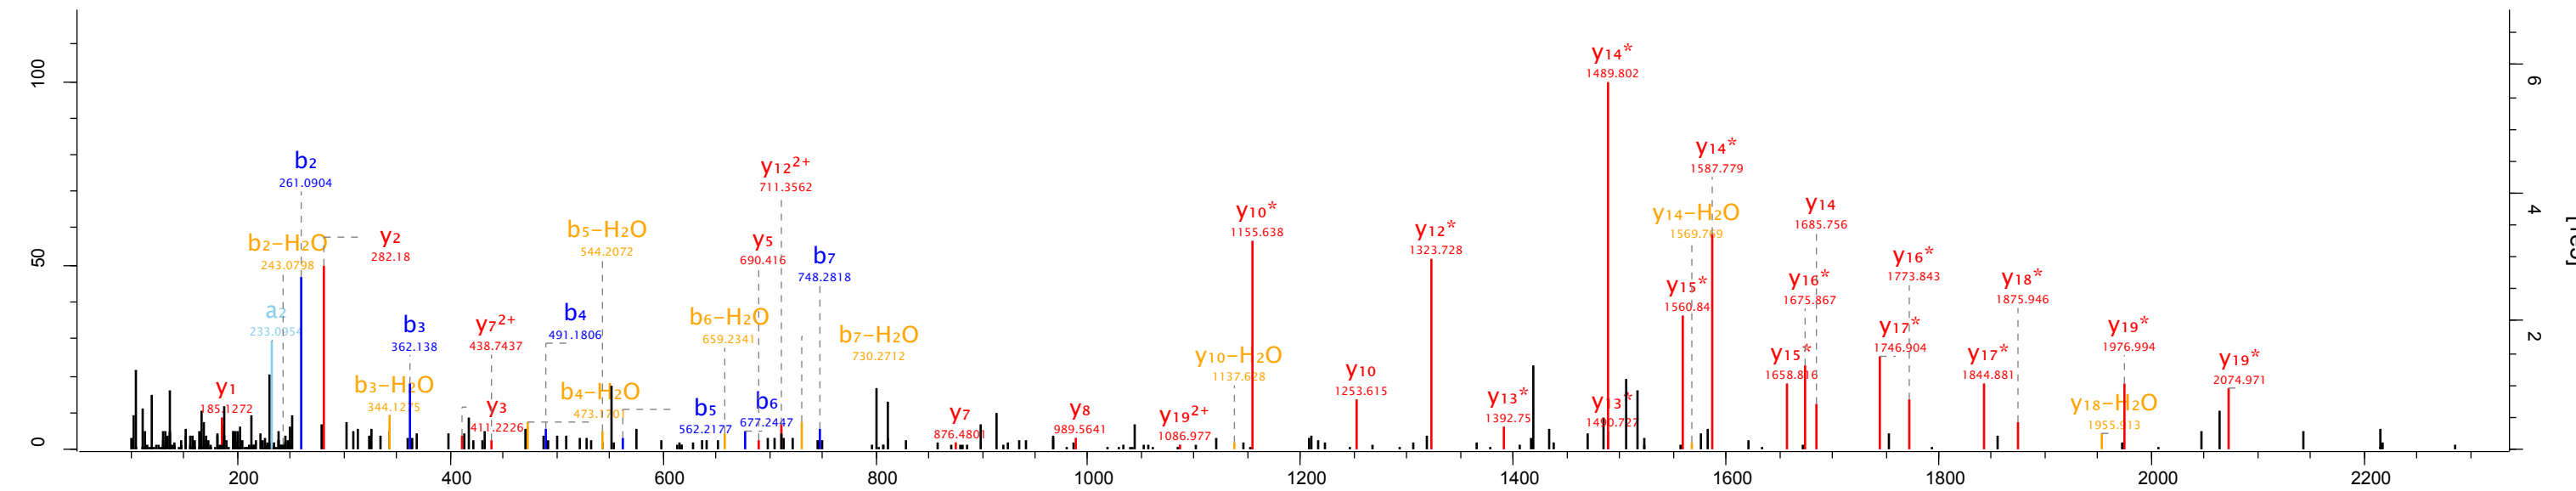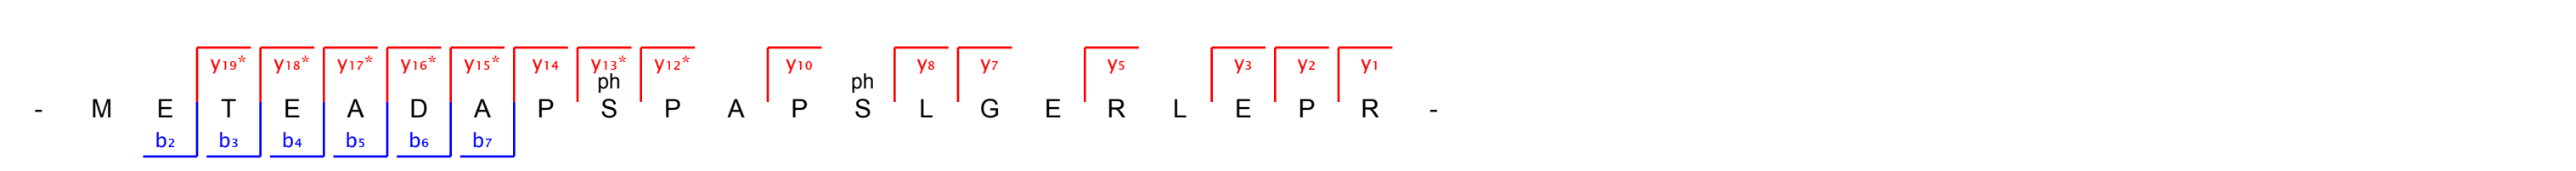

Raw file 20171215\_MaS\_33SR\_LMH\_phospho2\_03 Scan 13597 Method FTMS; HCD Score 54.67 m/z 608.94 Gene names SPAG9

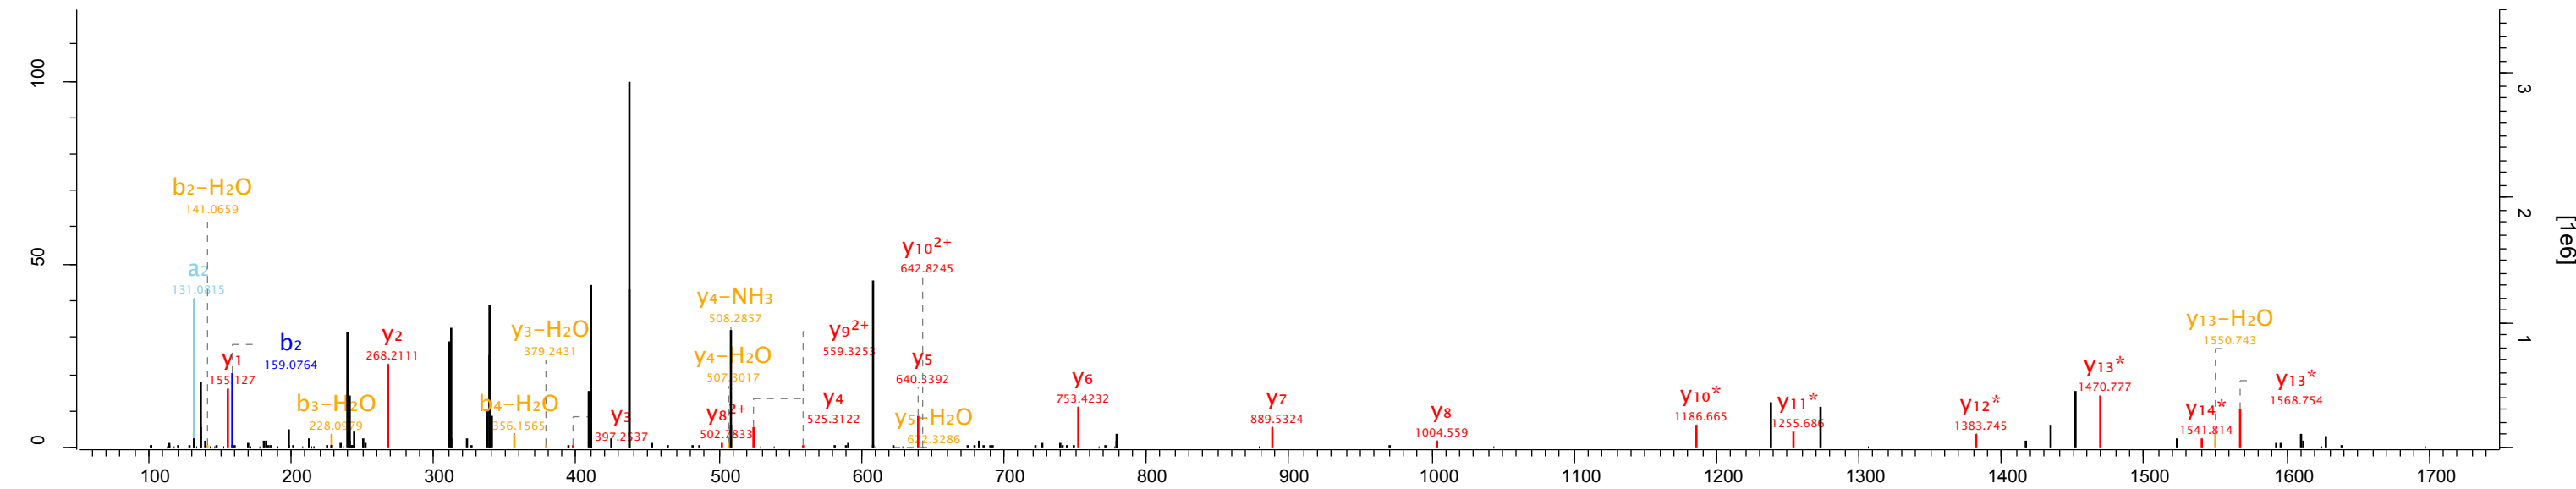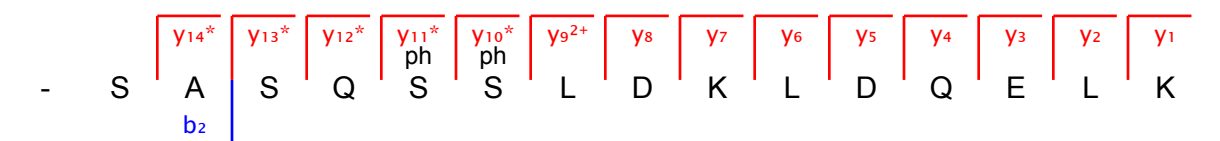

Raw file: 20171215\_MaS\_33SR\_LMH\_phospho2\_03  
 Scan: 13727 Method: FTMS; HCD Score: 142.65 m/z: 1099.84 Gene names: MAP7D1

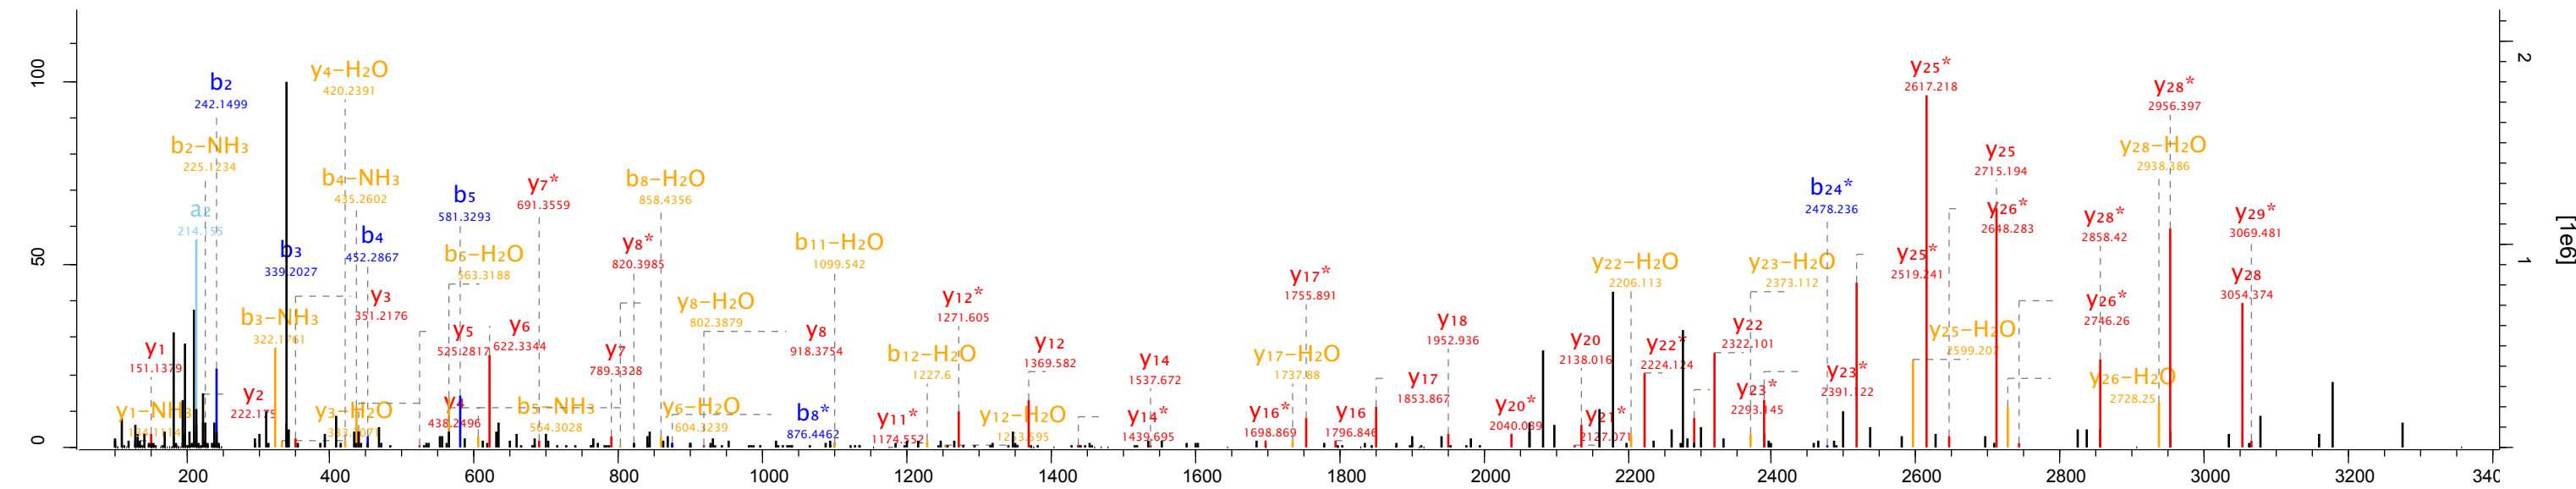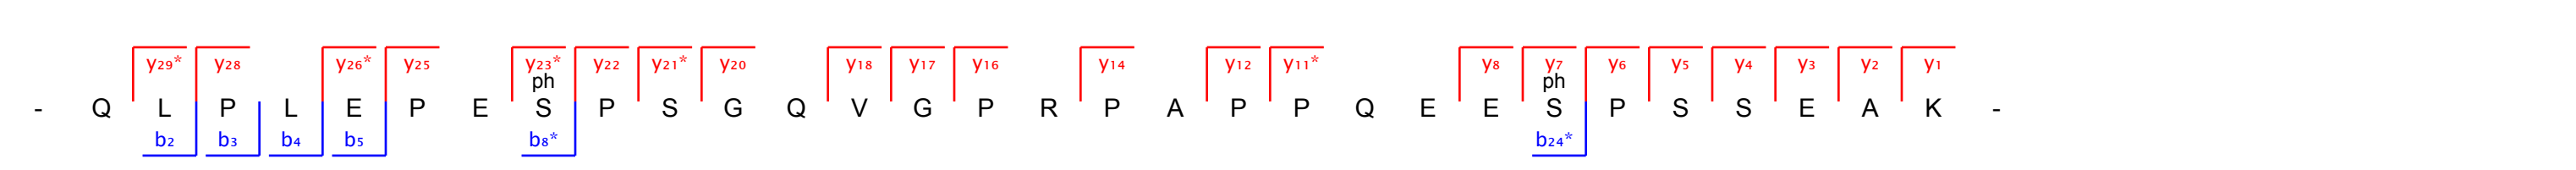

Raw file 20171215\_MaS\_33SR\_LMH\_phospho2\_03 Scan 13887 Method FTMS; HCD Score 145.06 m/z 850.06 Gene names MAP1B

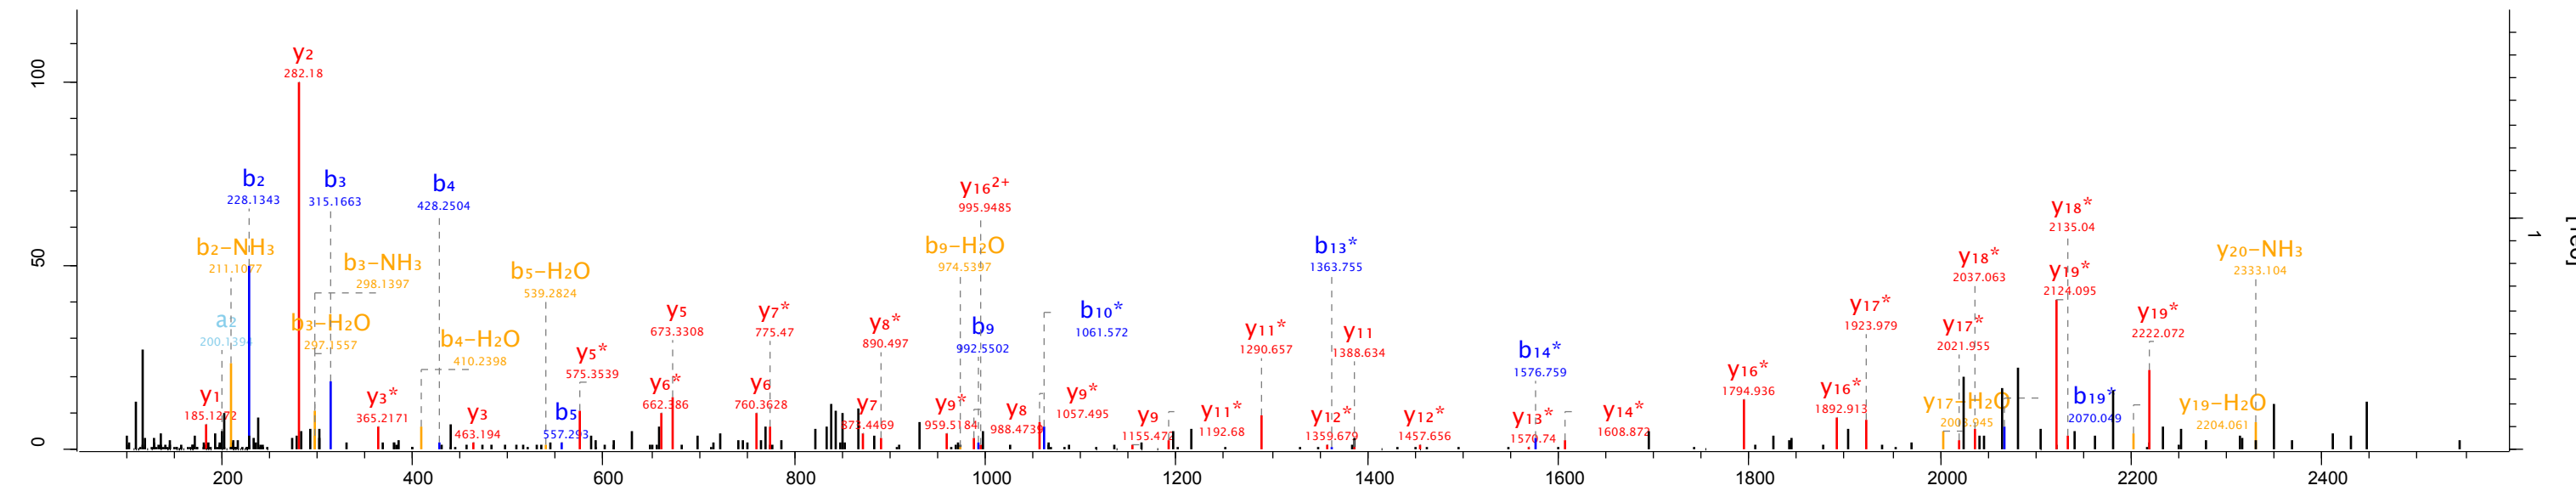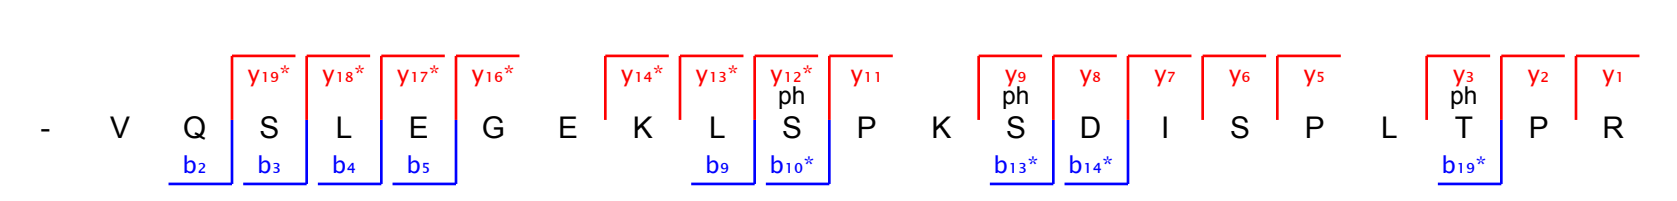



Raw file 20171215\_MaS\_33SR\_LMH\_phospho2\_03 Scan 13957 Method FTMS; HCD Score 131.32 m/z 723.31 Gene names PDXDC1

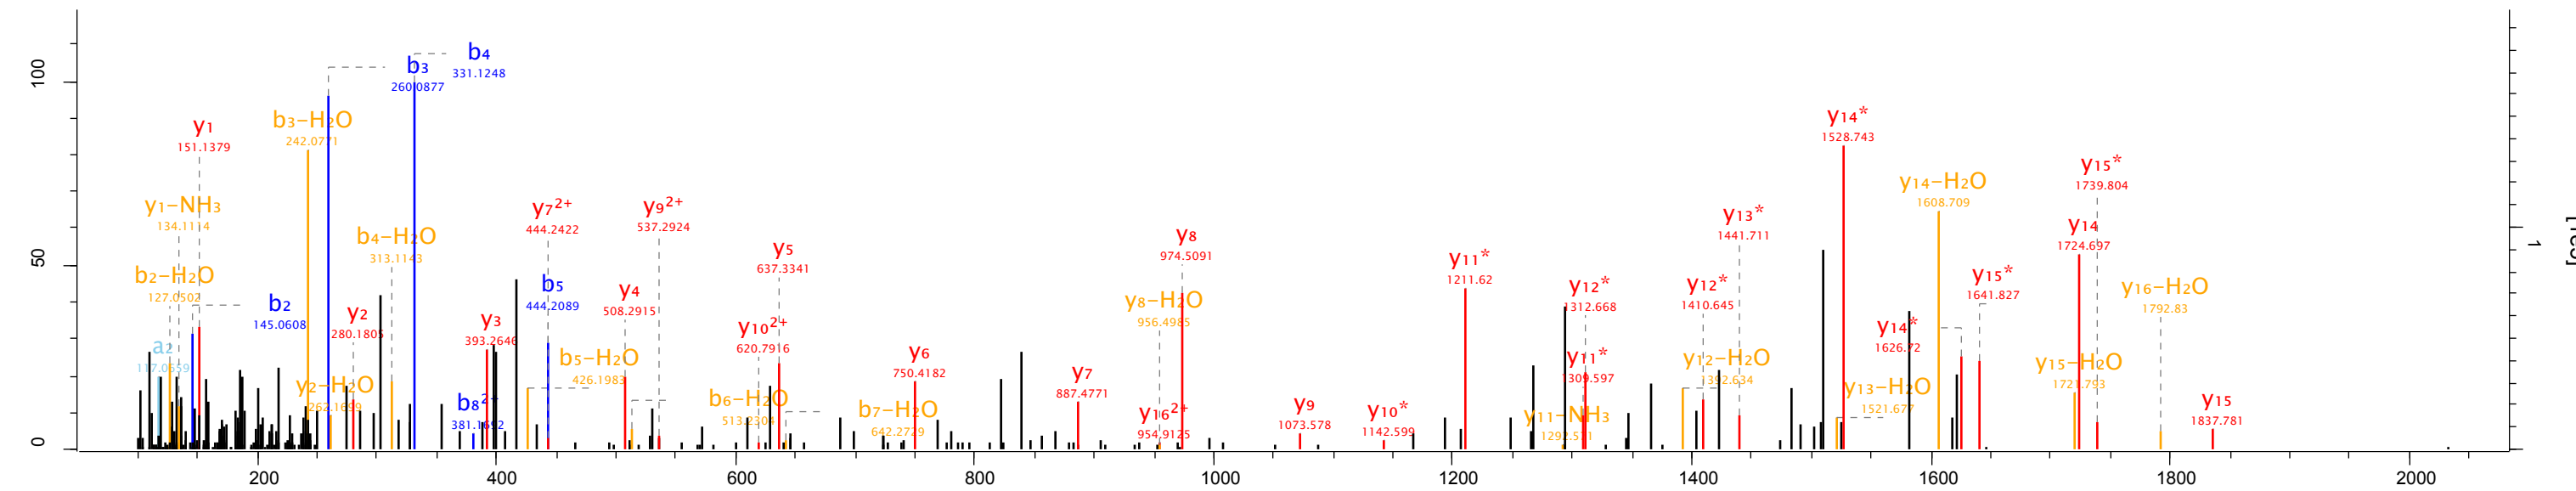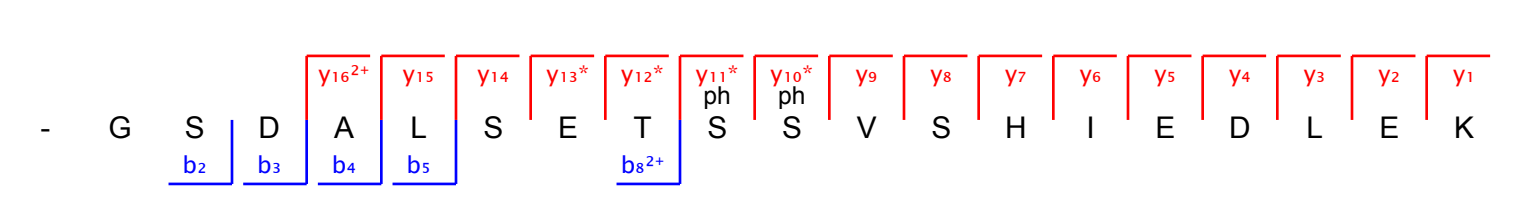

Raw file 20171215\_MaS\_33SR\_LMH\_phospho2\_03 Scan 14167 Method FTMS; HCD Score 106.38 m/z 554.24

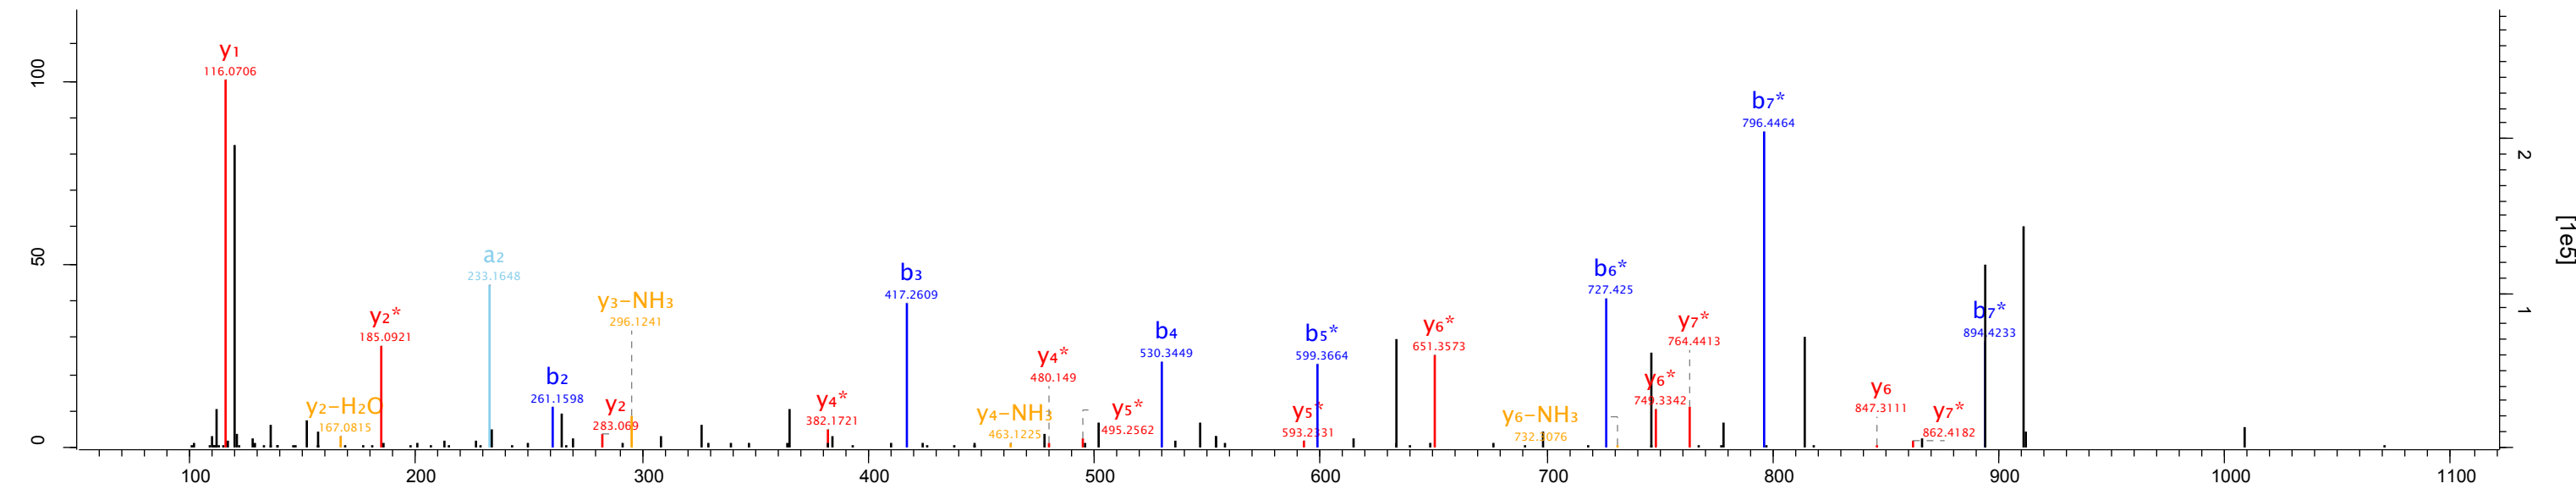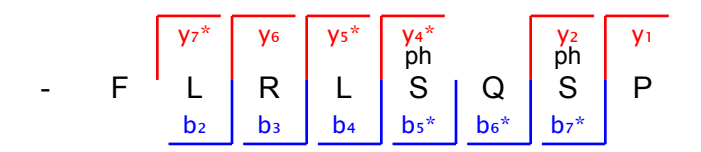

Raw file 20171215\_MaS\_33SR\_LMH\_phospho2\_03 Scan 14367 Method FTMS; HCD Score 229.16 m/z 1358.51 Gene names FTSJ3

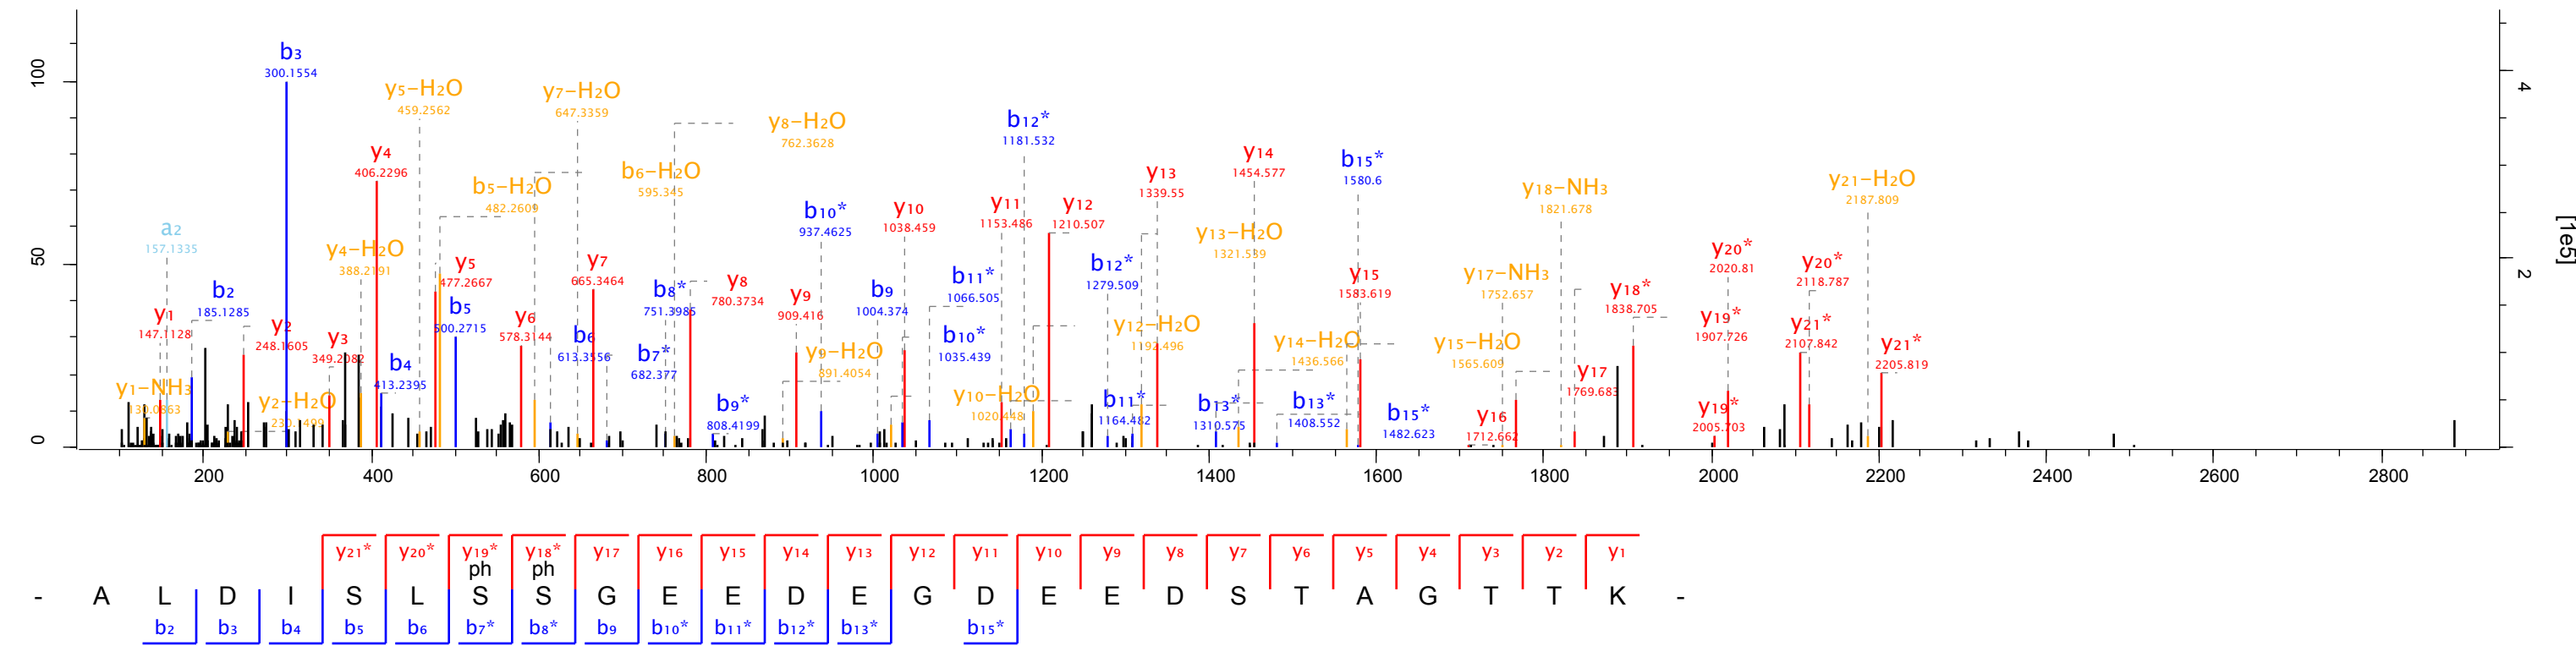

Raw file 20171215\_MaS\_33SR\_LMH\_phospho2\_03 Scan 14417 Method FTMS; HCD Score 44.66 m/z 744.35 Gene names ZMYND8

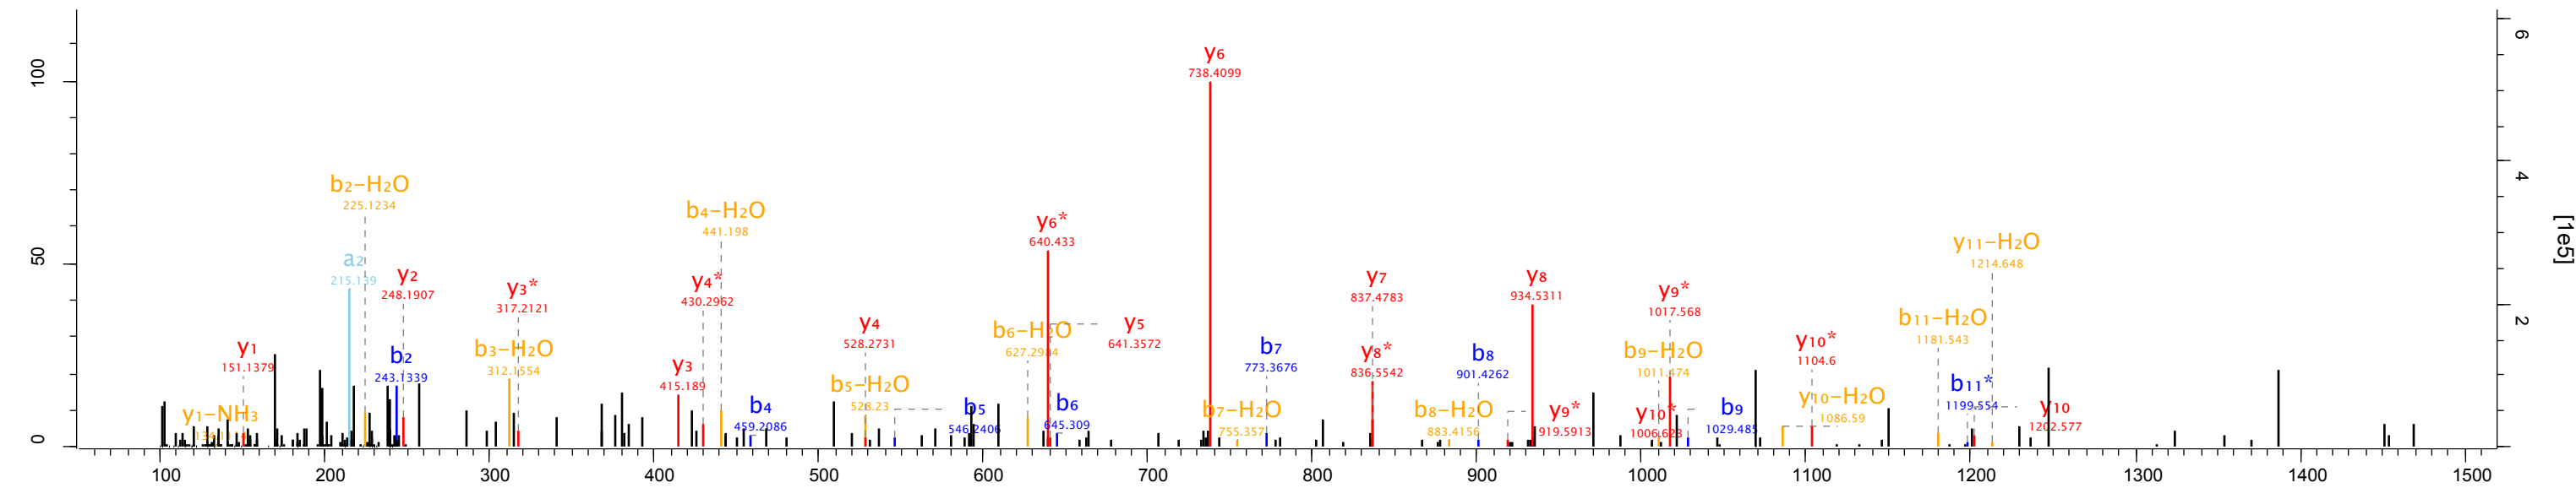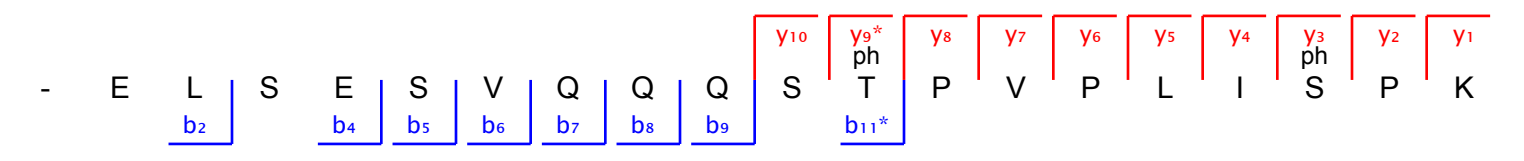

Raw file: 20171215\_MaS\_33SR\_LMH\_phospho2\_03  
 Scan: 14657 Method: FTMS; HCD Score: 386.24 m/z: 1140.47

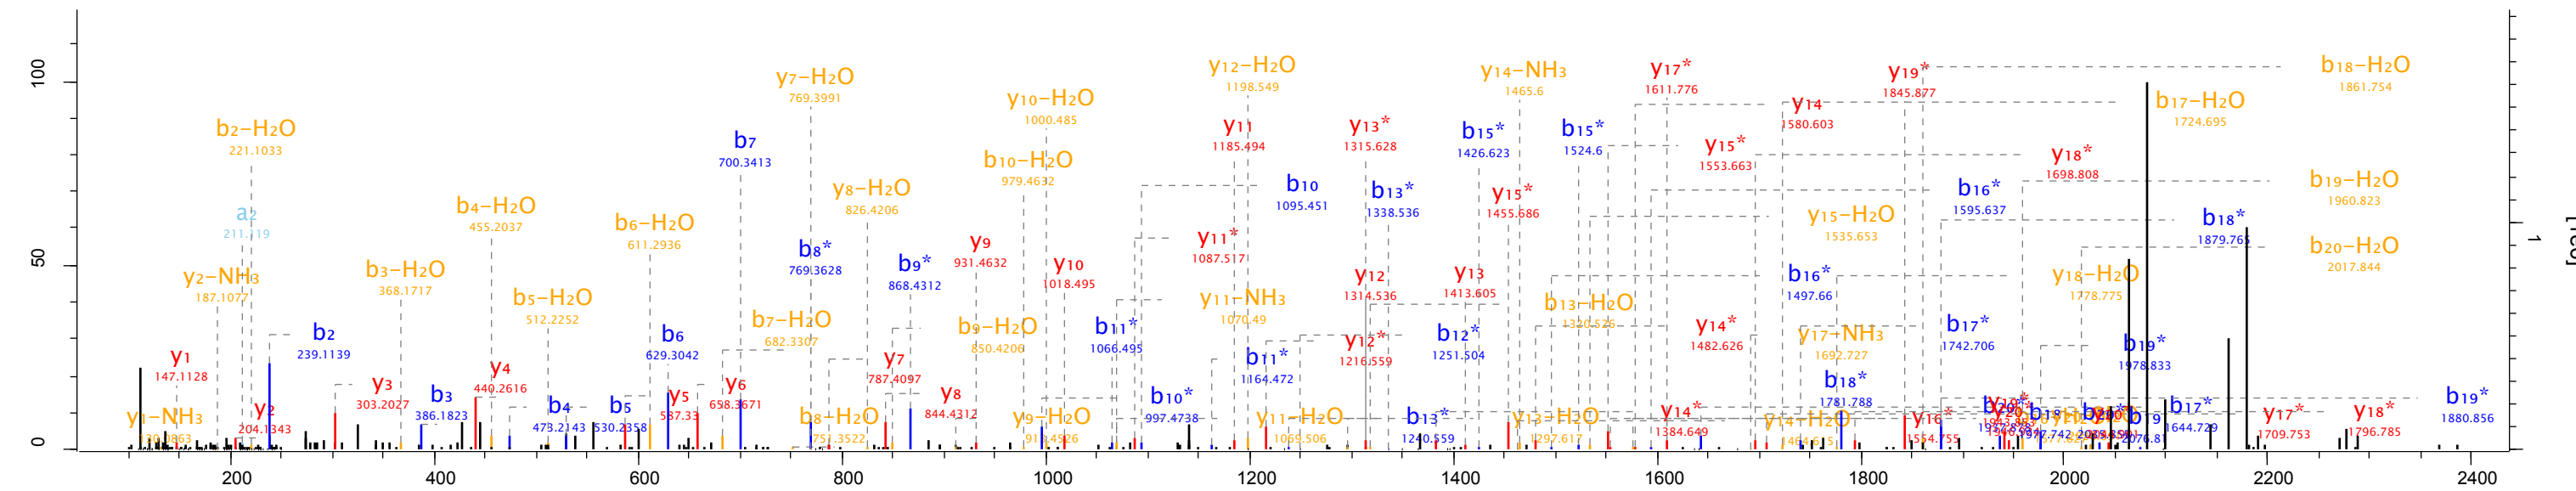

Protein sequence: H T F S G V A S V E S S G E A F H V G K

Fragmentation mapping (b and y ions):

|                   |                   |                   |                   |                   |                   |                    |                  |                 |                    |                   |                   |                |                   |                   |                   |                 |                 |                   |                |
|-------------------|-------------------|-------------------|-------------------|-------------------|-------------------|--------------------|------------------|-----------------|--------------------|-------------------|-------------------|----------------|-------------------|-------------------|-------------------|-----------------|-----------------|-------------------|----------------|
| y <sub>20</sub> * | y <sub>19</sub> * | y <sub>18</sub> * | y <sub>17</sub> * | y <sub>16</sub> * | y <sub>15</sub> * | y <sub>14</sub> ph | y <sub>13</sub>  | y <sub>12</sub> | y <sub>11</sub> ph | y <sub>10</sub>   | y <sub>9</sub>    | y <sub>8</sub> | y <sub>7</sub>    | y <sub>6</sub>    | y <sub>5</sub>    | y <sub>4</sub>  | y <sub>3</sub>  | y <sub>2</sub>    | y <sub>1</sub> |
| b <sub>2</sub>    | b <sub>3</sub>    | b <sub>4</sub>    | b <sub>5</sub>    | b <sub>6</sub>    | b <sub>7</sub>    | b <sub>8</sub> *   | b <sub>9</sub> * | b <sub>10</sub> | b <sub>11</sub> *  | b <sub>12</sub> * | b <sub>13</sub> * |                | b <sub>15</sub> * | b <sub>16</sub> * | b <sub>17</sub> * | b <sub>18</sub> | b <sub>19</sub> | b <sub>20</sub> * | K              |

Raw file 20171215\_MaS\_33SR\_LMH\_phospho2\_03 Scan 14777 Method FTMS; HCD Score 116.55 m/z 933.35 Gene names CCDC97

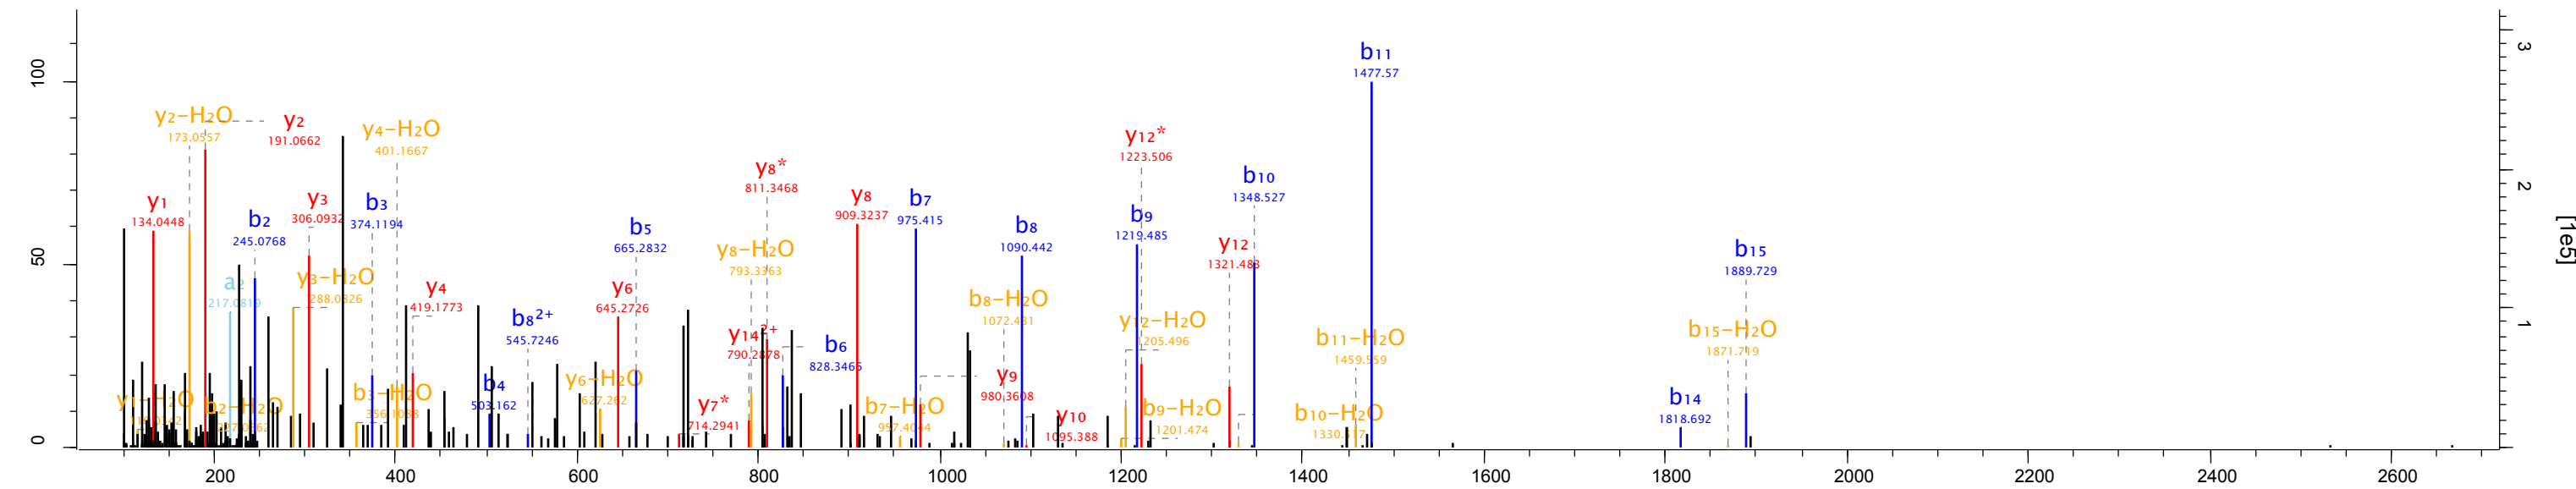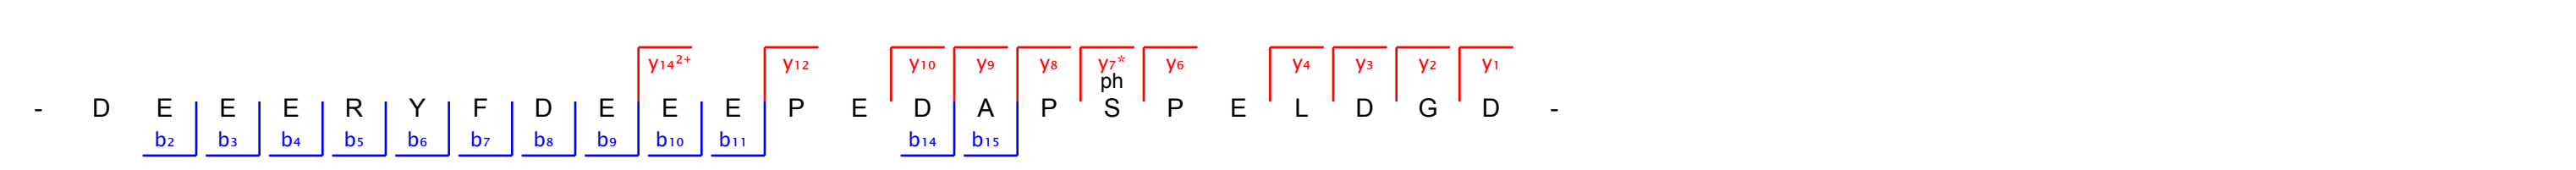

Raw file 20171215\_MaS\_33SR\_LMH\_phospho2\_03 Scan 14977 Method FTMS; HCD Score 317.09 m/z 1186.51 Gene names QSOX2

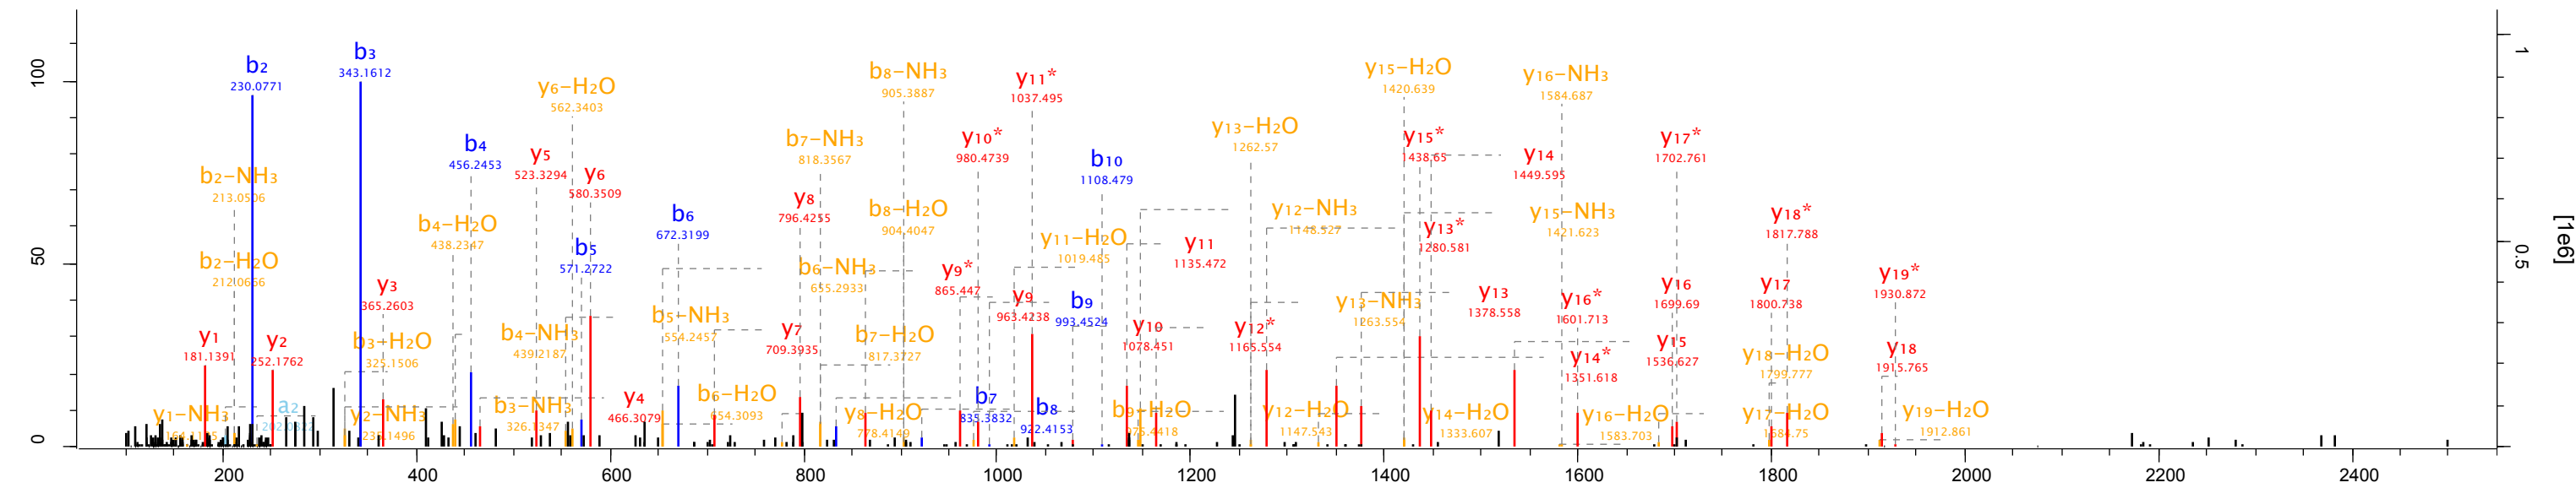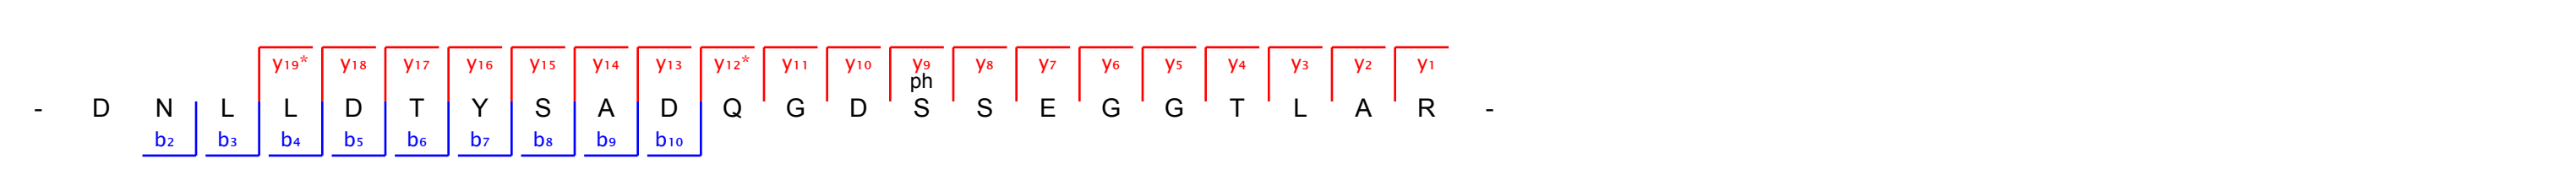

Raw file 20171215\_MaS\_33SR\_LMH\_phospho2\_03 Scan 16017 Method FTMS; HCD Score 82.19 m/z 612.27 Gene names MICALL1

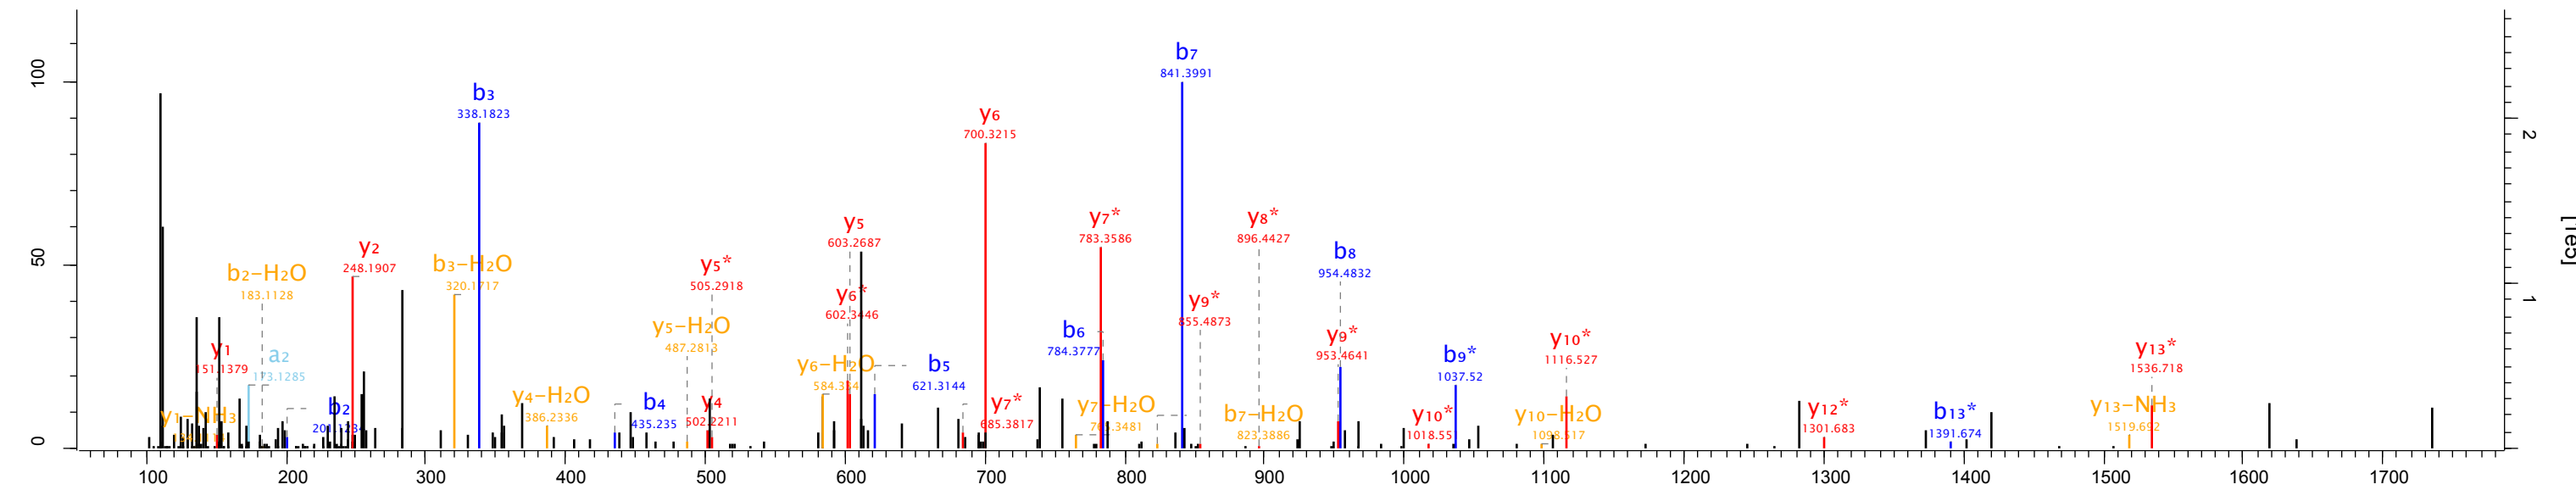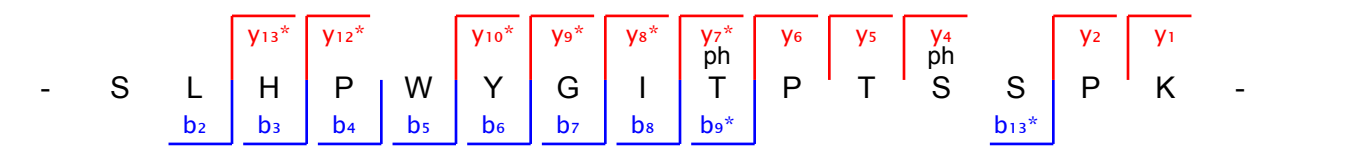



Raw file 20171215\_MaS\_33SR\_LMH\_phospho2\_03 Scan 16247 Method FTMS; HCD Score 87.68 m/z 718.83 Gene names SLC26A6

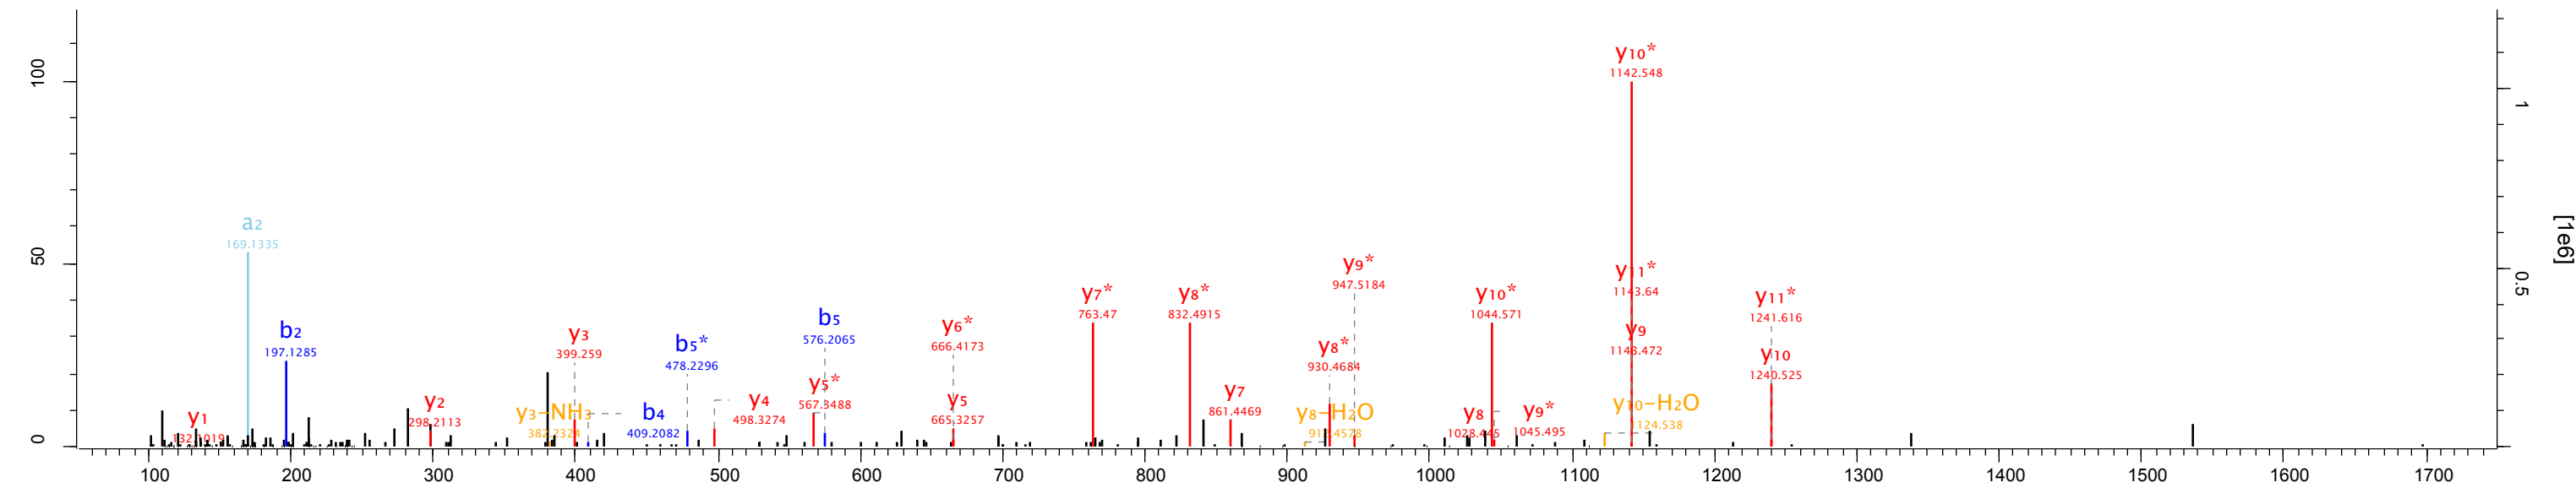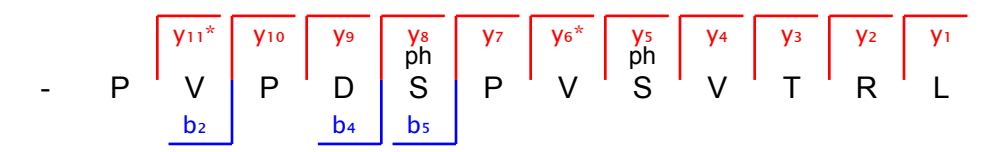

Raw file 20171215\_MaS\_33SR\_LMH\_phospho2\_03 Scan 16537 Method FTMS; HCD Score 94.42 m/z 958.37 Gene names OTUD4

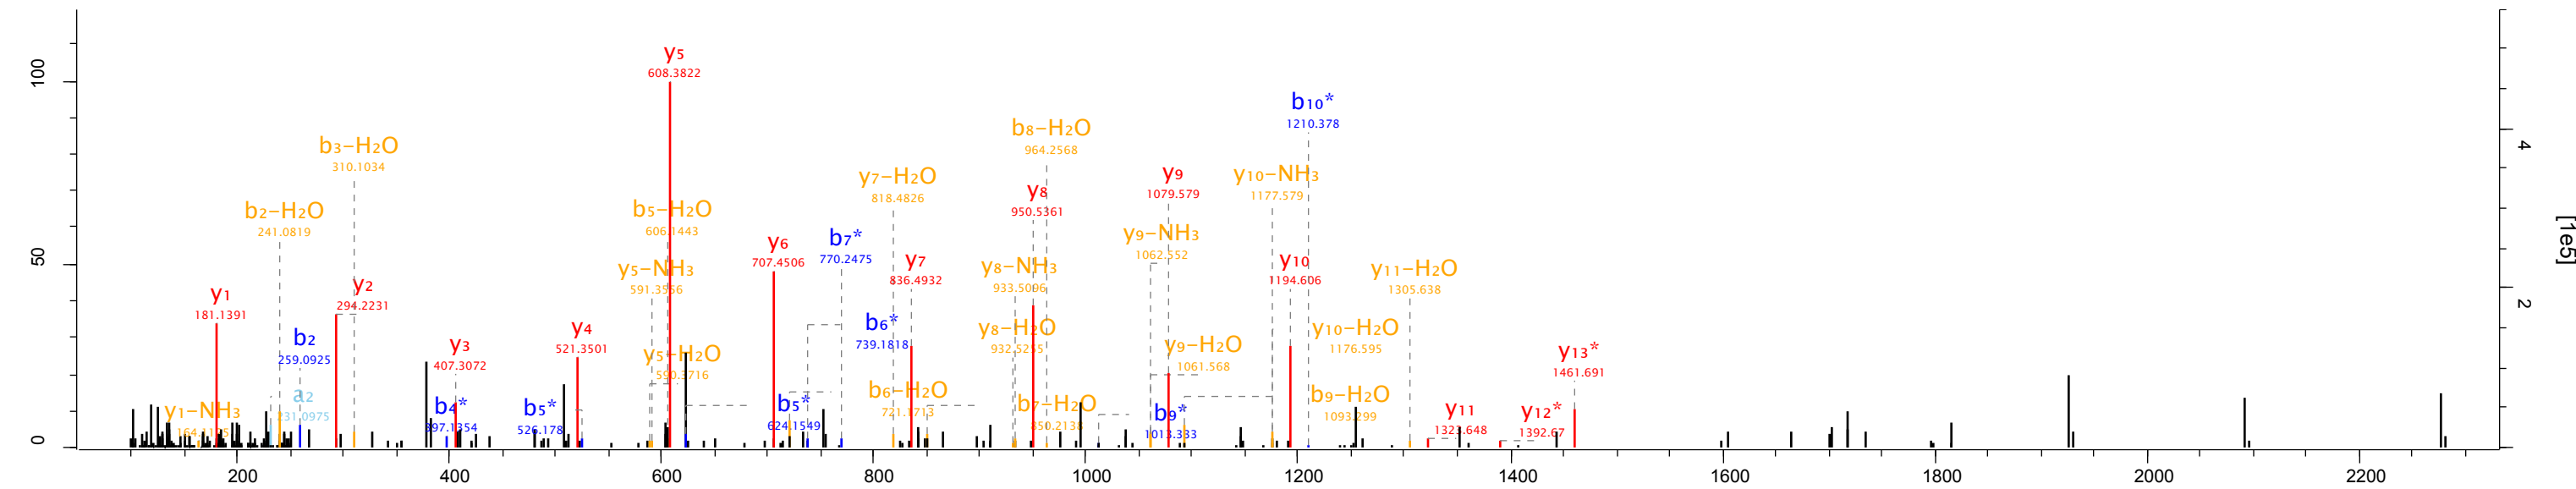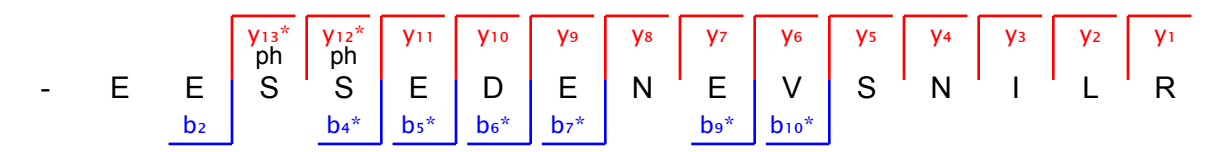

Raw file 20171215\_MaS\_33SR\_LMH\_phospho2\_03 Scan 16827 Method FTMS; HCD Score 147.01 m/z 1055.03 Gene names ZC3H13

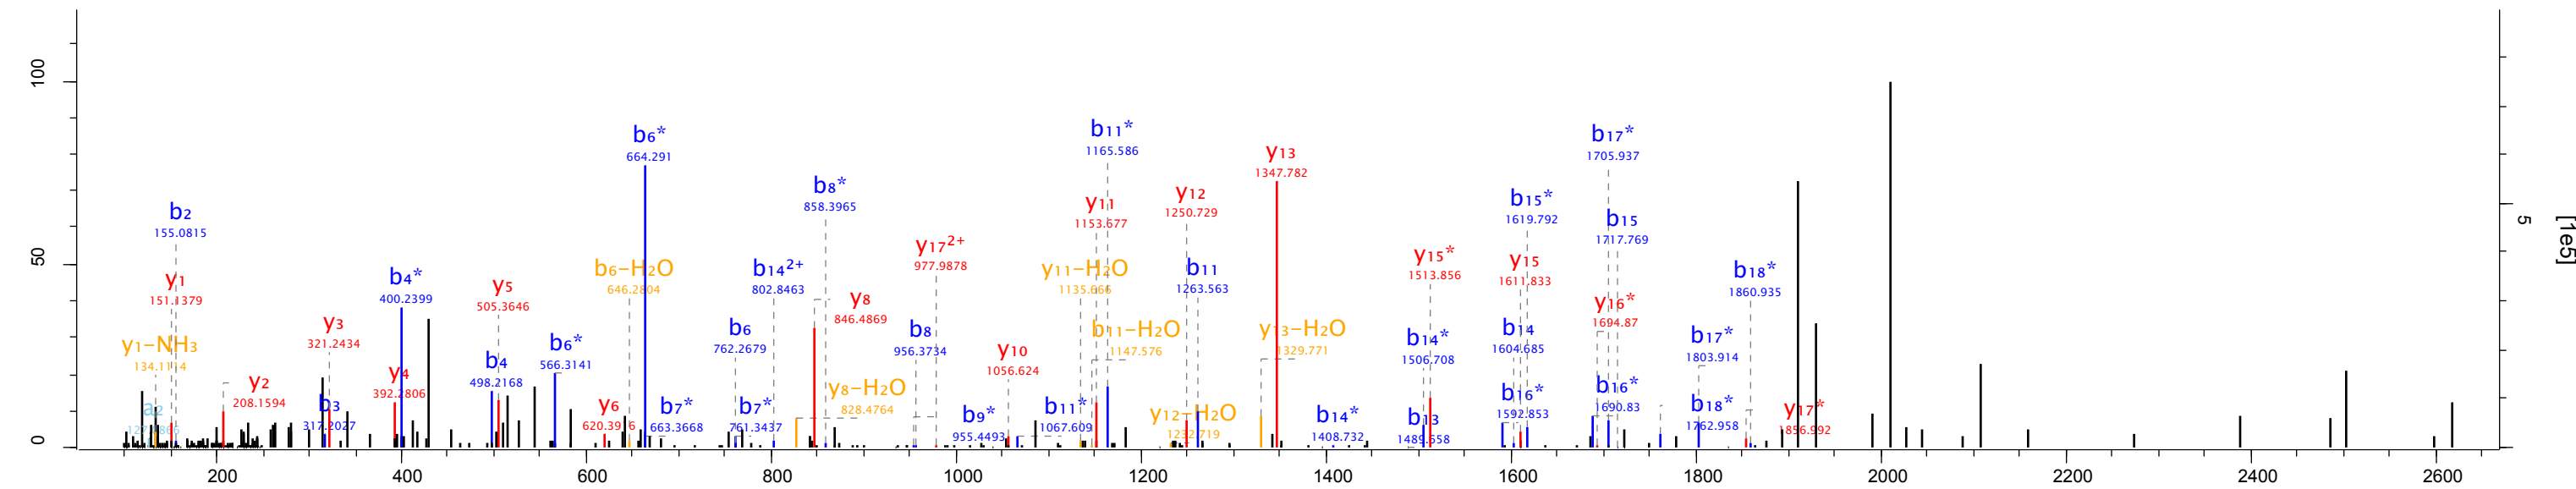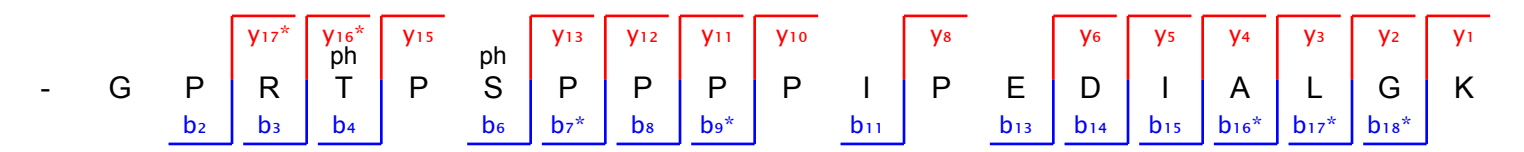

Raw file 20171215\_MaS\_33SR\_LMH\_phospho2\_03 Scan 17307 Method FTMS; HCD Score 100.44 m/z 811.36 Gene names MYO1E

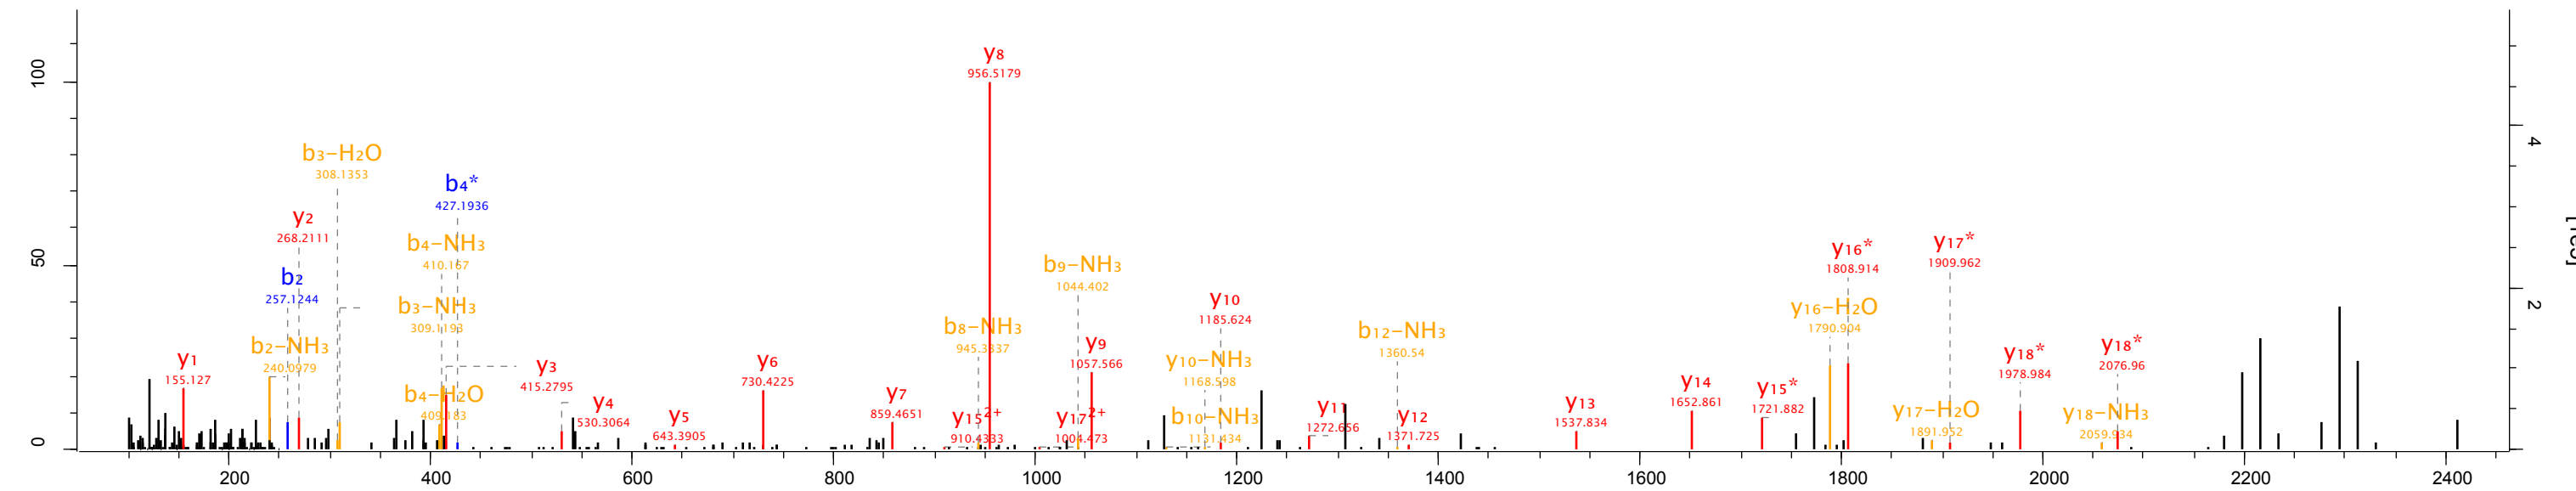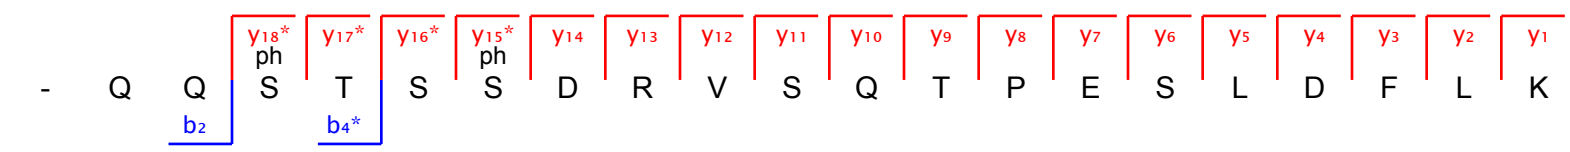

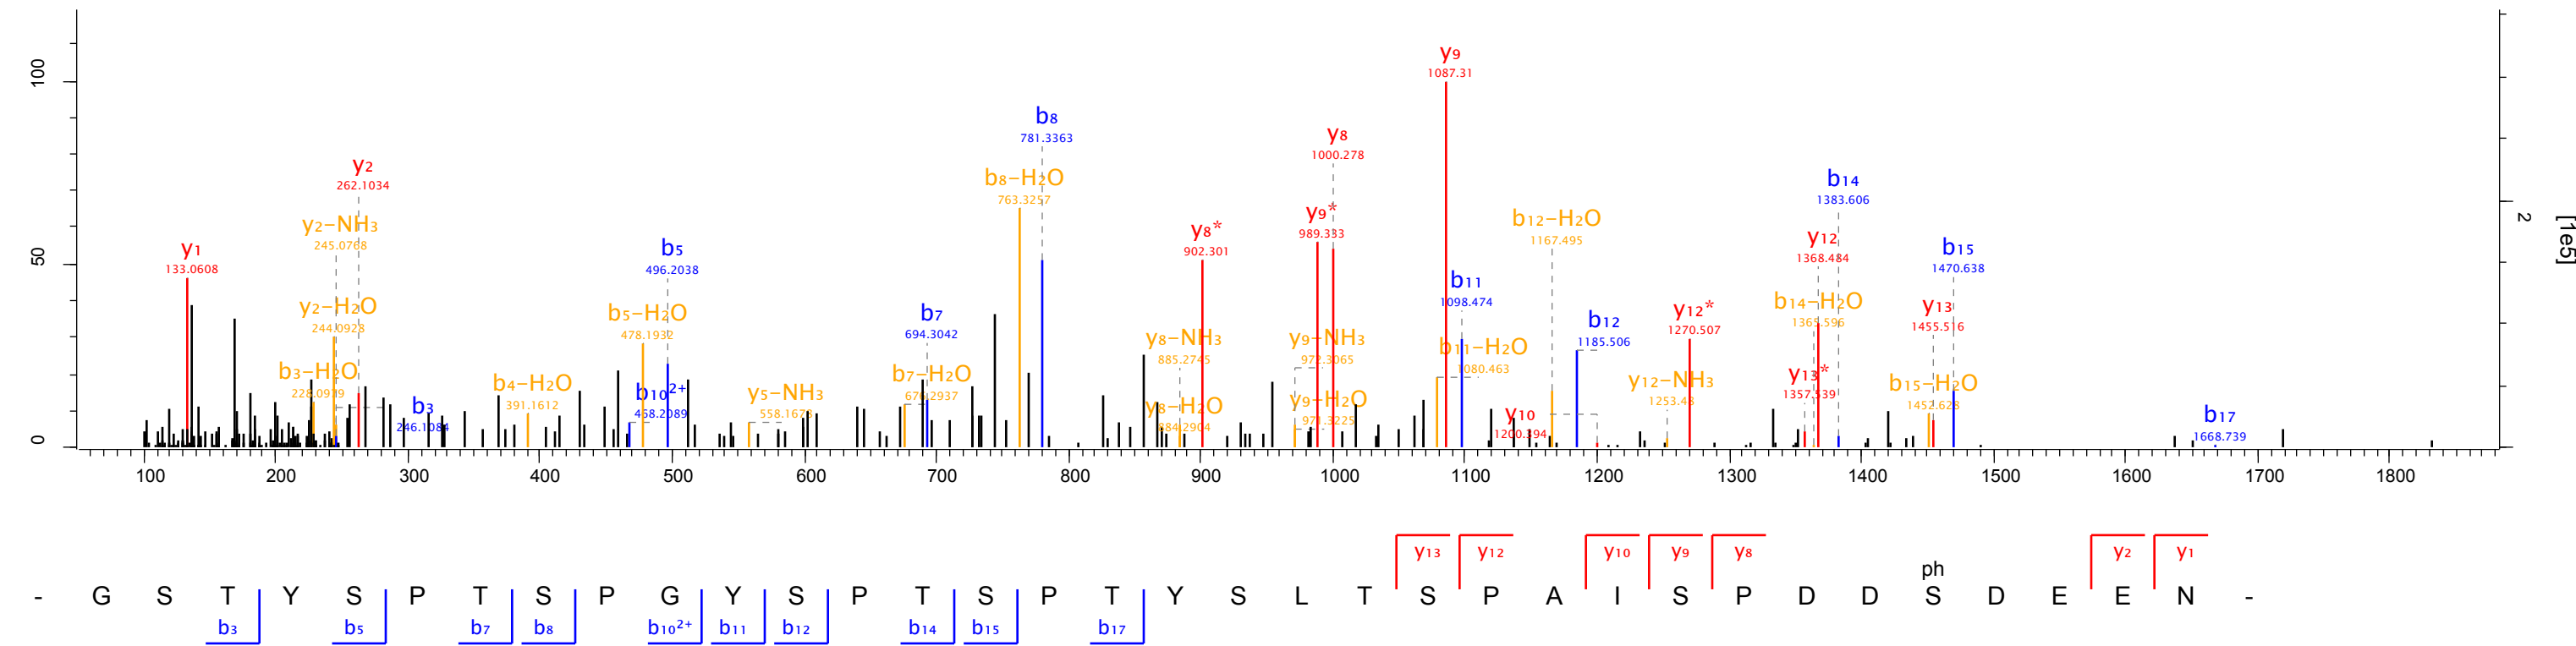

Raw file 20171215\_MaS\_33SR\_LMH\_phospho2\_03 Scan 18227 Method FTMS; HCD Score 114.1 m/z 1290.83 Gene names HNRNPC

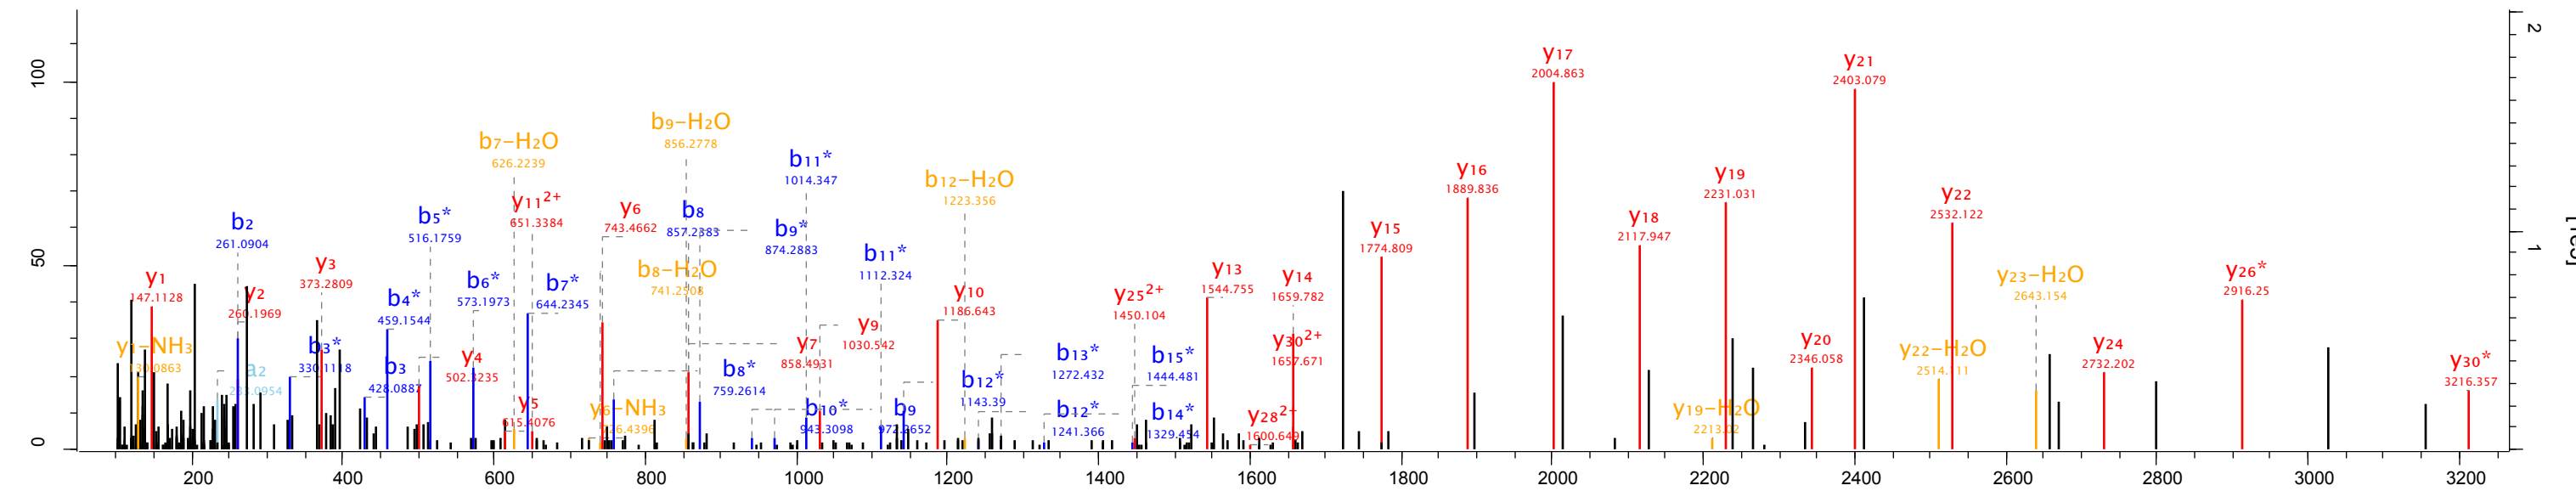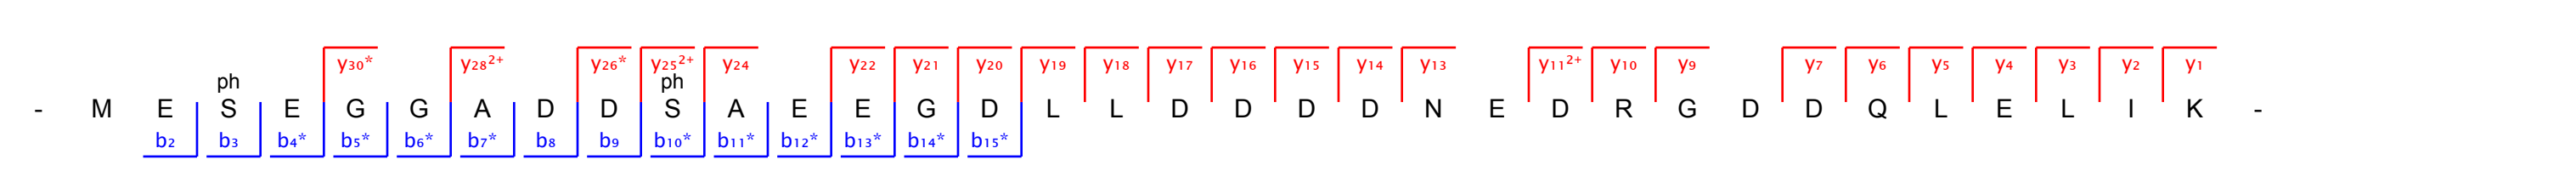

Raw file: 20171215\_MaS\_33SR\_LMH\_phospho2\_03  
 Scan: 18417 Method: FTMS; HCD Score: 169.08 m/z: 1052.44 Gene names: UBXN7

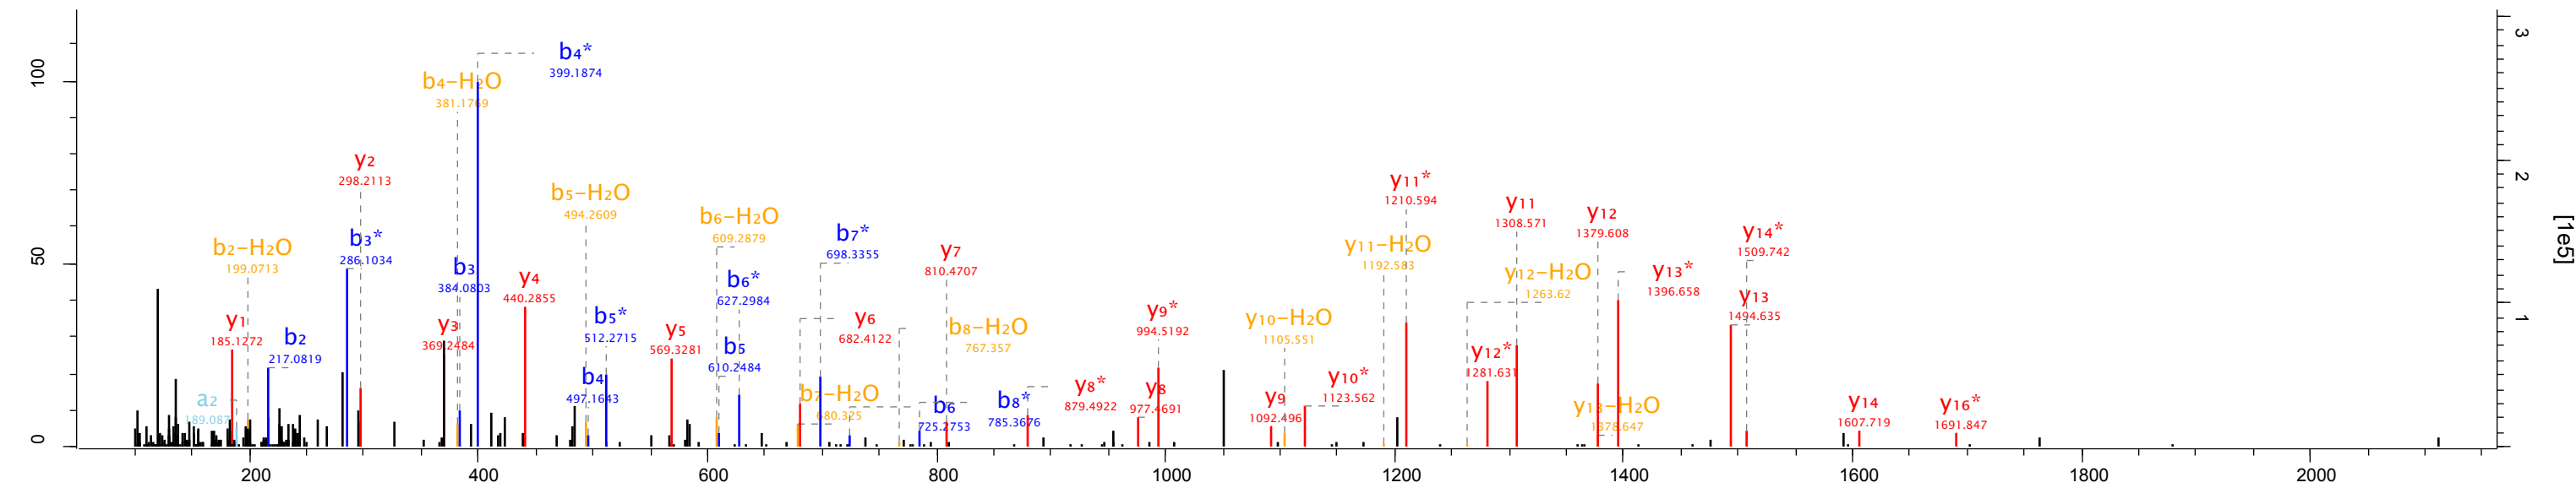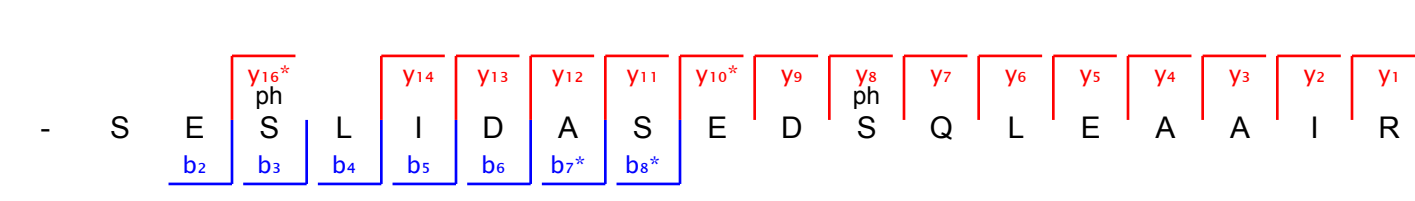

Raw file 20171215\_MaS\_33SR\_LMH\_phospho2\_03 Scan 18497 Method FTMS; HCD Score 115.54 m/z 573.28 Gene names STMN1

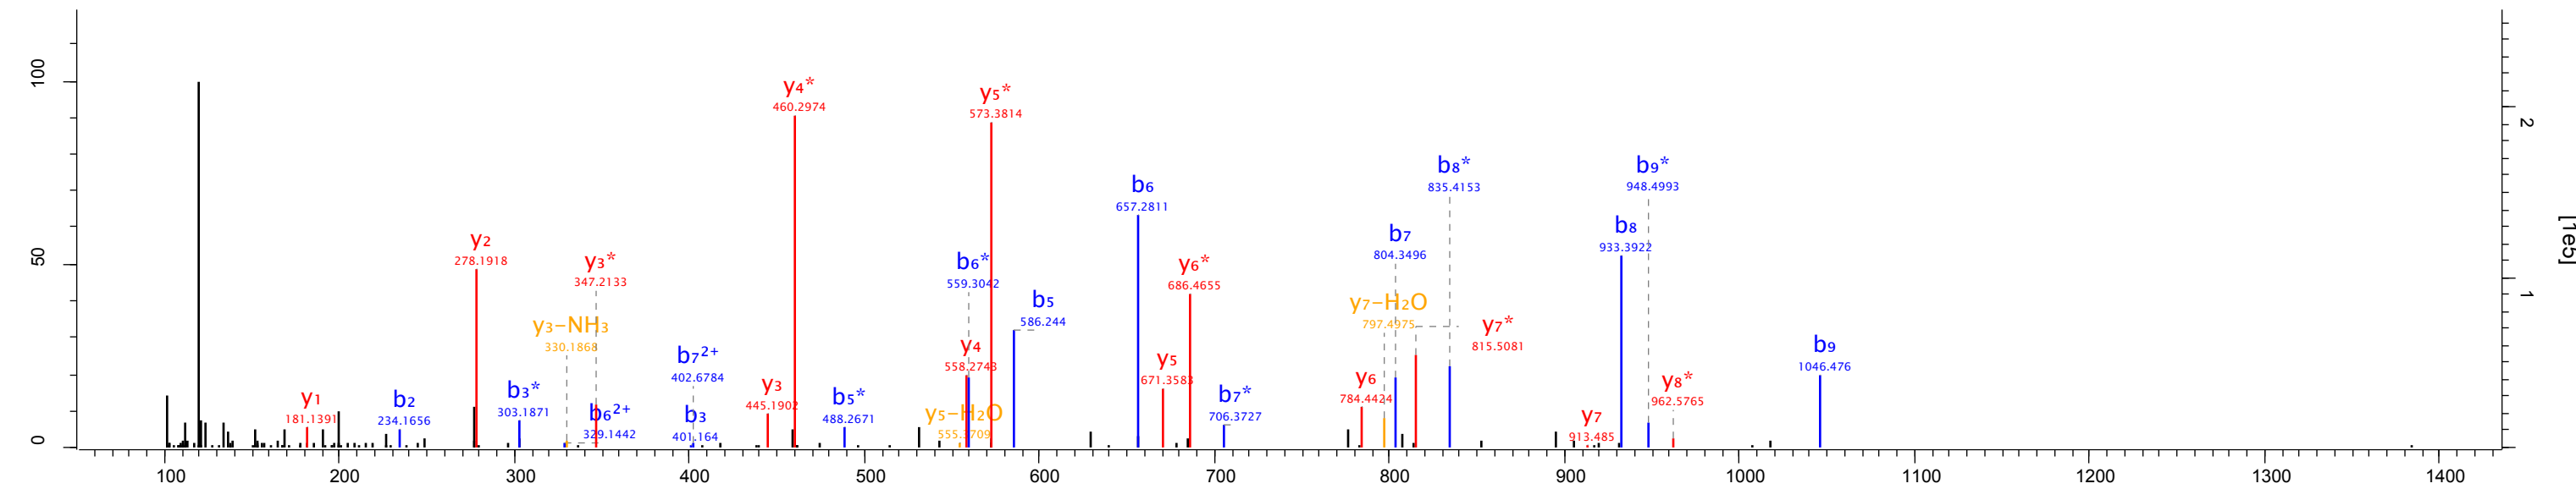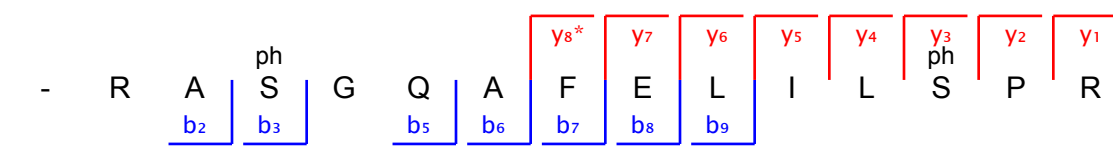



Raw file 20171215\_MaS\_33SR\_LMH\_phospho2\_03 Scan 18587 Method FTMS; HCD Score 42.12 m/z 1232.87 Gene names SQSTM1

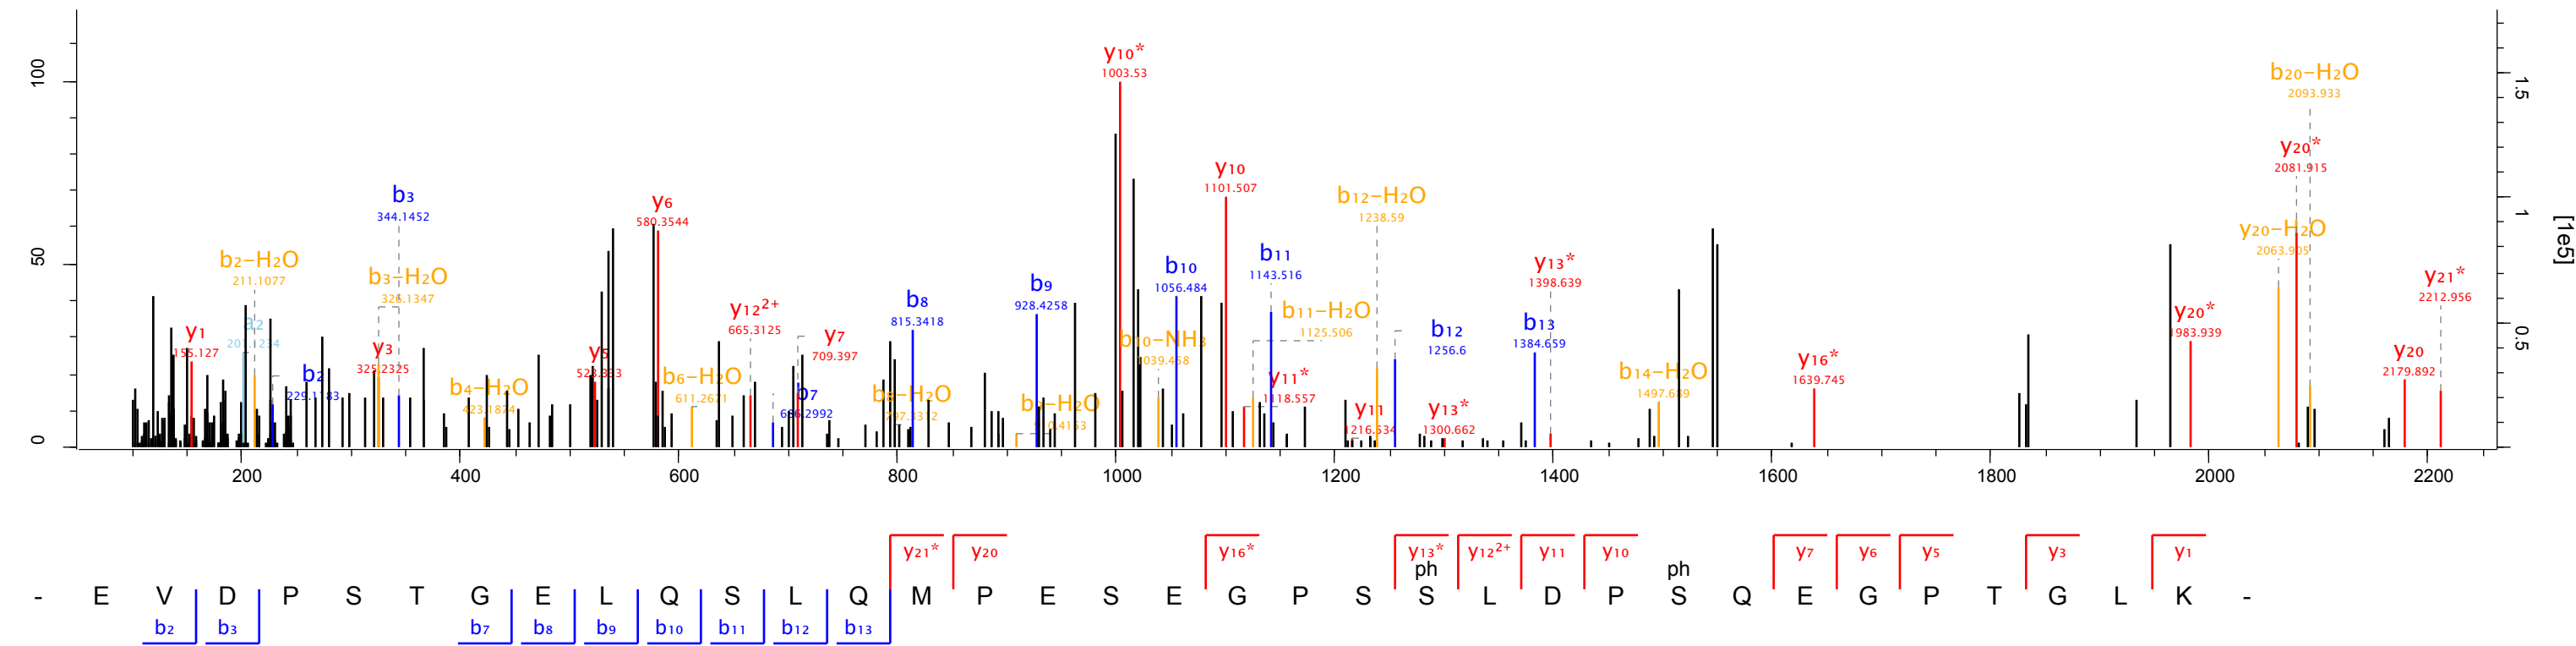

Raw file 20171215\_MaS\_33SR\_LMH\_phospho2\_03 Scan 18627 Method FTMS; HCD Score 260.53 m/z 1648.67 Gene names G3BP1

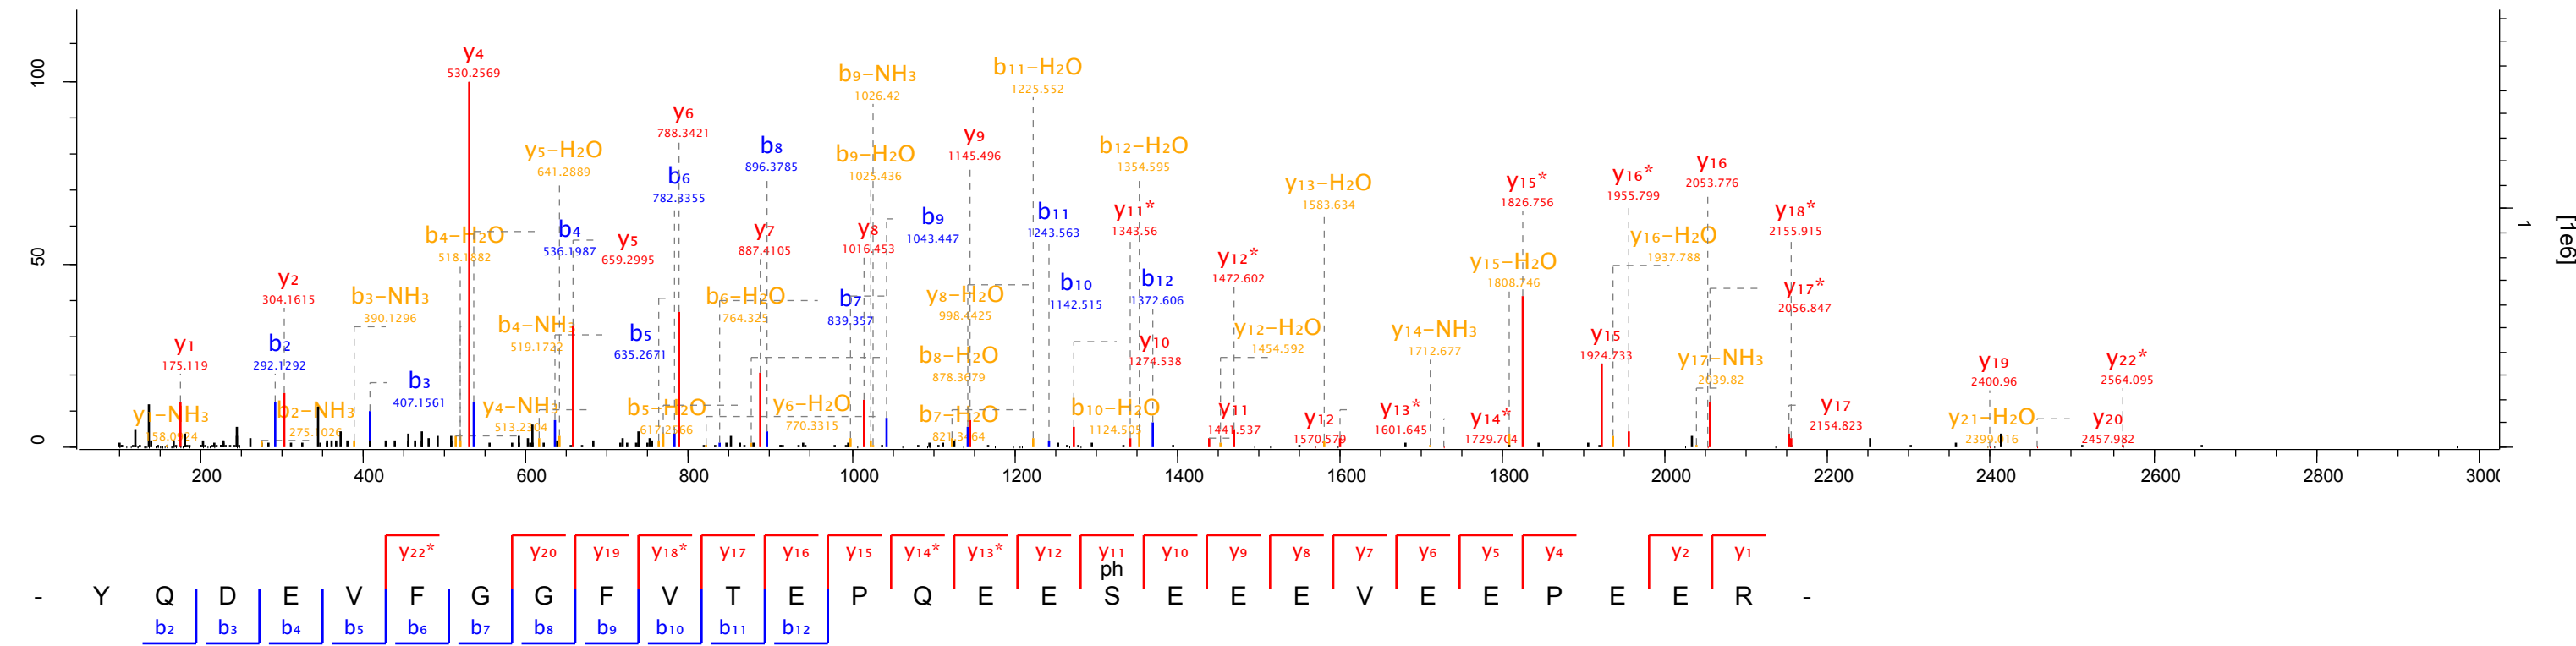

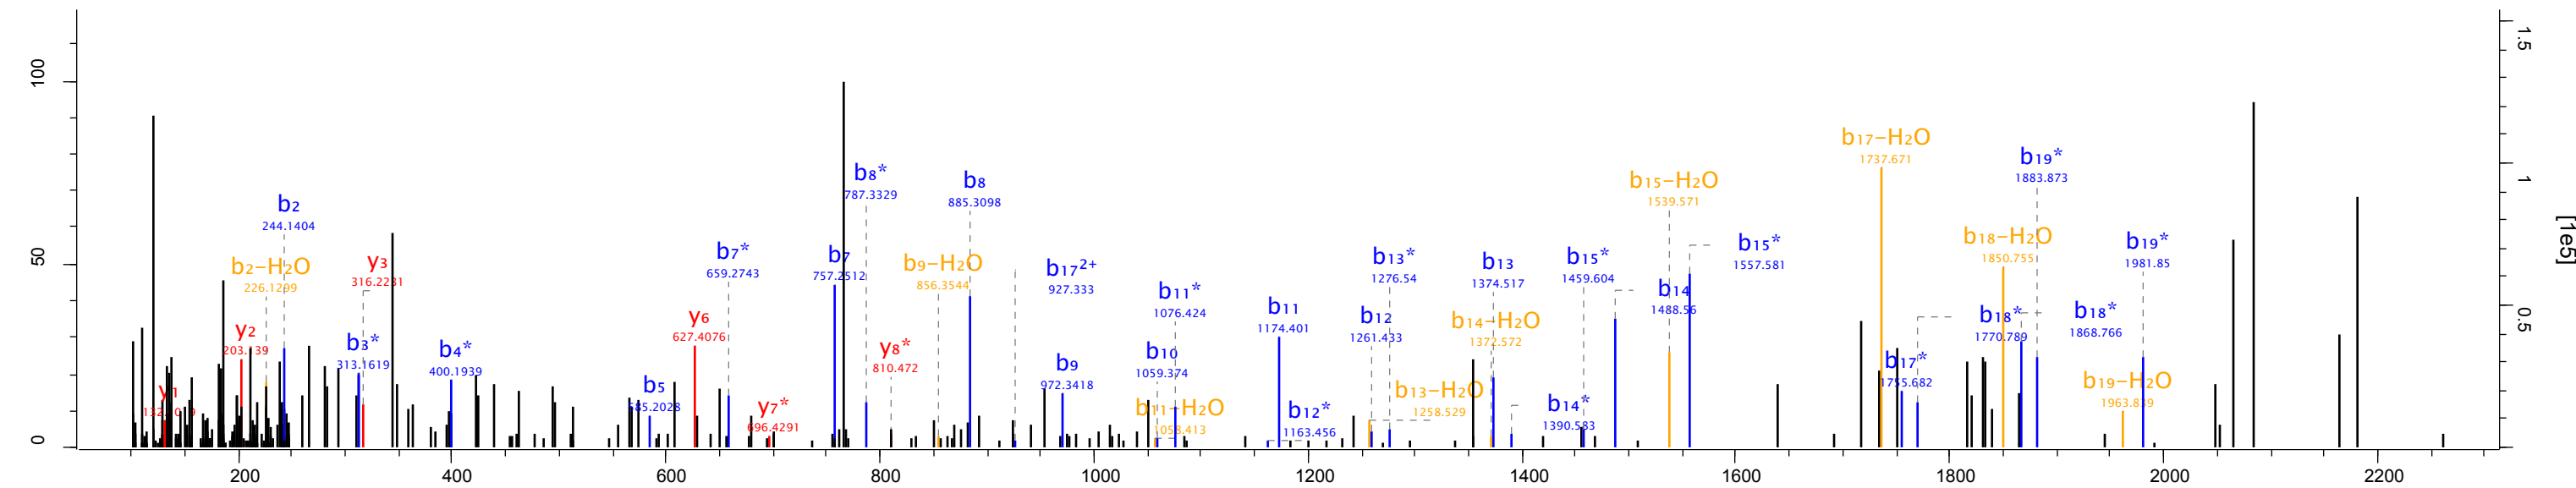

- R S S S S G D Q S S D S L N S P T L L A L -

b<sub>2</sub>
b<sub>3</sub><sup>\*</sup>
b<sub>4</sub><sup>\*</sup>
b<sub>5</sub>
b<sub>7</sub>
b<sub>8</sub>
b<sub>9</sub>
b<sub>10</sub>
b<sub>11</sub>
b<sub>12</sub>
b<sub>13</sub>
b<sub>14</sub>
b<sub>15</sub><sup>\*</sup>
b<sub>17</sub><sup>\*</sup>
b<sub>18</sub><sup>\*</sup>
b<sub>19</sub><sup>\*</sup>
y<sub>8</sub><sup>\*</sup>
y<sub>7</sub><sup>\*</sup>
y<sub>6</sub>
y<sub>3</sub>
y<sub>2</sub>
y<sub>1</sub>

ph  
 ph  
 ph

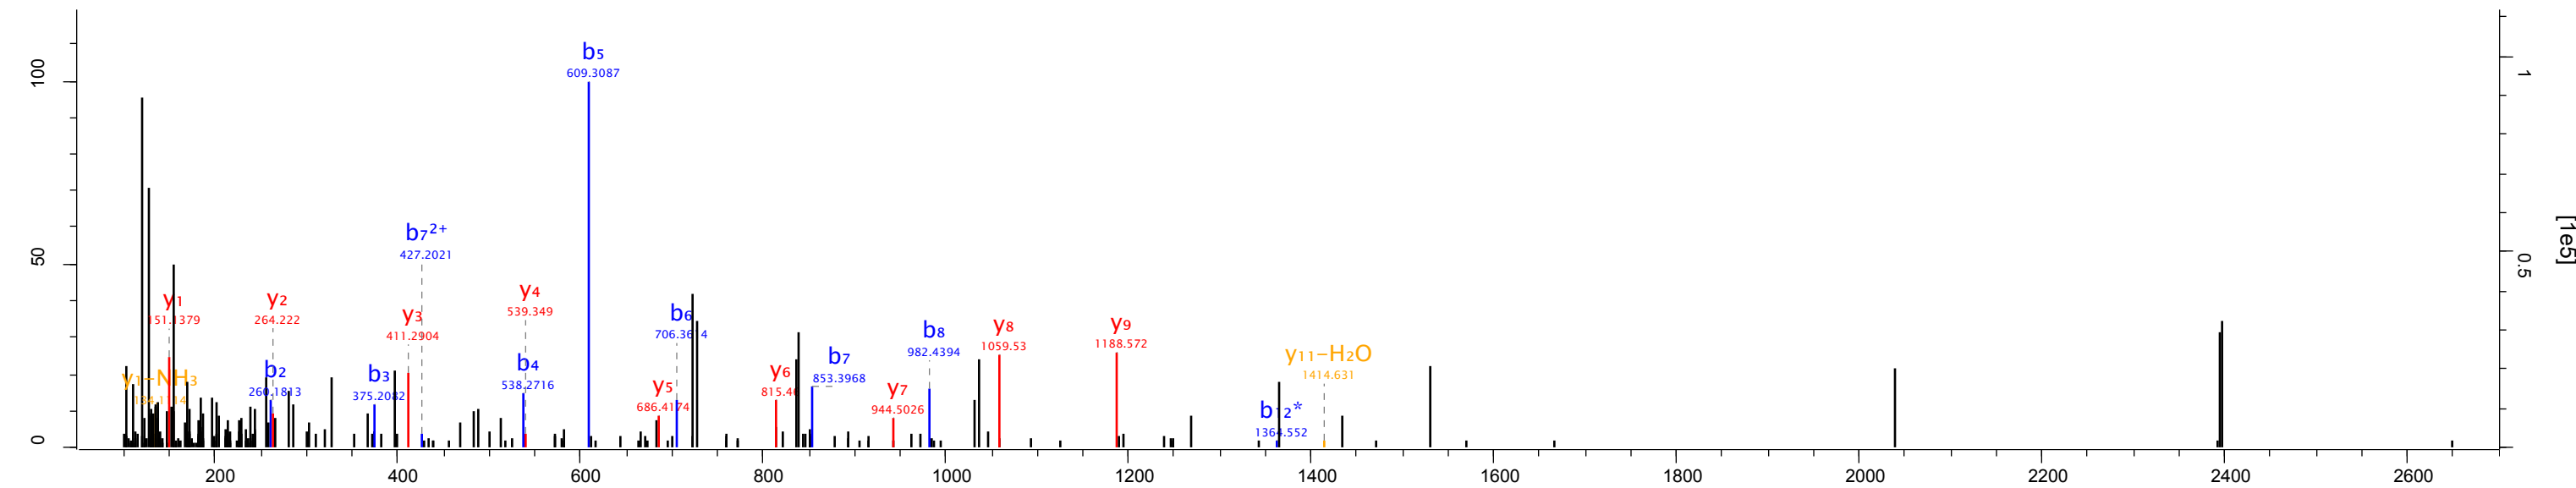

- R P D Y A P ox M E ph S ph S D E E D E E F Q F I K -

Fragmentation mapping (b and y ions) is shown below the sequence:

- b2: P
- b3: DP
- b4: DYP
- b5: DYAP
- b6: DYAPox
- b7: DYAPoxM
- b8: DYAPoxME
- b12\*: D
- y1: K
- y2: IK
- y3: IKF
- y4: IKFQ
- y5: IKFE
- y6: IKFEE
- y7: IKFEEDE
- y8: IKFEEDE
- y9: IKFEEDEE

Raw file 20171215\_MaS\_33SR\_LMH\_phospho2\_03 Scan 2477 Method FTMS; HCD Score 126.31 m/z 666.77 Gene names PPP1R18

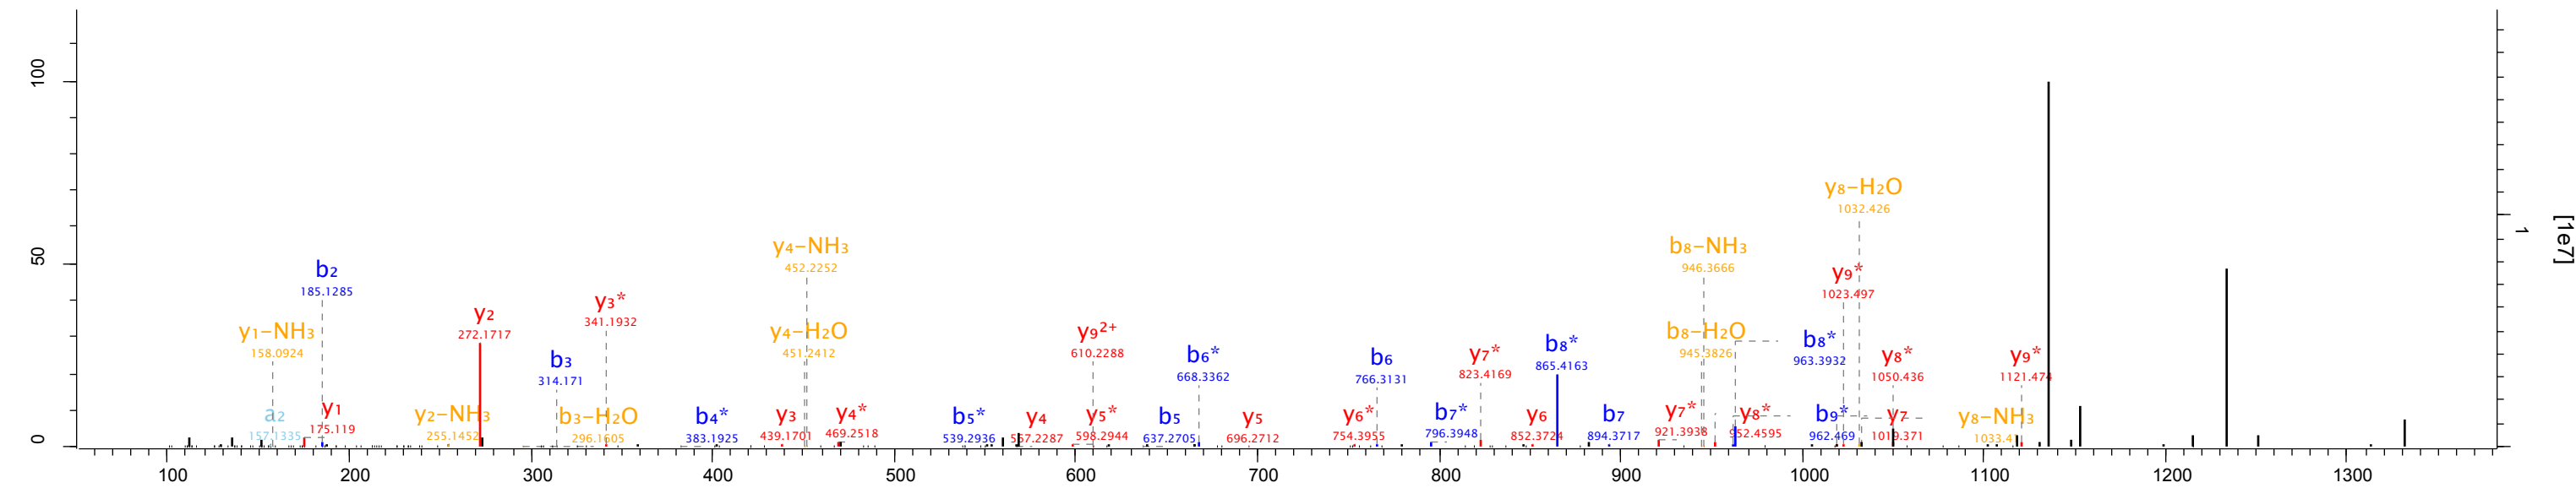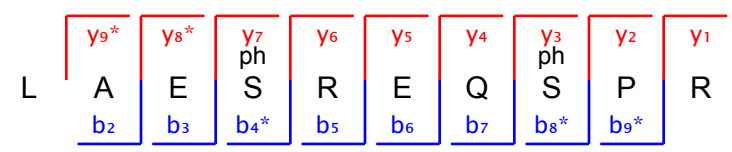

Raw file 20171215\_MaS\_33SR\_LMH\_phospho2\_03 Scan 2727 Method FTMS; HCD Score 70.57 m/z 664.62 Gene names NKAP

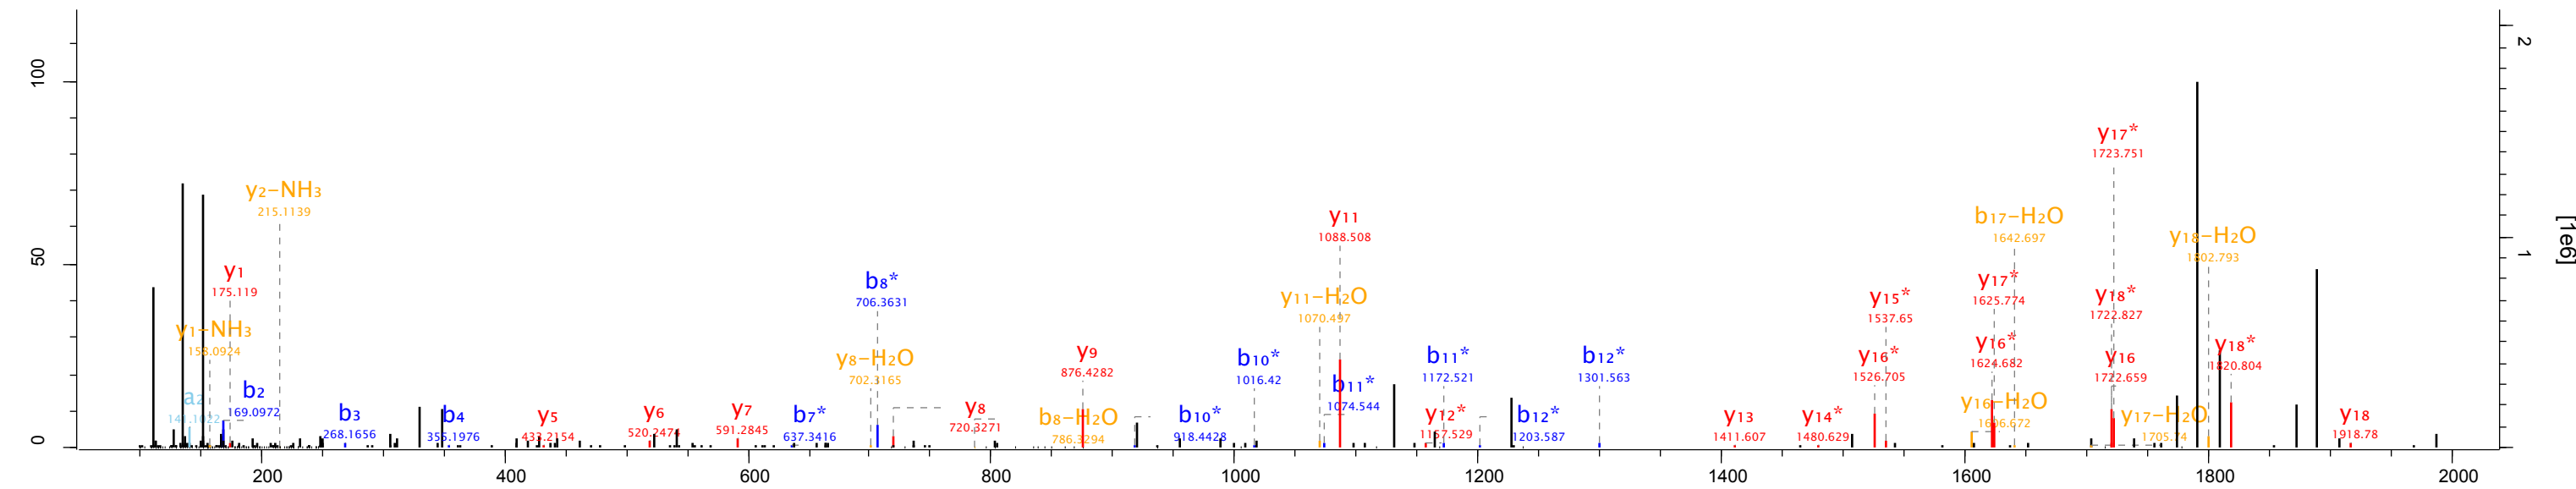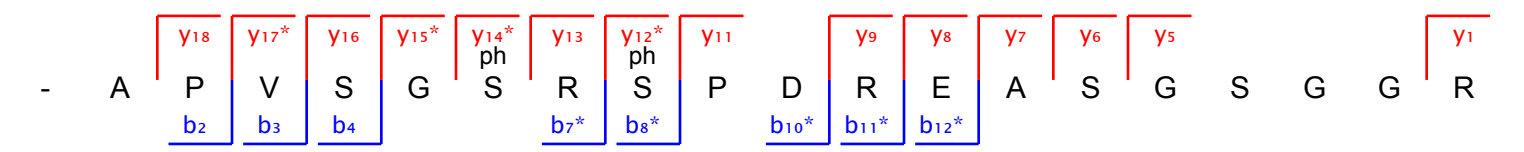

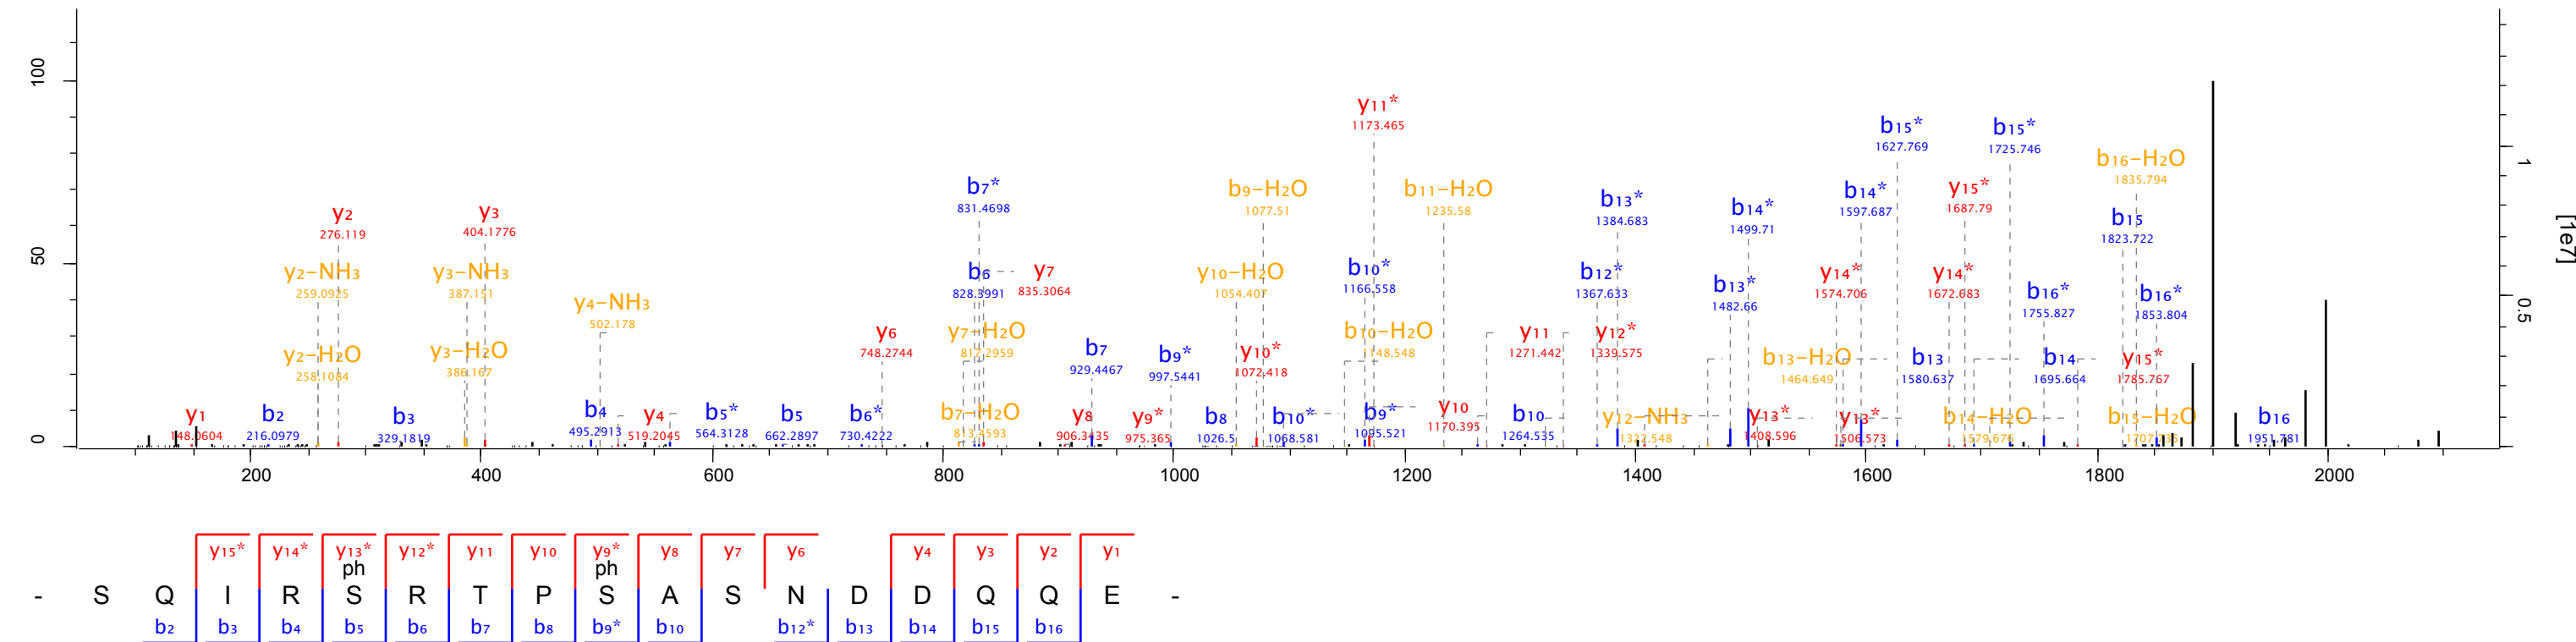

Raw file: 20171215\_MaS\_33SR\_LMH\_phospho2\_03  
 Scan: 3407 Method: FTMS; HCD Score: 84.17 m/z: 578.77 Gene names: C17orf85

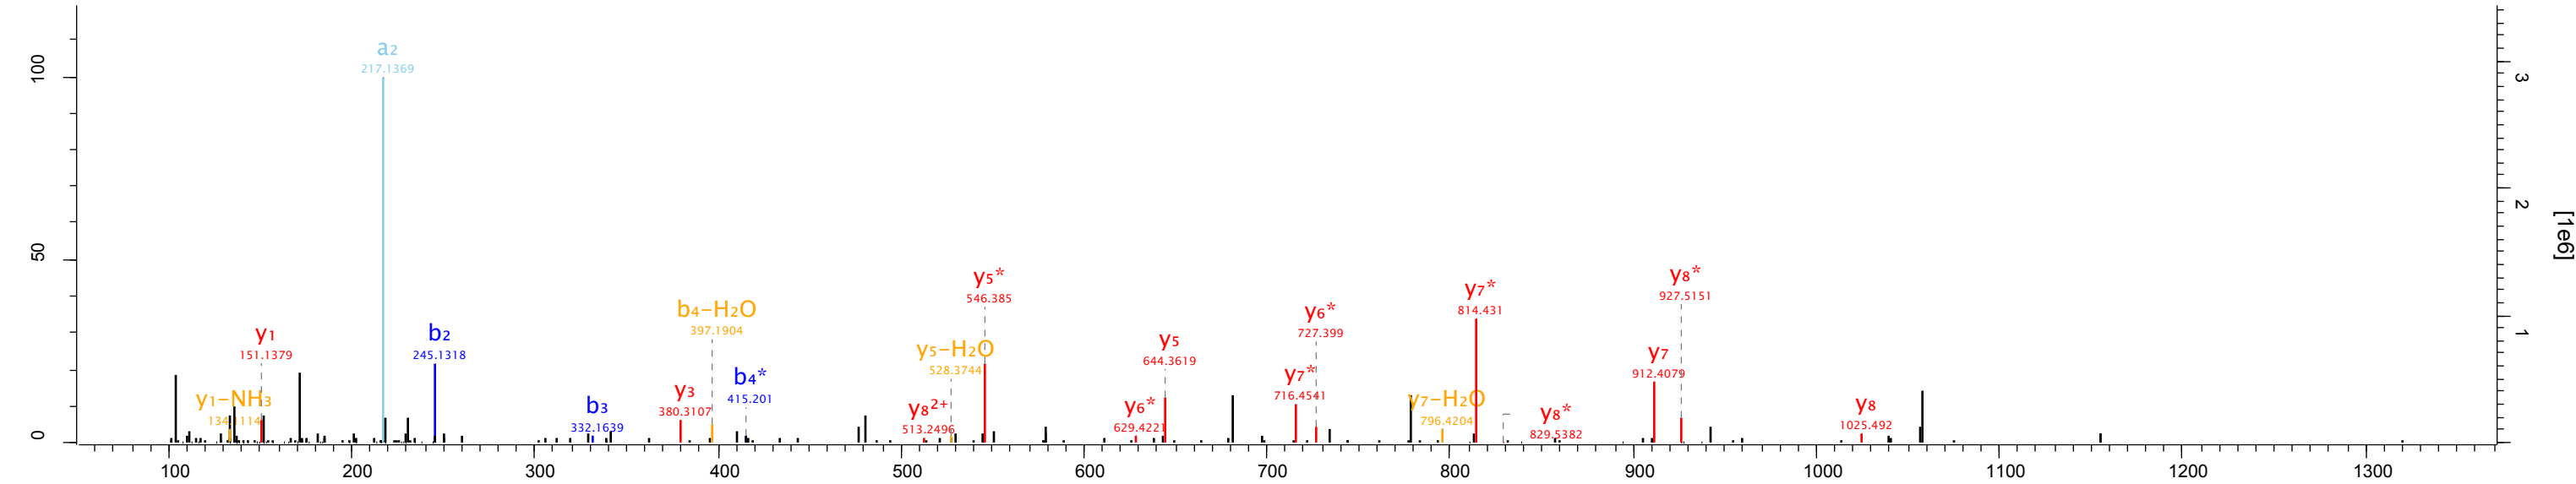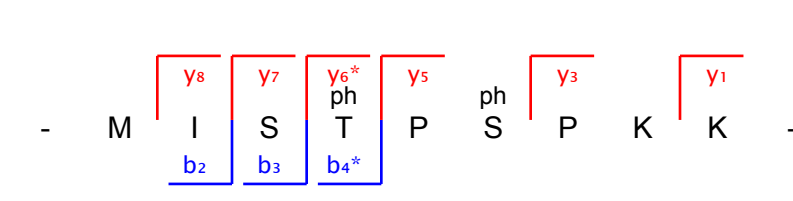



Raw file 20171215\_MaS\_33SR\_LMH\_phospho2\_03 Scan 3457 Method FTMS; HCD Score 158.94 m/z 745.63 Gene names TRA2B

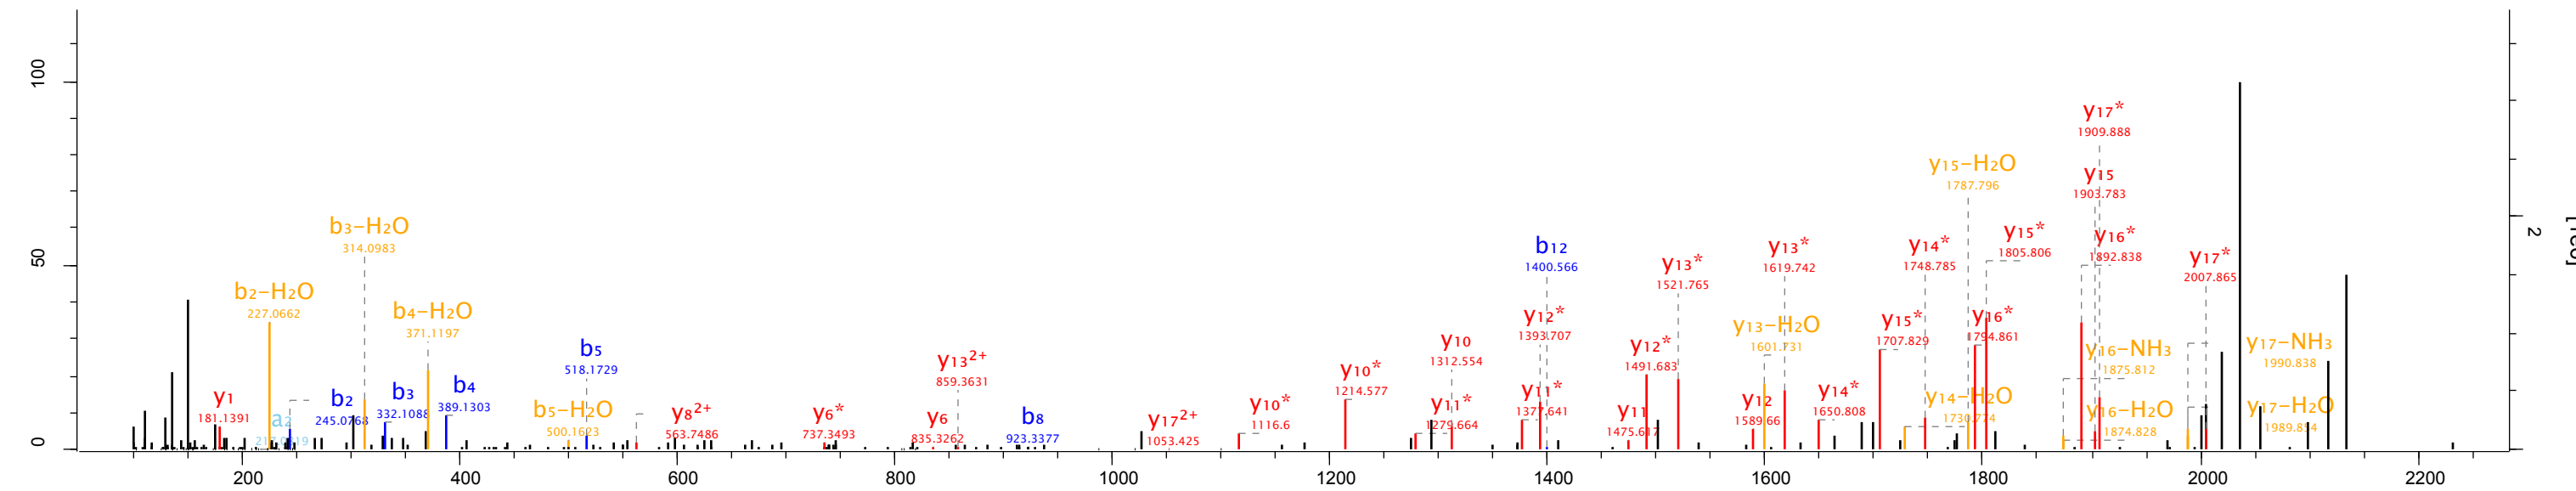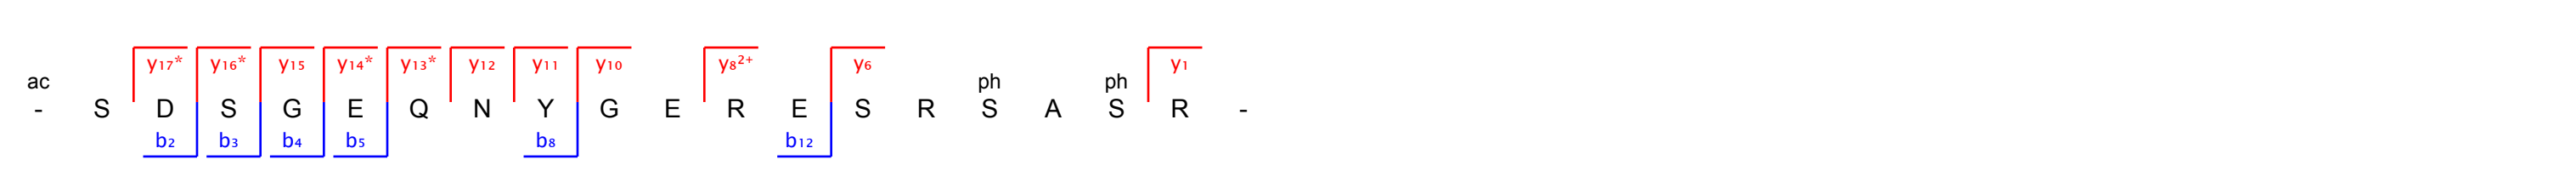

Raw file 20171215\_MaS\_33SR\_LMH\_phospho2\_03 Scan 3687 Method FTMS; HCD Score 260.06 m/z 890.85 Gene names HNRNPA1

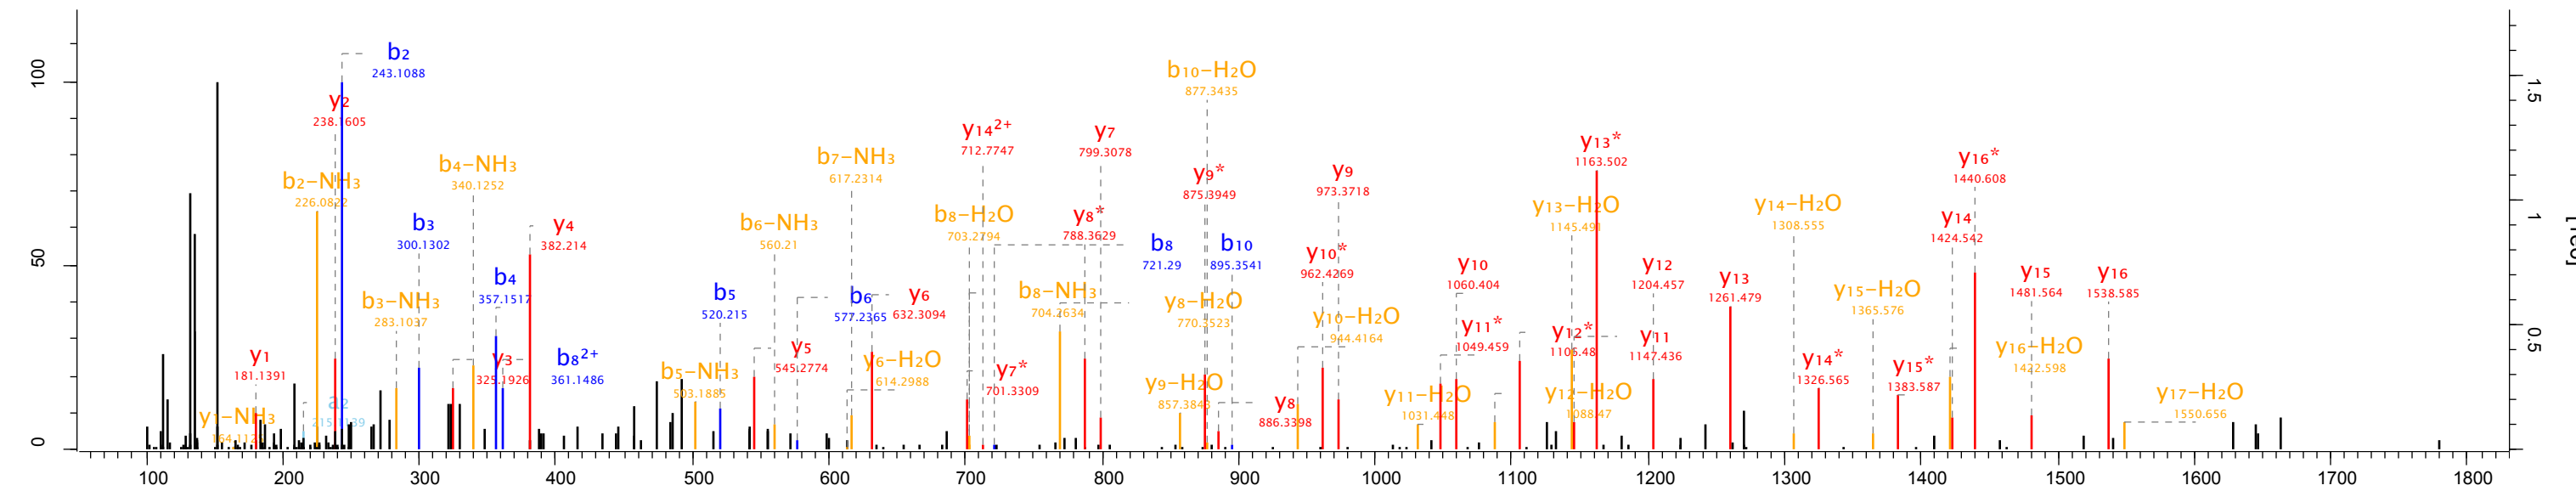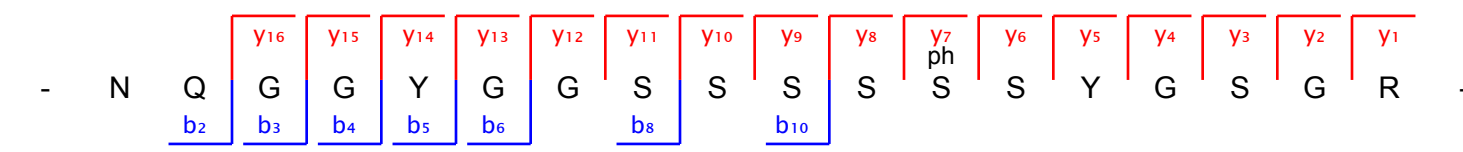

Raw file 20171215\_MaS\_33SR\_LMH\_phospho2\_03 Scan 3707 Method FTMS; HCD Score 255.78 m/z 923.91 Gene names SRRM2

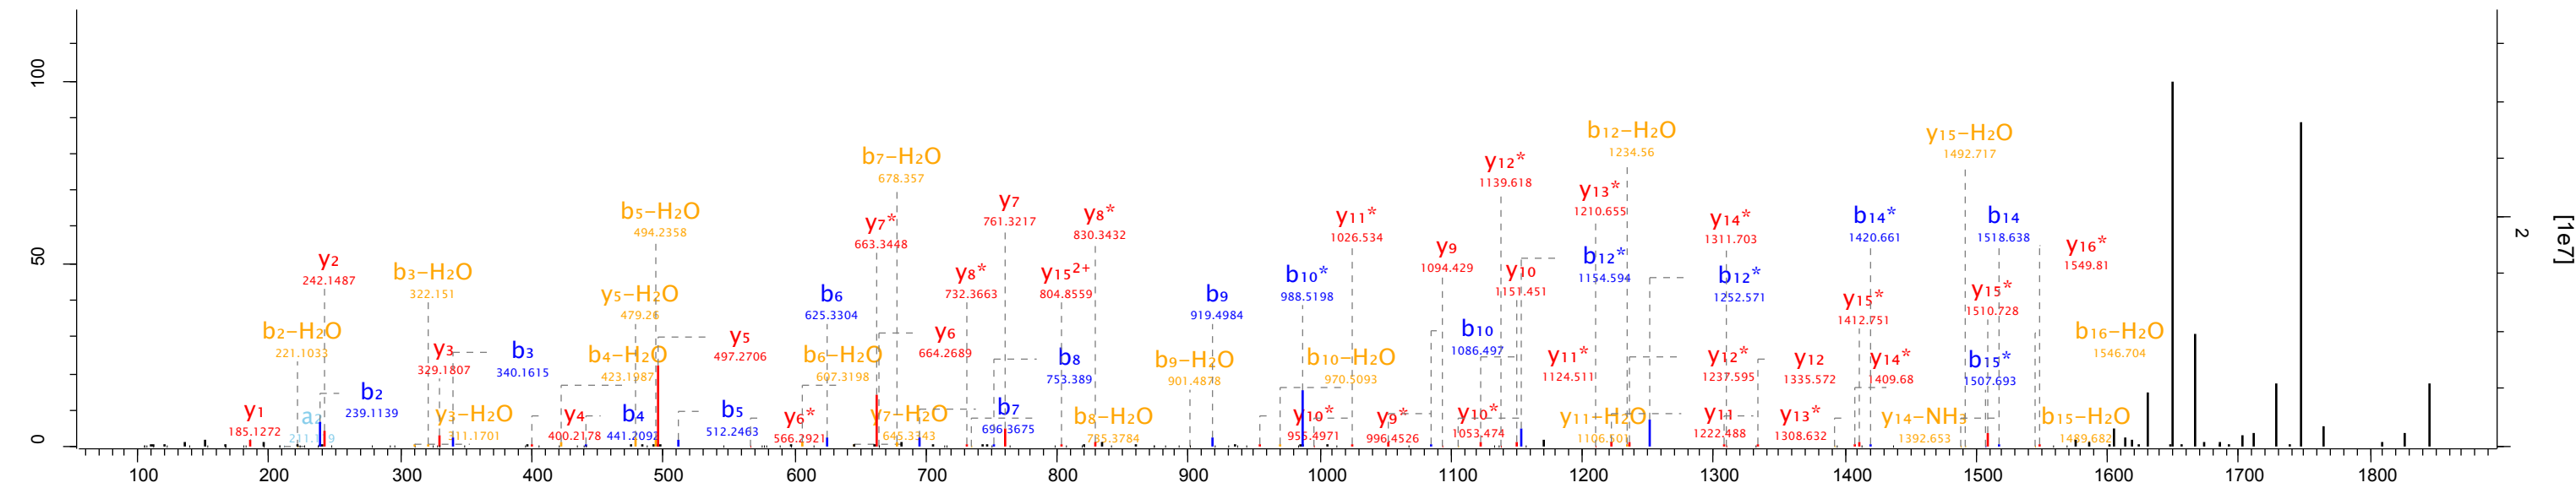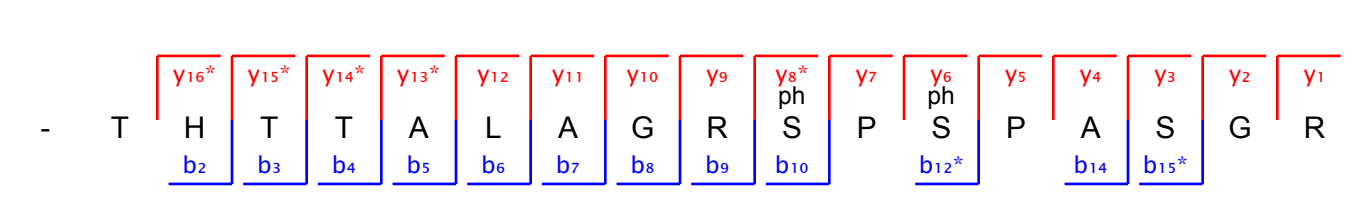

Raw file 20171215\_MaS\_33SR\_LMH\_phospho2\_03 Scan 3867 Method FTMS; HCD Score 78.12 m/z 538.24 Gene names EPB41L3

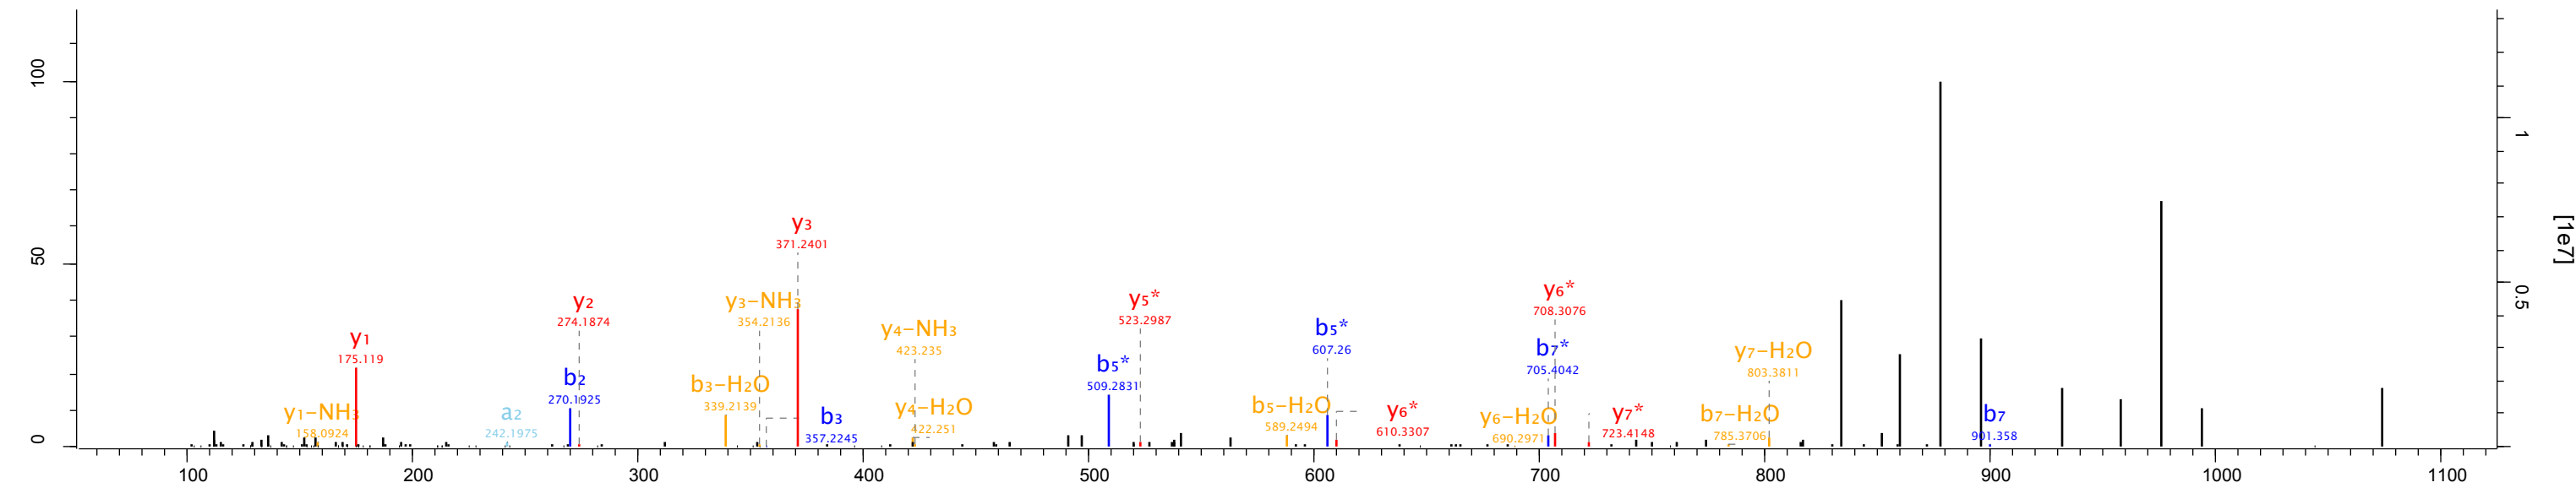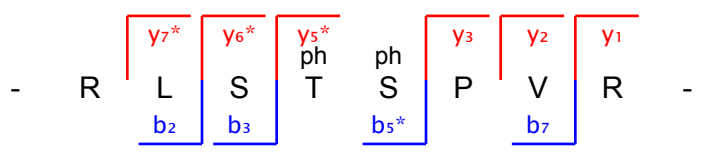

Raw file 20171215\_MaS\_33SR\_LMH\_phospho2\_03 Scan 4077 Method FTMS; HCD Score 154.92 m/z 750.32 Gene names HSF1

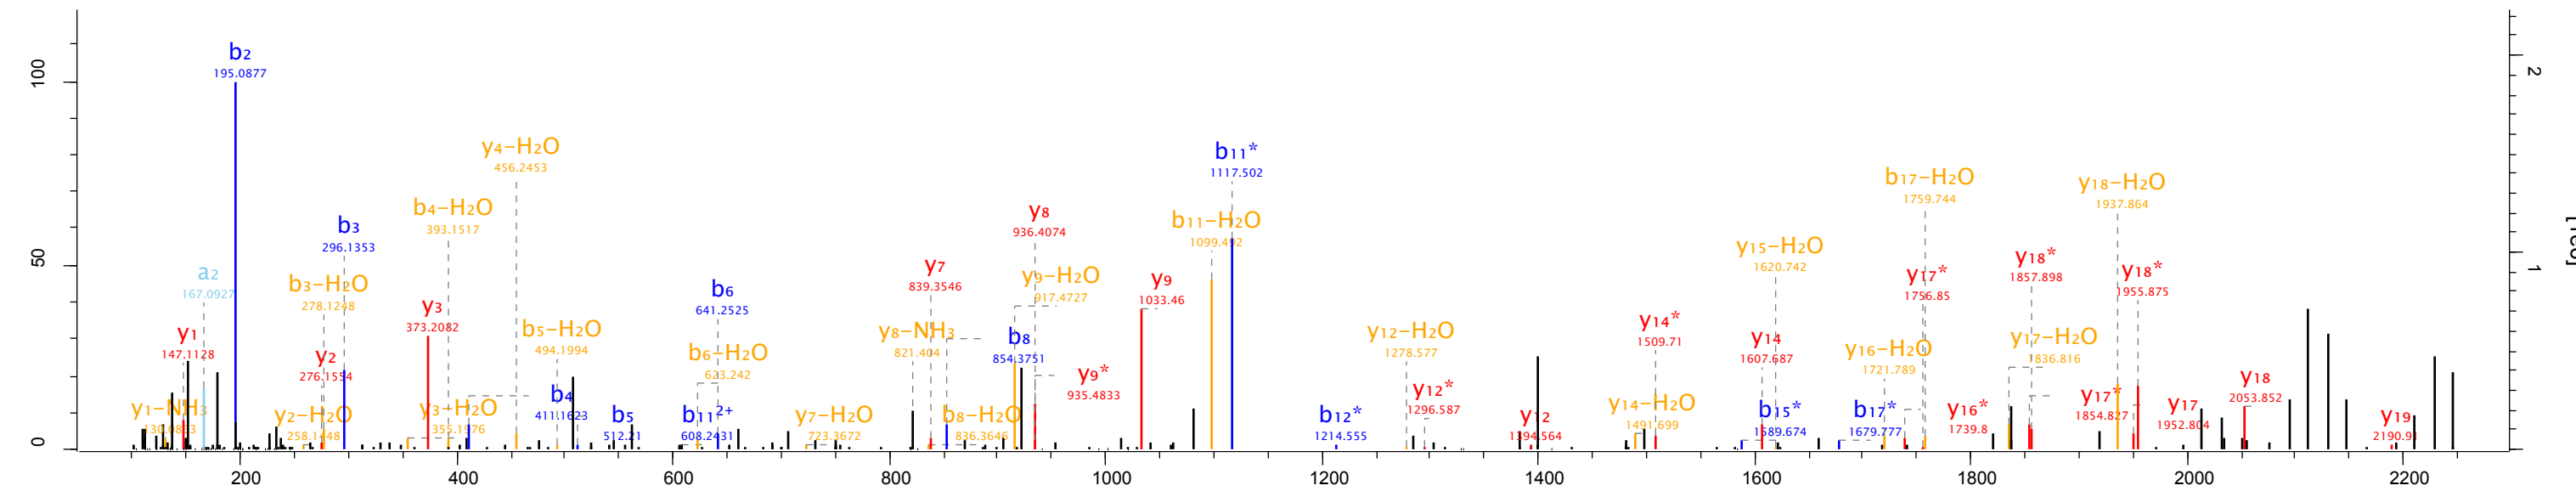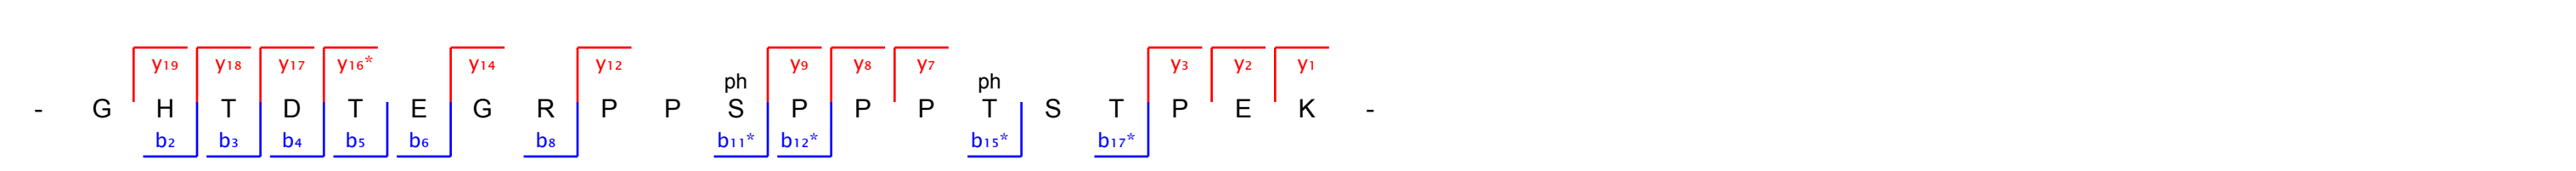

Raw file 20171215\_MaS\_33SR\_LMH\_phospho2\_03 Scan 4227 Method FTMS; HCD Score 321.97 m/z 1033.38 Gene names UTP18

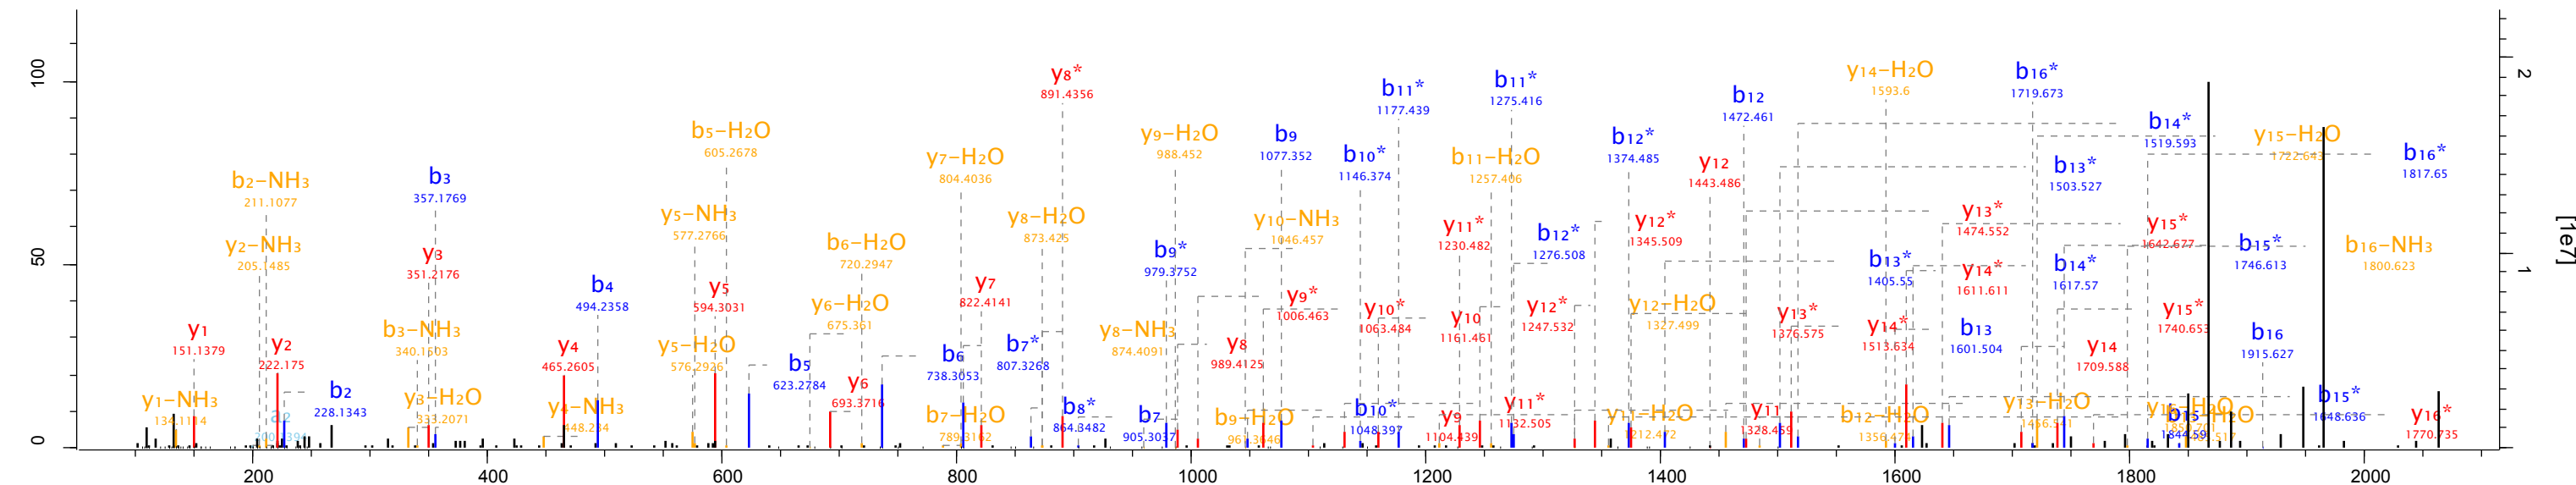

- V Q E H E D S G D S E V E N E A K -

y16\*
y15\*
y14
y13\*
y12
y11
y10
y9
y8
y7
y6
y5
y4
y3
y2
y1

b2
b3
b4
b5
b6
b7
b8\*
b9
b10\*
b11\*
b12
b13
b14\*
b15
b16

Raw file 20171215\_MaS\_33SR\_LMH\_phospho2\_03 Scan 4317 Method FTMS; HCD Score 63.8 m/z 650.27 Gene names SRSF7

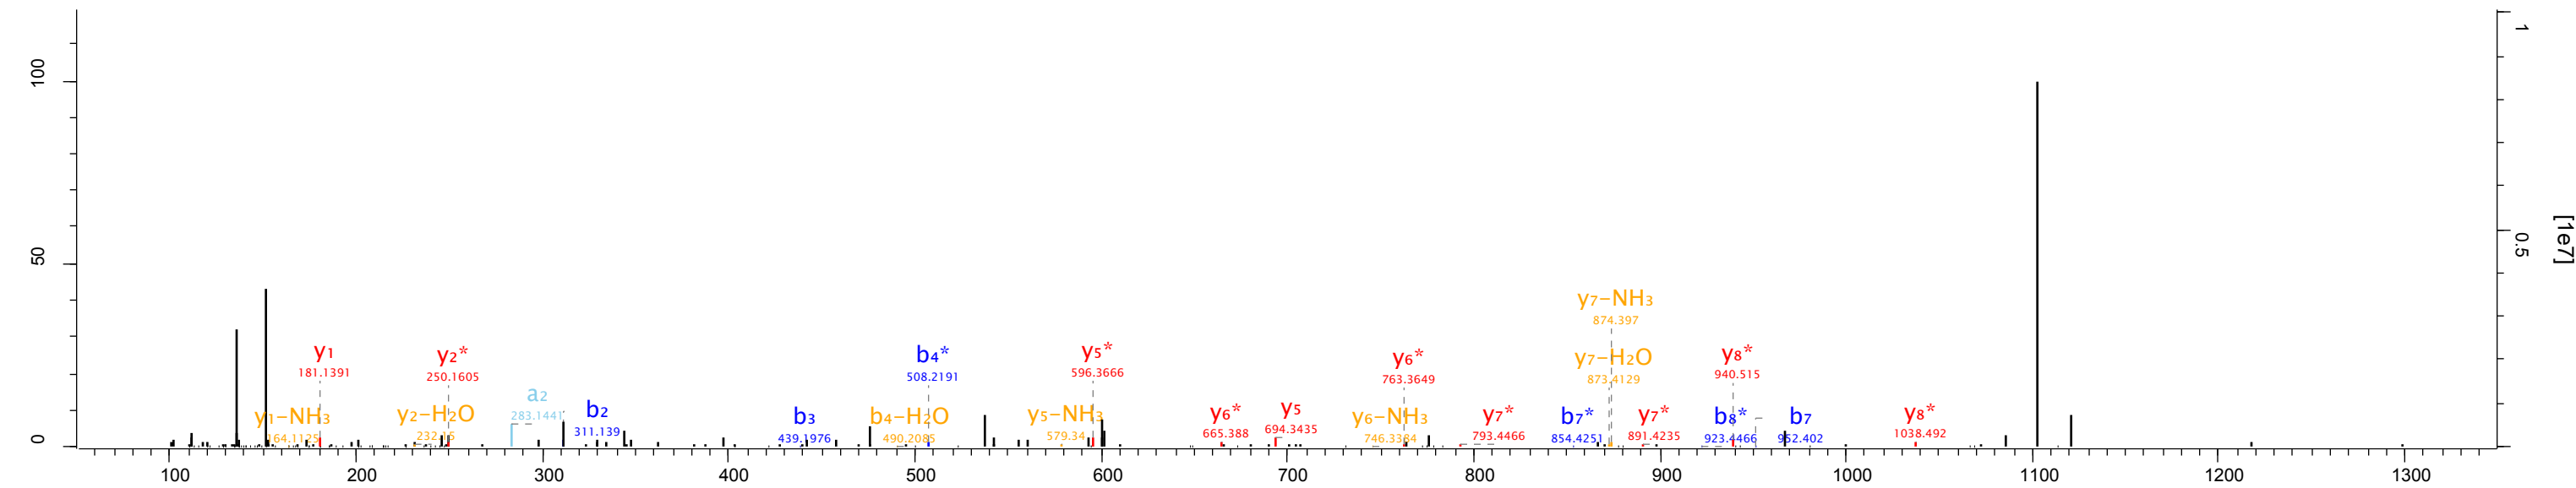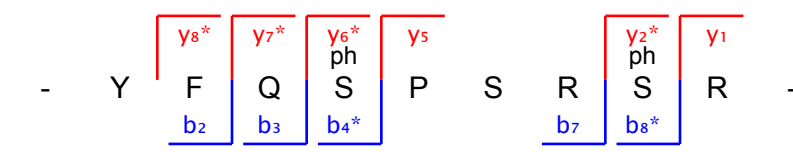

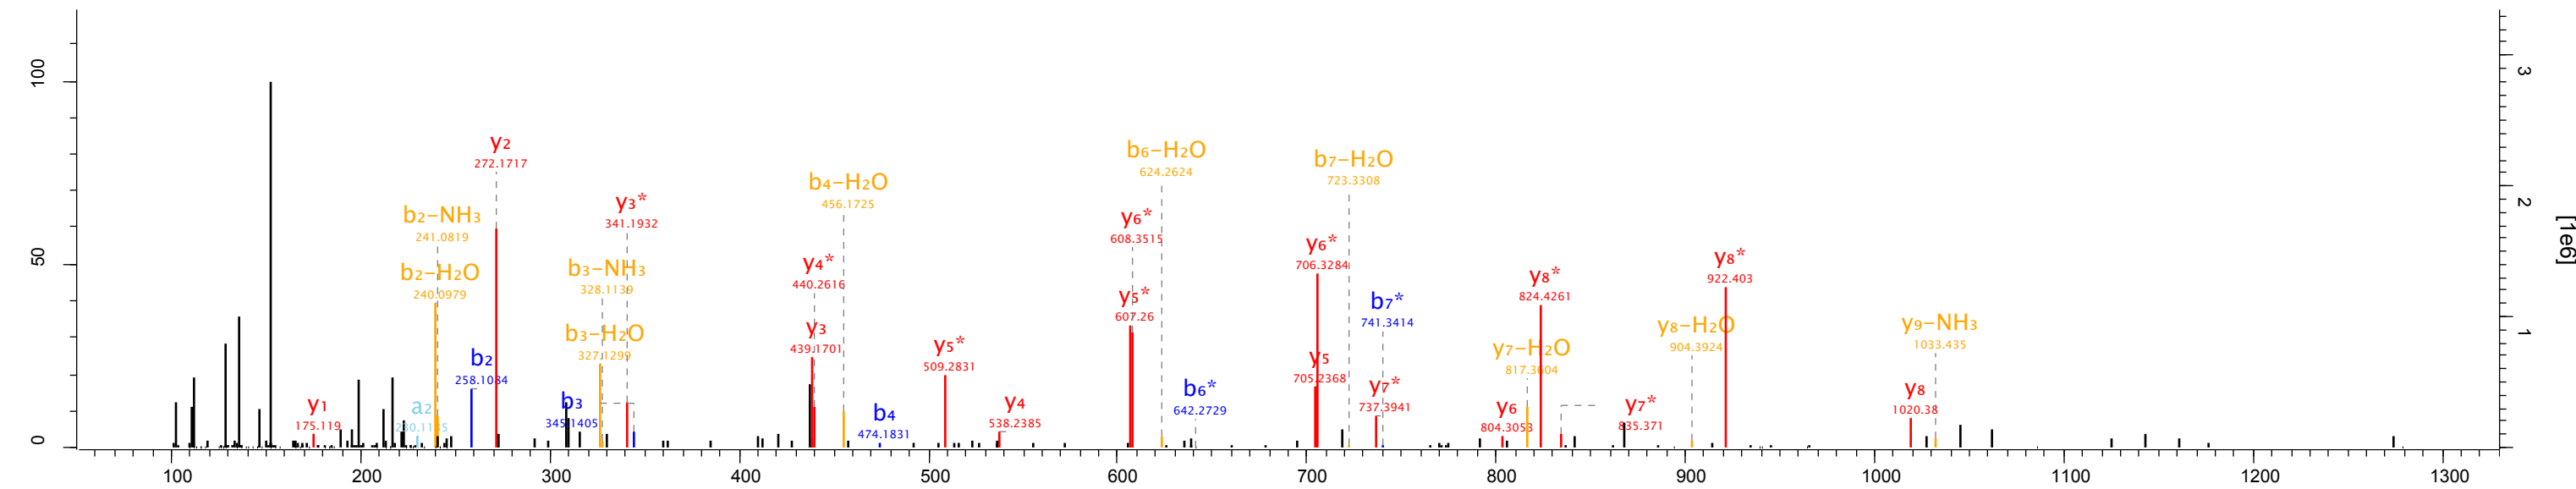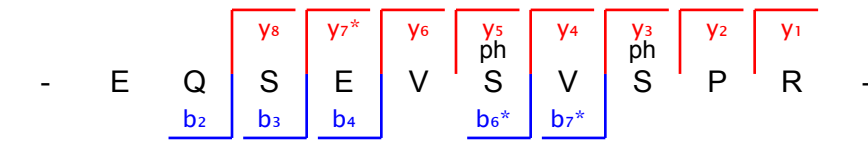



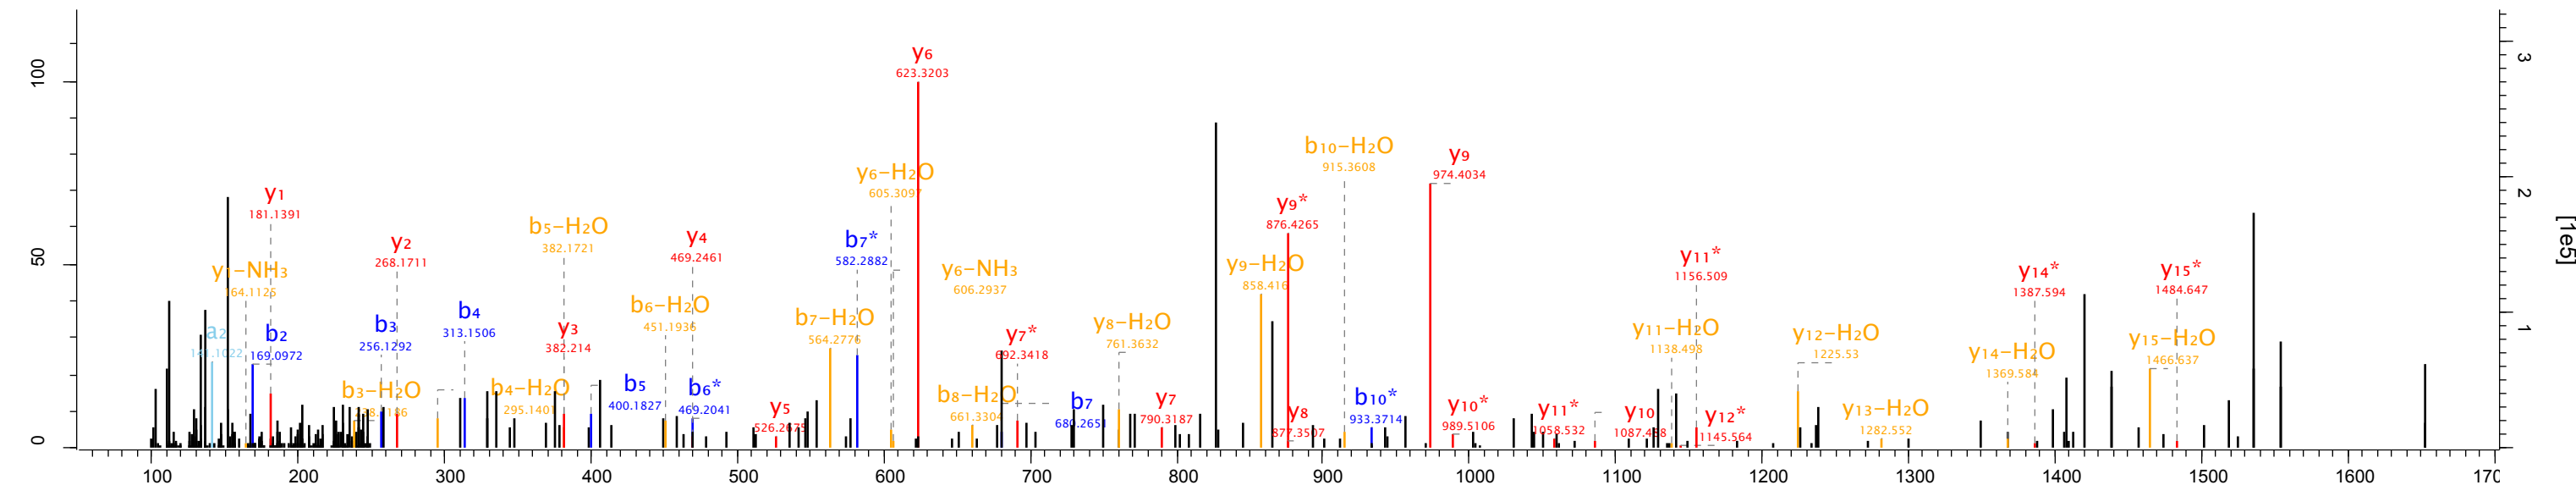

- A P S G S S L P S P G S N S R -

b<sub>2</sub> b<sub>3</sub> b<sub>4</sub> b<sub>5</sub> b<sub>6</sub>\* b<sub>7</sub> b<sub>10</sub>\*

y<sub>15</sub>\* y<sub>14</sub>\* y<sub>12</sub>\* y<sub>11</sub>\* ph y<sub>10</sub> y<sub>9</sub> y<sub>8</sub> y<sub>7</sub> y<sub>6</sub> y<sub>5</sub> y<sub>4</sub> y<sub>3</sub> y<sub>2</sub> y<sub>1</sub>

Raw file 20171215\_MaS\_33SR\_LMH\_phospho2\_03 Scan 5017 Method FTMS; HCD Score 132.24 m/z 614.27 Gene names SRRM1

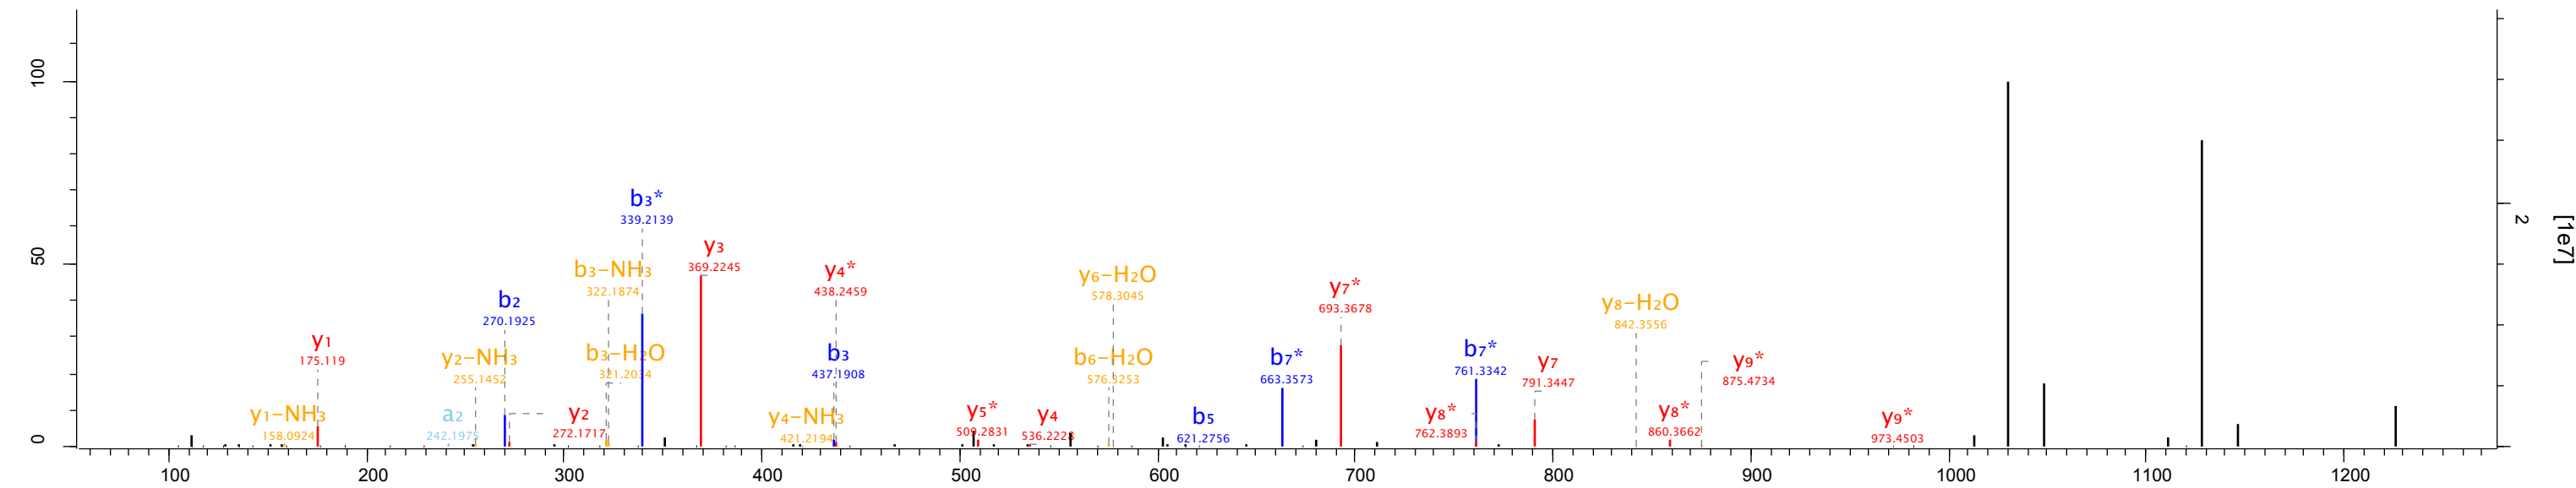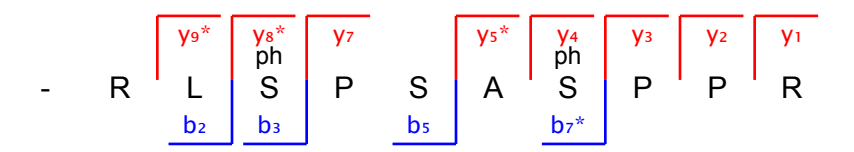

Raw file 20171215\_MaS\_33SR\_LMH\_phospho2\_03 Scan 5087 Method FTMS; HCD Score 84.95 m/z 589.26 Gene names E2F8

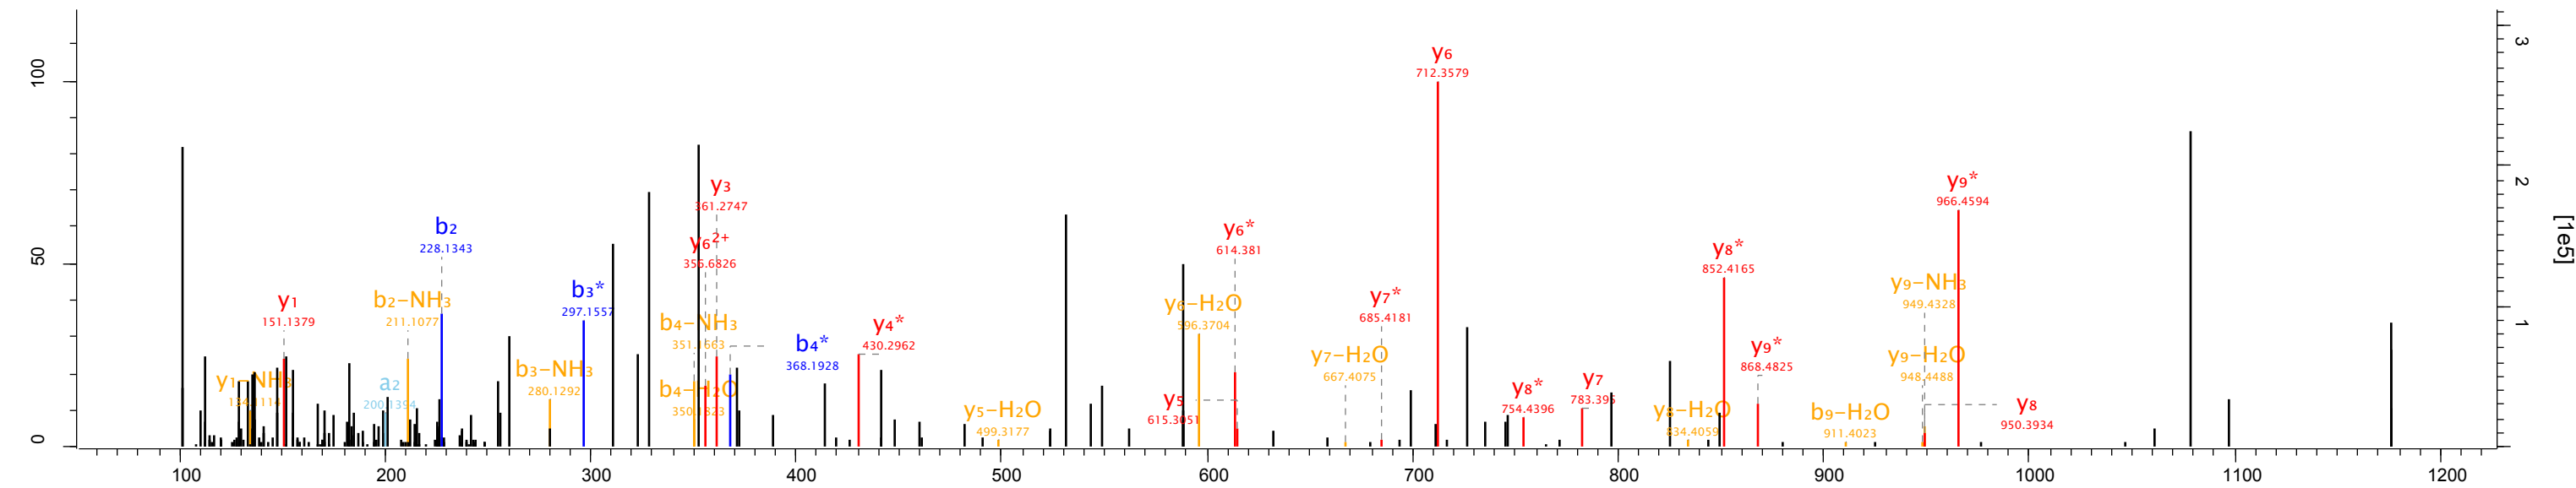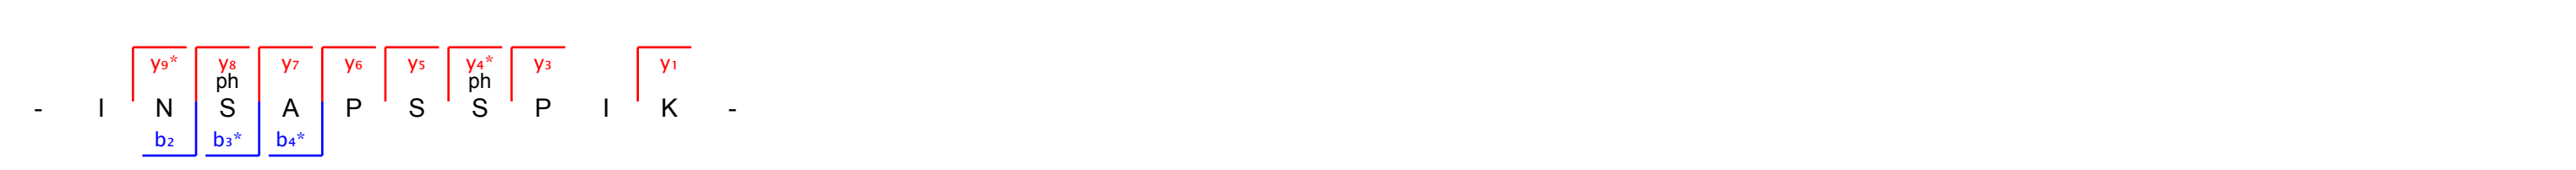

Raw file 20171215\_MaS\_33SR\_LMH\_phospho2\_03 Scan 5207 Method FTMS; HCD Score 70.36 m/z 843.84 Gene names STAU2

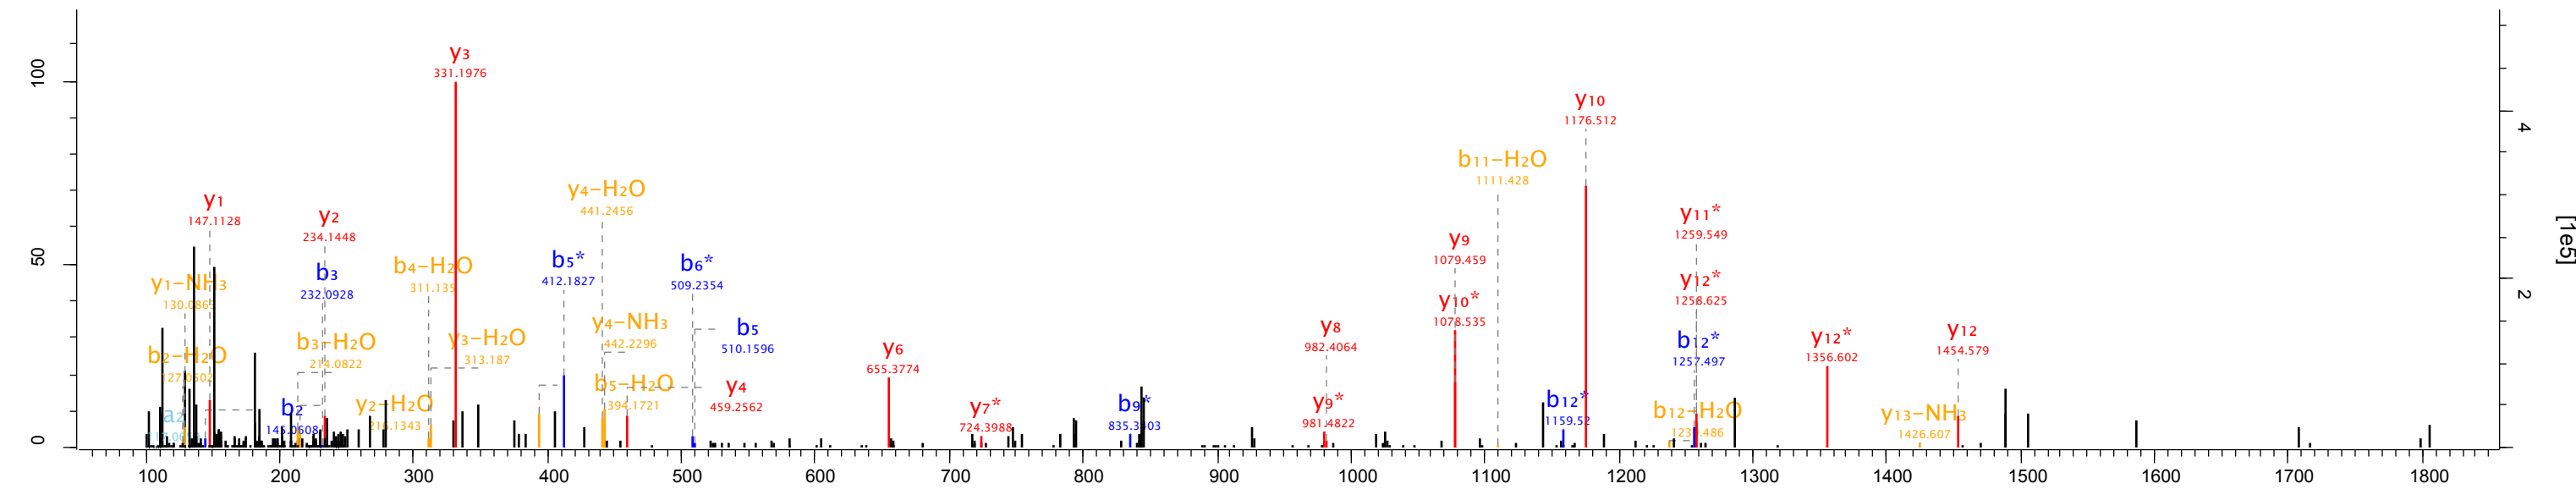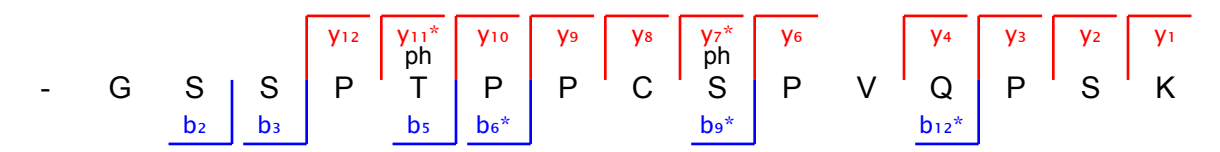

Raw file 20171215\_MaS\_33SR\_LMH\_phospho2\_03 Scan 5327 Method FTMS; HCD Score 191.8 m/z 881.36 Gene names ZNF318

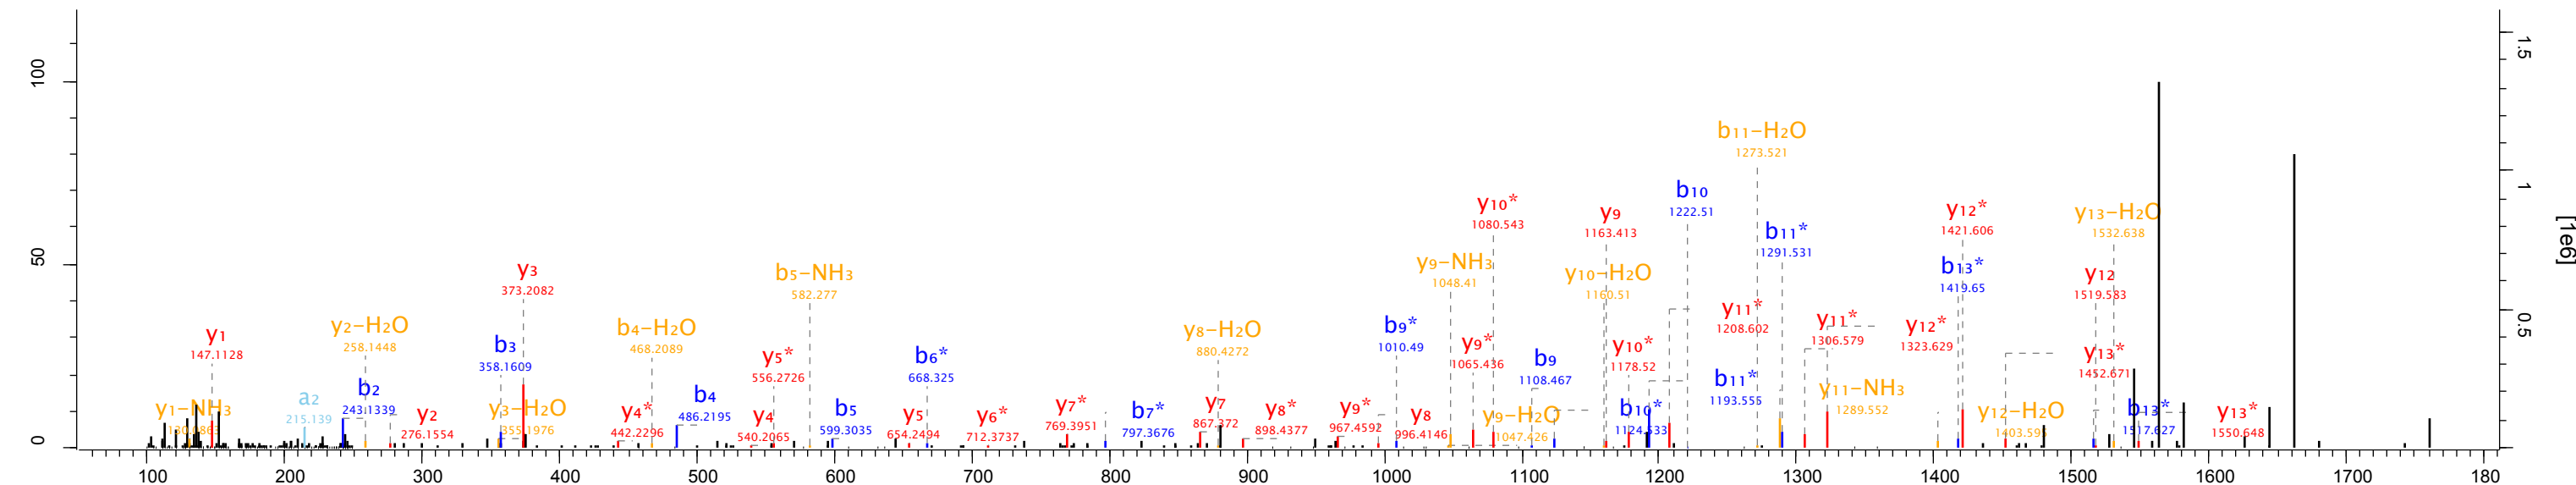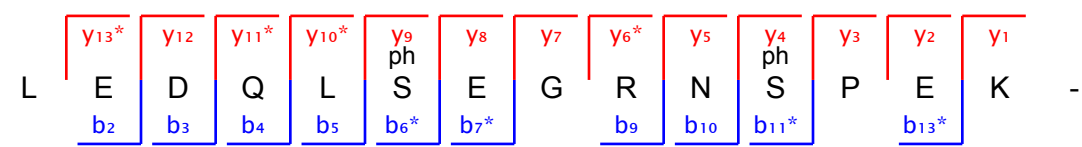

Raw file  
20171215\_MaS\_33SR\_LMH\_phospho2\_03

Scan 5377 Method FTMS; HCD Score 225.65 m/z 1069.41 Gene names SUDS3

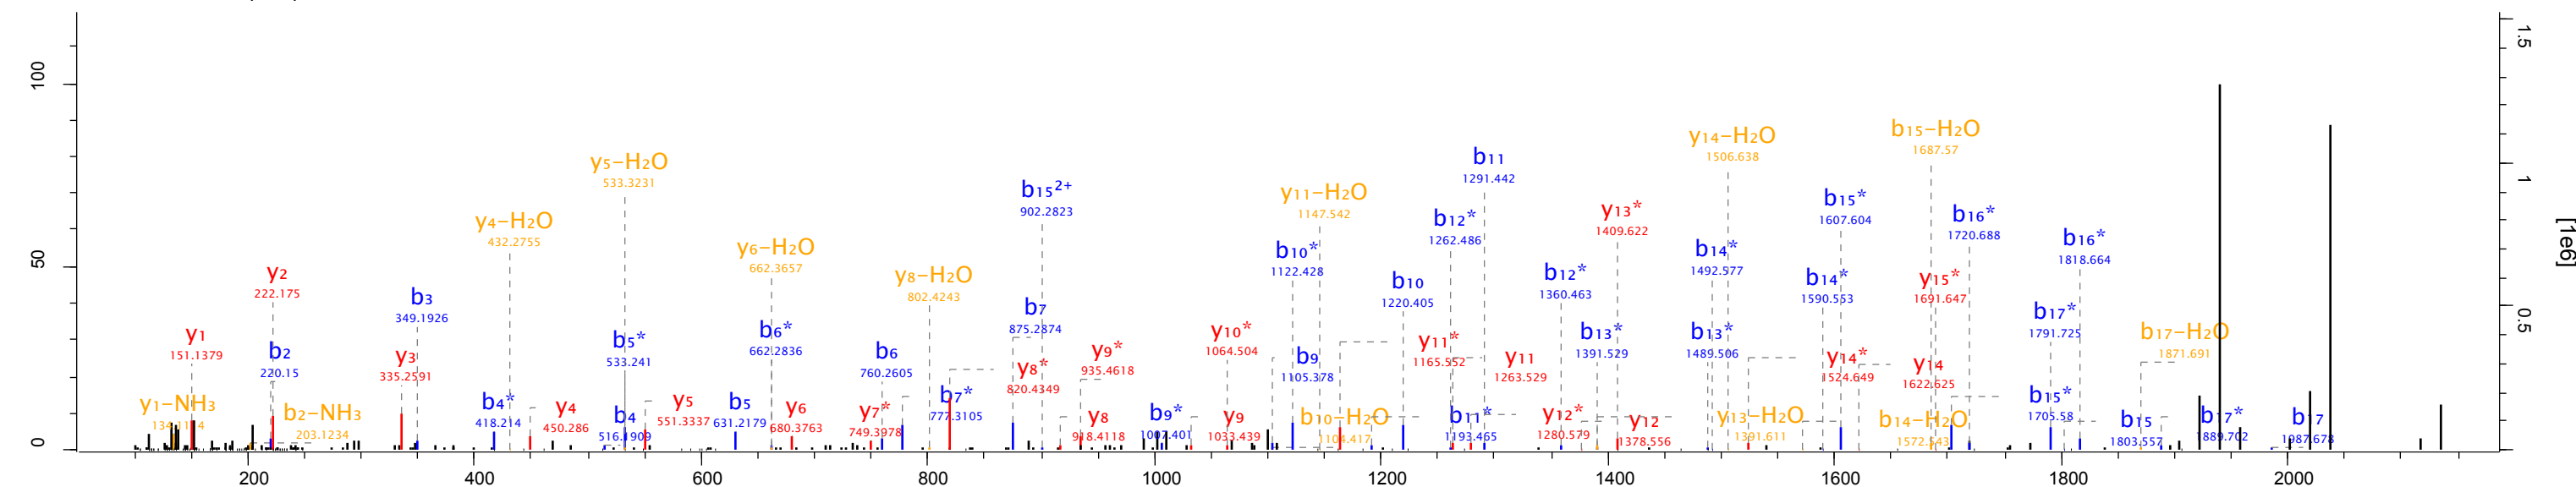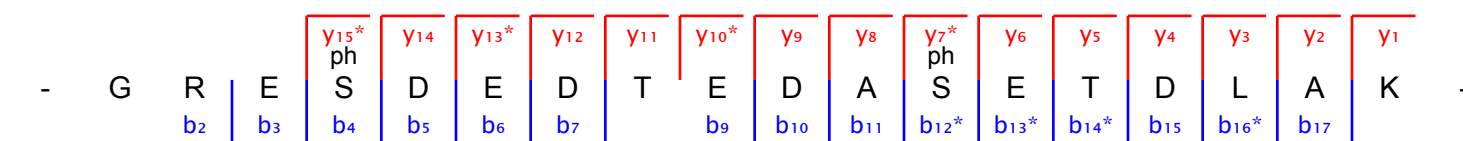

Raw file 20171215\_MaS\_33SR\_LMH\_phospho2\_03 Scan 5437 Method FTMS; HCD Score 138.23 m/z 939.36 Gene names SLC4A7

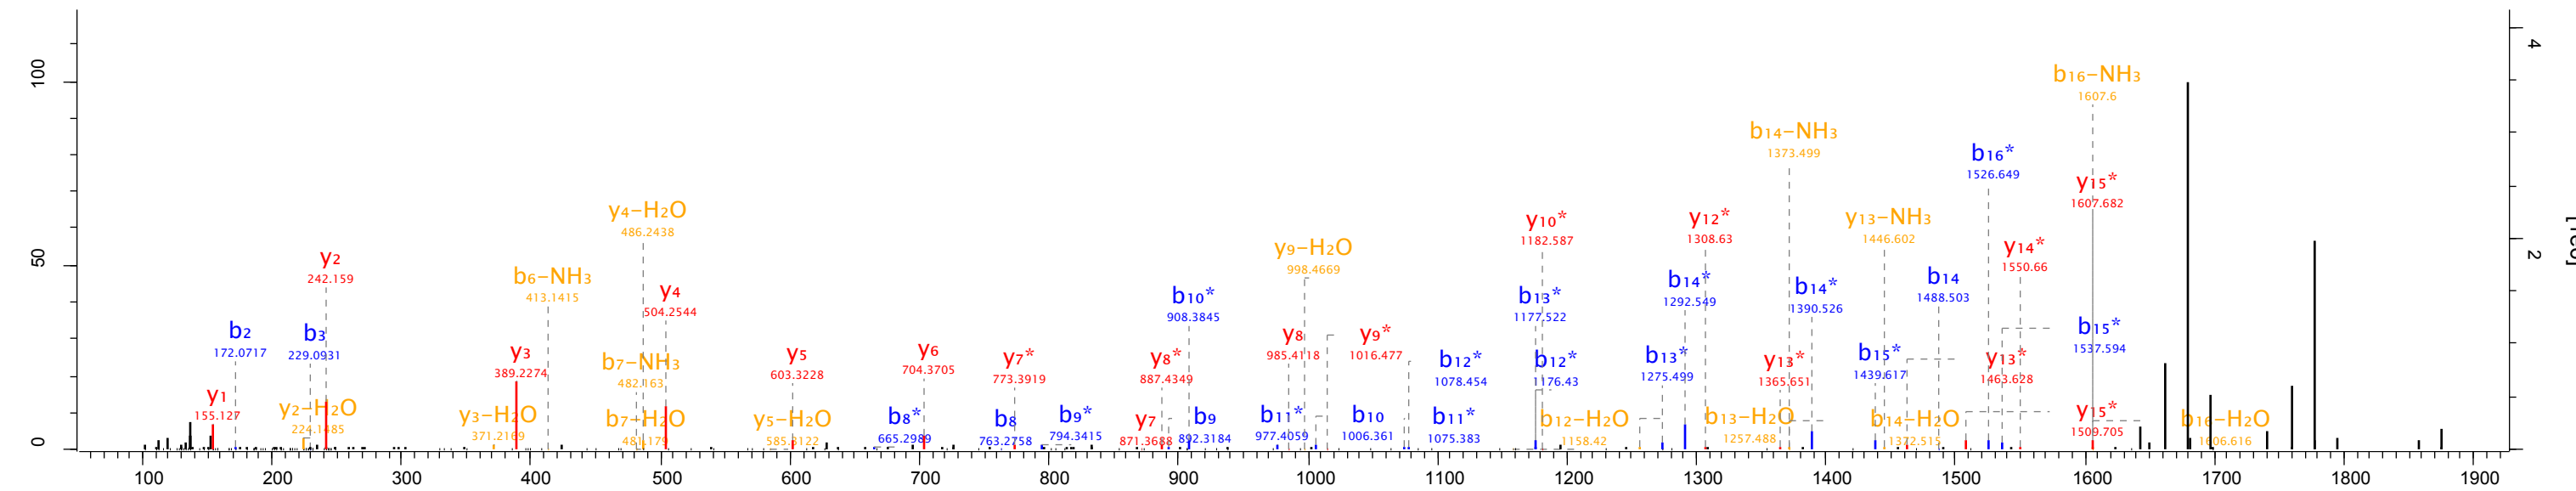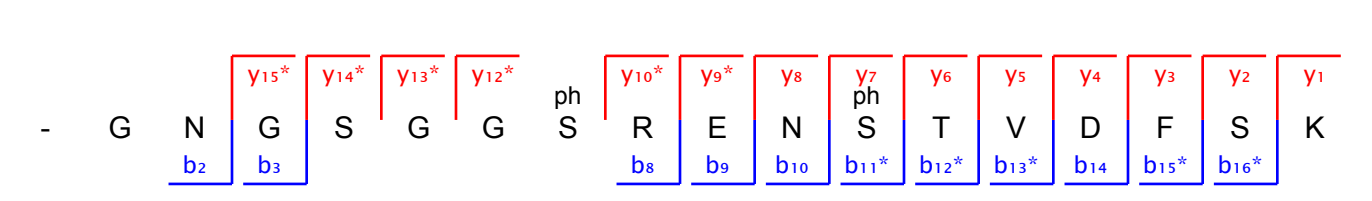

Raw file 20171215\_MaS\_33SR\_LMH\_phospho2\_03 Scan 5447 Method FTMS; HCD Score 84.2 m/z 715.83 Gene names SRRM2

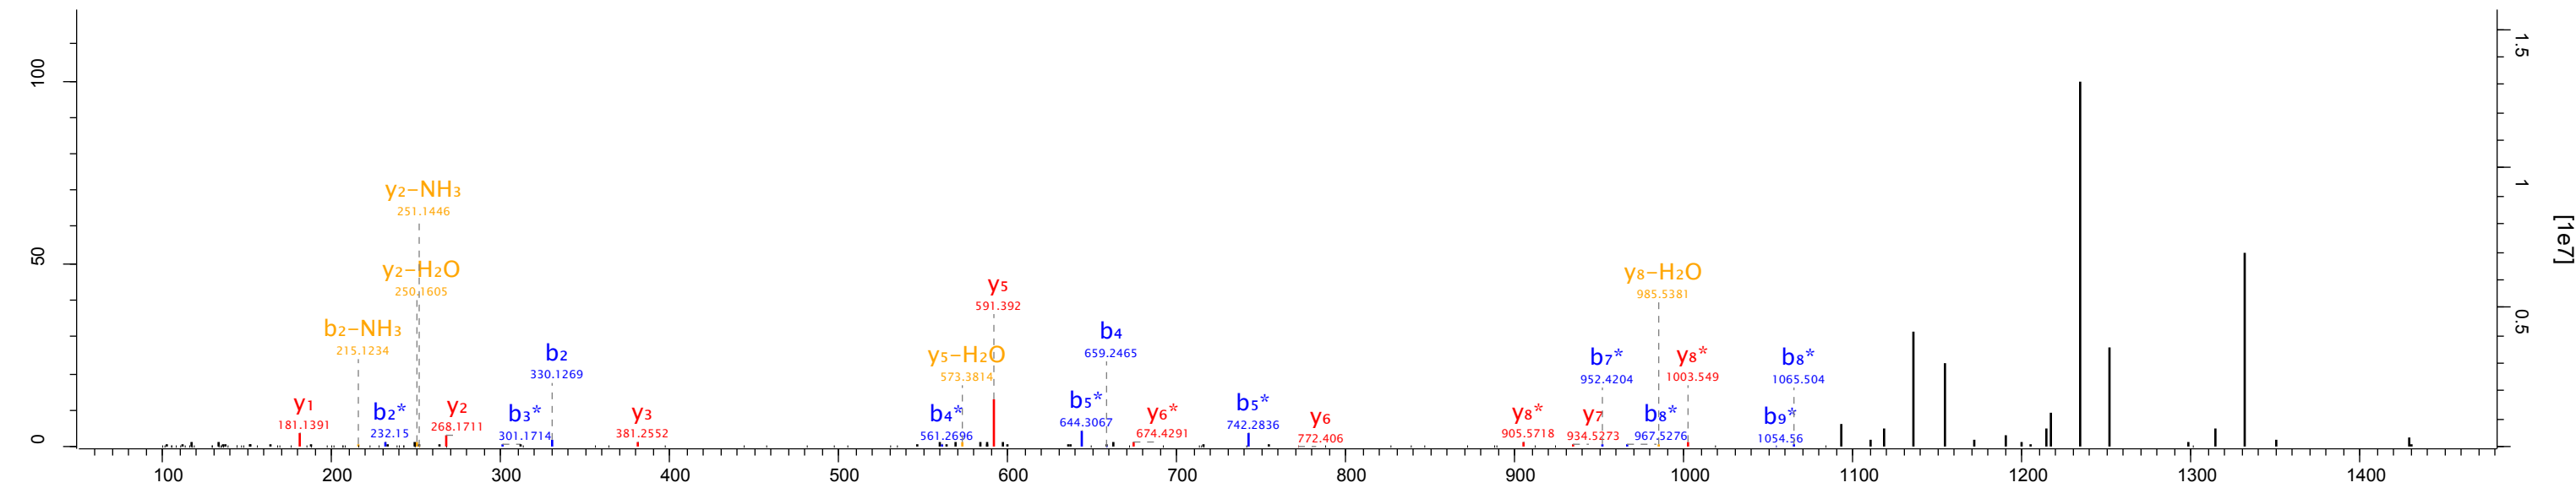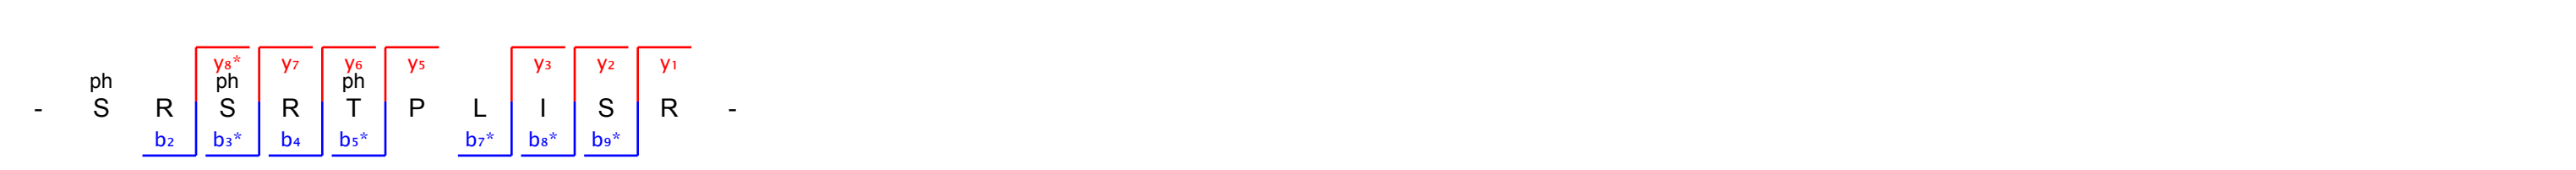



Raw file 20171215\_MaS\_33SR\_LMH\_phospho2\_03 Scan 5507 Method FTMS; HCD Score 66.66 m/z 610.72 Gene names ATF7IP

20171215\_MaS\_33SR\_LMH\_phospho2\_03

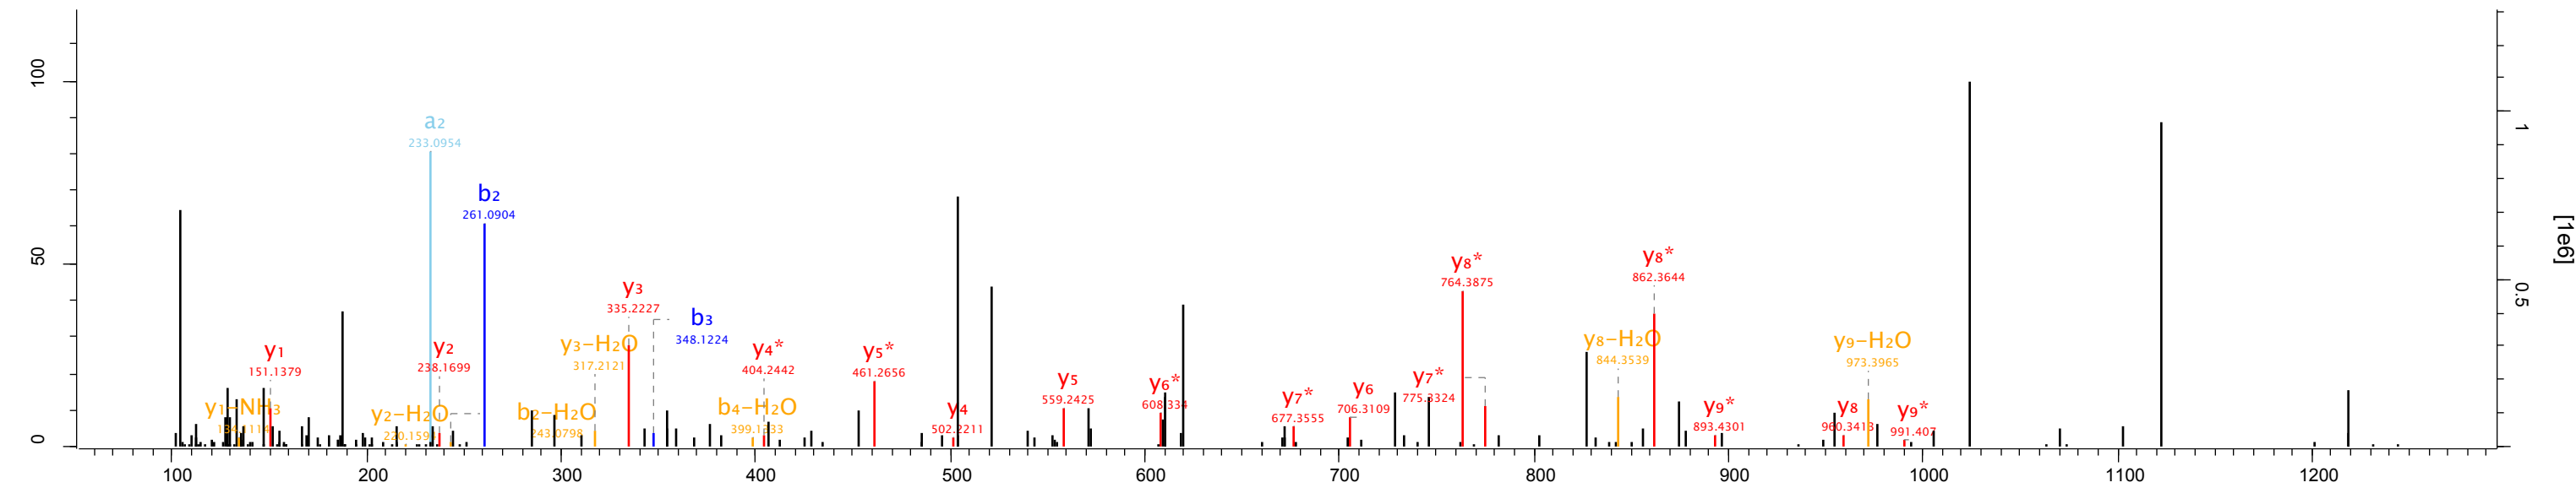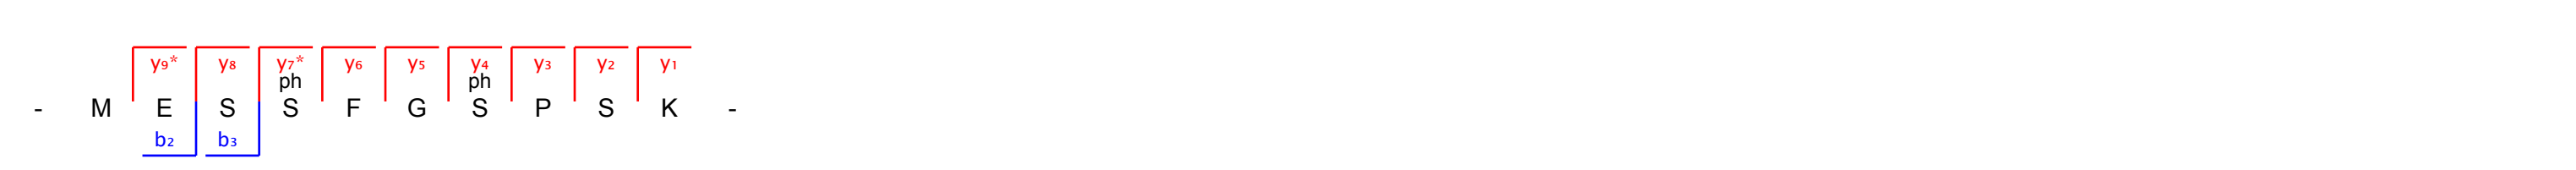

Raw file 20171215\_MaS\_33SR\_LMH\_phospho2\_03 Scan 6257 Method FTMS; HCD Score 139.41 m/z 683.31 Gene names CCDC86

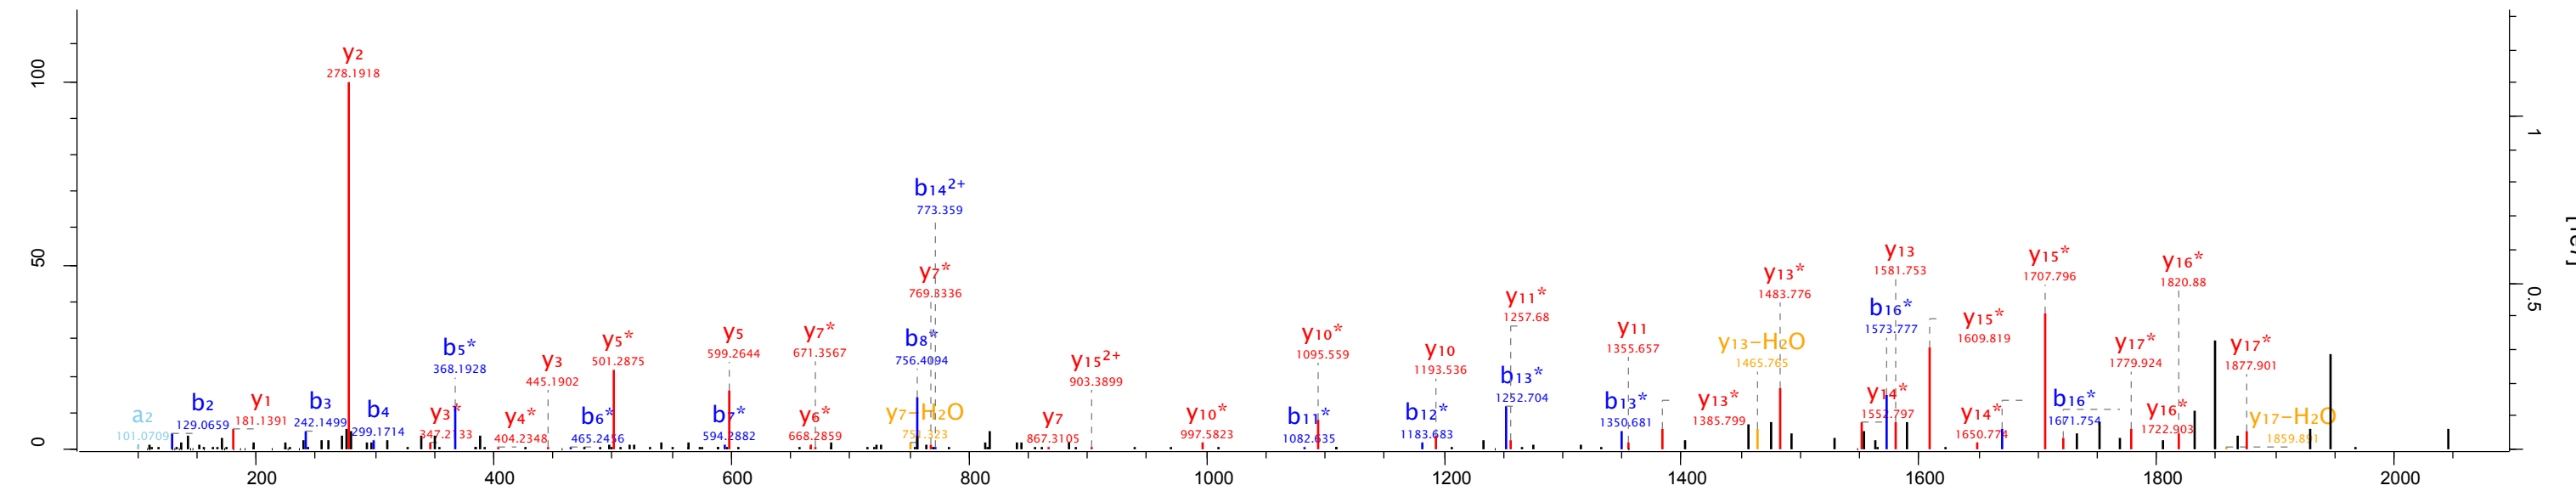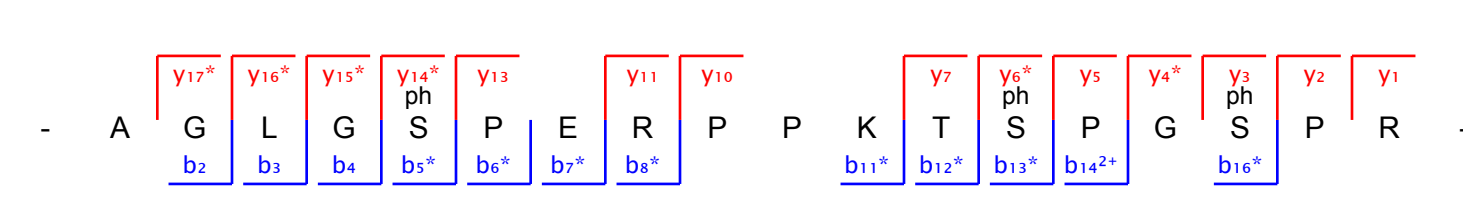

Raw file 20171215\_MaS\_33SR\_LMH\_phospho2\_03 Scan 6297 Method FTMS; HCD Score 84.75 m/z 602.77 Gene names BRPF3

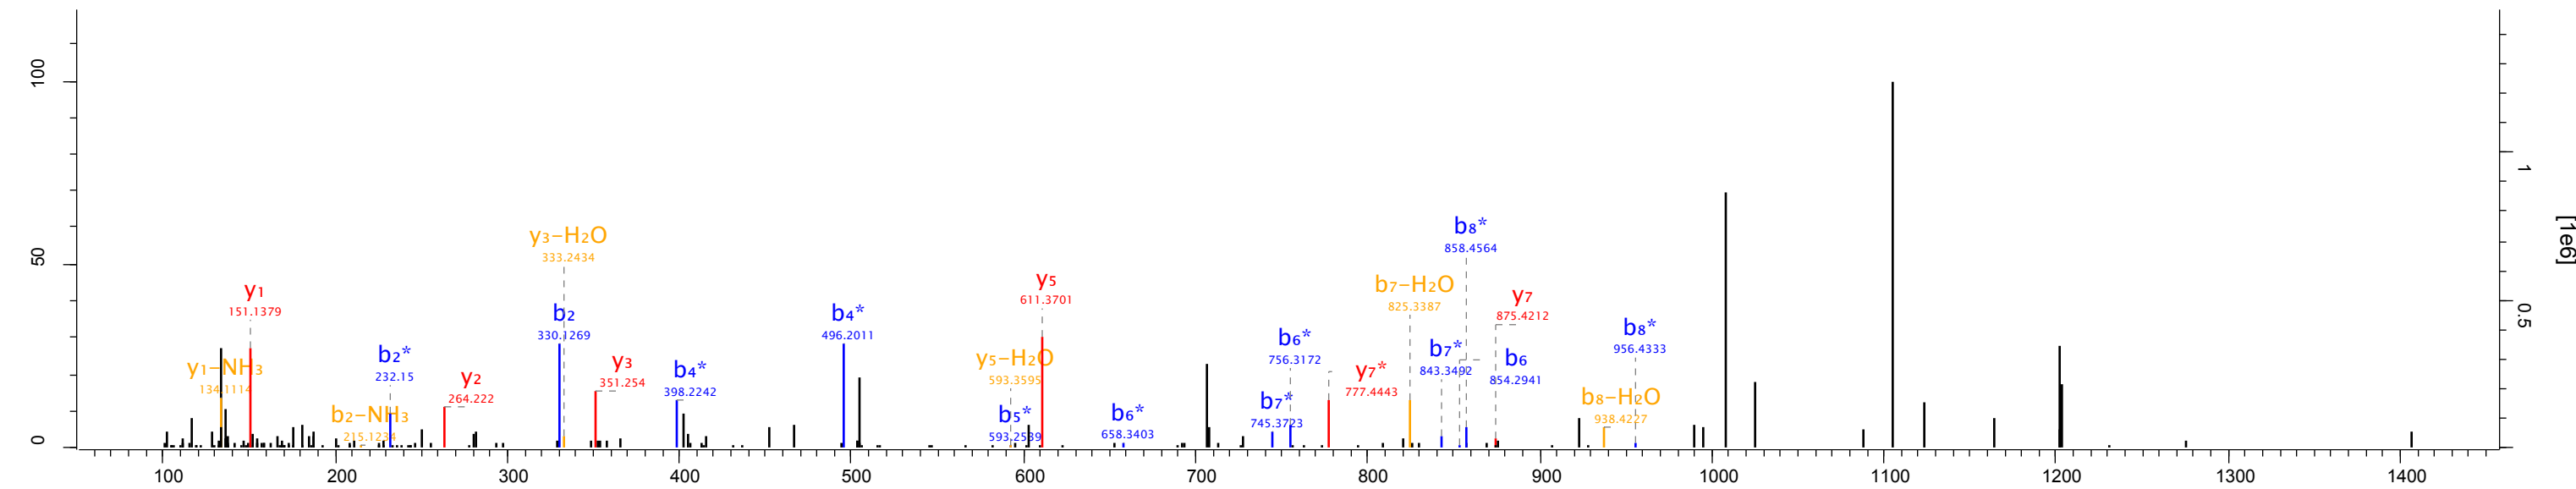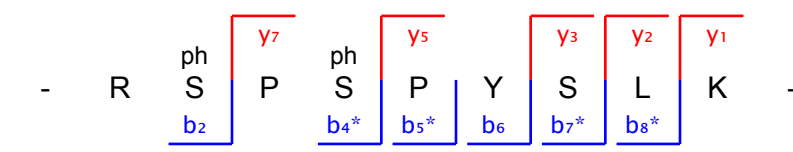

Raw file 20171215\_MaS\_33SR\_LMH\_phospho2\_03 Scan 6307 Method FTMS; HCD Score 156.15 m/z 749.79 Gene names NDRG1

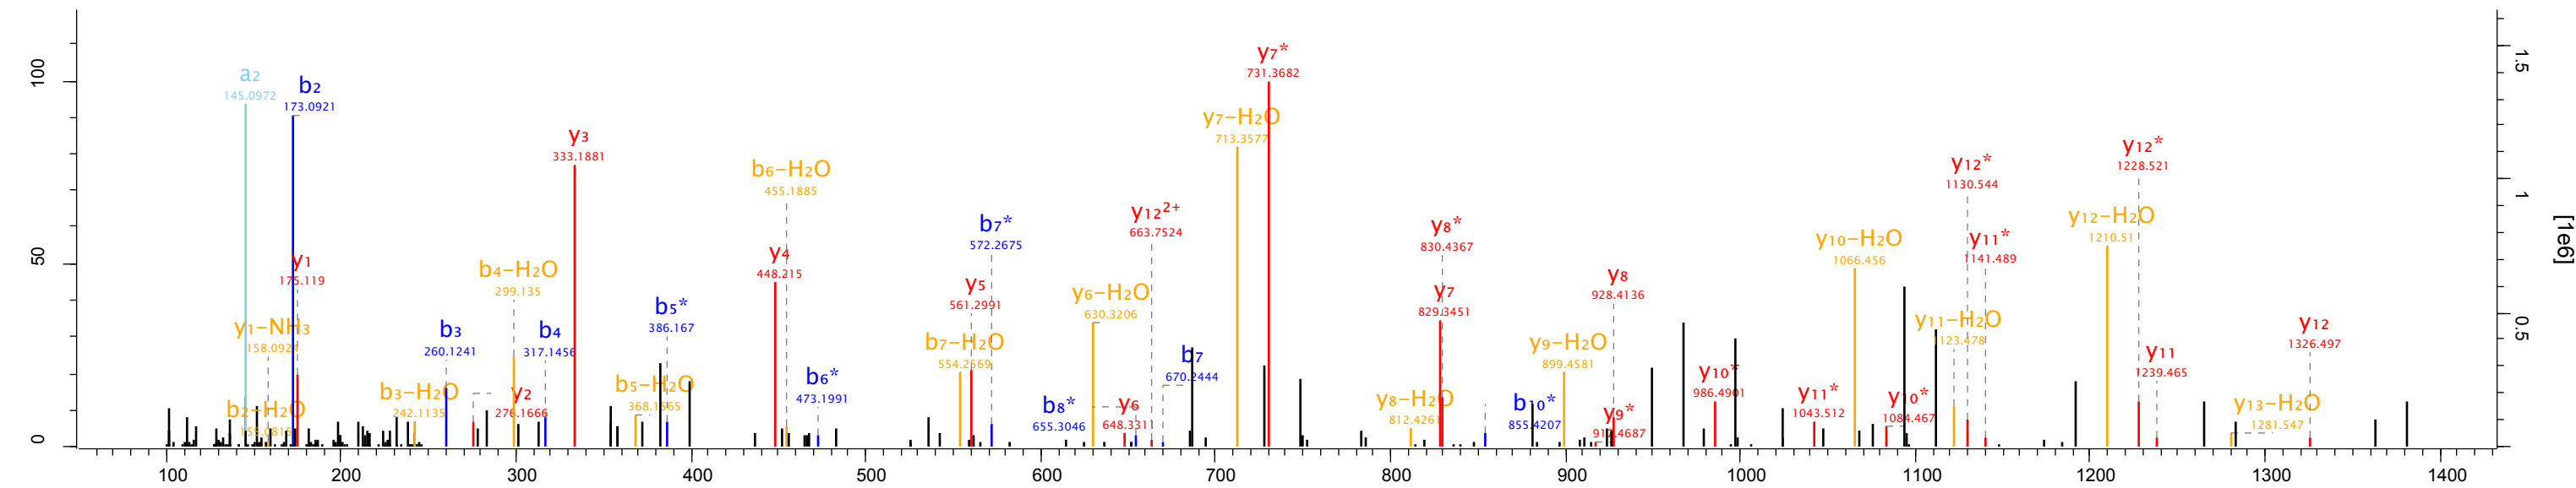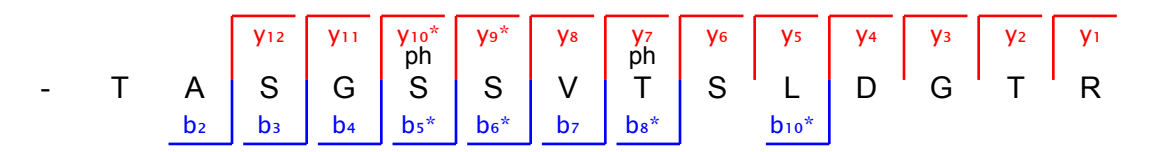

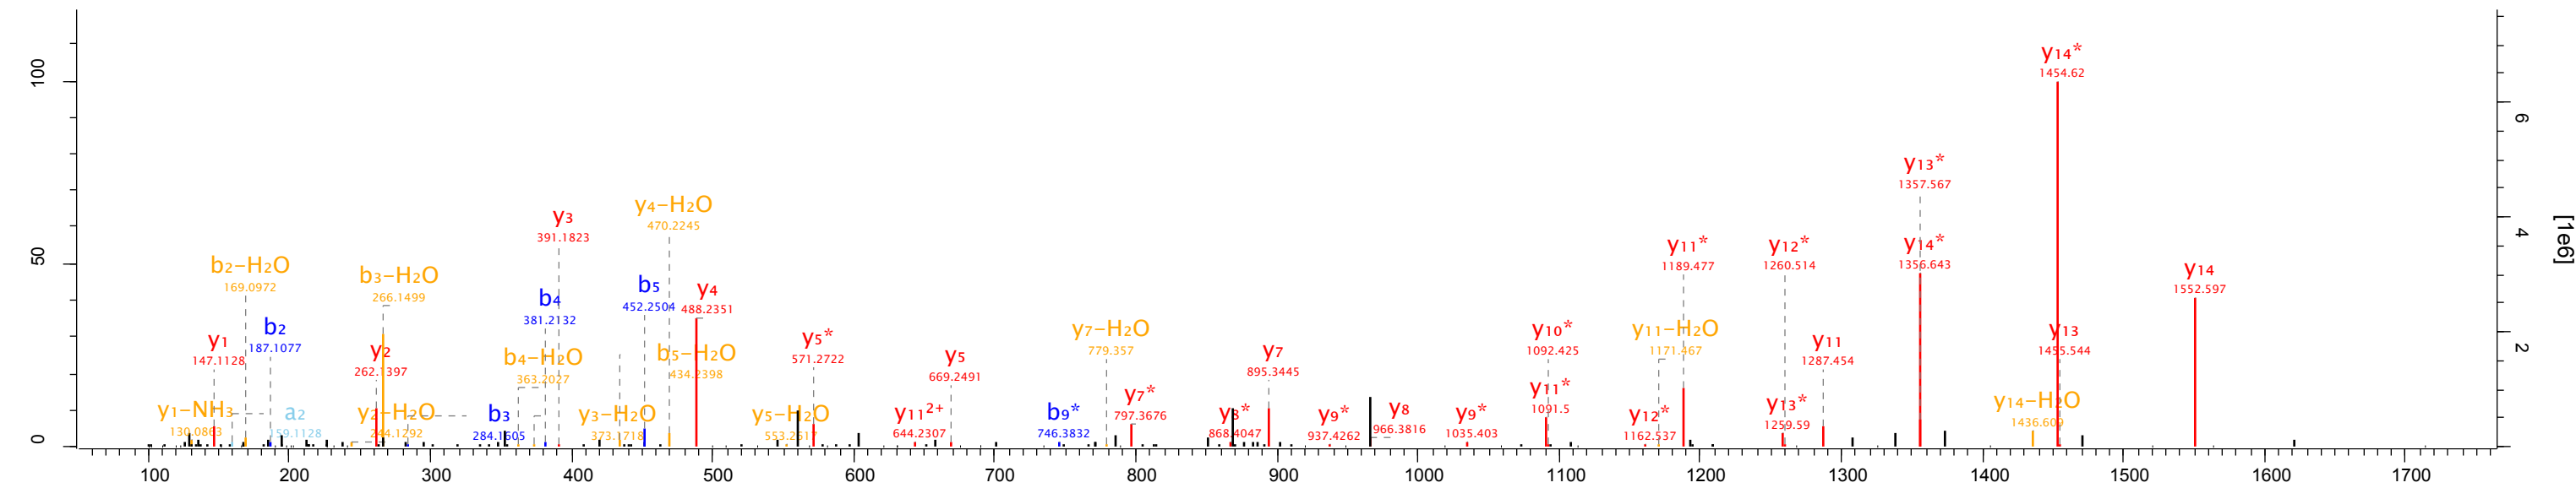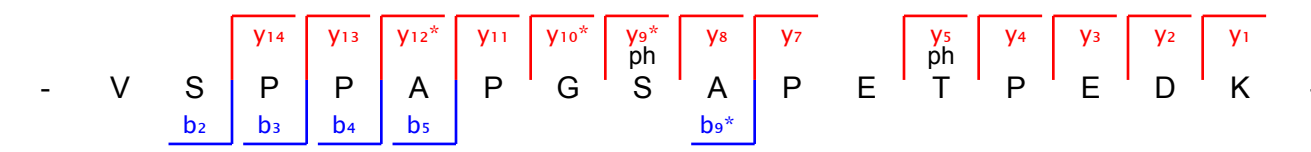

Raw file  
20171215\_MaS\_33SR\_LMH\_phospho2\_03

Scan 6817 Method FTMS; HCD Score 162.41 m/z 971.89 Gene names SPAG9

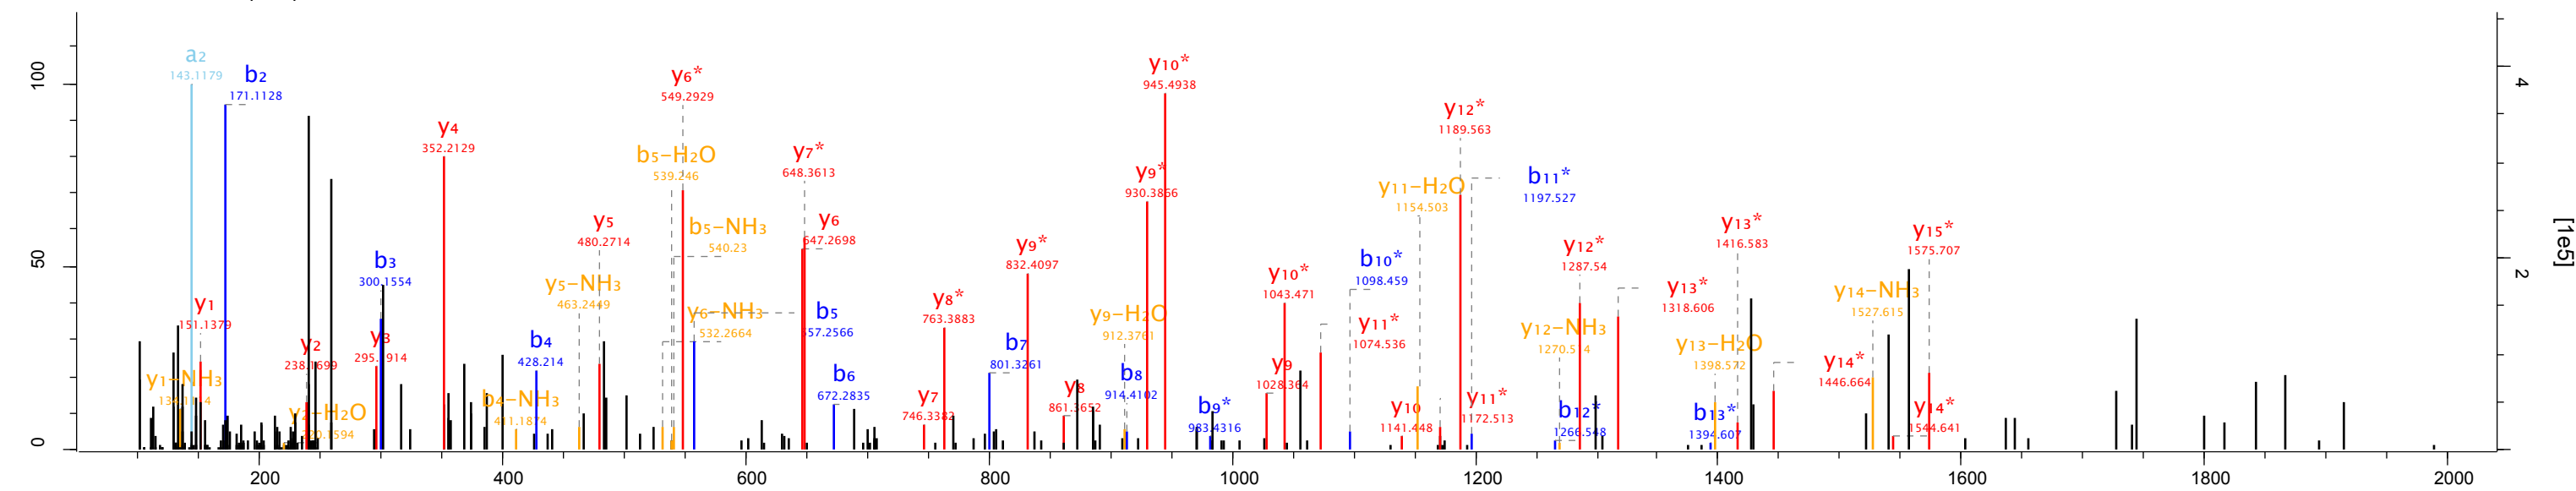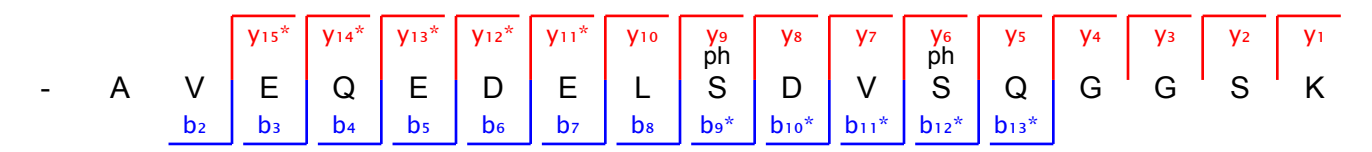

Raw file 20171215\_MaS\_33SR\_LMH\_phospho2\_03 Scan 7147 Method FTMS; HCD Score 45.84 m/z 913.35 Gene names ZNF8;RANBP3

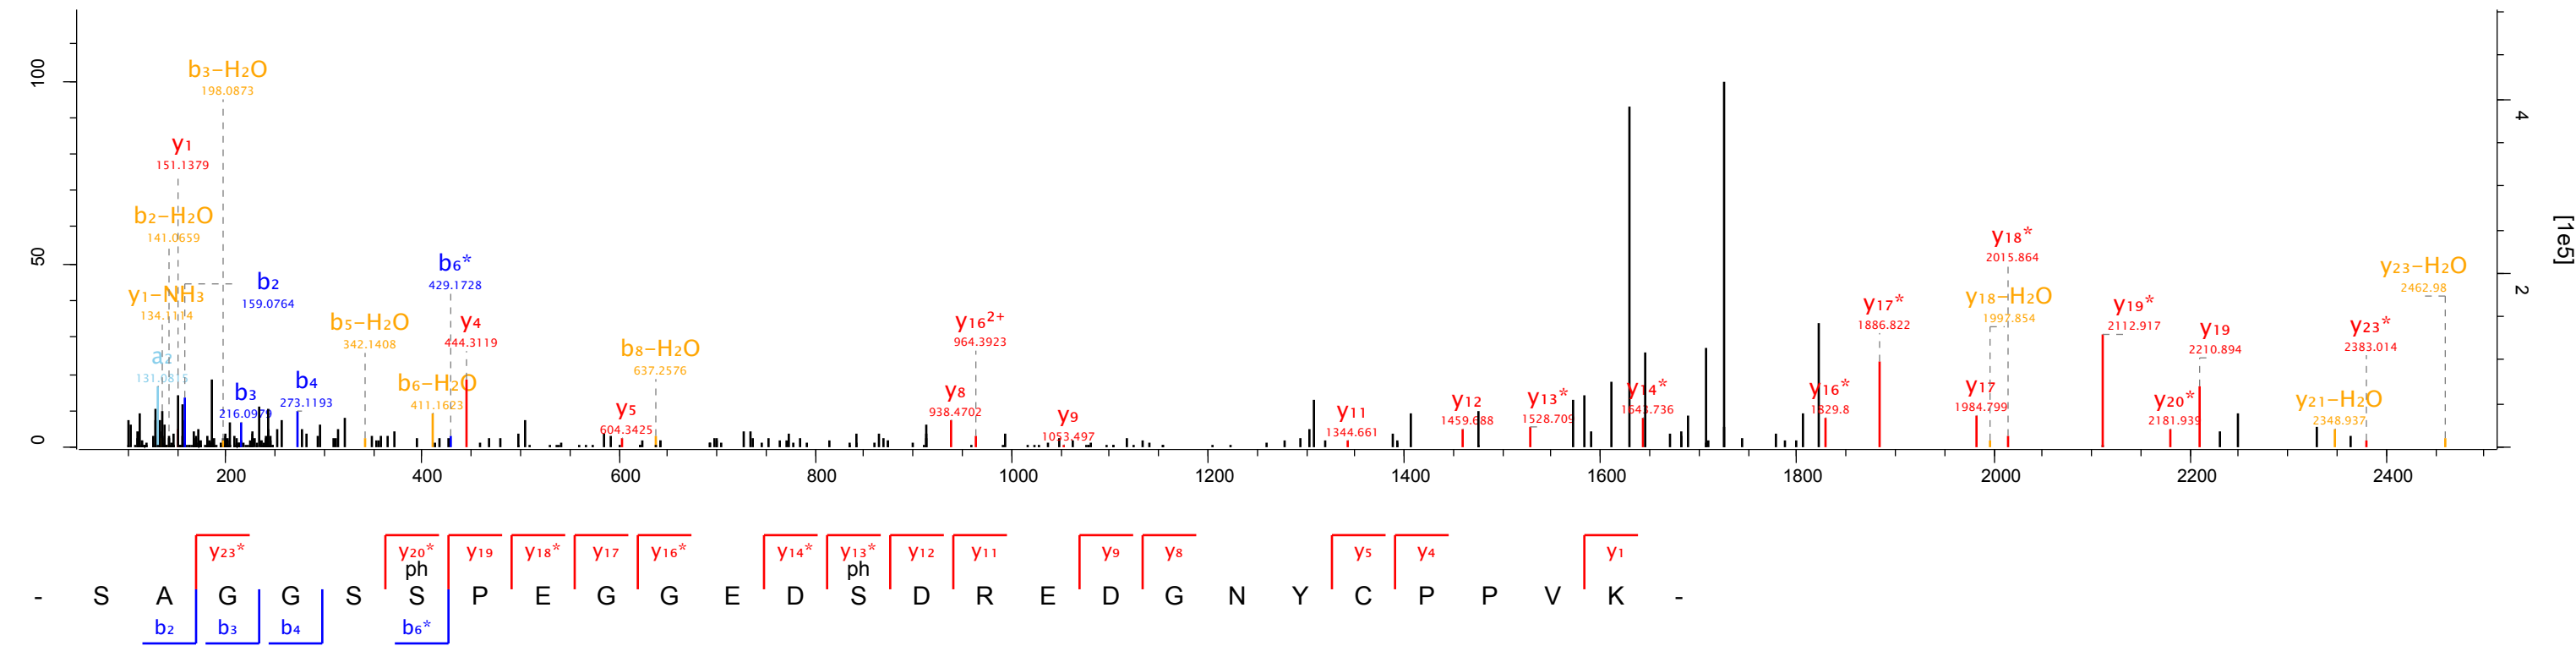

Raw file 20171215\_MaS\_33SR\_LMH\_phospho2\_03 Scan 7337 Method FTMS; HCD Score 126.4 m/z 770.32 Gene names NFIC

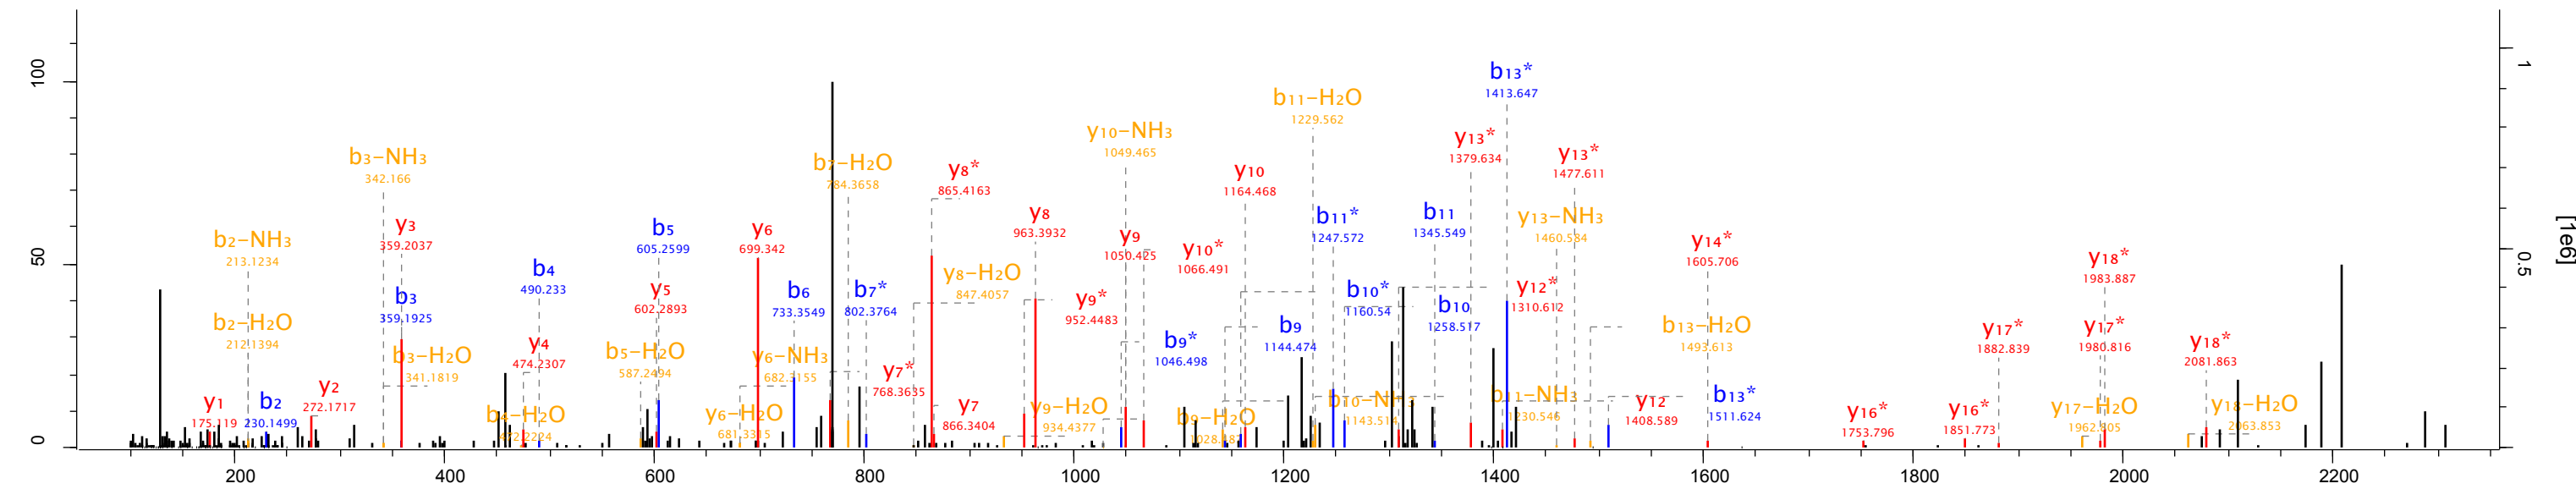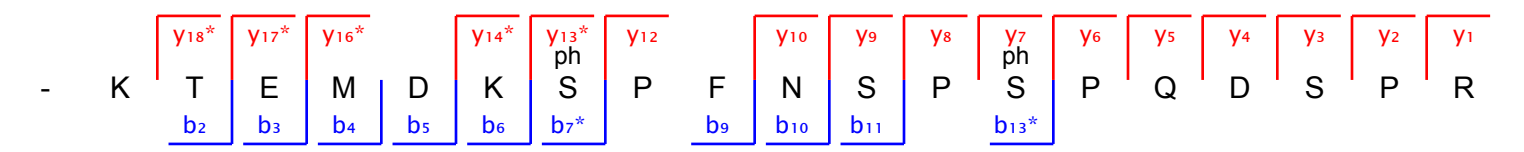



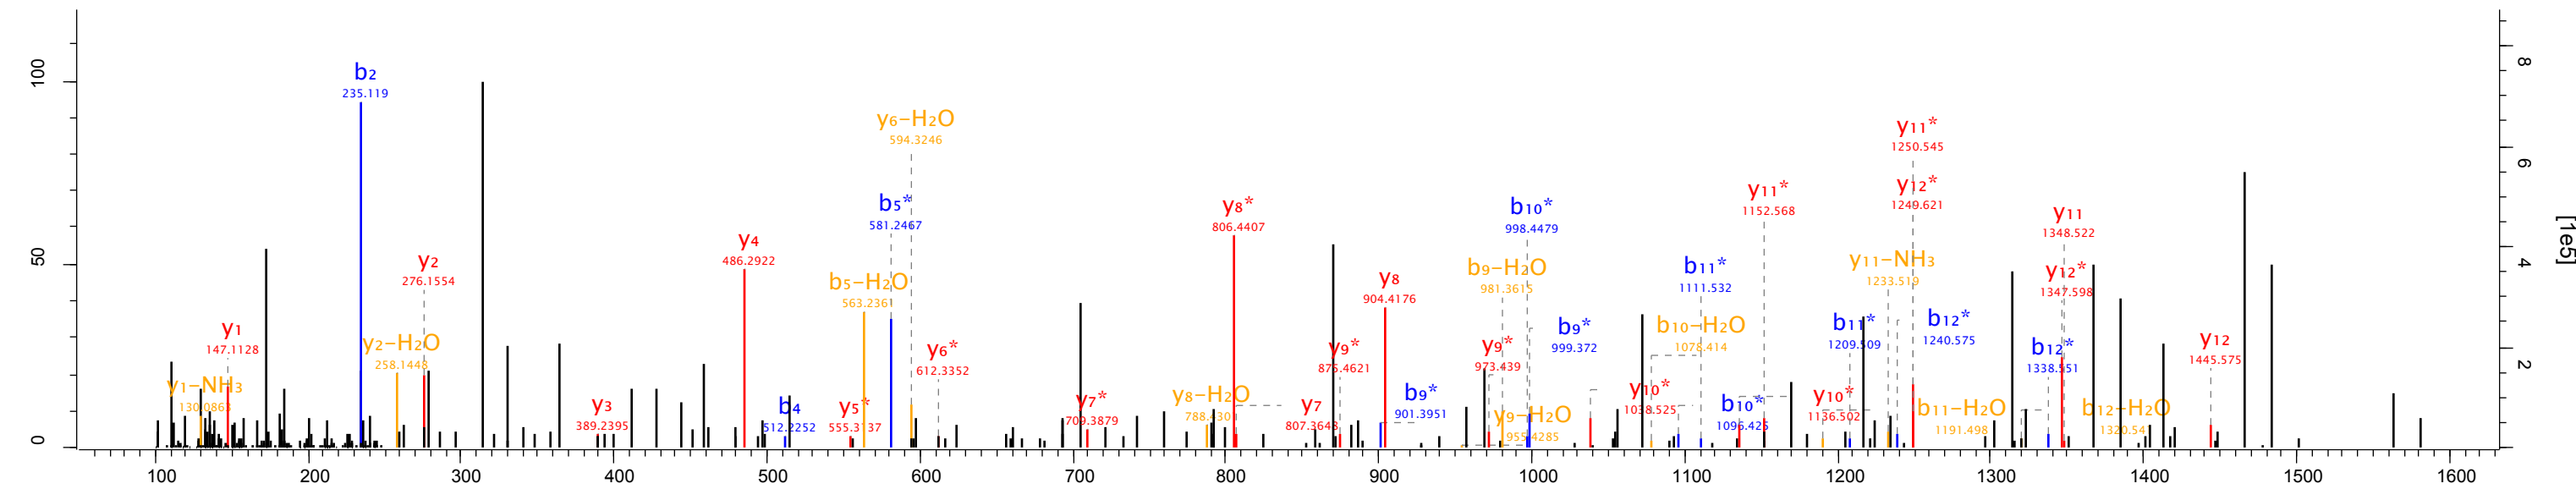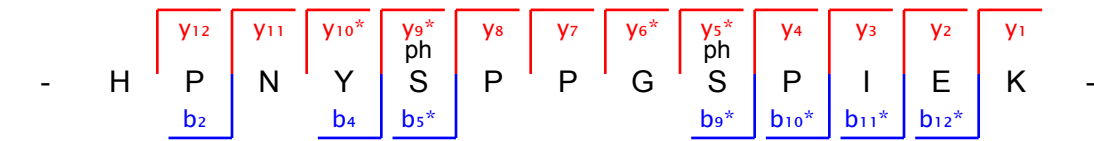

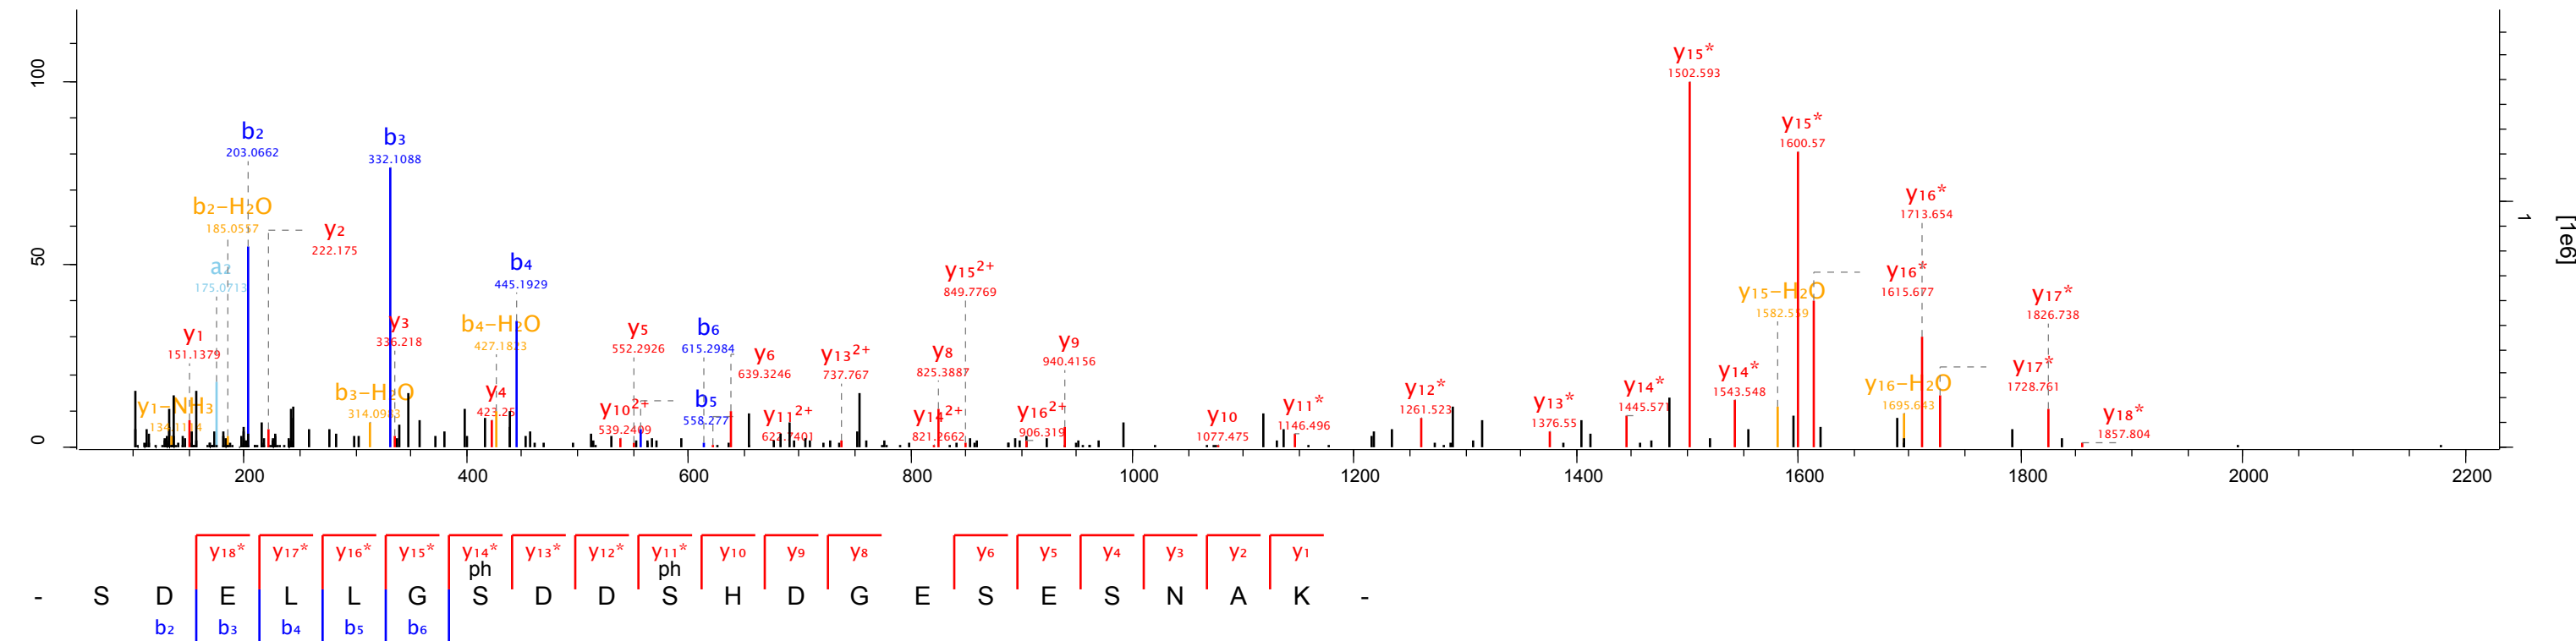

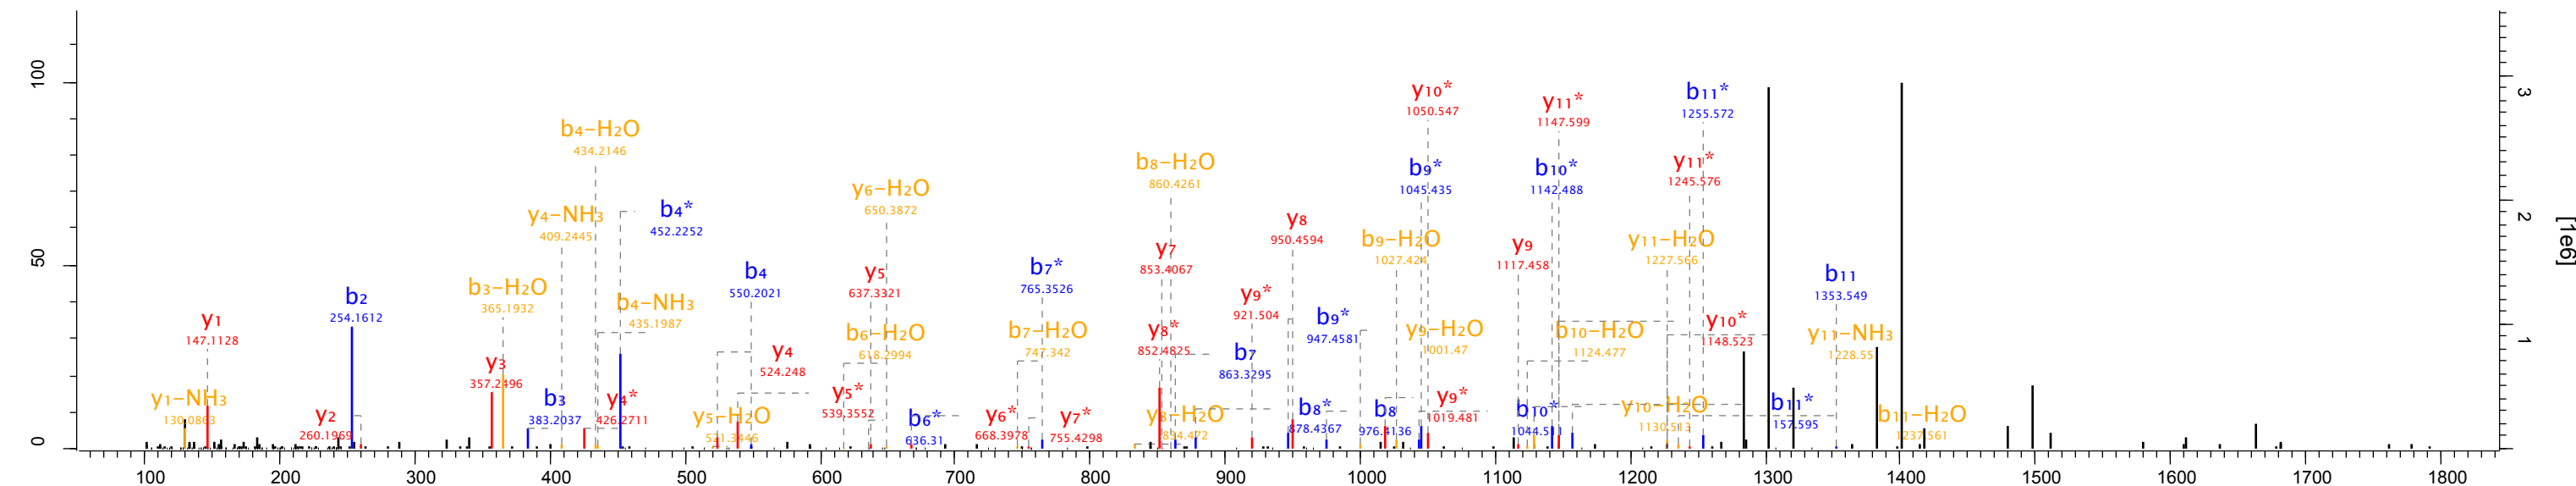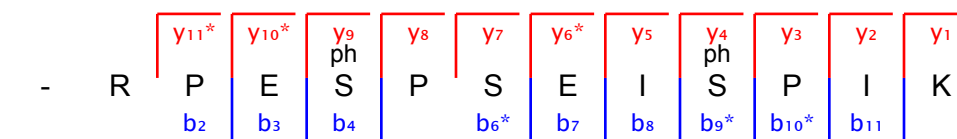

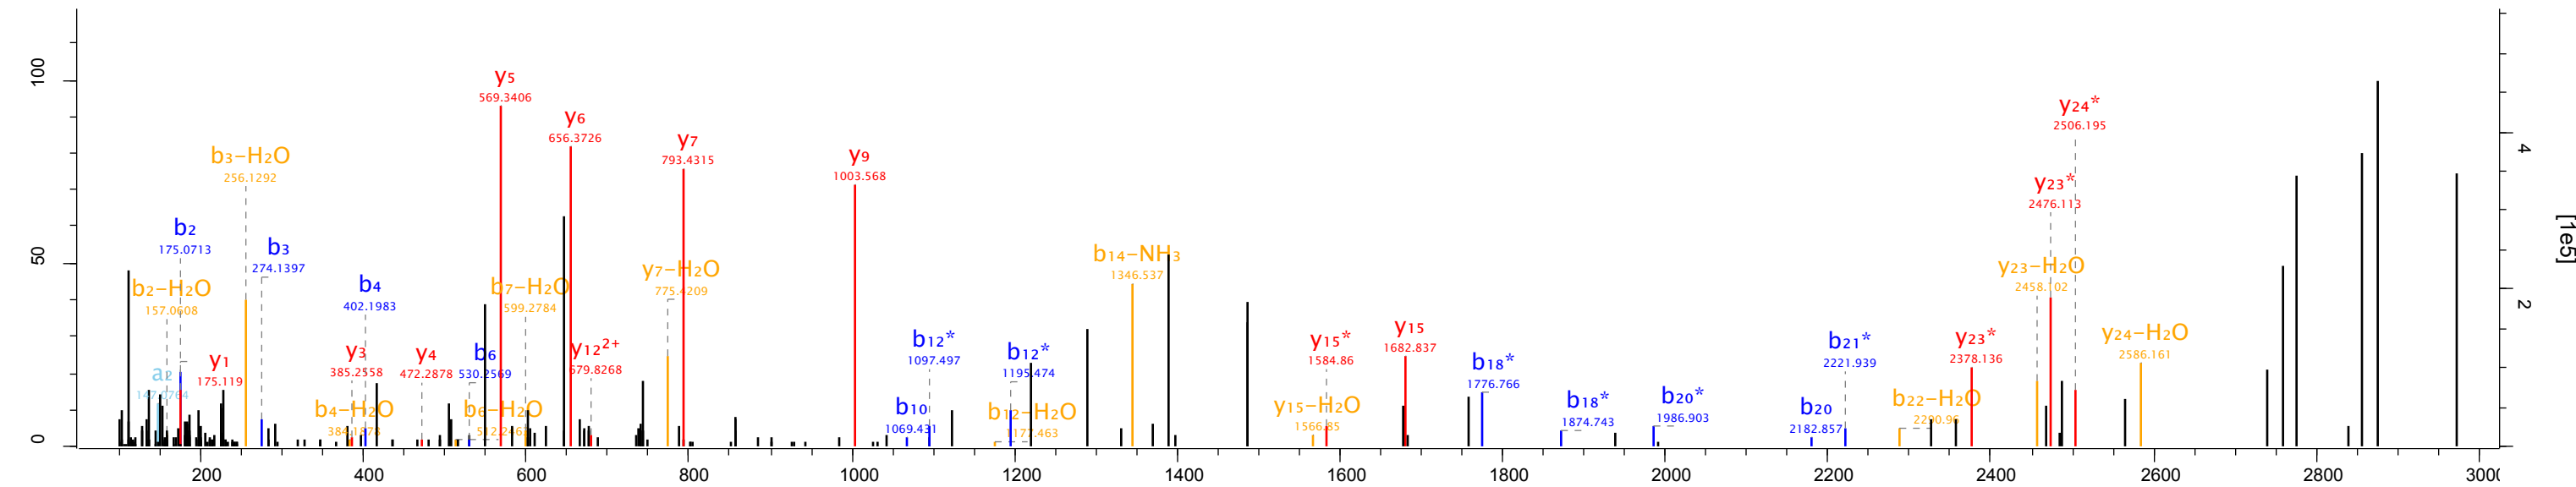

- S S V Q G A S S R E G S P A R S T P L H S P S P I R -

Fragmentation sites are indicated by brackets below the sequence:

- b2 (S-S)
- b3 (S-V)
- b4 (V-Q)
- b6 (A-S)
- b10 (E-G)
- b12\* (S-P)
- b18\* (T-P)
- b20 (L-P)
- b21\* (L-H)

Y-ion fragmentation sites are indicated by brackets above the sequence:

- y1 (I-R)
- y3 (P-S)
- y4 (S-P)
- y5 (P-S)
- y6 (S-P)
- y7 (H-S)
- y9 (P-S)
- y12<sup>2+</sup> (S-P)
- y15 (P-S)
- y23\* (S-P)
- y24\* (Q-G)

Raw file 20171215\_MaS\_33SR\_LMH\_phospho2\_03 Scan 8097 Method FTMS; HCD Score 104.3 m/z 581.61 Gene names PLEKHG5

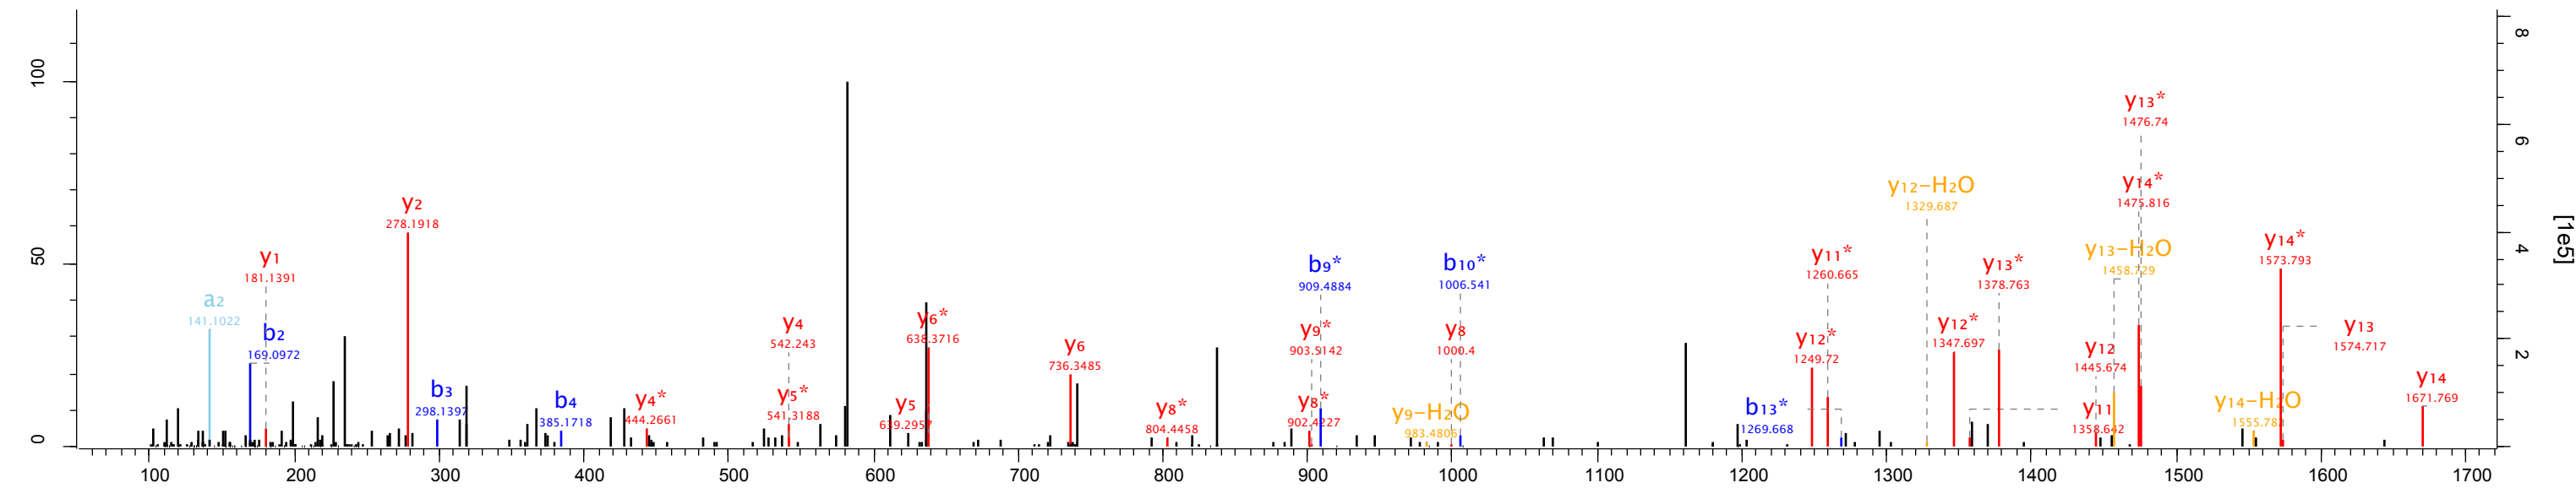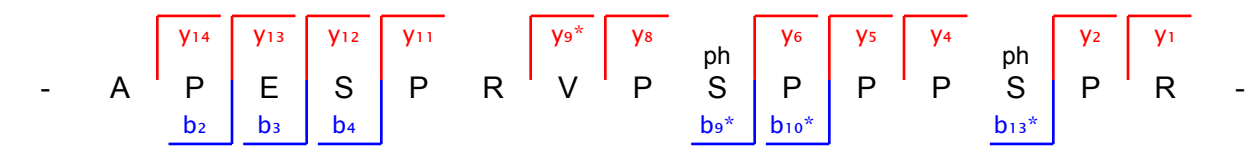

Raw file 20171215\_MaS\_33SR\_LMH\_phospho2\_03 Scan 8157 Method FTMS; HCD Score 115 m/z 886.4 Gene names ZNF532

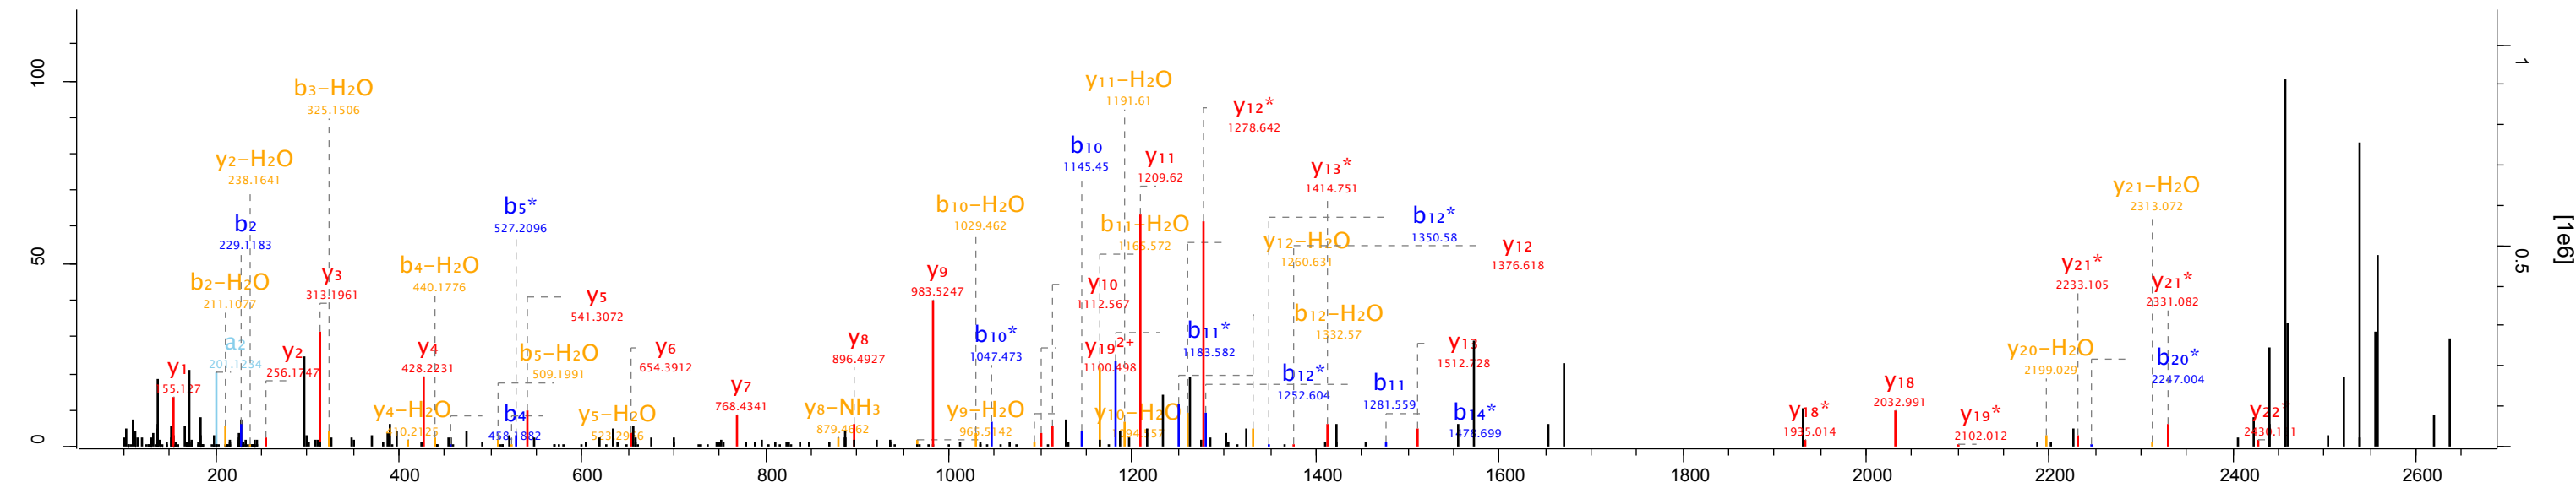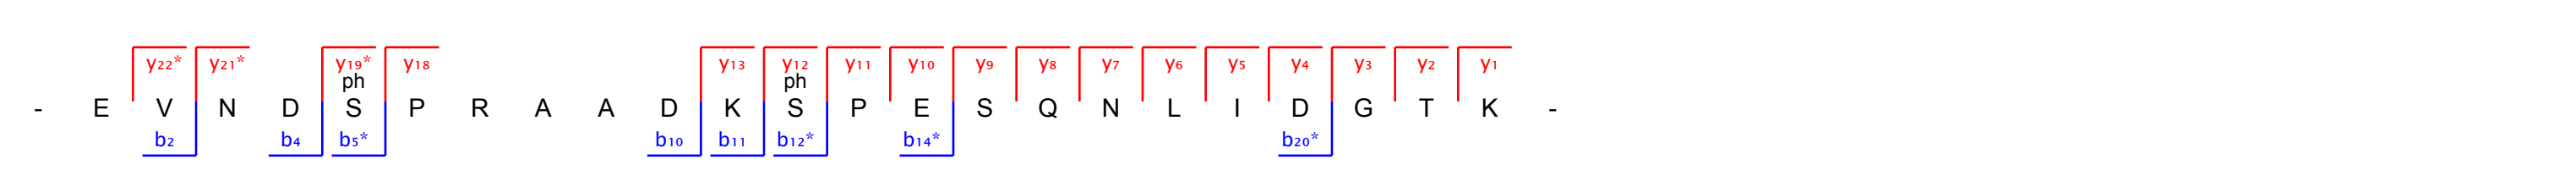

Raw file: 20171215\_MaS\_33SR\_LMH\_phospho2\_03  
 Scan: 8207 Method: FTMS; HCD Score: 102.65 m/z: 695.01 Gene names: HSPH1

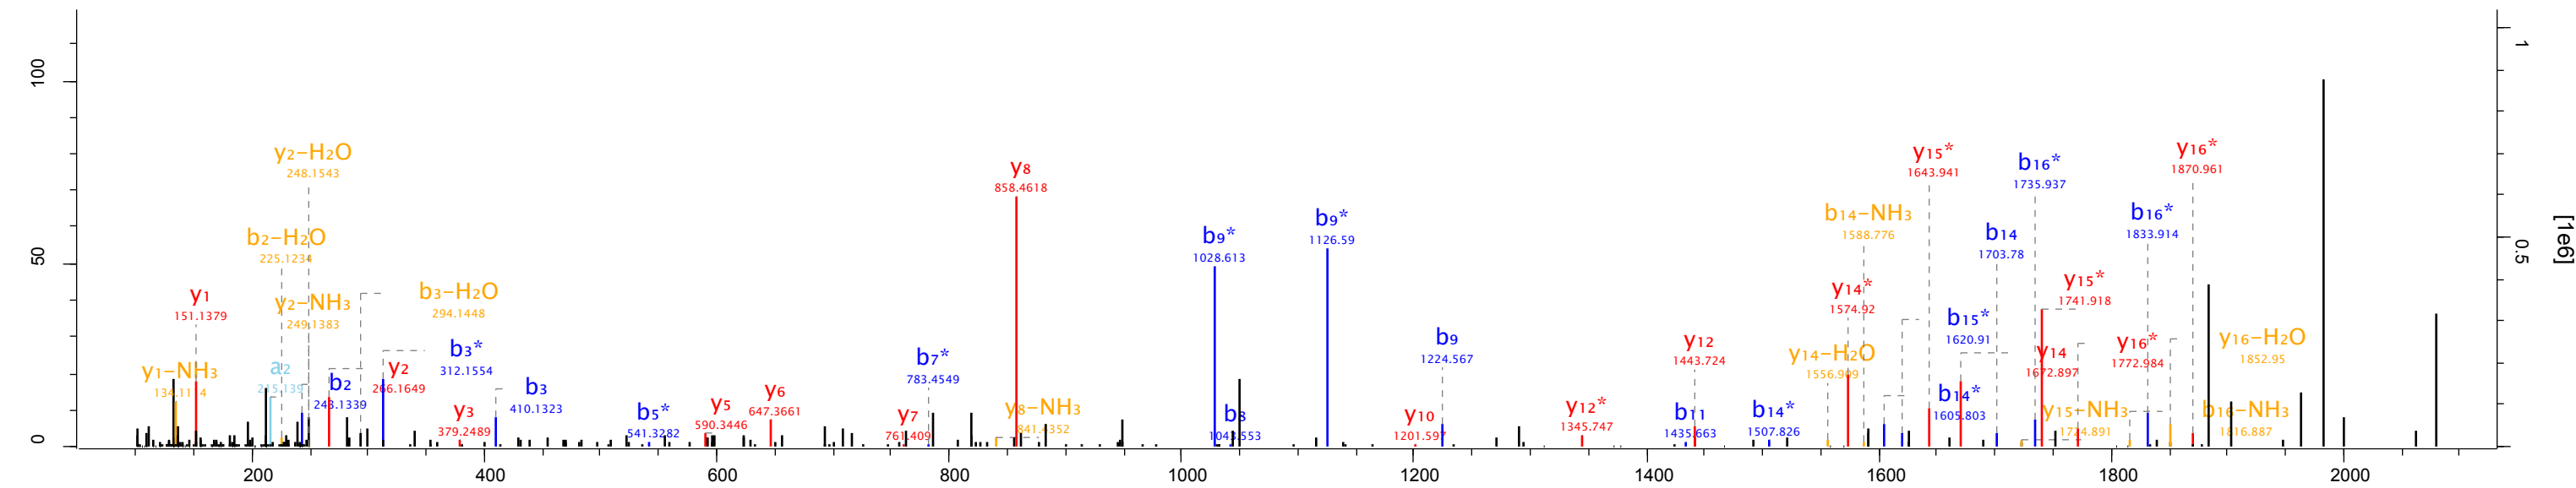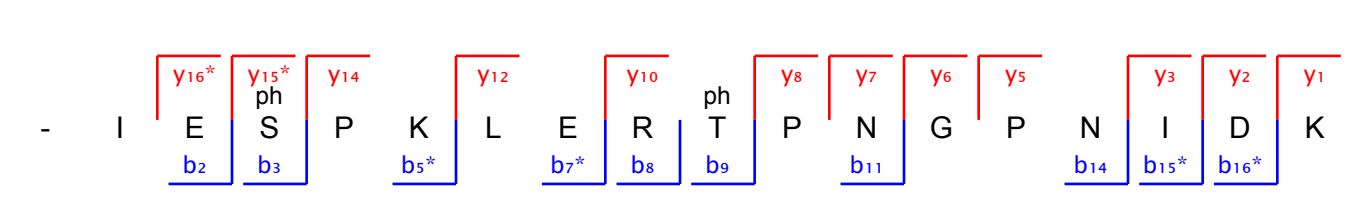

Raw file

20171215\_MaS\_33SR\_LMH\_phospho2\_03

| Scan | Method    | Score | m/z   | Gene names |
|------|-----------|-------|-------|------------|
| 8297 | FTMS; HCD | 84.33 | 605.6 | DOT1L      |

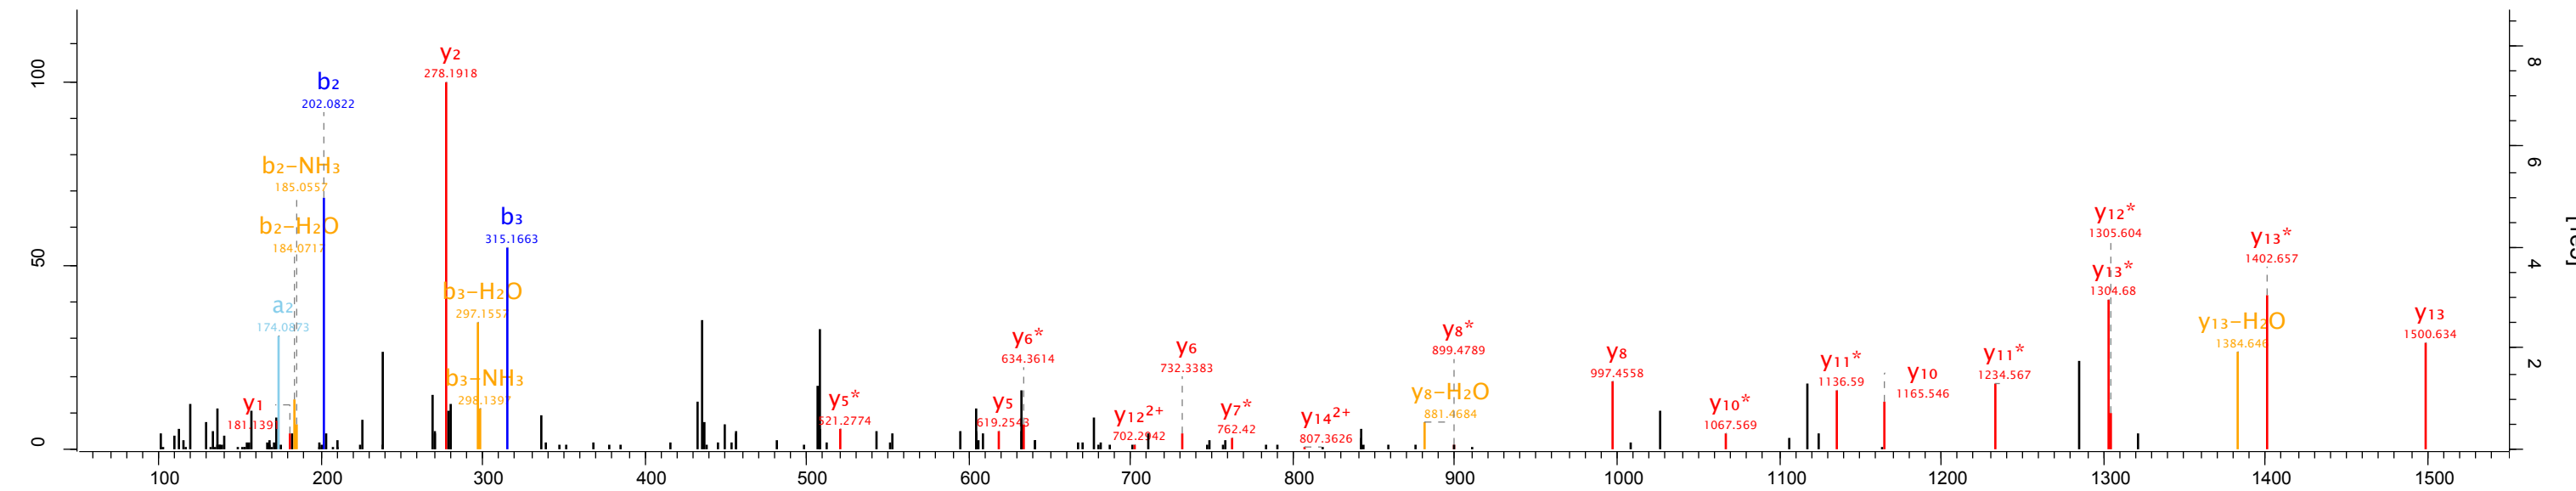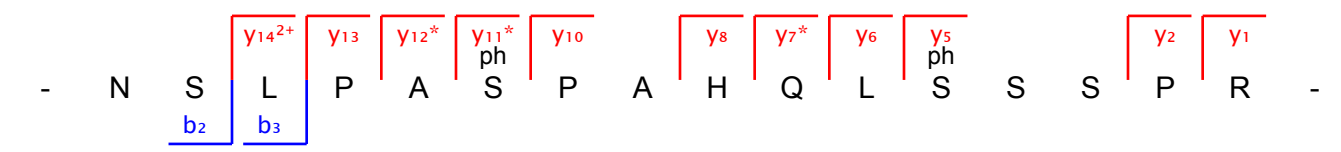



Raw file 20171215\_MaS\_33SR\_LMH\_phospho2\_03 Scan 8497 Method FTMS; HCD Score 82.26 m/z 921.73 Gene names PLEC

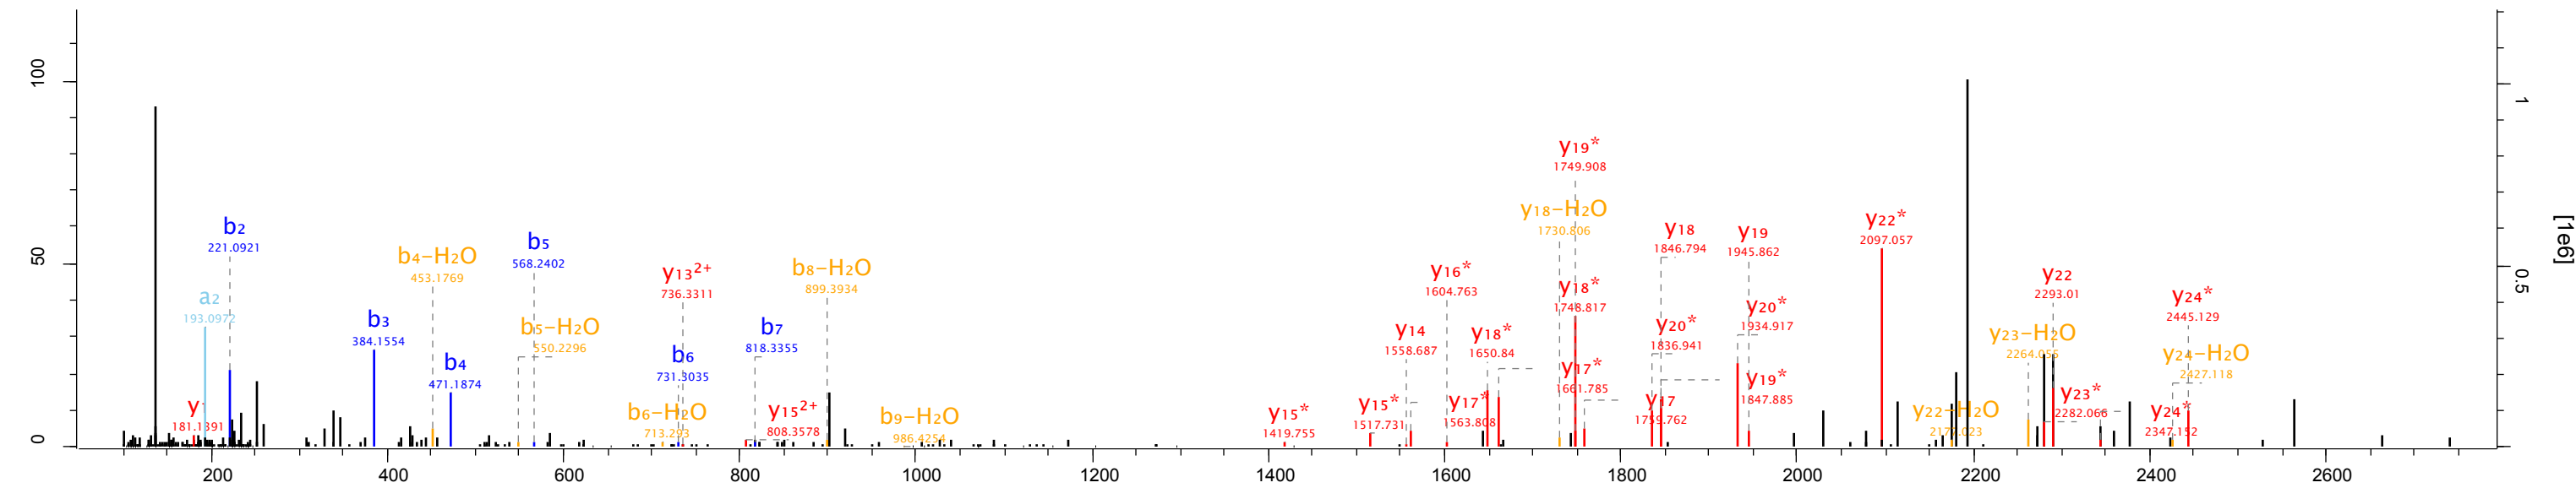

- G Y Y S P Y S V S G S G S T A G S R T G S R T G S R -

Fragmentation mapping (b and y ions):

- b ions (blue boxes):** b<sub>2</sub> (Y), b<sub>3</sub> (Y), b<sub>4</sub> (S), b<sub>5</sub> (P), b<sub>6</sub> (Y), b<sub>7</sub> (S)
- y ions (red boxes):** y<sub>24</sub><sup>\*</sup> (Y), y<sub>23</sub><sup>\*</sup> (S), y<sub>22</sub> (P), y<sub>20</sub><sup>\*</sup> (S), y<sub>19</sub> (V), y<sub>18</sub> (S), y<sub>17</sub> (G), y<sub>16</sub><sup>\*</sup> (S), y<sub>15</sub><sup>\*</sup> (G), y<sub>14</sub> (S), y<sub>13</sub><sup>2+</sup> (T)

Raw file 20171215\_MaS\_33SR\_LMH\_phospho2\_03 Scan 8527 Method FTMS; HCD Score 93.42 m/z 532.9 Gene names OPTN

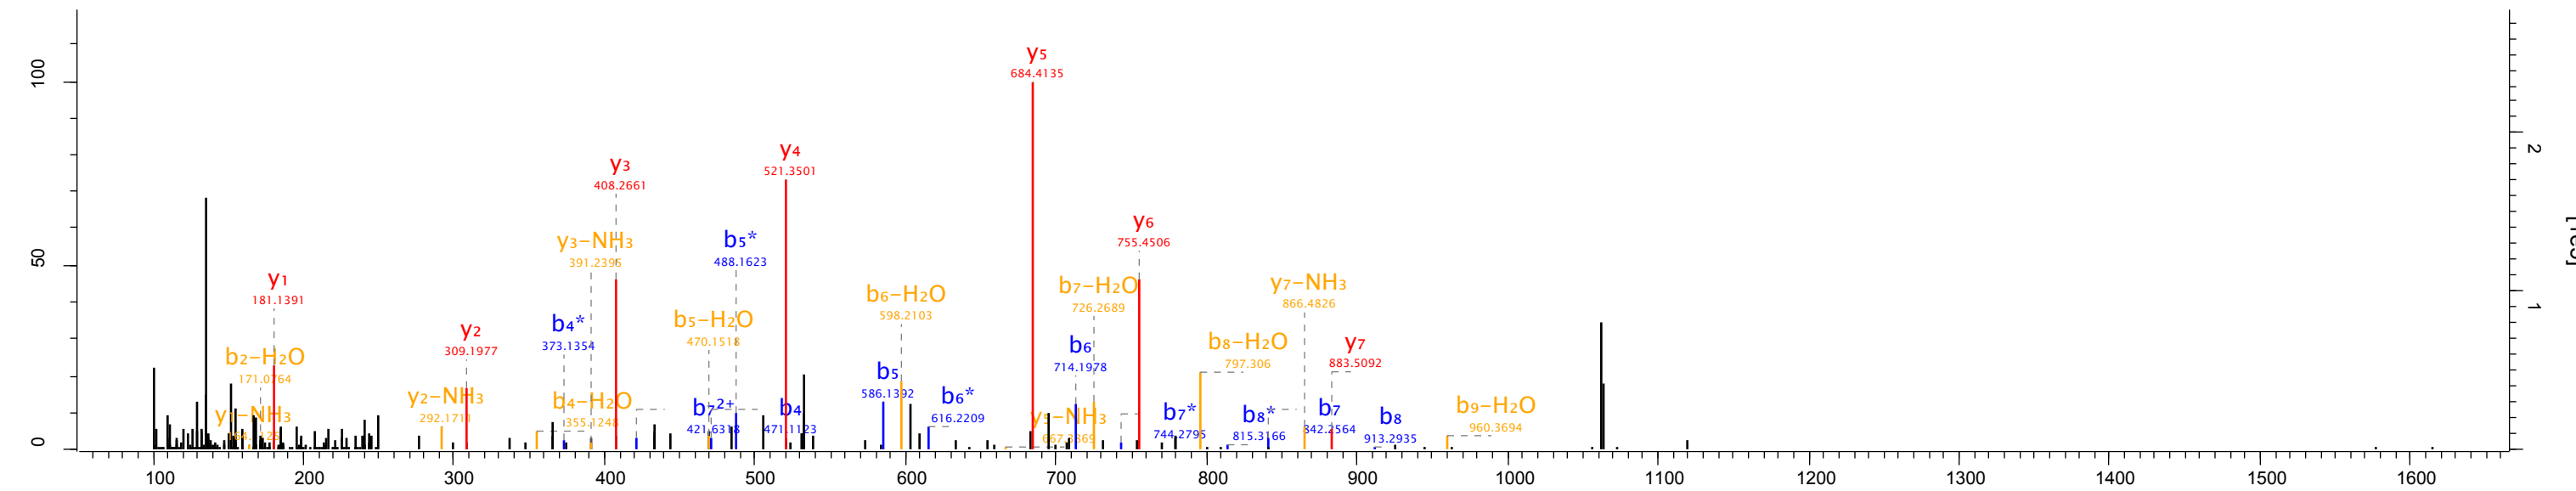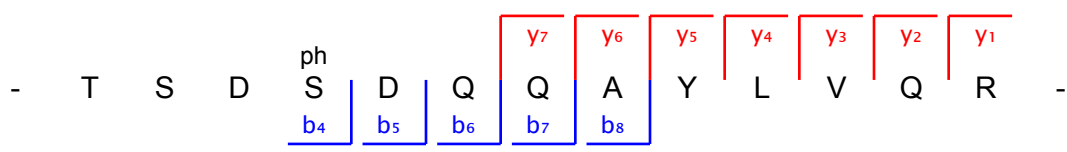

Raw file: 20171215\_MaS\_33SR\_LMH\_phospho2\_03  
 Scan: 8597 Method: FTMS; HCD Score: 100.21 m/z: 692.79 Gene names: ANK3

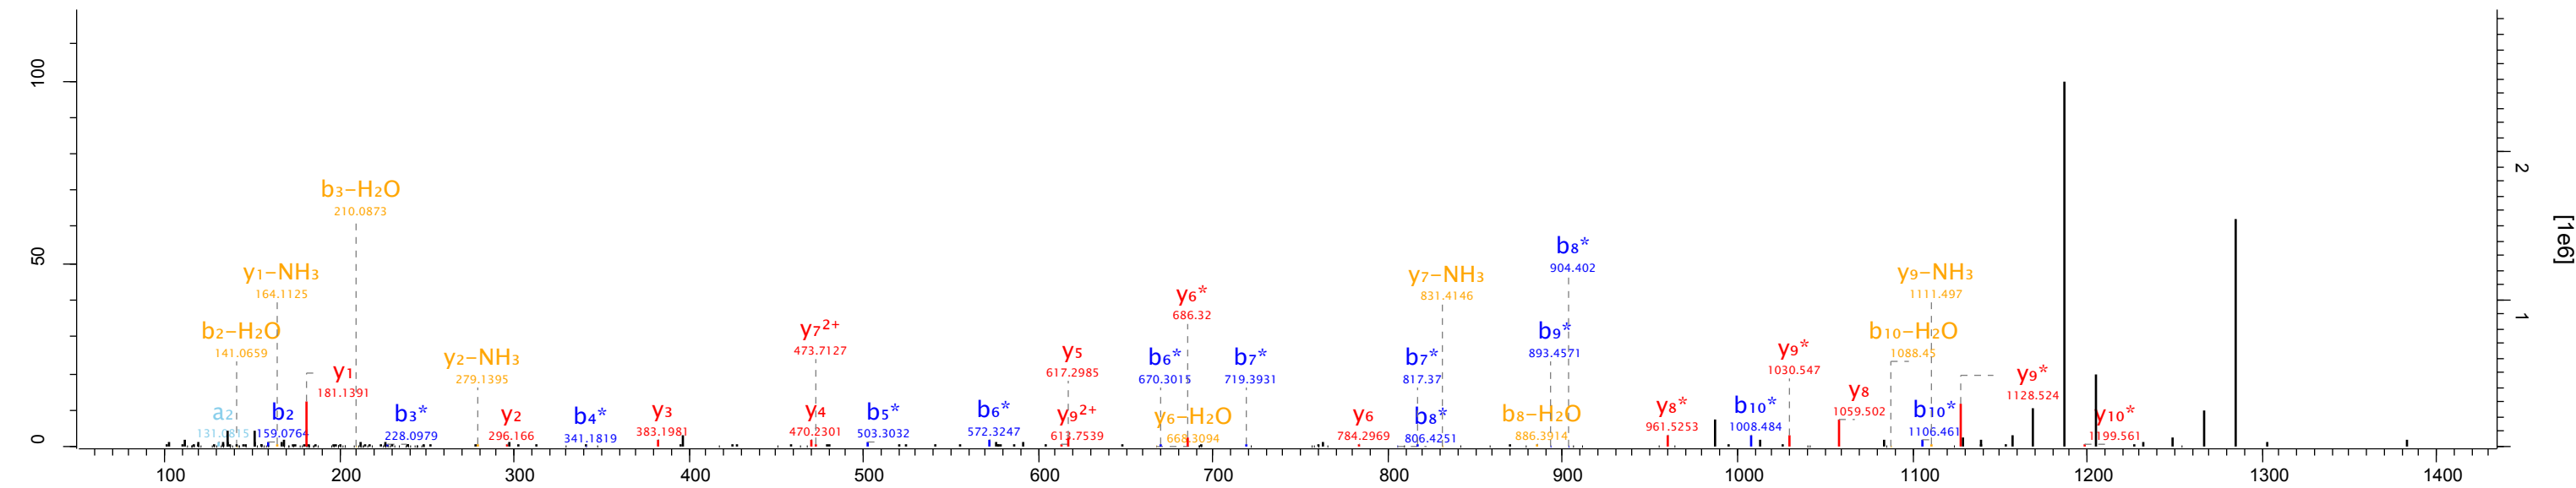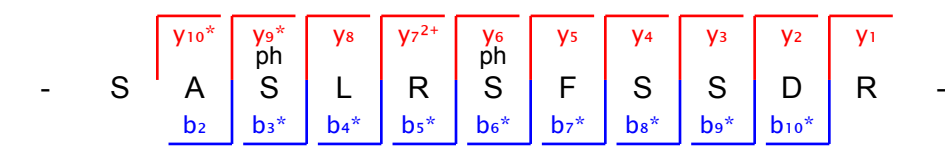

Raw file 20171215\_MaS\_33SR\_LMH\_phospho2\_03 Scan 8757 Method FTMS; HCD Score 73.39 m/z 741.31 Gene names NDRG1

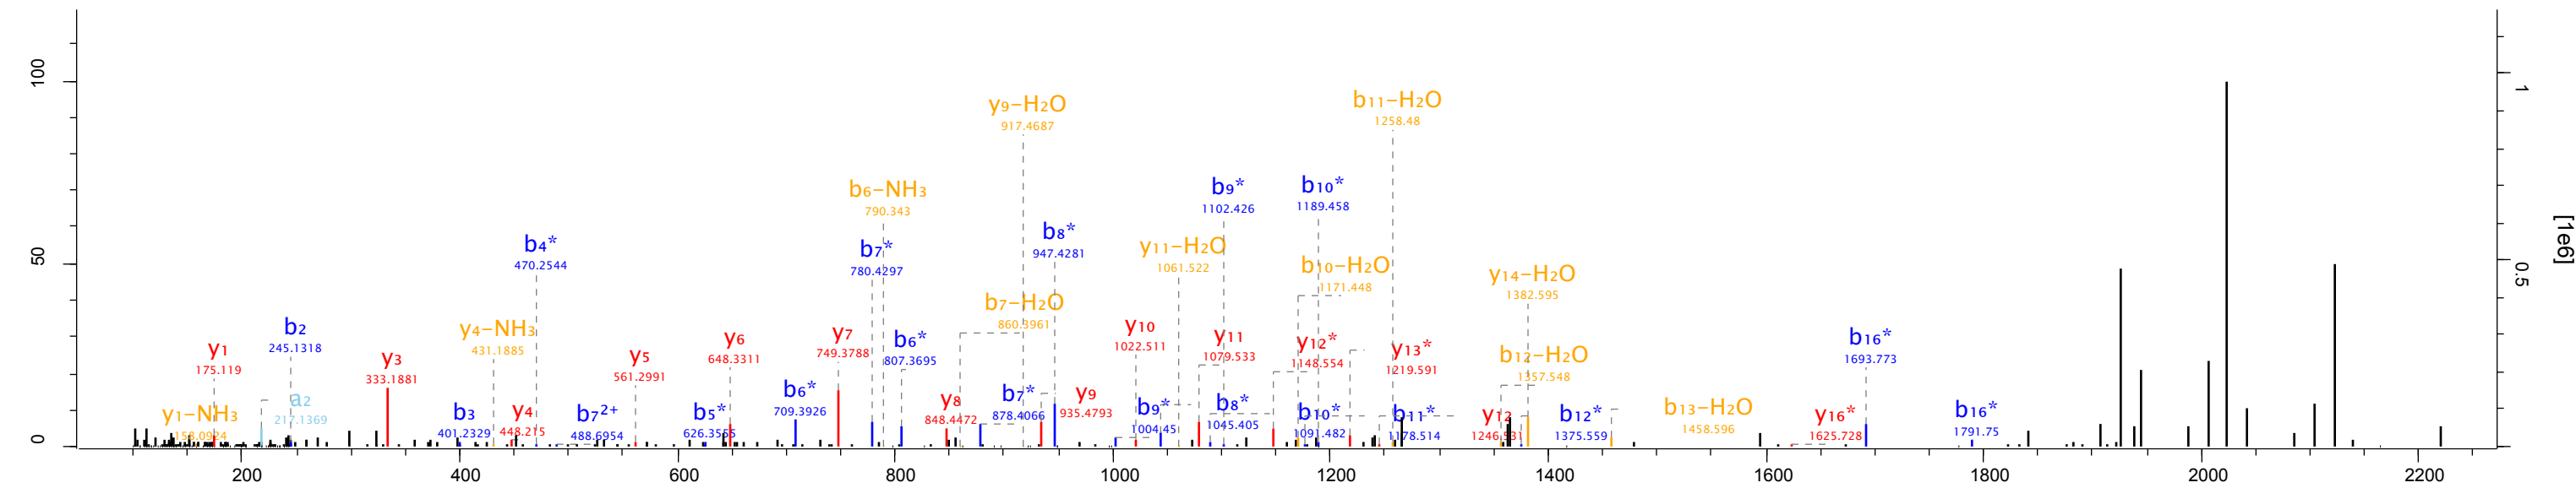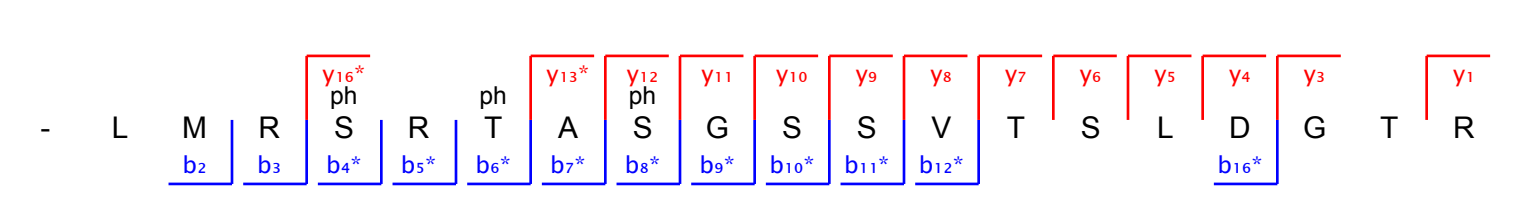

Raw file  
20171215\_MaS\_33SR\_LMH\_phospho2\_03

Scan 8797 Method FTMS; HCD Score 83.87 m/z 632.62 Gene names EML4

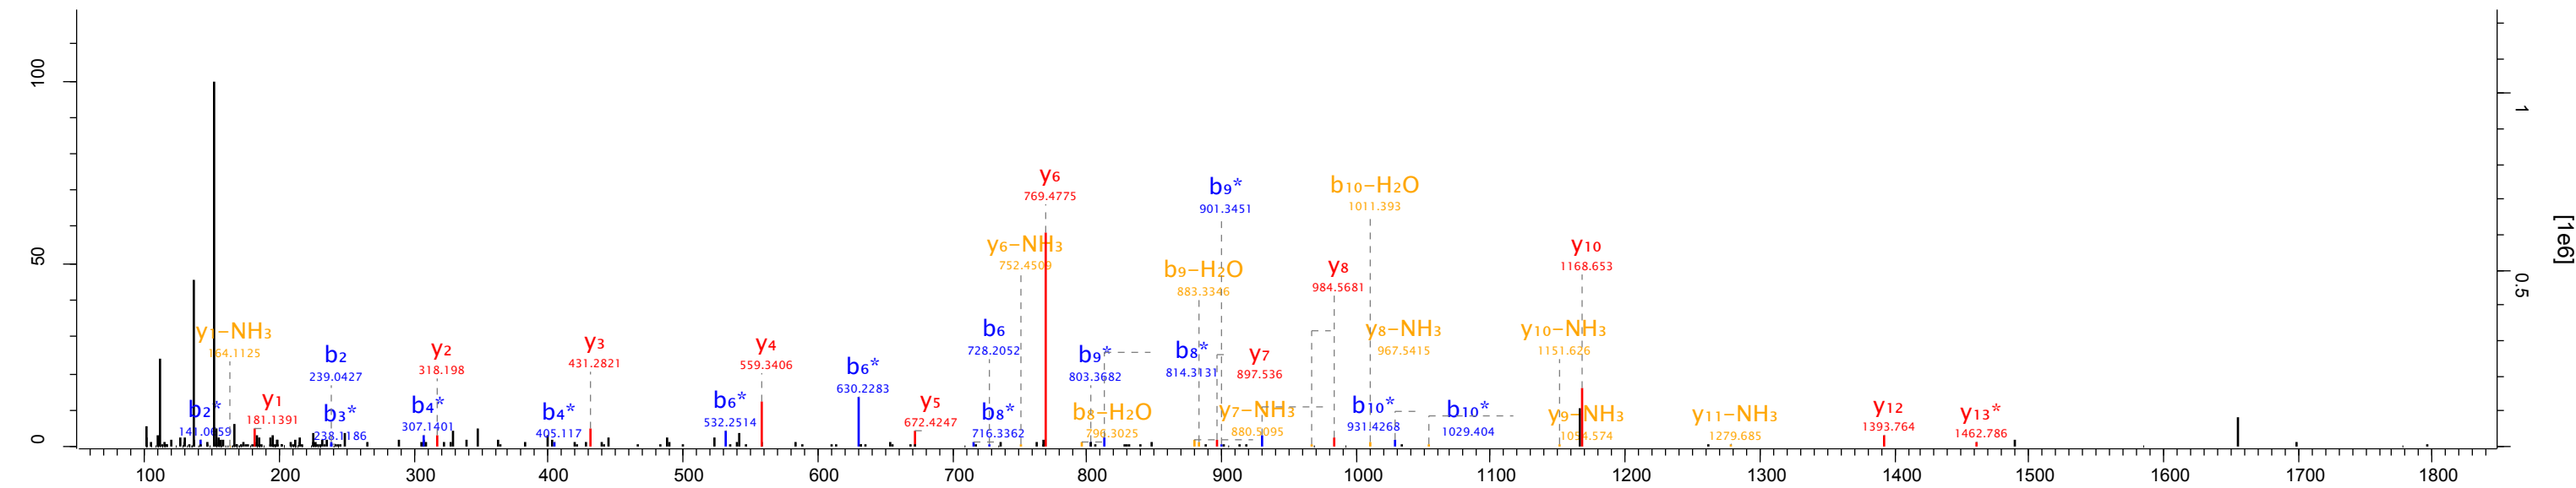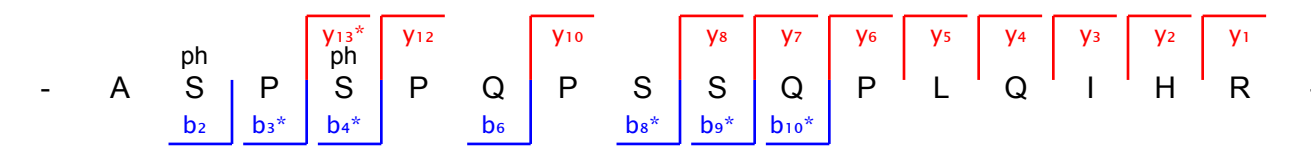

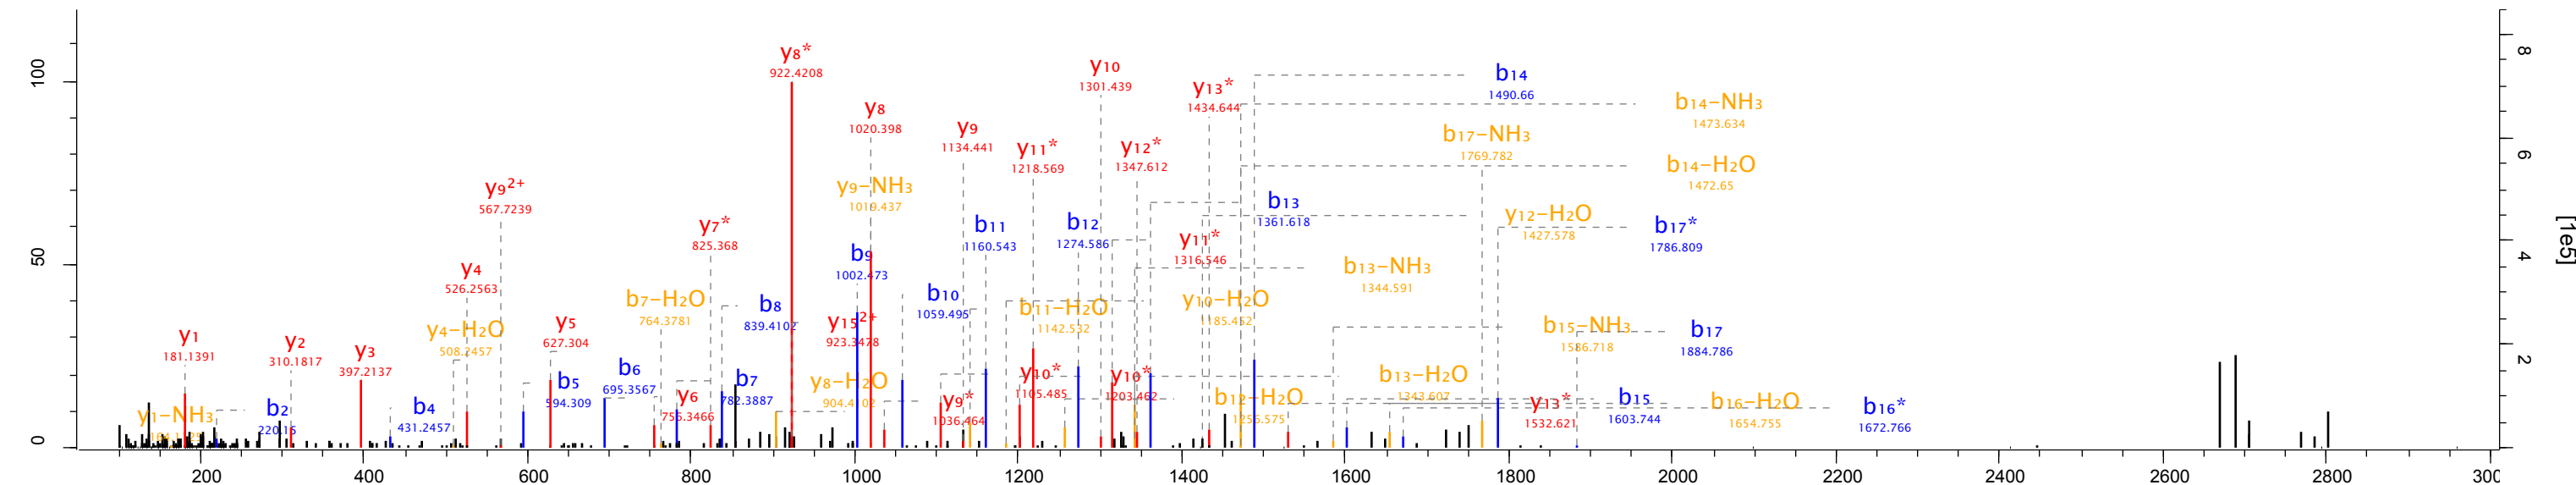

- R G P N Y T S G Y G T N S E L S N P S E T E S E R -

b<sub>2</sub>
b<sub>4</sub>
b<sub>5</sub>
b<sub>6</sub>
b<sub>7</sub>
b<sub>8</sub>
b<sub>9</sub>
b<sub>10</sub>
b<sub>11</sub>
b<sub>12</sub>
b<sub>13</sub>
b<sub>14</sub>
b<sub>15</sub>
b<sub>16</sub><sup>\*</sup>
b<sub>17</sub>

y<sub>15</sub><sup>2+</sup>
y<sub>13</sub><sup>\*</sup>
y<sub>12</sub><sup>\*</sup>
y<sub>11</sub><sup>\*</sup>
y<sub>10</sub>  
ph
y<sub>9</sub>
y<sub>8</sub>
y<sub>7</sub><sup>\*</sup>  
ph
y<sub>6</sub>
y<sub>5</sub>
y<sub>4</sub>
y<sub>3</sub>
y<sub>2</sub>
y<sub>1</sub>

Raw file  
20171215\_MaS\_33SR\_LMH\_phospho2\_03

Scan 9477 Method FTMS; HCD Score 98.39 m/z 911.04 Gene names ZNF446

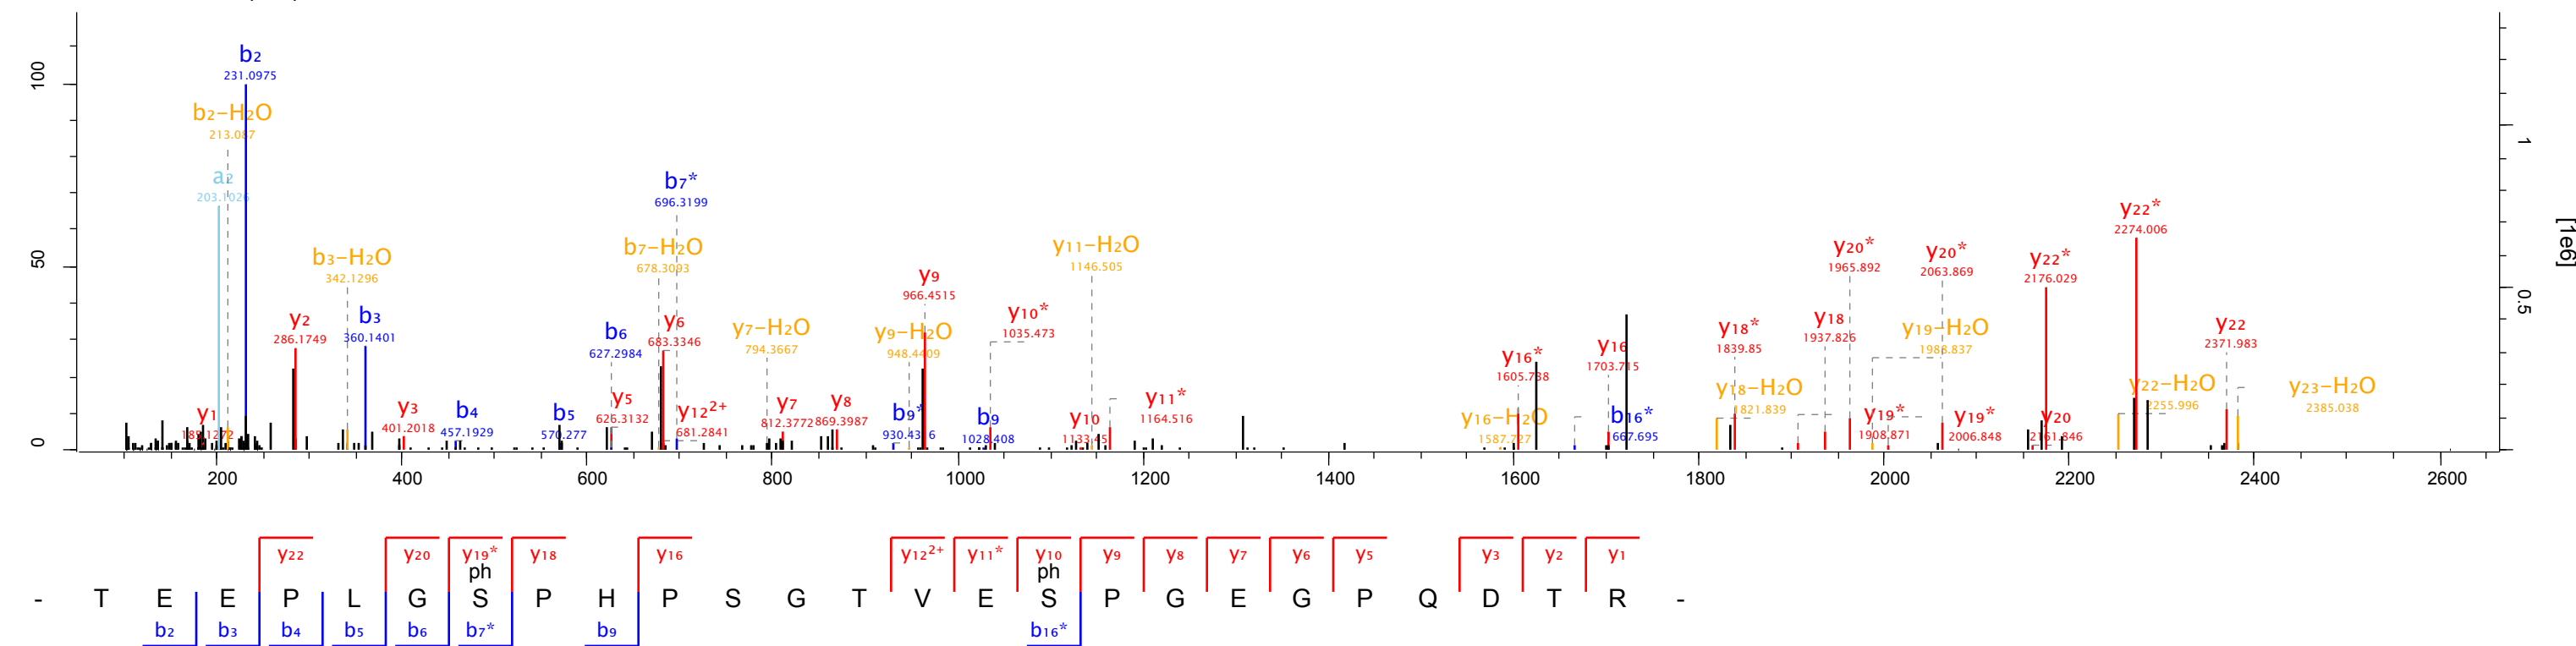

20171215\_MaS\_33SR\_LMH\_phospho2\_03 9577 FTMS; HCD 108.66 662.27 MYCBP2

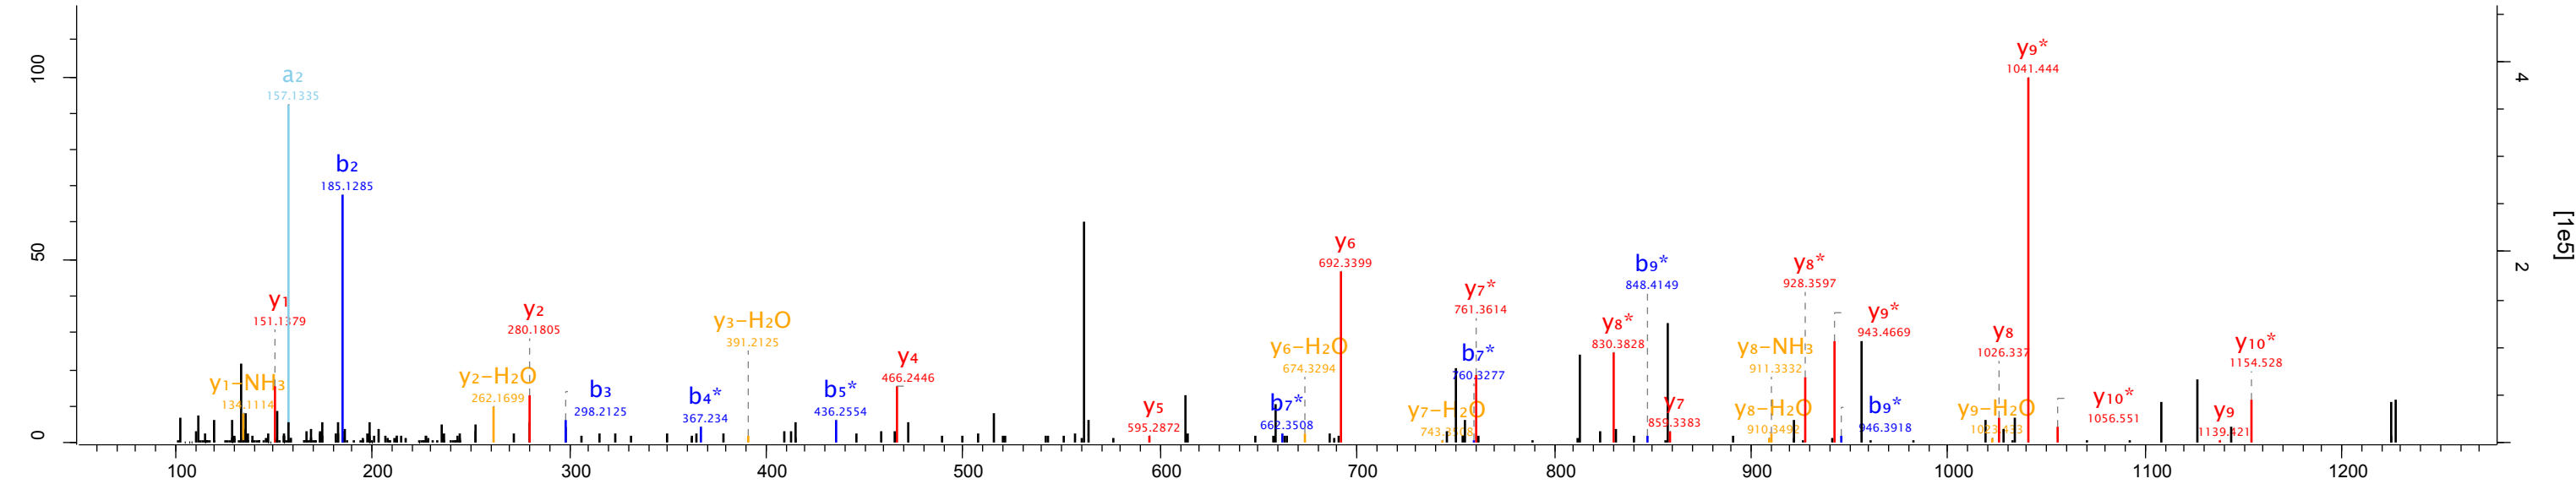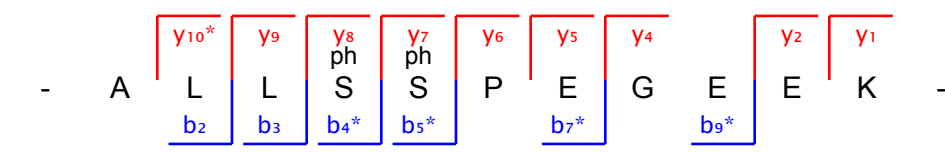



Raw file: 20171215\_MaS\_33SR\_LMH\_phospho2\_03  
 Scan: 9817 Method: FTMS; HCD Score: 90.73 m/z: 615.26 Gene names: AFF4

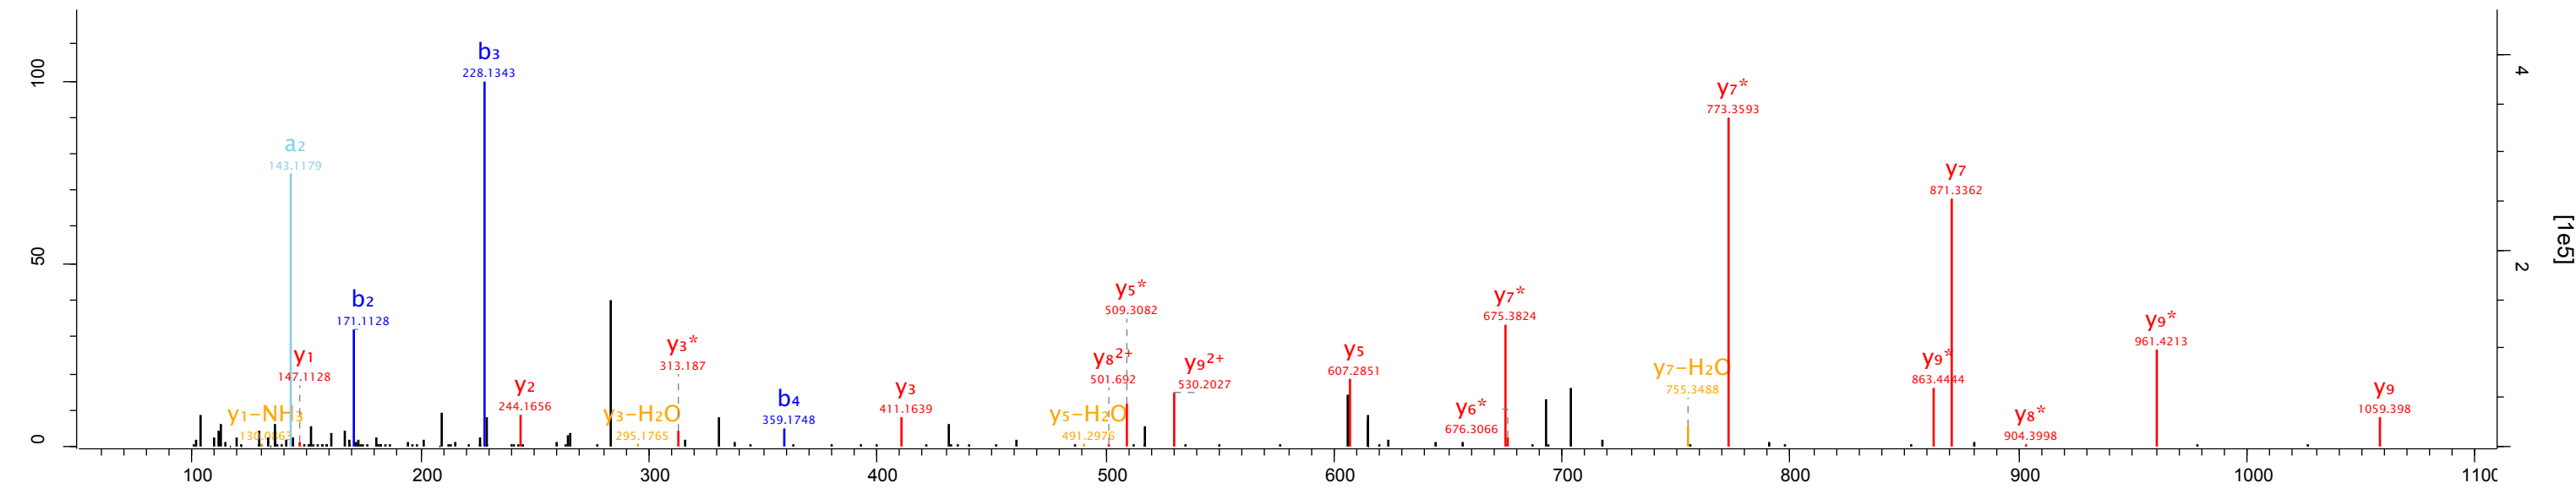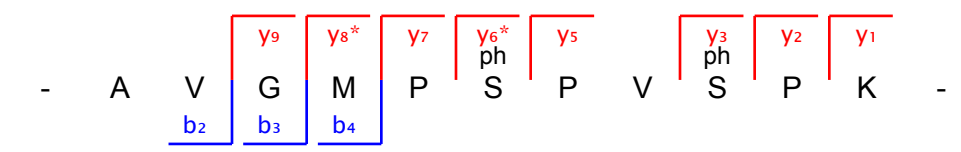

Raw file: 20171215\_MaS\_33SR\_LMH\_phospho2\_03  
 Scan: 9827 Method: FTMS; HCD Score: 134.06 m/z: 642.75 Gene names: HSPA1A

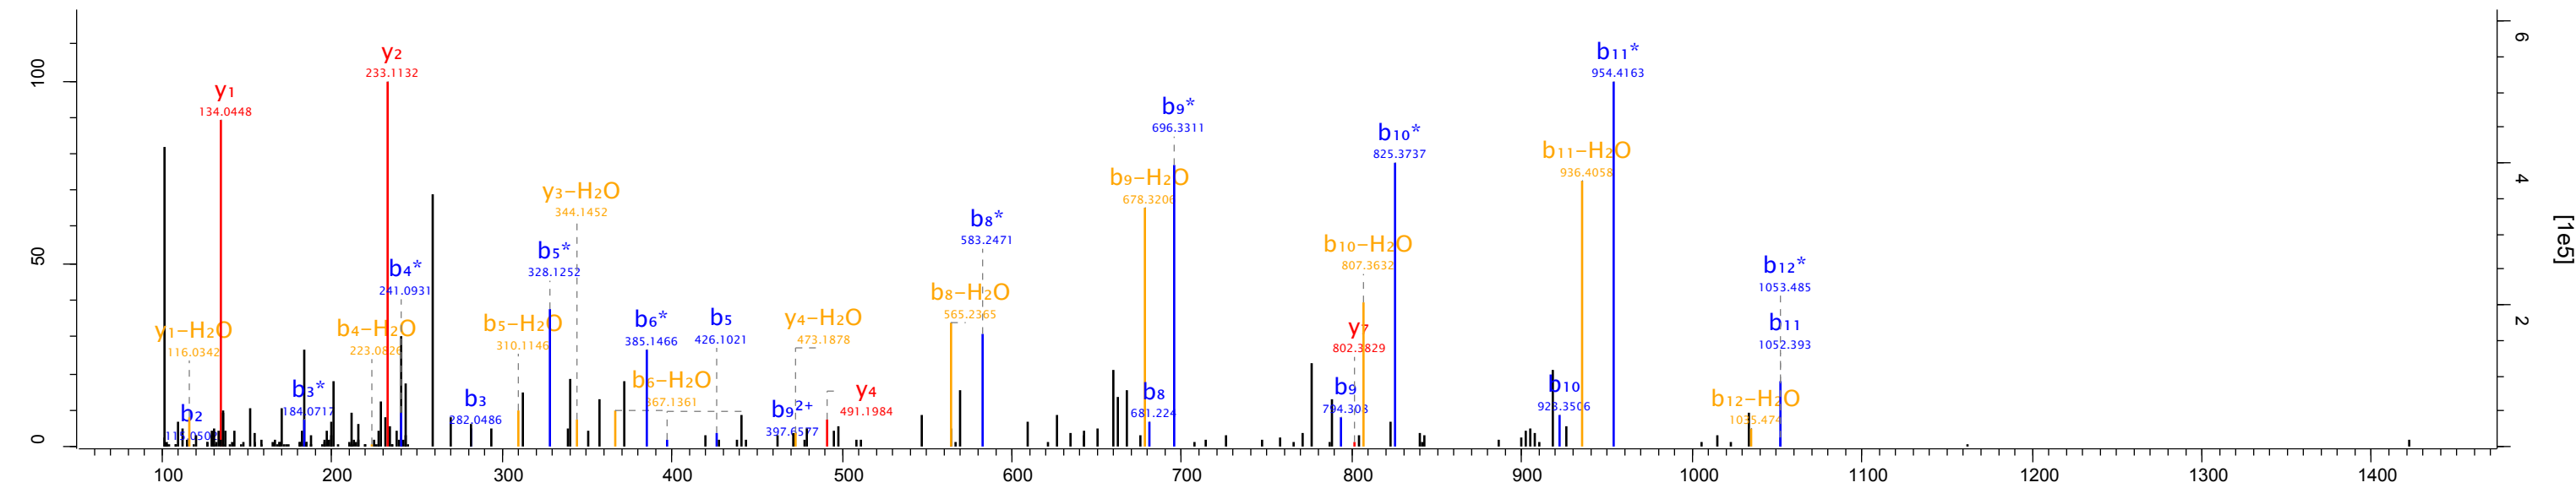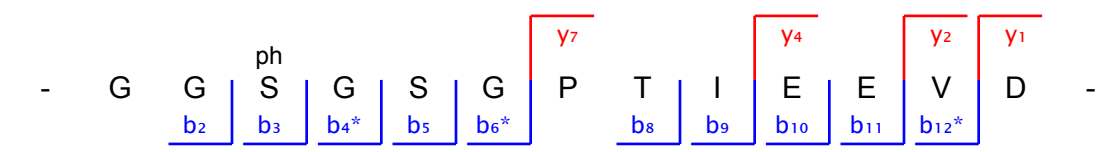

Raw file: 20171215\_MaS\_33SR\_LMH\_phospho2\_03  
 Scan: 9887 Method: FTMS; HCD Score: 155.16 m/z: 1027.93 Gene names: GLE1

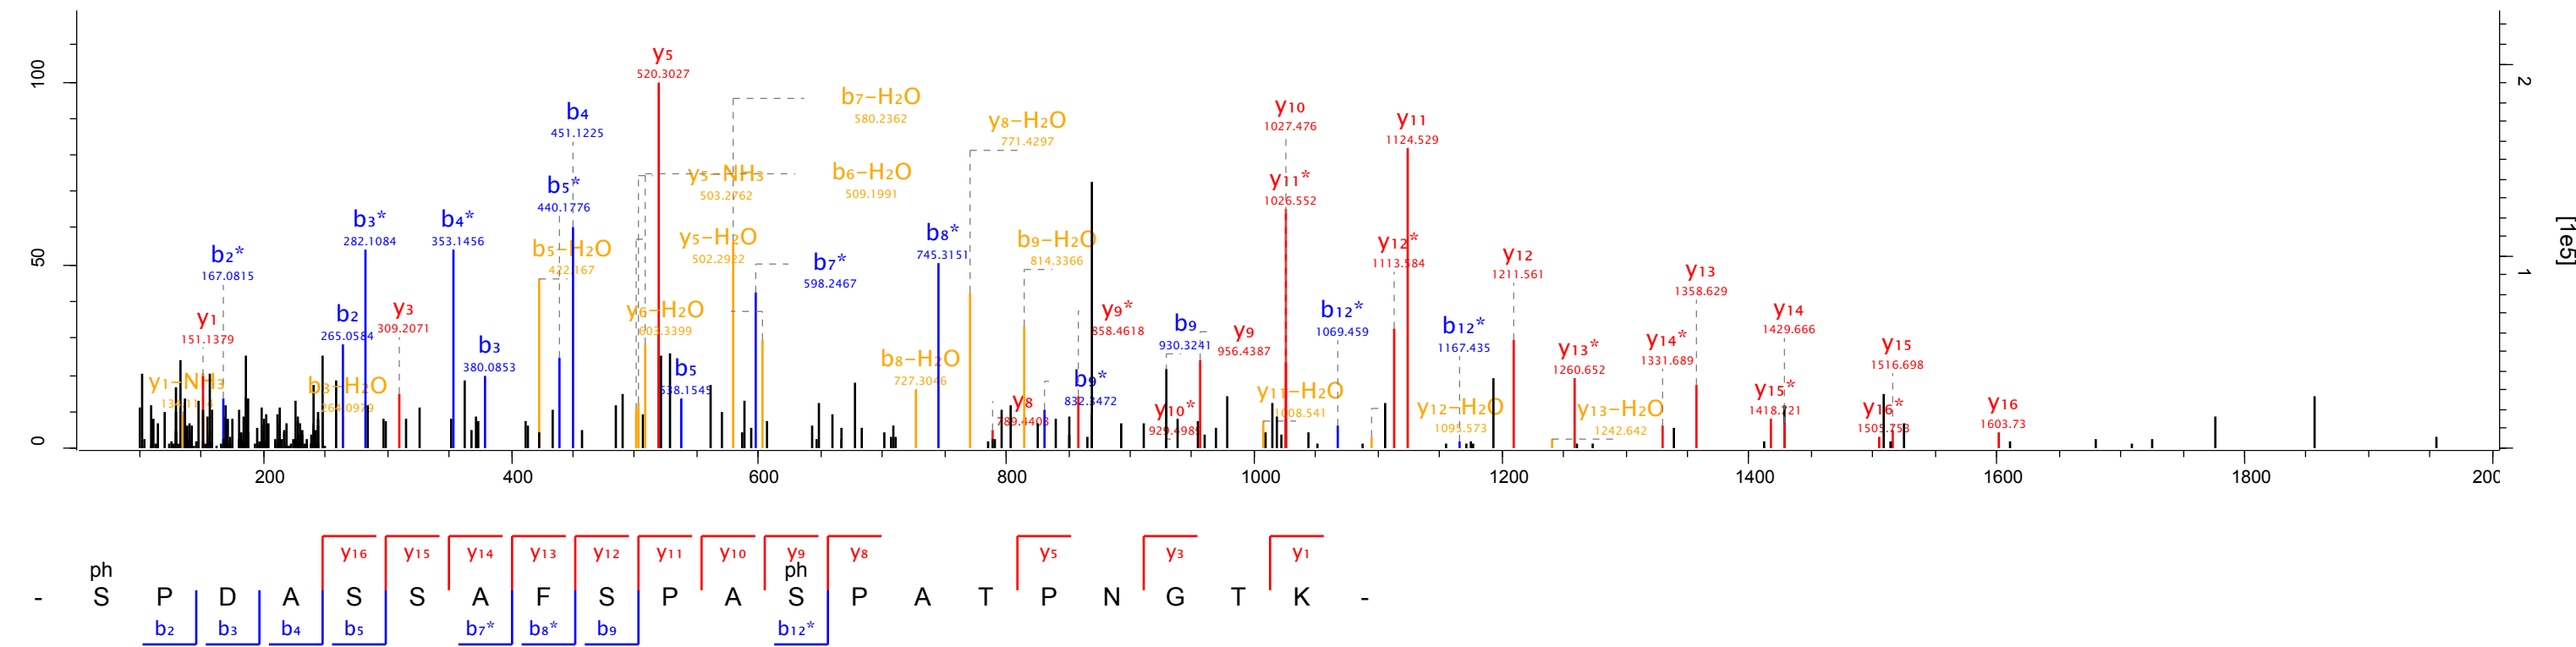

Raw file  
20171215\_MaS\_33SR\_LMH\_phospho2\_04

Scan 2397 Method FTMS; HCD Score 135.21 m/z 545.89 Gene names BAG3

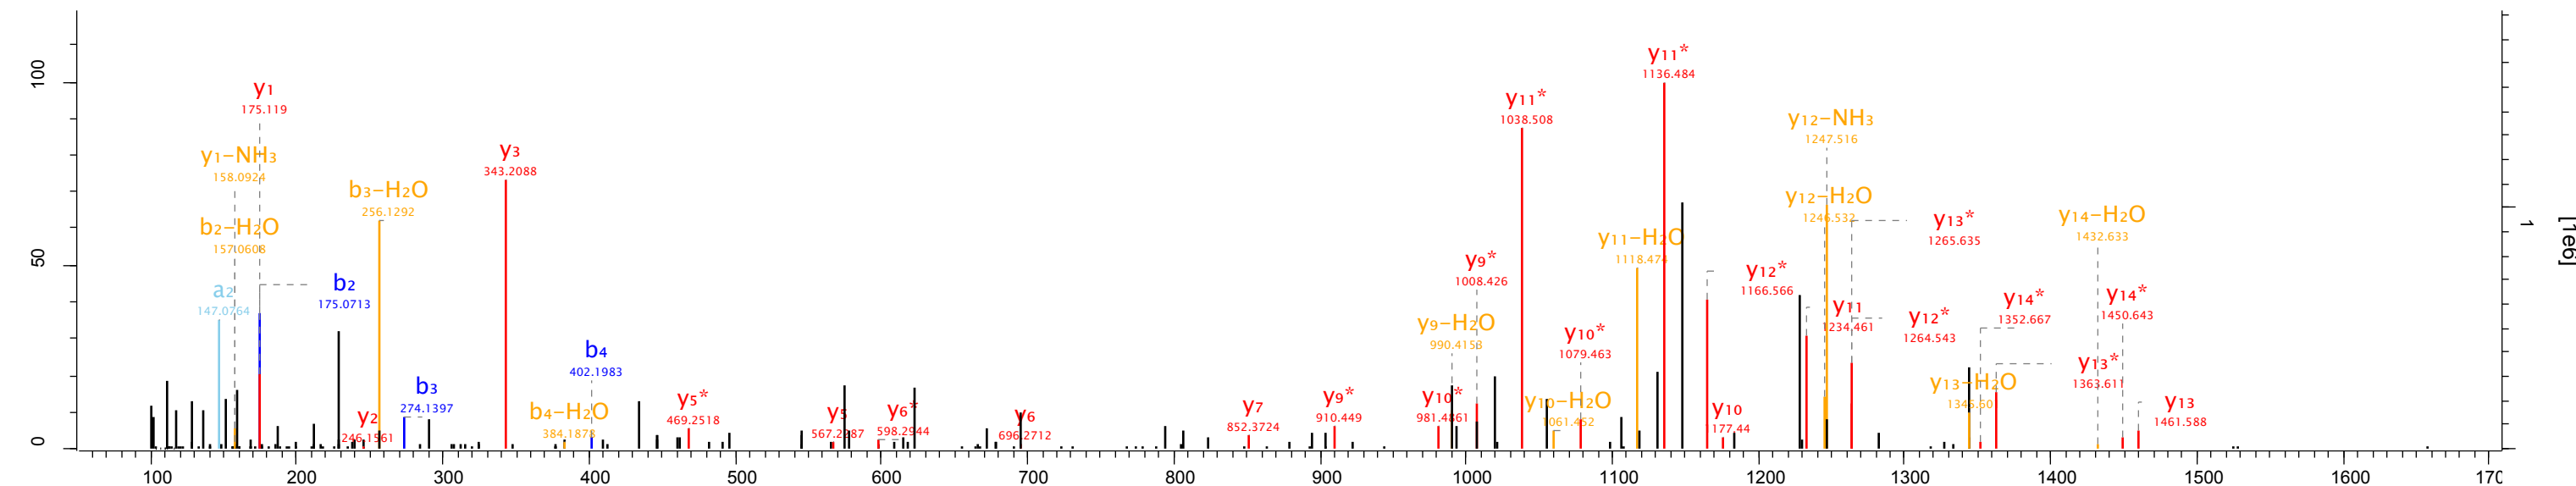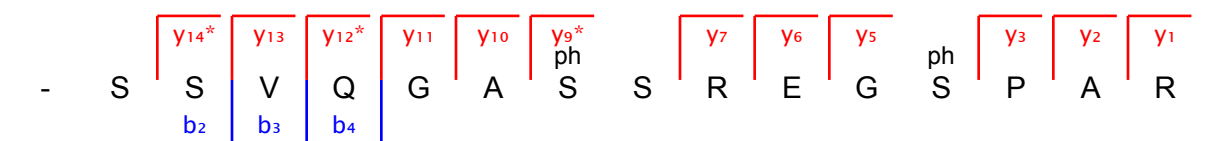

Raw file  
 20171215\_MaS\_33SR\_LMH\_phospho2\_04  
 Scan 2597 Method FTMS; HCD Score 100.07 m/z 718.77 Gene names SRRM2

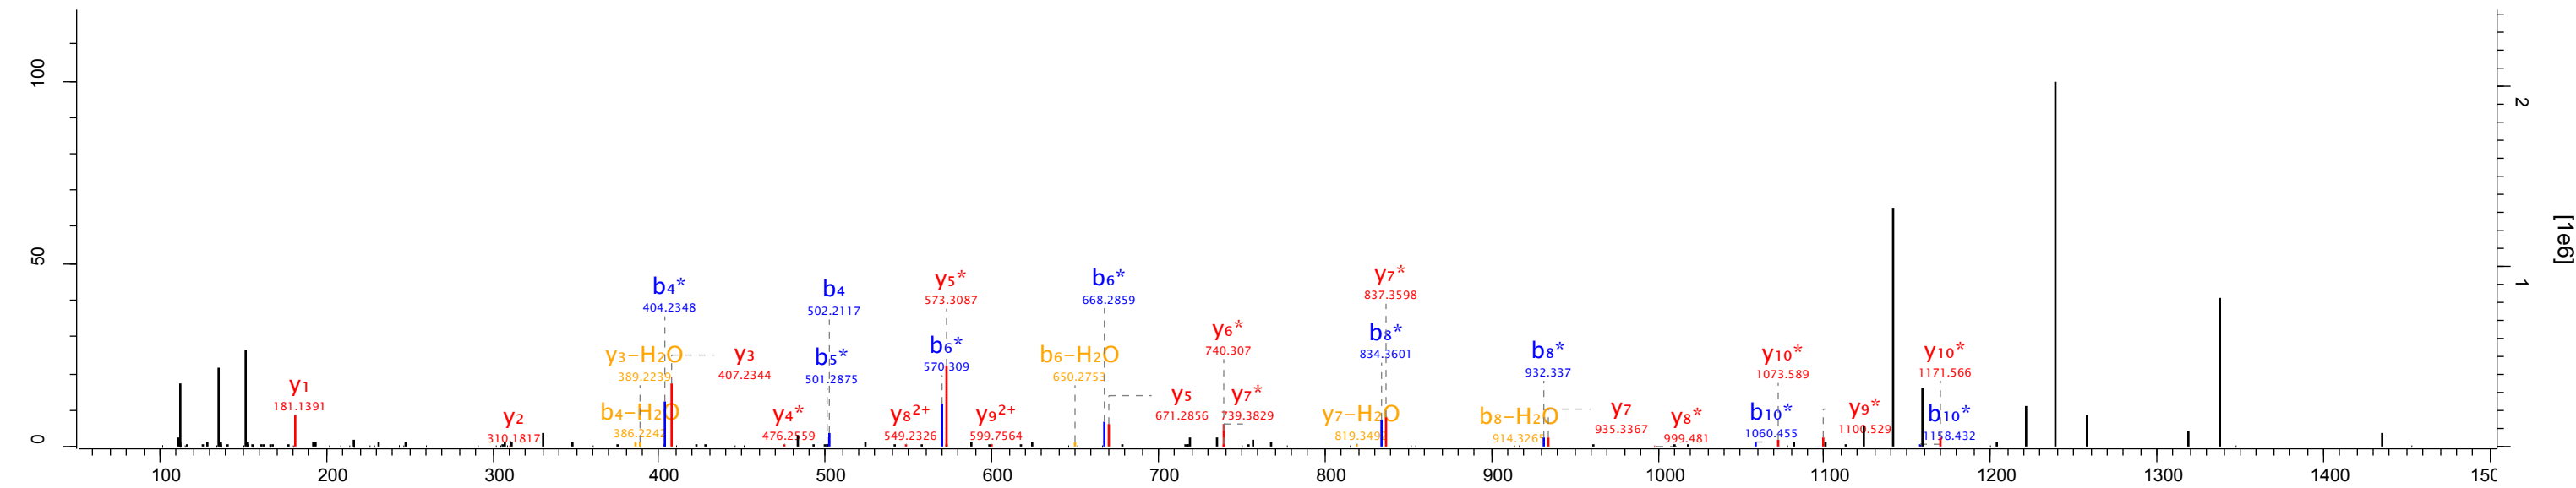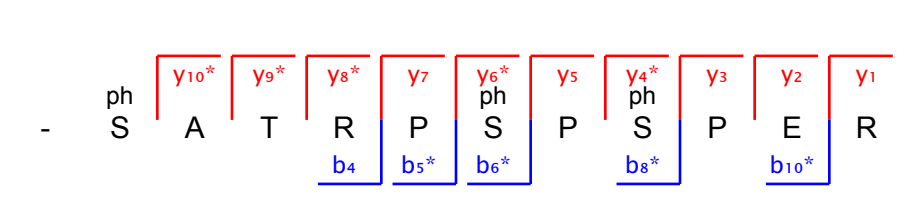

20171215\_MaS\_33SR\_LMH\_phospho2\_04 3307 FTMS; HCD 136.5 460.67 SRRM2

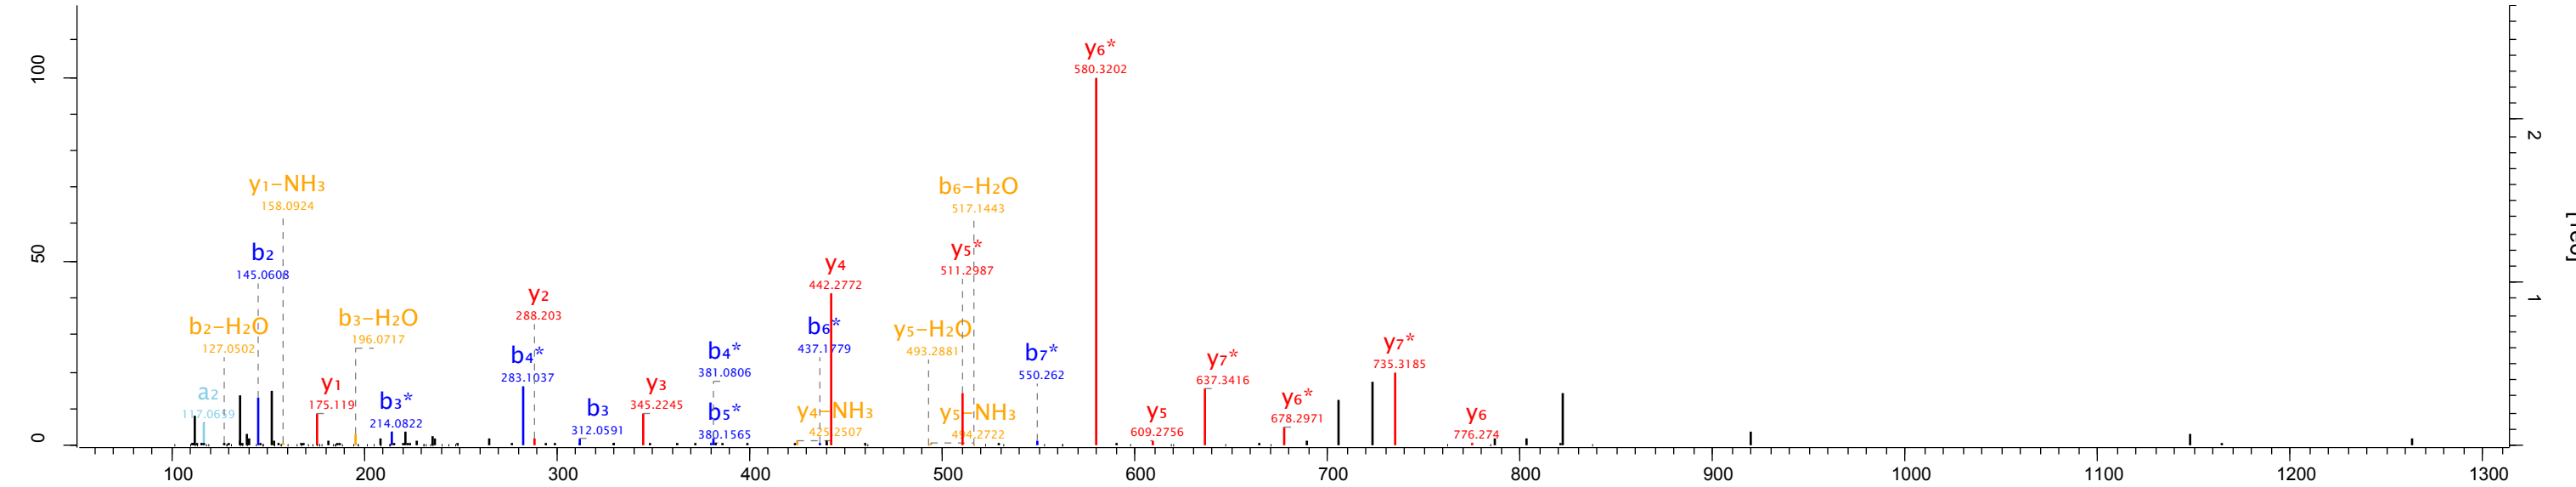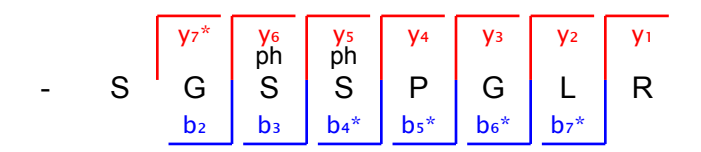

Raw file 20171215\_MaS\_33SR\_LMH\_phospho2\_04 Scan 3317 Method FTMS; HCD Score 68.84 m/z 892.31 Gene names CLIP2

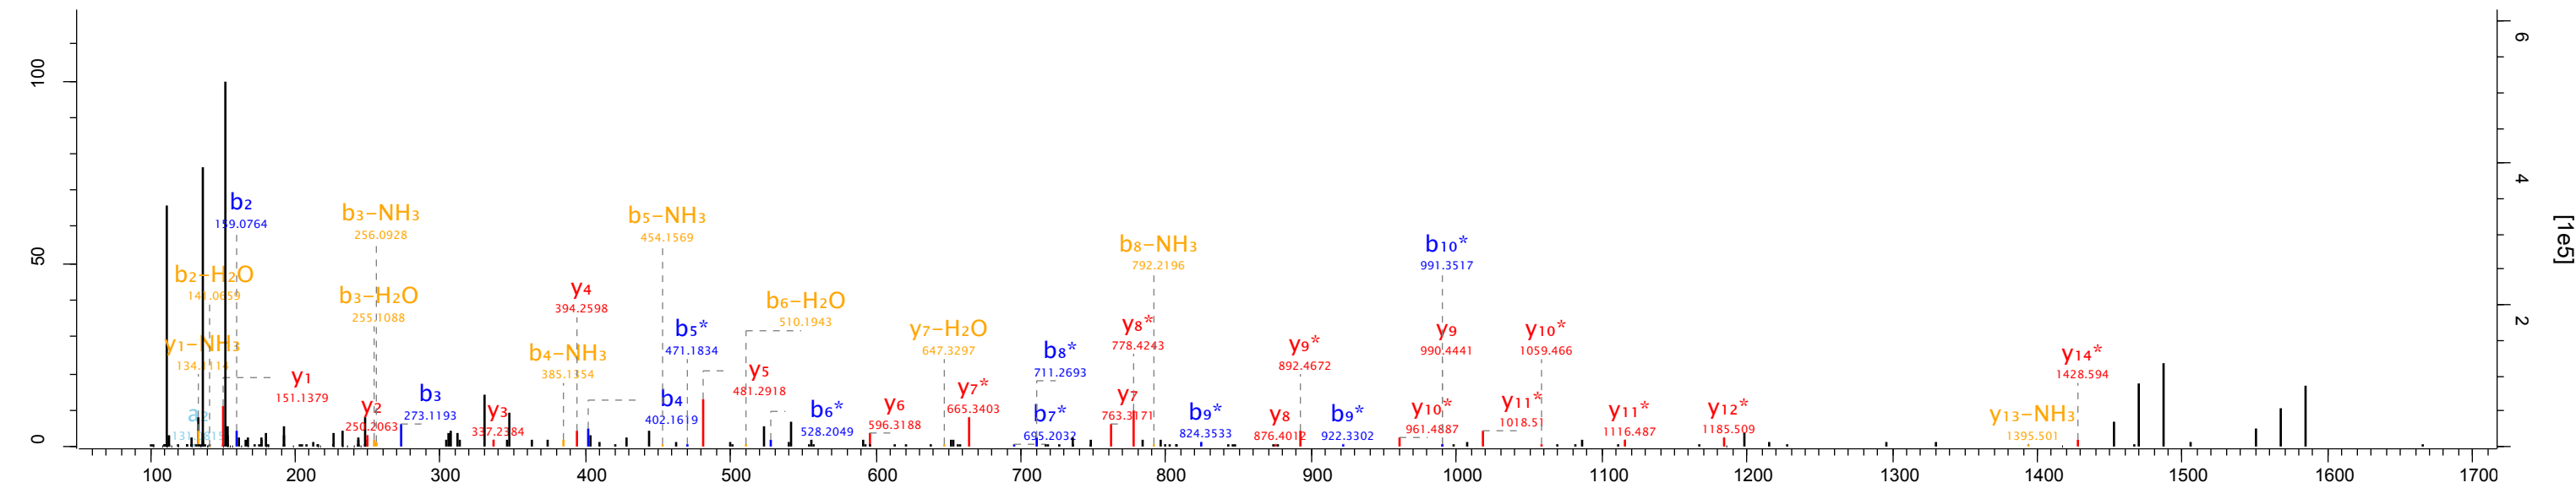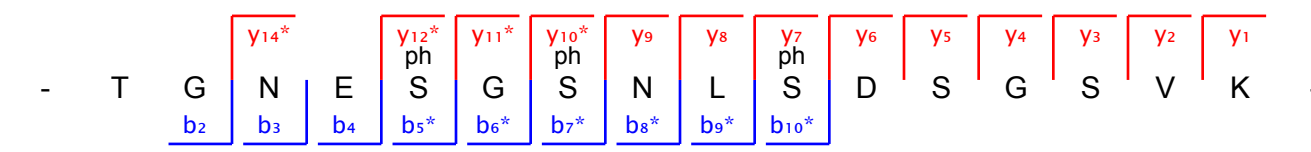

Raw file  
20171215\_MaS\_33SR\_LMH\_phospho2\_04

Scan Method Score m/z Gene names  
3457 FTMS; HCD 153.21 753.74 CIC

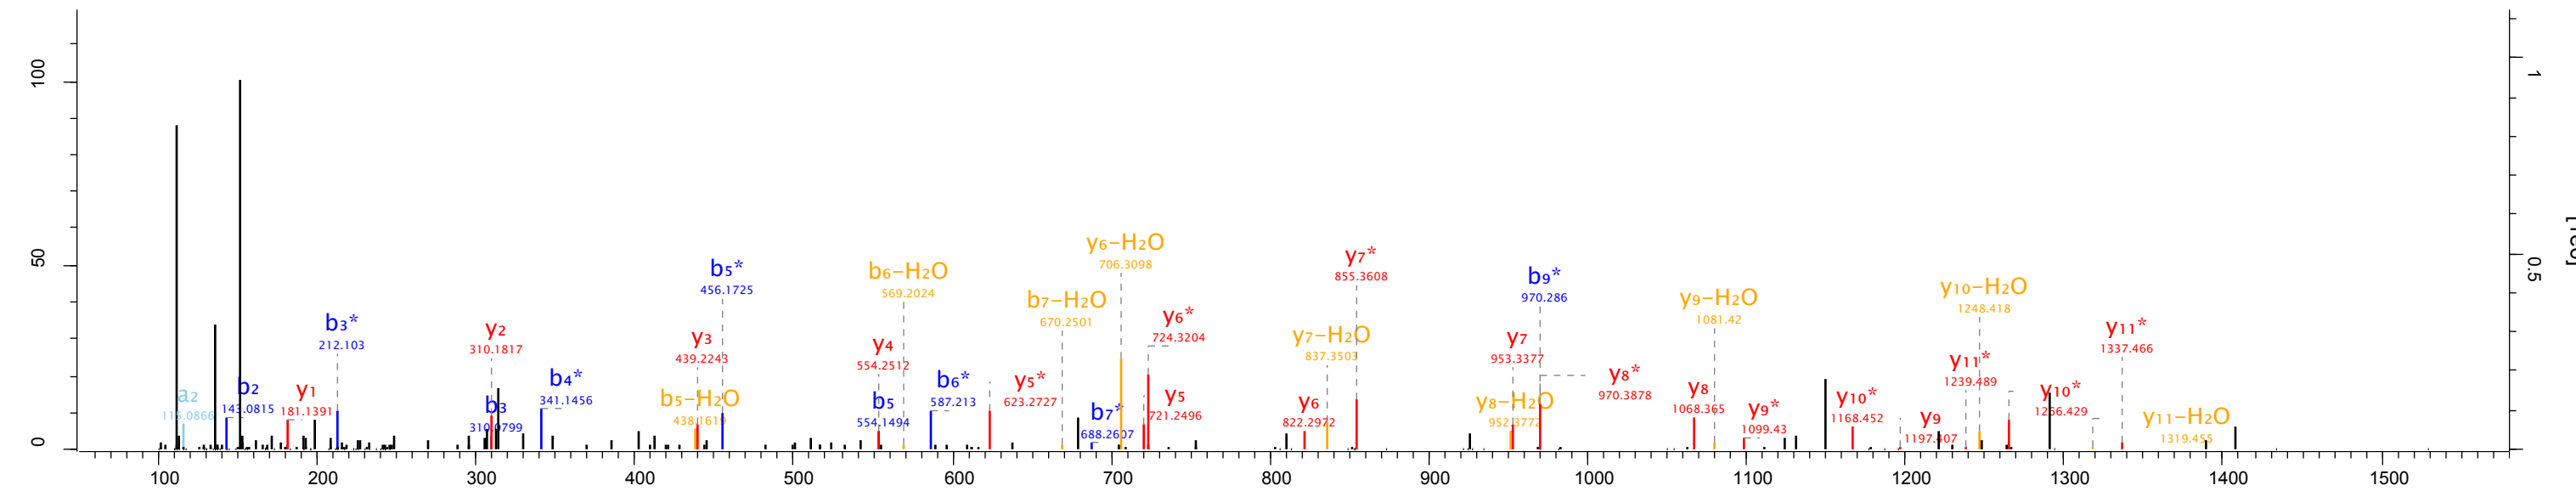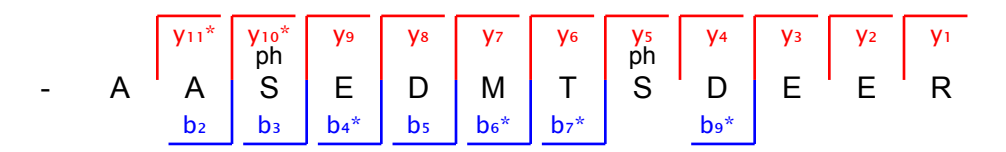



Raw file: 20171215\_MaS\_33SR\_LMH\_phospho2\_04  
 Scan: 4117 Method: FTMS; HCD Score: 192.11 m/z: 930.82 Gene names: SART3

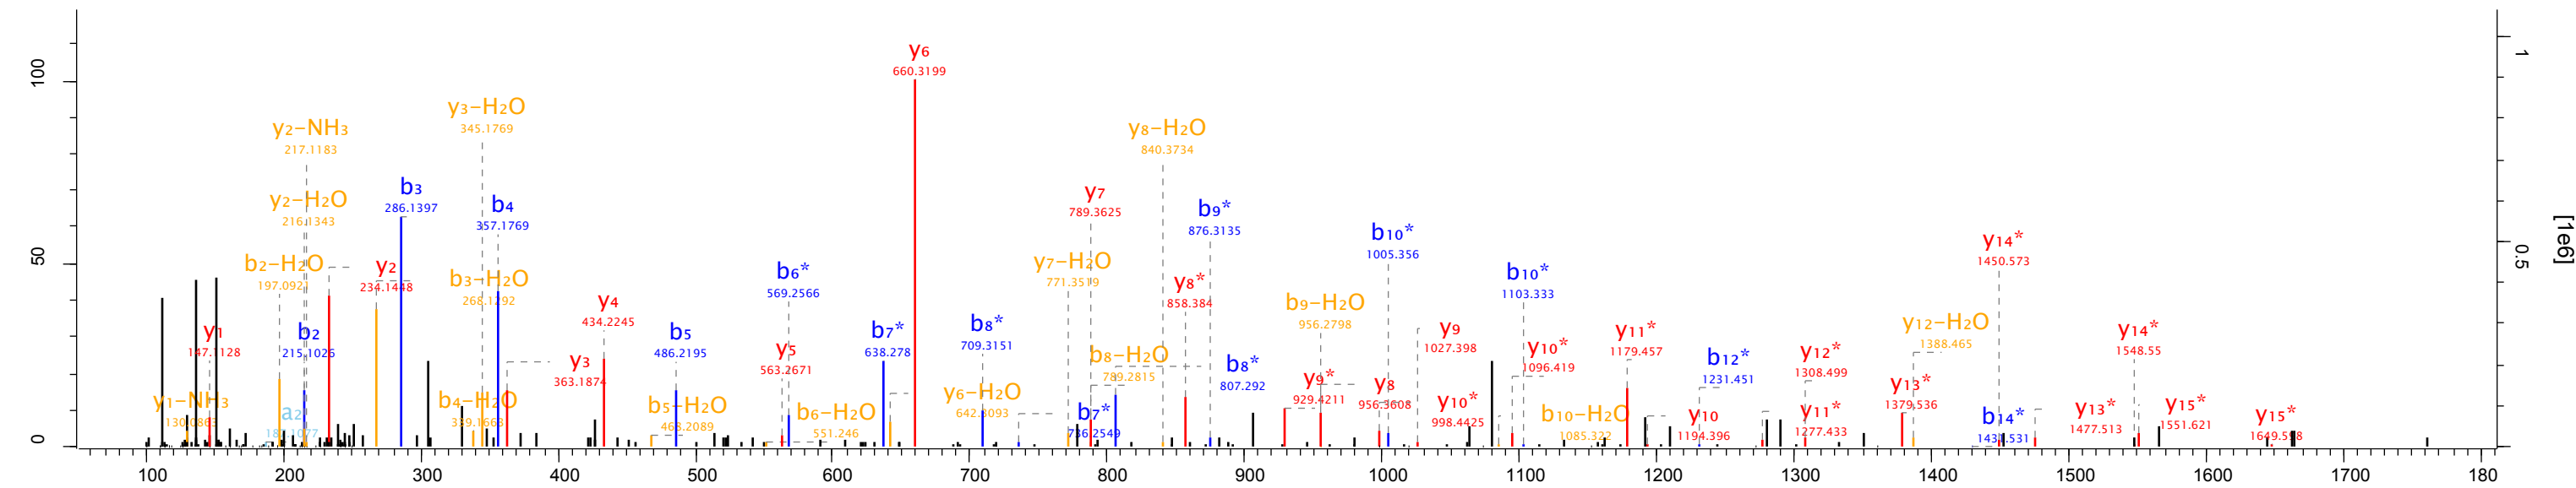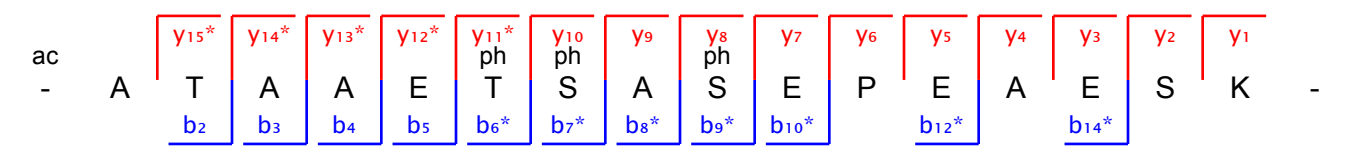

Raw file: 20171215\_MaS\_33SR\_LMH\_phospho2\_04  
 Scan: 4437 Method: FTMS; HCD Score: 221.86 m/z: 1349.04 Gene names: UBAP2L

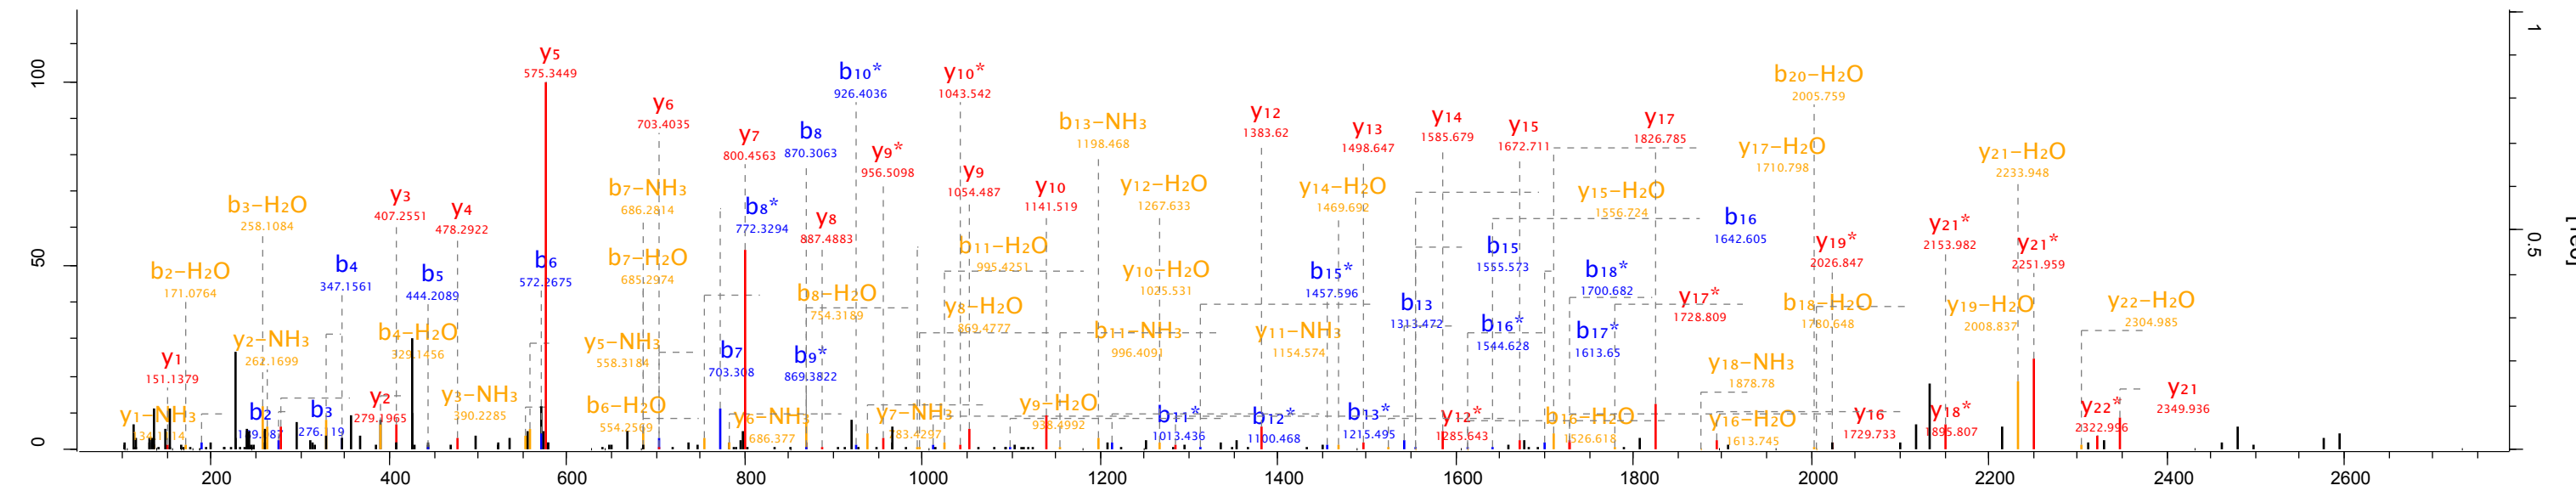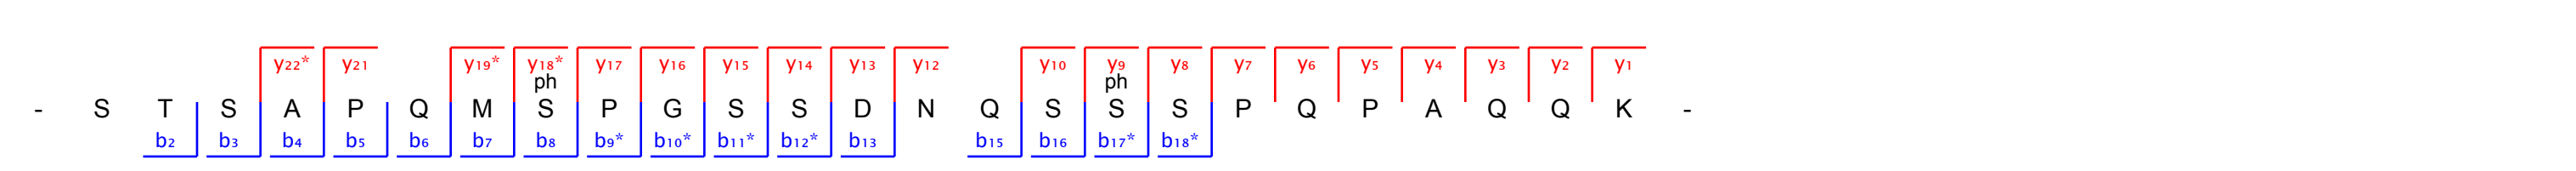

Raw file 20171215\_MaS\_33SR\_LMH\_phospho2\_04 Scan 5587 Method FTMS; HCD Score 124.1 m/z 778.79 Gene names PPIP5K2

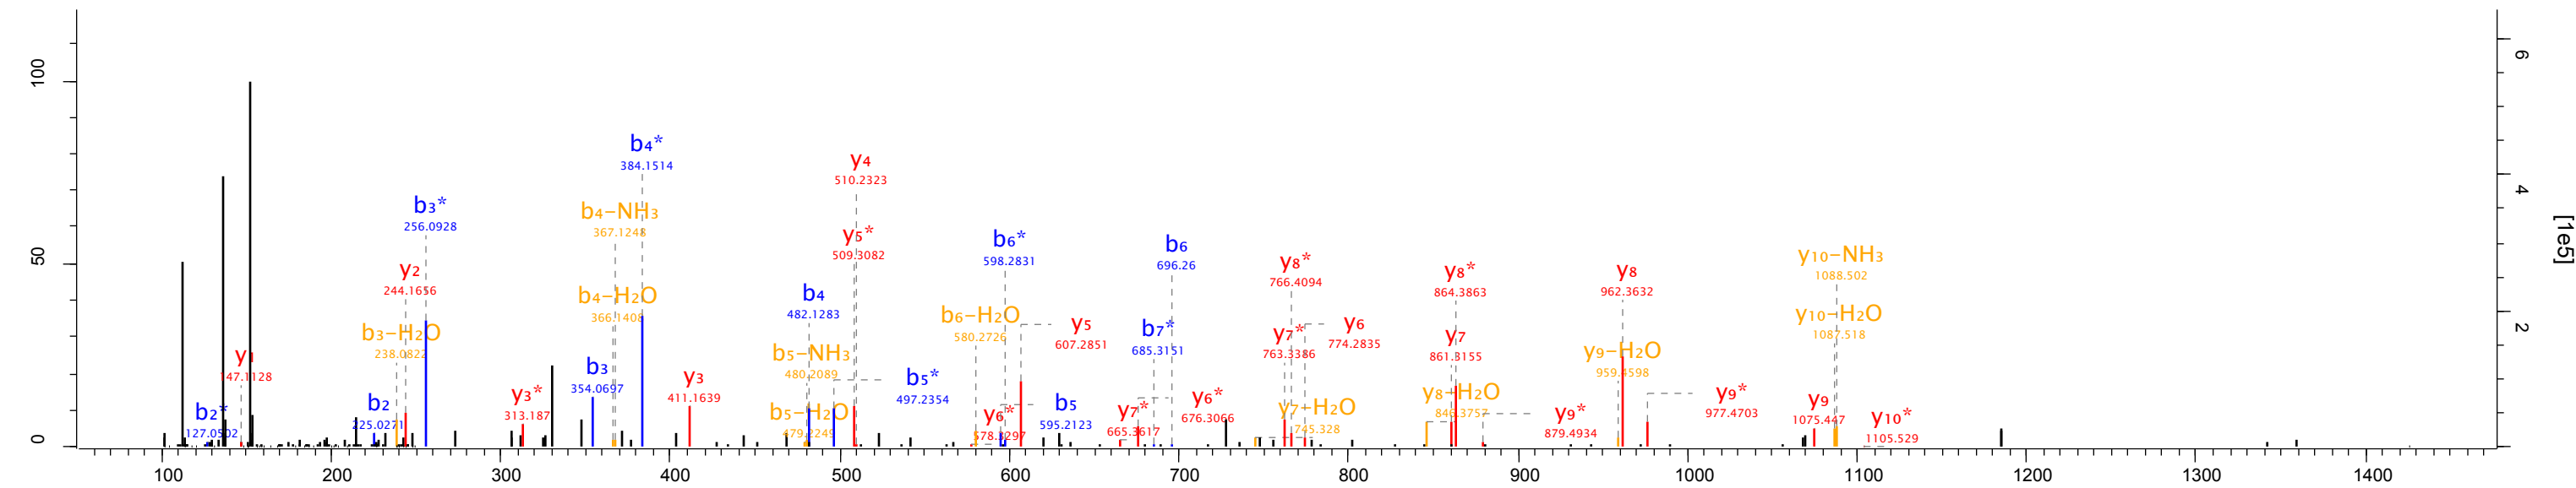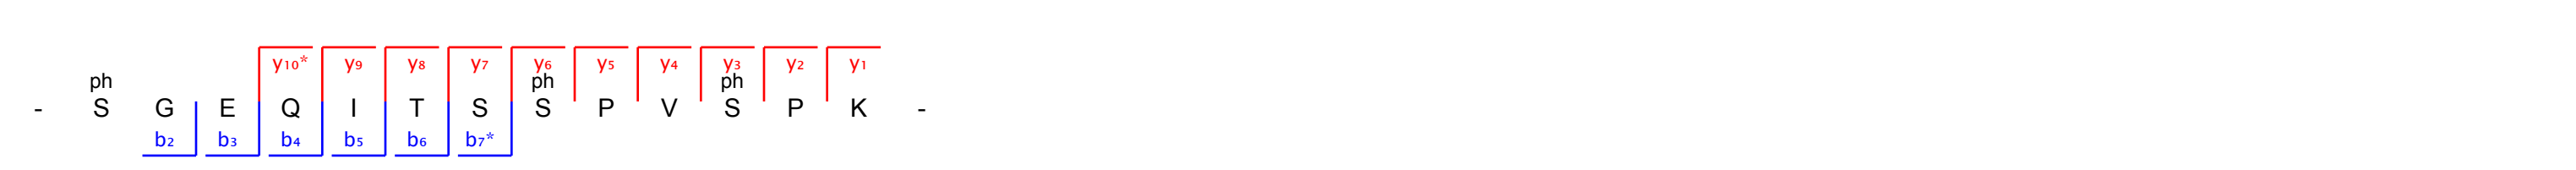

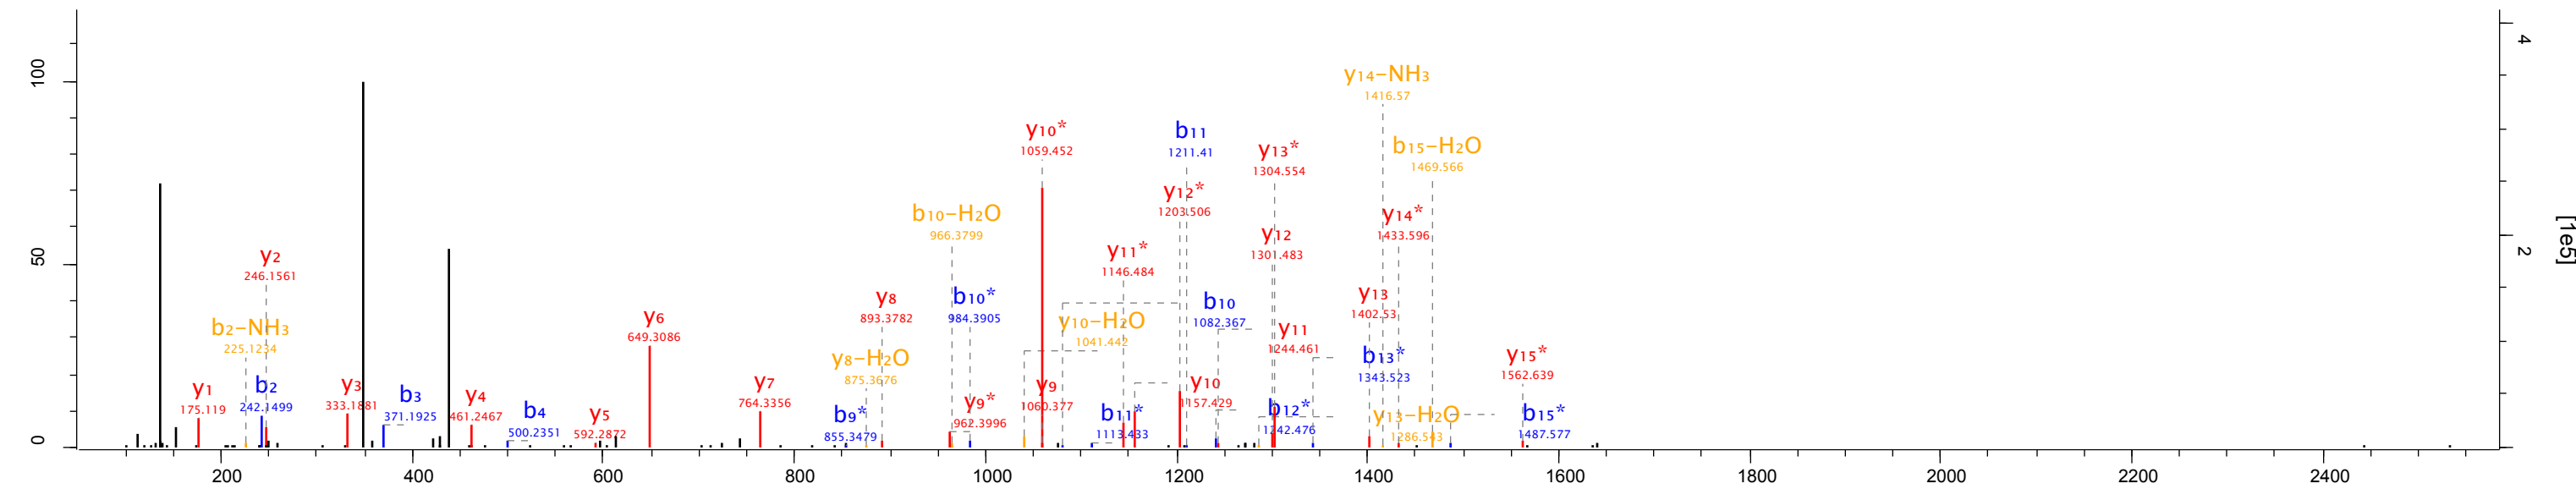

- L Q E E G G G ph S D E E E T G S P S E D G M Q S A R -

Fragmentation mapping (b ions in blue, y ions in red):

- Q: b<sub>2</sub>, b<sub>3</sub>, b<sub>4</sub>
- E: b<sub>9</sub><sup>\*</sup>, b<sub>10</sub>
- E: b<sub>11</sub>, b<sub>12</sub><sup>\*</sup>, b<sub>13</sub><sup>\*</sup>
- T: b<sub>15</sub><sup>\*</sup>
- S: b<sub>9</sub><sup>\*</sup>, b<sub>10</sub>, b<sub>11</sub>, b<sub>12</sub><sup>\*</sup>, b<sub>13</sub><sup>\*</sup>, b<sub>15</sub><sup>\*</sup>
- P: y<sub>10</sub>
- S: y<sub>9</sub>, y<sub>ph</sub>
- E: y<sub>8</sub>
- D: y<sub>7</sub>
- G: y<sub>6</sub>
- M: y<sub>5</sub>
- Q: y<sub>4</sub>
- S: y<sub>3</sub>
- A: y<sub>2</sub>
- R: y<sub>1</sub>

Raw file: 20171215\_MaS\_33SR\_LMH\_phospho2\_04  
 Scan: 7027 Method: FTMS; HCD Score: 144.55 m/z: 1200.93 Gene names: ZFAND5

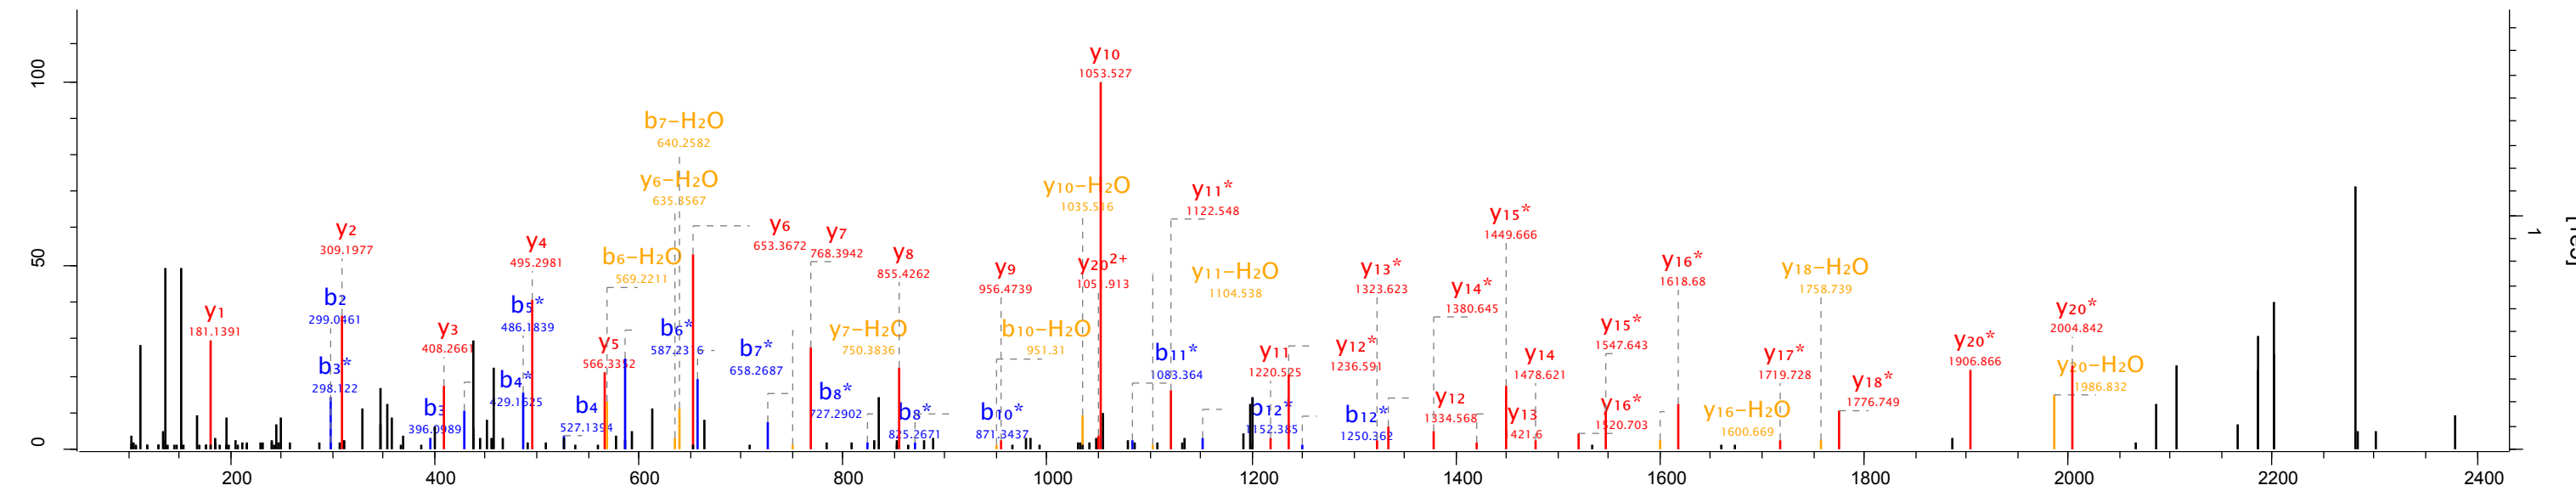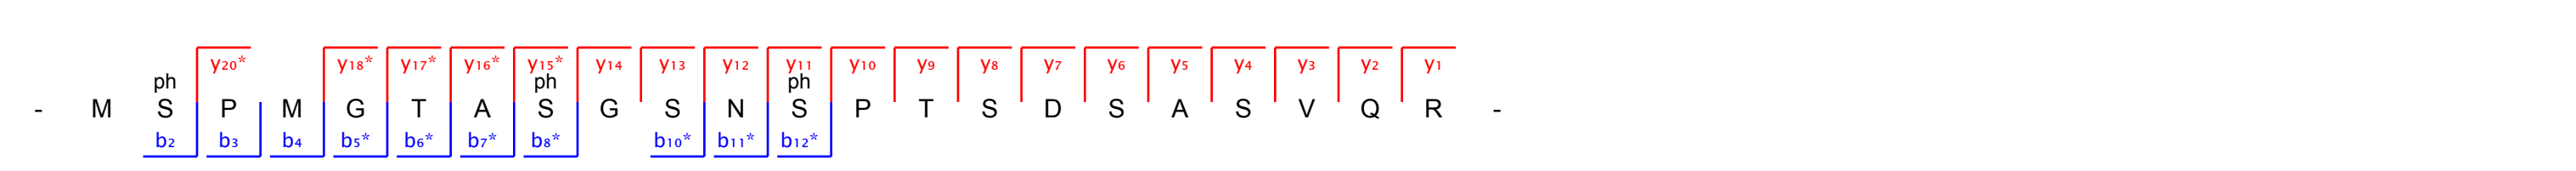

Raw file 20171215\_MaS\_33SR\_LMH\_phospho2\_04 Scan 7527 Method FTMS; HCD Score 103.42 m/z 960.42 Gene names SNAPIN

20171215\_MaS\_33SR\_LMH\_phospho2\_04

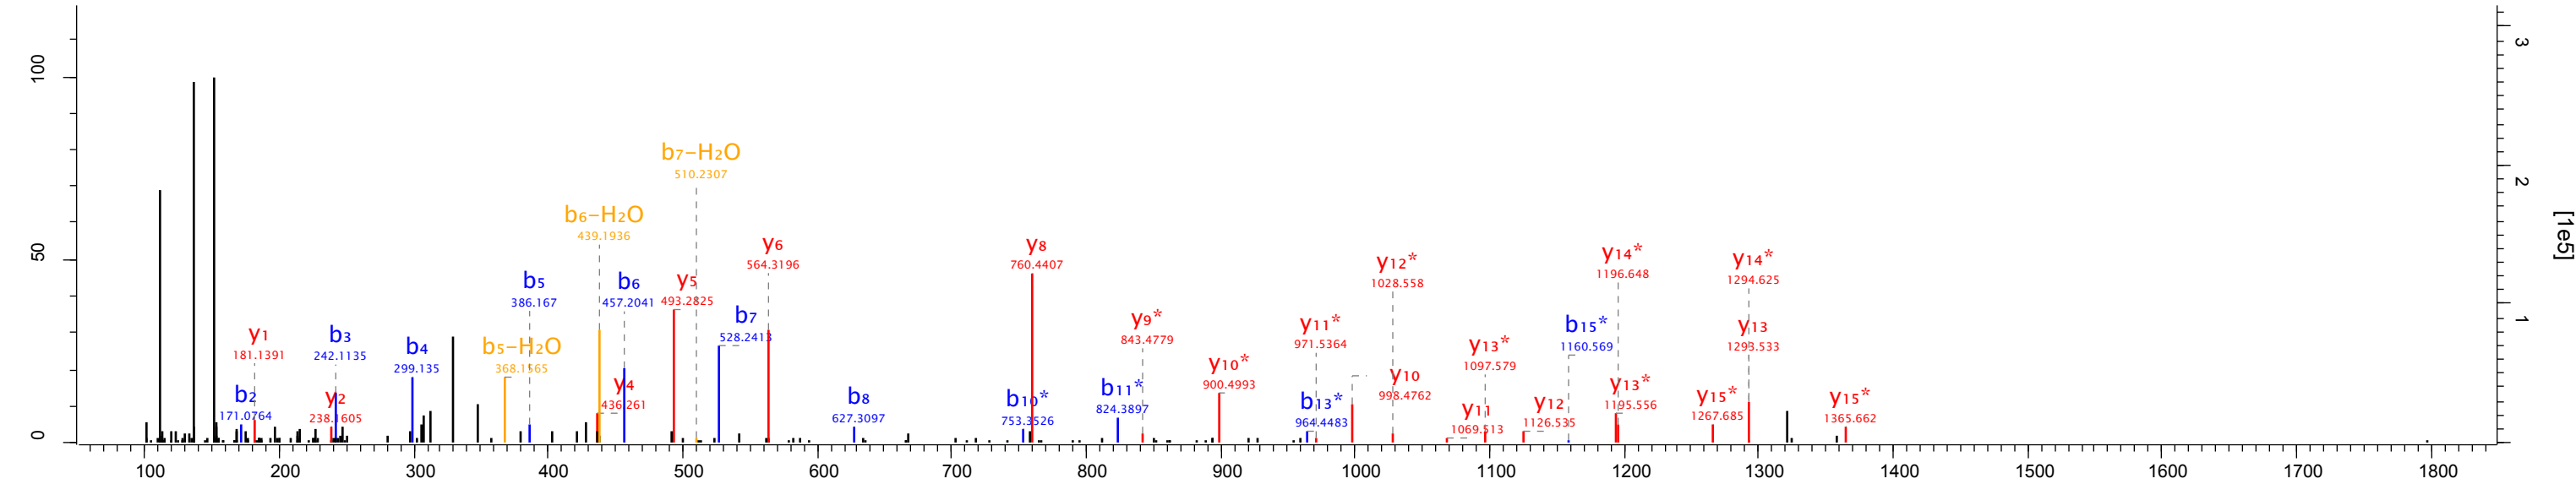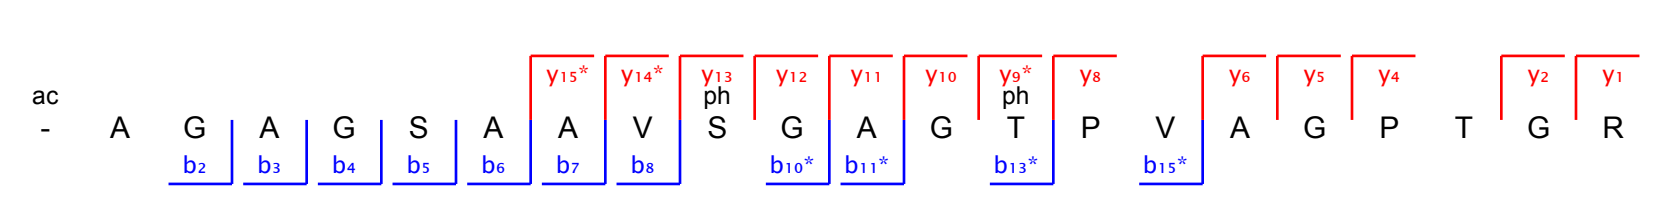

Raw file: 20171215\_MaS\_33SR\_LMH\_phospho2\_04  
 Scan: 7887 Method: FTMS; HCD Score: 101.43 m/z: 599.23 Gene names: SRRM2

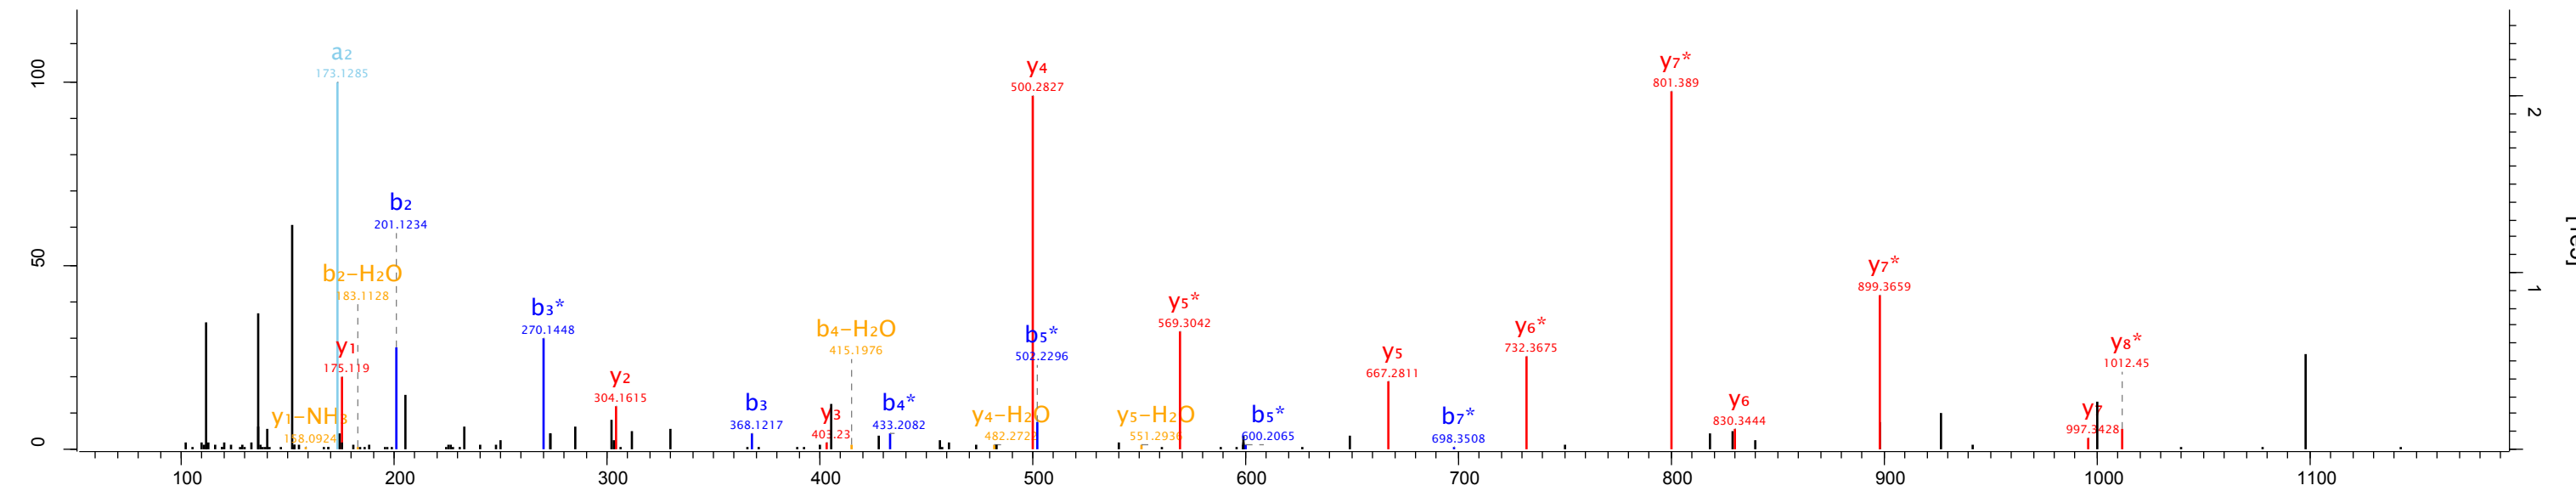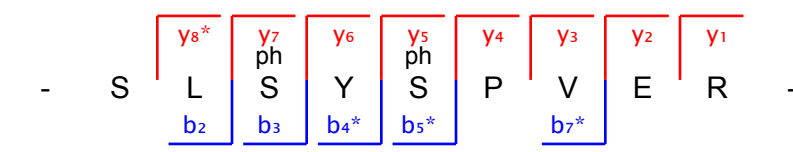

Raw file 20171215\_MaS\_33SR\_LMH\_phospho2\_05 Scan 3287 Method FTMS; HCD Score 71.18 m/z 400.83 Gene names SRRM2

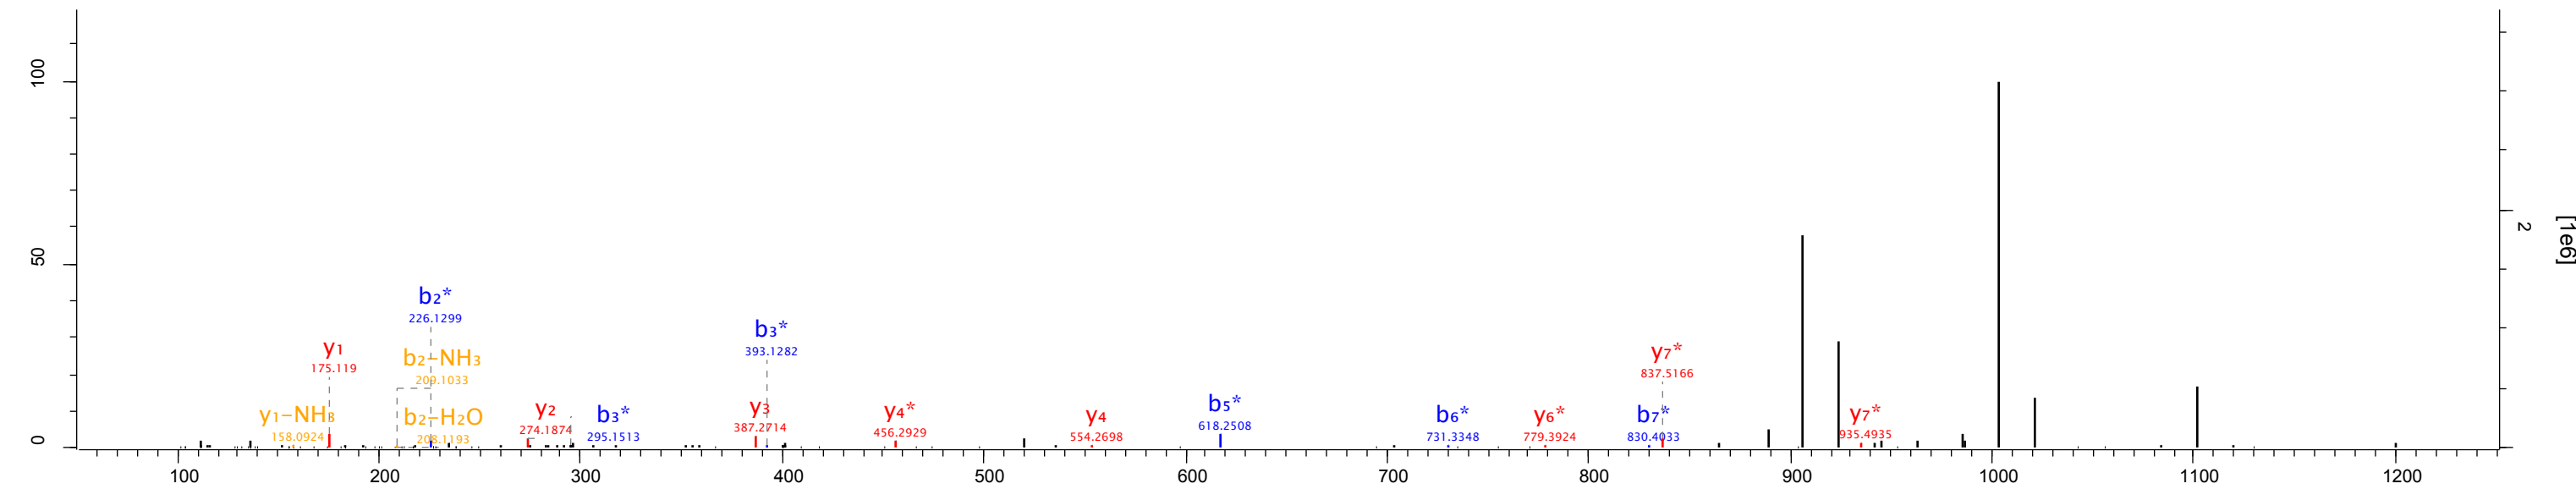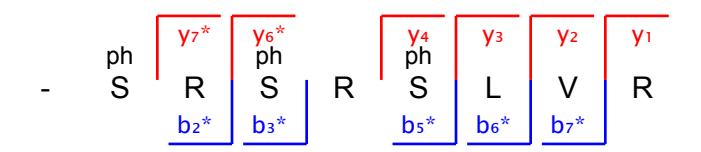



Raw file 20171215\_MaS\_33SR\_LMH\_phospho2\_05 Scan 3367 Method FTMS; HCD Score 192.2 m/z 972.85 Gene names SRSF2

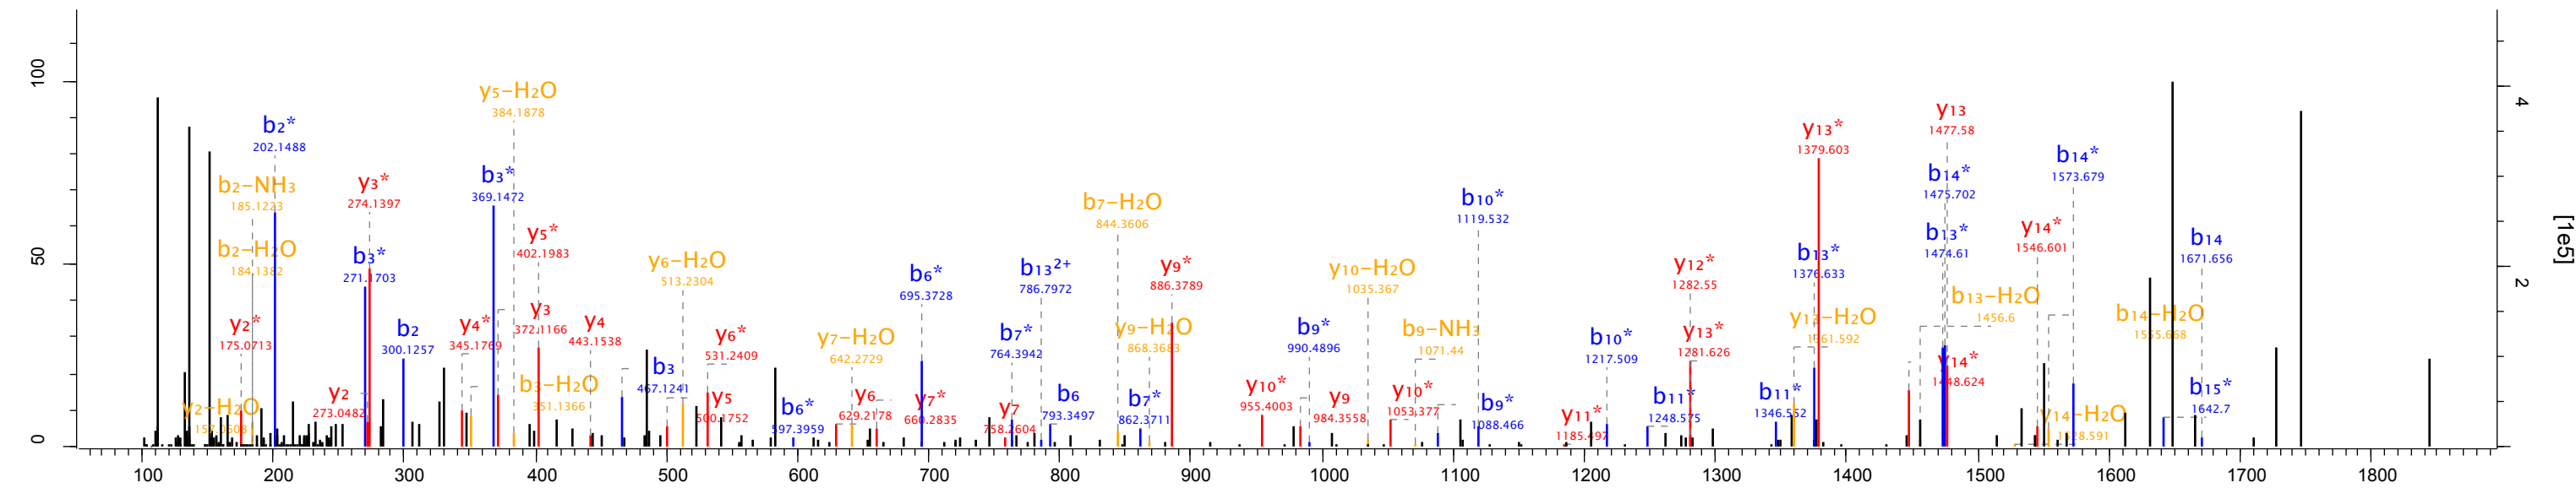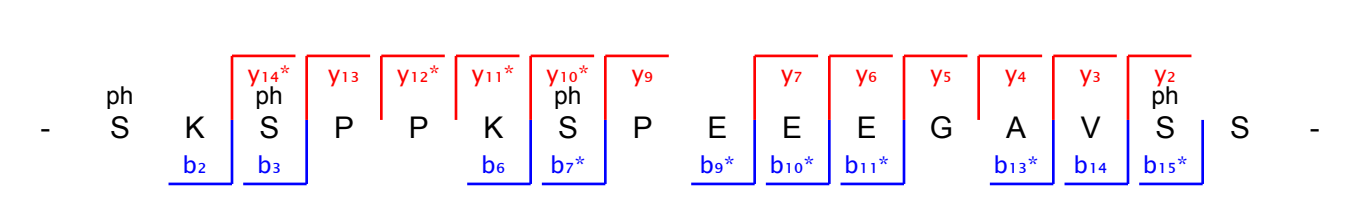

Raw file 20171215\_MaS\_33SR\_LMH\_phospho2\_05 Scan 3397 Method FTMS; HCD Score 124.62 m/z 592.22 Gene names SRRM2

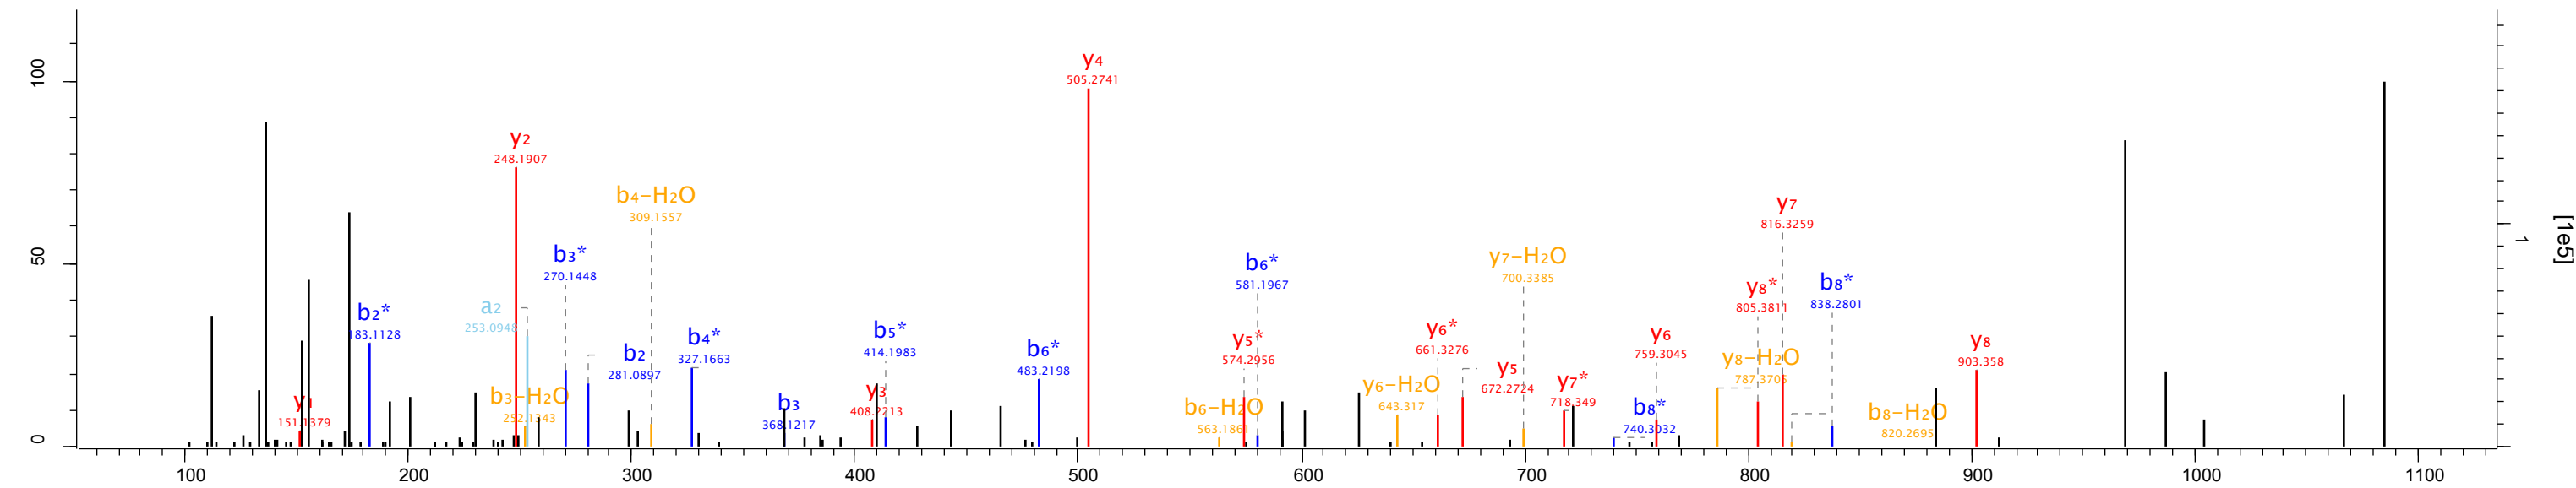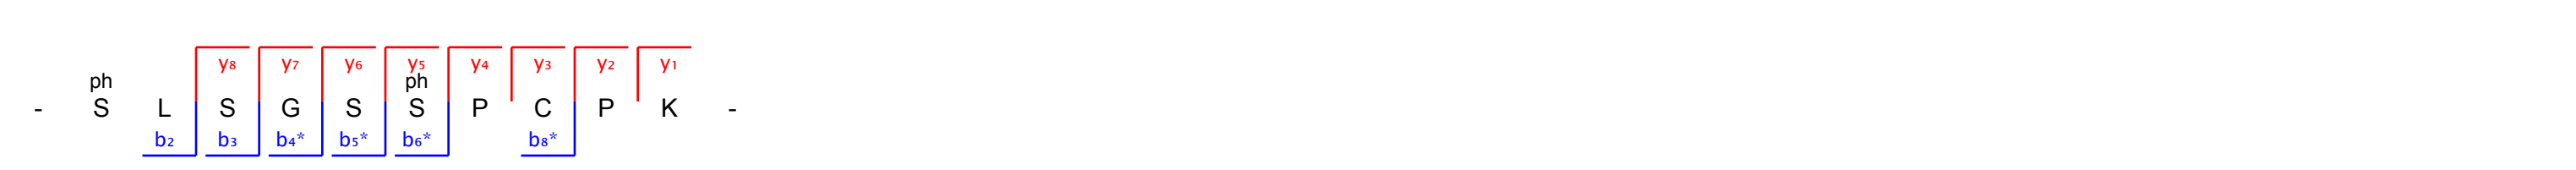

Raw file 20171215\_MaS\_33SR\_LMH\_phospho2\_05 Scan 6177 Method FTMS; HCD Score 52.43 m/z 853.81 Gene names TBC1D9B

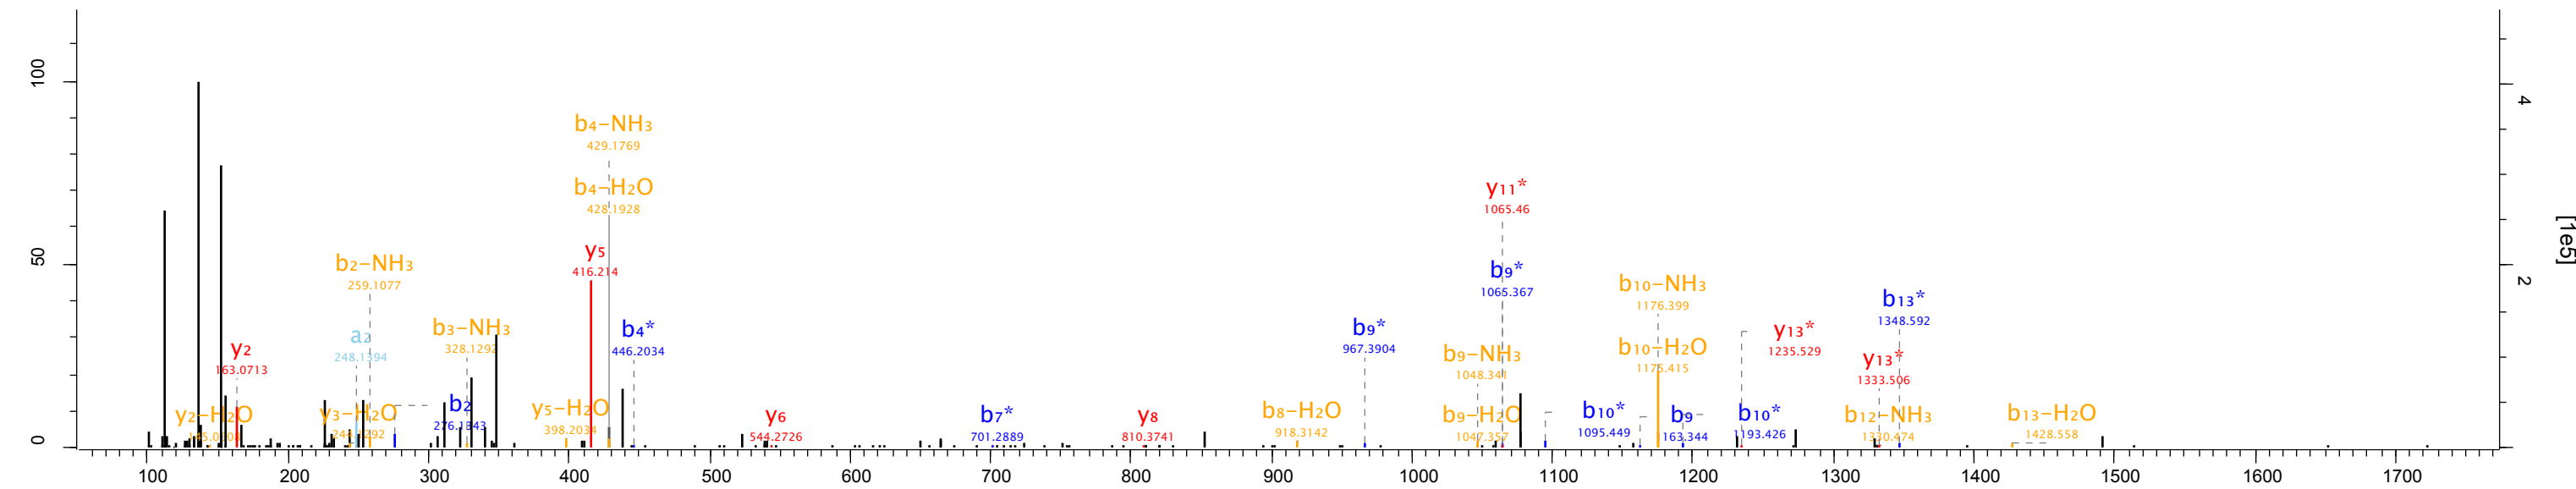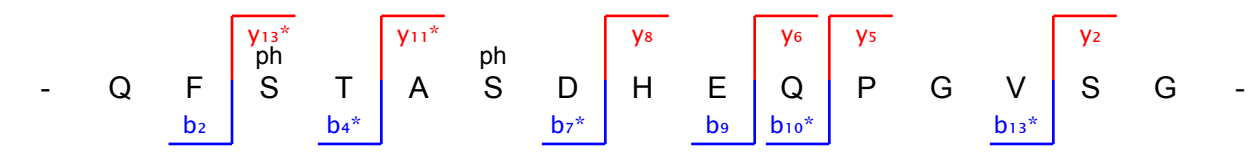

Raw file 20171215\_MaS\_33SR\_LMH\_phospho2\_05 Scan 6237 Method FTMS; HCD Score 61.99 m/z 871.33 Gene names FRMD6

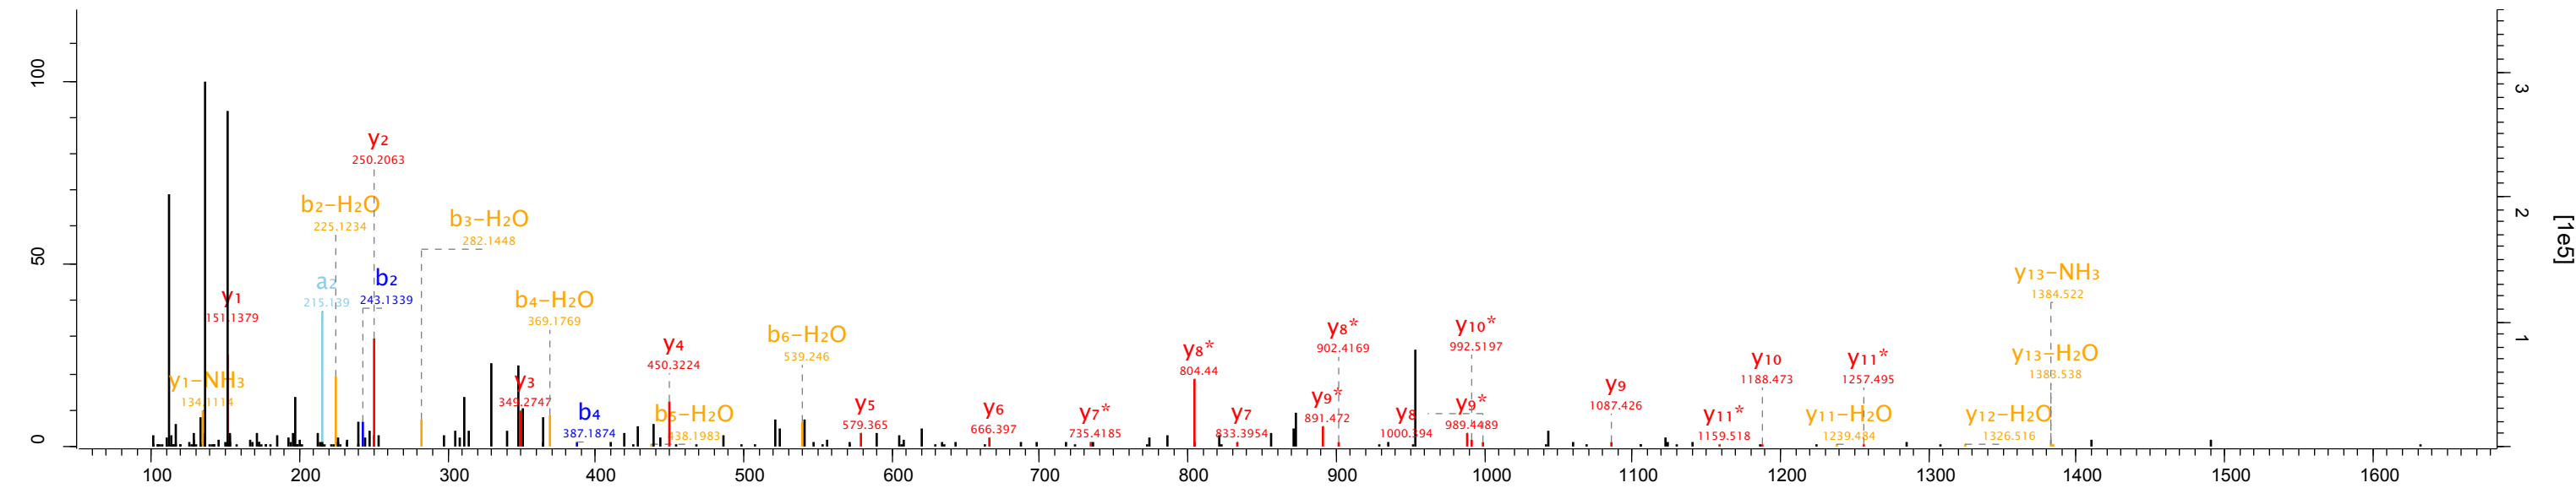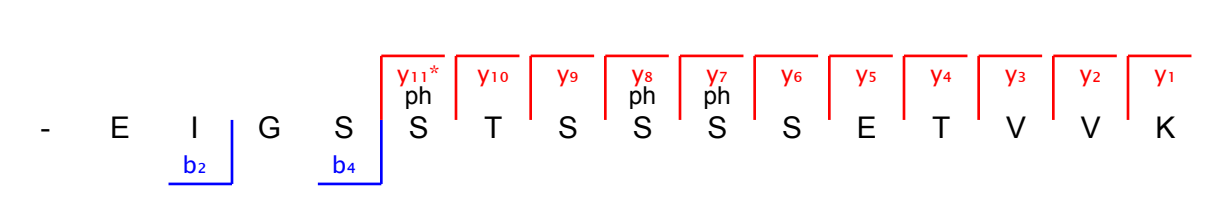

Raw file 20171215\_MaS\_33SR\_LMH\_phospho2\_05 Scan 7007 Method FTMS; HCD Score 54 m/z 861.7 Gene names DUS3L

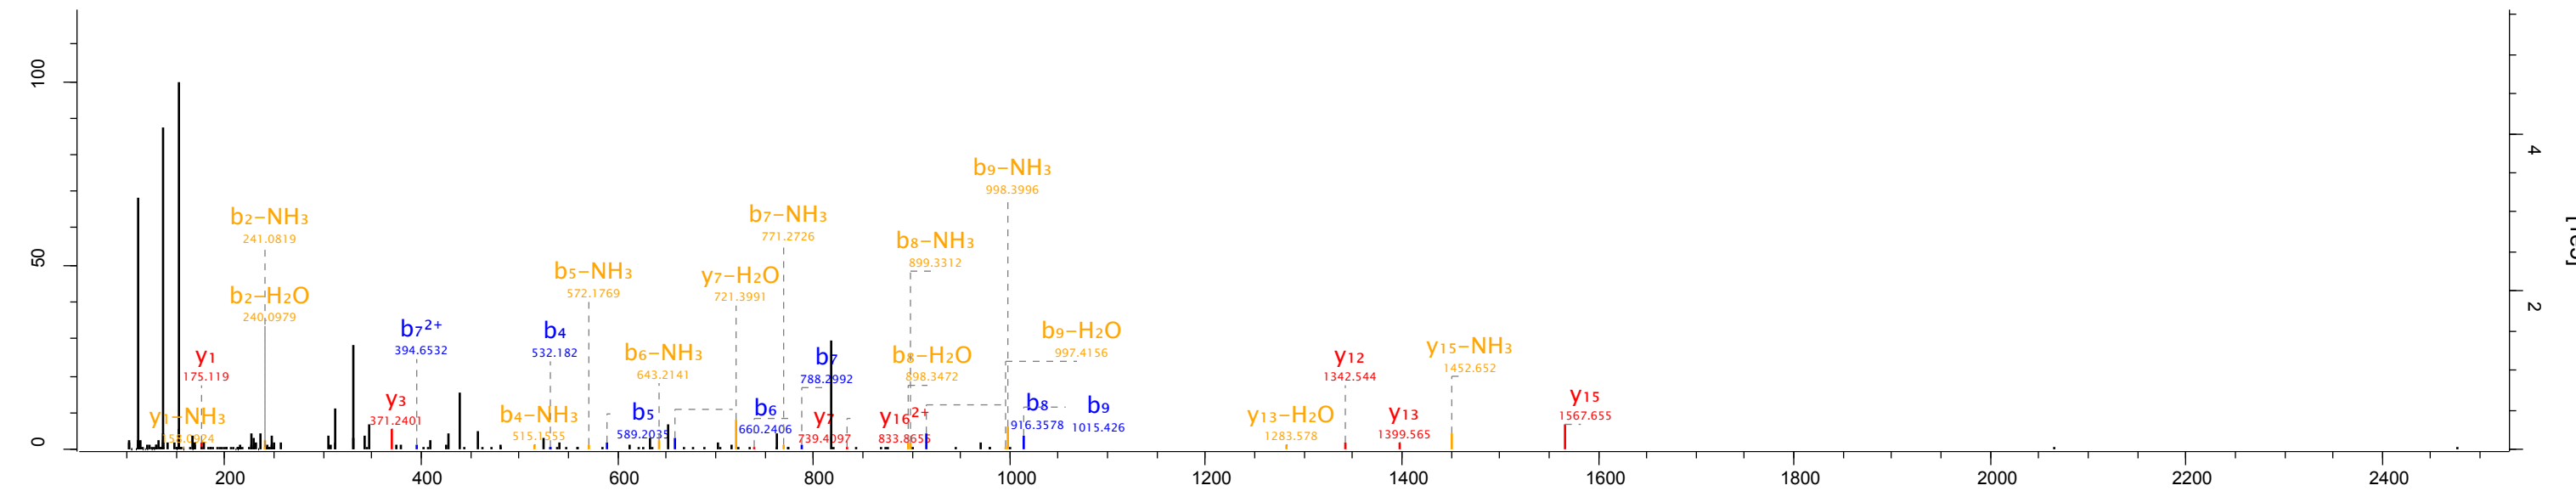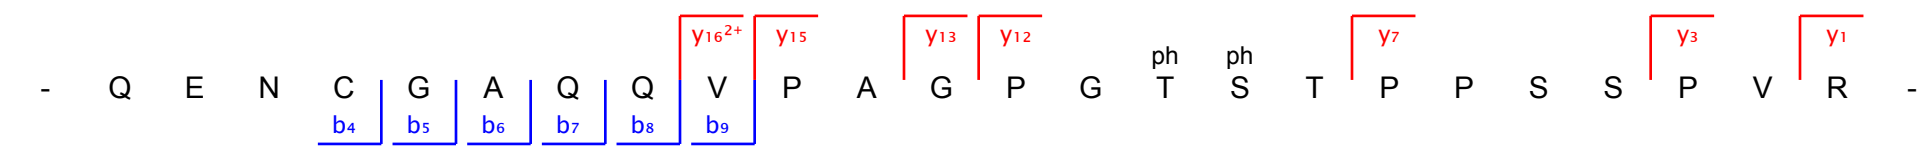

Raw file 20171215\_MaS\_33SR\_LMH\_phospho2\_05 Scan 7797 Method FTMS; HCD Score 143.28 m/z 752.8 Gene names DDX20

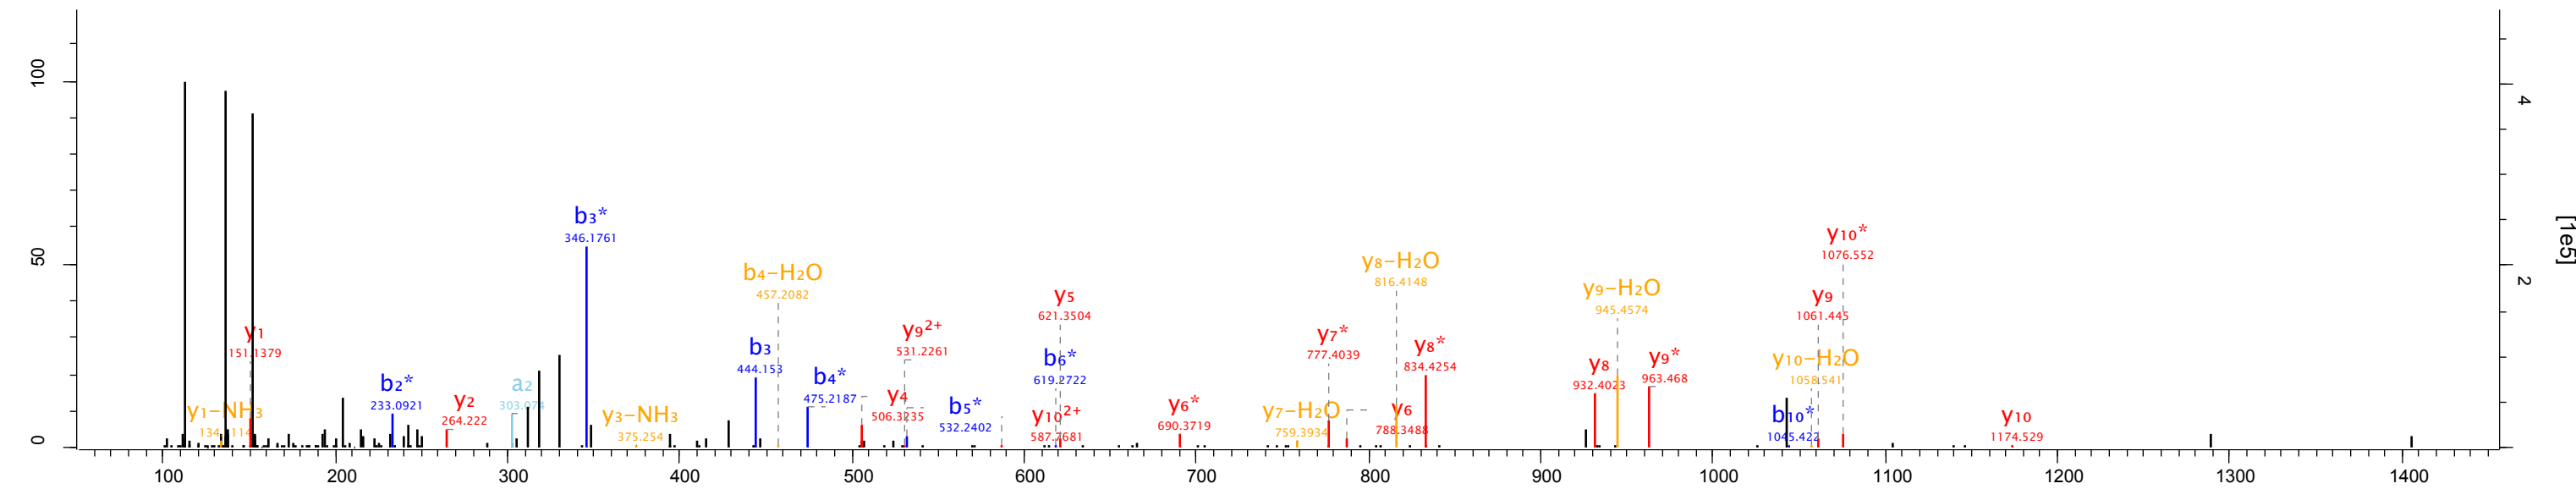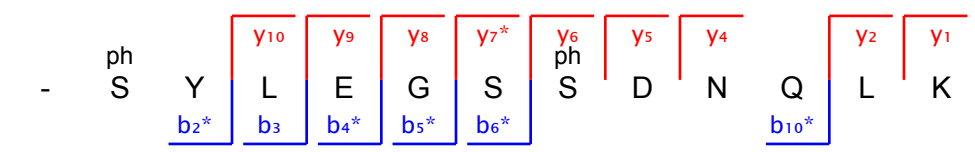

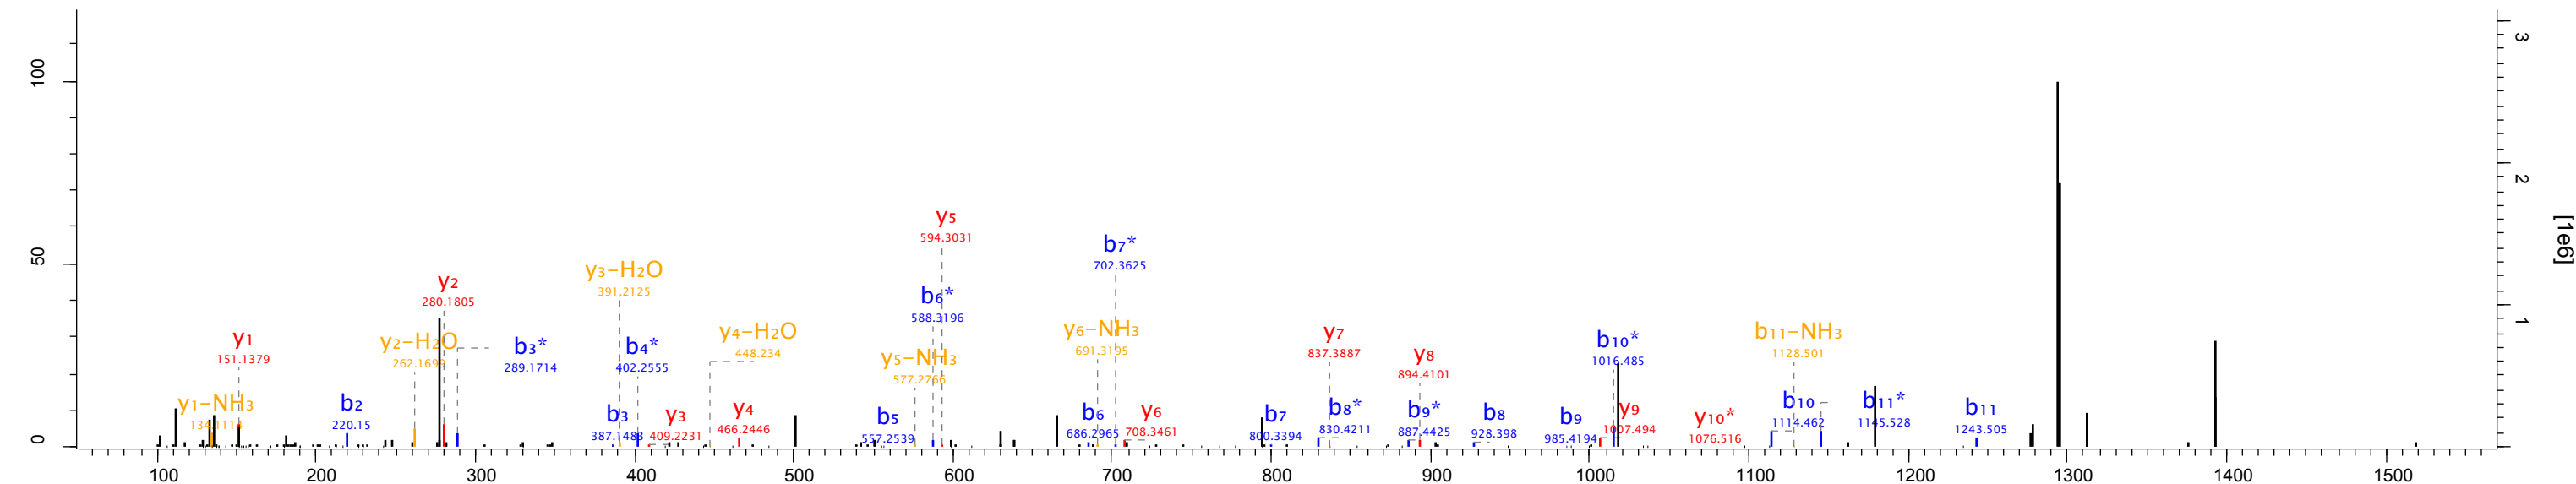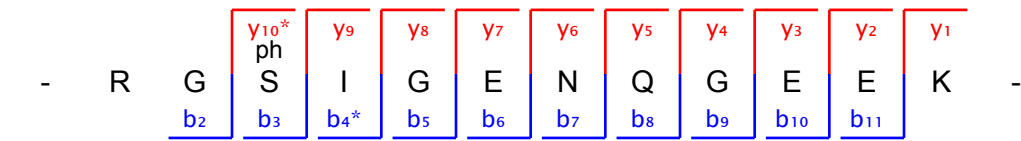

Raw file 20171215\_MaS\_33SR\_LMH\_phospho2\_06  
 Scan 2817 Method FTMS; HCD Score 66.3 m/z 432.71 Gene names BBX

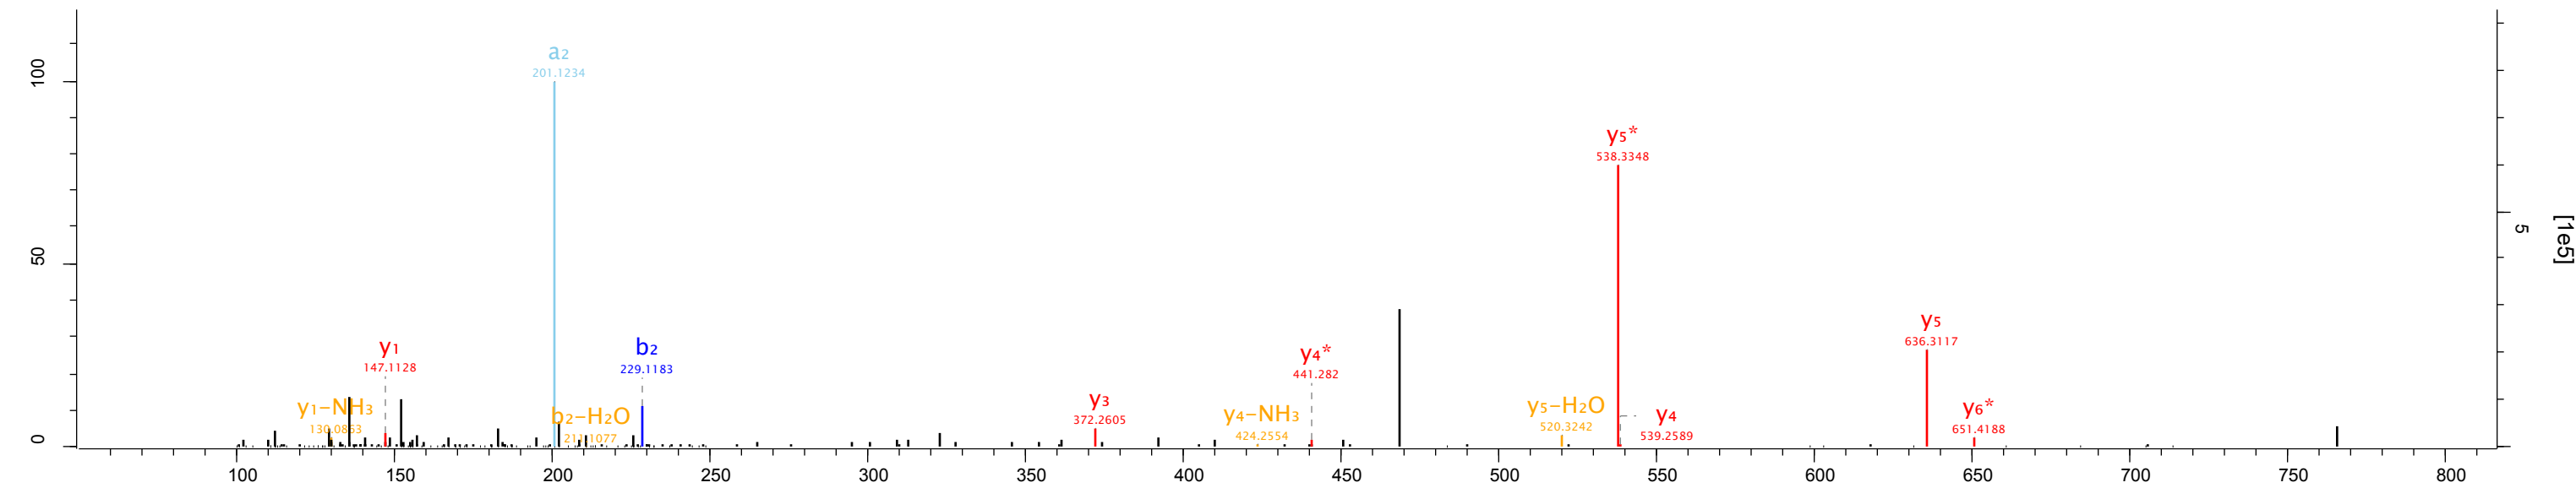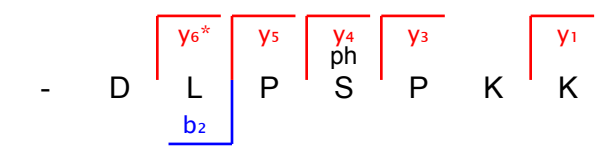



Raw file 20171215\_MaS\_33SR\_LMH\_phospho2\_06 Scan 2867 Method FTMS; HCD Score 235.72 m/z 809.8 Gene names EIF5B

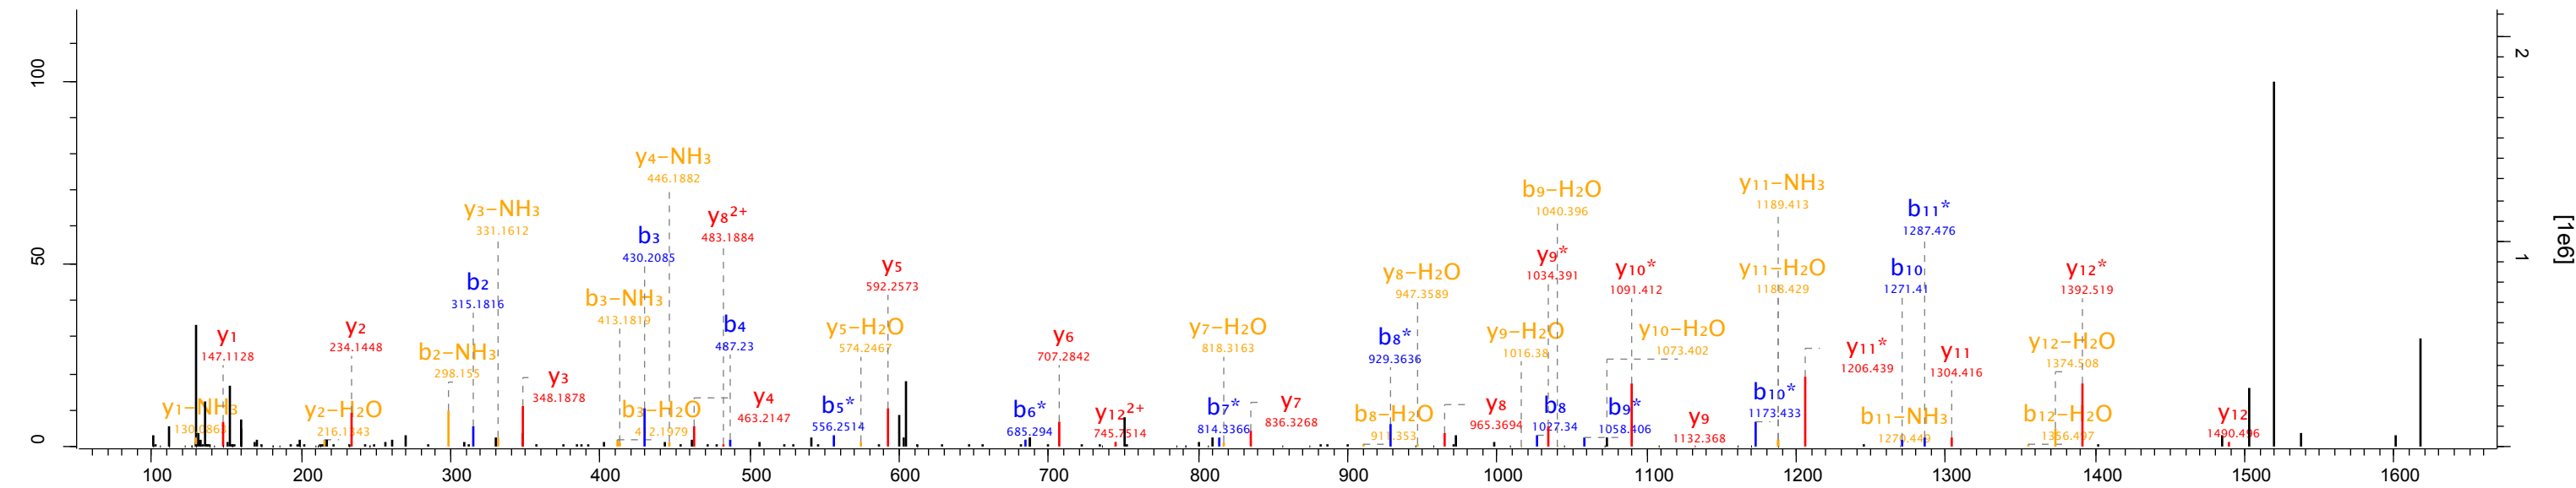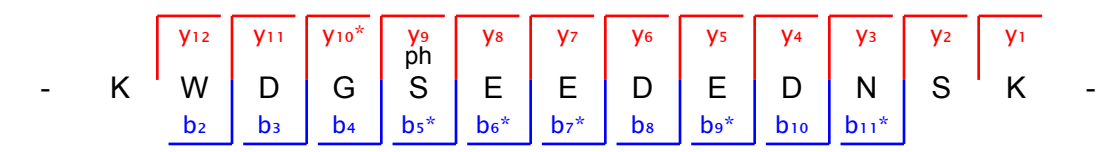

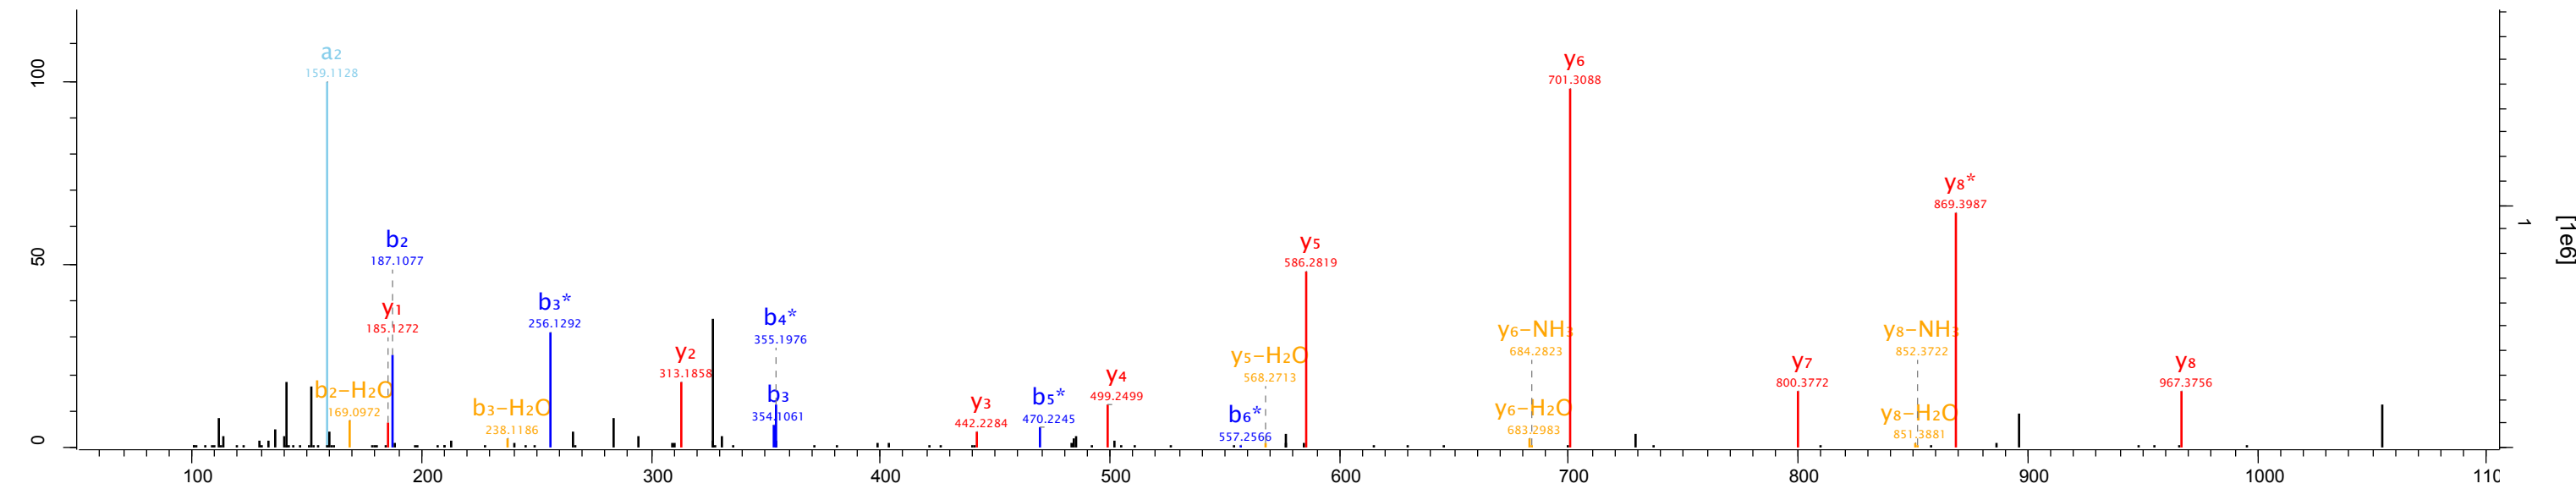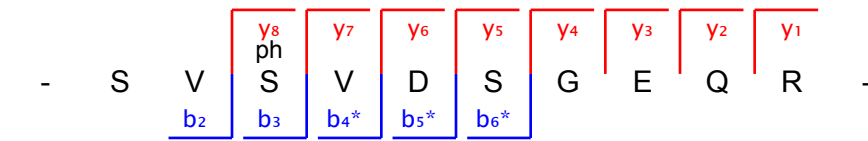

Raw file 20171215\_MaS\_33SR\_LMH\_phospho2\_06 Scan 3787 Method FTMS; HCD Score 62.68 m/z 614.79 Gene names NOL8

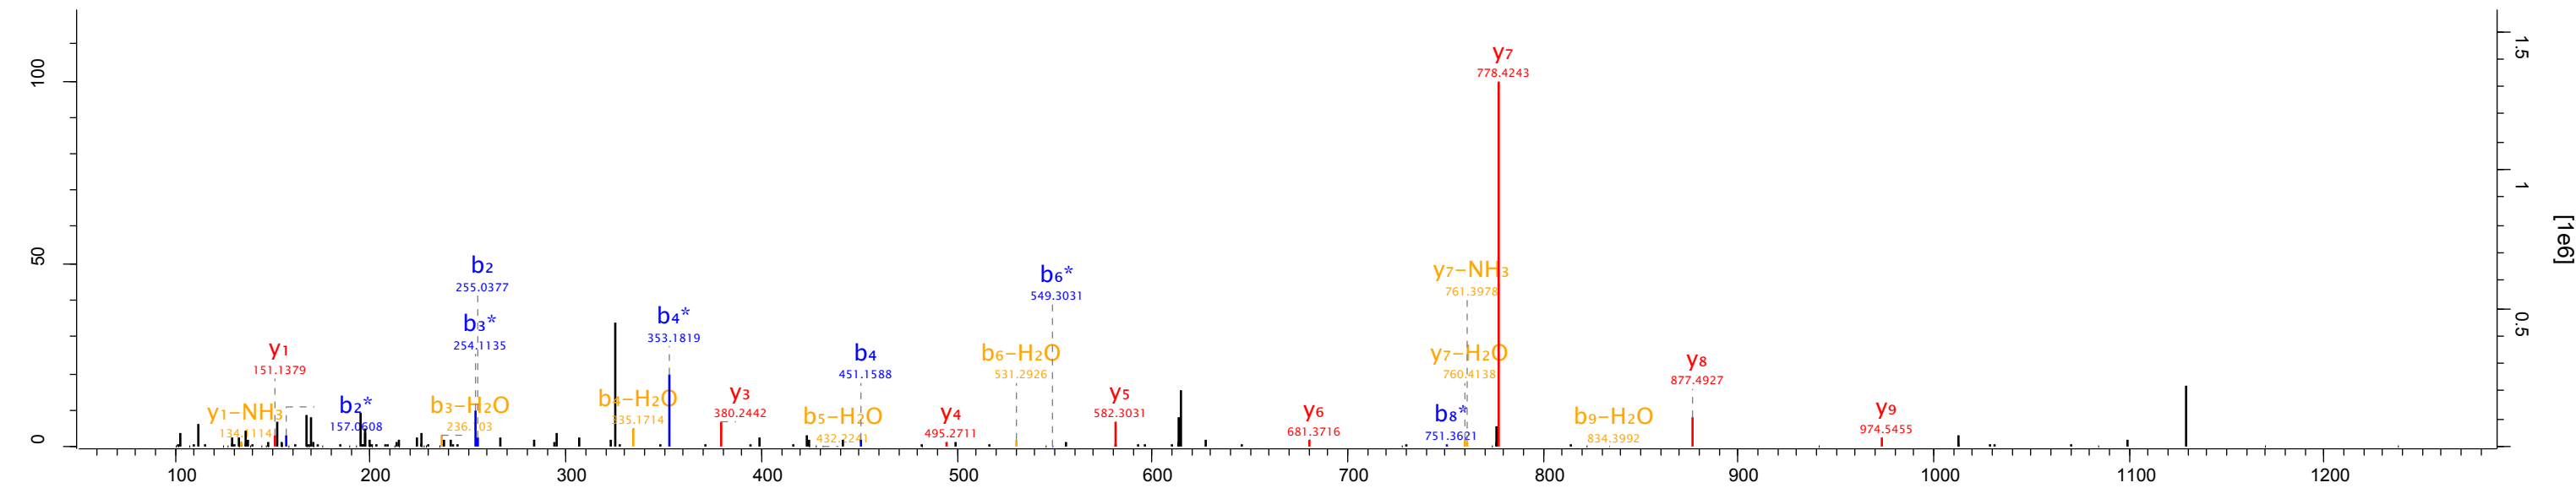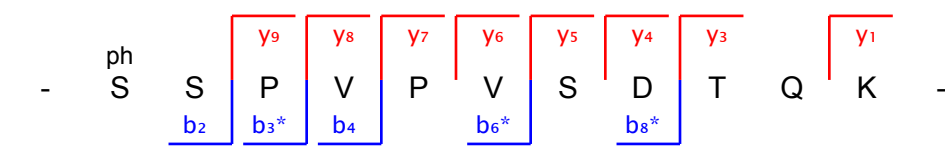

Raw file

20171215\_MaS\_33SR\_LMH\_phospho2\_06

| Scan | Method    | Score | m/z    | Gene names |
|------|-----------|-------|--------|------------|
| 3847 | FTMS; HCD | 61.53 | 529.74 | GLCCI1     |

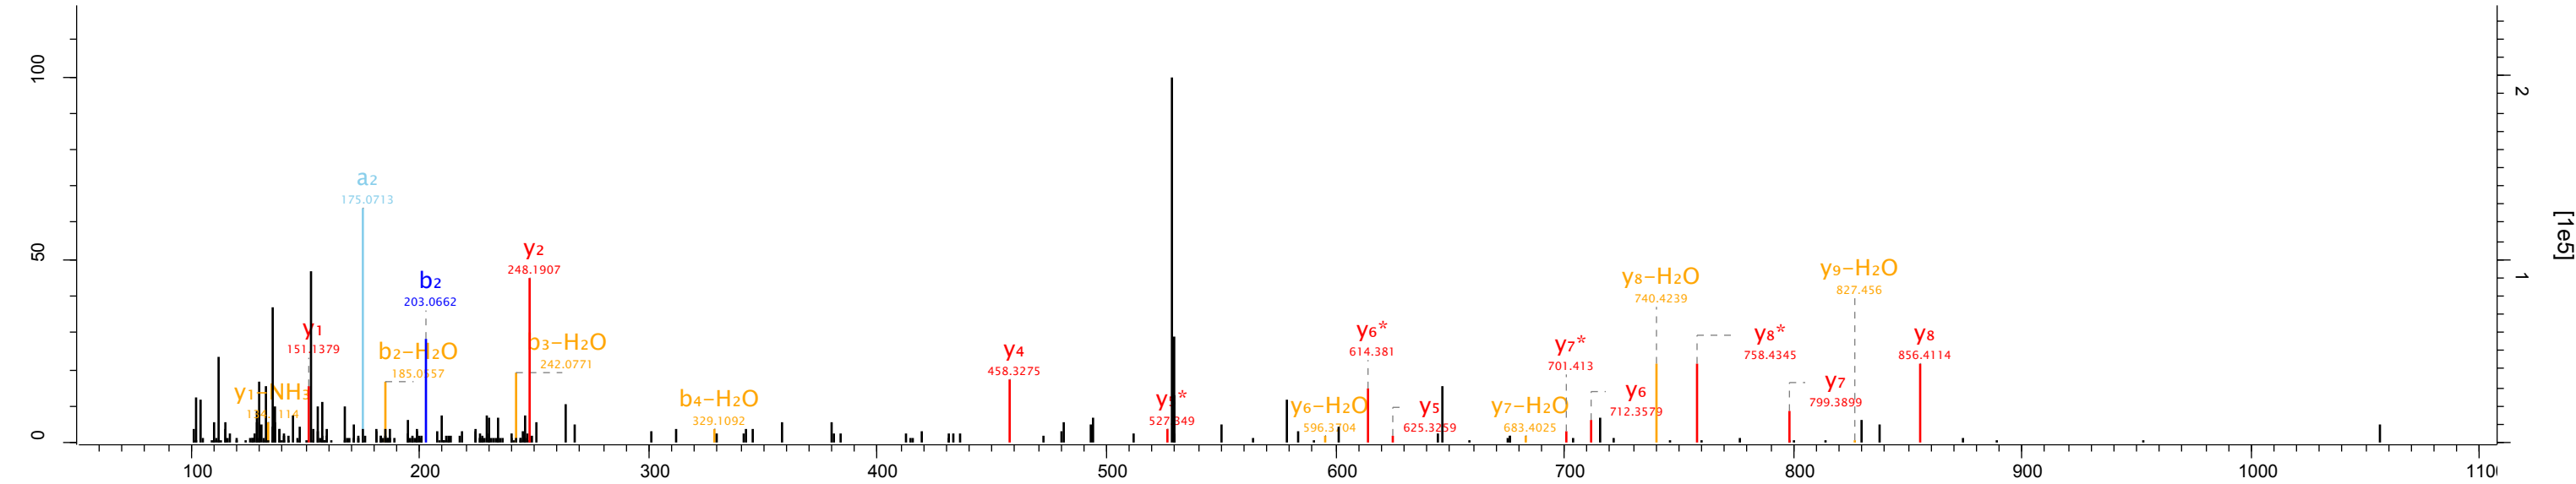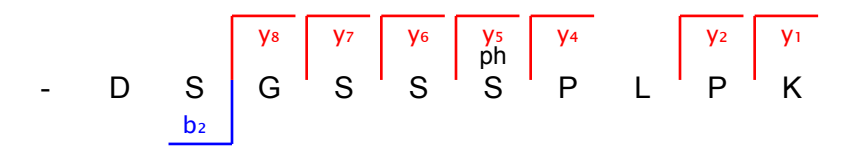

Raw file: 20171215\_MaS\_33SR\_LMH\_phospho2\_06  
 Scan: 4897 Method: FTMS; HCD Score: 71 m/z: 708.31 Gene names: HTATSF1

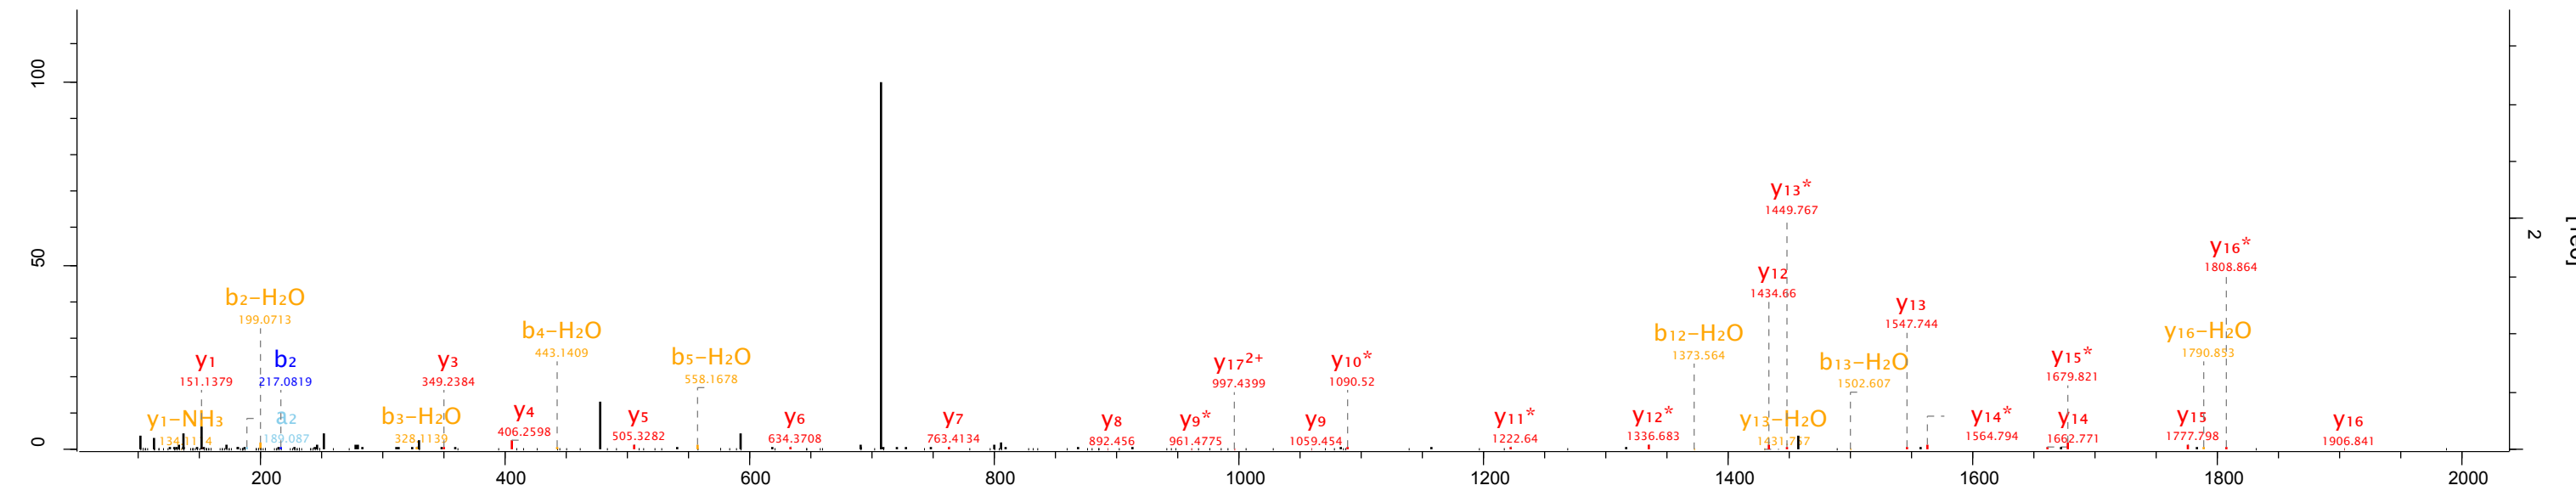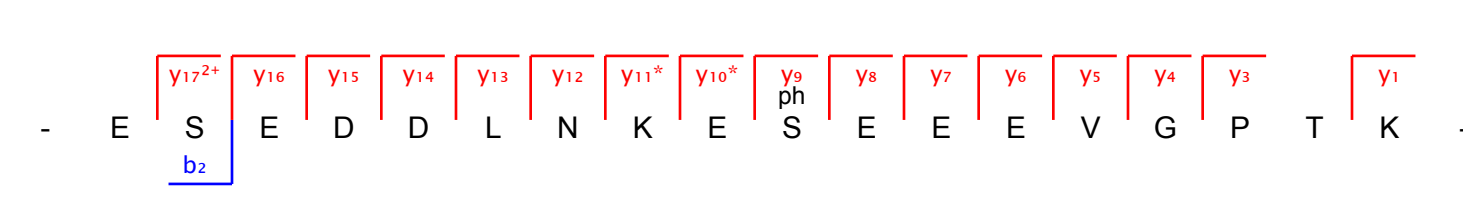

Raw file: 20171215\_MaS\_33SR\_LMH\_phospho2\_06  
 Scan: 5347 Method: FTMS; HCD Score: 119.88 m/z: 583.26 Gene names: PPP1R9B

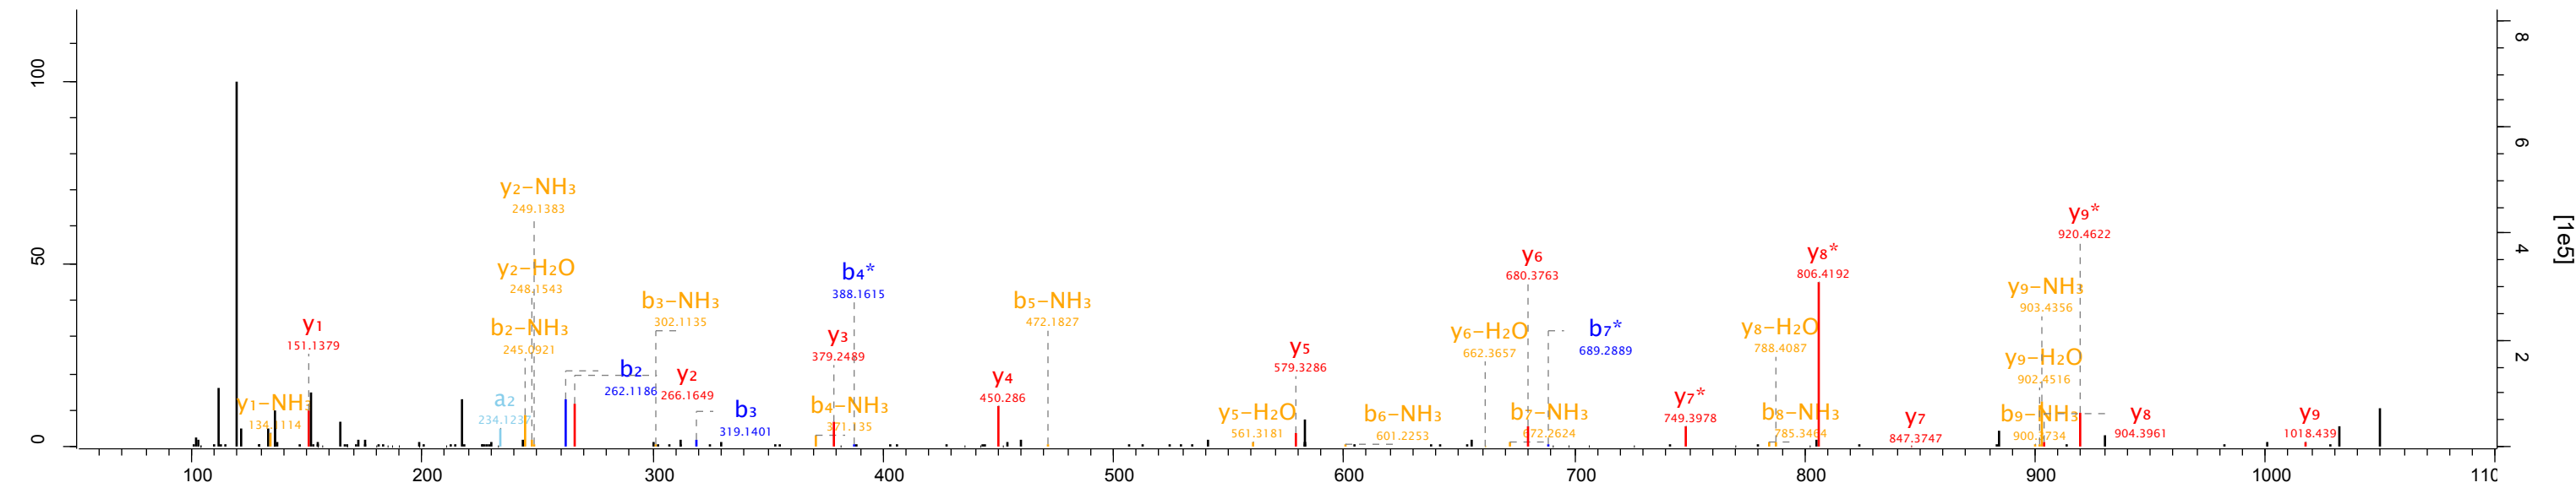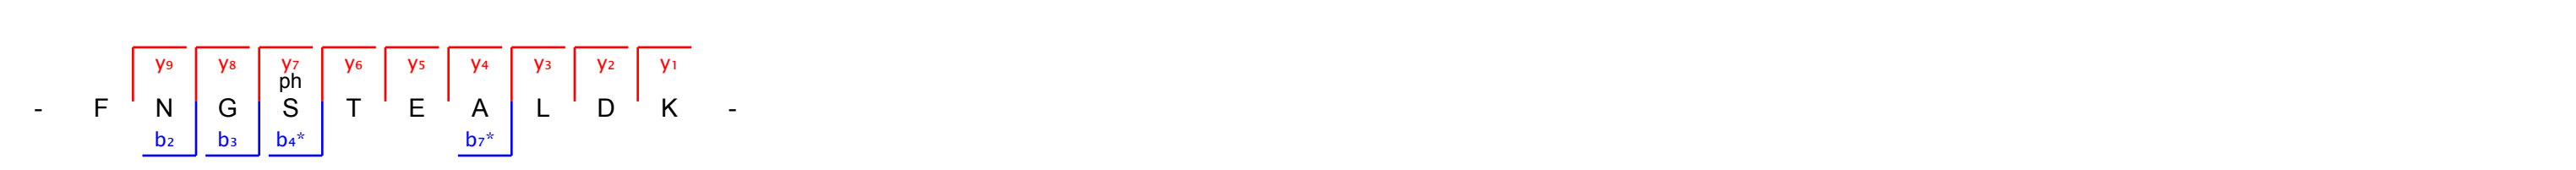

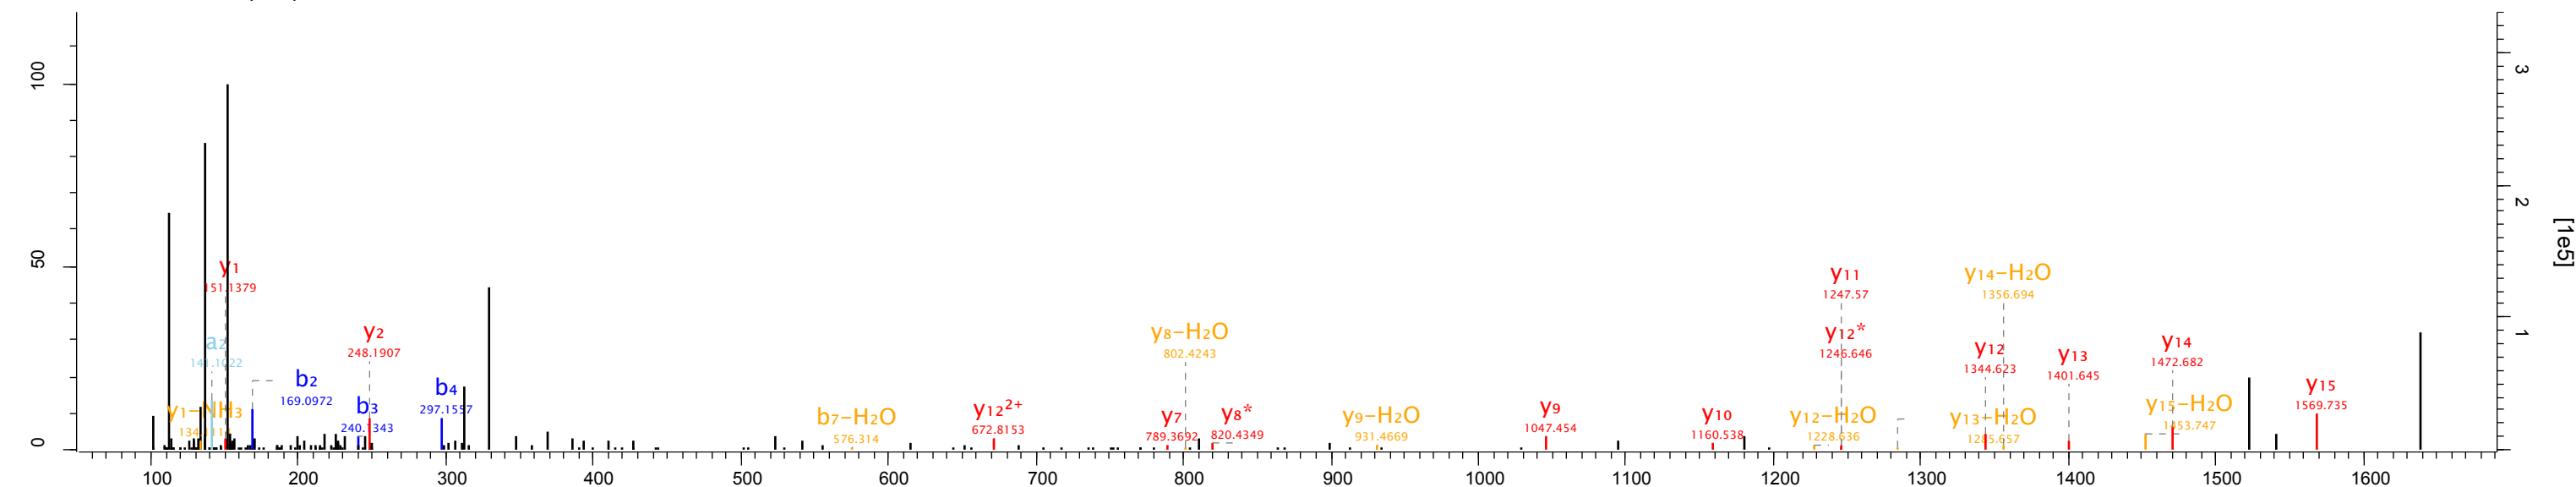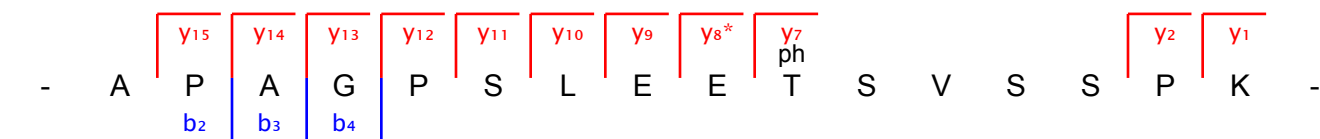

Raw file 20171215\_MaS\_33SR\_LMH\_phospho2\_06 Scan 8177 Method FTMS; HCD Score 69.46 m/z 642.75 Gene names HSPA1A

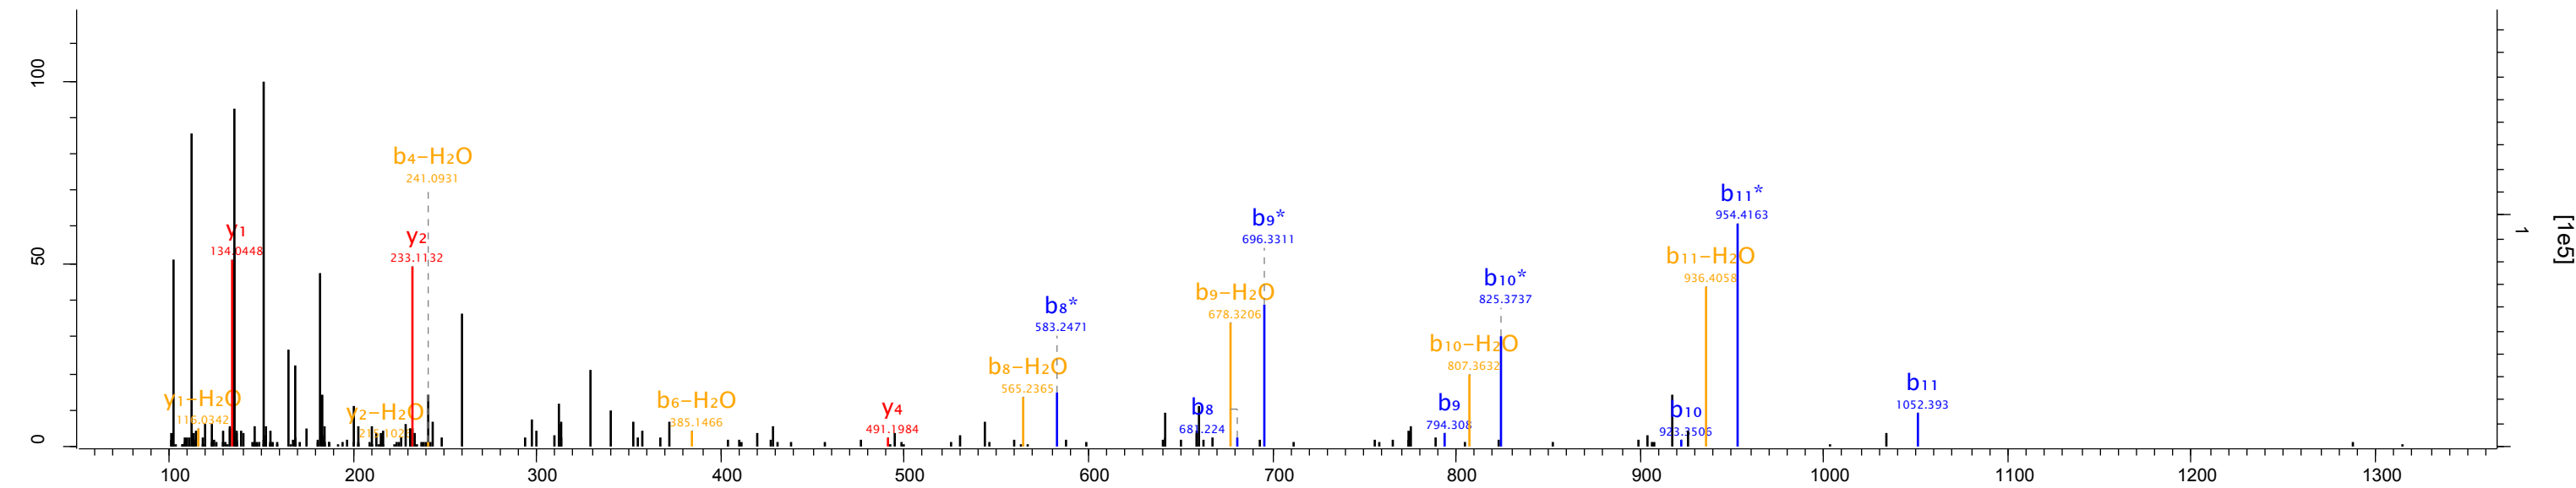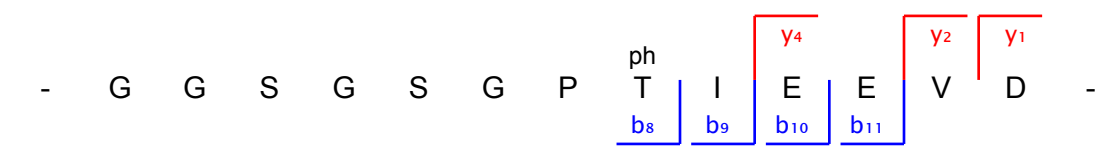



Raw file 20171215\_MaS\_33SR\_LMH\_phospho2\_08 Scan 2047 Method FTMS; HCD Score 128.99 m/z 719.32 Gene names PHC3

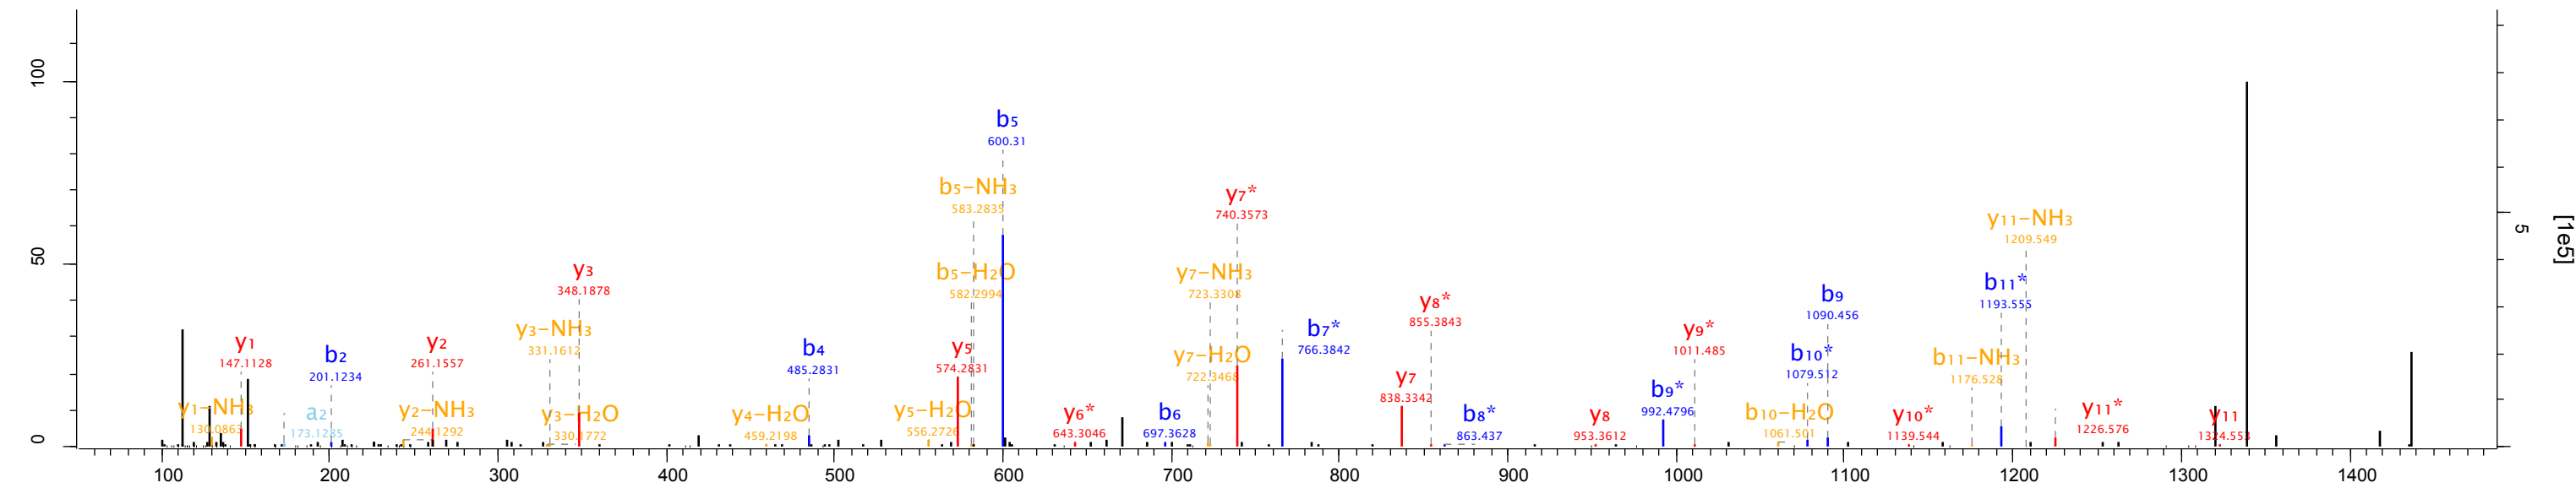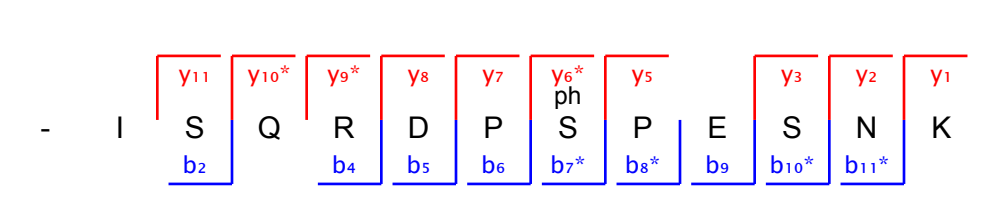

Raw file: 20171215\_MaS\_33SR\_LMH\_phospho2\_08  
 Scan: 3187 Method: FTMS; HCD Score: 150.68 m/z: 681.33 Gene names: RABGEF1

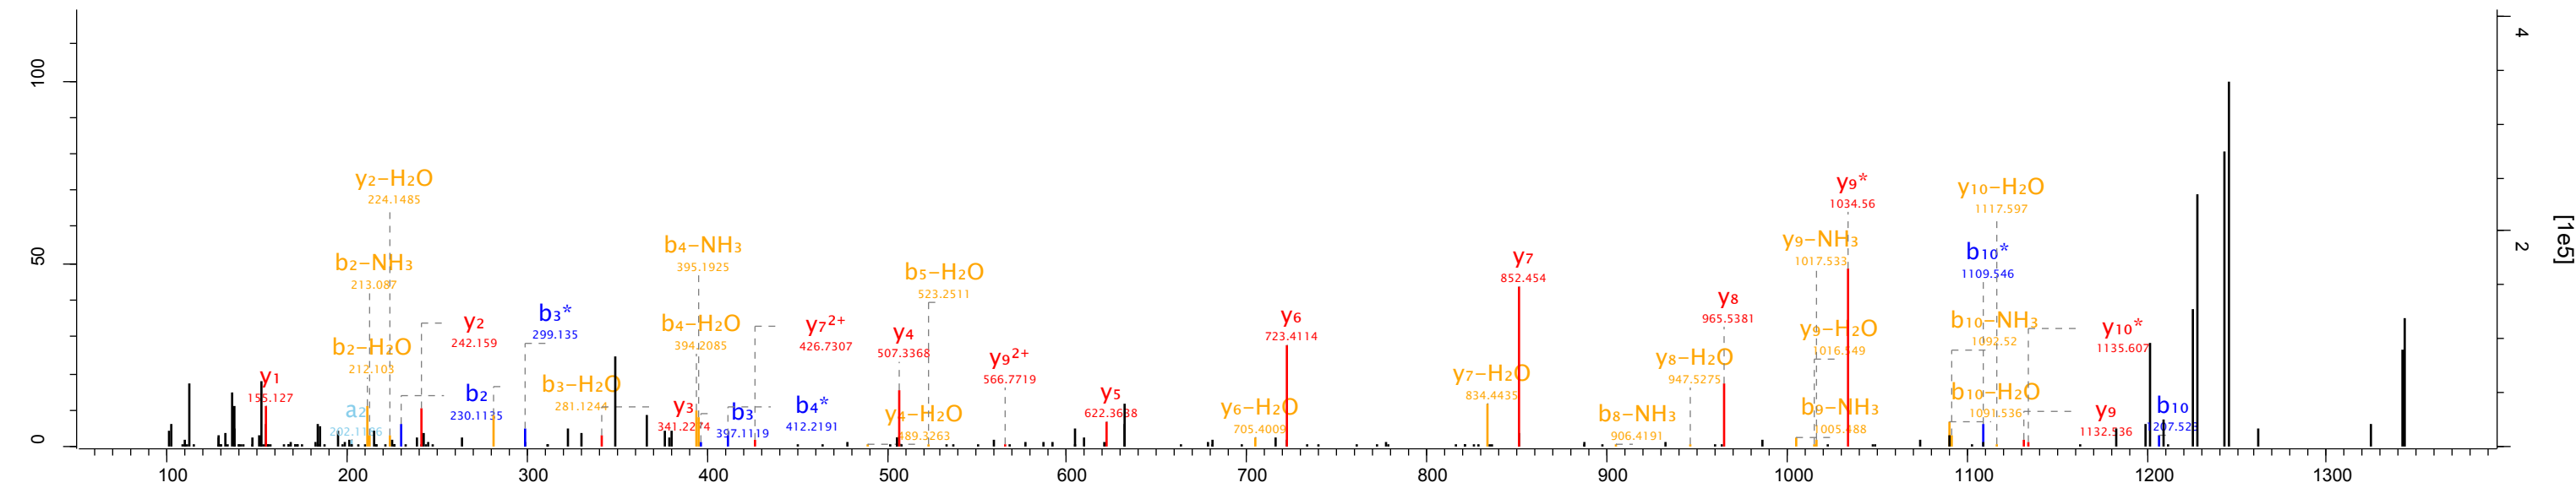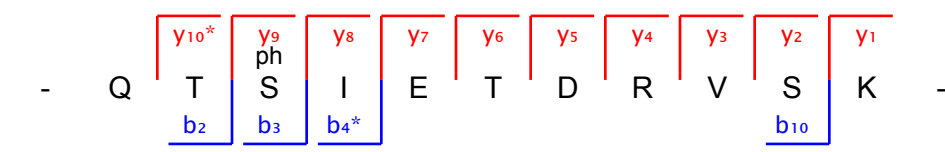

Raw file 20171215\_MaS\_33SR\_LMH\_phospho2\_08 Scan 5817 Method FTMS; HCD Score 61.41 m/z 643.31 Gene names STIM2

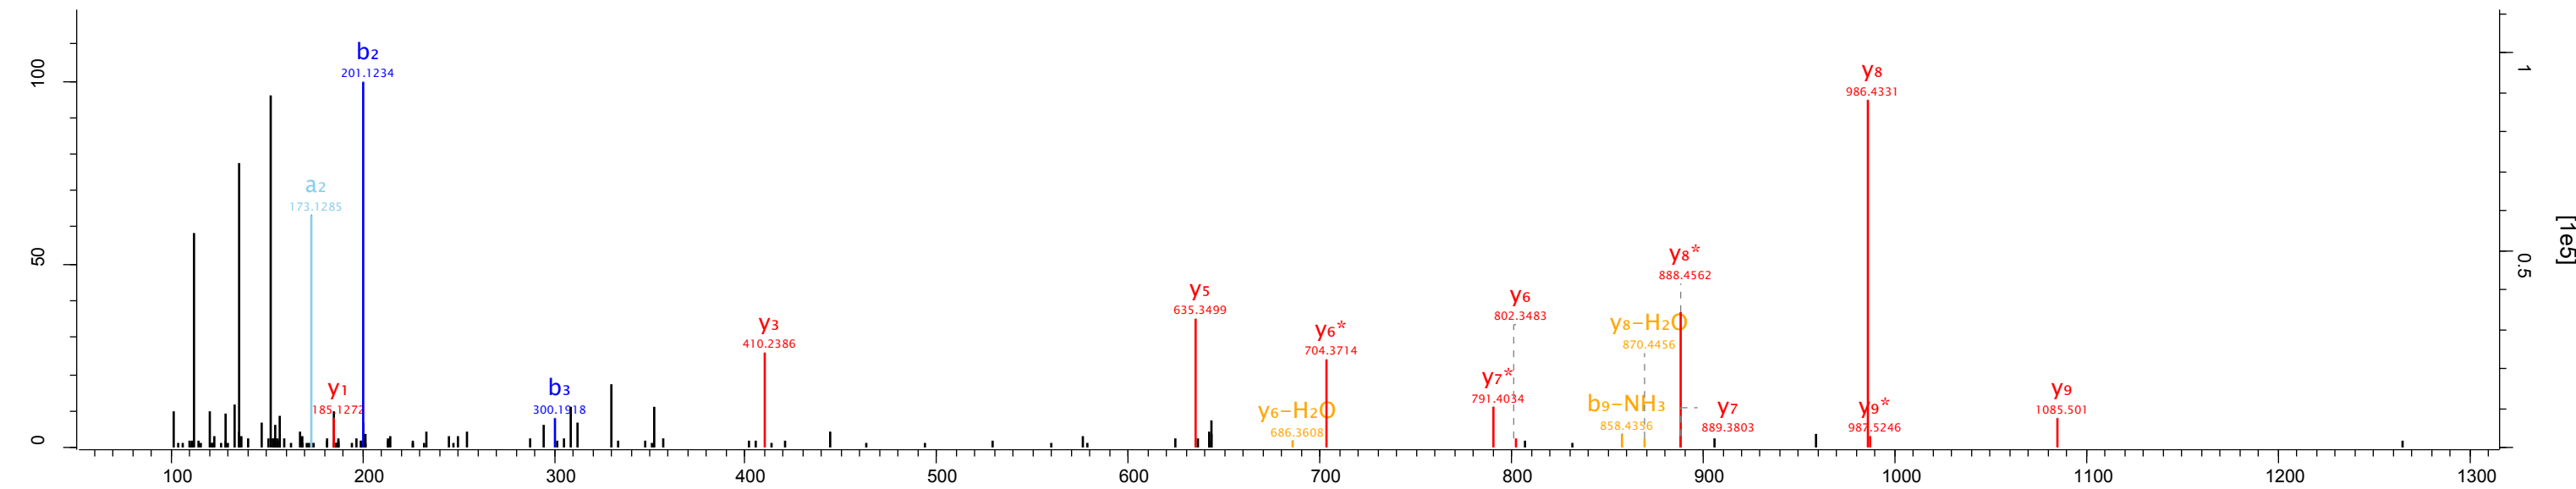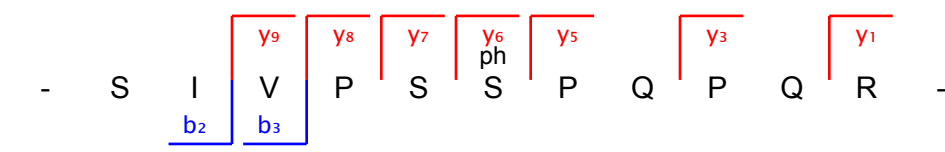

Raw file: 20171215\_MaS\_33SR\_LMH\_phospho2\_08  
 Scan: 8867 Method: FTMS; HCD Score: 91.6 m/z: 999.76 Gene names: MARCKS

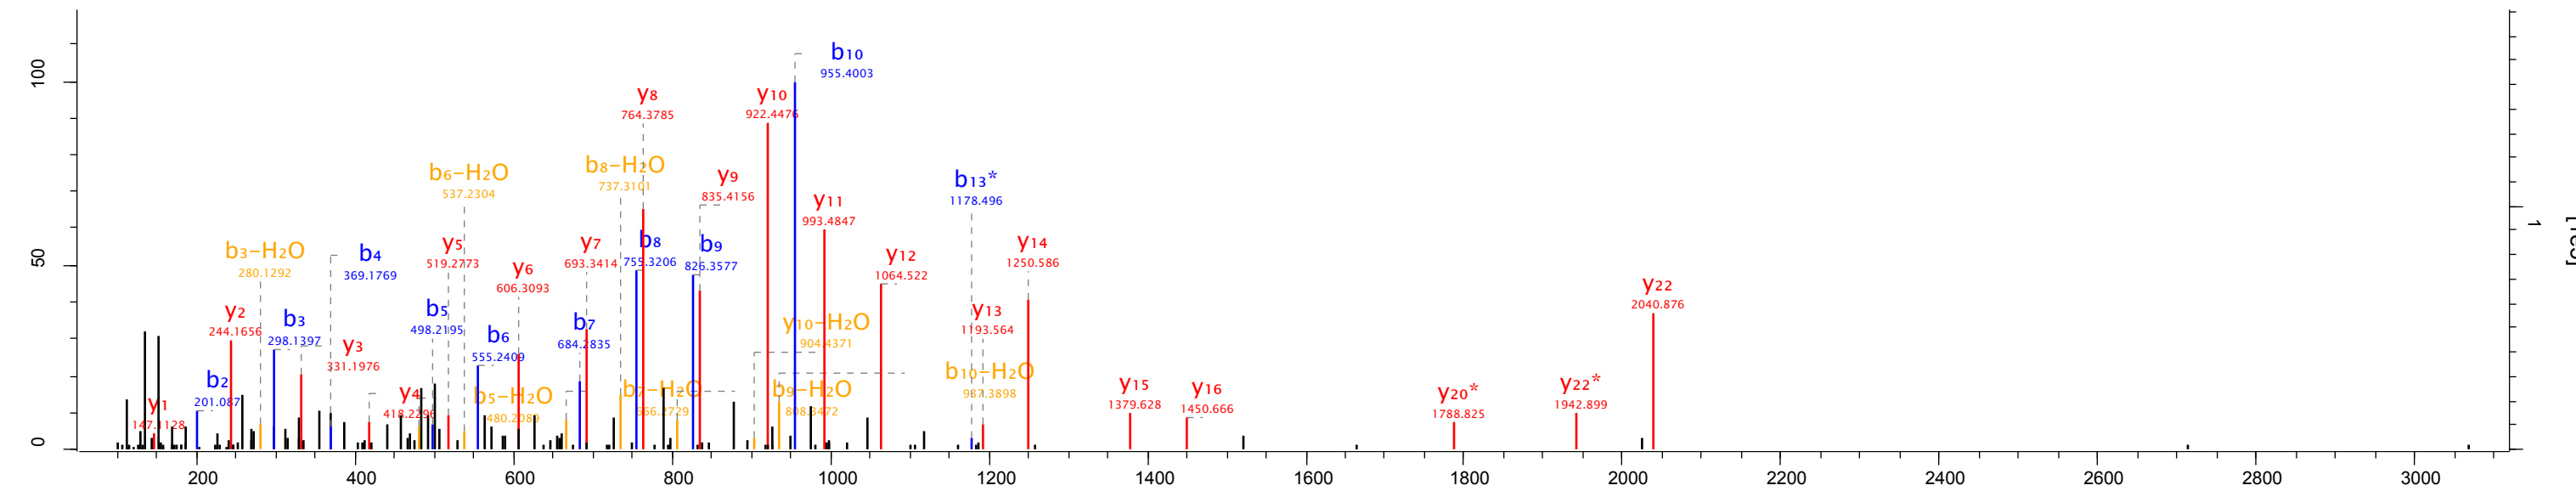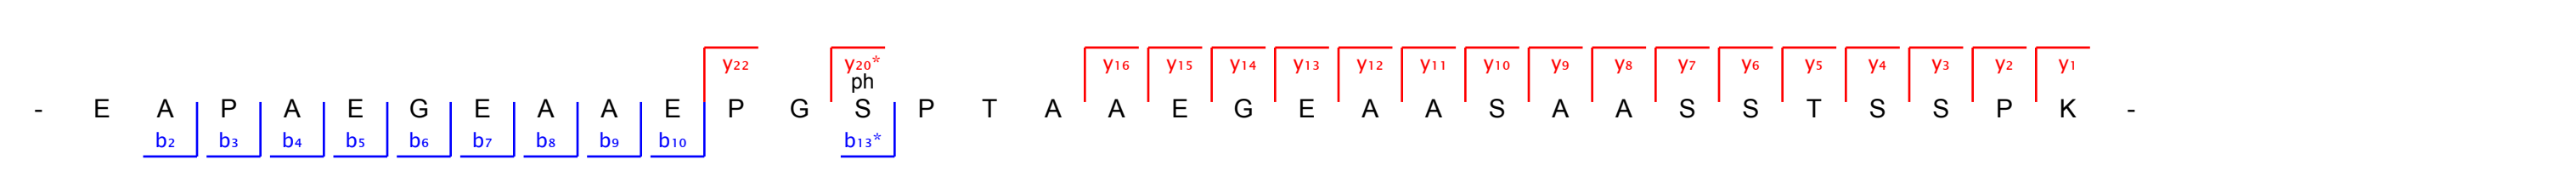

Raw file 20171215\_MaS\_33SR\_LMH\_phospho2\_09 Scan 10017 Method FTMS; HCD Score 46.34 m/z 719.85 Gene names TRUB1

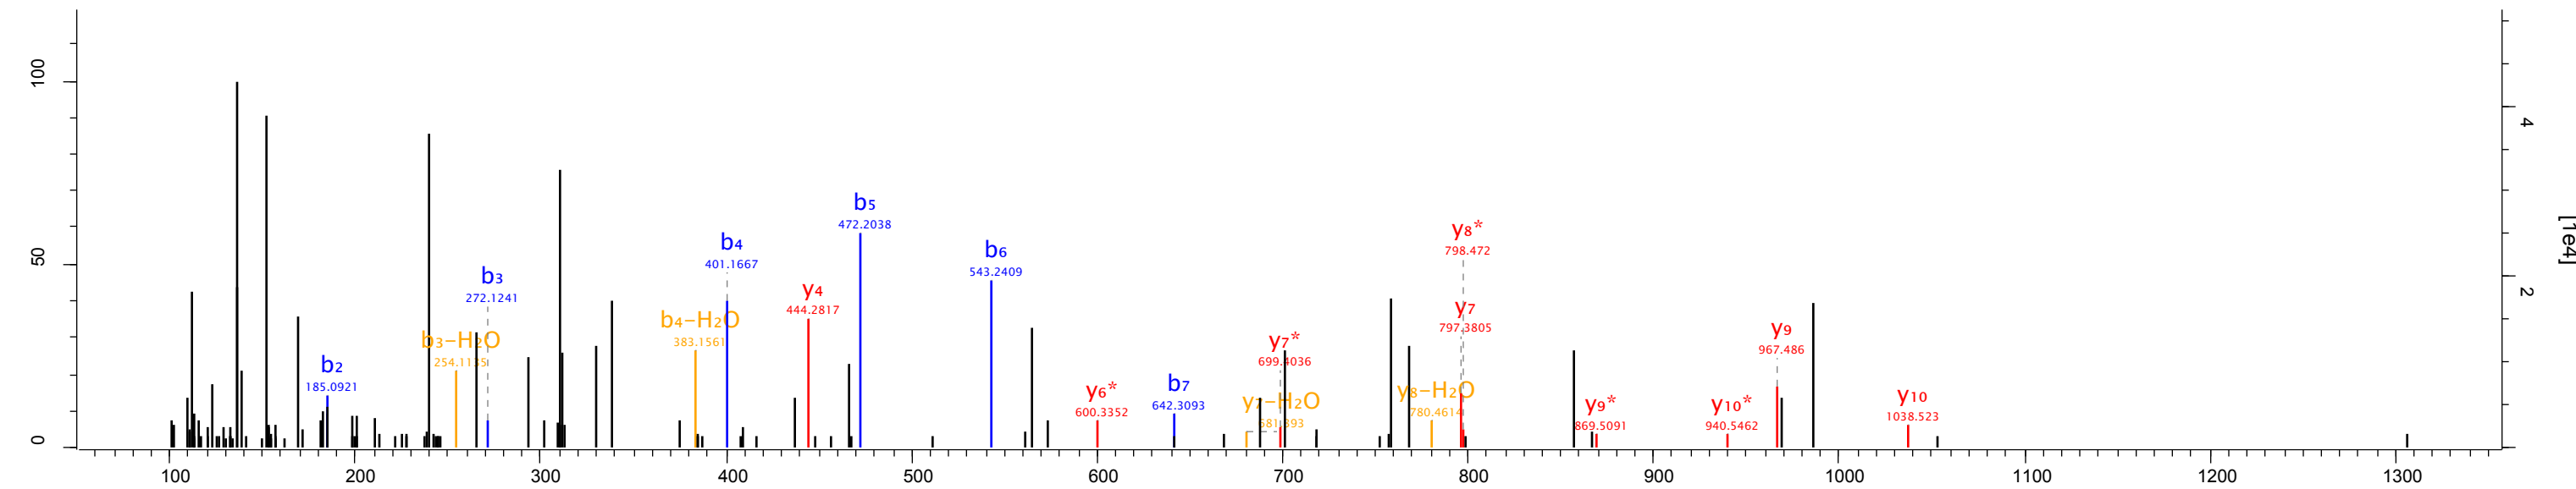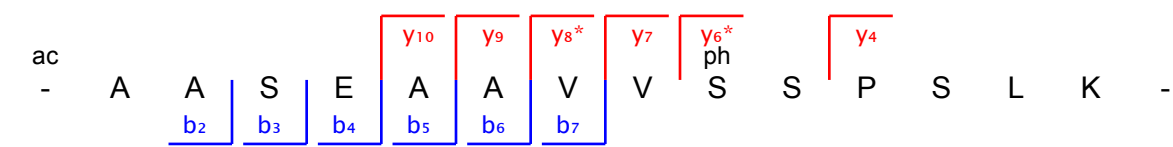

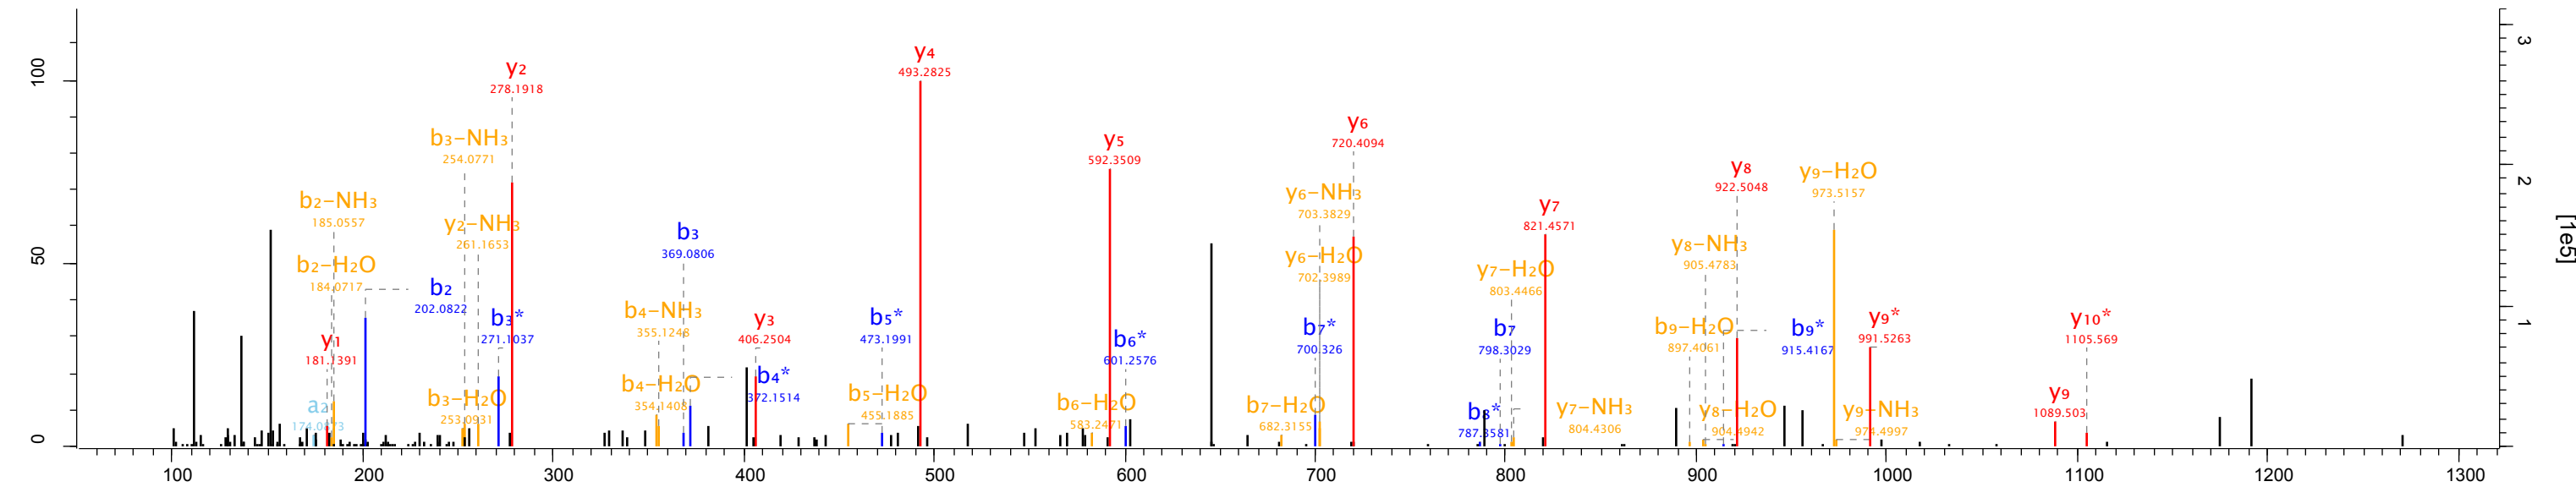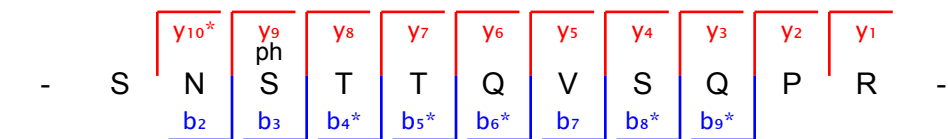

Raw file: 20171215\_MaS\_33SR\_LMH\_phospho2\_09  
 Scan: 3127 Method: FTMS; HCD Score: 103.43 m/z: 545.23 Gene names: FHOD1

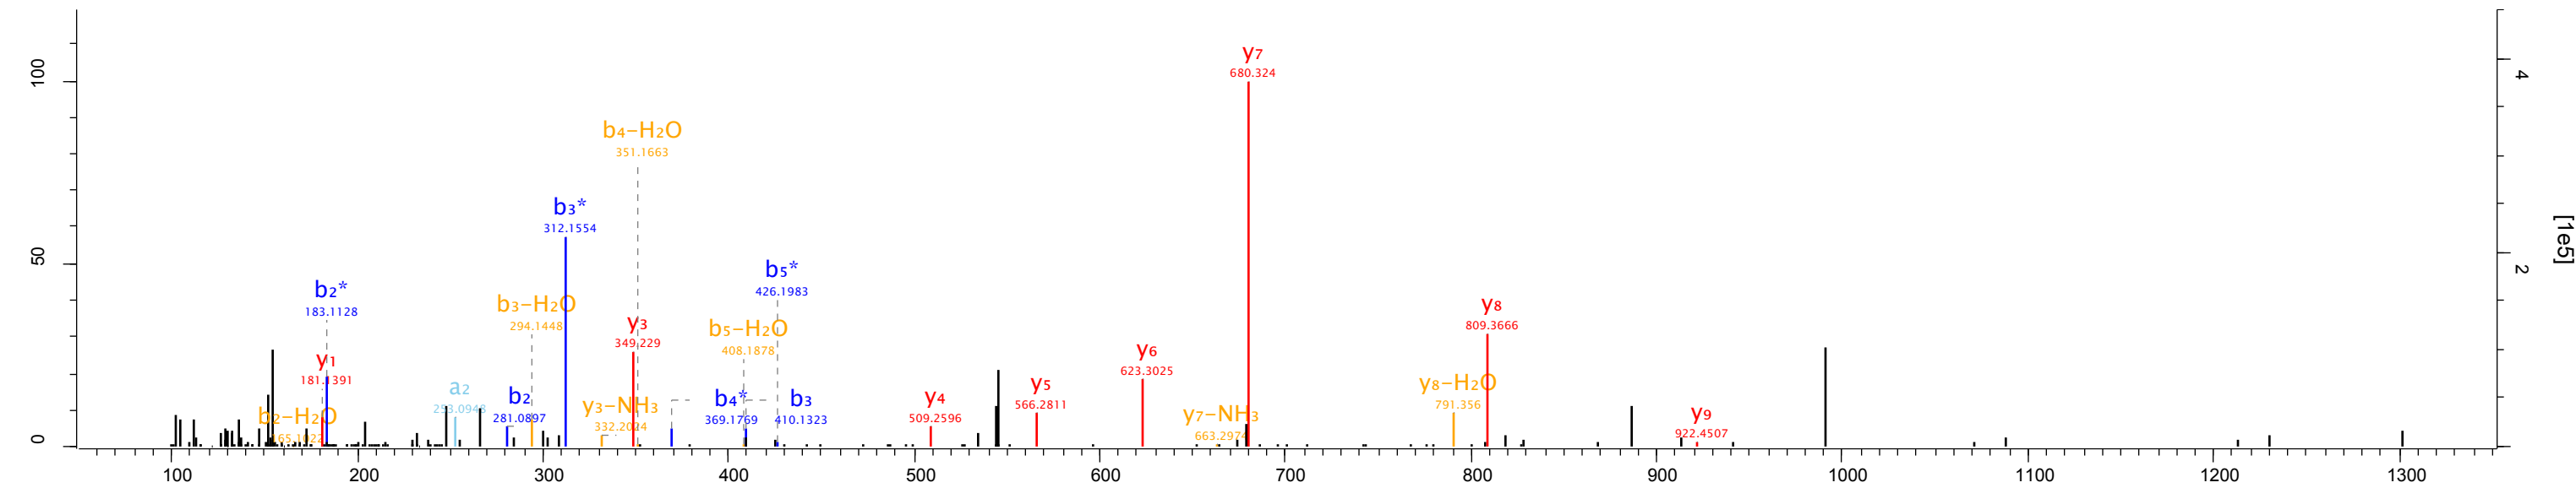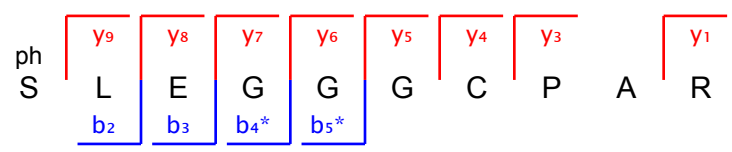

Raw file

20171215\_MaS\_33SR\_LMH\_phospho2\_09

| Scan | Method    | Score | m/z    | Gene names |
|------|-----------|-------|--------|------------|
| 4747 | FTMS; HCD | 46.89 | 644.79 | RAPH1      |

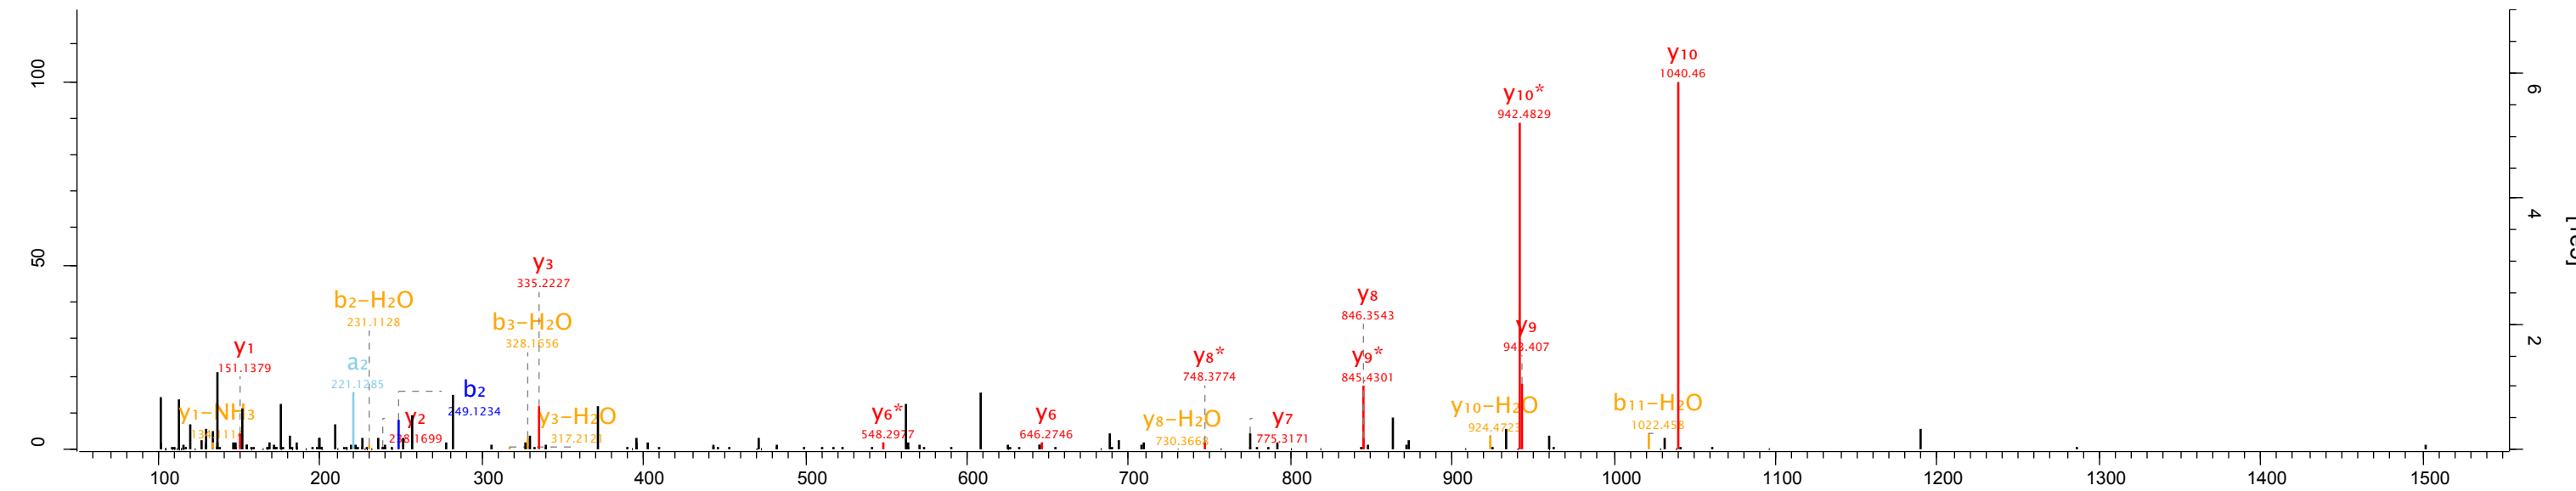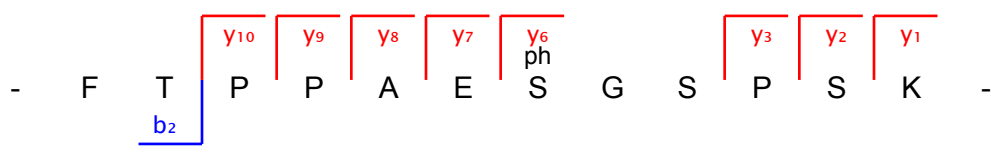



Raw file 20171215\_MaS\_33SR\_LMH\_phospho2\_09 Scan 5067 Method FTMS; HCD Score 106.28 m/z 833.4 Gene names ATXN2

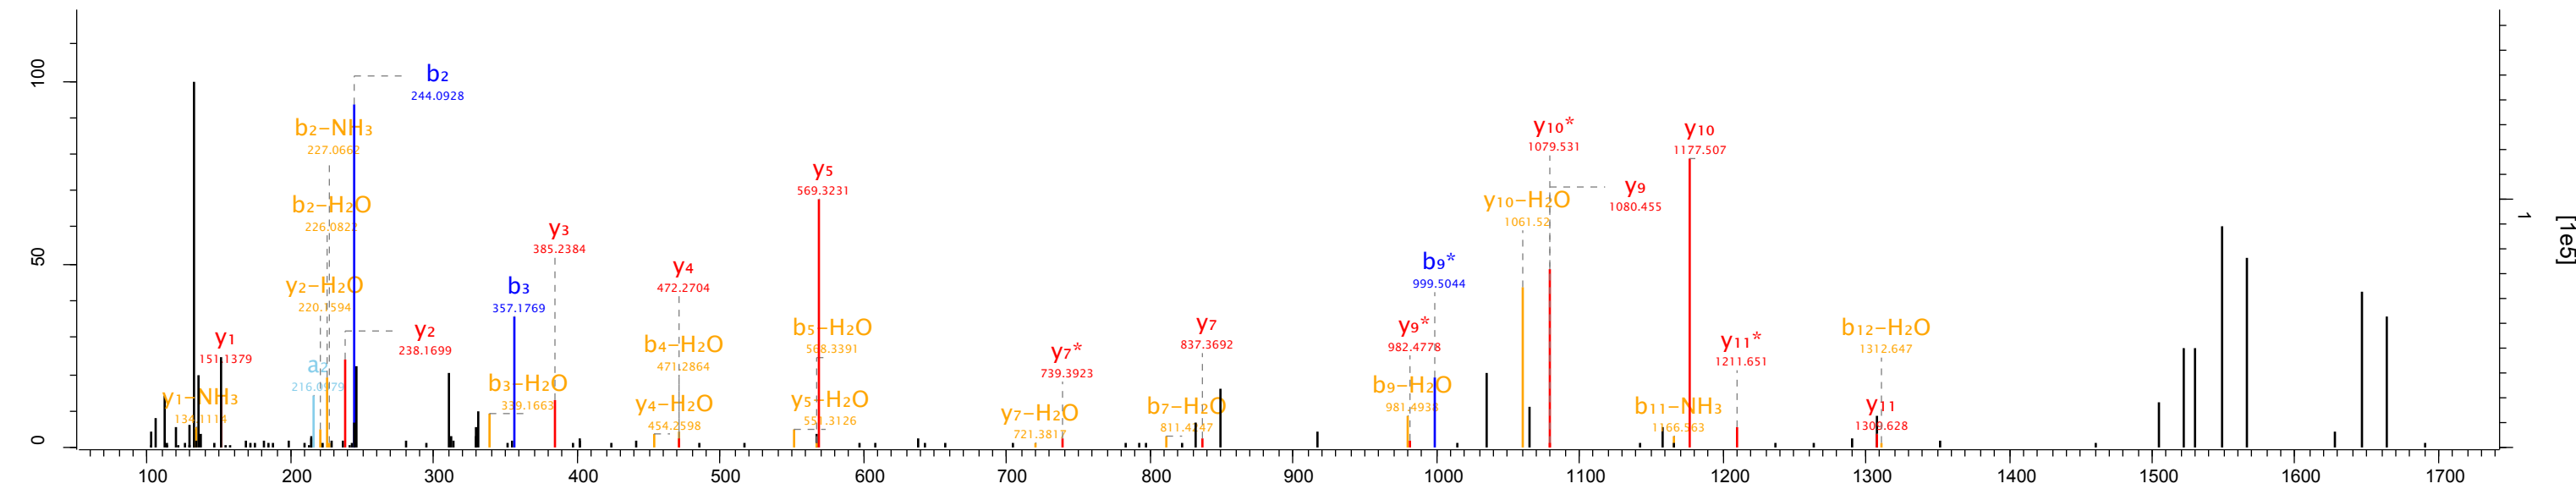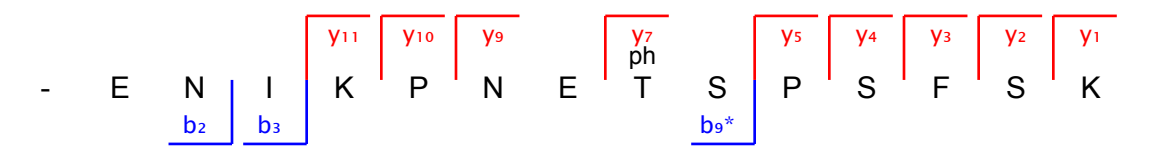

Raw file  
 20171215\_MaS\_33SR\_LMH\_phospho2\_09  
 Scan 6107 Method FTMS; HCD Score 70.33 m/z 760.34 Gene names AMBRA1

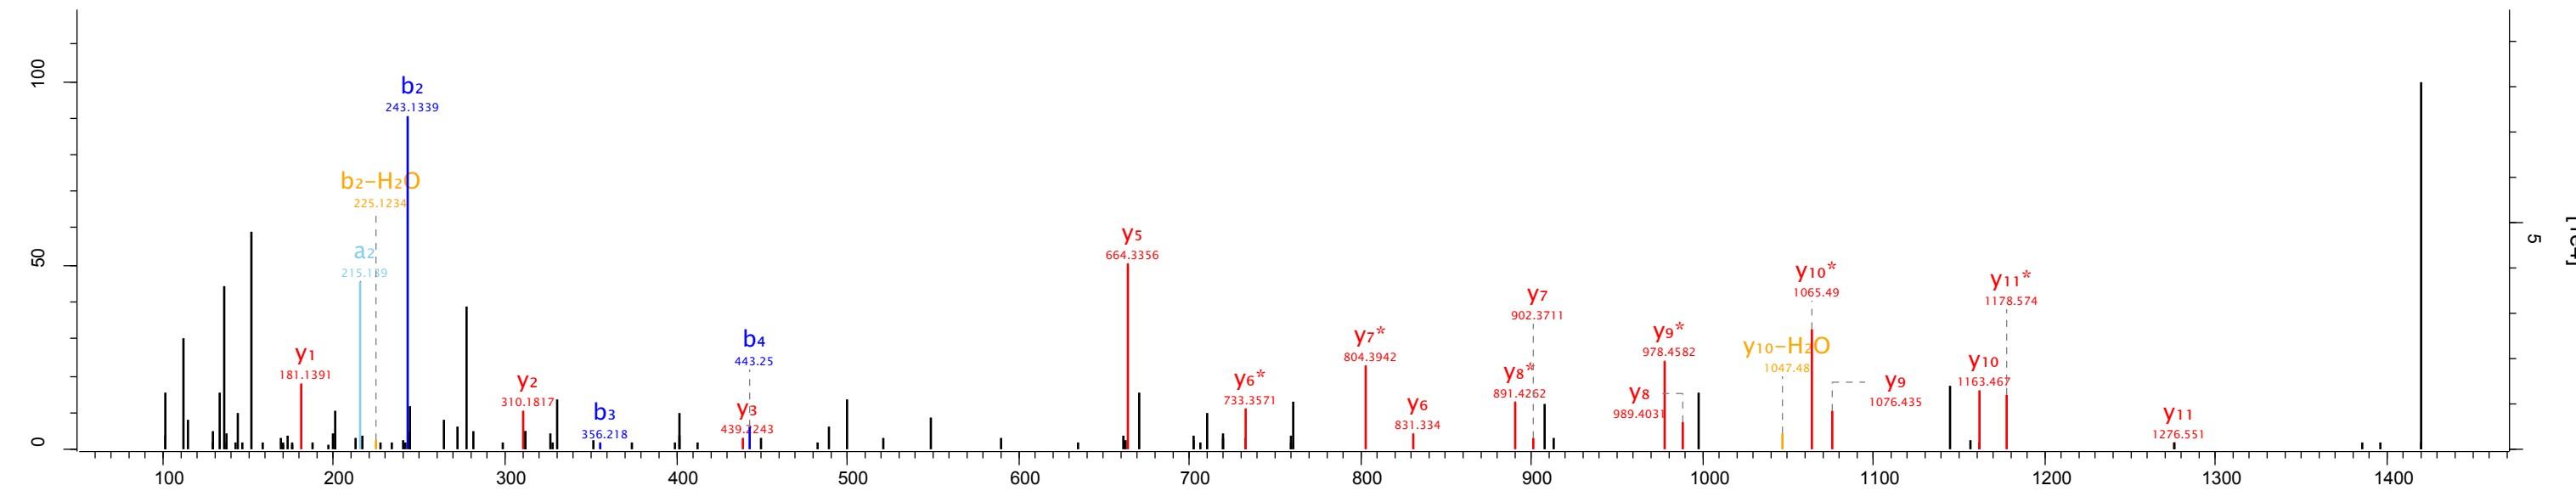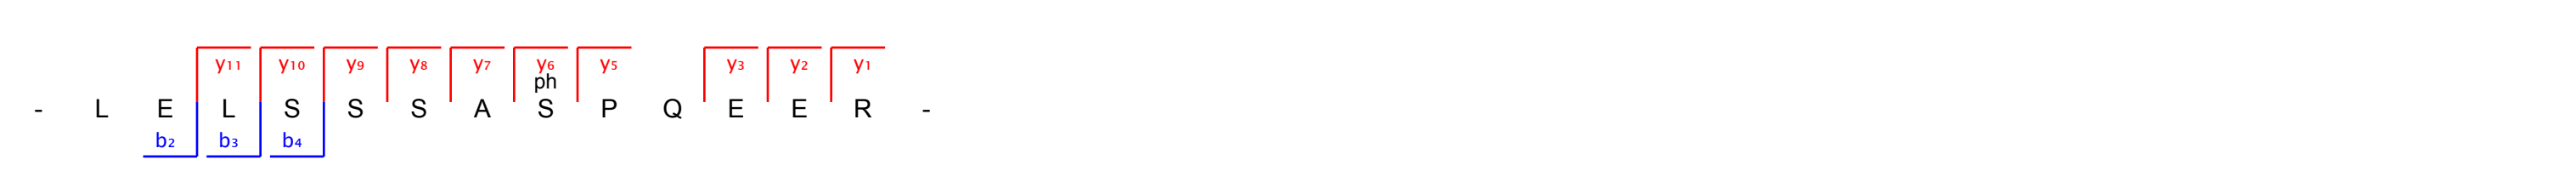

Raw file

20171215\_MaS\_33SR\_LMH\_phospho2\_09

| Scan | Method    | Score | m/z    | Gene names |
|------|-----------|-------|--------|------------|
| 8547 | FTMS; HCD | 40.19 | 639.82 | TOPBP1     |

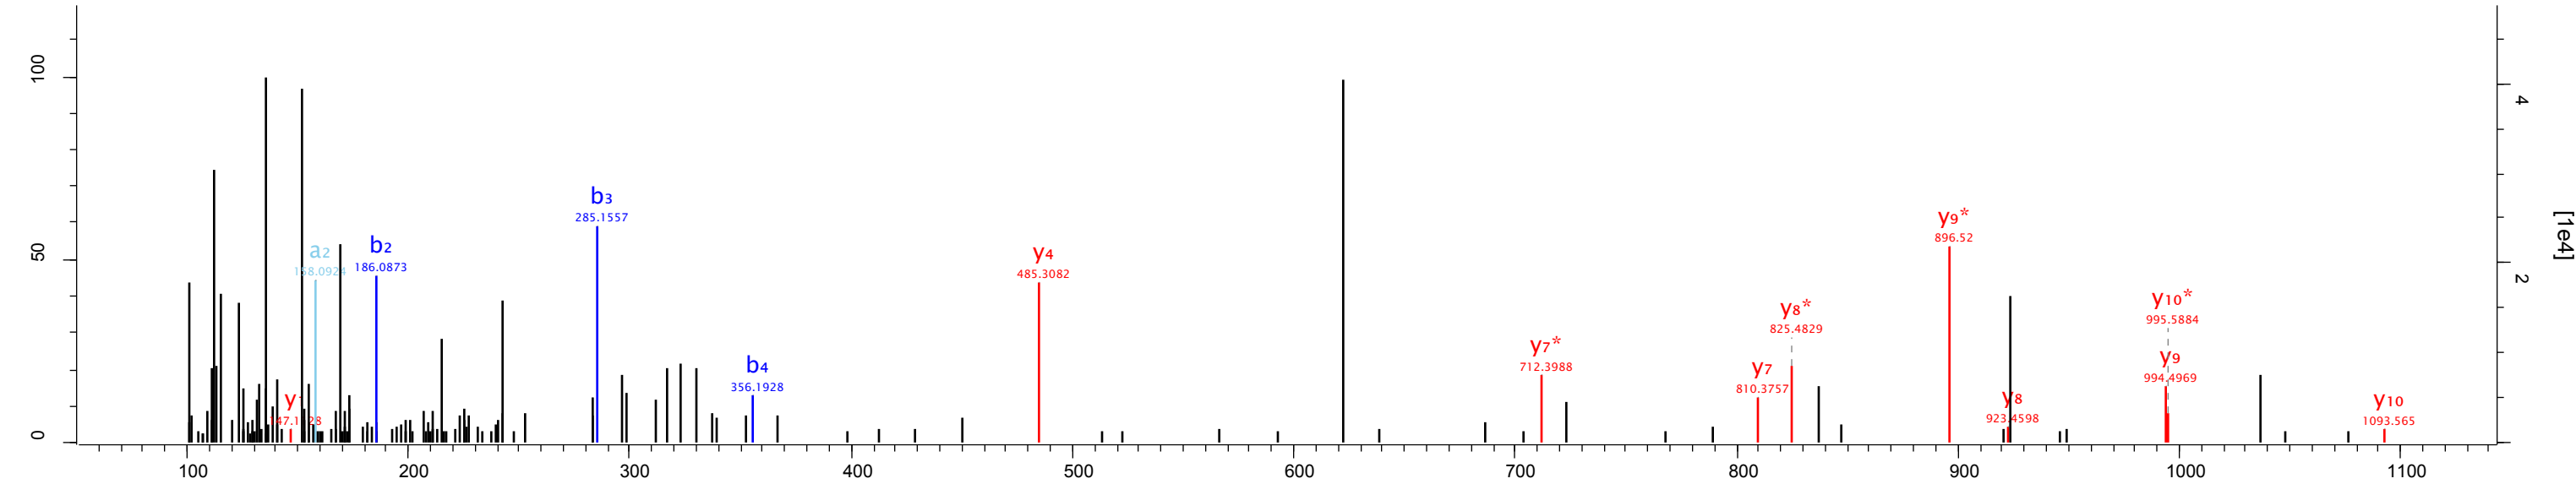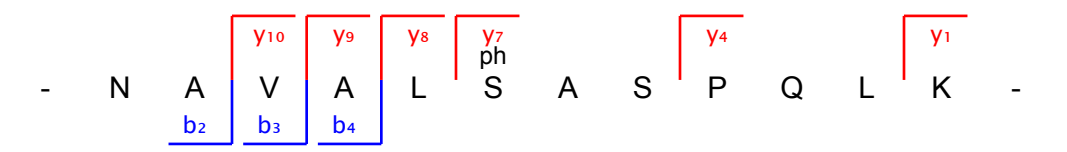

Raw file 20171215\_MaS\_33SR\_LMH\_proteome\_01 Scan 115267 Method FTMS; HCD Score 46.88 m/z 715.4

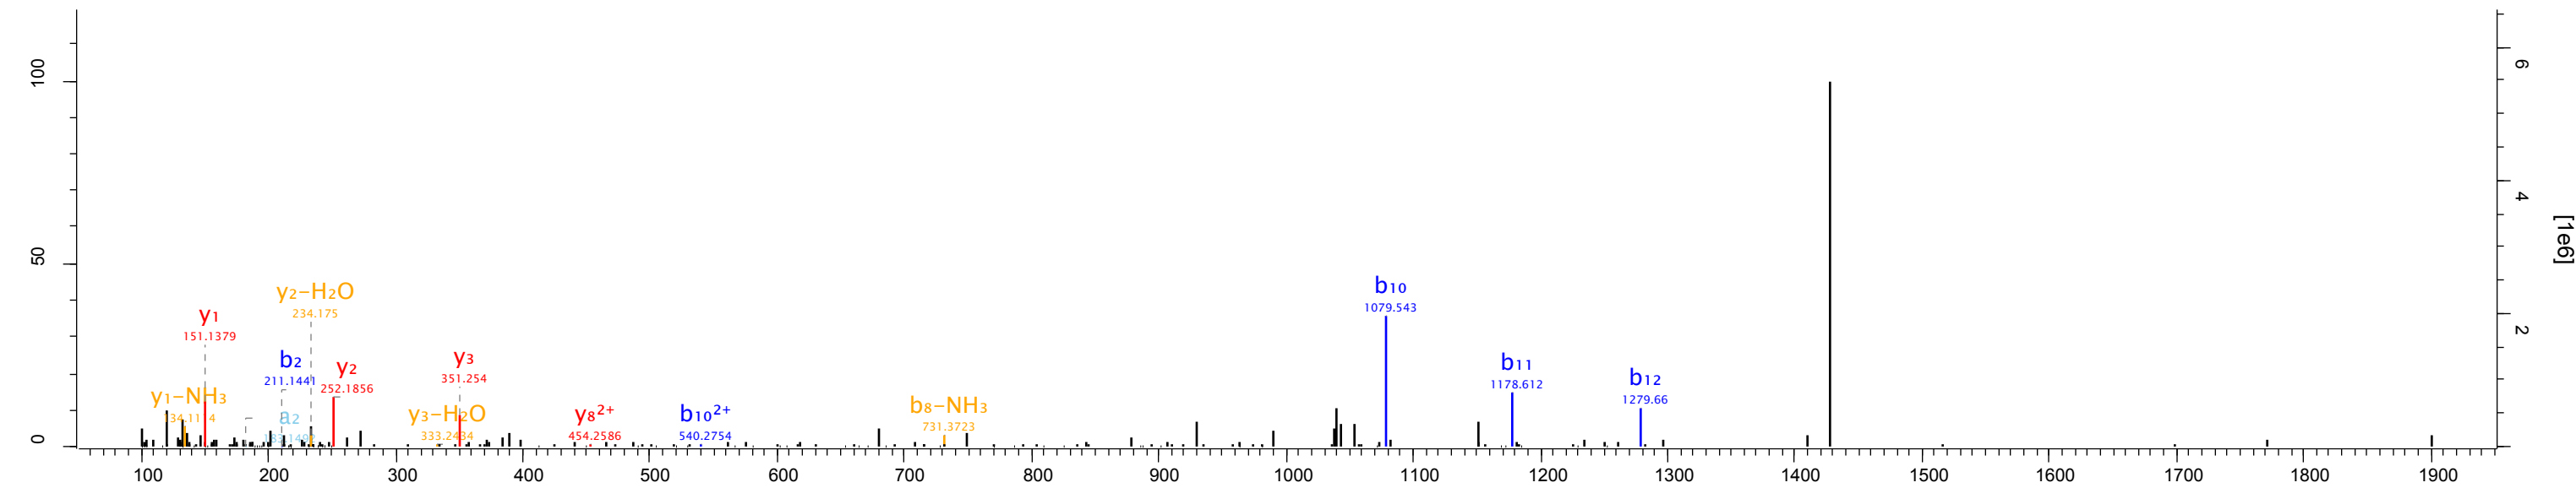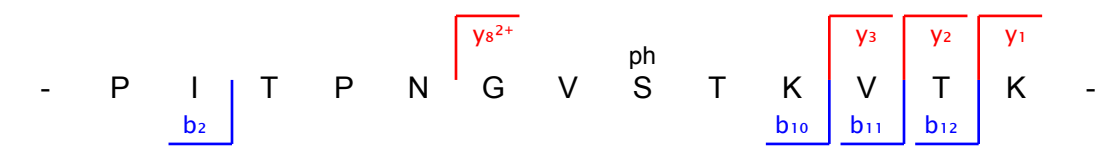

20171215\_MaS\_33SR\_LMH\_proteome\_01 50757 FTMS; HCD 89.72 856.36 CALU

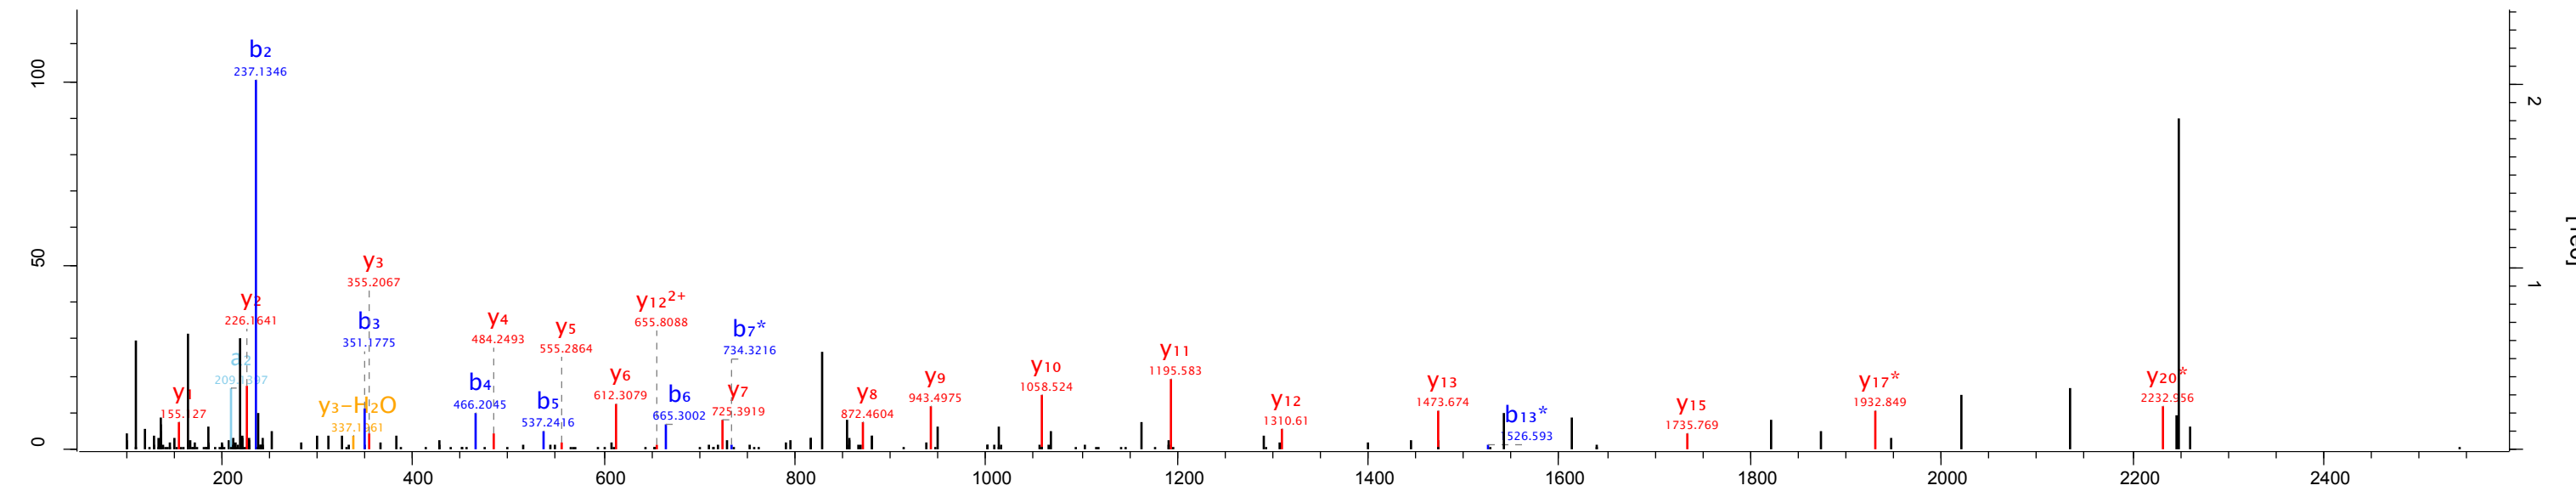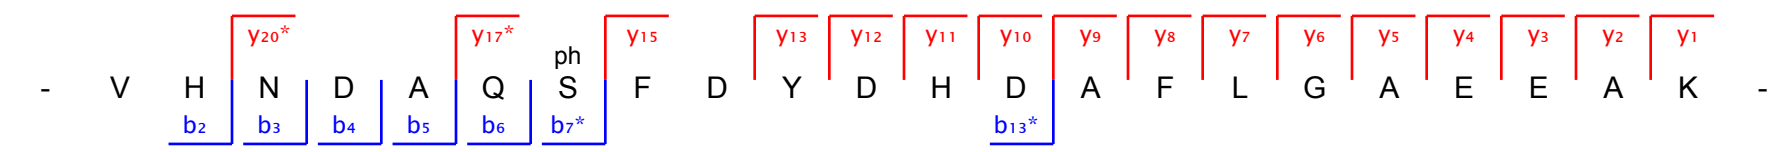

Raw file 20171215\_MaS\_33SR\_LMH\_proteome\_01 Scan 85267 Method FTMS; HCD Score 107.73 m/z 1032.87 Gene names FAM129B

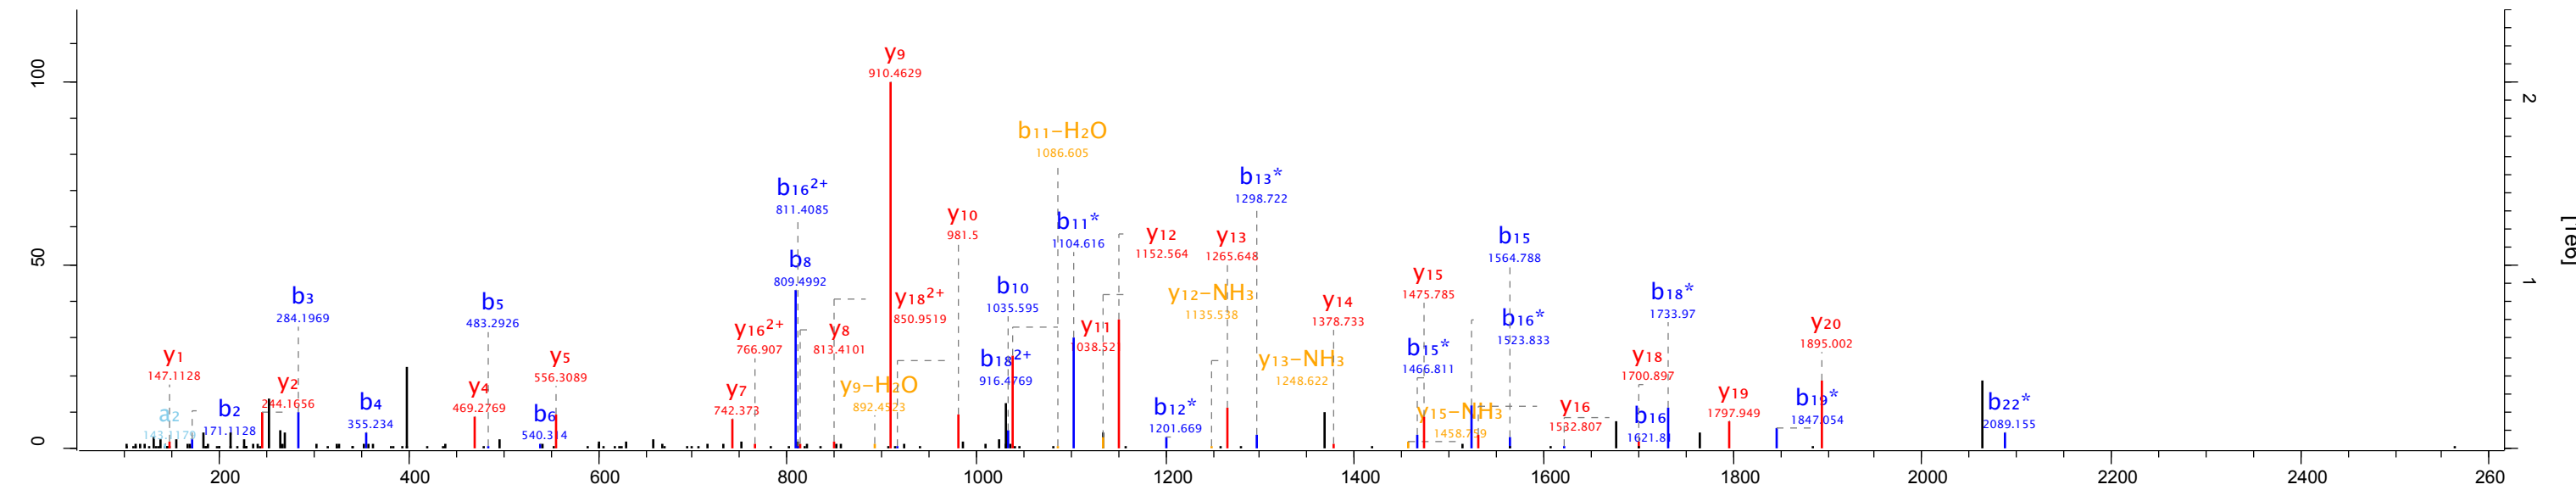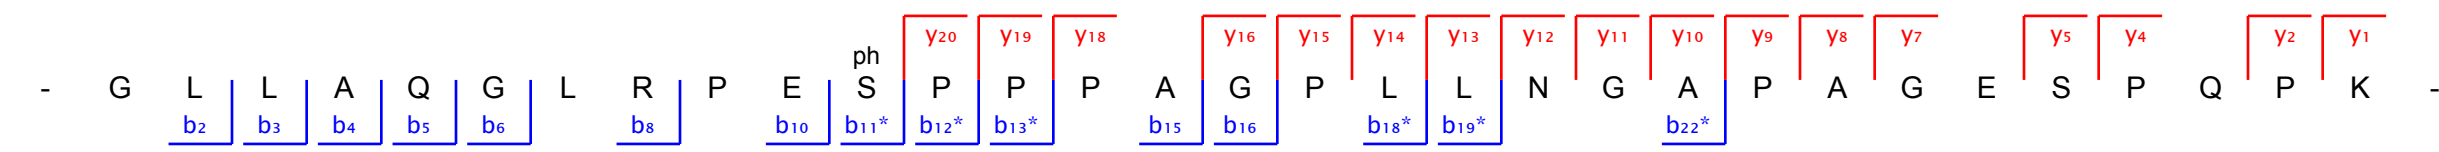

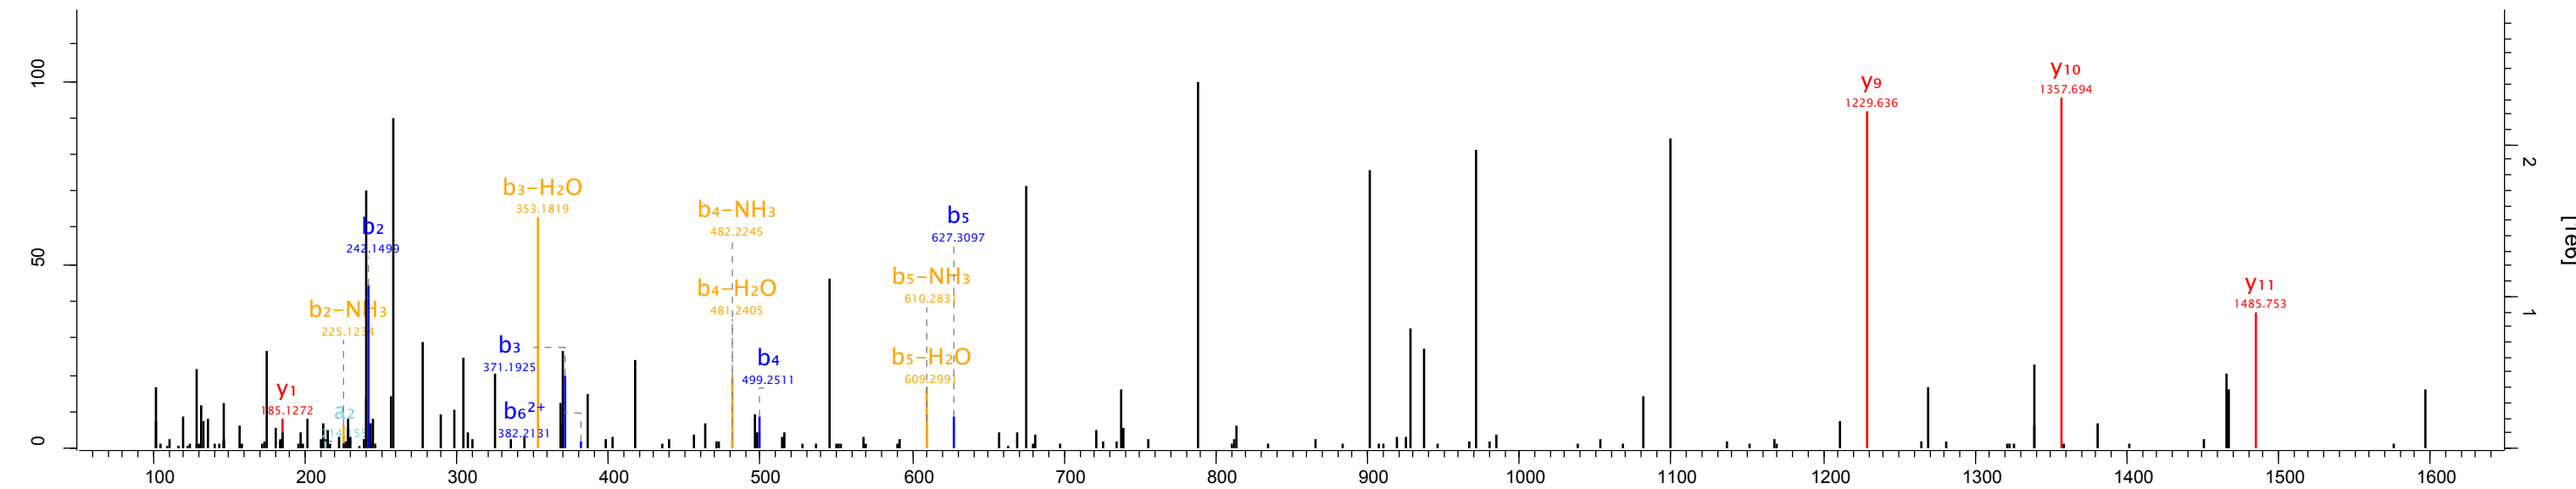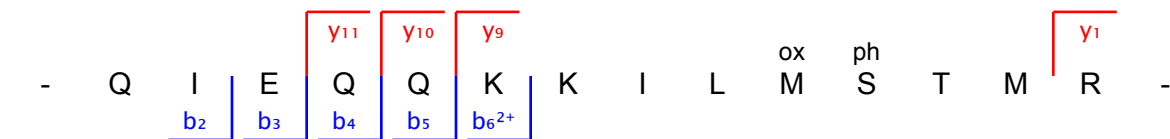

Raw file: 20171215\_MaS\_33SR\_LMH\_proteome\_02  
 Scan: 35747 Method: FTMS; HCD Score: 40.49 m/z: 700.64 Gene names: RALGAPB

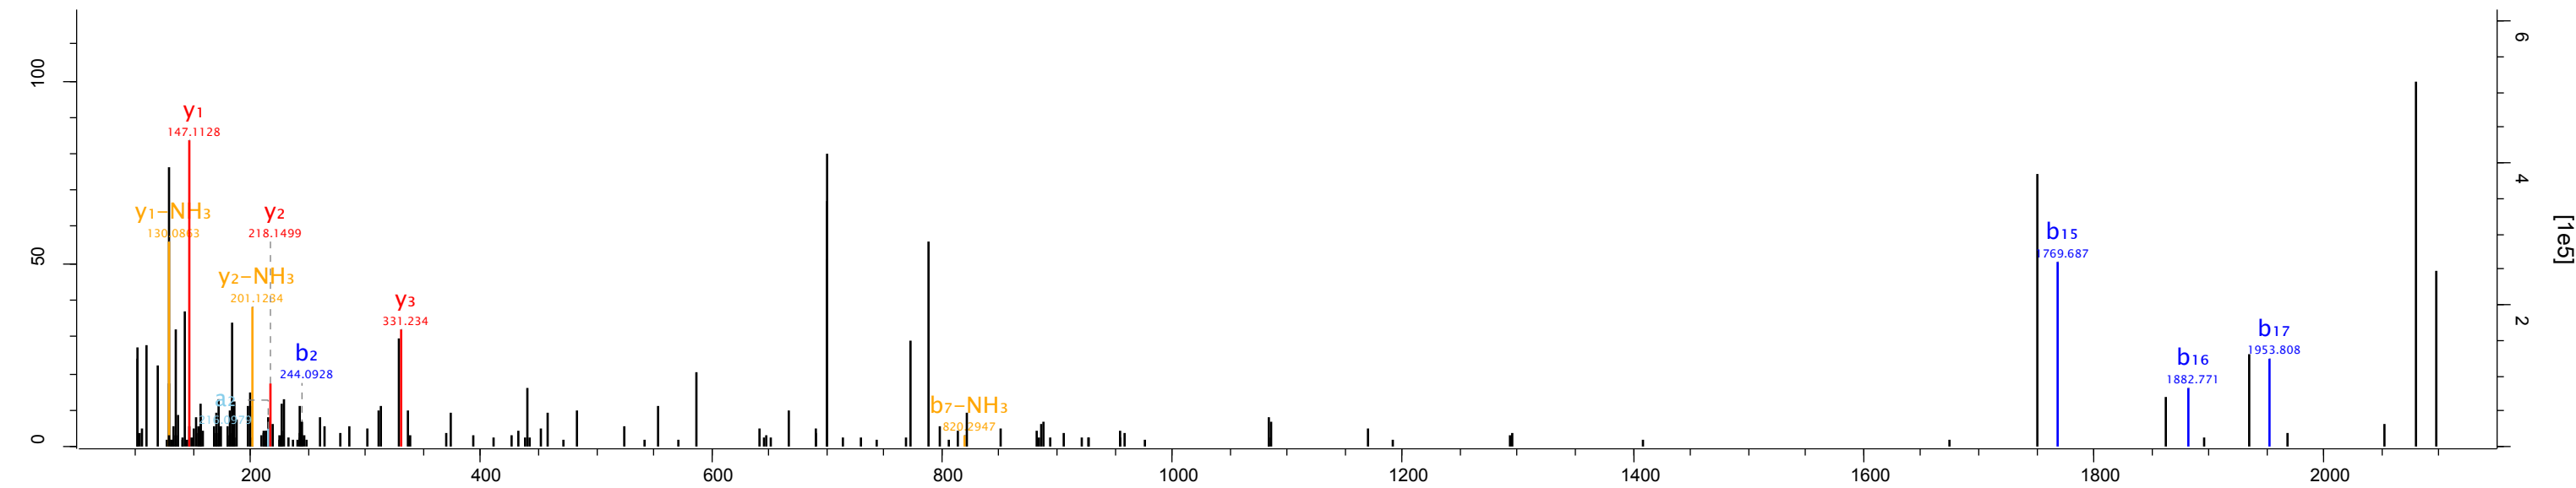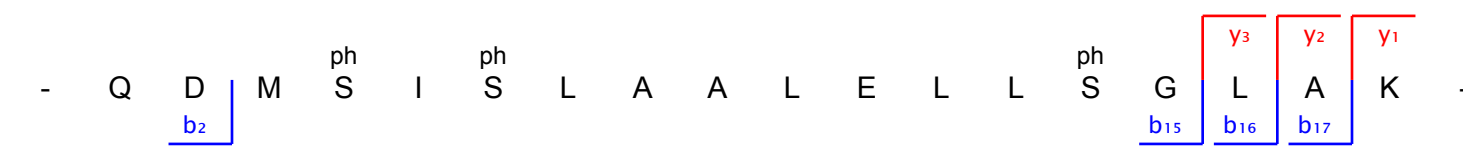



Raw file 20171215\_MaS\_33SR\_LMH\_proteome\_02 Scan 36537 Method FTMS; HCD Score 74.84 m/z 705.35 Gene names OR52Z1

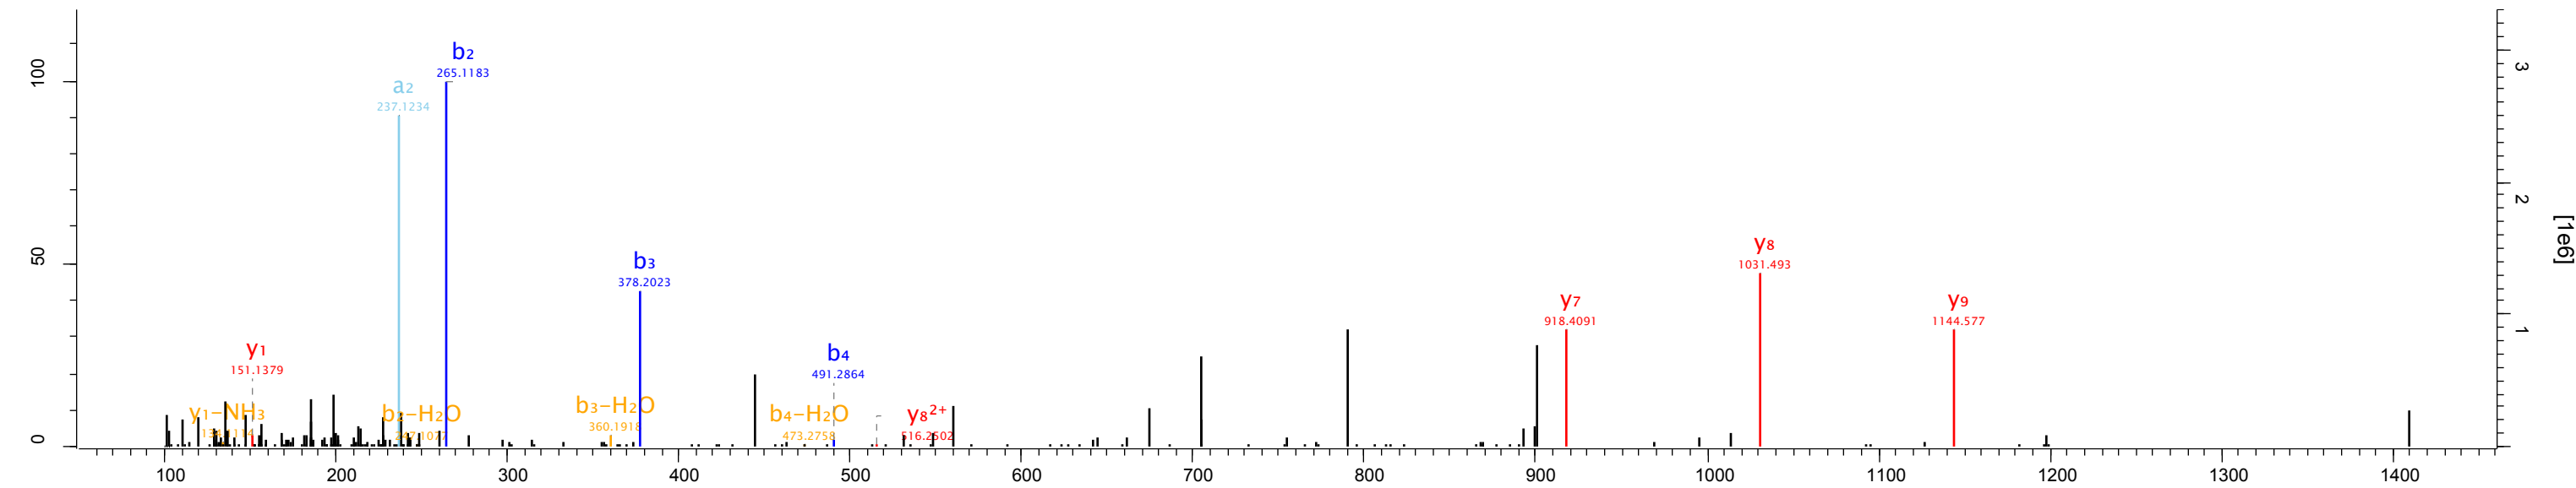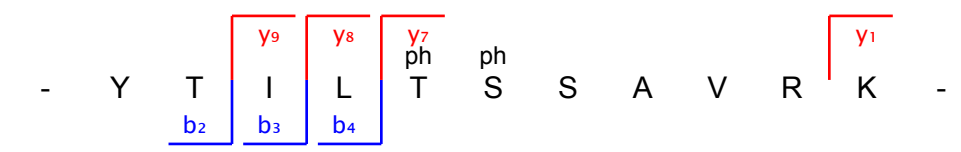

Raw file: 20171215\_MaS\_33SR\_LMH\_proteome\_02  
 Scan: 48747 Method: FTMS; HCD Score: 48.57 m/z: 749.88 Gene names: CHRNA3

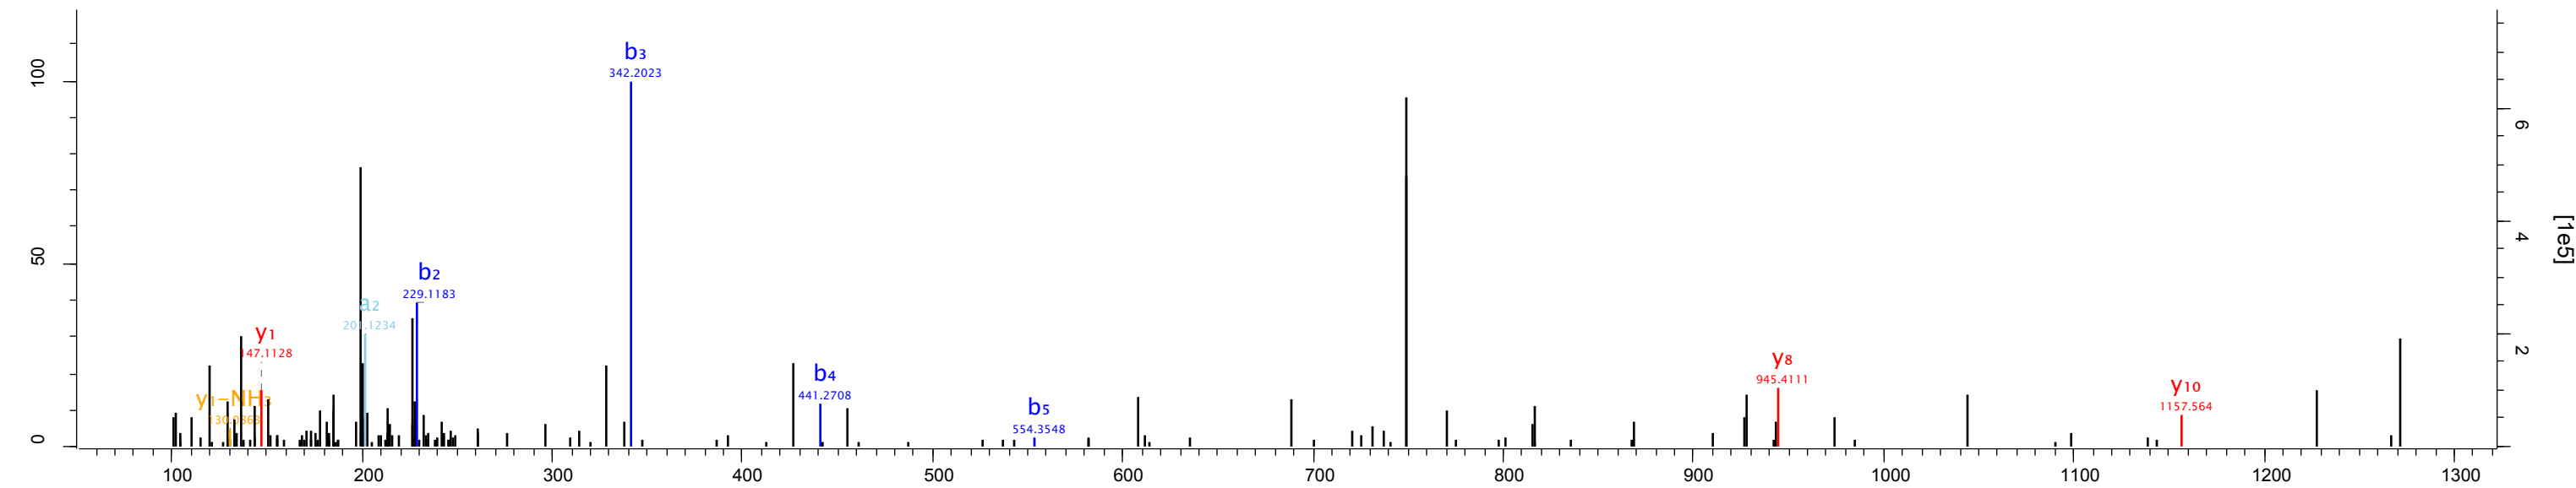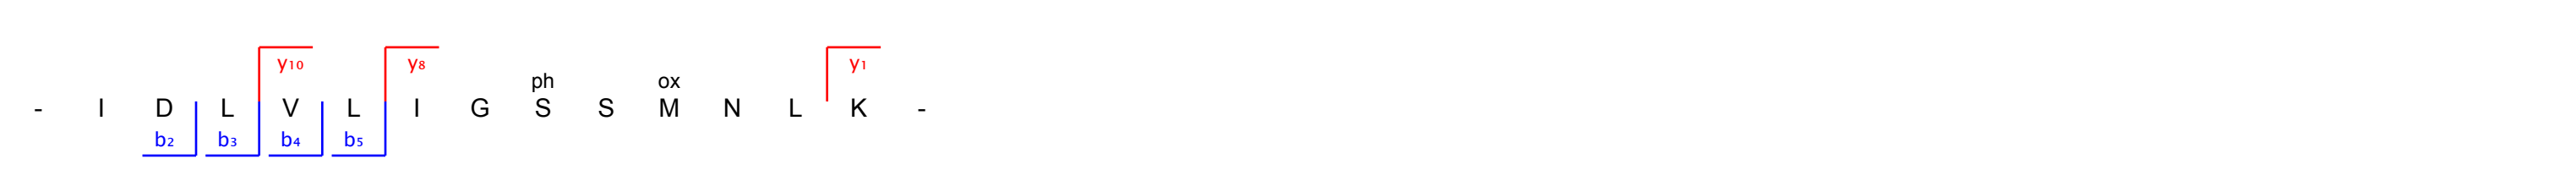

Raw file 20171215\_MaS\_33SR\_LMH\_proteome\_02 Scan 88157 Method FTMS; HCD Score 48.53 m/z 1008.47 Gene names PTPRC

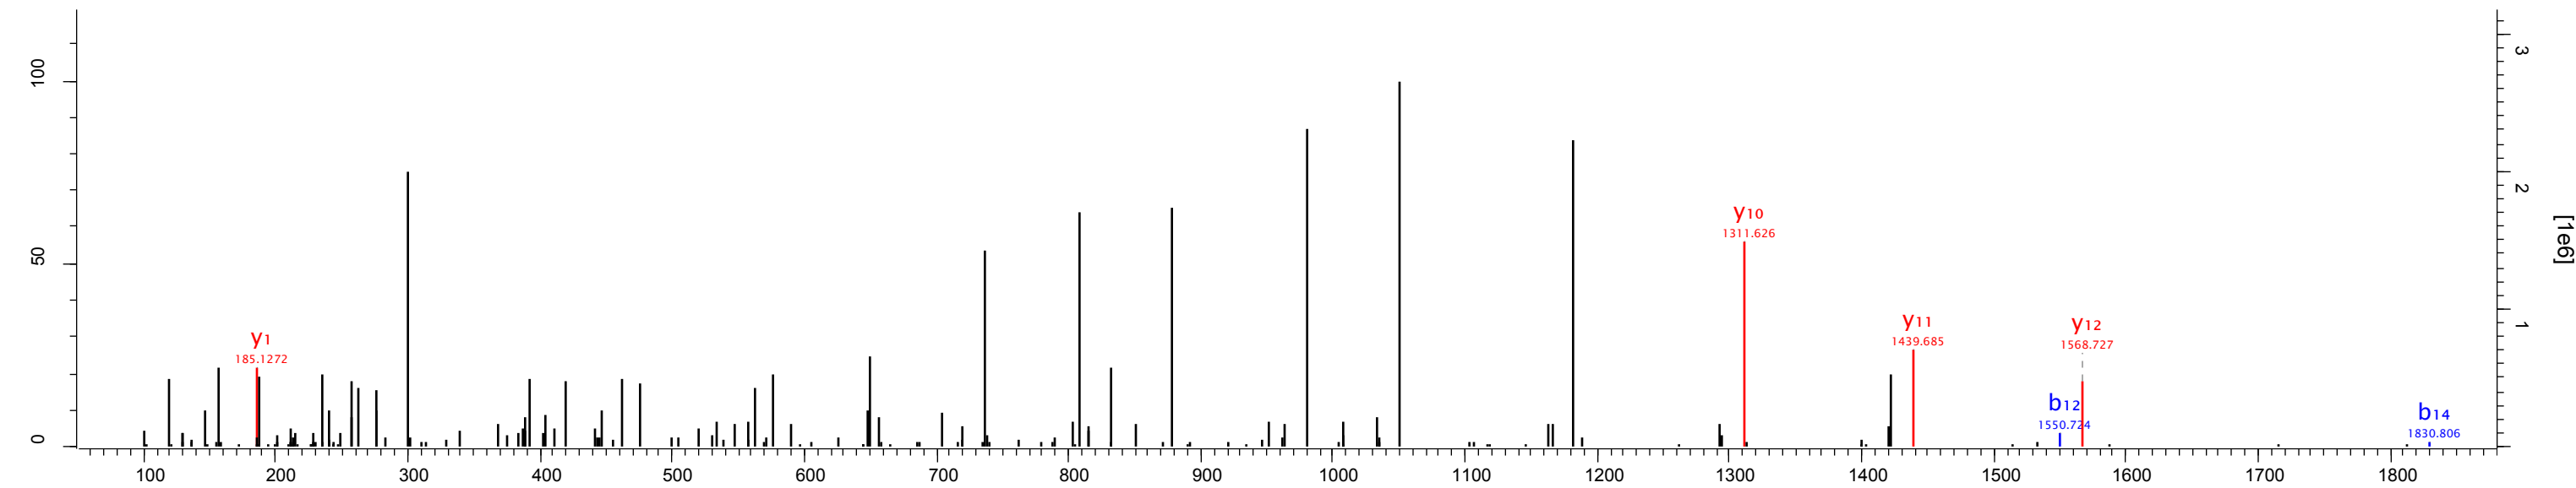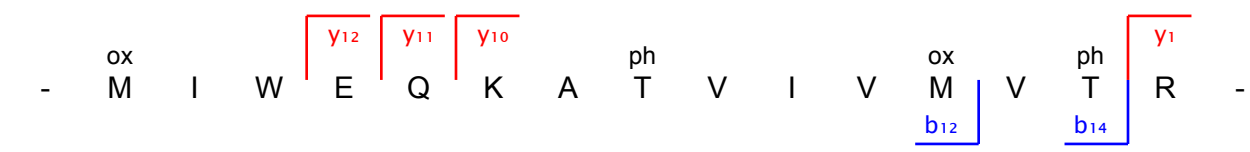

Raw file: 20171215\_MaS\_33SR\_LMH\_phospho\_01  
 Scan: 10448 Method: FTMS; HCD Score: 84.79 m/z: 1247.51 Gene names: ZC3H4

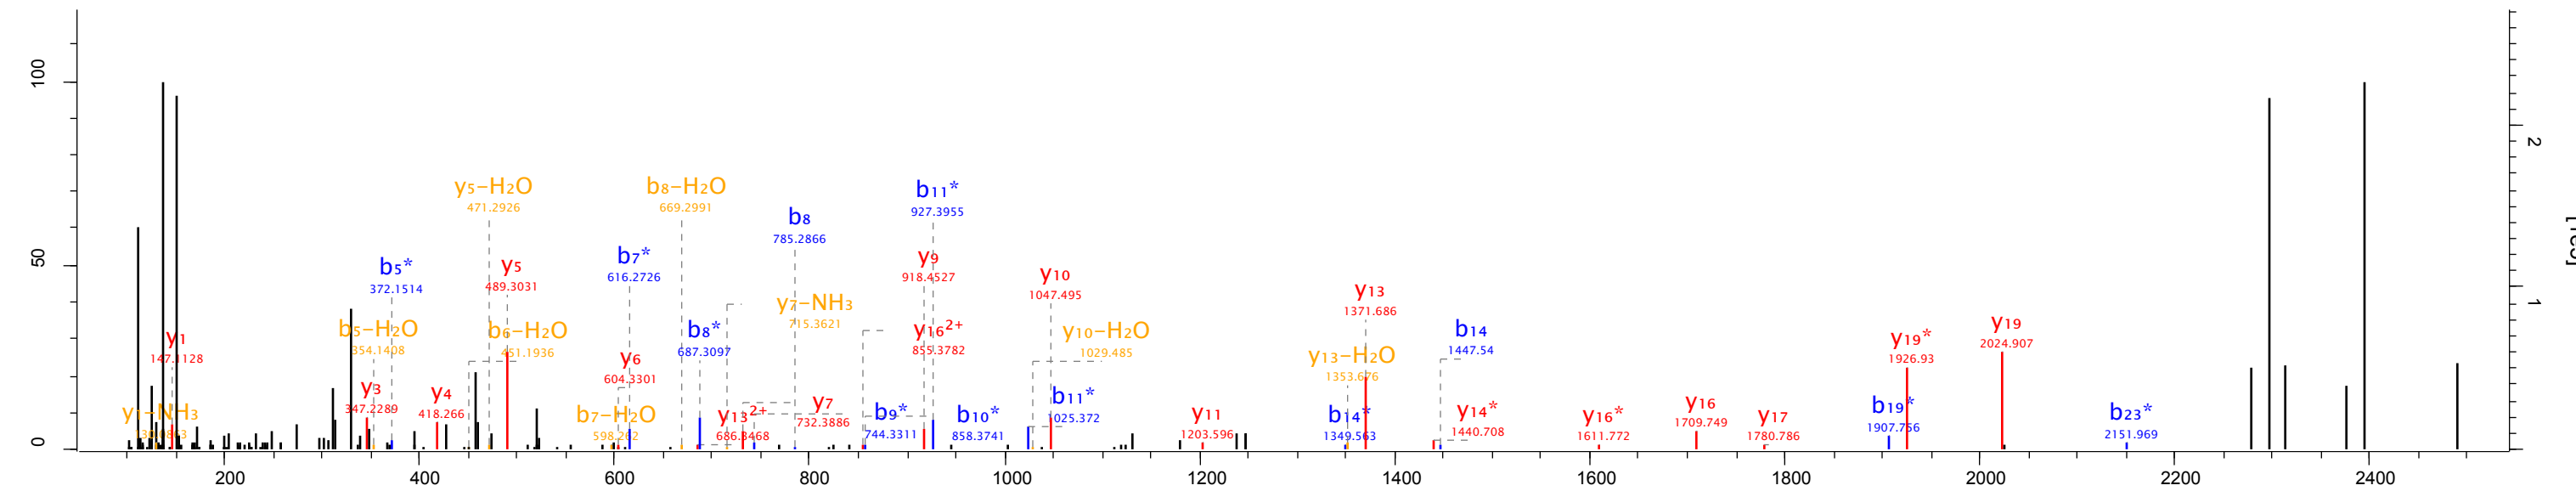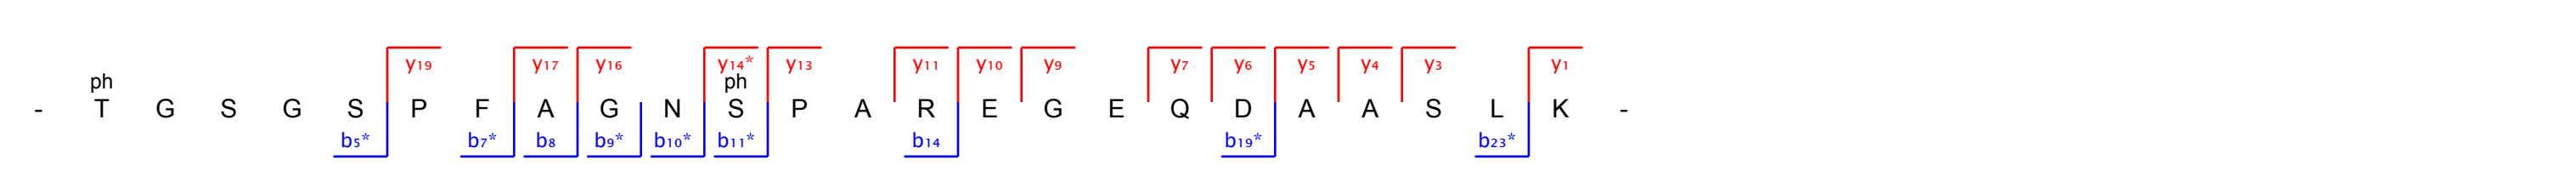

Raw file 20171215\_MaS\_33SR\_LMH\_phospho\_01 Scan 10888 Method FTMS; HCD Score 131.4 m/z 972.74 Gene names UBE4B

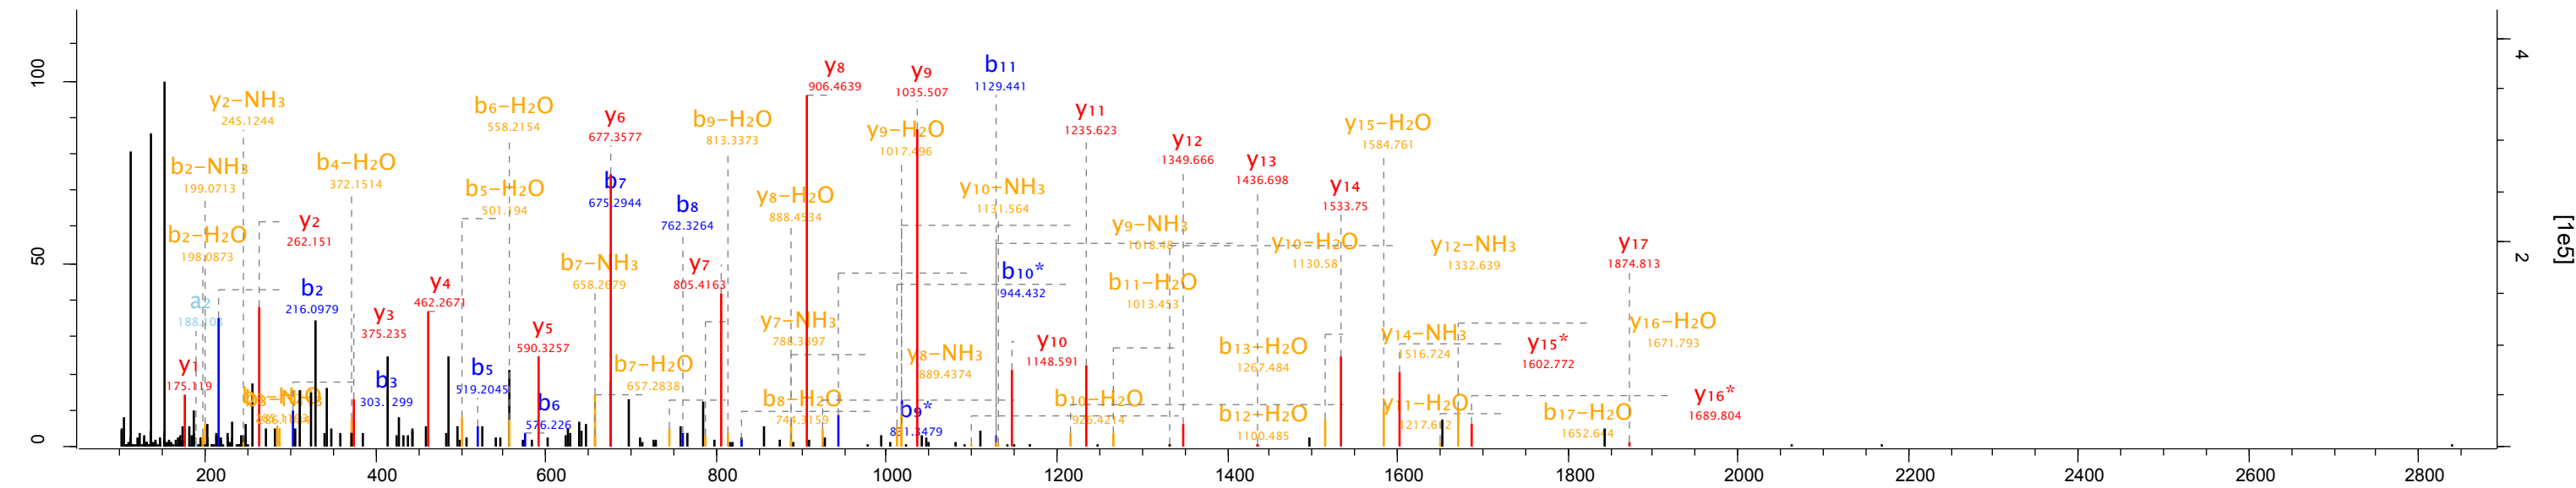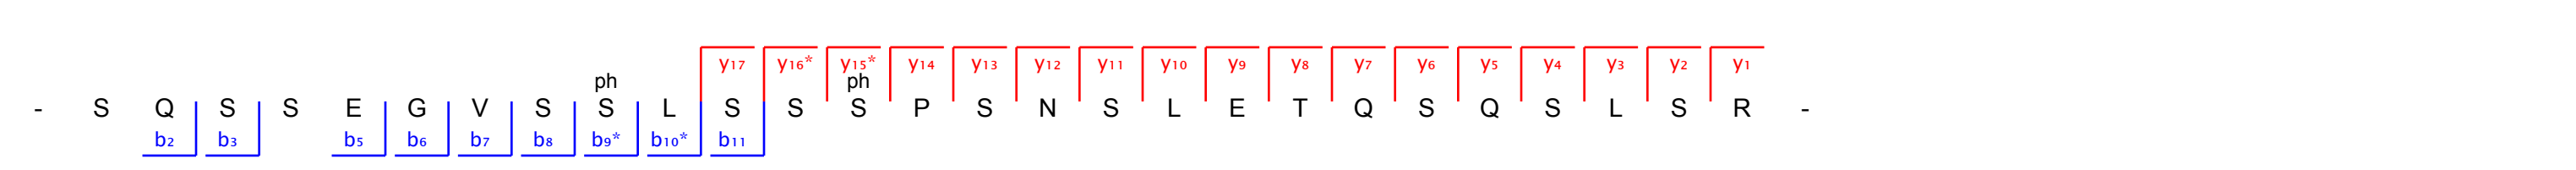

Raw file 20171215\_MaS\_33SR\_LMH\_phospho\_01 Scan 11788 Method FTMS; HCD Score 204.47 m/z 912.91 Gene names SPAG9

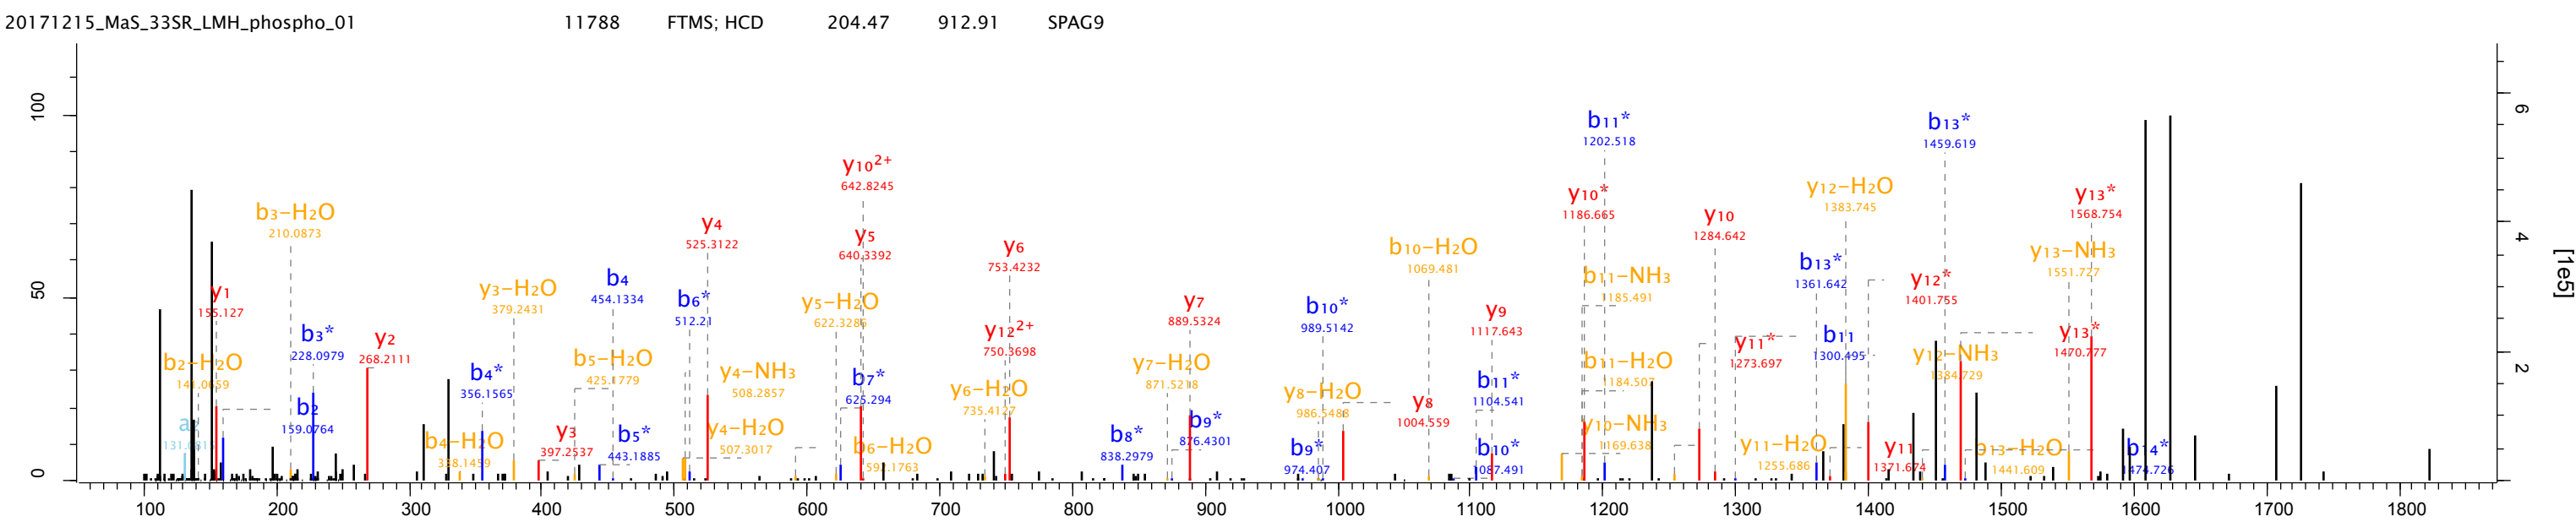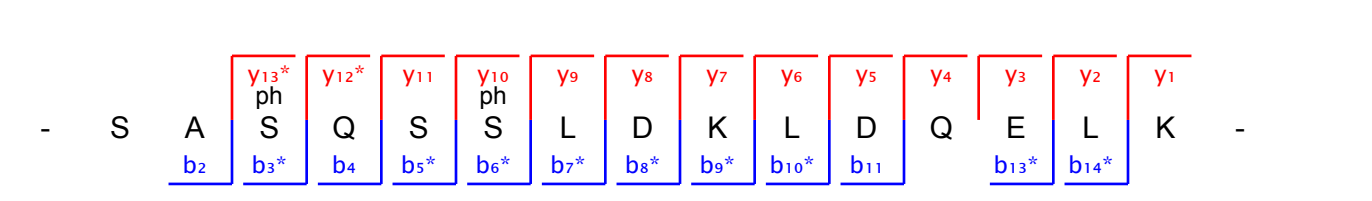

Raw file 20171215\_MaS\_33SR\_LMH\_phospho\_01 Scan 12118 Method FTMS; HCD Score 97.39 m/z 939.38 Gene names DIDO1

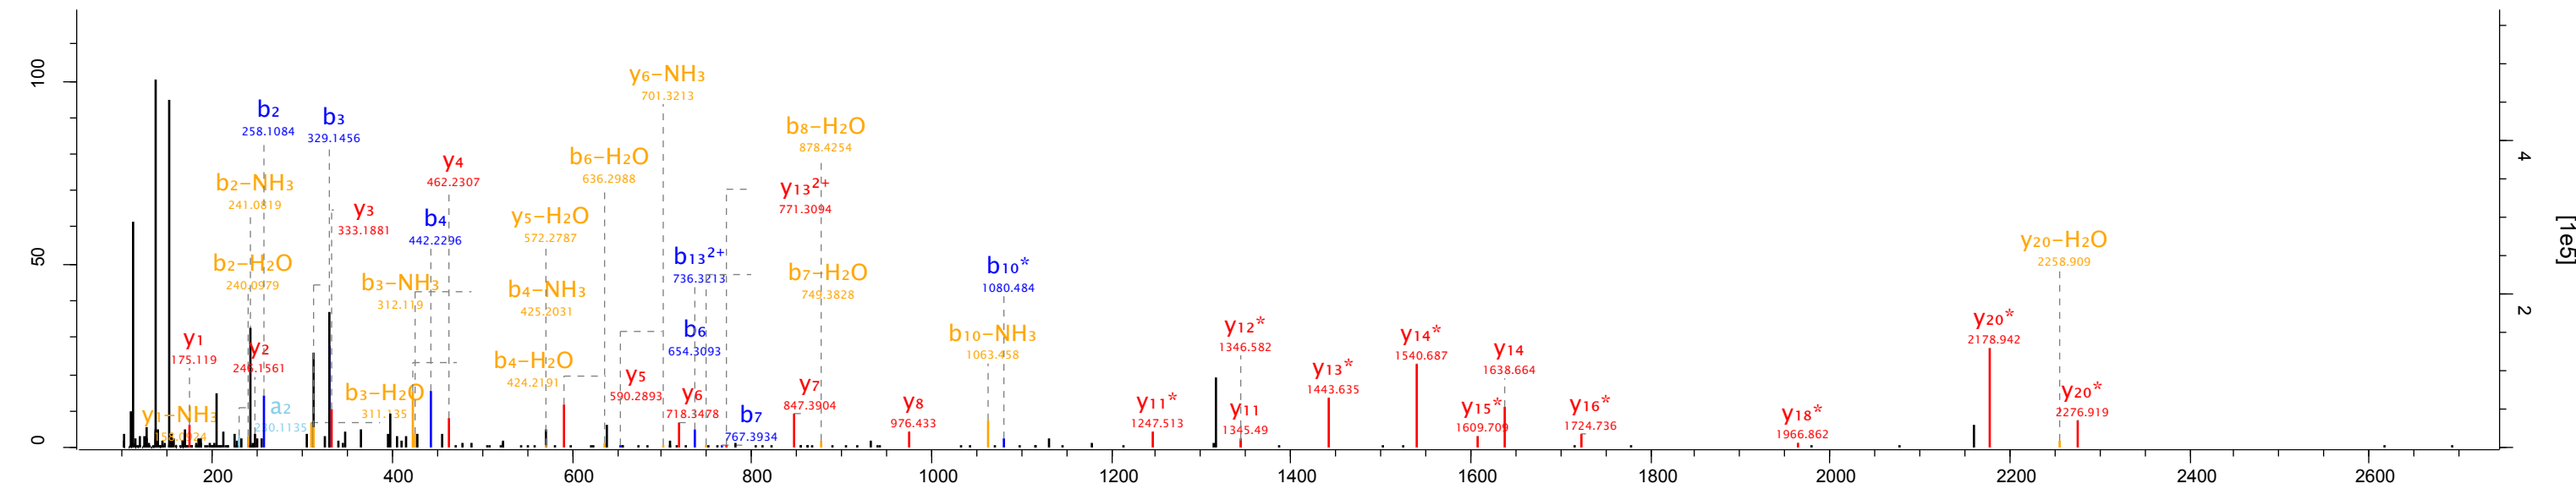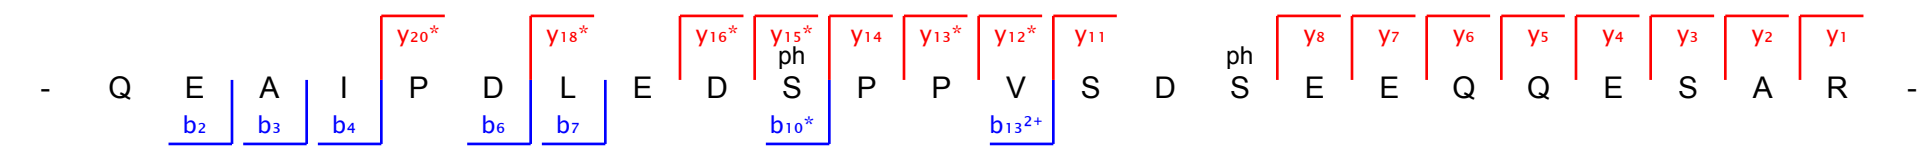

Raw file 20171215\_MaS\_33SR\_LMH\_phospho\_01 Scan 12358 Method FTMS; HCD Score 44.39 m/z 832.79 Gene names SLC9A8

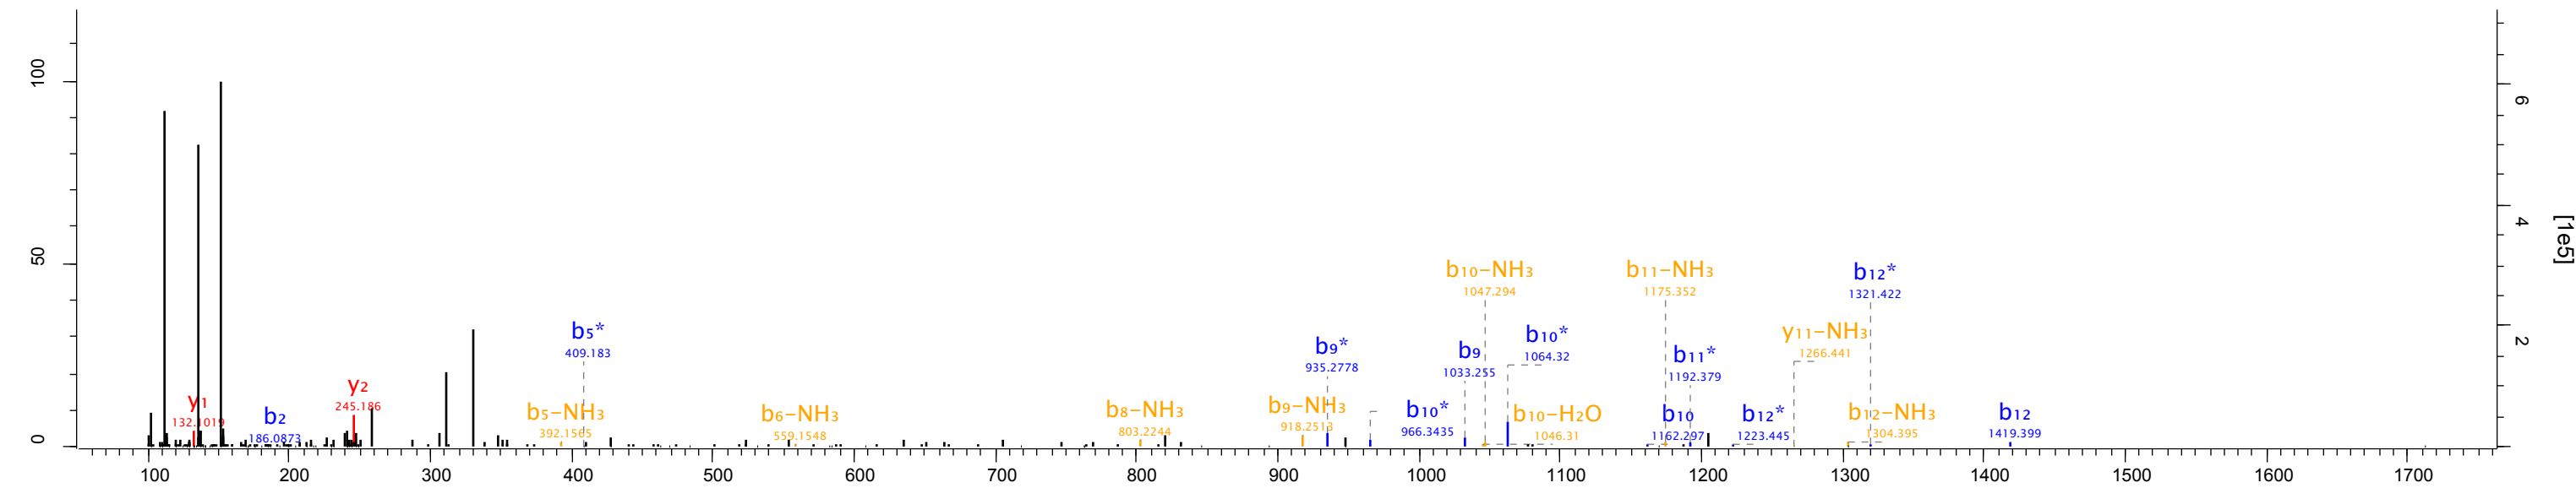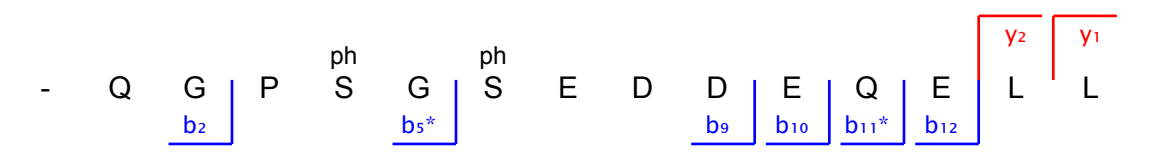



Raw file 20171215\_MaS\_33SR\_LMH\_phospho\_01 Scan 12698 Method FTMS; HCD Score 83.49 m/z 942.09 Gene names SRRM1

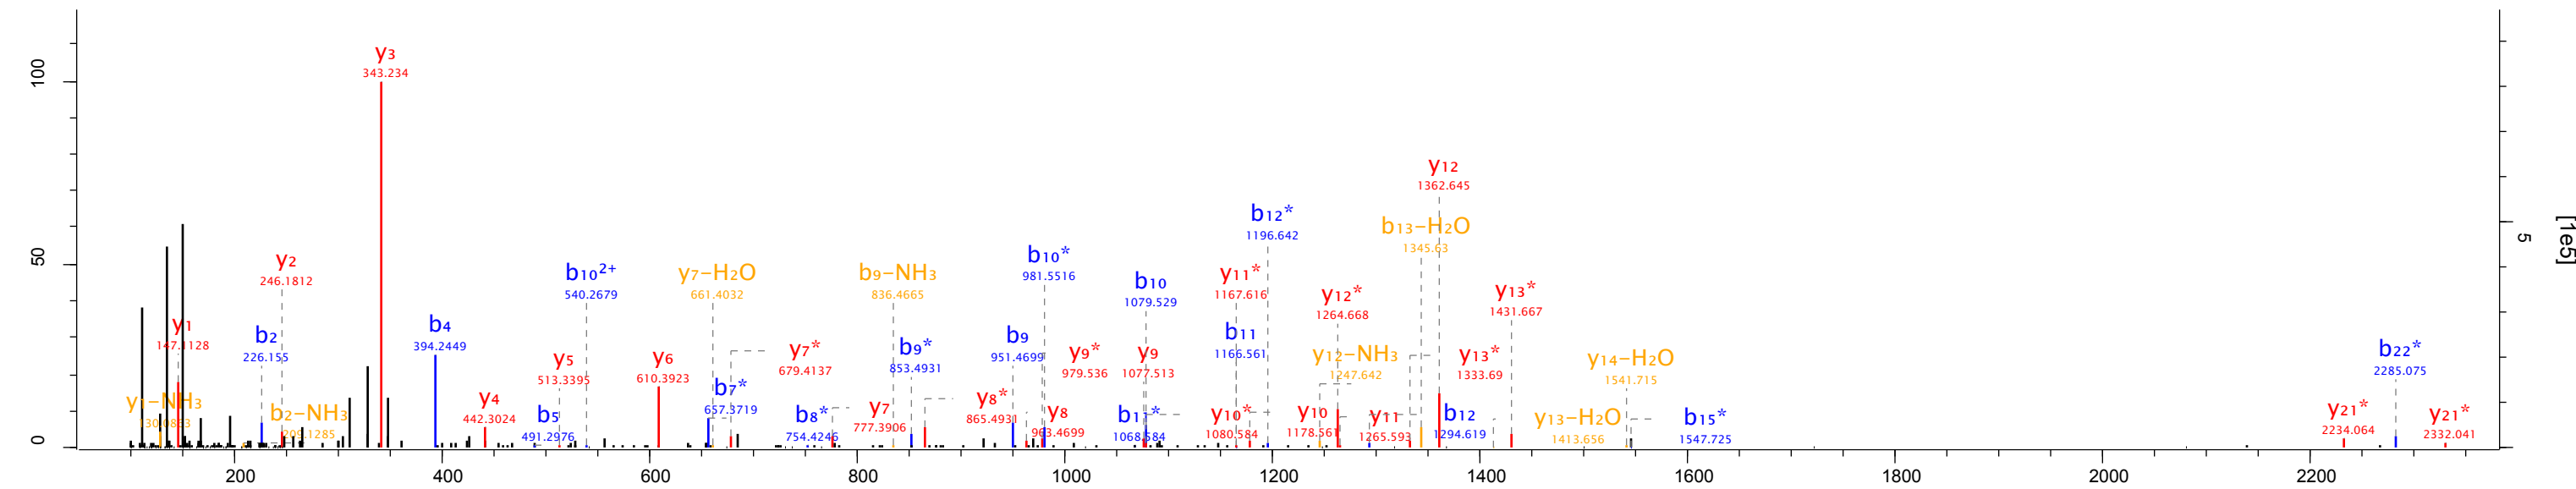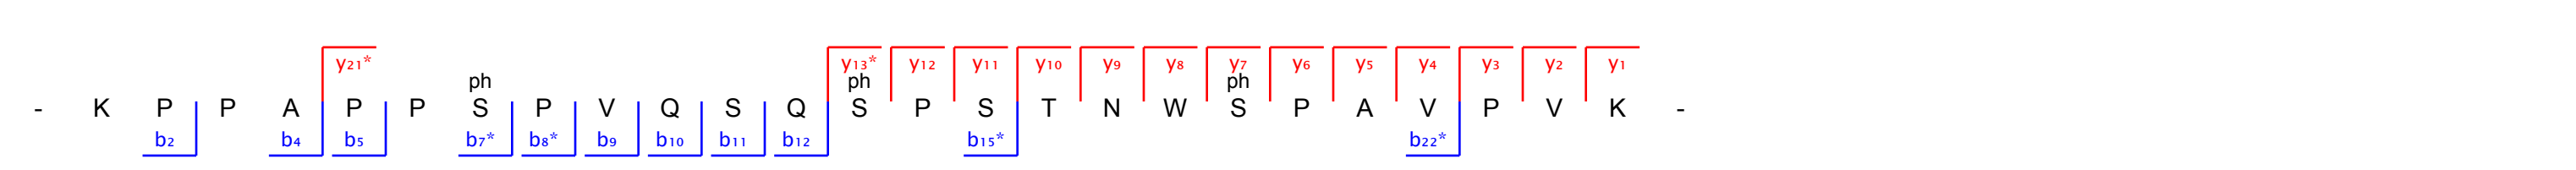

20171215\_MaS\_33SR\_LMH\_phospho\_01 13578 FTMS; HCD 127.18 806.86 GFPT1

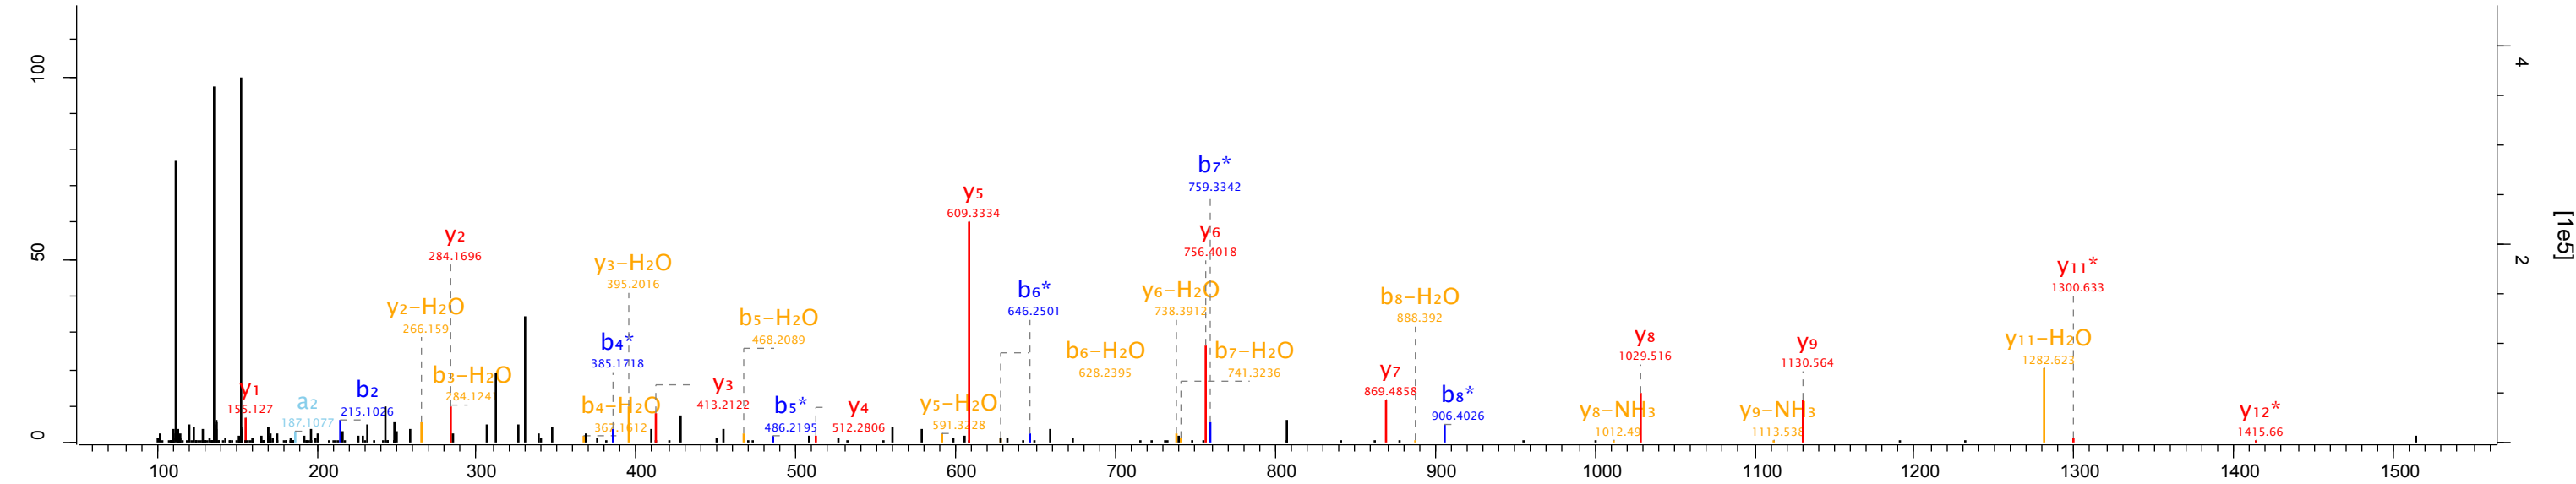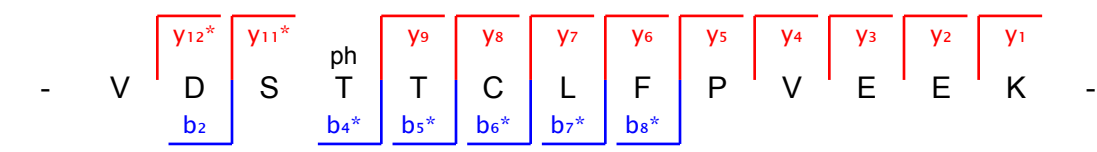

Raw file 20171215\_MaS\_33SR\_LMH\_phospho\_01 Scan 2558 Method FTMS; HCD Score 110.09 m/z 720.78 Gene names TJP1

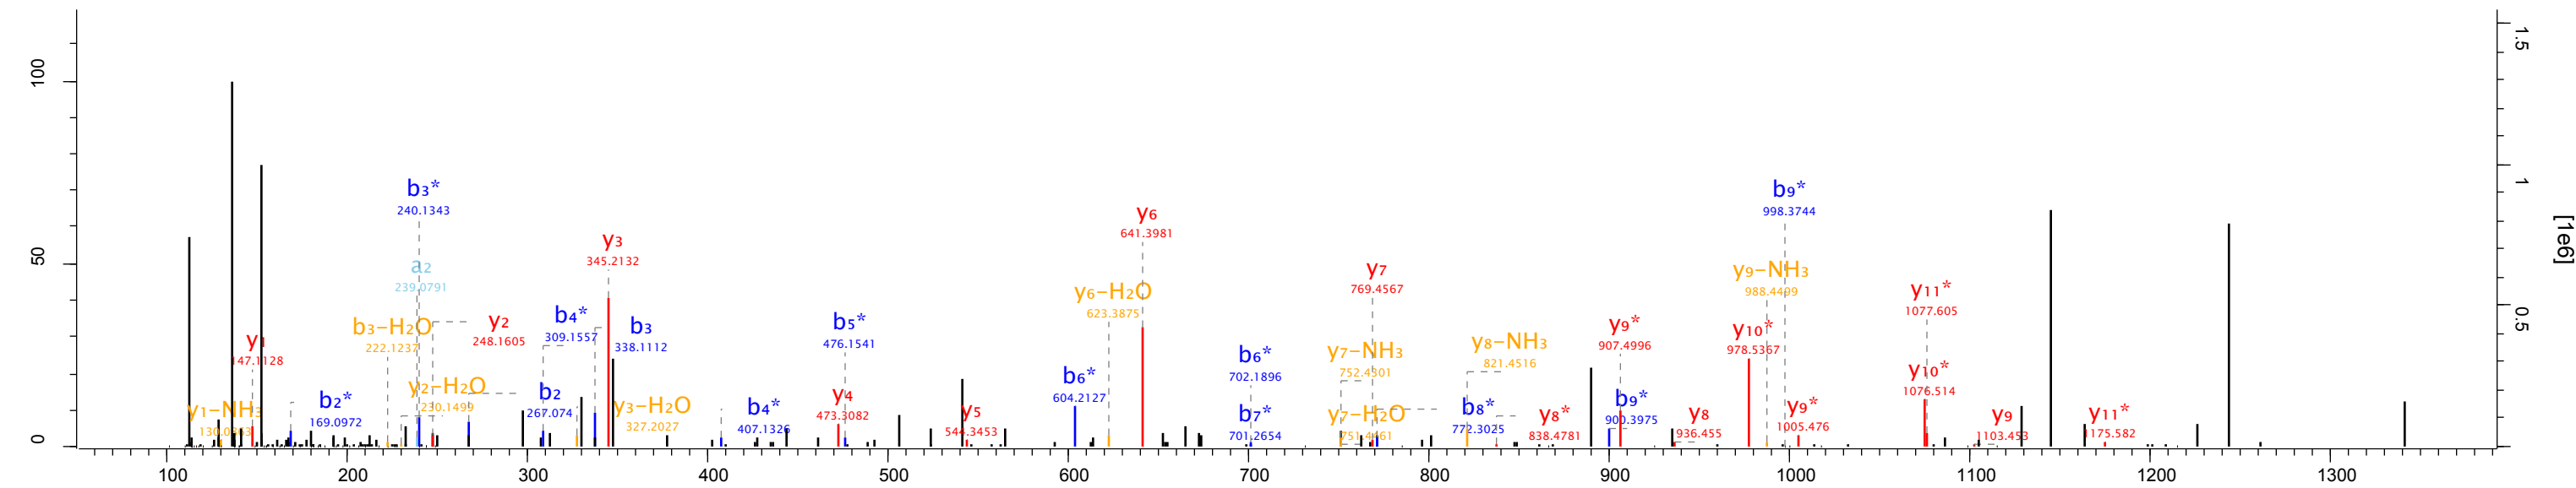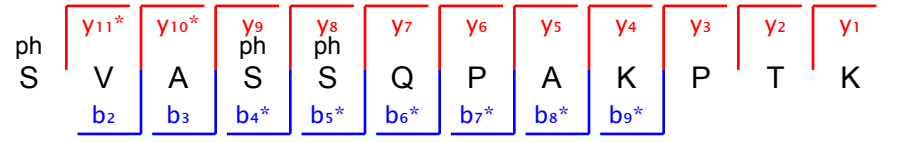

Raw file 20171215\_MaS\_33SR\_LMH\_phospho\_01 Scan 2738 Method FTMS; HCD Score 61.17 m/z 485.22 Gene names SRSF2

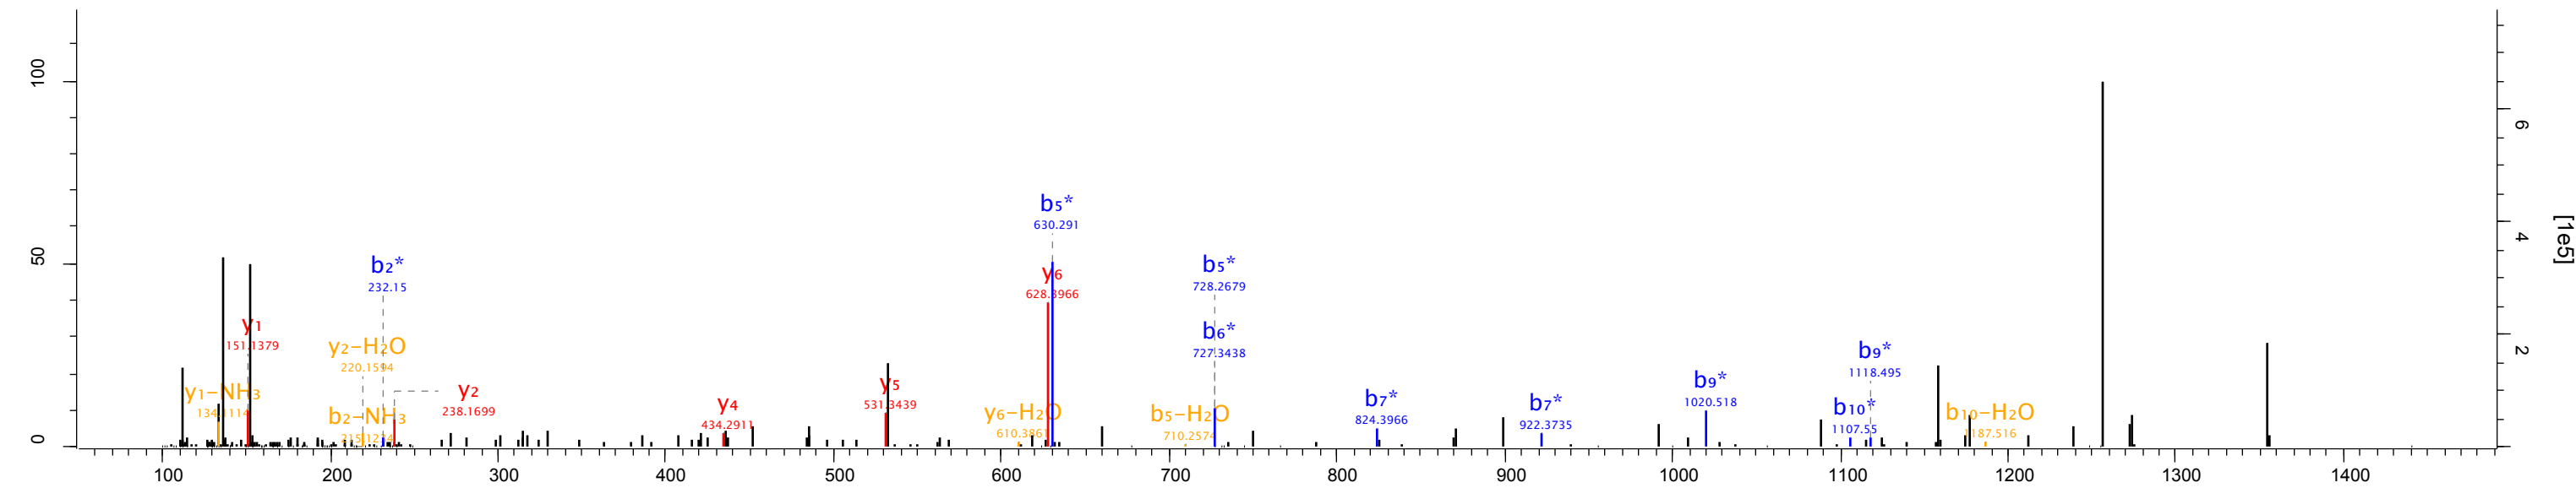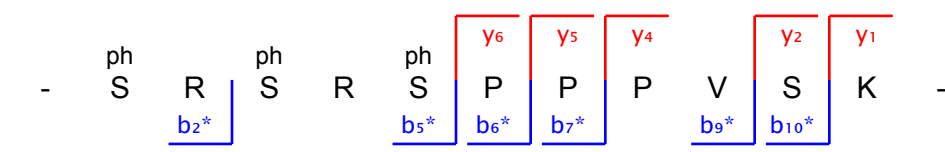

Raw file 20171215\_MaS\_33SR\_LMH\_phospho\_01 Scan 2808 Method FTMS; HCD Score 149.95 m/z 893.34 Gene names SRRM1

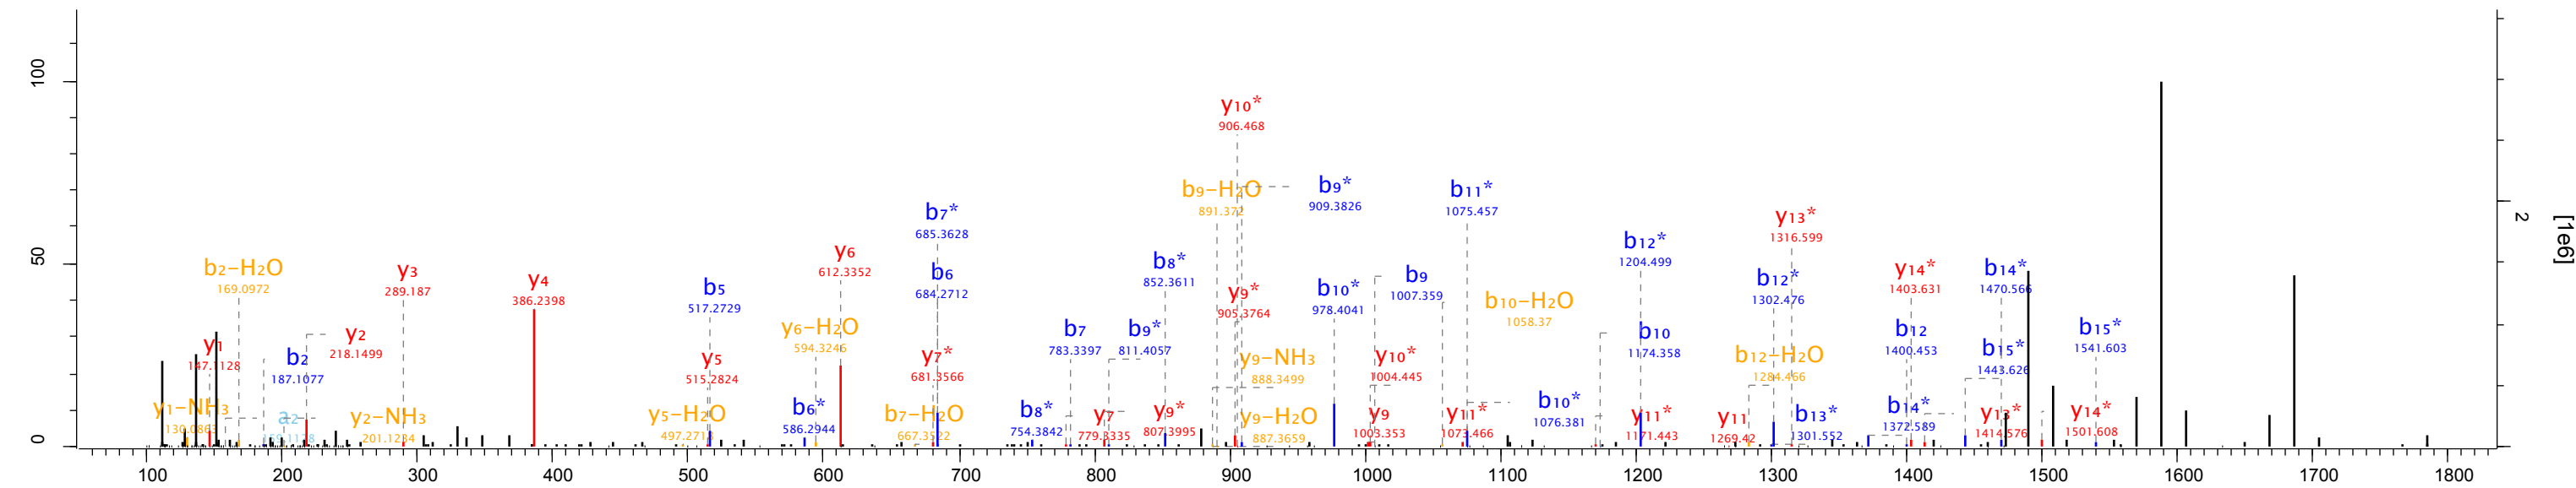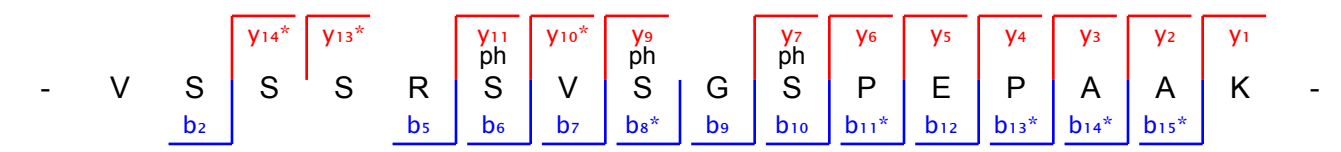

20171215\_MaS\_33SR\_LMH\_phospho\_01 2938 FTMS; HCD 149.41 1142.41 HMGA2

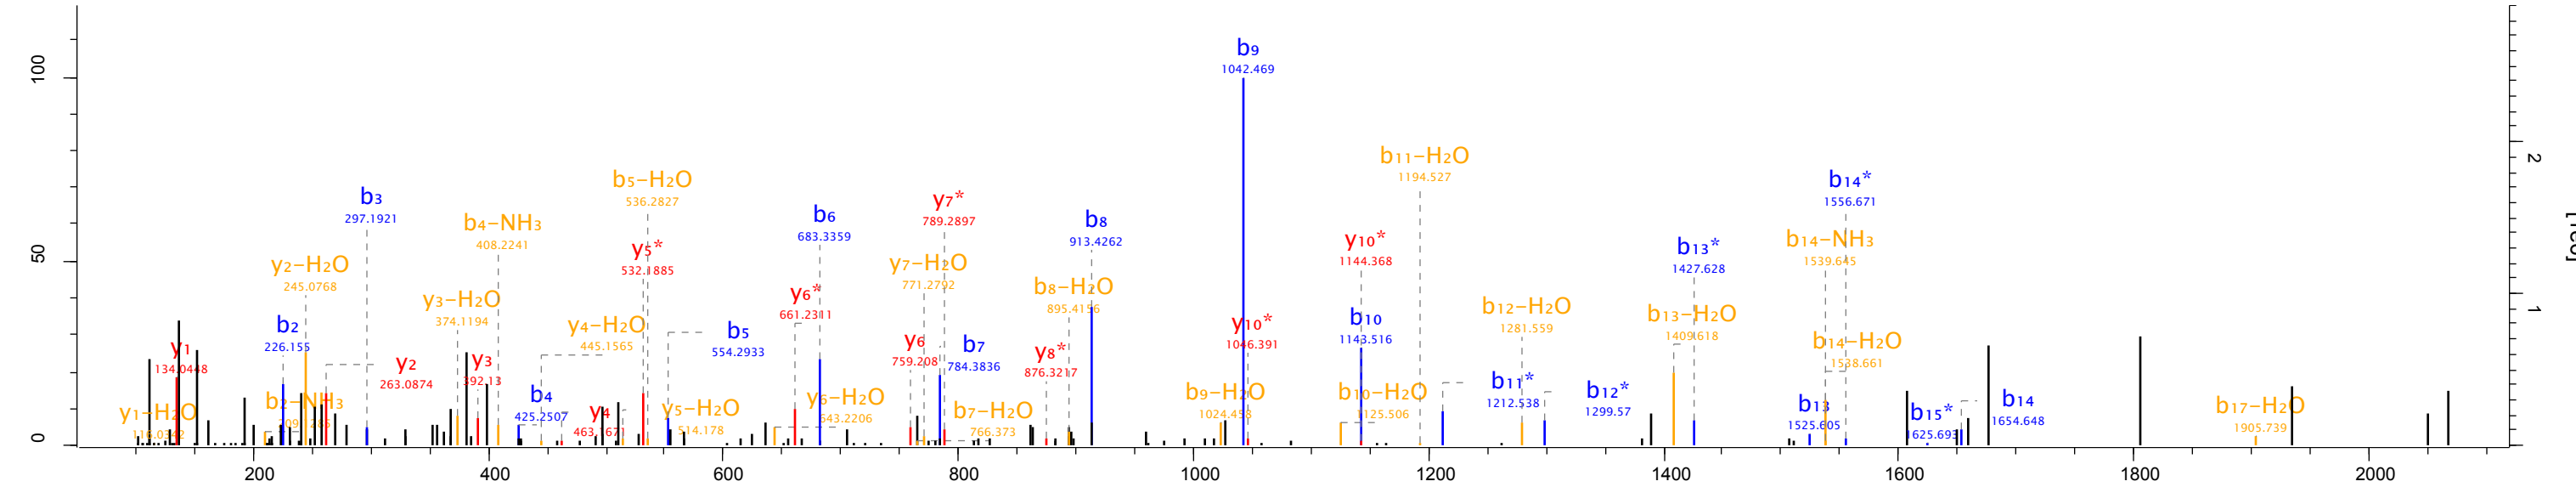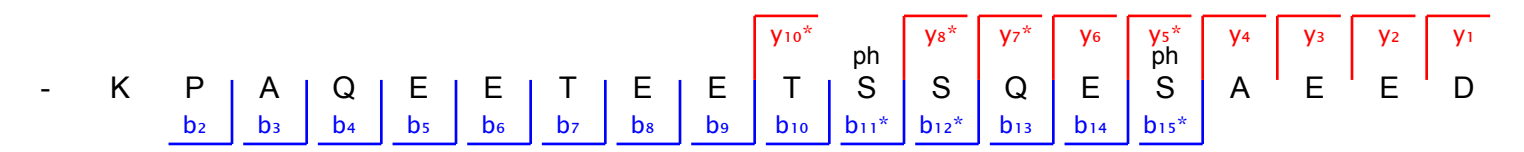

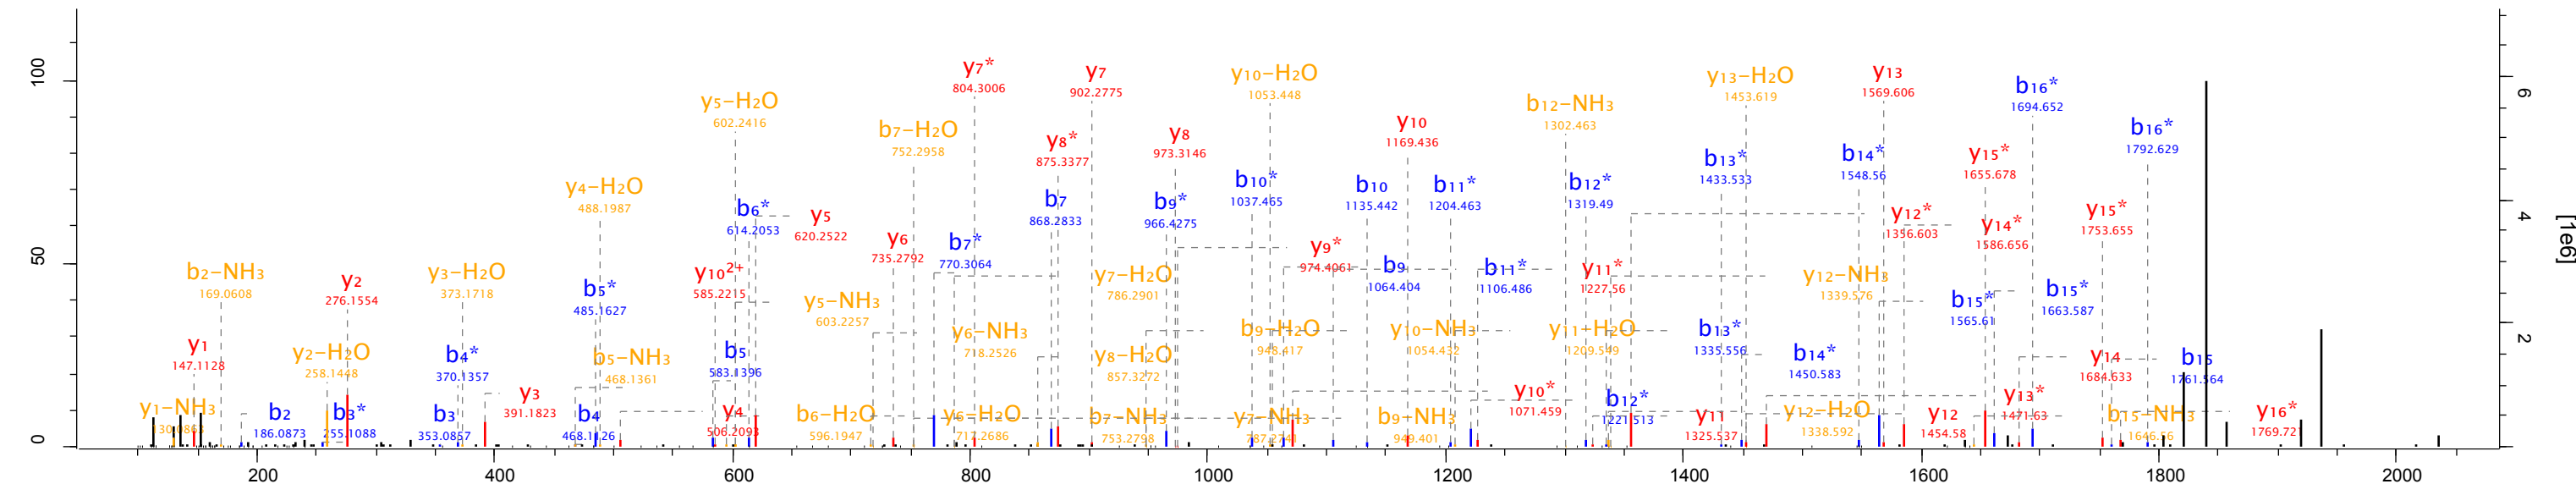

- A N S D D E R P V A S D N D D E K -

y<sub>16</sub>\*
y<sub>15</sub>\*
y<sub>14</sub>
y<sub>13</sub>
y<sub>12</sub>
y<sub>11</sub>
y<sub>10</sub>
y<sub>9</sub>\*
y<sub>8</sub>
y<sub>7</sub>
y<sub>6</sub>
y<sub>5</sub>
y<sub>4</sub>
y<sub>3</sub>
y<sub>2</sub>
y<sub>1</sub>

b<sub>2</sub>
b<sub>3</sub>
b<sub>4</sub>
b<sub>5</sub>
b<sub>6</sub>\*
b<sub>7</sub>
b<sub>9</sub>
b<sub>10</sub>
b<sub>11</sub>\*
b<sub>12</sub>\*
b<sub>13</sub>\*
b<sub>14</sub>\*
b<sub>15</sub>
b<sub>16</sub>\*

Raw file 20171215\_MaS\_33SR\_LMH\_phospho\_01 Scan 3588 Method FTMS; HCD Score 117.94 m/z 618.19 Gene names ATRX

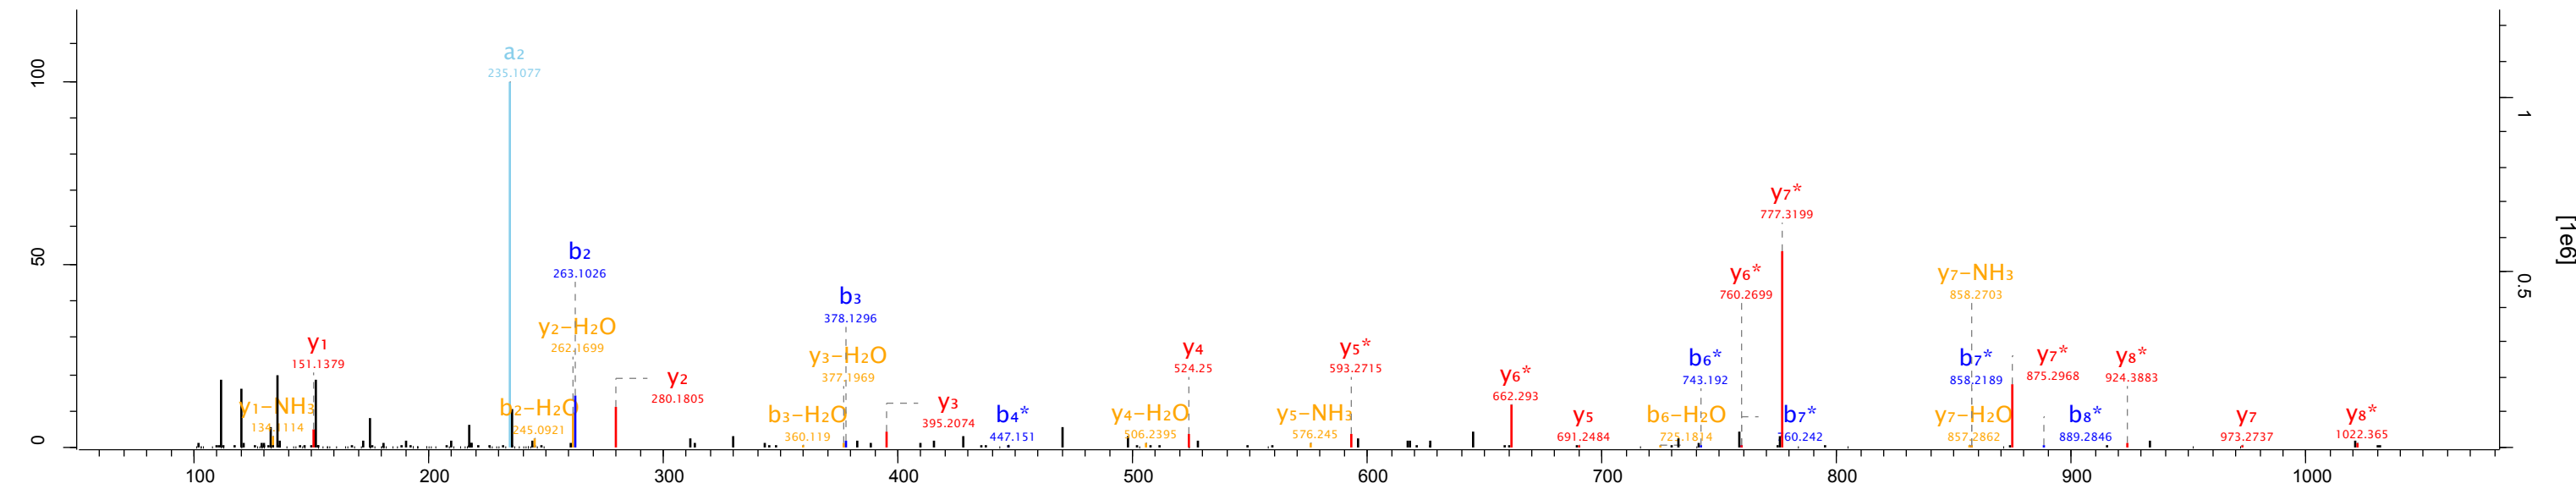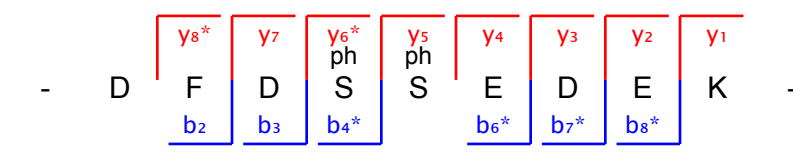



Raw file: 20171215\_MaS\_33SR\_LMH\_phospho\_01  
 Scan: 4088 Method: FTMS; HCD Score: 161.56 m/z: 1072.38 Gene names: POLR3E

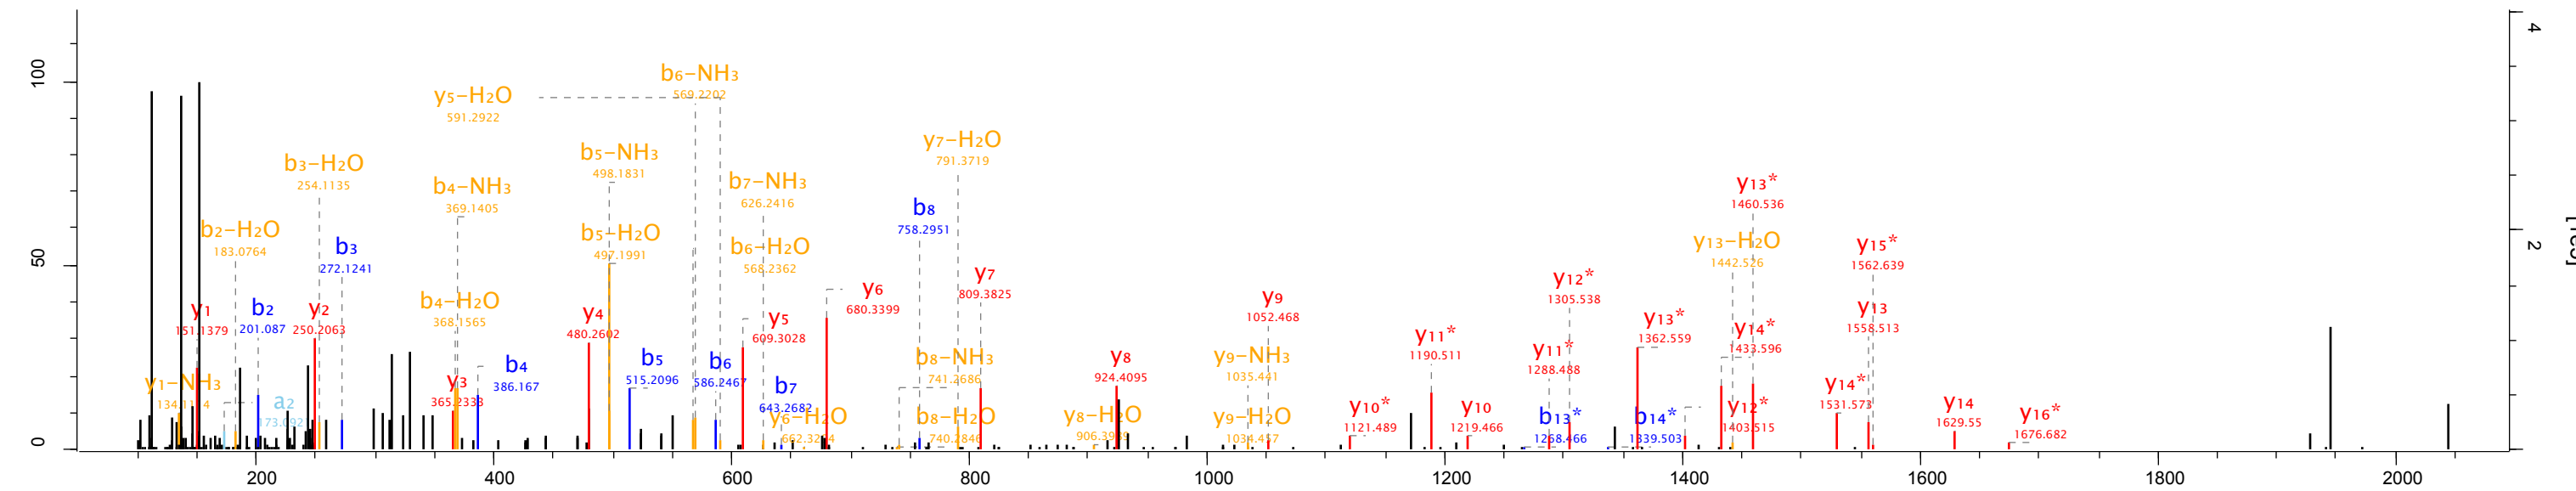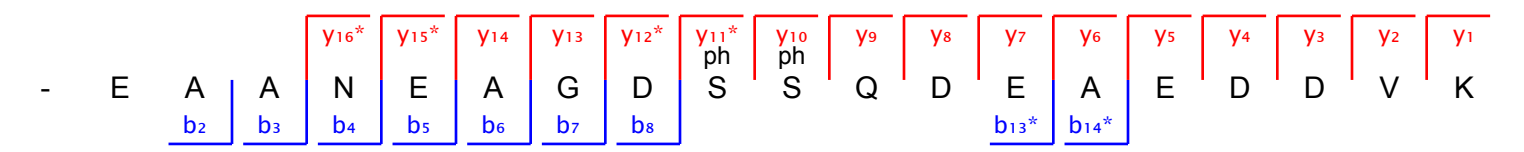

Raw file 20171215\_MaS\_33SR\_LMH\_phospho\_01 Scan 4658 Method FTMS; HCD Score 199.31 m/z 831.8 Gene names IRF2BP2

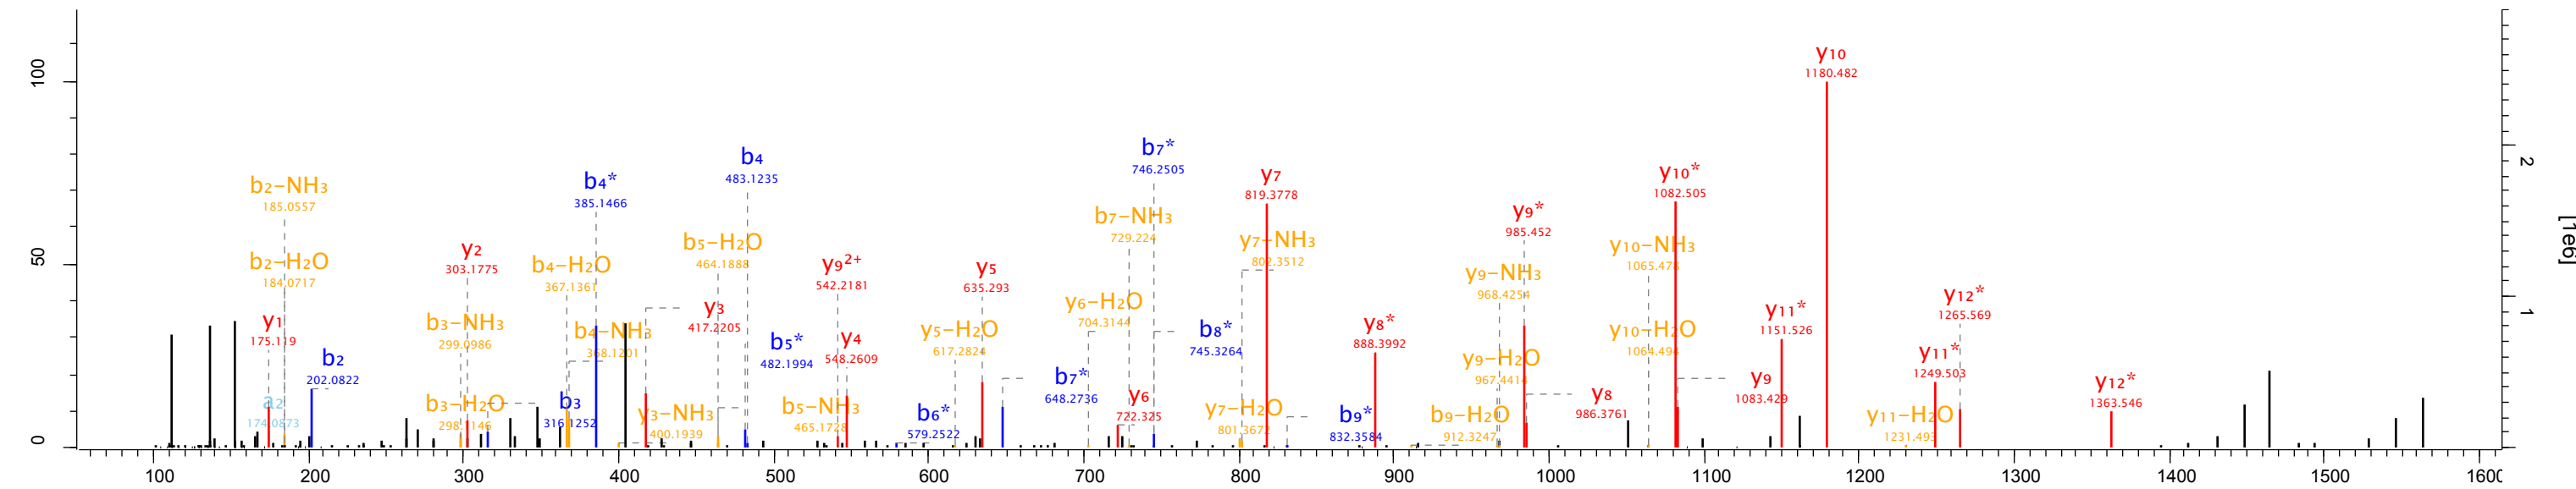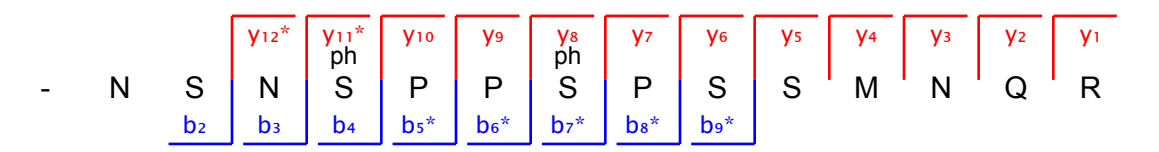

Raw file 20171215\_MaS\_33SR\_LMH\_phospho\_01 Scan 5108 Method FTMS; HCD Score 40.37 m/z 542.22 Gene names SPEN

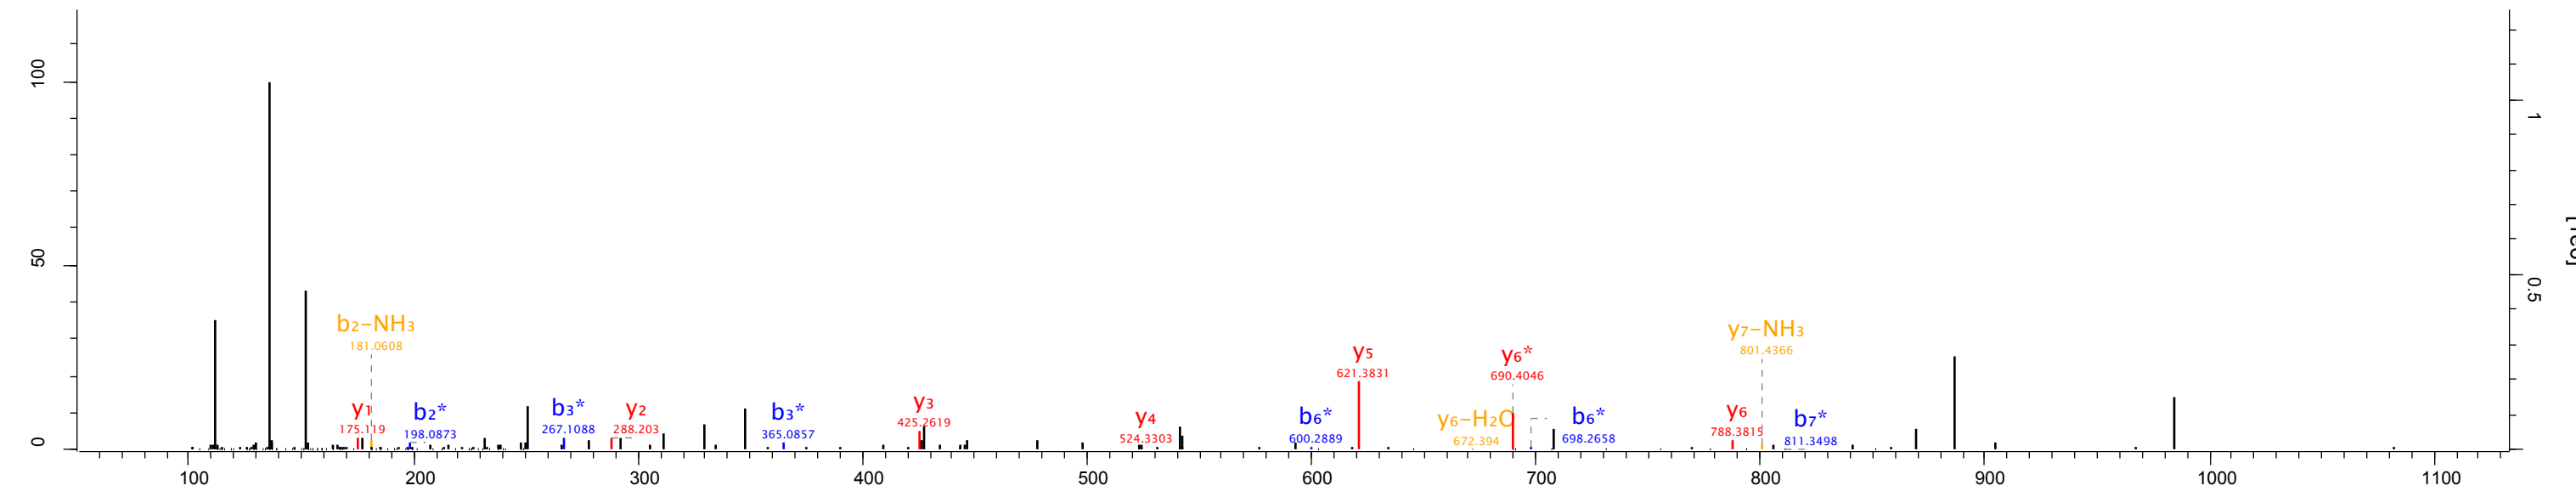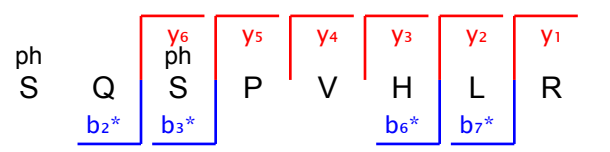

Raw file 20171215\_MaS\_33SR\_LMH\_phospho\_01 Scan 5788 Method FTMS; HCD Score 90.91 m/z 640.59 Gene names SRRM2

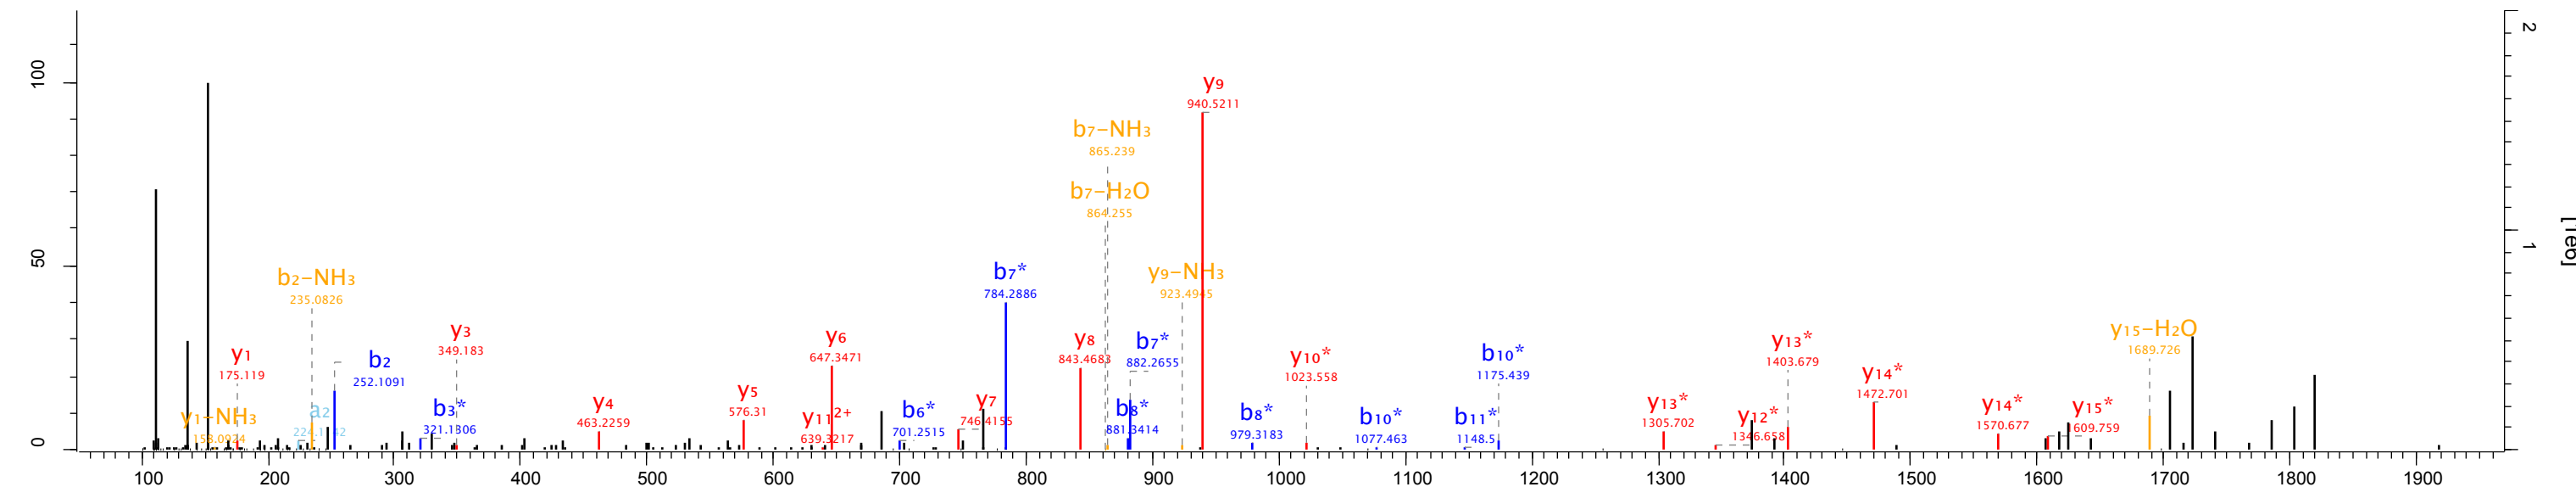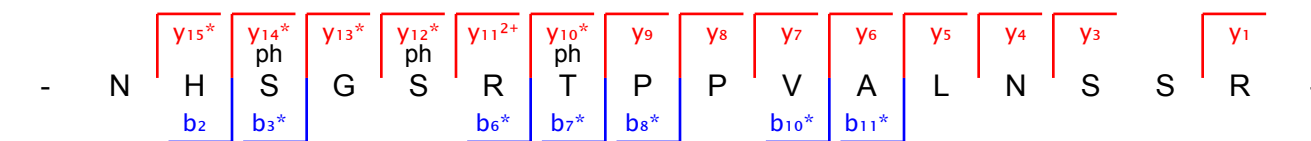

Raw file 20171215\_MaS\_33SR\_LMH\_phospho\_01 Scan 6508 Method FTMS; HCD Score 116.94 m/z 772.32 Gene names BIVM-ERCC5;ERCC5

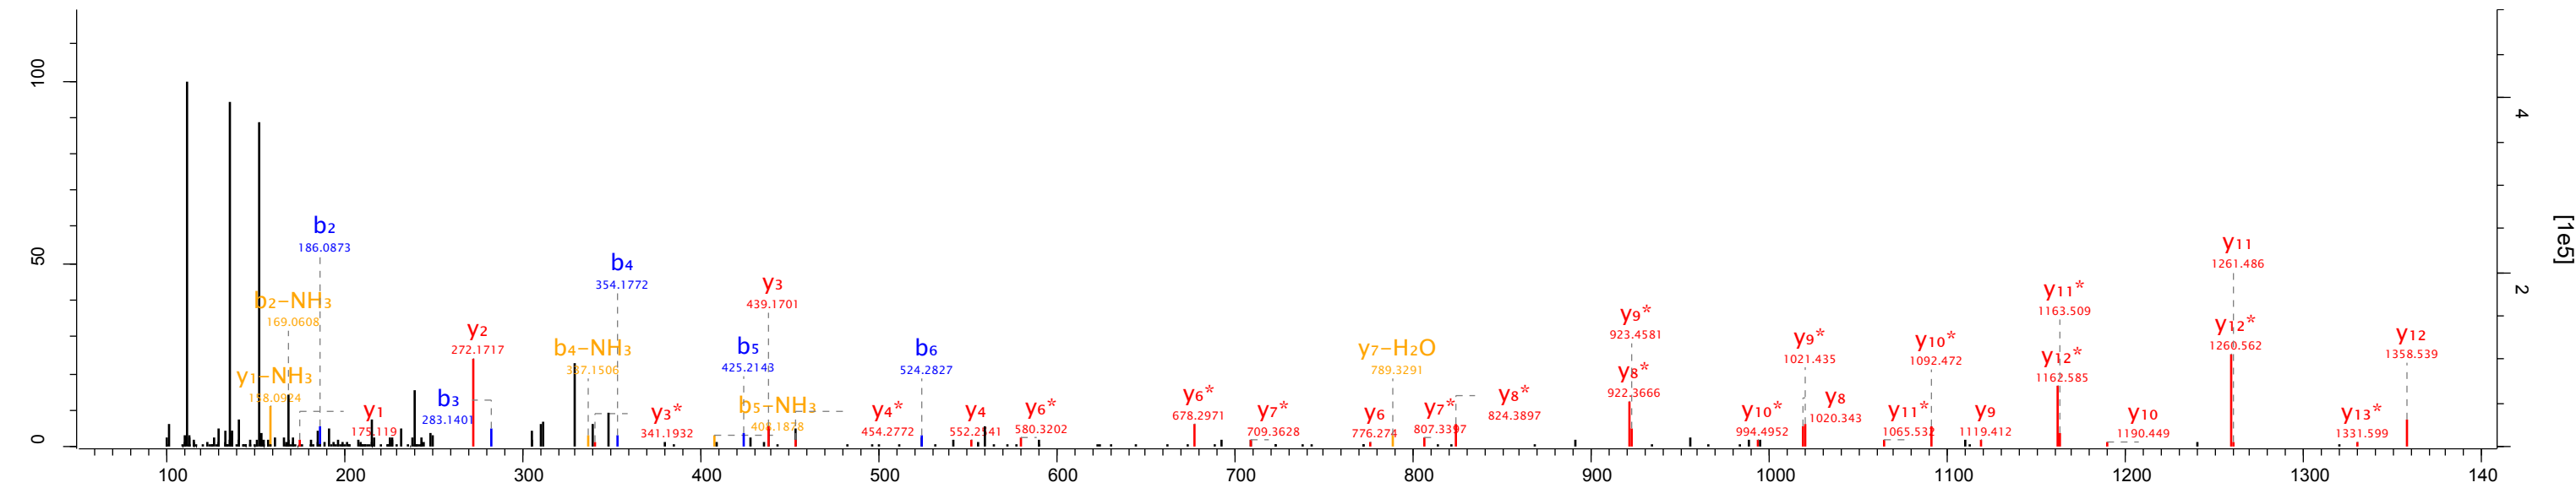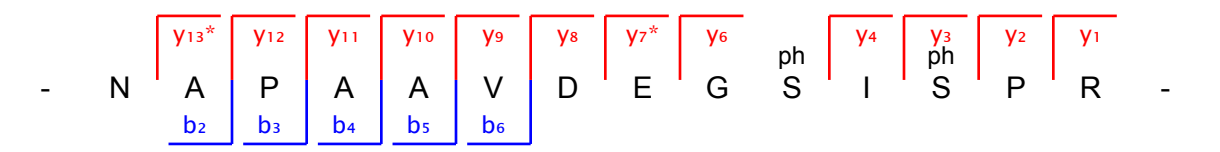

Raw file 20171215\_MaS\_33SR\_LMH\_phospho\_01 Scan 6988 Method FTMS; HCD Score 53.12 m/z 800.96 Gene names ZFAND5

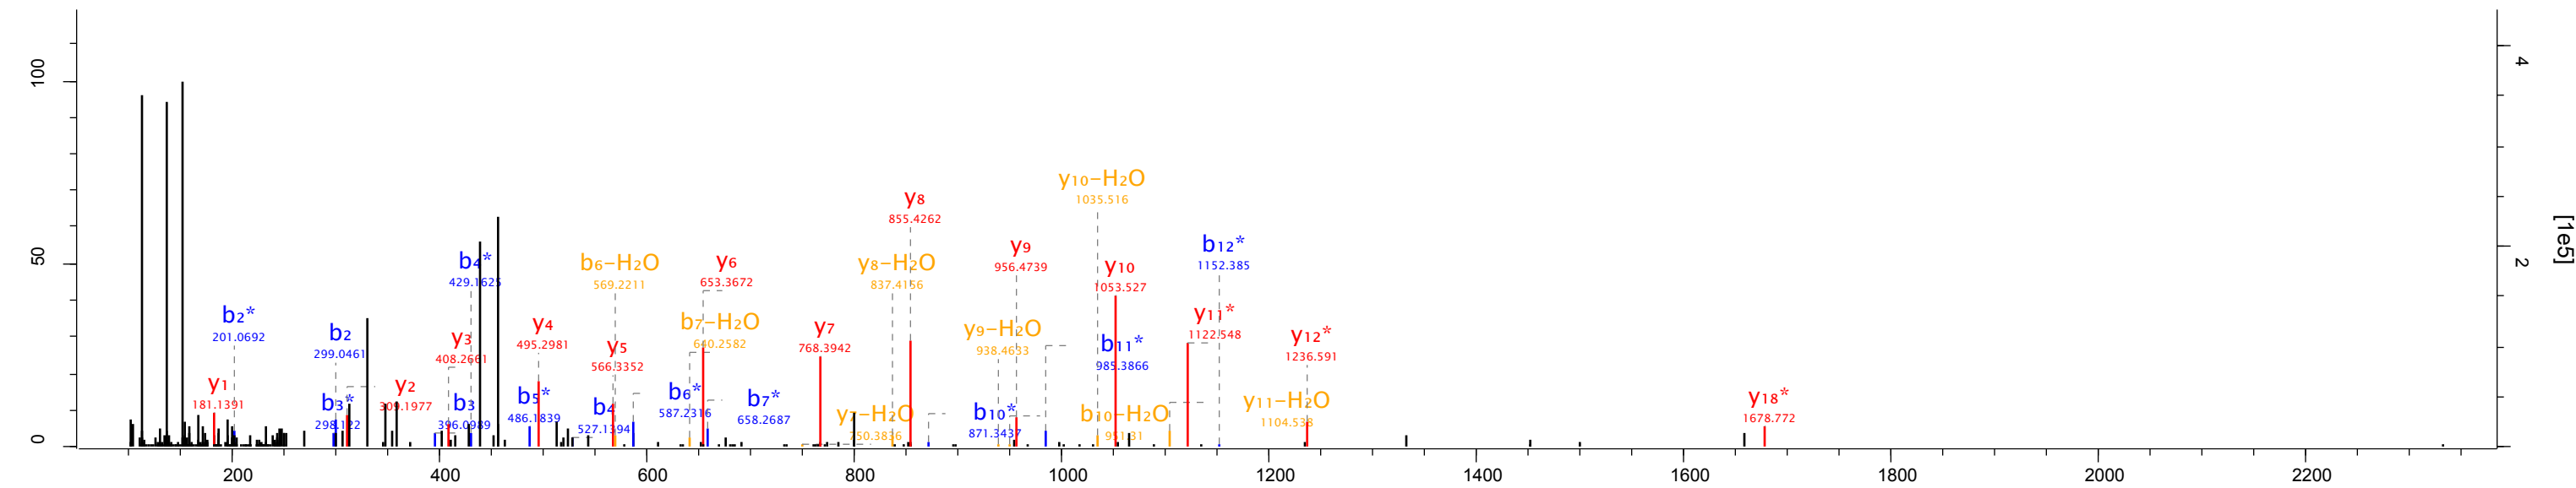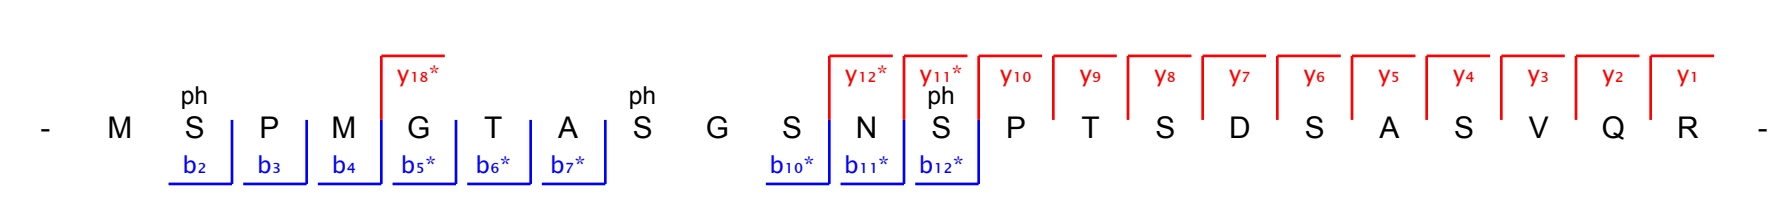

Raw file 20171215\_MaS\_33SR\_LMH\_phospho\_01 Scan 7298 Method FTMS; HCD Score 91.66 m/z 669.27 Gene names SRRM2

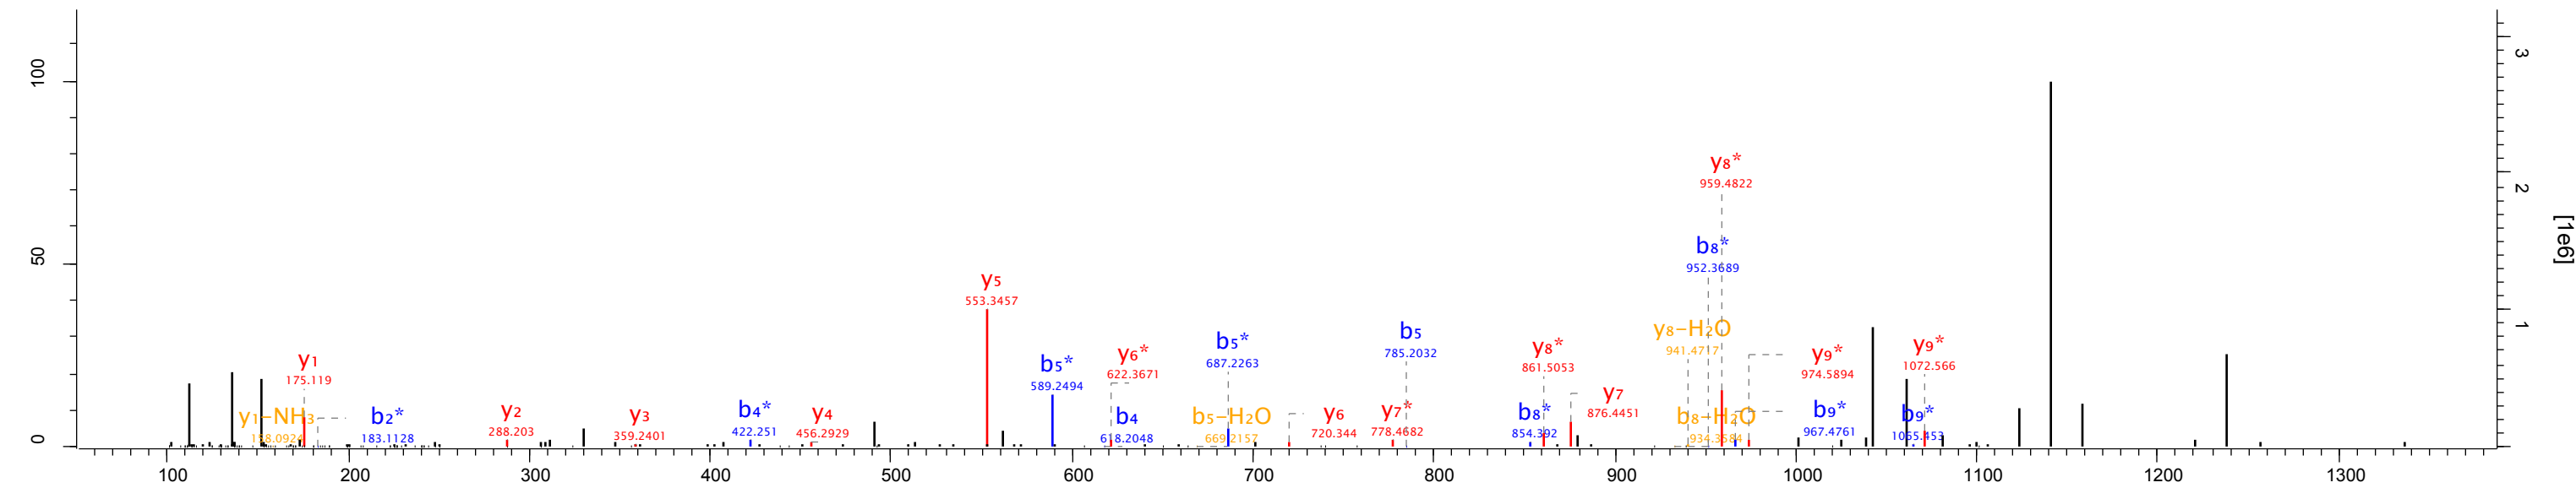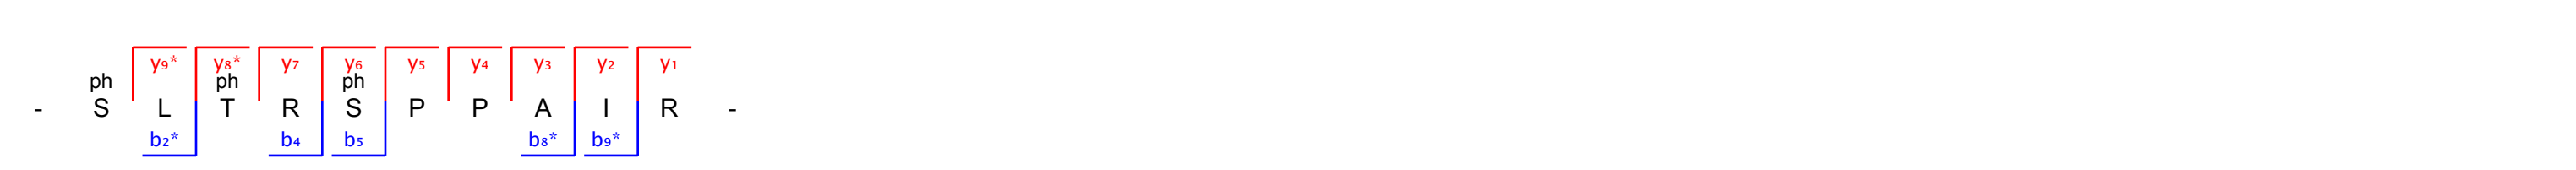

Raw file 20171215\_MaS\_33SR\_LMH\_phospho\_01 Scan 7478 Method FTMS; HCD Score 99.44 m/z 506.69 Gene names CDK12

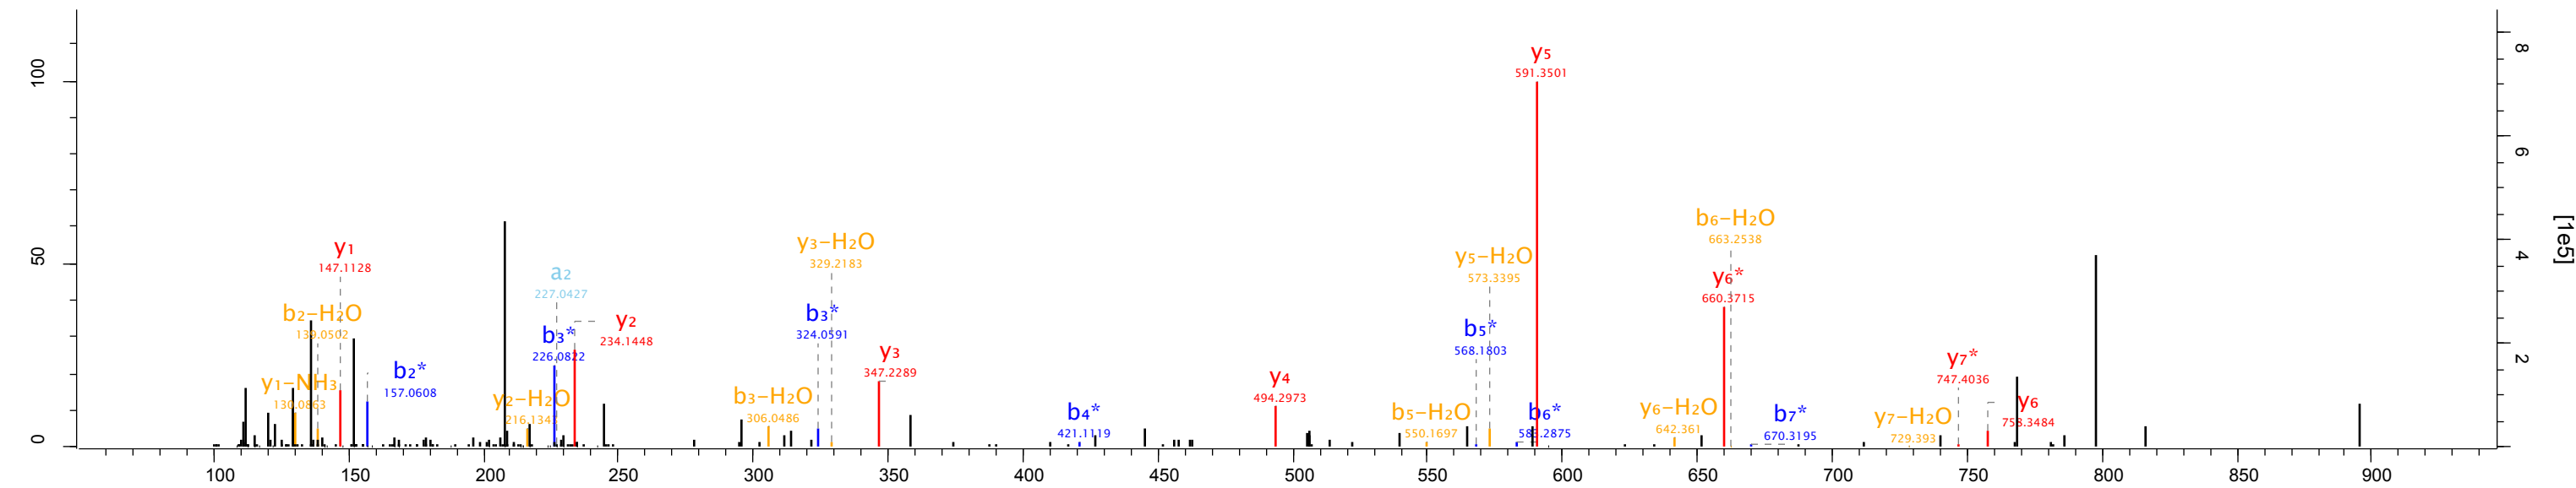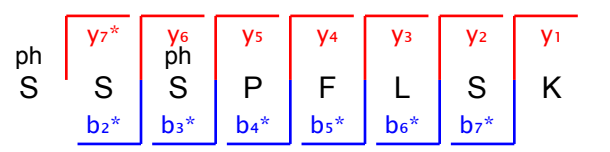



Raw file 20171215\_MaS\_33SR\_LMH\_phospho\_01 Scan 7678 Method FTMS; HCD Score 303.76 m/z 923.86 Gene names TNKS1BP1

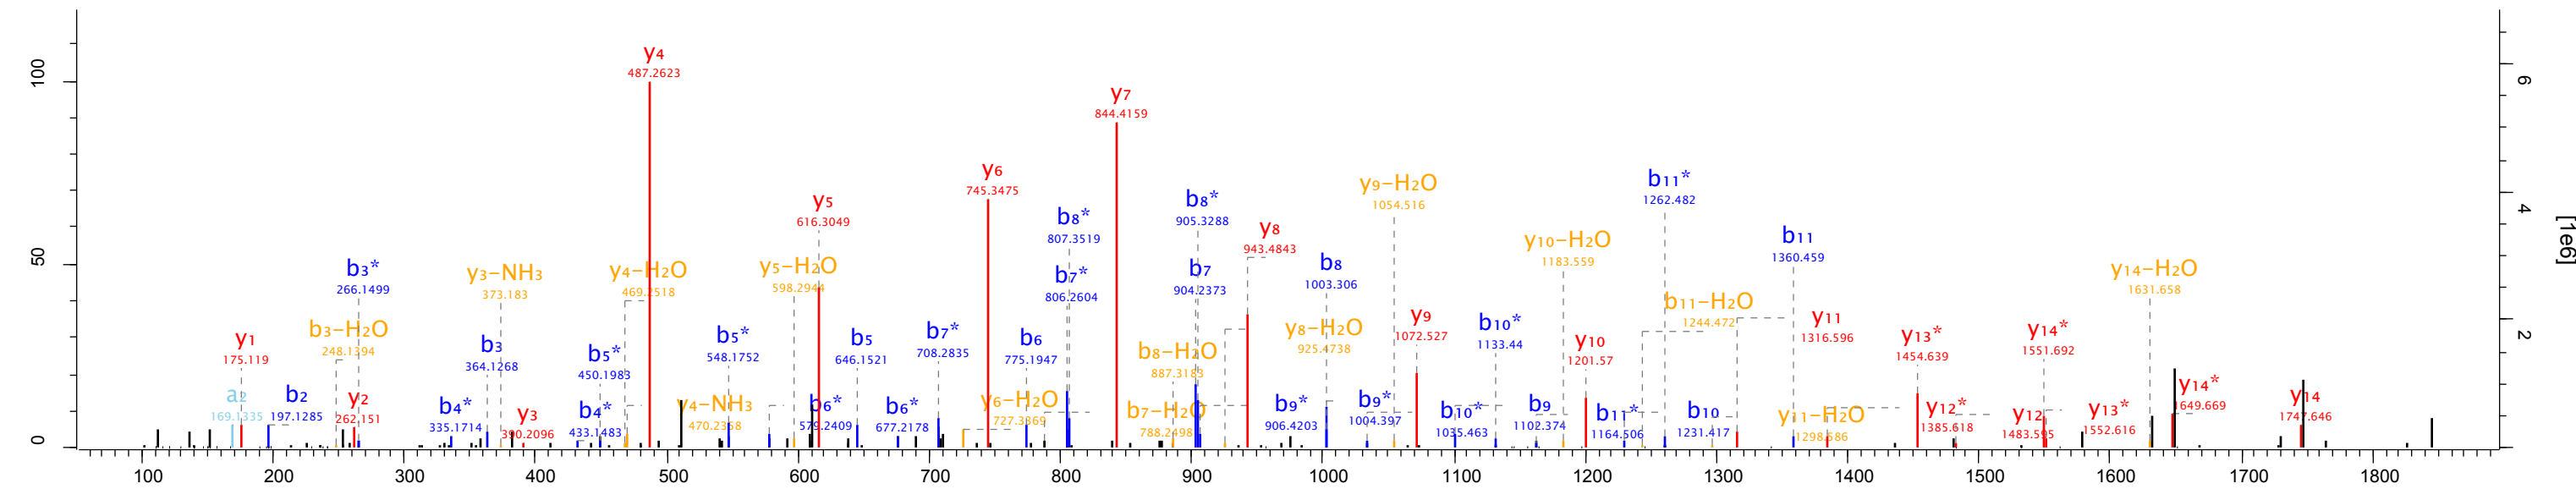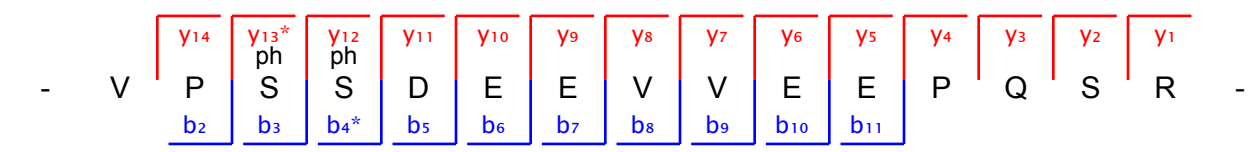

Raw file 20171215\_MaS\_33SR\_LMH\_phospho\_01 Scan 7788 Method FTMS; HCD Score 245.1 m/z 820.31 Gene names TMF1

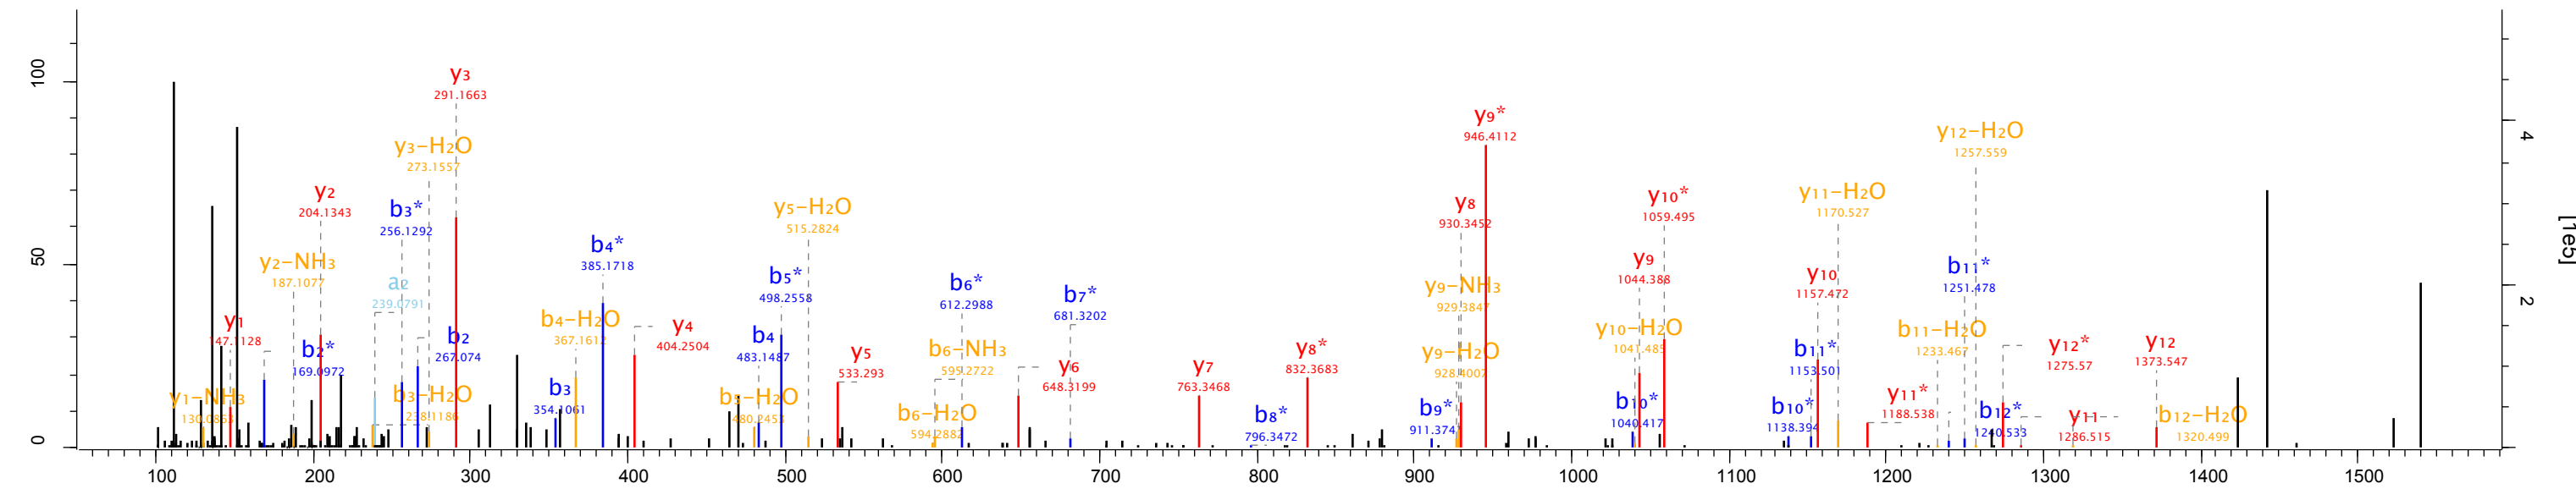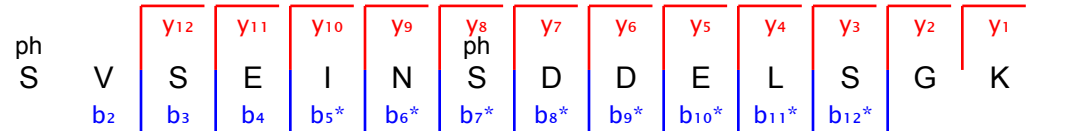

Raw file 20171215\_MaS\_33SR\_LMH\_phospho\_01 Scan 7818 Method FTMS; HCD Score 129.5 m/z 1037.44 Gene names PCYT1A

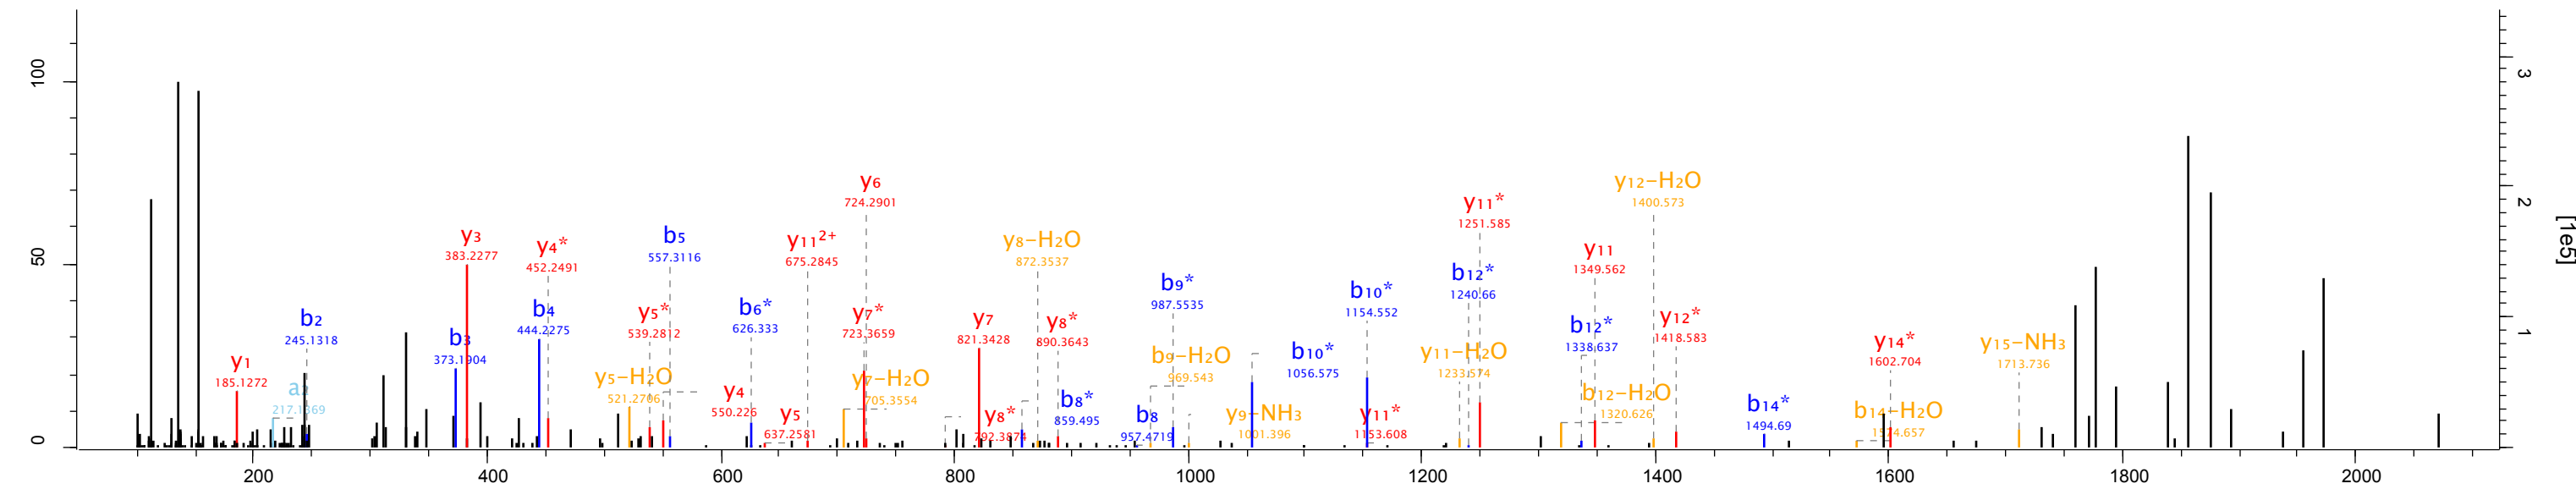

- M L Q A I P K Q S P S S P T R -

b<sub>2</sub>
b<sub>3</sub>
b<sub>4</sub>
b<sub>5</sub>
b<sub>6</sub><sup>\*</sup>
b<sub>8</sub>
b<sub>9</sub><sup>\*</sup>
b<sub>10</sub><sup>\*</sup>
b<sub>12</sub><sup>\*</sup>
b<sub>14</sub><sup>\*</sup>
y<sub>14</sub><sup>\*</sup>
y<sub>12</sub><sup>\*</sup>
y<sub>11</sub>
y<sub>8</sub><sup>\*</sup>
y<sub>7</sub>
y<sub>6</sub>
y<sub>5</sub>
y<sub>4</sub>
y<sub>3</sub>
y<sub>1</sub>

Raw file

20171215\_MaS\_33SR\_LMH\_phospho\_01

Scan 8398 Method FTMS; HCD Score 76.49 m/z 851 Gene names TOR1AIP1

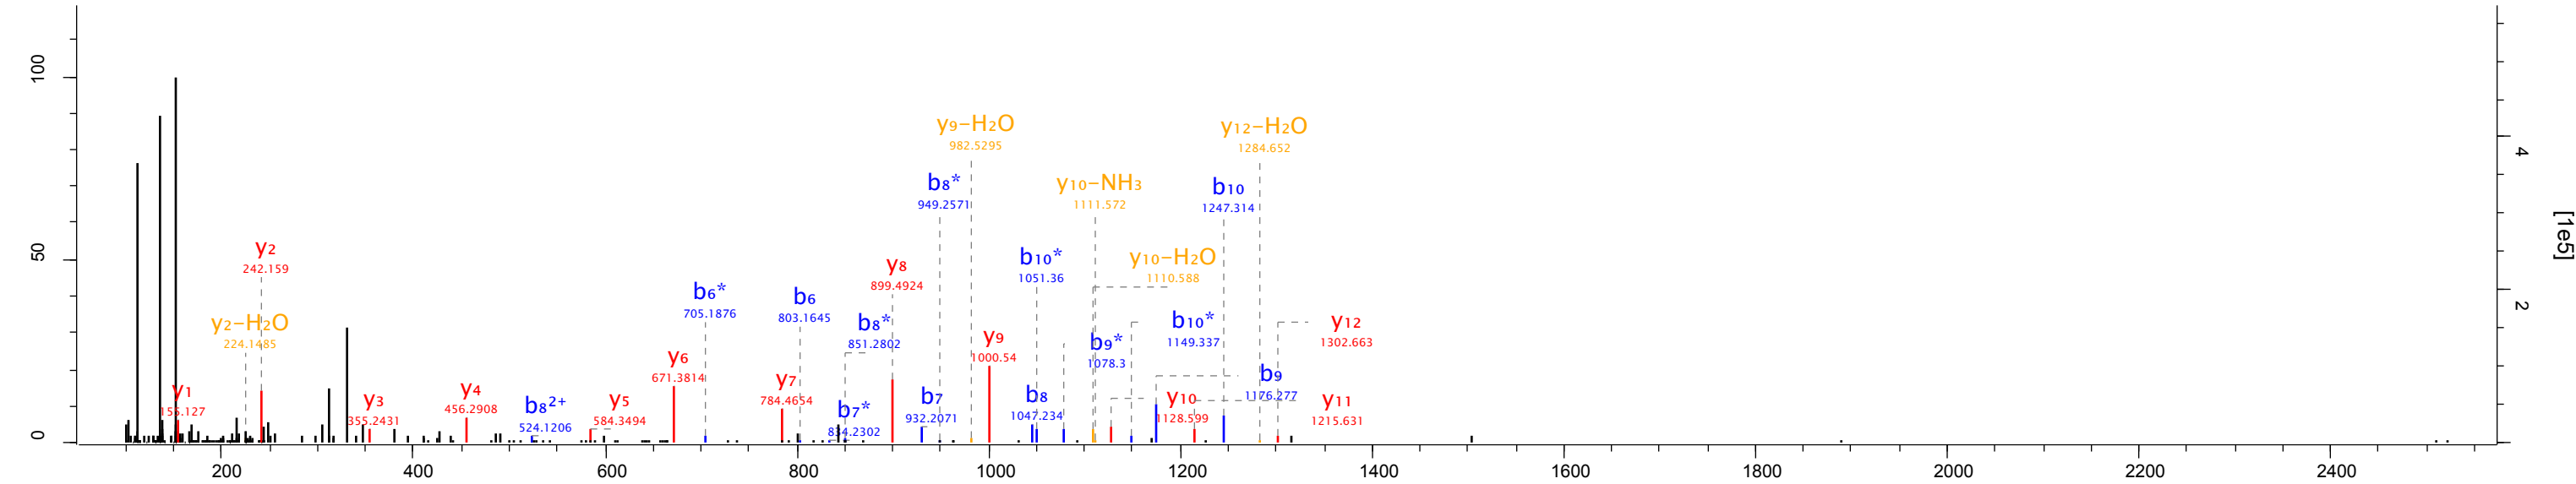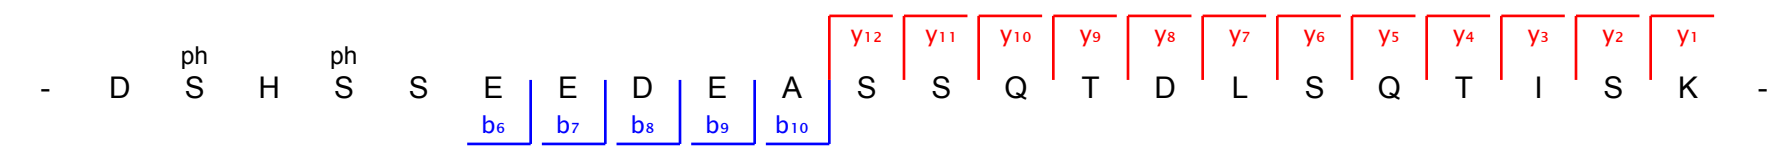

Raw file 20171215\_MaS\_33SR\_LMH\_phospho\_01 Scan 8618 Method FTMS; HCD Score 165.34 m/z 878.33 Gene names FOXK1

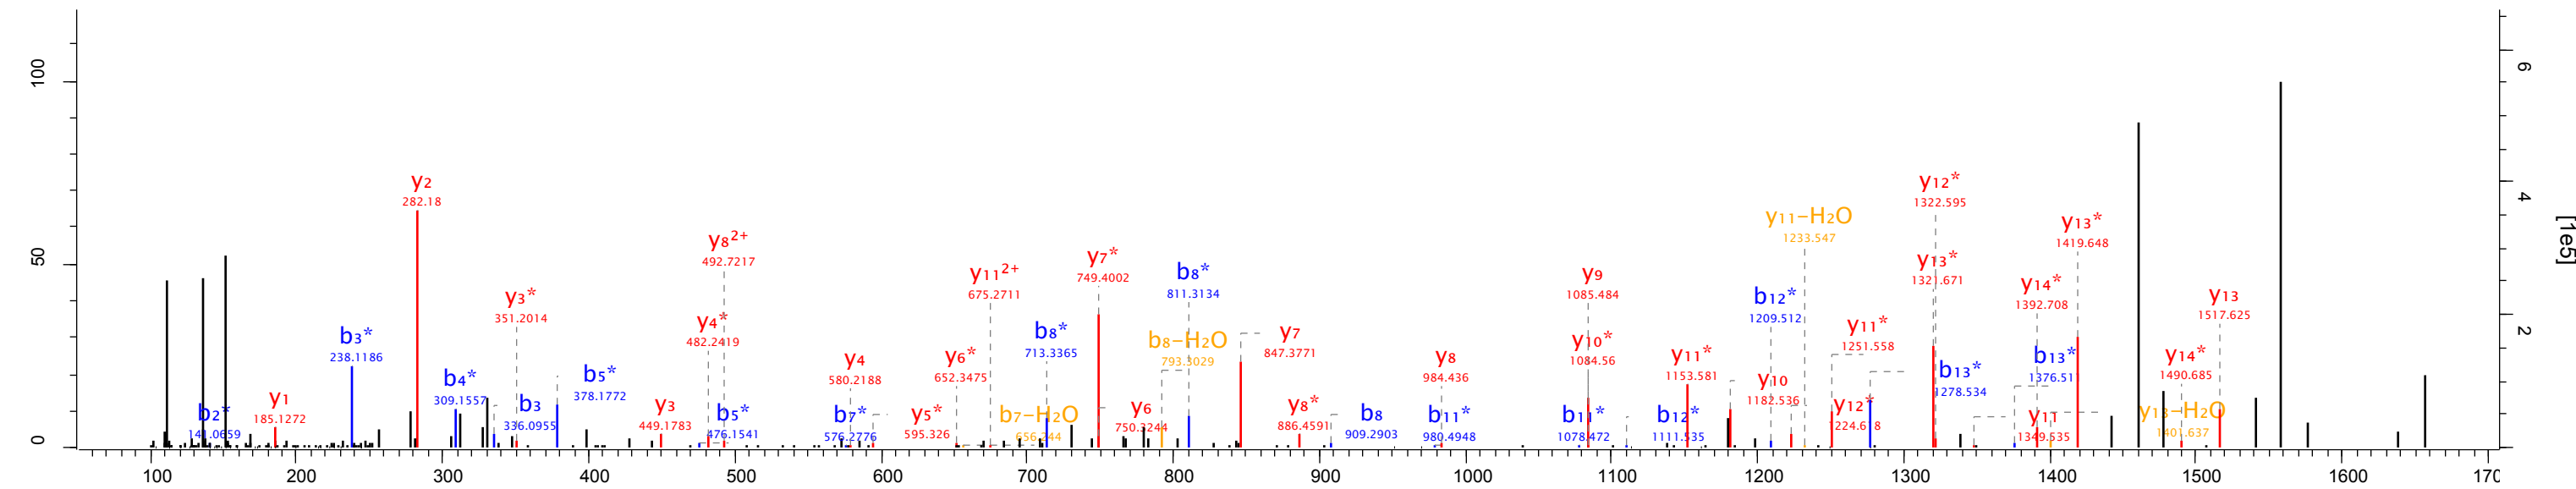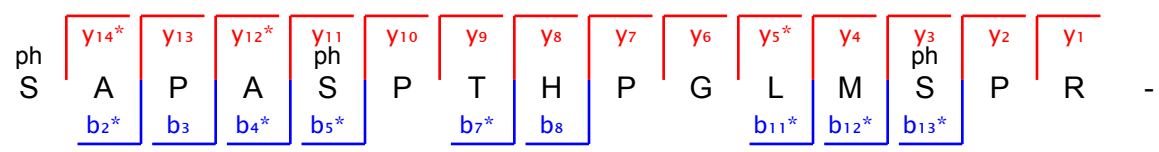

Raw file  
20171215\_MaS\_33SR\_LMH\_phospho\_01

Scan 8898 Method FTMS; HCD Score 93.37 m/z 921.4 Gene names MPRIP

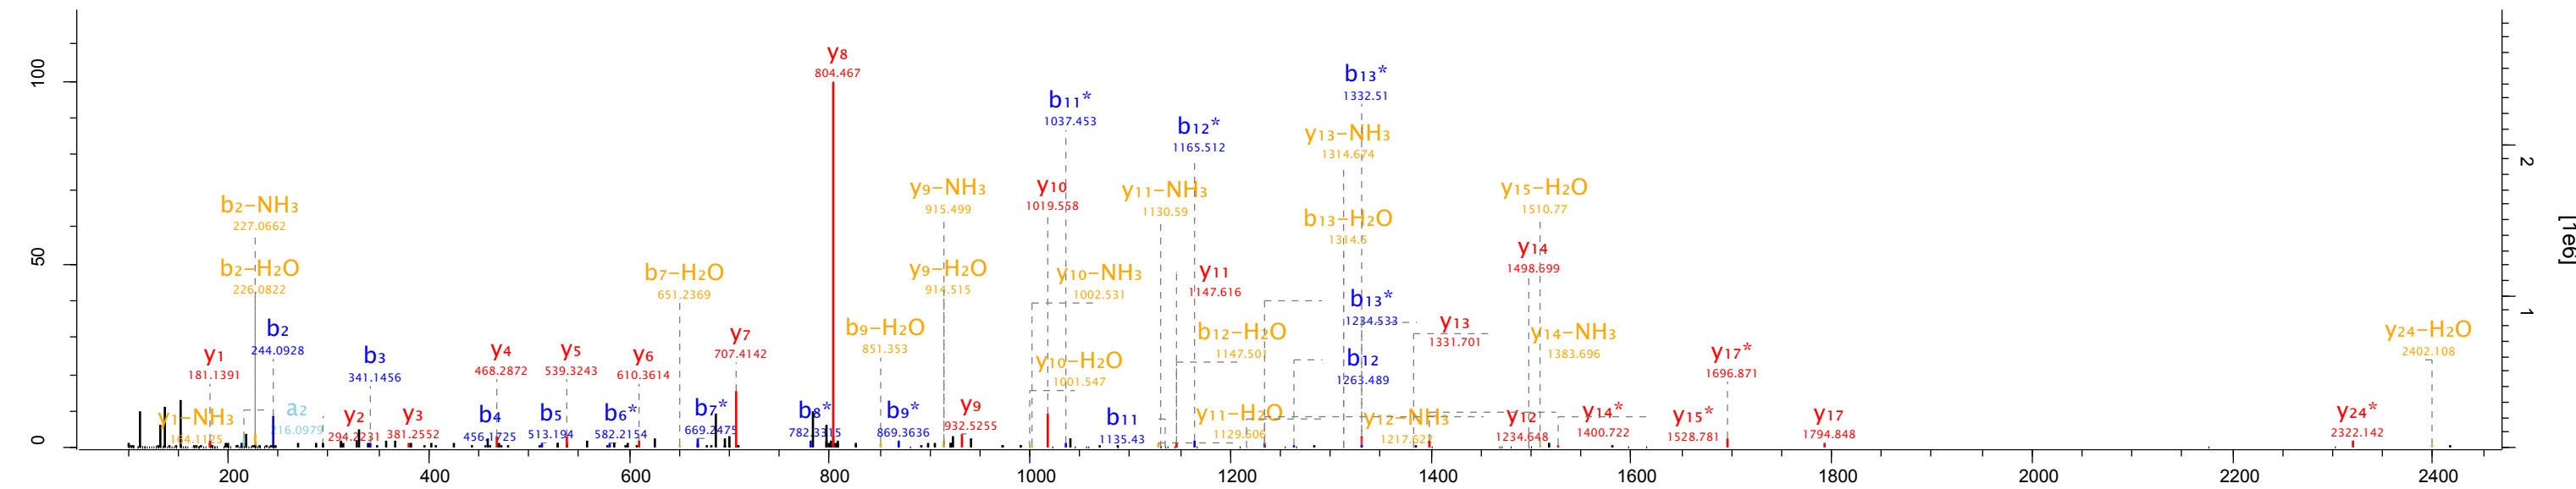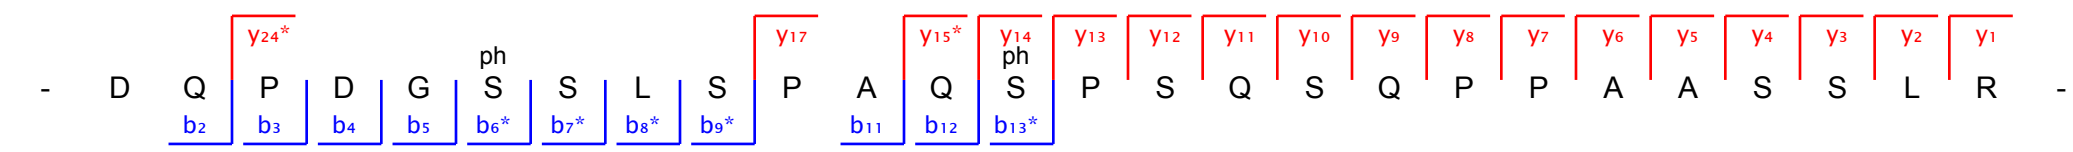

Raw file 20171215\_MaS\_33SR\_LMH\_phospho\_01 Scan 9288 Method FTMS; HCD Score 78.51 m/z 648.28 Gene names MAP7D1

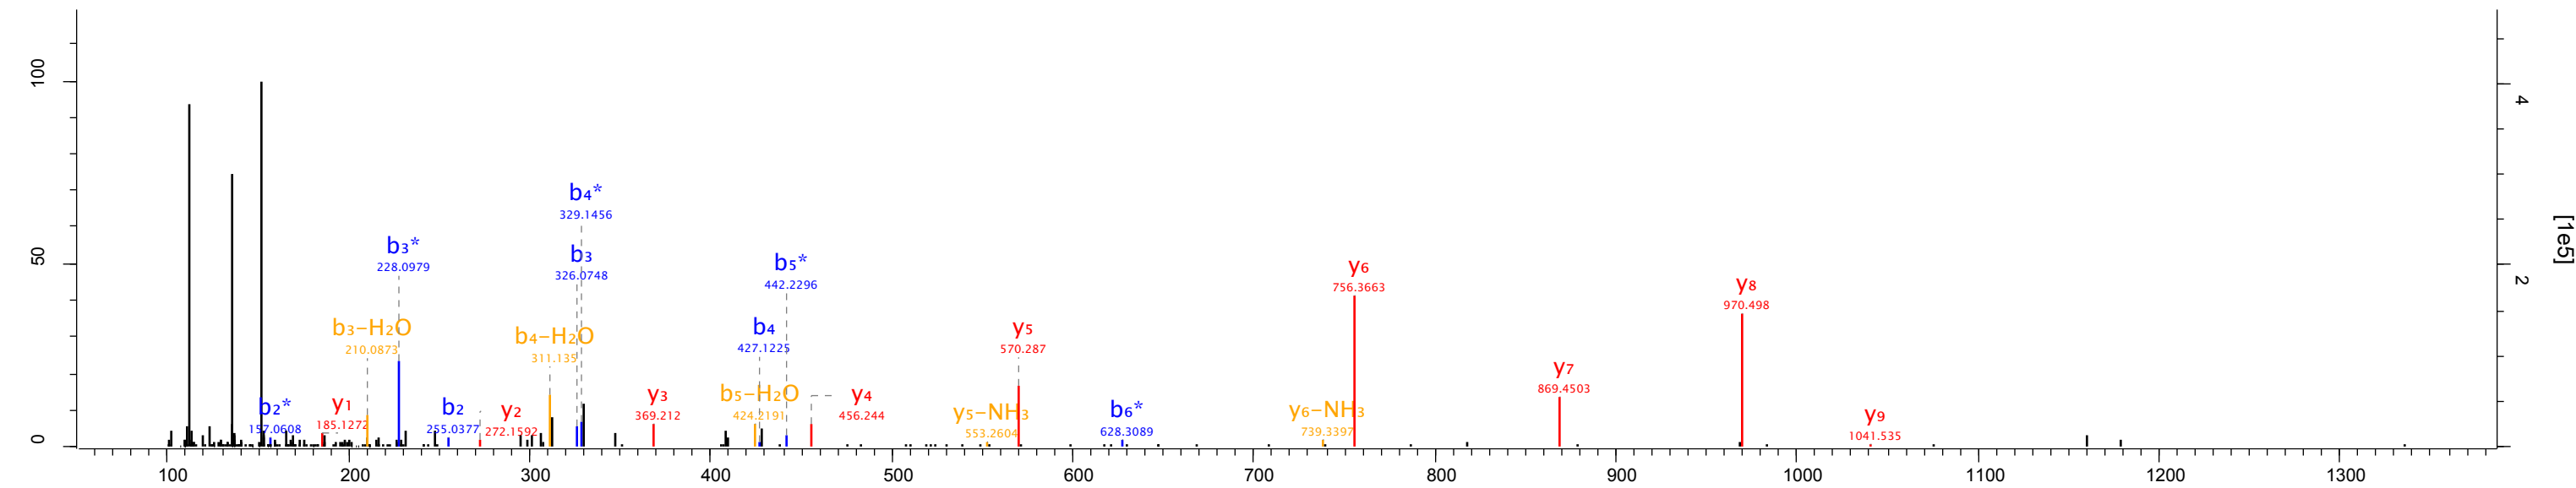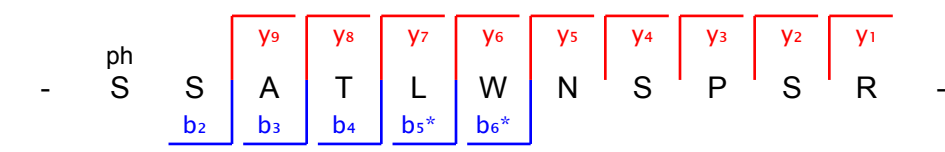

Raw file 20171215\_MaS\_33SR\_LMH\_phospho\_01 Scan 9878 Method FTMS; HCD Score 101.14 m/z 878.74 Gene names UNG;DKFZp781L1143

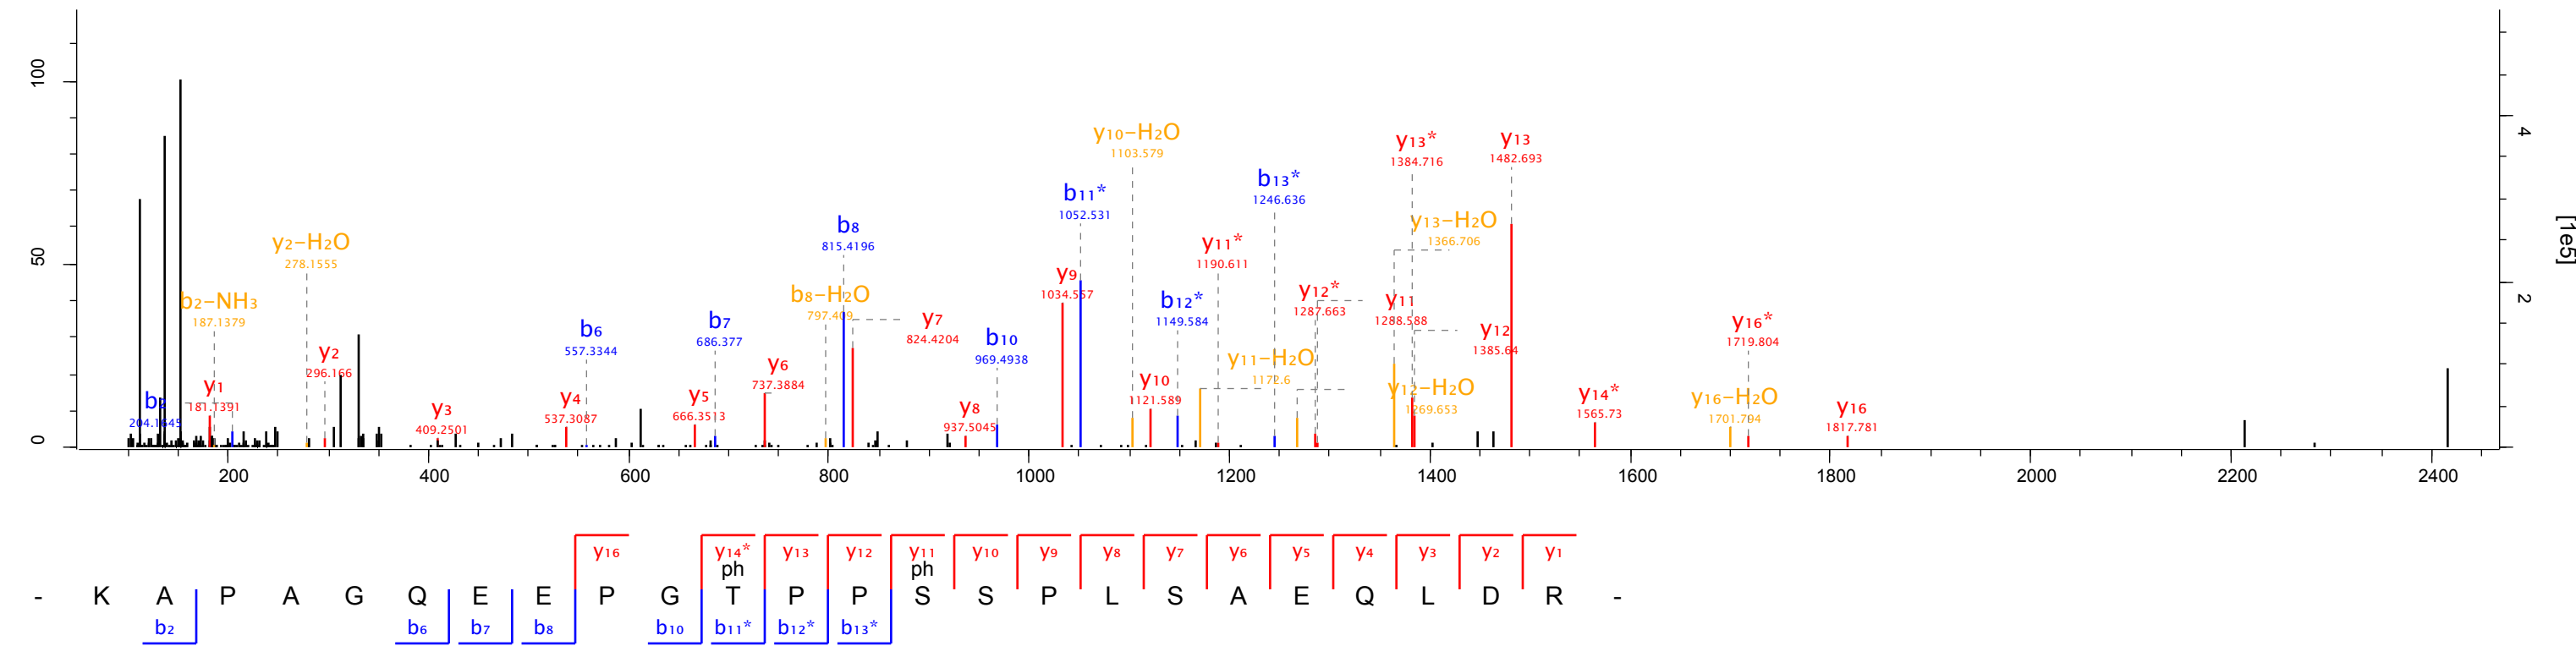



Raw file 20171215\_MaS\_33SR\_LMH\_phospho\_01 Scan 9938 Method FTMS; HCD Score 133.21 m/z 846.83 Gene names LIG1

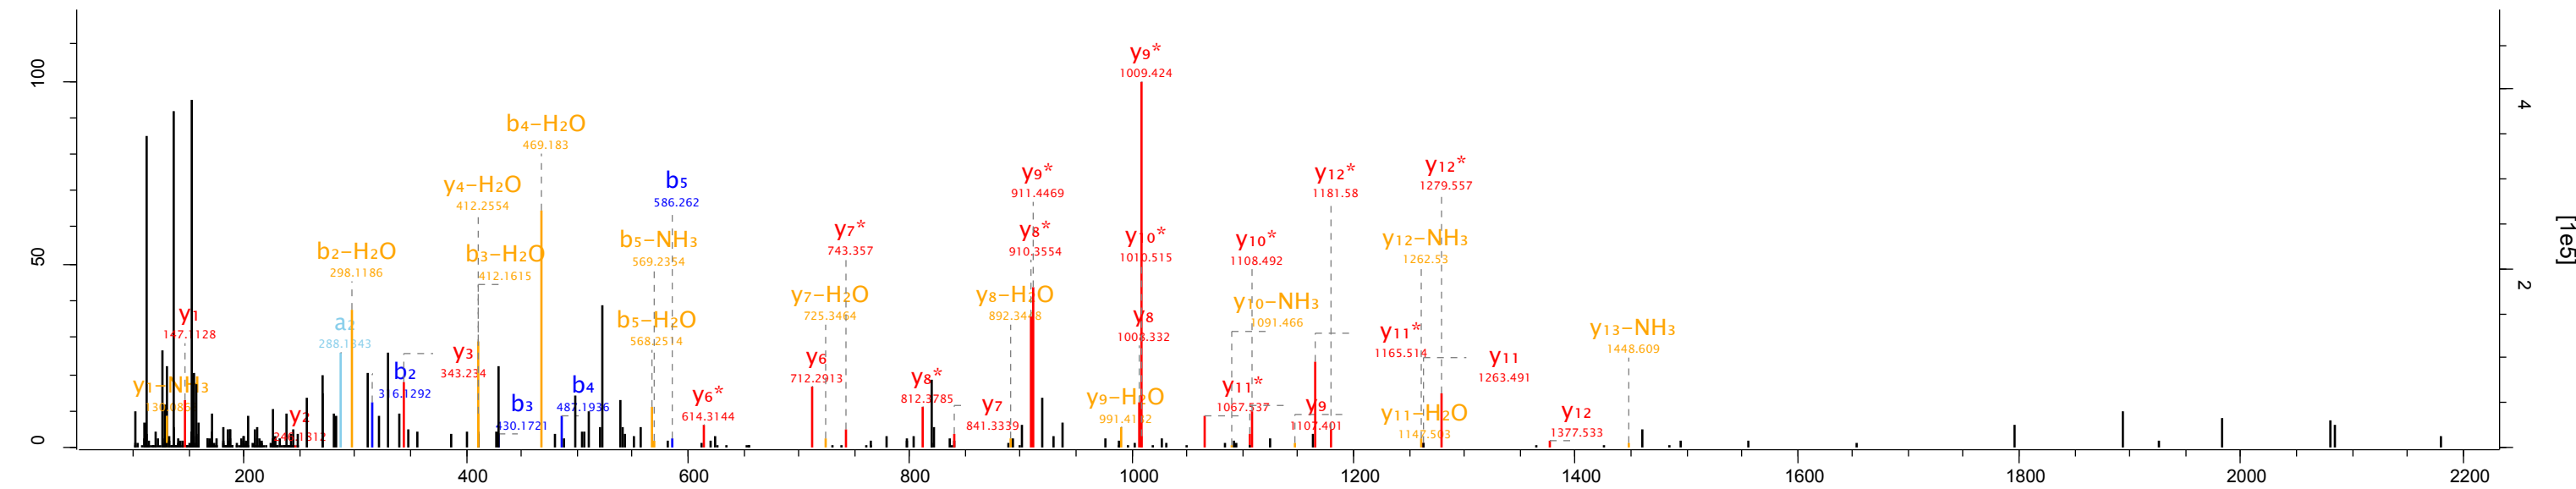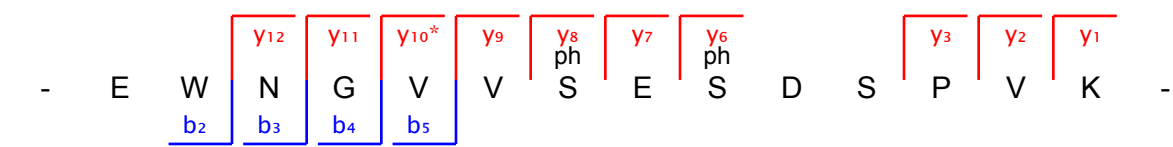

Raw file: 20171215\_MaS\_33SR\_LMH\_phospho\_02  
 Scan: 10018 Method: FTMS; HCD Score: 129.91 m/z: 899.39 Gene names: DCP1A

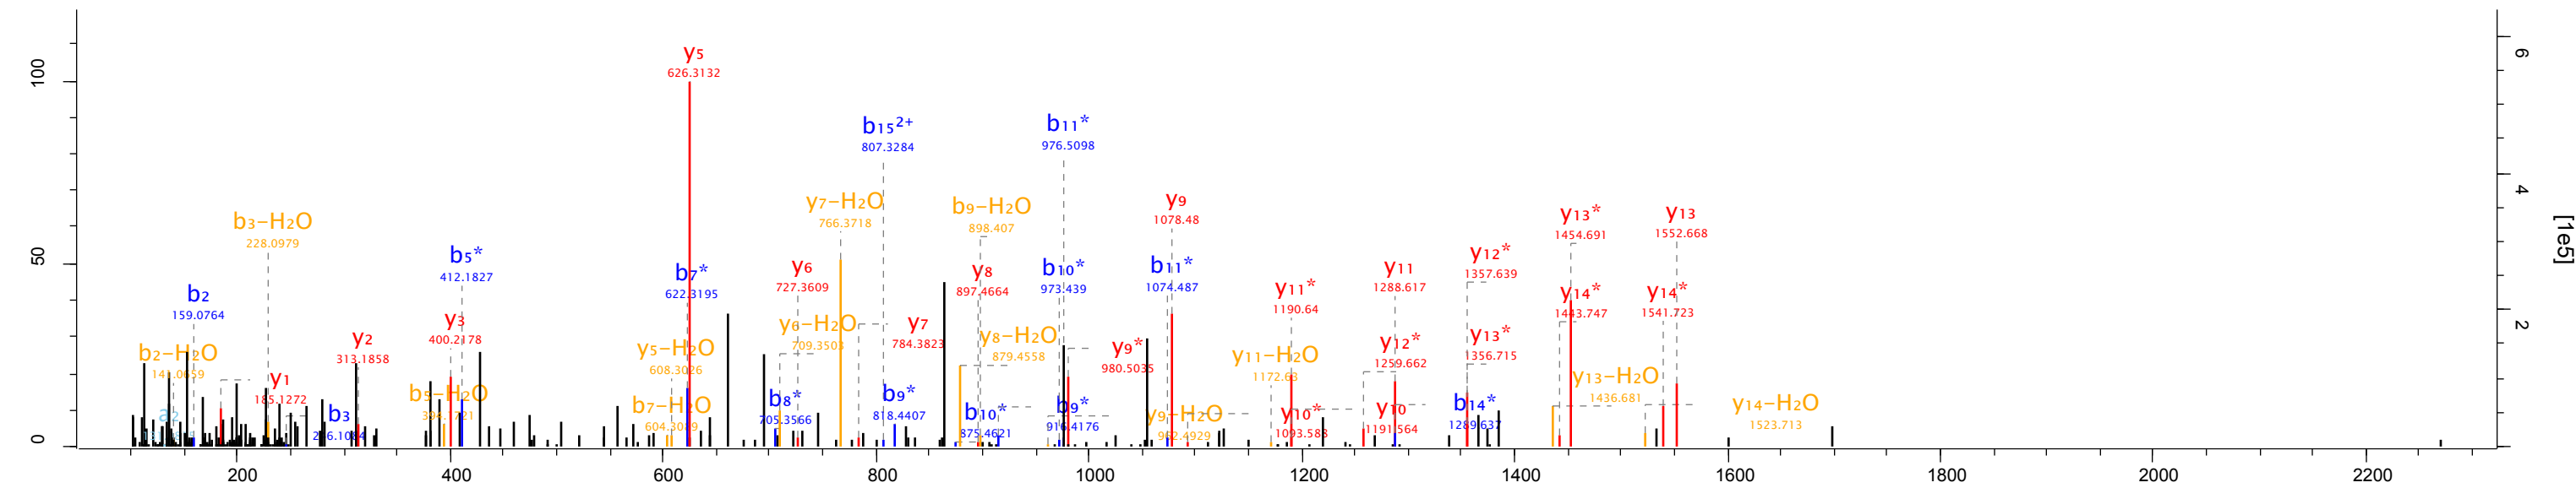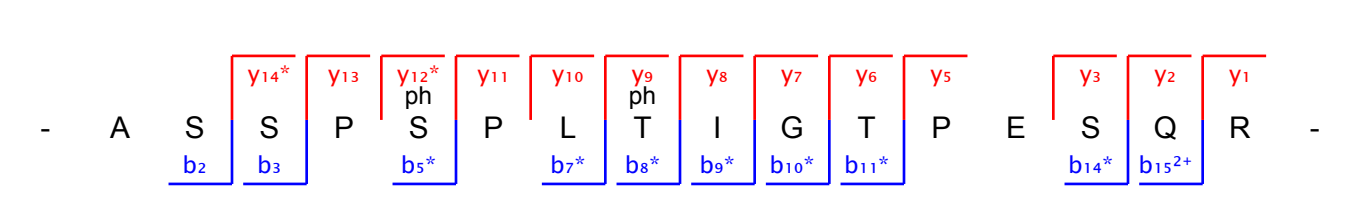

Raw file 20171215\_MaS\_33SR\_LMH\_phospho\_02 Scan 10198 Method FTMS; HCD Score 81.76 m/z 968.91 Gene names HUWE1

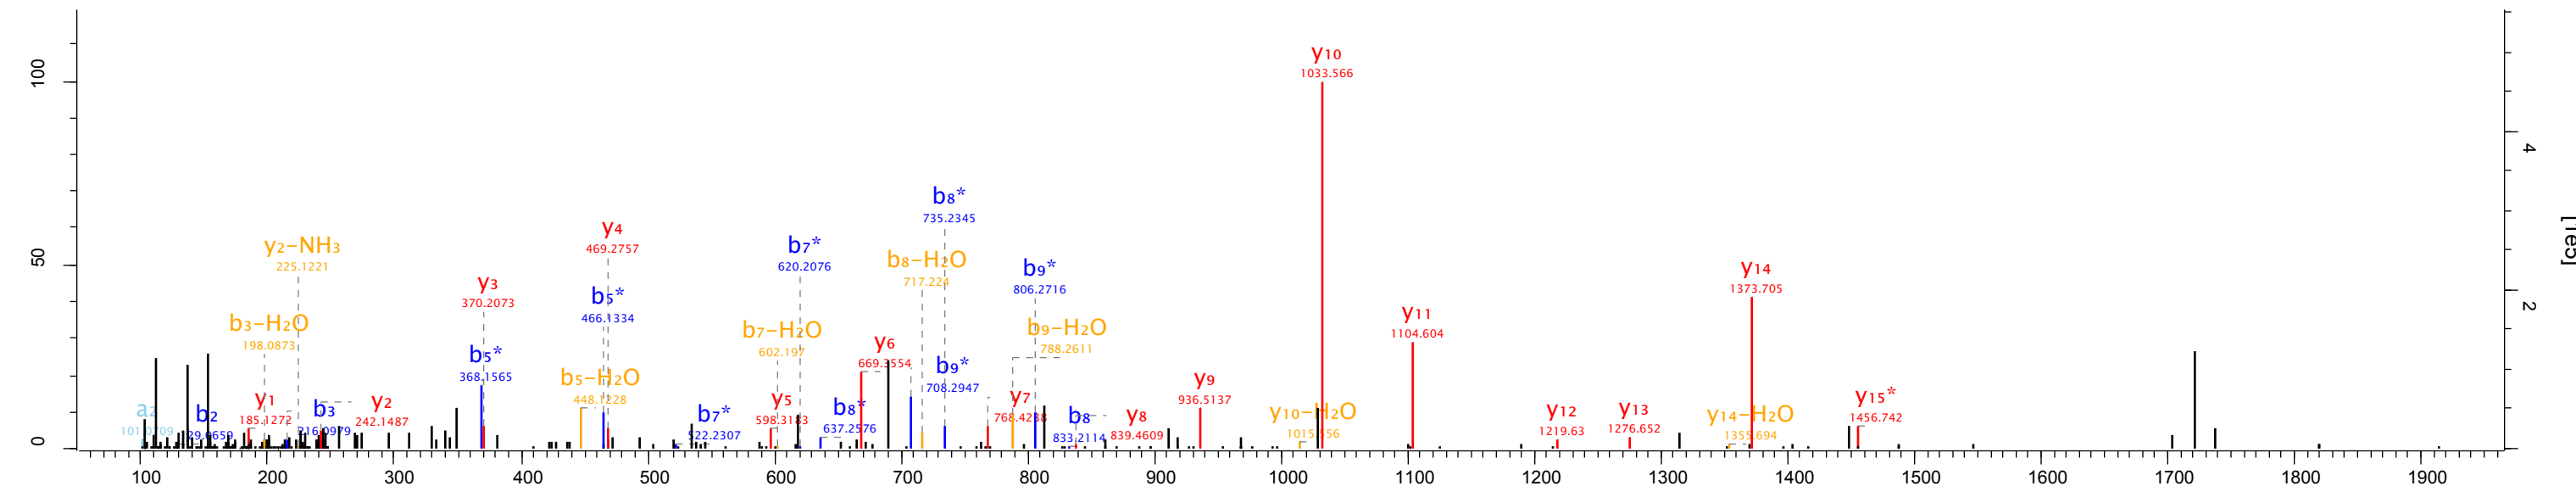

- A G S ph S y15\* ph T y14 P y13 G y12 D y11 A y10 P y9 P y8 A y7 V y6 A y5 E y4 V y3 Q y2 G y1 R -

Fragmentation sites are indicated by brackets below the amino acid sequence:

- b2 (under G)
- b3 (under S)
- b5\* (under T)
- b7\* (under G)
- b8 (under D)
- b9\* (under A)

Raw file: 20171215\_MaS\_33SR\_LMH\_phospho\_02  
 Scan: 10478 Method: FTMS; HCD Score: 300.3 m/z: 846.37 Gene names: FGFR1OP

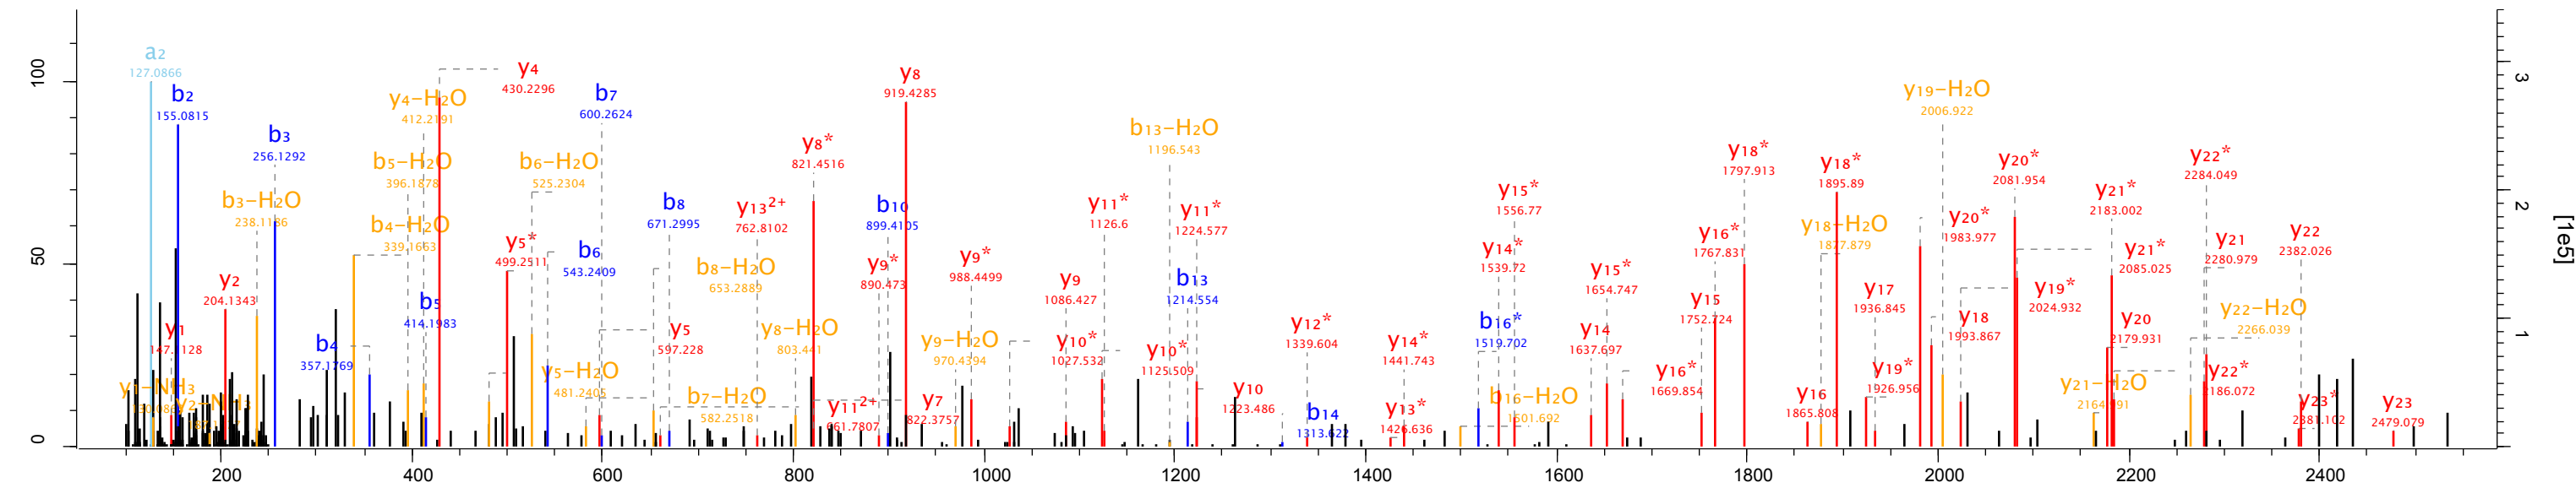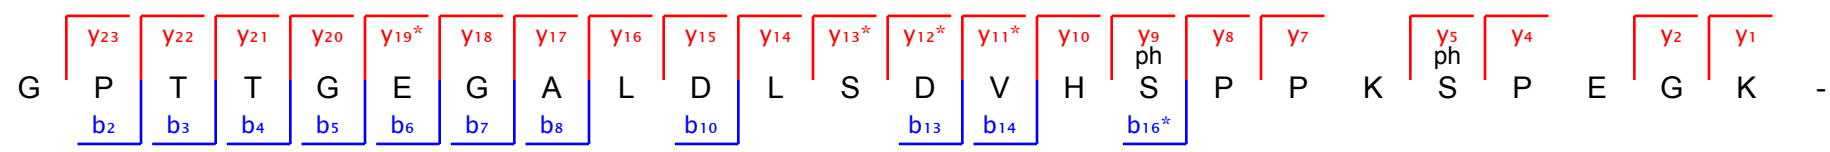

Raw file 20171215\_MaS\_33SR\_LMH\_phospho\_02 Scan 10638 Method FTMS; HCD Score 121.76 m/z 901.05 Gene names QSER1

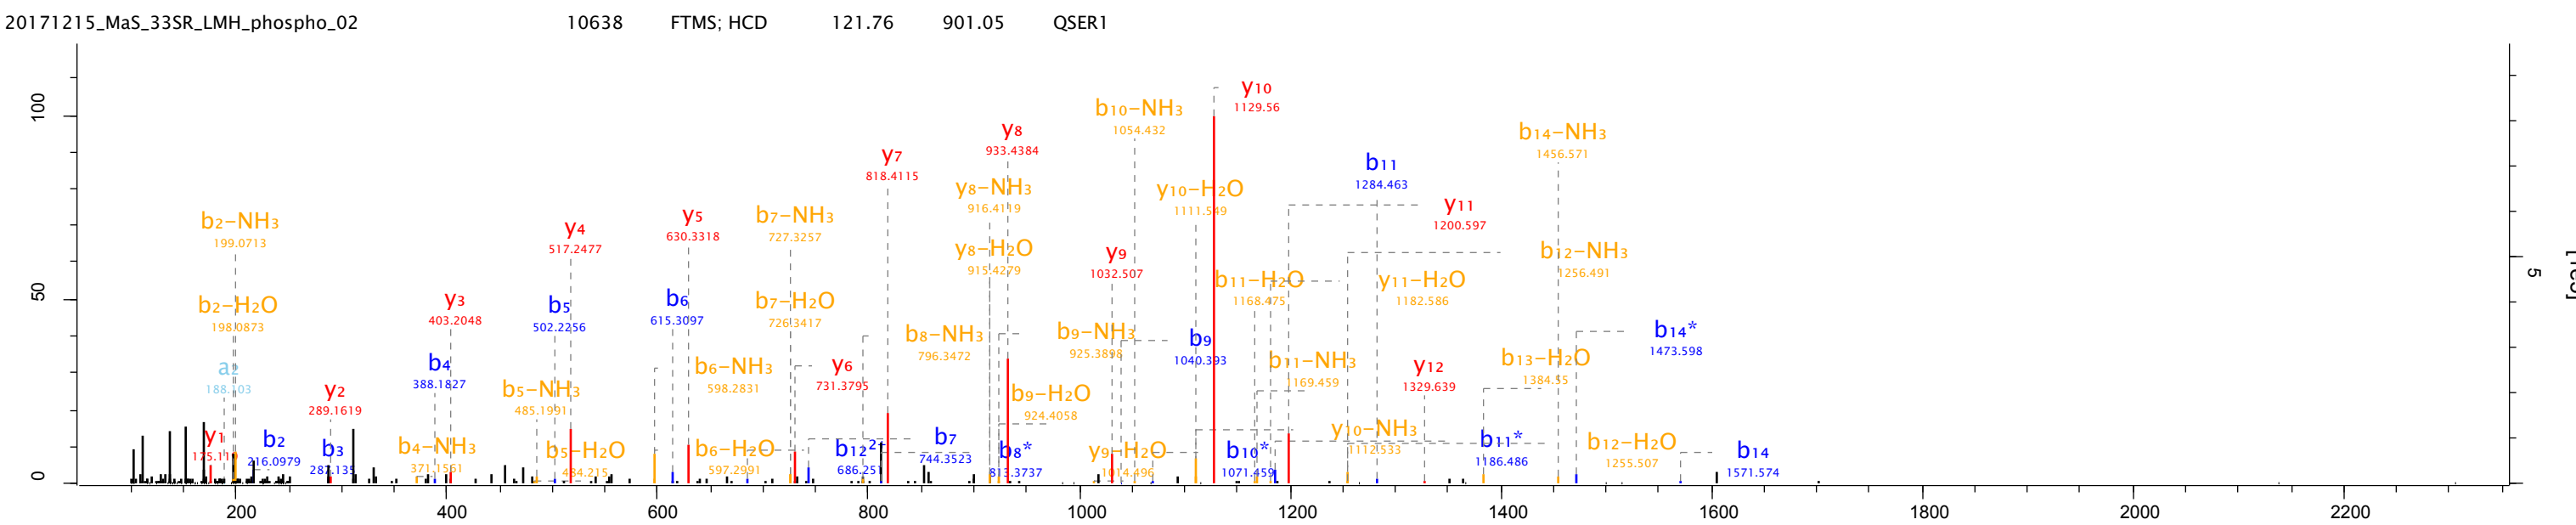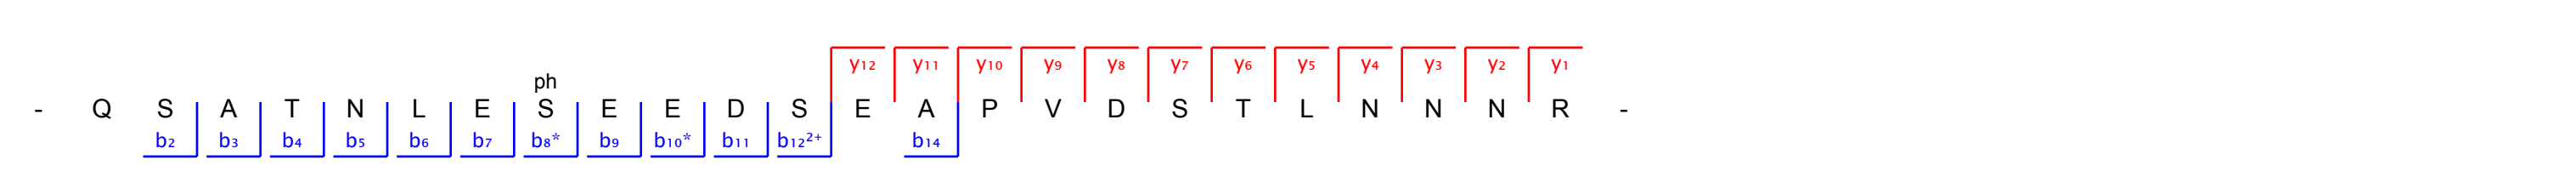

Raw file

20171215\_MaS\_33SR\_LMH\_phospho\_02

| Scan  | Method    | Score | m/z    | Gene names |
|-------|-----------|-------|--------|------------|
| 11318 | FTMS; HCD | 67.23 | 632.26 | SOWAHC     |

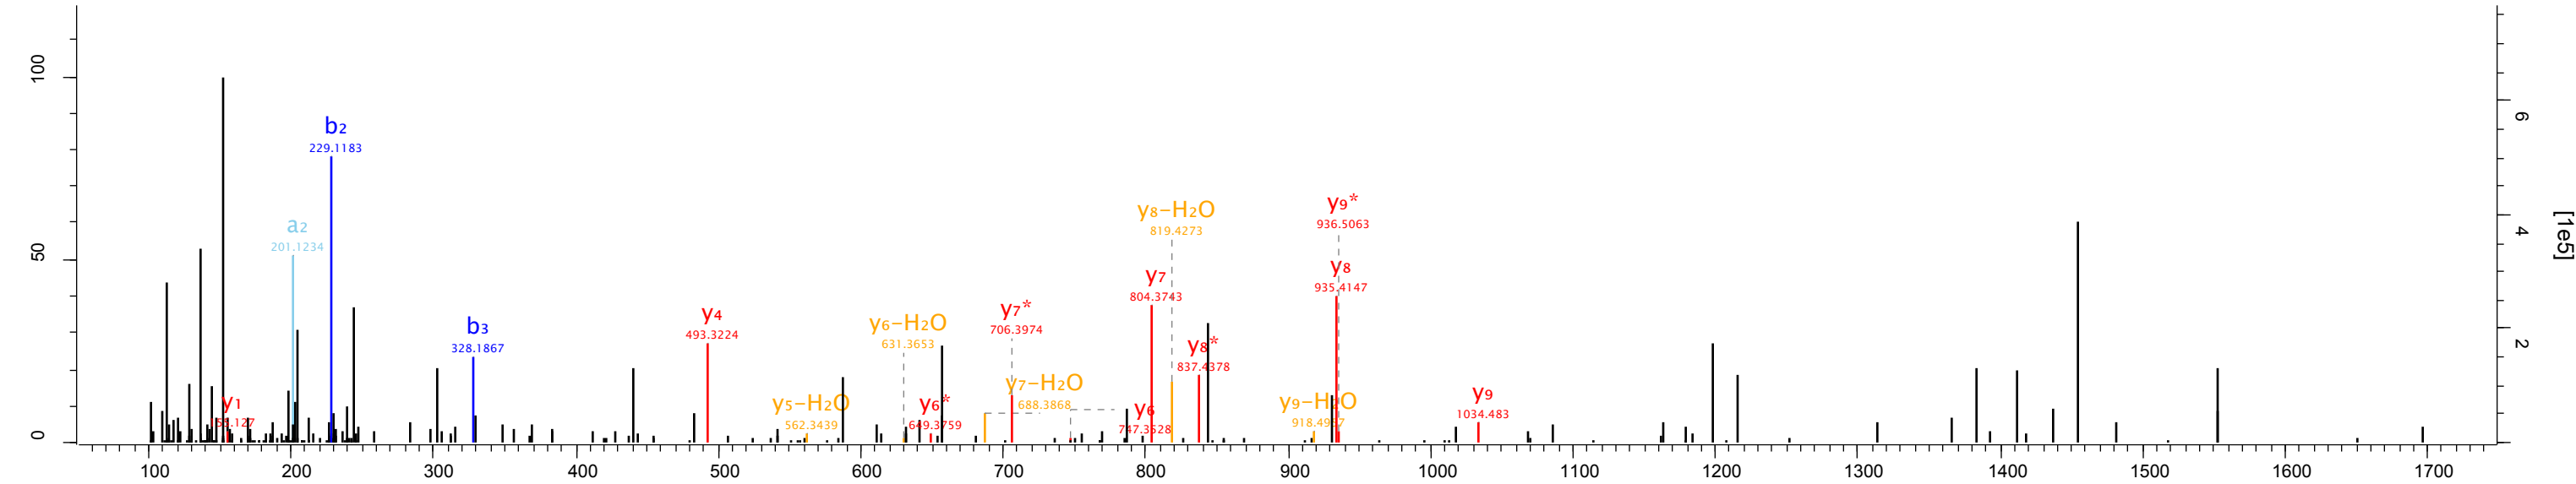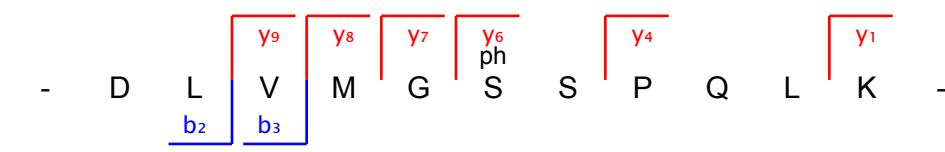

20171215\_MaS\_33SR\_LMH\_phospho\_02 11488 FTMS; HCD 180.63 869.36 OSBPL11

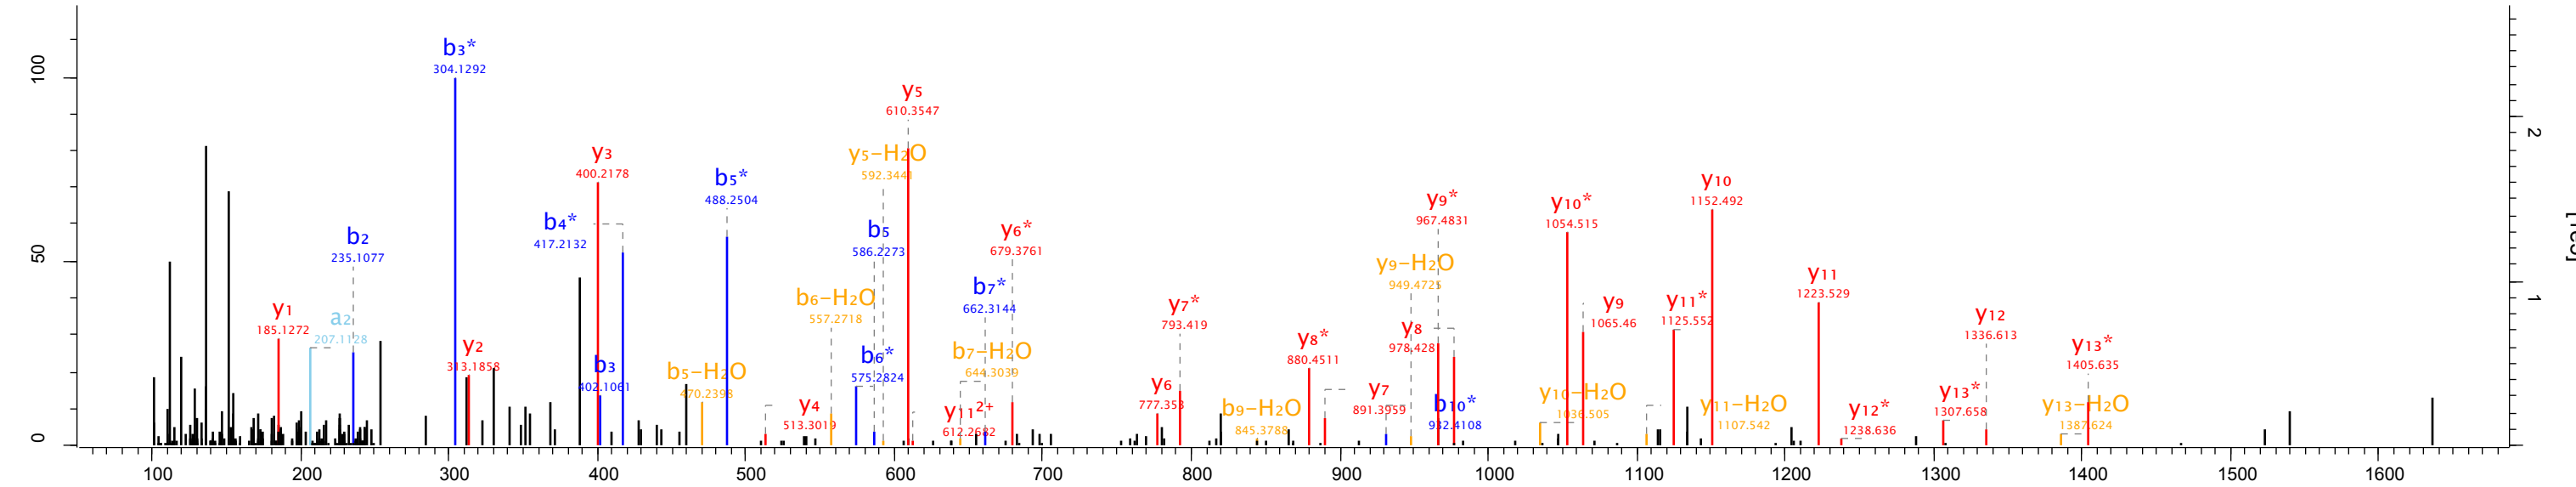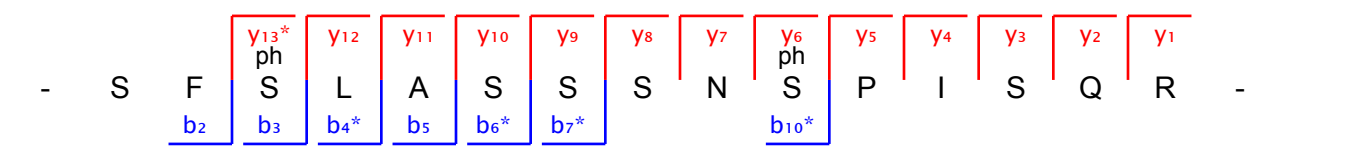

Raw file 20171215\_MaS\_33SR\_LMH\_phospho\_02 Scan 11528 Method FTMS; HCD Score 189.51 m/z 972.41 Gene names MAP1A

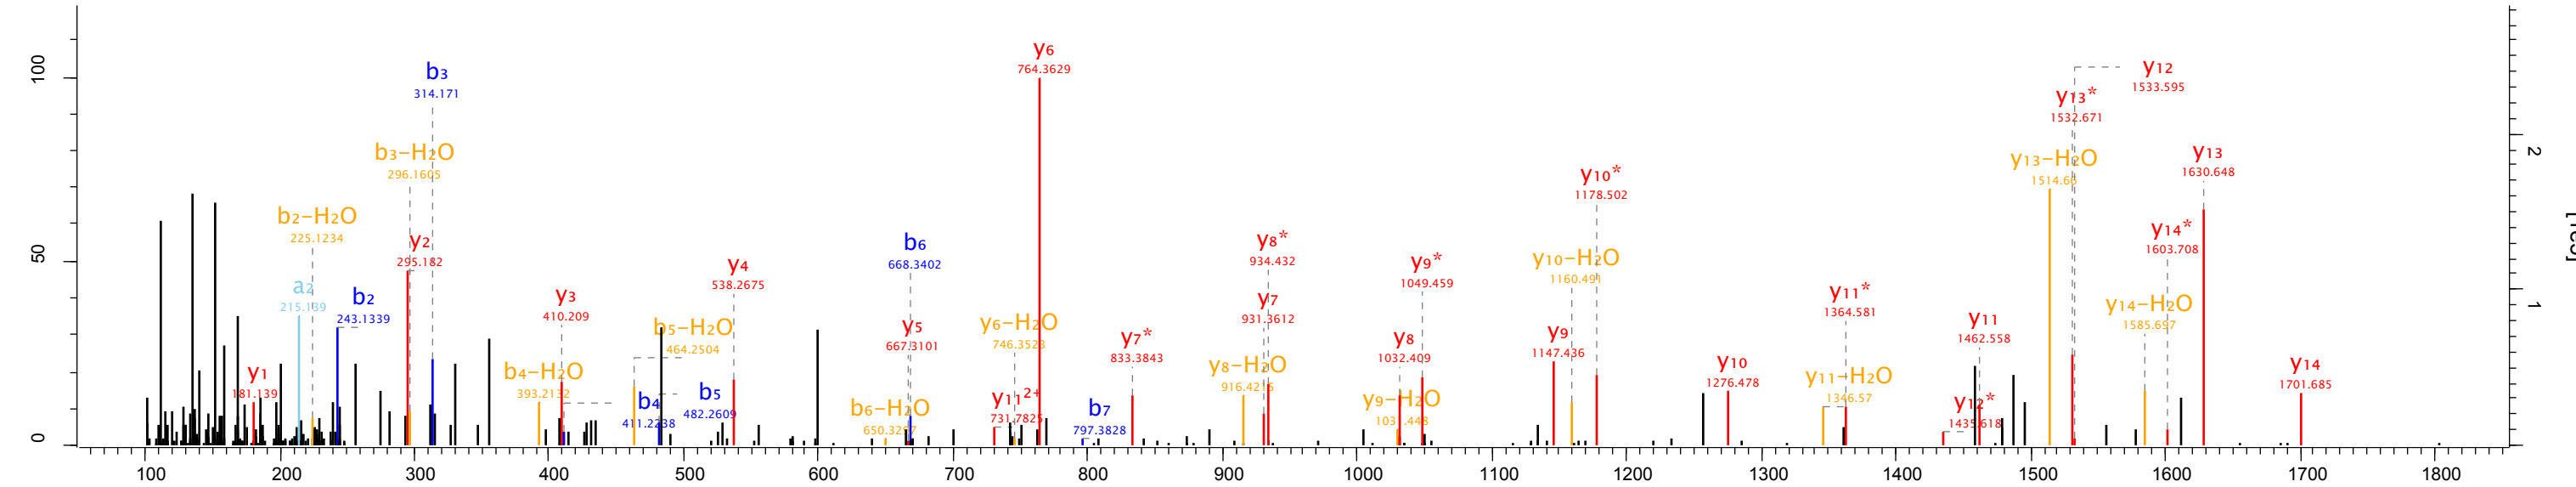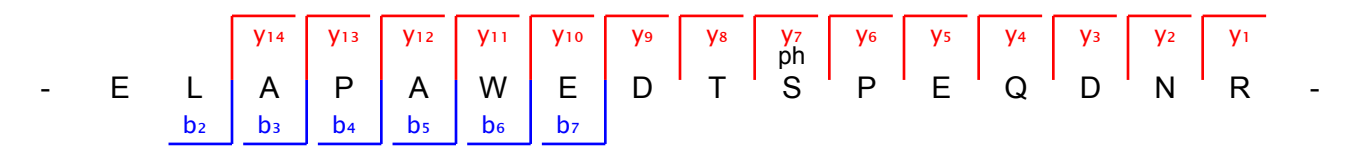



Raw file 20171215\_MaS\_33SR\_LMH\_phospho\_02 Scan 11608 Method FTMS; HCD Score 47.81 m/z 901.38 Gene names ZRANB2

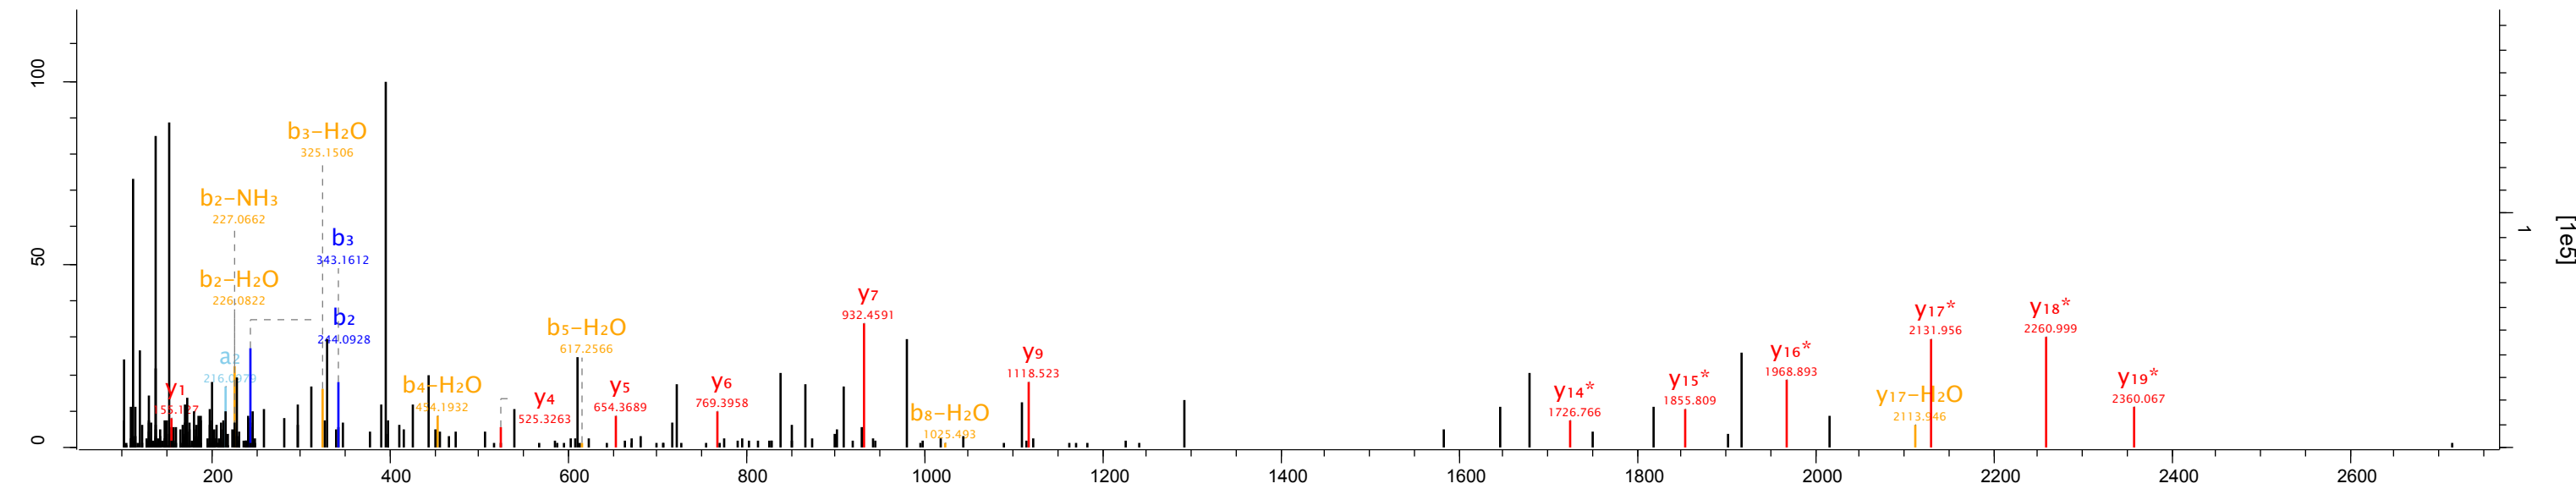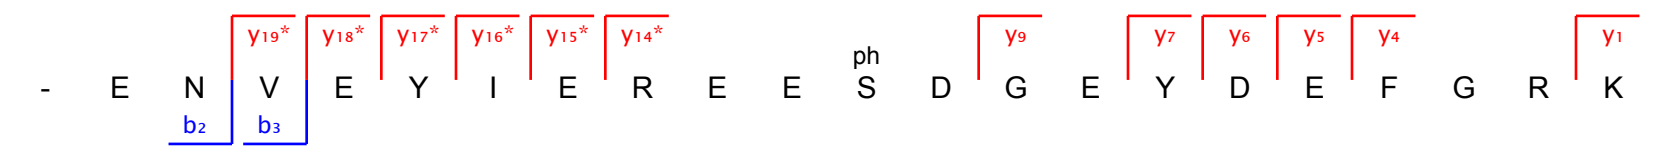

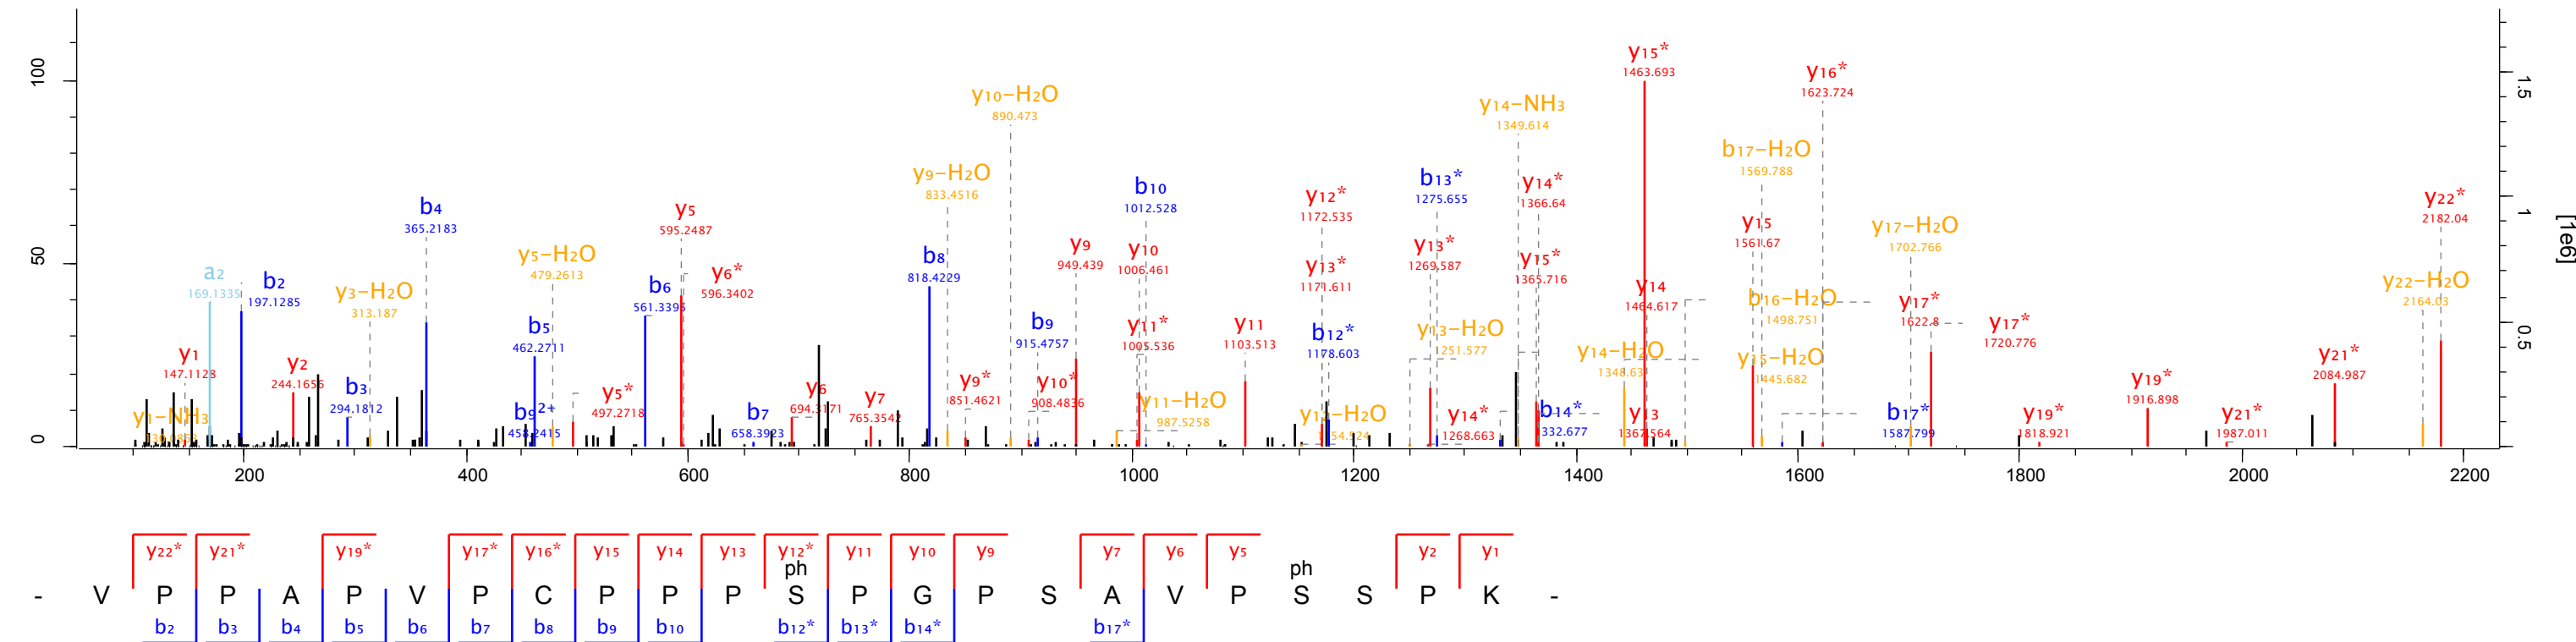

Raw file 20171215\_MaS\_33SR\_LMH\_phospho\_02 Scan 12448 Method FTMS; HCD Score 58.93 m/z 1190.18 Gene names MIER1

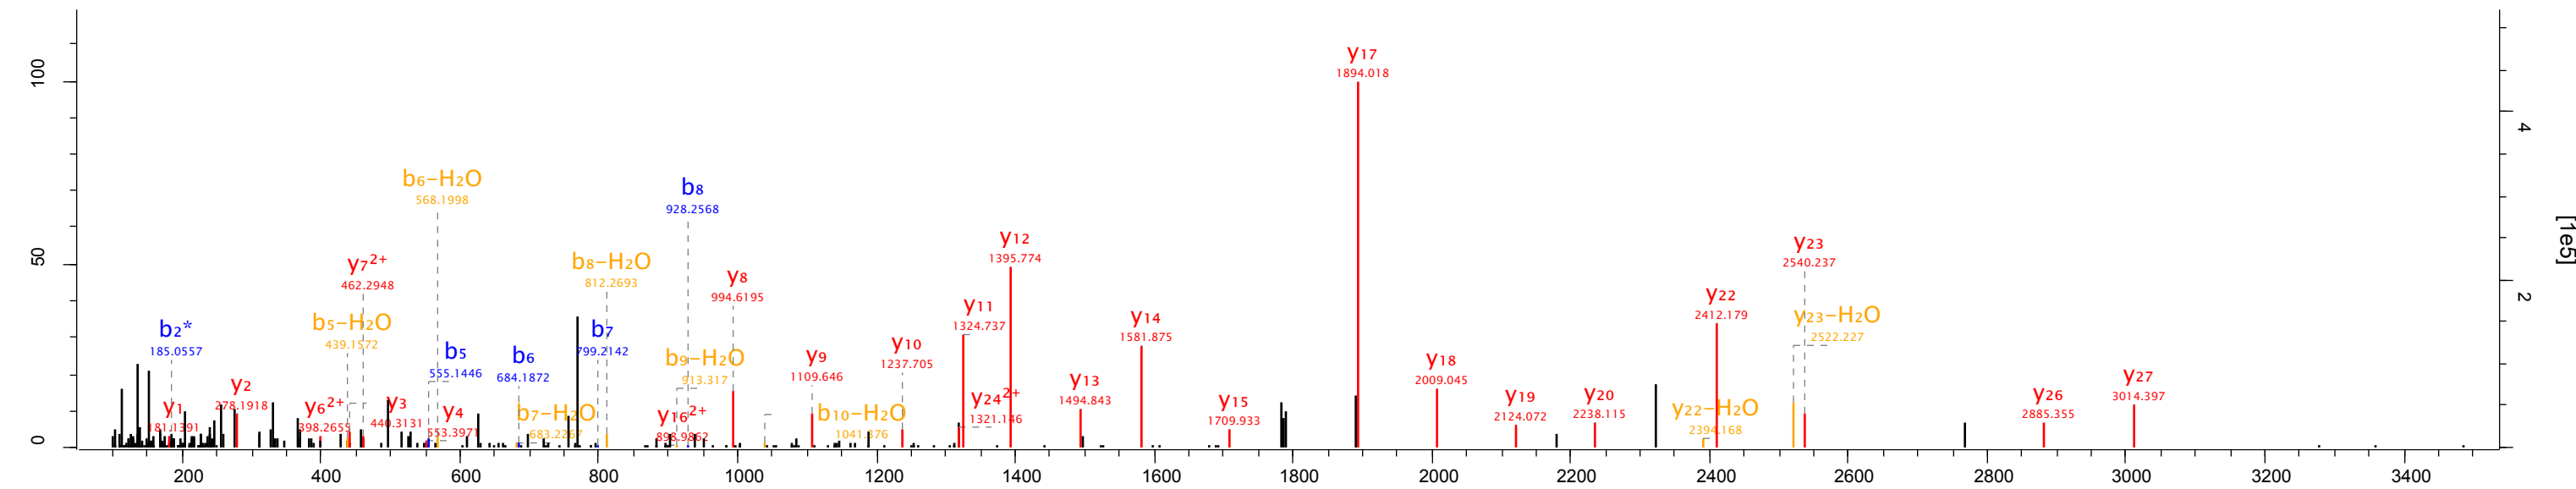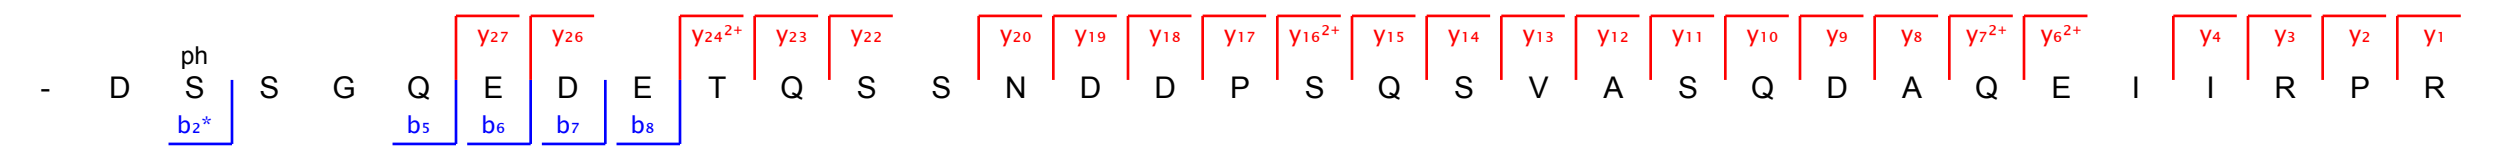

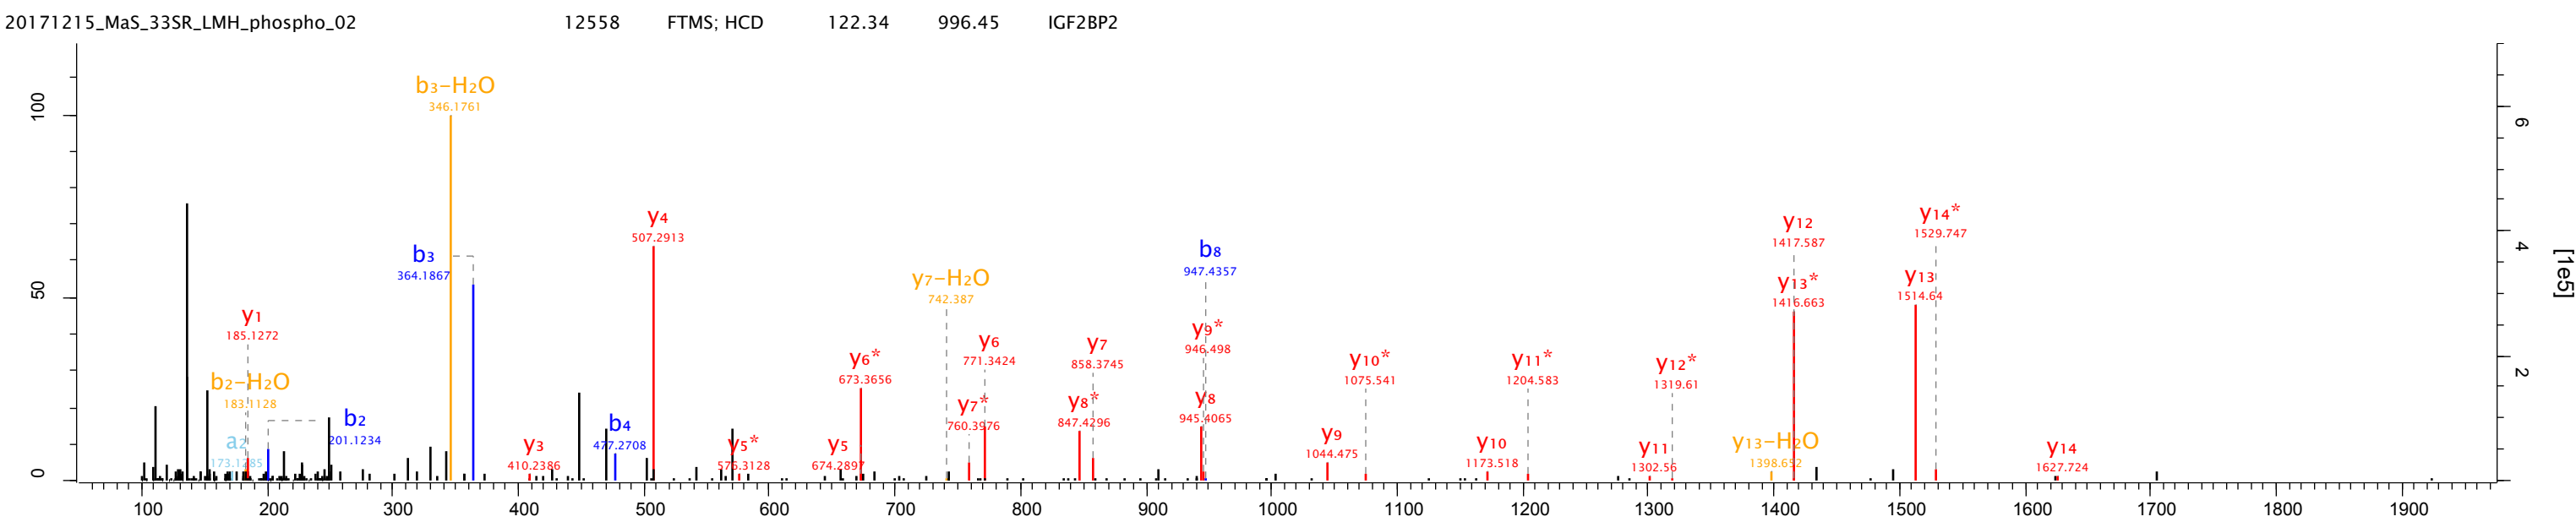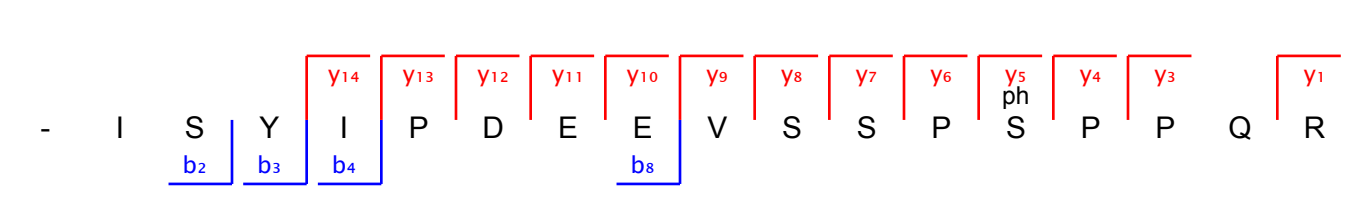

Raw file 20171215\_MaS\_33SR\_LMH\_phospho\_02 Scan 13378 Method FTMS; HCD Score 123.87 m/z 928.94 Gene names RALGPS2

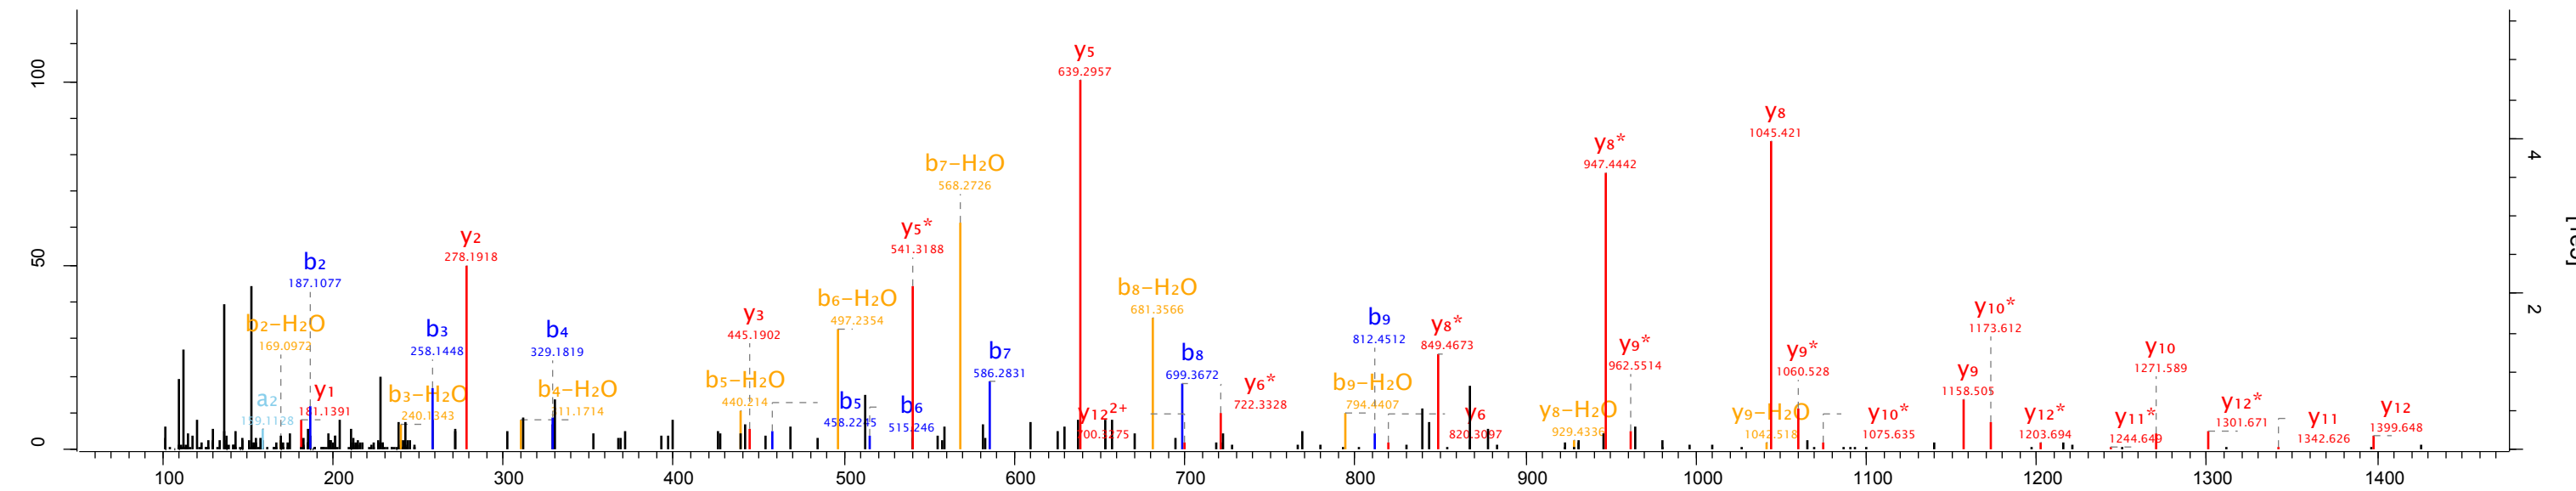

- S V A A E G A L L P Q T P P S P R -

b2
b3
b4
b5
y12
y11
y10
y9
y8
y6 ph
y5
y3 ph
y2
y1

Raw file 20171215\_MaS\_33SR\_LMH\_phospho\_02 Scan 14008 Method FTMS; HCD Score 87.75 m/z 811.7 Gene names ANKRD13D

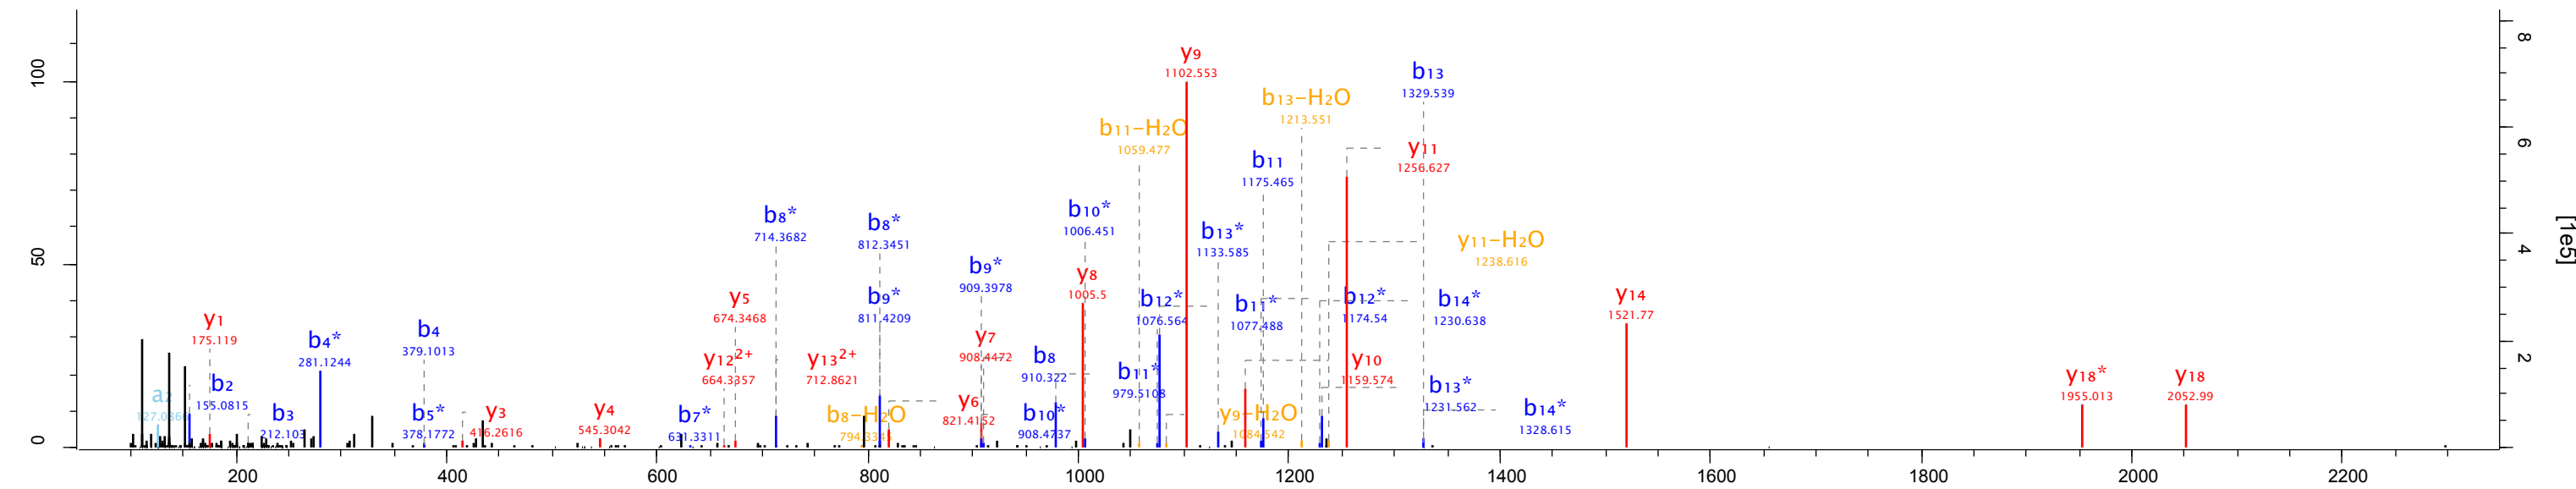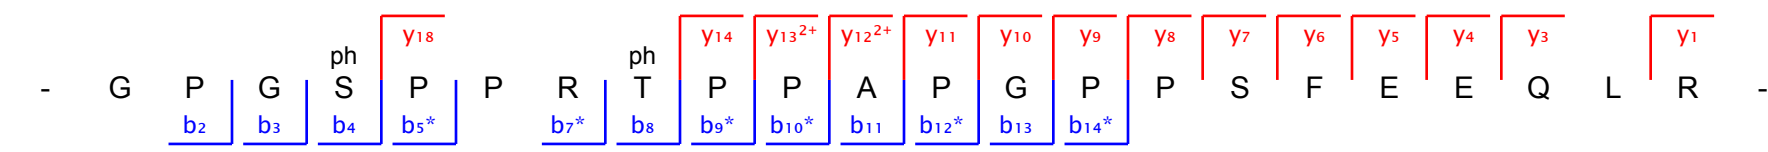

Raw file 20171215\_MaS\_33SR\_LMH\_phospho\_02 Scan 15858 Method FTMS; HCD Score 88.77 m/z 1245.48 Gene names YWHAZ

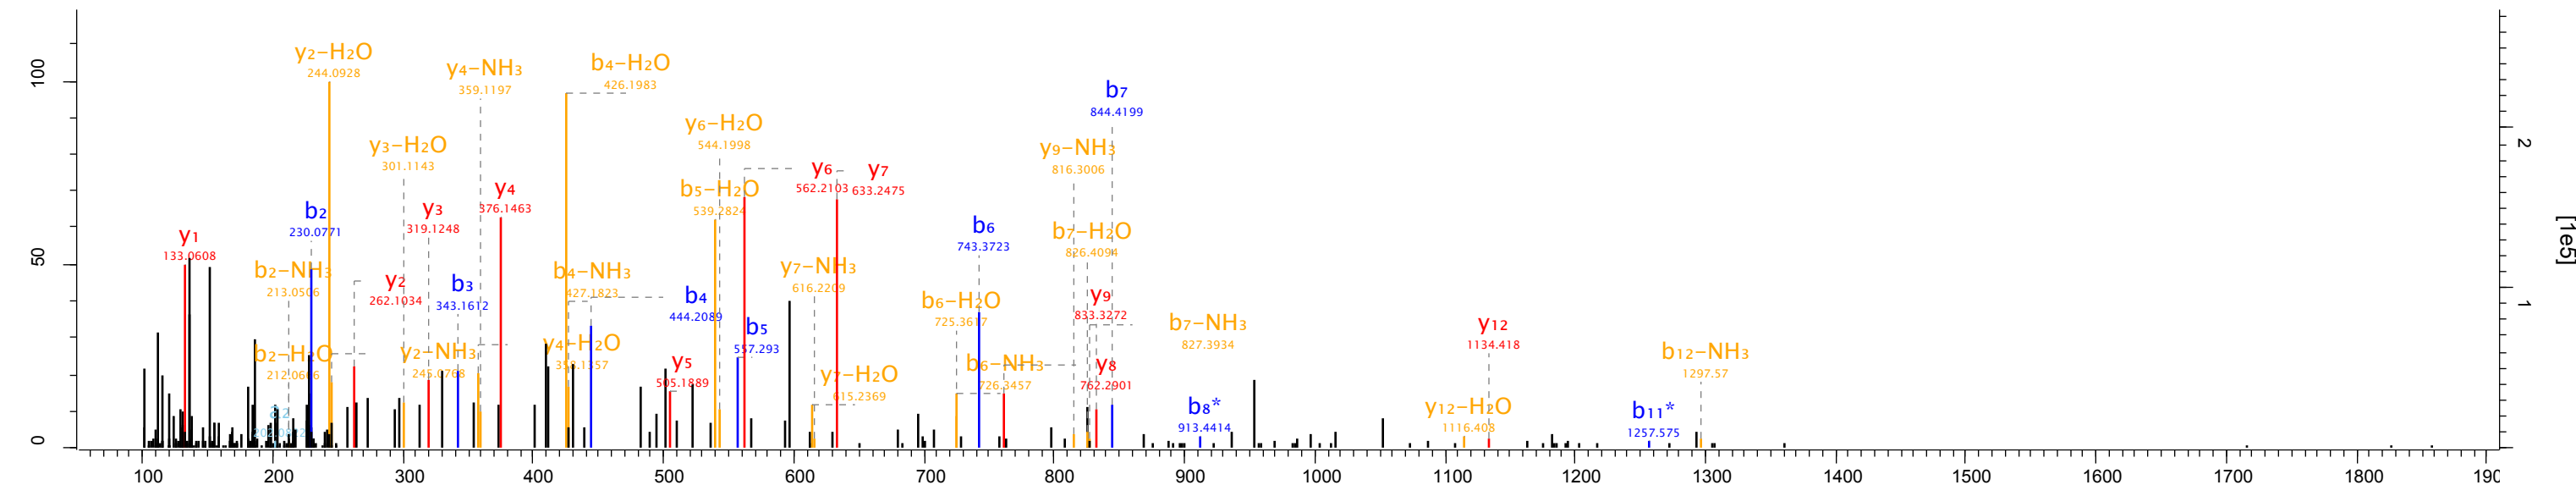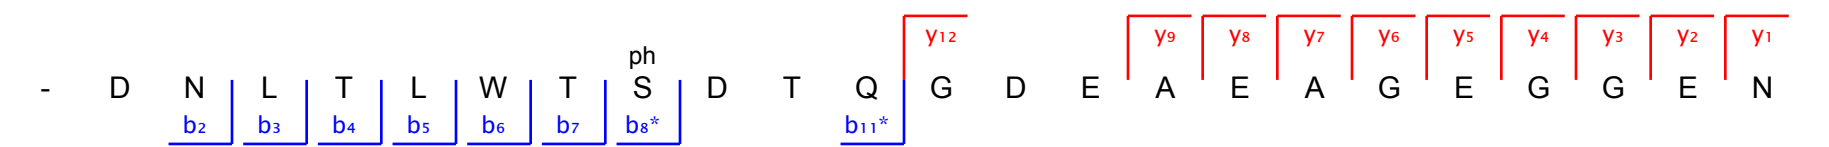

Raw file 20171215\_MaS\_33SR\_LMH\_phospho\_02 Scan 16848 Method FTMS; HCD Score 92.15 m/z 1122.01 Gene names FRMD8

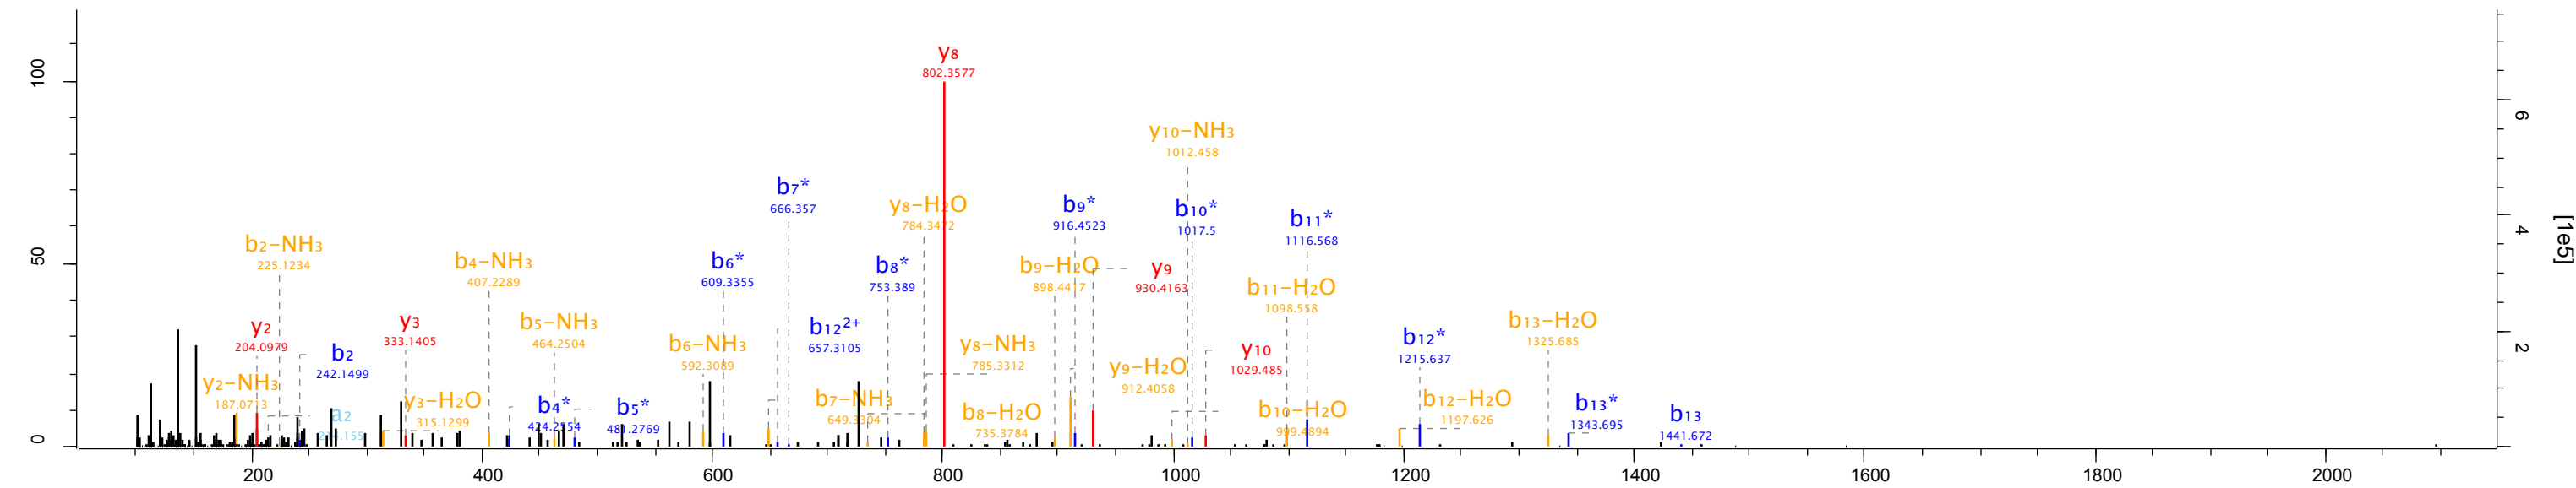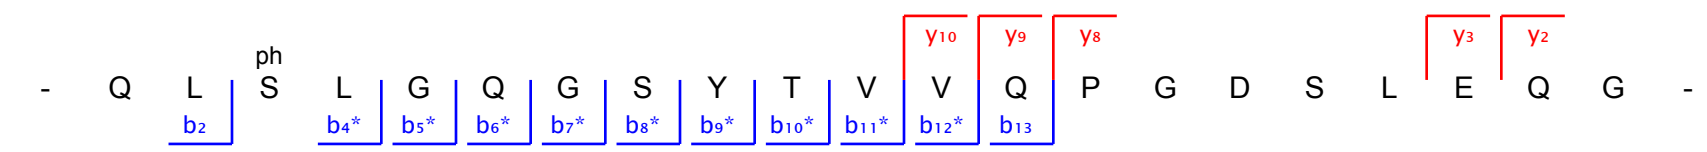



Raw file

20171215\_MaS\_33SR\_LMH\_phospho\_02

| Scan  | Method    | Score | m/z     | Gene names                              |
|-------|-----------|-------|---------|-----------------------------------------|
| 17838 | FTMS; HCD | 59.91 | 1046.44 | TUBA1B;KLK9;TUBA1A;TUBA1C;TUBA3C;TUBA3E |

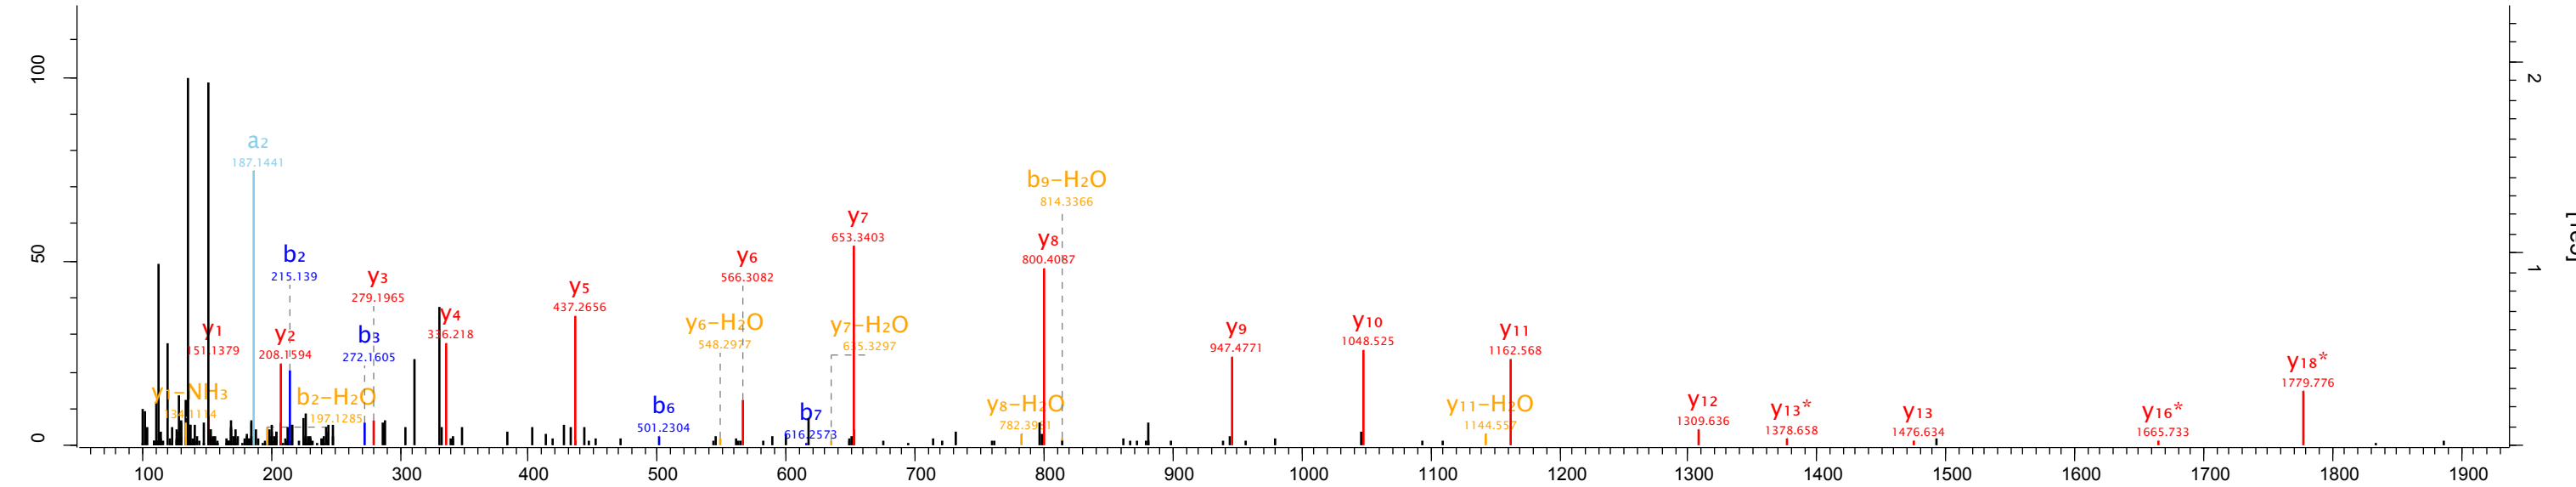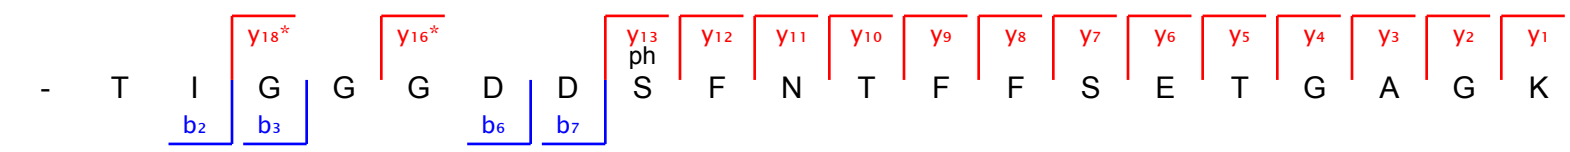

Raw file 20171215\_MaS\_33SR\_LMH\_phospho\_02 Scan 1948 Method FTMS; HCD Score 56.2 m/z 417.18 Gene names SRRM1

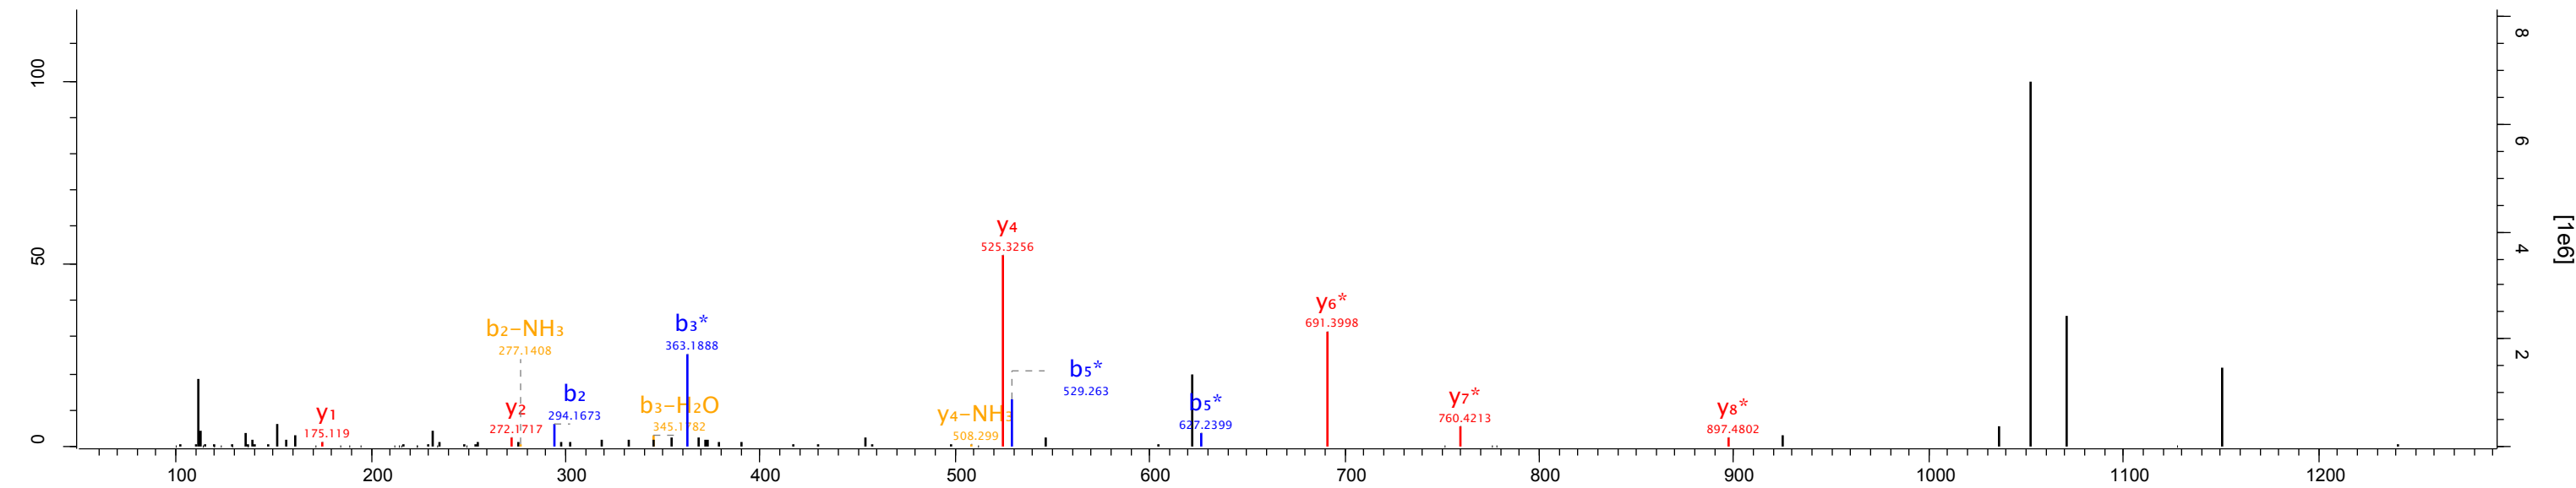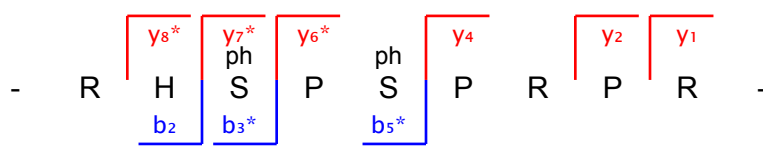

Raw file 20171215\_MaS\_33SR\_LMH\_phospho\_02 Scan 2108 Method FTMS; HCD Score 213.93 m/z 820.33 Gene names CBX3

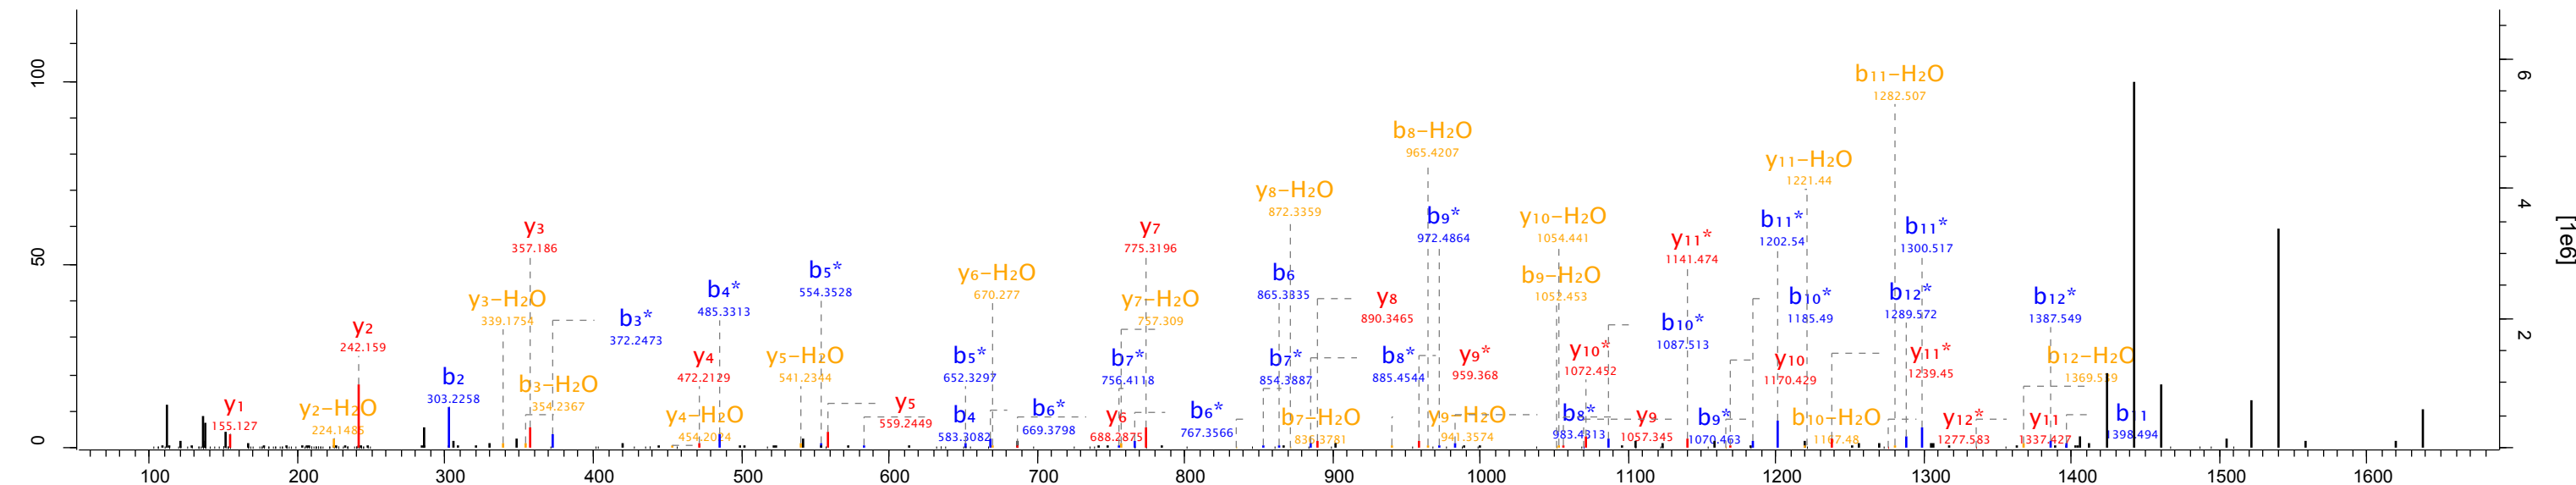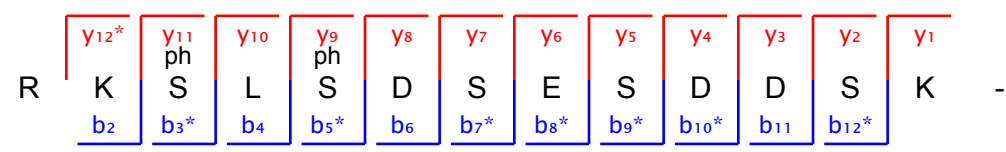

Raw file: 20171215\_MaS\_33SR\_LMH\_phospho\_02  
 Scan: 2198 Method: FTMS; HCD Score: 189.99 m/z: 880.86 Gene names: EIF4B

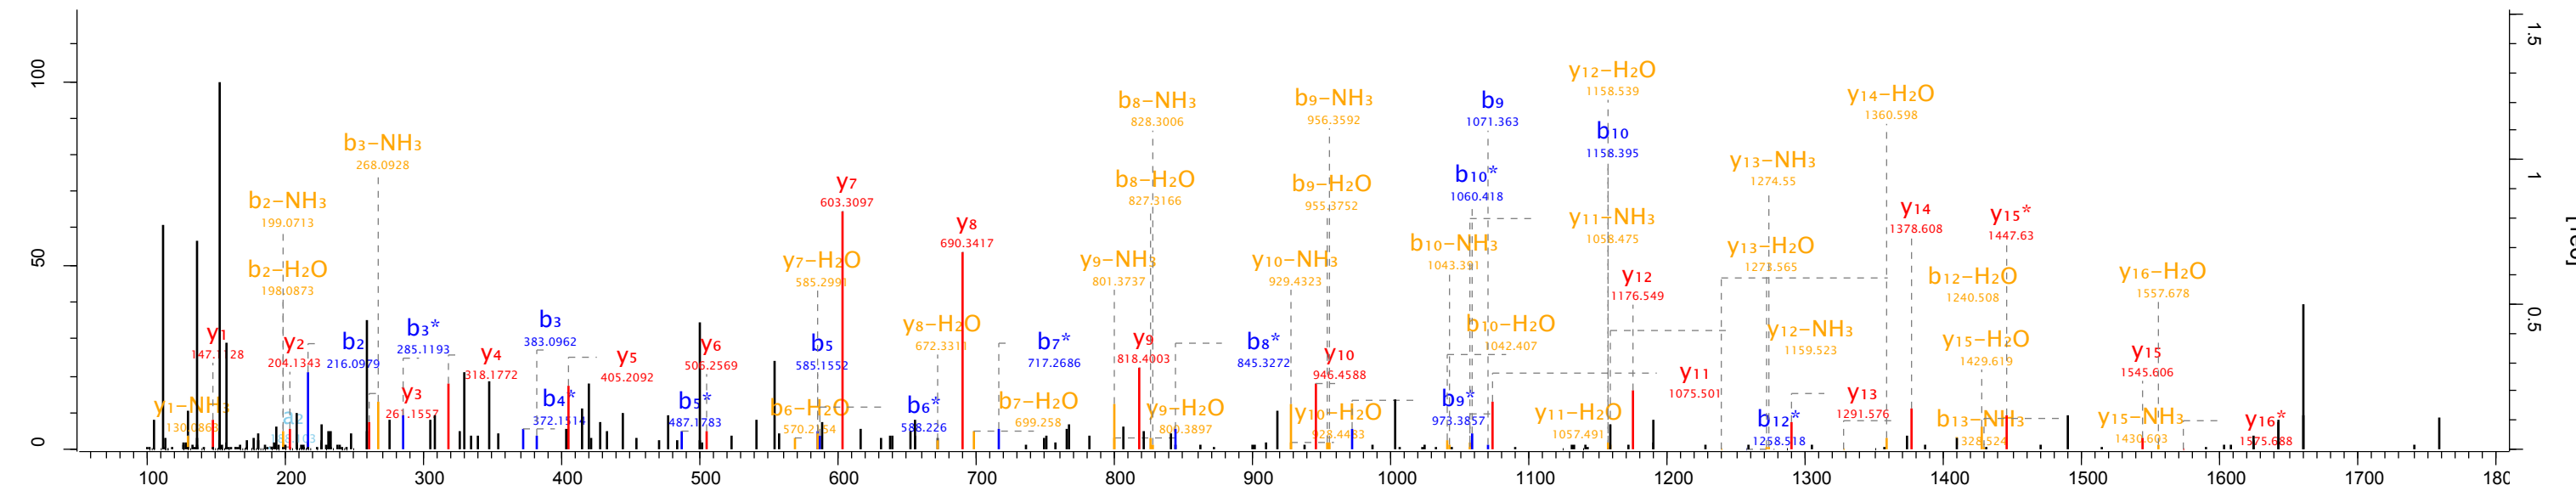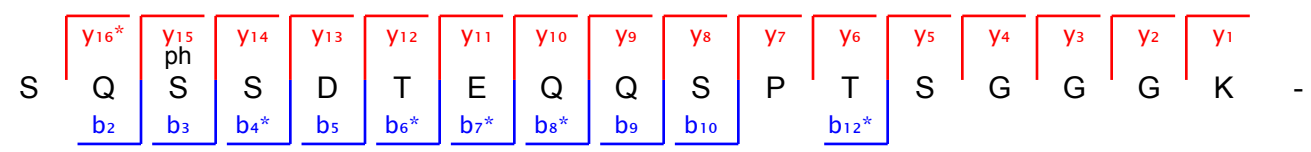

Raw file 20171215\_MaS\_33SR\_LMH\_phospho\_02 Scan 2228 Method FTMS; HCD Score 47.27 m/z 628.74 Gene names SF3B1

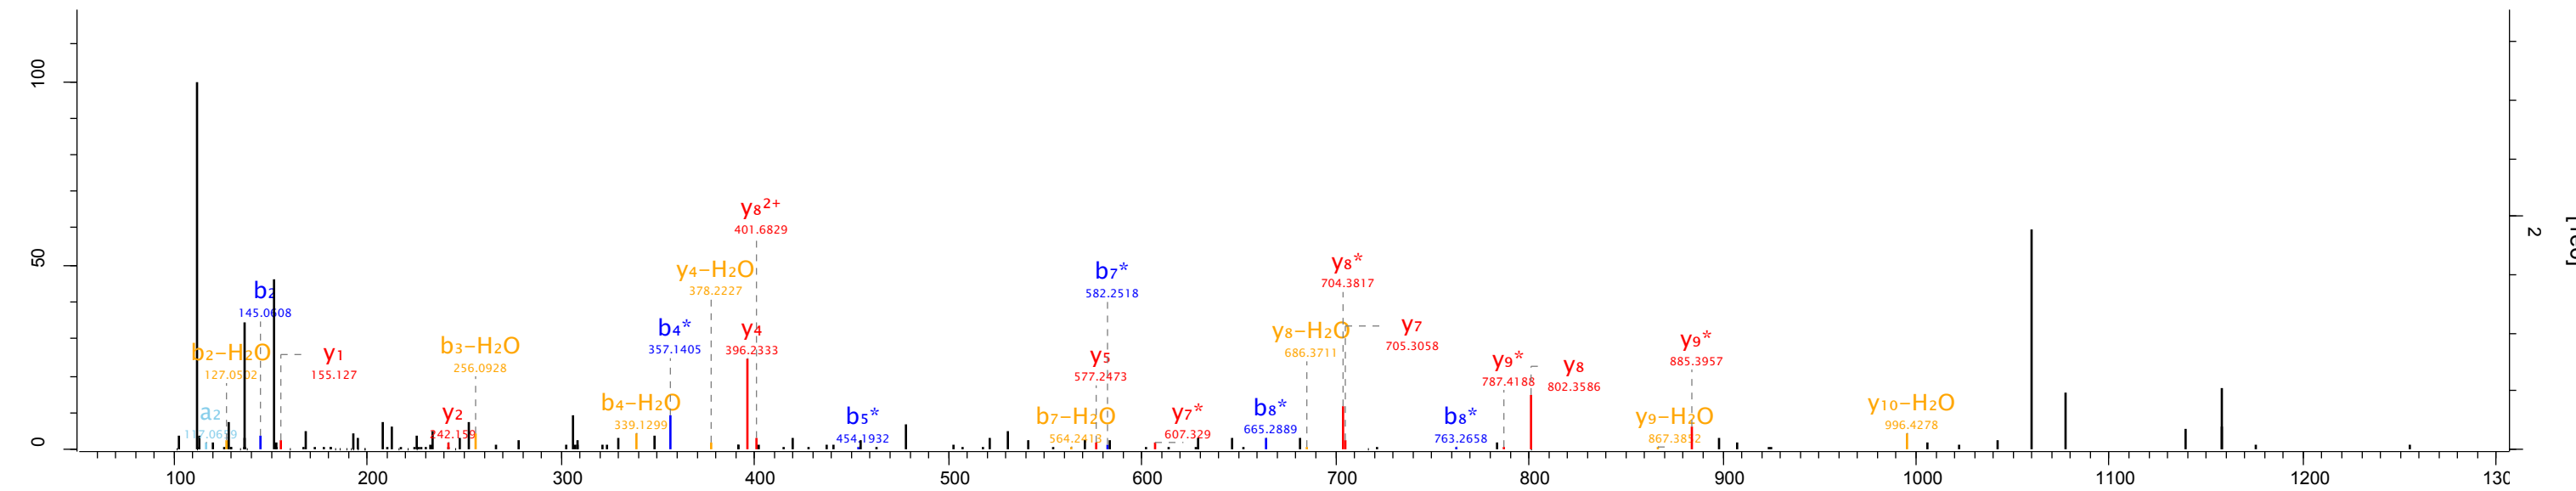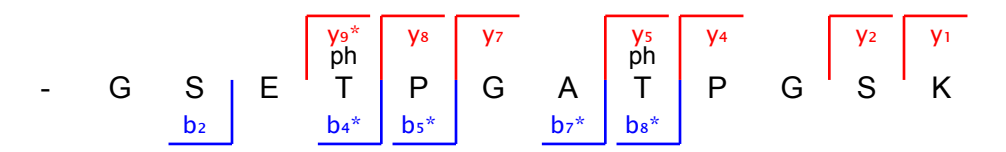

Raw file 20171215\_MaS\_33SR\_LMH\_phospho\_02 Scan 2278 Method FTMS; HCD Score 69.48 m/z 631.75 Gene names LARP4B

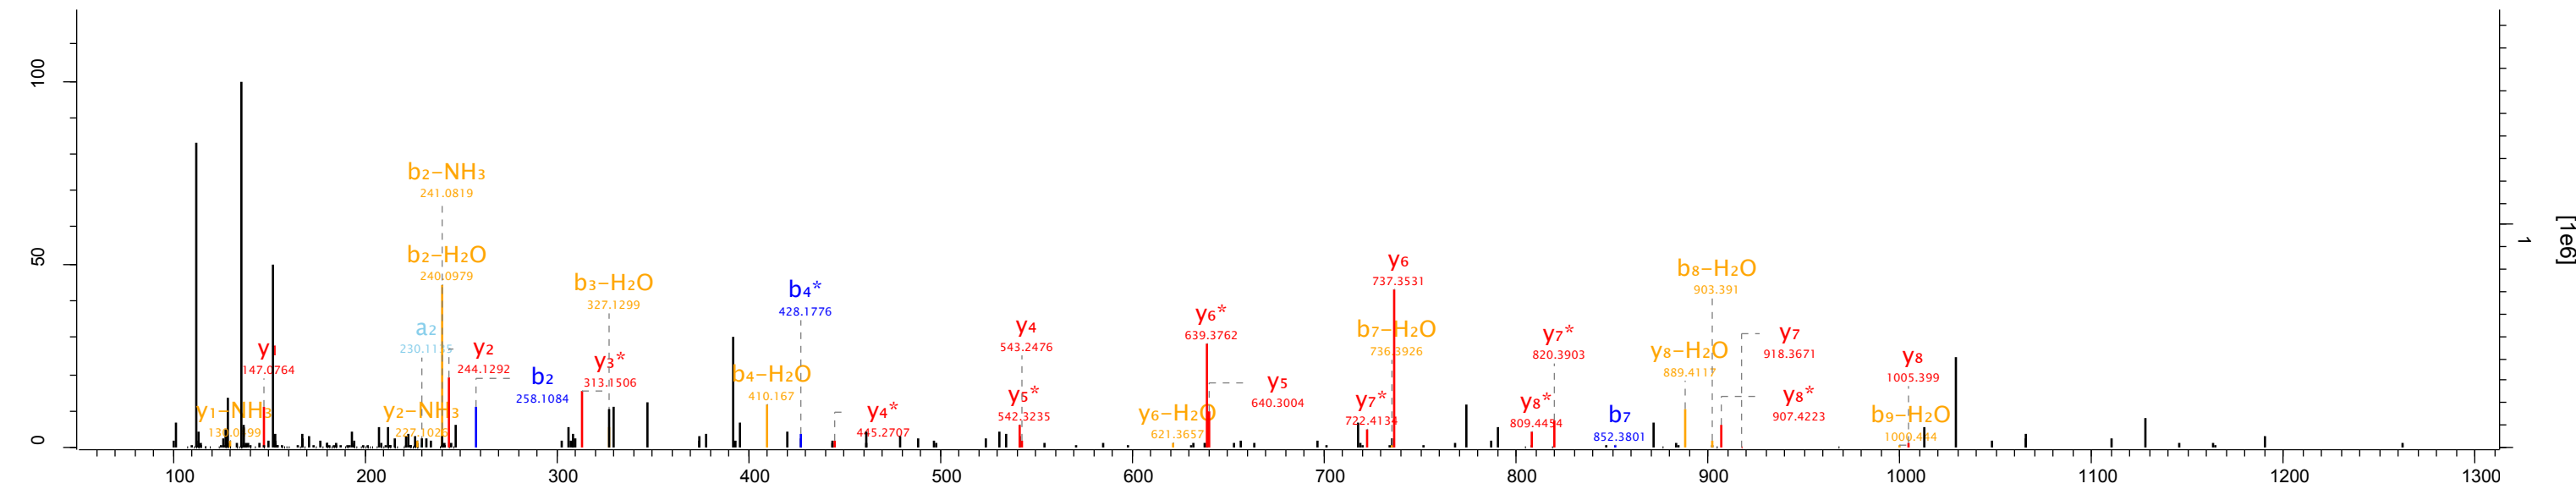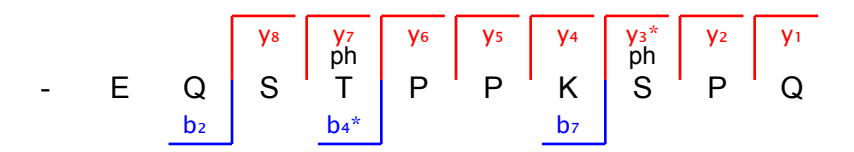

Raw file 20171215\_MaS\_33SR\_LMH\_phospho\_02 Scan 2388 Method FTMS; HCD Score 152.5 m/z 668.27 Gene names BCLAF1

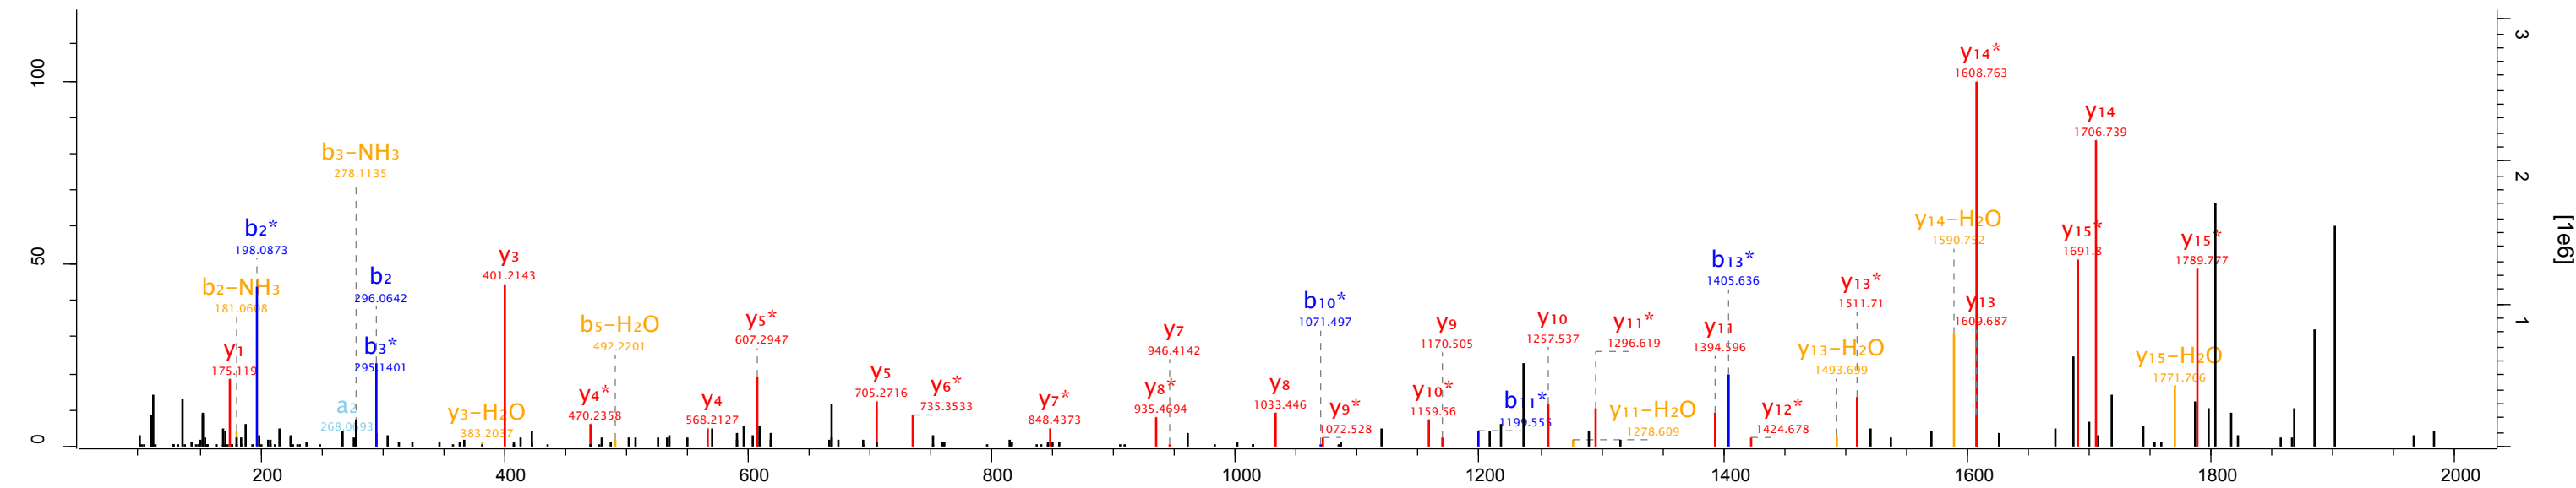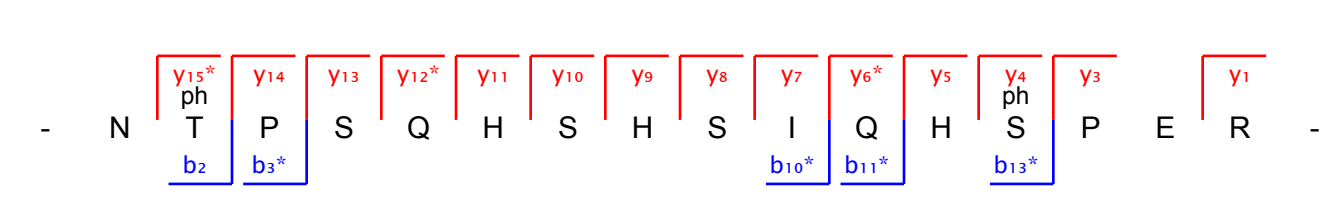

Raw file 20171215\_MaS\_33SR\_LMH\_phospho\_02 Scan 2588 Method FTMS; HCD Score 116.35 m/z 697.64 Gene names HNRNPC

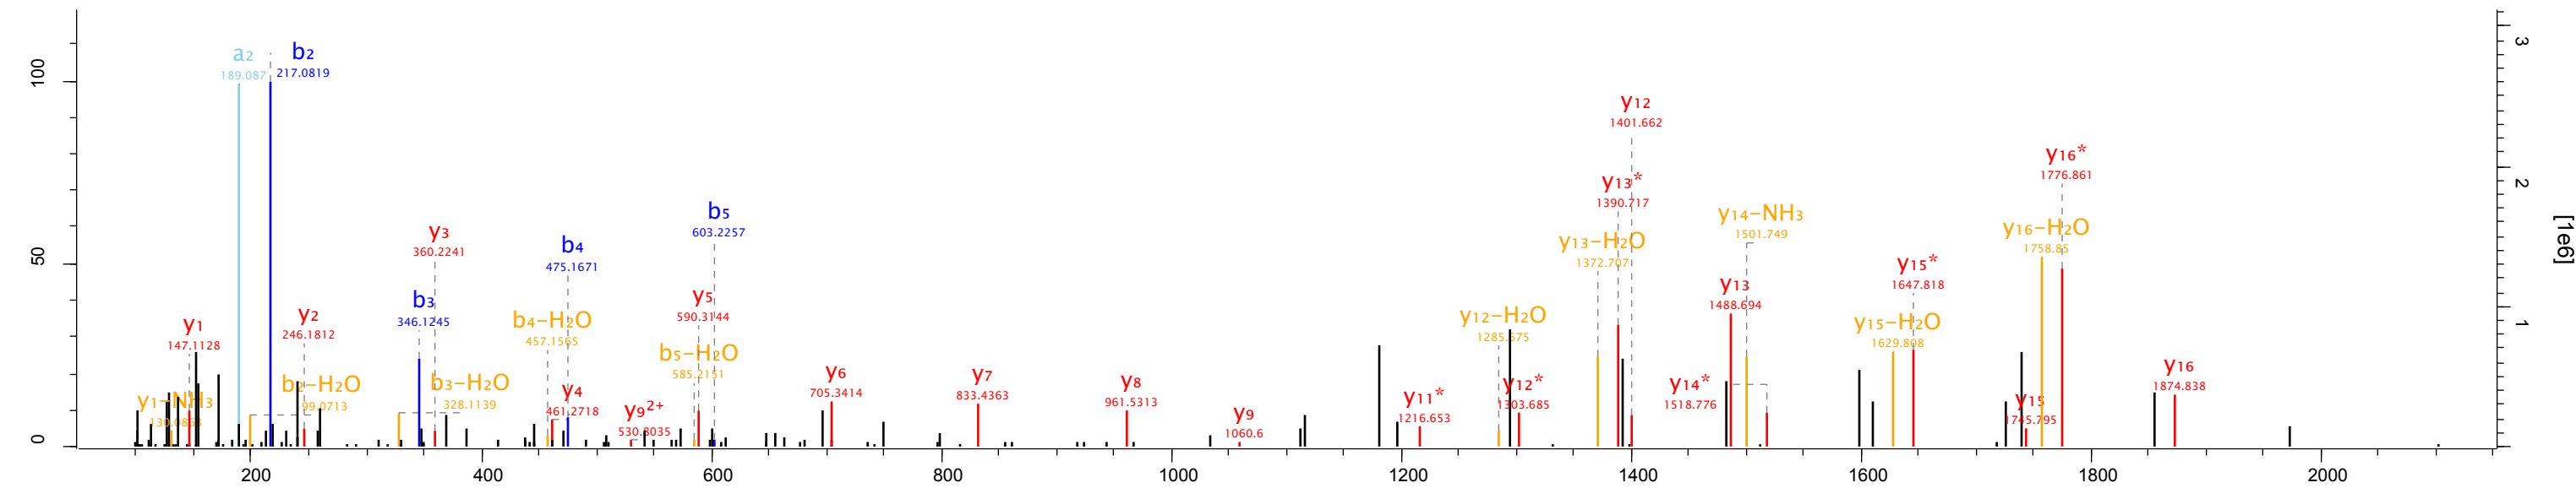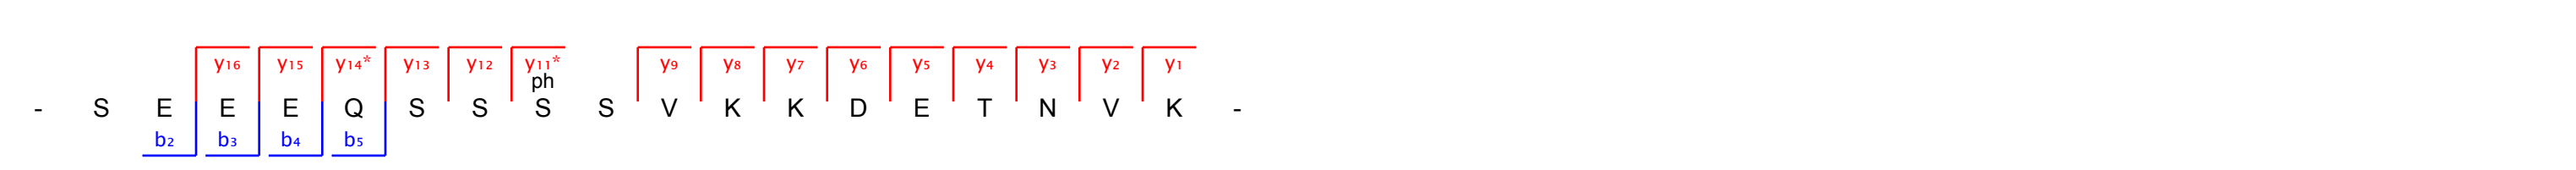



Raw file 20171215\_MaS\_33SR\_LMH\_phospho\_02 Scan 2668 Method FTMS; HCD Score 78.51 m/z 441.52 Gene names SRSF1

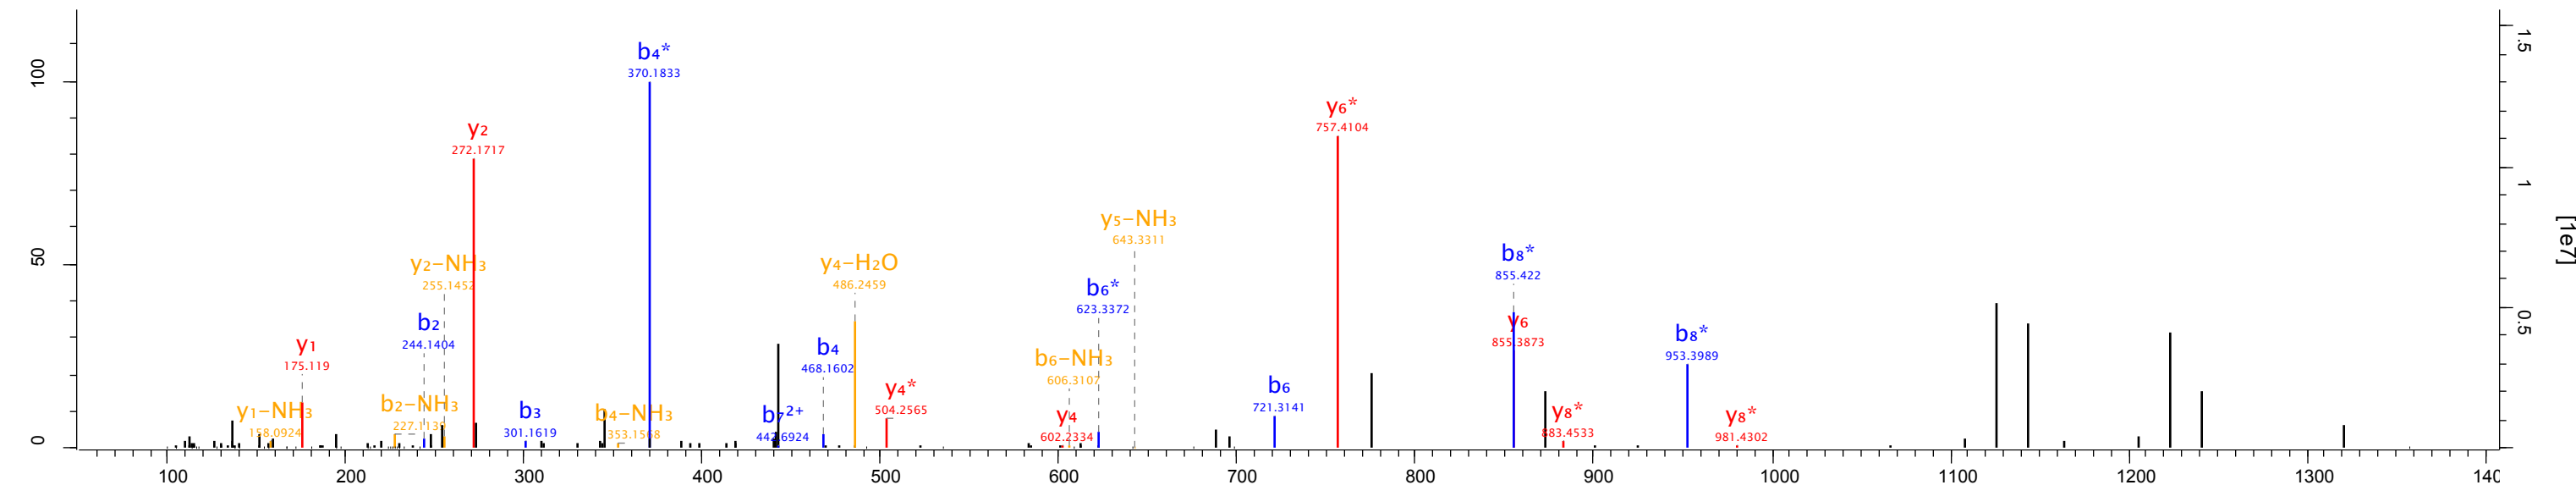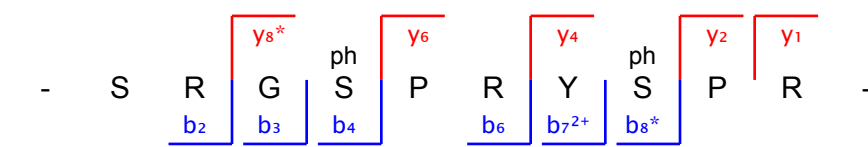

Raw file 20171215\_MaS\_33SR\_LMH\_phospho\_02 Scan 2738 Method FTMS; HCD Score 124.18 m/z 577.7 Gene names FTH1

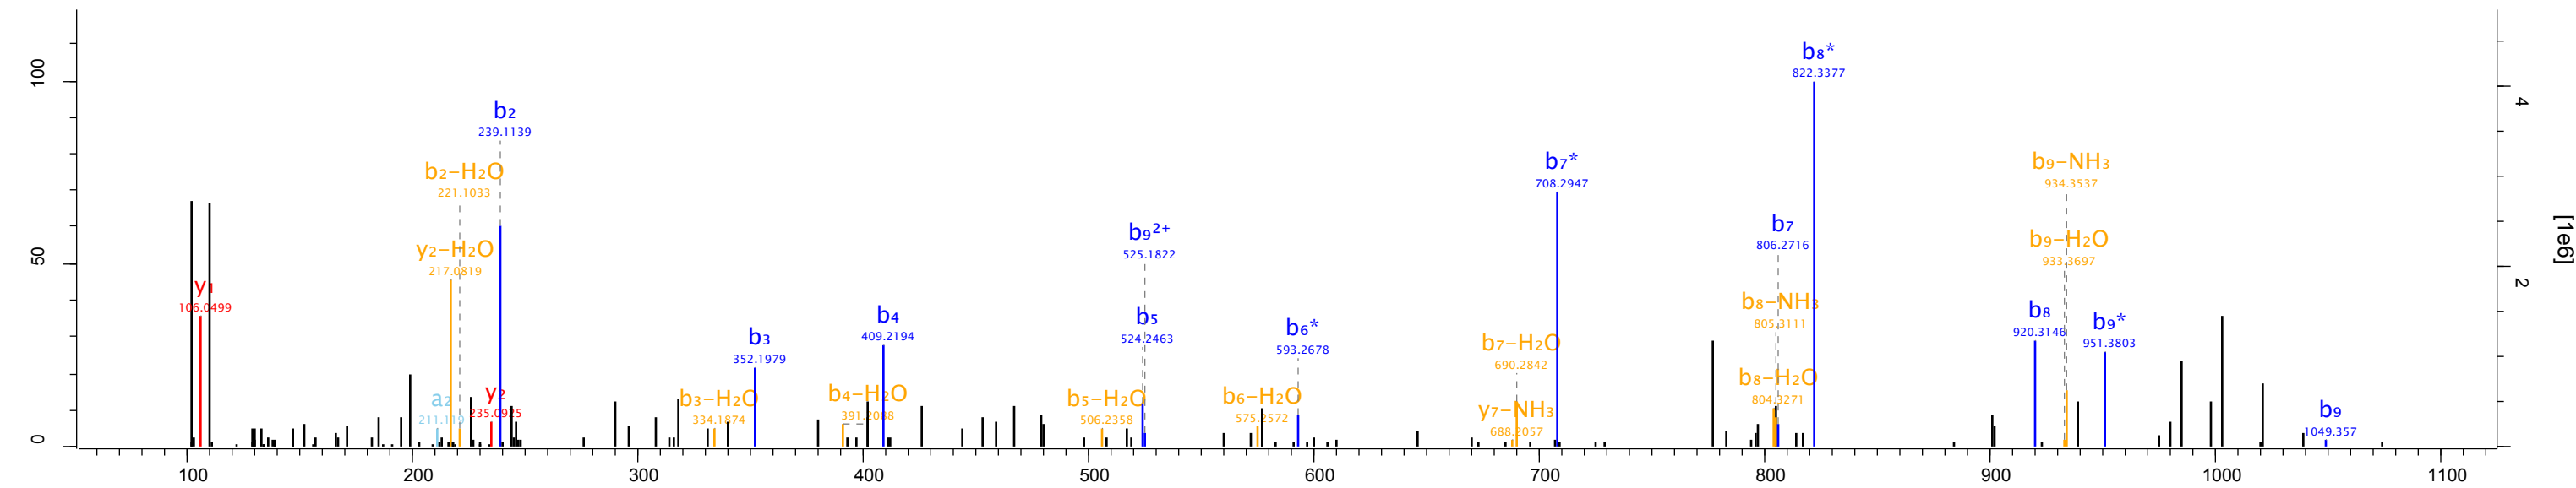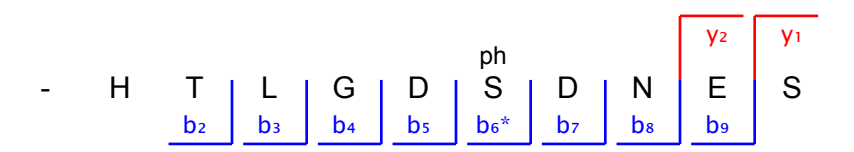

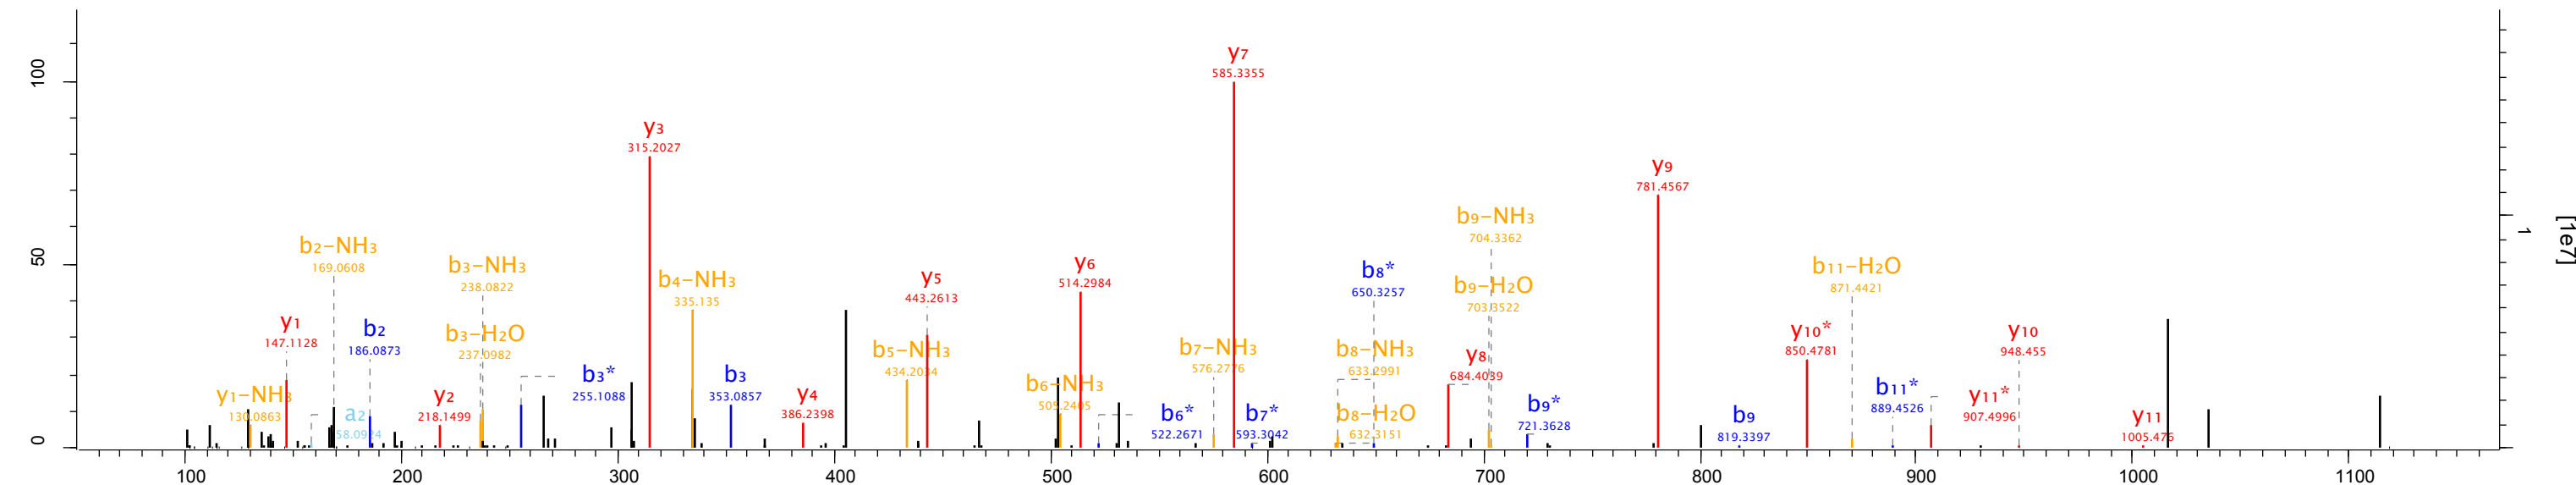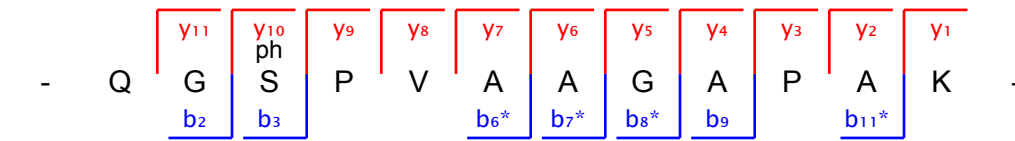

Raw file 20171215\_MaS\_33SR\_LMH\_phospho\_02 Scan 3288 Method FTMS; HCD Score 149.72 m/z 758.31 Gene names FNBP1

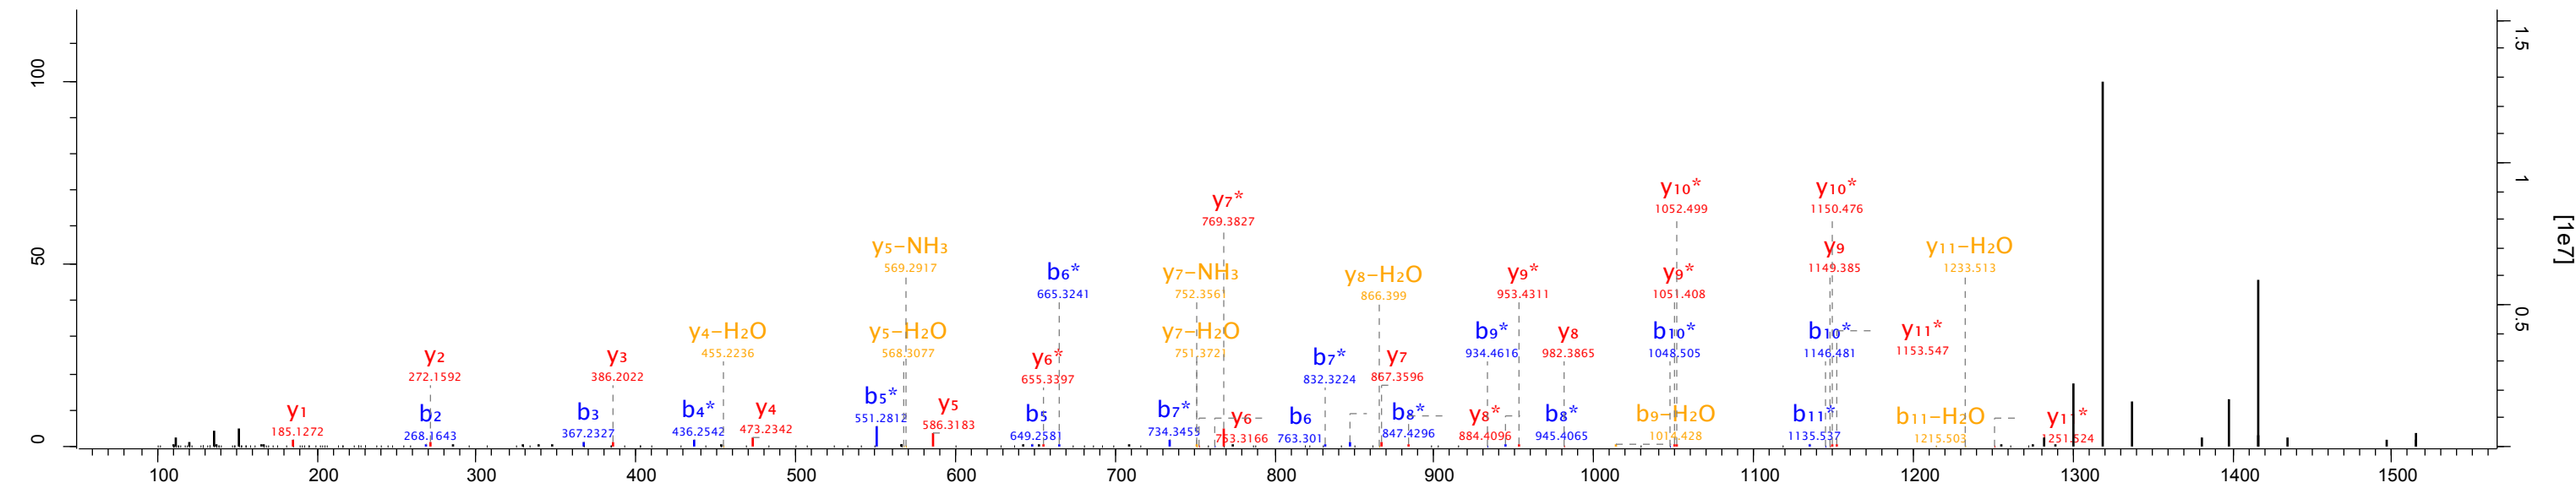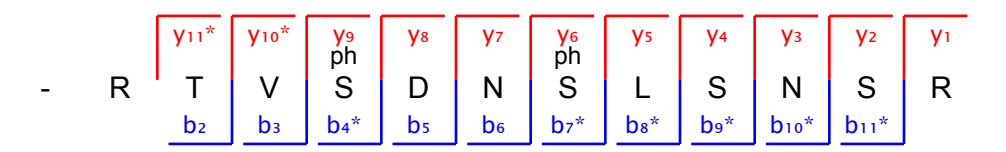

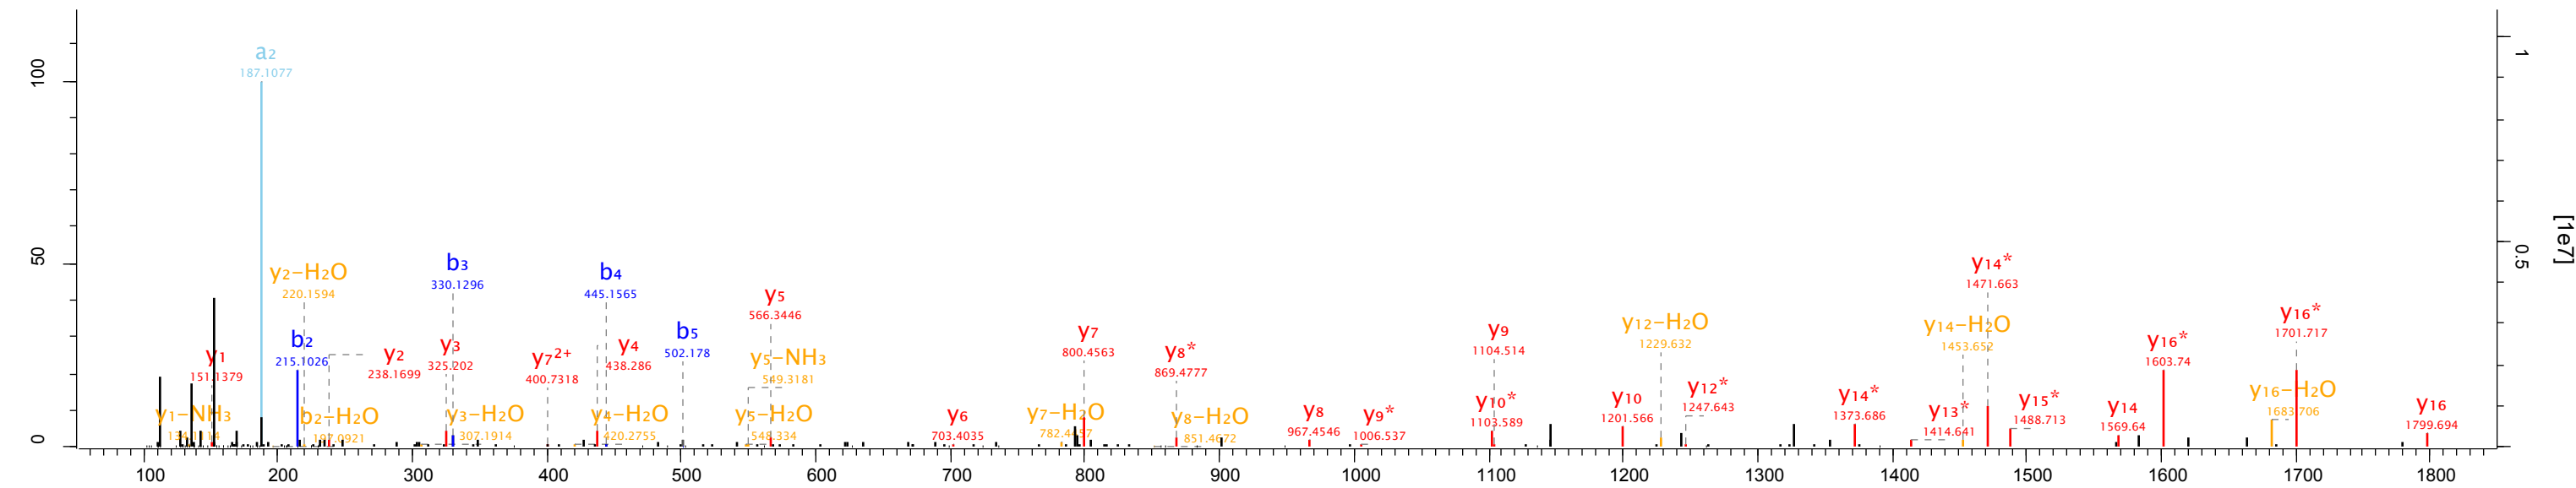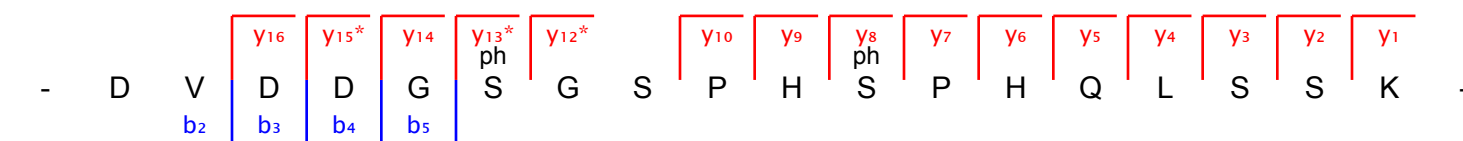

Raw file 20171215\_MaS\_33SR\_LMH\_phospho\_02 Scan 3388 Method FTMS; HCD Score 264.98 m/z 1005.89 Gene names WNK1

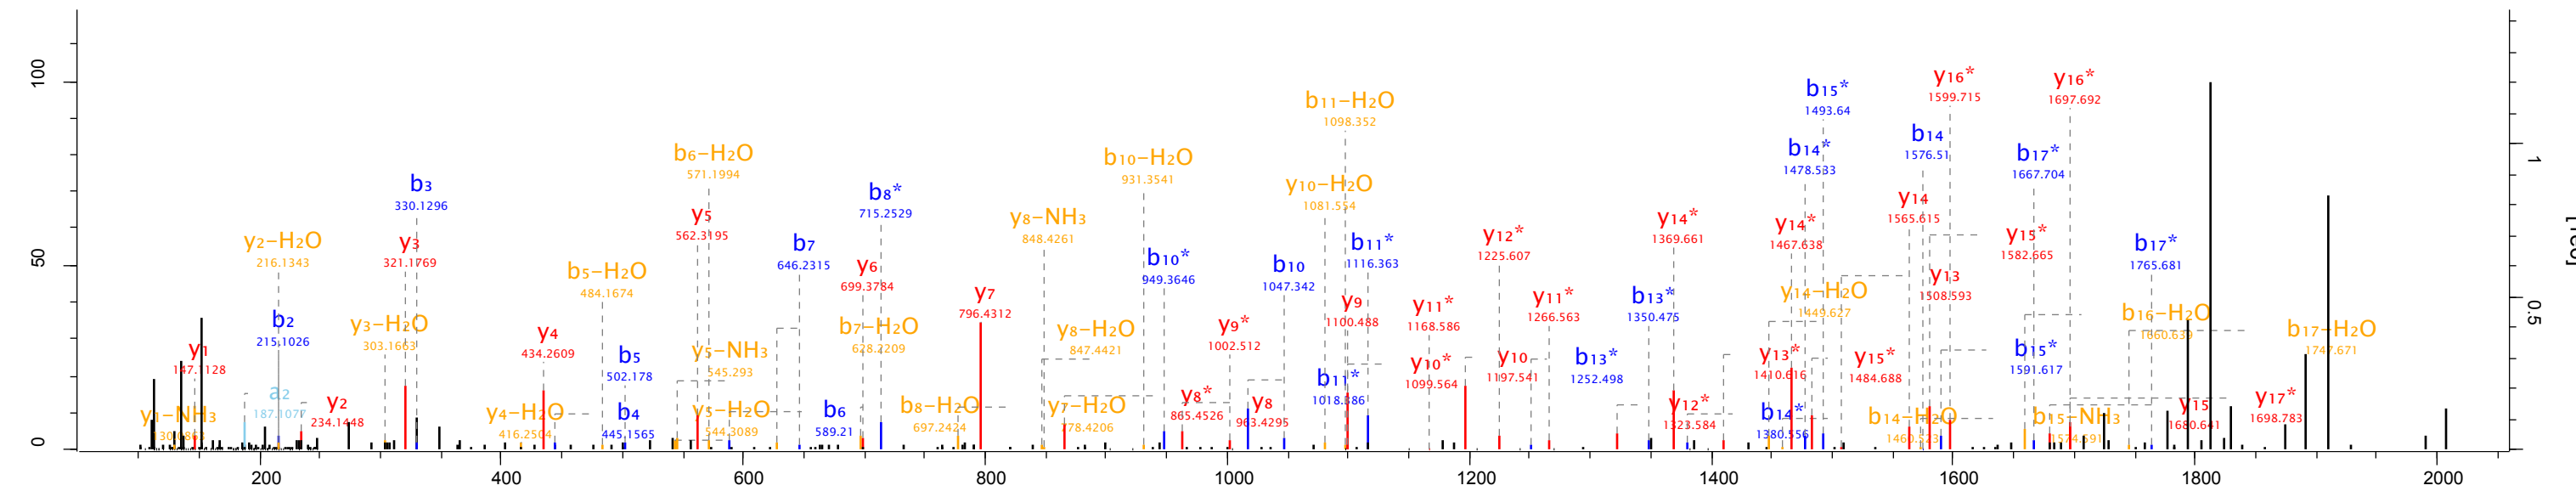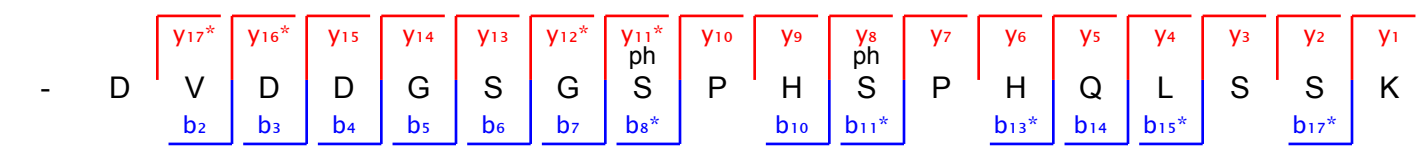

20171215\_MaS\_33SR\_LMH\_phospho\_02

3638 FTMS; HCD 47.62 580.72 ZFPM2

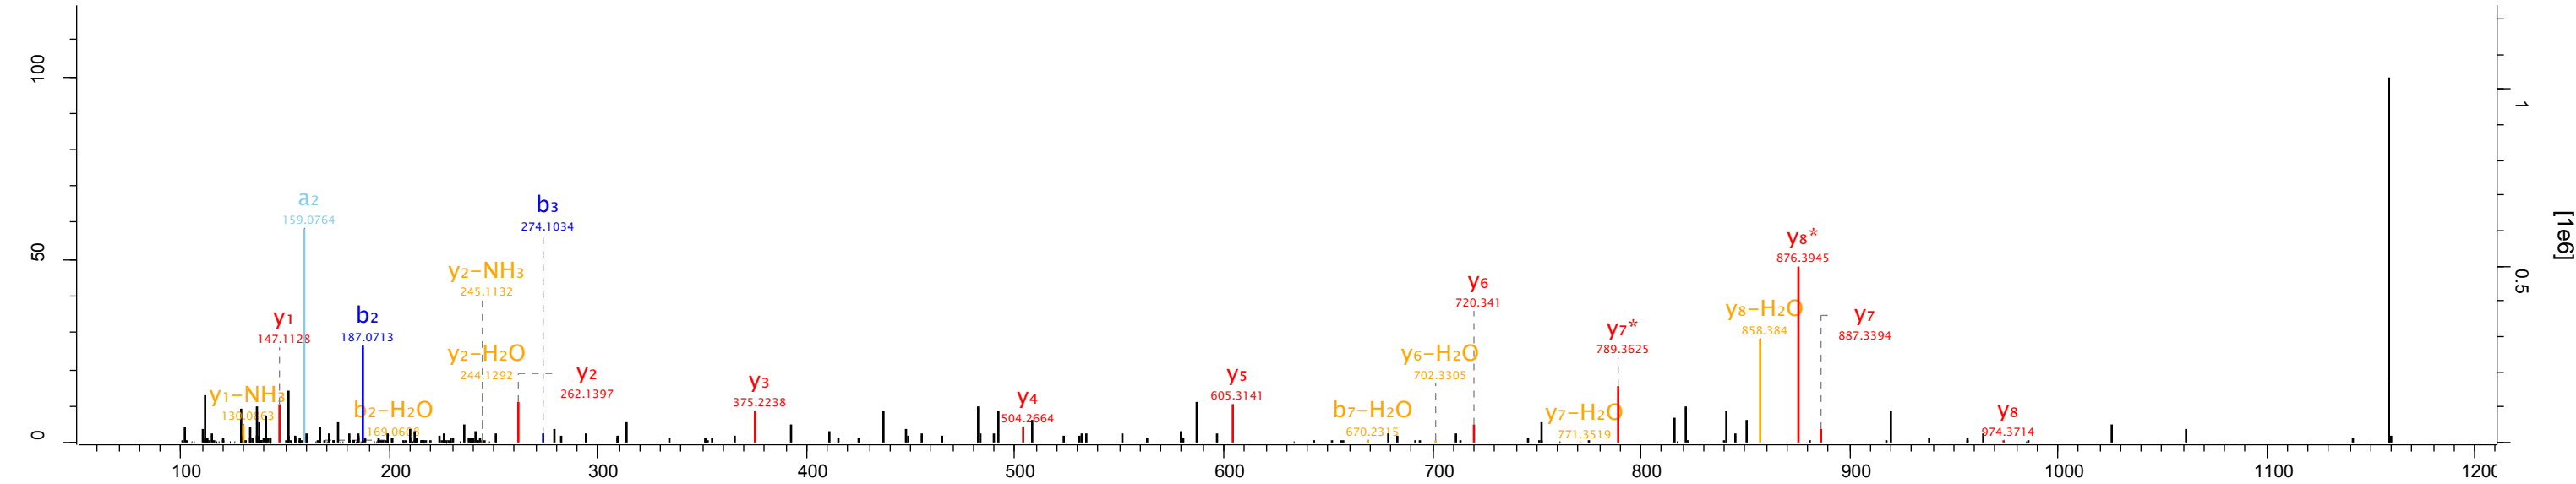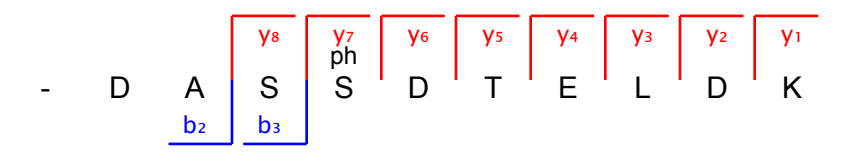

Raw file 20171215\_MaS\_33SR\_LMH\_phospho\_02 Scan 3678 Method FTMS; HCD Score 78.32 m/z 544.26 Gene names EPB41L3

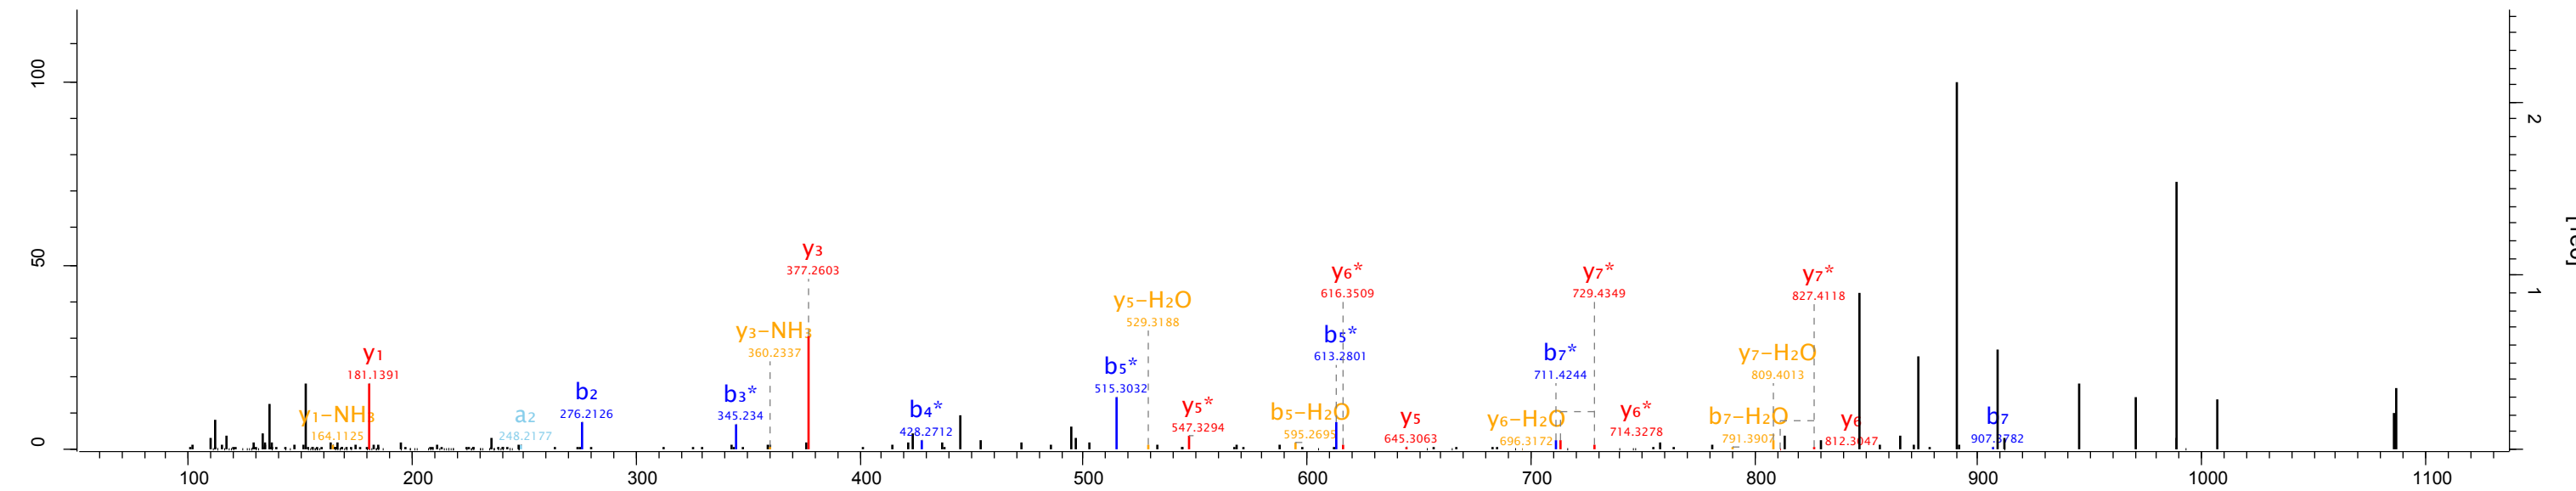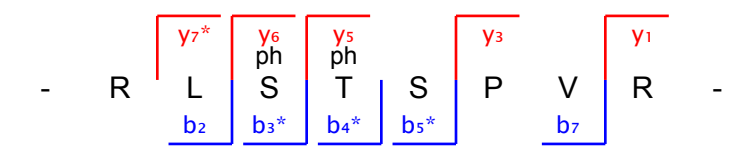



Raw file 20171215\_MaS\_33SR\_LMH\_phospho\_02 Scan 3698 Method FTMS; HCD Score 172.2 m/z 712.8 Gene names ZNF609

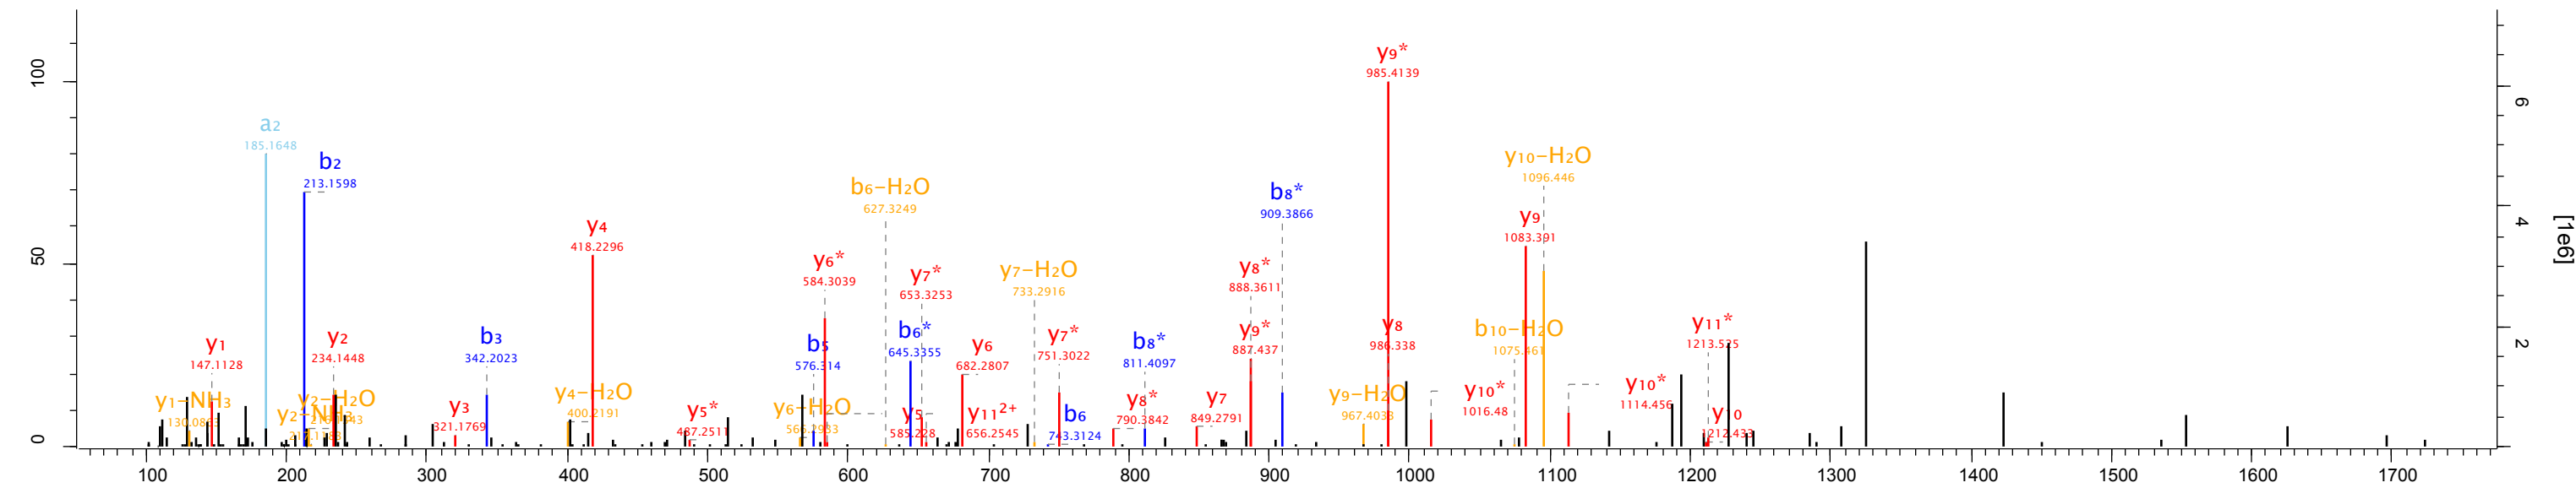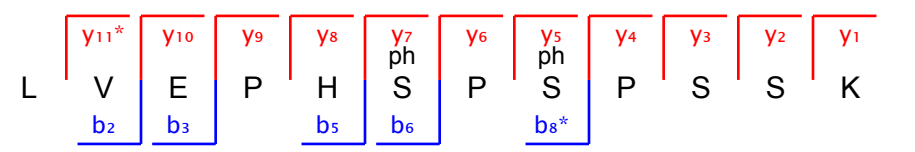

Raw file 20171215\_MaS\_33SR\_LMH\_phospho\_02 Scan 3708 Method FTMS; HCD Score 181.23 m/z 848.31 Gene names MAP1A

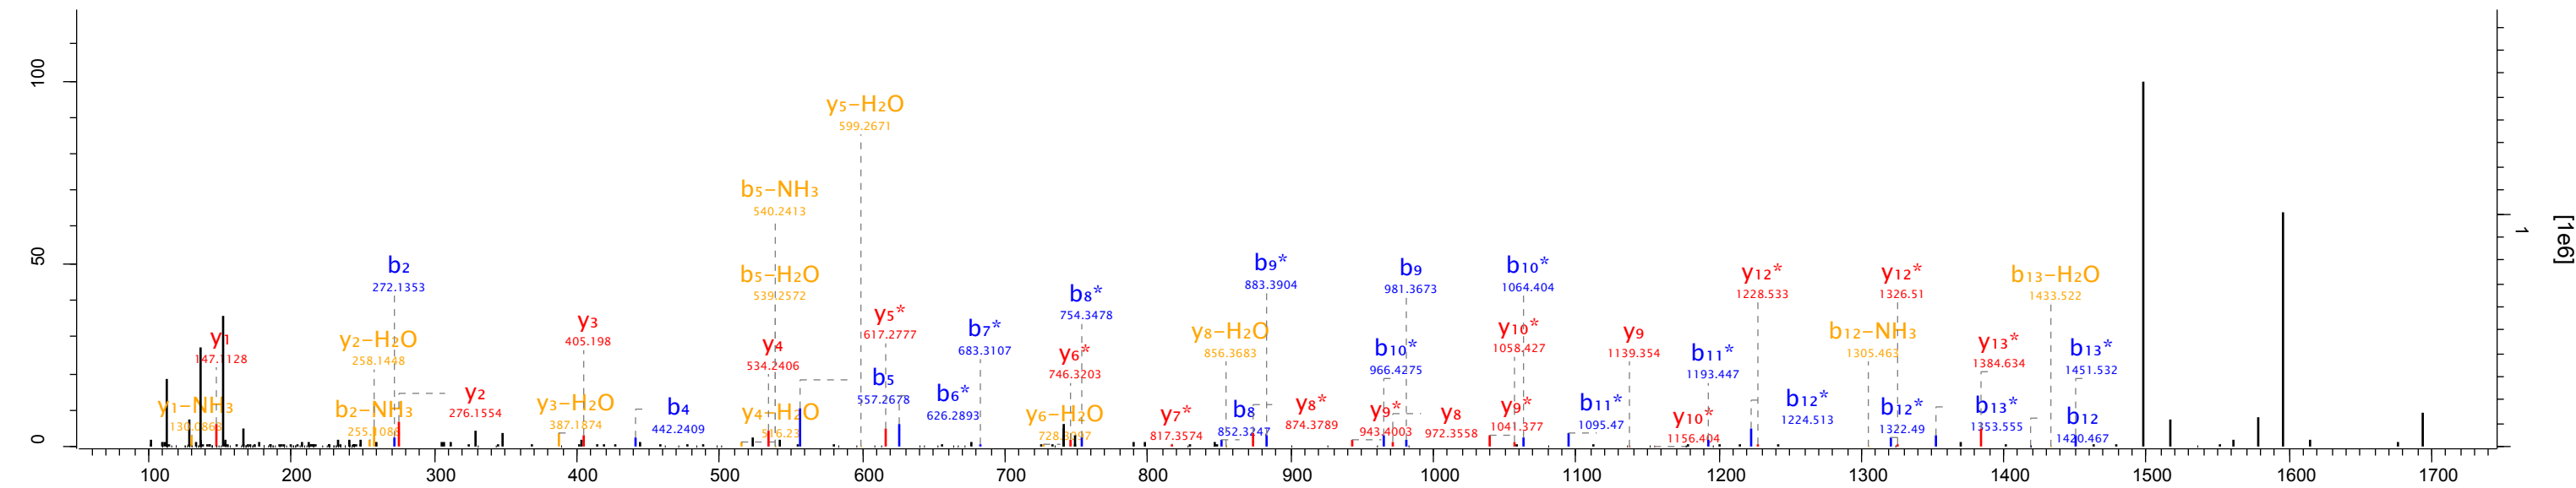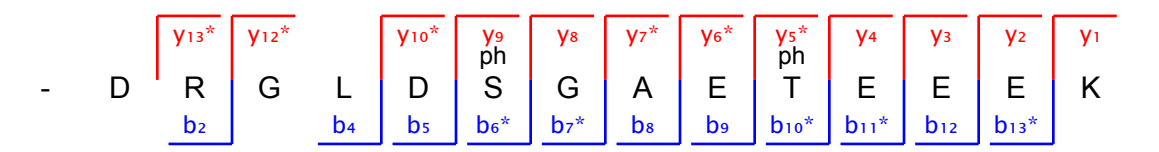



Raw file 20171215\_MaS\_33SR\_LMH\_phospho\_02 Scan 3998 FTMS; HCD Score 216.38 m/z 967.88 Gene names AJUBA

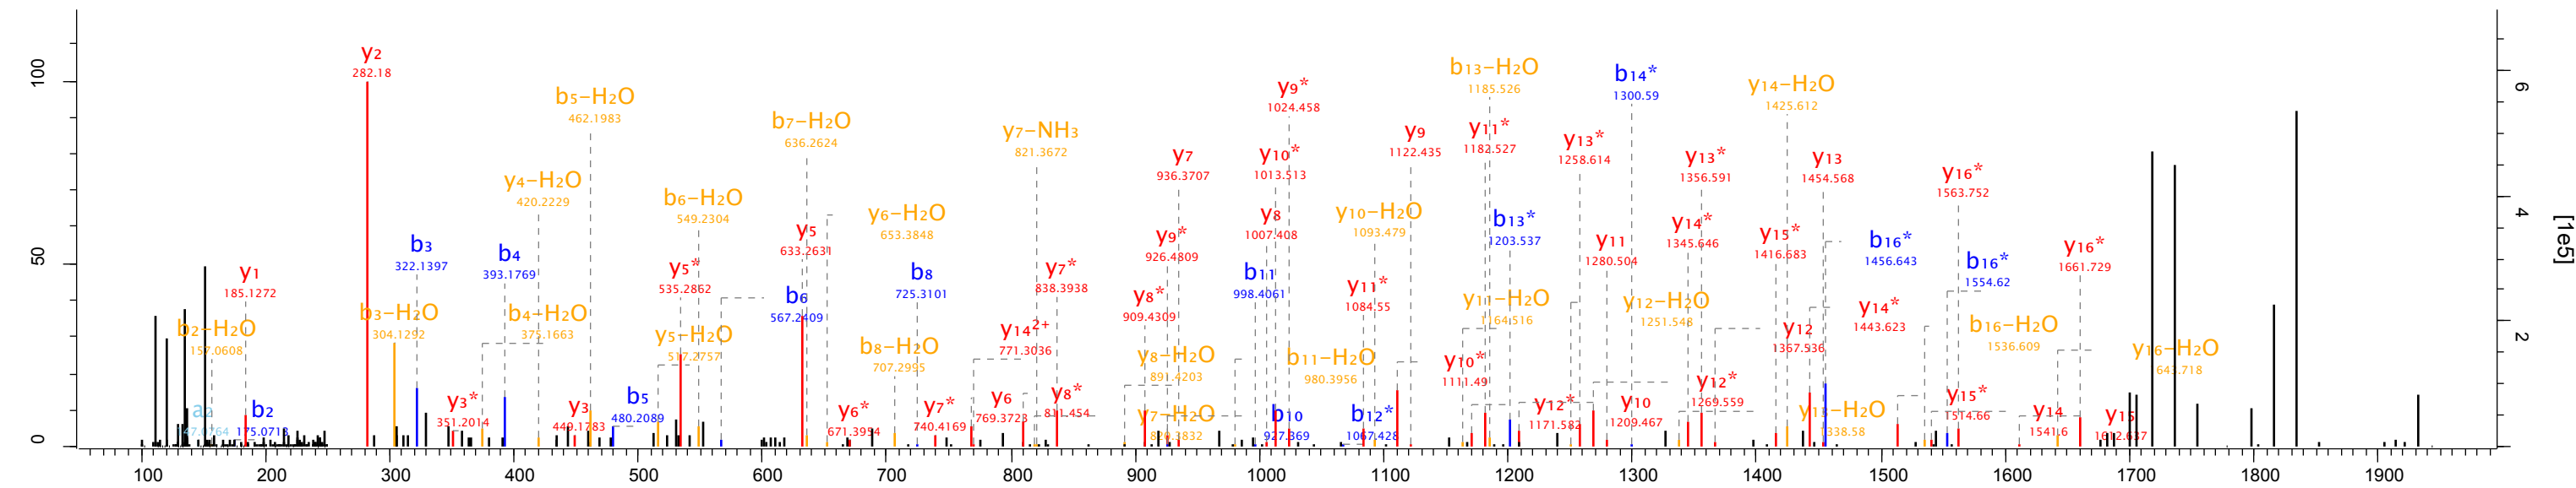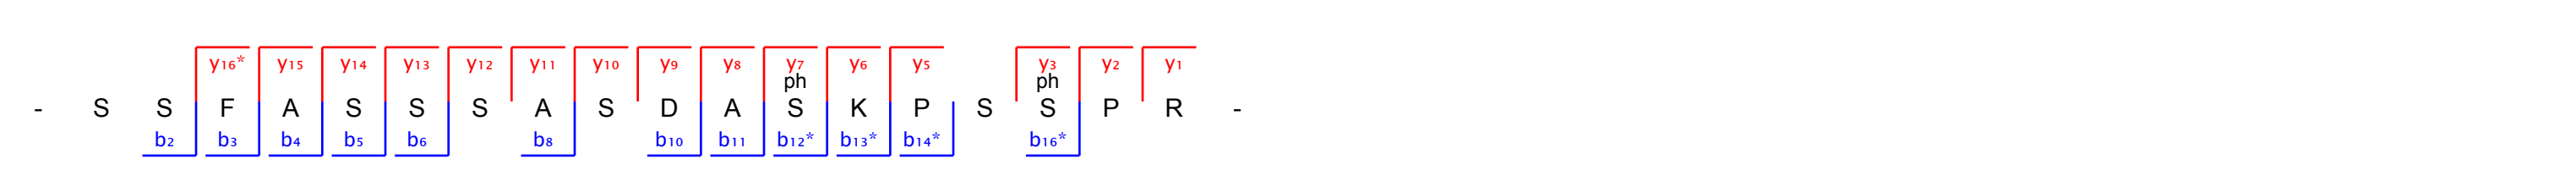

Raw file  
20171215\_MaS\_33SR\_LMH\_phospho\_02

Scan 4428 Method FTMS; HCD Score 180.34 m/z 915.4 Gene names TCF20

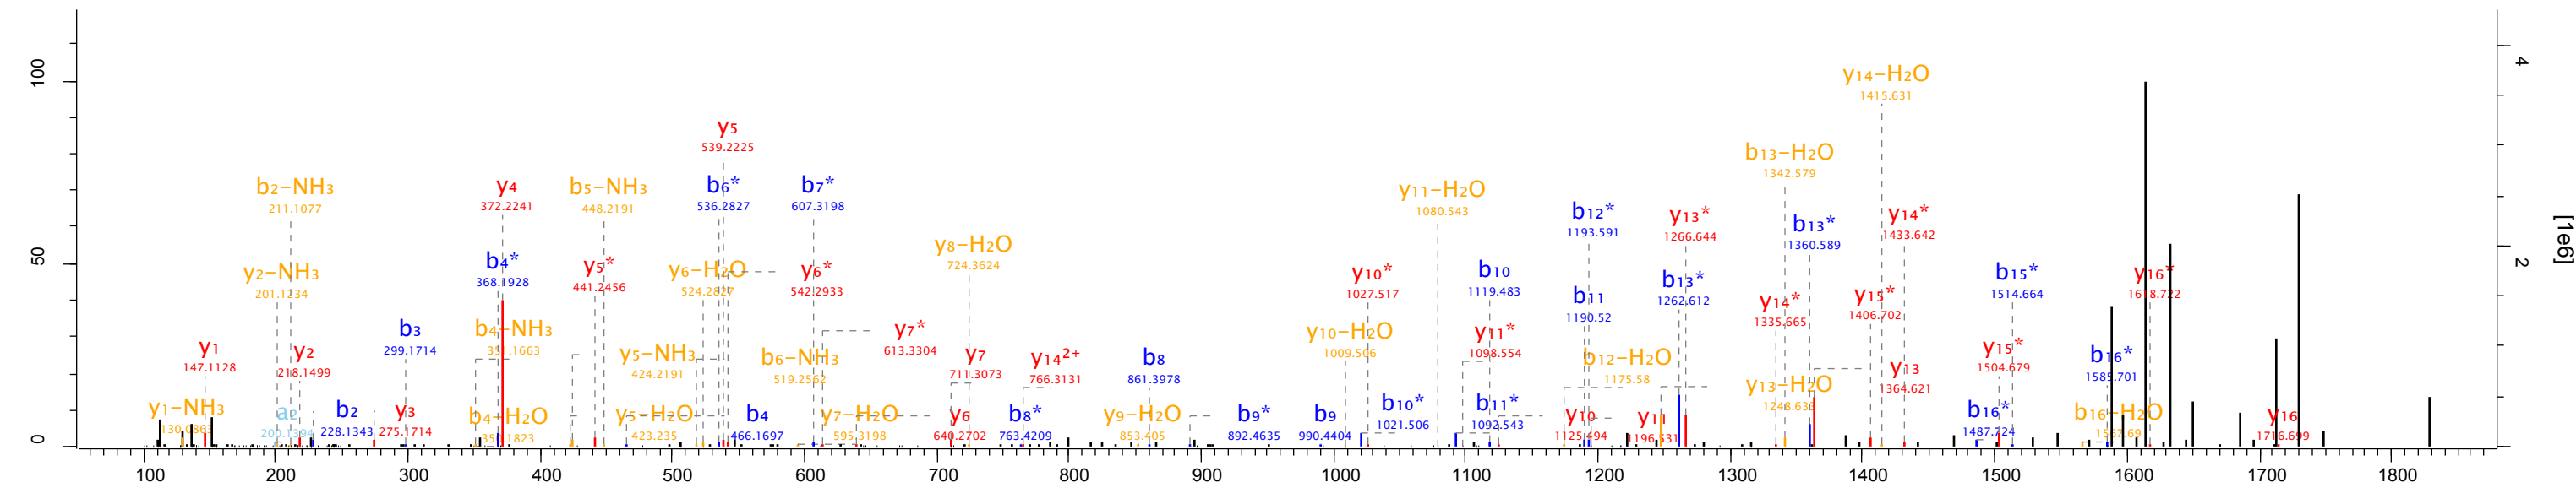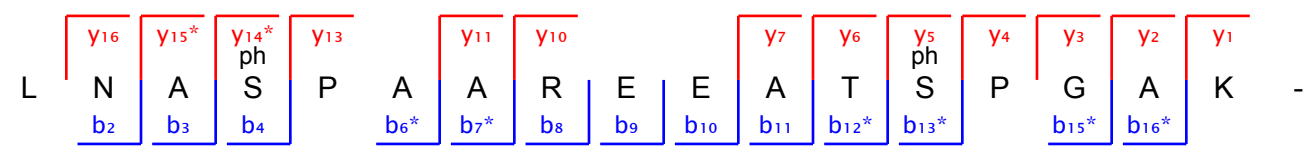

Raw file 20171215\_MaS\_33SR\_LMH\_phospho\_02 Scan 4498 Method FTMS; HCD Score 174.04 m/z 769.31 Gene names SF3B1

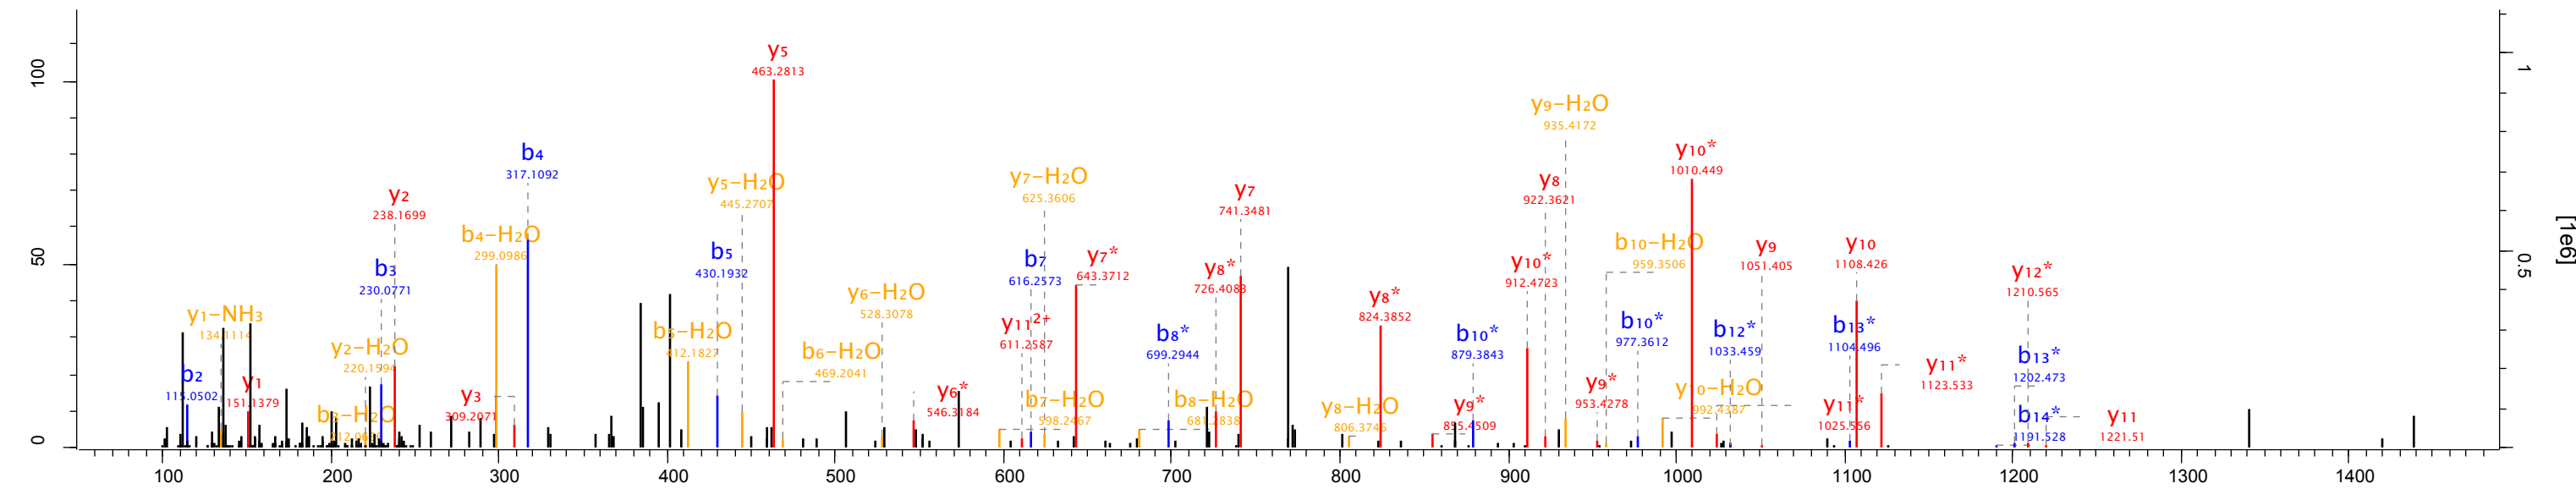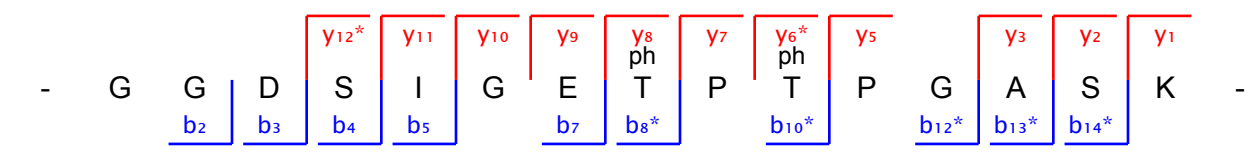

Raw file: 20171215\_MaS\_33SR\_LMH\_phospho\_02  
 Scan: 4838 Method: FTMS; HCD Score: 172.54 m/z: 1025.95 Gene names: SQSTM1

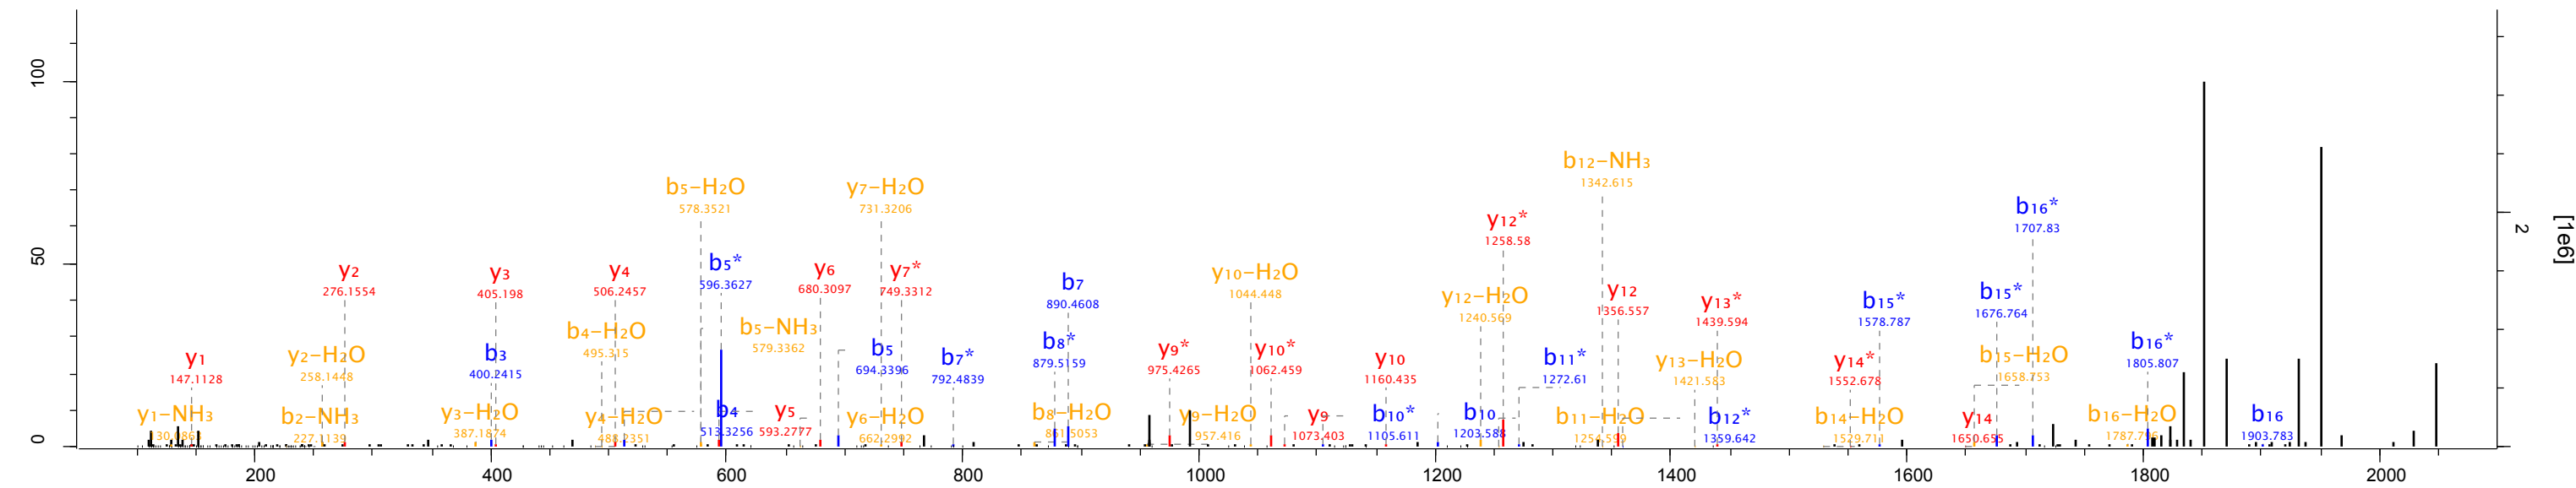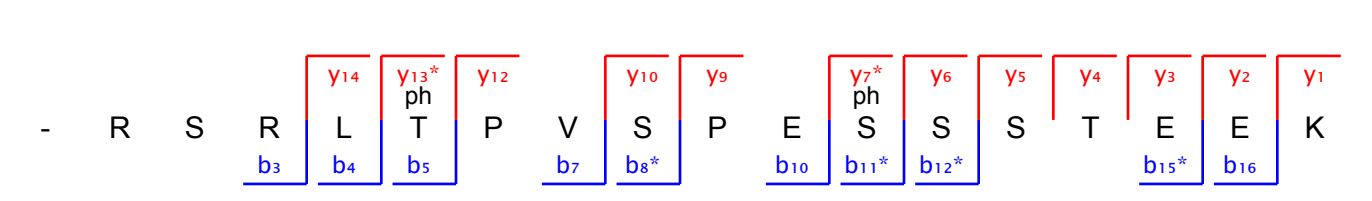

Raw file 20171215\_MaS\_33SR\_LMH\_phospho\_02 Scan 4958 Method FTMS; HCD Score 144.27 m/z 582.71 Gene names SULF2

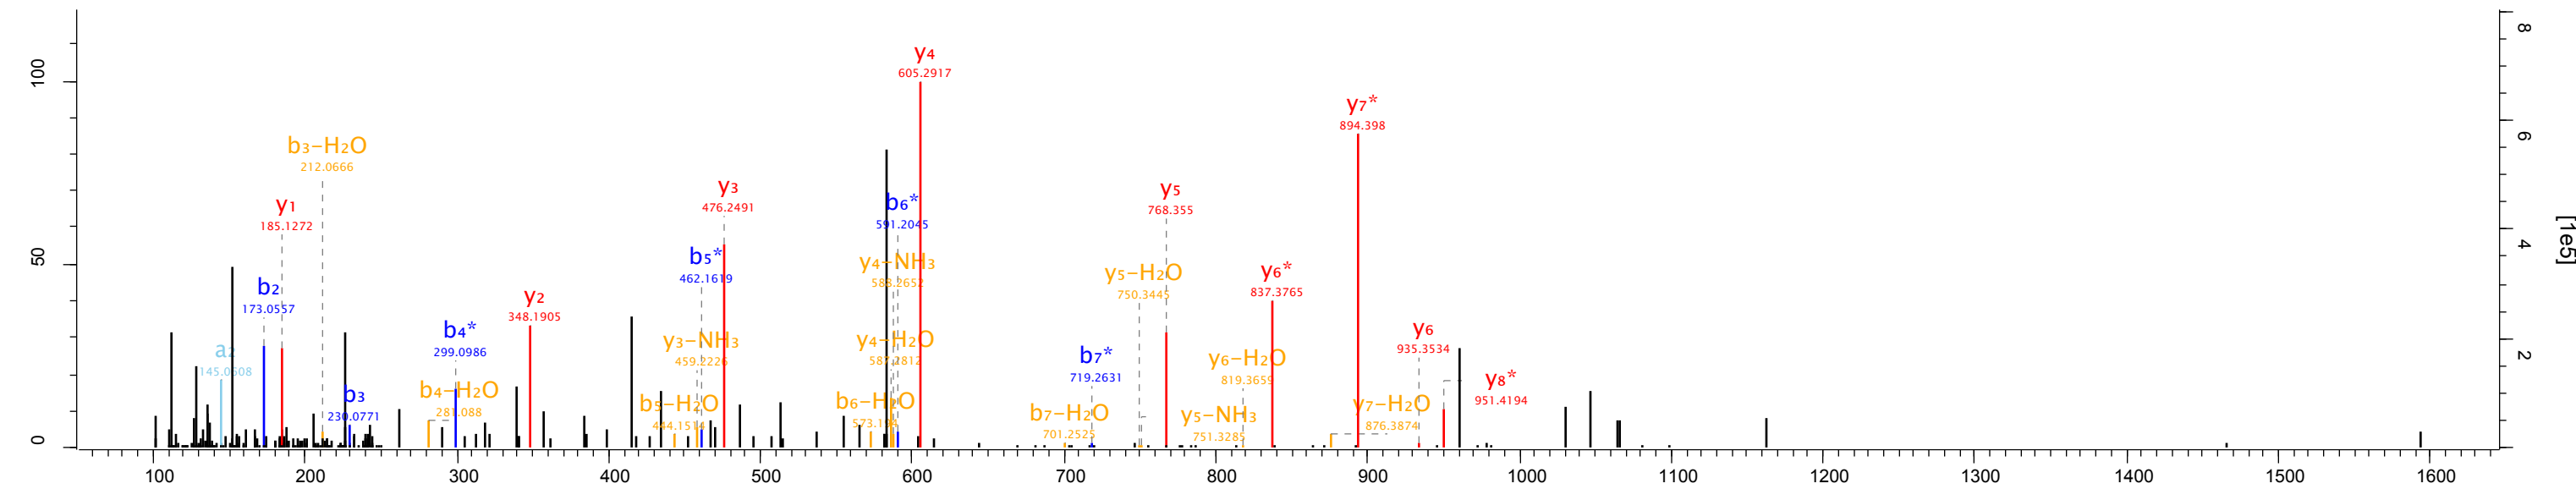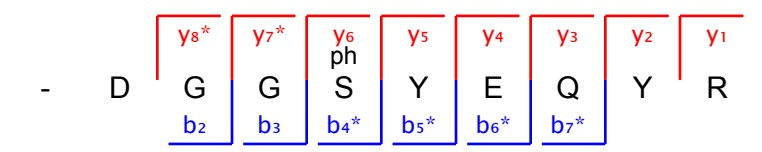



Raw file 20171215\_MaS\_33SR\_LMH\_phospho\_02 Scan 5158 Method FTMS; HCD Score 155.7 m/z 937.34 Gene names UBN2

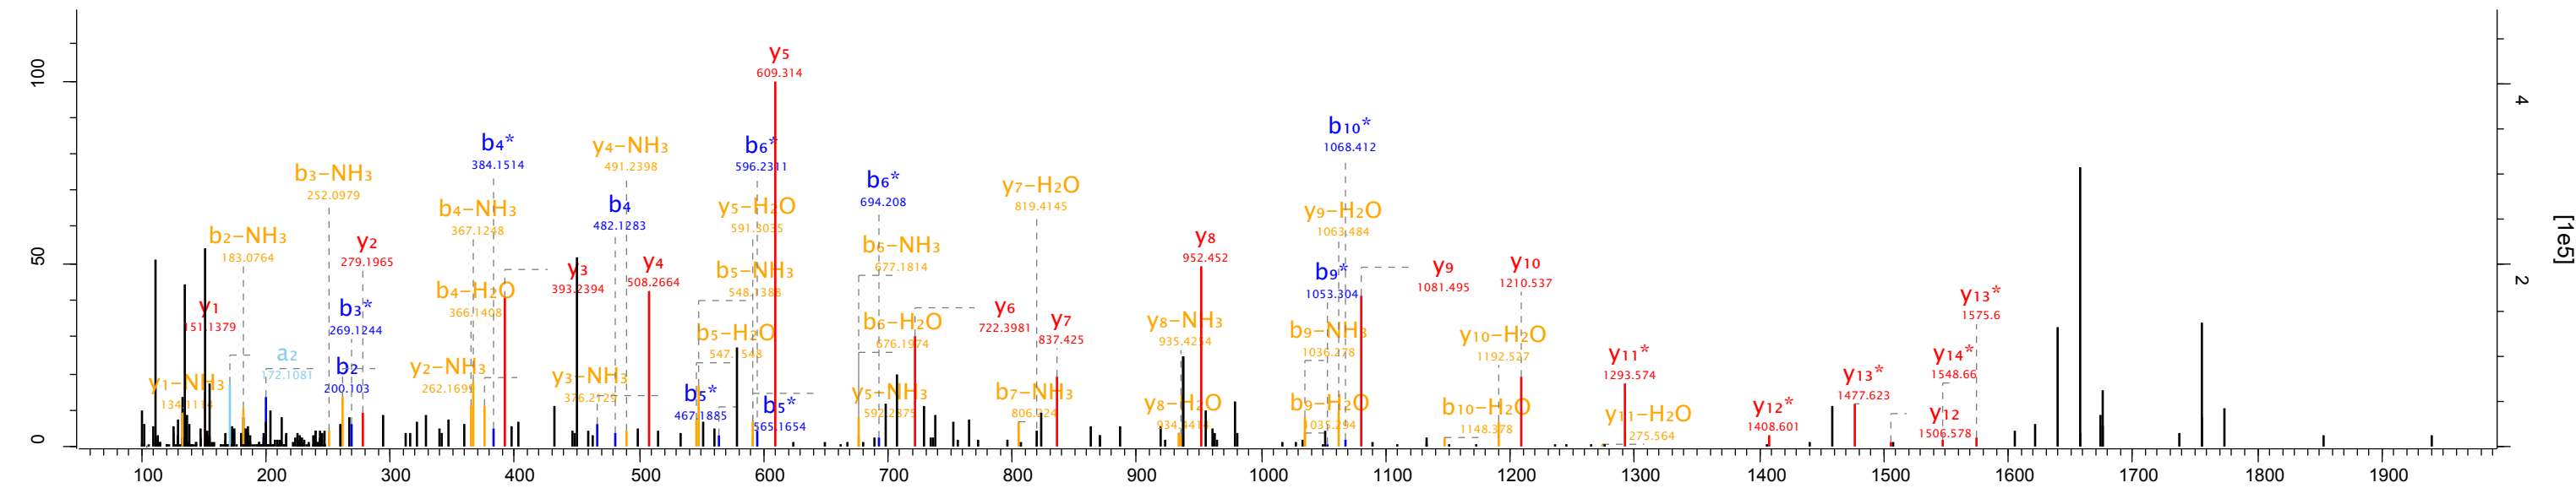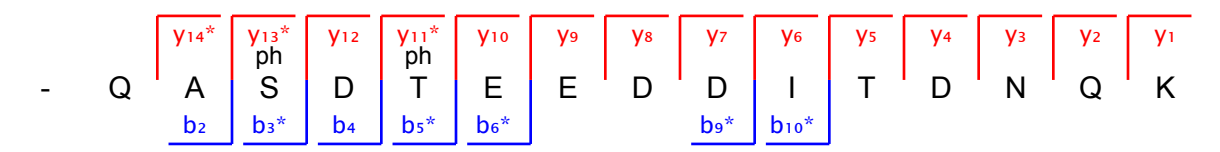

Raw file 20171215\_MaS\_33SR\_LMH\_phospho\_02 Scan 5428 Method FTMS; HCD Score 62.08 m/z 521.21 Gene names SASH1

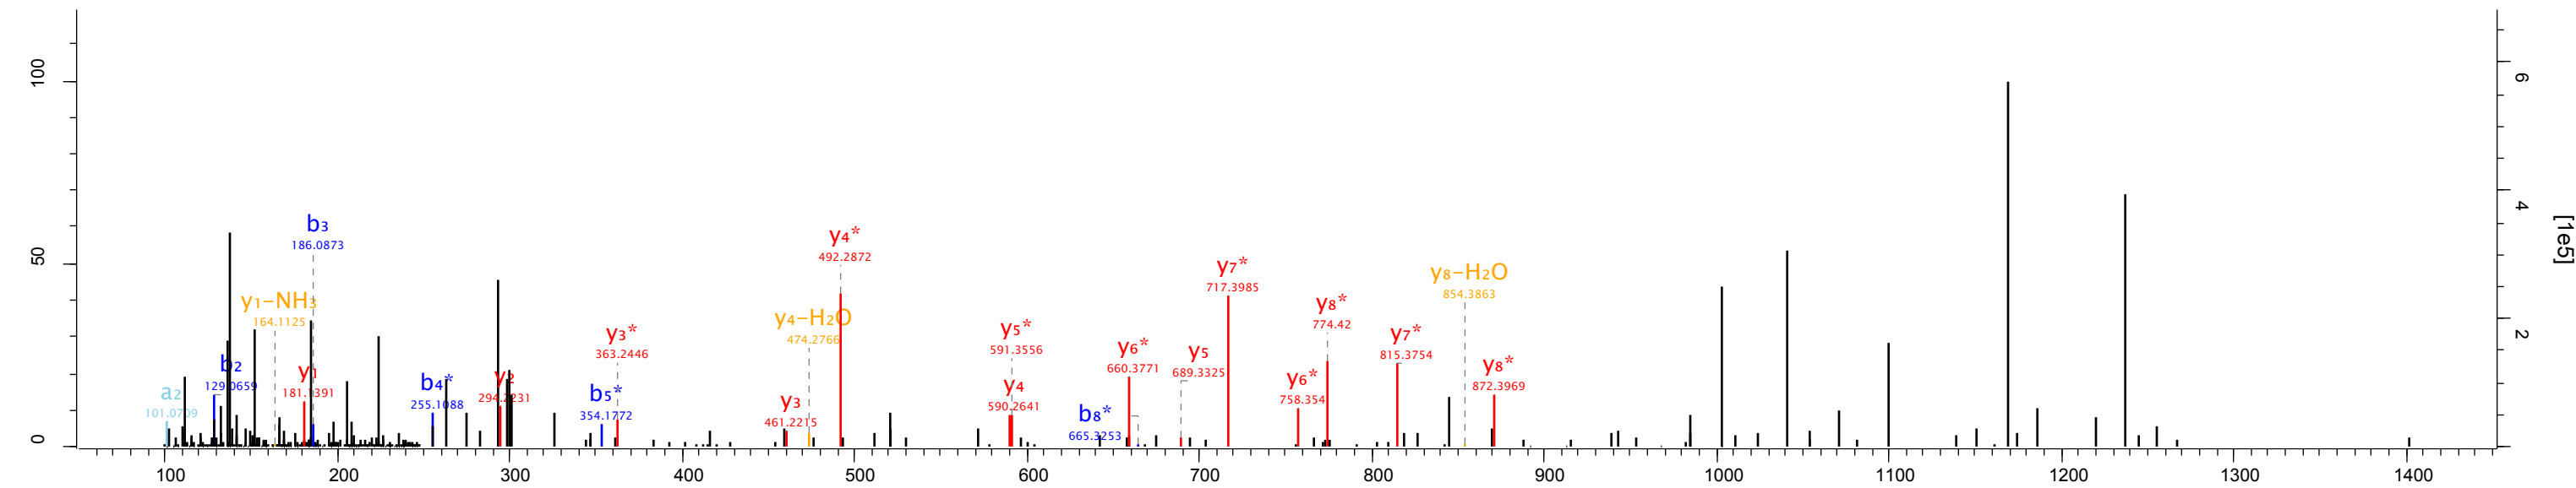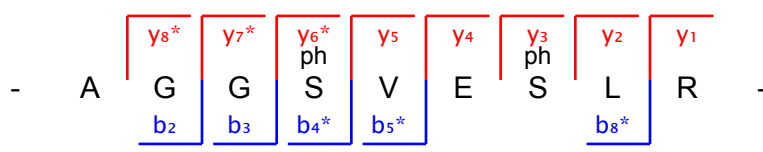

Raw file 20171215\_MaS\_33SR\_LMH\_phospho\_02 Scan 5438 Method FTMS; HCD Score 43.07 m/z 628.27 Gene names RABEP1

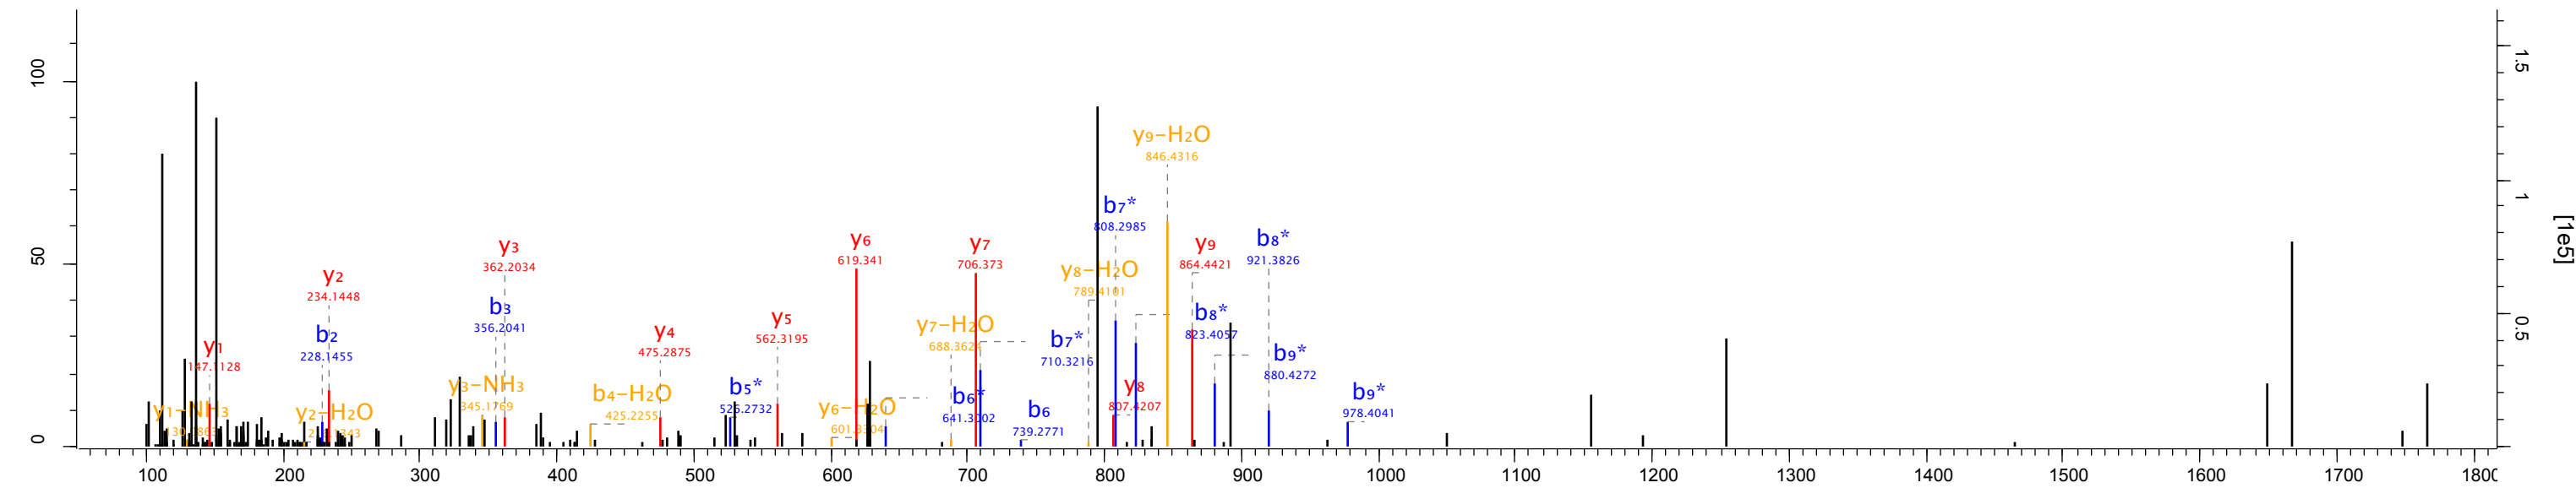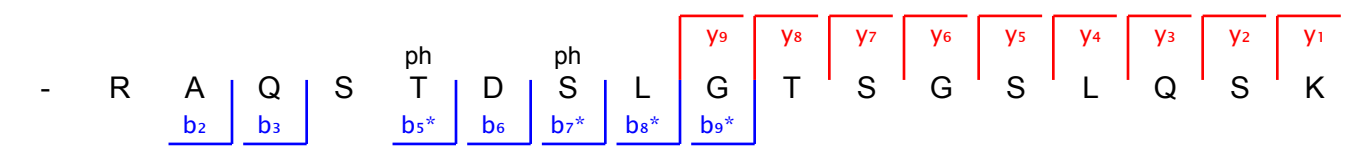

Raw file  
20171215\_MaS\_33SR\_LMH\_phospho\_02

Scan 5778 Method FTMS; HCD Score 129.01 m/z 631.77 Gene names WDR43

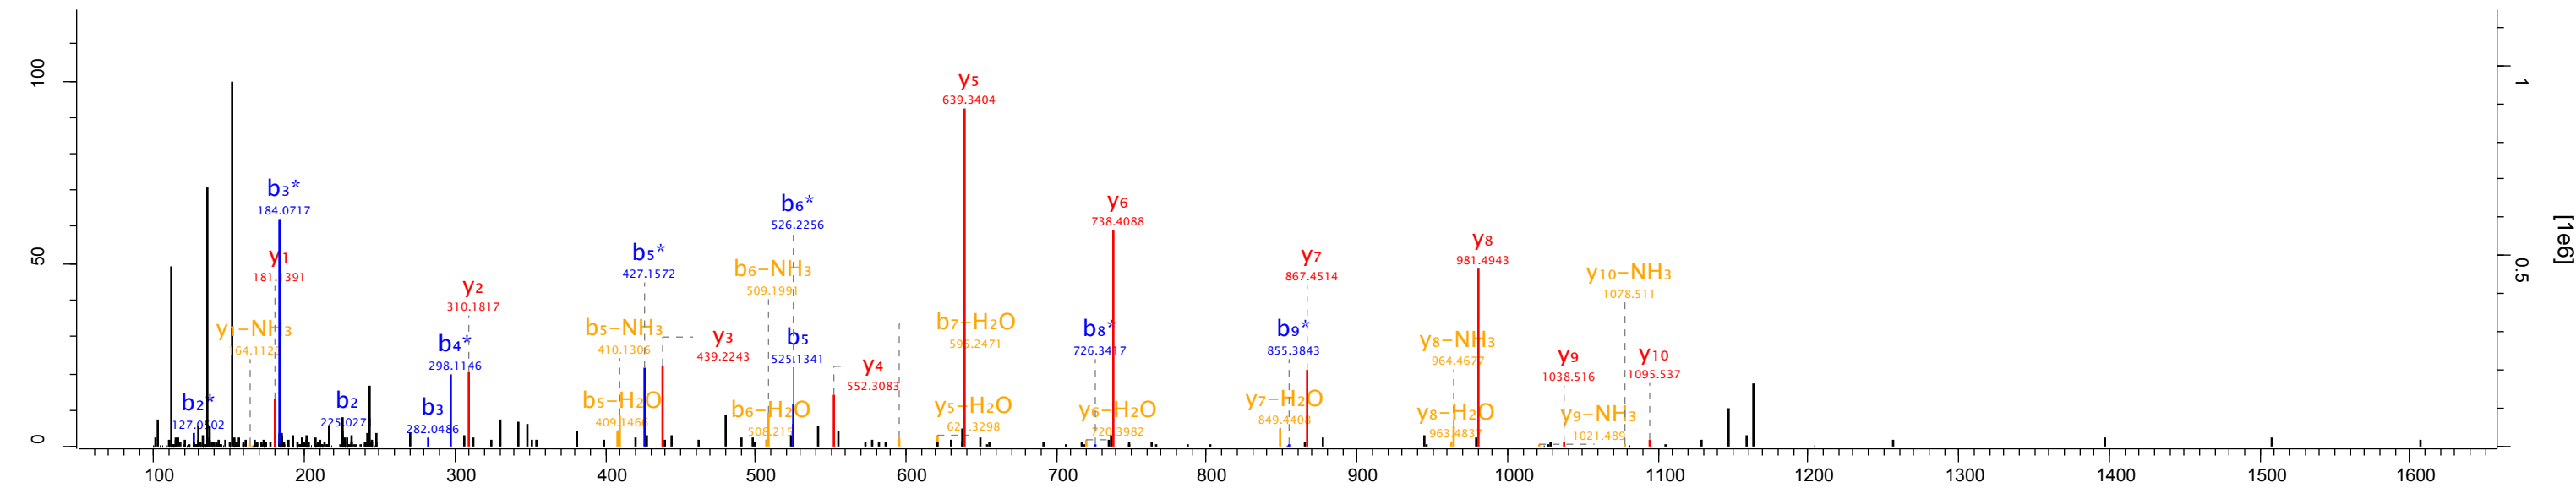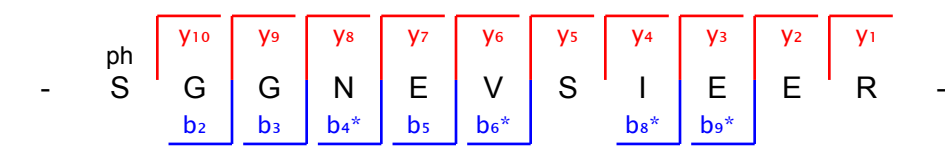

Raw file 20171215\_MaS\_33SR\_LMH\_phospho\_02 Scan 5808 Method FTMS; HCD Score 192.78 m/z 707.27 Gene names PRRC2A

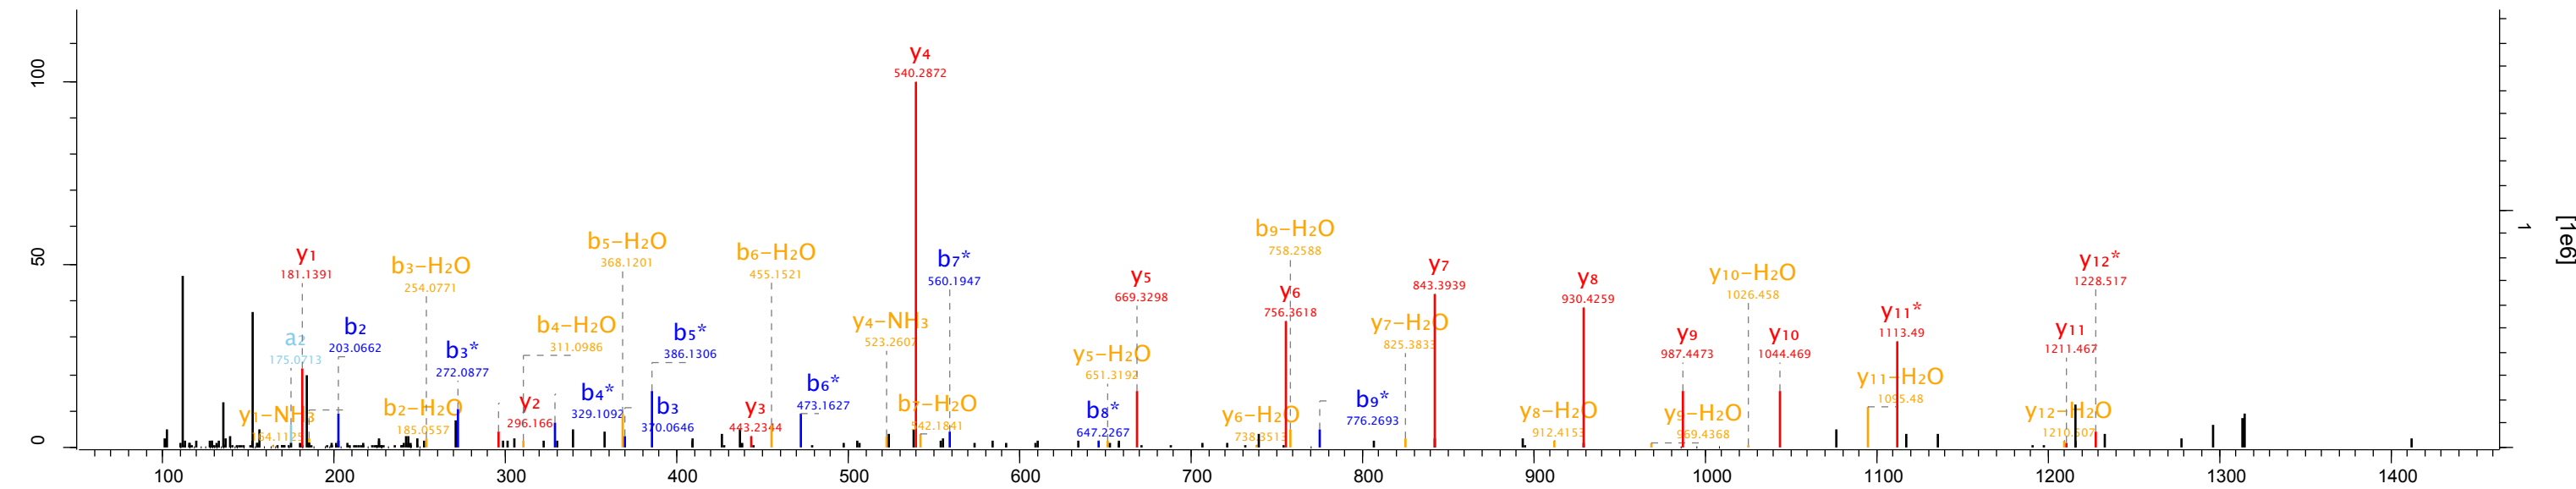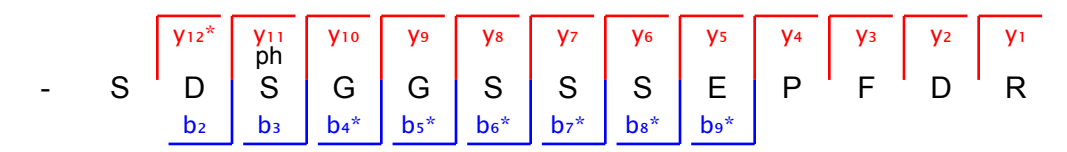

Raw file 20171215\_MaS\_33SR\_LMH\_phospho\_02 Scan 6188 Method FTMS; HCD Score 107.79 m/z 878.44 Gene names NPM1

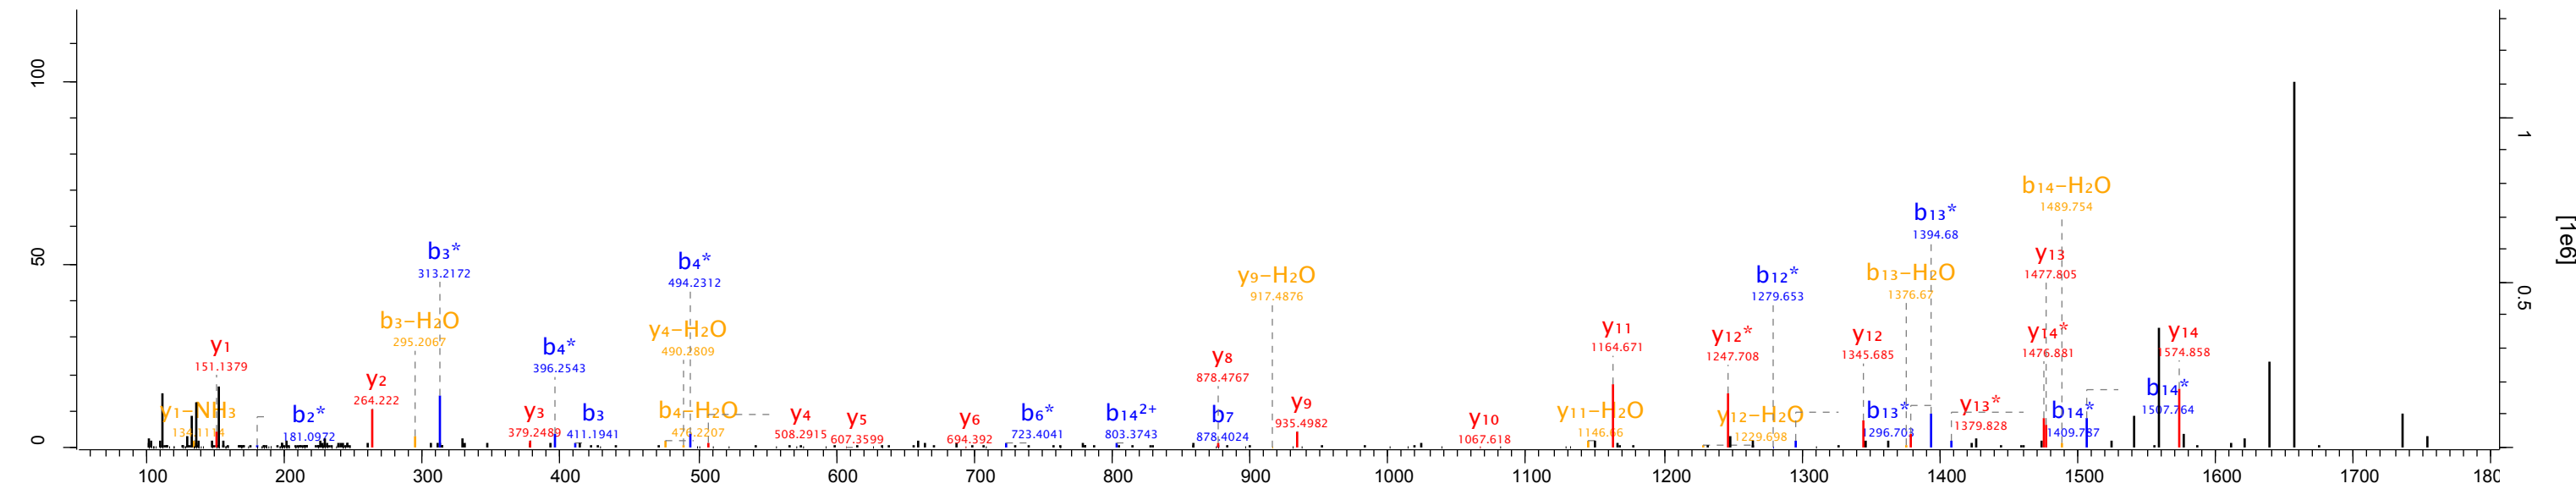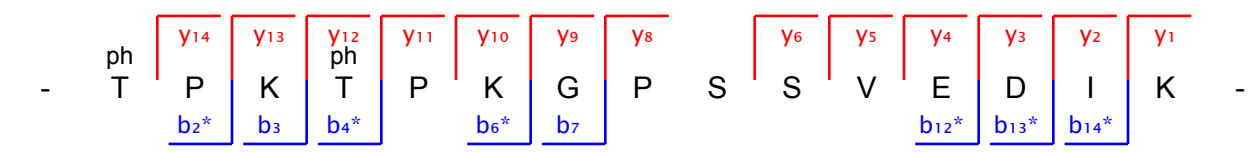

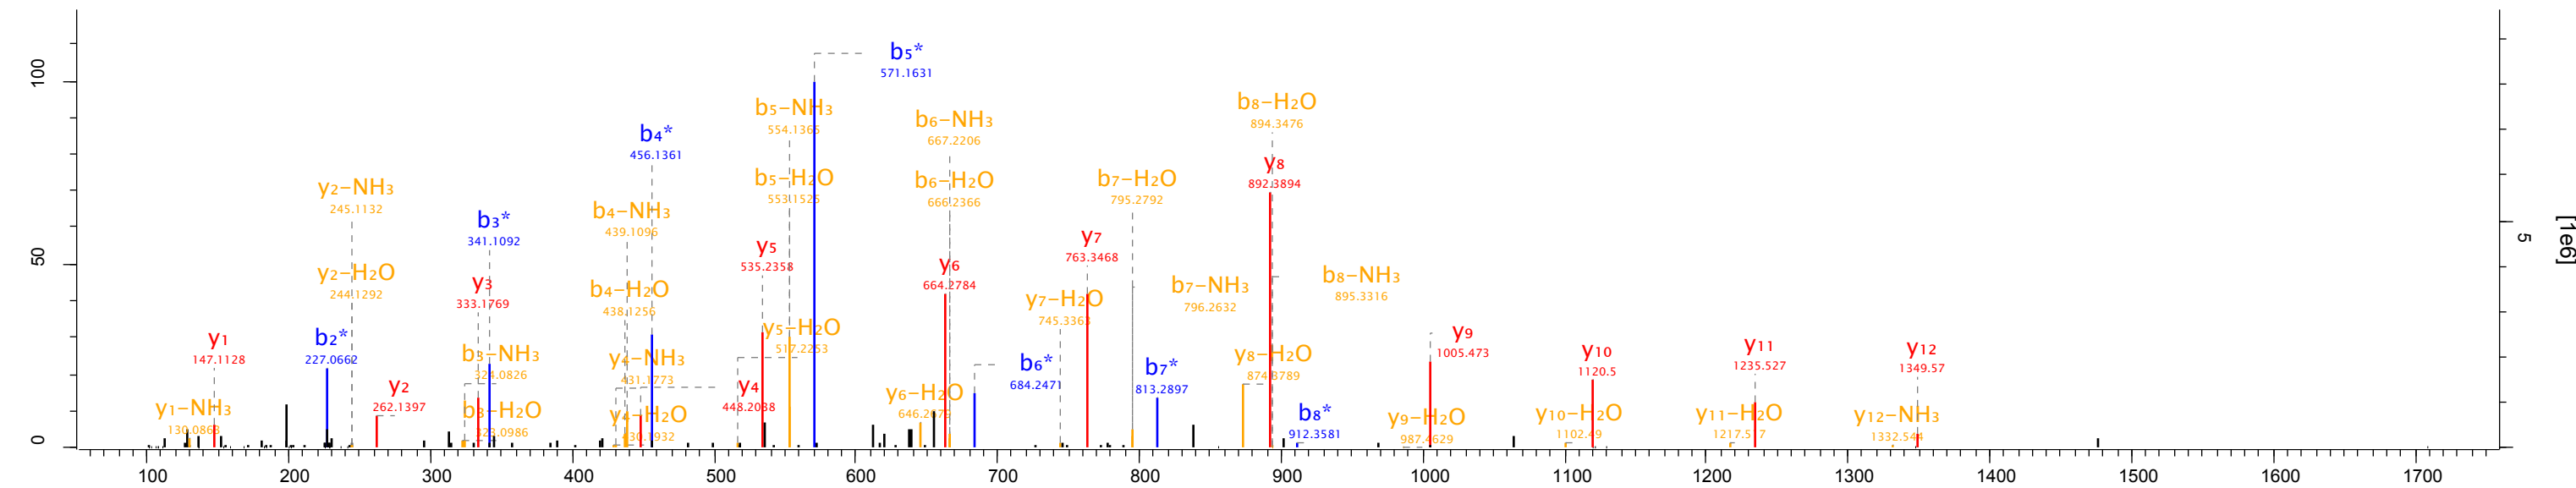

ac - S D N D D I E V E S D A D K -

b<sub>2</sub>\* b<sub>3</sub>\* b<sub>4</sub>\* b<sub>5</sub>\* b<sub>6</sub>\* b<sub>7</sub>\* b<sub>8</sub>\* y<sub>12</sub> y<sub>11</sub> y<sub>10</sub> y<sub>9</sub> y<sub>8</sub> y<sub>7</sub> y<sub>6</sub> y<sub>5</sub> y<sub>4</sub> y<sub>3</sub> y<sub>2</sub> y<sub>1</sub>

Raw file 20171215\_MaS\_33SR\_LMH\_phospho\_02 Scan 8788 Method FTMS; HCD Score 104.16 m/z 665.26 Gene names CCP110

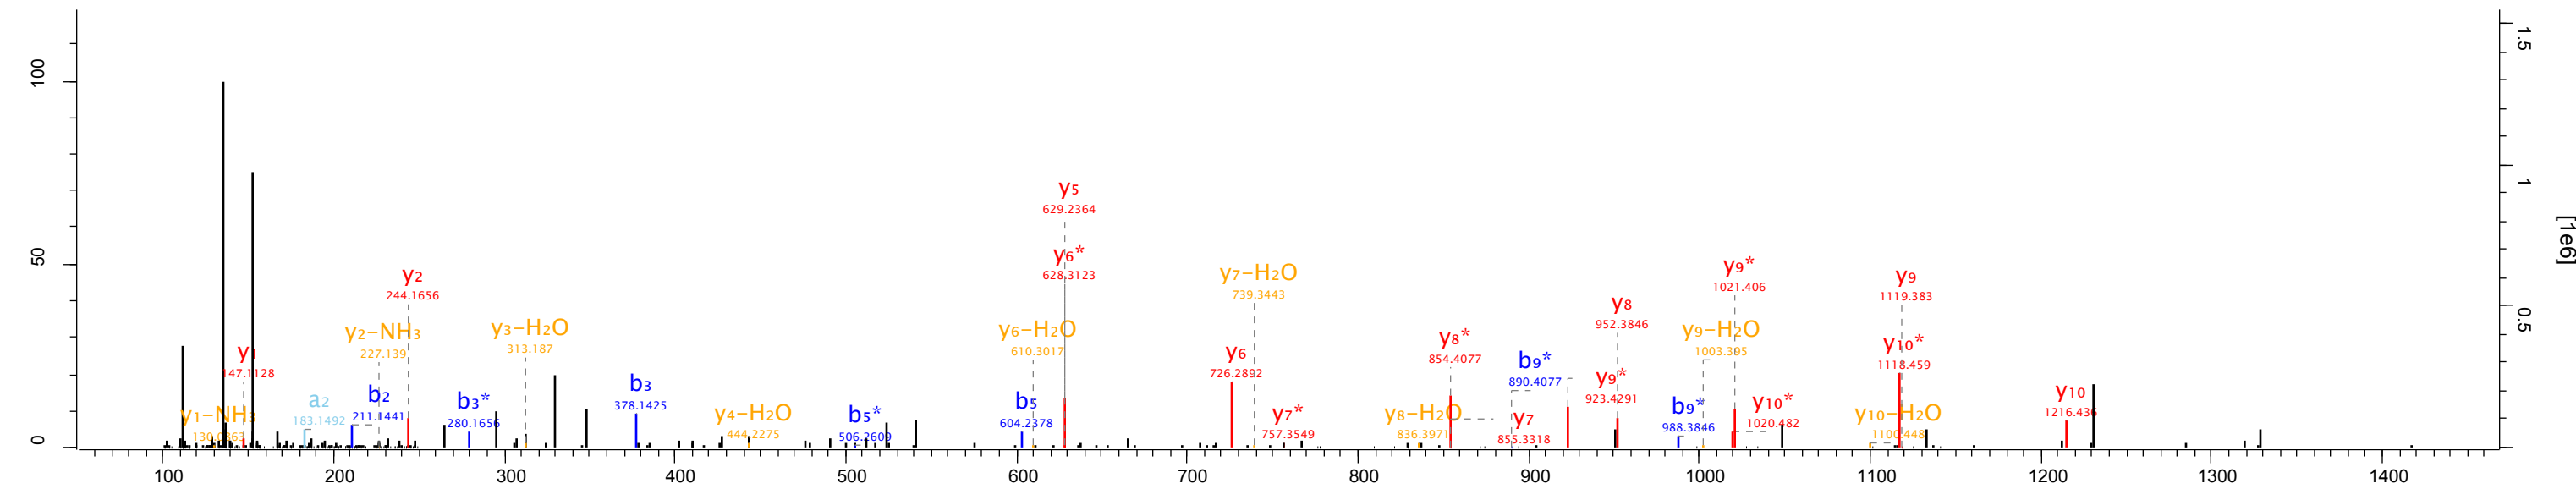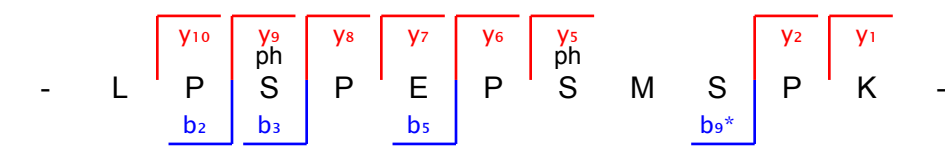



Raw file 20171215\_MaS\_33SR\_LMH\_phospho\_02 Scan 9268 Method FTMS; HCD Score 227.91 m/z 765.3 Gene names ITGA2

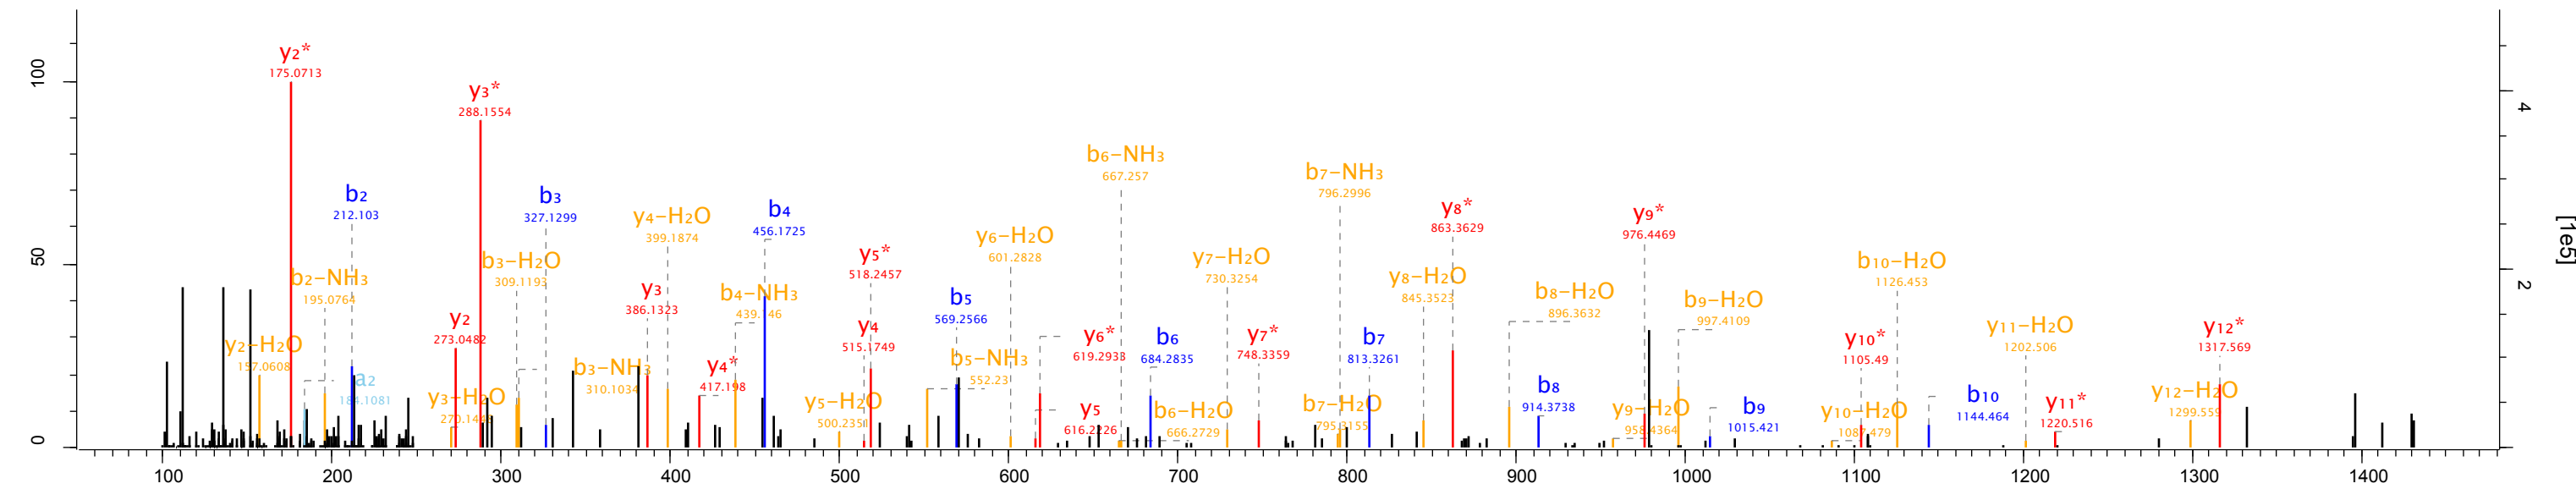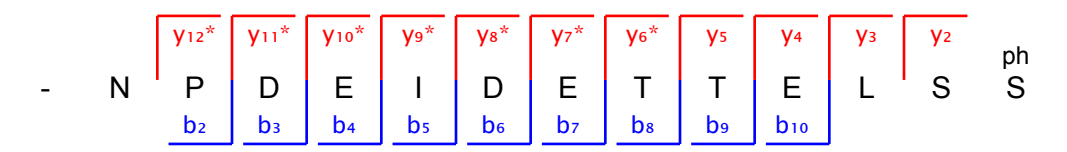

Raw file 20171215\_MaS\_33SR\_LMH\_phospho\_02 Scan 9278 Method FTMS; HCD Score 106.18 m/z 935.41 Gene names NRD1

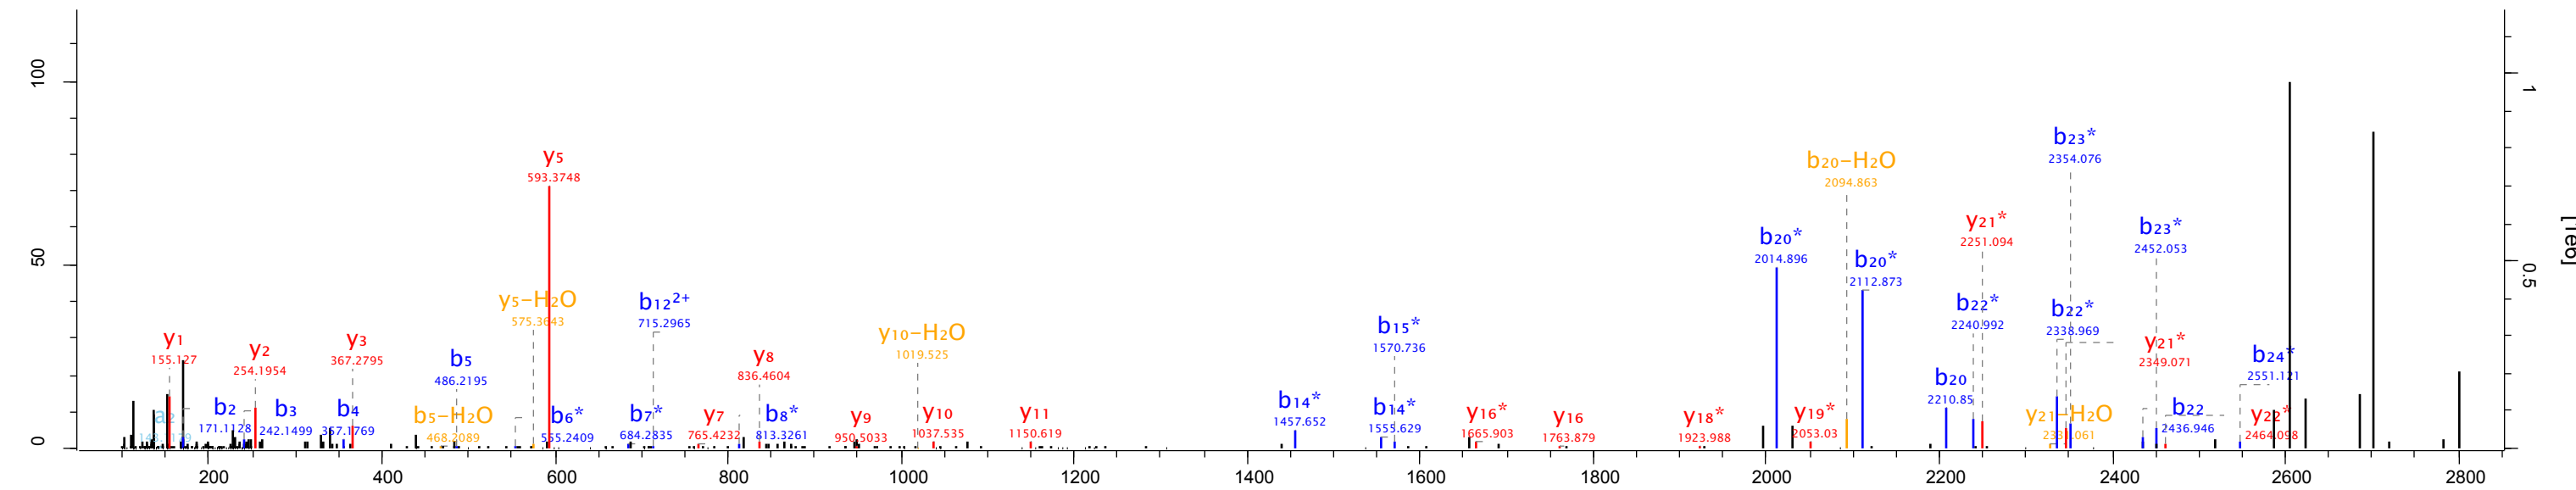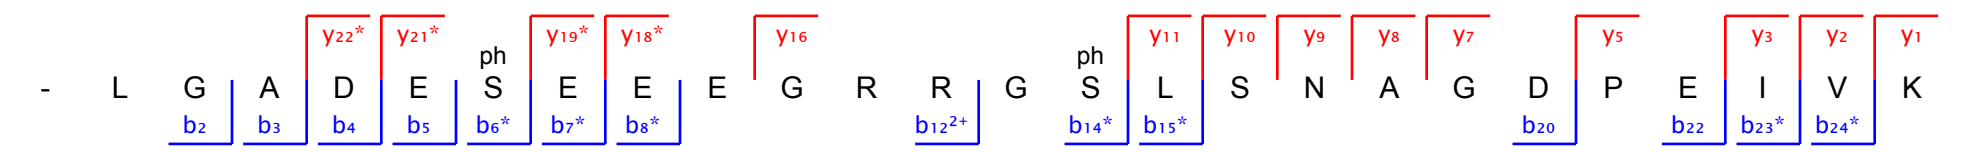

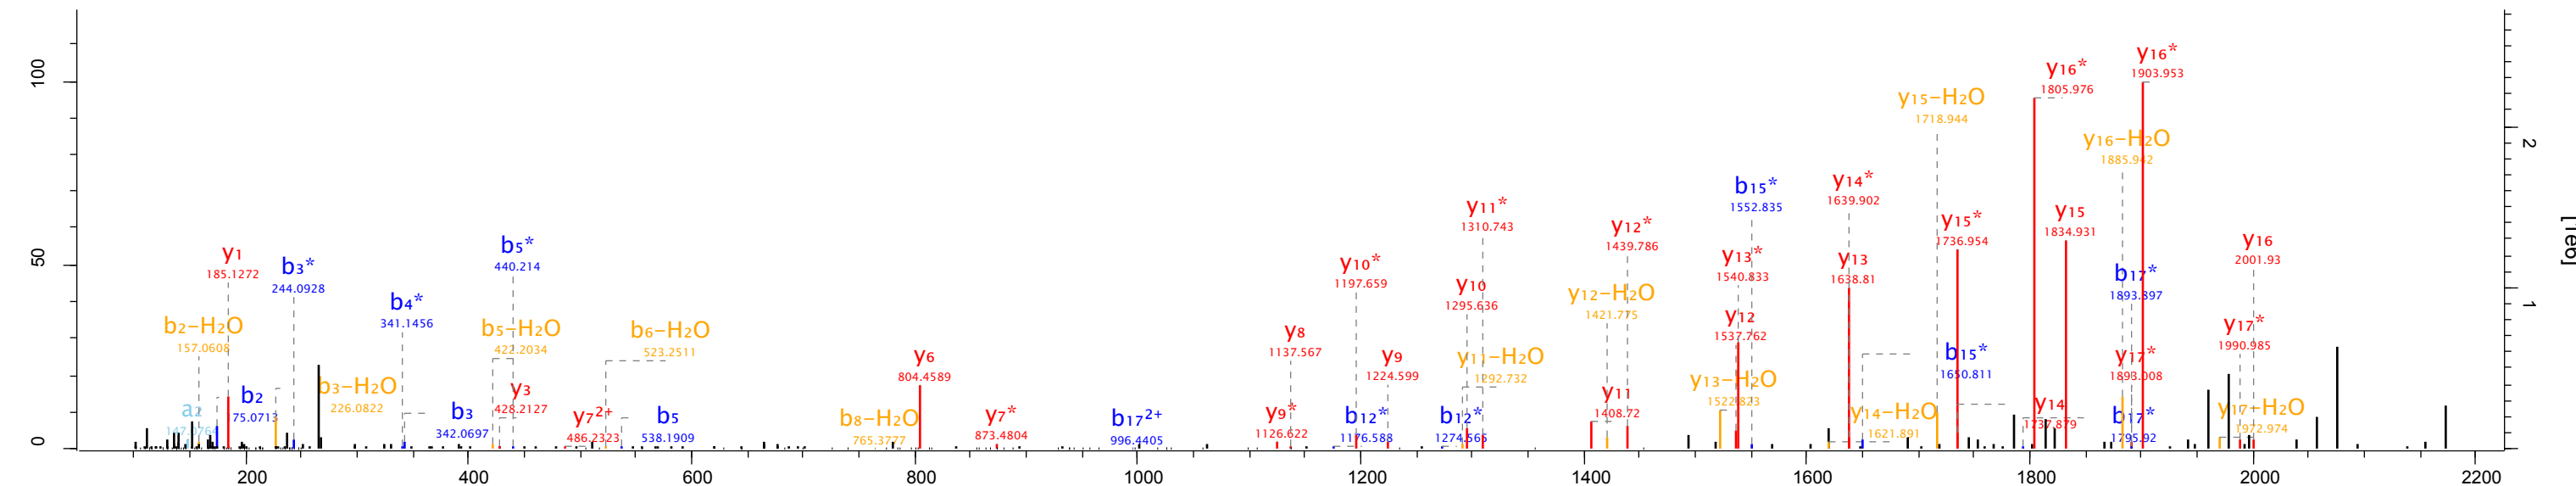

- S S S P V T E L A S R S P I R Q D R -

Fragmentation scheme showing amino acid residues and their corresponding b and y ion series:

- S: b<sub>2</sub>, y<sub>17</sub>\*
- S: b<sub>3</sub>, y<sub>16</sub>ph
- P: b<sub>4</sub>\*
- V: b<sub>5</sub>, y<sub>14</sub>
- T: y<sub>13</sub>
- E: y<sub>12</sub>
- L: y<sub>11</sub>
- A: y<sub>10</sub>
- S: y<sub>9</sub>
- R: y<sub>8</sub>
- S: b<sub>12</sub>\*
- P: y<sub>6</sub>
- I: b<sub>15</sub>\*
- R: y<sub>3</sub>
- Q: b<sub>17</sub>\*
- D: b<sub>17</sub>\*
- R: y<sub>1</sub>

Raw file 20171215\_MaS\_33SR\_LMH\_phospho\_02 Scan 9488 Method FTMS; HCD Score 98.15 m/z 1084.97 Gene names KDM6A

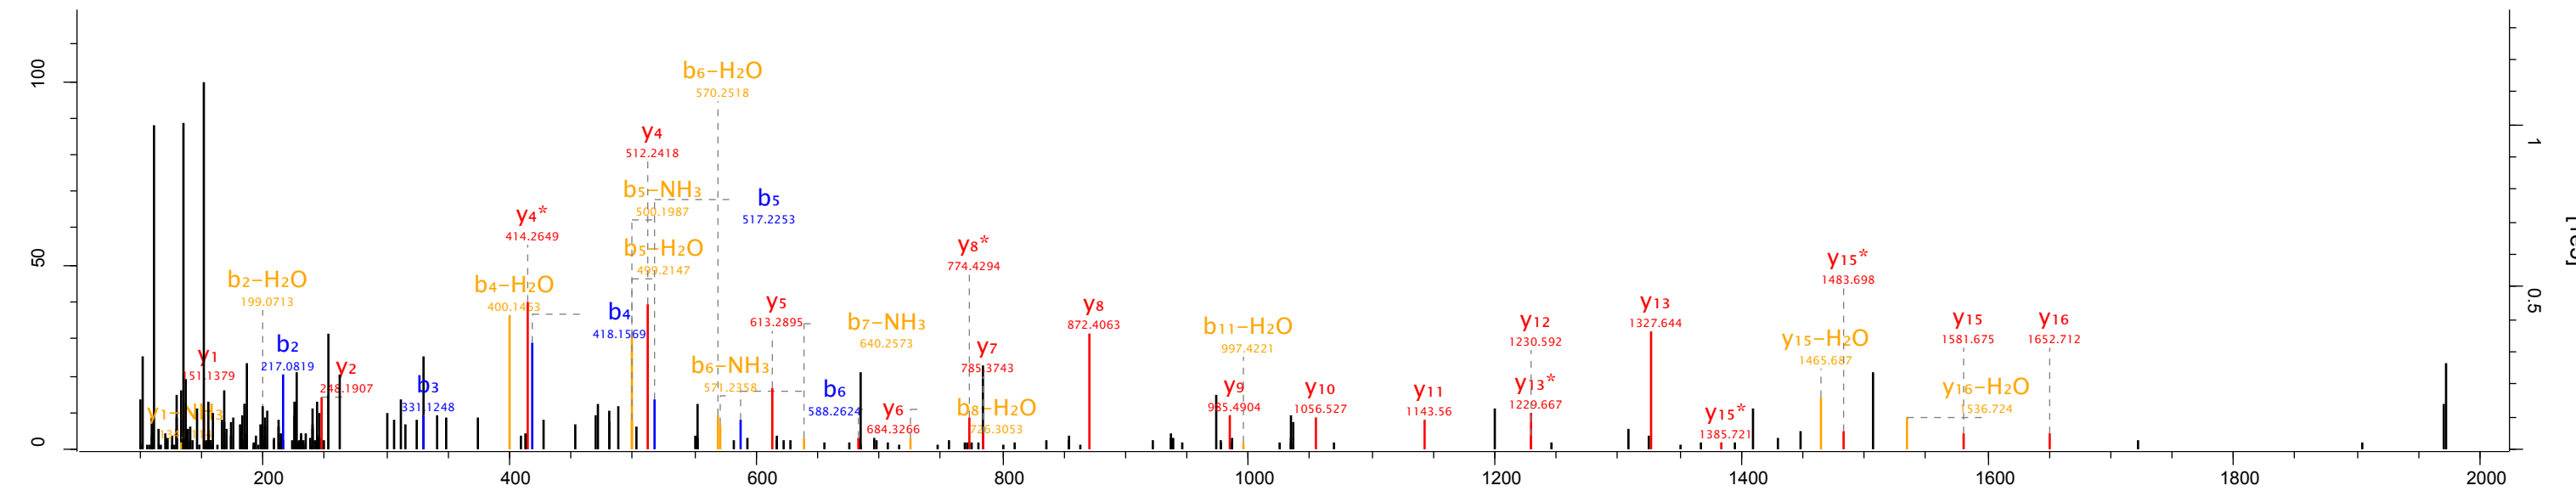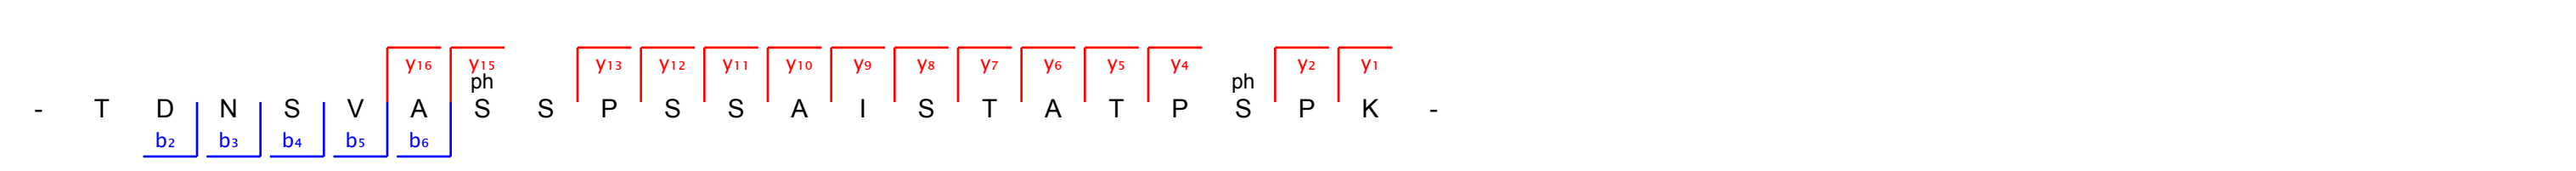



Raw file 20171215\_MaS\_33SR\_LMH\_phospho\_03 Scan 10028 Method FTMS; HCD Score 107.58 m/z 470.2 Gene names CHAMP1

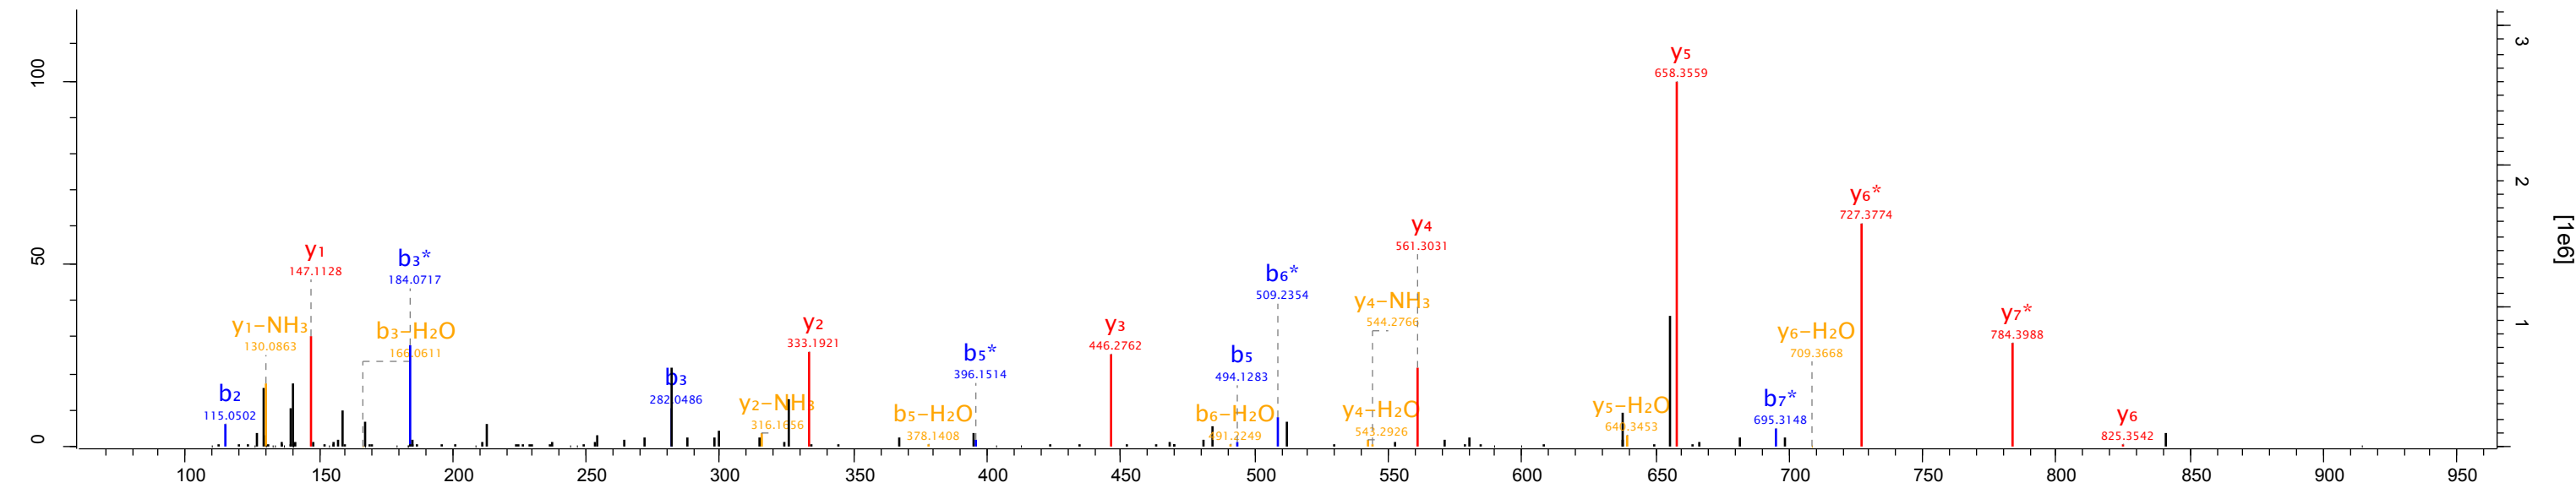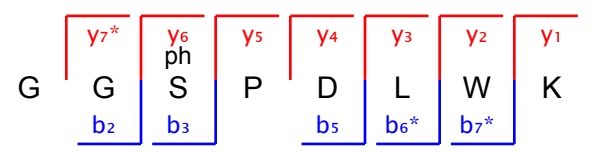

Raw file 20171215\_MaS\_33SR\_LMH\_phospho\_03 Scan 10878 Method FTMS; HCD Score 114.68 m/z 1092.45 Gene names TSC2

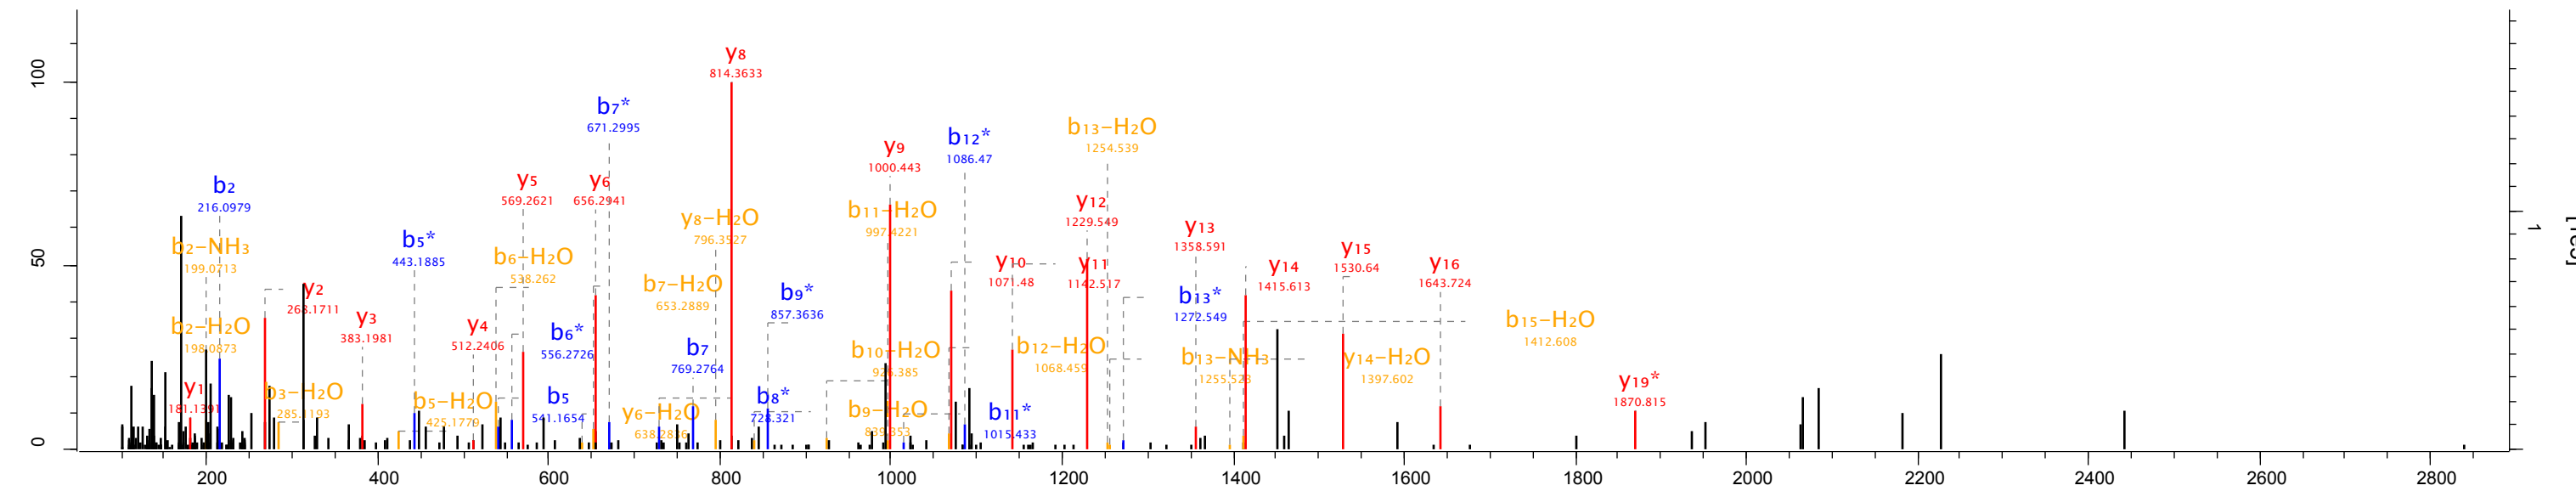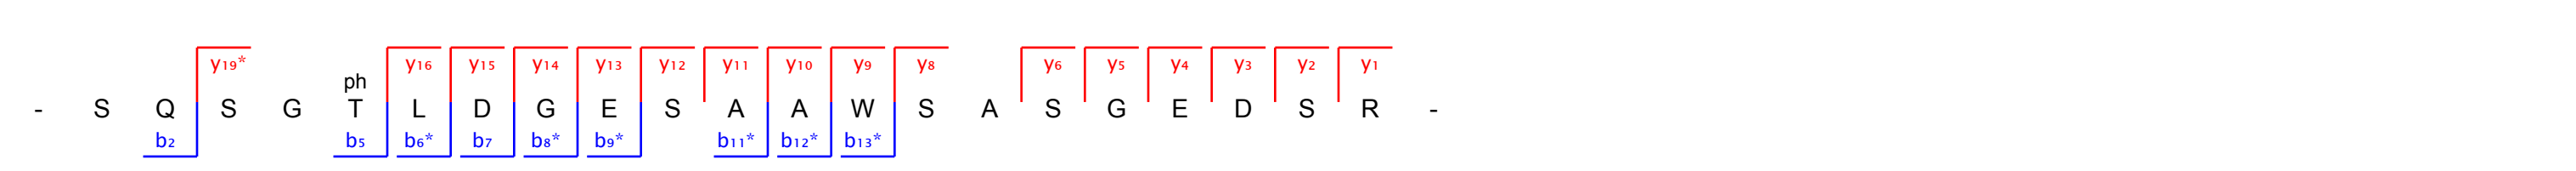

Raw file 20171215\_MaS\_33SR\_LMH\_phospho\_03 Scan 11228 Method FTMS; HCD Score 98.63 m/z 896.1 Gene names TCOF1

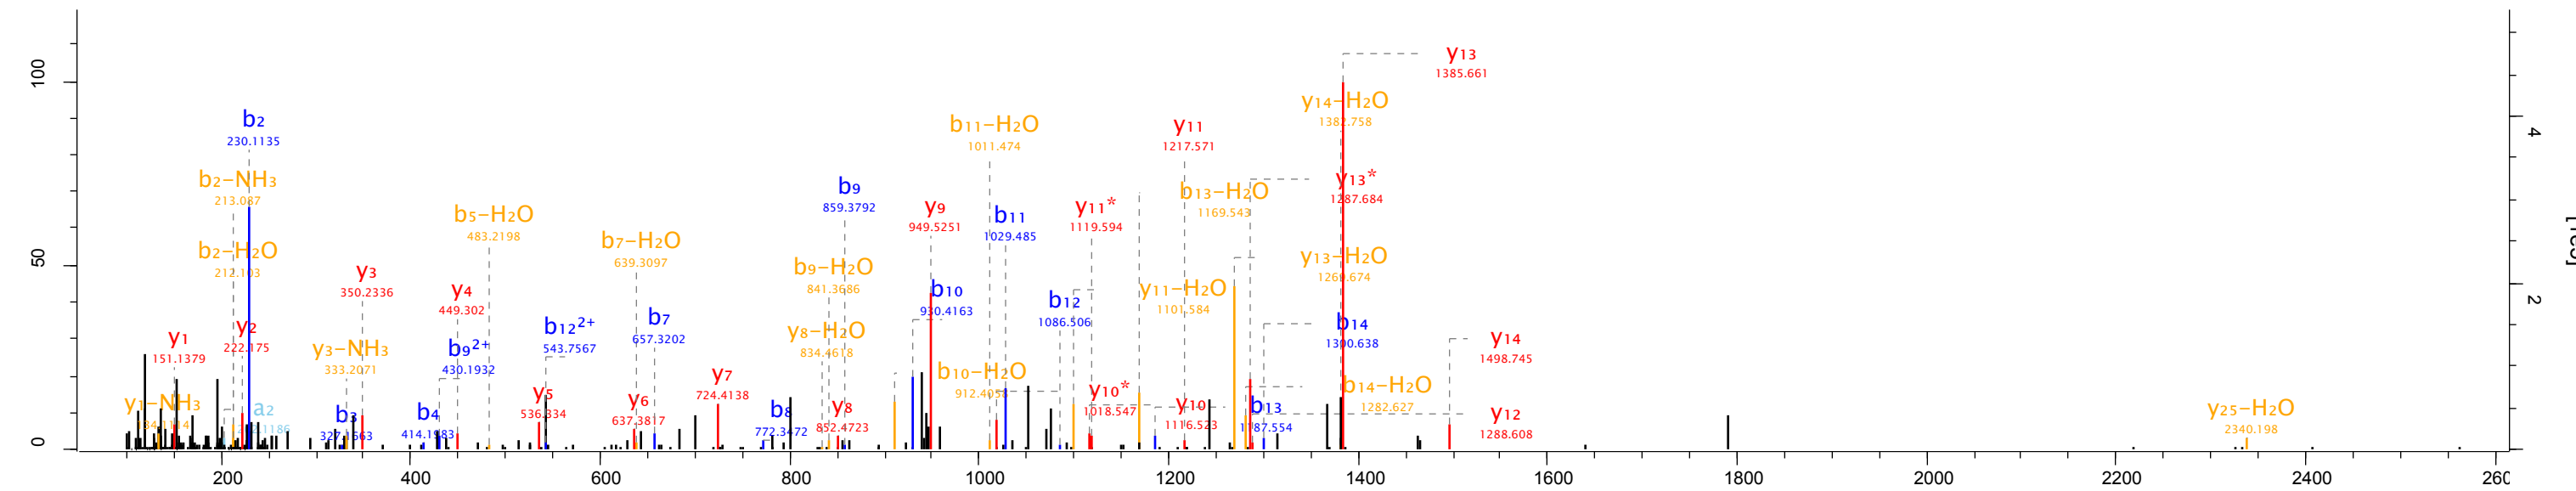

- T Q P S S G V D S A V G T L P A T S<sub>ph</sub> P Q S T S V Q A K -

Labels below the sequence indicate the b and y ions corresponding to the peaks in the mass spectrum:

- Blue boxes under Q, P, S, V, D, S, A, V, G, T, L: b<sub>2</sub>, b<sub>3</sub>, b<sub>4</sub>, b<sub>7</sub>, b<sub>8</sub>, b<sub>9</sub>, b<sub>10</sub>, b<sub>11</sub>, b<sub>12</sub>, b<sub>13</sub>, b<sub>14</sub>
- Red boxes under L, P, A, T, S, P, Q, S, T, S, V, Q, A, K: y<sub>14</sub>, y<sub>13</sub>, y<sub>12</sub>, y<sub>11</sub>, y<sub>10</sub>, y<sub>9</sub>, y<sub>8</sub>, y<sub>7</sub>, y<sub>6</sub>, y<sub>5</sub>, y<sub>4</sub>, y<sub>3</sub>, y<sub>2</sub>, y<sub>1</sub>



Raw file 20171215\_MaS\_33SR\_LMH\_phospho\_03 Scan 11458 Method FTMS; HCD Score 40.38 m/z 816.83 Gene names CNKSR3

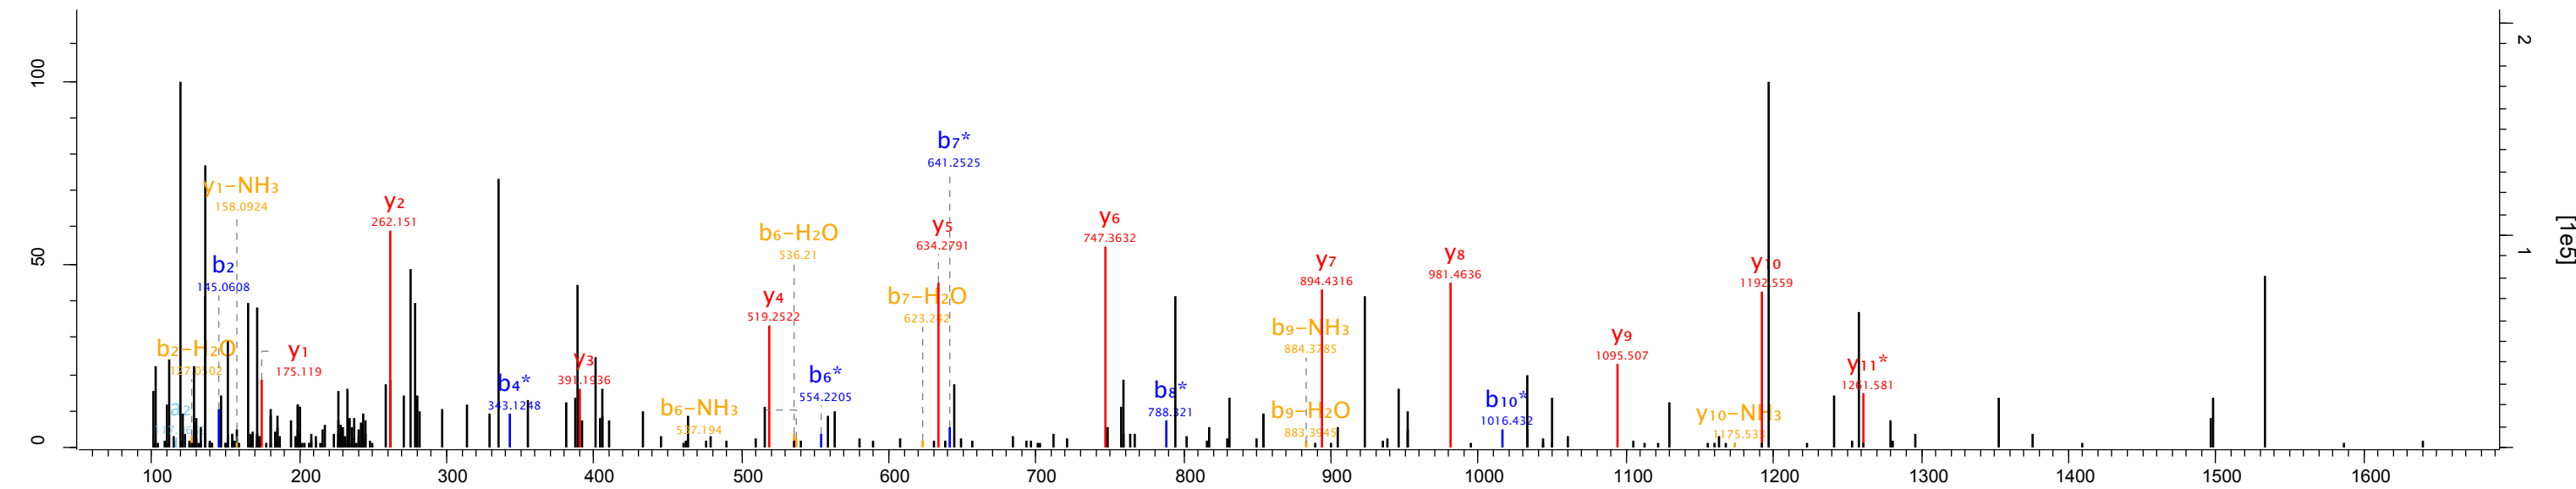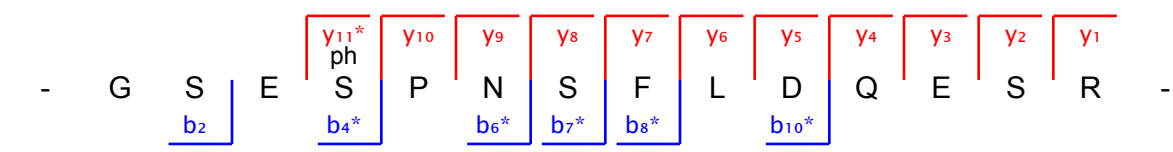

Raw file 20171215\_MaS\_33SR\_LMH\_phospho\_03 Scan 11818 Method FTMS; HCD Score 106.93 m/z 750.81 Gene names SLC2A3

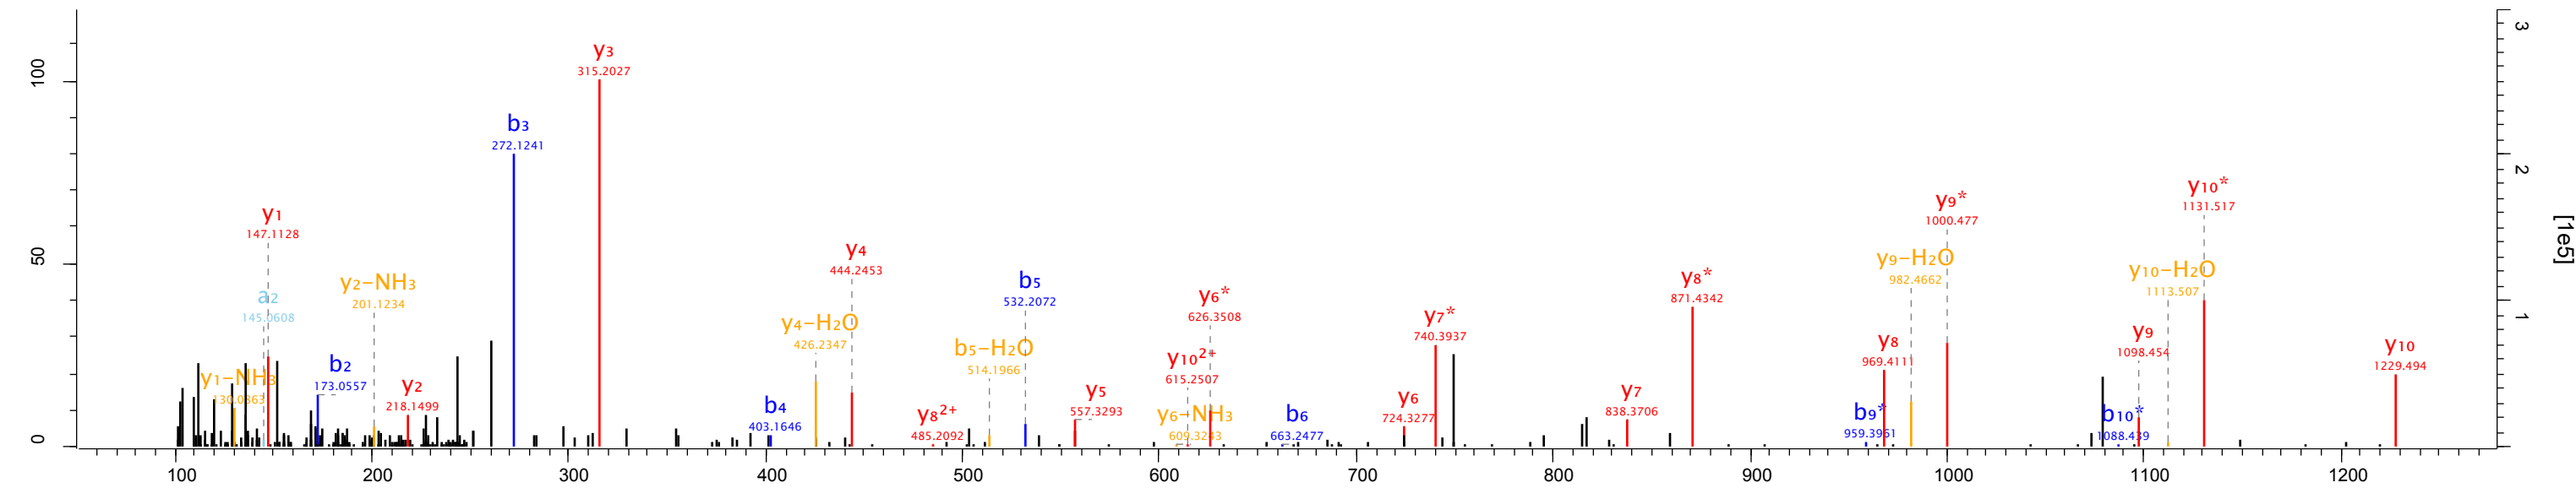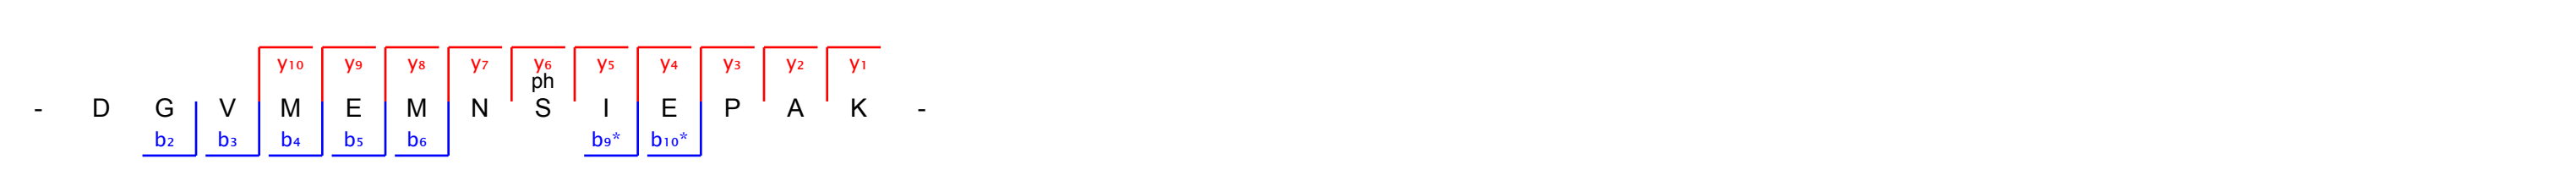

Raw file 20171215\_MaS\_33SR\_LMH\_phospho\_03 Scan 11858 Method FTMS; HCD Score 288.58 m/z 845.87 Gene names KANK1

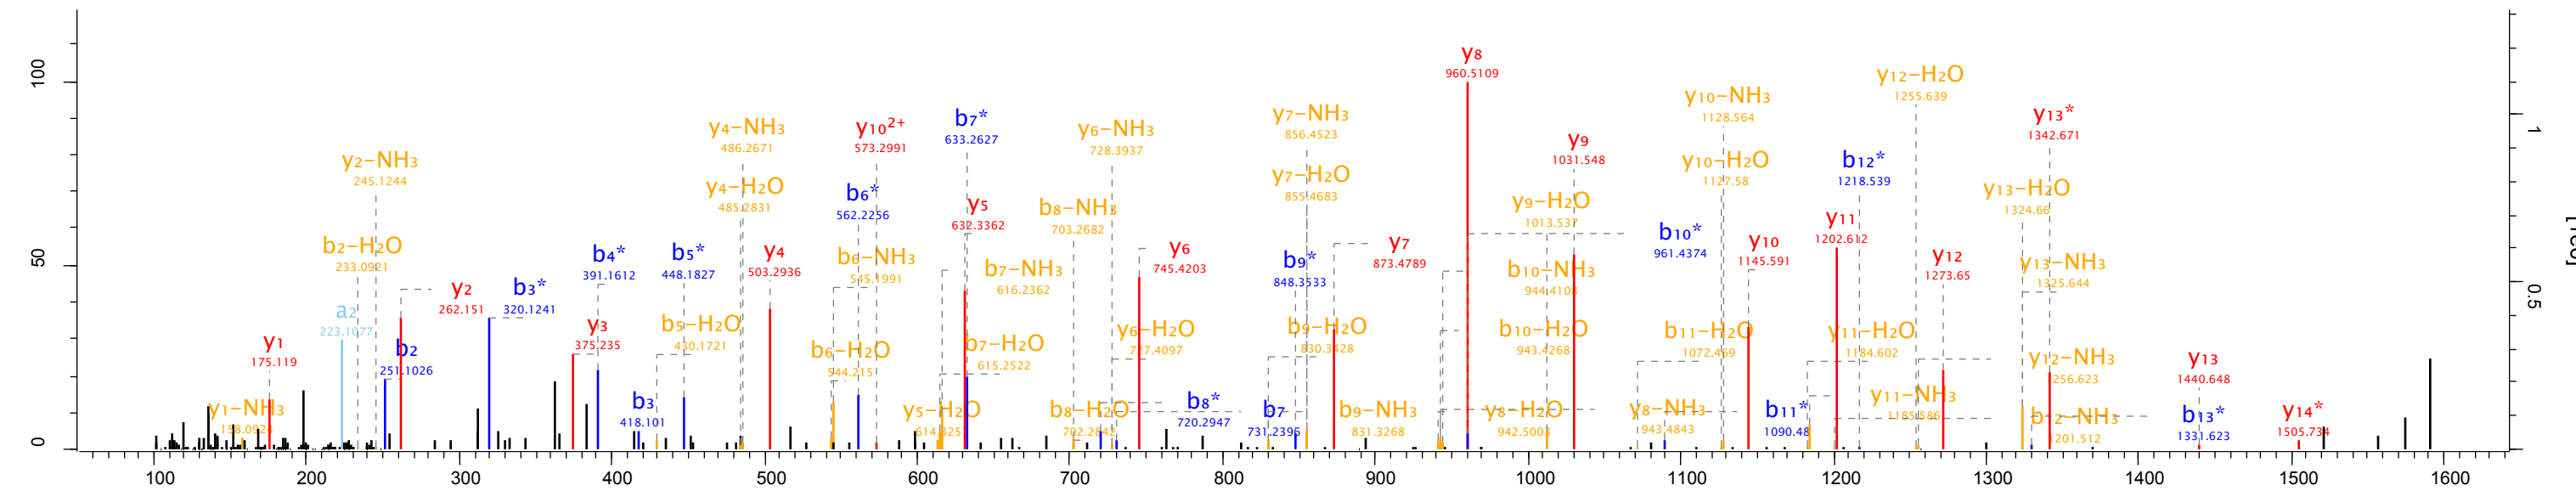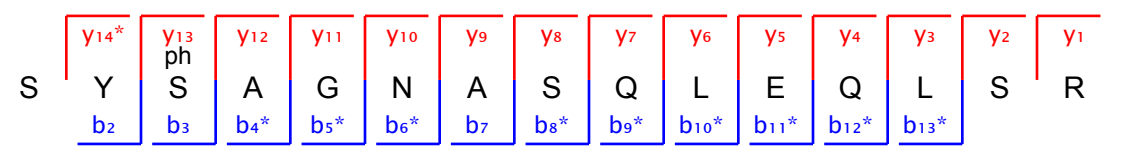

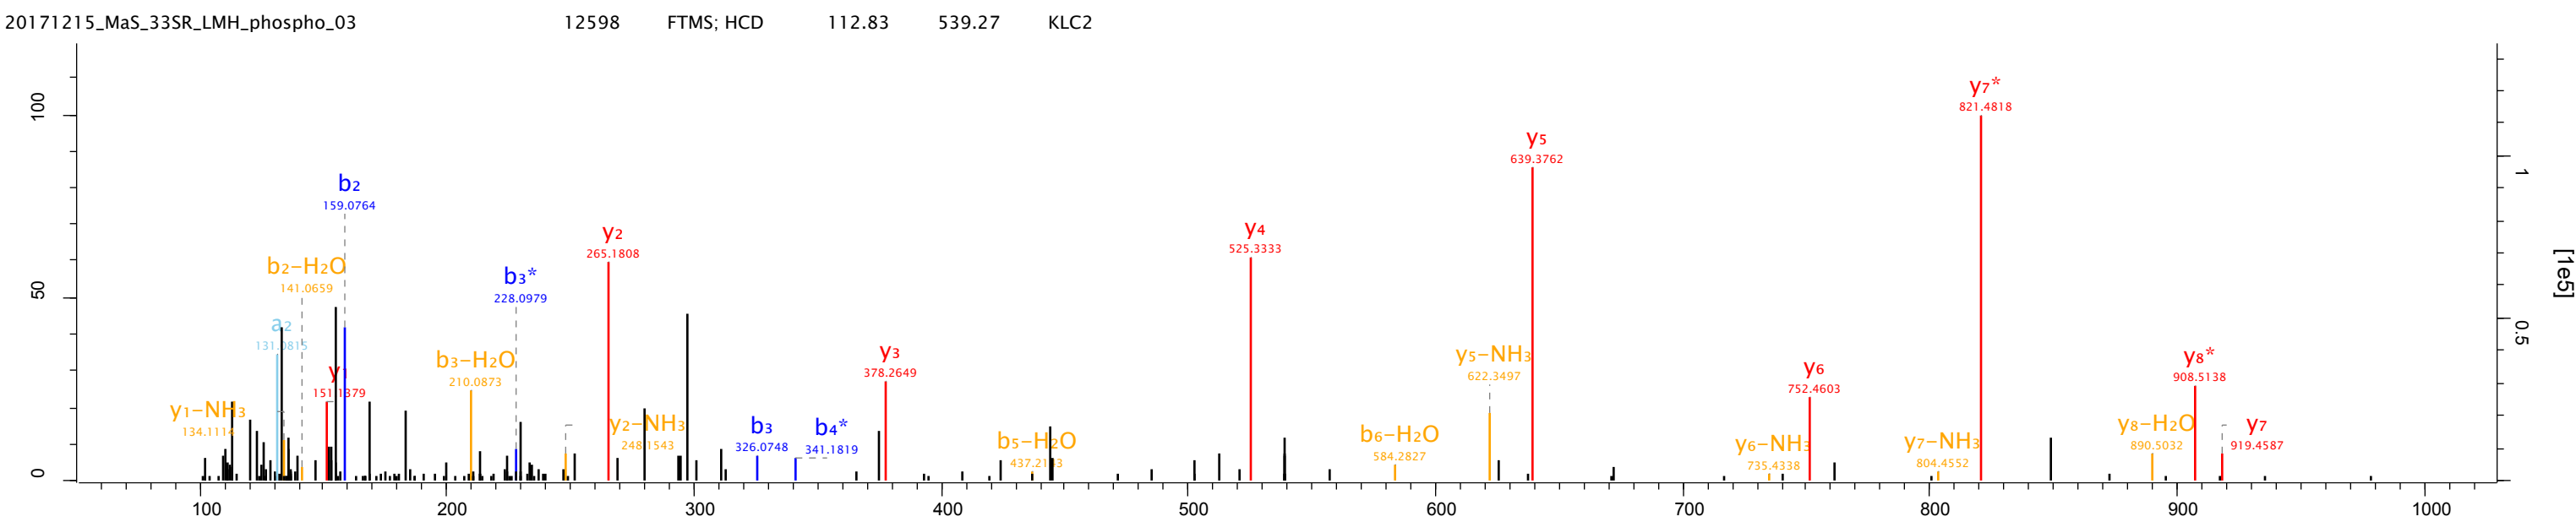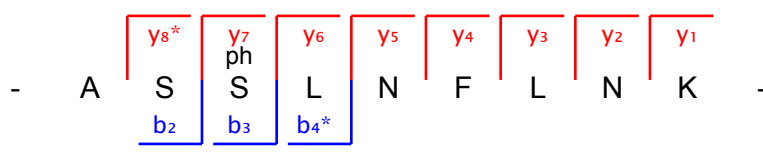

Raw file 20171215\_MaS\_33SR\_LMH\_phospho\_03 Scan 12908 Method FTMS; HCD Score 45.83 m/z 529.74 Gene names AHNAK

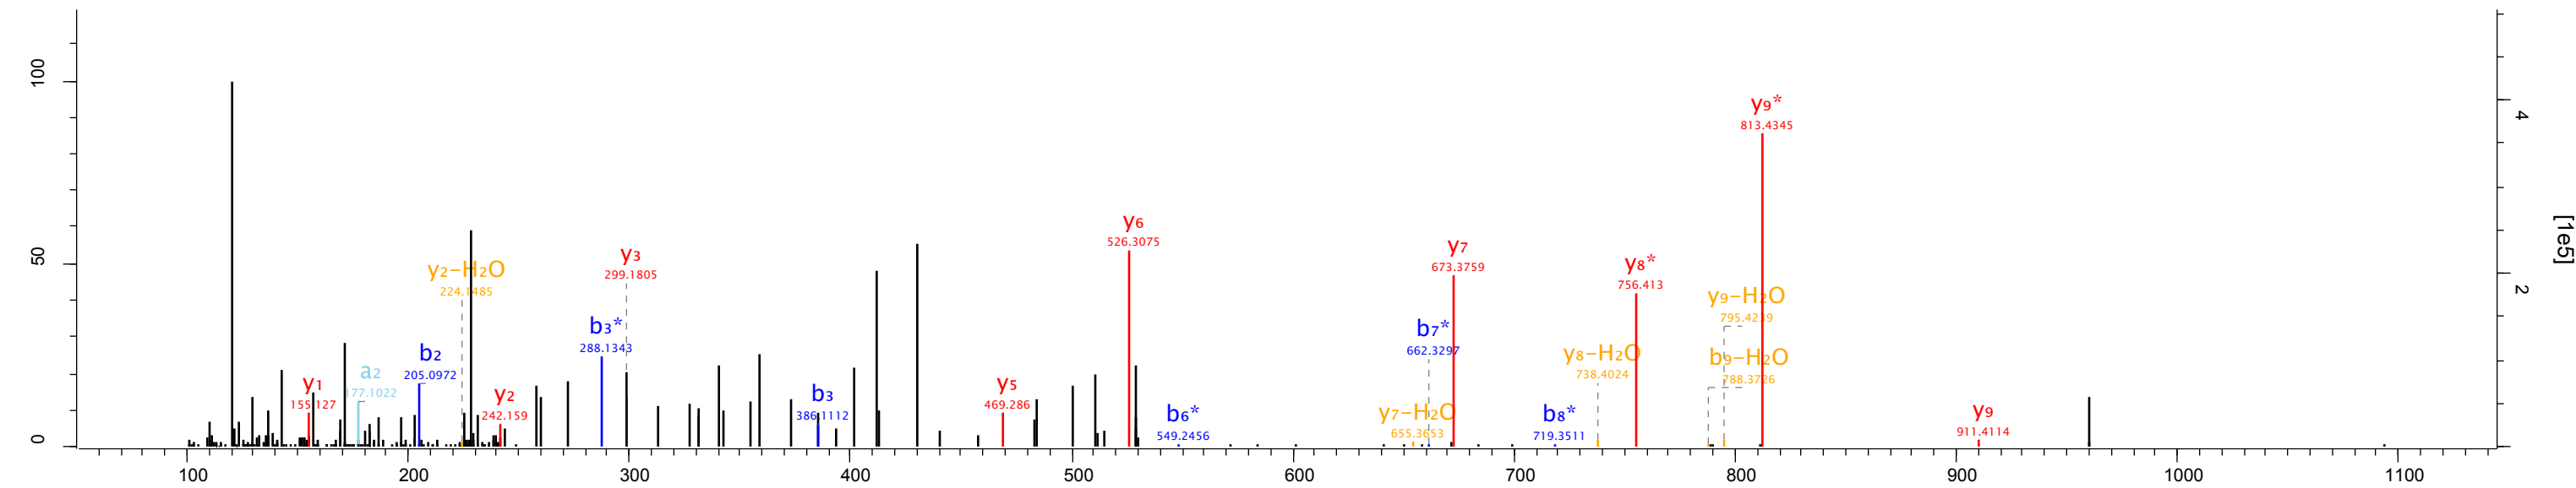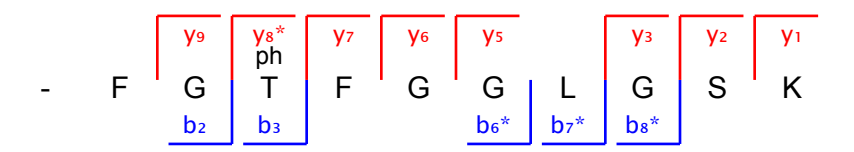

Raw file 20171215\_MaS\_33SR\_LMH\_phospho\_03 Scan 14128 Method FTMS; HCD Score 231.44 m/z 1101.42 Gene names BYSL

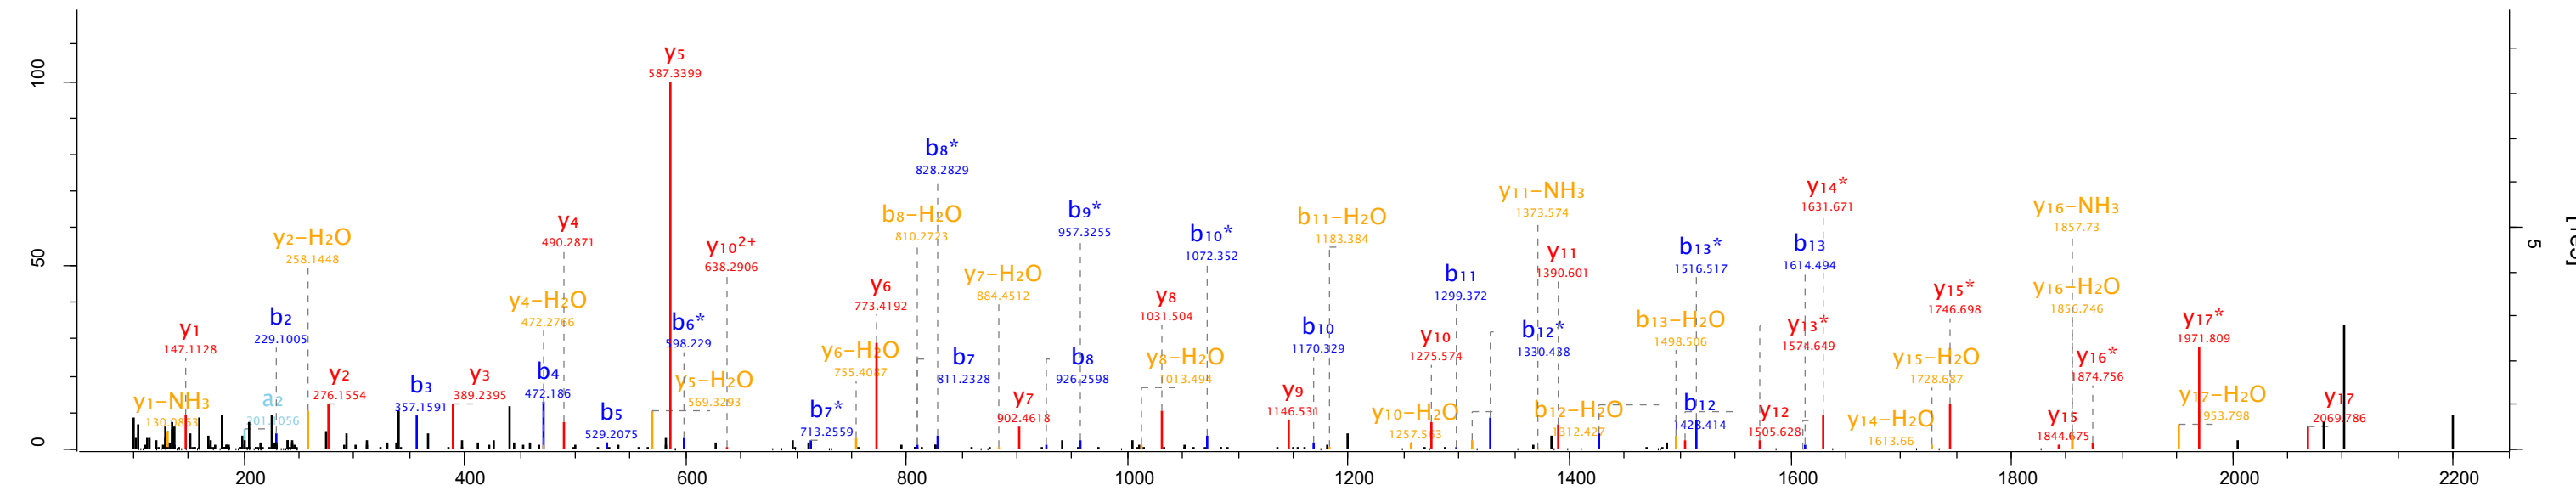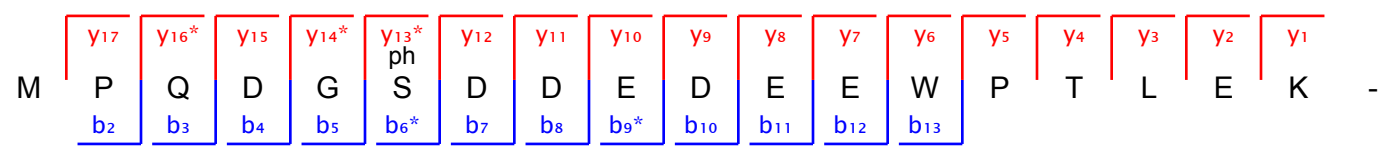

20171215\_MaS\_33SR\_LMH\_phospho\_03 14248 FTMS; HCD 119.47 866.34 FERMT2

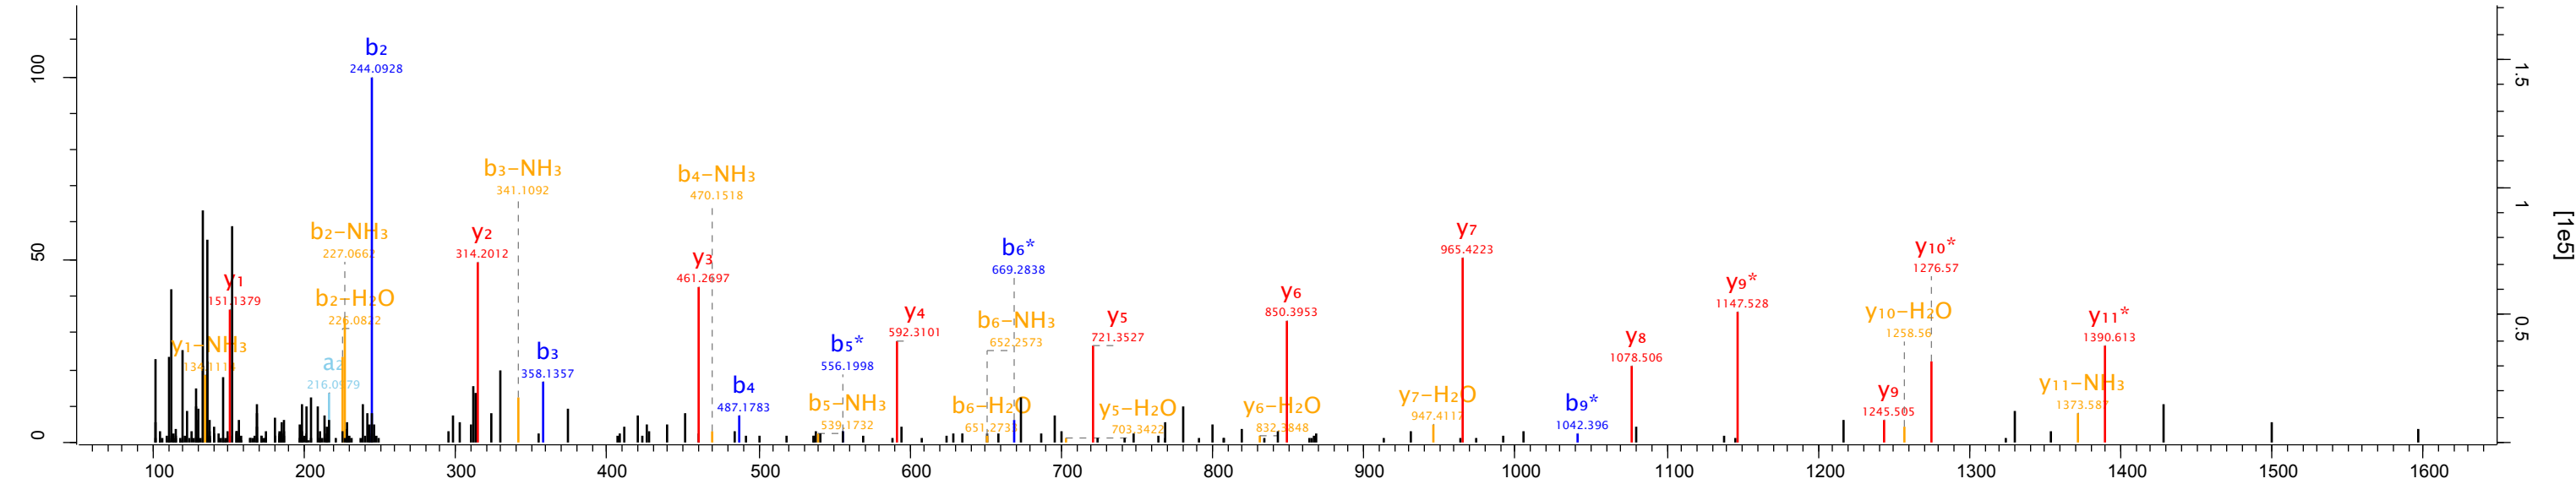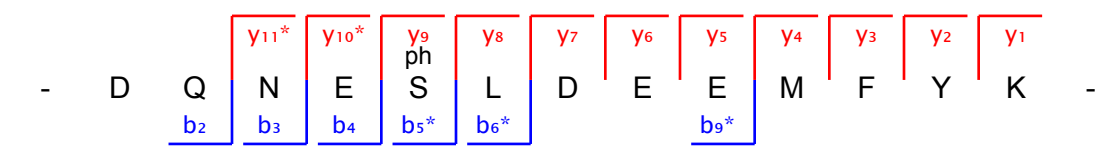

Raw file: 20171215\_MaS\_33SR\_LMH\_phospho\_03  
 Scan: 14298 Method: FTMS; HCD Score: 107.5 m/z: 734.85 Gene names: ARHGEF7;ARHGEF6

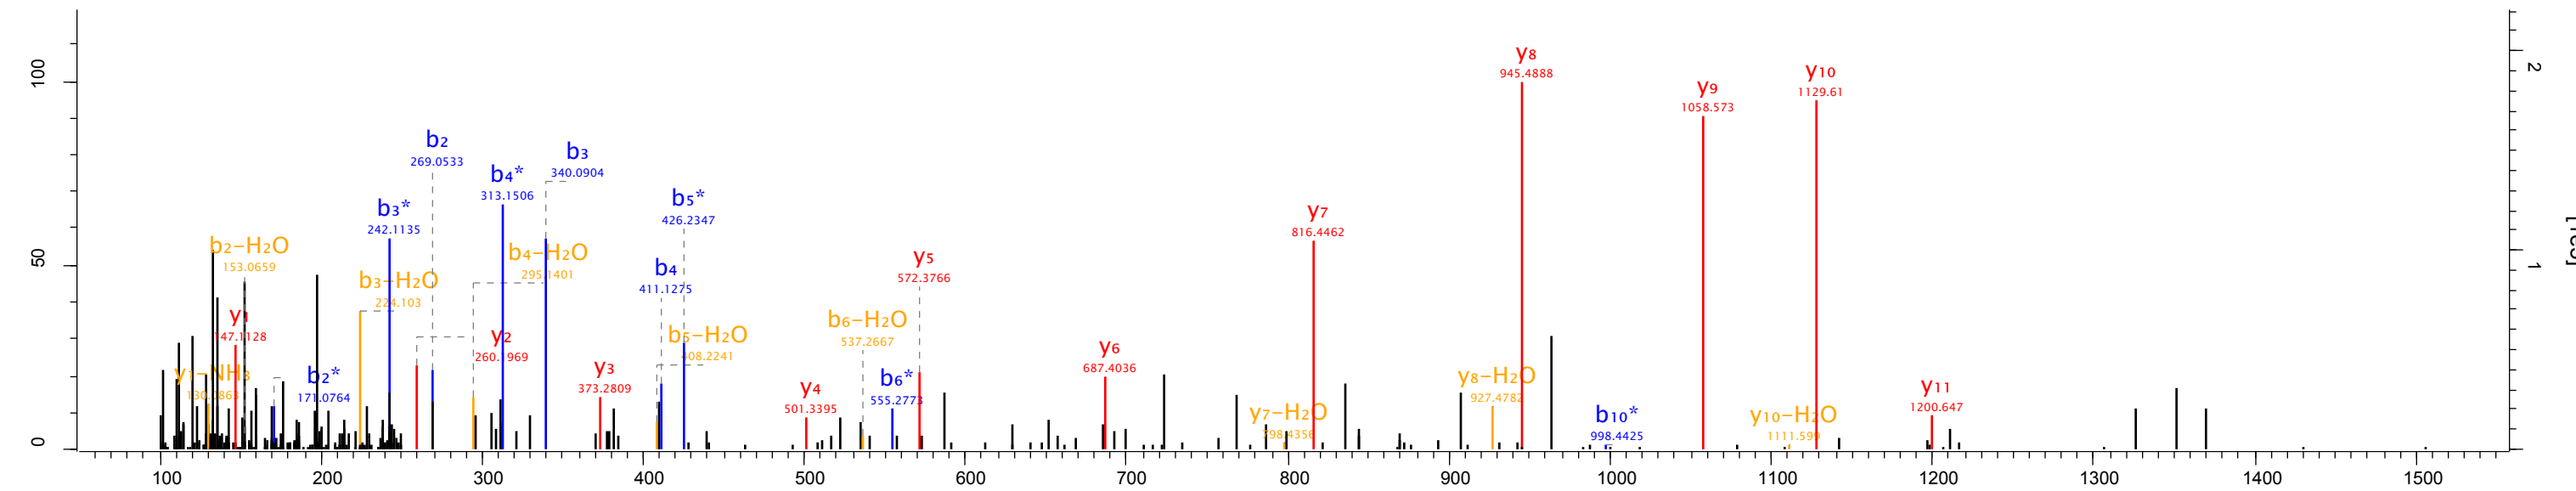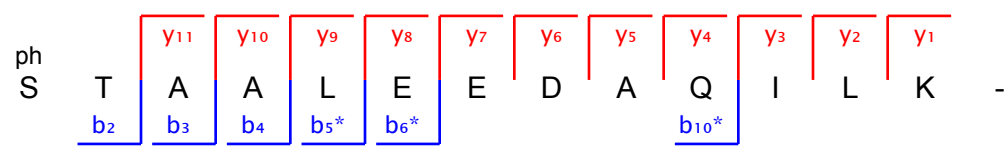



Raw file 20171215\_MaS\_33SR\_LMH\_phospho\_03 Scan 14908 Method FTMS; HCD Score 110.9 m/z 908.74 Gene names RPRD1A

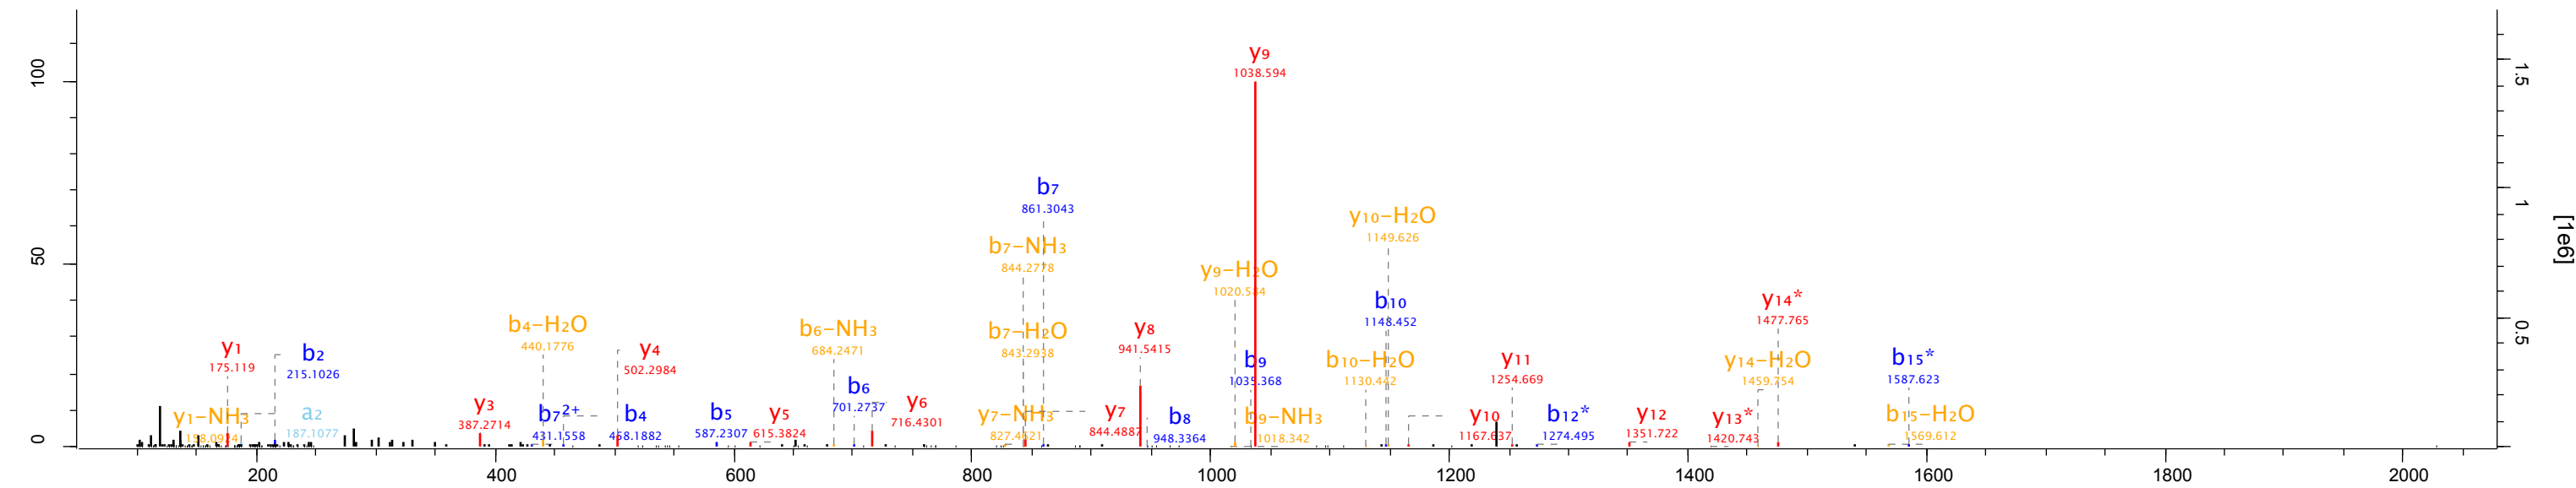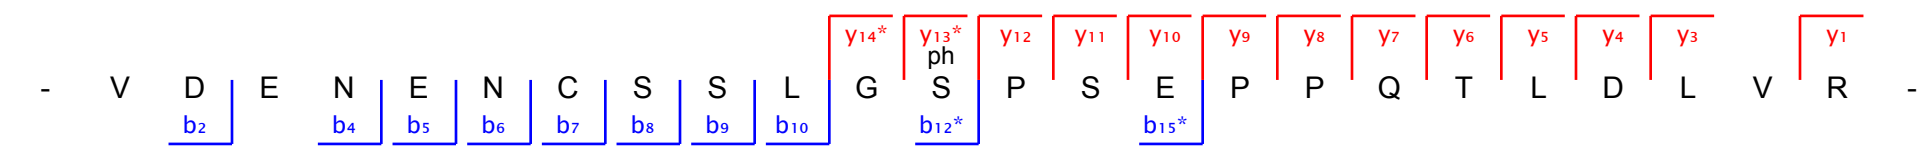

Raw file: 20171215\_MaS\_33SR\_LMH\_phospho\_03  
 Scan: 17688 Method: FTMS; HCD Score: 273.27 m/z: 1125.5 Gene names: PA2G4

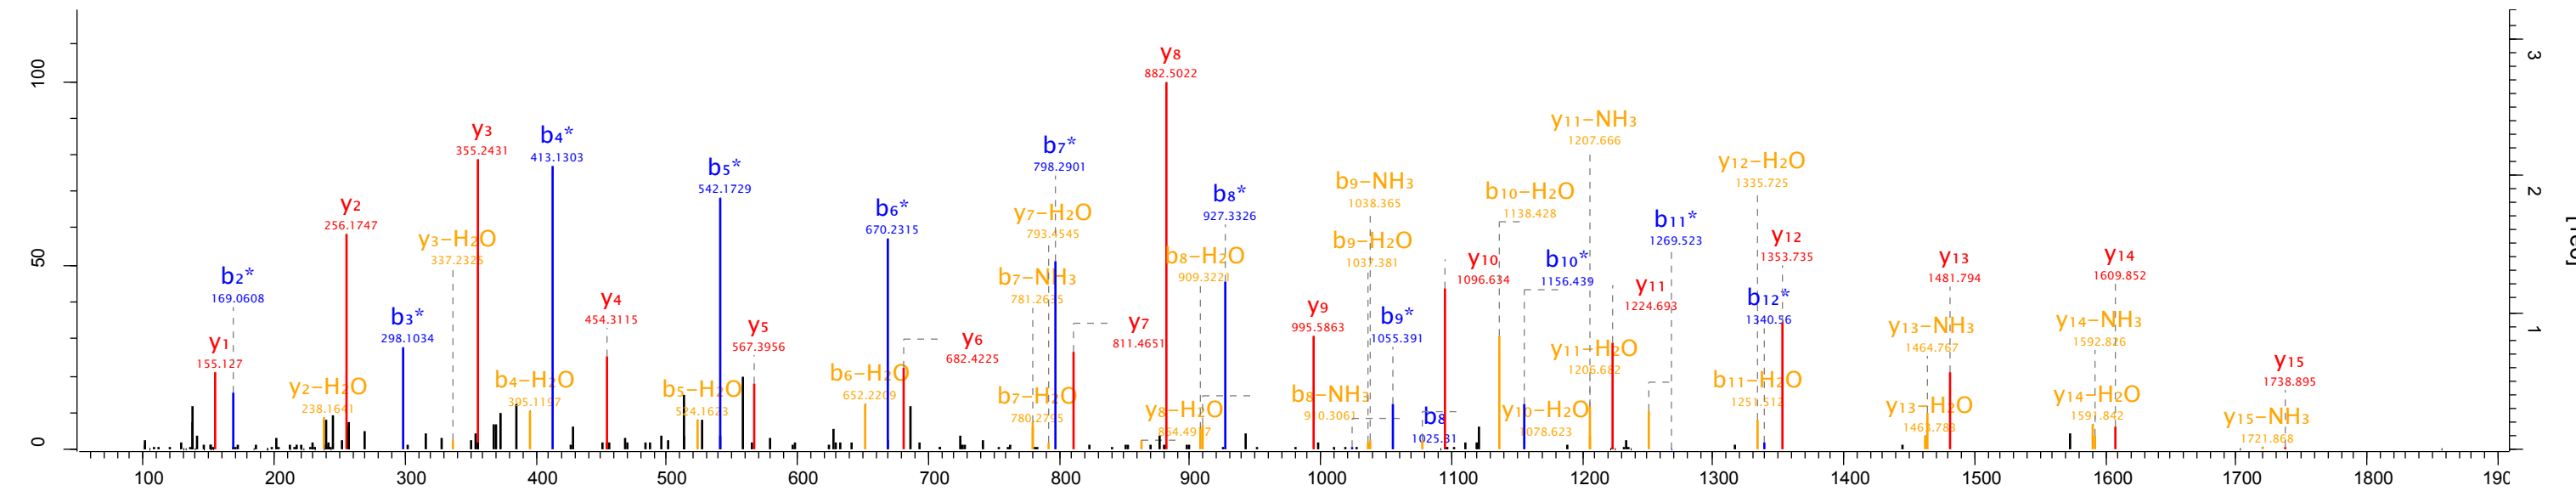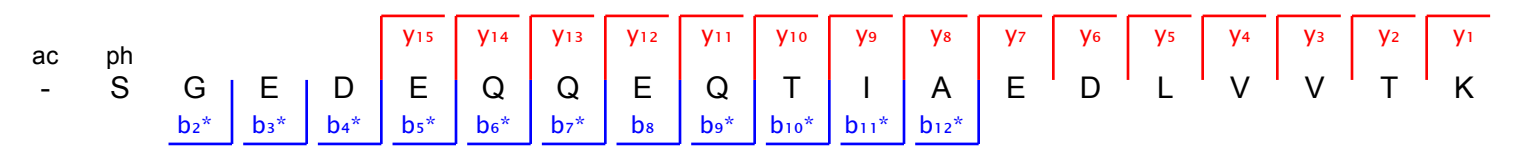

Raw file 20171215\_MaS\_33SR\_LMH\_phospho\_03 Scan 1928 Method FTMS; HCD Score 124.88 m/z 659.97 Gene names SRRM2

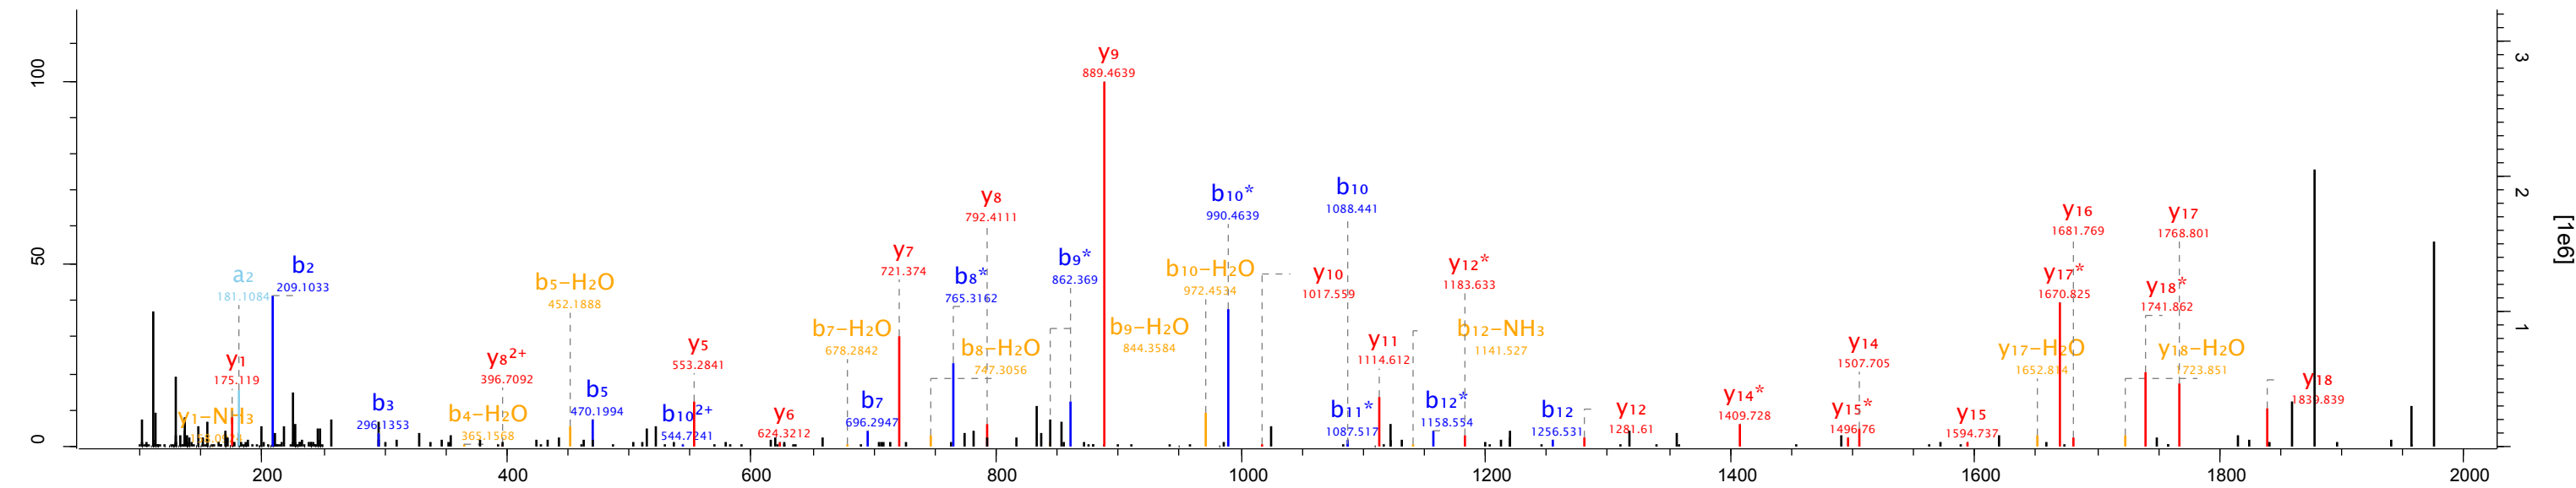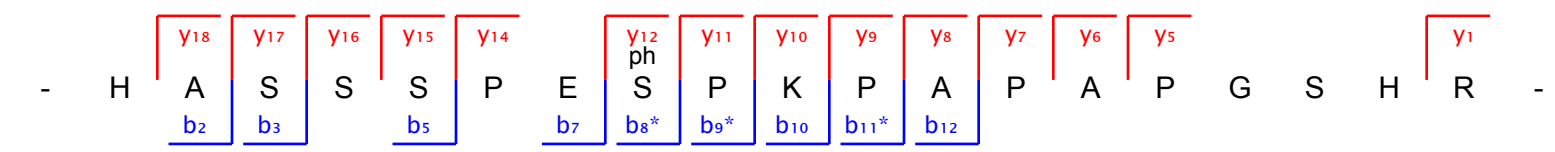

Raw file 20171215\_MaS\_33SR\_LMH\_phospho\_03 Scan 2008 Method FTMS; HCD Score 130.15 m/z 557.28 Gene names SRRM2

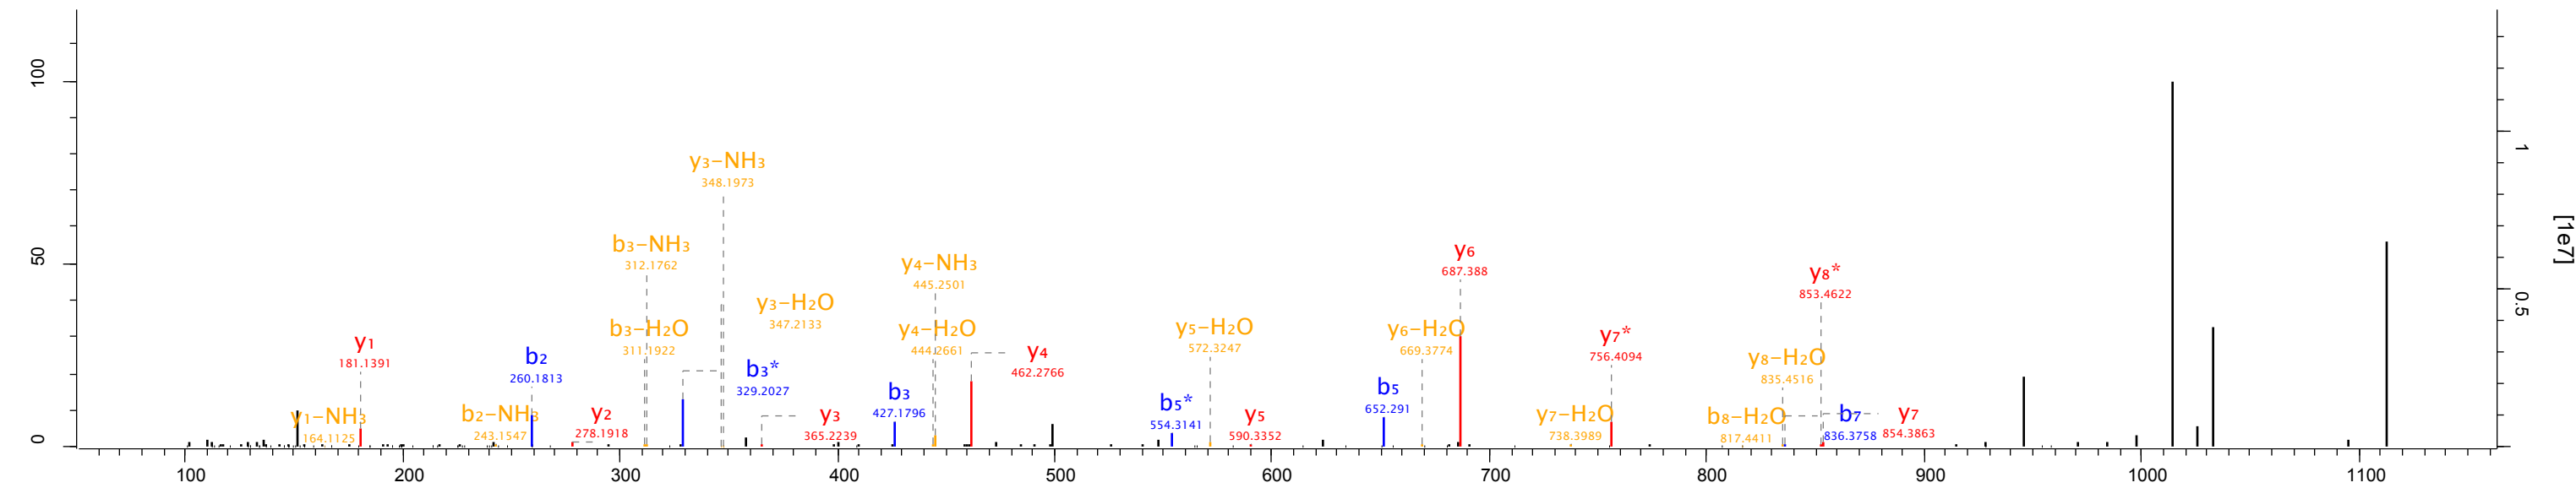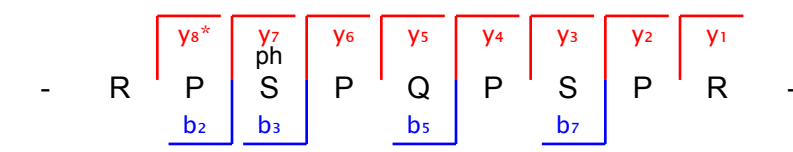

Raw file 20171215\_MaS\_33SR\_LMH\_phospho\_03 Scan 2048 Method FTMS; HCD Score 213.69 m/z 445.21 Gene names SEPT9

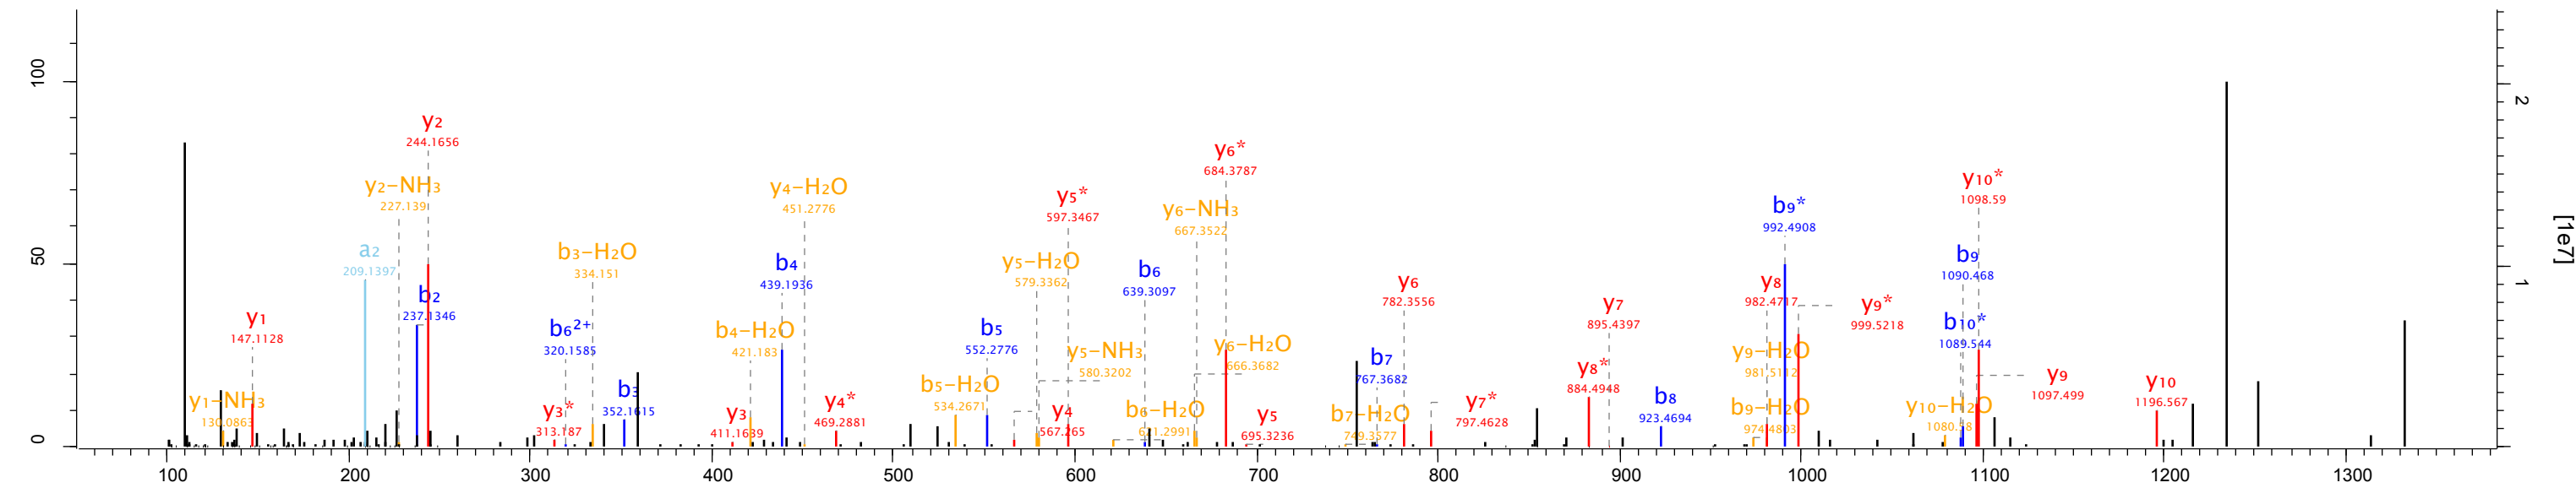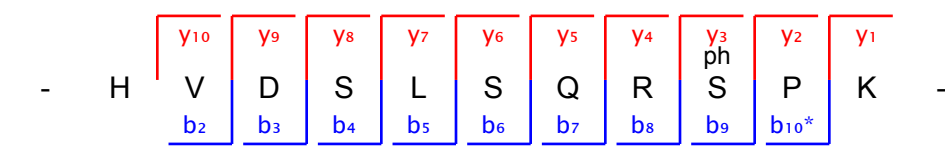

Raw file 20171215\_MaS\_33SR\_LMH\_phospho\_03 Scan 2108 Method FTMS; HCD Score 184.37 m/z 771.38 Gene names HMGA2

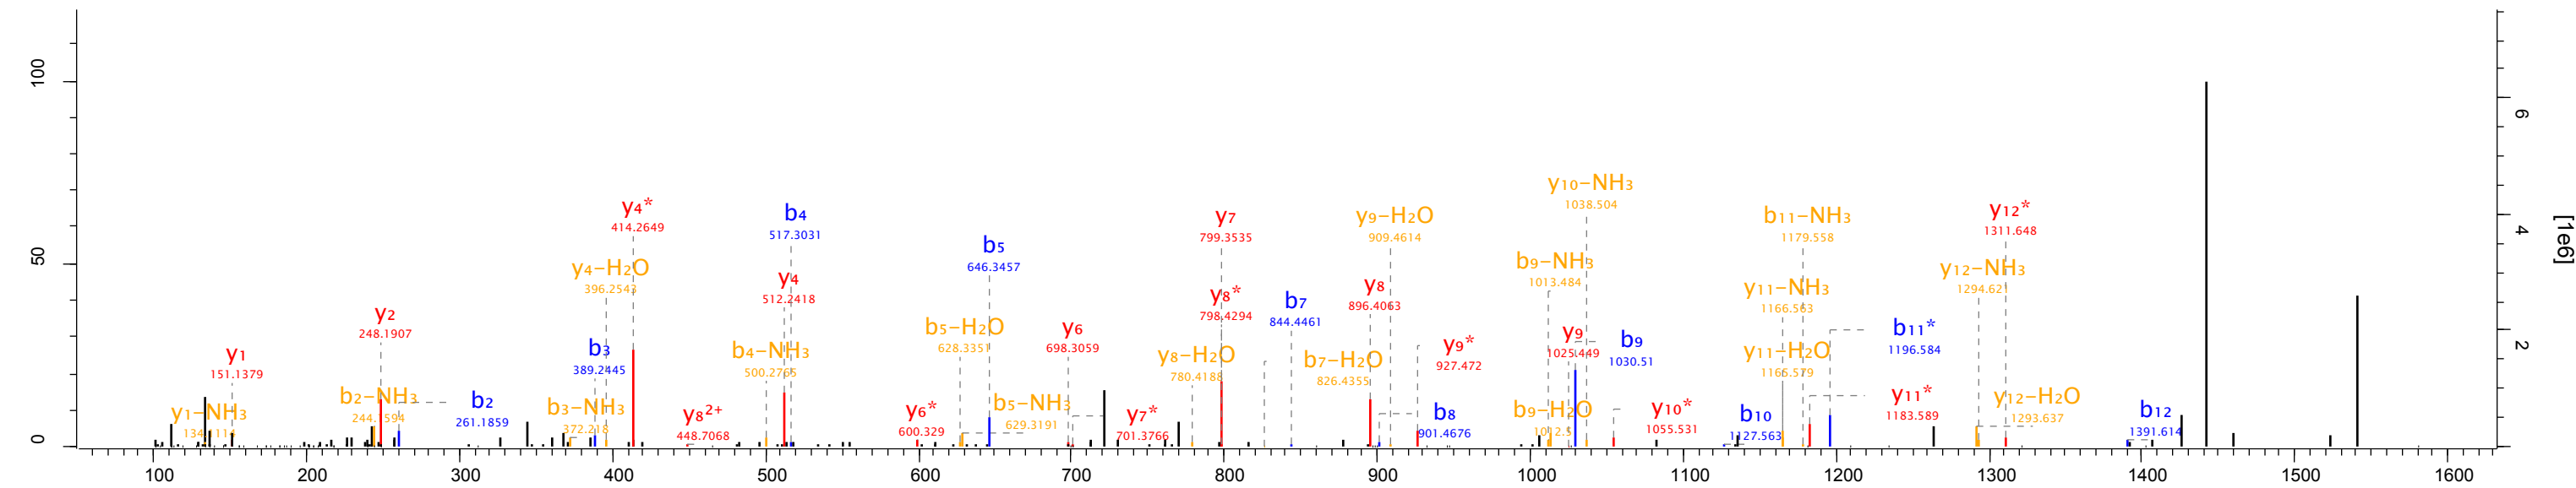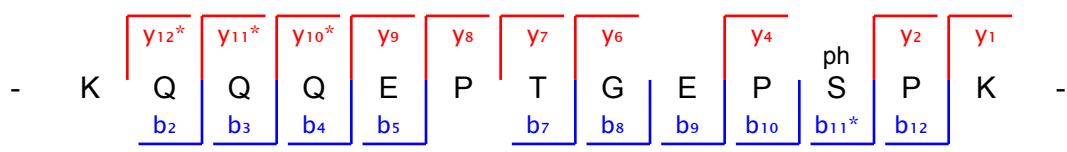

Raw file 20171215\_MaS\_33SR\_LMH\_phospho\_03 Scan 2528 Method FTMS; HCD Score 151.16 m/z 595.3 Gene names MCM4

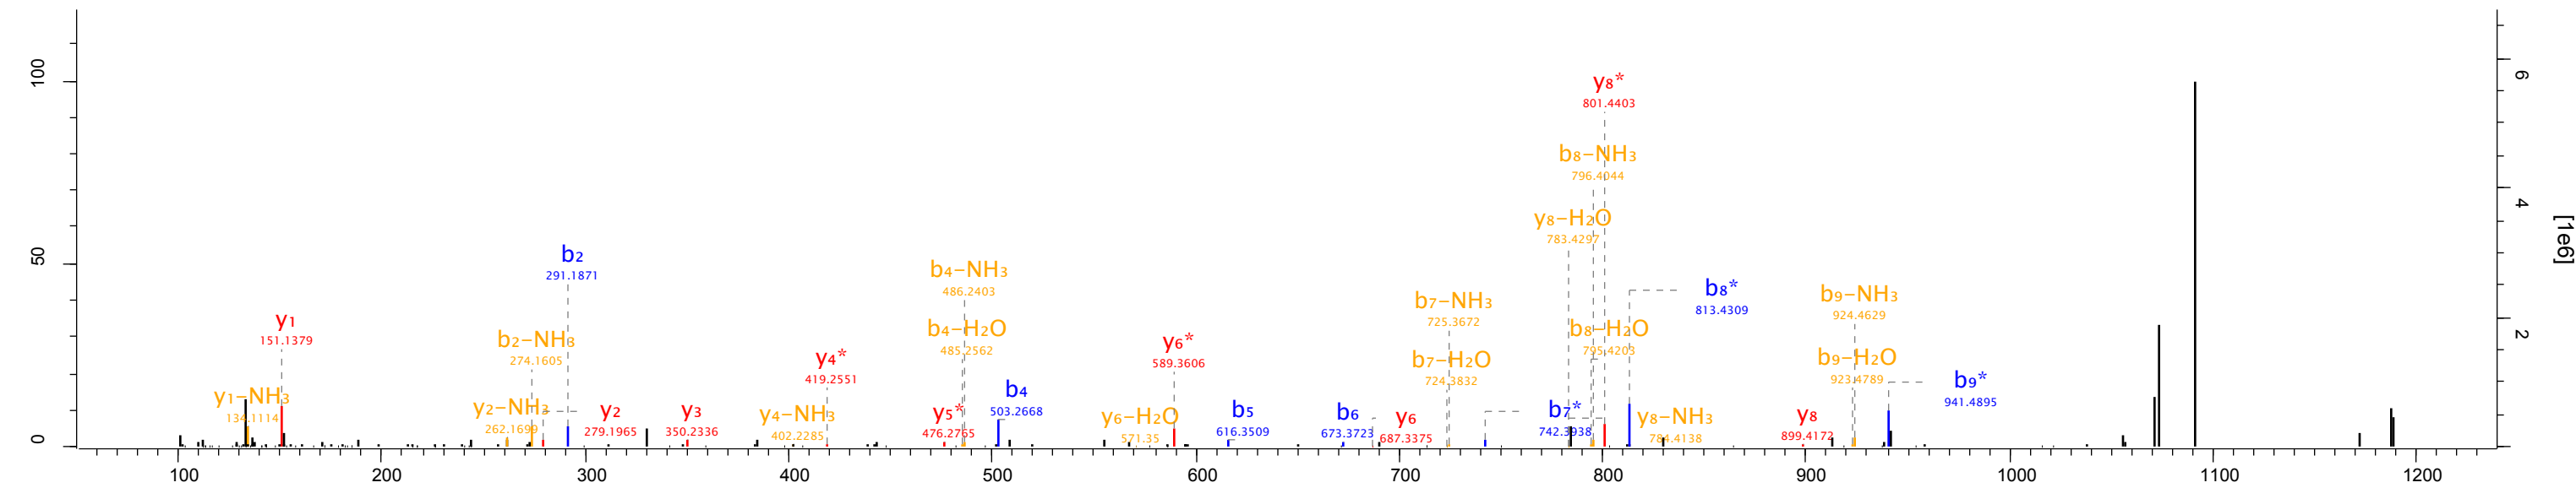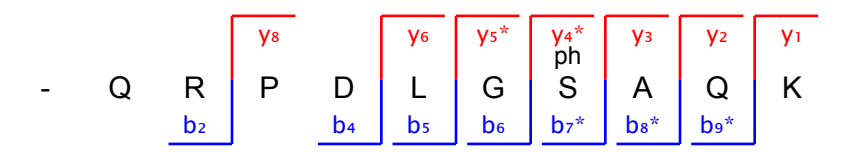

Raw file 20171215\_MaS\_33SR\_LMH\_phospho\_03 Scan 2668 Method FTMS; HCD Score 121.71 m/z 534.76 Gene names CSDE1

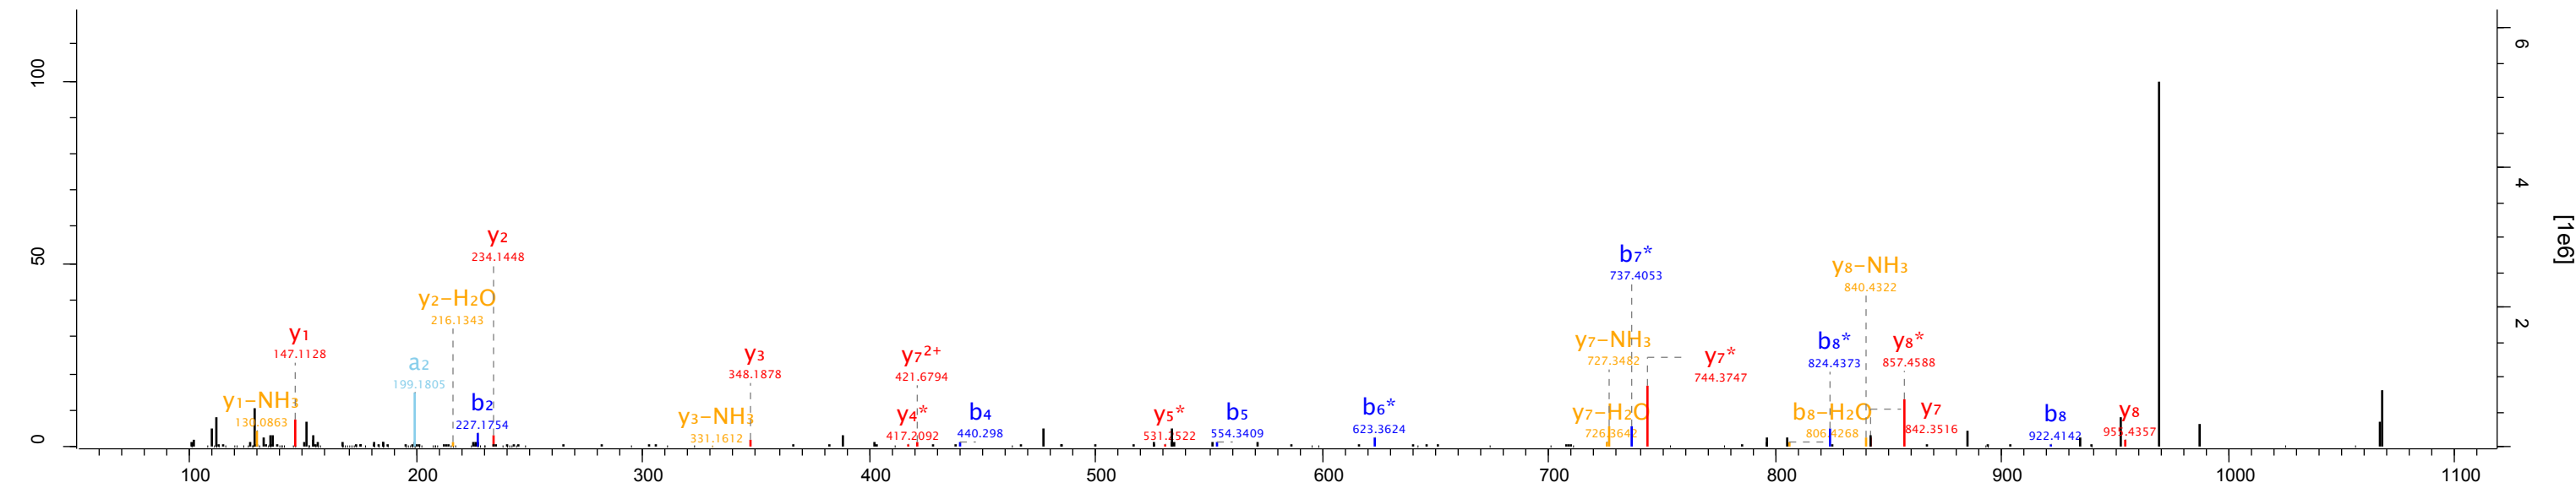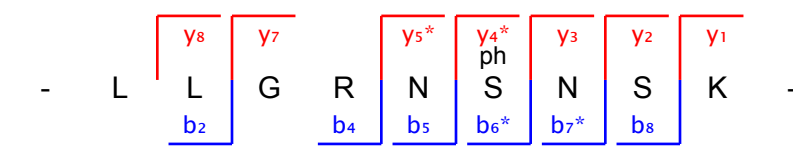



Raw file 20171215\_MaS\_33SR\_LMH\_phospho\_03 Scan 3488 Method FTMS; HCD Score 89.02 m/z 857.04 Gene names JADE3

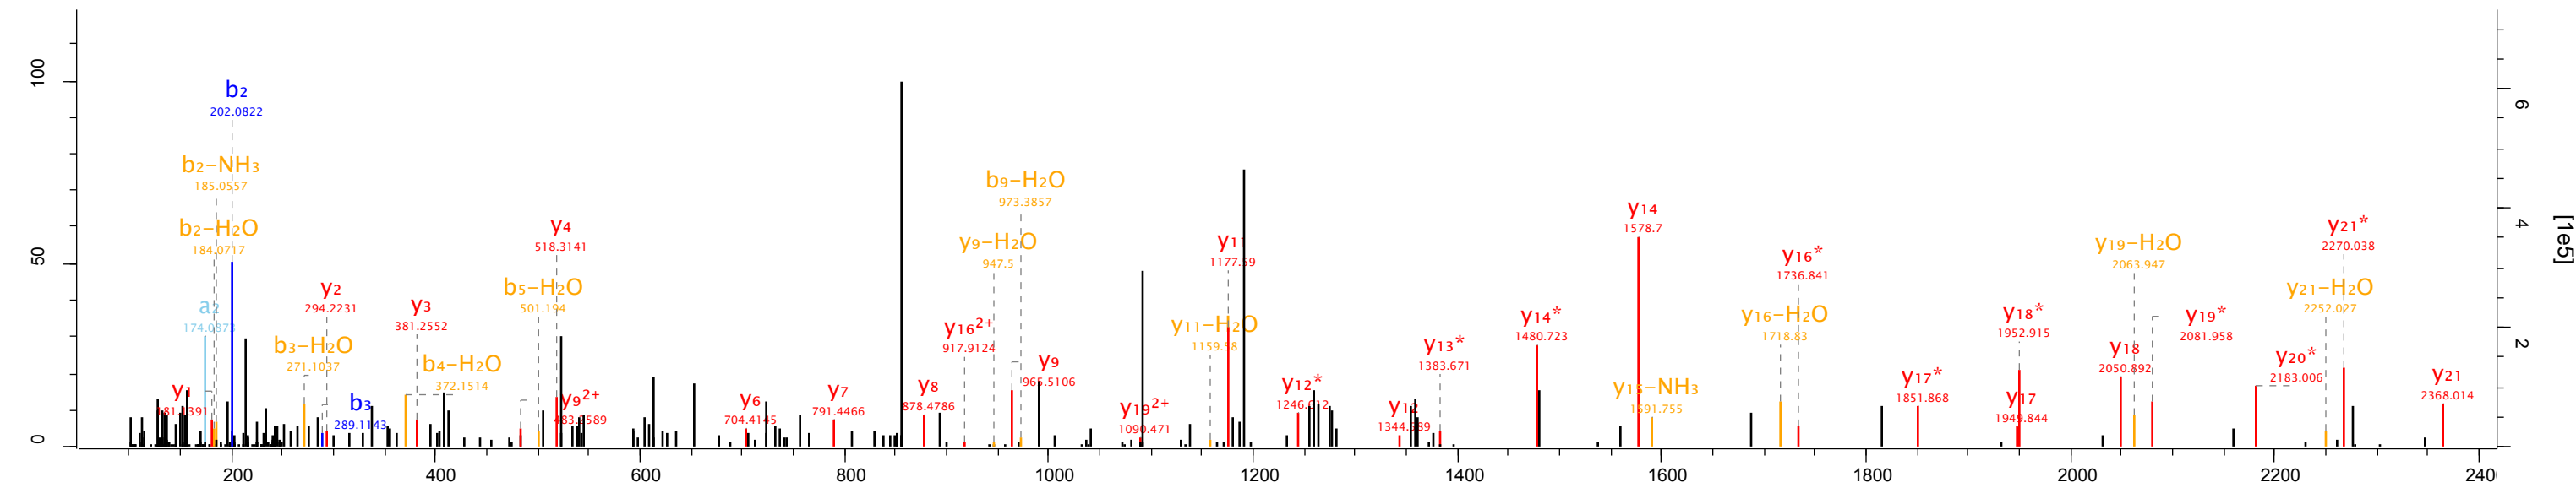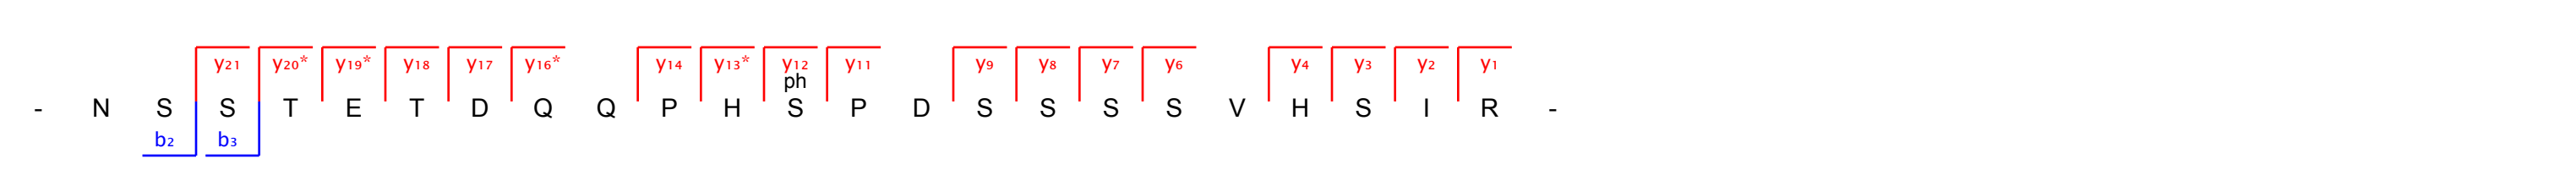

Raw file 20171215\_MaS\_33SR\_LMH\_phospho\_03 Scan 3838 Method FTMS; HCD Score 186.51 m/z 647.78 Gene names ABI2

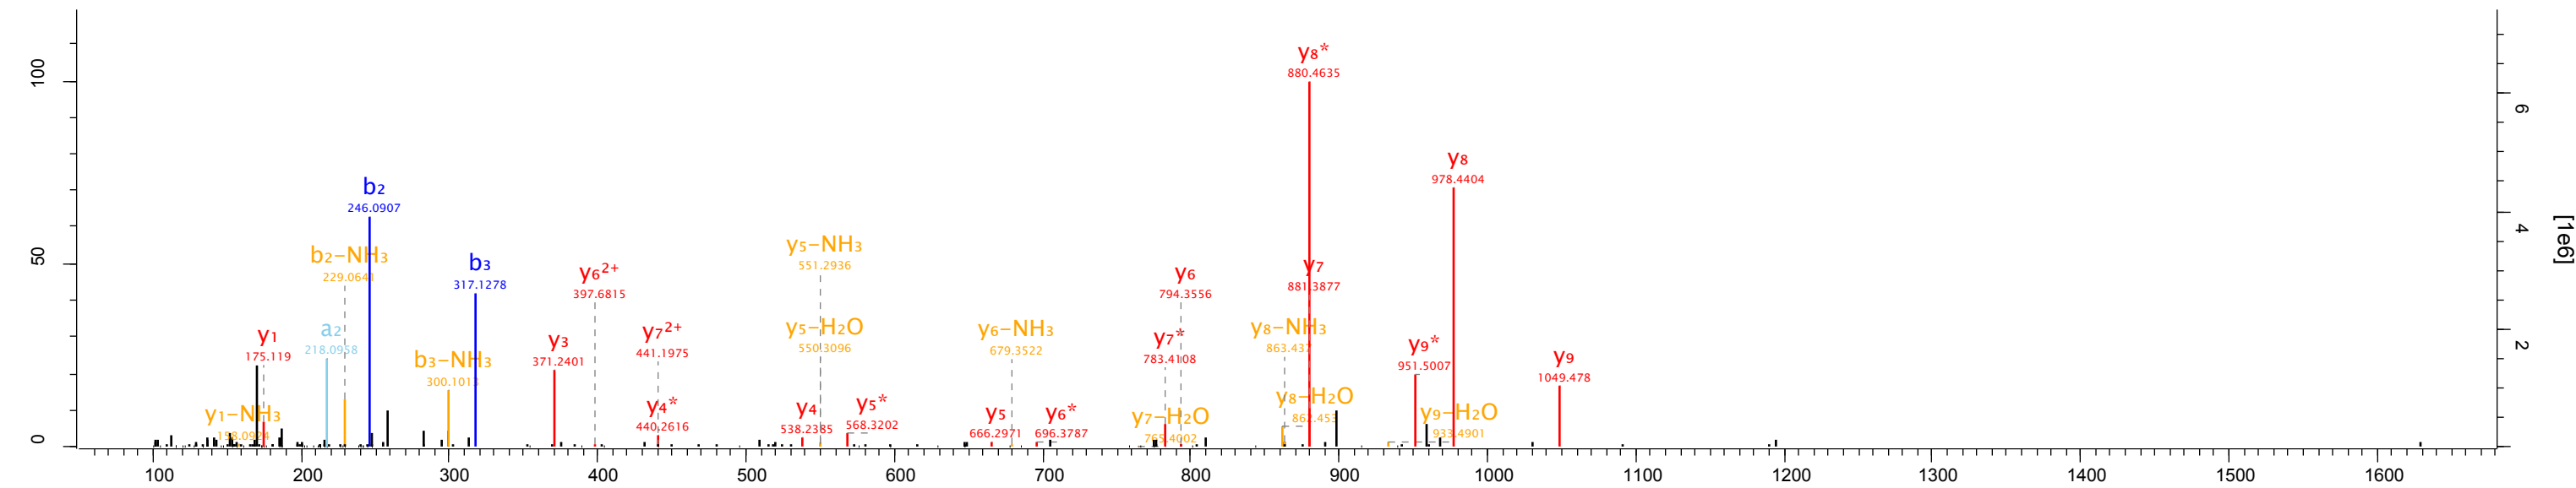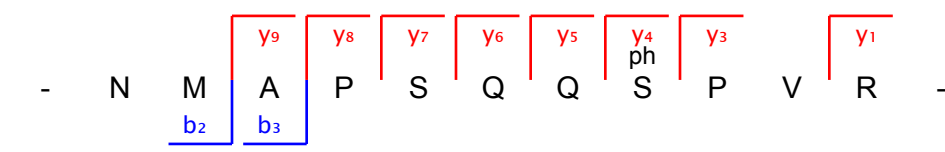

Raw file 20171215\_MaS\_33SR\_LMH\_phospho\_03 Scan 4318 Method FTMS; HCD Score 117.8 m/z 532.24 Gene names KIF13B

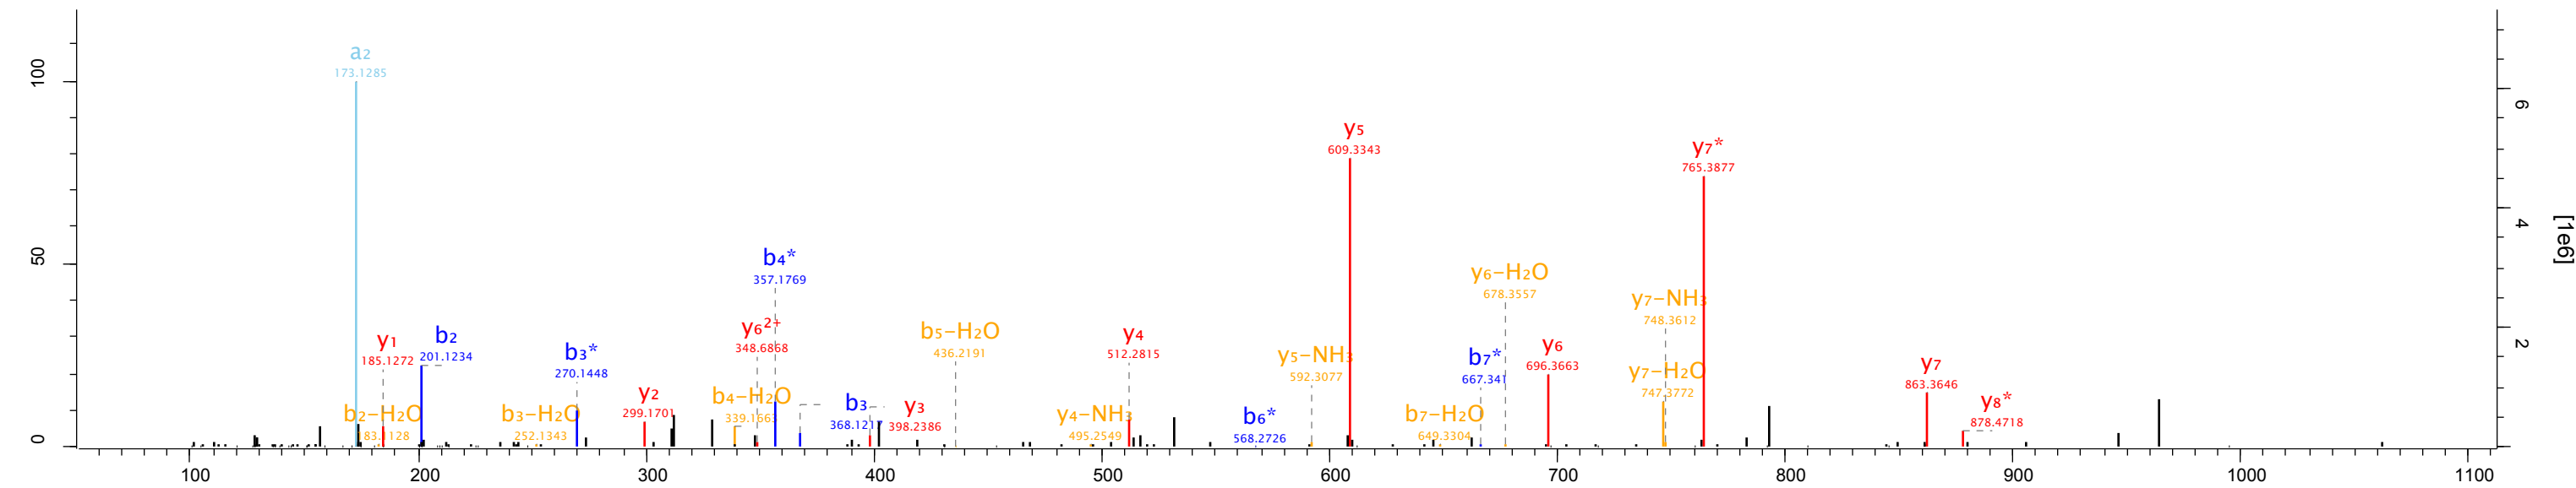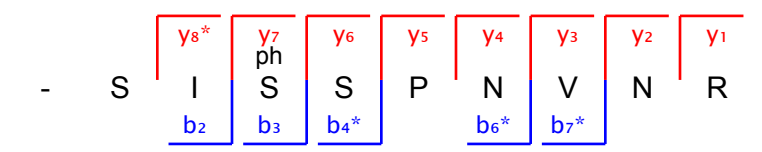

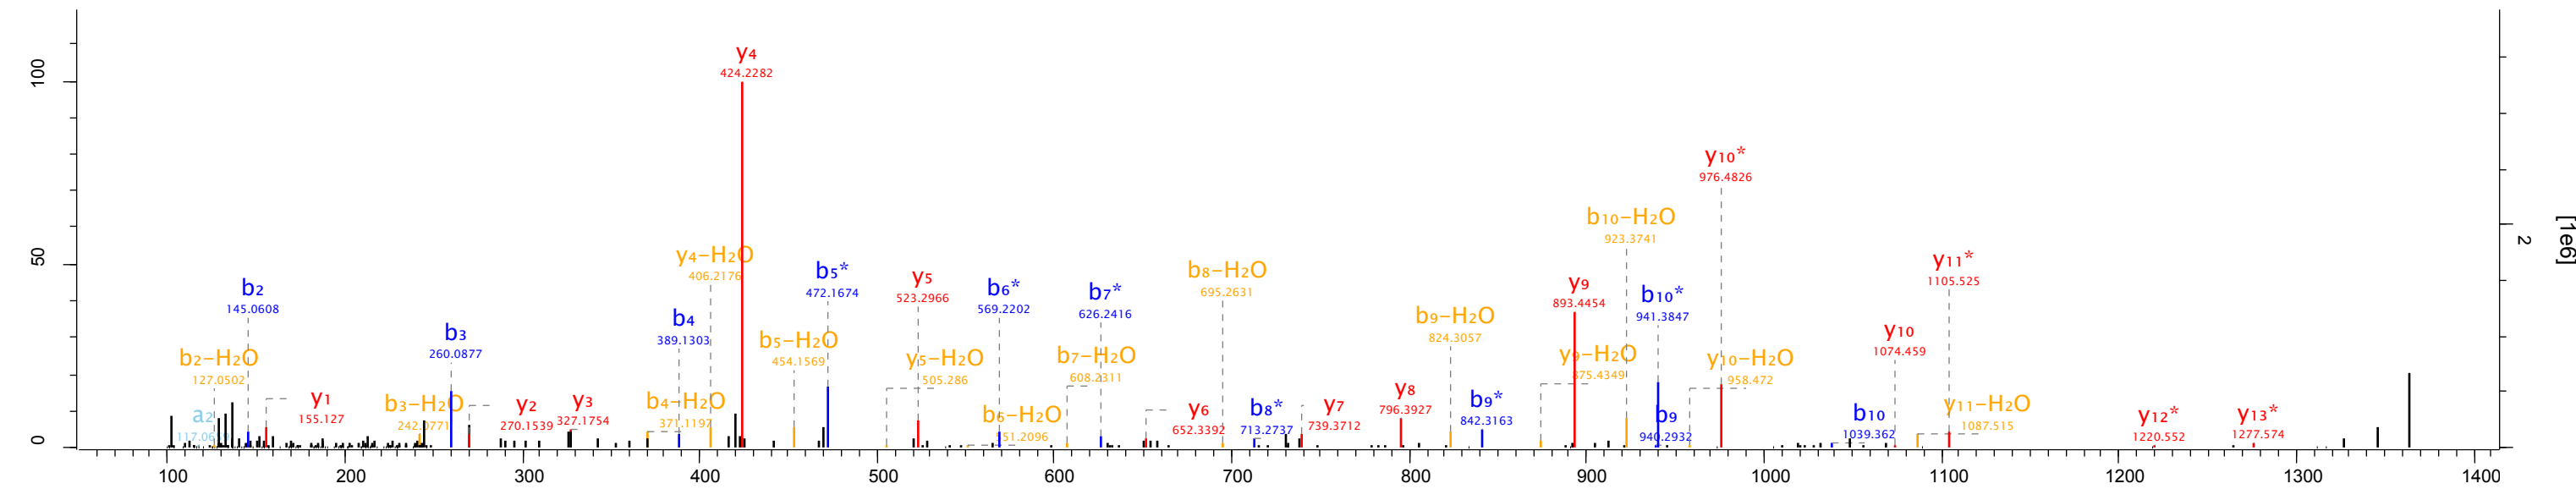

- S y<sub>13</sub>\* y<sub>12</sub>\* y<sub>11</sub>\* y<sub>10</sub>ph y<sub>9</sub> y<sub>8</sub> y<sub>7</sub> y<sub>6</sub> y<sub>5</sub> y<sub>4</sub> y<sub>3</sub> y<sub>2</sub> y<sub>1</sub> -  
b<sub>2</sub> b<sub>3</sub> b<sub>4</sub> b<sub>5</sub>\* b<sub>6</sub>\* b<sub>7</sub>\* b<sub>8</sub>\* b<sub>9</sub> b<sub>10</sub> P G D K -

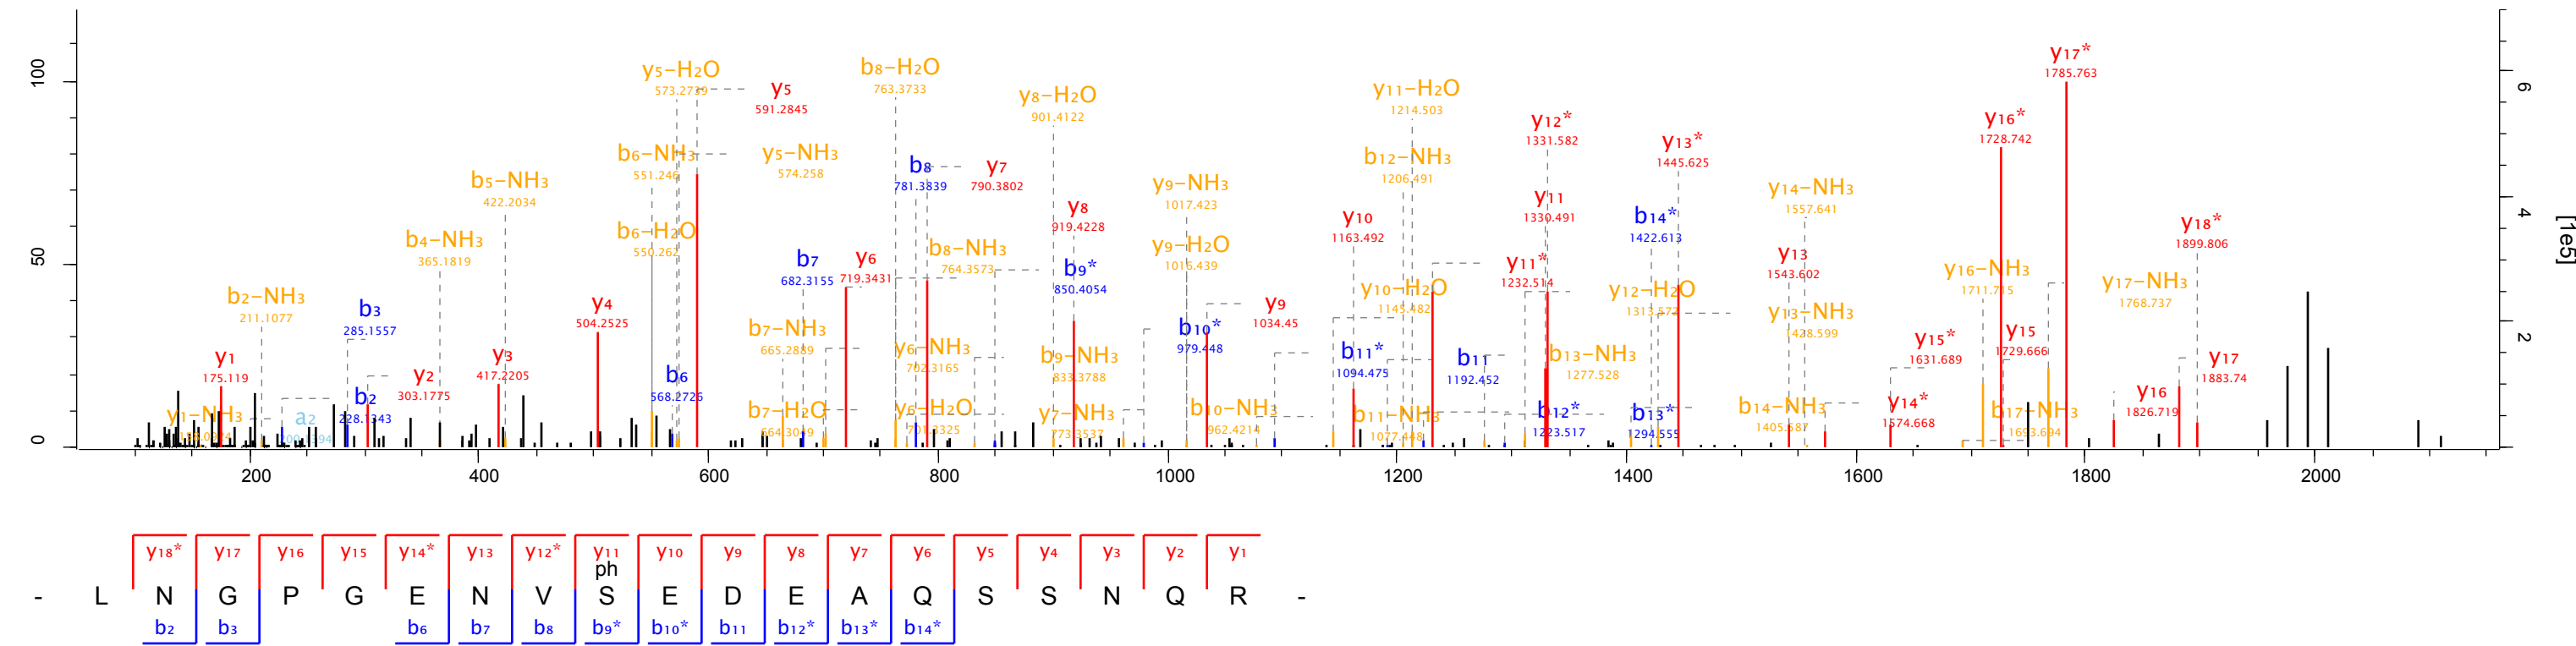

Raw file 20171215\_MaS\_33SR\_LMH\_phospho\_03 Scan 5638 Method FTMS; HCD Score 102.5 m/z 739.33 Gene names METTL3

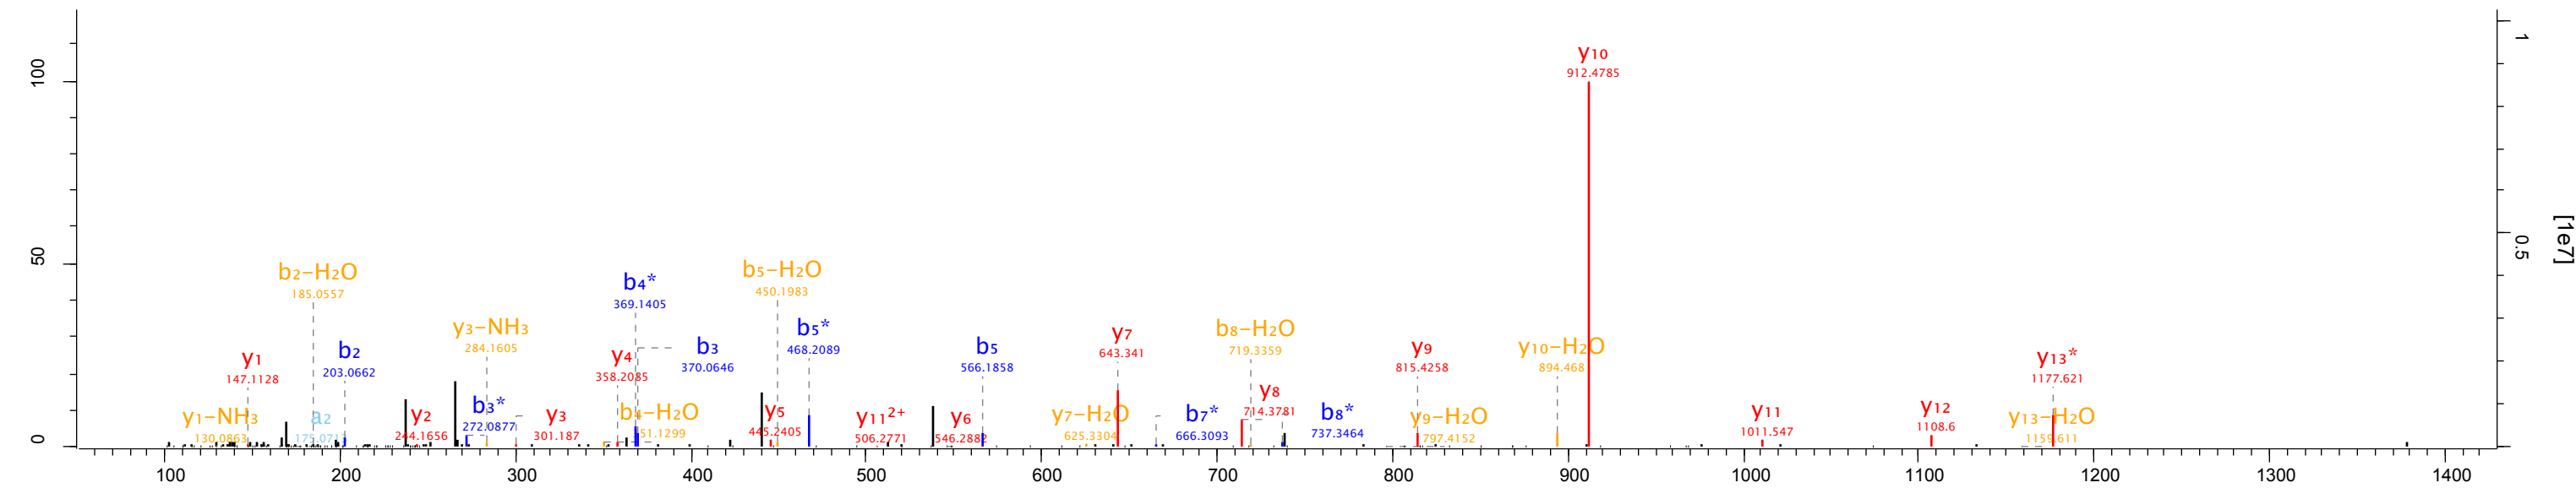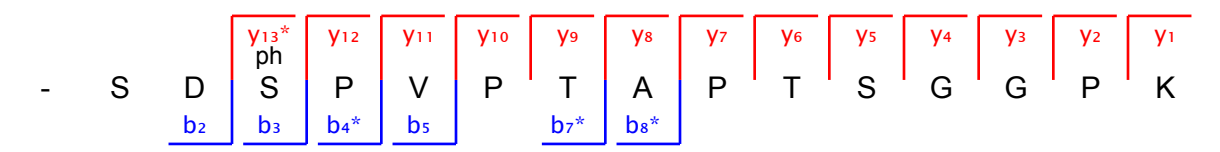

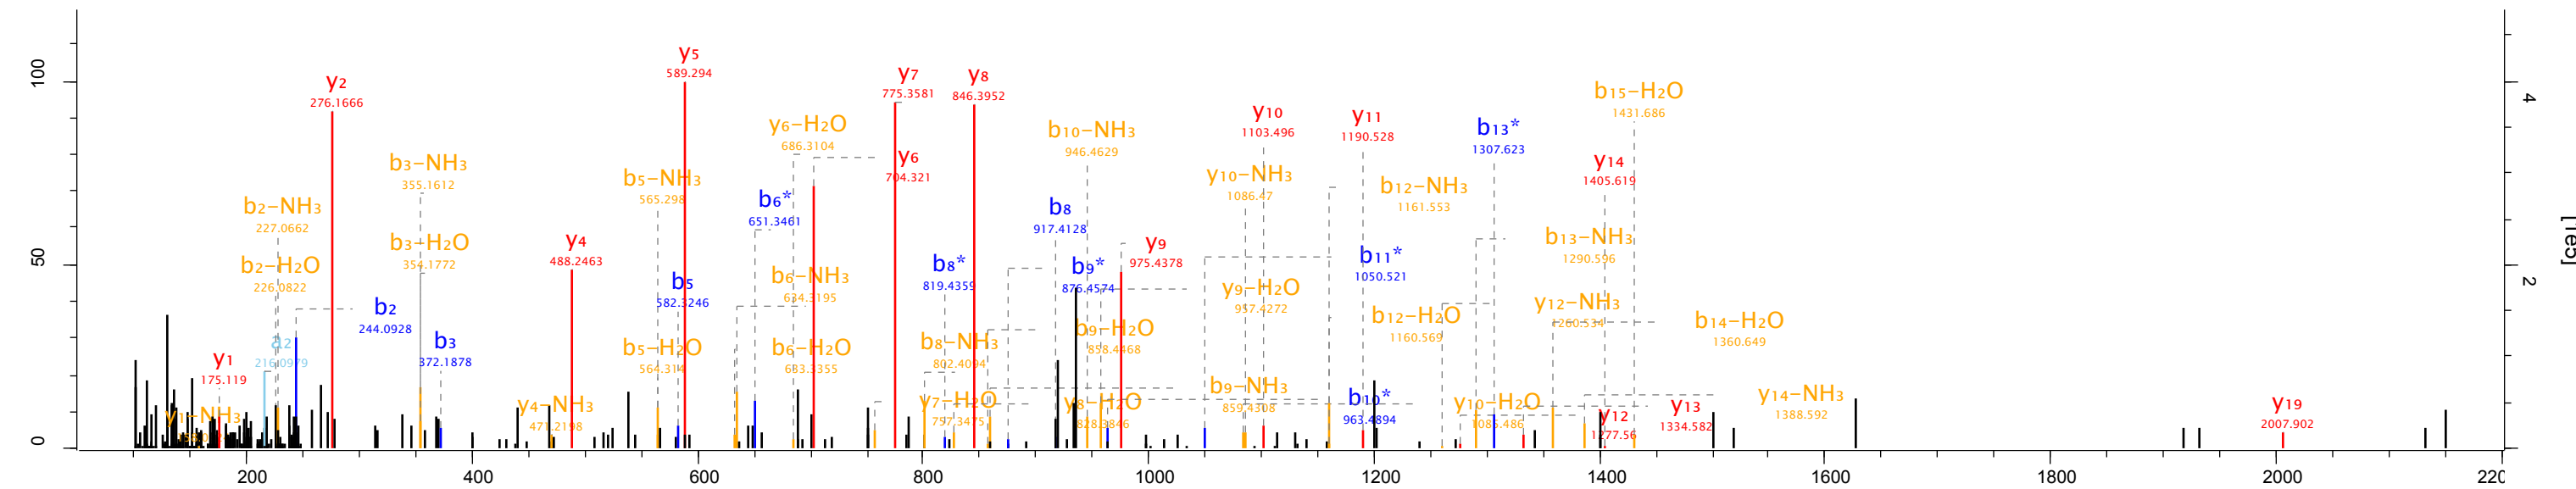

- Q D K P L S P A G S S Q E A A D T P D T R -  
 b<sub>2</sub> b<sub>3</sub> b<sub>5</sub> b<sub>6</sub><sup>\*</sup> b<sub>8</sub> b<sub>9</sub><sup>\*</sup> b<sub>10</sub><sup>\*</sup> b<sub>11</sub><sup>\*</sup> b<sub>13</sub><sup>\*</sup> y<sub>19</sub> y<sub>14</sub> y<sub>13</sub> y<sub>12</sub> y<sub>11</sub> y<sub>10</sub> y<sub>9</sub> y<sub>8</sub> y<sub>7</sub> y<sub>6</sub> y<sub>5</sub> y<sub>4</sub> y<sub>2</sub> y<sub>1</sub>

Raw file 20171215\_MaS\_33SR\_LMH\_phospho\_03 Scan 5878 Method FTMS; HCD Score 196.4 m/z 937.89 Gene names BAZ1B

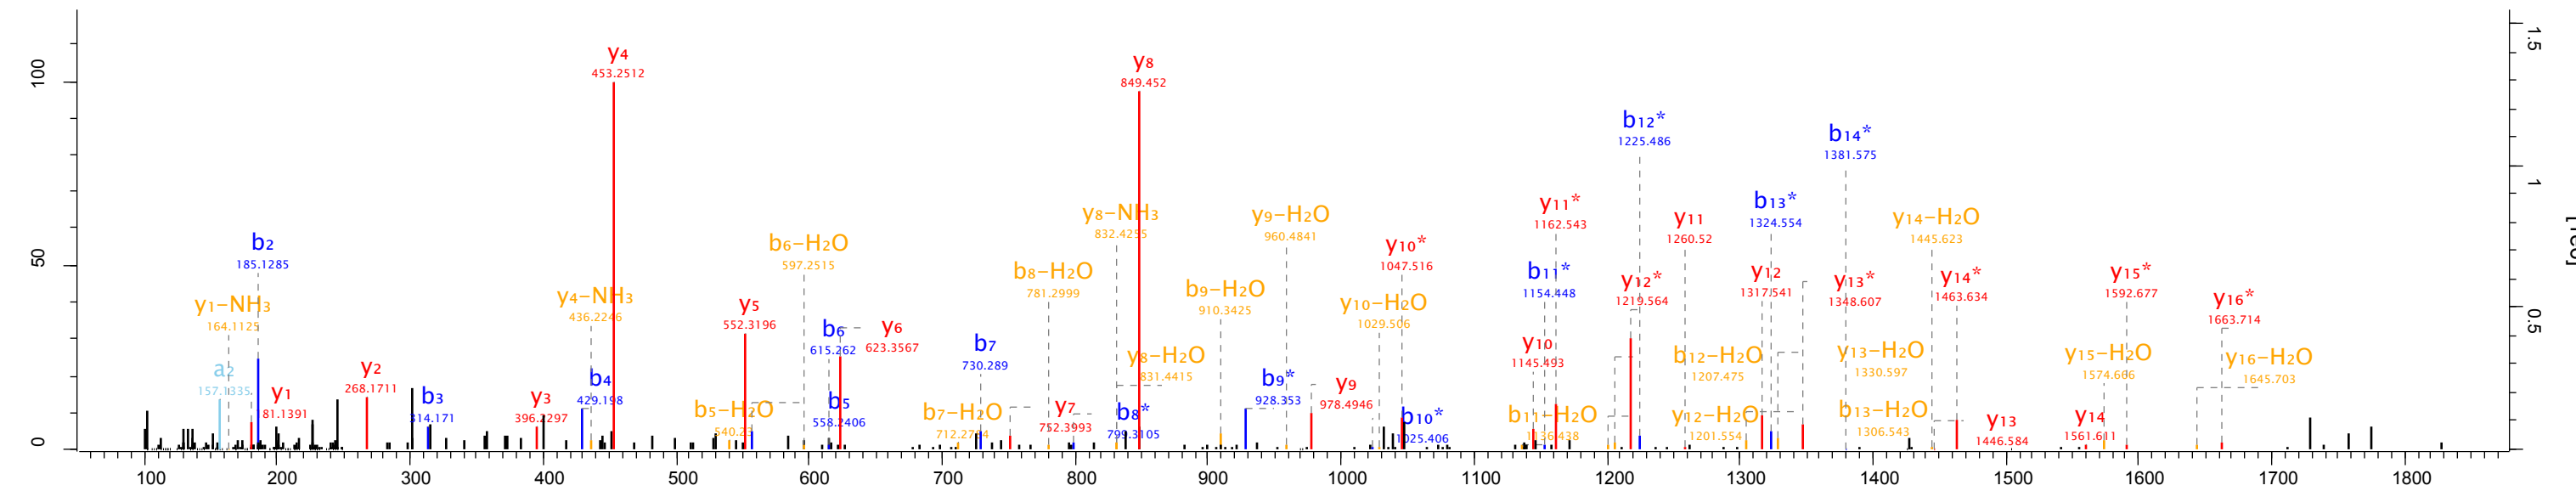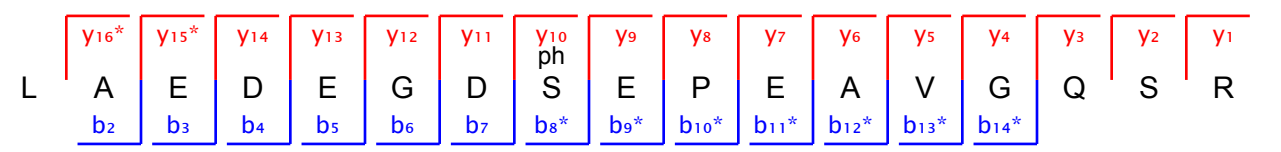



Raw file: 20171215\_MaS\_33SR\_LMH\_phospho\_03  
 Scan: 6128 Method: FTMS; HCD Score: 92.87 m/z: 557.25 Gene names: TNRC6A

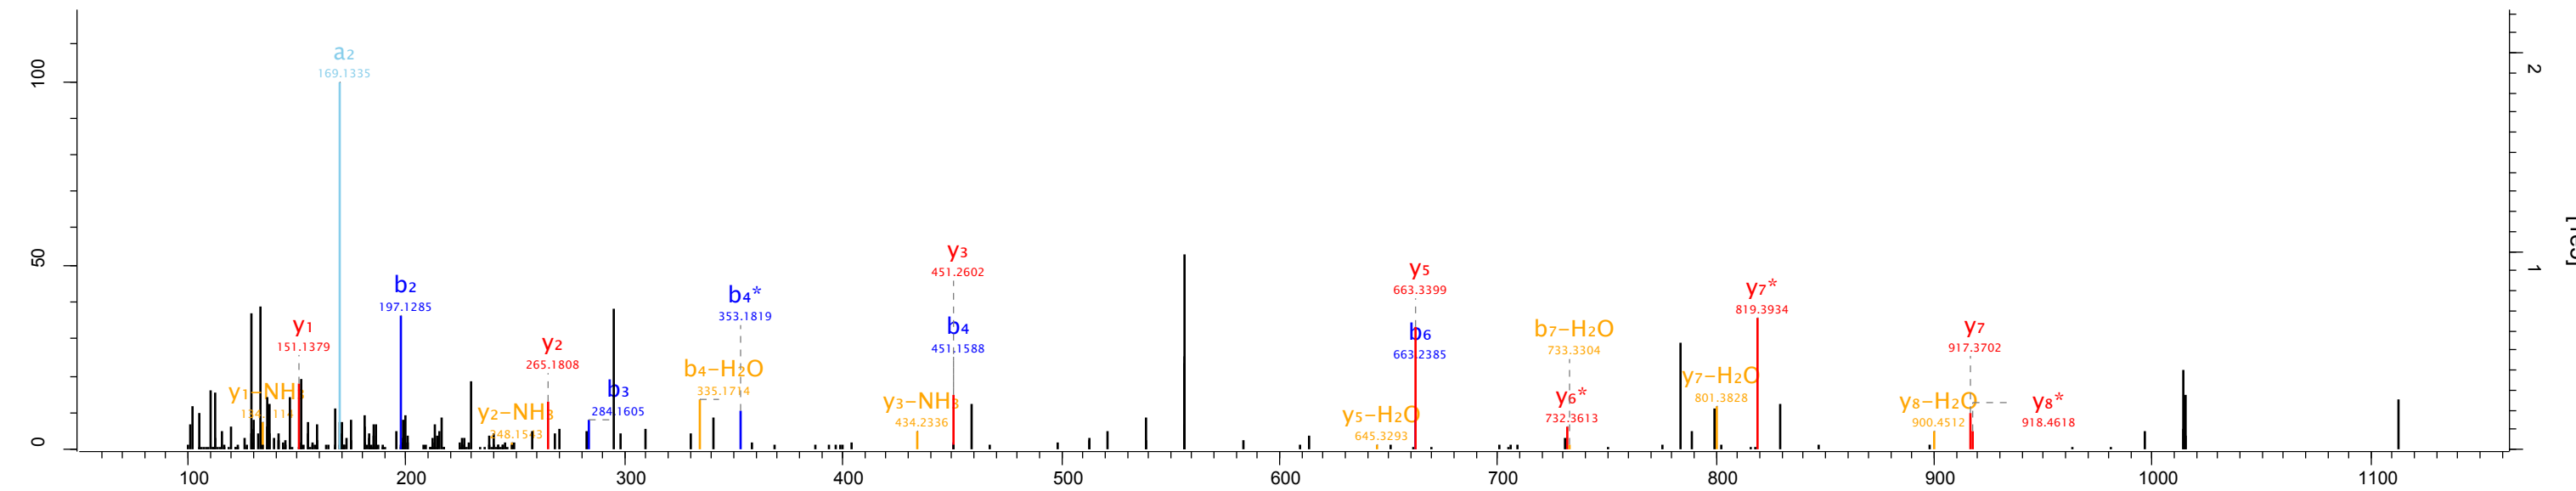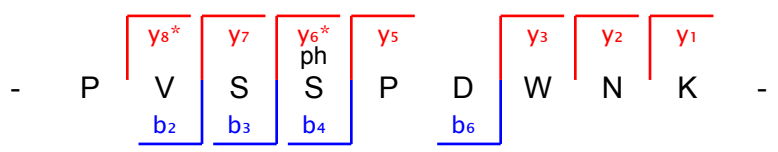

Raw file 20171215\_MaS\_33SR\_LMH\_phospho\_03 Scan 6748 Method FTMS; HCD Score 60.75 m/z 885.88 Gene names WDHD1

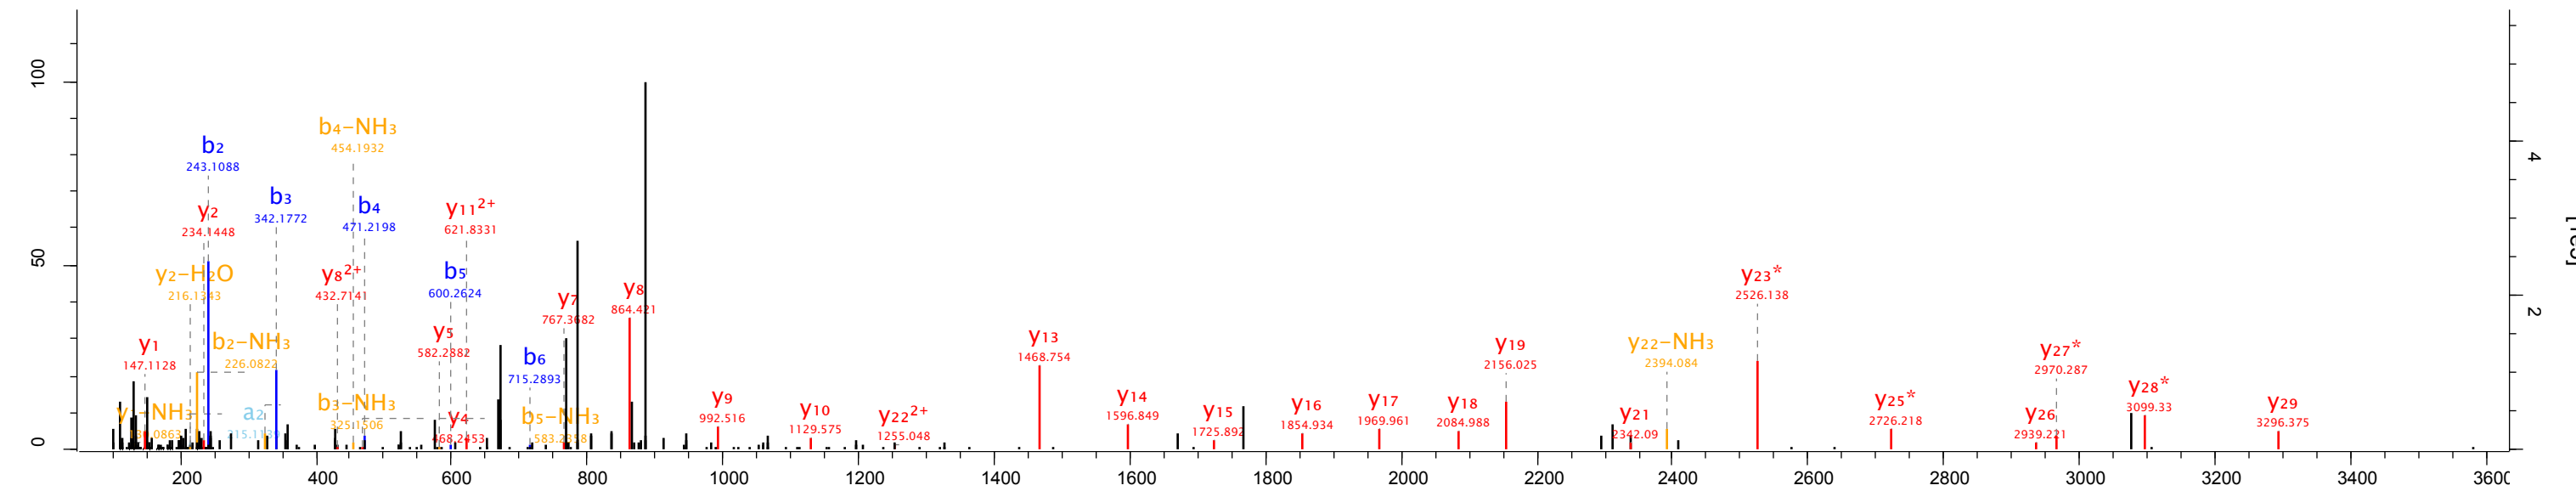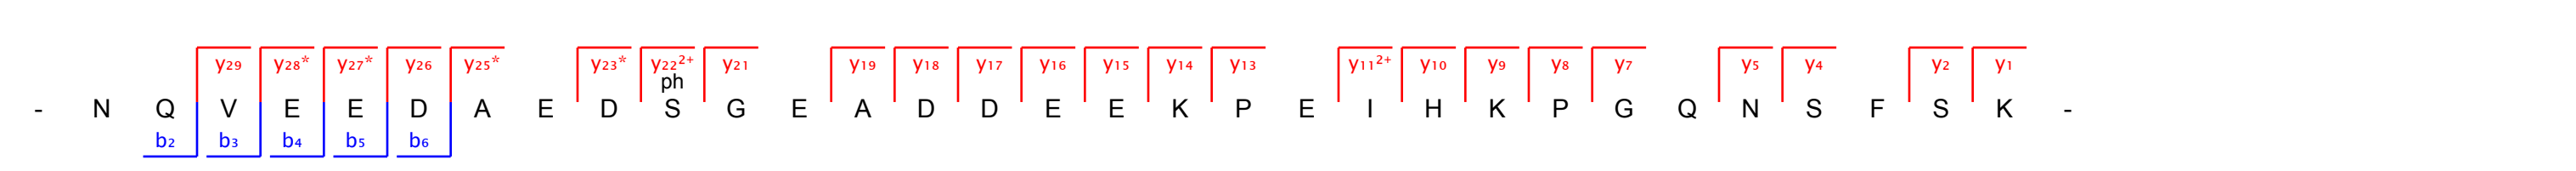

Raw file 20171215\_MaS\_33SR\_LMH\_phospho\_03 Scan 6848 Method FTMS; HCD Score 47.6 m/z 513.2 Gene names FAM134C

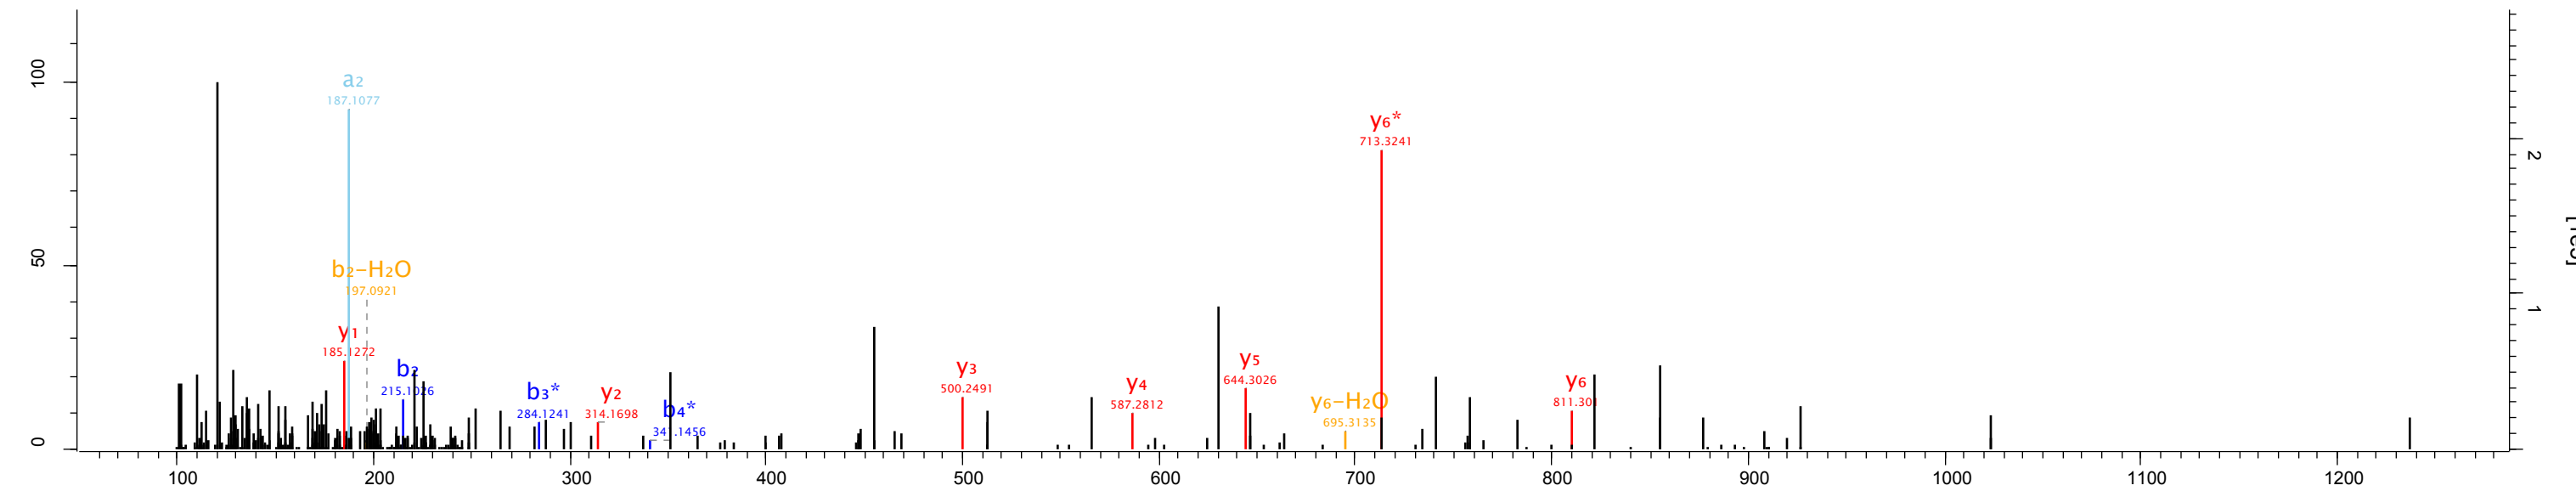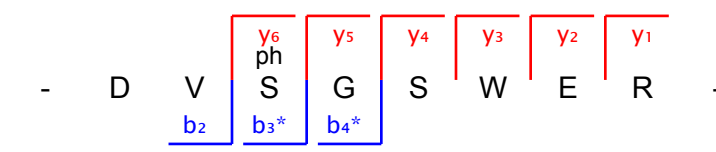

Raw file 20171215\_MaS\_33SR\_LMH\_phospho\_03 Scan 7008 Method FTMS; HCD Score 41.26 m/z 612.3 Gene names MINK1

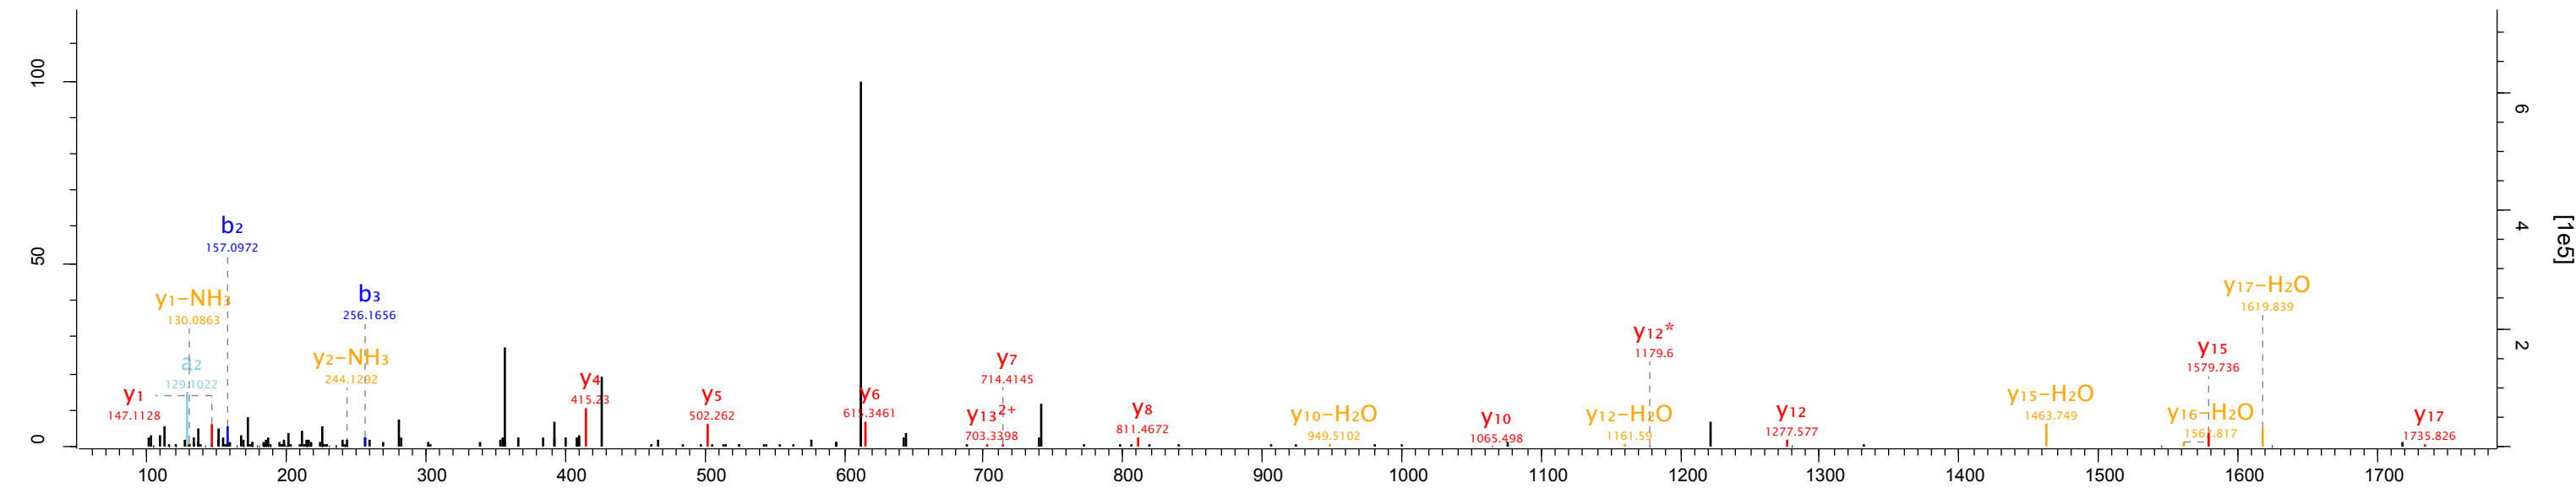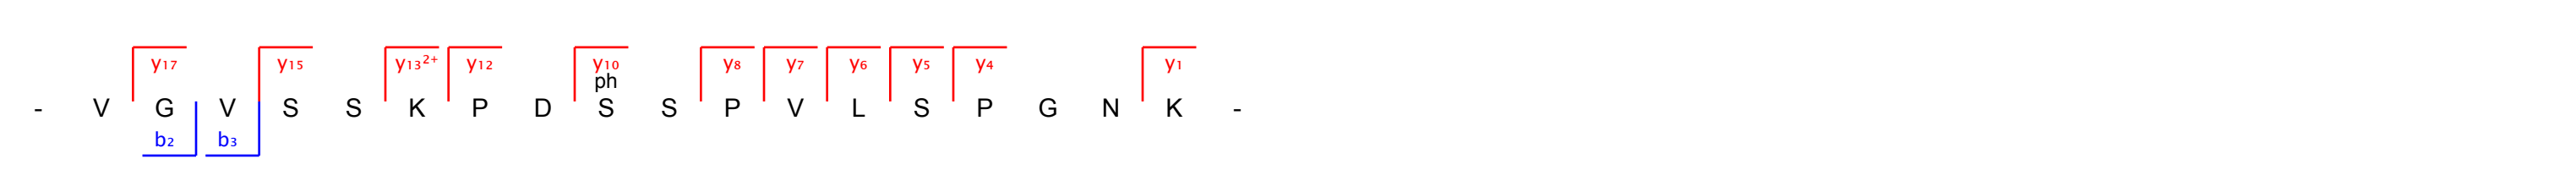

Raw file 20171215\_MaS\_33SR\_LMH\_phospho\_03 Scan 7108 Method FTMS; HCD Score 176.23 m/z 903.41 Gene names IRS2

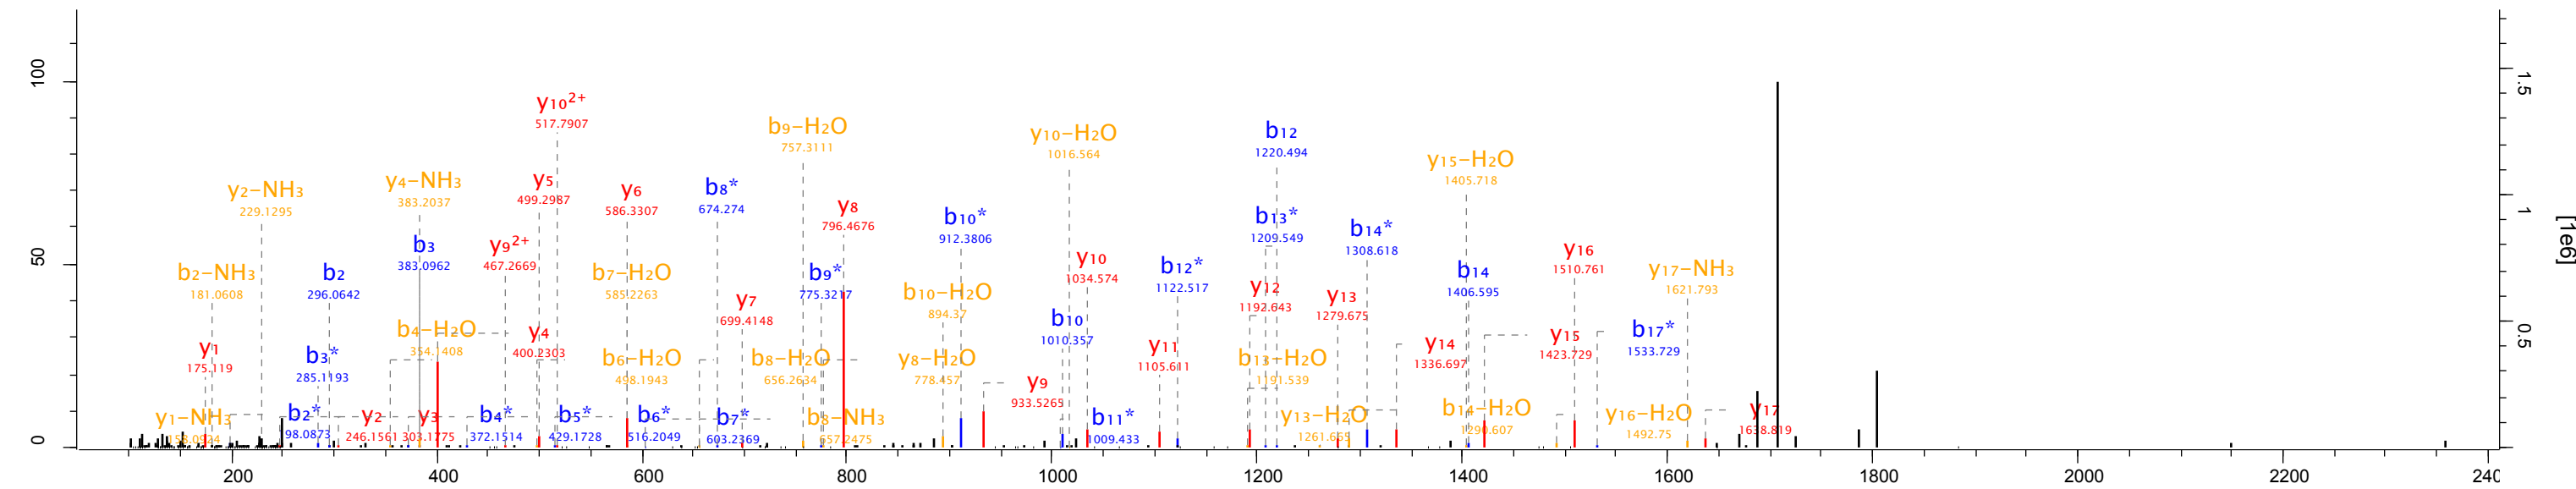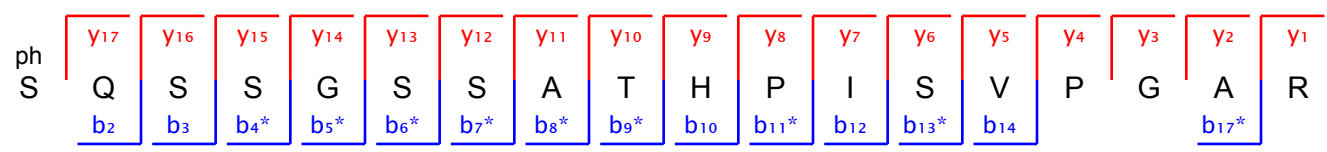

Raw file 20171215\_MaS\_33SR\_LMH\_phospho\_03 Scan 7198 Method FTMS; HCD Score 162.68 m/z 496.24 Gene names ZC3H18

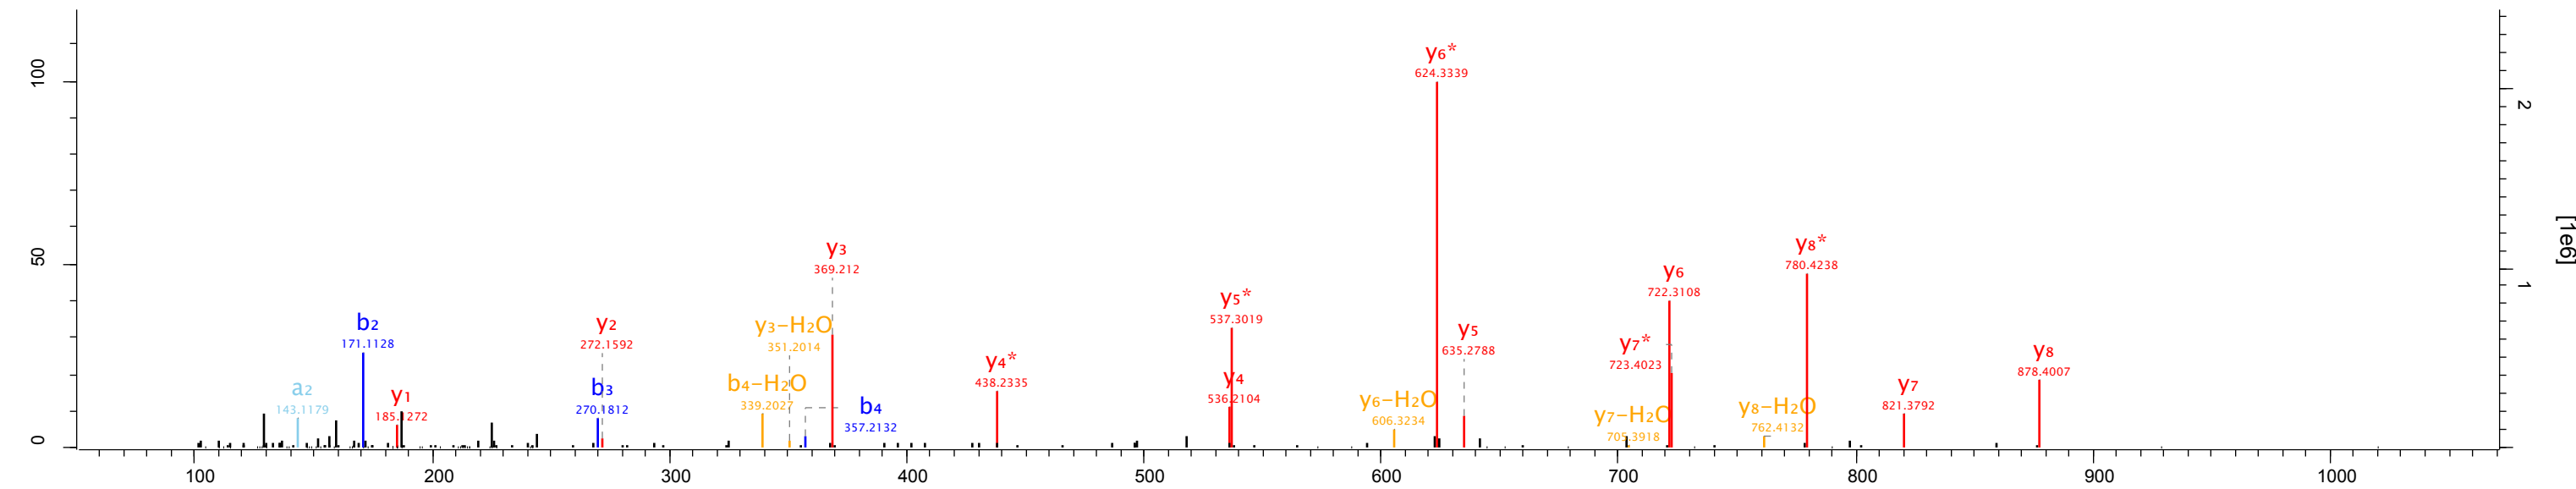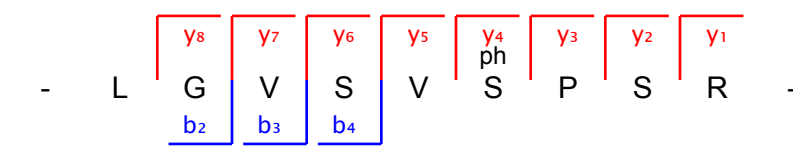

Raw file 20171215\_MaS\_33SR\_LMH\_phospho\_03 Scan 7388 Method FTMS; HCD Score 124.69 m/z 901.9 Gene names KLC2

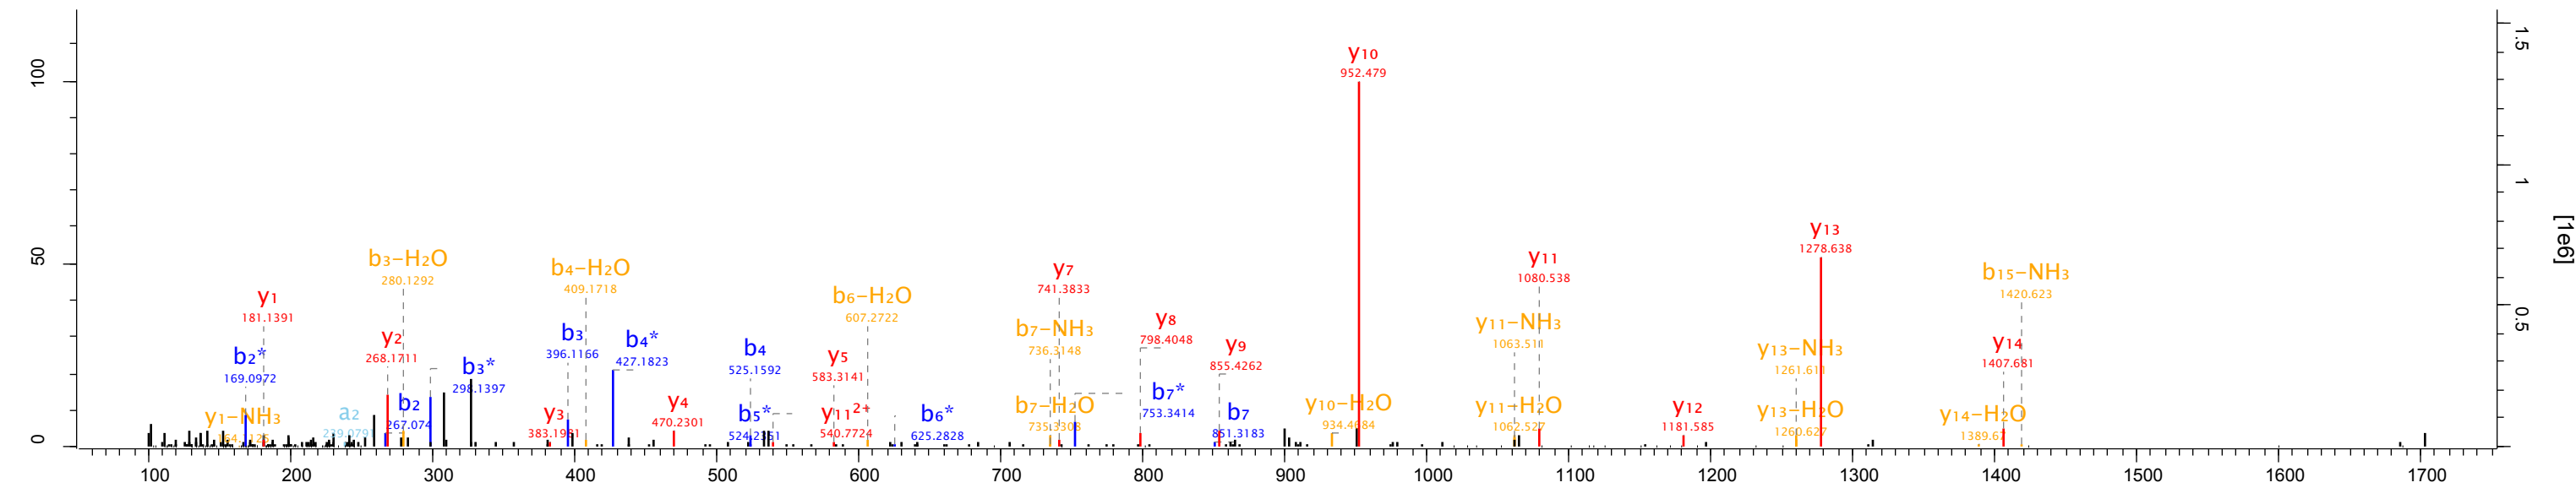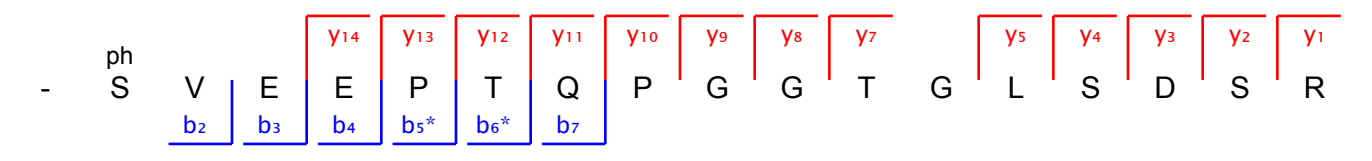

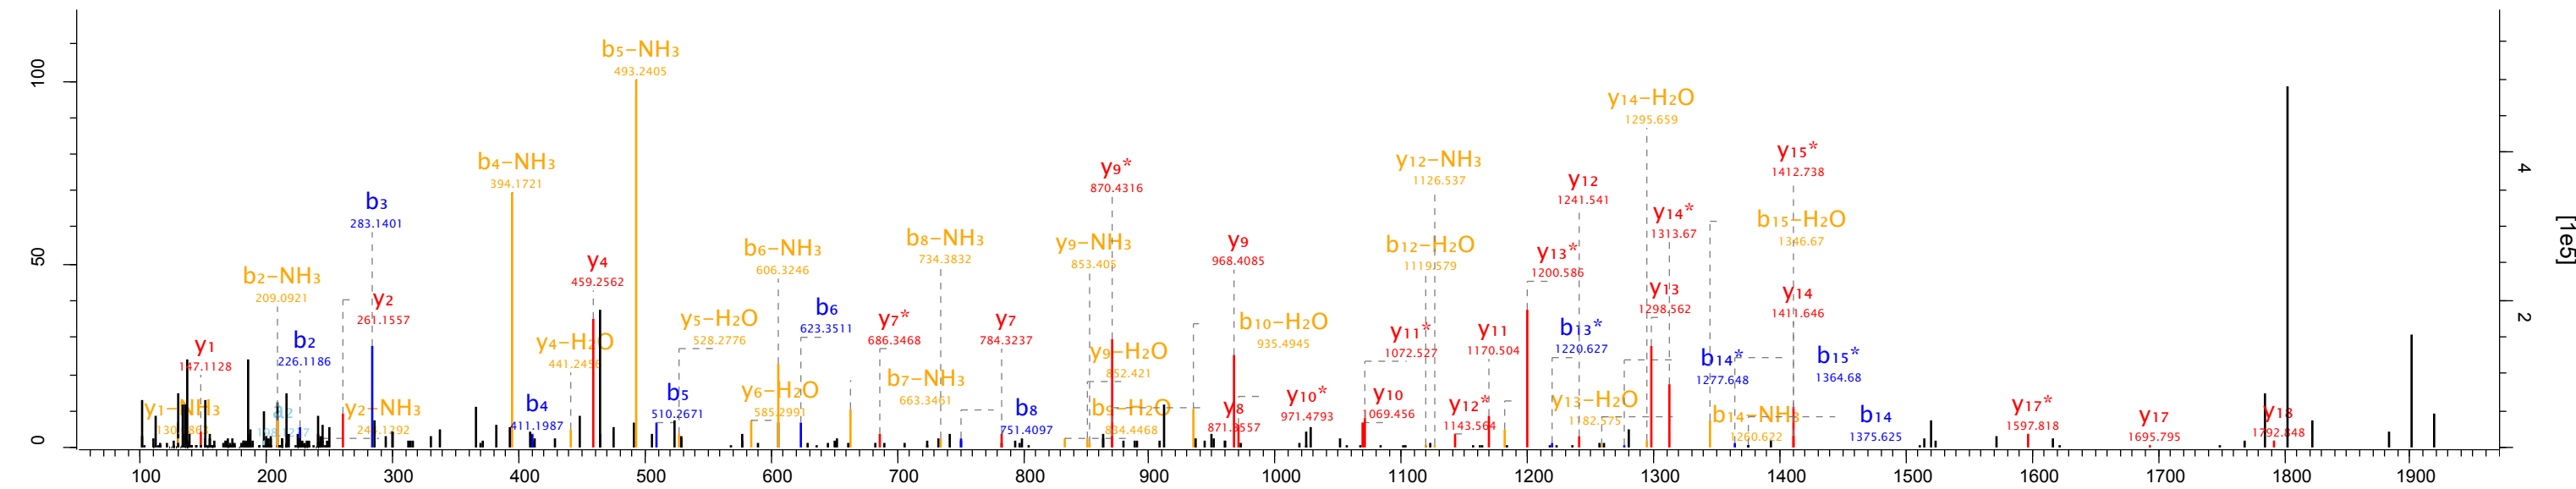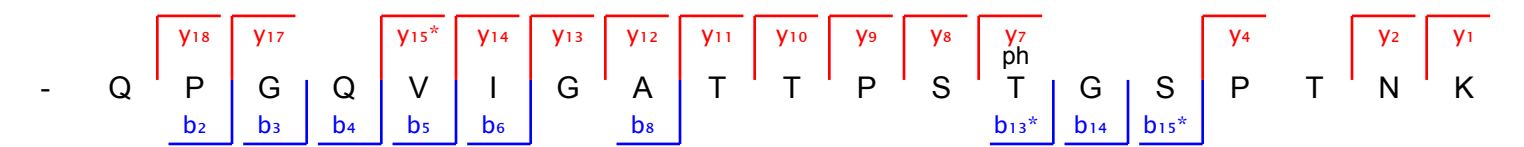



Raw file 20171215\_MaS\_33SR\_LMH\_phospho\_03 Scan 7548 Method FTMS; HCD Score 85.58 m/z 775.27 Gene names STARD10

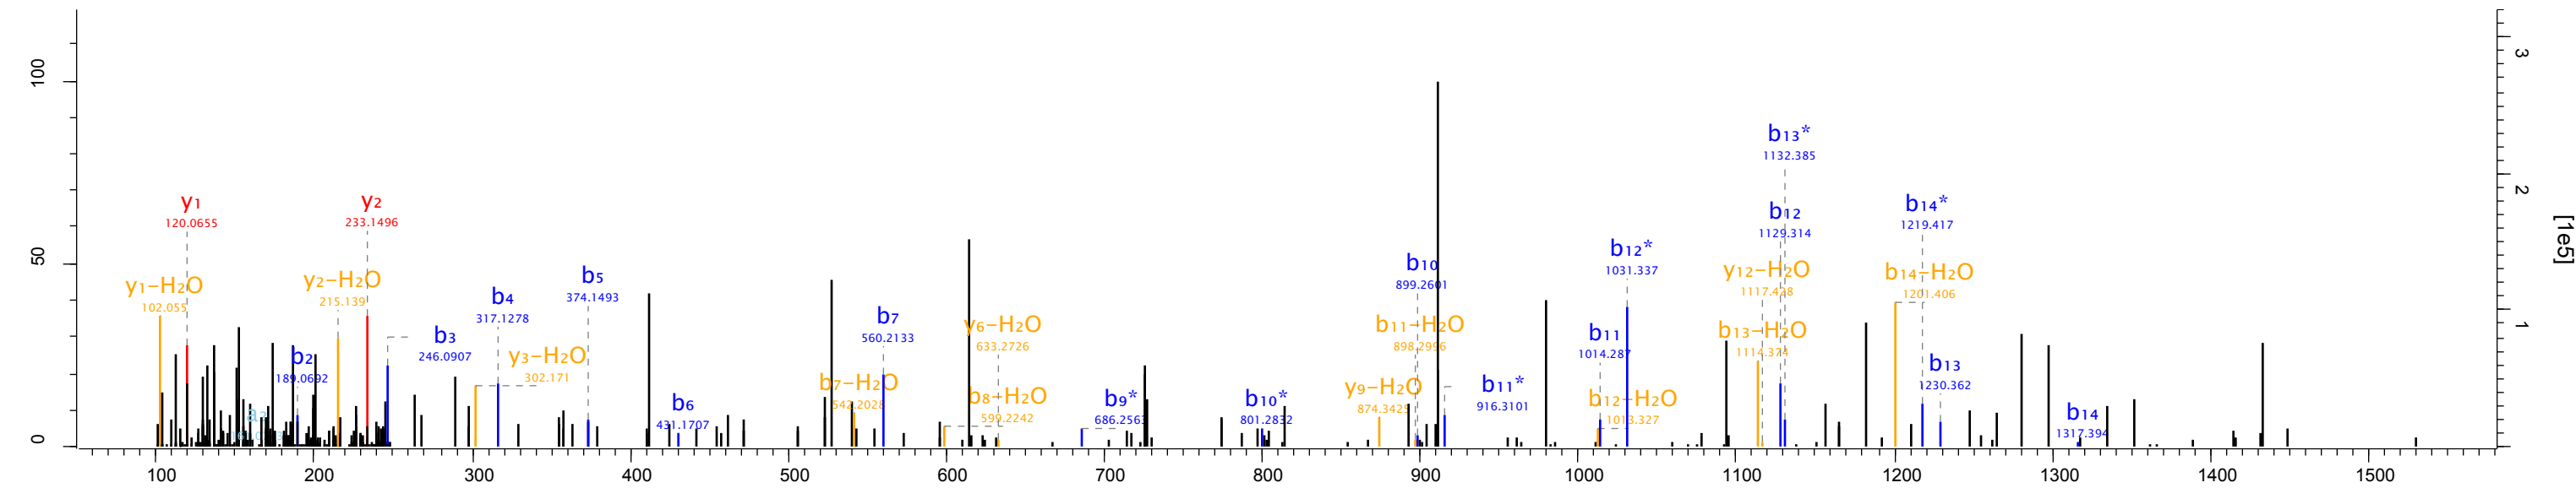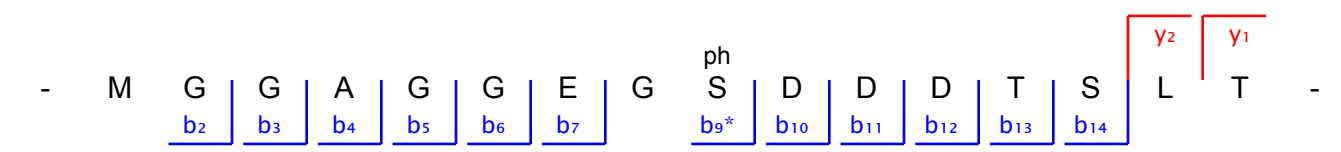

Raw file 20171215\_MaS\_33SR\_LMH\_phospho\_03 Scan 7638 Method FTMS; HCD Score 142.4 m/z 817.81 Gene names NEXN

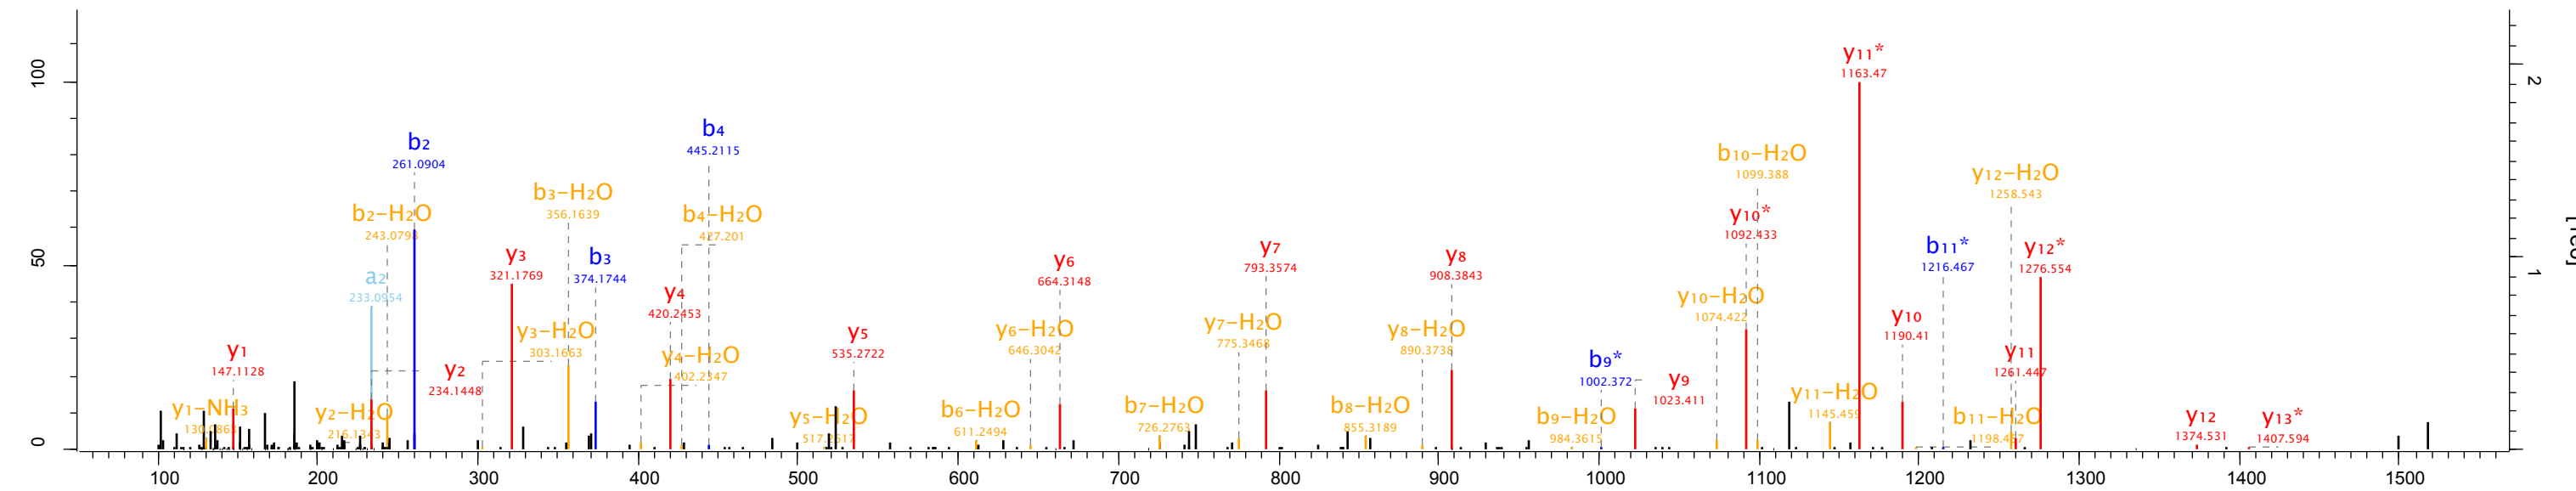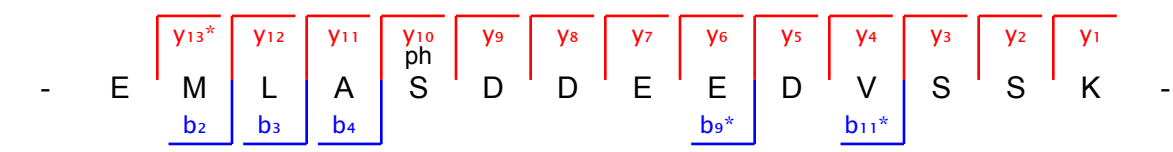

Raw file 20171215\_MaS\_33SR\_LMH\_phospho\_03 Scan 7728 Method FTMS; HCD Score 109.42 m/z 745.97 Gene names ZFAND5

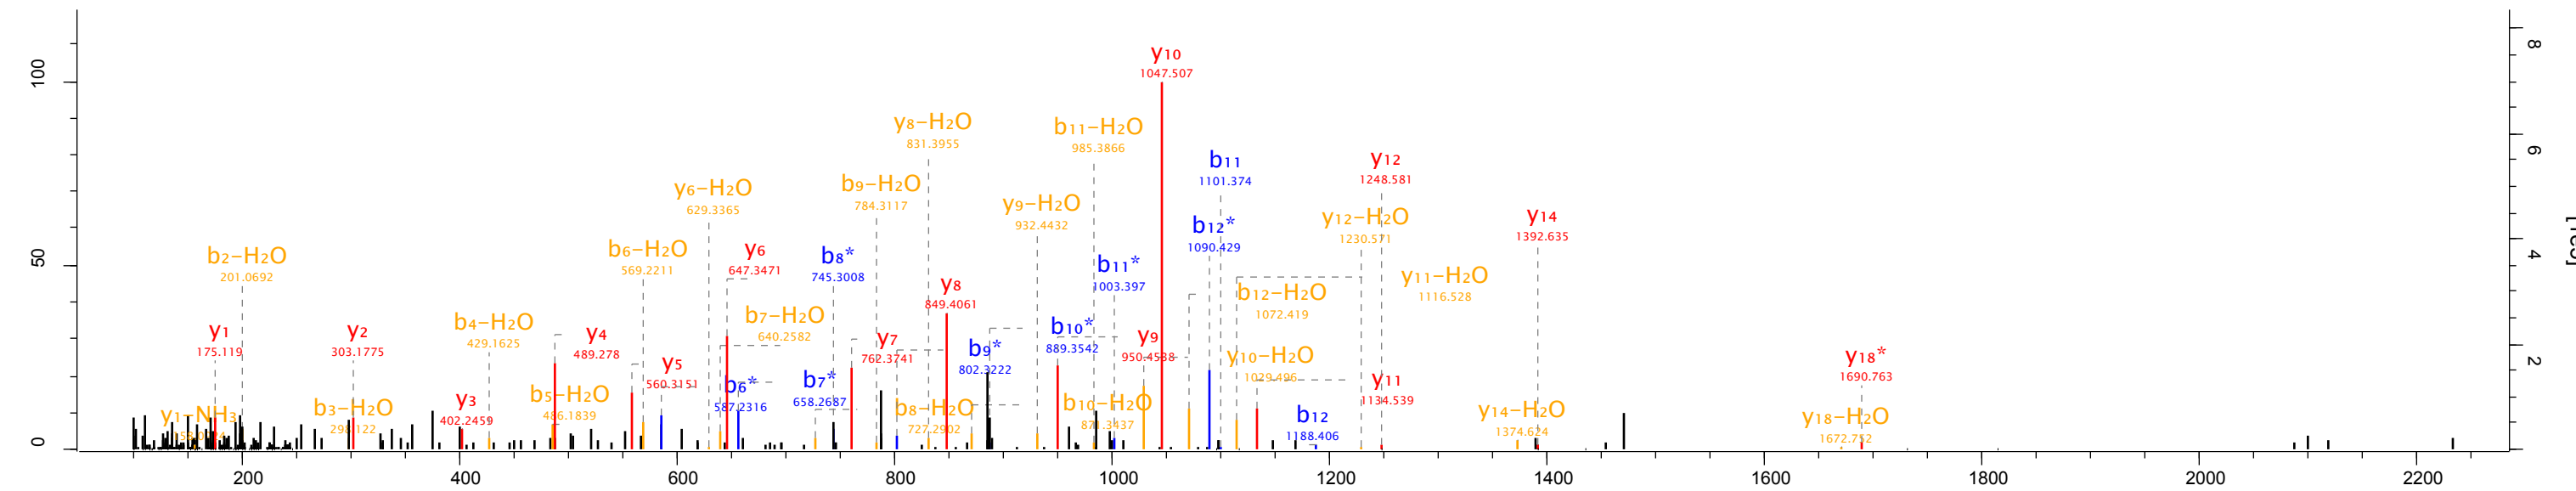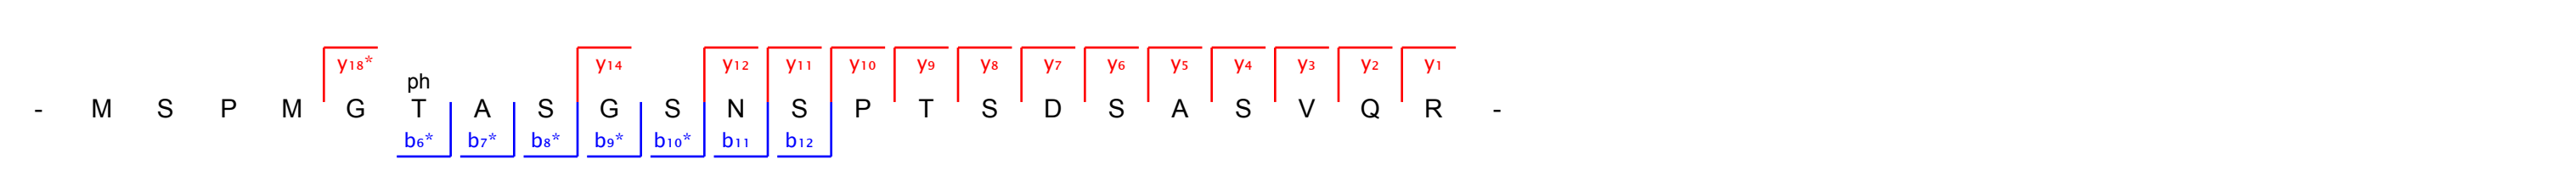



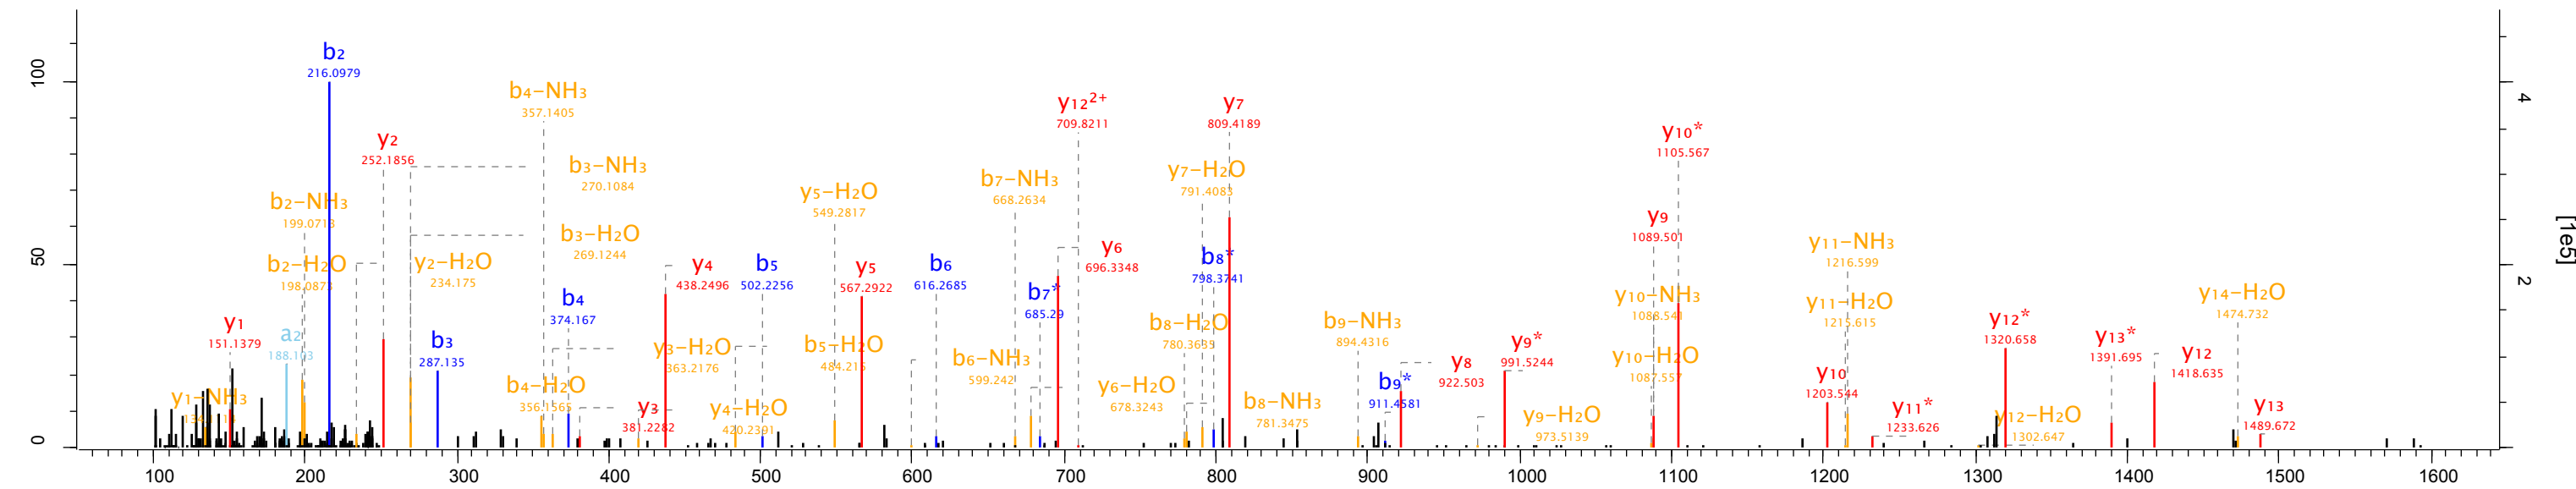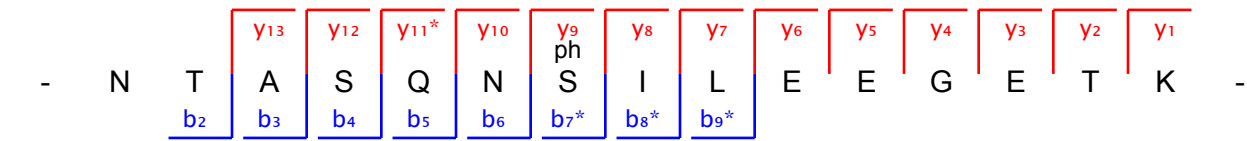

Raw file 20171215\_MaS\_33SR\_LMH\_phospho\_03 Scan 8138 Method FTMS; HCD Score 95.75 m/z 671.82 Gene names TCF20

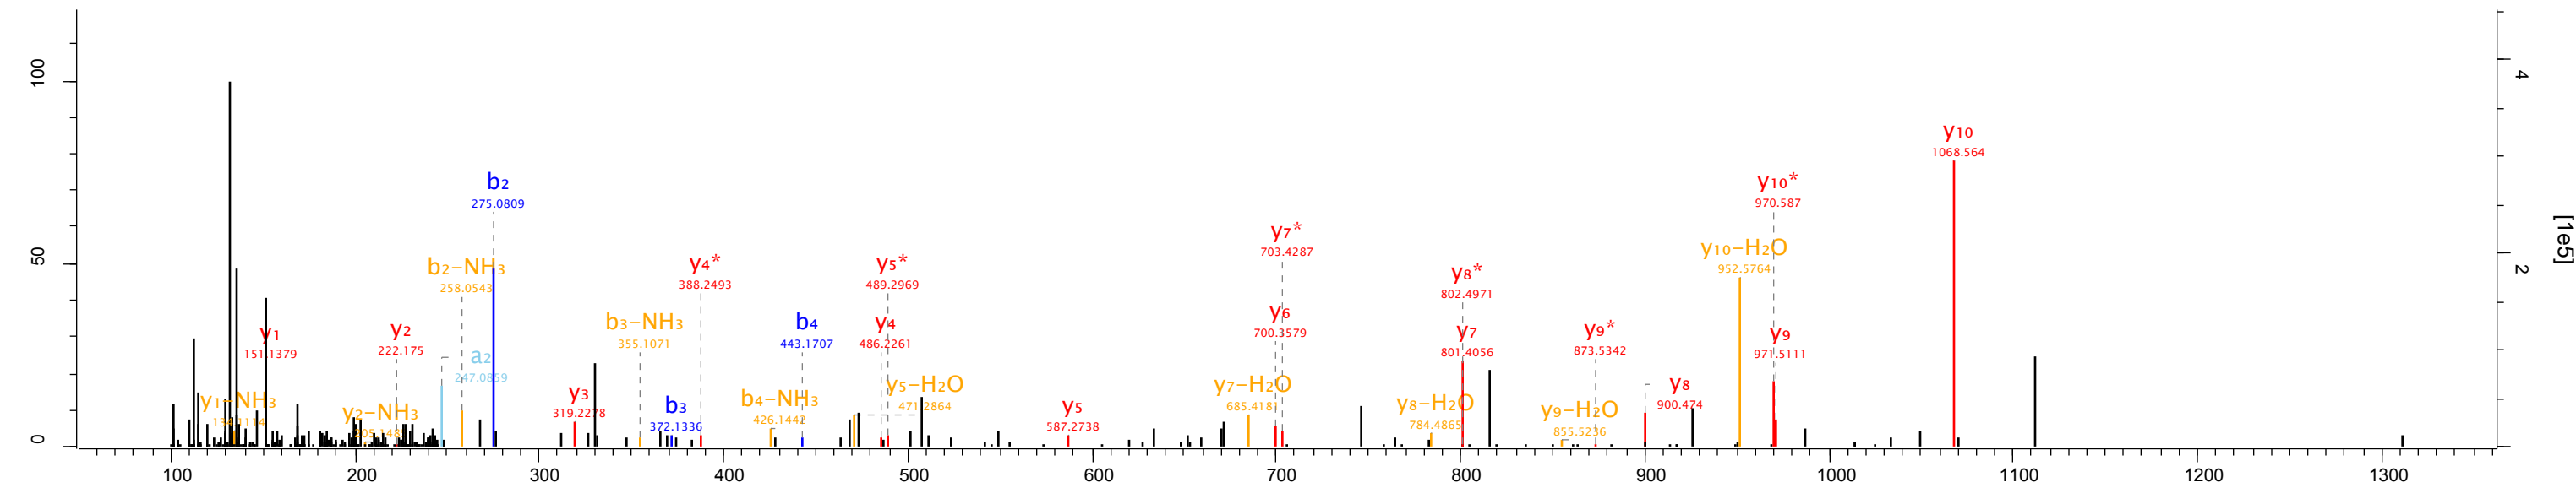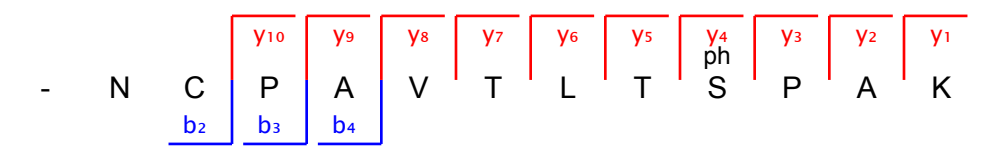

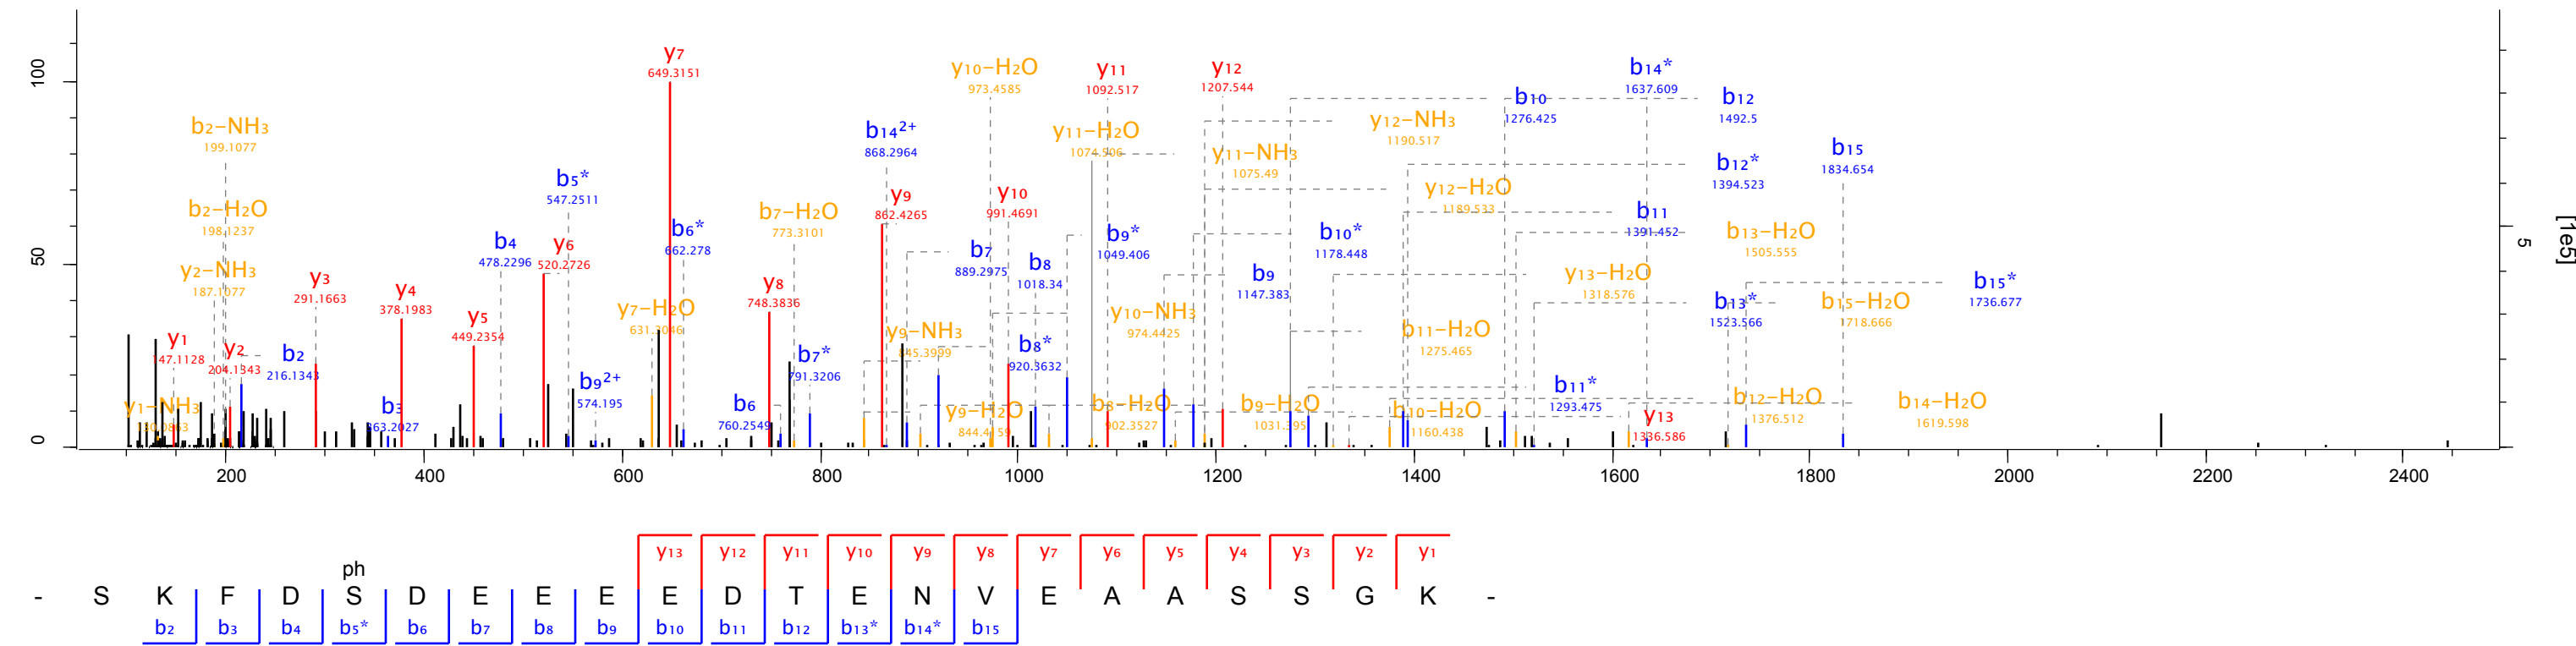

Raw file 20171215\_MaS\_33SR\_LMH\_phospho\_03 Scan 8348 Method FTMS; HCD Score 147.49 m/z 781.32 Gene names BSDC1

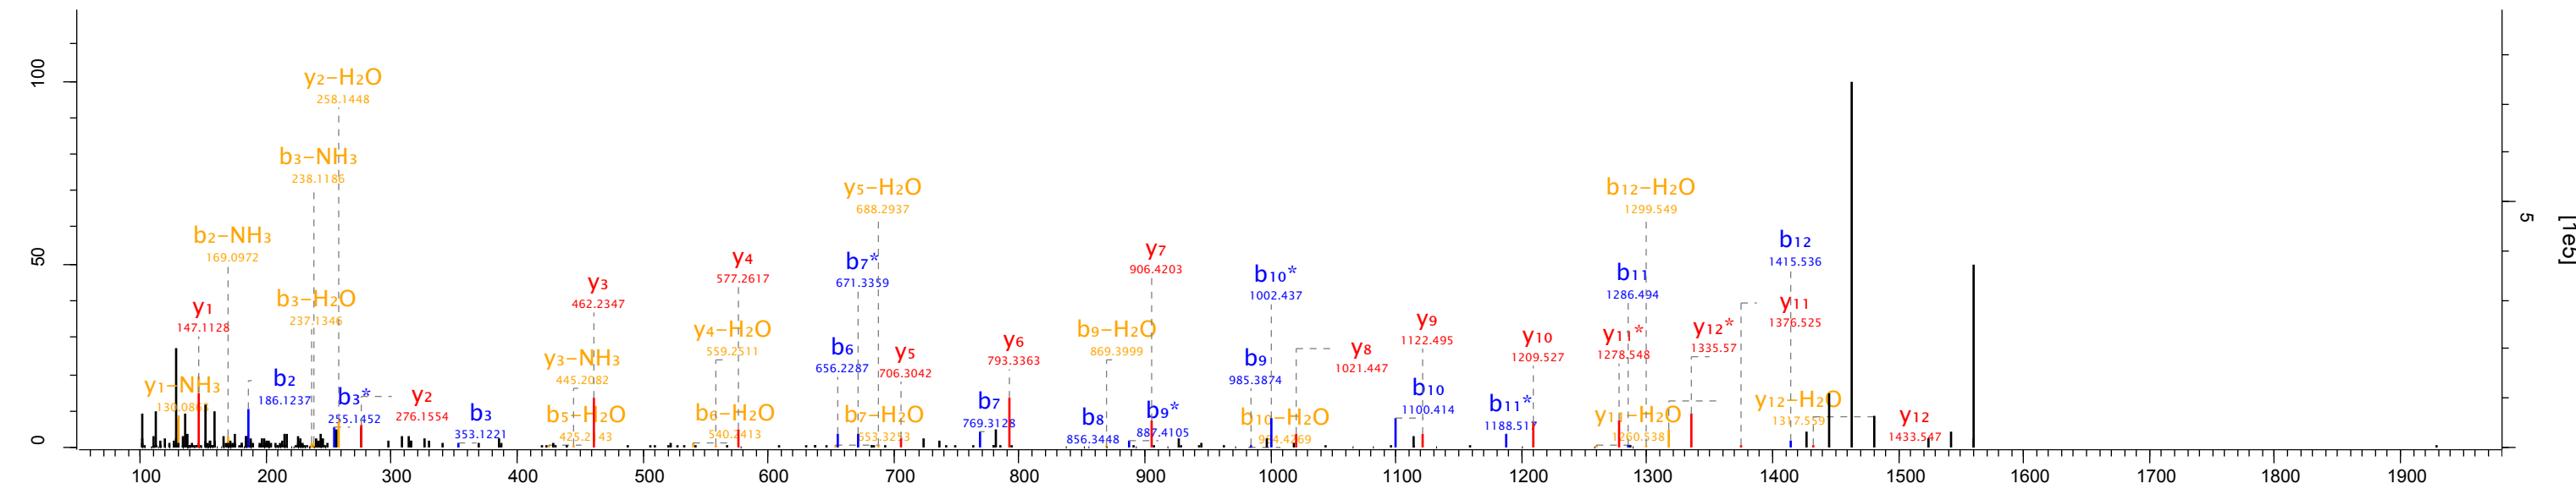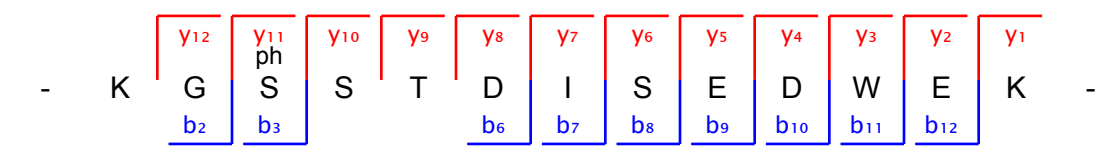



Raw file 20171215\_MaS\_33SR\_LMH\_phospho\_03 Scan 8478 Method FTMS; HCD Score 52.01 m/z 701.27 Gene names PPFIBP1

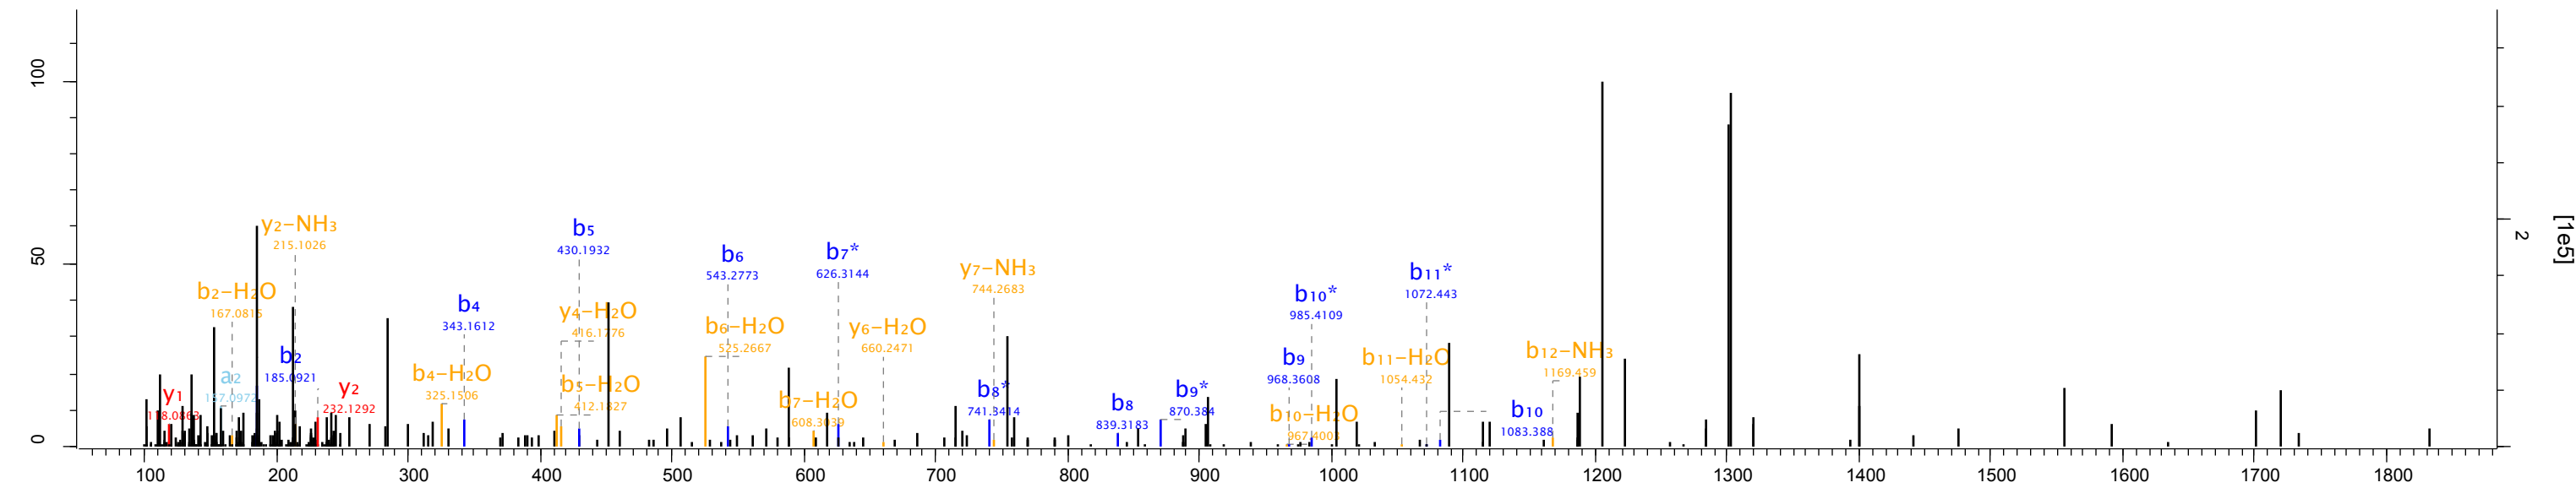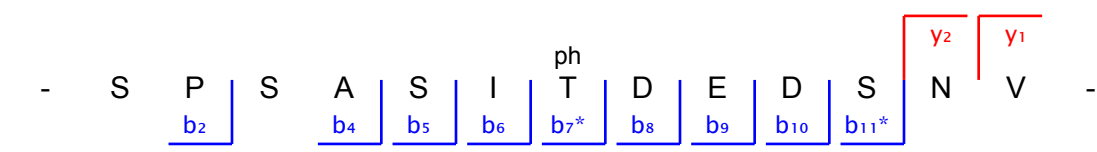

Raw file 20171215\_MaS\_33SR\_LMH\_phospho\_03 Scan 8538 Method FTMS; HCD Score 84.05 m/z 726.82 Gene names AKAP9

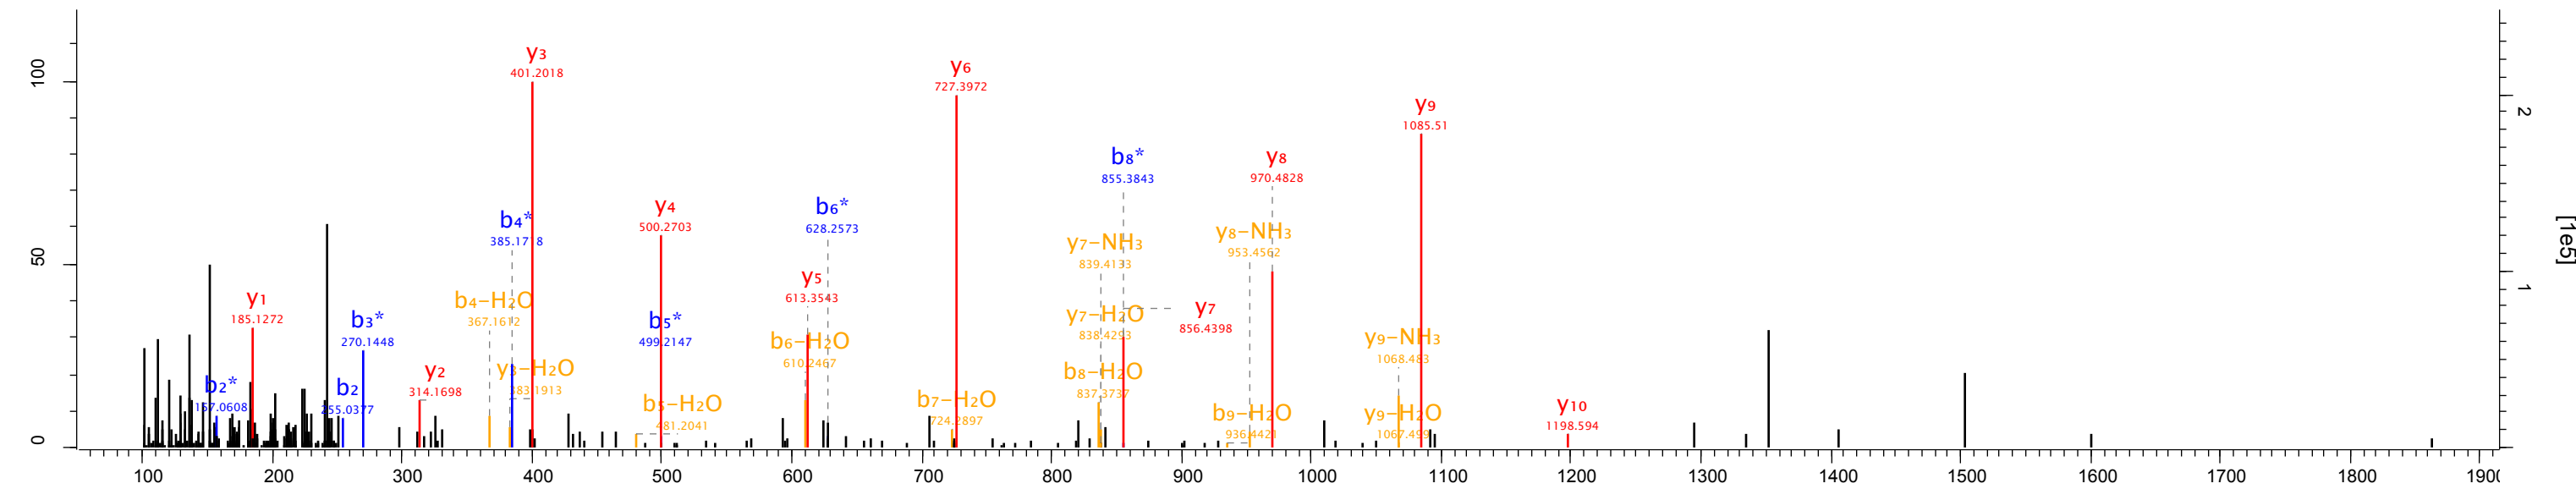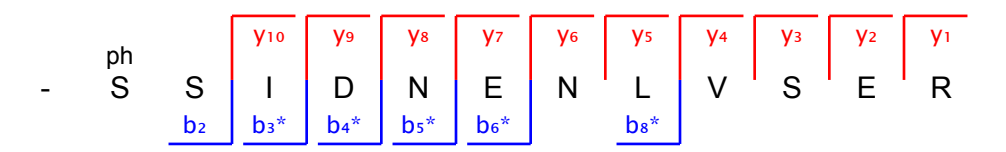

Raw file 20171215\_MaS\_33SR\_LMH\_phospho\_03 Scan 8668 Method FTMS; HCD Score 44.79 m/z 606.3 Gene names RBM23

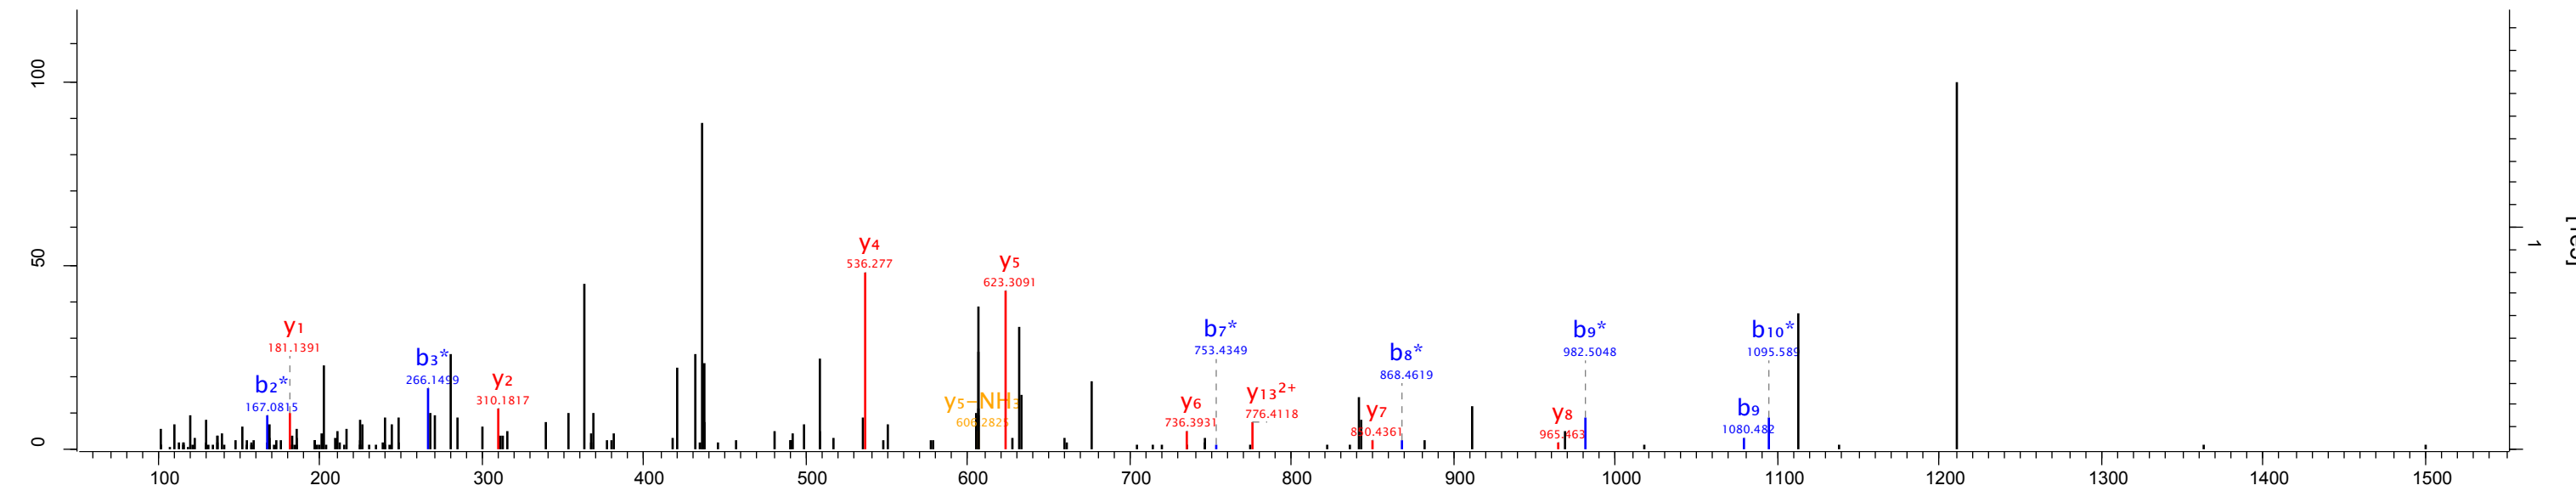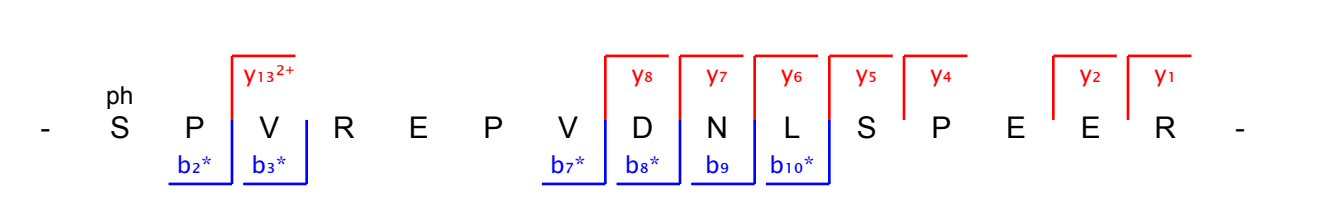

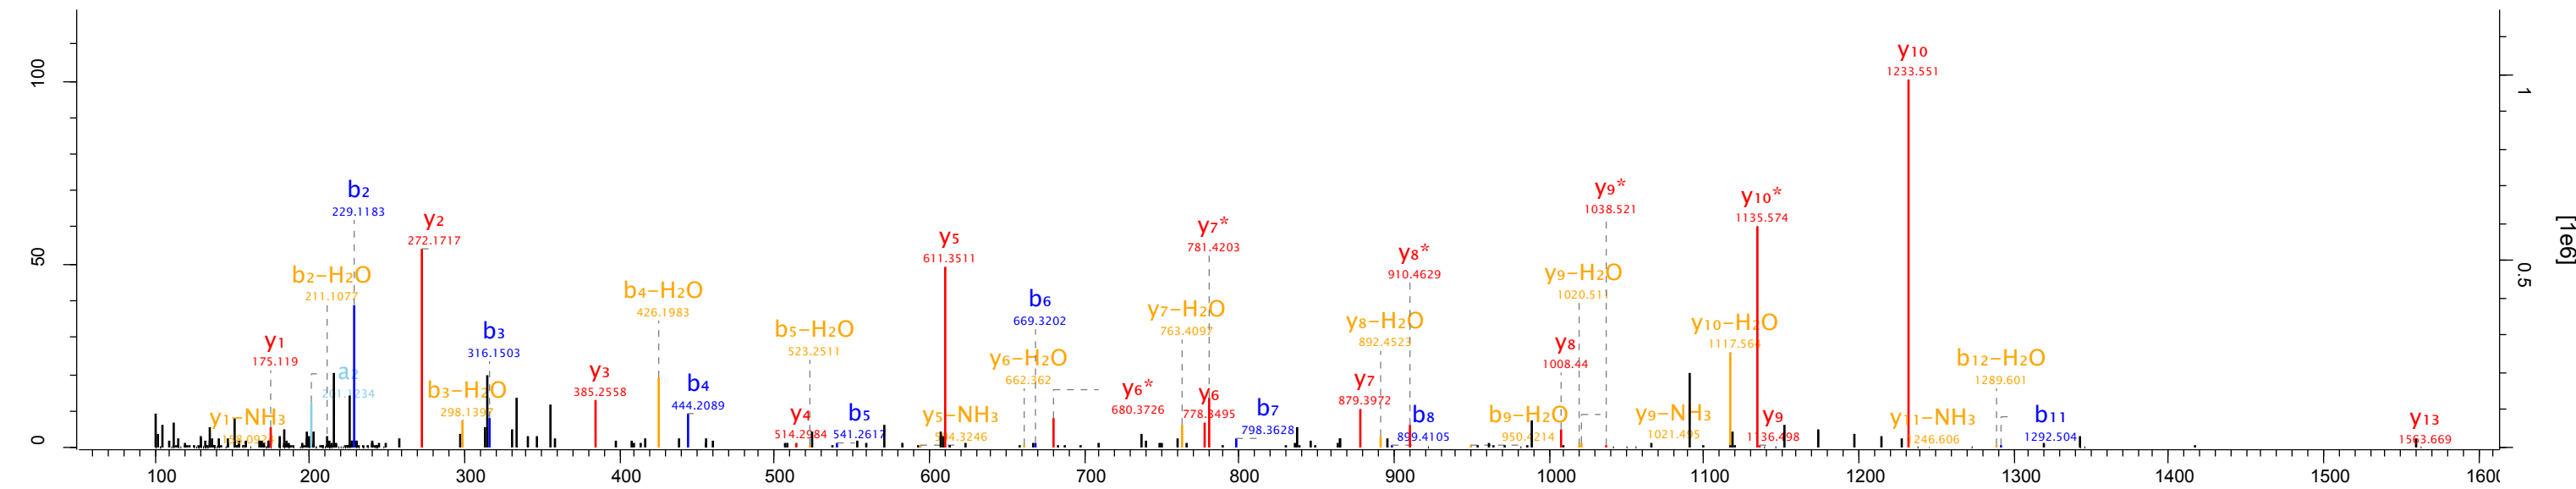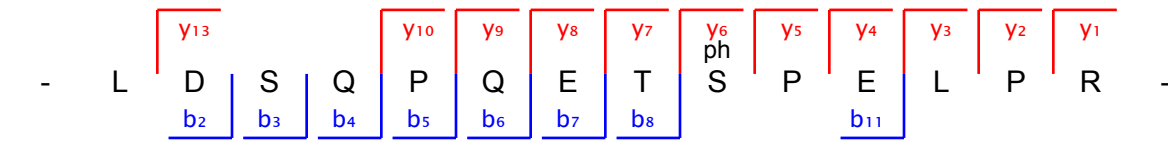

Raw file 20171215\_MaS\_33SR\_LMH\_phospho\_03 Scan 8878 Method FTMS; HCD Score 97.69 m/z 882.37 Gene names AIM1

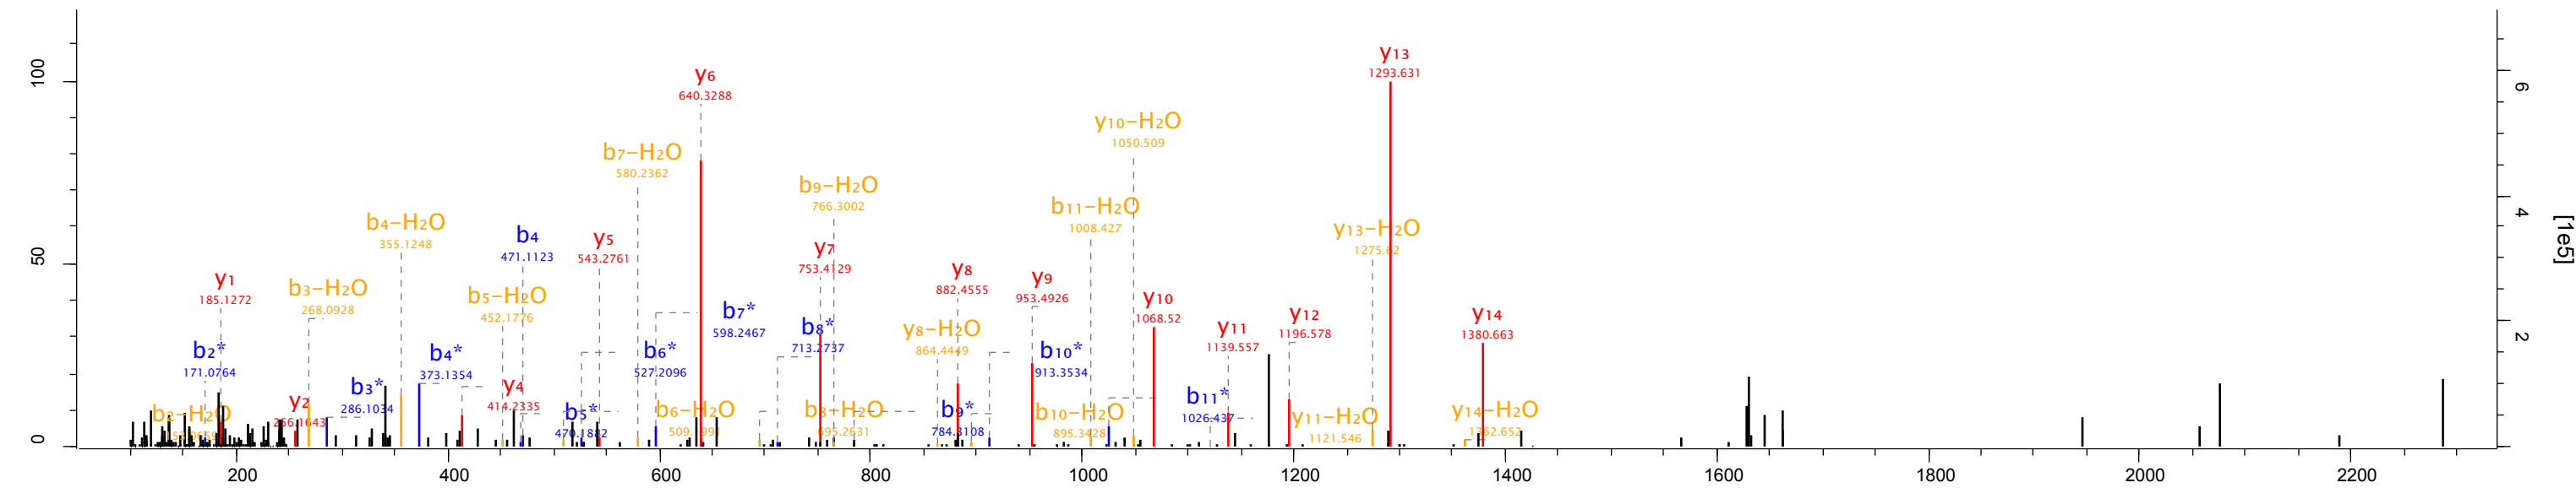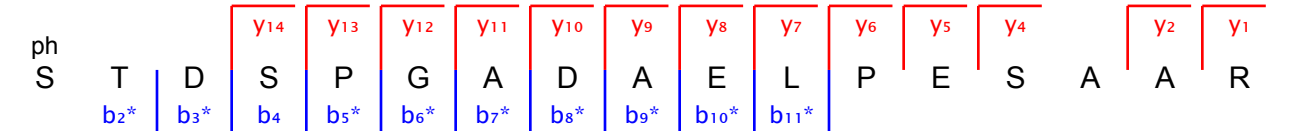

Raw file 20171215\_MaS\_33SR\_LMH\_phospho\_03 Scan 9028 Method FTMS; HCD Score 57.11 m/z 550.23 Gene names ZFYVE19

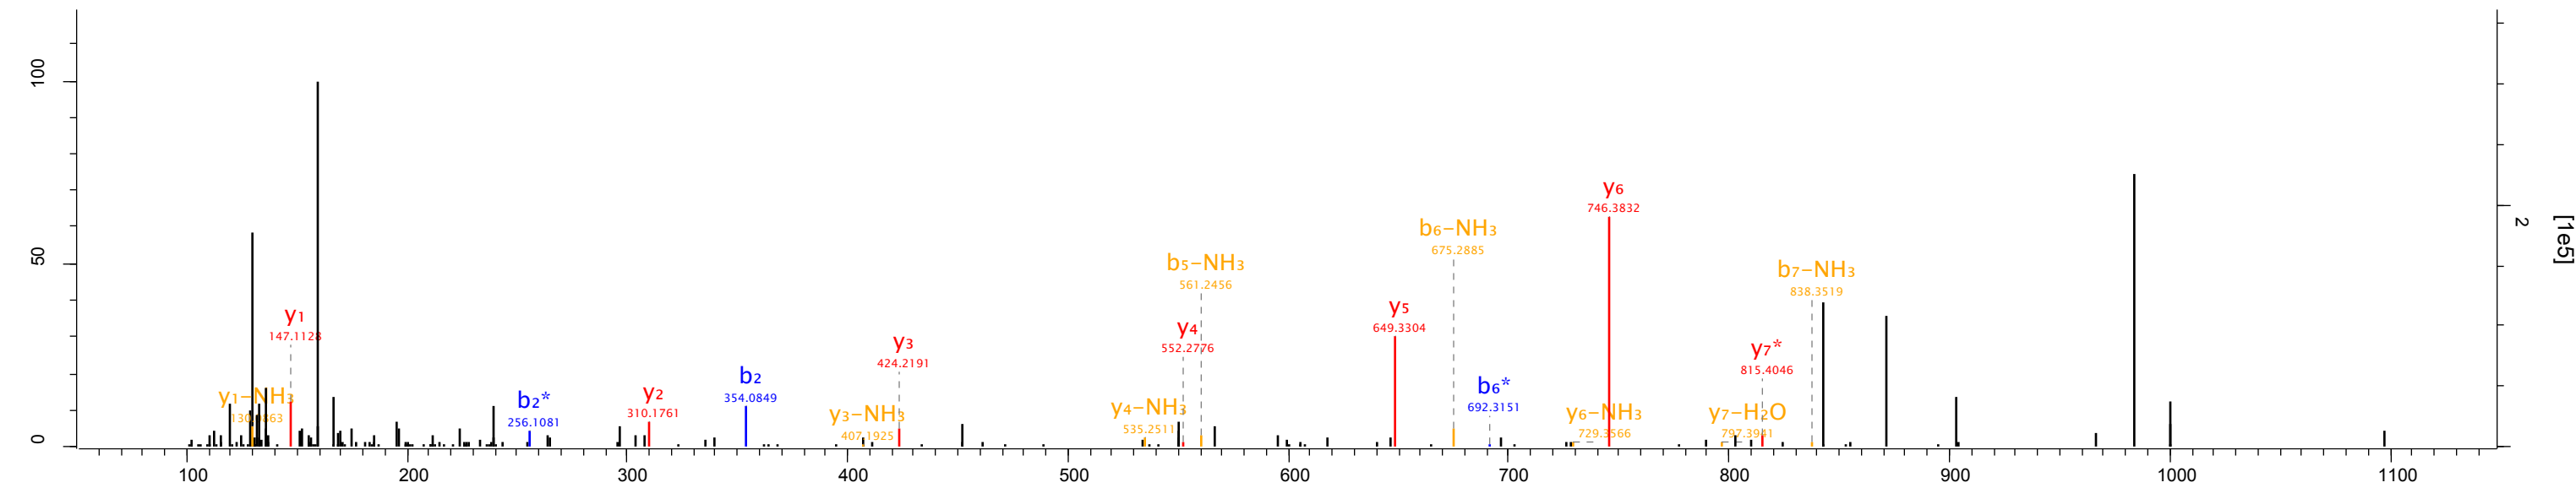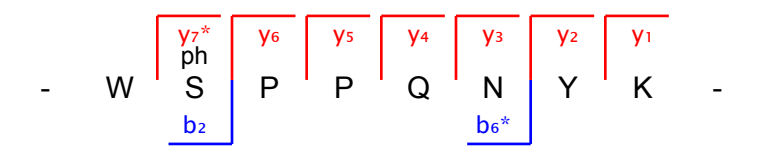

Raw file 20171215\_MaS\_33SR\_LMH\_phospho\_03 Scan 9098 Method FTMS; HCD Score 279.93 m/z 1152.5 Gene names TNKS1BP1

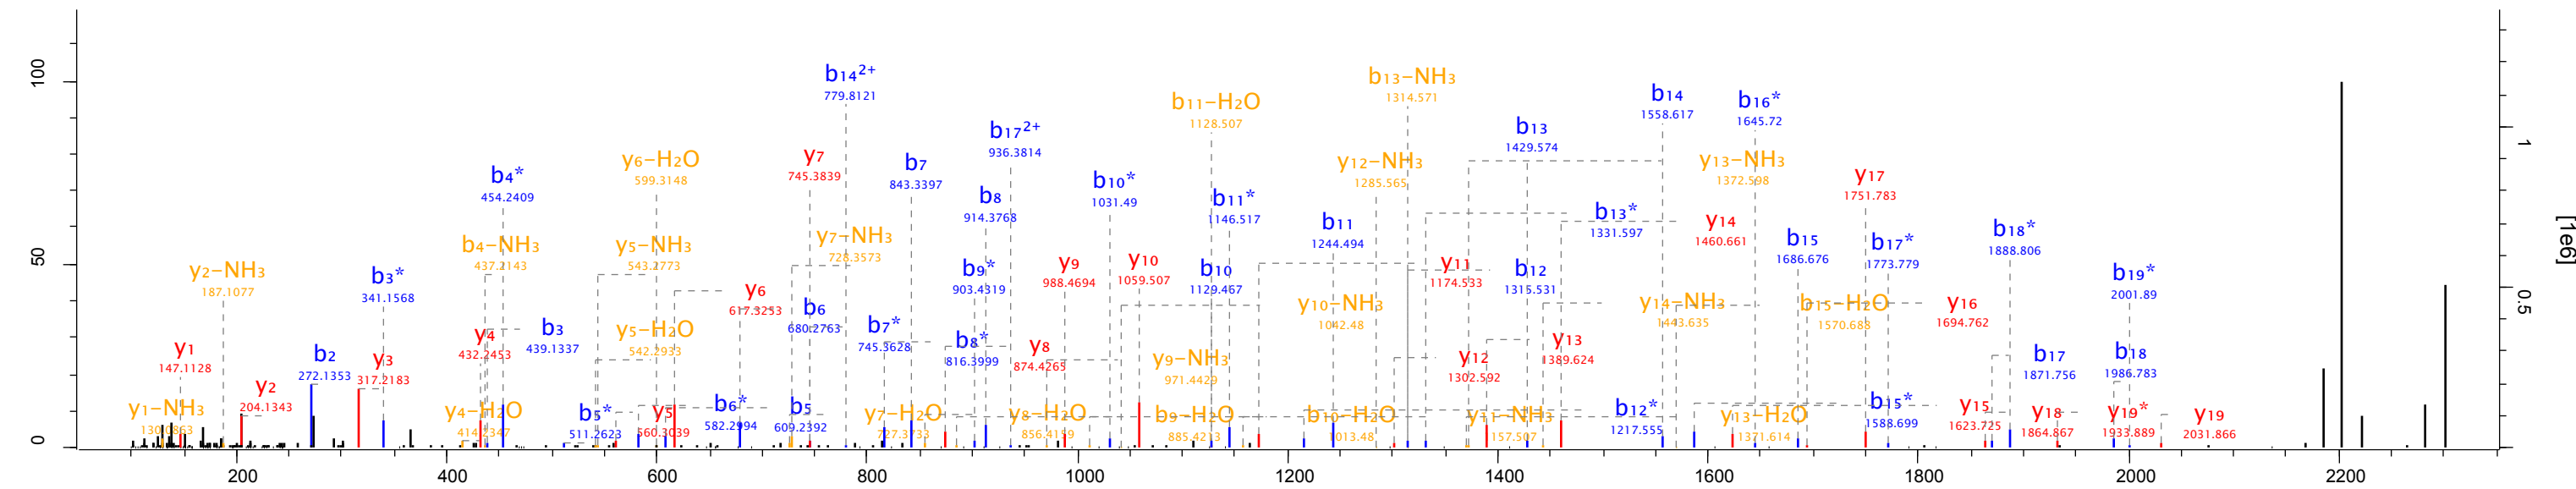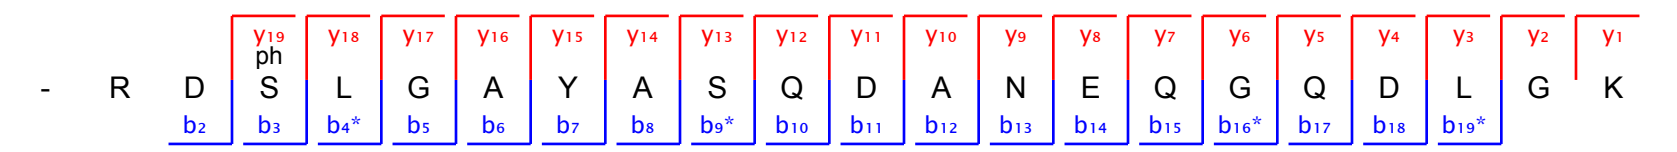

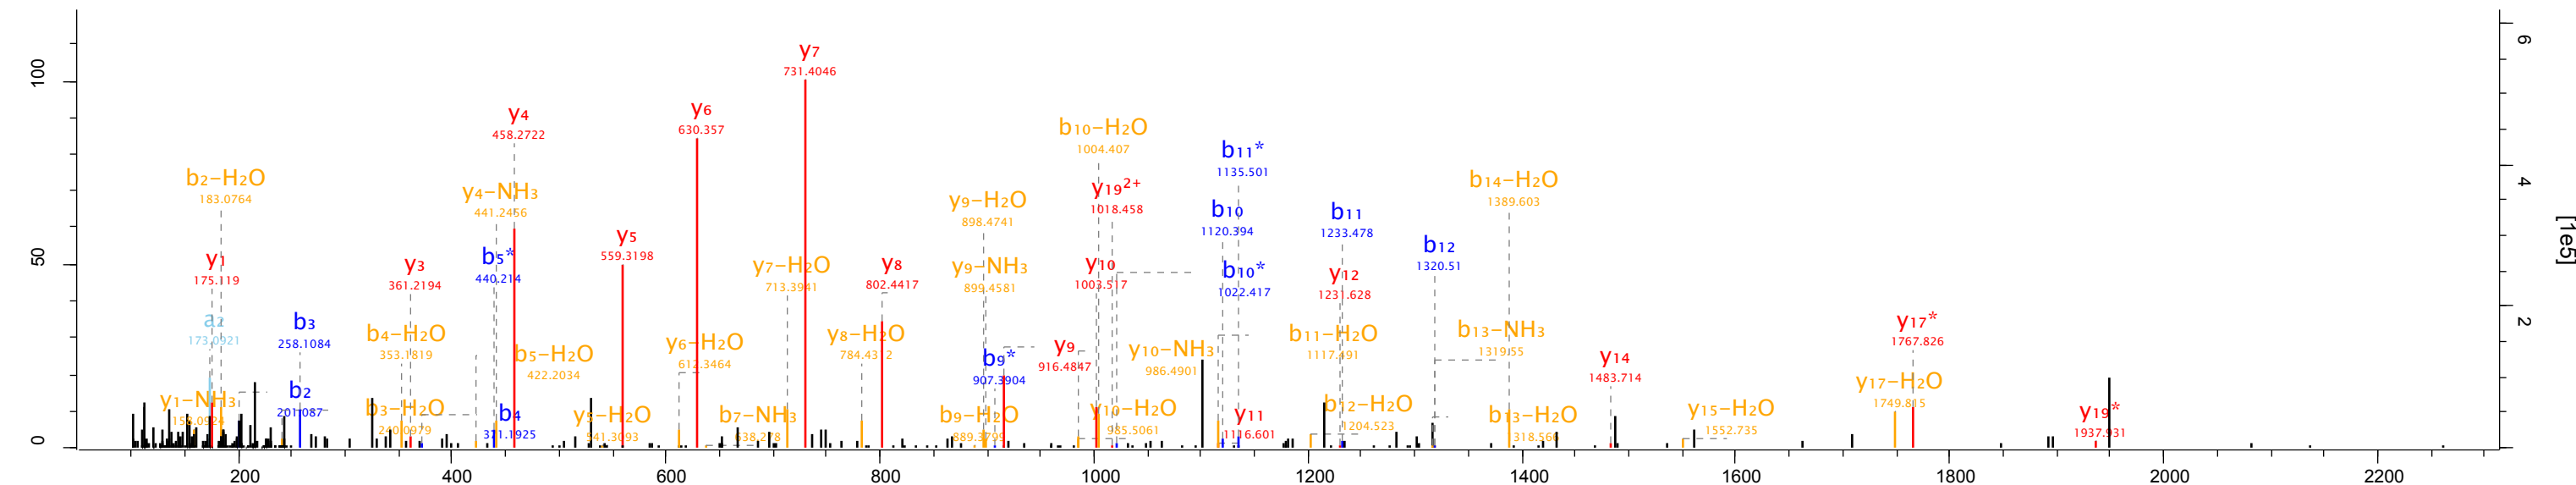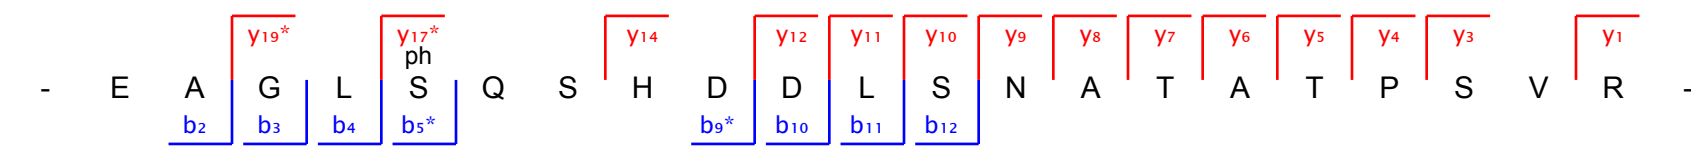



Raw file 20171215\_MaS\_33SR\_LMH\_phospho\_03 Scan 9448 Method FTMS; HCD Score 193.26 m/z 879.88 Gene names TNKS1BP1

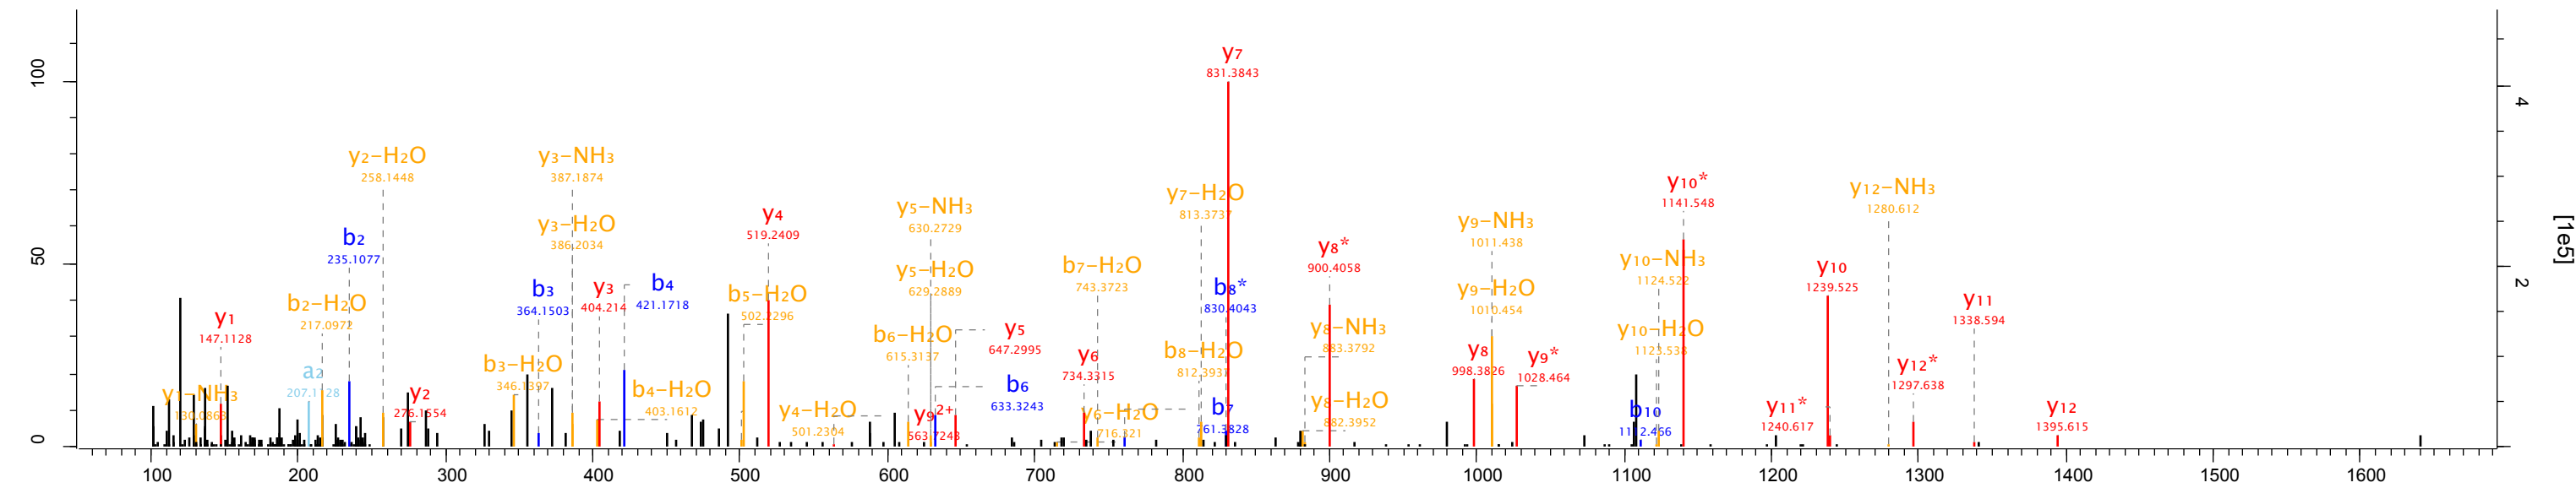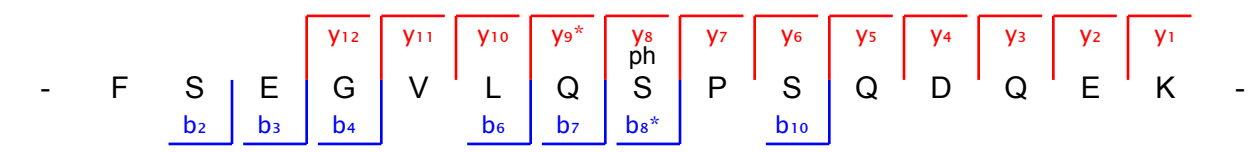

Raw file: 20171215\_MaS\_33SR\_LMH\_phospho\_03  
 Scan: 9548 Method: FTMS; HCD Score: 149.76 m/z: 1138.95 Gene names: HNRNPA2B1

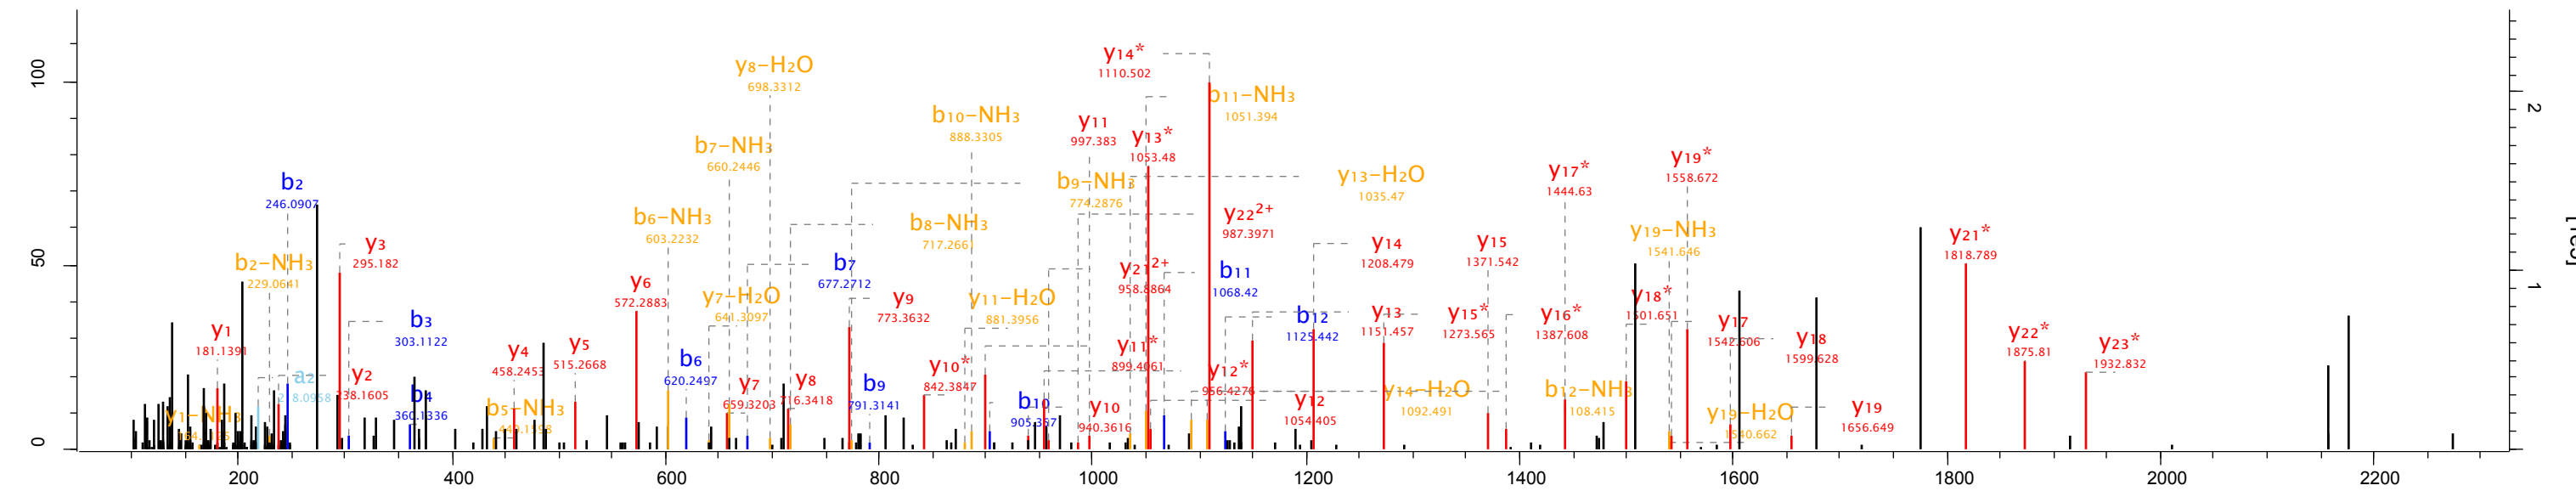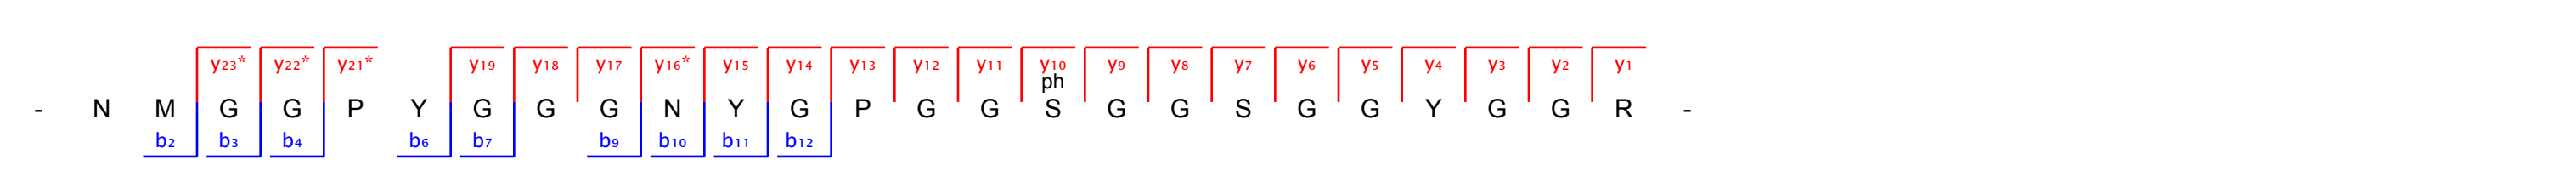

Raw file 20171215\_MaS\_33SR\_LMH\_phospho\_03 Scan 9918 Method FTMS; HCD Score 73.89 m/z 461.74 Gene names MAP4

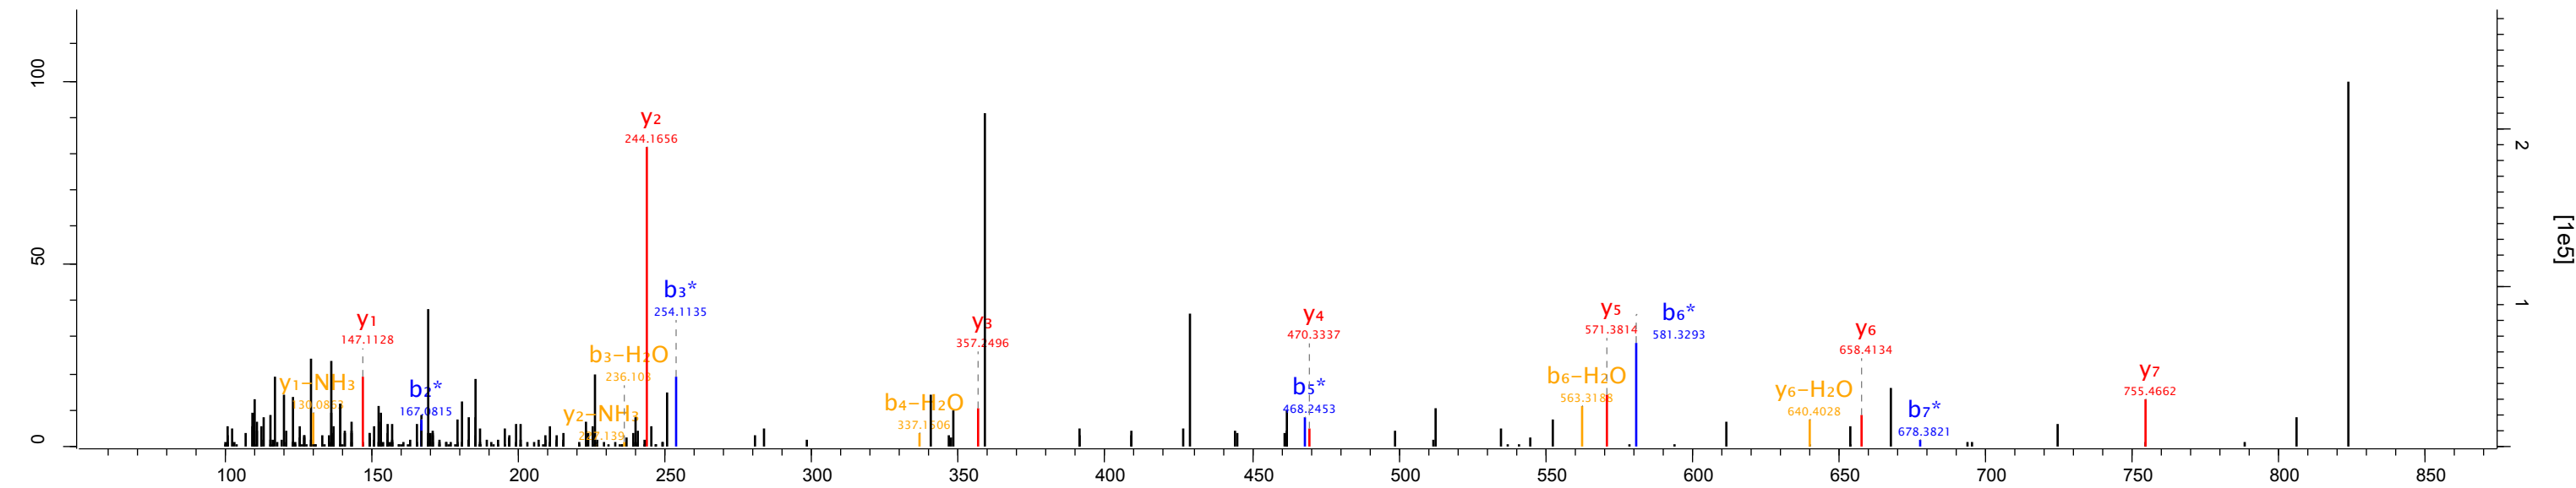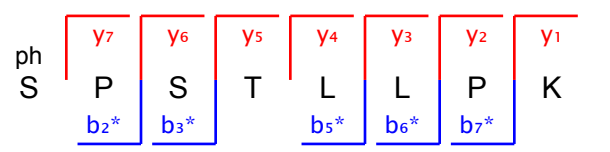

Raw file 20171215\_MaS\_33SR\_LMH\_phospho\_03 Scan 9938 Method FTMS; HCD Score 250.47 m/z 922.42 Gene names PAK2

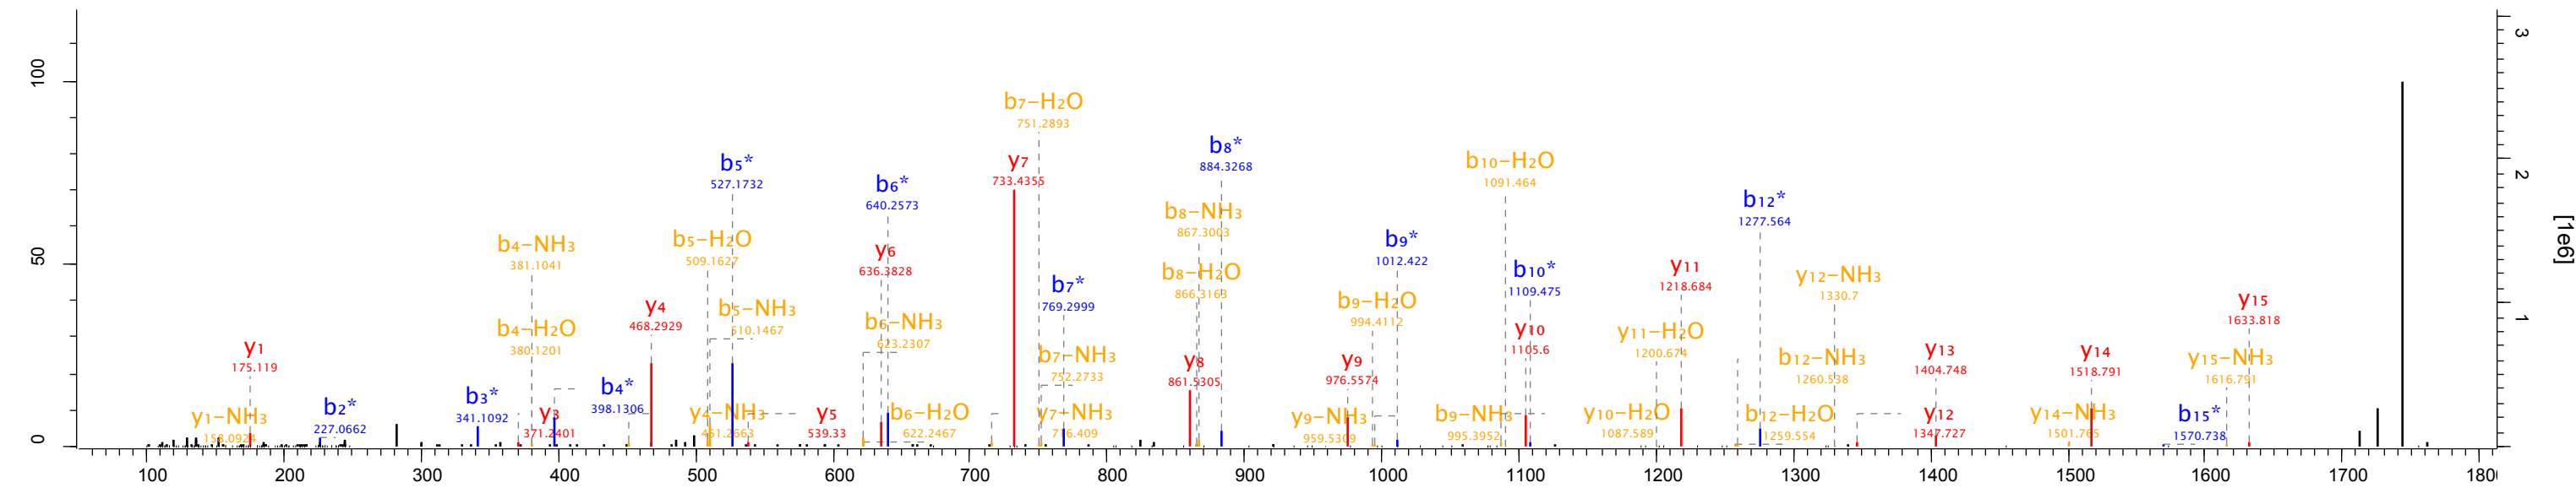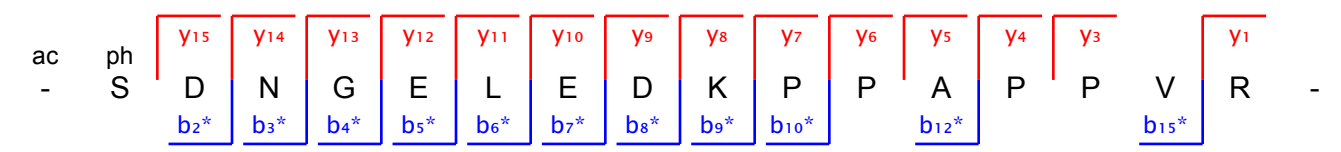

Raw file 20171215\_MaS\_33SR\_LMH\_phospho\_03 Scan 9958 Method FTMS; HCD Score 134.21 m/z 913.38 Gene names SHROOM2

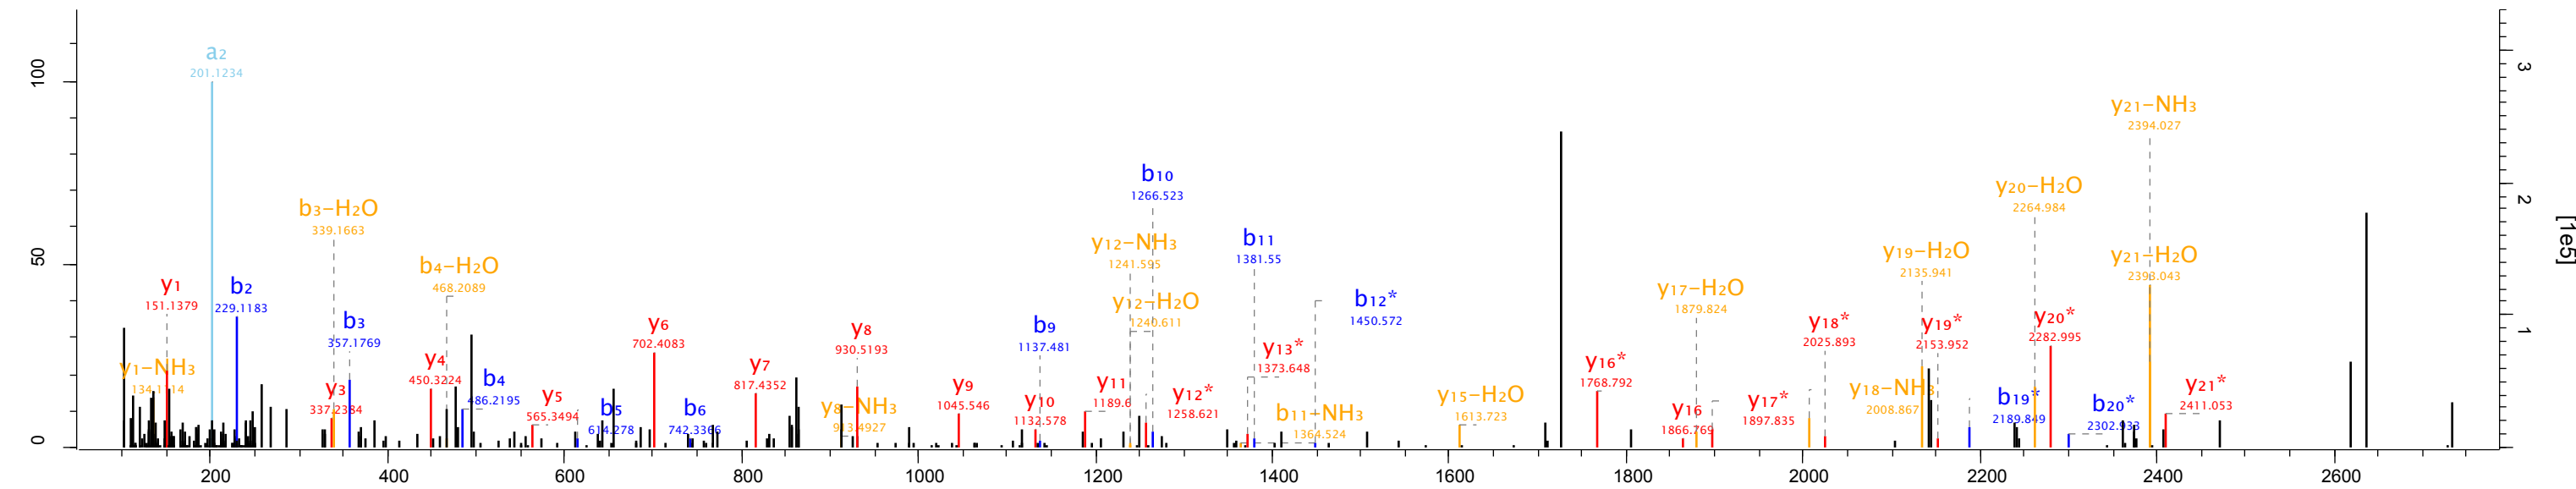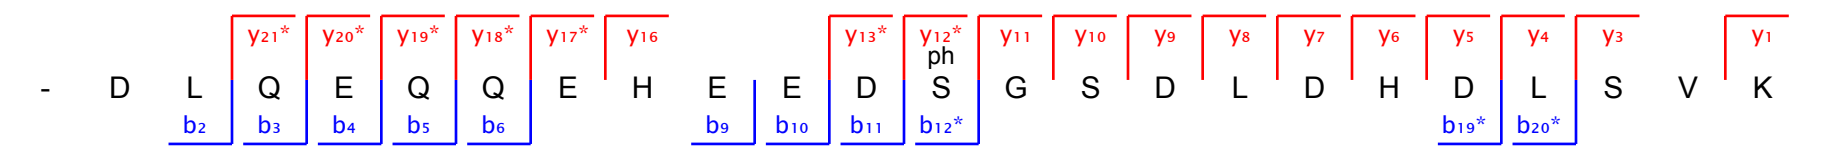

Raw file 20171215\_MaS\_33SR\_LMH\_phospho\_05 Scan 10378 Method FTMS; HCD Score 45.88 m/z 873.88 Gene names SNURF

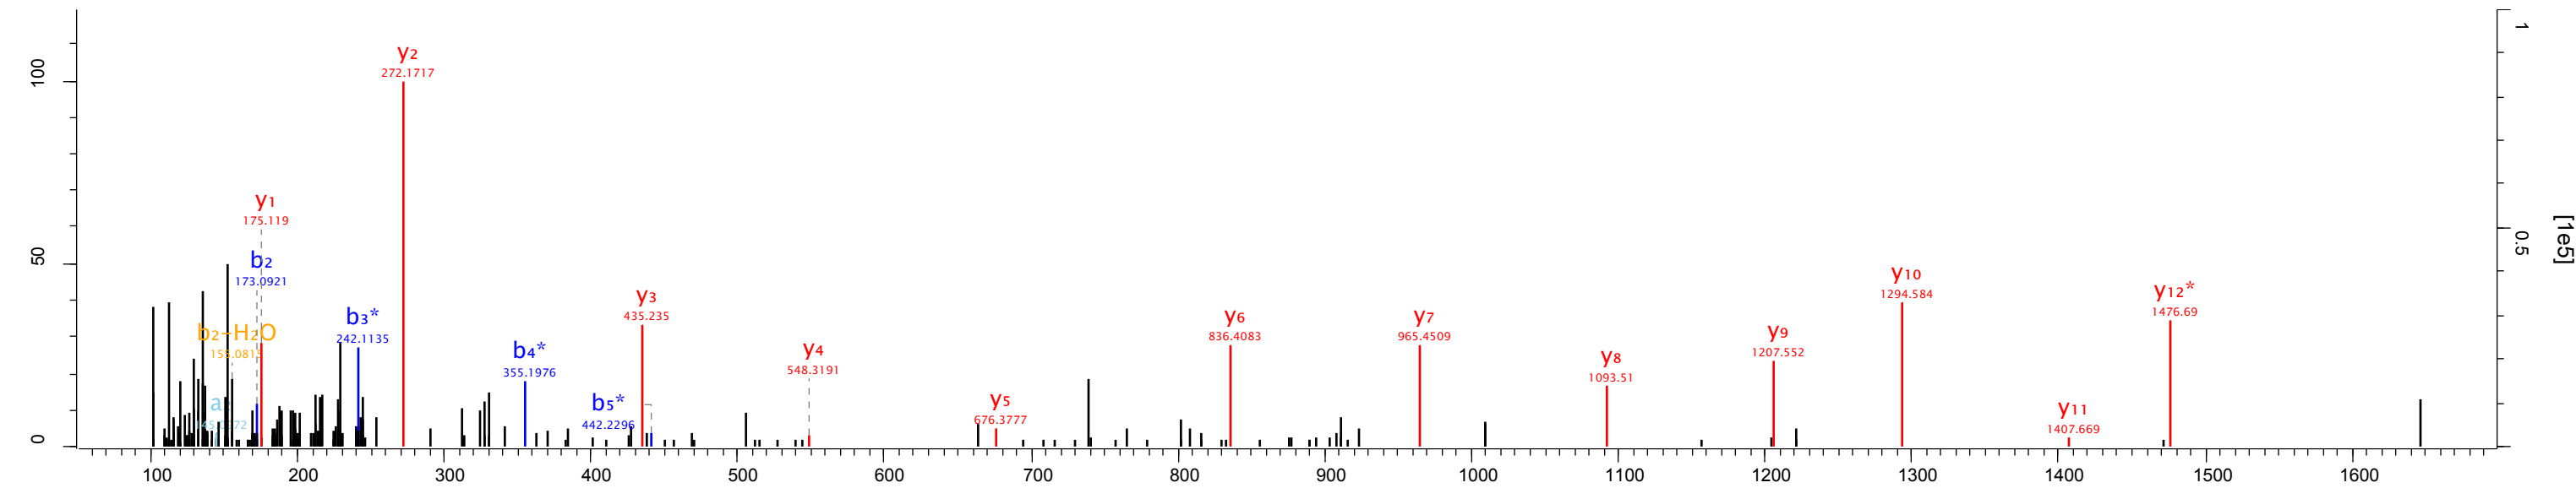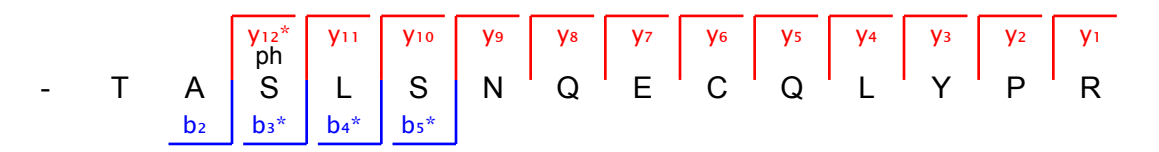

Raw file 20171215\_MaS\_33SR\_LMH\_phospho\_05 Scan 10768 Method FTMS; HCD Score 55.31 m/z 949.08 Gene names GBF1

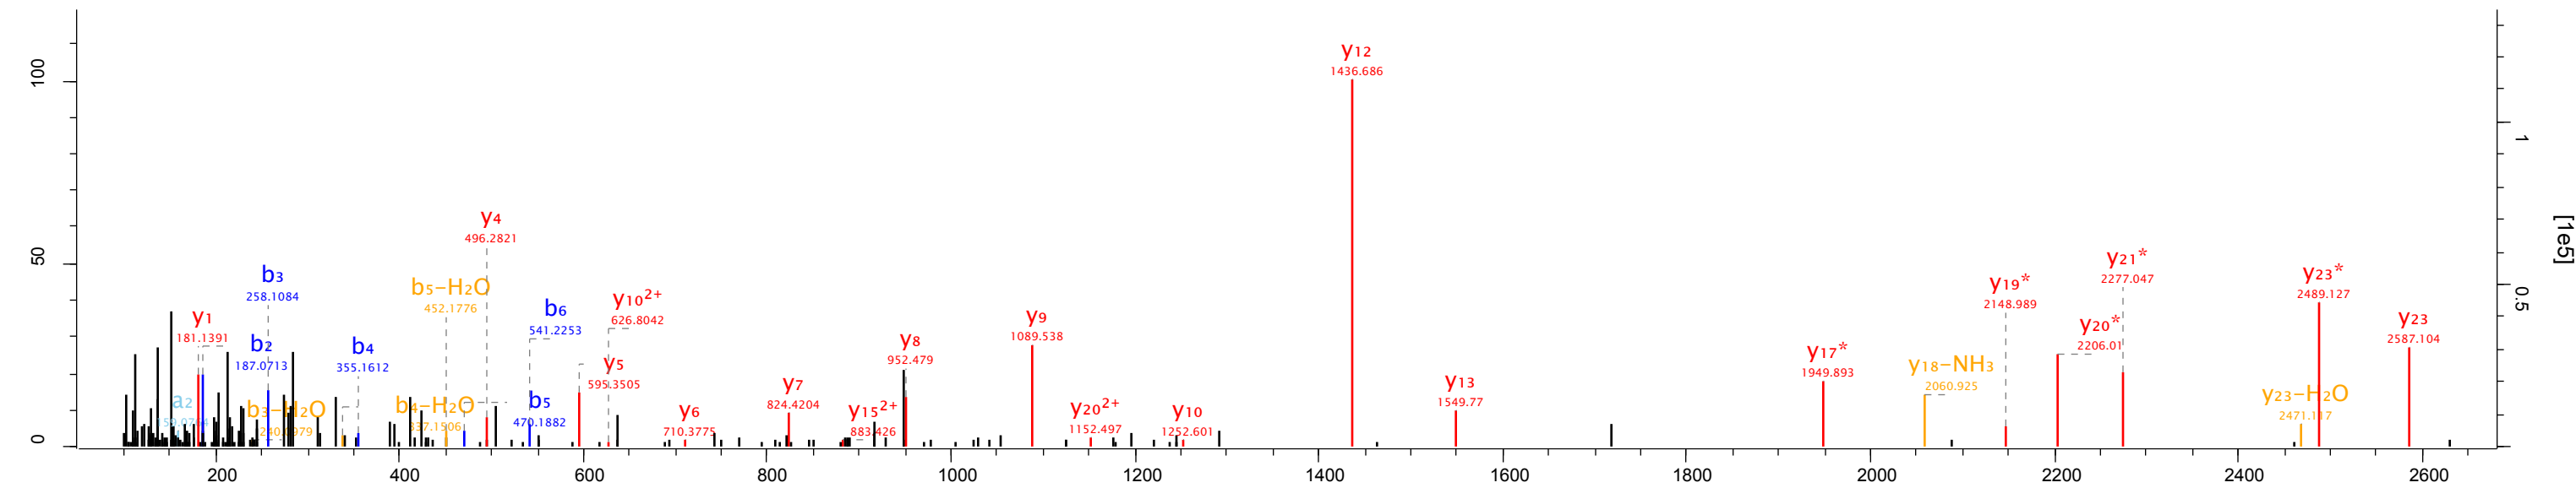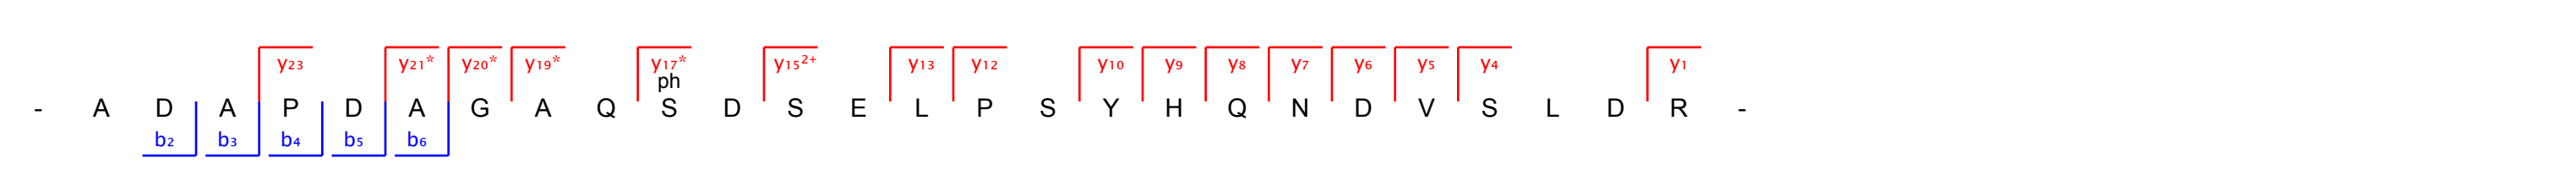

Raw file 20171215\_MaS\_33SR\_LMH\_phospho\_05 Scan 10778 Method FTMS; HCD Score 59.15 m/z 914.37 Gene names INPP5F

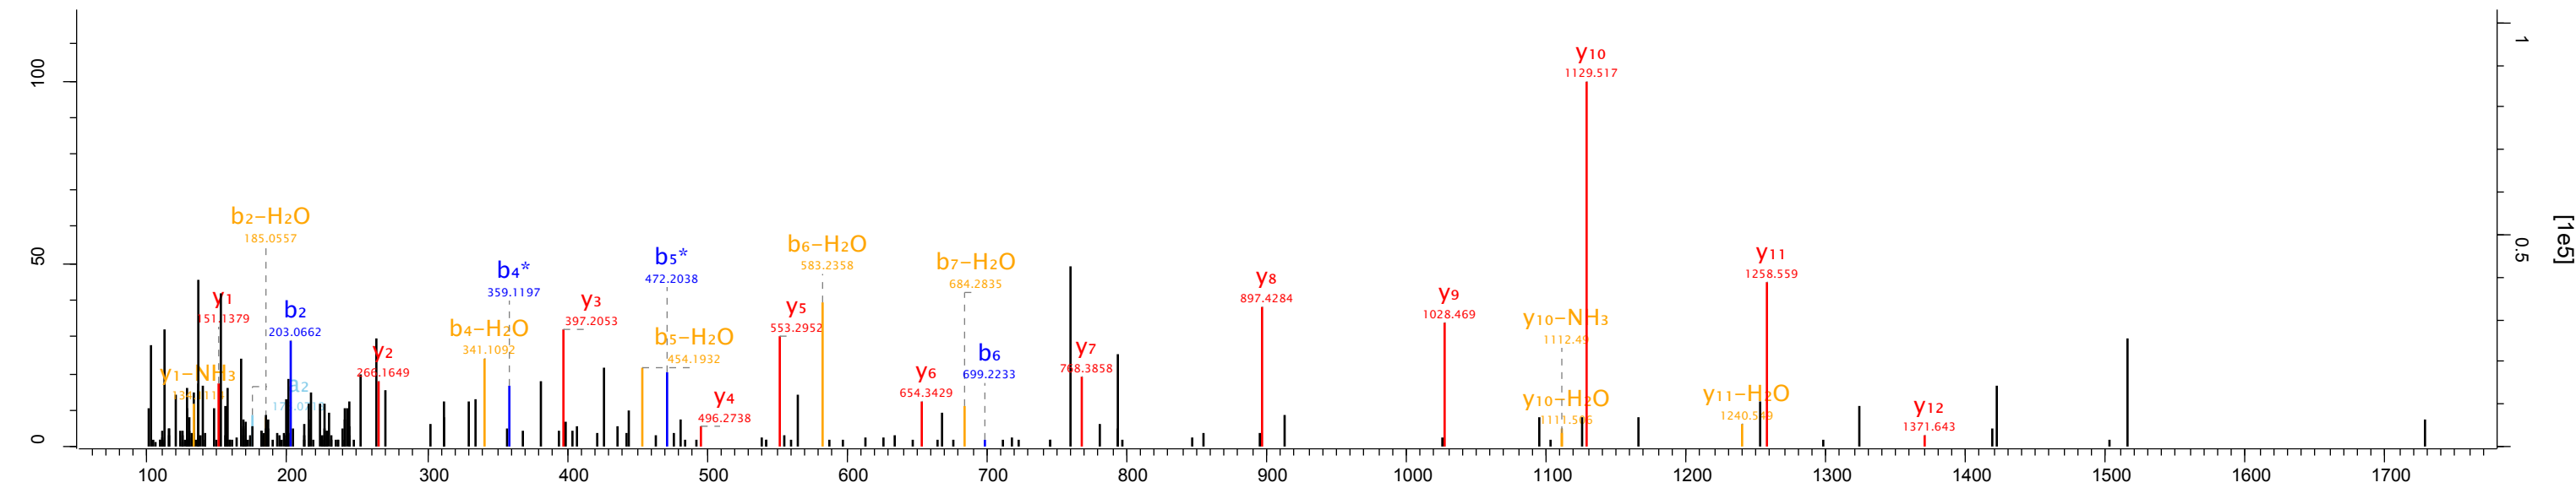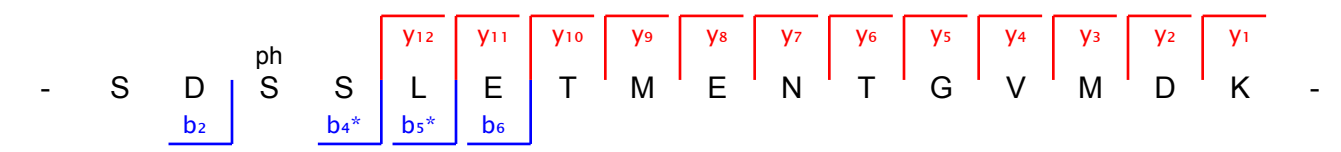



Raw file 20171215\_MaS\_33SR\_LMH\_phospho\_05 Scan 12468 Method FTMS; HCD Score 49.45 m/z 619.77 Gene names RAD23B

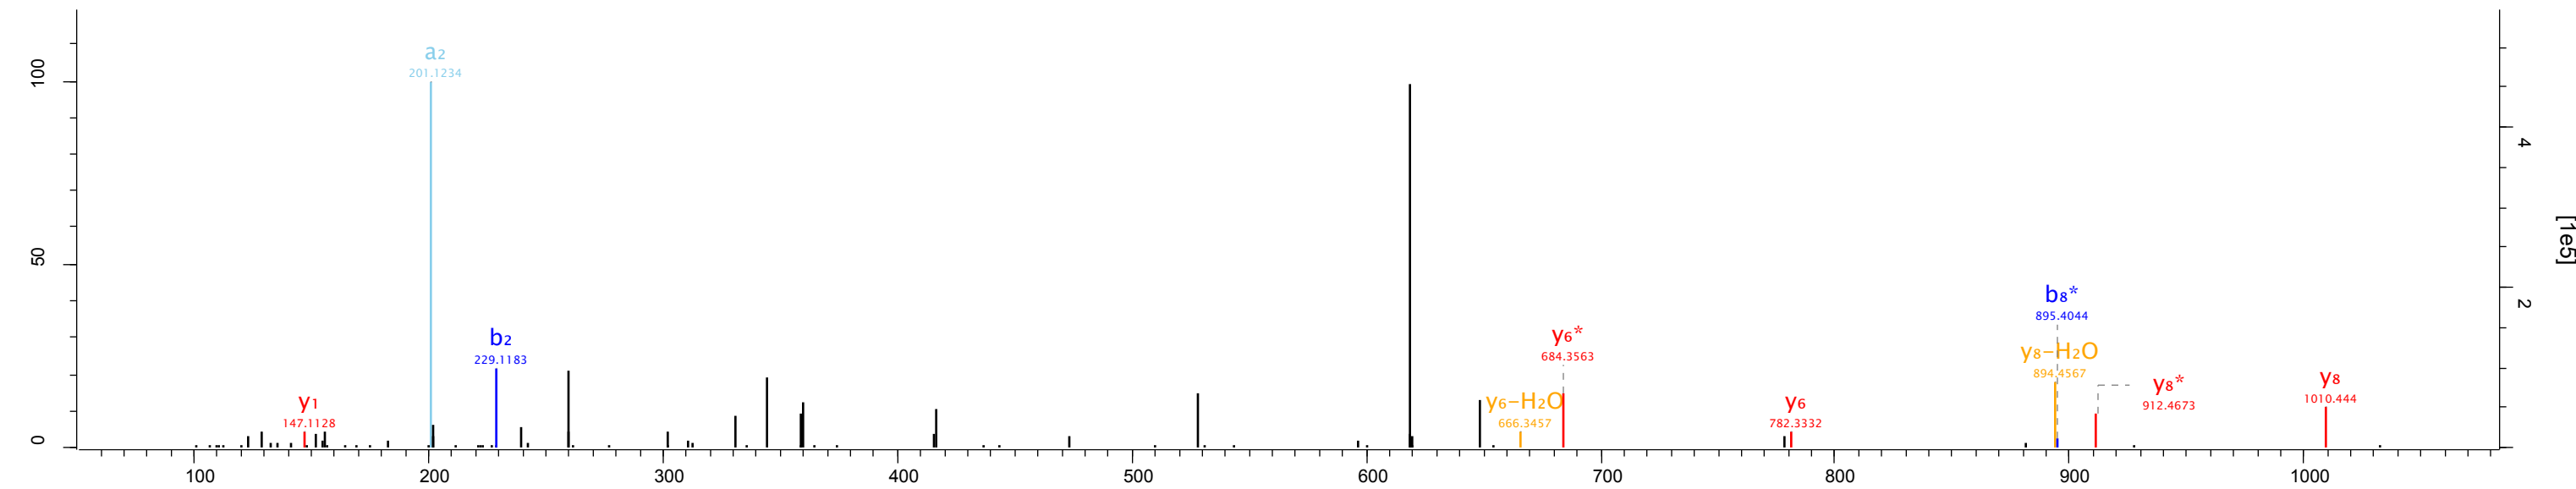

- I D I D P E E ph T V K -  
 b<sub>2</sub> y<sub>8</sub> y<sub>6</sub> b<sub>8</sub>\* y<sub>1</sub>

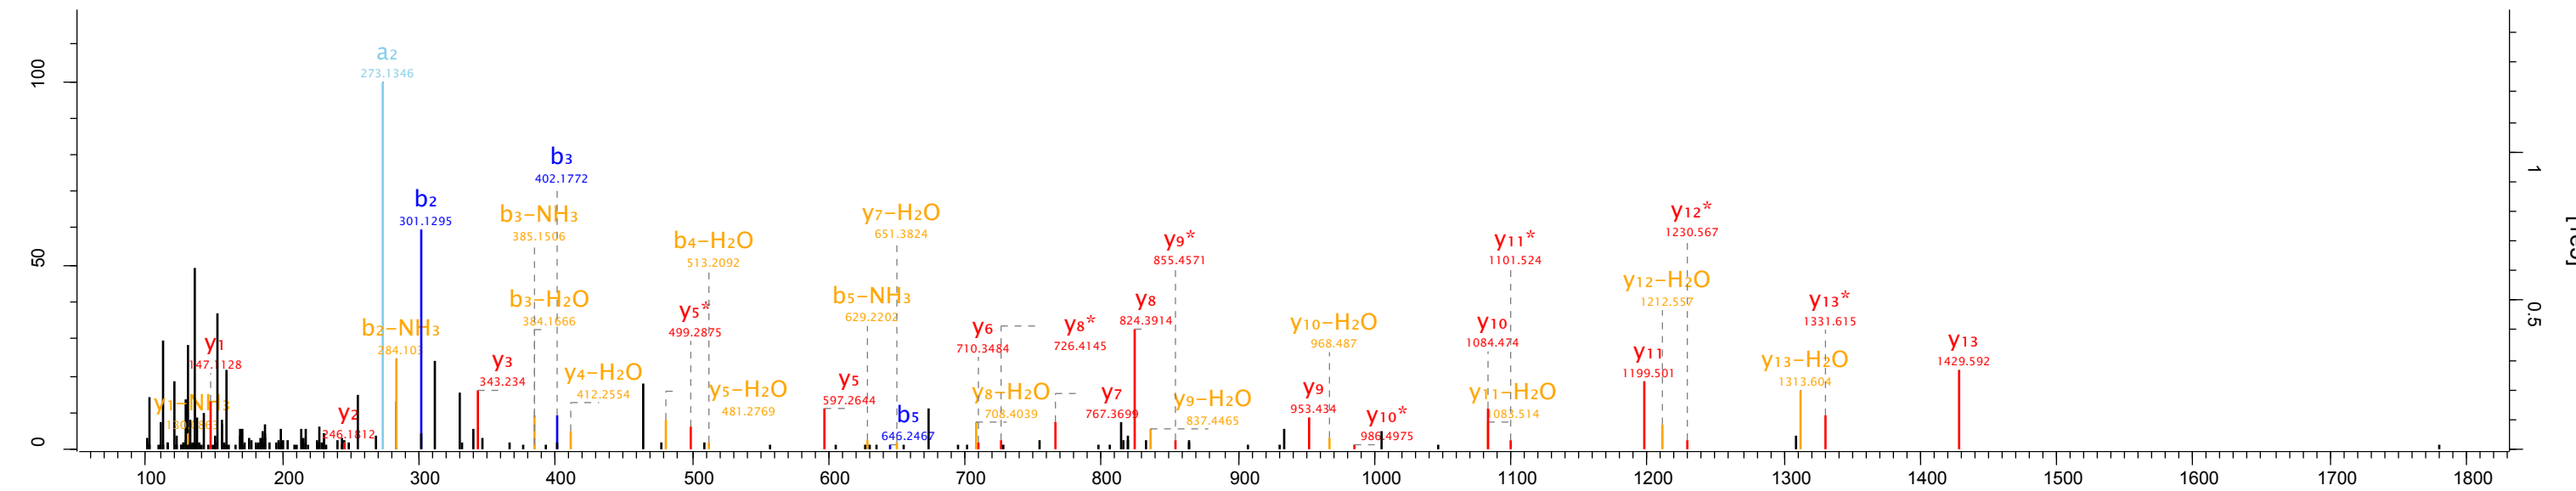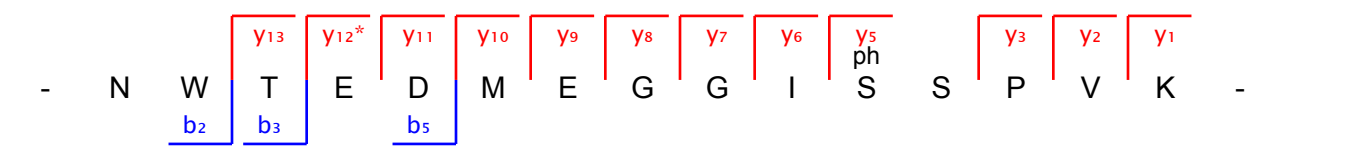

Raw file 20171215\_MaS\_33SR\_LMH\_phospho\_05 Scan 15408 Method FTMS; HCD Score 76.81 m/z 1102.96 Gene names SMN1

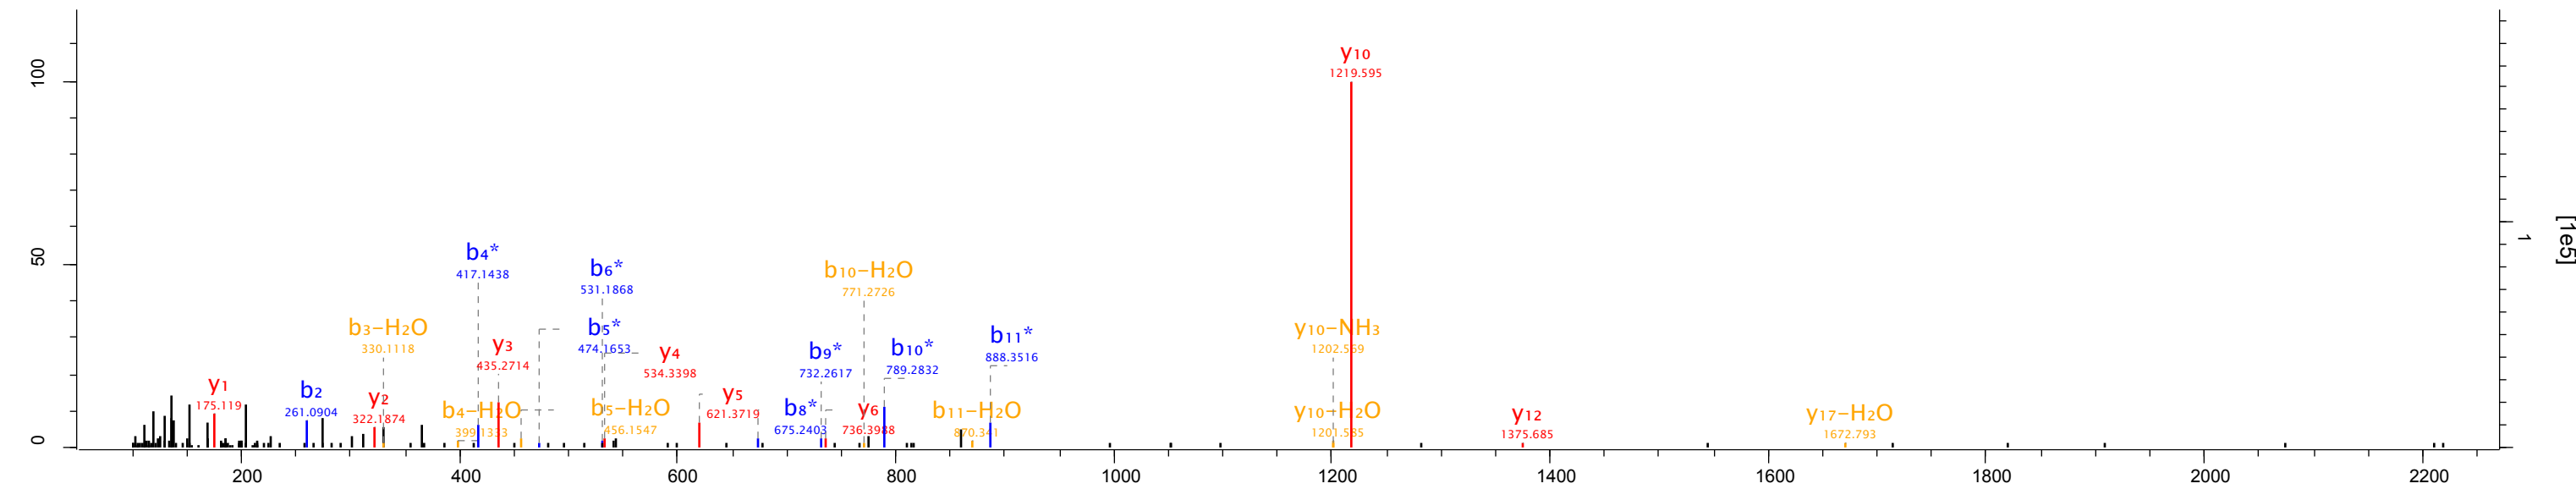

ac - A ox M S ph S G G S G G G V P E Q E D S V L F R -

Fragmentation mapping: b2 (M), b4\* (S), b5\* (G), b6\* (G), b8\* (G), b9\* (G), b10\* (G), b11\* (V), y12 (G), y10 (V), y6 (D), y5 (S), y4 (V), y3 (L), y2 (F), y1 (R).

Raw file 20171215\_MaS\_33SR\_LMH\_phospho\_05 Scan 1978 Method FTMS; HCD Score 150.11 m/z 483.56 Gene names SMARCC1

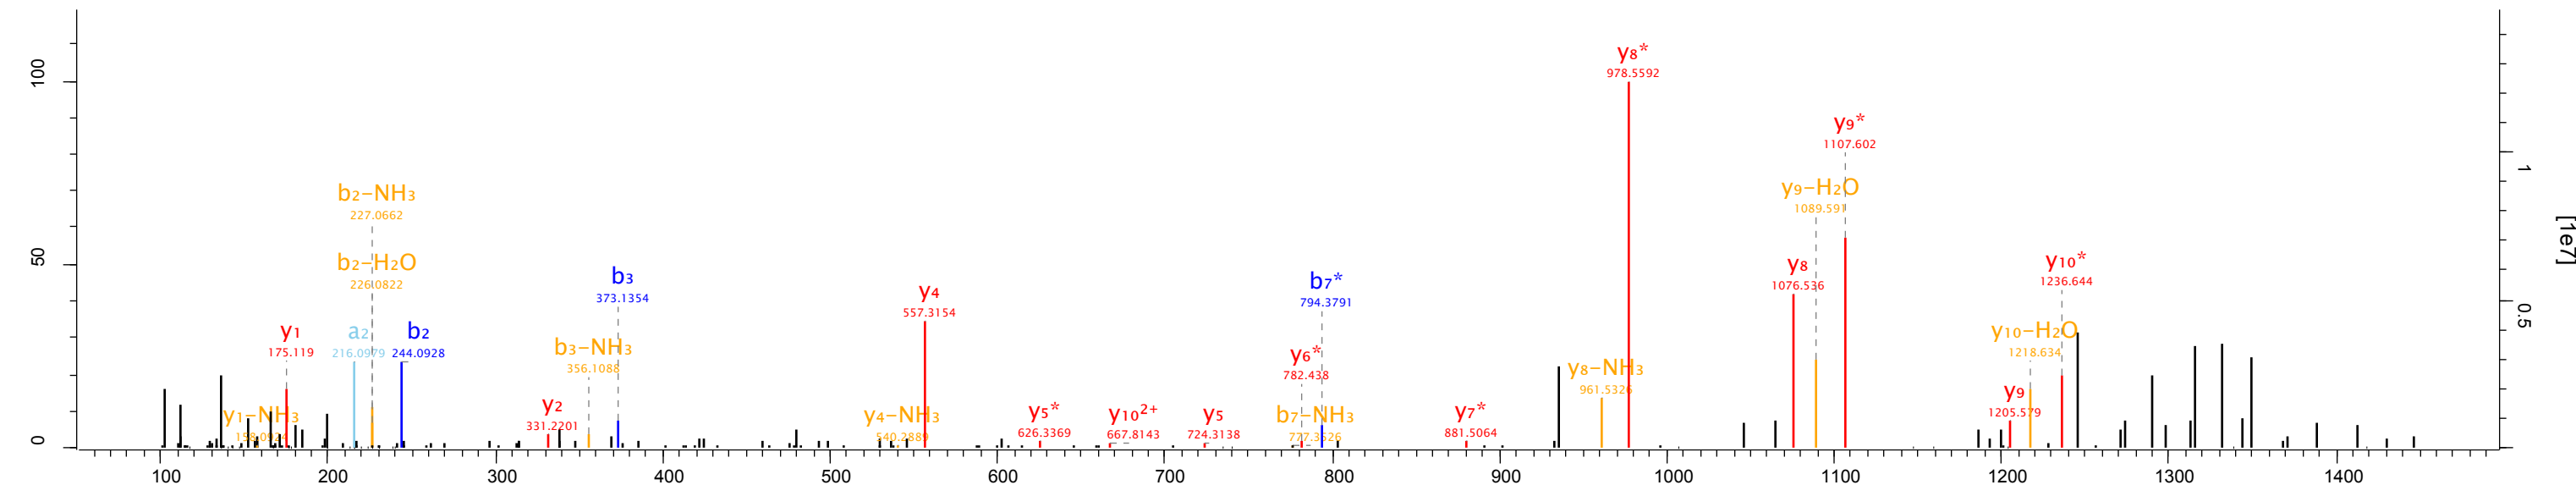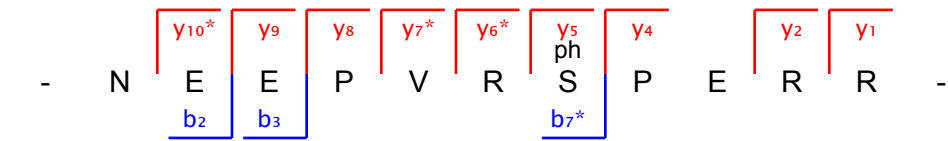

Raw file 20171215\_MaS\_33SR\_LMH\_phospho\_05 Scan 2028 Method FTMS; HCD Score 294.17 m/z 854.84 Gene names ACIN1

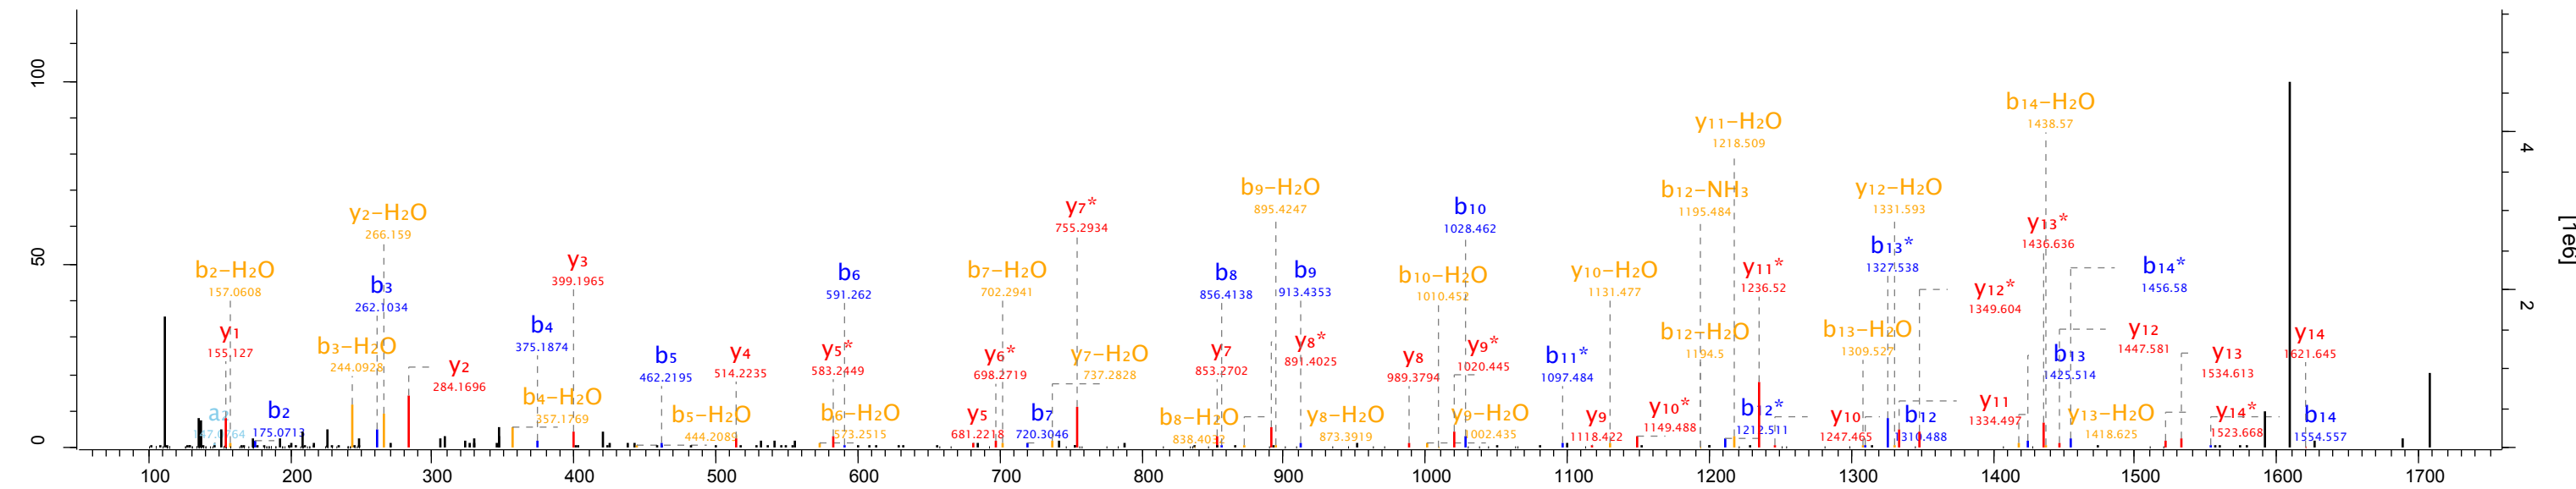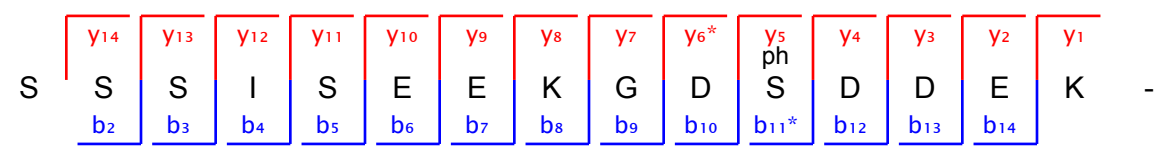

Raw file 20171215\_MaS\_33SR\_LMH\_phospho\_05 Scan 2138 Method FTMS; HCD Score 94.92 m/z 503.58 Gene names MAP1B

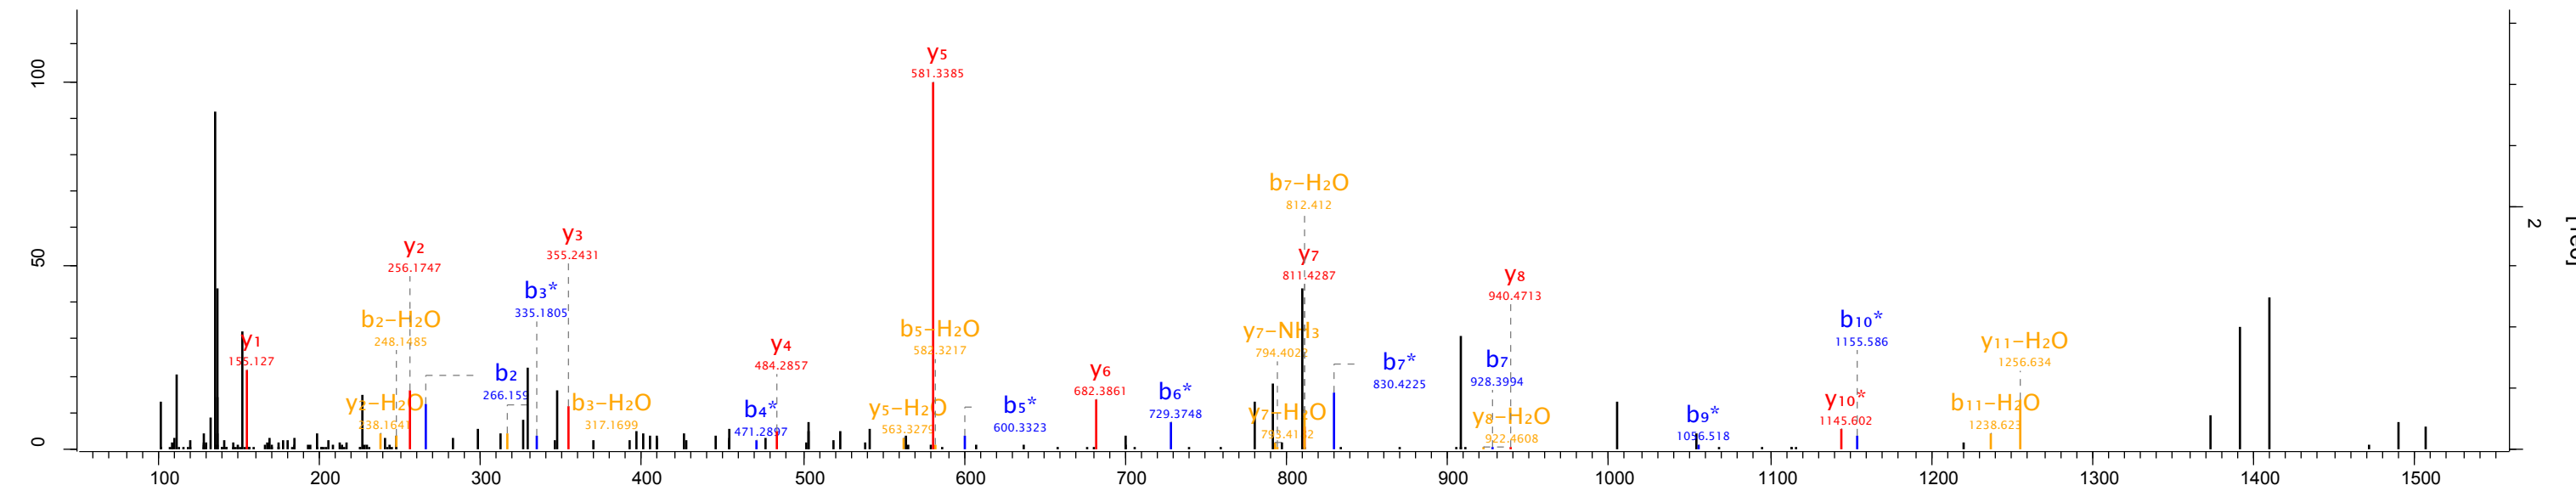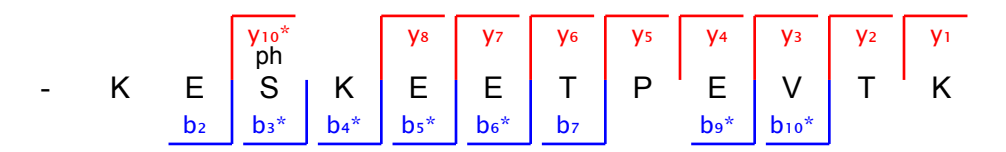

Raw file 20171215\_MaS\_33SR\_LMH\_phospho\_05 Scan 2588 Method FTMS; HCD Score 201.61 m/z 629.96 Gene names C9orf78

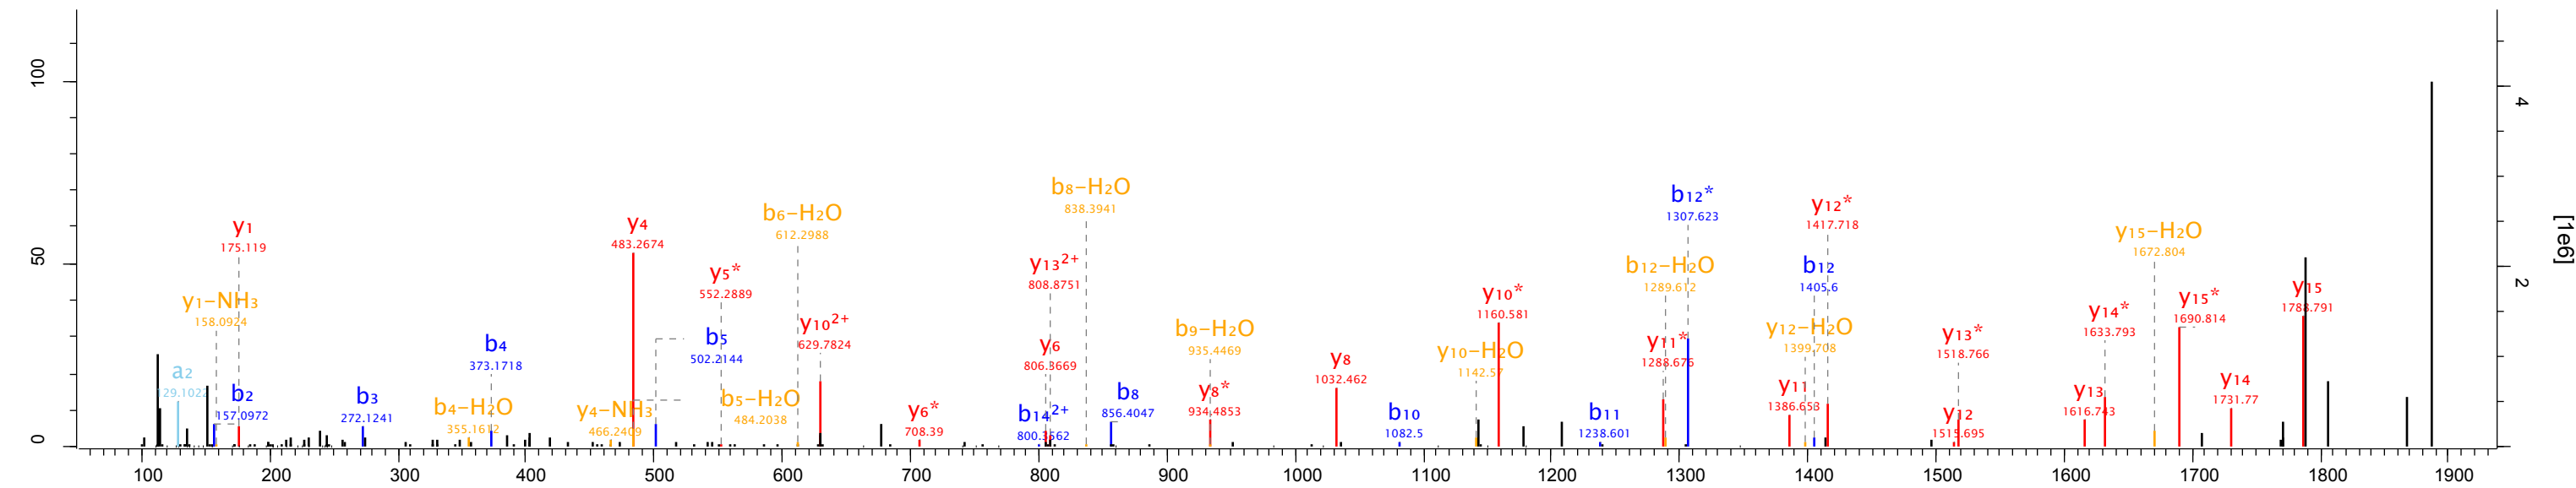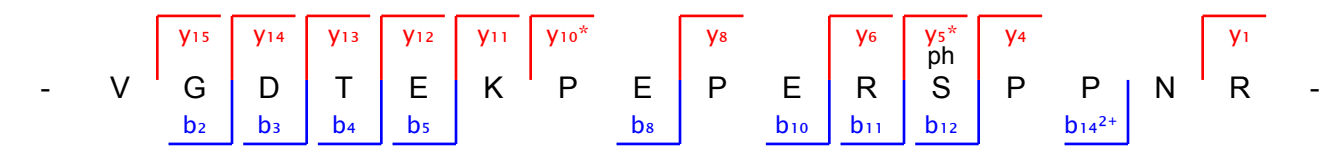

Raw file 20171215\_MaS\_33SR\_LMH\_phospho\_05 Scan 2658 Method FTMS; HCD Score 77.75 m/z 483.94 Gene names CCNK

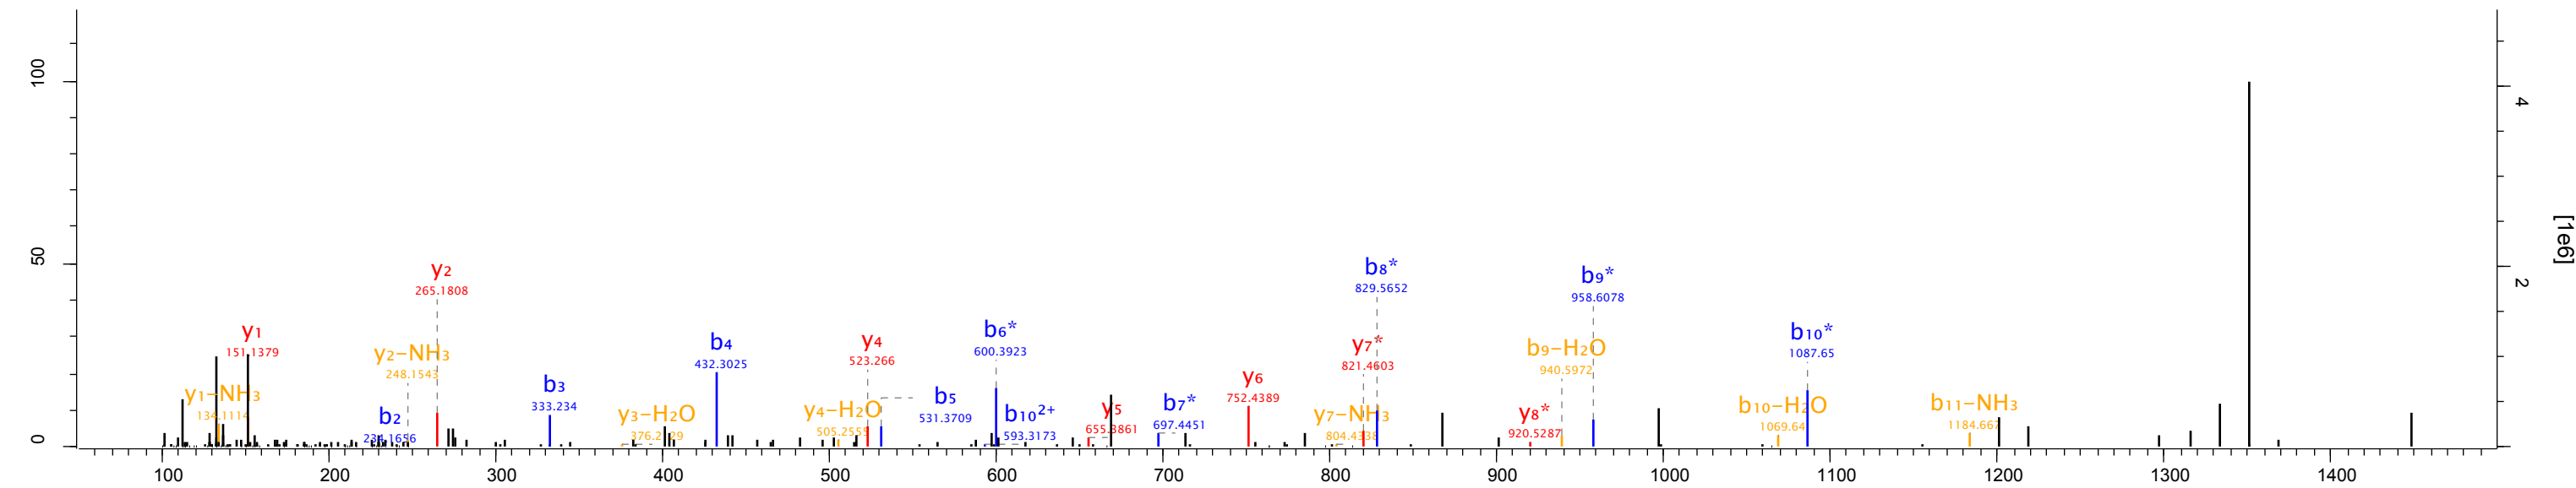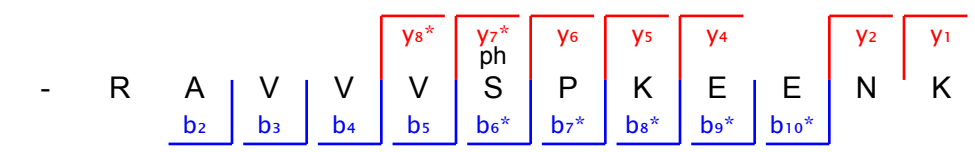



Raw file 20171215\_MaS\_33SR\_LMH\_phospho\_05 Scan 2828 Method FTMS; HCD Score 90.41 m/z 679.29 Gene names PAPOLA

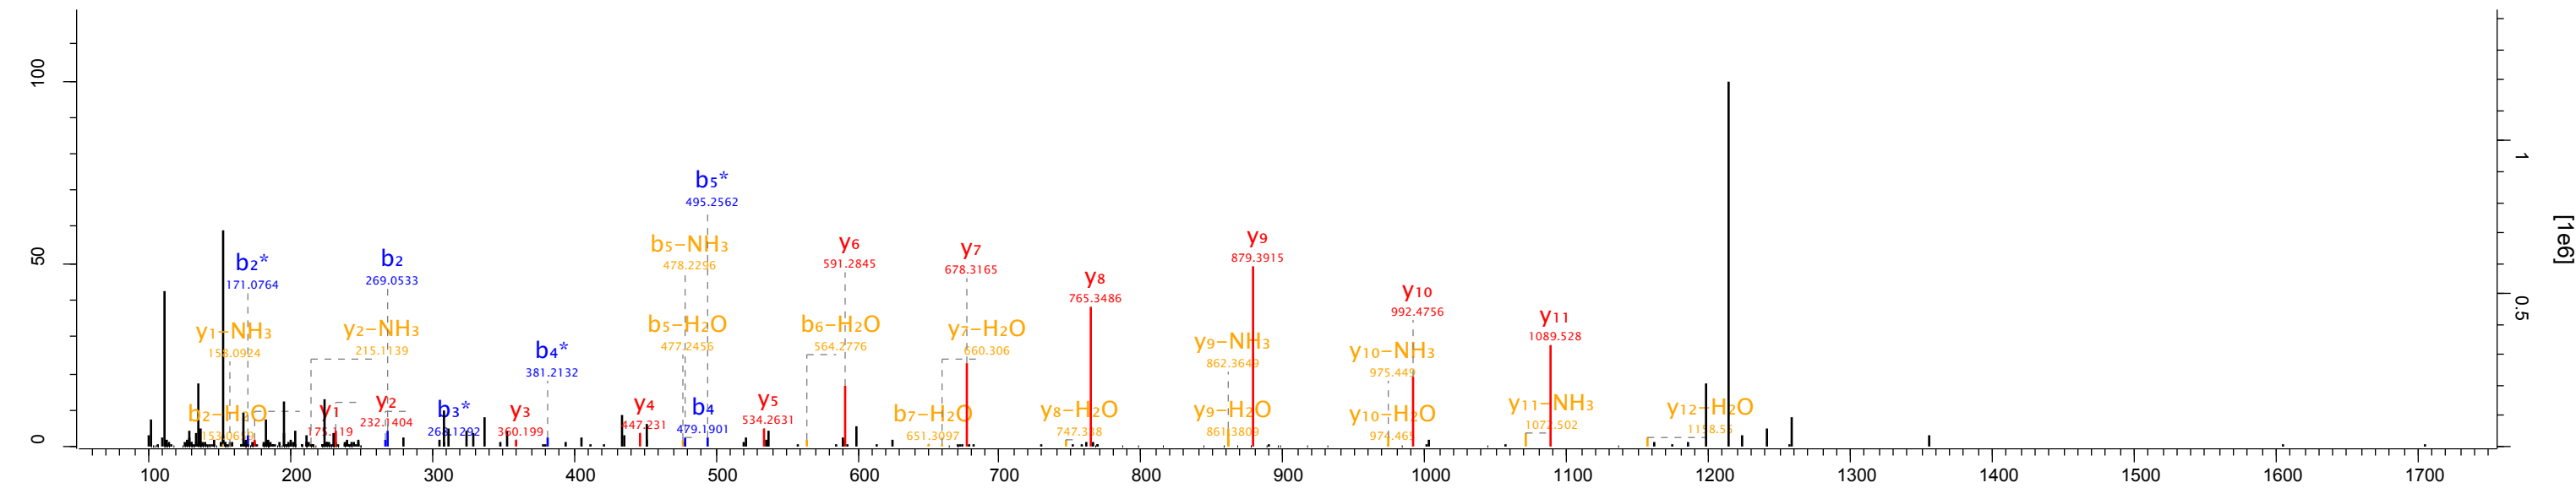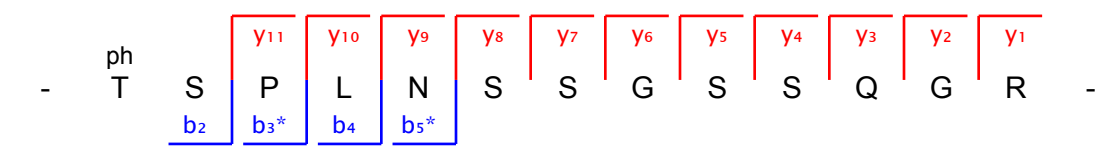

Raw file 20171215\_MaS\_33SR\_LMH\_phospho\_05 Scan 2858 Method FTMS; HCD Score 119.77 m/z 455.22 Gene names ZC3H13

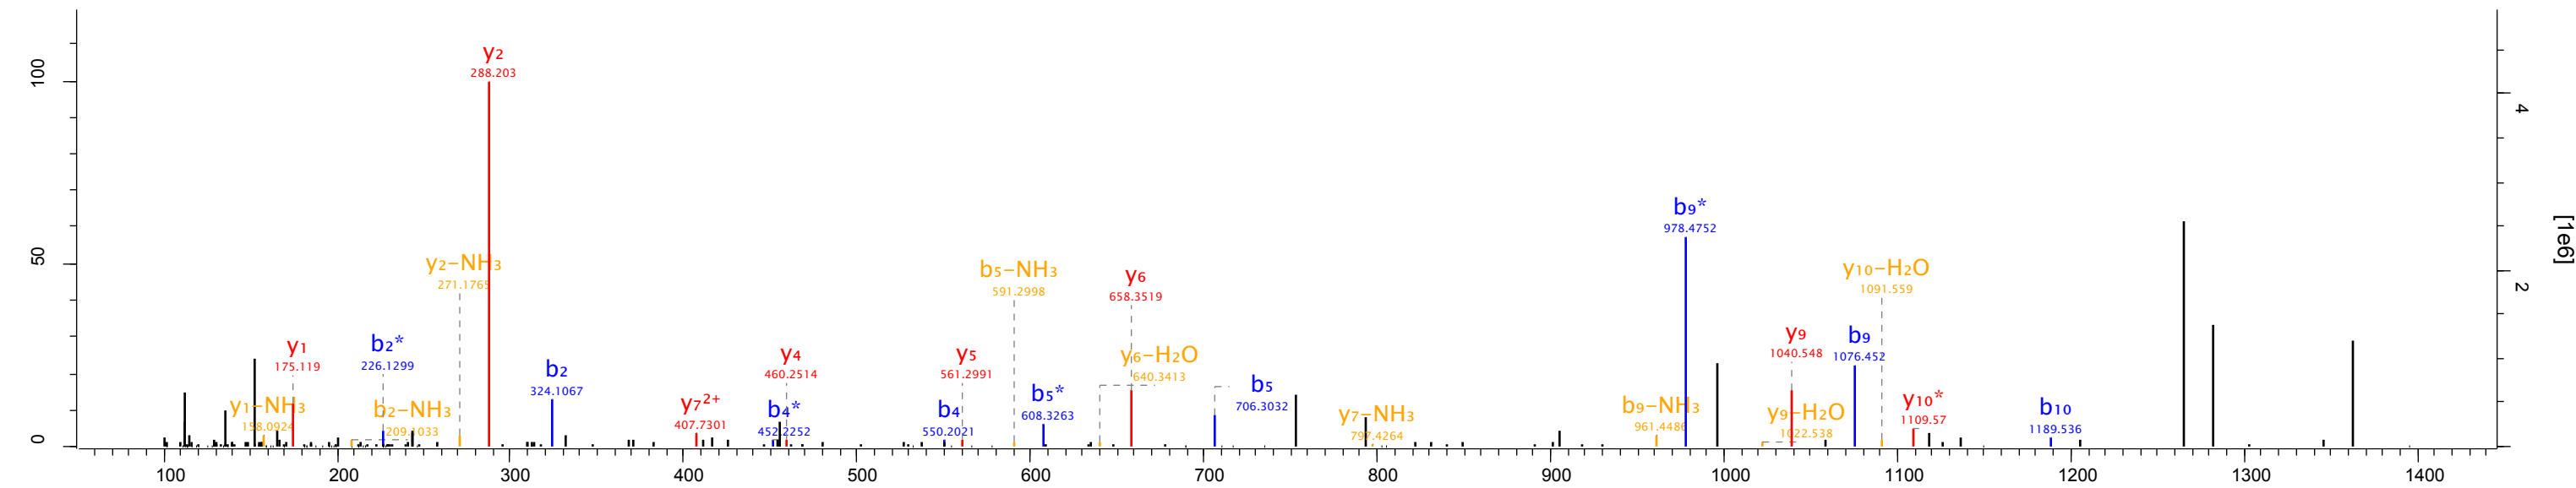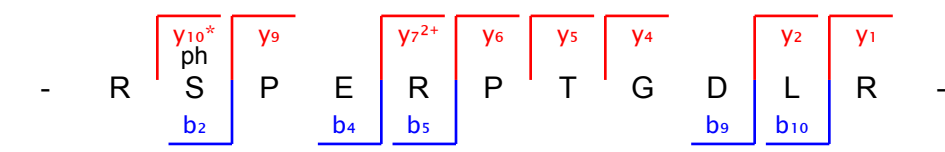

Raw file 20171215\_MaS\_33SR\_LMH\_phospho\_05 Scan 3008 Method FTMS; HCD Score 82.36 m/z 933.9 Gene names MIER1

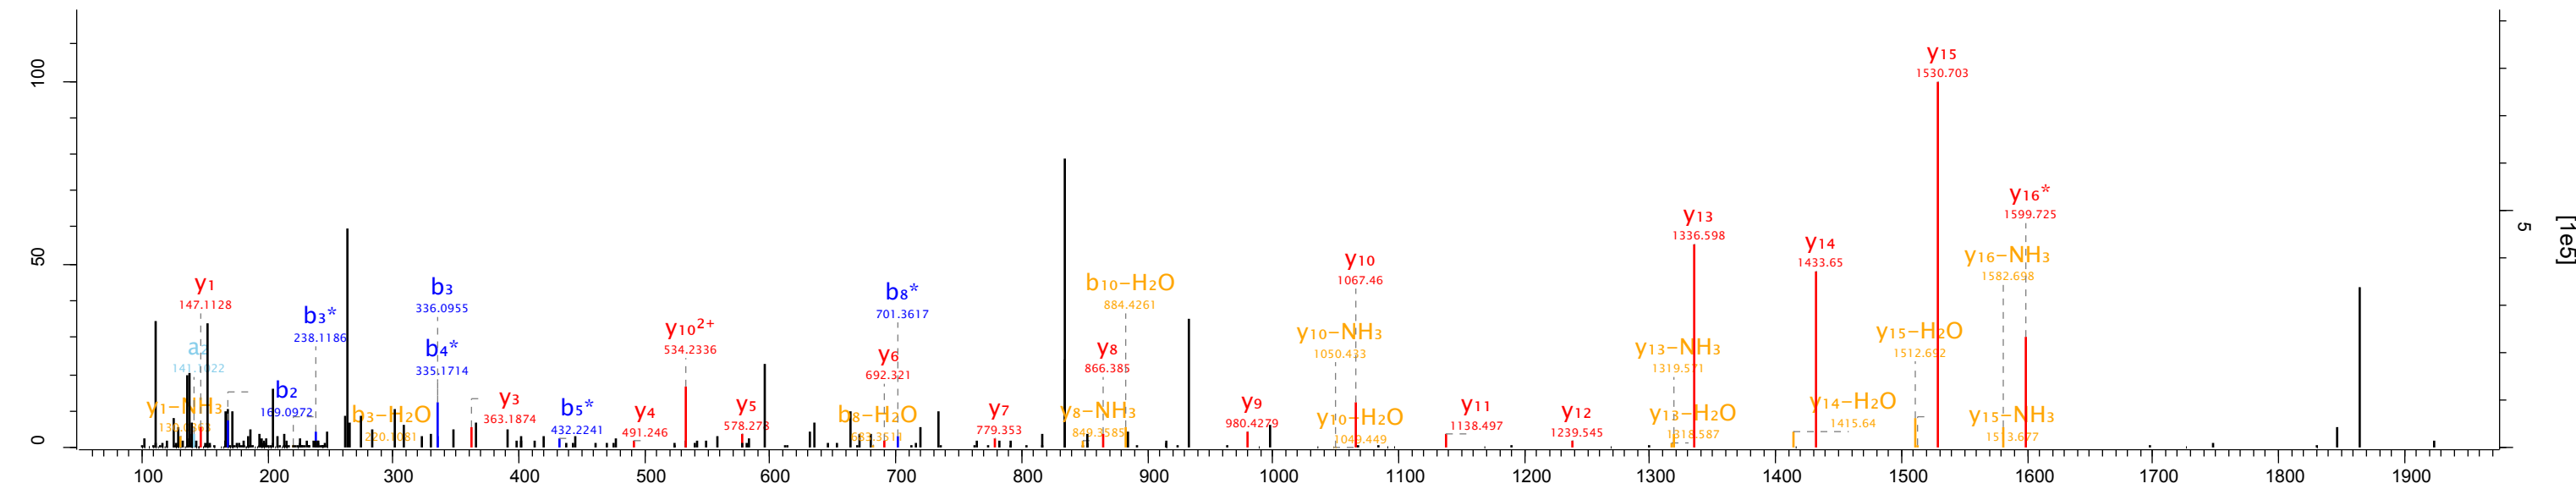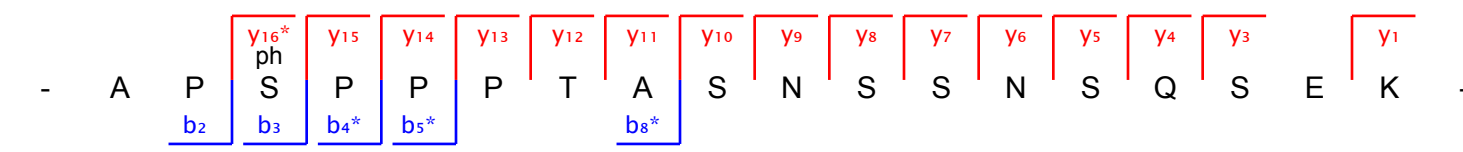

Raw file 20171215\_MaS\_33SR\_LMH\_phospho\_05 Scan 3168 Method FTMS; HCD Score 98.77 m/z 737.98 Gene names PRRC2A

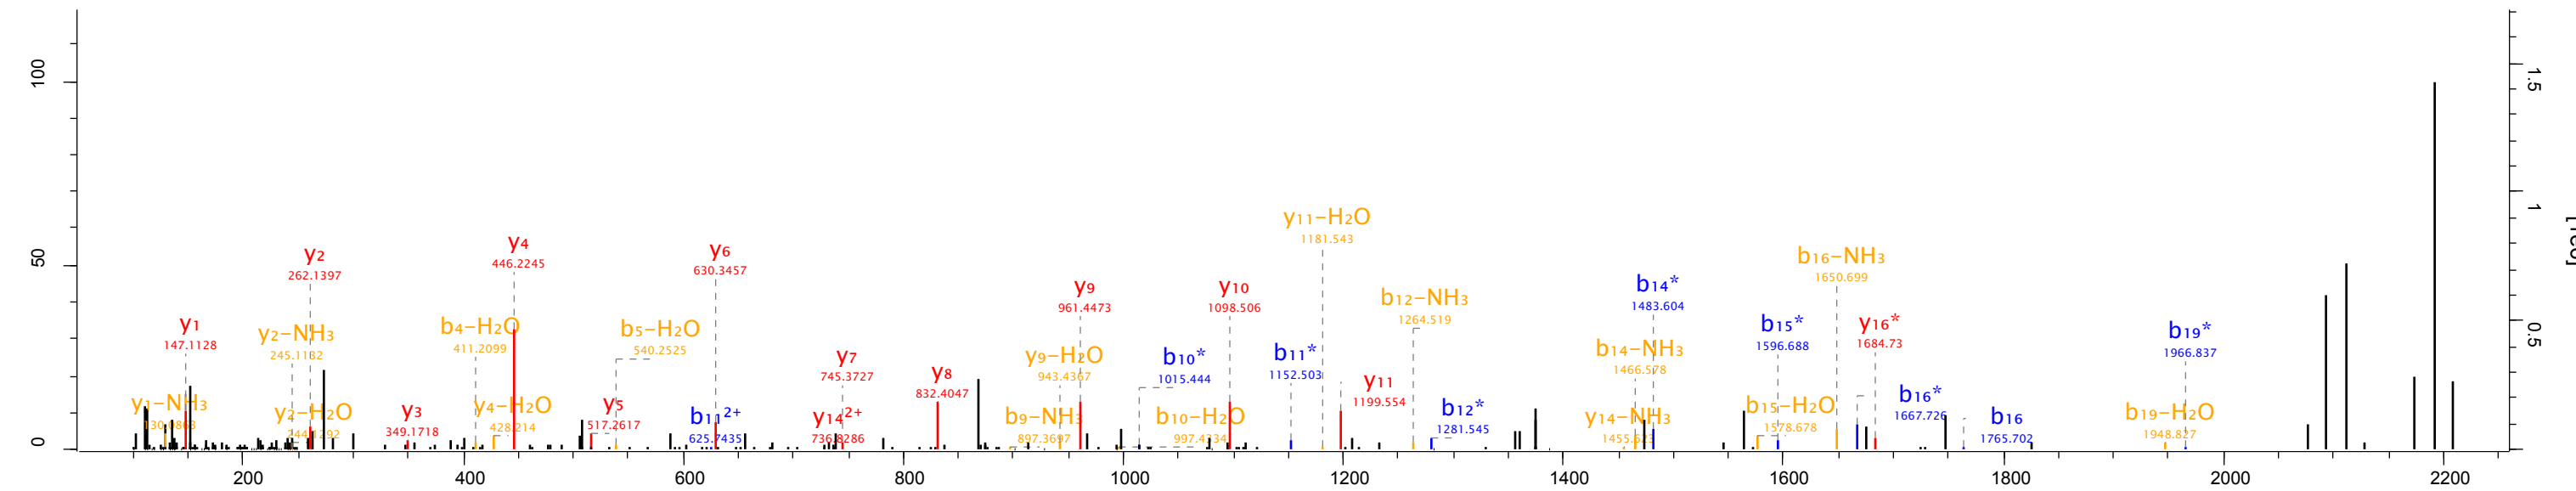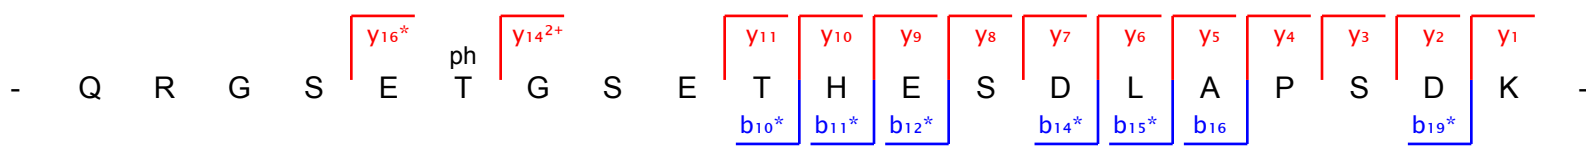

Raw file 20171215\_MaS\_33SR\_LMH\_phospho\_05 Scan 4338 Method FTMS; HCD Score 78.26 m/z 426.73

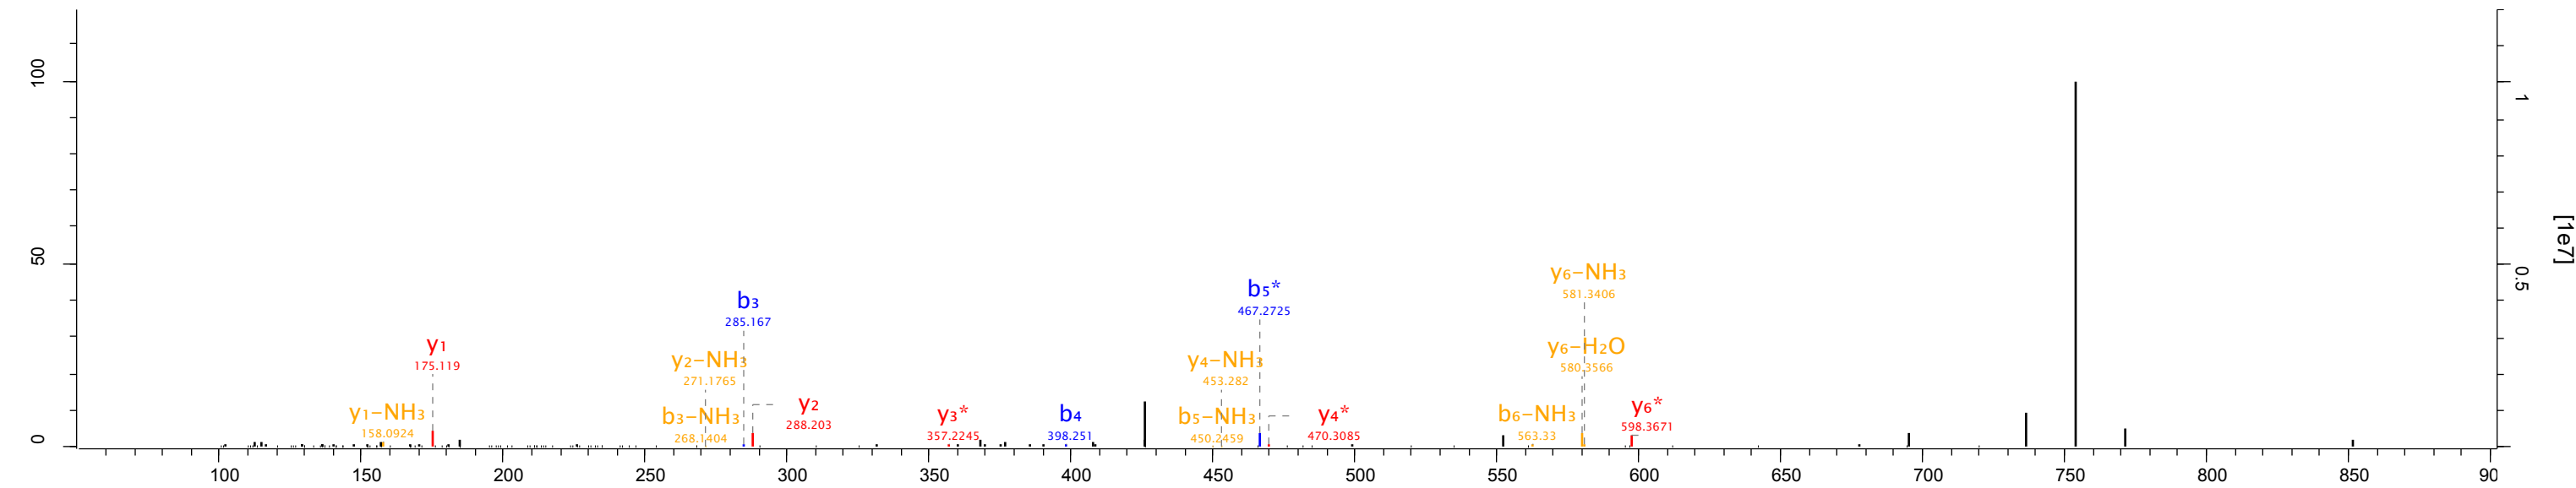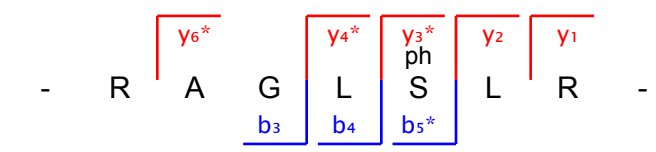

Raw file 20171215\_MaS\_33SR\_LMH\_phospho\_05 Scan 4538 Method FTMS; HCD Score 223.86 m/z 863.86 Gene names STK10

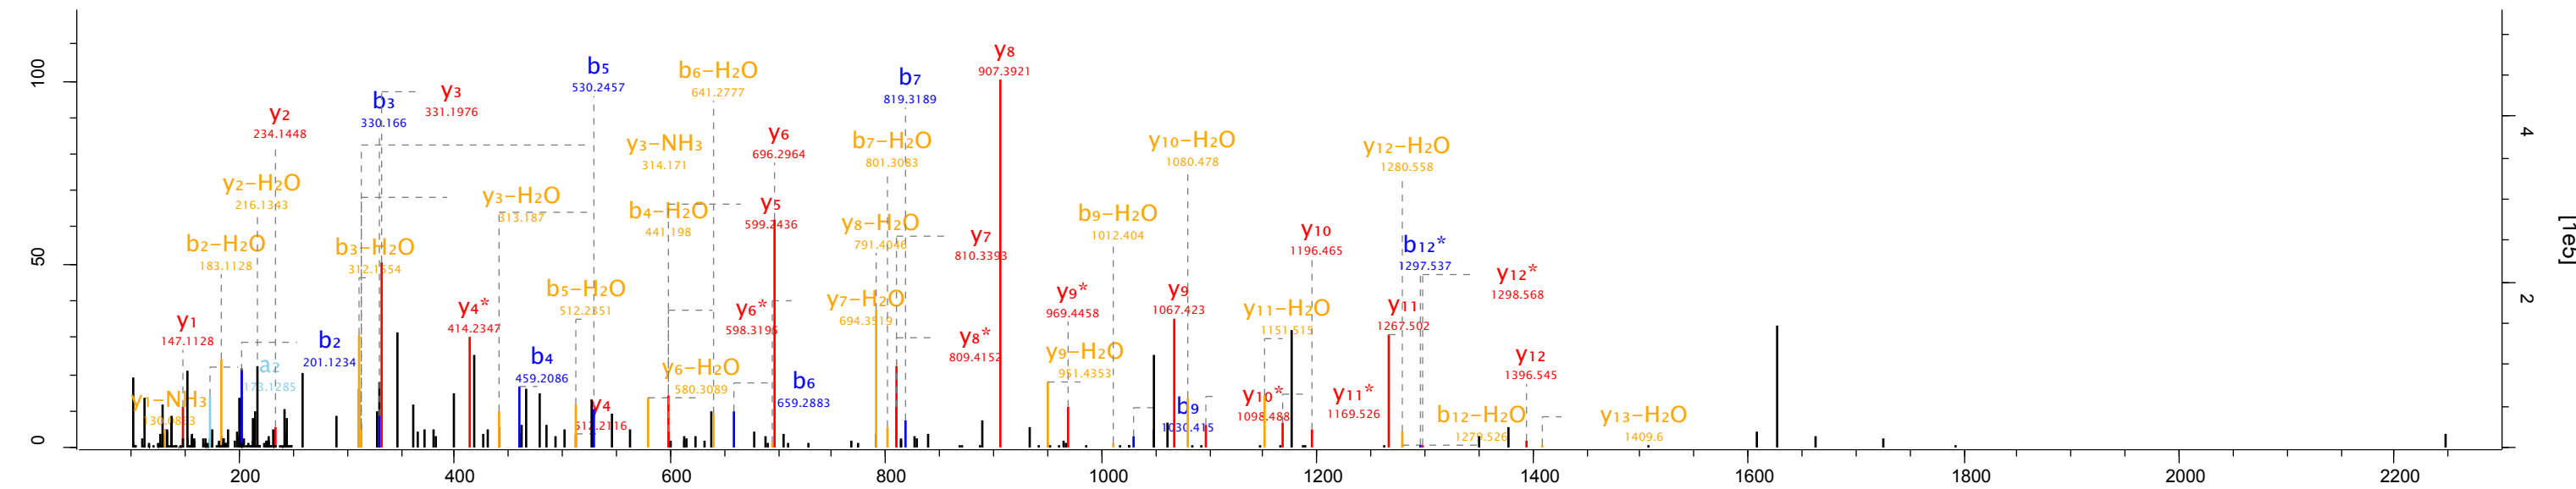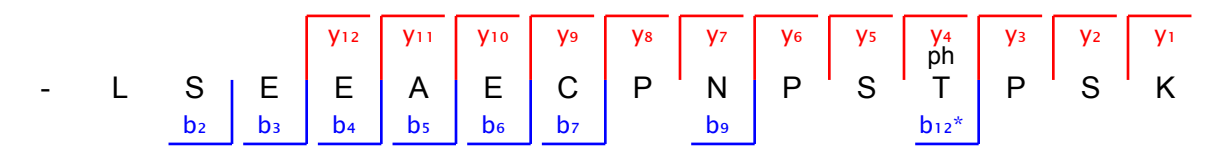

Raw file 20171215\_MaS\_33SR\_LMH\_phospho\_05 Scan 4968 Method FTMS; HCD Score 52.1 m/z 530.75 Gene names VGLL4

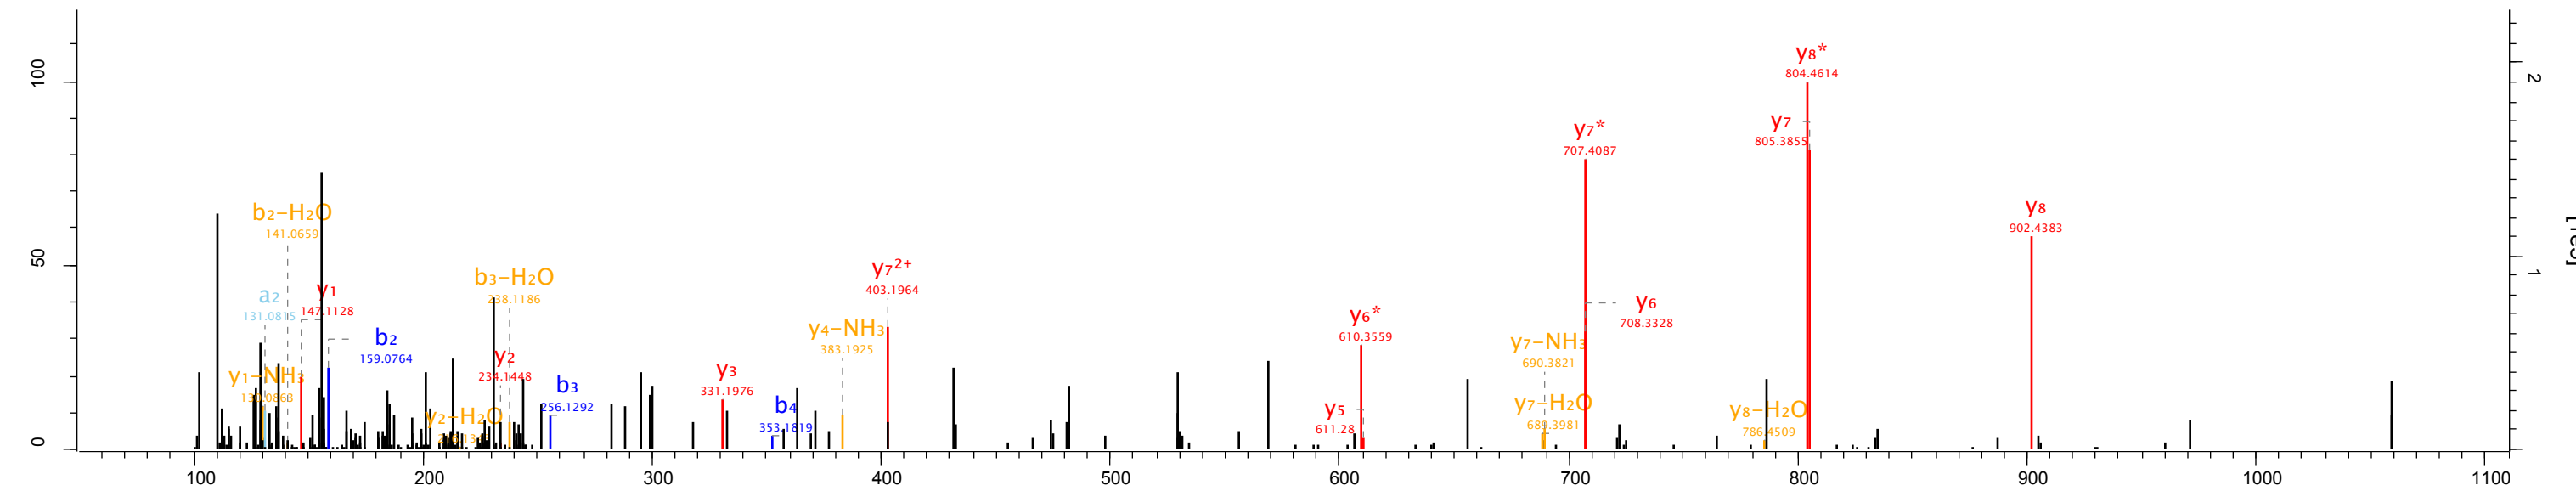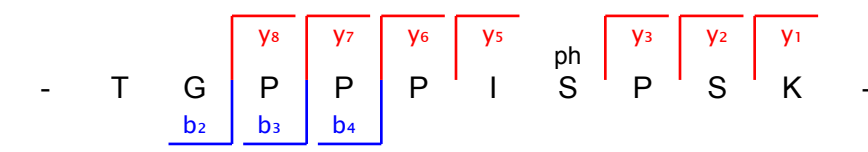

Raw file 20171215\_MaS\_33SR\_LMH\_phospho\_05 Scan 5178 Method FTMS; HCD Score 148.26 m/z 752.87 Gene names RAB11FIP5

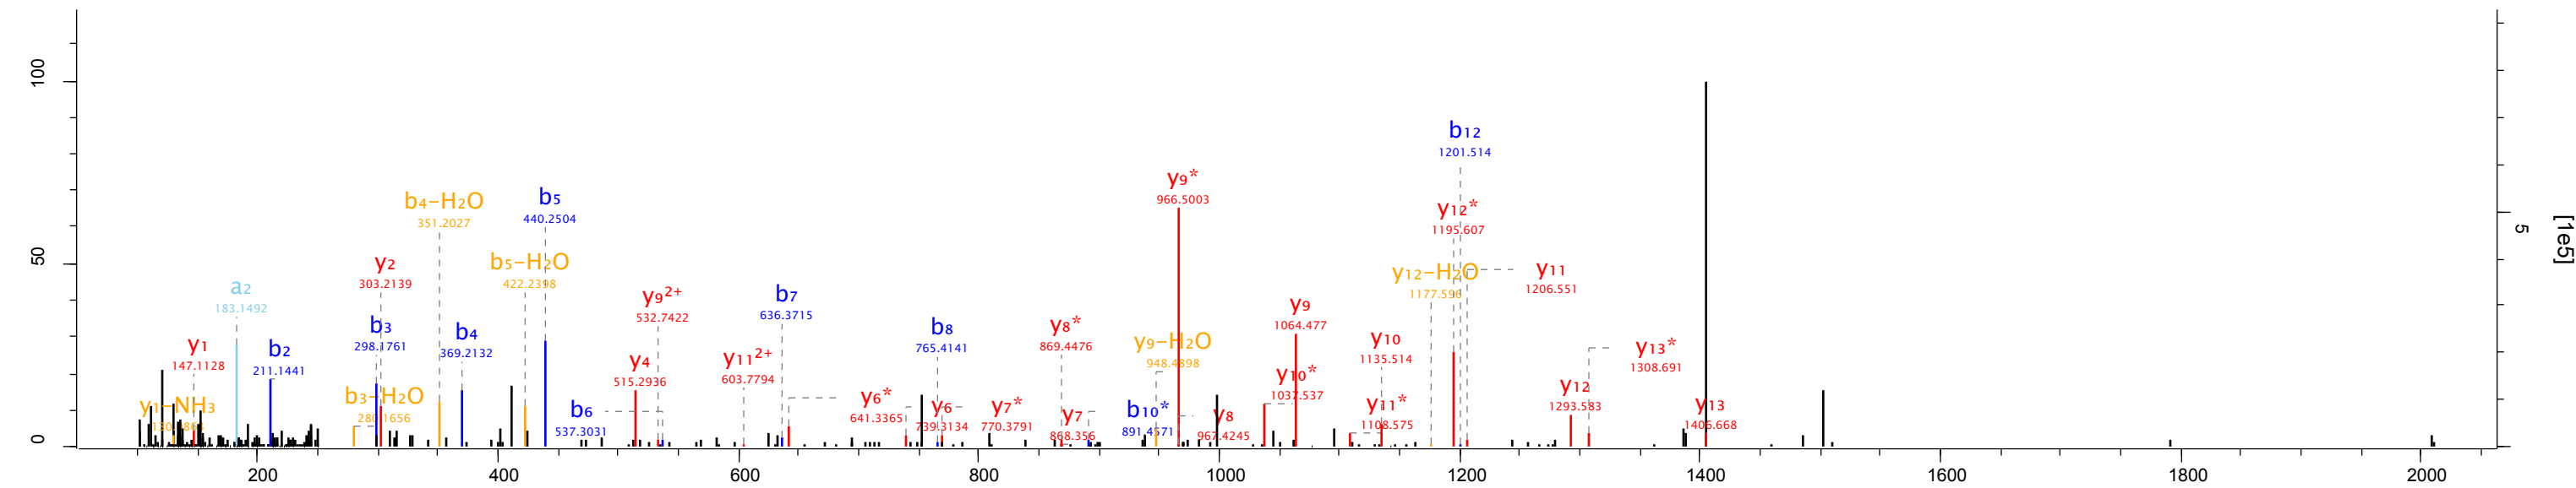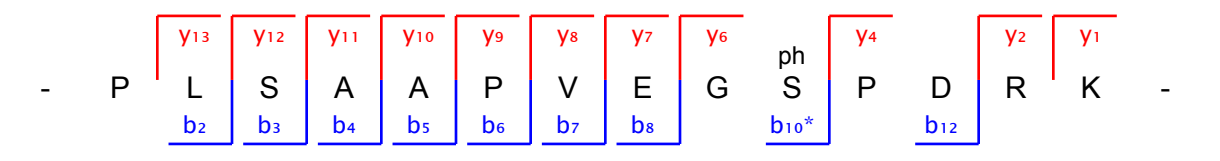



Raw file 20171215\_MaS\_33SR\_LMH\_phospho\_05 Scan 5268 Method FTMS; HCD Score 115.41 m/z 480.73 Gene names FRMD4A

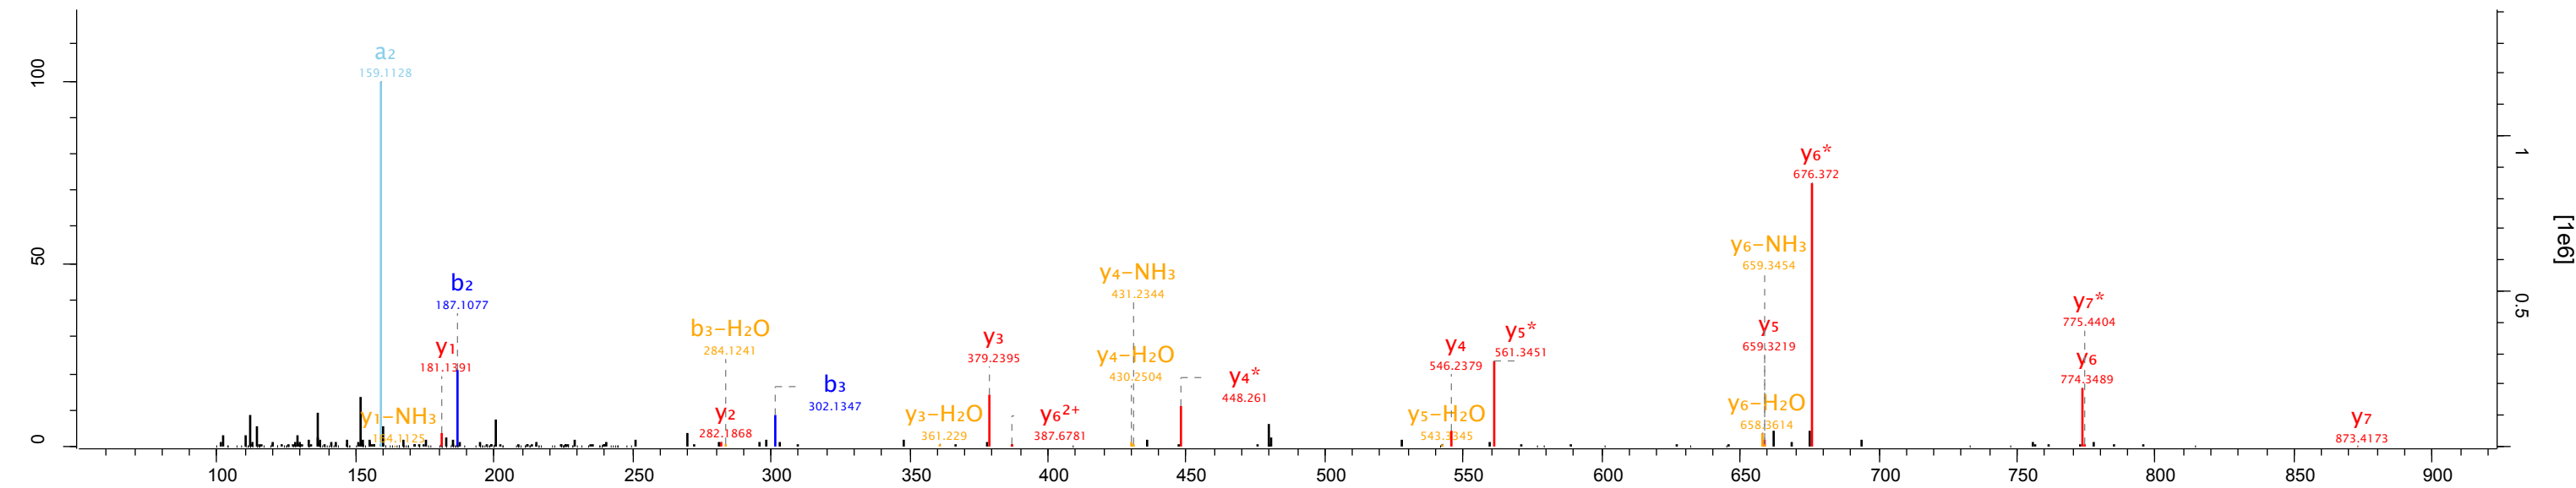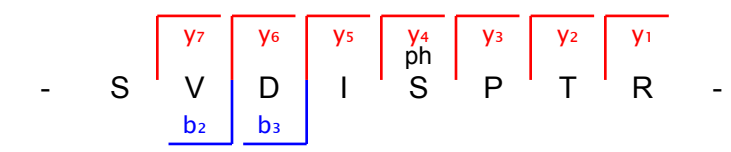

Raw file 20171215\_MaS\_33SR\_LMH\_phospho\_05 Scan 5388 Method FTMS; HCD Score 157.88 m/z 858.37 Gene names LMO7

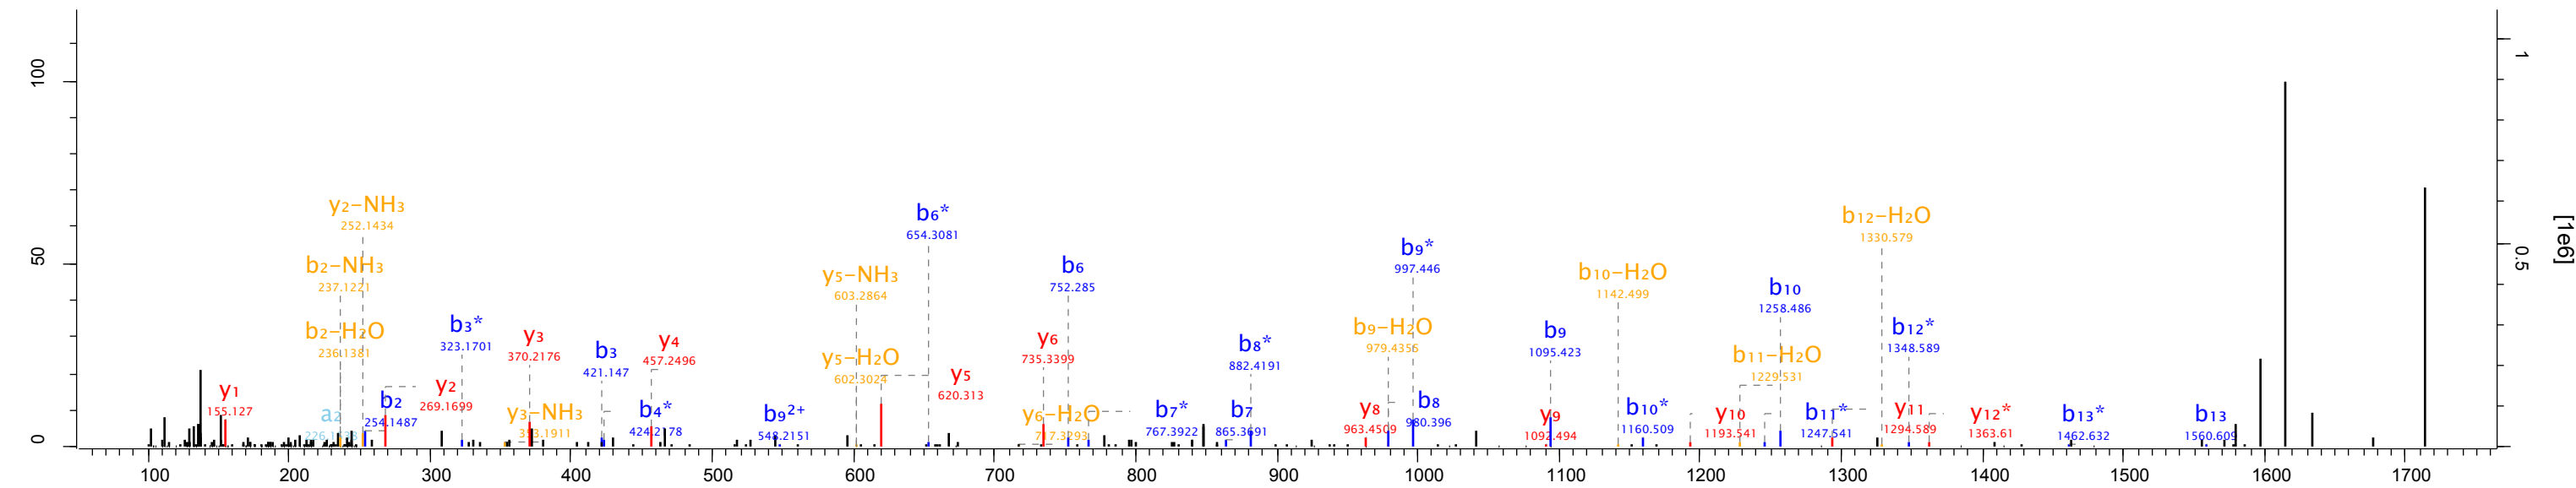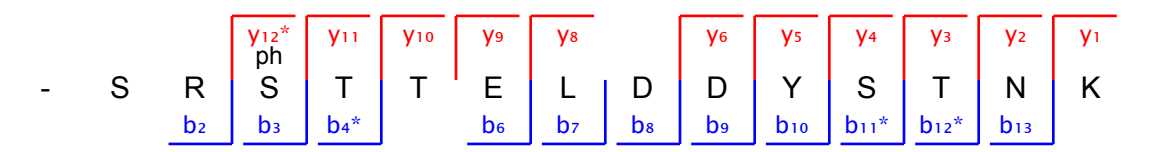

Raw file 20171215\_MaS\_33SR\_LMH\_phospho\_05 Scan 6698 Method FTMS; HCD Score 192.23 m/z 709.81 Gene names NDRG1

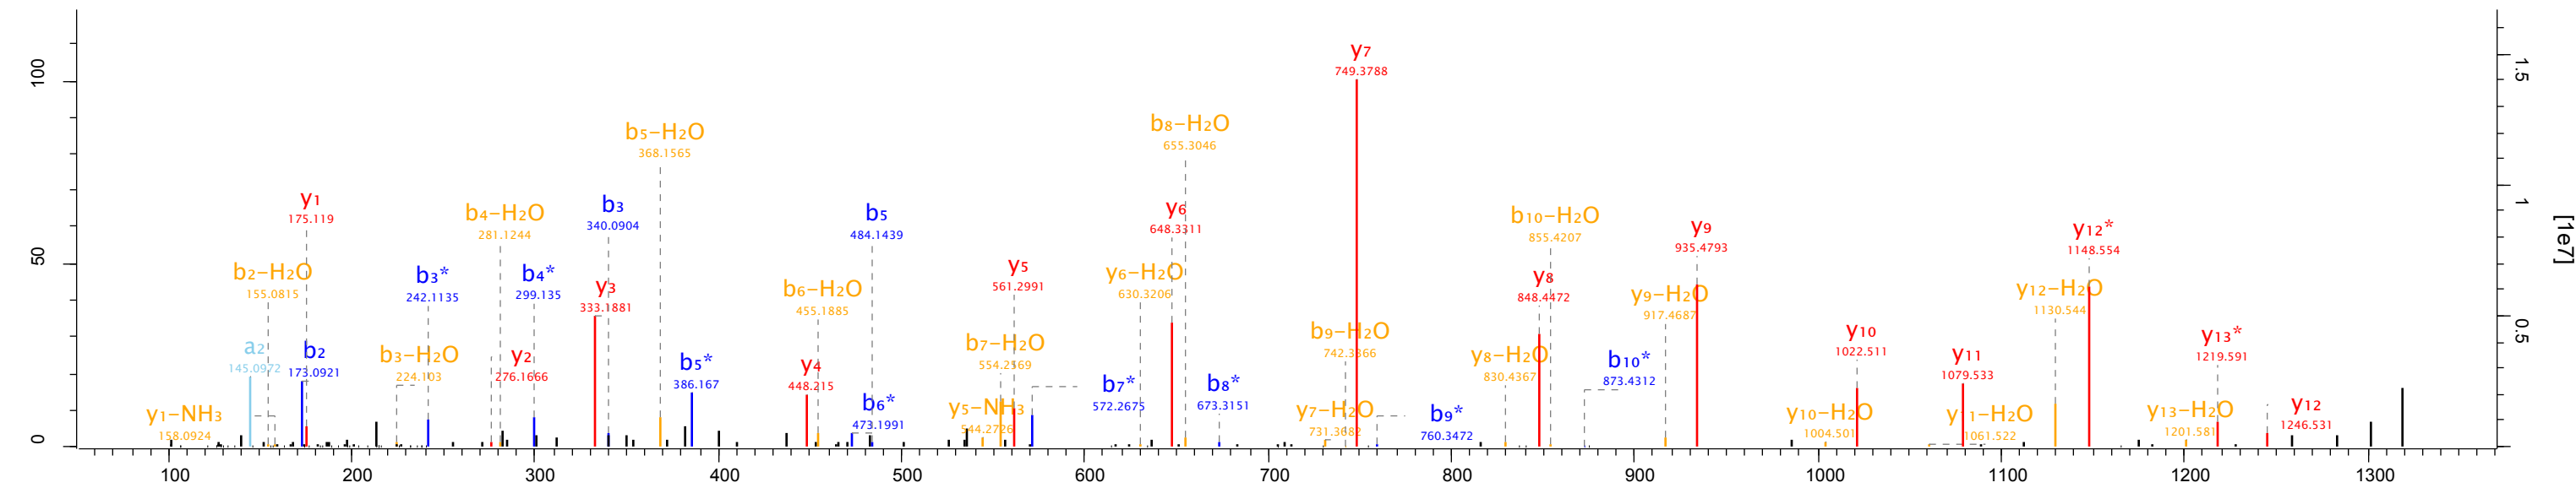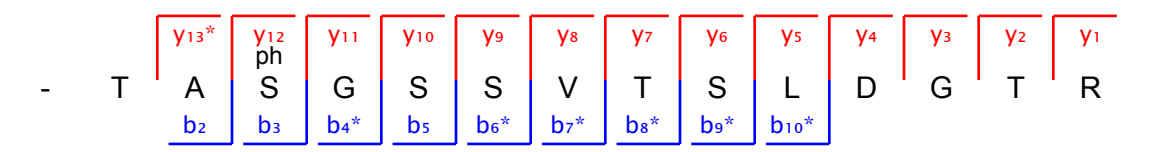

Raw file 20171215\_MaS\_33SR\_LMH\_phospho\_05 Scan 8508 Method FTMS; HCD Score 92.65 m/z 629.28 Gene names SH3PXD2A

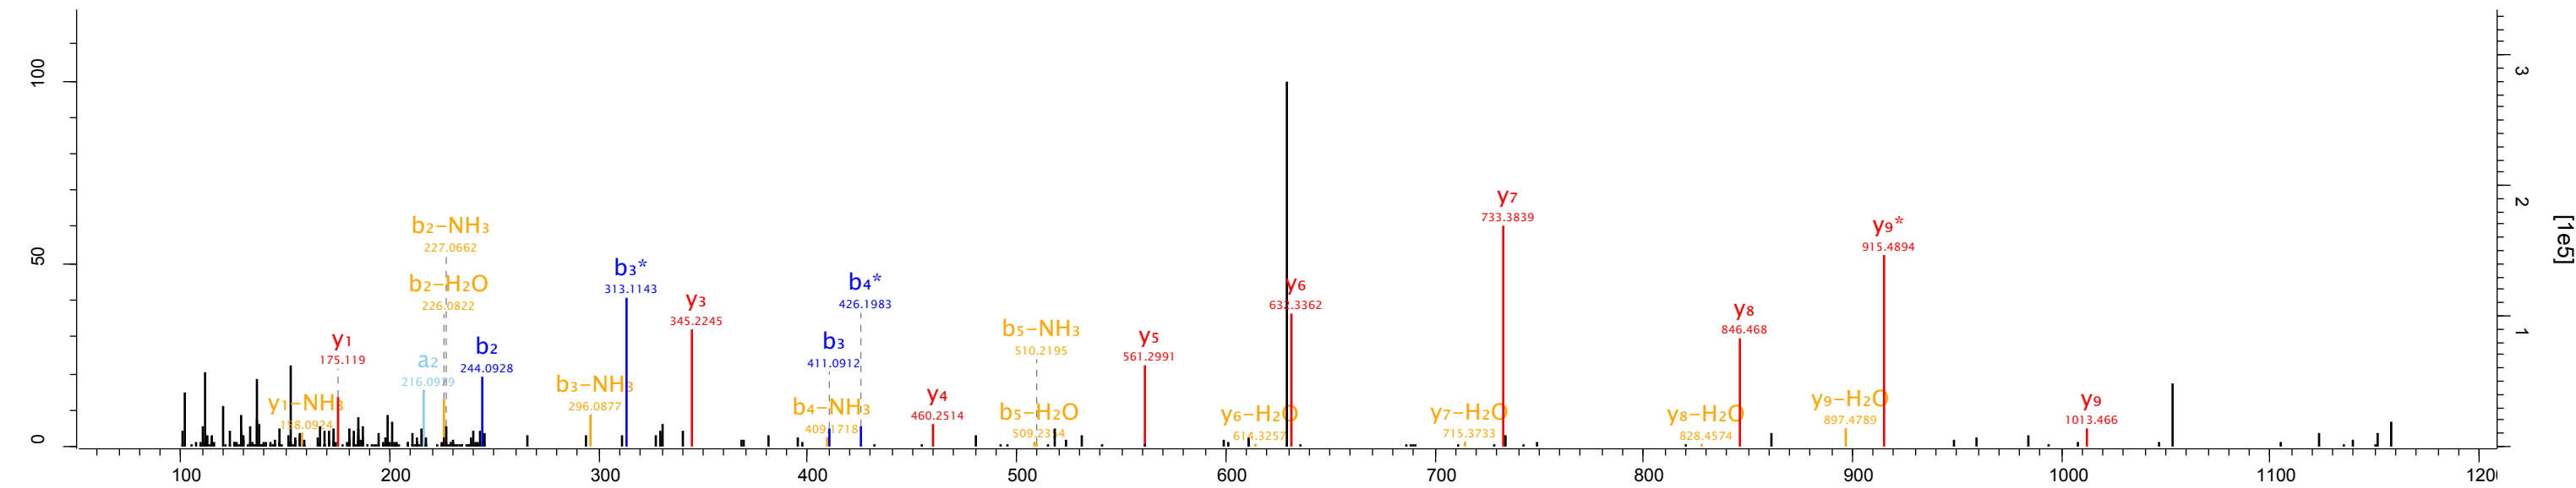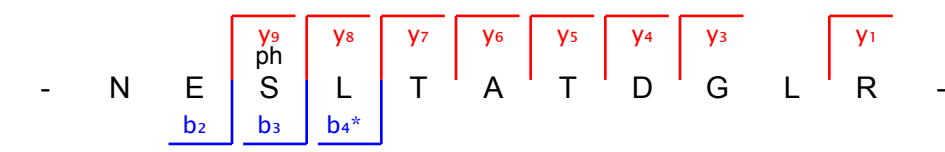

Raw file 20171215\_MaS\_33SR\_LMH\_phospho\_05 Scan 8688 Method FTMS; HCD Score 63.22 m/z 845.89 Gene names MAP4K4

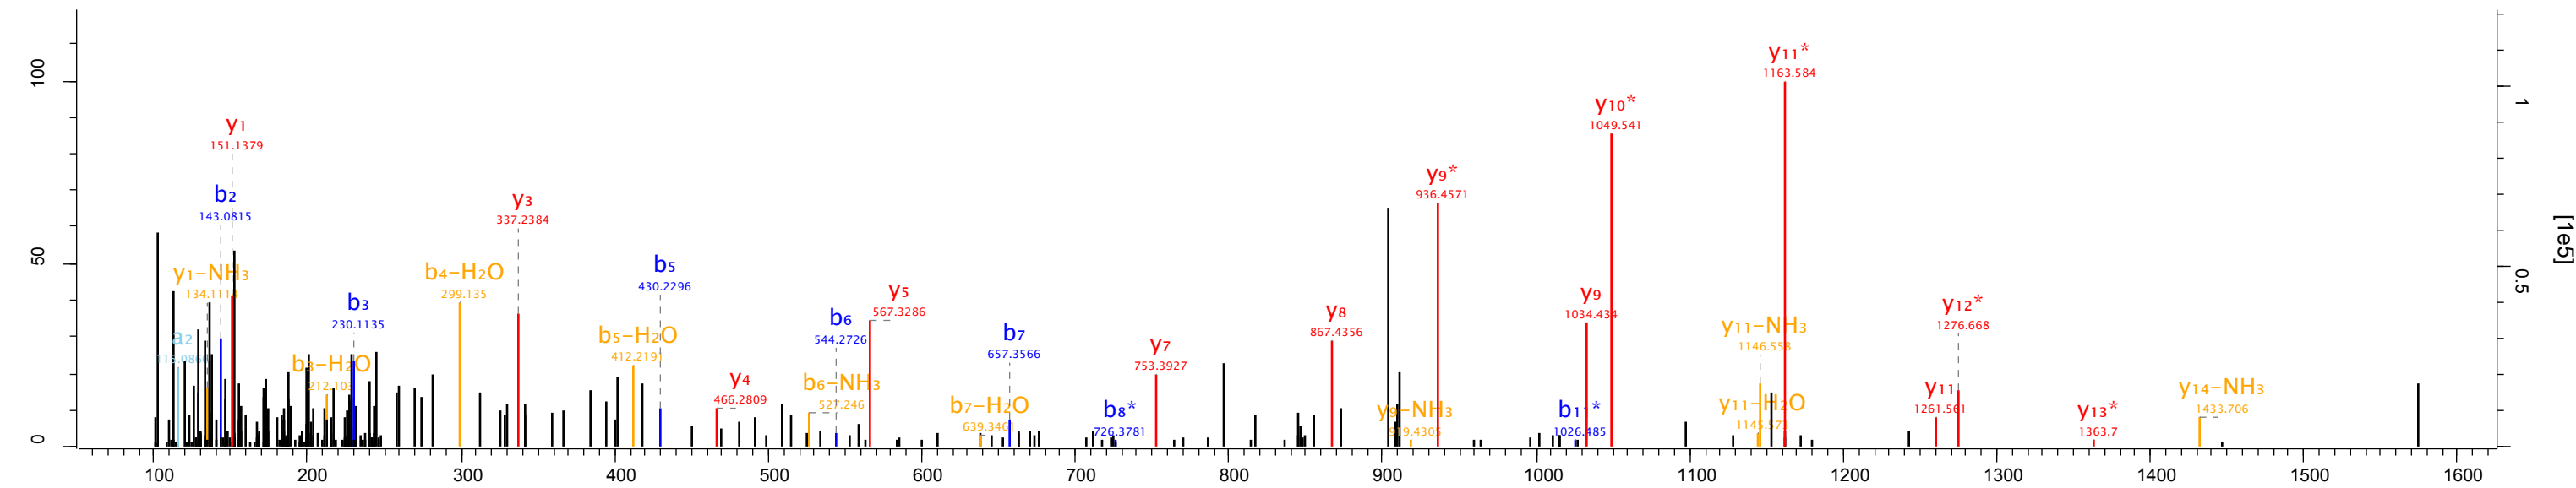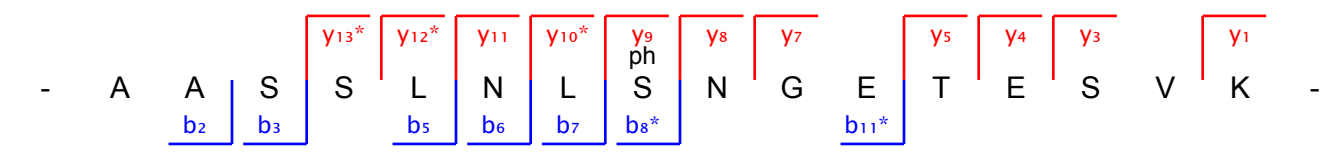



Raw file 20171215\_MaS\_33SR\_LMH\_phospho\_06 Scan 10228 Method FTMS; HCD Score 152.01 m/z 743.83 Gene names TBX3

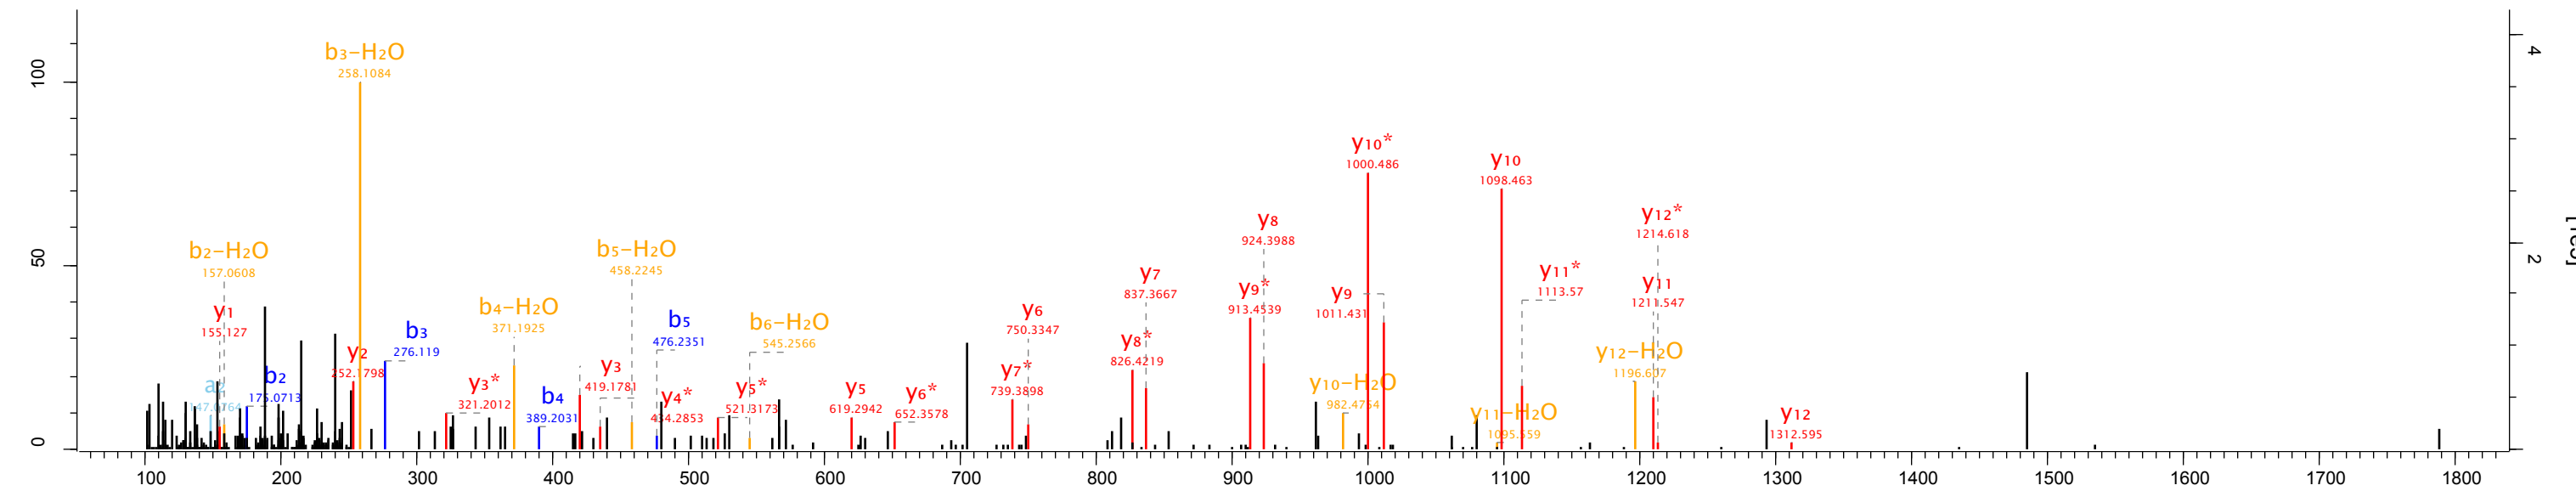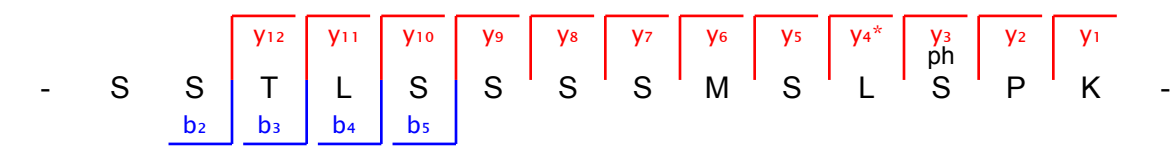

Raw file 20171215\_MaS\_33SR\_LMH\_phospho\_06 Scan 10308 Method FTMS; HCD Score 172.77 m/z 846.91 Gene names MAP4

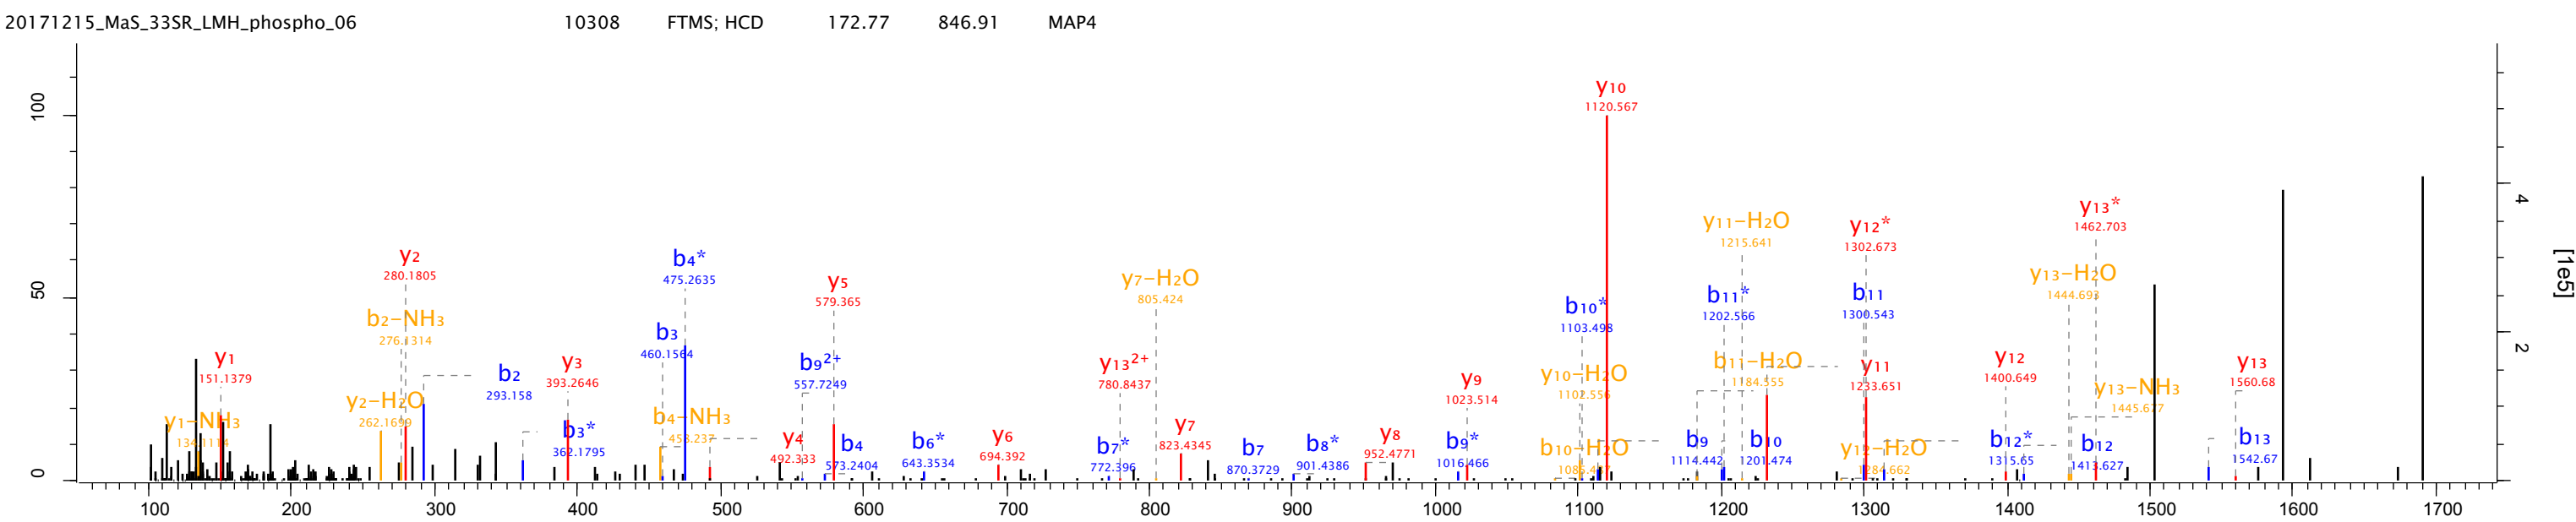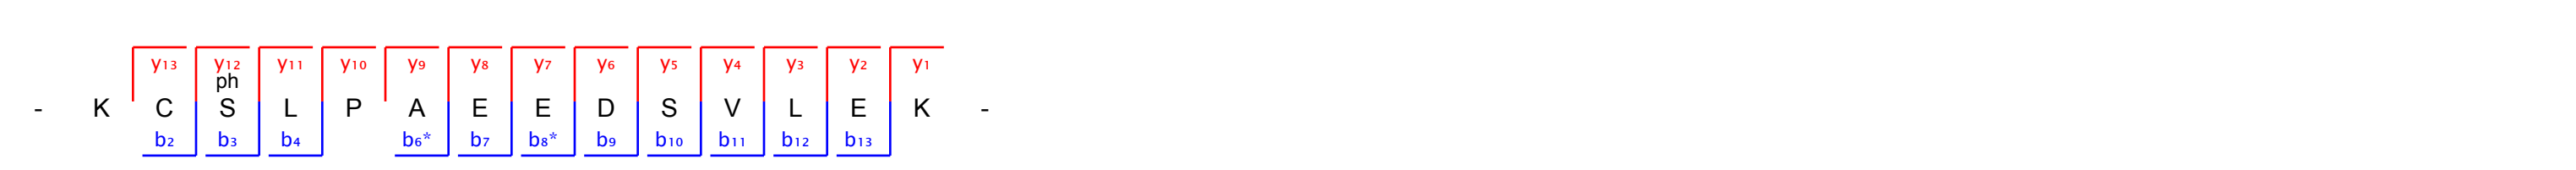



Raw file 20171215\_MaS\_33SR\_LMH\_phospho\_06 Scan 11098 Method FTMS; HCD Score 105.53 m/z 700.83 Gene names MED1

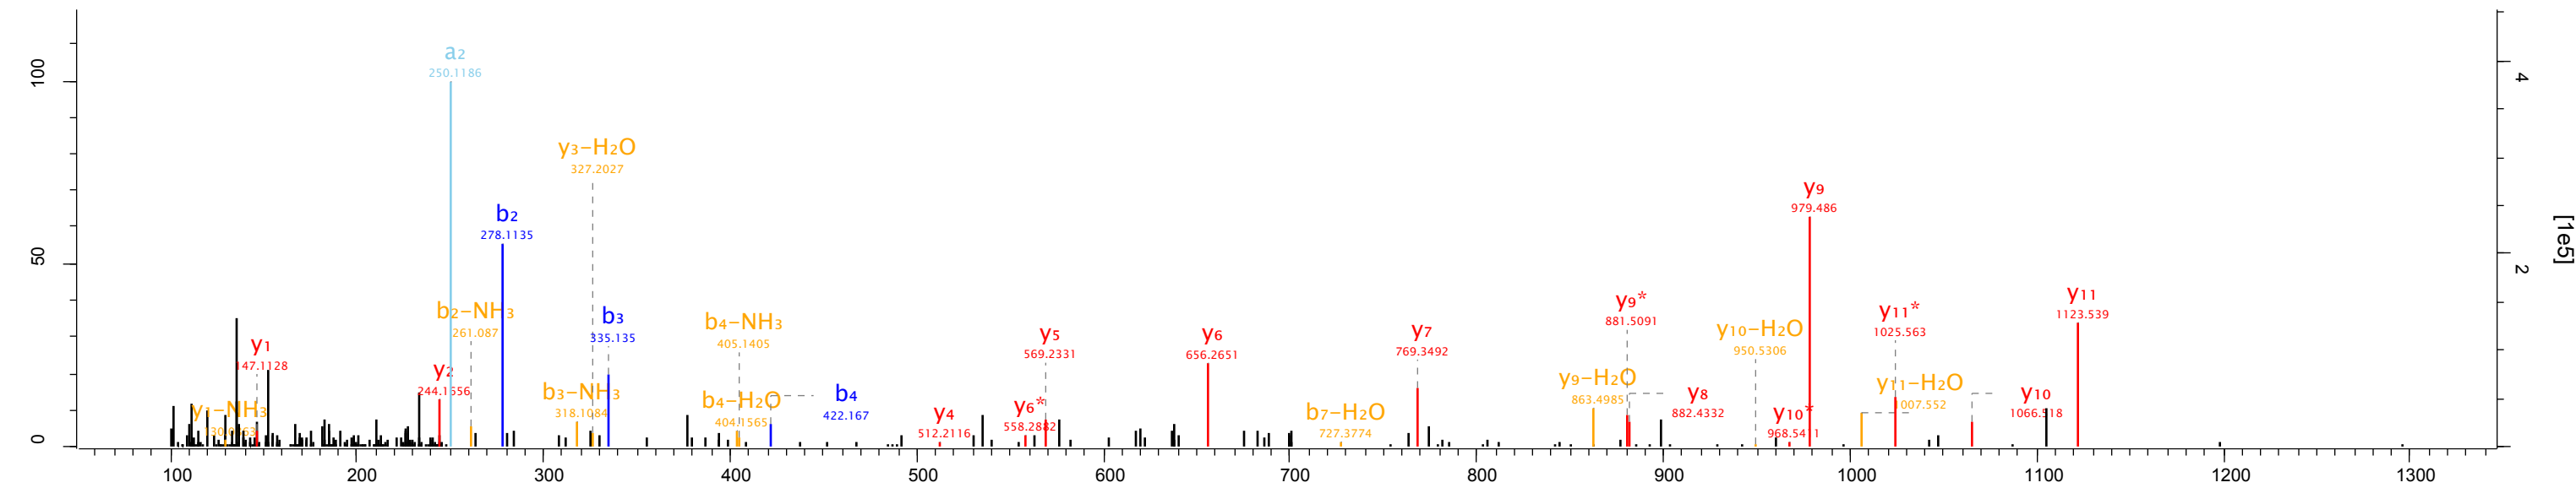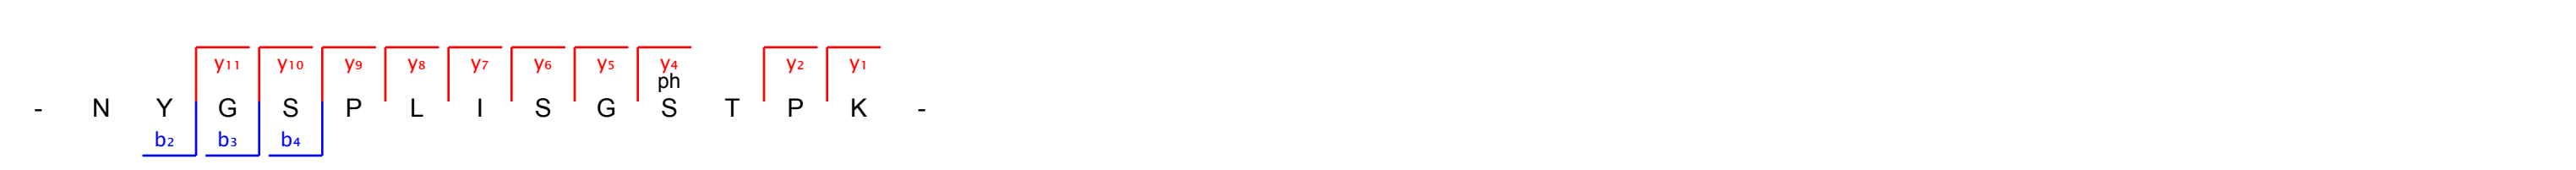

Raw file 20171215\_MaS\_33SR\_LMH\_phospho\_06 Scan 11318 Method FTMS; HCD Score 121.21 m/z 861.91 Gene names MARK3

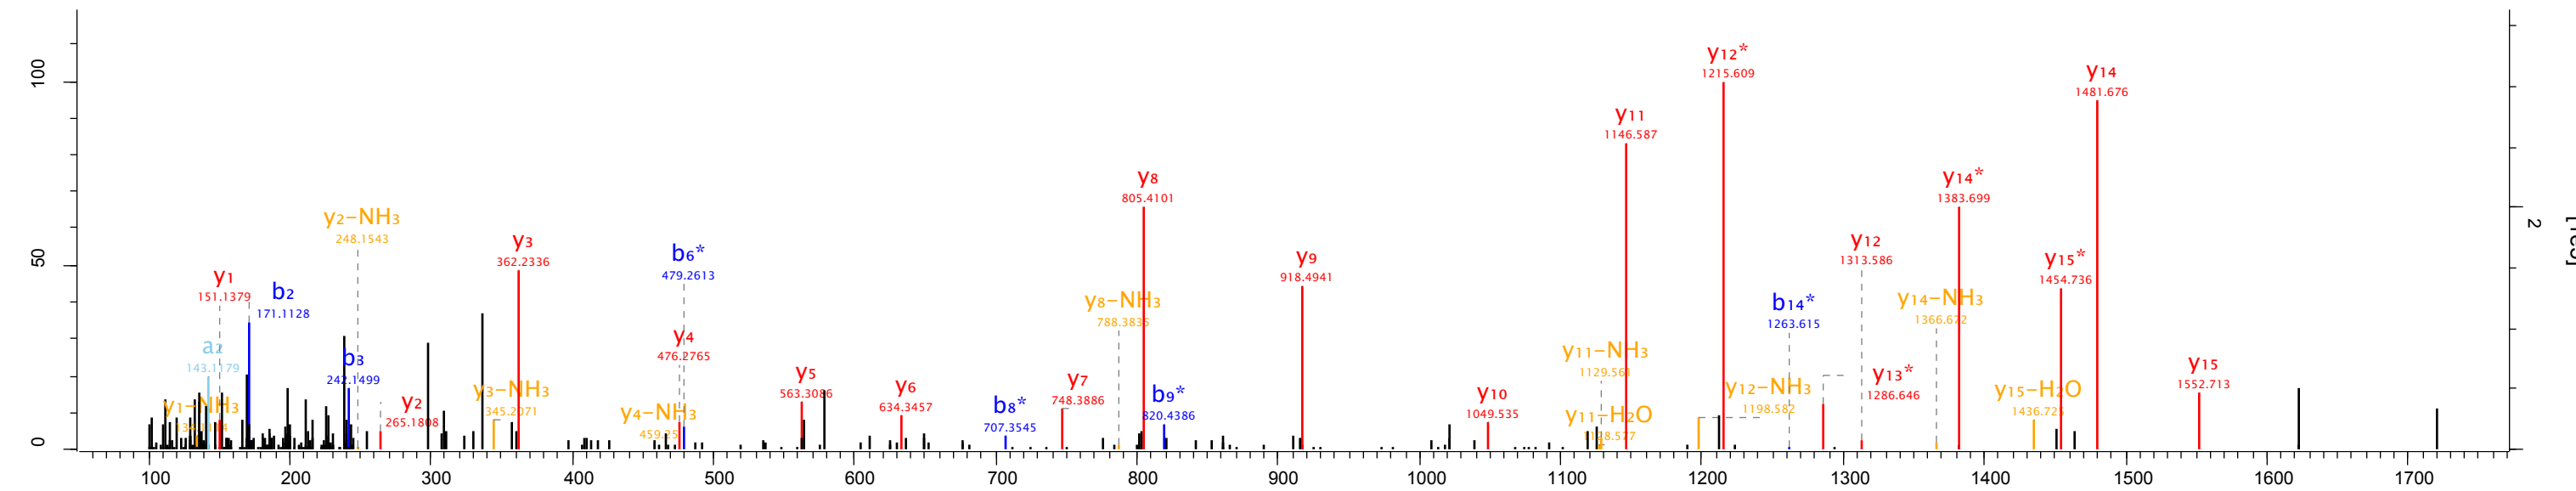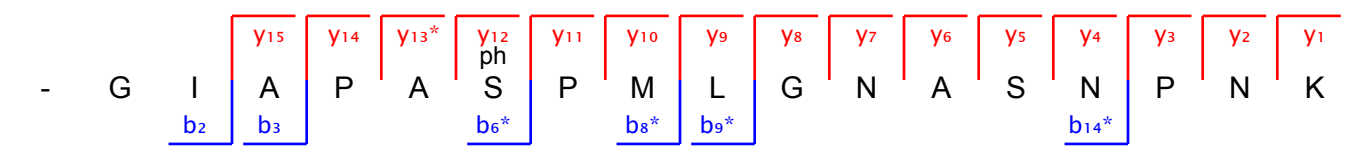

Raw file 20171215\_MaS\_33SR\_LMH\_phospho\_06 Scan 11508 Method FTMS; HCD Score 158.86 m/z 830.42 Gene names RSF1

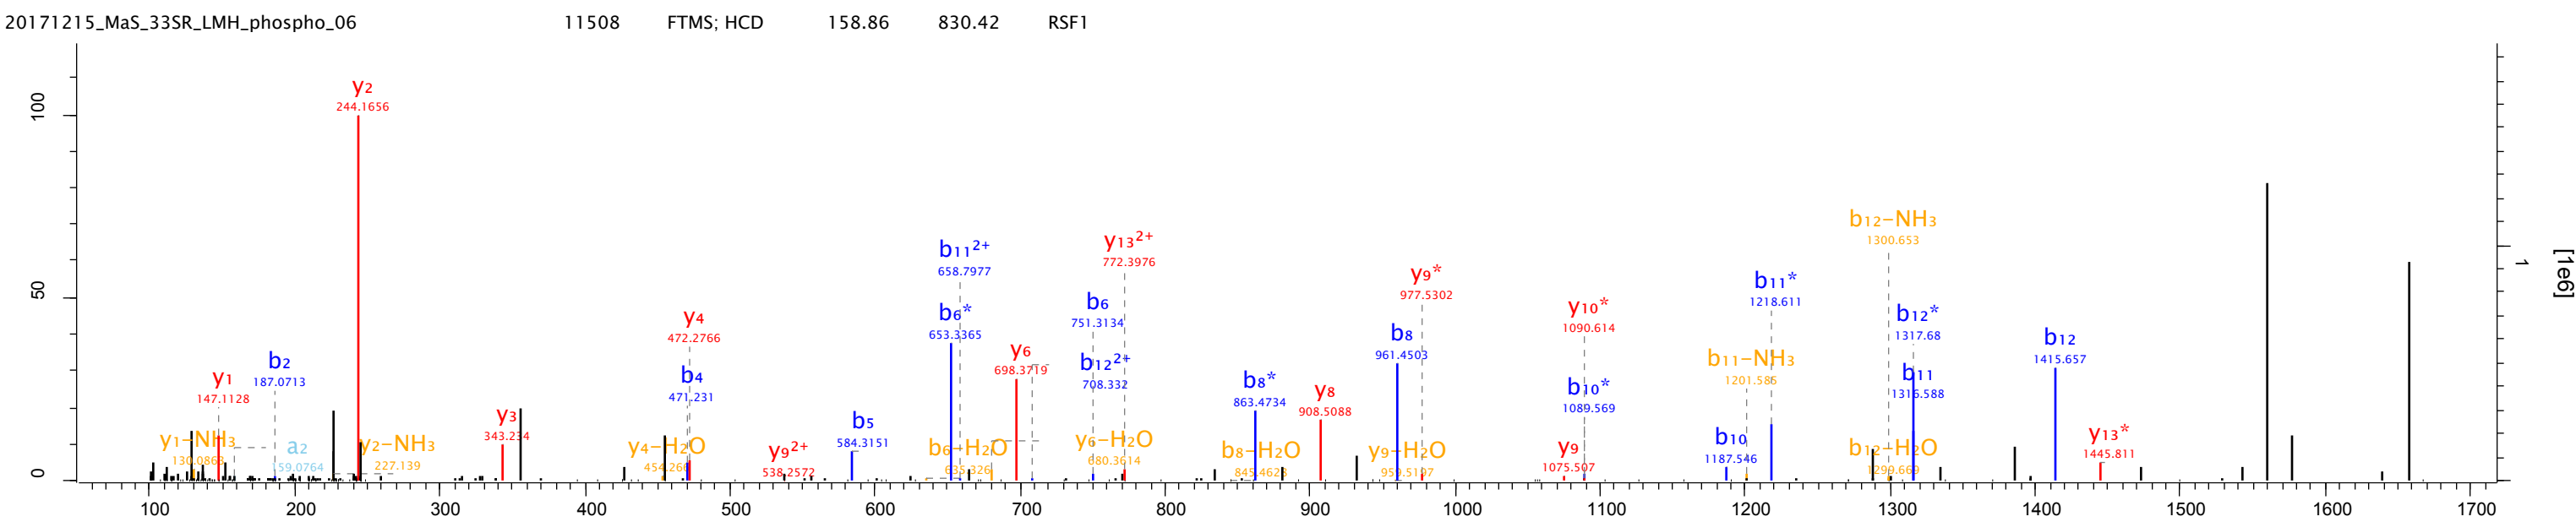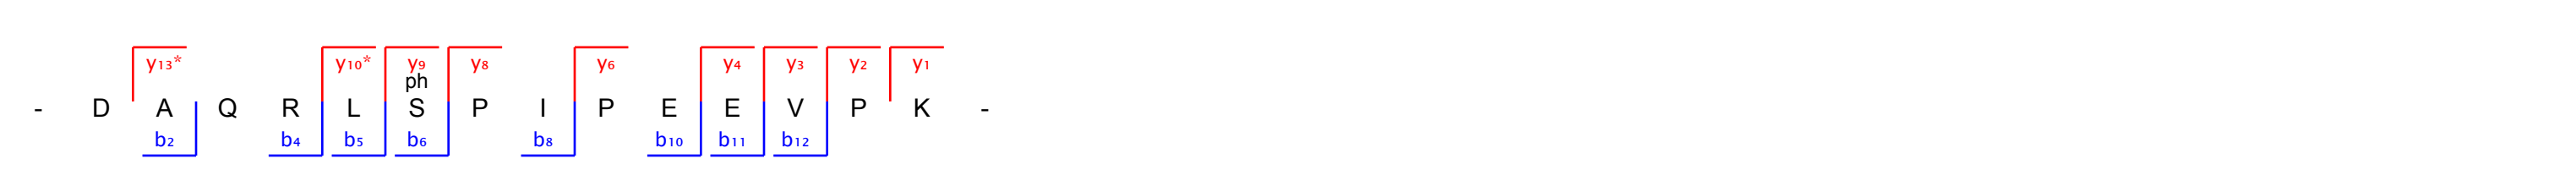

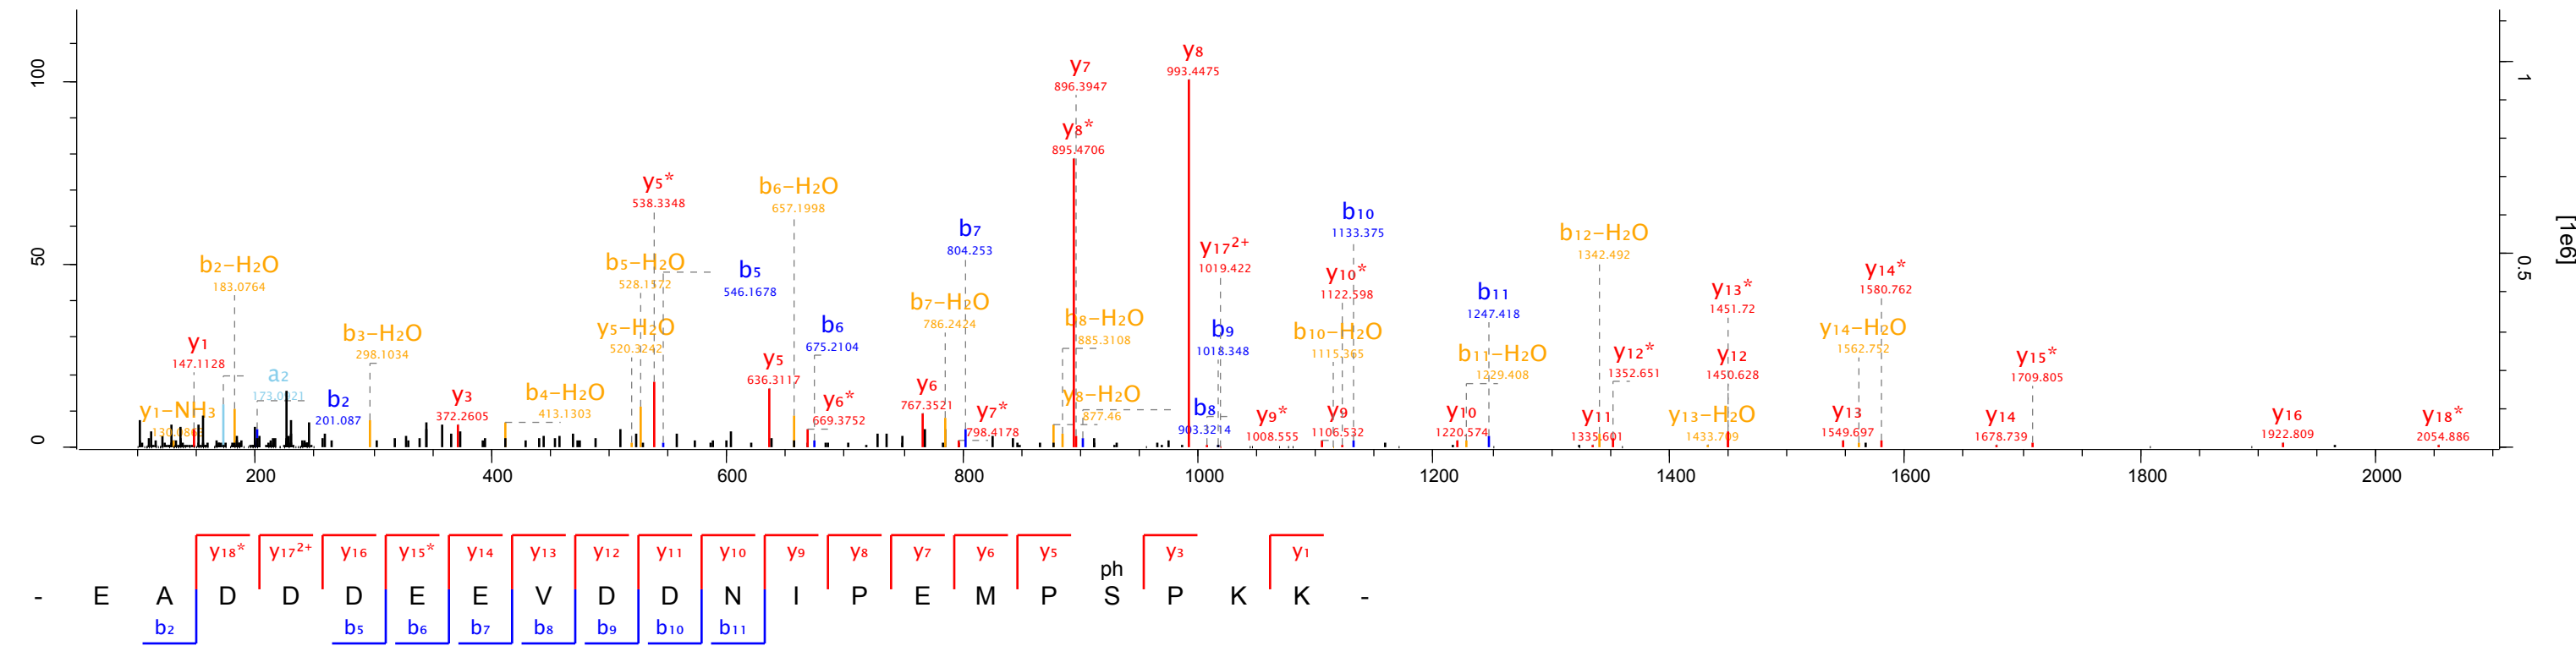

Raw file 20171215\_MaS\_33SR\_LMH\_phospho\_06 Scan 11668 Method FTMS; HCD Score 206.41 m/z 1028.47 Gene names SAFB;SAFB2

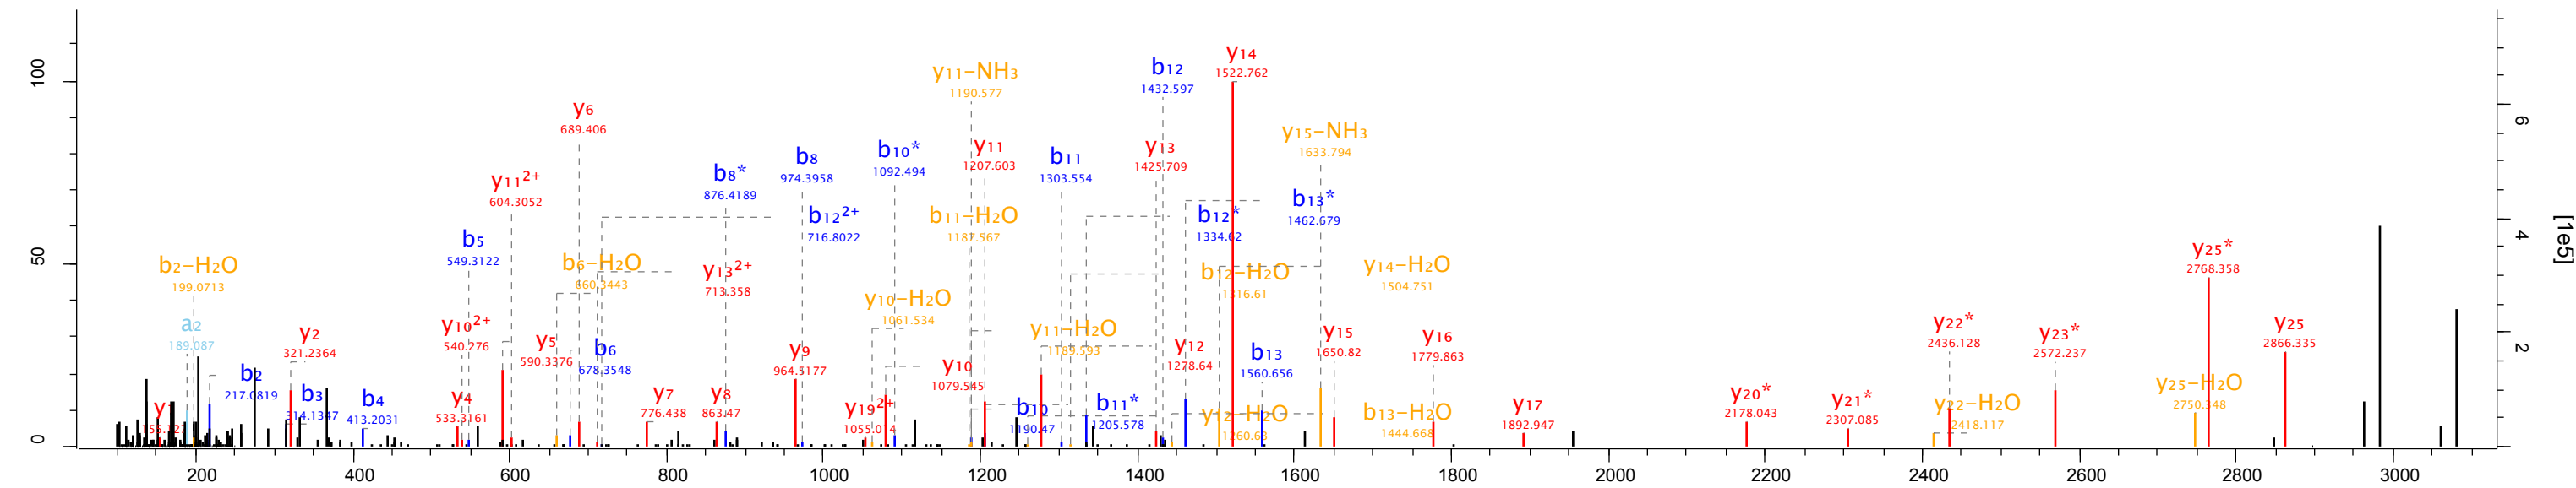

- S E P V K E E S S E L E Q P F A Q D T S S V G P D R K -

Fragmentation mapping below the sequence:

- Peptide: S E P V K E E S S E L E Q P F A Q D T S S V G P D R K
- Fragmentation sites (b-ions): b2 (E), b3 (P), b4 (V), b5 (K), b6 (E), b8 (S), b10 (E), b11 (L), b12 (E), b13 (Q)
- Fragmentation sites (y-ions): y25 (P), y23\* (V), y22\* (K), y21\* (E), y20\* (E), y192+ (S), y17 (E), y16 (L), y15 (E), y14 (P), y13 (F), y12 (A), y11 (Q), y10 (D), y9 (T), y8 (S), y7 (S), y6 (V), y5 (G), y4 (P)

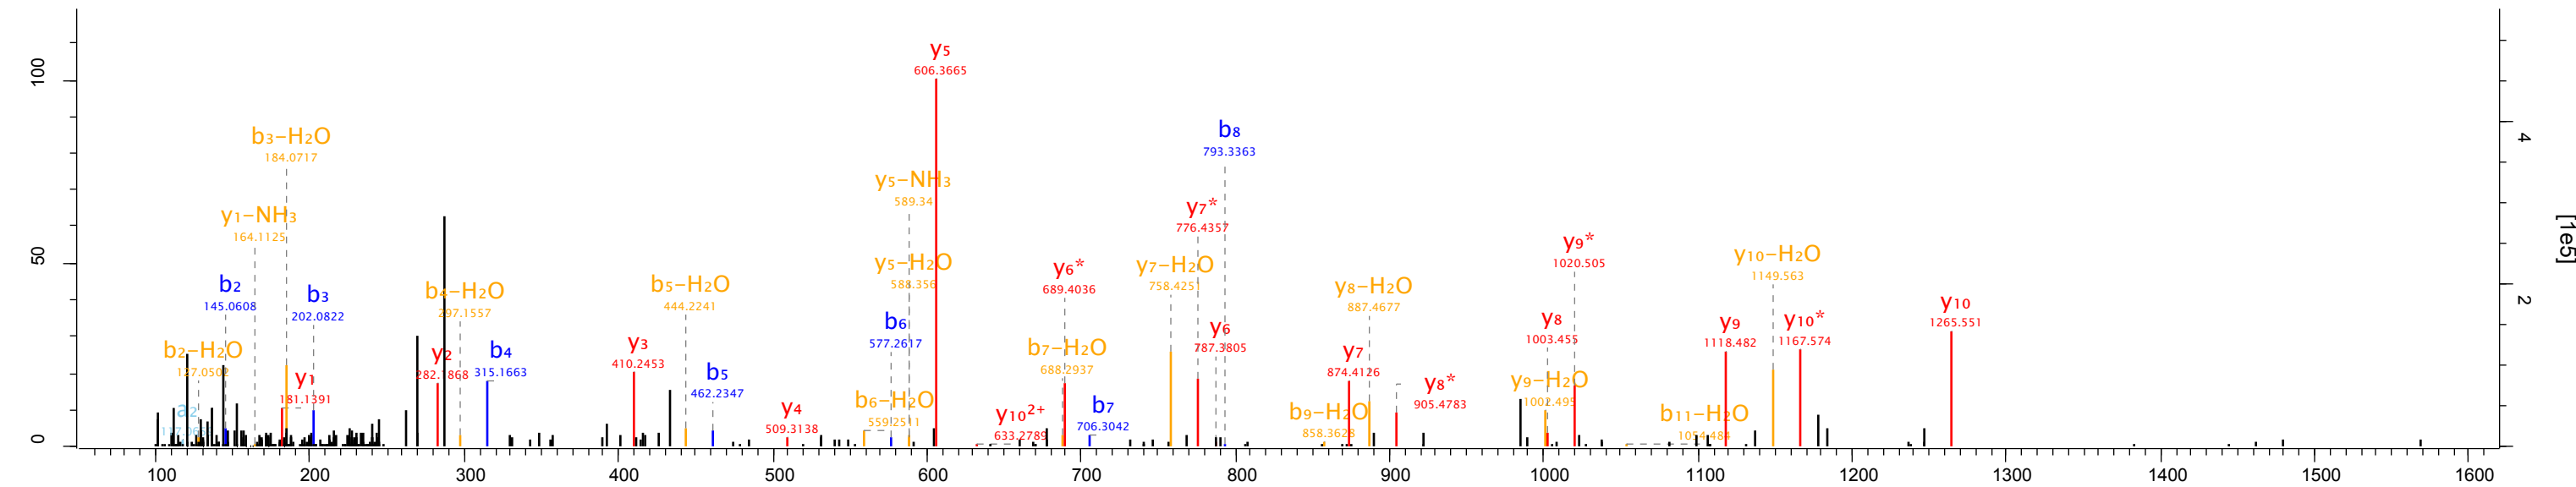

- G S G I F D E S T P V Q T R -

b<sub>2</sub> b<sub>3</sub> b<sub>4</sub> b<sub>5</sub> b<sub>6</sub> b<sub>7</sub> b<sub>8</sub> y<sub>10</sub> y<sub>9</sub> y<sub>8</sub> y<sub>7</sub> y<sub>6</sub> y<sub>5</sub> y<sub>4</sub> y<sub>3</sub> y<sub>2</sub> y<sub>1</sub>

ph

Raw file 20171215\_MaS\_33SR\_LMH\_phospho\_06 Scan 11808 Method FTMS; HCD Score 98.9 m/z 575.79 Gene names MLLT4

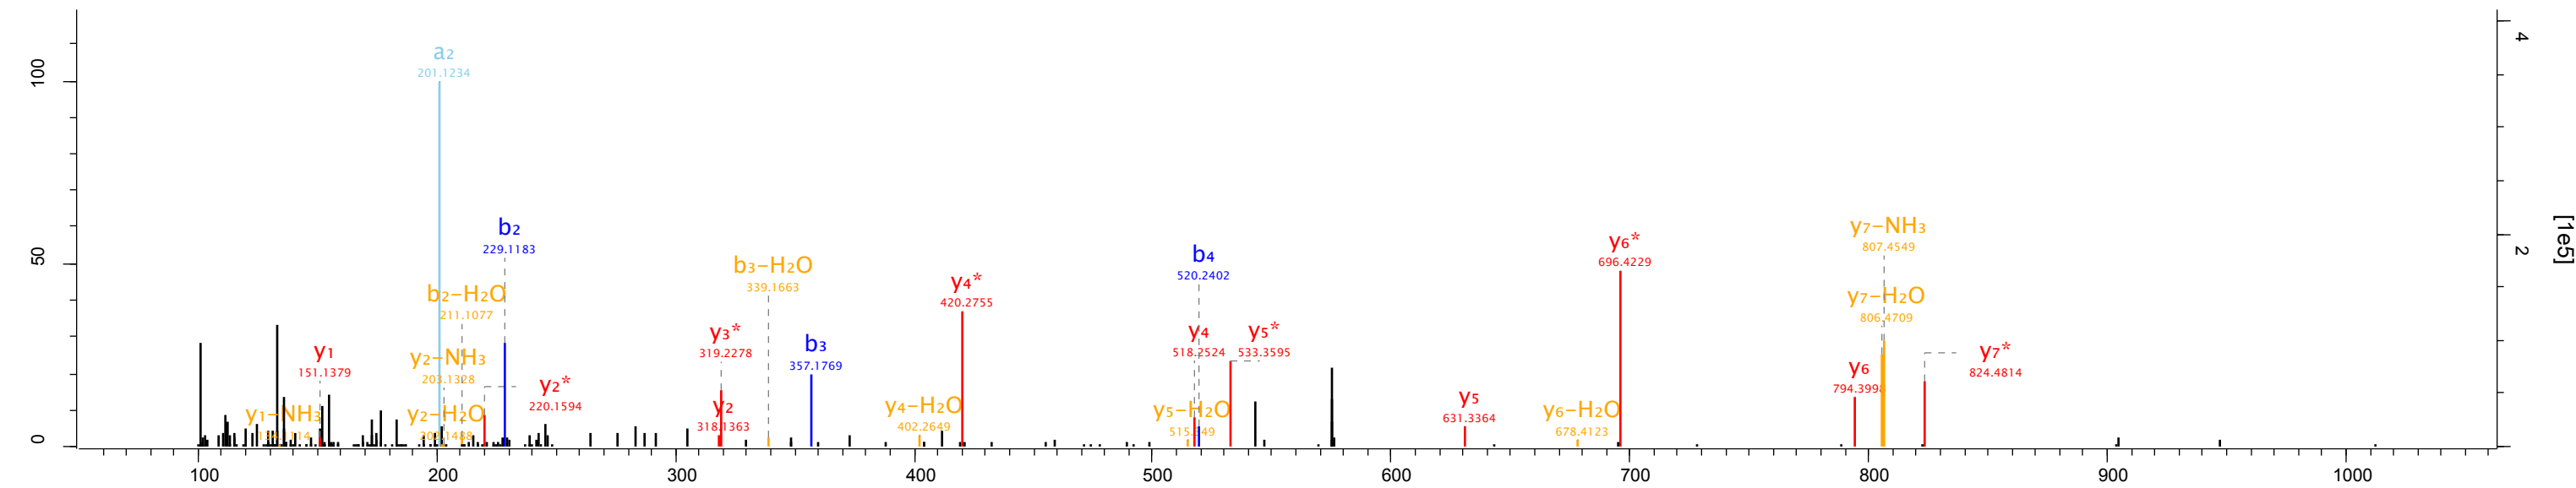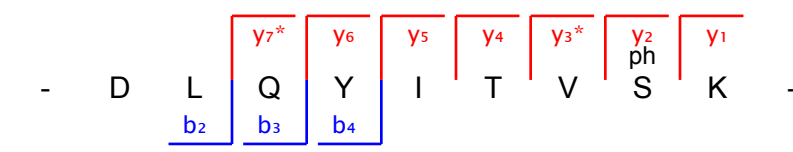

Raw file 20171215\_MaS\_33SR\_LMH\_phospho\_06 Scan 11988 Method FTMS; HCD Score 48.65 m/z 1186.52 Gene names TRIM16

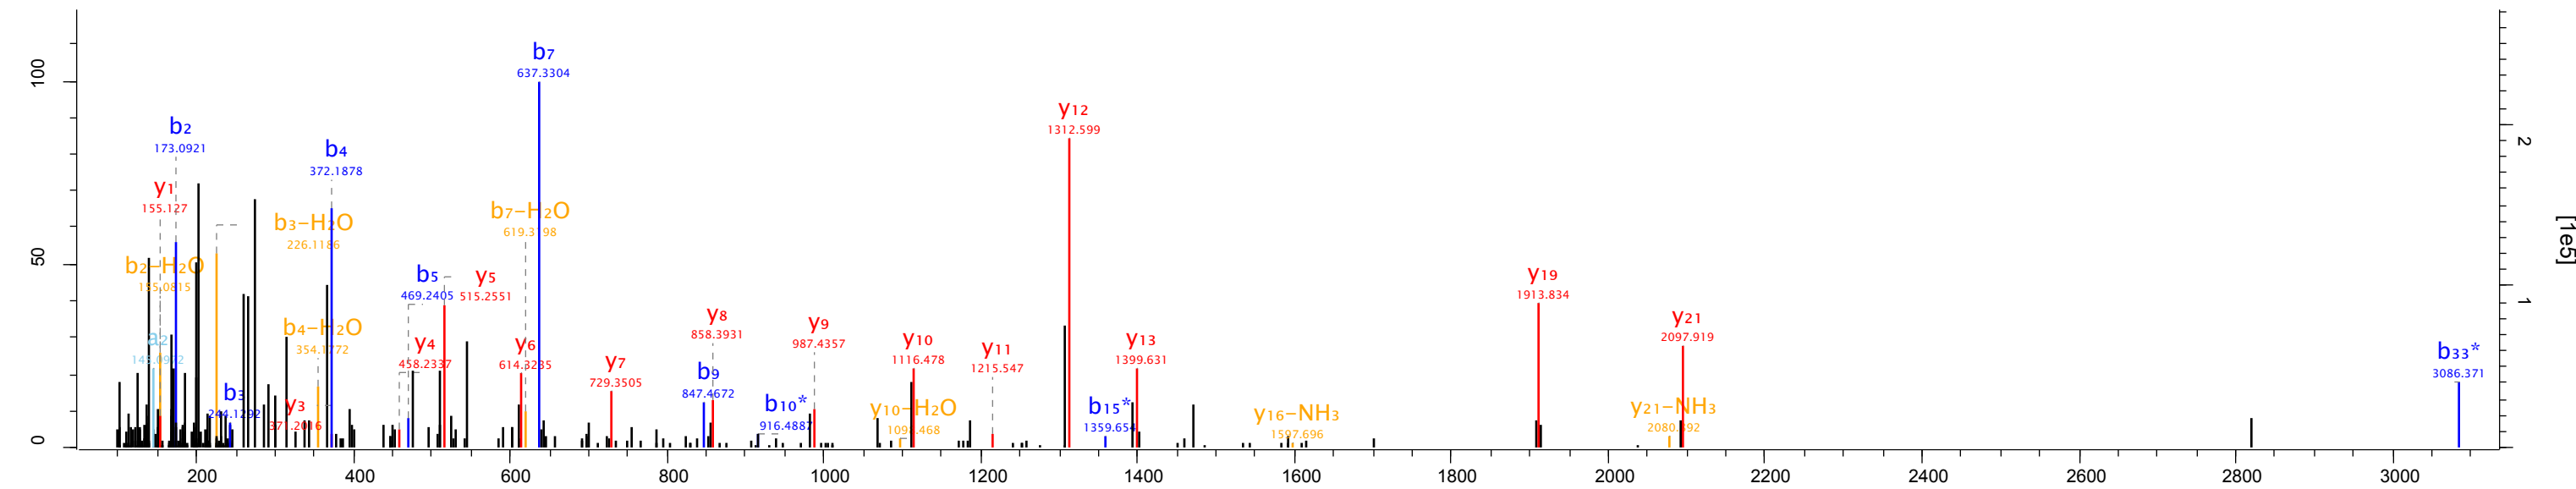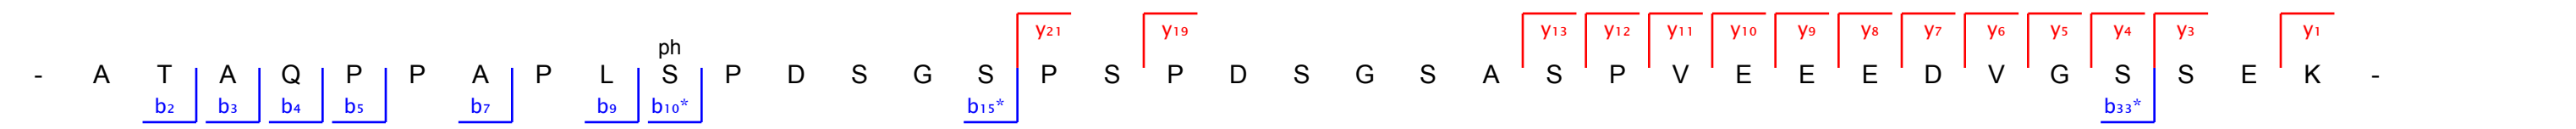



Raw file 20171215\_MaS\_33SR\_LMH\_phospho\_06 Scan 12098 Method FTMS; HCD Score 127.3 m/z 669.82 Gene names SAFB2

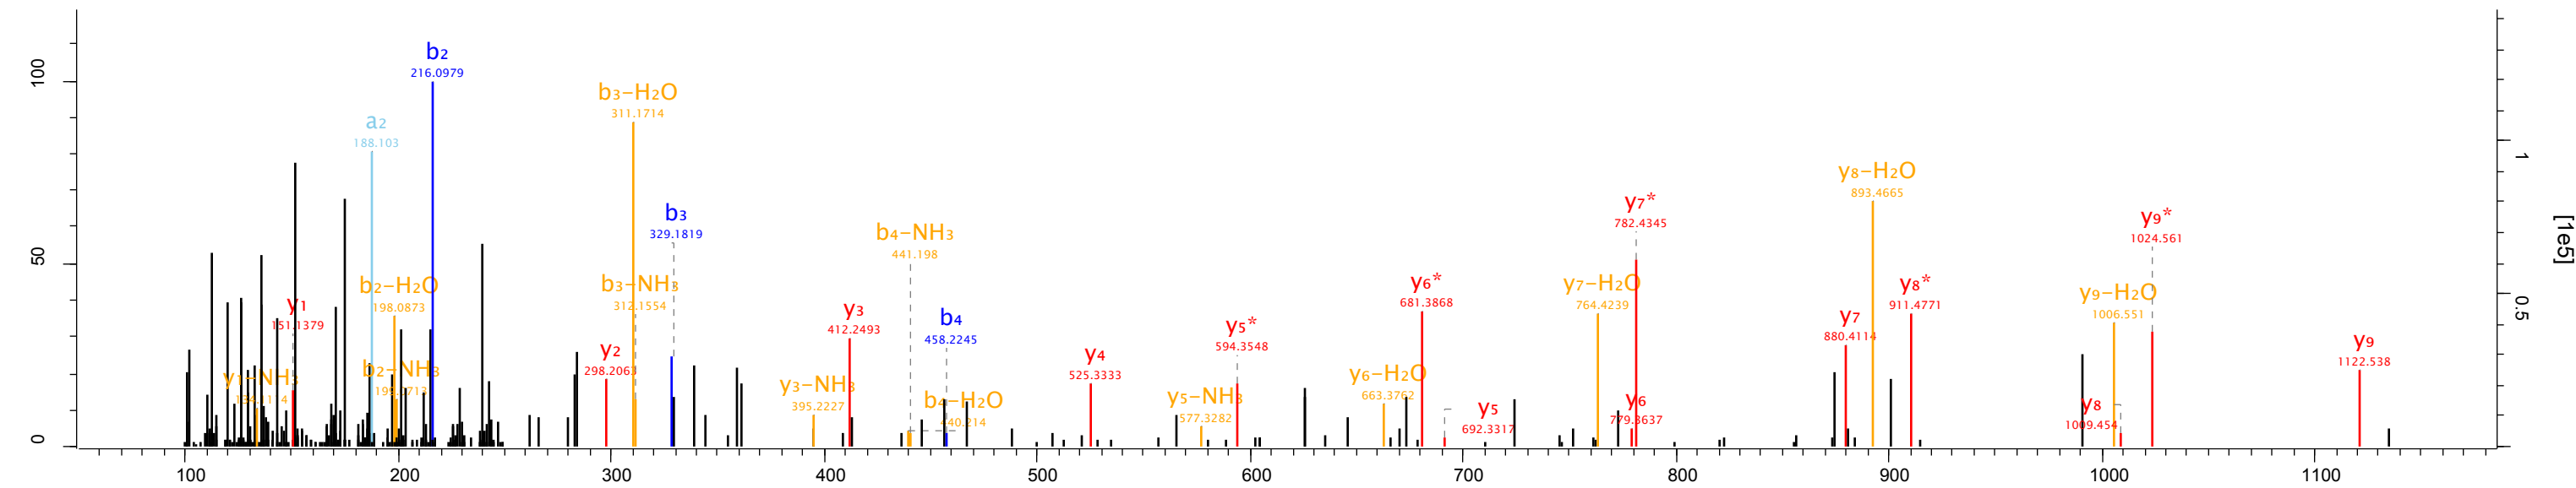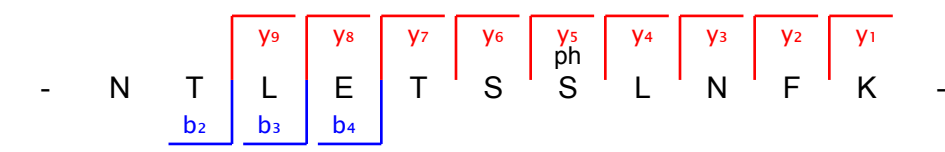

Raw file 20171215\_MaS\_33SR\_LMH\_phospho\_06 Scan 12268 Method FTMS; HCD Score 138.55 m/z 941.77 Gene names CNOT4

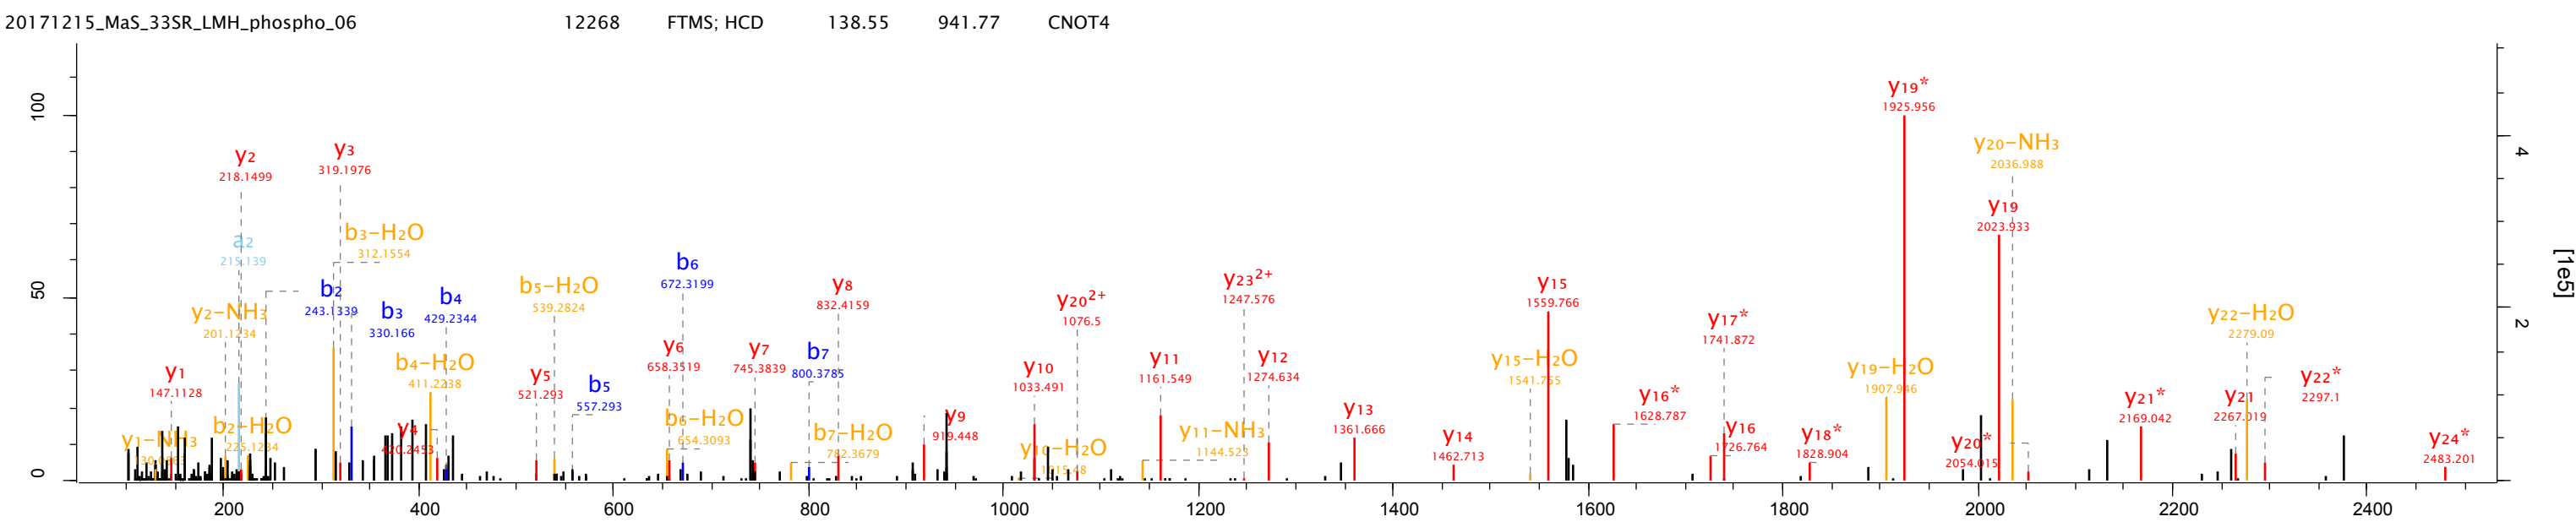

- E L S V Q D Q P S L S P T S L Q N S S H T T T A K -

Fragmentation sites are indicated by boxes below the sequence:

- Red boxes: y24\*, y23<sup>2+</sup>, y22\*, y21, y20\*, y19, y18\*, y17\*, y16, y15, y14, y13, y12, y11, y10, y9, y8, y7, y6, y5, y4, y3, y2, y1
- Blue boxes: b2, b3, b4, b5, b6, b7

Raw file 20171215\_MaS\_33SR\_LMH\_phospho\_06 Scan 12428 Method FTMS; HCD Score 102.4 m/z 1001.47 Gene names RRBP1

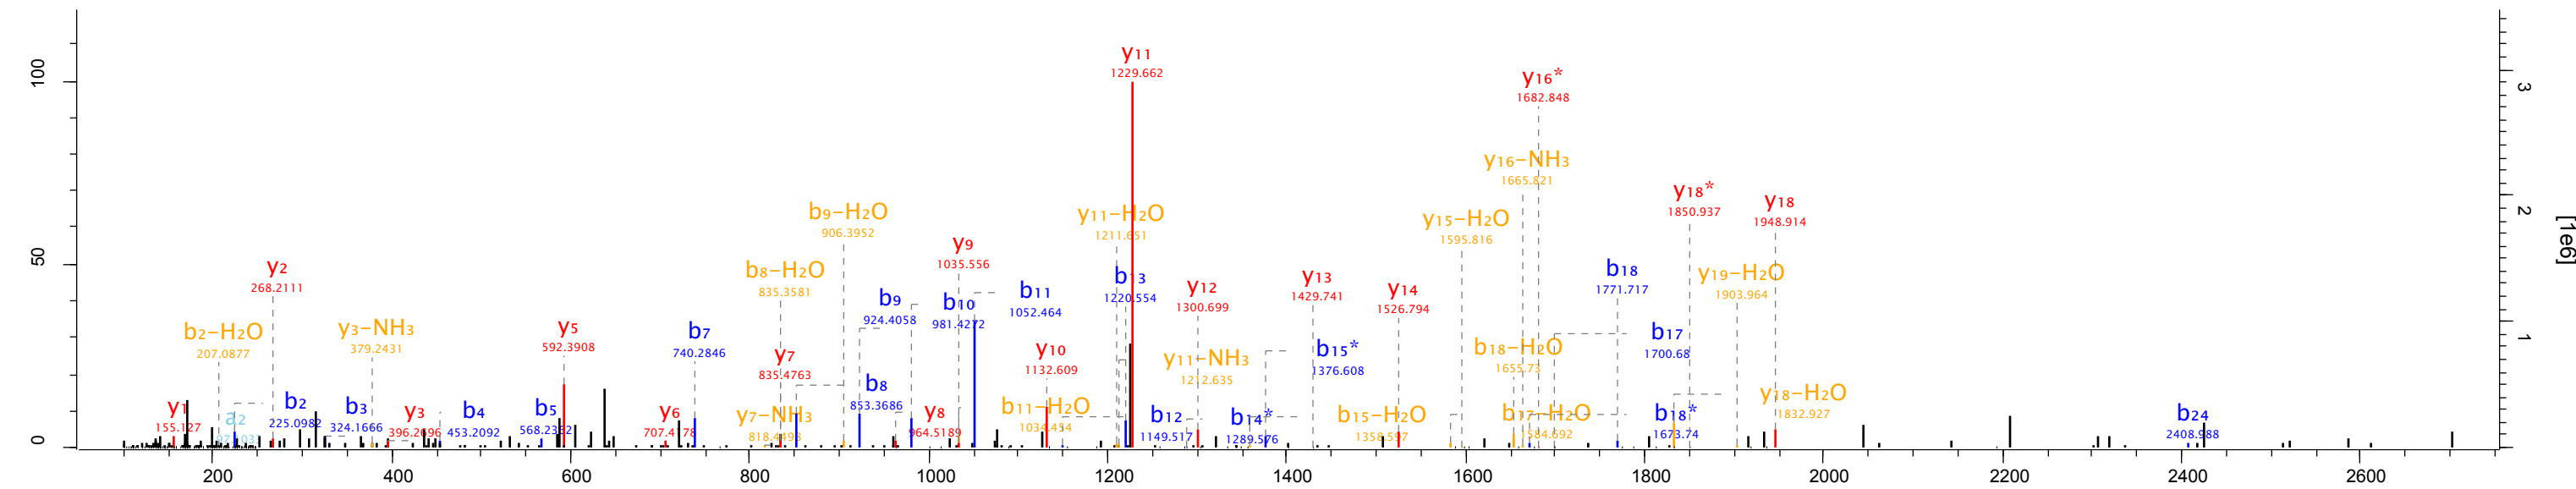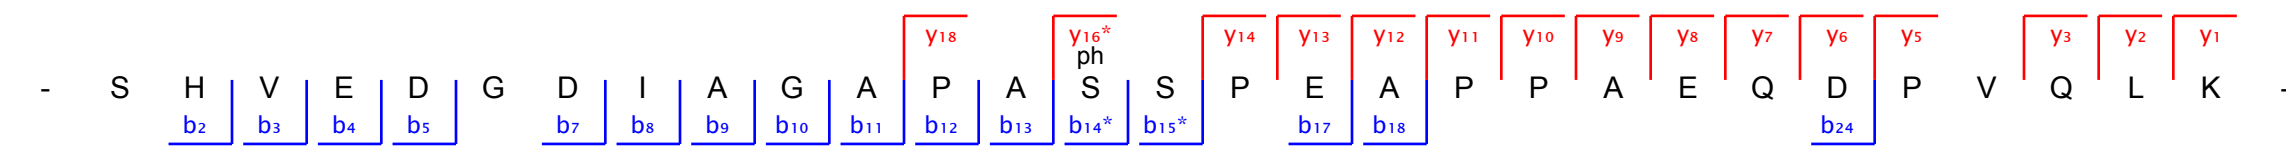

Raw file: 20171215\_MaS\_33SR\_LMH\_phospho\_06  
 Scan: 12888 Method: FTMS; HCD Score: 141.78 m/z: 996.46 Gene names: IGF2BP2

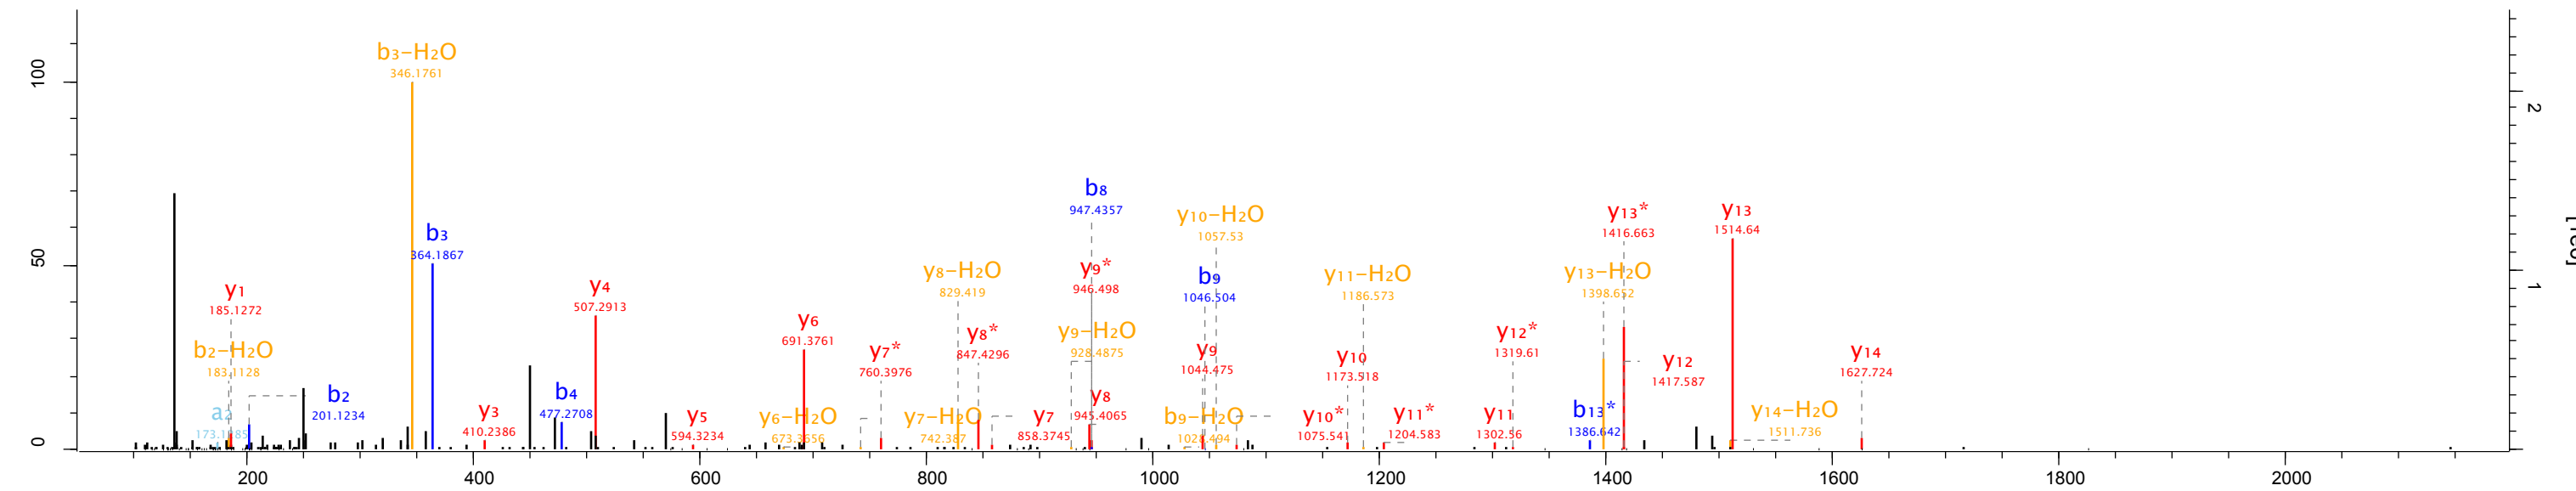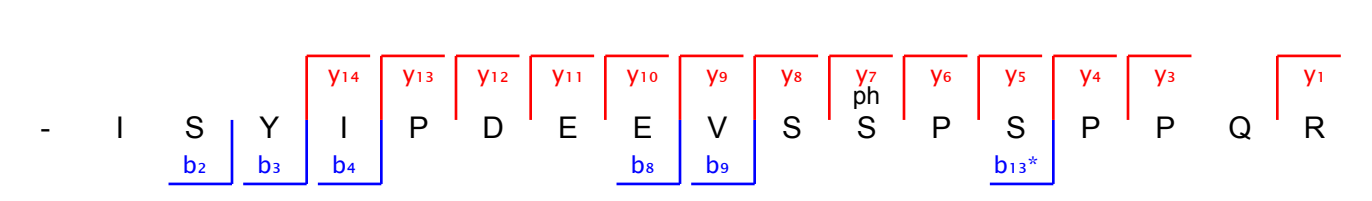

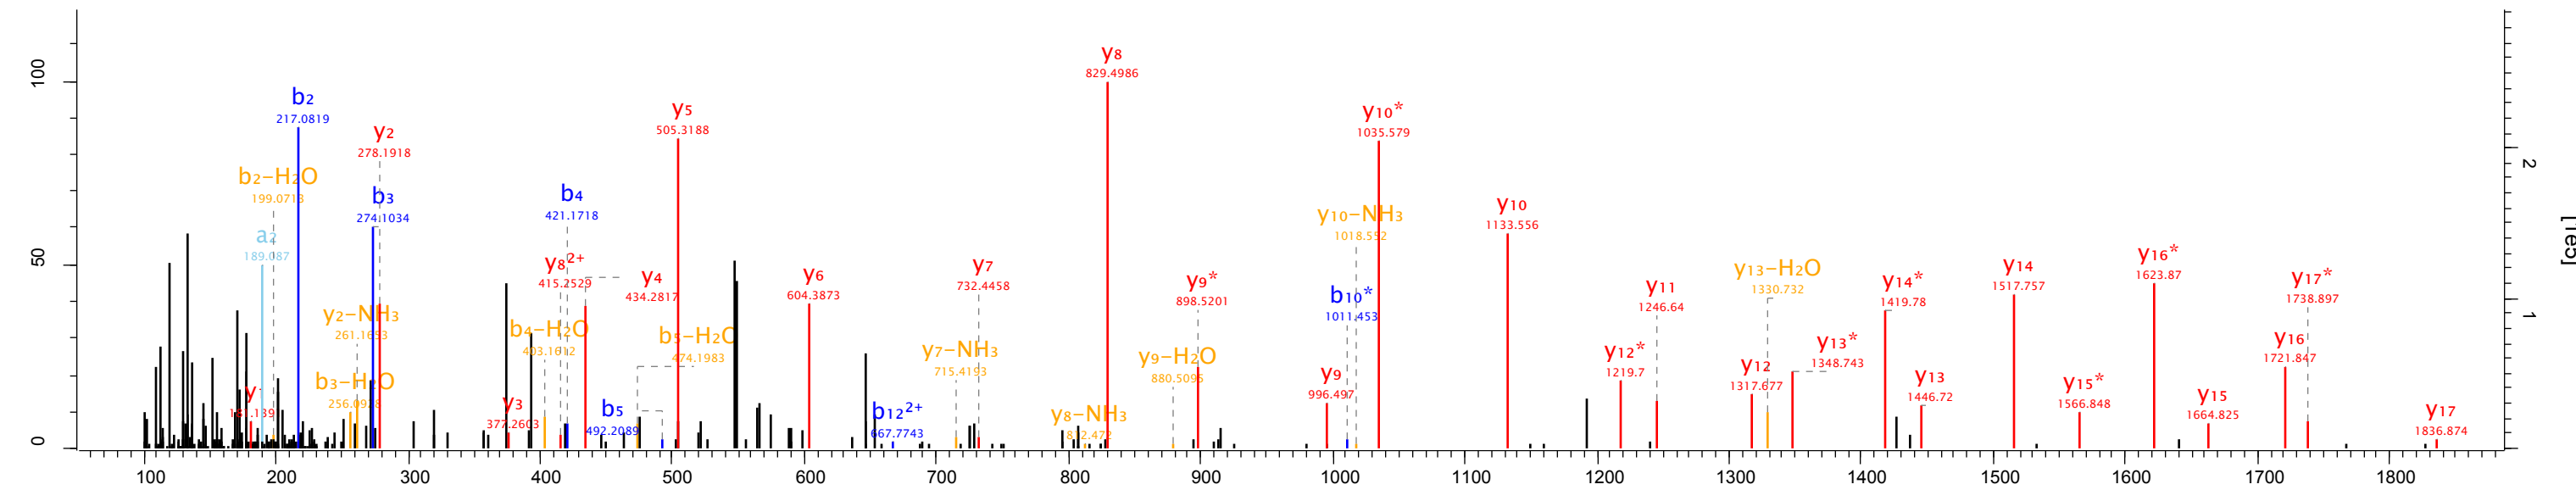

- T D R G F A E A I H S P Q V A G V P R -

b<sub>2</sub>
b<sub>3</sub>
b<sub>4</sub>
b<sub>5</sub>
y<sub>17</sub>
y<sub>16</sub>
y<sub>15</sub>
y<sub>14</sub>
y<sub>13</sub>
y<sub>12</sub>
y<sub>11</sub>
y<sub>10</sub>
y<sub>9</sub>ph
y<sub>8</sub>
y<sub>7</sub>
y<sub>6</sub>
y<sub>5</sub>
y<sub>4</sub>
y<sub>3</sub>
y<sub>2</sub>
y<sub>1</sub>

Raw file 20171215\_MaS\_33SR\_LMH\_phospho\_06 Scan 13568 Method FTMS; HCD Score 205.78 m/z 748.89 Gene names MAP4

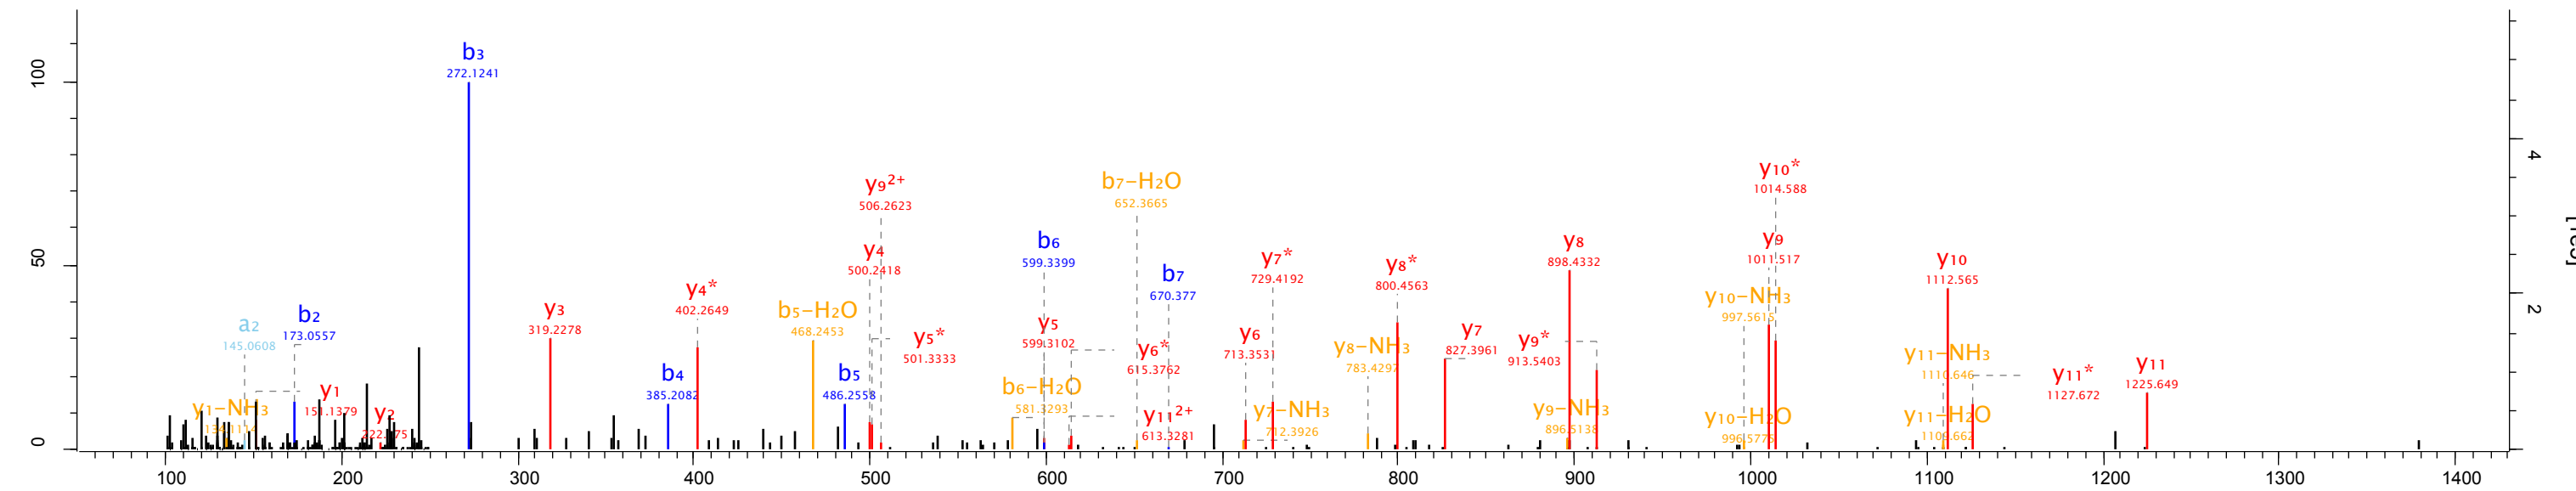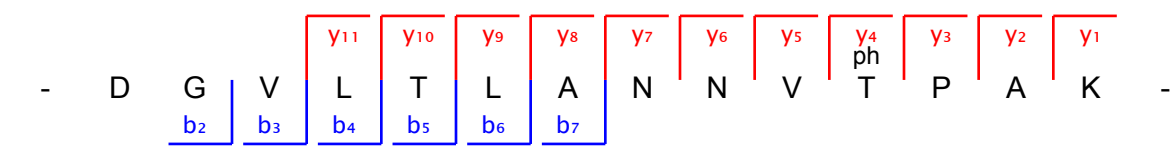

Raw file 20171215\_MaS\_33SR\_LMH\_phospho\_06 Scan 13708 Method FTMS; HCD Score 160.81 m/z 687.8 Gene names CAMSAP2

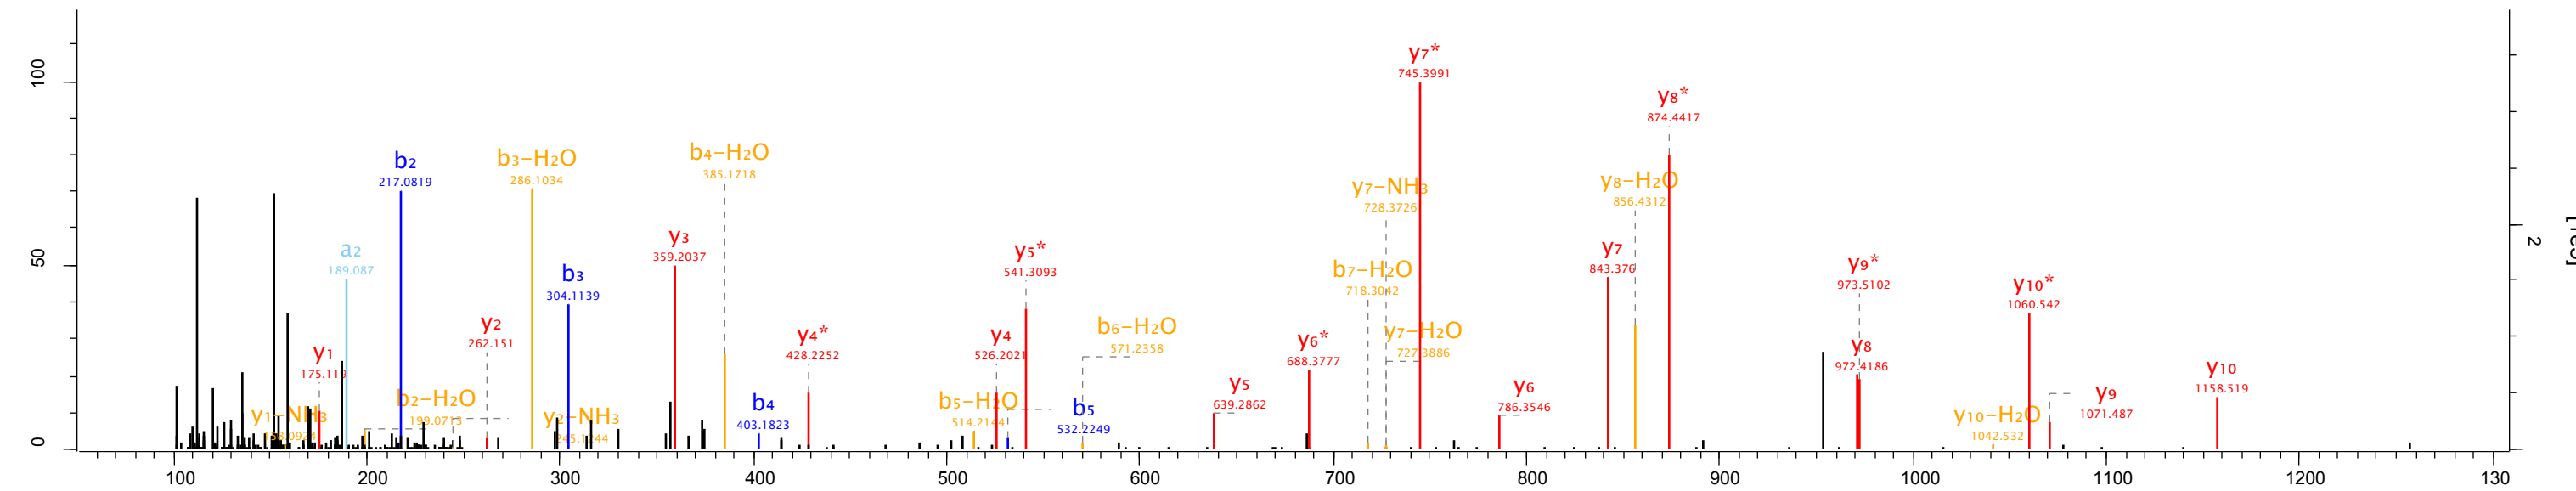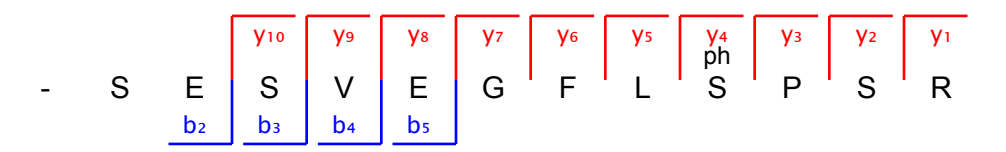

Raw file 20171215\_MaS\_33SR\_LMH\_phospho\_06 Scan 13938 Method FTMS; HCD Score 115.57 m/z 867.42 Gene names ZC3H11A

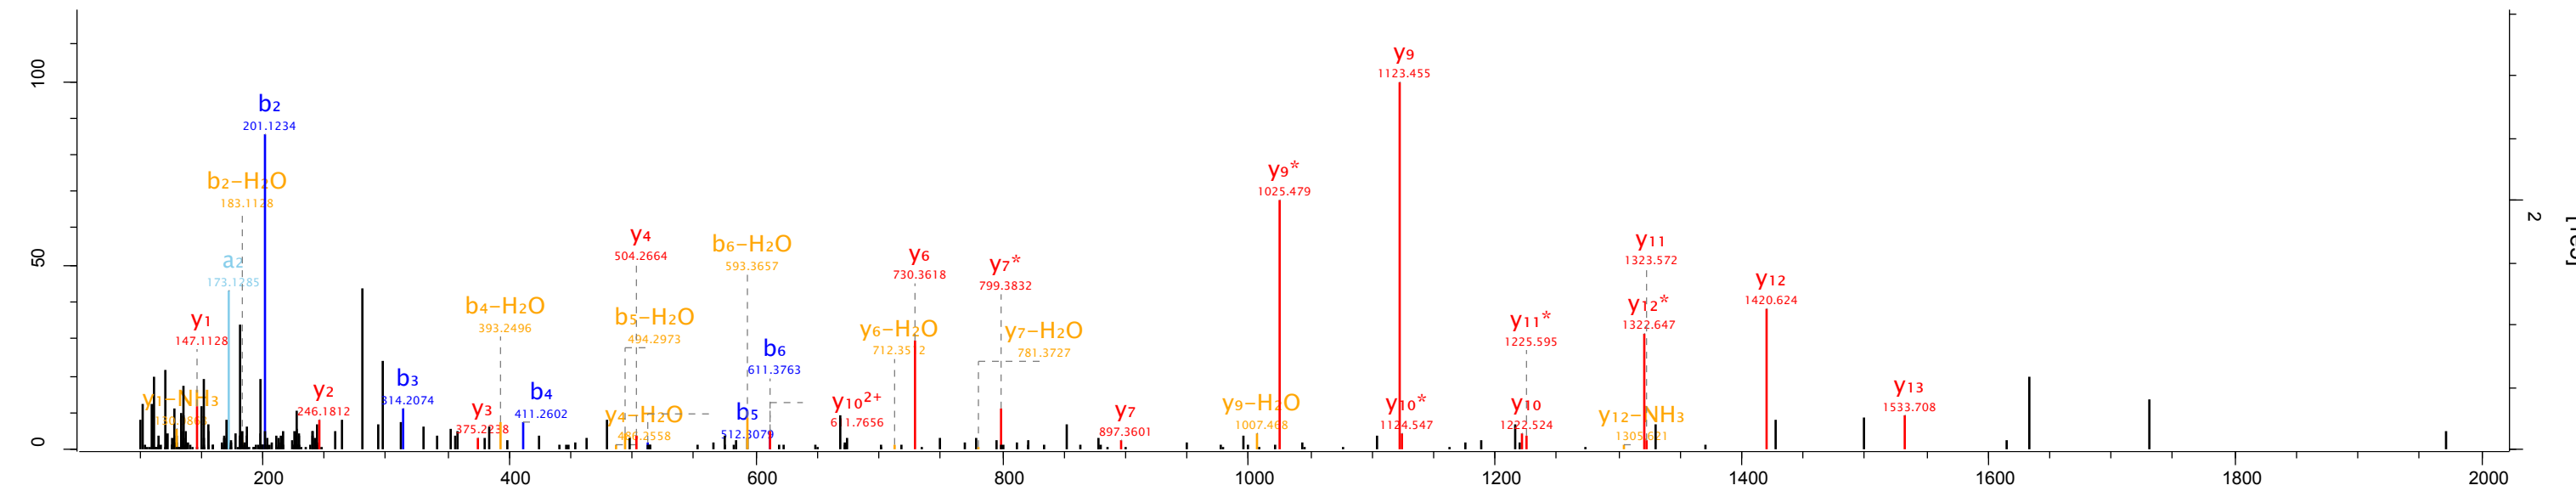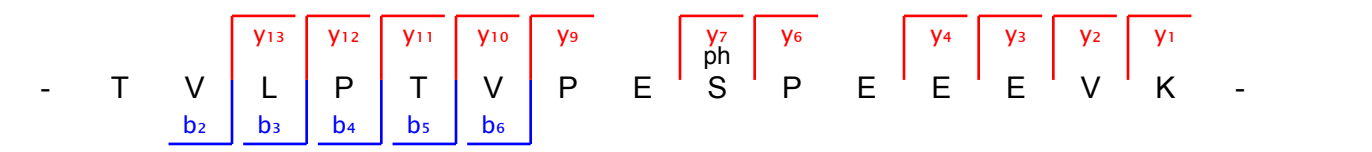



Raw file 20171215\_MaS\_33SR\_LMH\_phospho\_06 Scan 14008 Method FTMS; HCD Score 115.69 m/z 597.81 Gene names MTMR12

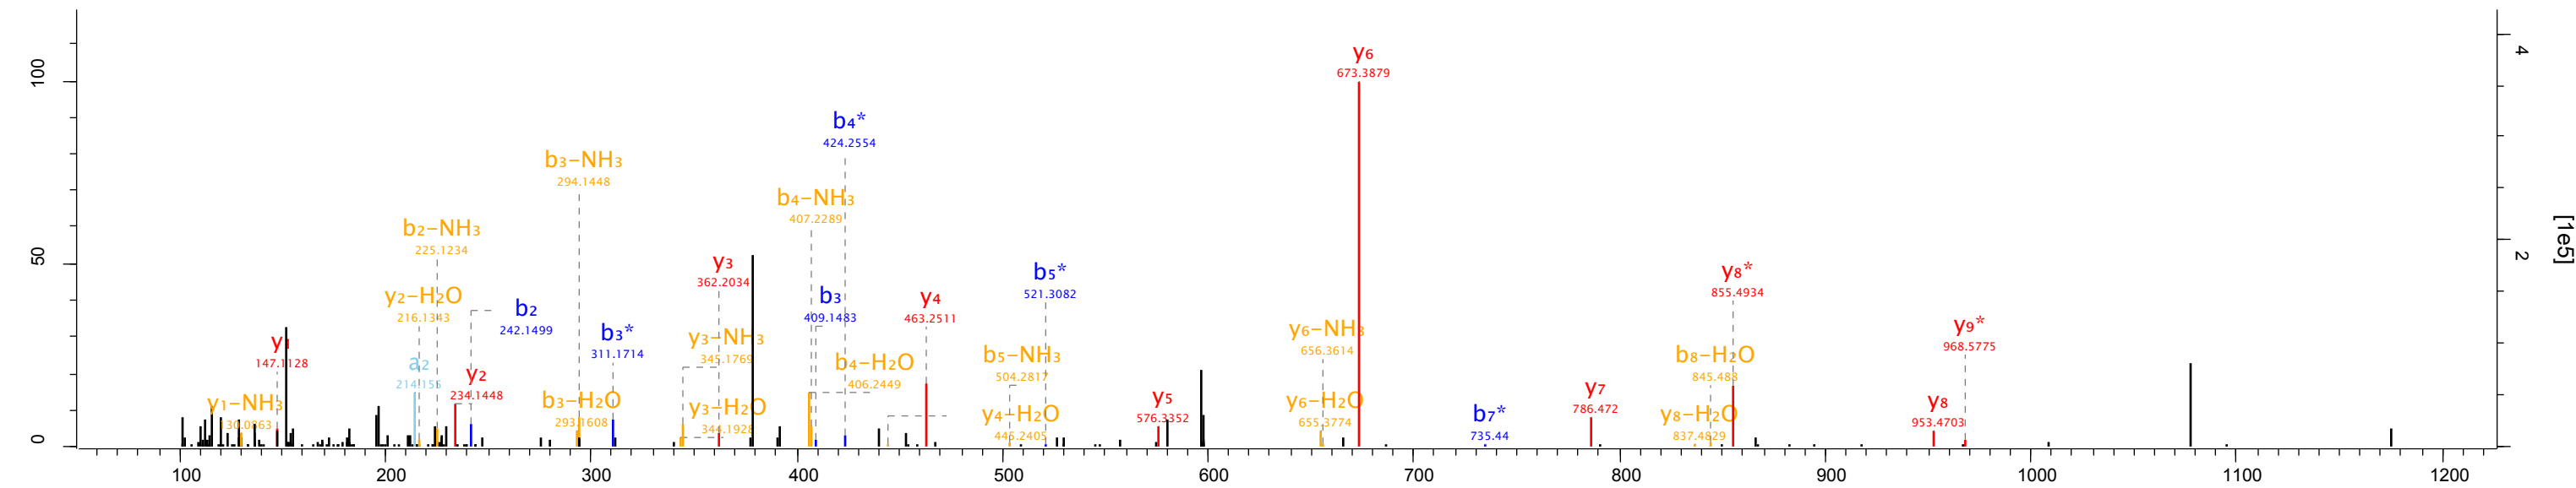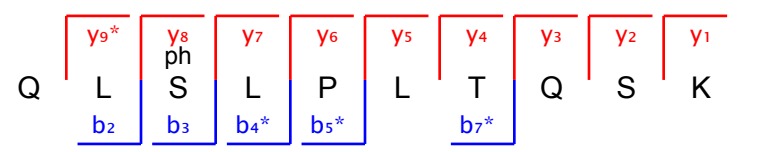

Raw file

20171215\_MaS\_33SR\_LMH\_phospho\_06

Scan: 14298  
 Method: FTMS; HCD  
 Score: 105.63  
 m/z: 728.31  
 Gene names: TOMM20

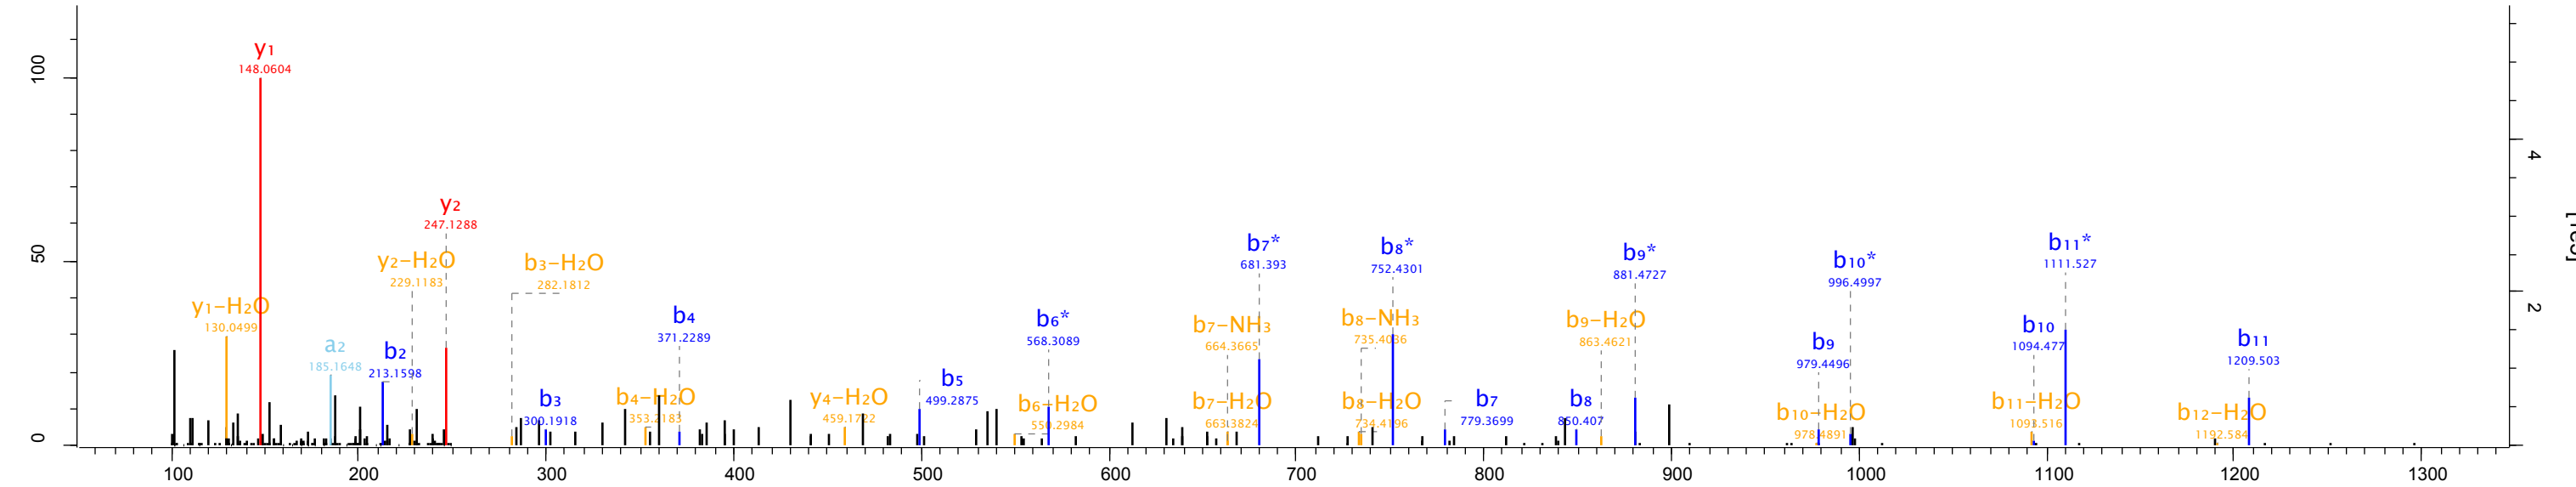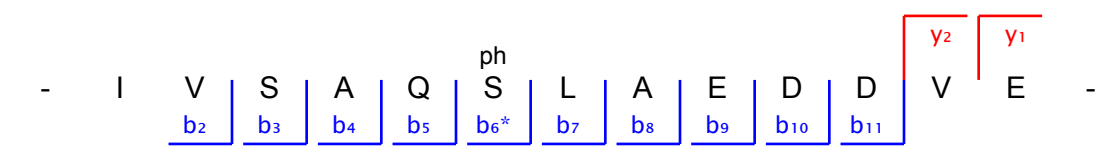

Raw file 20171215\_MaS\_33SR\_LMH\_phospho\_06 Scan 14508 Method FTMS; HCD Score 131.82 m/z 966.93 Gene names ADAR

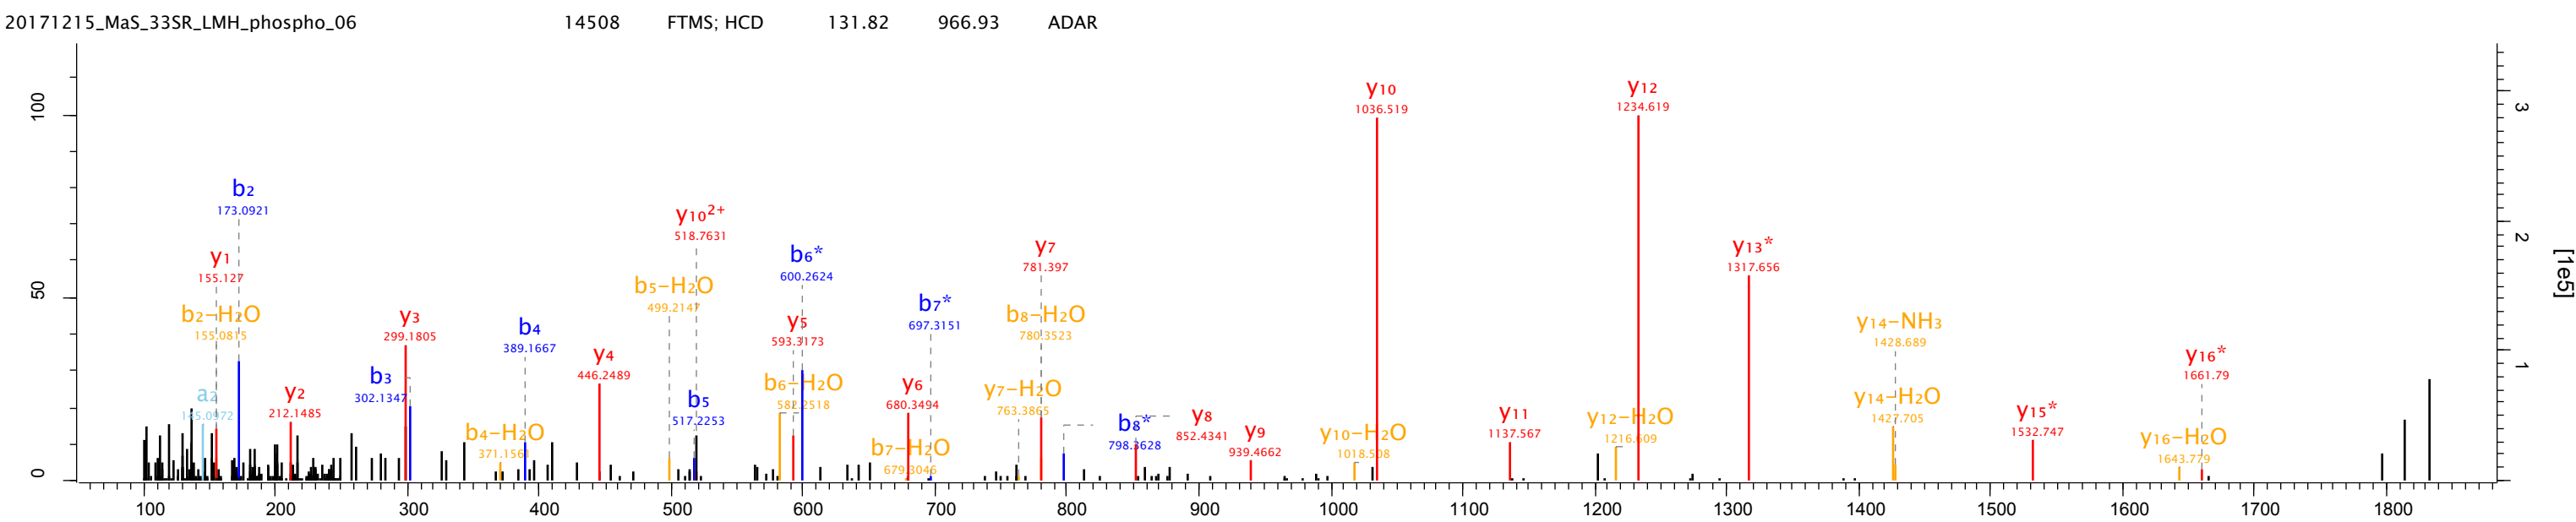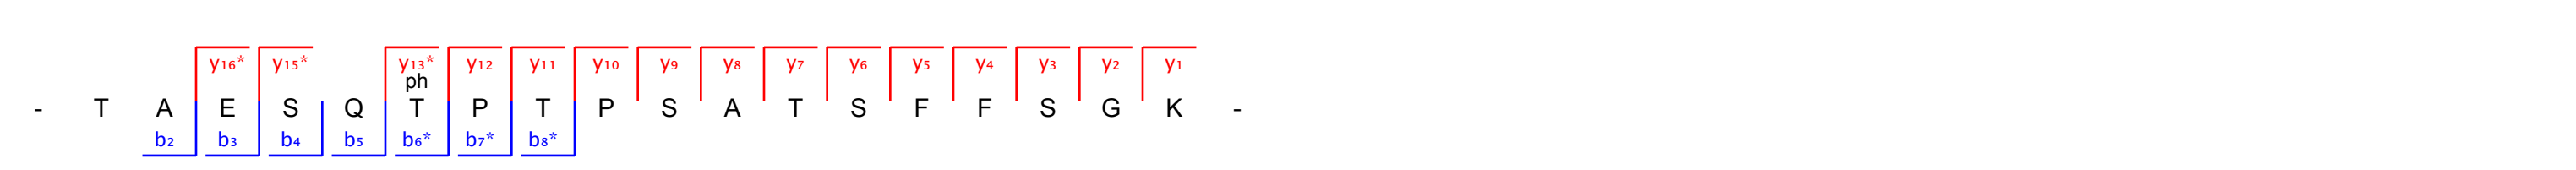

Raw file 20171215\_MaS\_33SR\_LMH\_phospho\_06 Scan 14718 Method FTMS; HCD Score 251.47 m/z 971.09 Gene names TNKS1BP1

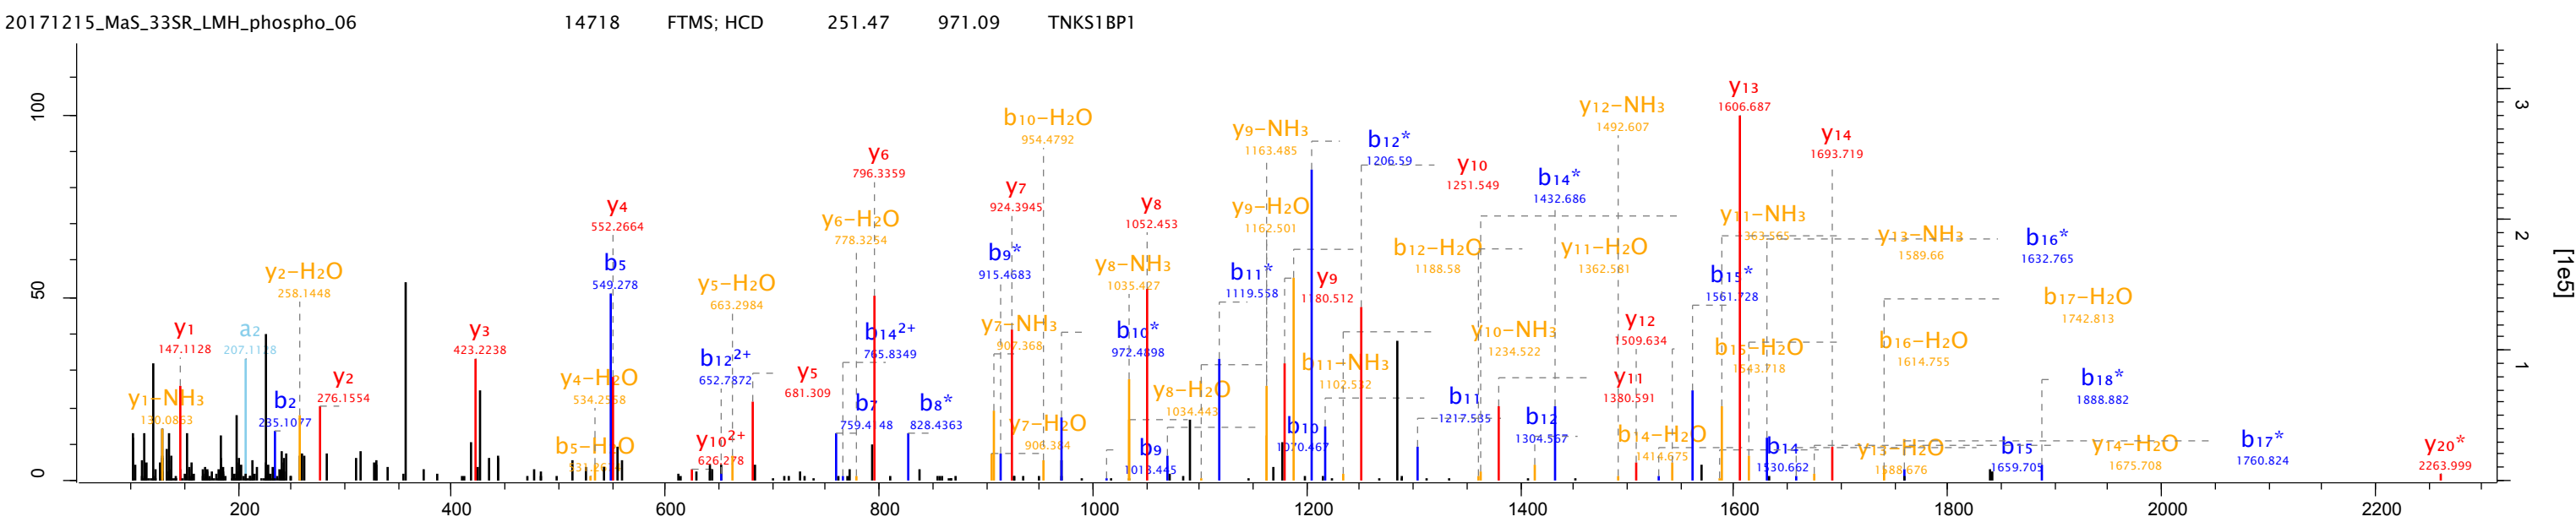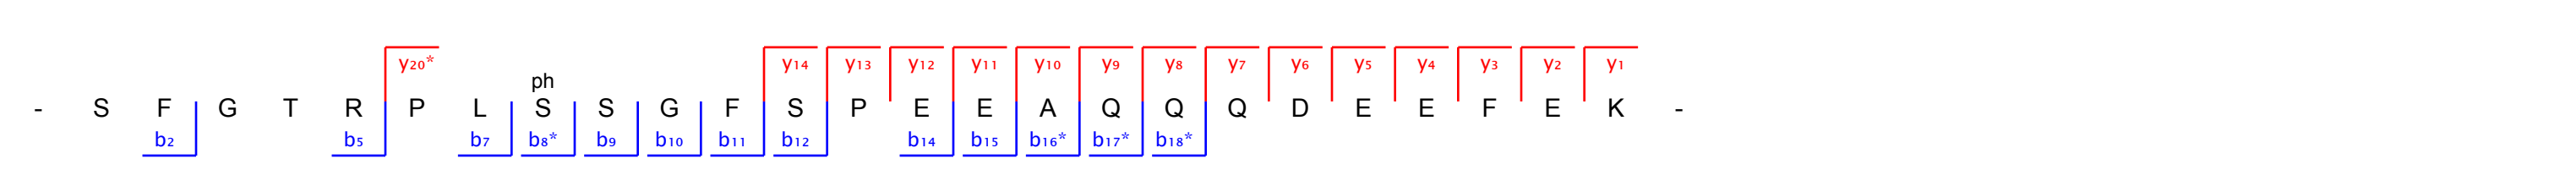

Raw file 20171215\_MaS\_33SR\_LMH\_phospho\_06 Scan 15188 Method FTMS; HCD Score 88.57 m/z 1140.49 Gene names CCDC43

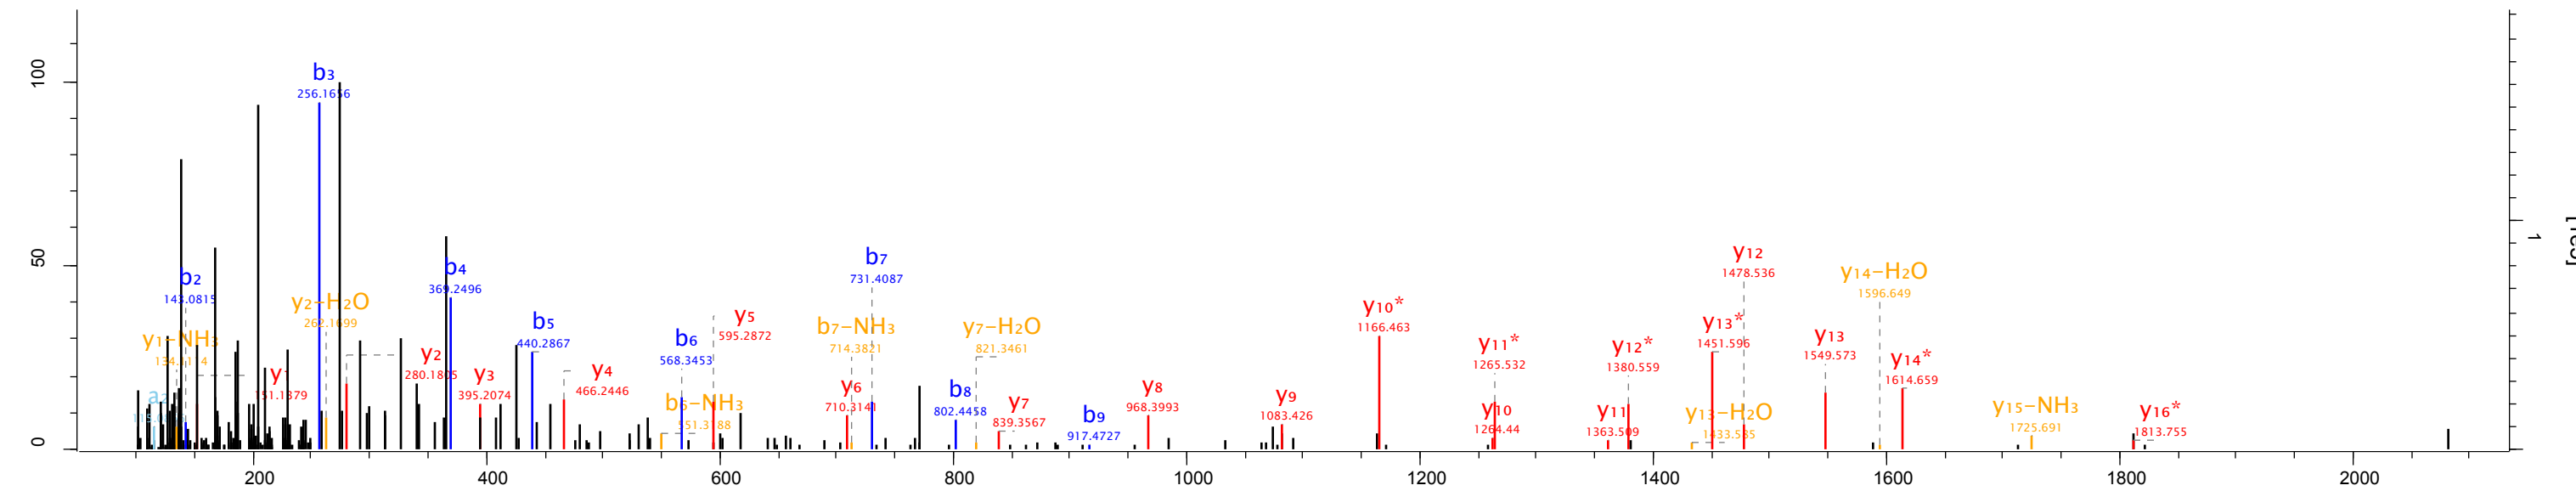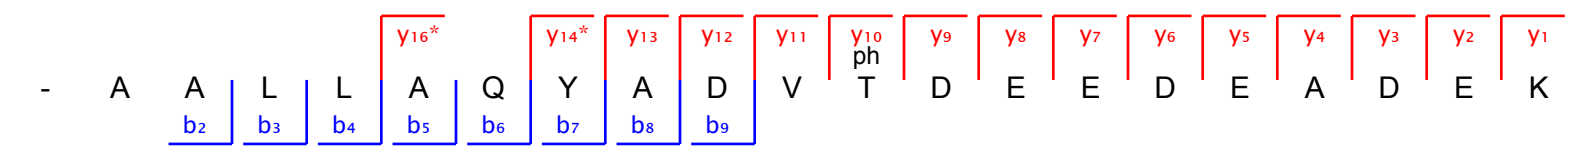

Raw file 20171215\_MaS\_33SR\_LMH\_phospho\_06 Scan 15378 Method FTMS; HCD Score 164.53 m/z 726.32 Gene names RBM15B

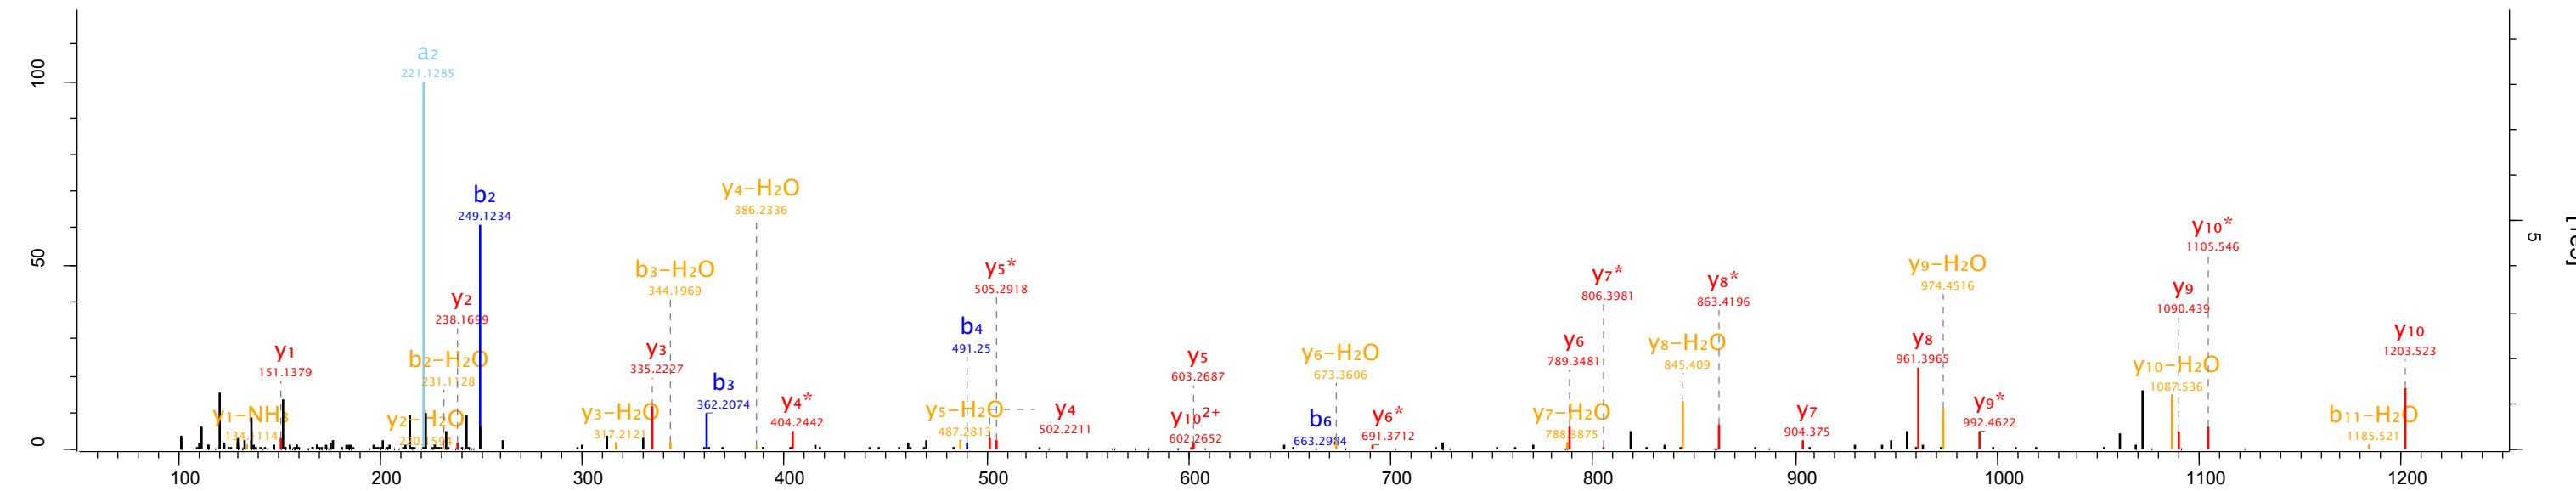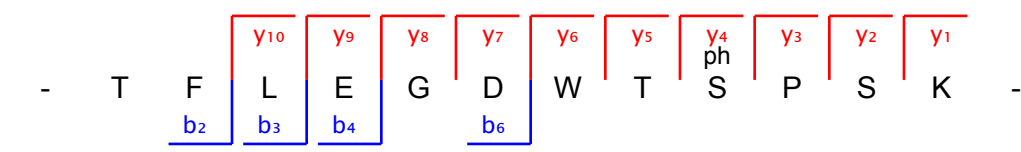

Raw file 20171215\_MaS\_33SR\_LMH\_phospho\_06 Scan 15658 Method FTMS; HCD Score 92.25 m/z 547.27 Gene names YTHDC1

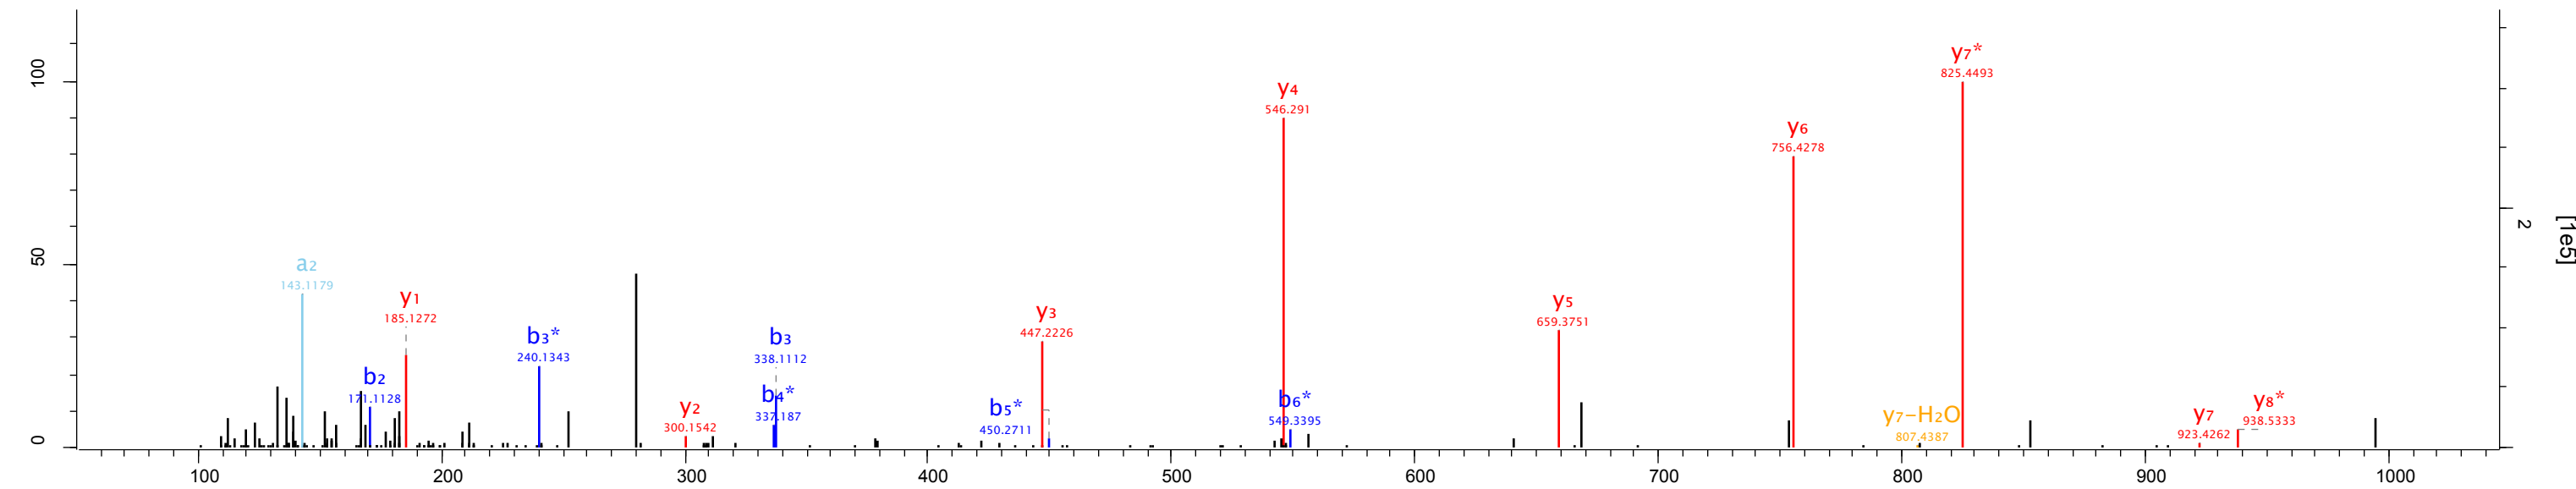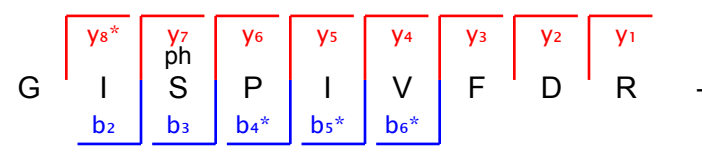

Raw file 20171215\_MaS\_33SR\_LMH\_phospho\_06 Scan 16248 Method FTMS; HCD Score 93.48 m/z 675.34 Gene names MAP7D1

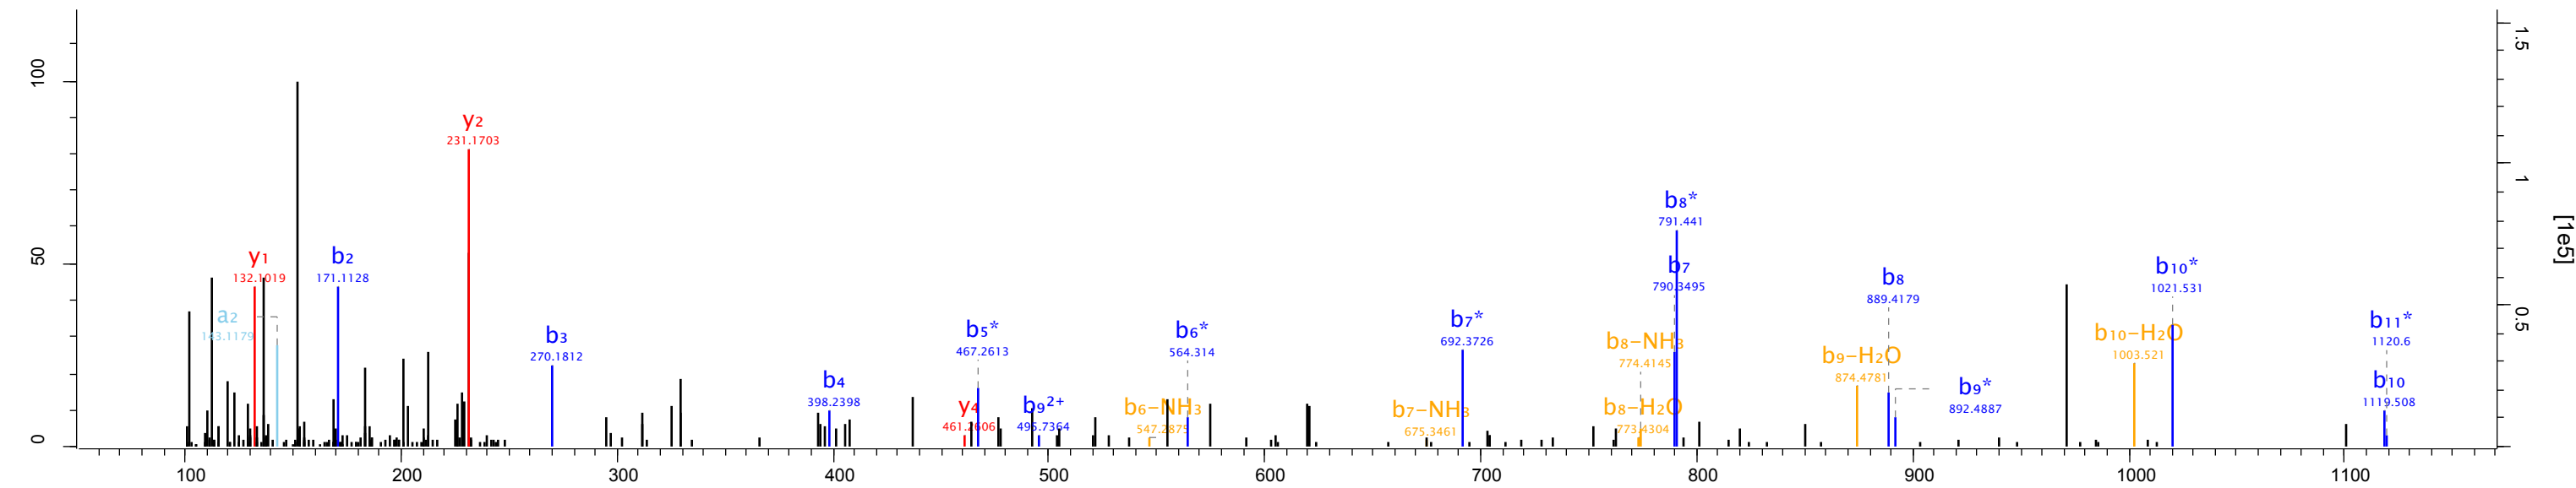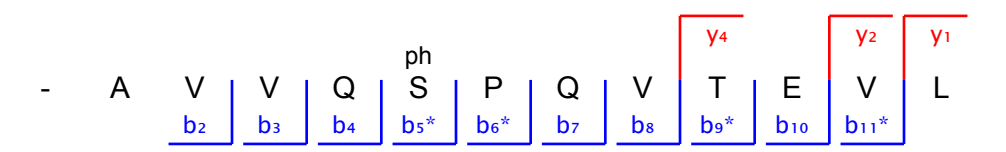



Raw file 20171215\_MaS\_33SR\_LMH\_phospho\_06 Scan 1978 Method FTMS; HCD Score 90.71 m/z 462.9 Gene names MAP7D1

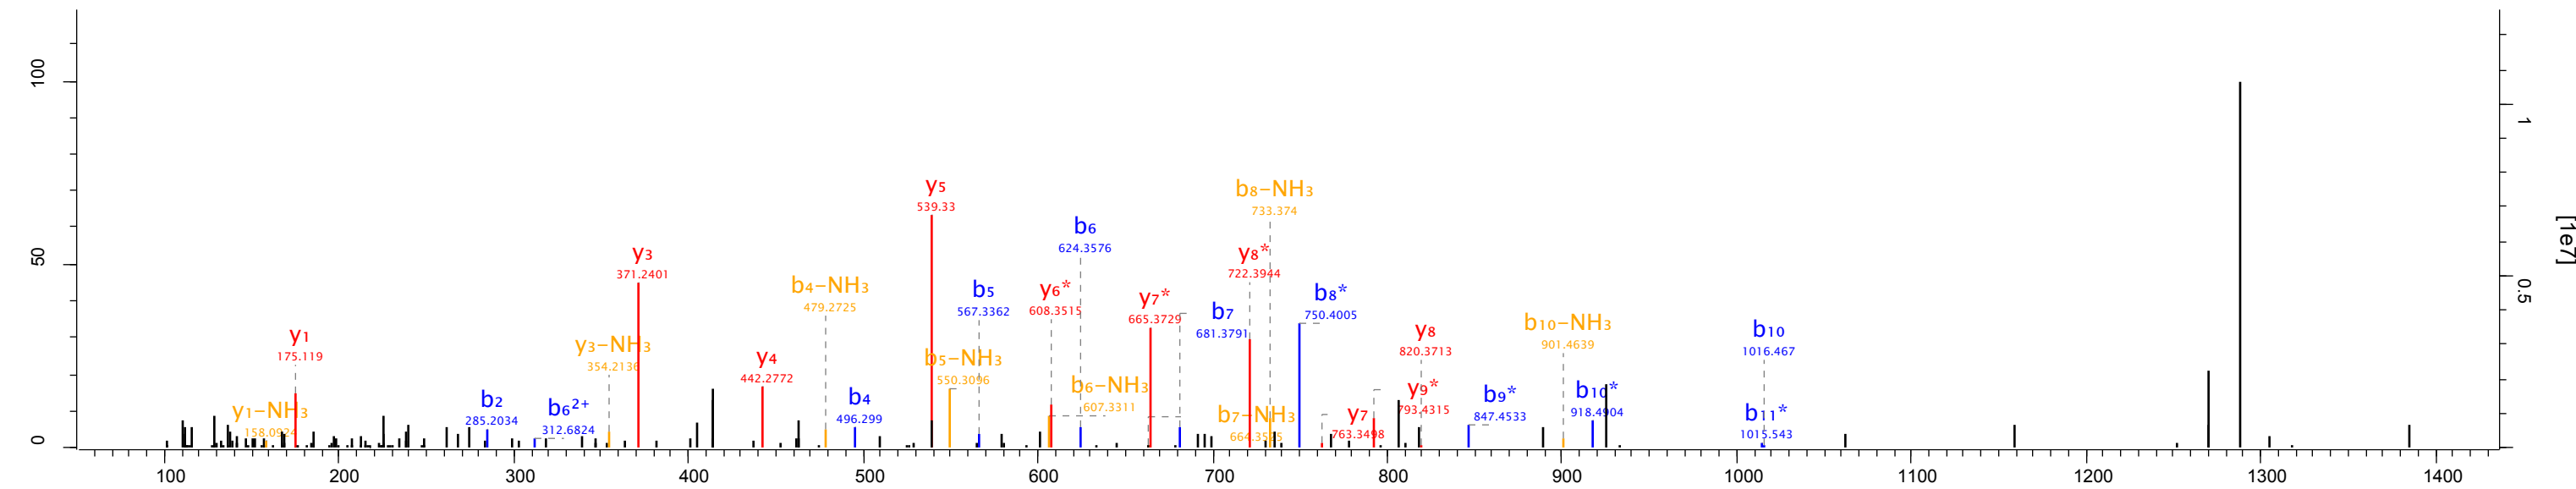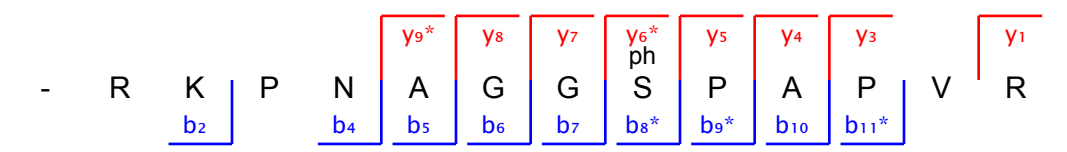

Raw file 20171215\_MaS\_33SR\_LMH\_phospho\_06 Scan 2648 Method FTMS; HCD Score 75.74 m/z 435.22 Gene names CIZ1

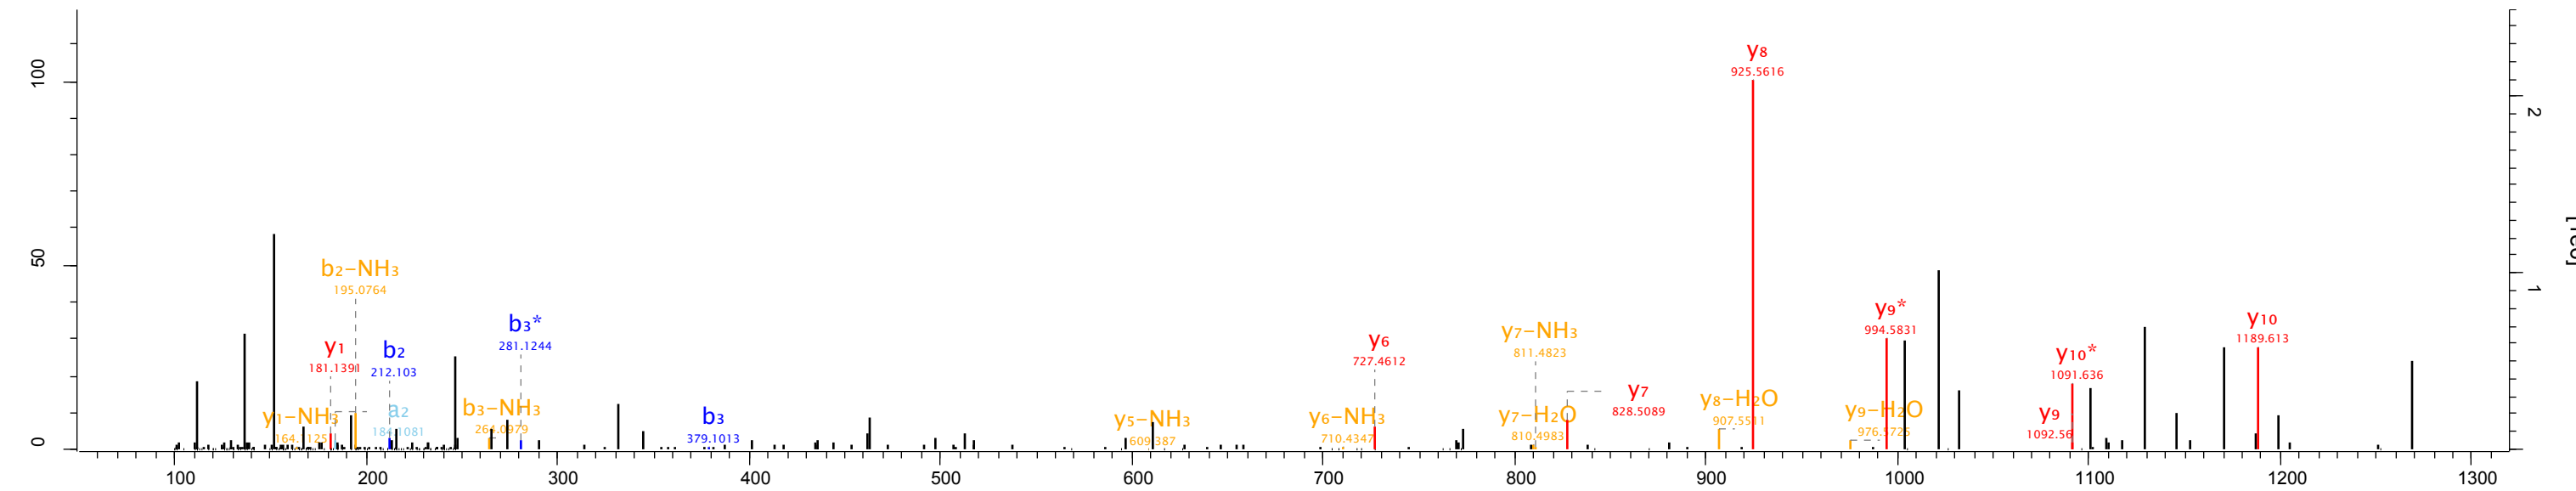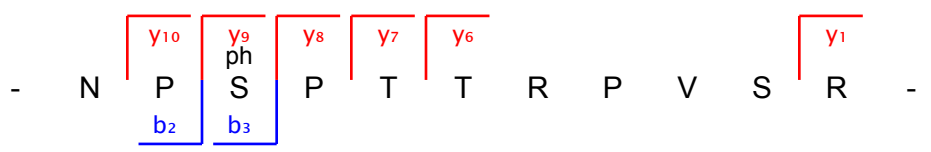

Raw file 20171215\_MaS\_33SR\_LMH\_phospho\_06 Scan 2848 Method FTMS; HCD Score 94.31 m/z 349.82 Gene names EIF4B

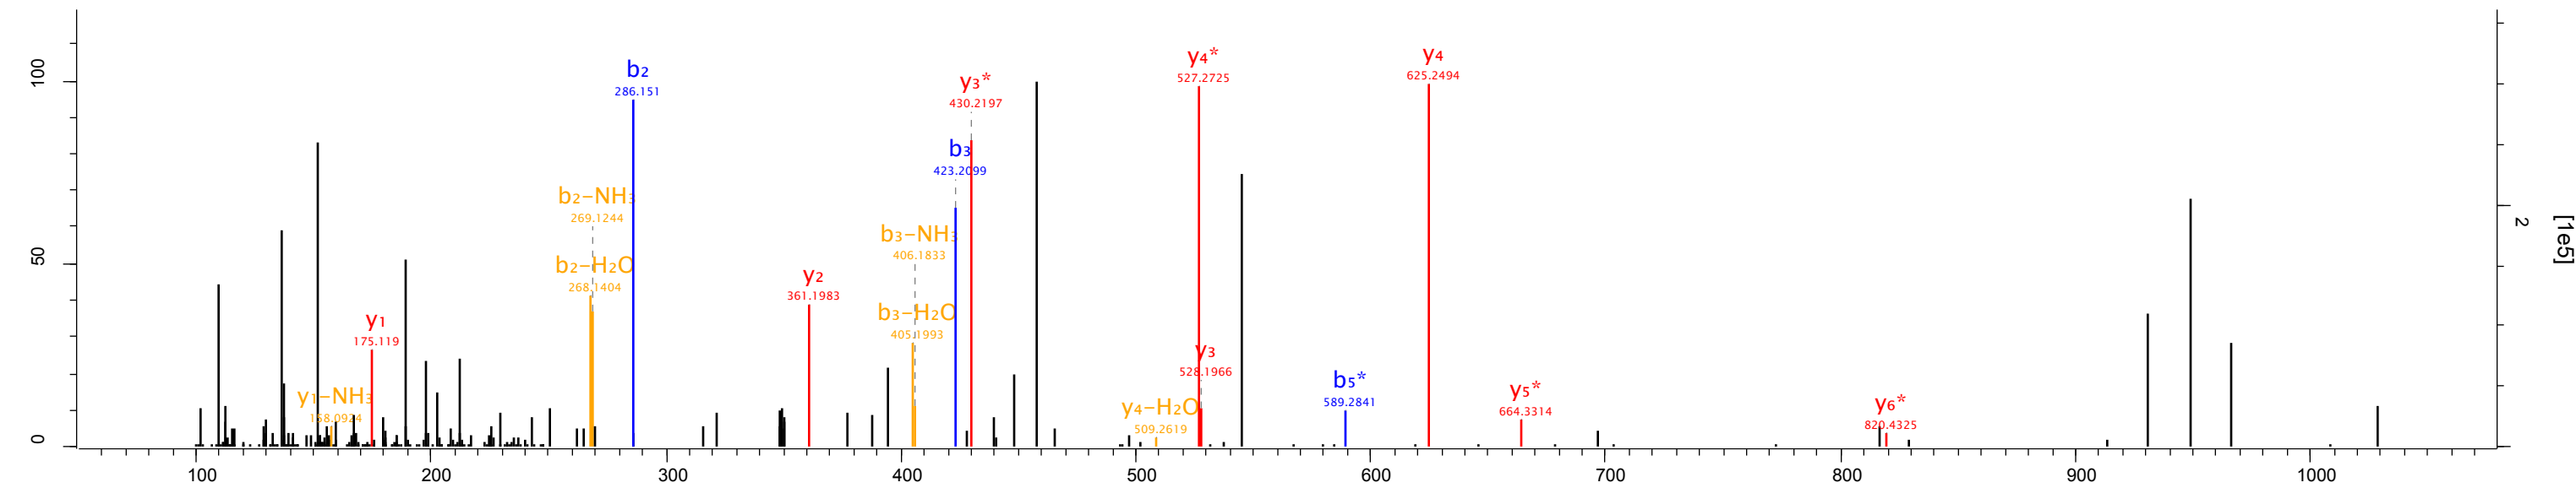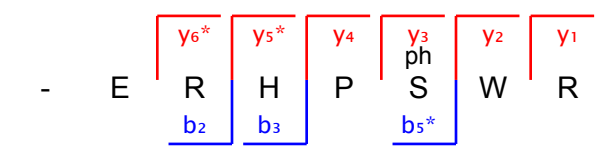

Raw file 20171215\_MaS\_33SR\_LMH\_phospho\_06 Scan 2868 Method FTMS; HCD Score 103.14 m/z 587.77 Gene names PACS1

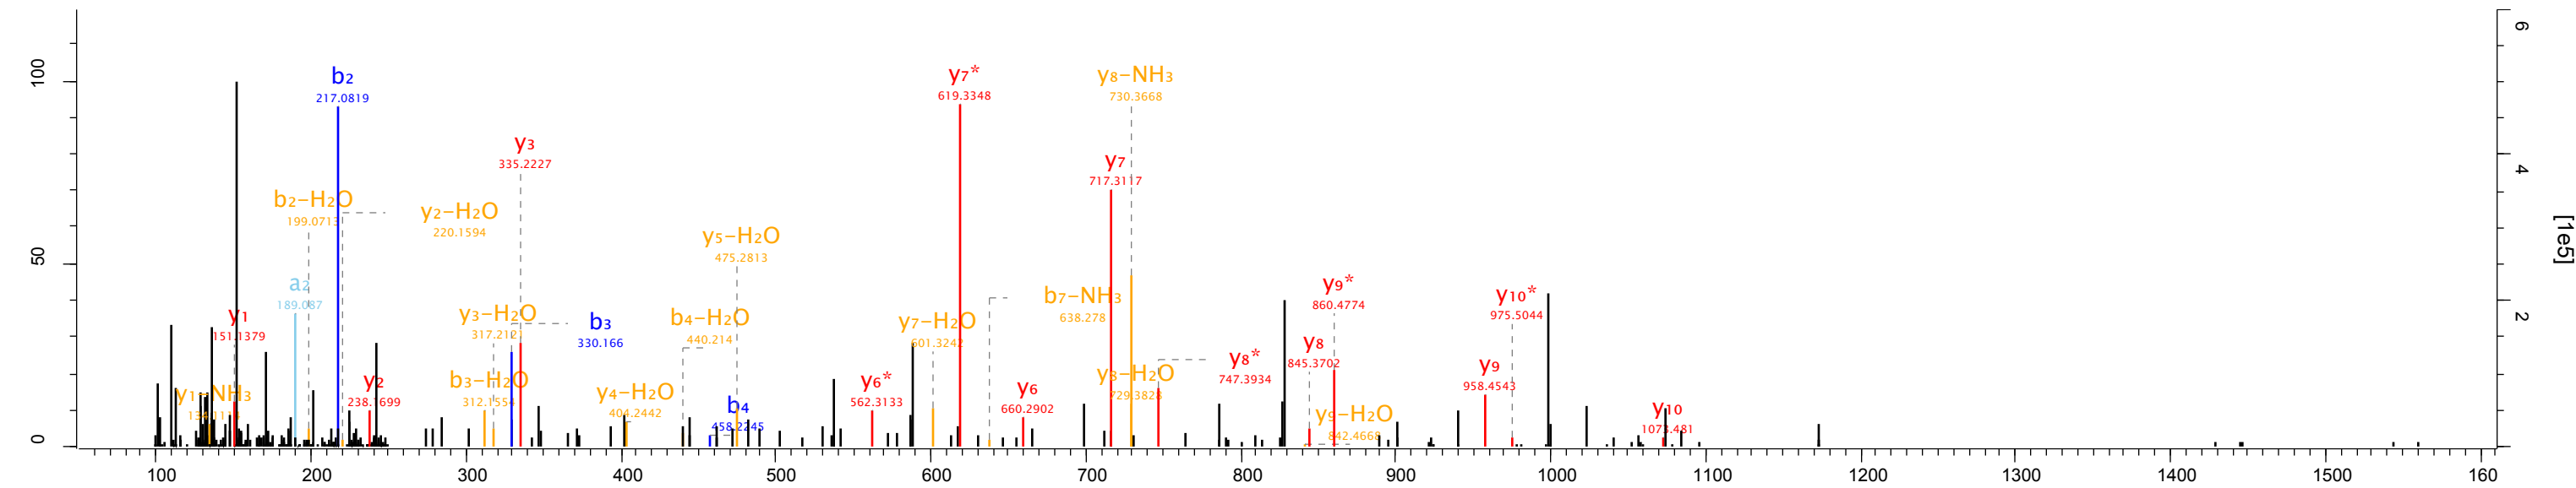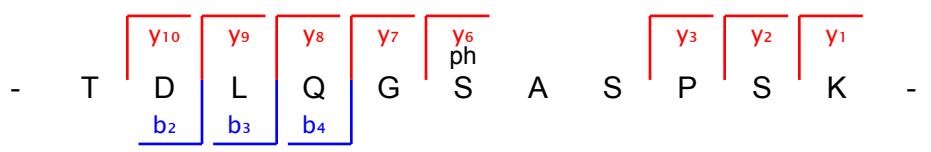

Raw file 20171215\_MaS\_33SR\_LMH\_phospho\_06 Scan 3058 Method FTMS; HCD Score 71.52 m/z 475.19 Gene names PRKAA1

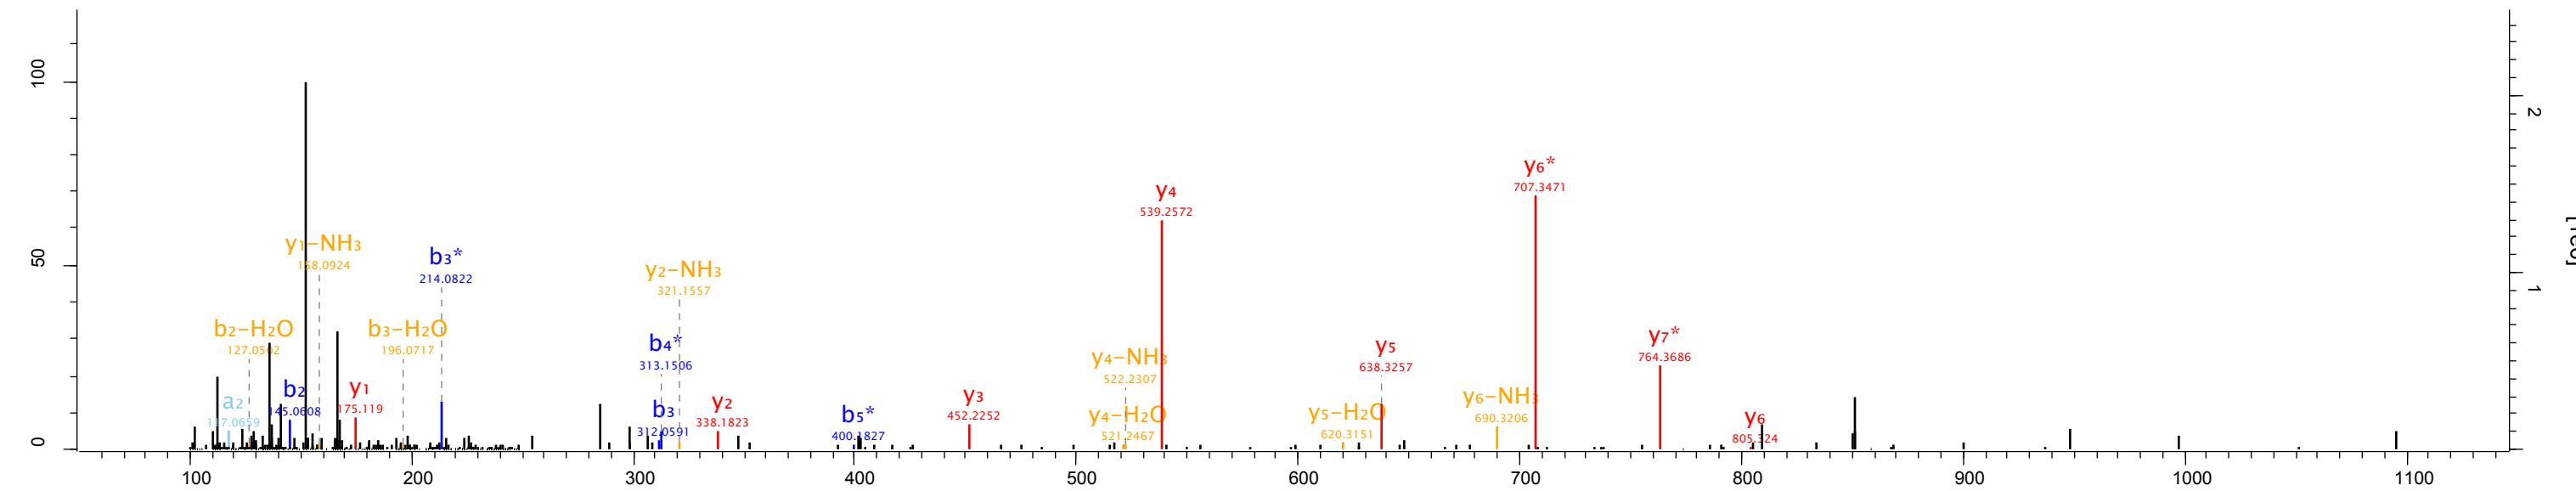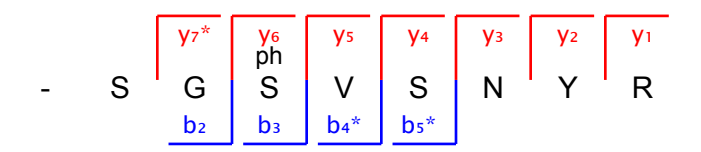

Raw file 20171215\_MaS\_33SR\_LMH\_phospho\_06 Scan 3328 Method FTMS; HCD Score 98.94 m/z 565.29 Gene names SRRM2

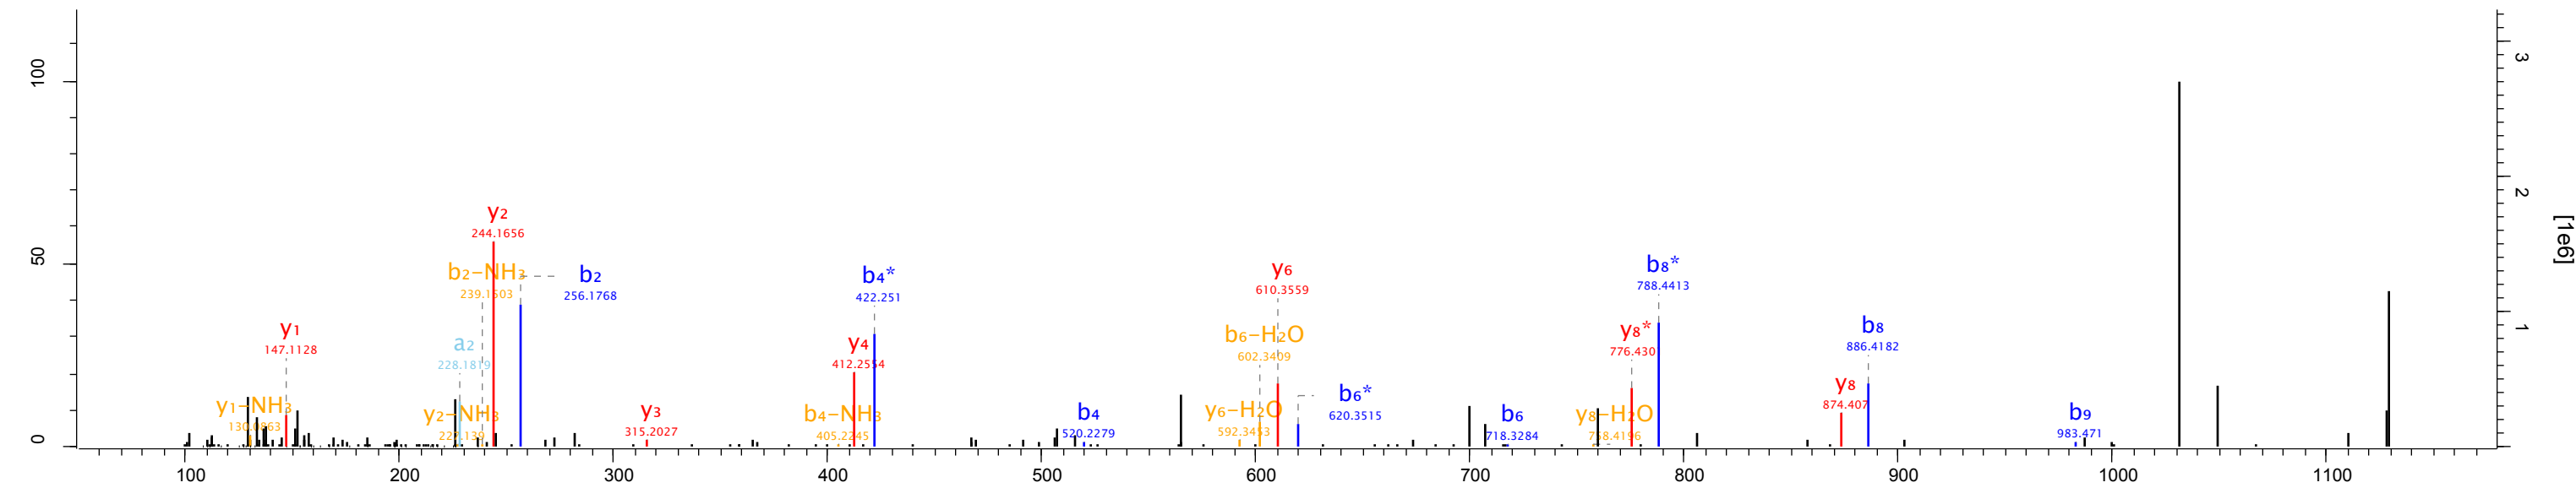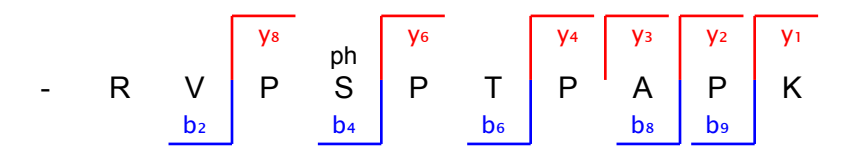

Raw file 20171215\_MaS\_33SR\_LMH\_phospho\_06 Scan 3368 Method FTMS; HCD Score 74.36 m/z 646.65 Gene names PI4KB

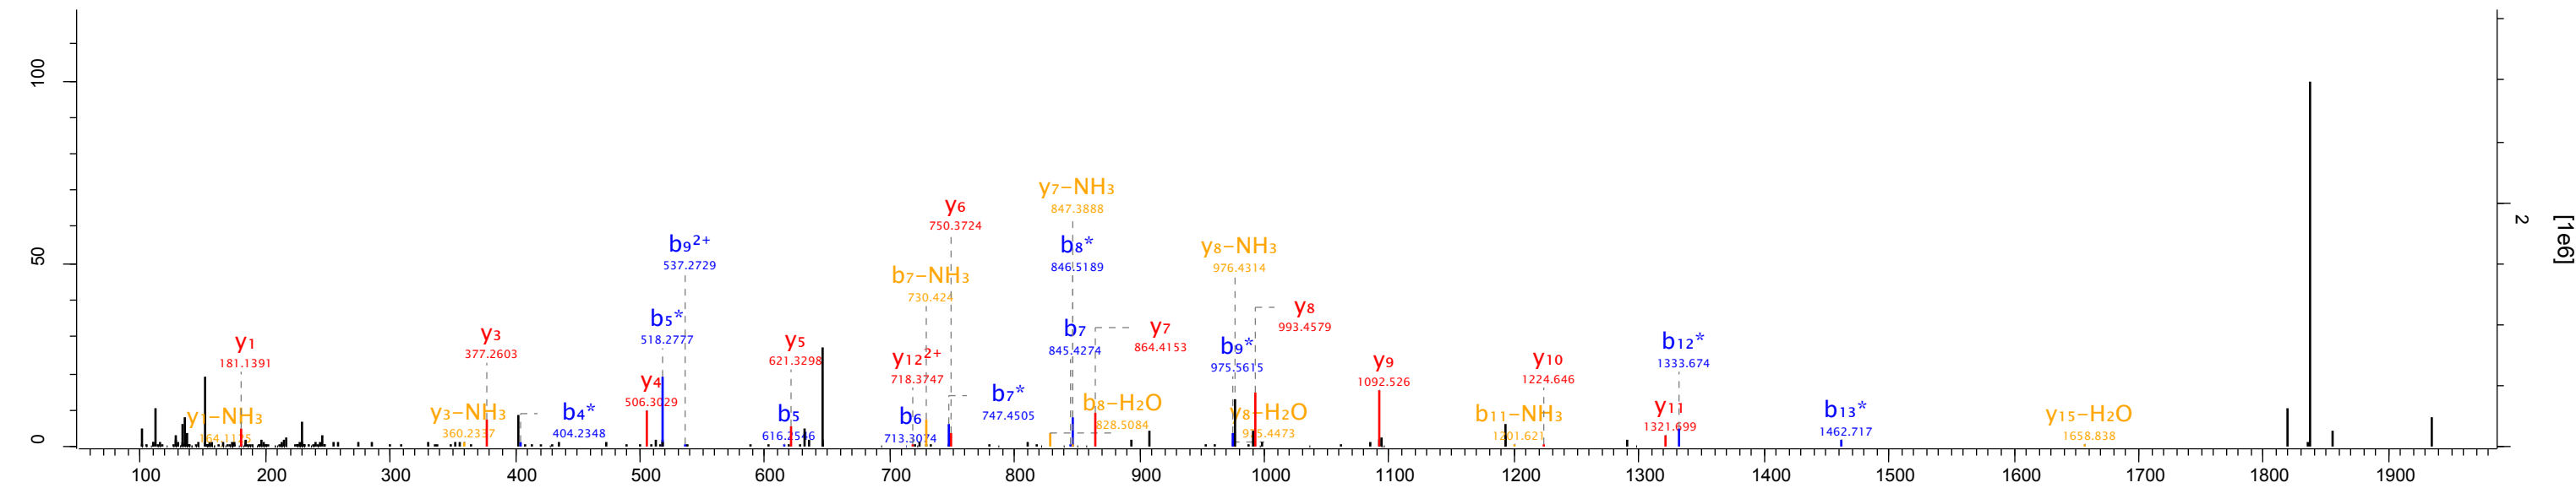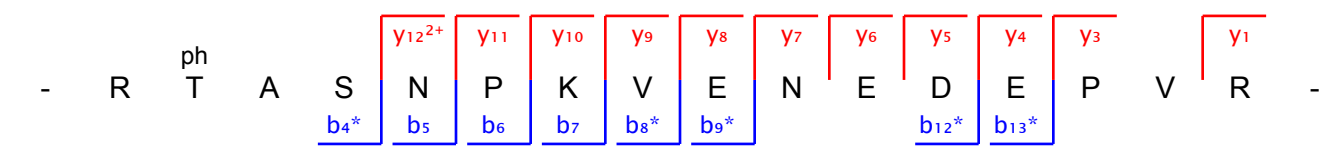

Raw file 20171215\_MaS\_33SR\_LMH\_phospho\_06 Scan 3868 Method FTMS; HCD Score 57.29 m/z 439.23 Gene names RCC1

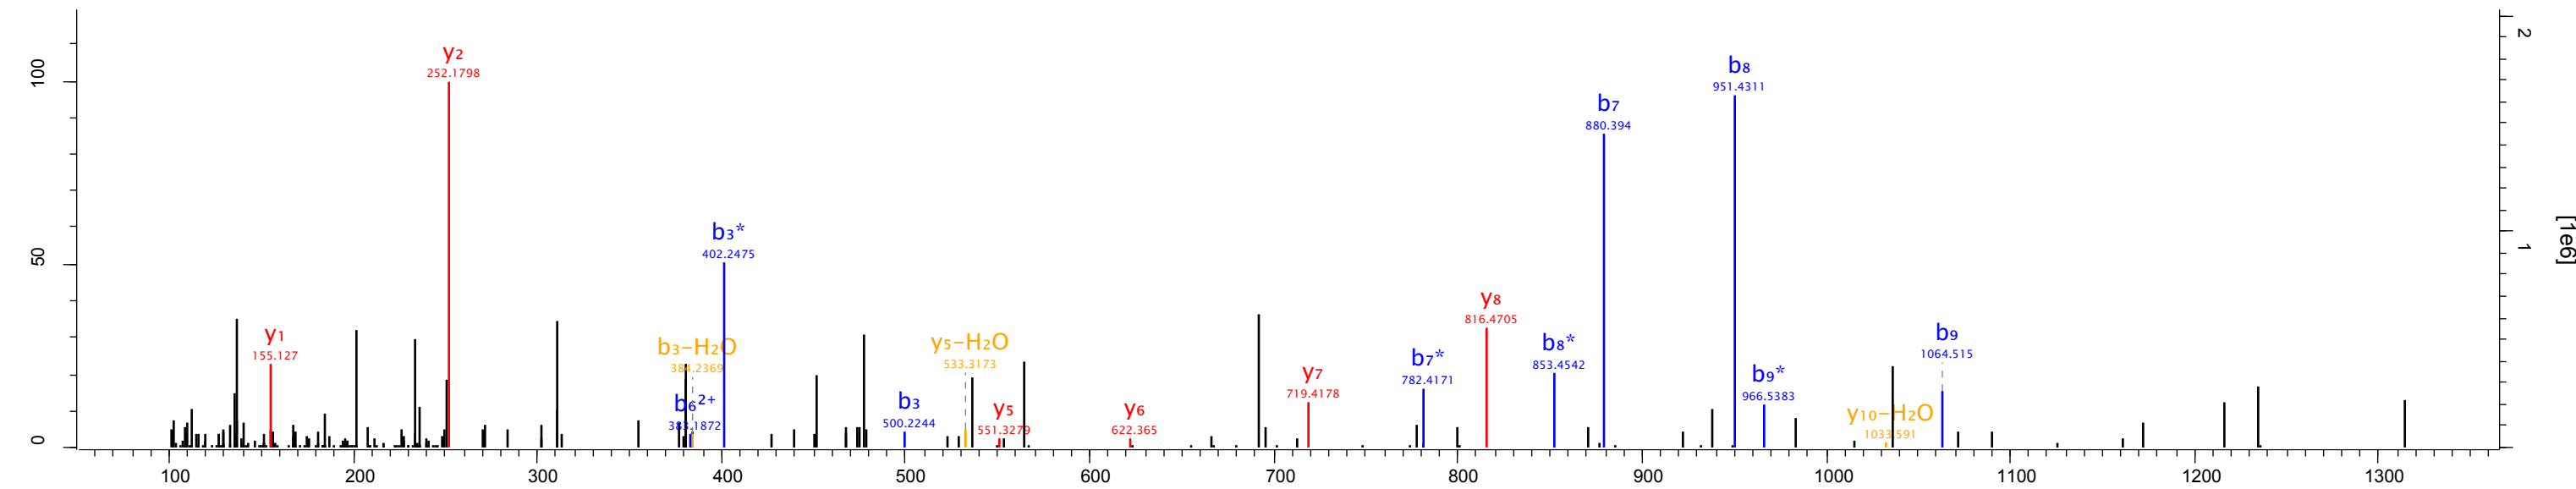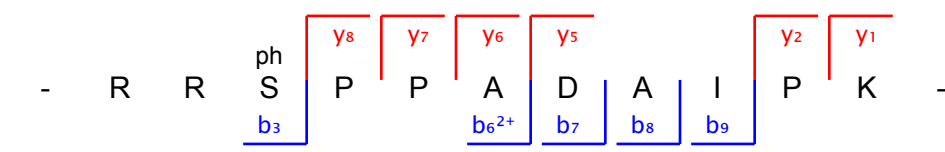



Raw file 20171215\_MaS\_33SR\_LMH\_phospho\_06 Scan 3988 Method FTMS; HCD Score 360.04 m/z 1003.42 Gene names NUCKS1

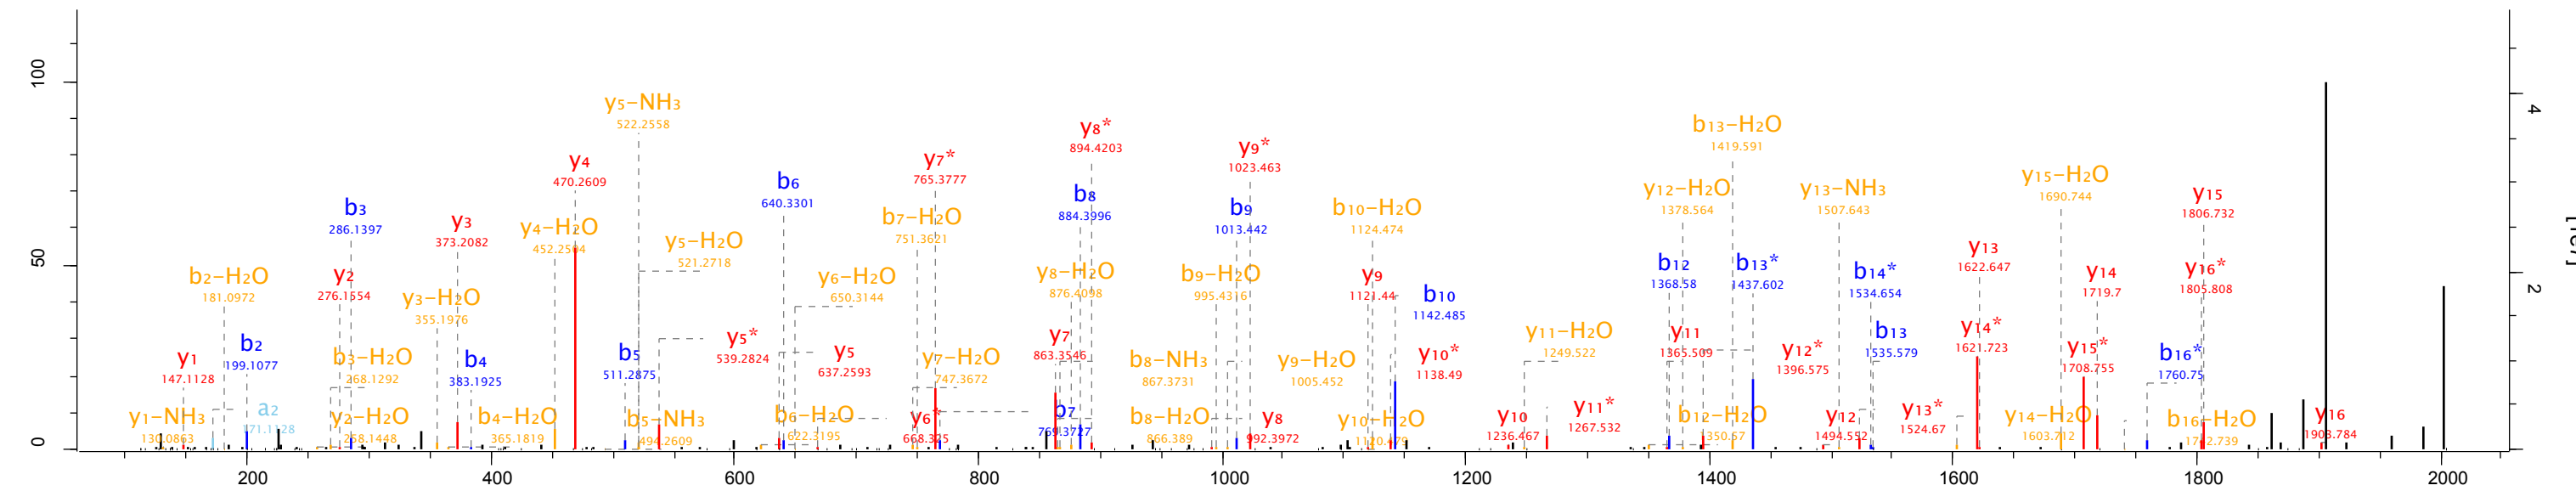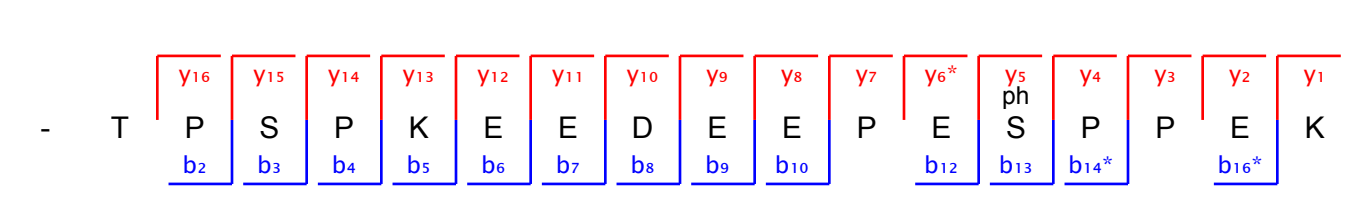

Raw file 20171215\_MaS\_33SR\_LMH\_phospho\_06 Scan 4028 Method FTMS; HCD Score 71.08 m/z 469.74 Gene names PRC1

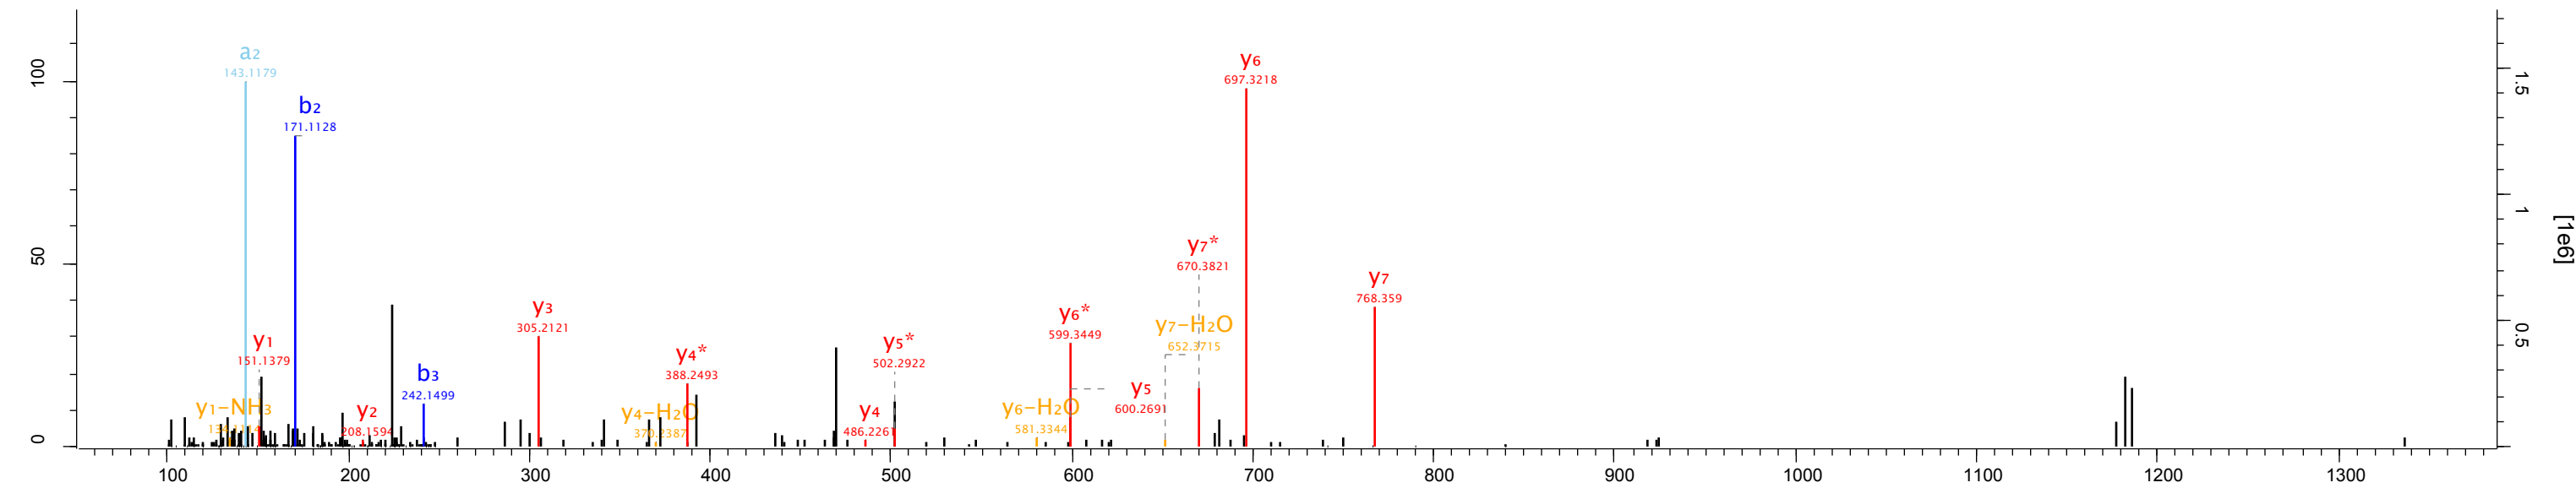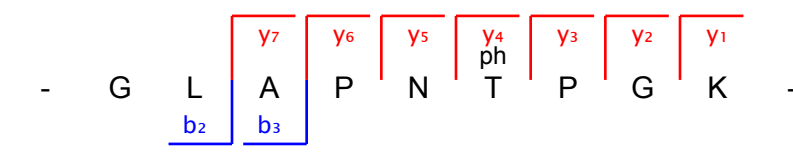

Raw file  
 20171215\_MaS\_33SR\_LMH\_phospho\_06  
 Scan 4098 Method FTMS; HCD Score 72.06 m/z 536.59 Gene names GPATCH8

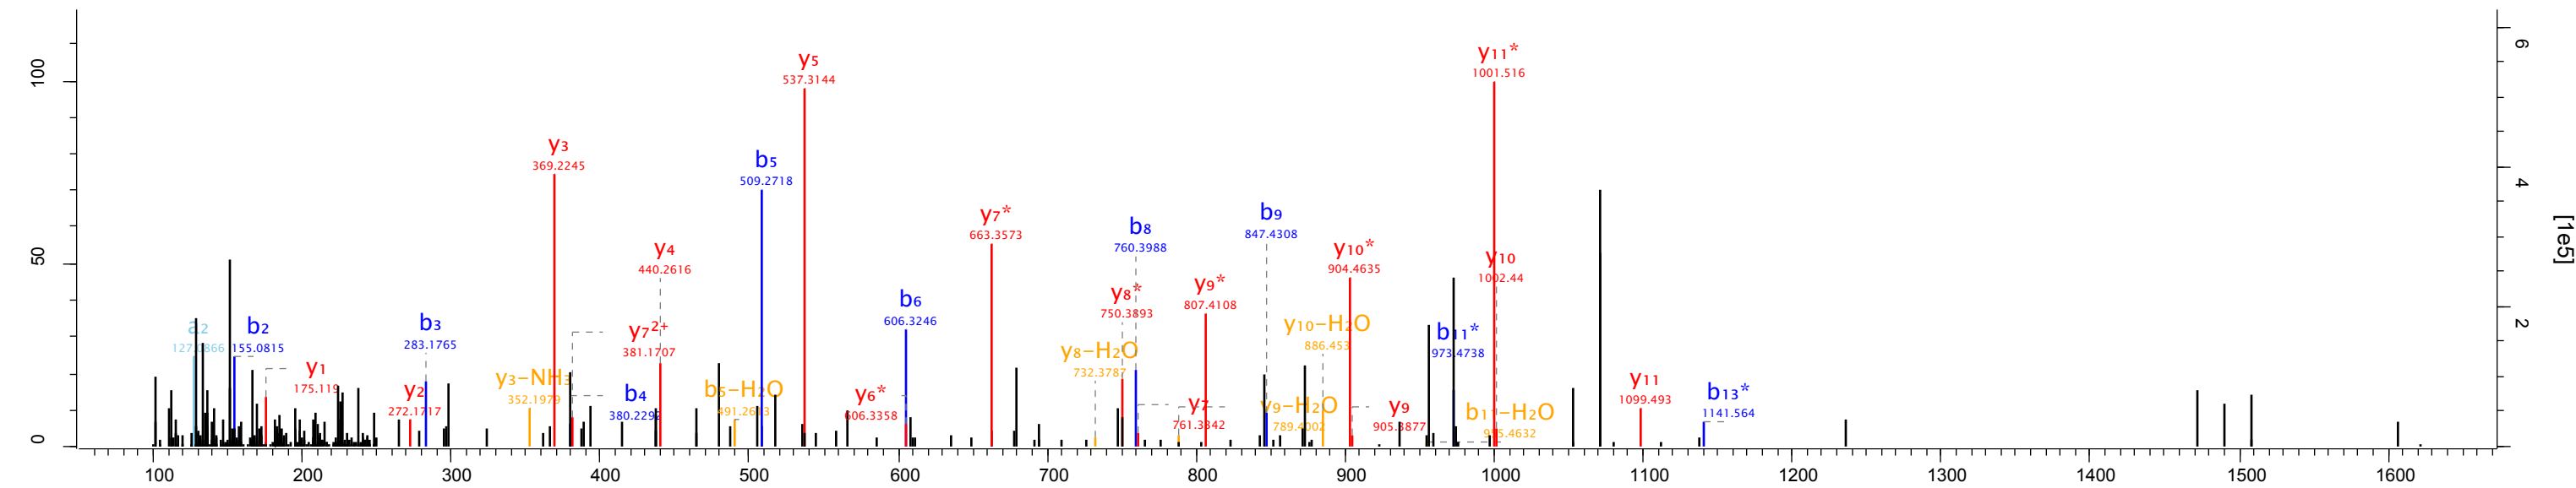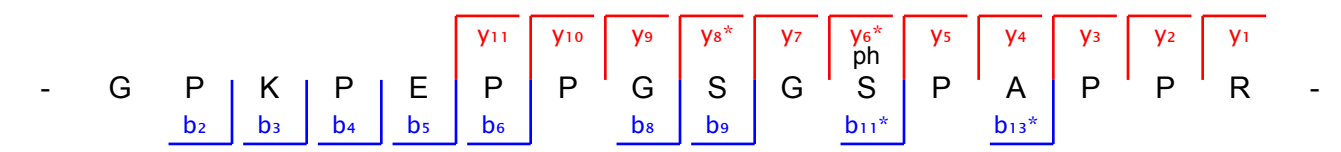

Raw file 20171215\_MaS\_33SR\_LMH\_phospho\_06 Scan 4138 Method FTMS; HCD Score 91.56 m/z 874.86 Gene names TP53BP1

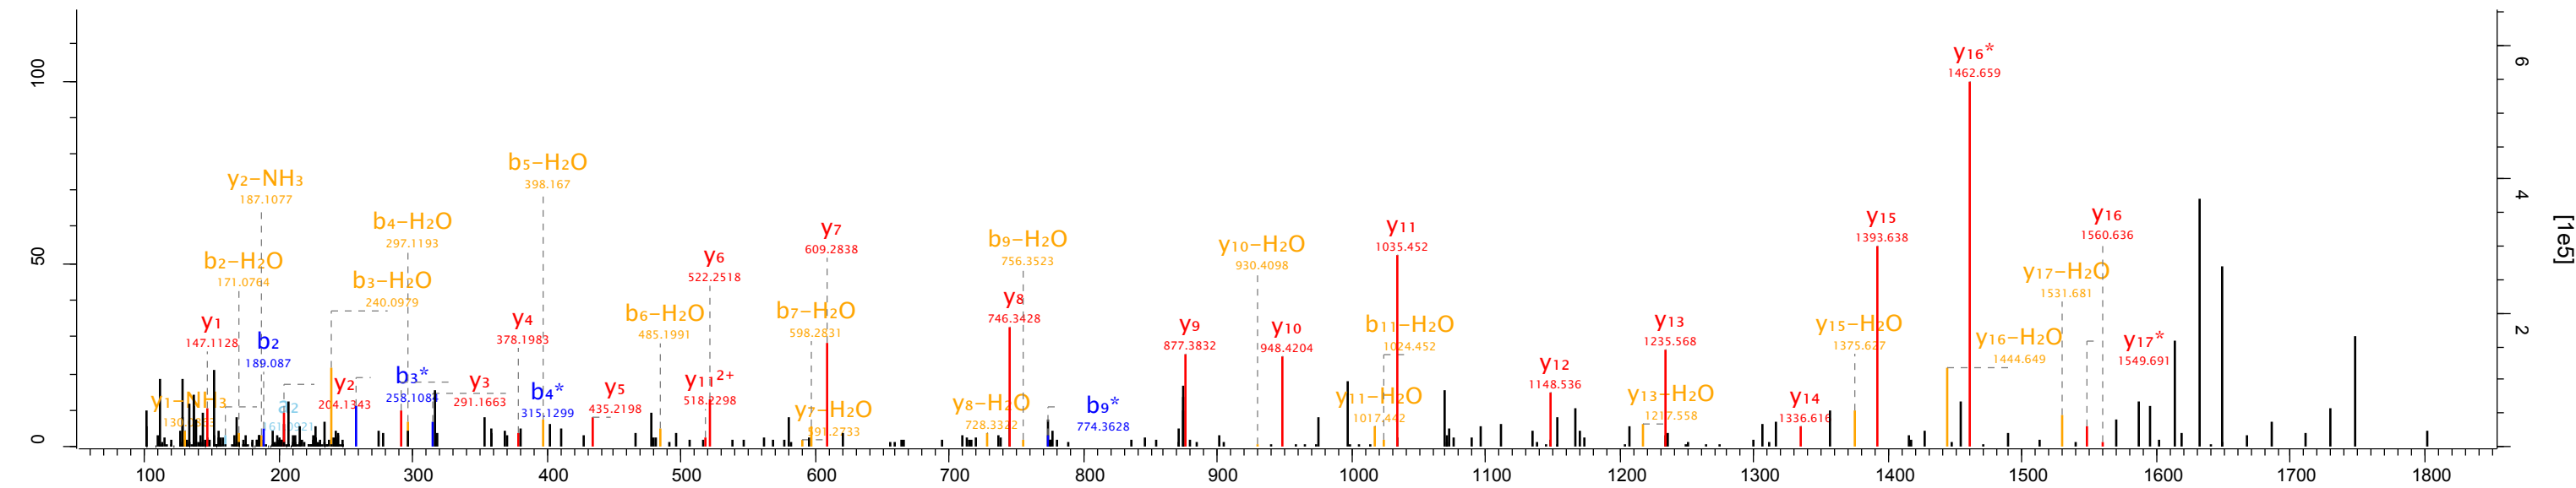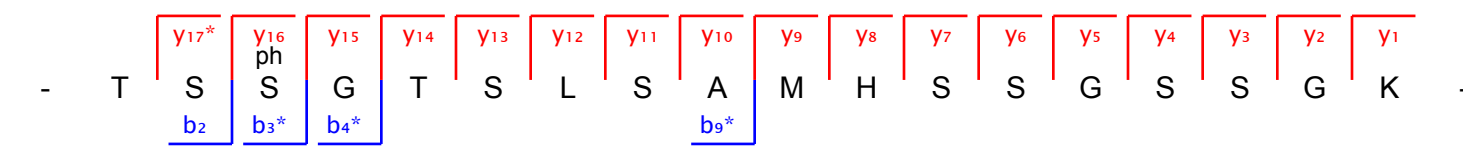

Raw file 20171215\_MaS\_33SR\_LMH\_phospho\_06 Scan 4178 Method FTMS; HCD Score 65.18 m/z 523.73 Gene names BRAF

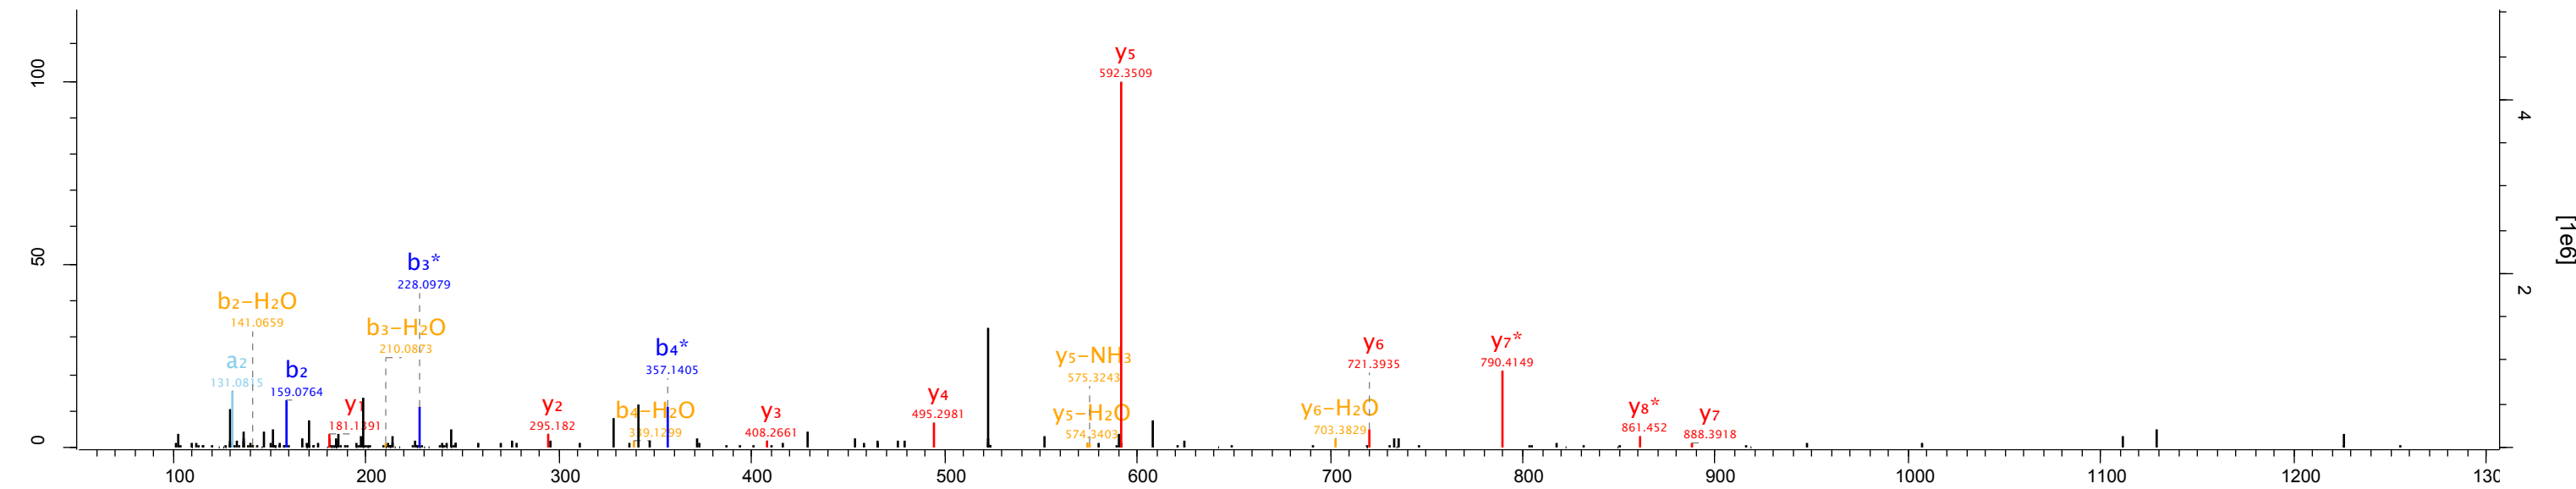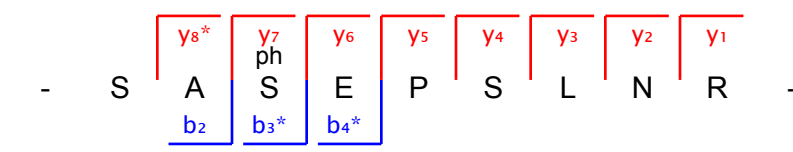

Raw file 20171215\_MaS\_33SR\_LMH\_phospho\_06 Scan 4728 Method FTMS; HCD Score 98.05 m/z 479.69 Gene names RBBP6

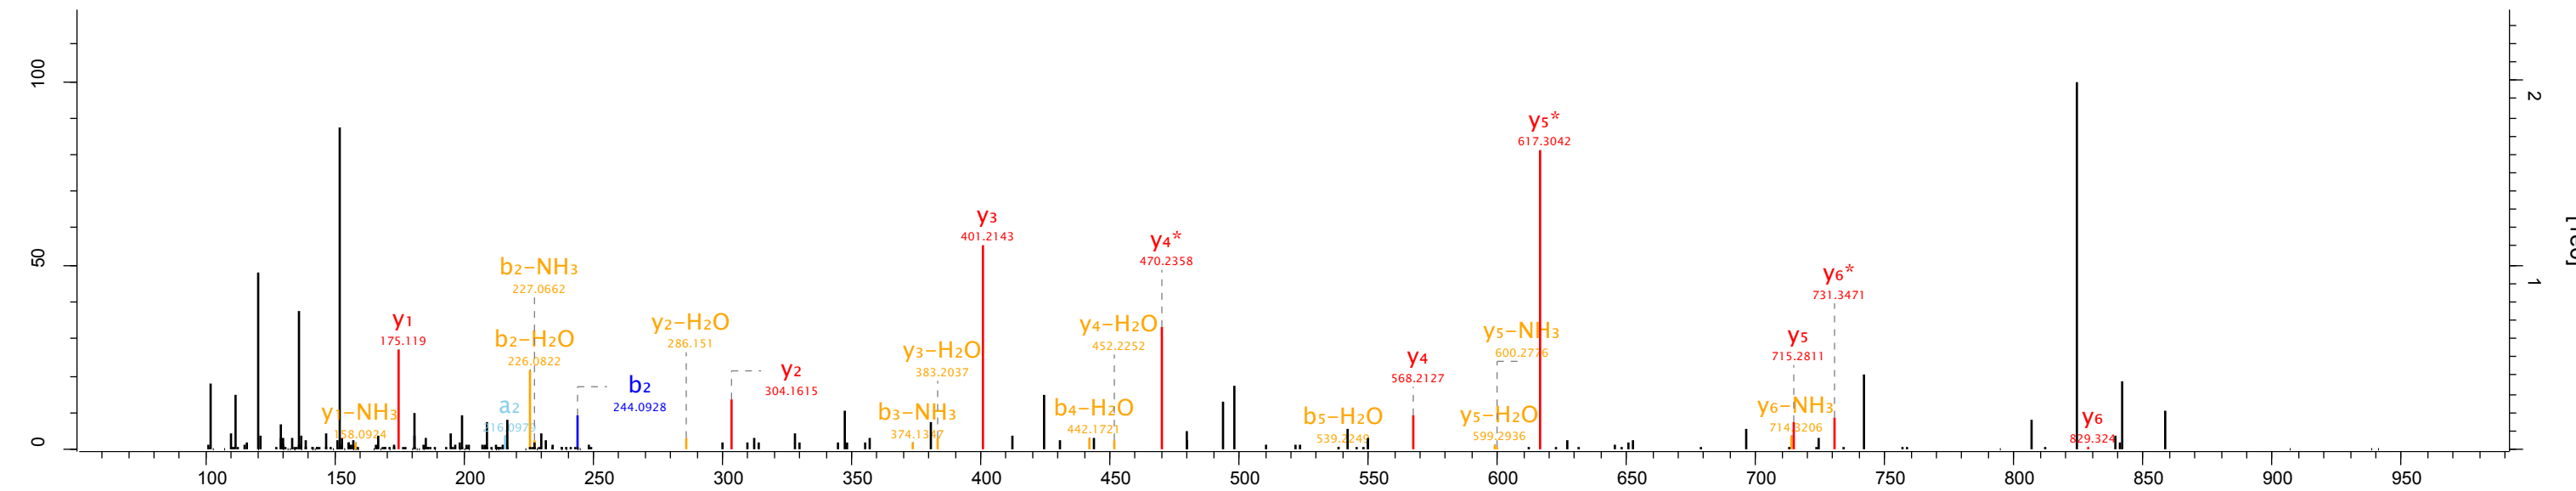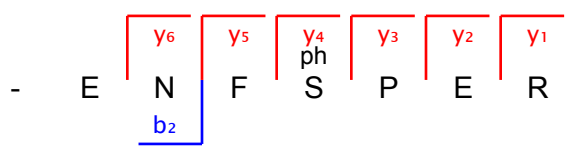

Raw file 20171215\_MaS\_33SR\_LMH\_phospho\_06 Scan 4838 Method FTMS; HCD Score 153.06 m/z 830.88 Gene names IFI16

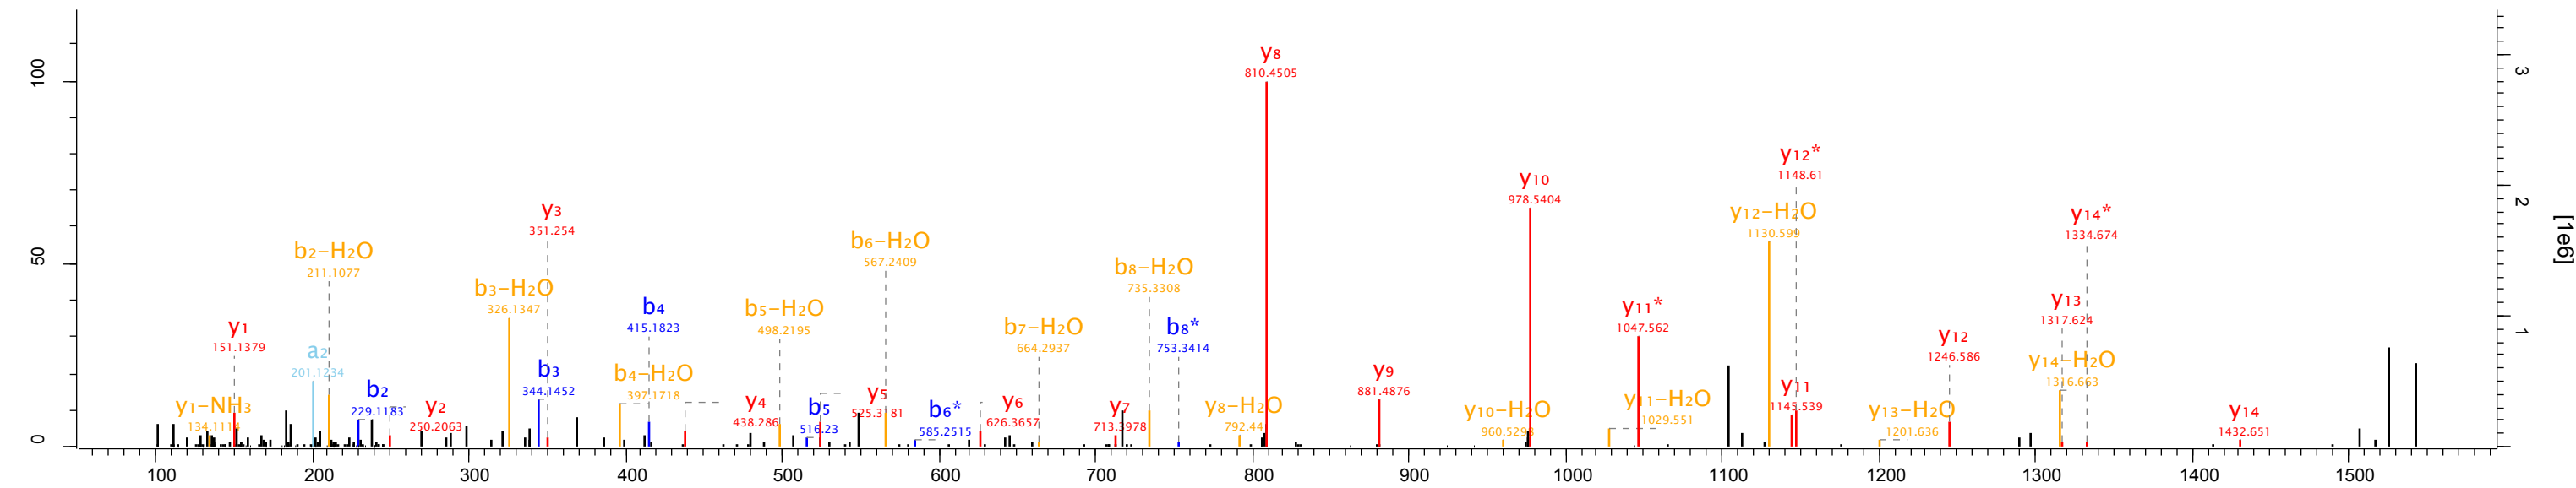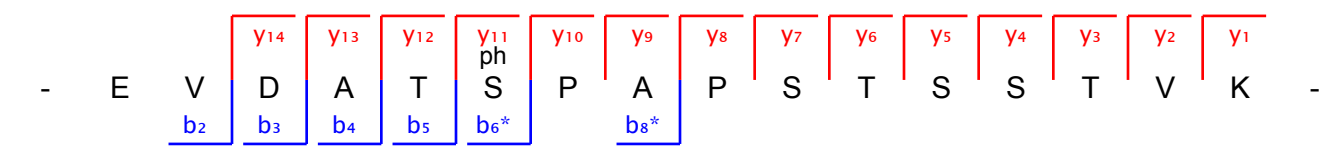

Raw file 20171215\_MaS\_33SR\_LMH\_phospho\_06 Scan 5008 Method FTMS; HCD Score 79.71 m/z 634.8 Gene names METAP2

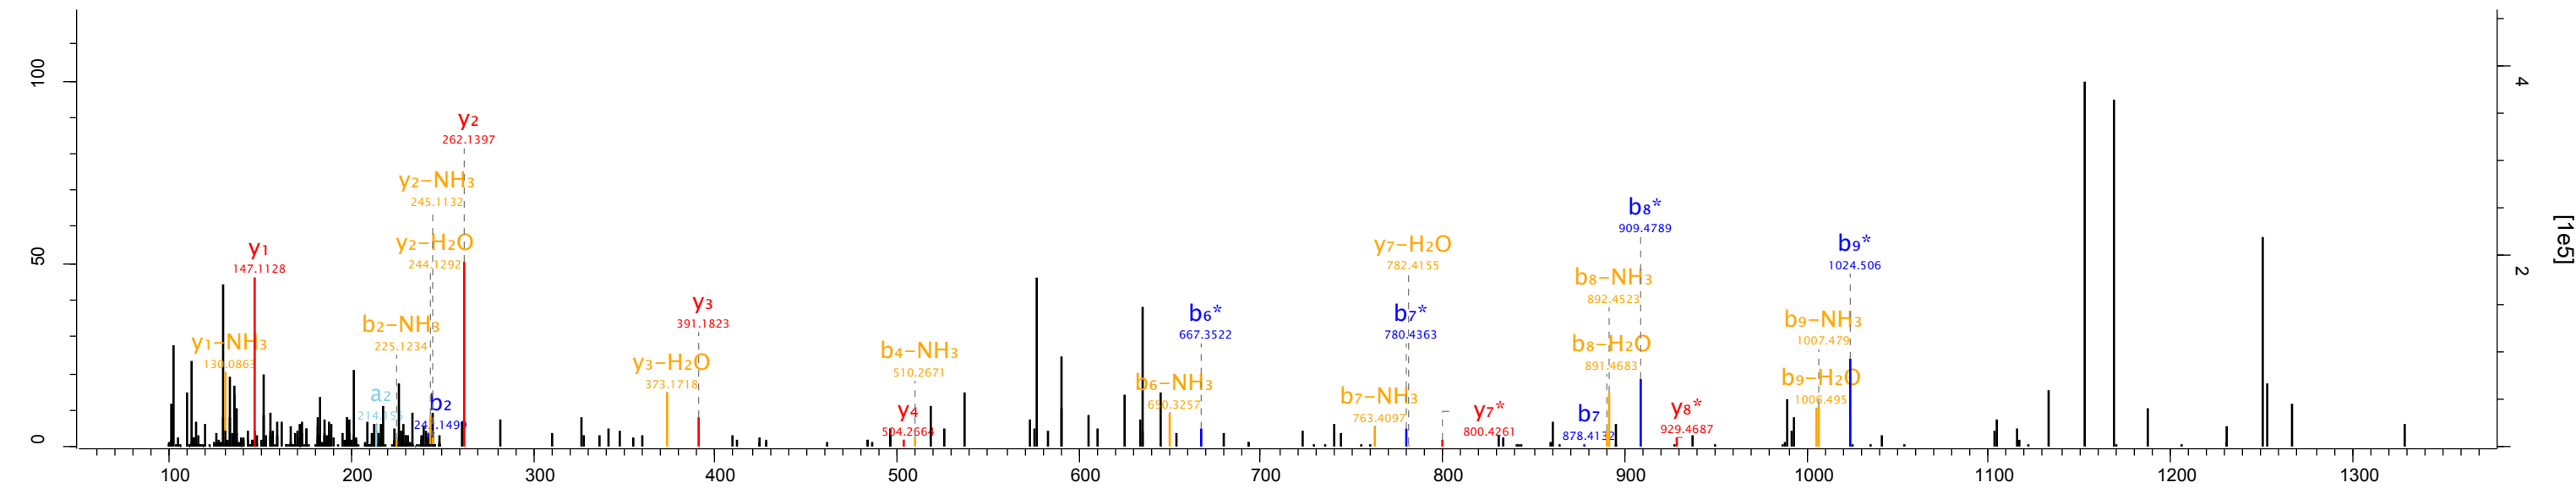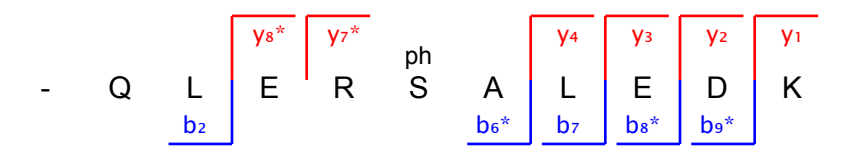



Raw file: 20171215\_MaS\_33SR\_LMH\_phospho\_06  
 Scan: 5088 Method: FTMS; HCD Score: 184.59 m/z: 664.81 Gene names: PPP1R12A

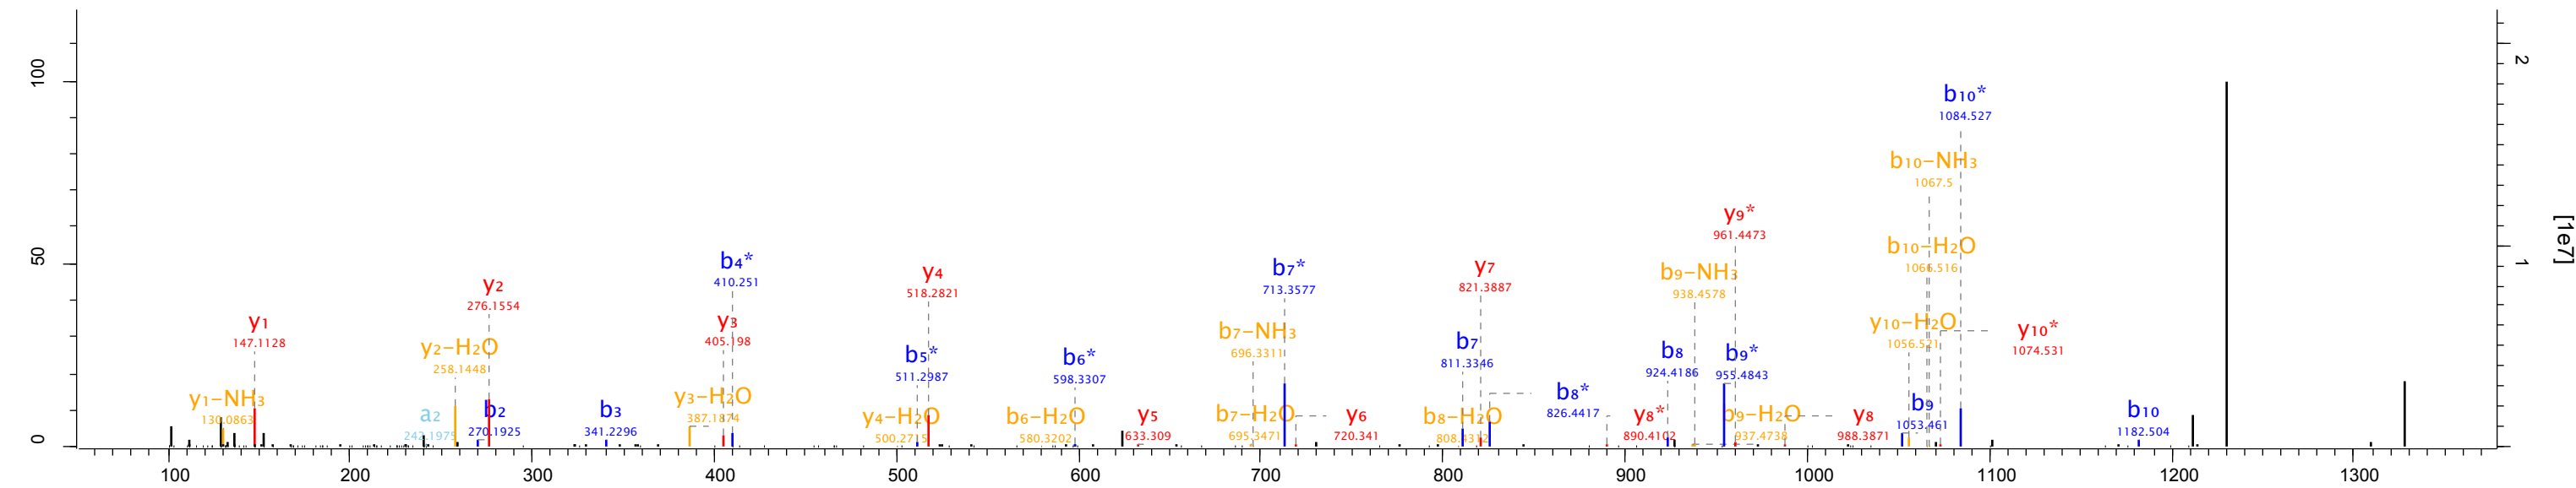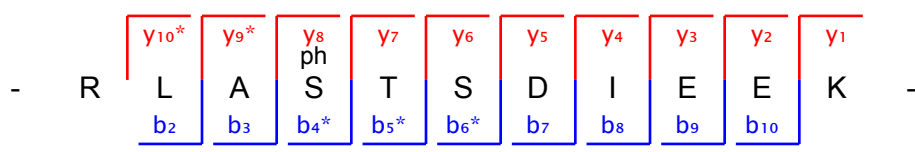

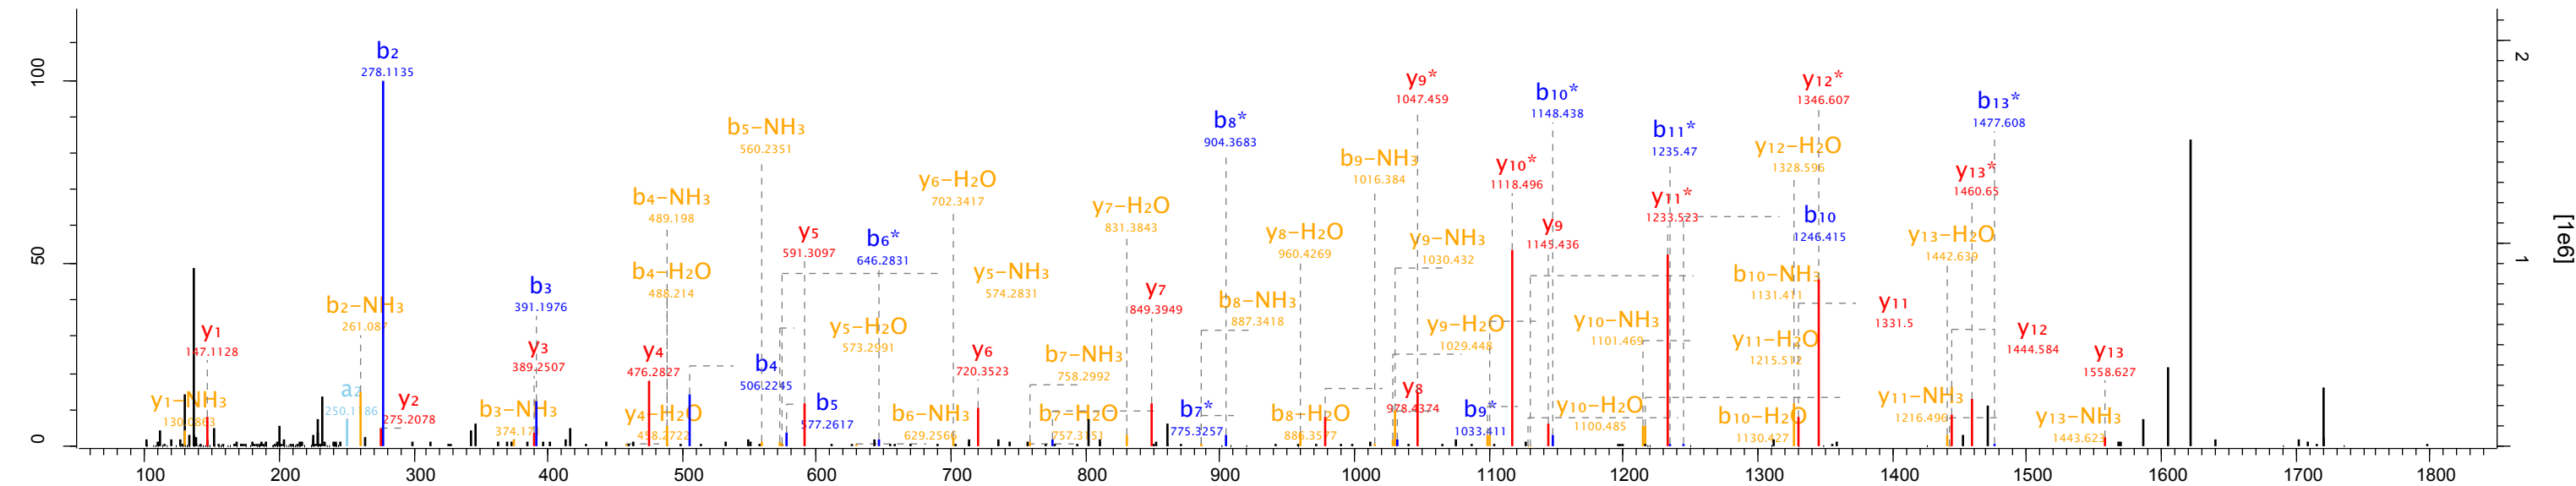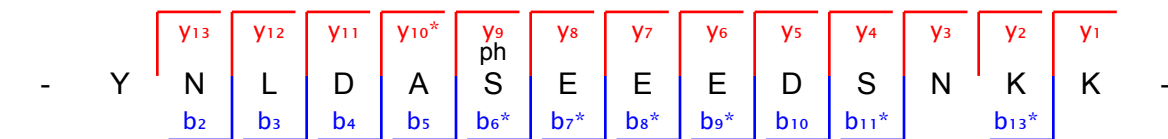

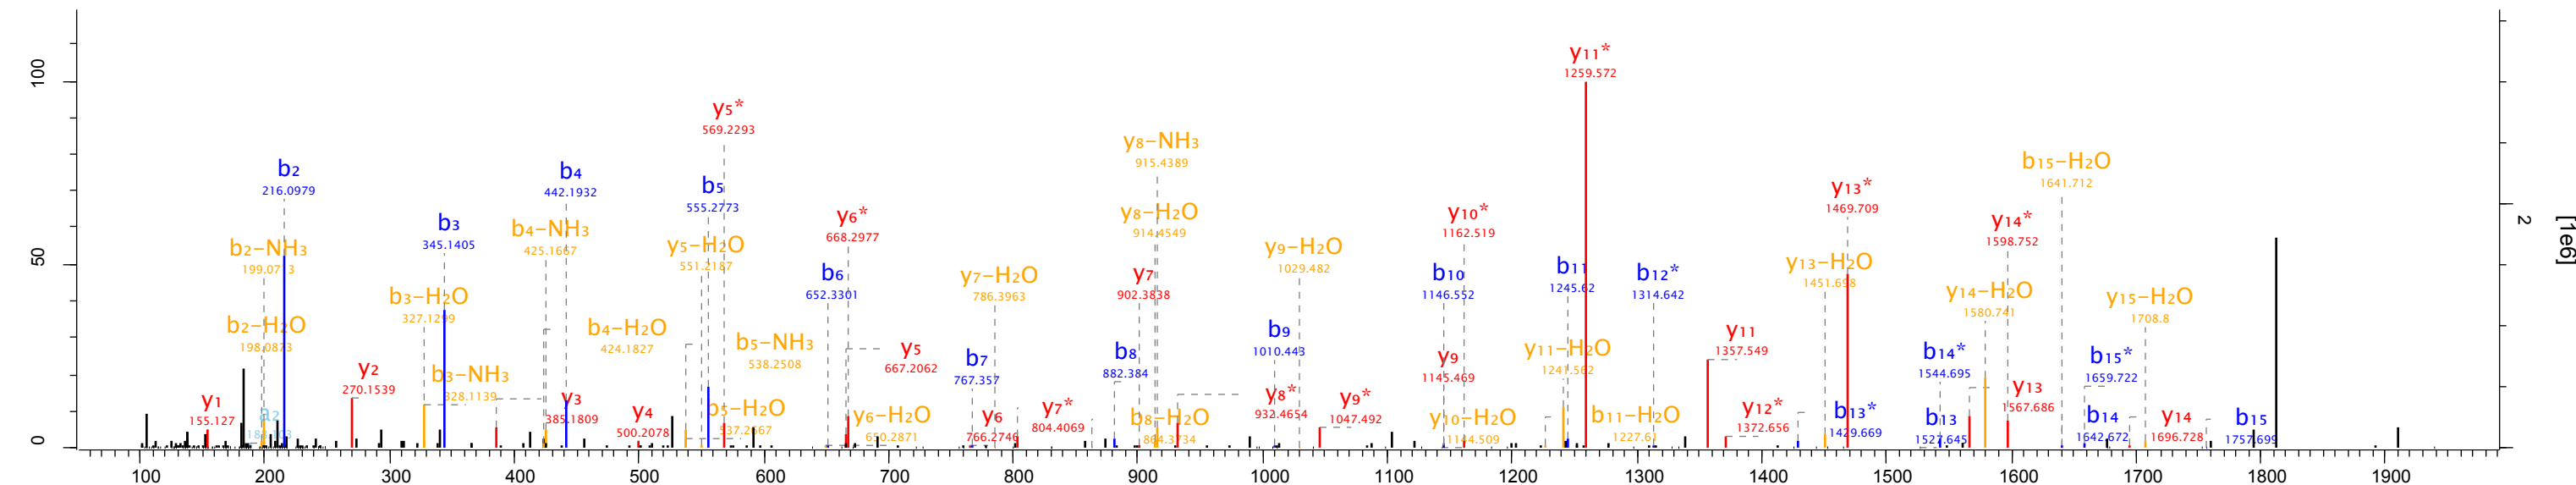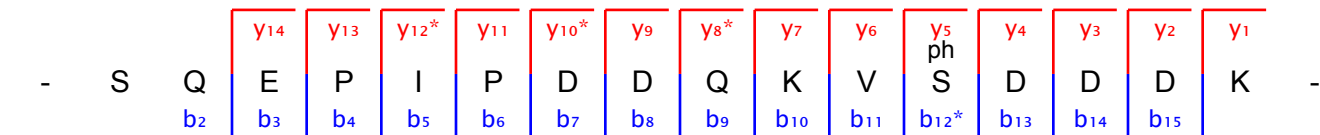

Raw file 20171215\_MaS\_33SR\_LMH\_phospho\_06 Scan 5848 Method FTMS; HCD Score 97.69 m/z 884.36 Gene names RBMX

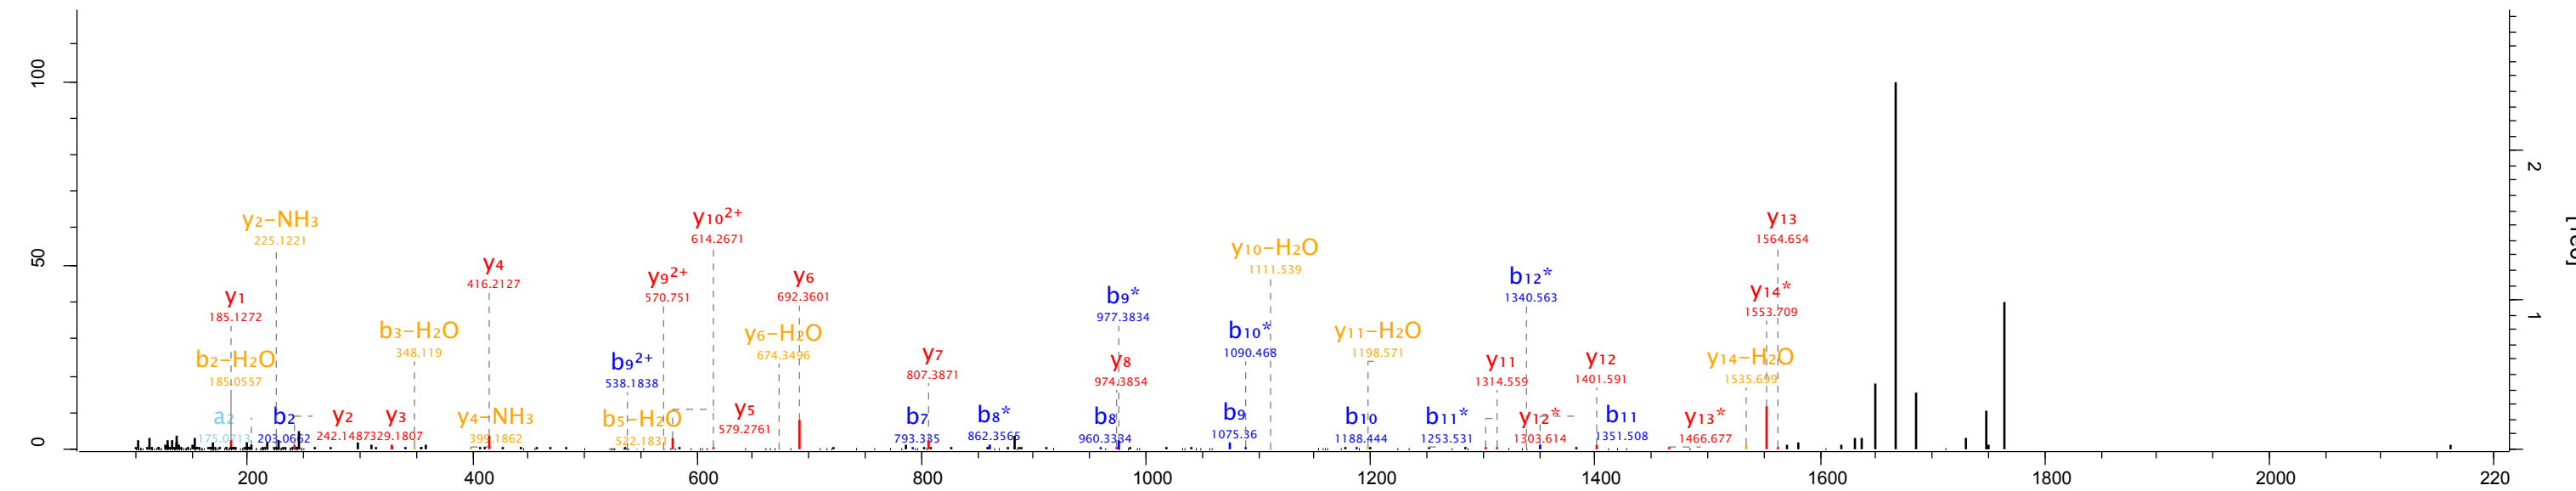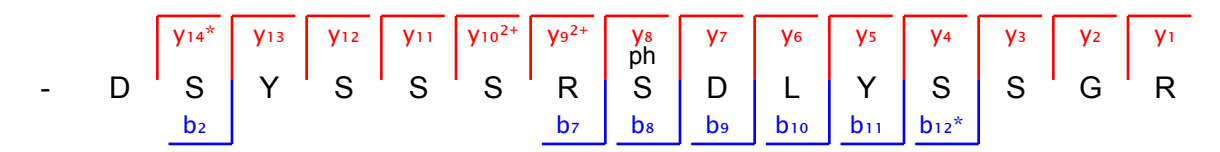

Raw file 20171215\_MaS\_33SR\_LMH\_phospho\_06 Scan 6228 Method FTMS; HCD Score 67.95 m/z 554.25 Gene names BNC1

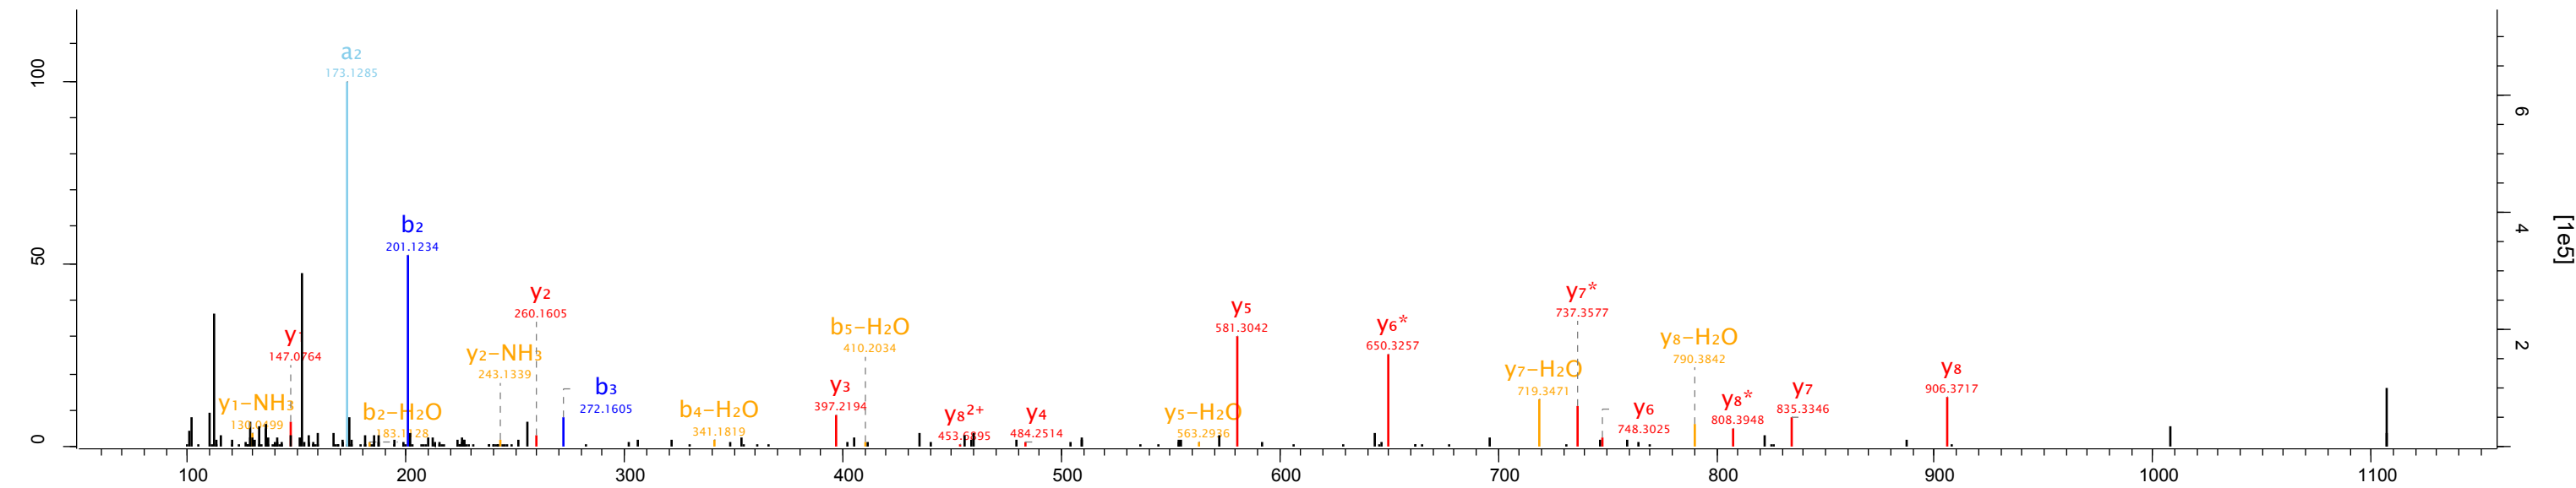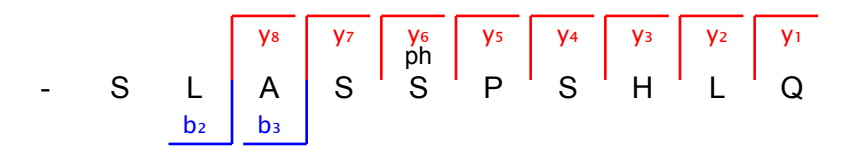

Raw file 20171215\_MaS\_33SR\_LMH\_phospho\_06 Scan 6338 Method FTMS; HCD Score 103.21 m/z 538.26 Gene names SH3PXD2A

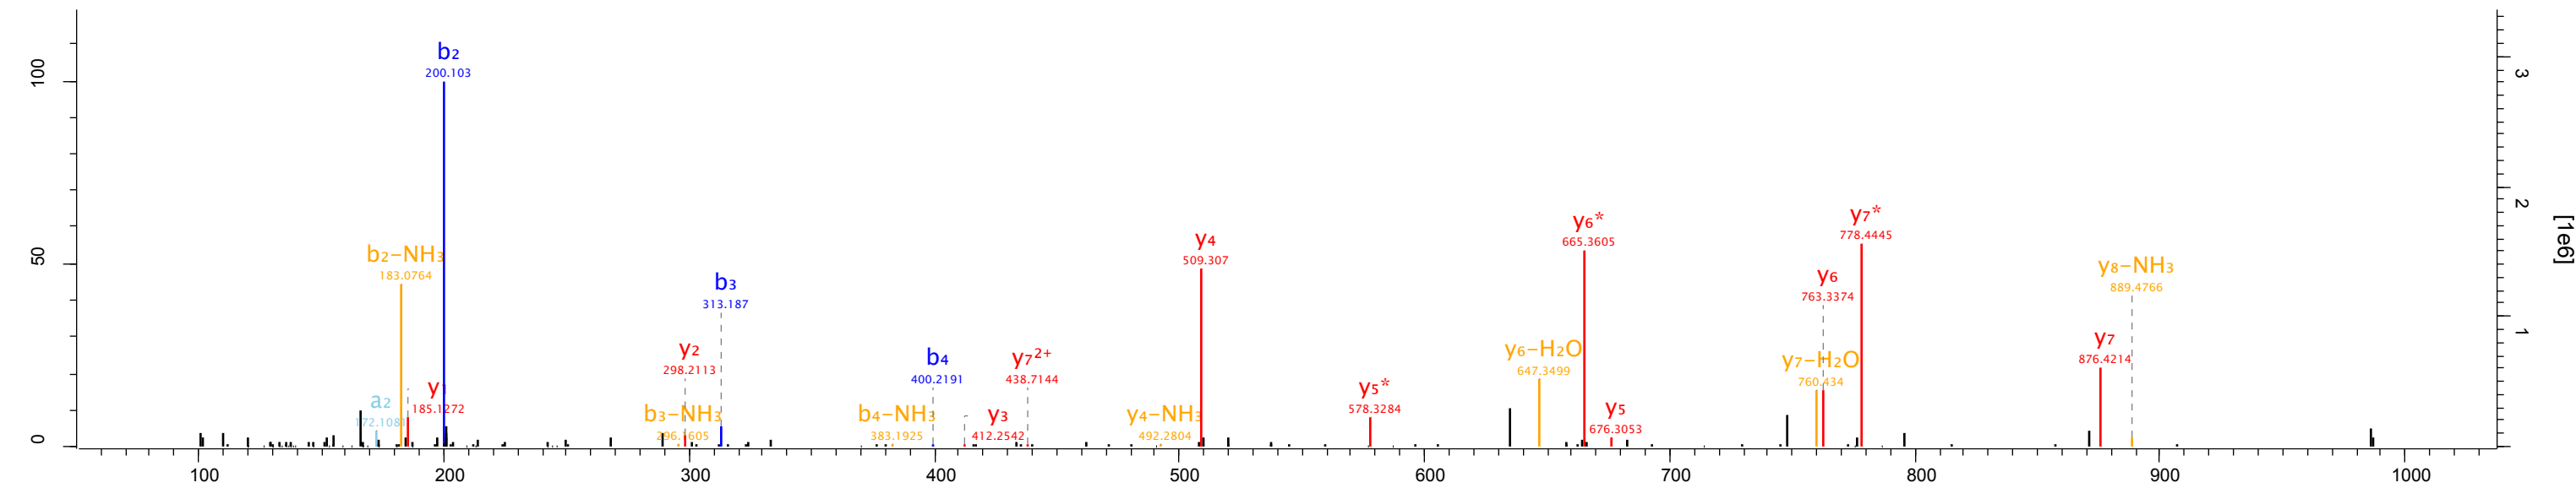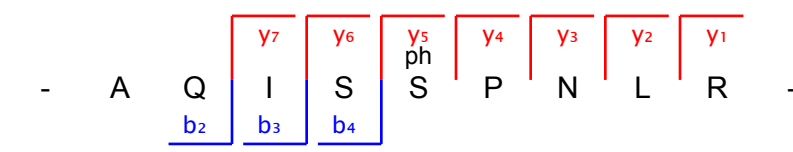

Raw file 20171215\_MaS\_33SR\_LMH\_phospho\_06 Scan 6698 Method FTMS; HCD Score 107.88 m/z 919.93 Gene names APBB2

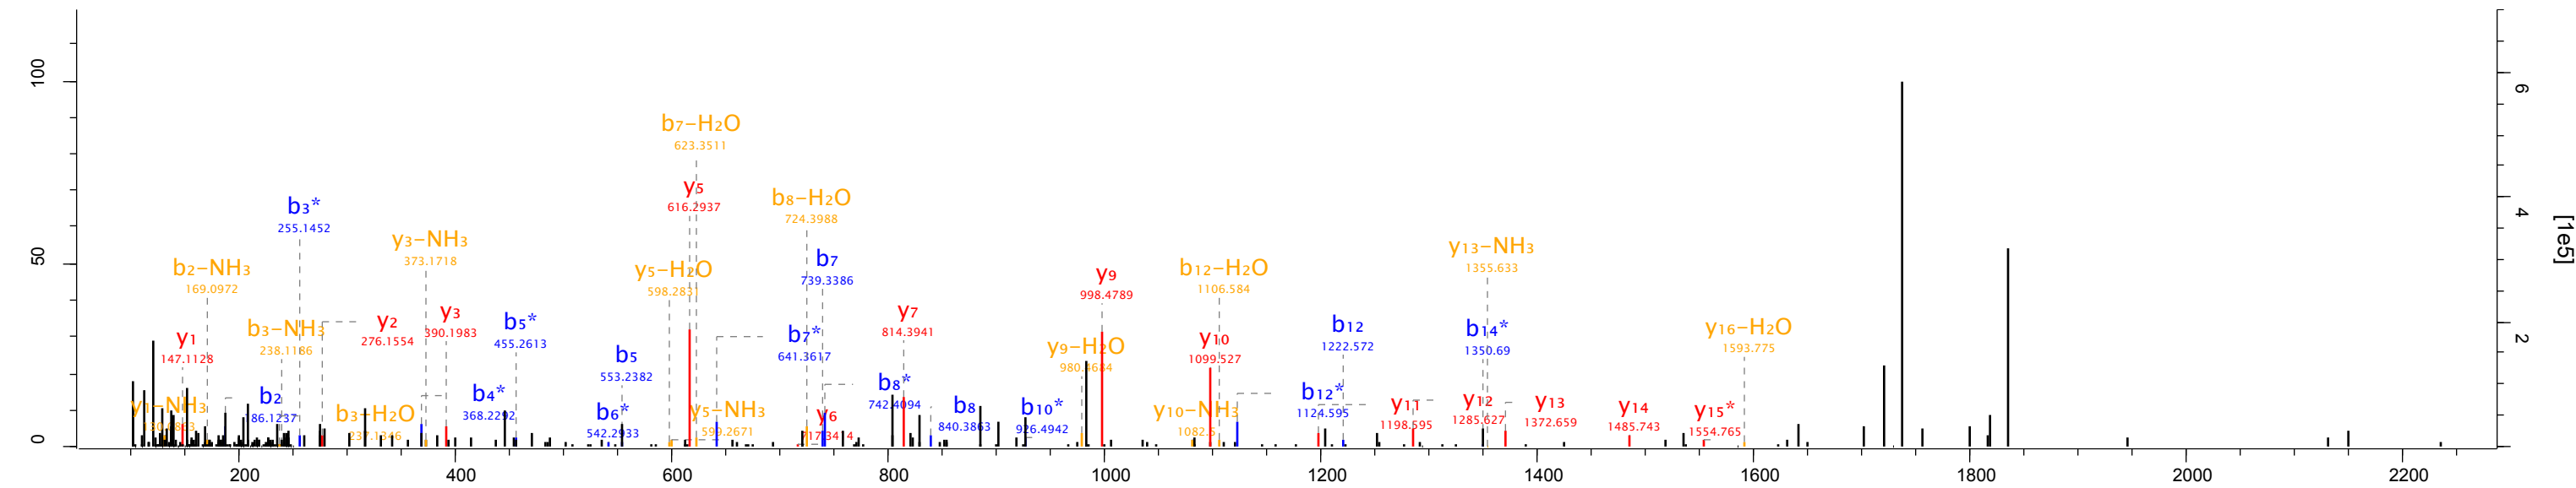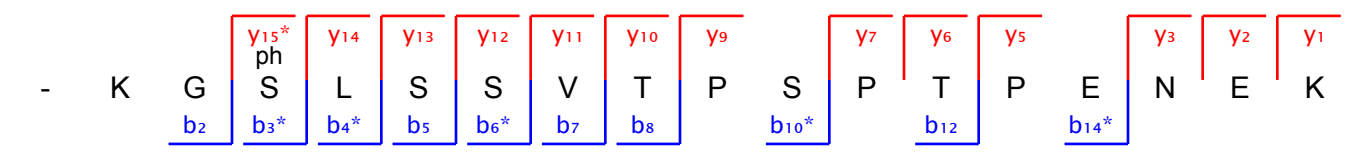

Raw file 20171215\_MaS\_33SR\_LMH\_phospho\_06 Scan 6918 Method FTMS; HCD Score 149.3 m/z 671.33 Gene names MYBBP1A

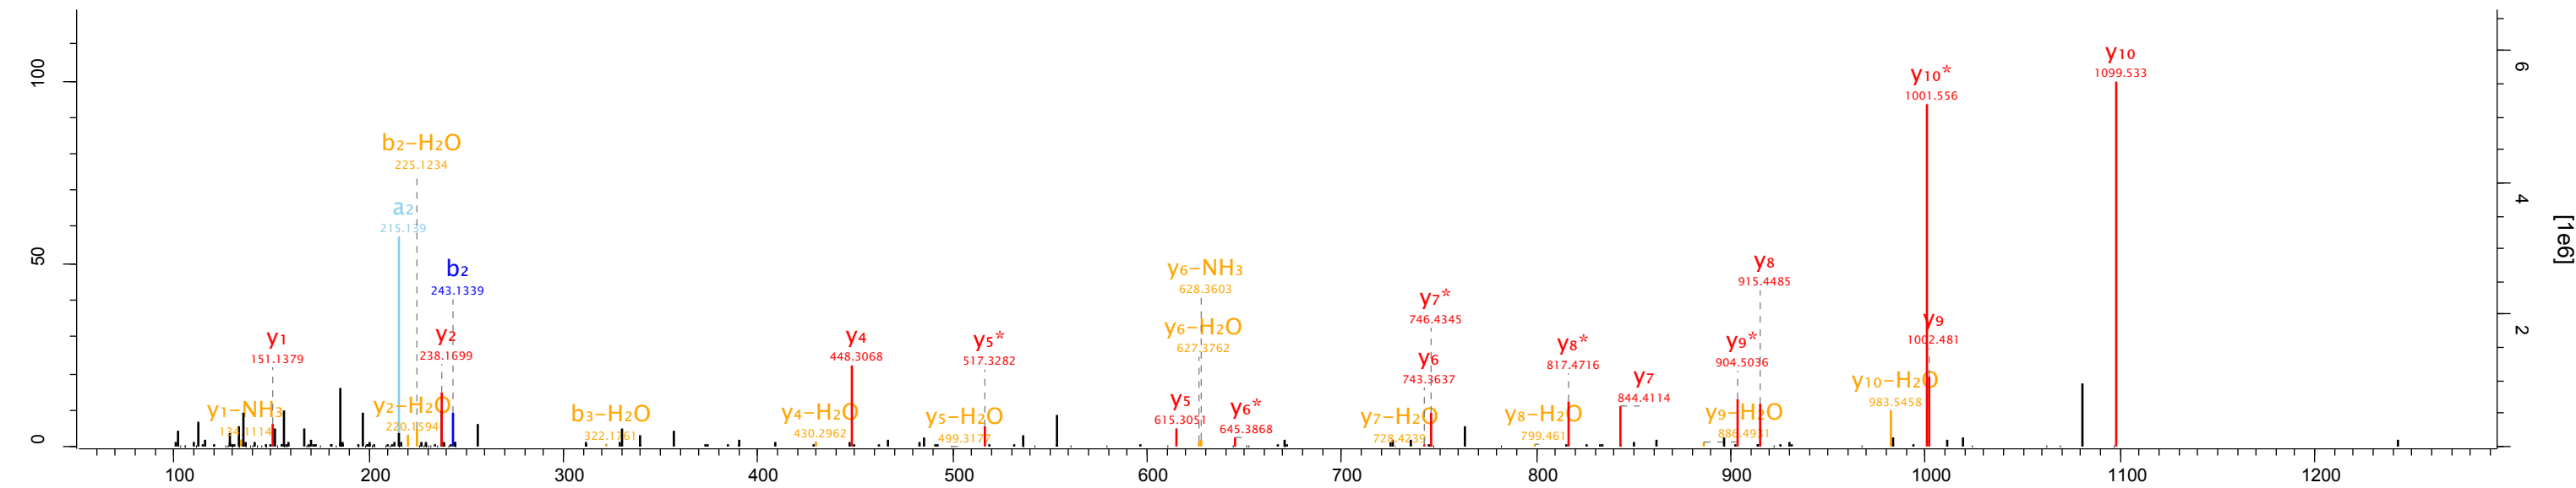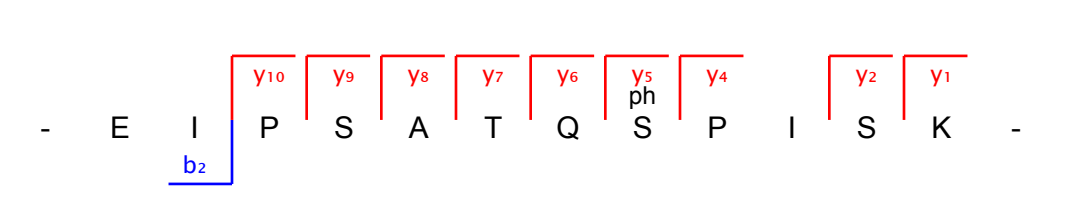



Raw file 20171215\_MaS\_33SR\_LMH\_phospho\_06 Scan 7028 Method FTMS; HCD Score 78.6 m/z 730.84 Gene names CAMSAP2

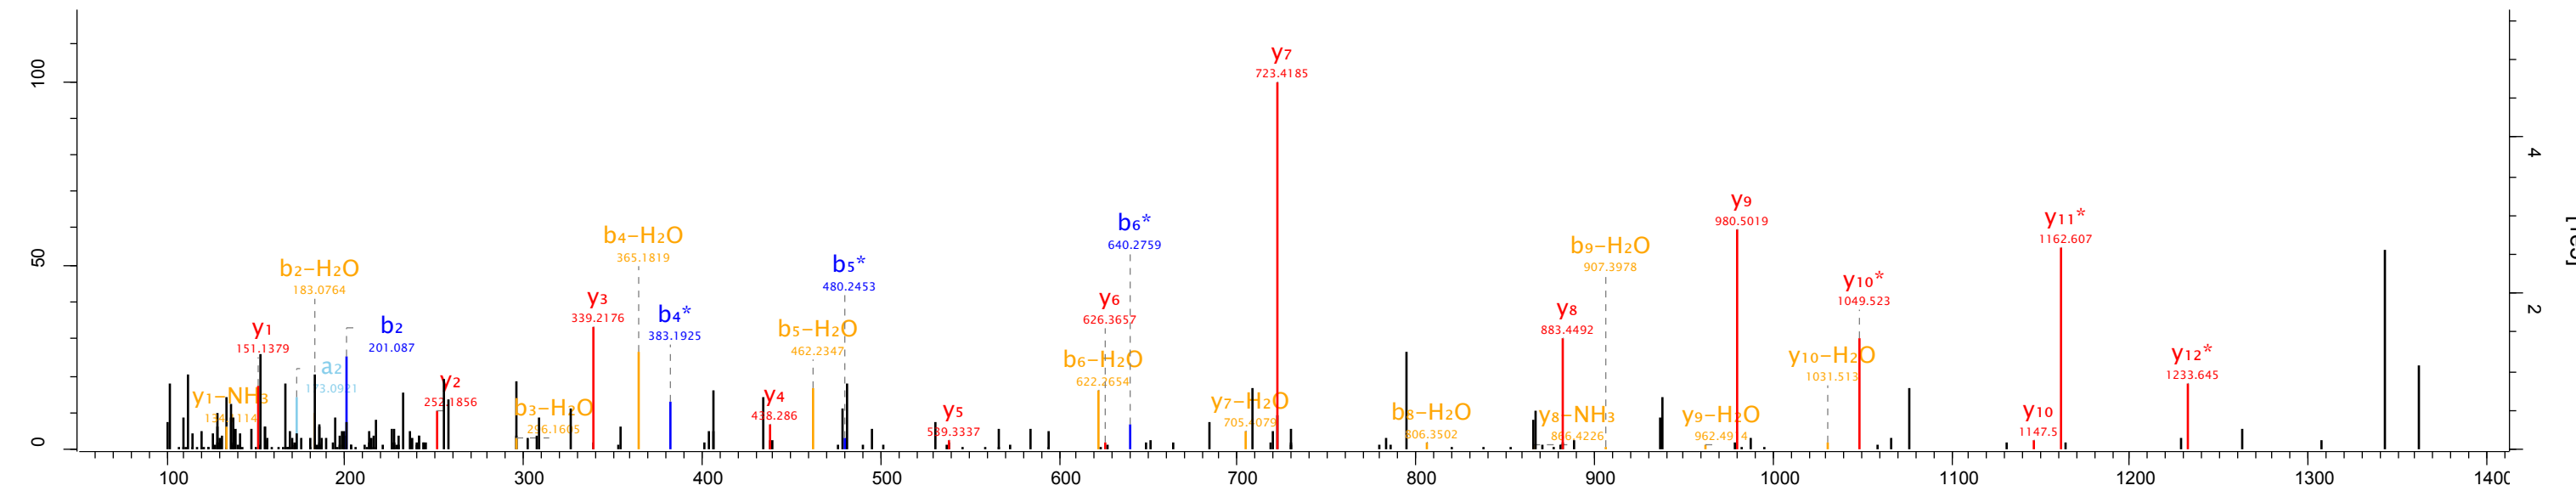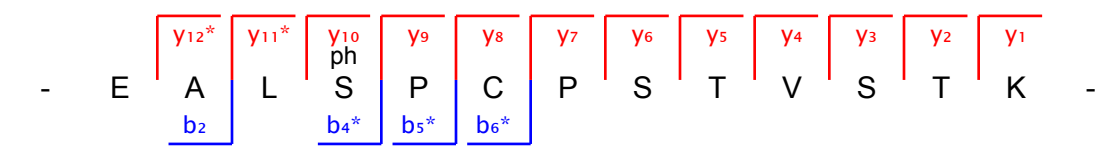

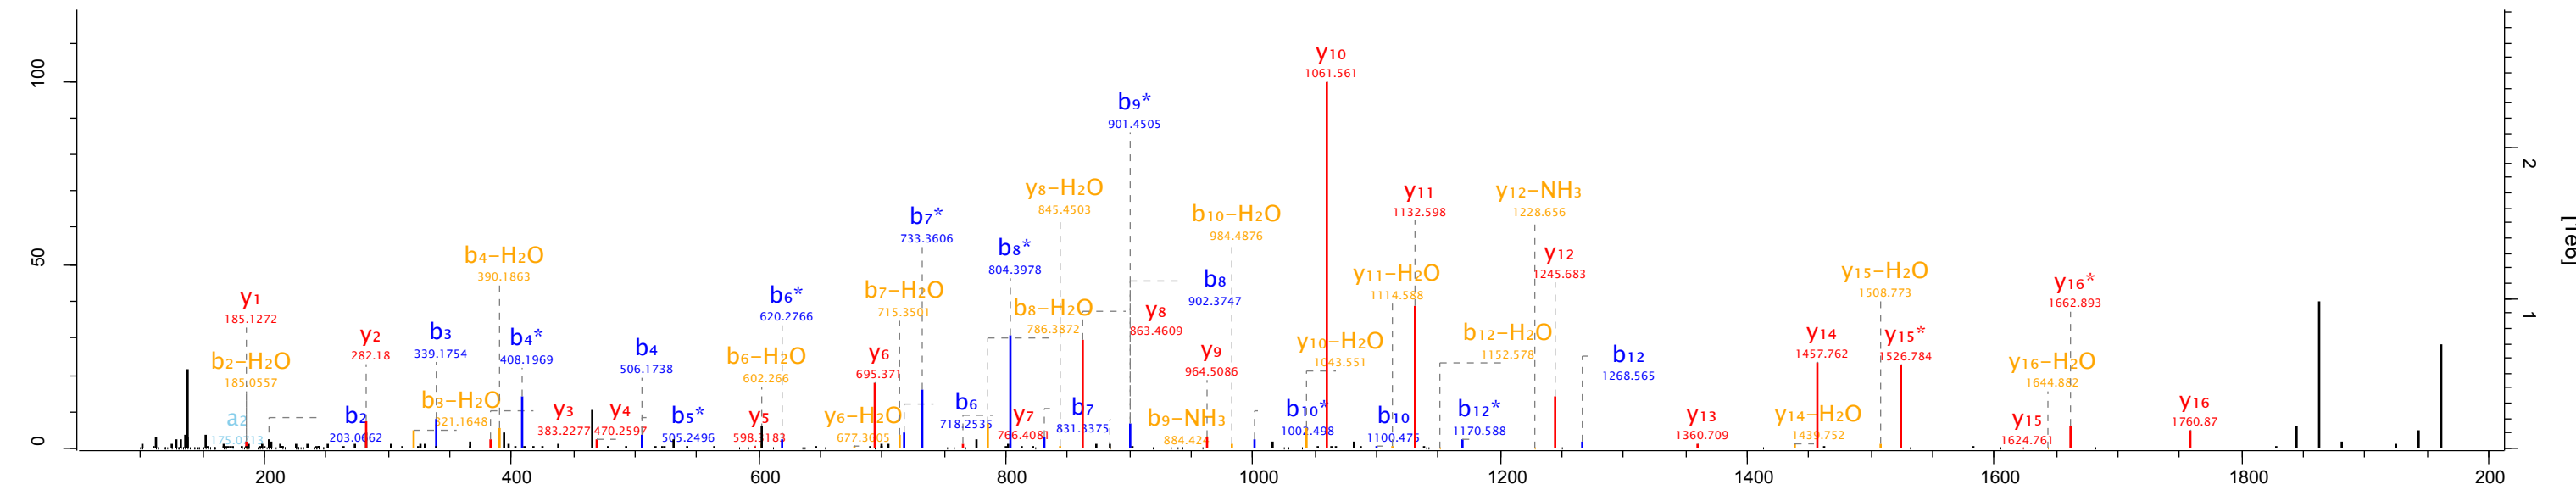

- S D K y<sub>16</sub> y<sub>15</sub>ph S y<sub>14</sub> y<sub>13</sub> y<sub>12</sub> y<sub>11</sub> y<sub>10</sub> y<sub>9</sub> y<sub>8</sub> y<sub>7</sub> y<sub>6</sub> y<sub>5</sub> y<sub>4</sub> y<sub>3</sub> y<sub>2</sub> y<sub>1</sub> -  
 b<sub>2</sub> b<sub>3</sub> b<sub>4</sub> b<sub>5</sub>\* b<sub>6</sub> b<sub>7</sub> b<sub>8</sub> b<sub>9</sub>\* b<sub>10</sub> b<sub>12</sub>

Raw file 20171215\_MaS\_33SR\_LMH\_phospho\_06 Scan 7138 Method FTMS; HCD Score 170.11 m/z 873.39 Gene names ACLY

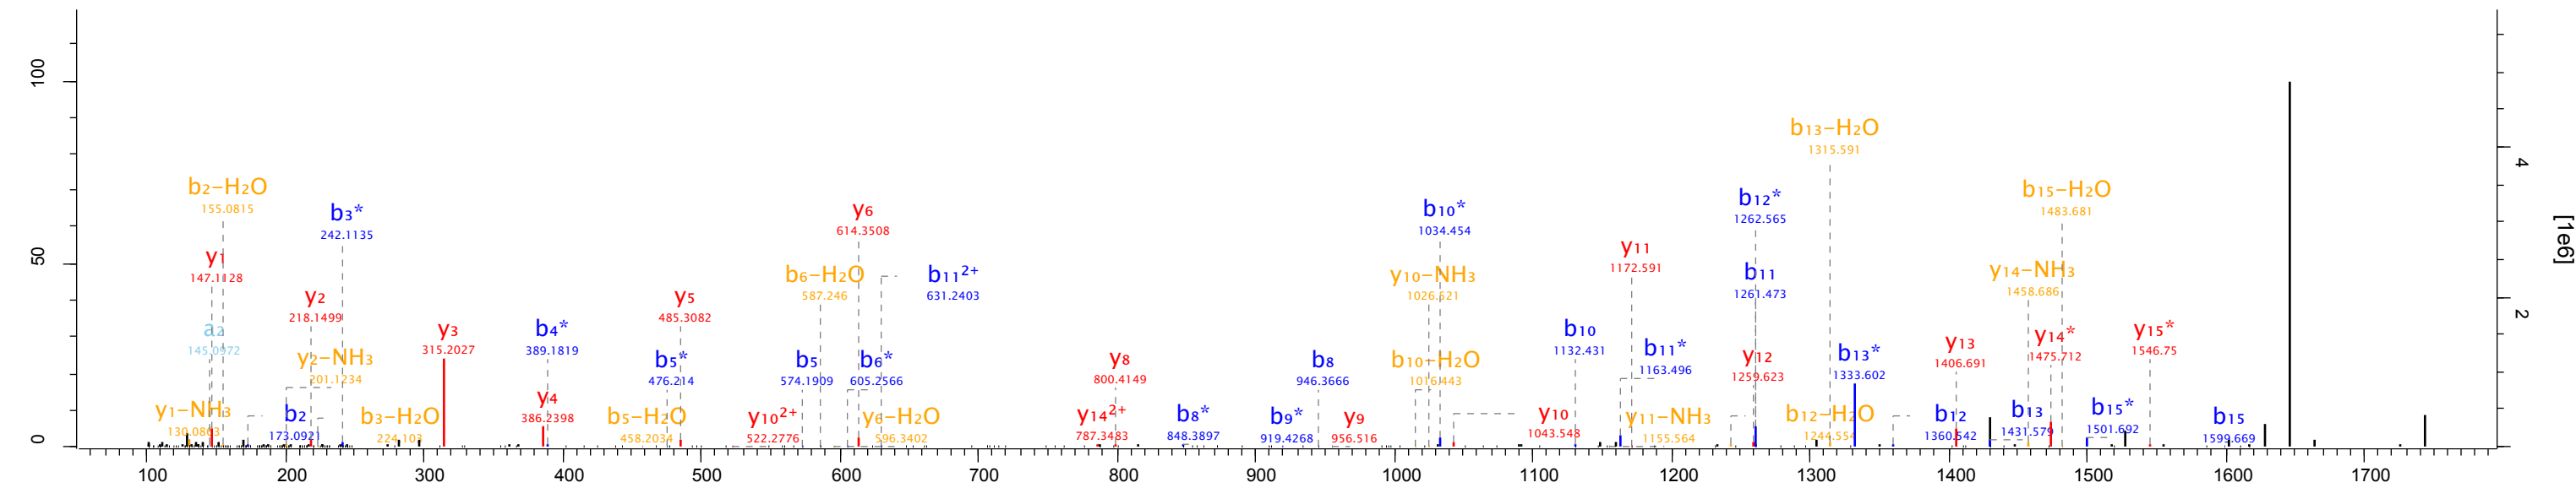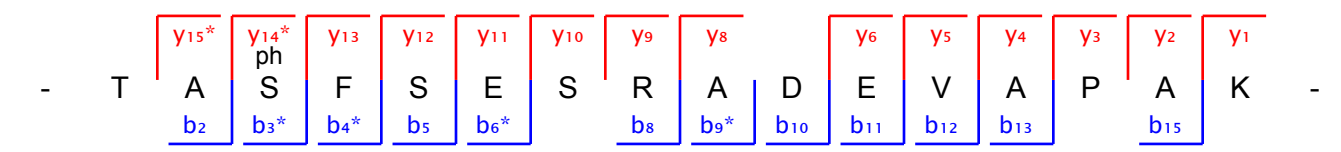

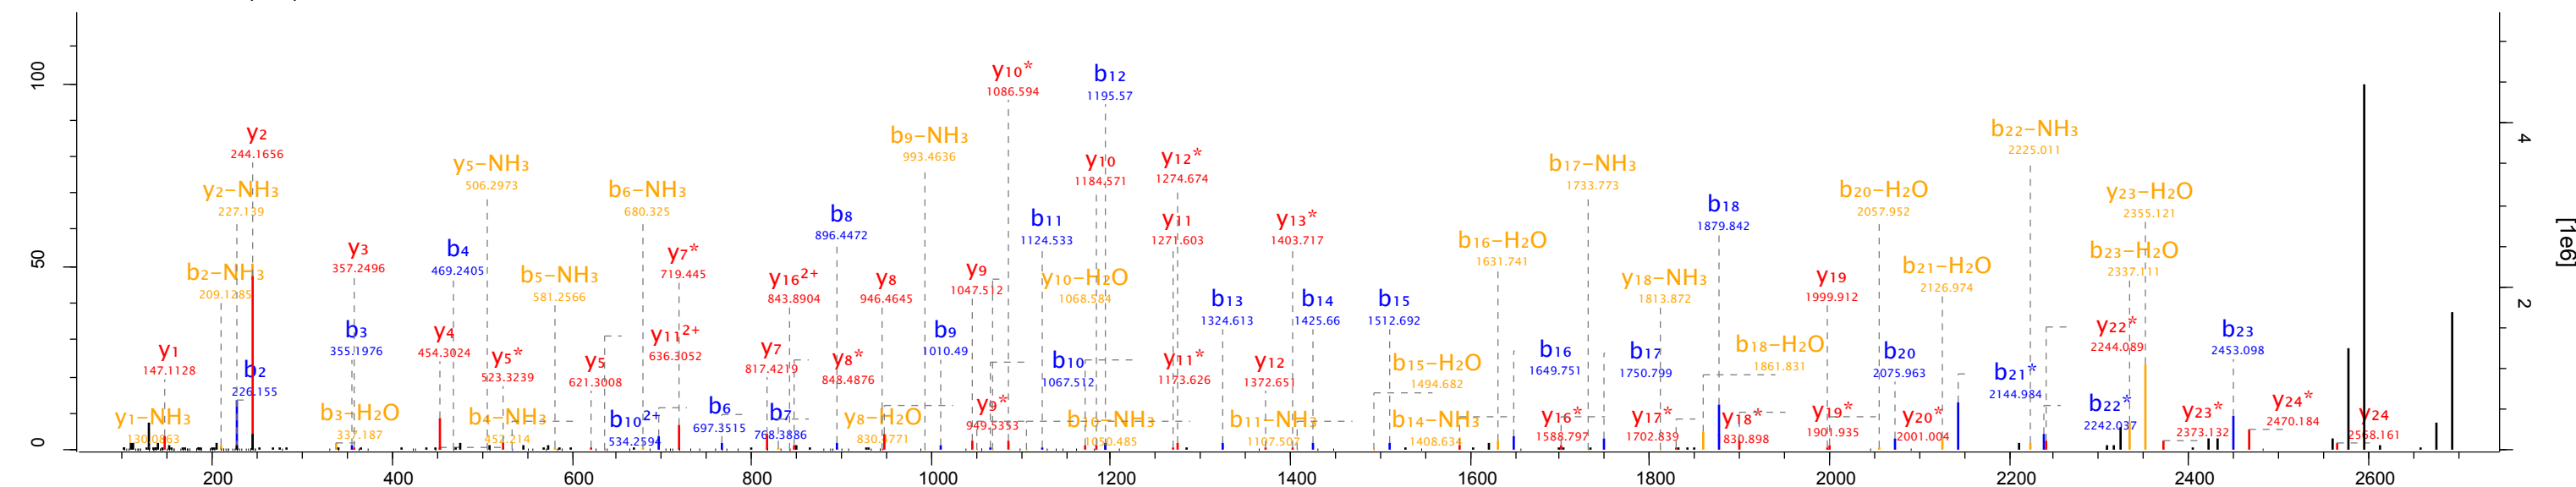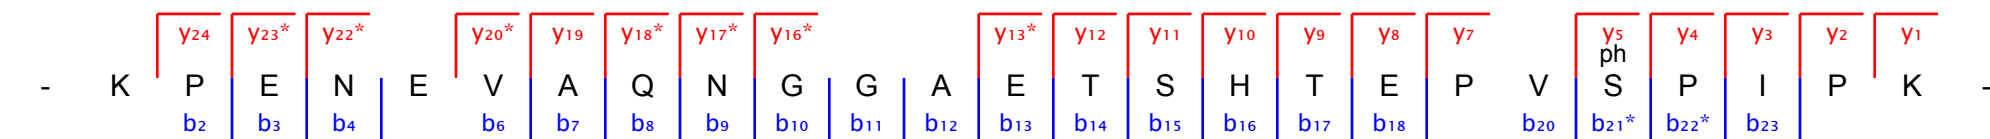

Raw file 20171215\_MaS\_33SR\_LMH\_phospho\_06 Scan 7248 Method FTMS; HCD Score 131.35 m/z 609.8 Gene names MAP4

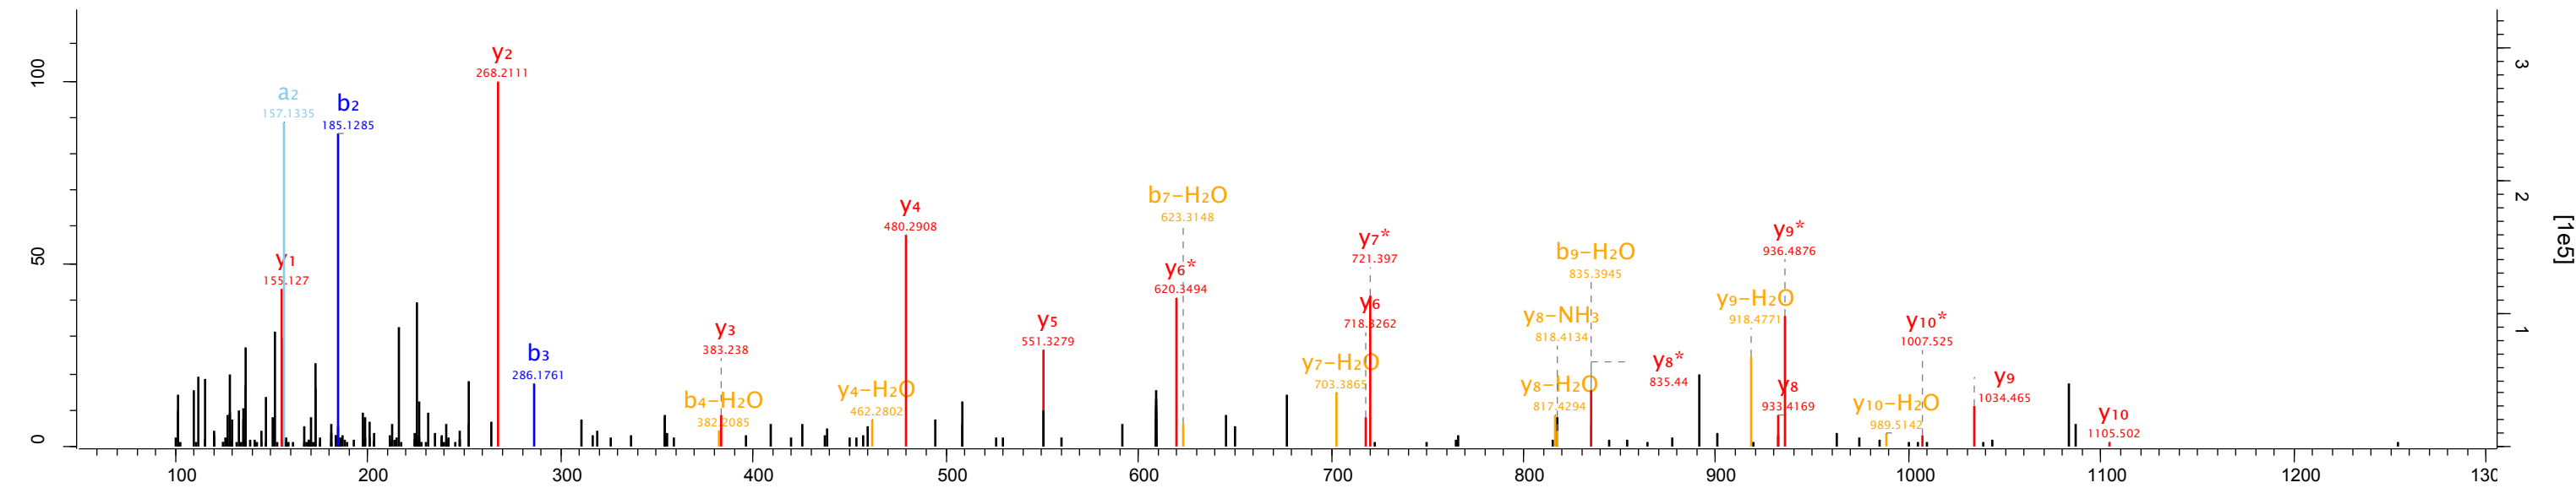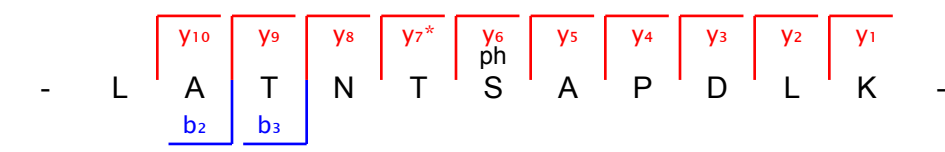

Raw file 20171215\_MaS\_33SR\_LMH\_phospho\_06 Scan 7488 Method FTMS; HCD Score 130.41 m/z 475.73 Gene names MTRF1L

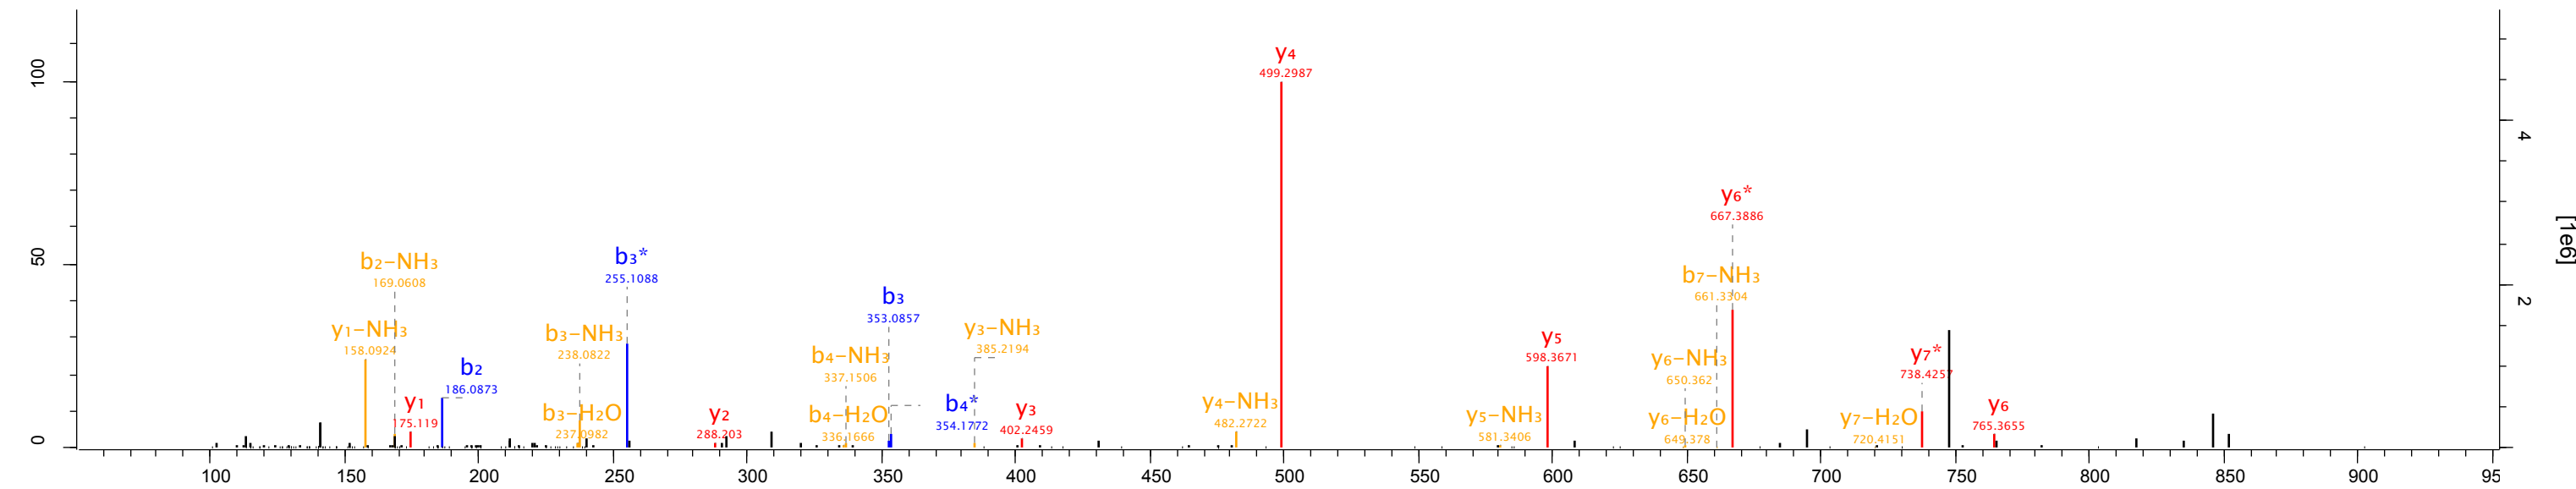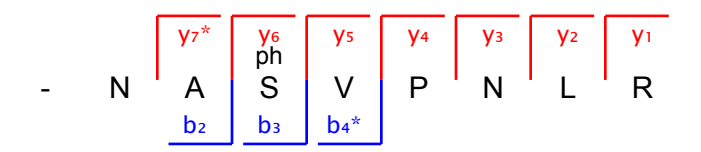

Raw file 20171215\_MaS\_33SR\_LMH\_phospho\_06 Scan 7608 Method FTMS; HCD Score 100.31 m/z 685.29 Gene names SMARCA4

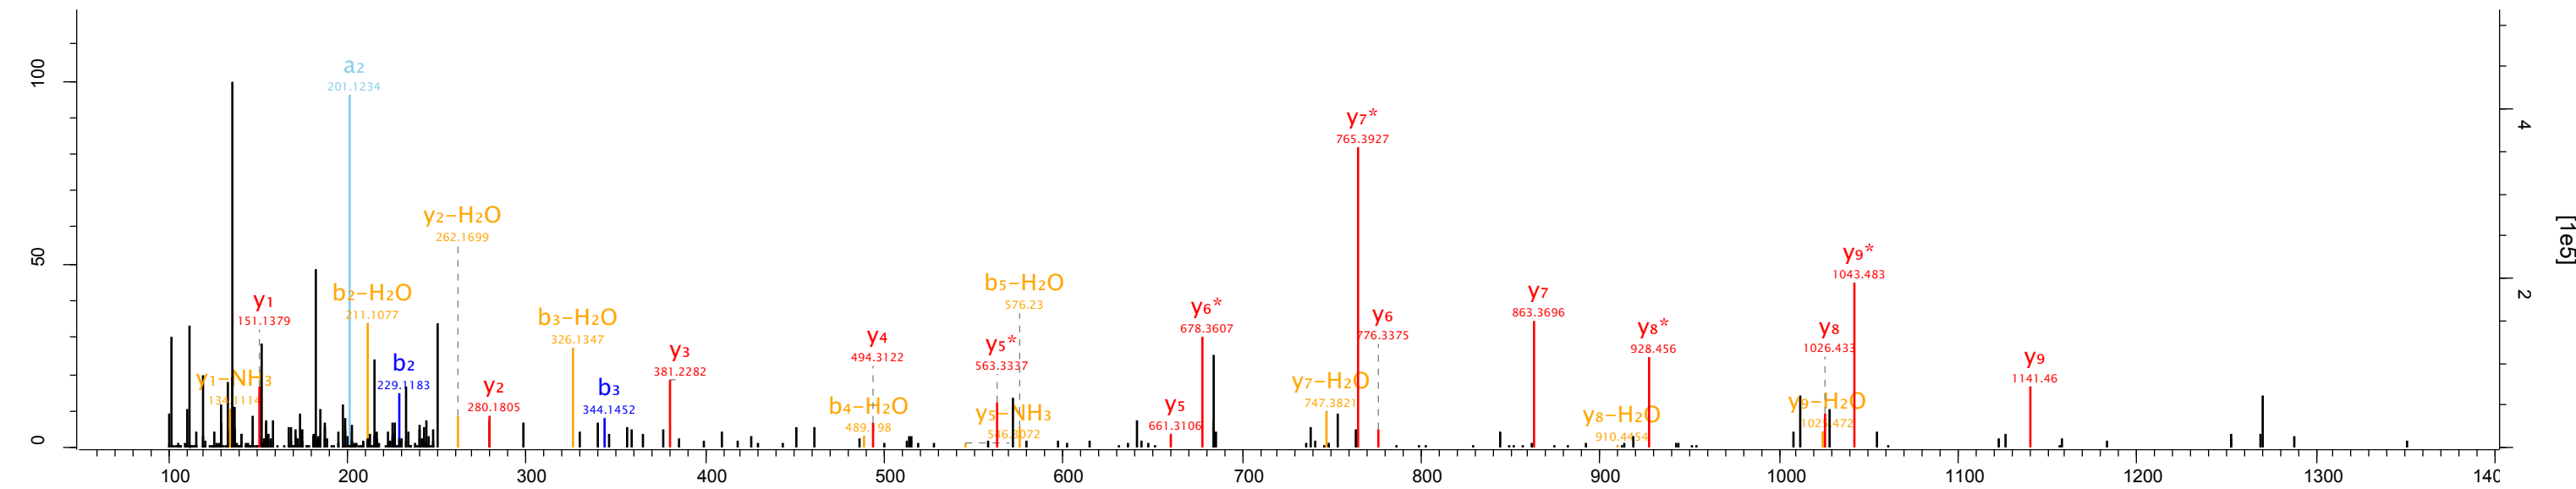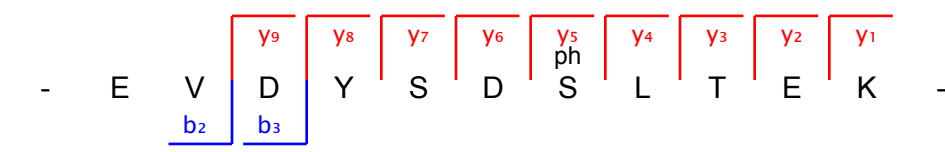

Raw file 20171215\_MaS\_33SR\_LMH\_phospho\_06 Scan 7898 Method FTMS; HCD Score 206.94 m/z 868.72 Gene names PHRF1

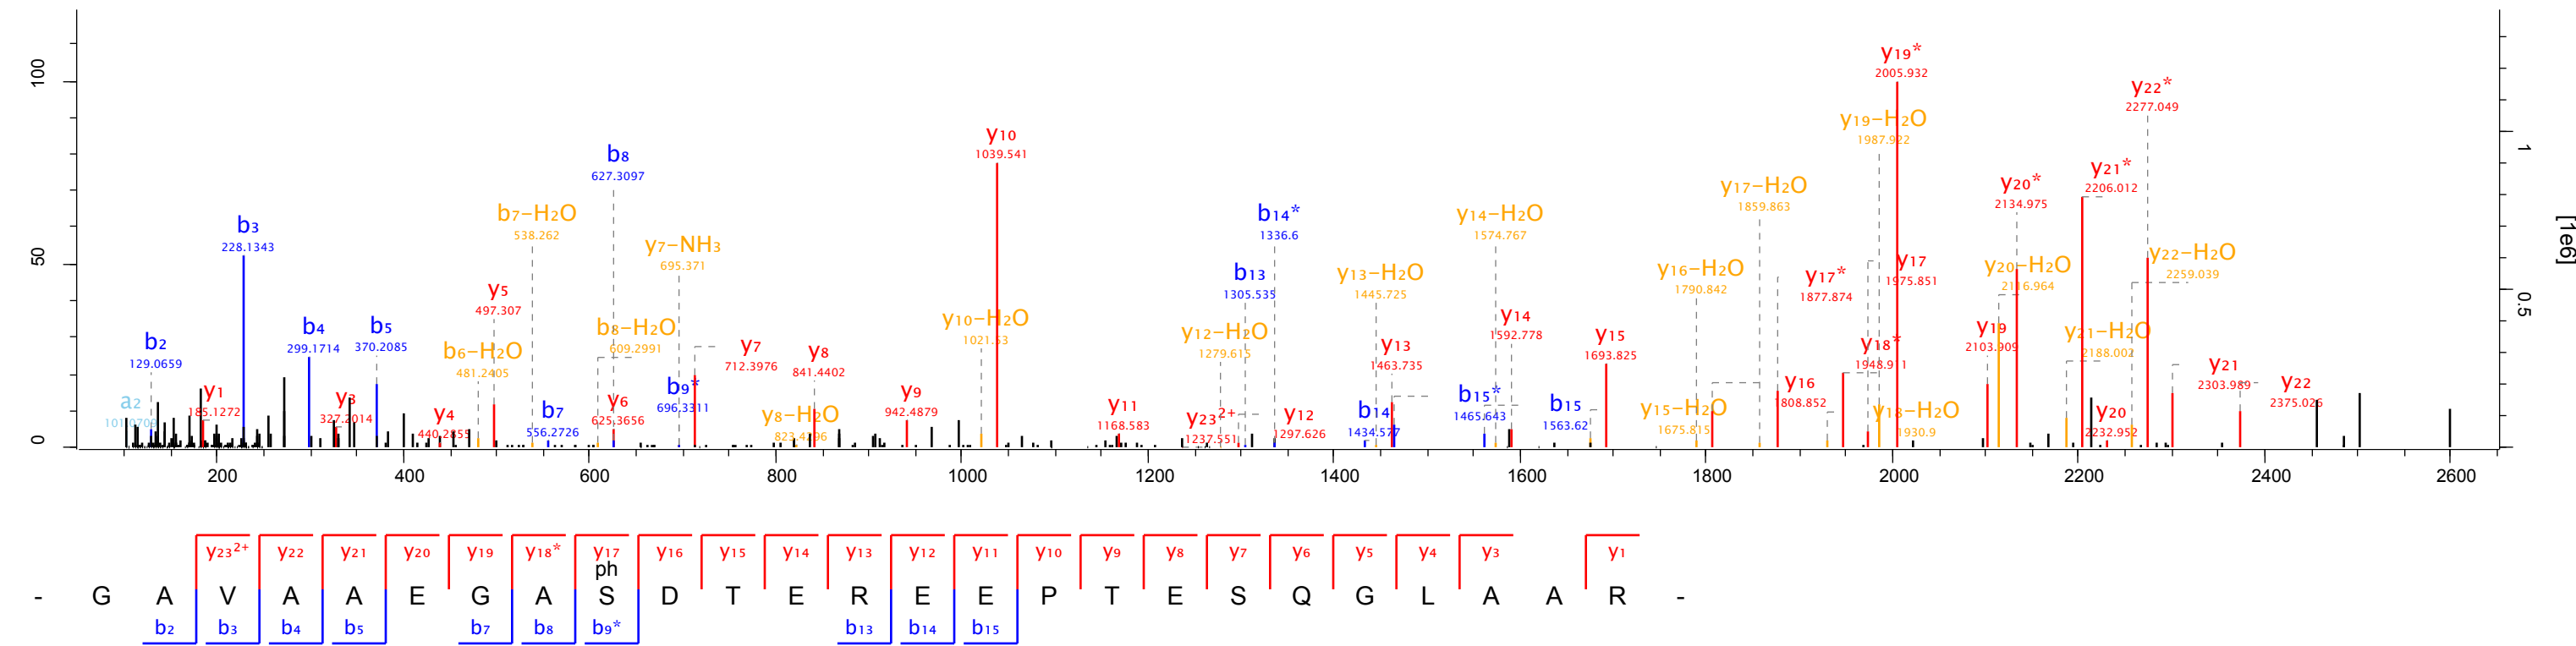



Raw file 20171215\_MaS\_33SR\_LMH\_phospho\_06 Scan 7998 Method FTMS; HCD Score 272.13 m/z 892.37 Gene names ARL6IP4

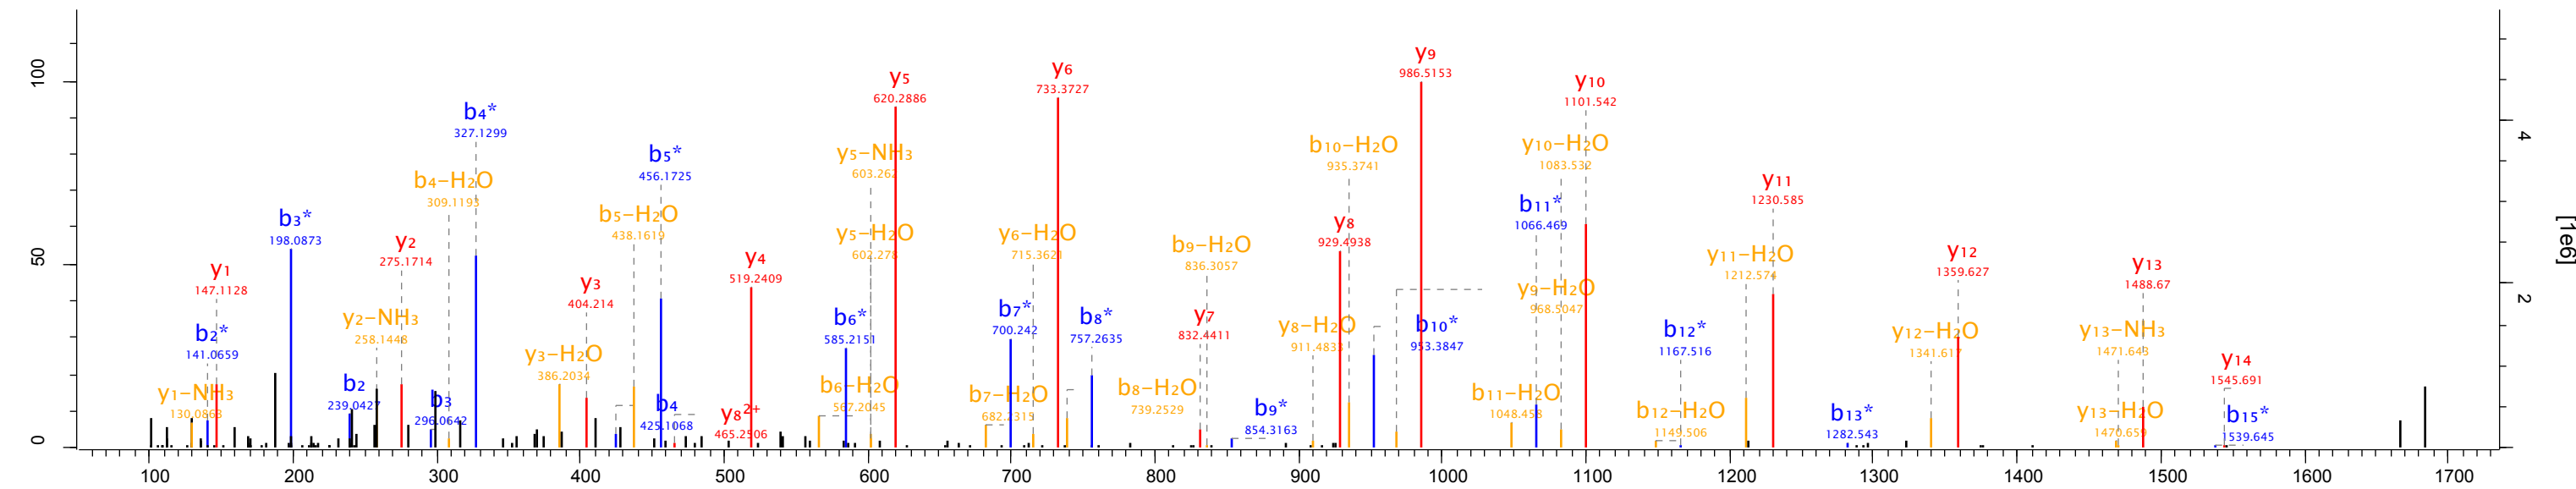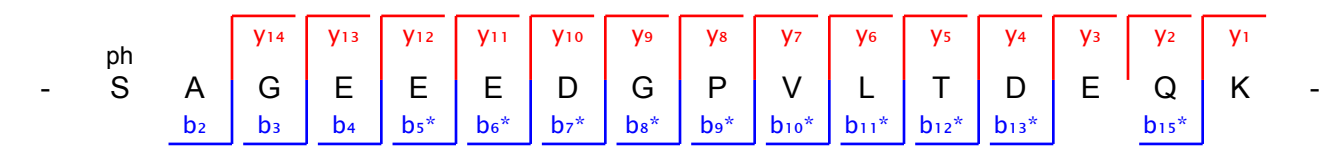

Raw file 20171215\_MaS\_33SR\_LMH\_phospho\_06 Scan 8058 Method FTMS; HCD Score 85.28 m/z 639.79 Gene names EPB41L2

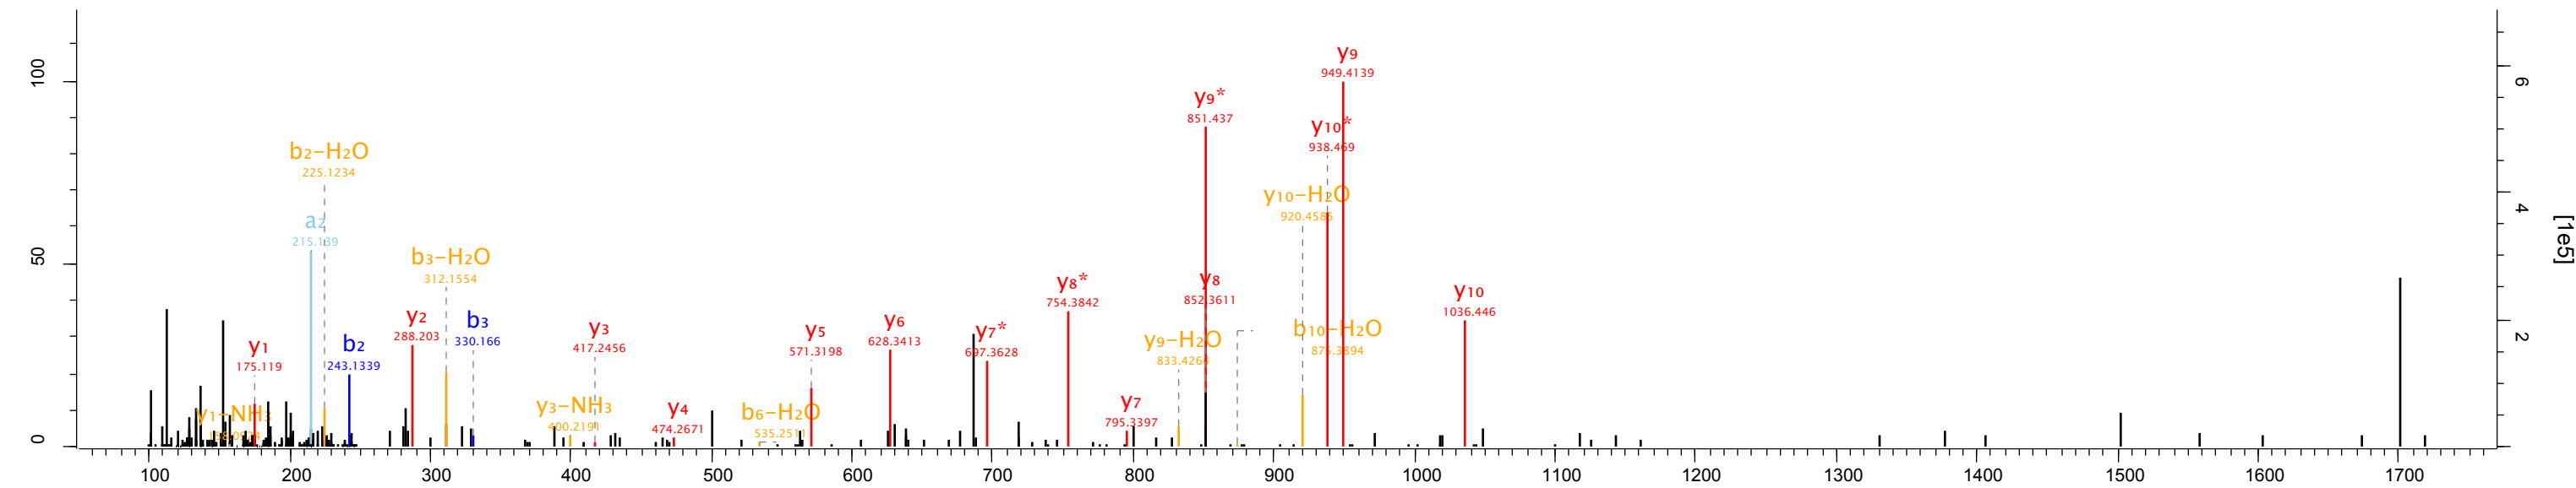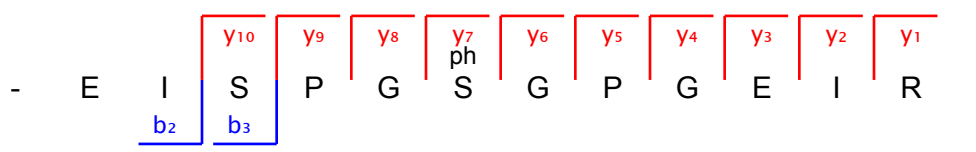

Raw file 20171215\_MaS\_33SR\_LMH\_phospho\_06 Scan 8258 Method FTMS; HCD Score 115.67 m/z 846.39 Gene names GTF3C3

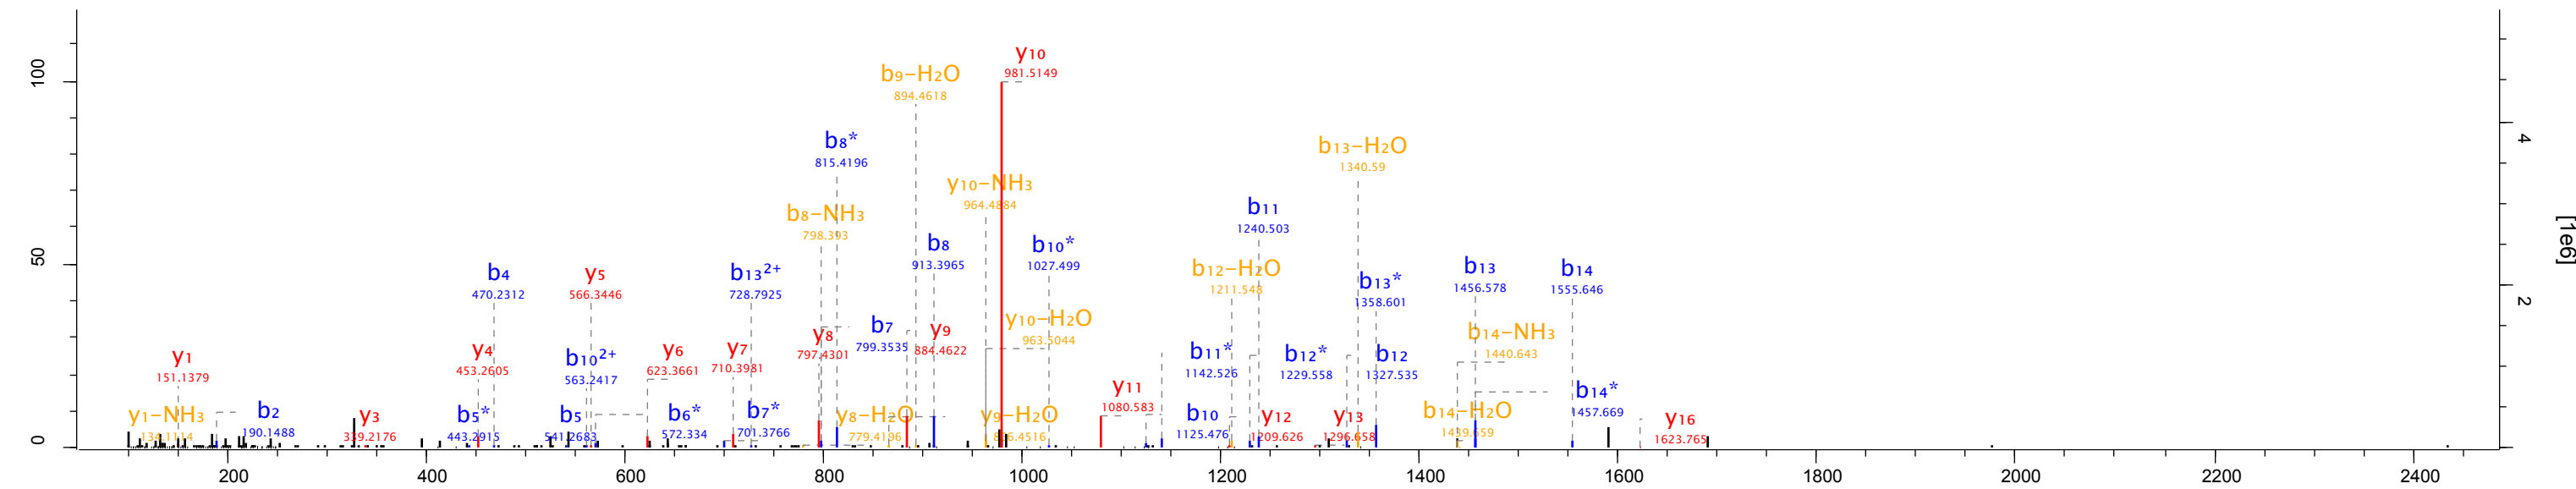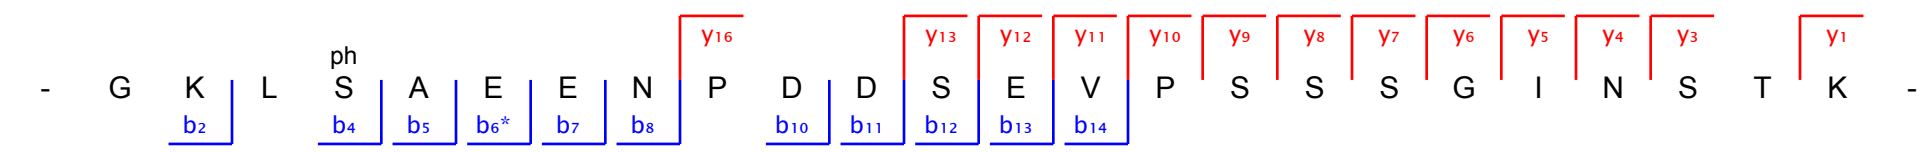

Raw file 20171215\_MaS\_33SR\_LMH\_phospho\_06 Scan 8308 Method FTMS; HCD Score 288.88 m/z 947.17 Gene names GIGYF2

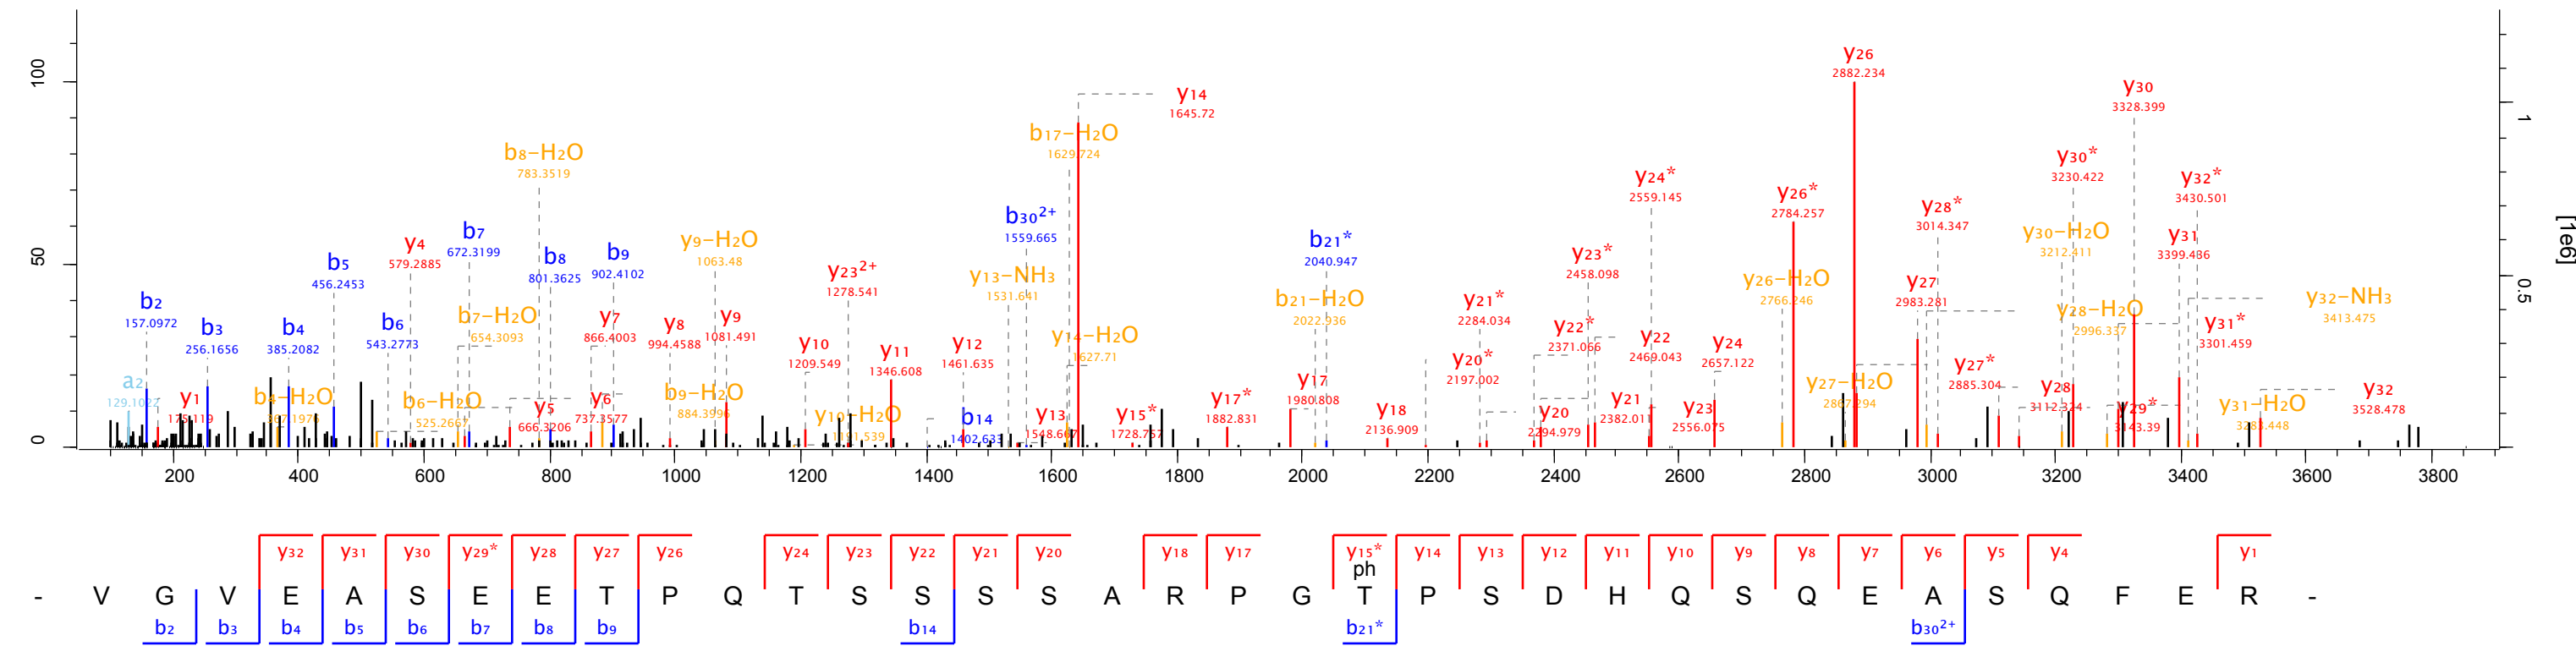

Raw file 20171215\_MaS\_33SR\_LMH\_phospho\_06 Scan 8618 Method FTMS; HCD Score 87.99 m/z 706.36 Gene names ZC3H11A

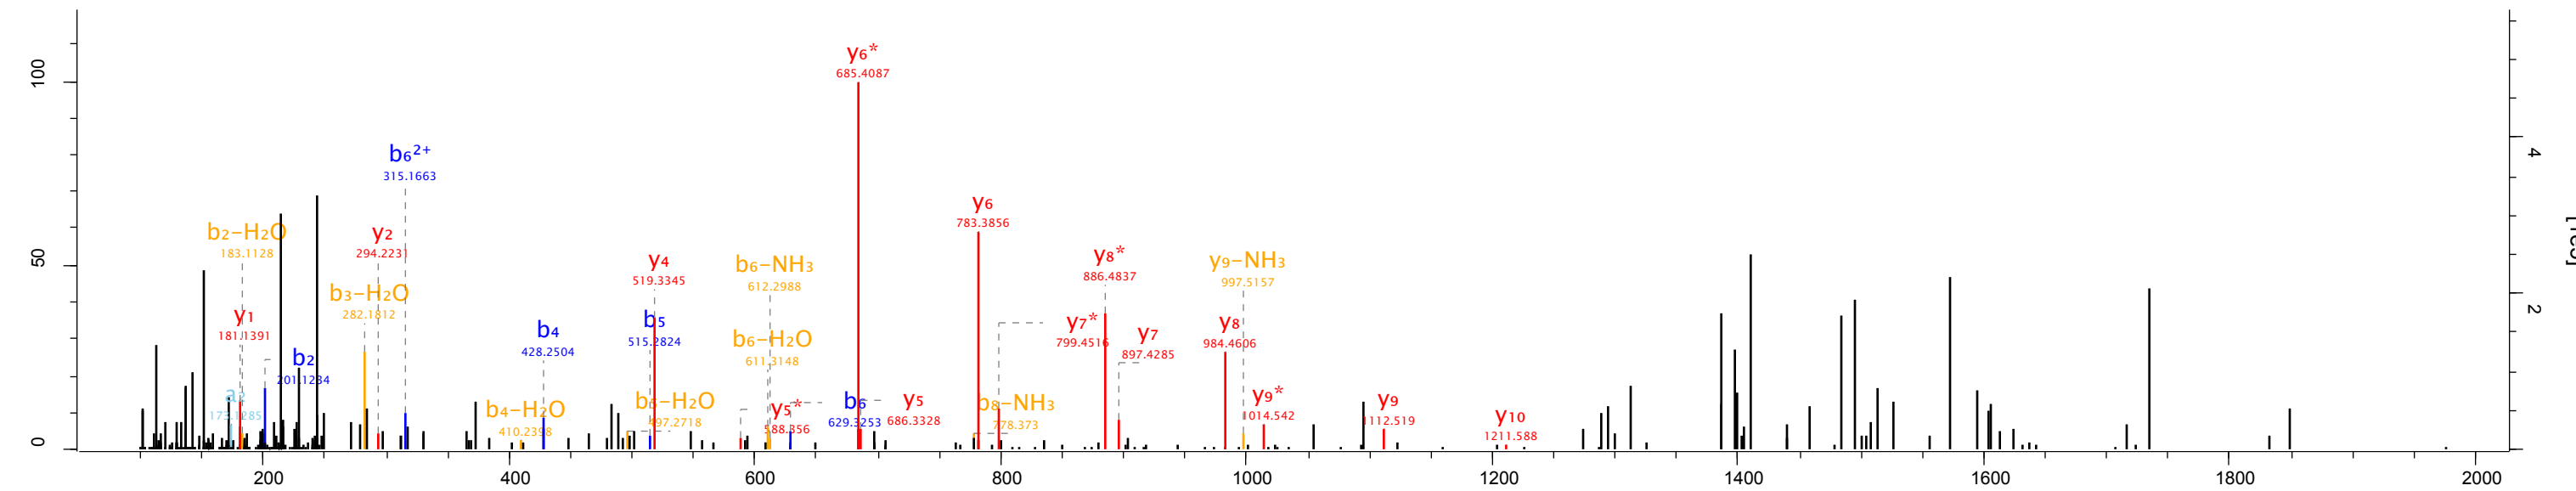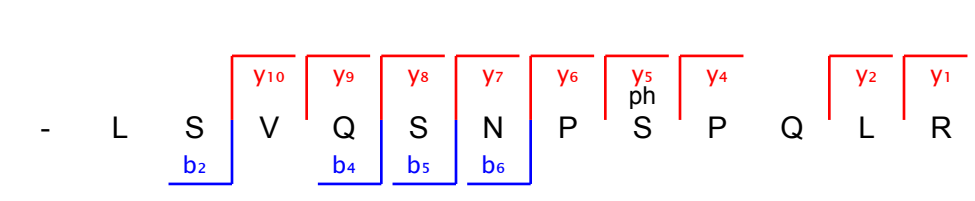

Raw file 20171215\_MaS\_33SR\_LMH\_phospho\_06 Scan 8788 Method FTMS; HCD Score 149.84 m/z 740.62 Gene names SLC4A1AP

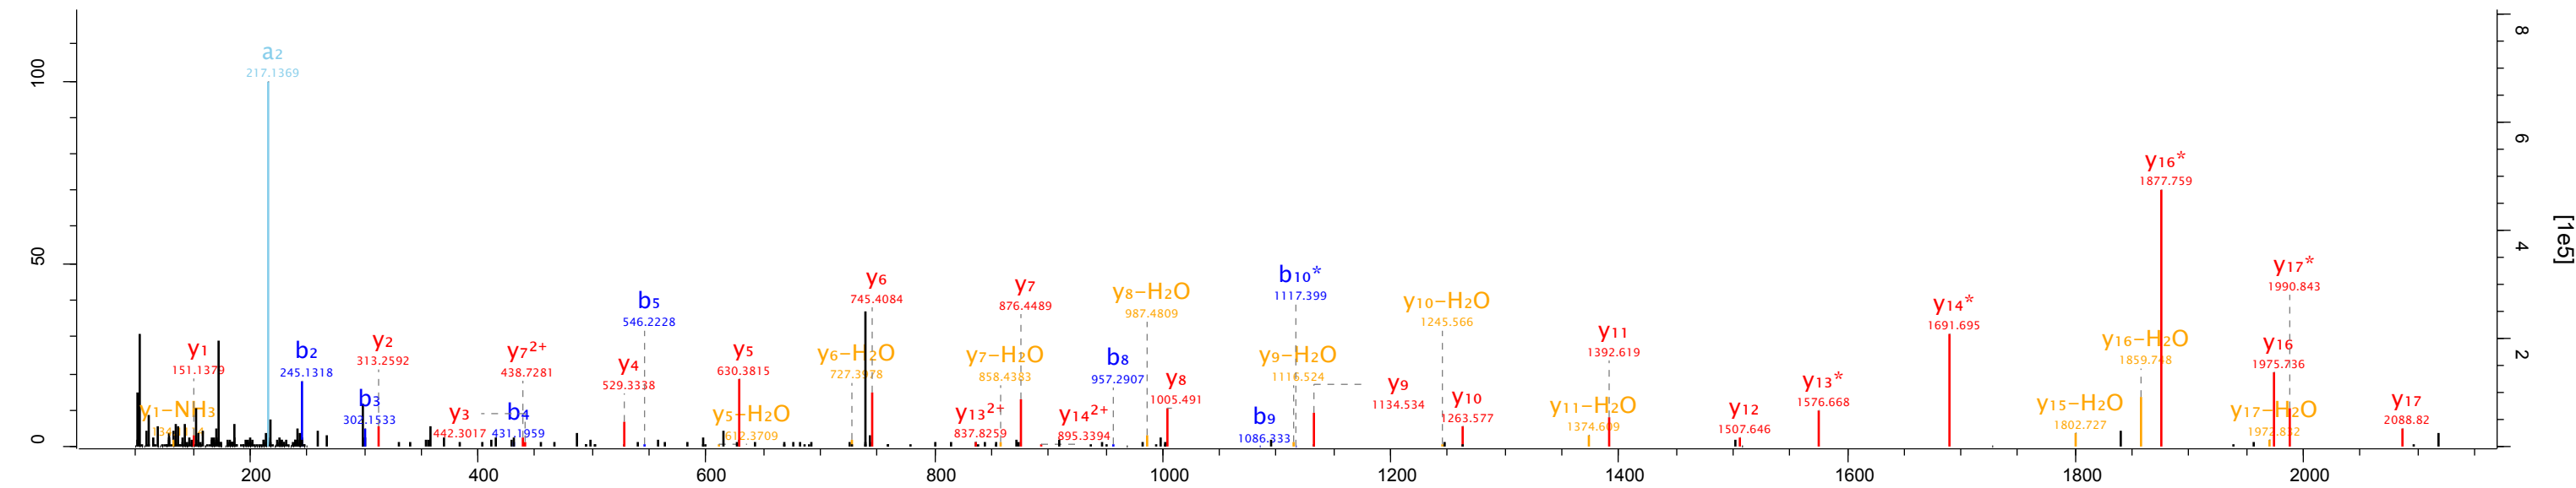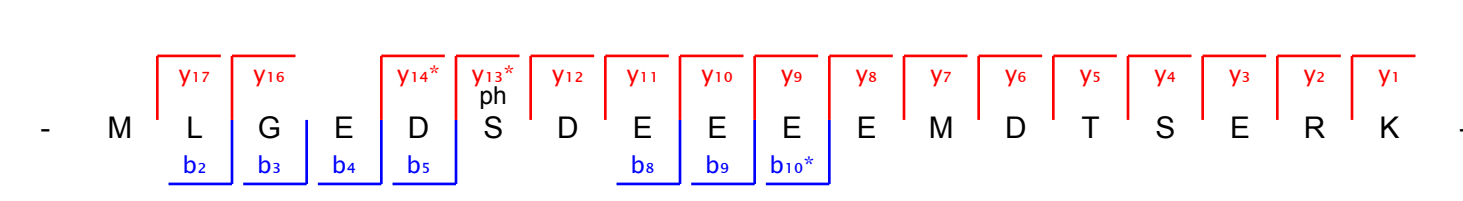

Raw file: 20171215\_MaS\_33SR\_LMH\_phospho\_06  
 Scan: 9068 Method: FTMS; HCD Score: 218.87 m/z: 1050.95 Gene names: GOLGA4

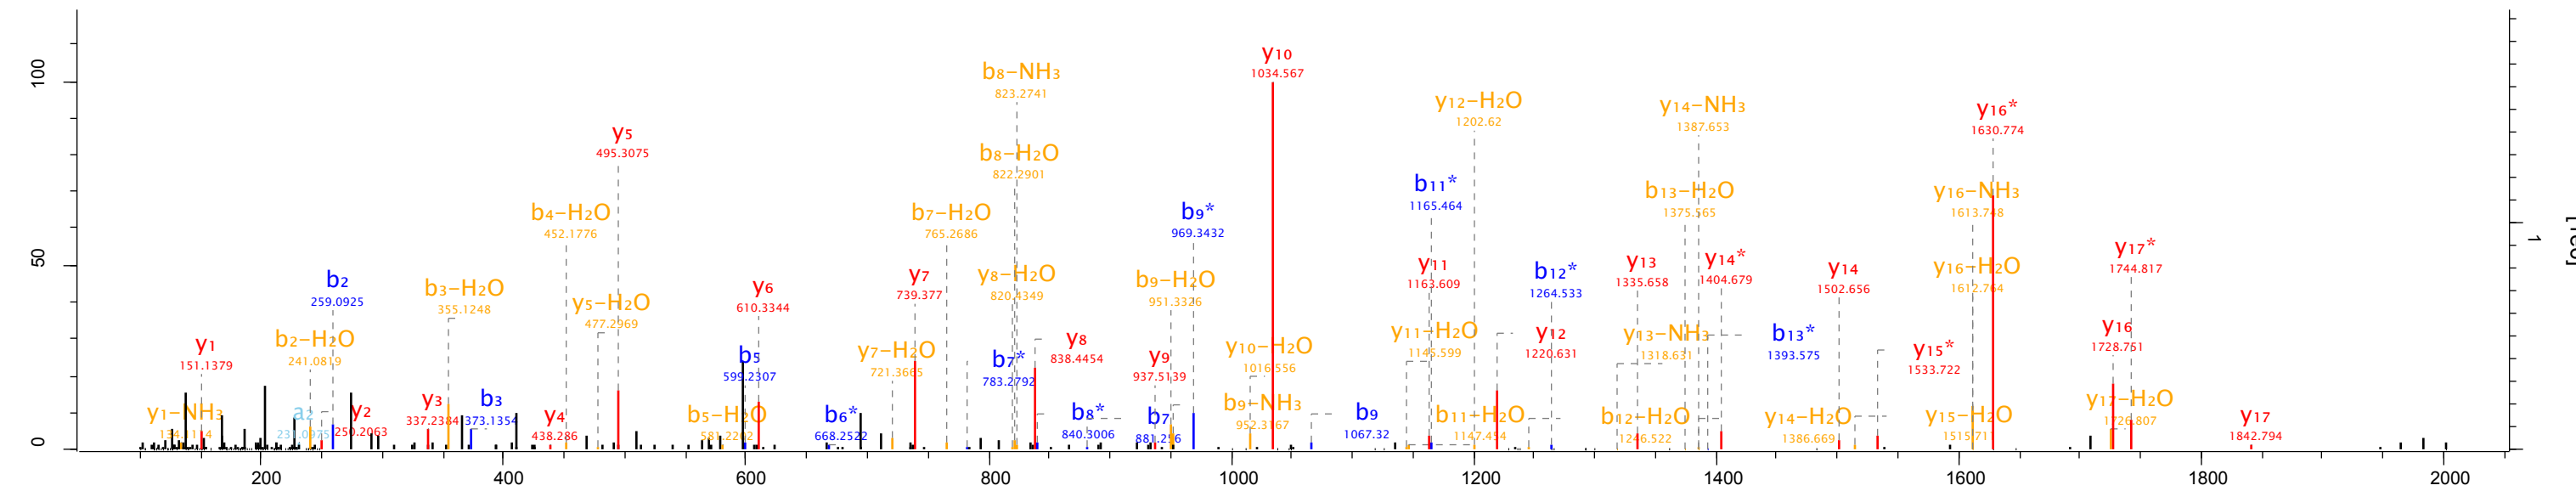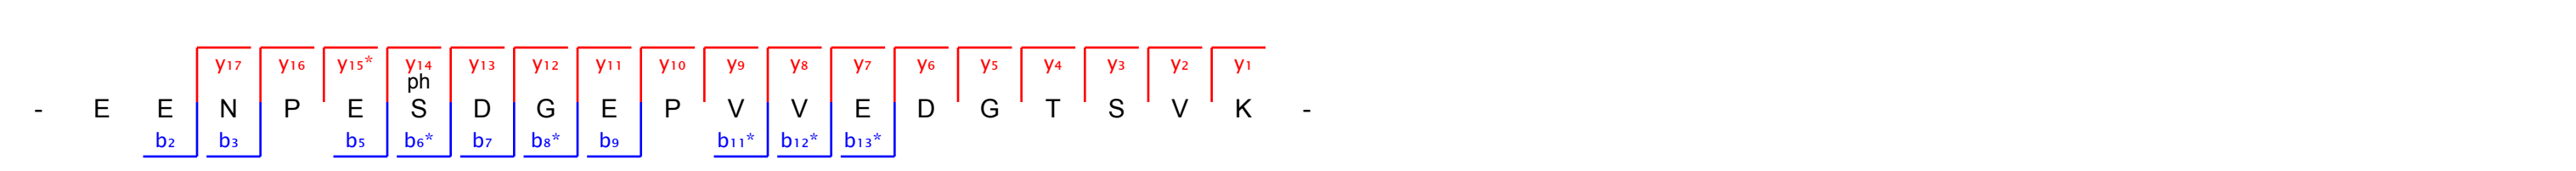

Raw file 20171215\_MaS\_33SR\_LMH\_phospho\_06 Scan 9108 Method FTMS; HCD Score 202.61 m/z 907.39 Gene names NDRG3

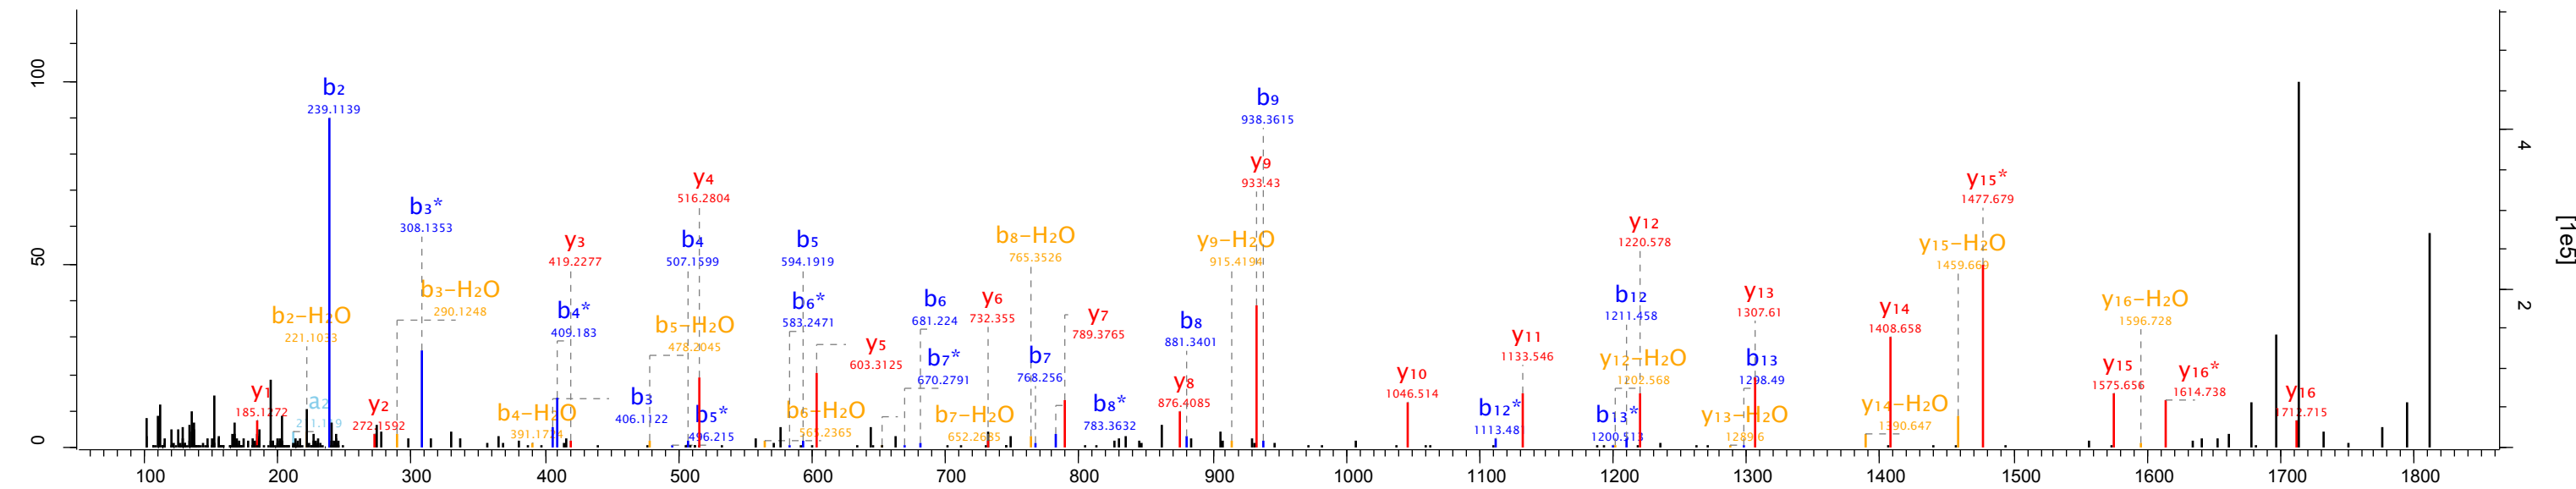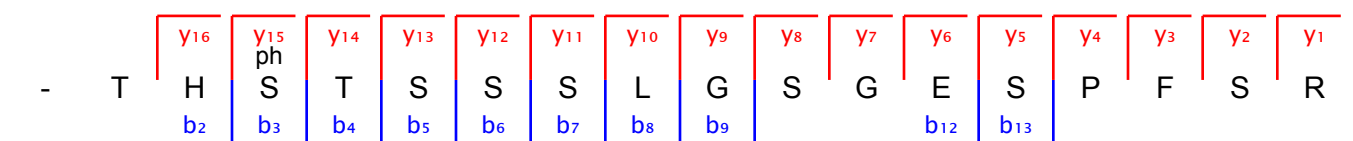



Raw file 20171215\_MaS\_33SR\_LMH\_phospho\_06 Scan 9148 Method FTMS; HCD Score 219.51 m/z 820.04 Gene names EHBP1L1

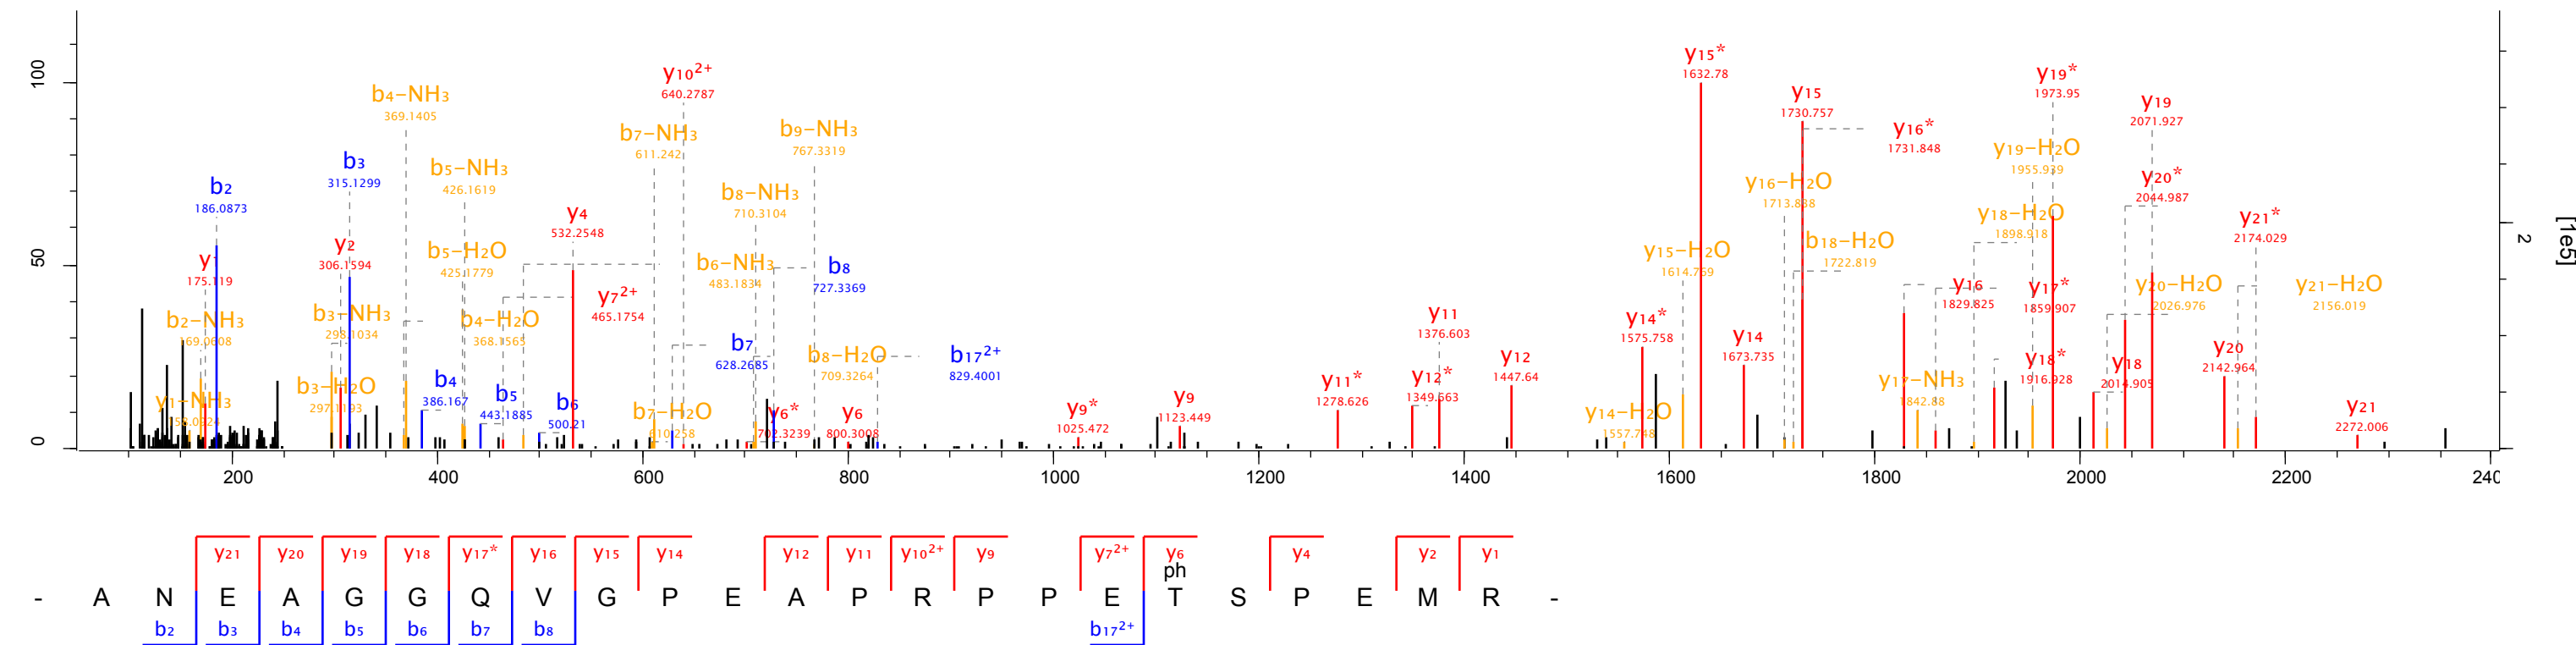

Raw file 20171215\_MaS\_33SR\_LMH\_phospho\_06 Scan 9308 Method FTMS; HCD Score 127.35 m/z 795.88 Gene names MICALL1

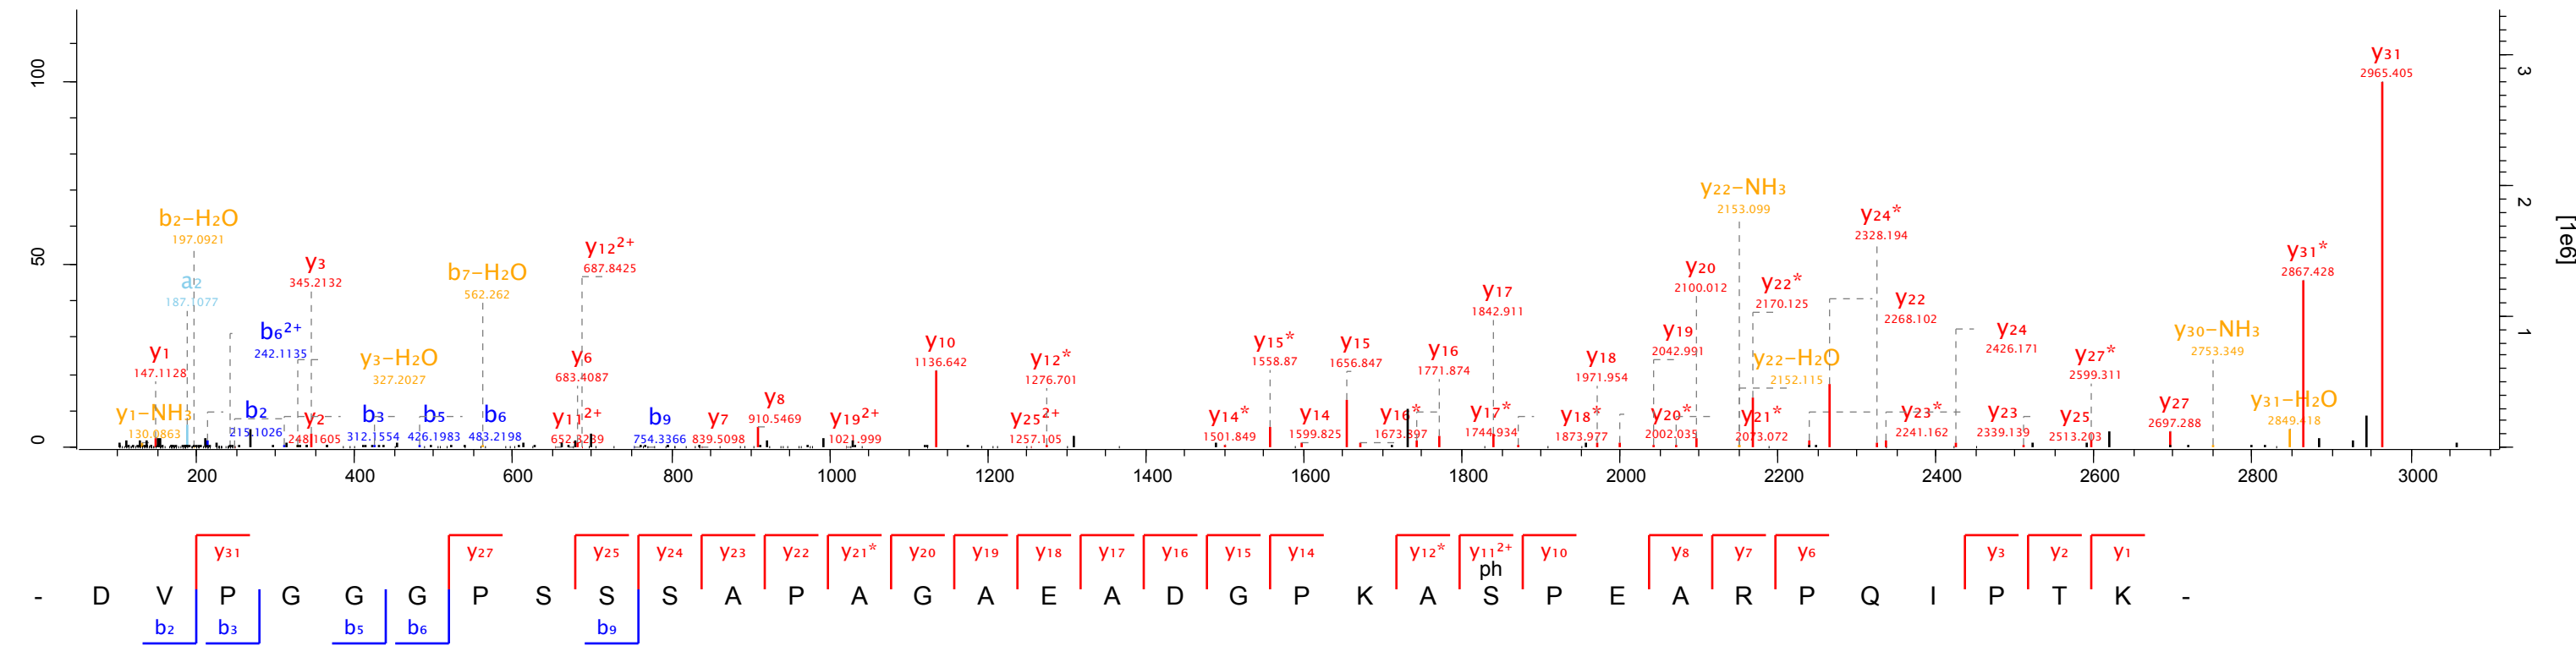

Raw file 20171215\_MaS\_33SR\_LMH\_phospho\_06 Scan 9538 Method FTMS; HCD Score 165.49 m/z 872.34 Gene names ST13;ST13P4

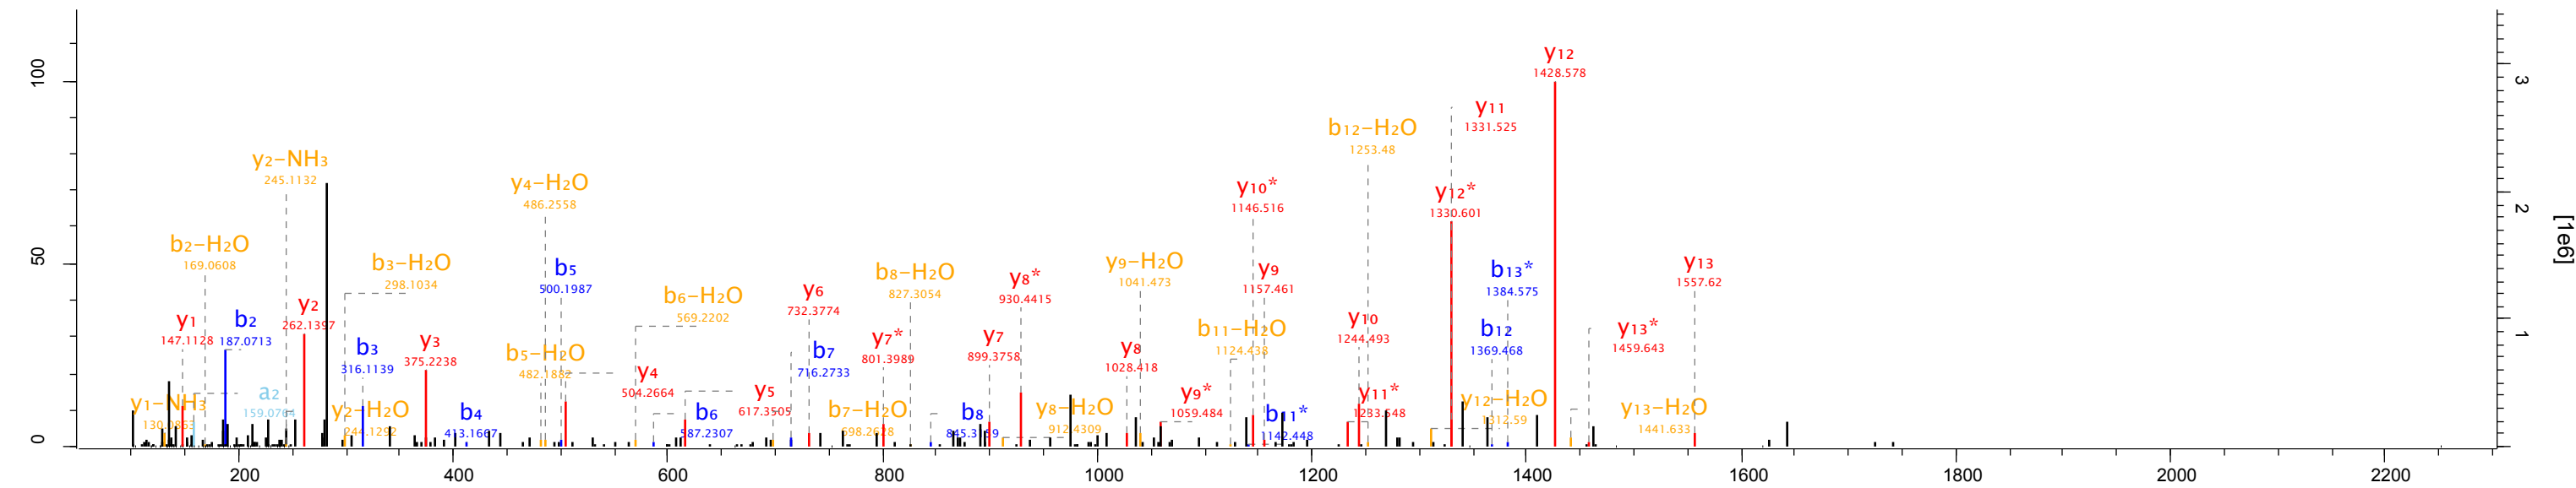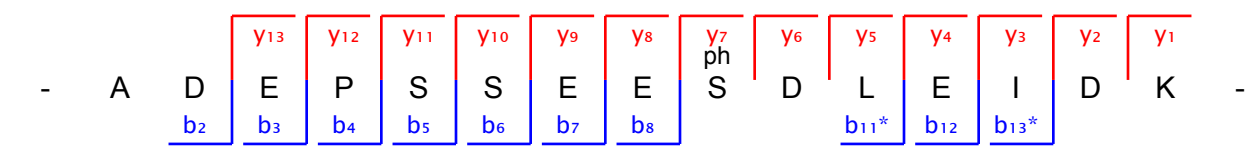

Raw file Scan Method Score m/z Gene names  
 20171215\_MaS\_33SR\_LMH\_phospho\_07 1898 FTMS; HCD 254.82 720.32 NASP

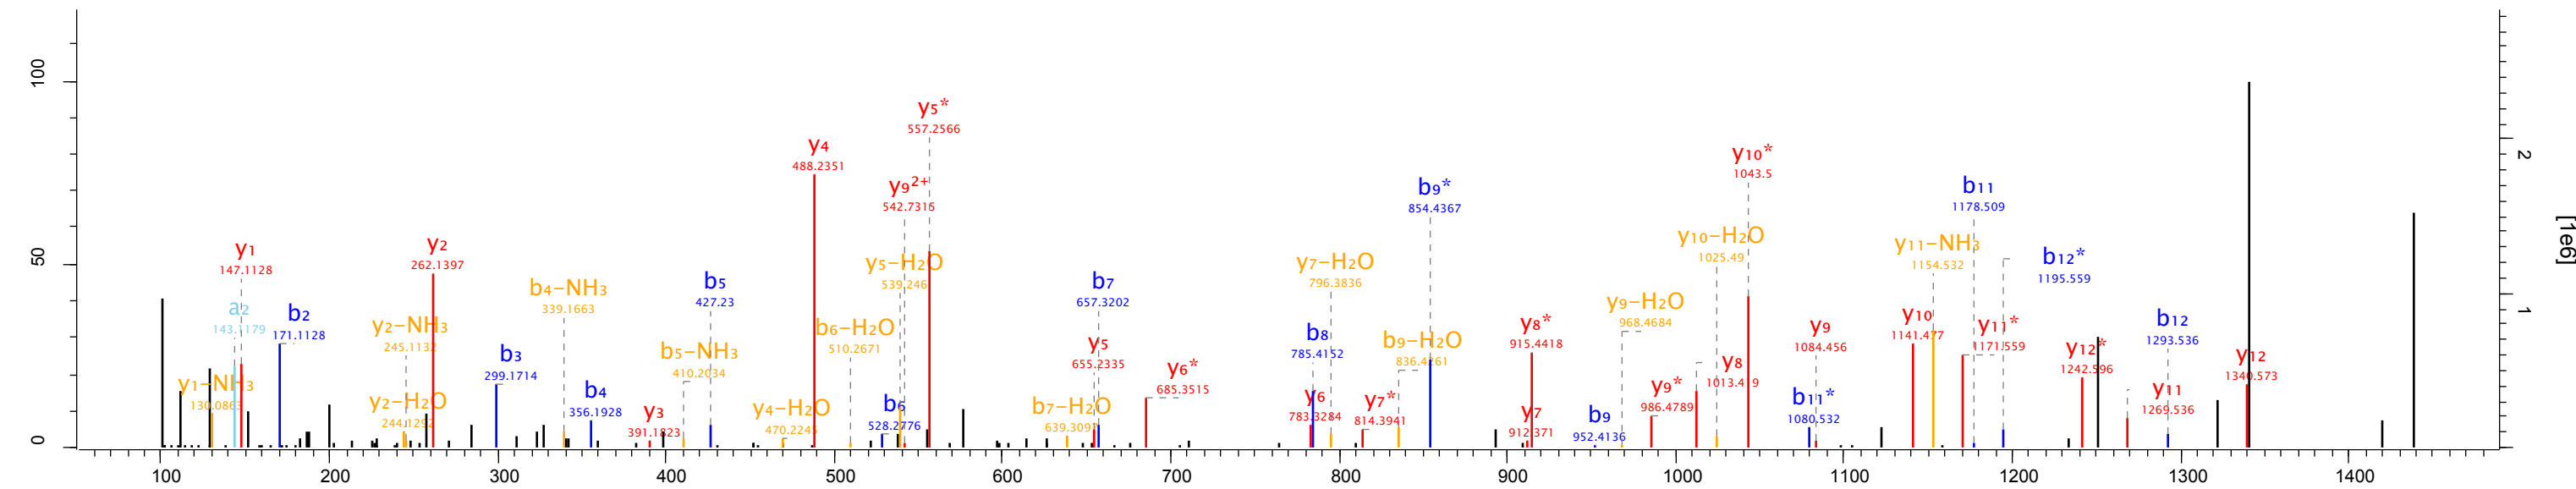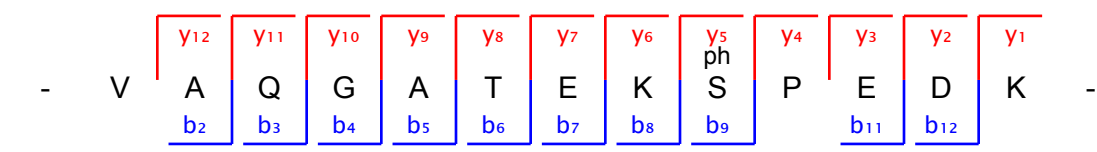

Raw file 20171215\_MaS\_33SR\_LMH\_phospho\_07 Scan 1928 Method FTMS; HCD Score 61.53 m/z 523.25 Gene names TNKS1BP1

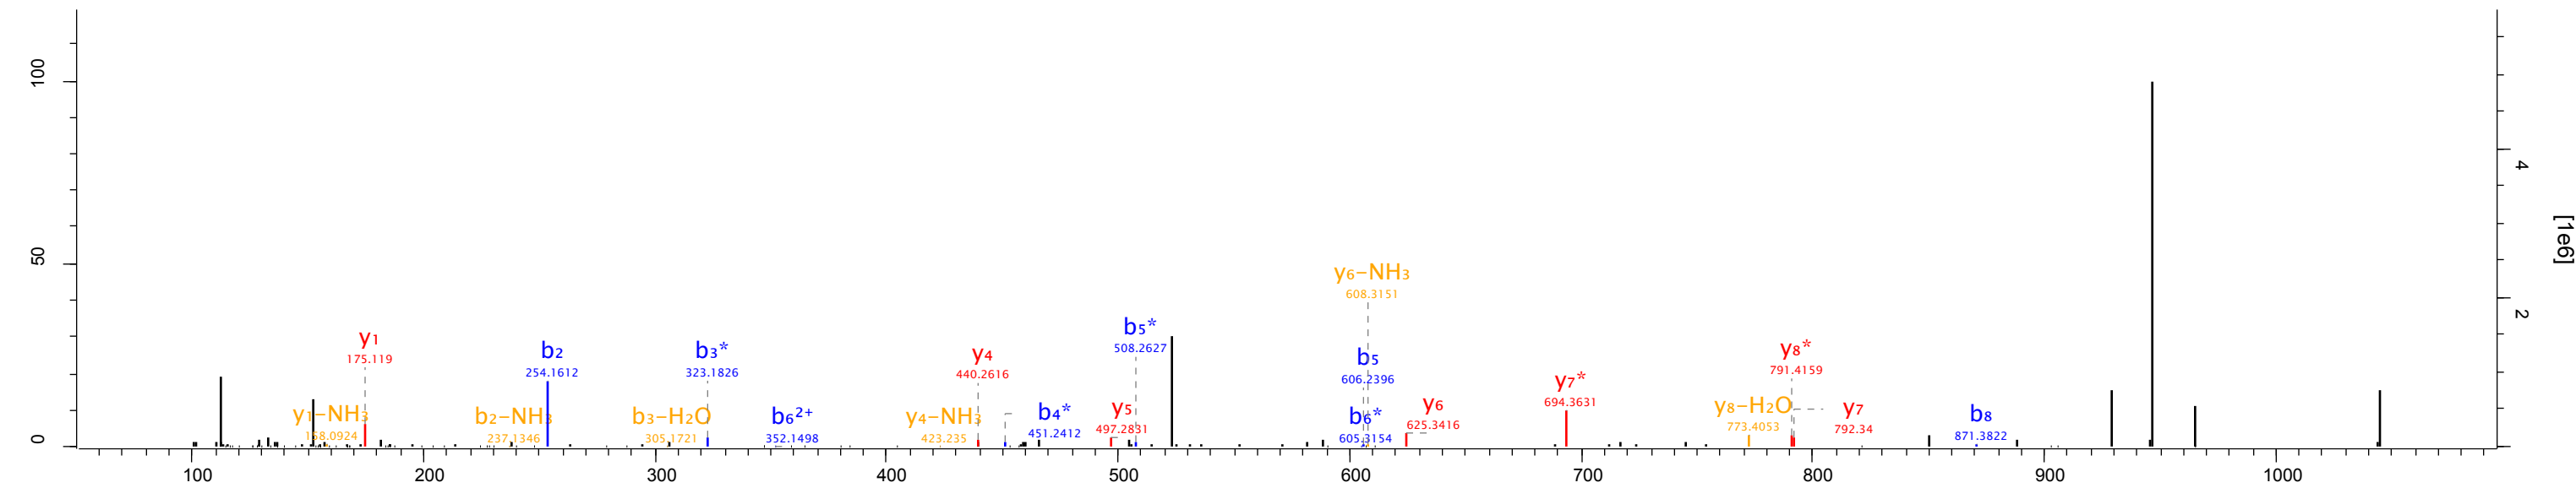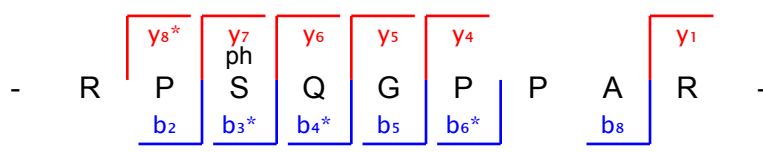

Raw file 20171215\_MaS\_33SR\_LMH\_phospho\_07 Scan 2308 Method FTMS; HCD Score 52.86 m/z 488.87 Gene names C18orf25;ARKL1

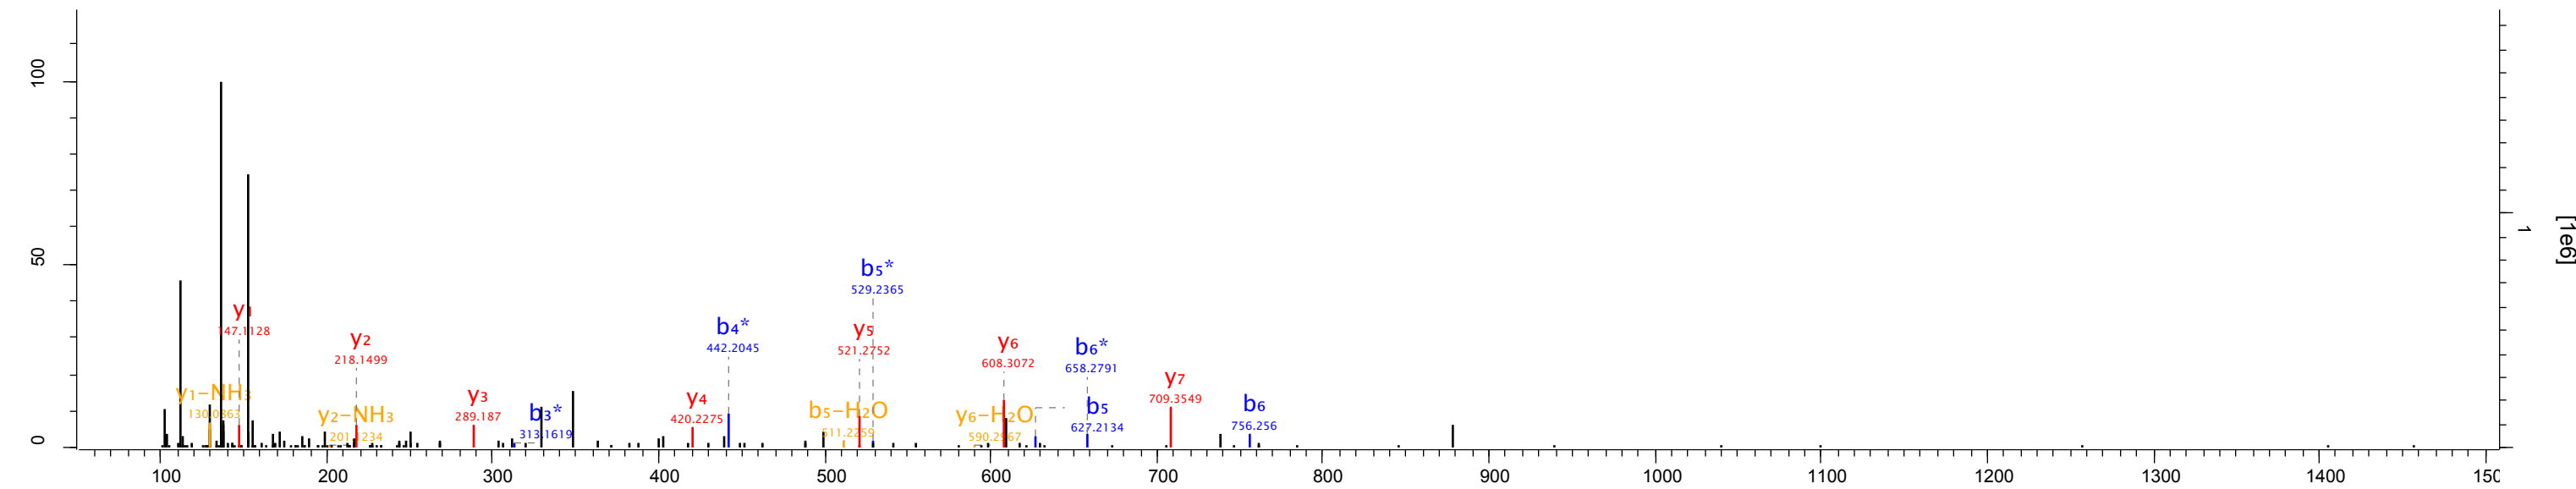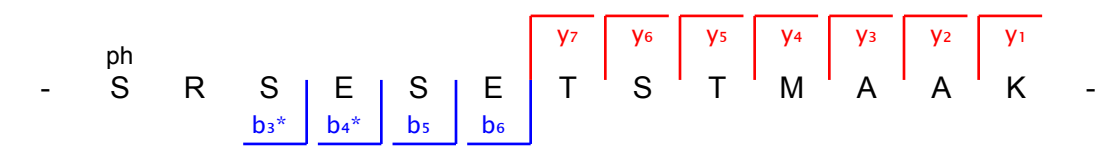

Raw file 20171215\_MaS\_33SR\_LMH\_phospho\_07 Scan 2388 Method FTMS; HCD Score 98.37 m/z 593.76 Gene names RBM15

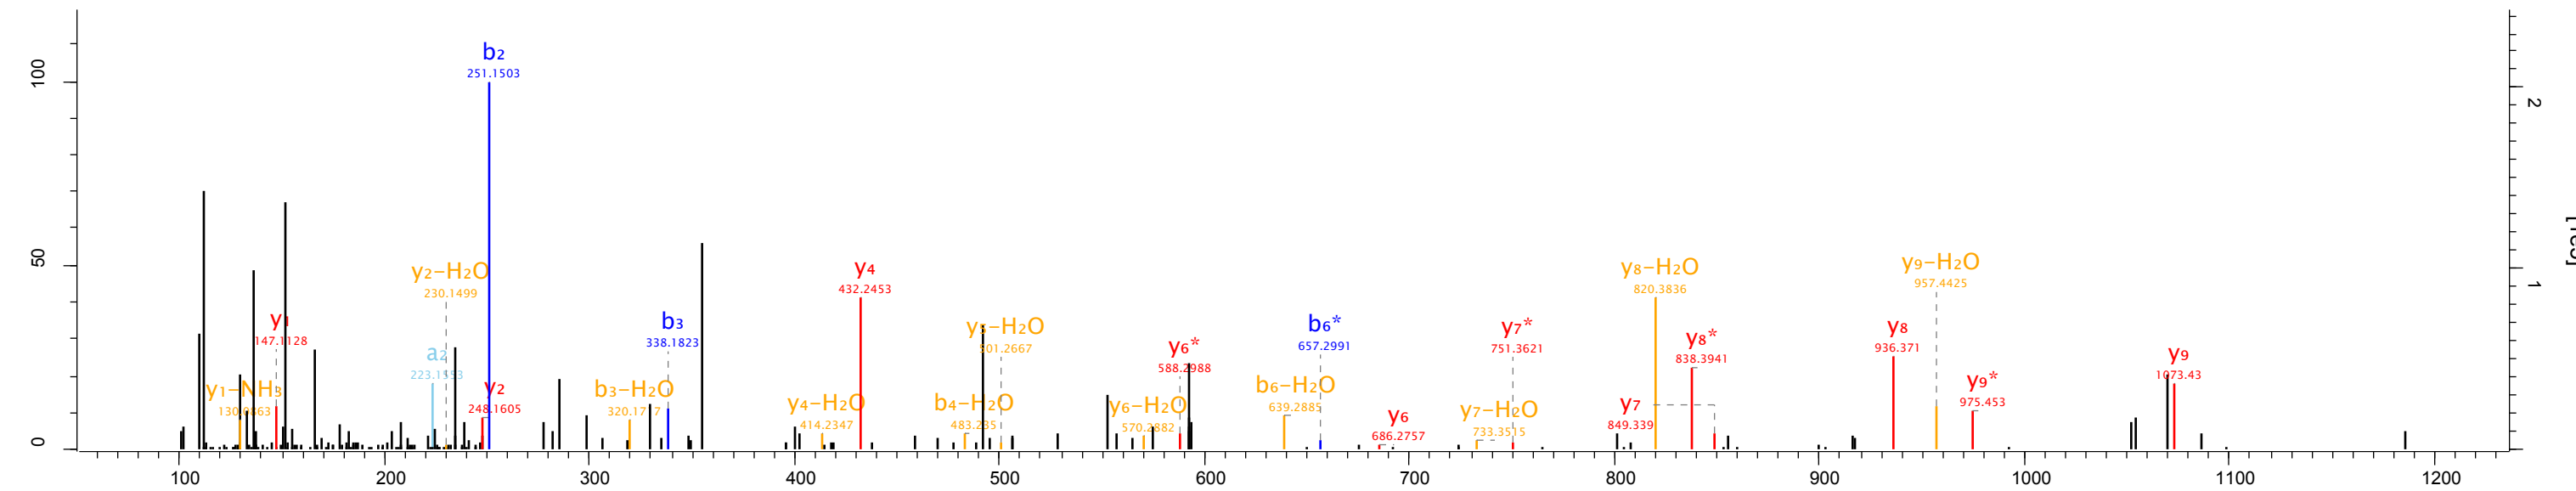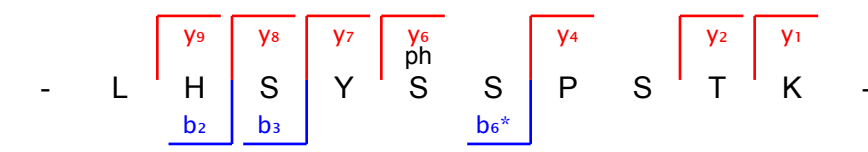

Raw file 20171215\_MaS\_33SR\_LMH\_phospho\_07 Scan 2778 Method FTMS; HCD Score 273.78 m/z 808.35 Gene names CUL4B

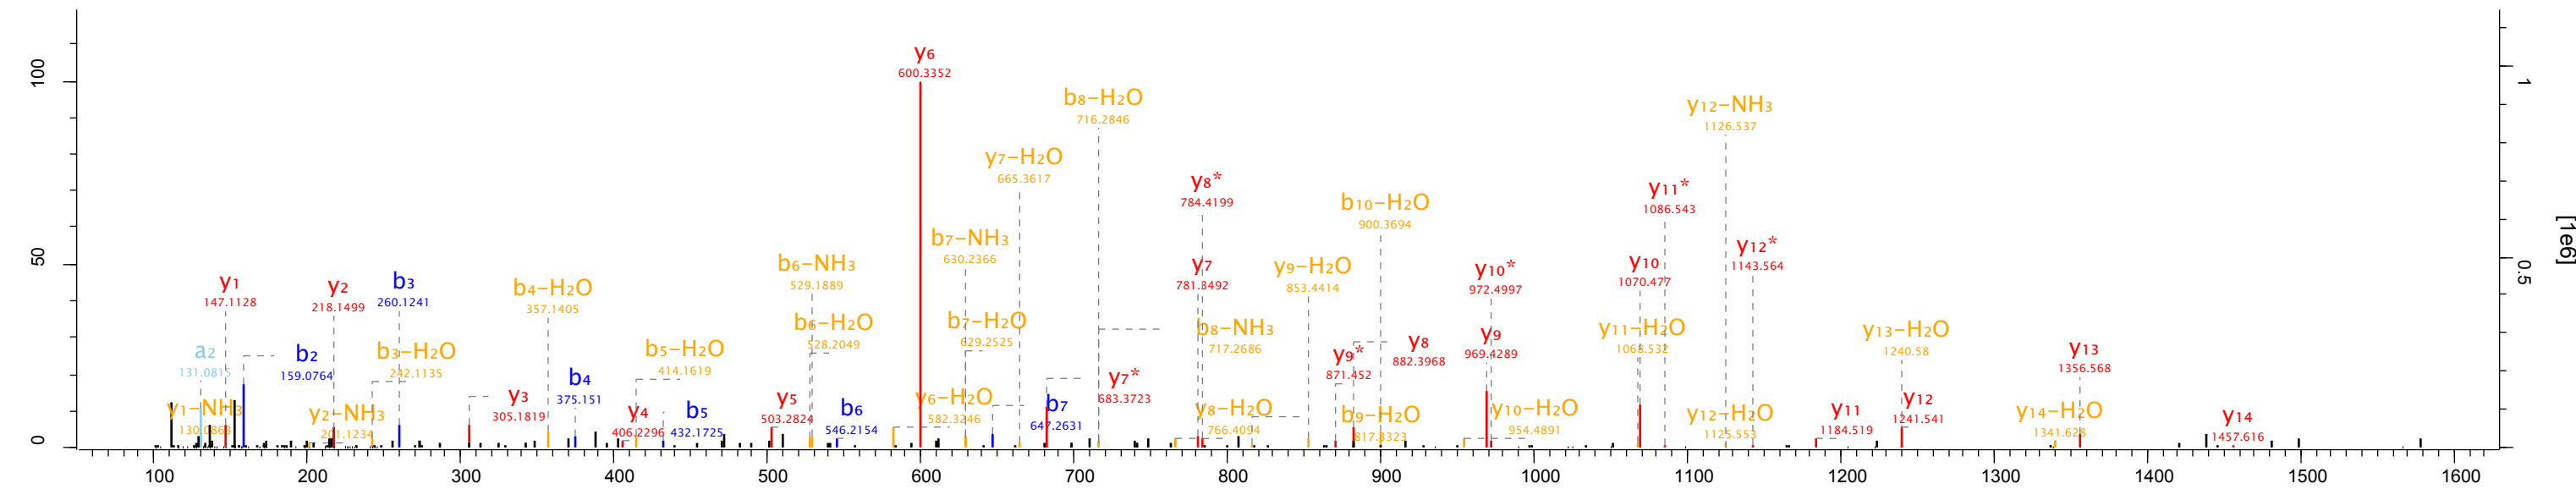

- S A T D G N T S T T P P T S A K -

b2 b3 b4 b5 b6 b7

y14 y13 y12 y11 y10 y9 y8 y7-ph y6 y5 y4 y3 y2 y1



Raw file 20171215\_MaS\_33SR\_LMH\_phospho\_07 Scan 2828 Method FTMS; HCD Score 60.1 m/z 341.17 Gene names SRRM2

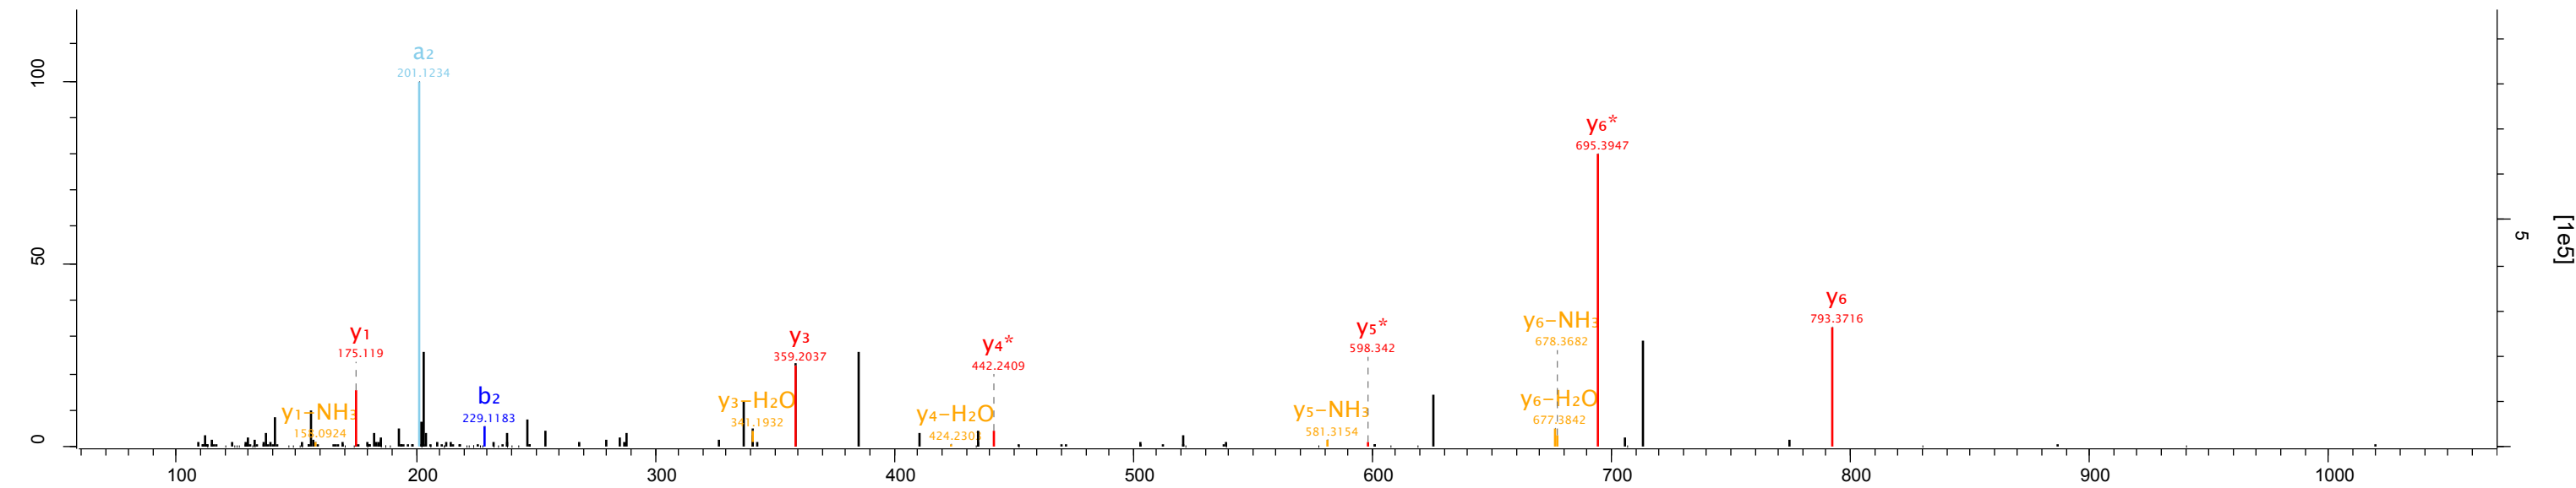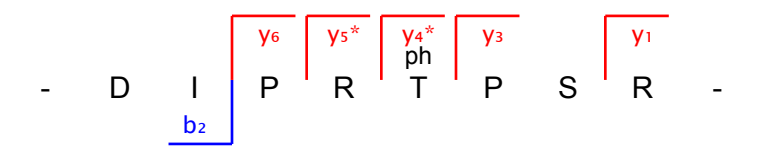

Raw file 20171215\_MaS\_33SR\_LMH\_phospho\_07 Scan 5138 Method FTMS; HCD Score 68 m/z 581.24 Gene names PPP1R9B

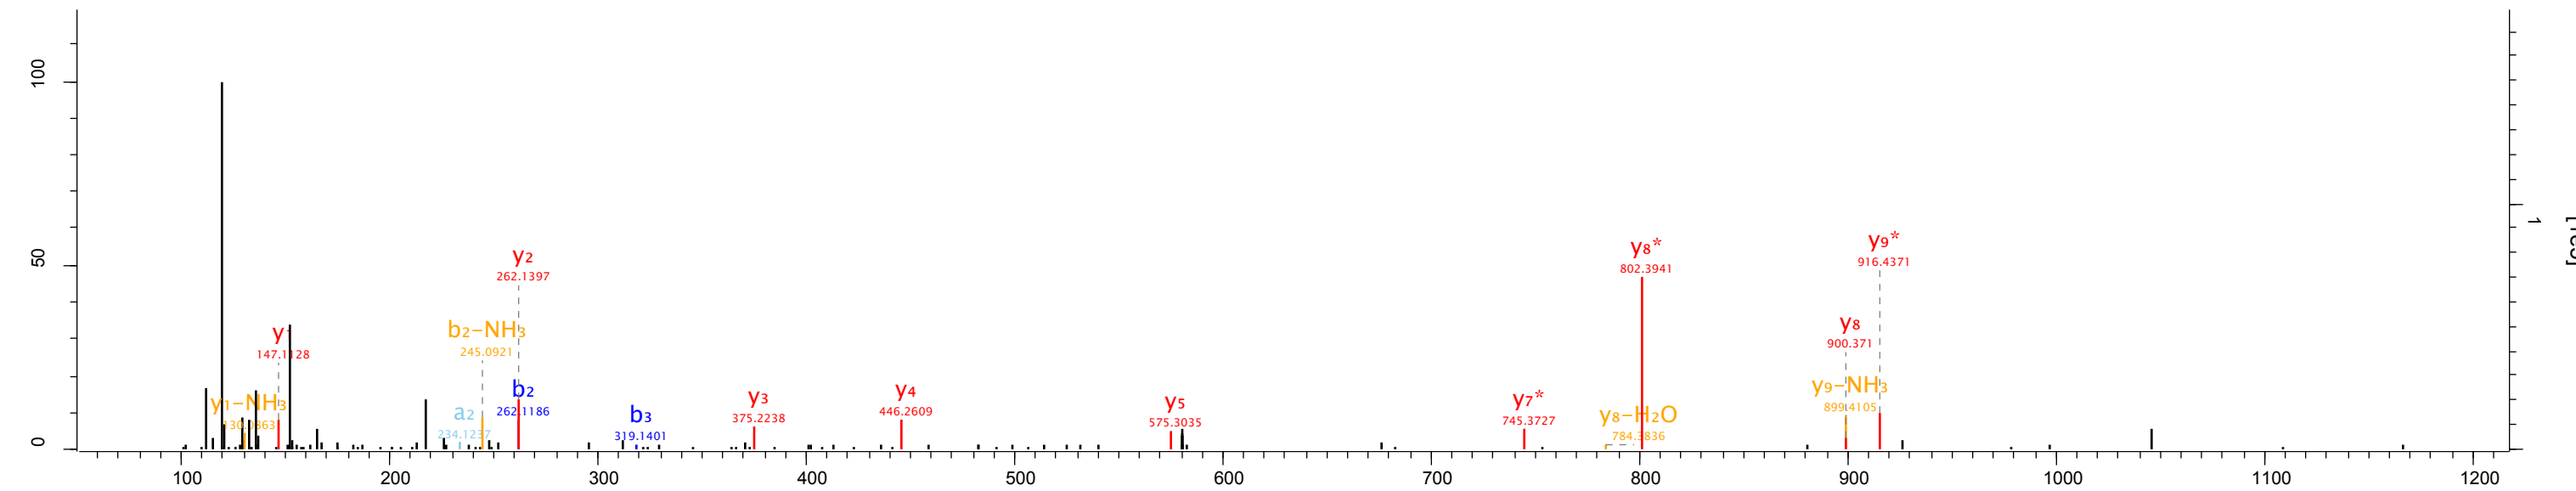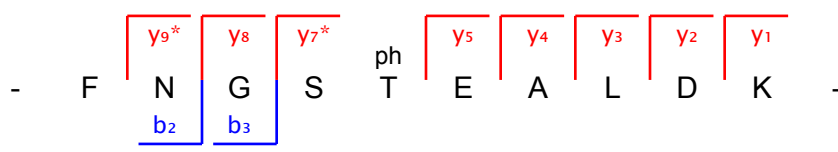

Raw file 20171215\_MaS\_33SR\_LMH\_phospho\_07 Scan 8618 Method FTMS; HCD Score 63.22 m/z 948.92 Gene names AKAP12

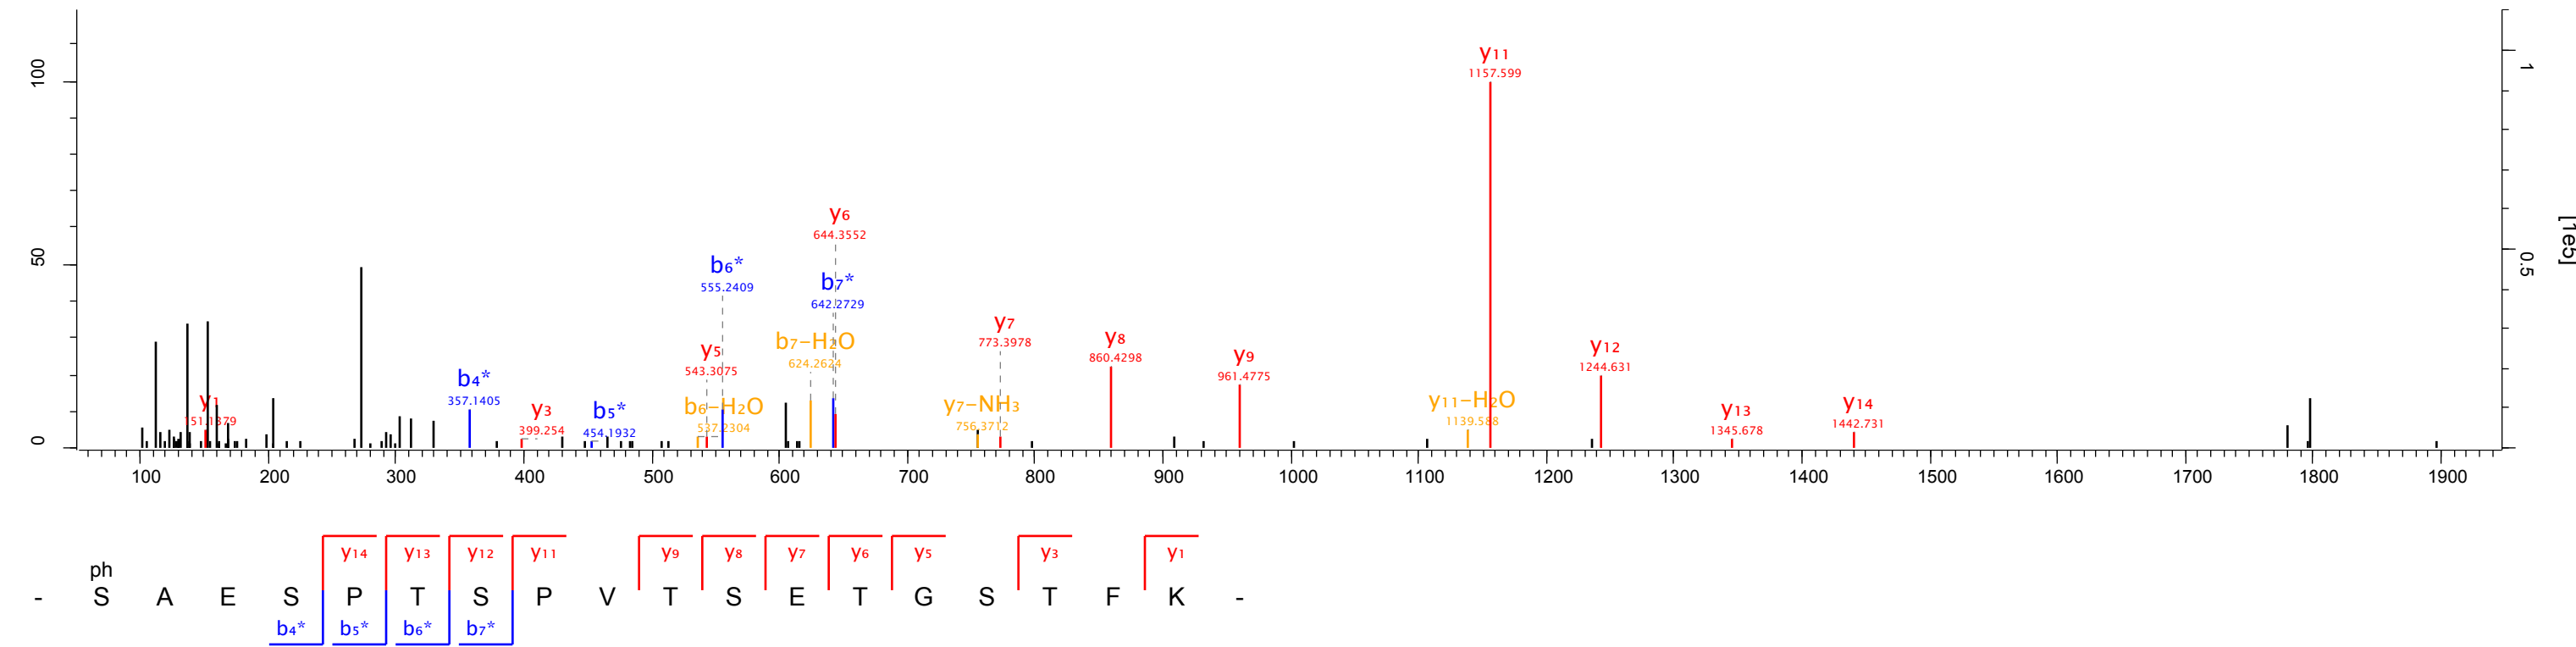

Raw file 20171215\_MaS\_33SR\_LMH\_phospho\_08 Scan 10288 Method FTMS; HCD Score 94.38 m/z 946.91 Gene names POU3F2

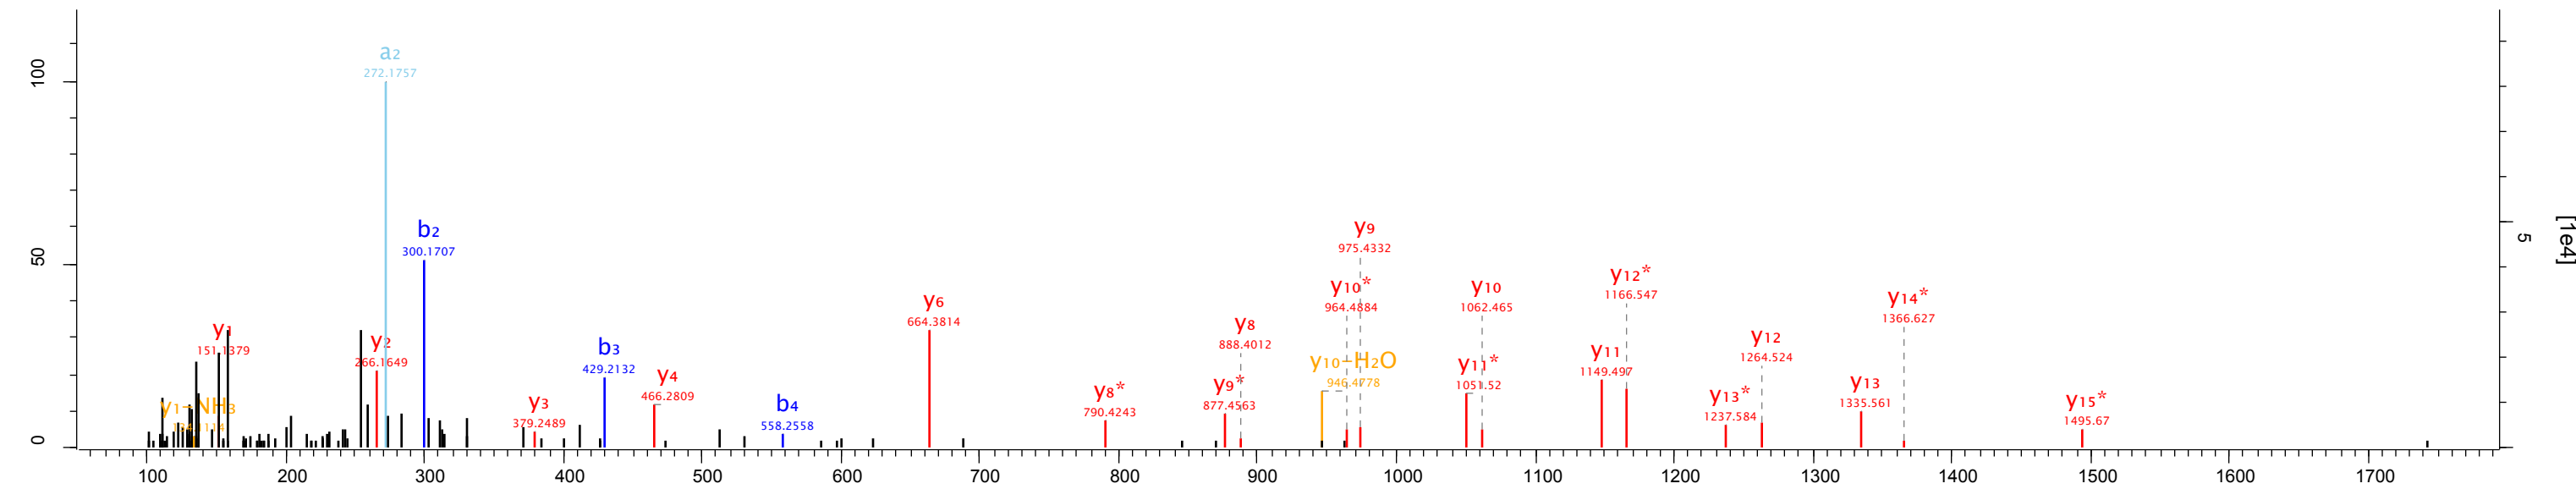

- W L E E A D S S S G S P T S I D K -

Fragmentation mapping (b-ions and y-ions) is shown below the sequence:

- b2: L
- b3: E
- b4: E
- y1: K
- y2: D
- y3: I
- y4: S
- y6: P
- y8: G
- y9: S
- y10: S
- y11: S
- y12: A
- y13: E
- y14: E
- y15: L

Raw file 20171215\_MaS\_33SR\_LMH\_phospho\_08 Scan 12108 Method FTMS; HCD Score 60.33 m/z 909.42 Gene names TP53BP1

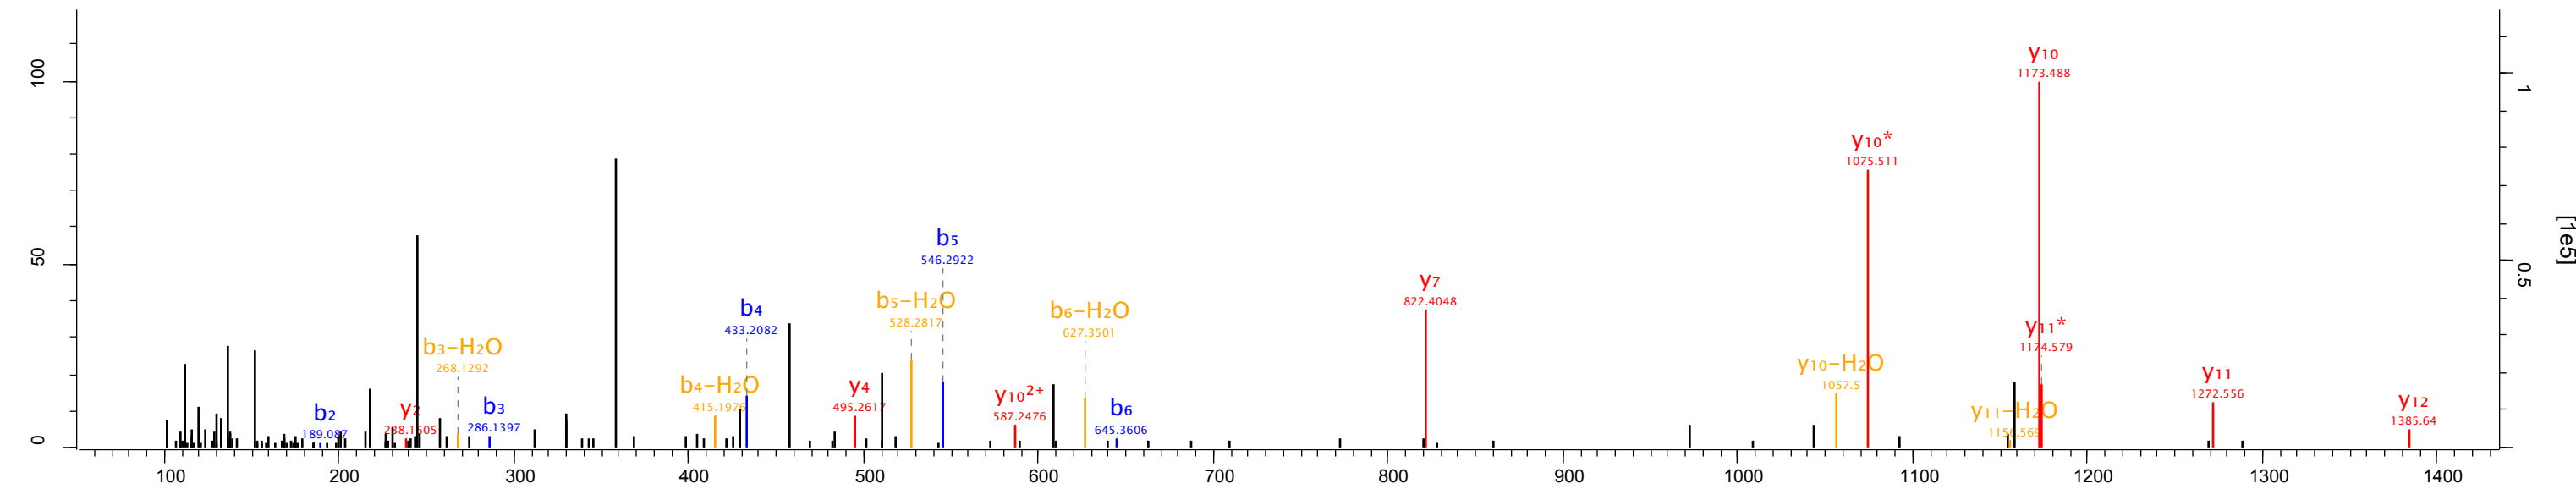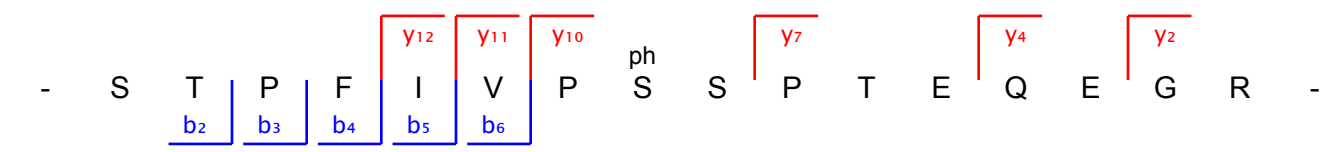

Raw file 20171215\_MaS\_33SR\_LMH\_phospho\_08 Scan 1898 Method FTMS; HCD Score 93.91 m/z 499.55 Gene names TJP2

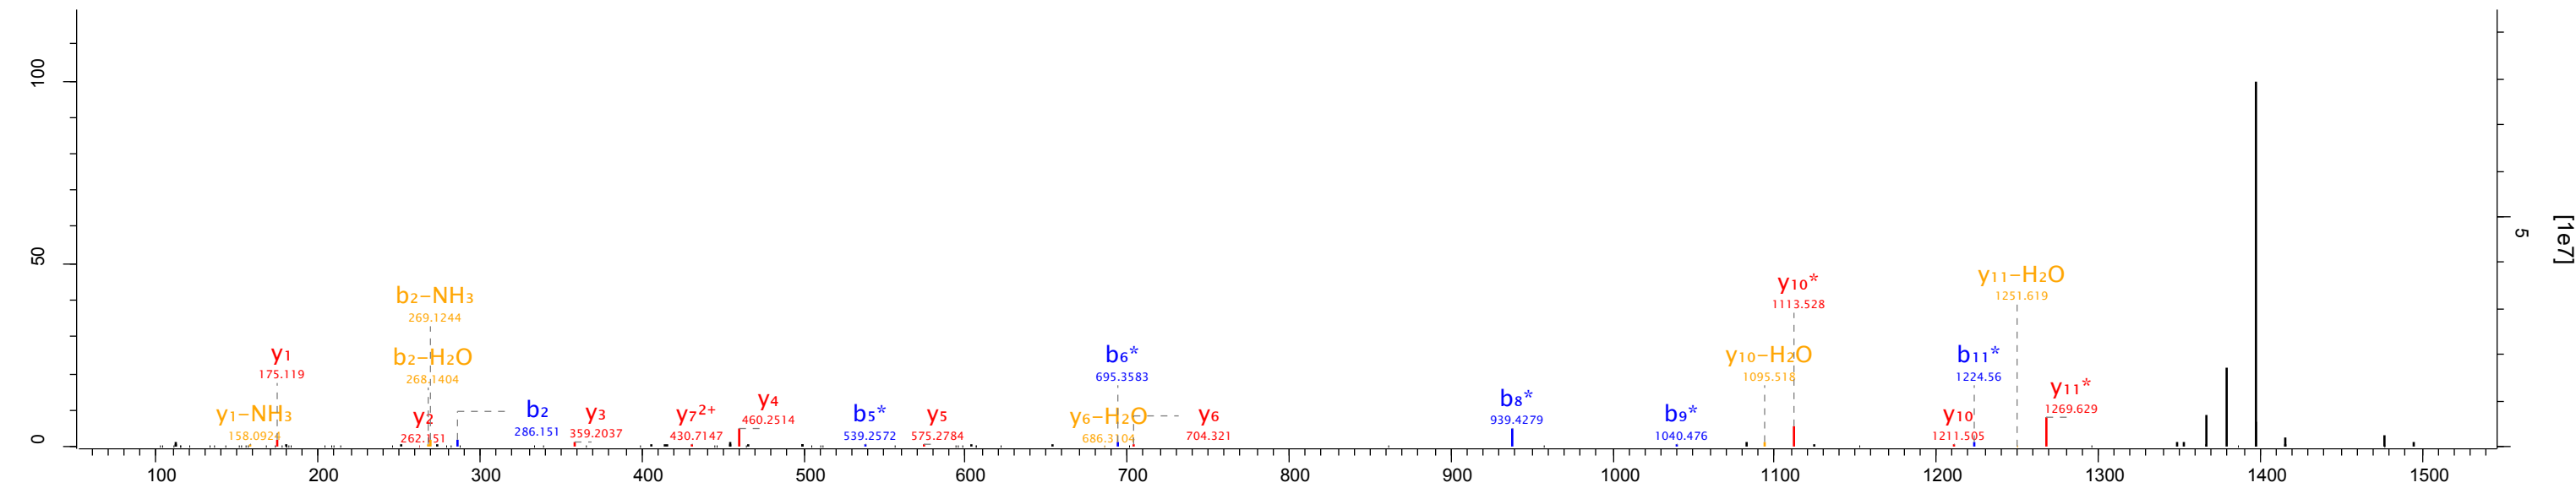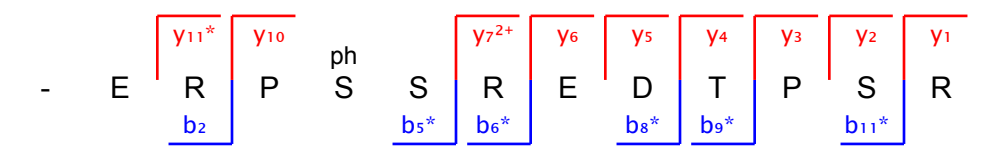

Raw file  
20171215\_MaS\_33SR\_LMH\_phospho\_08

Scan Method Score m/z Gene names  
2028 FTMS; HCD 142.51 539.34 NCL

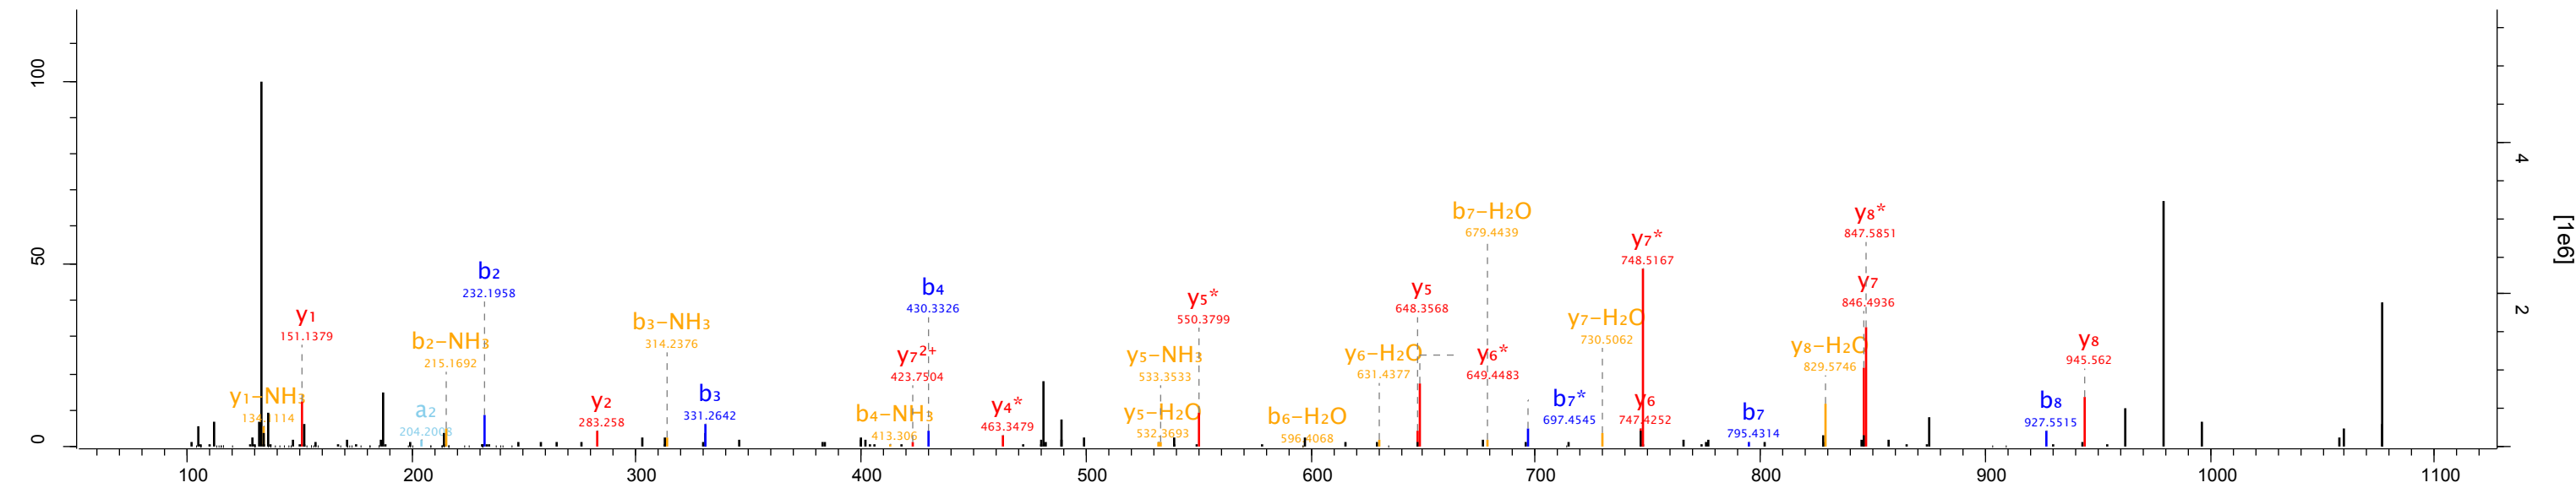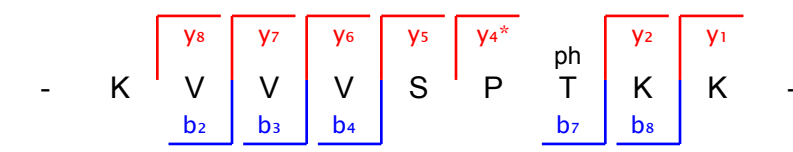

Raw file 20171215\_MaS\_33SR\_LMH\_phospho\_08 Scan 2628 Method FTMS; HCD Score 45.43 m/z 682.81 Gene names SREBF1

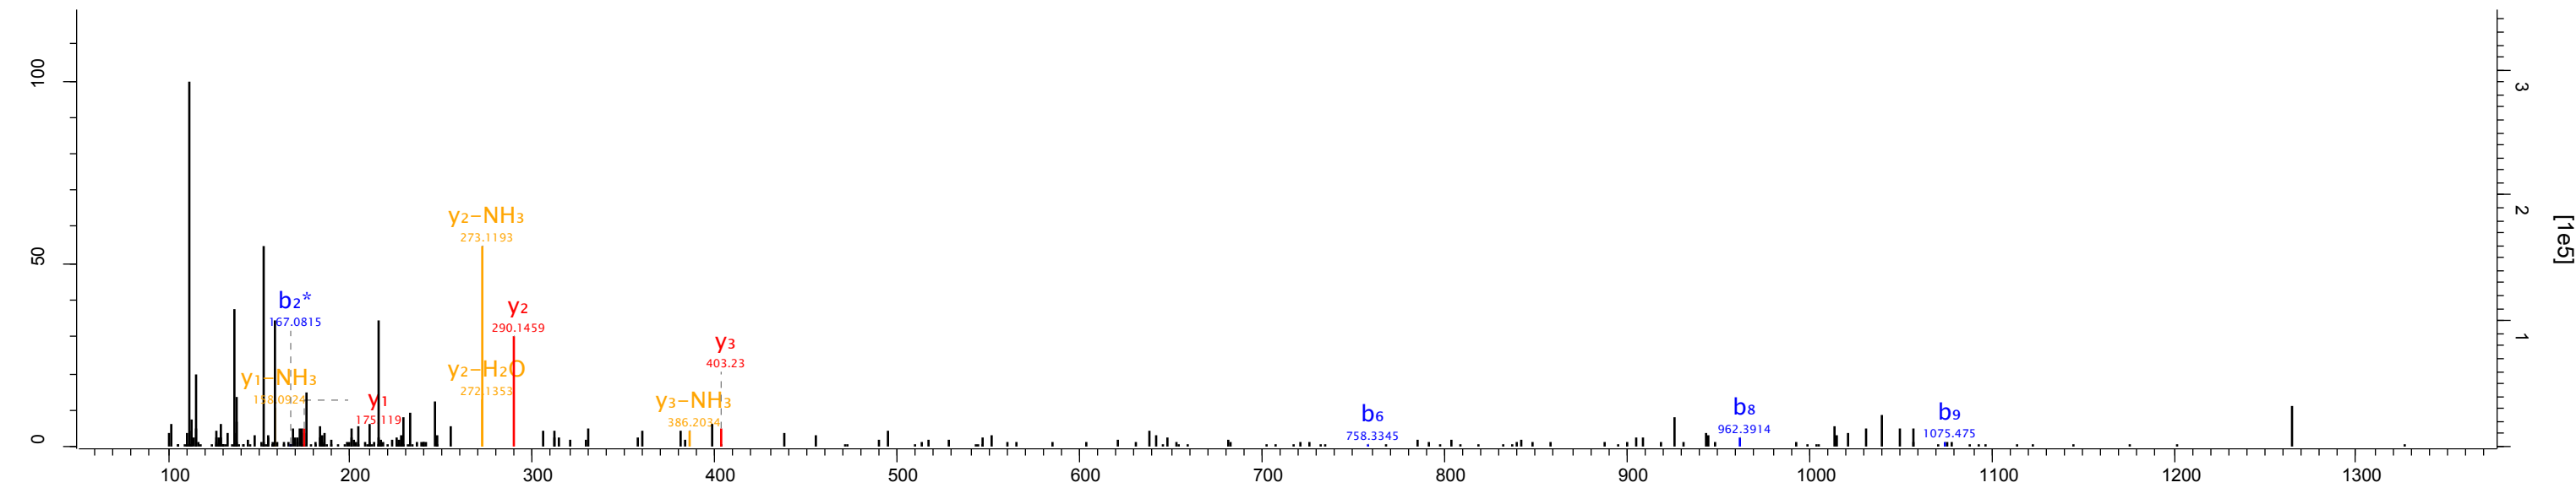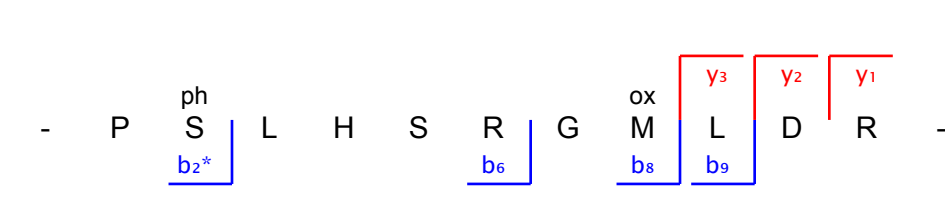



Raw file 20171215\_MaS\_33SR\_LMH\_phospho\_08 Scan 2668 Method FTMS; HCD Score 205.98 m/z 741.32 Gene names RBMX2

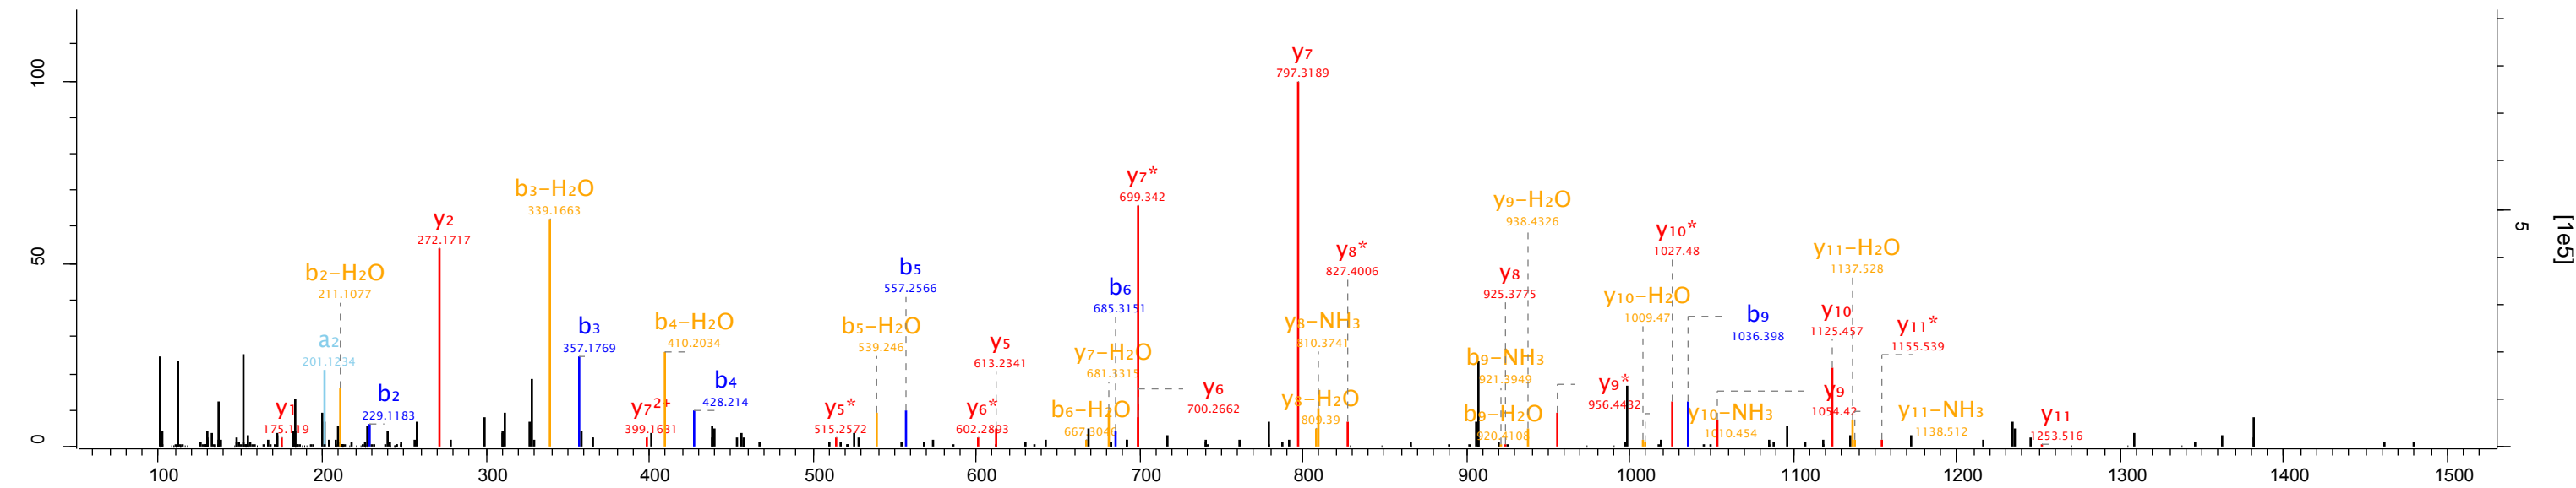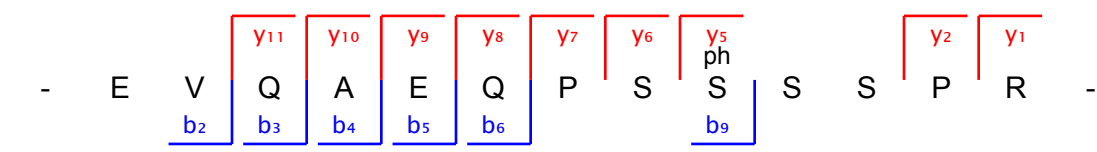

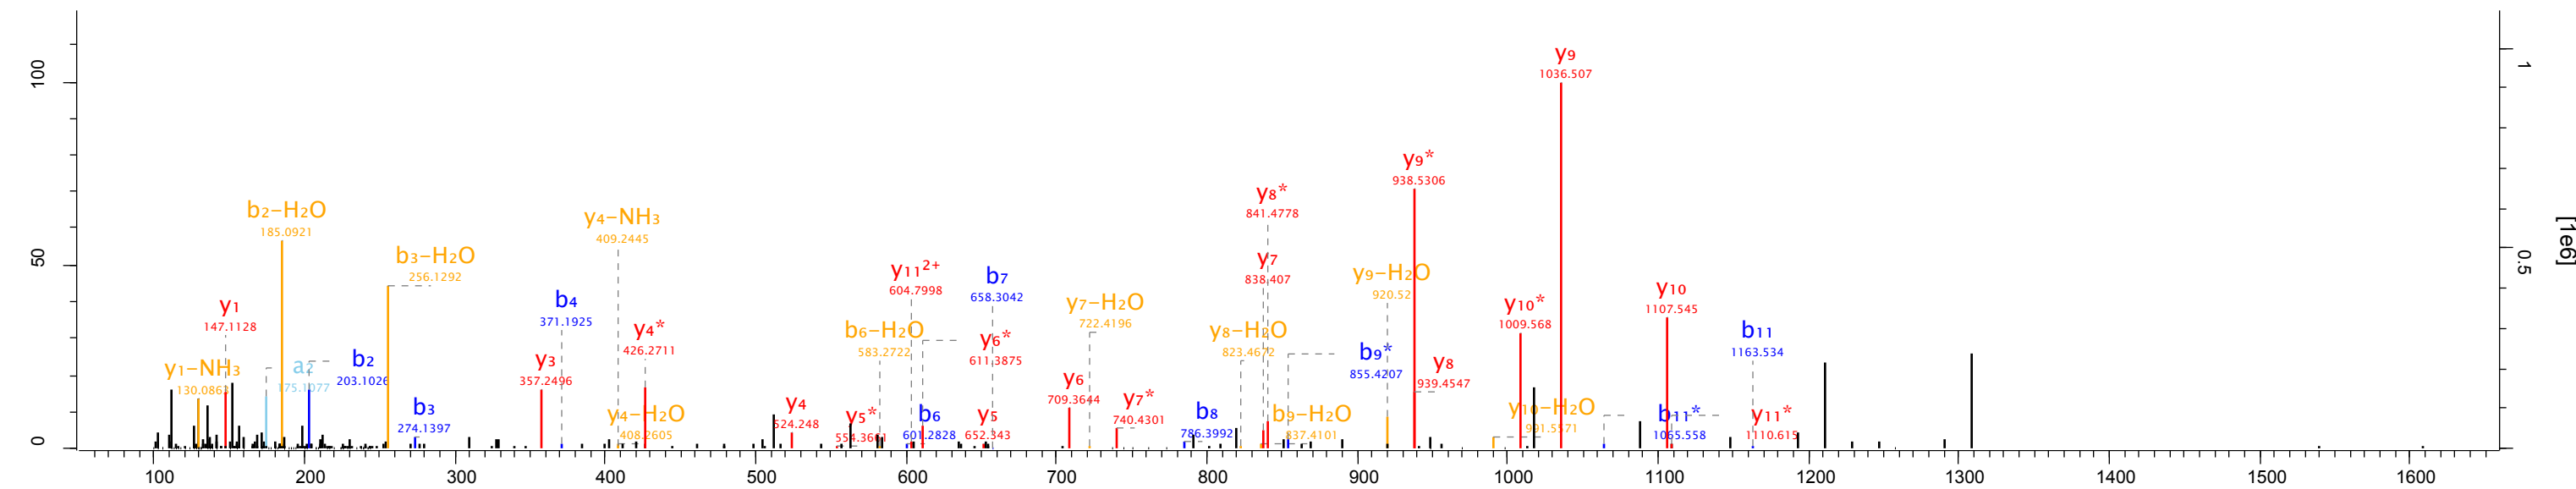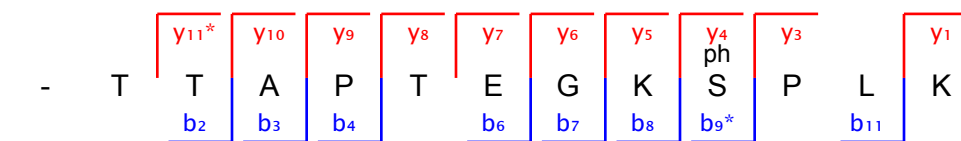

Raw file 20171215\_MaS\_33SR\_LMH\_phospho\_08 Scan 5098 Method FTMS; HCD Score 80.76 m/z 484.23 Gene names HDAC7

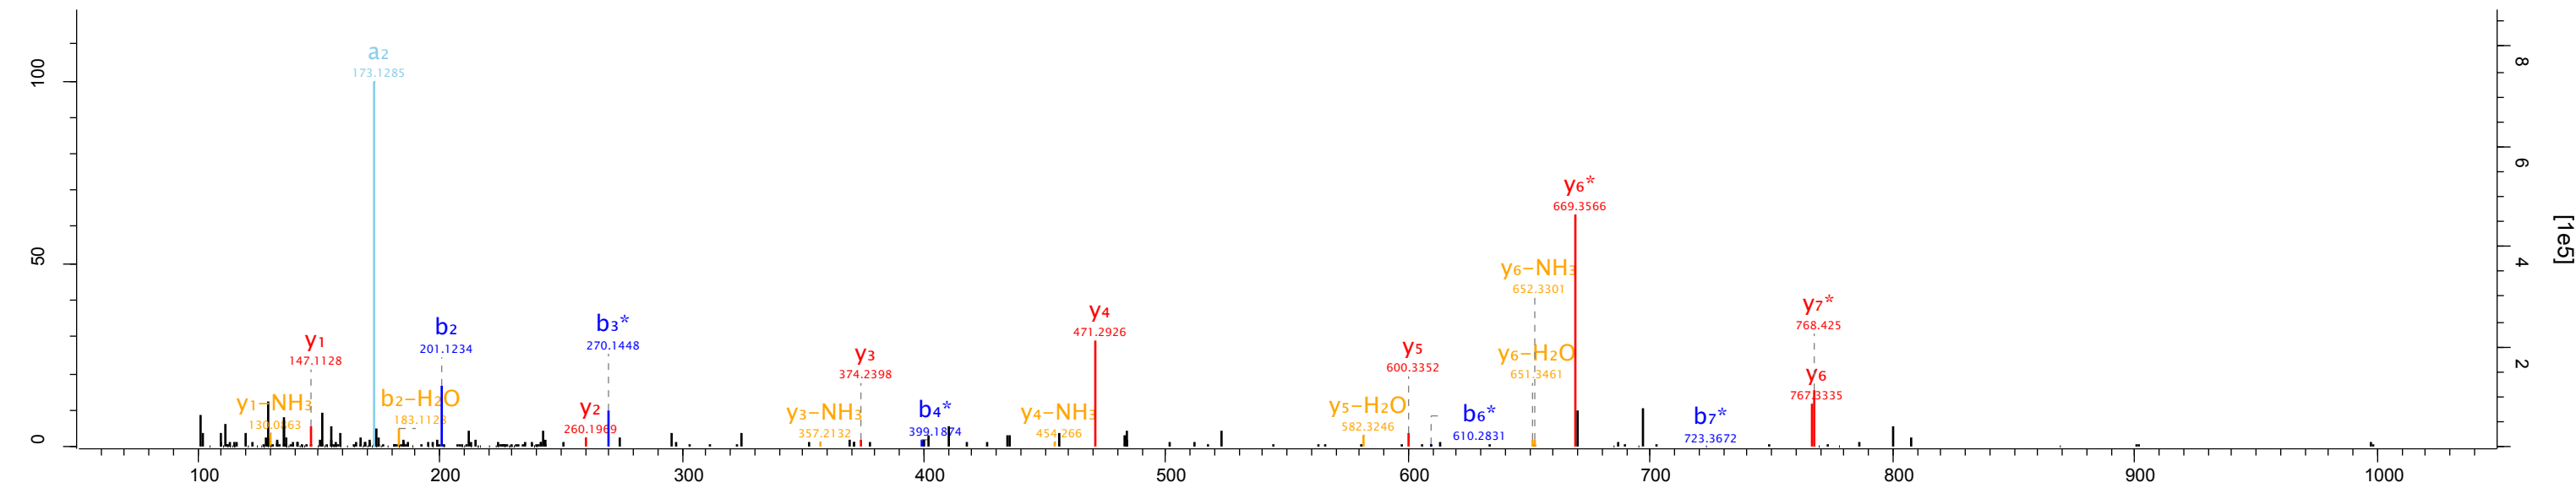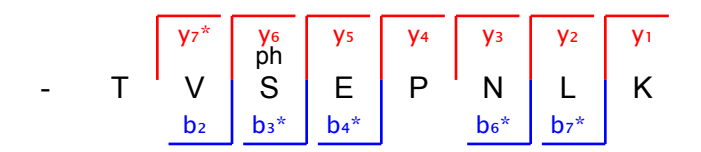

Raw file 20171215\_MaS\_33SR\_LMH\_phospho\_08 Scan 5738 Method FTMS; HCD Score 148.15 m/z 852.39 Gene names MARCKS

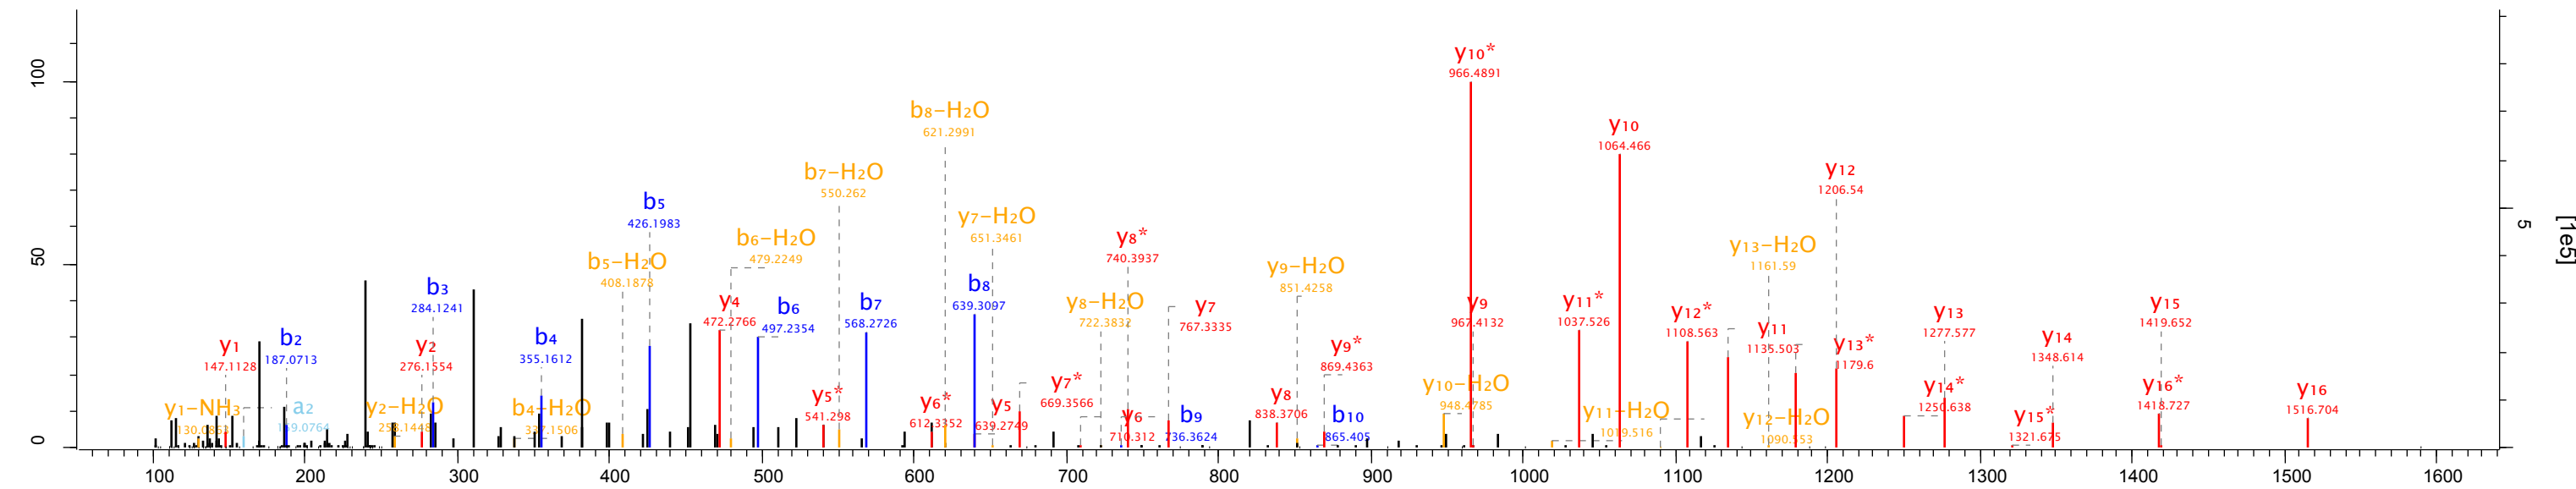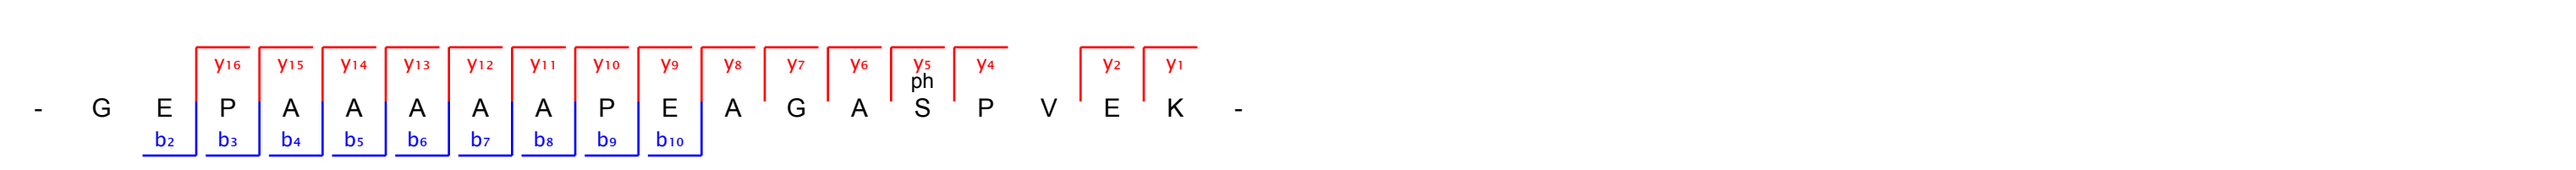

Raw file  
 20171215\_MaS\_33SR\_LMH\_phospho\_08  
 Scan 6498 Method FTMS; HCD Score 161.46 m/z 837.39 Gene names RAB12

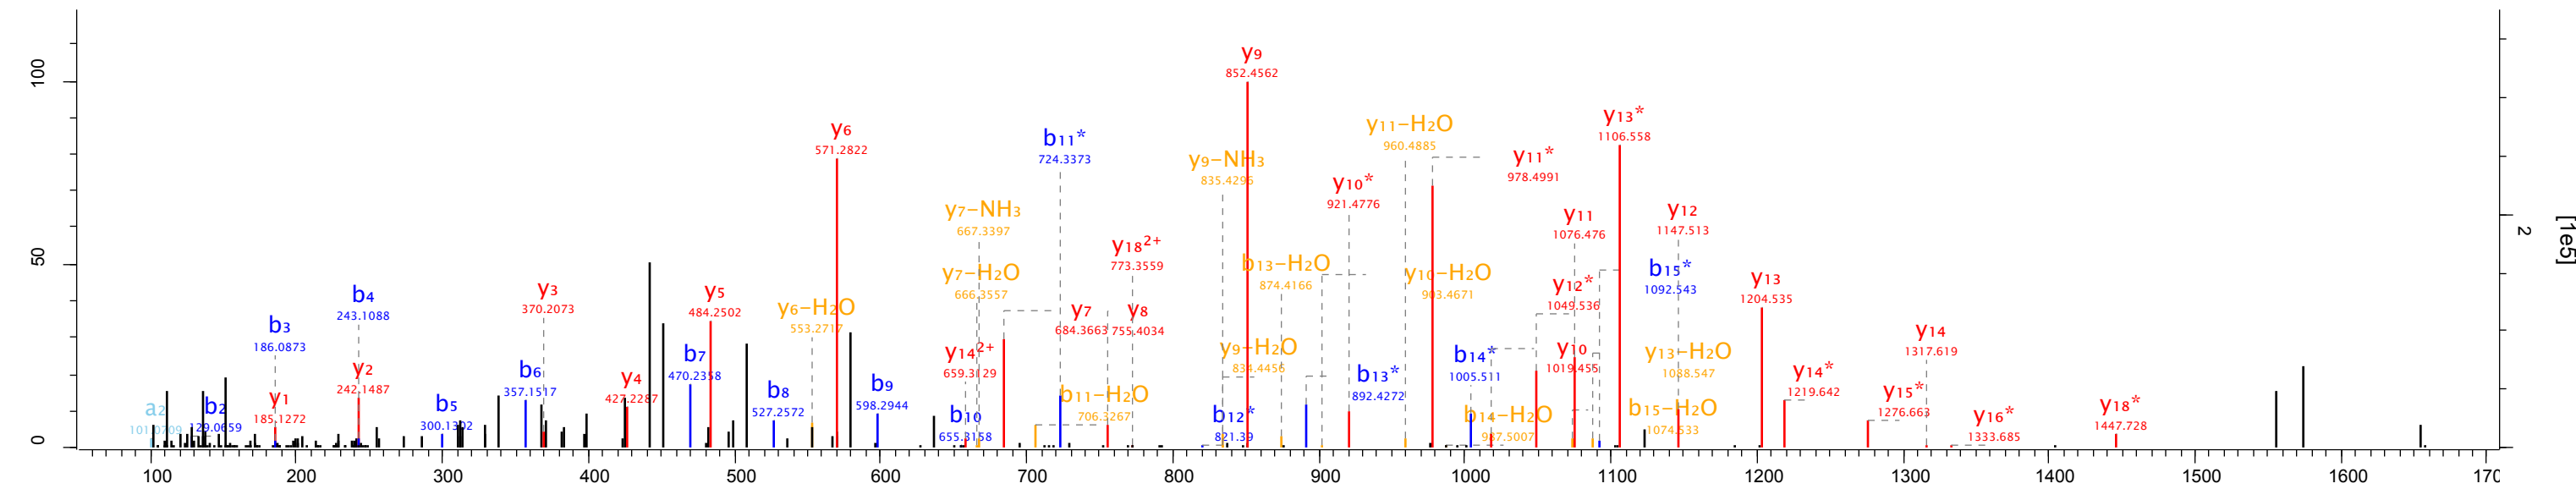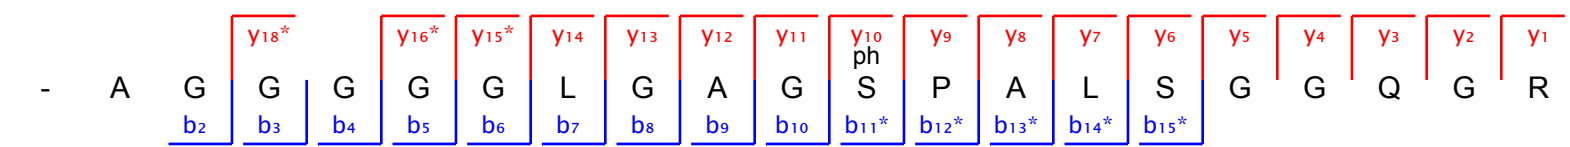

Raw file 20171215\_MaS\_33SR\_LMH\_phospho\_08 Scan 8828 Method FTMS; HCD Score 108.66 m/z 637.32 Gene names NHSL1

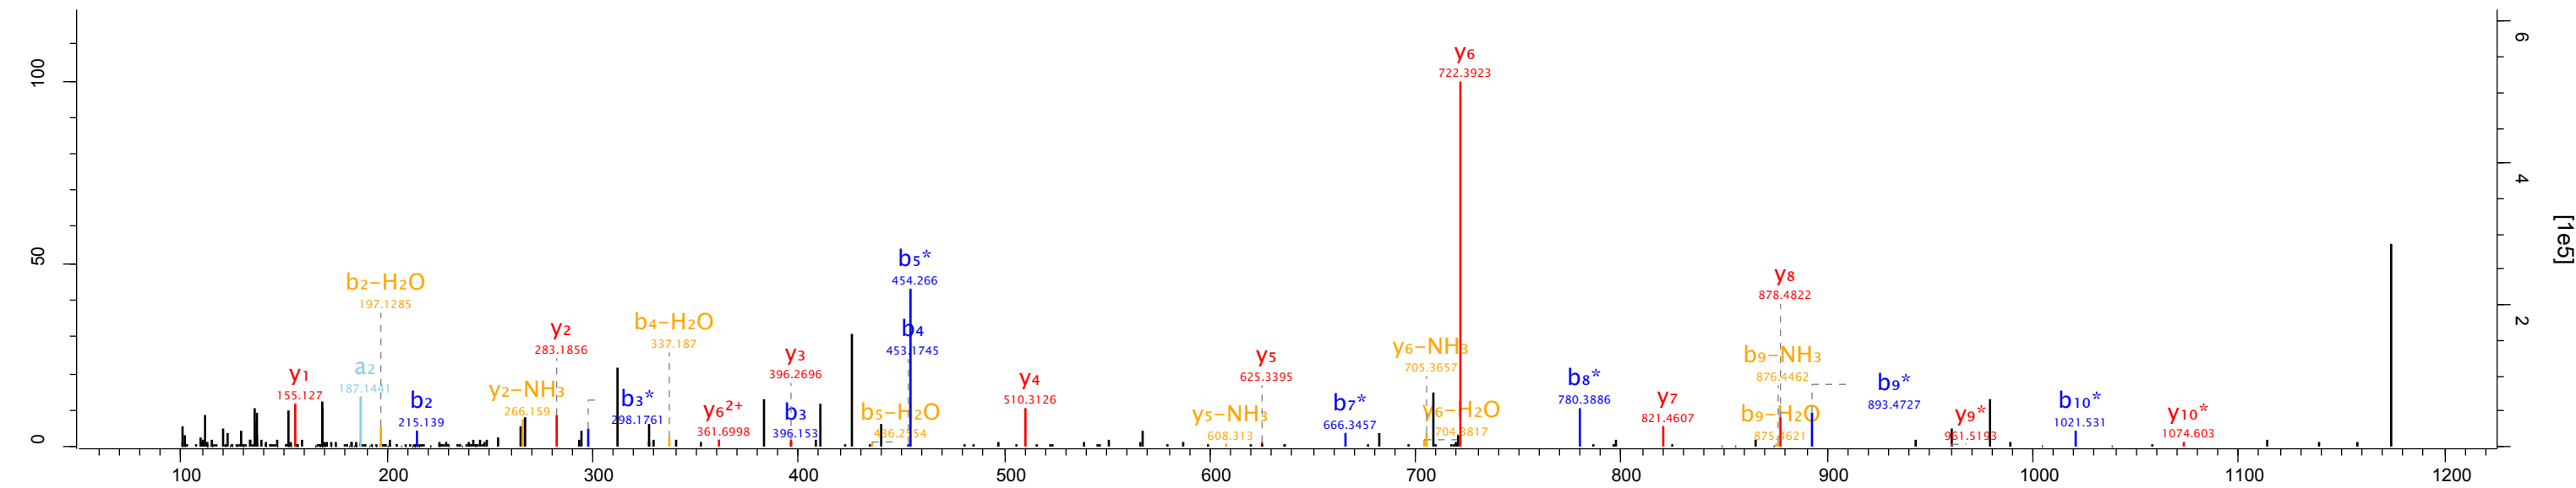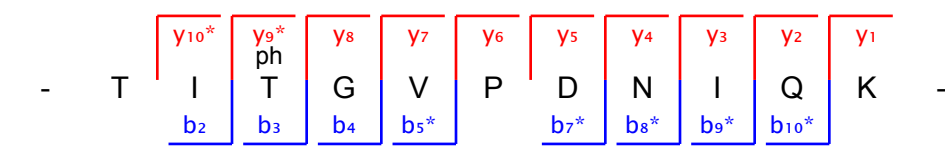

Raw file 20171215\_MaS\_33SR\_LMH\_phospho\_08 Scan 8968 Method FTMS; HCD Score 97.77 m/z 687.83 Gene names MYOF

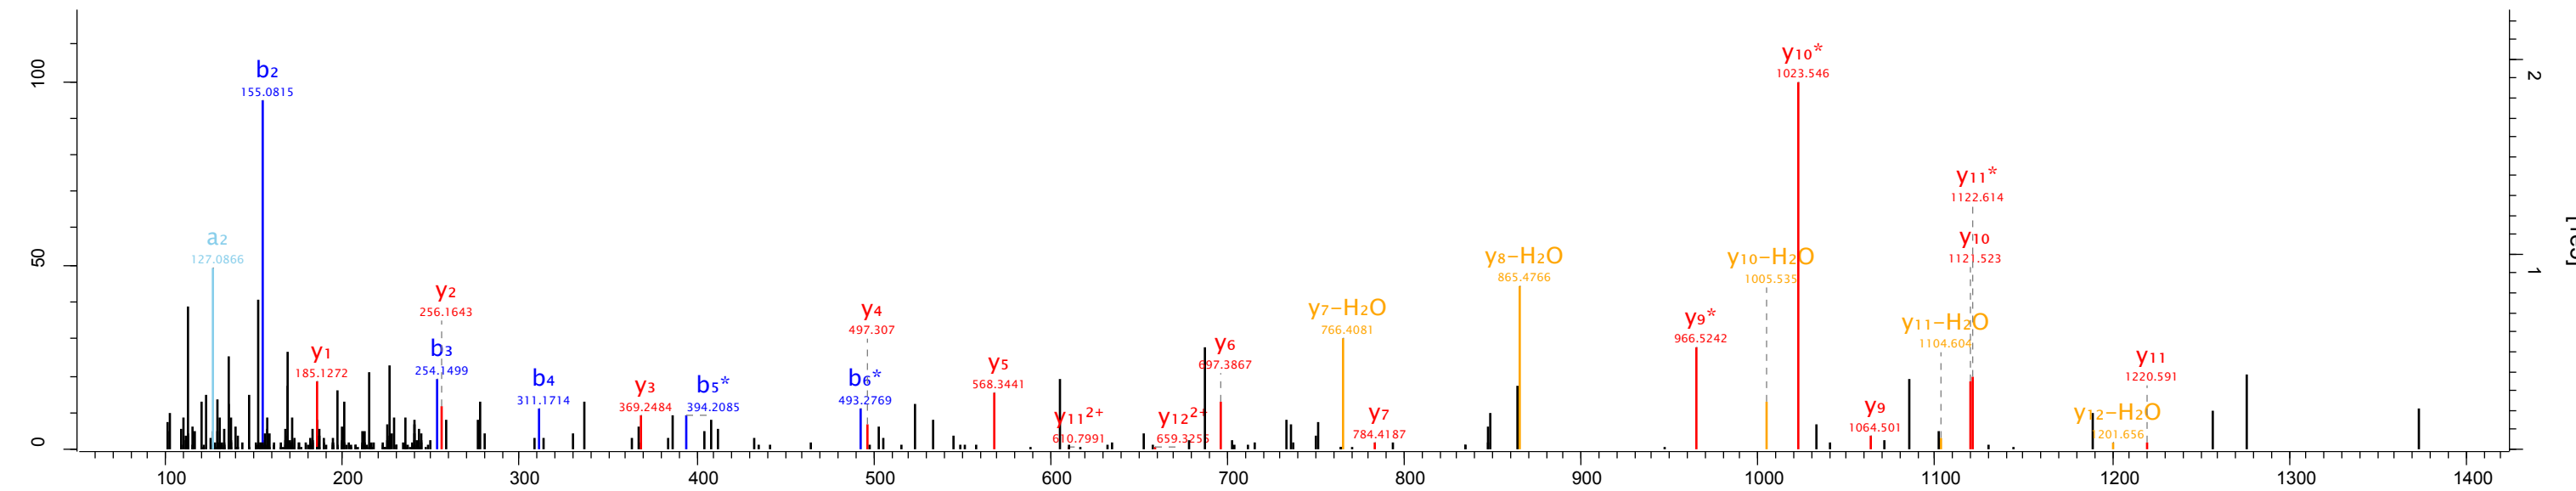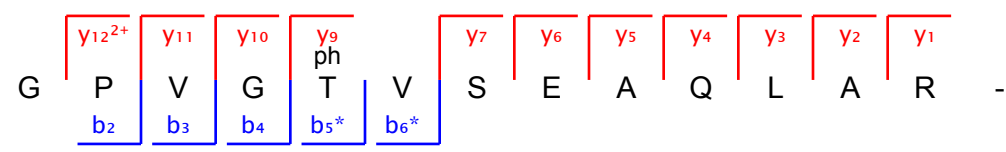

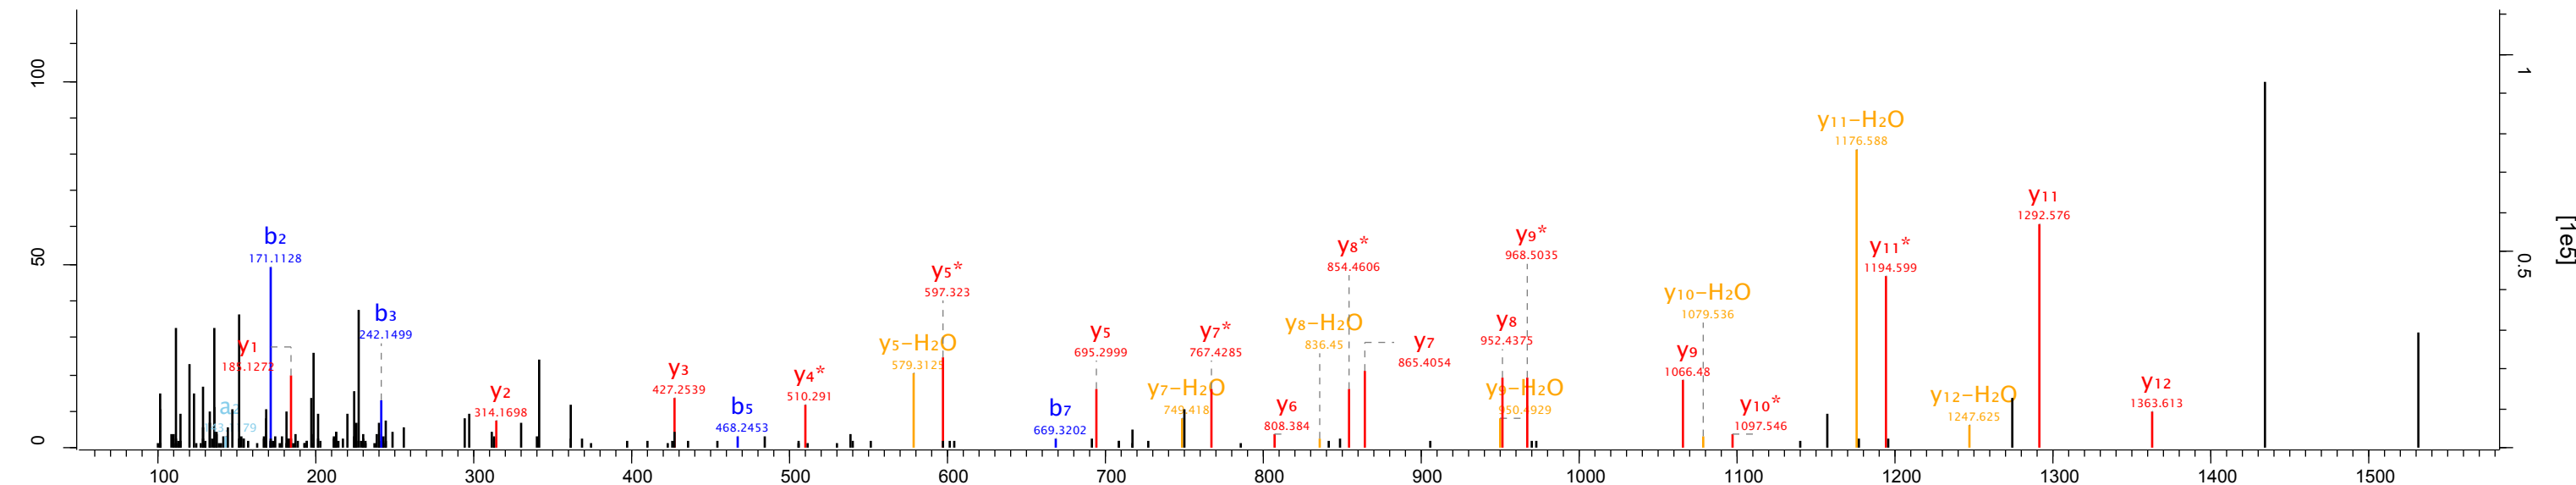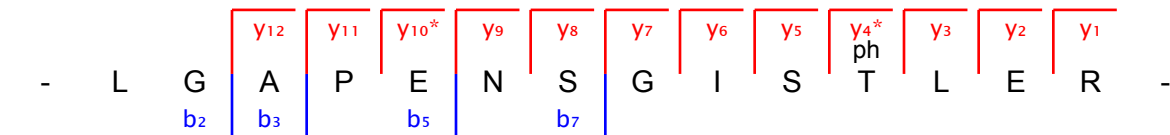



Raw file 20171215\_MaS\_33SR\_LMH\_phospho\_08 Scan 9418 Method FTMS; HCD Score 132.14 m/z 710.85 Gene names ALDOA

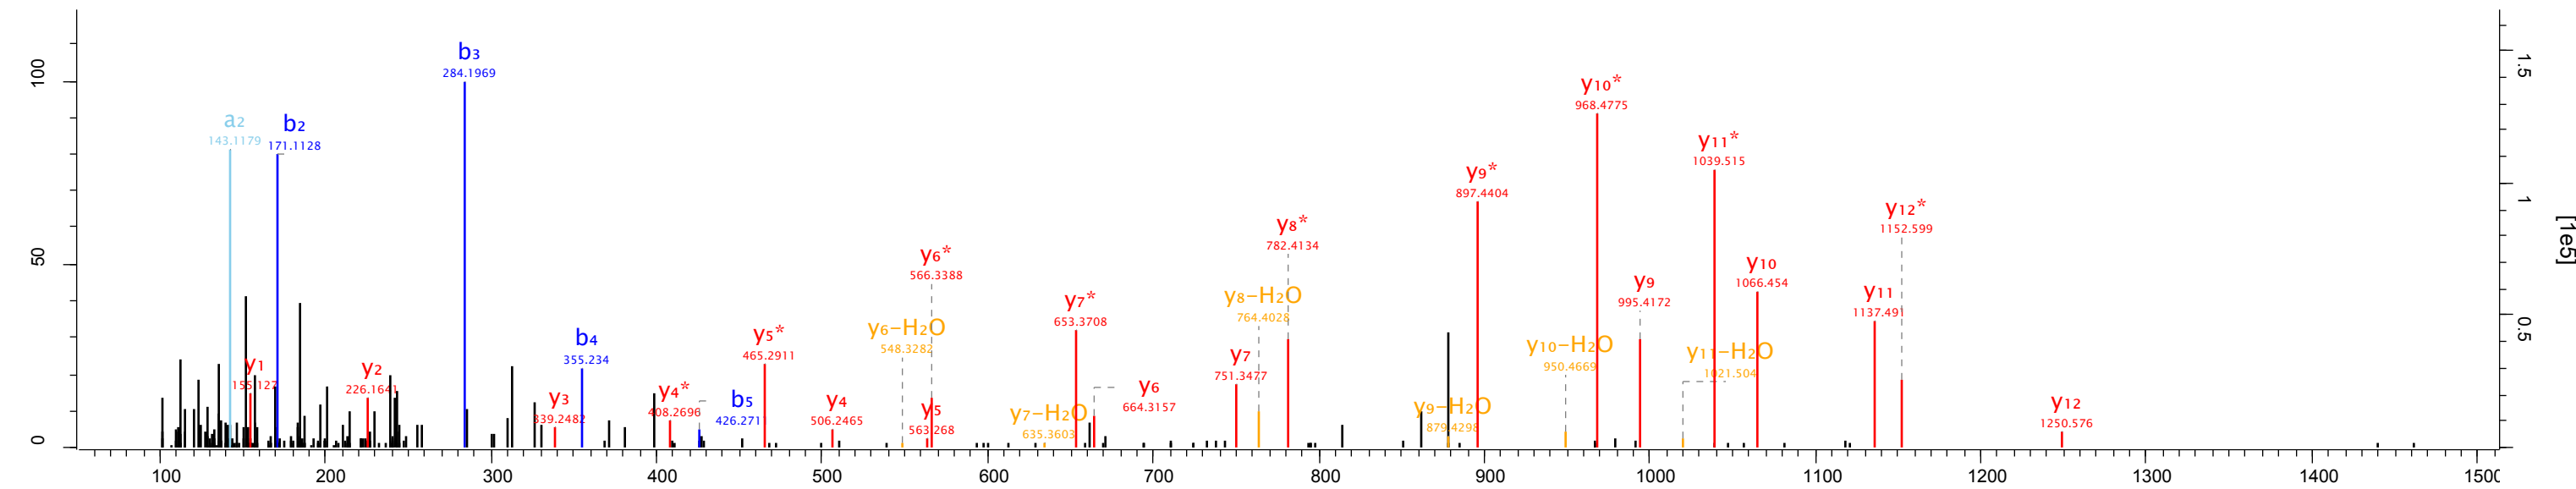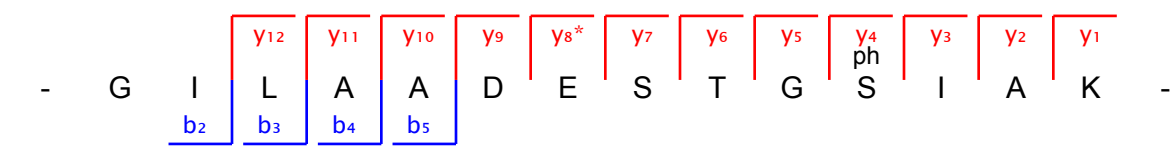

Raw file 20171215\_MaS\_33SR\_LMH\_phospho\_09 Scan 2168 Method FTMS; HCD Score 84.75 m/z 610.27 Gene names ENAH

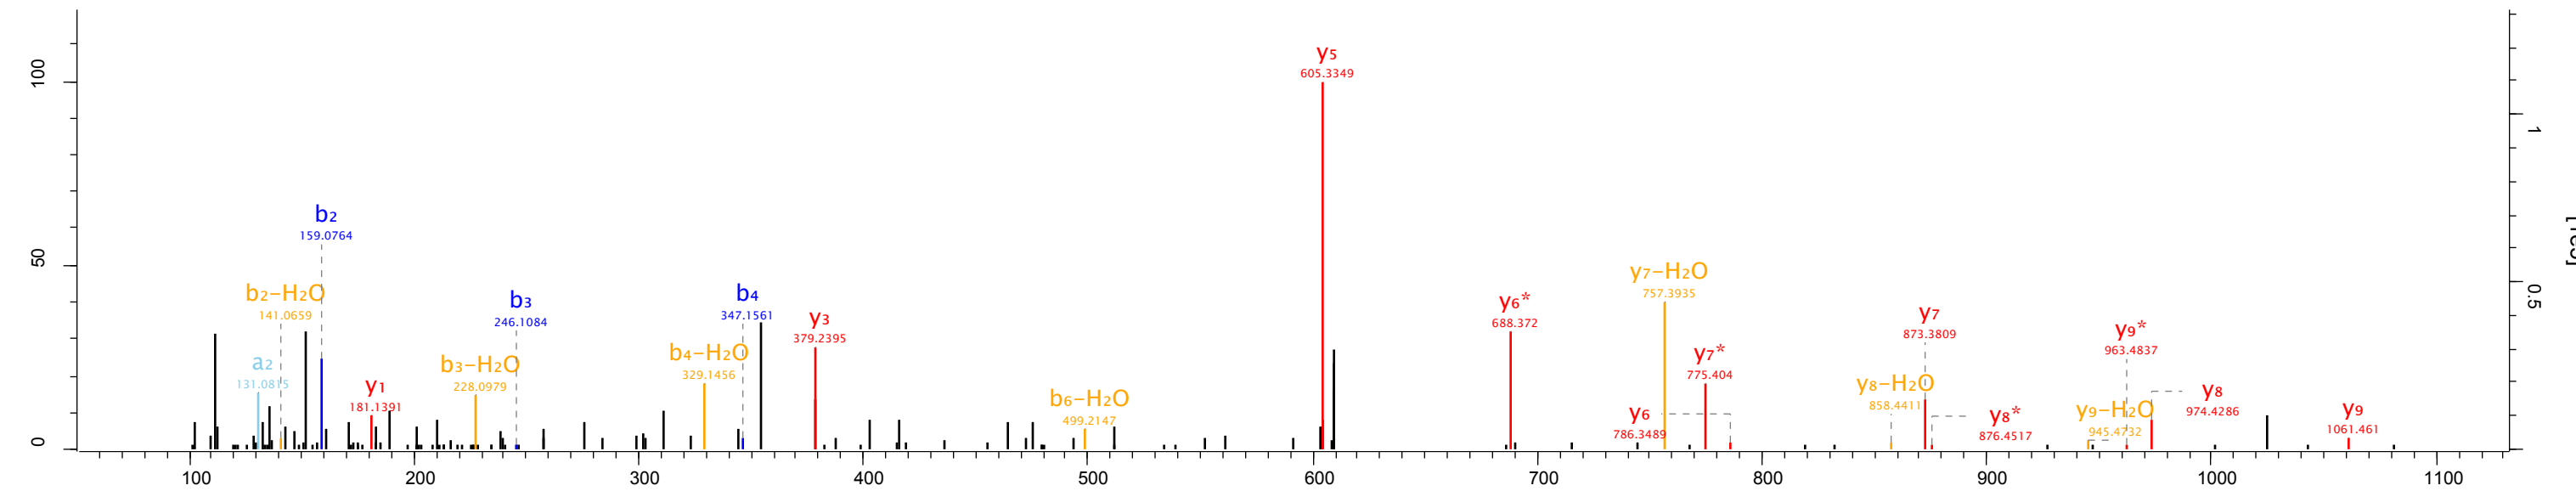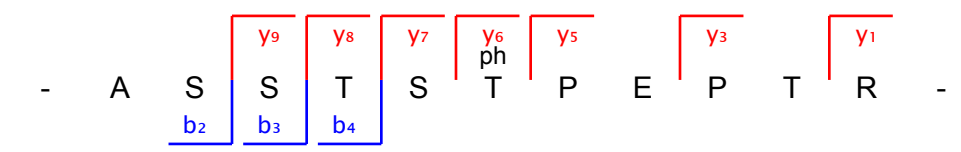

Raw file 20171215\_MaS\_33SR\_LMH\_phospho\_09 Scan 2528 Method FTMS; HCD Score 224.36 m/z 704.31 Gene names MARCKSL1

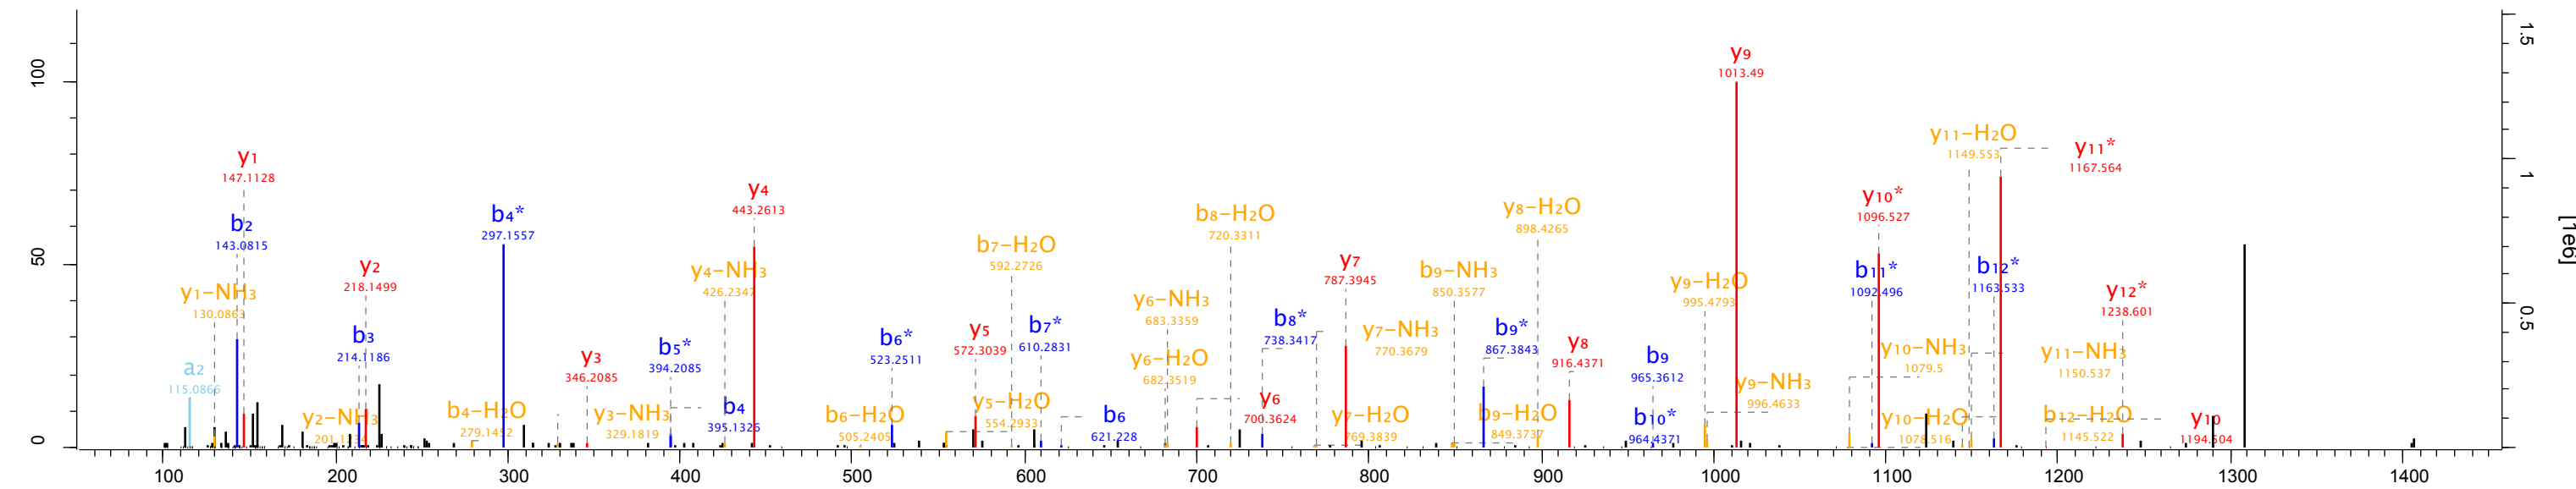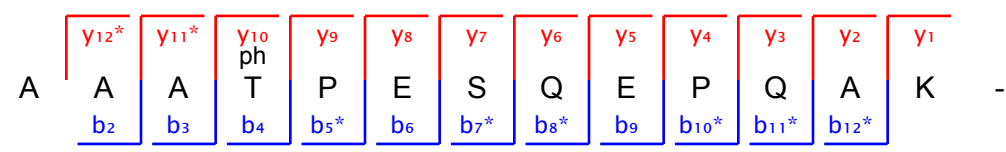

Raw file 20171215\_MaS\_33SR\_LMH\_phospho\_09 Scan 3228 Method FTMS; HCD Score 133.81 m/z 470.73 Gene names PHLDB1

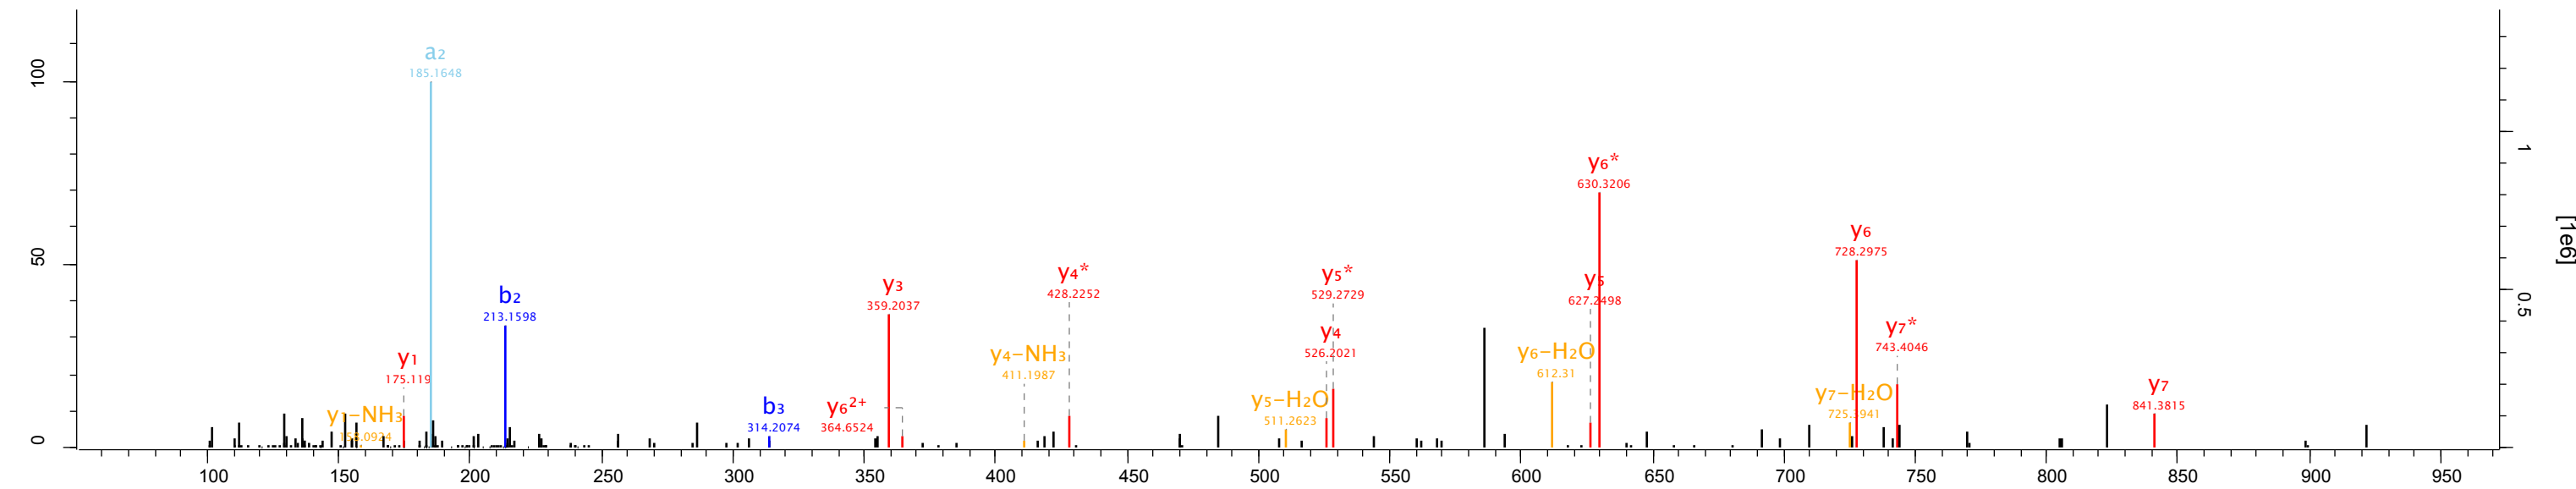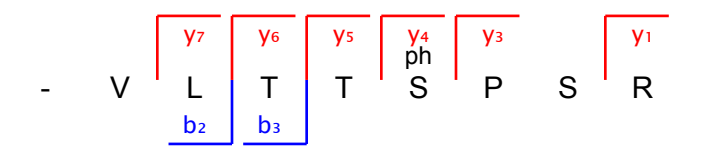

Raw file 20171215\_MaS\_33SR\_LMH\_phospho\_09 Scan 4208 Method FTMS; HCD Score 112.13 m/z 437.73 Gene names PPP1R10

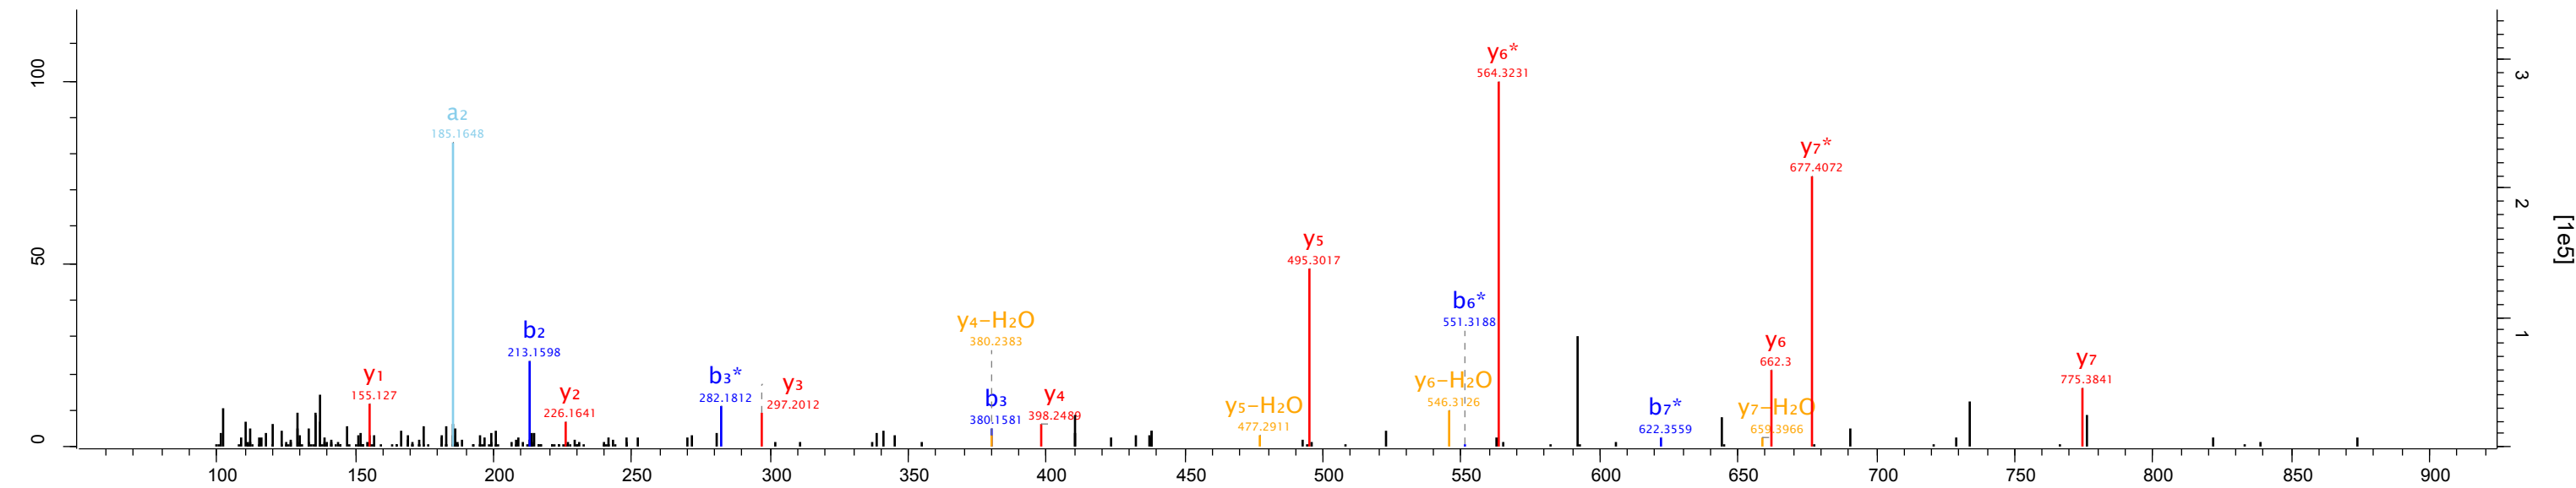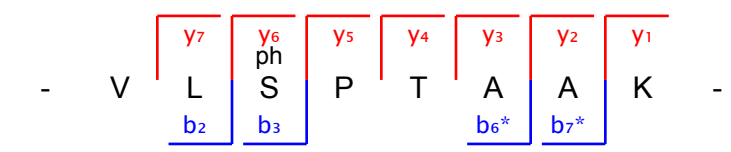

Raw file 20171215\_MaS\_33SR\_LMH\_phospho\_09 Scan 5308 Method FTMS; HCD Score 162.26 m/z 655.3 Gene names AKAP10

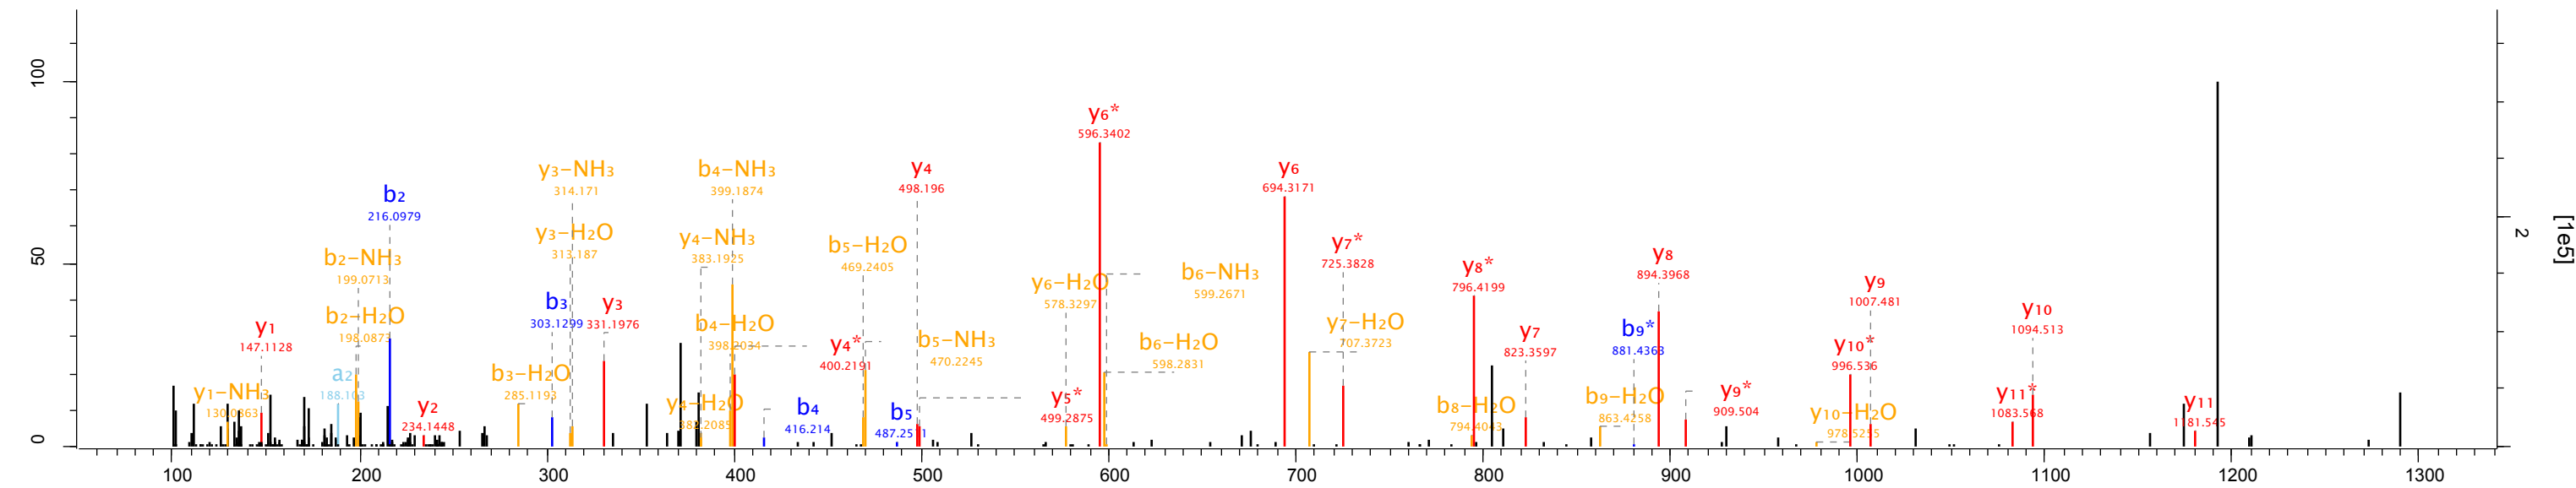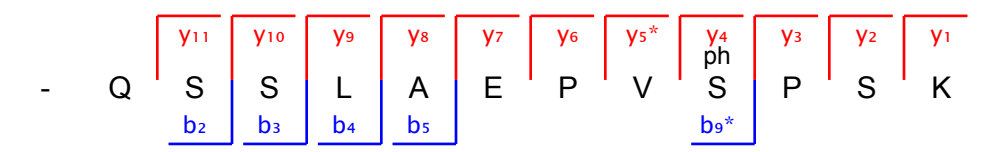

Raw file 20171215\_MaS\_33SR\_LMH\_phospho\_09 Scan 6498 Method FTMS; HCD Score 62.69 m/z 679.31 Gene names PHLDB2

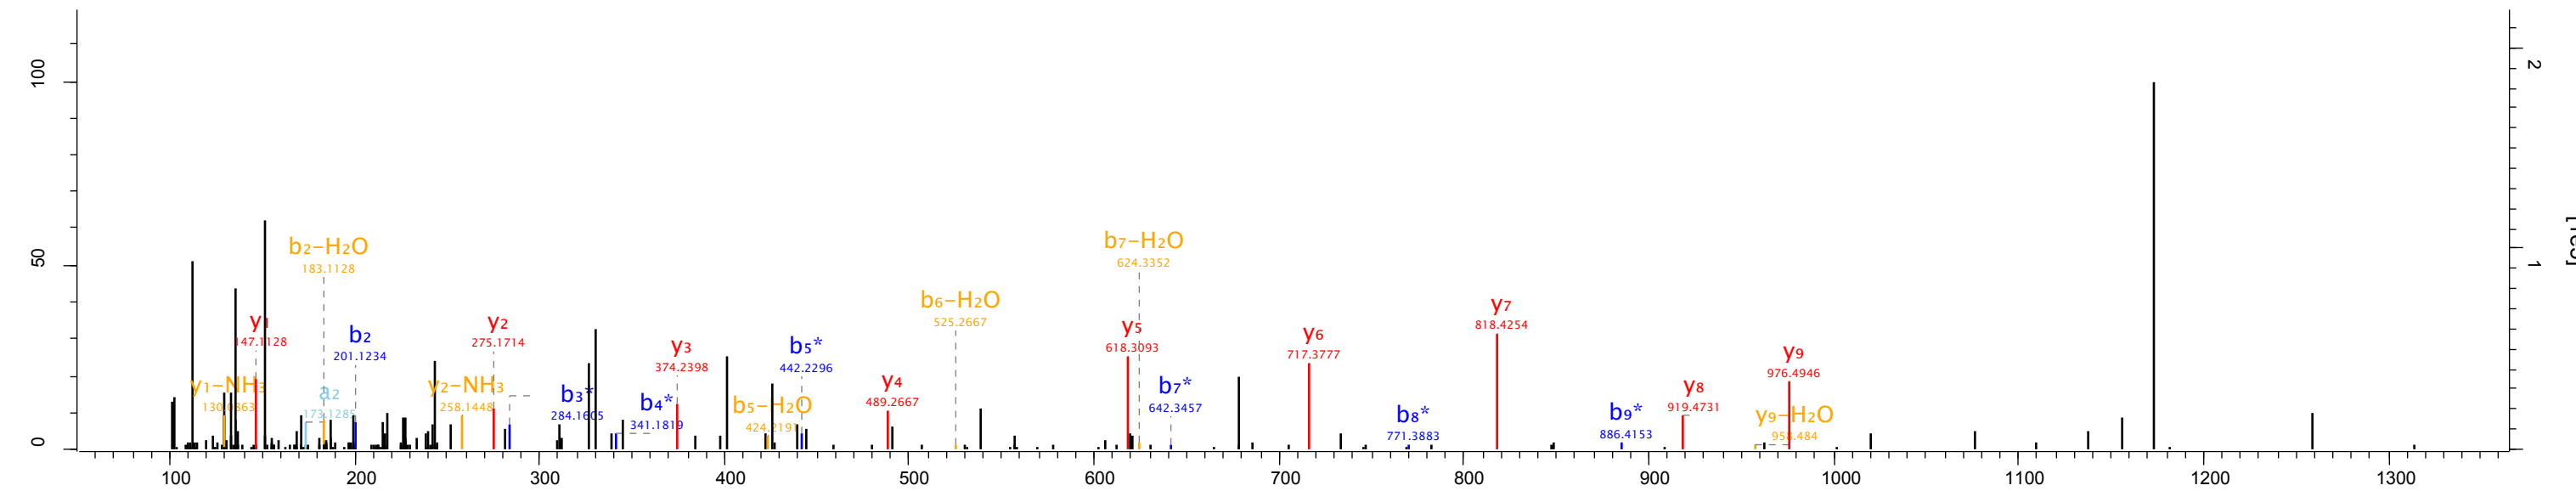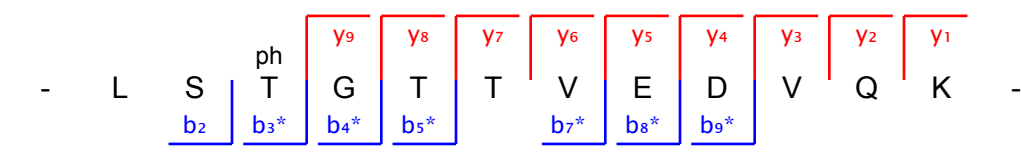

Raw file 20171215\_MaS\_33SR\_LMH\_phospho\_09 Scan 6698 Method FTMS; HCD Score 44.54 m/z 481.24 Gene names PRDM2

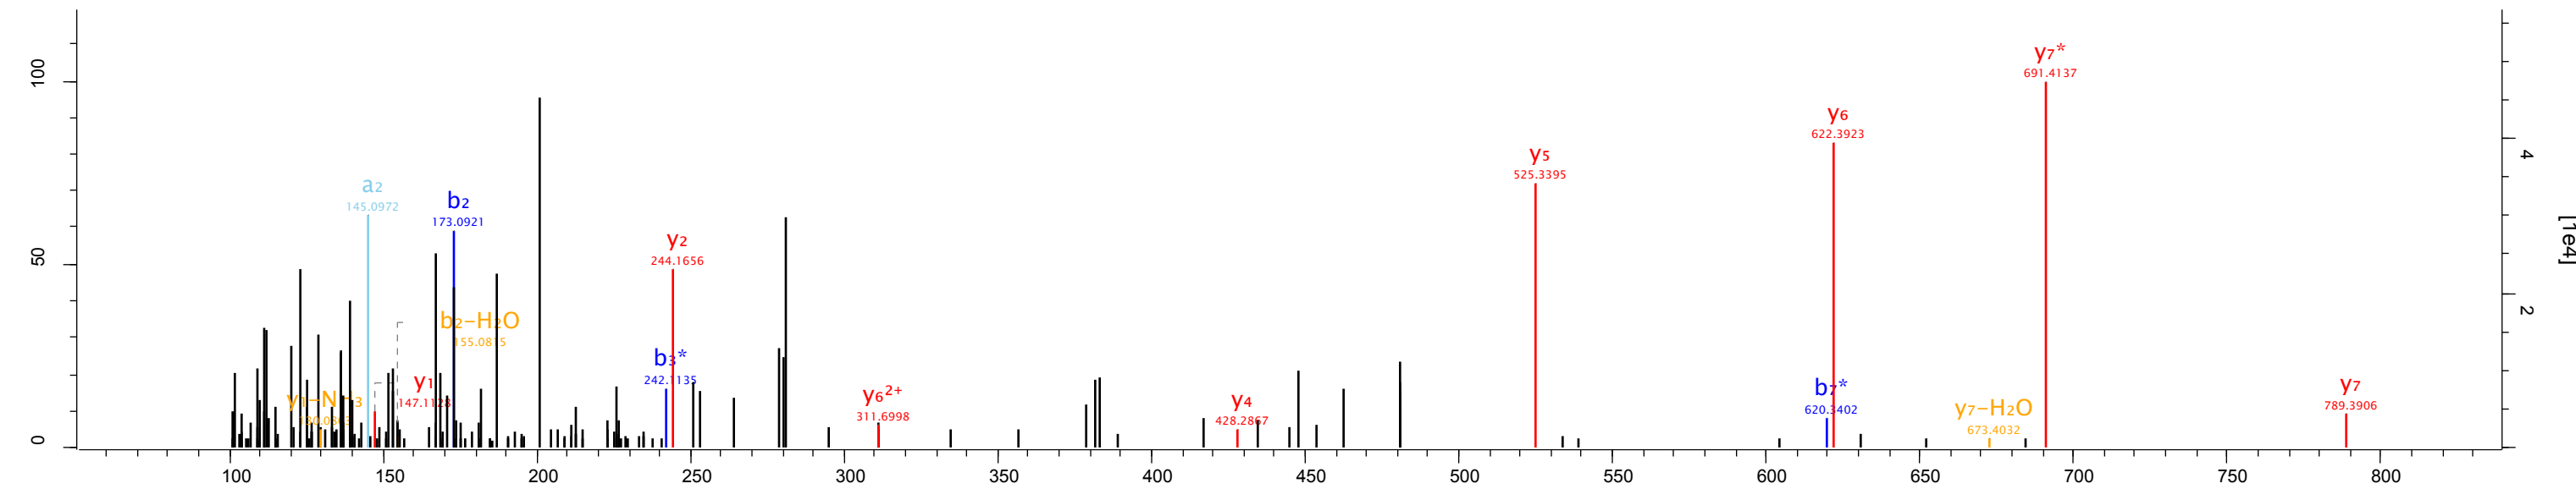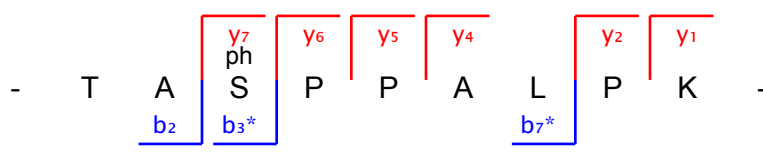



Raw file 20171215\_MaS\_33SR\_LMH\_phospho2\_01 Scan 11618 Method FTMS; HCD Score 83.78 m/z 416.2 Gene names PDYN

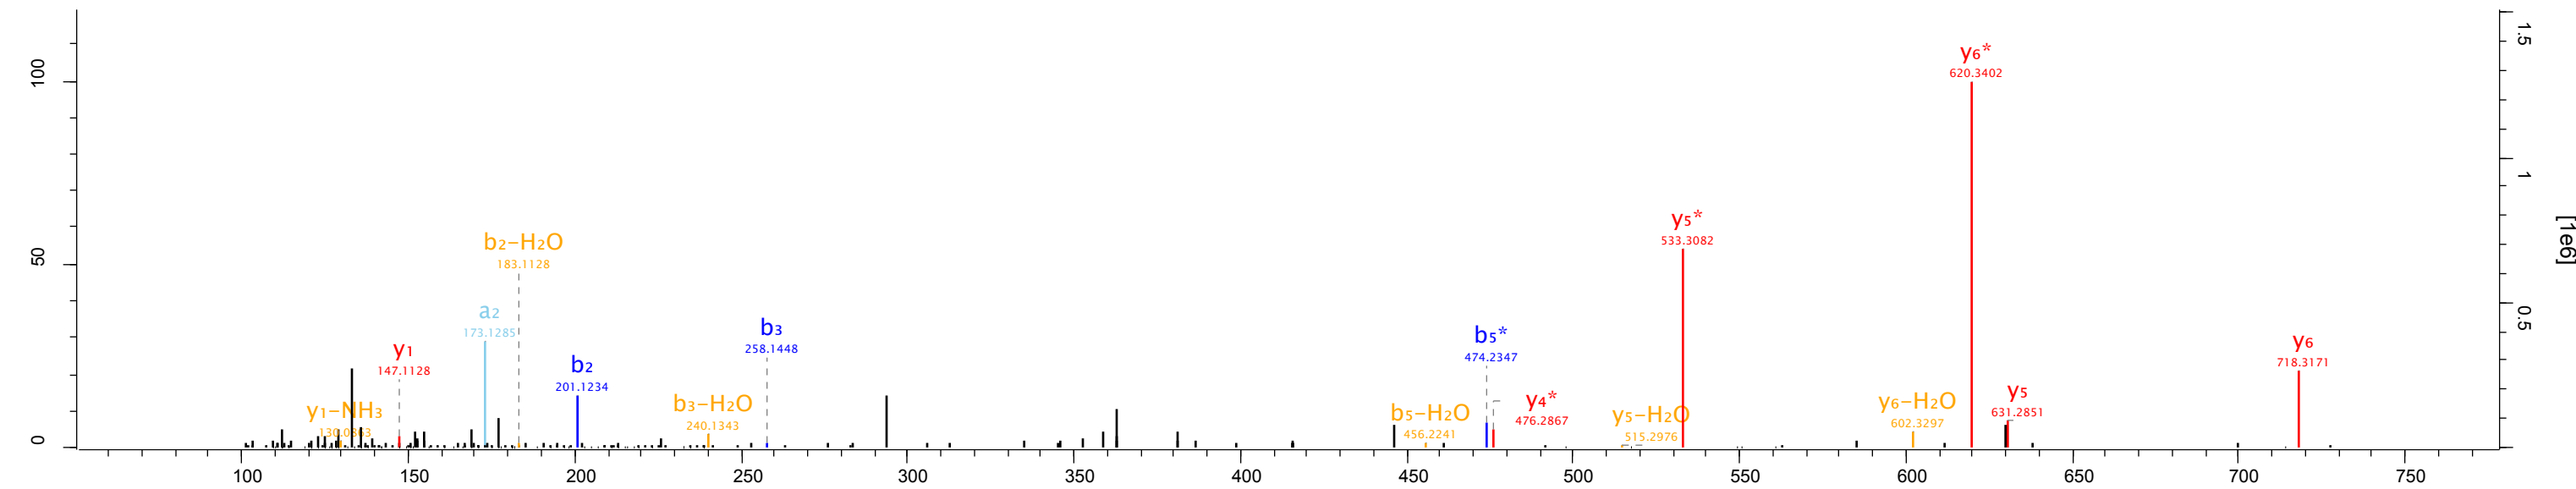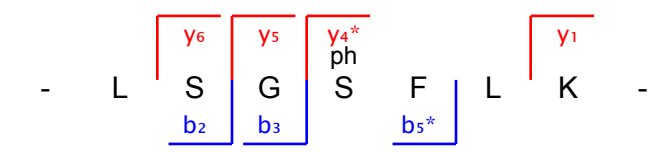

Raw file  
20171215\_MaS\_33SR\_LMH\_phospho2\_01

Scan 2238 Method FTMS; HCD Score 287.57 m/z 847.32 Gene names SLK

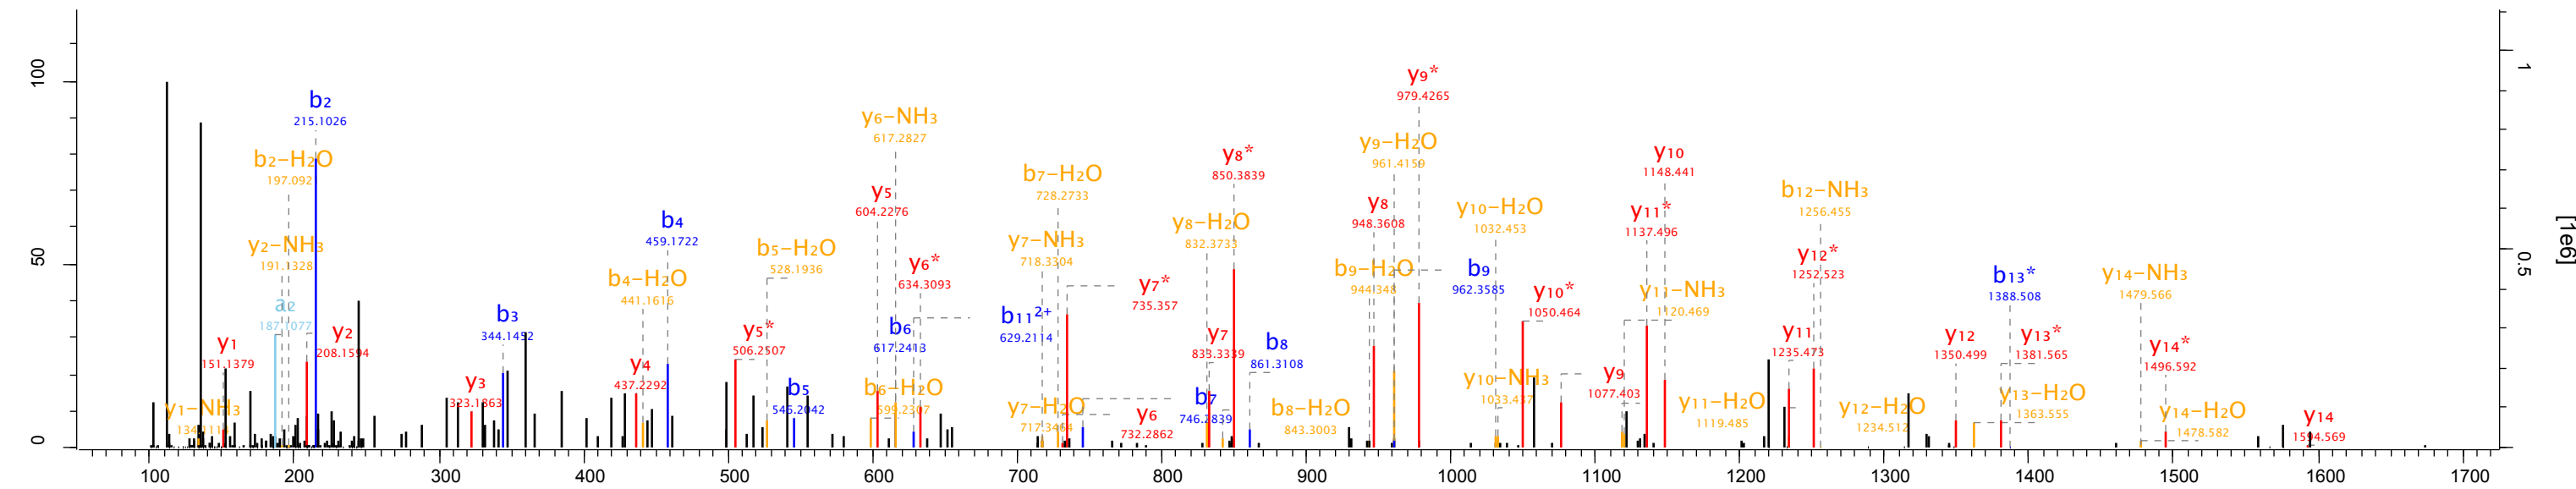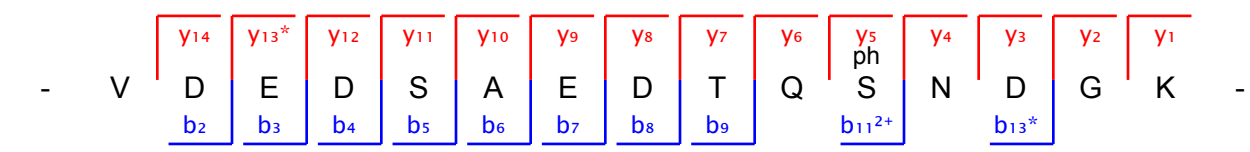

Raw file 20171215\_MaS\_33SR\_LMH\_phospho2\_01 Scan 2638 Method FTMS; HCD Score 135.08 m/z 698.26 Gene names SSH3

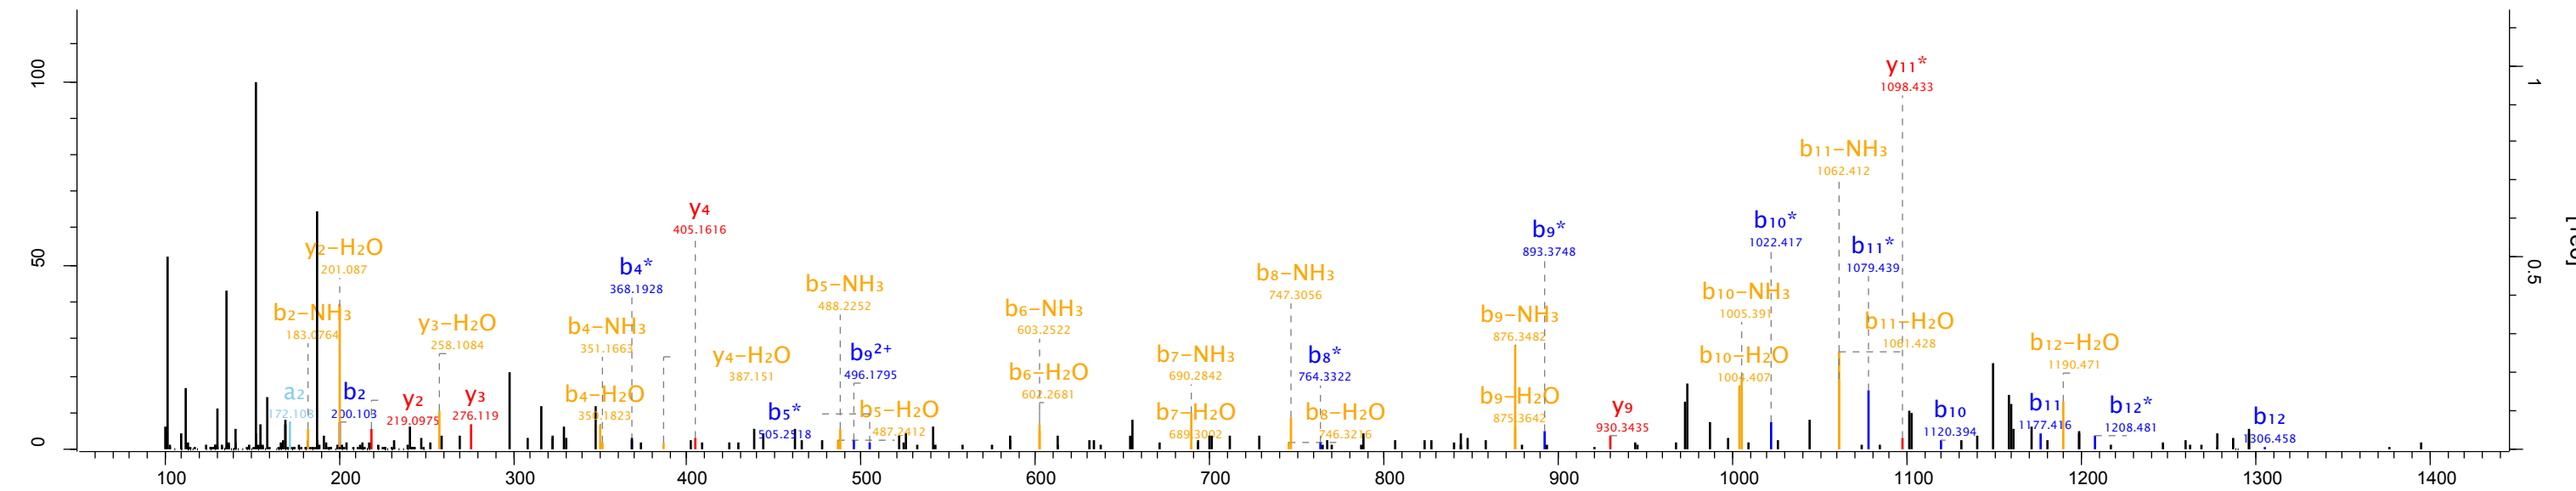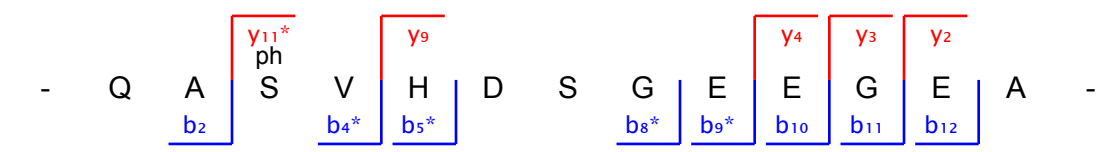

Raw file  
20171215\_MaS\_33SR\_LMH\_phospho2\_01

Scan 3468 Method FTMS; HCD Score 234.11 m/z 825.32 Gene names FANCD2

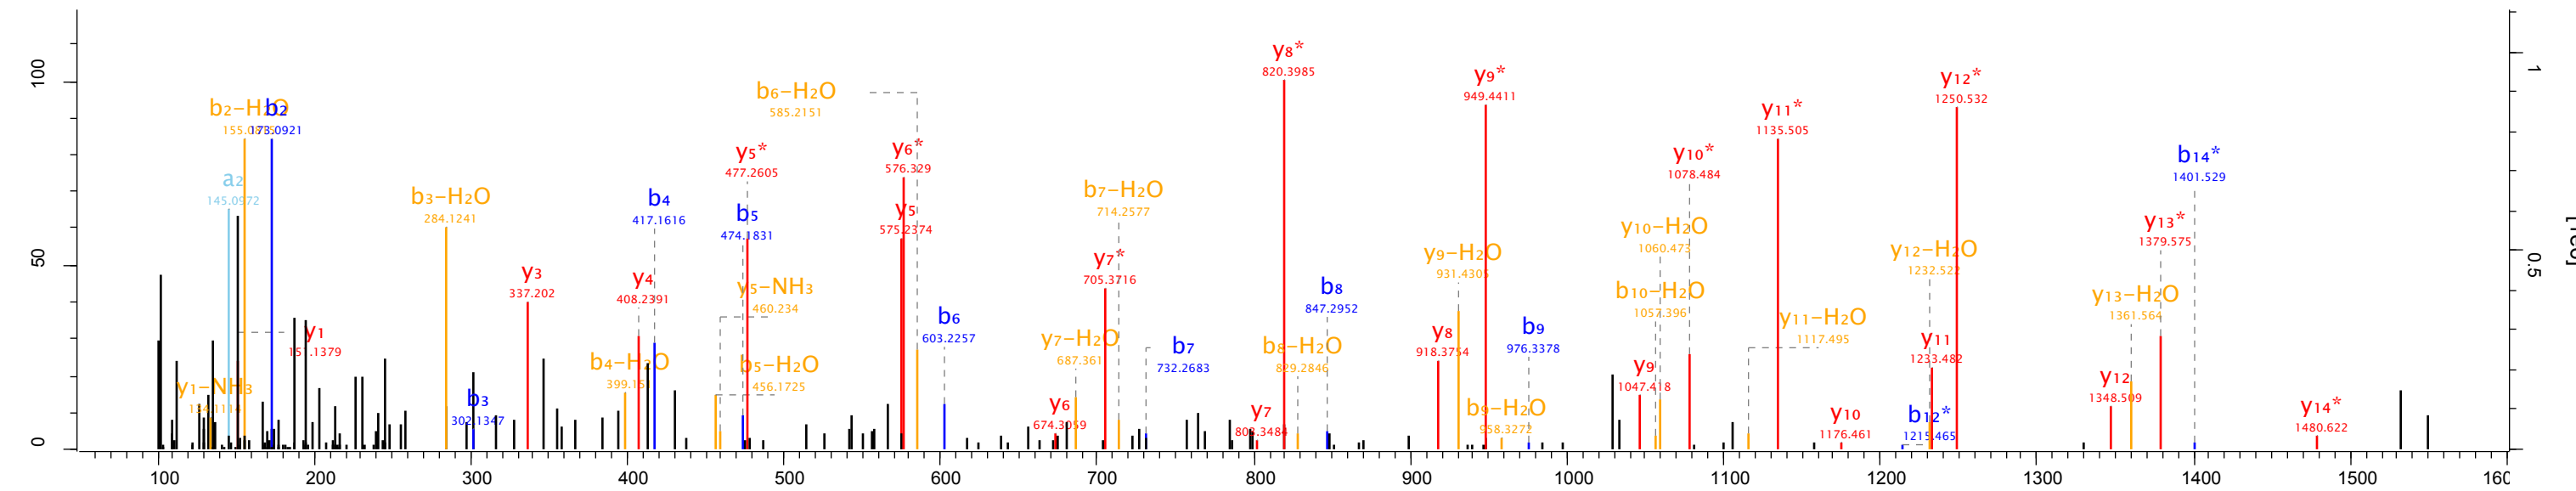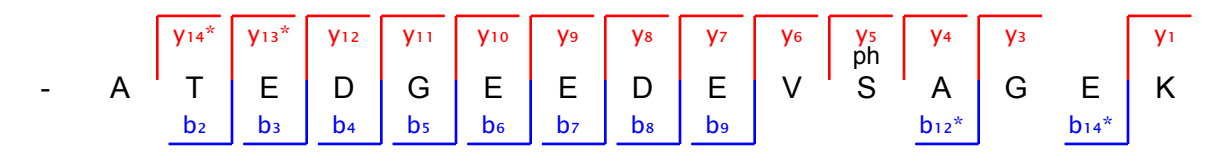

20171215\_MaS\_33SR\_LMH\_phospho2\_01 3828 FTMS; HCD 177.01 734.33 PUM2

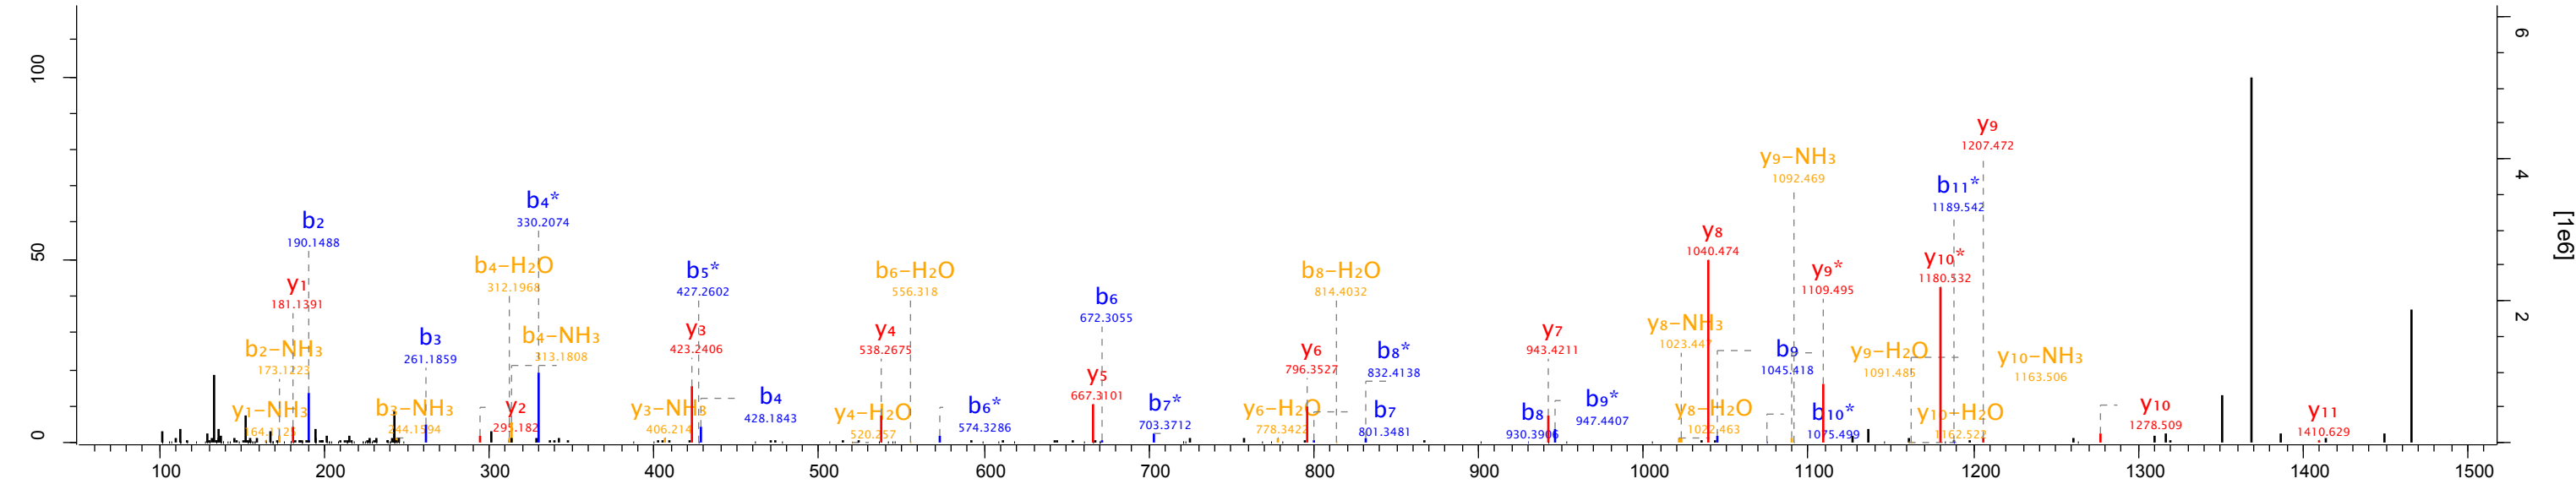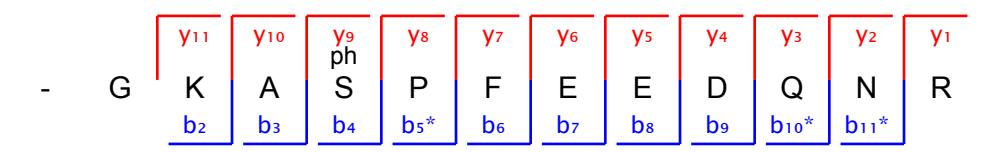

Raw file 20171215\_MaS\_33SR\_LMH\_phospho2\_01 Scan 3908 Method FTMS; HCD Score 45.43 m/z 571.77 Gene names CCDC43;BAIAP2

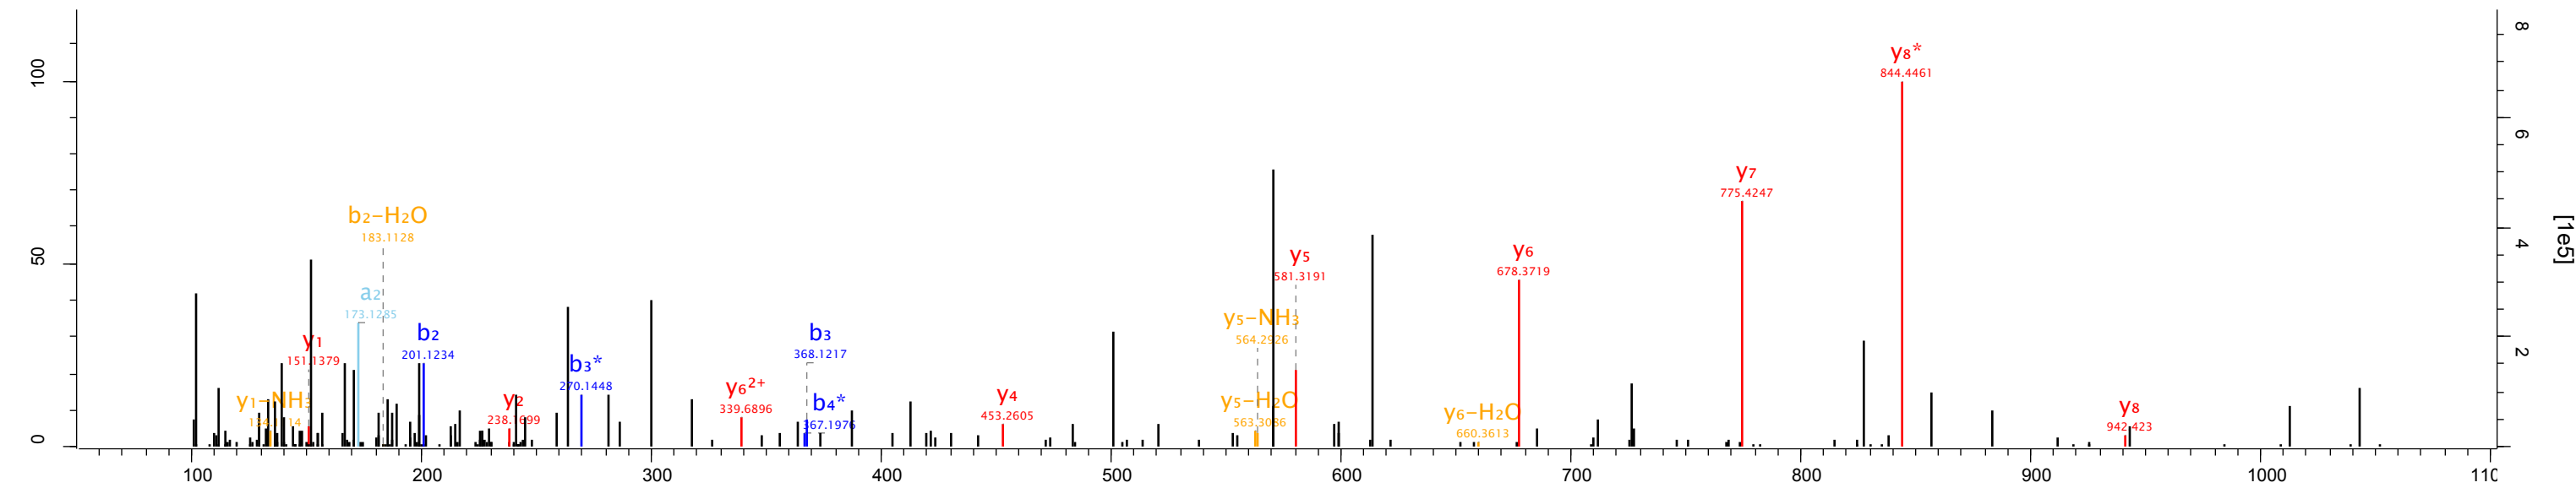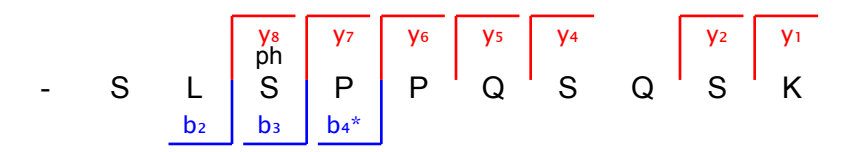

Raw file 20171215\_MaS\_33SR\_LMH\_phospho2\_01 Scan 4318 Method FTMS; HCD Score 387.32 m/z 1042.92 Gene names ENSA

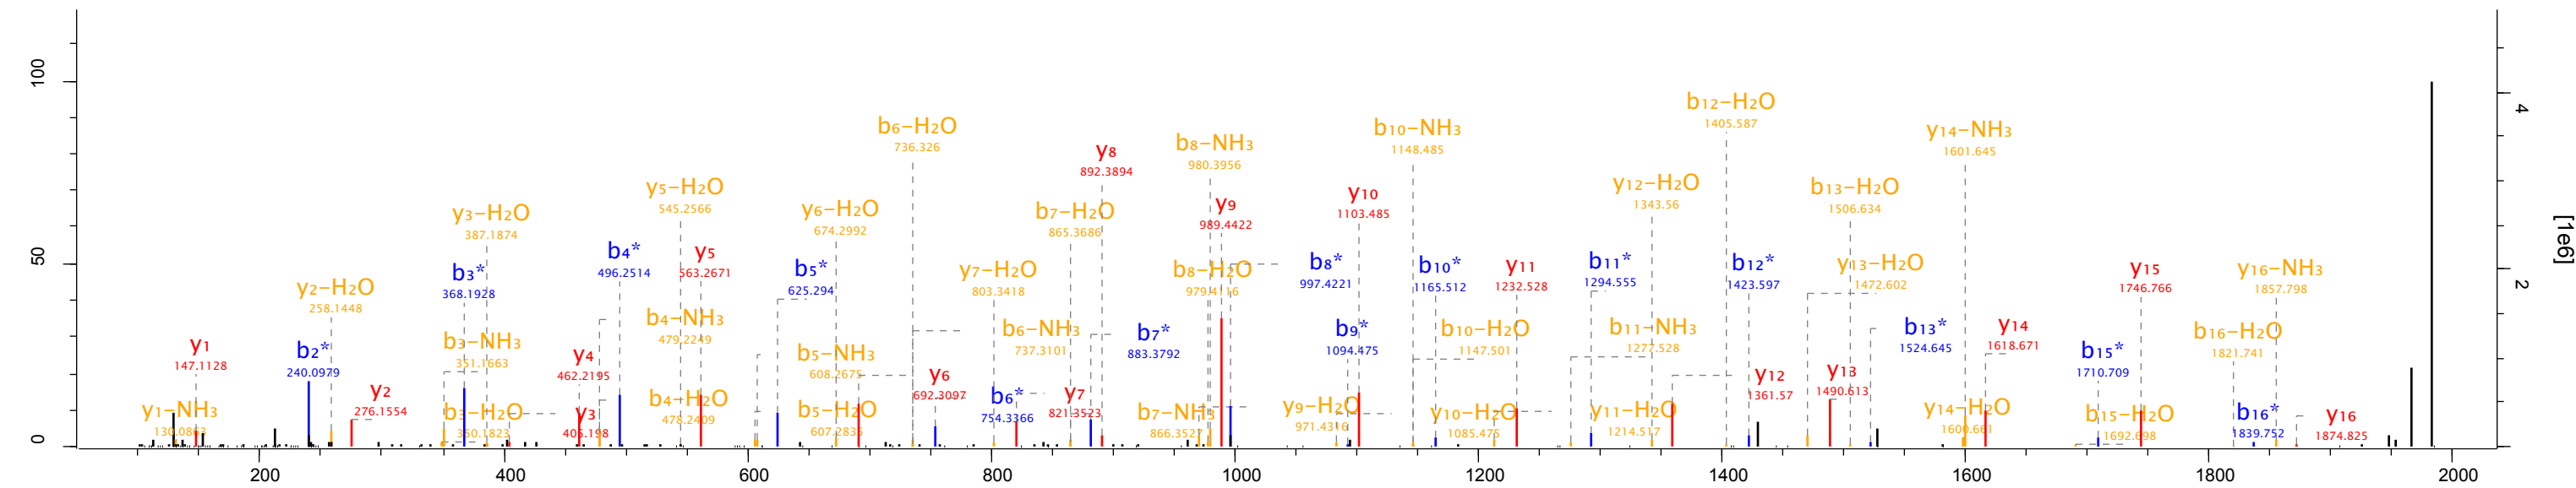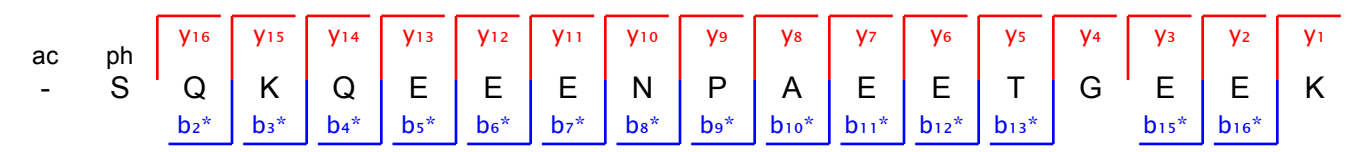

Raw file 20171215\_MaS\_33SR\_LMH\_phospho2\_01 Scan 4428 Method FTMS; HCD Score 142.08 m/z 532.24 Gene names NUCKS1

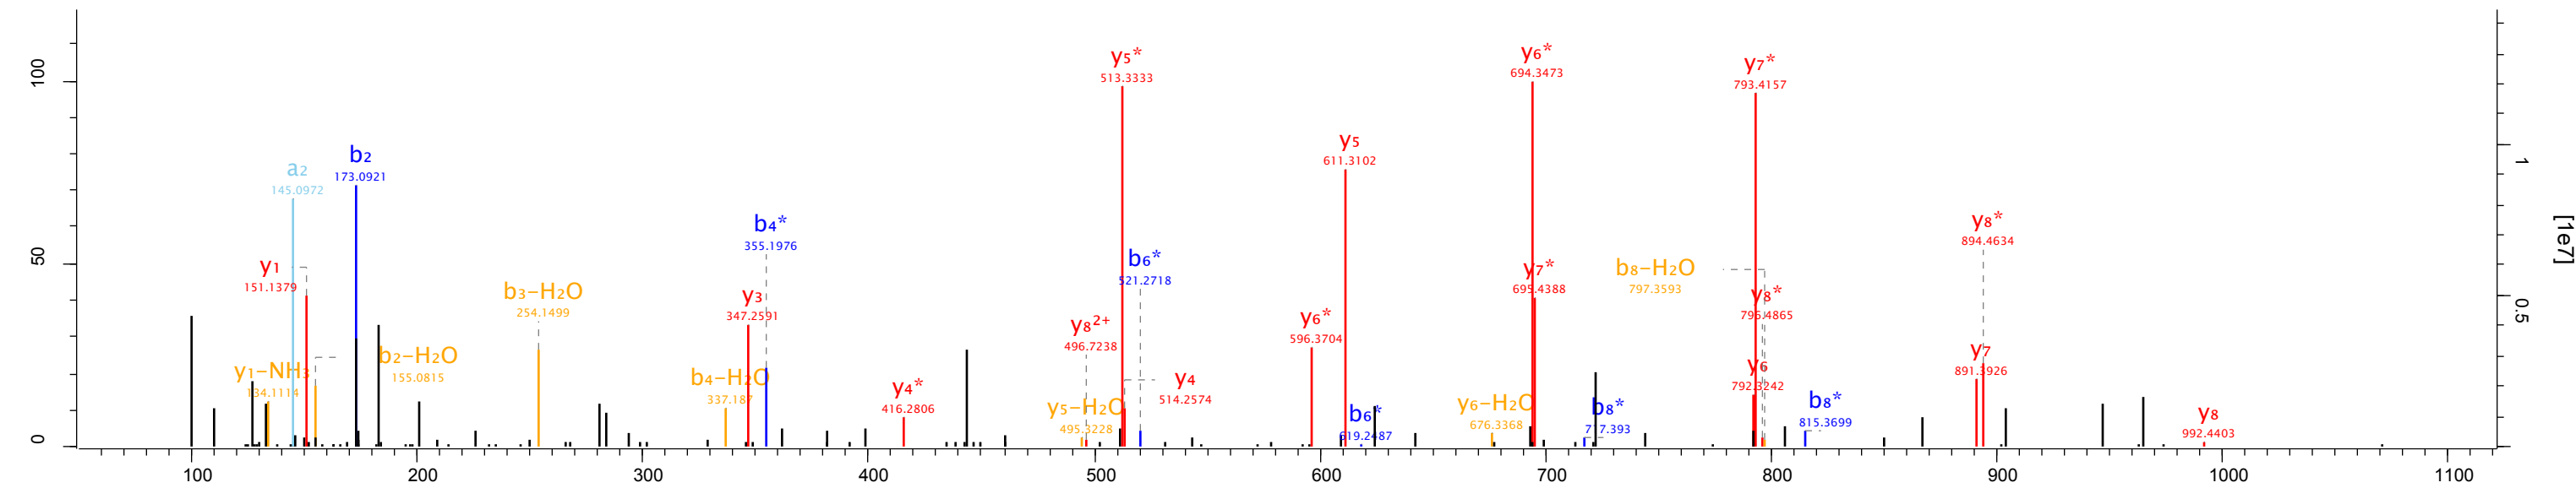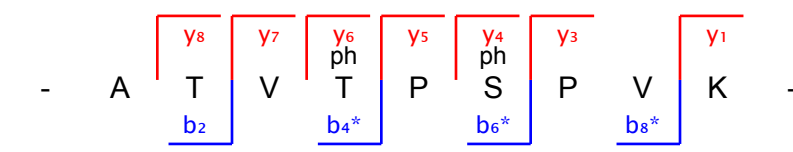



Raw file 20171215\_MaS\_33SR\_LMH\_phospho2\_01 Scan 4658 Method FTMS; HCD Score 124.2 m/z 670.64 Gene names PCM1

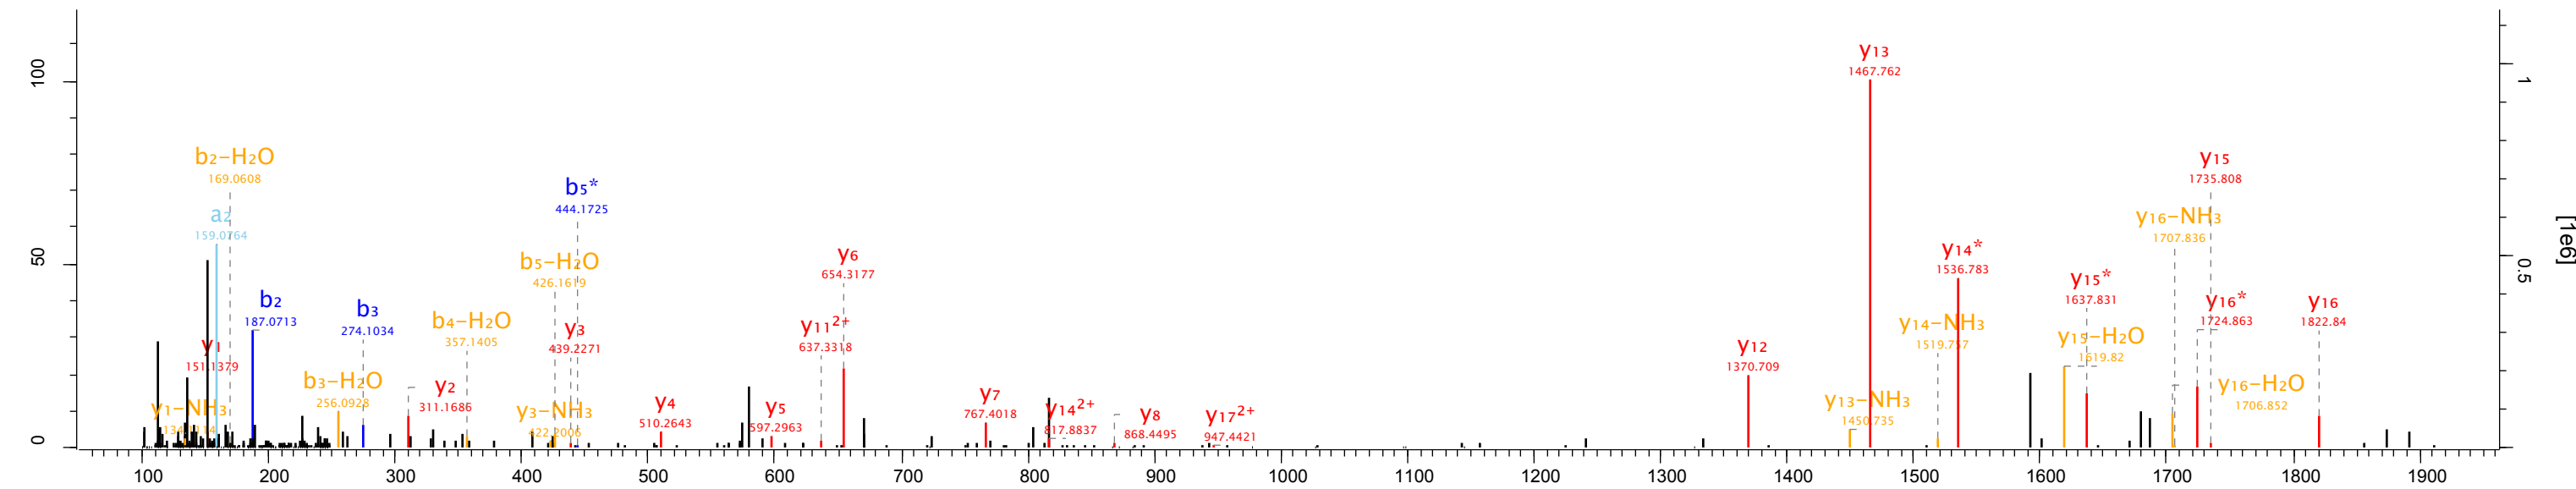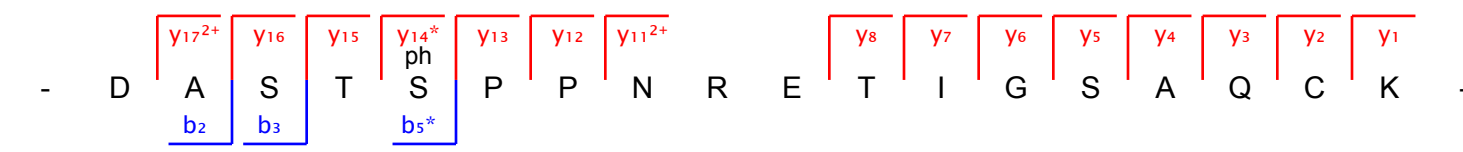

Raw file  
20171215\_MaS\_33SR\_LMH\_phospho2\_01

Scan 4668 Method FTMS; HCD Score 76.69 m/z 674.29 Gene names EPN2

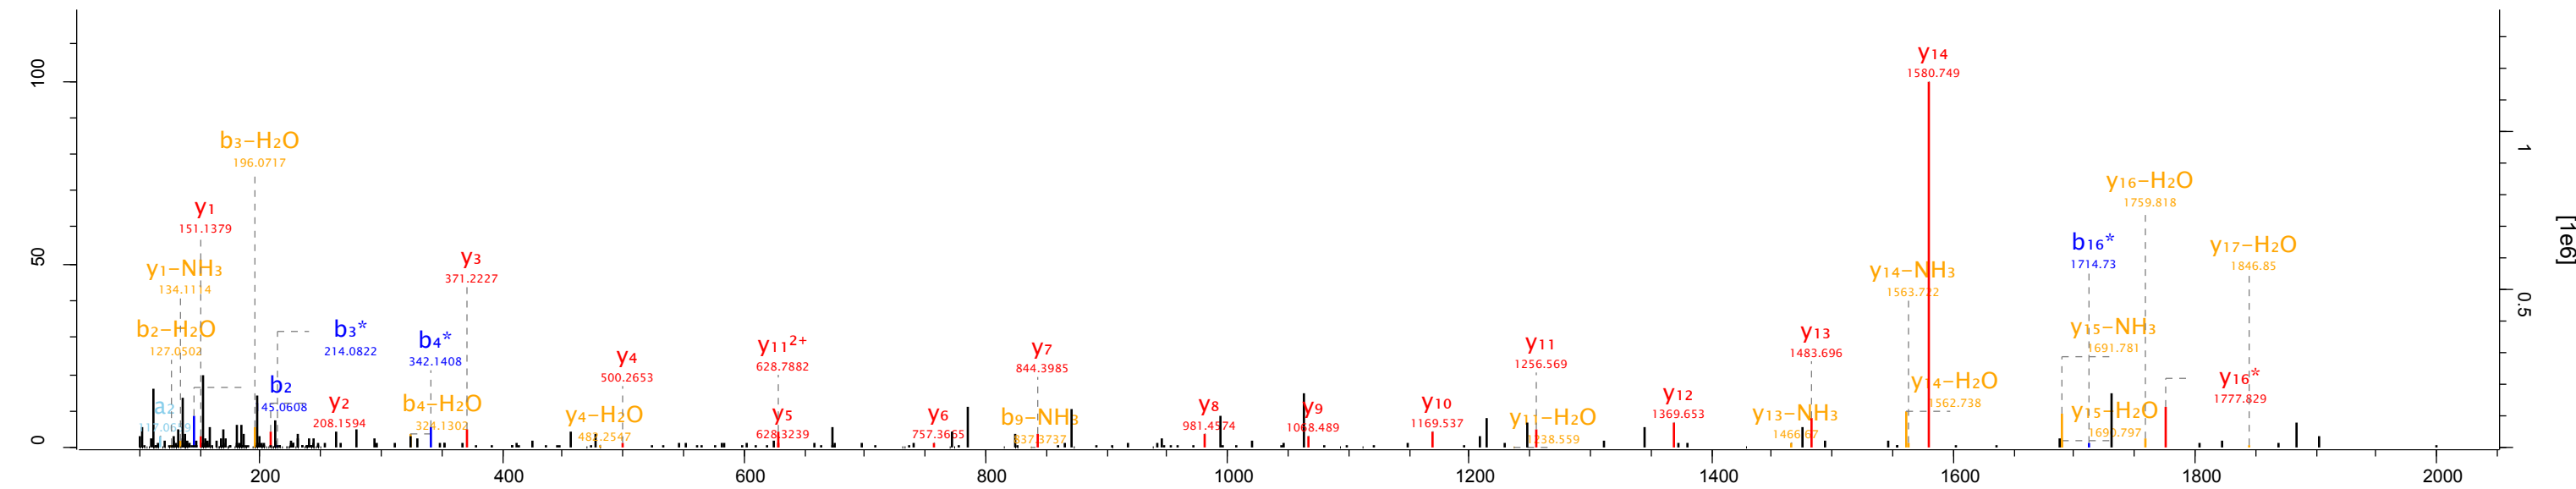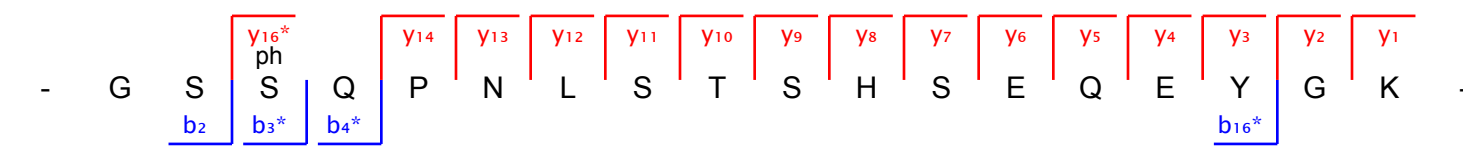

Raw file 20171215\_MaS\_33SR\_LMH\_phospho2\_01 Scan 5058 Method FTMS; HCD Score 82.07 m/z 562.79 Gene names BCL6

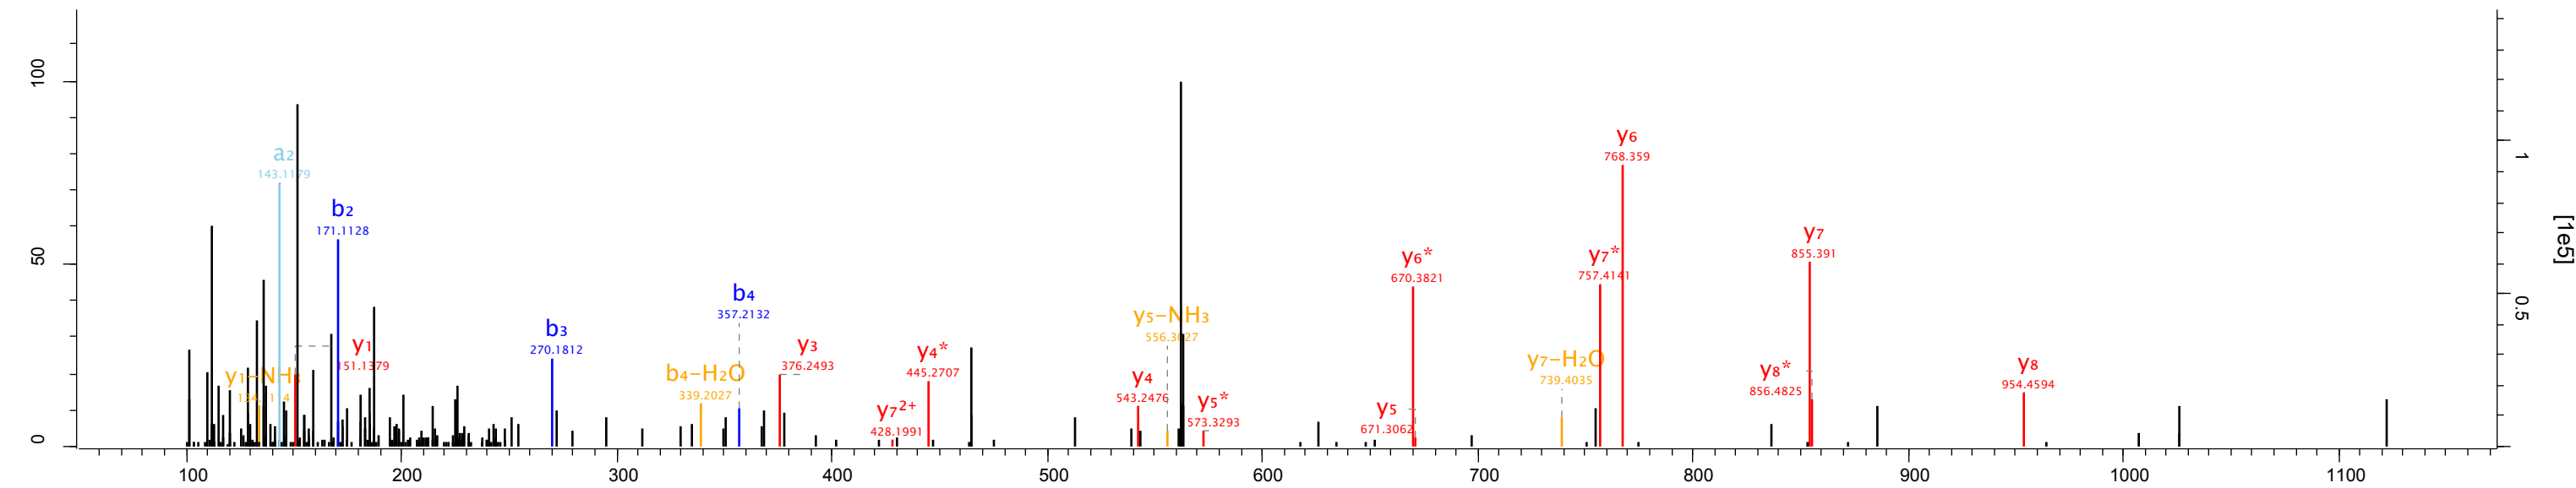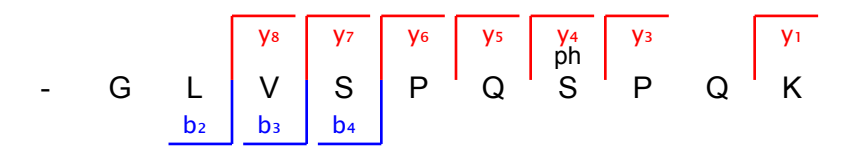

Raw file 20171215\_MaS\_33SR\_LMH\_phospho2\_01 Scan 5068 Method FTMS; HCD Score 151.58 m/z 767.36 Gene names TP53BP1

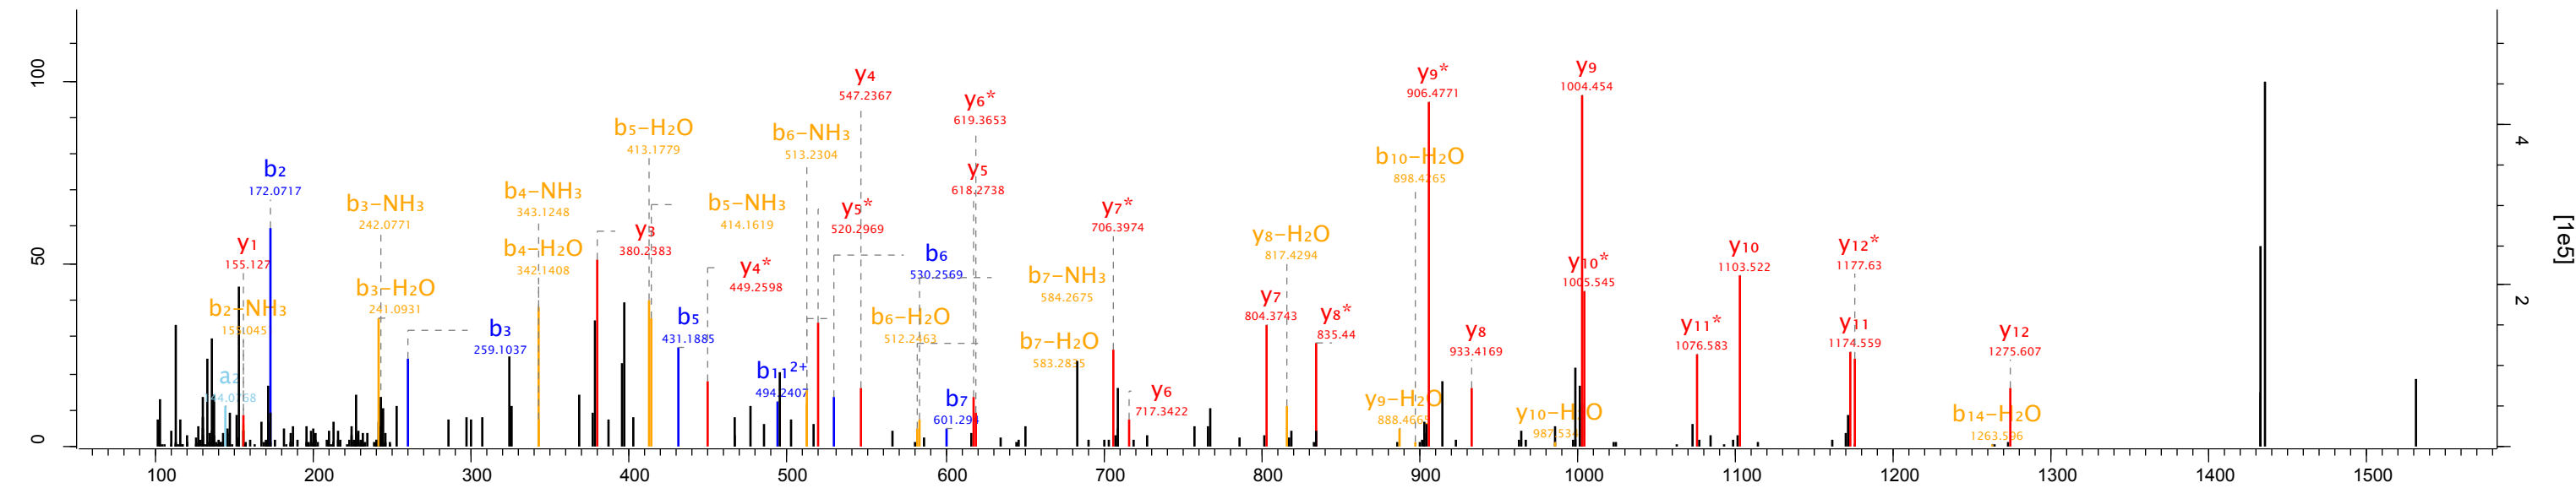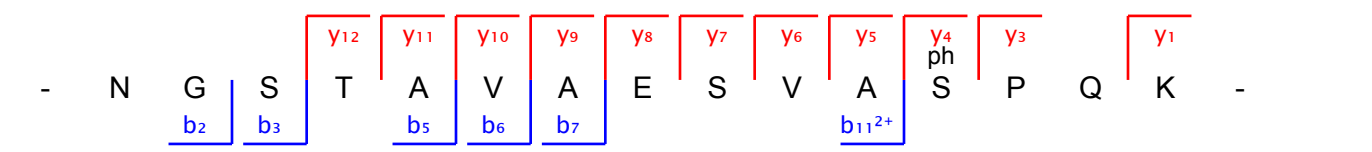

Raw file 20171215\_MaS\_33SR\_LMH\_phospho2\_01 Scan 5638 Method FTMS; HCD Score 371.4 m/z 979.9 Gene names SLC9A3R1

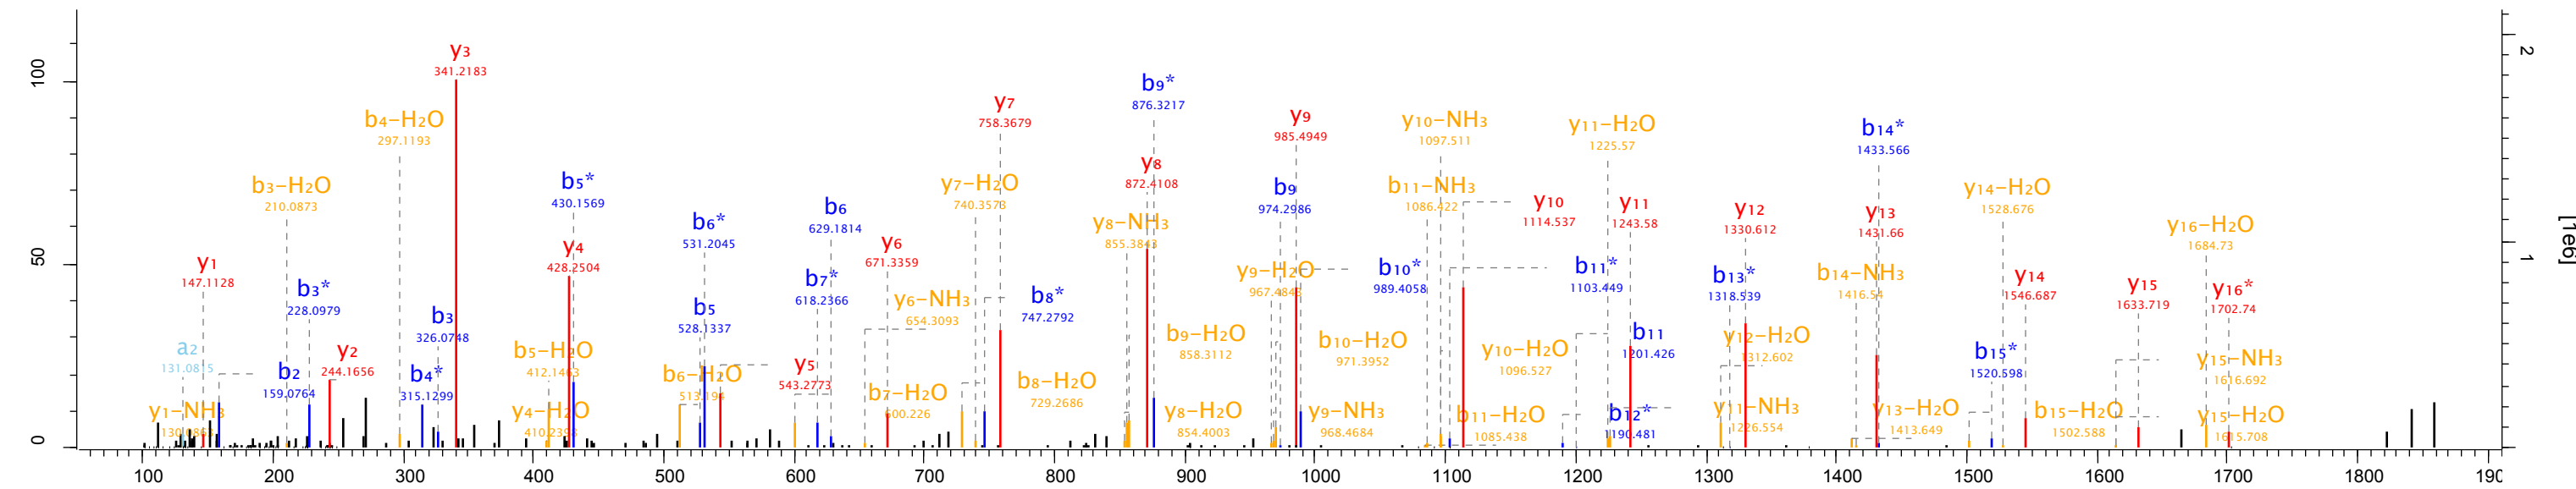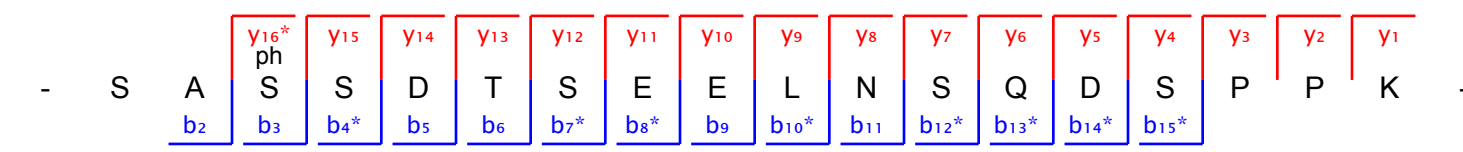

Raw file 20171215\_MaS\_33SR\_LMH\_phospho2\_01 Scan 6658 Method FTMS; HCD Score 134.08 m/z 720.31 Gene names BAG3

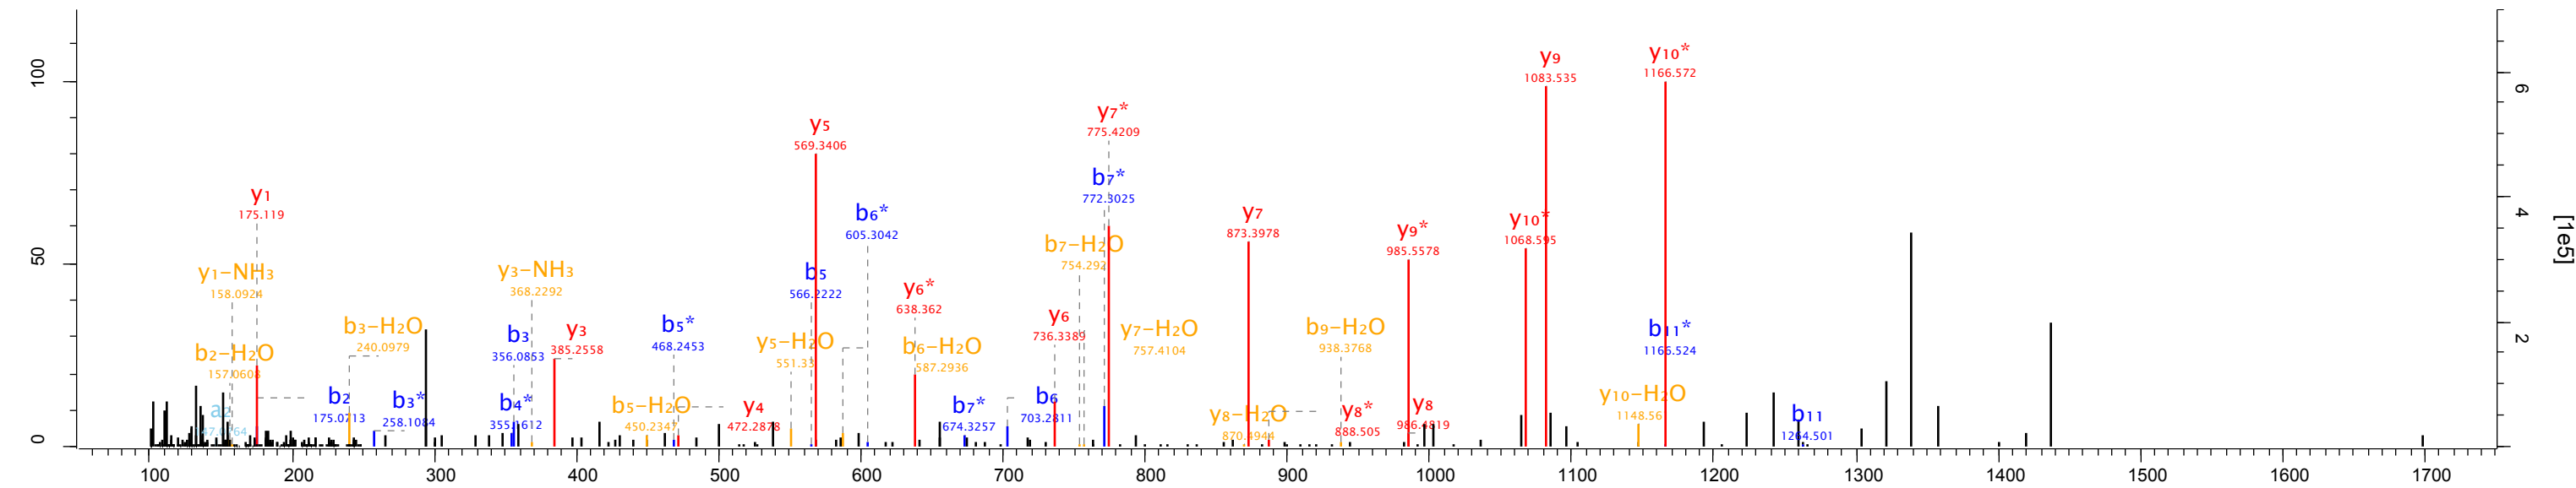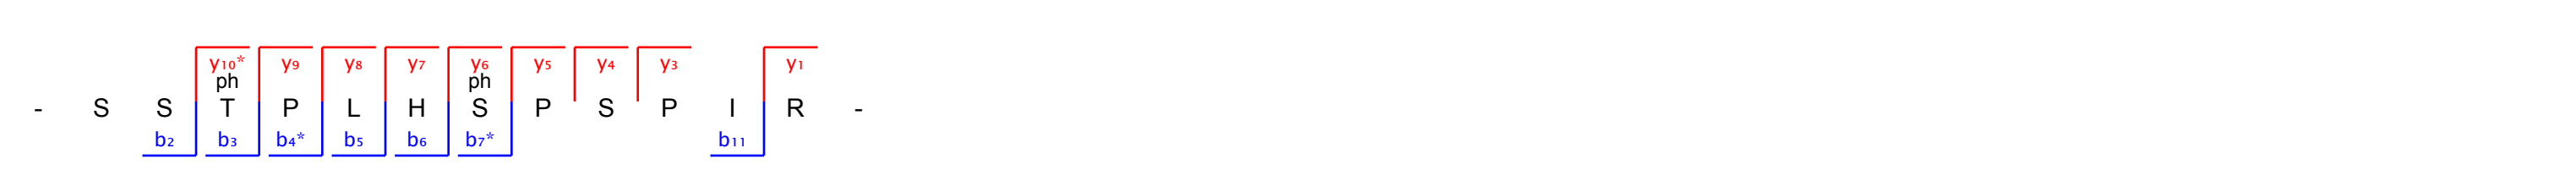

Raw file 20171215\_MaS\_33SR\_LMH\_phospho2\_01 Scan 6808 Method FTMS; HCD Score 196.45 m/z 829.37 Gene names INTS10

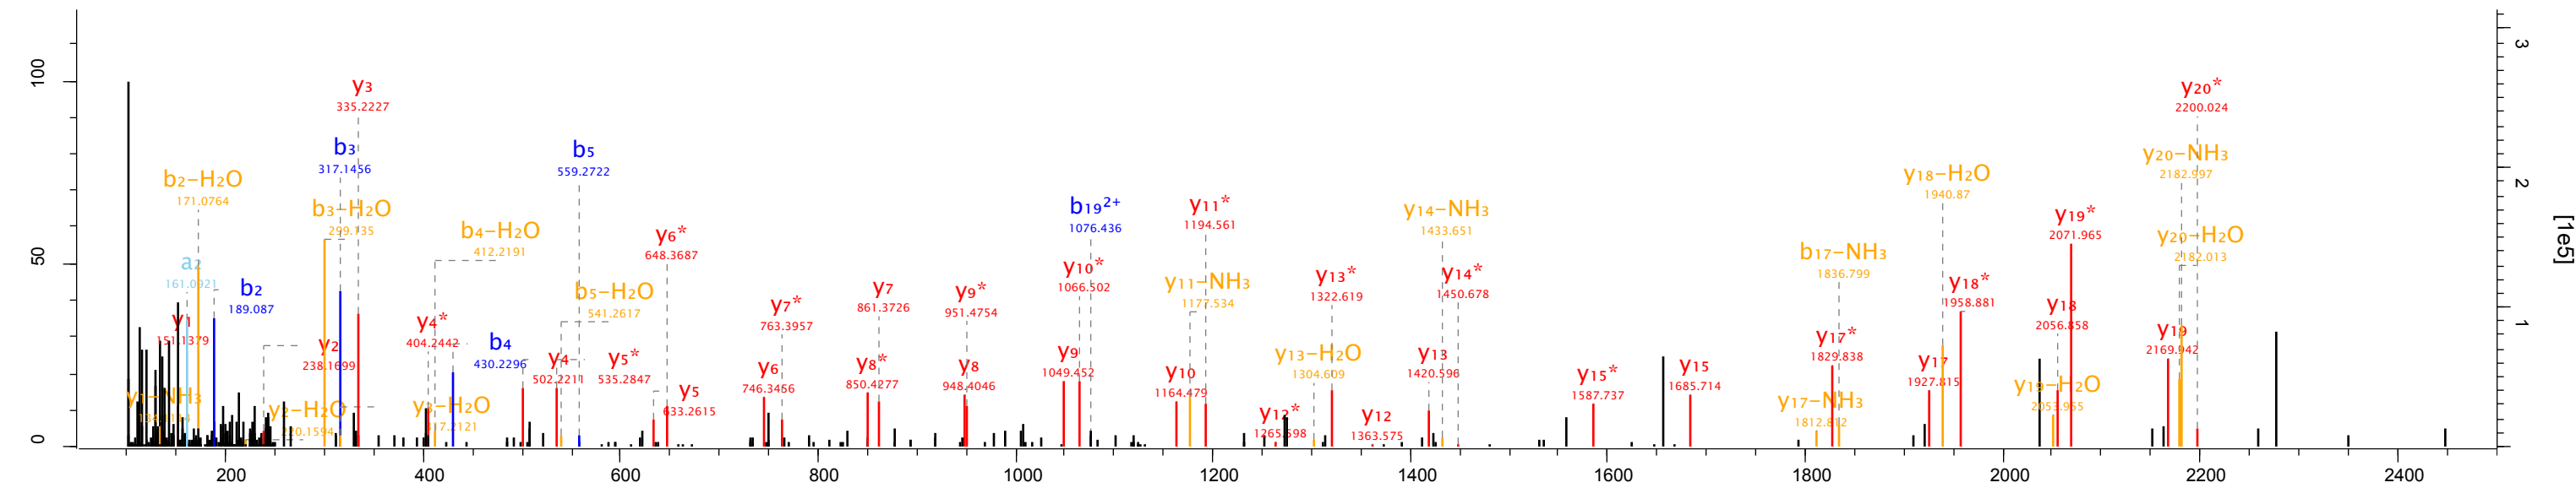

- S T Q I E N Q H Q G A Q D T S D L M S P S K -

b<sub>2</sub>
b<sub>3</sub>
b<sub>4</sub>
b<sub>5</sub>
y<sub>20</sub>\*
y<sub>19</sub>
y<sub>18</sub>
y<sub>17</sub>
y<sub>15</sub>
y<sub>14</sub>\*
y<sub>13</sub>
y<sub>12</sub>
y<sub>11</sub>\*
y<sub>10</sub>
y<sub>9</sub>
y<sub>8</sub>
y<sub>7</sub>
y<sub>6</sub>
y<sub>5</sub>
y<sub>4</sub>  
ph
y<sub>3</sub>
y<sub>2</sub>
y<sub>1</sub>
b<sub>19</sub><sup>2+</sup>

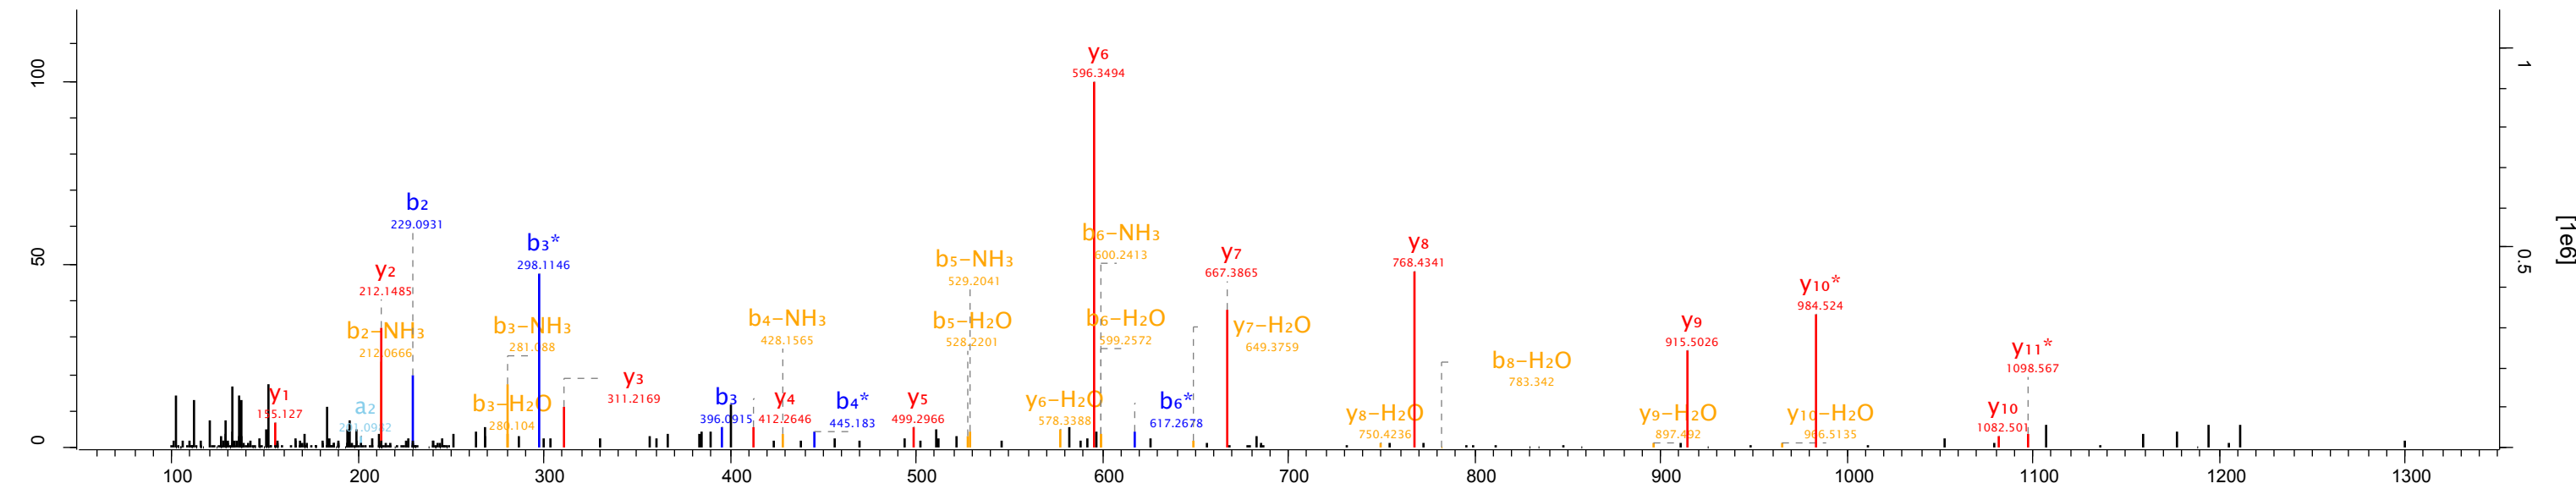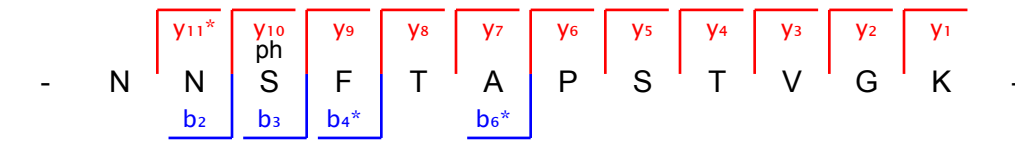



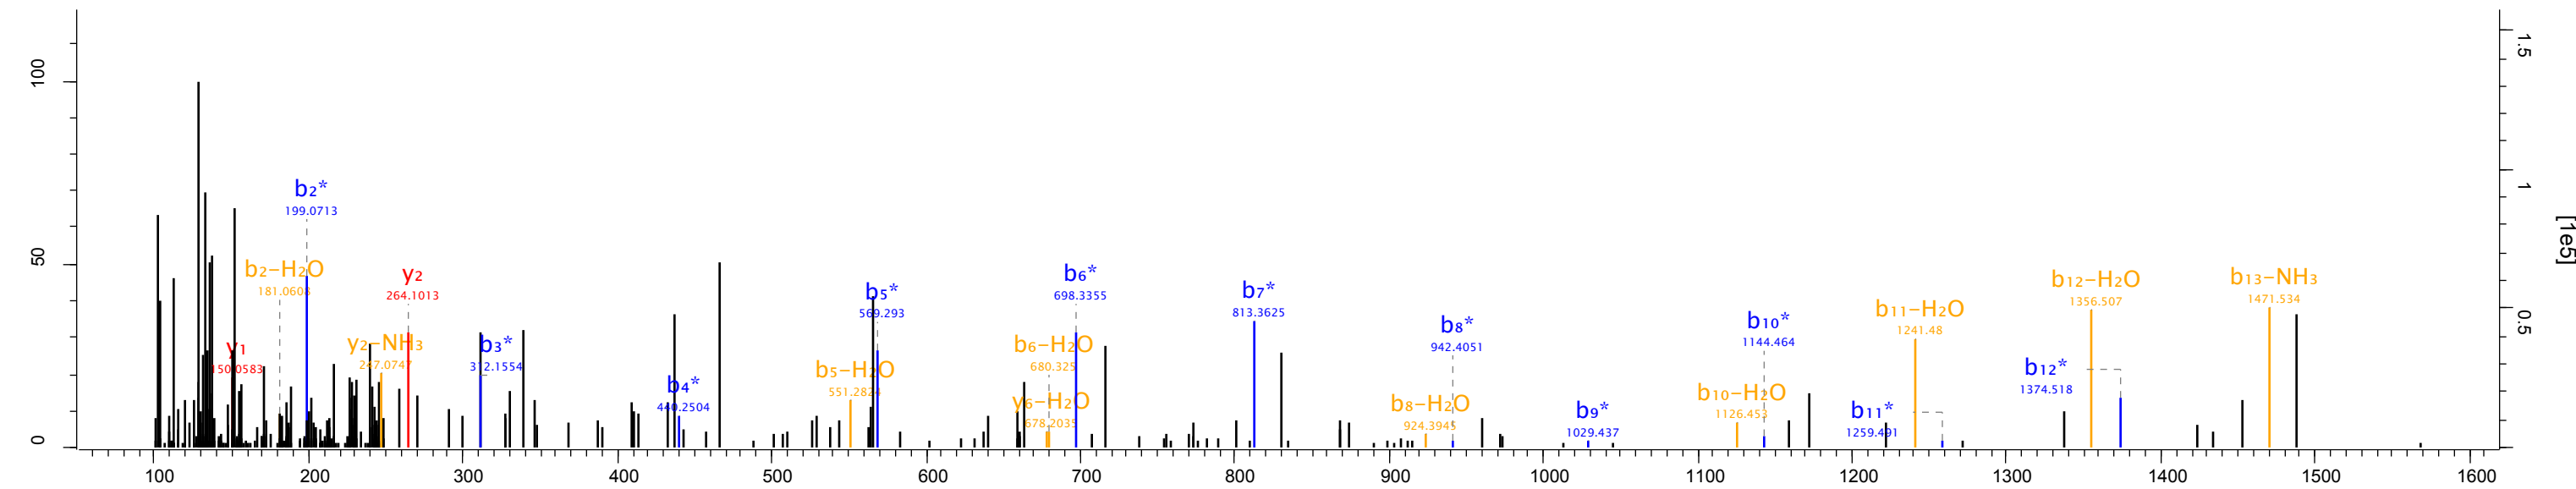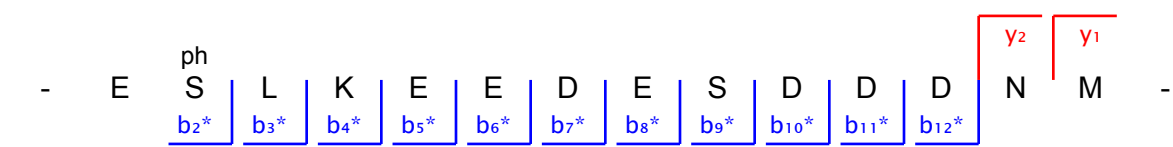

Raw file 20171215\_MaS\_33SR\_LMH\_phospho2\_02 Scan 10328 Method FTMS; HCD Score 62.65 m/z 887.02 Gene names CD44

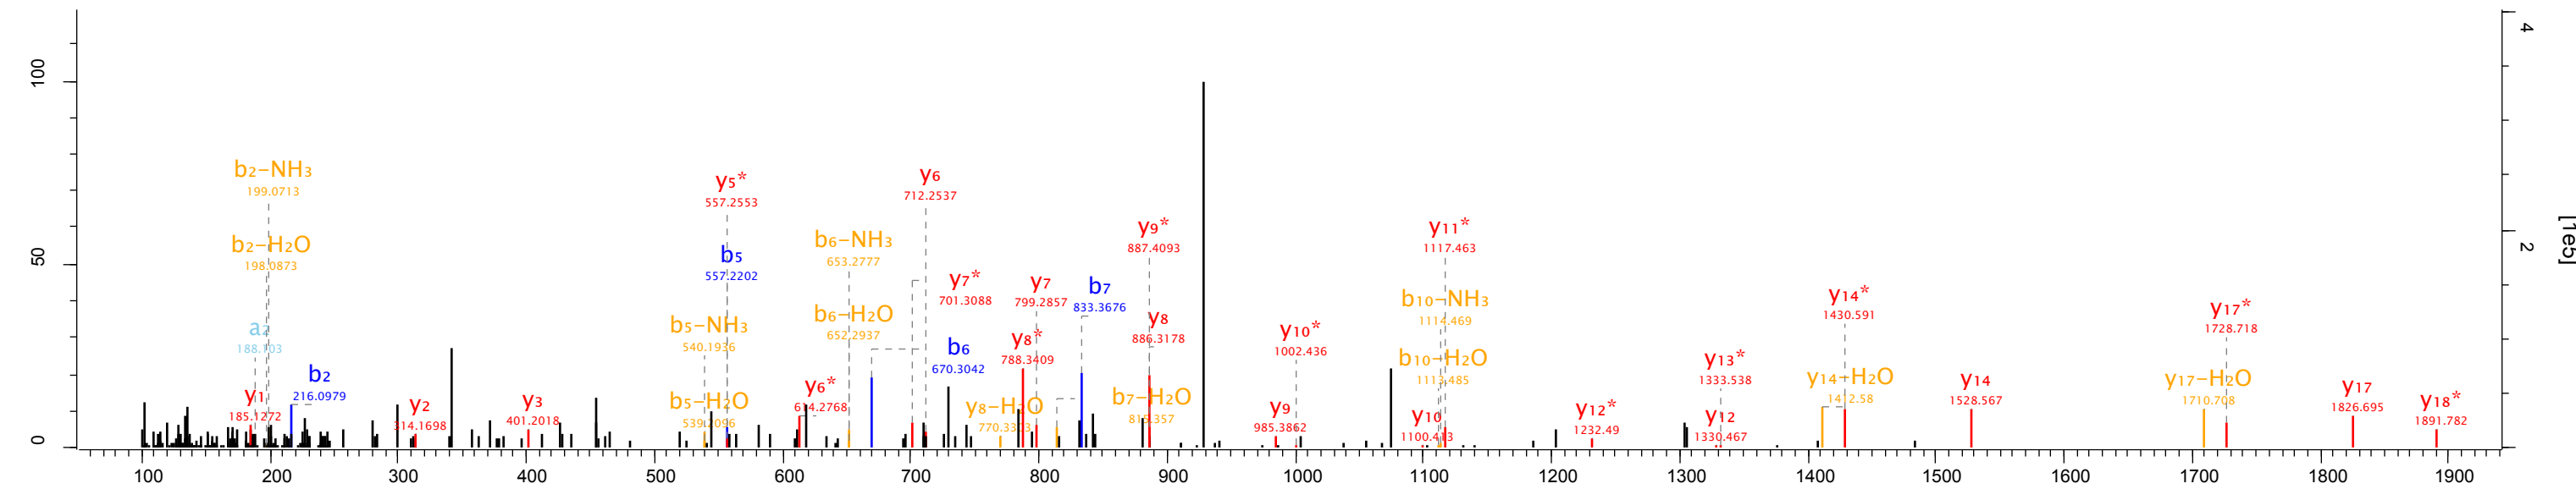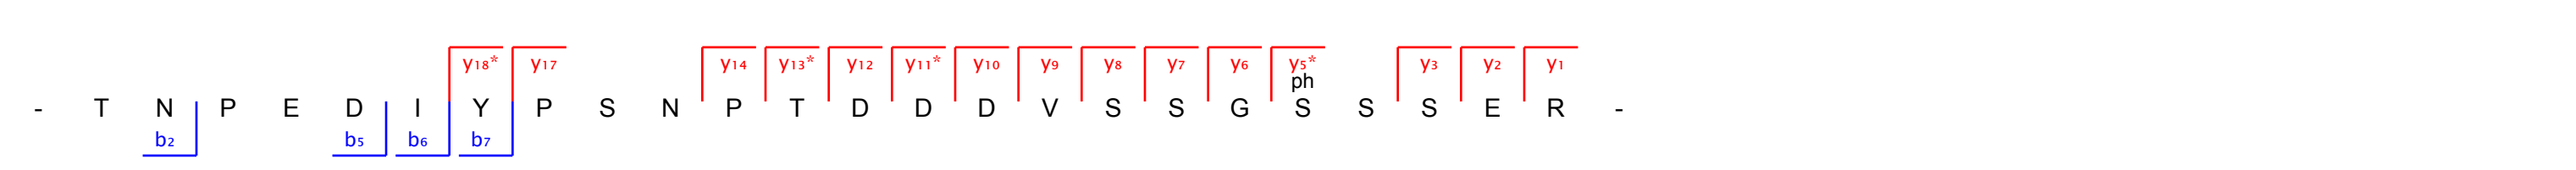

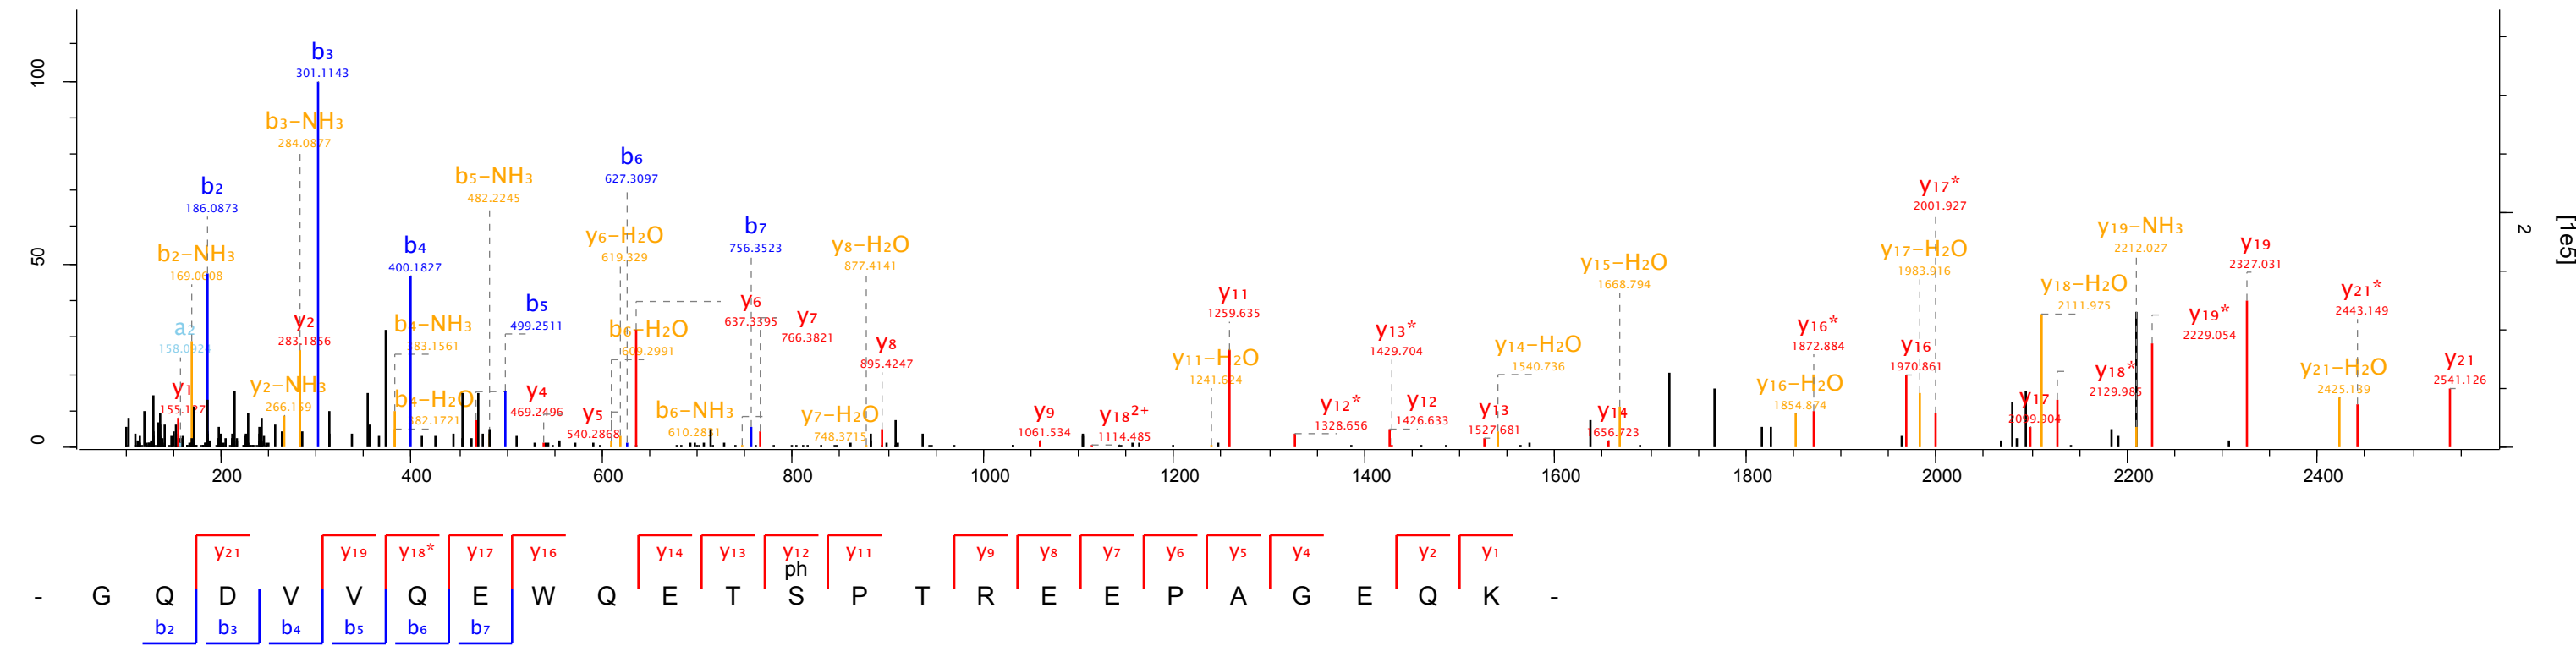

Raw file: 20171215\_MaS\_33SR\_LMH\_phospho2\_02  
 Scan: 10648 Method: FTMS; HCD Score: 64.38 m/z: 928.42 Gene names: CCDC114

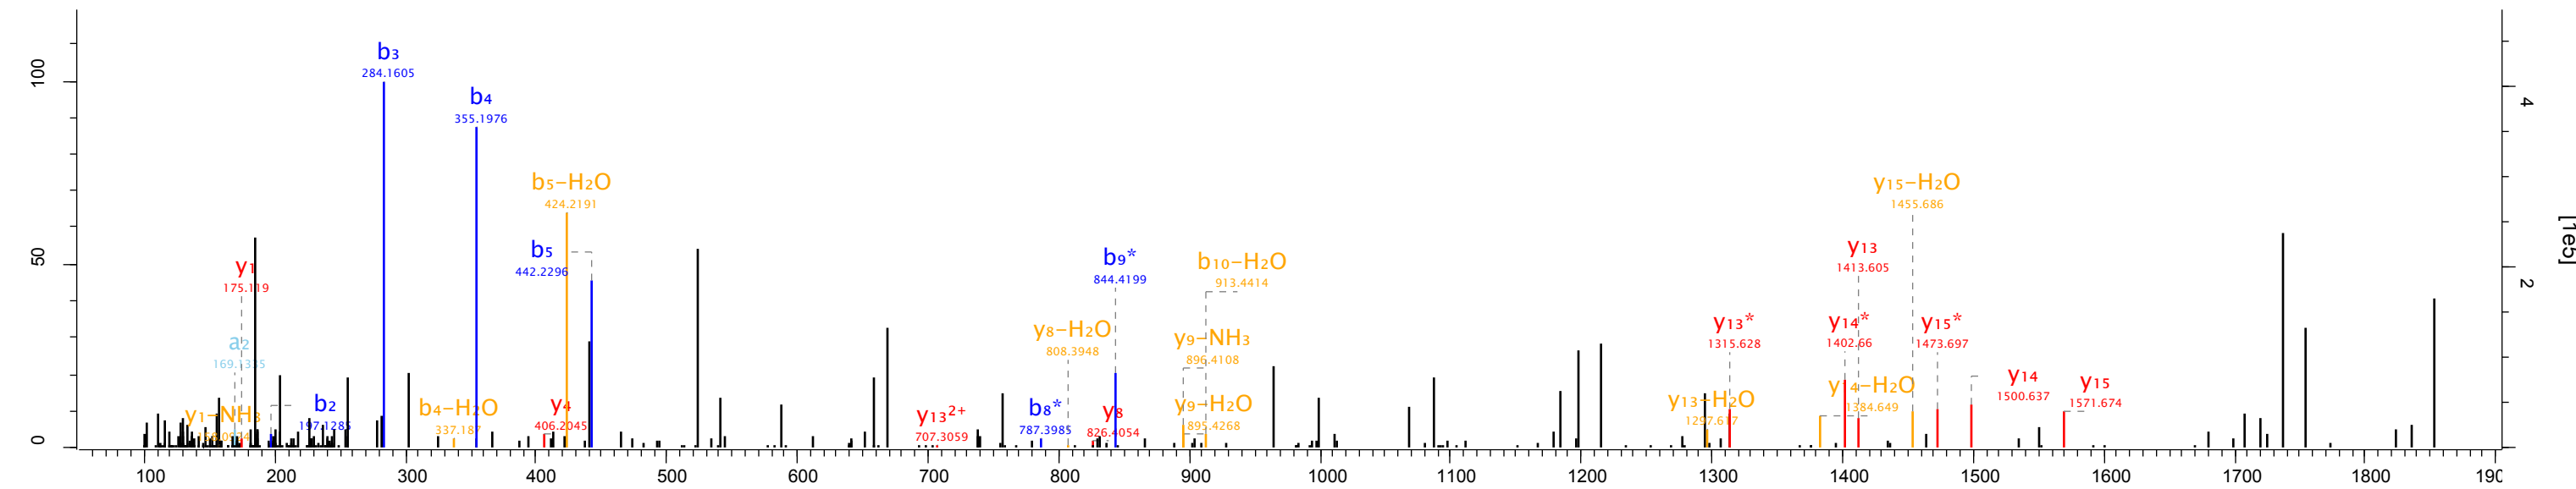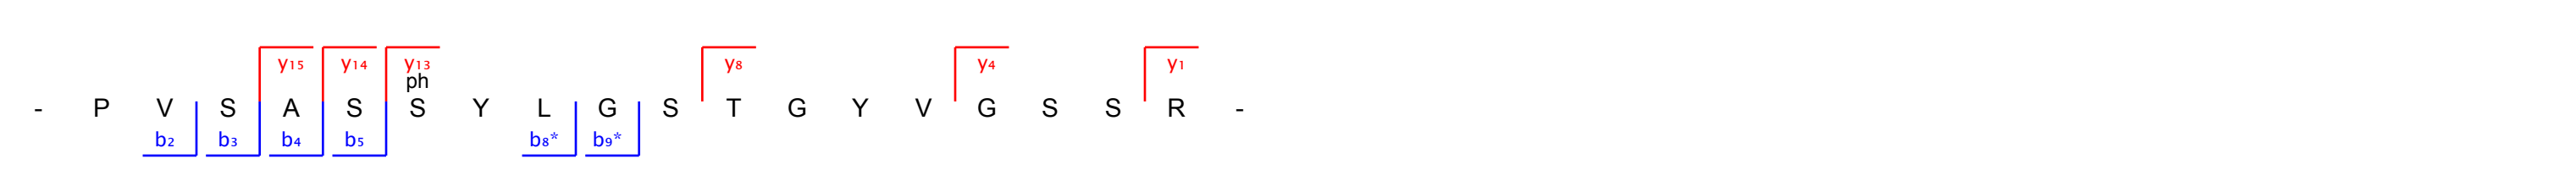

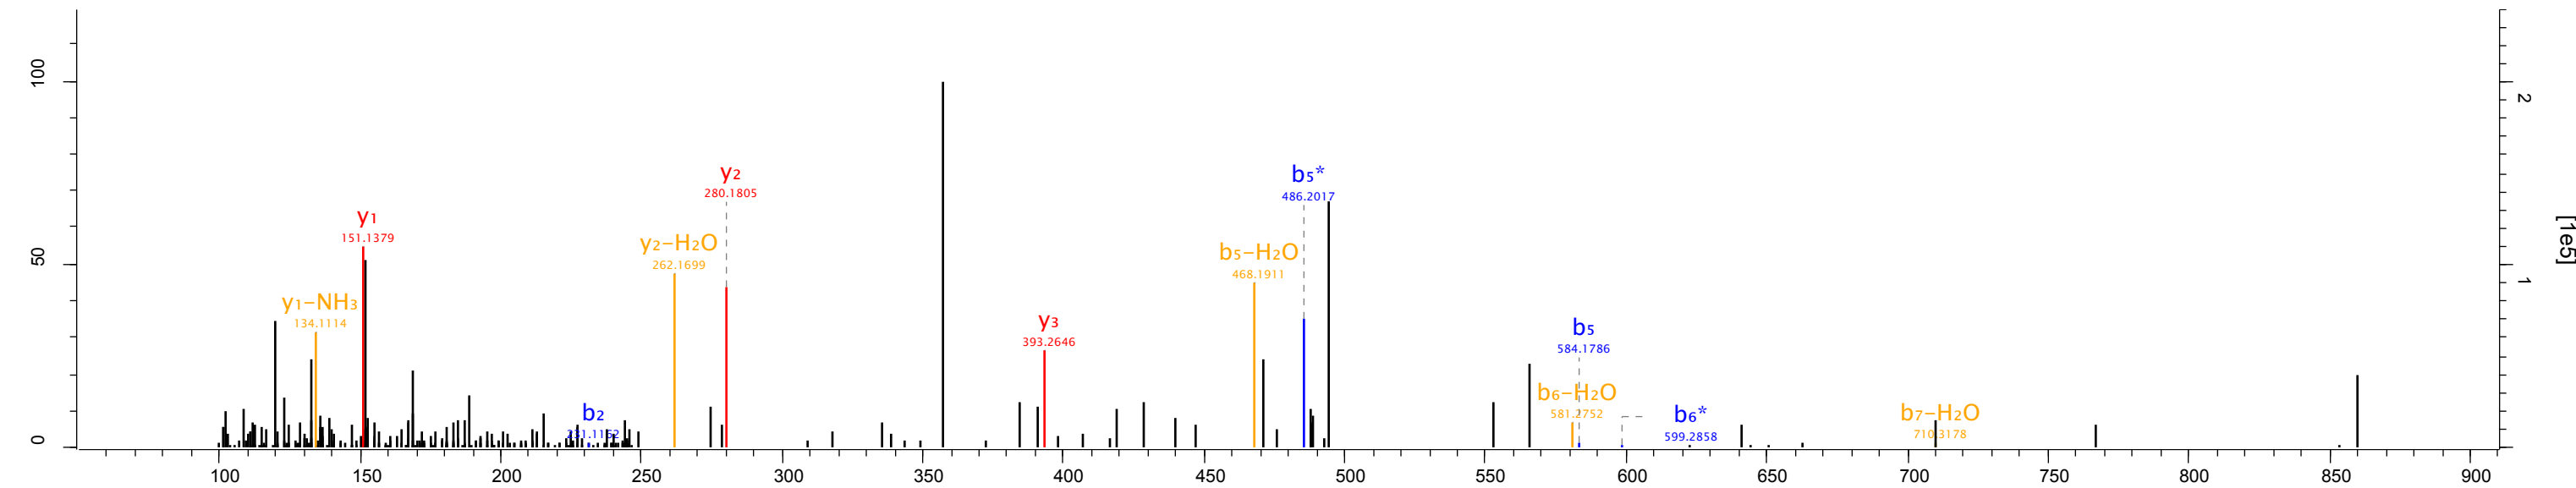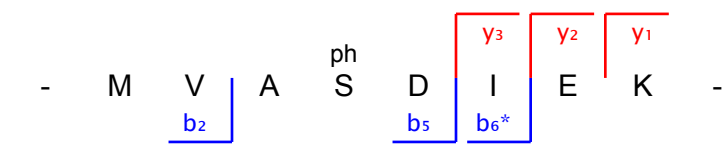

Raw file 20171215\_MaS\_33SR\_LMH\_phospho2\_02 Scan 10978 Method FTMS; HCD Score 94.96 m/z 826.36 Gene names AAK1

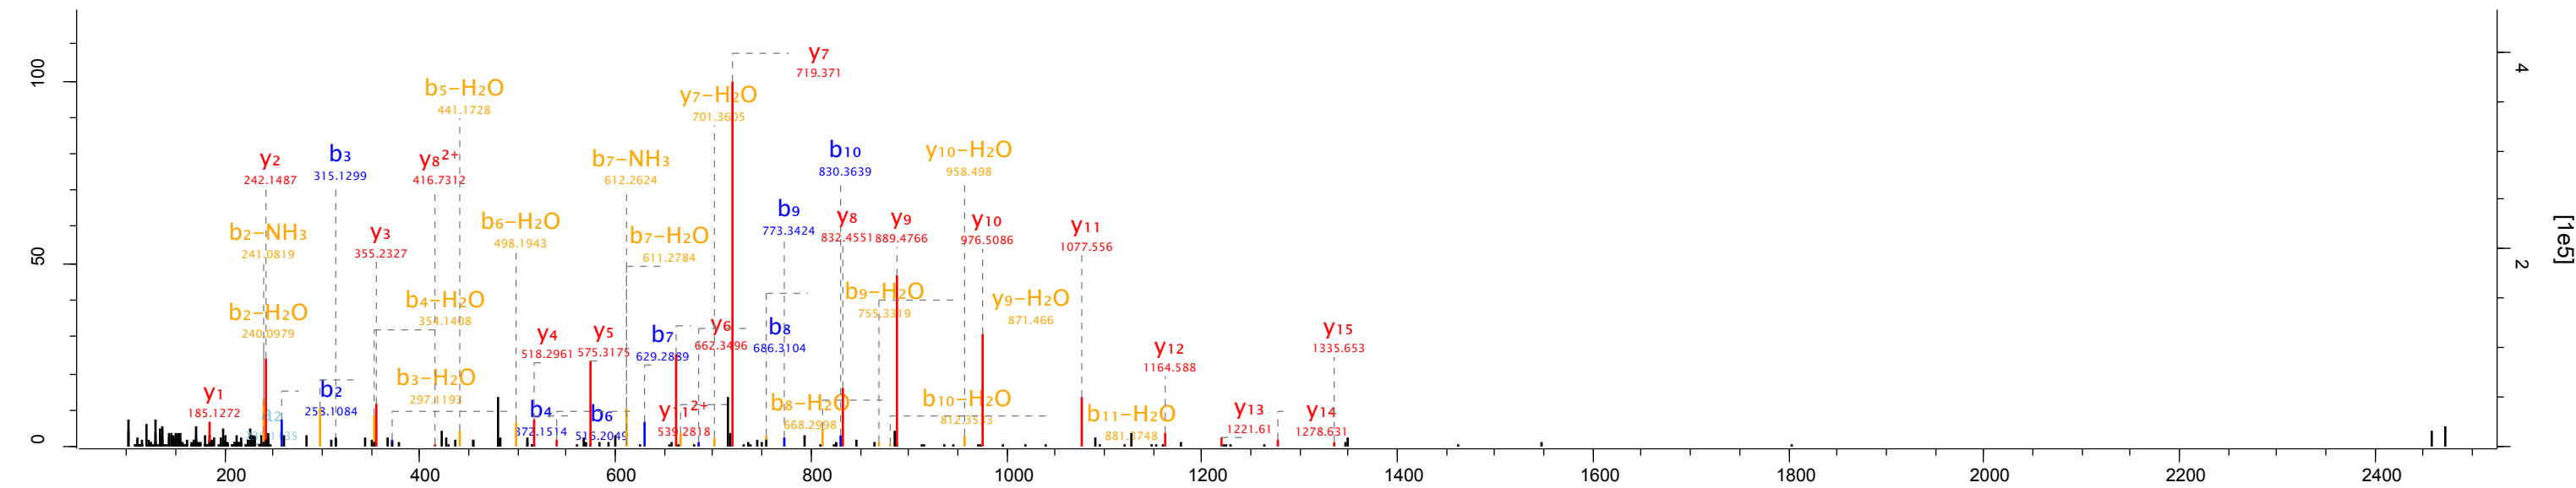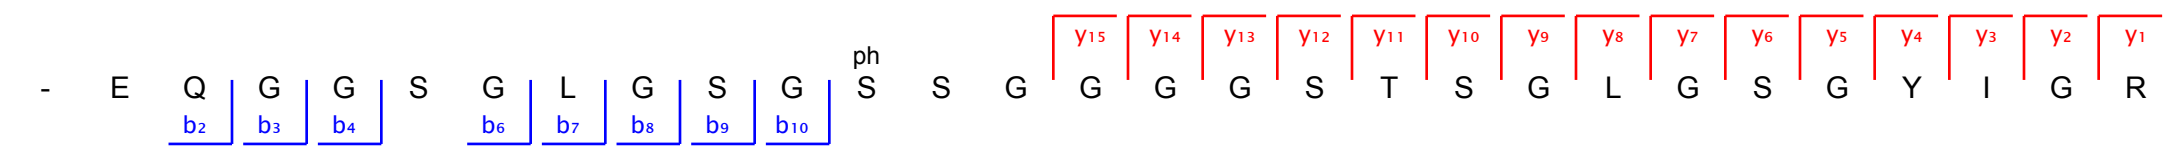

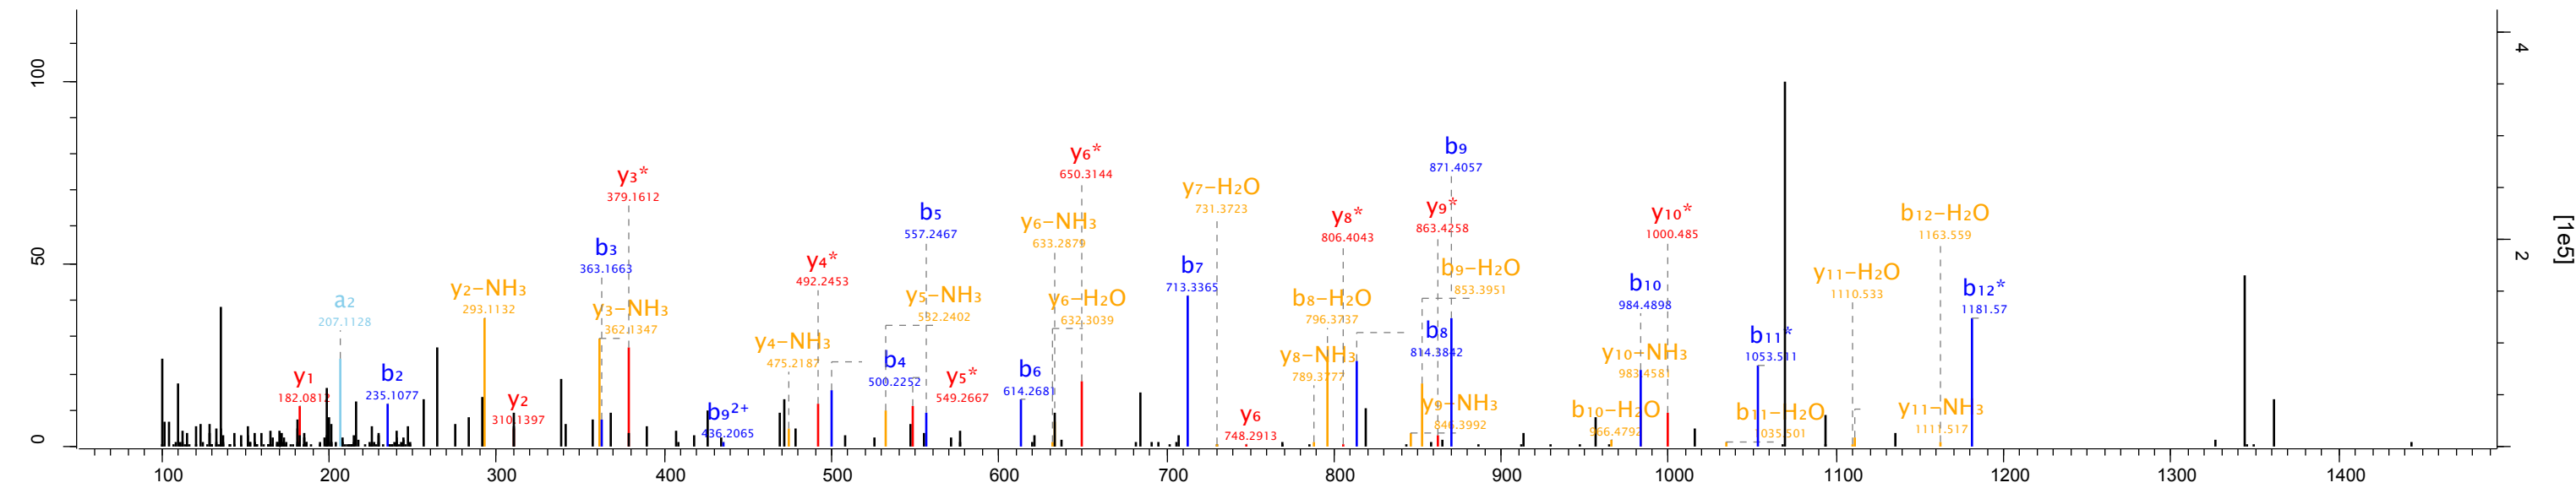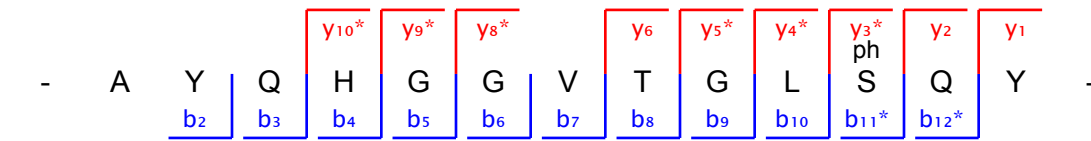

Raw file 20171215\_MaS\_33SR\_LMH\_phospho2\_02 Scan 11388 Method FTMS; HCD Score 110.6 m/z 773.34 Gene names PARD3

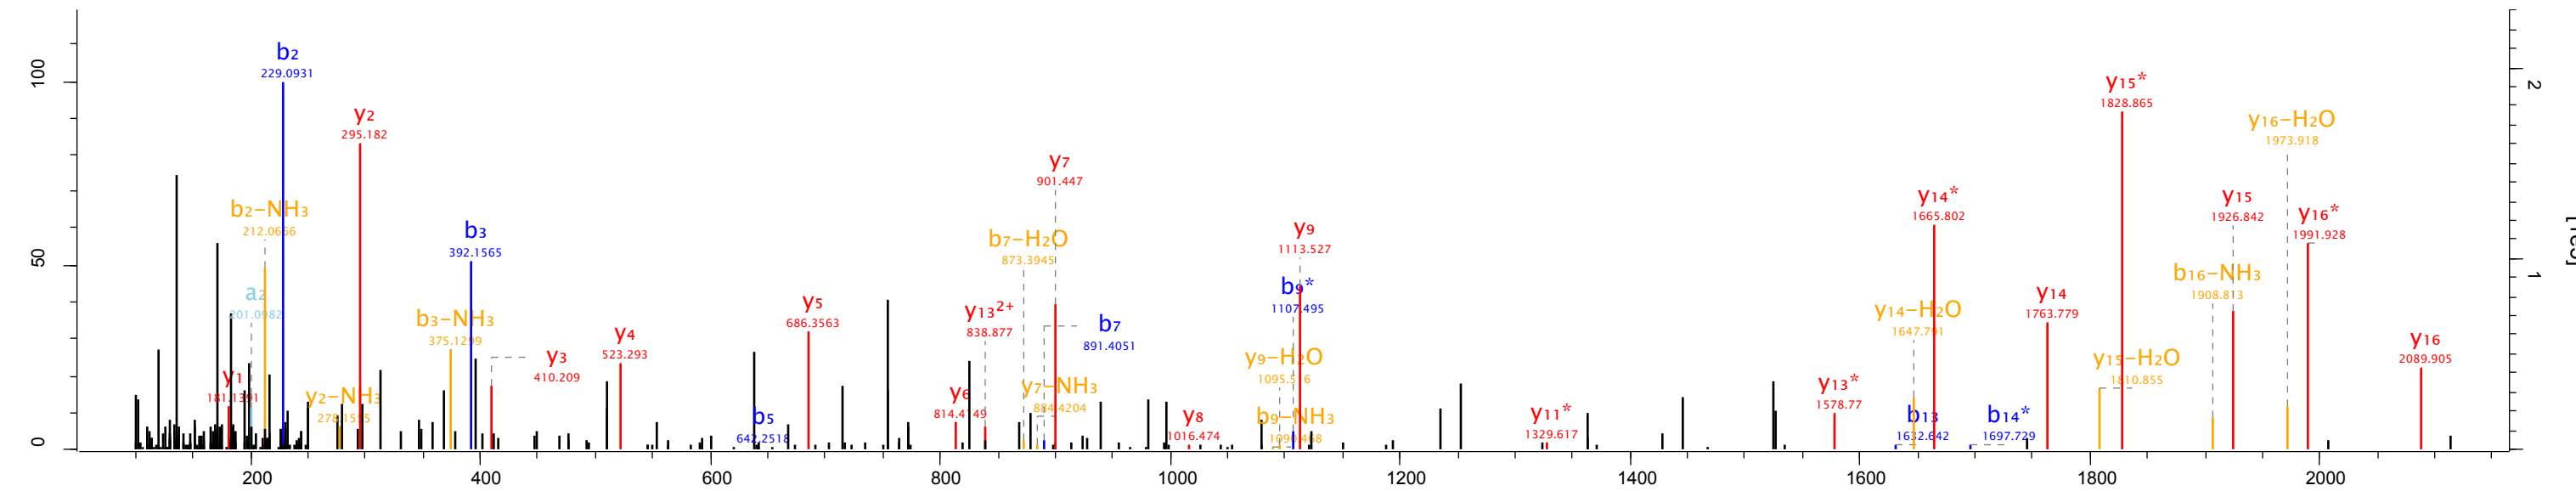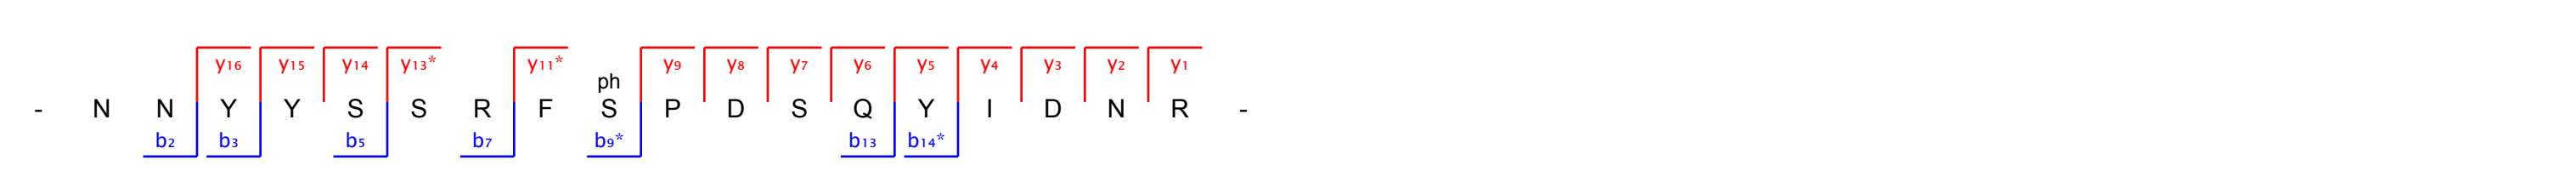



Raw file 20171215\_MaS\_33SR\_LMH\_phospho2\_02 Scan 11398 Method FTMS; HCD Score 205.26 m/z 852.37 Gene names TLN1

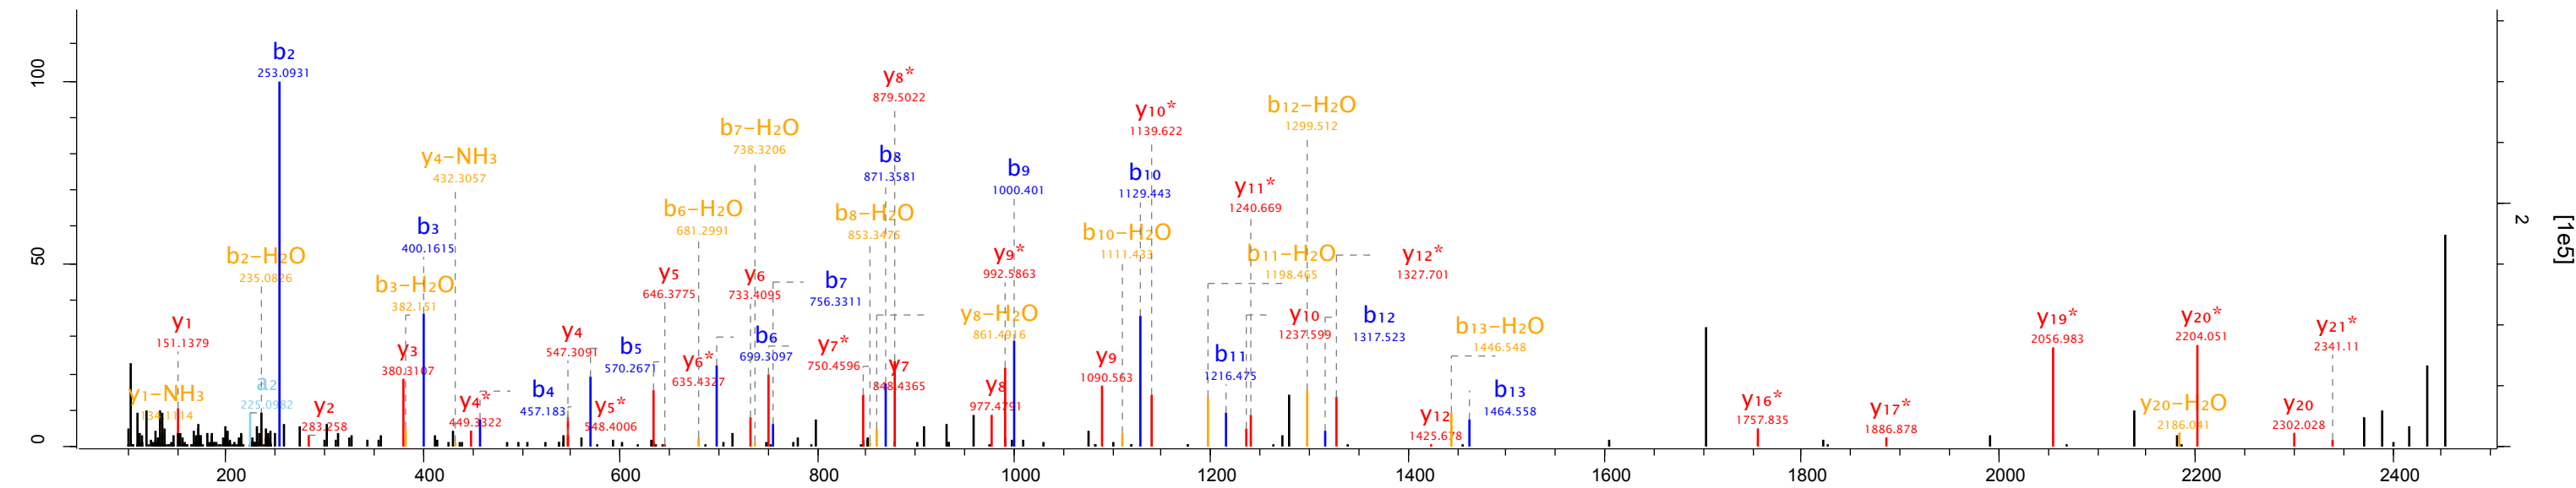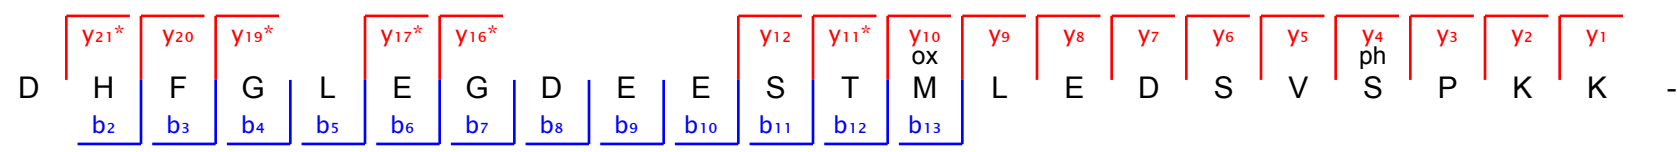

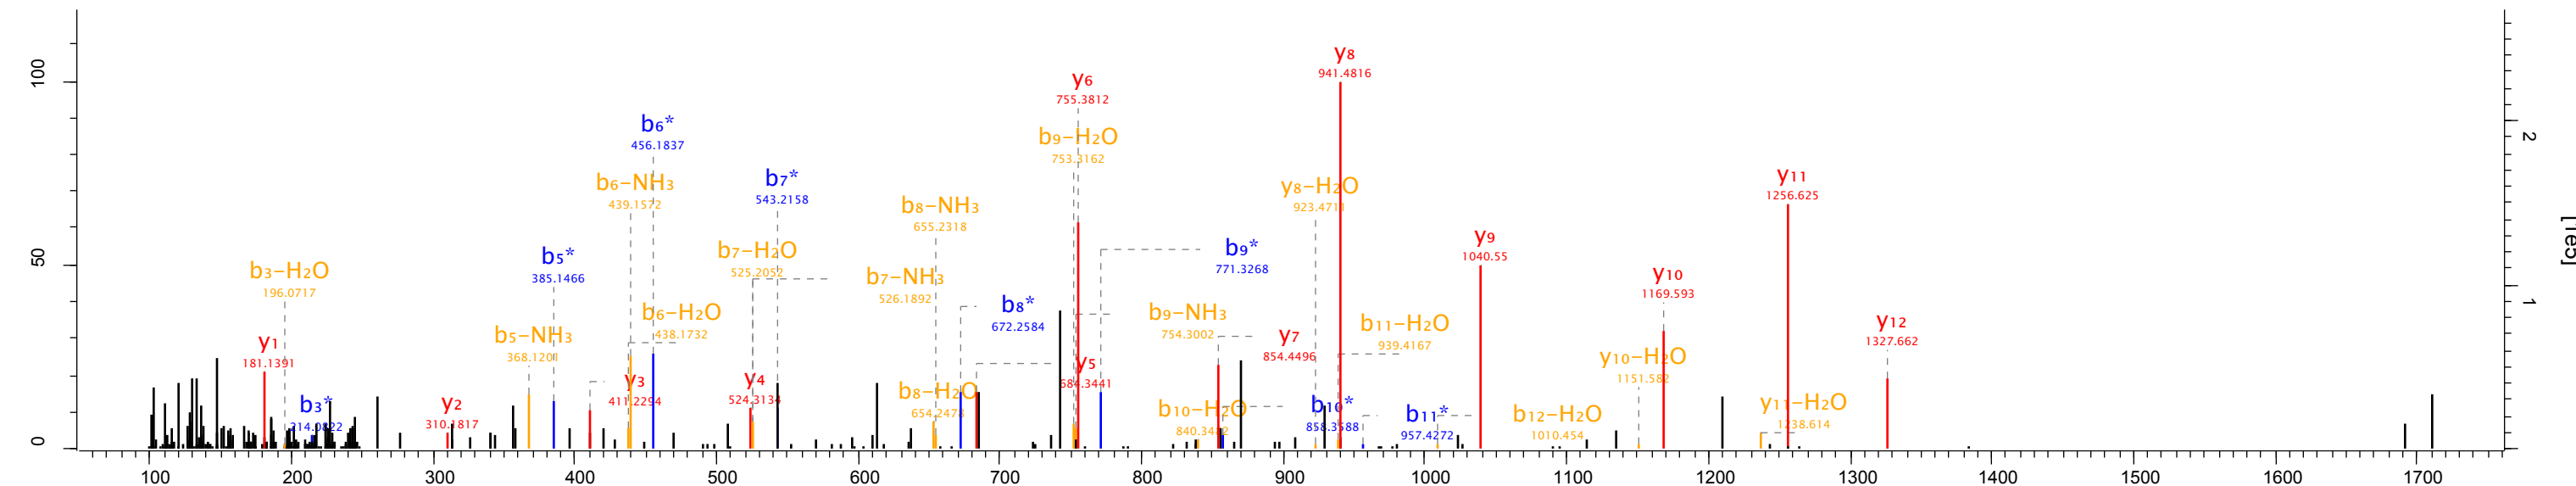

- G <sup>ph</sup>S S G N A S E V S V A C L T E R -  
b<sub>3</sub>\* b<sub>5</sub>\* b<sub>6</sub>\* b<sub>7</sub>\* b<sub>8</sub>\* b<sub>9</sub>\* b<sub>10</sub>\* b<sub>11</sub>\*

Raw file 20171215\_MaS\_33SR\_LMH\_phospho2\_02 Scan 12028 Method FTMS; HCD Score 137.09 m/z 661.76 Gene names KLC4

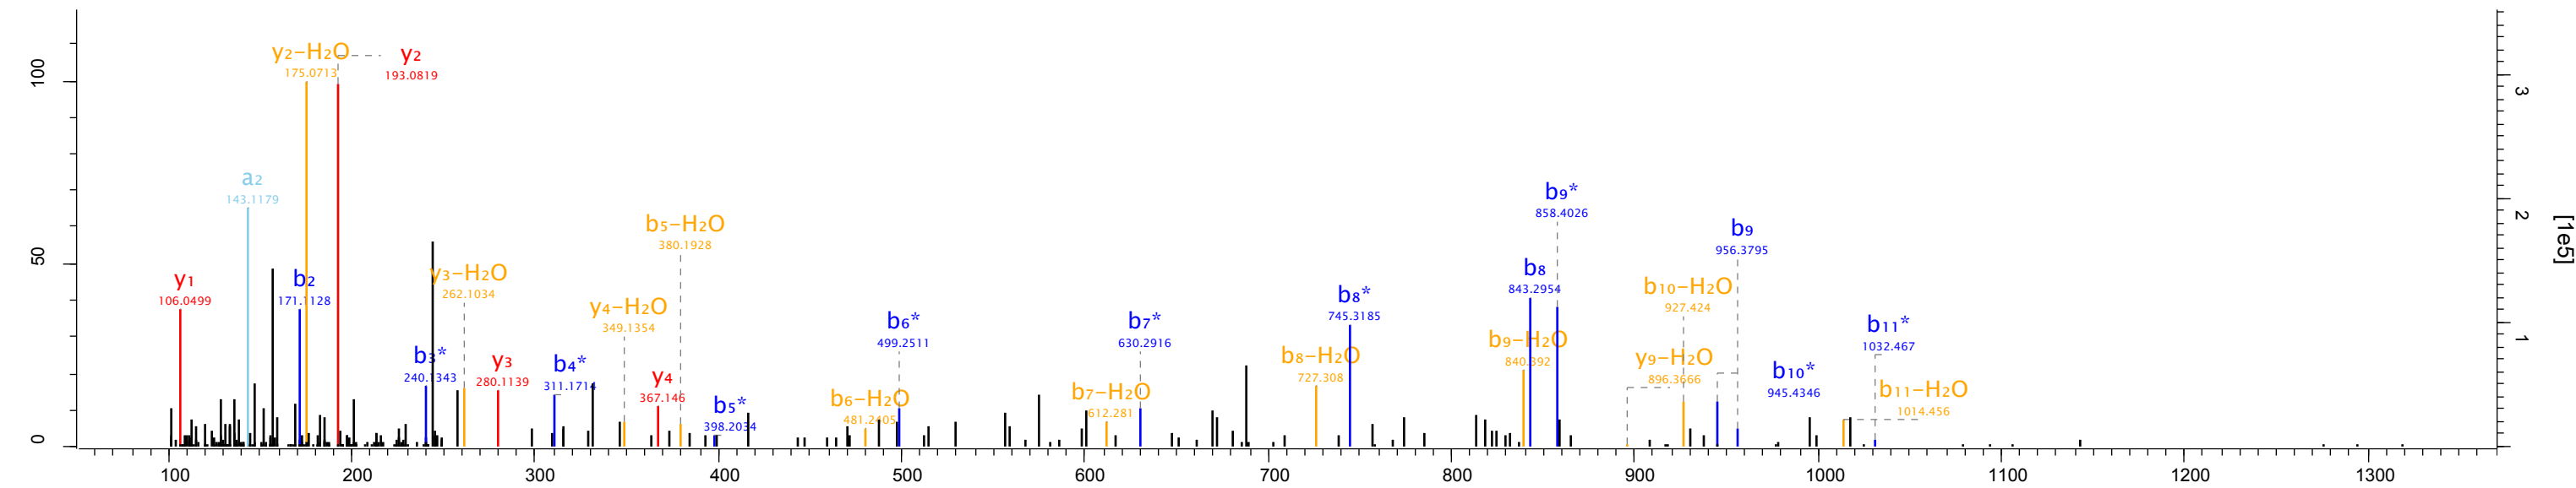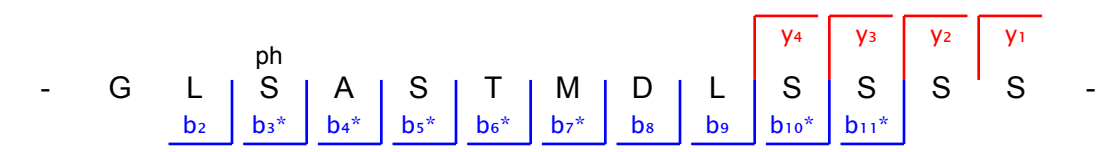

Raw file 20171215\_MaS\_33SR\_LMH\_phospho2\_02 Scan 12318 Method FTMS; HCD Score 278.79 m/z 862.38 Gene names HN1

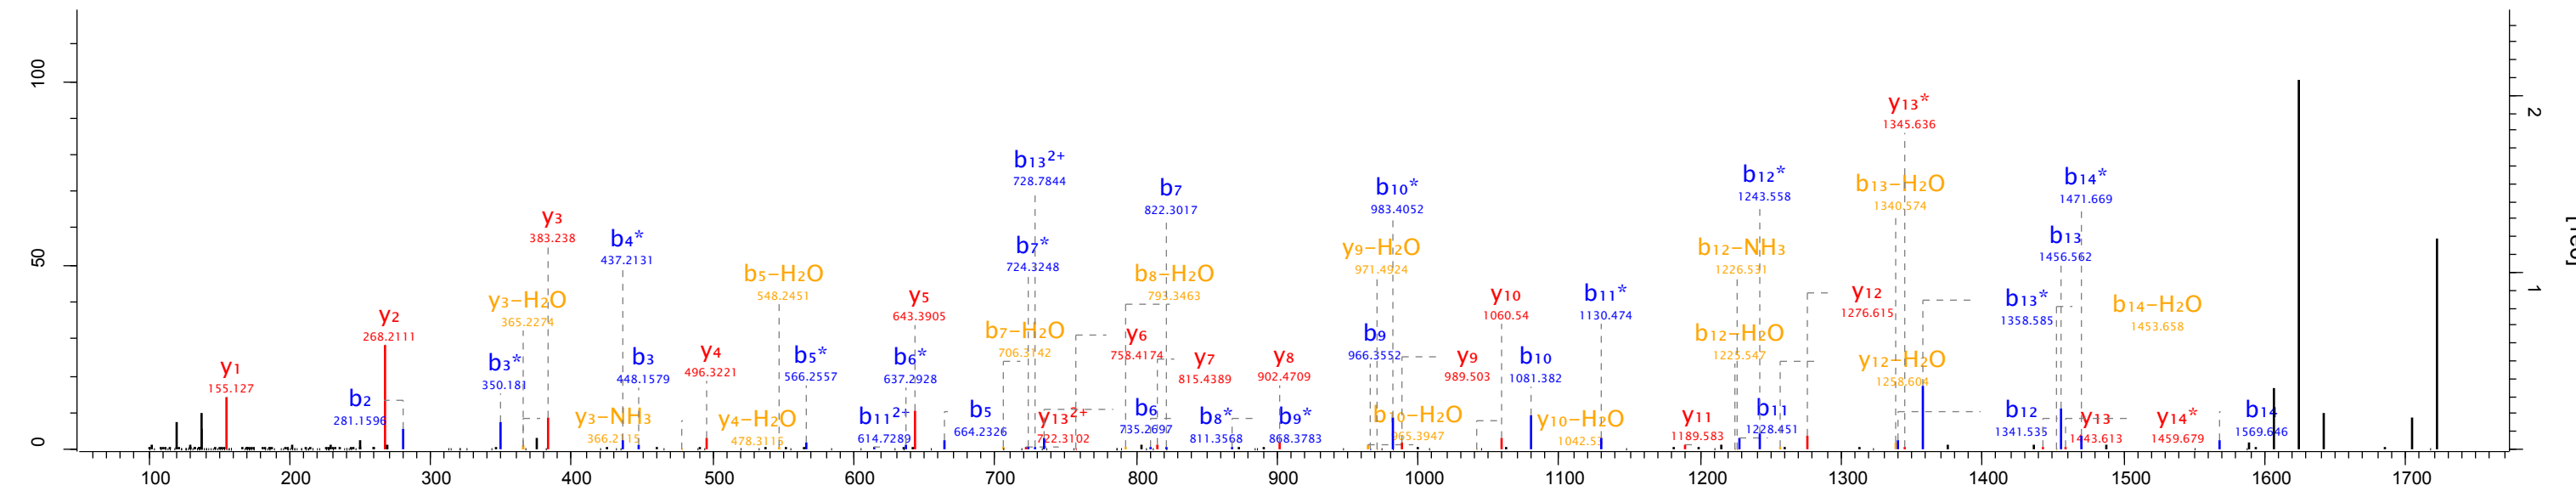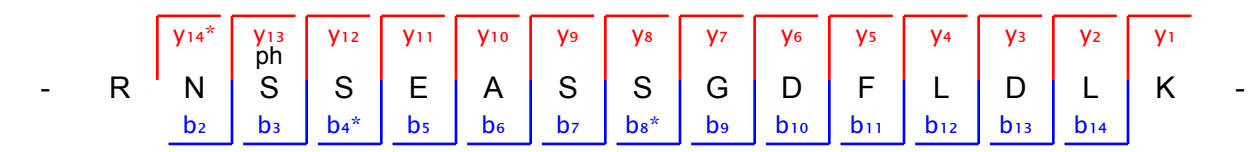

Raw file 20171215\_MaS\_33SR\_LMH\_phospho2\_02 Scan 12868 Method FTMS; HCD Score 85.45 m/z 986.44 Gene names NACA

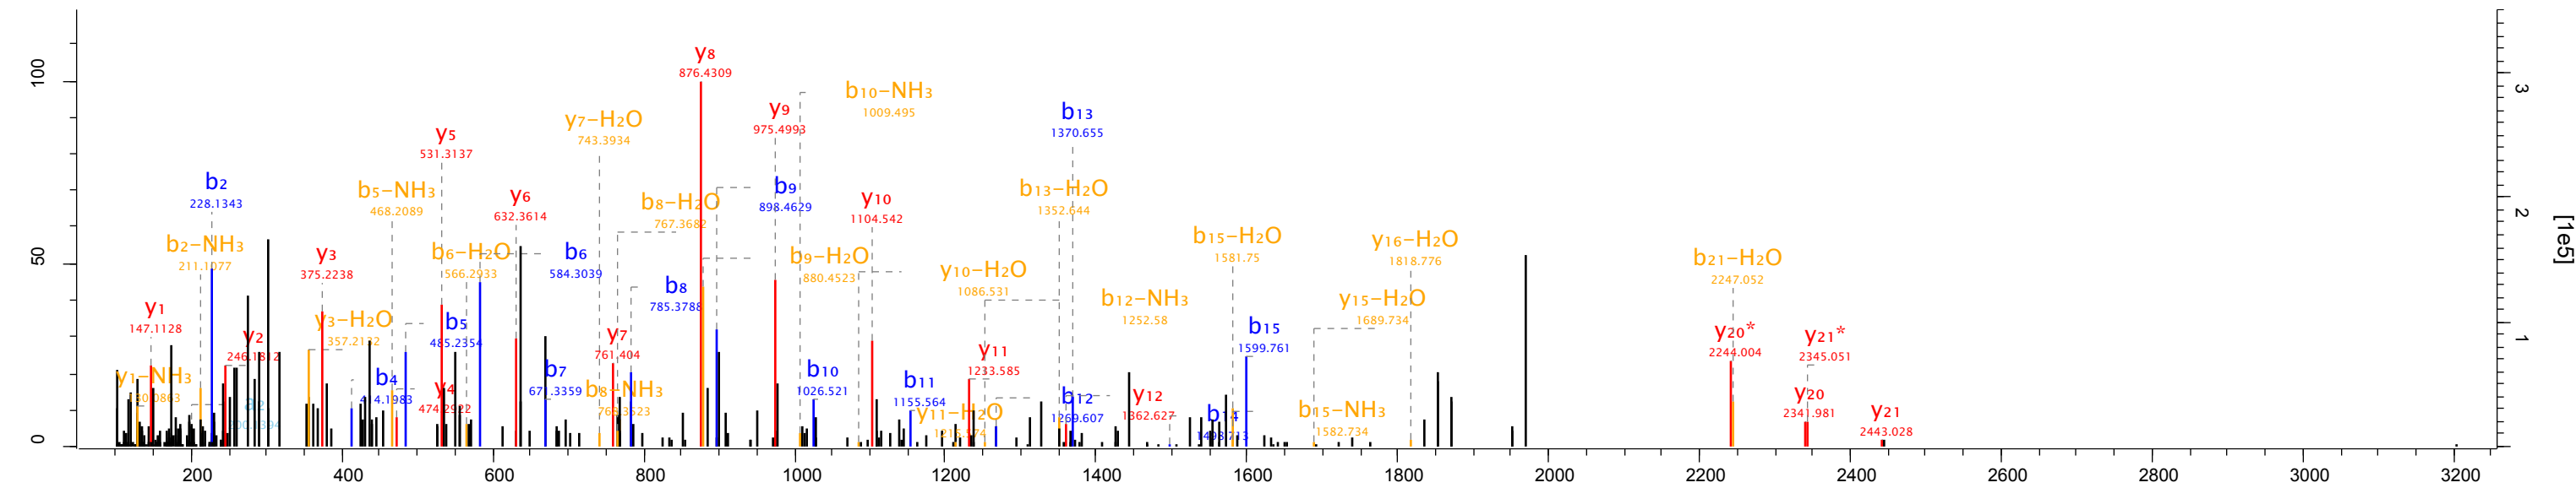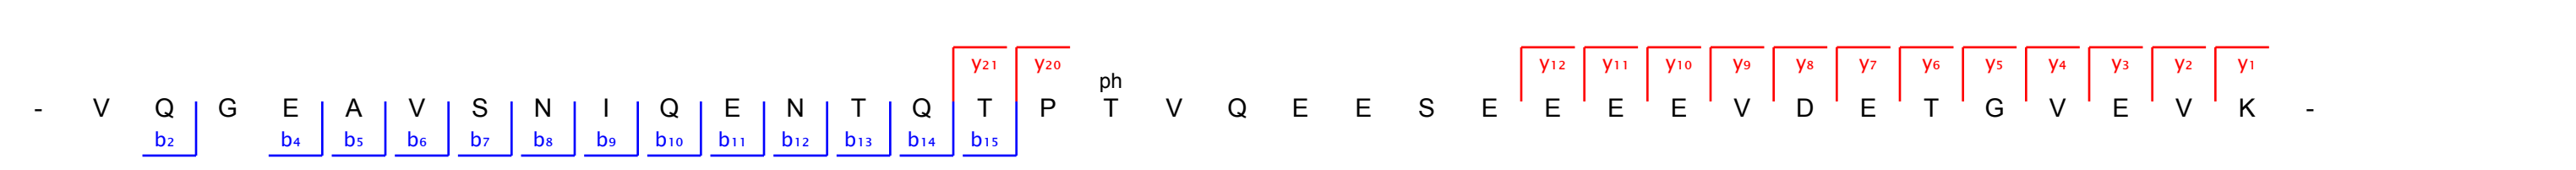

Raw file 20171215\_MaS\_33SR\_LMH\_phospho2\_02 Scan 15938 Method FTMS; HCD Score 108.08 m/z 1040.47 Gene names SMARCC2

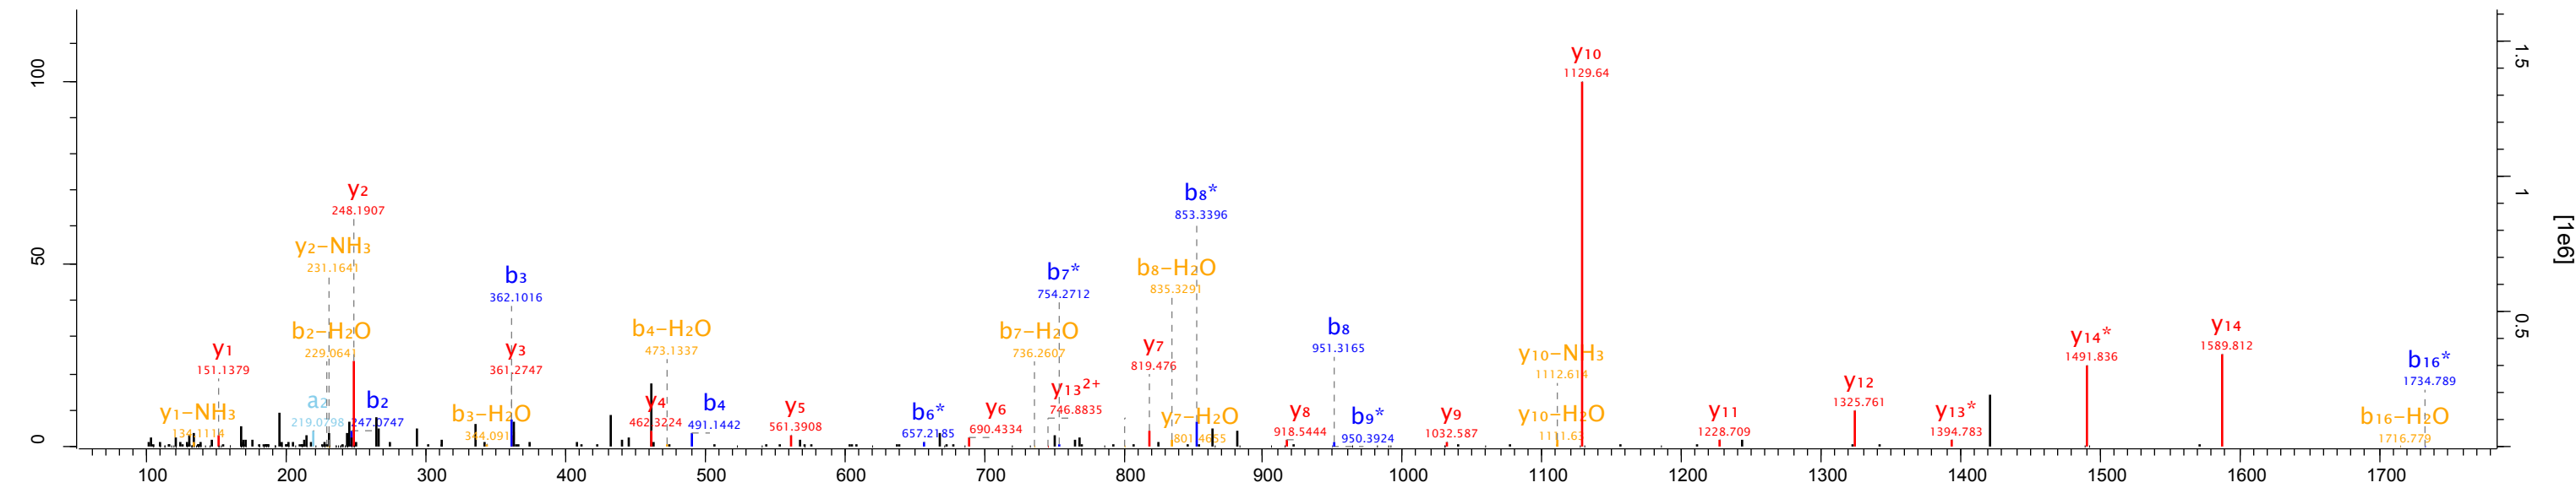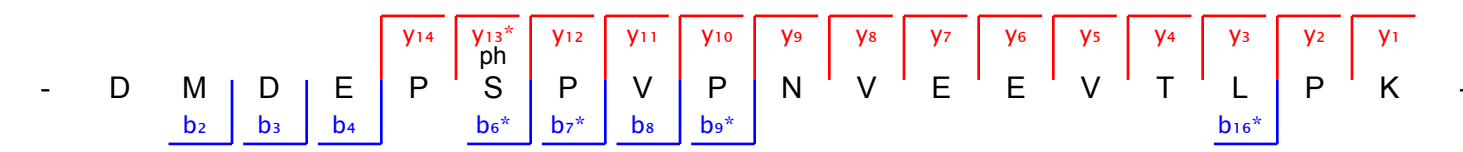

Raw file  
20171215\_MaS\_33SR\_LMH\_phospho2\_02

Scan 1978 Method FTMS; HCD Score 346.07 m/z 839.84 Gene names ILF3

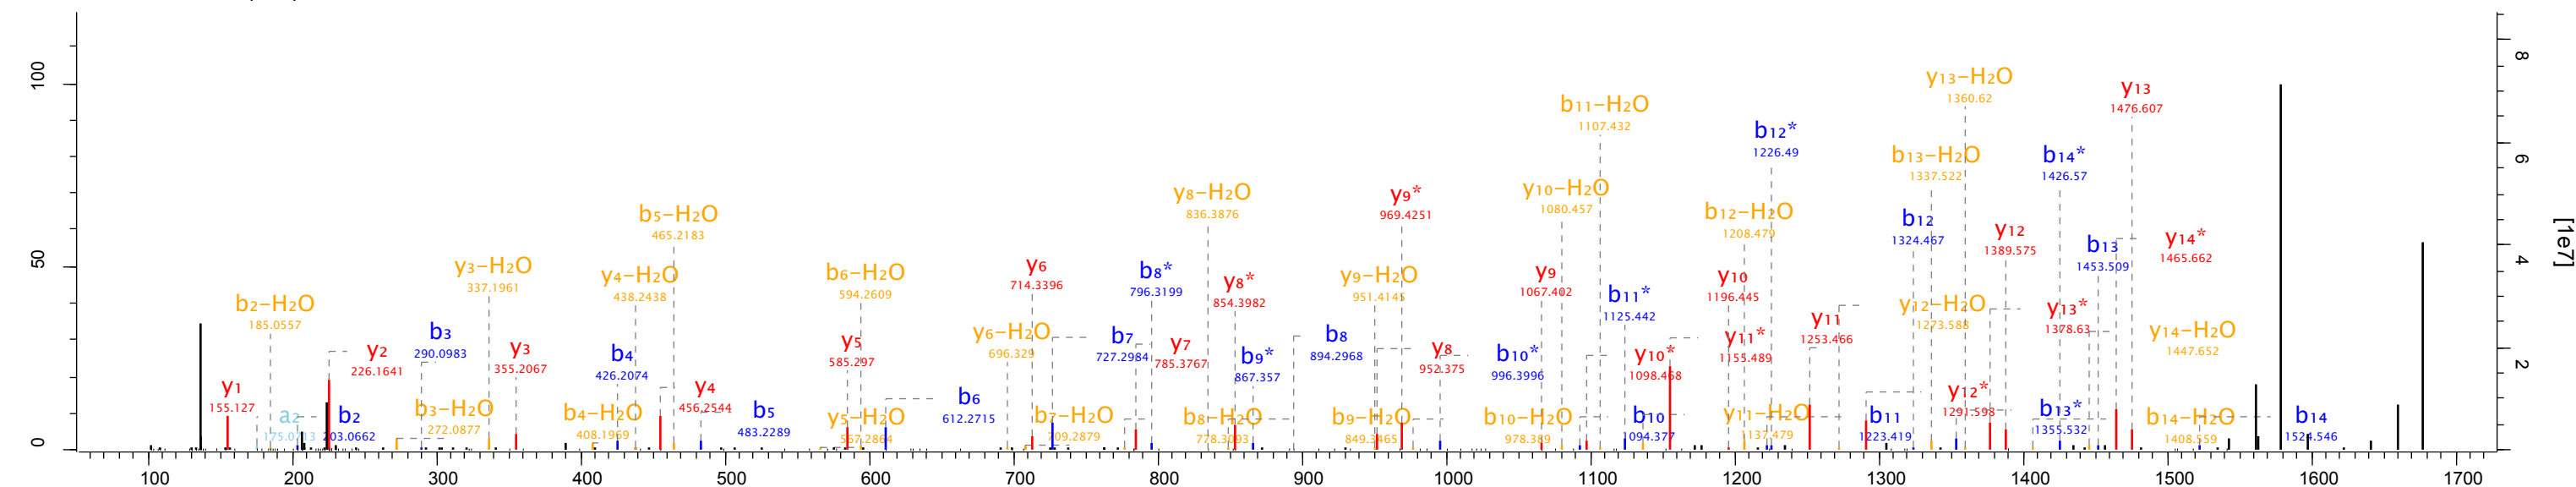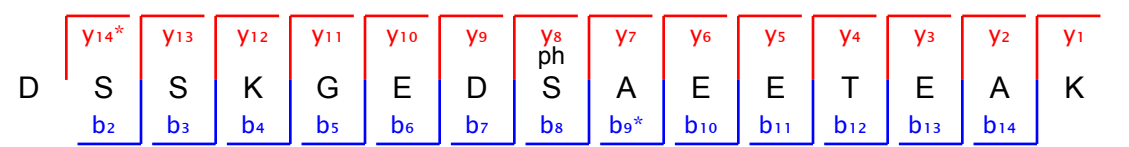

Raw file 20171215\_MaS\_33SR\_LMH\_phospho2\_02 Scan 1988 Method FTMS; HCD Score 261.45 m/z 631.32 Gene names BCLAF1

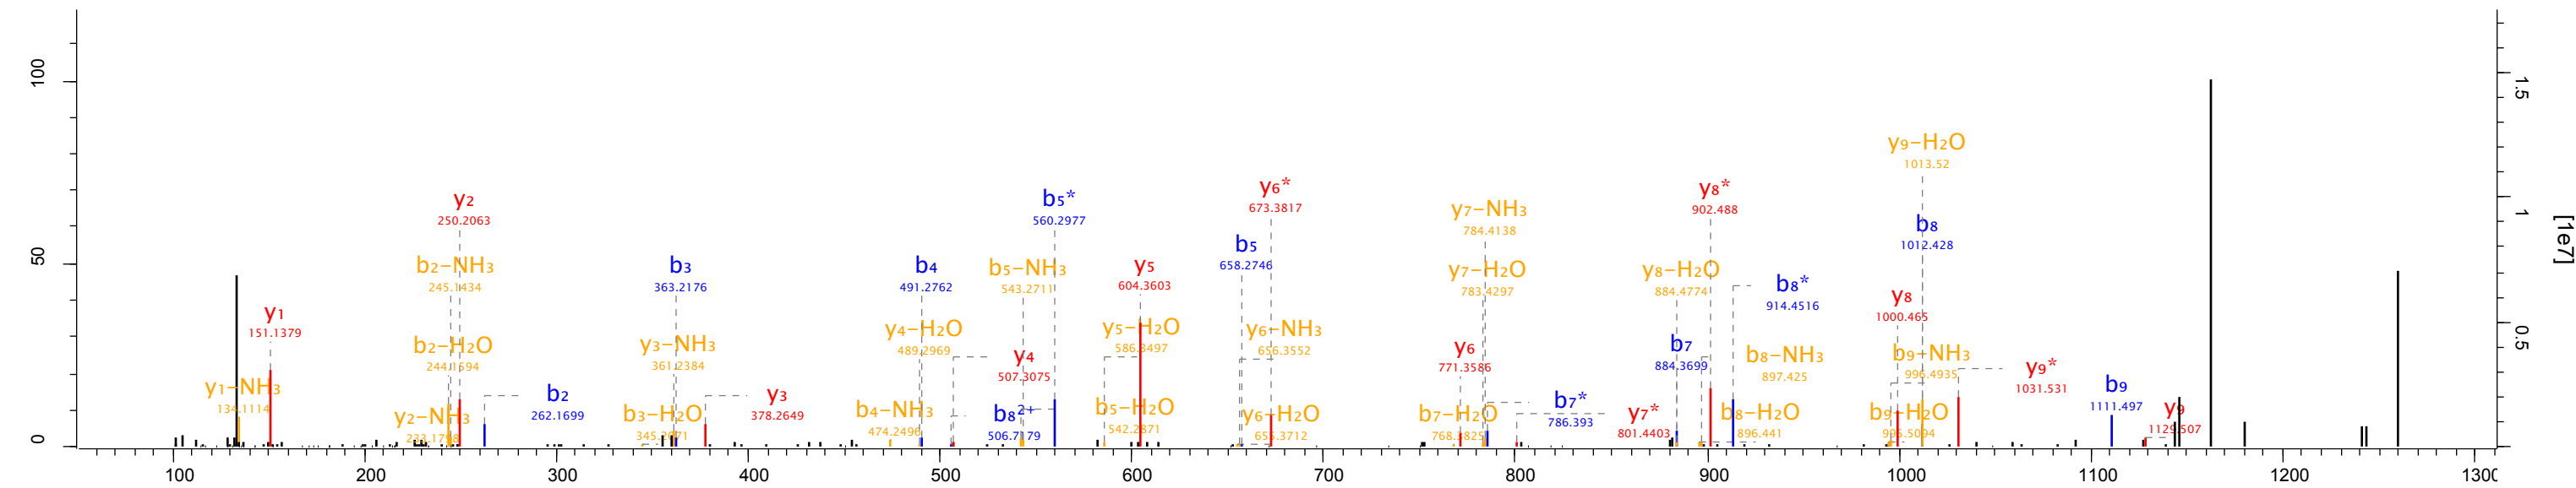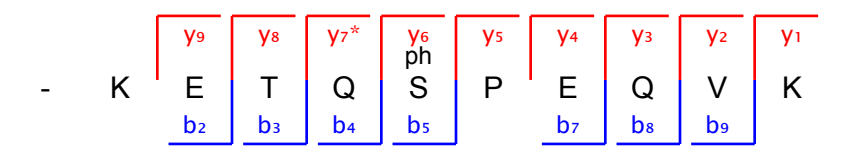



Raw file

20171215\_MaS\_33SR\_LMH\_phospho2\_02

| Scan | Method    | Score | m/z    | Gene names |
|------|-----------|-------|--------|------------|
| 2738 | FTMS; HCD | 66.84 | 544.78 | EHBP1      |

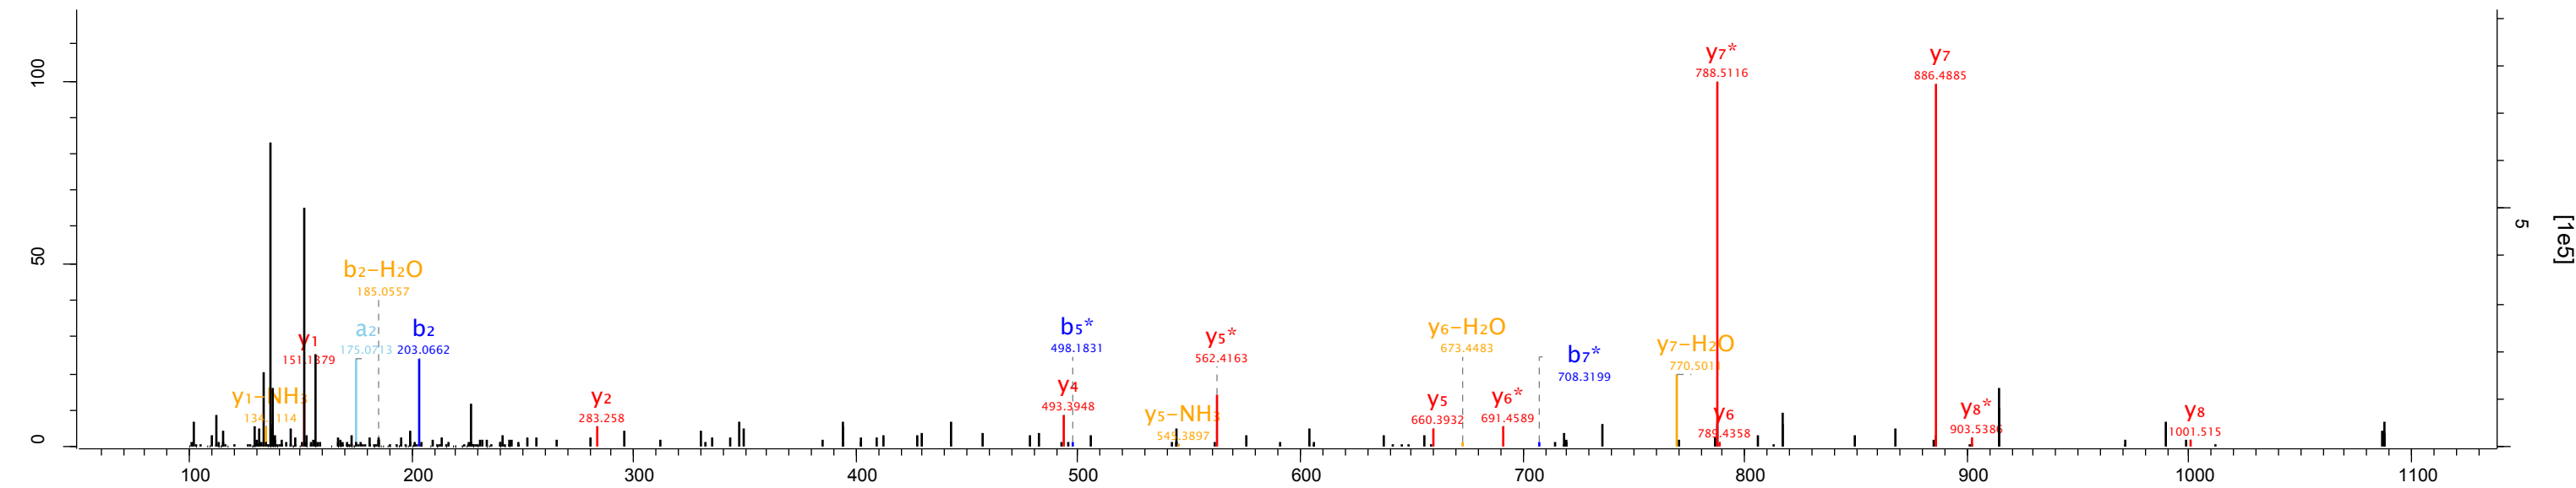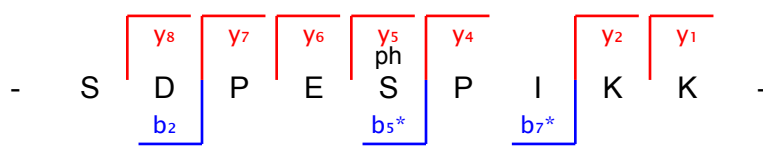

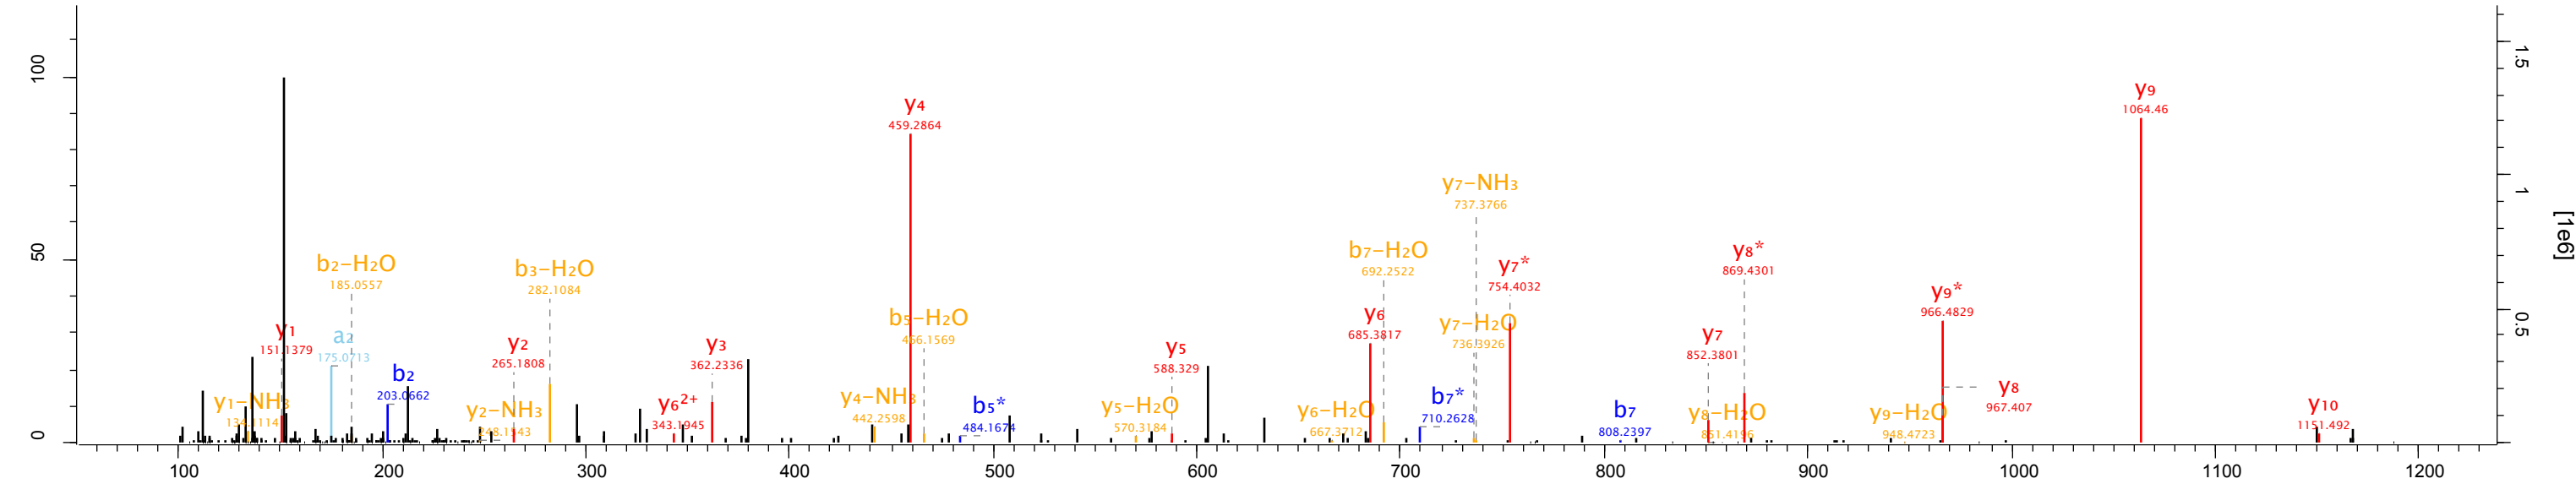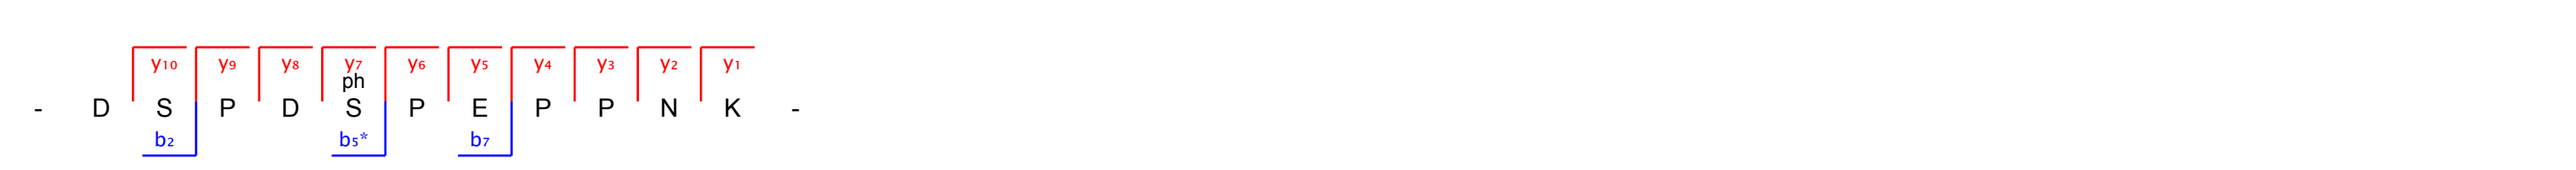

Raw file

20171215\_MaS\_33SR\_LMH\_phospho2\_02

| Scan | Method    | Score | m/z    | Gene names |
|------|-----------|-------|--------|------------|
| 3058 | FTMS; HCD | 74.84 | 446.68 | SRSF10     |

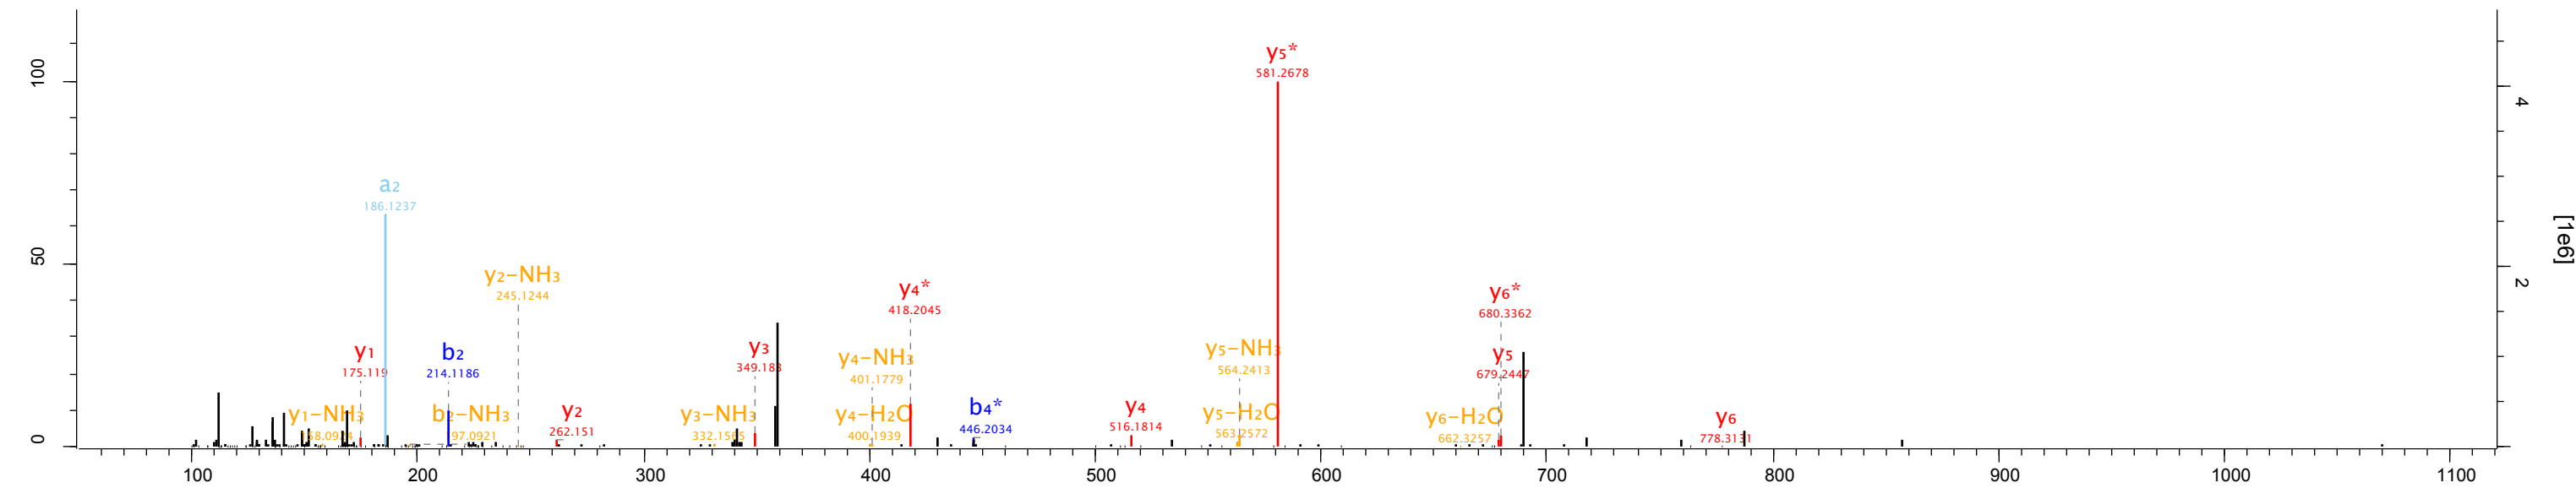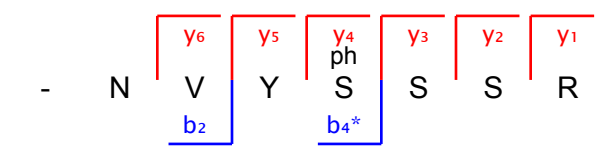

Raw file 20171215\_MaS\_33SR\_LMH\_phospho2\_02 Scan 3148 Method FTMS; HCD Score 89.36 m/z 493.73 Gene names MSH6

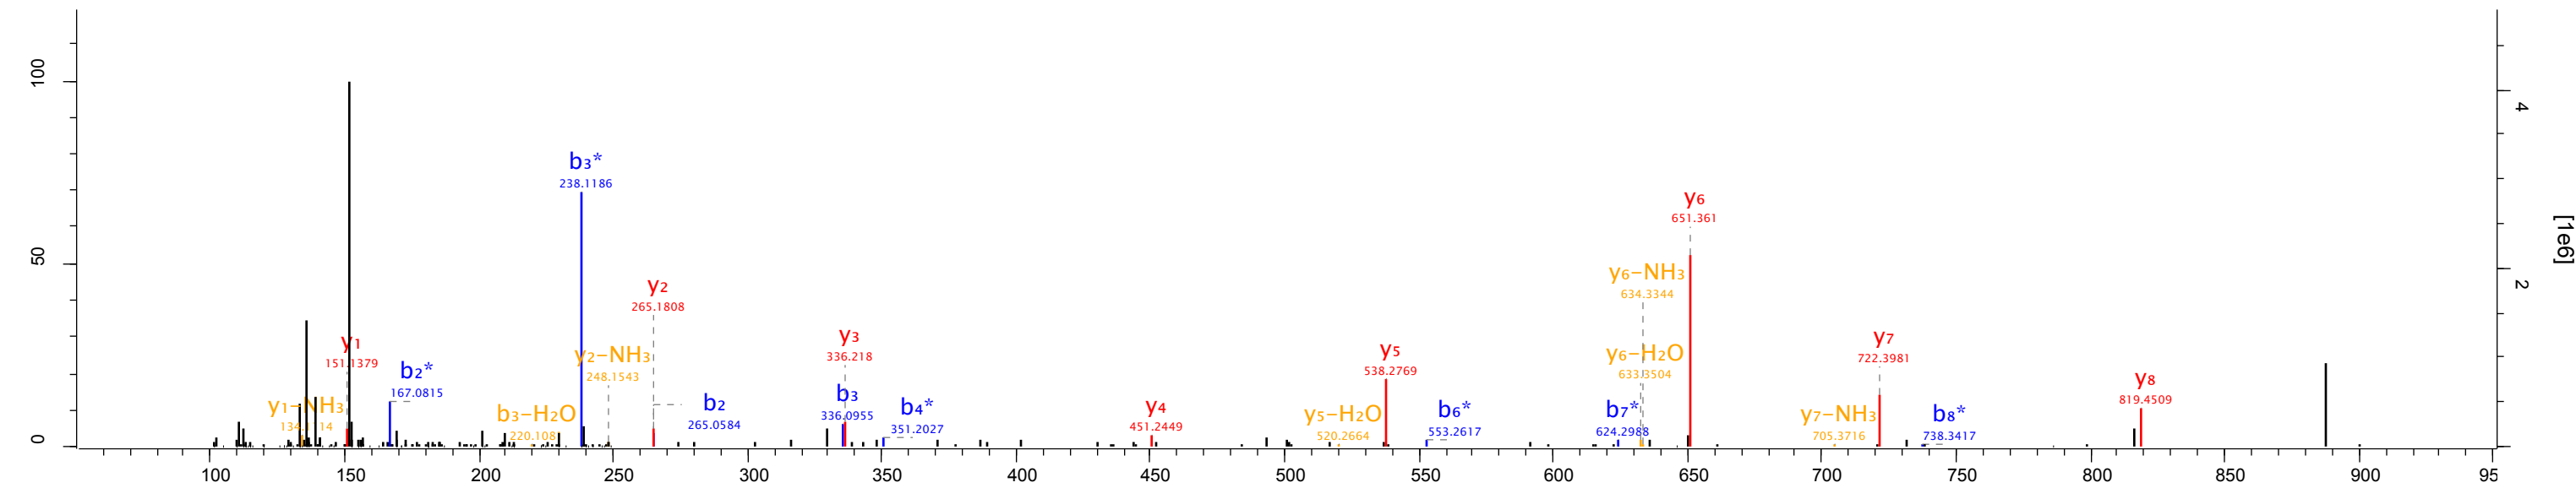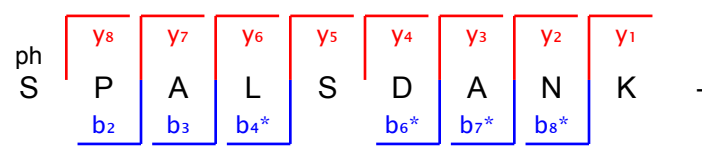

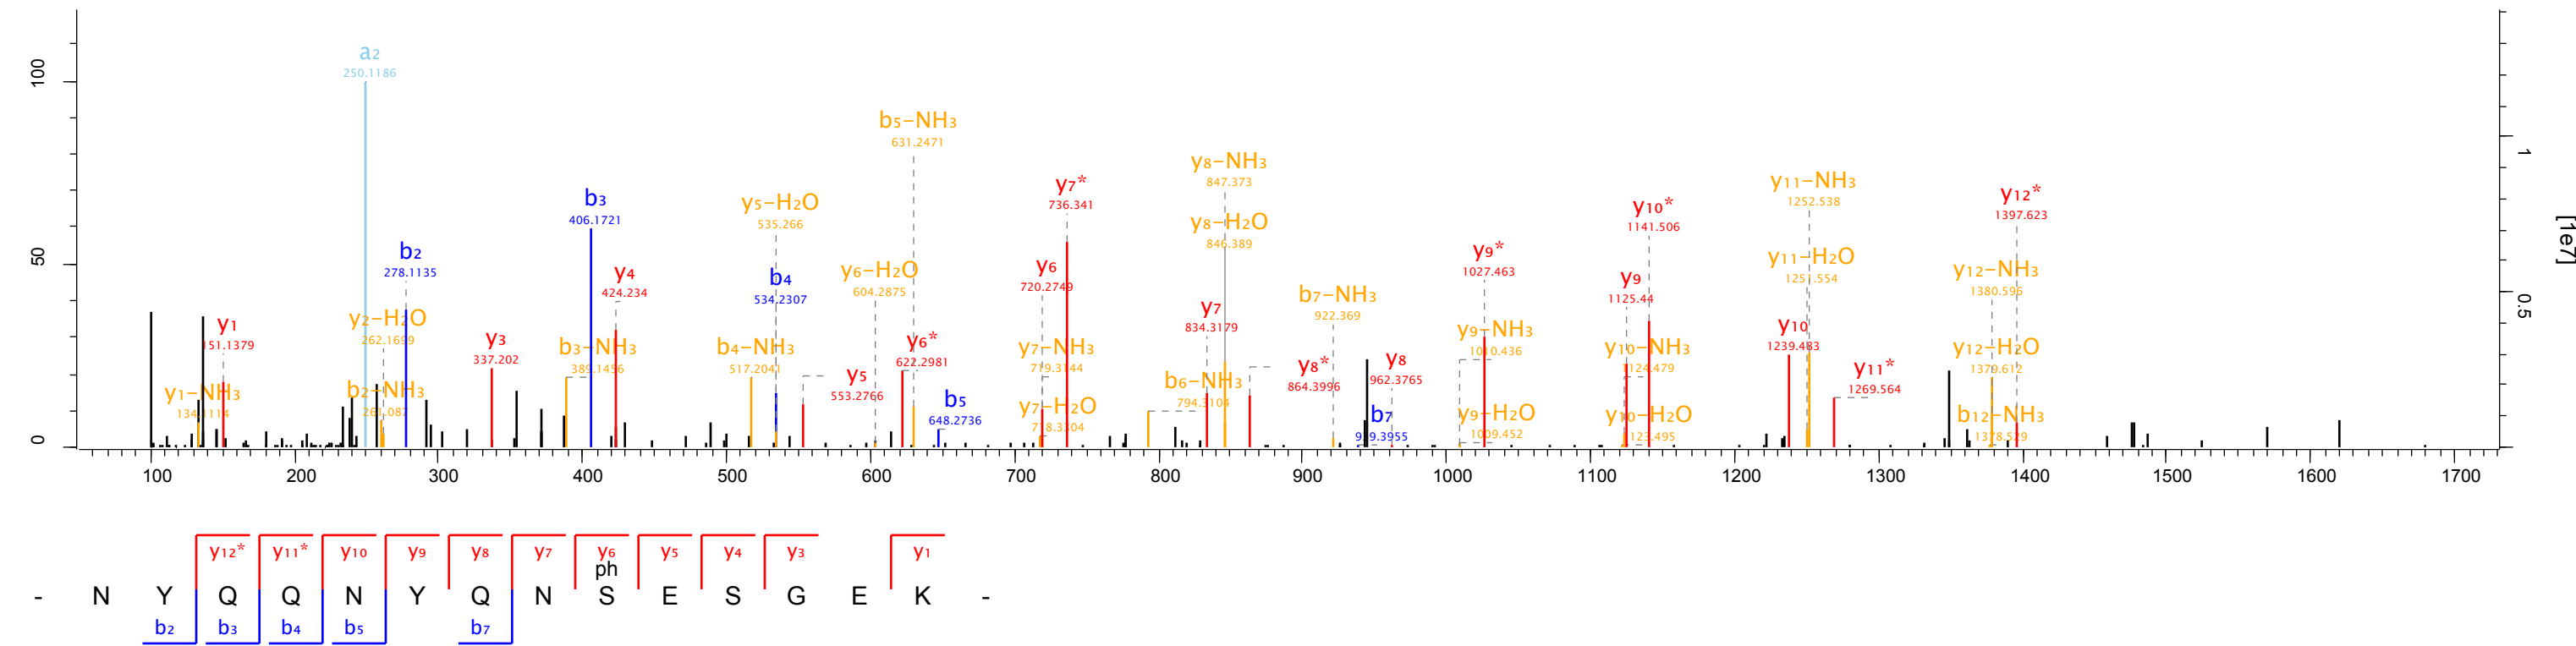

Raw file 20171215\_MaS\_33SR\_LMH\_phospho2\_02 Scan 3968 Method FTMS; HCD Score 50.04 m/z 489.77 Gene names RAPGEF6

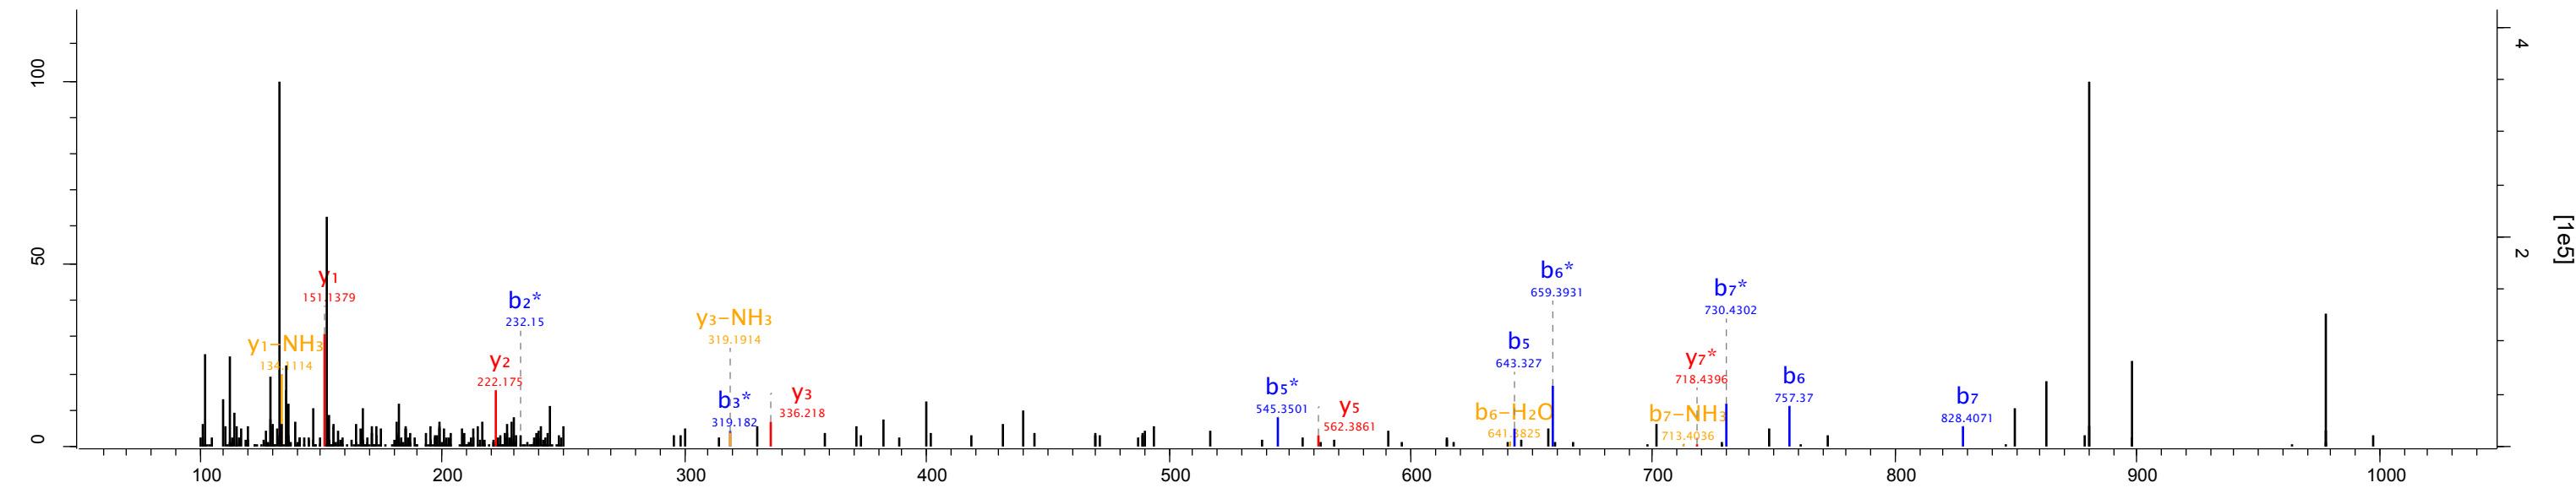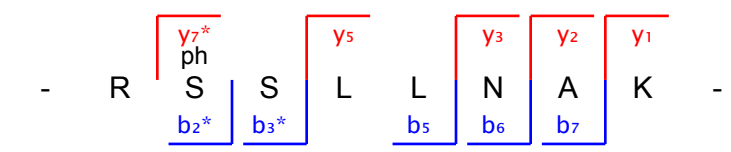

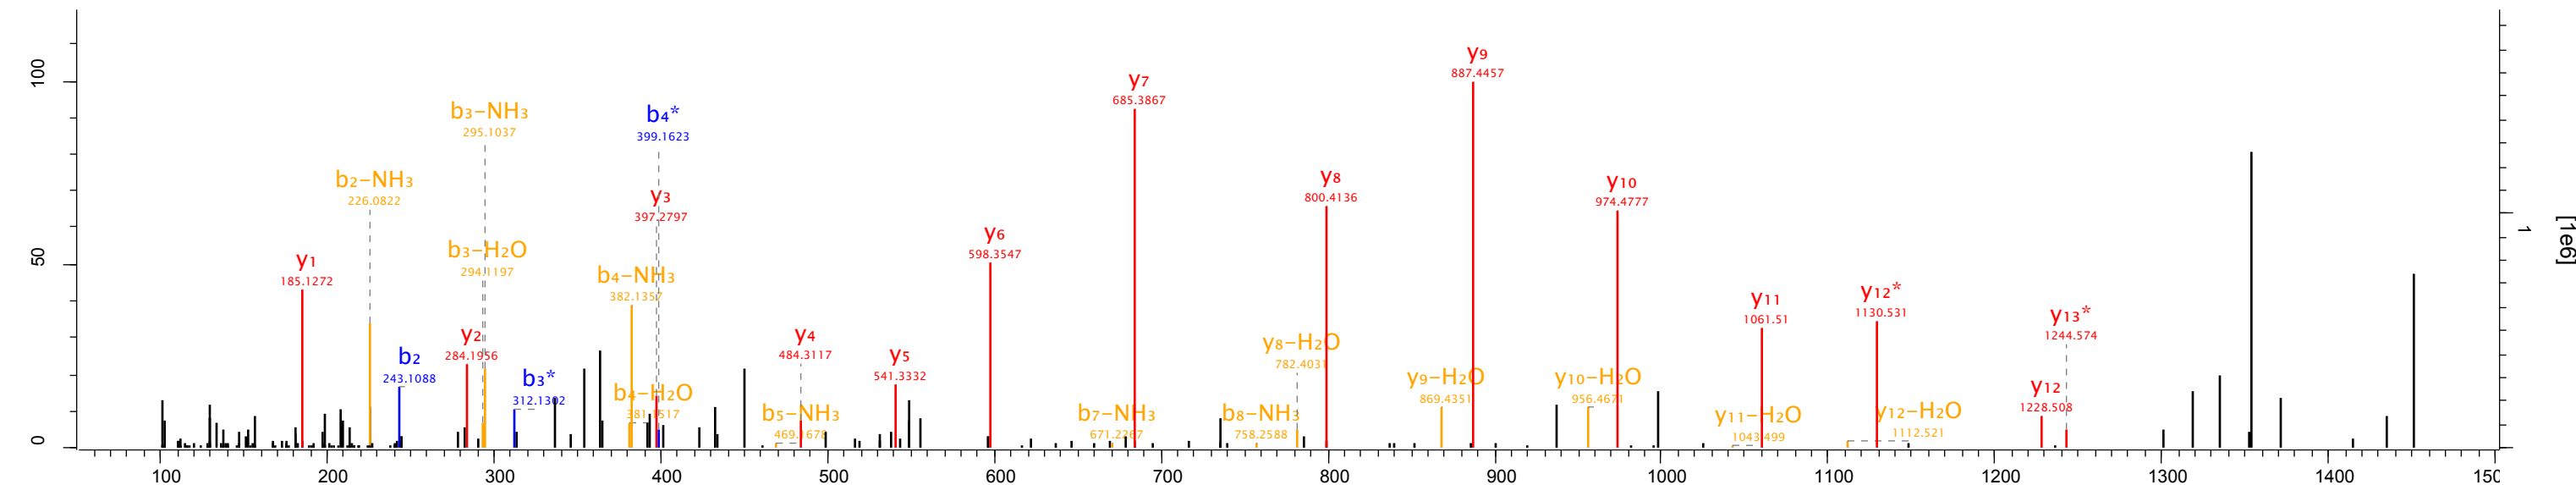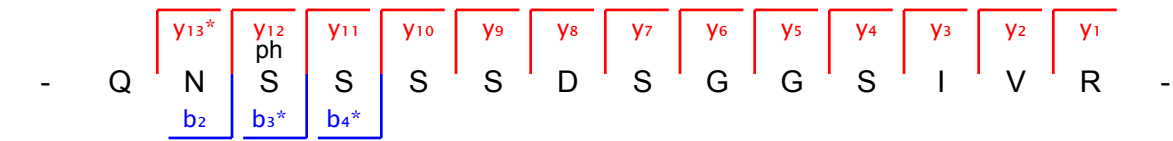

Raw file  
20171215\_MaS\_33SR\_LMH\_phospho2\_02

Scan 4178 Method FTMS; HCD Score 57.29 m/z 757.85 Gene names RASAL2

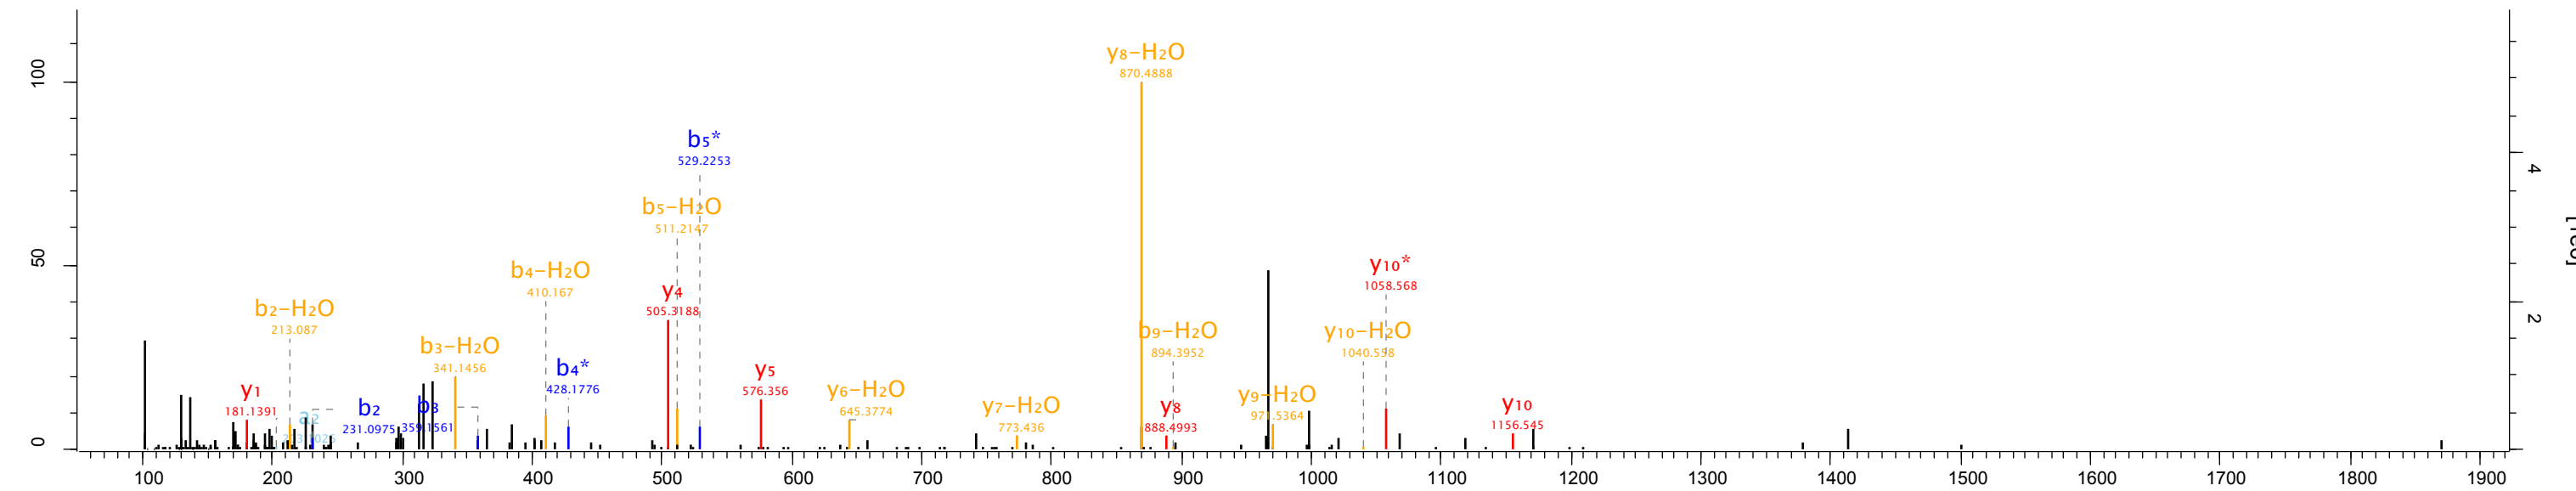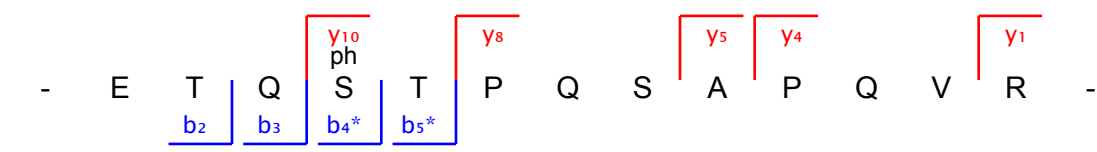



Raw file 20171215\_MaS\_33SR\_LMH\_phospho2\_02 Scan 4418 Method FTMS; HCD Score 202.61 m/z 768.34 Gene names LRRFIP2

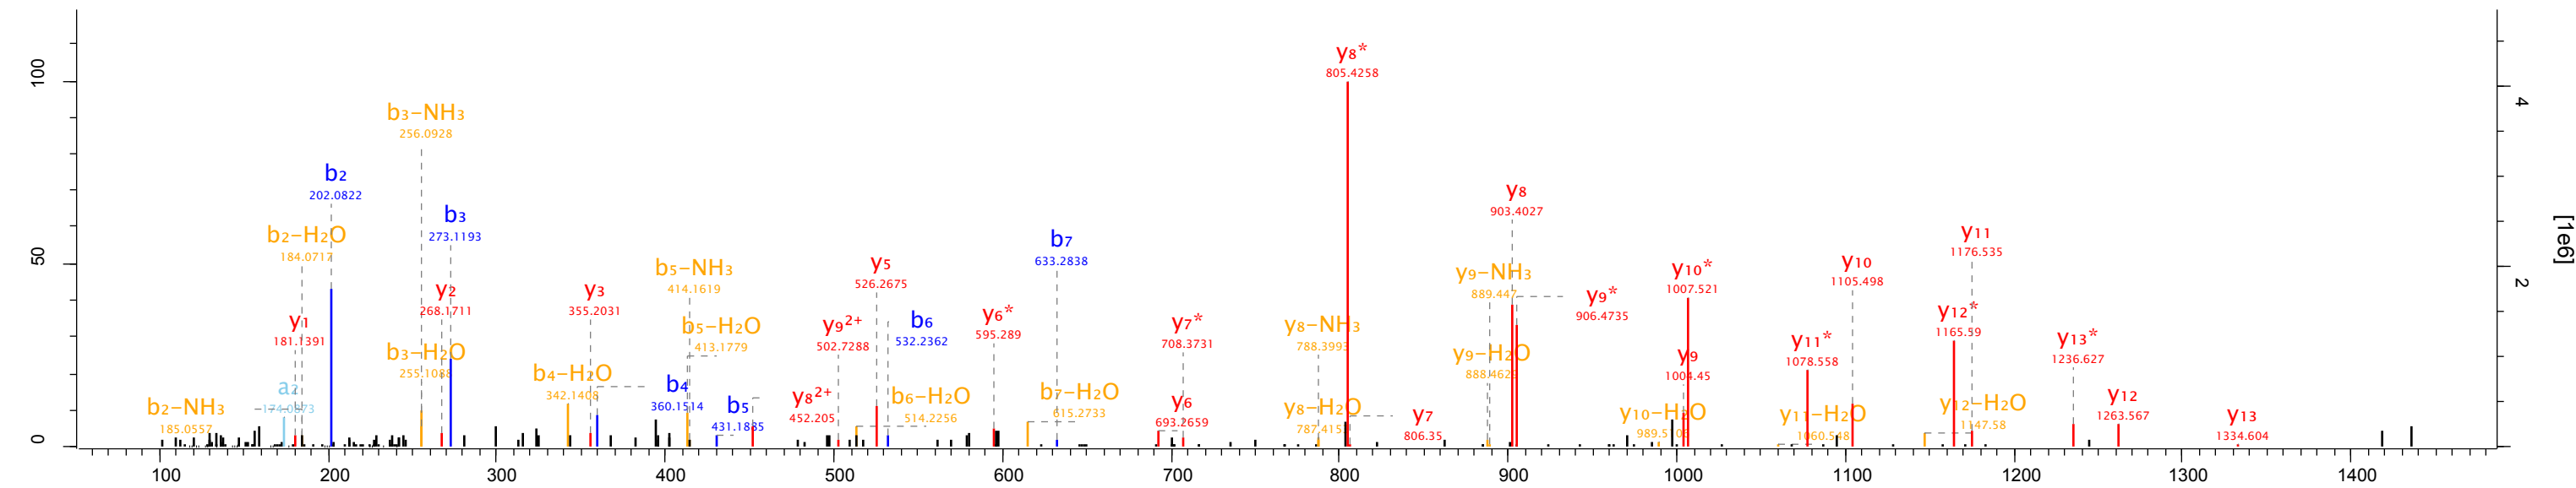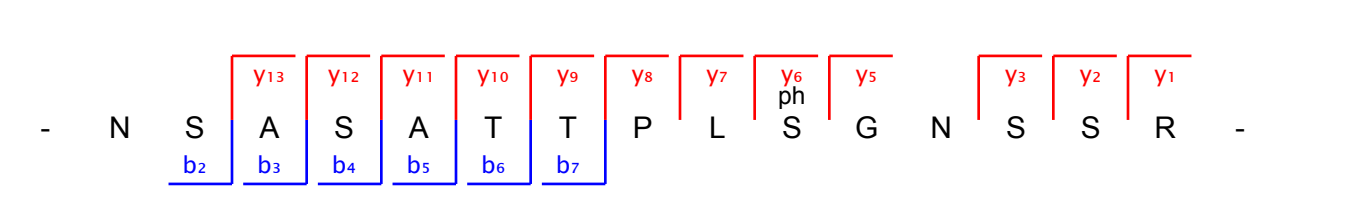

Raw file: 20171215\_MaS\_33SR\_LMH\_phospho2\_02  
 Scan: 4458 Method: FTMS; HCD Score: 92.04 m/z: 556.27 Gene names: KMT2A

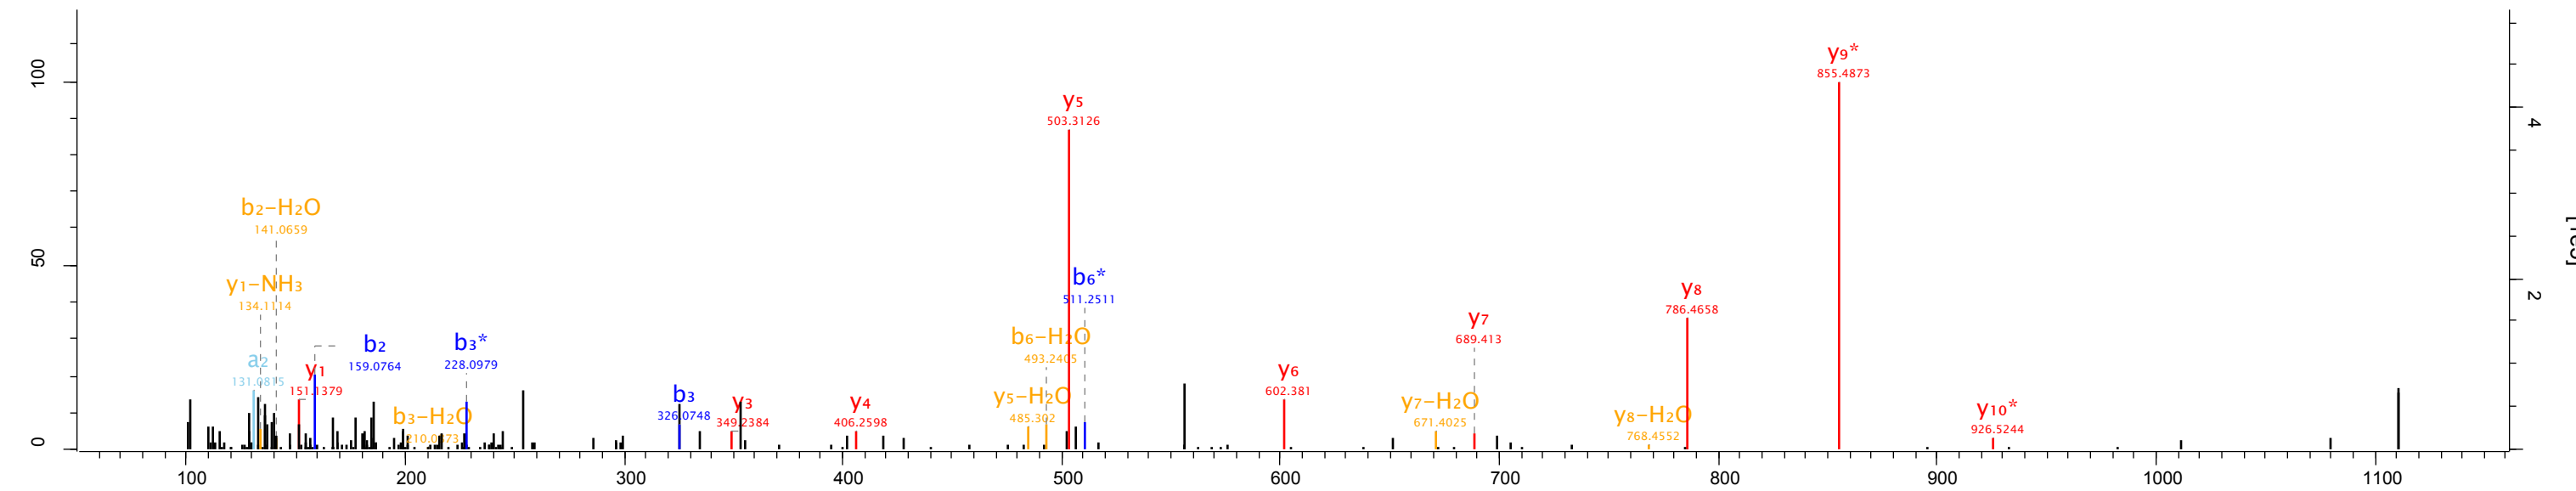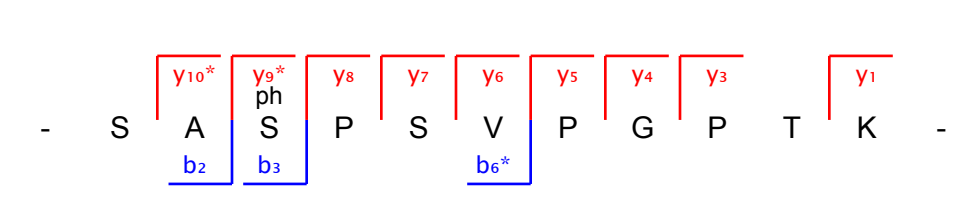

Raw file 20171215\_MaS\_33SR\_LMH\_phospho2\_02 Scan 4558 Method FTMS; HCD Score 158.17 m/z 709.3 Gene names CCDC93

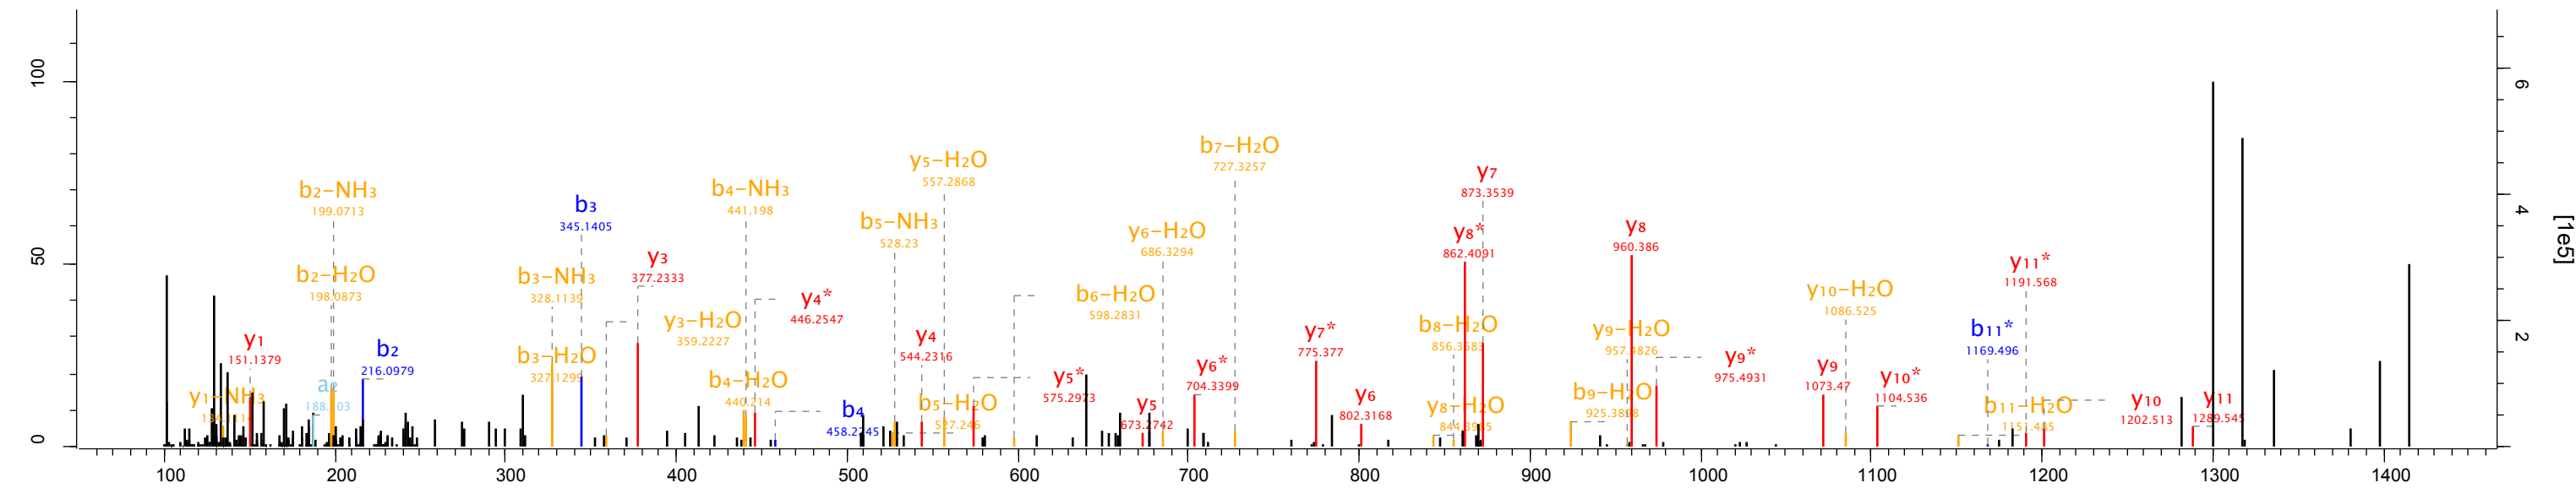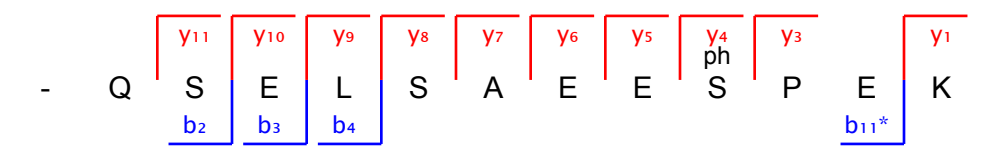

Raw file 20171215\_MaS\_33SR\_LMH\_phospho2\_02 Scan 4918 Method FTMS; HCD Score 91.24 m/z 534.25 Gene names HMGA1

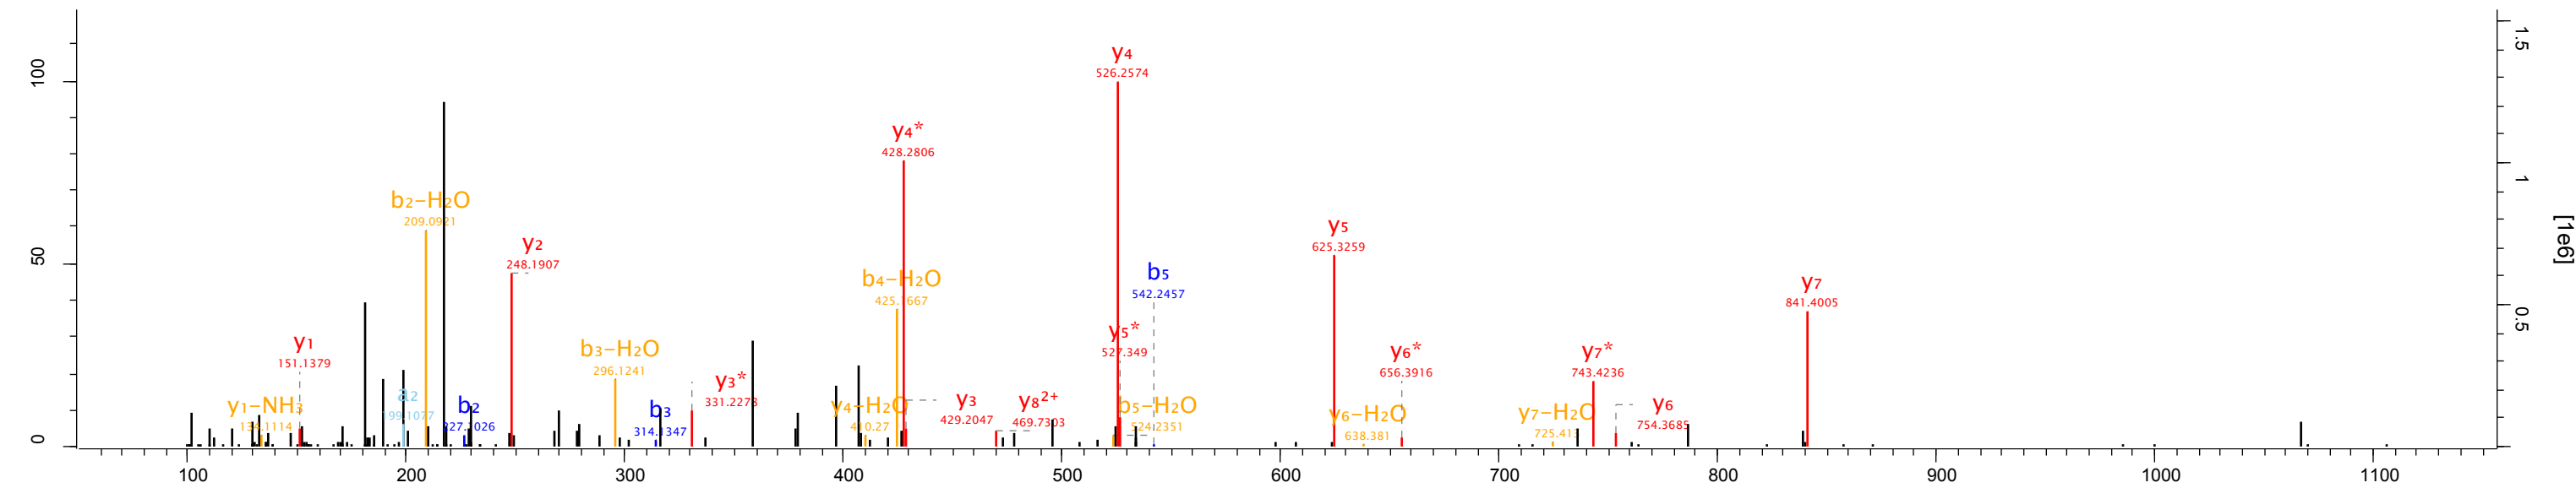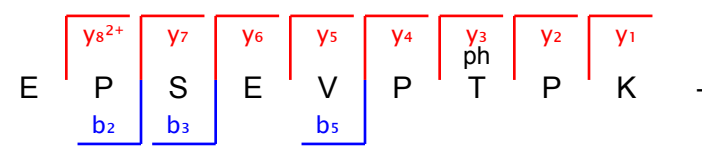

Raw file 20171215\_MaS\_33SR\_LMH\_phospho2\_02 Scan 5178 Method FTMS; HCD Score 59.42 m/z 566.76

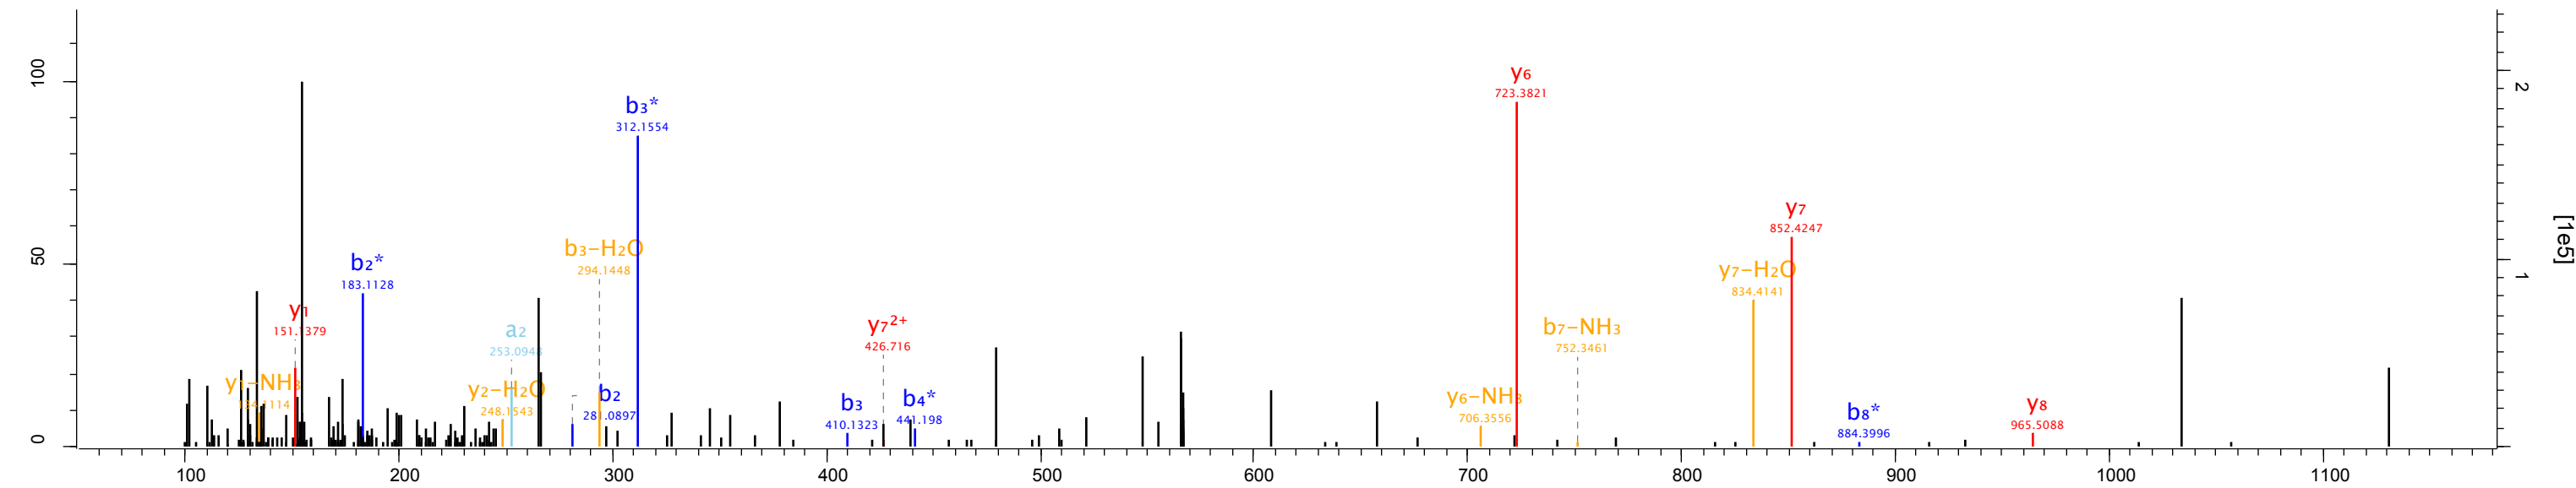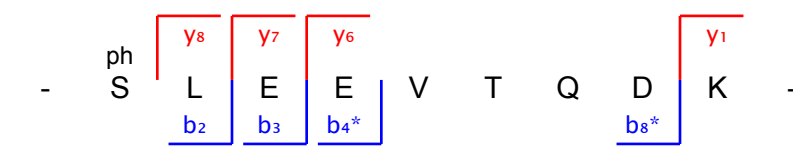

Raw file 20171215\_MaS\_33SR\_LMH\_phospho2\_02 Scan 5208 Method FTMS; HCD Score 99.69 m/z 437.19 Gene names CDK11A;CDK11B;CDC2L1

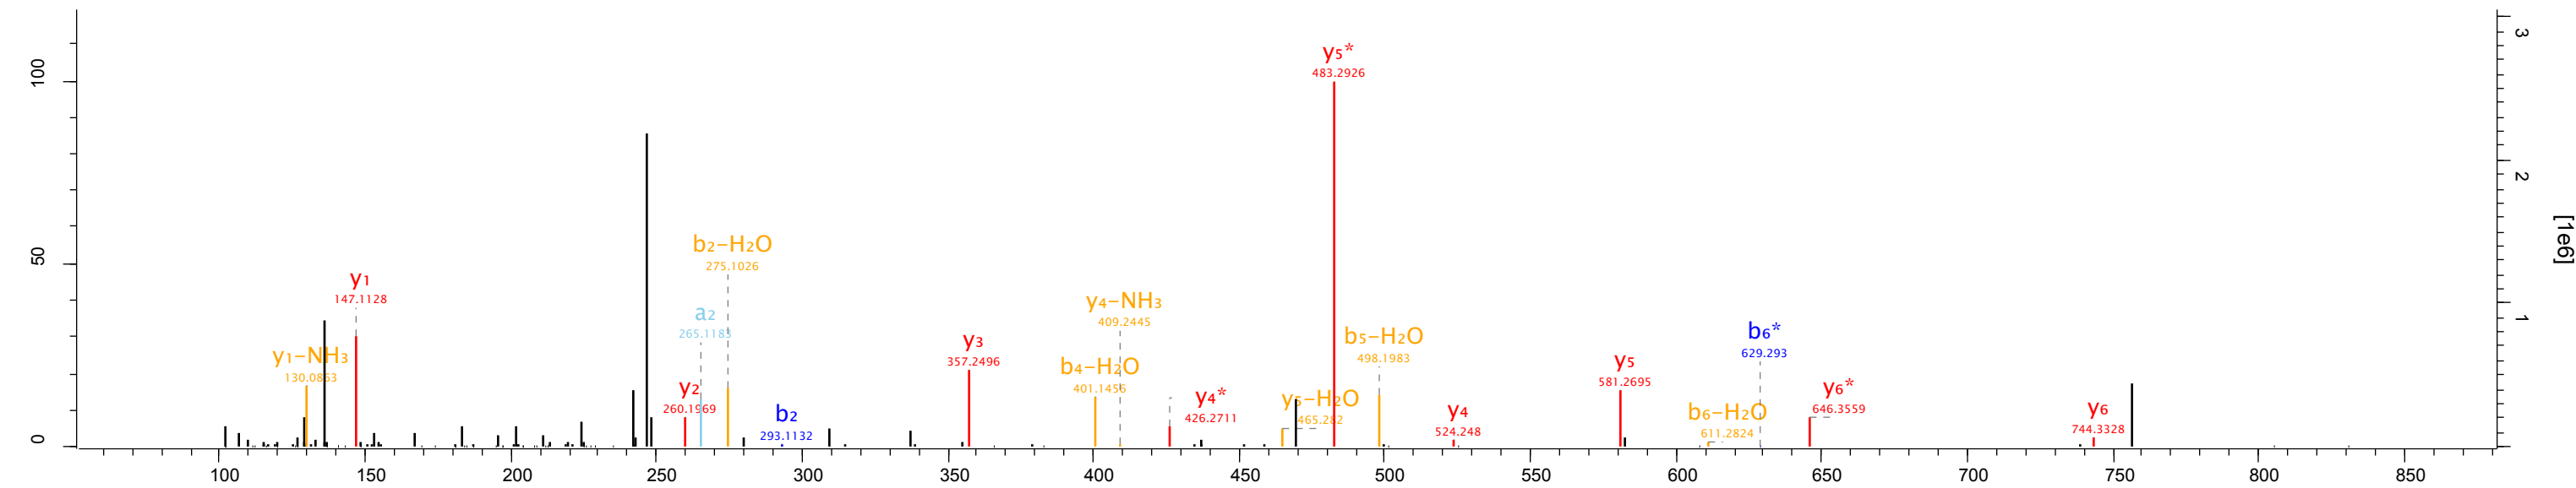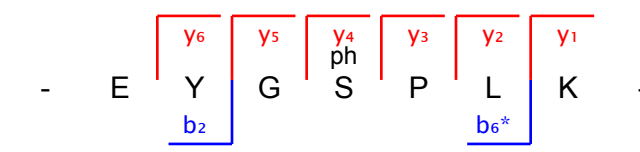

Raw file 20171215\_MaS\_33SR\_LMH\_phospho2\_02 Scan 5608 Method FTMS; HCD Score 125.74 m/z 478.23 Gene names RNF113A

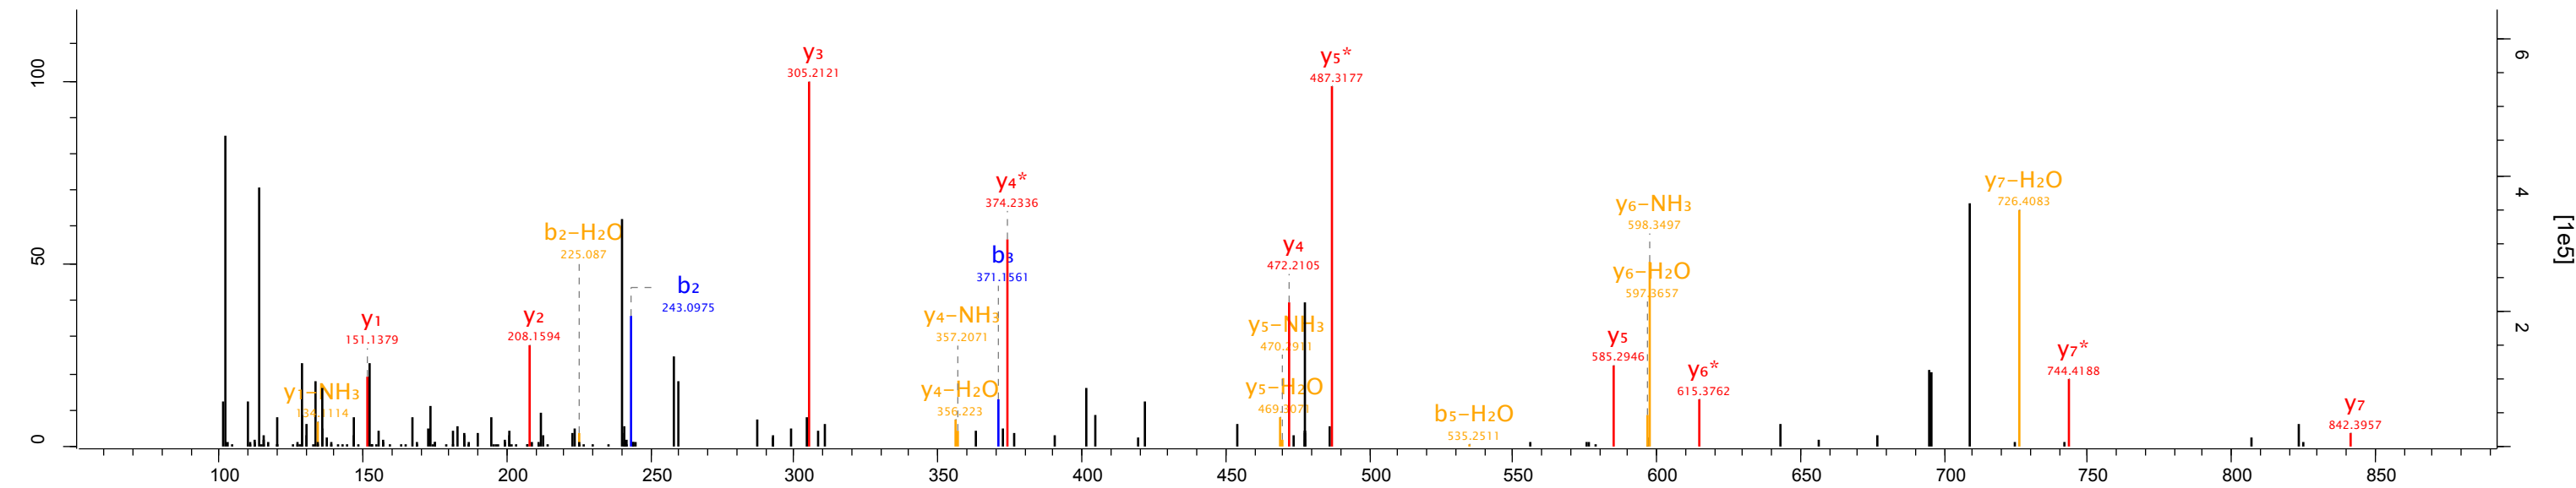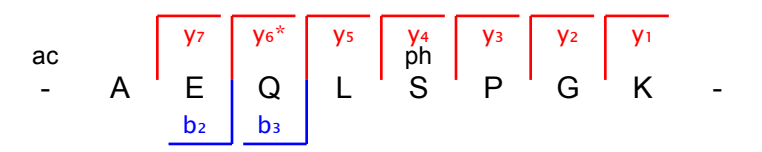

Raw file Scan Method Score m/z Gene names

20171215\_MaS\_33SR\_LMH\_phospho2\_02 5838 FTMS; HCD 145.01 539.22 MAP1B

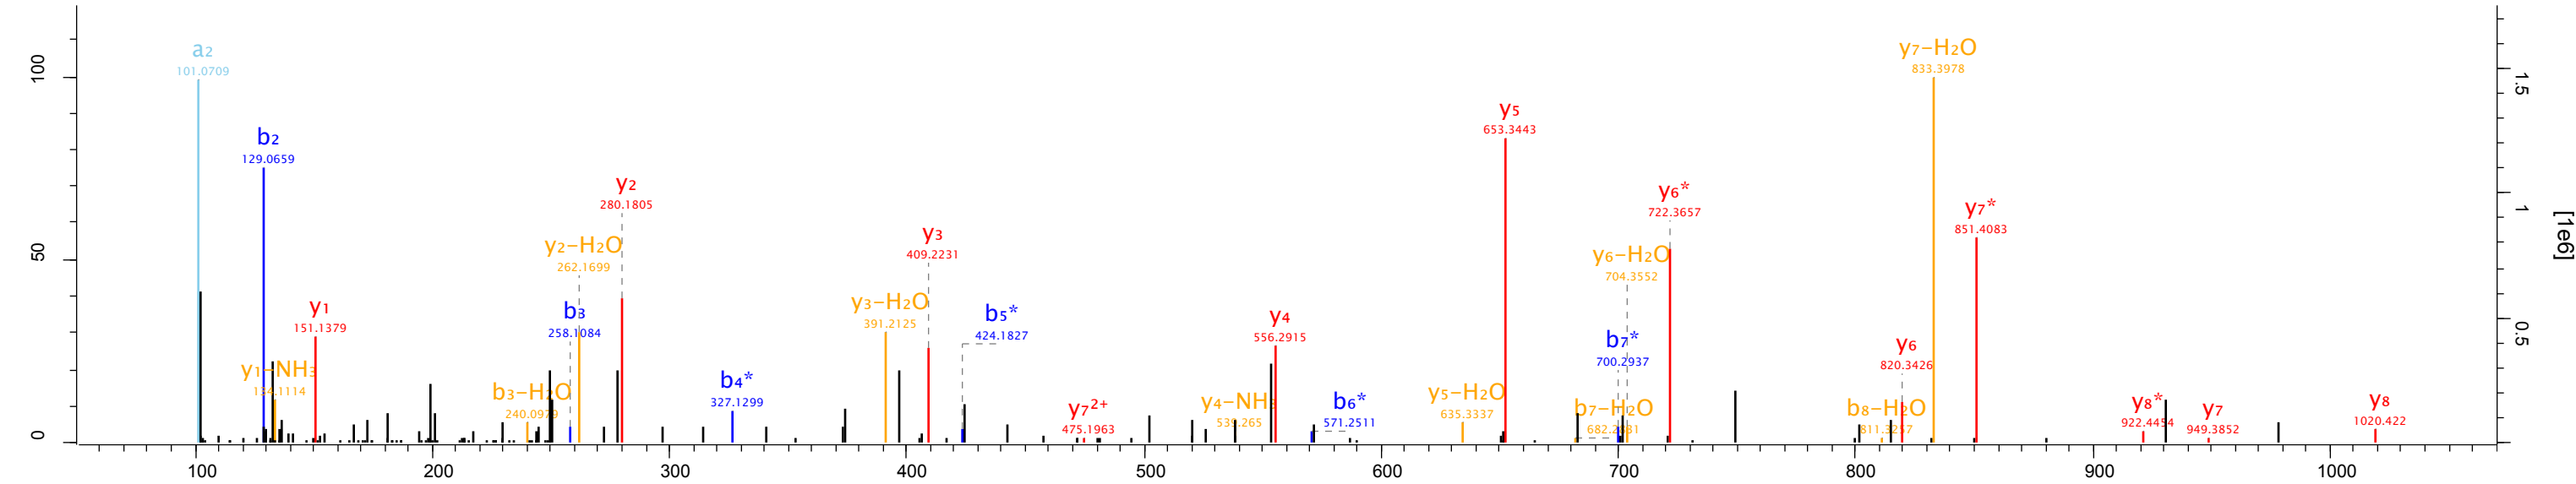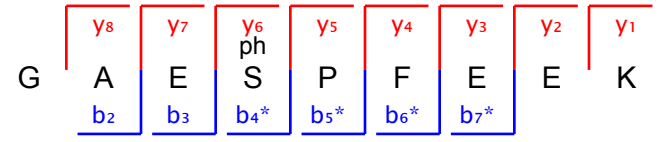



Raw file 20171215\_MaS\_33SR\_LMH\_phospho2\_02 Scan 7348 Method FTMS; HCD Score 44.66 m/z 548.9 Gene names ITGB4

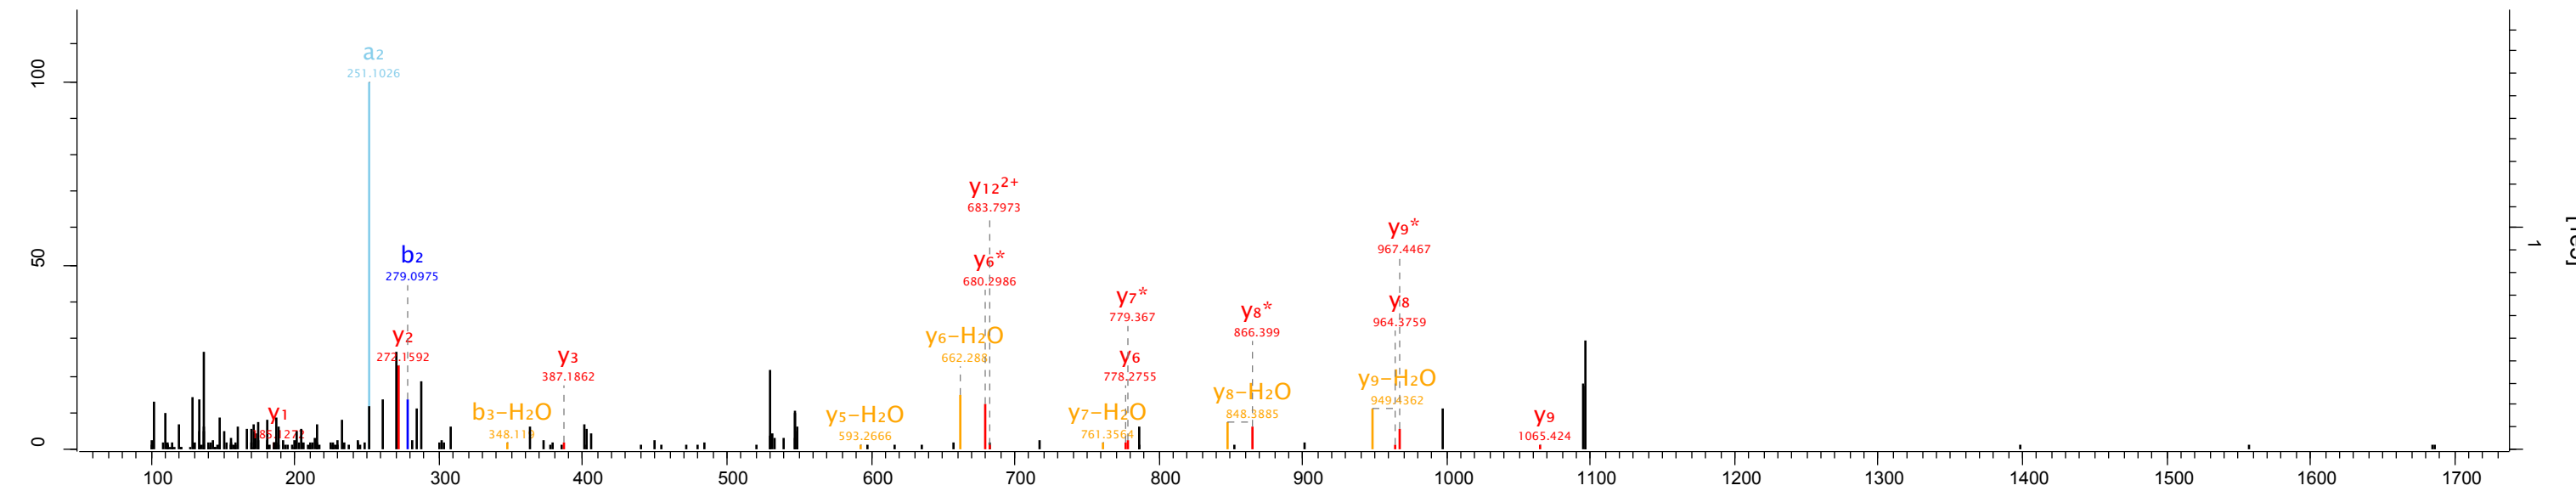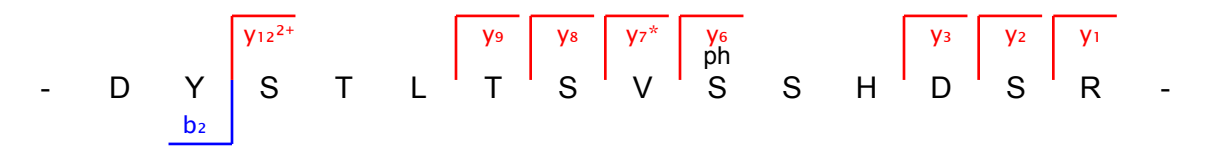

Raw file 20171215\_MaS\_33SR\_LMH\_phospho2\_02 Scan 7558 Method FTMS; HCD Score 92.61 m/z 642.19 Gene names PDCD5

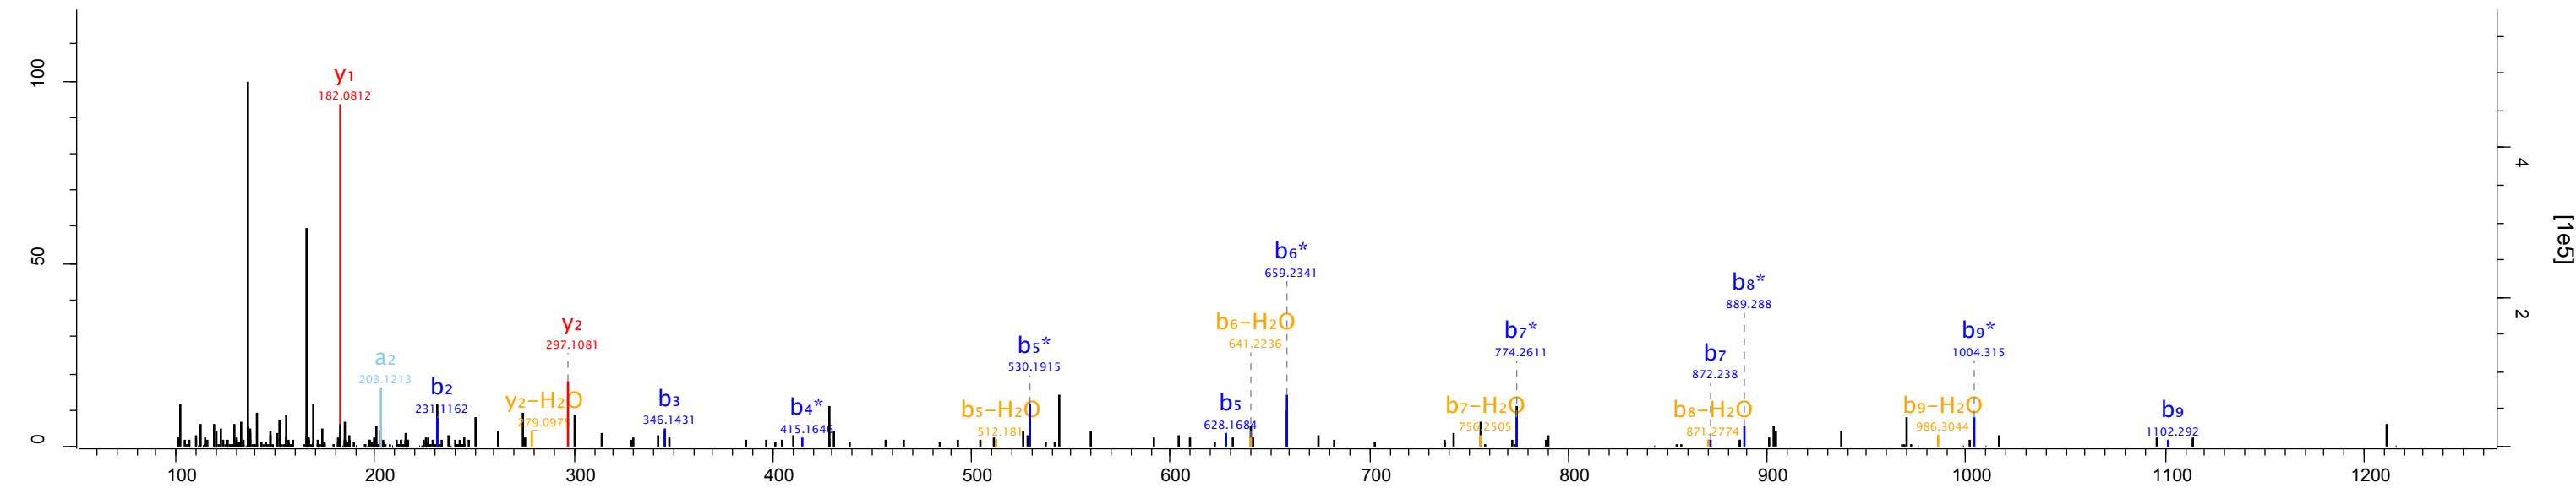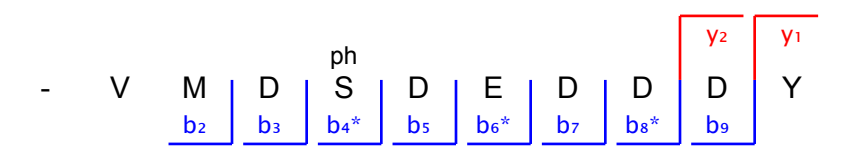

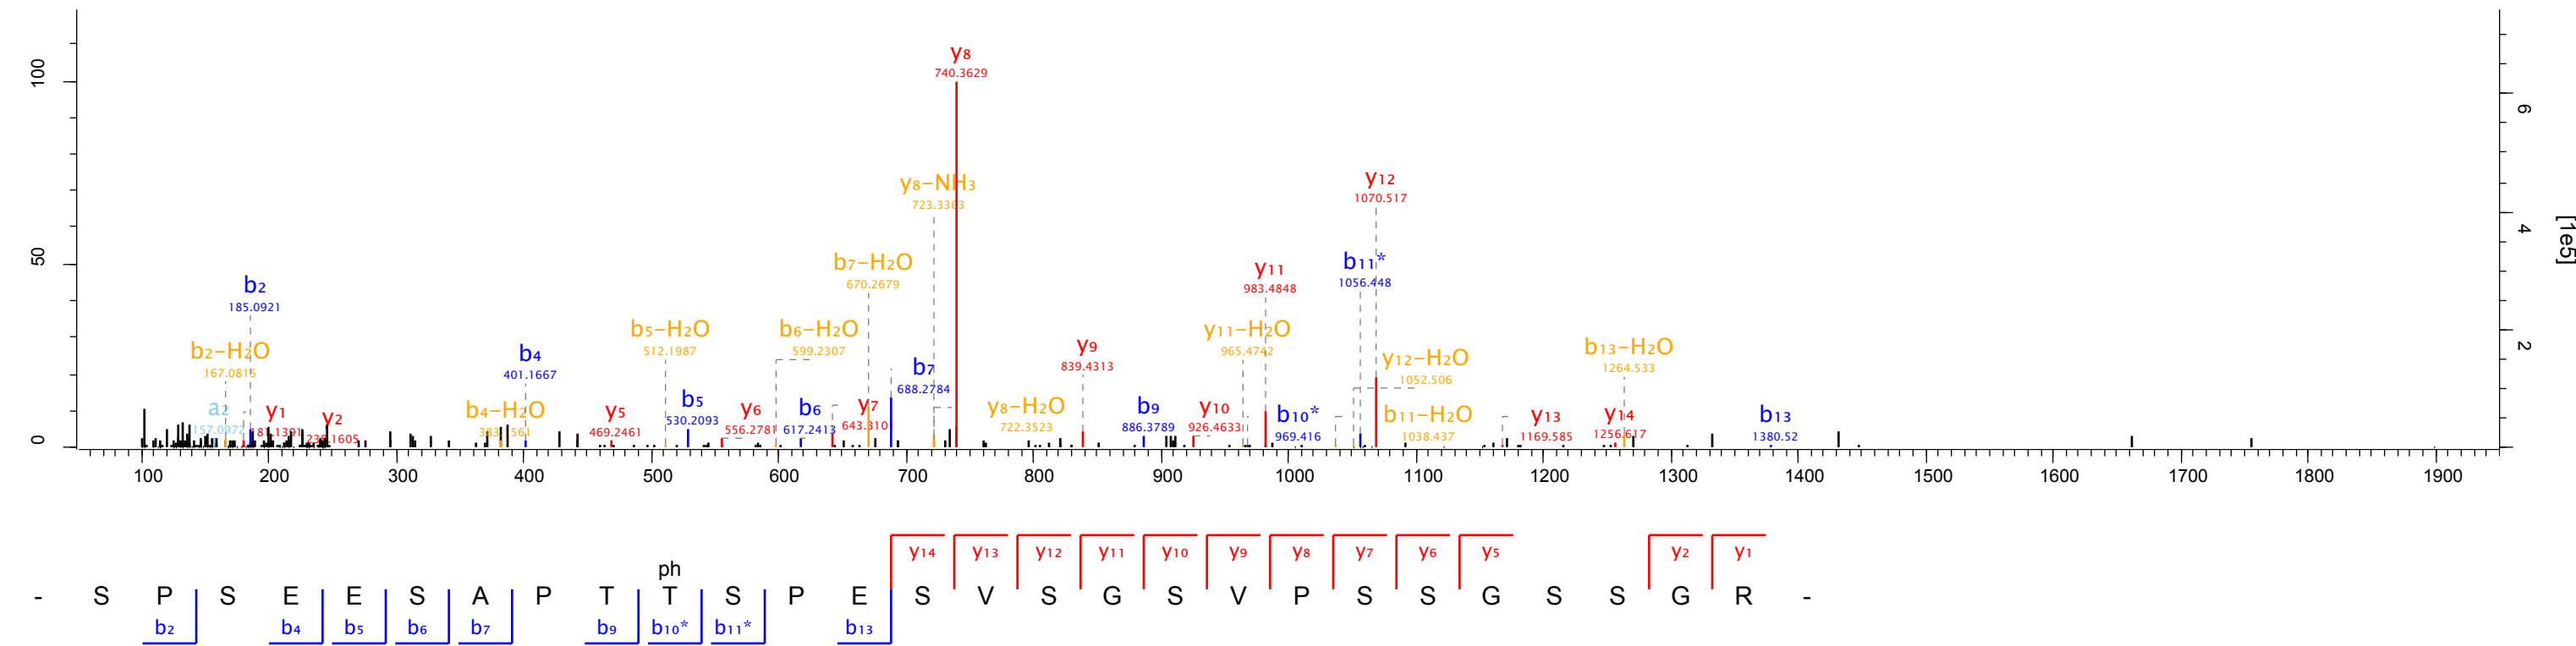

Raw file: 20171215\_MaS\_33SR\_LMH\_phospho2\_02

Scan: 9068 Method: FTMS; HCD Score: 193.16 m/z: 884.37 Gene names: DKC1

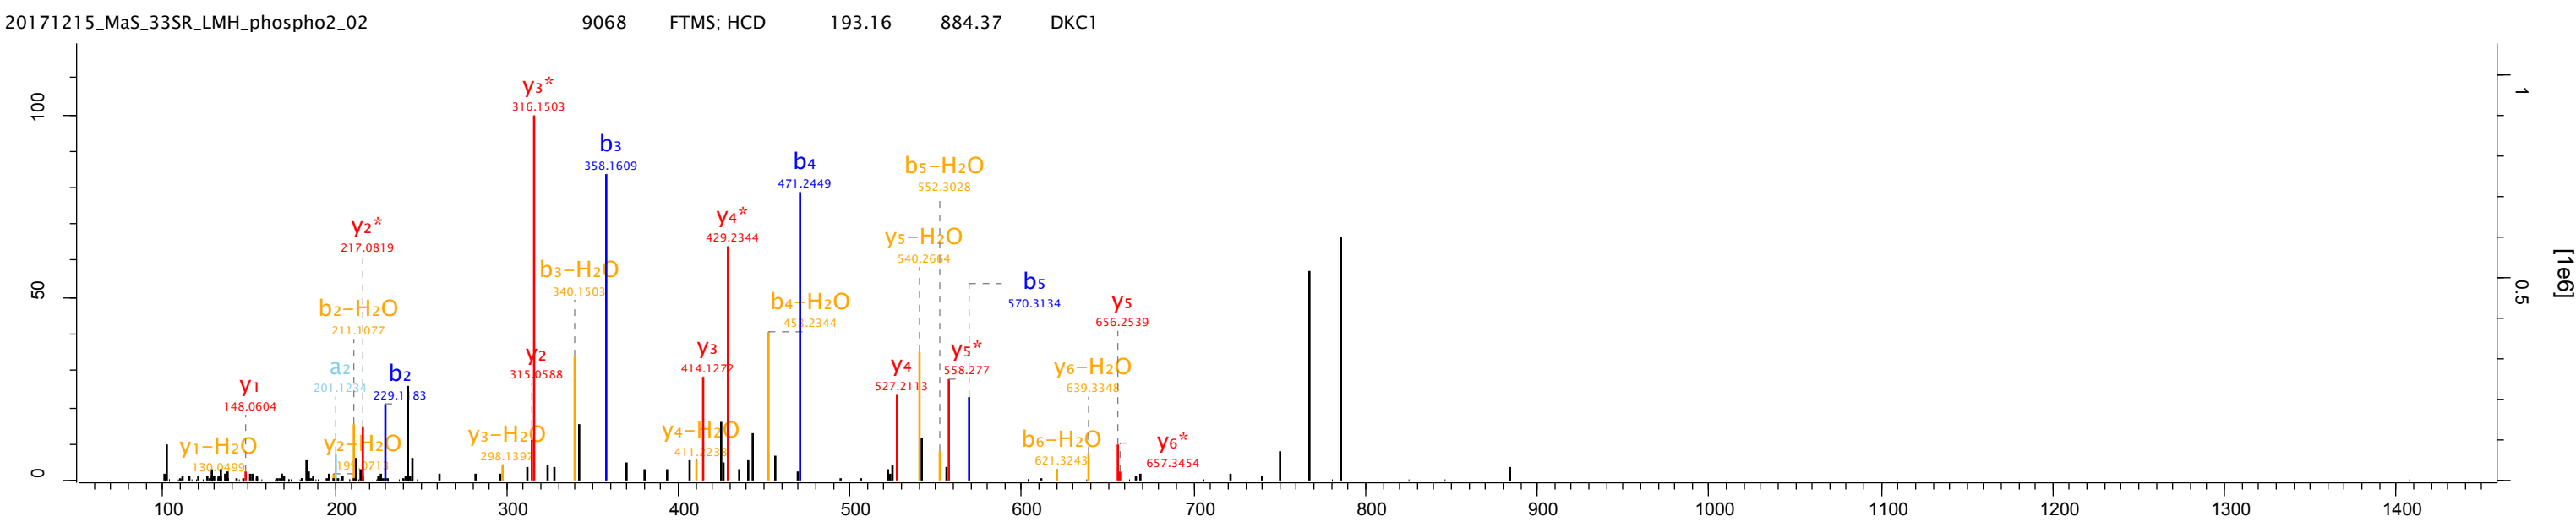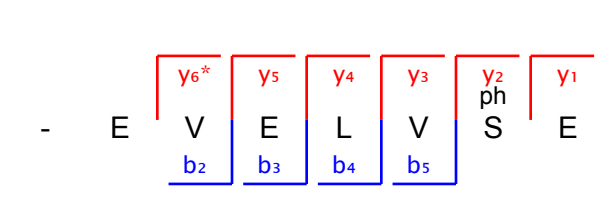

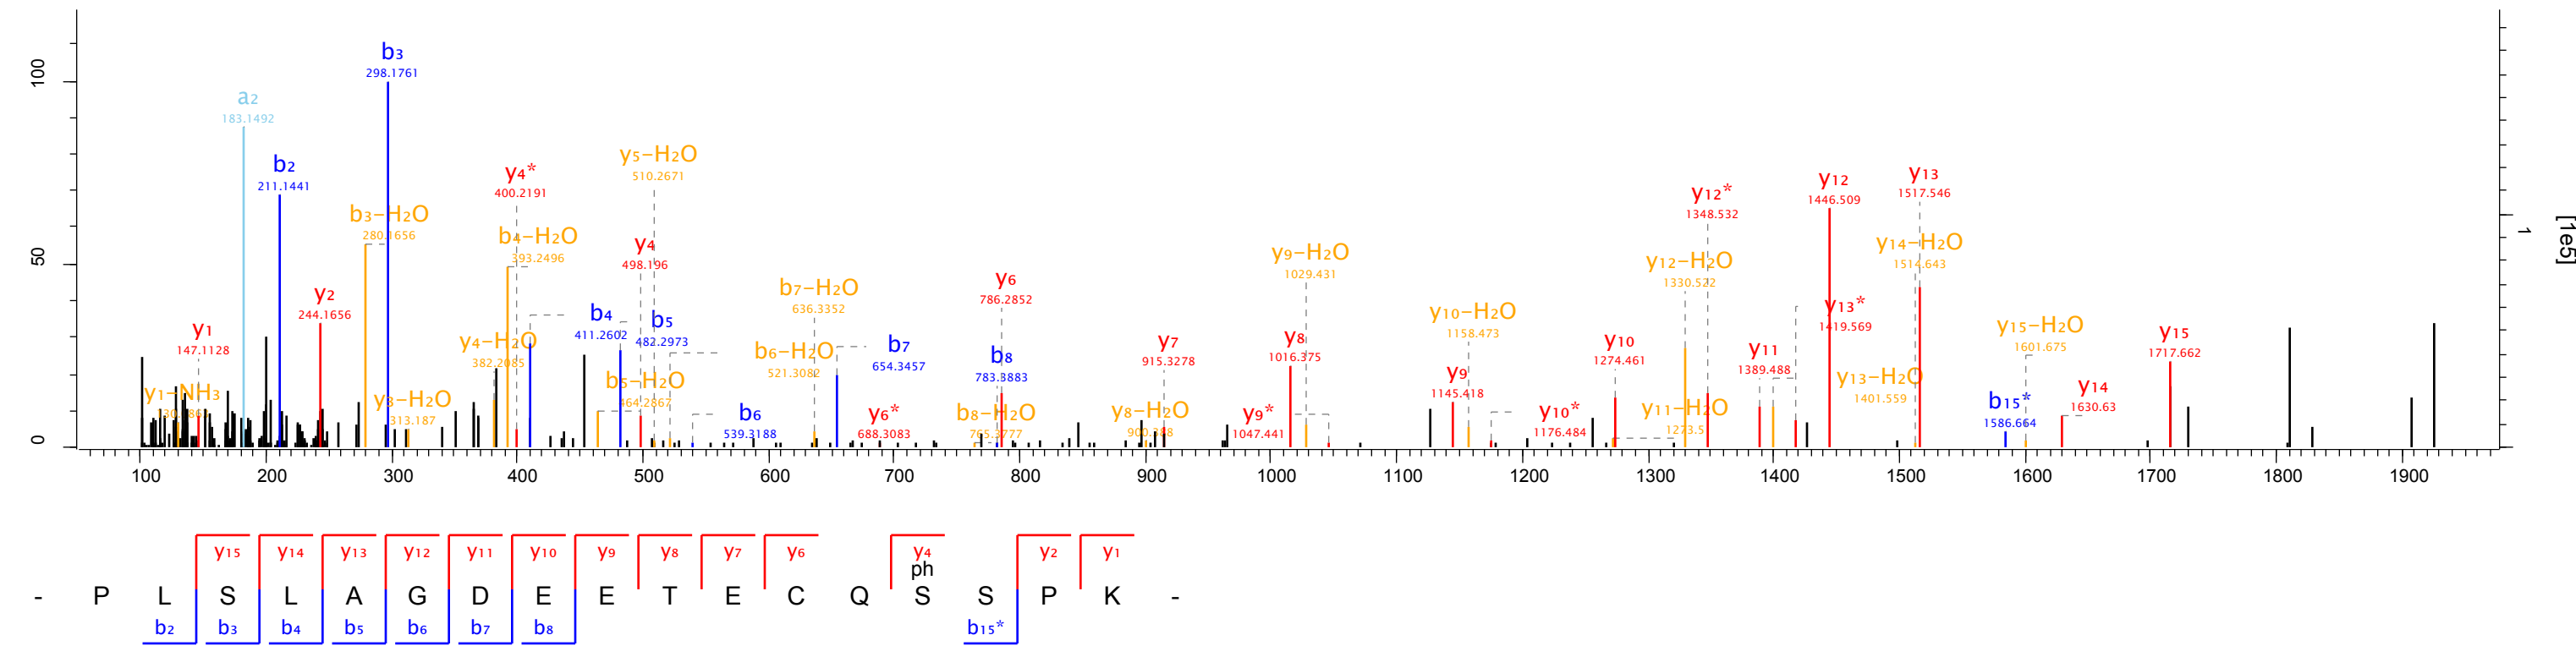



Raw file 20171215\_MaS\_33SR\_LMH\_phospho2\_02 Scan 9278 Method FTMS; HCD Score 169.6 m/z 803.38 Gene names KIAA1432

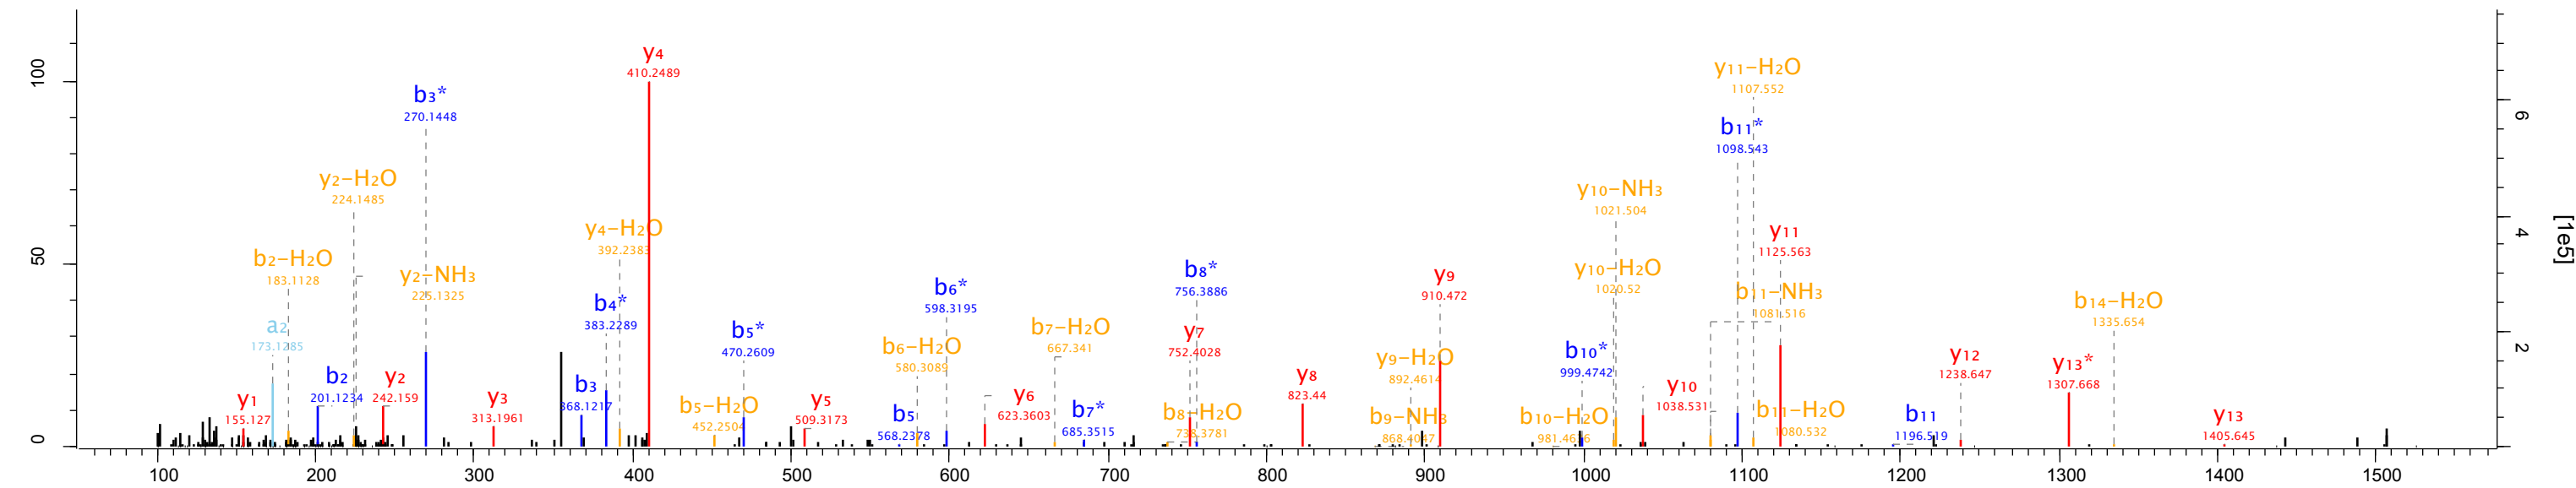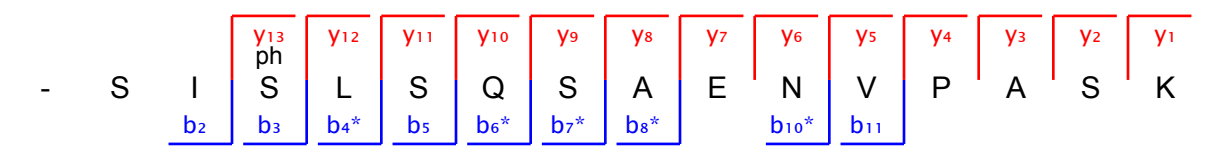

Raw file: 20171215\_MaS\_33SR\_LMH\_phospho2\_02  
 Scan: 9808 Method: FTMS; HCD Score: 206.49 m/z: 919.76 Gene names: EIF4ENIF1

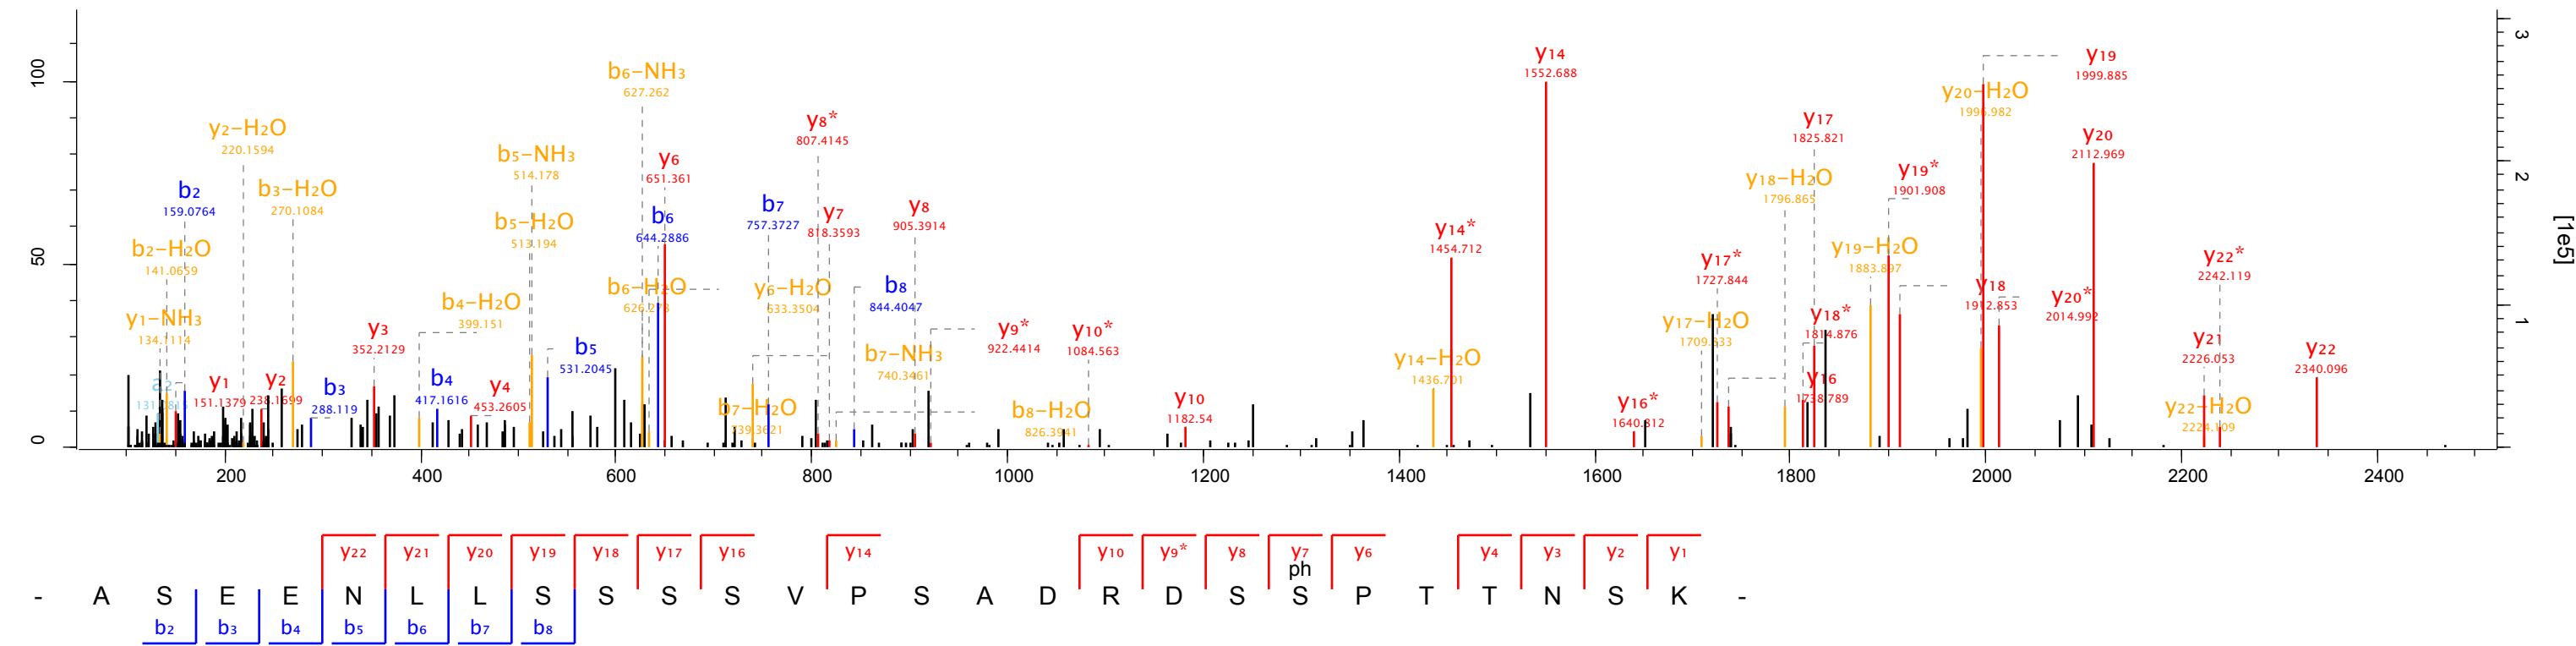



Raw file 20171215\_MaS\_33SR\_LMH\_phospho2\_02 Scan 9988 Method FTMS; HCD Score 54.8 m/z 1173.51 Gene names AKAP12

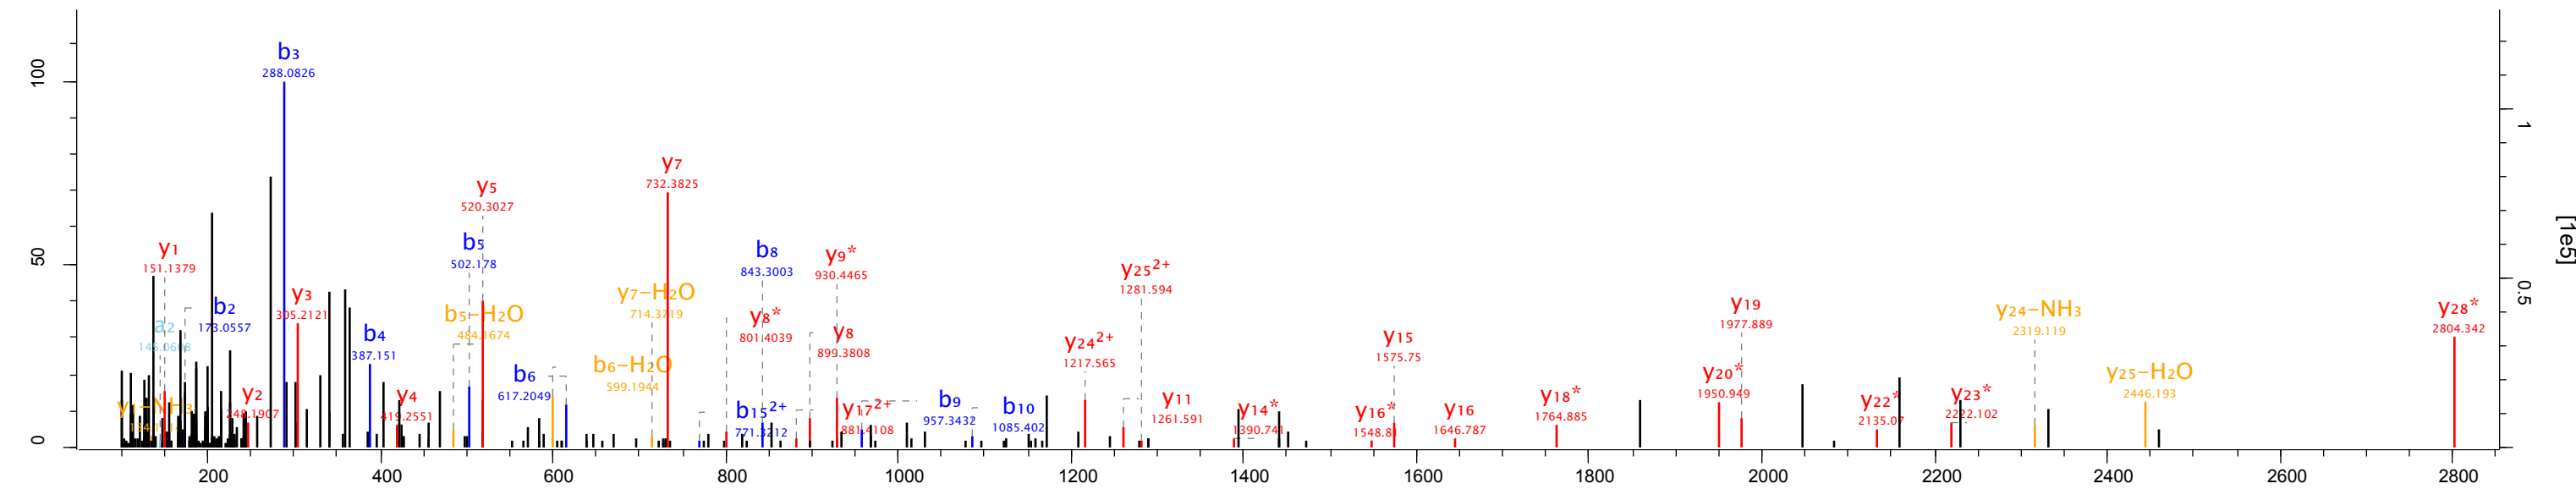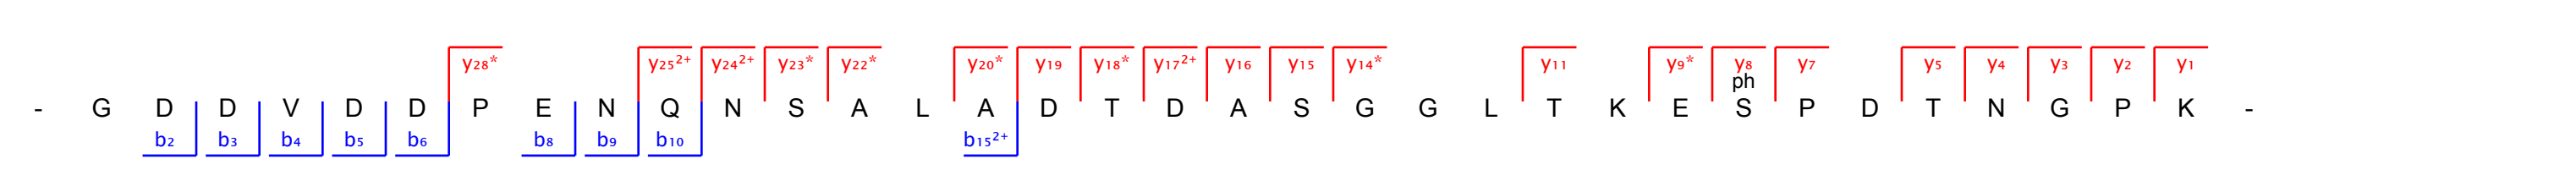

Raw file 20171215\_MaS\_33SR\_LMH\_phospho2\_03 Scan 10008 Method FTMS; HCD Score 54.66 m/z 785.34 Gene names CXorf23

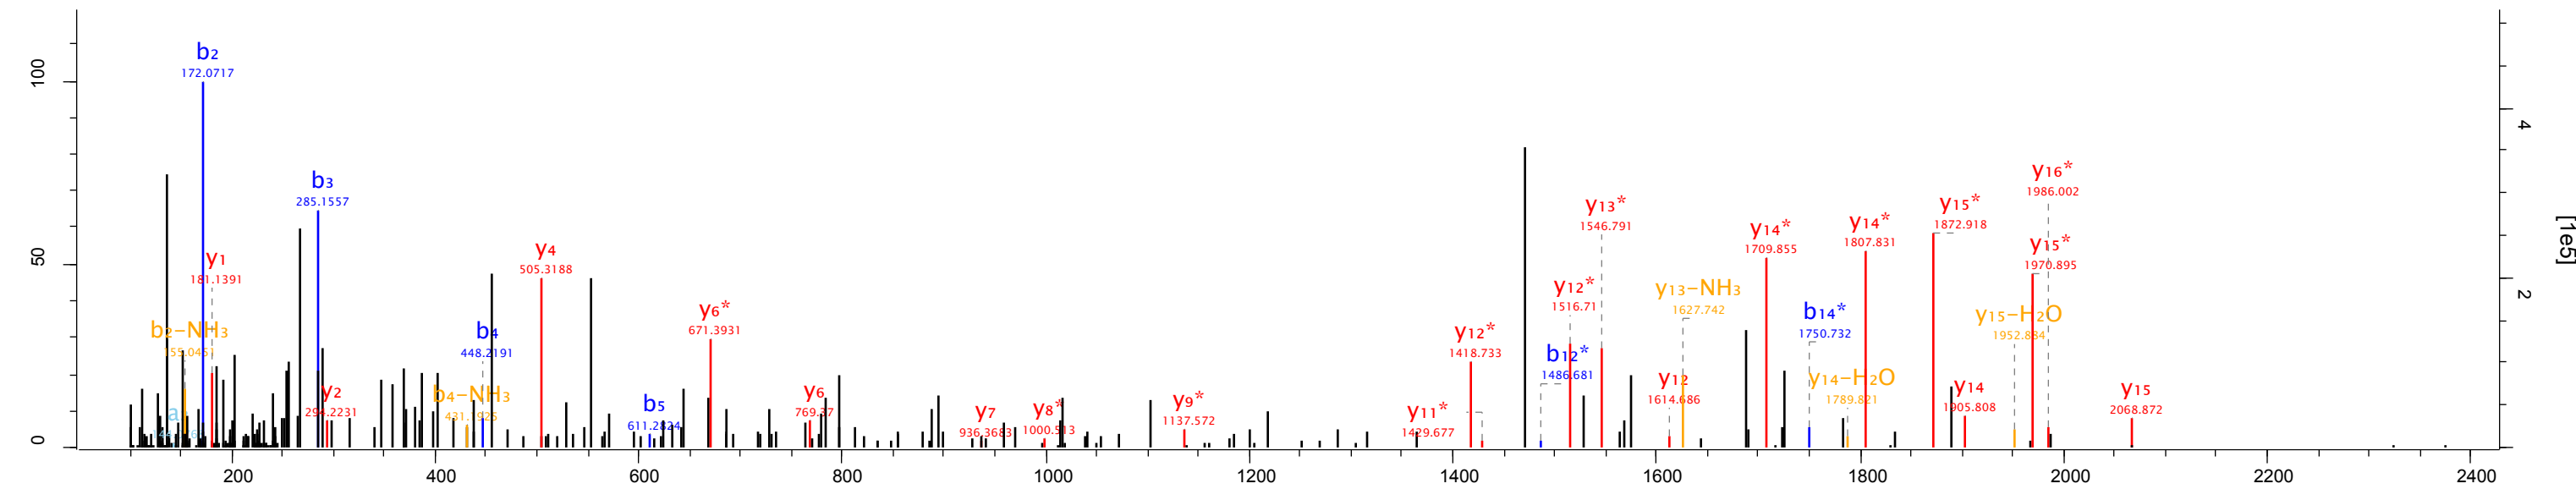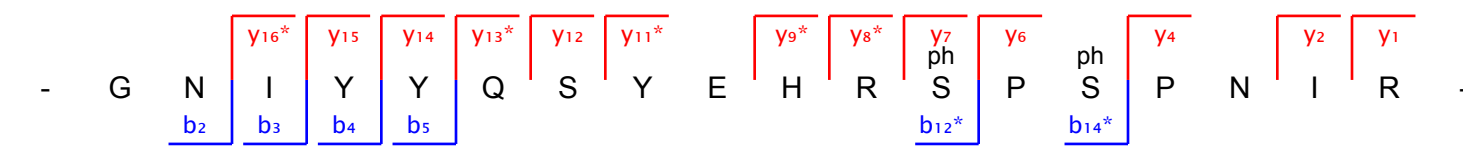

Raw file: 20171215\_MaS\_33SR\_LMH\_phospho2\_03  
 Scan: 10048 Method: FTMS; HCD Score: 127.95 m/z: 1085.47 Gene names: KDM6A

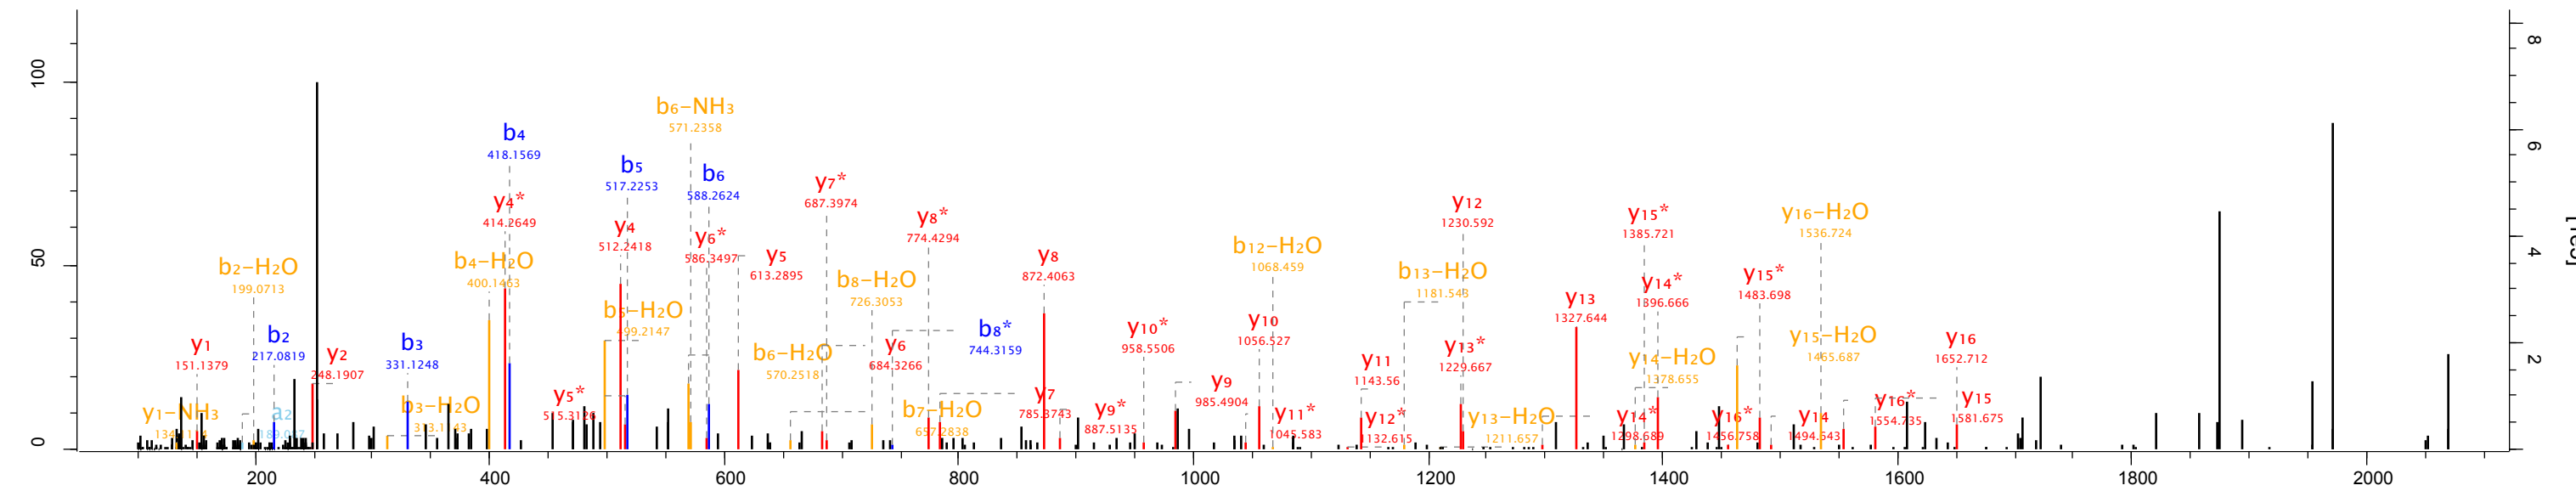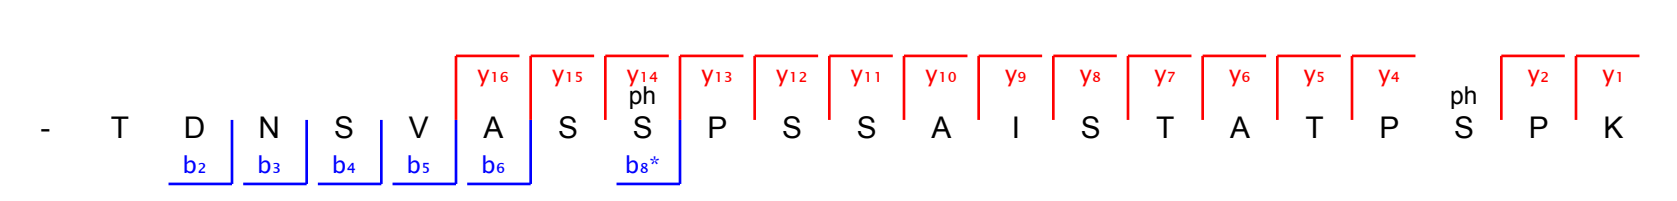

20171215\_MaS\_33SR\_LMH\_phospho2\_03 10218 FTMS; HCD 102.08 661.77 ARHGEF11

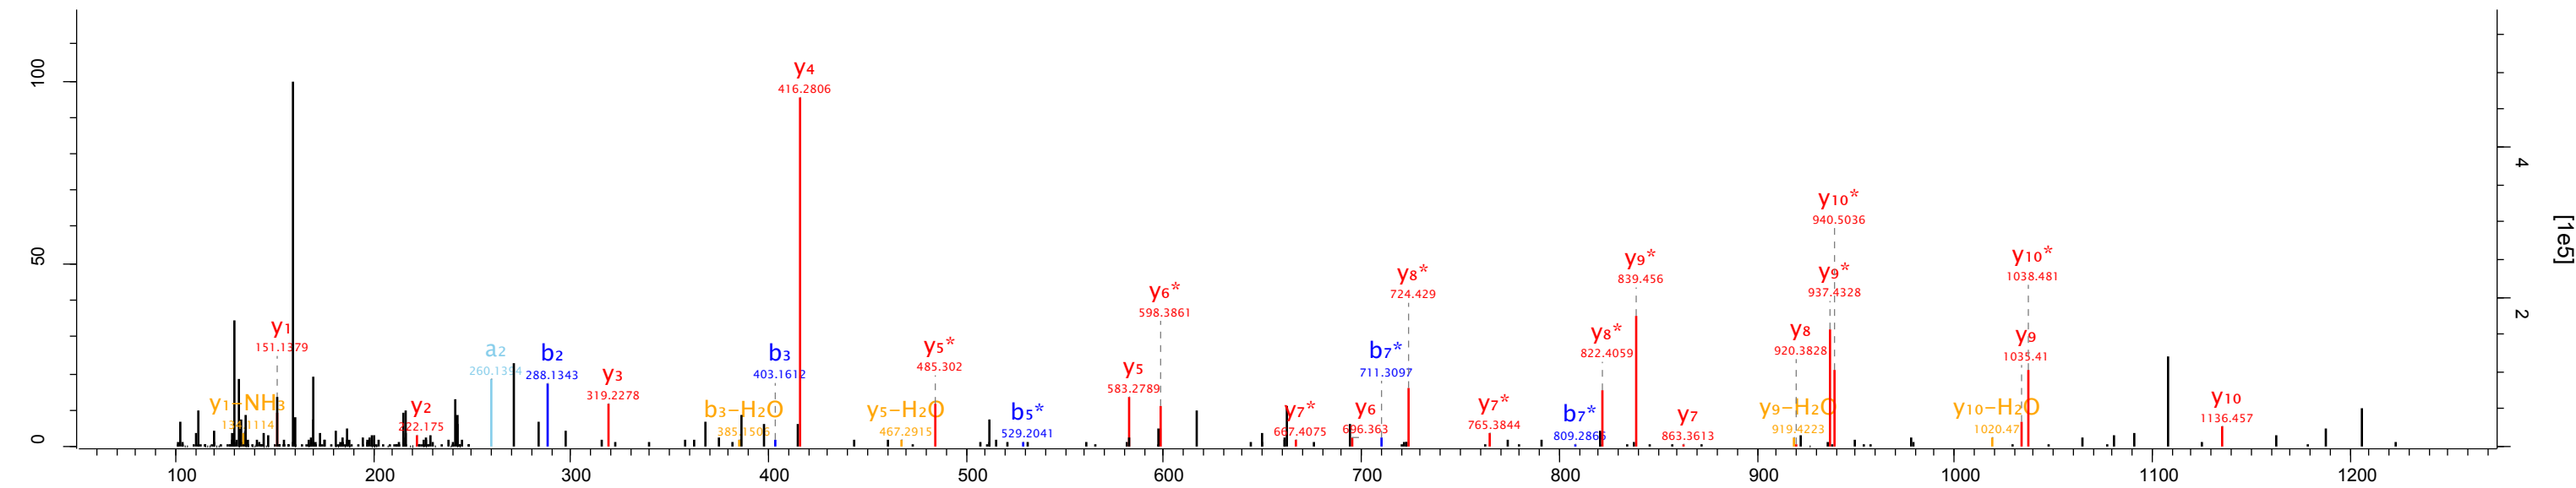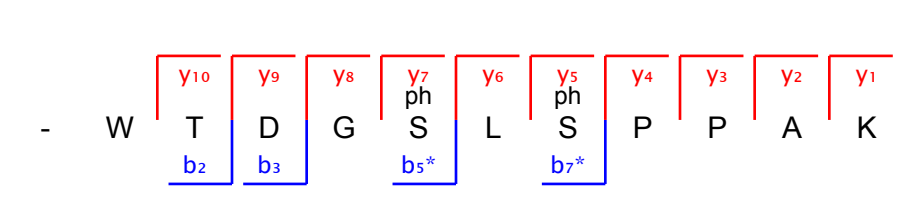

Raw file 20171215\_MaS\_33SR\_LMH\_phospho2\_03 Scan 10228 Method FTMS; HCD Score 198.21 m/z 1133.47 Gene names CRTCI

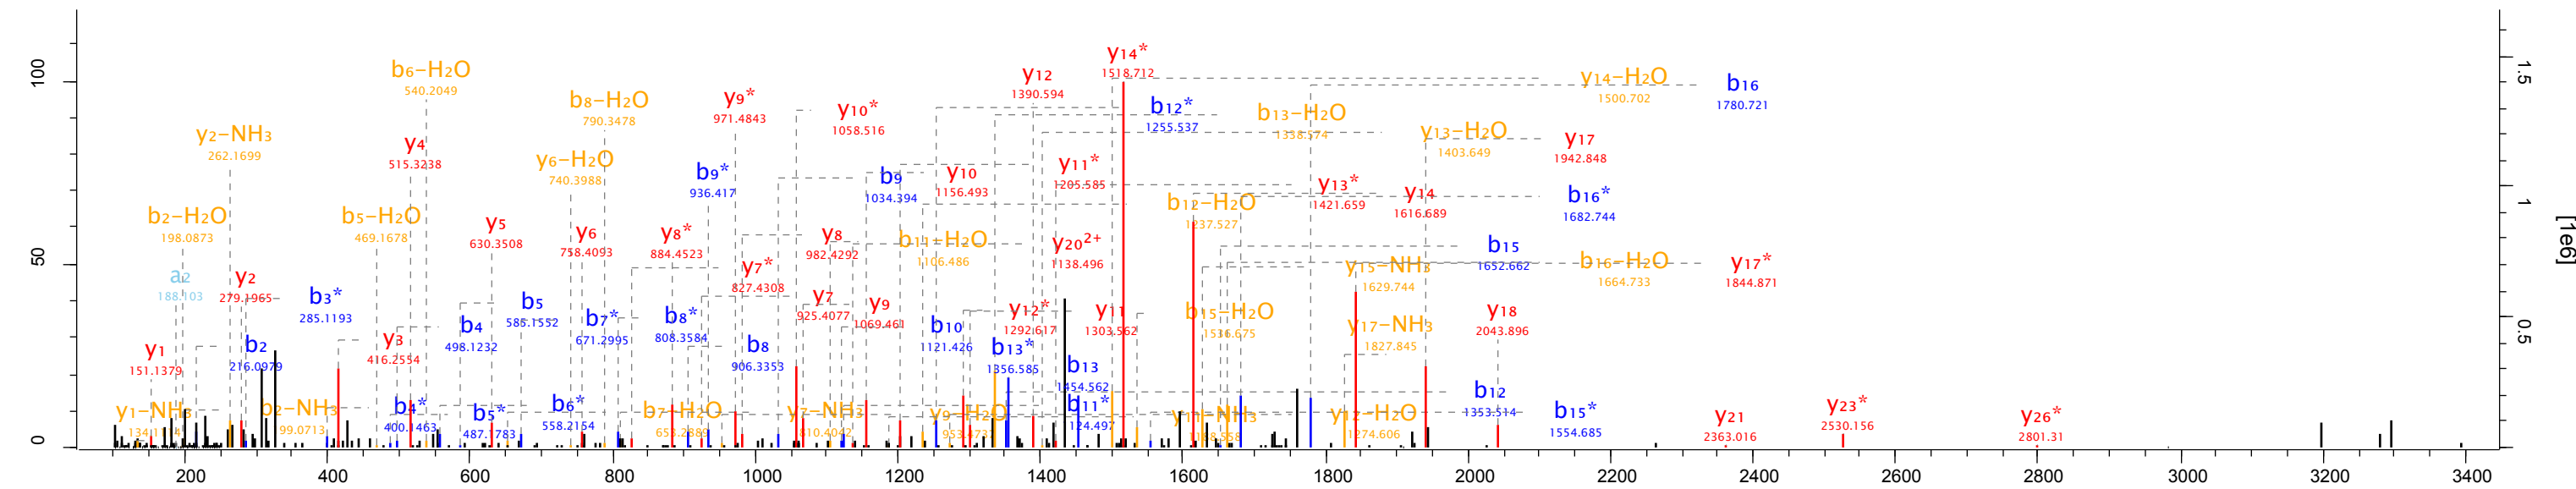

- T N S D S A L H Q S T M T P T Q P E S F S S G S Q D V H Q K -

ph

b<sub>2</sub> b<sub>3</sub>\* b<sub>4</sub> b<sub>5</sub> b<sub>6</sub>\* b<sub>7</sub>\* b<sub>8</sub> b<sub>9</sub> b<sub>10</sub> b<sub>11</sub>\* b<sub>12</sub> b<sub>13</sub> b<sub>15</sub> b<sub>16</sub> y<sub>14</sub> y<sub>13</sub>\* y<sub>12</sub> y<sub>11</sub> y<sub>10</sub> y<sub>9</sub> y<sub>8</sub> y<sub>7</sub> y<sub>6</sub> y<sub>5</sub> y<sub>4</sub> y<sub>3</sub> y<sub>2</sub> y<sub>1</sub> y<sub>26</sub>\* y<sub>23</sub>\* y<sub>21</sub> y<sub>20</sub><sup>2+</sup> y<sub>18</sub> y<sub>17</sub>

Raw file: 20171215\_MaS\_33SR\_LMH\_phospho2\_03  
 Scan: 10378 Method: FTMS; HCD Score: 99.11 m/z: 795 Gene names: ARHGEF10

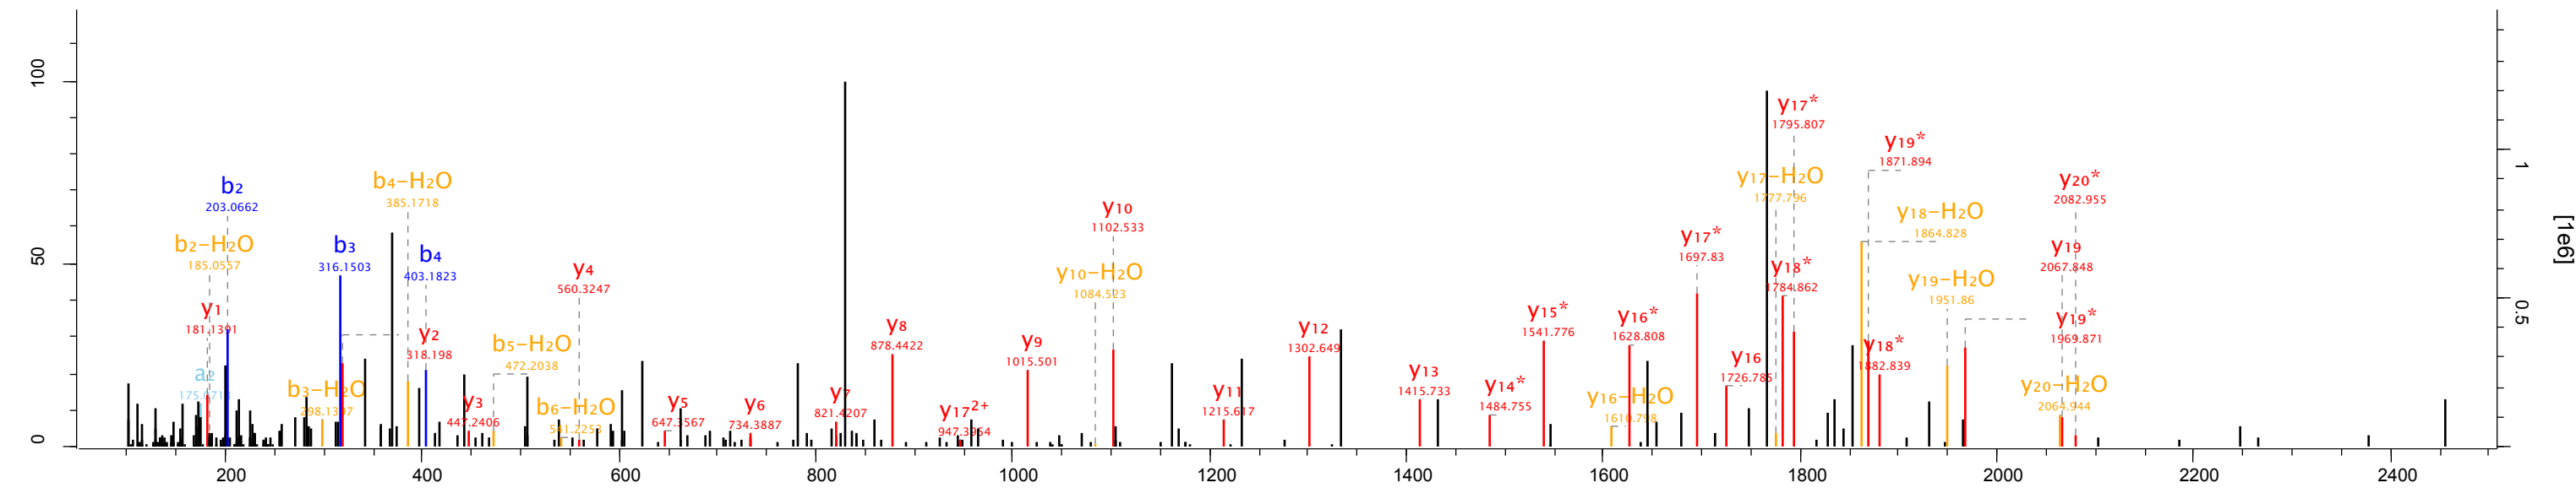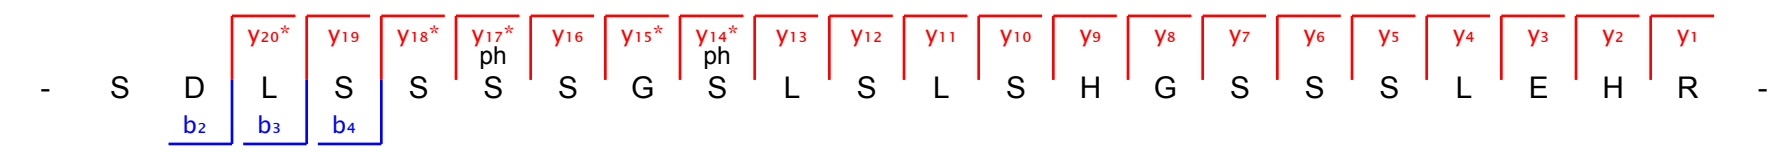

Raw file: 20171215\_MaS\_33SR\_LMH\_phospho2\_03  
 Scan: 10388 Method: FTMS; HCD Score: 126.25 m/z: 760.83 Gene names: KHSRP

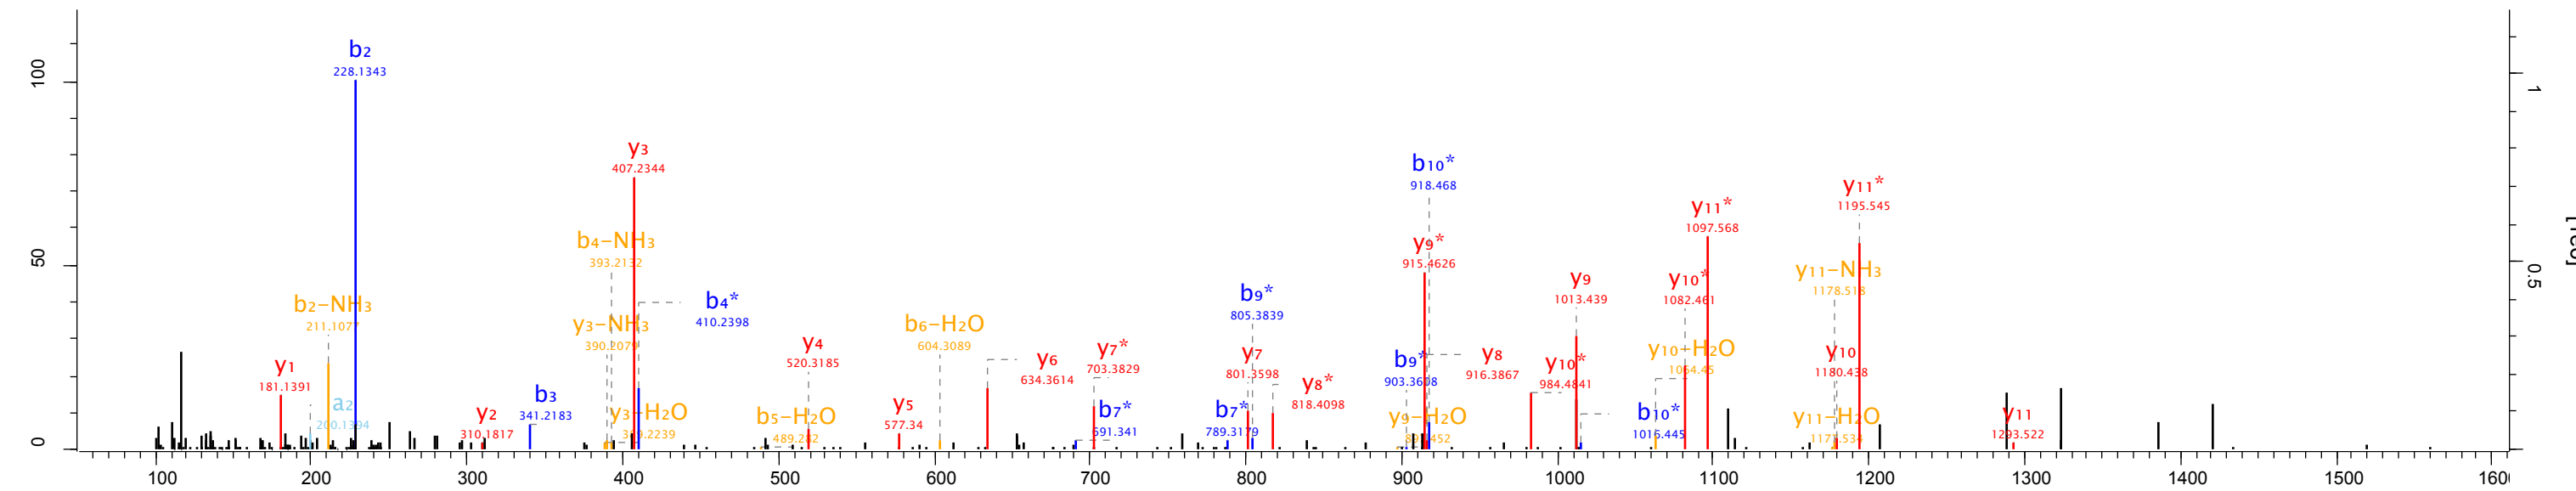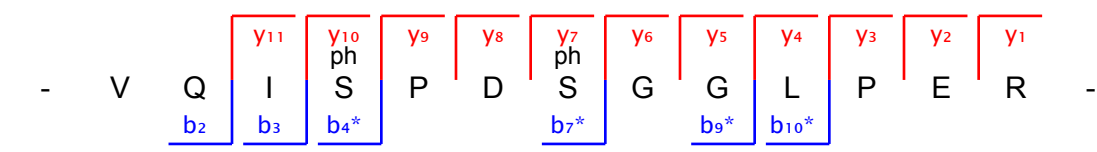

Raw file 20171215\_MaS\_33SR\_LMH\_phospho2\_03 Scan 10508 Method FTMS; HCD Score 228.55 m/z 1177.48 Gene names DOCK7

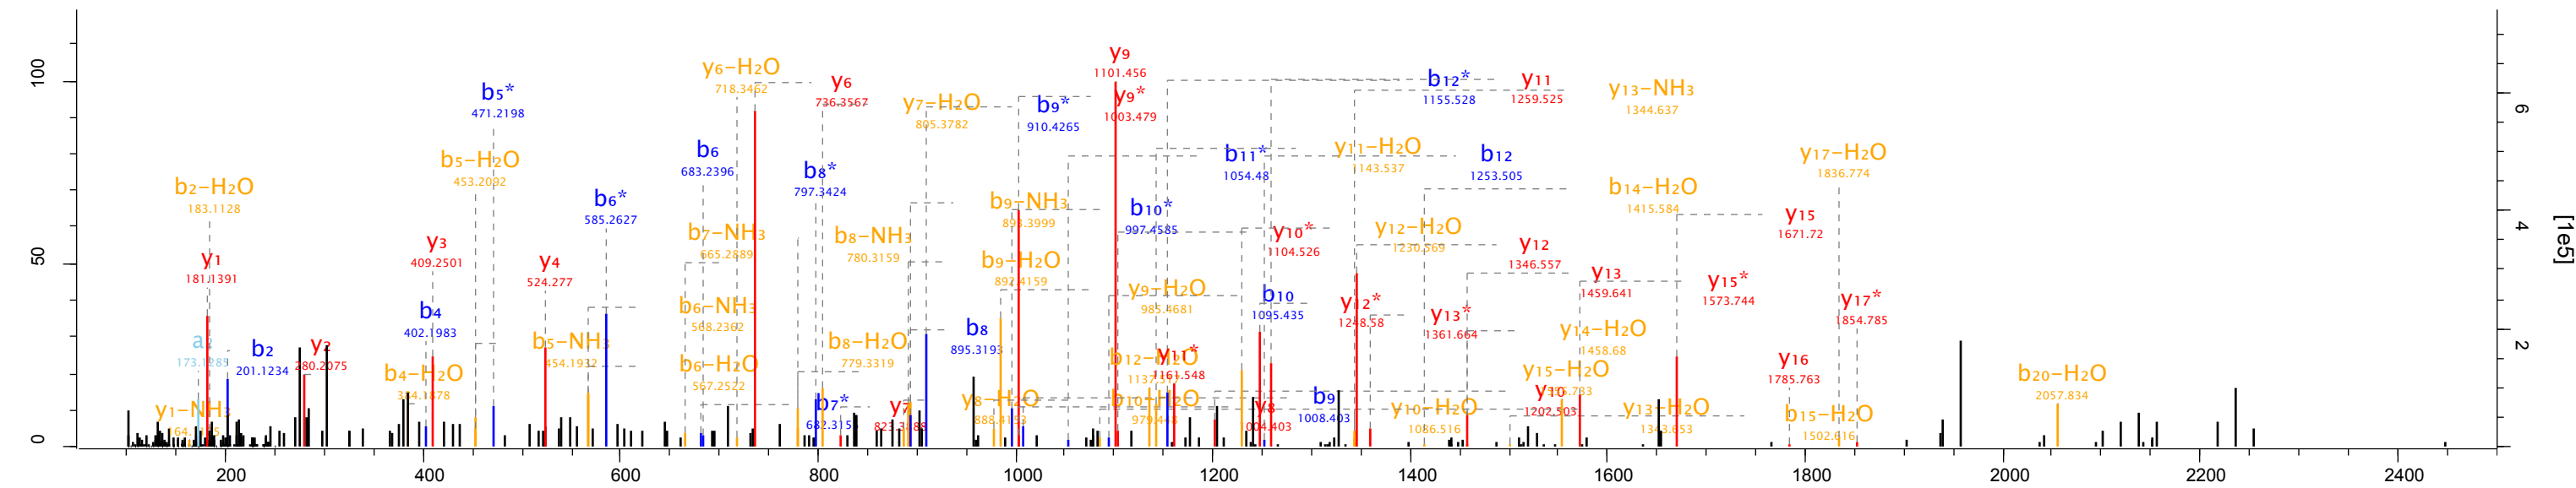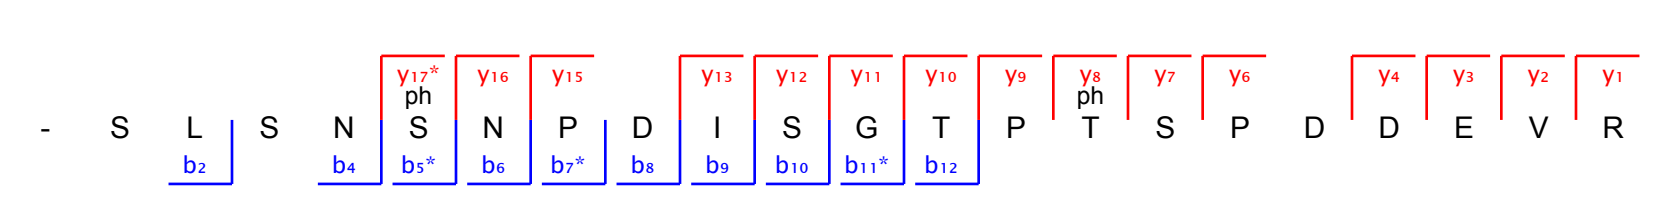



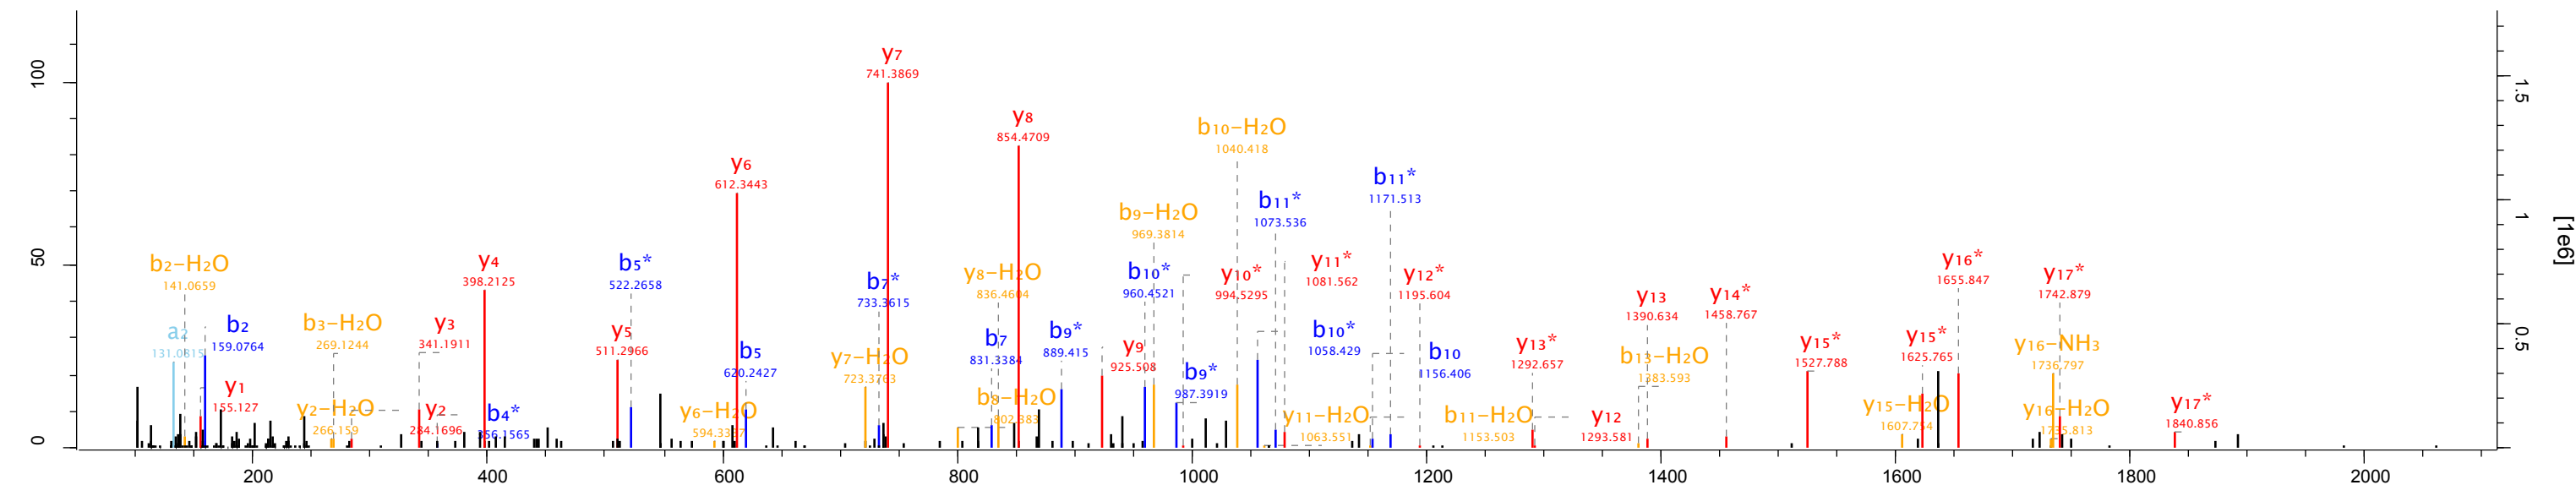

- A S Q S R P N S S A L E T L G G E K -

b<sub>2</sub>
b<sub>4</sub>\*
b<sub>5</sub>
b<sub>7</sub>
b<sub>9</sub>\*
b<sub>10</sub>
b<sub>11</sub>\*

y<sub>17</sub>\*
y<sub>16</sub>\*
y<sub>15</sub>\*
y<sub>14</sub>\*
y<sub>13</sub>
y<sub>12</sub>
y<sub>11</sub>\*
y<sub>10</sub>\*
y<sub>9</sub>
y<sub>8</sub>
y<sub>7</sub>
y<sub>6</sub>
y<sub>5</sub>
y<sub>4</sub>
y<sub>3</sub>
y<sub>2</sub>
y<sub>1</sub>

Raw file 20171215\_MaS\_33SR\_LMH\_phospho2\_03 Scan 10748 Method FTMS; HCD Score 221.3 m/z 1038.75 Gene names USP10

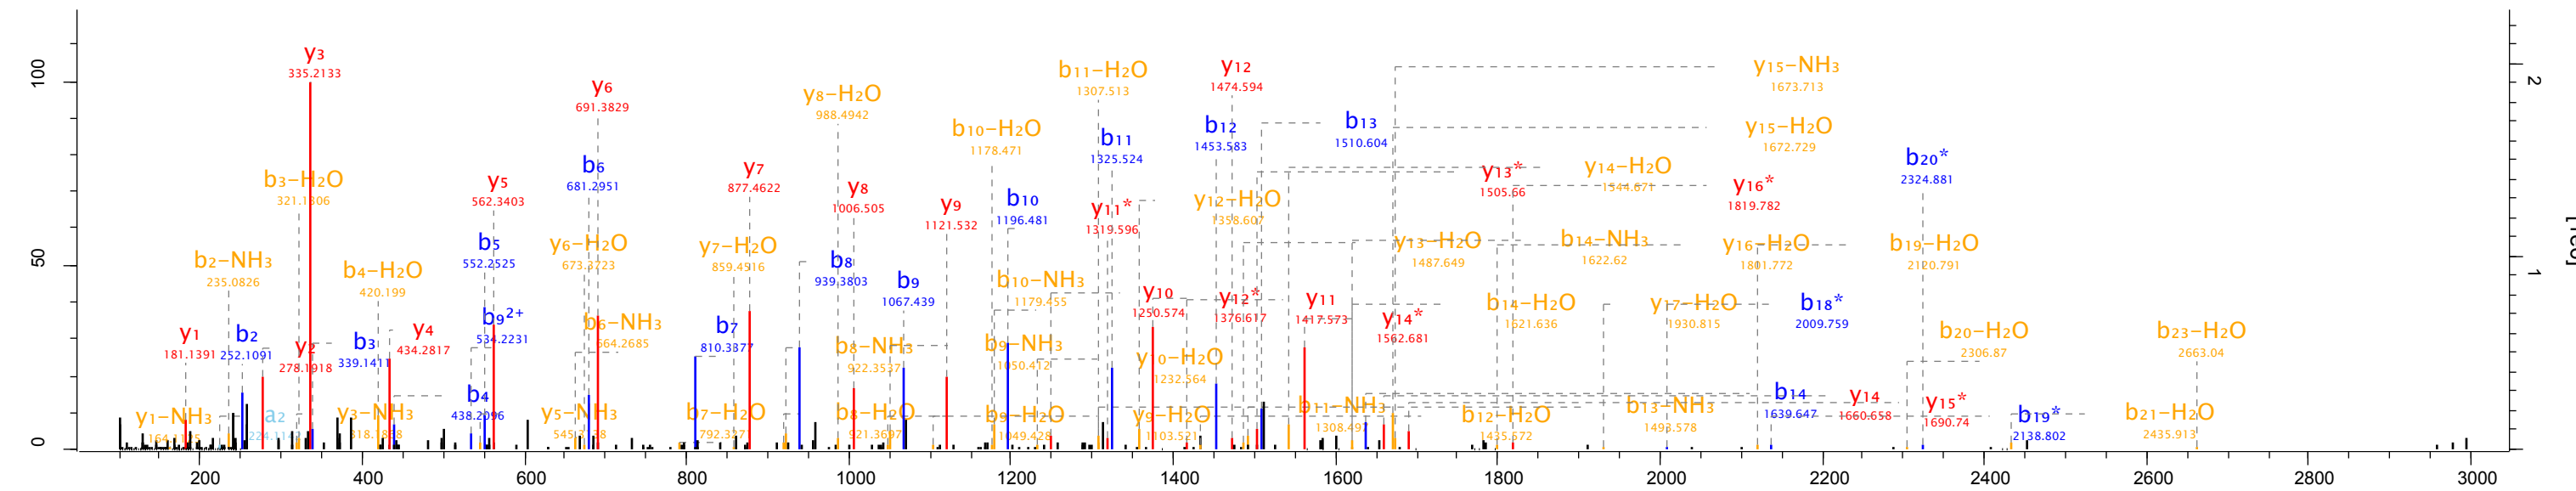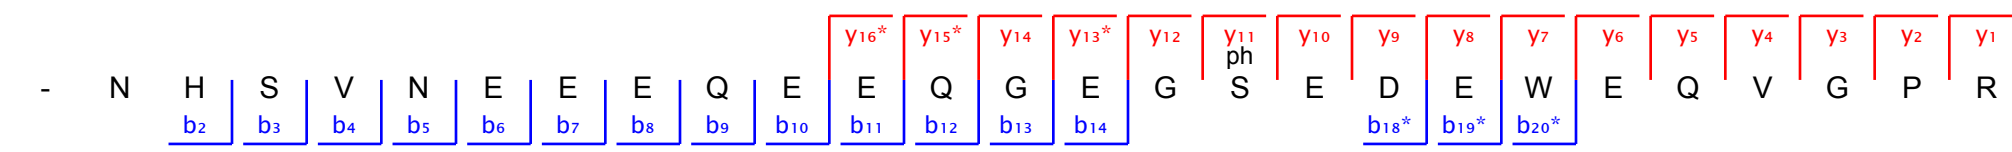

Raw file 20171215\_MaS\_33SR\_LMH\_phospho2\_03 Scan 11048 Method FTMS; HCD Score 234.88 m/z 1155.93 Gene names CDK12

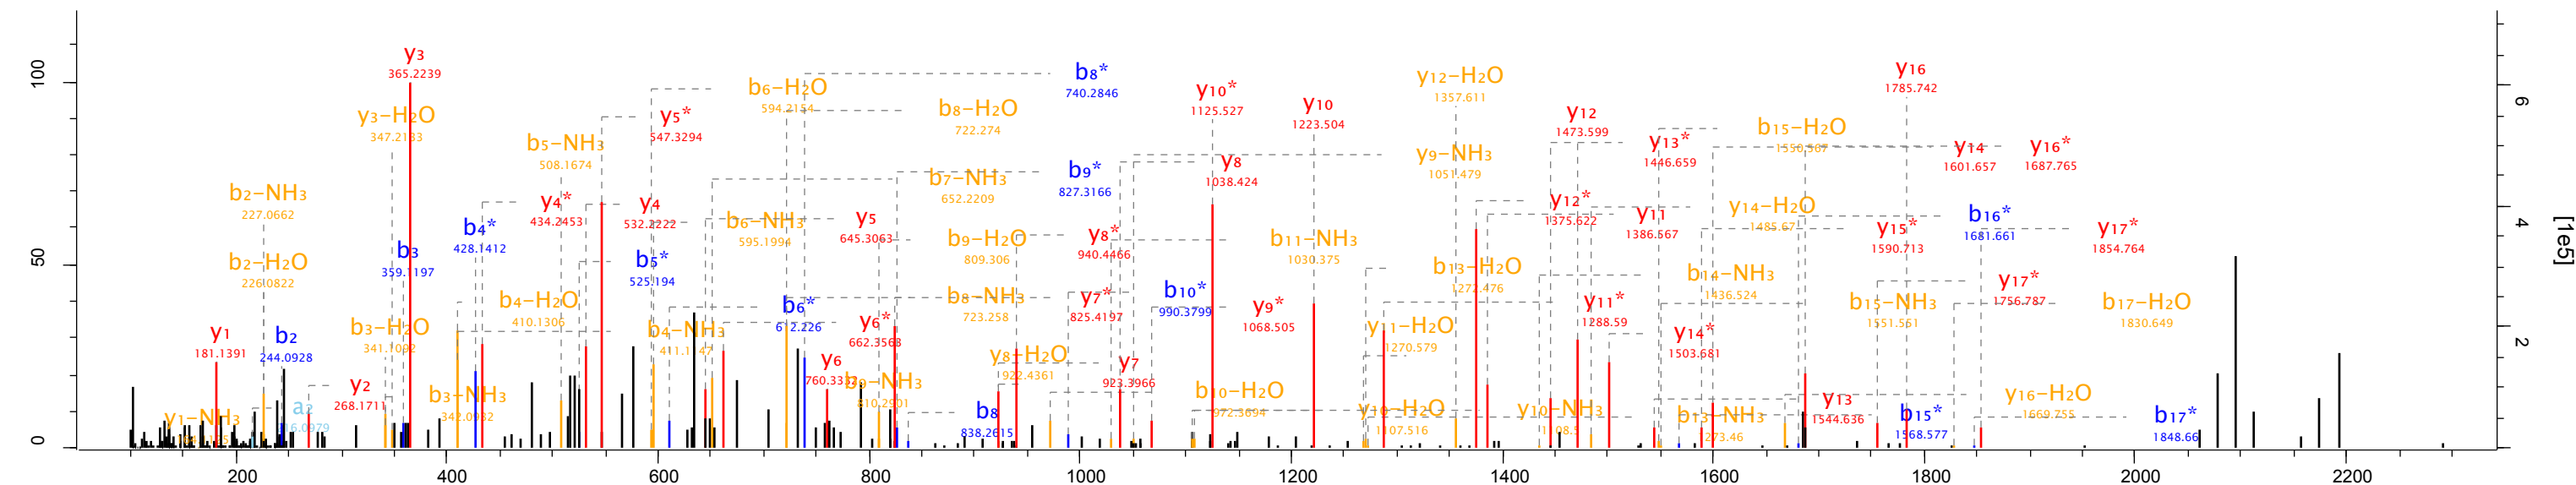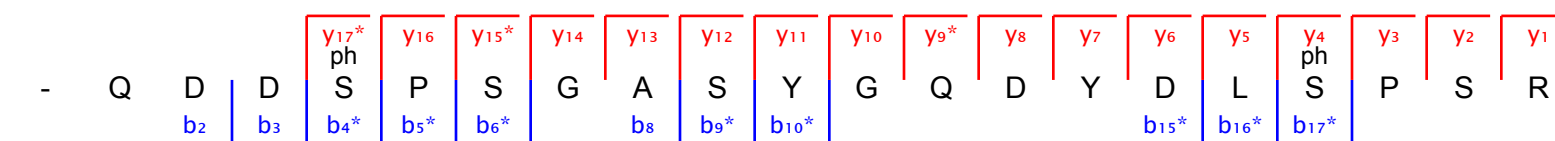

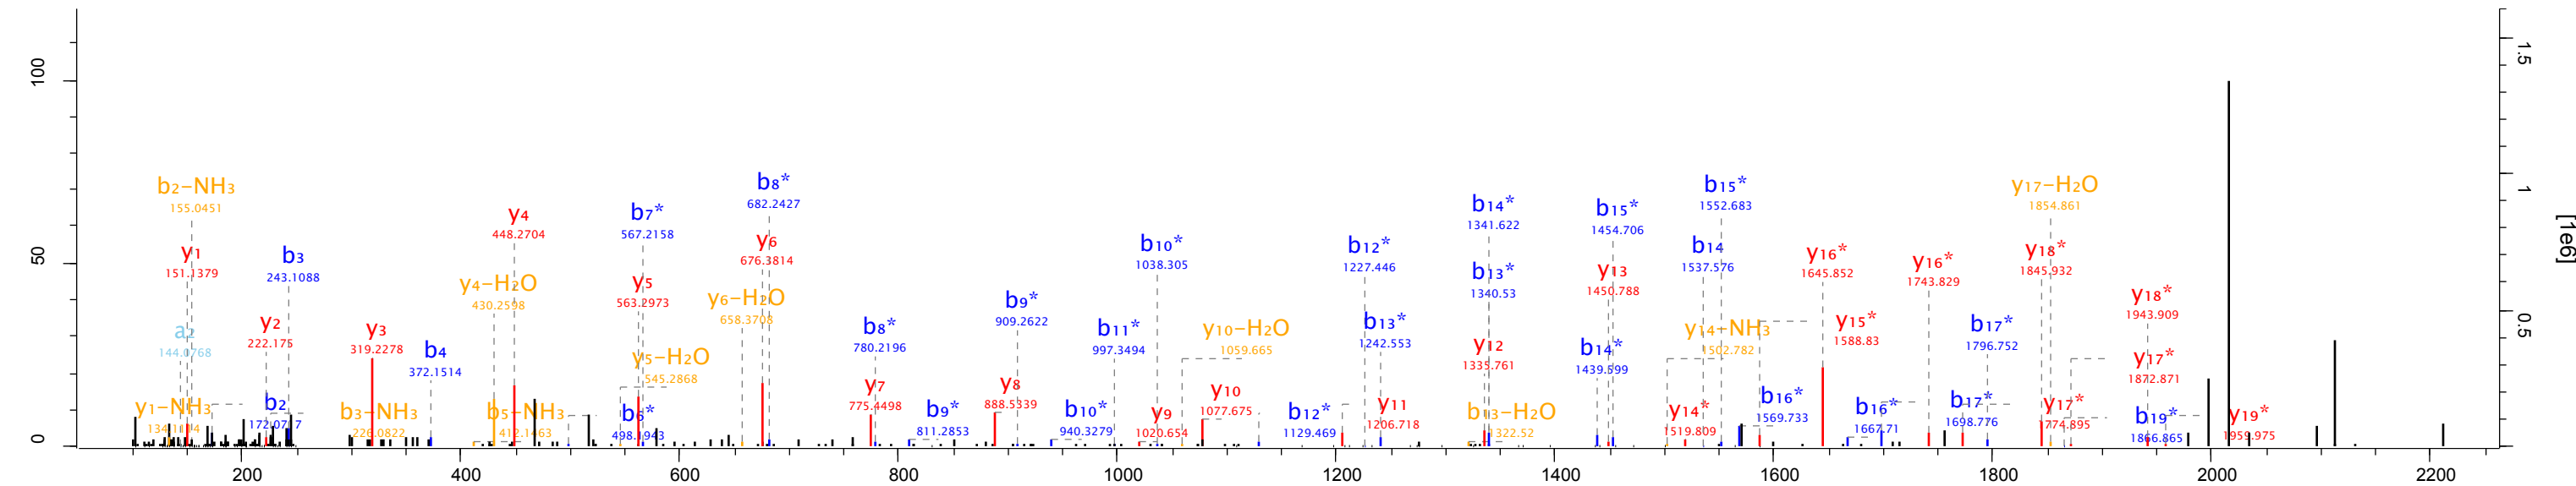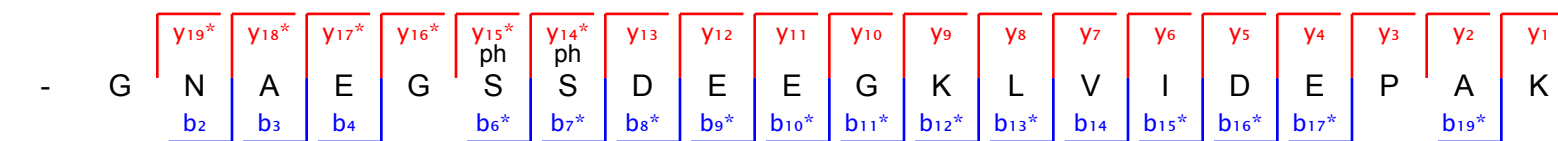

Raw file 20171215\_MaS\_33SR\_LMH\_phospho2\_03 Scan 11328 Method FTMS; HCD Score 96.35 m/z 742.98 Gene names SRRM2

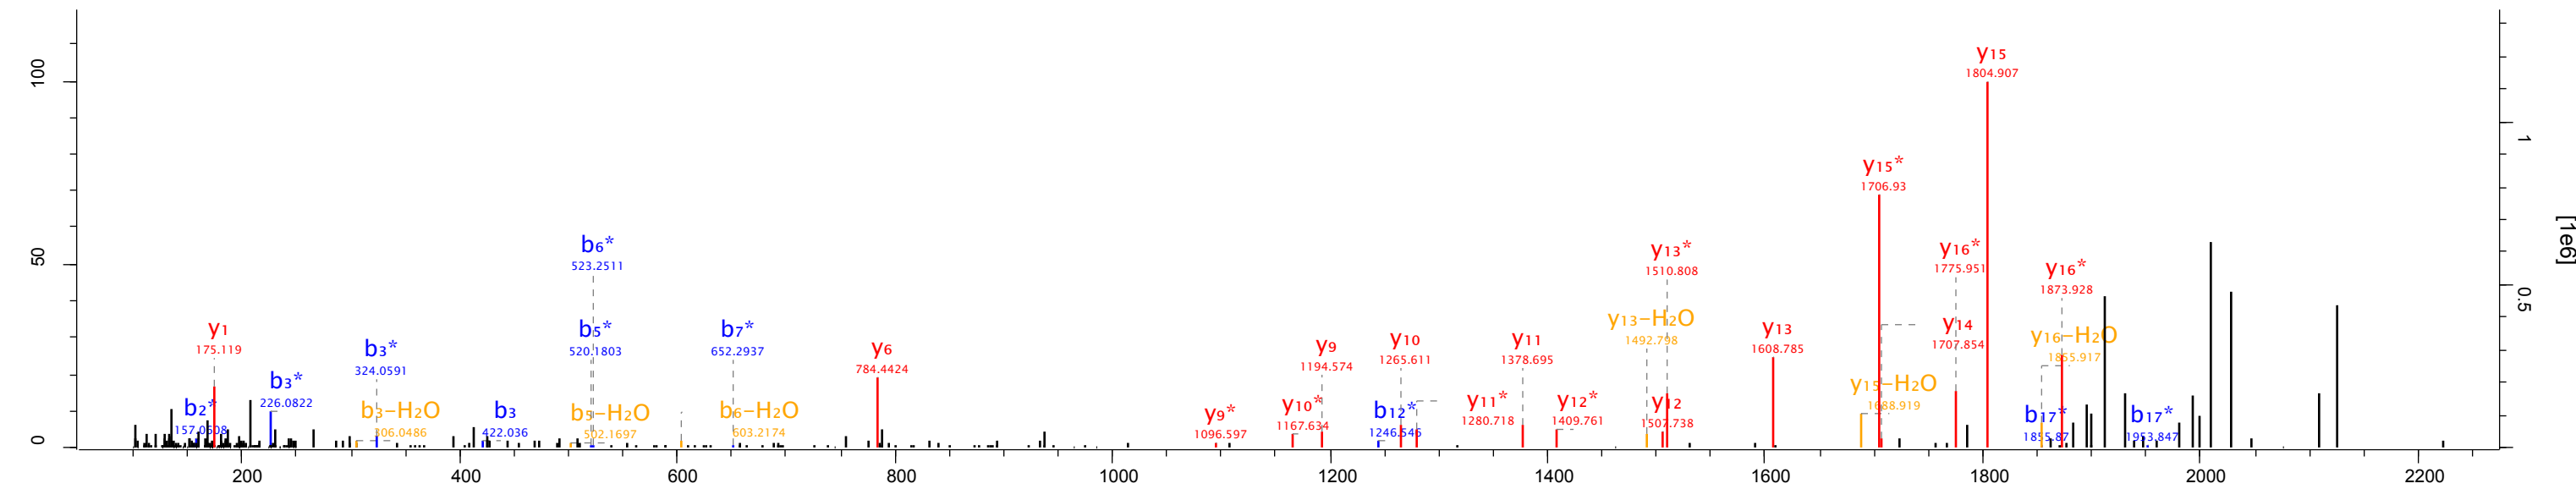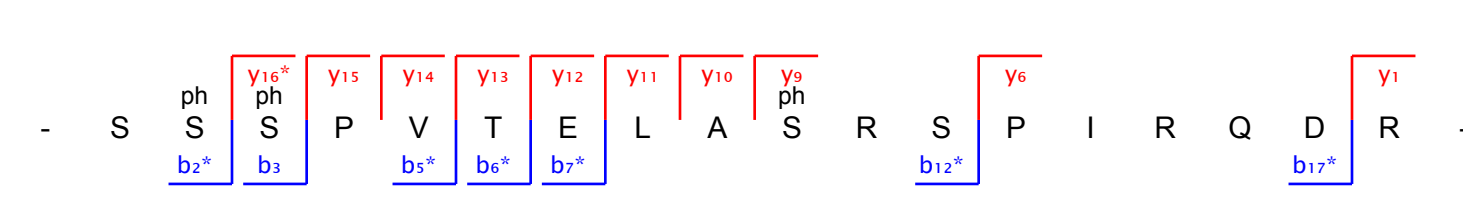

Raw file 20171215\_MaS\_33SR\_LMH\_phospho2\_03 Scan 11428 Method FTMS; HCD Score 158.94 m/z 1033.4 Gene names CHAMP1

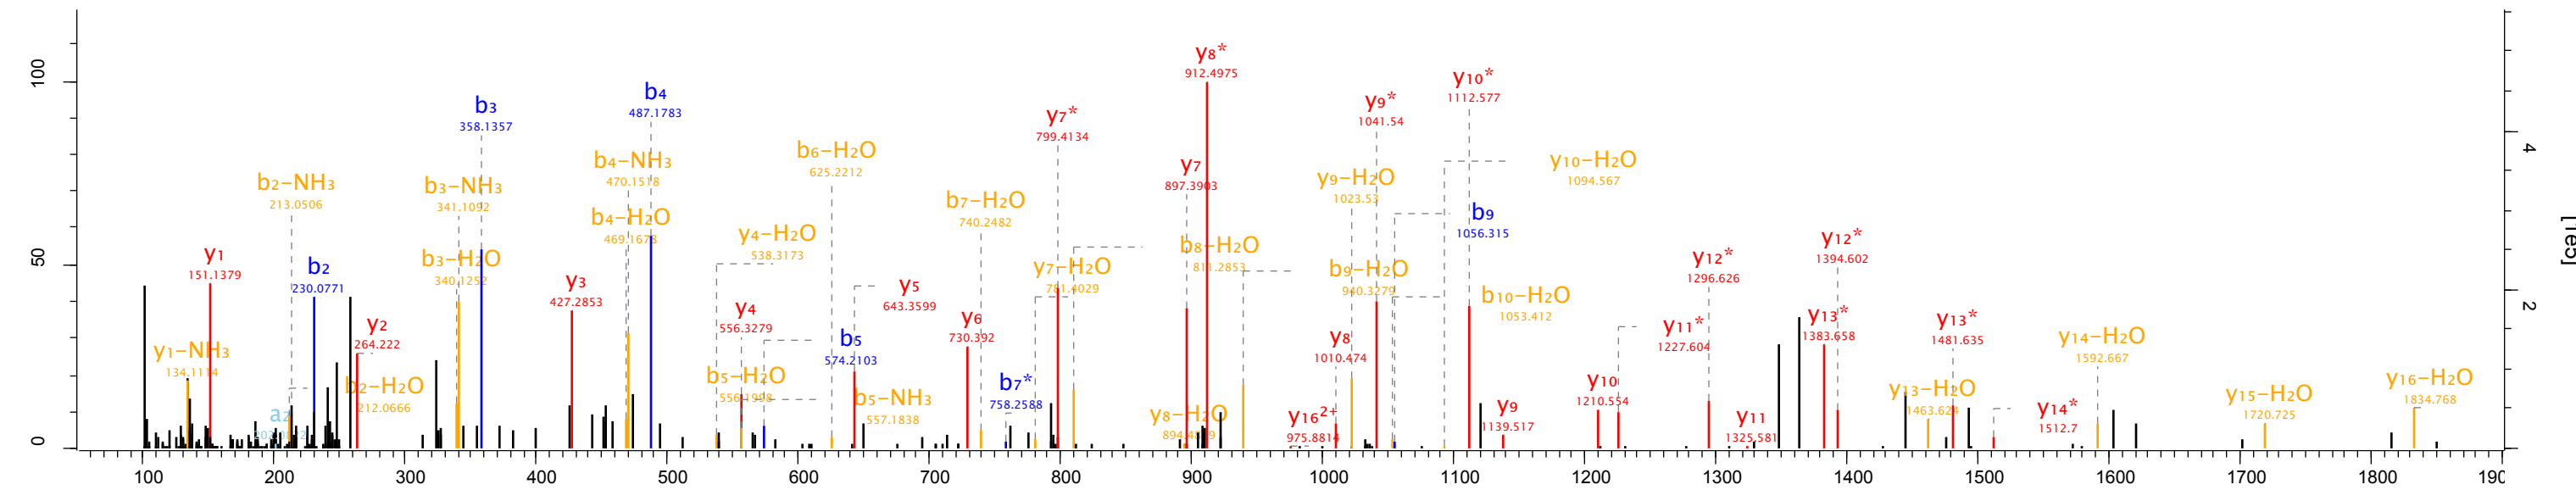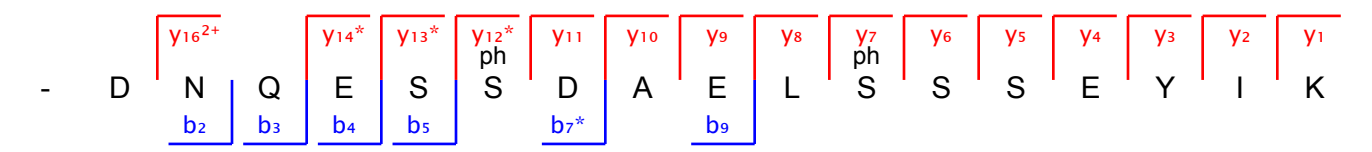

Raw file: 20171215\_MaS\_33SR\_LMH\_phospho2\_03  
 Scan: 11778 Method: FTMS; HCD Score: 190.2 m/z: 1141.46 Gene names: NES

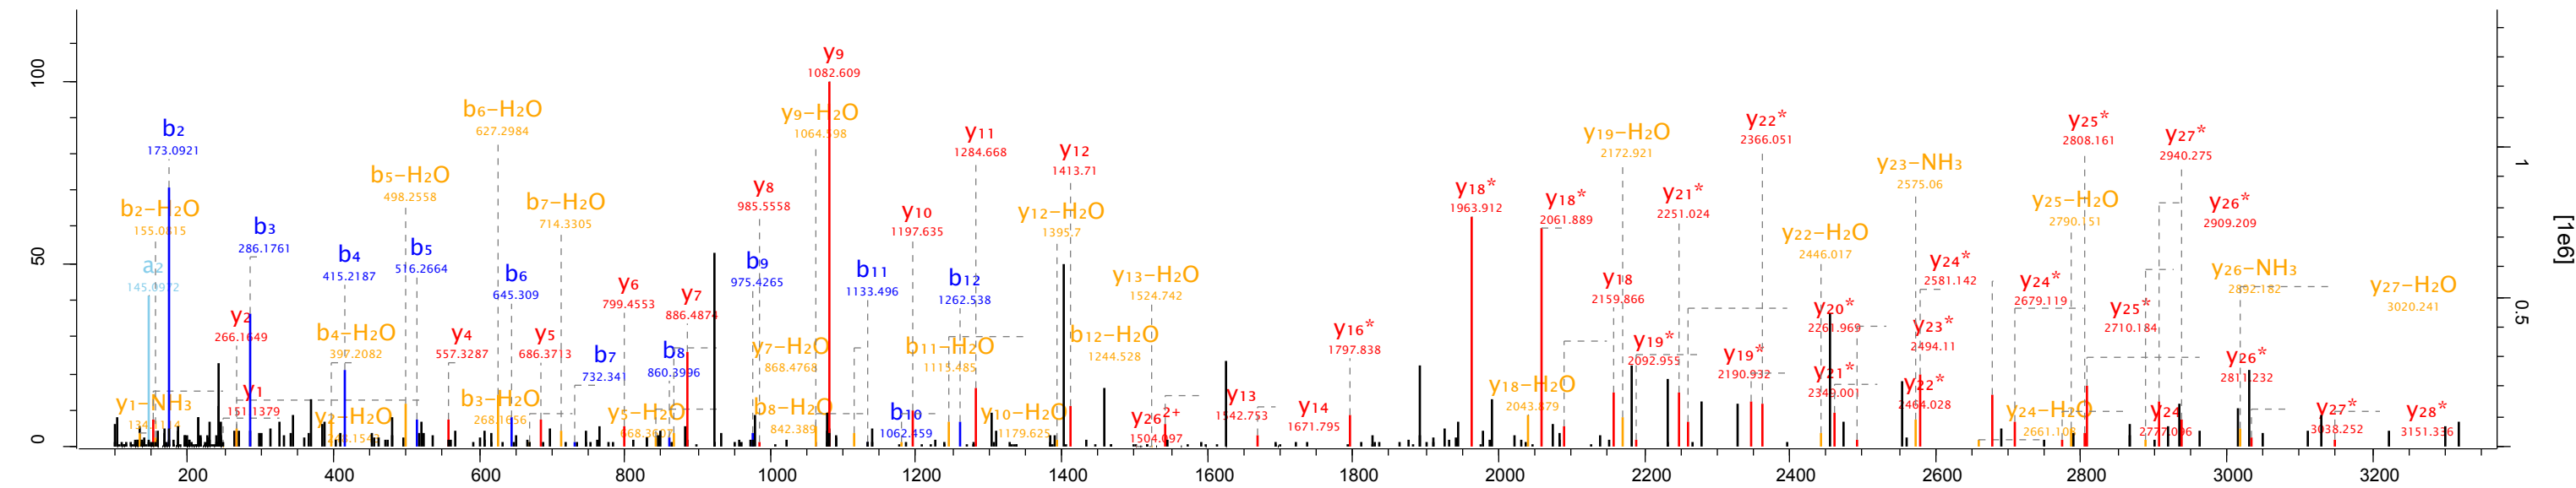

- T A L E T E S Q D S A E P S G S E E E S D P V S L E R E D K -  
 b2 b3 b4 b5 b6 b7 b8 b9 b10 b11 b12 y1 y2 y3 y4 y5 y6 y7 y8 y9 y10 y11 y12 y13 y14 y16\* y18\* y18\* y19\* y20\* y21\* y22\* y23\* y24\* y25\* y26\* y27\* y28\*

Raw file 20171215\_MaS\_33SR\_LMH\_phospho2\_03 Scan 11908 Method FTMS; HCD Score 93.23 m/z 566.24 Gene names RICTOR

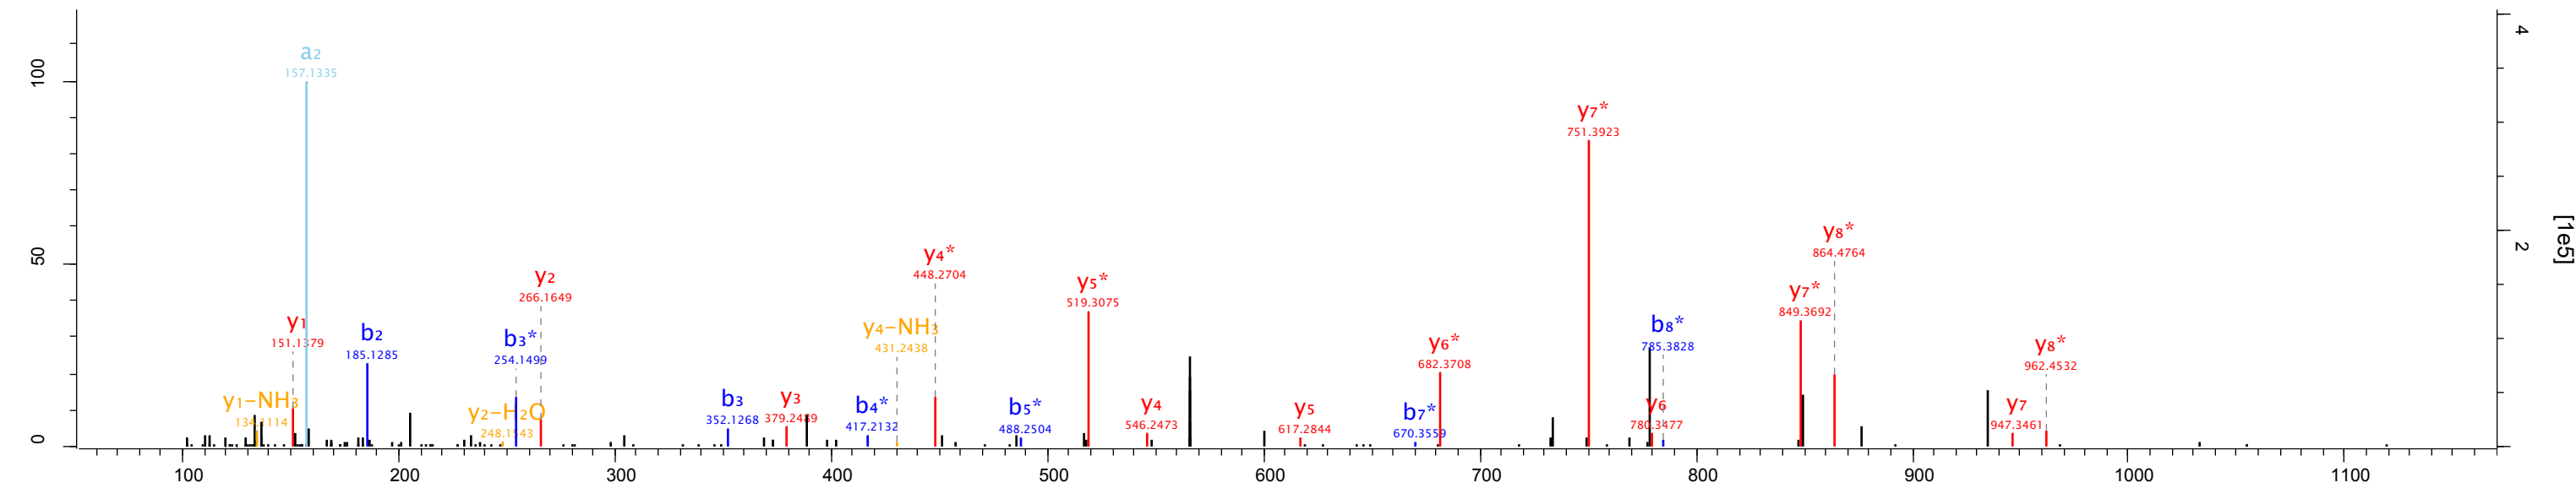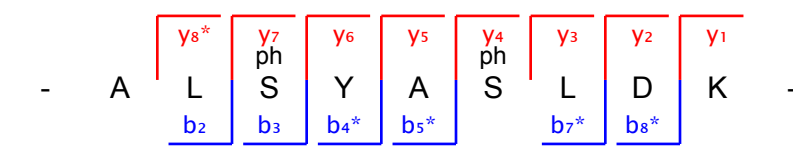



Raw file 20171215\_MaS\_33SR\_LMH\_phospho2\_03 Scan 11928 Method FTMS; HCD Score 109.44 m/z 862.03 Gene names TOX4

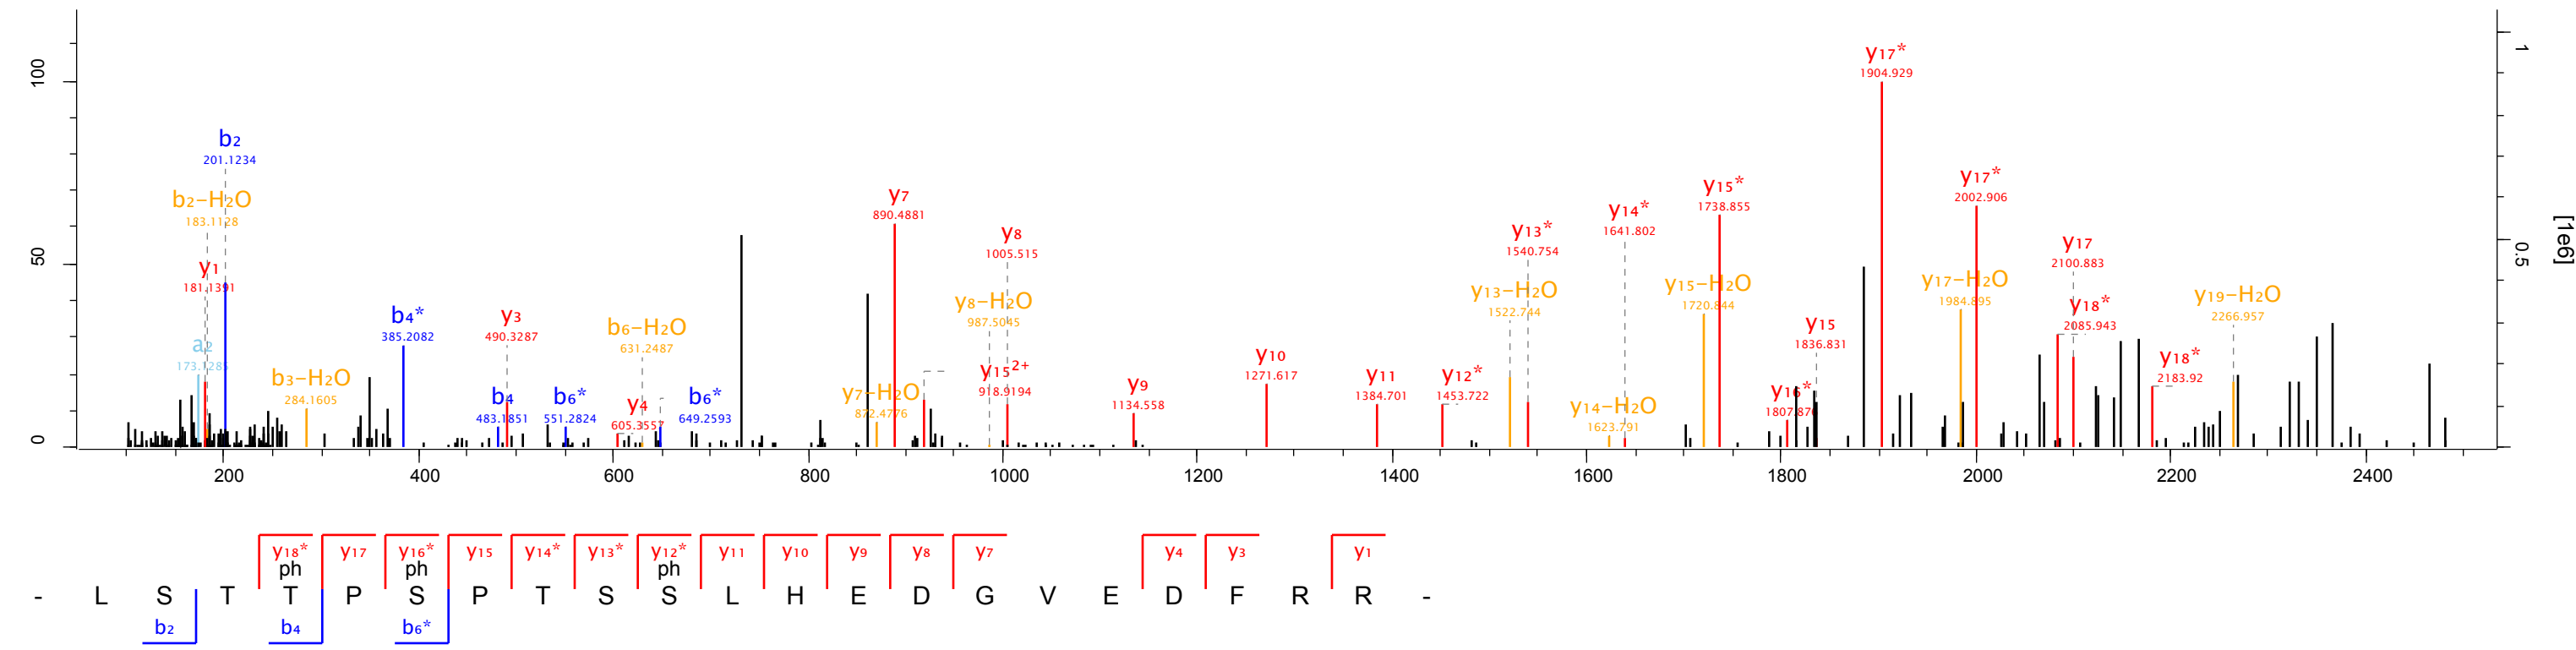

Raw file 20171215\_MaS\_33SR\_LMH\_phospho2\_03 Scan 12348 Method FTMS; HCD Score 147.49 m/z 933.38 Gene names PRR12

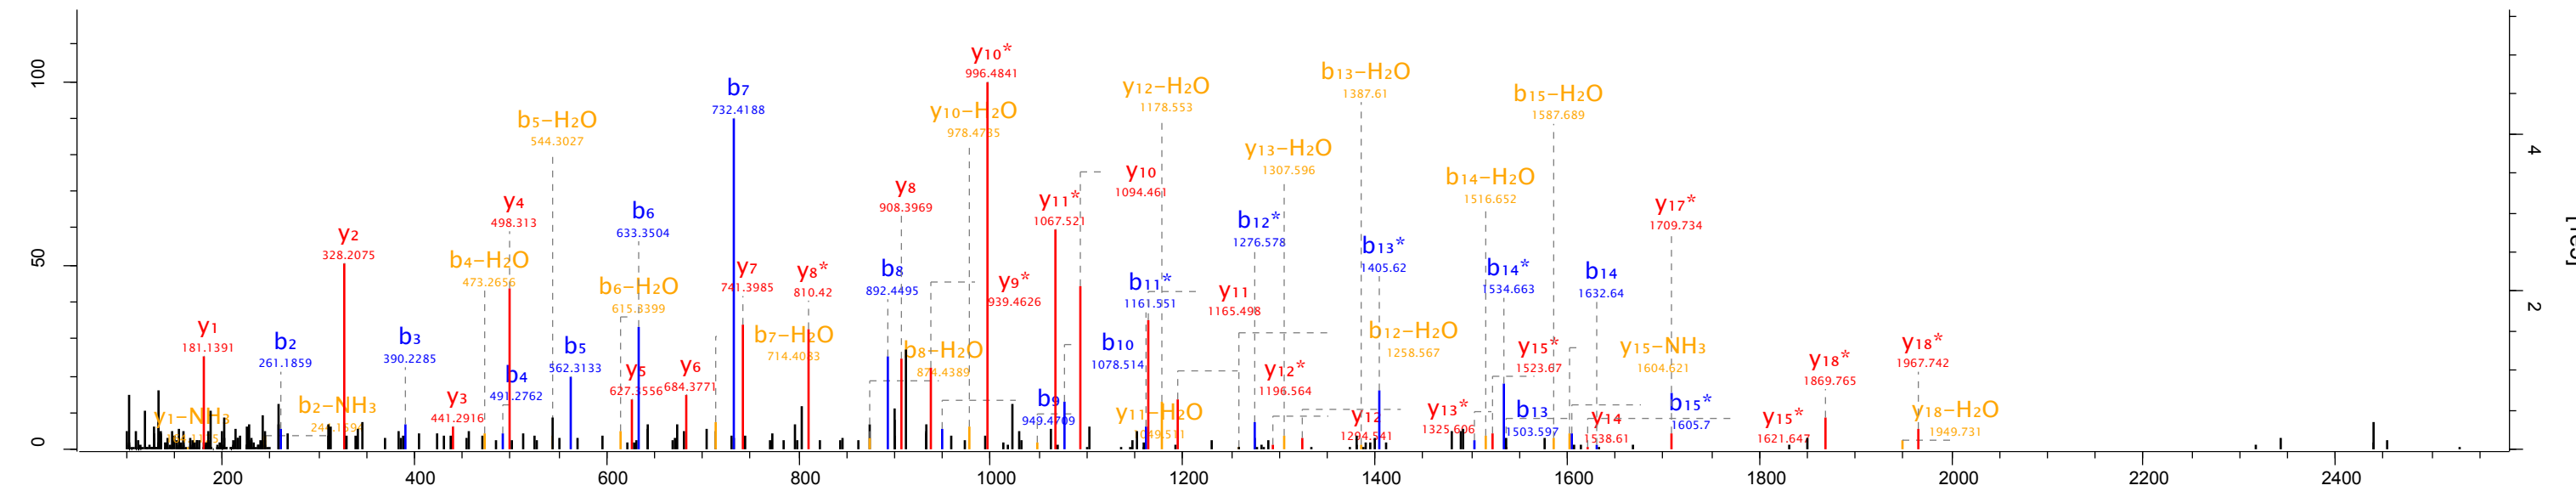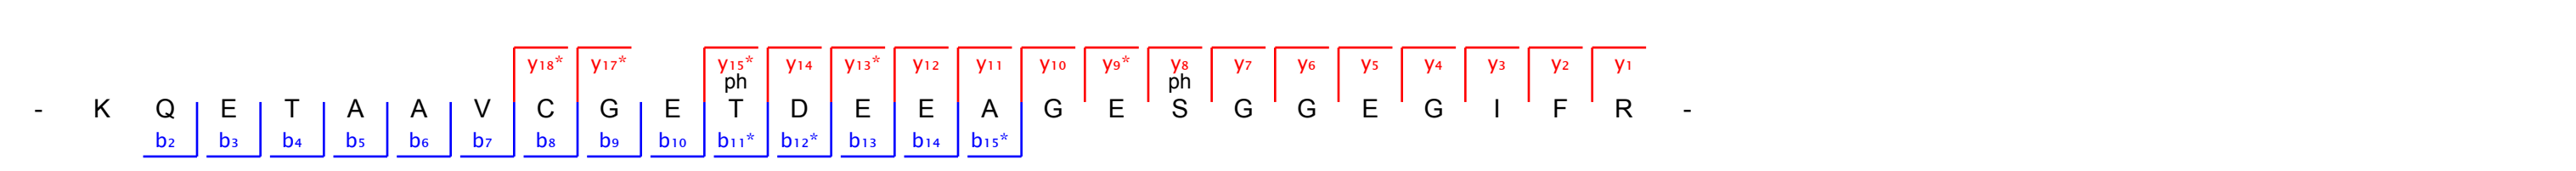

Raw file 20171215\_MaS\_33SR\_LMH\_phospho2\_03 Scan 12398 Method FTMS; HCD Score 99.72 m/z 748.99 Gene names DKC1

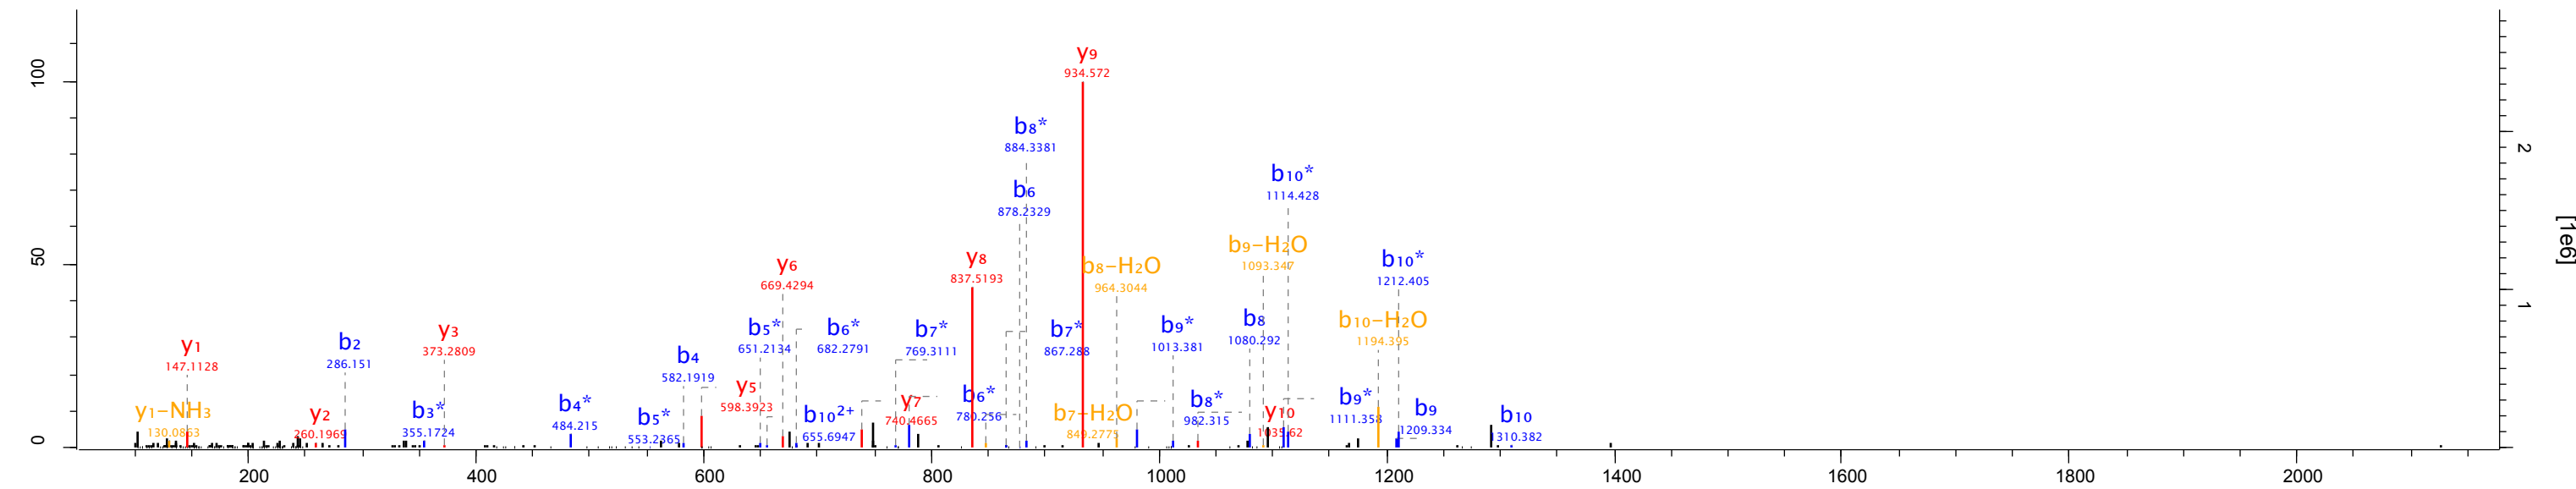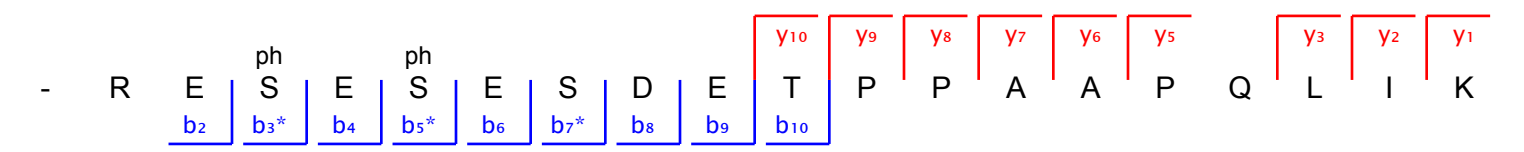

Raw file 20171215\_MaS\_33SR\_LMH\_phospho2\_03 Scan 12788 Method FTMS; HCD Score 145.32 m/z 1065.45 Gene names CT45A3;CT45A1

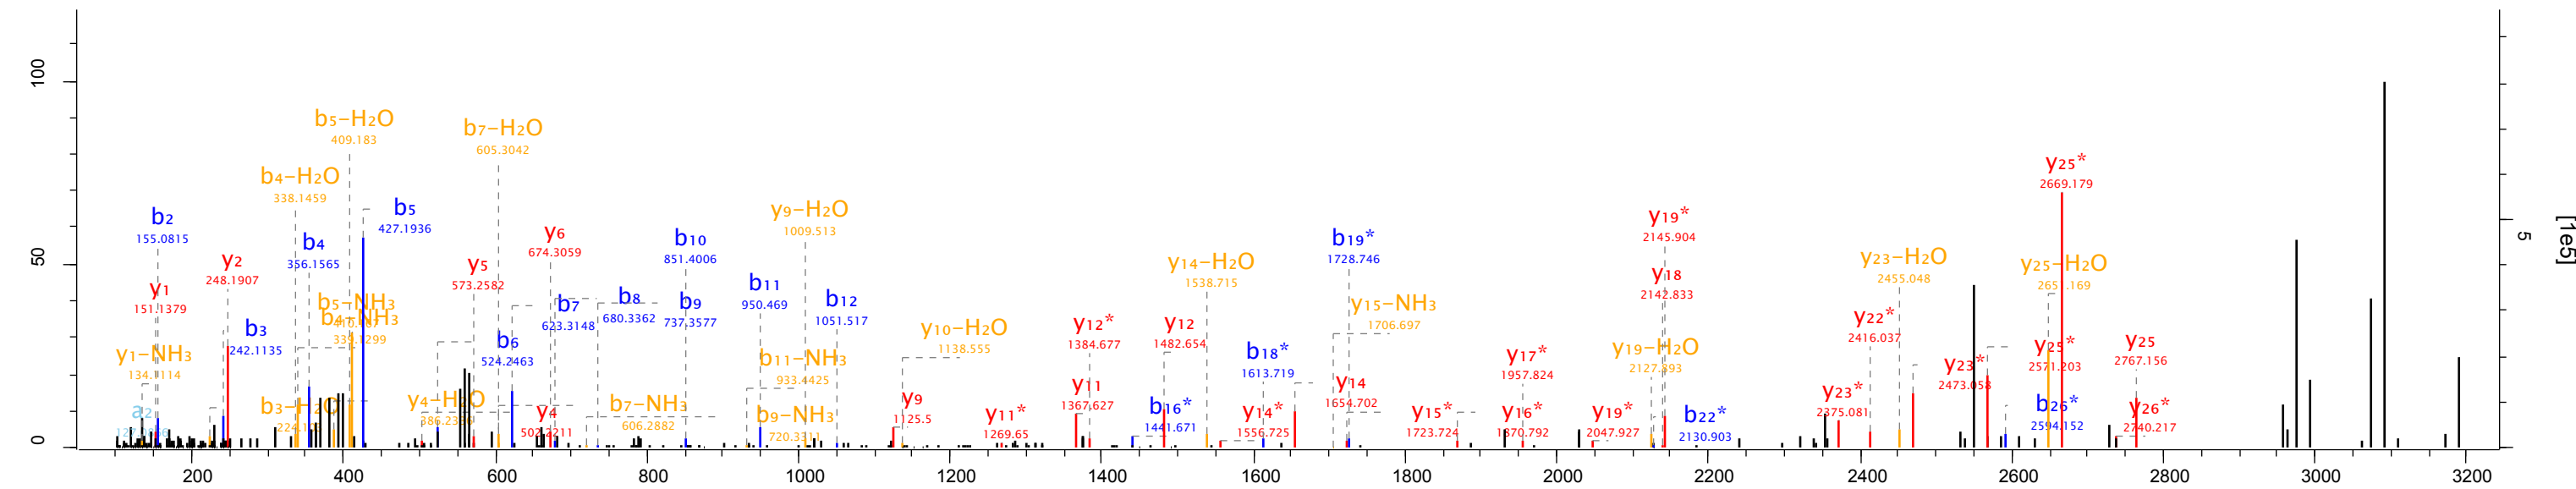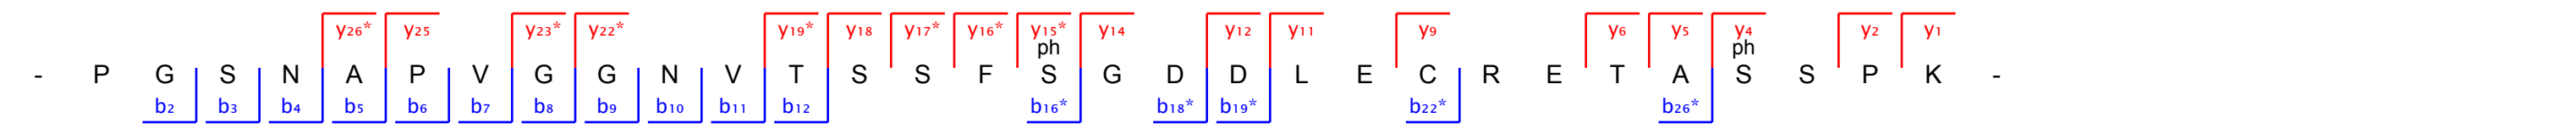

Raw file Scan Method Score m/z Gene names

20171215\_MaS\_33SR\_LMH\_phospho2\_03 12828 FTMS; HCD 148.35 813.7 MPRIP

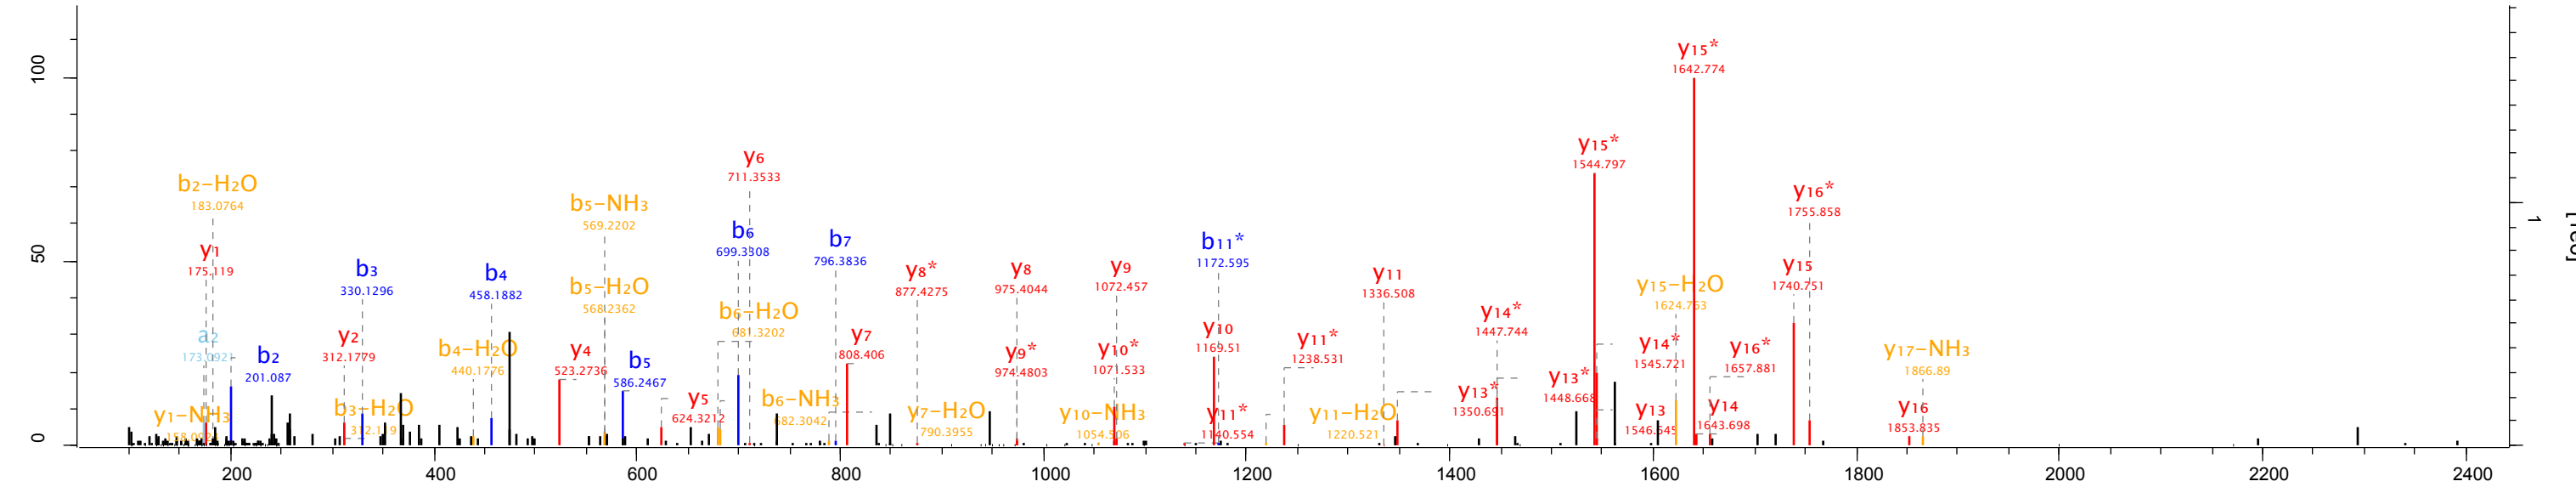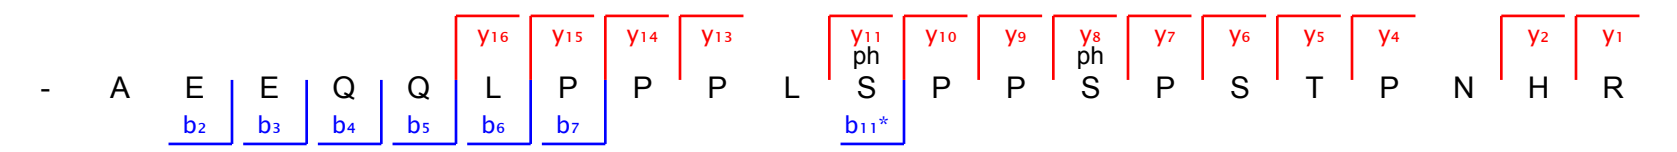

Raw file: 20171215\_MaS\_33SR\_LMH\_phospho2\_03  
 Scan: 13188 Method: FTMS; HCD Score: 141.82 m/z: 859.38 Gene names: CDK11A;CDK11B;CDC2L1

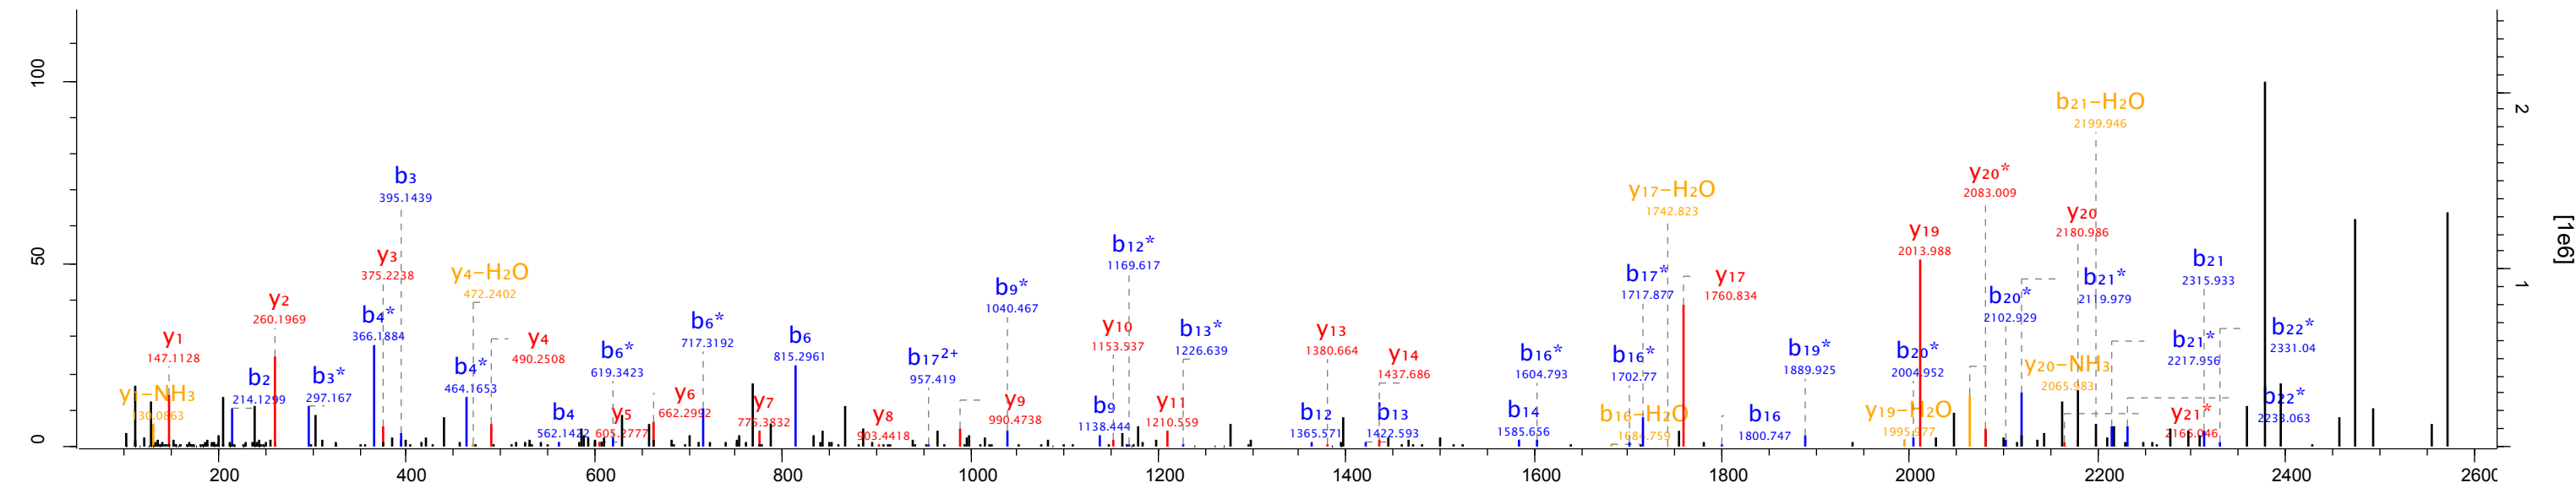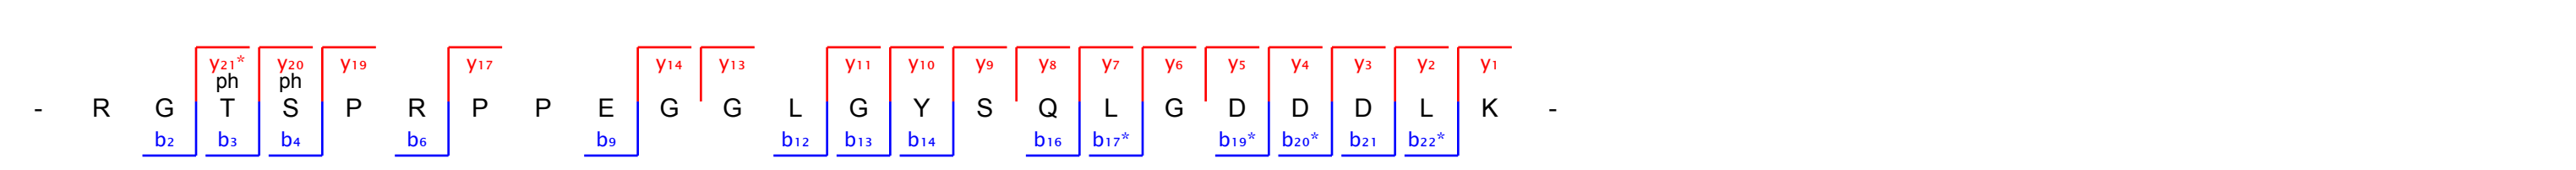



Raw file: 20171215\_MaS\_33SR\_LMH\_phospho2\_03  
 Scan: 13348 Method: FTMS; HCD Score: 105.02 m/z: 954.82 Gene names: MBD2

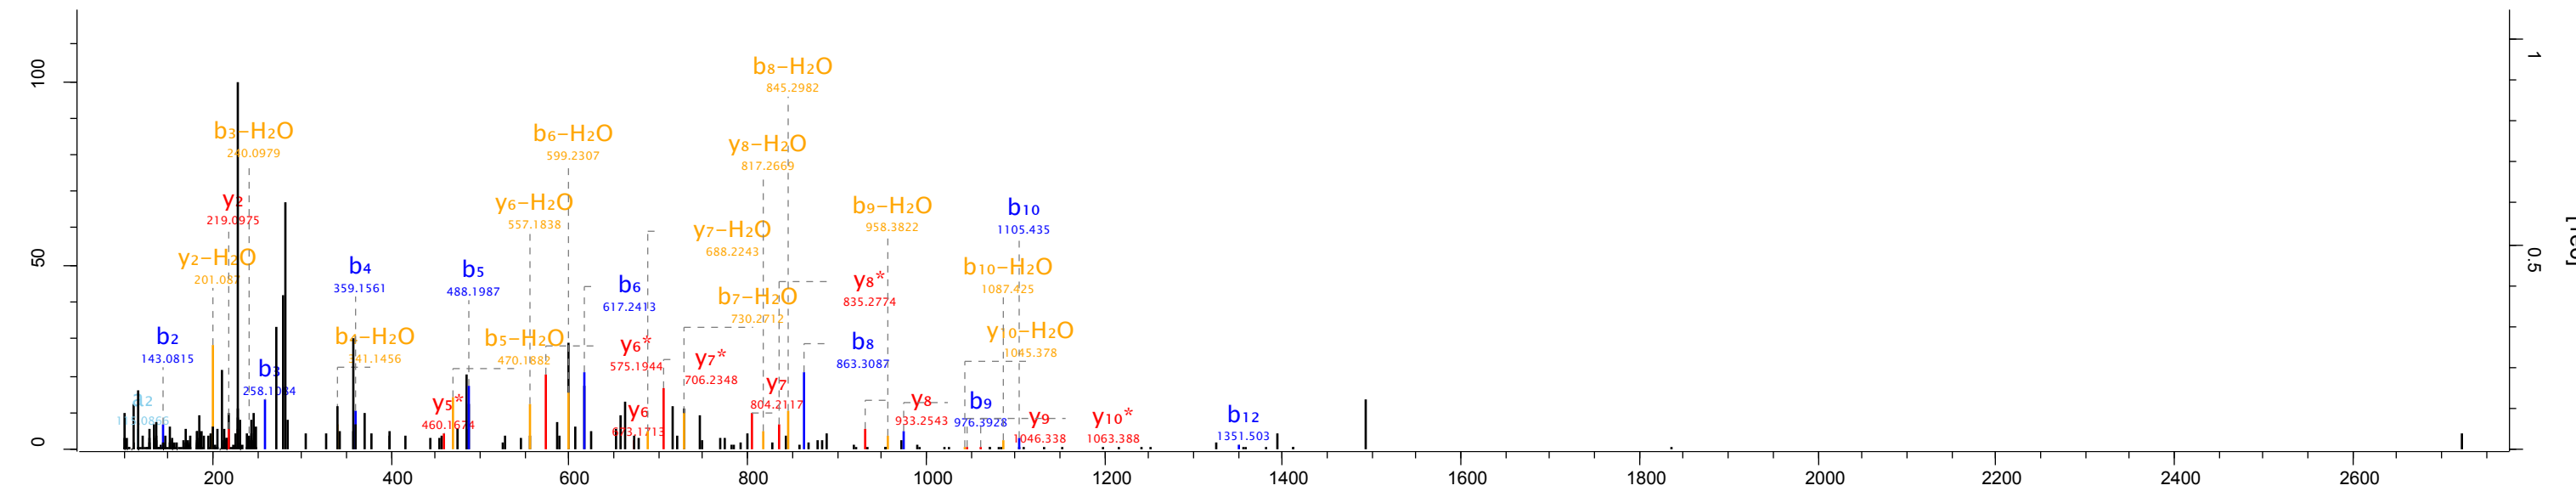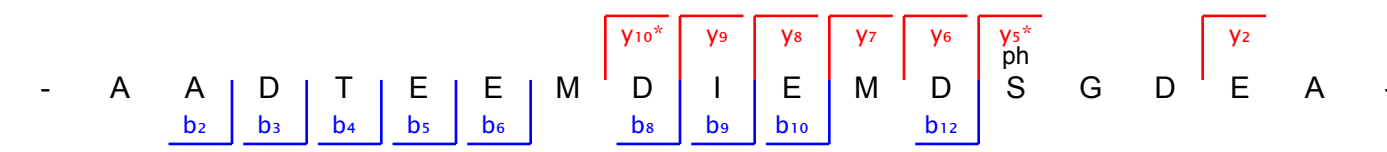



Raw file: 20171215\_MaS\_33SR\_LMH\_phospho2\_03  
 Scan: 13518 Method: FTMS; HCD Score: 171.08 m/z: 676.93 Gene names: SRRM2

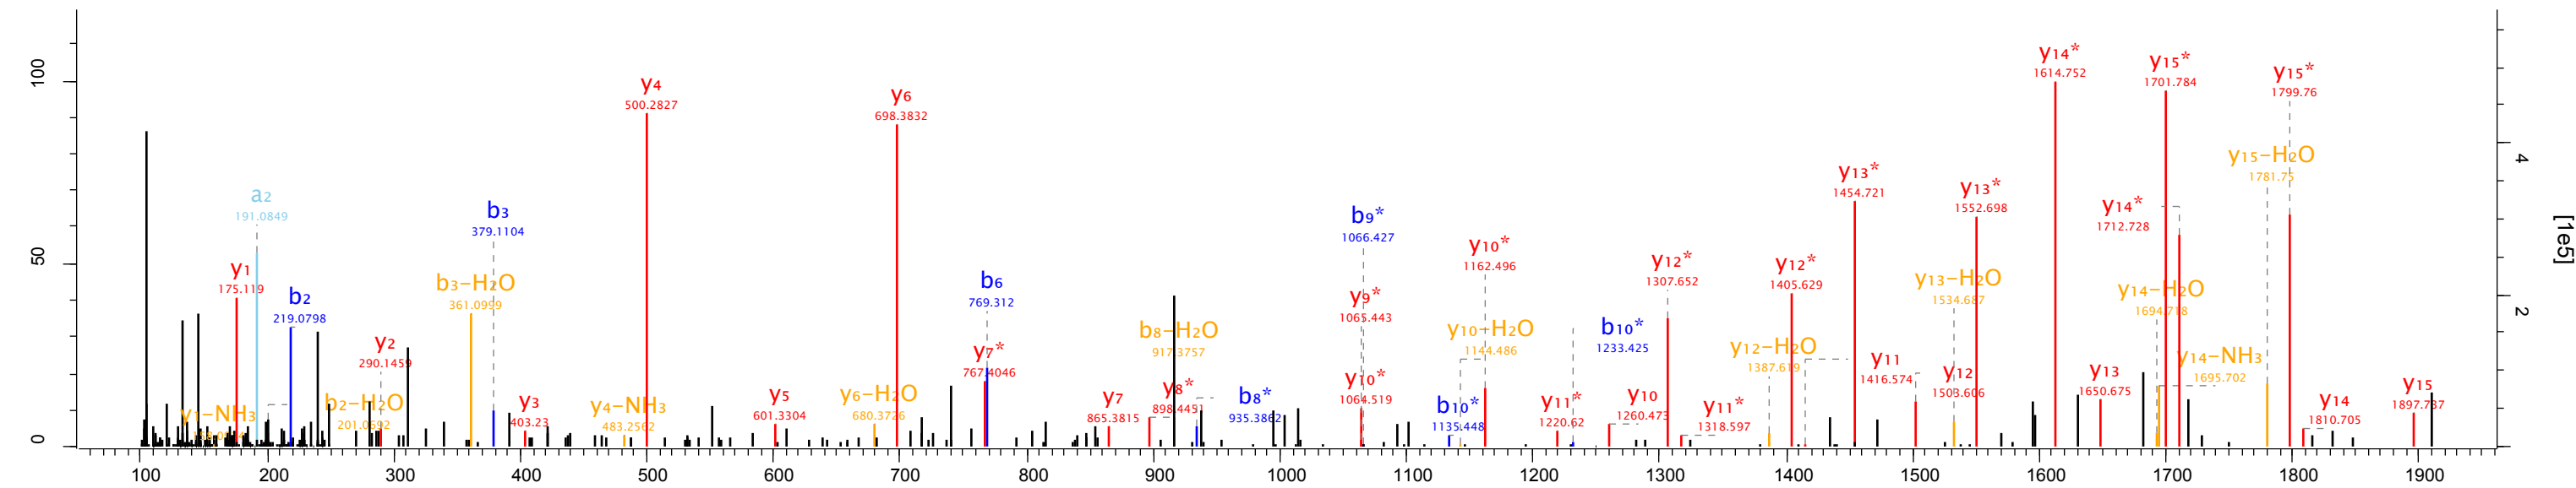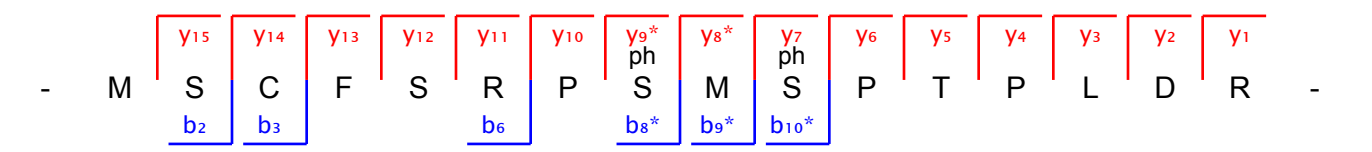

Raw file  
20171215\_MaS\_33SR\_LMH\_phospho2\_03

Scan 13578 Method FTMS; HCD Score 97.91 m/z 1133.99 Gene names PHLDB2

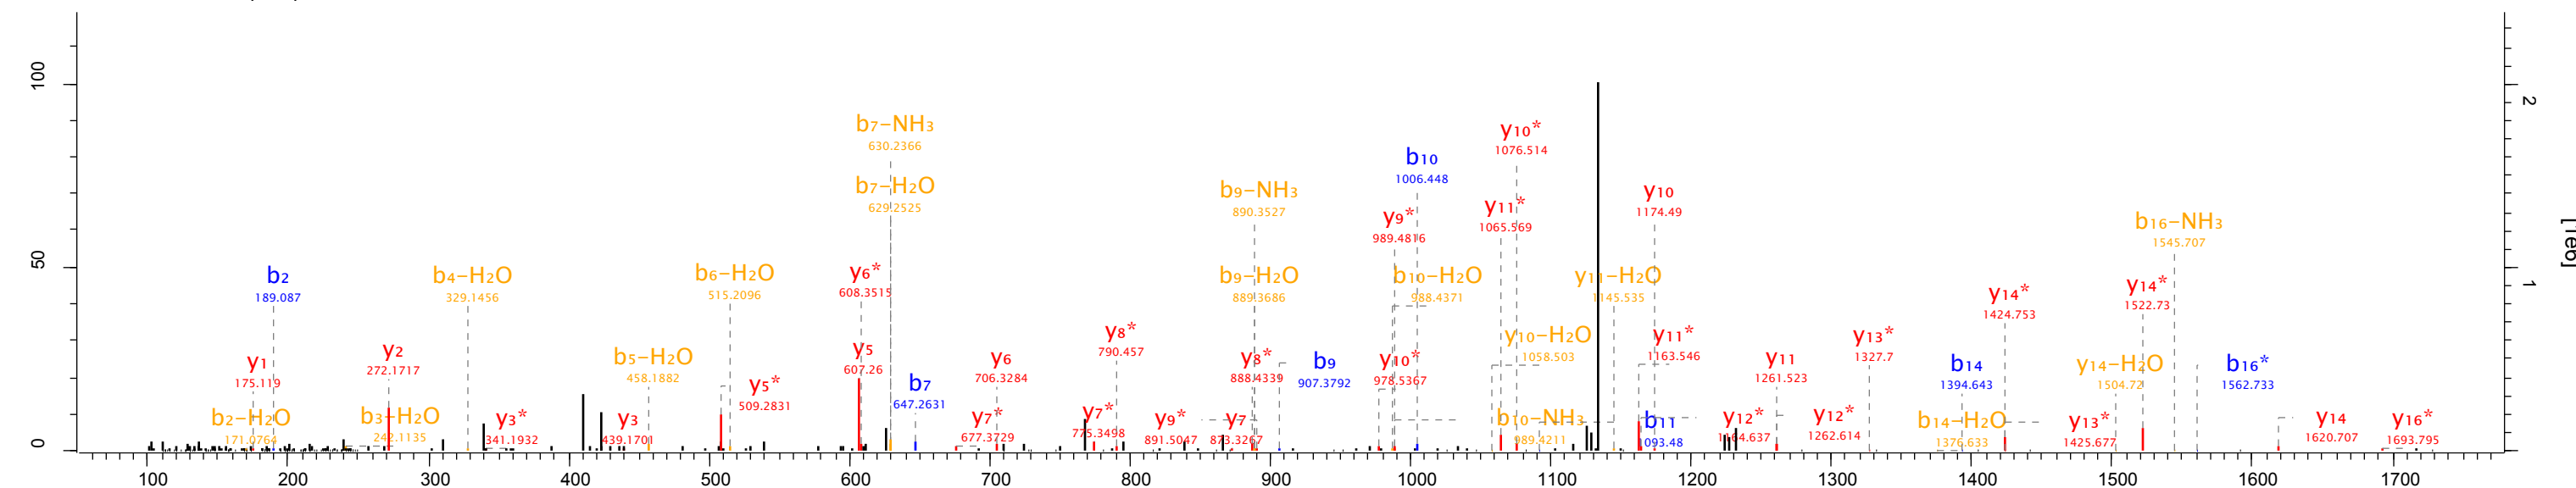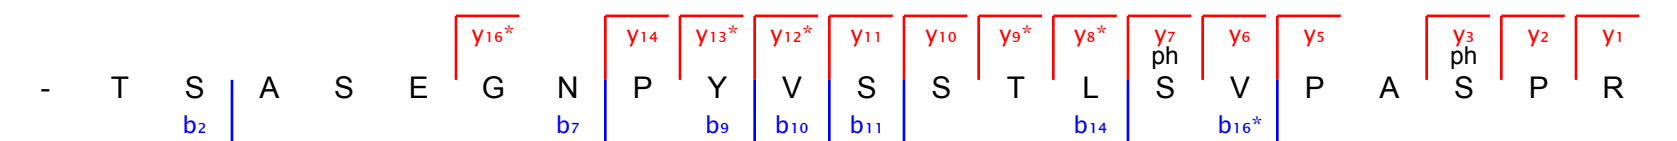

Raw file 20171215\_MaS\_33SR\_LMH\_phospho2\_03 Scan 14398 Method FTMS; HCD Score 207.69 m/z 1009.07 Gene names NAP1L4

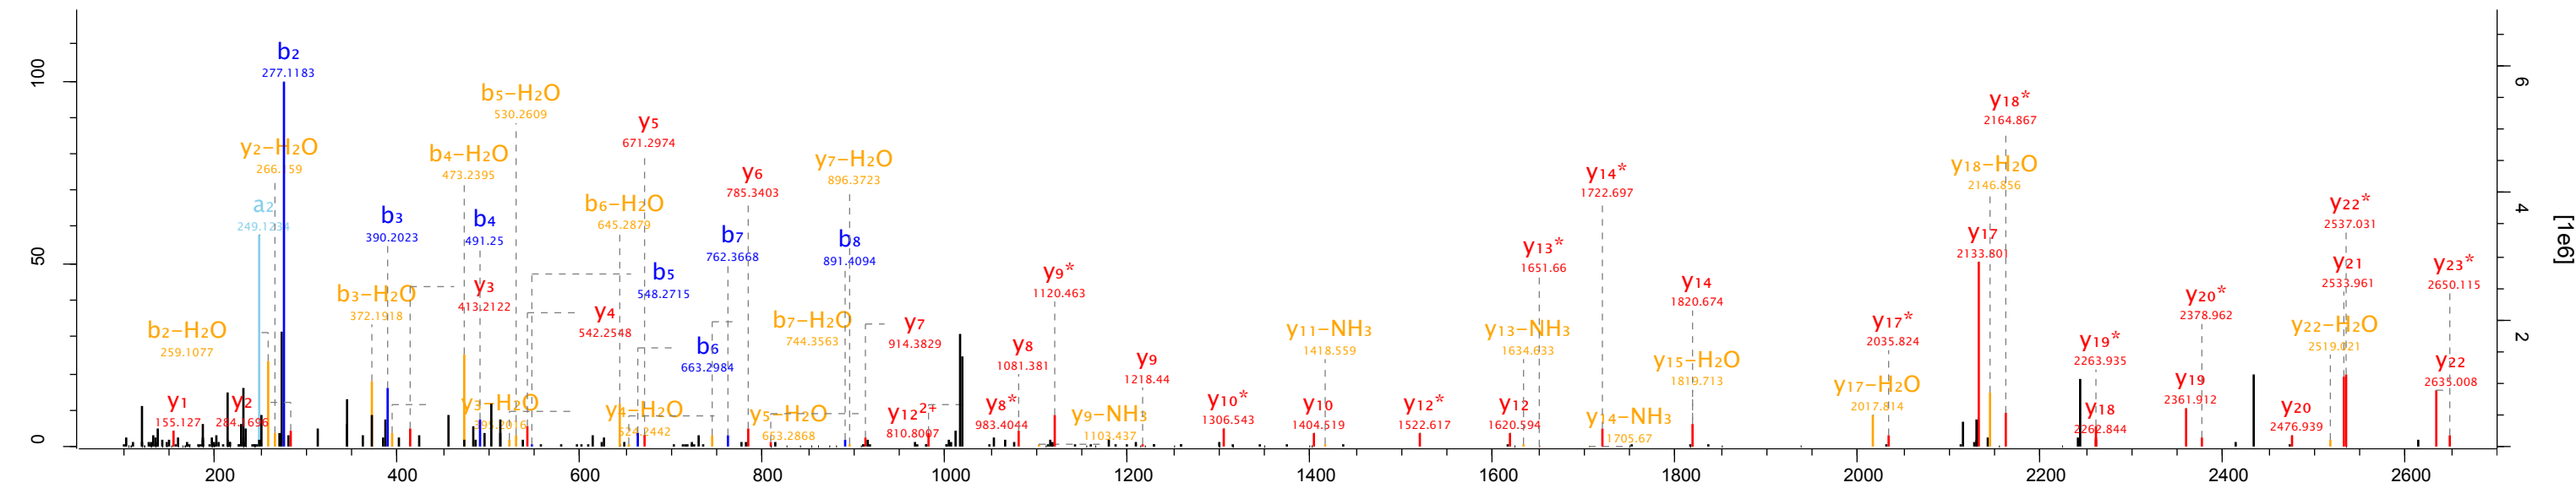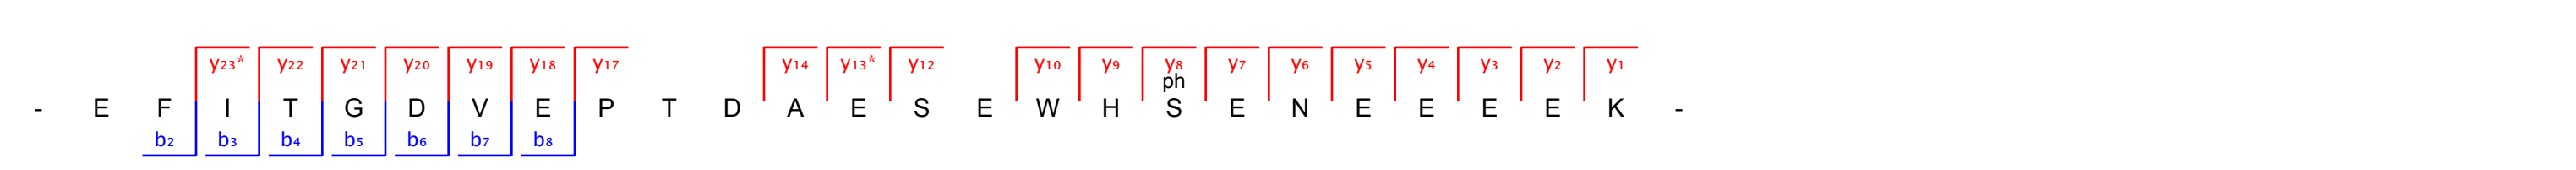

Raw file 20171215\_MaS\_33SR\_LMH\_phospho2\_03 Scan 14438 Method FTMS; HCD Score 161.15 m/z 971.03 Gene names KDM1A

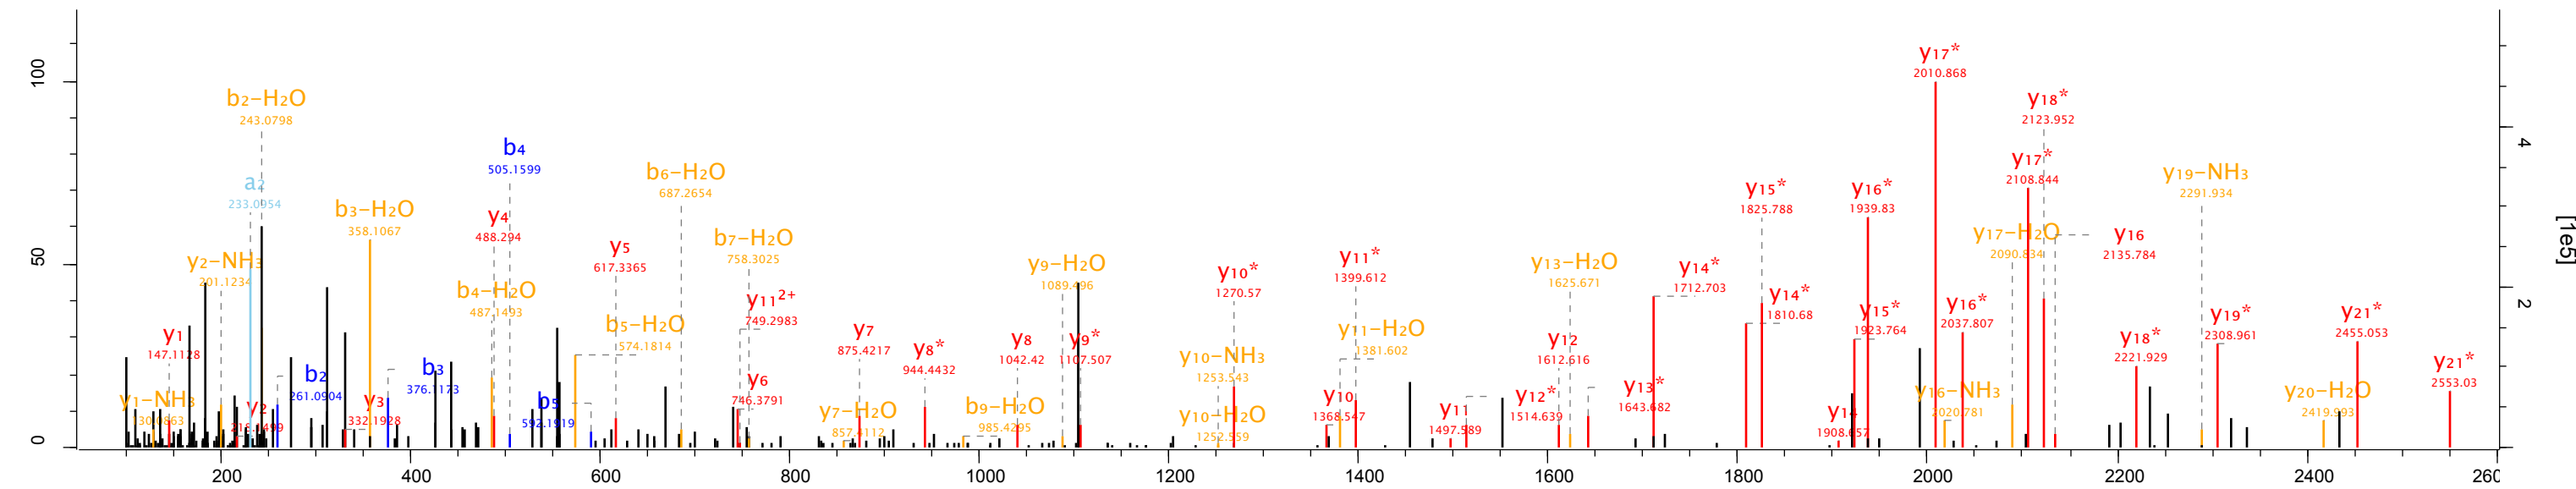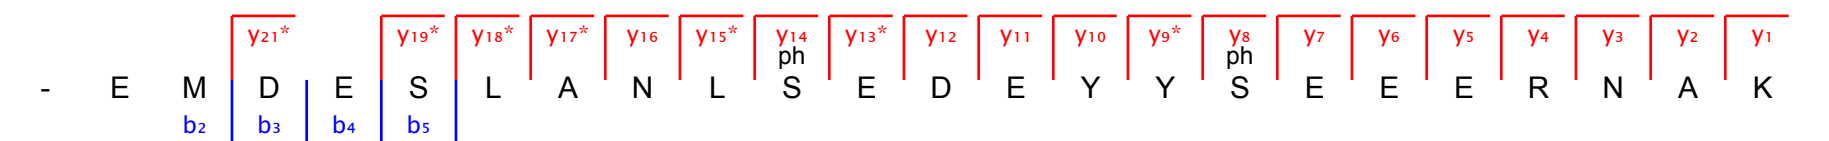

Raw file 20171215\_MaS\_33SR\_LMH\_phospho2\_03 Scan 14828 Method FTMS; HCD Score 185.65 m/z 1177.52 Gene names EPRS

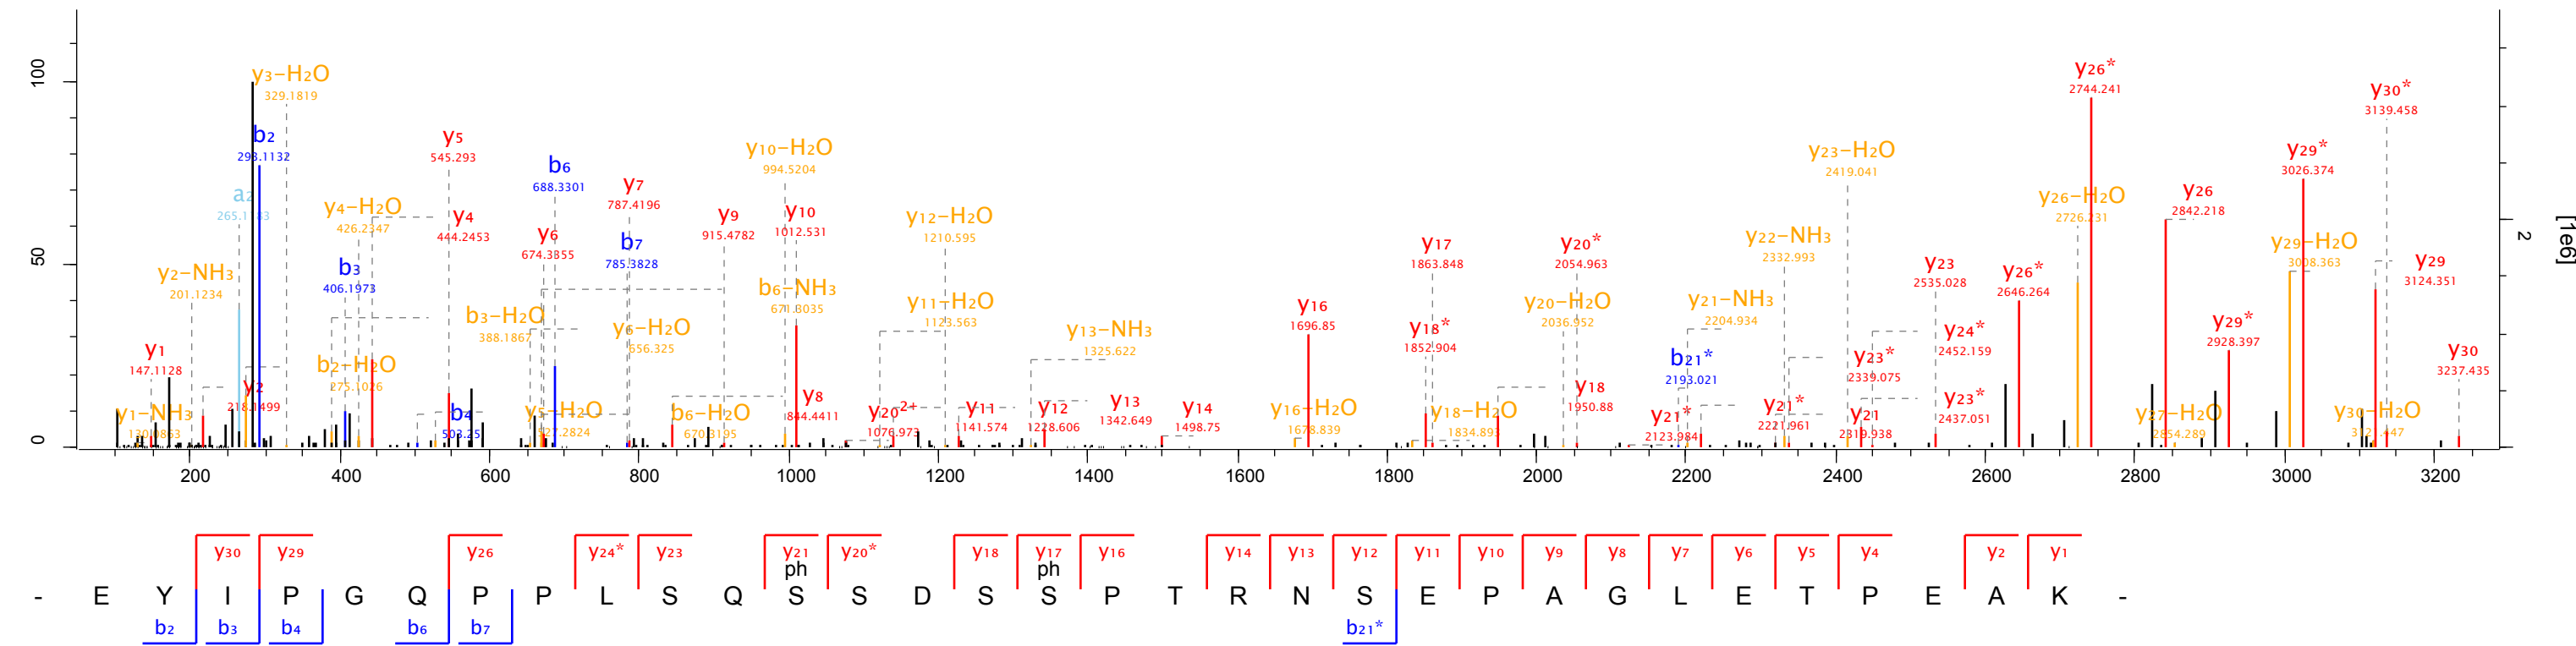

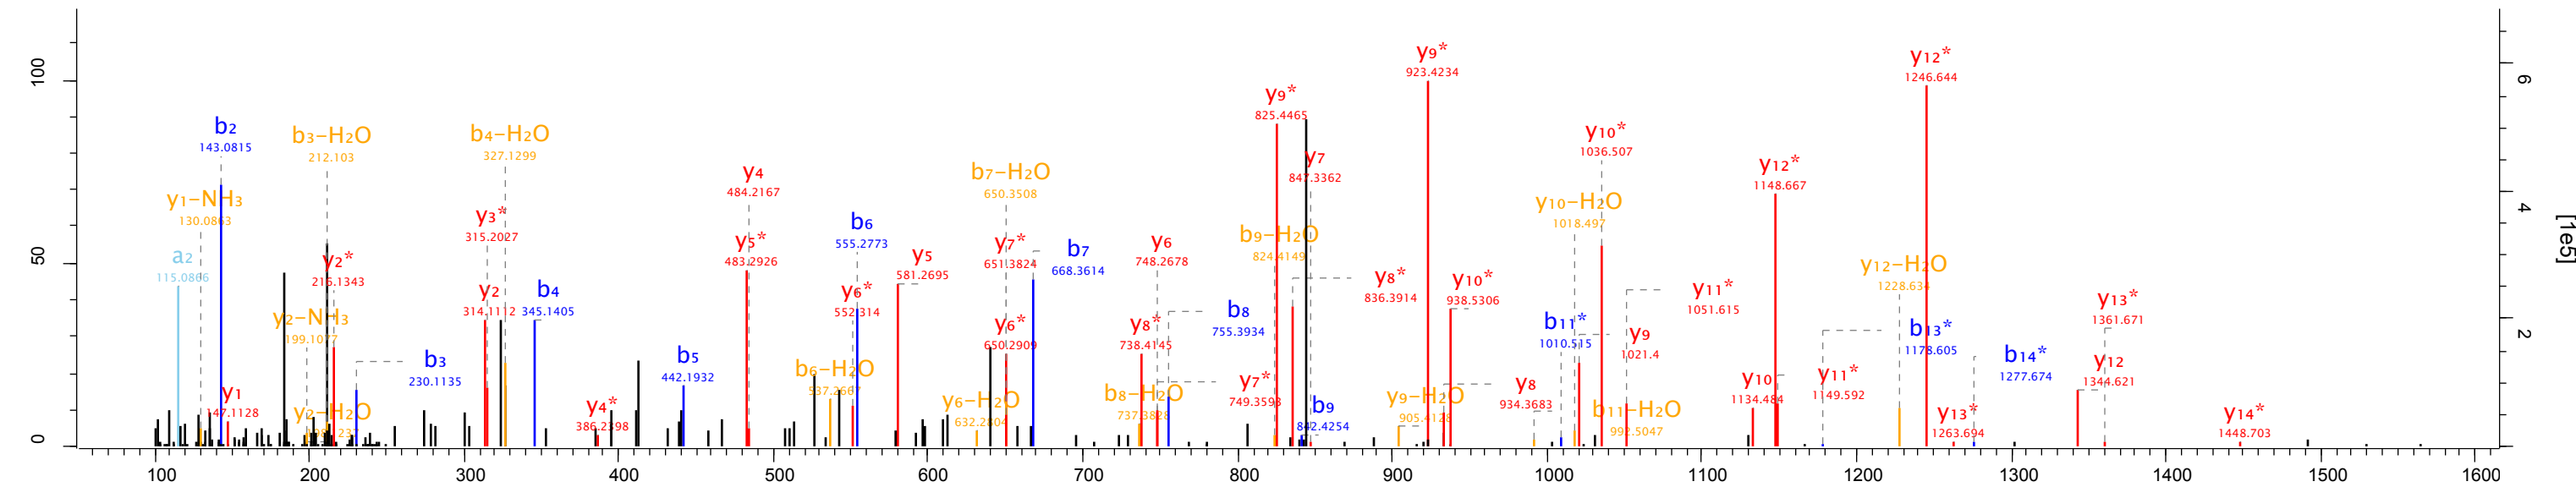

- A A S D P L L S S V S P A V S K -

b<sub>2</sub> b<sub>3</sub> b<sub>4</sub> b<sub>5</sub> b<sub>6</sub> b<sub>7</sub> b<sub>8</sub> b<sub>9</sub> b<sub>11</sub>\* b<sub>13</sub>\* b<sub>14</sub>\*

y<sub>14</sub>\* y<sub>13</sub>\* y<sub>12</sub> y<sub>11</sub>\* y<sub>10</sub> y<sub>9</sub> y<sub>8</sub> y<sub>7</sub> y<sub>6</sub> ph y<sub>5</sub> y<sub>4</sub> y<sub>3</sub>\* y<sub>2</sub> ph y<sub>1</sub>

Raw file 20171215\_MaS\_33SR\_LMH\_phospho2\_03 Scan 14888 Method FTMS; HCD Score 286.42 m/z 1292.49 Gene names EHD2

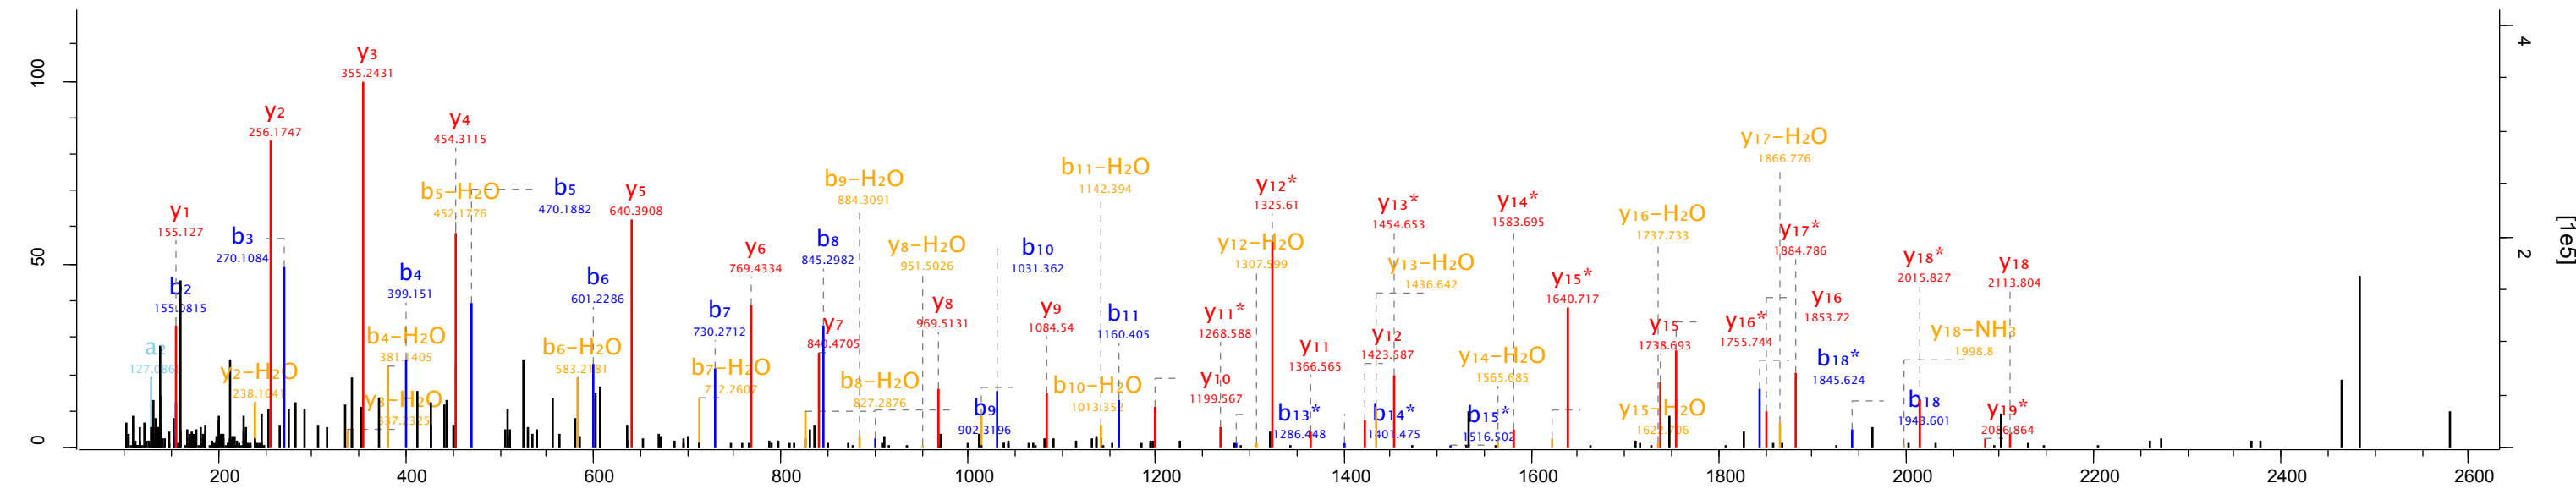

- G P D E A M E D G E E G S D D E A E W V V T K -

b<sub>2</sub>
b<sub>3</sub>
b<sub>4</sub>
b<sub>5</sub>
b<sub>6</sub>
b<sub>7</sub>
b<sub>8</sub>
b<sub>9</sub>
b<sub>10</sub>
b<sub>11</sub>
b<sub>13</sub>\*
b<sub>14</sub>\*
b<sub>15</sub>\*
b<sub>18</sub>

y<sub>19</sub>\*
y<sub>18</sub>
y<sub>17</sub>\*
y<sub>16</sub>
y<sub>15</sub>
y<sub>14</sub>\*
y<sub>13</sub>\*
y<sub>12</sub>
y<sub>11</sub>
y<sub>10</sub>
y<sub>9</sub>
y<sub>8</sub>
y<sub>7</sub>
y<sub>6</sub>
y<sub>5</sub>
y<sub>4</sub>
y<sub>3</sub>
y<sub>2</sub>
y<sub>1</sub>

Raw file 20171215\_MaS\_33SR\_LMH\_phospho2\_03 Scan 15068 Method FTMS; HCD Score 119.8 m/z 744.36 Gene names BCL9L

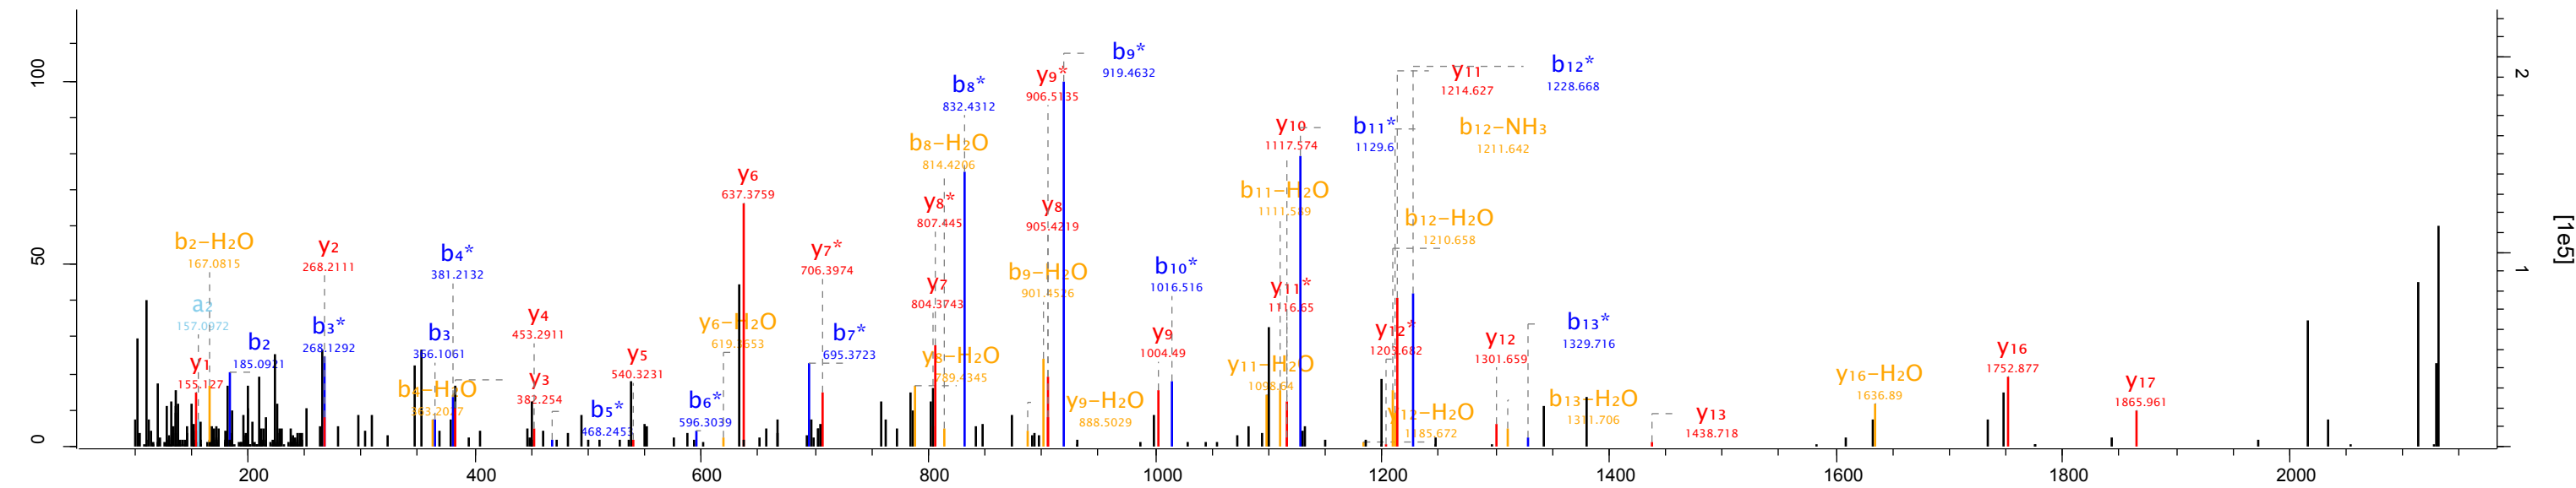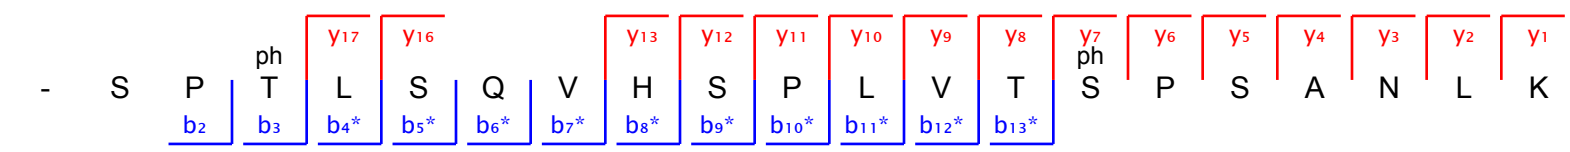



Raw file  
20171215\_MaS\_33SR\_LMH\_phospho2\_03

Scan 15218 Method FTMS; HCD Score 59.72 m/z 737.95 Gene names AKAP12

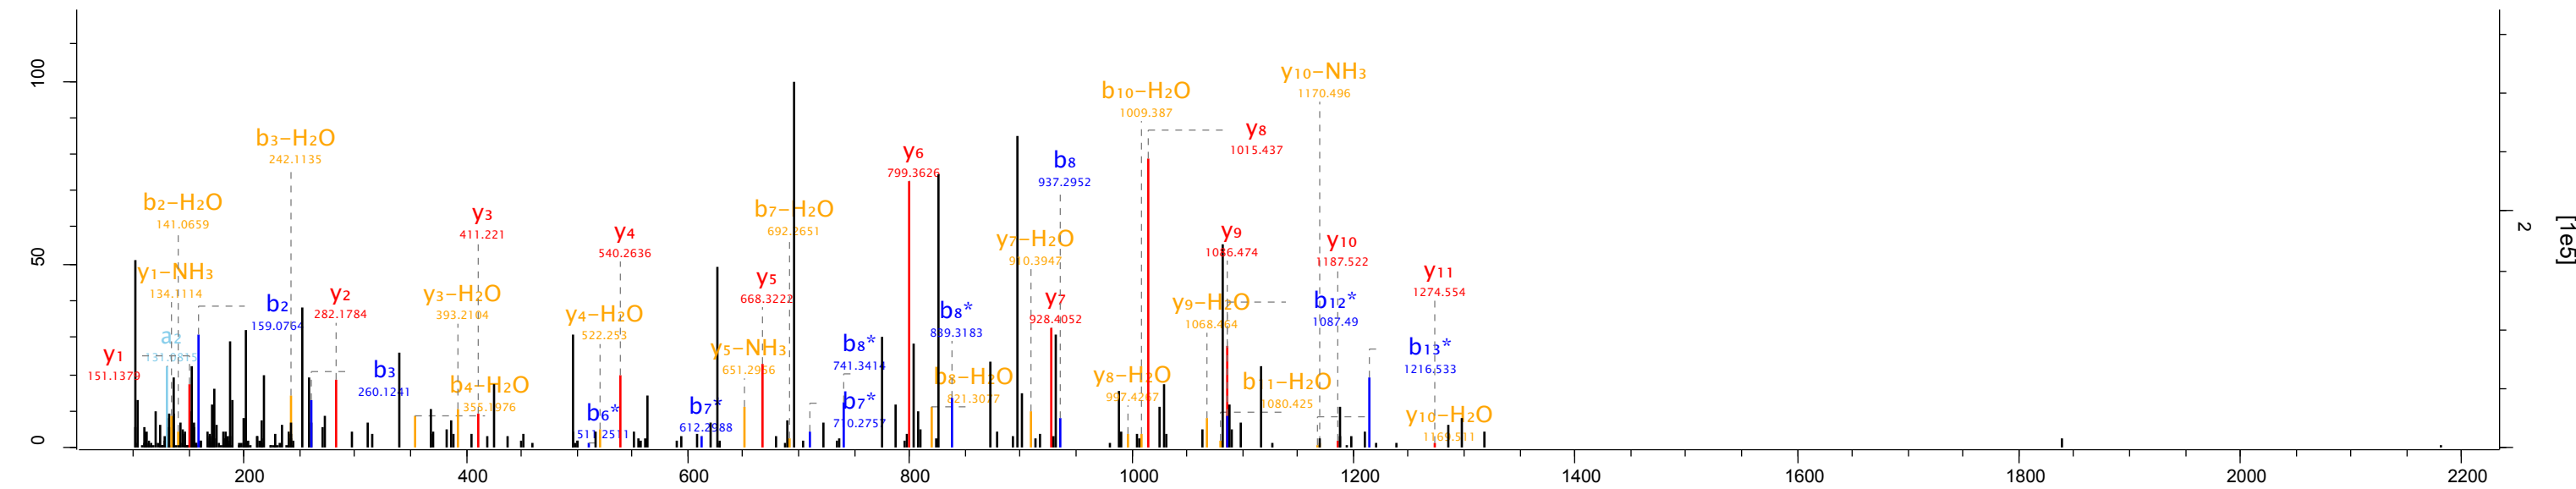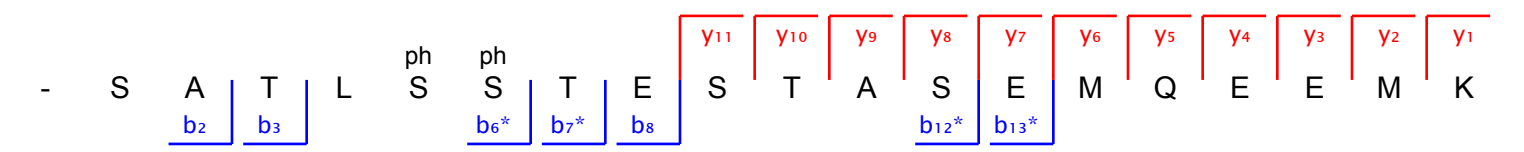

Raw file: 20171215\_MaS\_33SR\_LMH\_phospho2\_03  
 Scan: 15318 Method: FTMS; HCD Score: 173.86 m/z: 749.98 Gene names: MYO18A

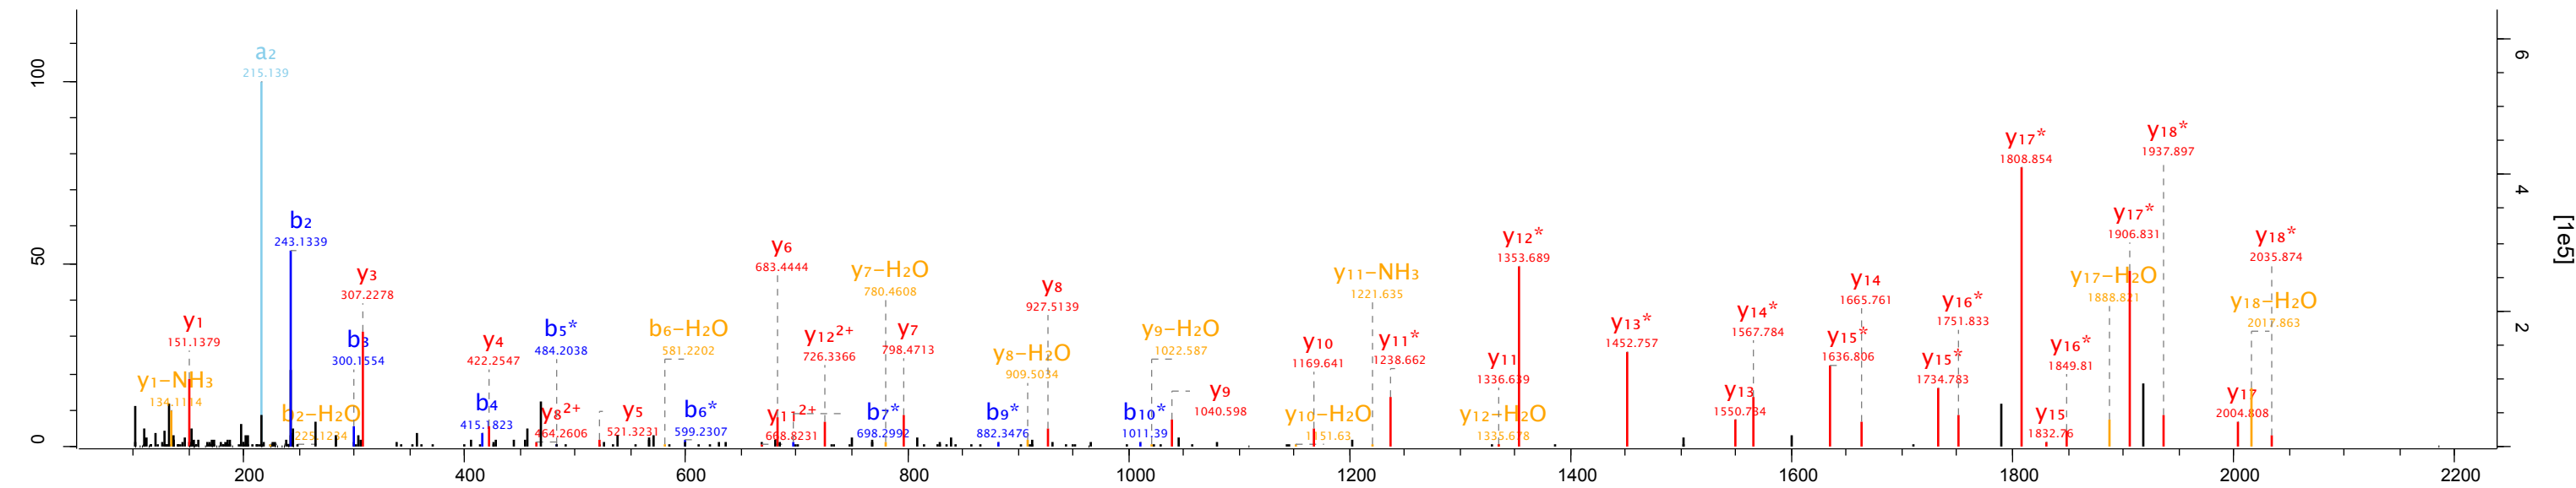

- L E G D S D V D S E L E D R V D G V K -

Fragmentation mapping (b and y ions) is shown below the sequence:

- b2 (E), b3 (G), b4 (D), b5\* (S), b6\* (D), b7\* (V), b9\* (S), b10\* (E)
- y1 (K), y3 (G), y4 (D), y5 (V), y6 (R), y7 (D), y8 (E), y9 (L), y10 (E), y11 (S), y12\* (D), y13 (V), y14 (D), y15 (S), y16\* (D), y17 (S), y18\* (E)

Raw file 20171215\_MaS\_33SR\_LMH\_phospho2\_03 Scan 15878 Method FTMS; HCD Score 217.01 m/z 798.37 Gene names ARHGEF11

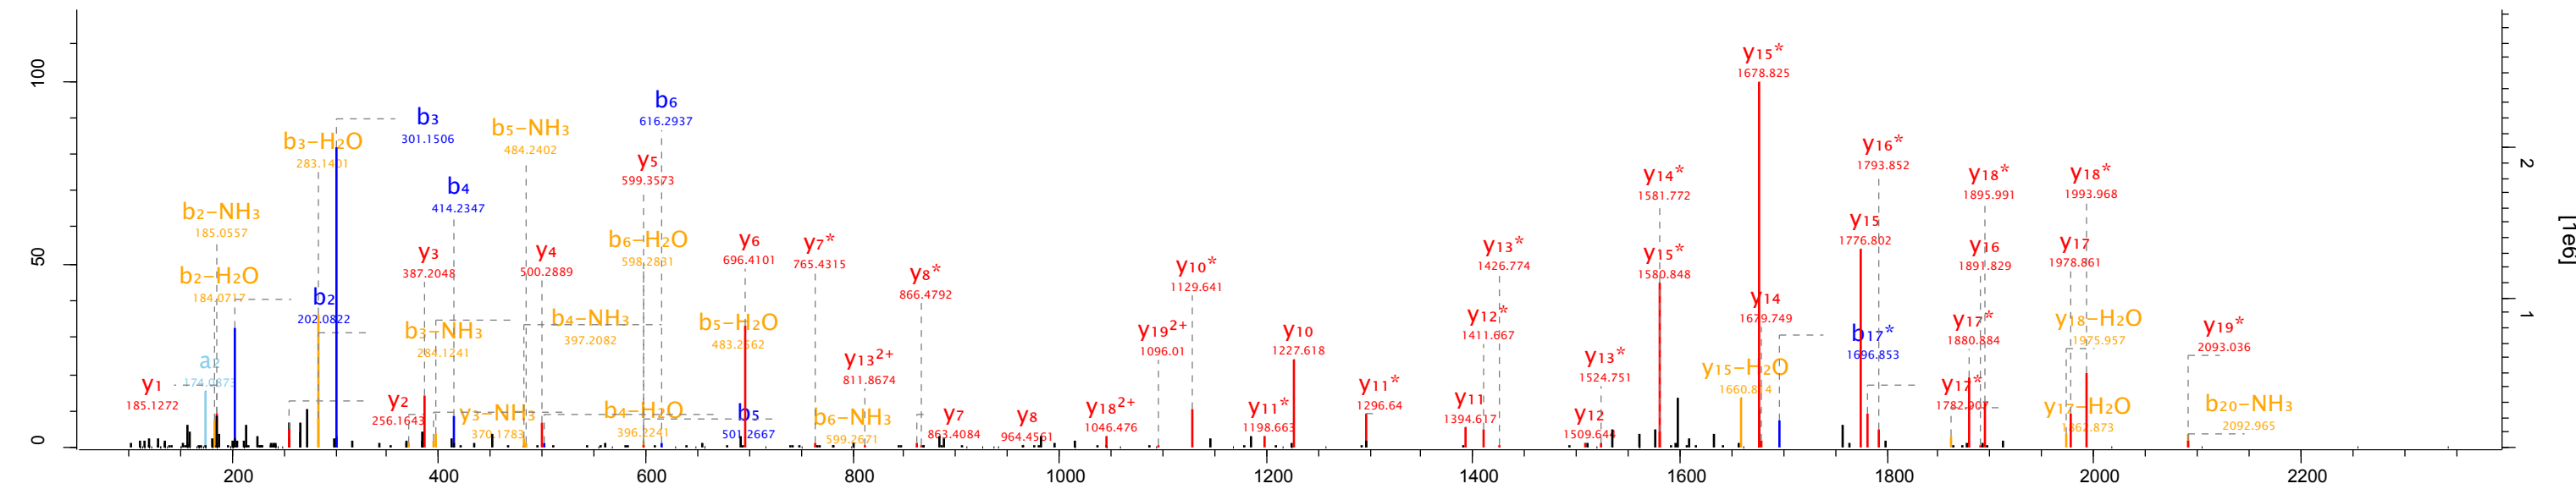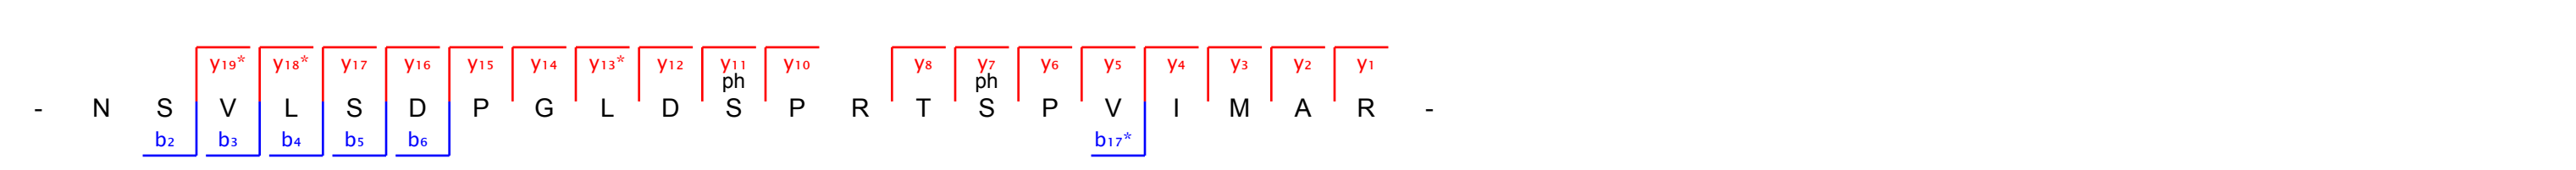

Raw file 20171215\_MaS\_33SR\_LMH\_phospho2\_03 Scan 15918 Method FTMS; HCD Score 107.47 m/z 731.94 Gene names PPID

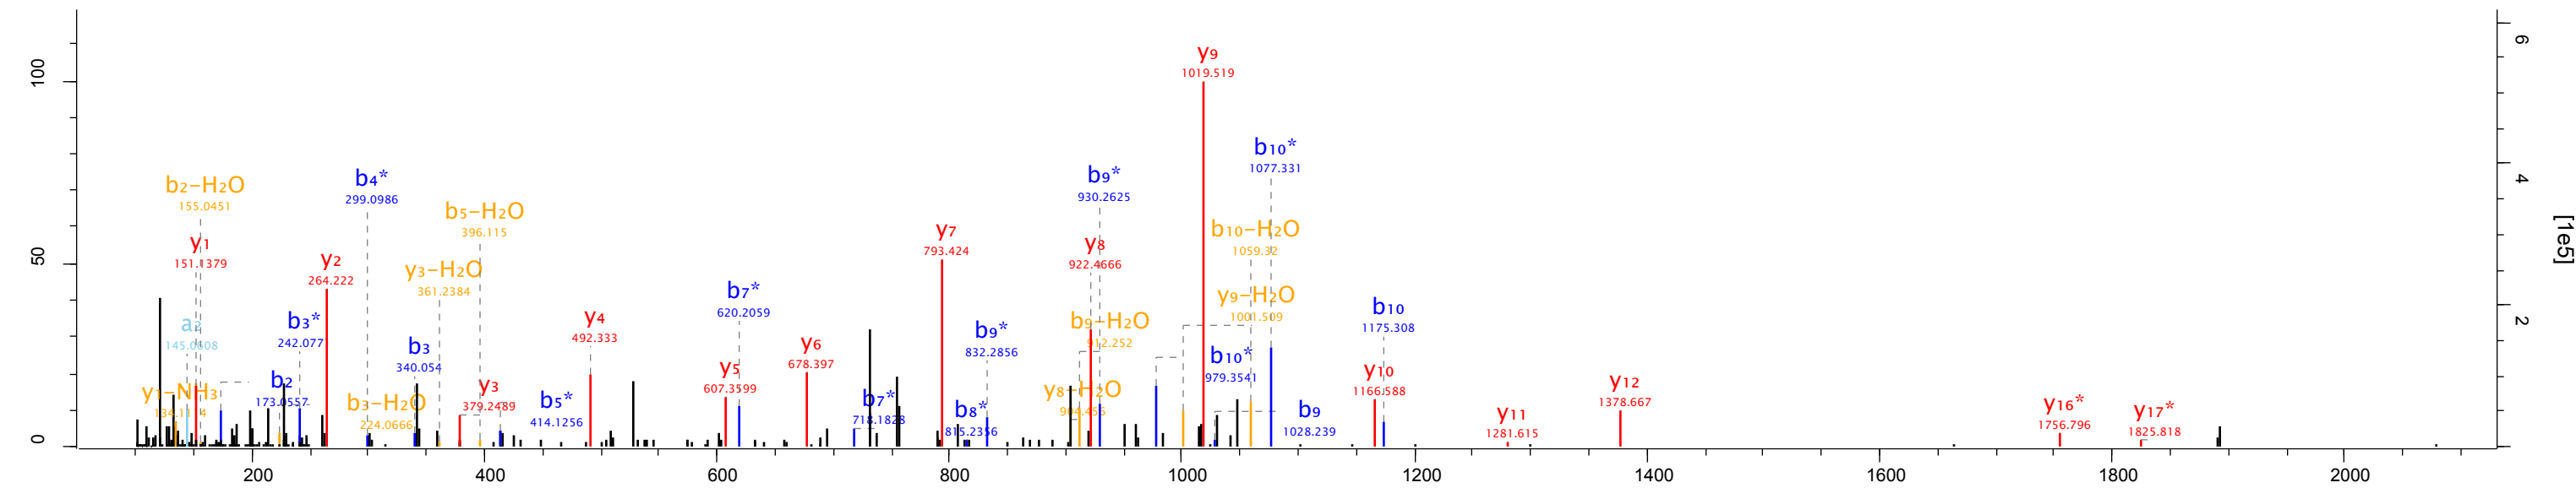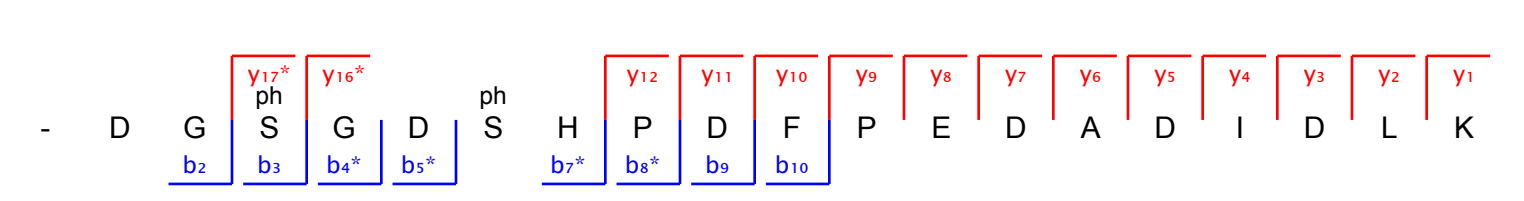

Raw file 20171215\_MaS\_33SR\_LMH\_phospho2\_03 Scan 16238 Method FTMS; HCD Score 93.65 m/z 486.72 Gene names WARS

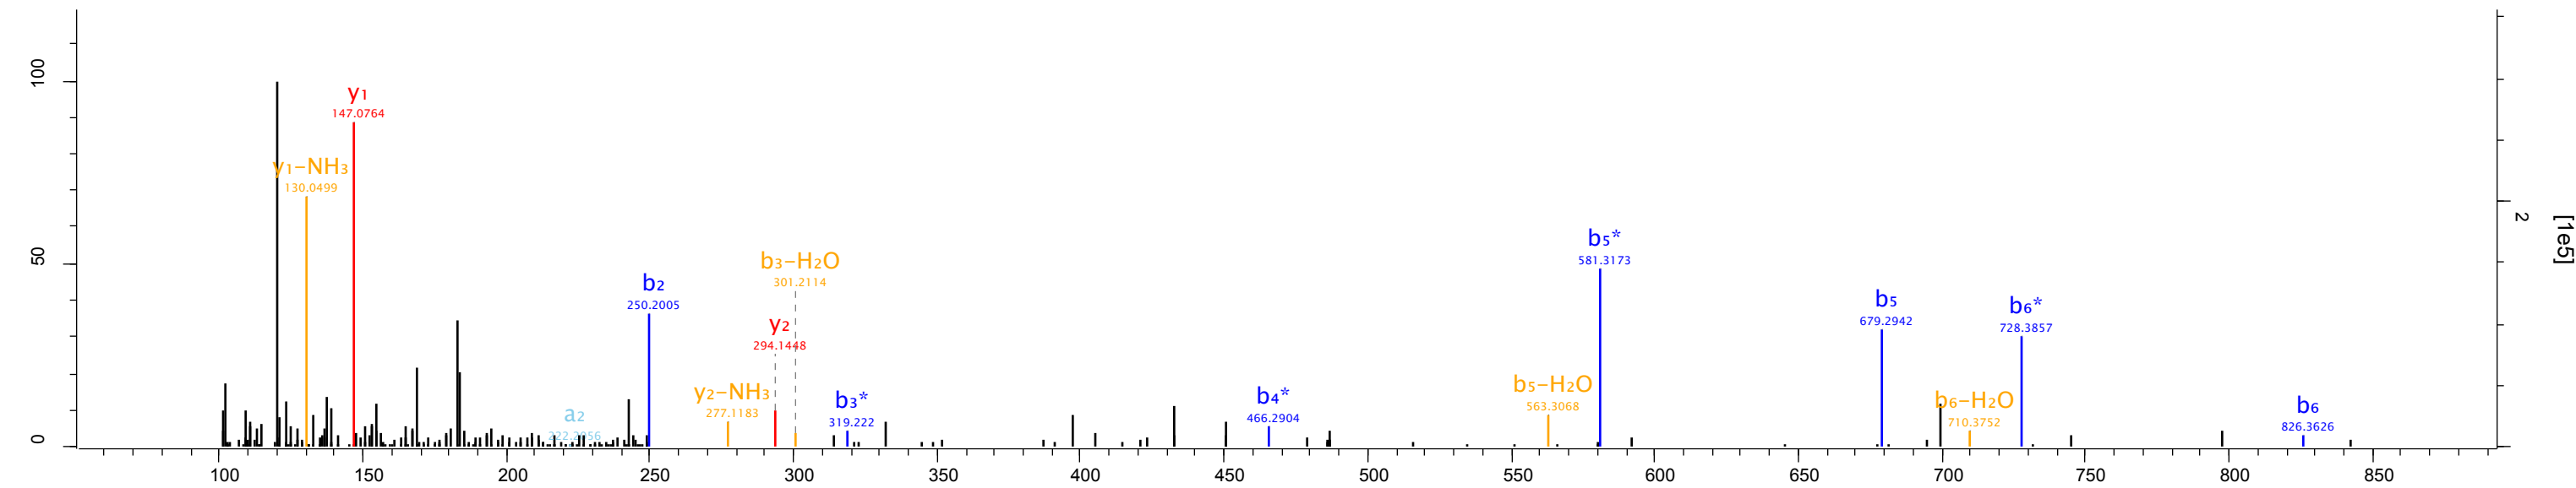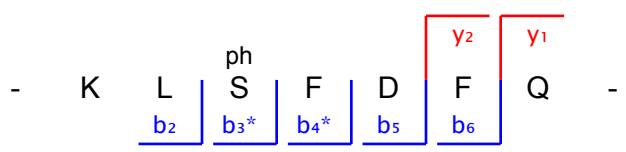

Raw file 20171215\_MaS\_33SR\_LMH\_phospho2\_03 Scan 16278 Method FTMS; HCD Score 205.9 m/z 1178.93 Gene names EEF1B2

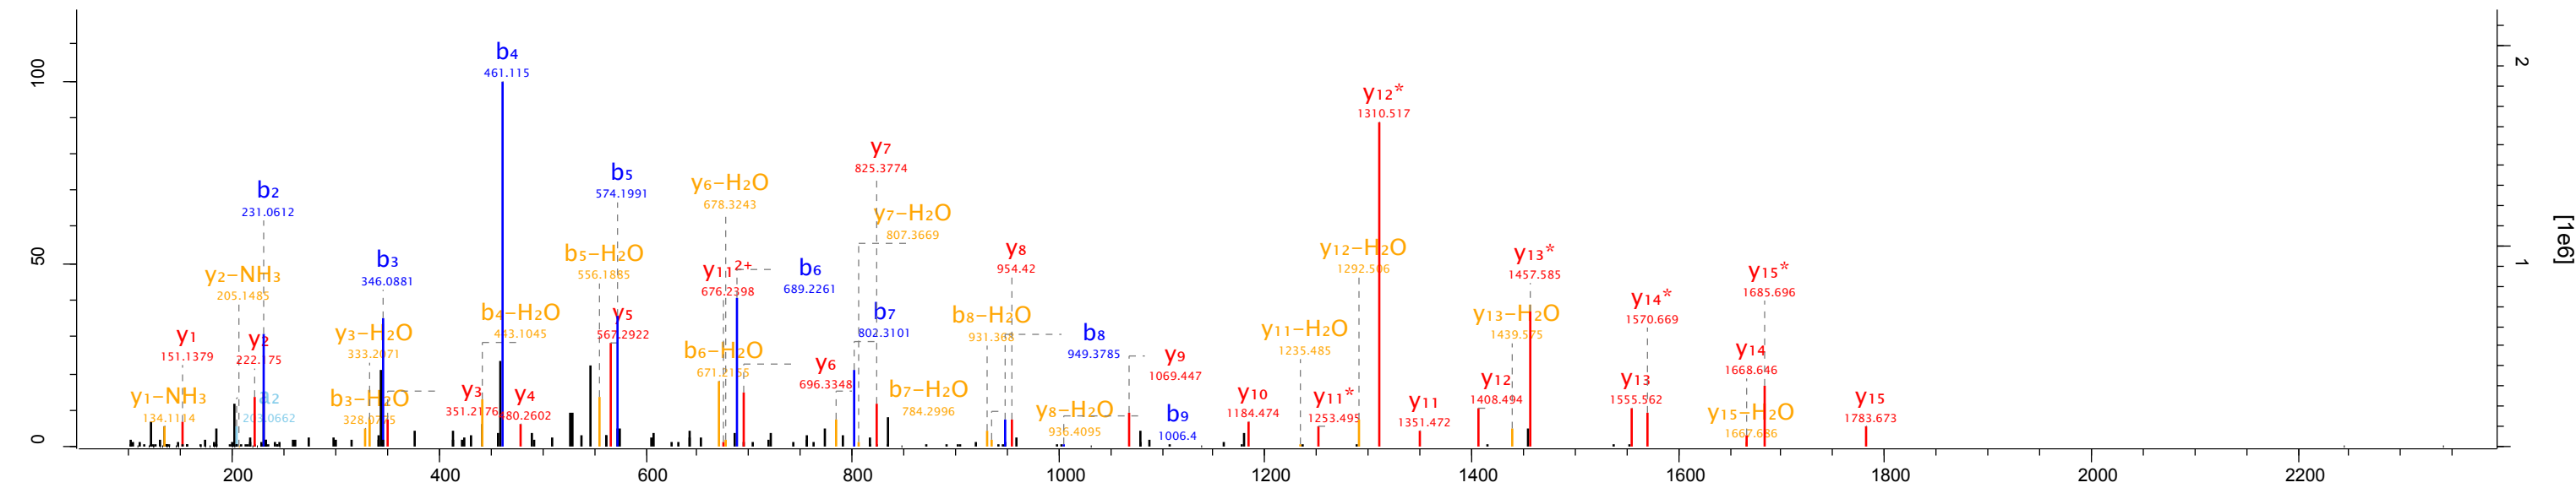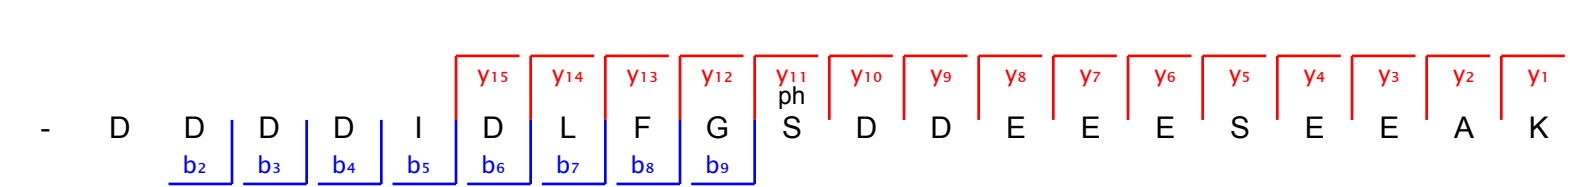

Raw file 20171215\_MaS\_33SR\_LMH\_phospho2\_03 Scan 16358 Method FTMS; HCD Score 78.42 m/z 855.33 Gene names CDC42BPA

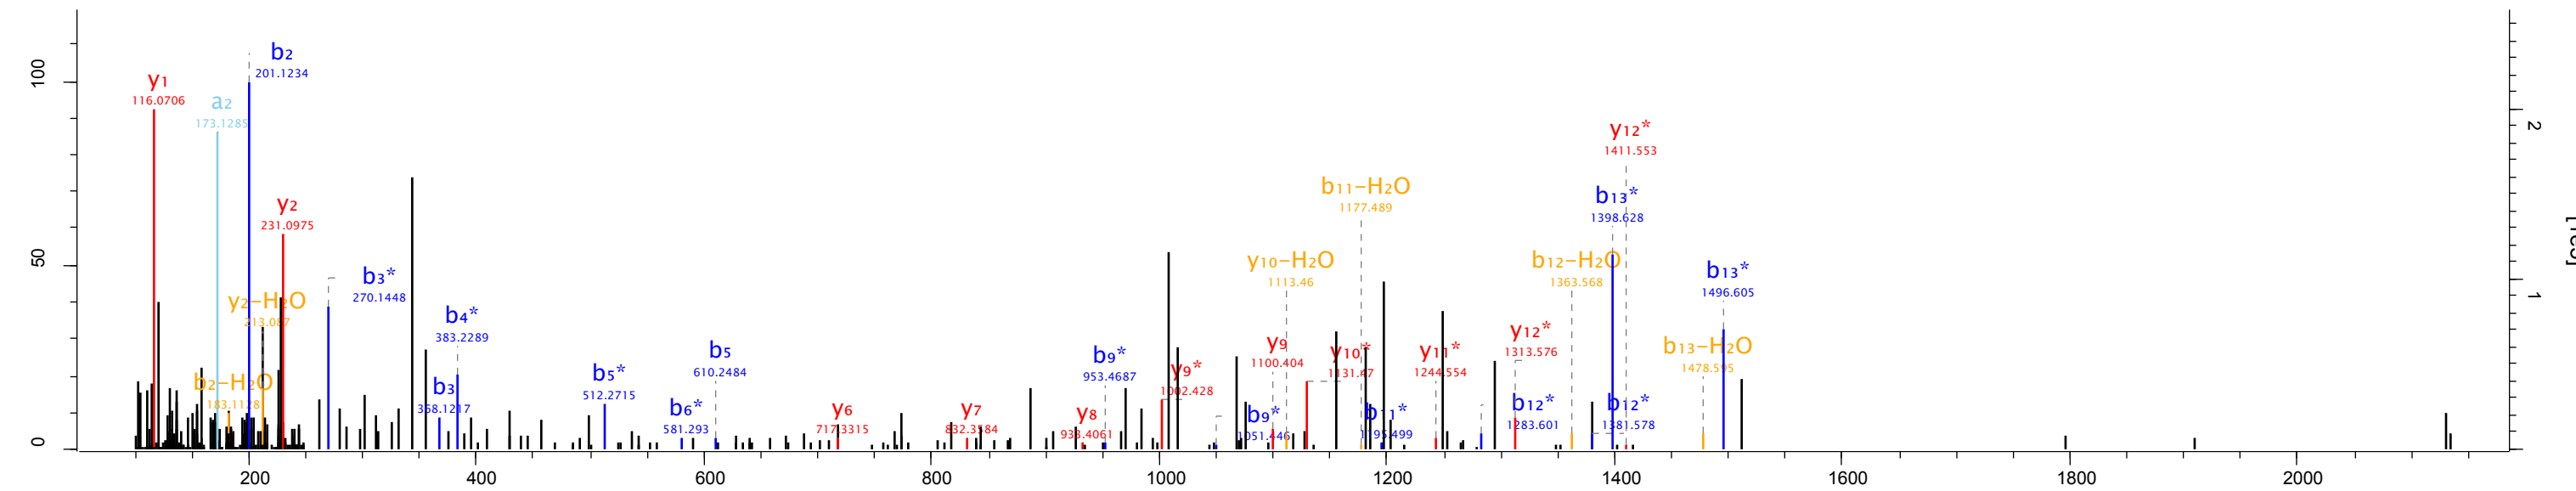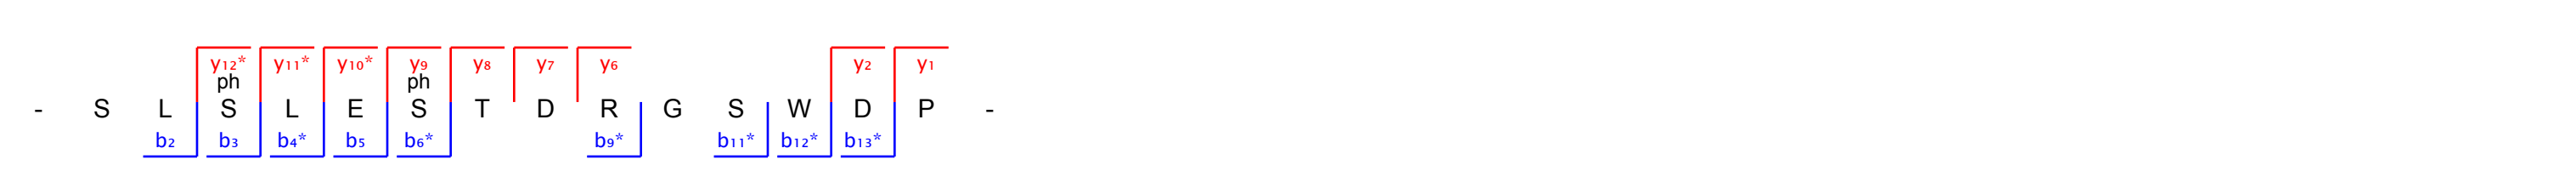

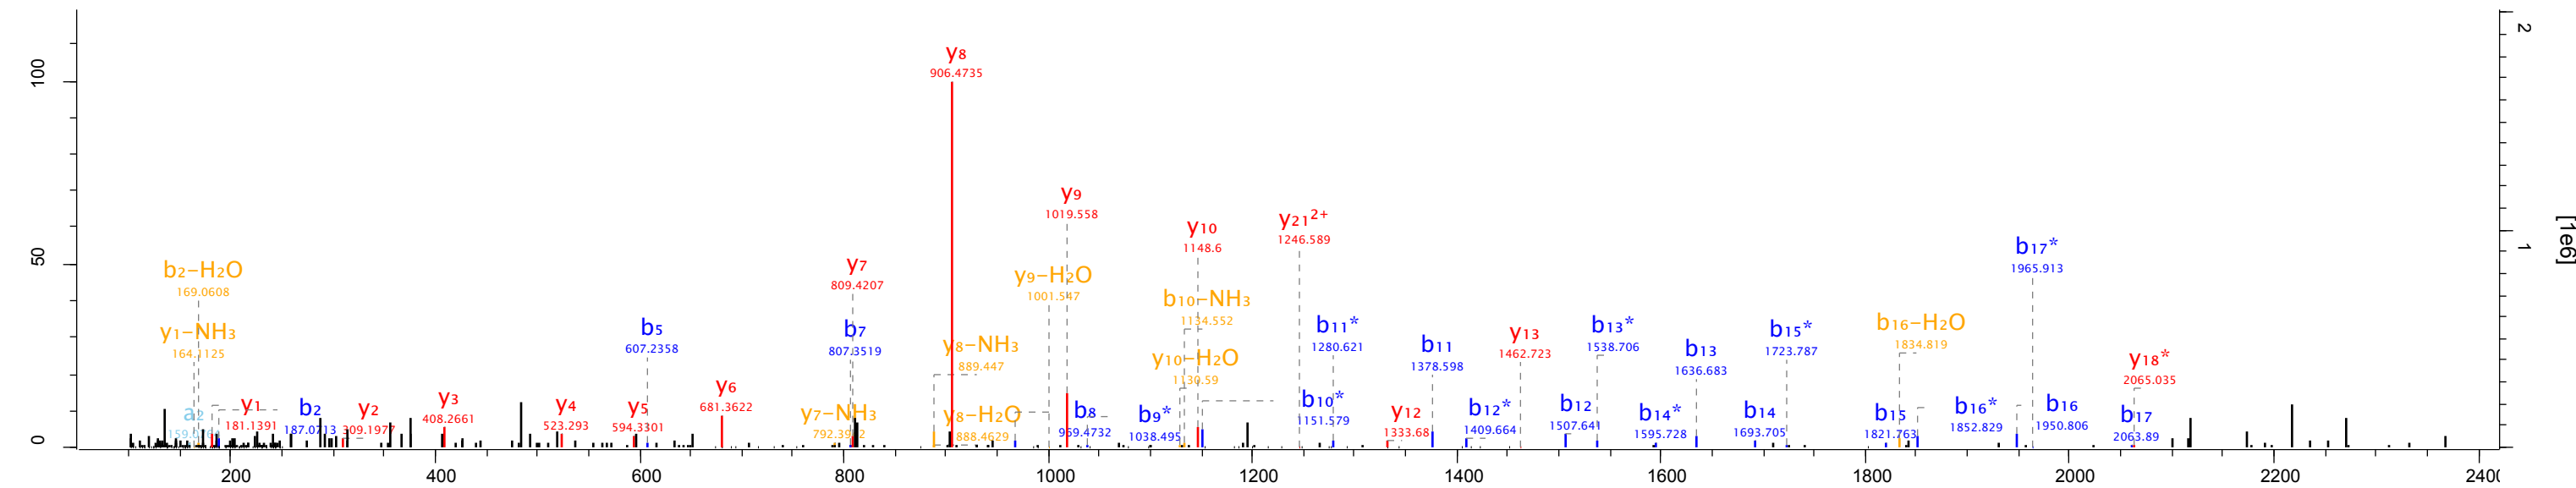

- G E Y Q E S L R S L E E E G Q E L P Q S A D V Q R -

Annotations below the sequence:

- $y_{21}^{2+}$  above E (position 5)
- $y_{18}^*$  above R (position 6)
- $b_2$  below E (position 2)
- $b_5$  below E (position 5)
- $b_7$  below L (position 7)
- $b_8$  below R (position 6)
- $b_9^*$  below S (position 8)
- $b_{10}^*$  below L (position 9)
- $b_{11}$  below E (position 10)
- $b_{12}$  below E (position 11)
- $b_{13}$  below E (position 12)
- $b_{14}$  below G (position 13)
- $b_{15}$  below Q (position 14)
- $b_{16}$  below E (position 15)
- $b_{17}$  below L (position 16)
- $y_{13}$  above E (position 12)
- $y_{12}$  above G (position 13)
- $y_{10}$  above E (position 15)
- $y_9$  above L (position 16)
- $y_8$  above P (position 17)
- $y_7$  above Q (position 18)
- $y_6$  above S (position 19)
- $y_5$  above A (position 20)
- $y_4$  above D (position 21)
- $y_3$  above V (position 22)
- $y_2$  above Q (position 23)
- $y_1$  above R (position 24)



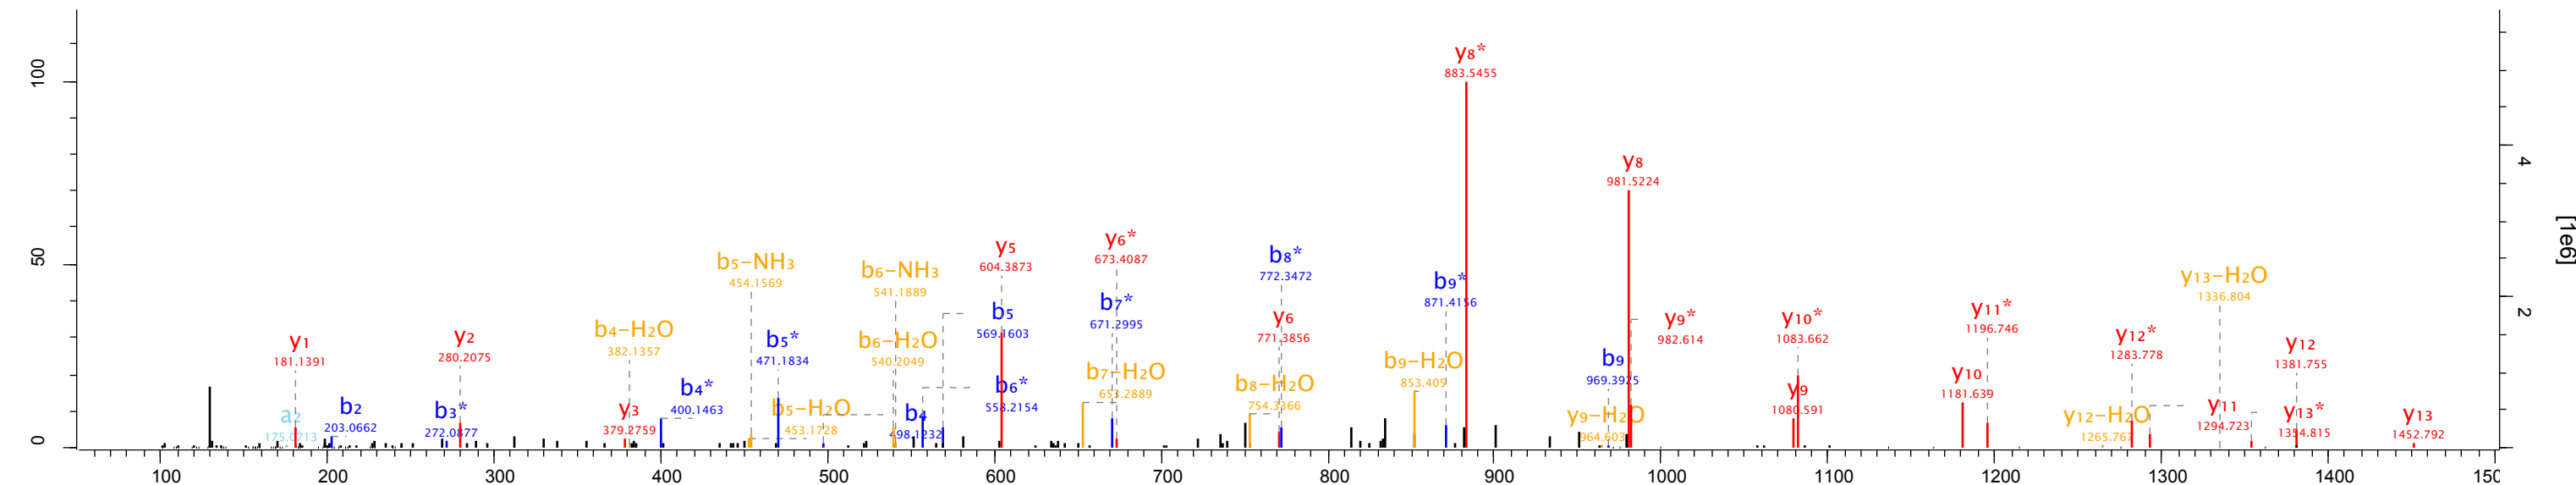

- S D S ph Q A S L T V P L S ph P Q V V R -

b<sub>2</sub> b<sub>3</sub>\* b<sub>4</sub> b<sub>5</sub> b<sub>6</sub>\* b<sub>7</sub>\* b<sub>8</sub>\* b<sub>9</sub> y<sub>13</sub> y<sub>12</sub> y<sub>11</sub> y<sub>10</sub> y<sub>9</sub> y<sub>8</sub> y<sub>6</sub> y<sub>5</sub> y<sub>3</sub> y<sub>2</sub> y<sub>1</sub>

Raw file 20171215\_MaS\_33SR\_LMH\_phospho2\_03 Scan 16888 Method FTMS; HCD Score 147.41 m/z 930.39 Gene names TFIP11

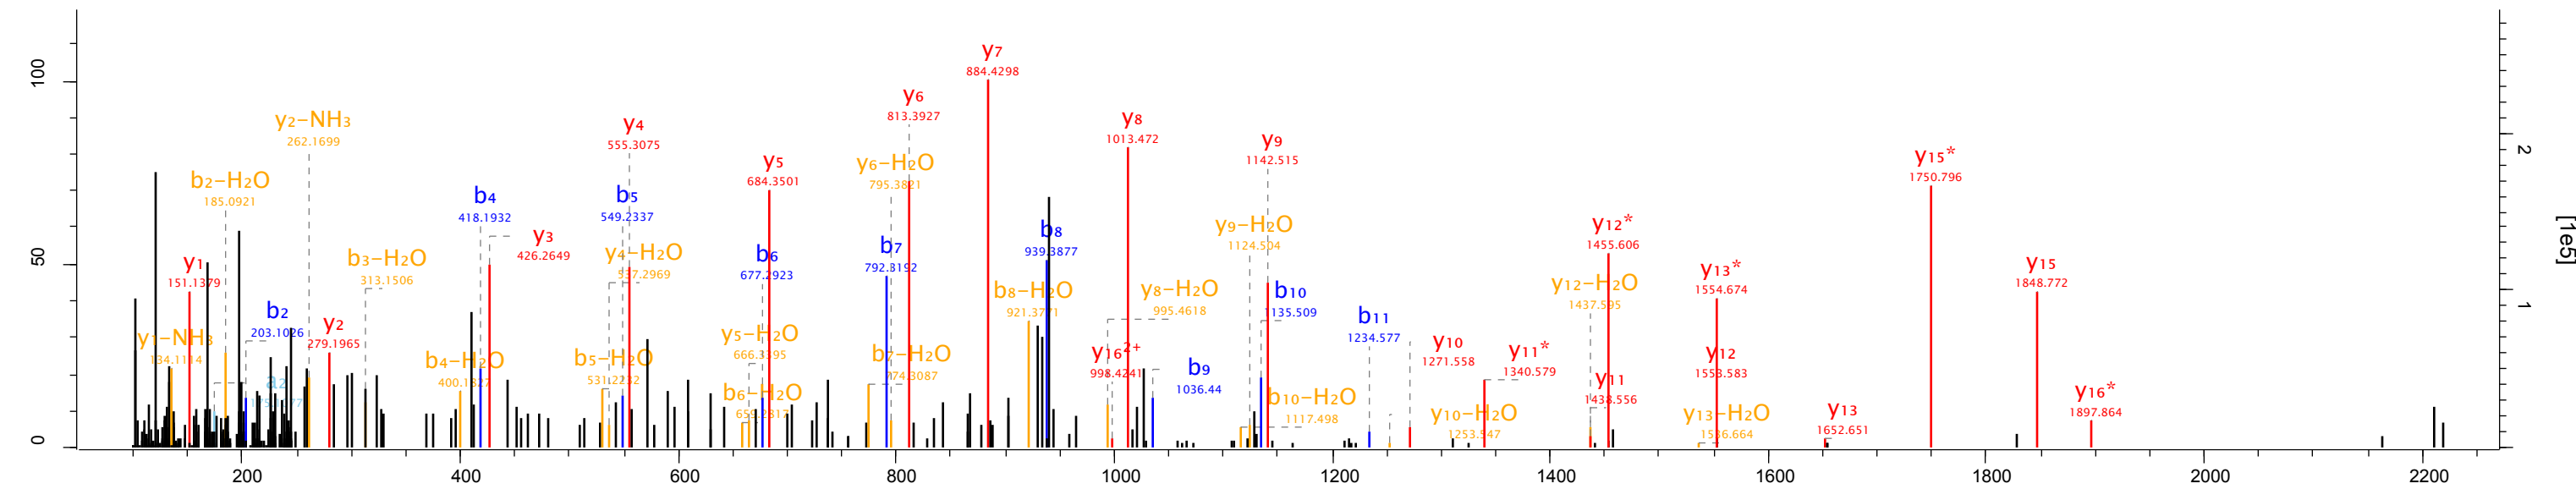

- T T Q S M Q D F P V V D S E E E A E E E F Q K -

b<sub>2</sub>
b<sub>4</sub>
b<sub>5</sub>
b<sub>6</sub>
b<sub>7</sub>
b<sub>8</sub>
b<sub>9</sub>
b<sub>10</sub>
b<sub>11</sub>
y<sub>16</sub>\*
y<sub>15</sub>
y<sub>13</sub>
y<sub>12</sub>
y<sub>11</sub>  
ph
y<sub>10</sub>
y<sub>9</sub>
y<sub>8</sub>
y<sub>7</sub>
y<sub>6</sub>
y<sub>5</sub>
y<sub>4</sub>
y<sub>3</sub>
y<sub>2</sub>
y<sub>1</sub>

Raw file  
20171215\_MaS\_33SR\_LMH\_phospho2\_03

Scan 16918 Method FTMS; HCD Score 61.59 m/z 1270.17 Gene names HNRNPC

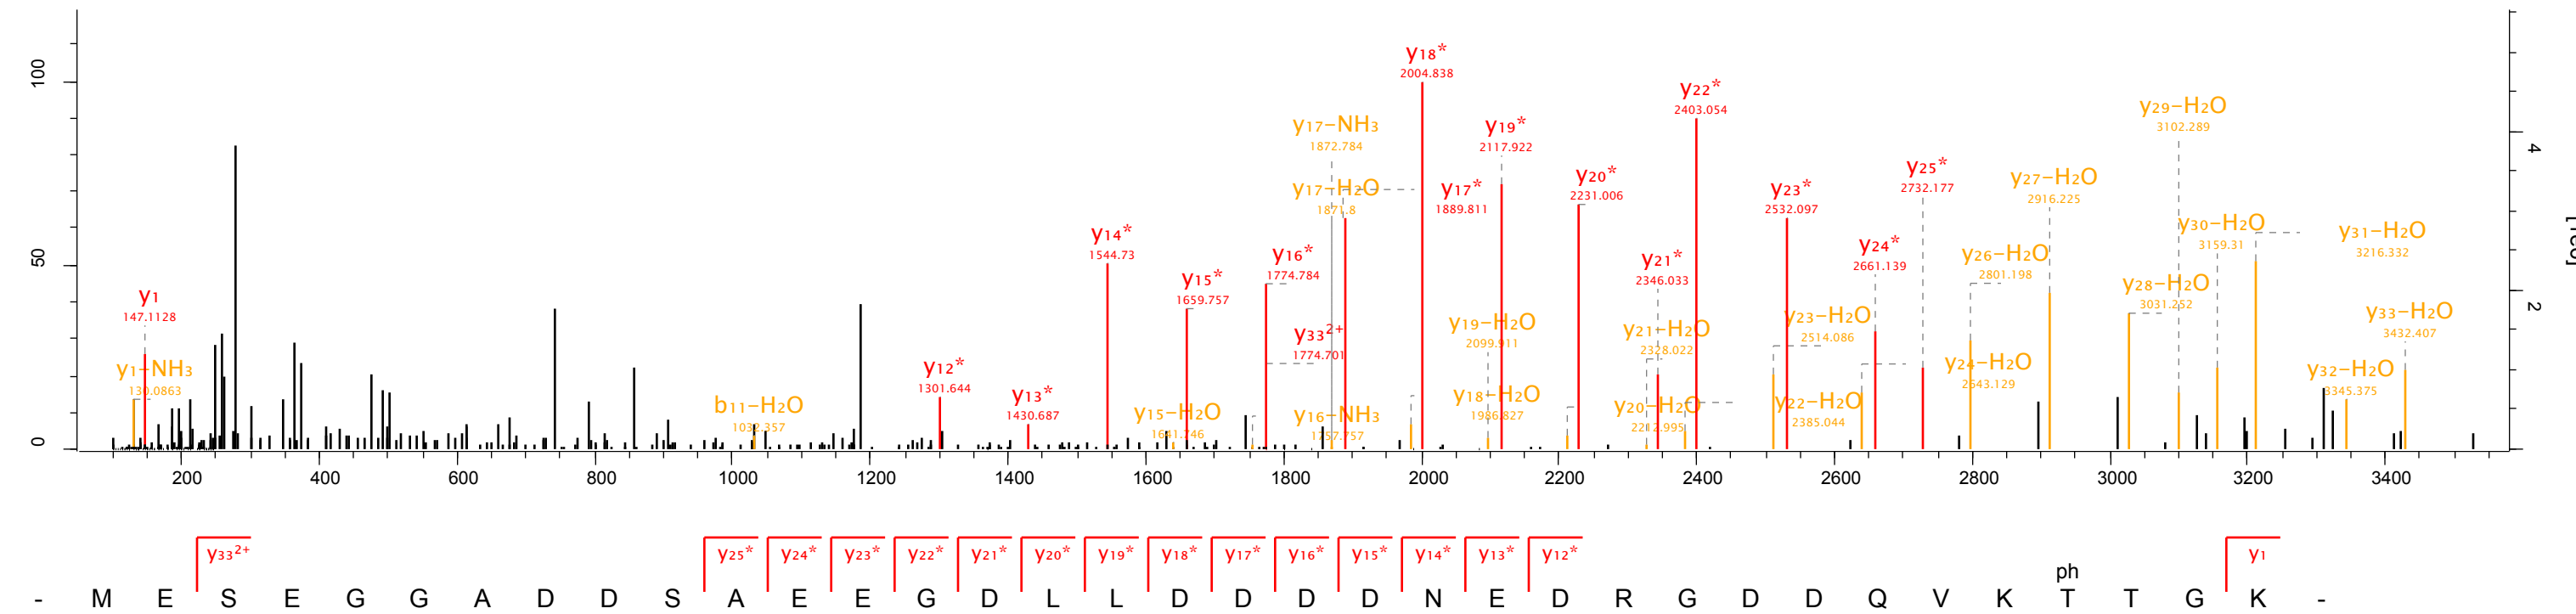

Raw file  
20171215\_MaS\_33SR\_LMH\_phospho2\_03

Scan 16928 Method FTMS; HCD Score 58.43 m/z 919.09 Gene names DDHD1

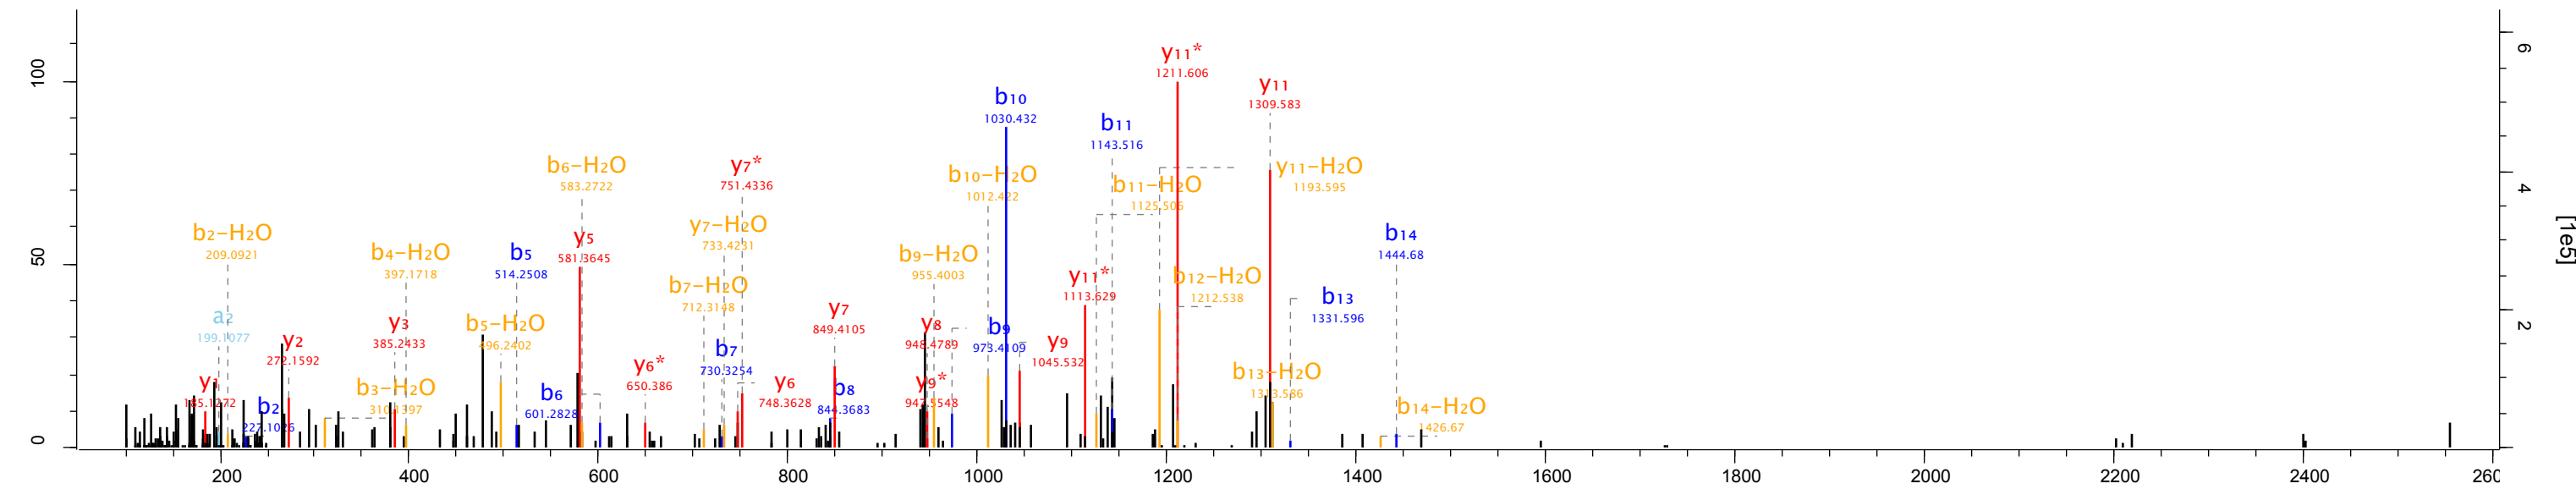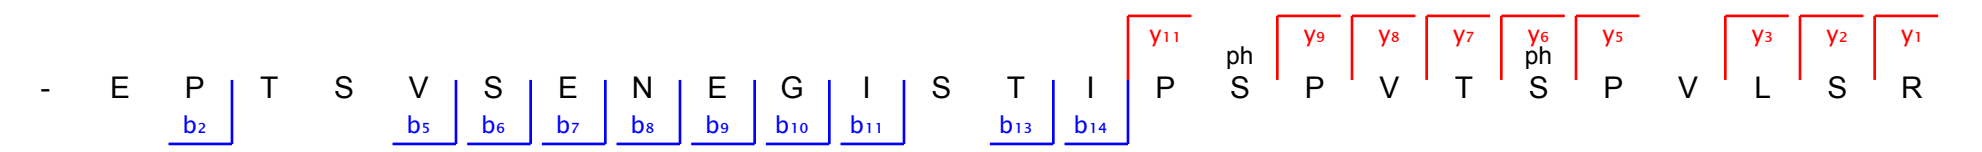

Raw file 20171215\_MaS\_33SR\_LMH\_phospho2\_03 Scan 17128 Method FTMS; HCD Score 177.03 m/z 749.34 Gene names NPM1

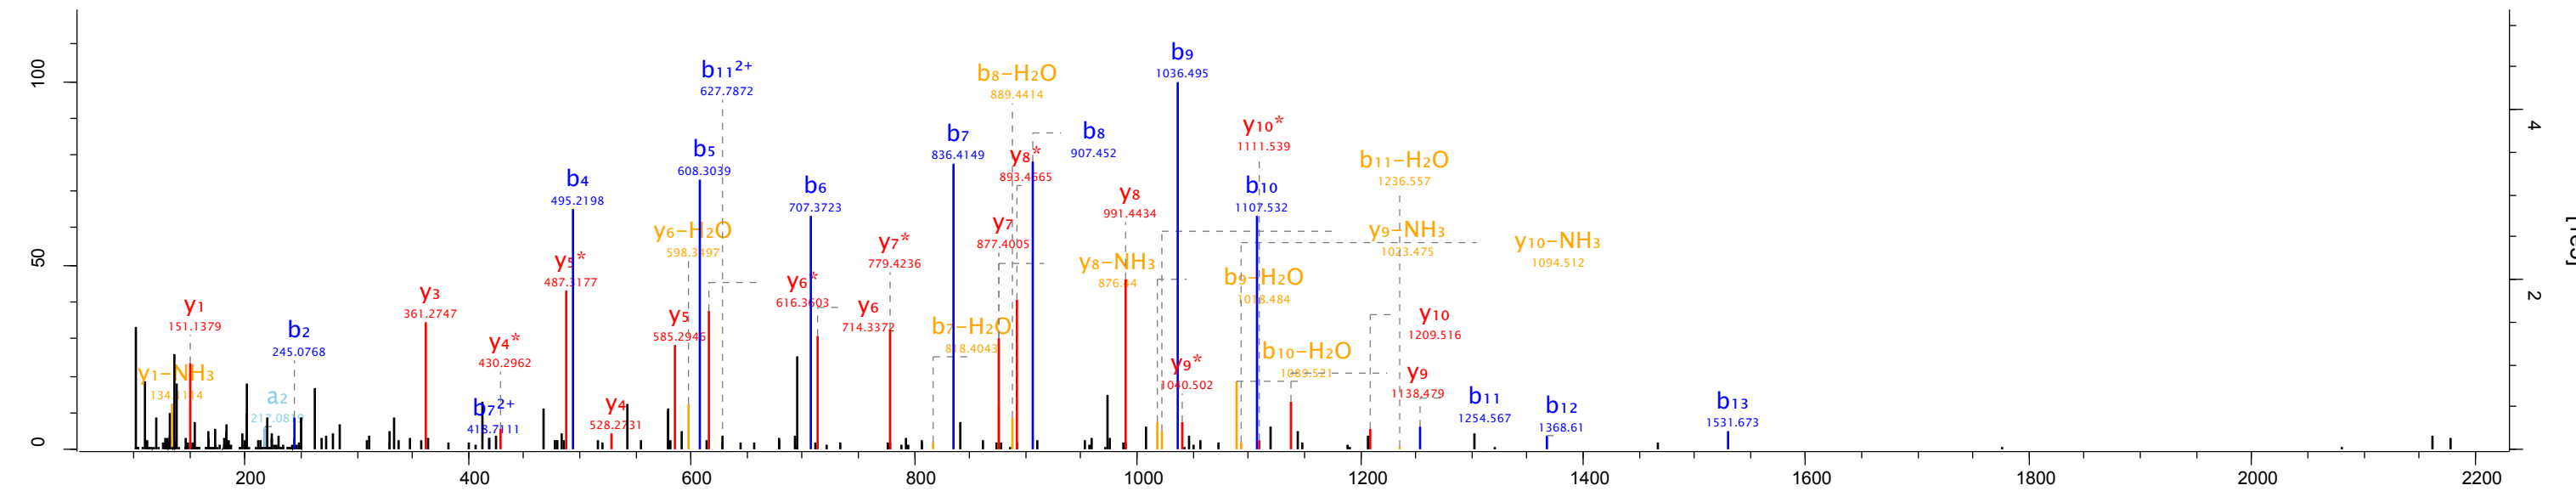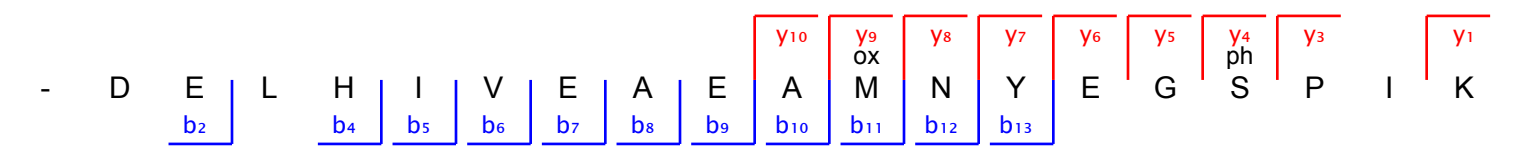

Raw file 20171215\_MaS\_33SR\_LMH\_phospho2\_03 Scan 17238 Method FTMS; HCD Score 53.03 m/z 963.38 Gene names MAP2K4

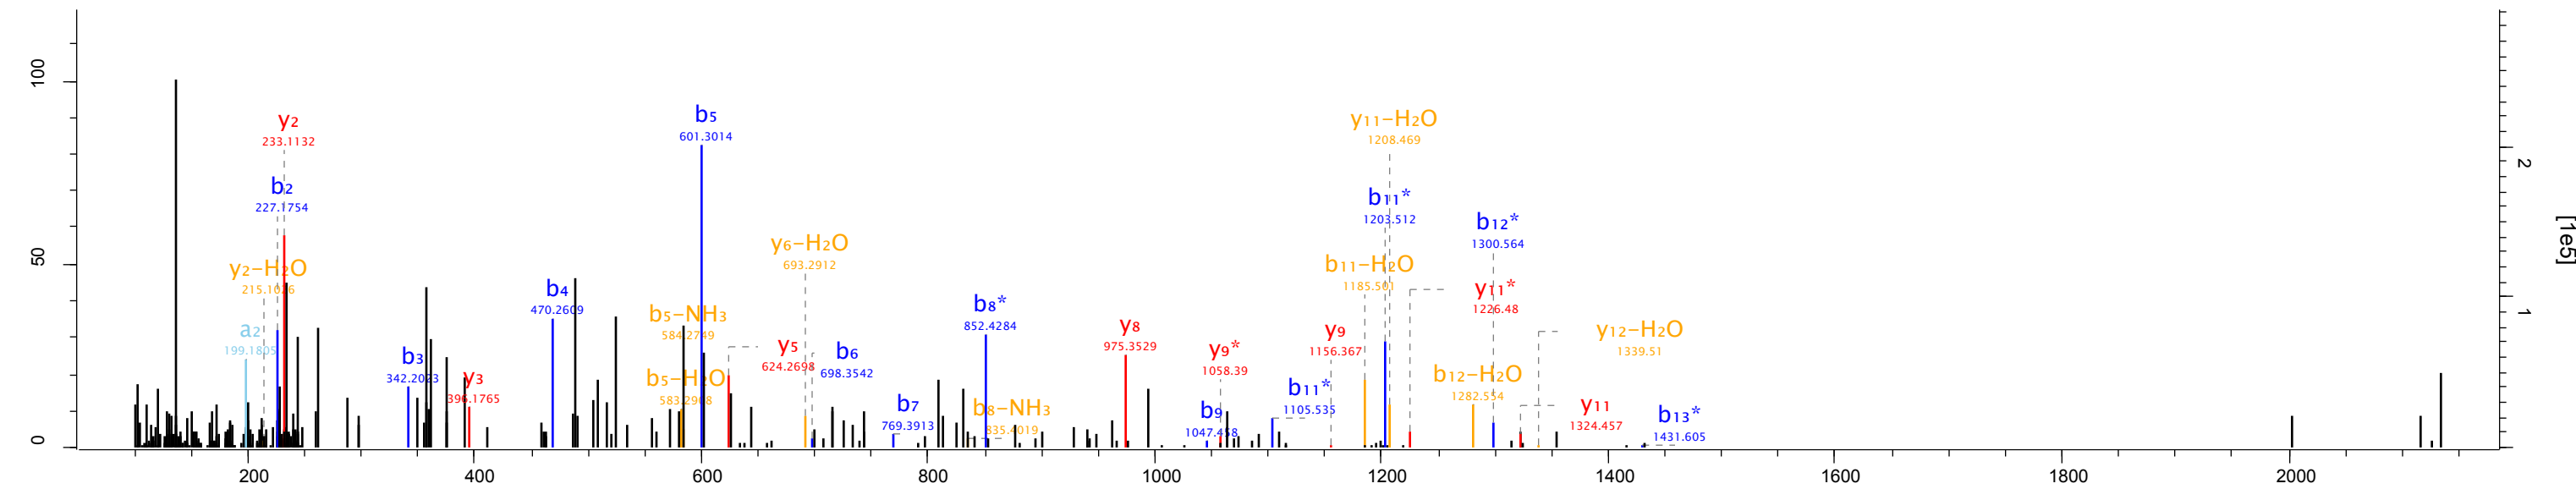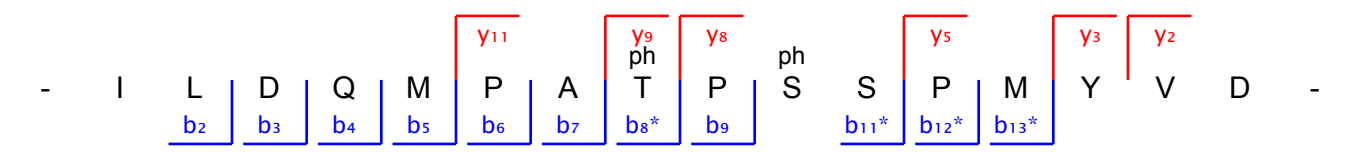

Raw file 20171215\_MaS\_33SR\_LMH\_phospho2\_03 Scan 17348 Method FTMS; HCD Score 112.68 m/z 1114.8 Gene names PDE12

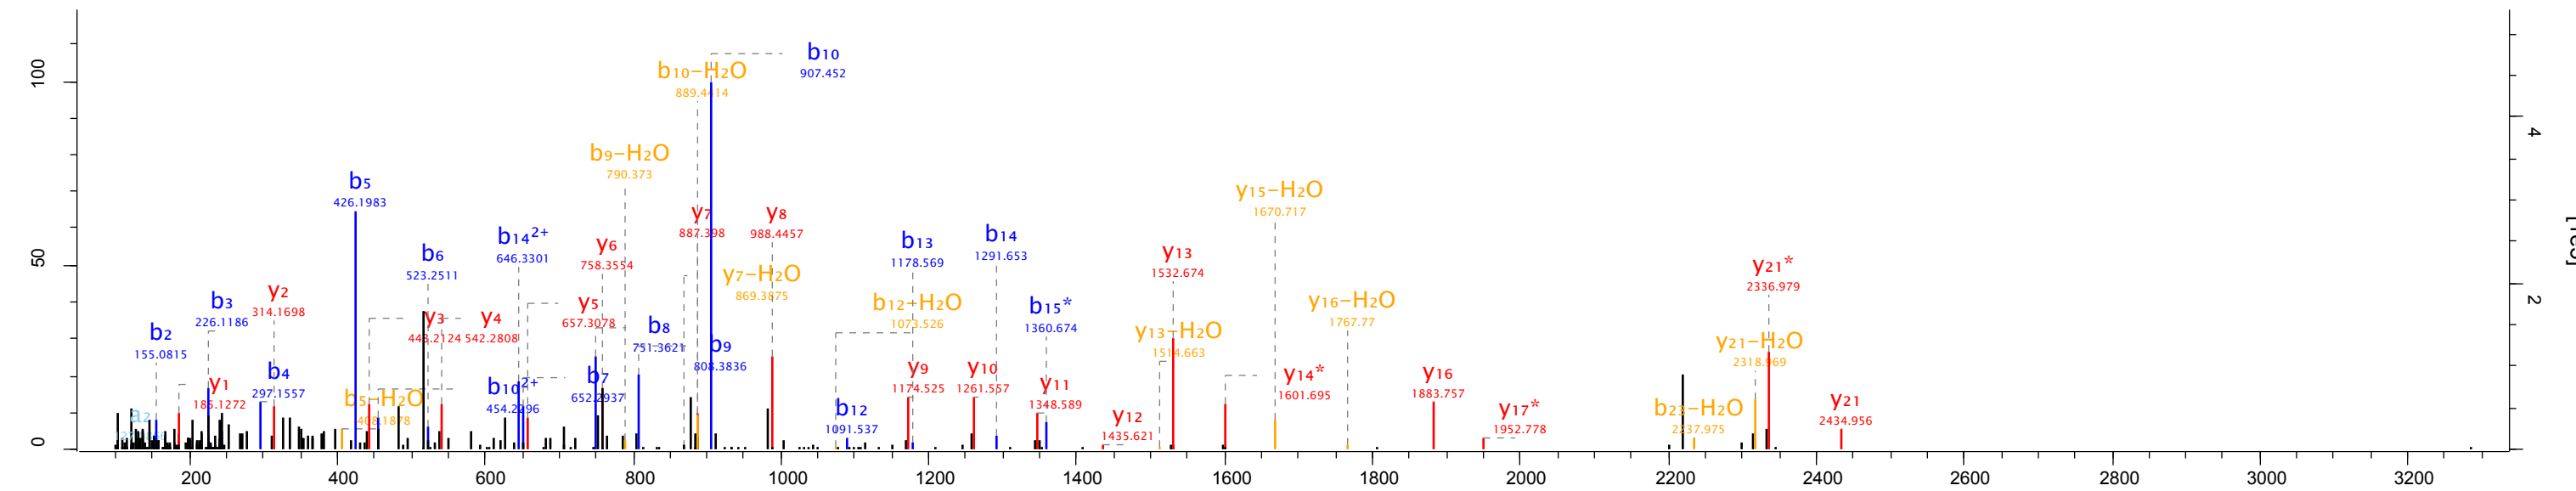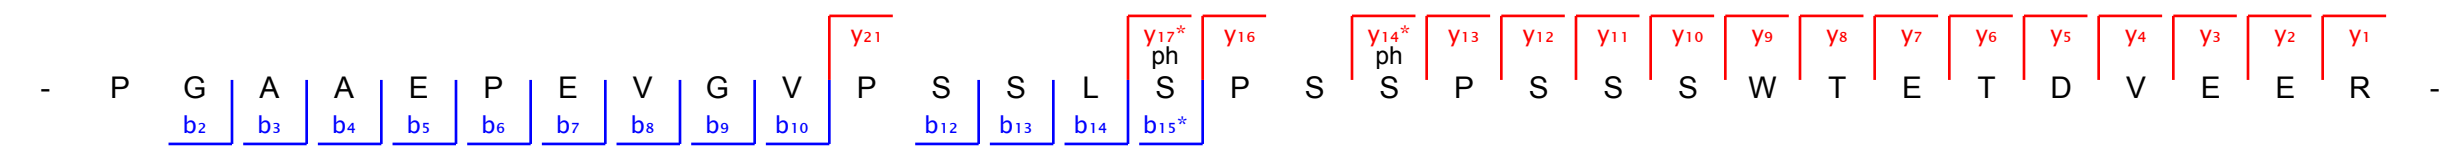

Raw file 20171215\_MaS\_33SR\_LMH\_phospho2\_03 Scan 17478 Method FTMS; HCD Score 397.8 m/z 1123.44 Gene names CTNNA1

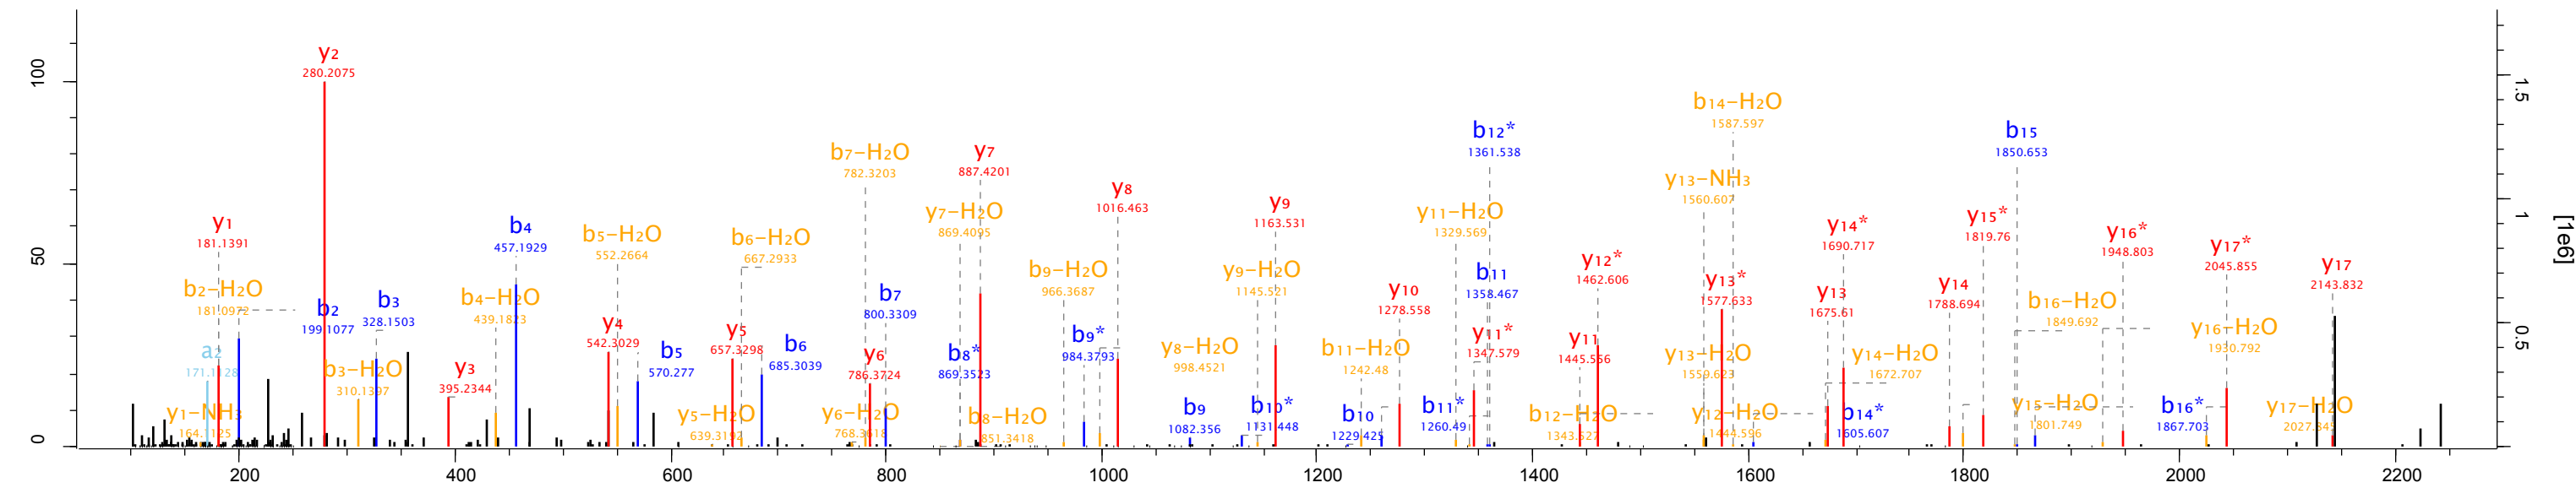

T P E E L D D S D F E T E D F D V R

b<sub>2</sub> b<sub>3</sub> b<sub>4</sub> b<sub>5</sub> b<sub>6</sub> b<sub>7</sub> b<sub>8</sub>\* b<sub>9</sub> b<sub>10</sub> b<sub>11</sub> b<sub>12</sub>\* b<sub>14</sub>\* b<sub>15</sub> b<sub>16</sub>\*

y<sub>17</sub> y<sub>16</sub>\* y<sub>15</sub>\* y<sub>14</sub> y<sub>13</sub> y<sub>12</sub>\* y<sub>11</sub>ph y<sub>10</sub> y<sub>9</sub> y<sub>8</sub> y<sub>7</sub> y<sub>6</sub> y<sub>5</sub> y<sub>4</sub> y<sub>3</sub> y<sub>2</sub> y<sub>1</sub>





Raw file: 20171215\_MaS\_33SR\_LMH\_phospho2\_03  
 Scan: 17608 Method: FTMS; HCD Score: 185.27 m/z: 833.05 Gene names: RABL6

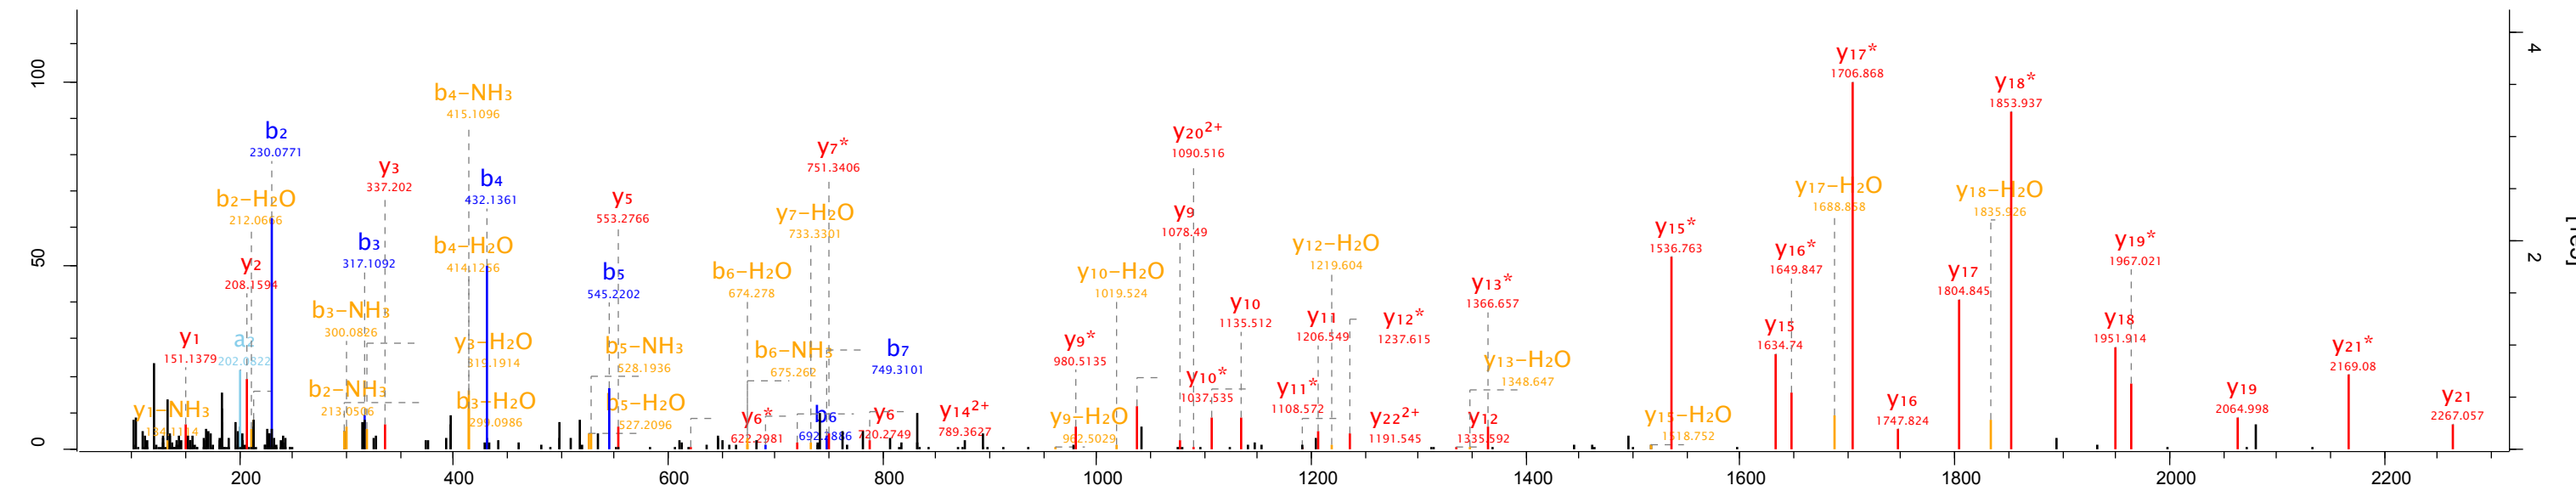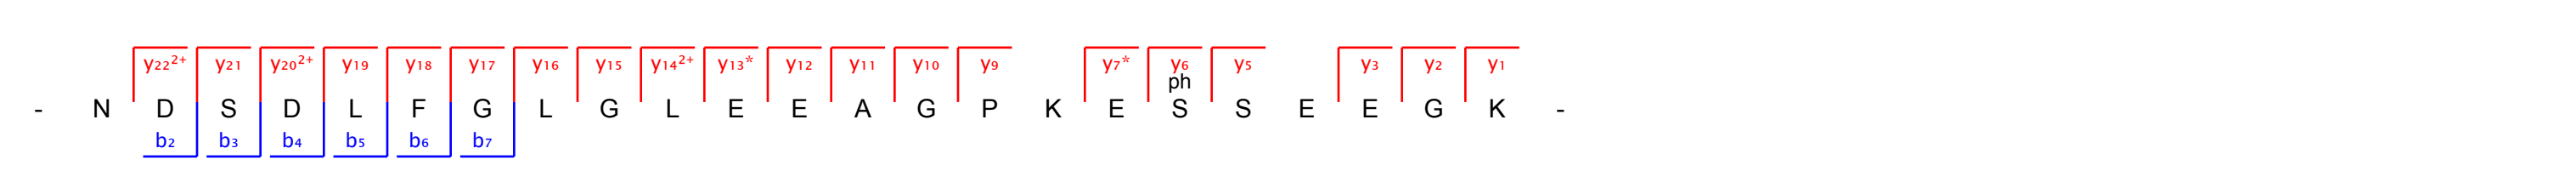

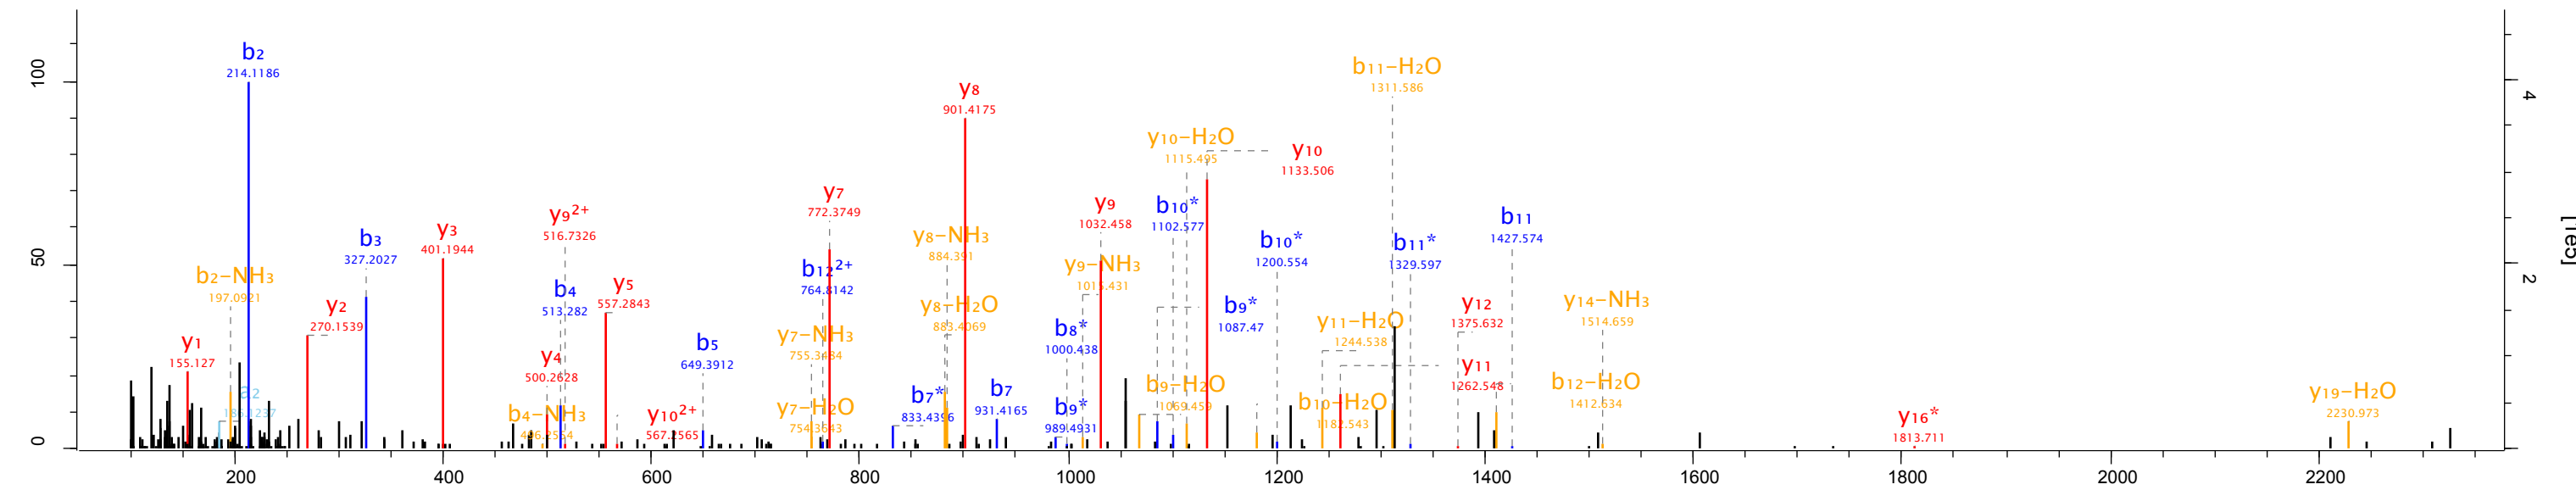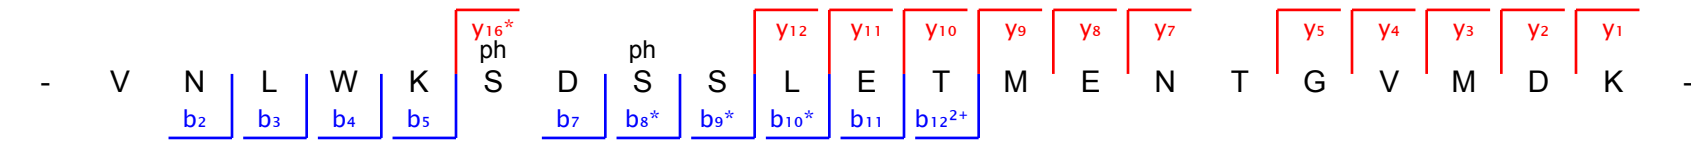

Raw file: 20171215\_MaS\_33SR\_LMH\_phospho2\_03  
 Scan: 17998 Method: FTMS; HCD Score: 125.43 m/z: 1091.11 Gene names: DDX41

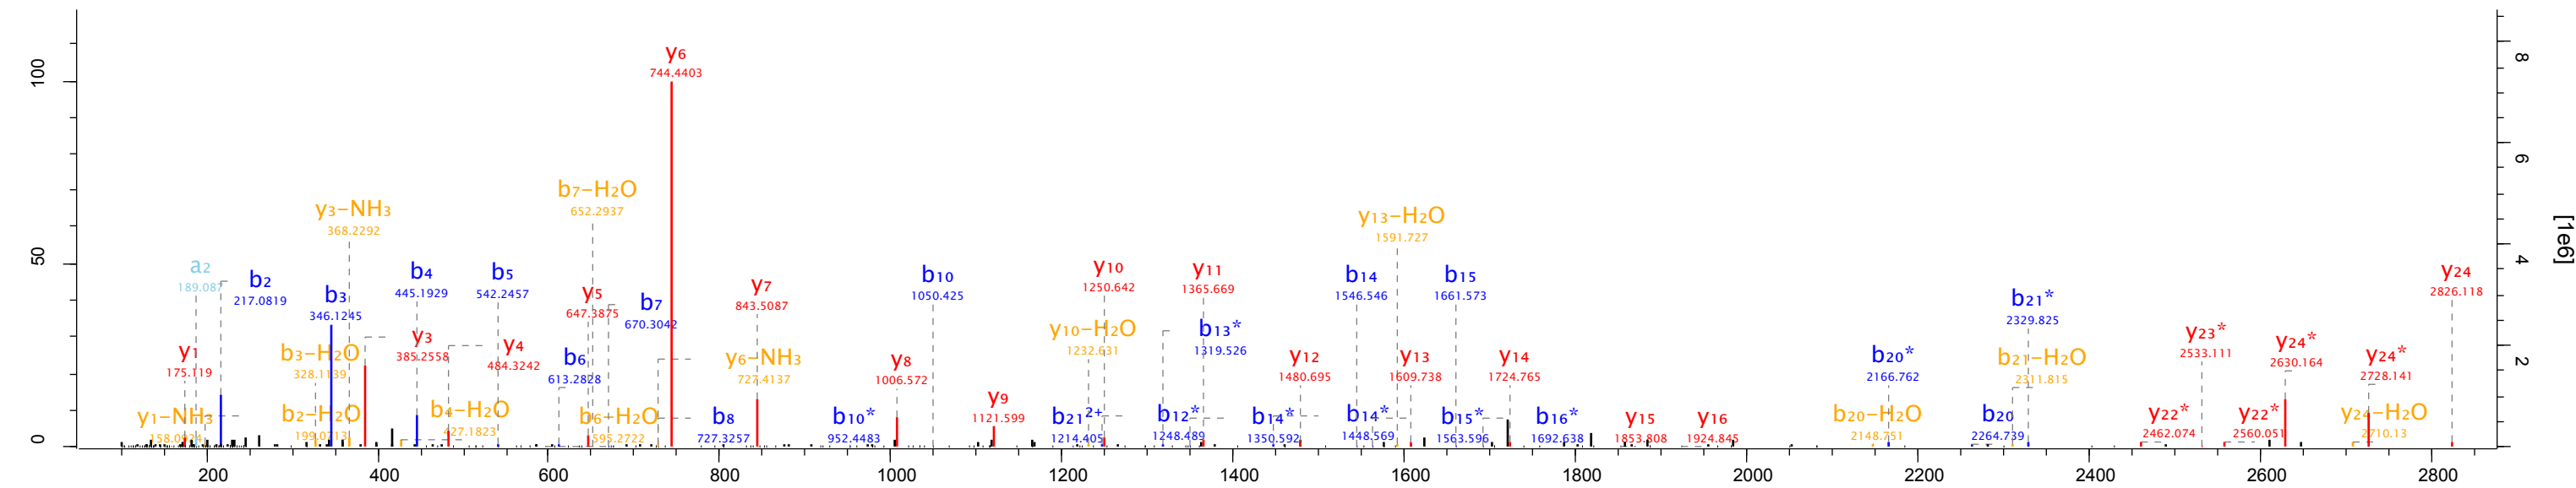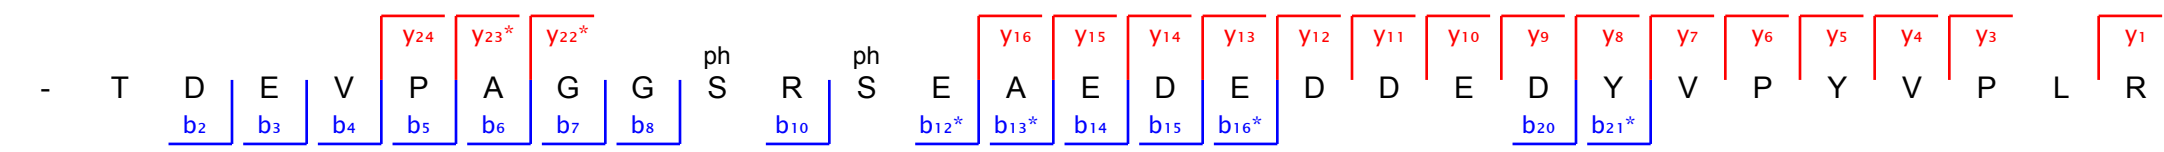

Raw file 20171215\_MaS\_33SR\_LMH\_phospho2\_03 Scan 18228 Method FTMS; HCD Score 50.22 m/z 980.44 Gene names HERC2

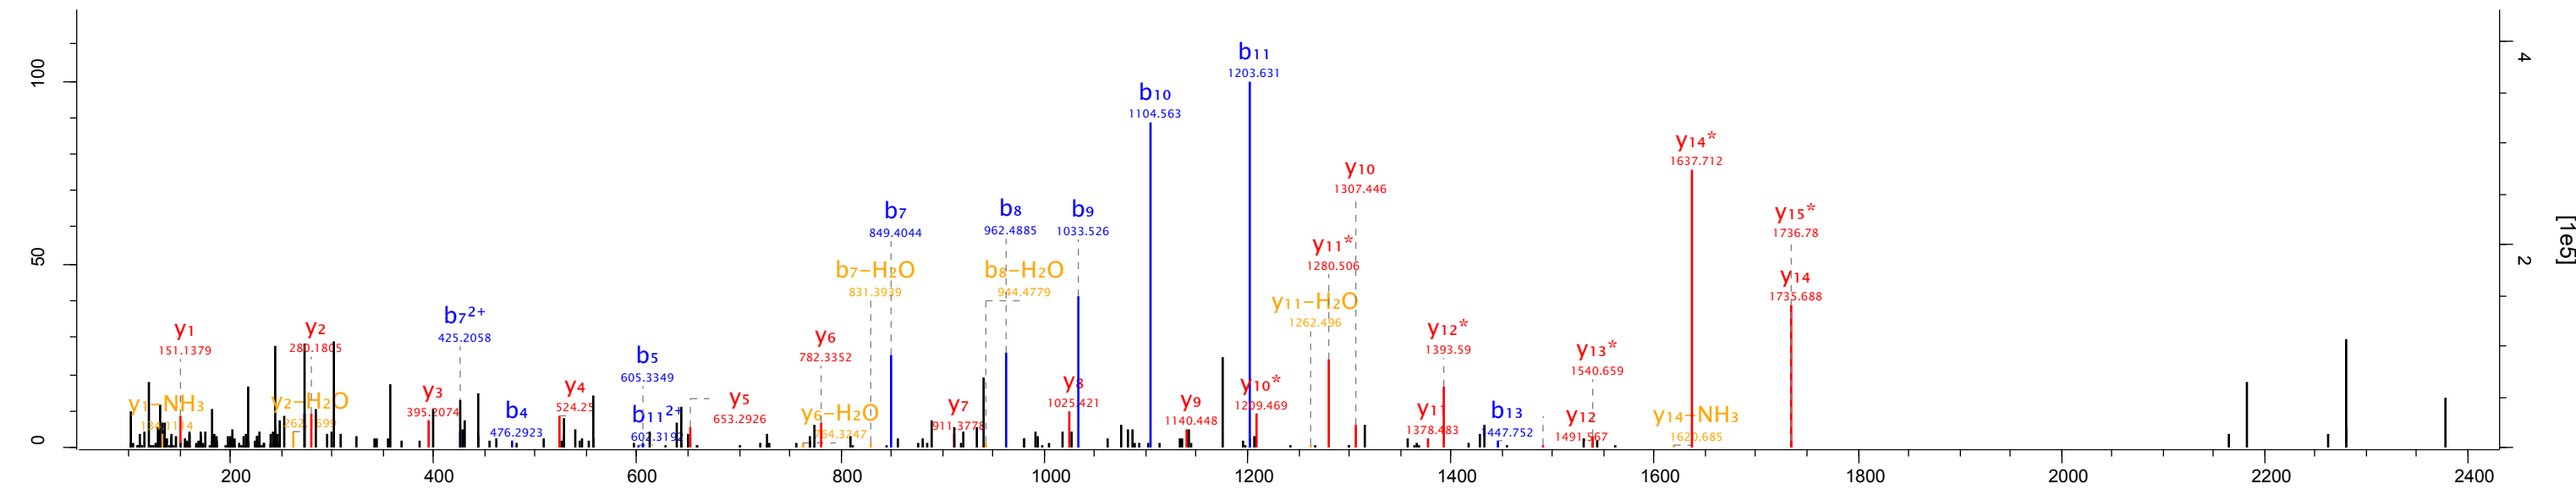

- I R A E E E D L A A V P F L A S D N E E E E D E K -

Fragmentation mapping (b and y ions) is shown below the sequence:

- b4: E
- b5: E
- b7: D
- b8: L
- b9: A
- b10: A
- b11: V
- b13: F
- y1: K
- y2: D
- y3: E
- y4: E
- y5: E
- y6: E
- y7: N
- y8: D
- y9: S
- y10: A
- y11: L
- y12: F
- y13: P
- y14: V
- y15: I

Raw file 20171215\_MaS\_33SR\_LMH\_phospho2\_03 Scan 18568 Method FTMS; HCD Score 126.33 m/z 1003.44 Gene names PHF21A

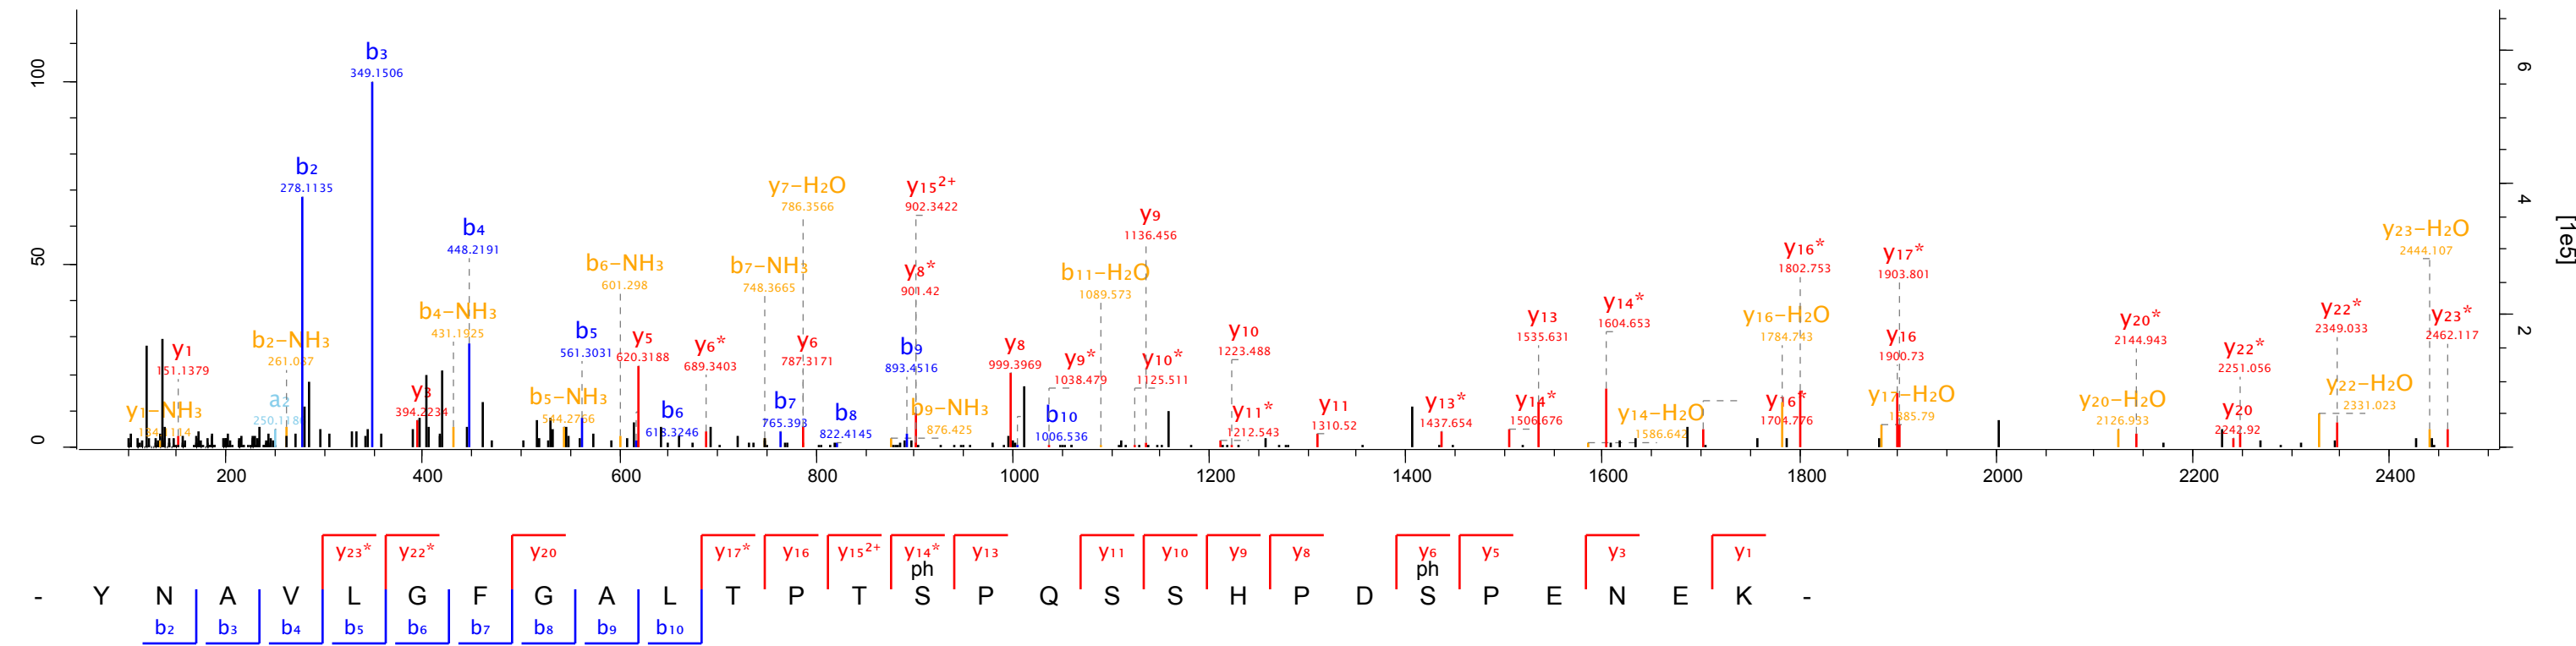

Raw file: 20171215\_MaS\_33SR\_LMH\_phospho2\_03  
 Scan: 19038 Method: FTMS; HCD Score: 210.14 m/z: 1583.63 Gene names: EIF2S2

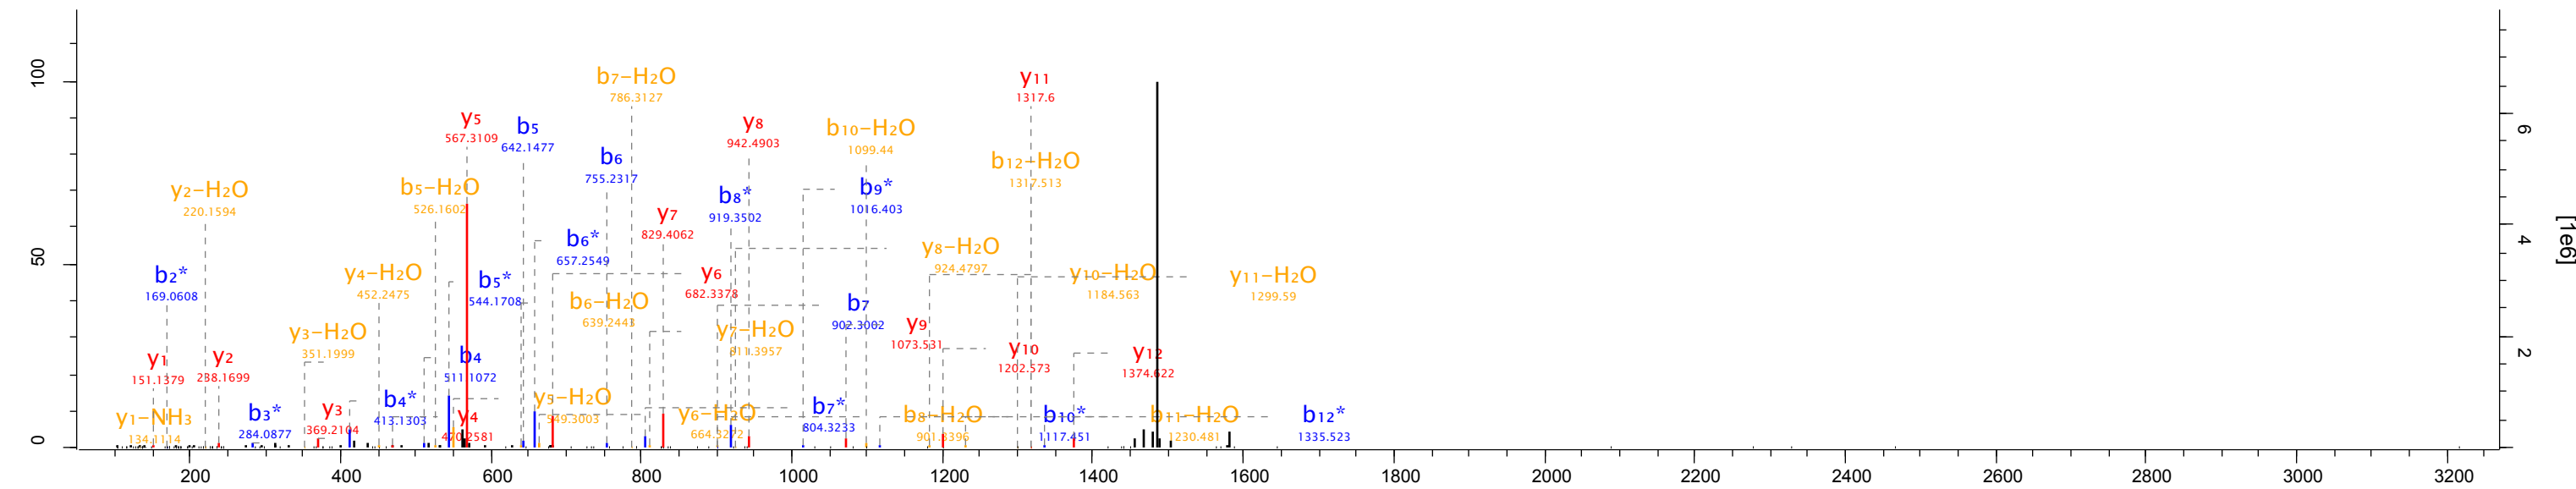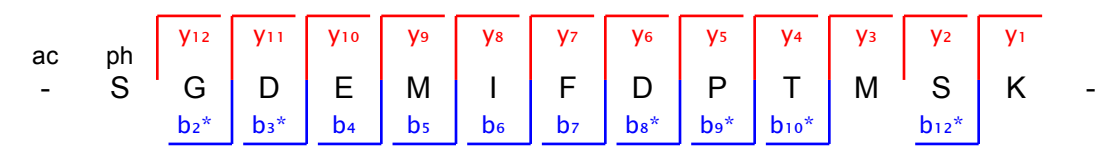

Raw file 20171215\_MaS\_33SR\_LMH\_phospho2\_03 Scan 19378 Method FTMS; HCD Score 153.25 m/z 859.37 Gene names RABL6

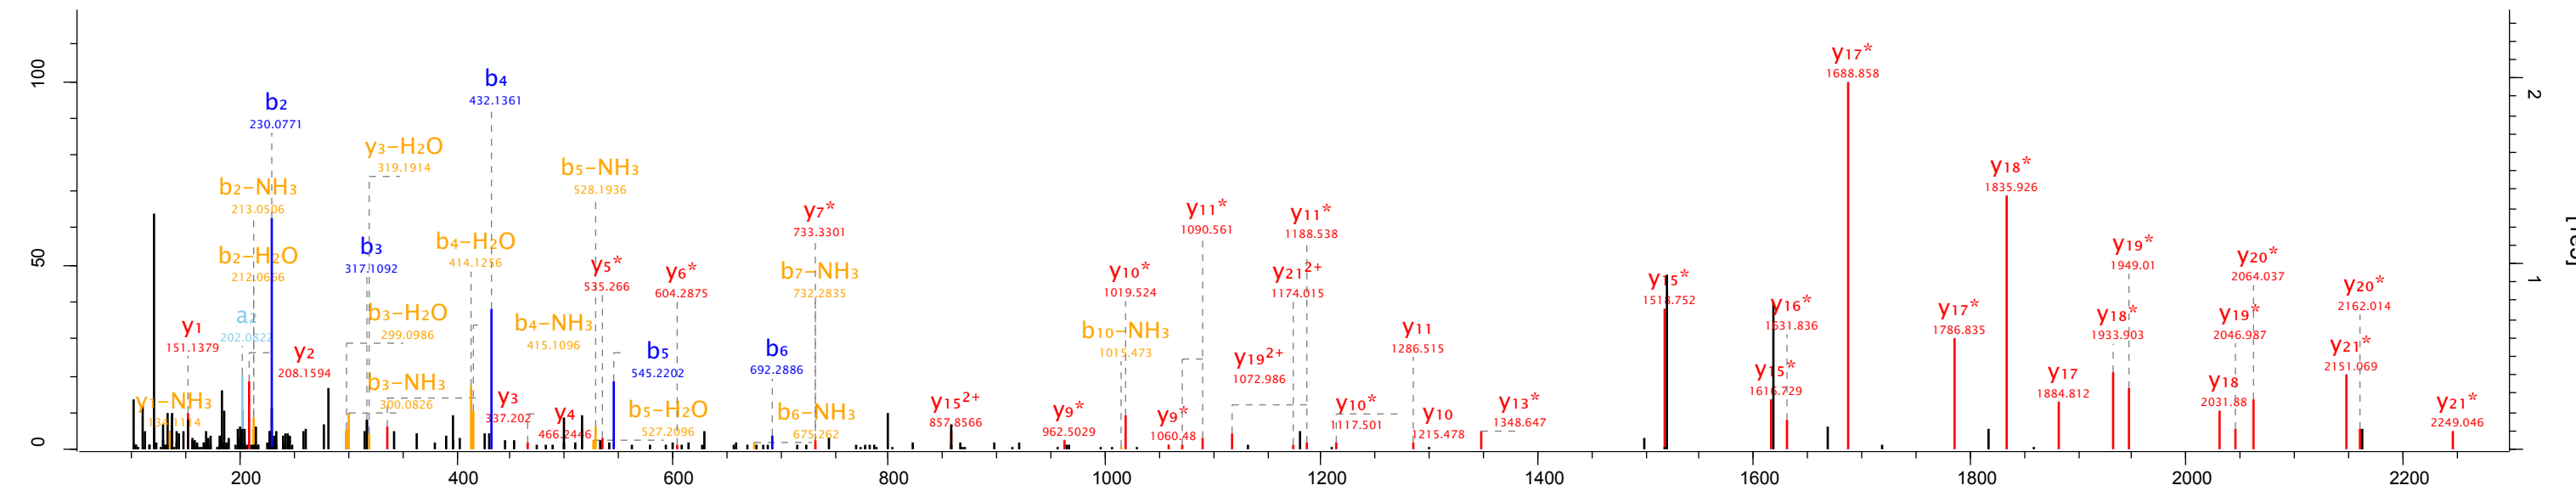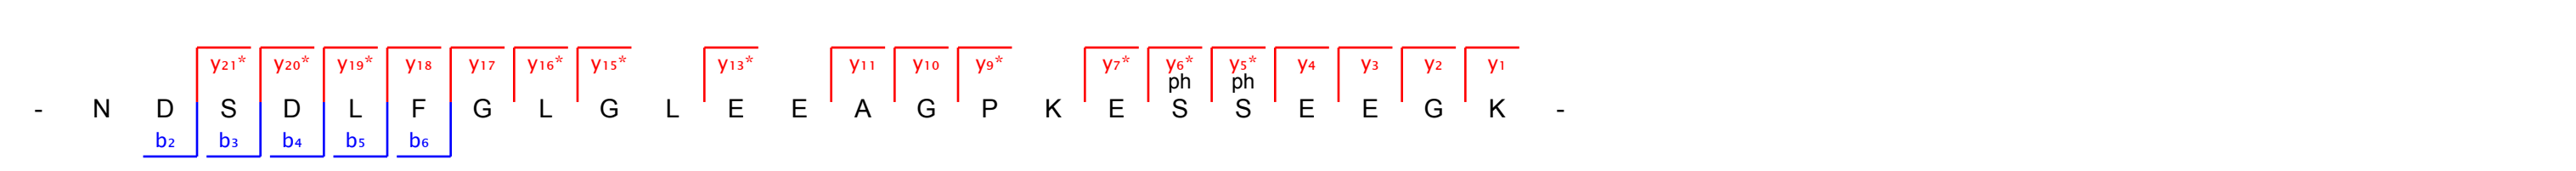



Raw file

20171215\_MaS\_33SR\_LMH\_phospho2\_03

| Scan | Method    | Score | m/z    | Gene names |
|------|-----------|-------|--------|------------|
| 1938 | FTMS; HCD | 59.16 | 419.85 | SRRM2      |

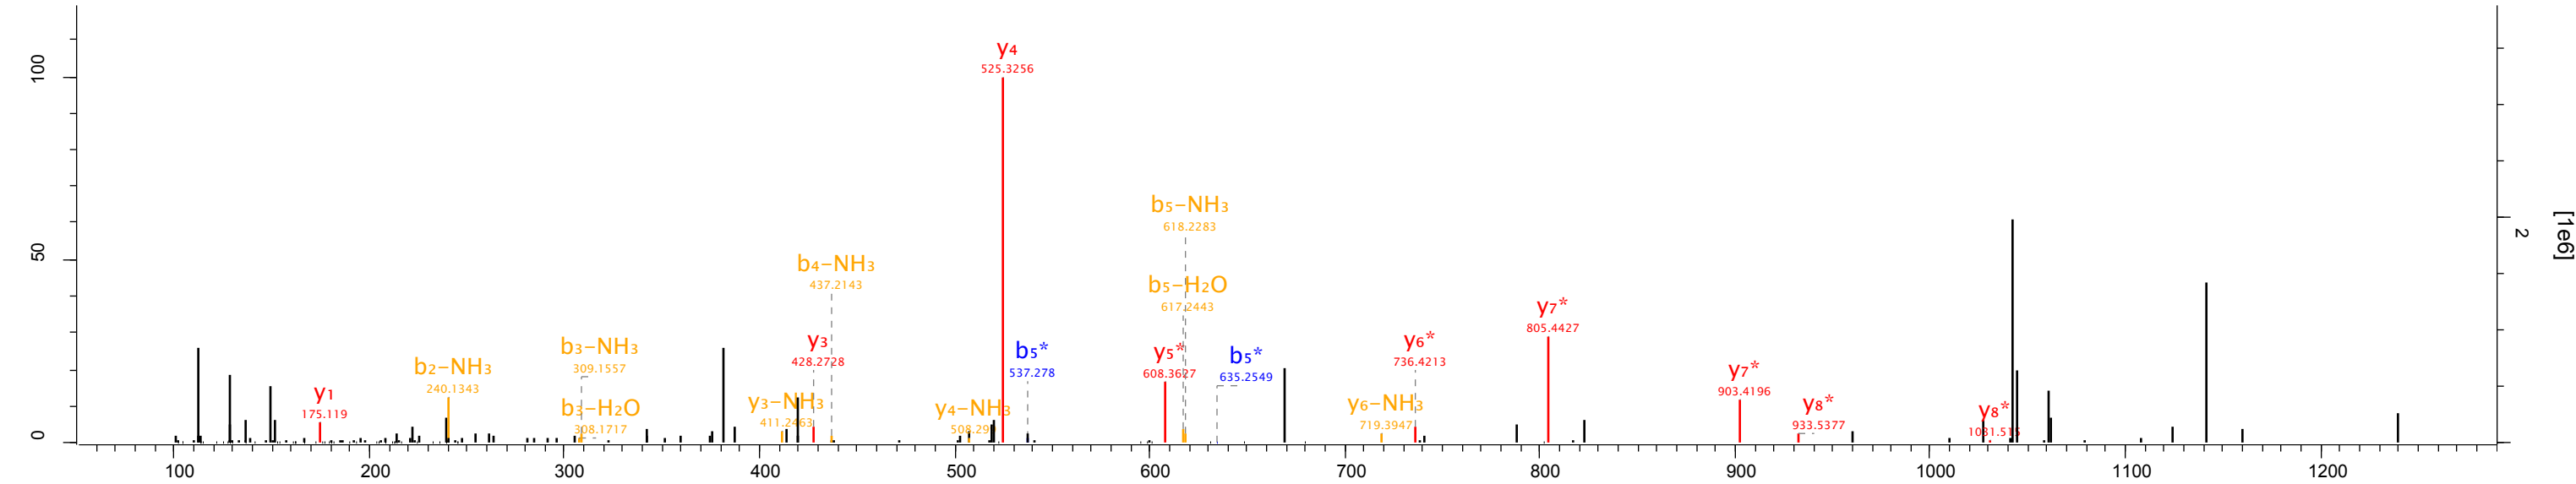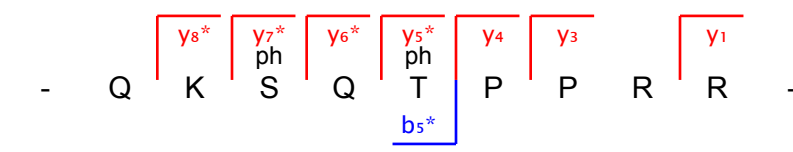

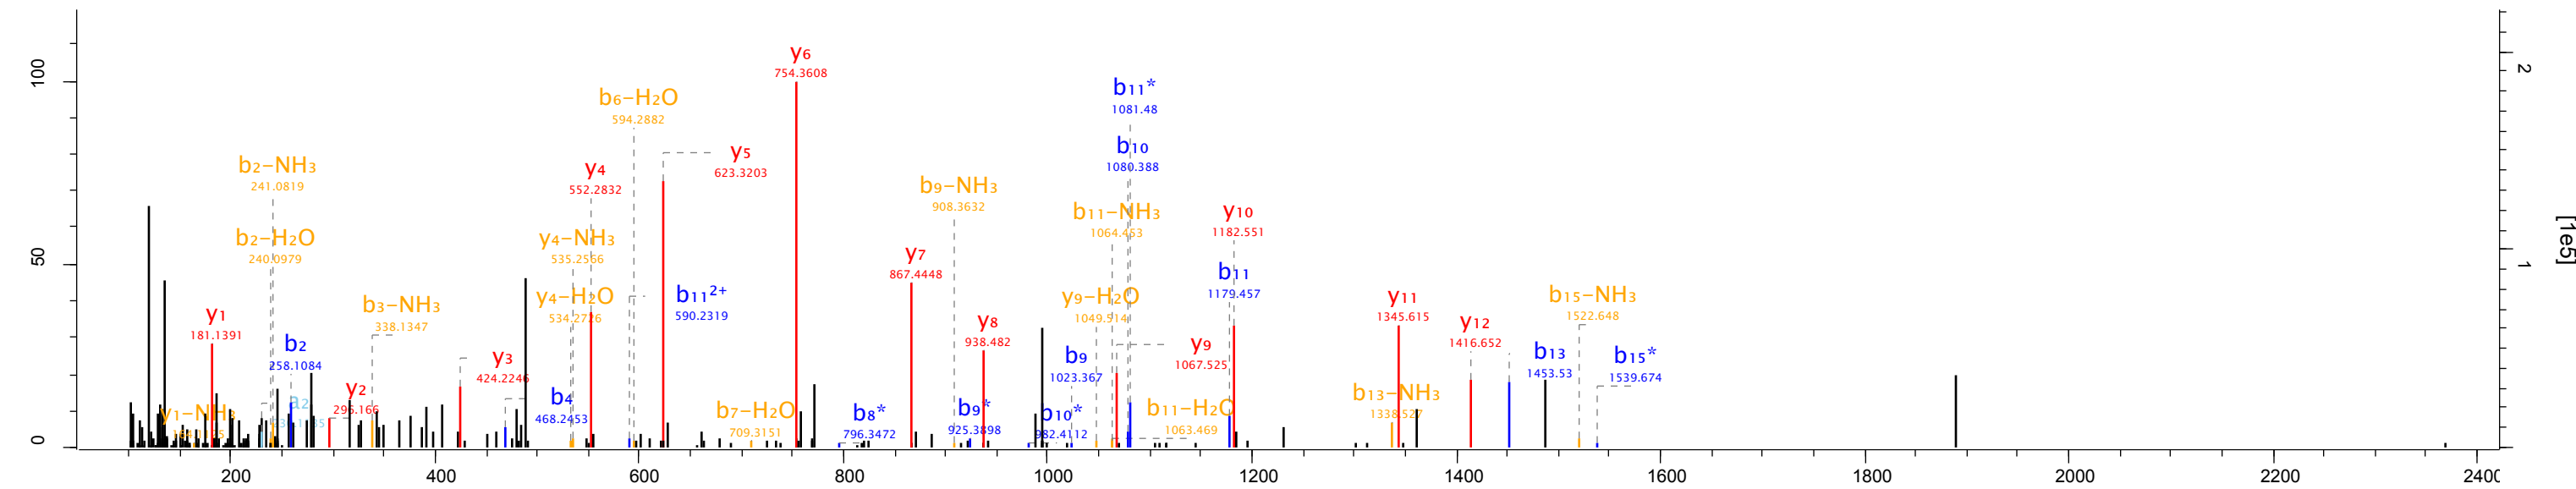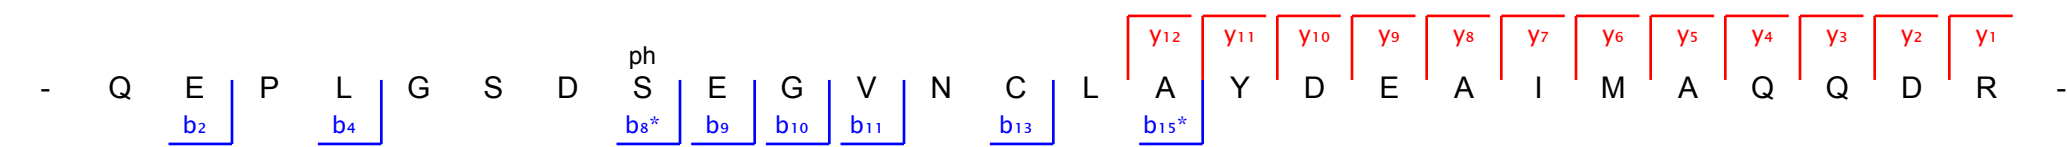

Raw file: 20171215\_MaS\_33SR\_LMH\_phospho2\_03  
 Scan: 19568 Method: FTMS; HCD Score: 172.42 m/z: 1146.44 Gene names: NOC2L

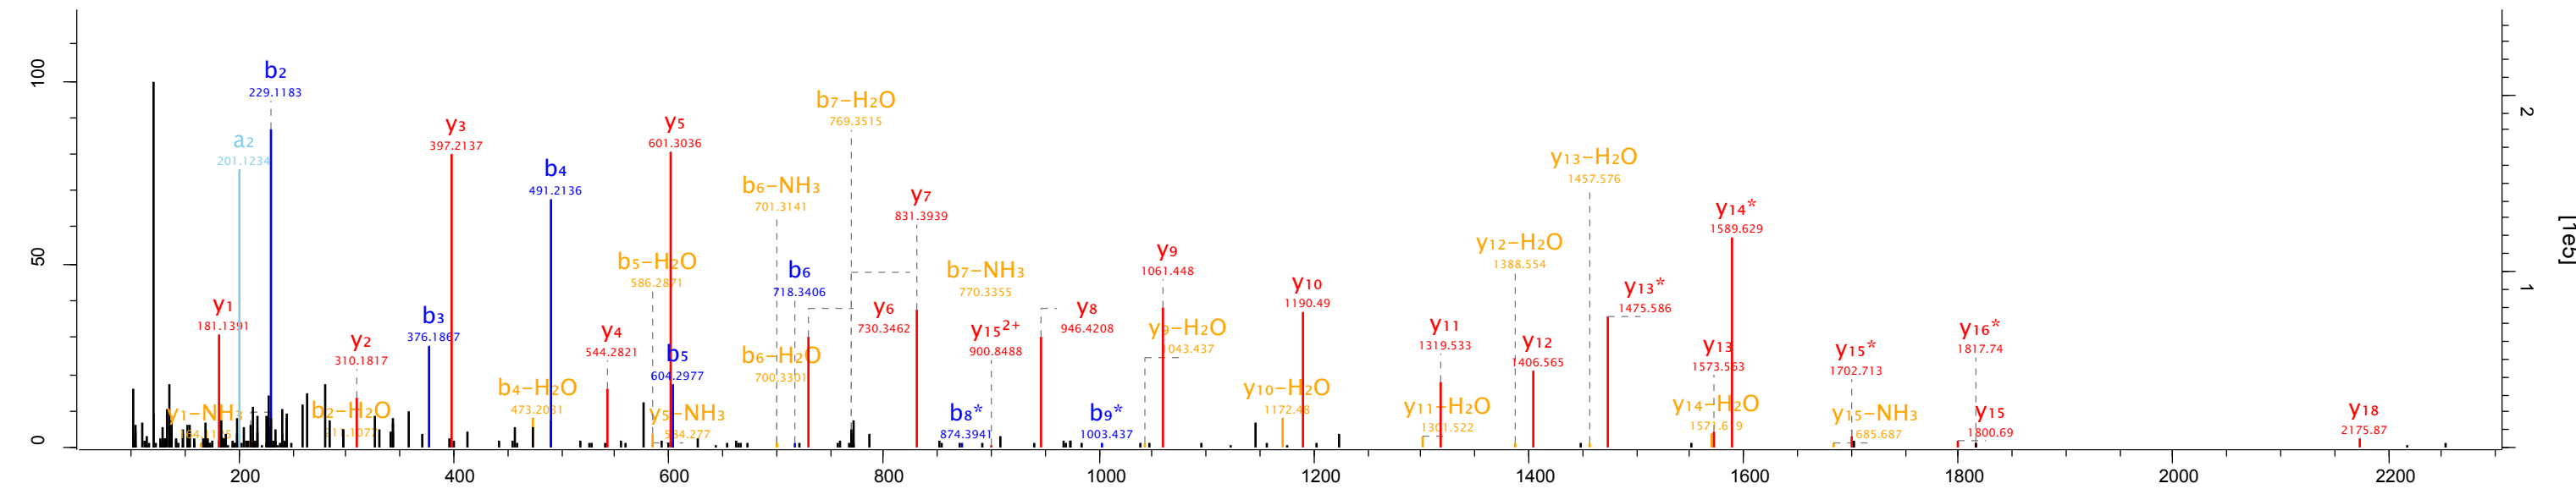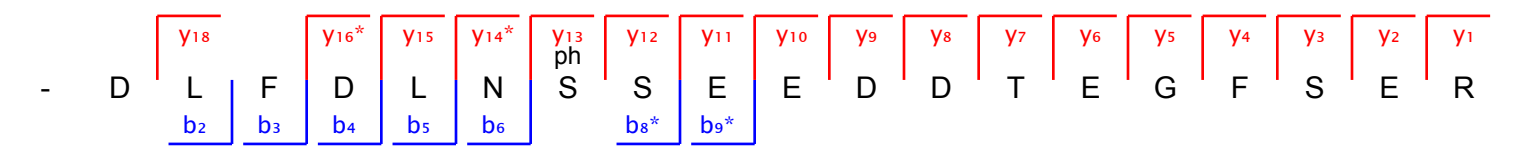

Raw file 20171215\_MaS\_33SR\_LMH\_phospho2\_03 Scan 19848 Method FTMS; HCD Score 199.58 m/z 797.87 Gene names PLEKHA5

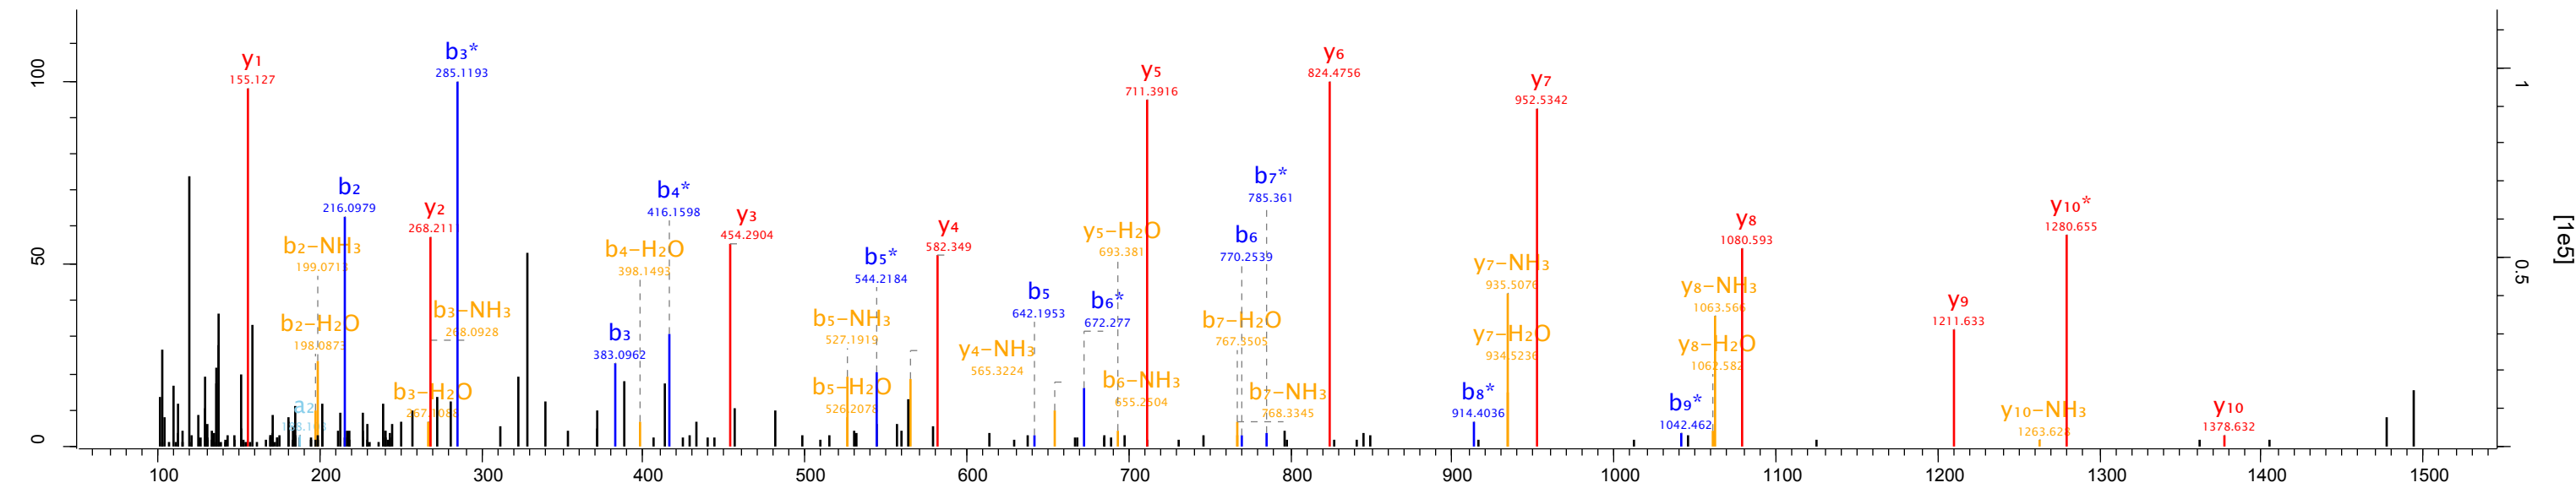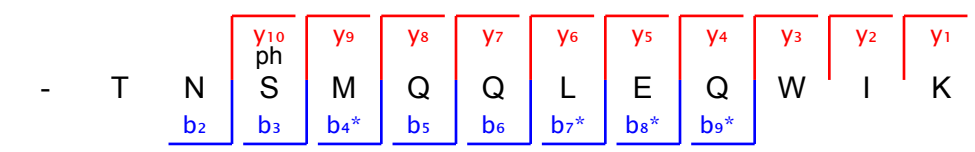

Raw file 20171215\_MaS\_33SR\_LMH\_phospho2\_03 Scan 3318 Method FTMS; HCD Score 76.05 m/z 606.28 Gene names TBX2

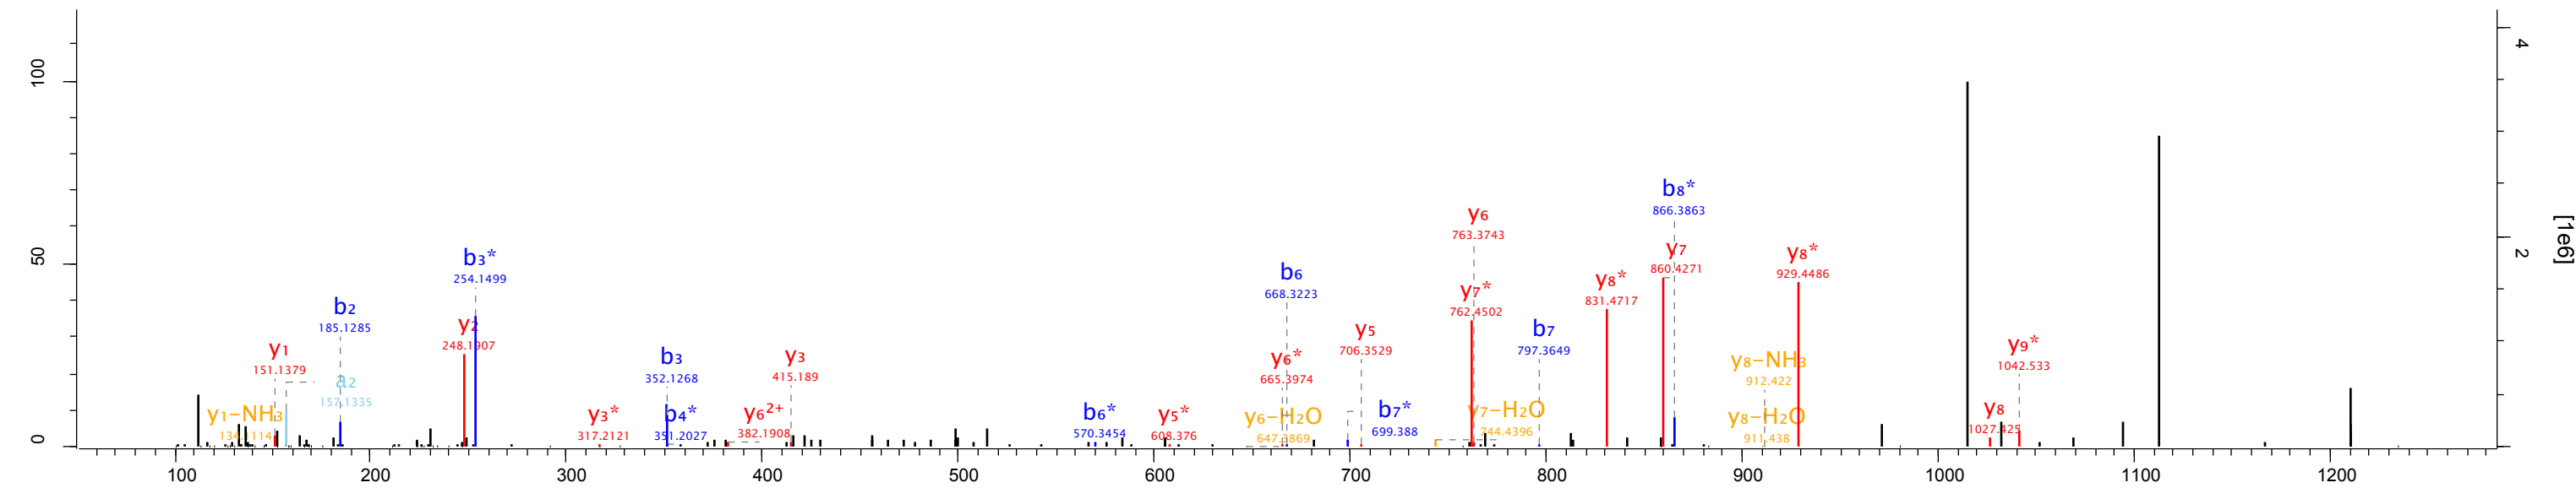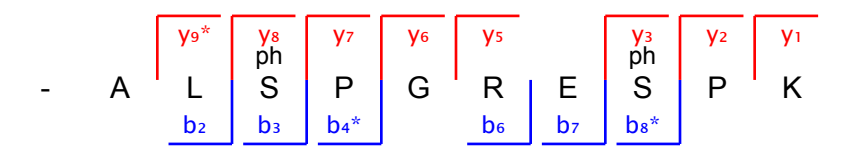

Raw file  
20171215\_MaS\_33SR\_LMH\_phospho2\_03

Scan 3518 Method FTMS; HCD Score 198.04 m/z 904.32 Gene names NUFIP2

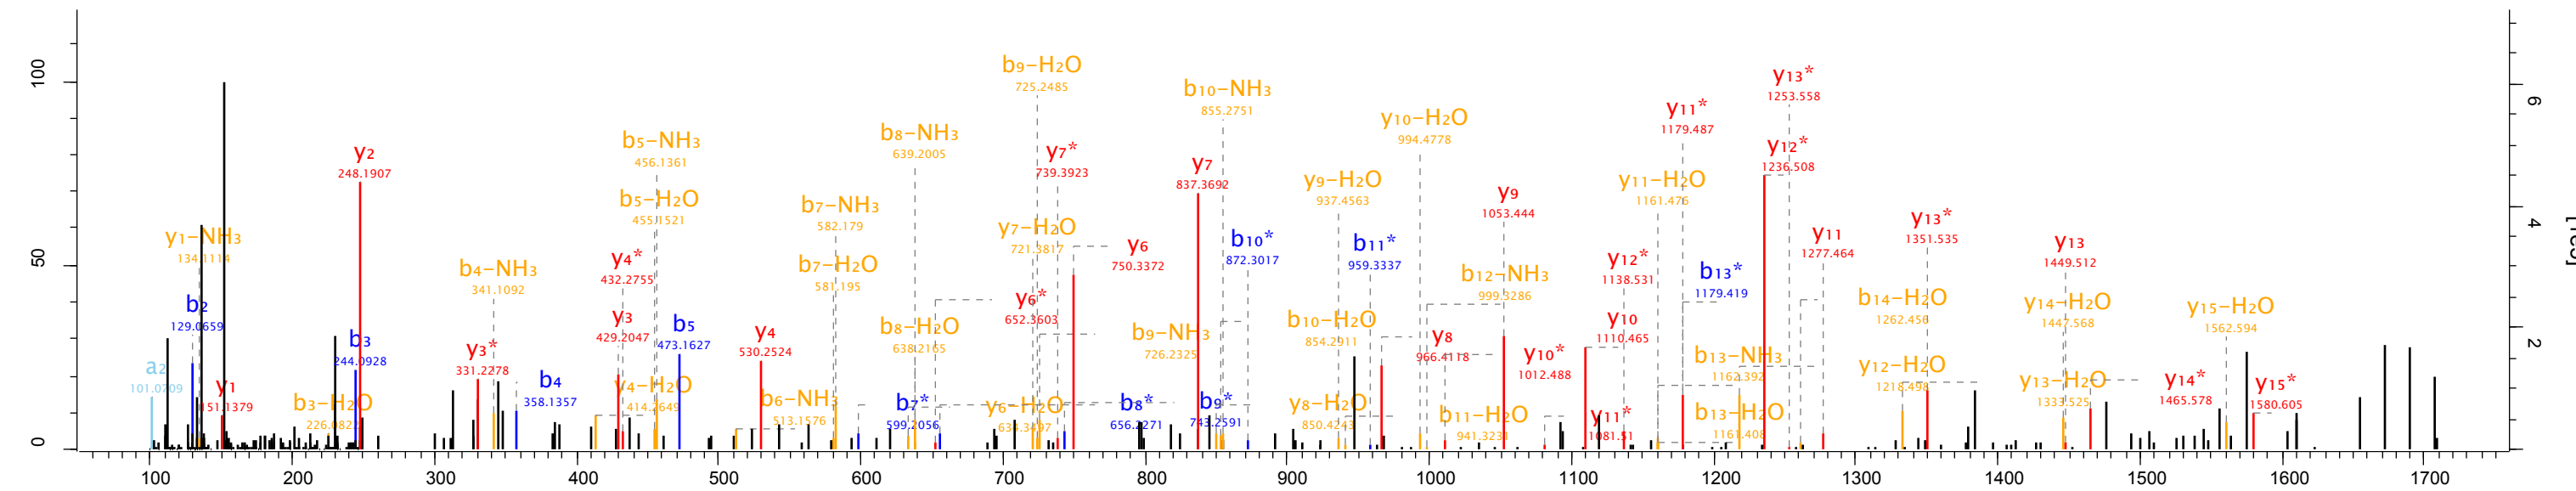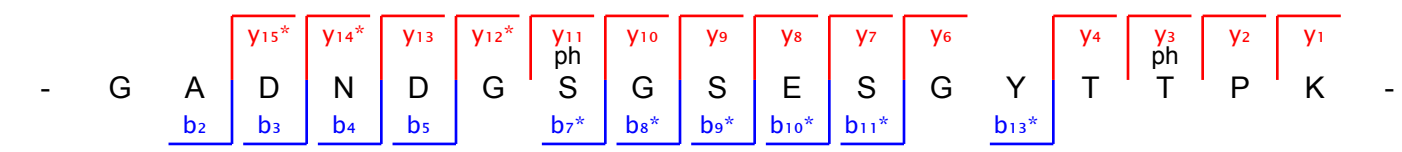

Raw file 20171215\_MaS\_33SR\_LMH\_phospho2\_03 Scan 3628 Method FTMS; HCD Score 112.96 m/z 650.27 Gene names SRRM2

20171215\_MaS\_33SR\_LMH\_phospho2\_03

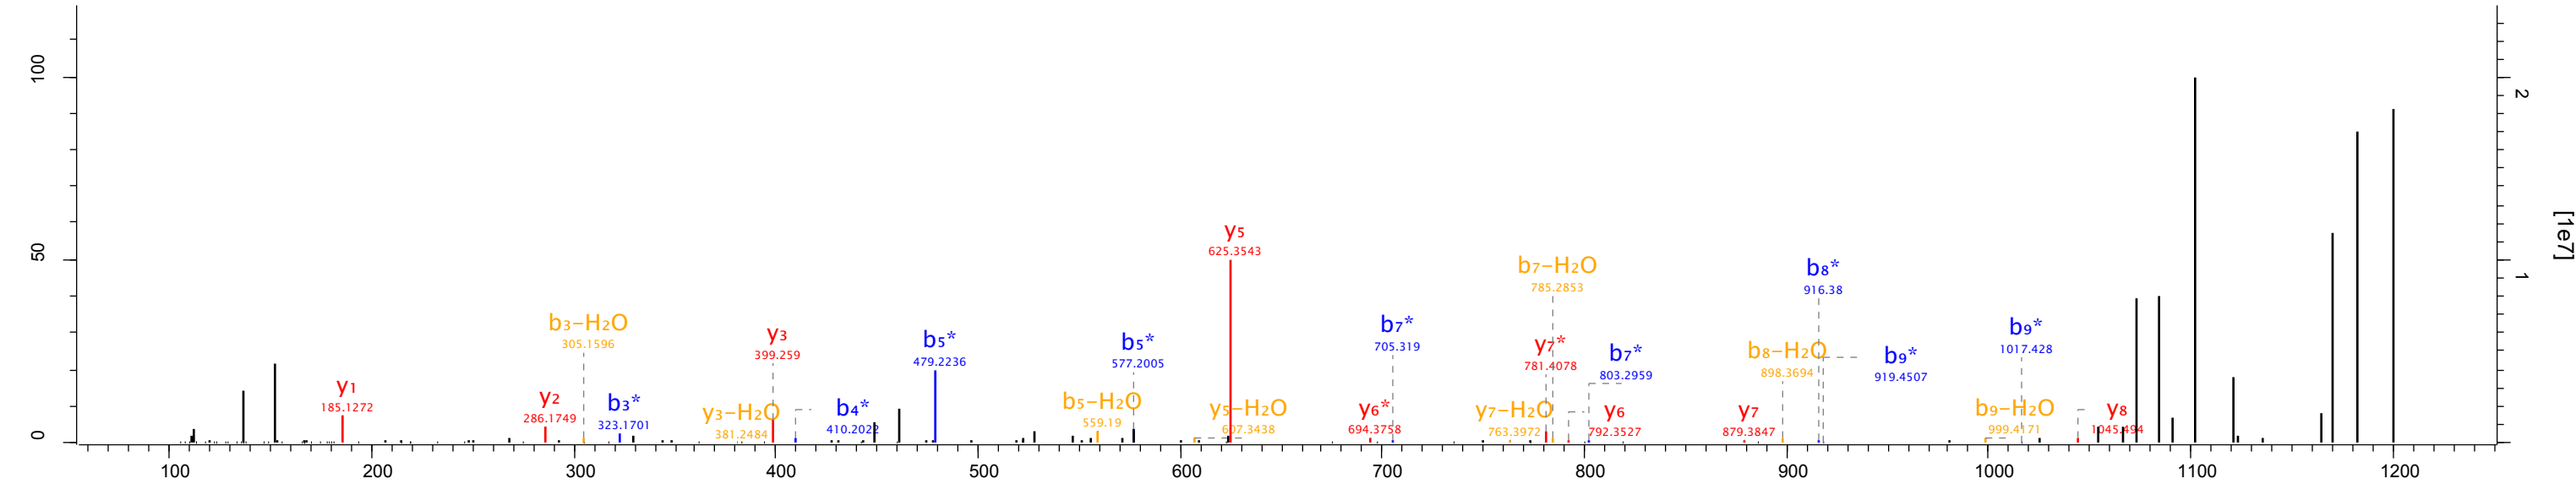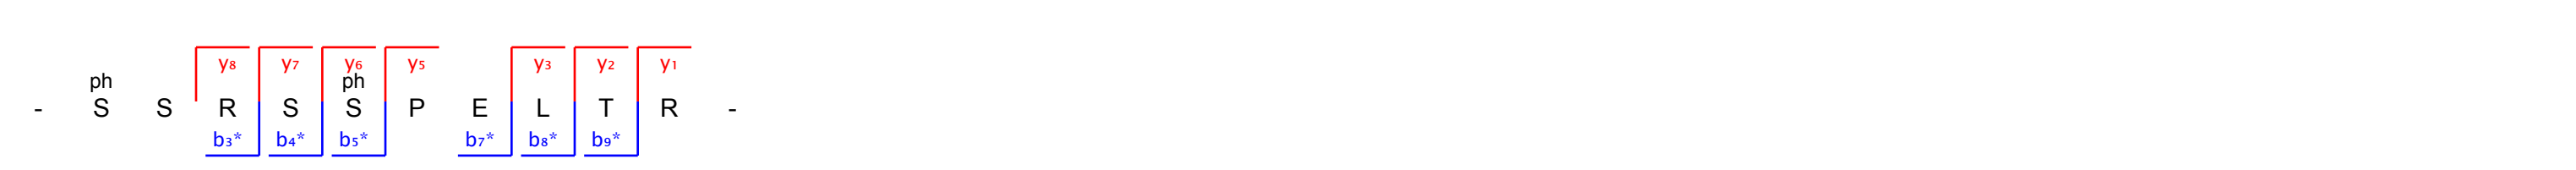

Raw file: 20171215\_MaS\_33SR\_LMH\_phospho2\_03  
 Scan: 4058 Method: FTMS; HCD Score: 142.23 m/z: 990.37 Gene names: TCEAL3;TCEAL6;TCEAL5

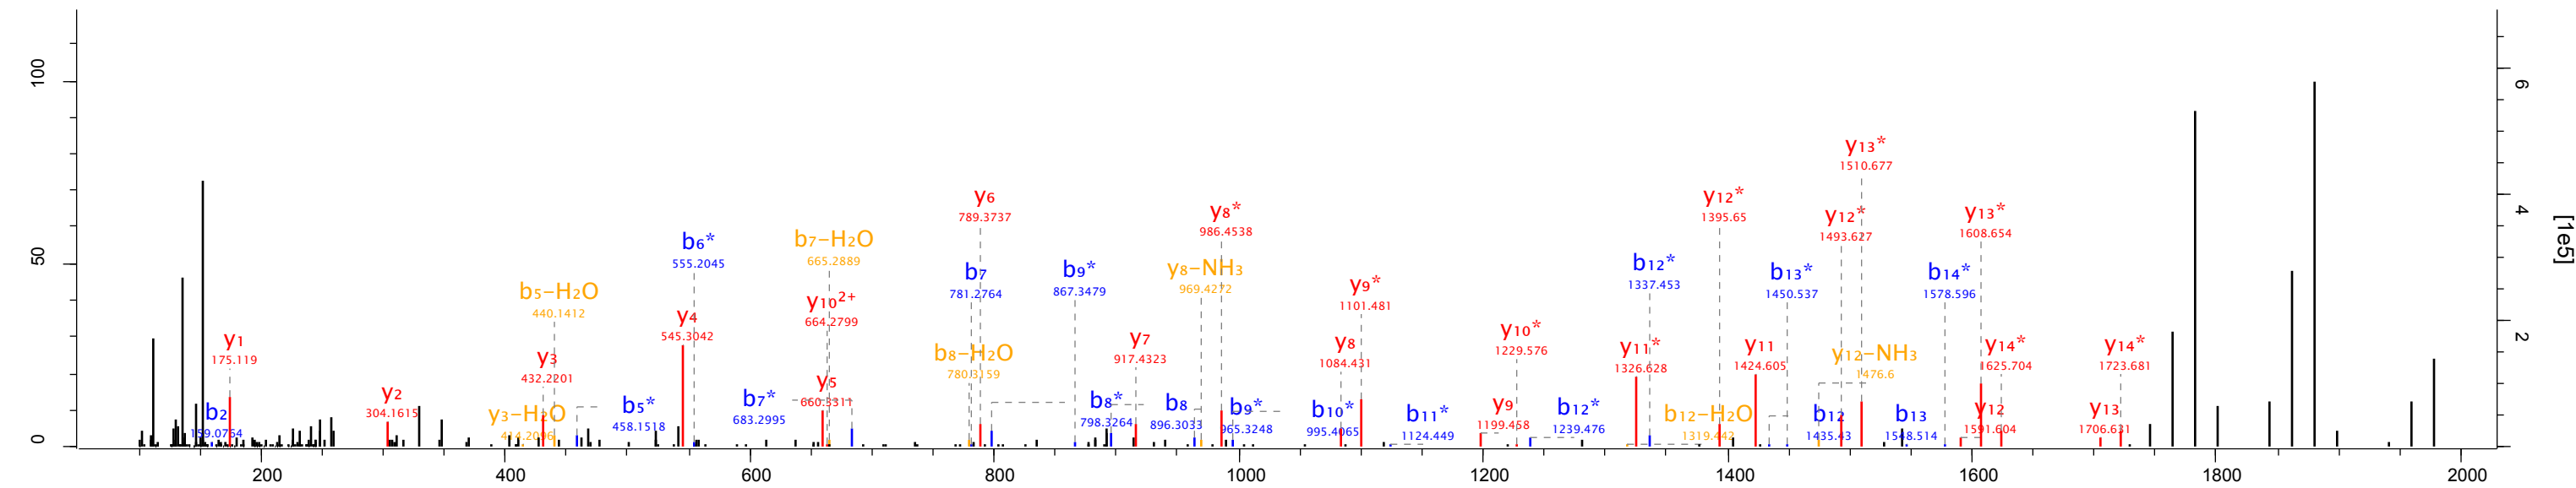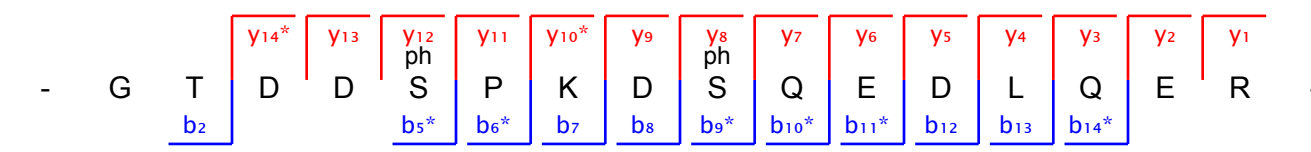



Raw file: 20171215\_MaS\_33SR\_LMH\_phospho2\_03  
 Scan: 4618 Method: FTMS; HCD Score: 173.31 m/z: 711.27 Gene names: TJP2

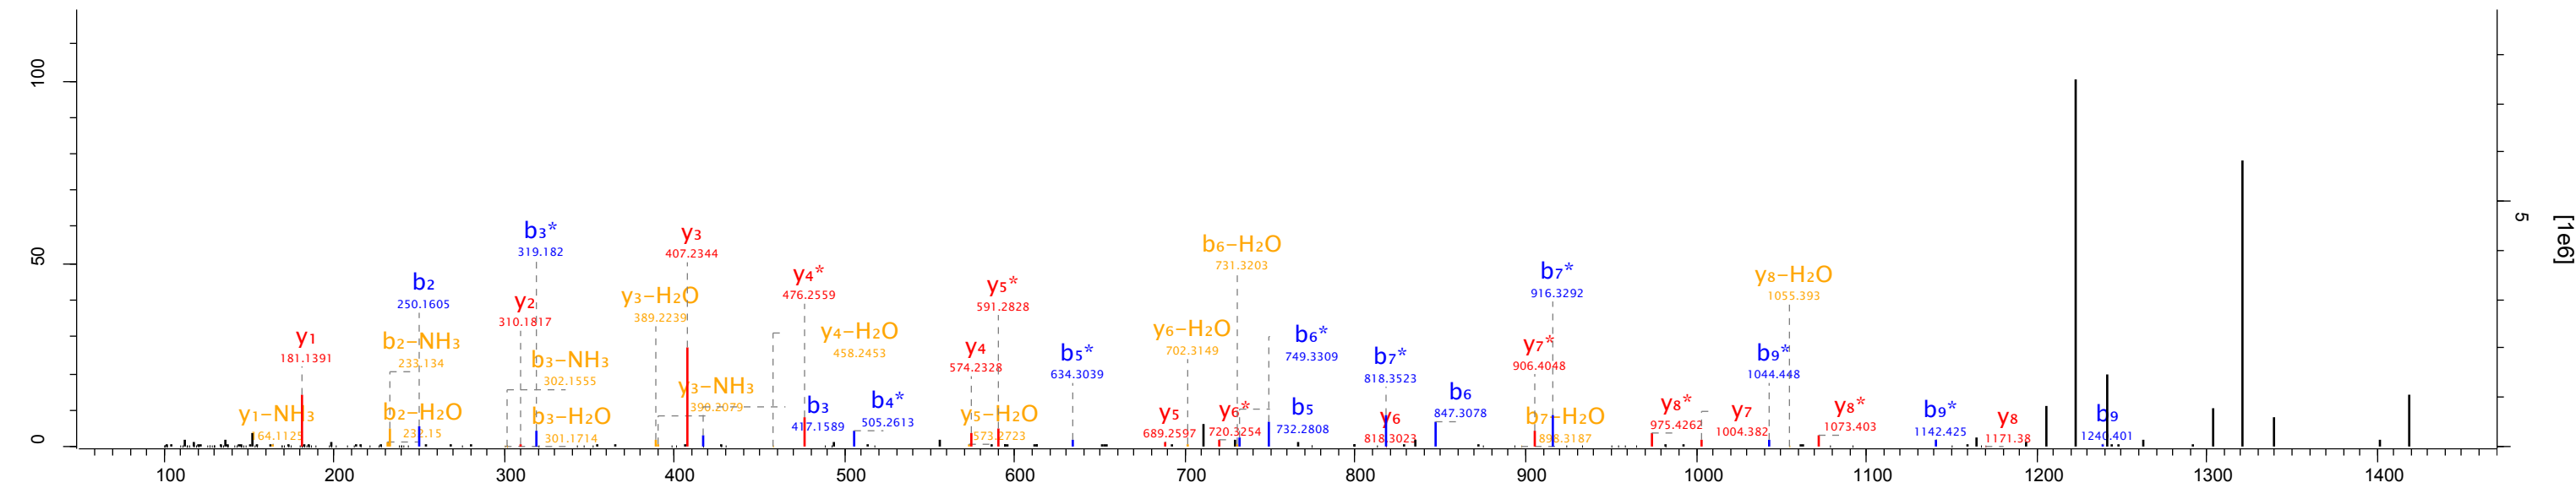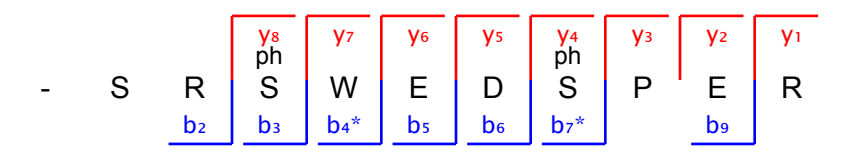

Raw file: 20171215\_MaS\_33SR\_LMH\_phospho2\_03  
 Scan: 4628 Method: FTMS; HCD Score: 136.99 m/z: 680.33 Gene names: ZC3H13

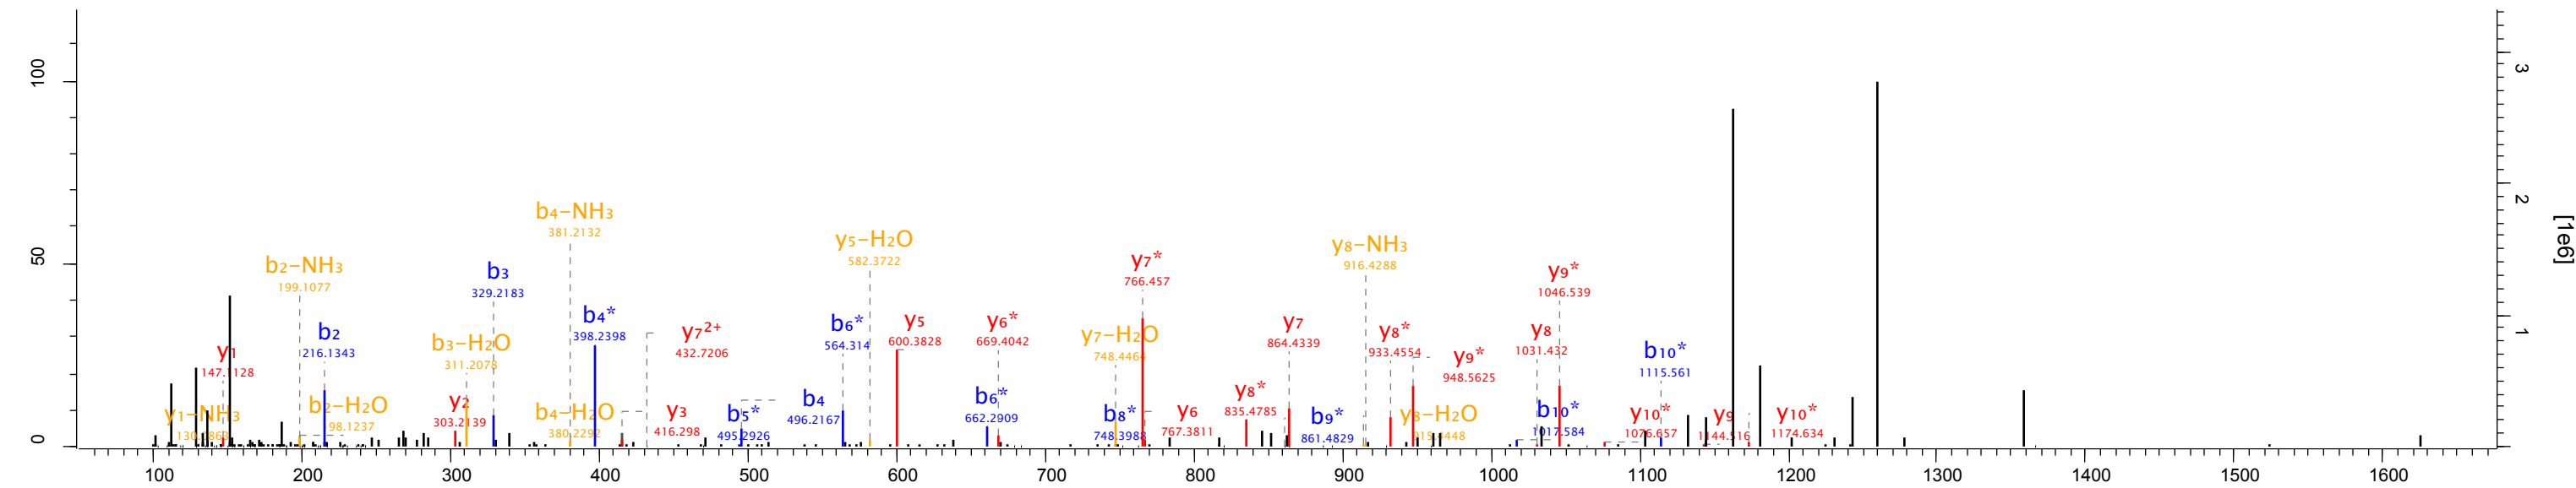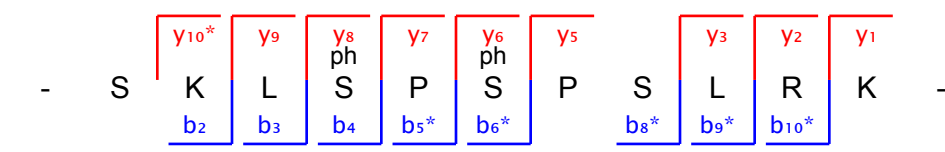

Raw file 20171215\_MaS\_33SR\_LMH\_phospho2\_03 Scan 4738 Method FTMS; HCD Score 41.35 m/z 871.64 Gene names WAC

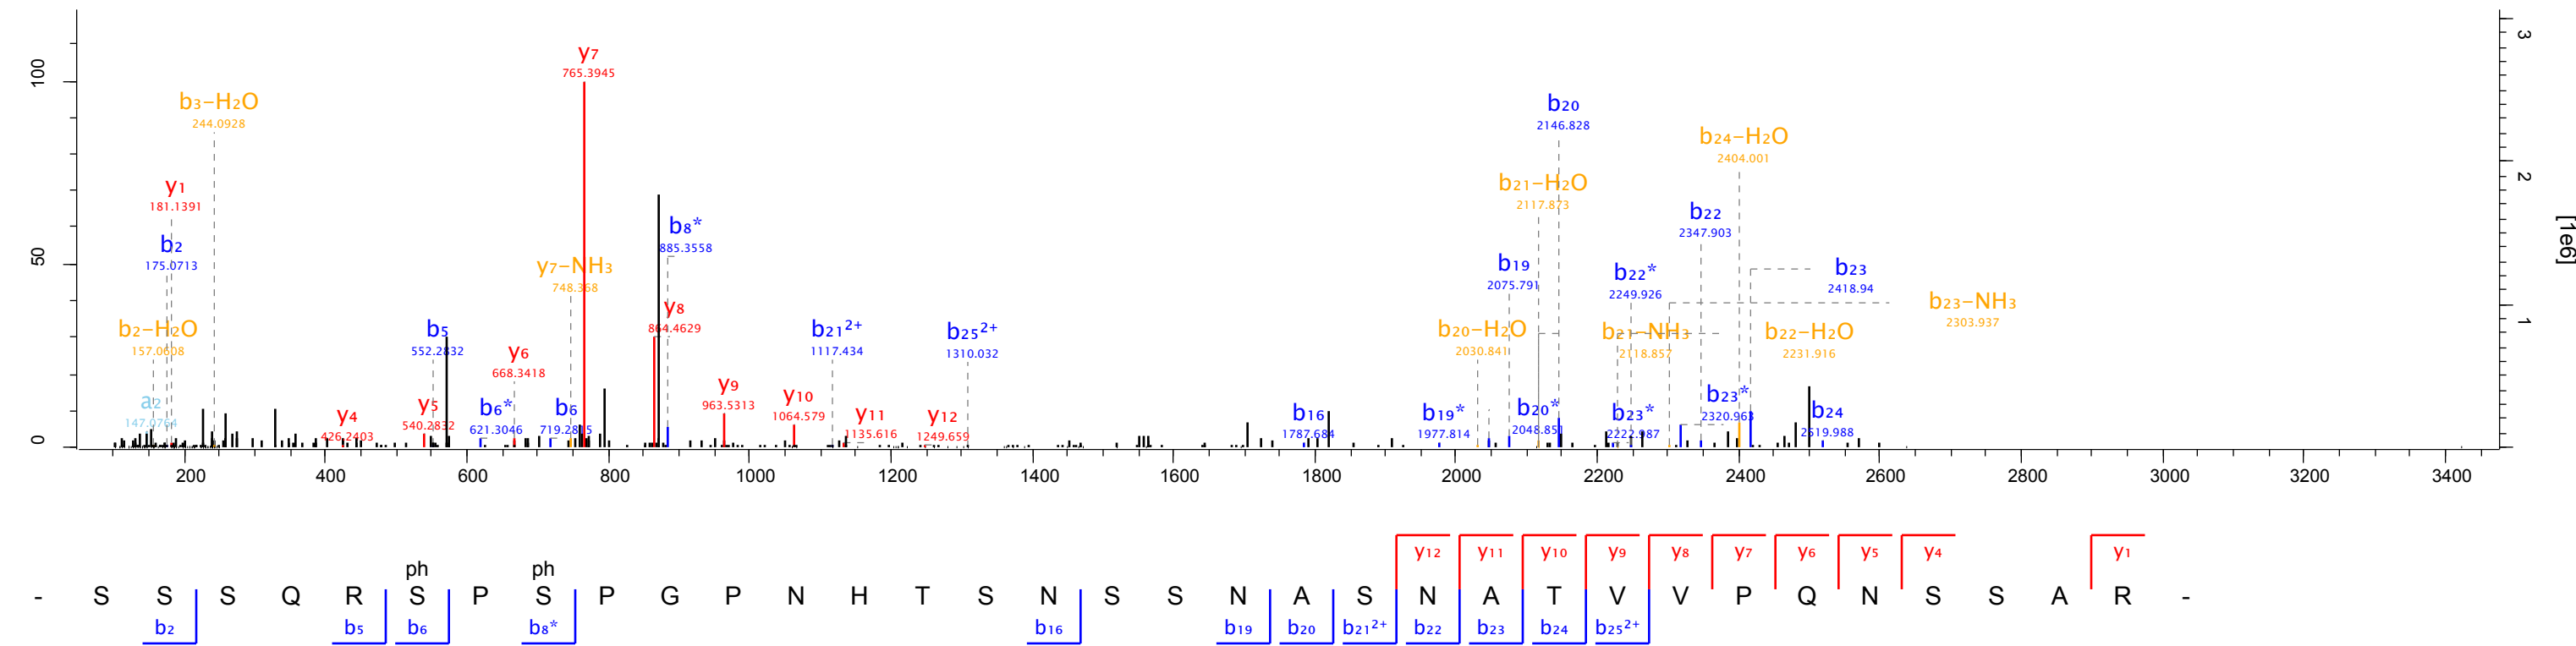

Raw file 20171215\_MaS\_33SR\_LMH\_phospho2\_03 Scan 4998 Method FTMS; HCD Score 66.98 m/z 471.54 Gene names CROCC

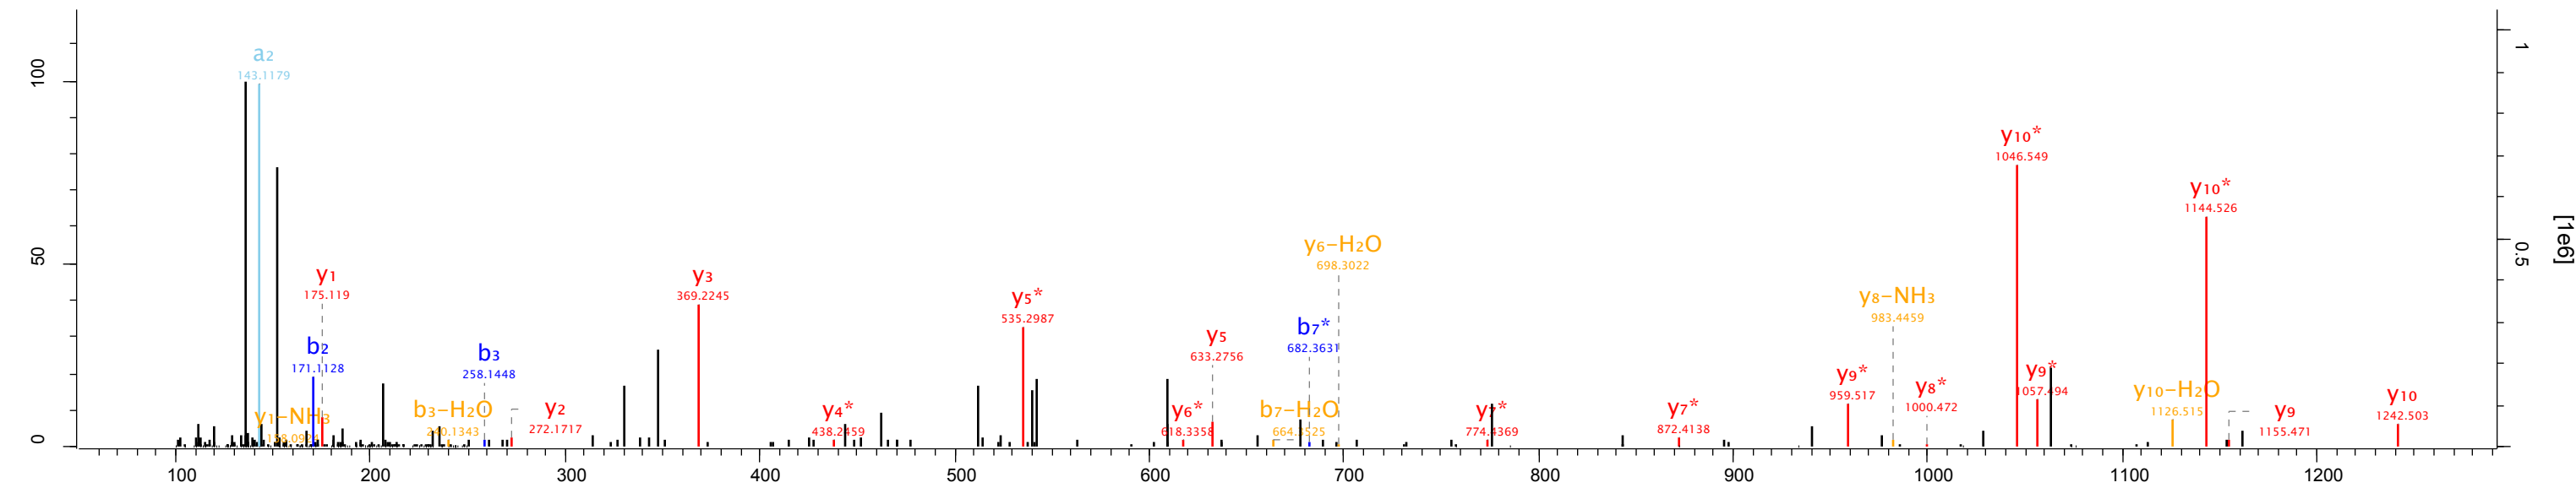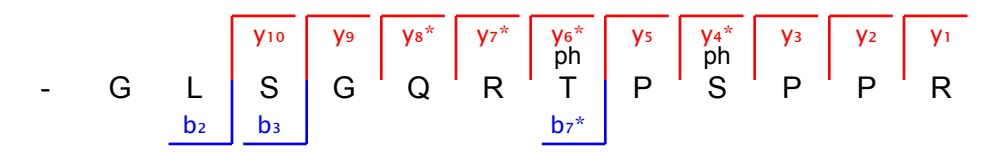

Raw file 20171215\_MaS\_33SR\_LMH\_phospho2\_03 Scan 5458 Method FTMS; HCD Score 108.77 m/z 685.79 Gene names NFIX

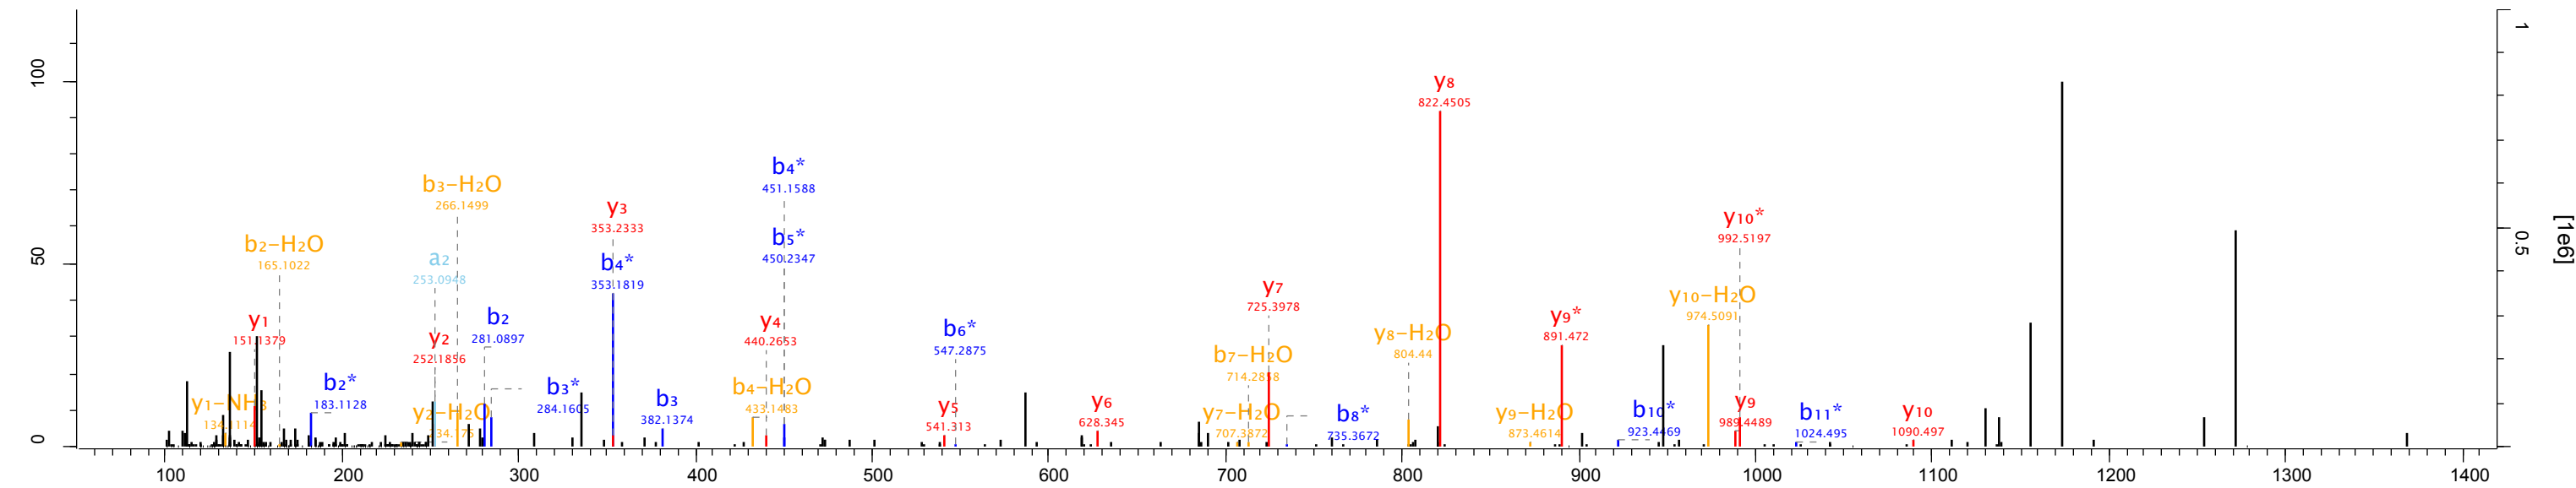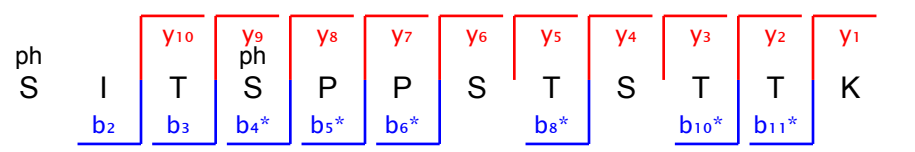

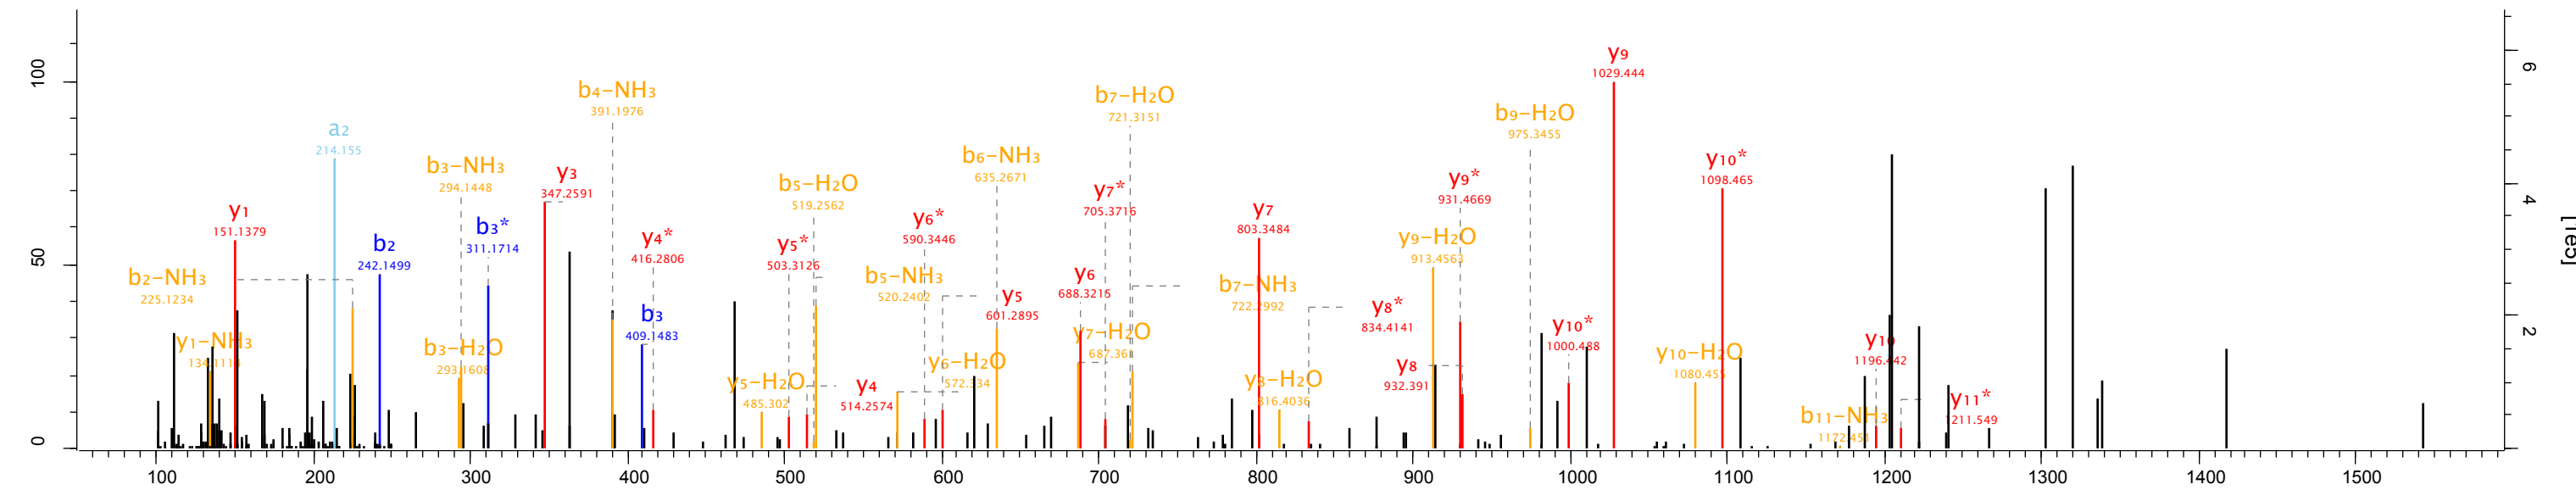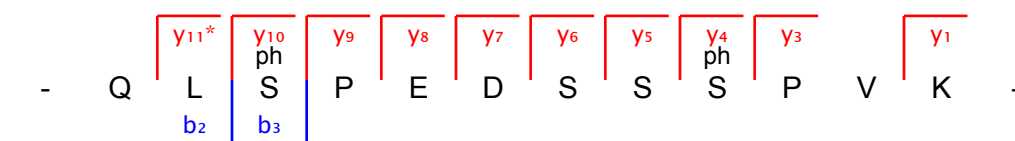

Raw file

20171215\_MaS\_33SR\_LMH\_phospho2\_03

| Scan | Method    | Score | m/z    | Gene names |
|------|-----------|-------|--------|------------|
| 5538 | FTMS; HCD | 51.73 | 490.55 | PPP2R5D    |

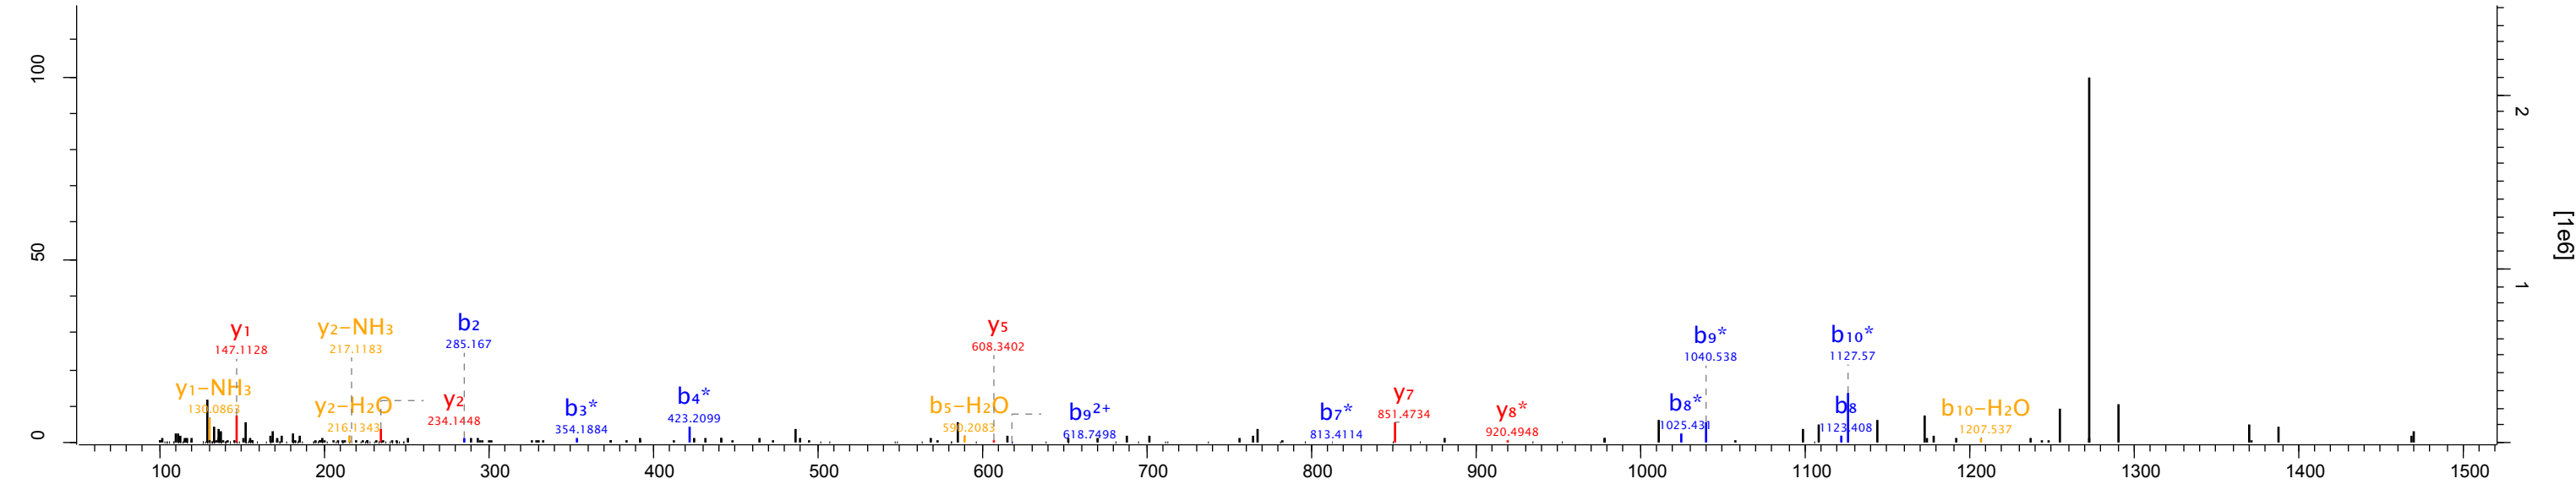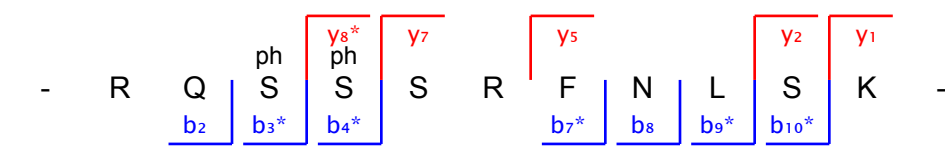

Raw file 20171215\_MaS\_33SR\_LMH\_phospho2\_03 Scan 5628 Method FTMS; HCD Score 181.63 m/z 902.05 Gene names NEDD4L

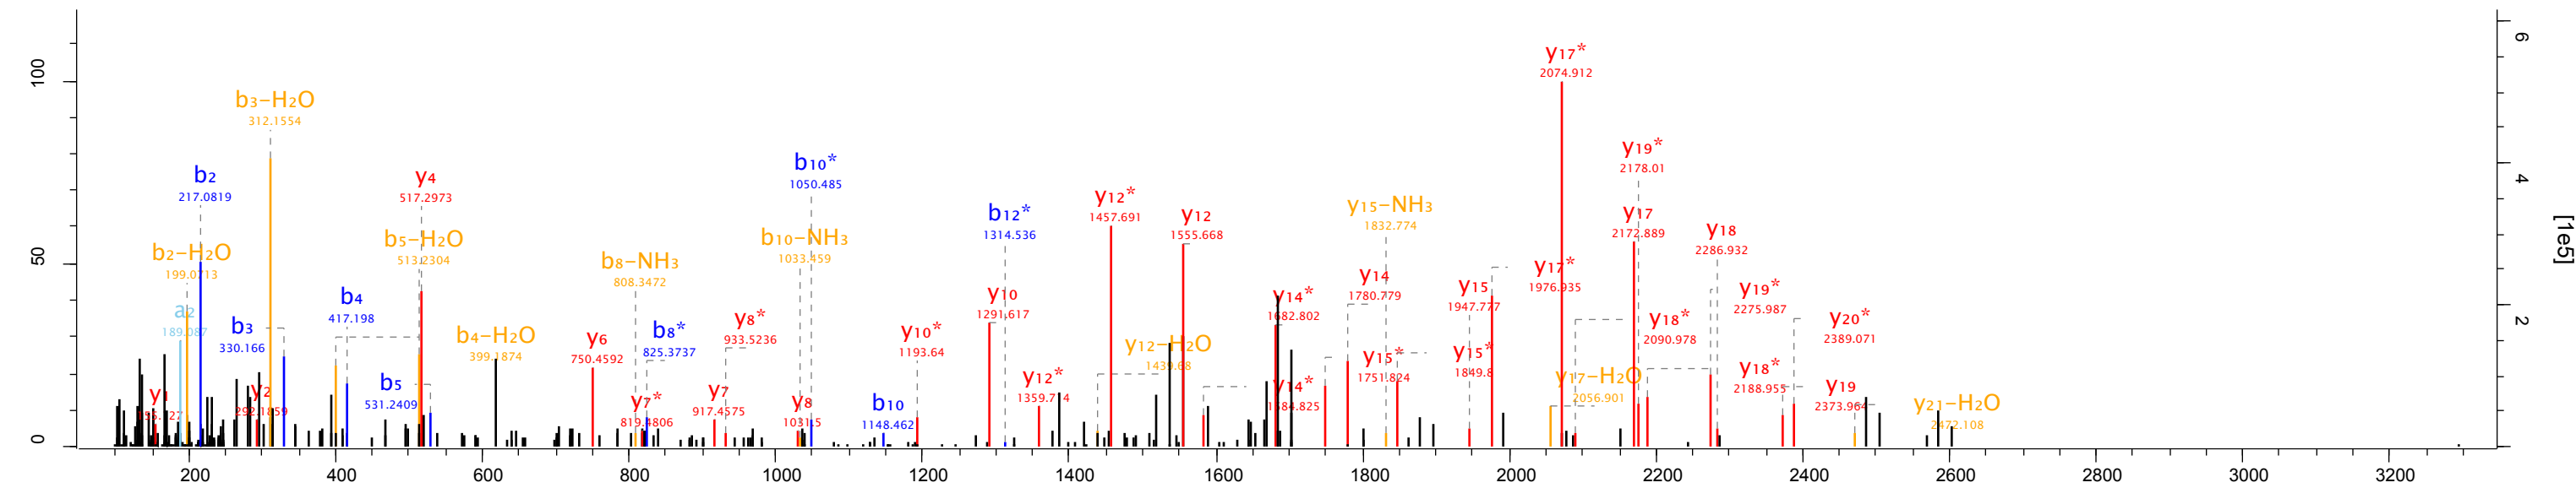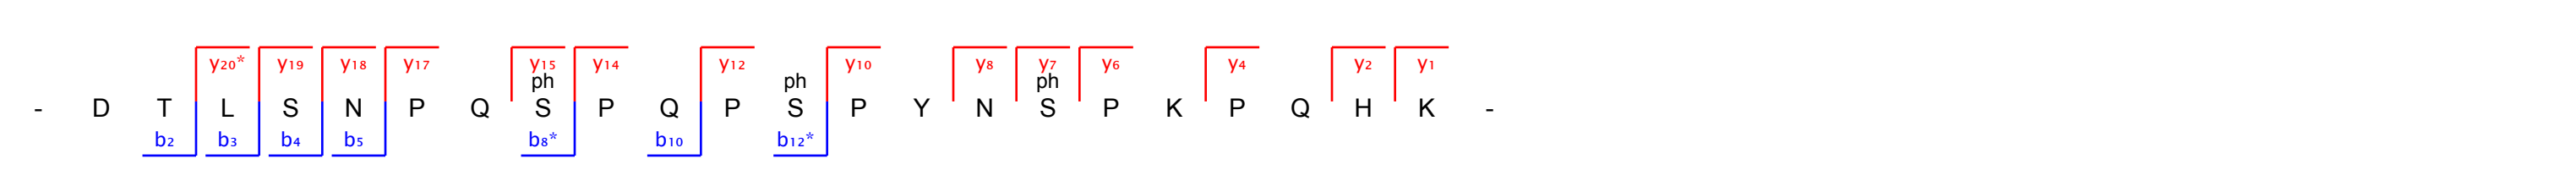



Raw file 20171215\_MaS\_33SR\_LMH\_phospho2\_03 Scan 5658 Method FTMS; HCD Score 285.16 m/z 944.37 Gene names HSP90AB2P;HSP90AB1

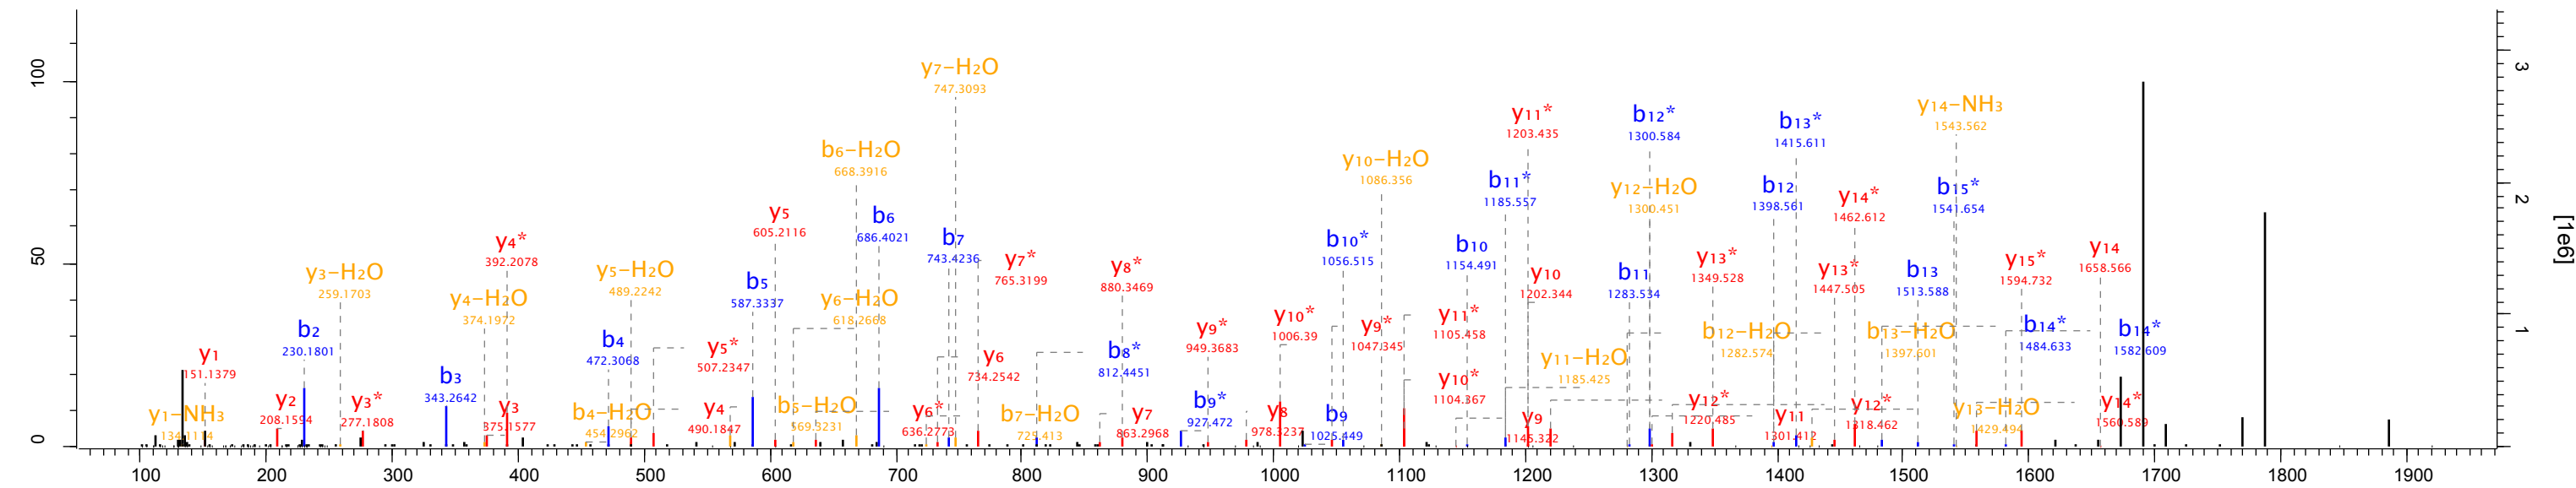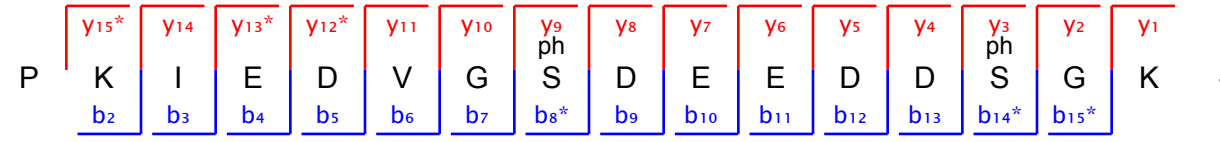

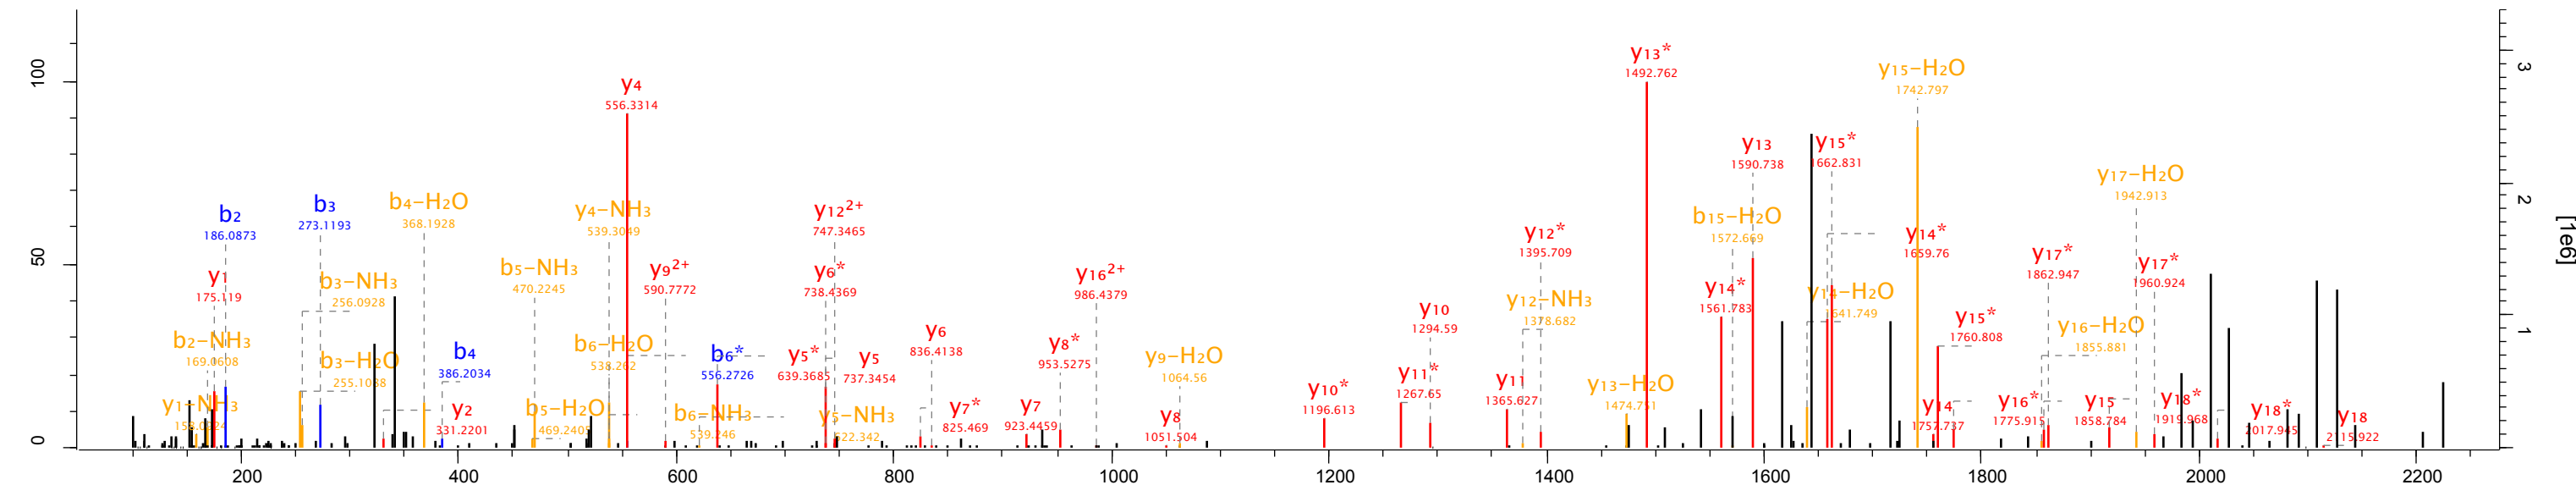

- Q G S I T S P Q A N E Q S V T P Q R R -

Fragmentation sites are indicated by brackets above the sequence:

- Red brackets above: y18, y17\*, y16\*, y15, y14 ph, y13, y12\*, y11, y10, y9<sup>2+</sup>, y8, y7, y6, y5 ph, y4, y2, y1
- Blue brackets below: b2, b3, b4, b6\*

Raw file 20171215\_MaS\_33SR\_LMH\_phospho2\_03 Scan 5938 Method FTMS; HCD Score 52.52 m/z 697.3 Gene names C1orf106

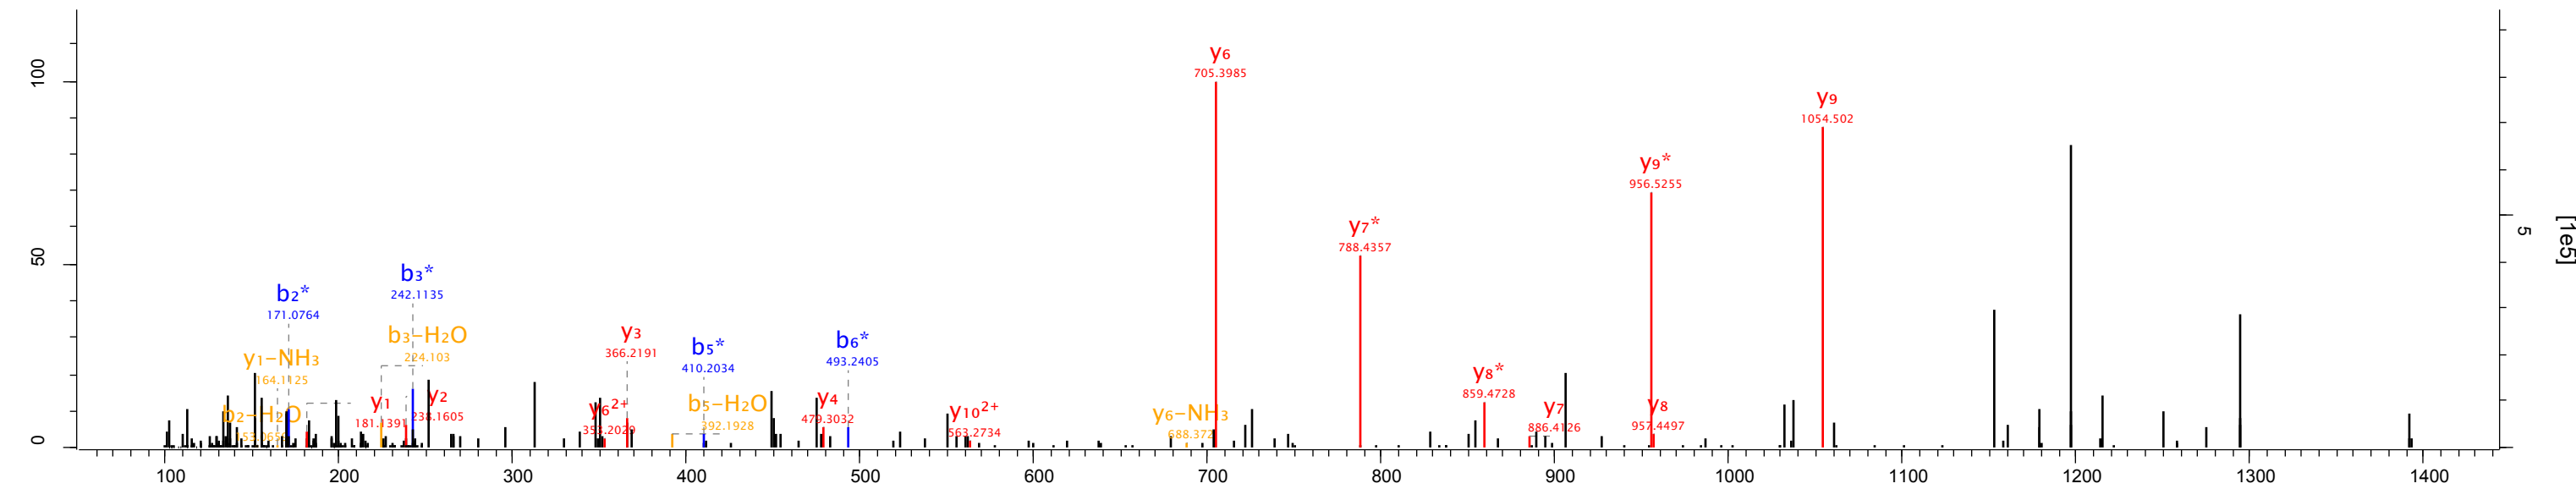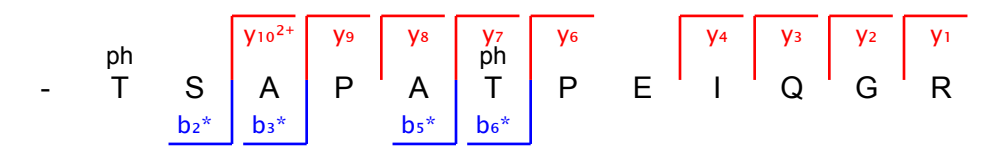

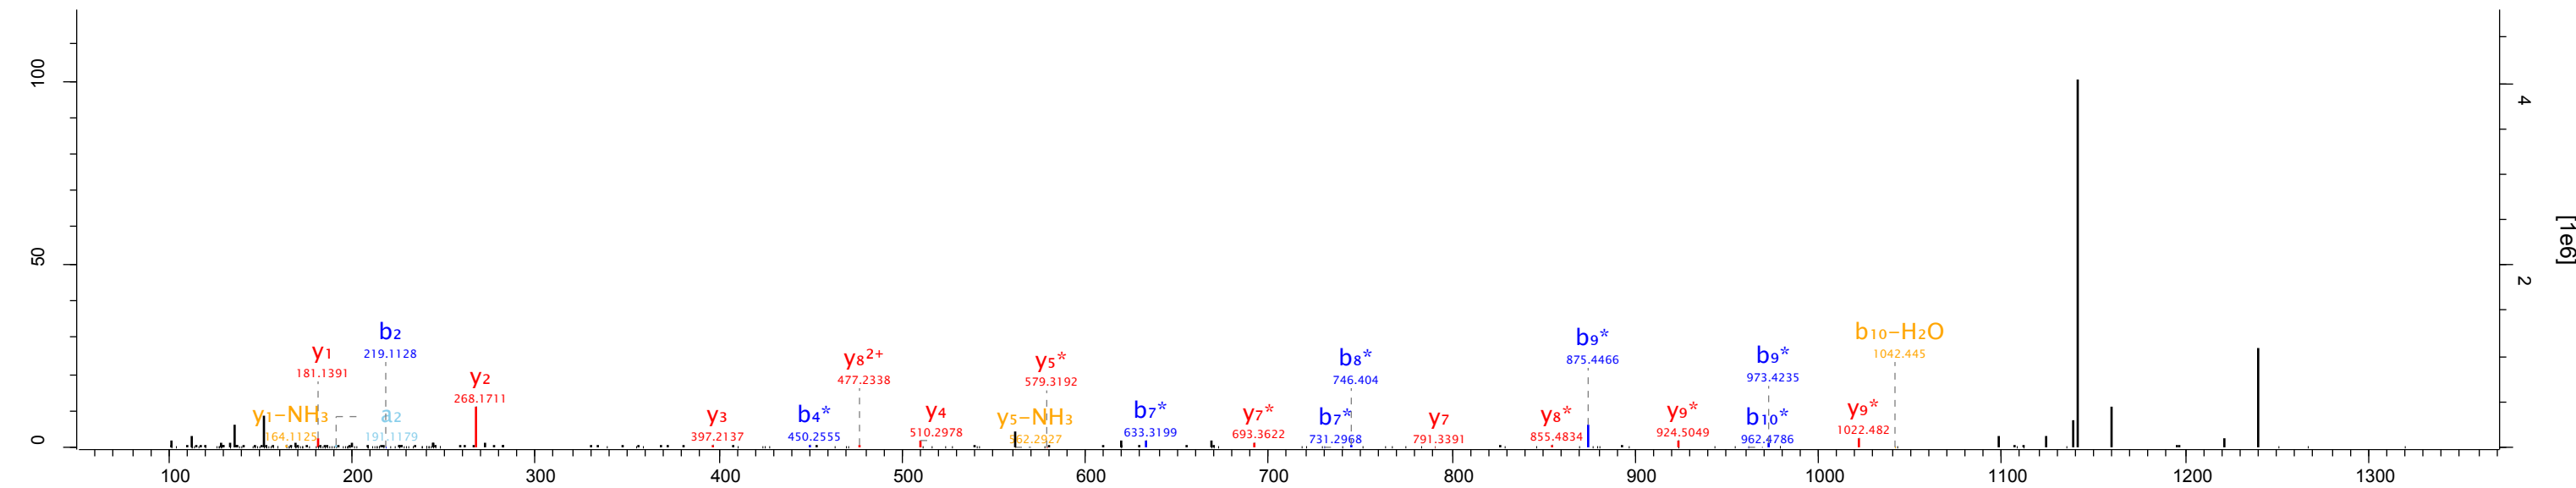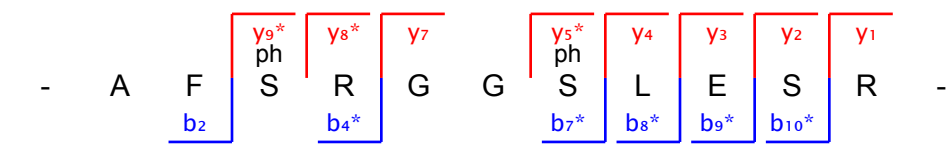

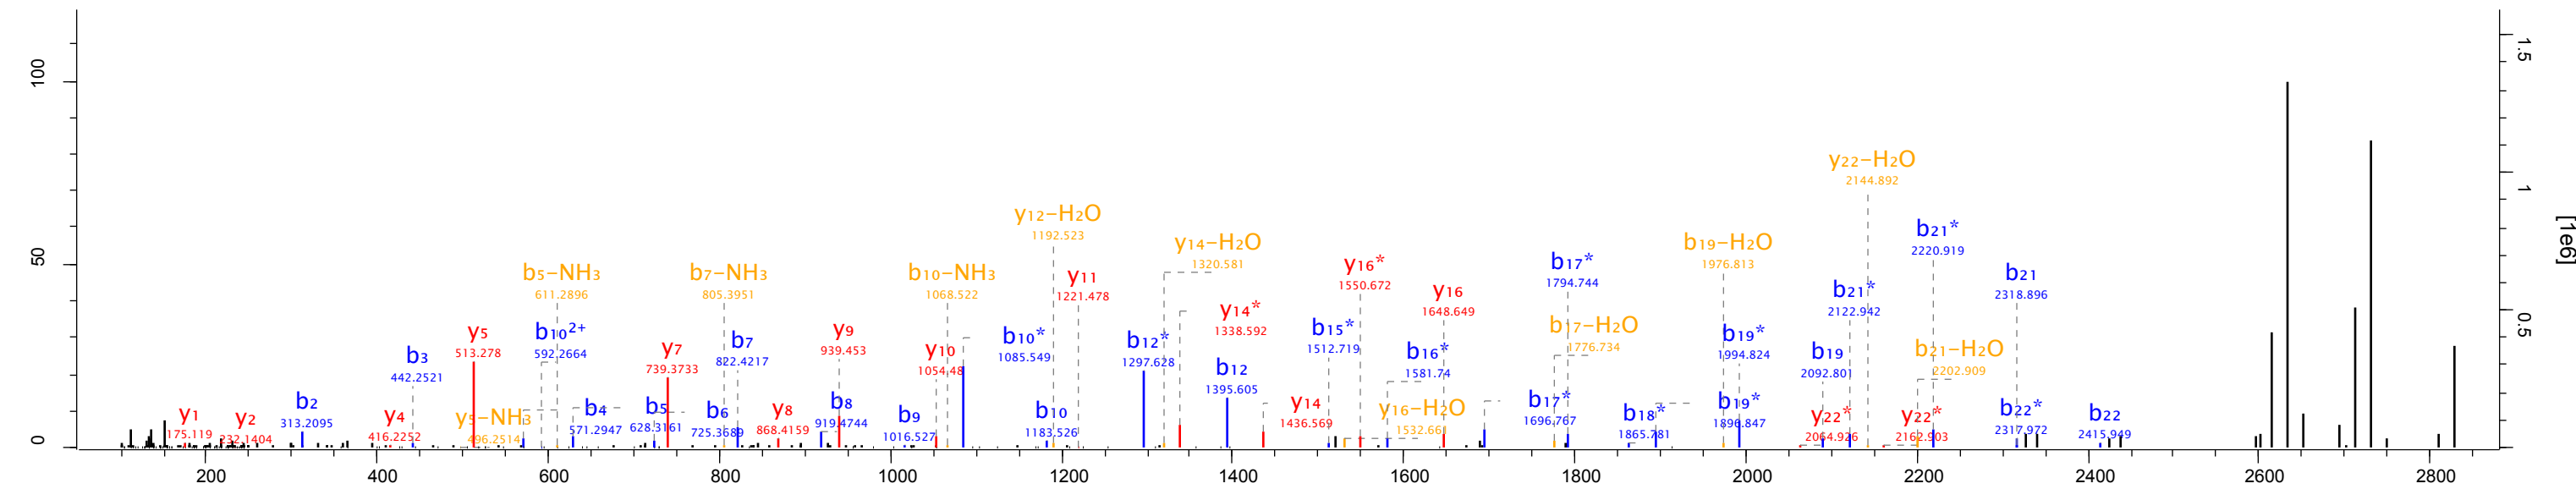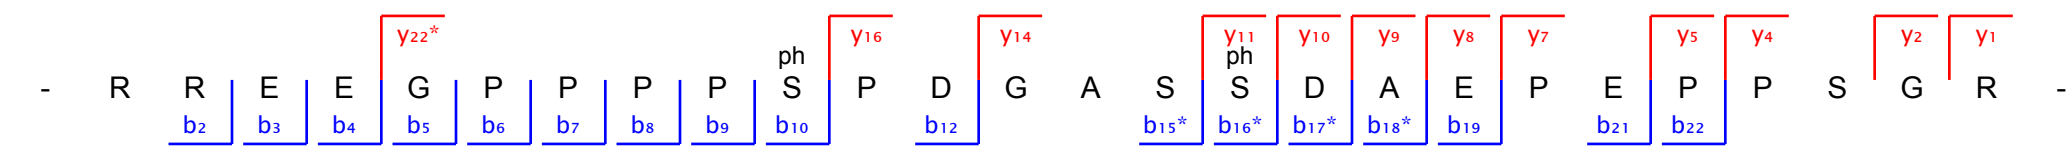

Raw file 20171215\_MaS\_33SR\_LMH\_phospho2\_03 Scan 6108 Method FTMS; HCD Score 133.92 m/z 974.37 Gene names CAMK2D

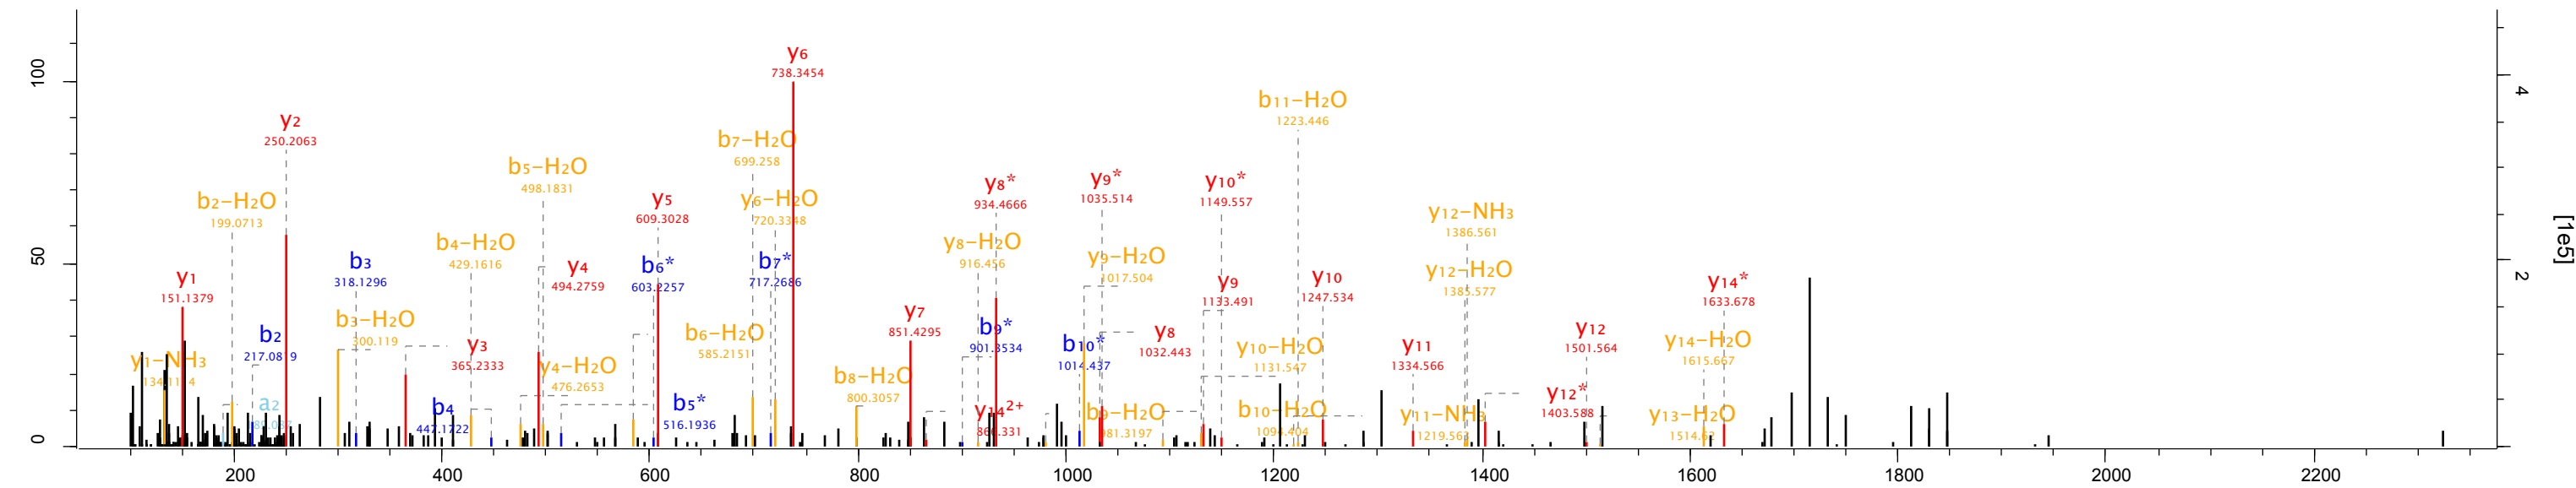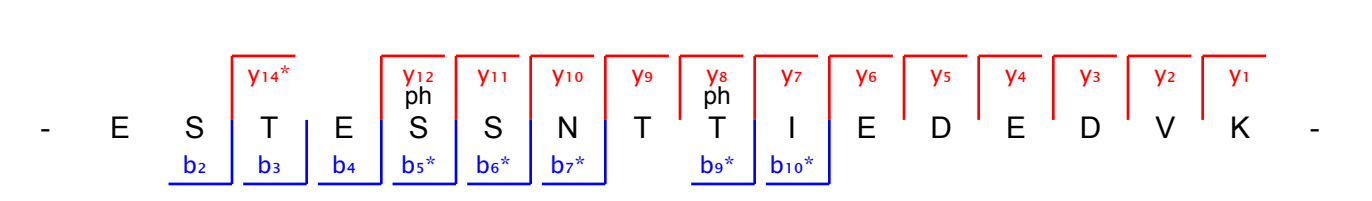

Raw file: 20171215\_MaS\_33SR\_LMH\_phospho2\_03  
 Scan: 6118 Method: FTMS; HCD Score: 100.39 m/z: 798.35 Gene names: HDGFRP2

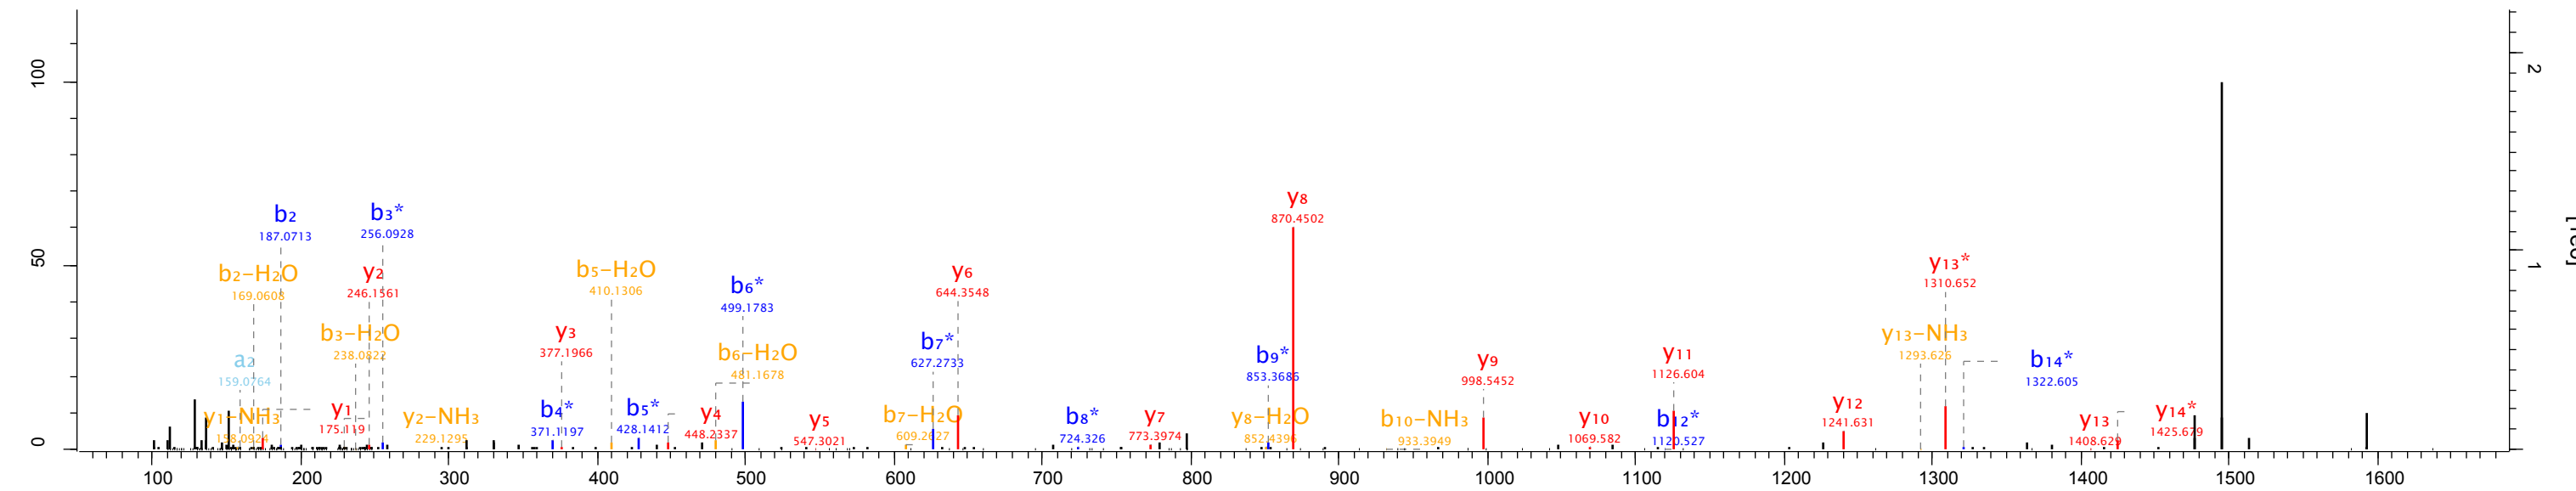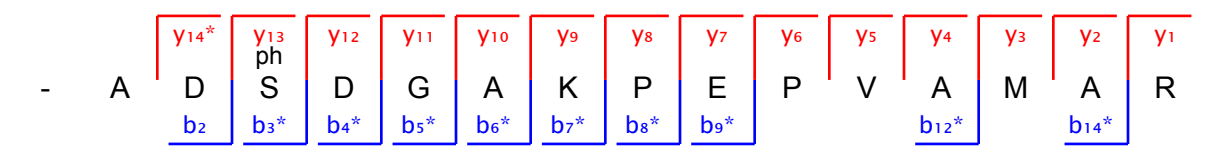

Raw file  
20171215\_MaS\_33SR\_LMH\_phospho2\_03

Scan 6138 Method FTMS; HCD Score 125.48 m/z 954.74 Gene names SMC4

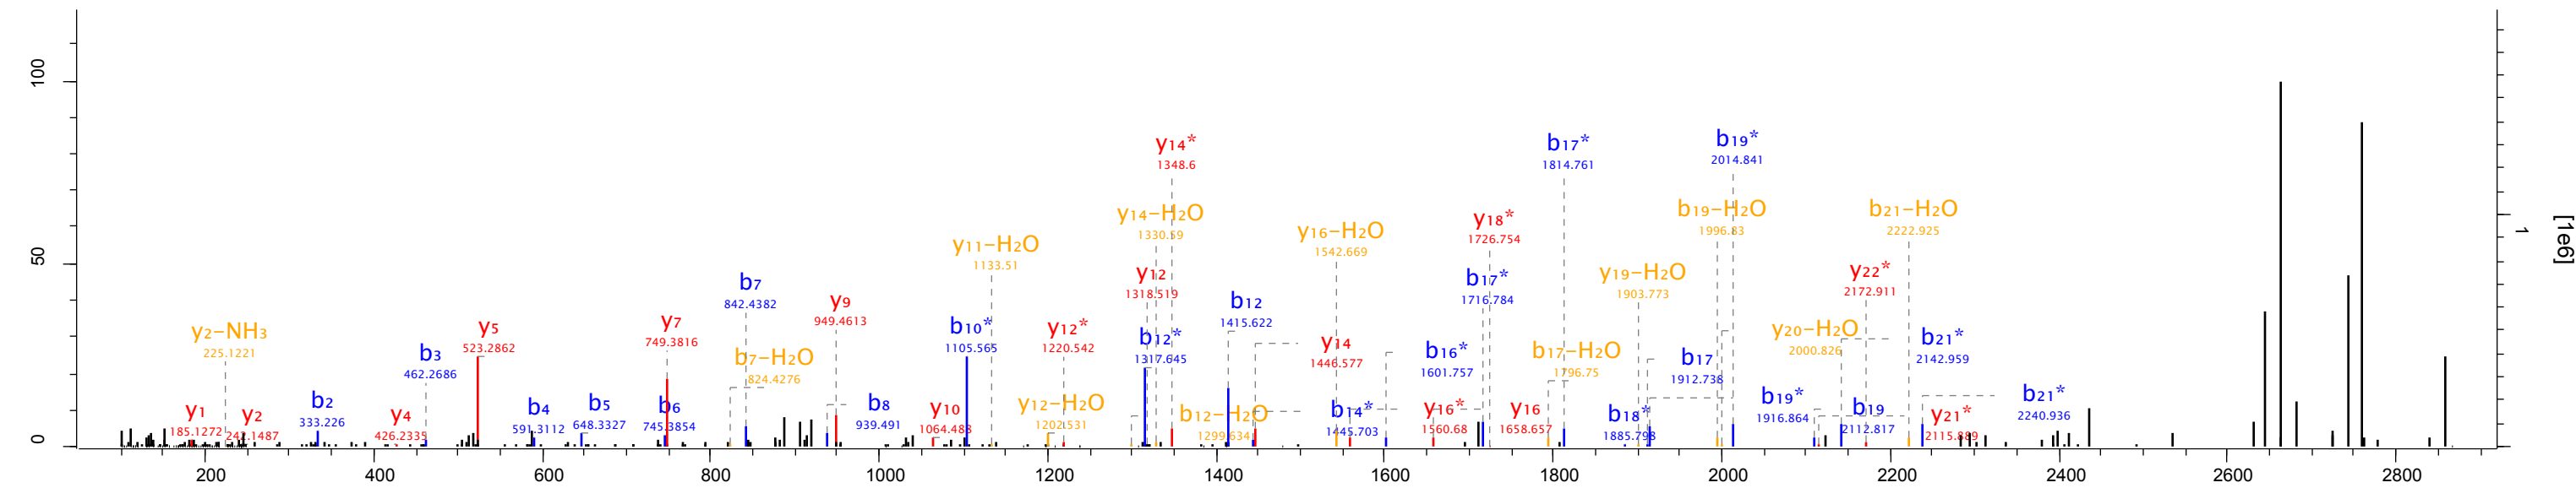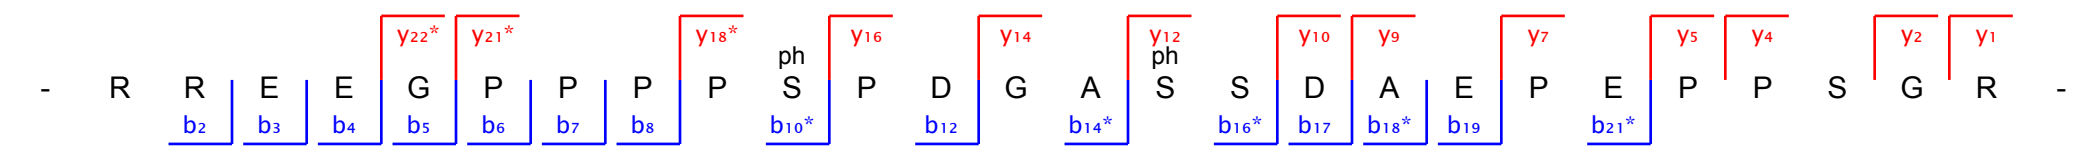



20171215\_MaS\_33SR\_LMH\_phospho2\_03 6418 FTMS; HCD 46.49 603.58 LEO1

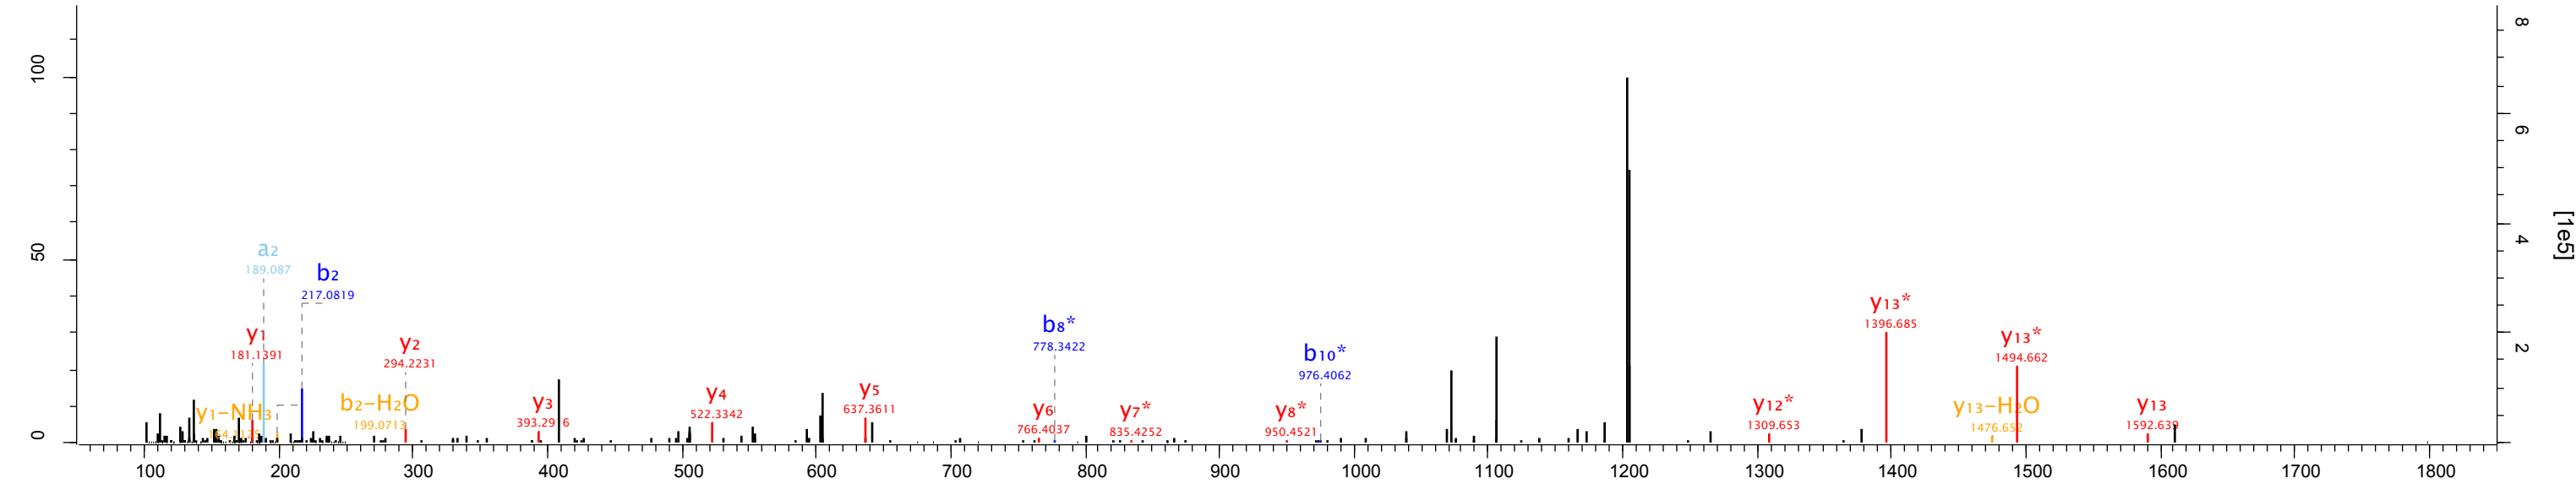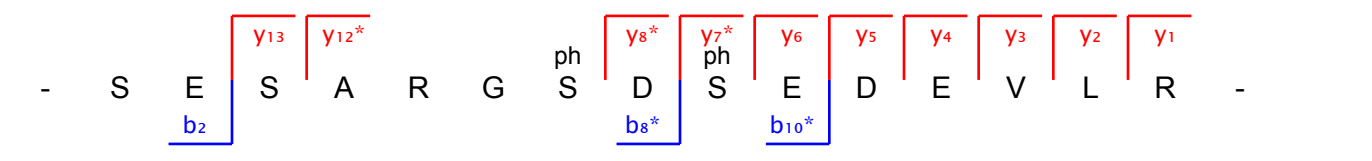

20171215\_MaS\_33SR\_LMH\_phospho2\_03 6518 FTMS; HCD 97.45 673.78 ITPKB

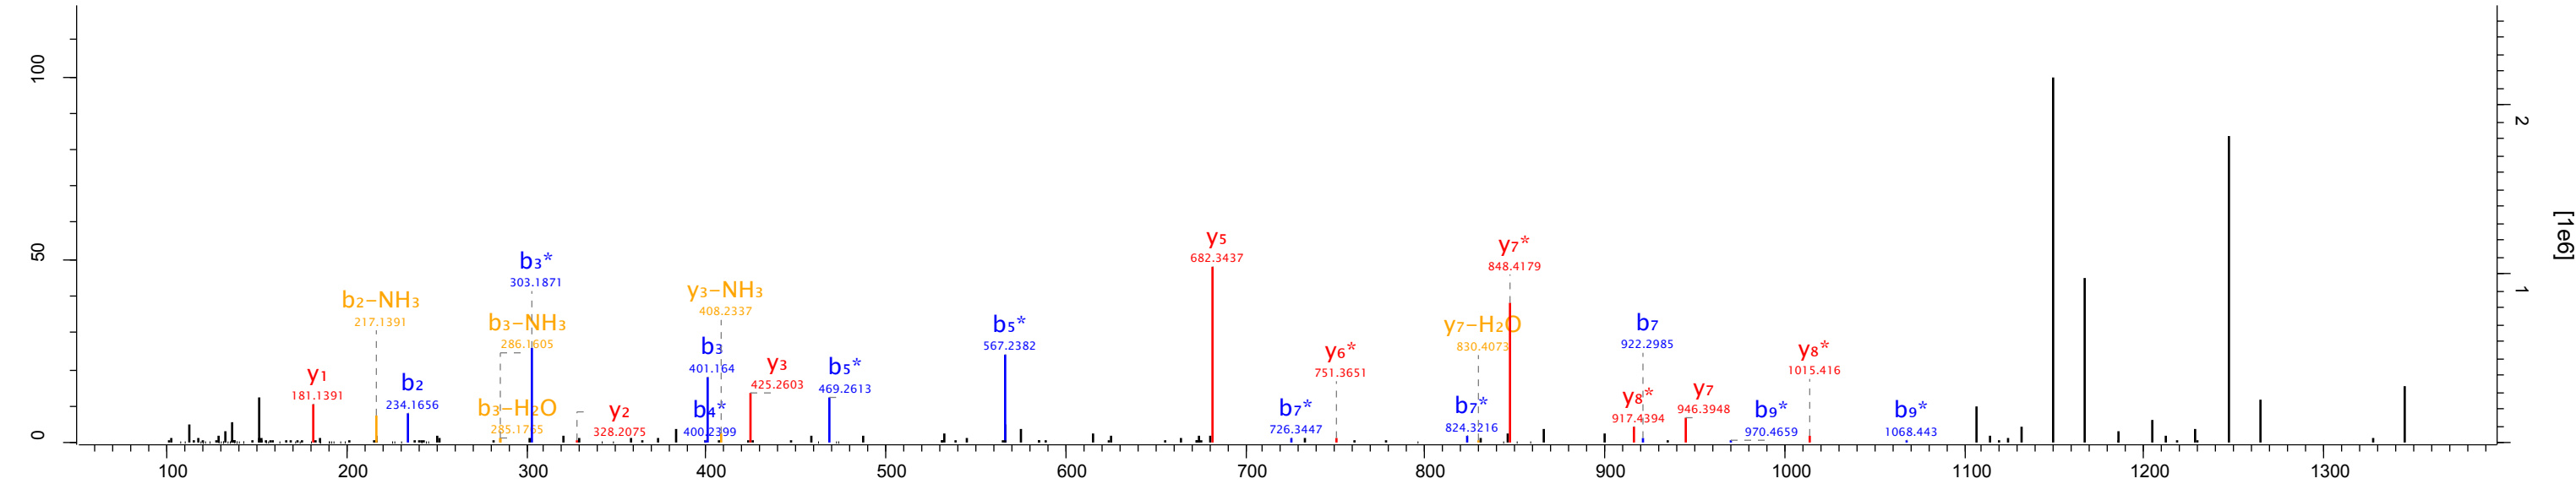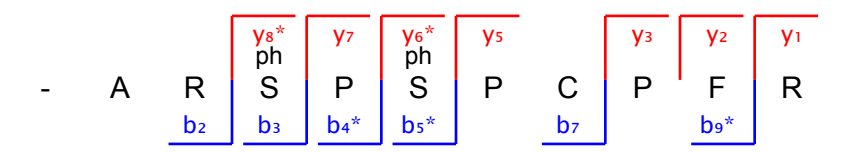



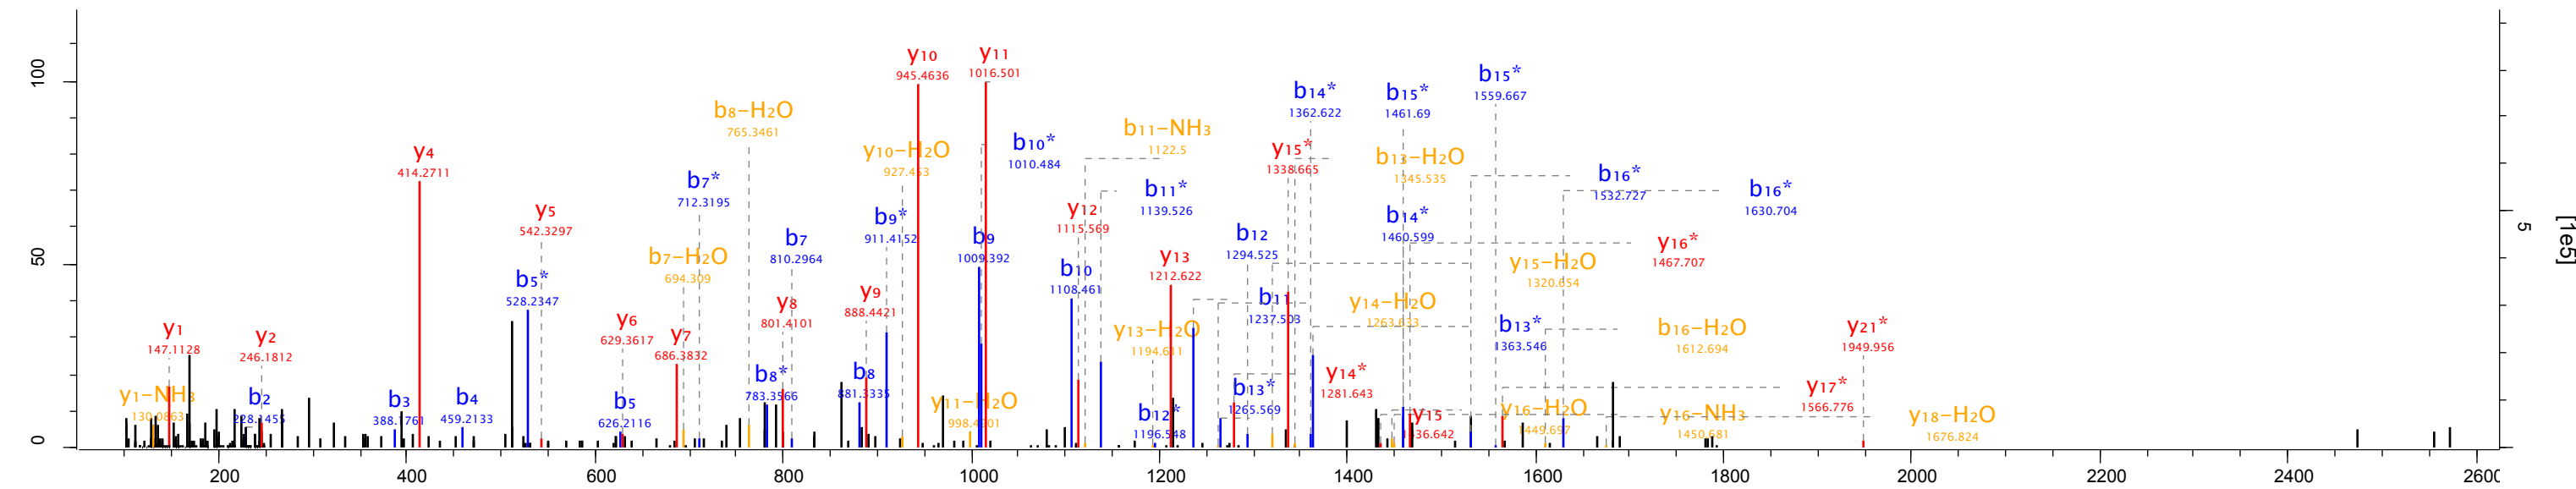

- R A C A S P S A Q V E G S P V A G S D G S Q P A V K -

b<sub>2</sub>
b<sub>3</sub>
b<sub>4</sub>
b<sub>5</sub>
b<sub>7</sub>
b<sub>8</sub>
b<sub>9</sub>
b<sub>10</sub>
b<sub>11</sub>
b<sub>12</sub>
b<sub>13</sub>\*
b<sub>14</sub>\*
b<sub>15</sub>\*
b<sub>16</sub>\*

y<sub>21</sub>\*
y<sub>17</sub>\*
y<sub>16</sub>\*
y<sub>15</sub>
y<sub>14</sub>\*
y<sub>13</sub>
y<sub>12</sub>
y<sub>11</sub>
y<sub>10</sub>
y<sub>9</sub>
y<sub>8</sub>
y<sub>7</sub>
y<sub>6</sub>
y<sub>5</sub>
y<sub>4</sub>
y<sub>2</sub>
y<sub>1</sub>

Raw file: 20171215\_MaS\_33SR\_LMH\_phospho2\_03  
 Scan: 7358 Method: FTMS; HCD Score: 149.33 m/z: 919.33 Gene names: IRS2

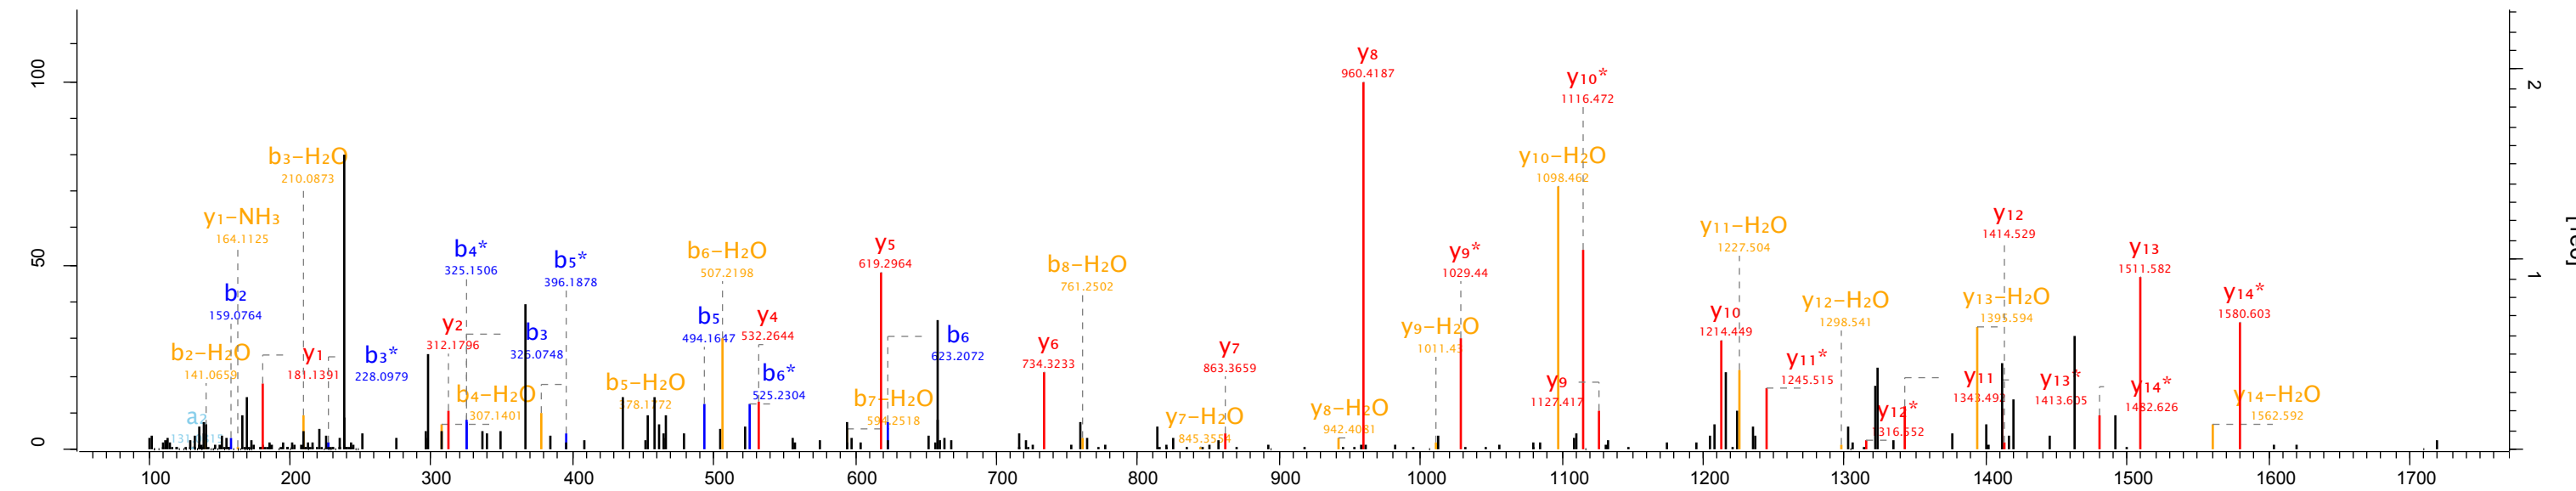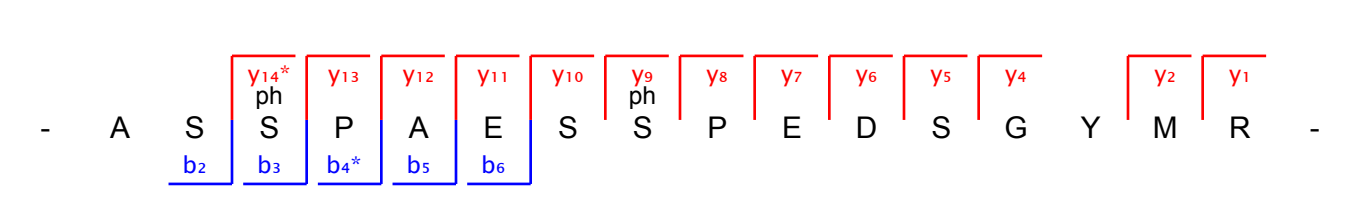

Raw file 20171215\_MaS\_33SR\_LMH\_phospho2\_03 Scan 7778 Method FTMS; HCD Score 204.89 m/z 853.34 Gene names ALKBH5

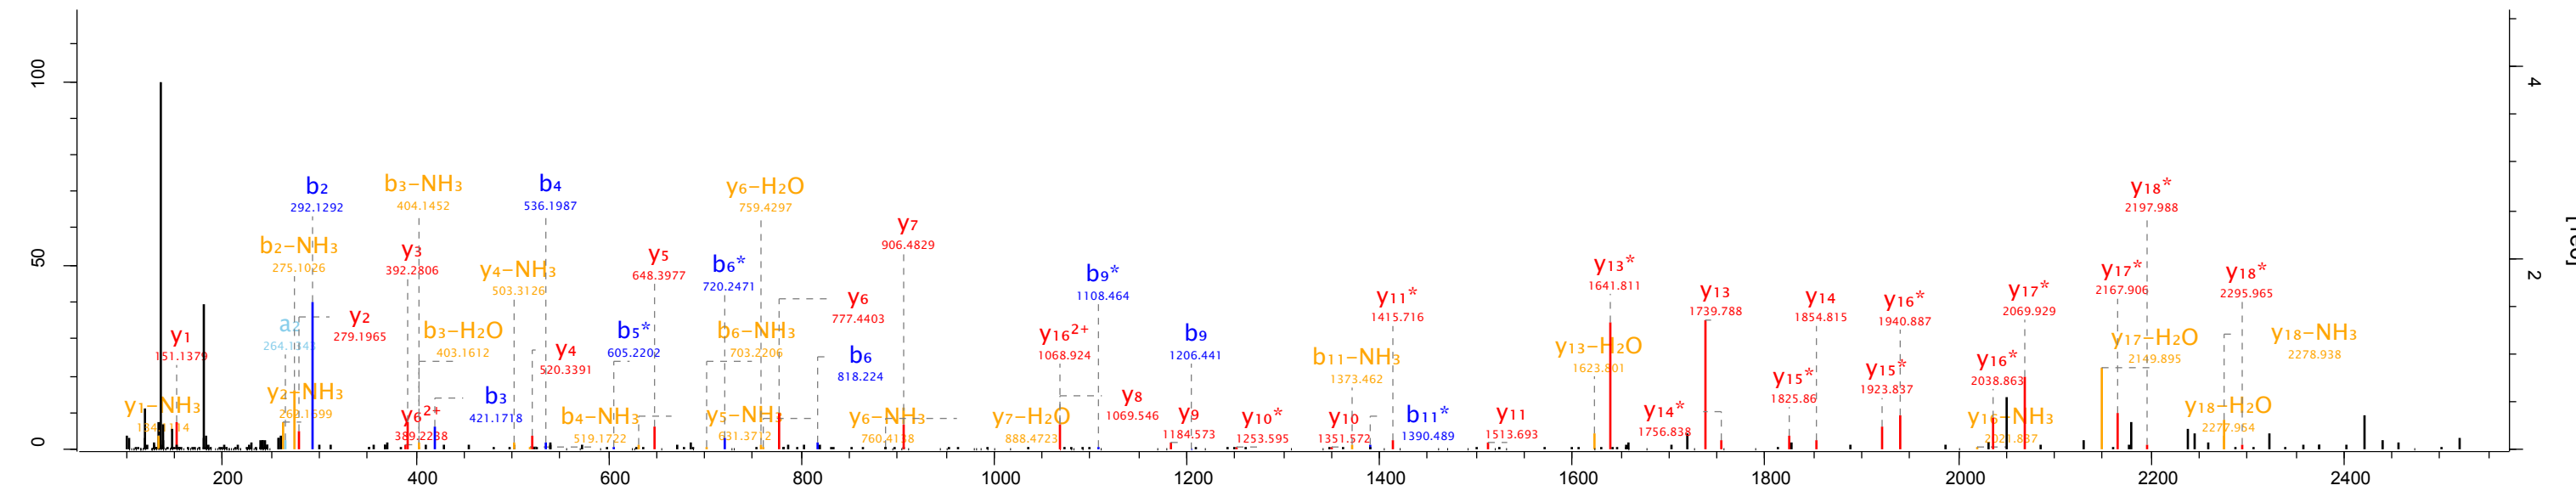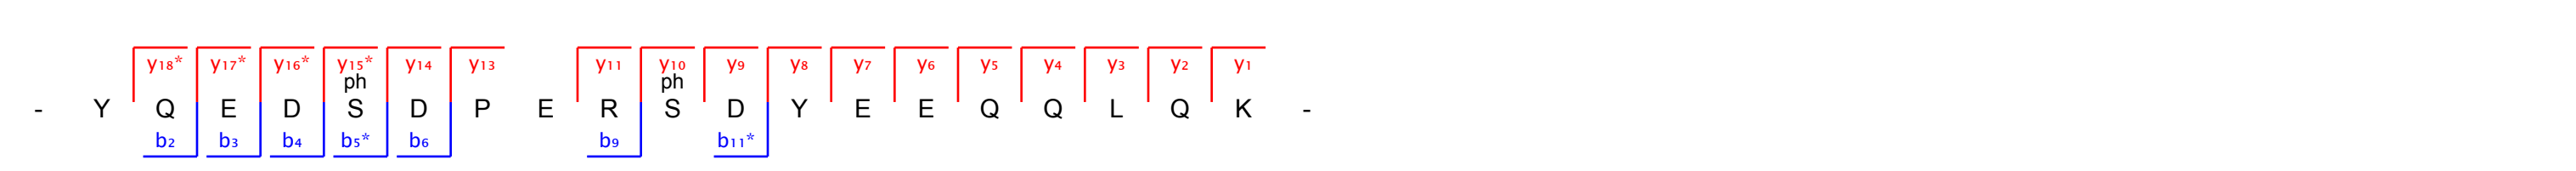

Raw file 20171215\_MaS\_33SR\_LMH\_phospho2\_03 Scan 8288 Method FTMS; HCD Score 133.46 m/z 907.9 Gene names DOT1L

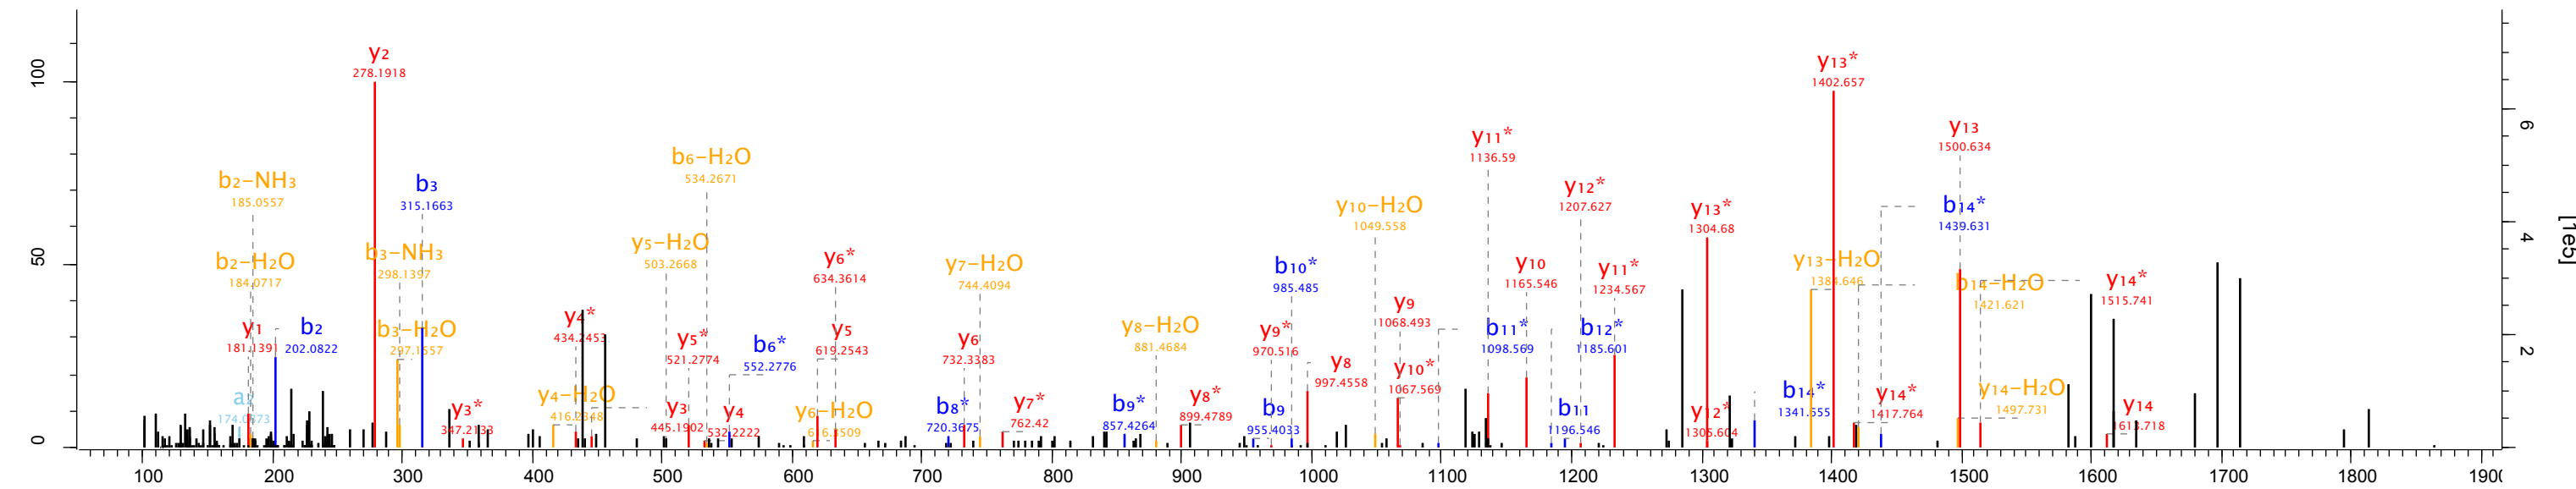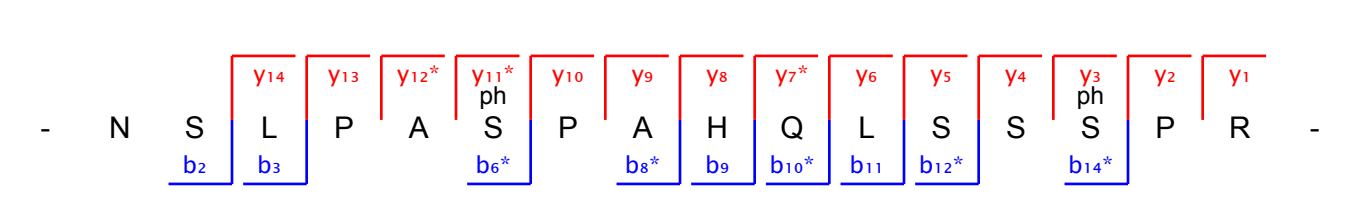





Raw file  
20171215\_MaS\_33SR\_LMH\_phospho2\_03

Scan 9028 Method FTMS; HCD Score 158.41 m/z 743.31 Gene names KIAA0930

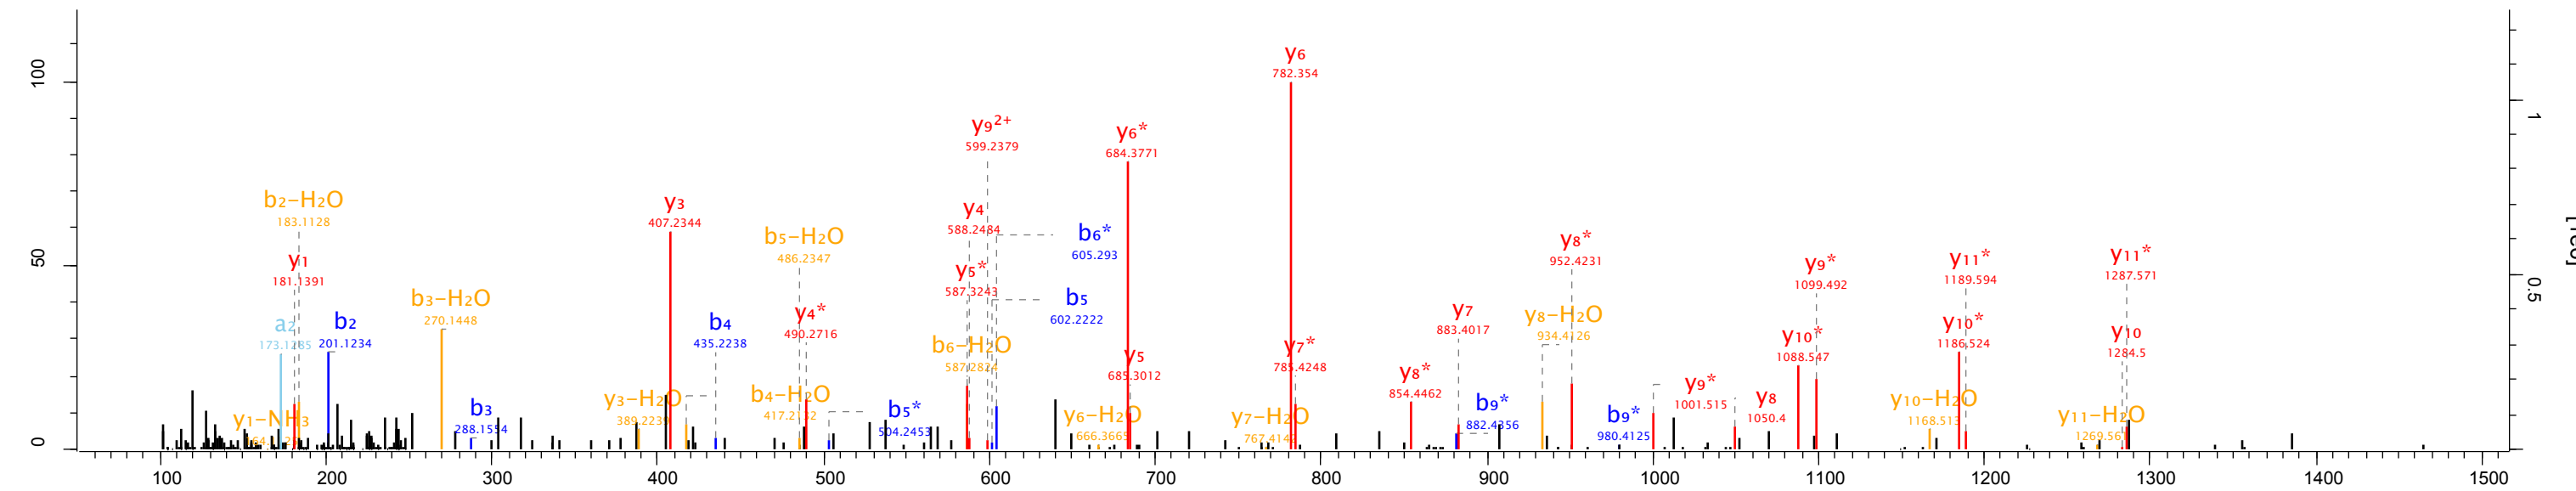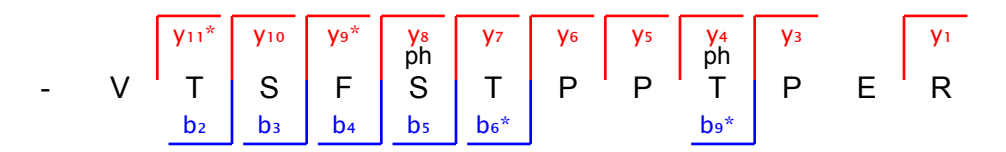

Raw file: 20171215\_MaS\_33SR\_LMH\_phospho2\_03  
 Scan: 9098 Method: FTMS; HCD Score: 71.3 m/z: 796.34 Gene names: ANKRD17

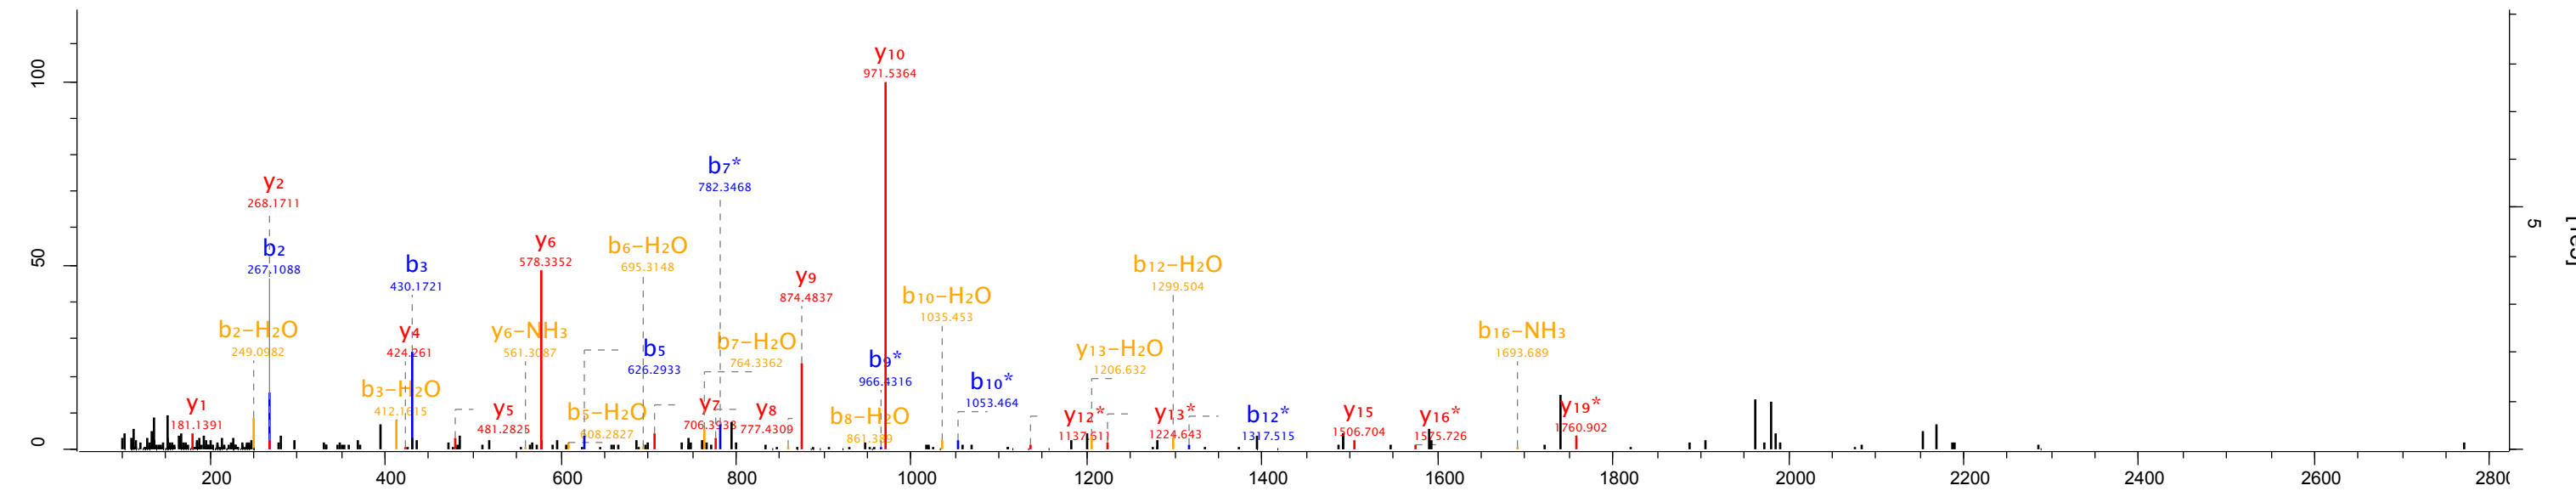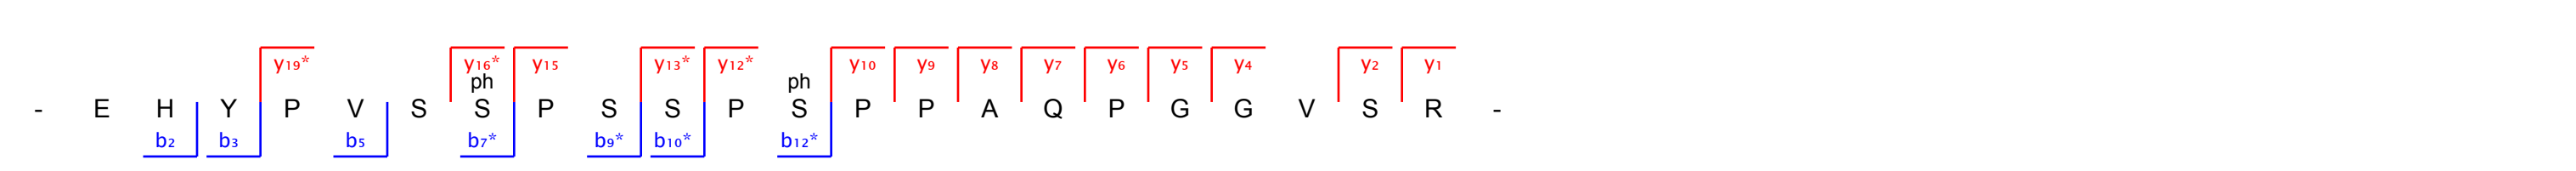



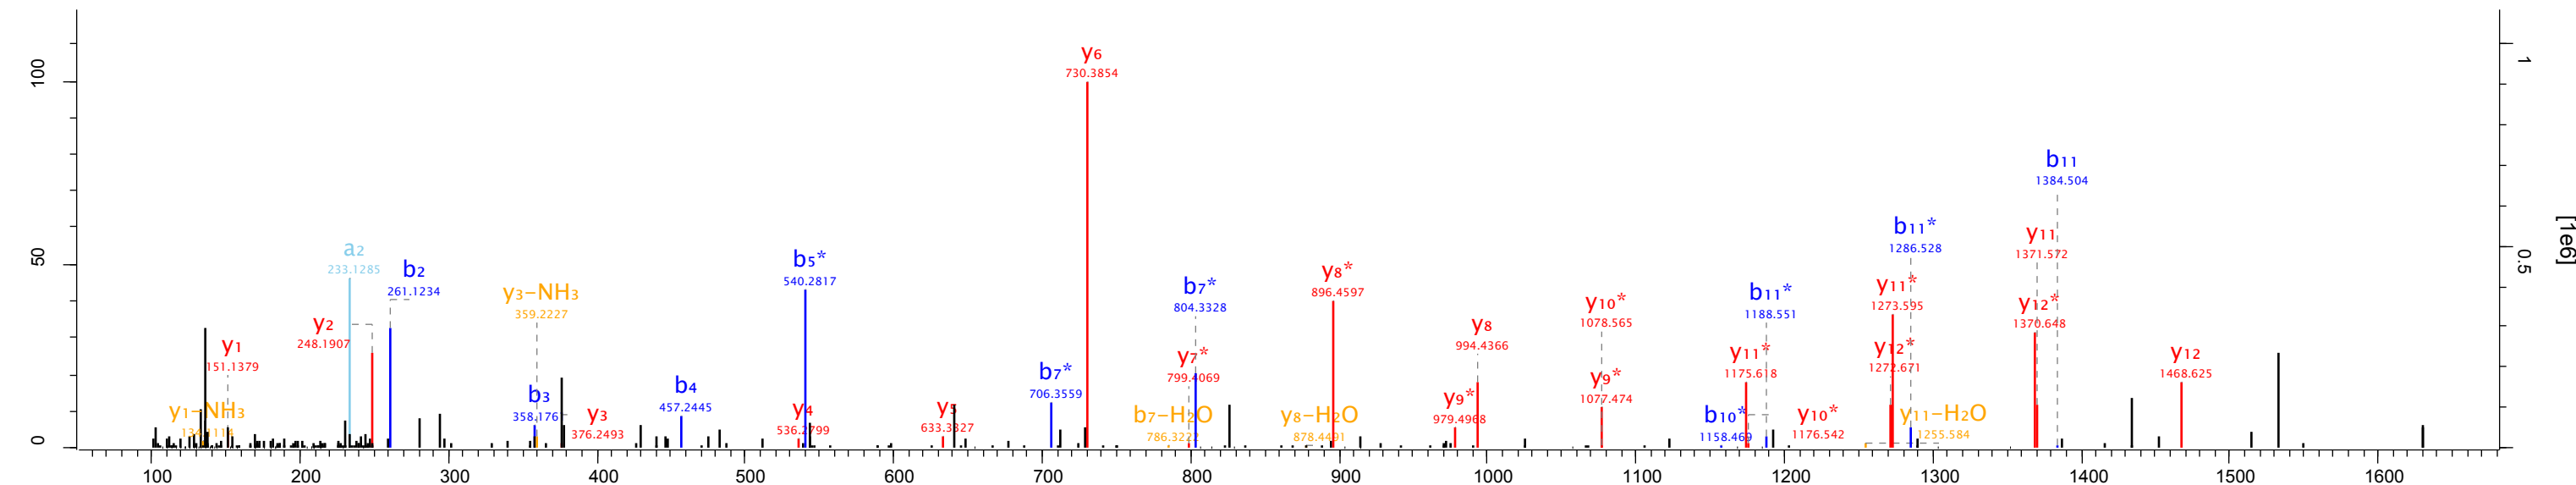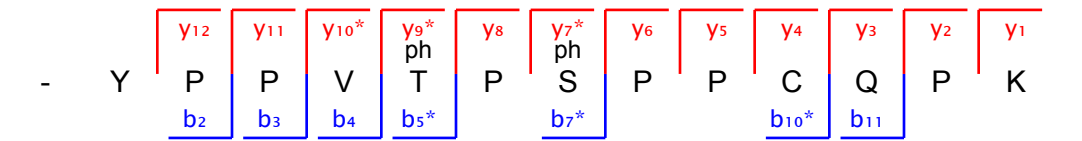

Raw file 20171215\_MaS\_33SR\_LMH\_phospho2\_03 Scan 9688 Method FTMS; HCD Score 236.83 m/z 962.73 Gene names TOR1AIP1

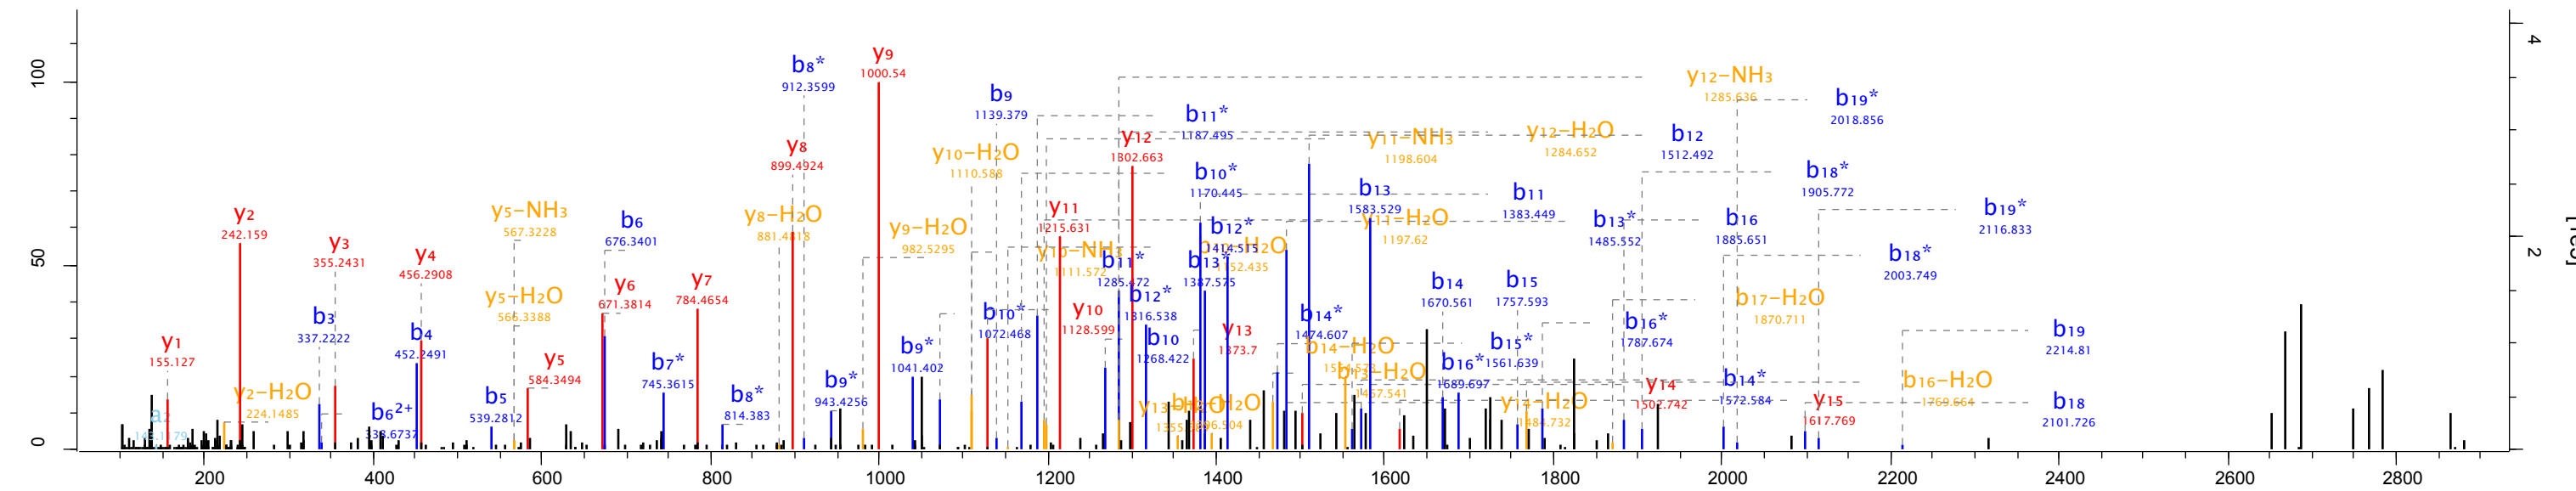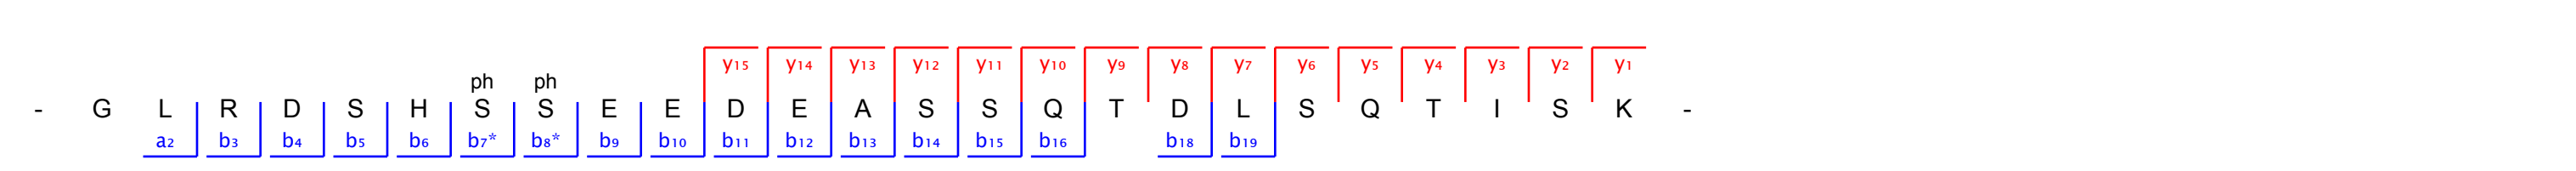

Raw file: 20171215\_MaS\_33SR\_LMH\_phospho2\_03  
 Scan: 9738 Method: FTMS; HCD Score: 59.75 m/z: 927.38 Gene names: MARCKSL1

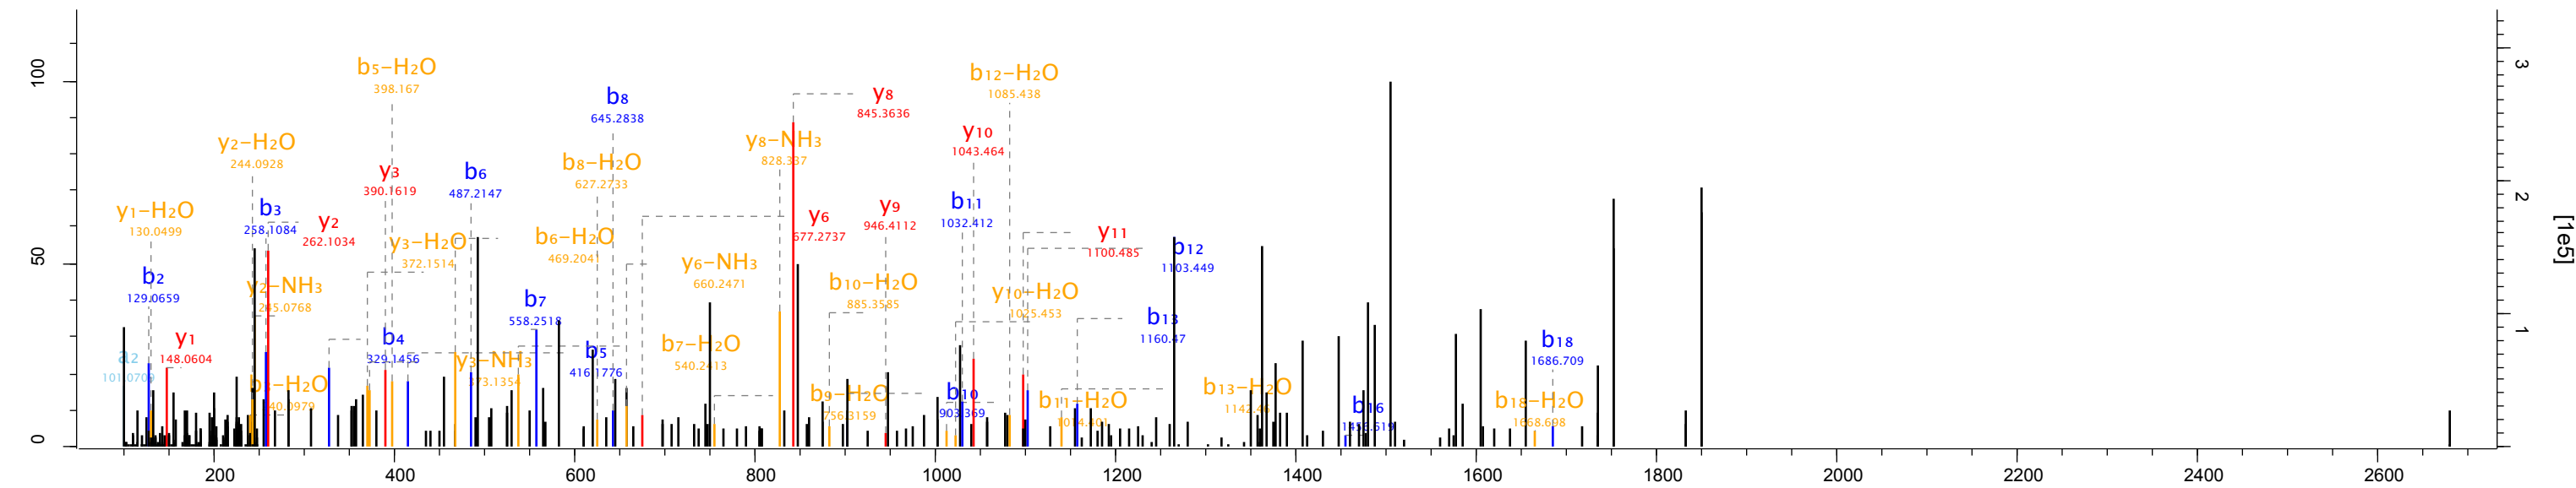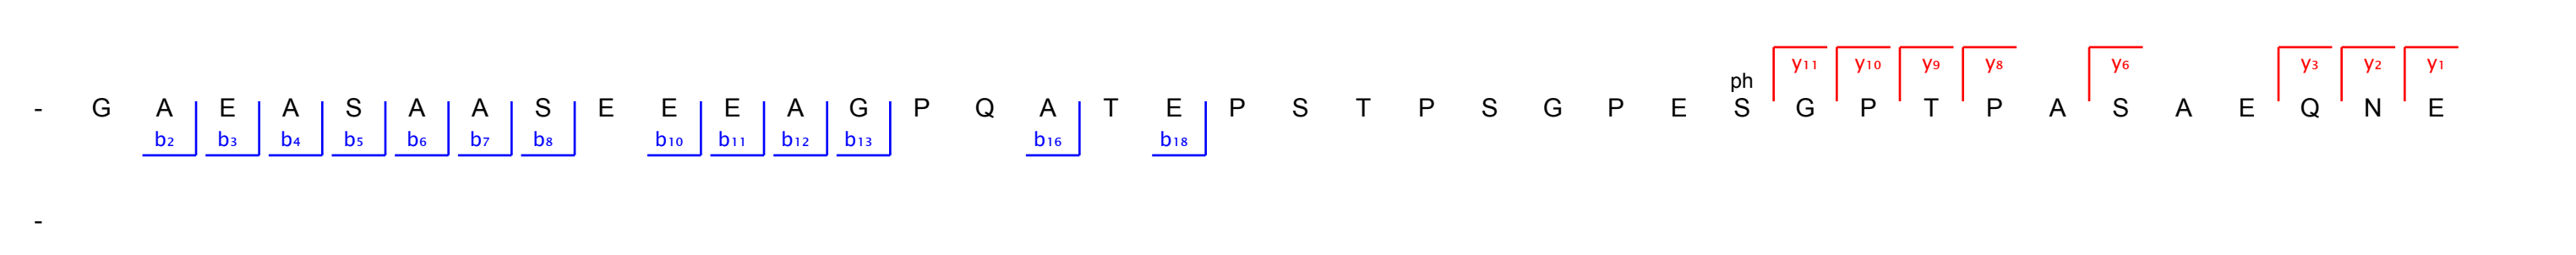

Raw file 20171215\_MaS\_33SR\_LMH\_phospho2\_03 Scan Method Score m/z Gene names  
 9848 FTMS; HCD 135.04 846.04 LMNA

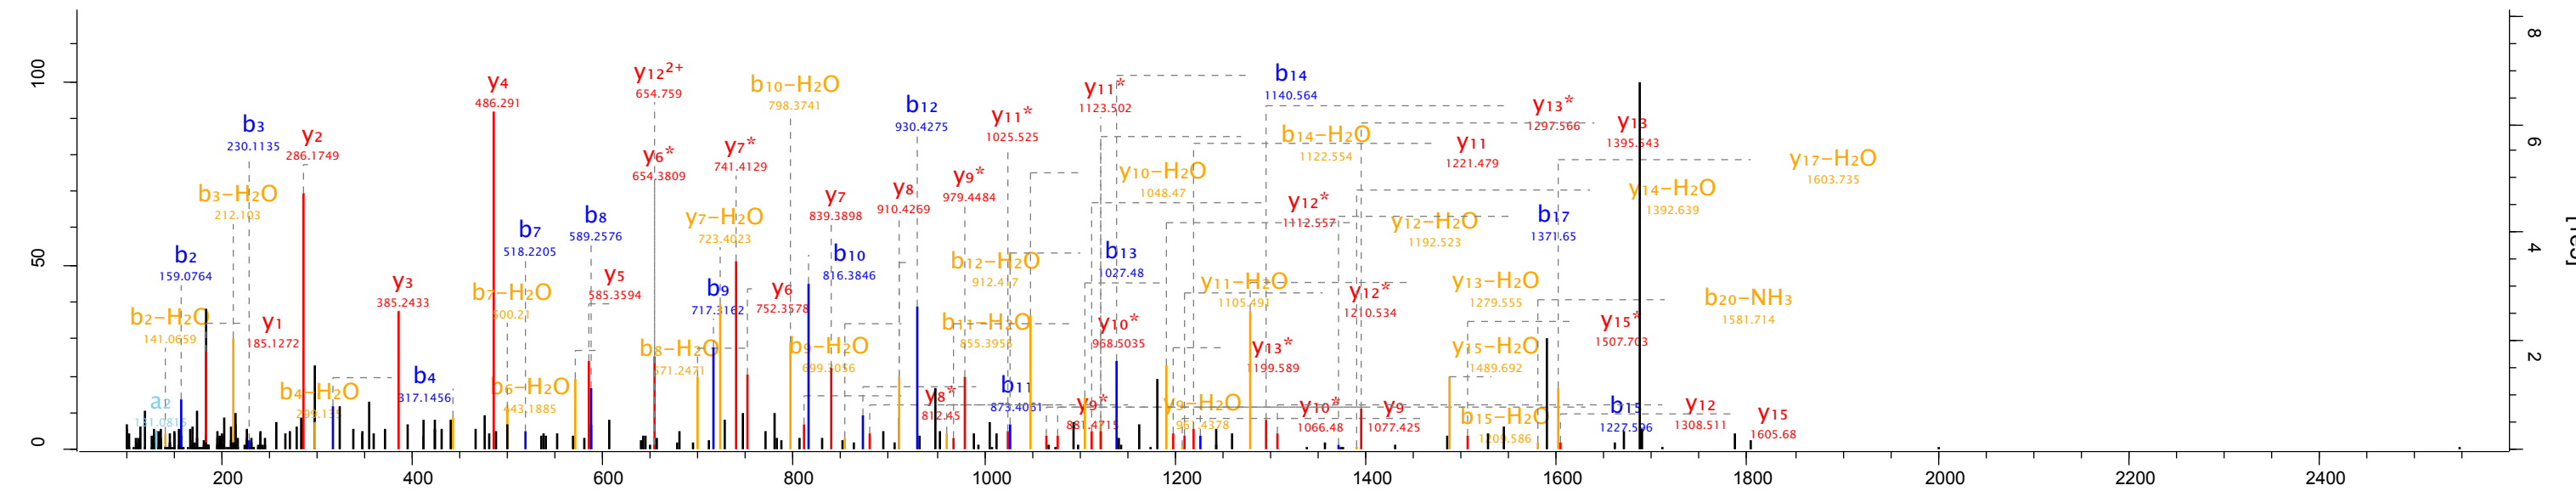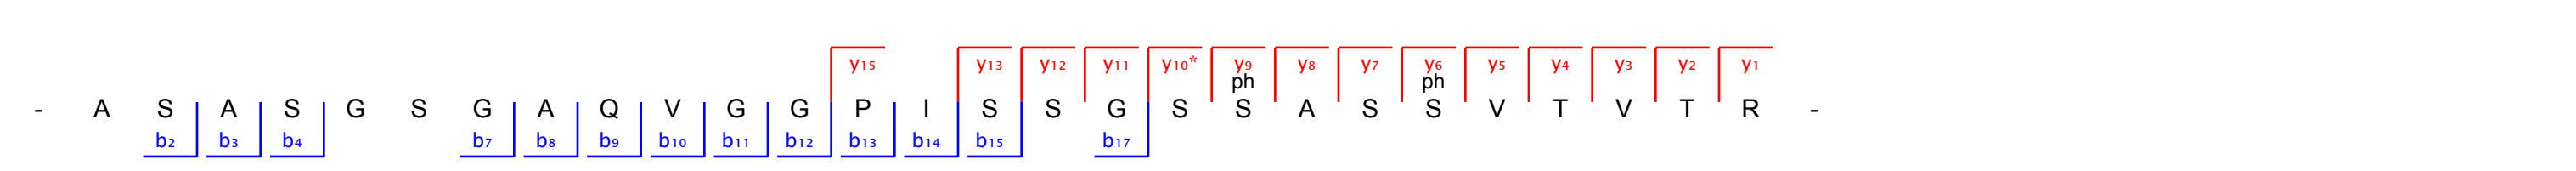

Raw file: 20171215\_MaS\_33SR\_LMH\_phospho2\_03  
 Scan: 9898 Method: FTMS; HCD Score: 199.27 m/z: 894.72 Gene names: CCDC86

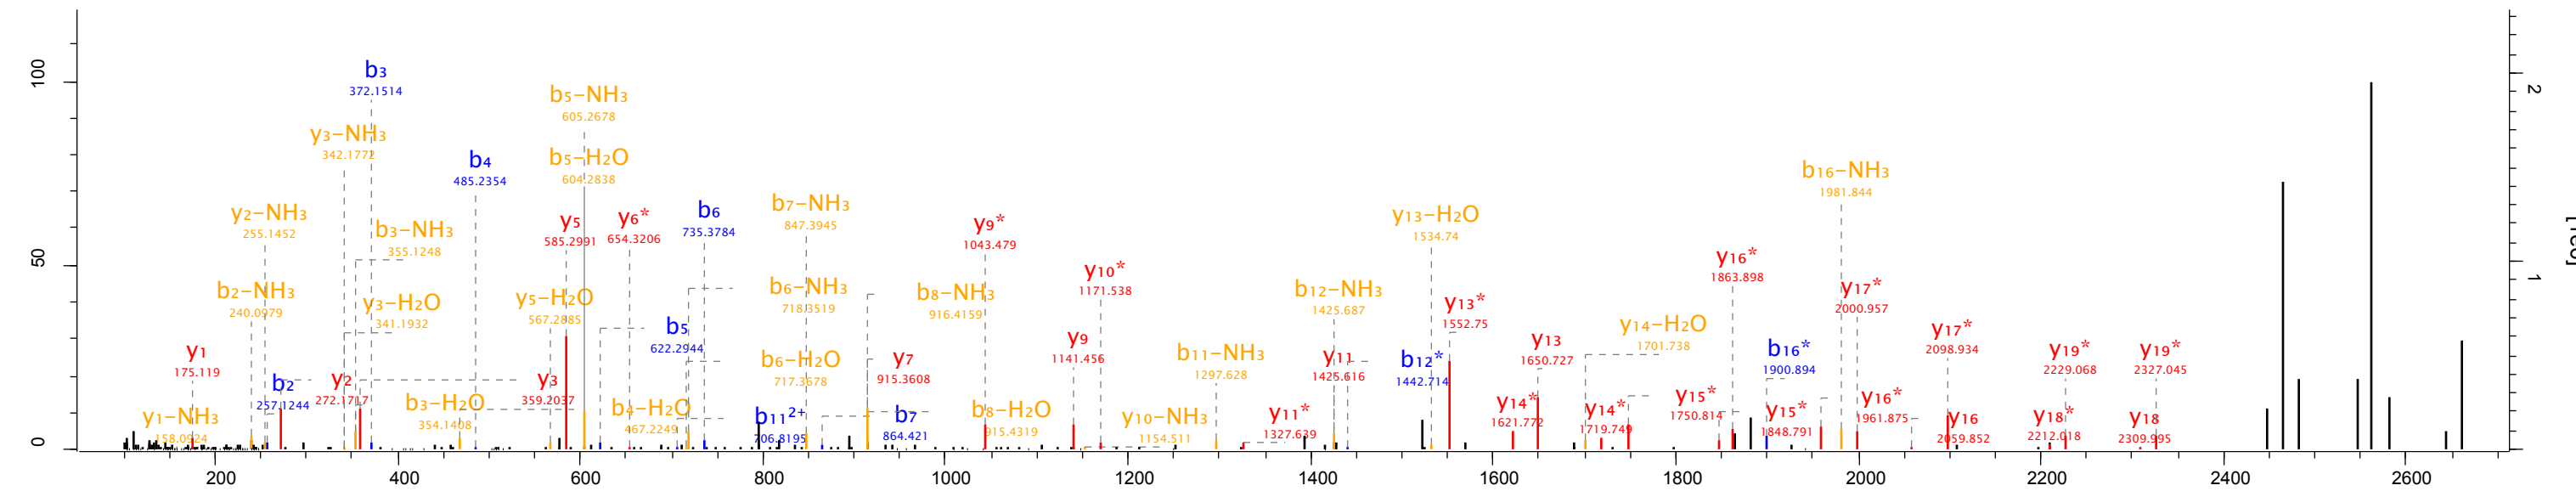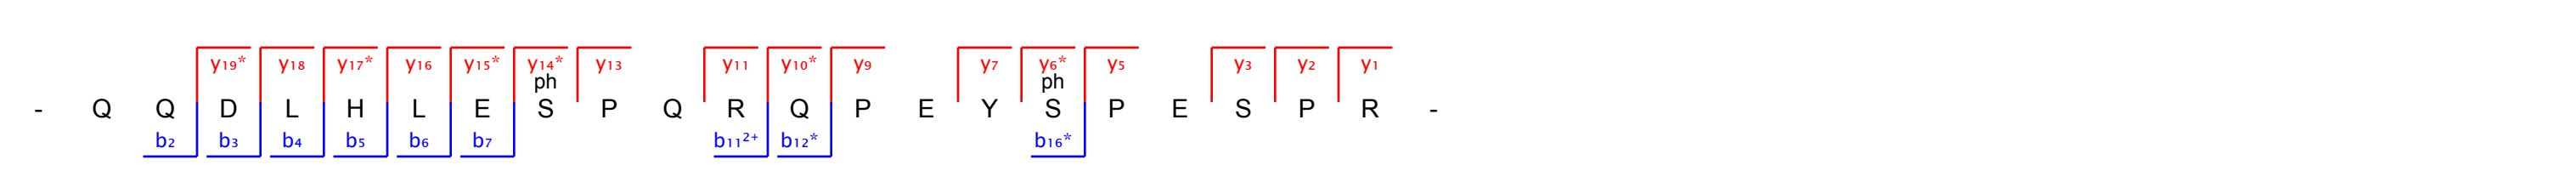



Raw file: 20171215\_MaS\_33SR\_LMH\_phospho2\_04  
 Scan: 11258 Method: FTMS; HCD Score: 61.72 m/z: 751 Gene names: BCL9L

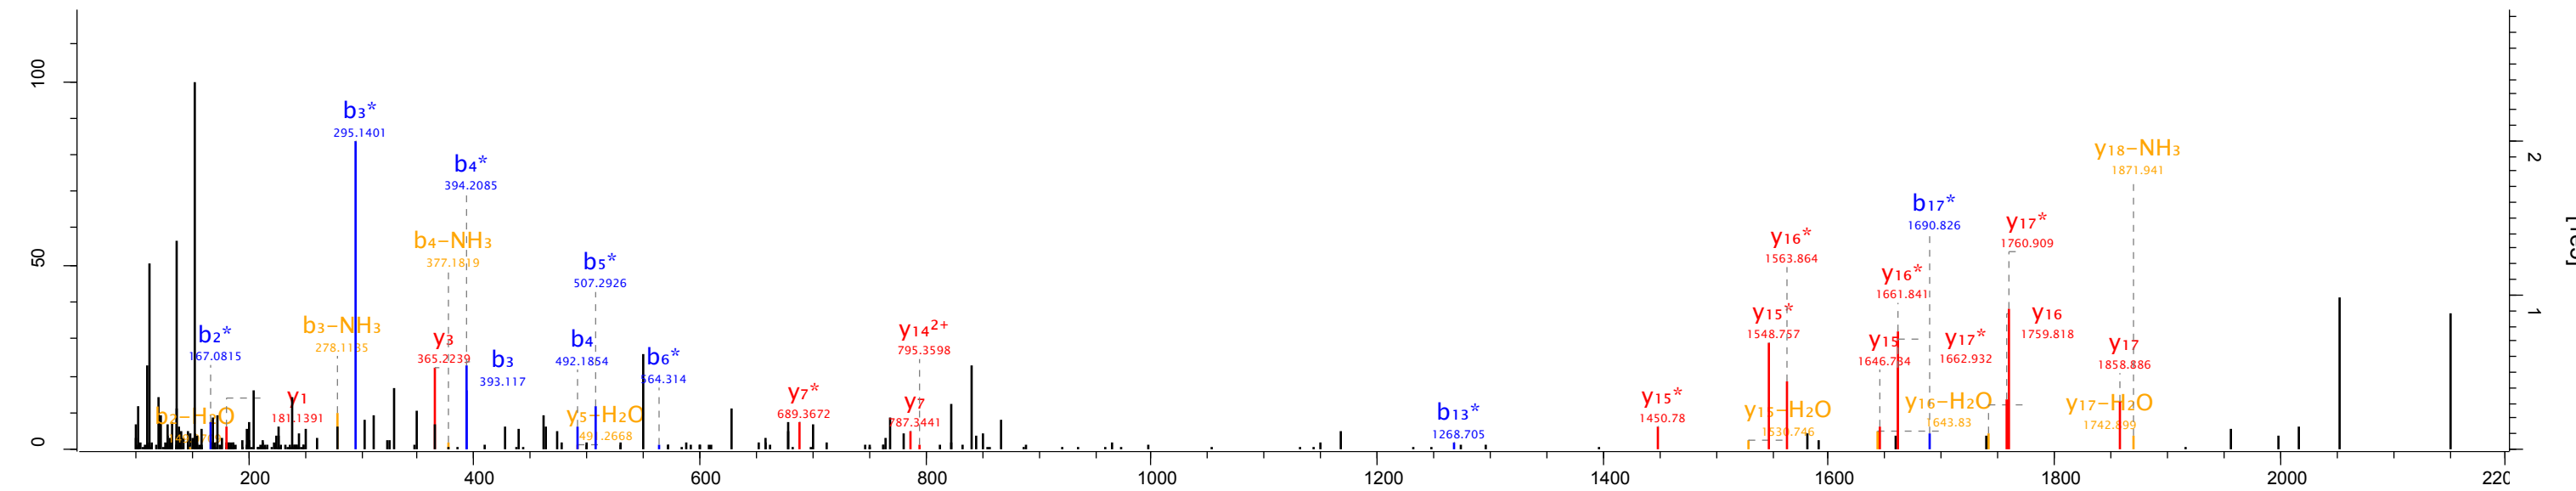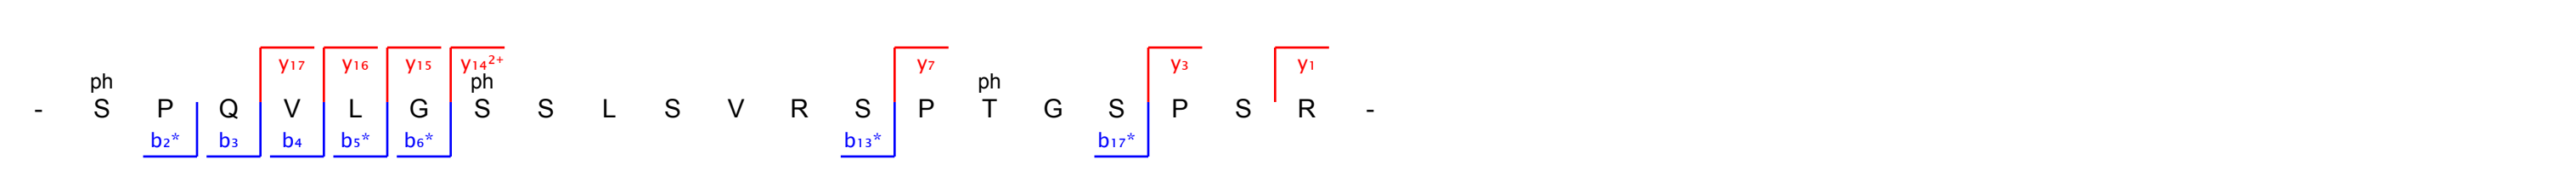

Raw file  
 20171215\_MaS\_33SR\_LMH\_phospho2\_04  
 Scan 11418 Method FTMS; HCD Score 56.01 m/z 1033.45 Gene names SRRM2

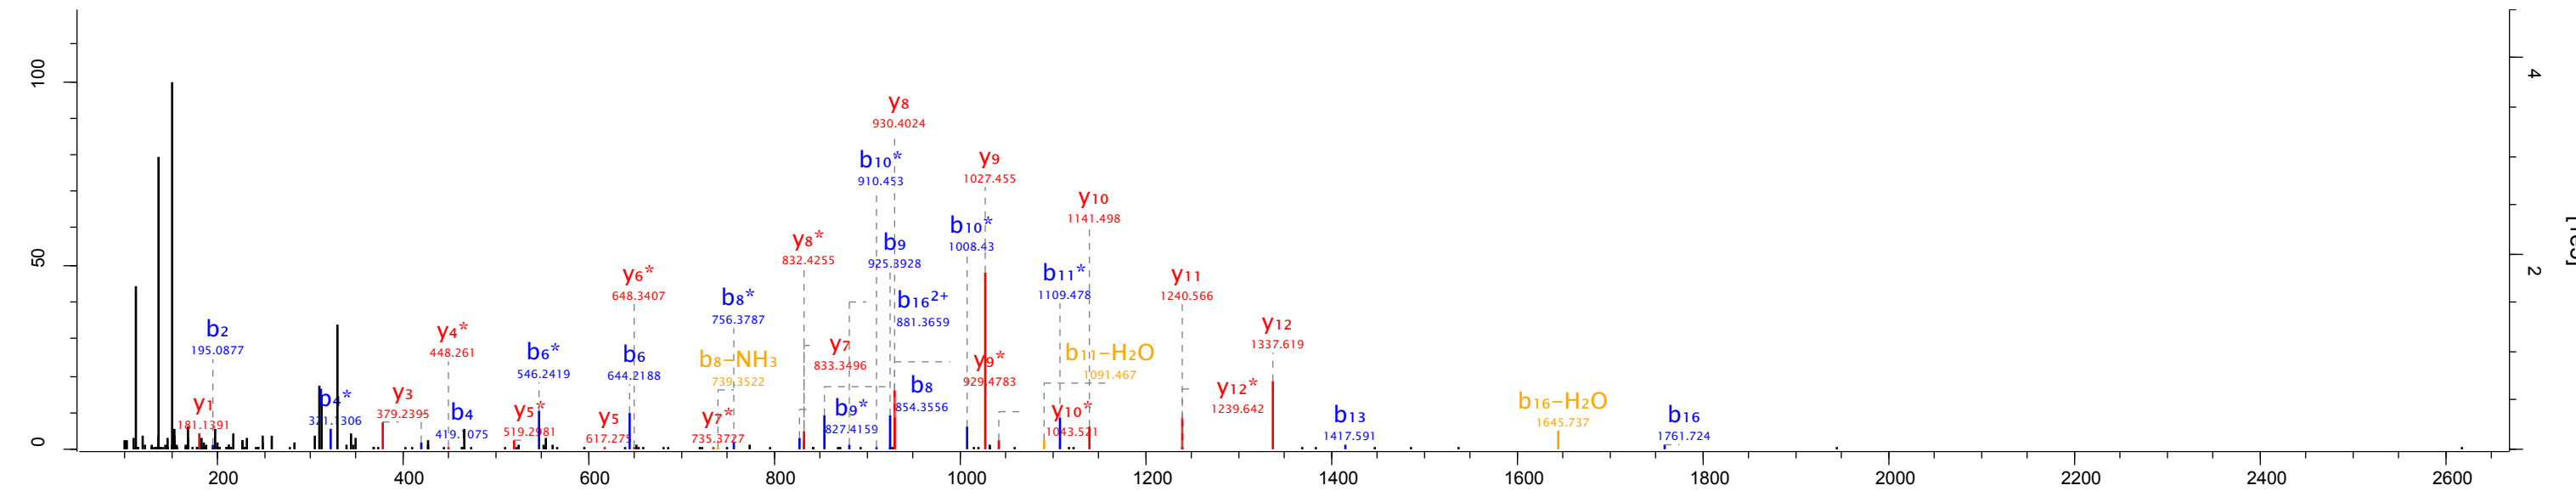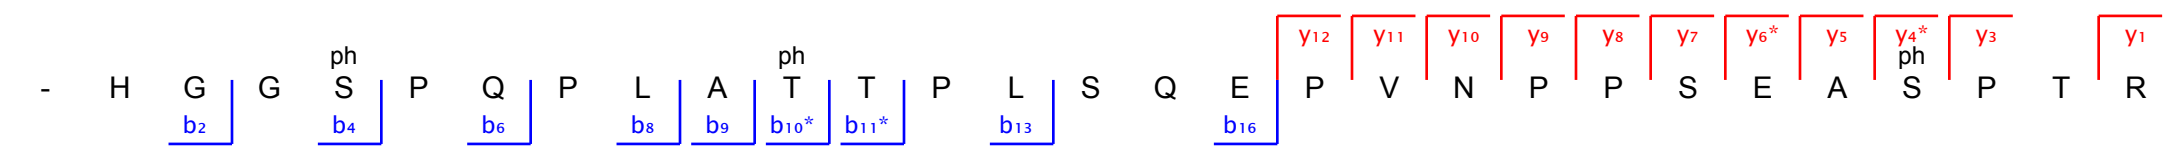

Raw file 20171215\_MaS\_33SR\_LMH\_phospho2\_04 Scan 12148 Method FTMS; HCD Score 58.72 m/z 1005.12 Gene names SRRM2

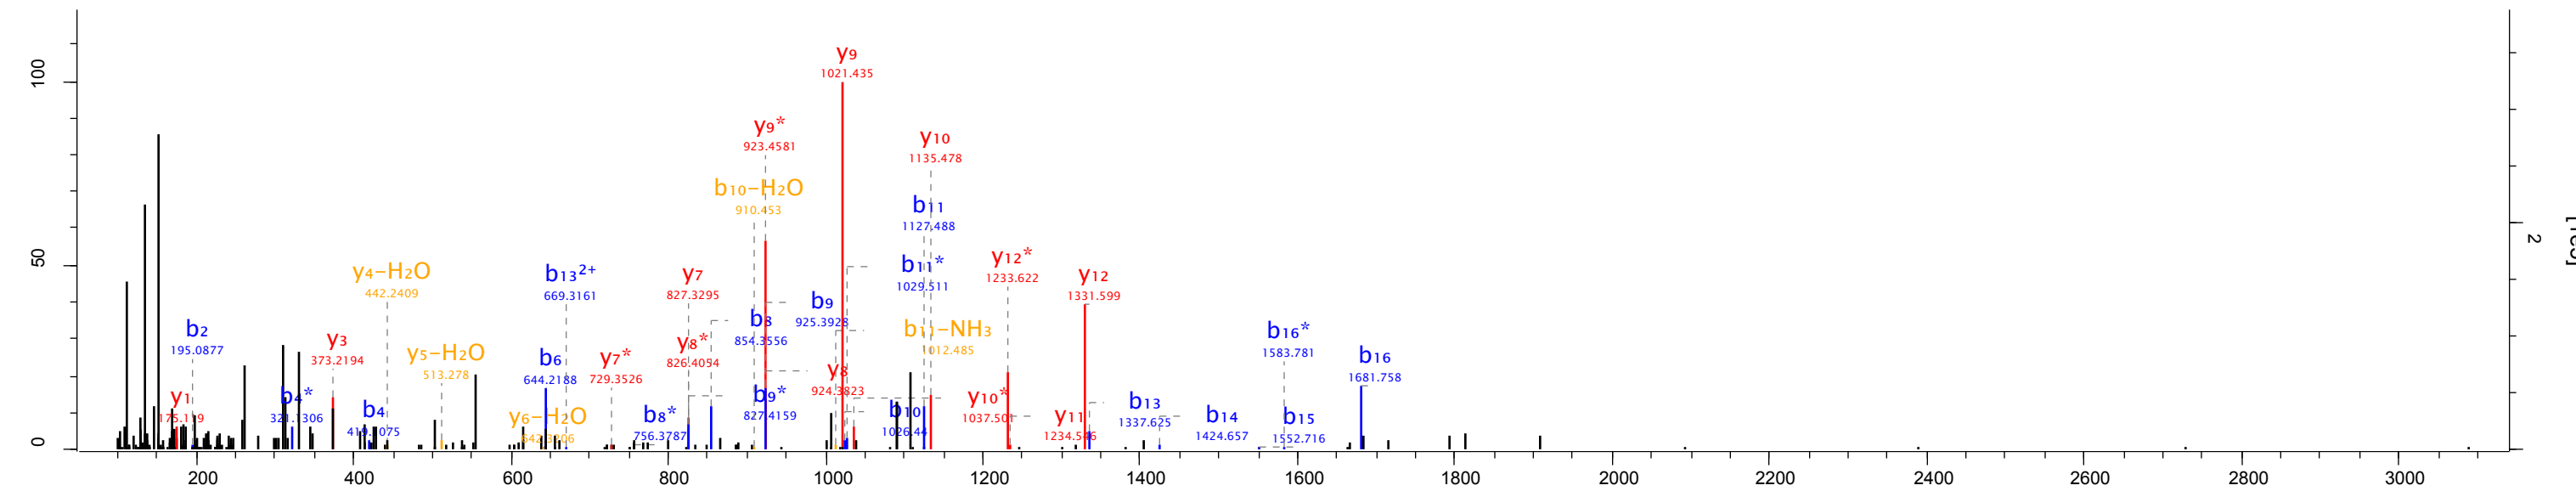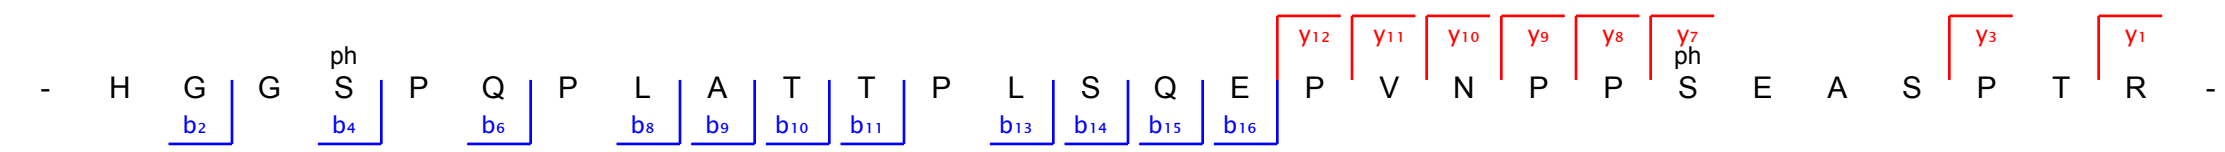

Raw file 20171215\_MaS\_33SR\_LMH\_phospho2\_04 Scan 2258 Method FTMS; HCD Score 65.22 m/z 878.77 Gene names C11orf57

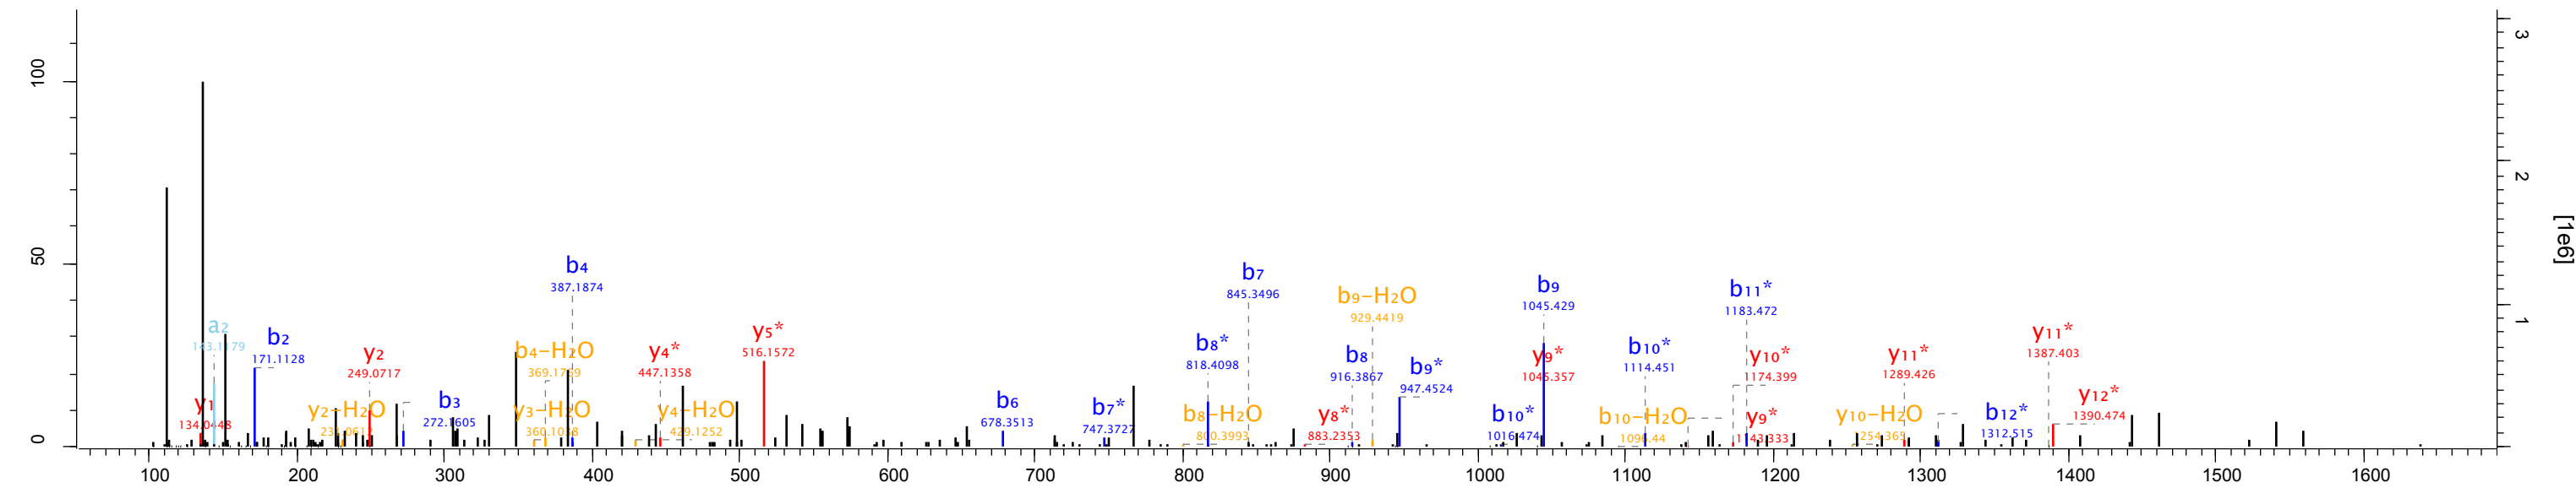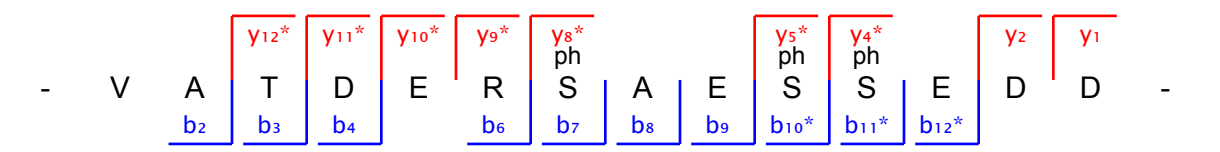

Raw file 20171215\_MaS\_33SR\_LMH\_phospho2\_04 Scan 2758 Method FTMS; HCD Score 86.02 m/z 707.81 Gene names SRRM2

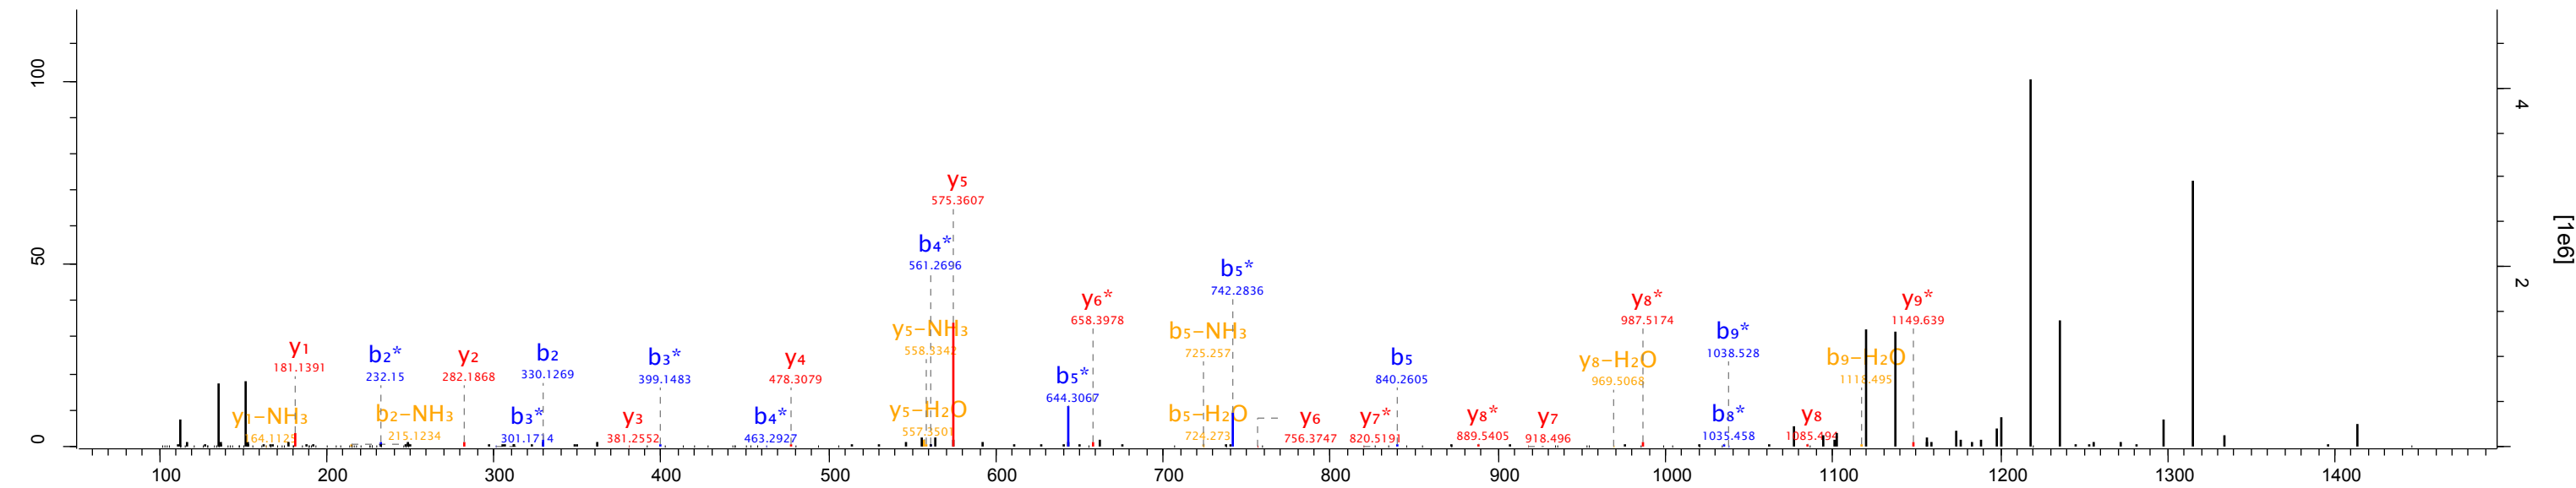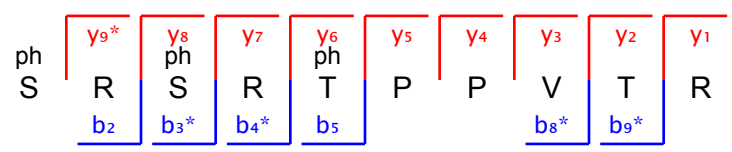

Raw file: 20171215\_MaS\_33SR\_LMH\_phospho2\_04  
 Scan: 3158 Method: FTMS; HCD Score: 68.96 m/z: 812.95 Gene names: MAGED2

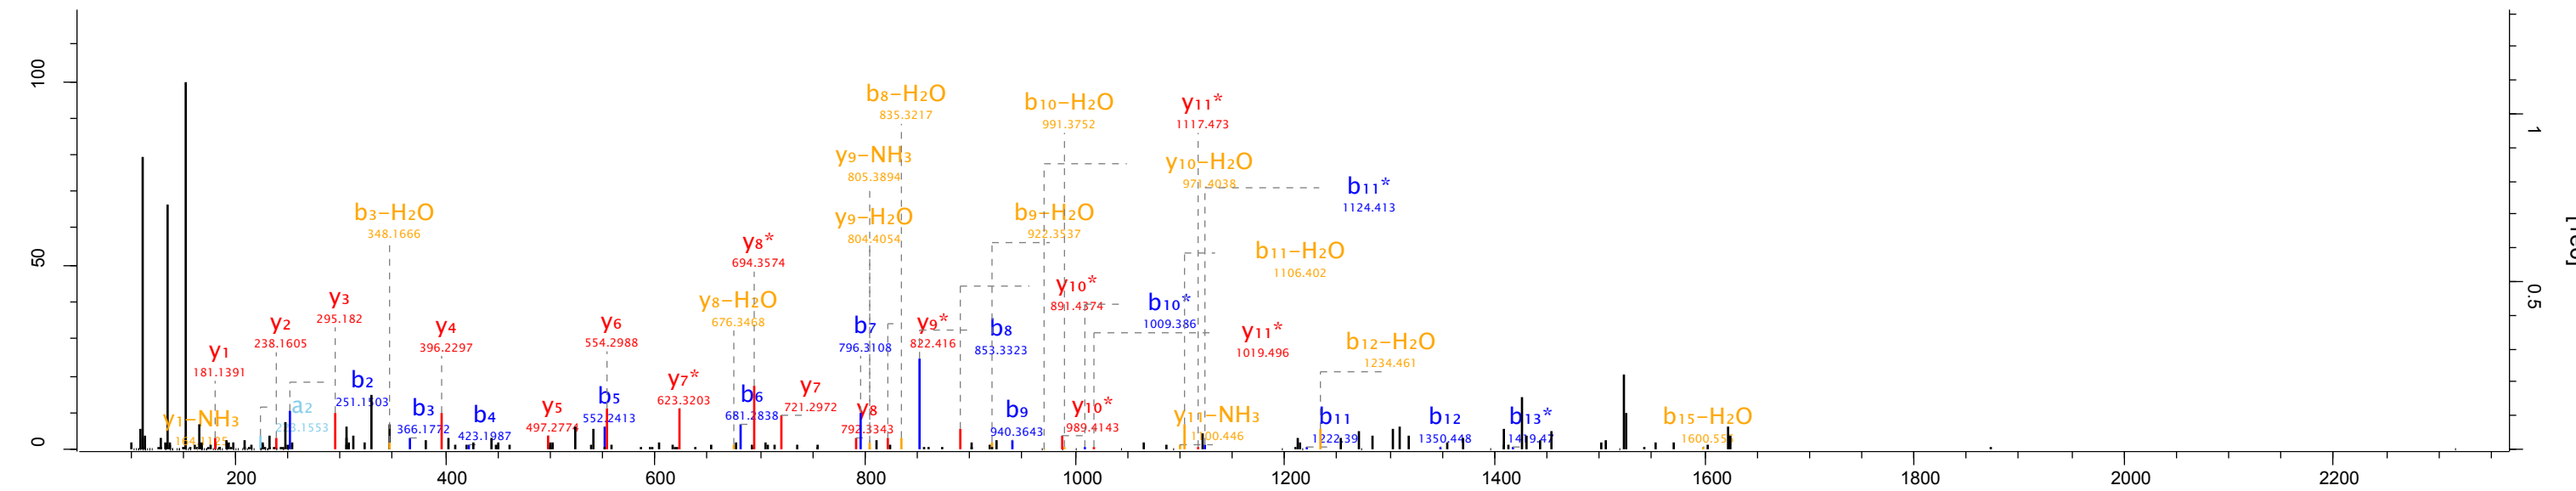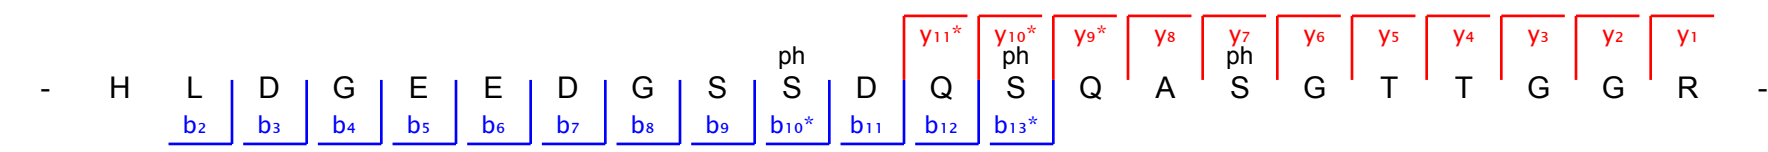

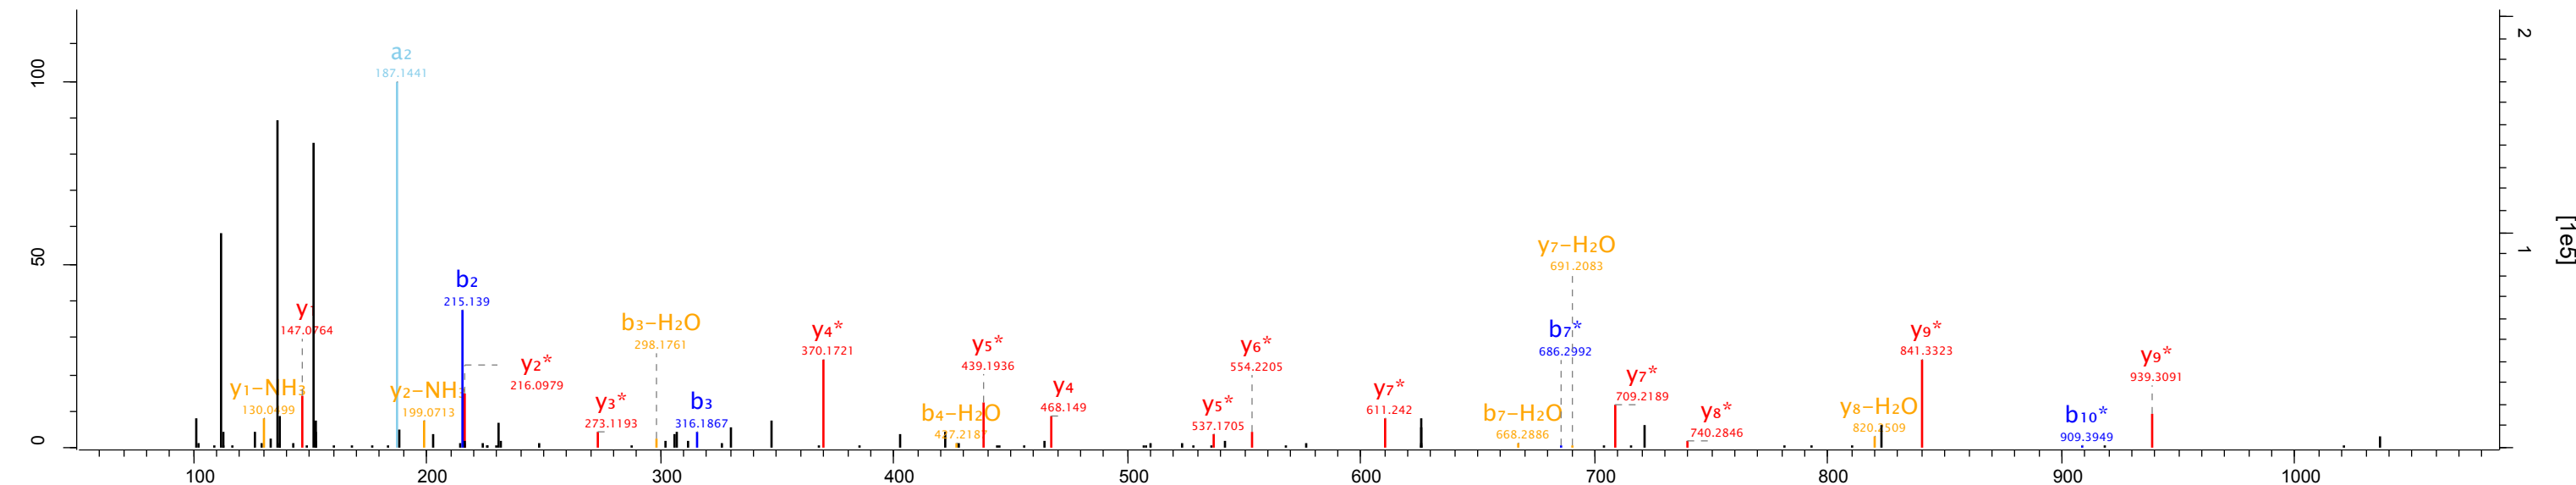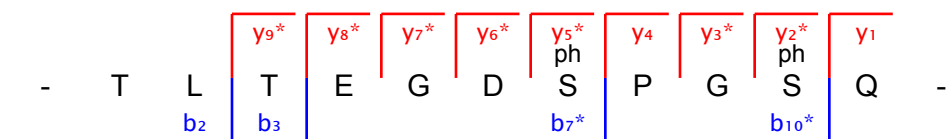

Raw file: 20171215\_MaS\_33SR\_LMH\_phospho2\_04  
 Scan: 3798 Method: FTMS; HCD Score: 135.68 m/z: 900.81 Gene names: CMTR1

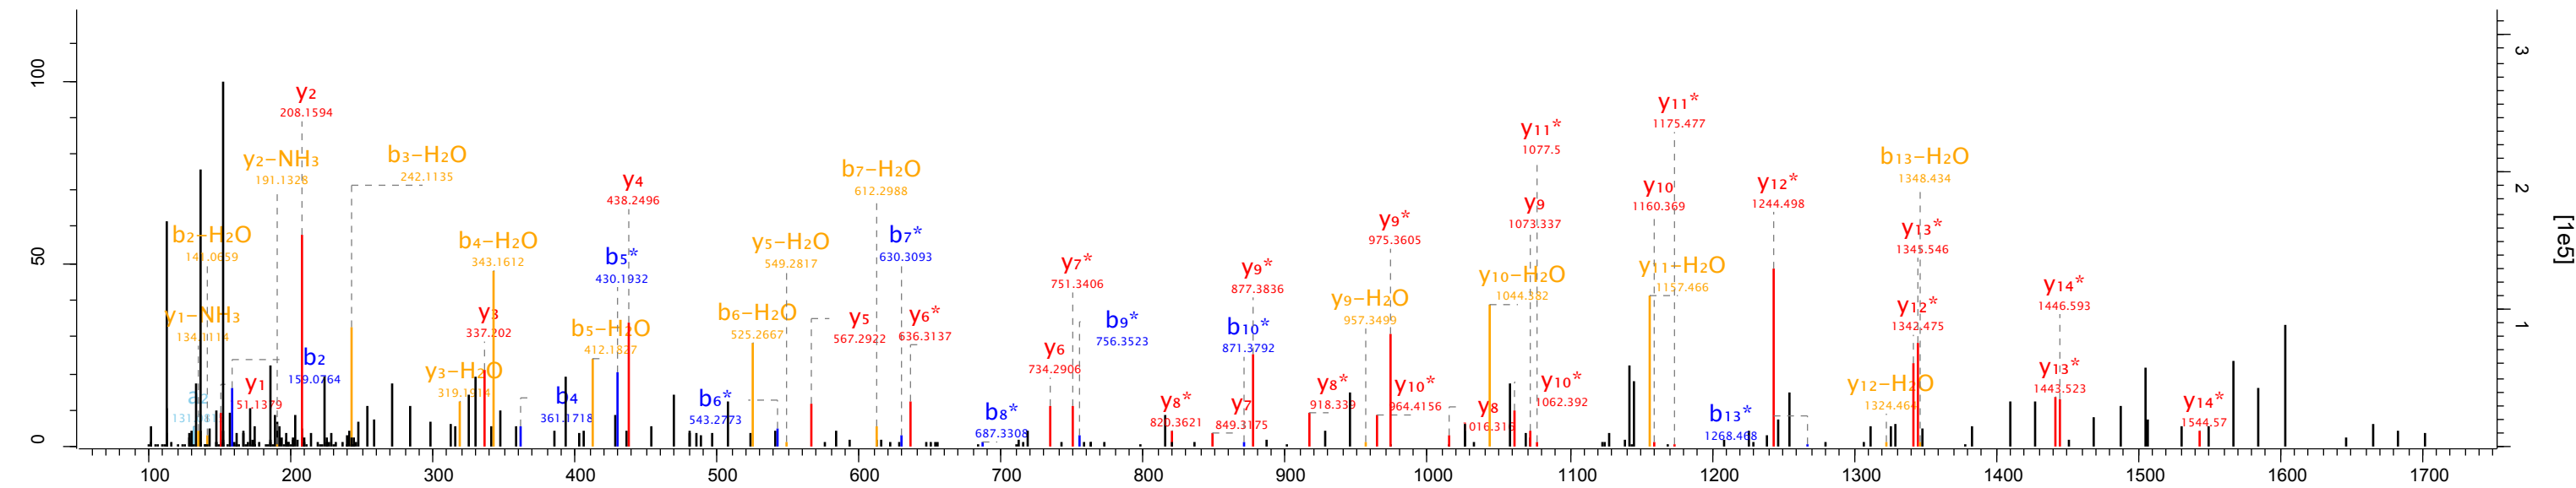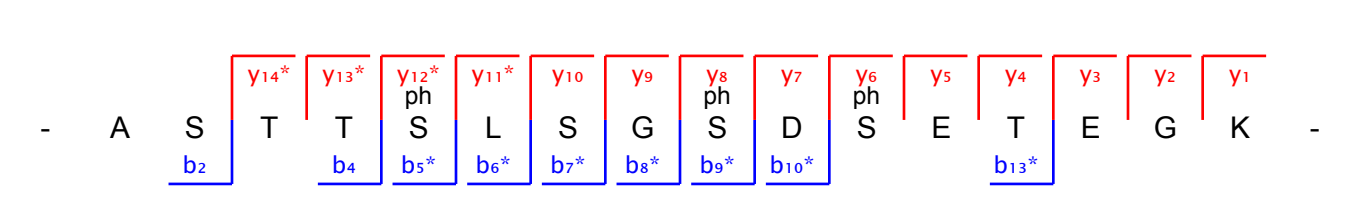



Raw file 20171215\_MaS\_33SR\_LMH\_phospho2\_04 Scan 4338 Method FTMS; HCD Score 88.98 m/z 811.79 Gene names SF3B1

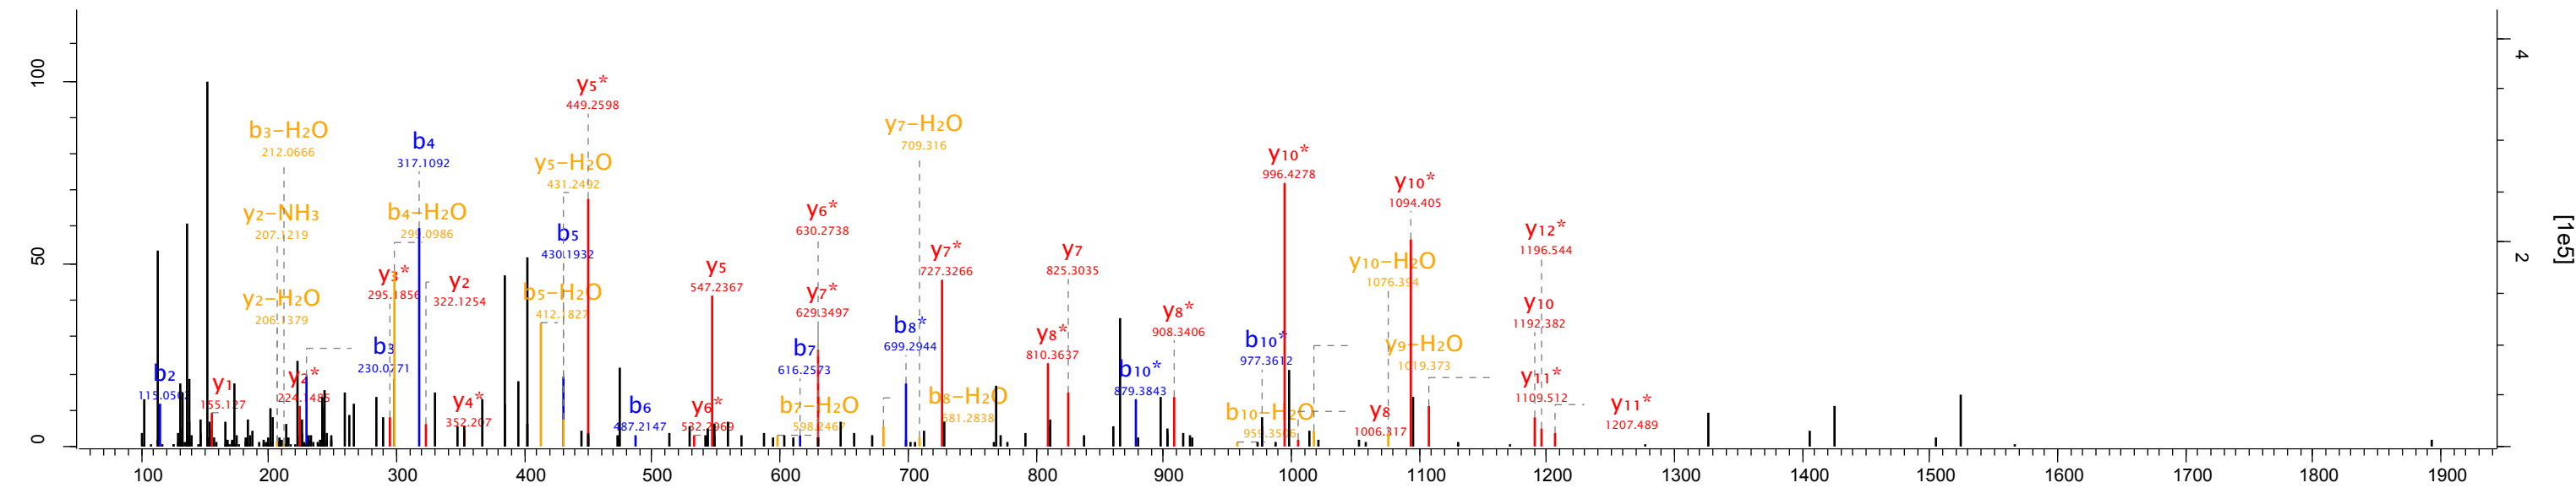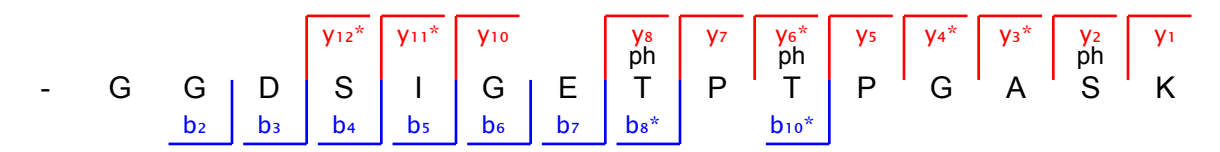

Raw file 20171215\_MaS\_33SR\_LMH\_phospho2\_04 Scan 4478 Method FTMS; HCD Score 133.98 m/z 867.3 Gene names ZZZ3

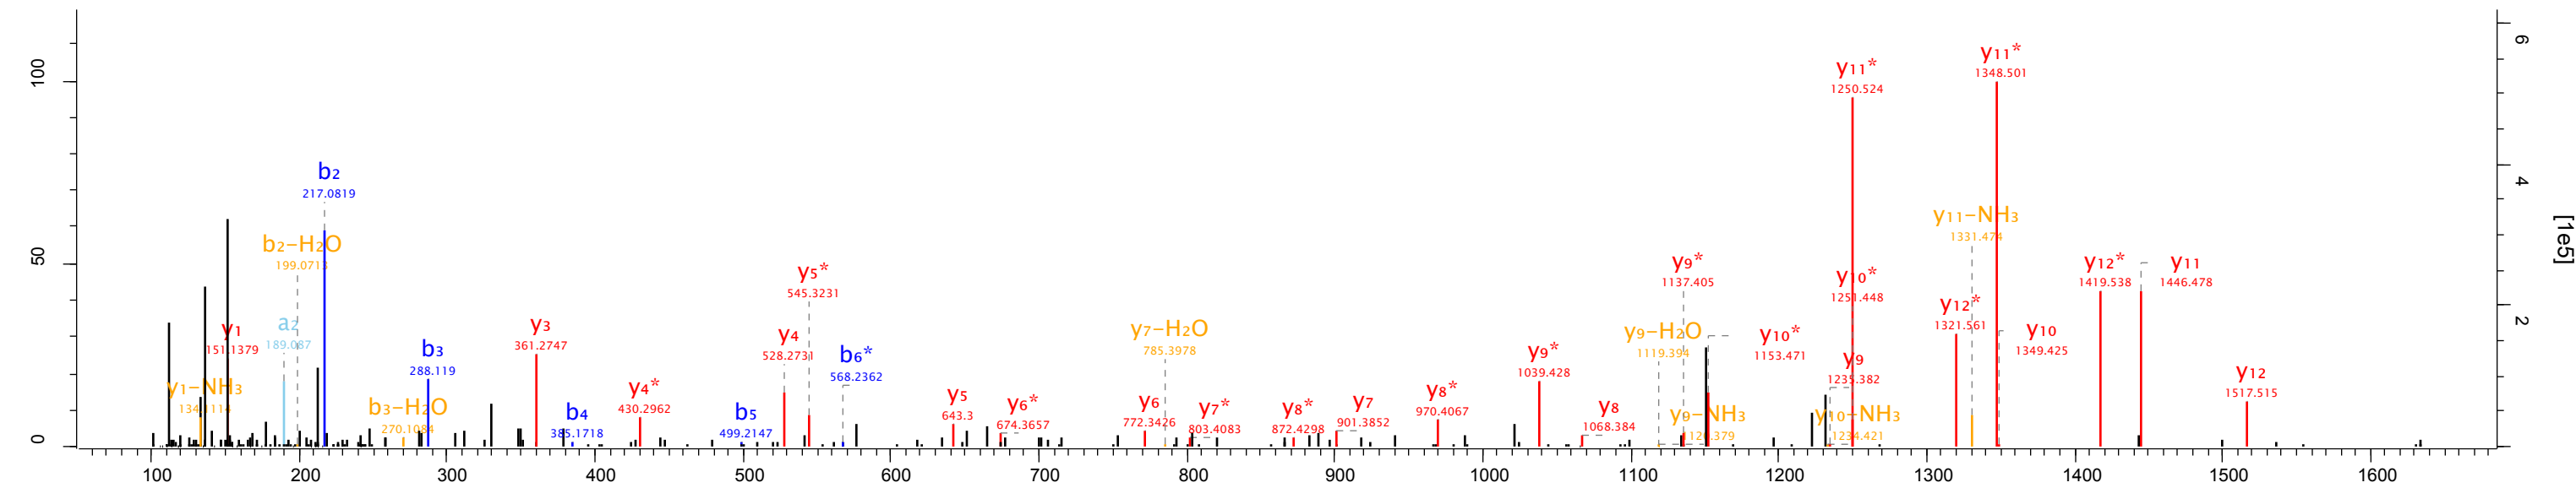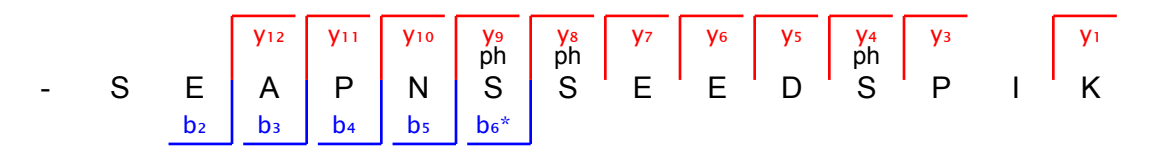

Raw file 20171215\_MaS\_33SR\_LMH\_phospho2\_04 Scan 5068 Method FTMS; HCD Score 65.86 m/z 780.3 Gene names NUP35

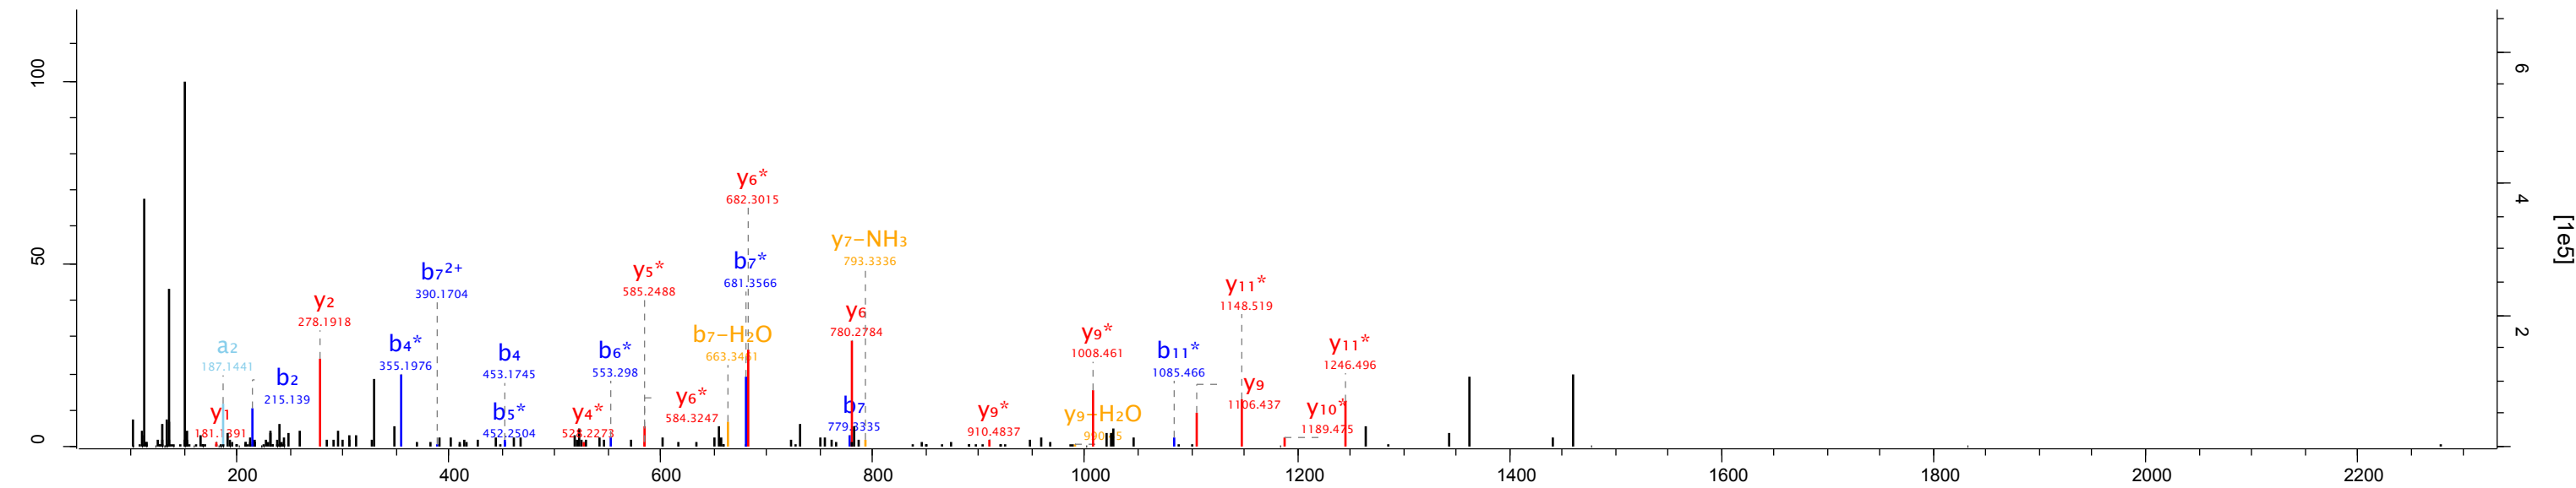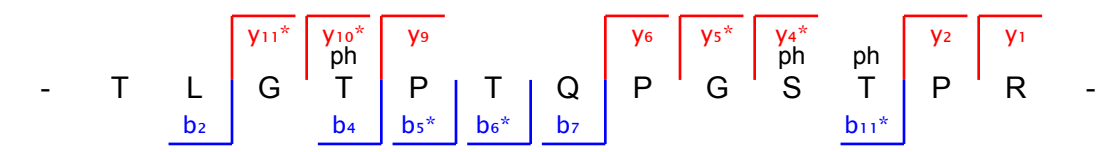

Raw file: 20171215\_MaS\_33SR\_LMH\_phospho2\_04  
 Scan: 5238 Method: FTMS; HCD Score: 109.62 m/z: 811.66 Gene names: PHRF1

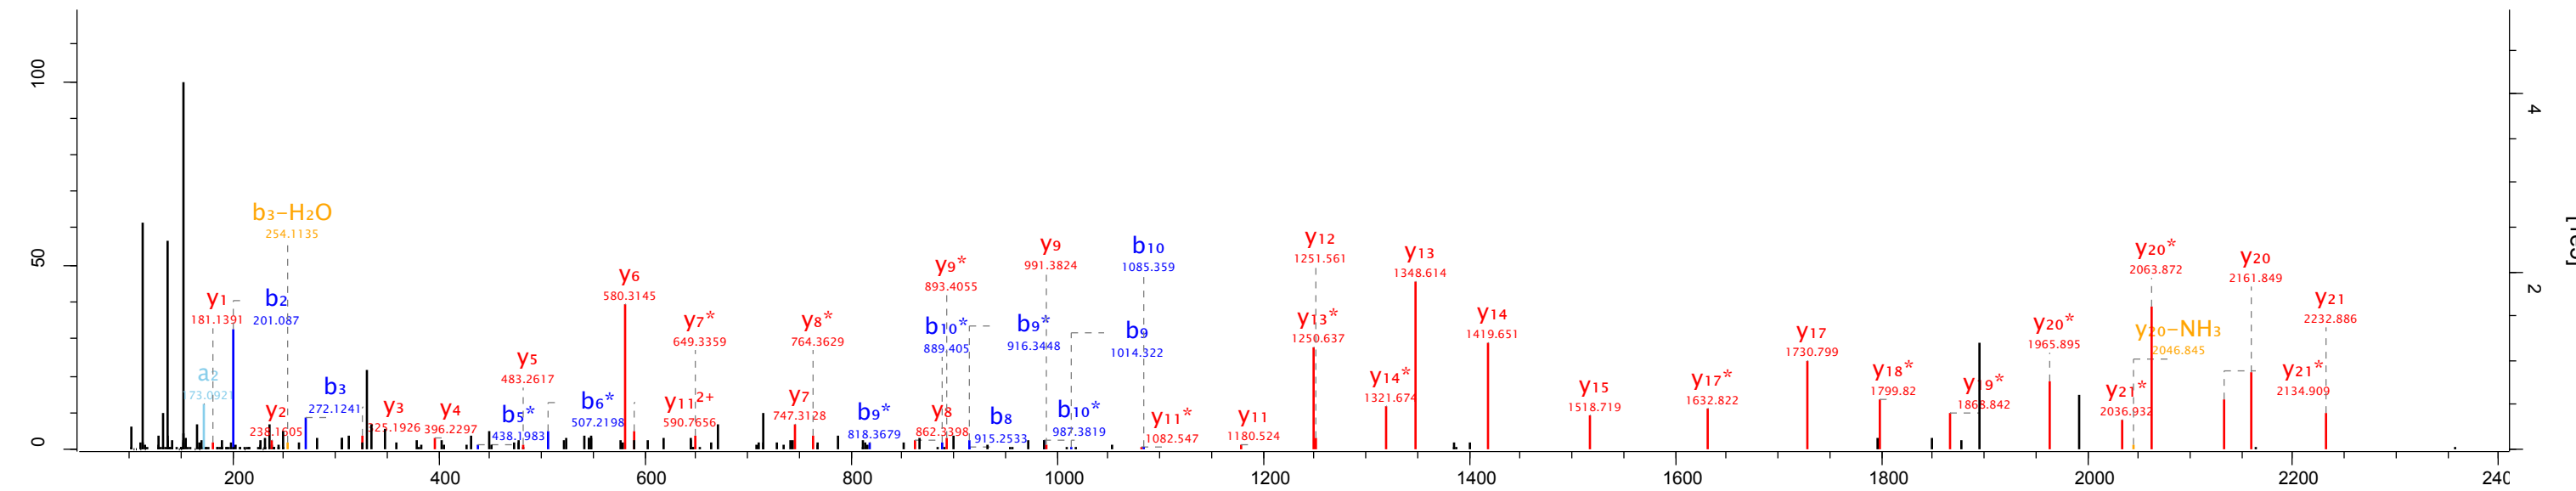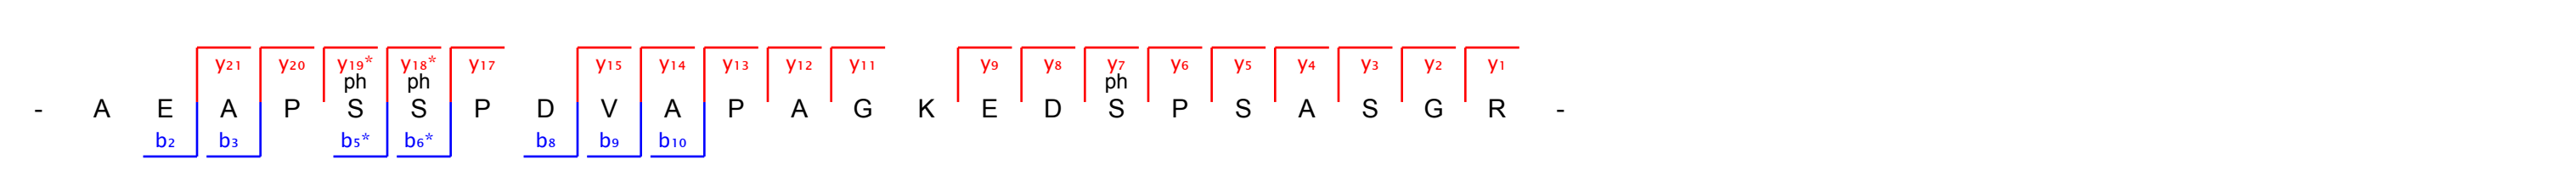

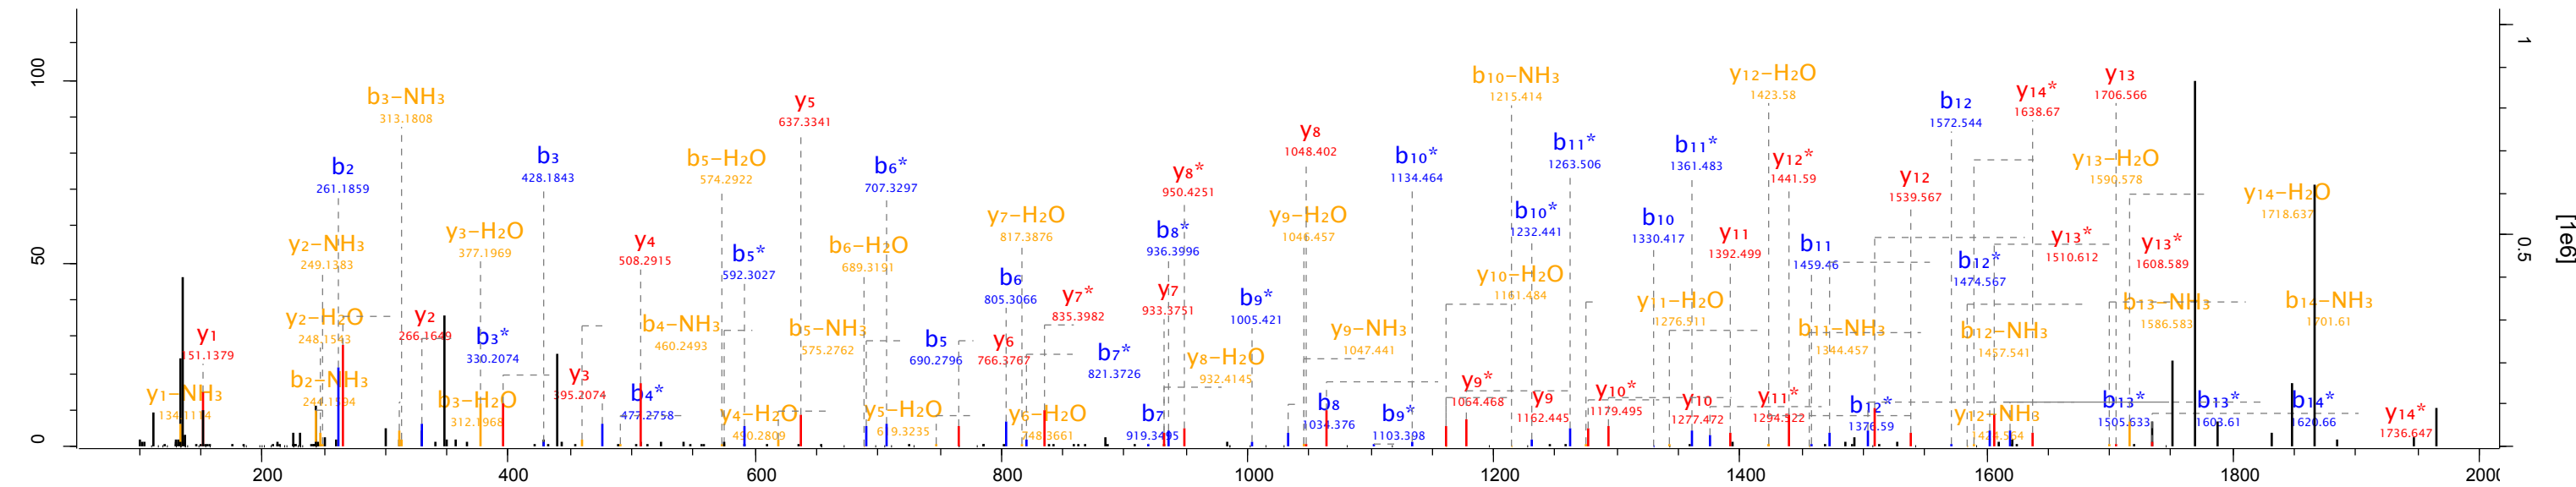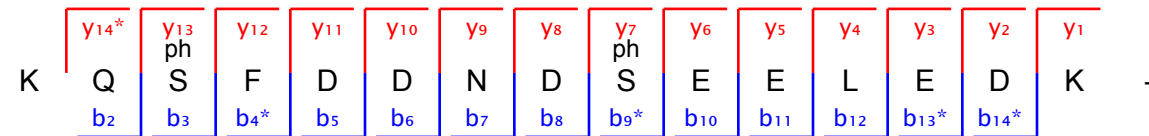

Raw file 20171215\_MaS\_33SR\_LMH\_phospho2\_04  
 Scan 8868 Method FTMS; HCD Score 55.1 m/z 762.26 Gene names PPP4R1

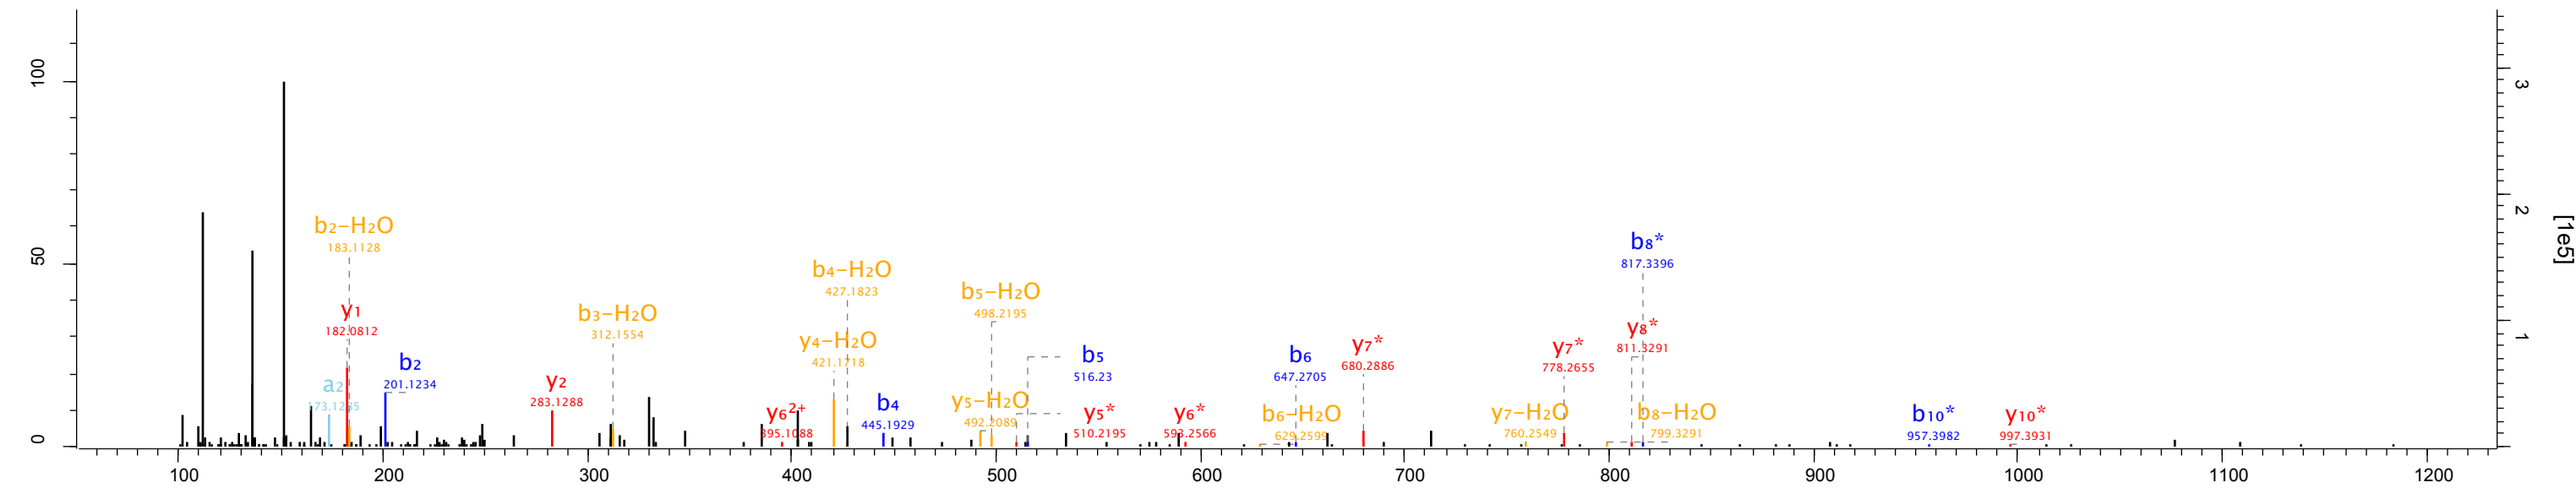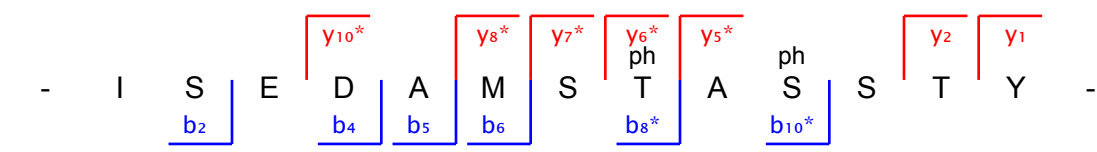

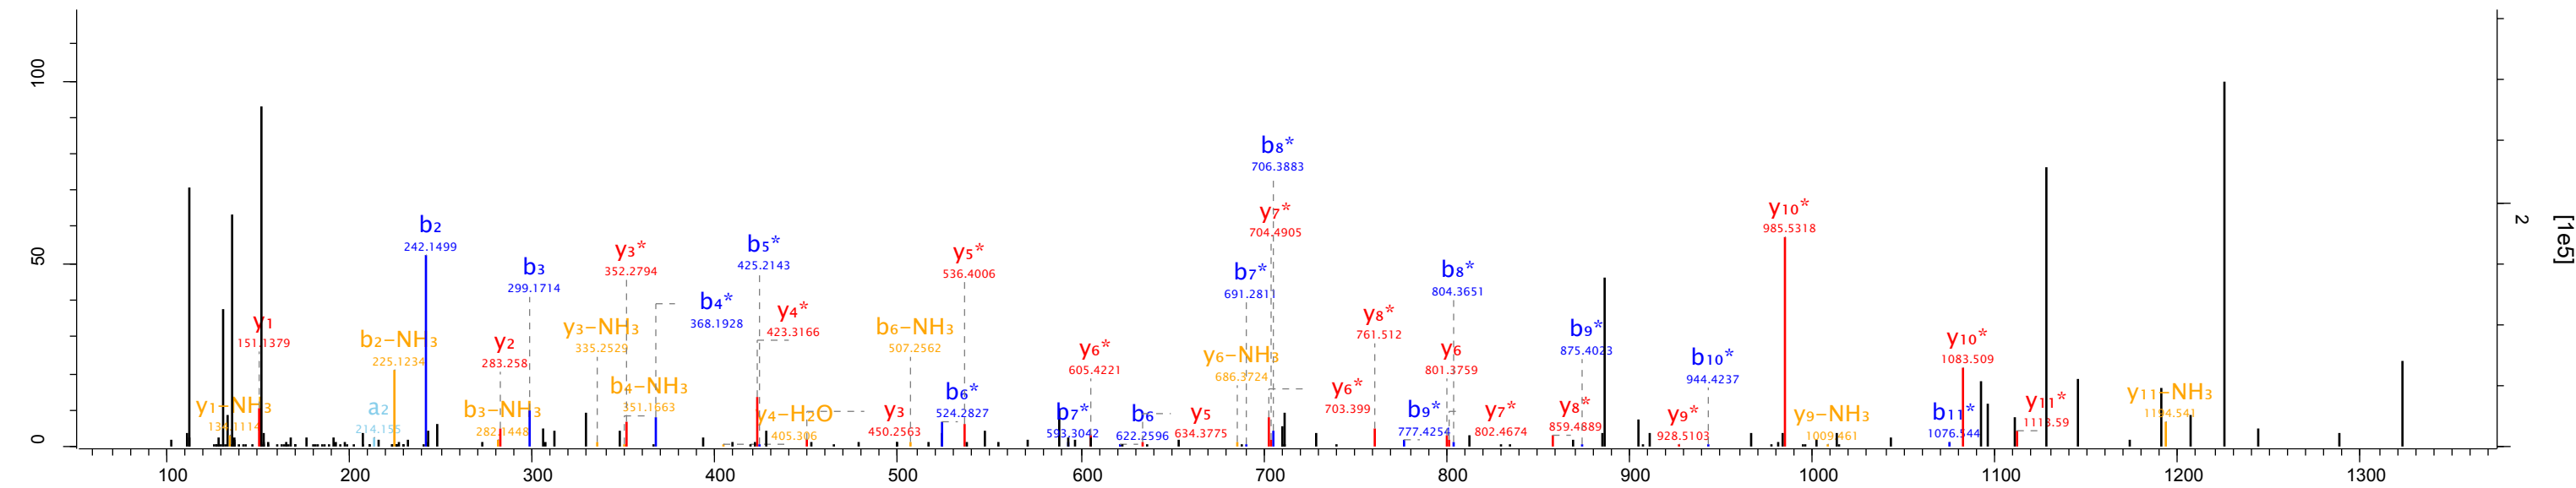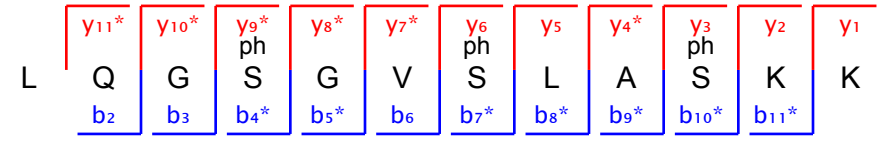

Raw file 20171215\_MaS\_33SR\_LMH\_phospho2\_05 Scan 6938 Method FTMS; HCD Score 160.69 m/z 1221.37 Gene names HTATSF1

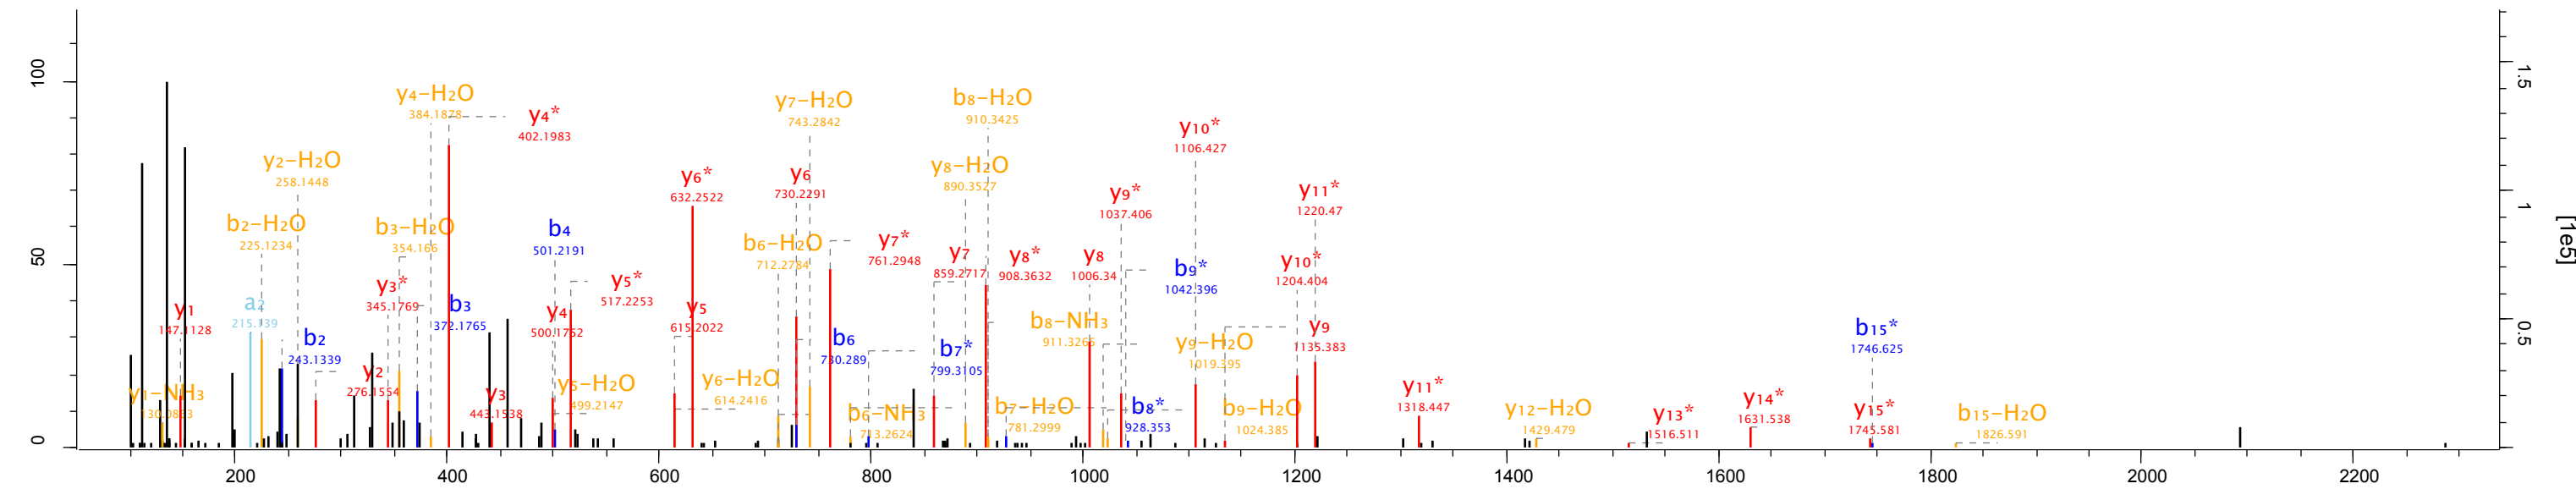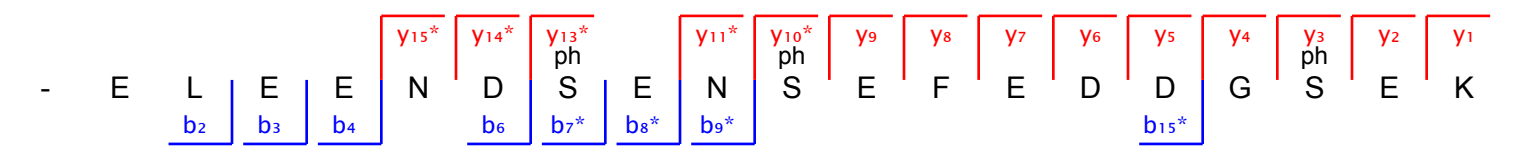



Raw file 20171215\_MaS\_33SR\_LMH\_phospho2\_06 Scan 10088 Method FTMS; HCD Score 80.02 m/z 843.05 Gene names SAFB;SAFB2

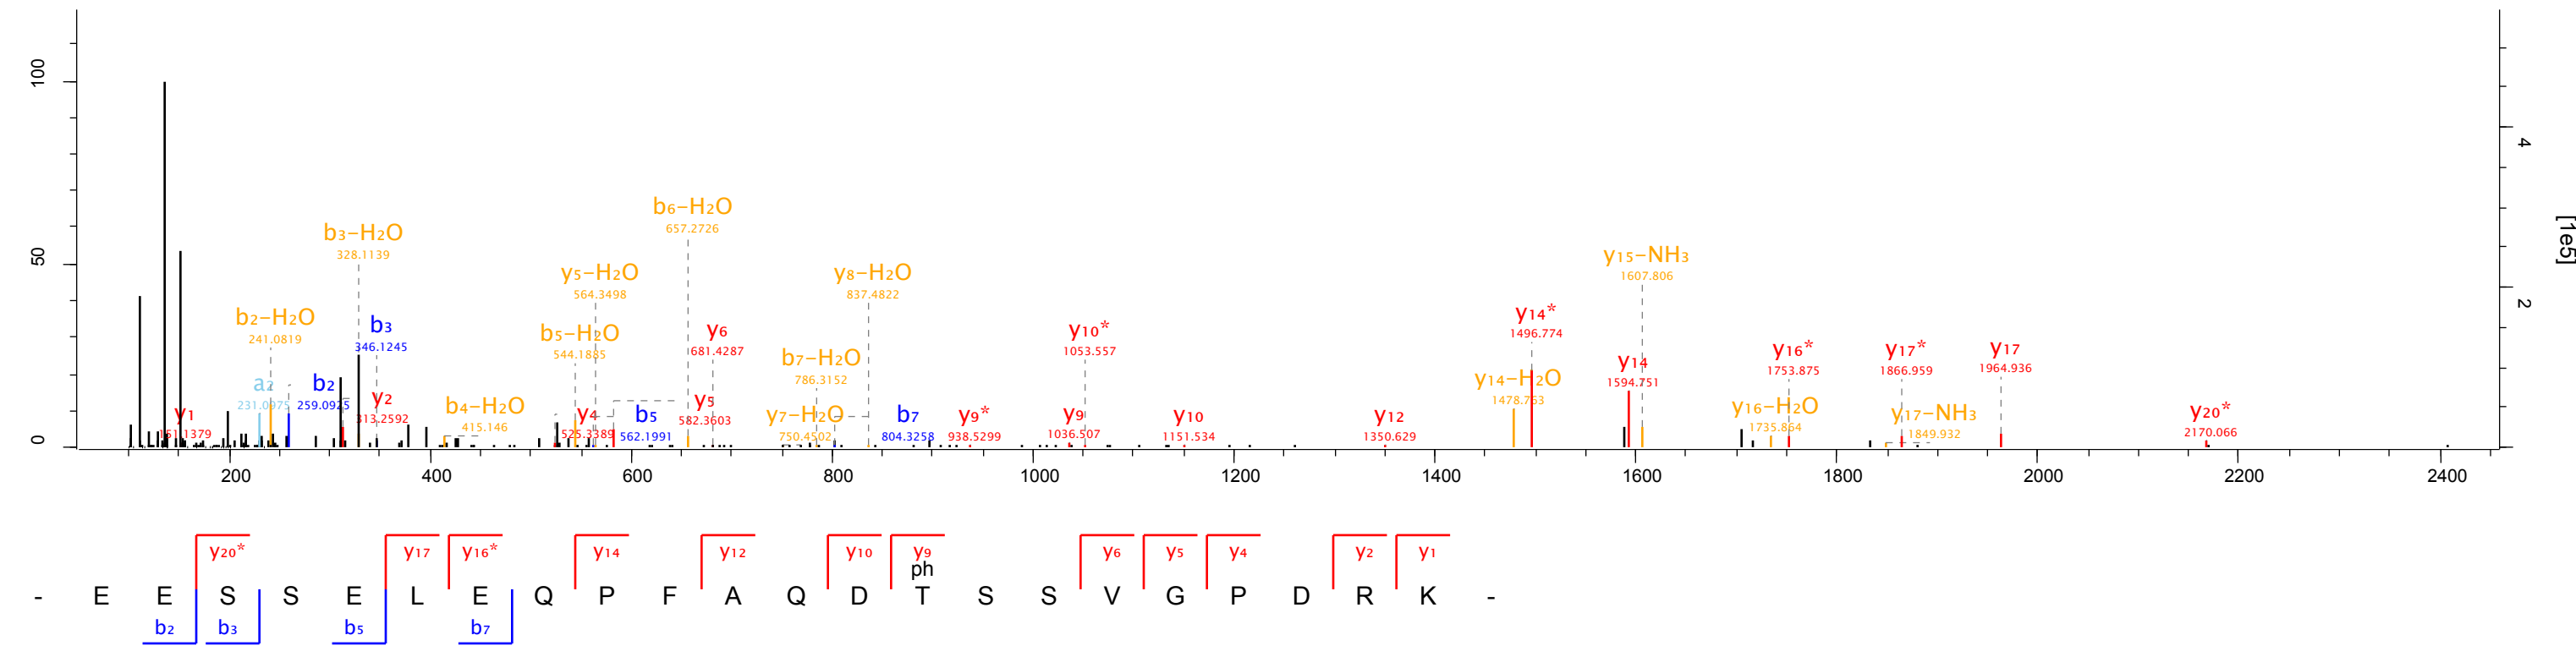

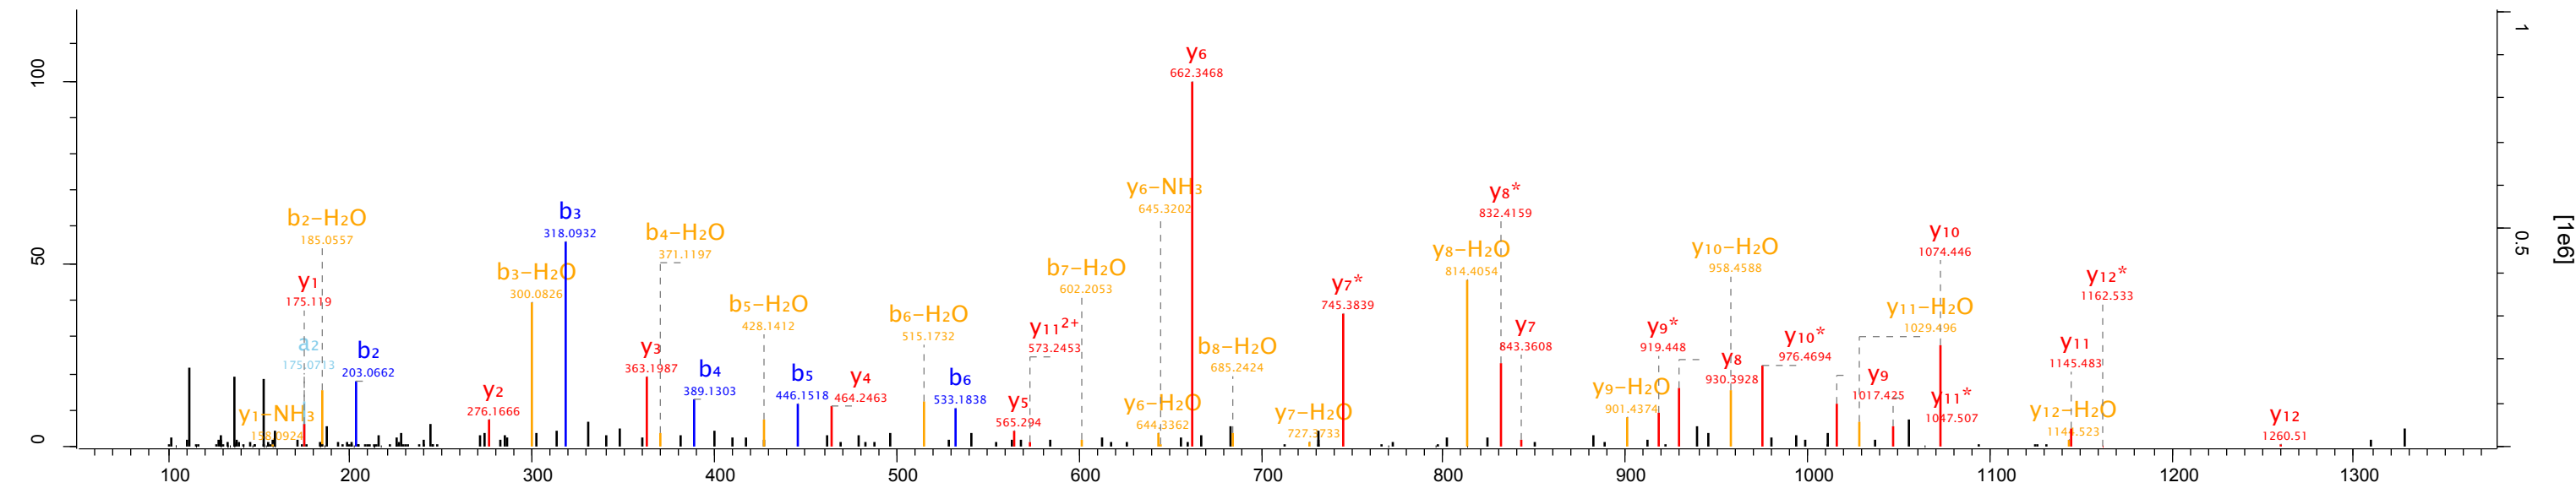

- D S D A G S S T P T T S T R -

b<sub>2</sub> b<sub>3</sub> b<sub>4</sub> b<sub>5</sub> b<sub>6</sub> y<sub>12</sub> y<sub>11</sub> y<sub>10</sub> y<sub>9</sub> y<sub>8</sub> y<sub>7</sub> y<sub>6</sub> y<sub>5</sub> y<sub>4</sub> y<sub>3</sub> y<sub>2</sub> y<sub>1</sub>

ph

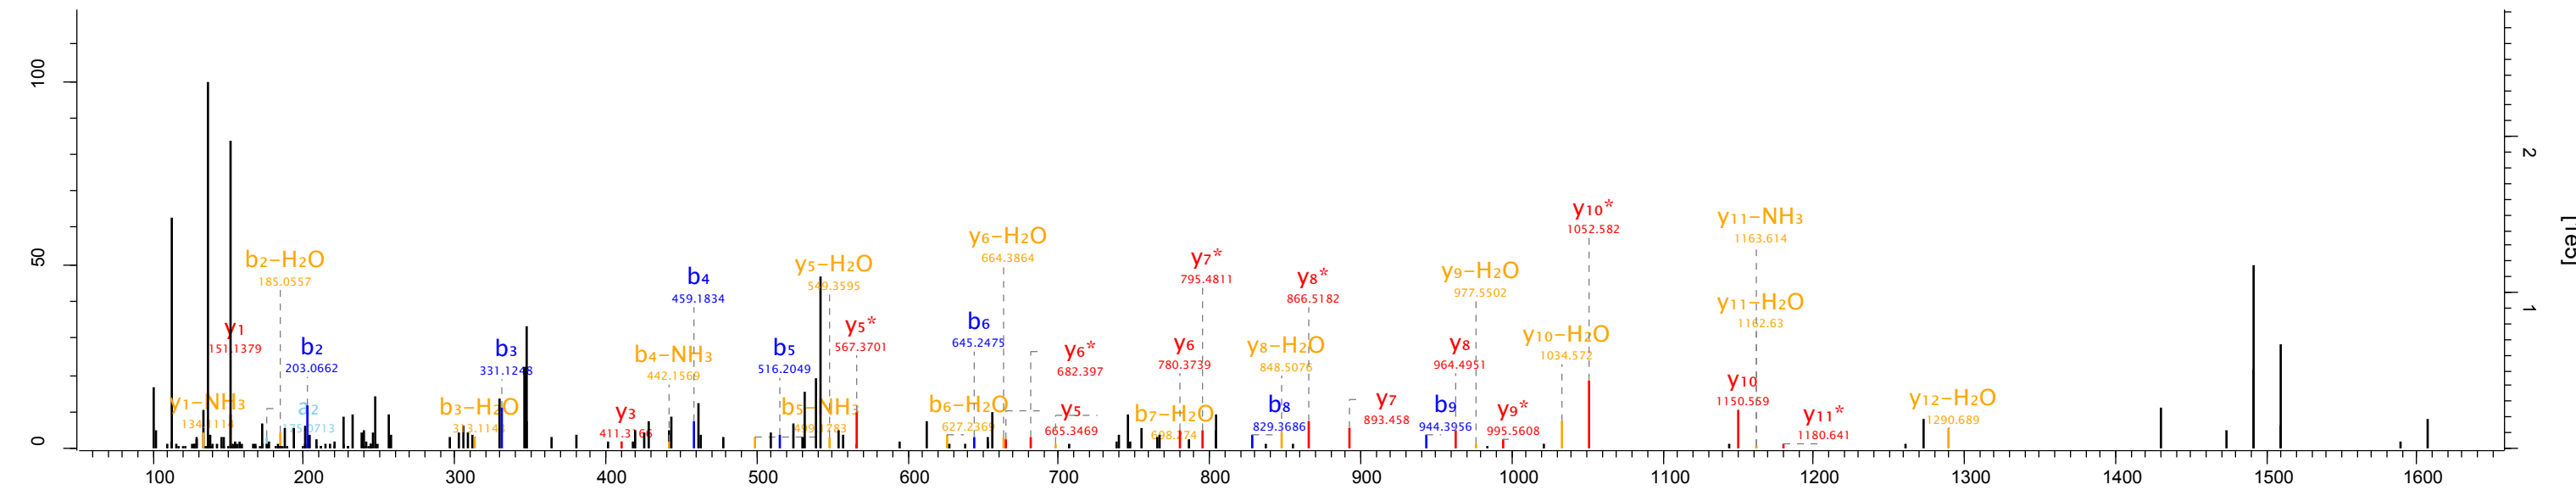

- S D Q Q G E A L D S S Q K K -

b<sub>2</sub>
b<sub>3</sub>
b<sub>4</sub>
b<sub>5</sub>
b<sub>6</sub>
b<sub>8</sub>
b<sub>9</sub>
y<sub>11</sub>\*
y<sub>10</sub>
y<sub>9</sub>\*
y<sub>8</sub>
y<sub>7</sub>
y<sub>6</sub>
y<sub>5</sub>ph
y<sub>3</sub>
y<sub>1</sub>

Raw file  
20171215\_MaS\_33SR\_LMH\_phospho2\_06

Scan 2218 Method FTMS; HCD Score 199.91 m/z 847.32 Gene names SLK

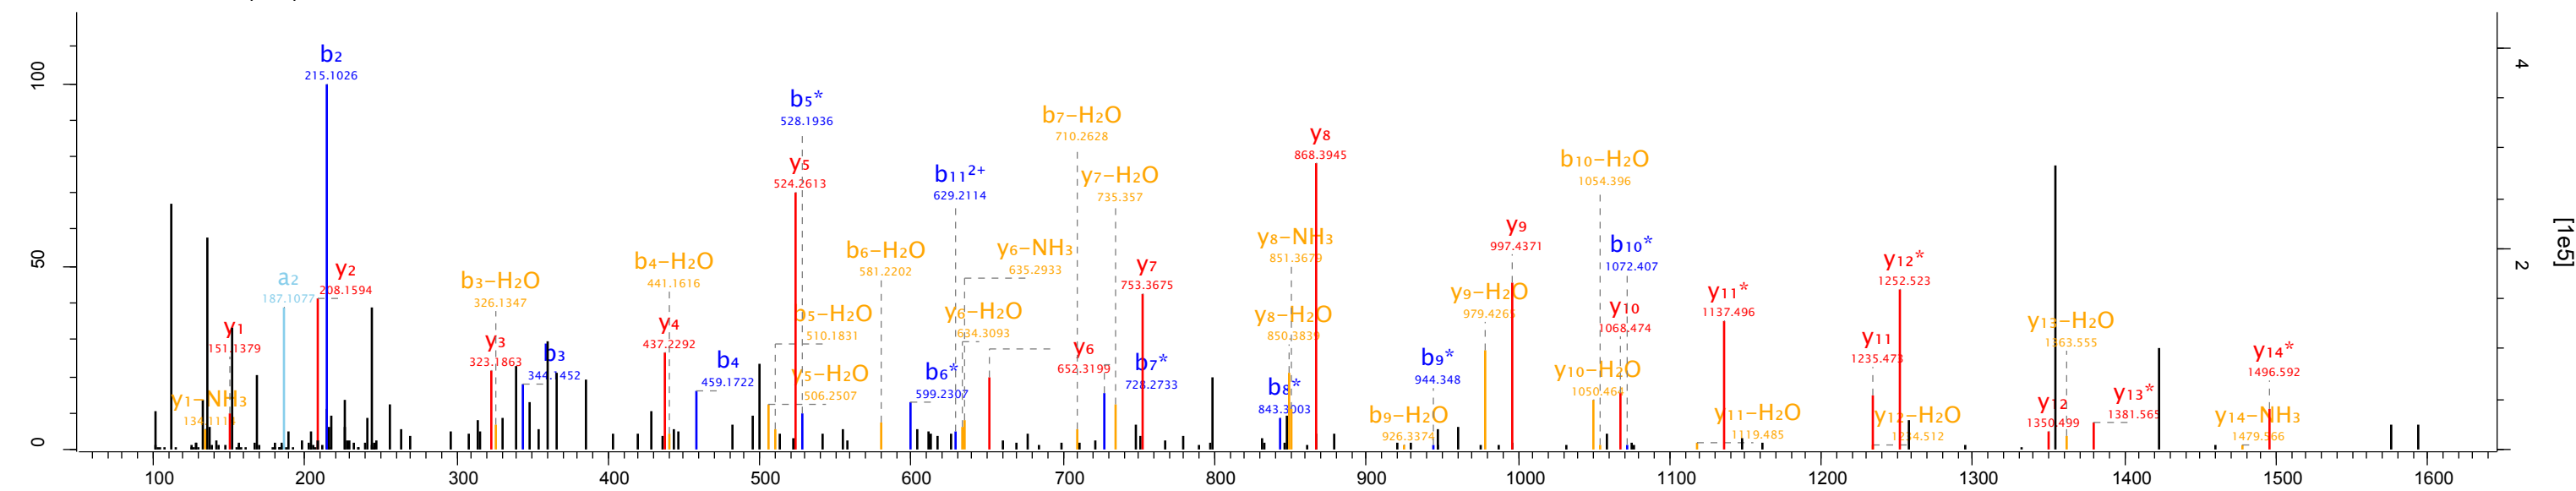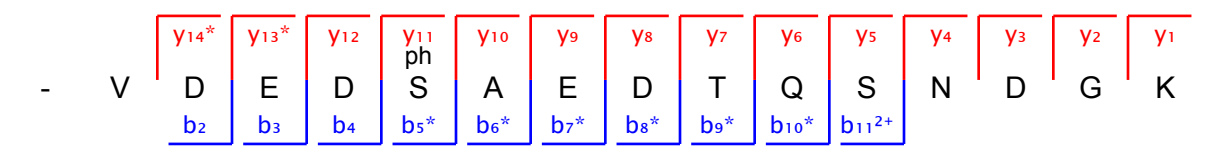

Raw file  
20171215\_MaS\_33SR\_LMH\_phospho2\_06

Scan 2778 Method FTMS; HCD Score 122.33 m/z 740.29 Gene names SASH1

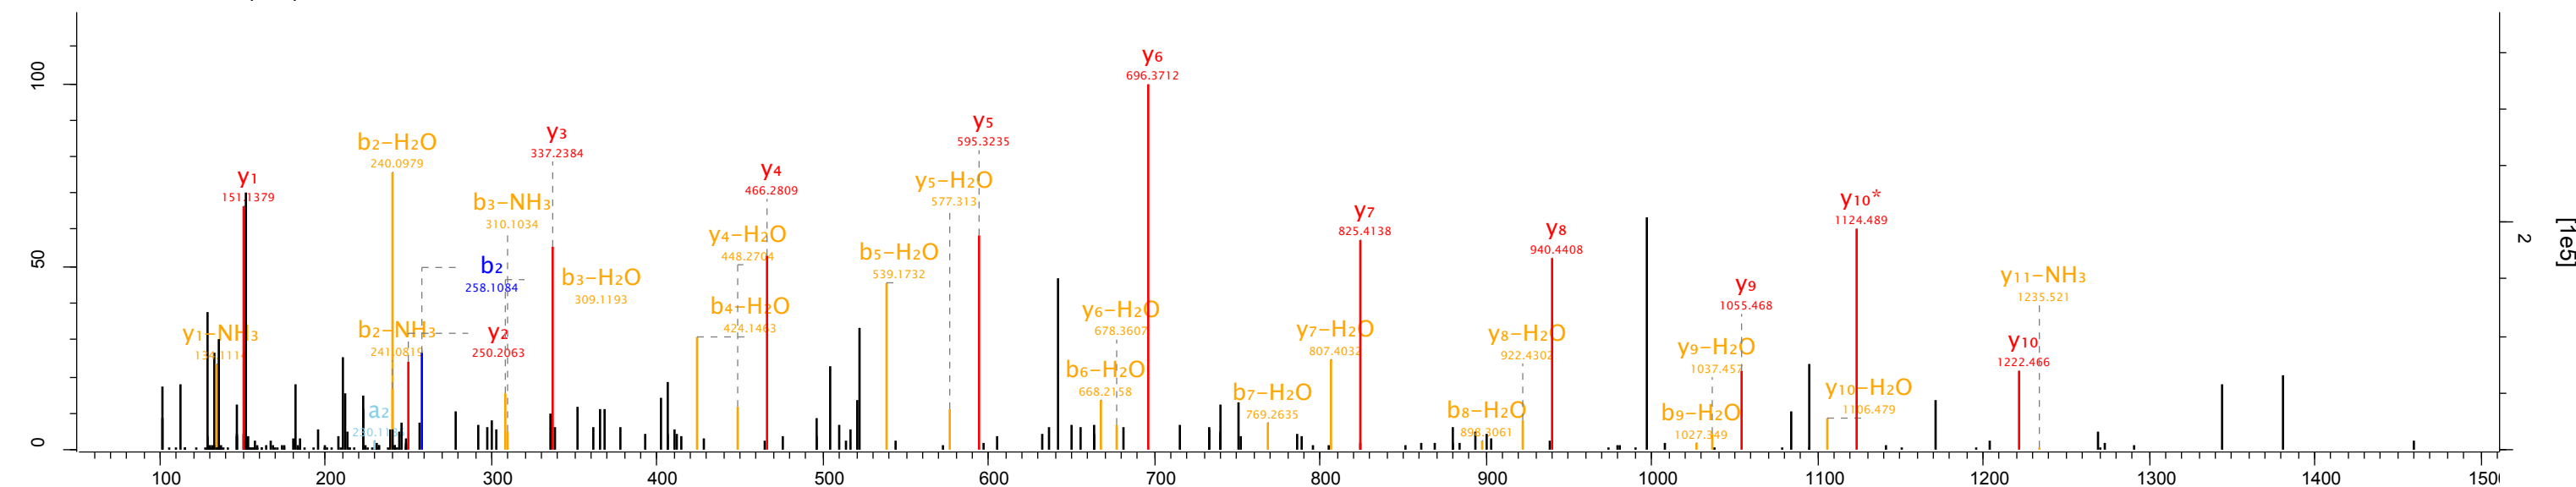

- E Q S D D E T E E S V K -  
b2

Raw file 20171215\_MaS\_33SR\_LMH\_phospho2\_06 Scan 3188 Method FTMS; HCD Score 66.95 m/z 546.74 Gene names ERBB2IP

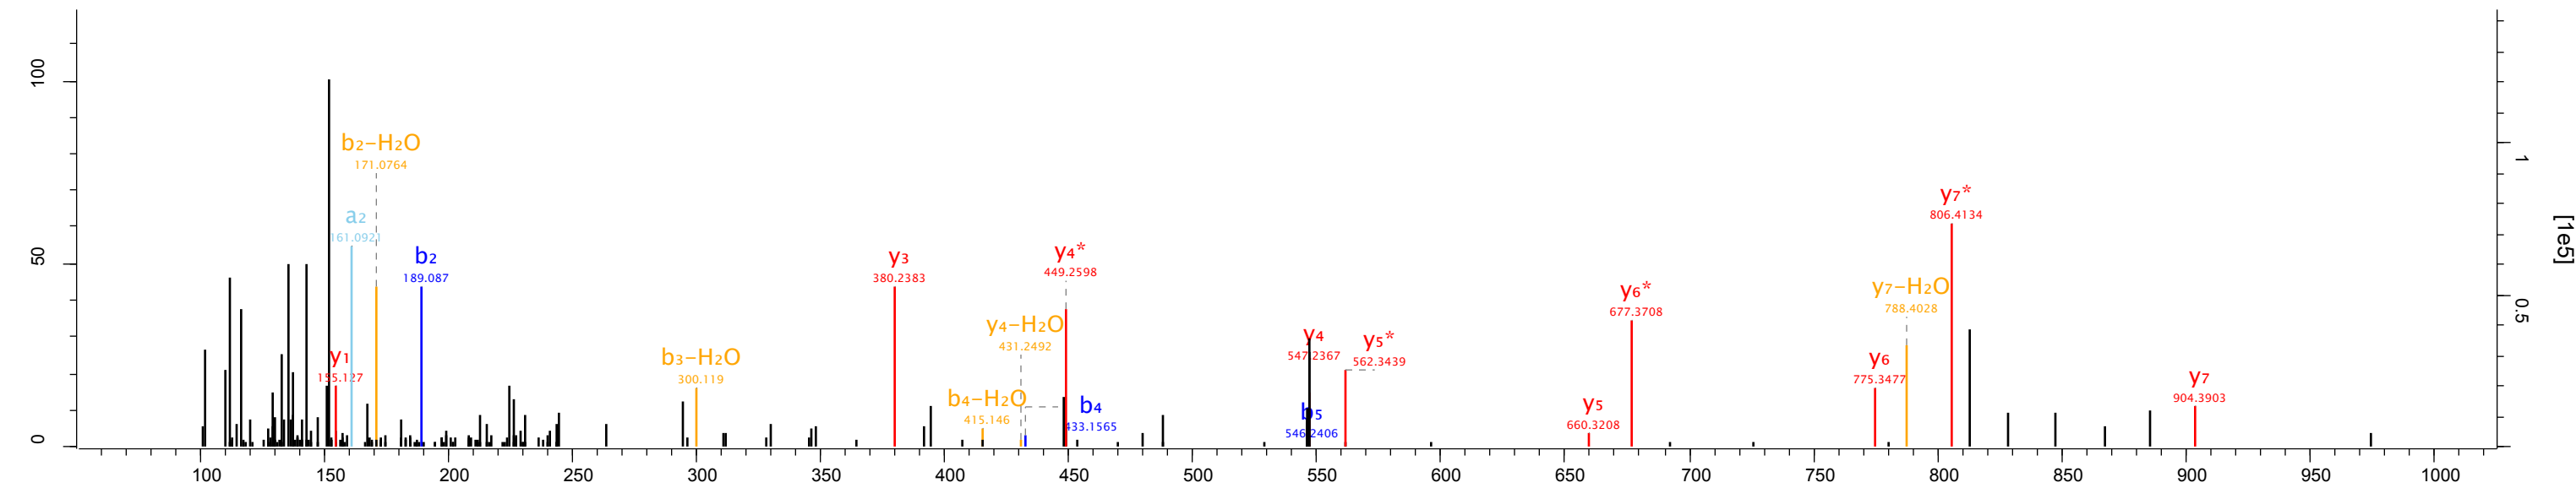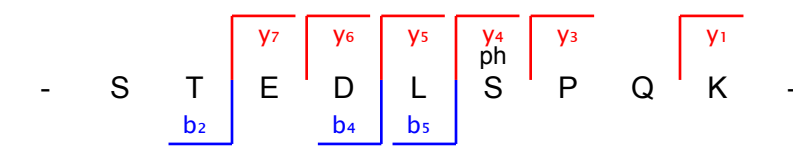

Raw file 20171215\_MaS\_33SR\_LMH\_phospho2\_06 Scan 3748 Method FTMS; HCD Score 44.39 m/z 544.59 Gene names CHAF1B

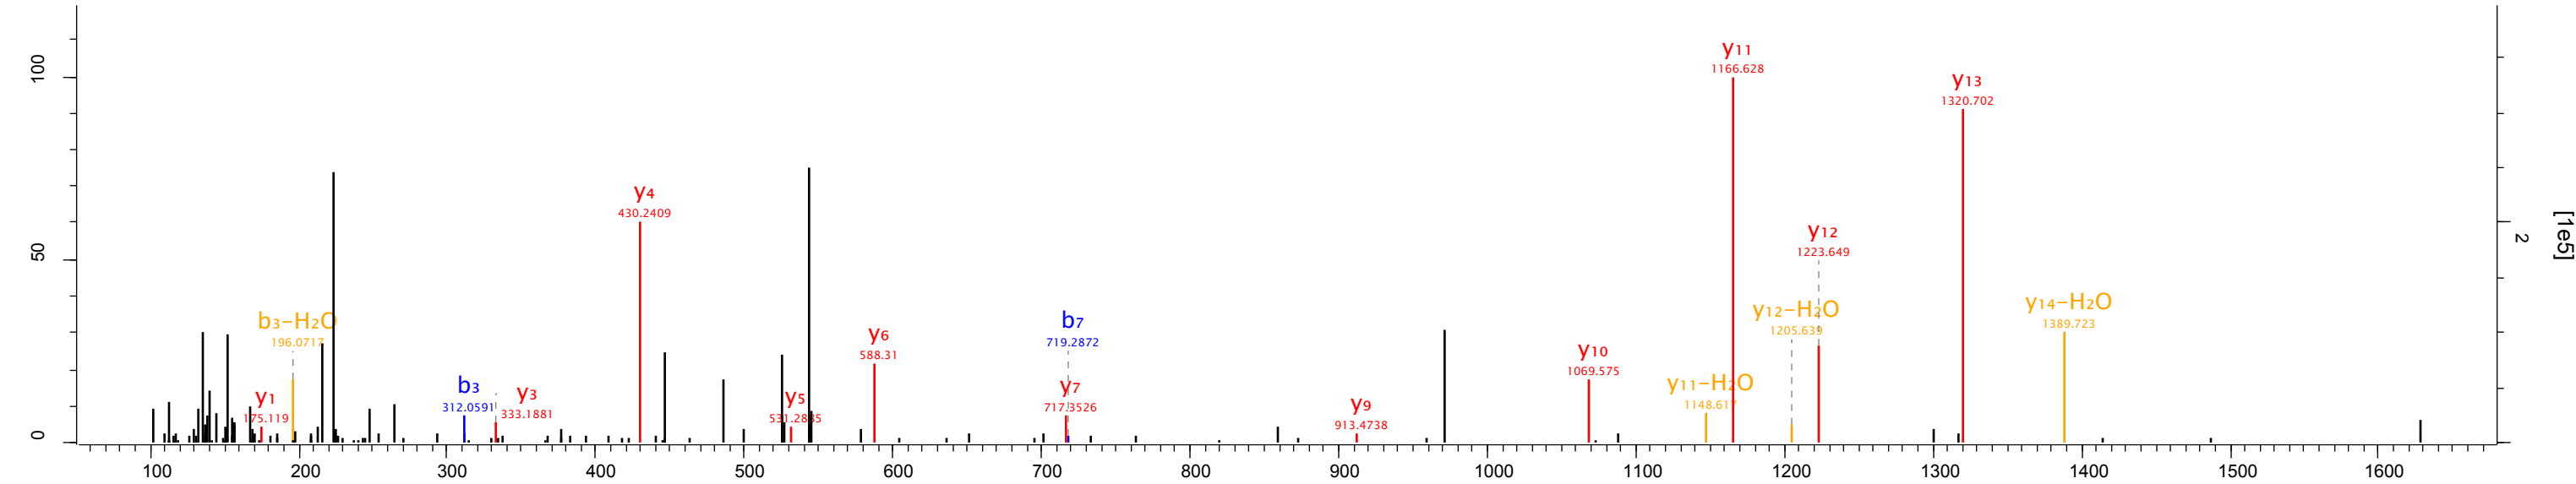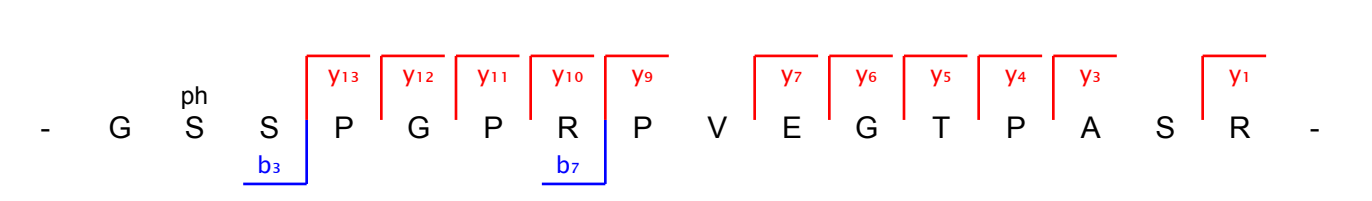

Raw file 20171215\_MaS\_33SR\_LMH\_phospho2\_06 Scan 5078 Method FTMS; HCD Score 61.94 m/z 857.87 Gene names LMO7

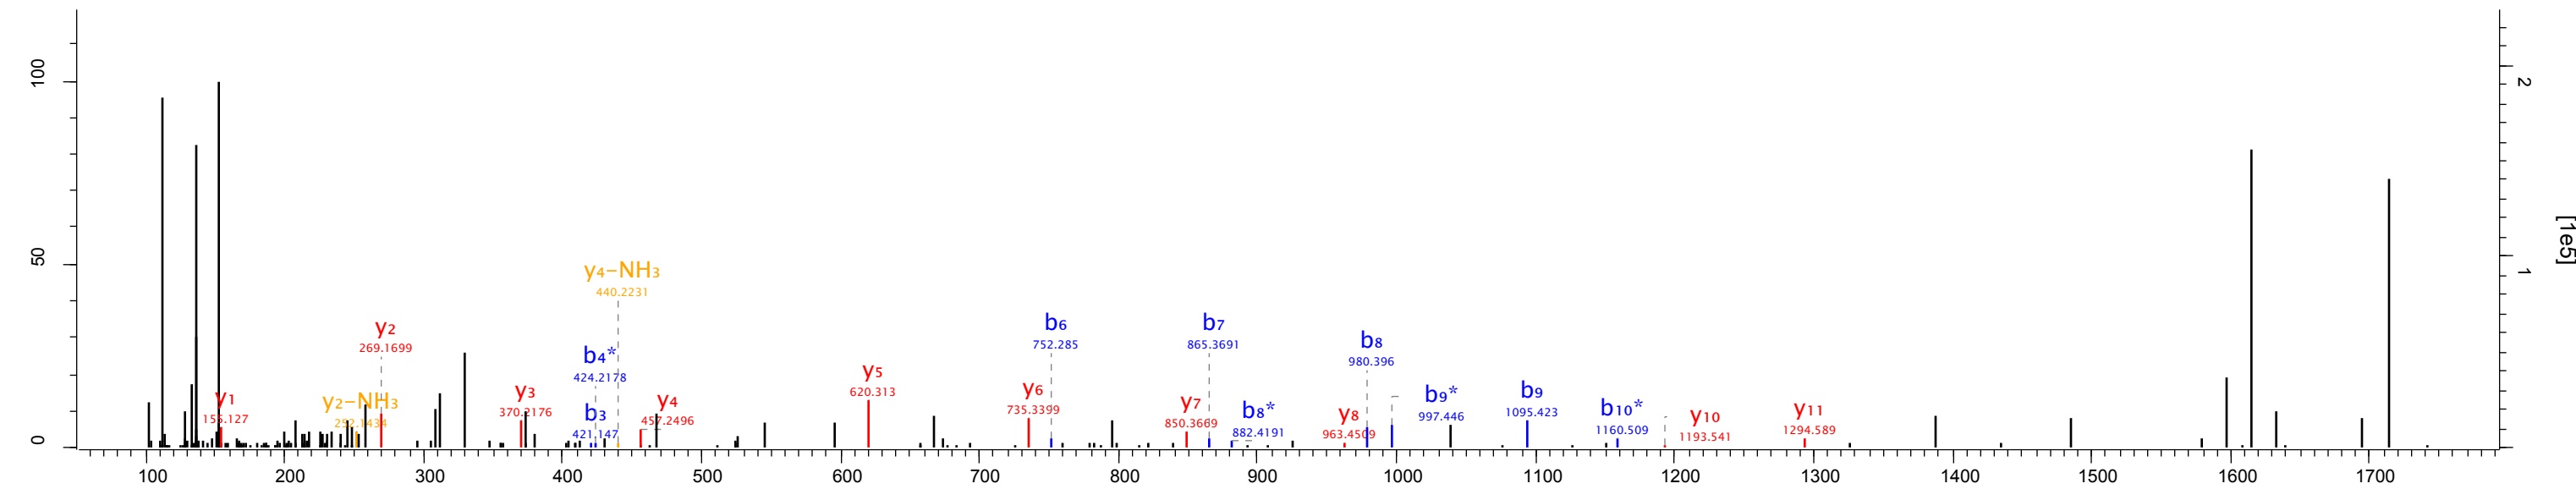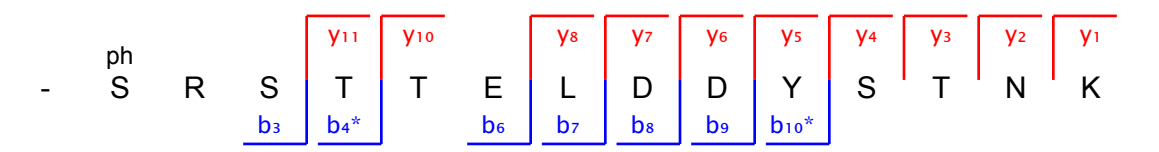



Raw file

20171215\_MaS\_33SR\_LMH\_phospho2\_06

| Scan | Method    | Score | m/z    | Gene names |
|------|-----------|-------|--------|------------|
| 5228 | FTMS; HCD | 59.15 | 416.21 | RPL12      |

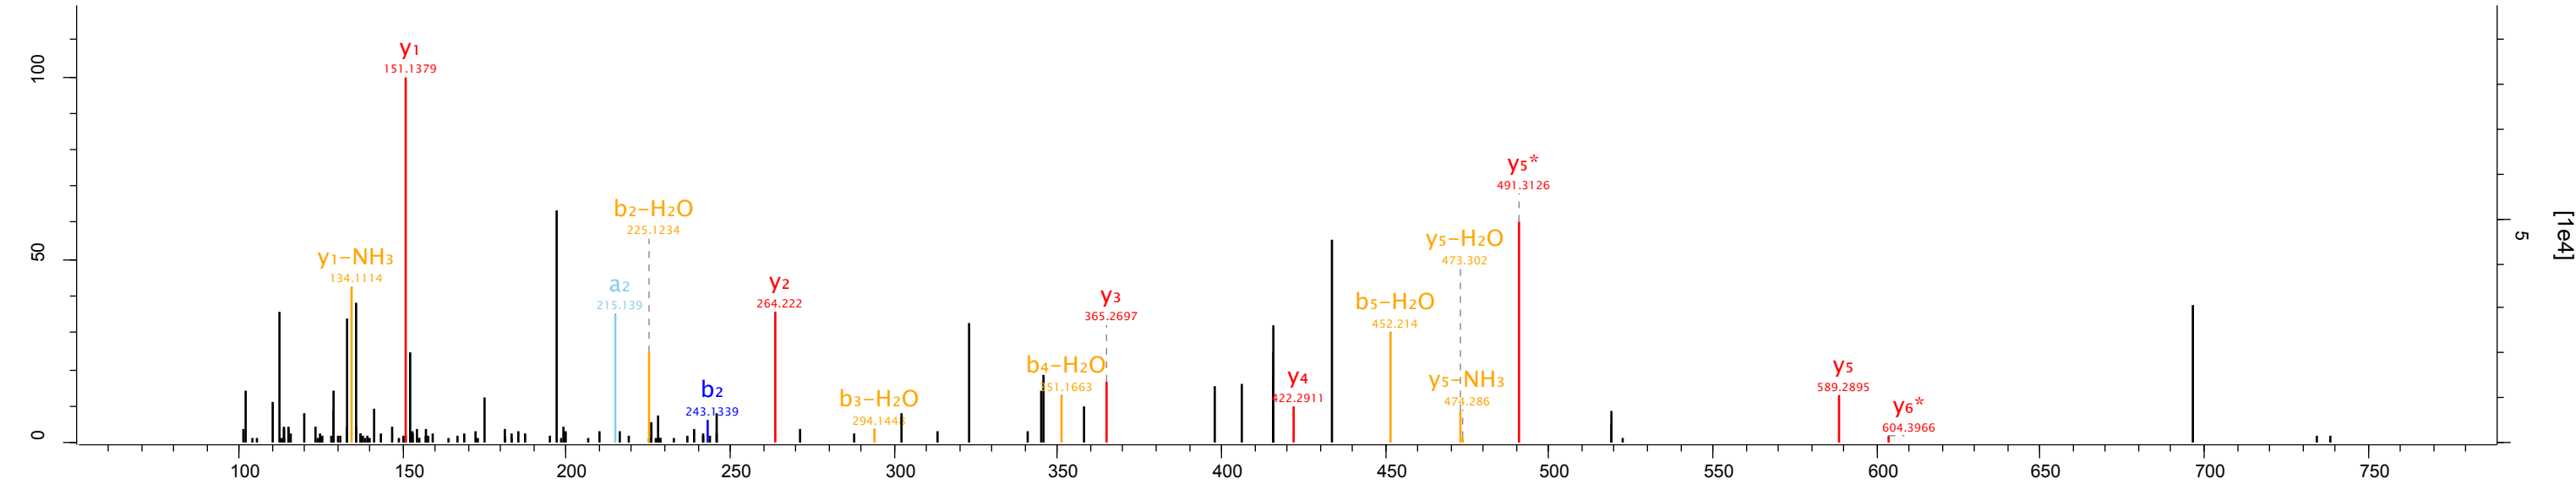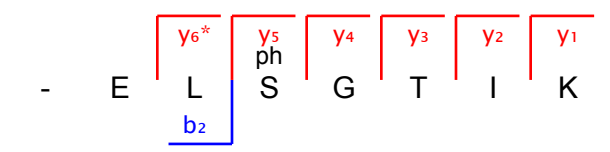

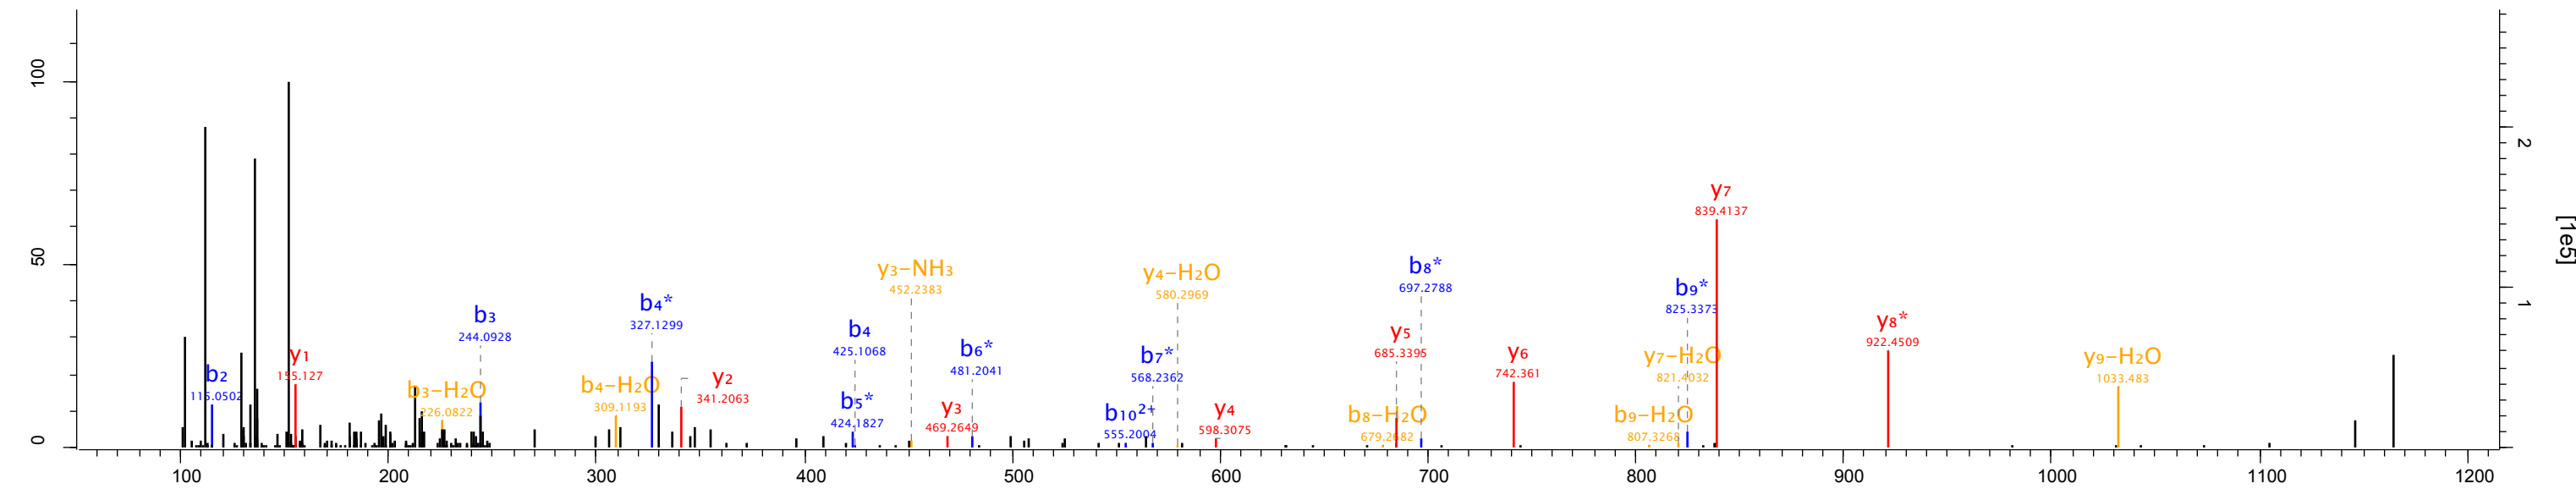

- G G E T P G S E Q W K -

b<sub>2</sub>
b<sub>3</sub>
b<sub>4</sub>
b<sub>5</sub><sup>\*</sup>
b<sub>6</sub><sup>\*</sup>
b<sub>7</sub><sup>\*</sup>
b<sub>8</sub><sup>\*</sup>
b<sub>9</sub><sup>\*</sup>
b<sub>10</sub><sup>2+</sup>

y<sub>8</sub><sup>\*</sup>
y<sub>7</sub>
y<sub>6</sub>
y<sub>5</sub>
y<sub>4</sub>
y<sub>3</sub>
y<sub>2</sub>
y<sub>1</sub>

ph

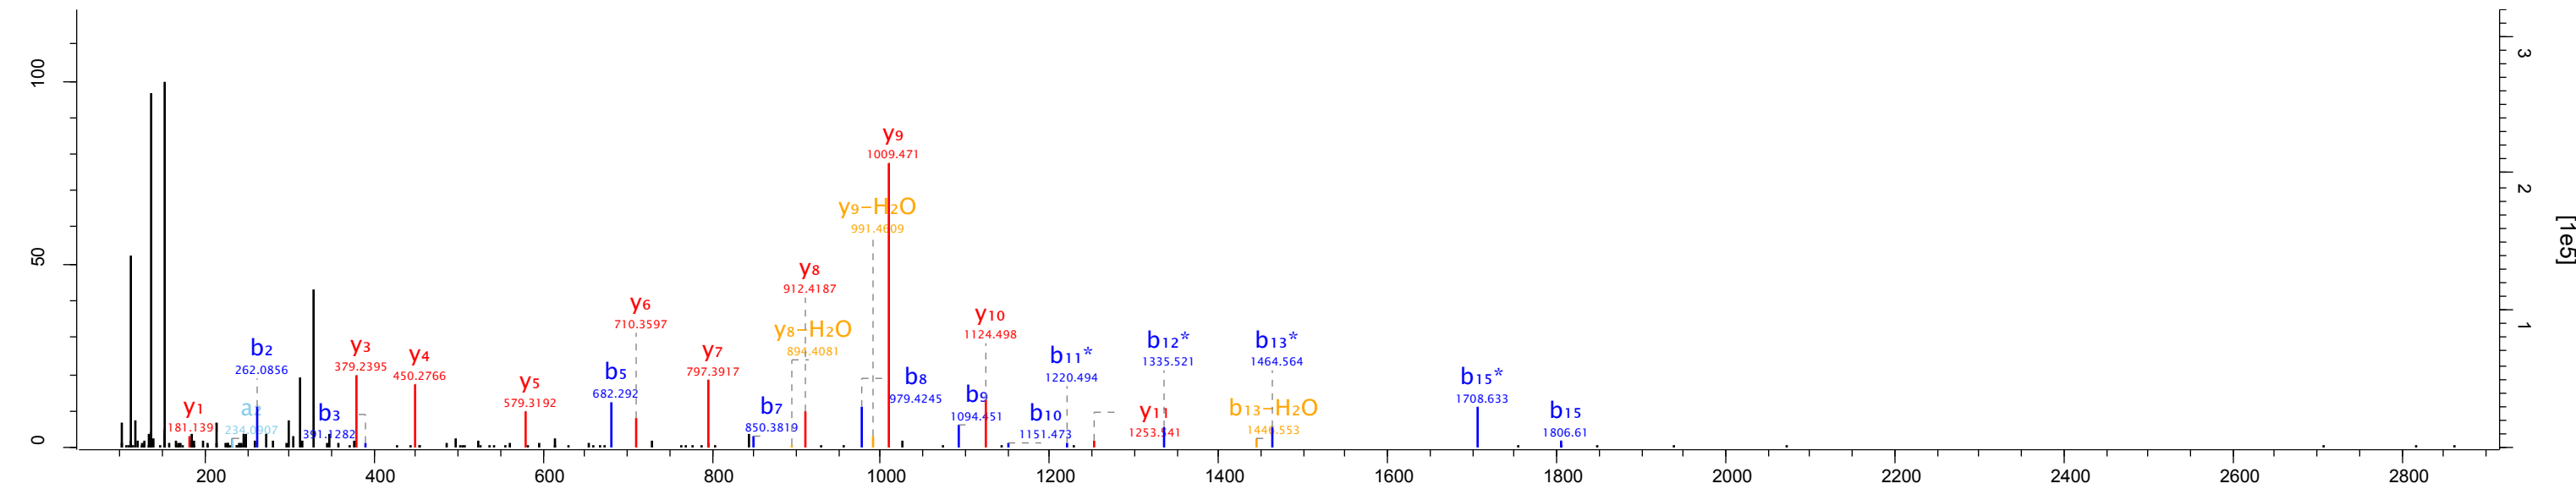

- T C E E R P A E D G S D E E D P D S M E A P T R -

ph

b2 b3 b5 b7 b8 b9 b10 b11\* b12\* b13\* b15 y11 y10 y9 y8 y7 y6 y5 y4 y3 y1

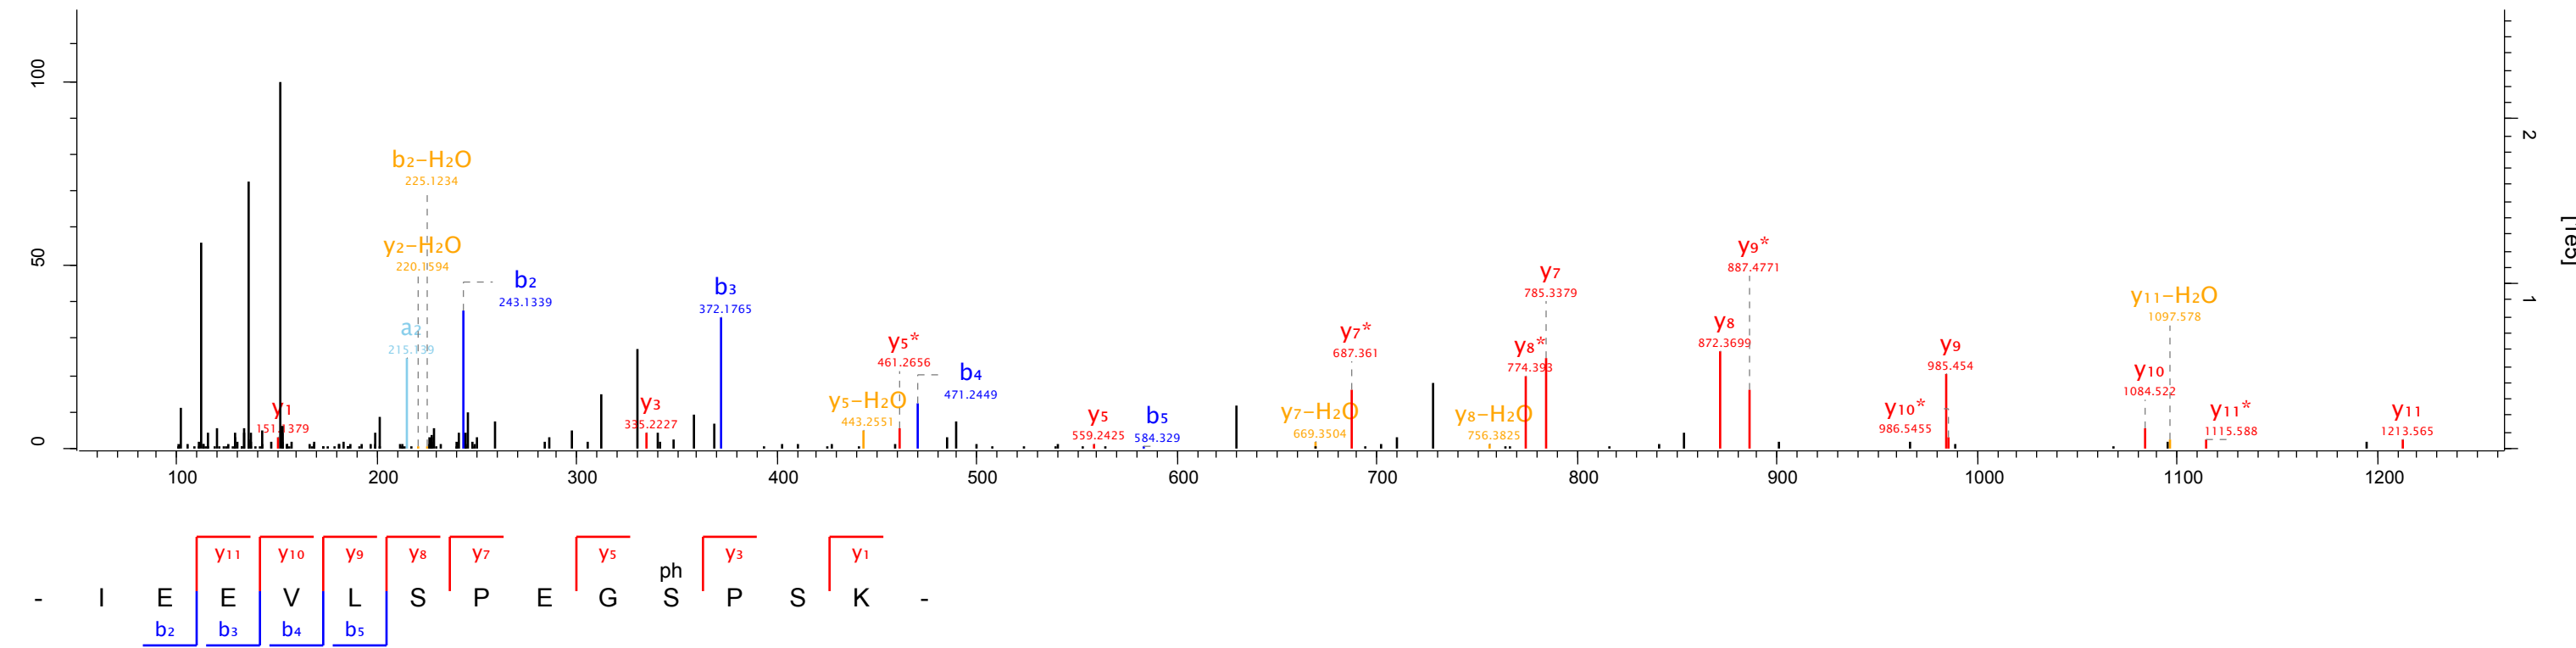

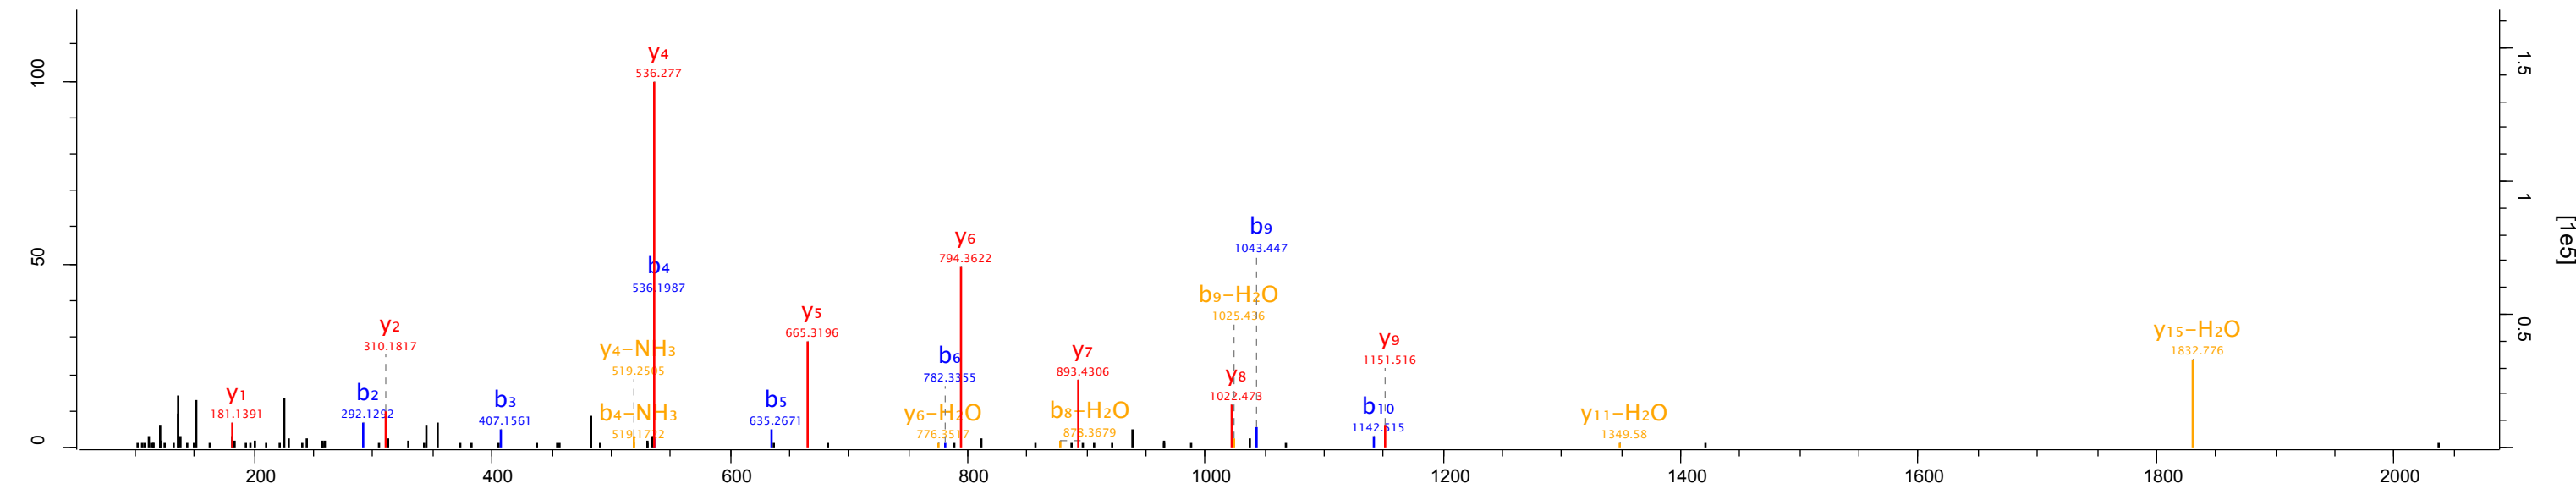

- Y Q D E V F G G F V T E P Q E E S E E E V E E P E E R -

b<sub>2</sub>
b<sub>3</sub>
b<sub>4</sub>
b<sub>5</sub>
b<sub>6</sub>
b<sub>9</sub>
b<sub>10</sub>
ph
y<sub>9</sub>
y<sub>8</sub>
y<sub>7</sub>
y<sub>6</sub>
y<sub>5</sub>
y<sub>4</sub>
y<sub>2</sub>
y<sub>1</sub>

Raw file  
20171215\_MaS\_33SR\_LMH\_phospho2\_08

Scan 2208 Method FTMS; HCD Score 75.91 m/z 577.23 Gene names SET

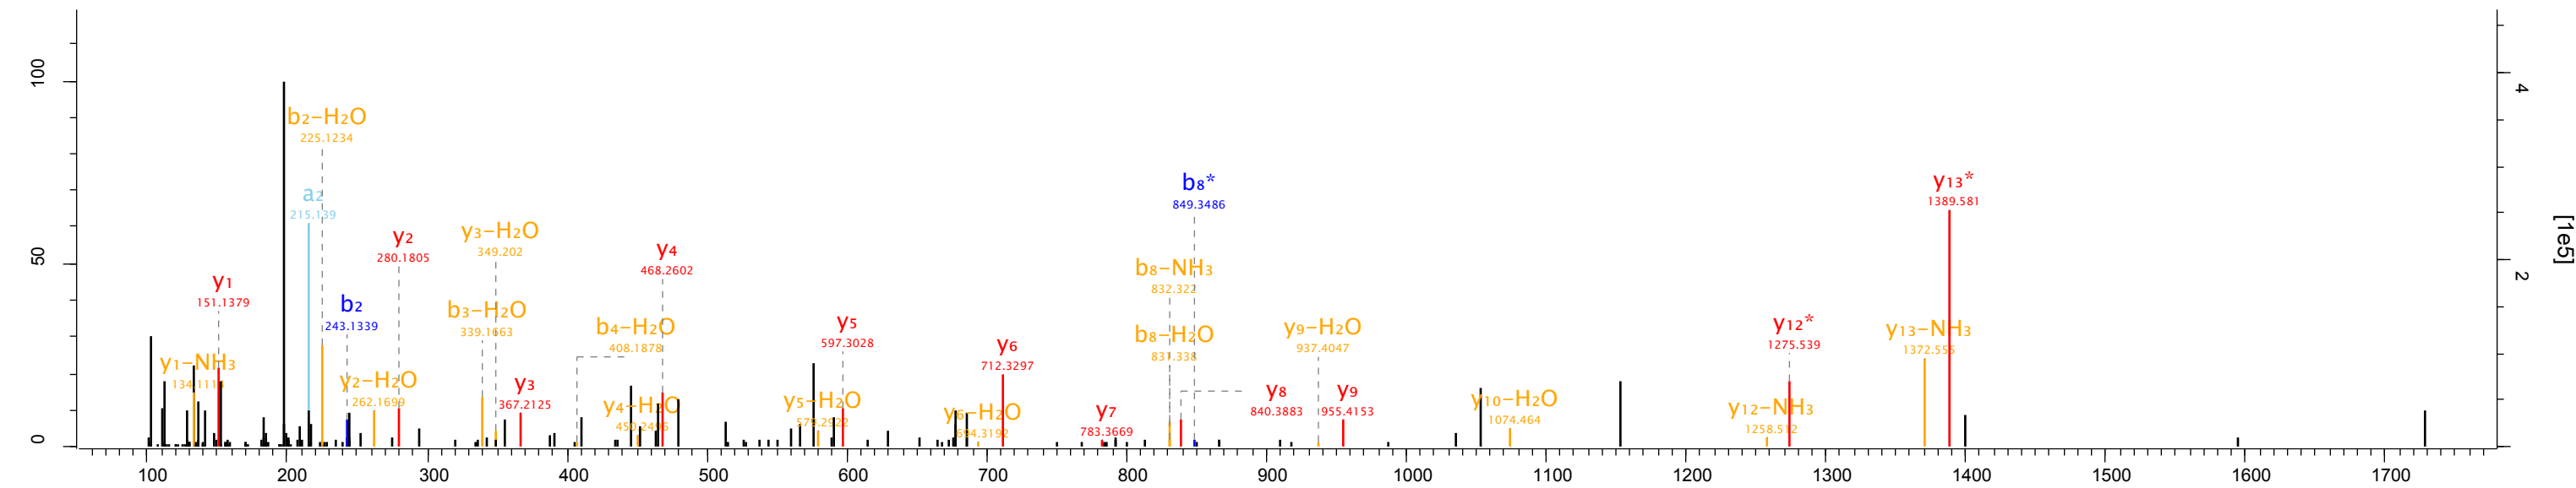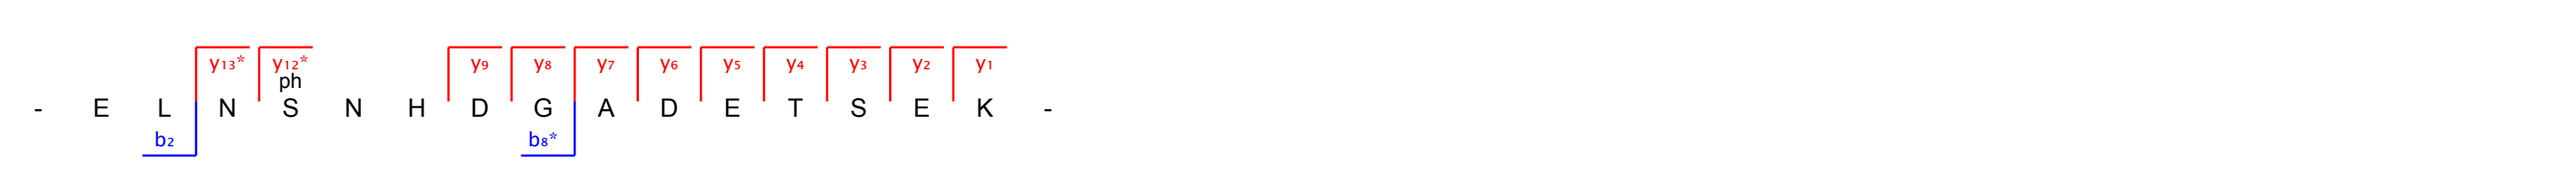

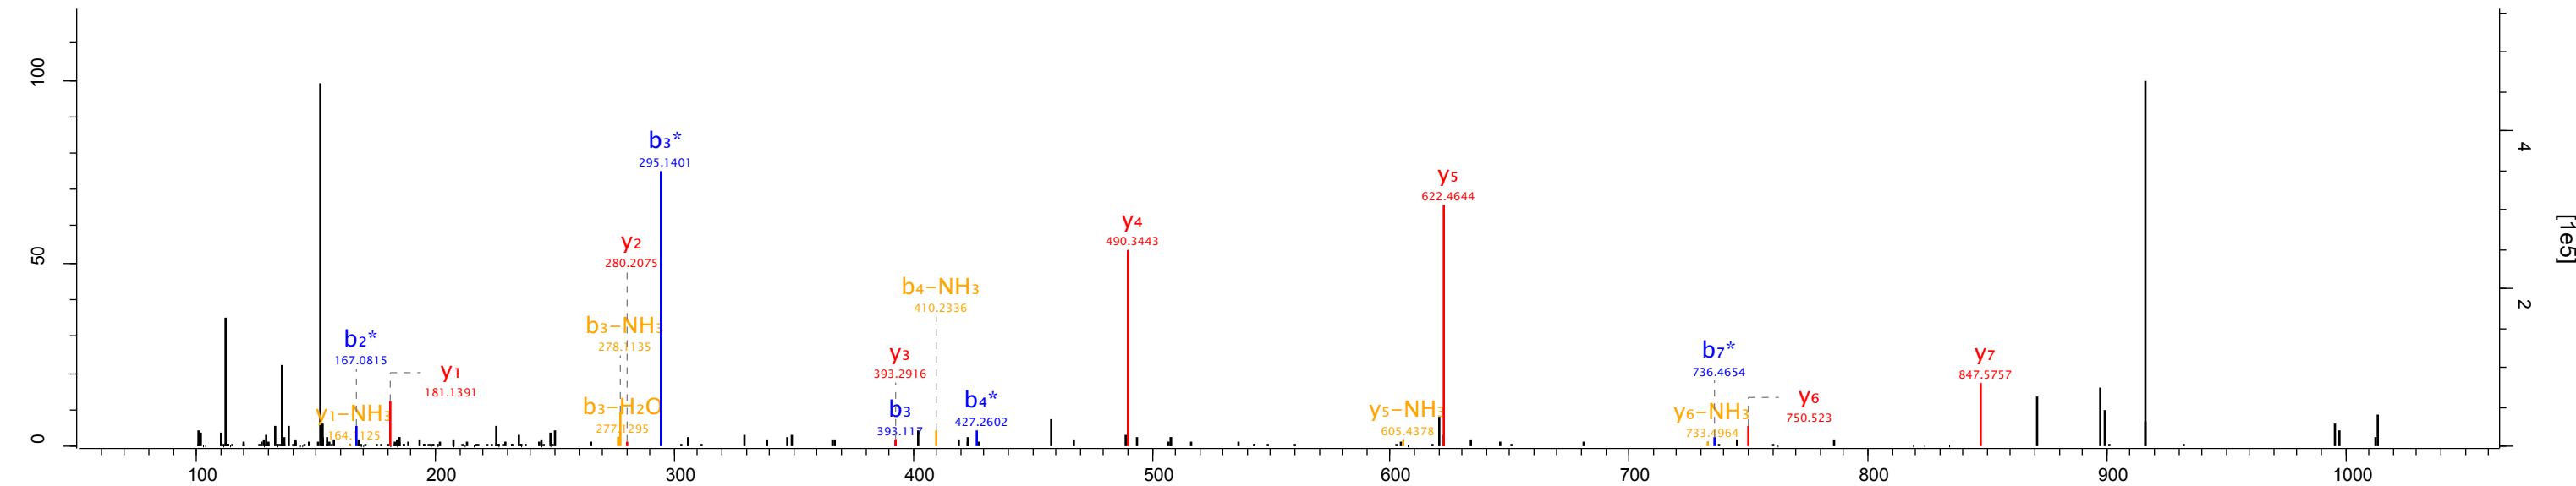

ph S -

|                  |                |                  |                |                |                  |                |
|------------------|----------------|------------------|----------------|----------------|------------------|----------------|
| y <sub>7</sub>   | y <sub>6</sub> | y <sub>5</sub>   | y <sub>4</sub> | y <sub>3</sub> | y <sub>2</sub>   | y <sub>1</sub> |
| P                | Q              | K                | P              | I              | V                | R              |
| b <sub>2</sub> * | b <sub>3</sub> | b <sub>4</sub> * |                |                | b <sub>7</sub> * |                |

-

Raw file: 20171215\_MaS\_33SR\_LMH\_phospho2\_08  
 Scan: 3458 Method: FTMS; HCD Score: 163.02 m/z: 725.37 Gene names: TP53BP1

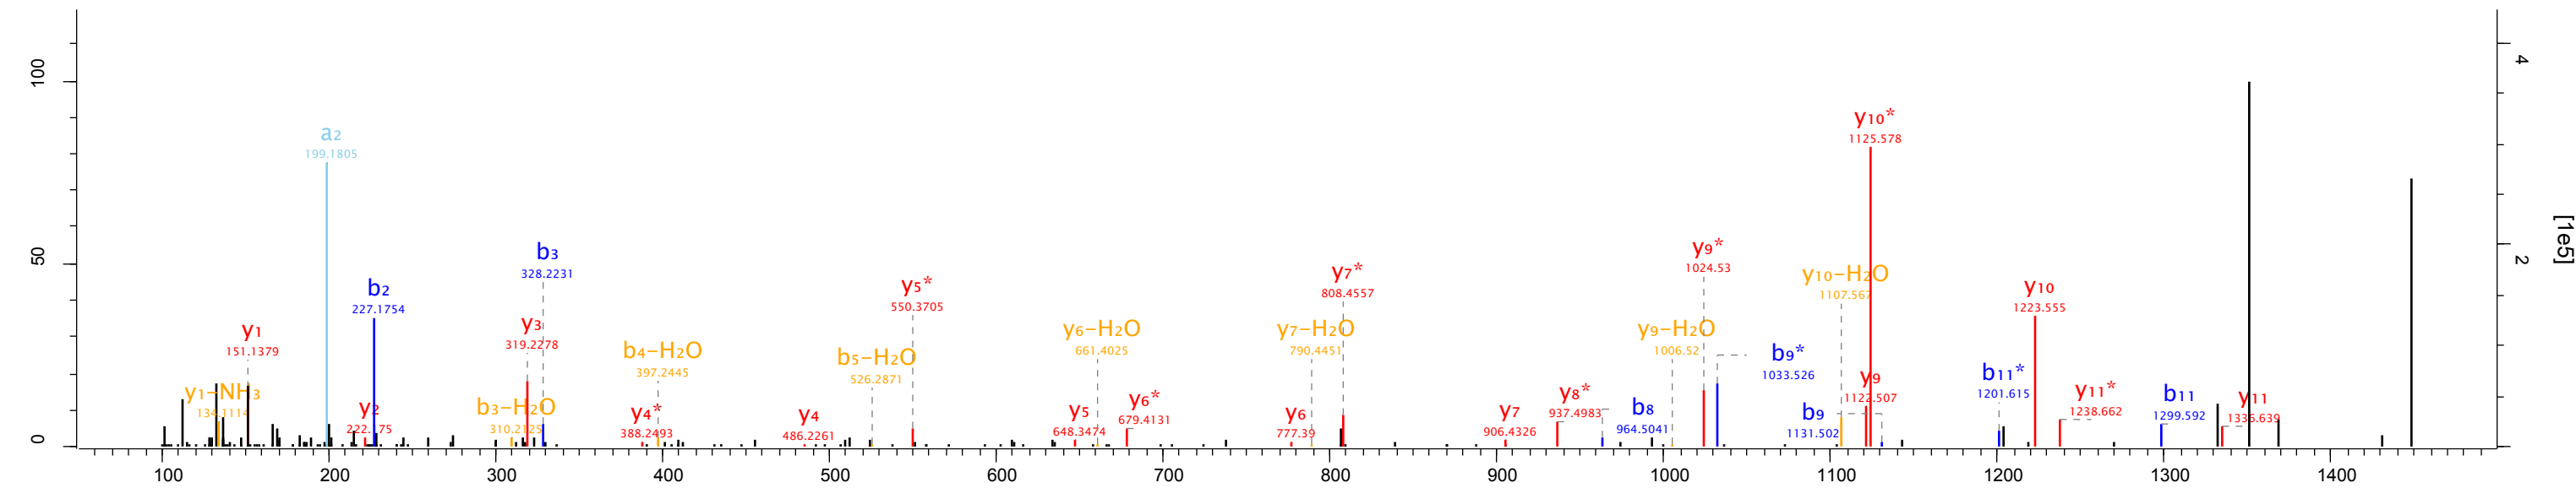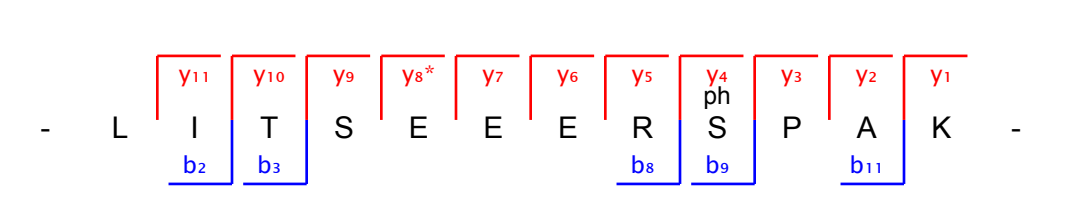



Raw file: 20171215\_MaS\_33SR\_LMH\_phospho2\_08  
 Scan: 3568 Method: FTMS; HCD Score: 111.77 m/z: 561.94 Gene names: IRF2BP2

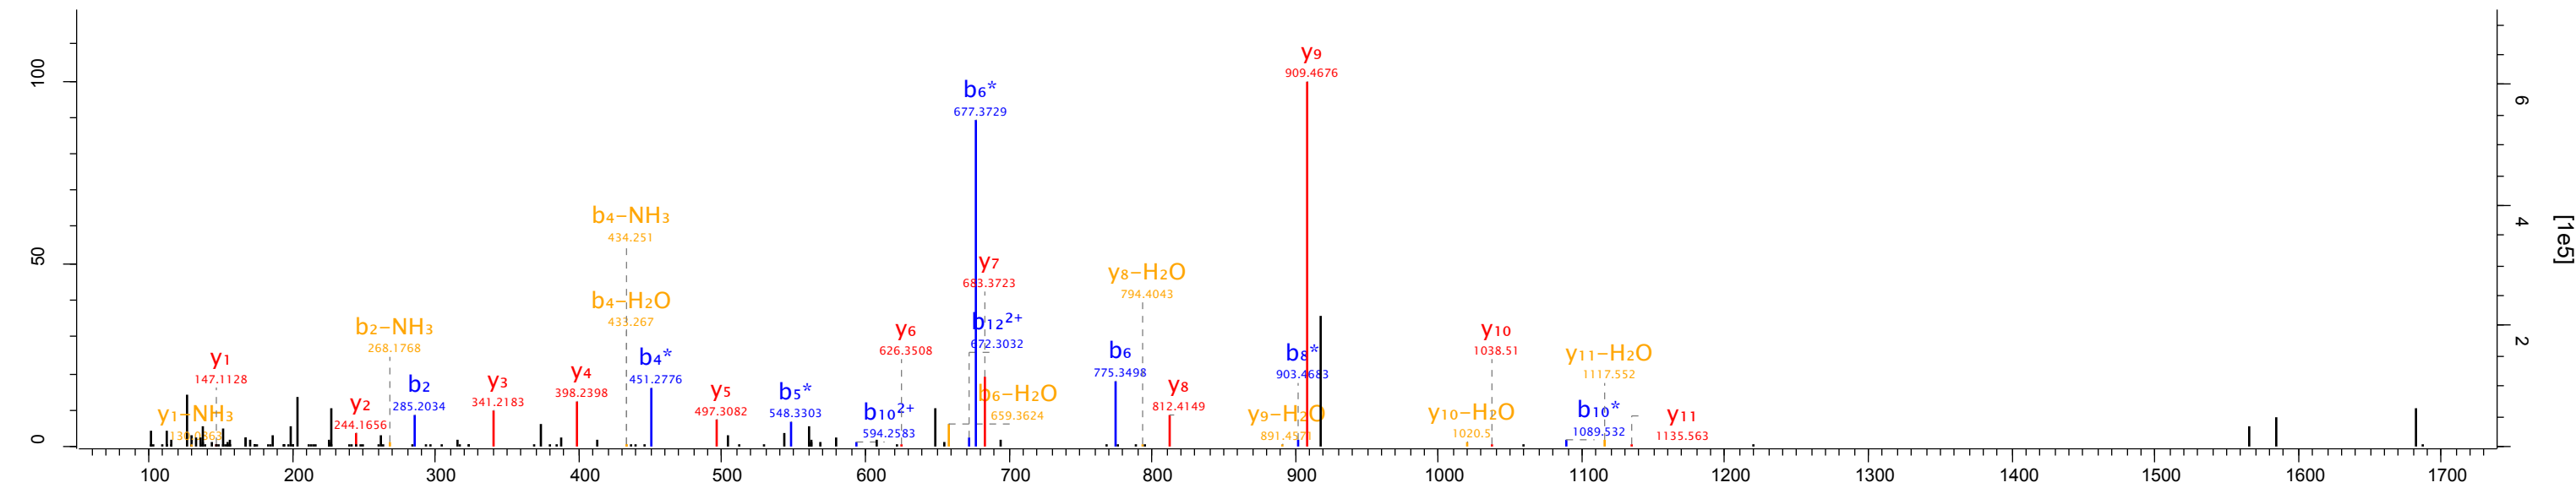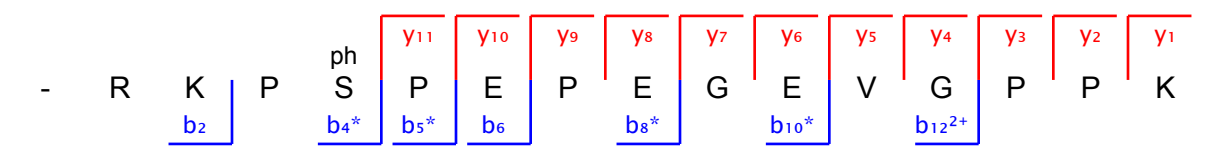

Raw file: 20171215\_MaS\_33SR\_LMH\_phospho2\_08  
 Scan: 3668 Method: FTMS; HCD Score: 84.48 m/z: 555.71 Gene names: GSK3B

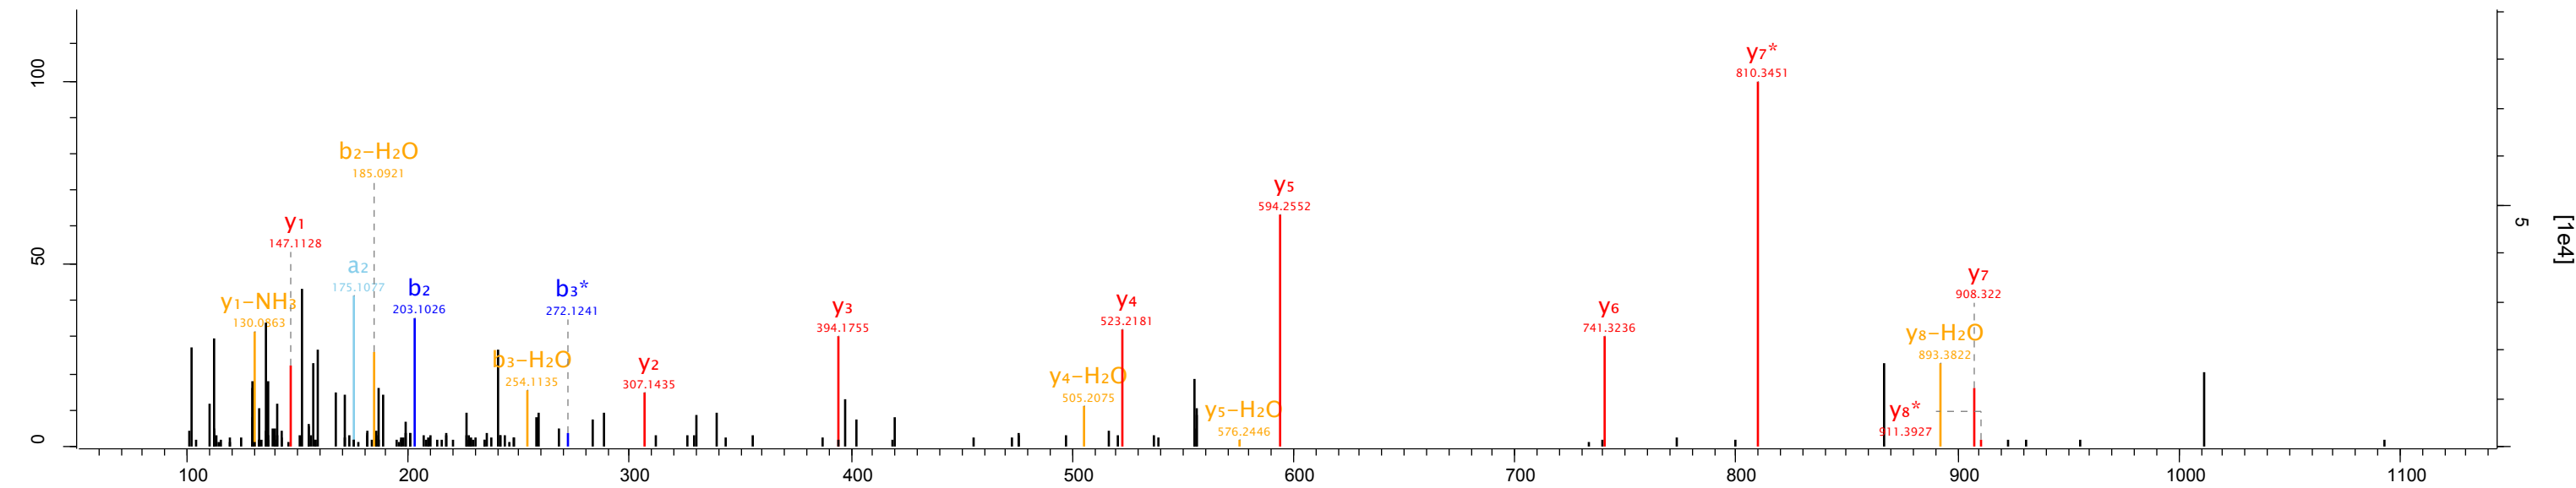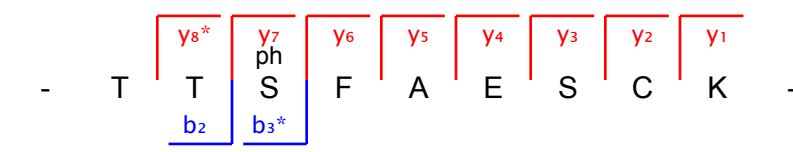

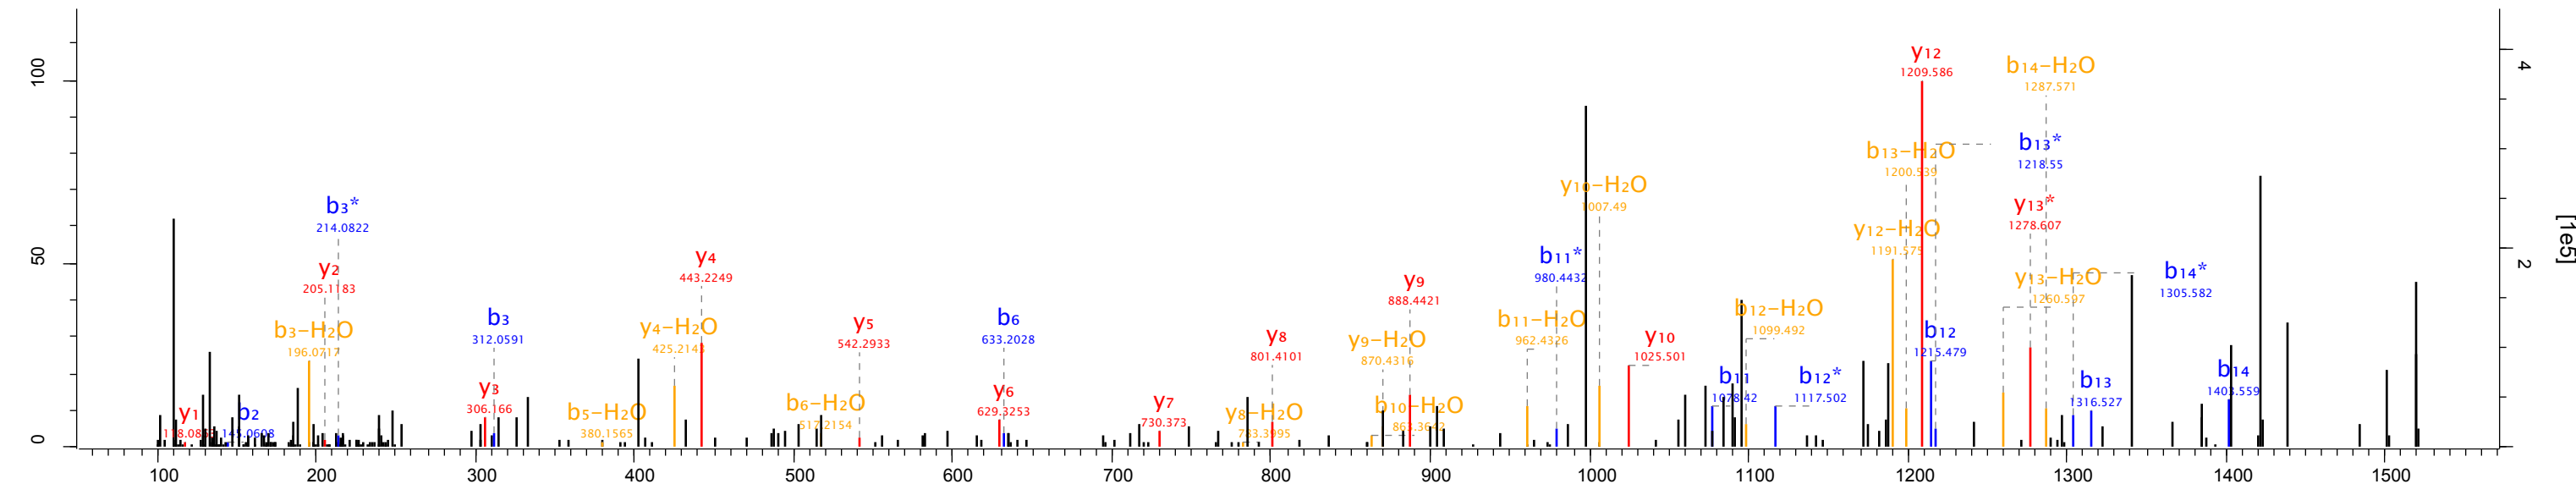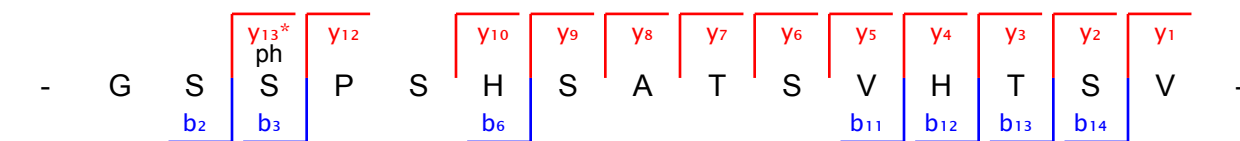

Raw file 20171215\_MaS\_33SR\_LMH\_phospho2\_08 Scan 6128 Method FTMS; HCD Score 68.13 m/z 494.26 Gene names FARSB

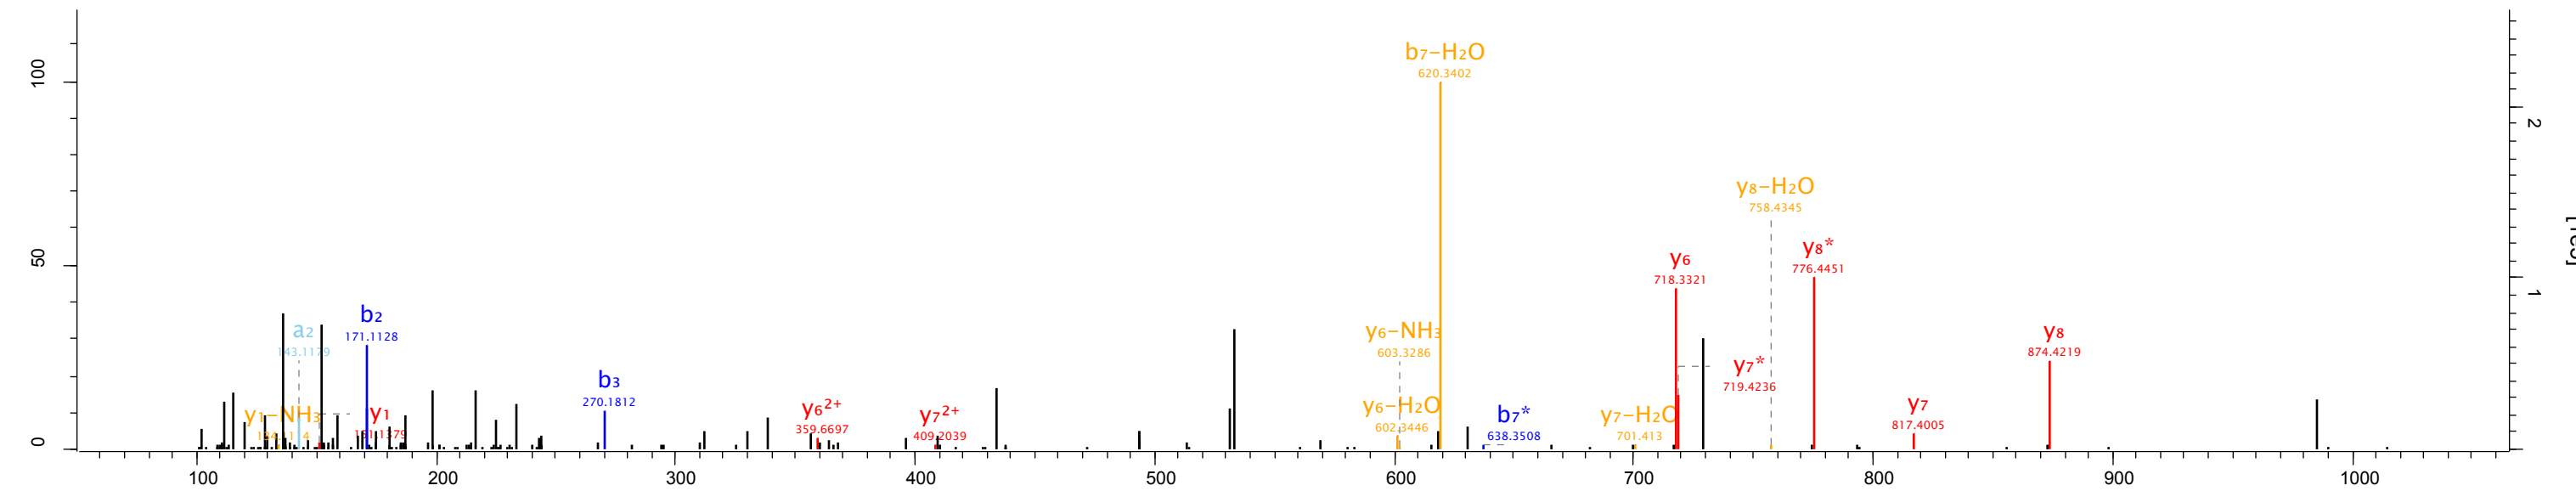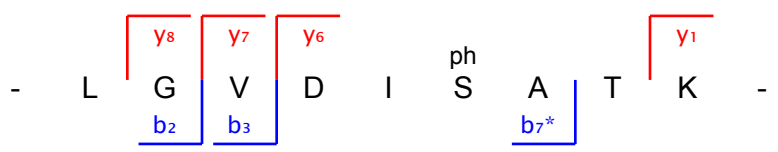

Raw file 20171215\_MaS\_33SR\_LMH\_phospho2\_08 Scan 6428 Method FTMS; HCD Score 58.08 m/z 712.33 Gene names SPAST

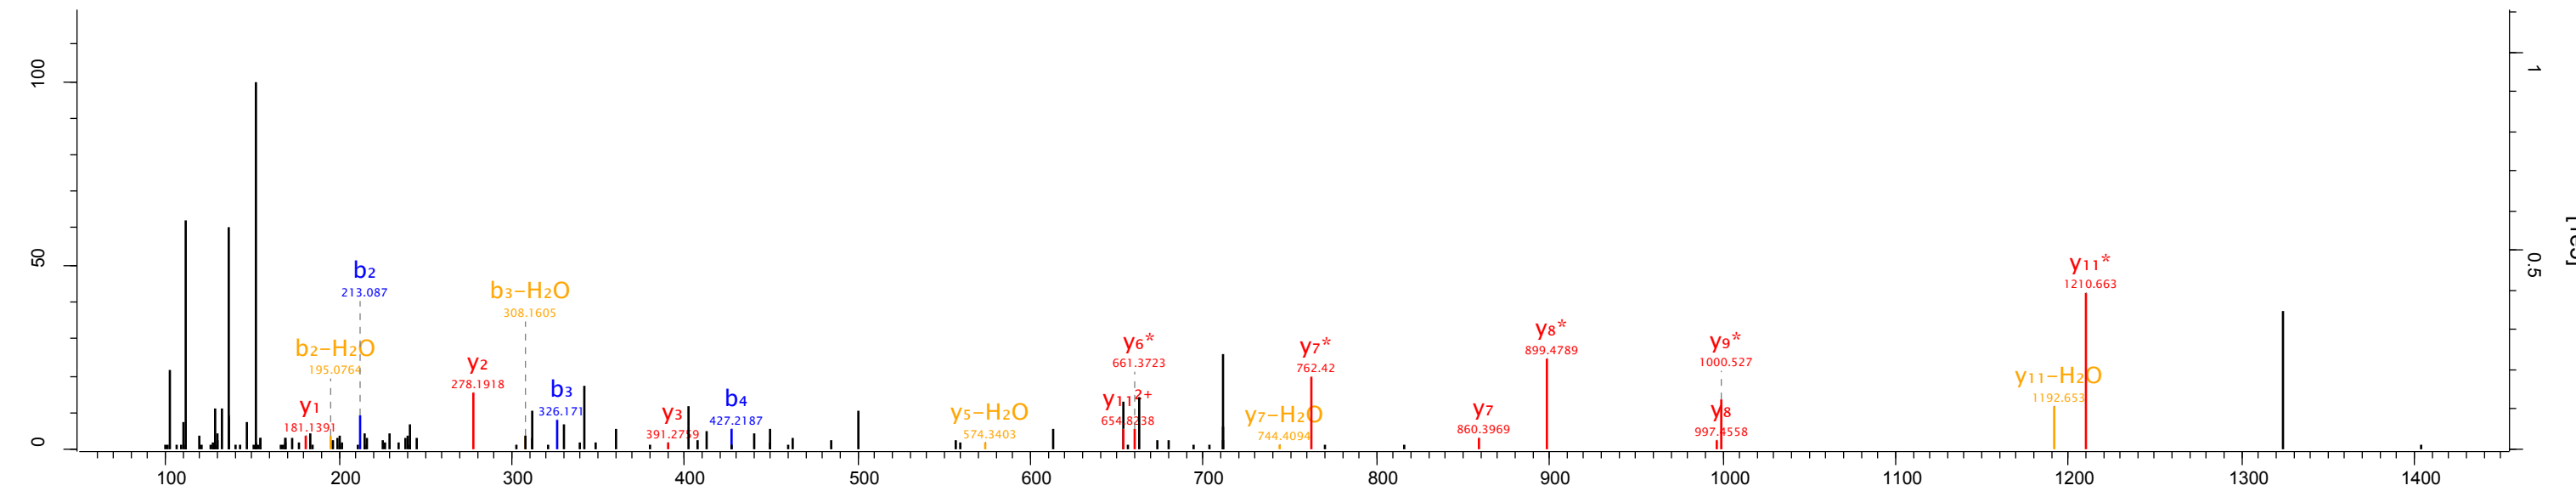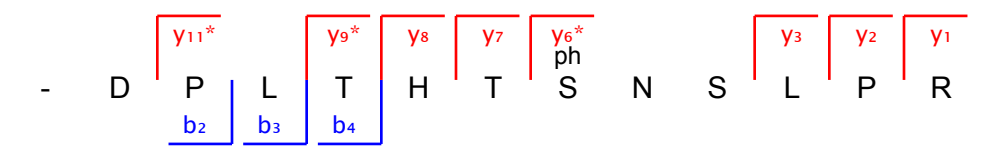

Raw file 20171215\_MaS\_33SR\_LMH\_phospho2\_09 Scan 11478 Method FTMS; HCD Score 41.51 m/z 795.38 Gene names MISP

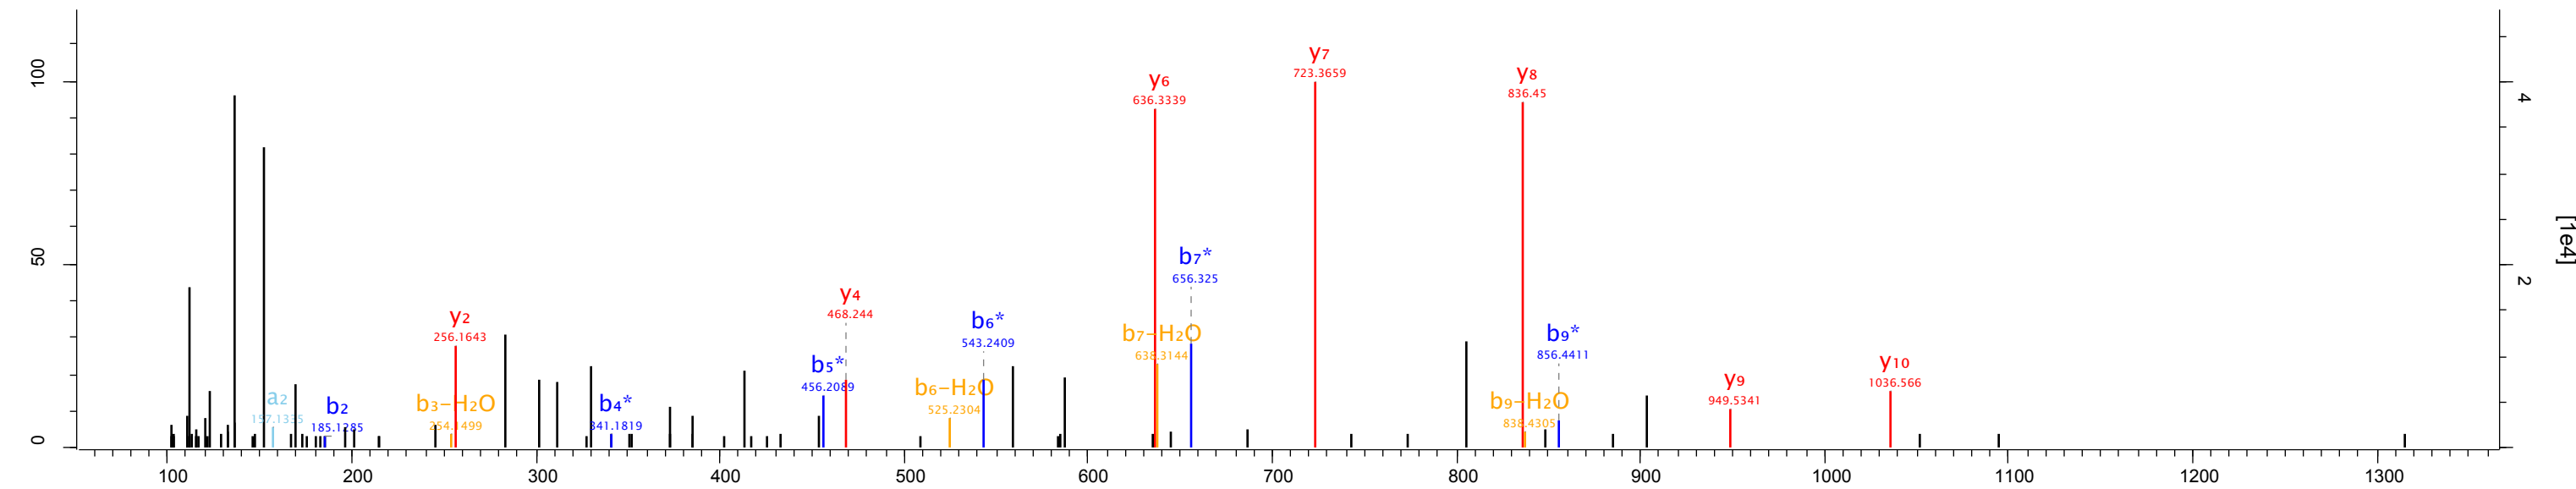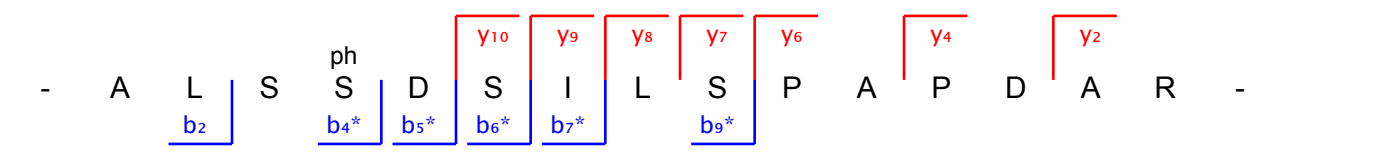

Raw file 20171215\_MaS\_33SR\_LMH\_phospho2\_09 Scan 12478 Method FTMS; HCD Score 62.66 m/z 727.35 Gene names PPP1R12A

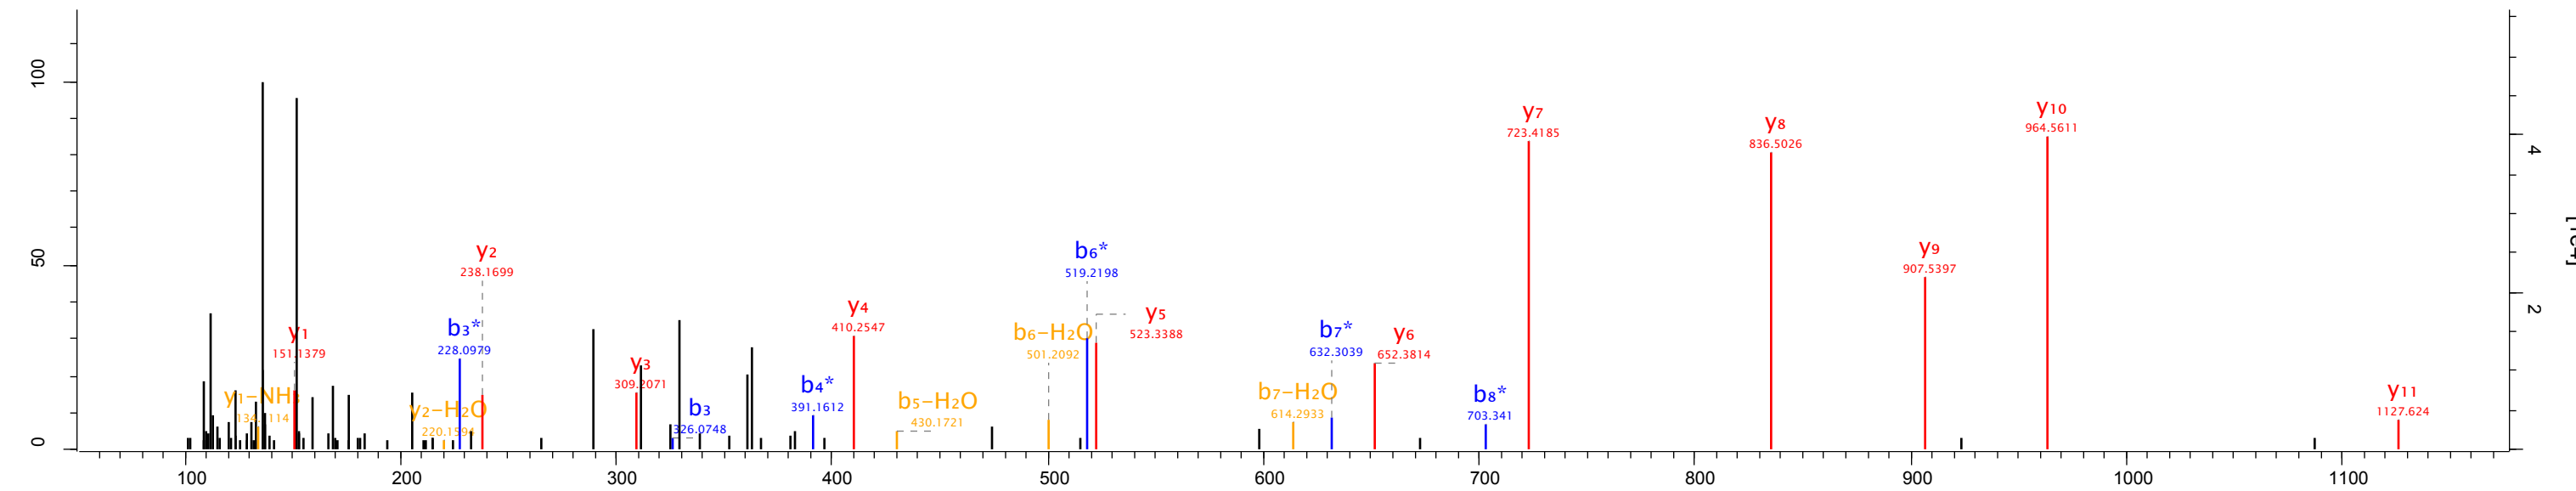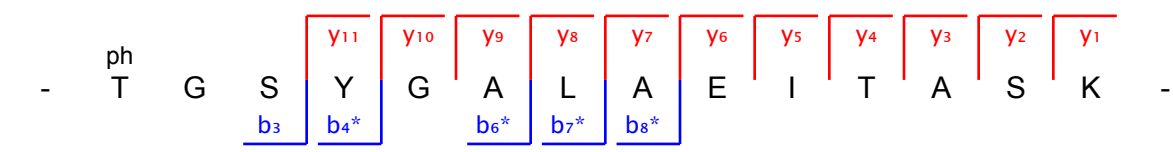

Raw file 20171215\_MaS\_33SR\_LMH\_phospho2\_09 Scan 2668 Method FTMS; HCD Score 115.12 m/z 633.79 Gene names MAP4K4

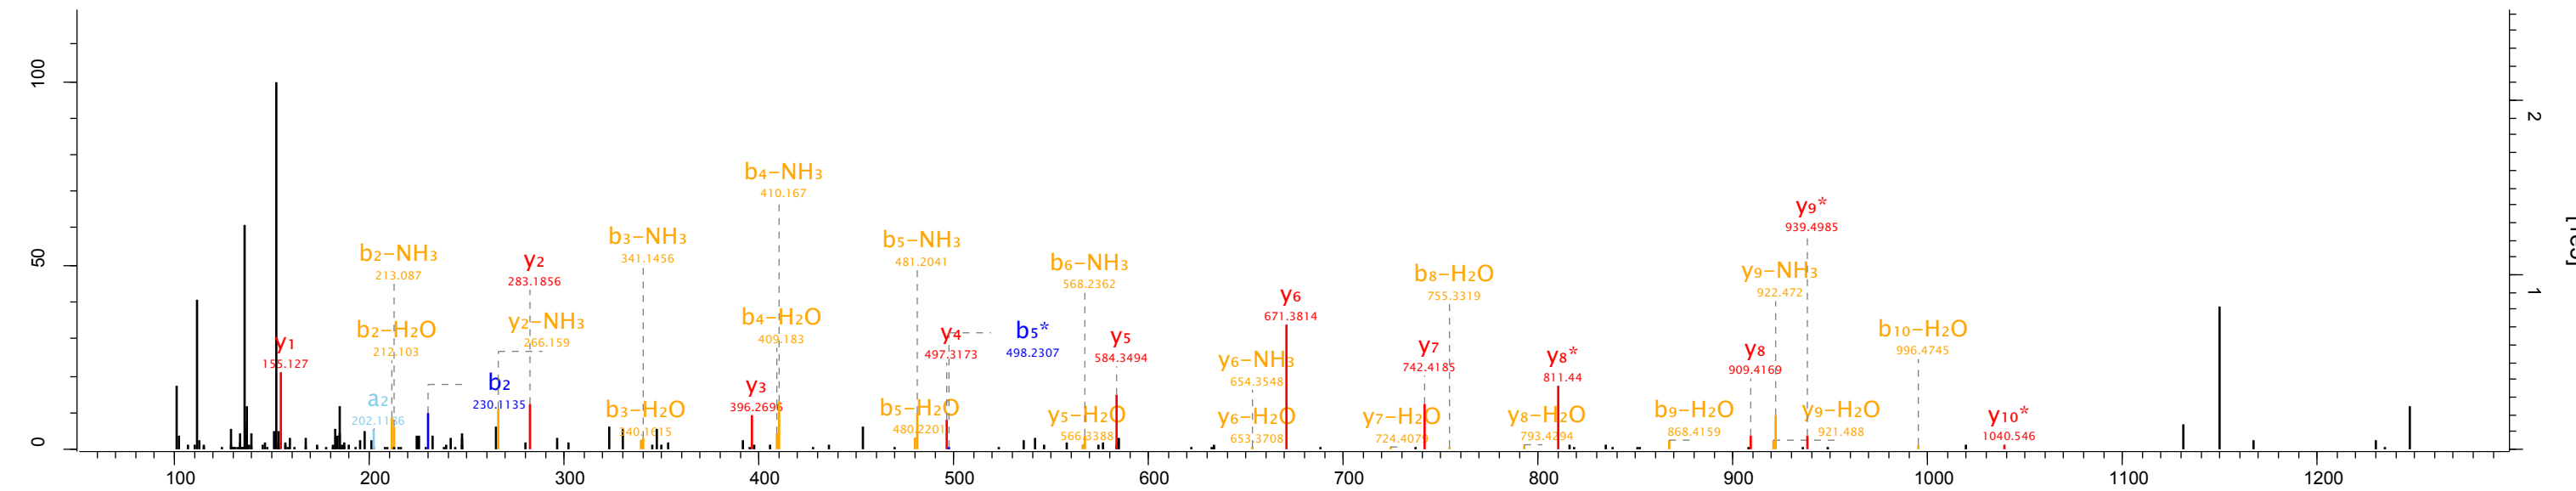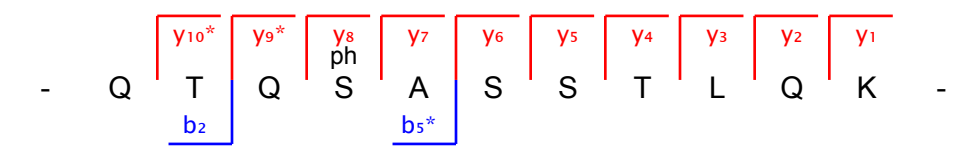



20171215\_MaS\_33SR\_LMH\_phospho2\_09 3858 FTMS; HCD 49.19 633.77 ALG3

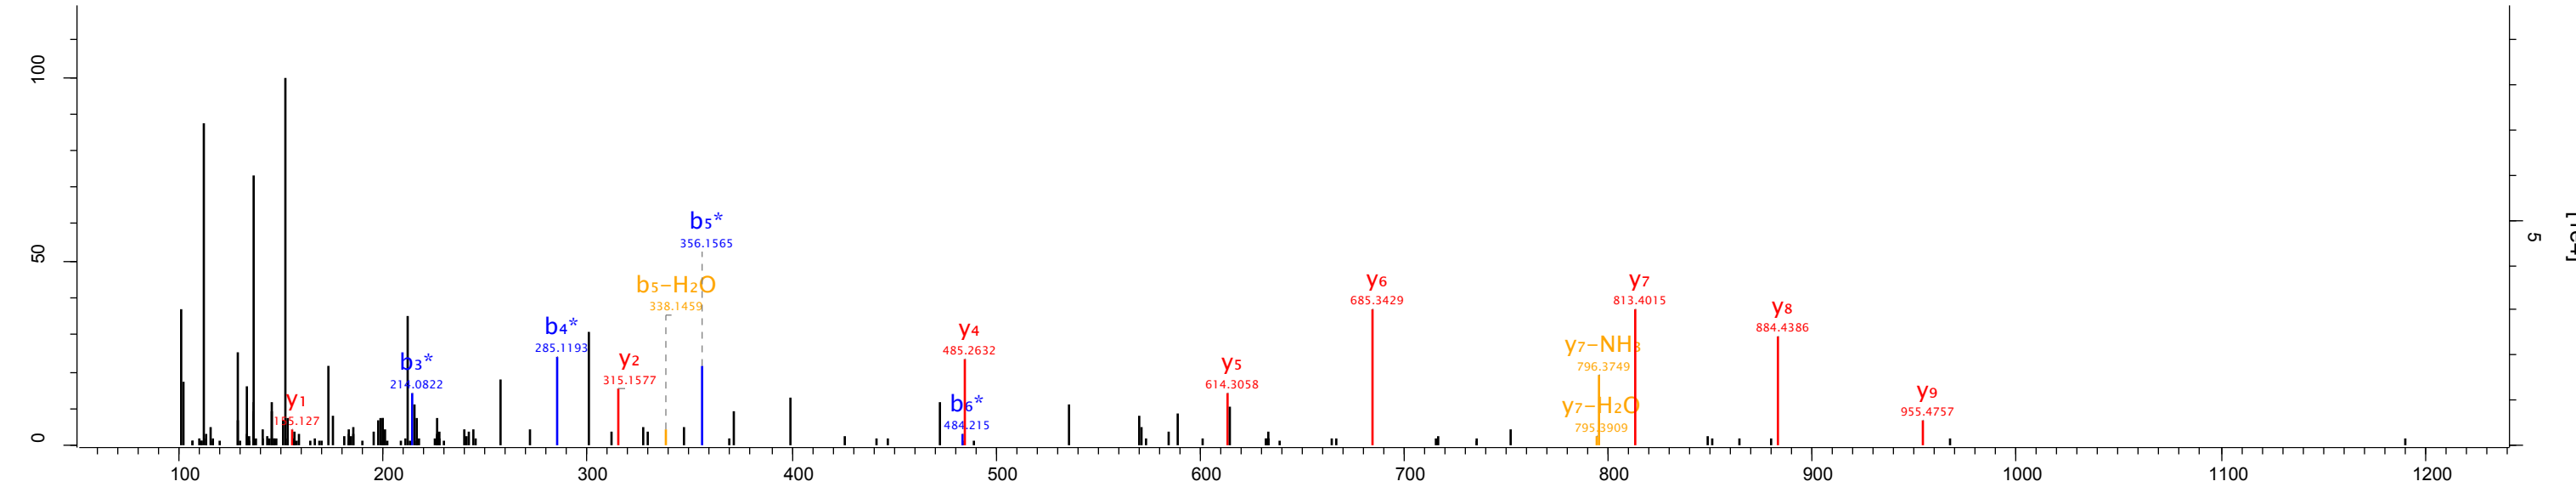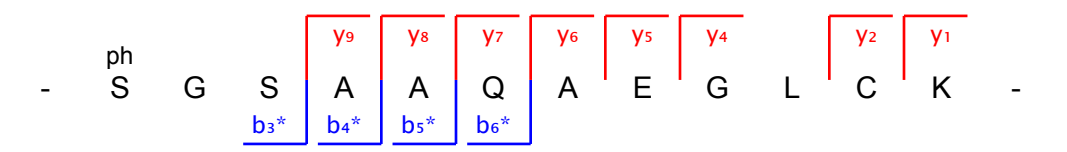

[1e4]

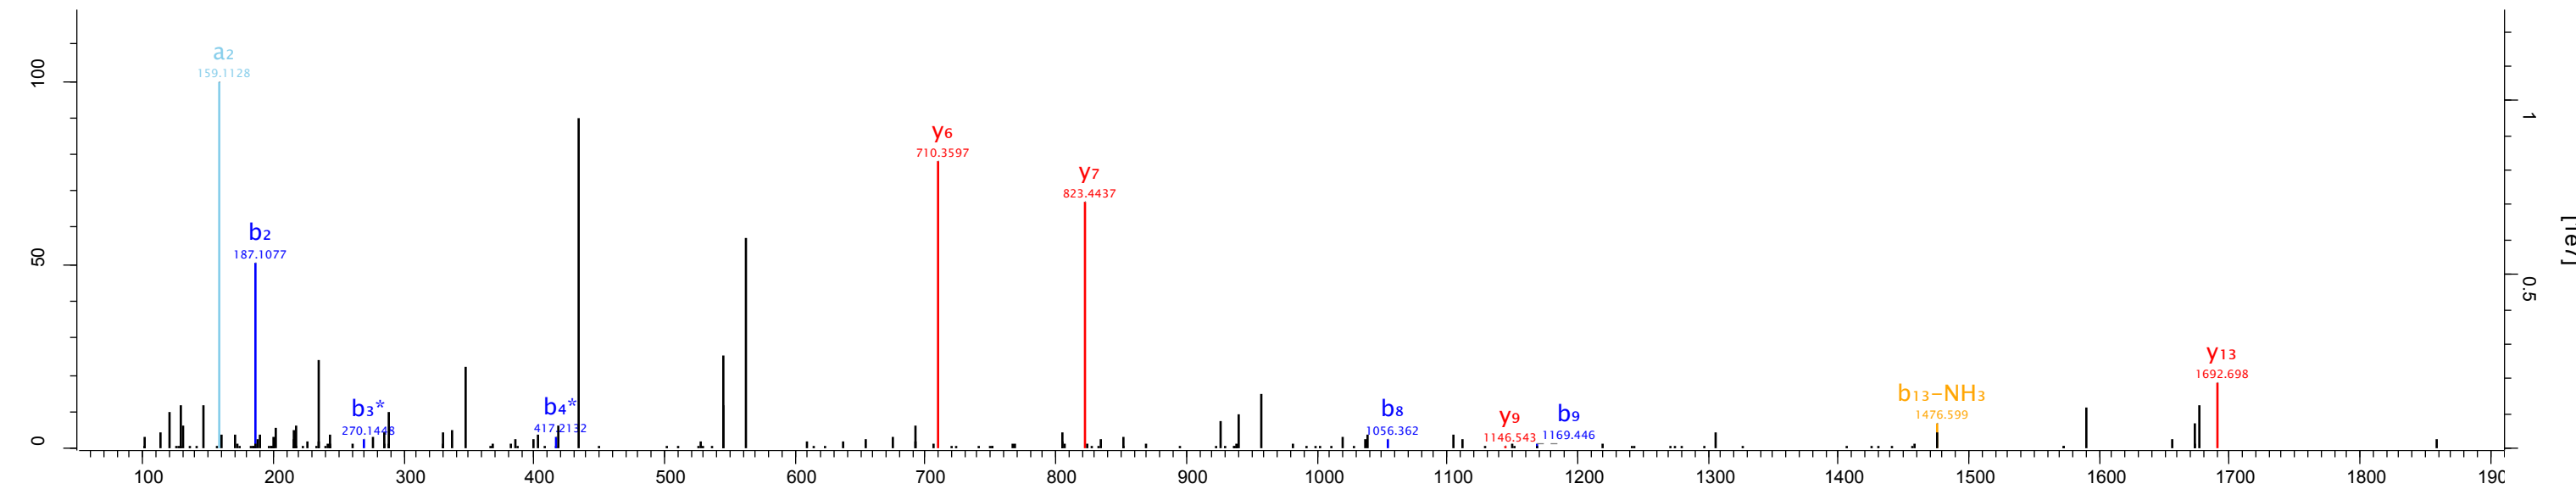

- V S T F A ox M R ph S L A ph S L A L R -

Fragmentation labels (b-ions in blue, y-ions in red) are shown below the sequence:

- b<sub>2</sub> (under S)
- b<sub>3</sub>\* (under T)
- b<sub>4</sub>\* (under F)
- b<sub>8</sub> (under S)
- b<sub>9</sub> (under L)
- y<sub>9</sub> (under R)
- y<sub>7</sub> (under L)
- y<sub>6</sub> (under A)
- y<sub>13</sub> (under T)

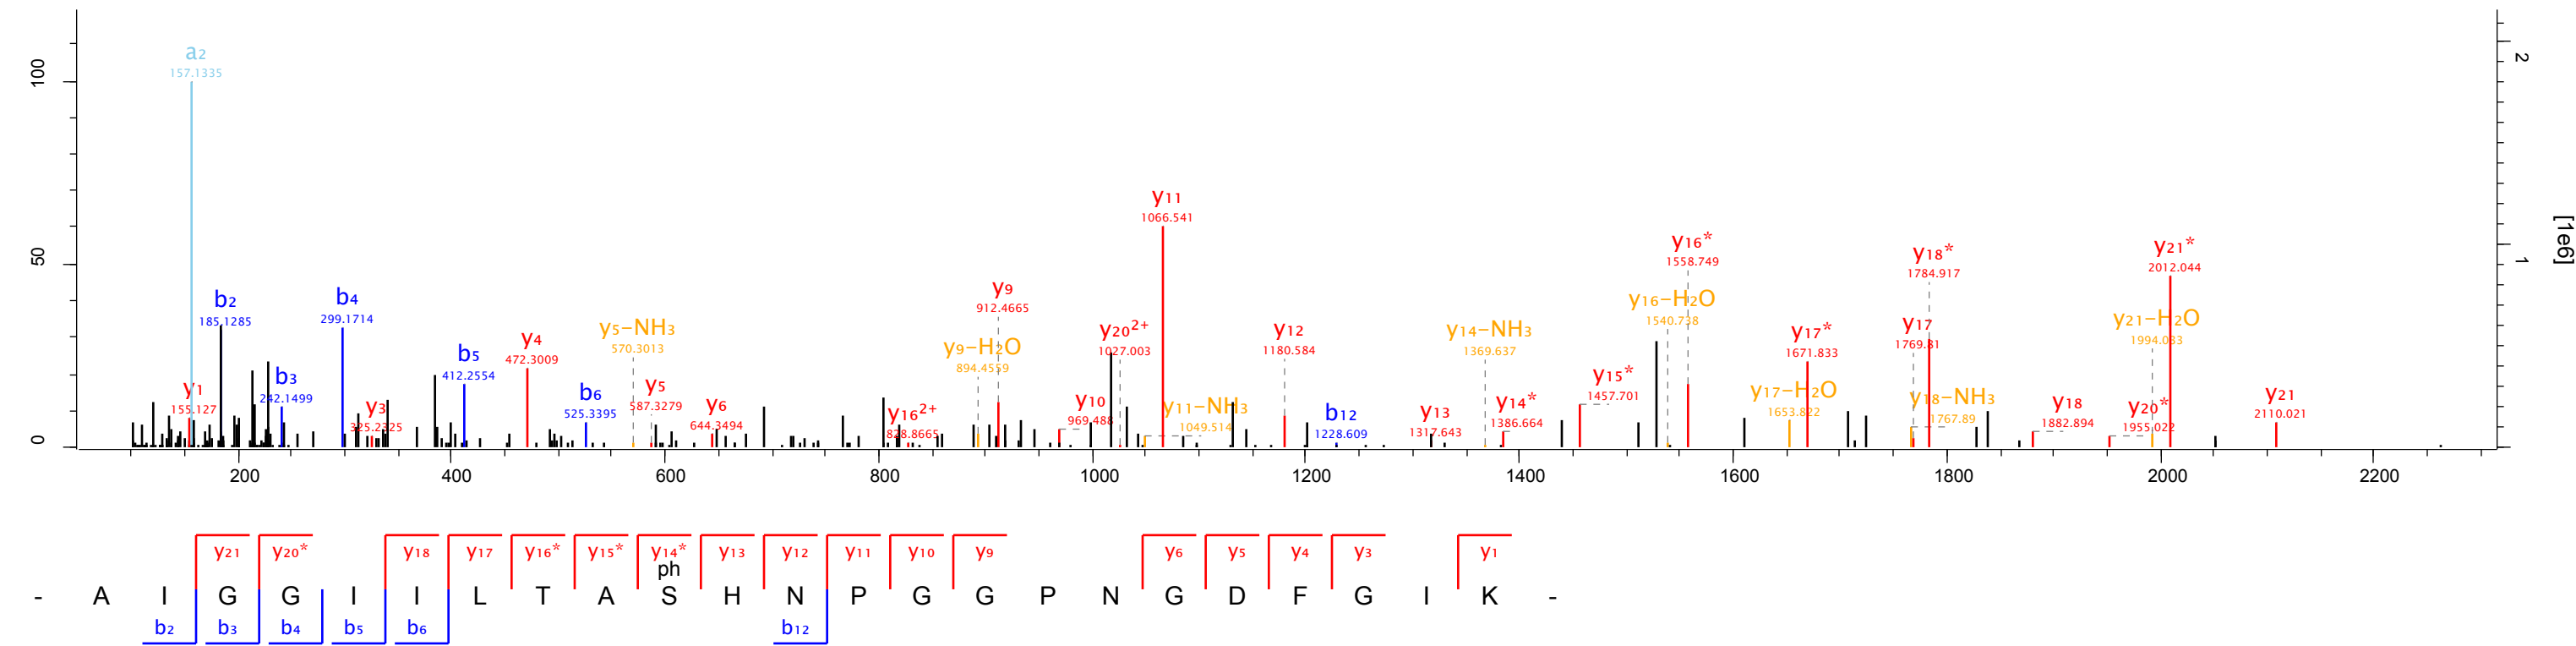

Raw file 20171215\_MaS\_33SR\_LMH\_proteome\_01 Scan 9208 Method FTMS; HCD Score 52.73 m/z 596.74 Gene names ZNF155

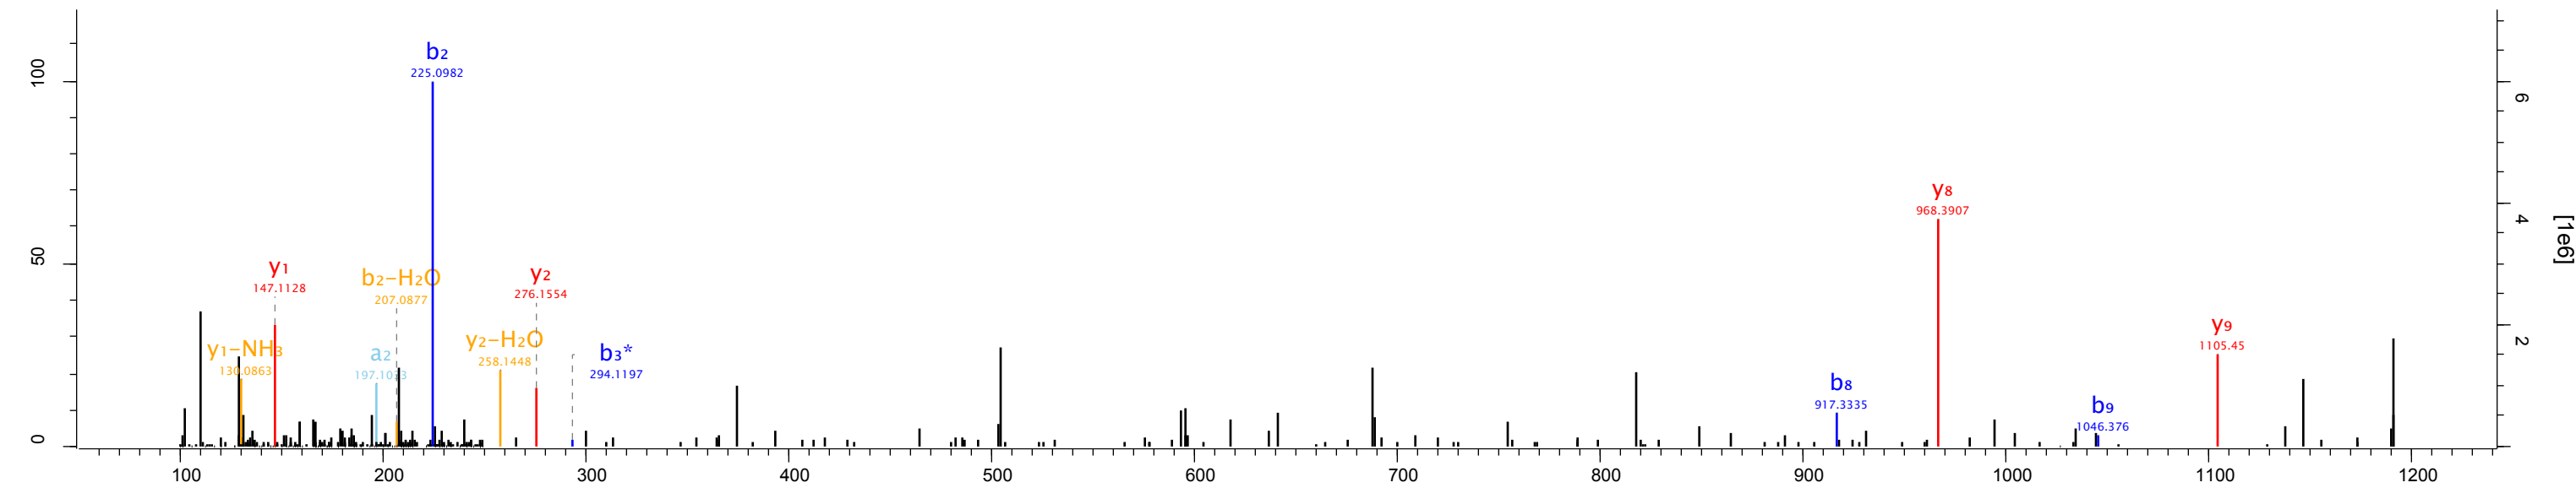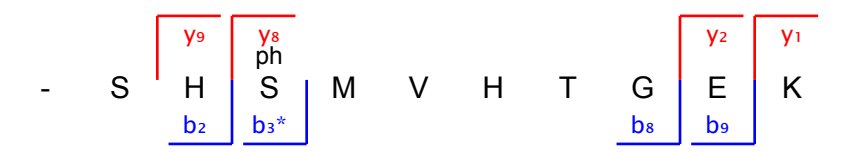

Raw file

20171215\_MaS\_33SR\_LMH\_proteome\_02

Scan 19638 Method FTMS; HCD Score 46.46 m/z 581.27 Gene names KDM5A

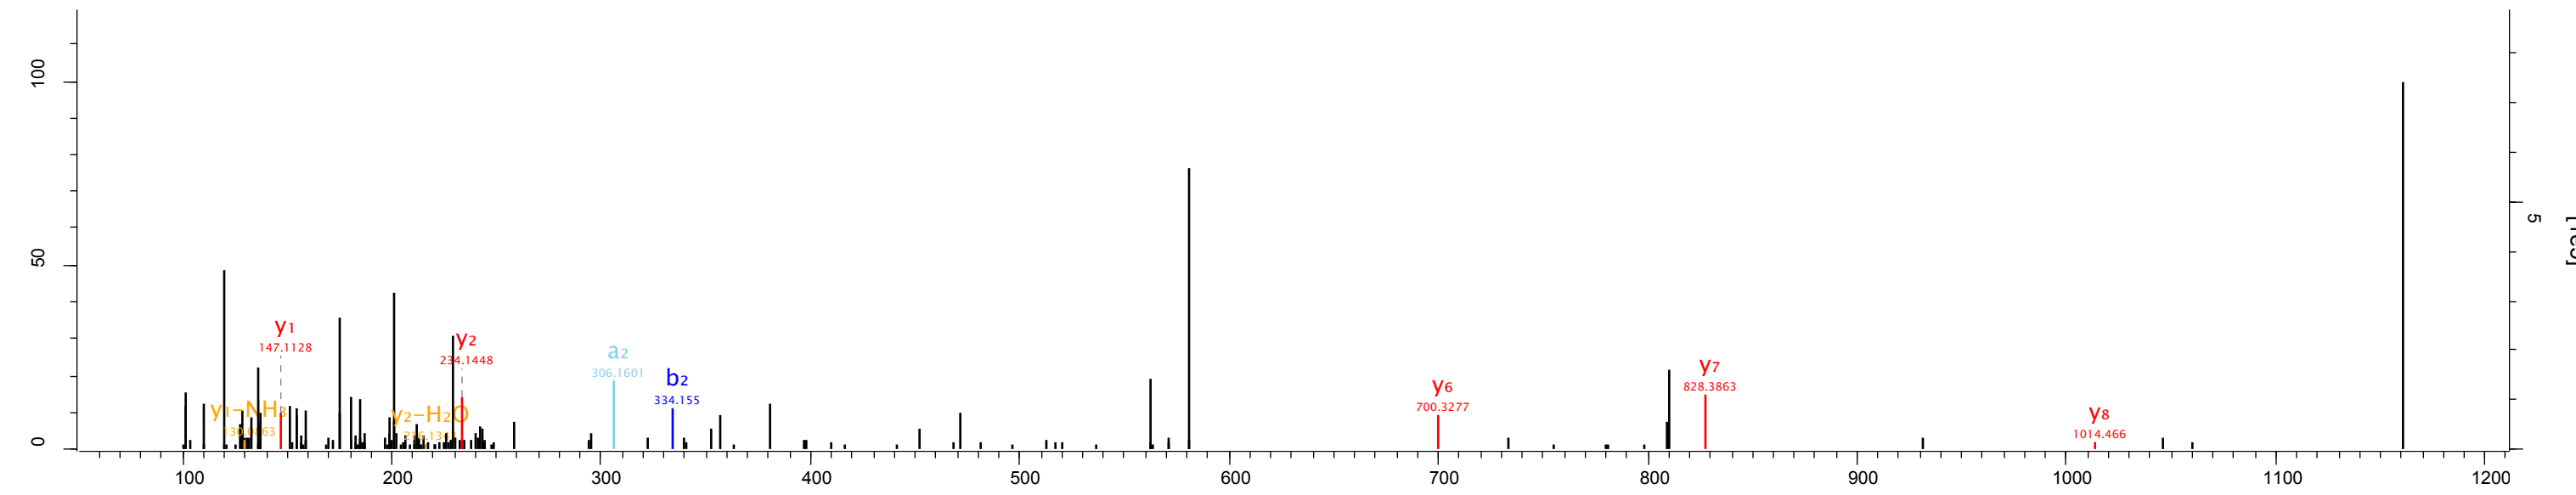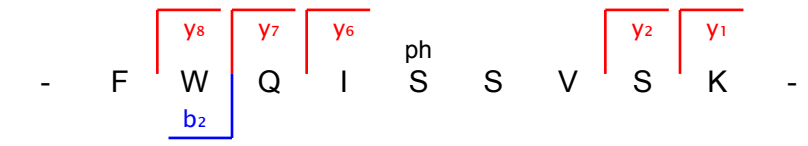

Raw file: 20171215\_MaS\_33SR\_LMH\_proteome\_02  
 Scan: 8178 Method: FTMS; HCD Score: 51.35 m/z: 498.26 Gene names: HERC4

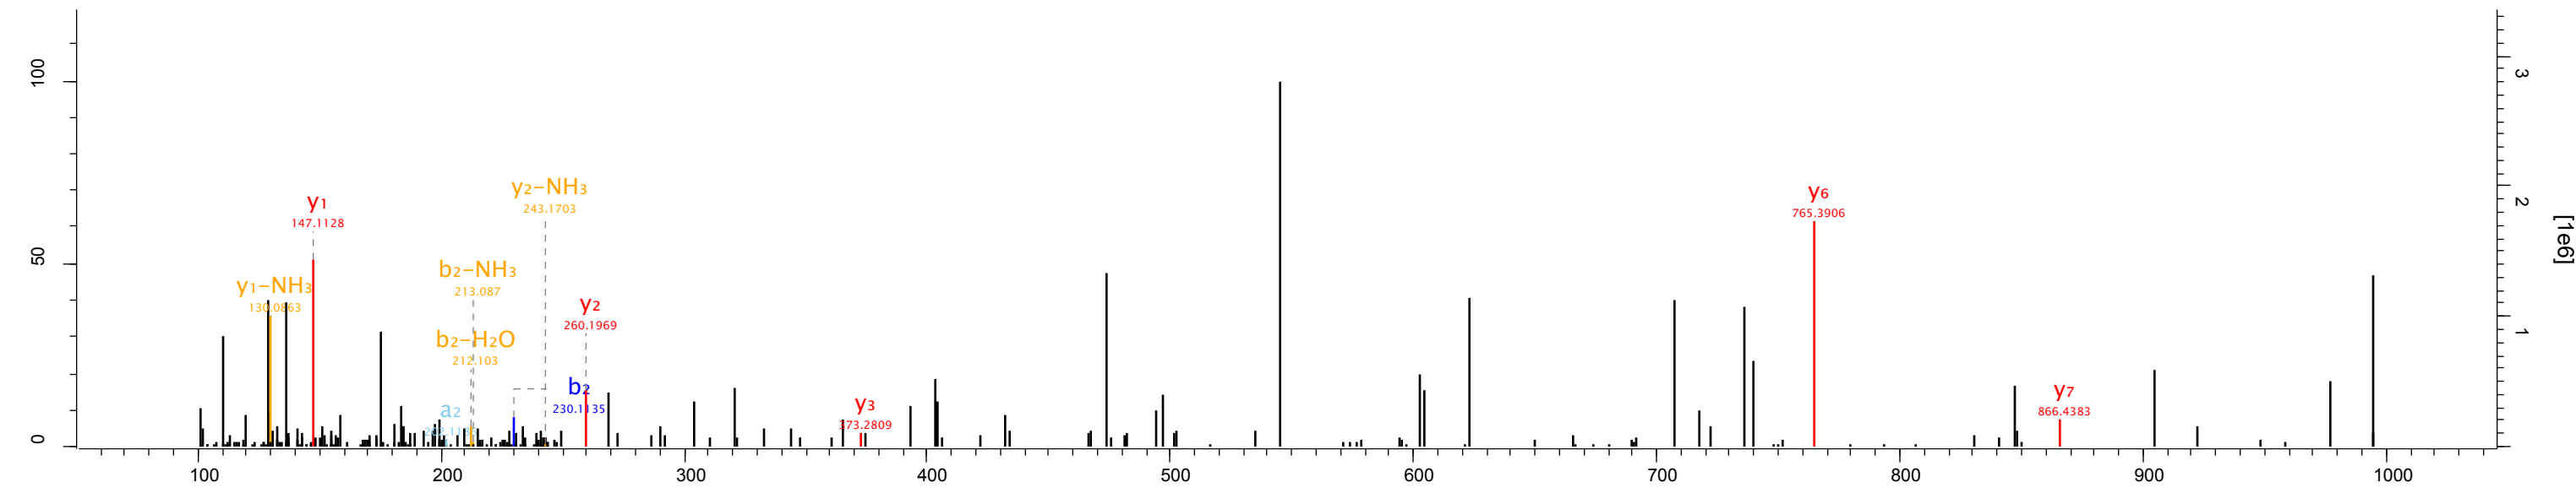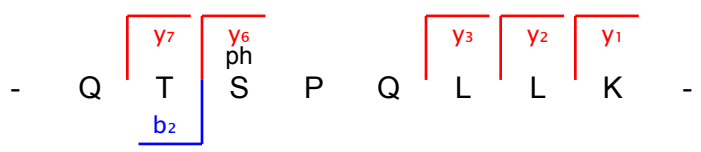

Raw file 20171215\_MaS\_33SR\_LMH\_proteome\_02 Scan 9328 Method FTMS; HCD Score 52.49 m/z 598.29 Gene names PRKAR1B

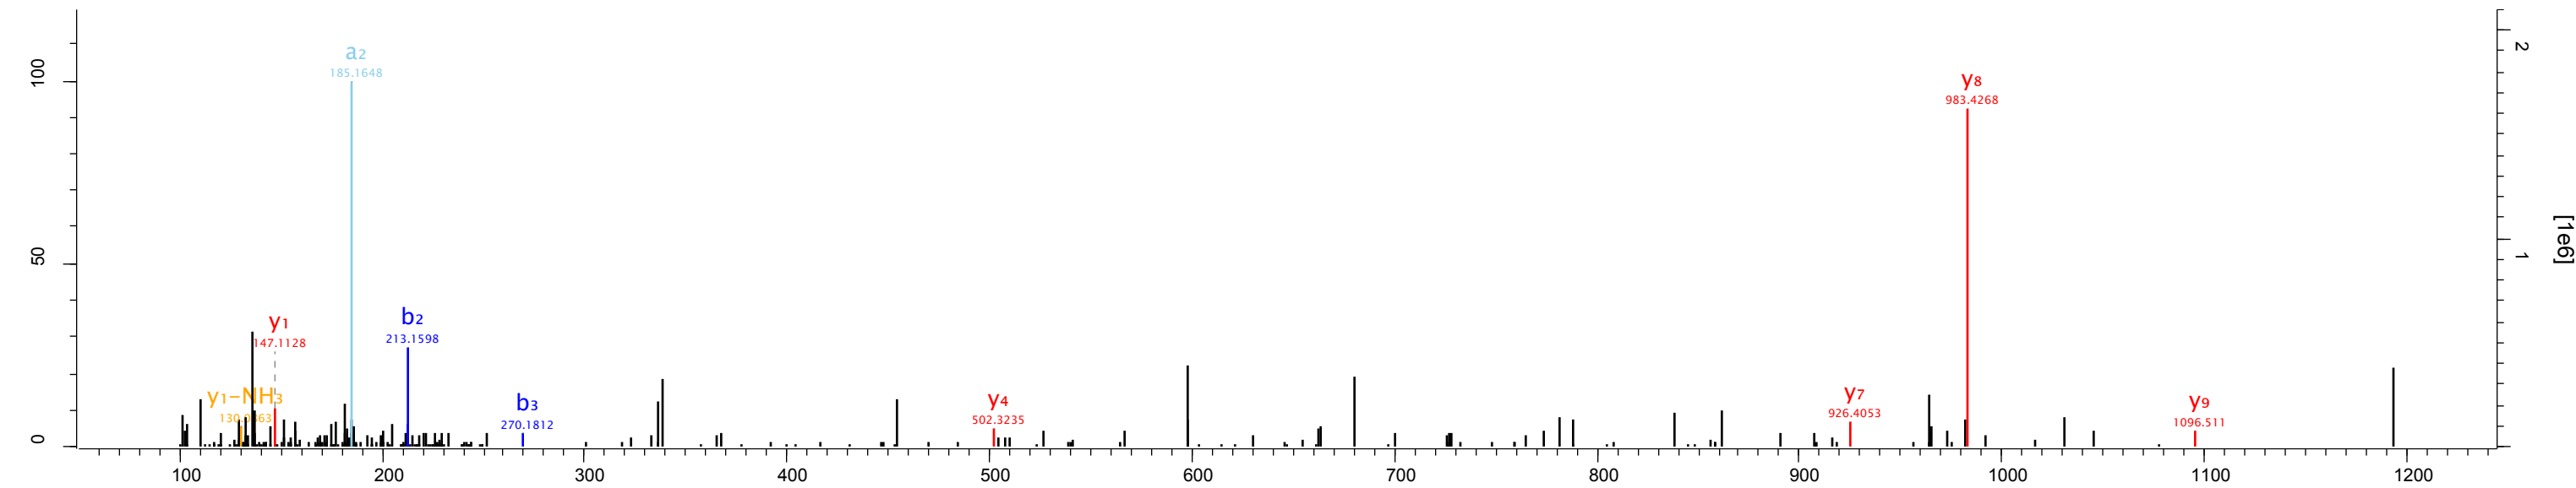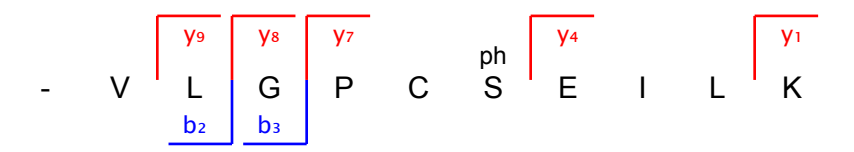

Raw file: 20171215\_MaS\_33SR\_LMH\_phospho\_01  
 Scan: 10539 Method: FTMS; HCD Score: 91.64 m/z: 1011.96 Gene names: RAB11FIP5

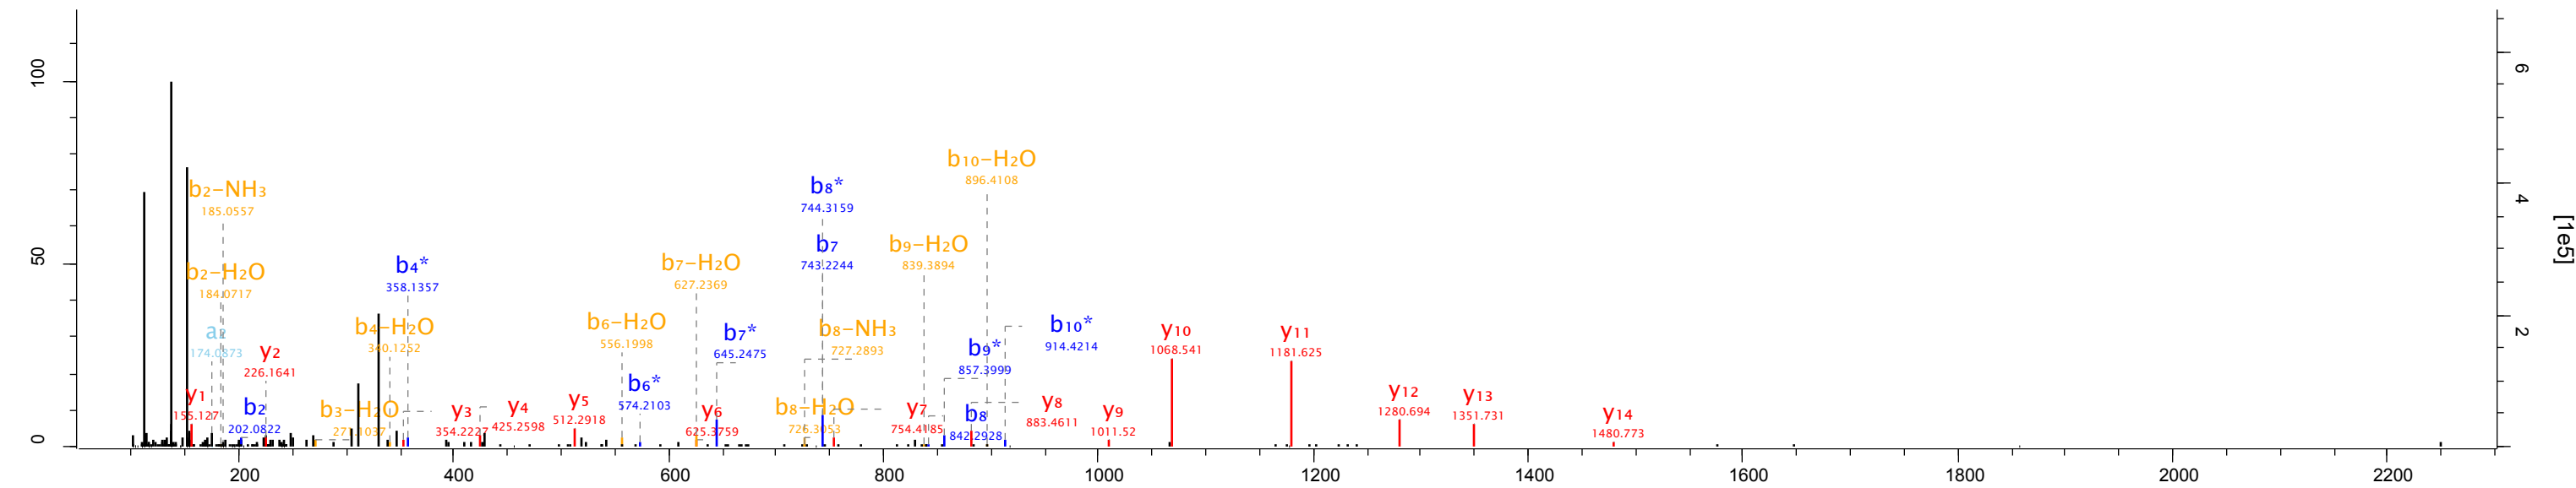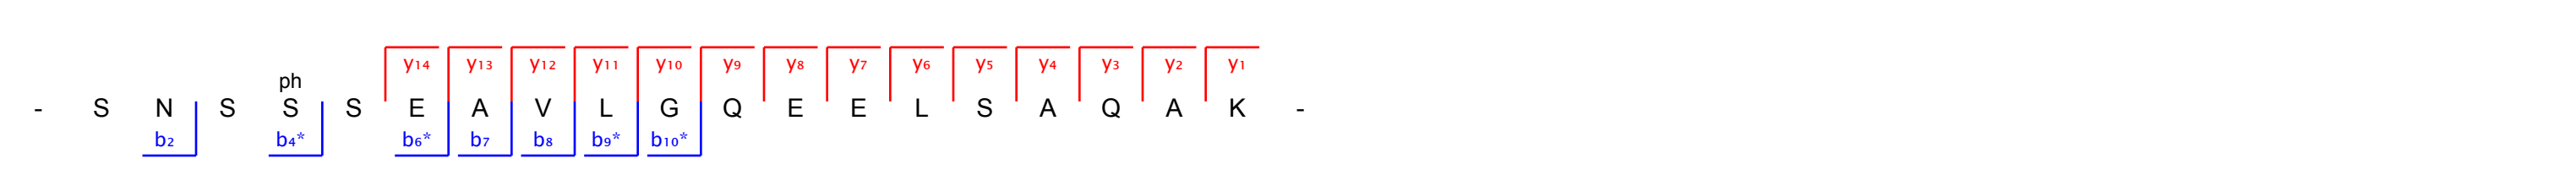



Raw file 20171215\_MaS\_33SR\_LMH\_phospho\_01 Scan 11229 Method FTMS; HCD Score 46.49 m/z 916.33 Gene names RYBP

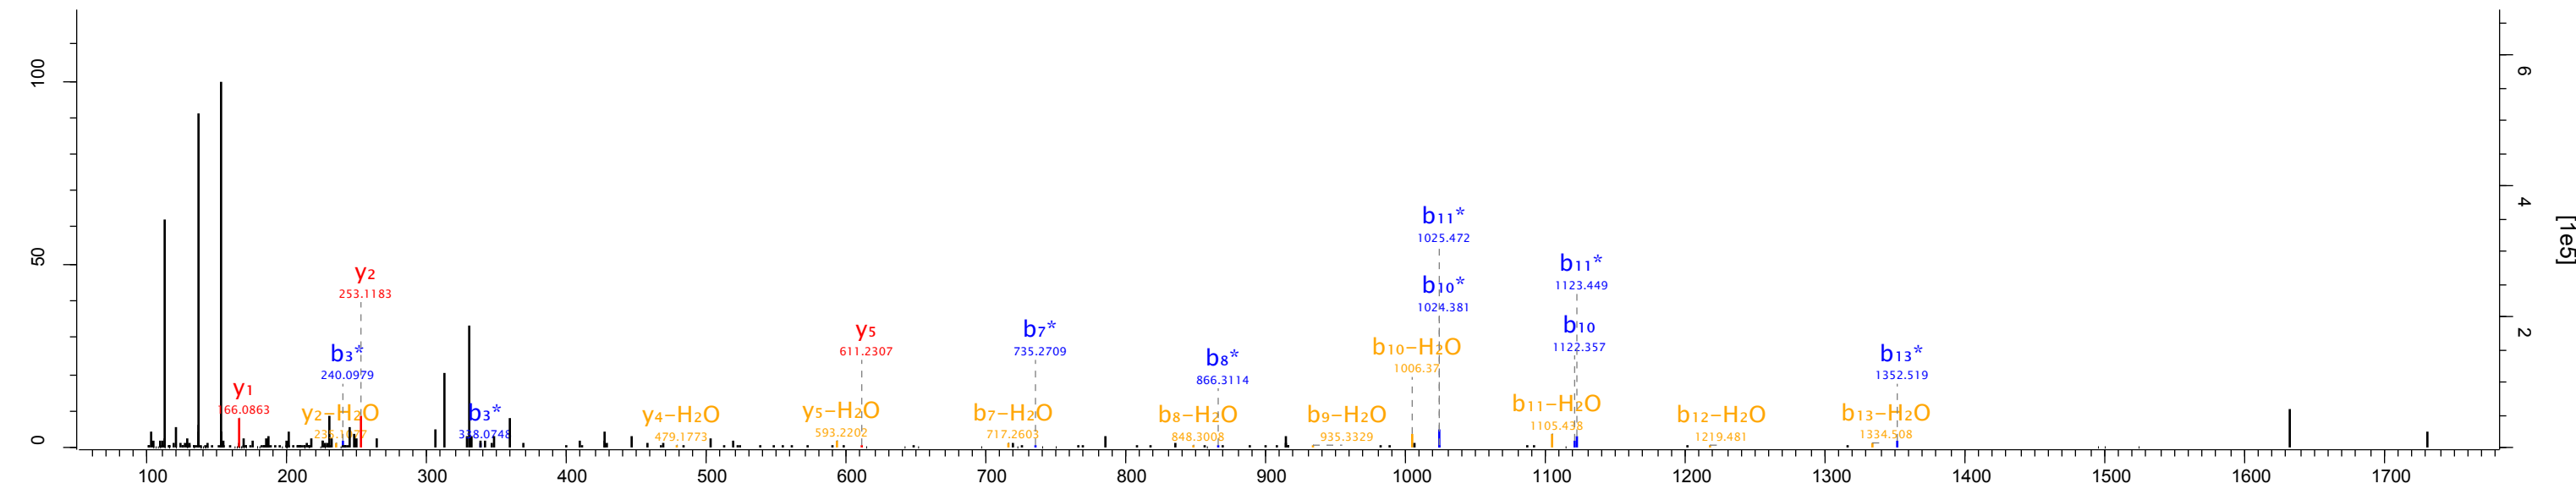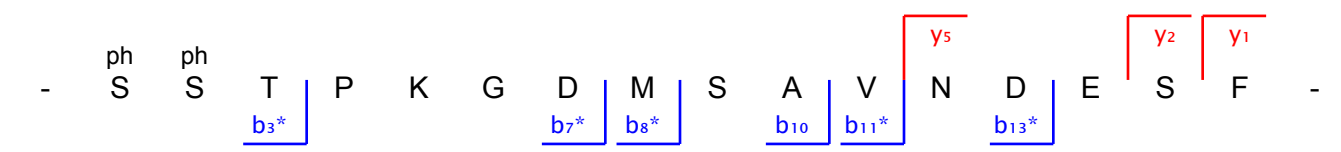

Raw file 20171215\_MaS\_33SR\_LMH\_phospho\_01 Scan 12669 Method FTMS; HCD Score 125.61 m/z 952.08 Gene names LRRC47

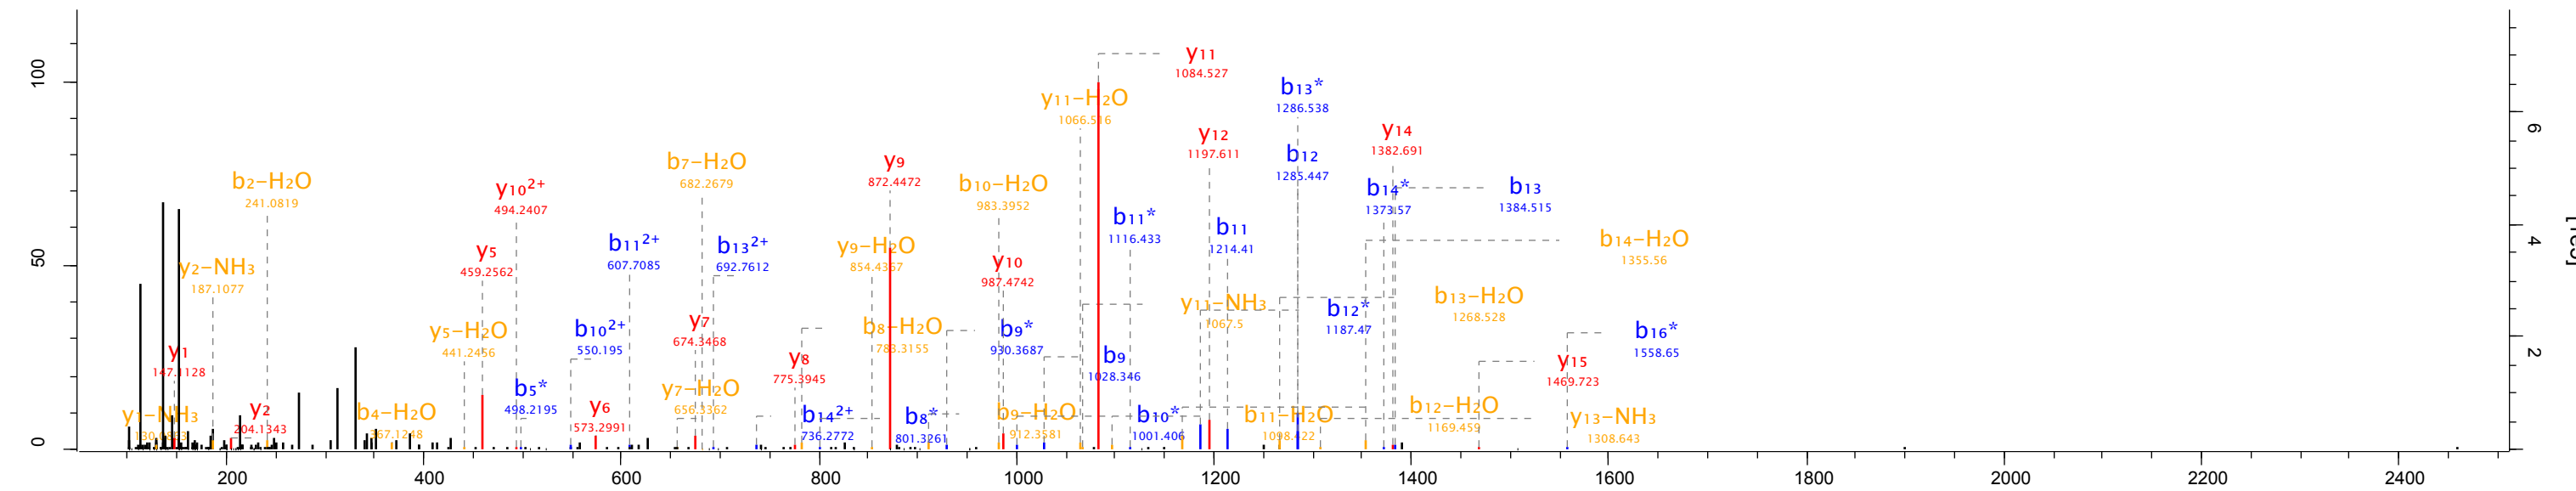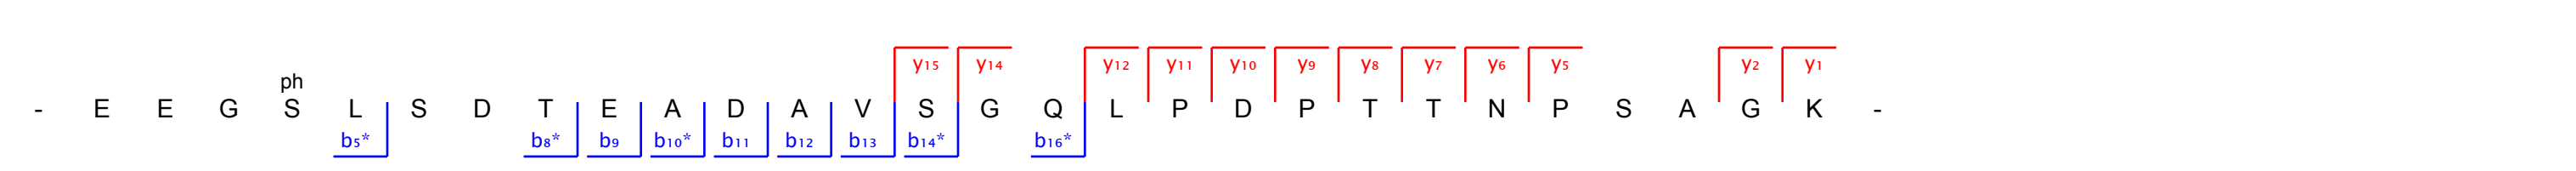



Raw file 20171215\_MaS\_33SR\_LMH\_phospho\_01 Scan 4579 Method FTMS; HCD Score 86.26 m/z 898.02 Gene names UBAP2L

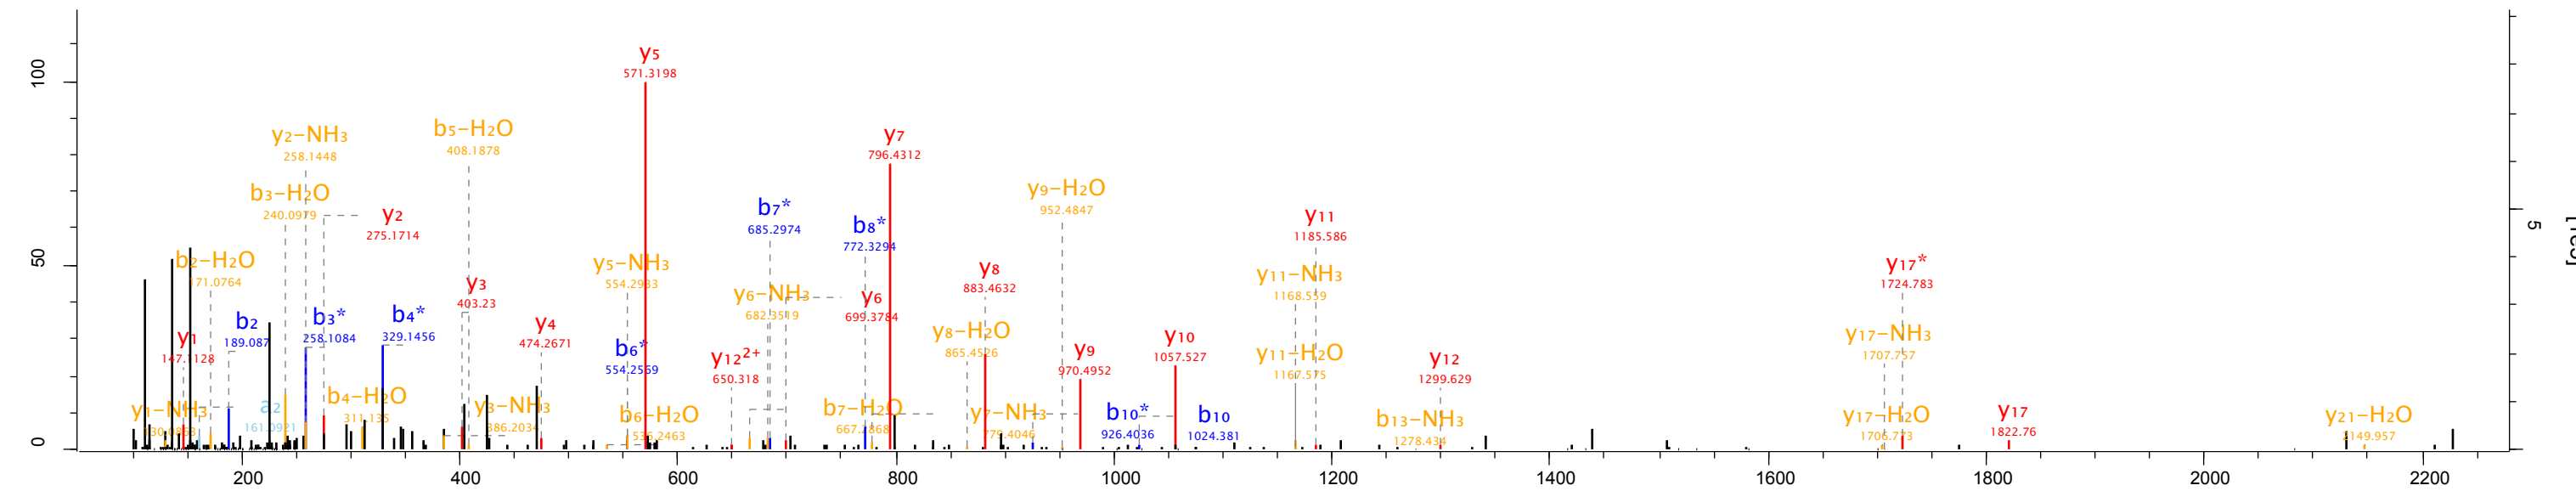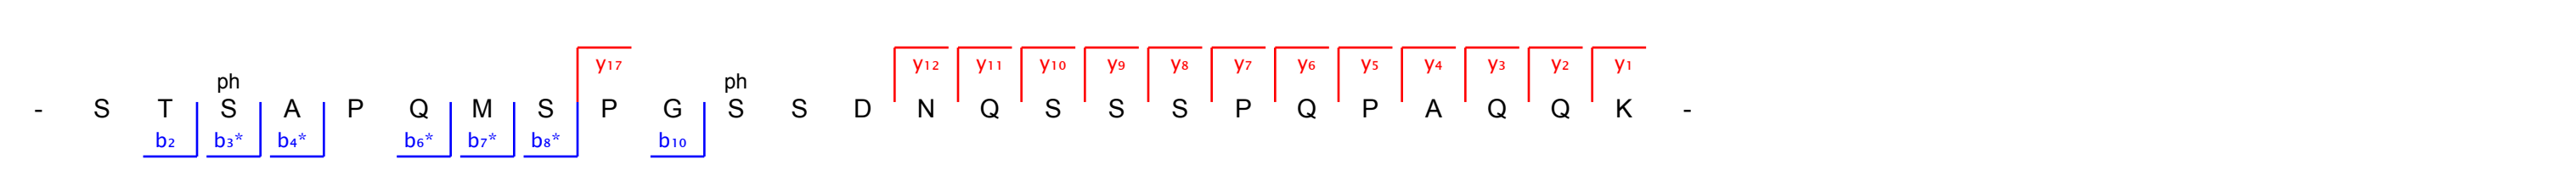

Raw file 20171215\_MaS\_33SR\_LMH\_phospho\_01 Scan 5039 Method FTMS; HCD Score 86.5 m/z 699.73 Gene names TRA2A

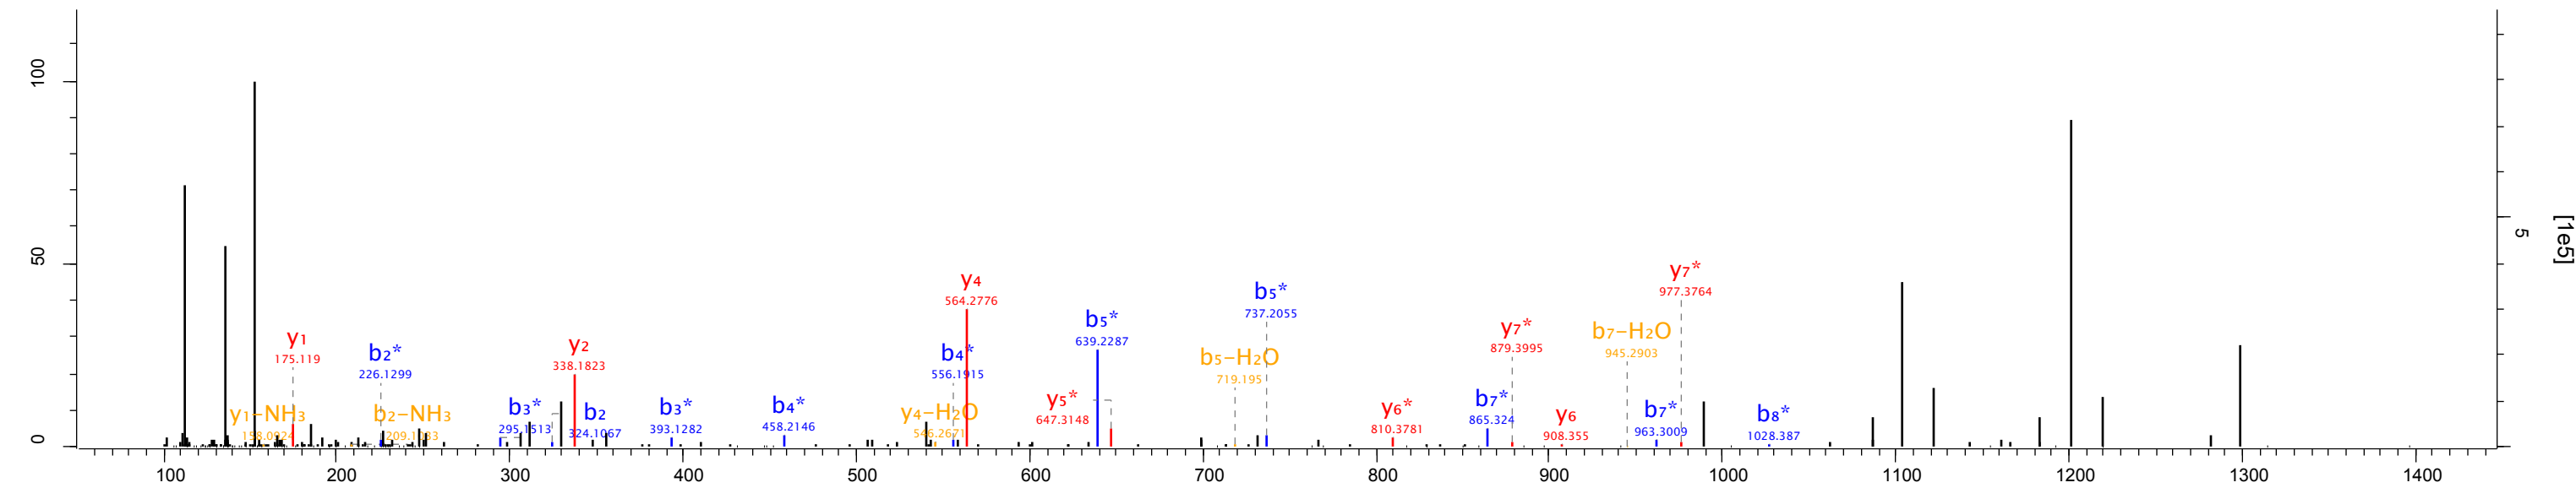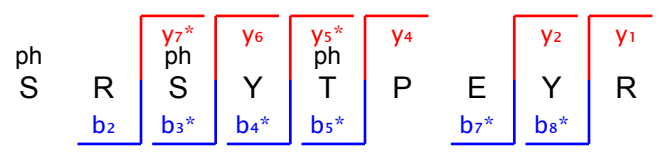

Raw file 20171215\_MaS\_33SR\_LMH\_phospho\_01 Scan 5689 Method FTMS; HCD Score 270.37 m/z 1098.37 Gene names PDAP1

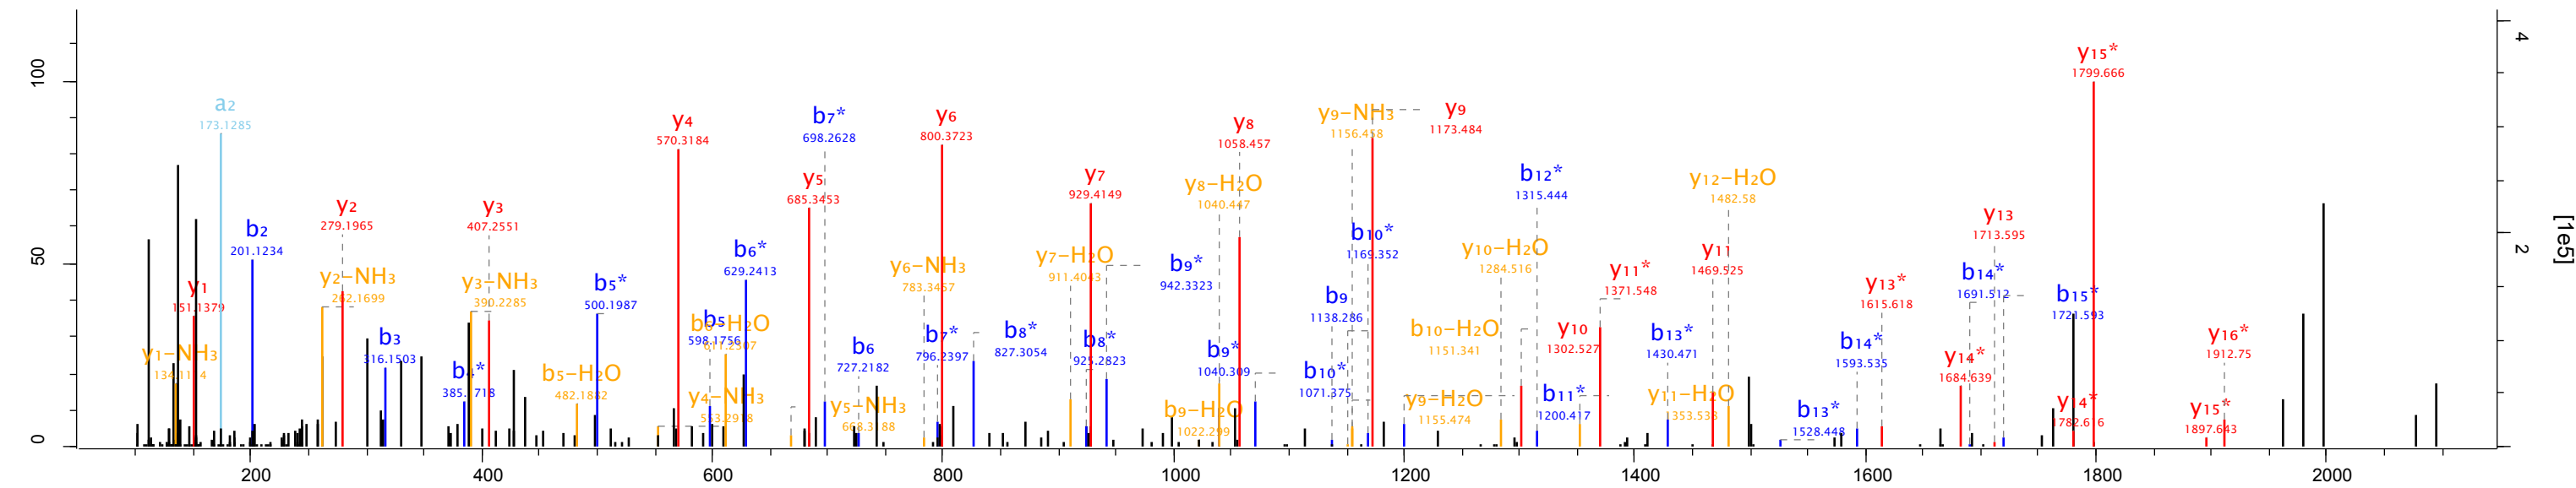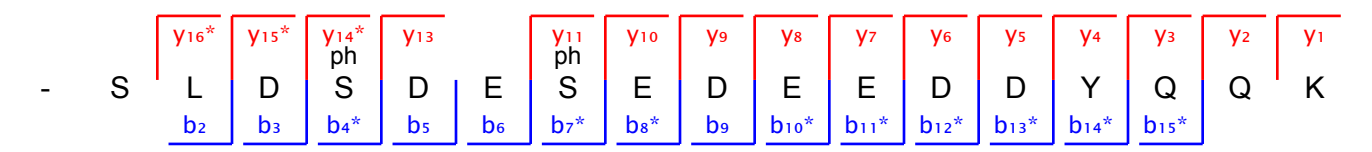

Raw file Scan Method Score m/z Gene names

20171215\_MaS\_33SR\_LMH\_phospho\_01 5769 FTMS; HCD 115.5 1136.34 PDAP1

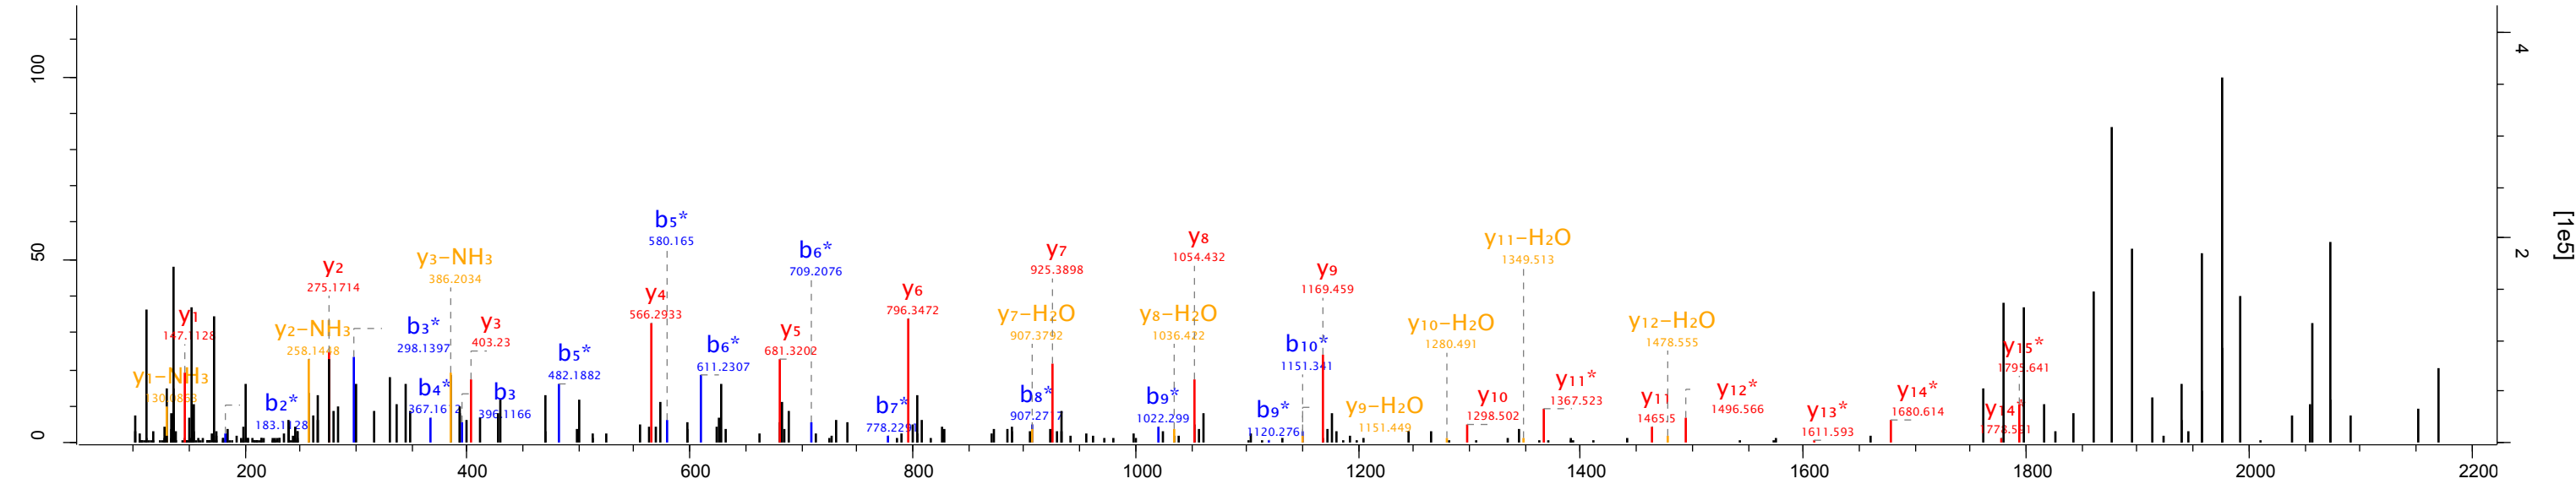

ph S L D S D E S E D E E D D Y Q Q K -

y15\*
y14\*  
ph
y13\*
y12\*
y11  
ph
y10
y9
y8
y7
y6
y5
y4
y3
y2
y1

b2\*
b3
b4\*
b5\*
b6\*
b7\*
b8\*
b9\*
b10\*

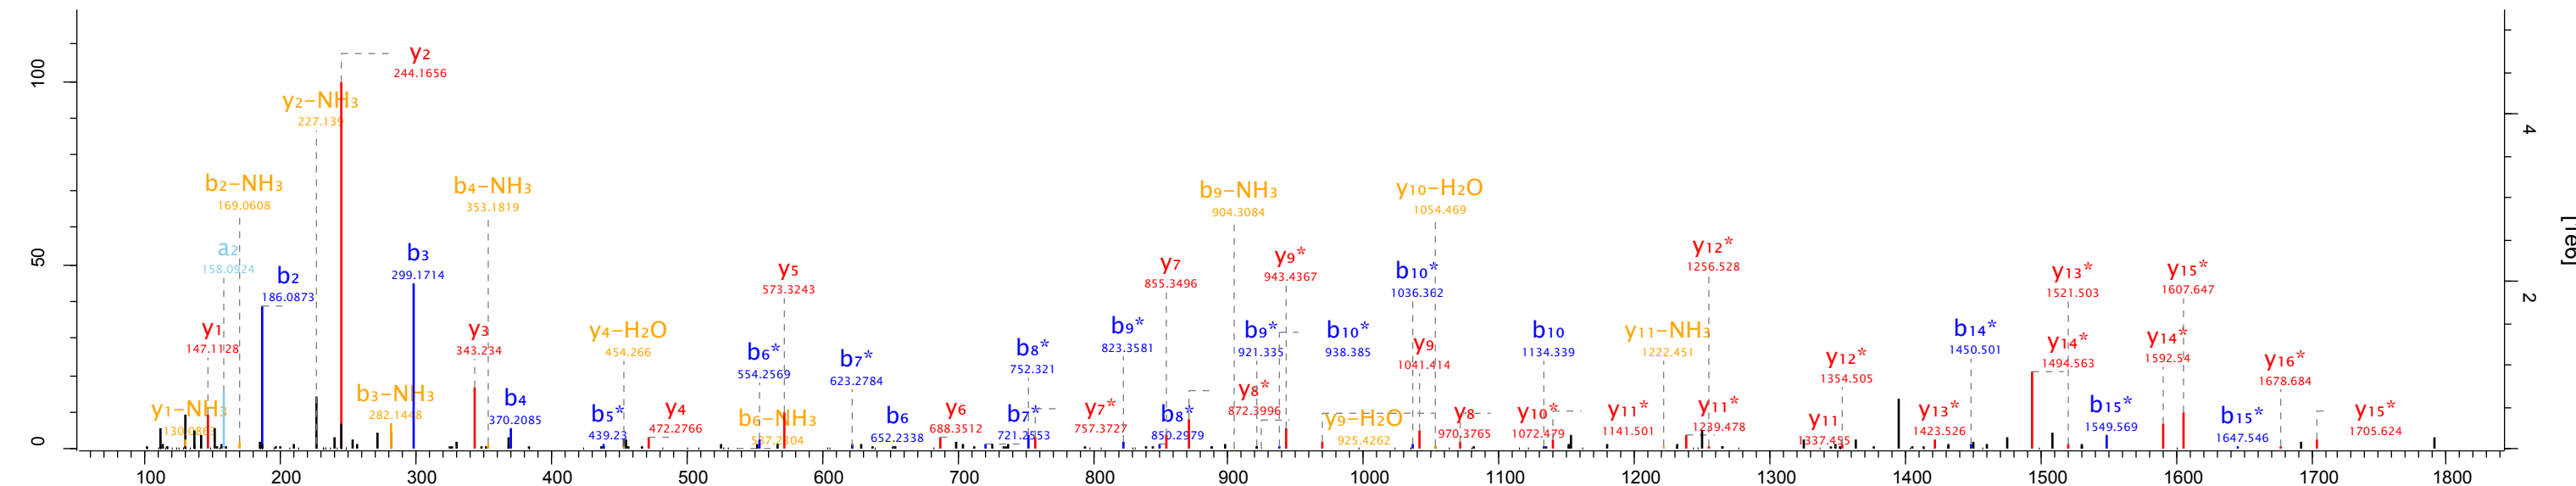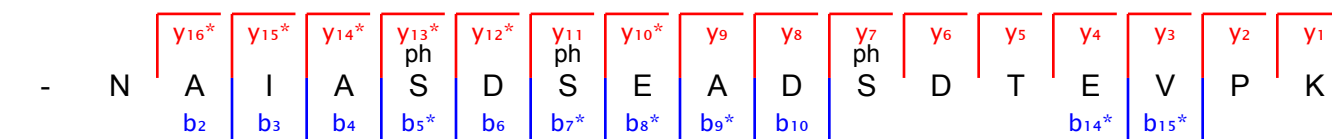



Raw file 20171215\_MaS\_33SR\_LMH\_phospho\_01 Scan 7109 Method FTMS; HCD Score 199.01 m/z 838.81 Gene names ZC3H18

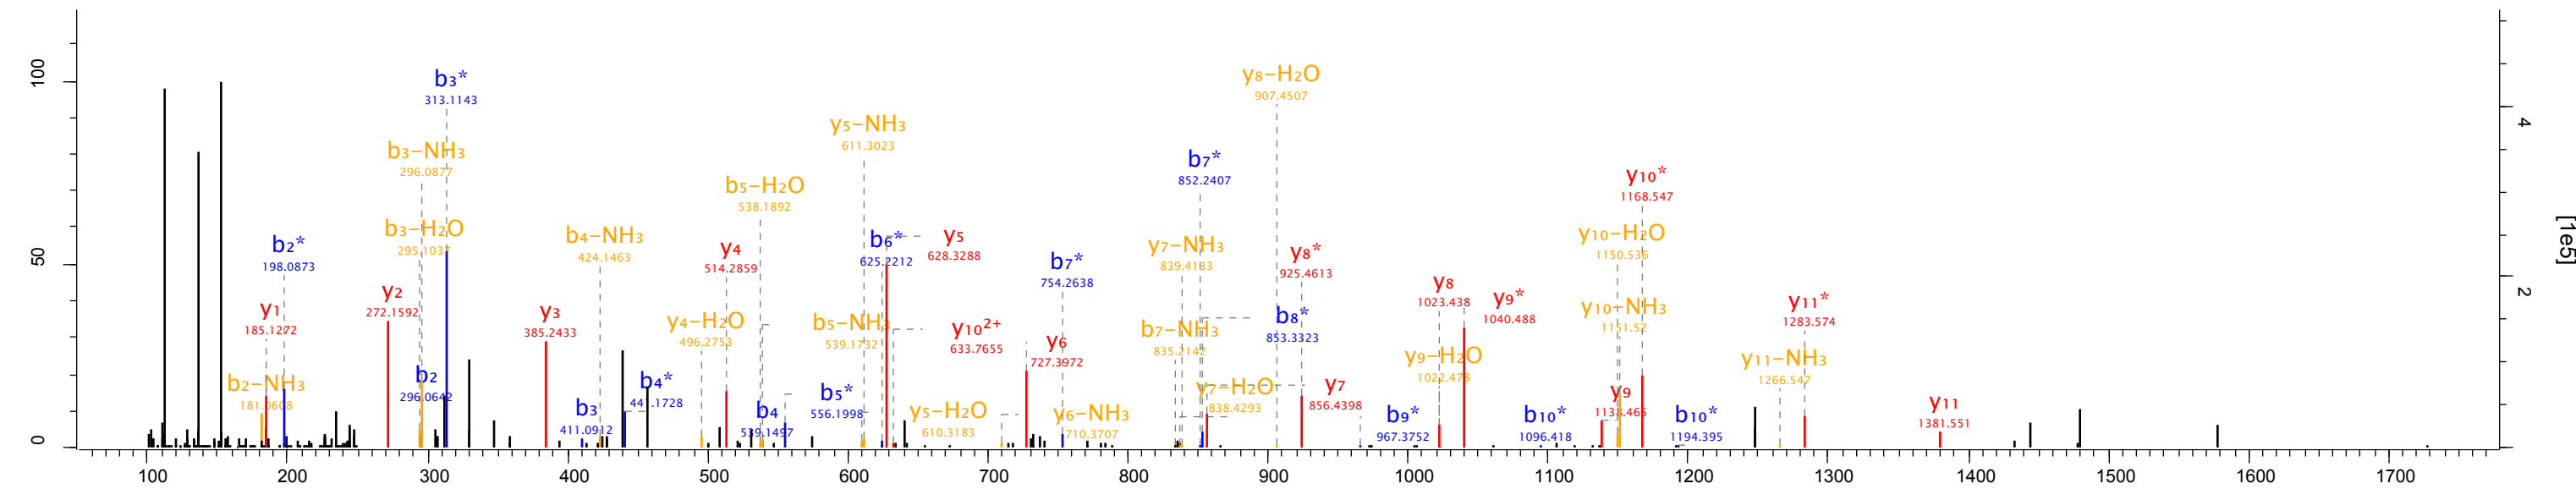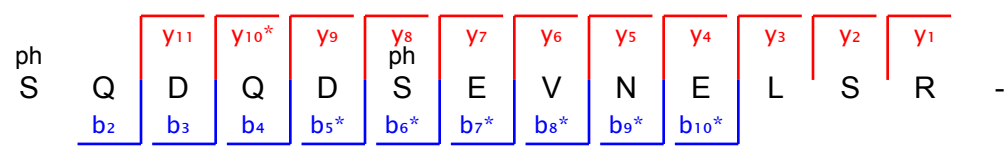

Raw file 20171215\_MaS\_33SR\_LMH\_phospho\_01 Scan 7229 Method FTMS; HCD Score 124.82 m/z 836.83 Gene names POLR2A

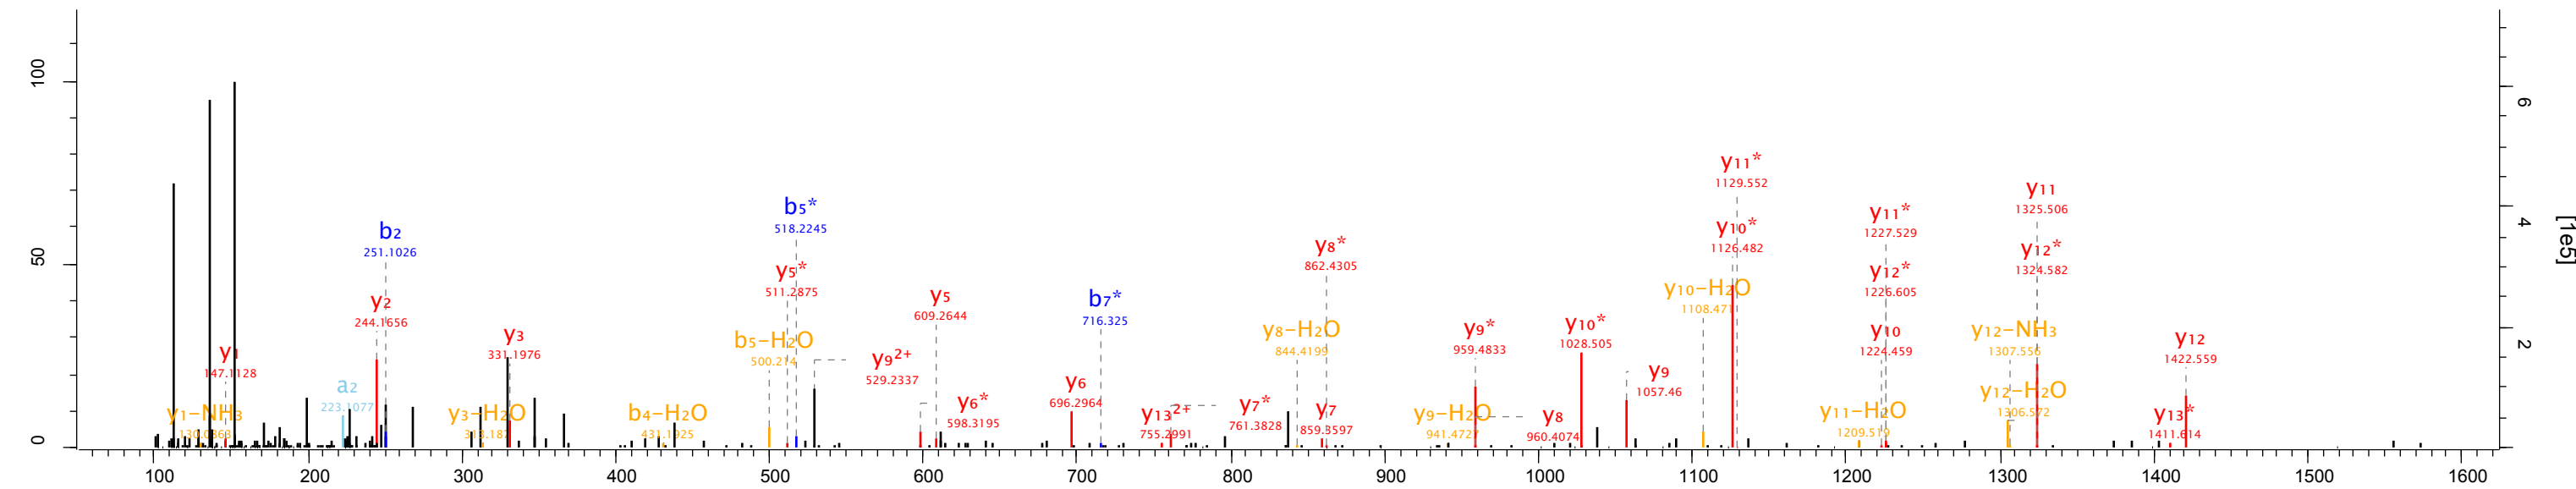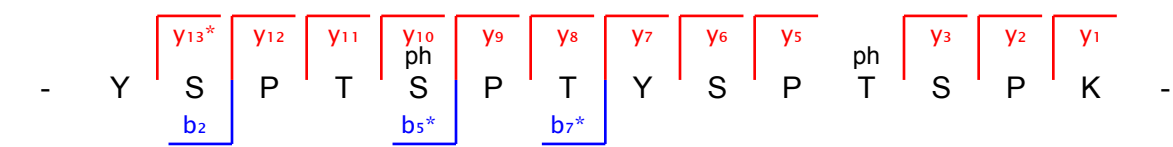

Raw file 20171215\_MaS\_33SR\_LMH\_phospho\_01 Scan 8609 Method FTMS; HCD Score 60.03 m/z 1186.46 Gene names TLK2

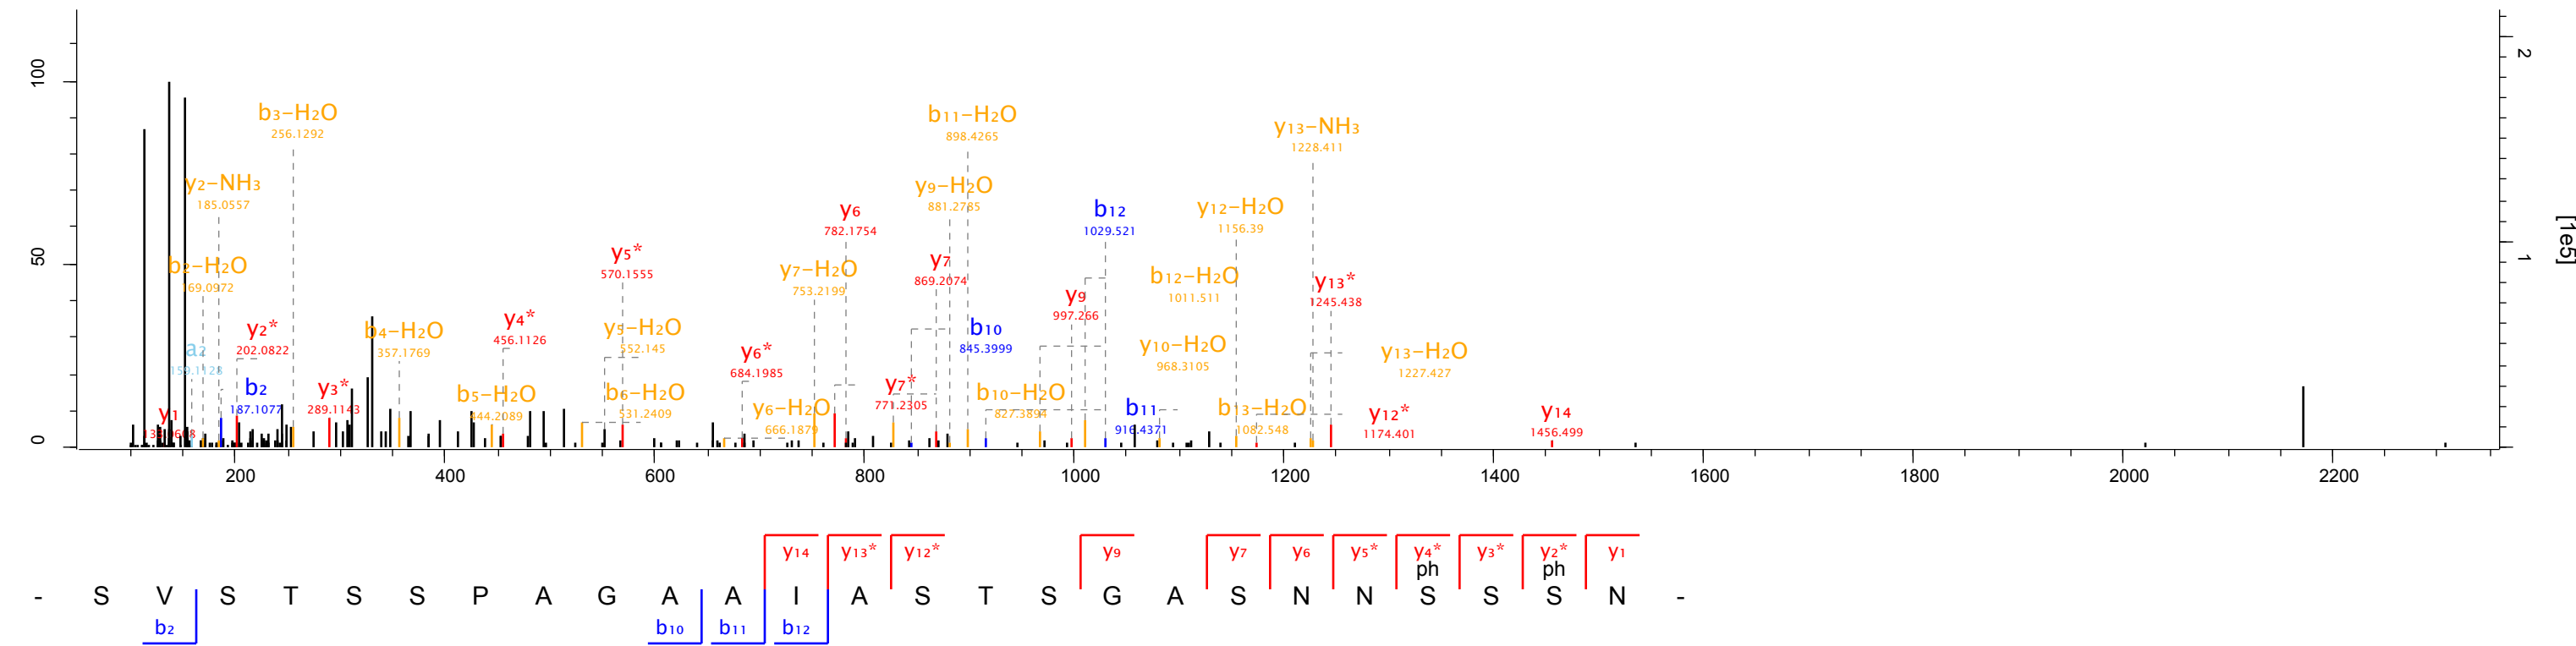

Raw file  
 20171215\_MaS\_33SR\_LMH\_phospho\_01  
 Scan 9609 FTMS; HCD Score 291.1 m/z 901.89 Gene names AHNAK

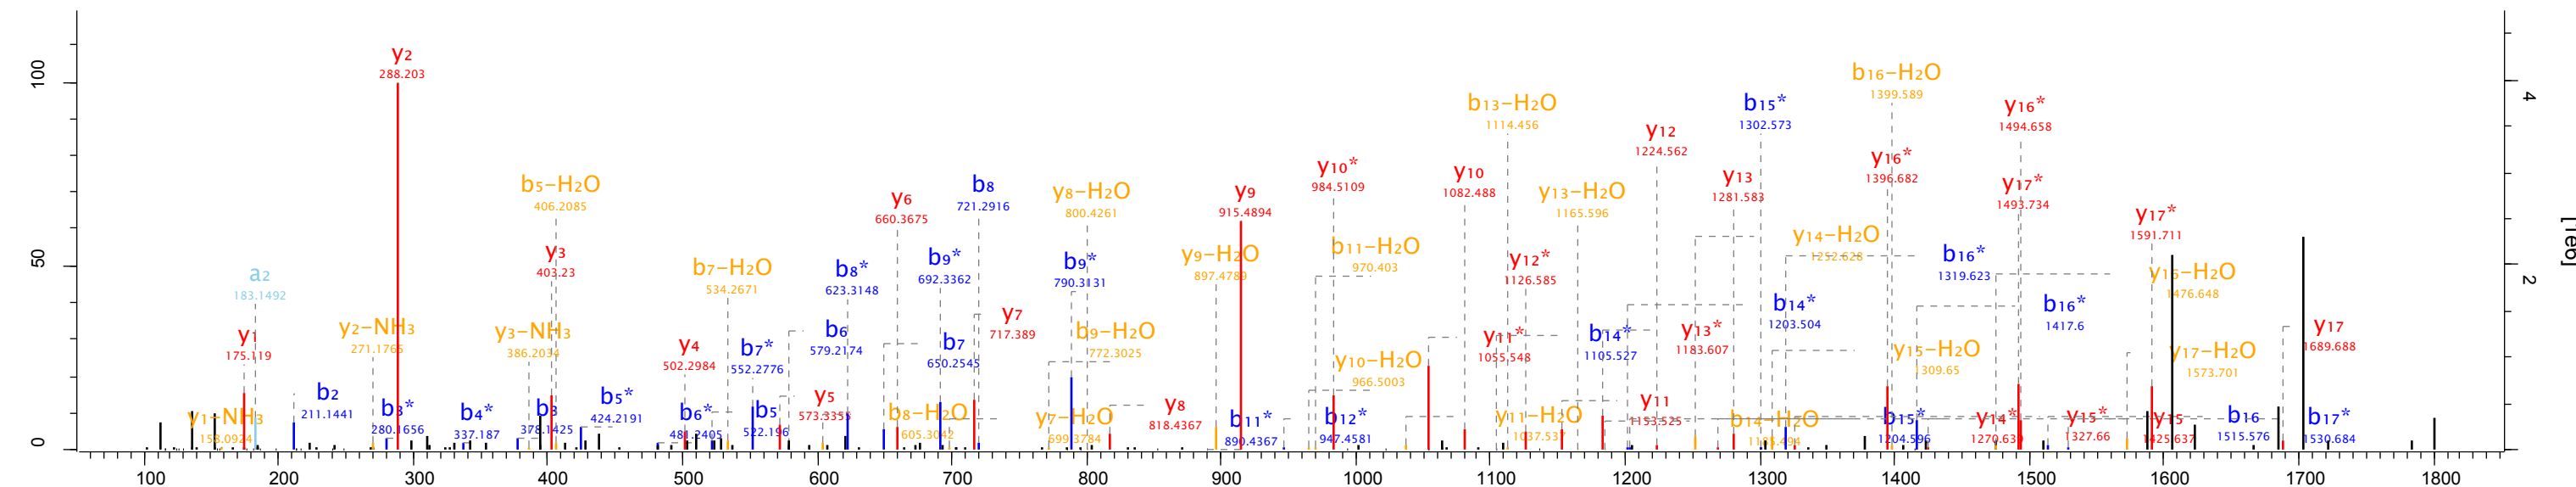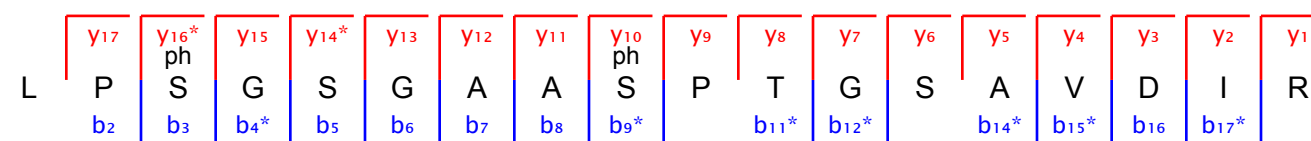

- L P S G S G A A S P T G S A V D I R -  
 b2 b3 b4\* b5 b6 b7 b8 b9\* b11\* b12\* b14\* b15\* b16 b17\*

Raw file 20171215\_MaS\_33SR\_LMH\_phospho\_01 Scan 9979 Method FTMS; HCD Score 145.61 m/z 682.72 Gene names KRT80

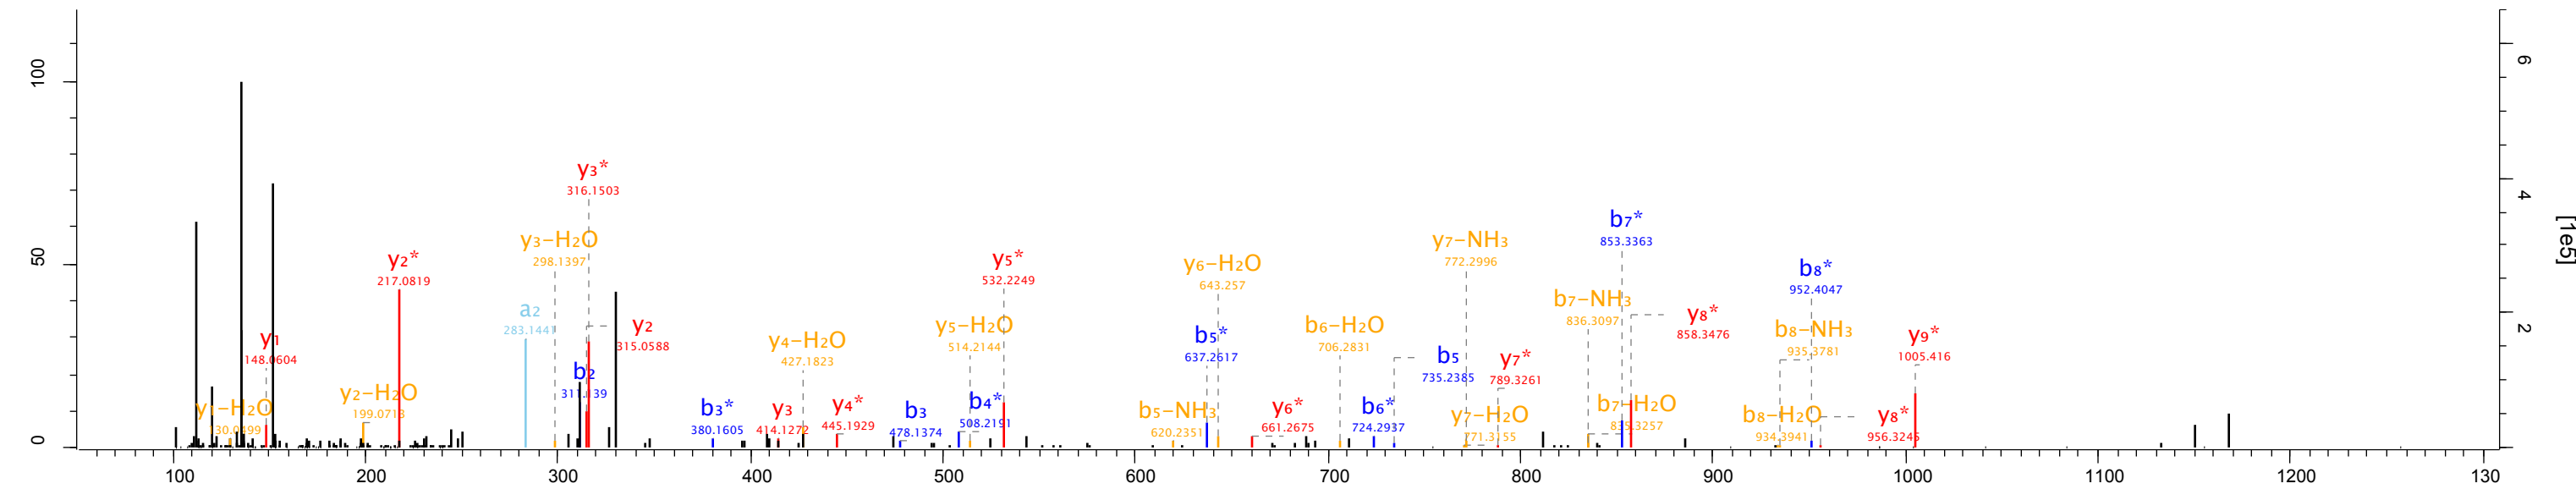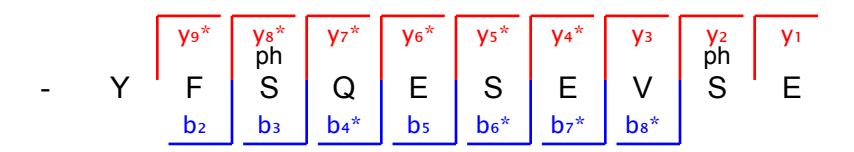

Raw file: 20171215\_MaS\_33SR\_LMH\_phospho\_02  
 Scan: 11029 Method: FTMS; HCD Score: 194.26 m/z: 1162.09 Gene names: CHAMP1

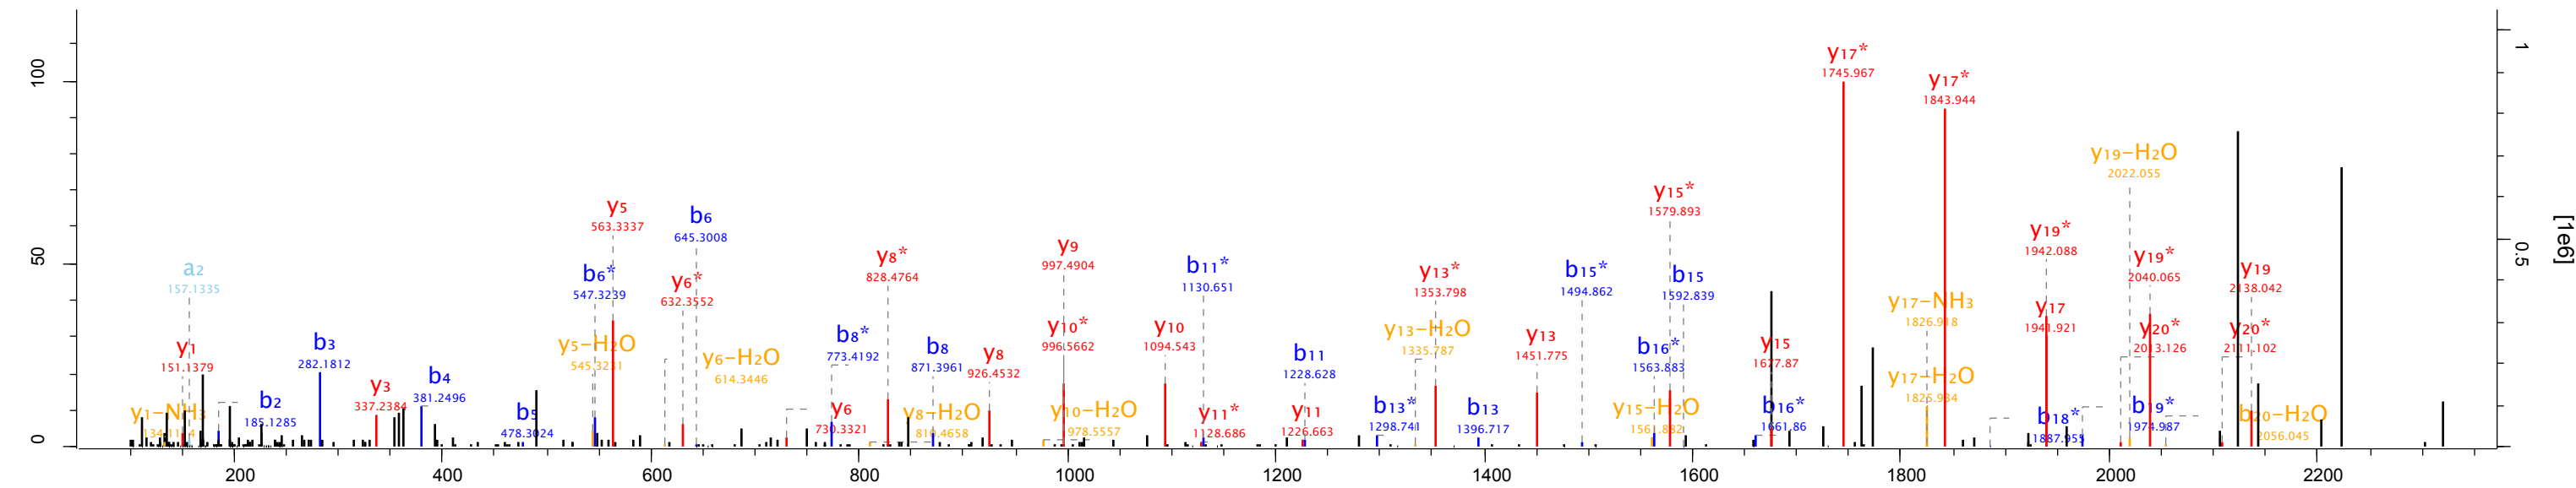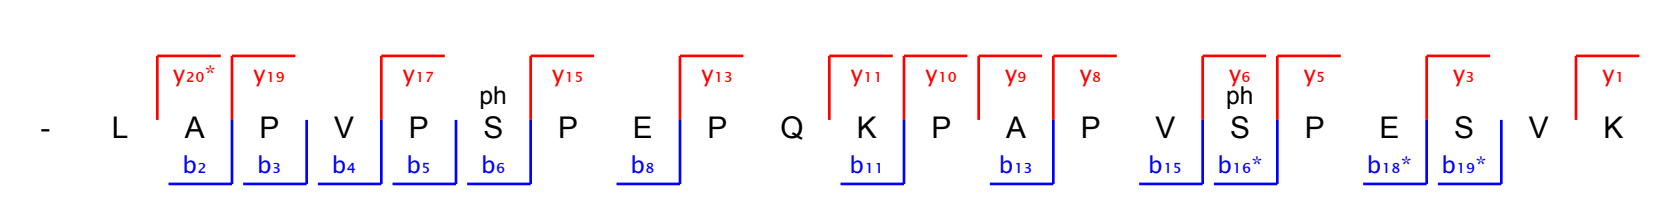

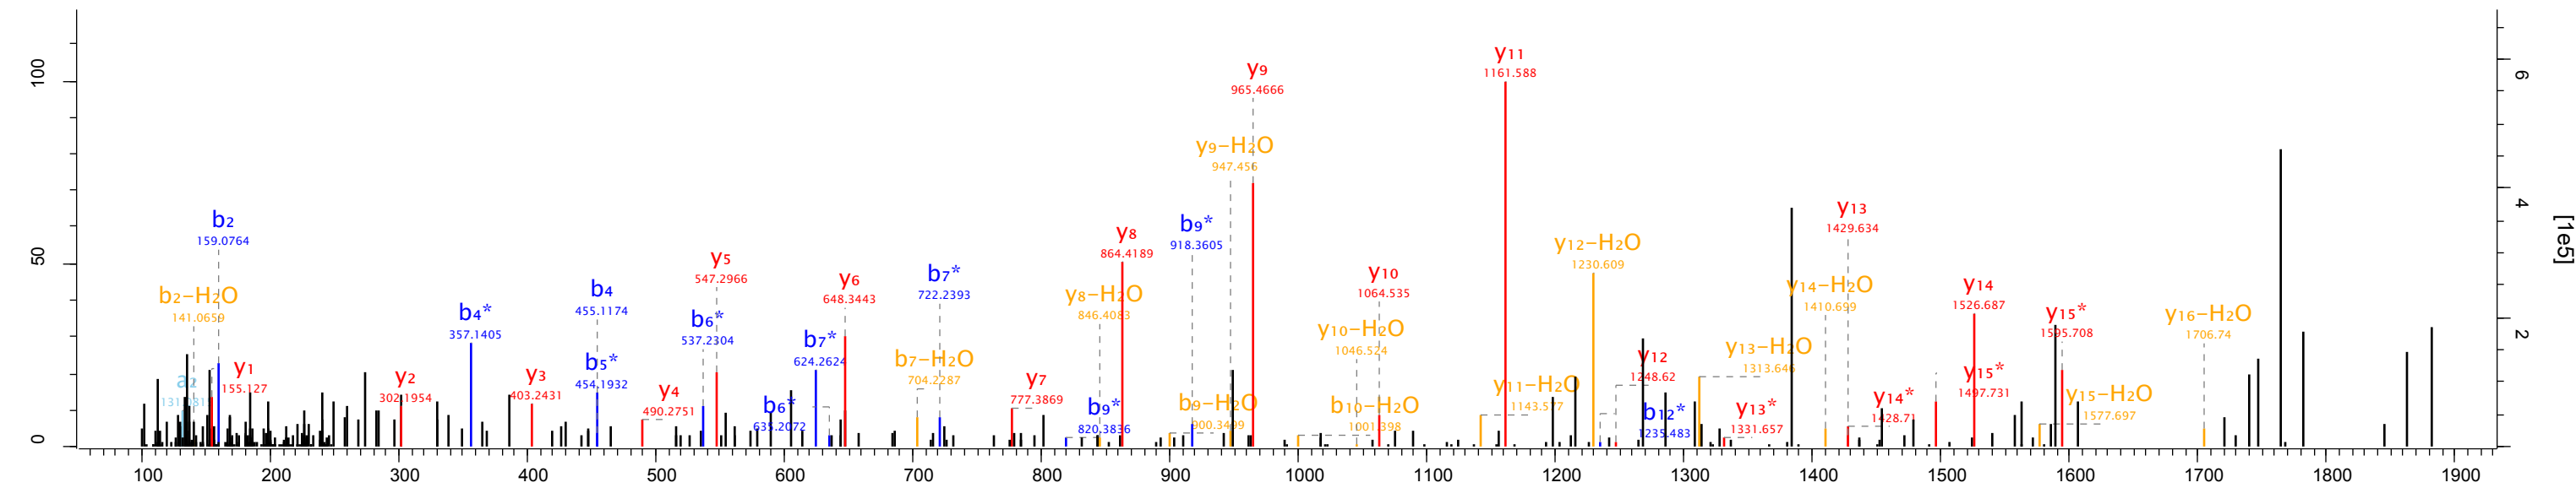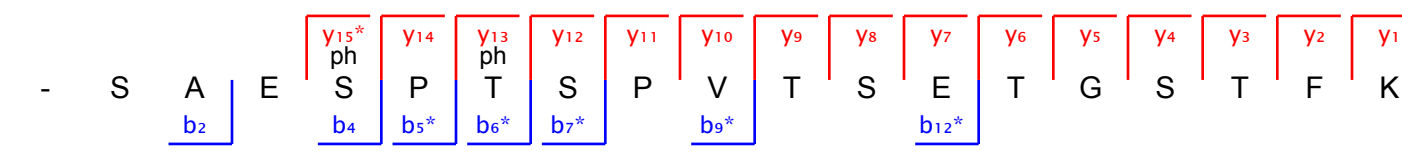

Raw file: 20171215\_MaS\_33SR\_LMH\_phospho\_02  
 Scan: 11059 Method: FTMS; HCD Score: 142.72 m/z: 725.33 Gene names: BCAR3

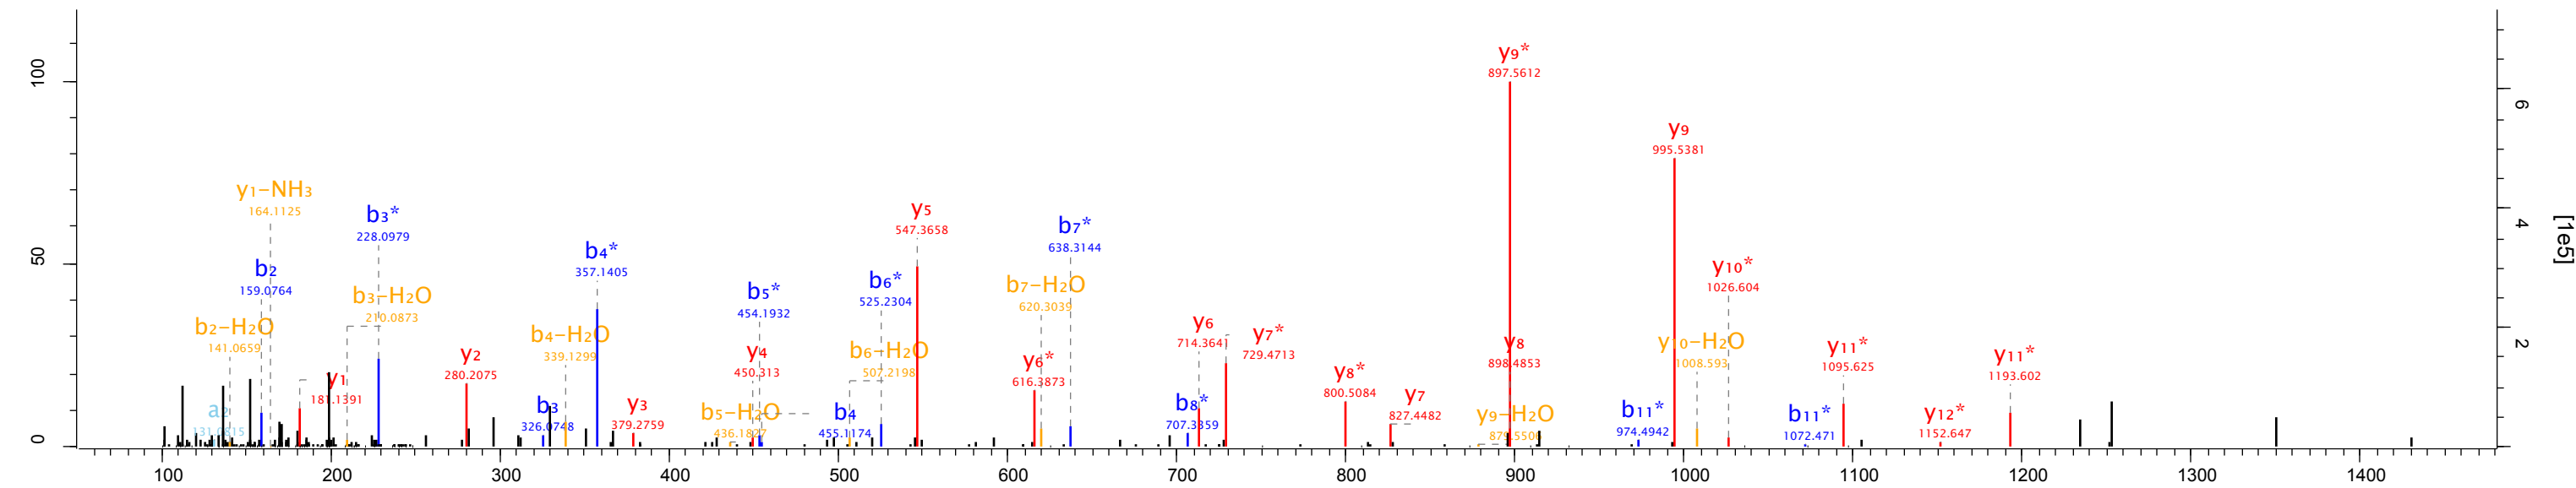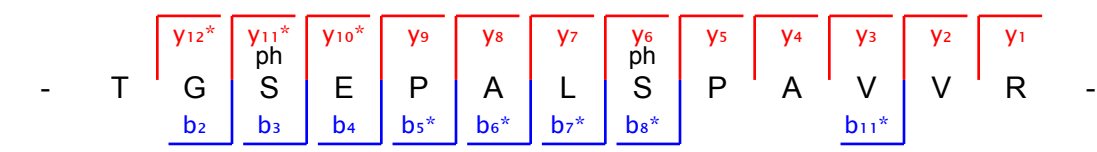



Raw file

20171215\_MaS\_33SR\_LMH\_phospho\_02

| Scan  | Method    | Score  | m/z     | Gene names |
|-------|-----------|--------|---------|------------|
| 11209 | FTMS; HCD | 104.15 | 1252.54 | ZC3H4      |

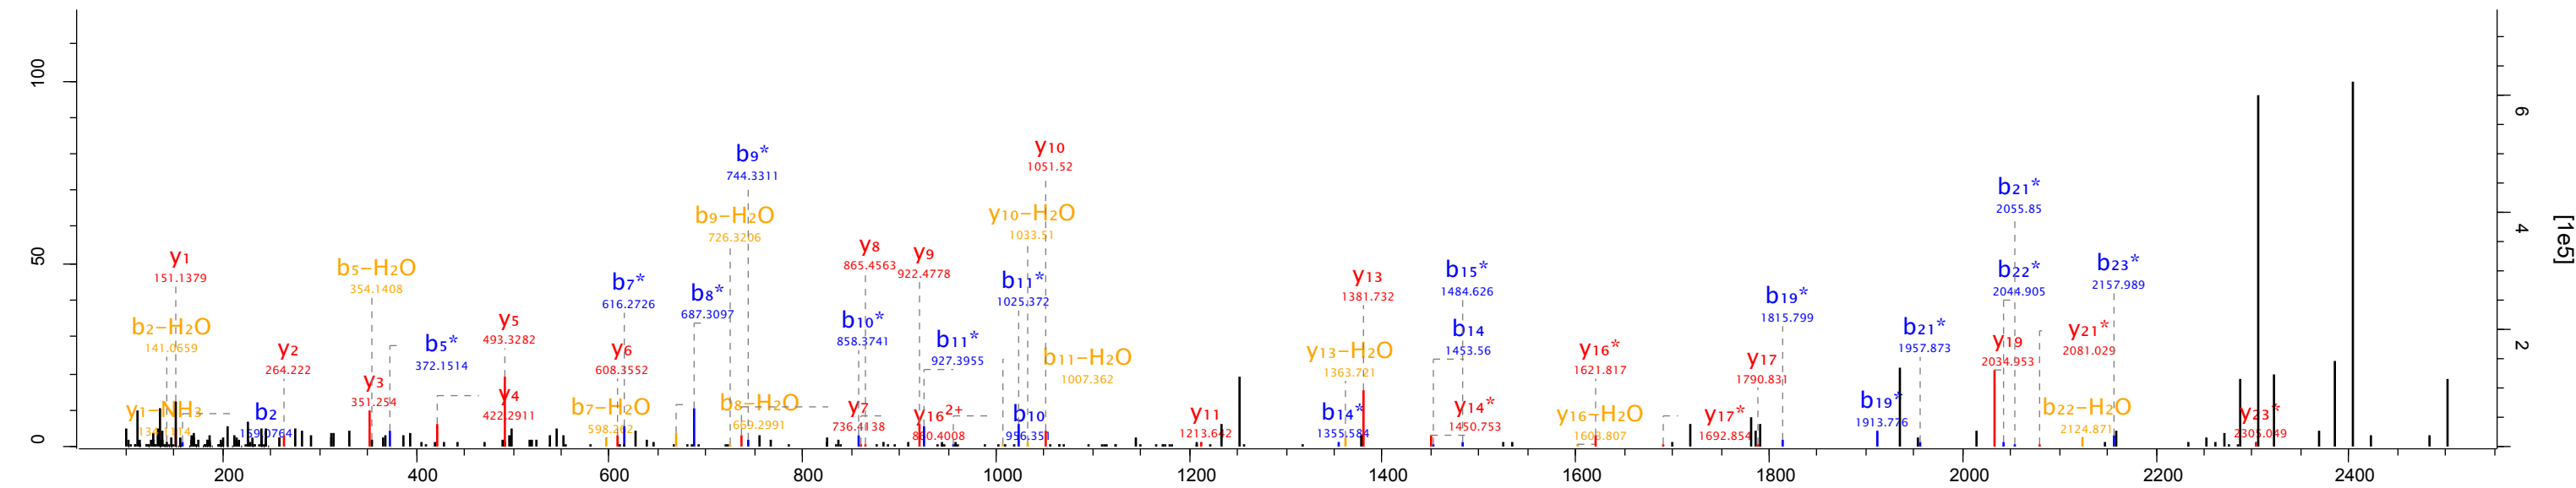

- T G S G S P F A G N S P A R E G E Q D A A S L K -

y<sub>23</sub>\*
y<sub>21</sub>\*
y<sub>19</sub>
y<sub>17</sub>
y<sub>16</sub>\*
y<sub>14</sub>\*
y<sub>13</sub>
y<sub>11</sub>
y<sub>10</sub>
y<sub>9</sub>
y<sub>8</sub>
y<sub>7</sub>
y<sub>6</sub>
y<sub>5</sub>
y<sub>4</sub>
y<sub>3</sub>
y<sub>2</sub>
y<sub>1</sub>

b<sub>2</sub>
b<sub>5</sub>\*
b<sub>7</sub>\*
b<sub>8</sub>\*
b<sub>9</sub>\*
b<sub>10</sub>
b<sub>11</sub>\*
b<sub>14</sub>
b<sub>15</sub>\*
b<sub>19</sub>\*
b<sub>21</sub>\*
b<sub>22</sub>\*
b<sub>23</sub>\*

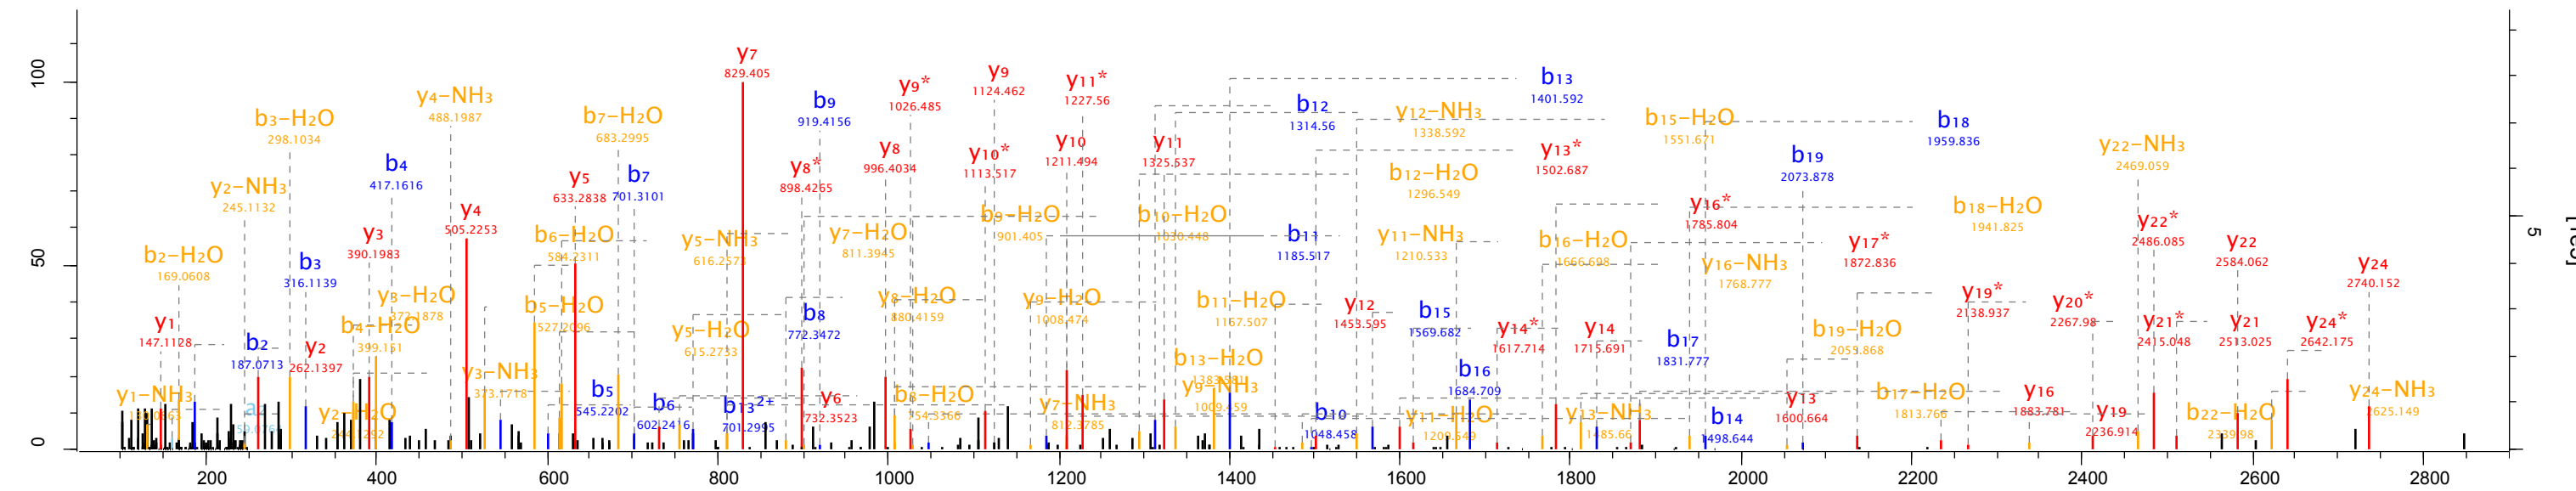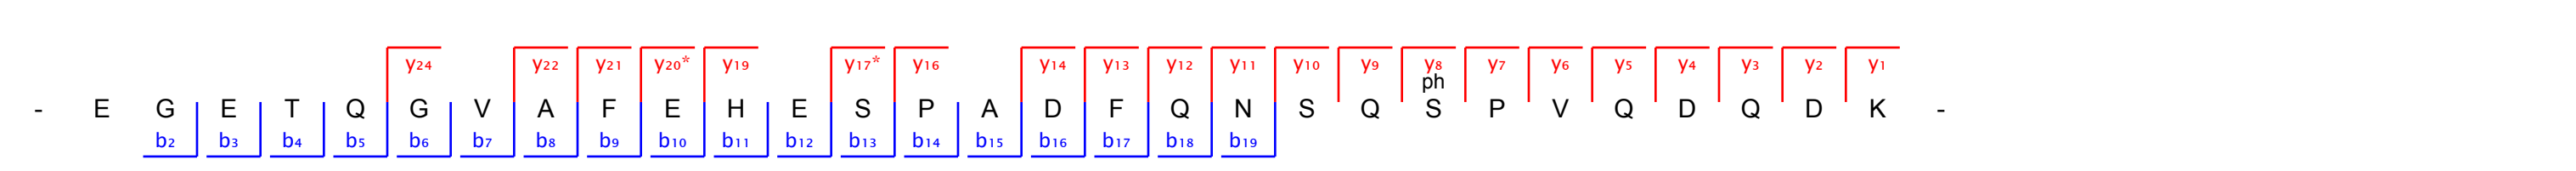

Raw file 20171215\_MaS\_33SR\_LMH\_phospho\_02 Scan 12939 Method FTMS; HCD Score 68.15 m/z 744.69 Gene names EZH2

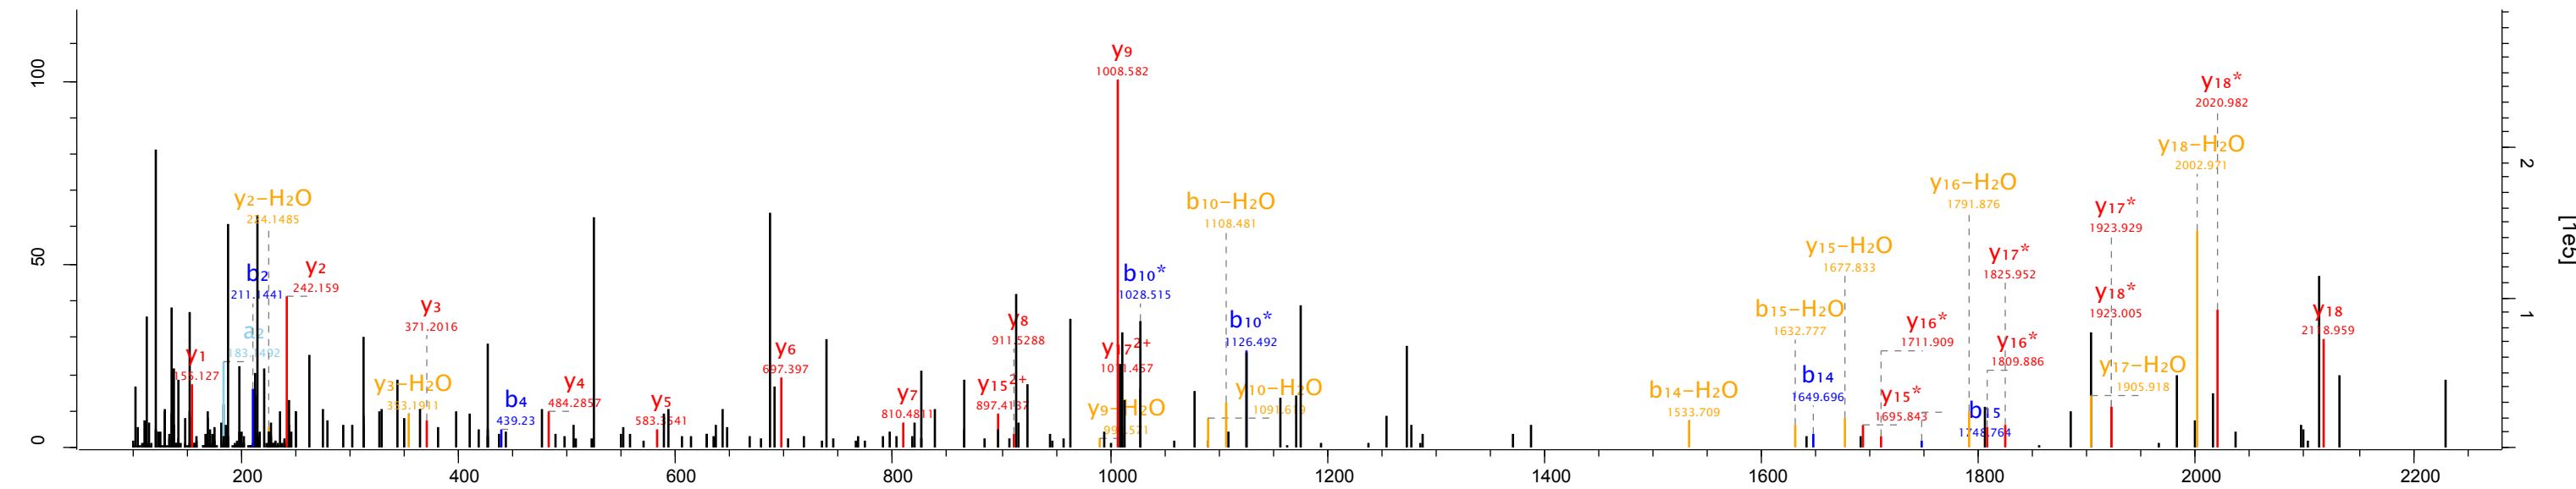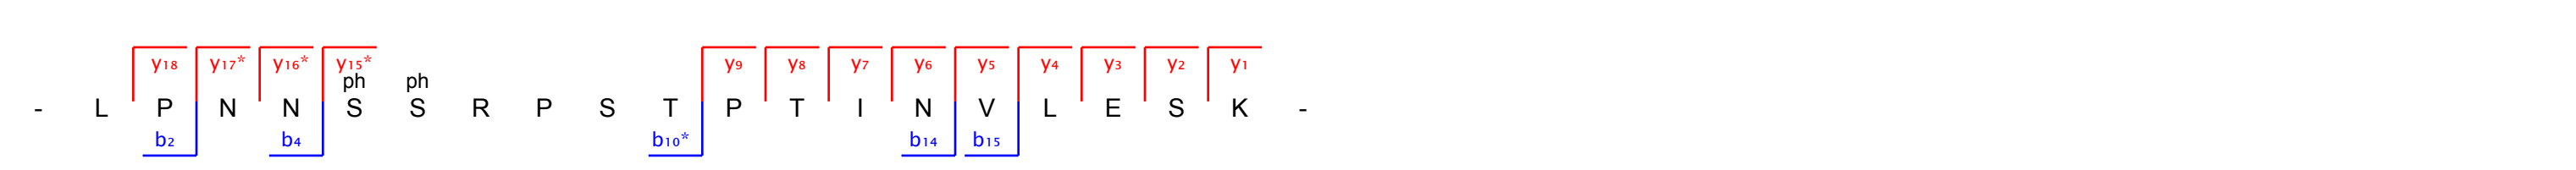

Raw file 20171215\_MaS\_33SR\_LMH\_phospho\_02 Scan 12979 Method FTMS; HCD Score 307.19 m/z 1288.01 Gene names HNRNPA2B1

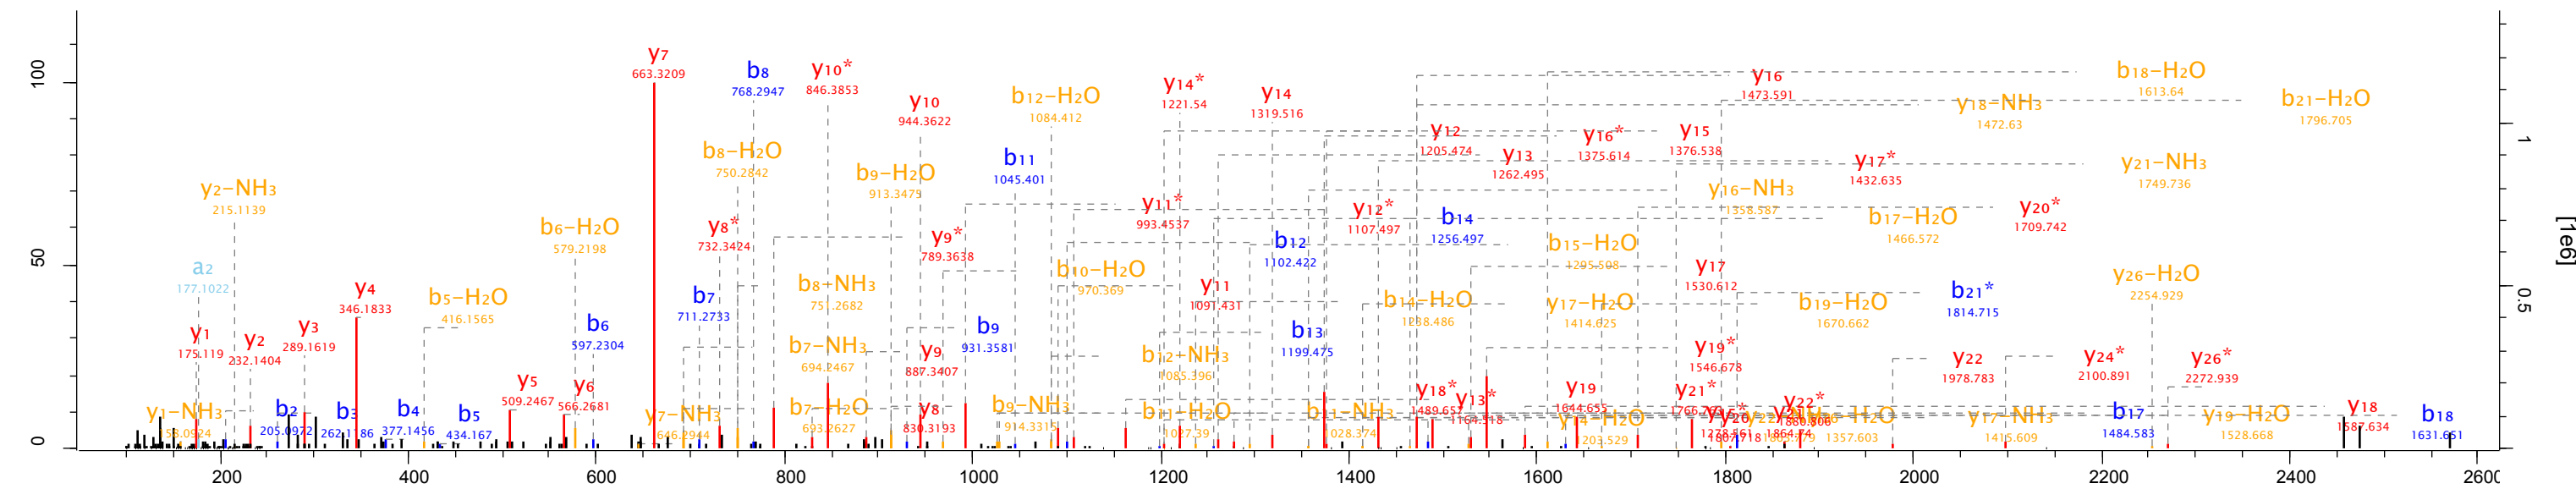

- G F G D G Y N G Y G G G P G G G G N F G G G Y G G G R -

Fragmentation labels below the sequence:

- b<sub>2</sub> (under F)
- b<sub>3</sub> (under G)
- b<sub>4</sub> (under D)
- b<sub>5</sub> (under G)
- b<sub>6</sub> (under Y)
- b<sub>7</sub> (under N)
- b<sub>8</sub> (under G)
- b<sub>9</sub> (under Y)
- b<sub>11</sub> (under G)
- b<sub>12</sub> (under G)
- b<sub>13</sub> (under P)
- b<sub>14</sub> (under G)
- b<sub>17</sub> (under N)
- b<sub>18</sub> (under F)
- b<sub>21</sub>\* (under S)

Fragmentation labels above the sequence:

- y<sub>26</sub>\* (above G)
- y<sub>24</sub>\* (above D)
- y<sub>22</sub> (above N)
- y<sub>21</sub> (above G)
- y<sub>20</sub> (above Y)
- y<sub>19</sub> (above G)
- y<sub>18</sub> (above G)
- y<sub>17</sub> (above G)
- y<sub>16</sub> (above P)
- y<sub>15</sub> (above G)
- y<sub>14</sub> (above G)
- y<sub>13</sub> (above G)
- y<sub>12</sub> (above N)
- y<sub>11</sub> (above F)
- y<sub>10</sub> (above G)
- y<sub>9</sub> (above G)
- y<sub>8</sub> (above S)
- y<sub>7</sub> (above P)
- y<sub>6</sub> (above G)
- y<sub>5</sub> (above Y)
- y<sub>4</sub> (above G)
- y<sub>3</sub> (above G)
- y<sub>2</sub> (above G)
- y<sub>1</sub> (above R)

Raw file 20171215\_MaS\_33SR\_LMH\_phospho\_02 Scan 13059 Method FTMS; HCD Score 85.93 m/z 1144.76 Gene names LARP1

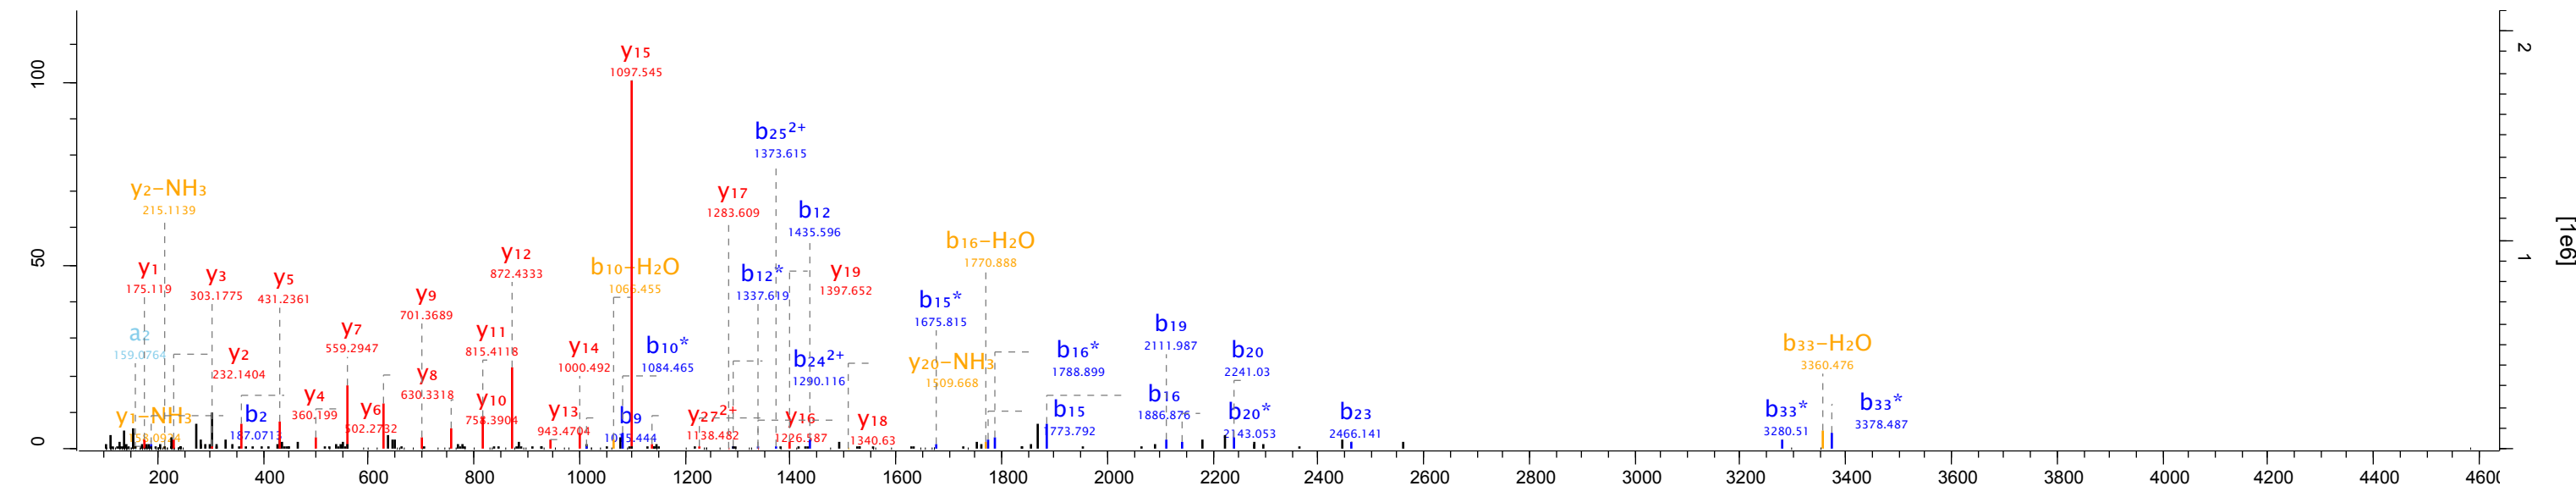

- E G T G Q Q E R E S P R P L Q L P G A E G P A I S D G E E G G G E P G A G G

ph ph

b<sub>2</sub> b<sub>9</sub> b<sub>10</sub>\* b<sub>12</sub> b<sub>15</sub> b<sub>16</sub> b<sub>19</sub> b<sub>20</sub> b<sub>23</sub> b<sub>24</sub><sup>2+</sup> b<sub>25</sub><sup>2+</sup> b<sub>33</sub>\*

y<sub>10</sub> y<sub>9</sub> y<sub>8</sub> y<sub>7</sub> y<sub>6</sub> y<sub>5</sub> y<sub>4</sub> y<sub>3</sub> y<sub>2</sub> y<sub>1</sub> y<sub>19</sub> y<sub>18</sub> y<sub>17</sub> y<sub>16</sub> y<sub>15</sub> y<sub>14</sub> y<sub>13</sub> y<sub>12</sub> y<sub>11</sub>

G A A G A A G A G R -

Raw file 20171215\_MaS\_33SR\_LMH\_phospho\_02 Scan 13309 Method FTMS; HCD Score 116.94 m/z 946.09 Gene names MACF1

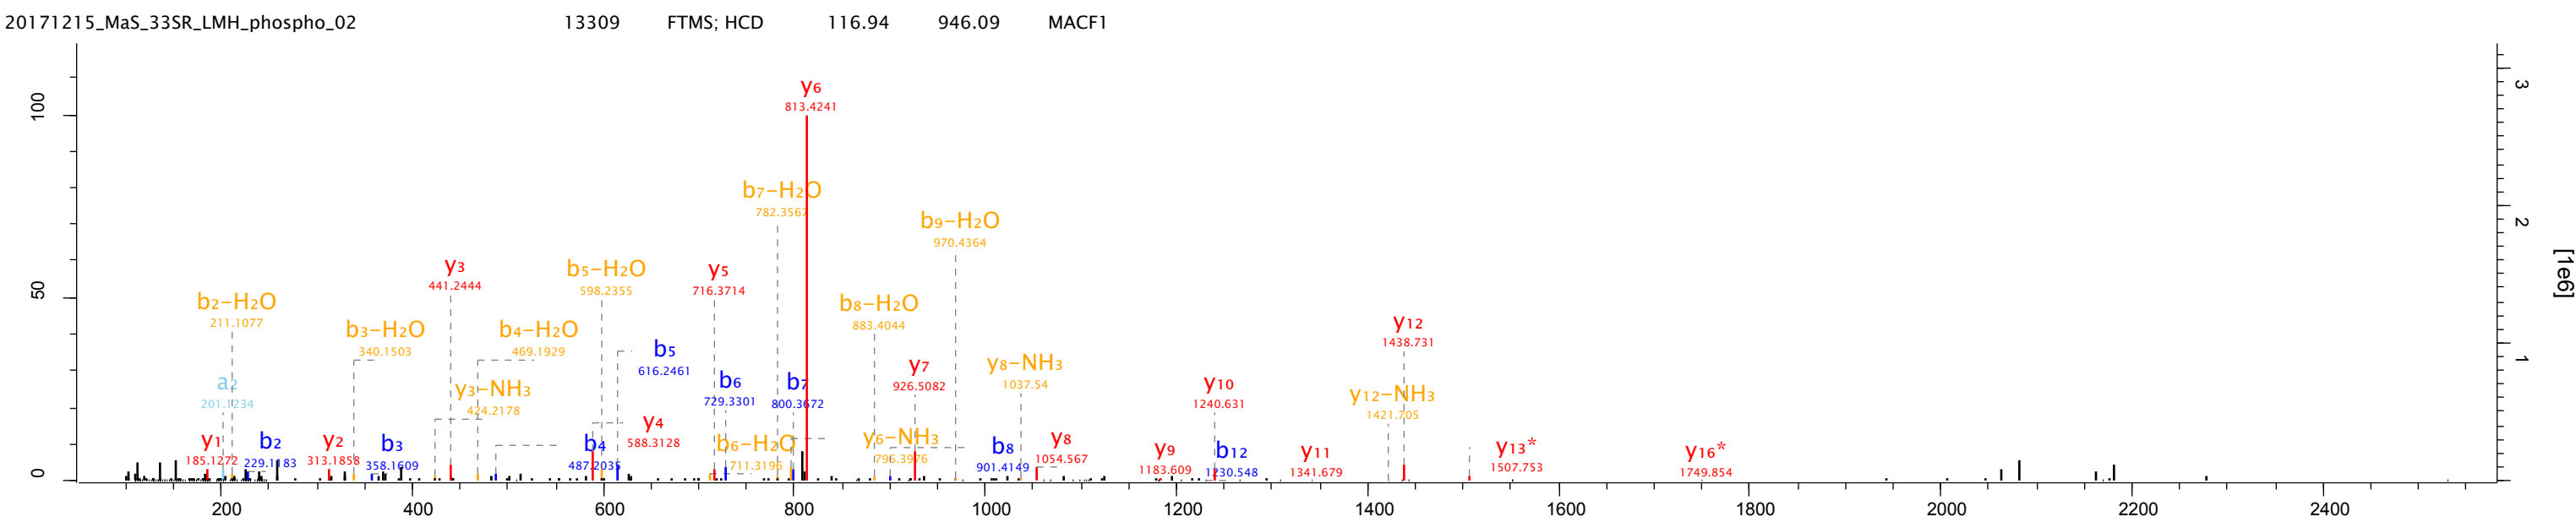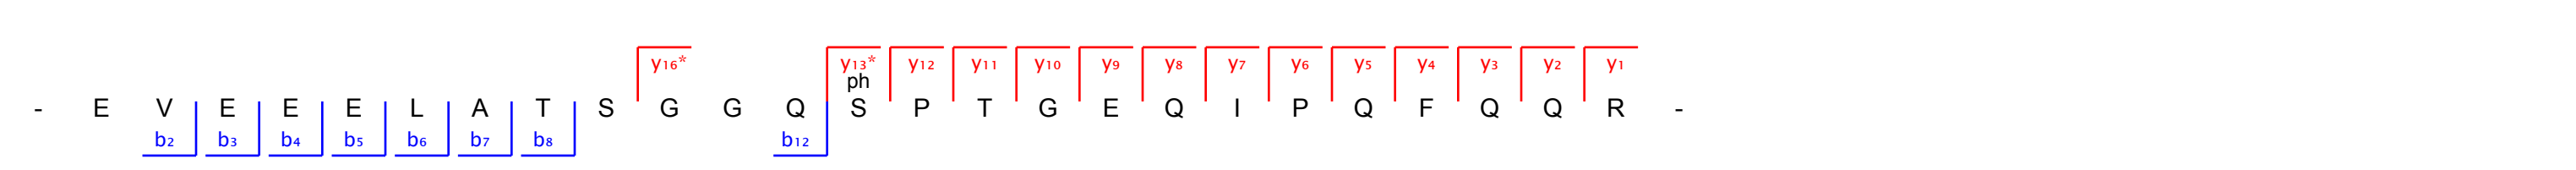

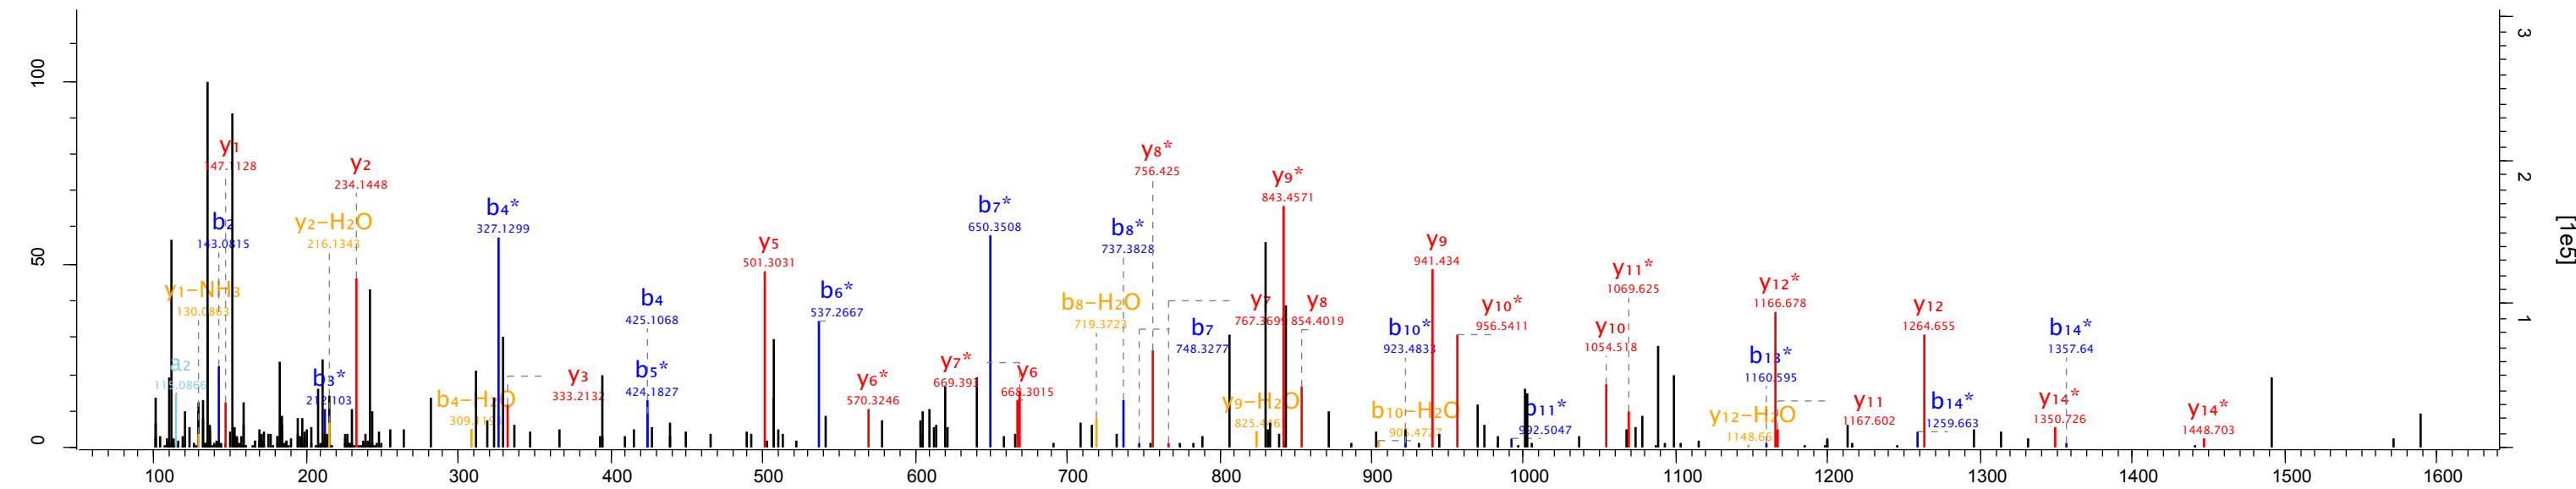

- A A A S D P L L S S V S P A V S K -

y<sub>14</sub><sup>\*</sup>  
ph  
y<sub>12</sub>  
y<sub>11</sub>  
y<sub>10</sub>  
y<sub>9</sub>  
y<sub>8</sub>  
y<sub>7</sub>  
y<sub>6</sub>  
ph  
y<sub>5</sub>  
y<sub>3</sub>  
y<sub>2</sub>  
y<sub>1</sub>

b<sub>2</sub>  
b<sub>3</sub><sup>\*</sup>  
b<sub>4</sub>  
b<sub>5</sub><sup>\*</sup>  
b<sub>6</sub><sup>\*</sup>  
b<sub>7</sub>  
b<sub>8</sub><sup>\*</sup>  
b<sub>10</sub><sup>\*</sup>  
b<sub>11</sub><sup>\*</sup>  
b<sub>13</sub><sup>\*</sup>  
b<sub>14</sub><sup>\*</sup>

Raw file 20171215\_MaS\_33SR\_LMH\_phospho\_02 Scan 14649 Method FTMS; HCD Score 94.83 m/z 783.71 Gene names SRGAP2

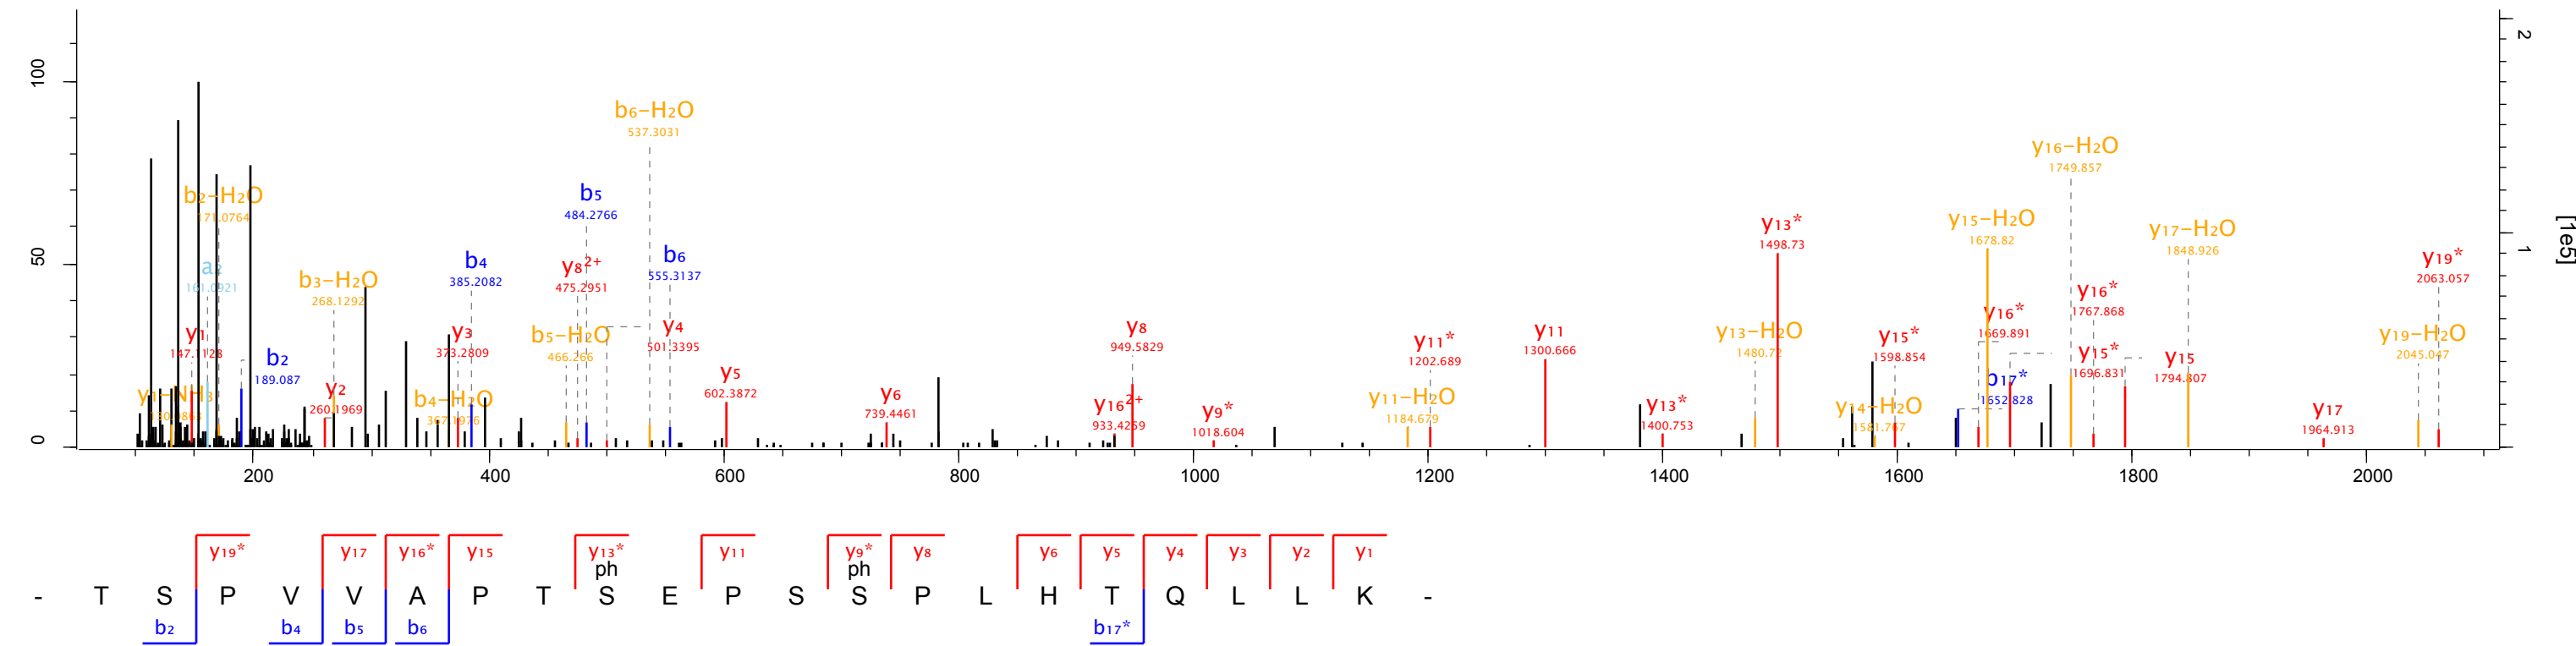



Raw file 20171215\_MaS\_33SR\_LMH\_phospho\_02 Scan 15469 Method FTMS; HCD Score 88.63 m/z 964.09 Gene names AGGF1

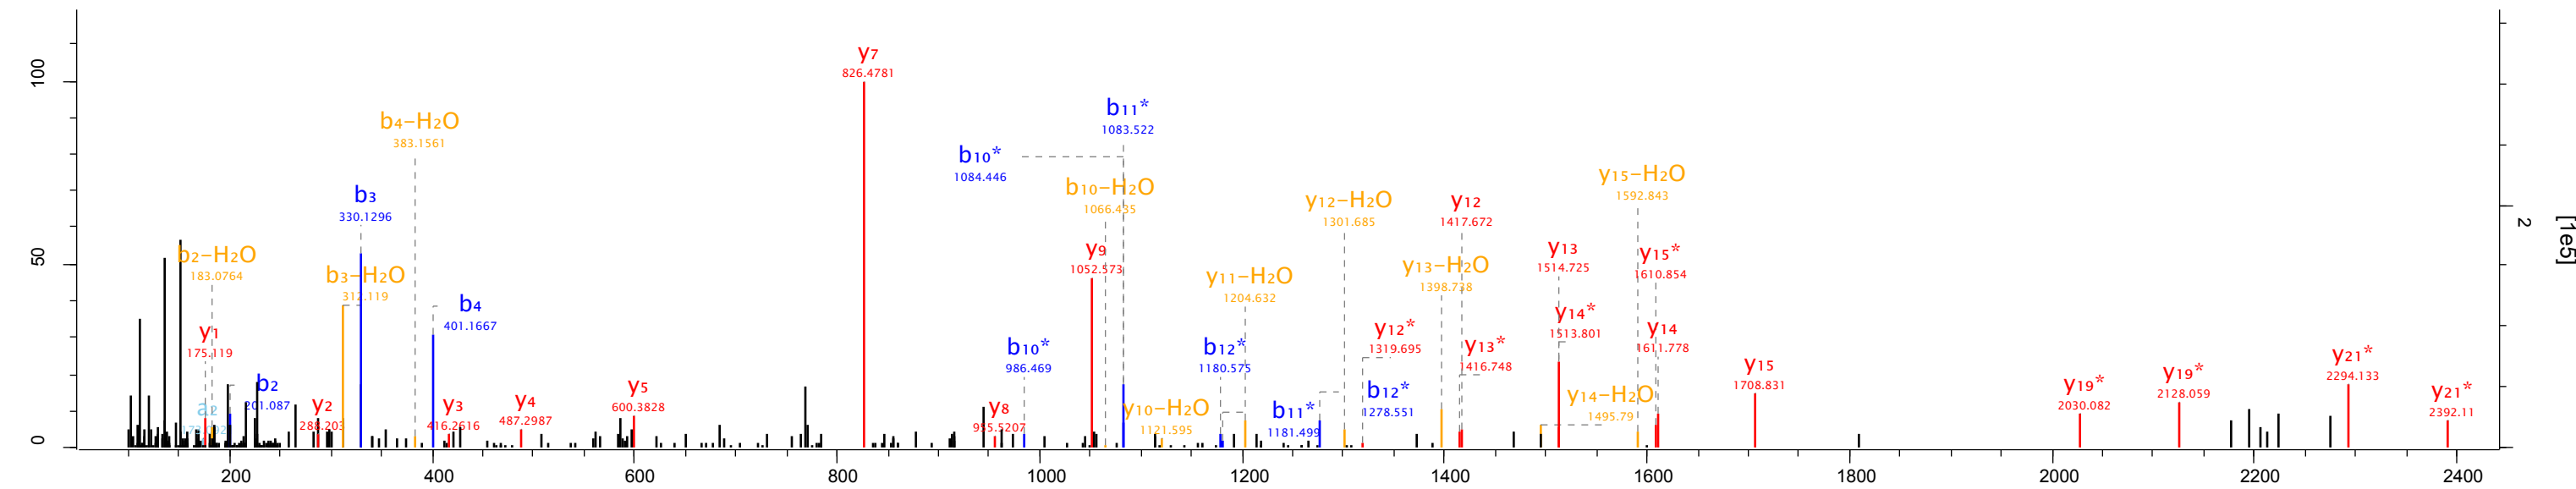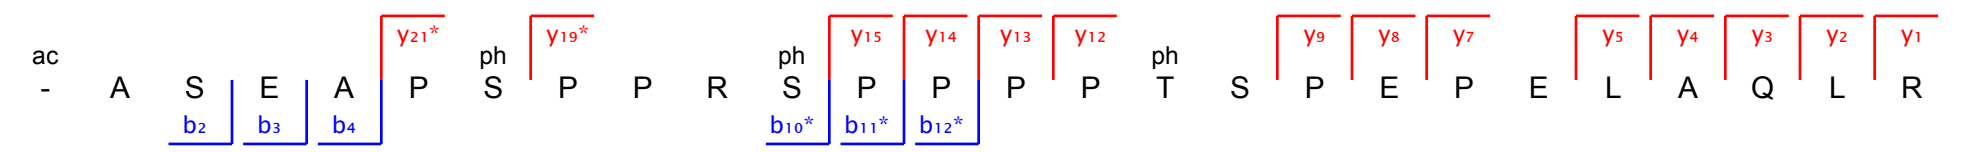

Raw file 20171215\_MaS\_33SR\_LMH\_phospho\_02 Scan 15809 Method FTMS; HCD Score 77.64 m/z 1095.13 Gene names BRD8

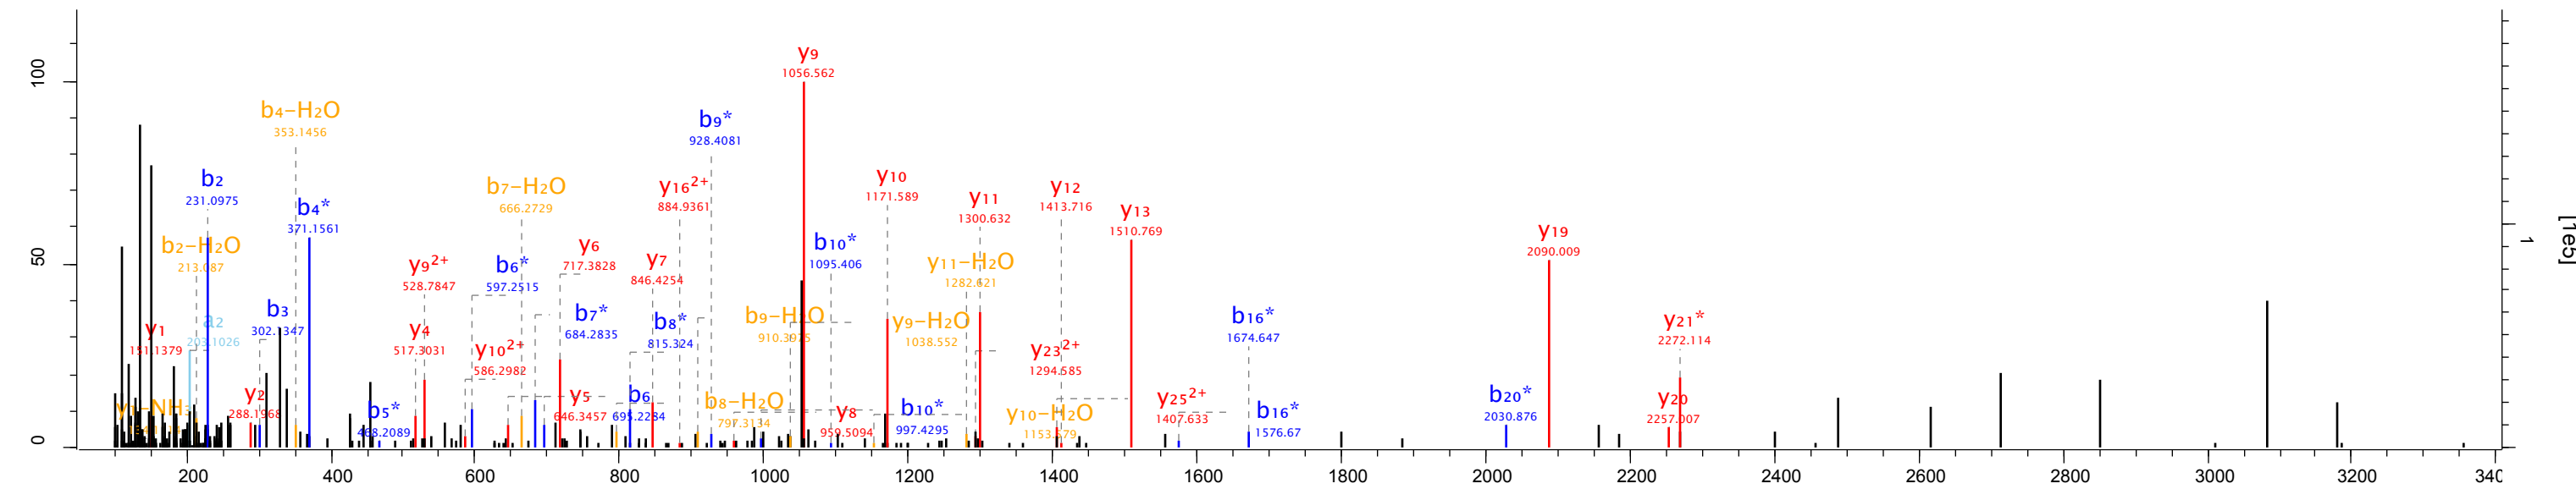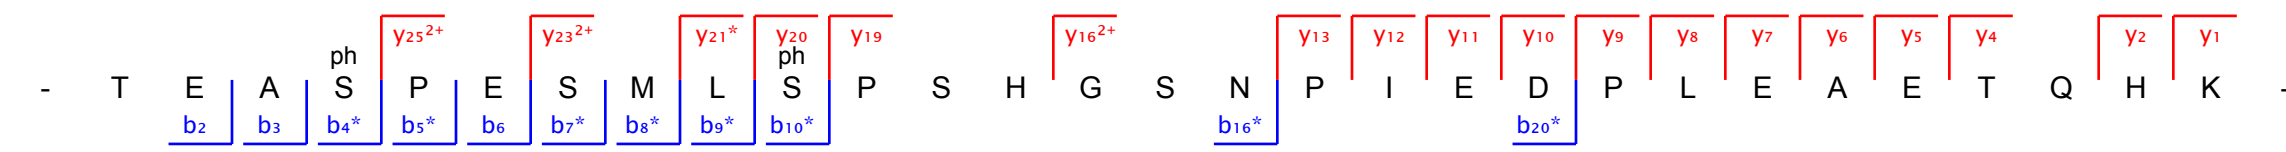

Raw file 21499 FTMS; HCD 267.17 999.78 TNKS1BP1

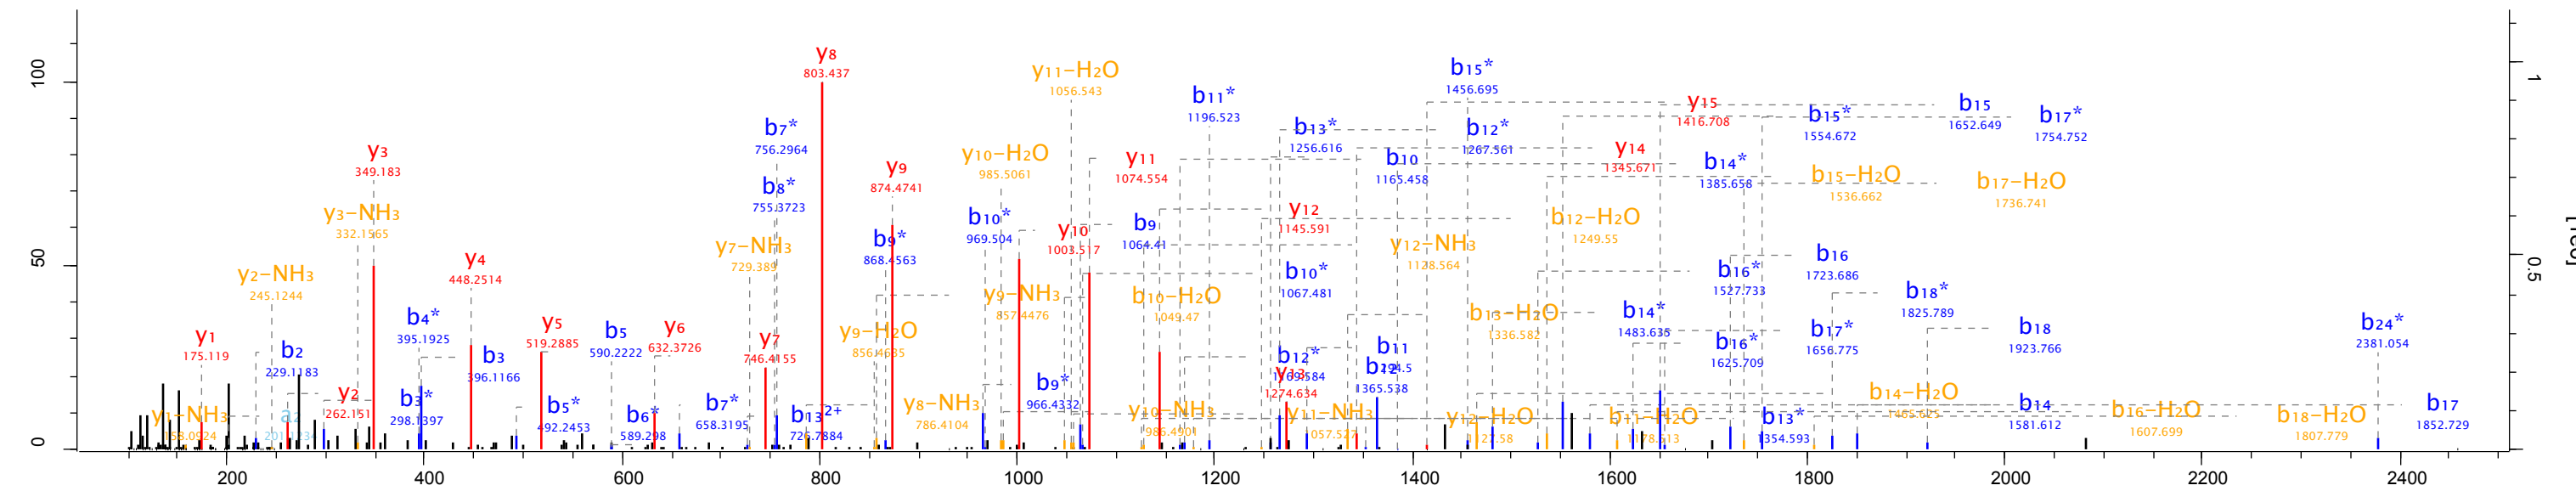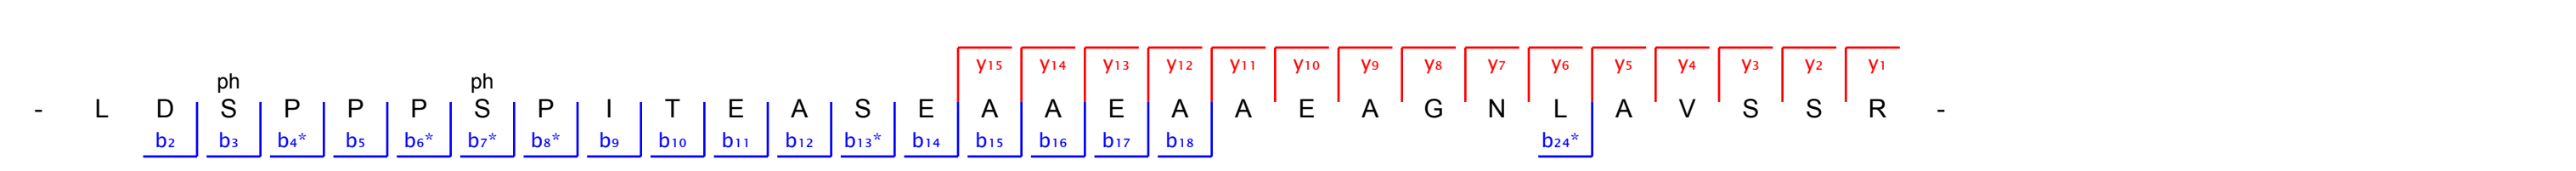

Raw file 20171215\_MaS\_33SR\_LMH\_phospho\_02 Scan 2259 Method FTMS; HCD Score 146.37 m/z 687.28 Gene names DNM1

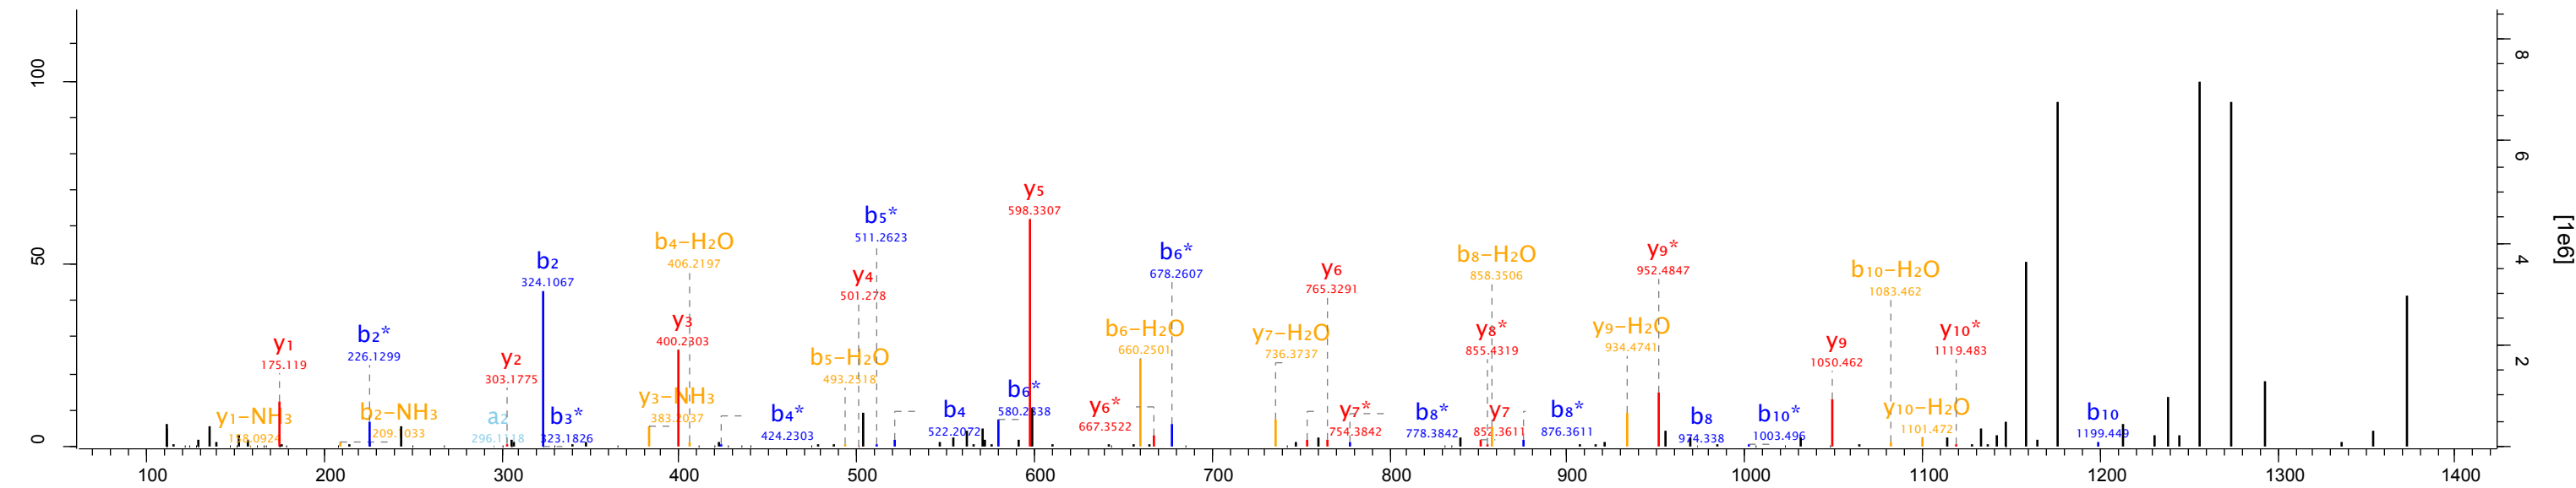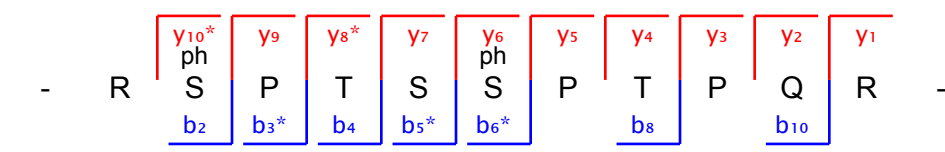

Raw file 20171215\_MaS\_33SR\_LMH\_phospho\_02 Scan 2419 Method FTMS; HCD Score 107.11 m/z 549.74 Gene names SRSF6

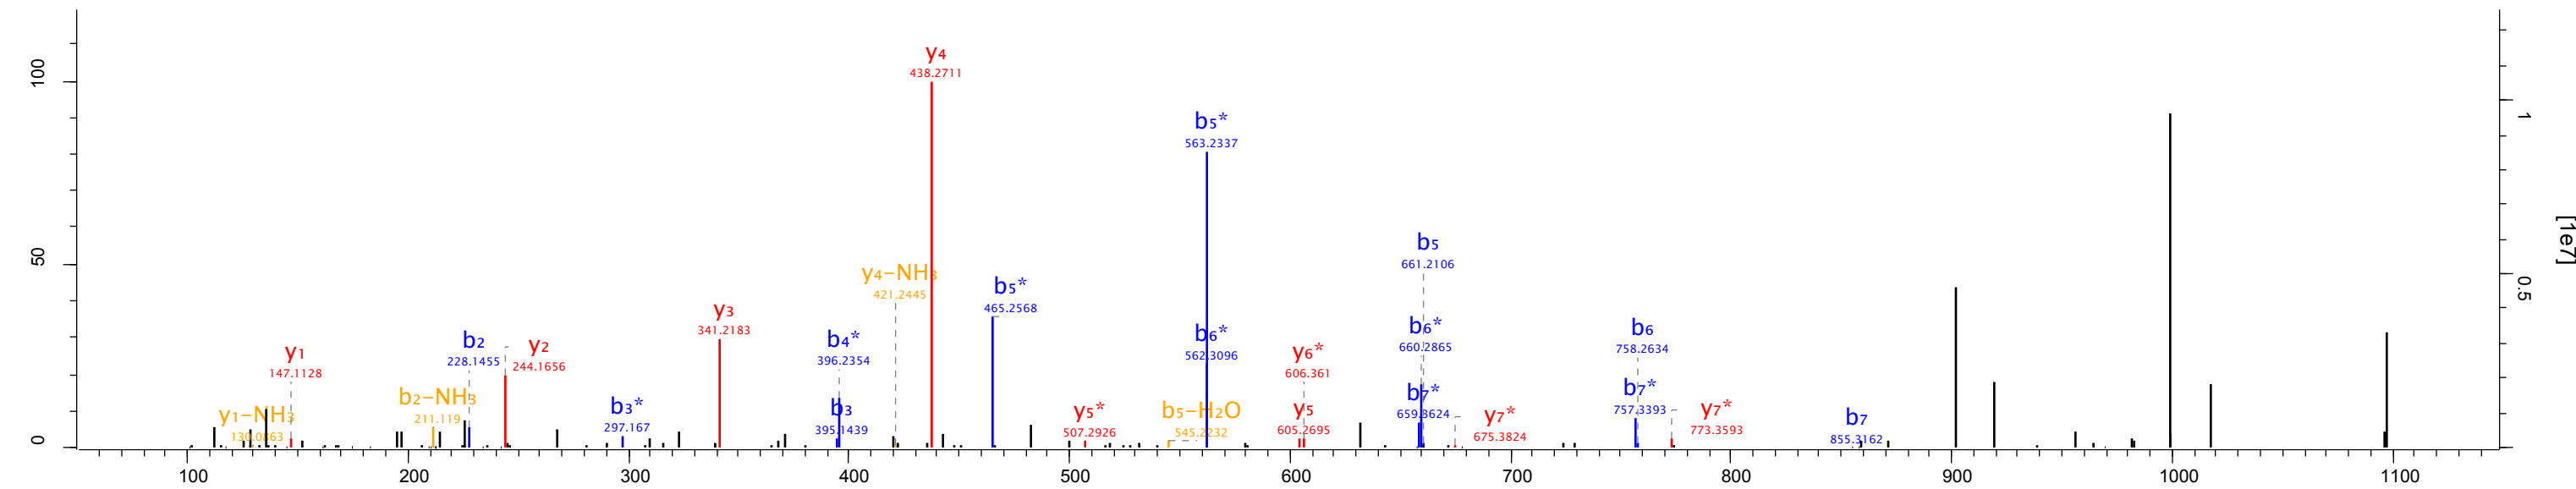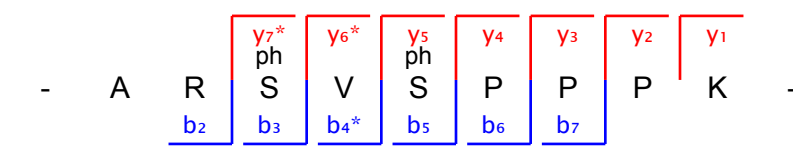

Raw file 20171215\_MaS\_33SR\_LMH\_phospho\_02 Scan 2459 Method FTMS; HCD Score 56.55 m/z 516.23

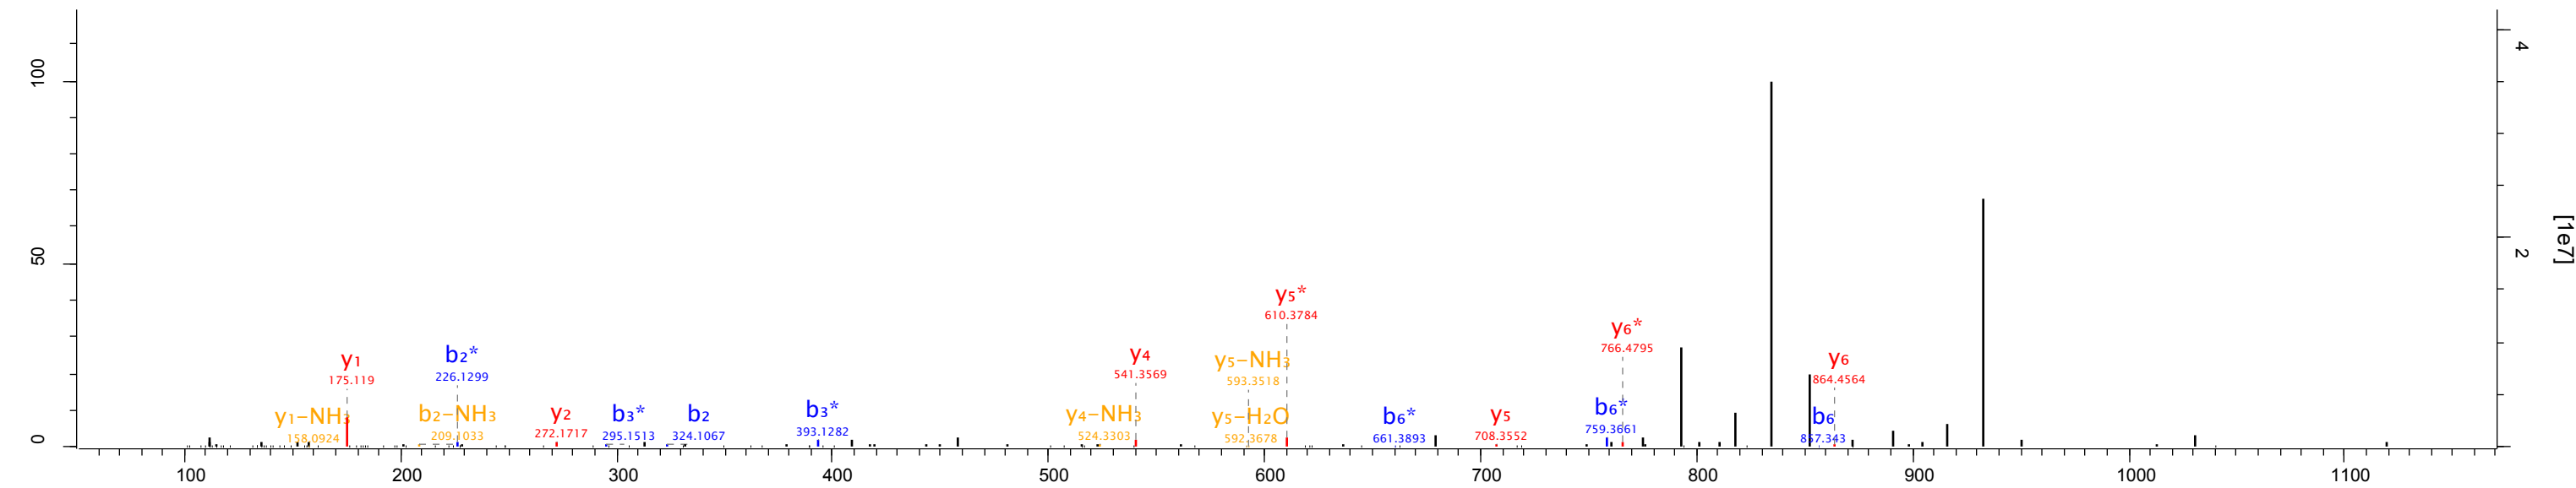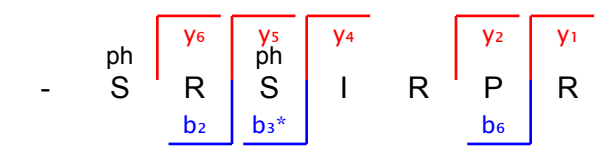

Raw file 20171215\_MaS\_33SR\_LMH\_phospho\_02 Scan 2849 Method FTMS; HCD Score 144.2 m/z 712.28 Gene names HTATSF1

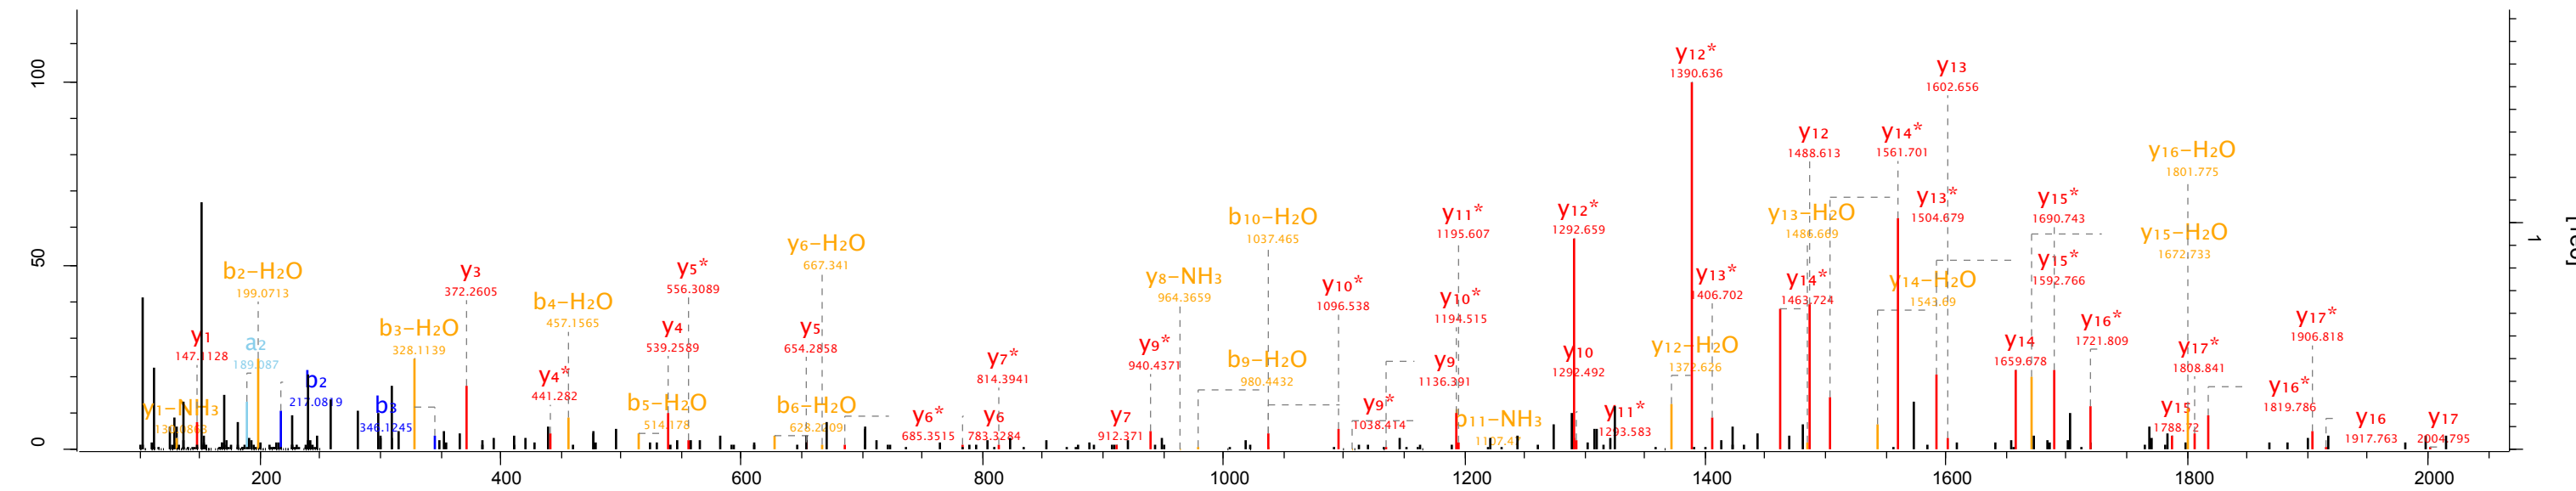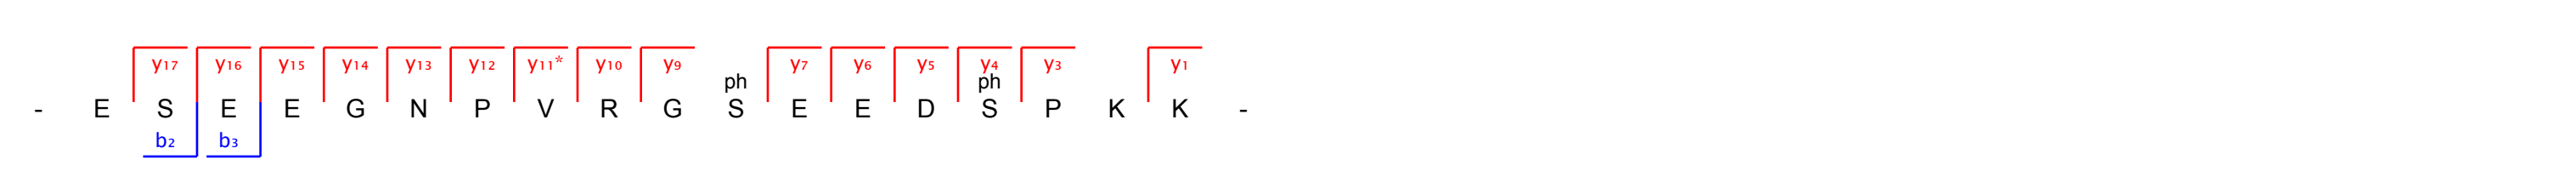

Raw file 20171215\_MaS\_33SR\_LMH\_phospho\_02 Scan 2979 Method FTMS; HCD Score 89.88 m/z 628.78 Gene names EIF4EBP1

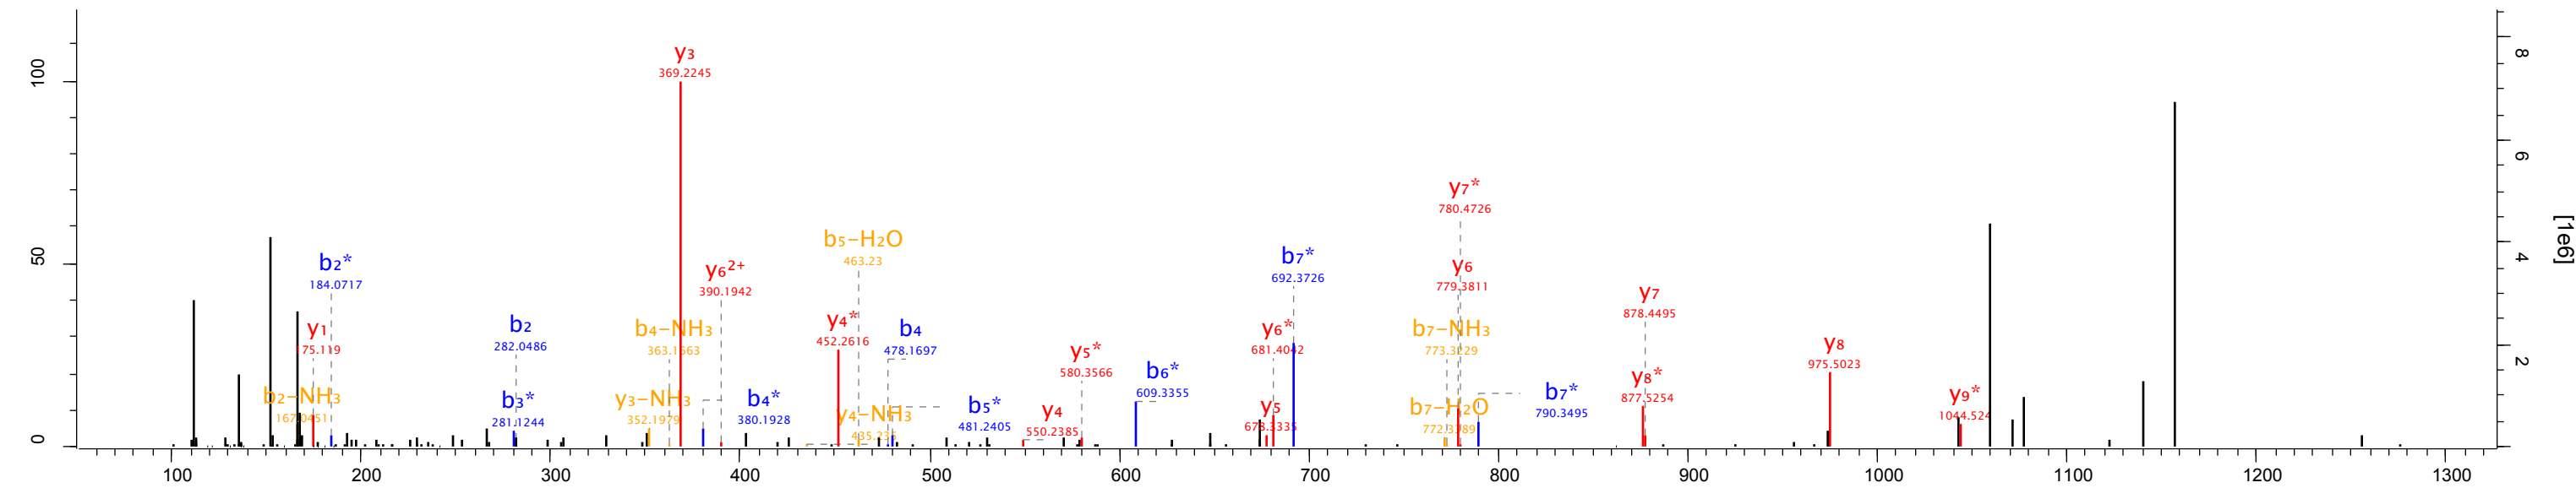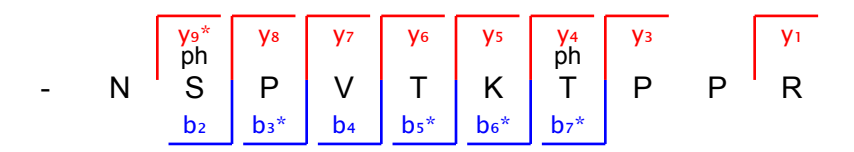



Raw file 20171215\_MaS\_33SR\_LMH\_phospho\_02 Scan 3349 Method FTMS; HCD Score 44.13 m/z 438.86 Gene names SRRM2

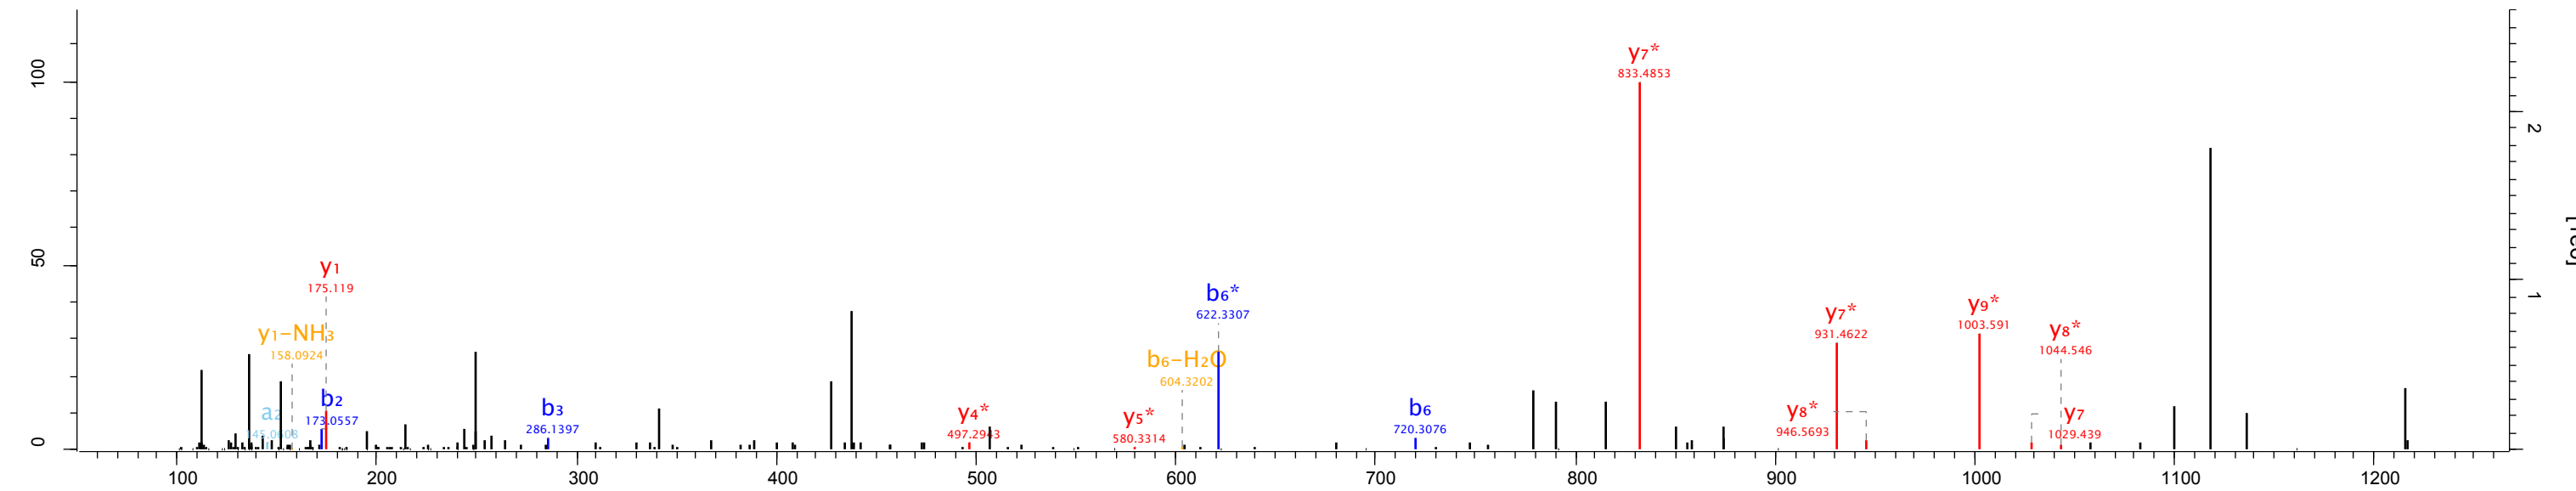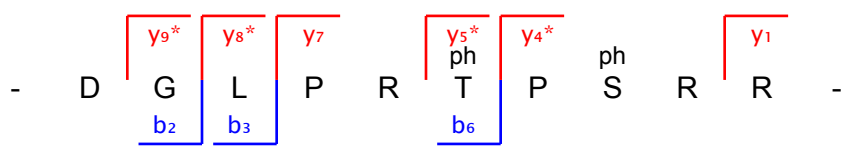

Raw file 20171215\_MaS\_33SR\_LMH\_phospho\_02 Scan 4909 Method FTMS; HCD Score 128.73 m/z 442.2 Gene names CDK12

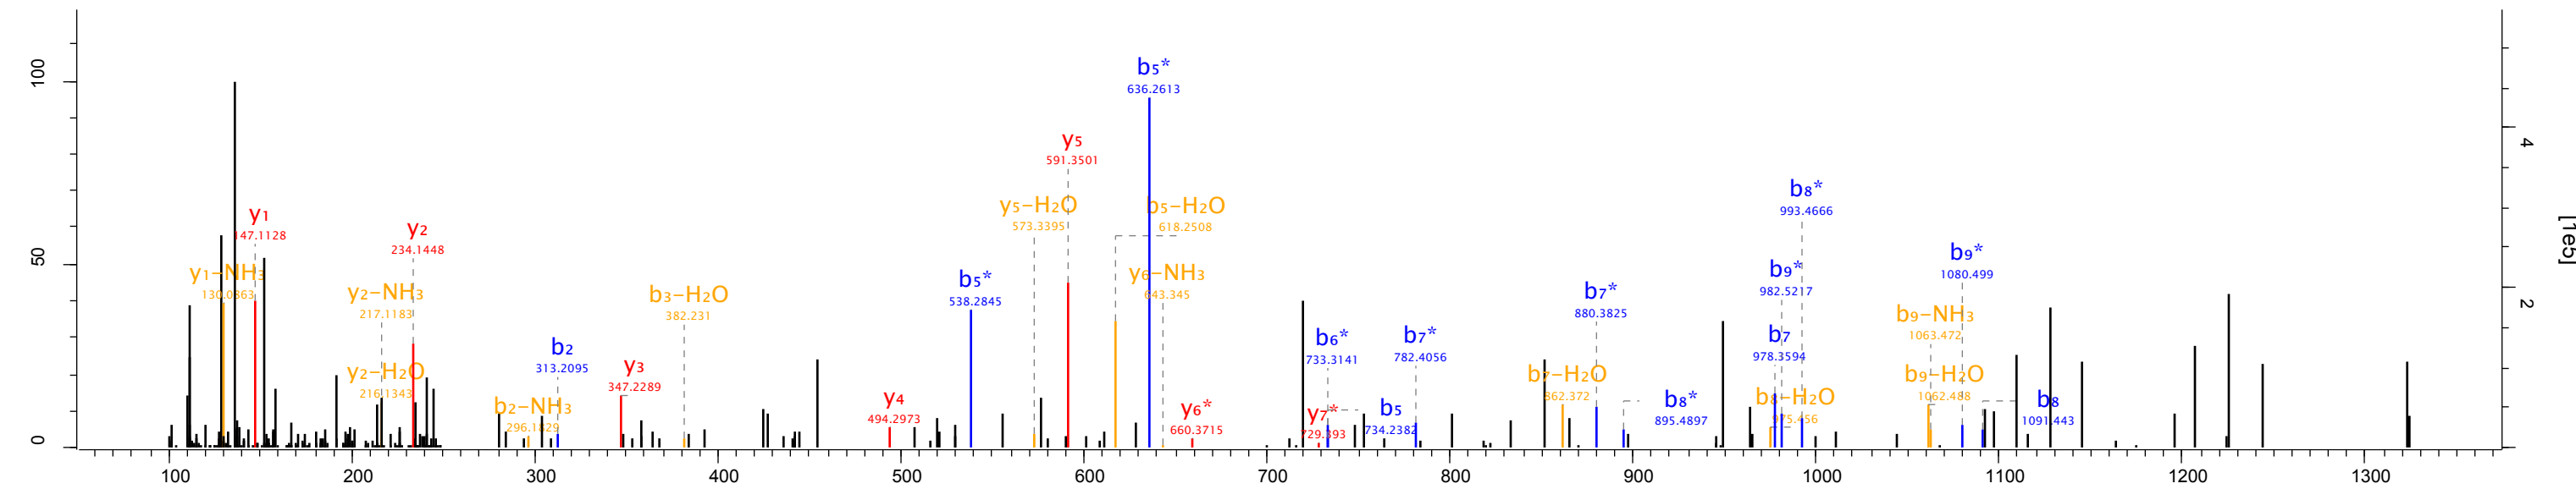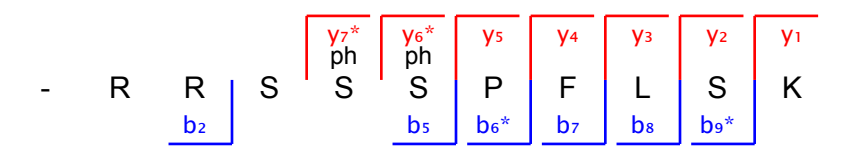

Raw file 20171215\_MaS\_33SR\_LMH\_phospho\_02 Scan 5389 Method FTMS; HCD Score 159.35 m/z 700.84 Gene names LARP4

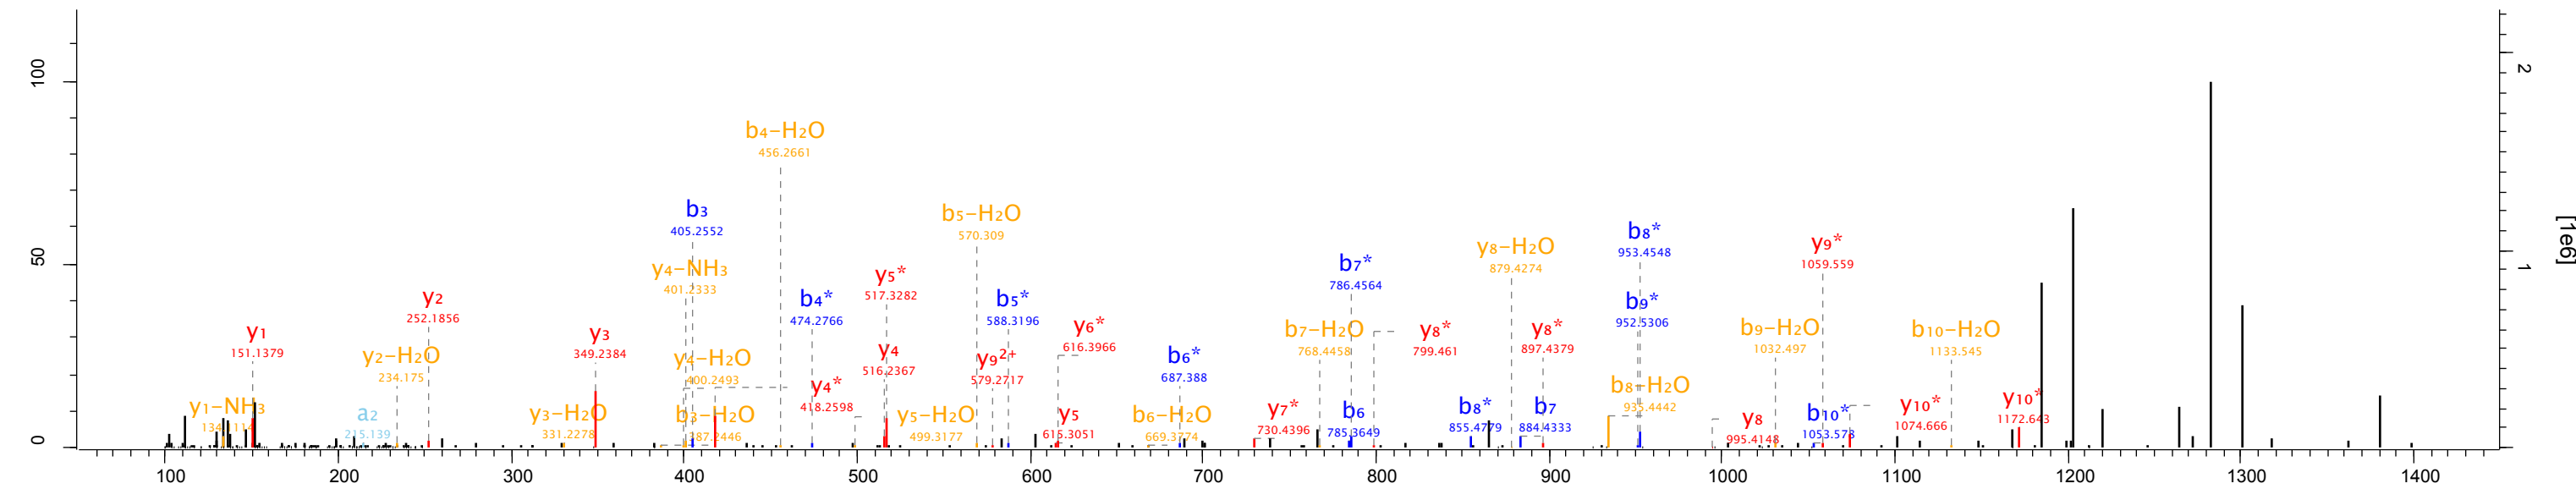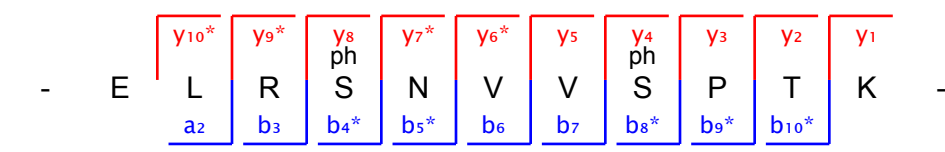

Raw file 20171215\_MaS\_33SR\_LMH\_phospho\_02 Scan 5739 Method FTMS; HCD Score 187.16 m/z 1133.43 Gene names TCEAL3

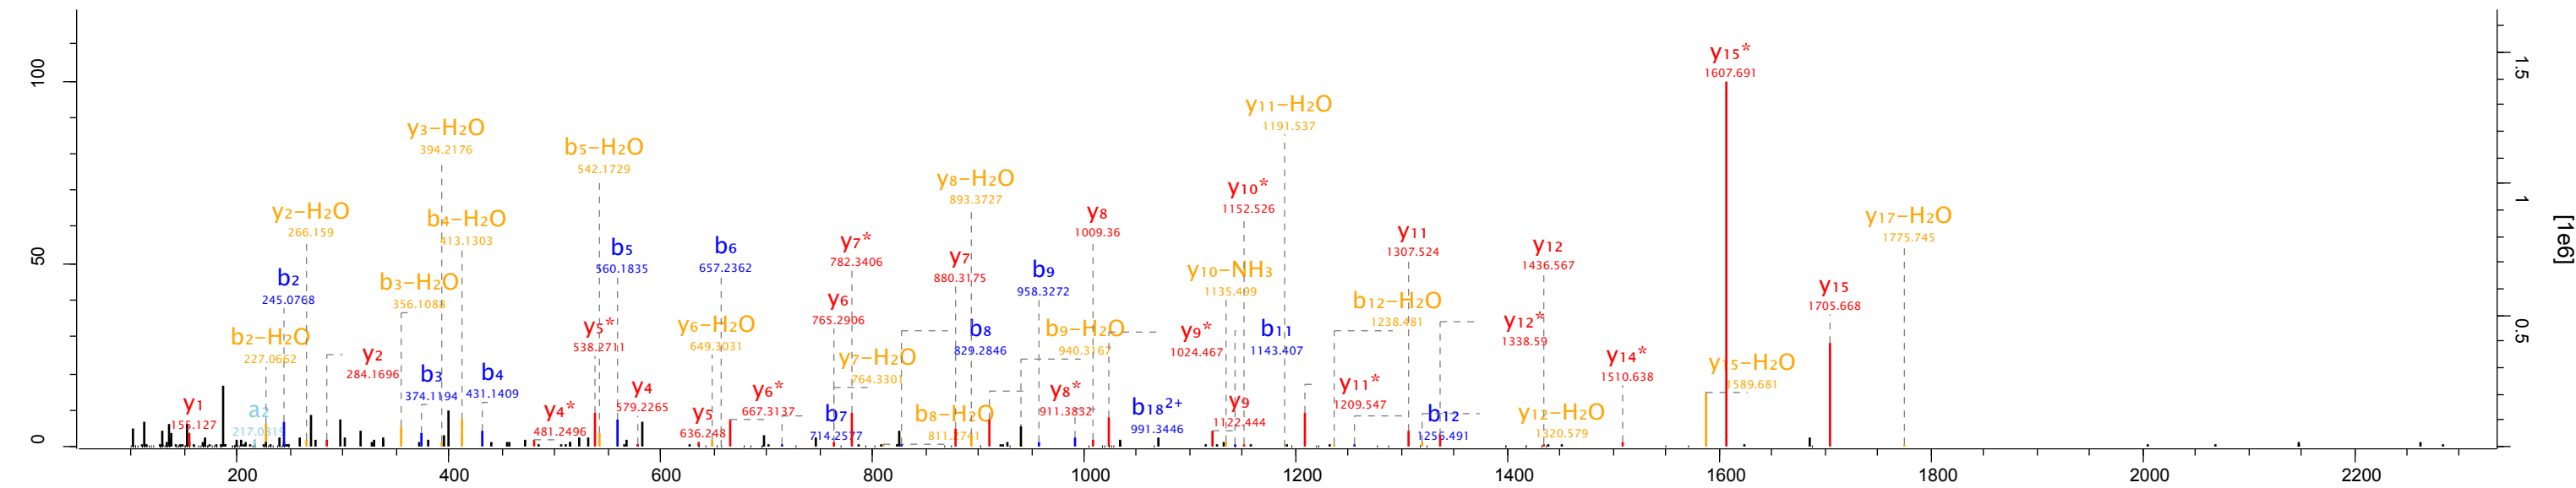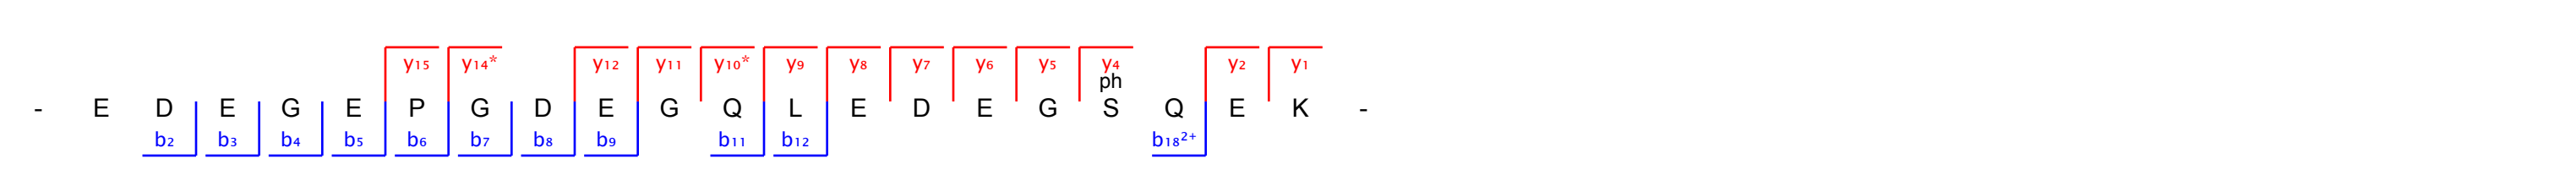

Raw file 20171215\_MaS\_33SR\_LMH\_phospho\_02 Scan 5819 Method FTMS; HCD Score 175.28 m/z 981.41 Gene names YBX3

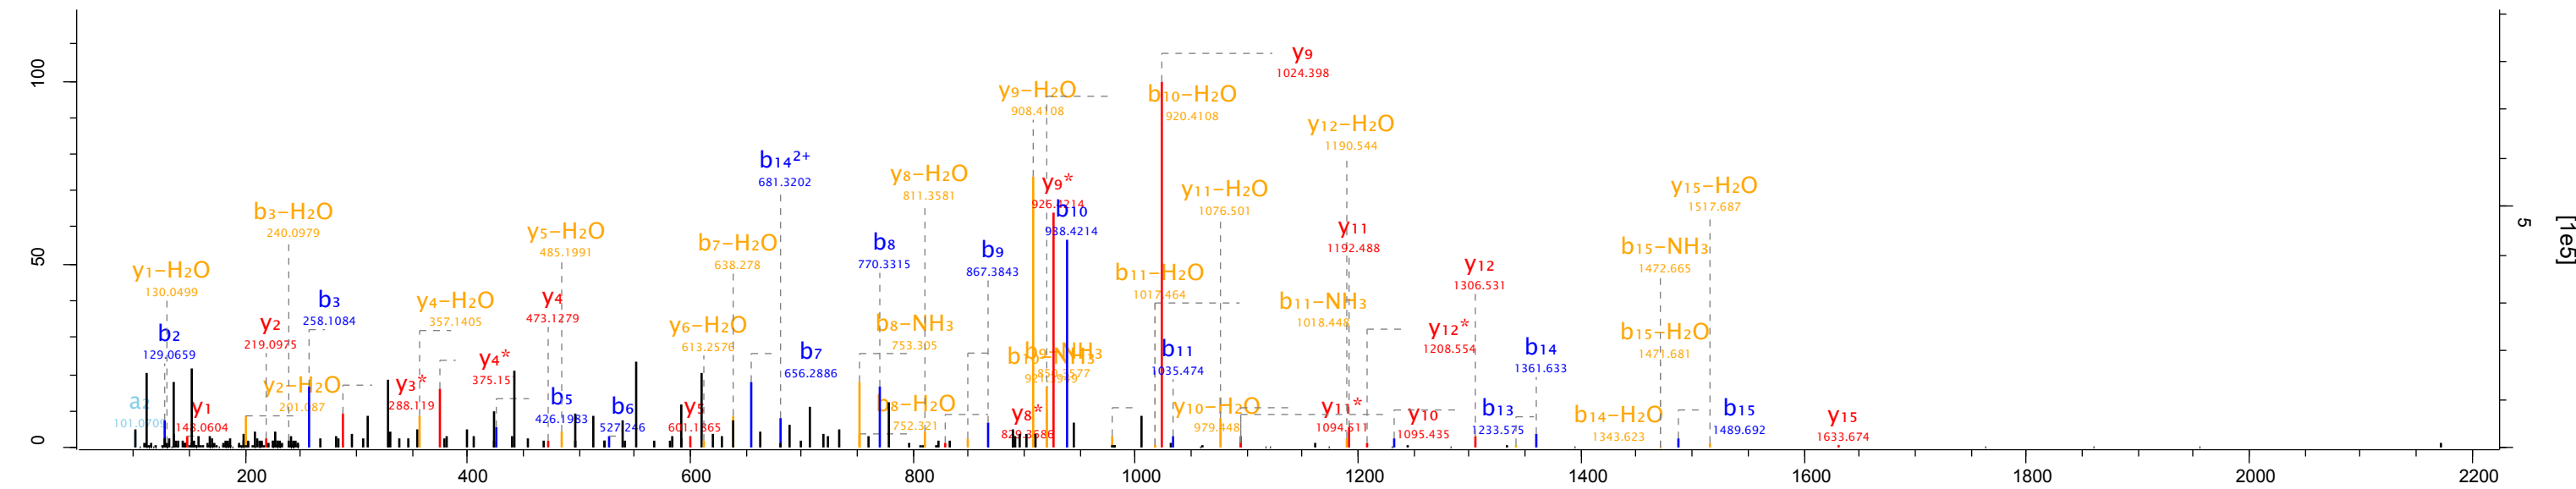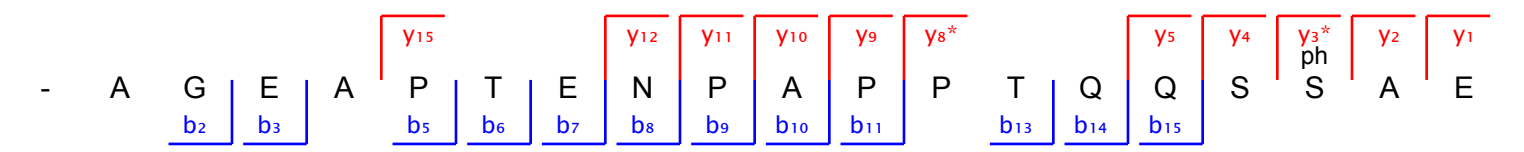

20171215\_MaS\_33SR\_LMH\_phospho\_02

6089 FTMS; HCD 77.91 742.36 POLA2

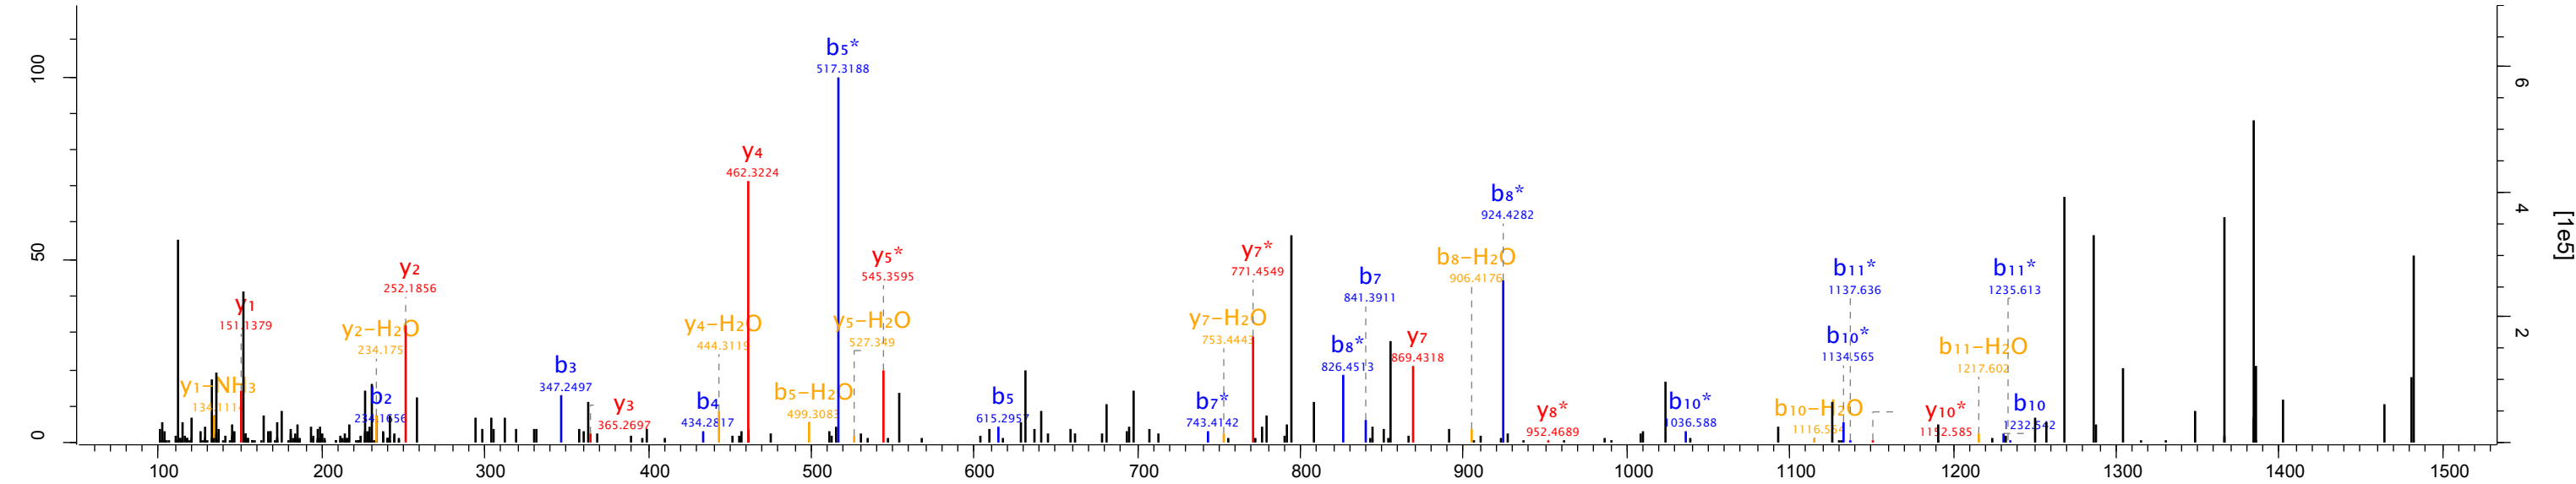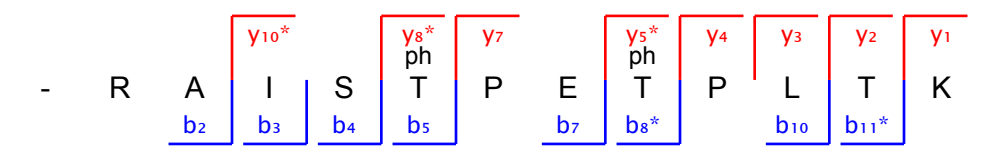

Raw file: 20171215\_MaS\_33SR\_LMH\_phospho\_02  
 Scan: 6409 Method: FTMS; HCD Score: 273.22 m/z: 1010.43 Gene names: SCAF11

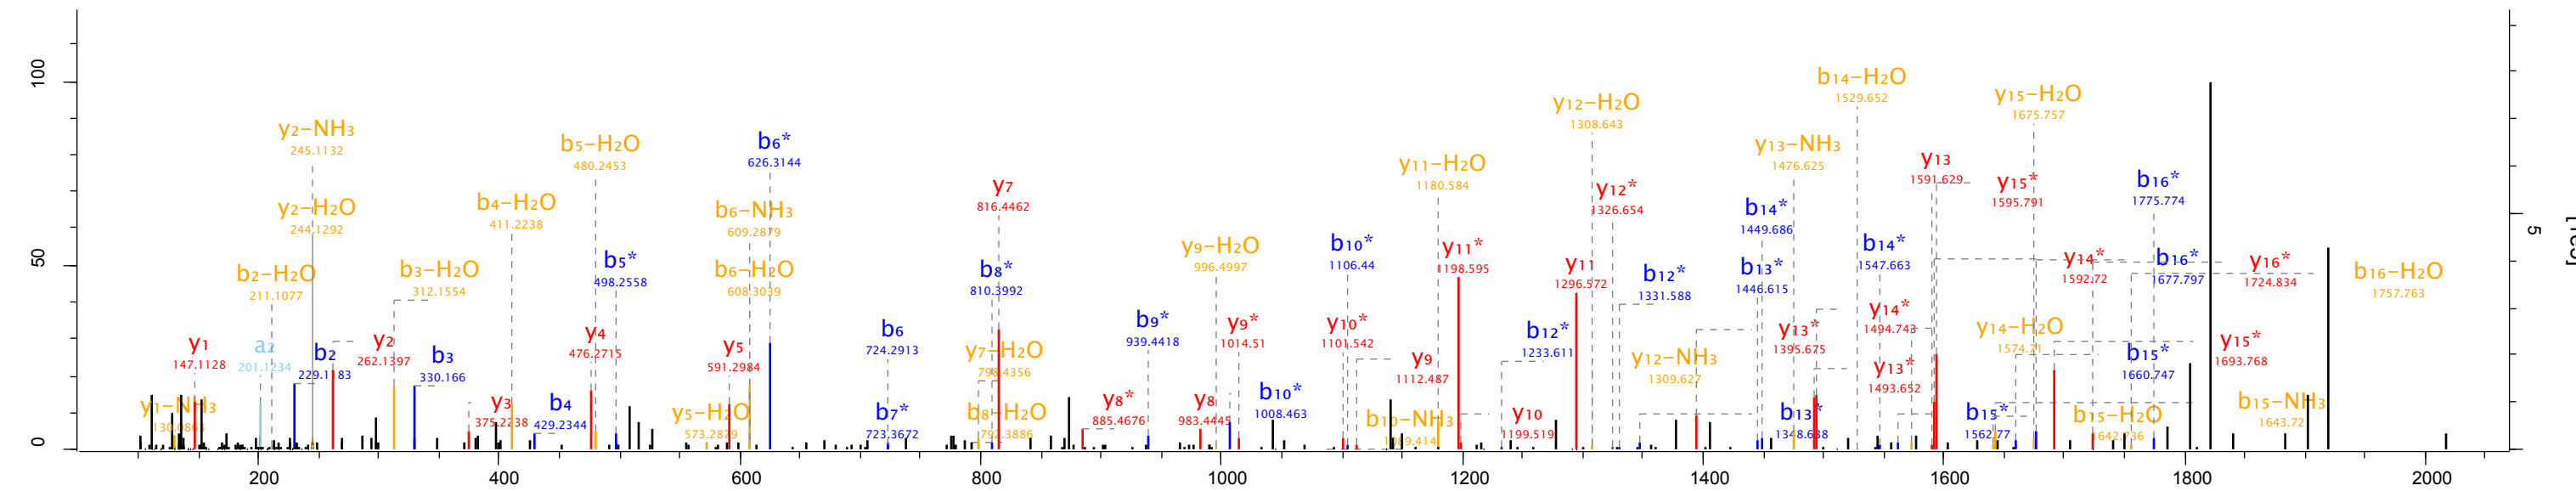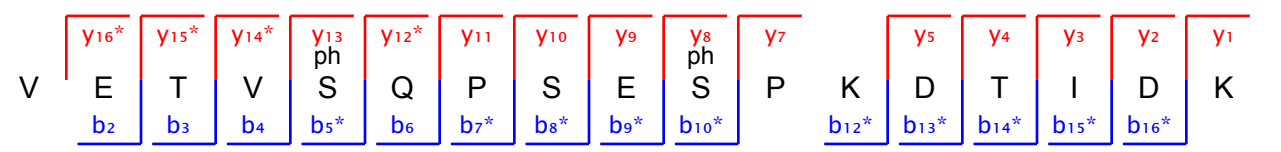

Raw file 20171215\_MaS\_33SR\_LMH\_phospho\_02 Scan 7219 Method FTMS; HCD Score 80.37 m/z 630.78 Gene names CLASP1

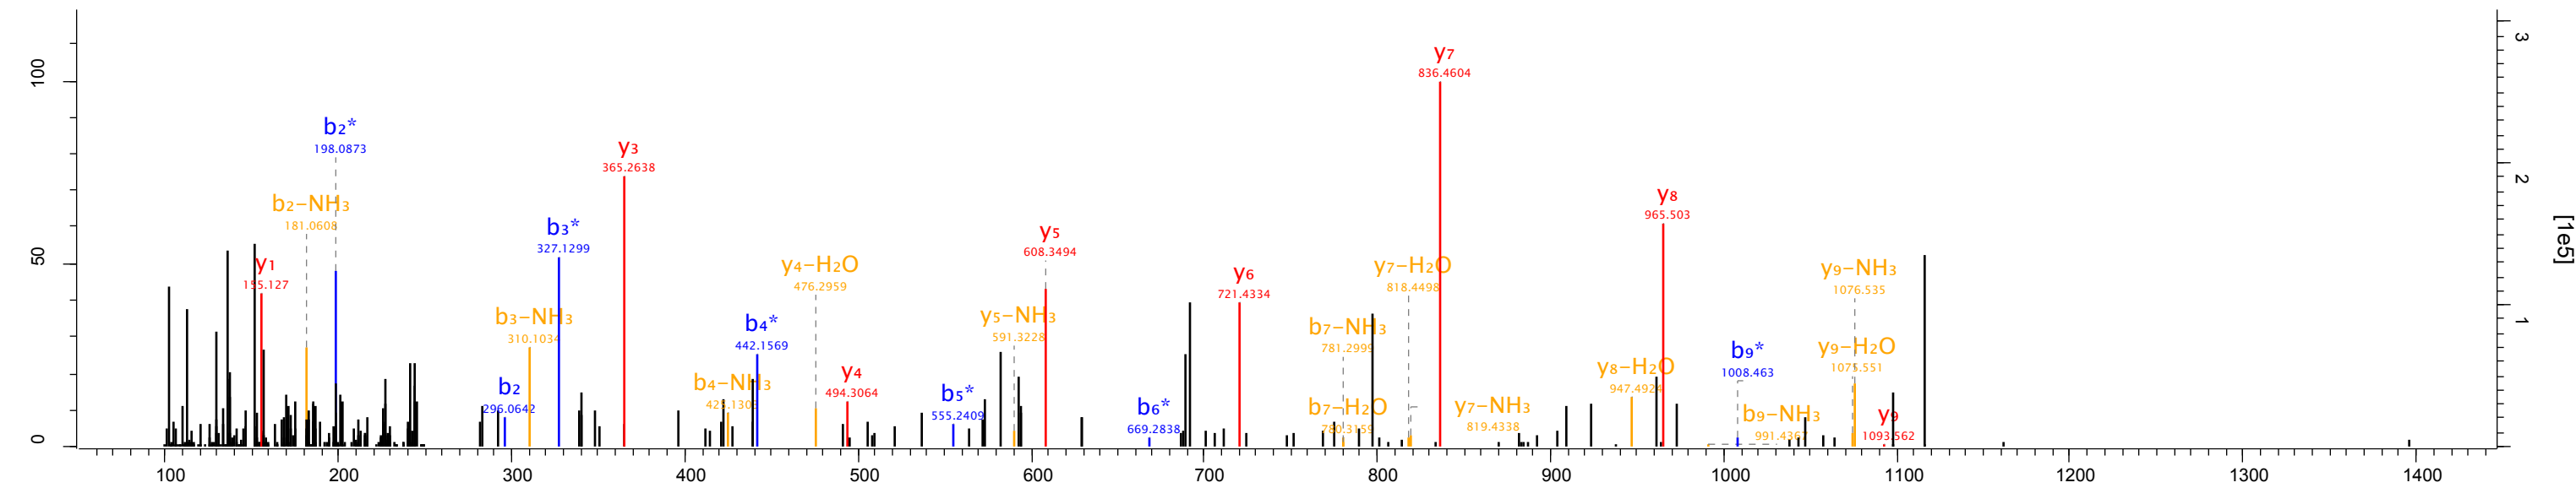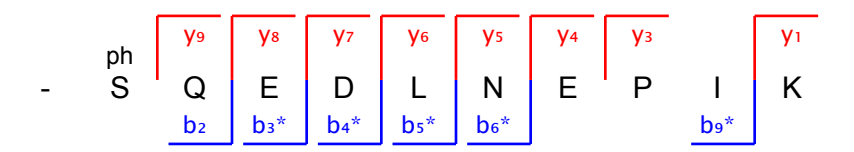



Raw file 20171215\_MaS\_33SR\_LMH\_phospho\_02 Scan 7449 Method FTMS; HCD Score 210.08 m/z 640.3 Gene names WDR44

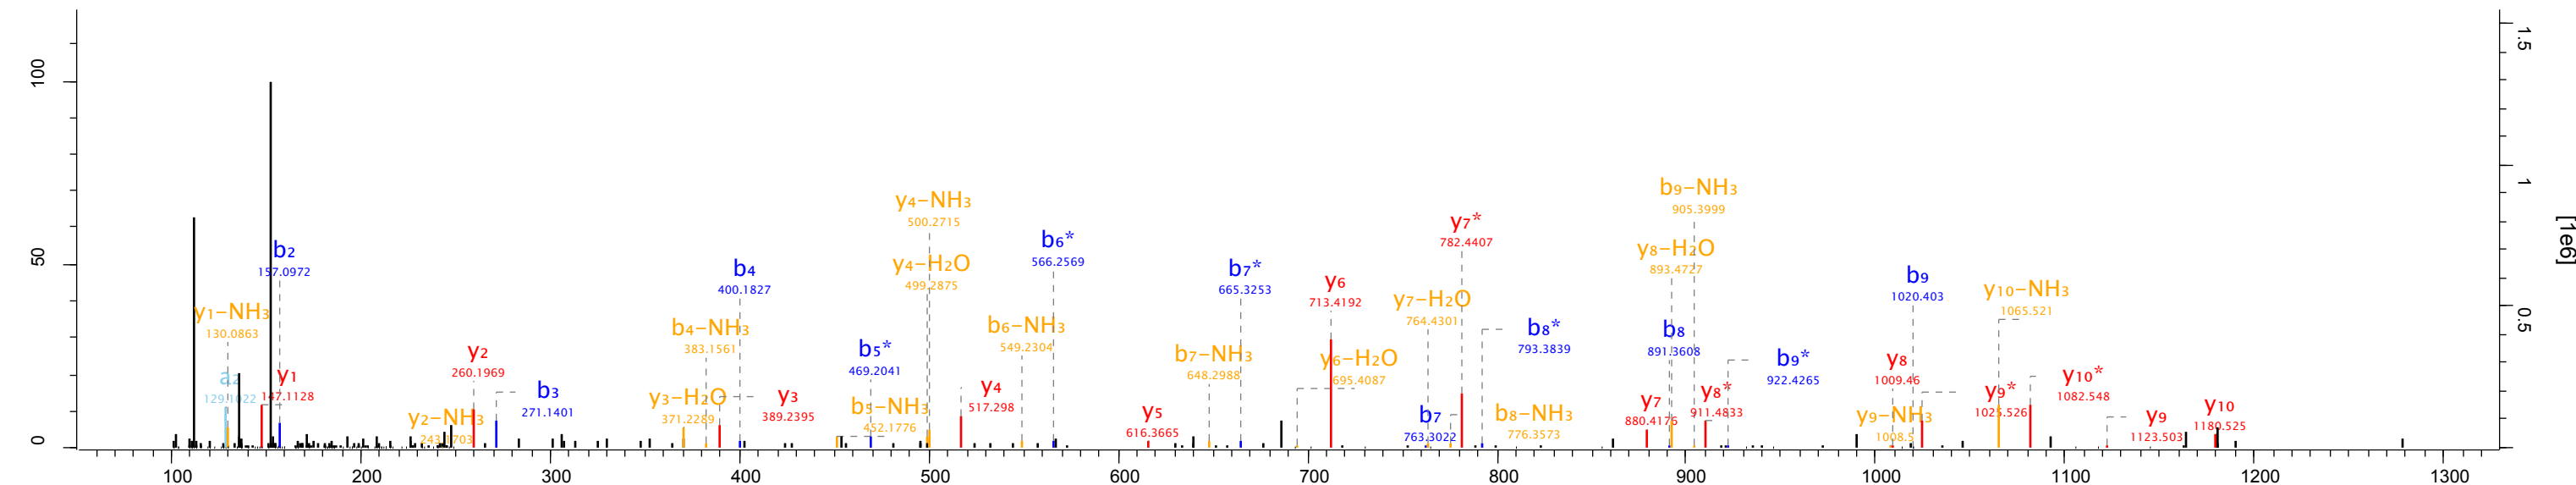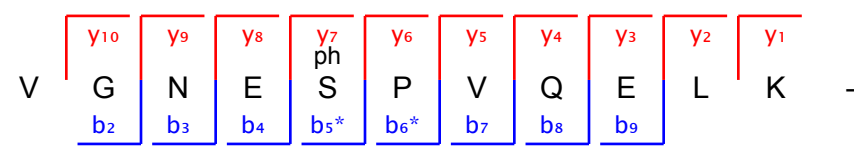

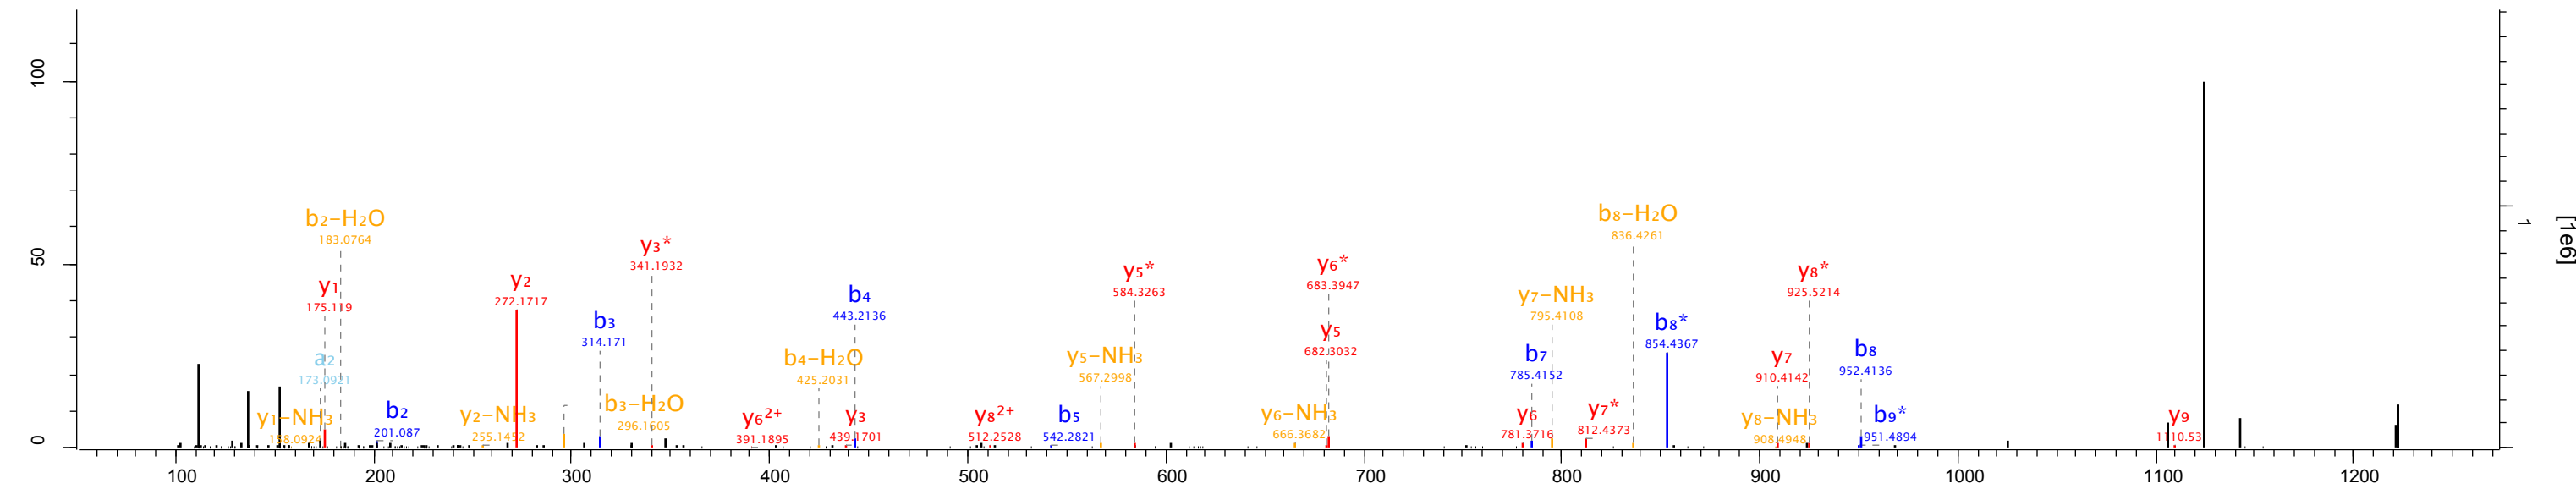

ac

-

A

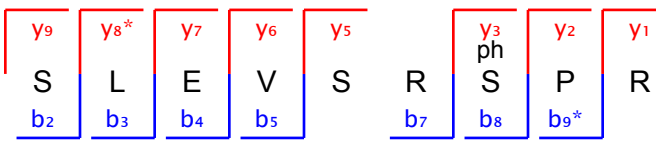

Raw file 20171215\_MaS\_33SR\_LMH\_phospho\_02 Scan 7699 Method FTMS; HCD Score 164.22 m/z 861.36 Gene names DUS3L

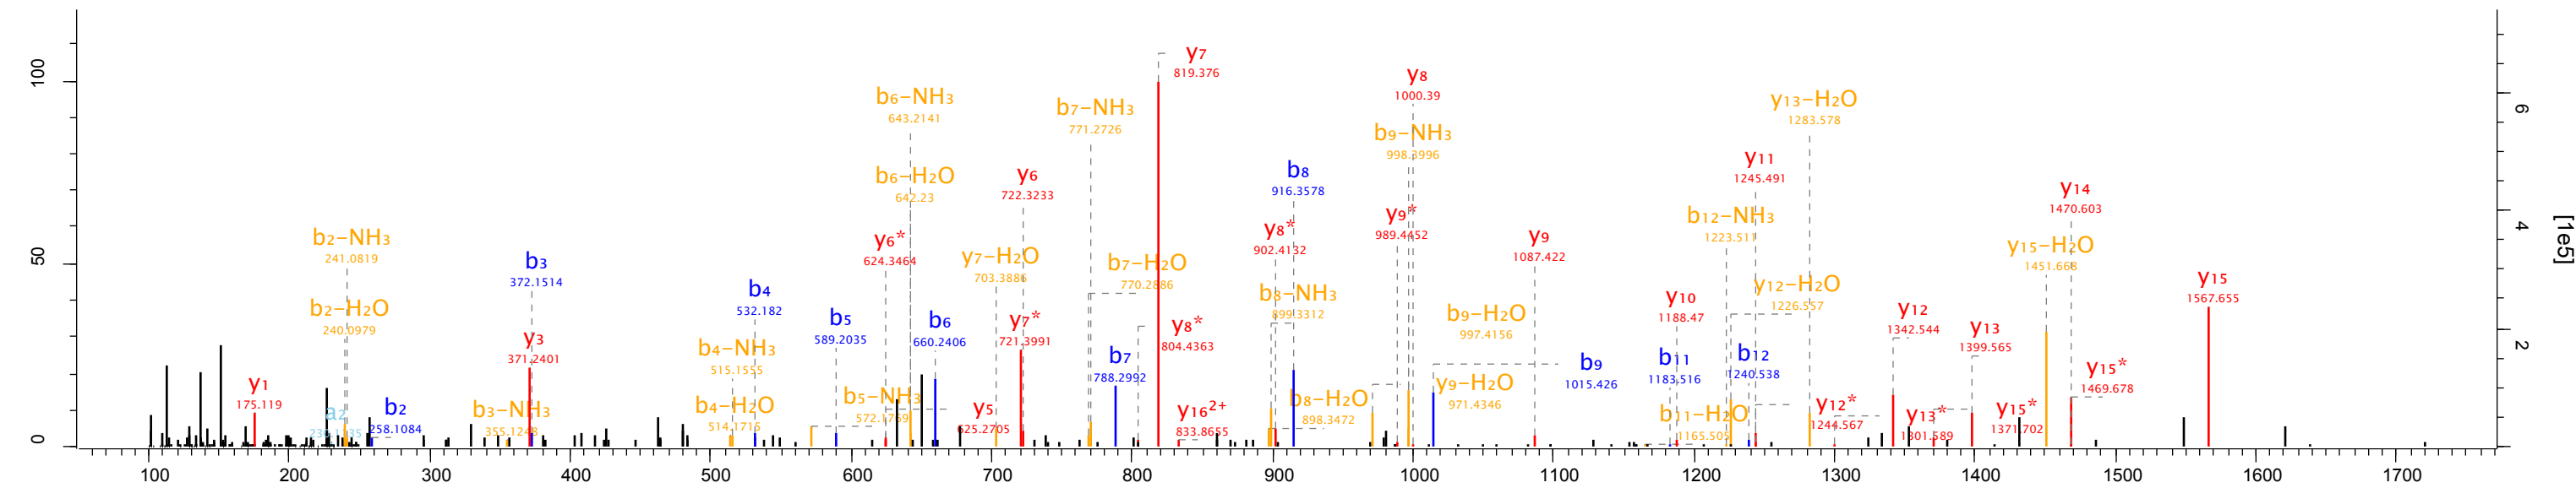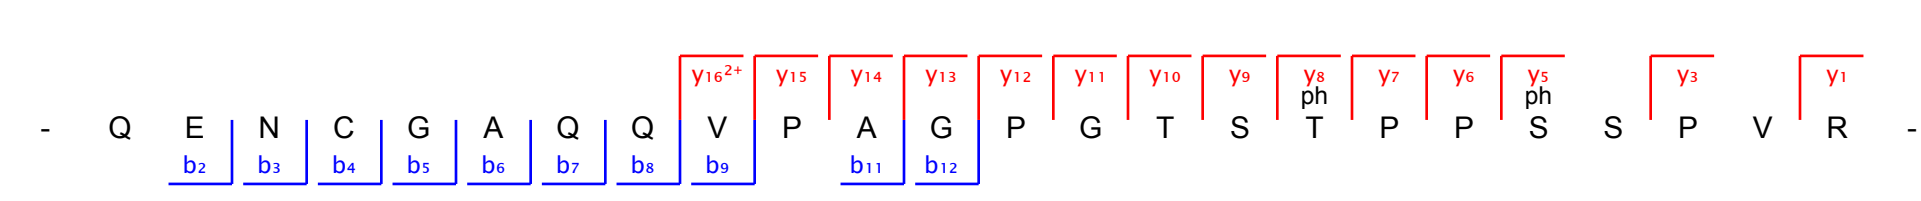

Raw file 20171215\_MaS\_33SR\_LMH\_phospho\_02 Scan 7729 Method FTMS; HCD Score 215.43 m/z 875.86 Gene names SNRNP70

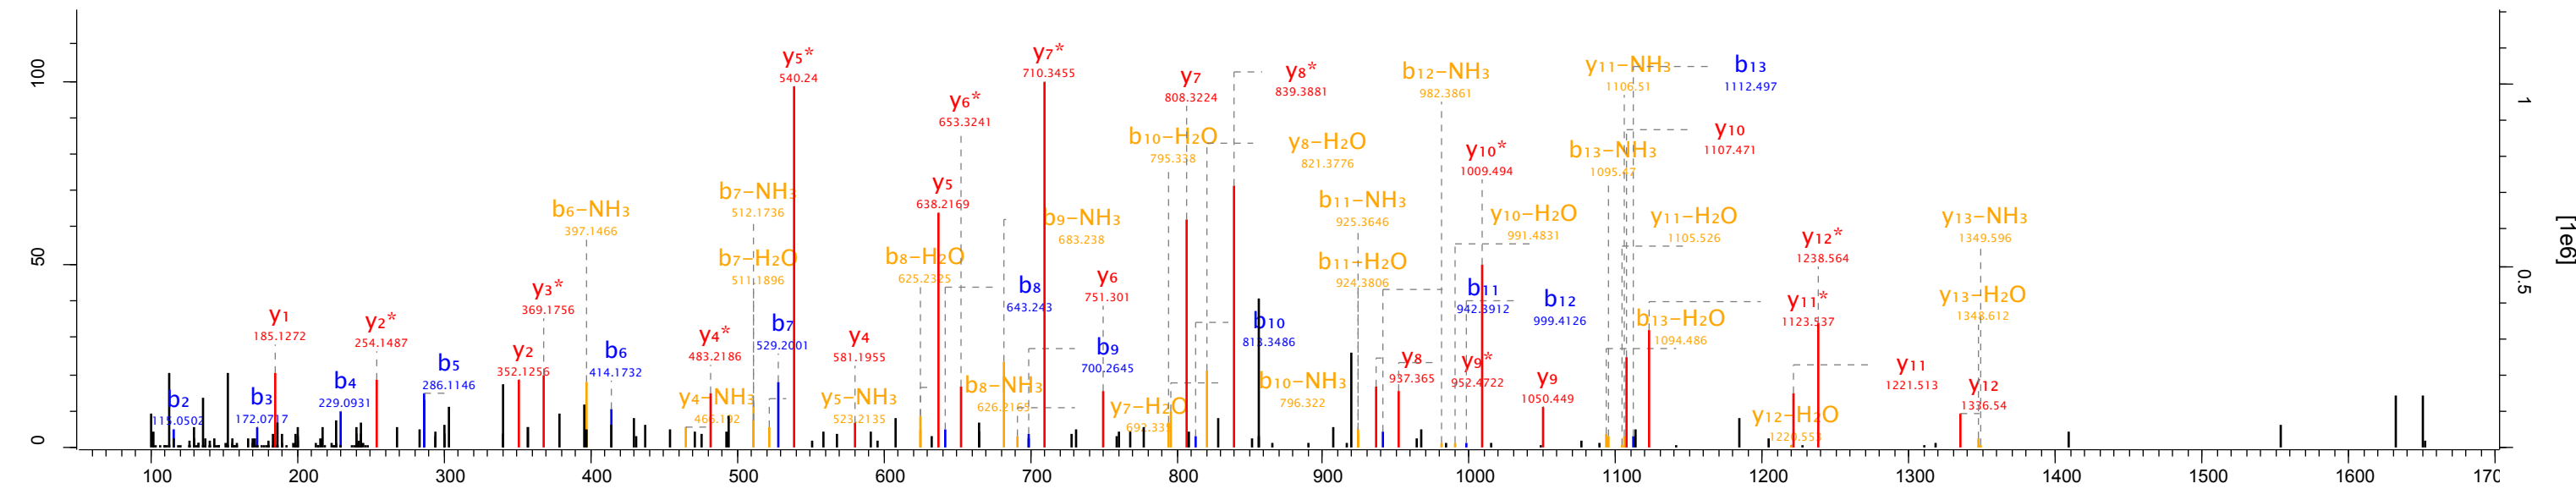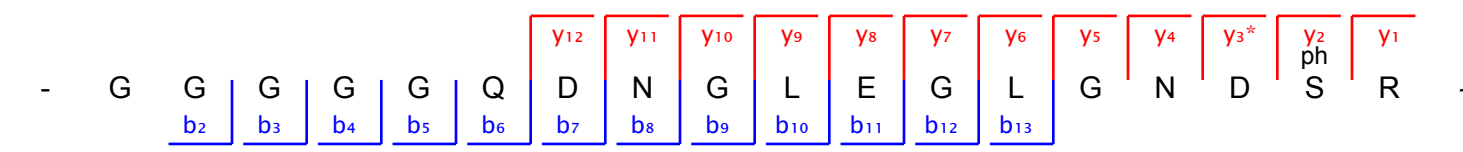

Raw file 20171215\_MaS\_33SR\_LMH\_phospho\_02 Scan 7739 Method FTMS; HCD Score 77.37 m/z 617.77 Gene names ZNF609

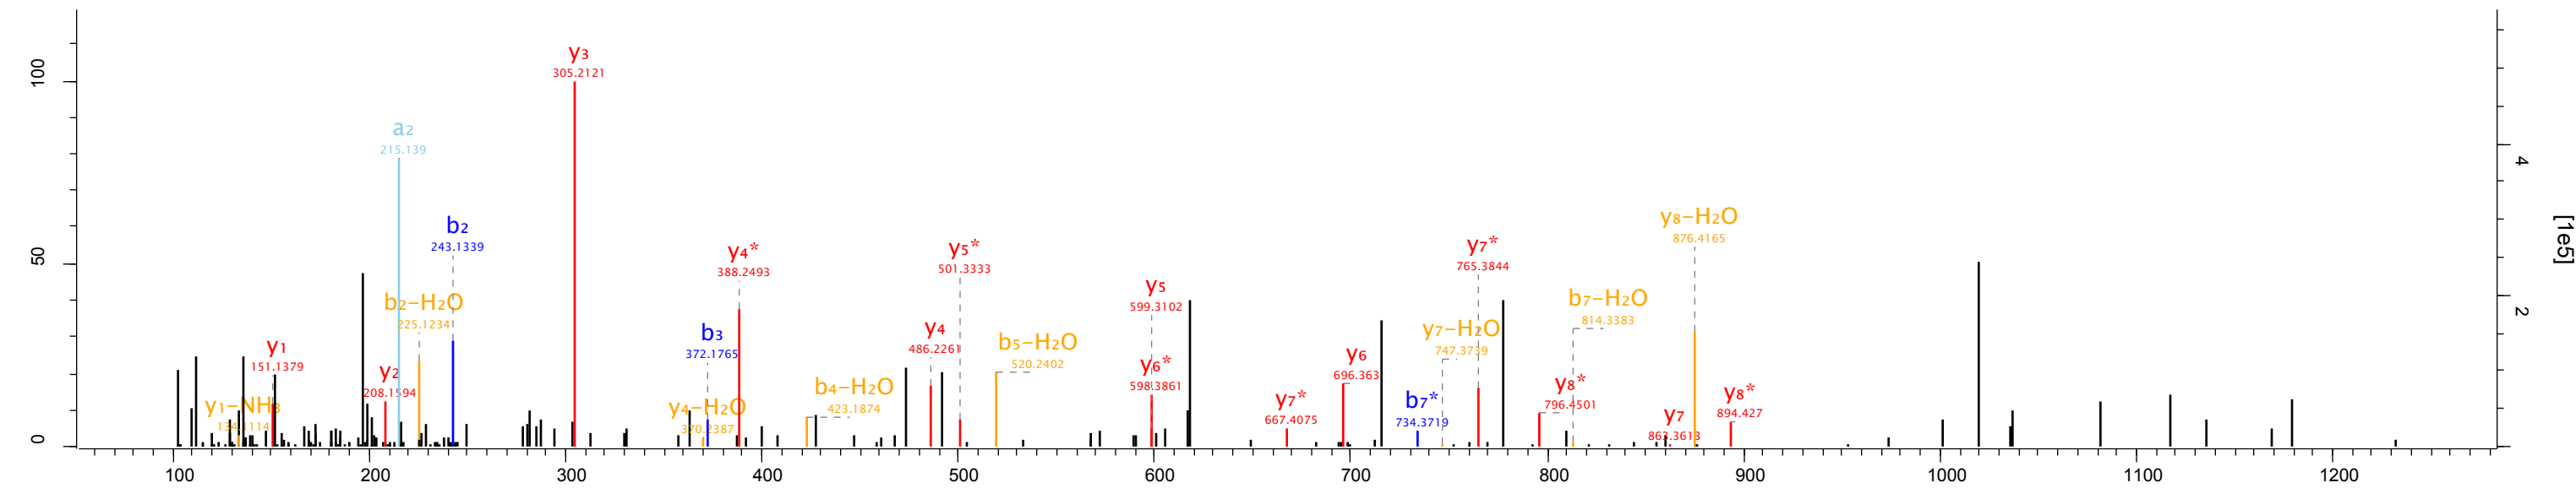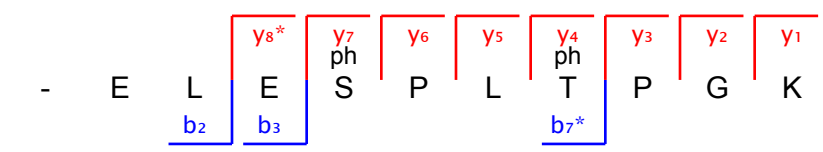

Raw file 20171215\_MaS\_33SR\_LMH\_phospho\_02 Scan 8299 Method FTMS; HCD Score 144.74 m/z 750.33 Gene names ZNF609

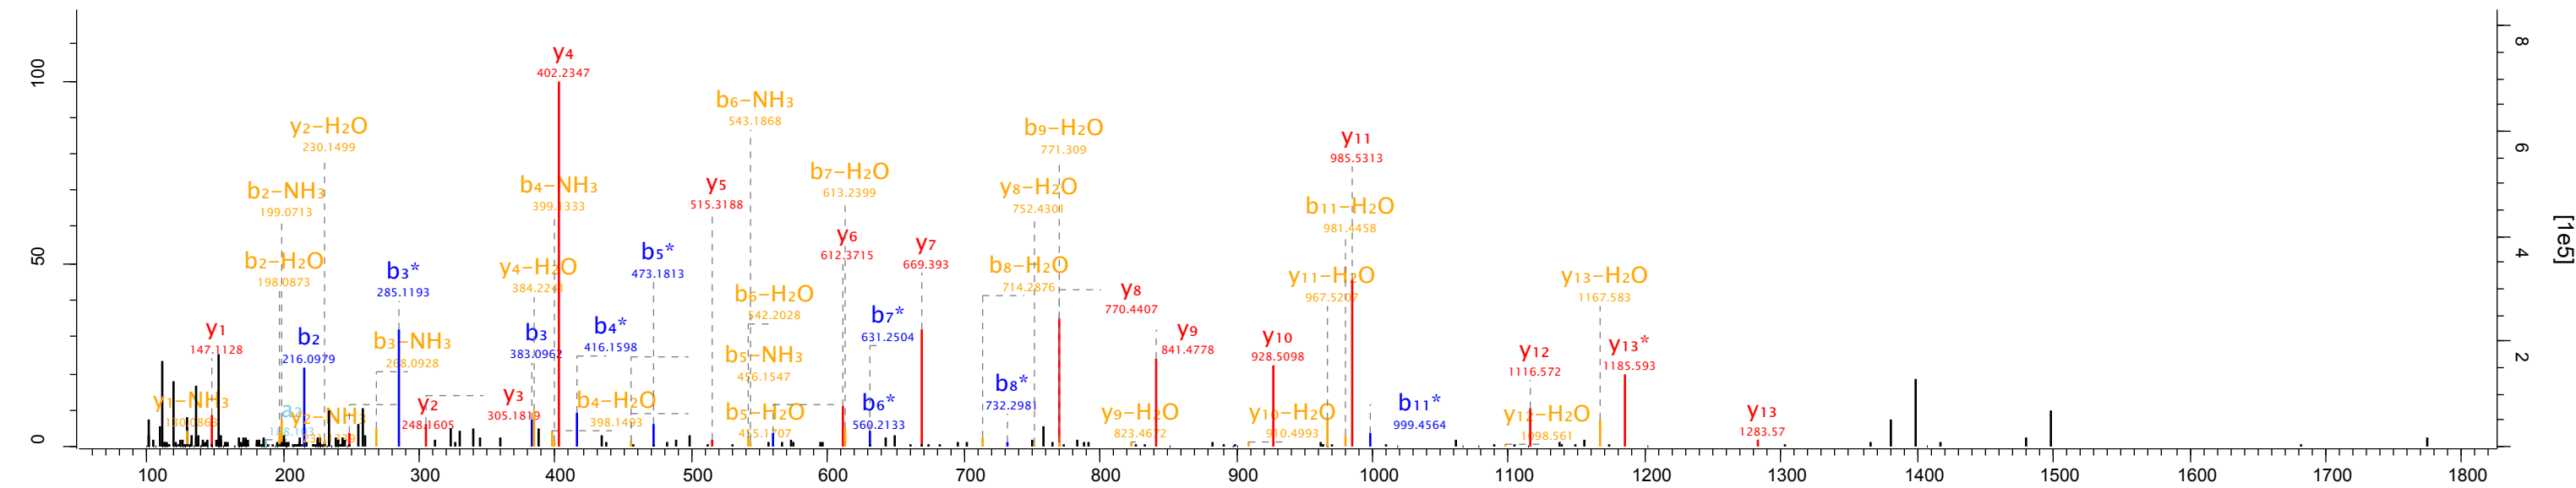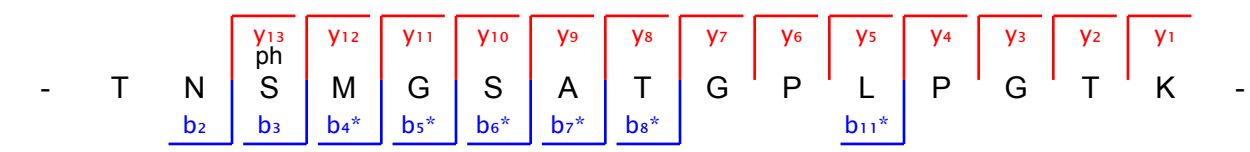

Raw file 20171215\_MaS\_33SR\_LMH\_phospho\_02 Scan 8719 Method FTMS; HCD Score 73.29 m/z 619.62 Gene names PHLDB1

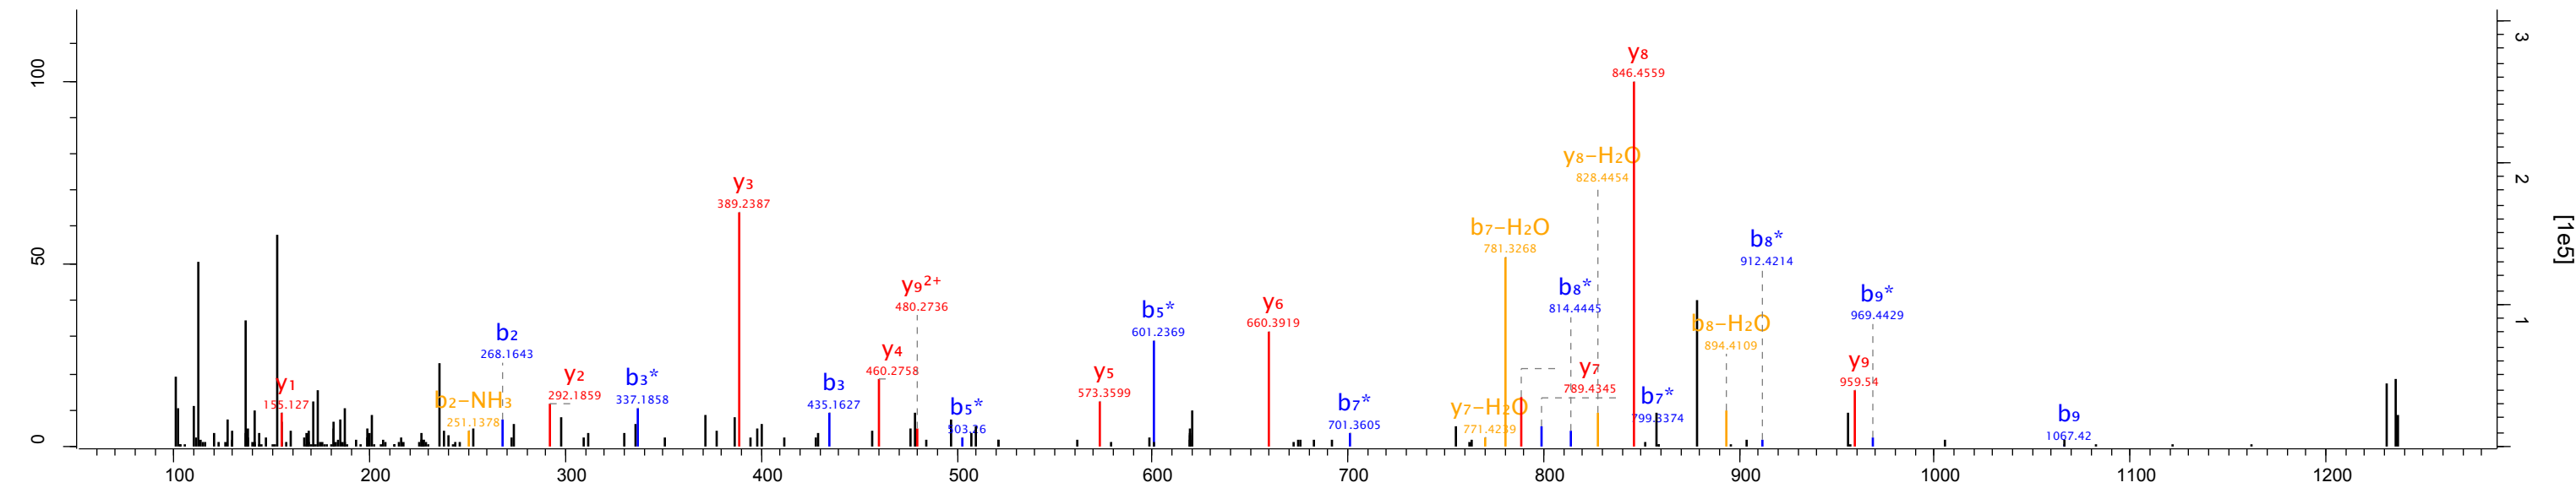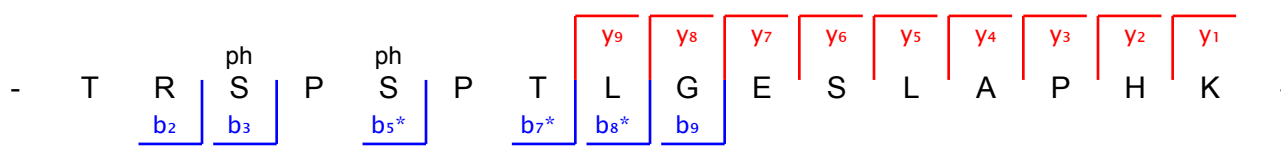

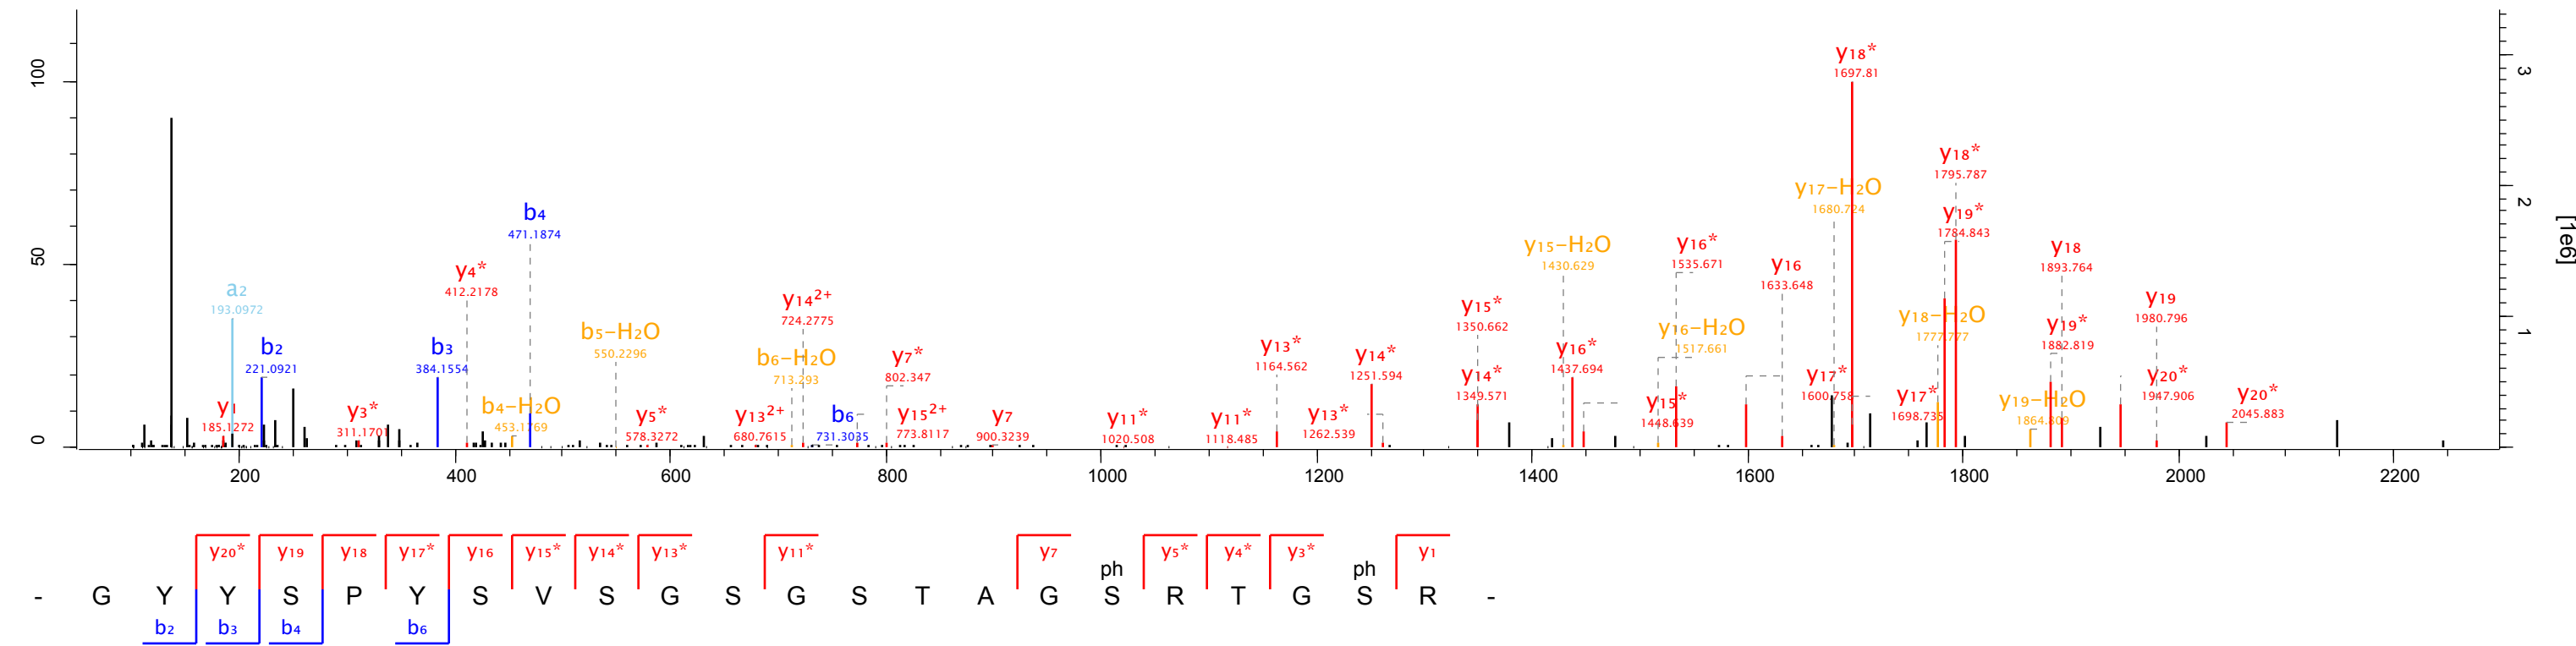



Raw file 20171215\_MaS\_33SR\_LMH\_phospho\_02 Scan 9319 Method FTMS; HCD Score 41.51 m/z 872.36 Gene names PHF12

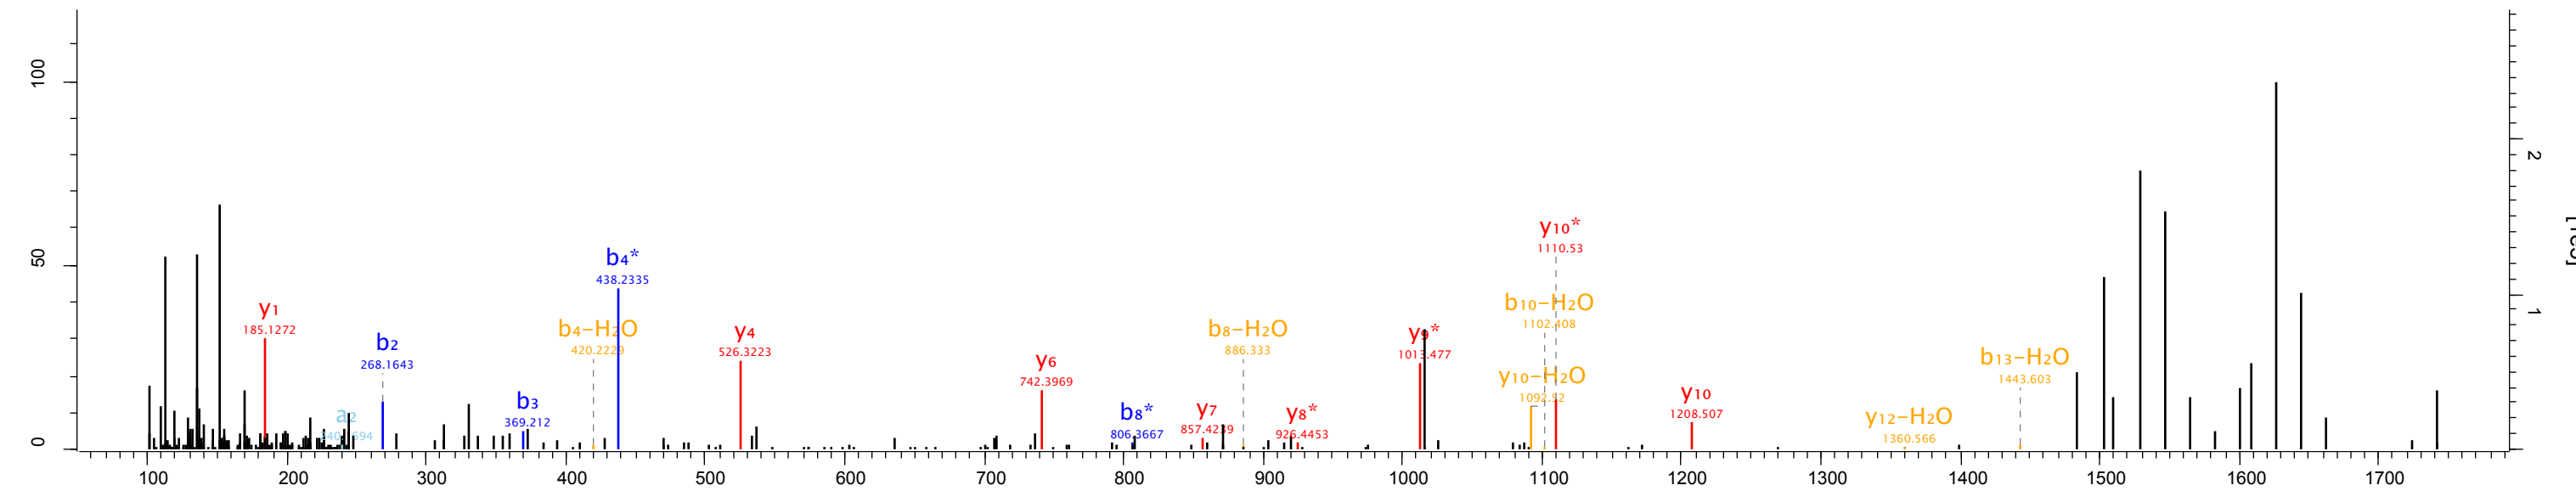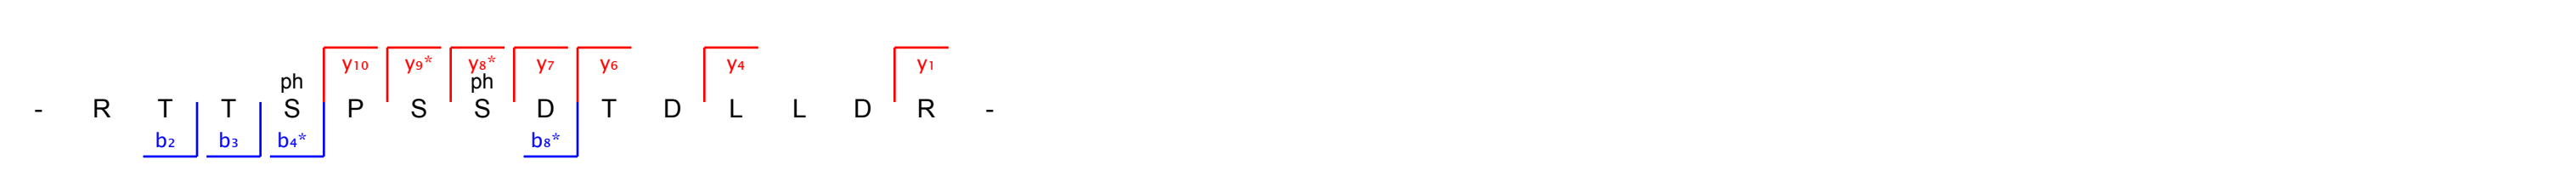

Raw file  
 20171215\_MaS\_33SR\_LMH\_phospho\_02  
 Scan 9379 Method FTMS; HCD Score 299.5 m/z 1135.94 Gene names HNRNPA2B1

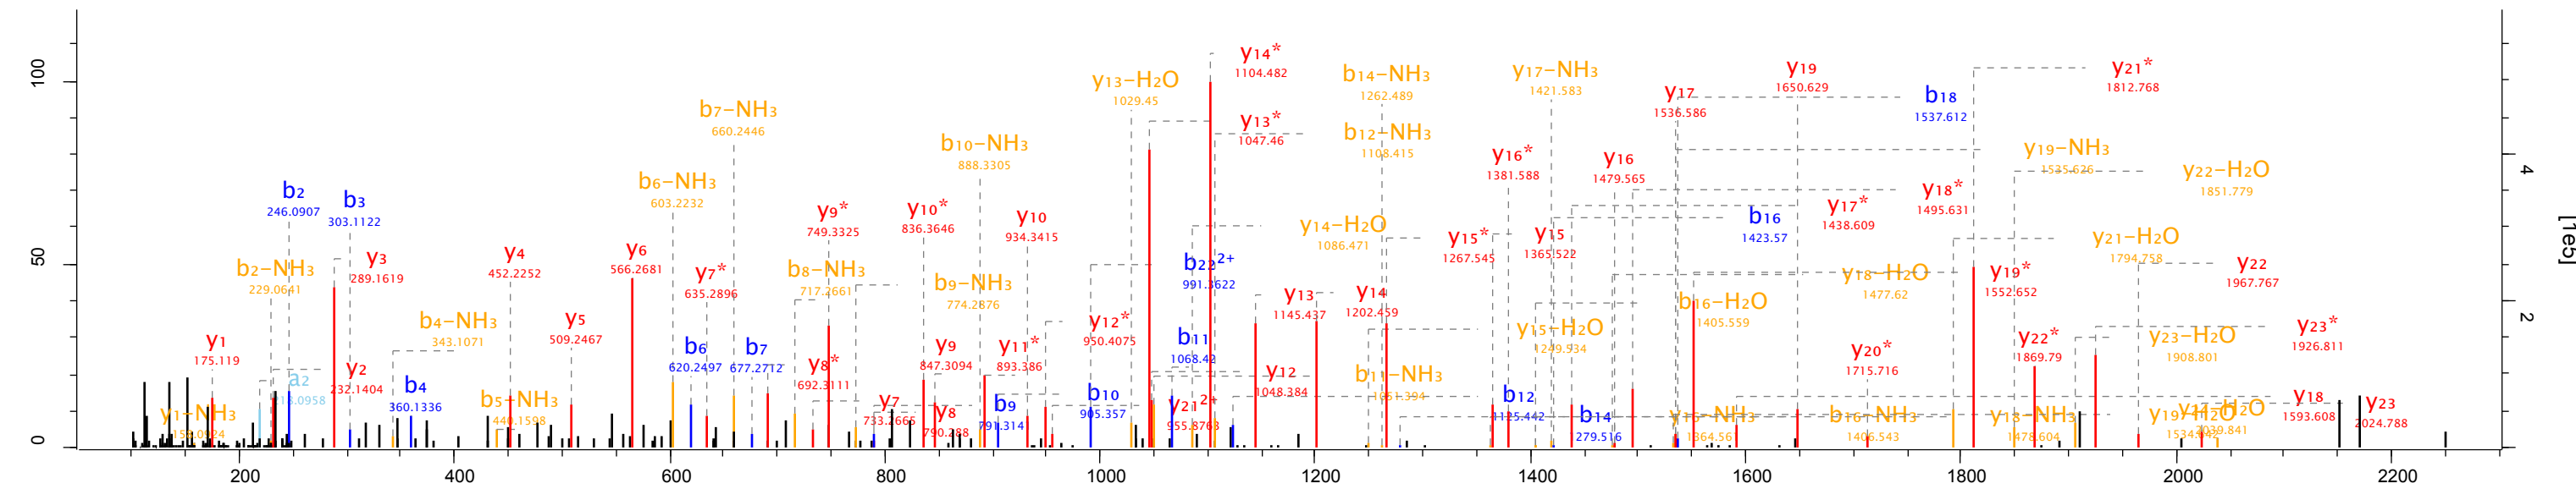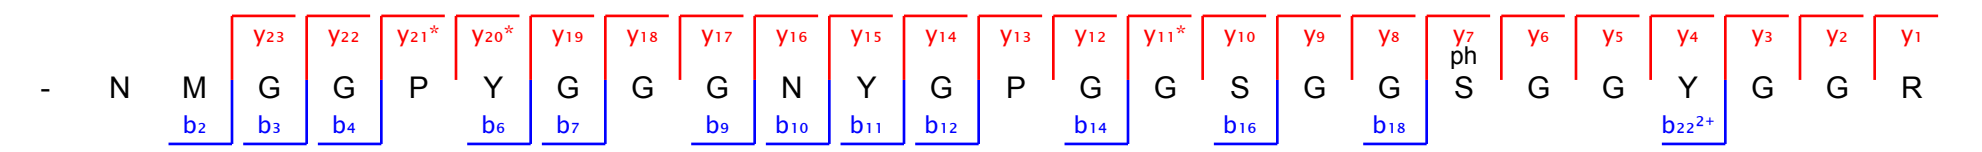

Raw file 20171215\_MaS\_33SR\_LMH\_phospho\_02 Scan 9779 Method FTMS; HCD Score 121.18 m/z 627.28 Gene names KIAA1429

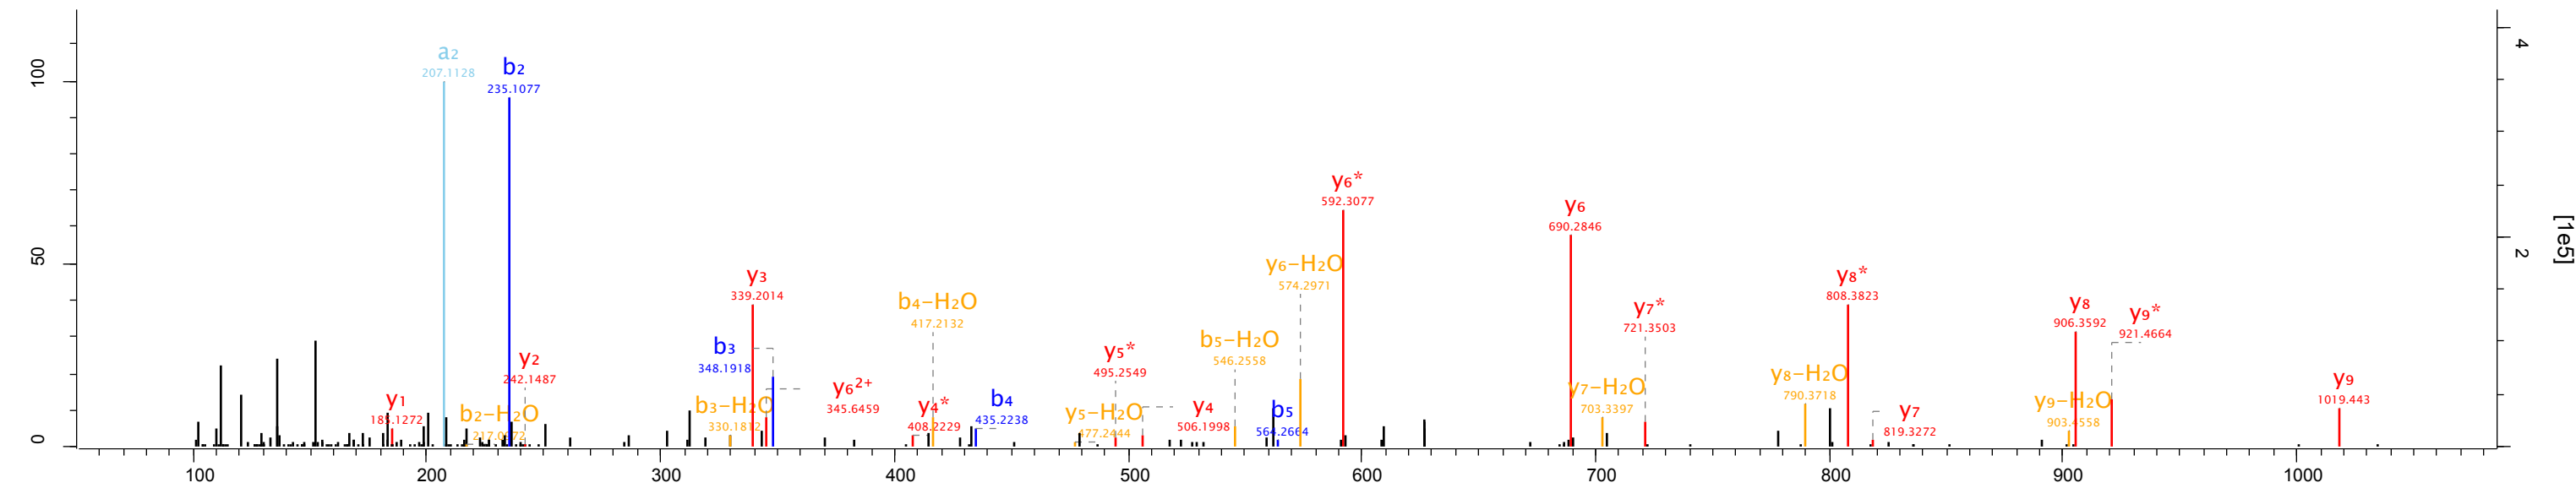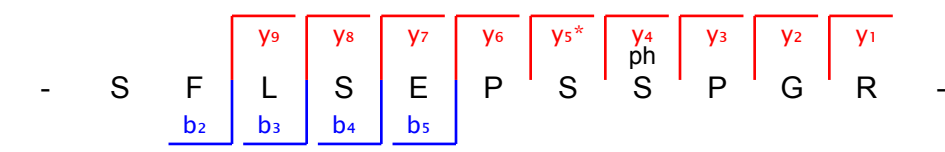

Raw file 20171215\_MaS\_33SR\_LMH\_phospho\_02 Scan 9909 Method FTMS; HCD Score 212.01 m/z 1001.45 Gene names STK10

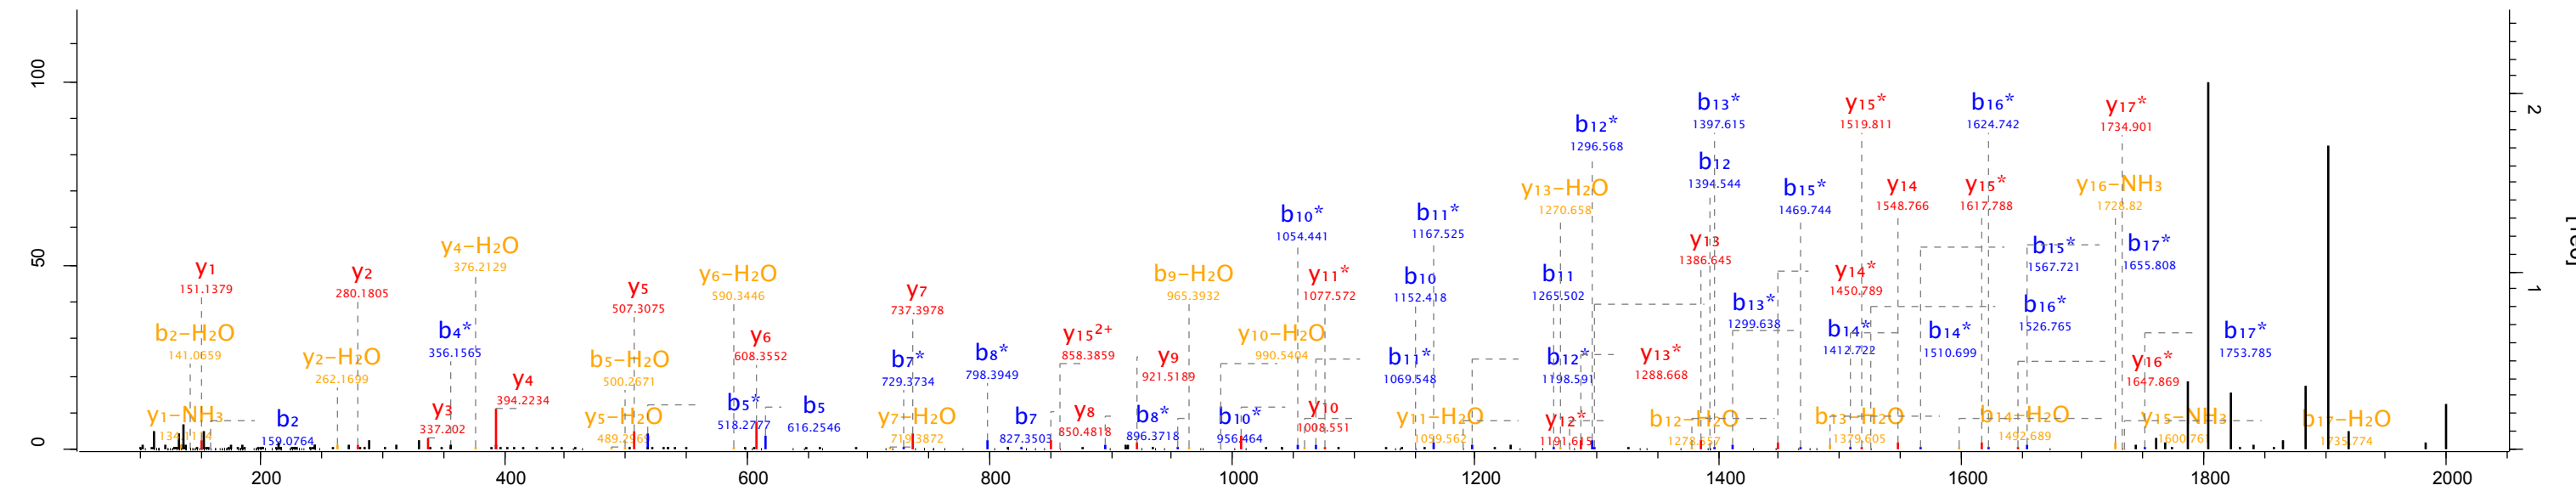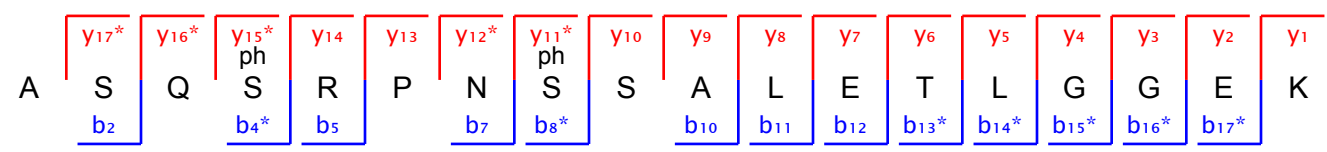

Raw file 20171215\_MaS\_33SR\_LMH\_phospho\_03 Scan 10169 Method FTMS; HCD Score 137.5 m/z 938.1 Gene names DBNL

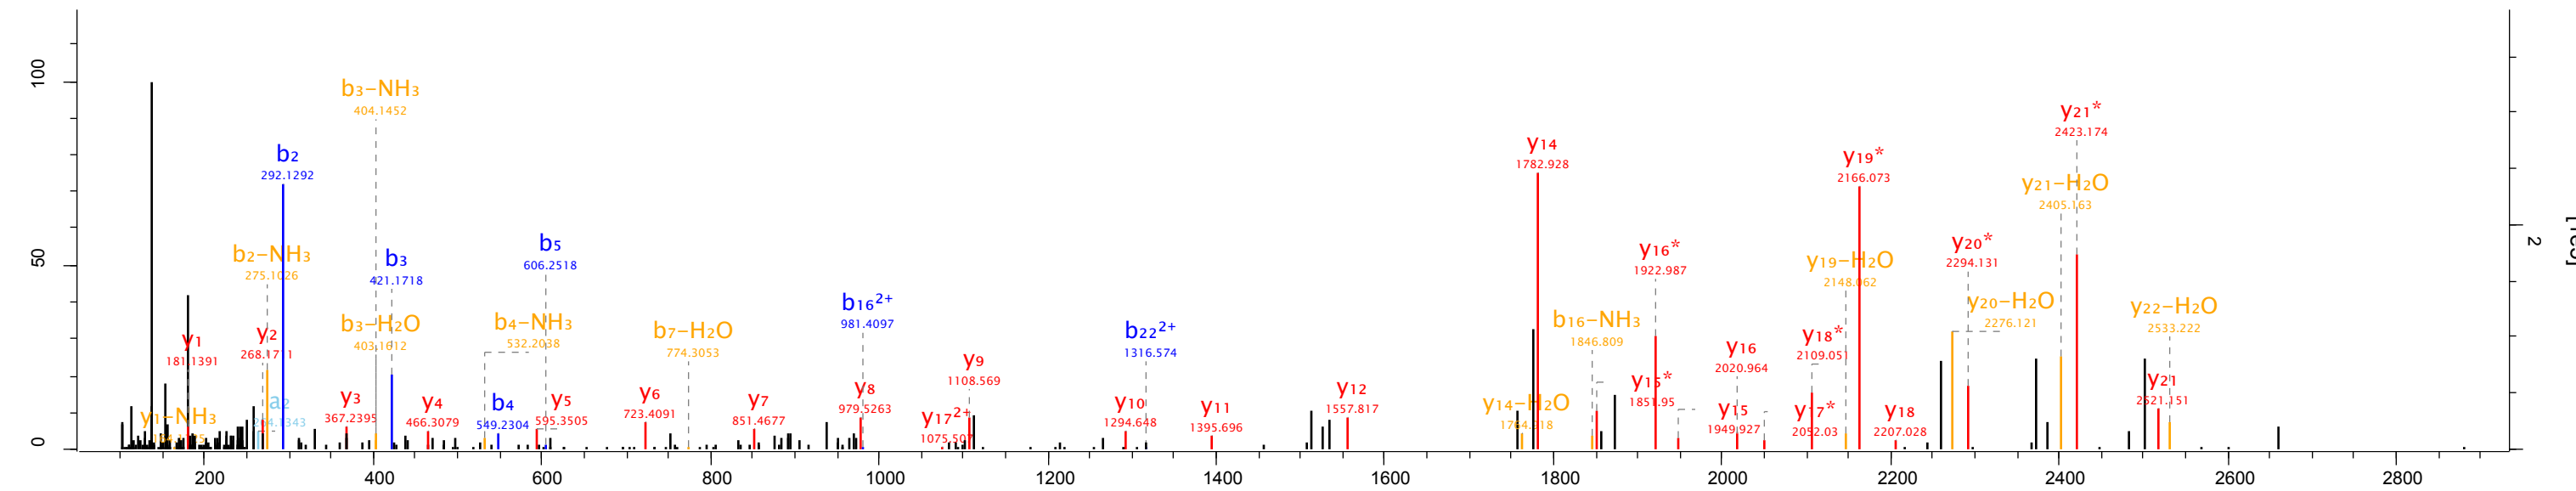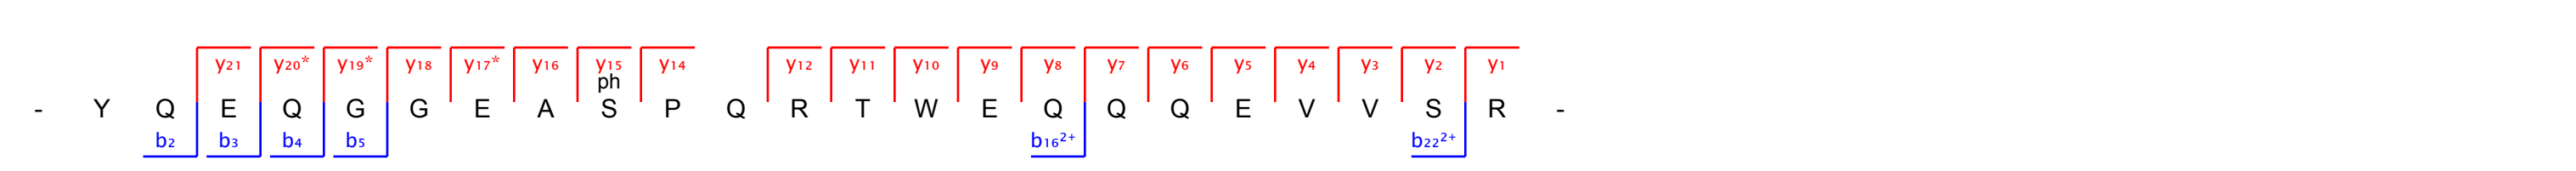

Raw file

20171215\_MaS\_33SR\_LMH\_phospho\_03

Scan 10259 Method FTMS; HCD Score 100.88 m/z 454.75 Gene names MOV10

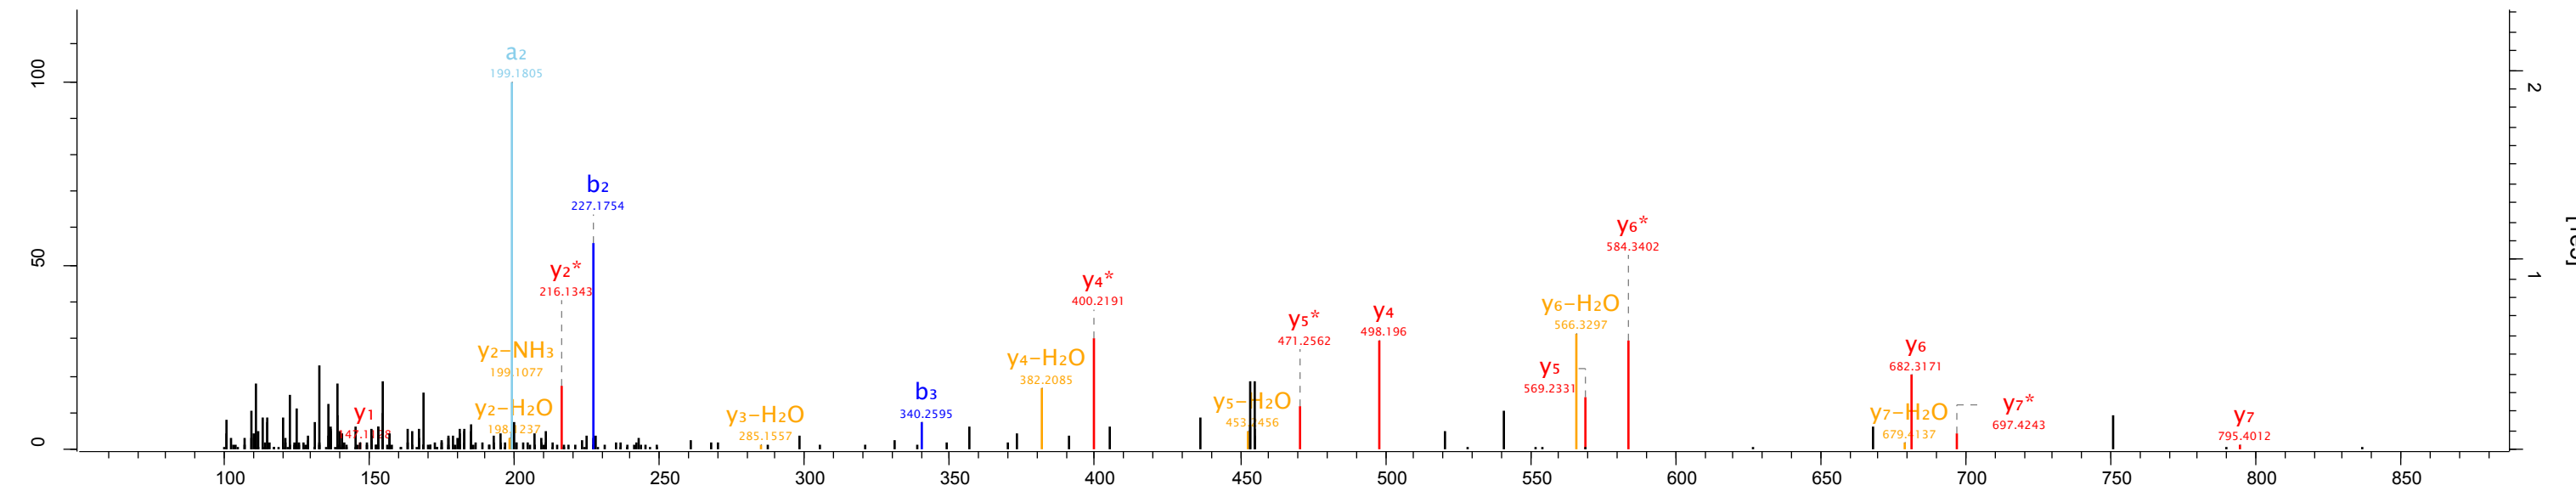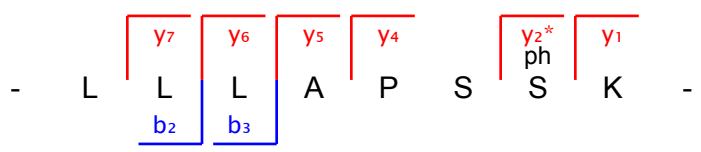

Raw file: 20171215\_MaS\_33SR\_LMH\_phospho\_03  
 Scan: 10559 Method: FTMS; HCD Score: 303.39 m/z: 972.91 Gene names: NAP1L4

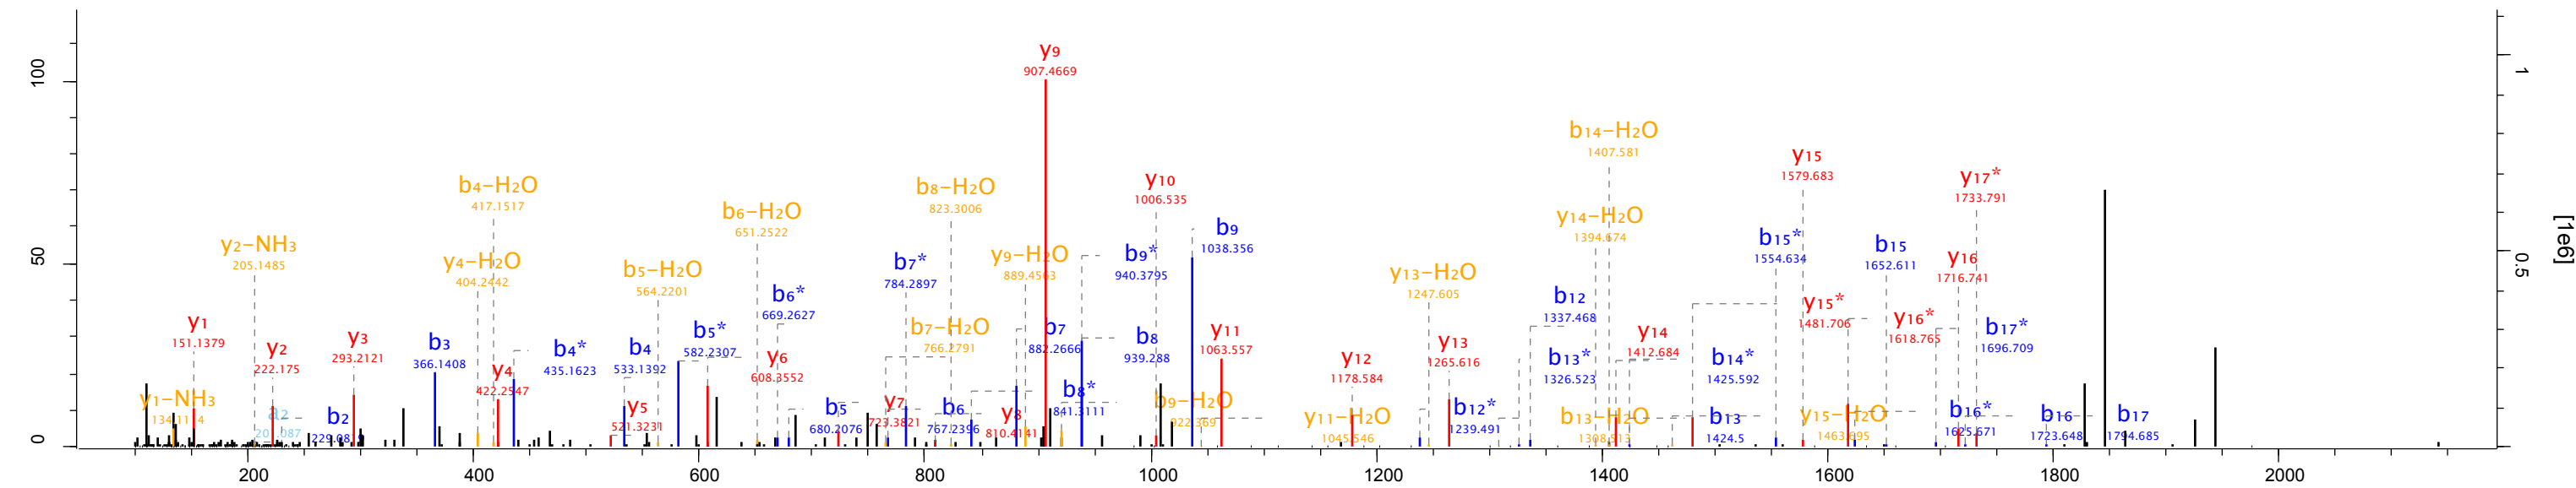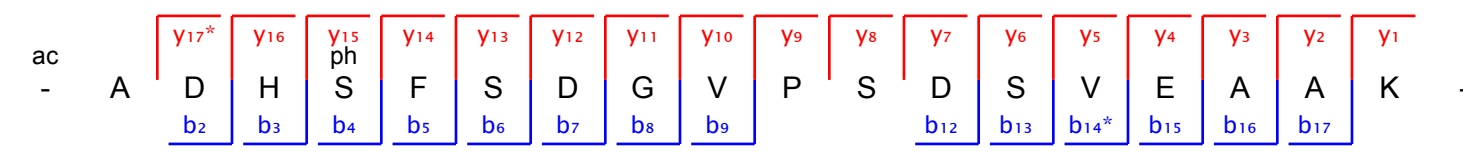

Raw file: 20171215\_MaS\_33SR\_LMH\_phospho\_03  
 Scan: 10699 Method: FTMS; HCD Score: 132.12 m/z: 745.86 Gene names: LRWD1

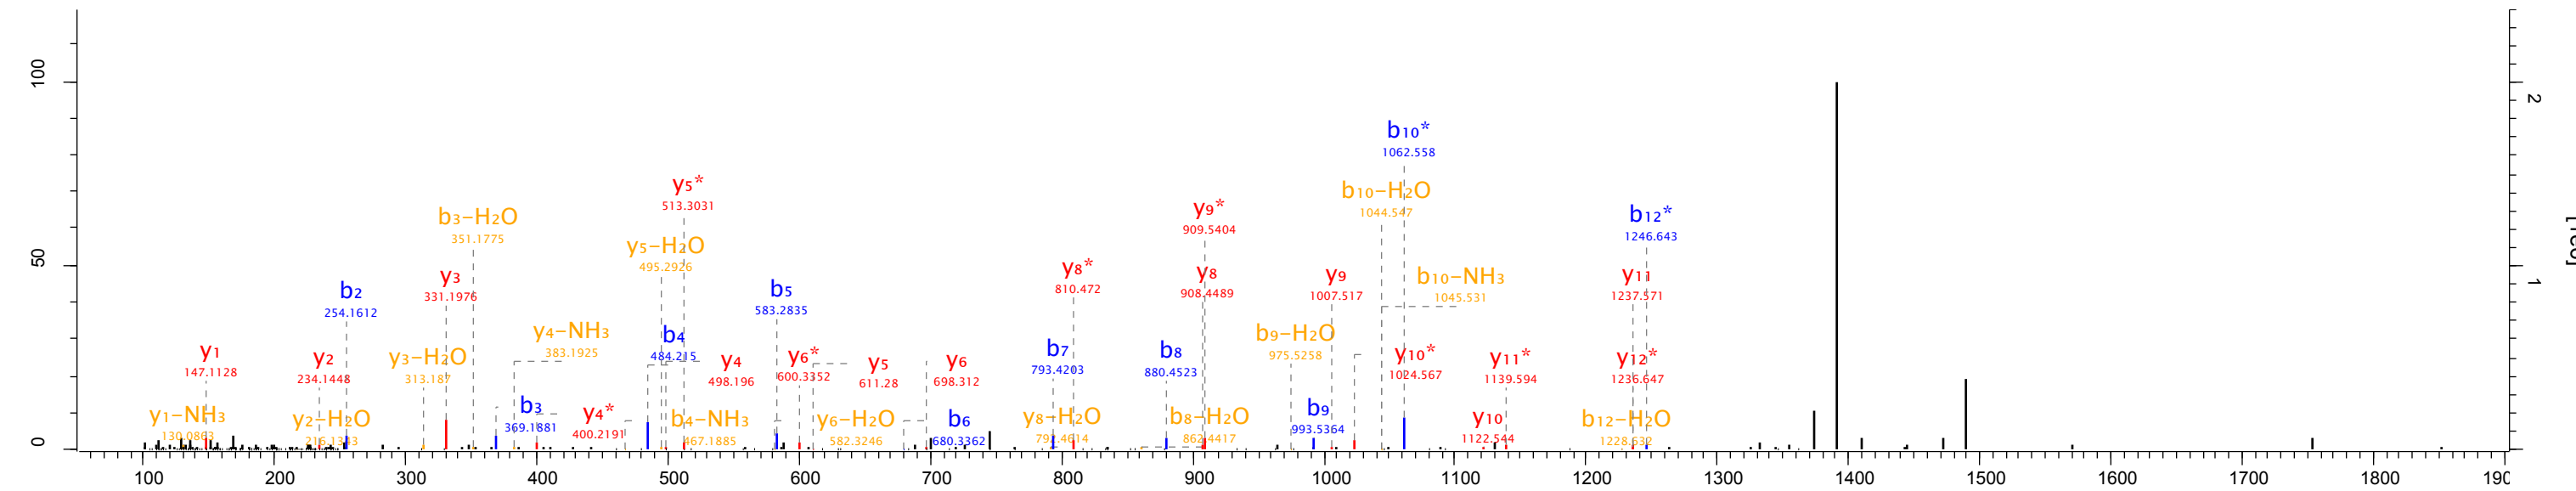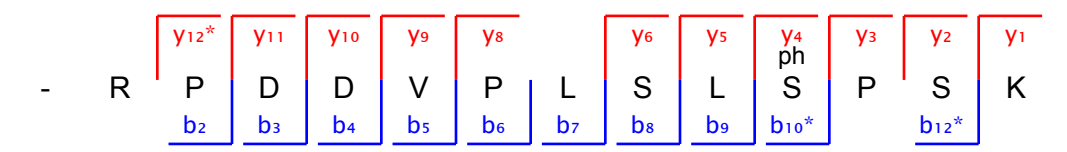



Raw file 20171215\_MaS\_33SR\_LMH\_phospho\_03 Scan 10789 Method FTMS; HCD Score 102.63 m/z 692.34 Gene names VCL

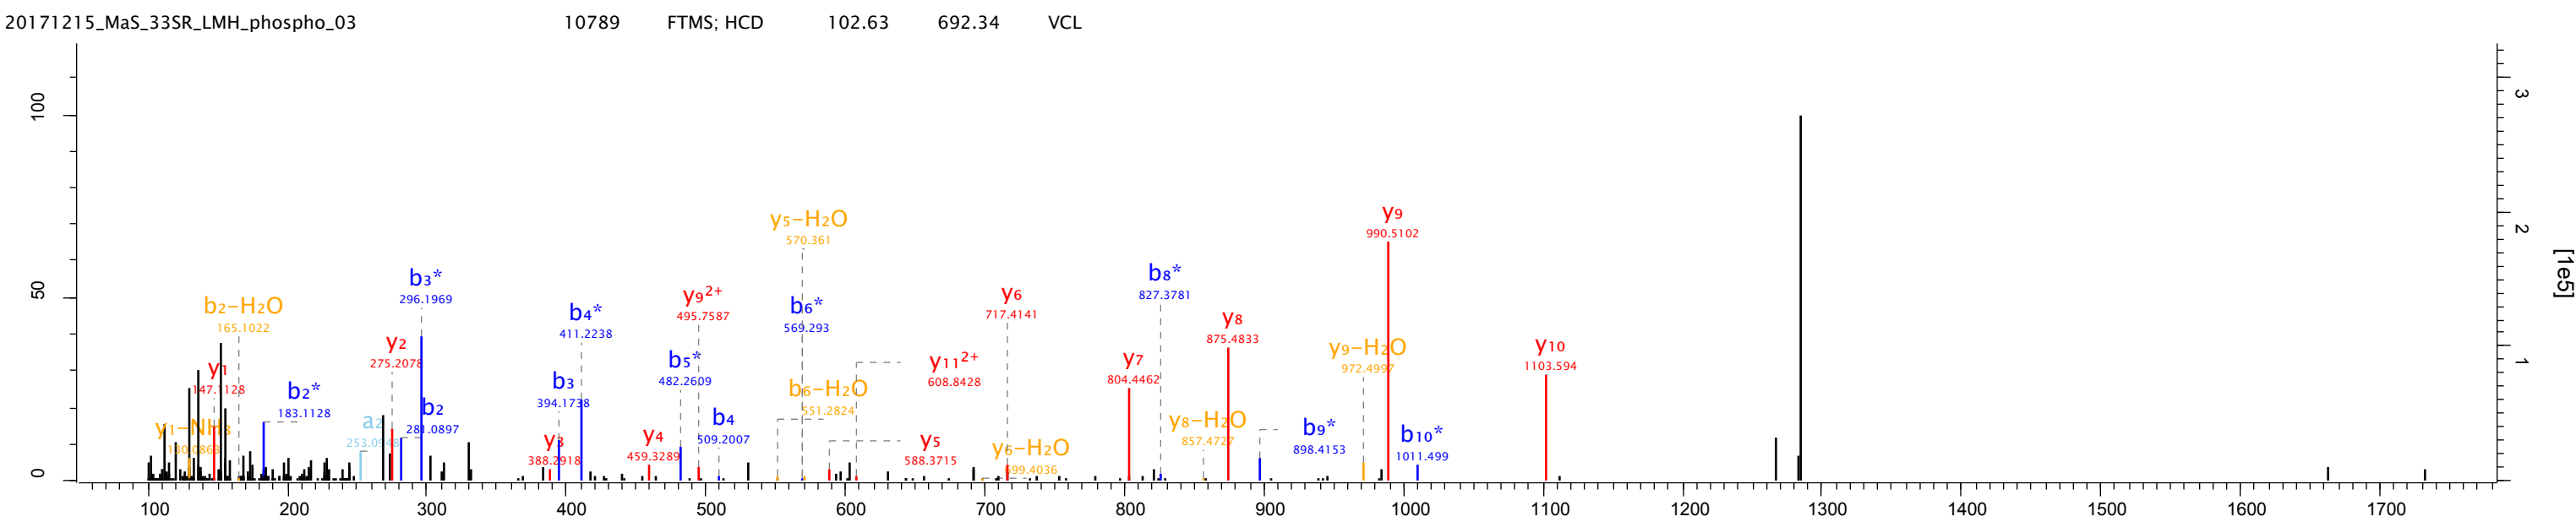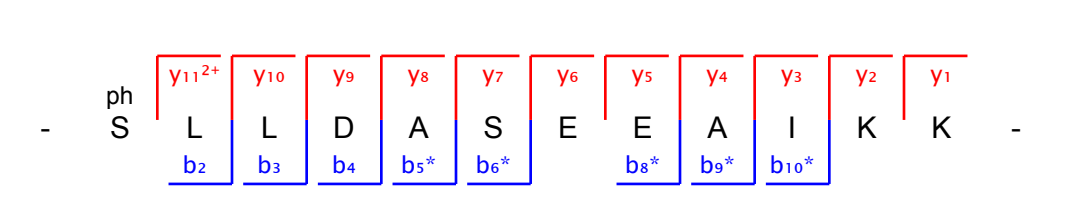

Raw file: 20171215\_MaS\_33SR\_LMH\_phospho\_03  
 Scan: 10959 Method: FTMS; HCD Score: 137.91 m/z: 707.34 Gene names: ALDOA

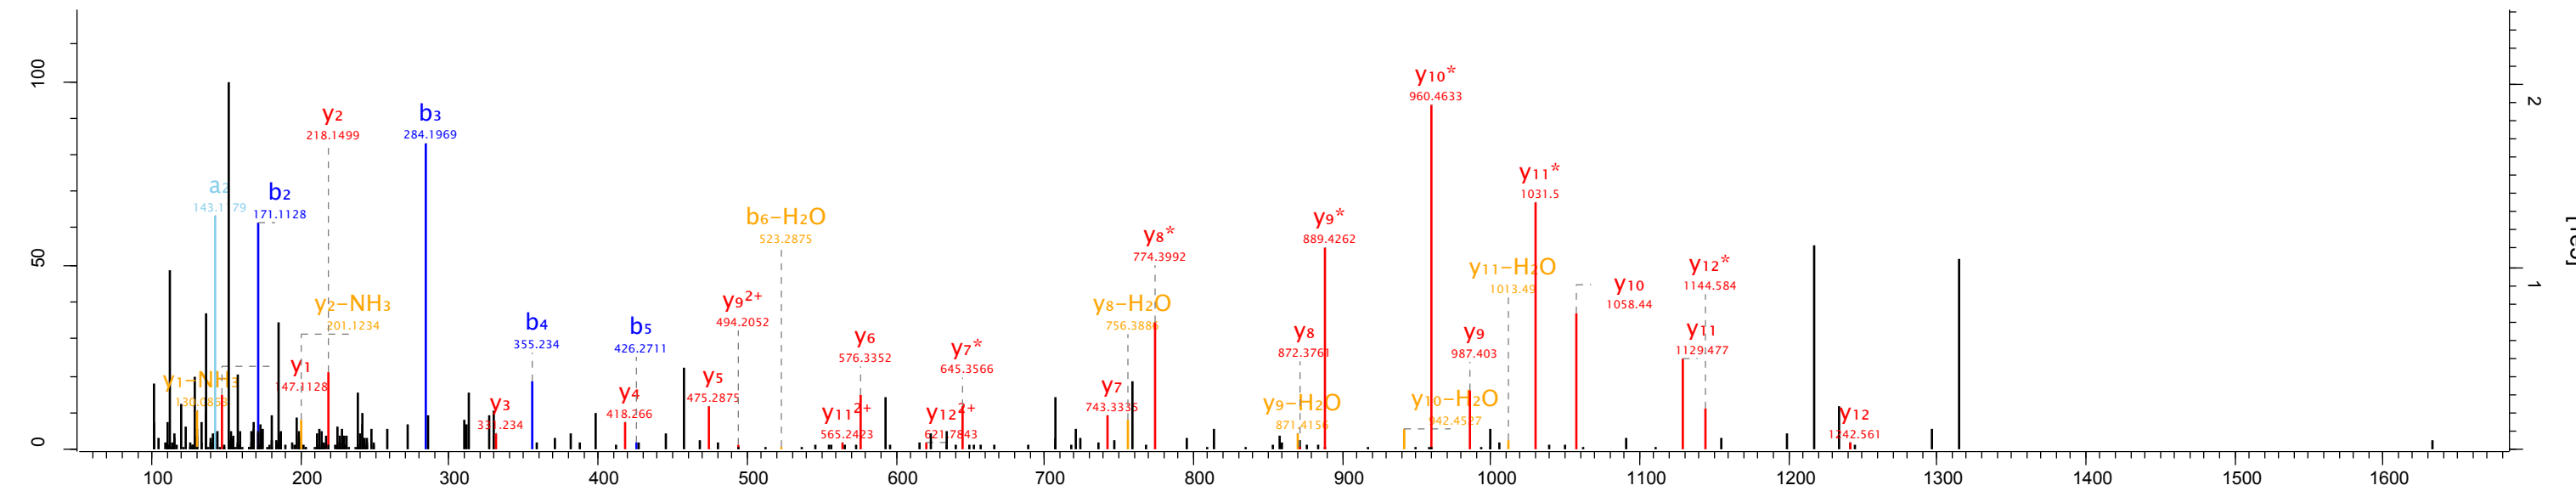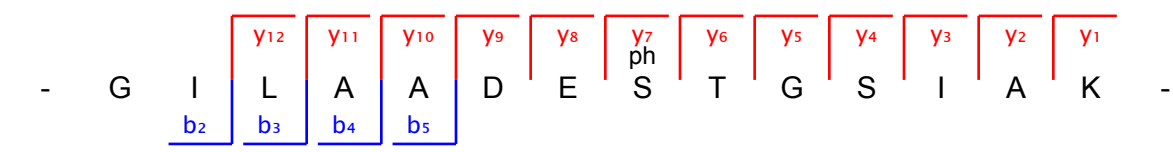

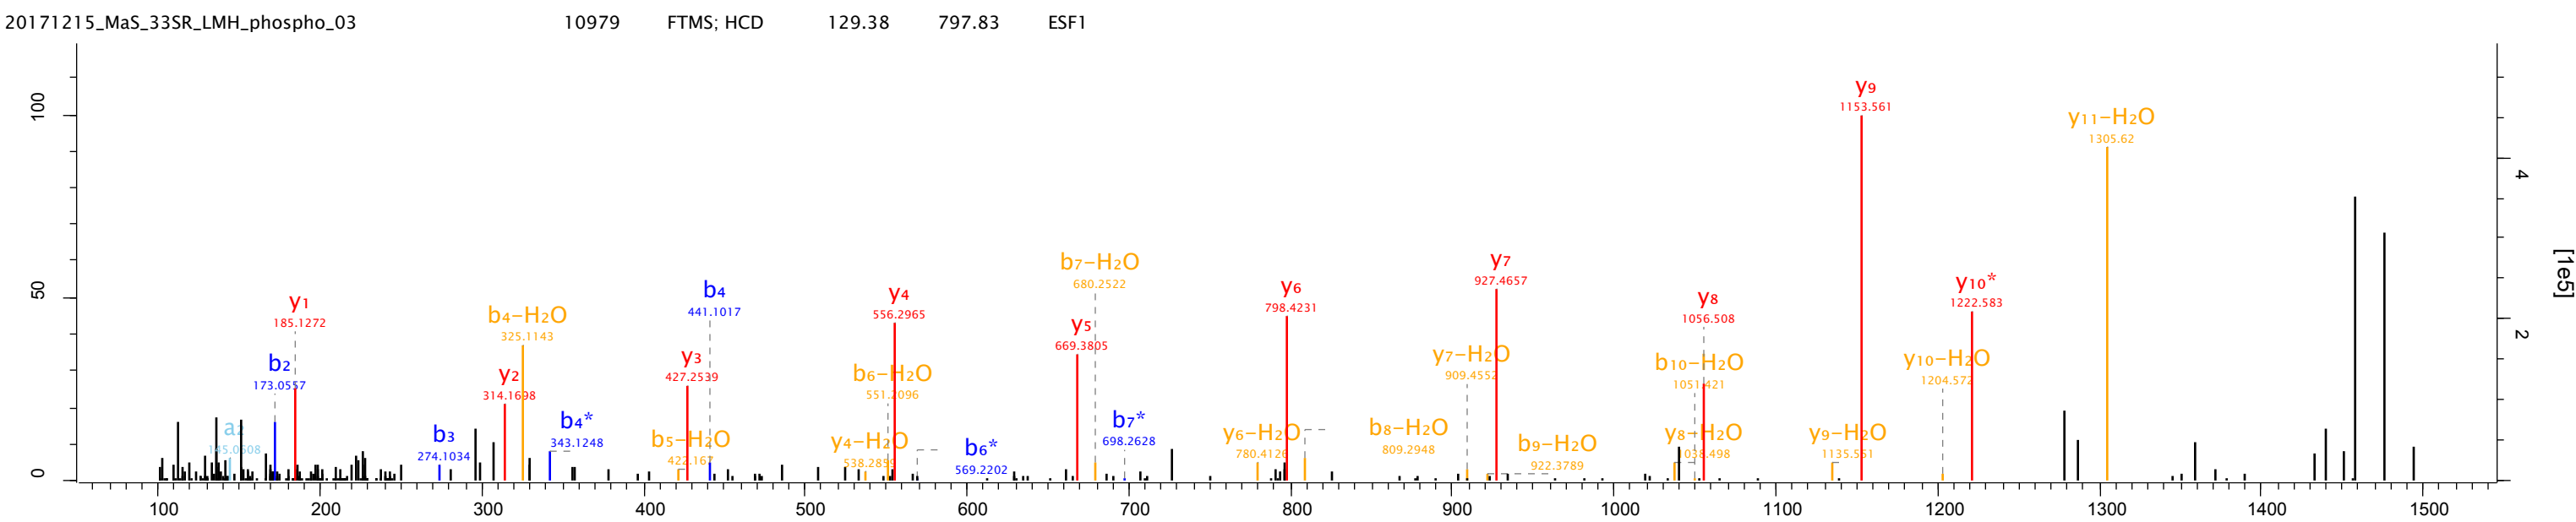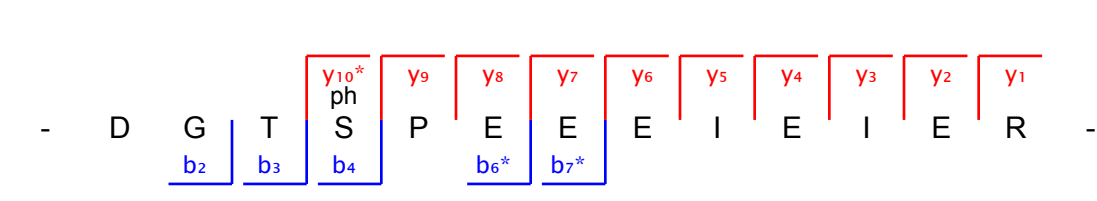

Raw file

20171215\_MaS\_33SR\_LMH\_phospho\_03

Scan 11049 Method FTMS; HCD Score 132.83 m/z 688.64 Gene names FAM195B

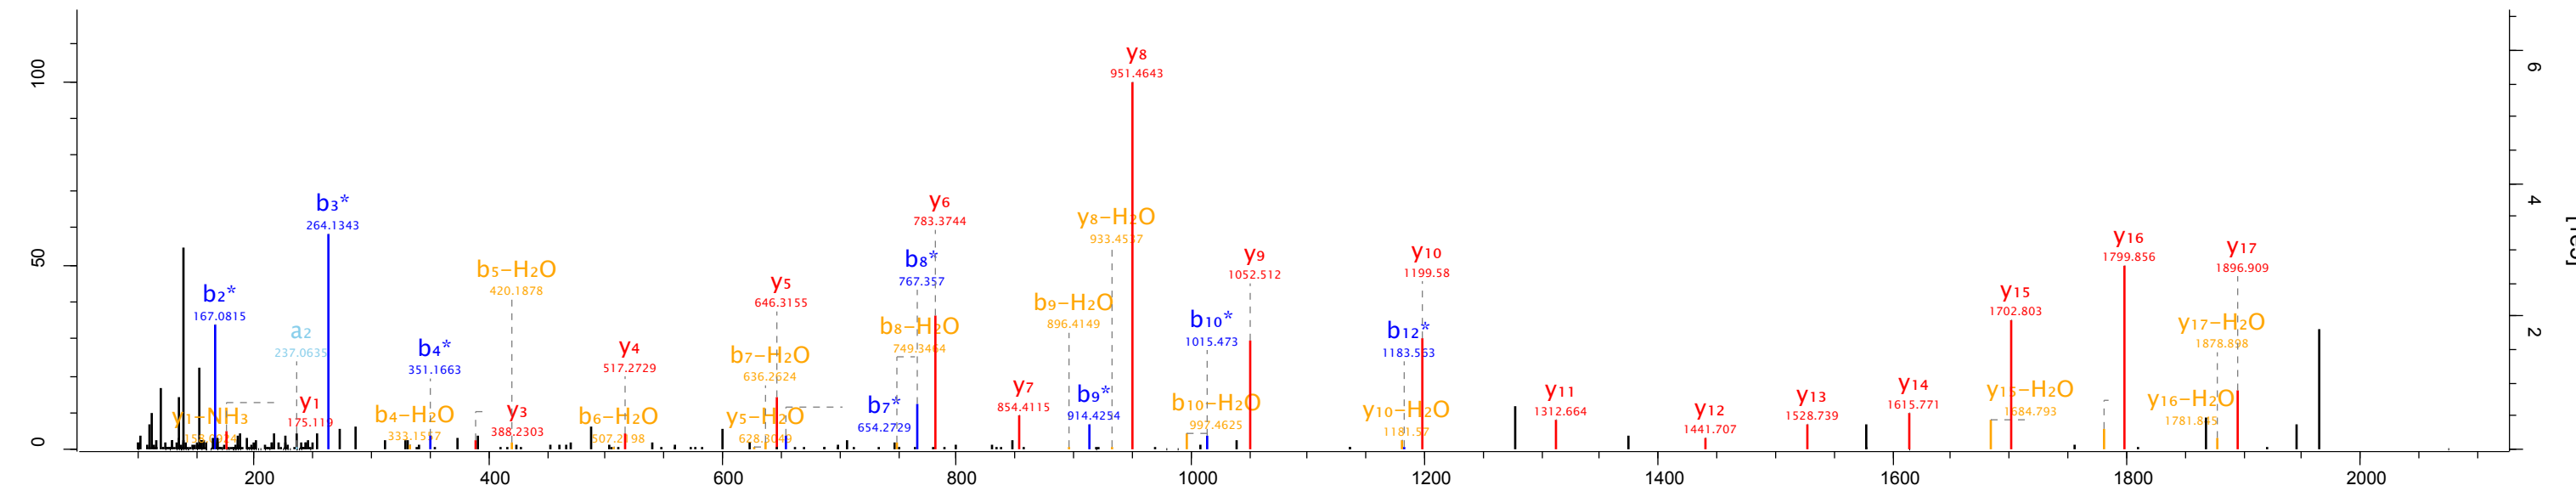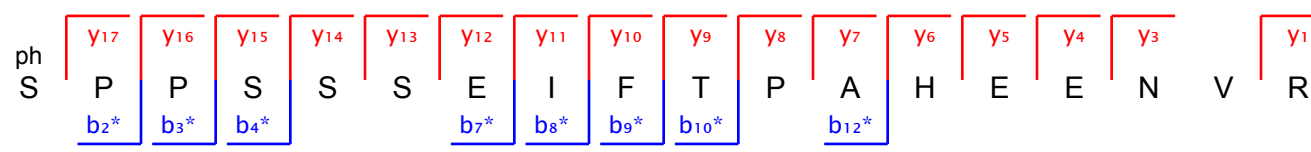

Raw file 20171215\_MaS\_33SR\_LMH\_phospho\_03 Scan 11089 Method FTMS; HCD Score 95.44 m/z 861.38 Gene names SETD1A

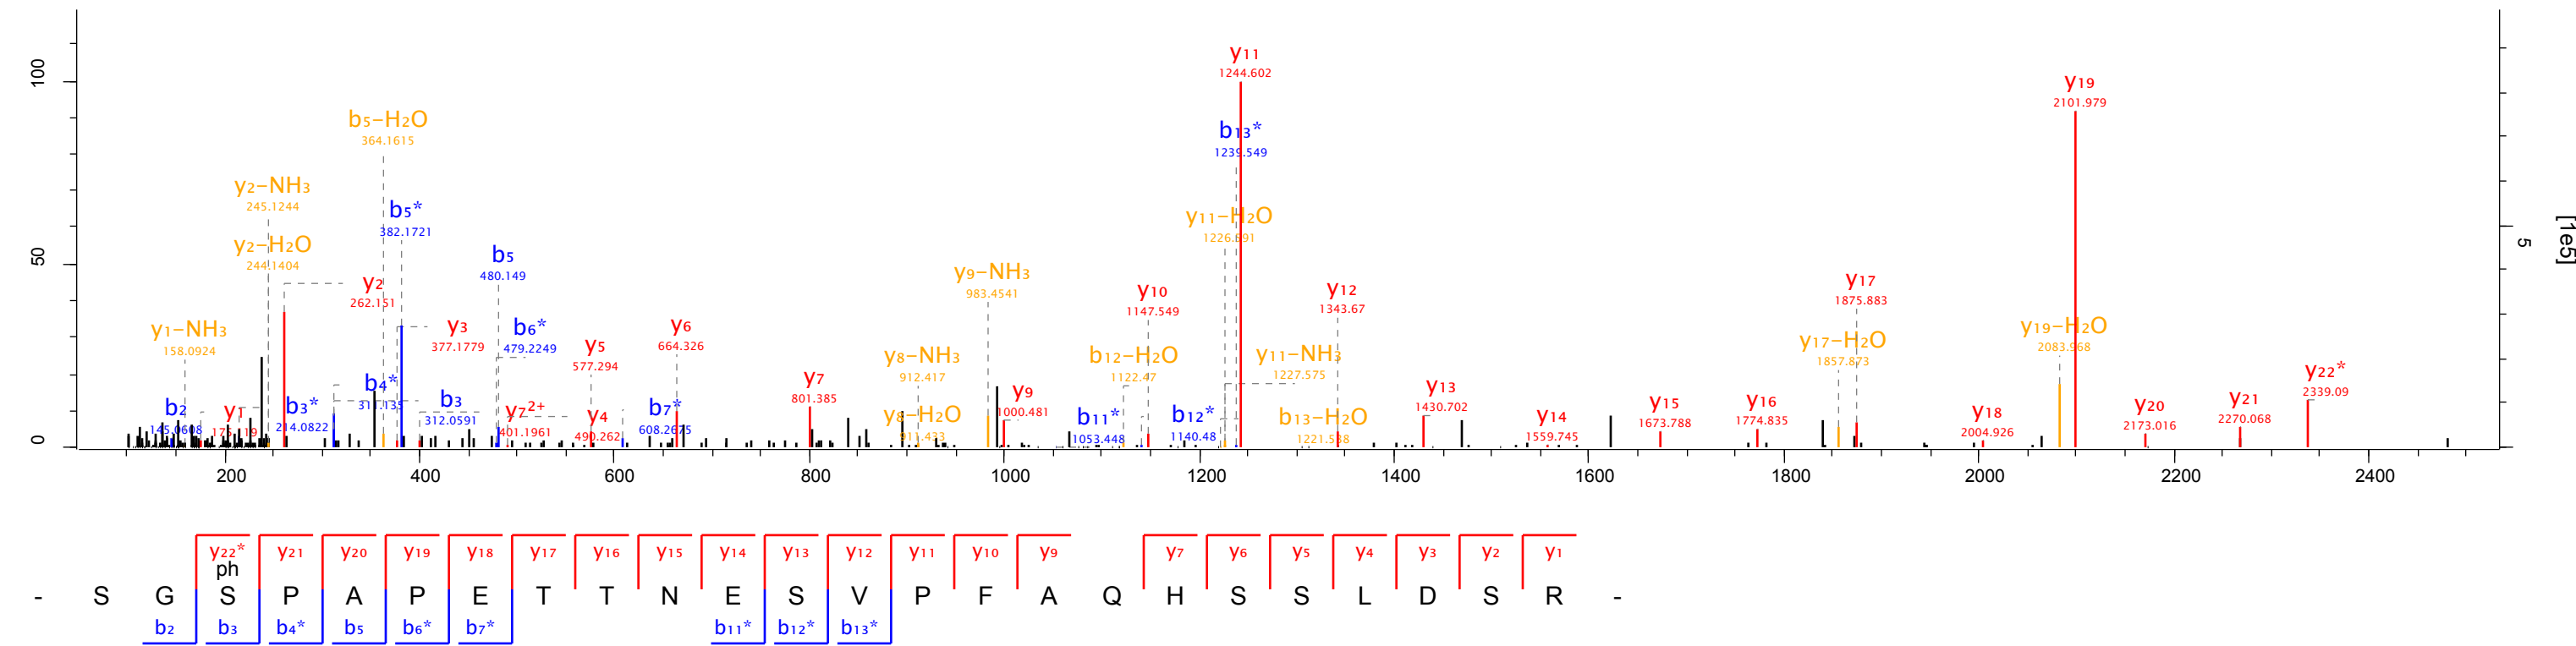

Raw file: 20171215\_MaS\_33SR\_LMH\_phospho\_03  
 Scan: 11159 Method: FTMS; HCD Score: 233.79 m/z: 910.92 Gene names: STRIP1

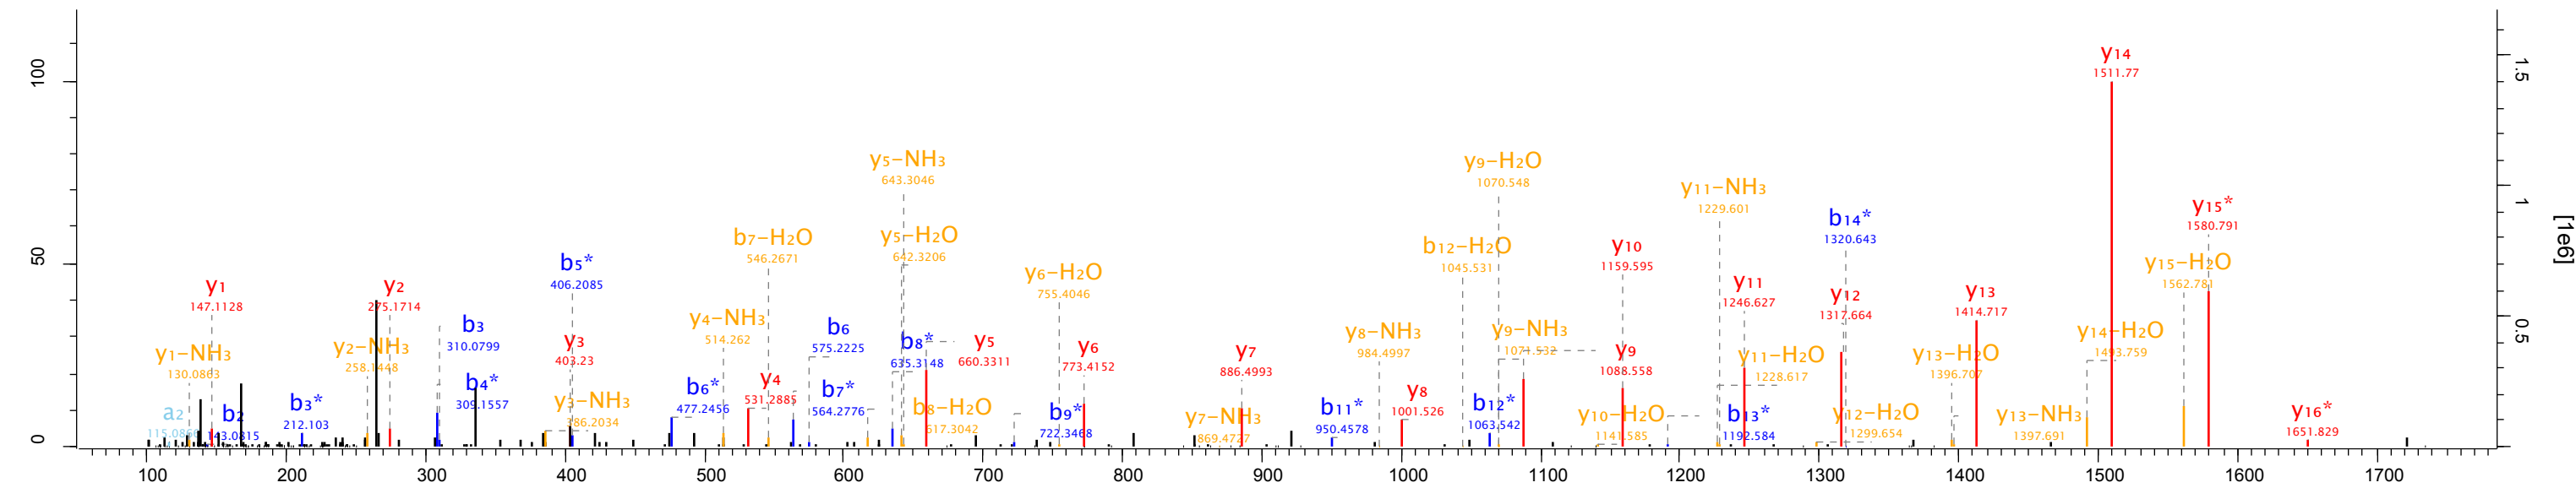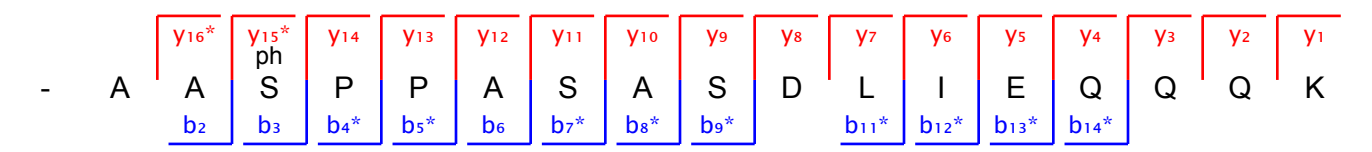

Raw file 20171215\_MaS\_33SR\_LMH\_phospho\_03 Scan 11479 Method FTMS; HCD Score 207.1 m/z 796.36 Gene names SORBS3

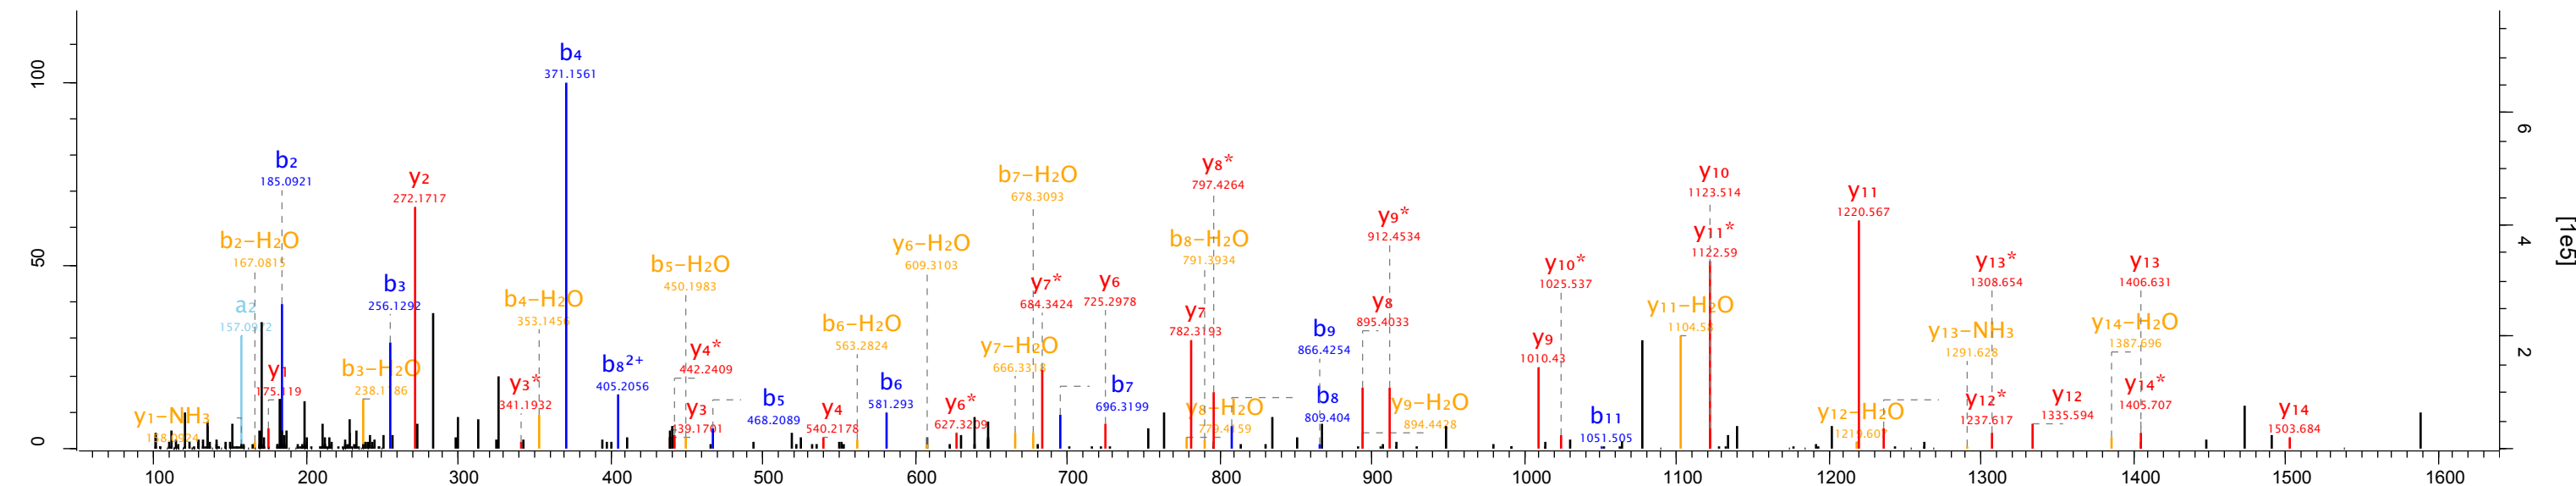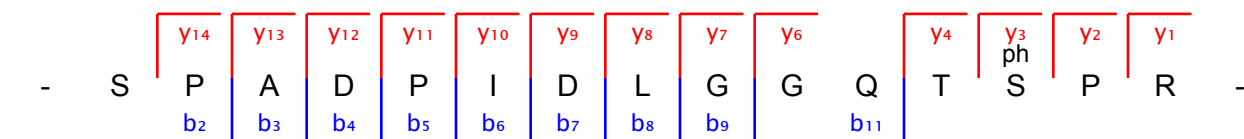

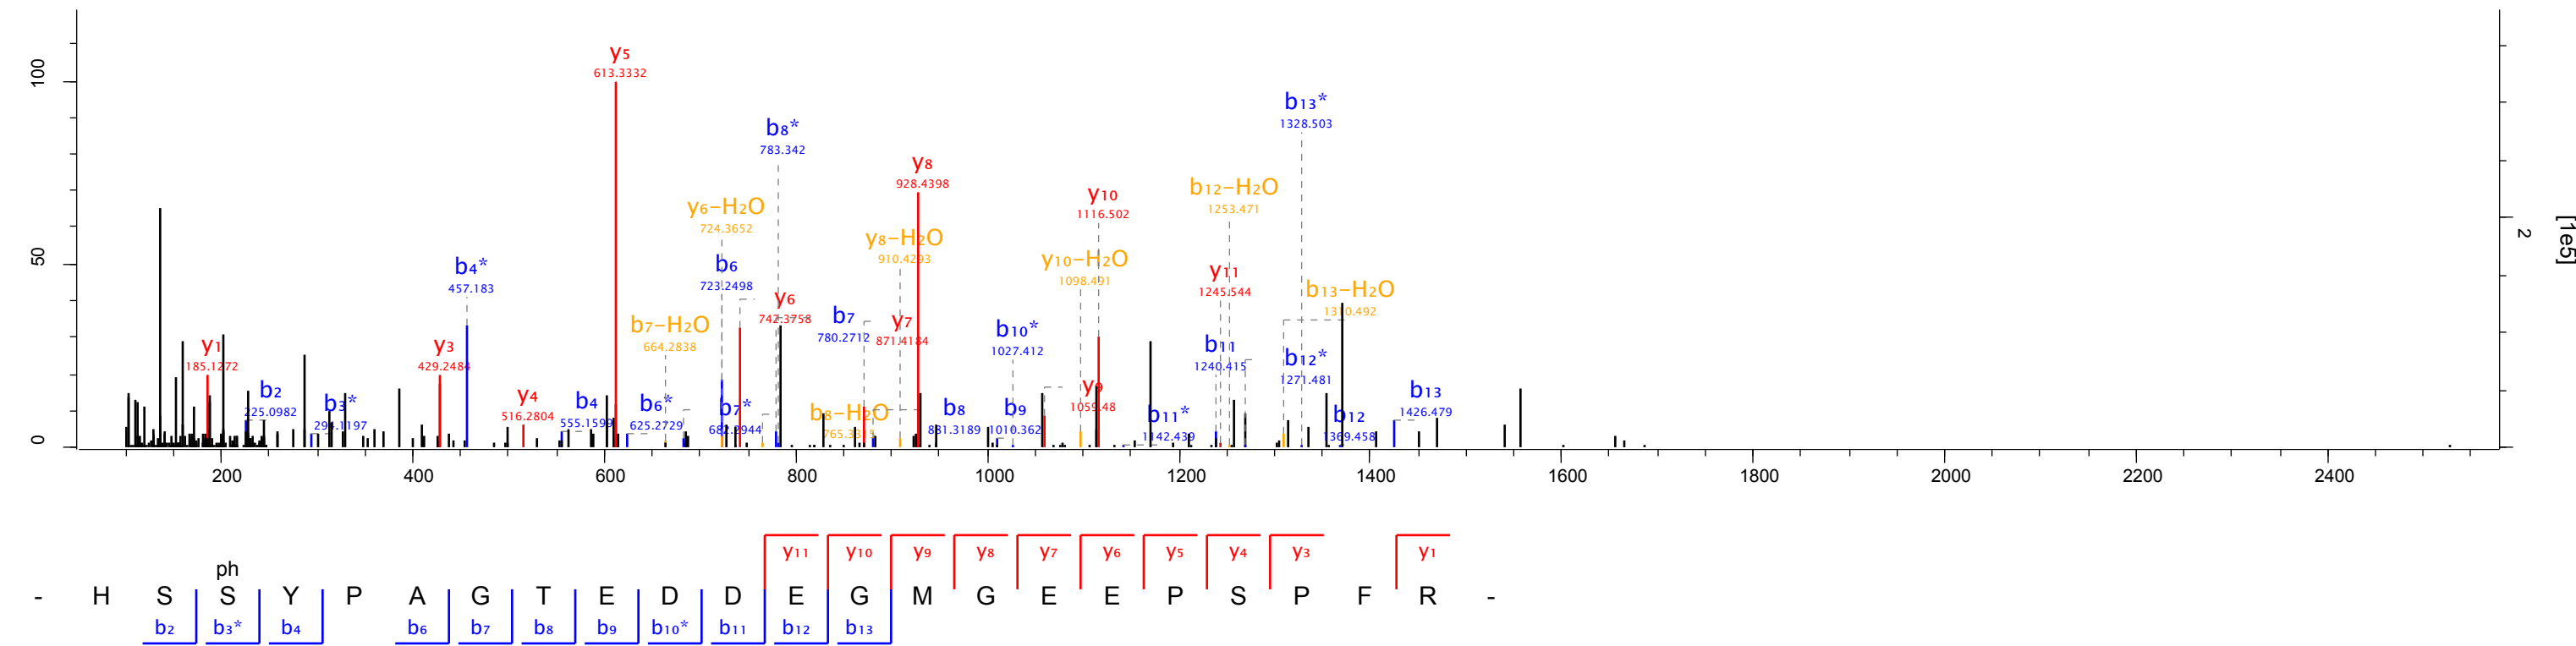



Raw file 20171215\_MaS\_33SR\_LMH\_phospho\_03 Scan 11619 Method FTMS; HCD Score 194.83 m/z 596.29 Gene names PRRC2C

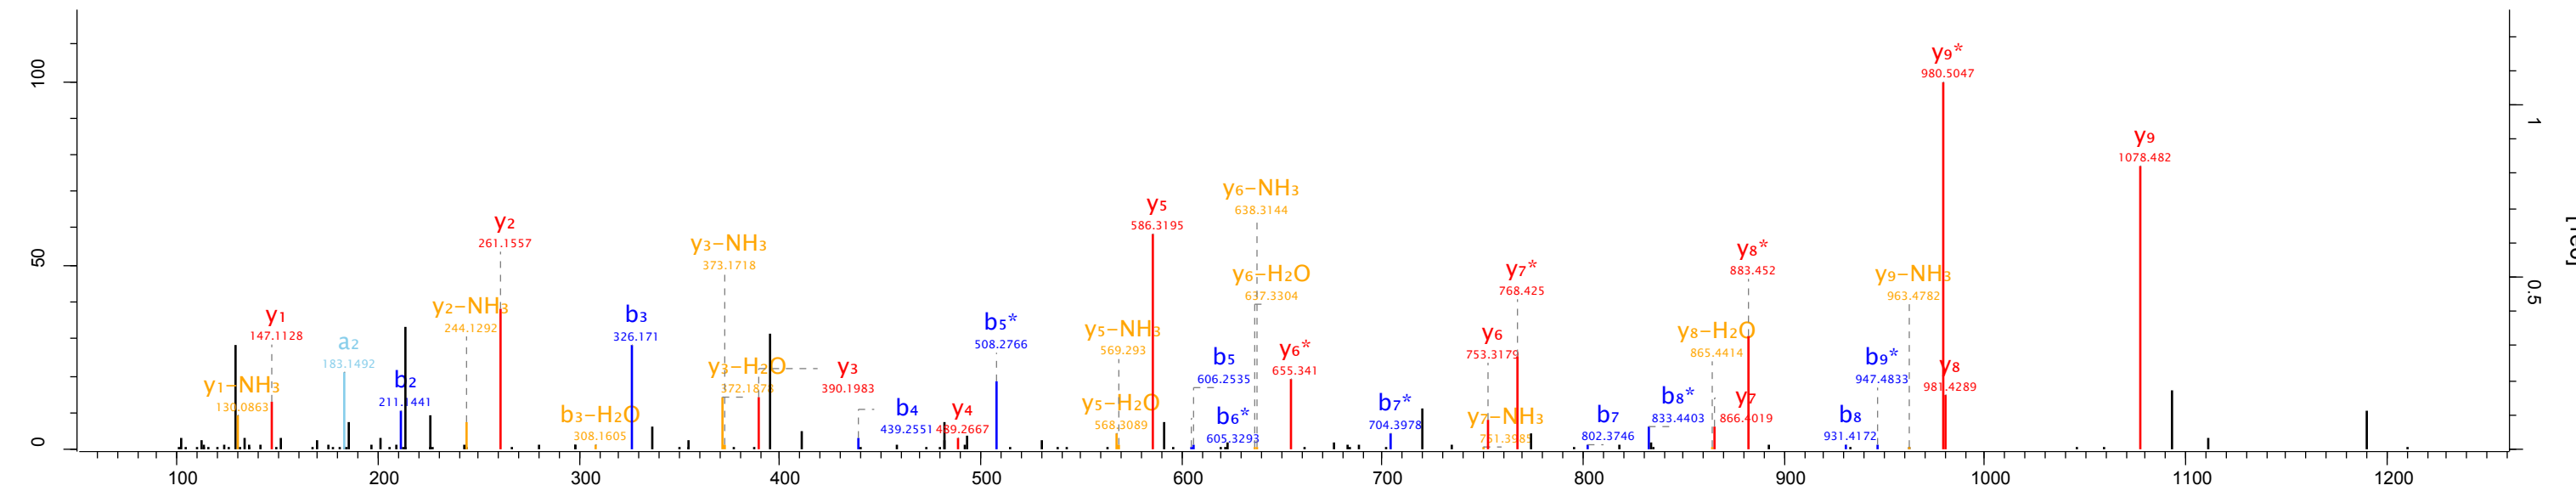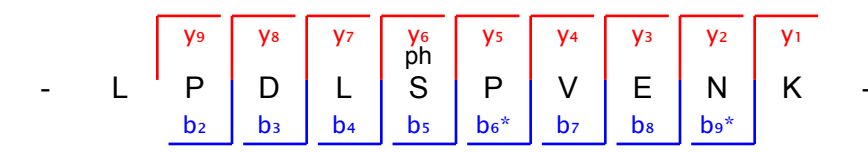

Raw file 20171215\_MaS\_33SR\_LMH\_phospho\_03 Scan 11749 Method FTMS; HCD Score 145.73 m/z 1023.42 Gene names SLC12A4

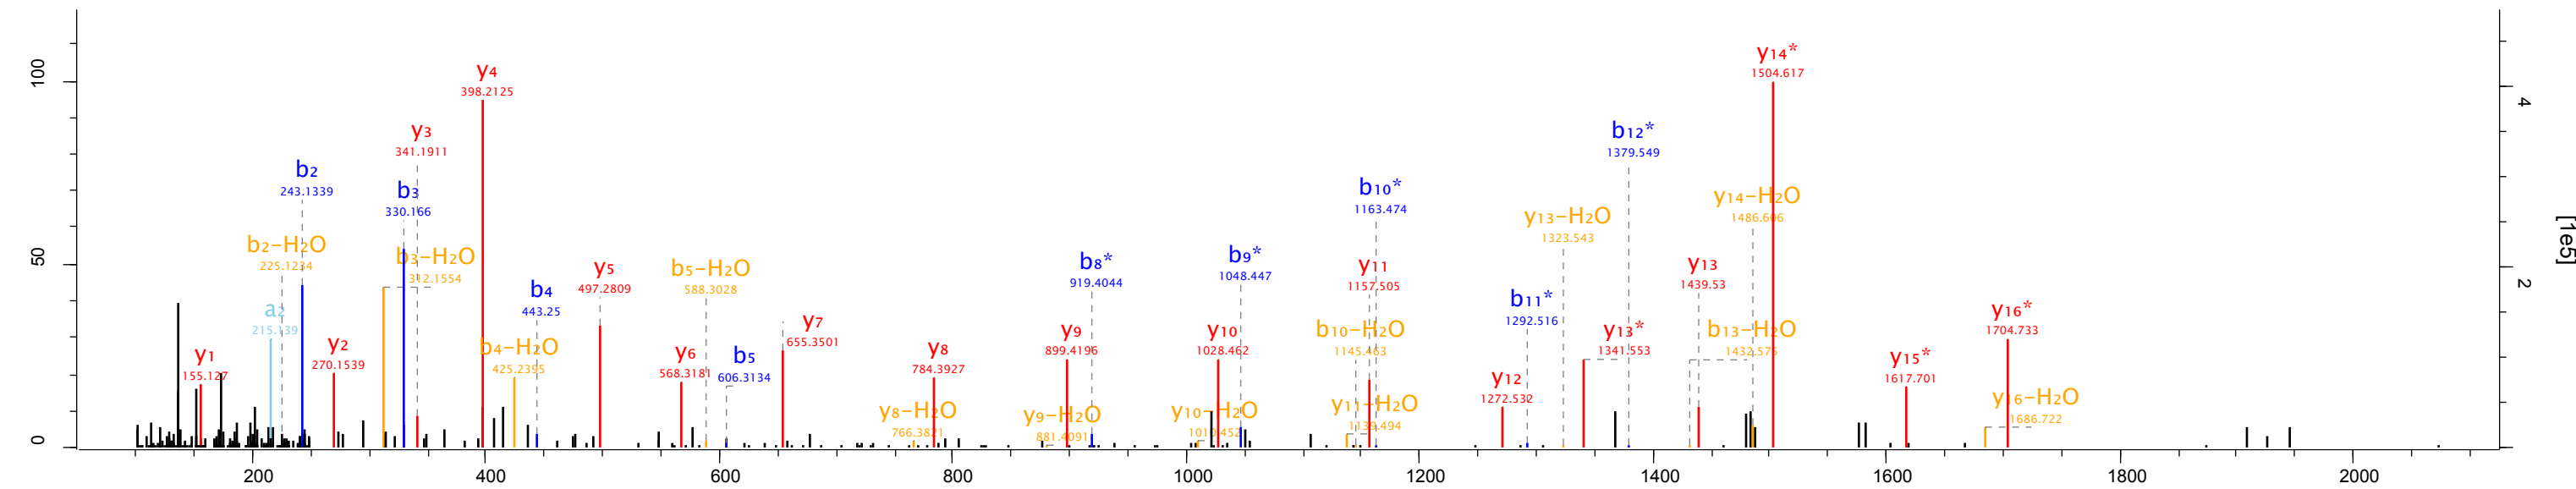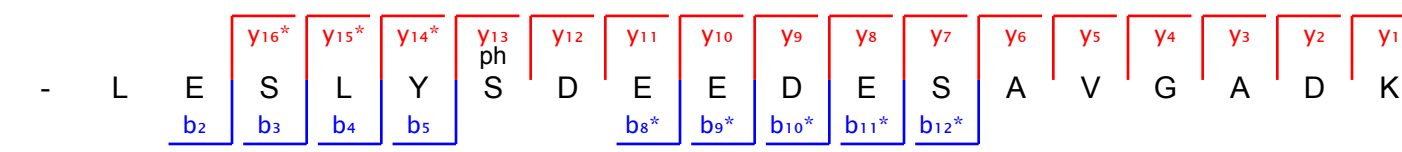

Raw file 20171215\_MaS\_33SR\_LMH\_phospho\_03 Scan 11789 Method FTMS; HCD Score 54.68 m/z 616.31 Gene names SLC1A5

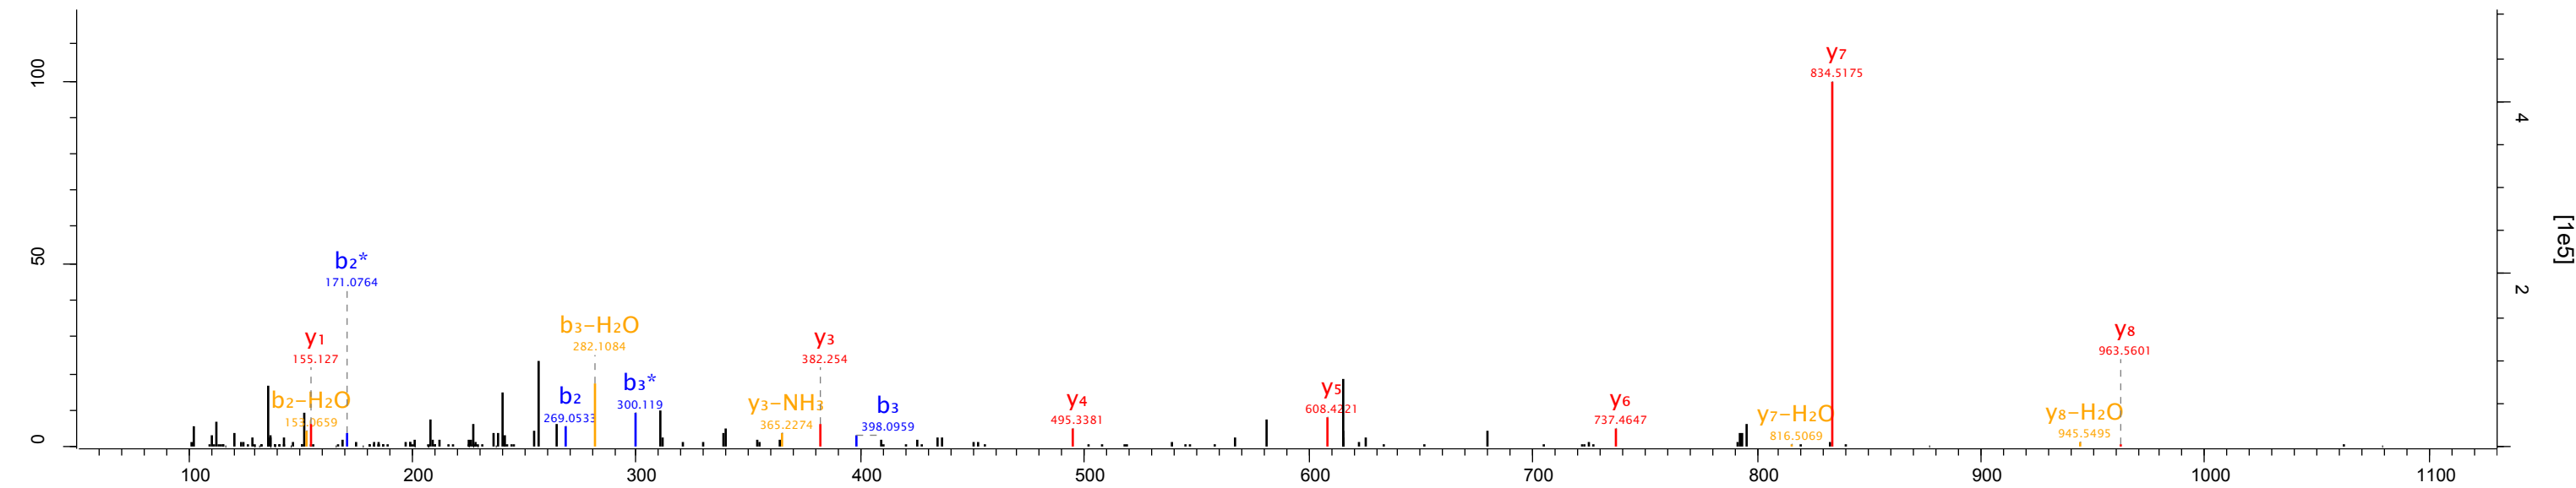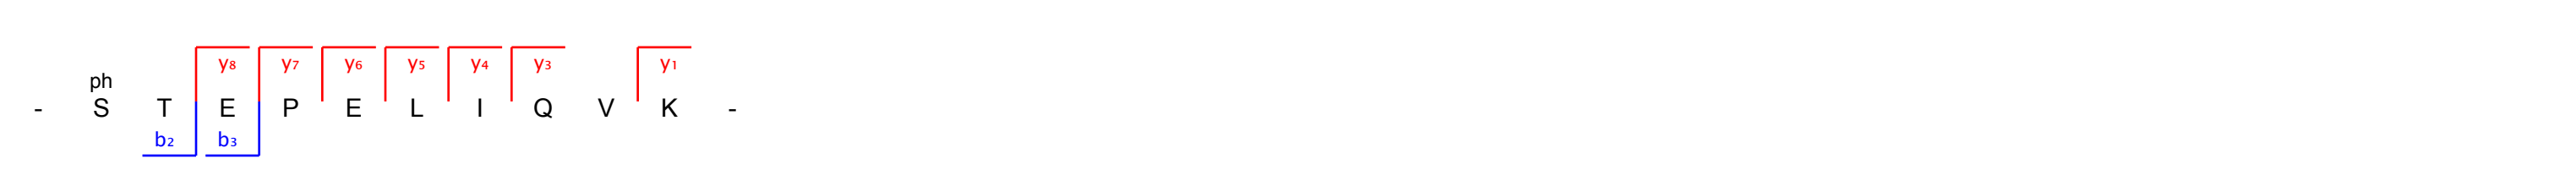

Raw file 20171215\_MaS\_33SR\_LMH\_phospho\_03 Scan 12209 Method FTMS; HCD Score 103.2 m/z 674.23 Gene names CLUAP1

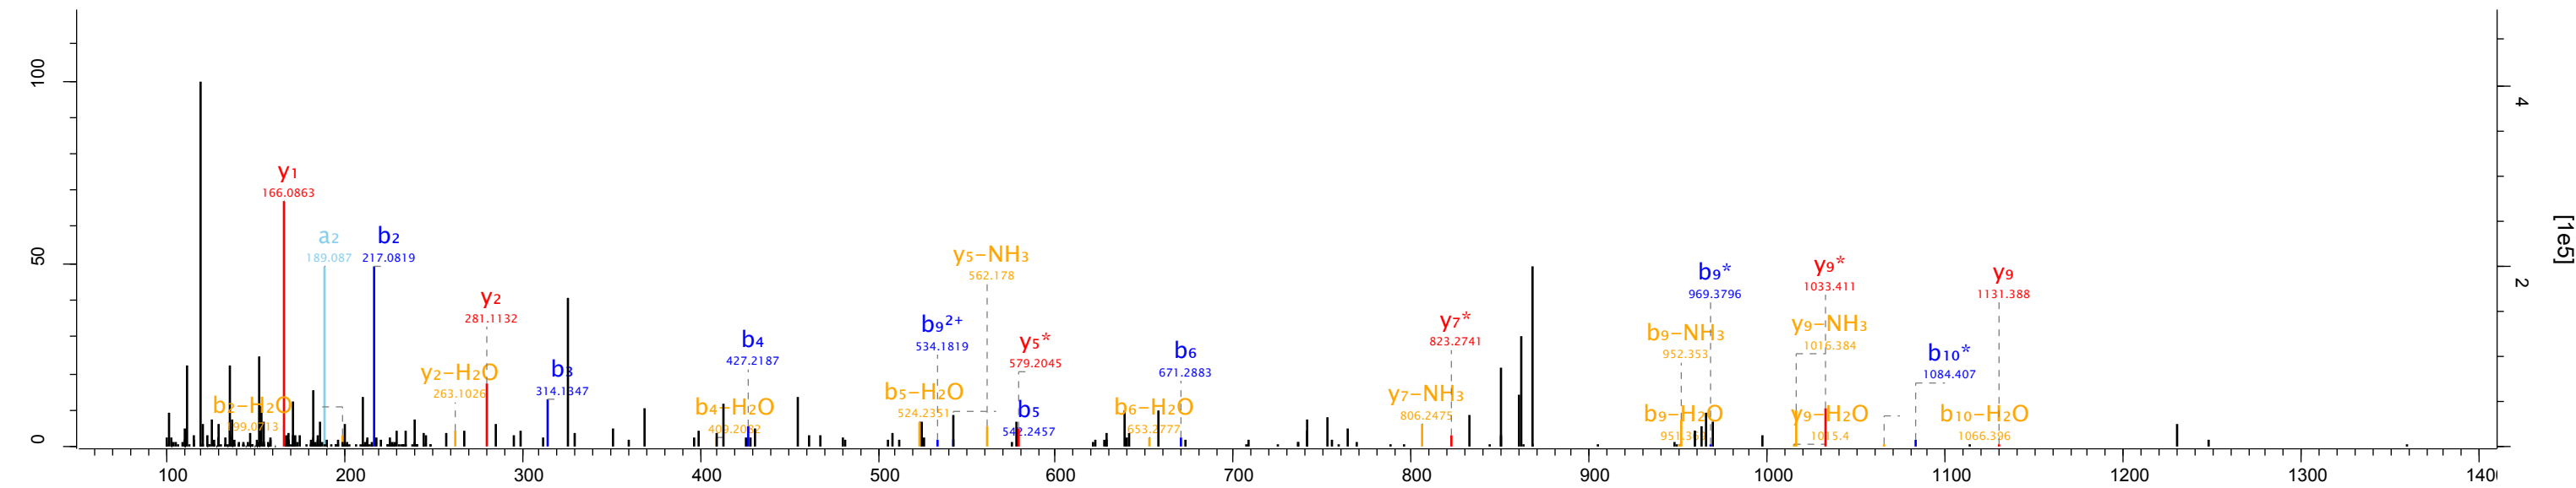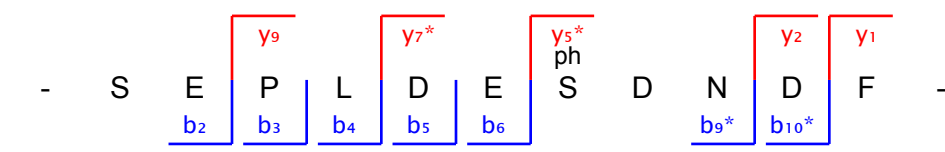

20171215\_MaS\_33SR\_LMH\_phospho\_03 12289 FTMS; HCD 102.87 573.75 SRRM2

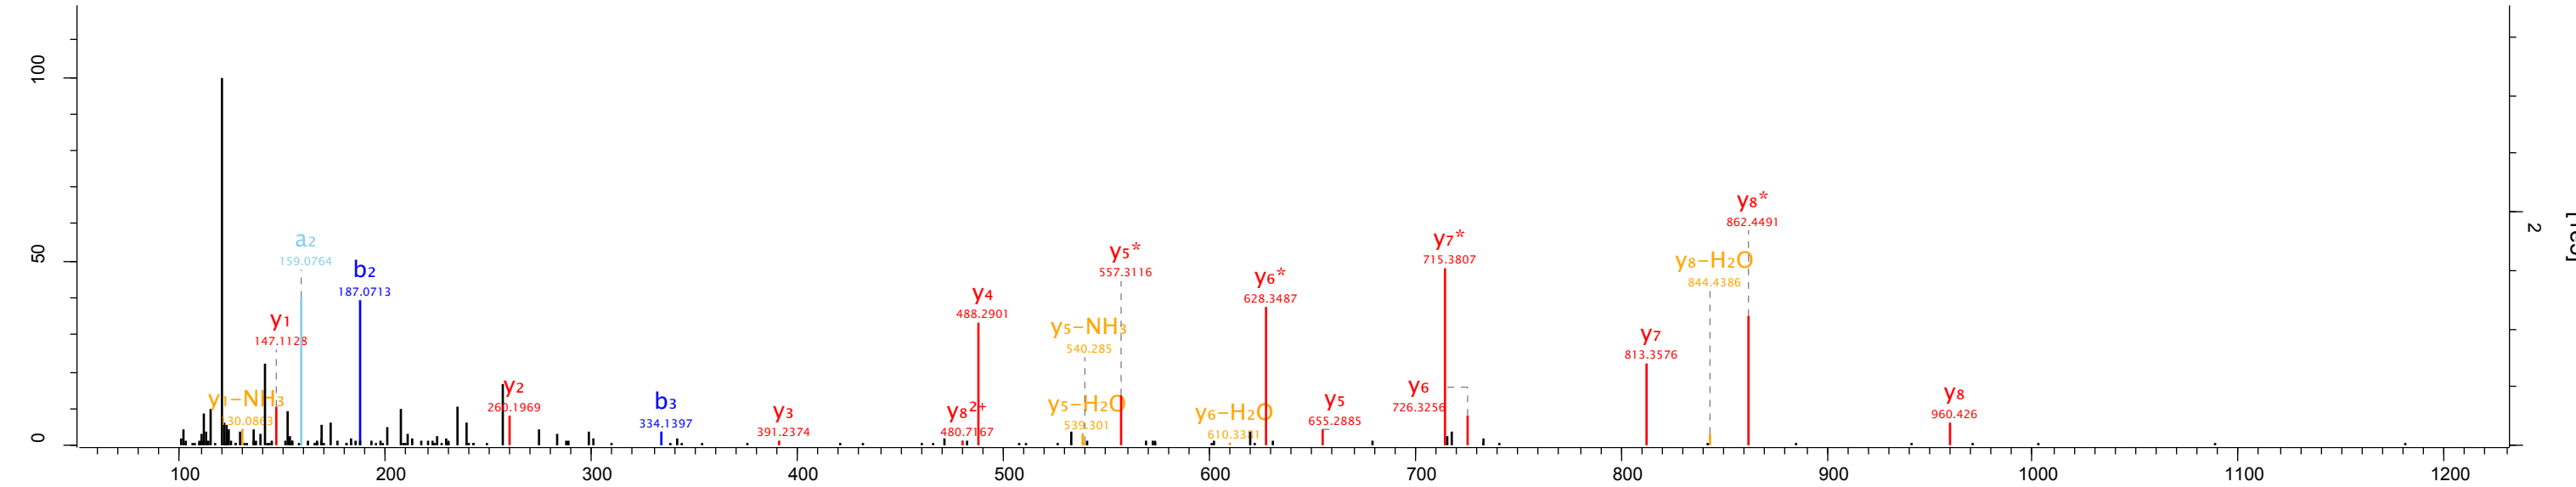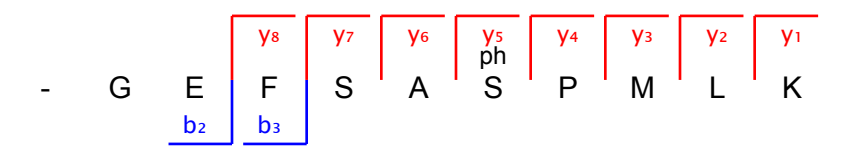

Raw file 20171215\_MaS\_33SR\_LMH\_phospho\_03 Scan 12879 Method FTMS; HCD Score 170.27 m/z 1063.44 Gene names KPNA3

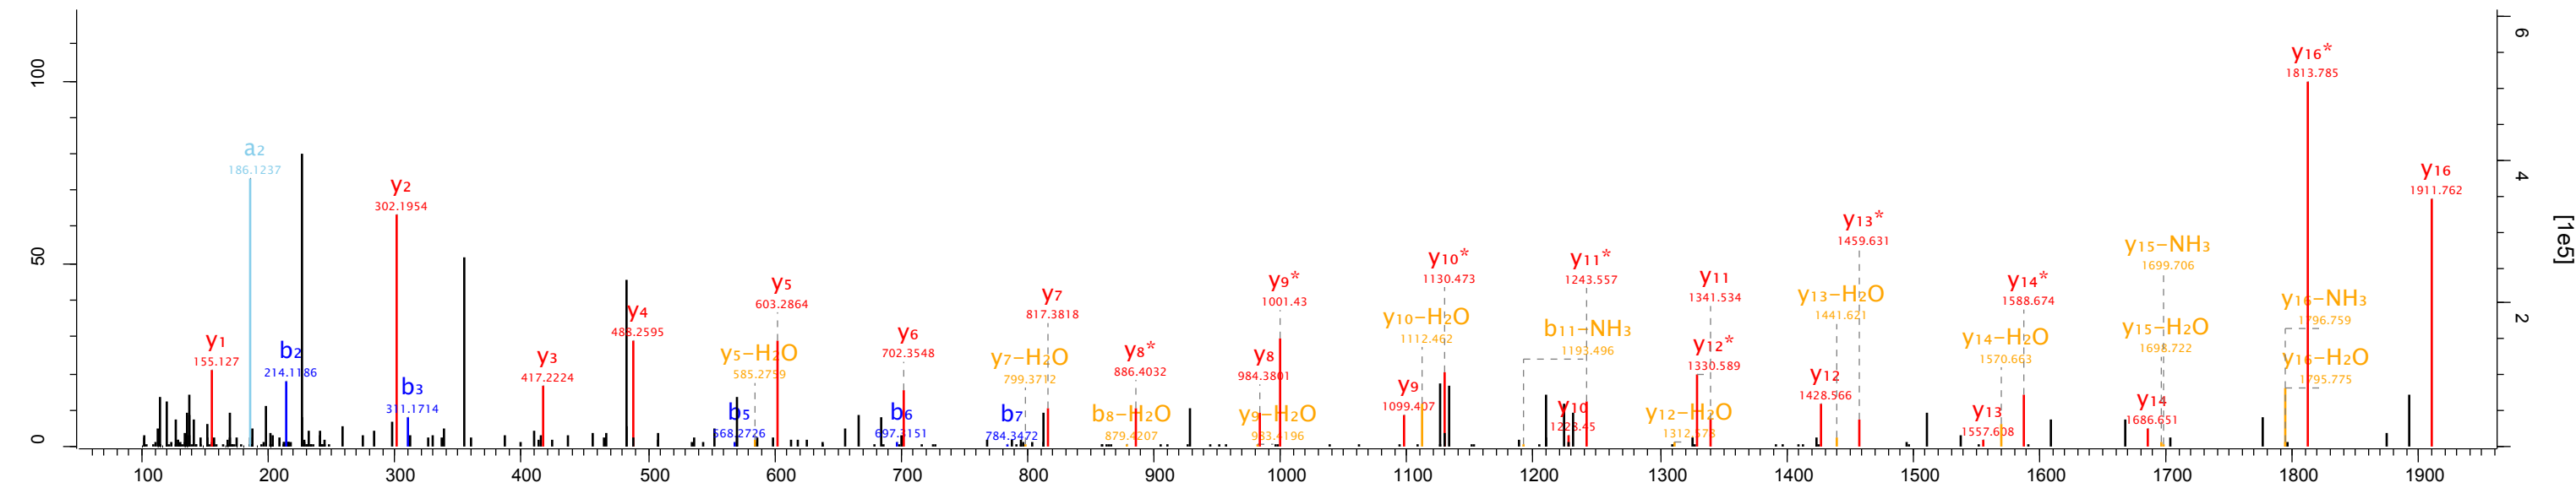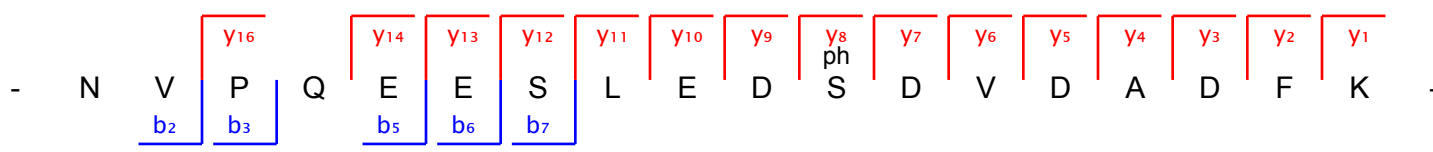

Raw file 20171215\_MaS\_33SR\_LMH\_phospho\_03 Scan 13049 Method FTMS; HCD Score 41.26 m/z 914.43

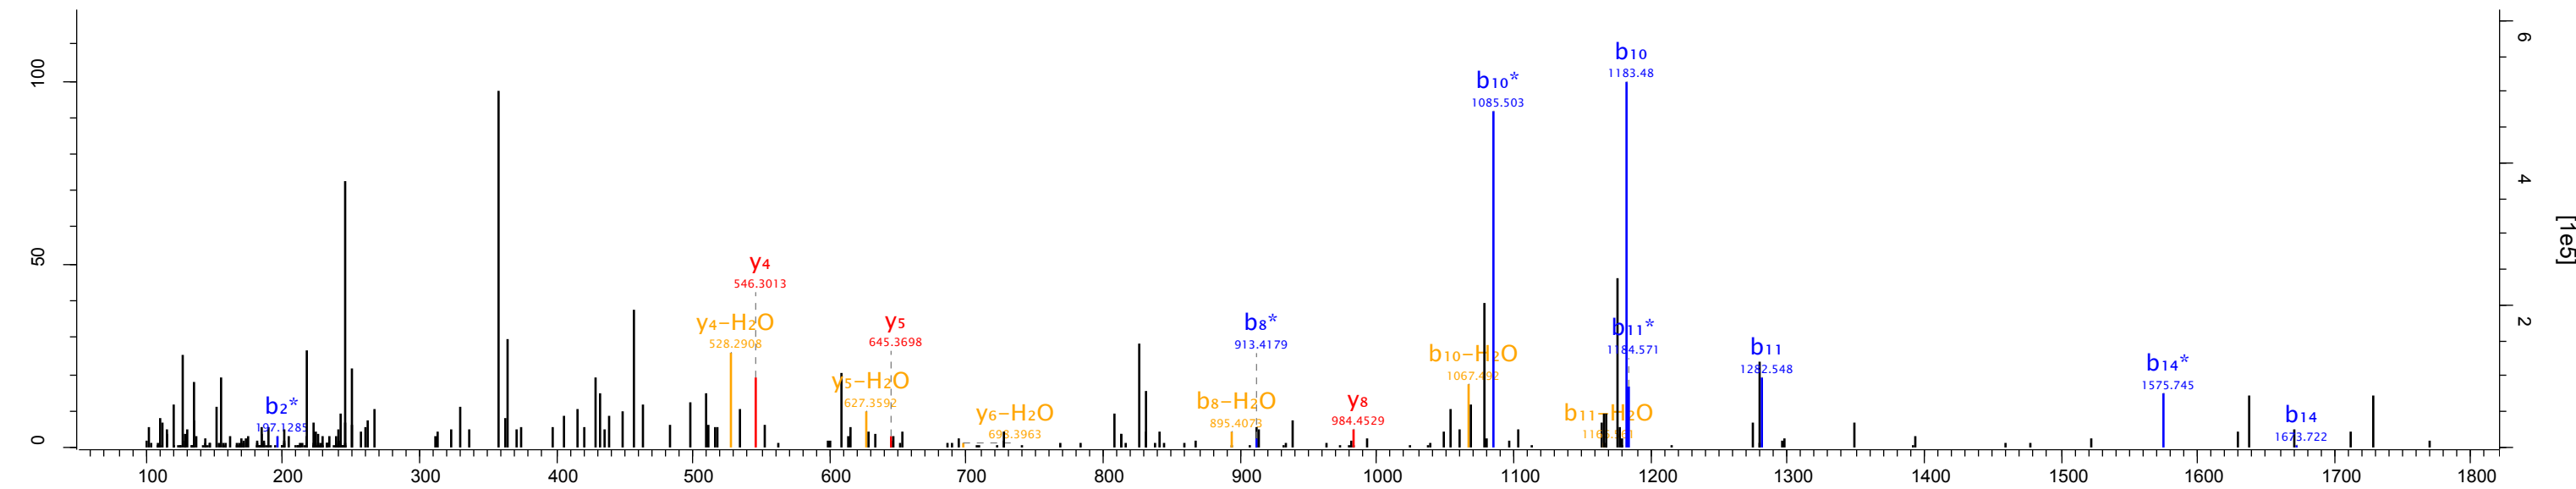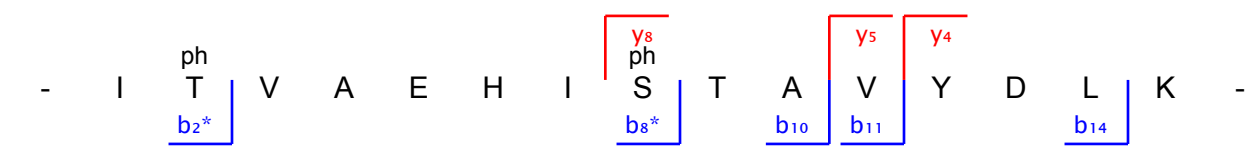

Raw file 20171215\_MaS\_33SR\_LMH\_phospho\_03 Scan 13529 Method FTMS; HCD Score 206.77 m/z 1226.06 Gene names LARP4

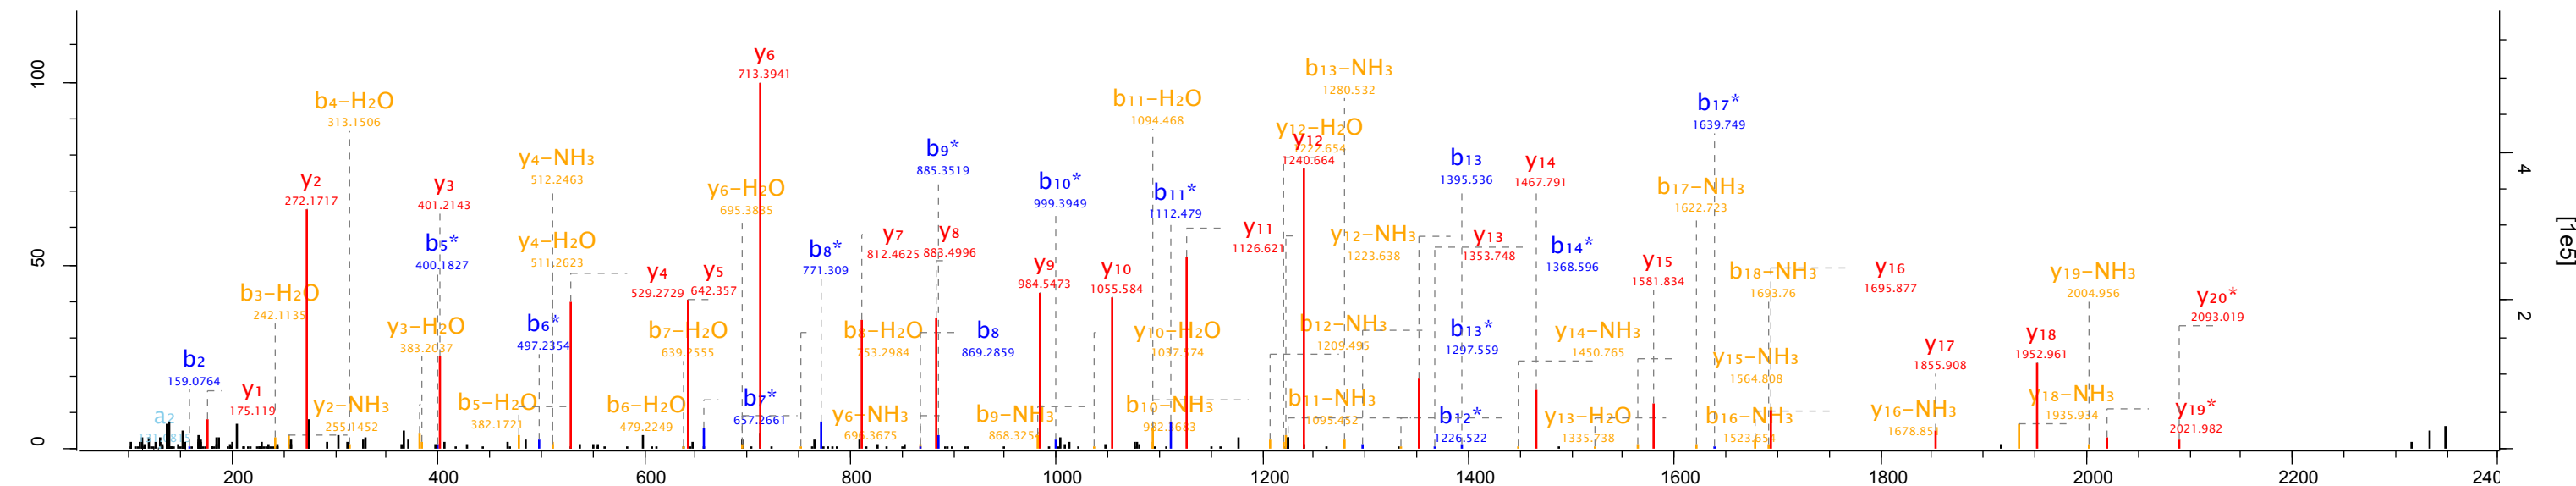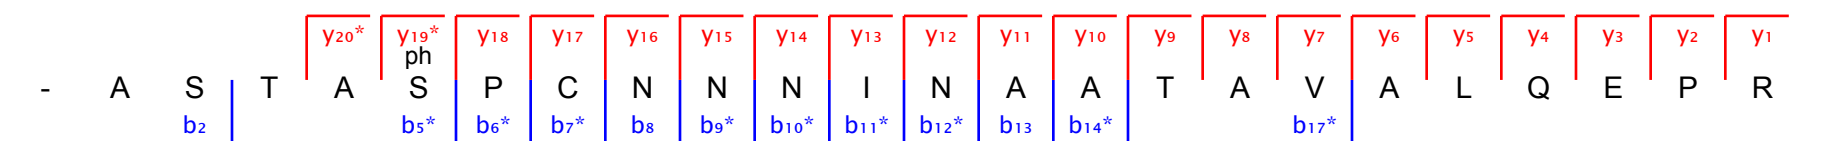



Raw file: 20171215\_MaS\_33SR\_LMH\_phospho\_03  
 Scan: 13979 Method: FTMS; HCD Score: 44.6 m/z: 841.37 Gene names: ADD2

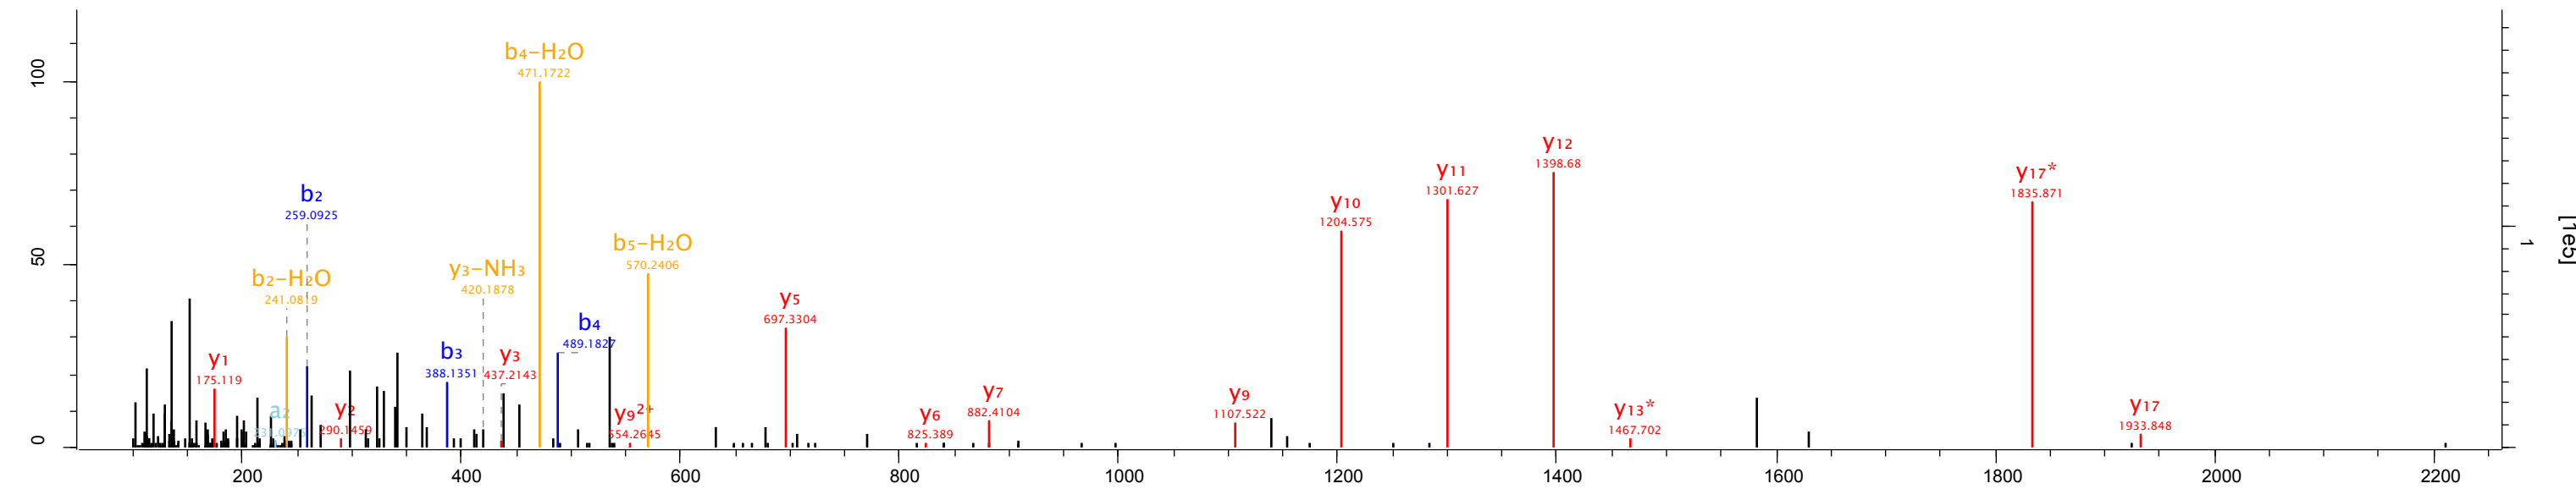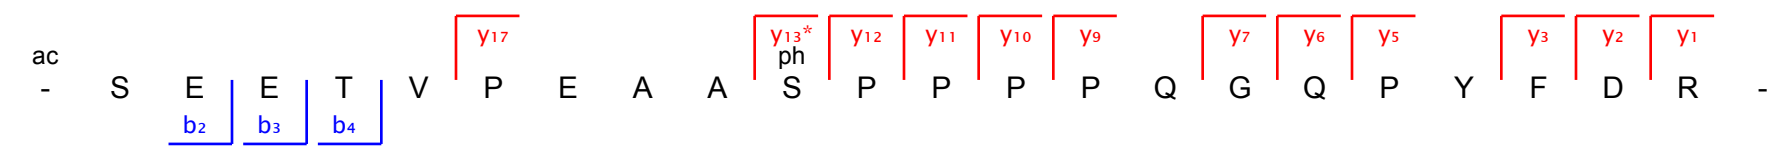

Raw file: 20171215\_MaS\_33SR\_LMH\_phospho\_03  
 Scan: 13989 Method: FTMS; HCD Score: 125.23 m/z: 893.92 Gene names: HNRNPDL

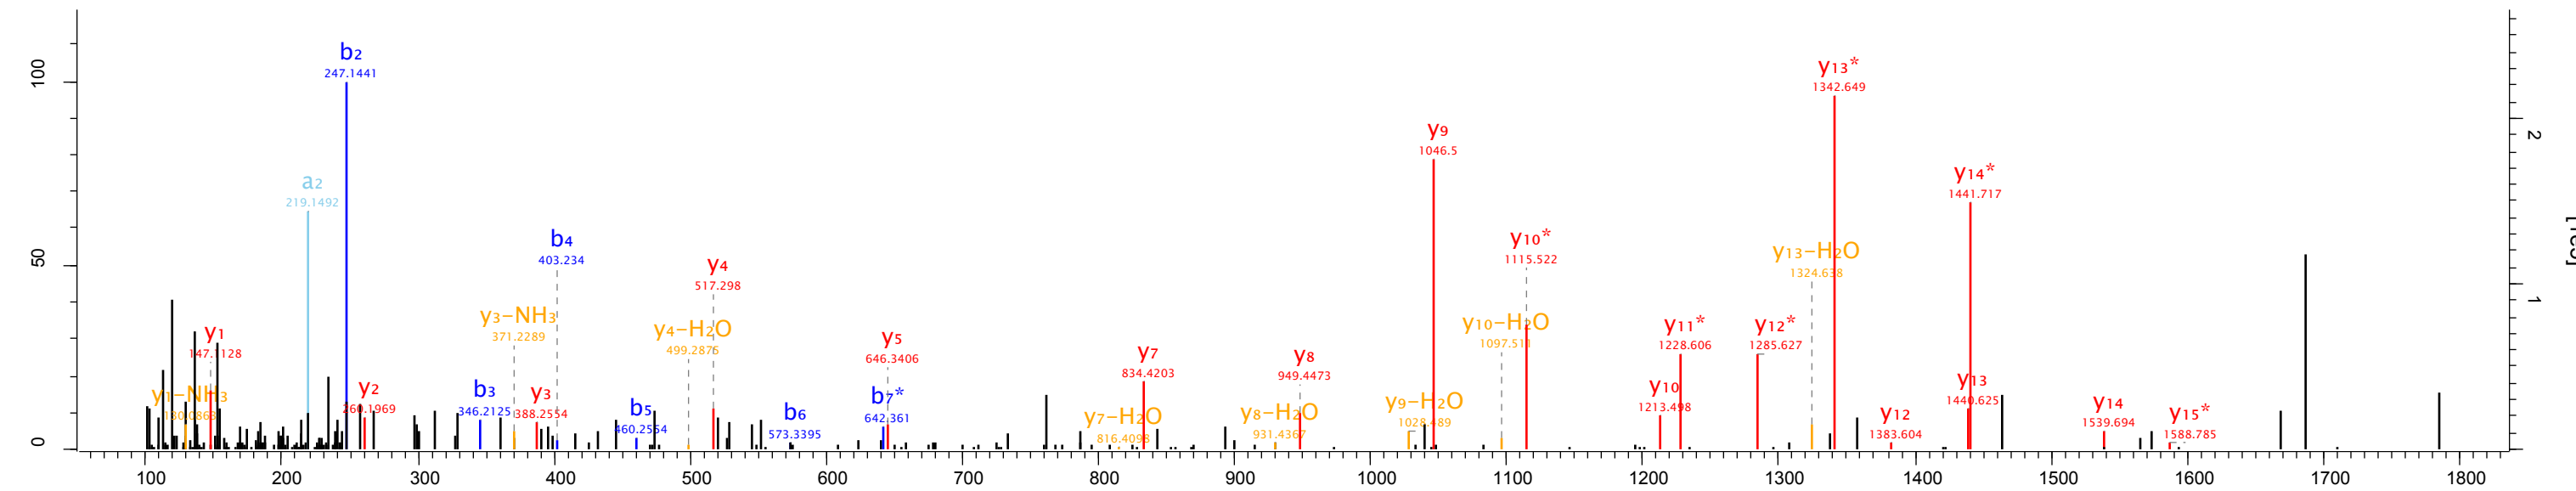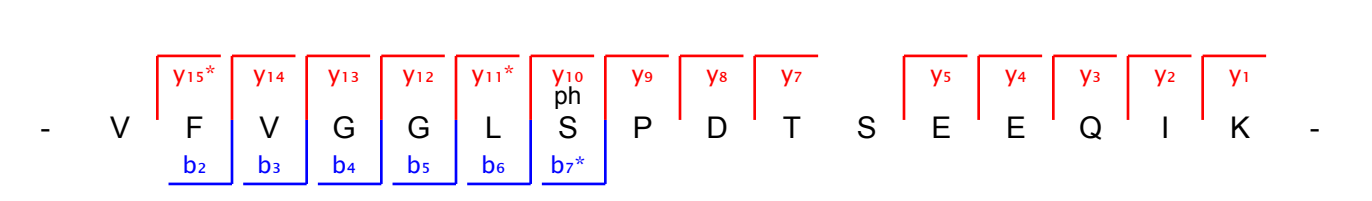

Raw file 20171215\_MaS\_33SR\_LMH\_phospho\_03 Scan 14069 Method FTMS; HCD Score 73.46 m/z 1201.24 Gene names ATXN2L

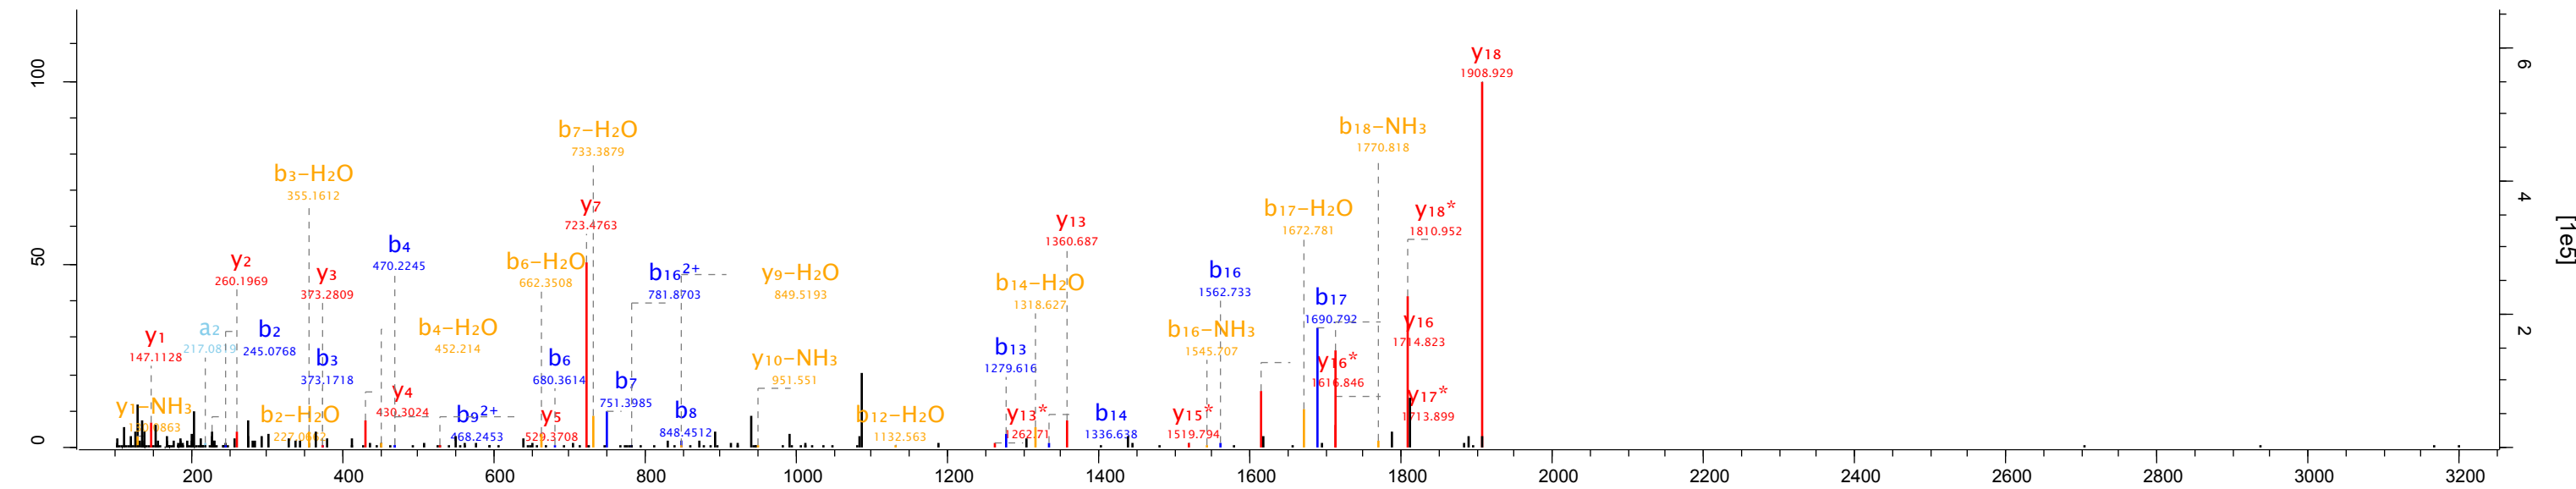

- E D K P P L A P S G G T E G P E Q P P P P C P S Q T G S P P V G L I K -

b<sub>2</sub>
b<sub>3</sub>
b<sub>4</sub>
b<sub>6</sub>
b<sub>7</sub>
b<sub>8</sub>
b<sub>9</sub><sup>2+</sup>
b<sub>13</sub>
b<sub>14</sub>
b<sub>16</sub>
b<sub>17</sub>
y<sub>18</sub>
y<sub>17</sub><sup>\*</sup>
y<sub>16</sub>
y<sub>15</sub><sup>\*</sup>
y<sub>7</sub>
y<sub>5</sub>
y<sub>4</sub>
y<sub>3</sub>
y<sub>2</sub>
y<sub>1</sub>

20171215\_MaS\_33SR\_LMH\_phospho\_03 14579 FTMS; HCD 199.03 688.27 PFDN4

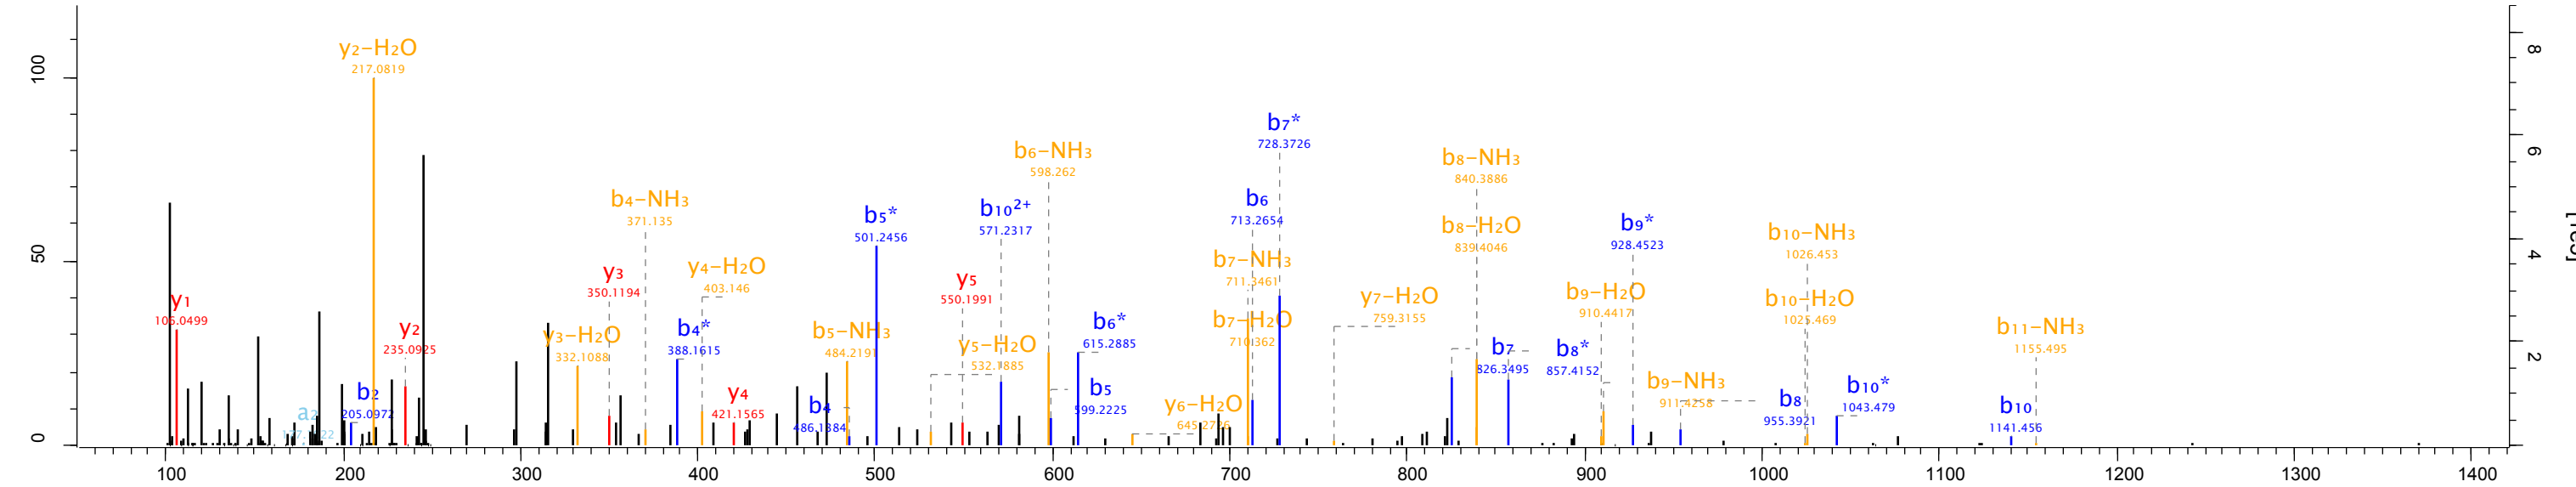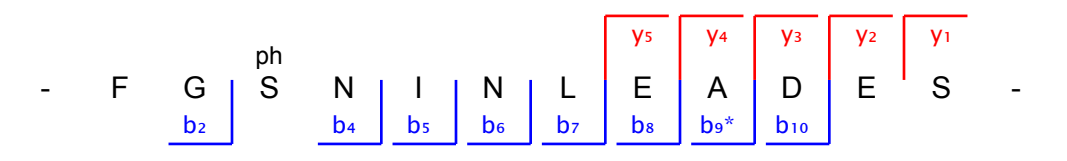

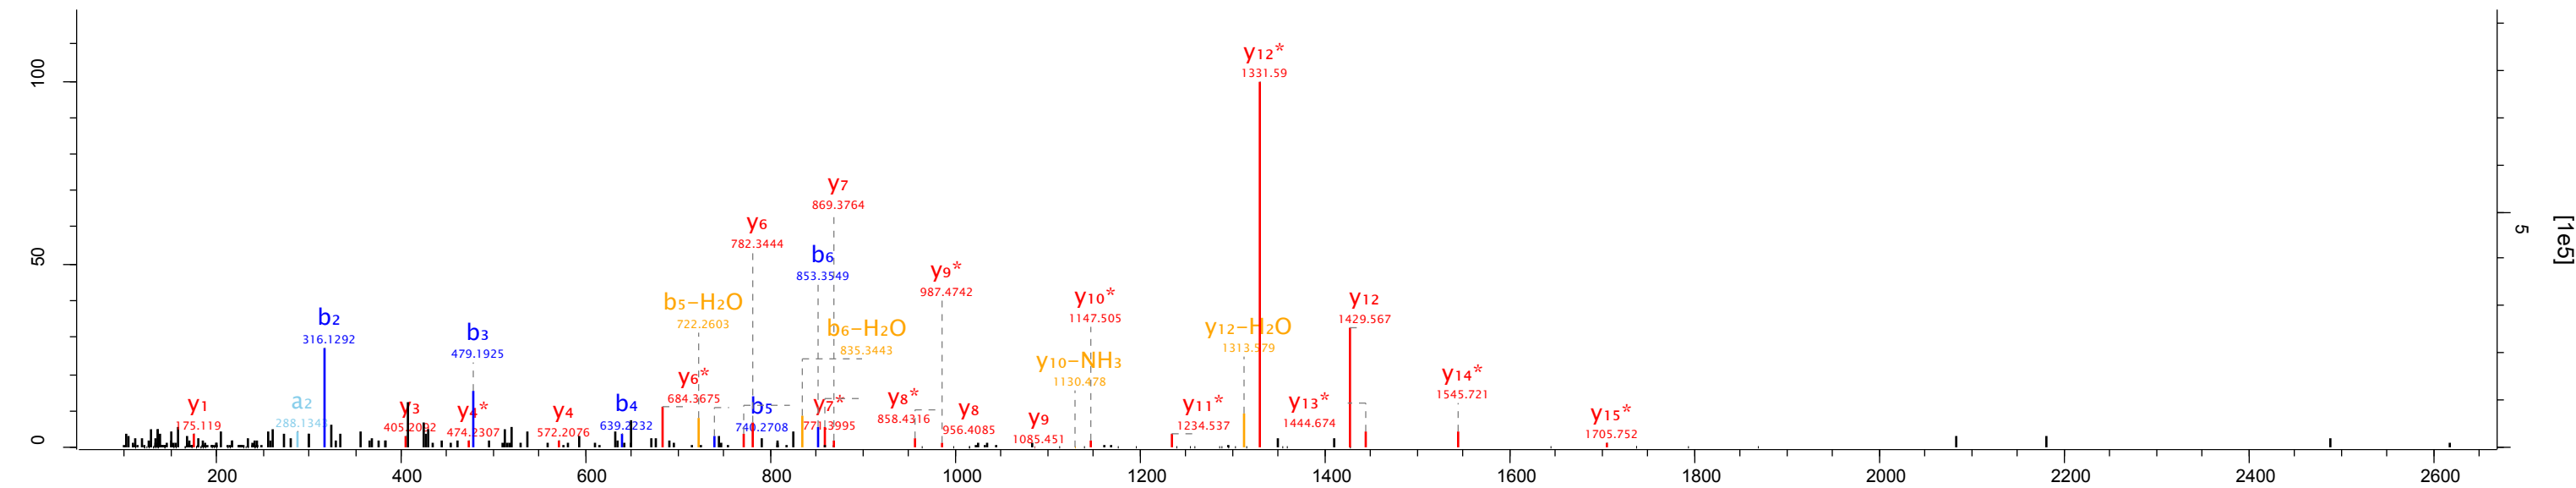

- W E Y C T I P S C E S S P L S T E R -

Fragmentation sites are indicated by brackets below the sequence:

- W E Y C T I P S C E S S P L S T E R
- b2 (under E)
- b3 (under Y)
- b4 (under C)
- b5 (under T)
- b6 (under I)
- y15\* (under T)
- y14\* (under I)
- y13\* (under P)
- y12 (under S)
- y11\* (under C)
- y10\* (under E)
- y9 (under S)
- y8 (under S)
- y7 (under P)
- y6 (under L)
- y4 ph (under S)
- y3 (under T)
- y1 (under E)

Raw file 20171215\_MaS\_33SR\_LMH\_phospho\_03 Scan 15199 Method FTMS; HCD Score 51.43 m/z 1006.41 Gene names CLASP2

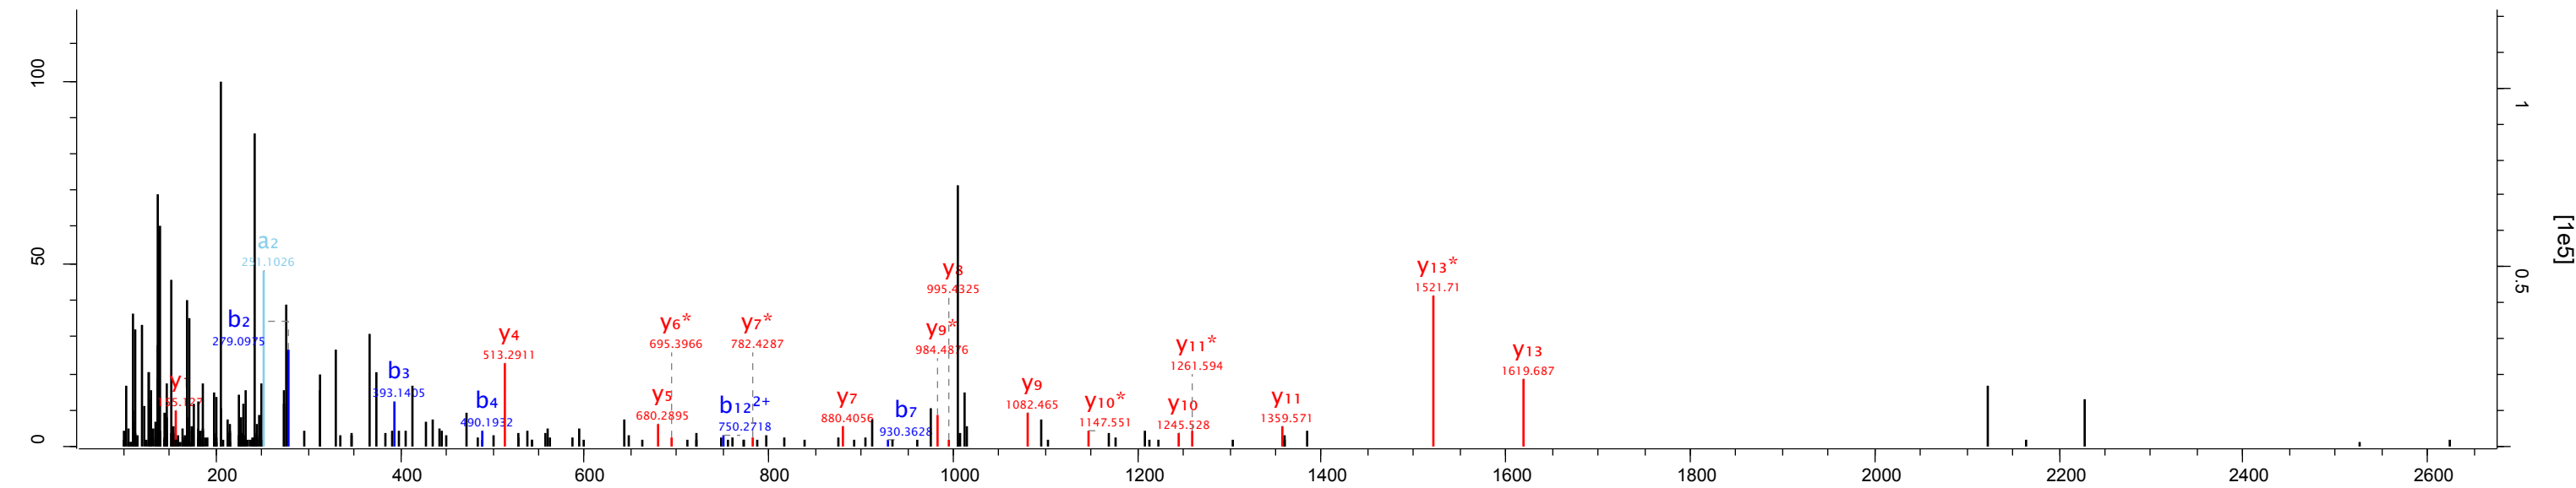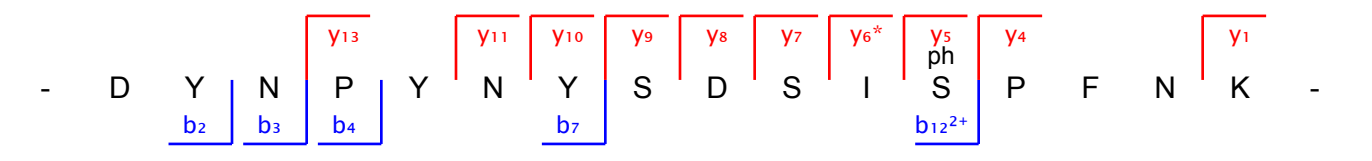

20171215\_MaS\_33SR\_LMH\_phospho\_03 15839 FTMS; HCD 133.28 808.91 MAP4

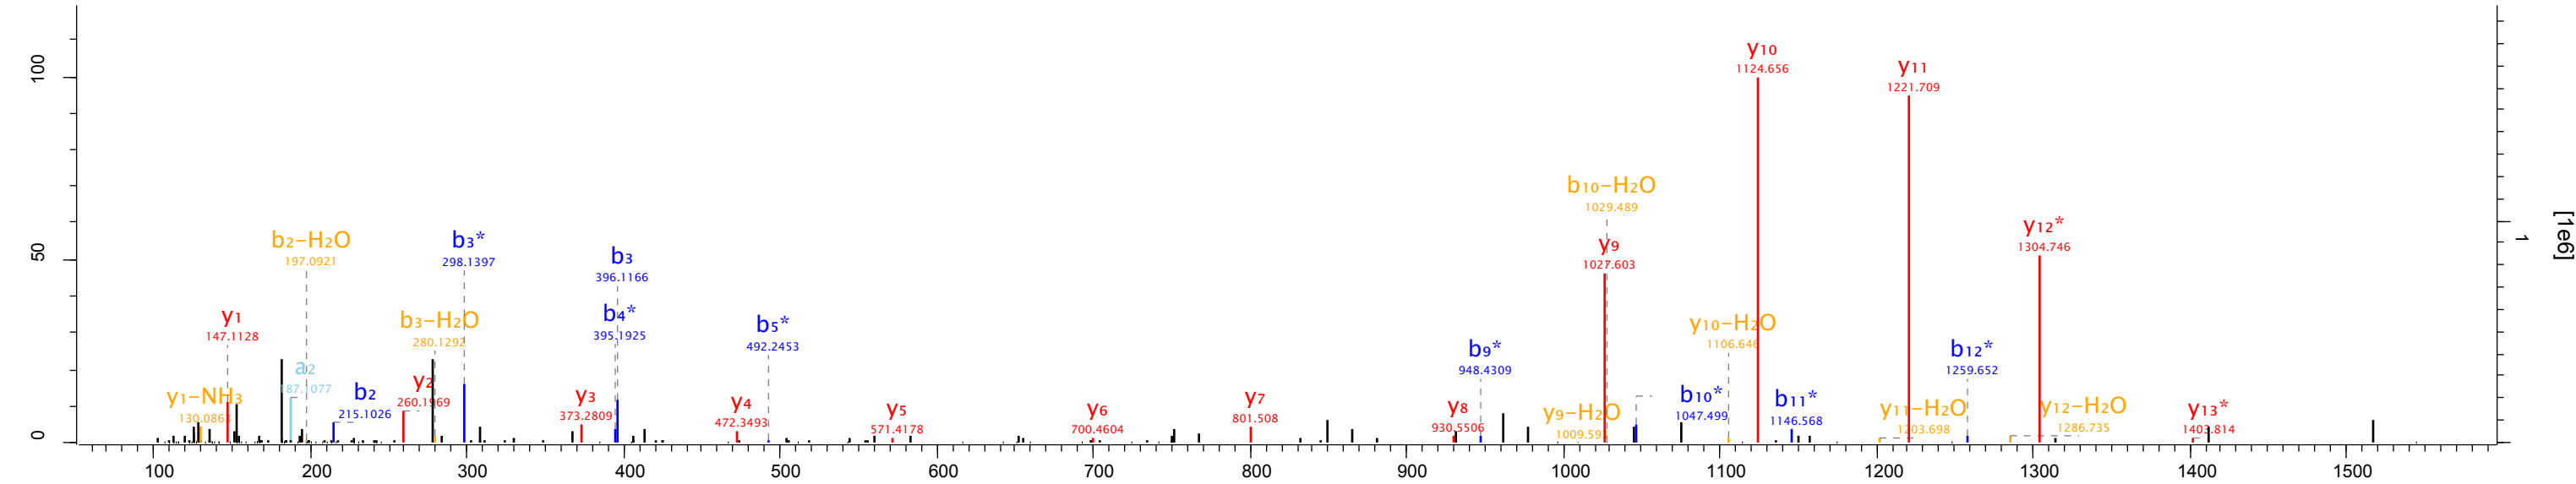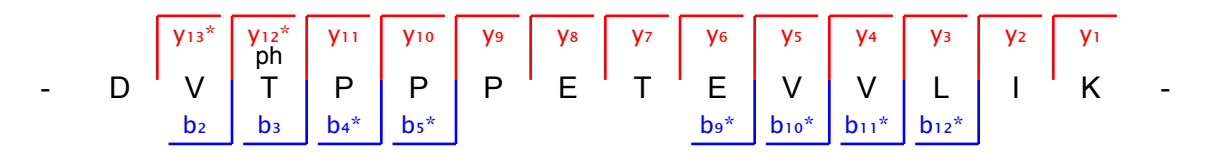

Raw file: 20171215\_MaS\_33SR\_LMH\_phospho\_03  
 Scan: 18089 Method: FTMS; HCD Score: 178.11 m/z: 1047.51 Gene names: TOMM22

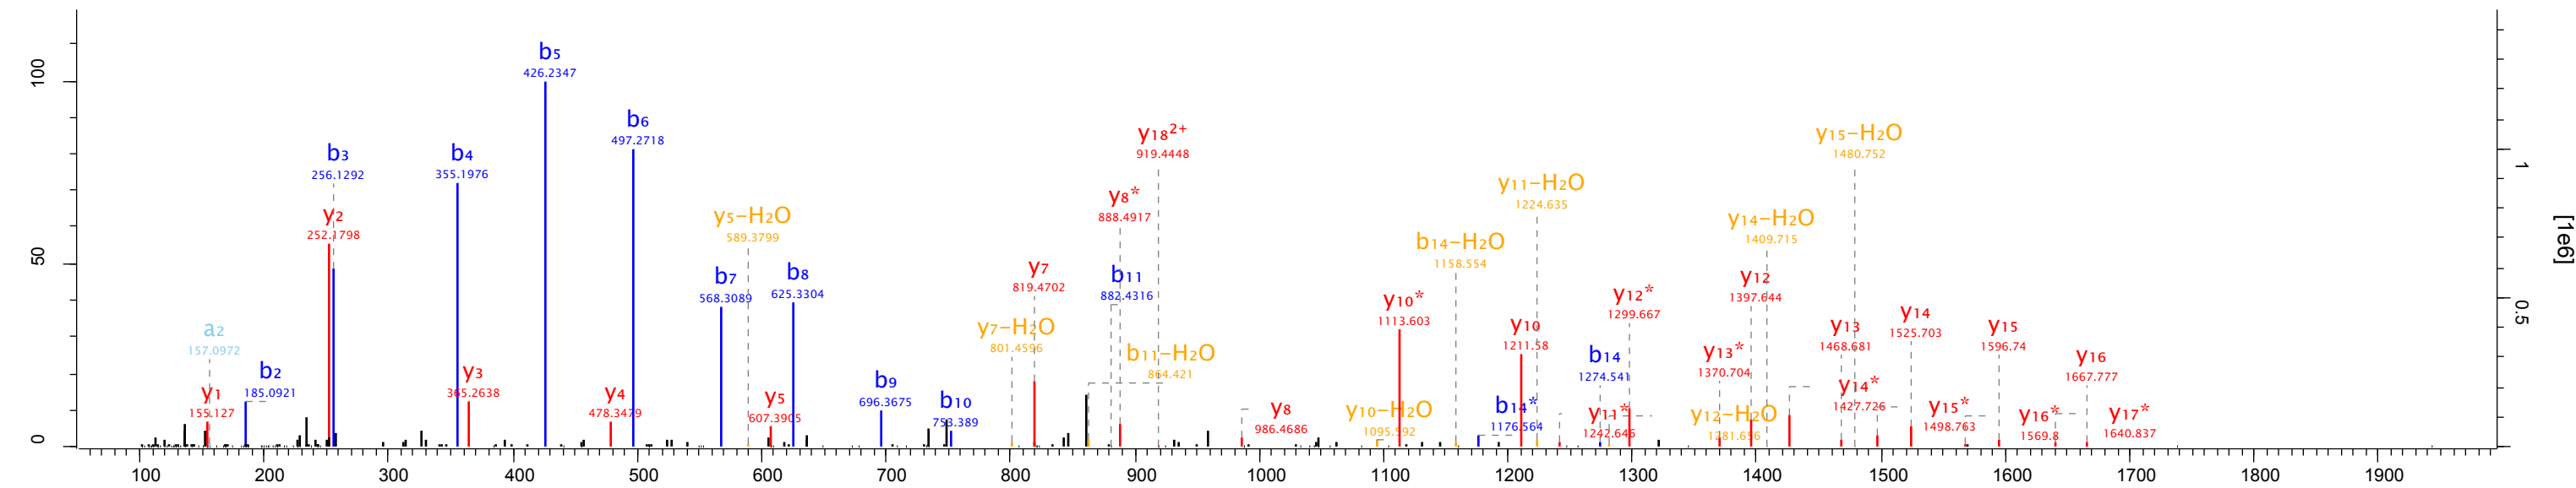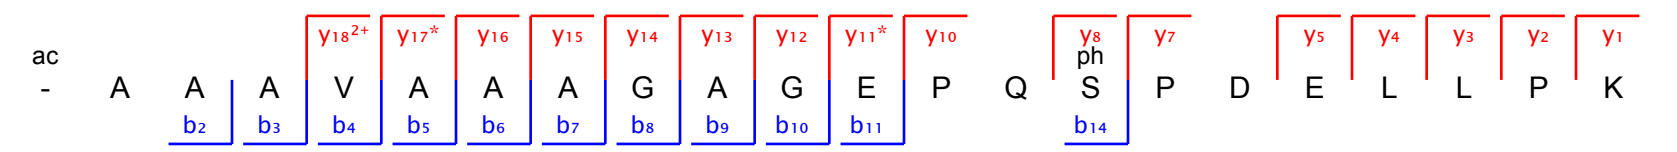



Raw file 20171215\_MaS\_33SR\_LMH\_phospho\_03 Scan 1929 Method FTMS; HCD Score 82.92 m/z 460.2 Gene names SRRM2

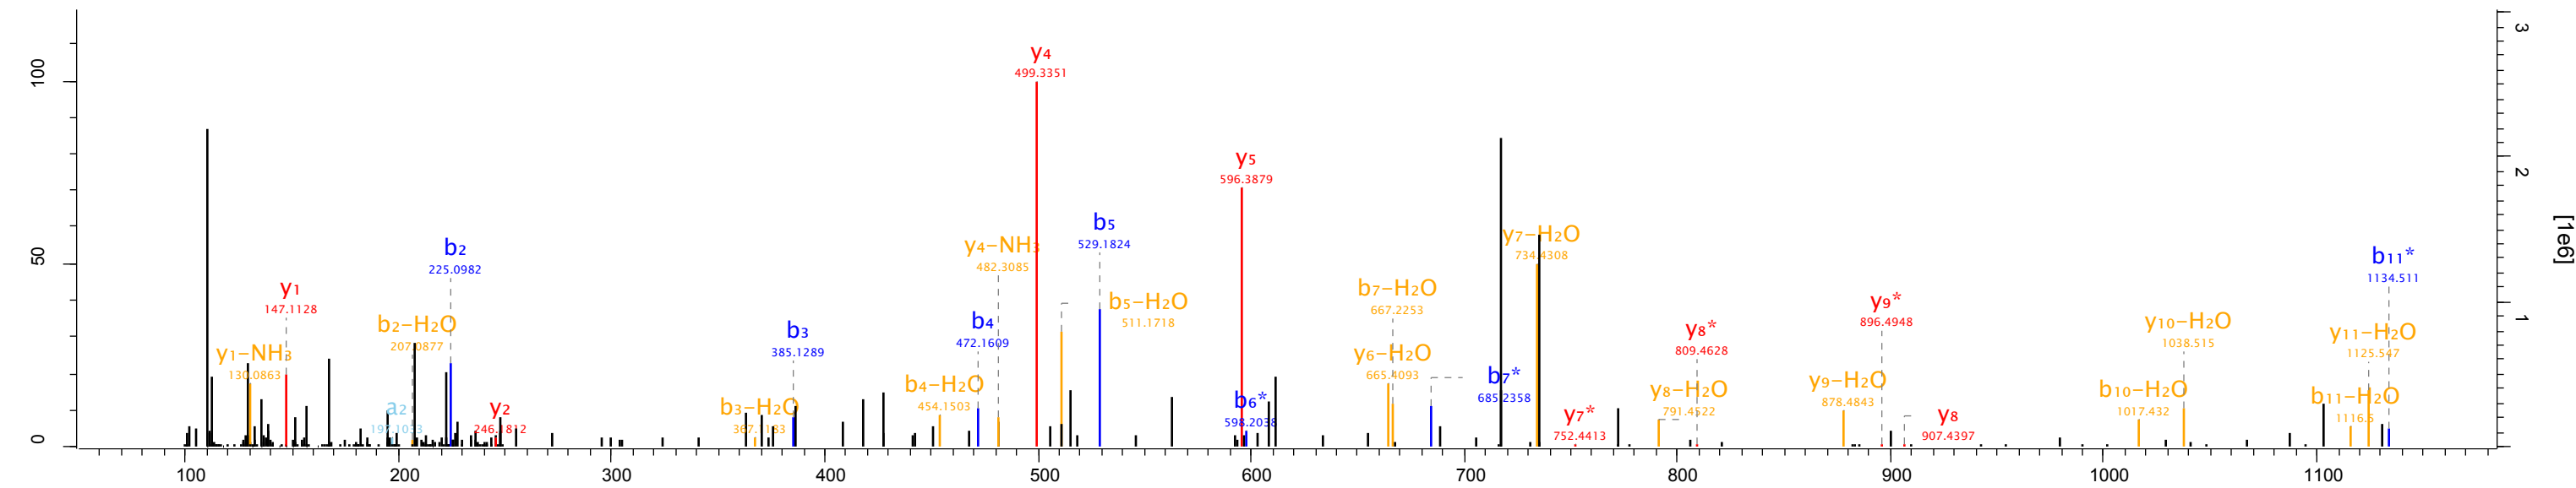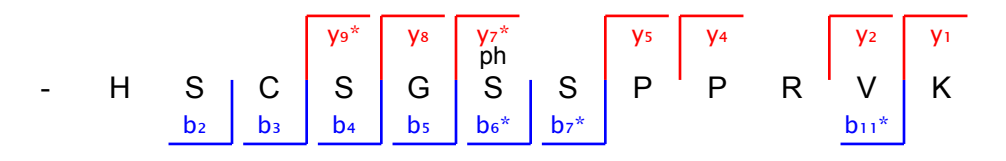

Raw file 20171215\_MaS\_33SR\_LMH\_phospho\_03 Scan 2039 Method FTMS; HCD Score 74.54 m/z 619.28 Gene names SRRM1

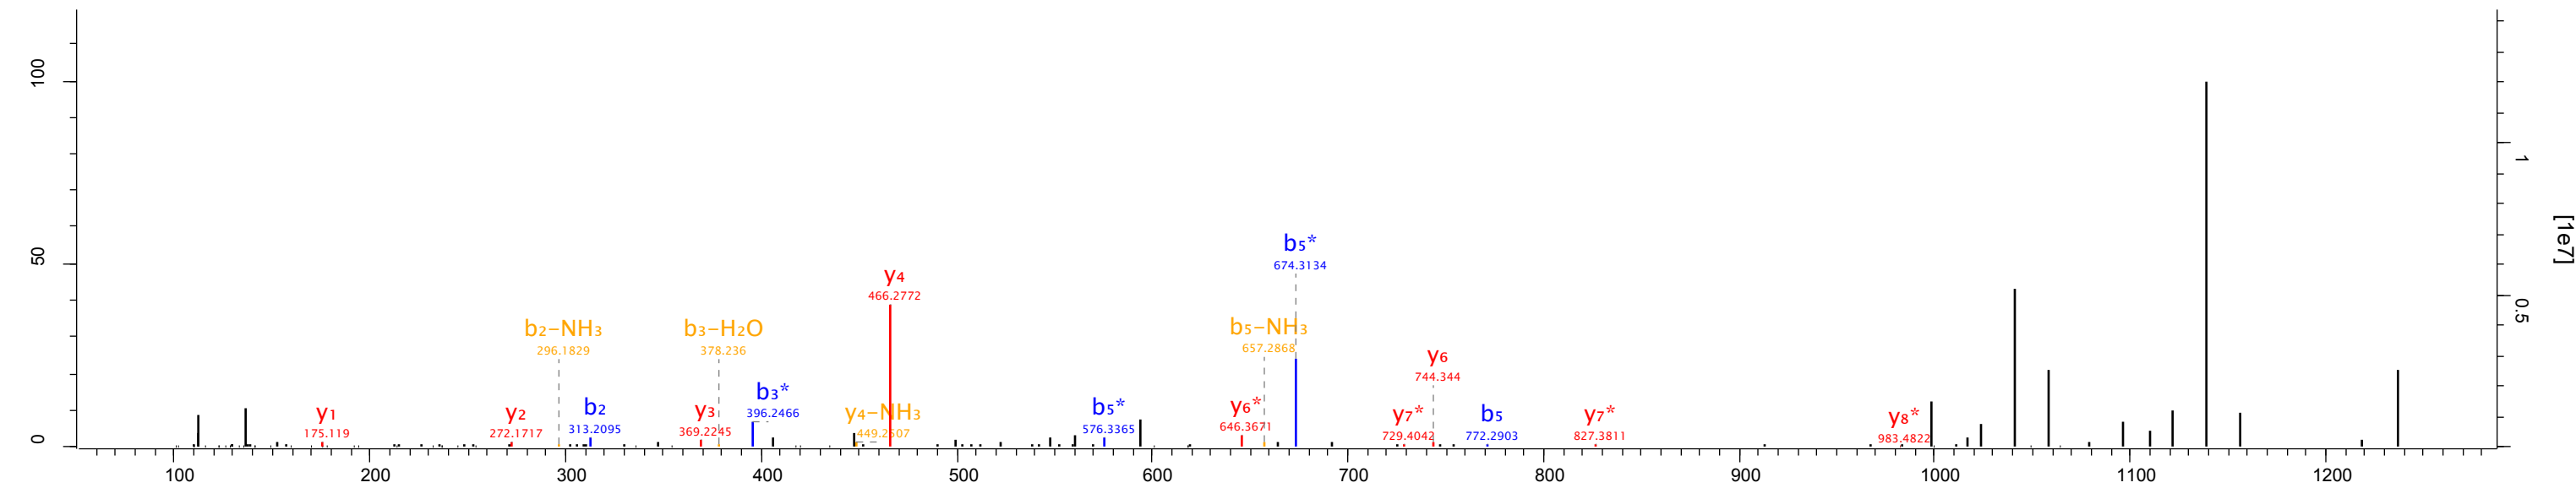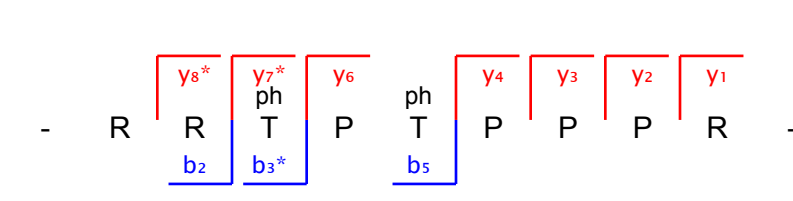

Raw file  
 20171215\_MaS\_33SR\_LMH\_phospho\_03  
 Scan 2179 Method FTMS; HCD Score 192.09 m/z 810.4 Gene names MED1

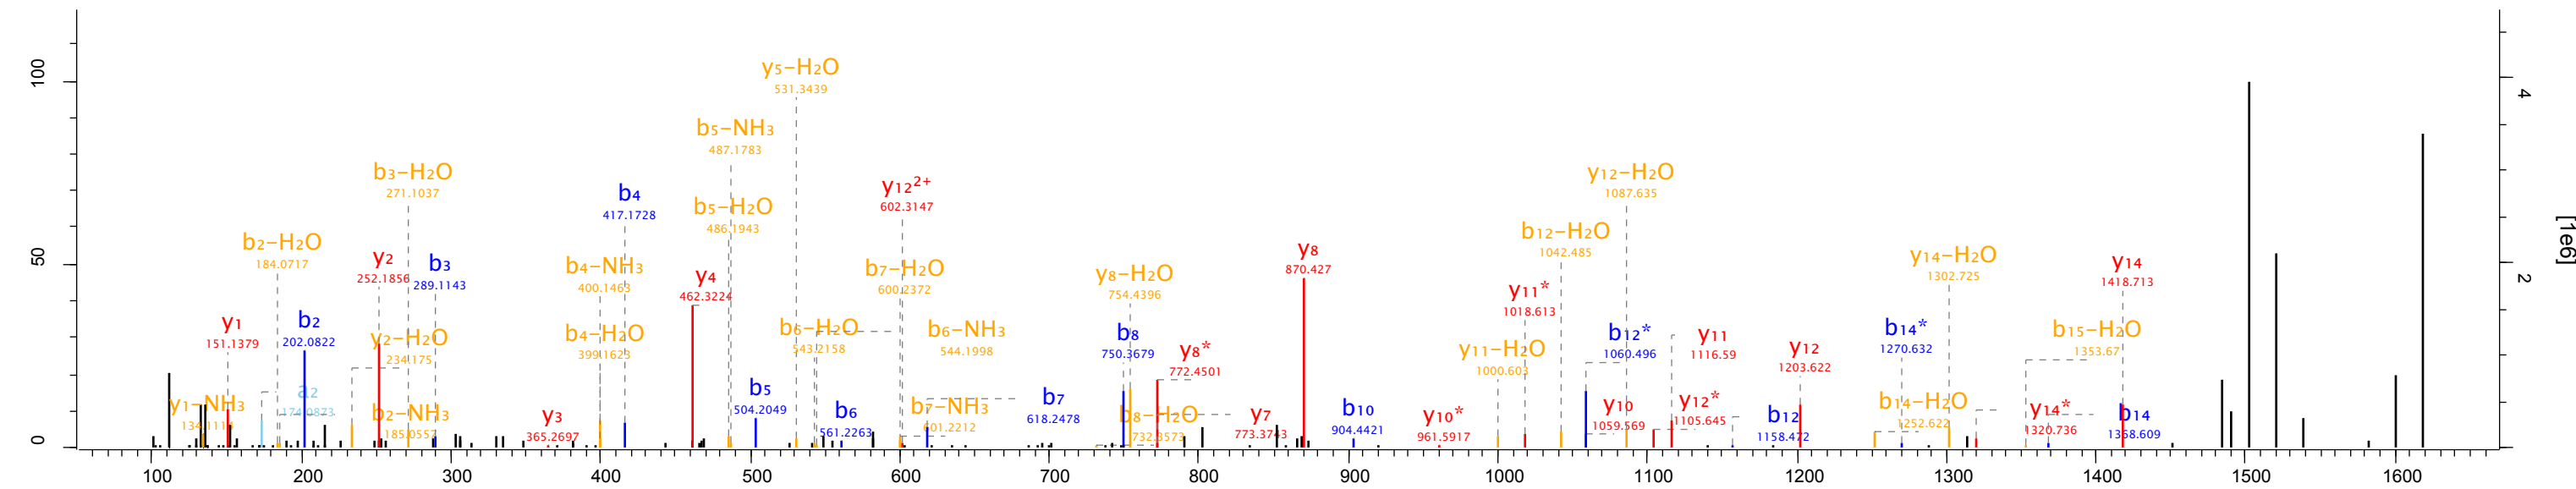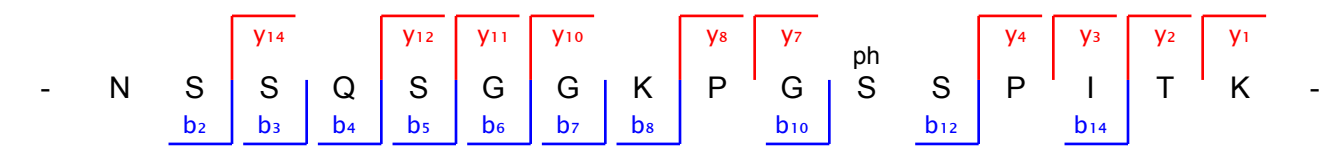

Raw file 20171215\_MaS\_33SR\_LMH\_phospho\_03 Scan 2209 Method FTMS; HCD Score 153.15 m/z 560.78 Gene names MAP4

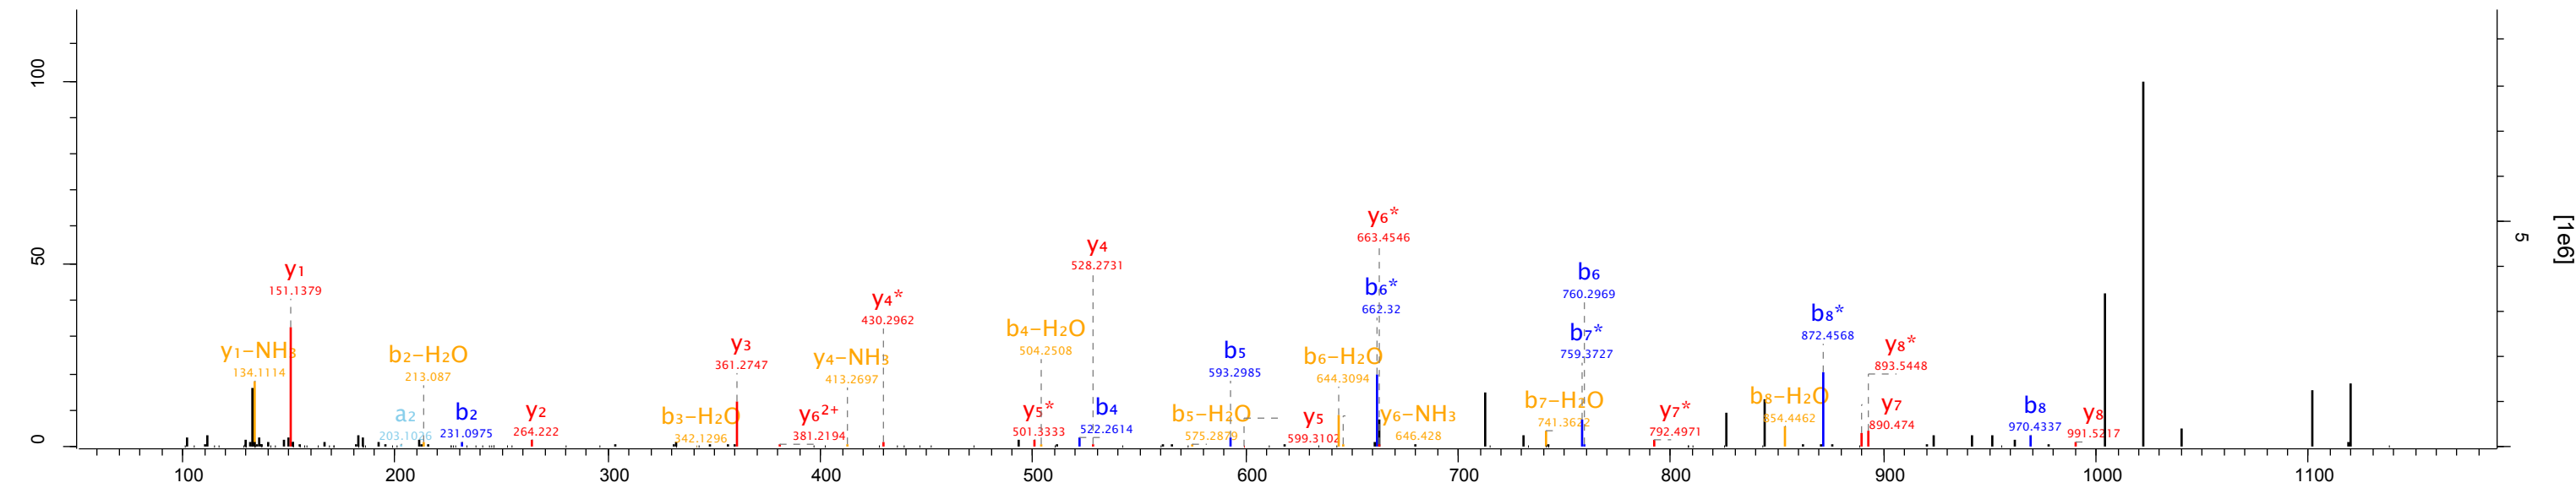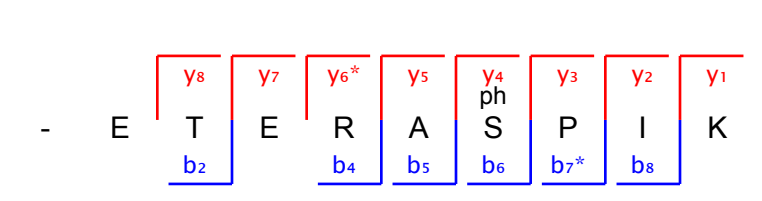

Raw file 20171215\_MaS\_33SR\_LMH\_phospho\_03 Scan 2219 Method FTMS; HCD Score 137.69 m/z 697.81 Gene names SEC31A

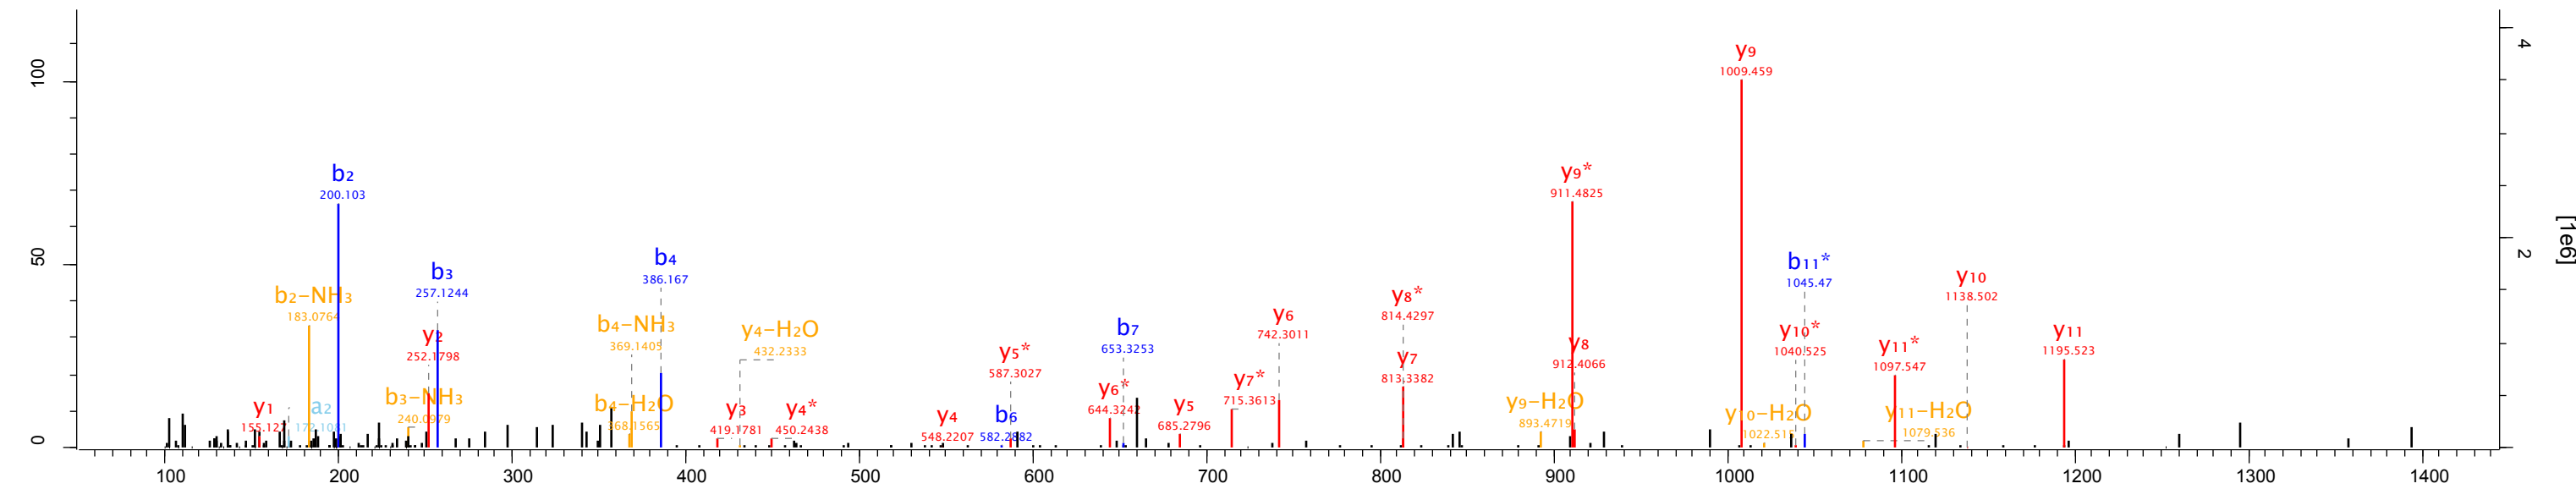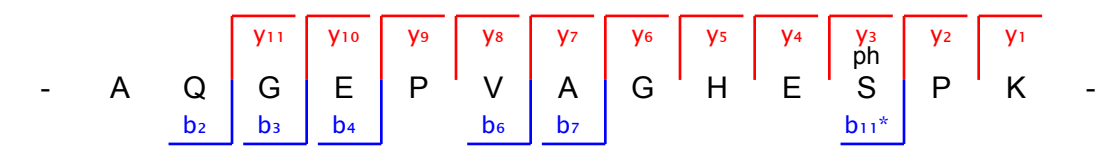

Raw file 20171215\_MaS\_33SR\_LMH\_phospho\_03 Scan 2679 Method FTMS; HCD Score 371.19 m/z 809.8 Gene names EIF5B

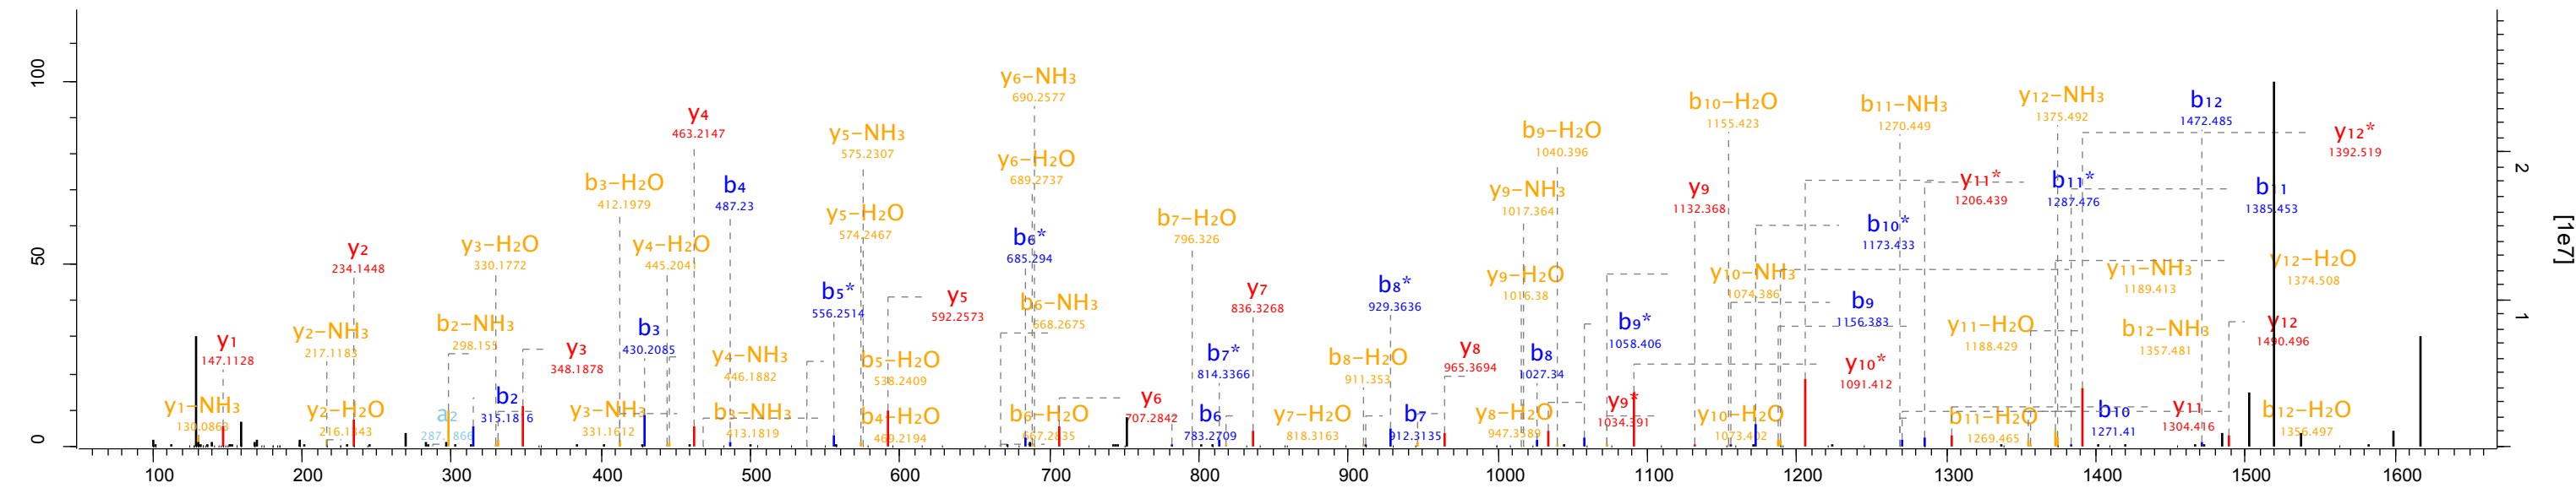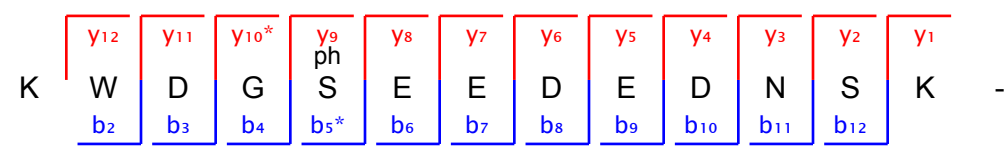

Raw file 20171215\_MaS\_33SR\_LMH\_phospho\_03 Scan 2919 Method FTMS; HCD Score 151.38 m/z 685.31 Gene names GTF3C2

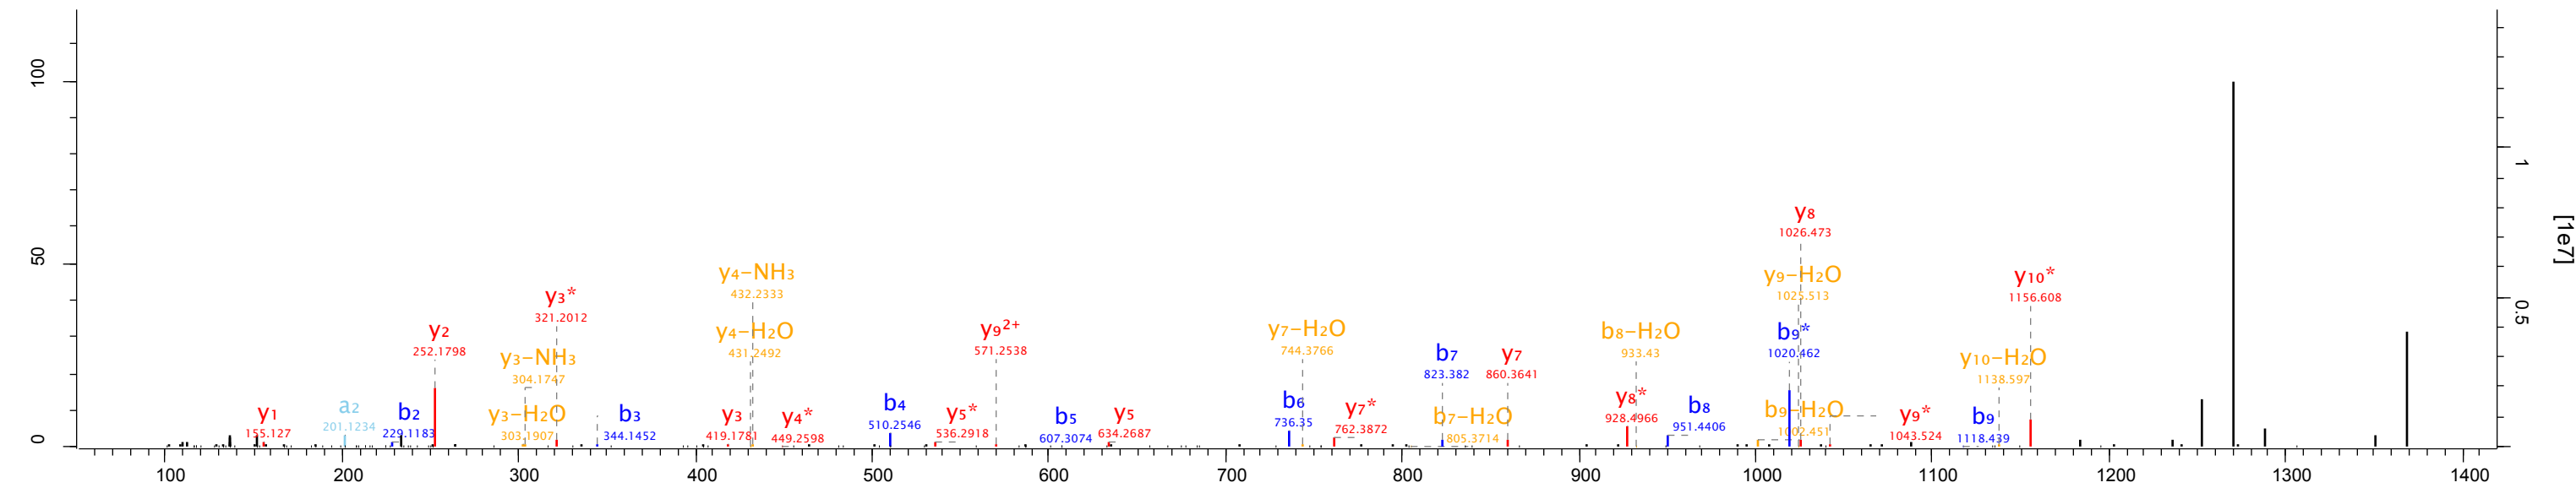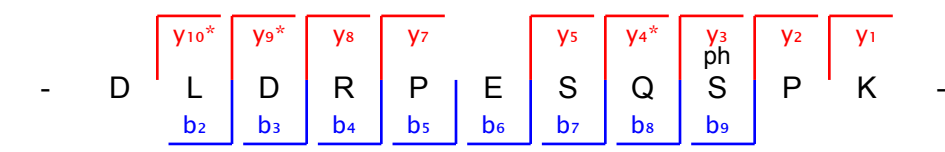

Raw file 20171215\_MaS\_33SR\_LMH\_phospho\_03 Scan 3069 Method FTMS; HCD Score 84.17 m/z 625.28 Gene names MINK1

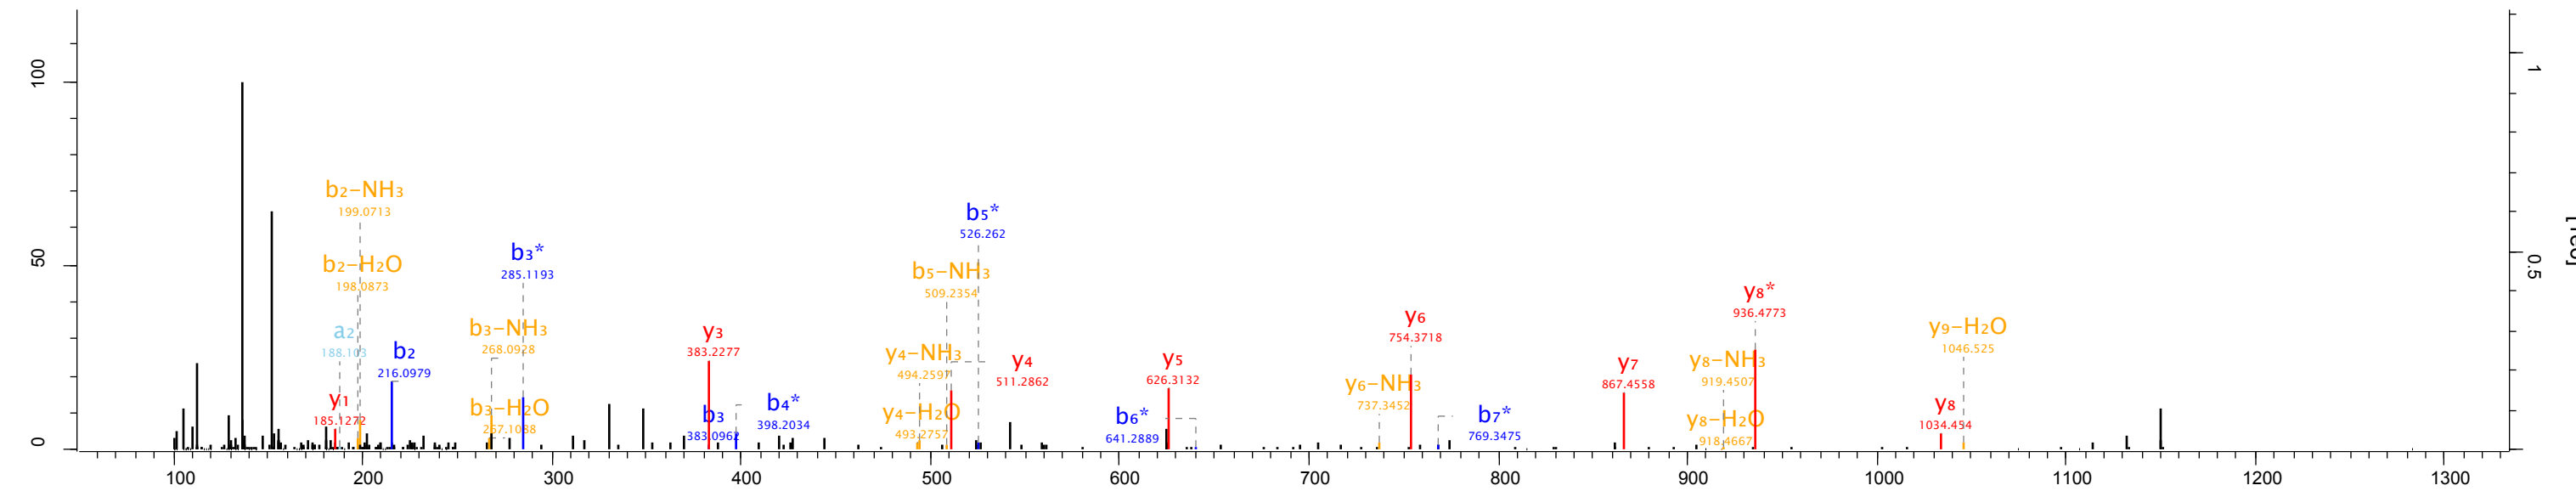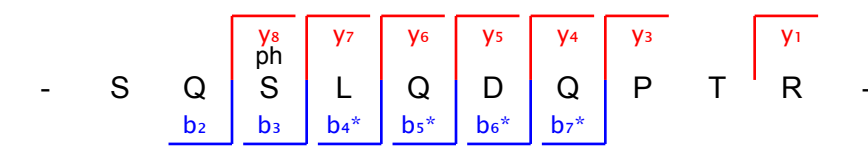



Raw file 20171215\_MaS\_33SR\_LMH\_phospho\_03 Scan 3209 Method FTMS; HCD Score 89.48 m/z 447.21 Gene names PHLDB1

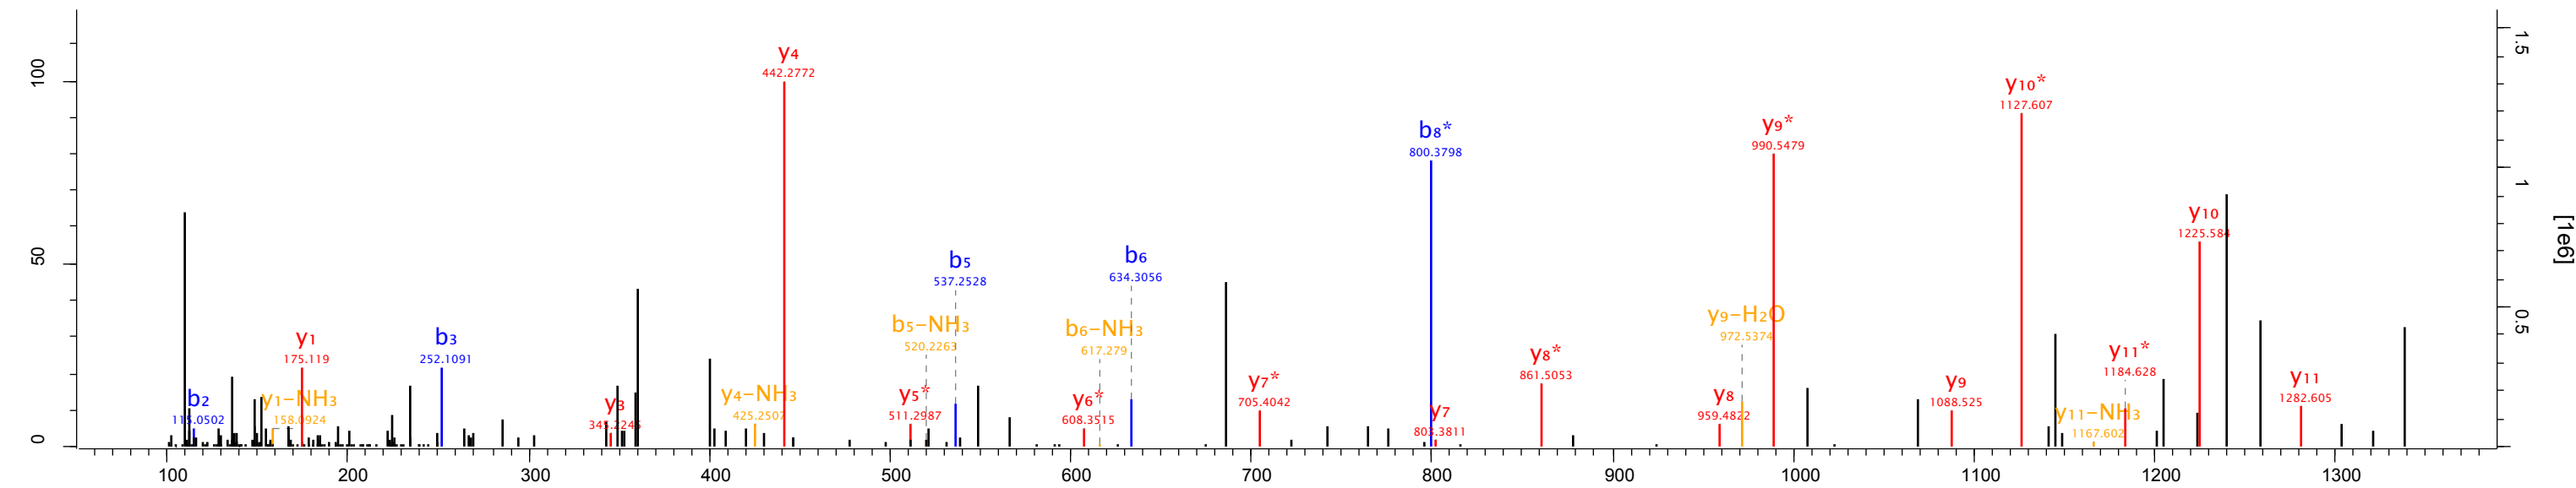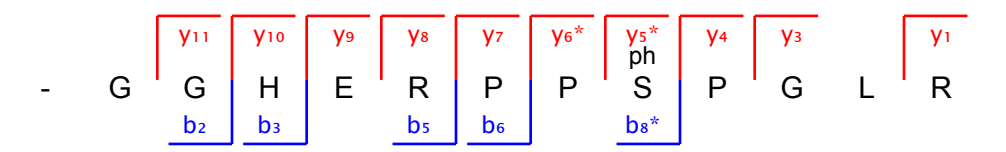

Raw file 20171215\_MaS\_33SR\_LMH\_phospho\_03 Scan 3299 Method FTMS; HCD Score 355.08 m/z 1208.52 Gene names CASC3

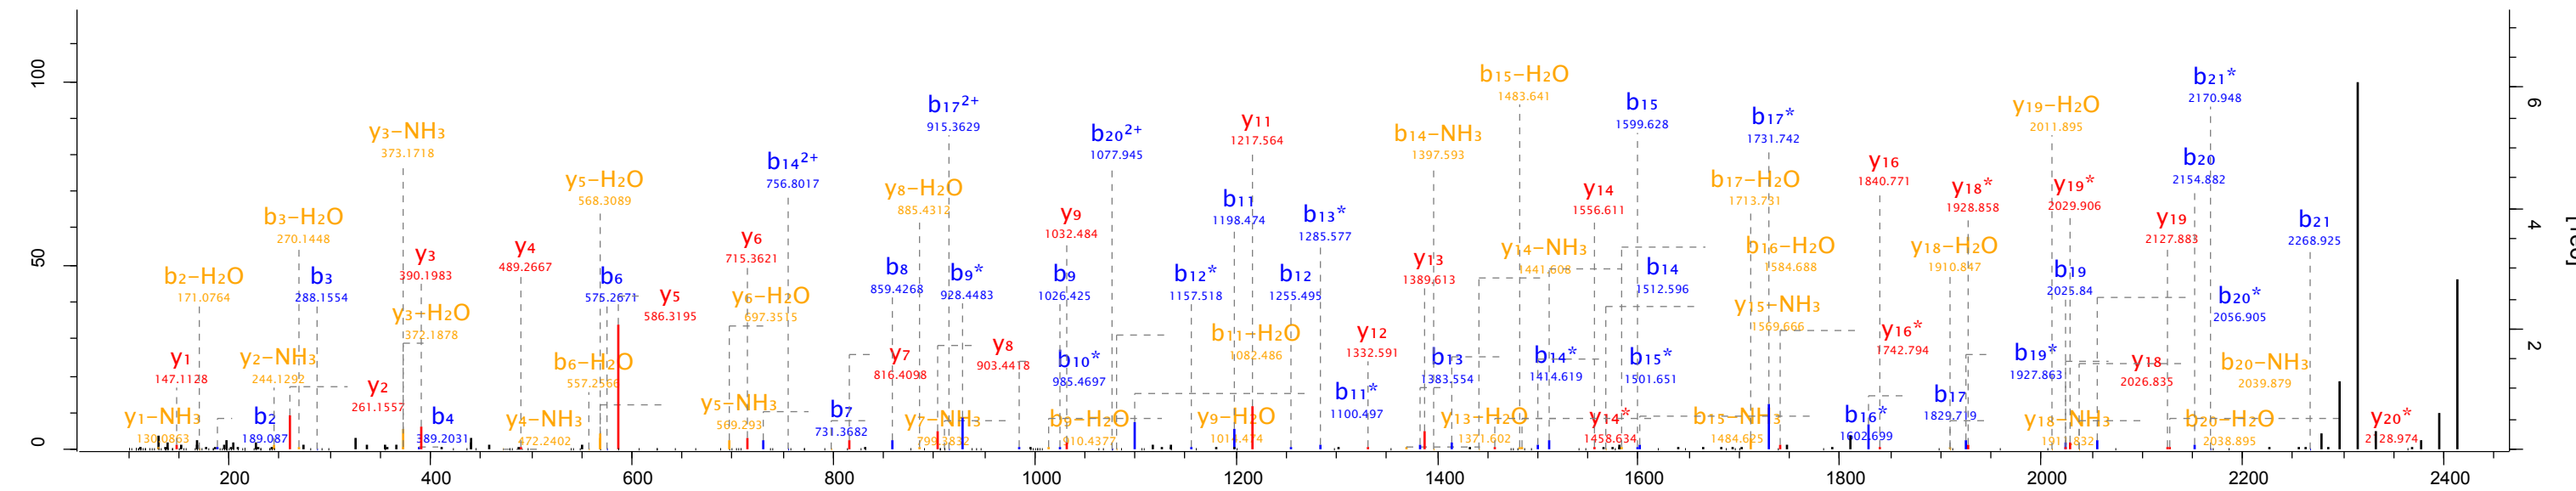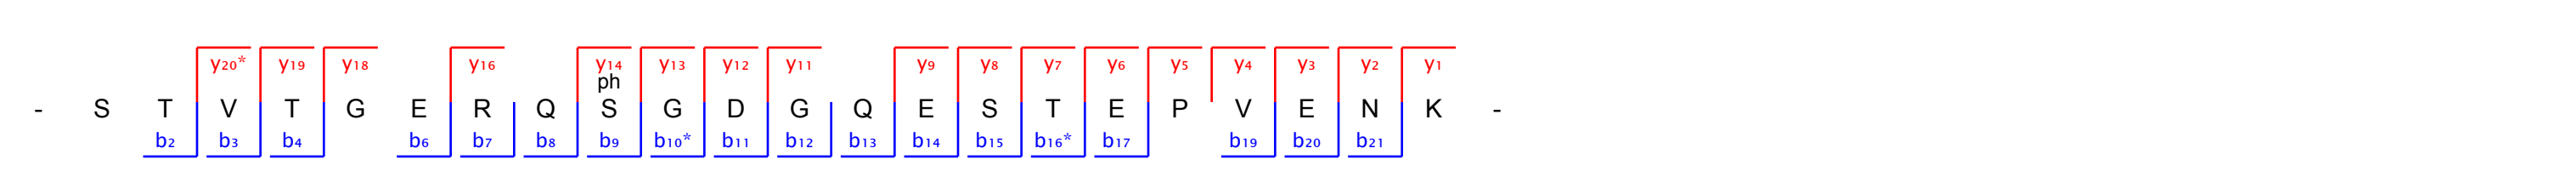

Raw file 20171215\_MaS\_33SR\_LMH\_phospho\_03 Scan 3369 Method FTMS; HCD Score 70.56 m/z 554.23 Gene names BRD7

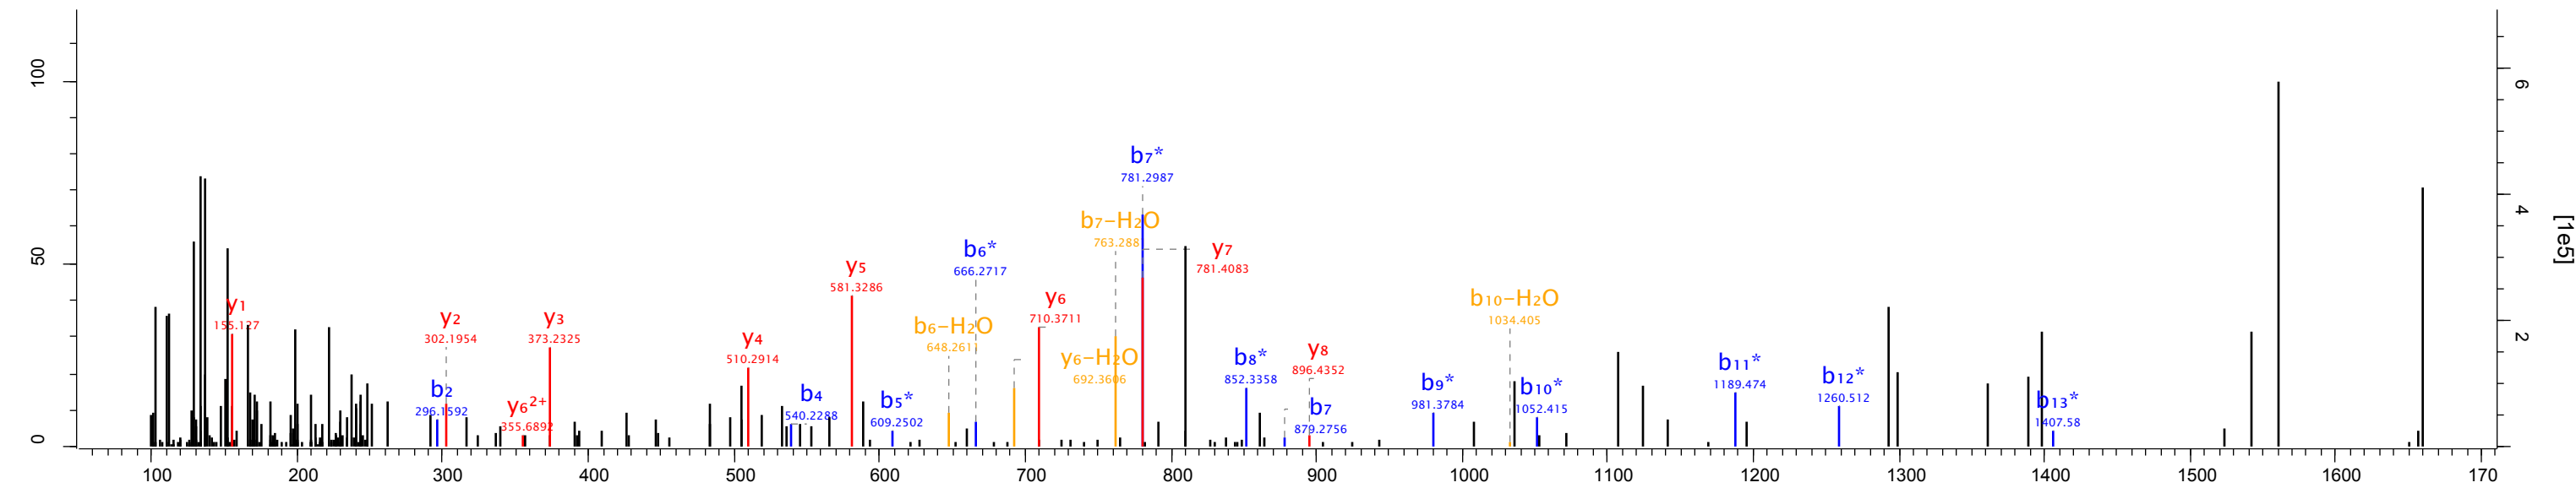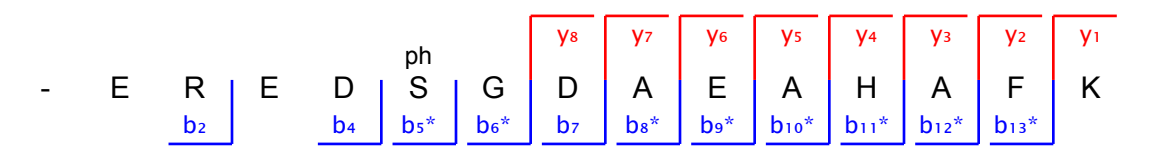

Raw file 20171215\_MaS\_33SR\_LMH\_phospho\_03 Scan 3569 Method FTMS; HCD Score 43.95 m/z 605.28 Gene names DMWD

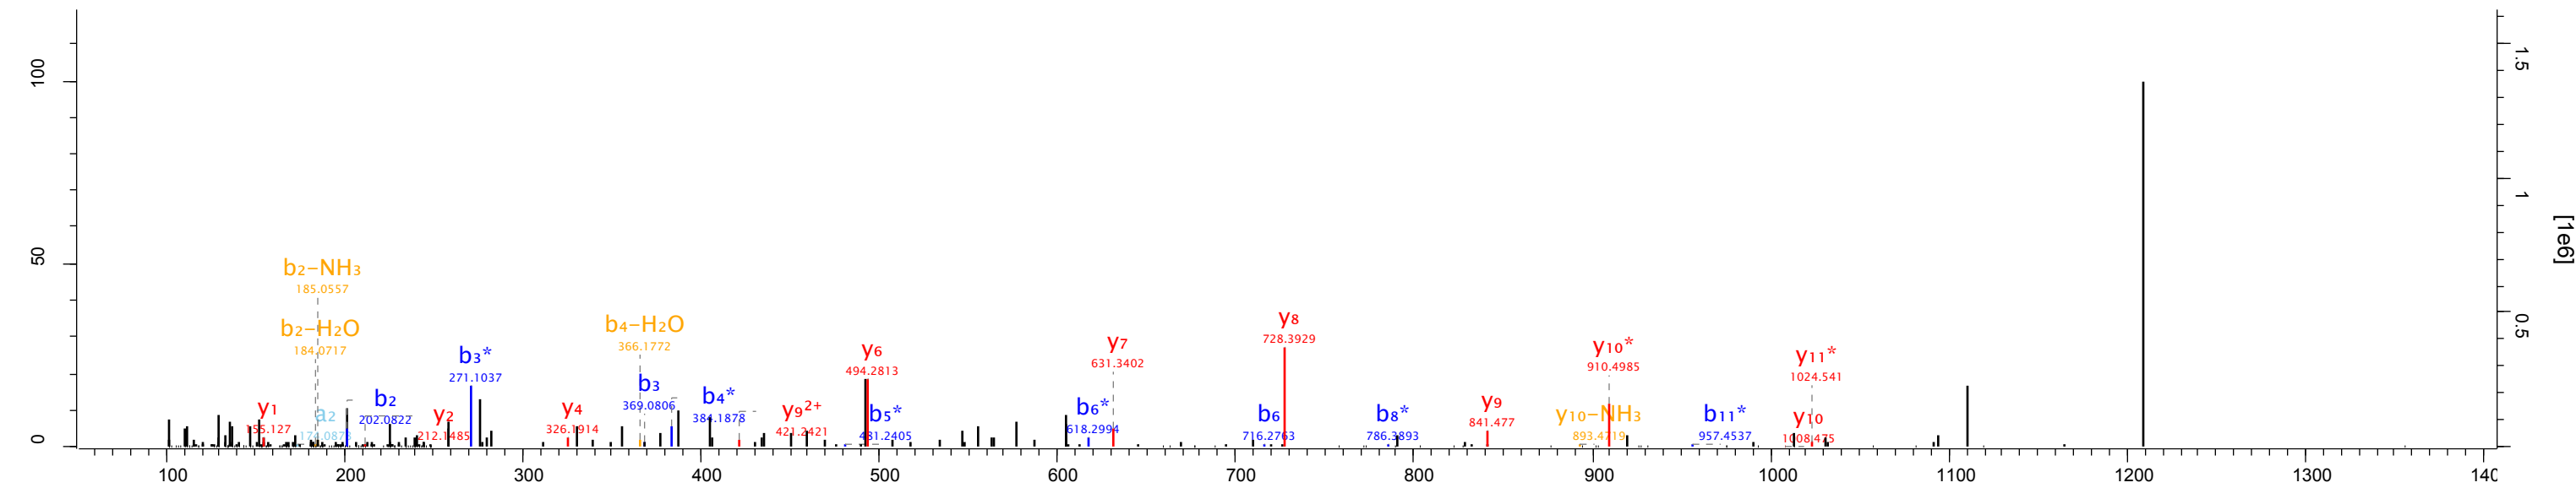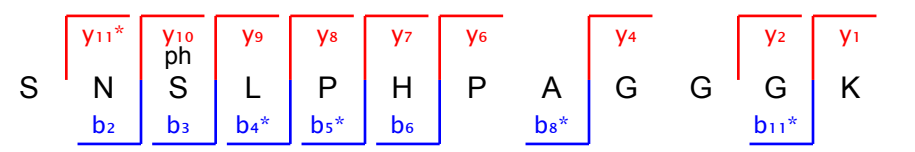

Raw file 20171215\_MaS\_33SR\_LMH\_phospho\_03 Scan 3579 Method FTMS; HCD Score 235.42 m/z 918.4 Gene names AJUBA

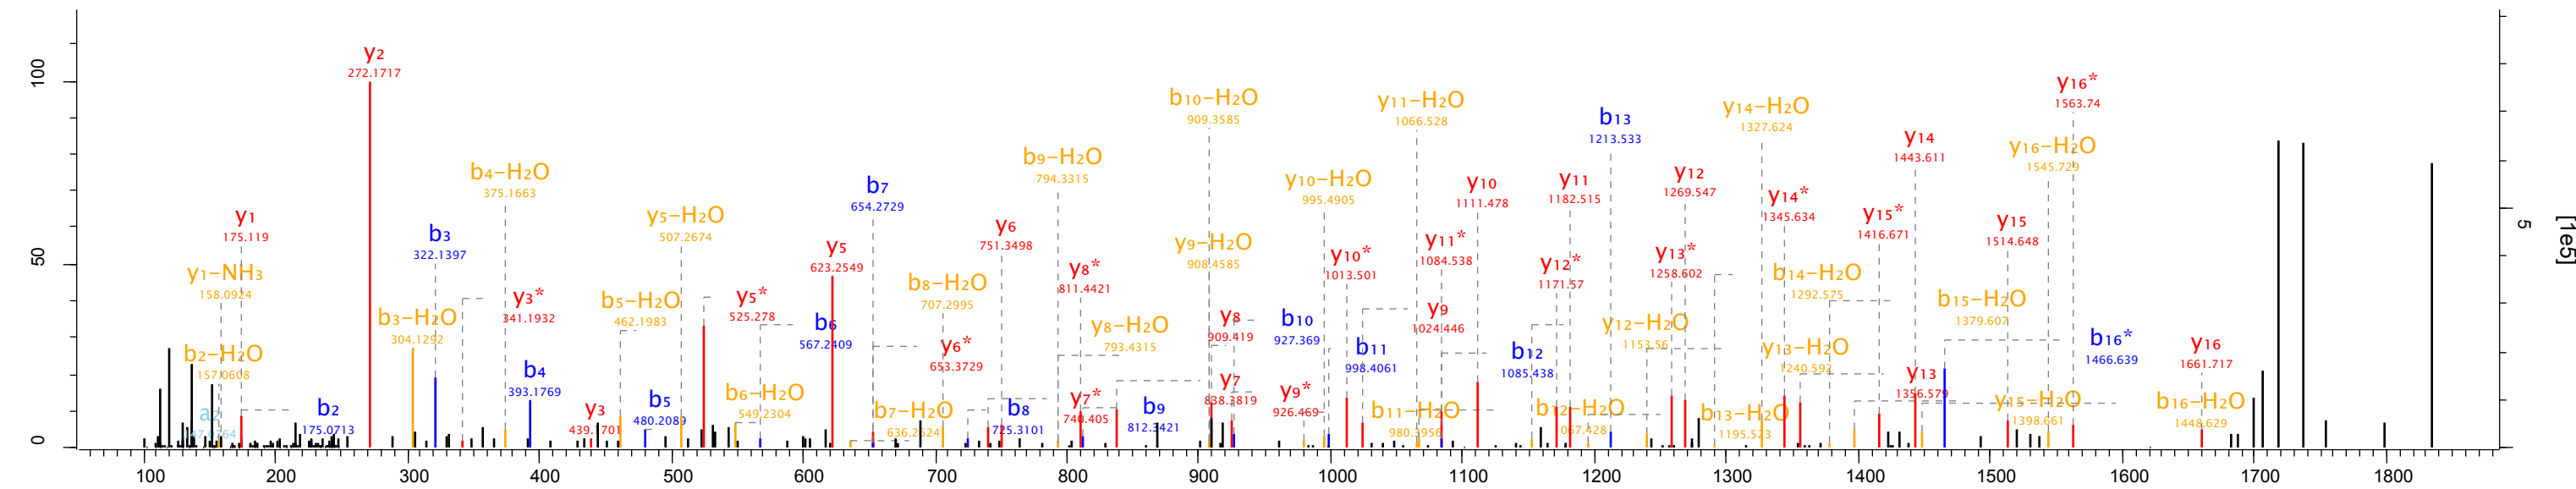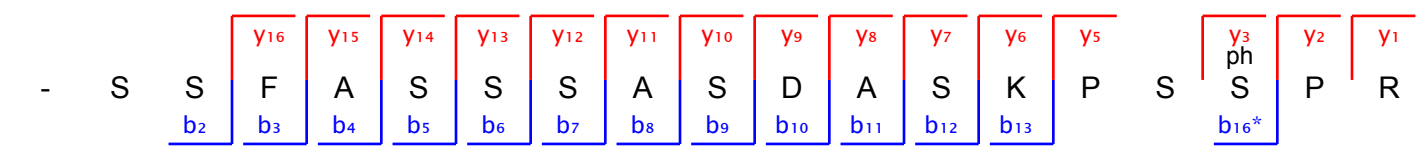

Raw file 20171215\_MaS\_33SR\_LMH\_phospho\_03 Scan 3649 Method FTMS; HCD Score 271.11 m/z 950.38 Gene names TCEAL3;TCEAL6;TCEAL5

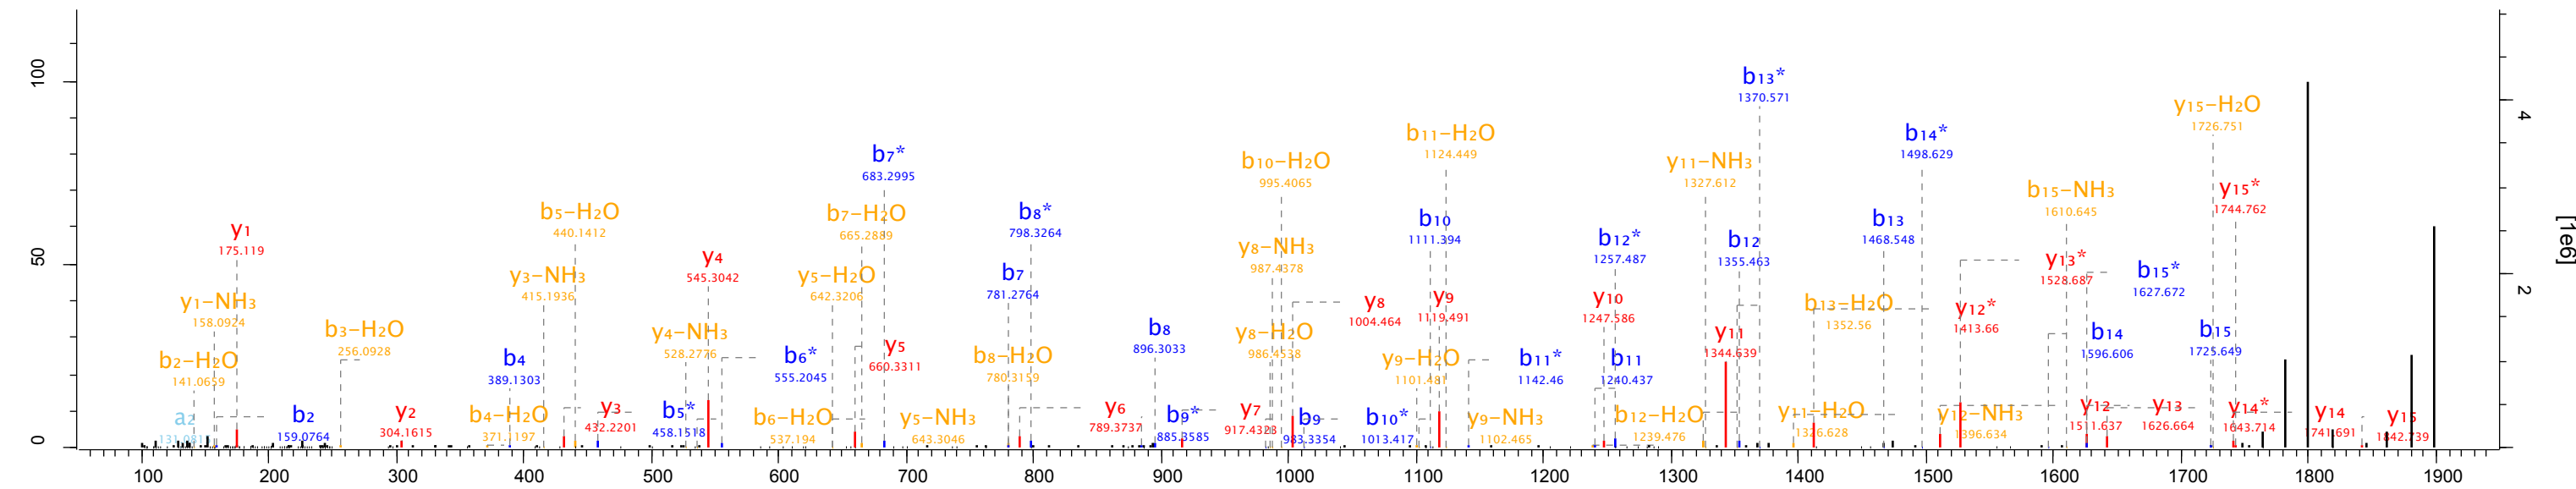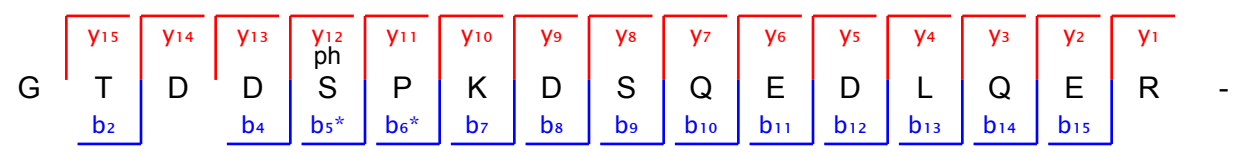

Raw file 20171215\_MaS\_33SR\_LMH\_phospho\_03 Scan 3889 Method FTMS; HCD Score 65.81 m/z 756.3 Gene names MYH10

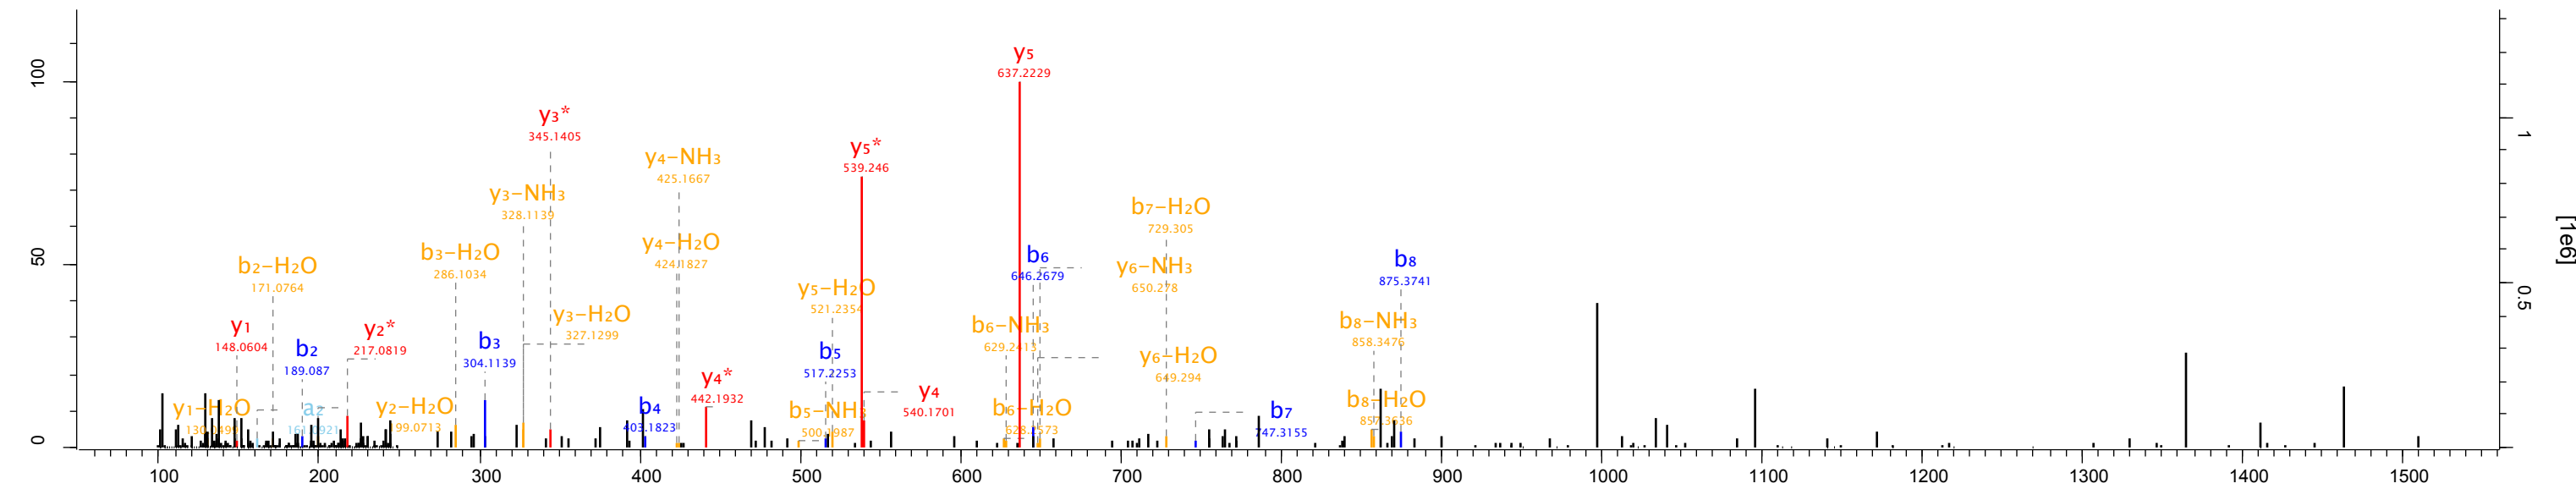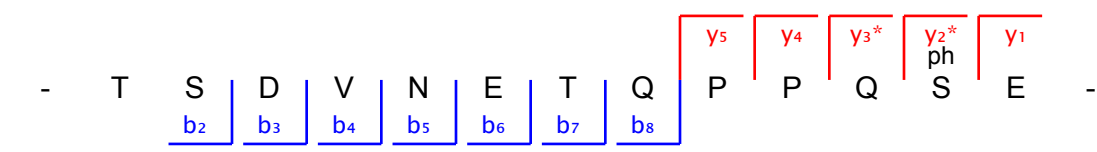

Raw file 20171215\_MaS\_33SR\_LMH\_phospho\_03 Scan 4239 Method FTMS; HCD Score 236.27 m/z 880.81 Gene names HAUS7

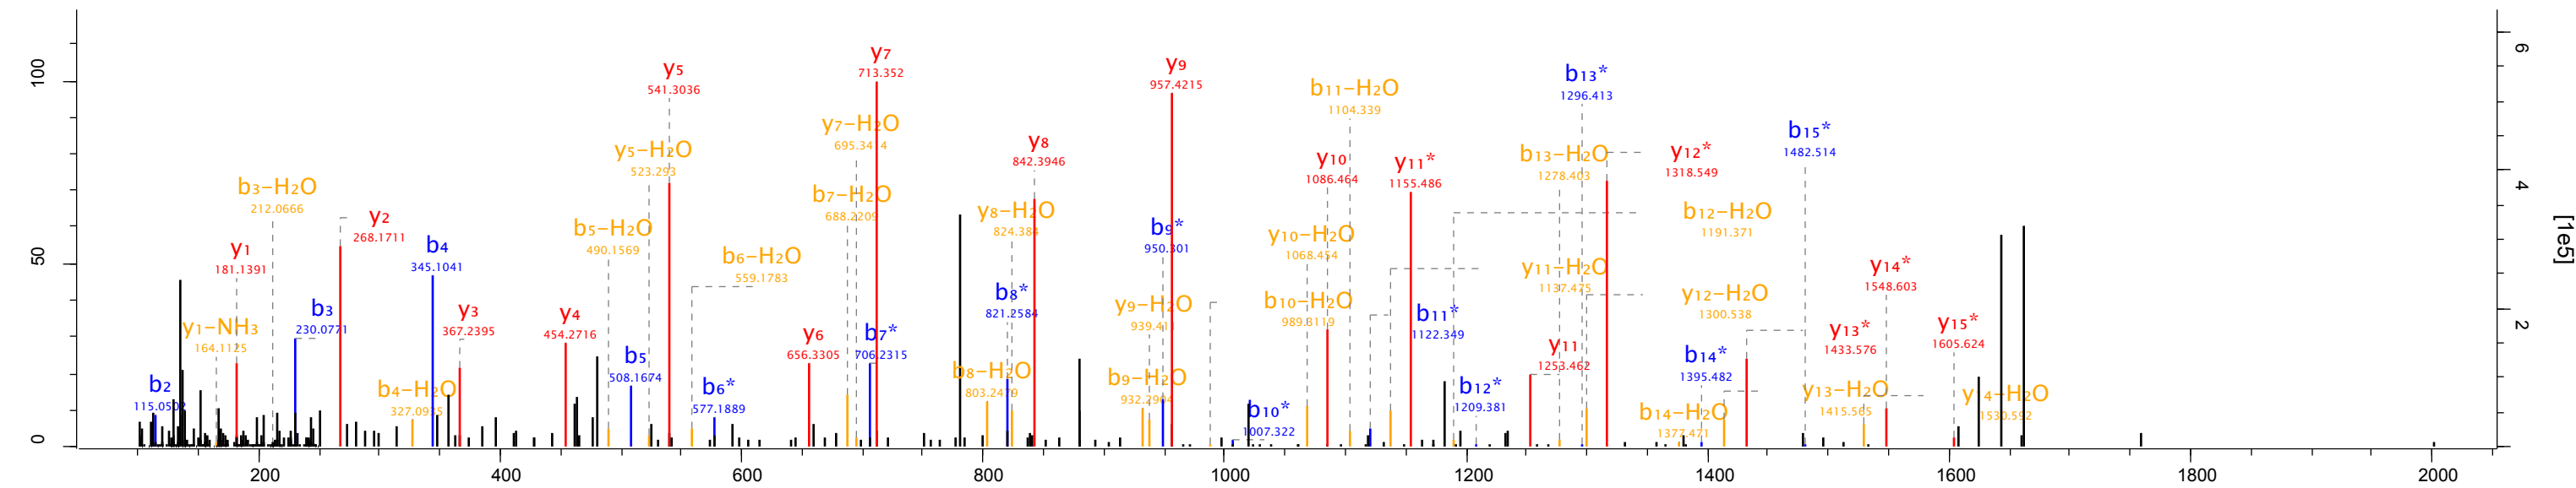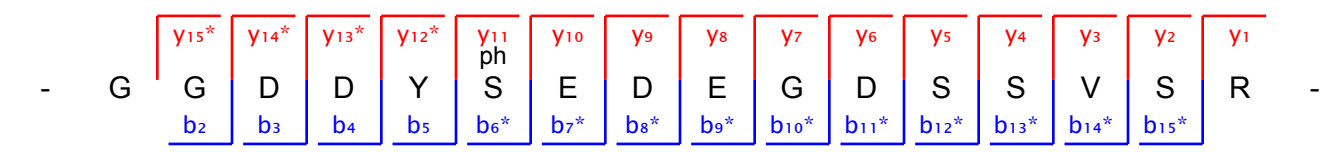



Raw file 20171215\_MaS\_33SR\_LMH\_phospho\_03 Scan 4559 Method FTMS; HCD Score 125.83 m/z 647.8 Gene names NFIX

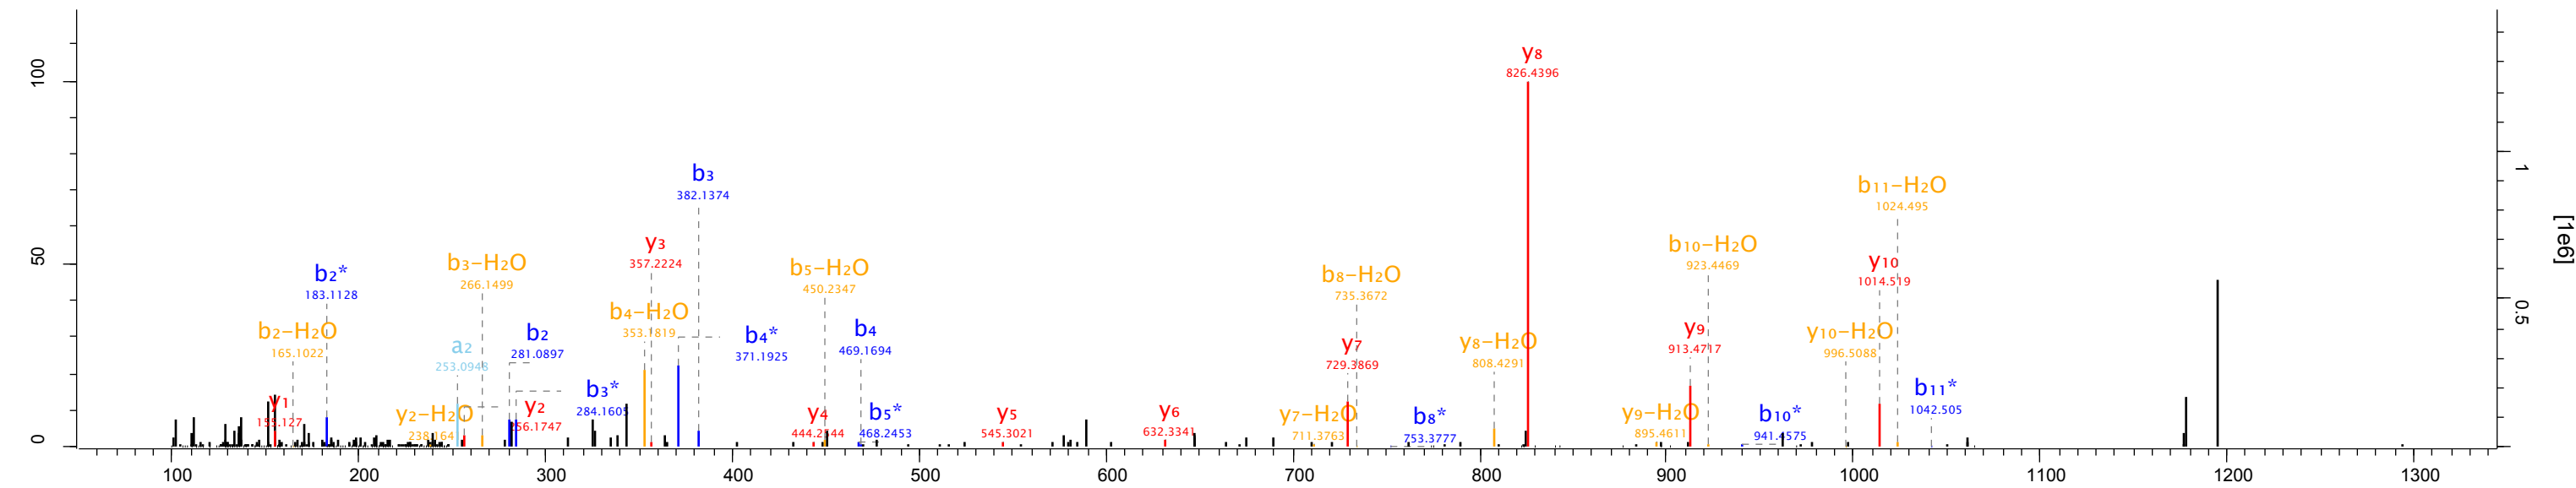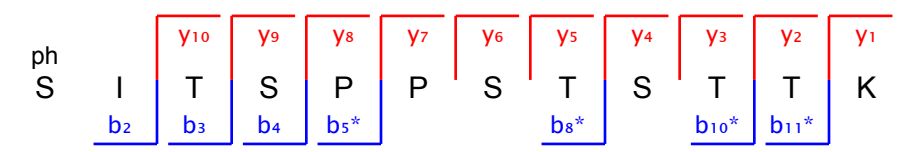

Raw file 20171215\_MaS\_33SR\_LMH\_phospho\_03 Scan 4609 Method FTMS; HCD Score 76.3 m/z 488.76 Gene names RFC1

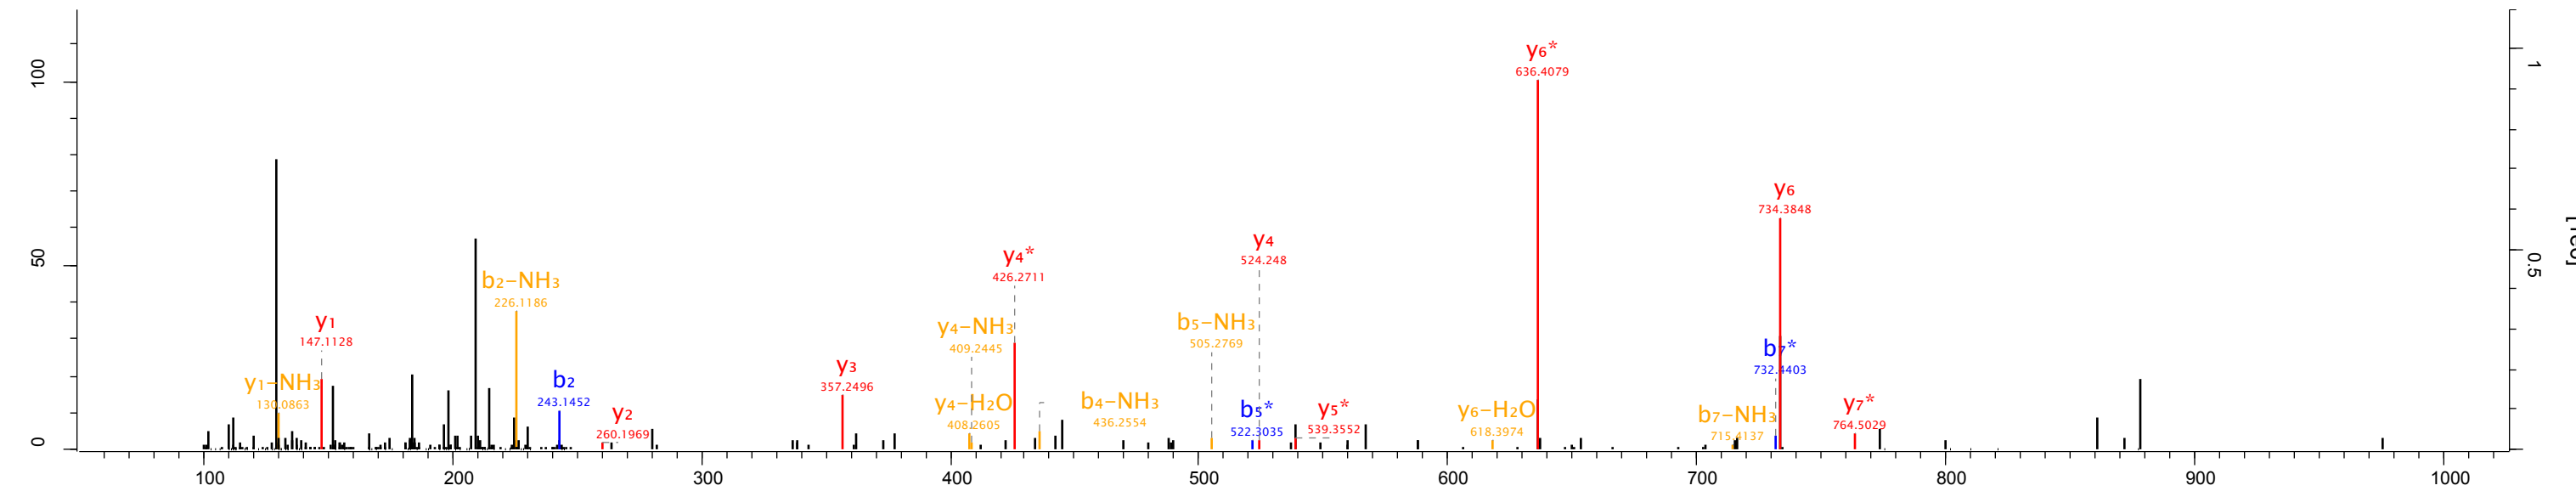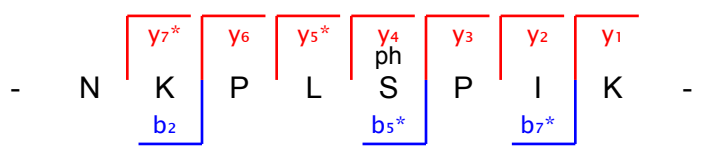

Raw file 20171215\_MaS\_33SR\_LMH\_phospho\_03 Scan 4639 Method FTMS; HCD Score 98.54 m/z 657.3 Gene names ATXN2

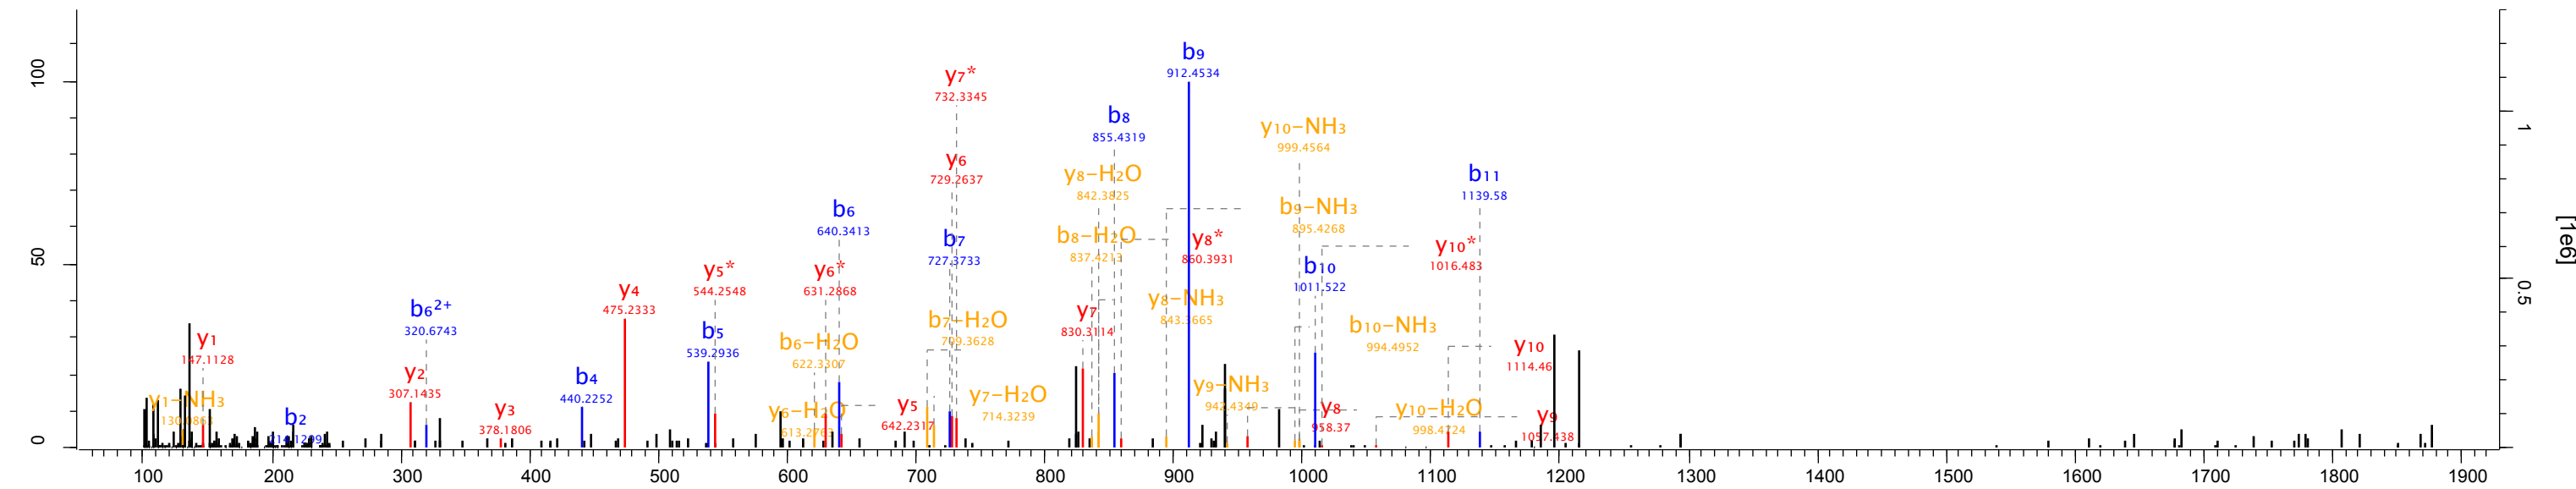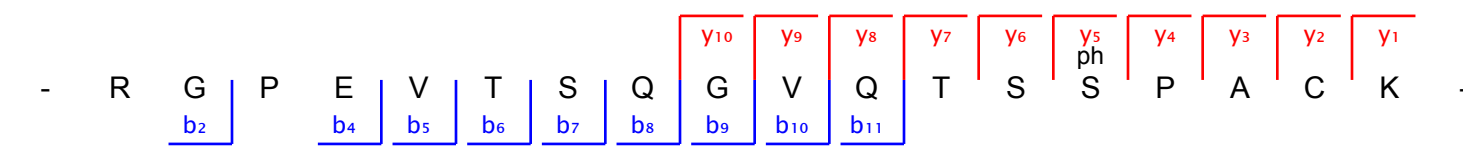

Raw file 20171215\_MaS\_33SR\_LMH\_phospho\_03 Scan 4669 Method FTMS; HCD Score 78.13 m/z 695.99 Gene names SIRT1

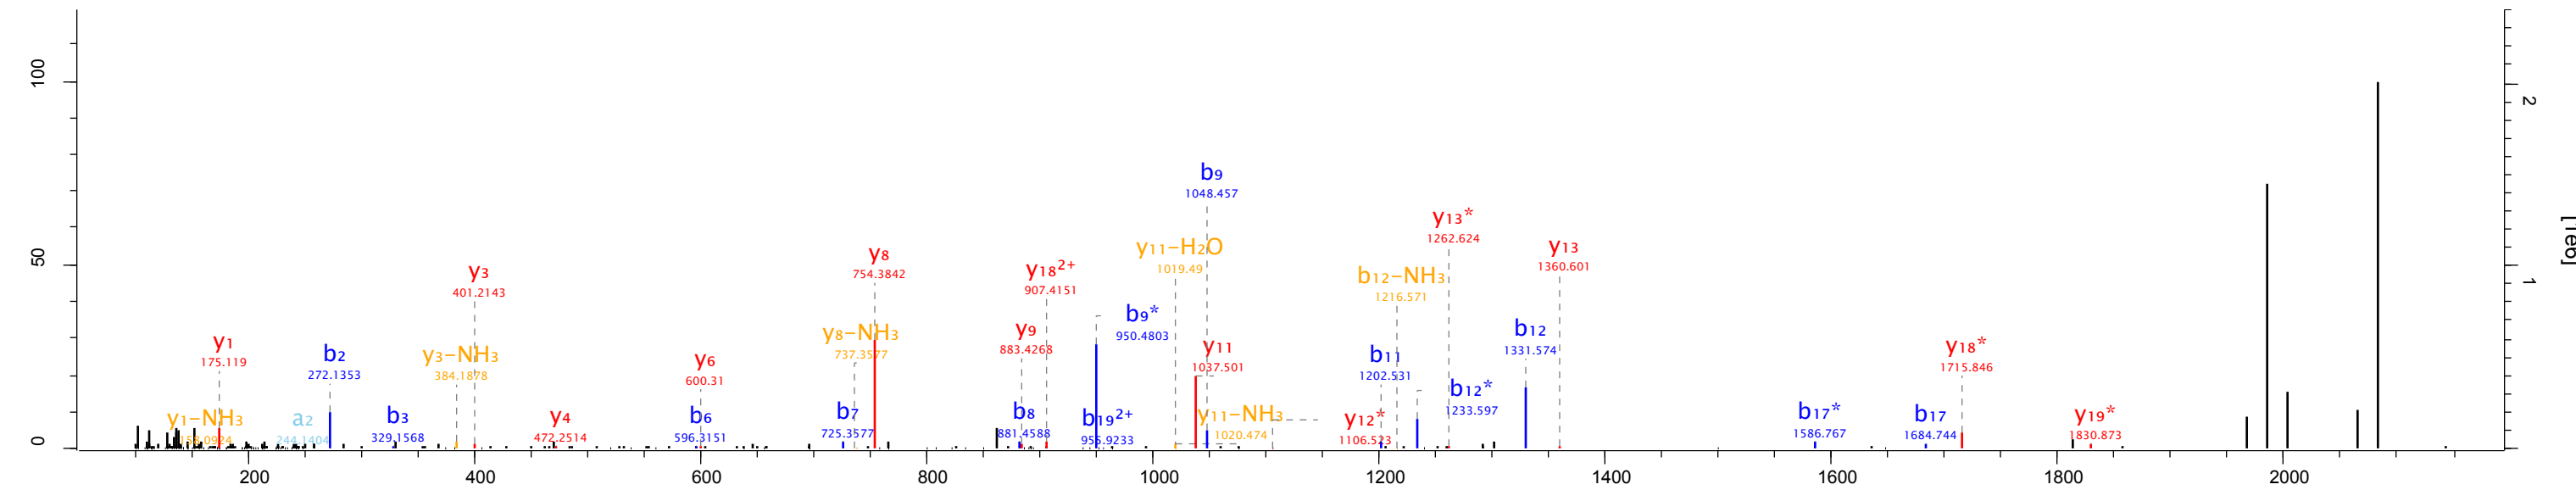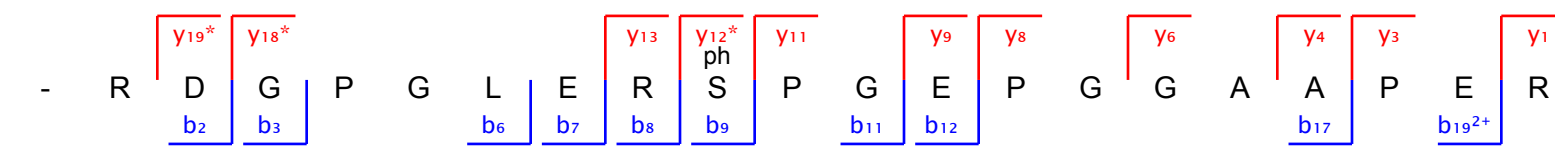

Raw file 20171215\_MaS\_33SR\_LMH\_phospho\_03 Scan 4679 Method FTMS; HCD Score 107.63 m/z 748.81 Gene names UBAP2L

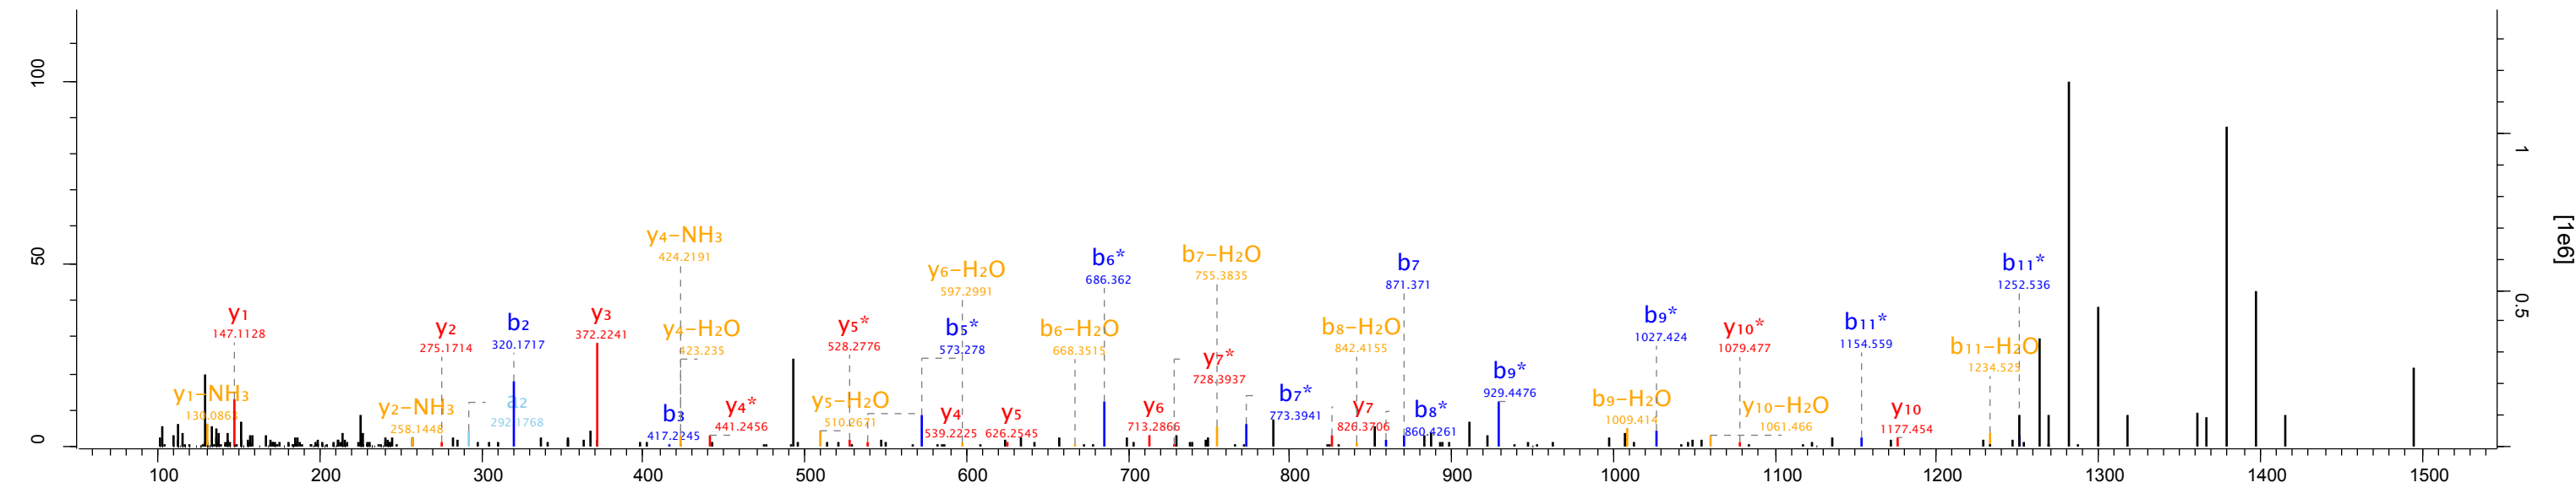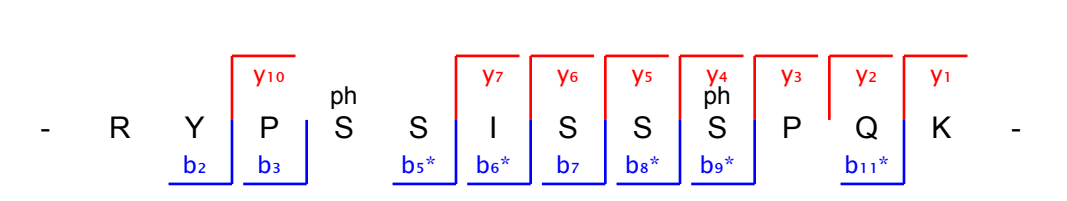

Raw file 20171215\_MaS\_33SR\_LMH\_phospho\_03 Scan 4689 Method FTMS; HCD Score 47.61 m/z 617.28 Gene names CPSF7

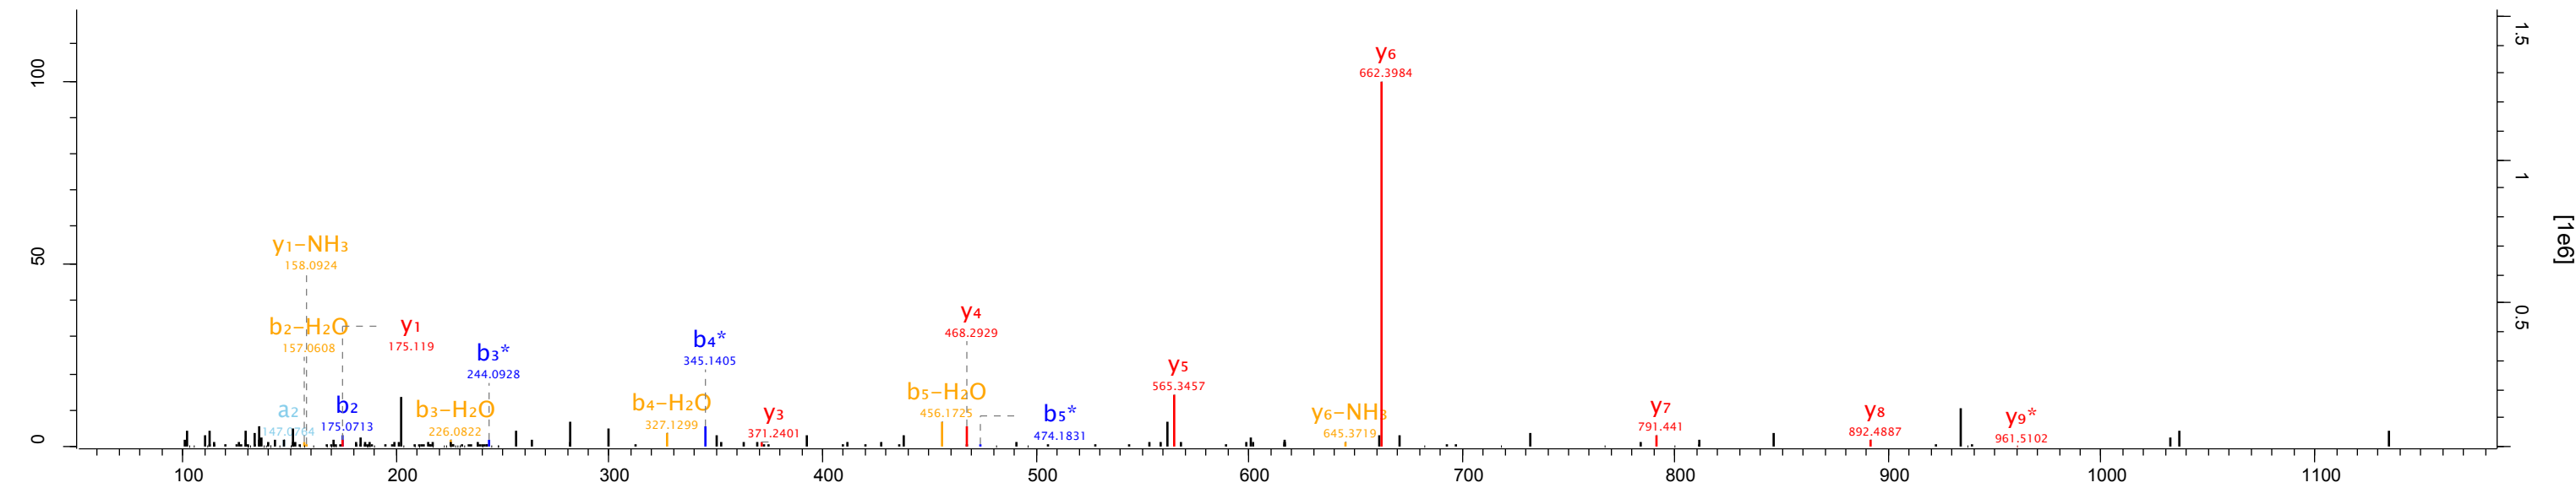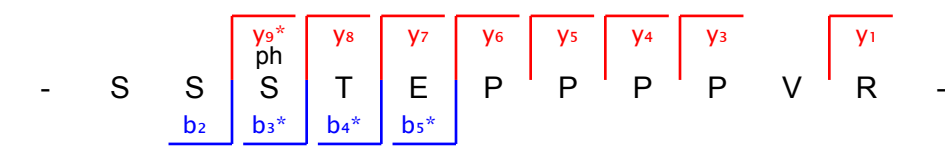

Raw file 20171215\_MaS\_33SR\_LMH\_phospho\_03 Scan 4769 Method FTMS; HCD Score 207.95 m/z 720.84 Gene names PPFIBP1

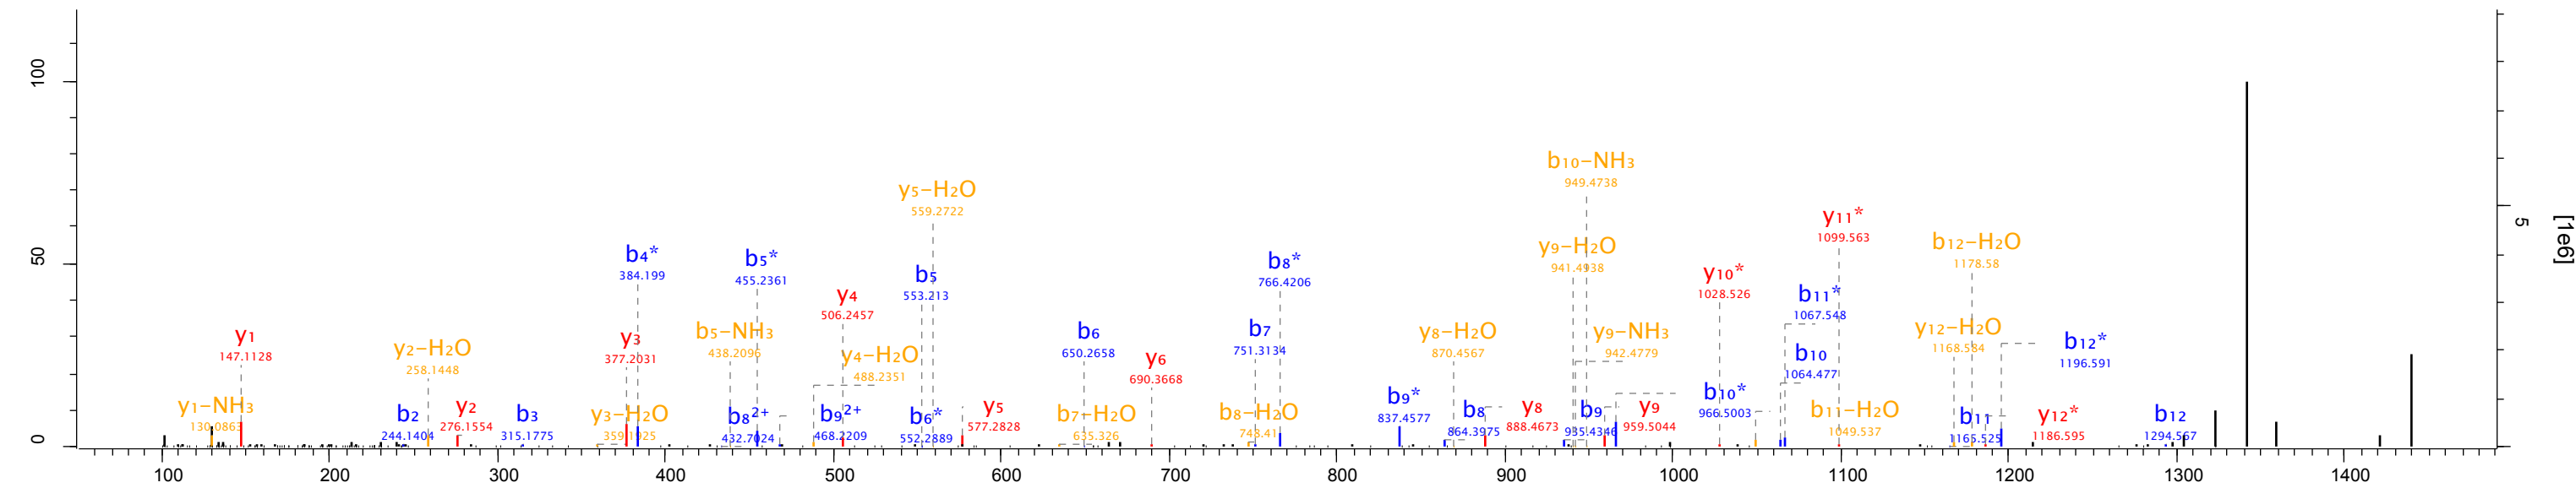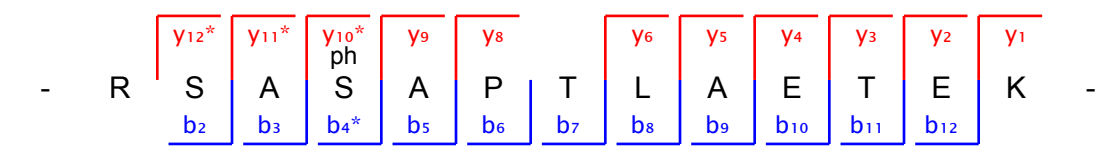

Raw file  
 20171215\_MaS\_33SR\_LMH\_phospho\_03  
 Scan 4979 Method FTMS; HCD Score 283.05 m/z 994.4 Gene names CDC42EP4

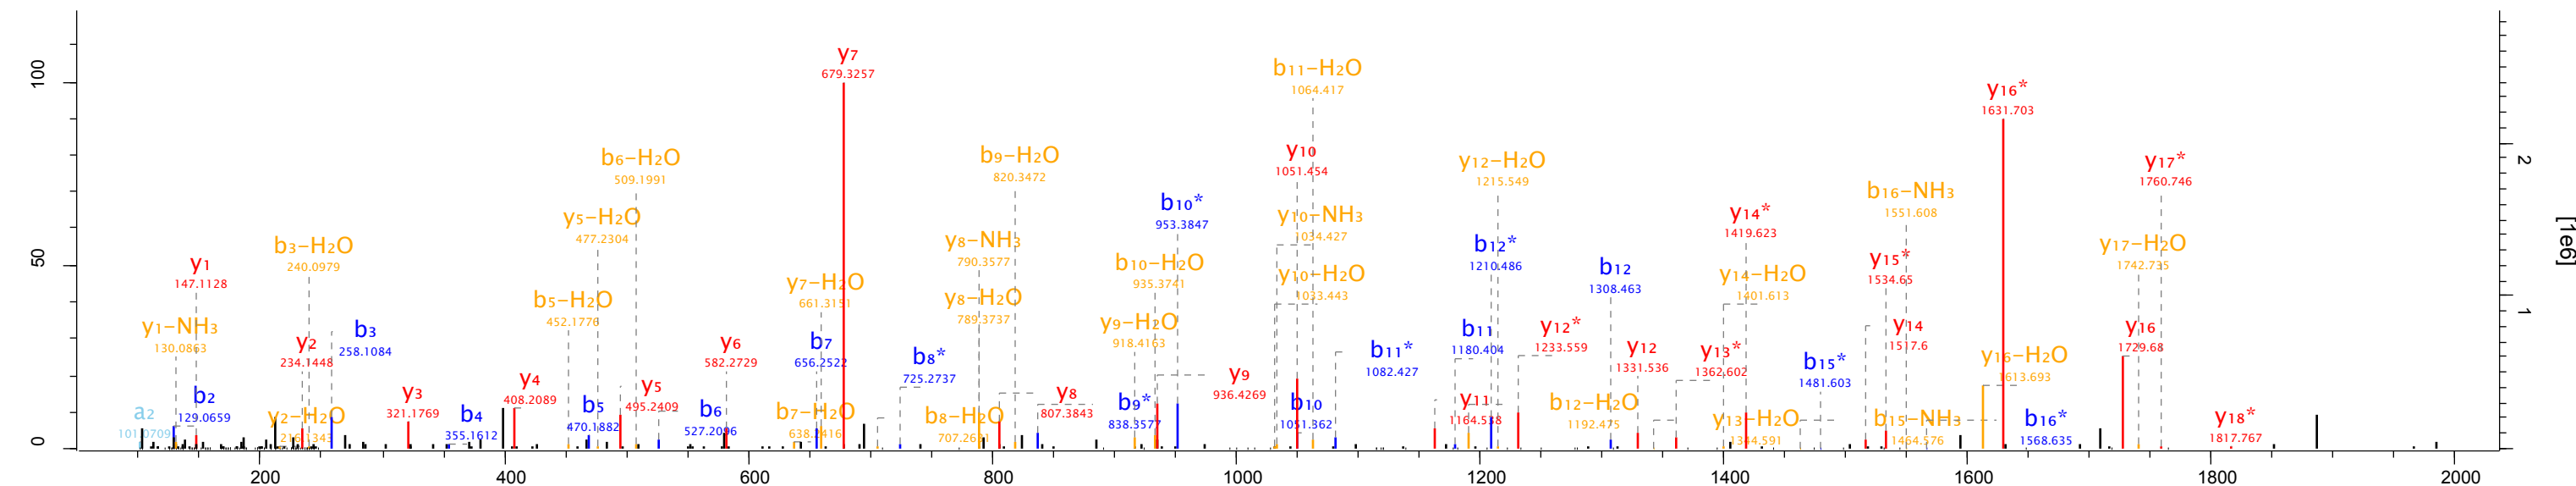

- A

|      |      |     |      |     |      |           |     |     |     |     |    |    |      |      |    |    |    |
|------|------|-----|------|-----|------|-----------|-----|-----|-----|-----|----|----|------|------|----|----|----|
| y18* | y17* | y16 | y15* | y14 | y13* | y12<br>ph | y11 | y10 | y9  | y8  | y7 | y6 | y5   | y4   | y3 | y2 | y1 |
| G    | E    | P   | D    | G   | E    | S         | L   | D   | E   | Q   | P  | S  | S    | S    | S  | S  | K  |
| b2   | b3   | b4  | b5   | b6  | b7   | b8*       | b9* | b10 | b11 | b12 |    |    | b15* | b16* |    |    |    |



Raw file 20171215\_MaS\_33SR\_LMH\_phospho\_03 Scan Method Score m/z Gene names  
 5019 FTMS; HCD 177.23 989.39 YBX1

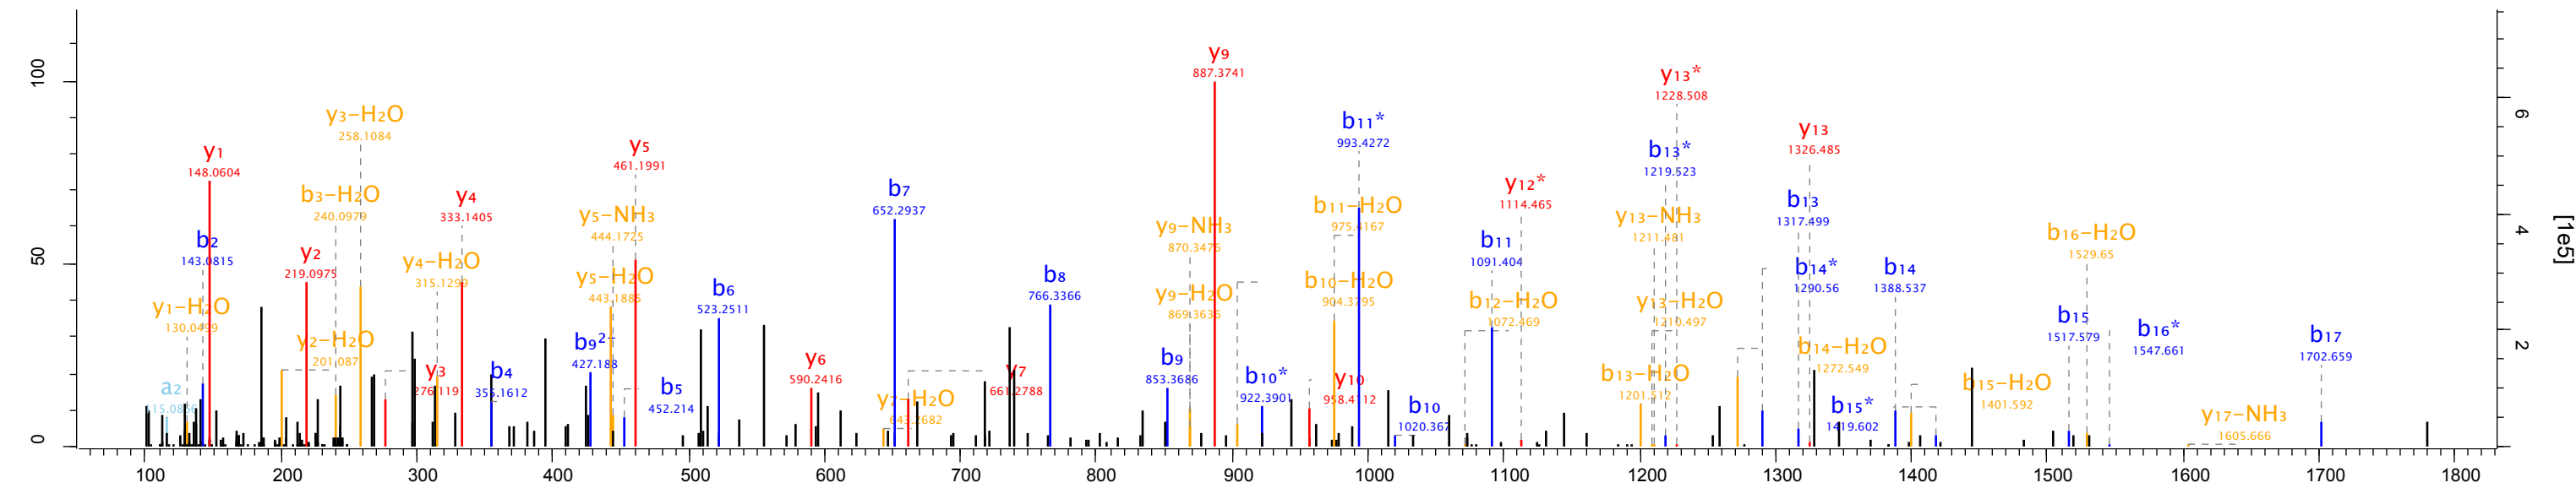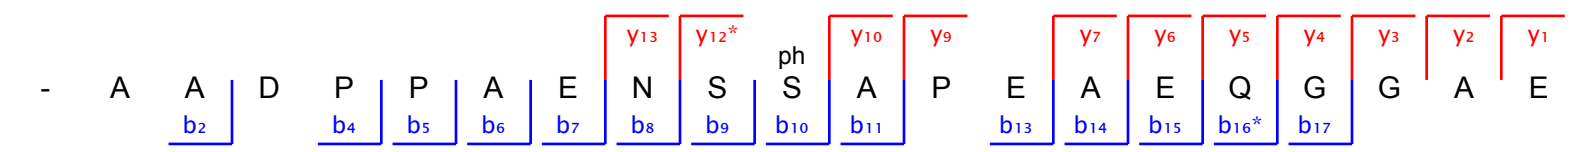

Raw file 20171215\_MaS\_33SR\_LMH\_phospho\_03 Scan 5139 Method FTMS; HCD Score 138.99 m/z 537.26 Gene names UBR4

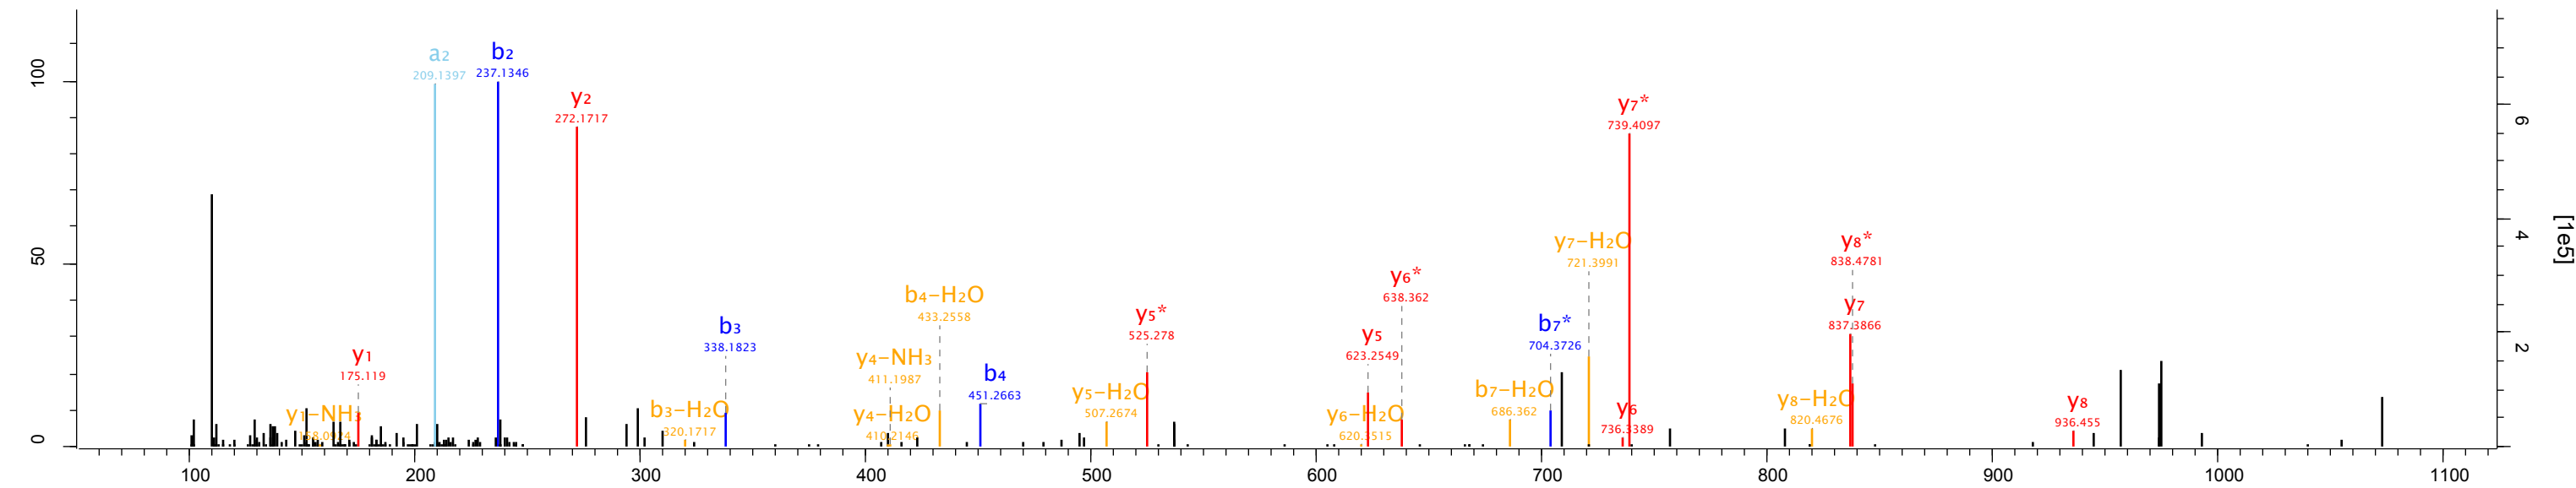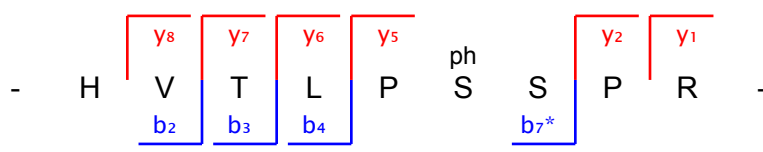

Raw file 20171215\_MaS\_33SR\_LMH\_phospho\_03 Scan 5179 Method FTMS; HCD Score 77.58 m/z 875.37 Gene names CUL4B

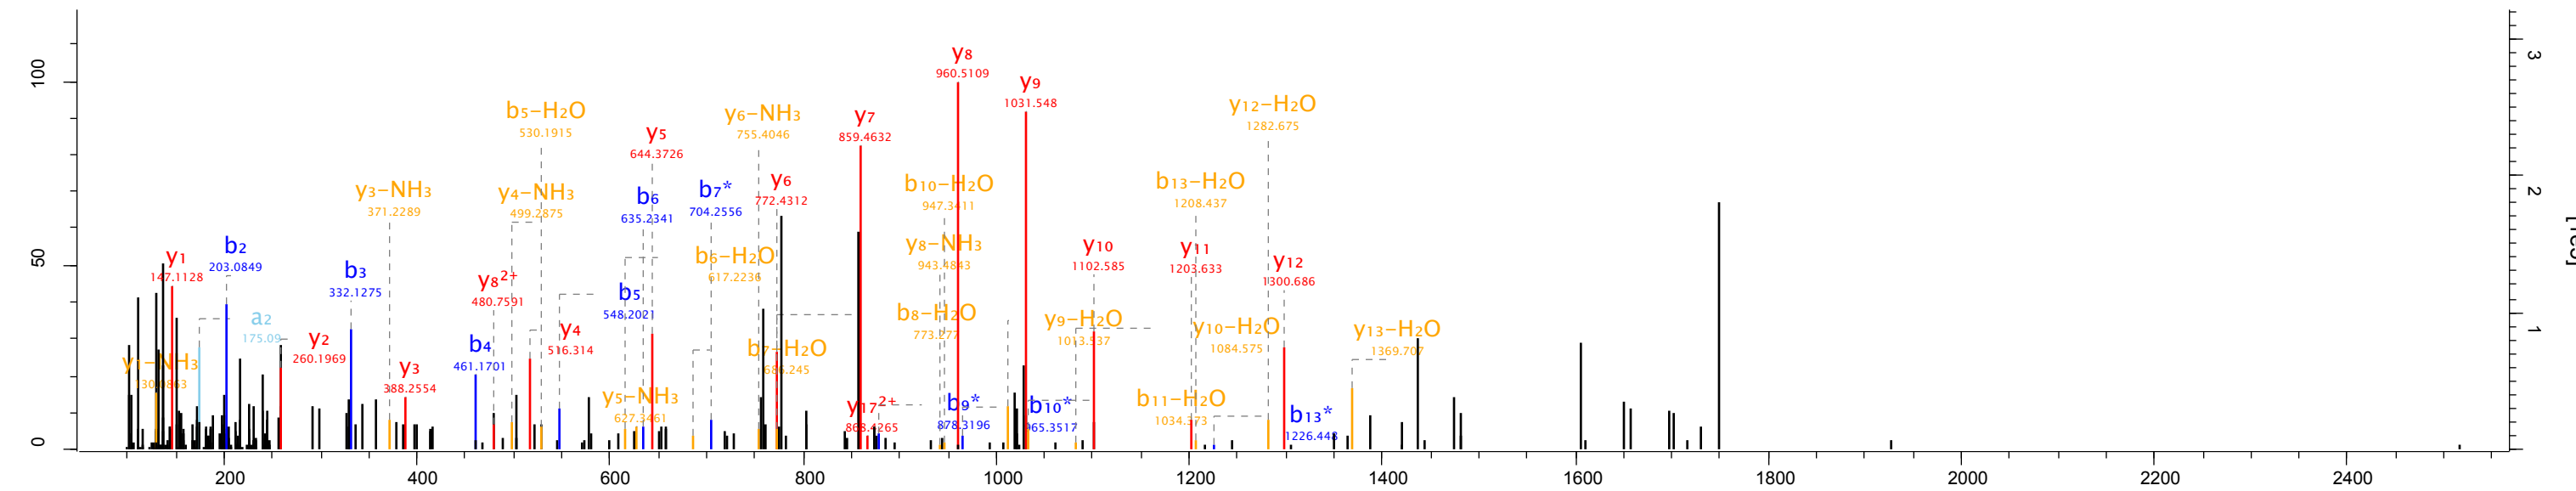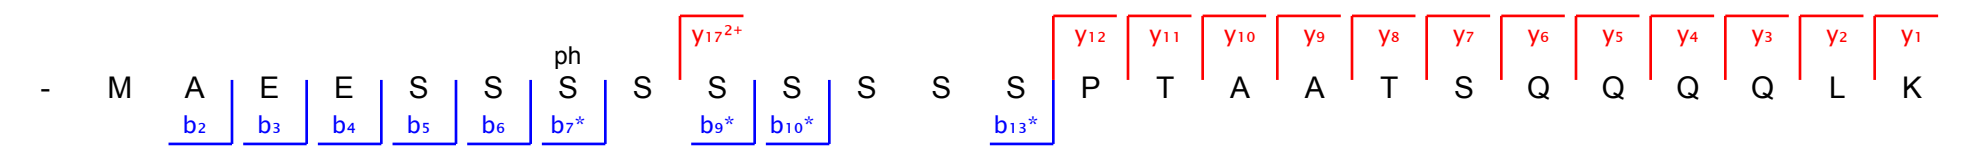

Raw file 20171215\_MaS\_33SR\_LMH\_phospho\_03 Scan 5189 Method FTMS; HCD Score 121.36 m/z 459.71 Gene names SH3GL1

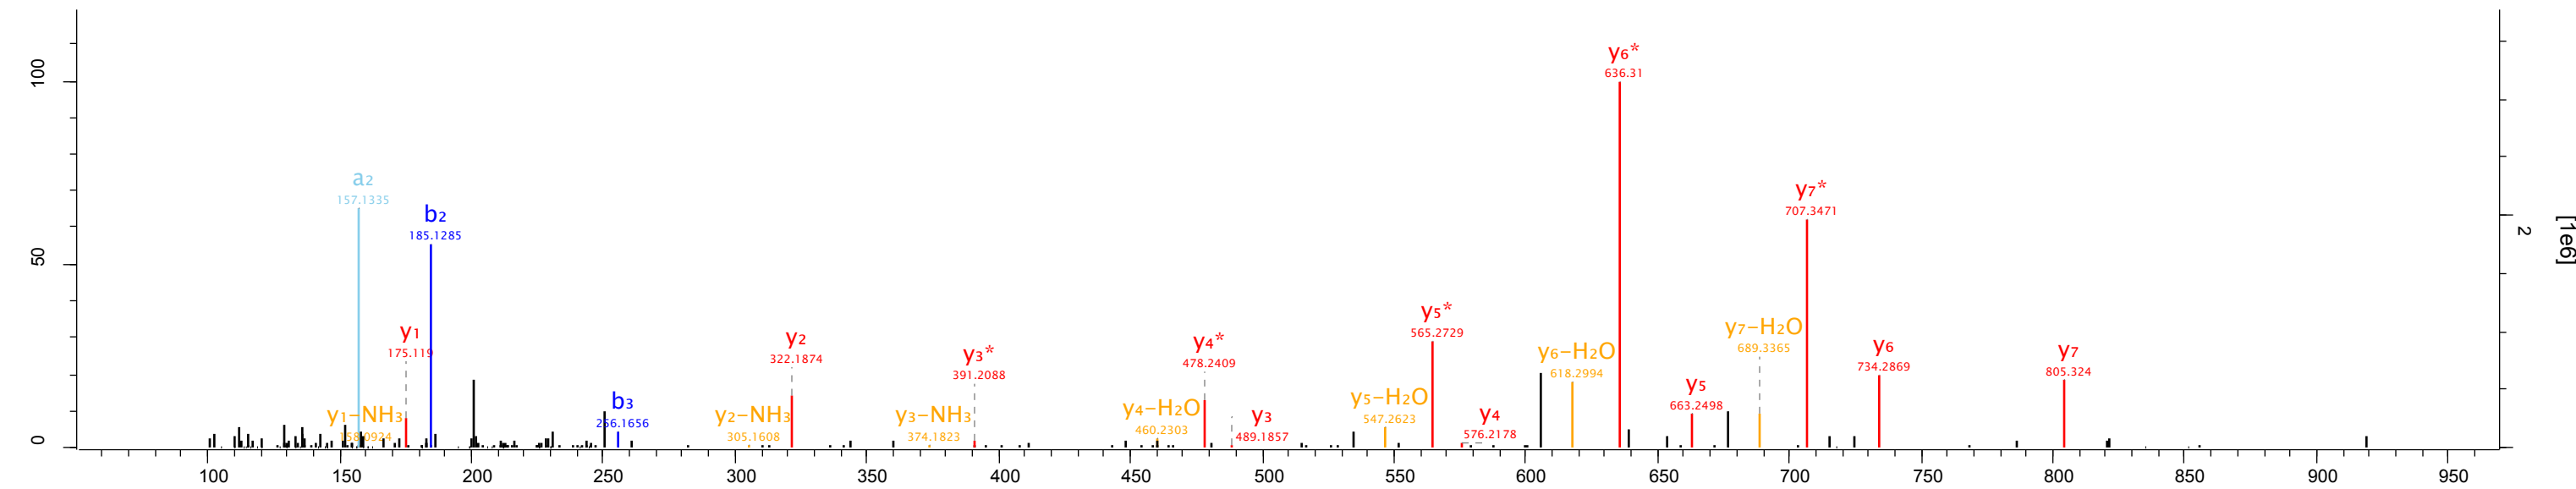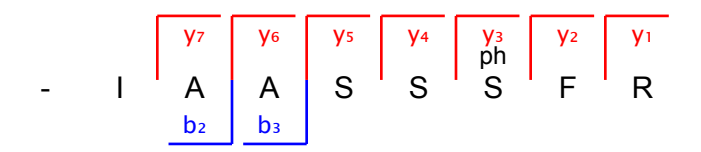

Raw file 20171215\_MaS\_33SR\_LMH\_phospho\_03 Scan 5209 Method FTMS; HCD Score 186.56 m/z 697.33 Gene names RPS6

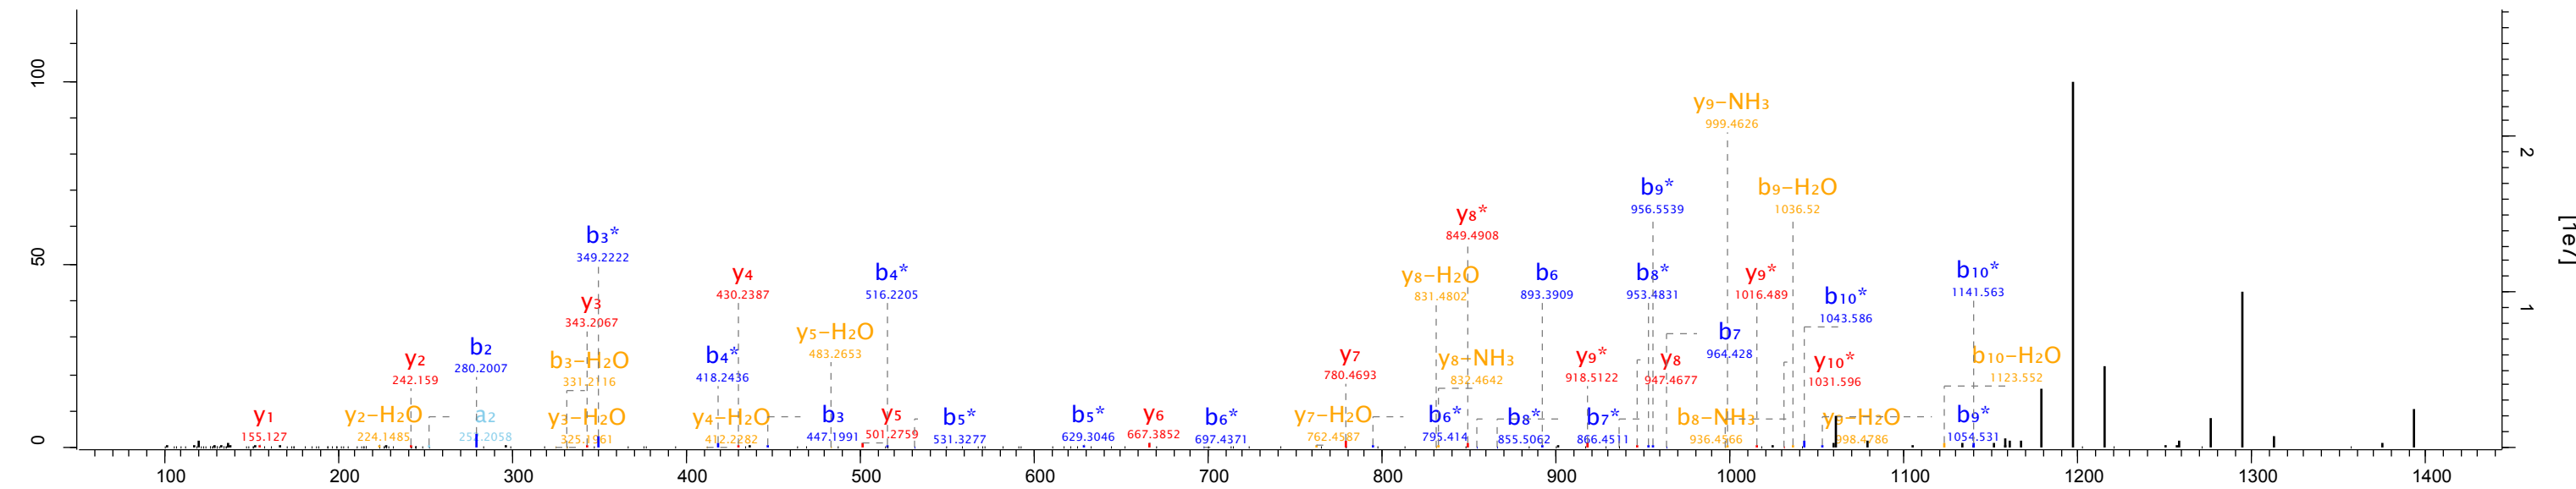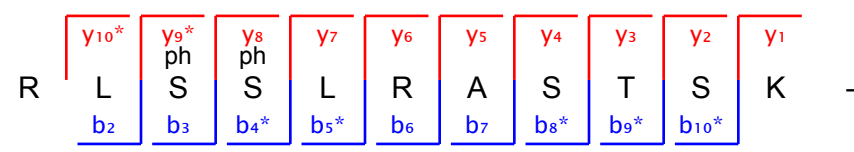

Raw file 20171215\_MaS\_33SR\_LMH\_phospho\_03 Scan 5229 Method FTMS; HCD Score 239.9 m/z 1030.43 Gene names CDV3

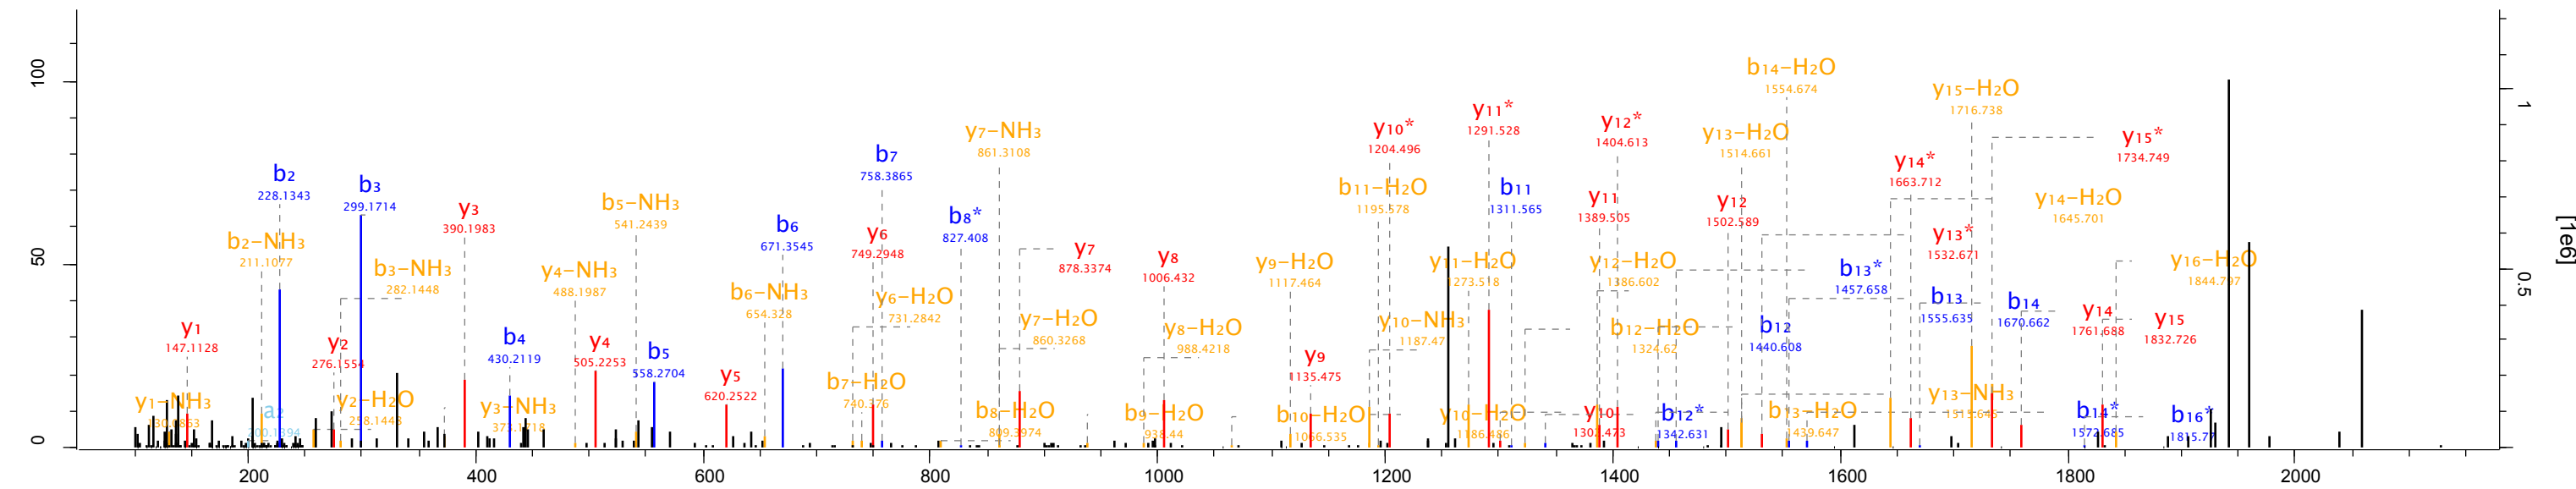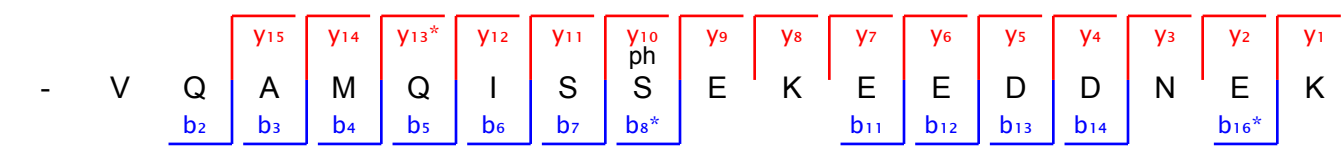

Raw file: 20171215\_MaS\_33SR\_LMH\_phospho\_03  
 Scan: 5379 Method: FTMS; HCD Score: 166.03 m/z: 865.68 Gene names: LASP1

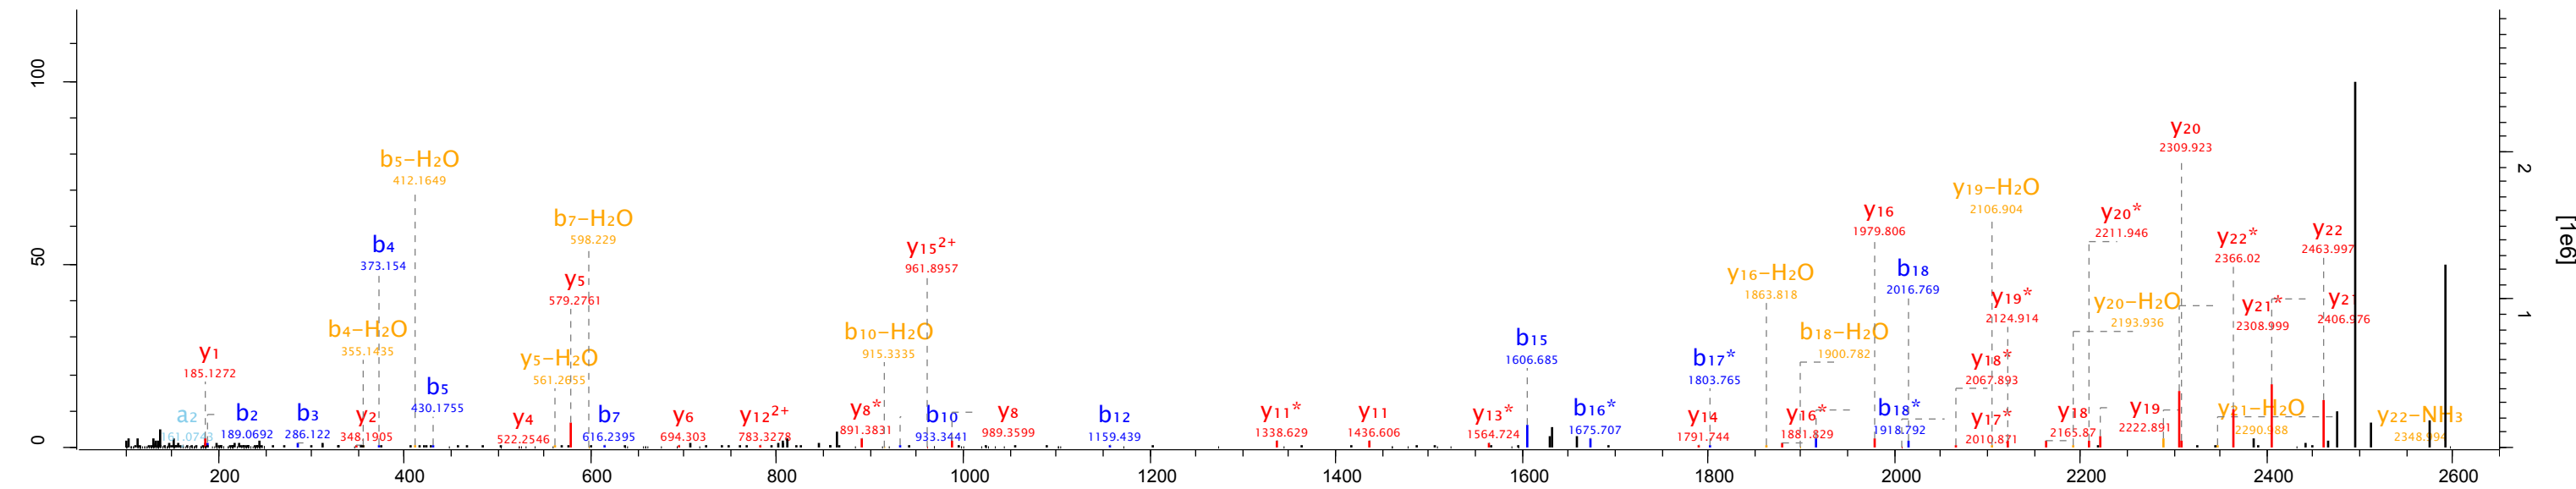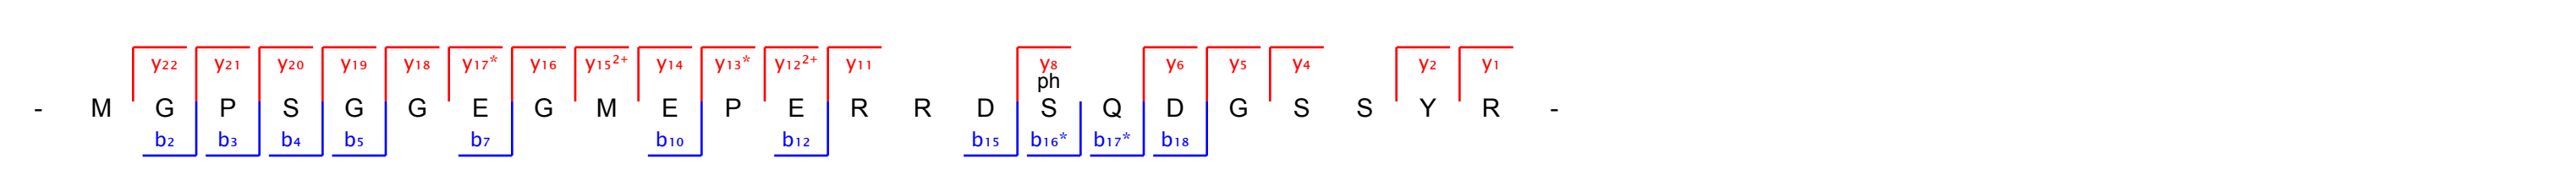

Raw file 20171215\_MaS\_33SR\_LMH\_phospho\_03 Scan 5399 Method FTMS; HCD Score 56.57 m/z 577.76 Gene names WIPI2

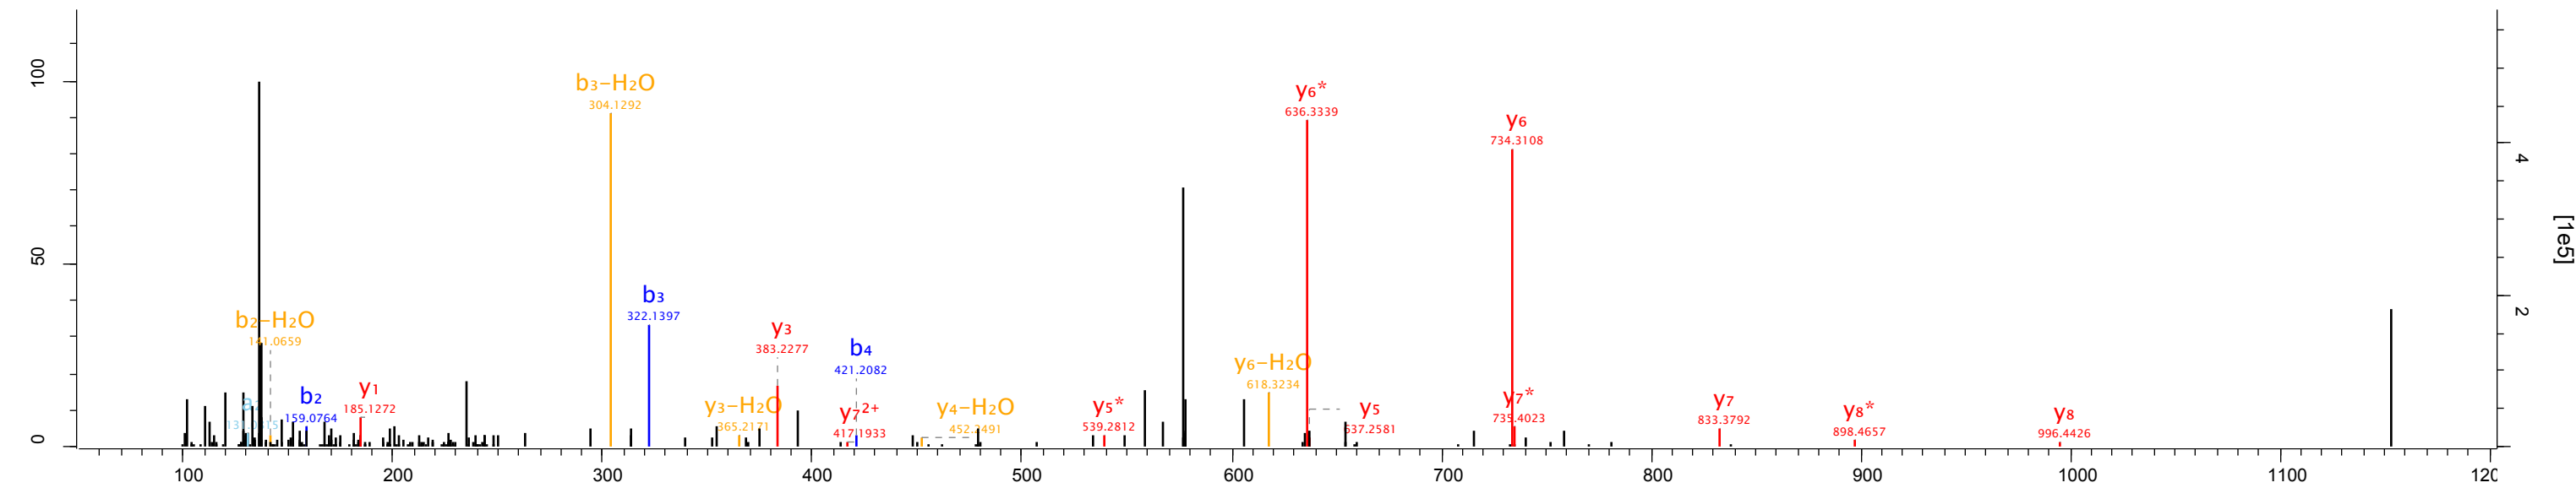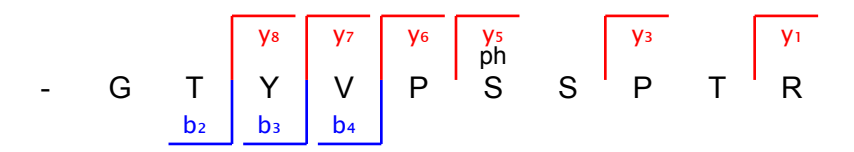



Raw file 20171215\_MaS\_33SR\_LMH\_phospho\_03 Scan 5409 Method FTMS; HCD Score 139.02 m/z 847.84 Gene names TFAP2C

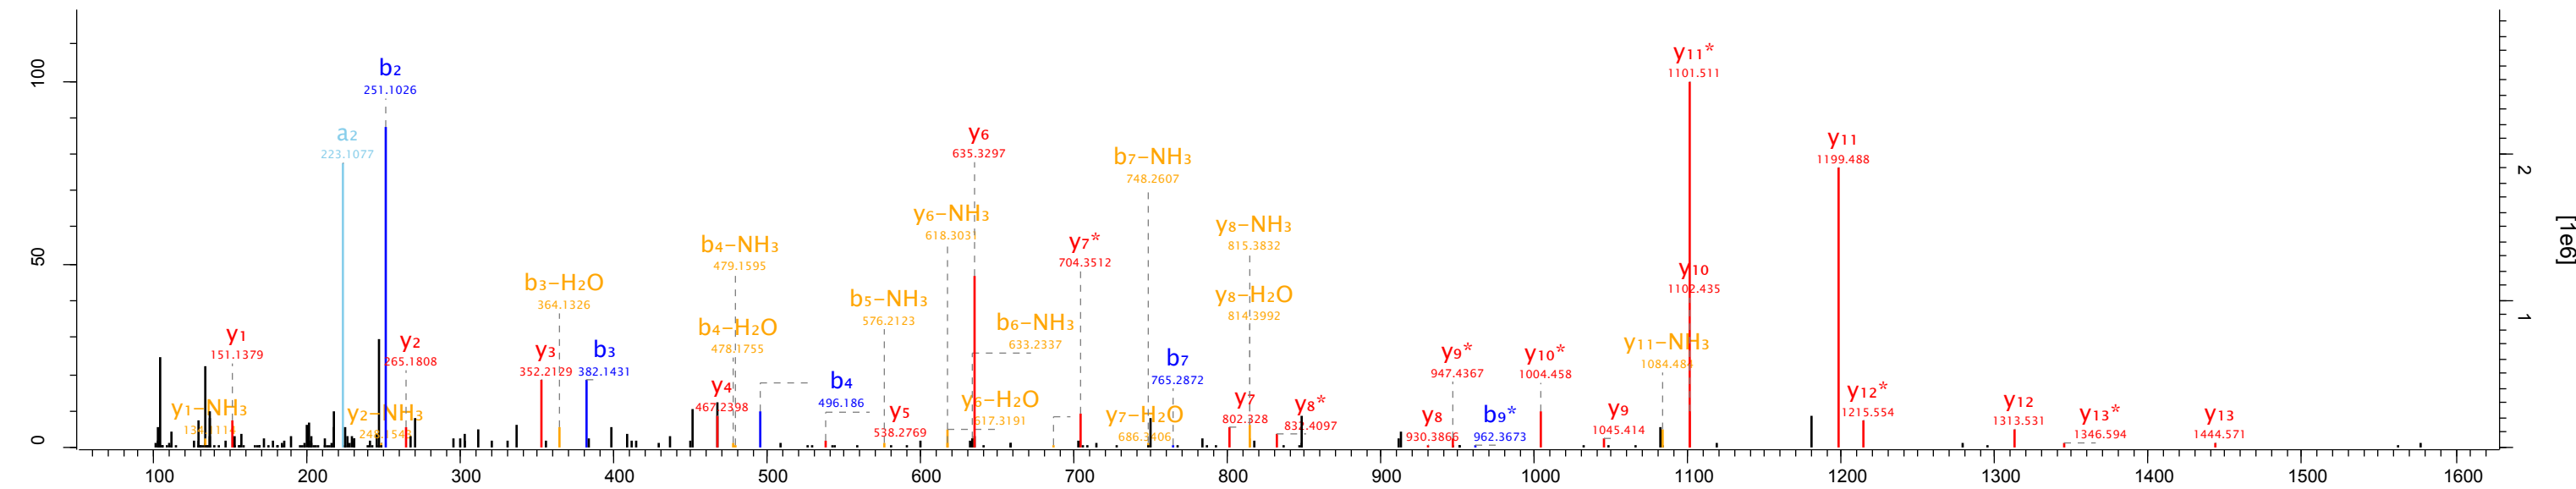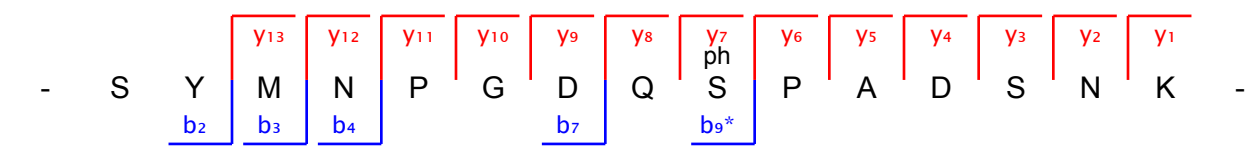

Raw file 20171215\_MaS\_33SR\_LMH\_phospho\_03 Scan 5449 Method FTMS; HCD Score 75.99 m/z 813.34 Gene names DNAJC21

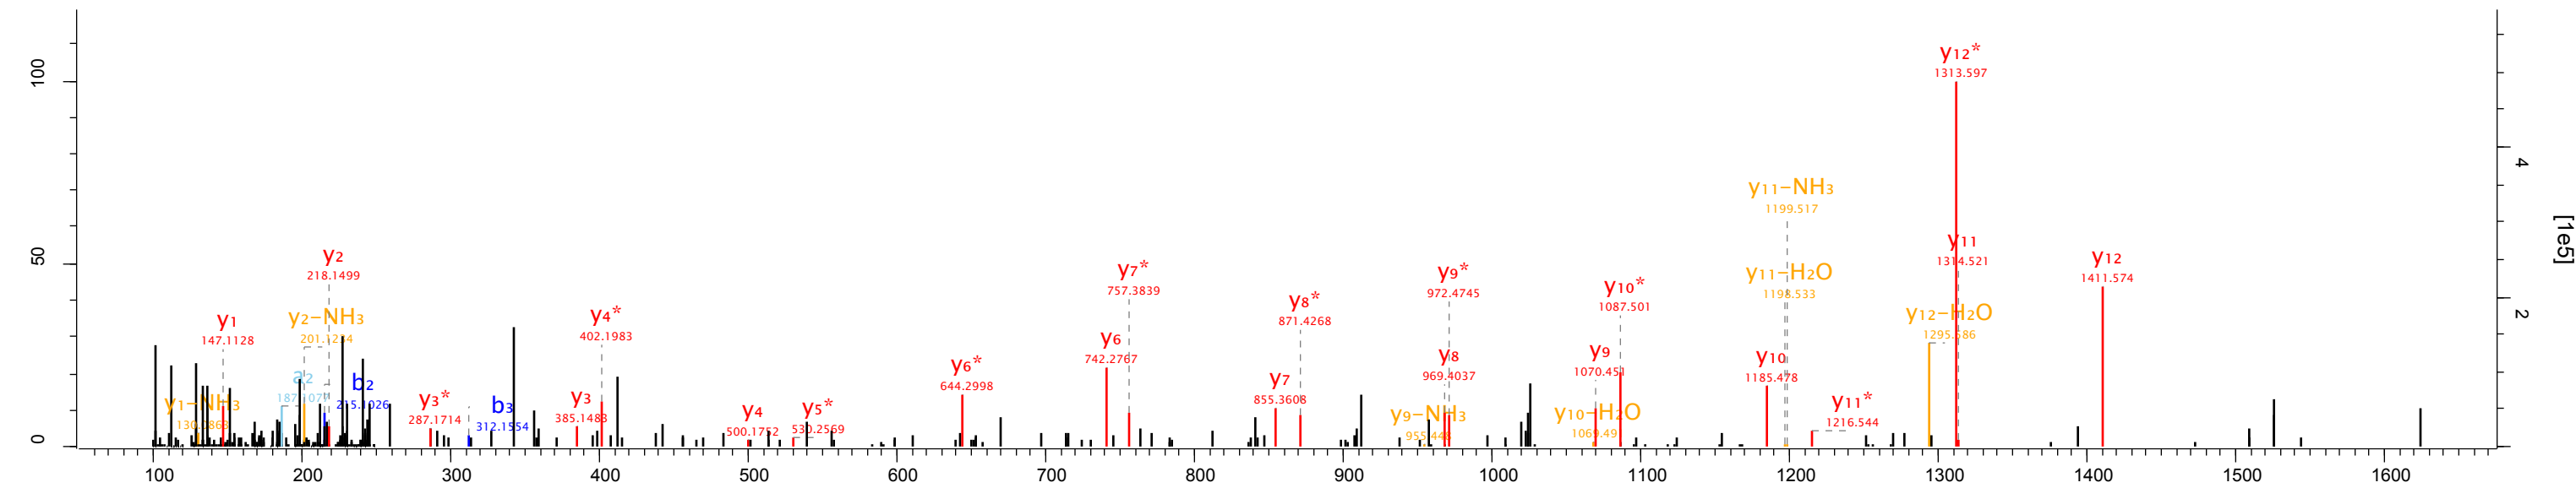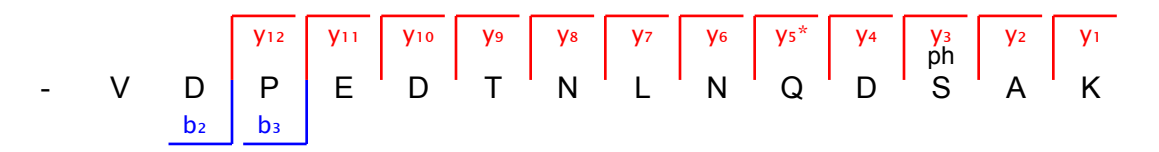

Raw file 20171215\_MaS\_33SR\_LMH\_phospho\_03 Scan 5589 Method FTMS; HCD Score 140.01 m/z 670.74 Gene names AP3B1

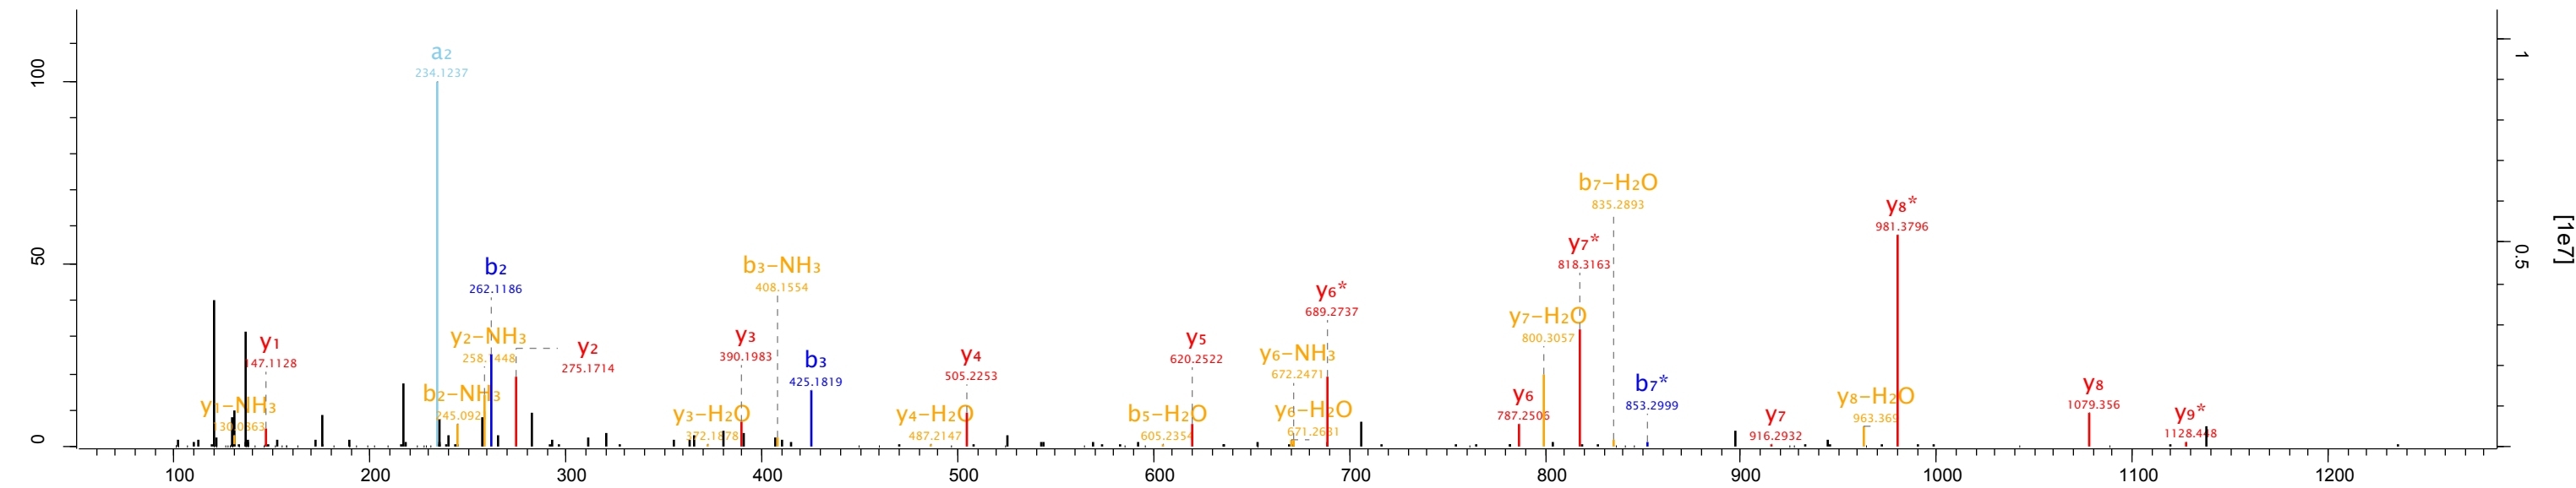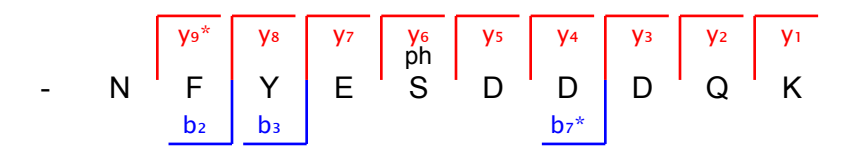

Raw file 20171215\_MaS\_33SR\_LMH\_phospho\_03 Scan 5909 Method FTMS; HCD Score 97.27 m/z 564.23 Gene names EIF2B5

20171215\_MaS\_33SR\_LMH\_phospho\_03

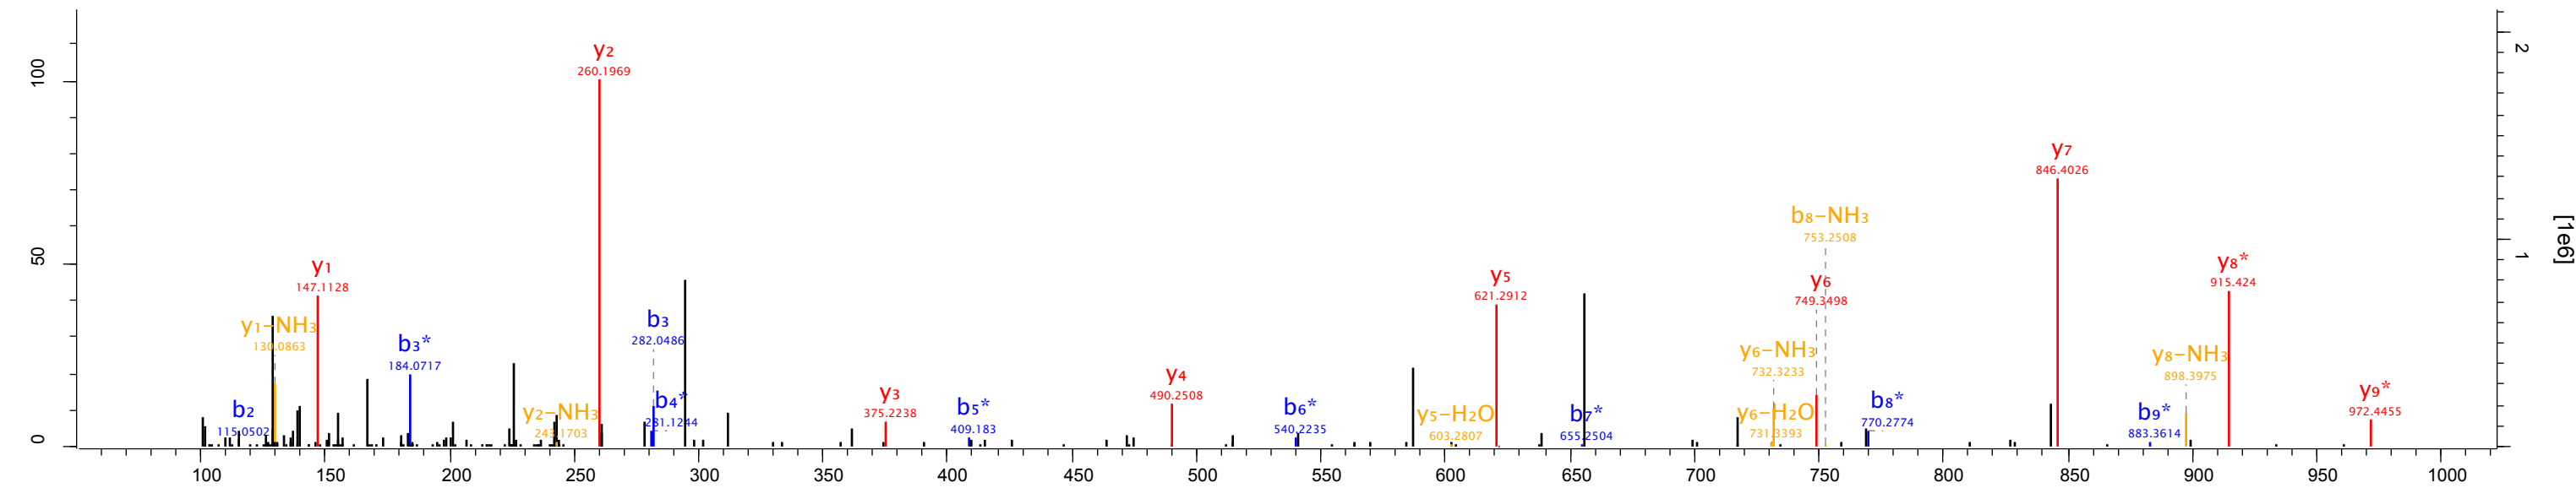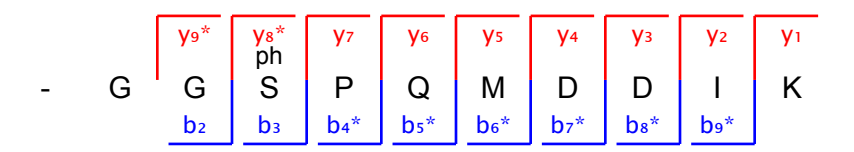

Raw file 20171215\_MaS\_33SR\_LMH\_phospho\_03 Scan 6039 Method FTMS; HCD Score 169.64 m/z 653.82 Gene names ZNF687

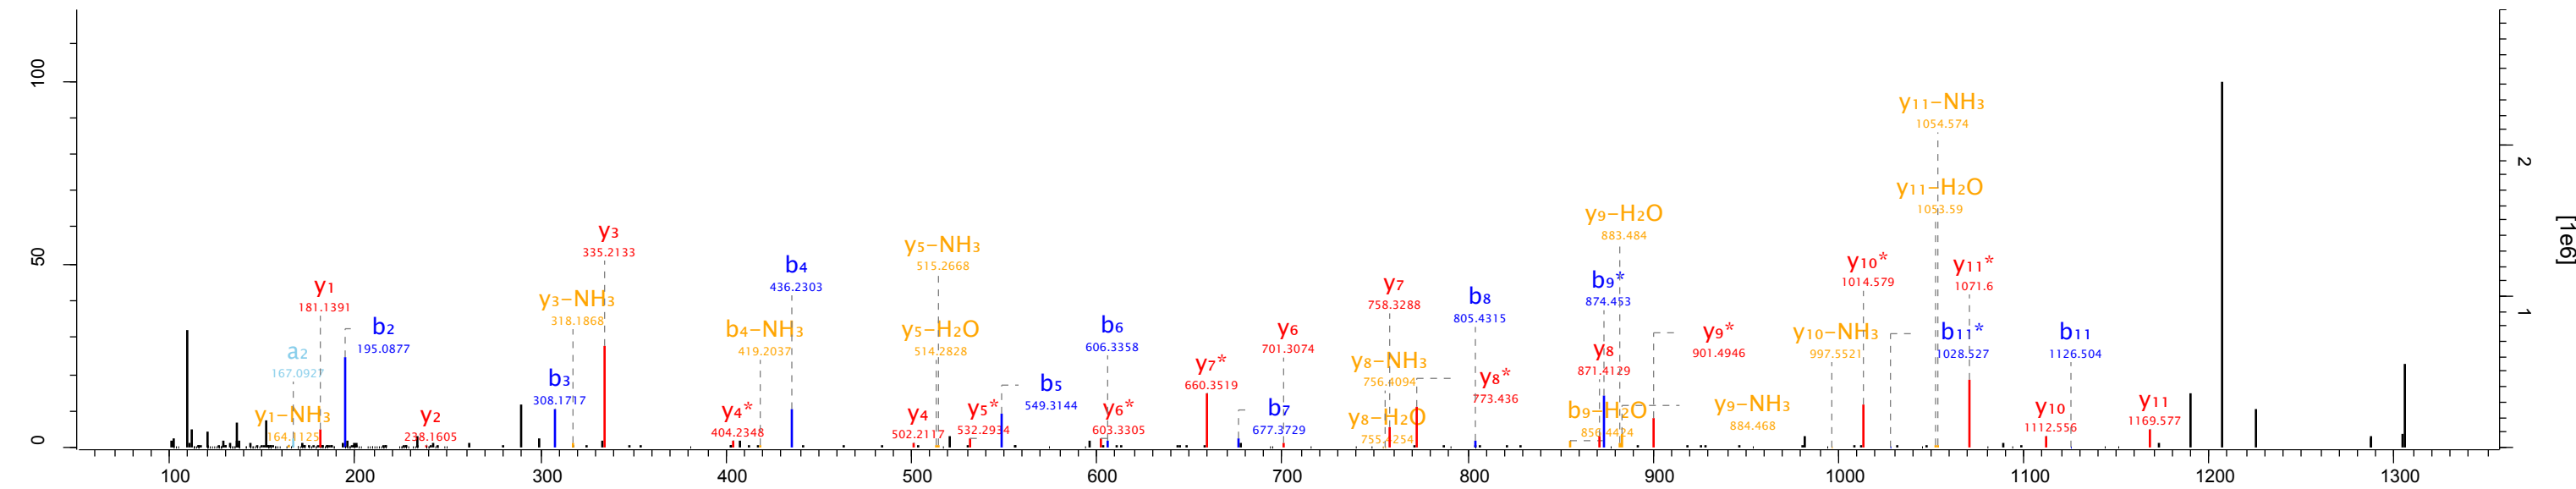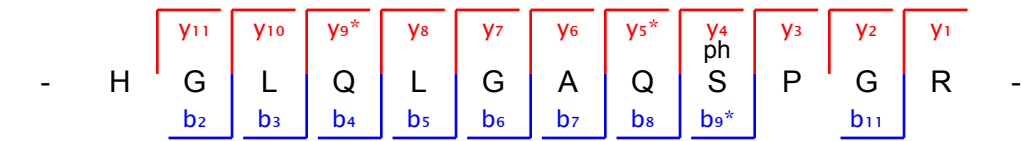

Raw file 20171215\_MaS\_33SR\_LMH\_phospho\_03 Scan 6309 Method FTMS; HCD Score 257.42 m/z 920.42 Gene names SPTBN1

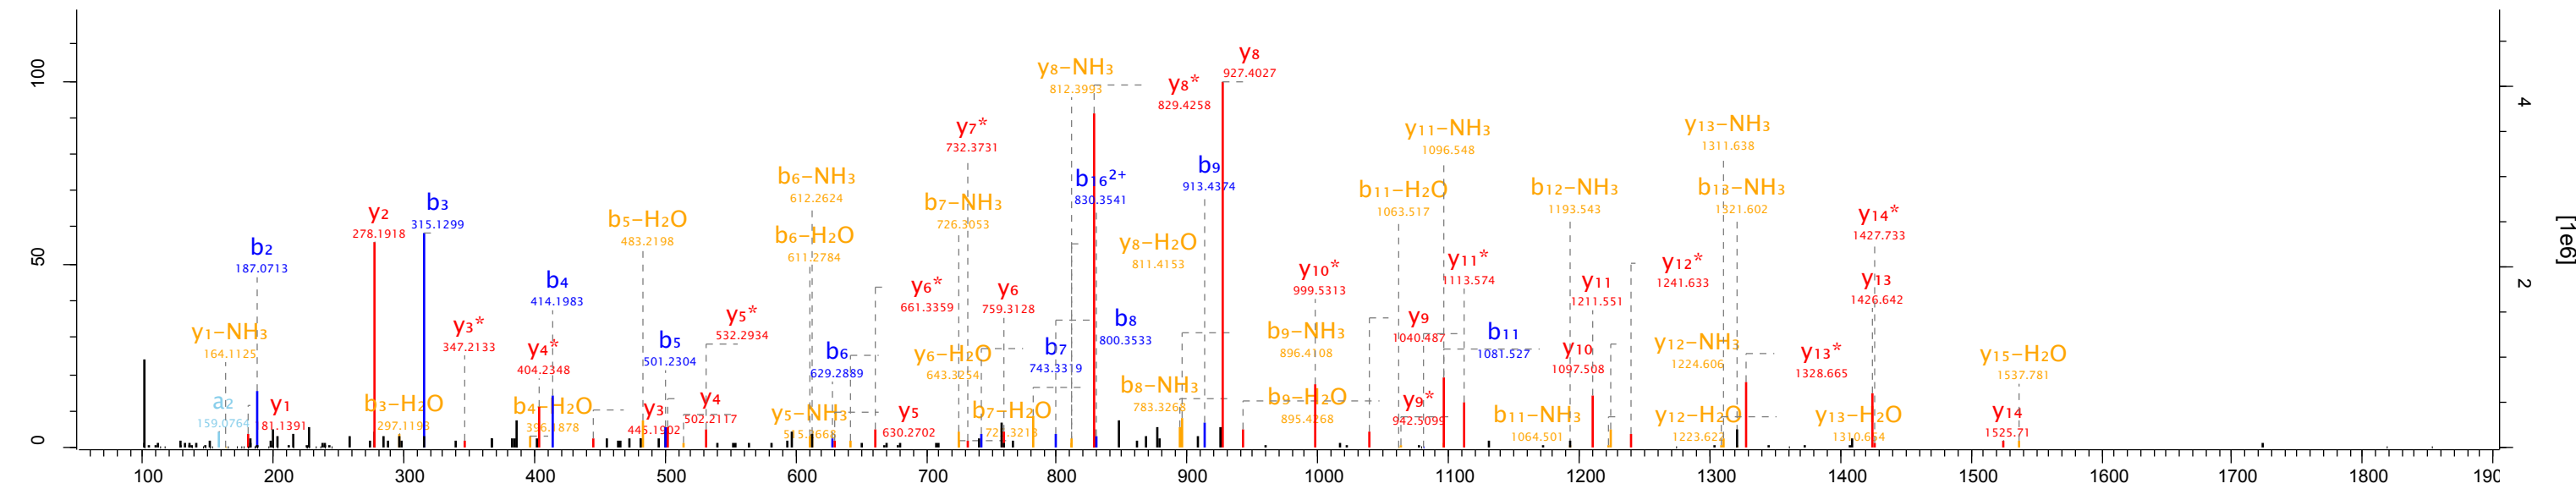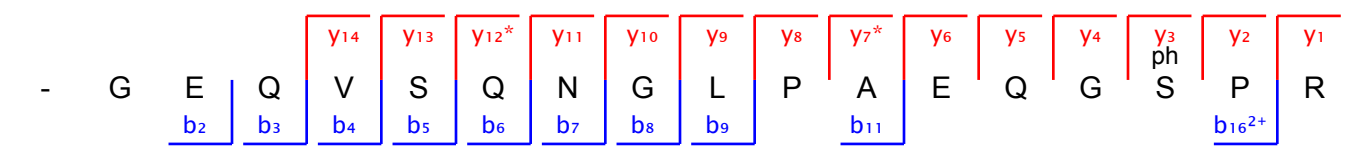

Raw file 20171215\_MaS\_33SR\_LMH\_phospho\_03 Scan 6379 Method FTMS; HCD Score 100.93 m/z 532.76 Gene names DOCK7

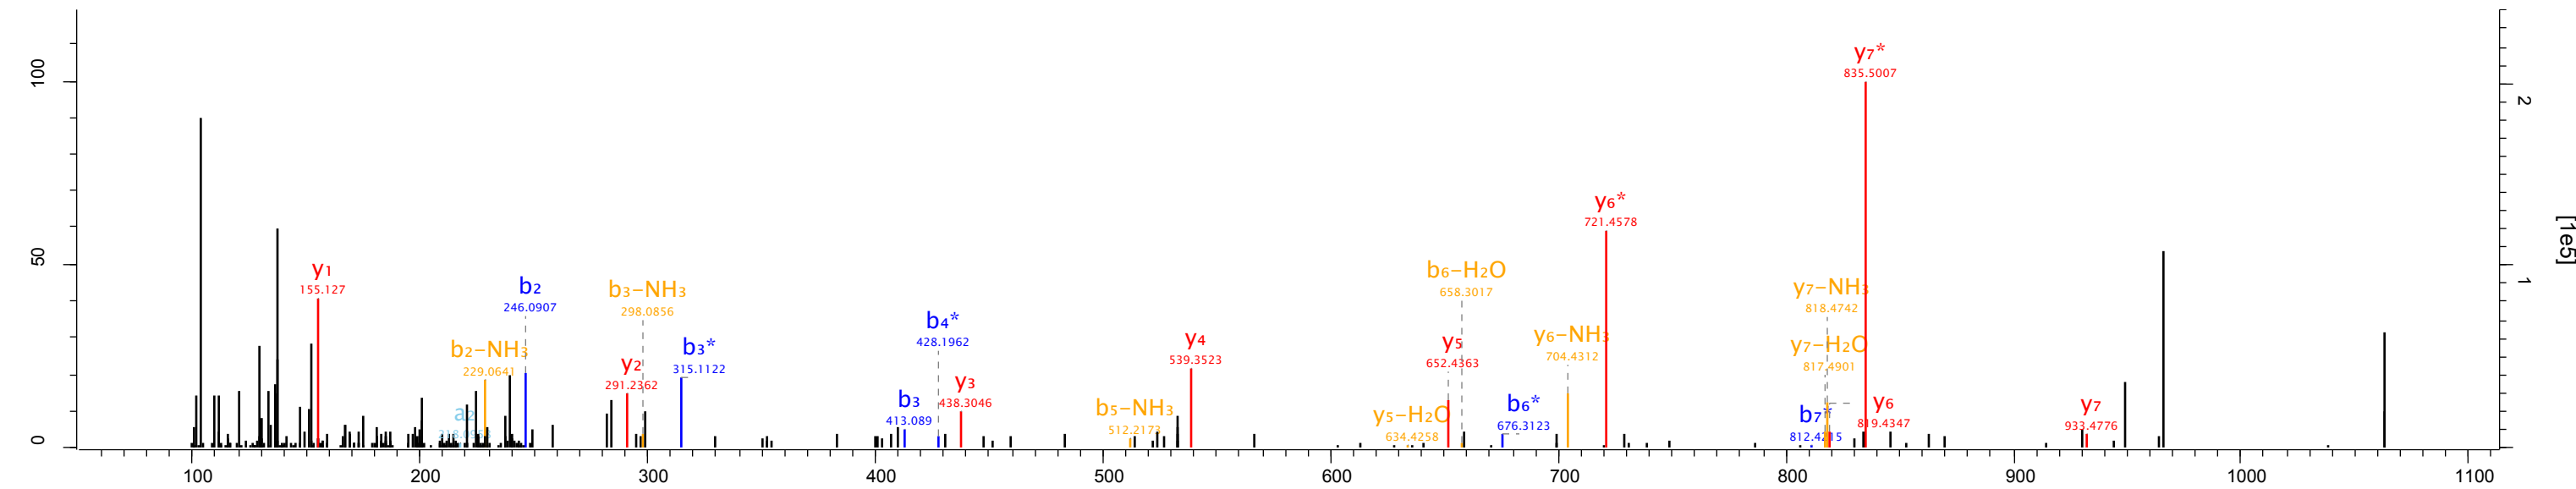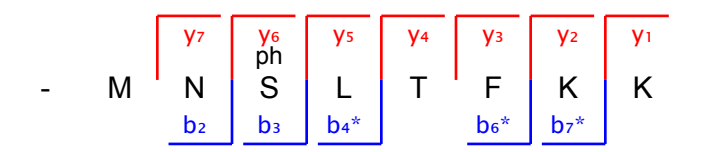

Raw file 20171215\_MaS\_33SR\_LMH\_phospho\_03 Scan 6409 Method FTMS; HCD Score 94.92 m/z 784.83 Gene names SYTL2

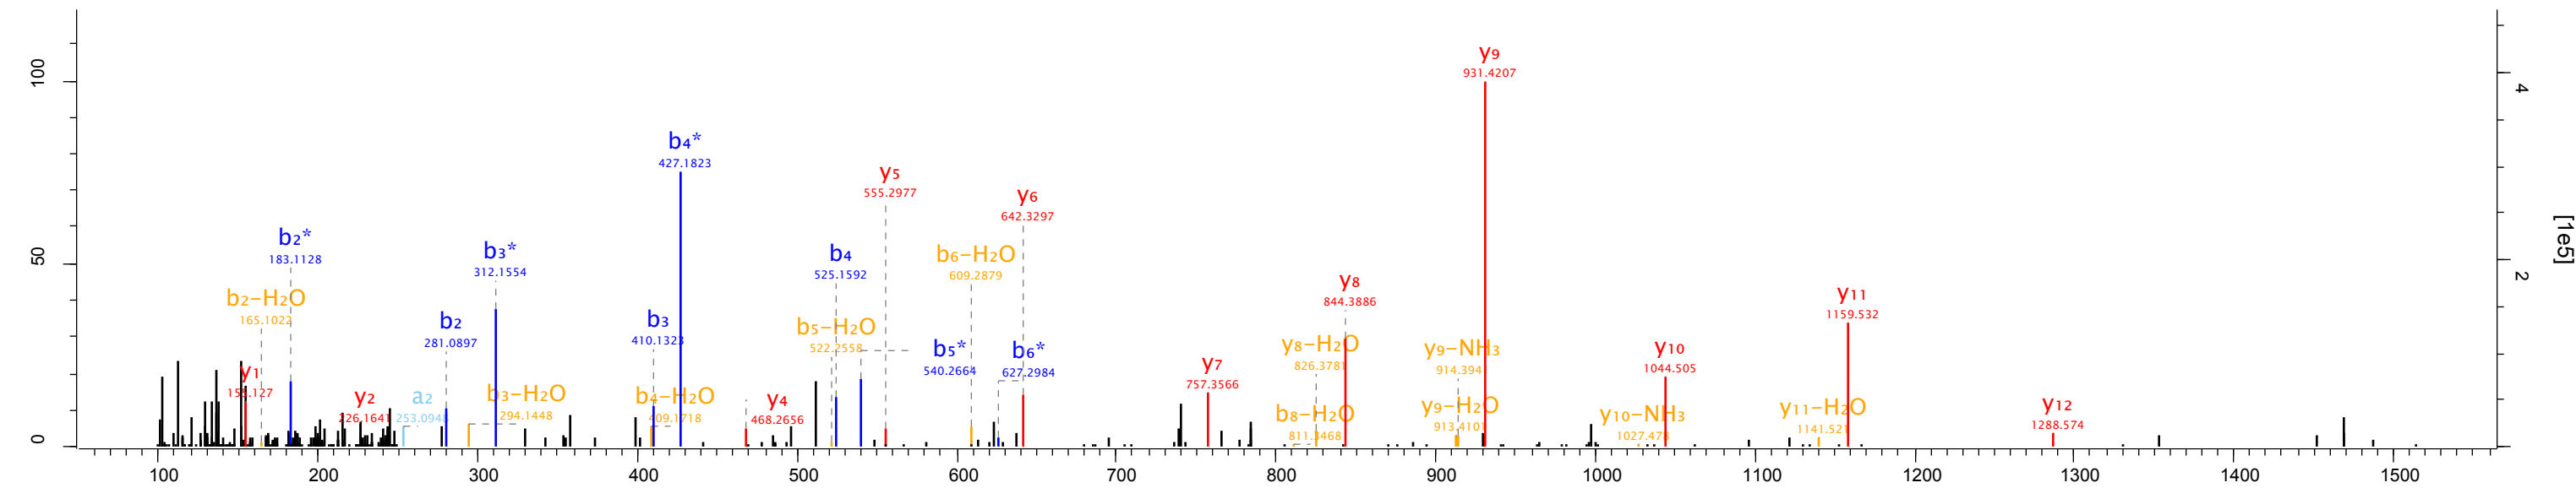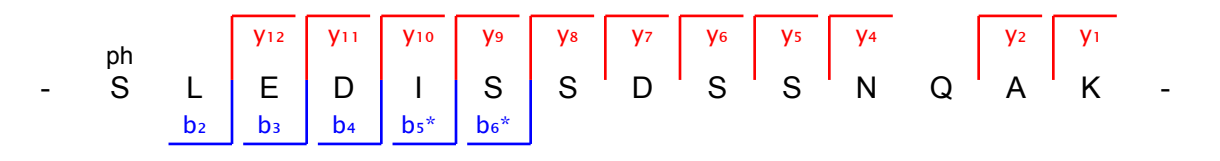



20171215\_MaS\_33SR\_LMH\_phospho\_03 6649 FTMS; HCD 72.58 694.81 TSC2

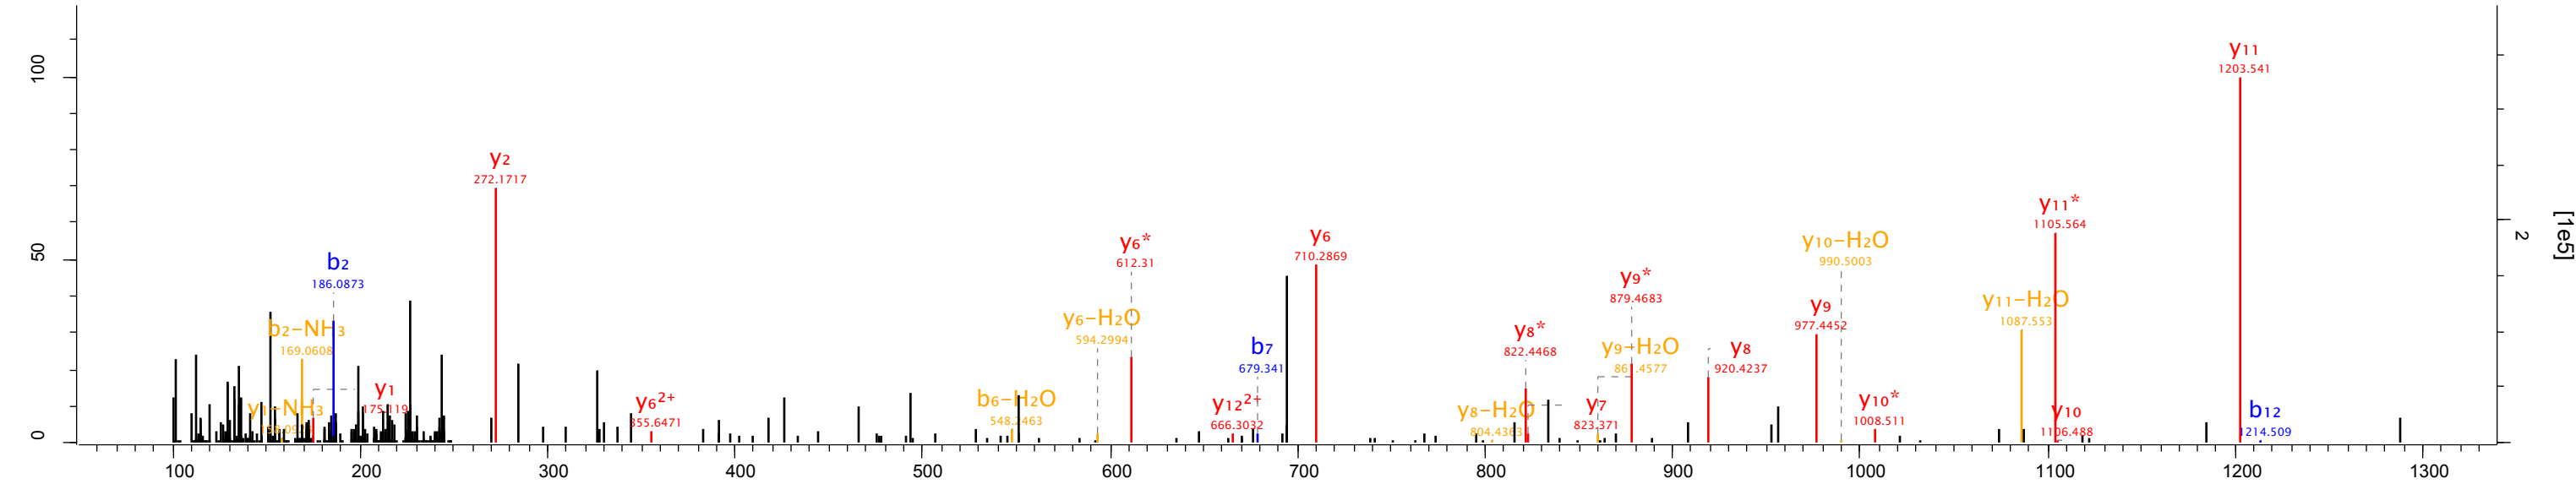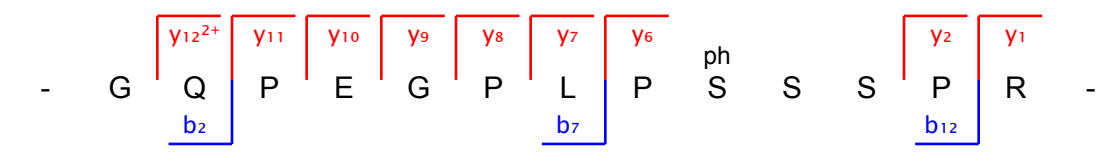

Raw file 20171215\_MaS\_33SR\_LMH\_phospho\_03 Scan 6939 Method FTMS; HCD Score 148.62 m/z 434.21 Gene names CARHSP1

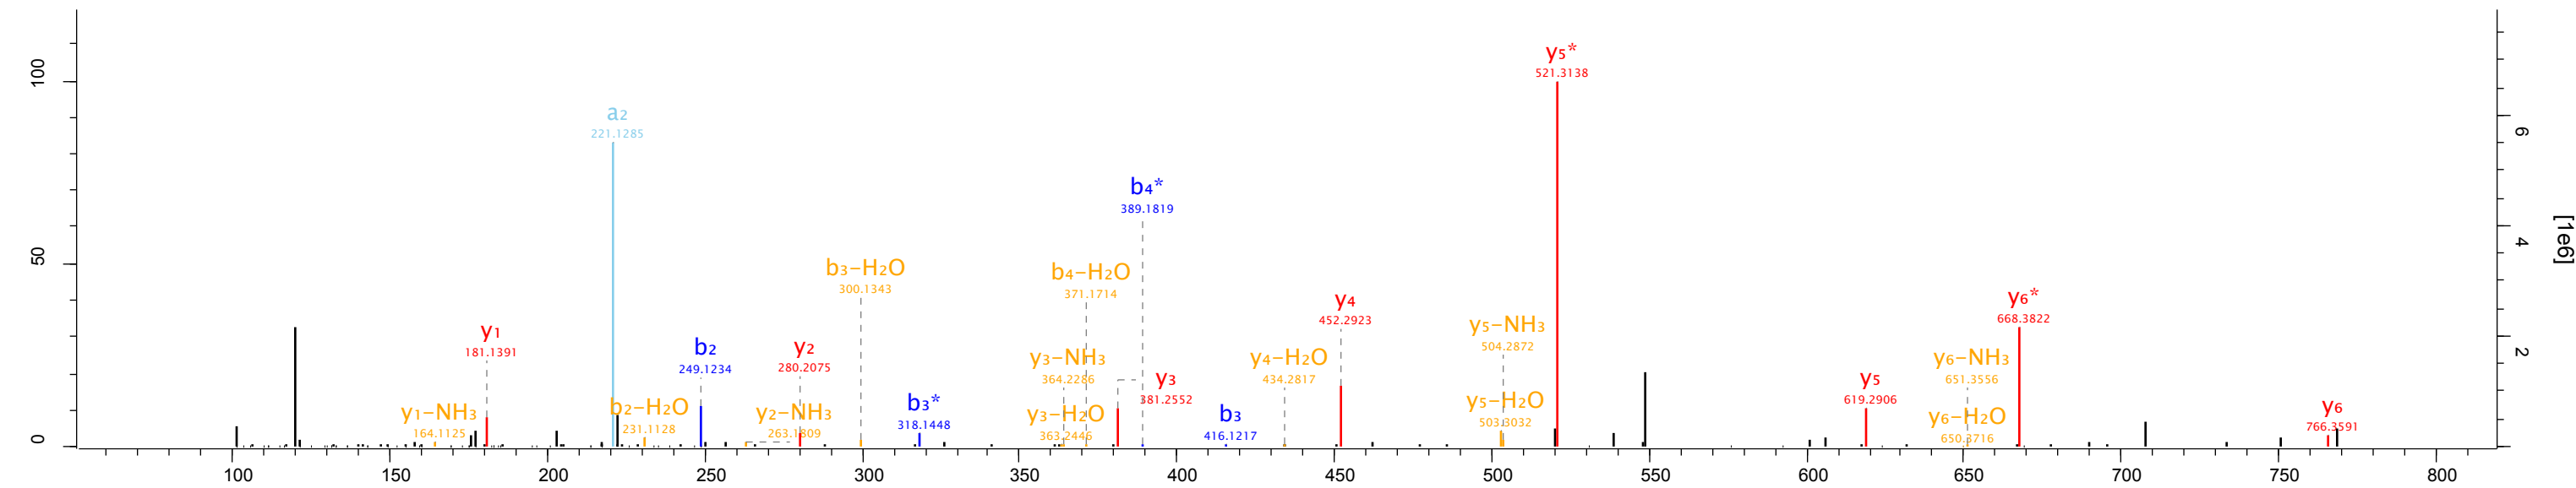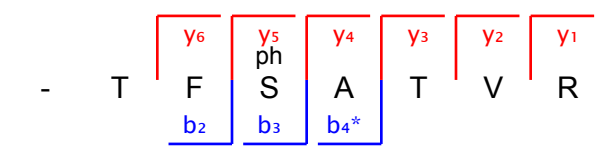

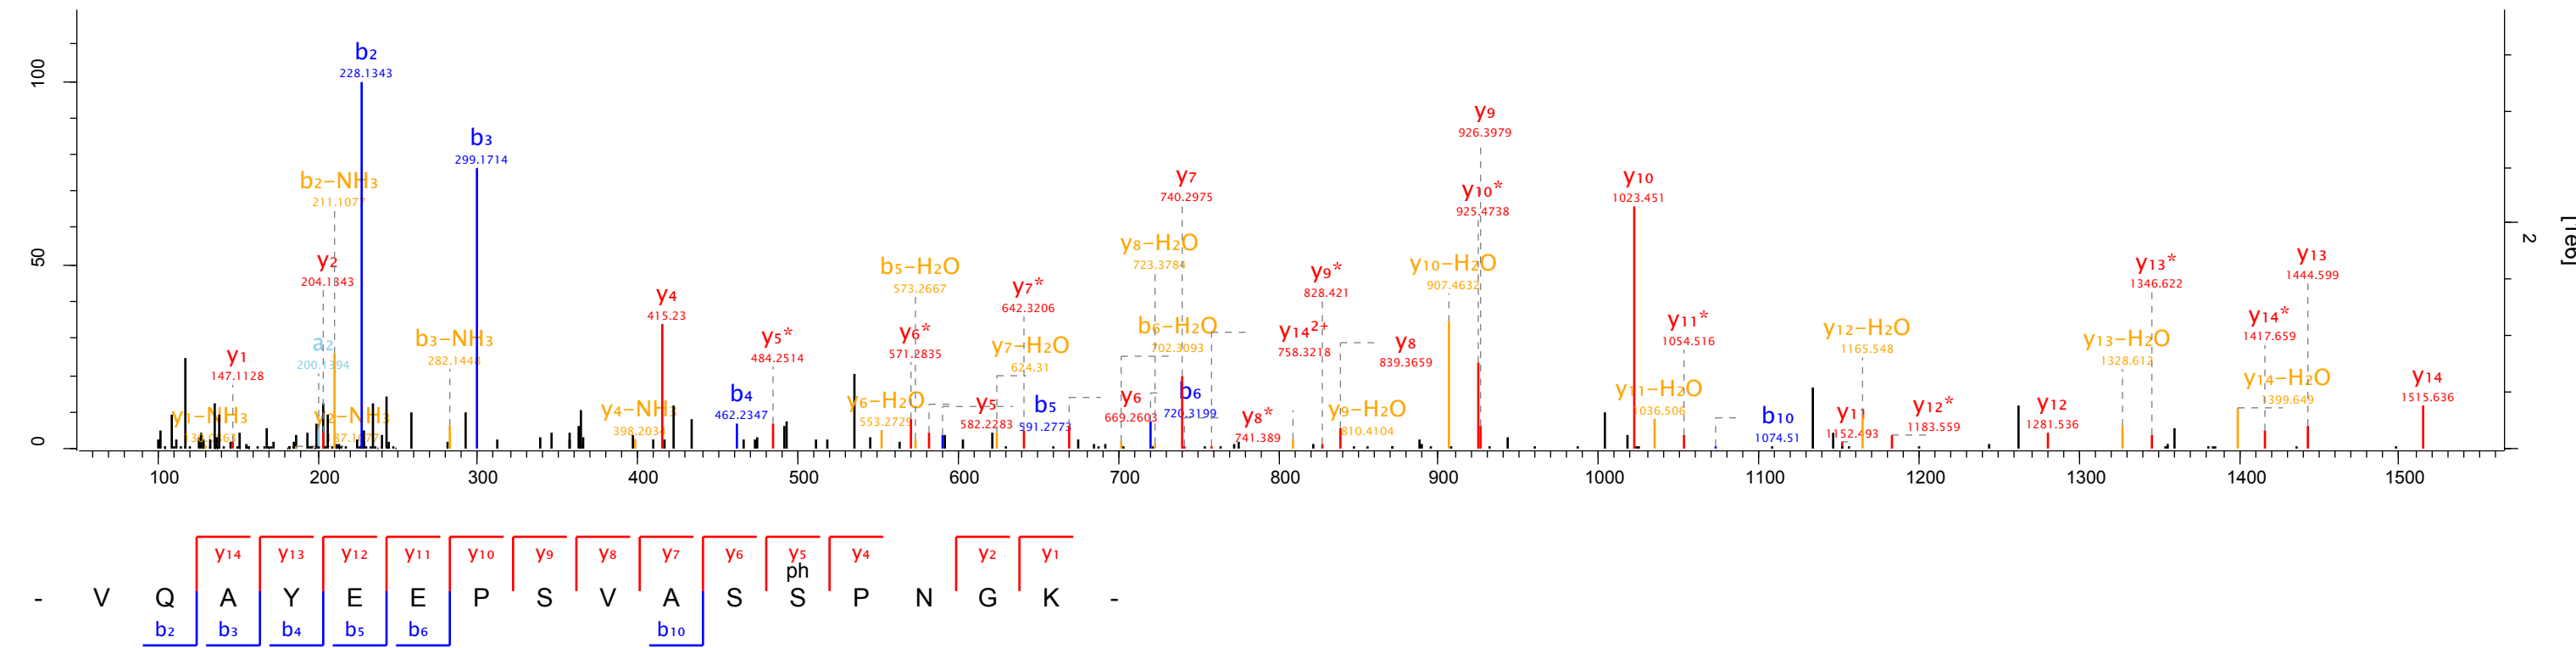

Raw file 20171215\_MaS\_33SR\_LMH\_phospho\_03 Scan 7139 Method FTMS; HCD Score 105.94 m/z 428.2 Gene names ZYX

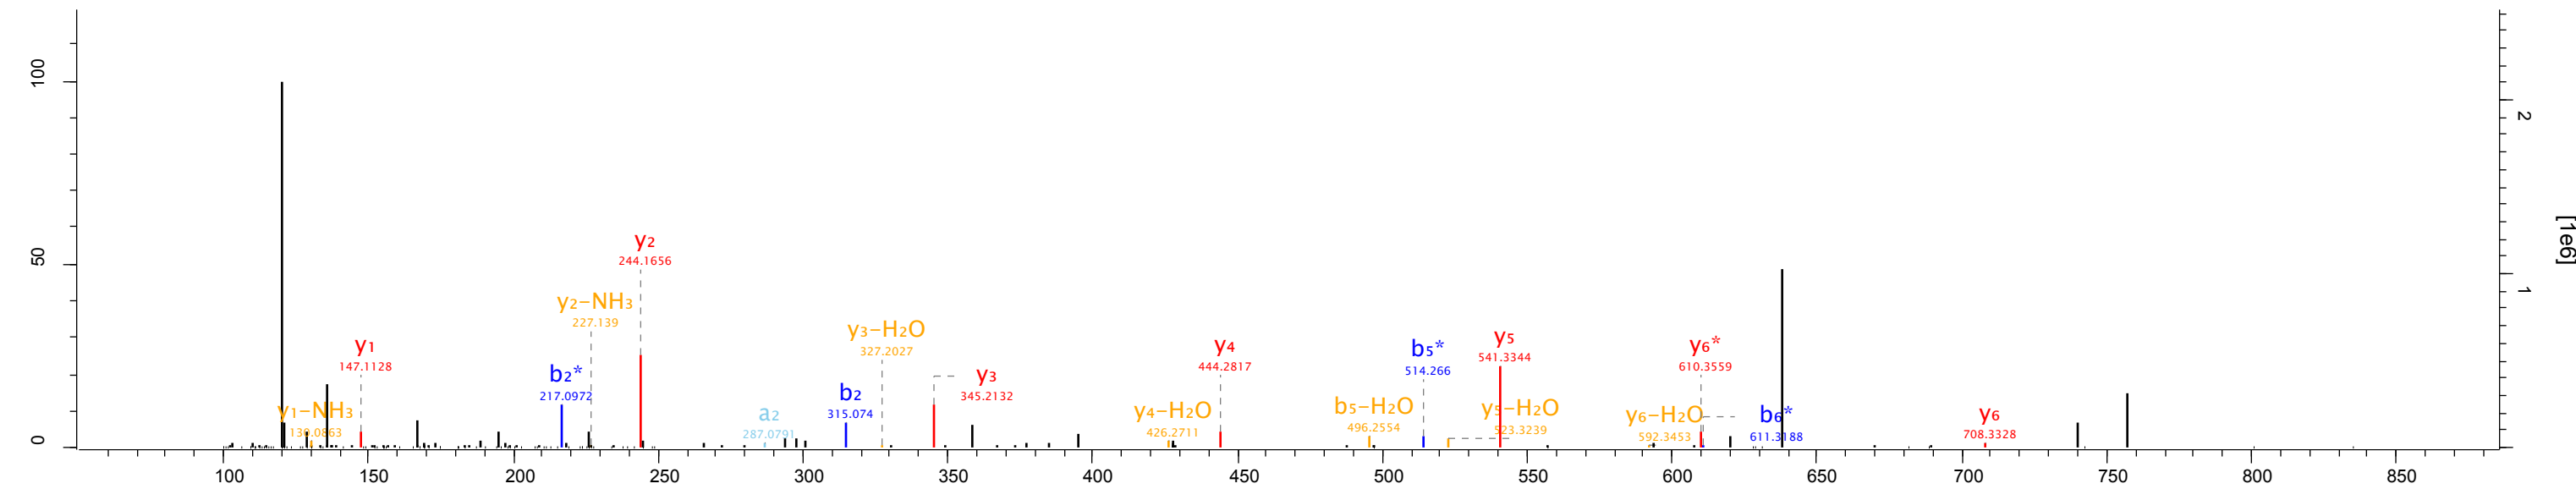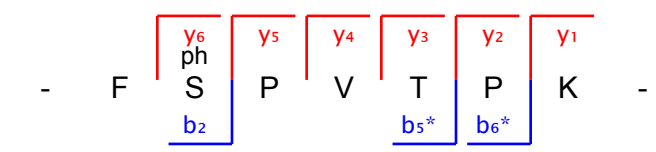

Raw file 20171215\_MaS\_33SR\_LMH\_phospho\_03 Scan 7359 Method FTMS; HCD Score 110.83 m/z 873.39 Gene names MSL1

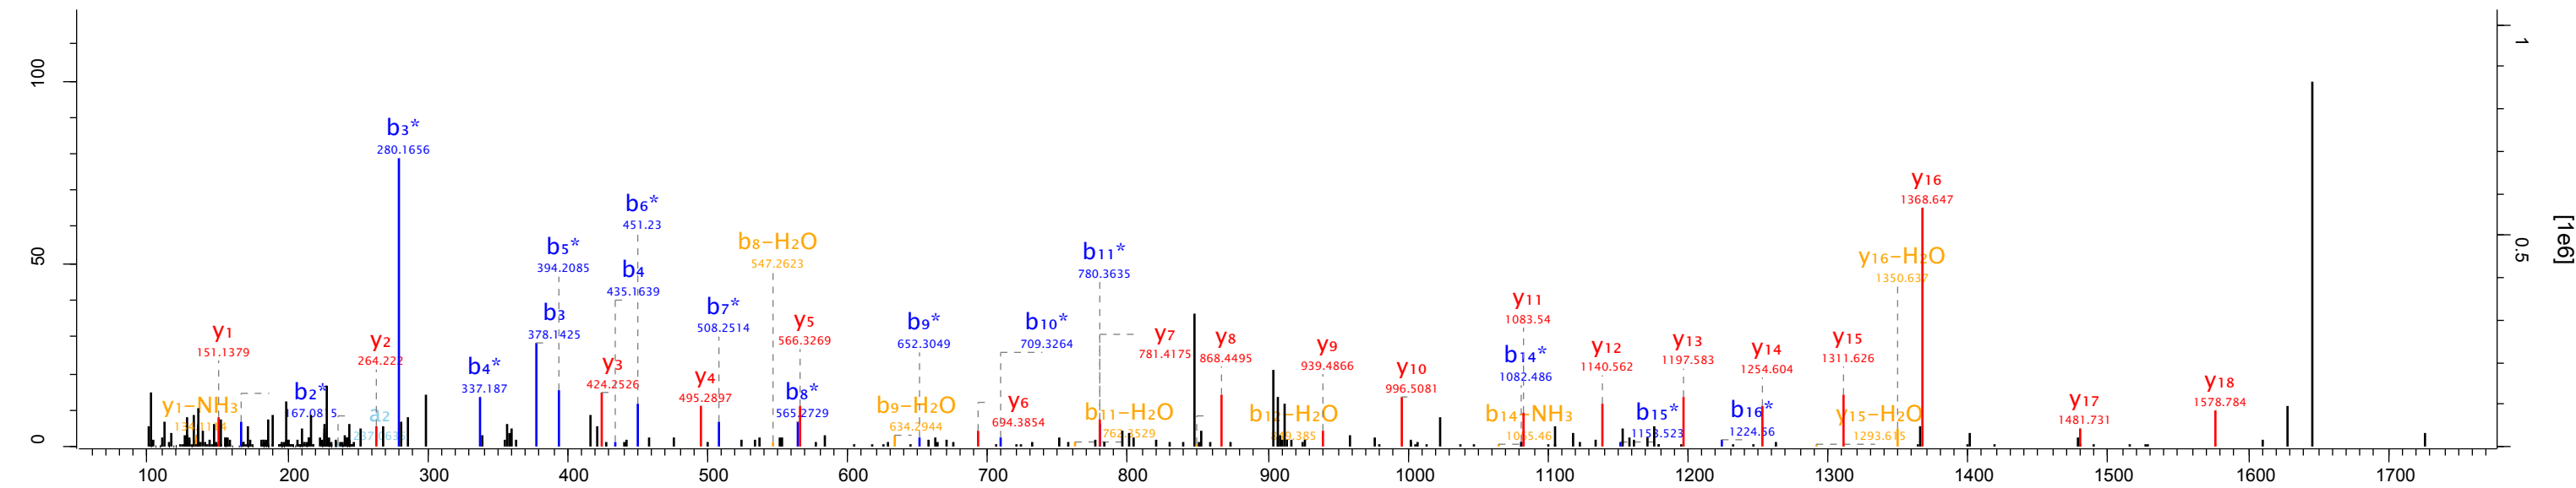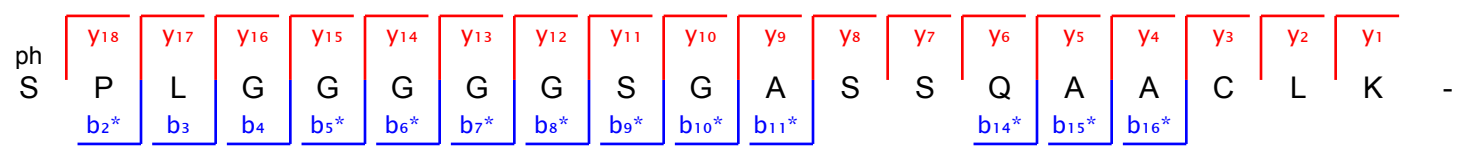

Raw file 20171215\_MaS\_33SR\_LMH\_phospho\_03 Scan 7599 Method FTMS; HCD Score 54.2 m/z 624.3

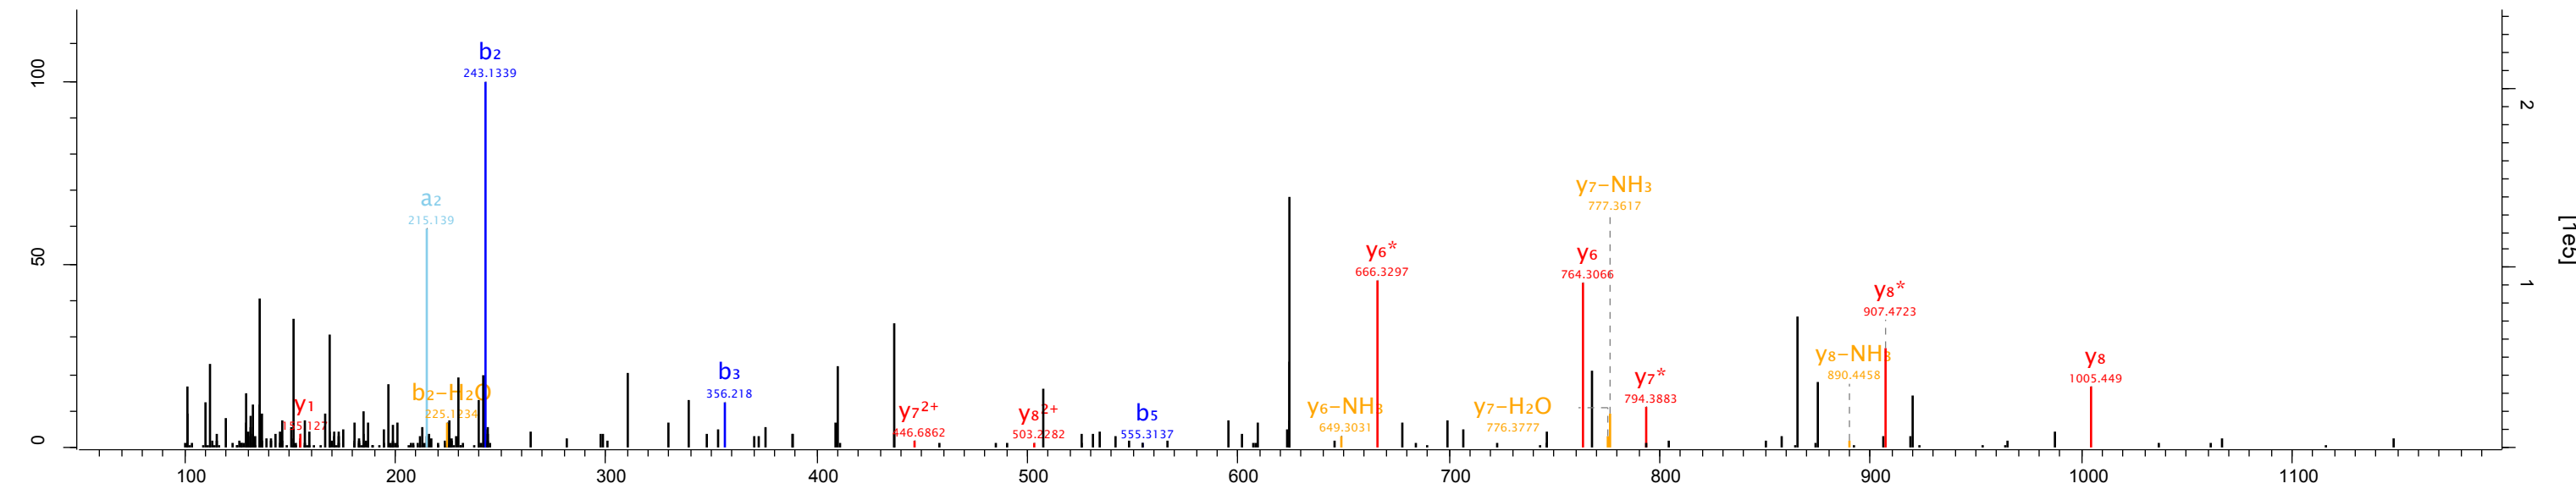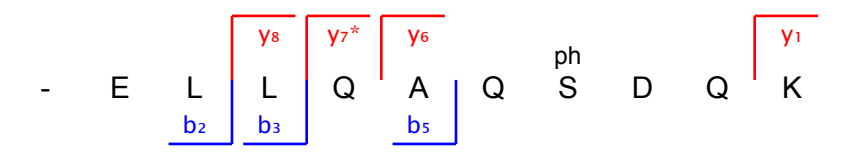

Raw file 20171215\_MaS\_33SR\_LMH\_phospho\_03 Scan 7689 Method FTMS; HCD Score 139.95 m/z 896.39 Gene names SLC7A5

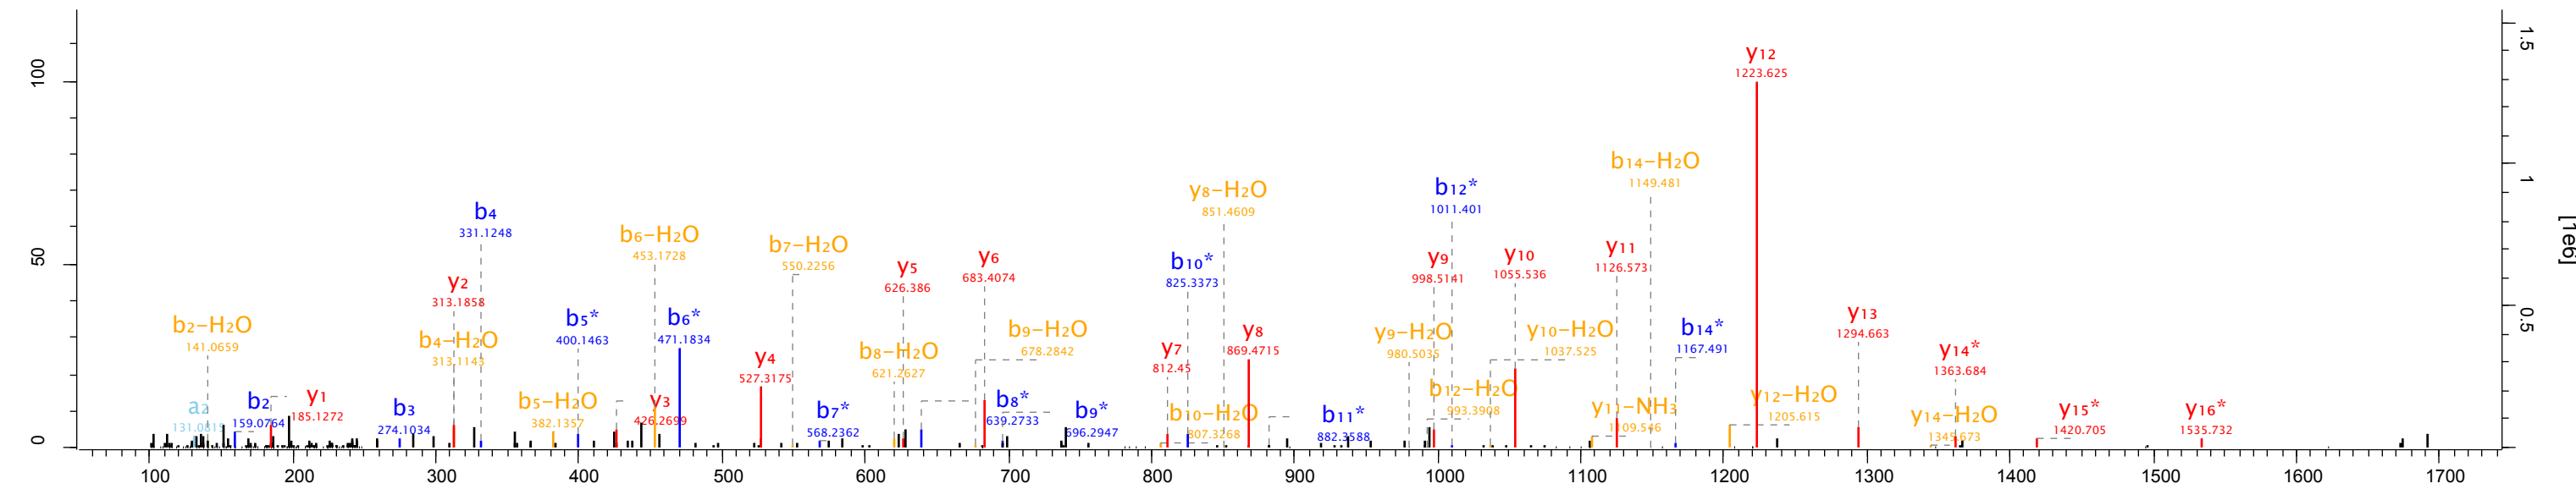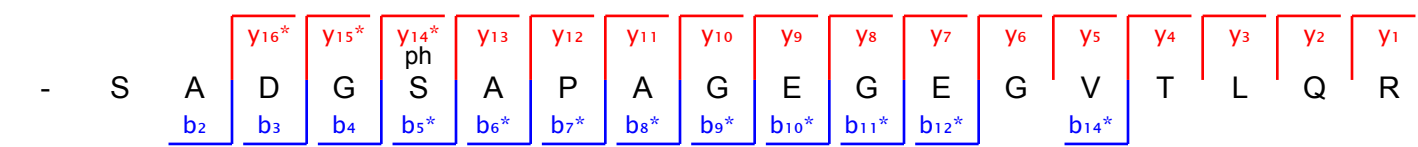

Raw file 20171215\_MaS\_33SR\_LMH\_phospho\_03 Scan 7789 Method FTMS; HCD Score 118.51 m/z 620.31 Gene names ADD3

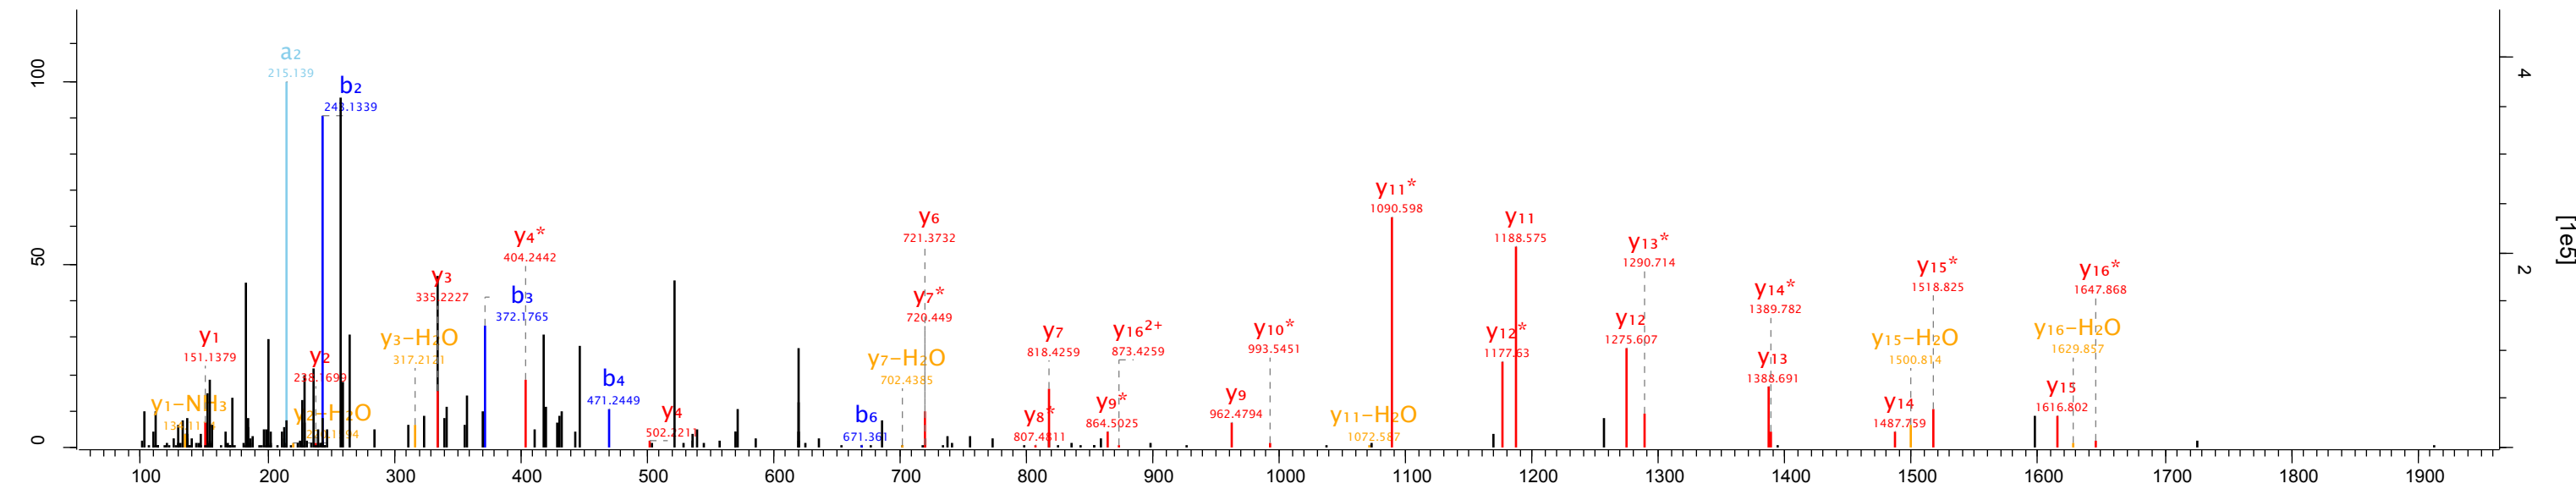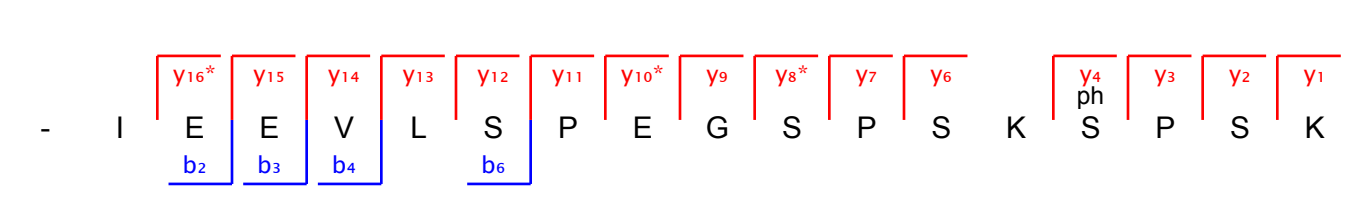





Raw file 20171215\_MaS\_33SR\_LMH\_phospho\_03 Scan 8009 Method FTMS; HCD Score 48.9 m/z 839.38 Gene names EIF2A

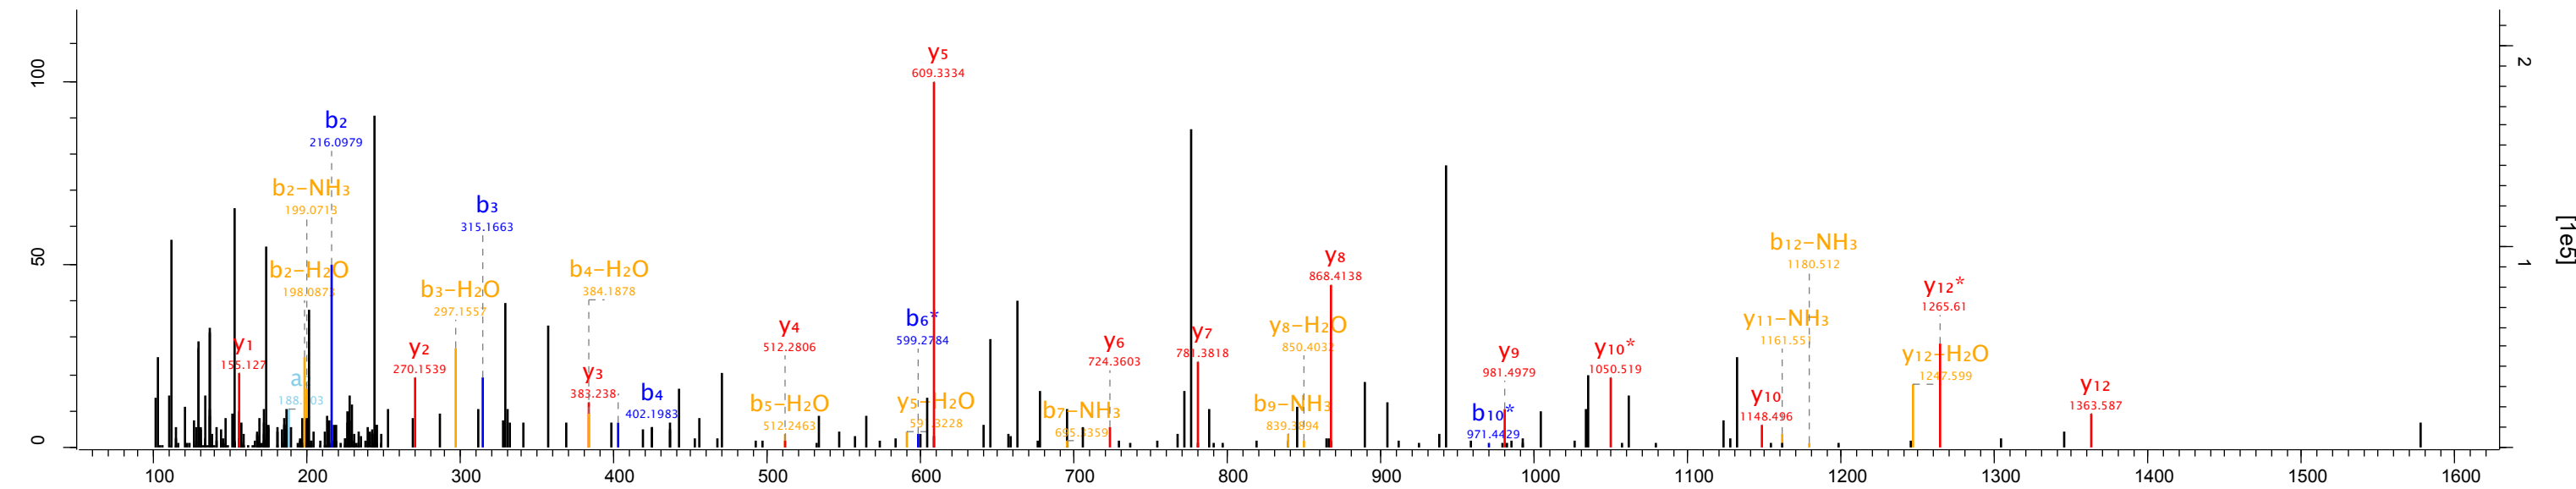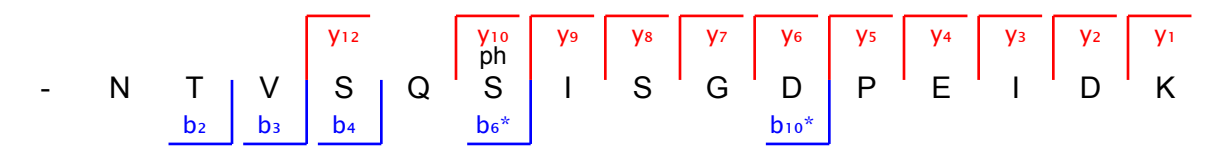

Raw file 20171215\_MaS\_33SR\_LMH\_phospho\_03 Scan 8409 Method FTMS; HCD Score 231.67 m/z 643.24 Gene names KRT80

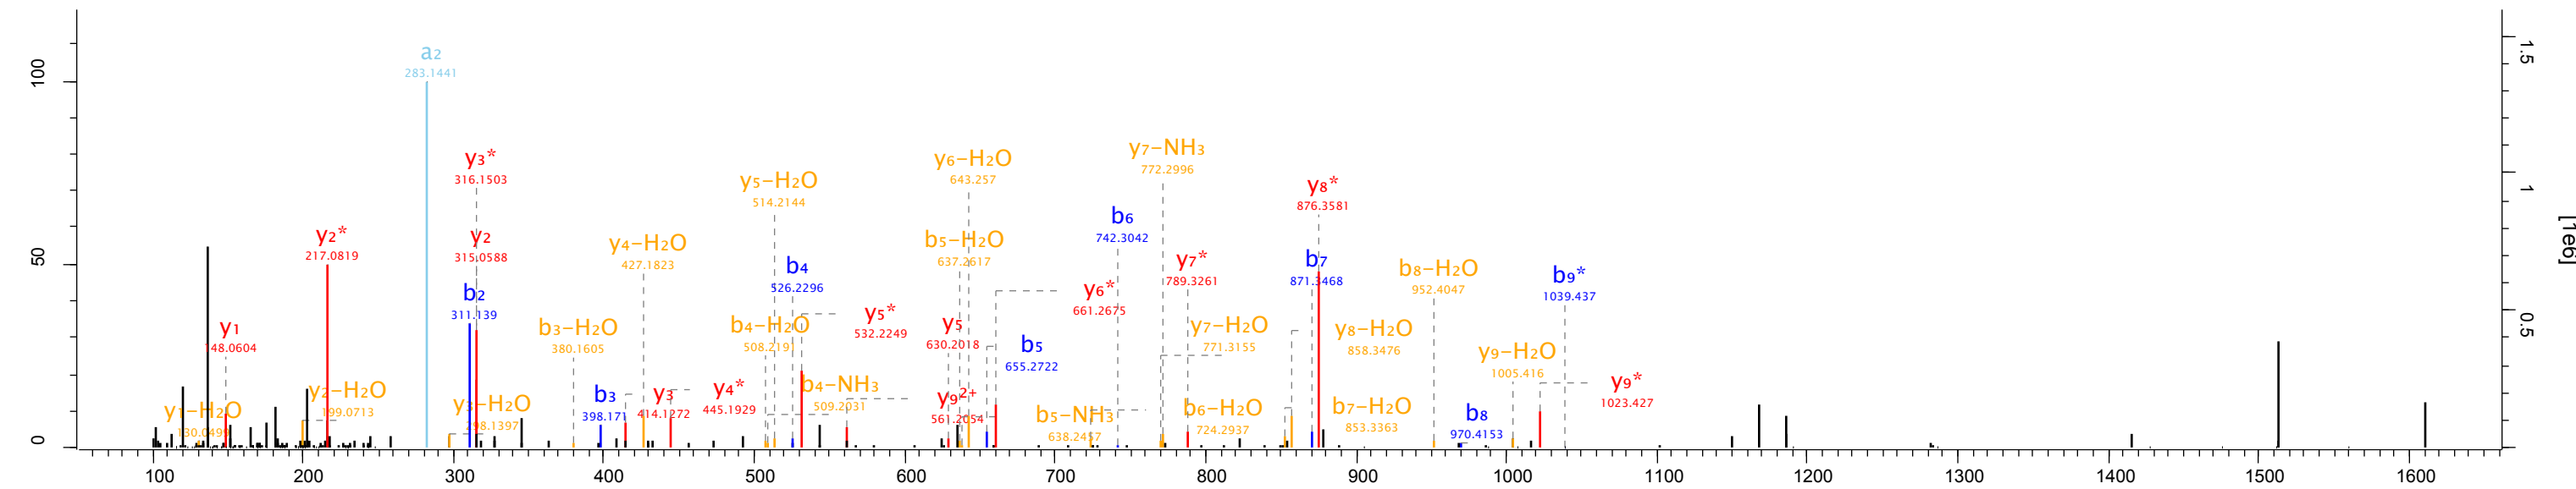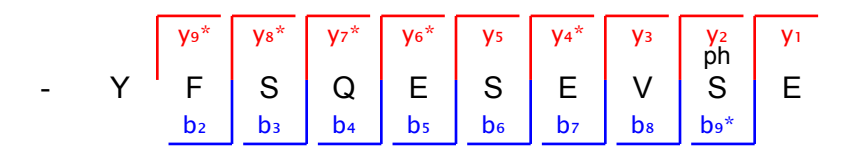

Raw file 20171215\_MaS\_33SR\_LMH\_phospho\_03 Scan 8419 Method FTMS; HCD Score 157.37 m/z 833.31 Gene names LEO1

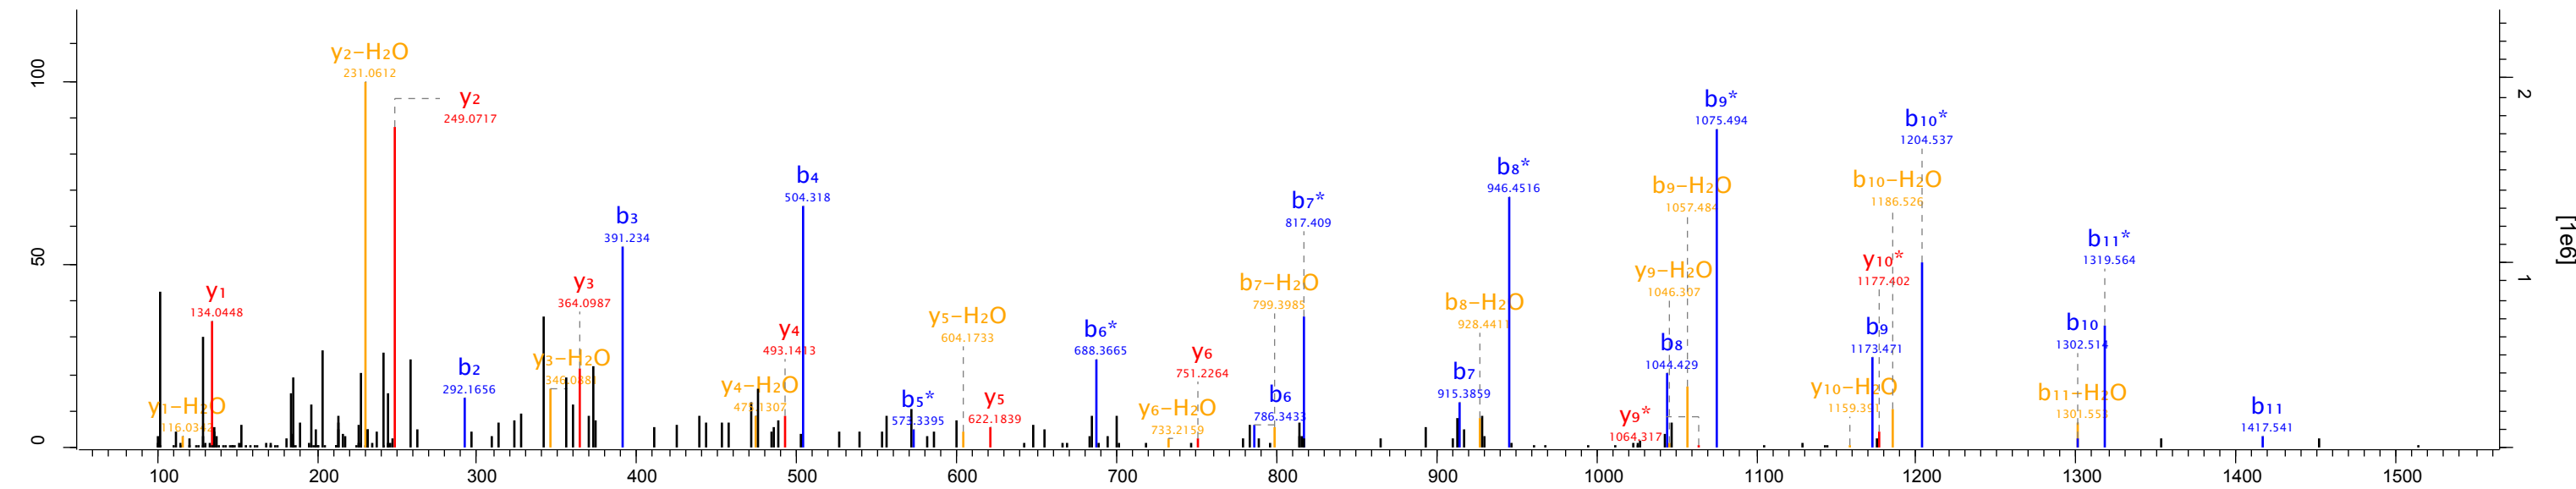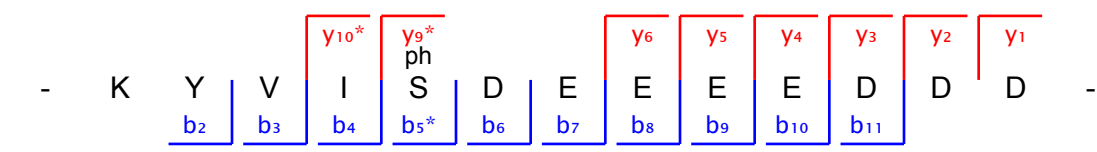

Raw file 20171215\_MaS\_33SR\_LMH\_phospho\_03 Scan 8589 Method FTMS; HCD Score 110.91 m/z 583.28 Gene names HSPB1

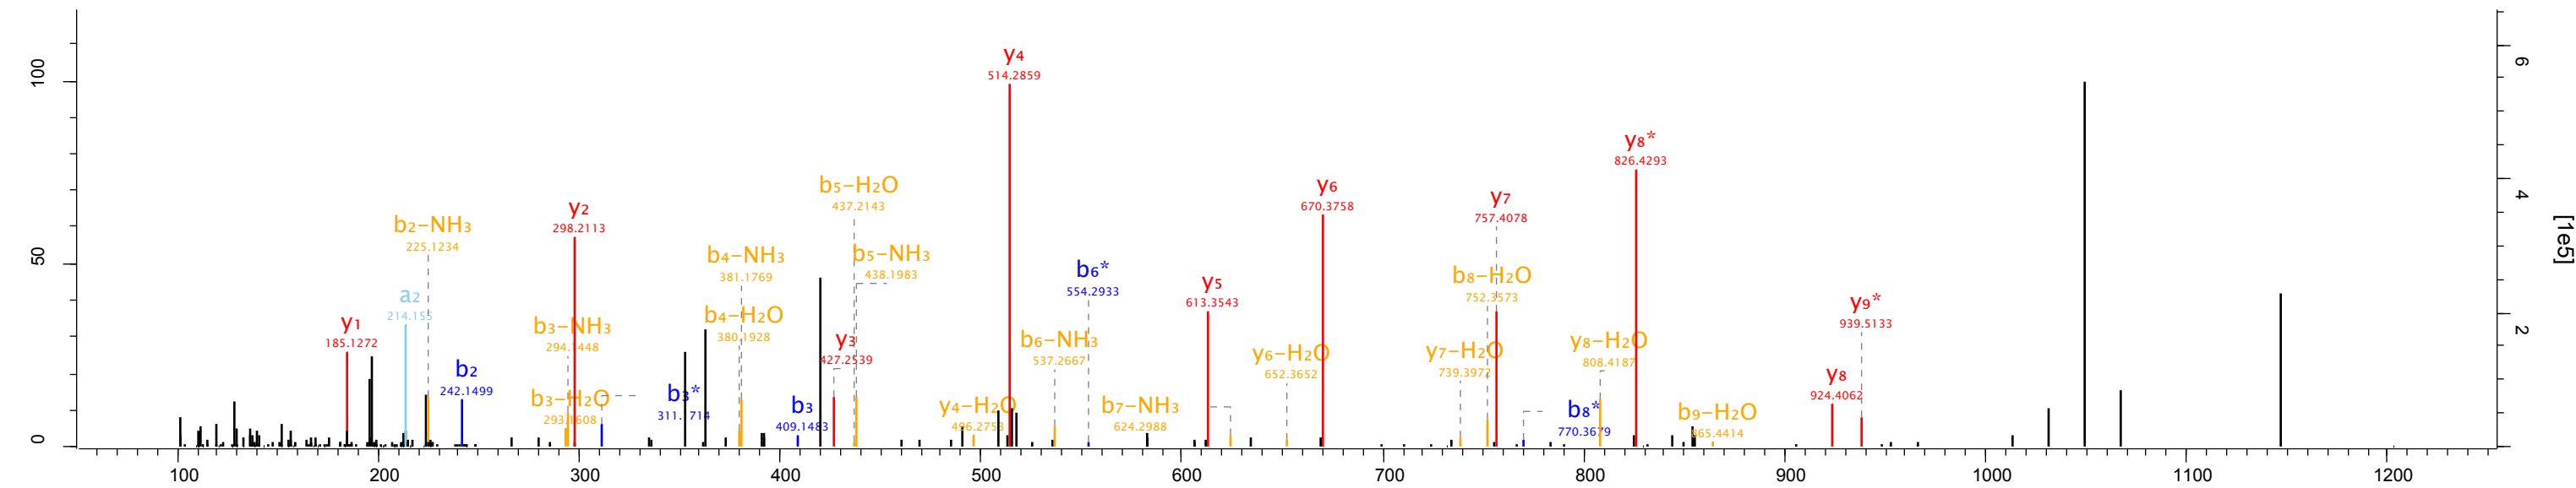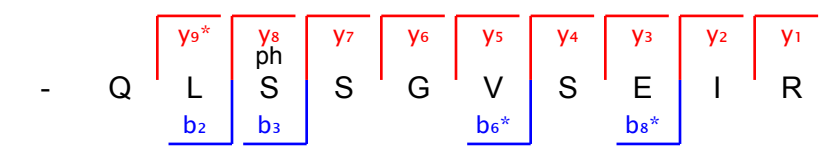

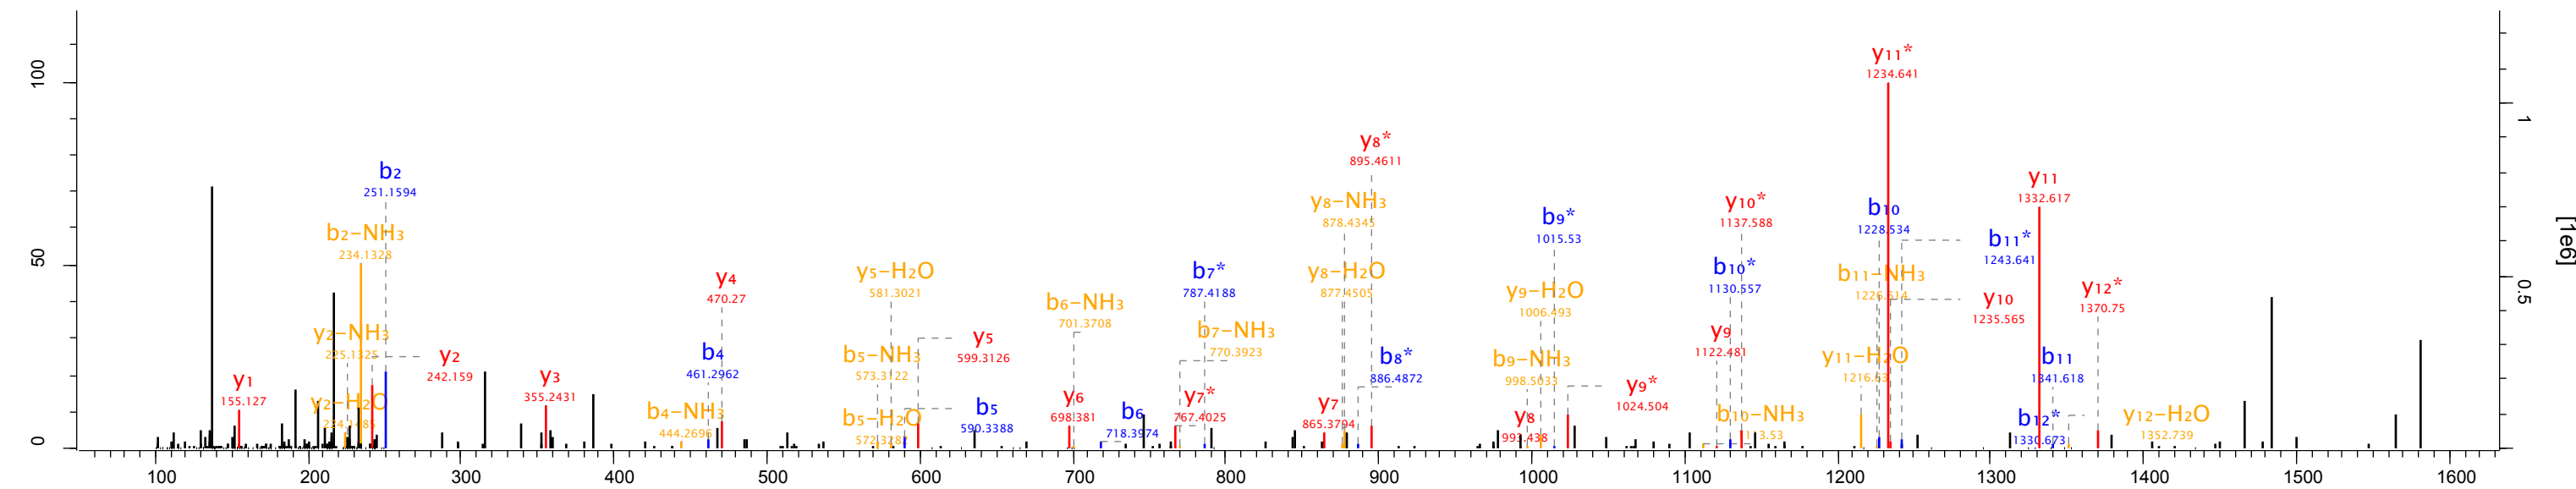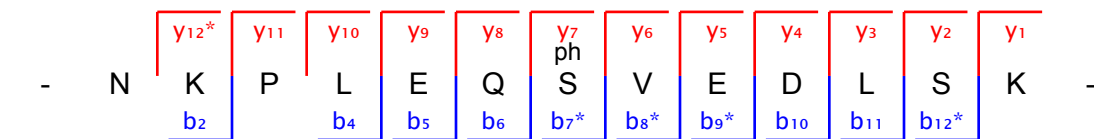

Raw file: 20171215\_MaS\_33SR\_LMH\_phospho\_03  
 Scan: 8899 Method: FTMS; HCD Score: 118.73 m/z: 426.54 Gene names: ARHGAP1

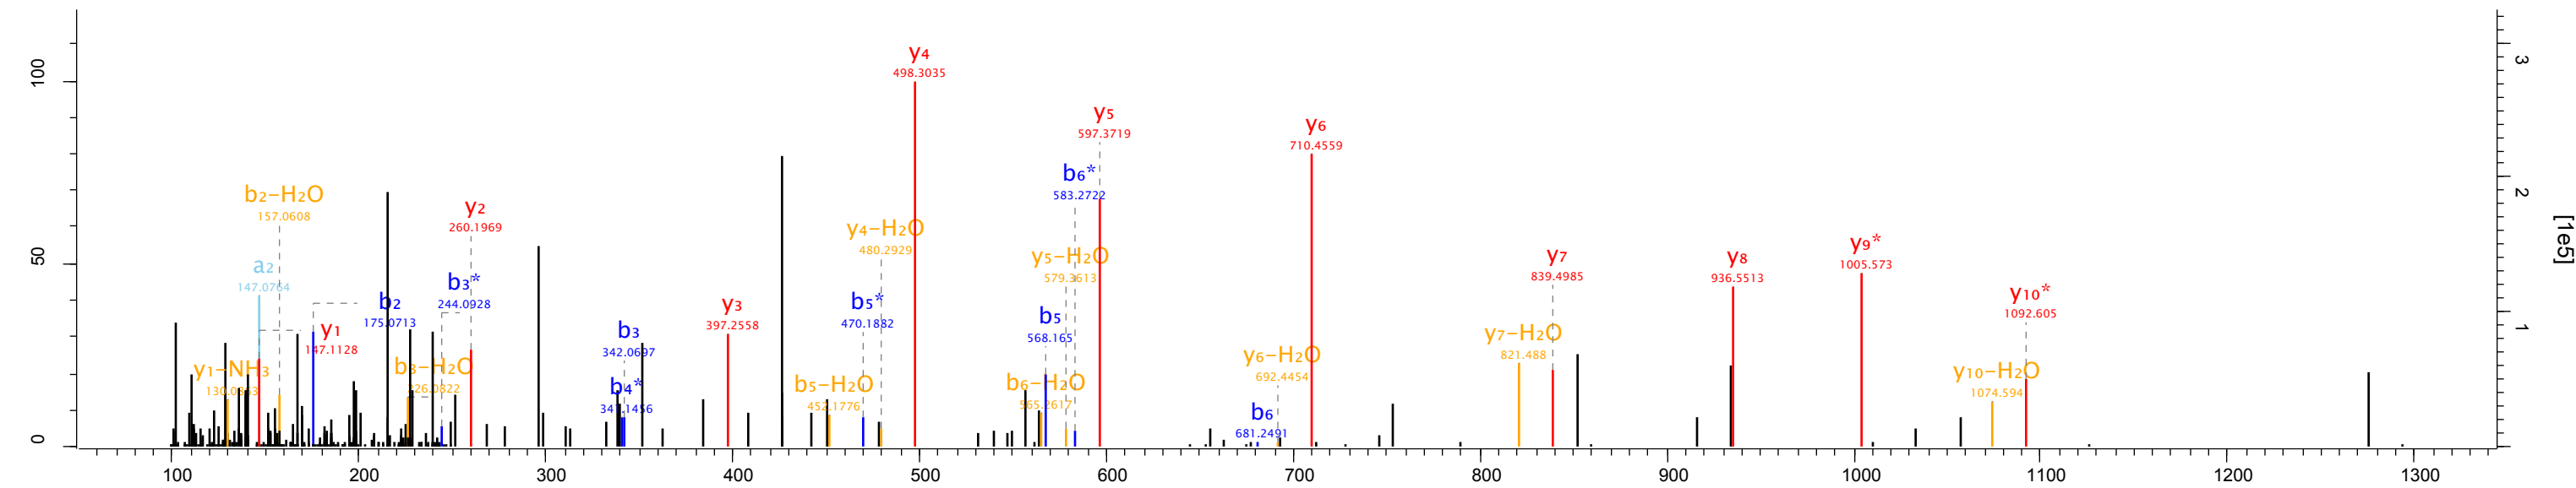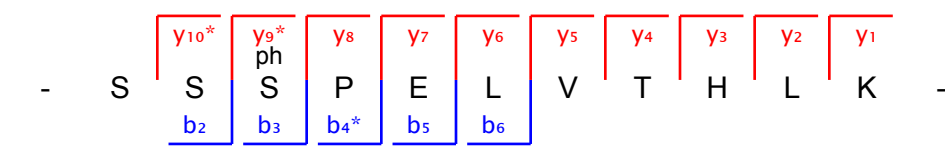

Raw file 20171215\_MaS\_33SR\_LMH\_phospho\_03 Scan 9109 Method FTMS; HCD Score 134.83 m/z 941.44 Gene names FOXR2

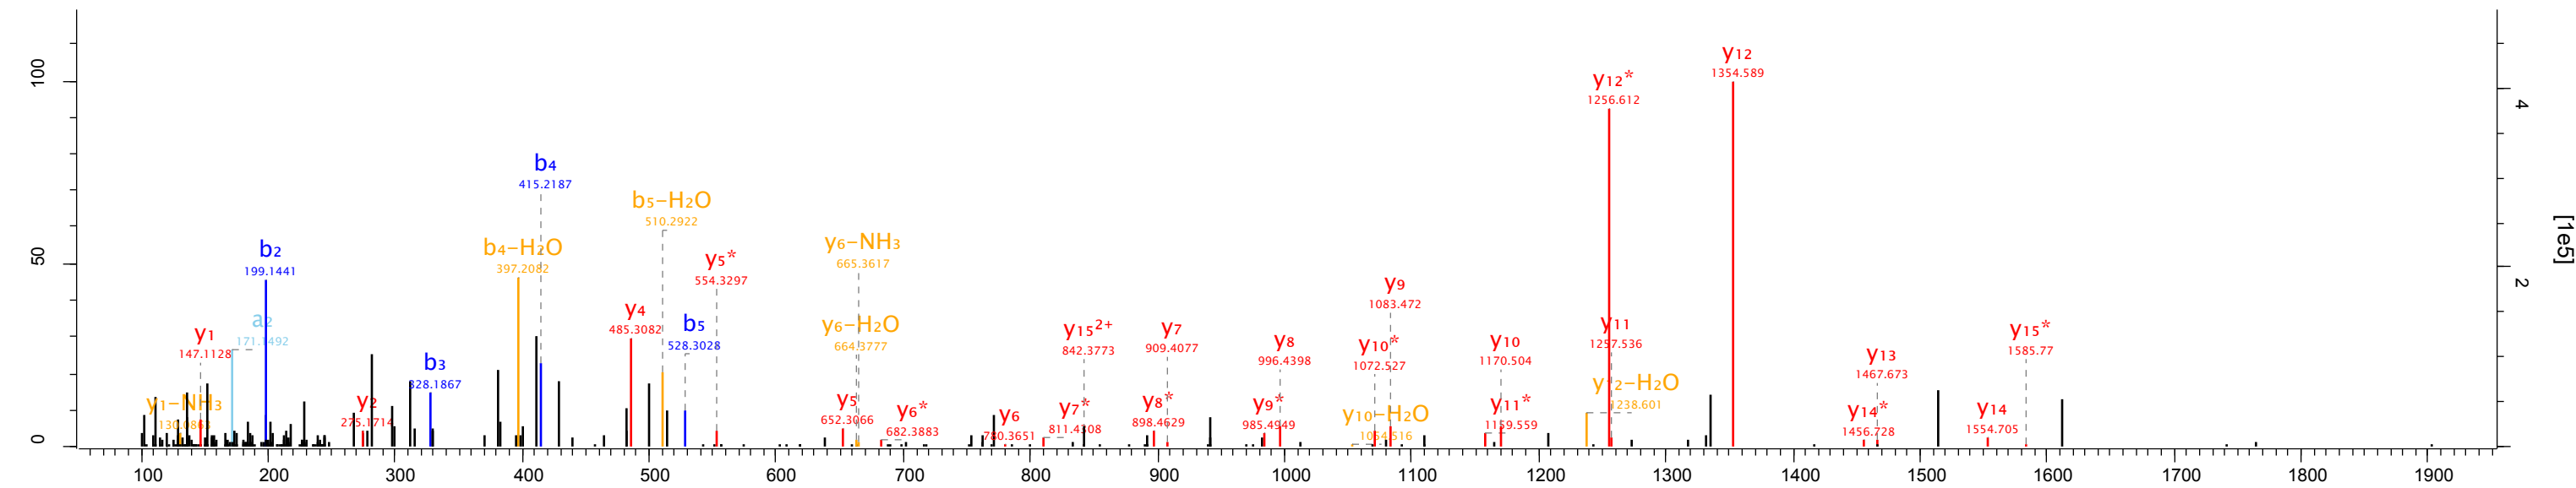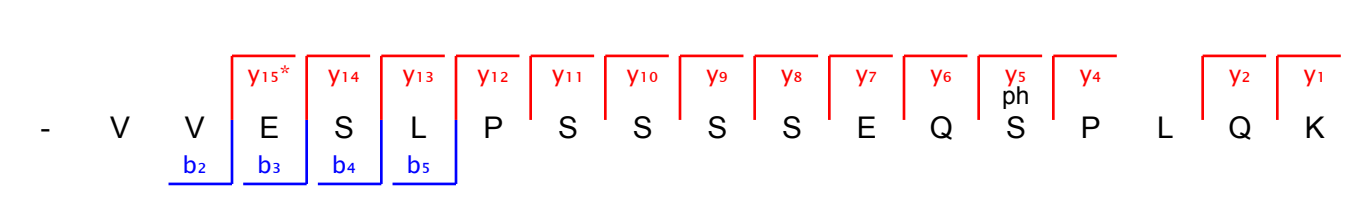



Raw file 20171215\_MaS\_33SR\_LMH\_phospho\_03 Scan 9259 Method FTMS; HCD Score 140.28 m/z 584.28 Gene names SRSF2

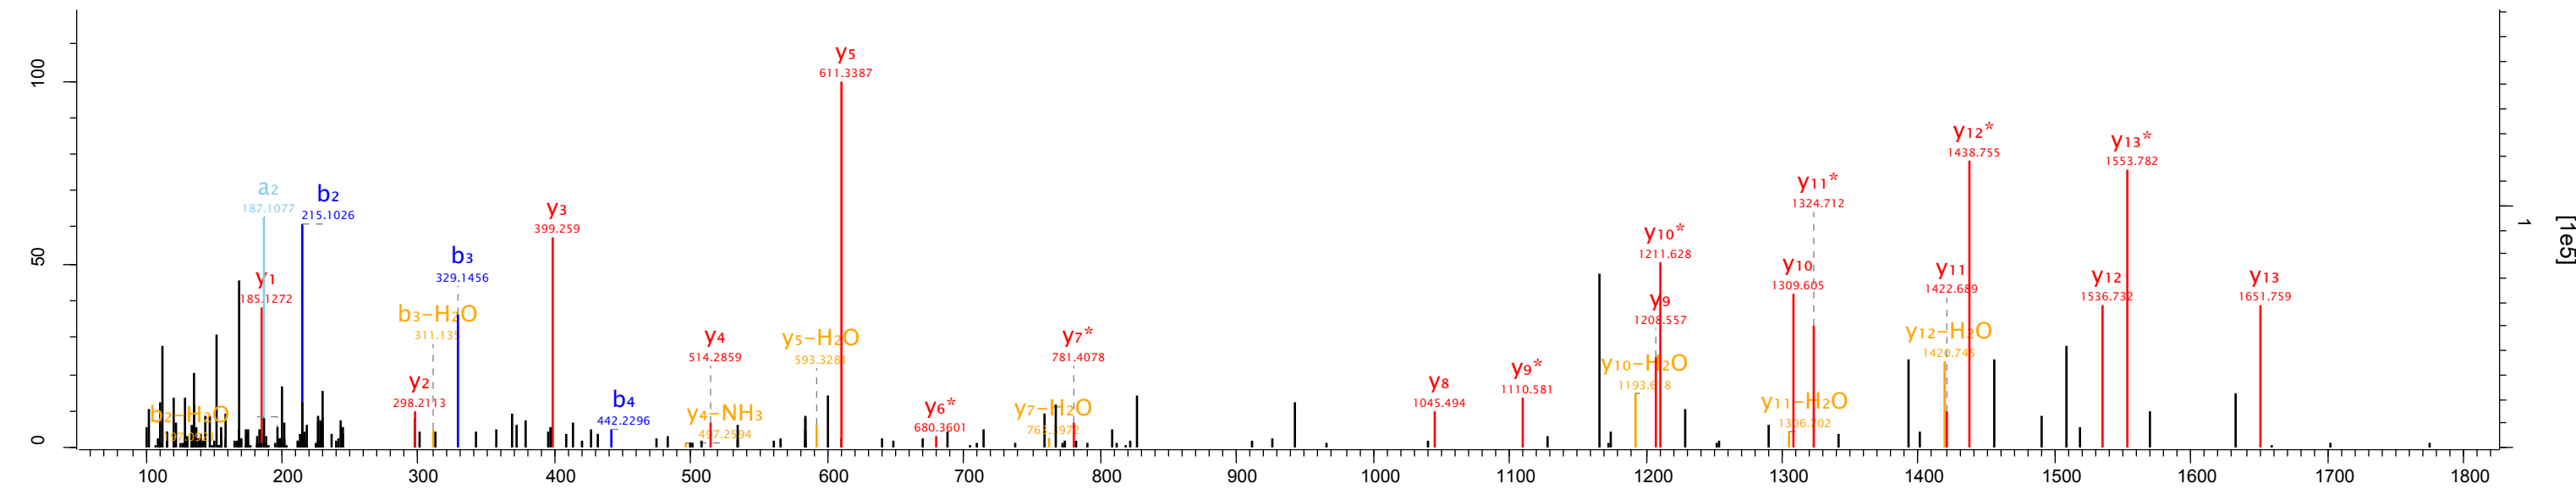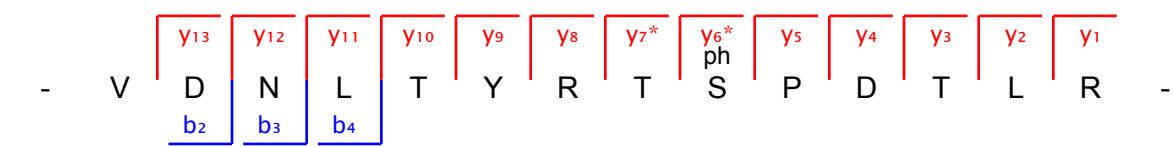

Raw file 20171215\_MaS\_33SR\_LMH\_phospho\_03 Scan 9409 Method FTMS; HCD Score 212.59 m/z 822.34 Gene names ARFGEF2

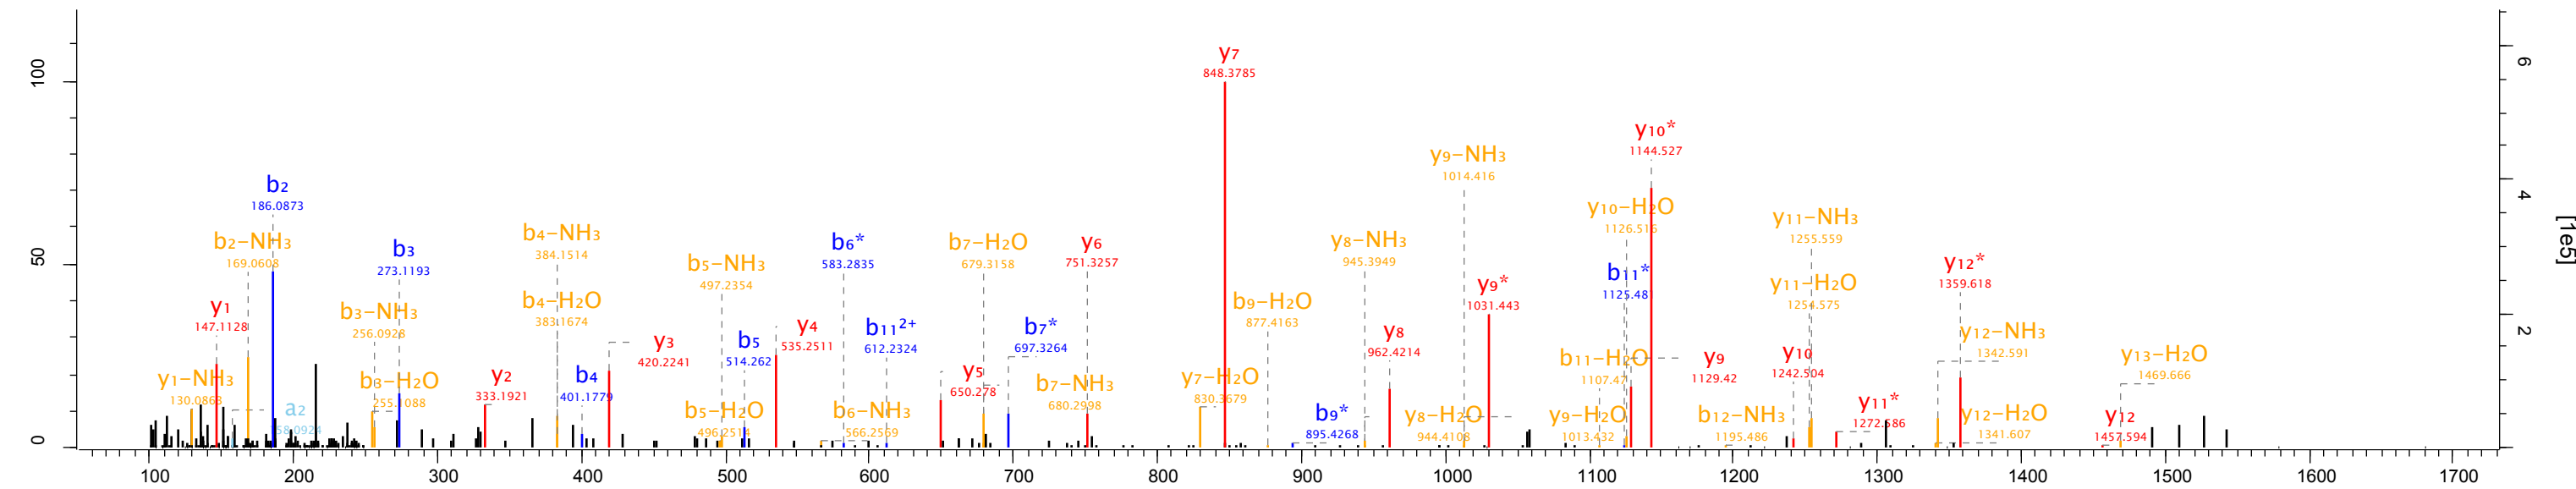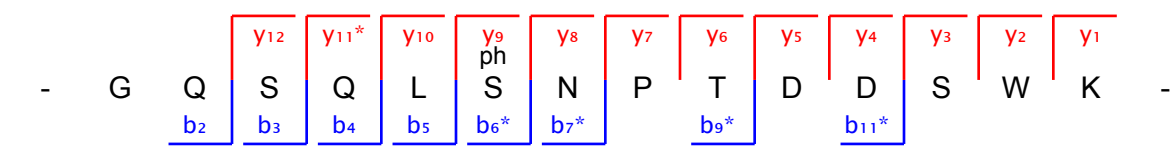

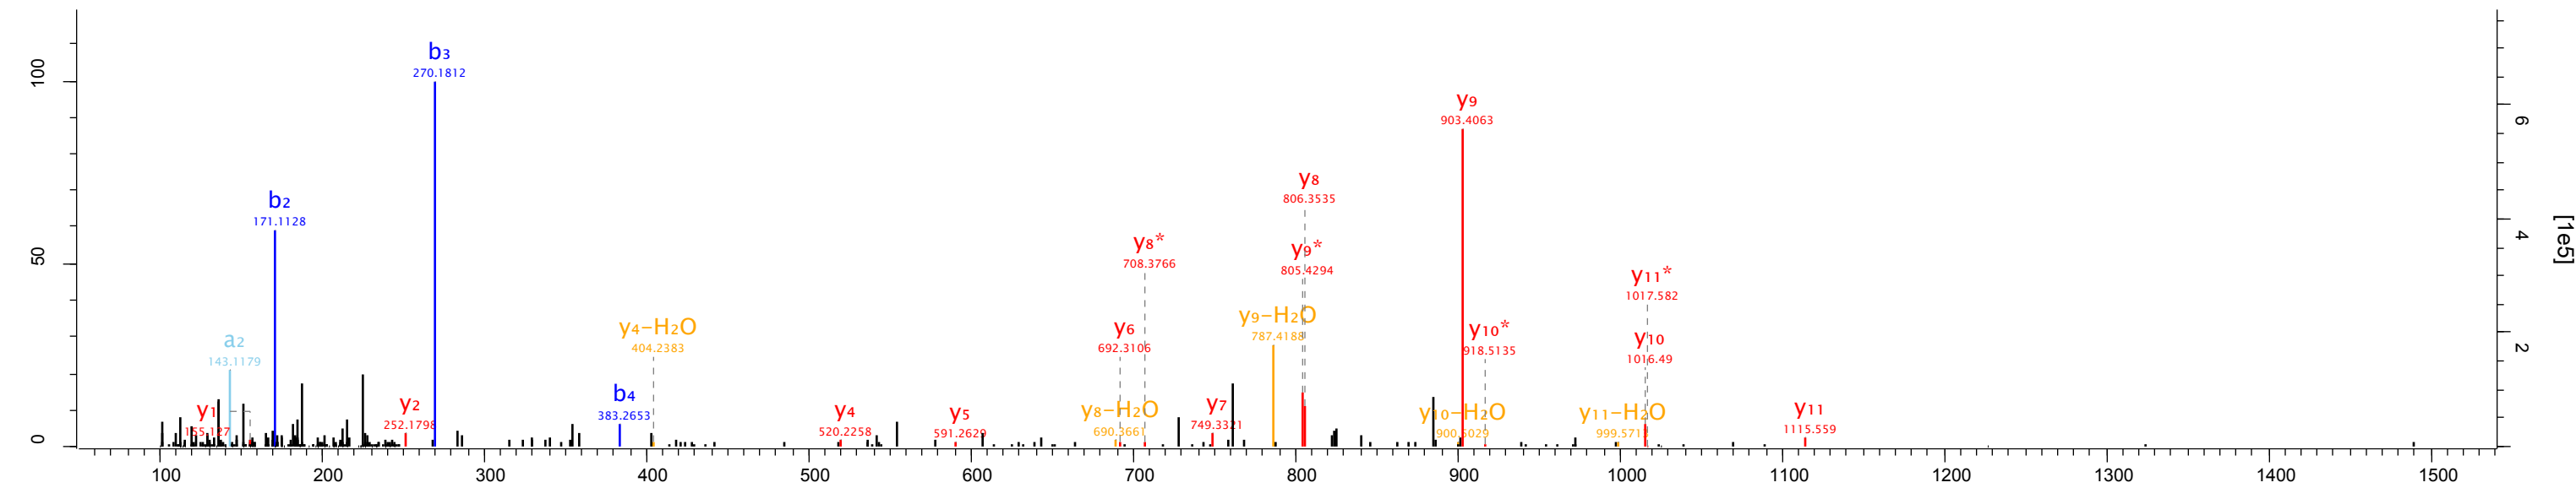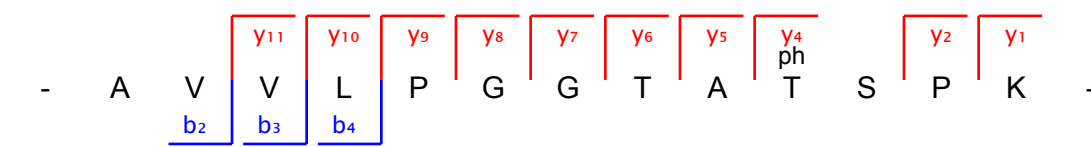

Raw file 20171215\_MaS\_33SR\_LMH\_phospho\_03 Scan 9579 Method FTMS; HCD Score 110.6 m/z 901.4 Gene names ZNF106

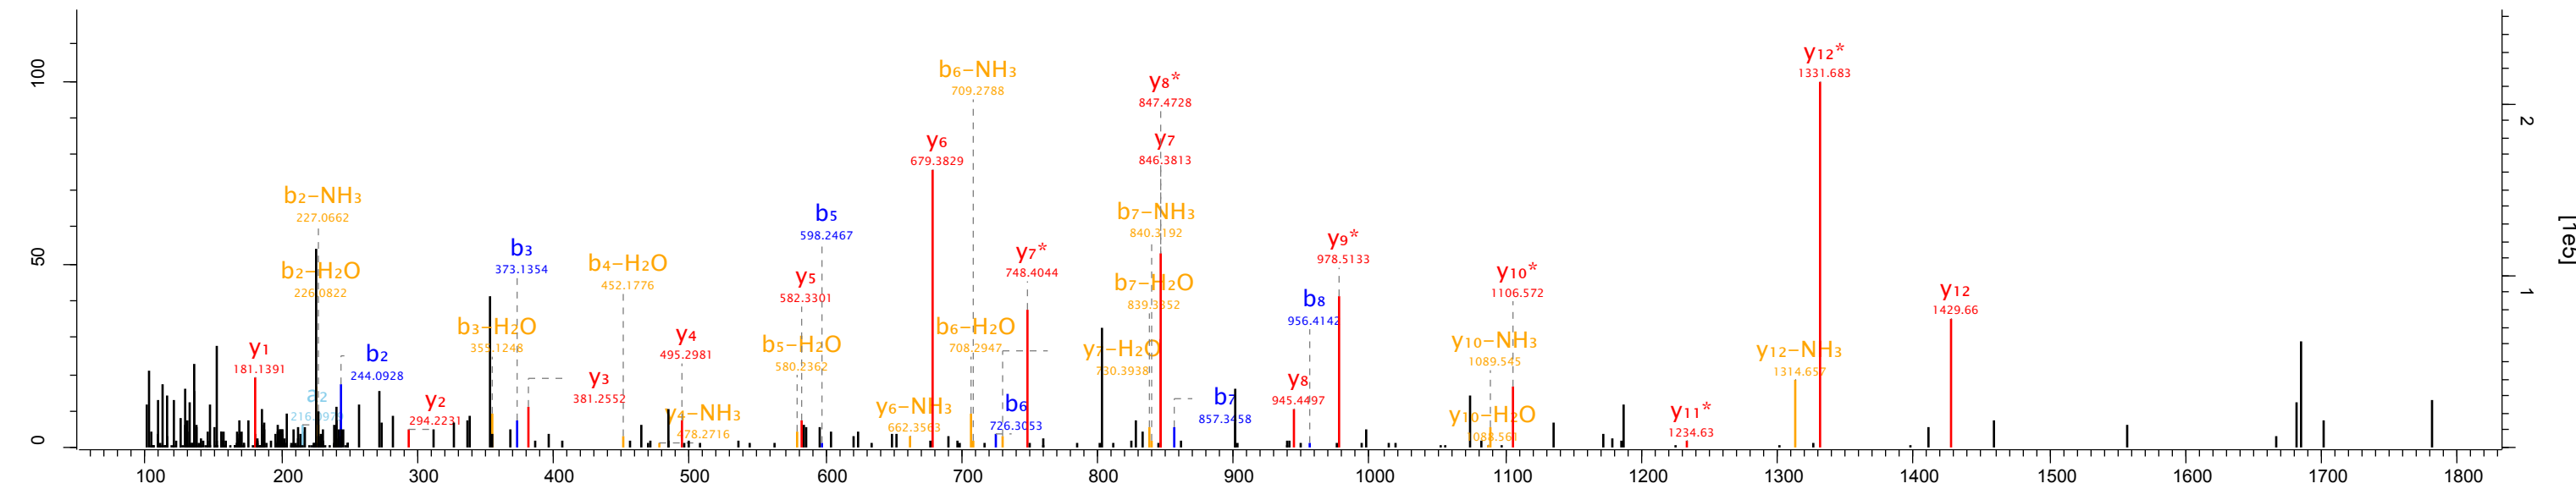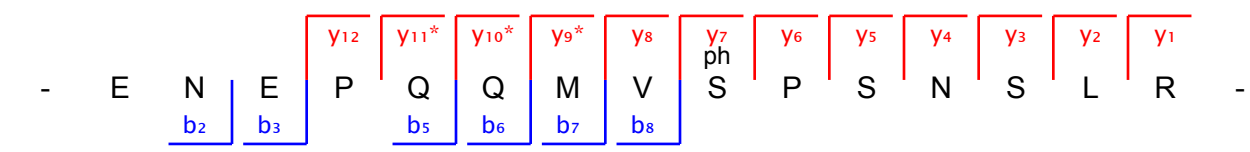

Raw file 20171215\_MaS\_33SR\_LMH\_phospho\_03 Scan Method Score m/z Gene names  
 9709 FTMS; HCD 155.47 1102.5 PNKP

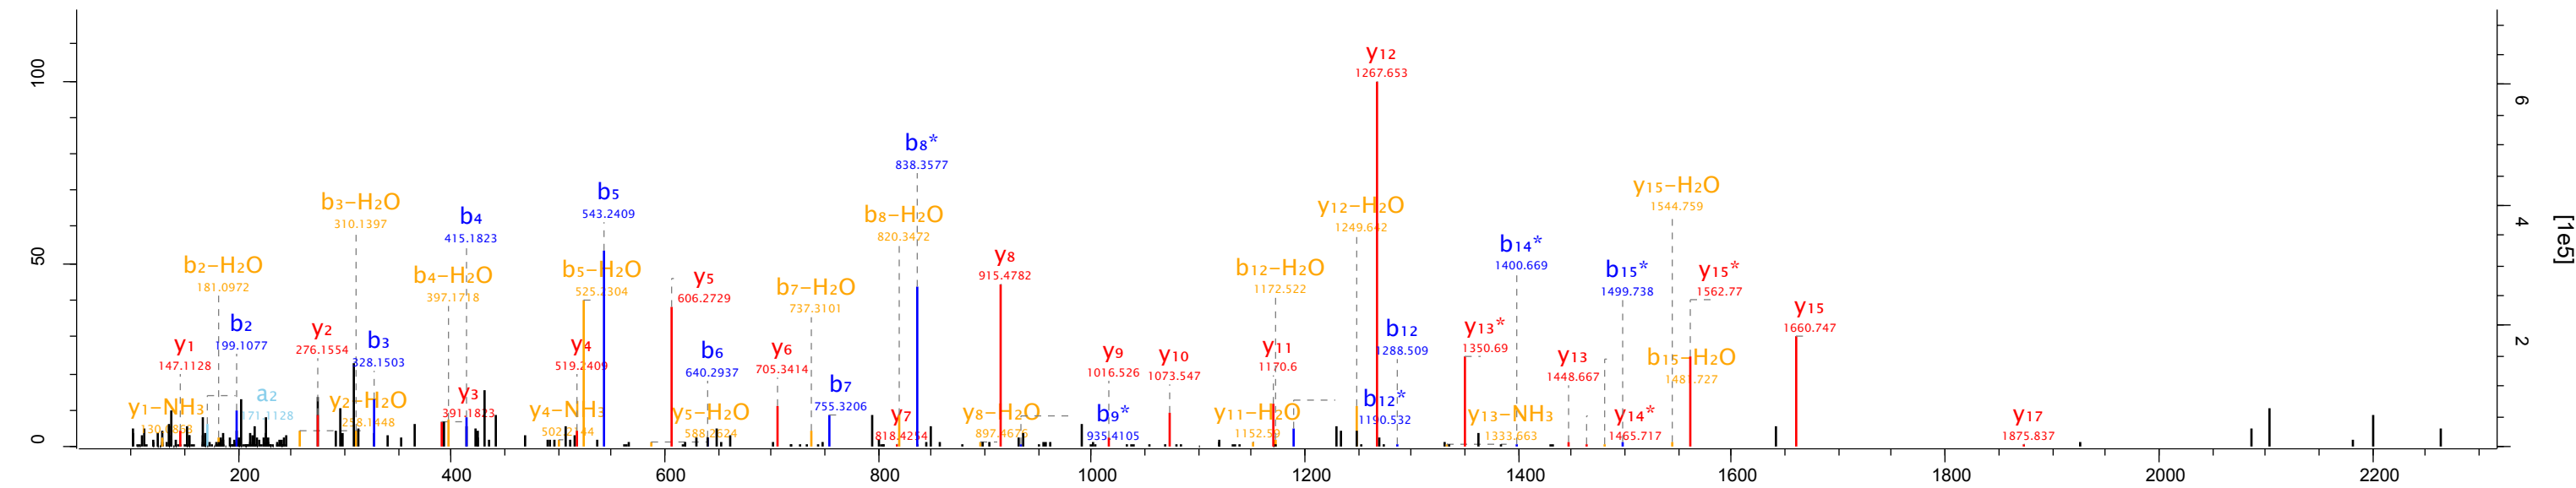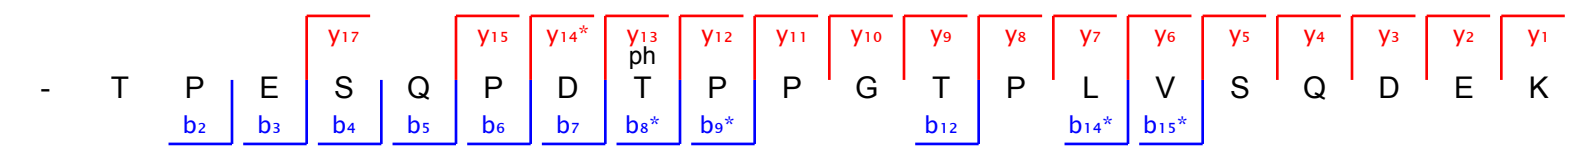

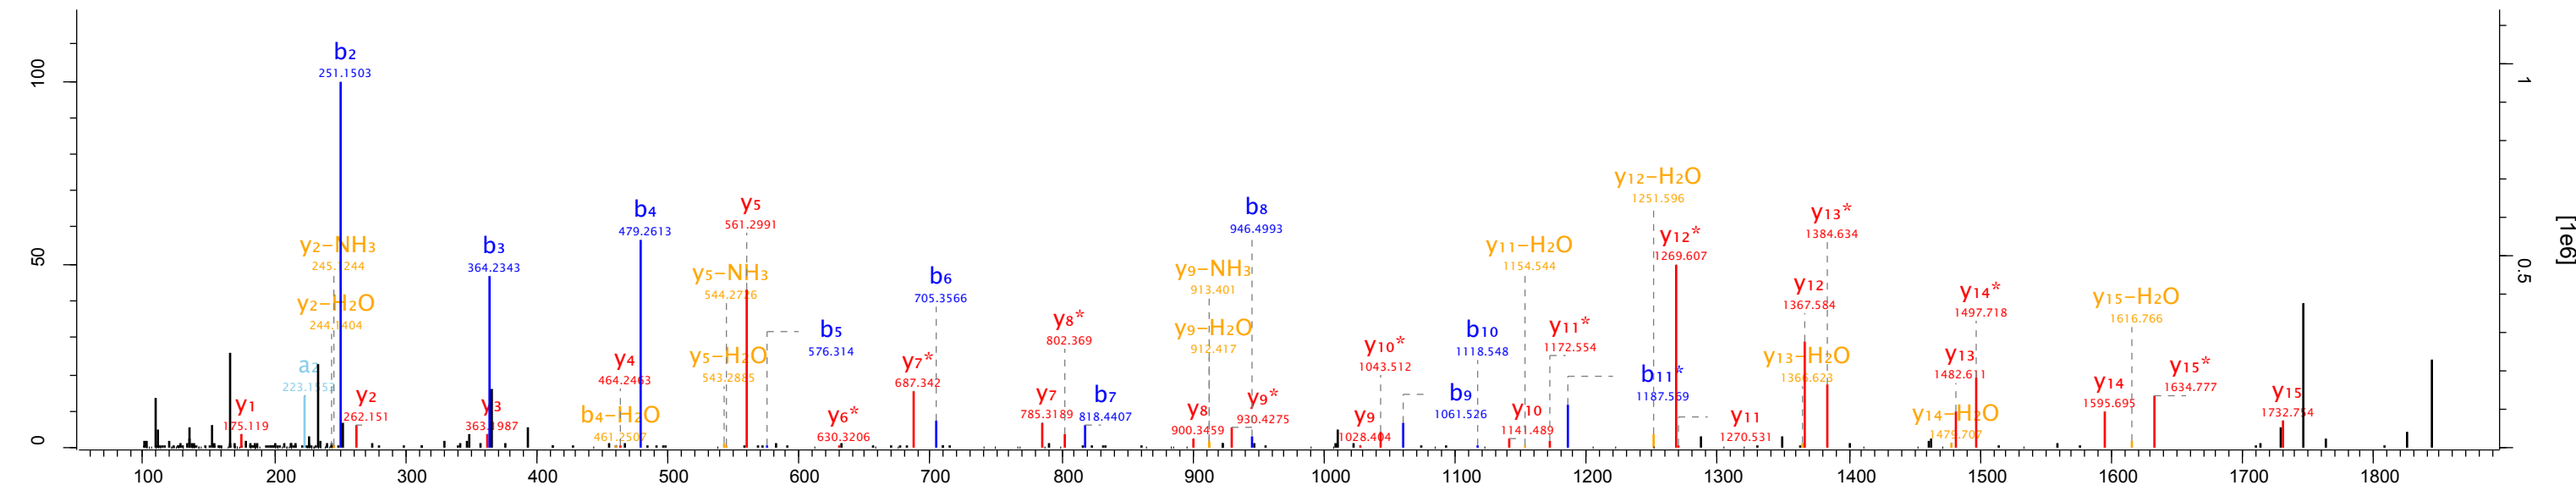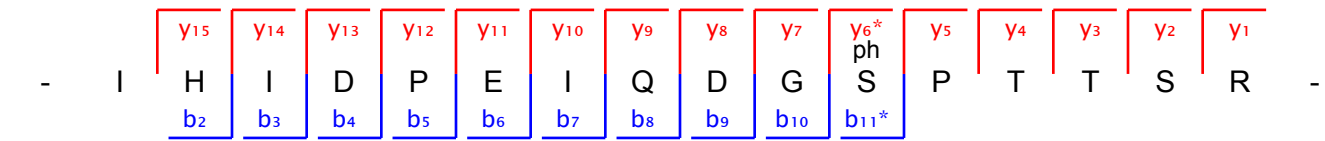

Raw file: 20171215\_MaS\_33SR\_LMH\_phospho\_05  
 Scan: 10019 Method: FTMS; HCD Score: 99.01 m/z: 832.35 Gene names: CHCHD3

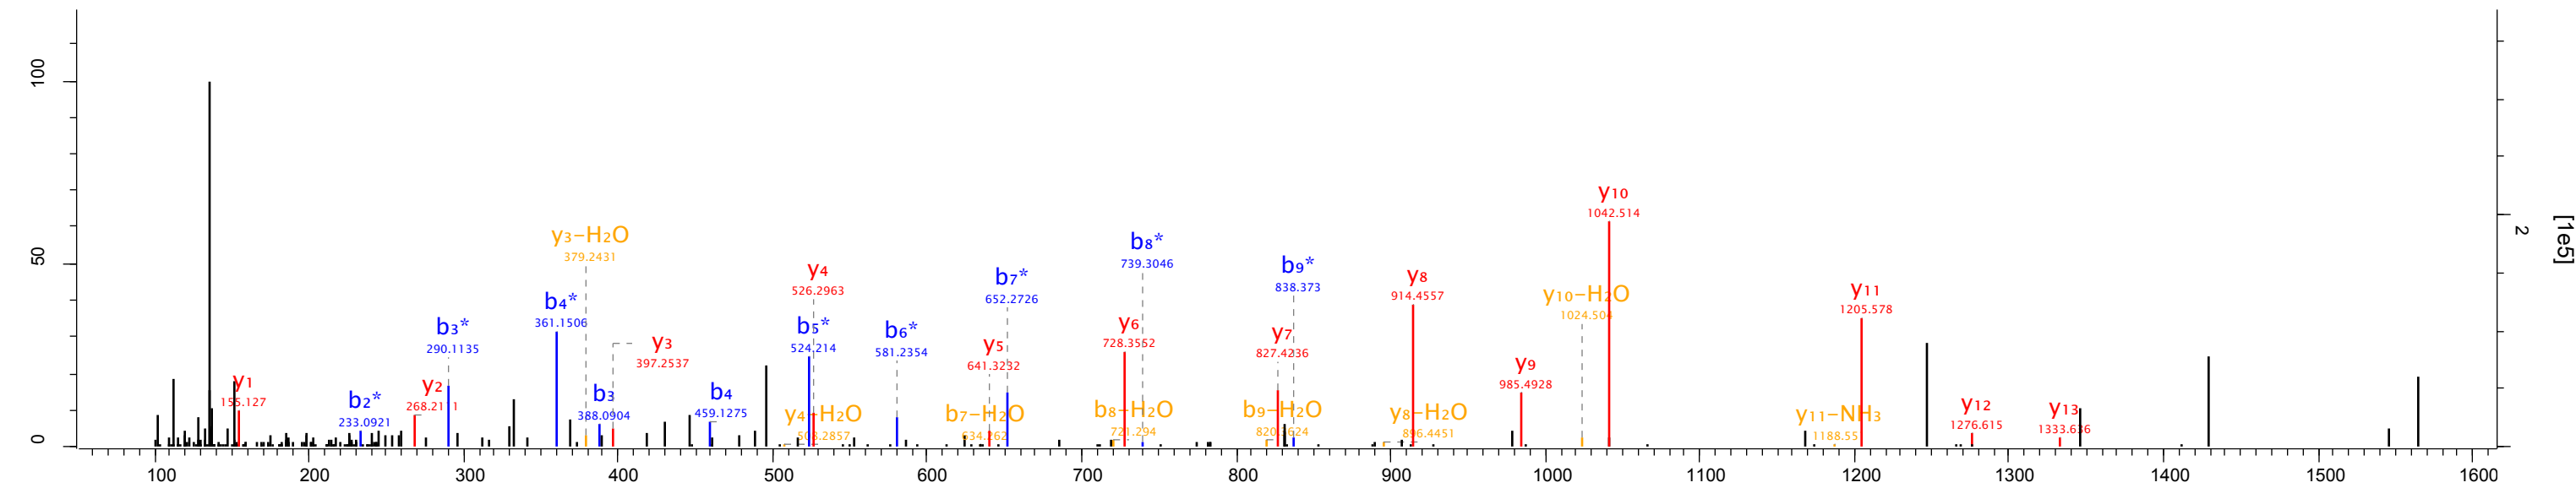

Sequence: - Y ph S G A Y G A S V S D E E L K -

Fragmentation sites (b ions): b2\*, b3, b4, b5\*, b6\*, b7\*, b8\*, b9\*

Fragmentation sites (y ions): y1, y2, y3, y4, y5, y6, y7, y8, y9, y10, y11, y12, y13

Raw file 20171215\_MaS\_33SR\_LMH\_phospho\_05 Scan 10109 Method FTMS; HCD Score 100.93 m/z 560.78 Gene names SRSF6;SRSF4;SRSF5

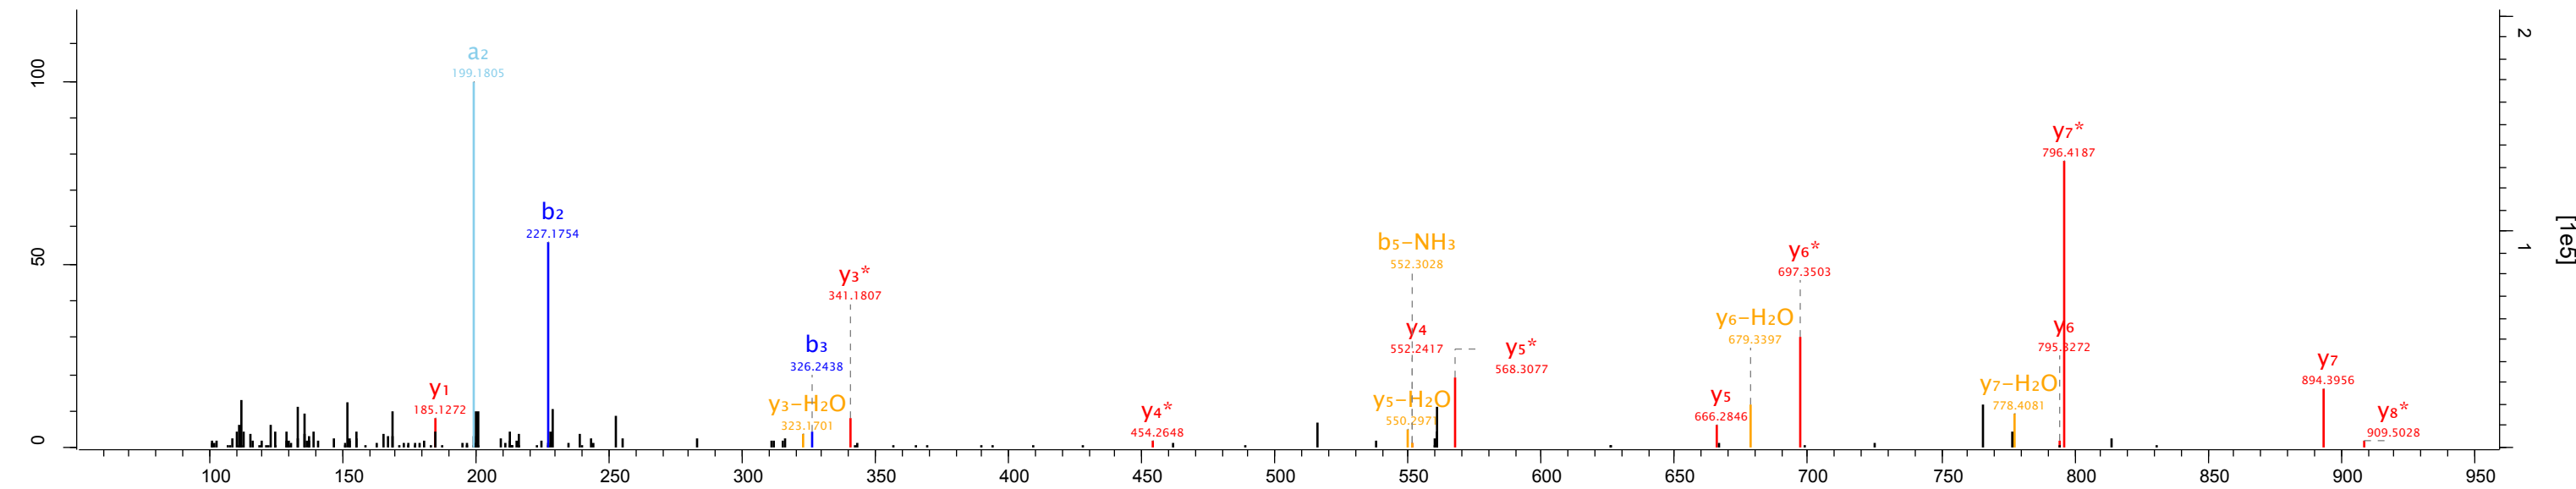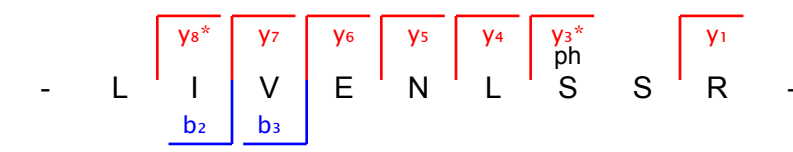



Raw file 20171215\_MaS\_33SR\_LMH\_phospho\_05 Scan 10679 Method FTMS; HCD Score 97.24 m/z 735.84 Gene names SSH2

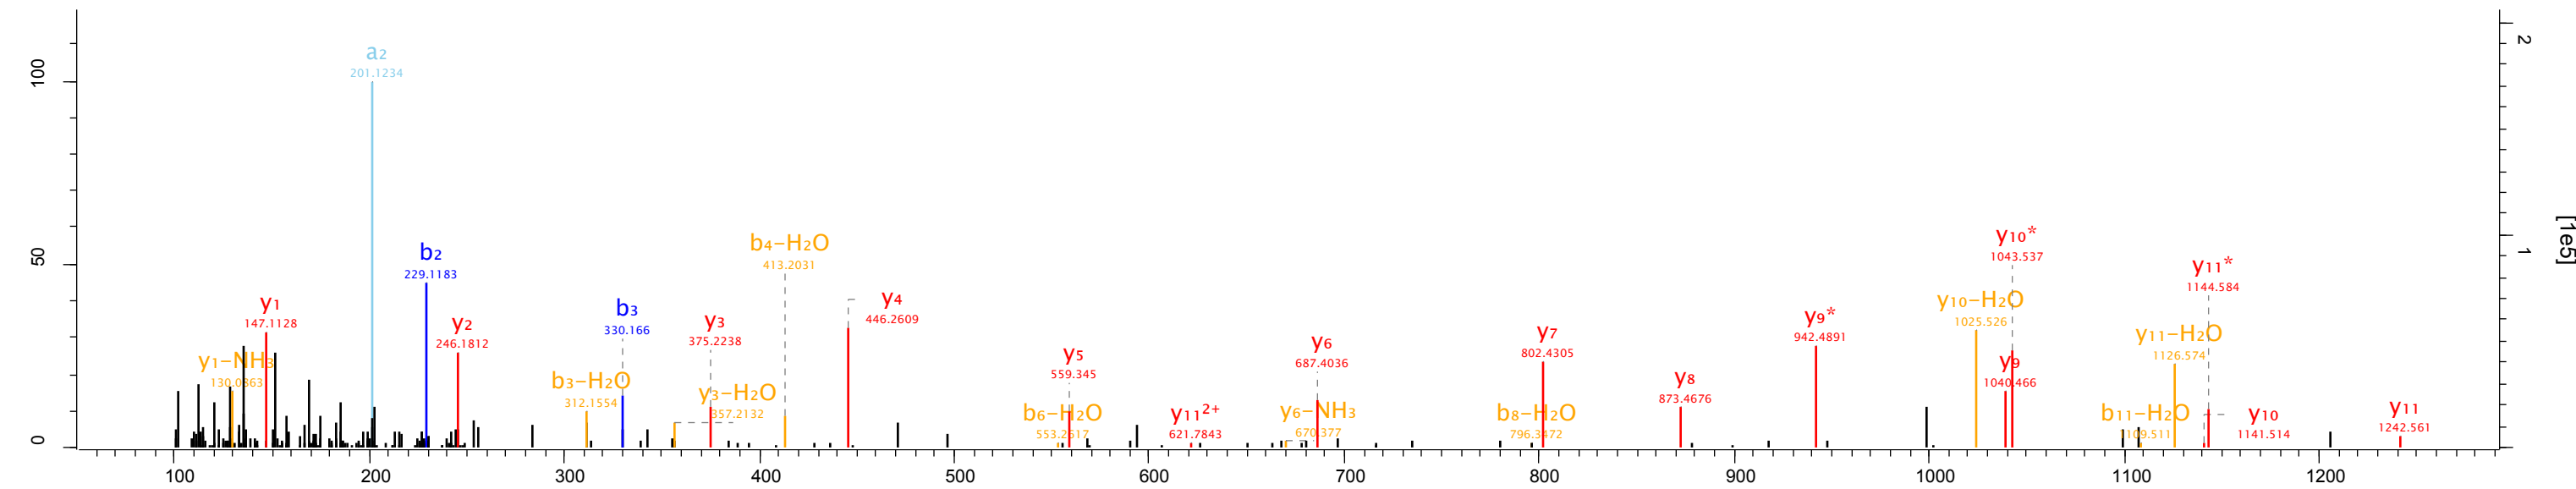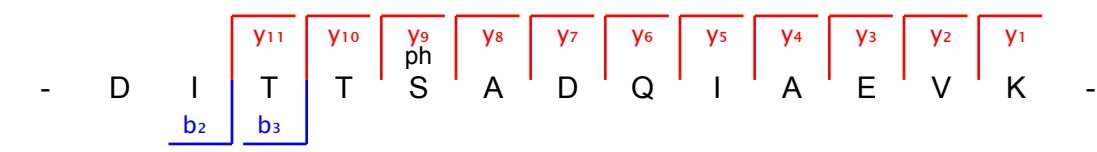

Raw file 20171215\_MaS\_33SR\_LMH\_phospho\_05 Scan 11709 Method FTMS; HCD Score 78.35 m/z 1041.5 Gene names PRRC2A

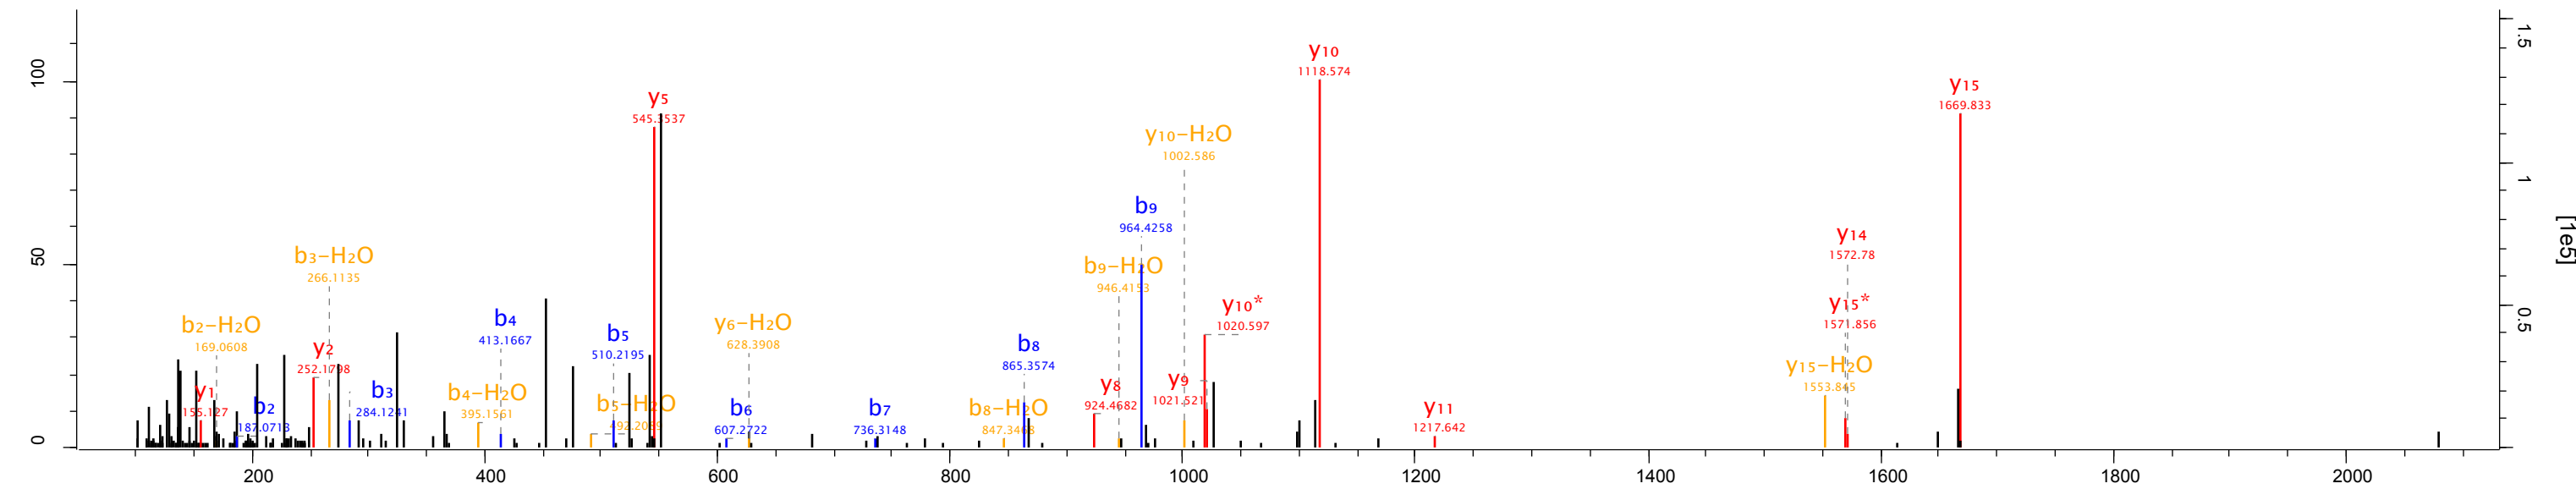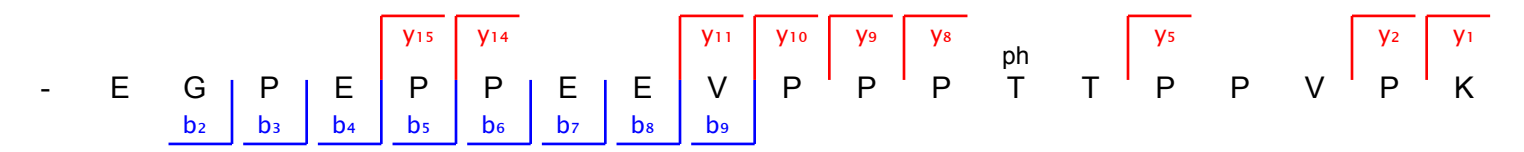

Raw file 20171215\_MaS\_33SR\_LMH\_phospho\_05 Scan 11819 Method FTMS; HCD Score 134.14 m/z 775.87 Gene names RPS3

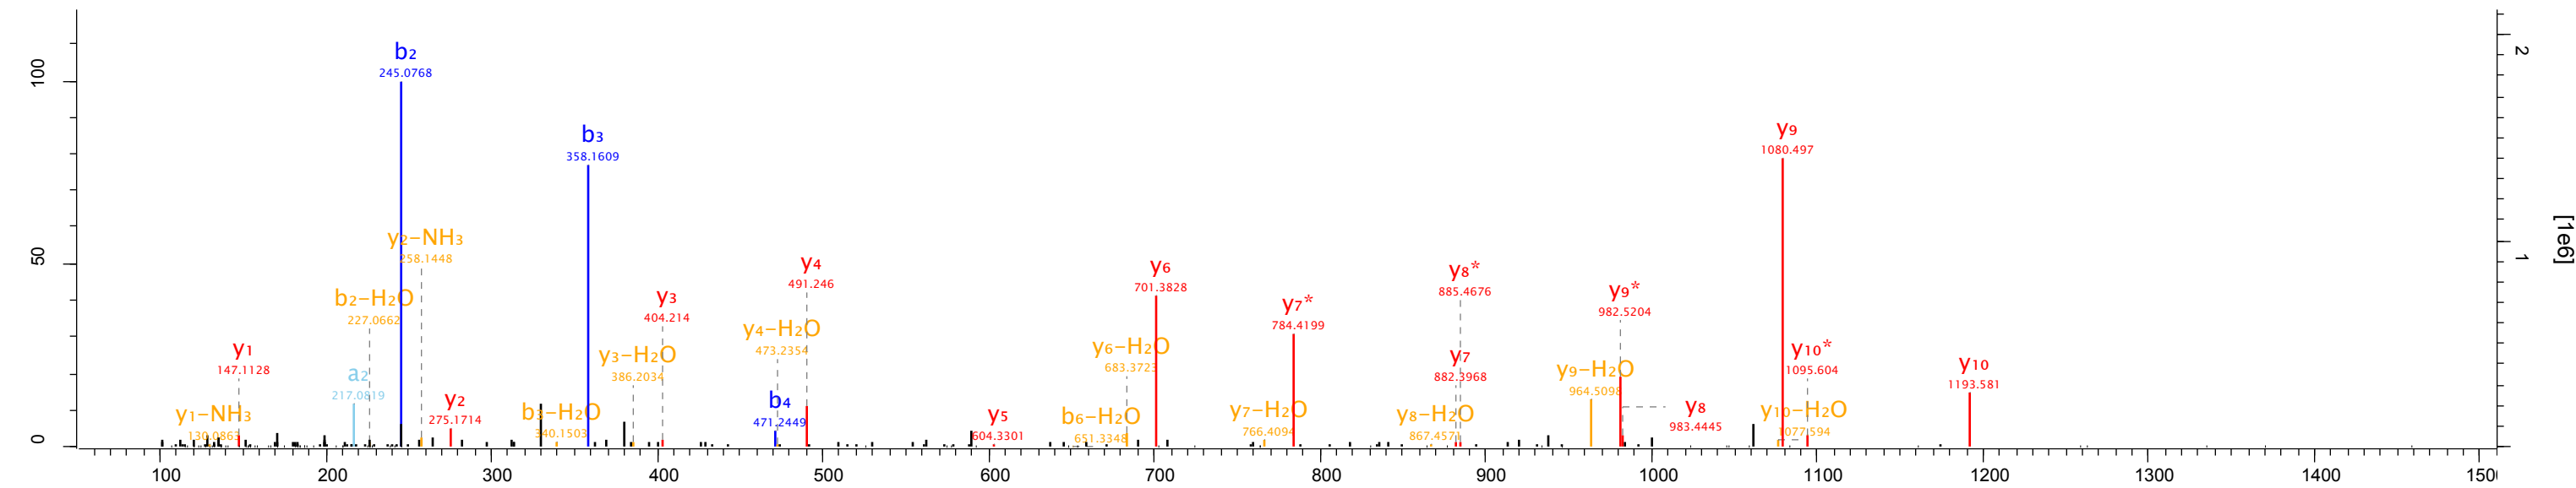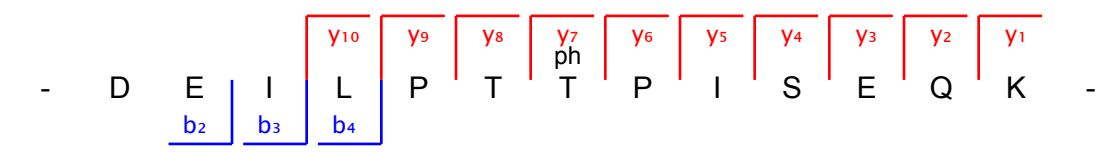

Raw file 20171215\_MaS\_33SR\_LMH\_phospho\_05 Scan 12089 Method FTMS; HCD Score 40.94 m/z 669.32 Gene names SAFB2

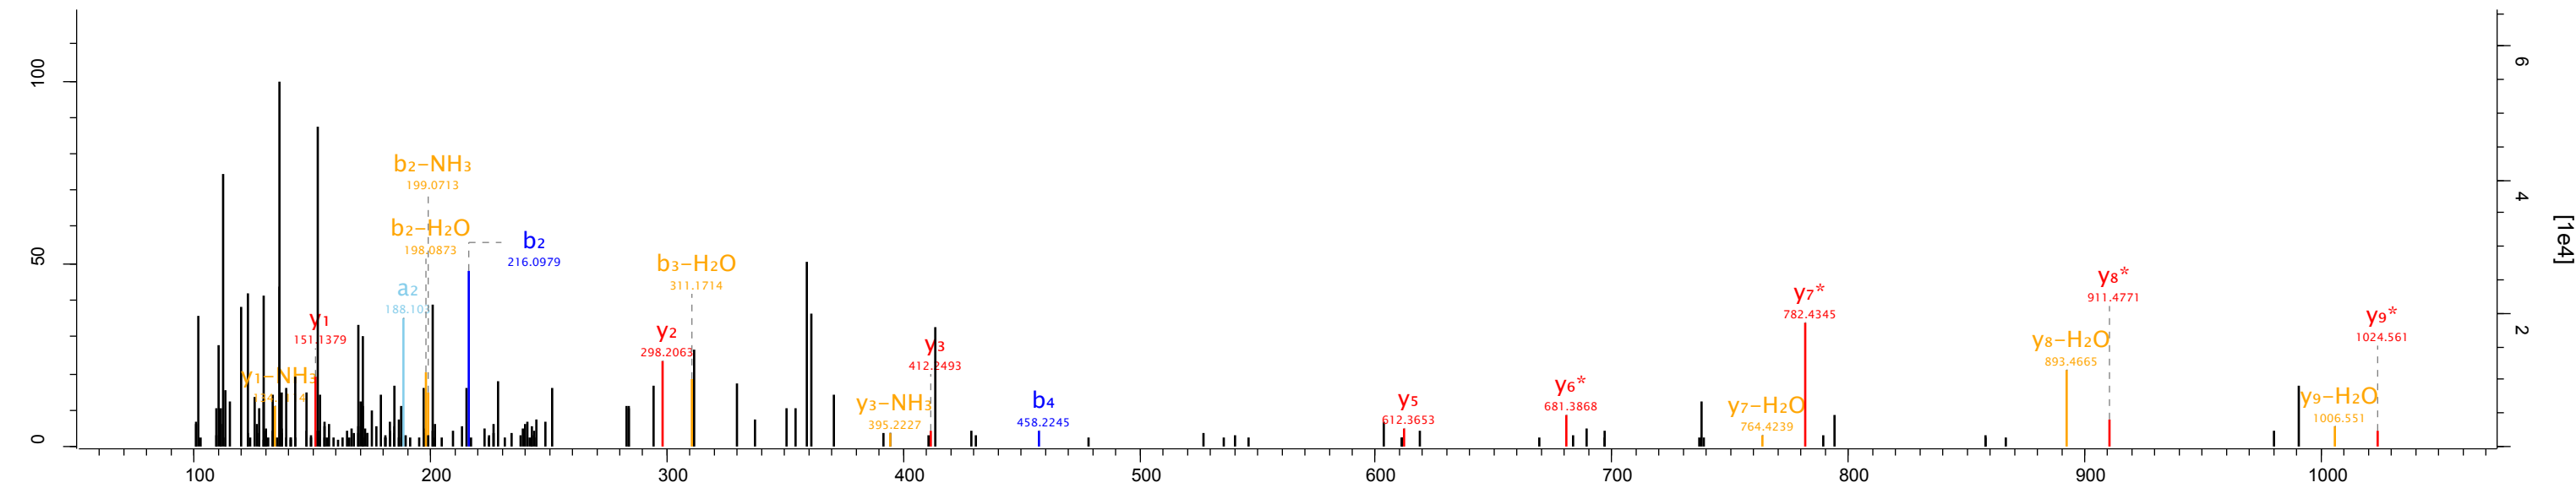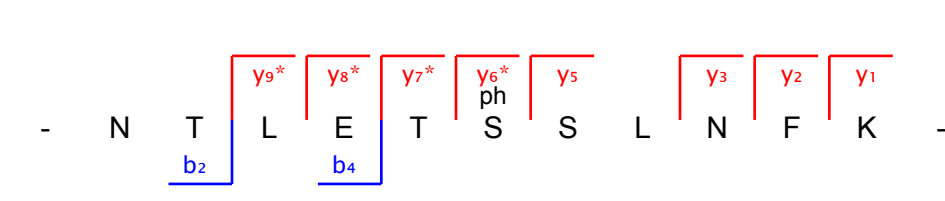

Raw file: 20171215\_MaS\_33SR\_LMH\_phospho\_05  
 Scan: 14439 Method: FTMS; HCD Score: 91.59 m/z: 861.92 Gene names: HIST1H1D

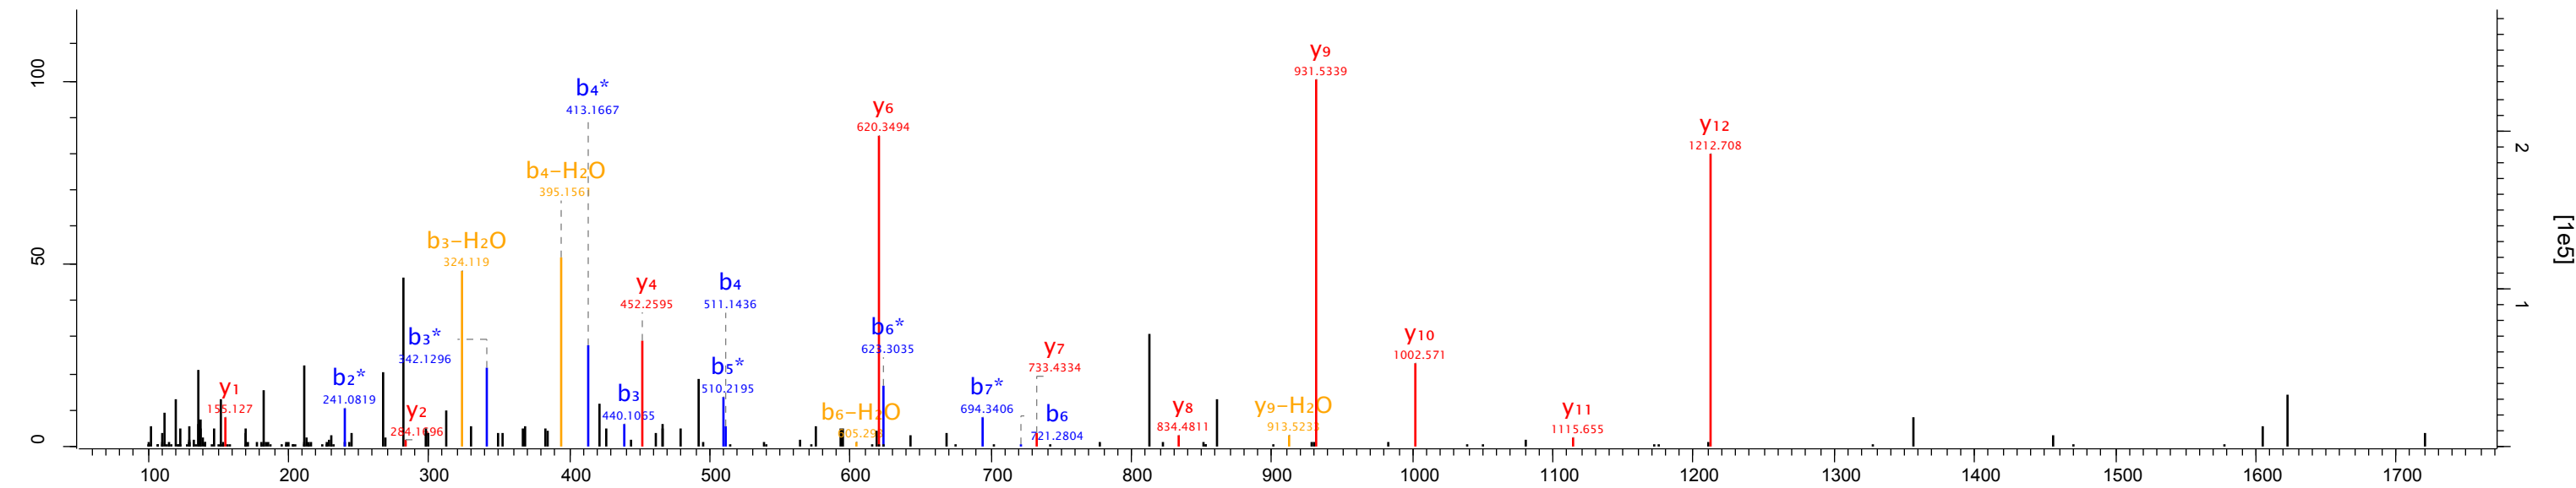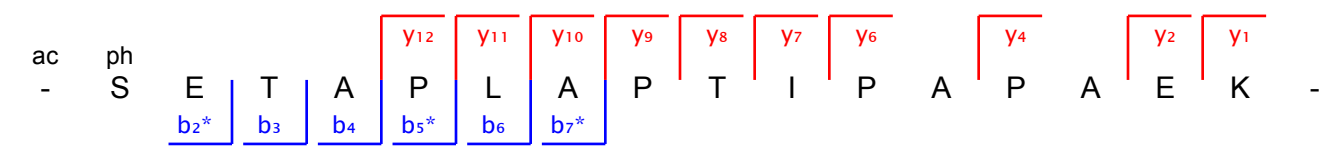

Raw file 20171215\_MaS\_33SR\_LMH\_phospho\_05 Scan 2379 Method FTMS; HCD Score 278.08 m/z 864.83 Gene names PNN

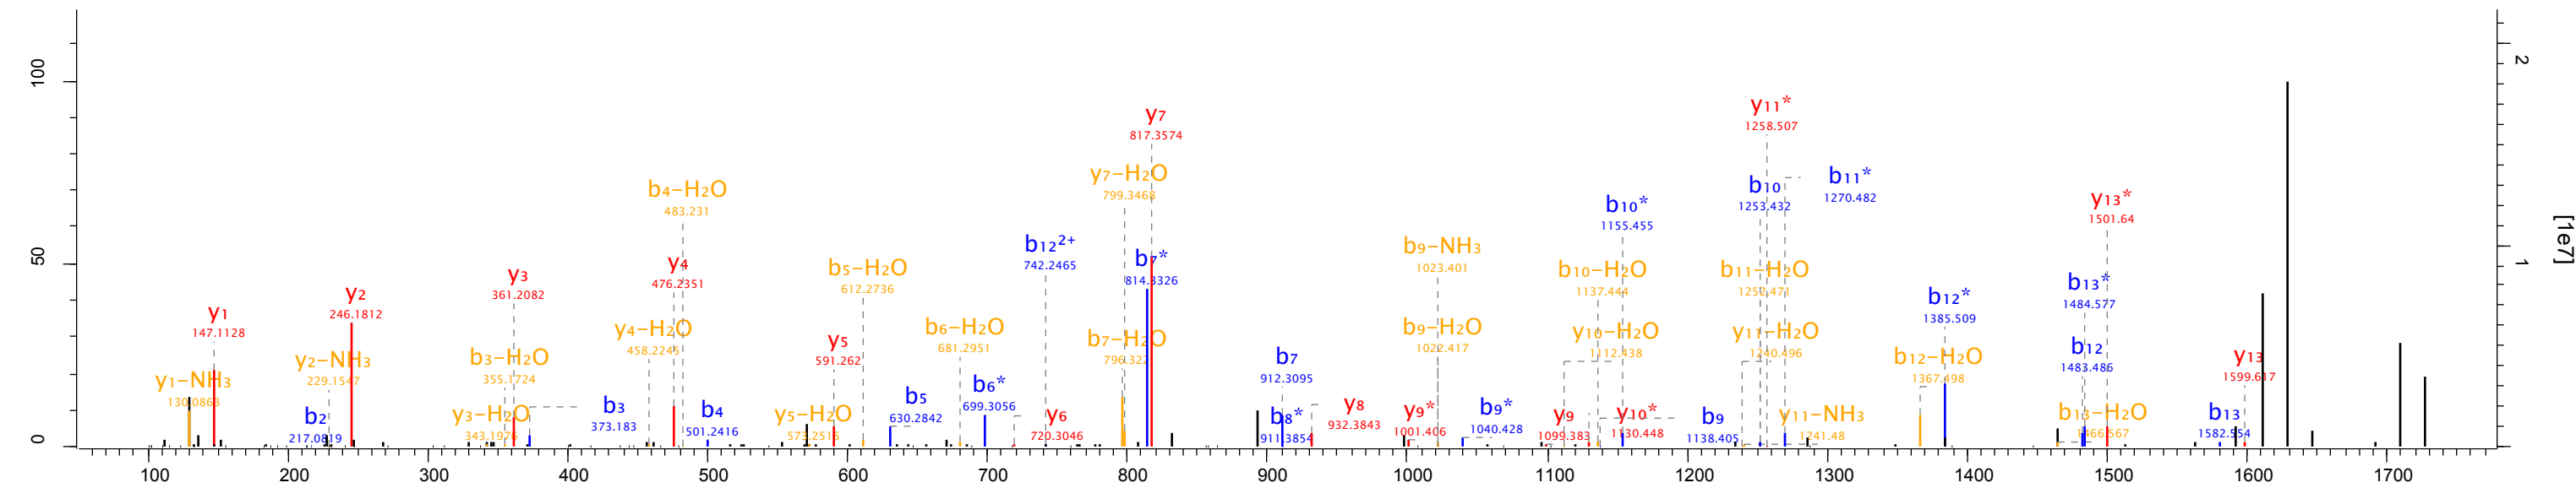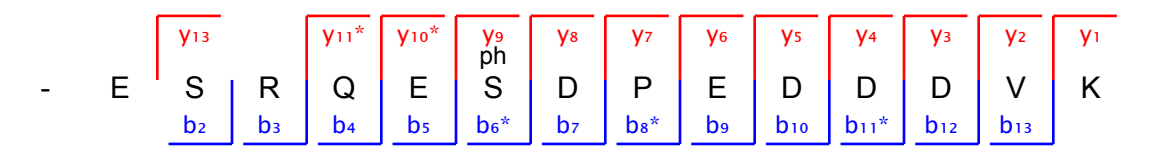

Raw file 20171215\_MaS\_33SR\_LMH\_phospho\_05 Scan 2719 Method FTMS; HCD Score 71.24 m/z 589.26 Gene names TAB2

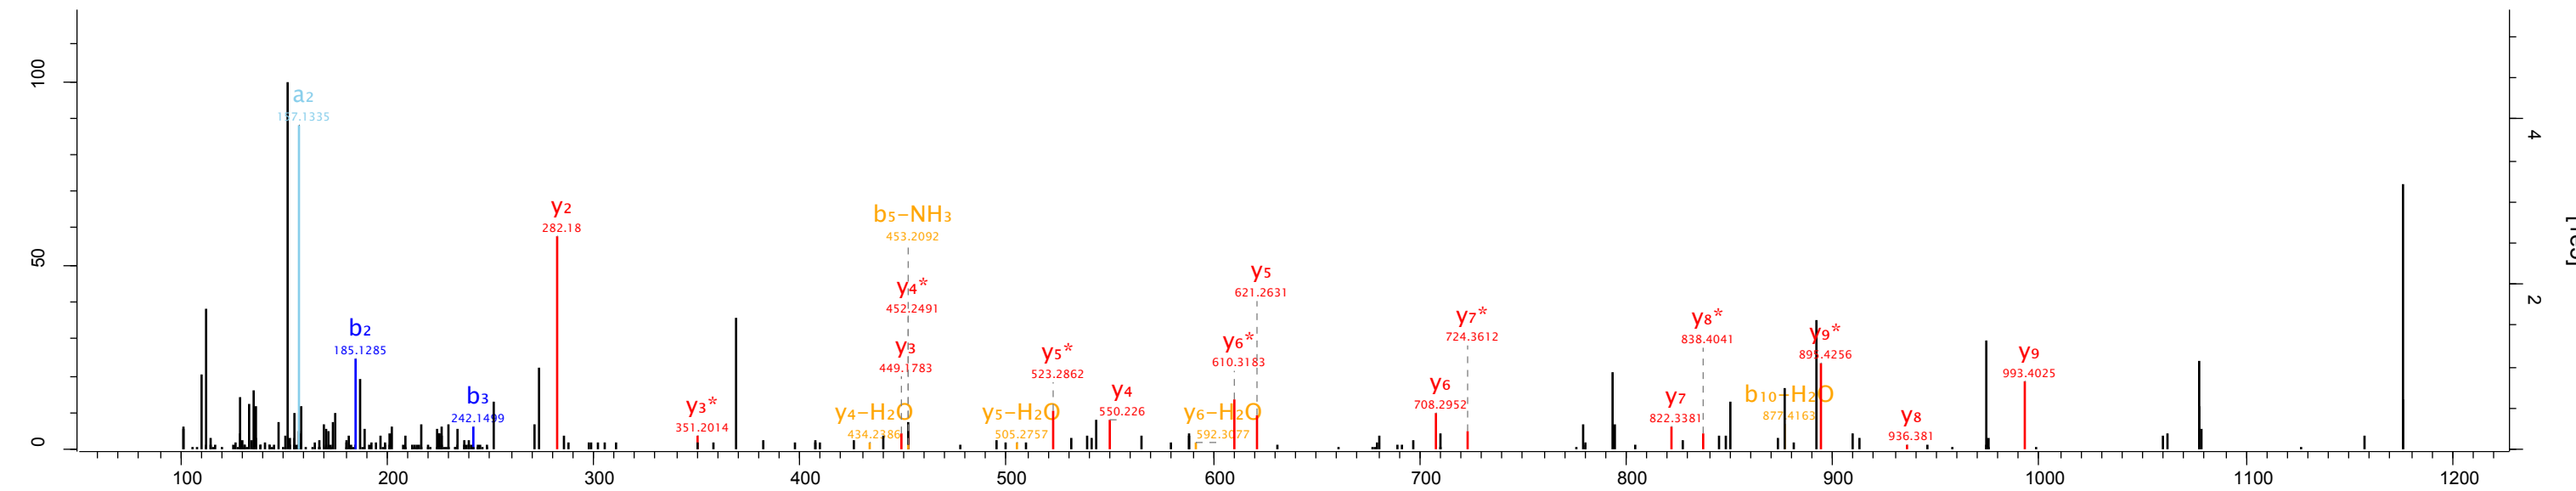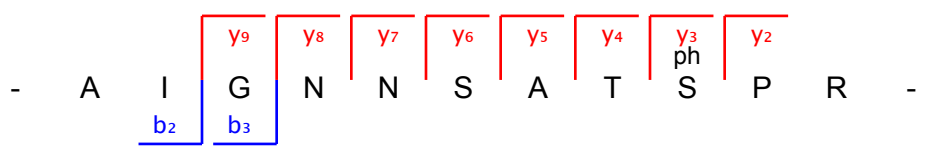

Raw file 20171215\_MaS\_33SR\_LMH\_phospho\_05 Scan 2859 Method FTMS; HCD Score 197.25 m/z 683.76 Gene names CLSPN

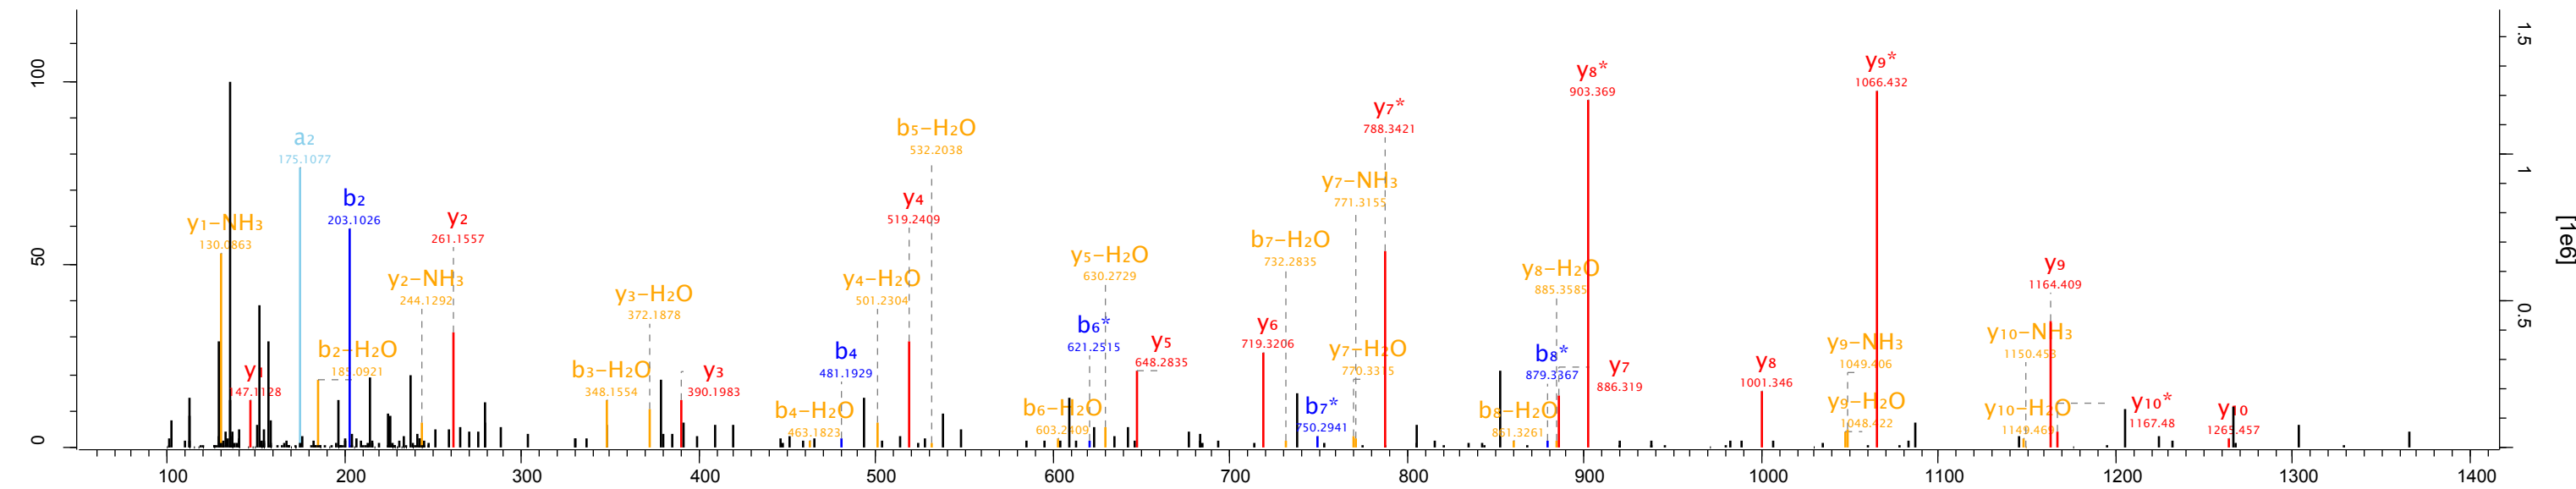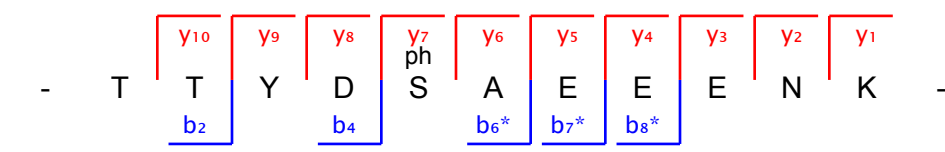



Raw file 20171215\_MaS\_33SR\_LMH\_phospho\_05 Scan 3019 Method FTMS; HCD Score 135.94 m/z 440.89 Gene names SRRM2

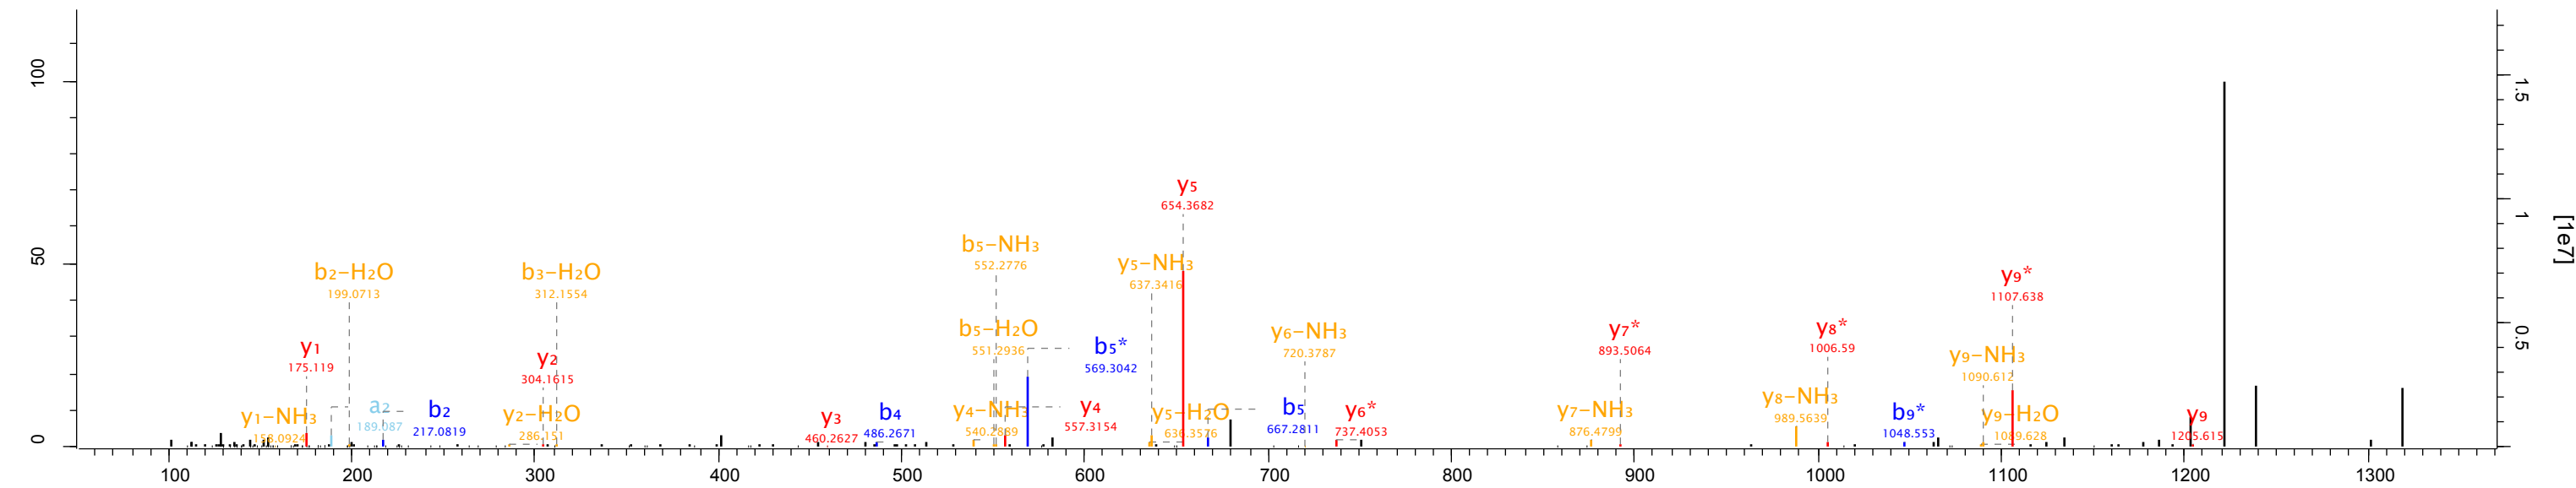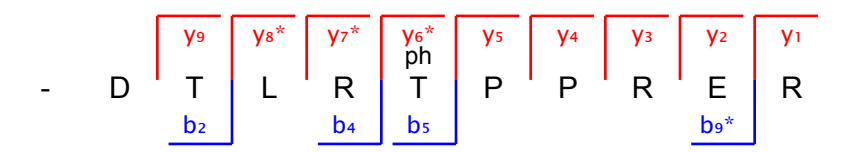

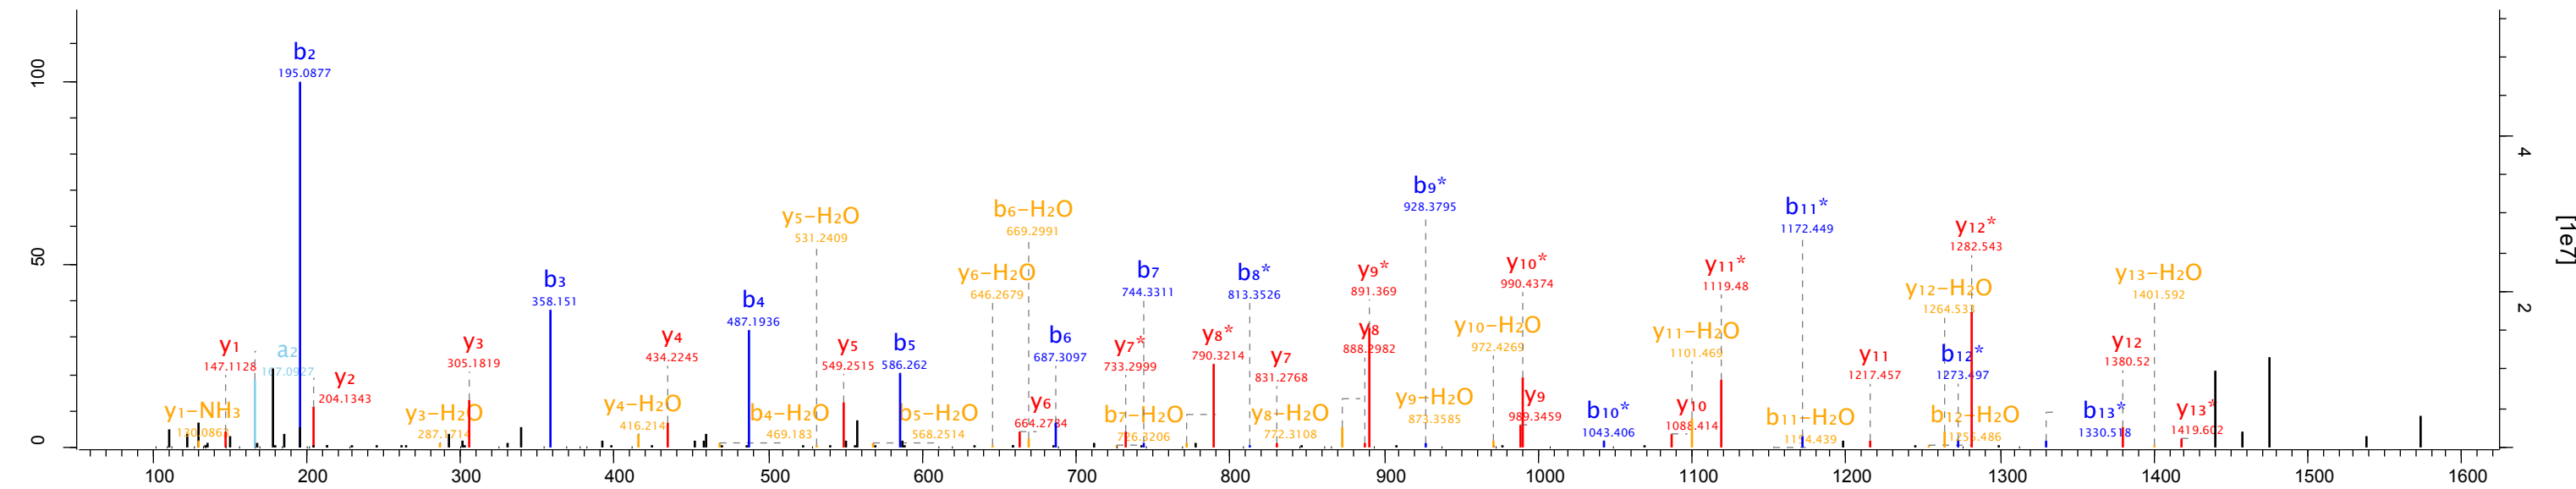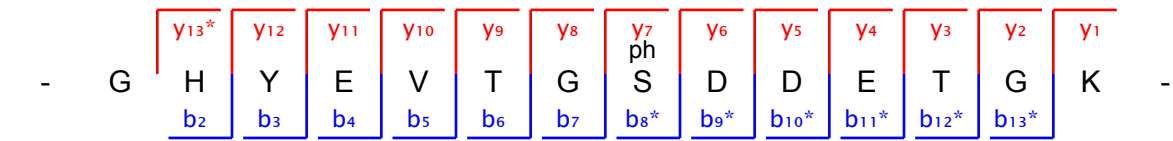

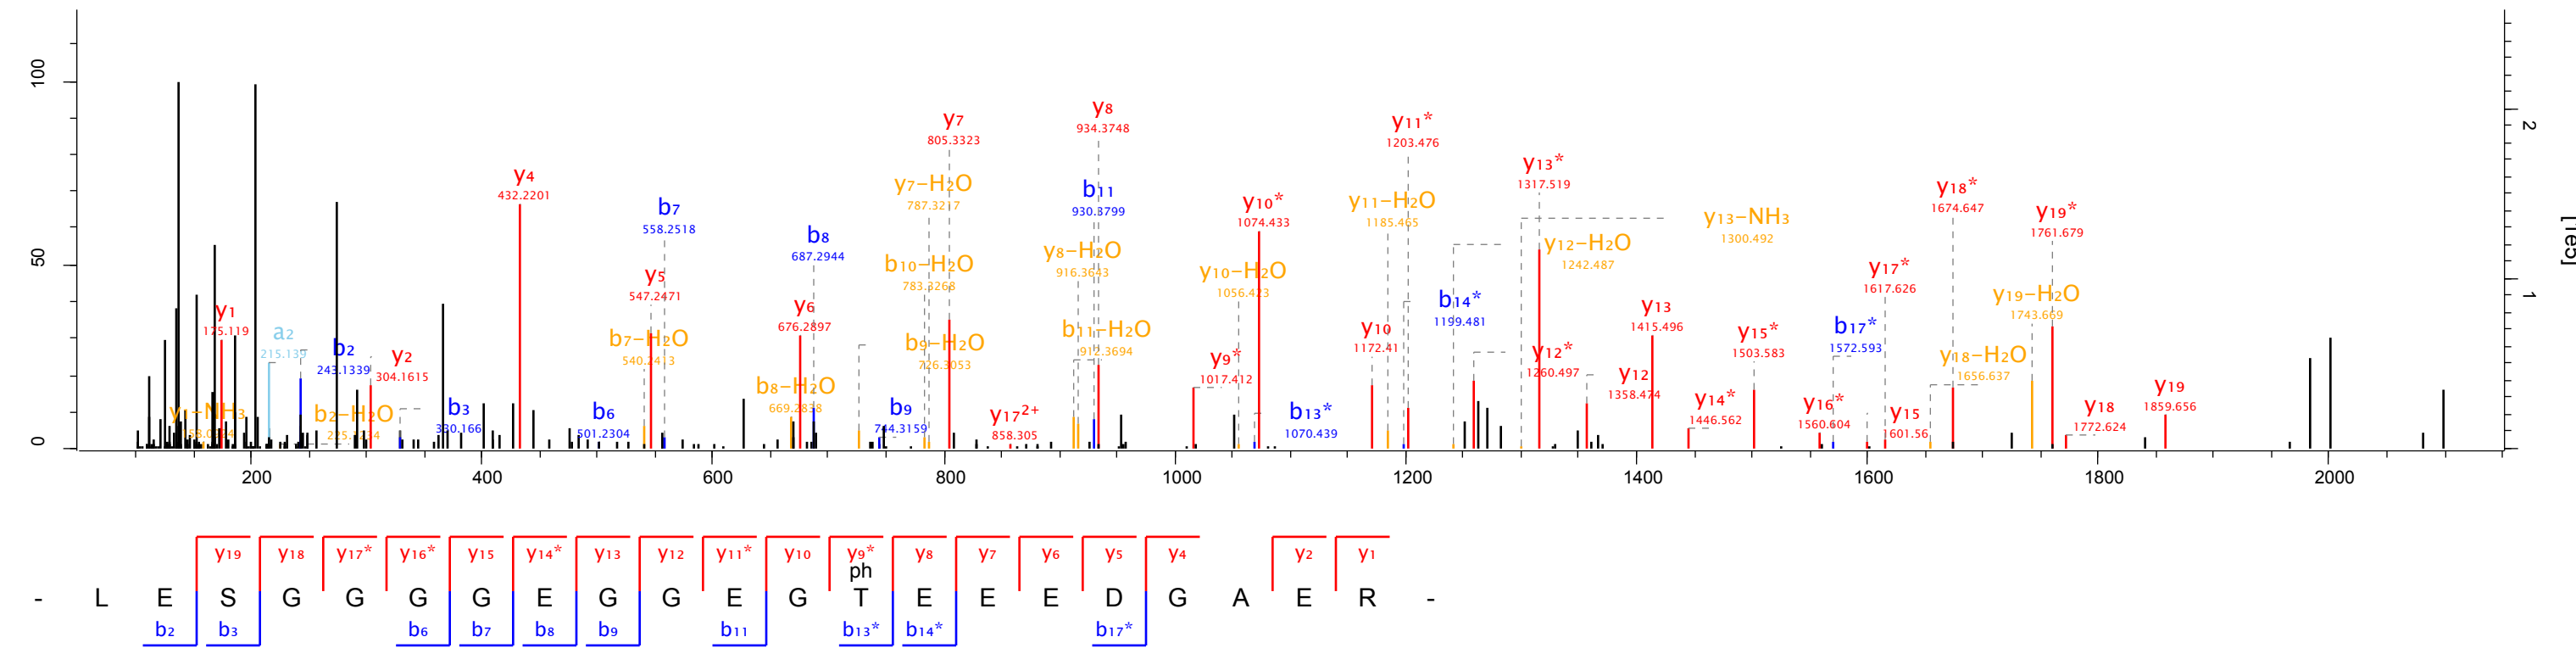

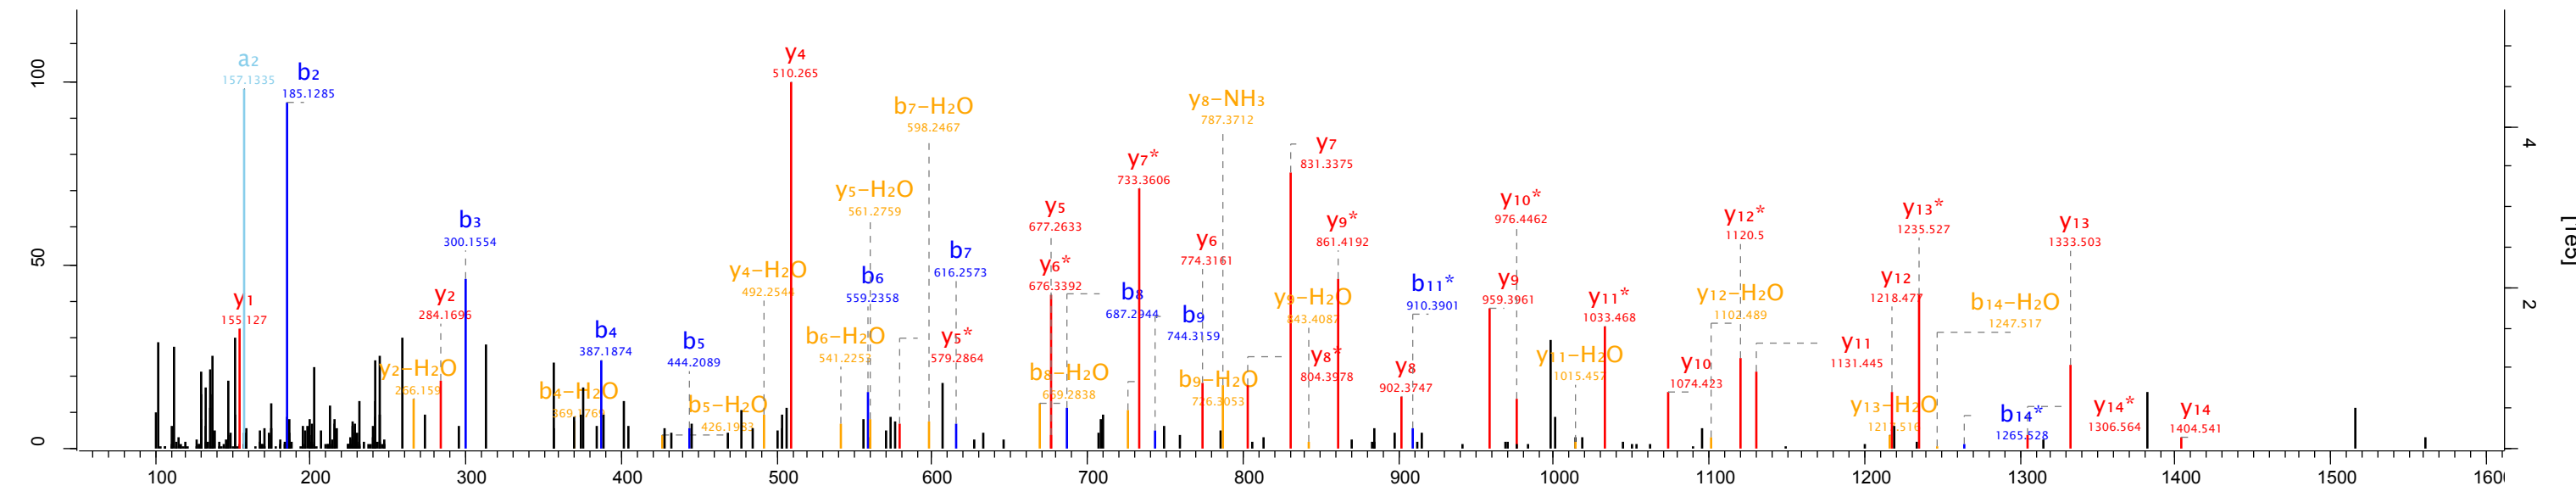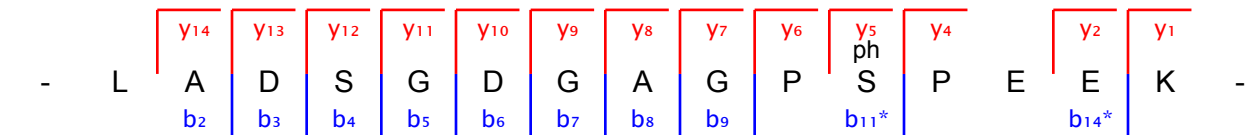

Raw file 20171215\_MaS\_33SR\_LMH\_phospho\_05 Scan 3649 Method FTMS; HCD Score 146.59 m/z 607.28 Gene names POLD3

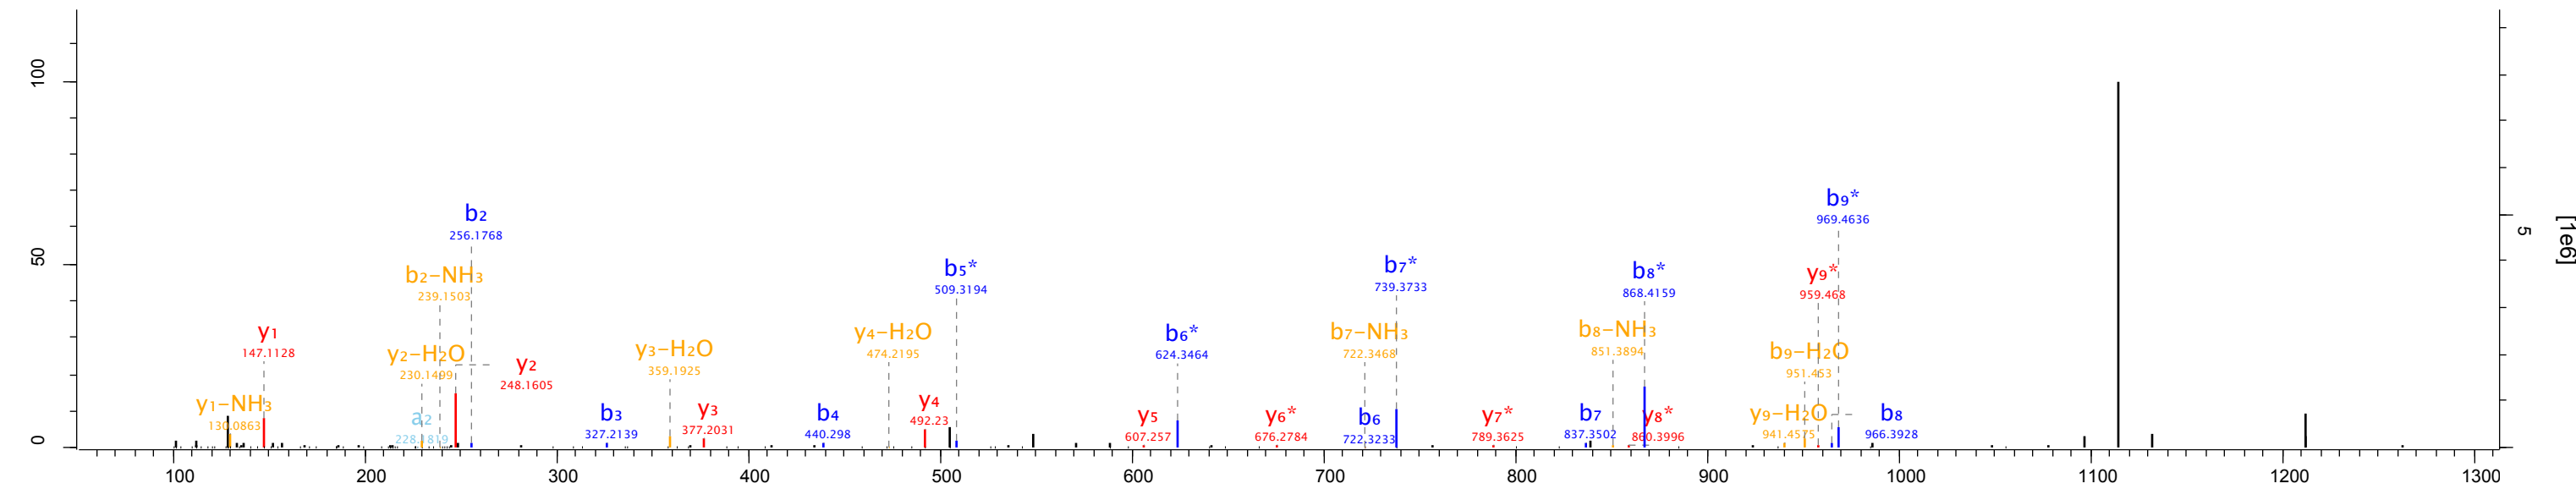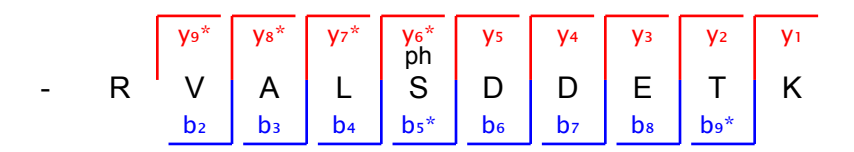

Raw file 20171215\_MaS\_33SR\_LMH\_phospho\_05 Scan 3969 Method FTMS; HCD Score 145.7 m/z 584.26 Gene names NMT1

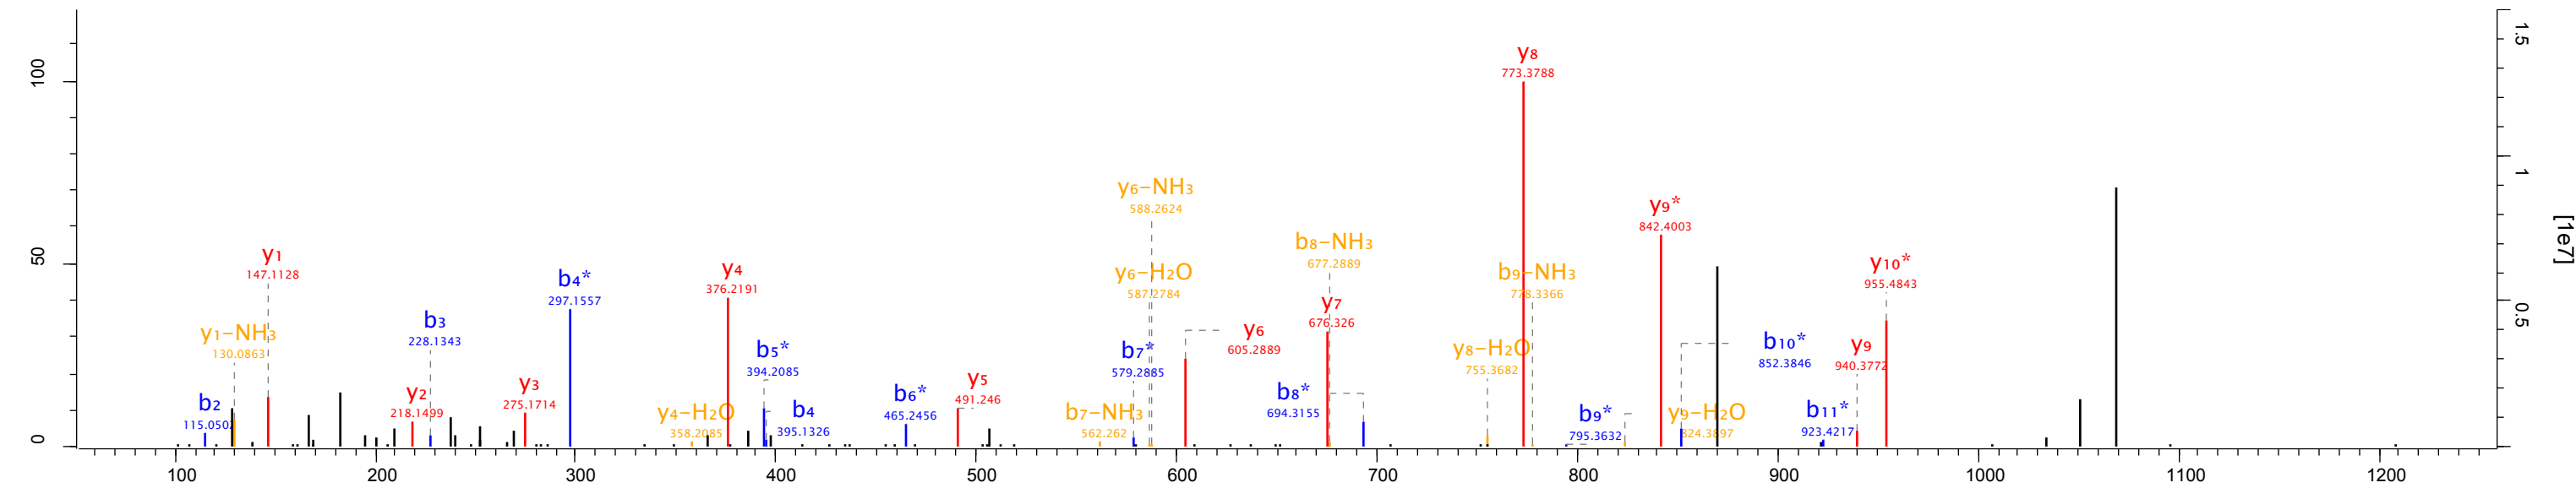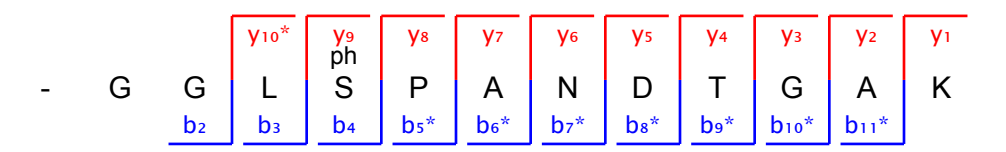

Raw file 20171215\_MaS\_33SR\_LMH\_phospho\_05 Scan 4319 Method FTMS; HCD Score 43.53 m/z 706.8 Gene names E2F7

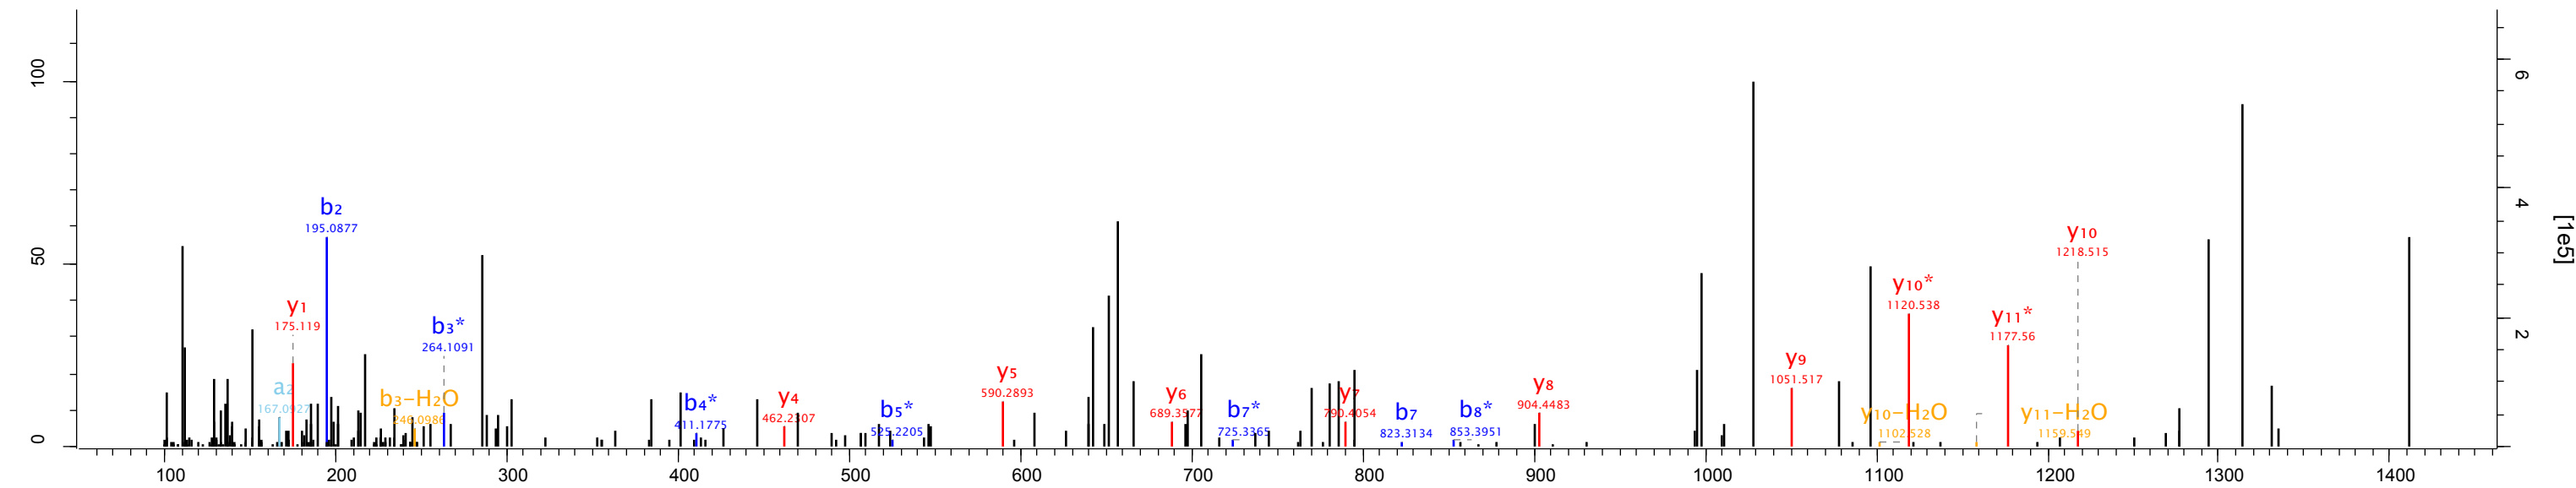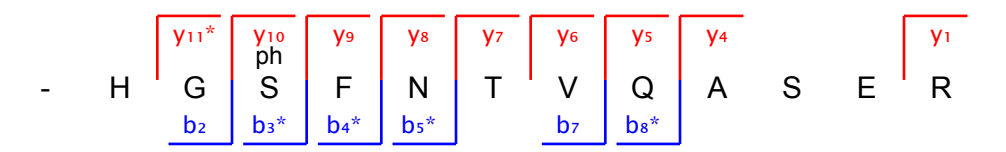

Raw file 20171215\_MaS\_33SR\_LMH\_phospho\_05 Scan 4349 Method FTMS; HCD Score 122.7 m/z 505.76 Gene names INCENP

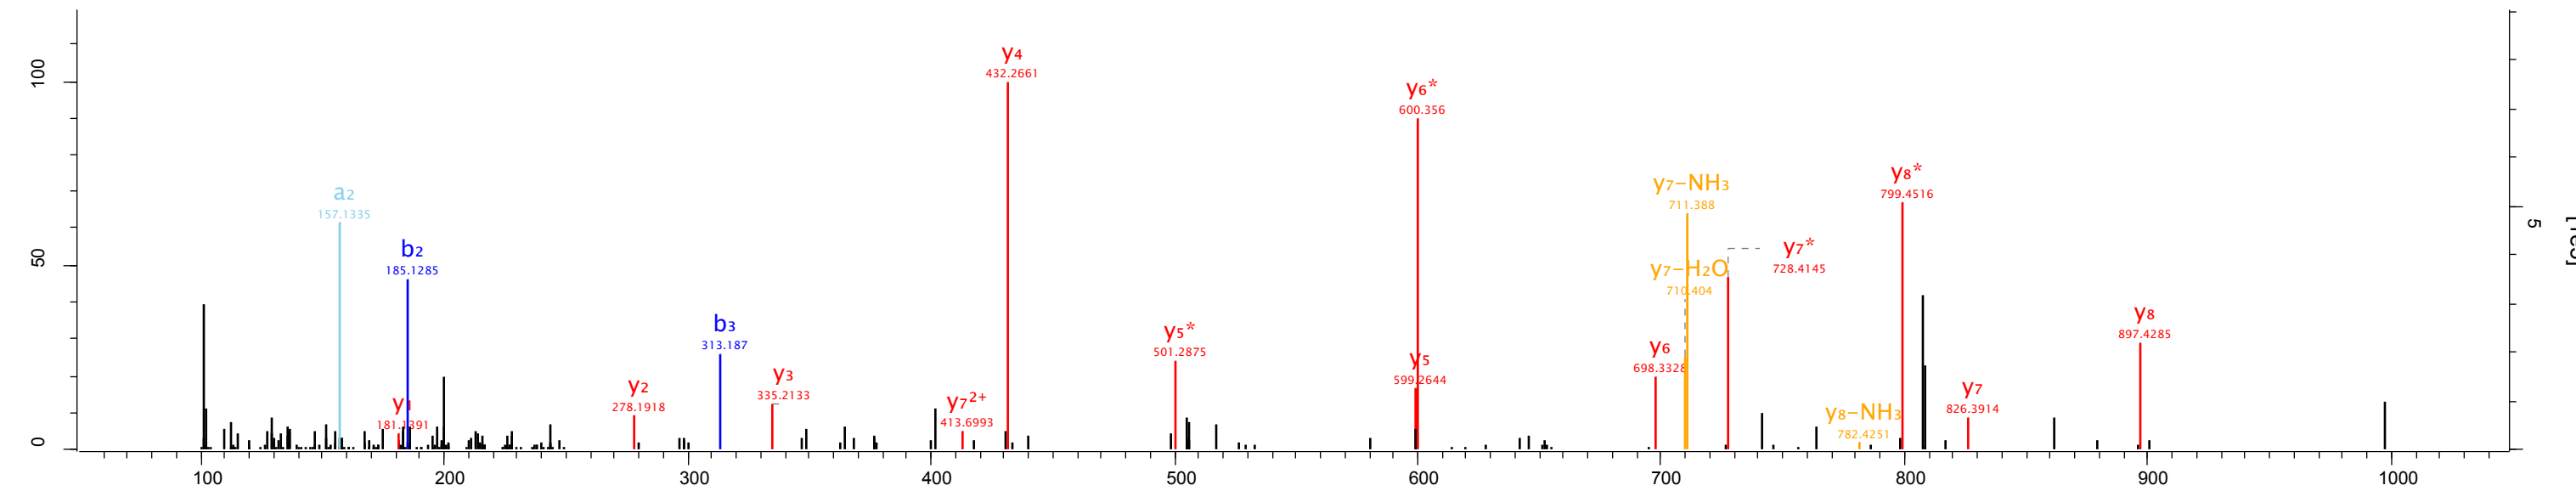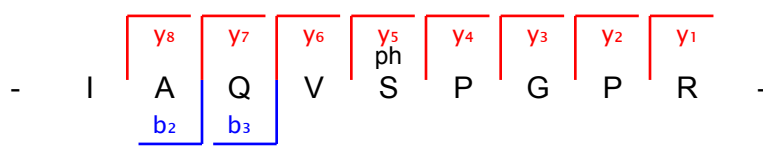



Raw file 20171215\_MaS\_33SR\_LMH\_phospho\_05 Scan 5049 Method FTMS; HCD Score 185.32 m/z 630.78 Gene names UBAP2L

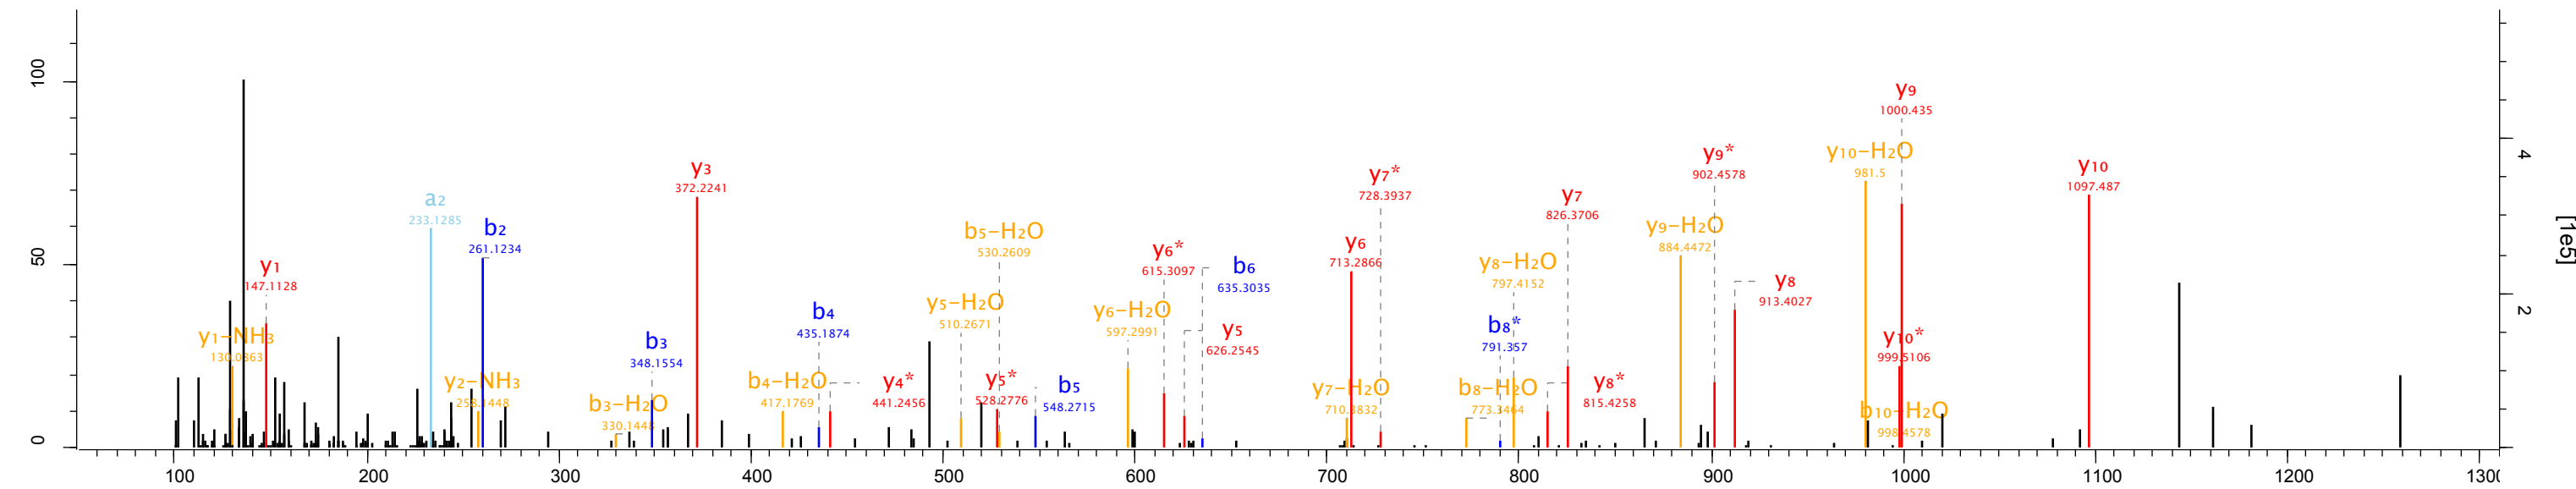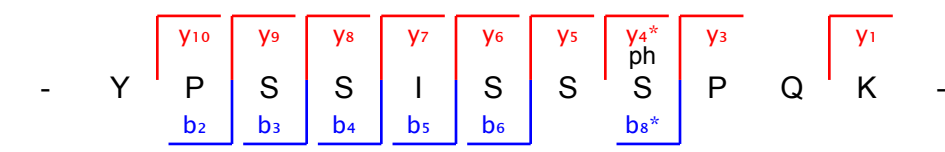

Raw file 20171215\_MaS\_33SR\_LMH\_phospho\_05 Scan 5449 Method FTMS; HCD Score 89.91 m/z 454.2 Gene names UNC13D

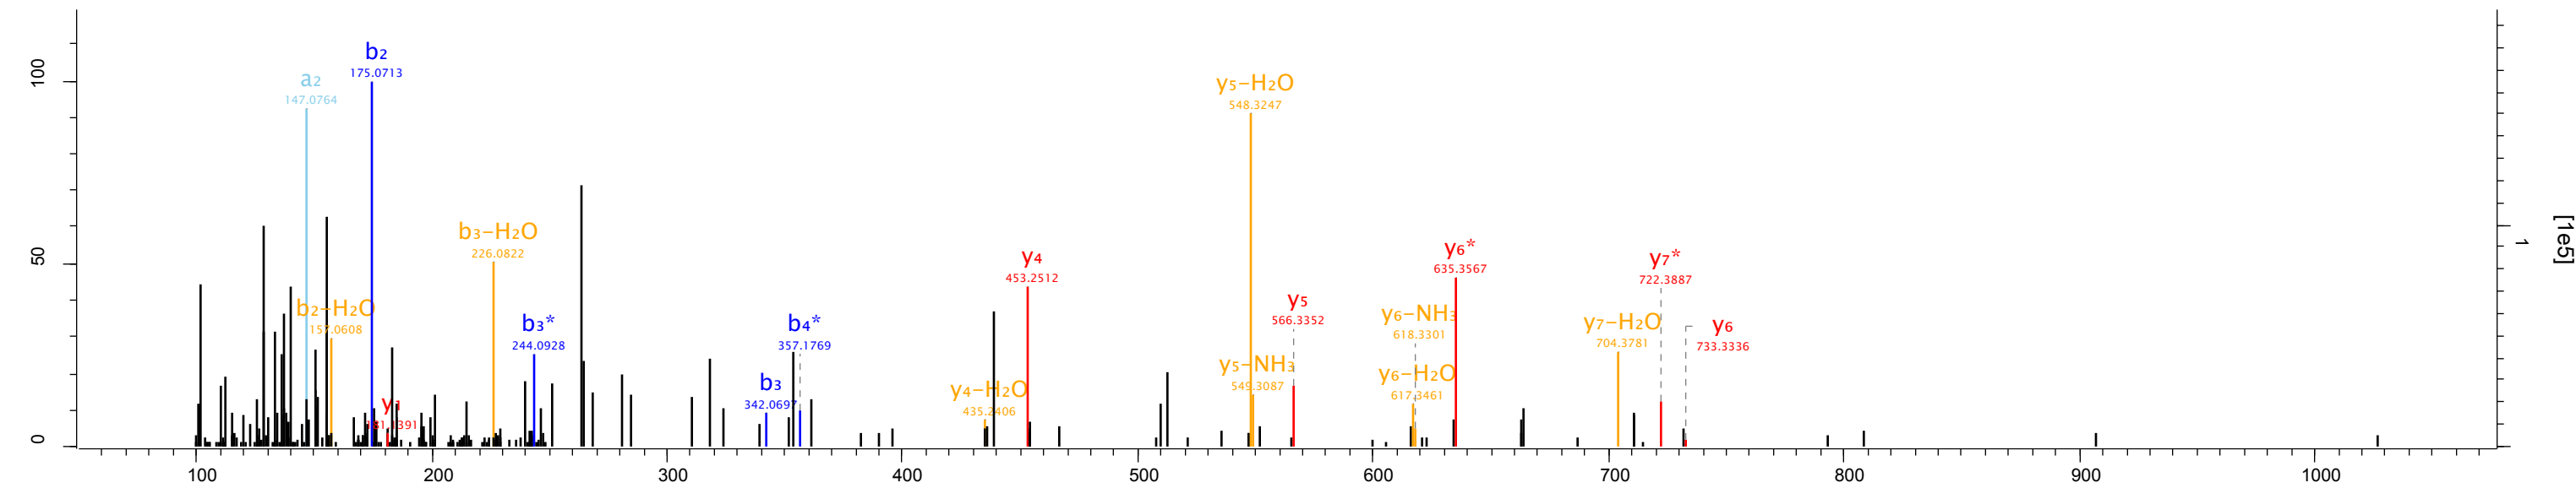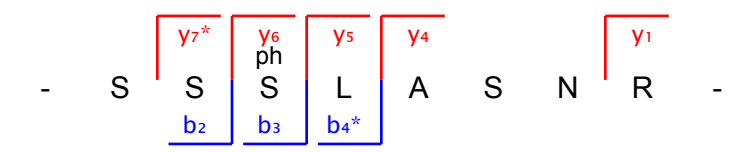

Raw file 20171215\_MaS\_33SR\_LMH\_phospho\_05 Scan 5459 Method FTMS; HCD Score 73.3 m/z 654.79 Gene names MLPH

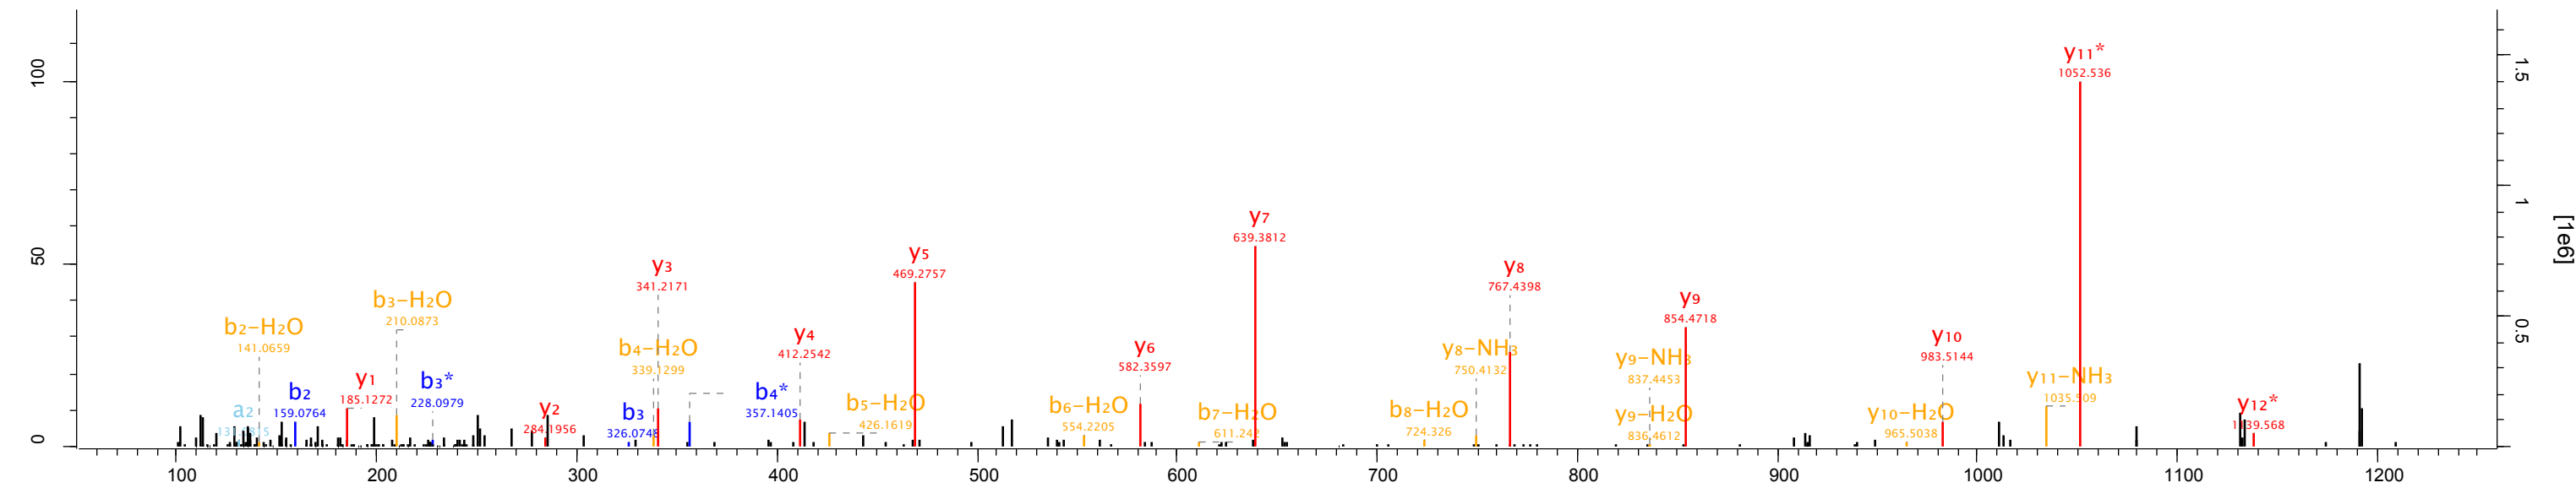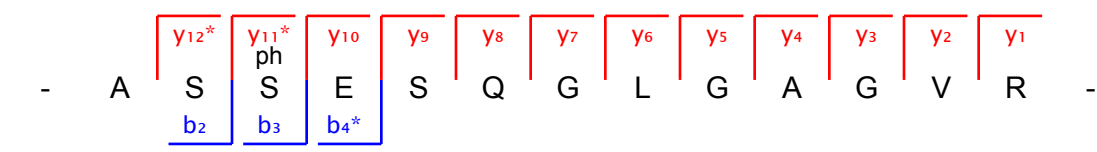

Raw file 20171215\_MaS\_33SR\_LMH\_phospho\_05 Scan 6519 Method FTMS; HCD Score 145.6 m/z 572.25 Gene names PSMA5

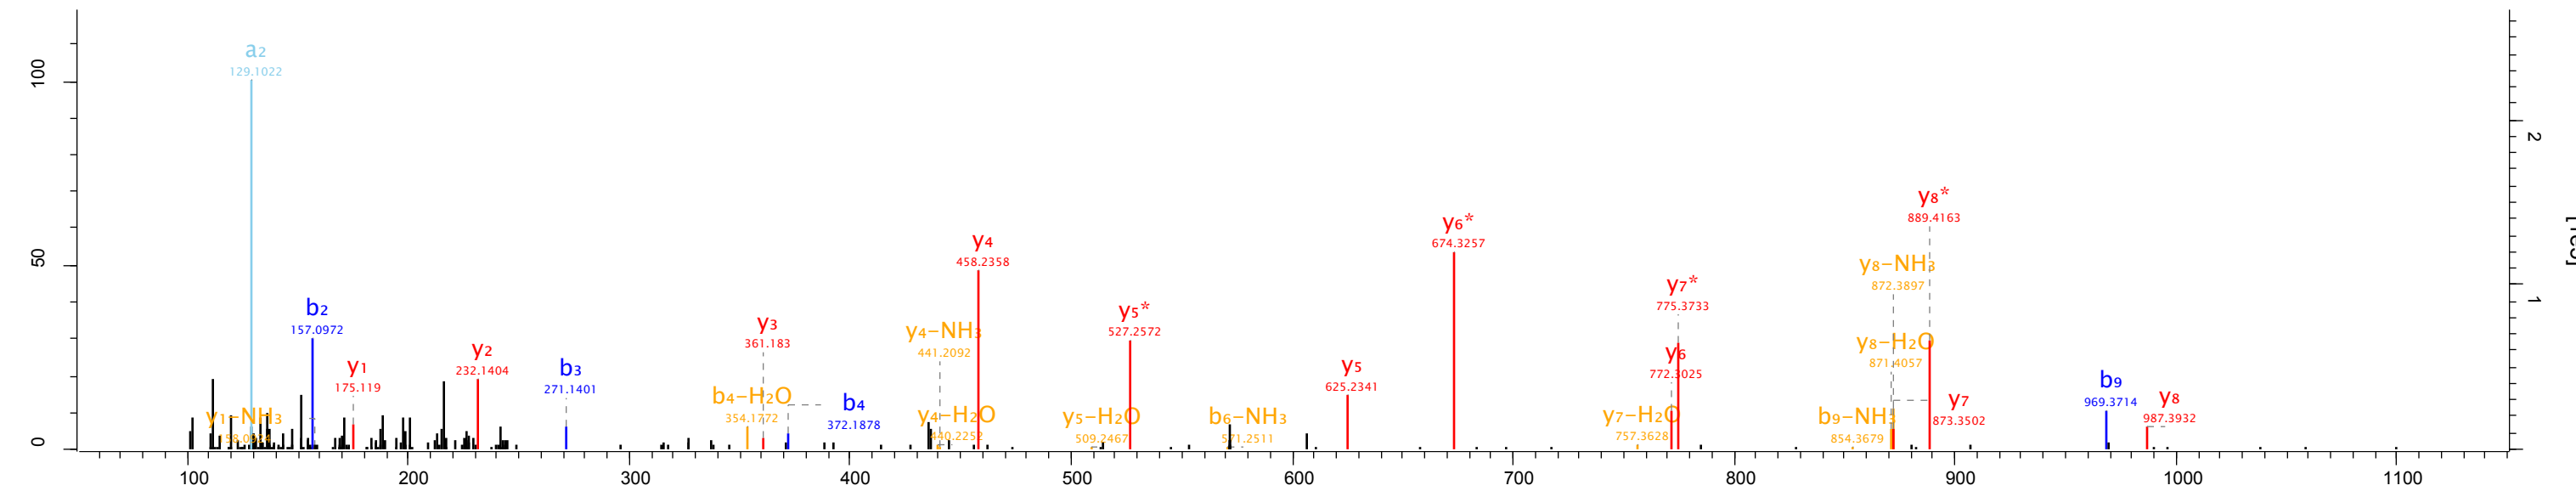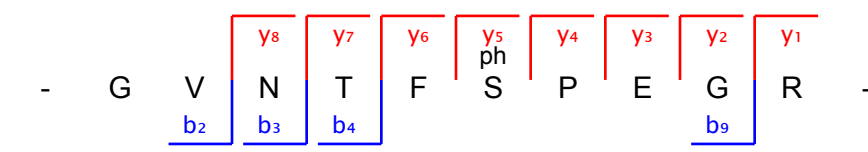

Raw file 20171215\_MaS\_33SR\_LMH\_phospho\_05 Scan 6549 Method FTMS; HCD Score 65.03 m/z 493.72 Gene names NMT2

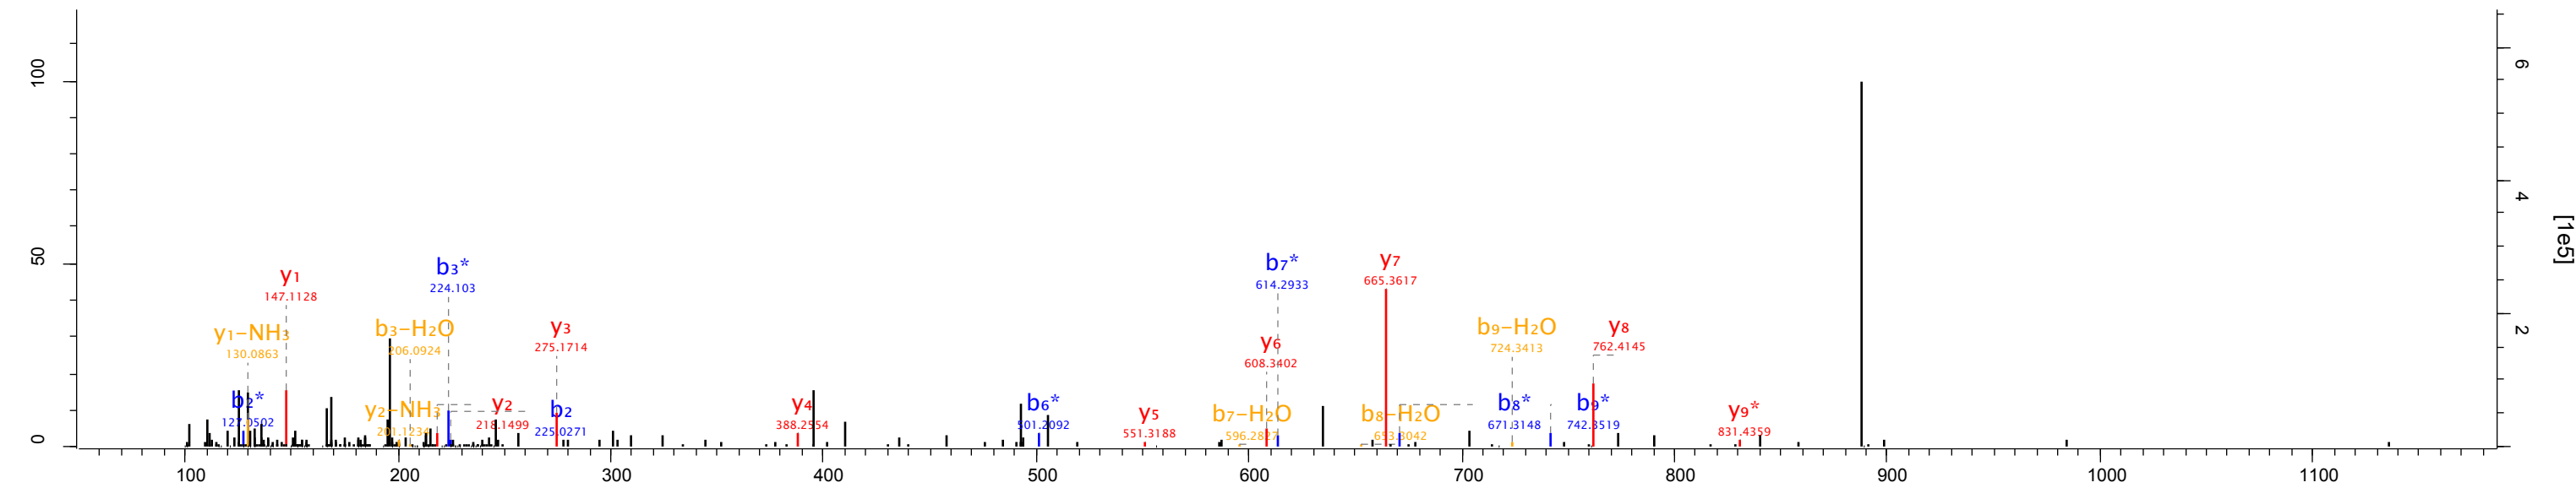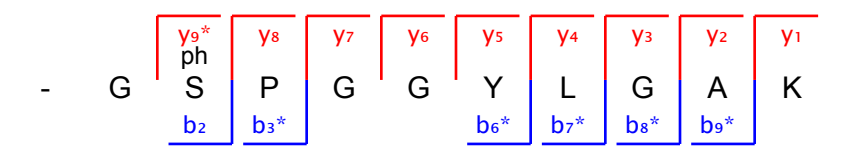

Raw file 20171215\_MaS\_33SR\_LMH\_phospho\_05 Scan 6719 Method FTMS; HCD Score 100.88 m/z 497.73 Gene names JUND;JUN

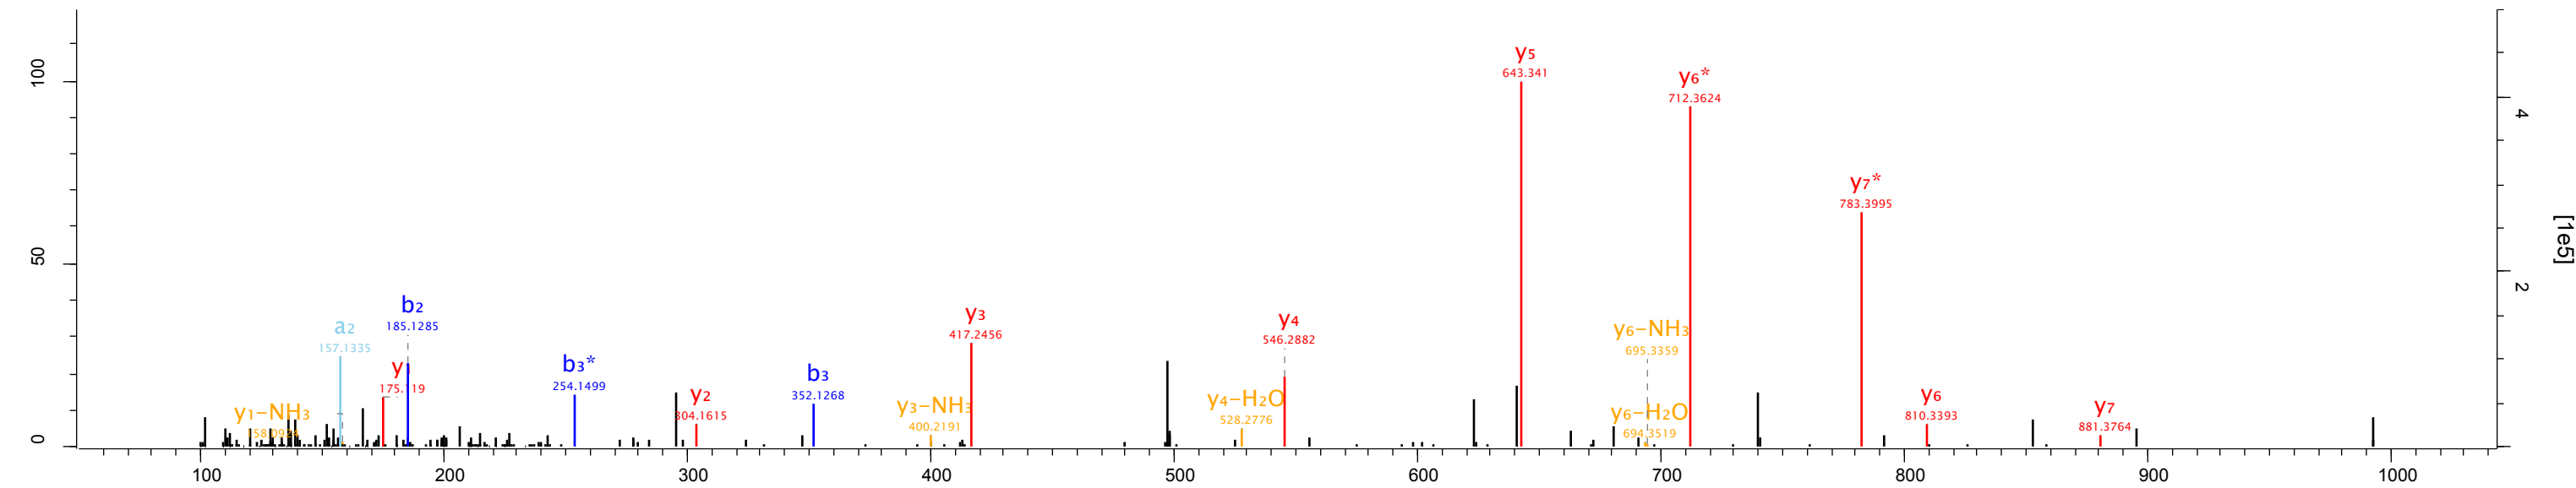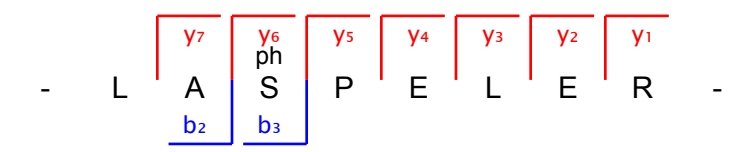

Raw file 20171215\_MaS\_33SR\_LMH\_phospho\_05 Scan 6869 Method FTMS; HCD Score 195.77 m/z 735.34 Gene names BIVM-ERCC5;ERCC5

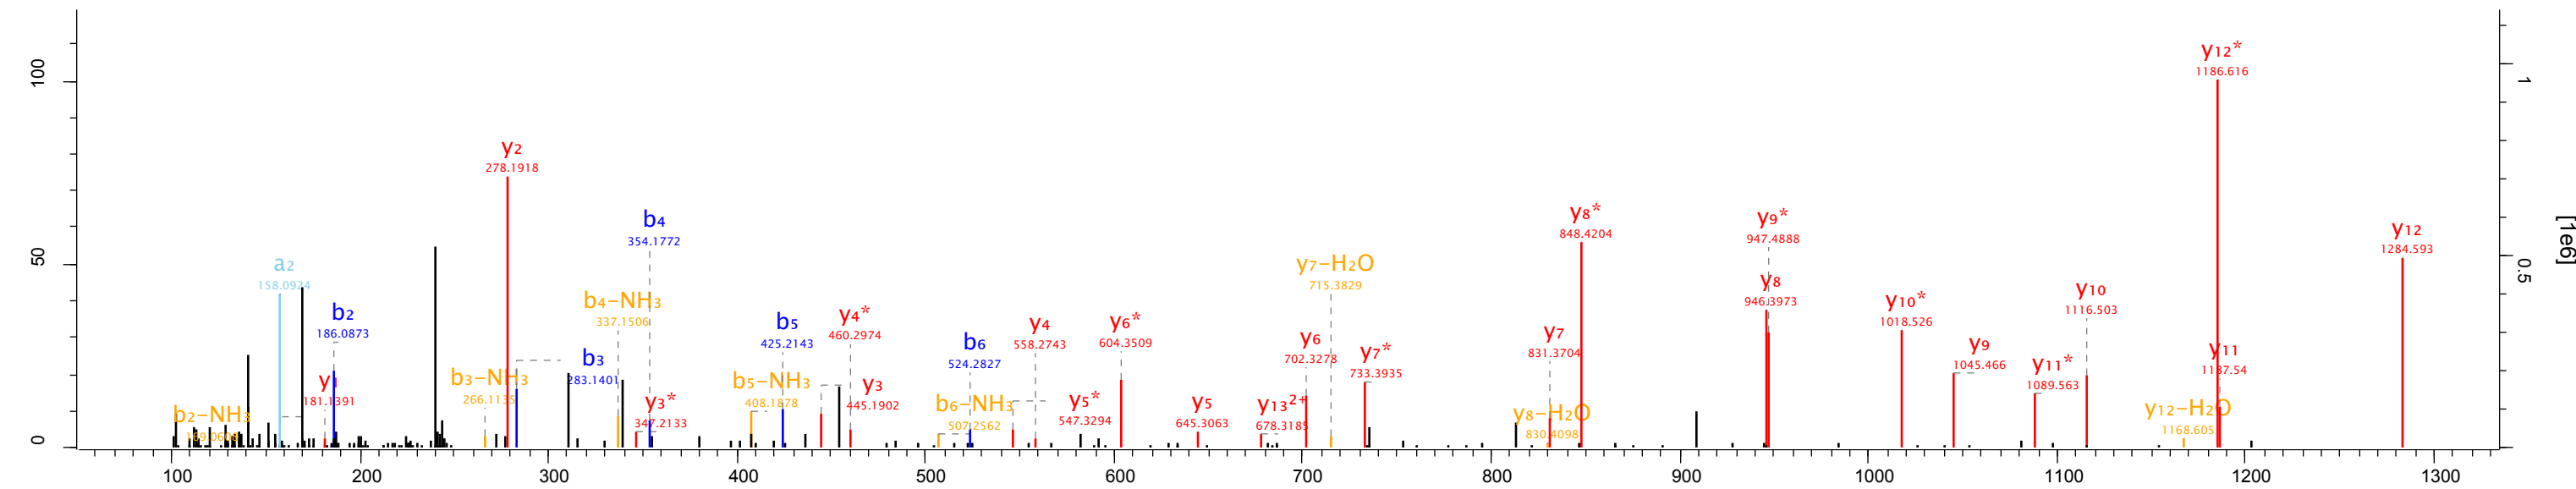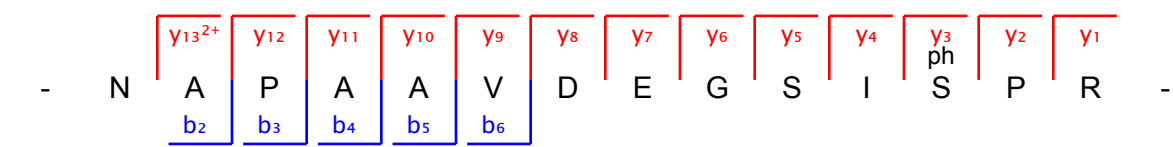

Raw file 20171215\_MaS\_33SR\_LMH\_phospho\_05 Scan 7559 Method FTMS; HCD Score 98.68 m/z 731.33 Gene names ARHGEF2

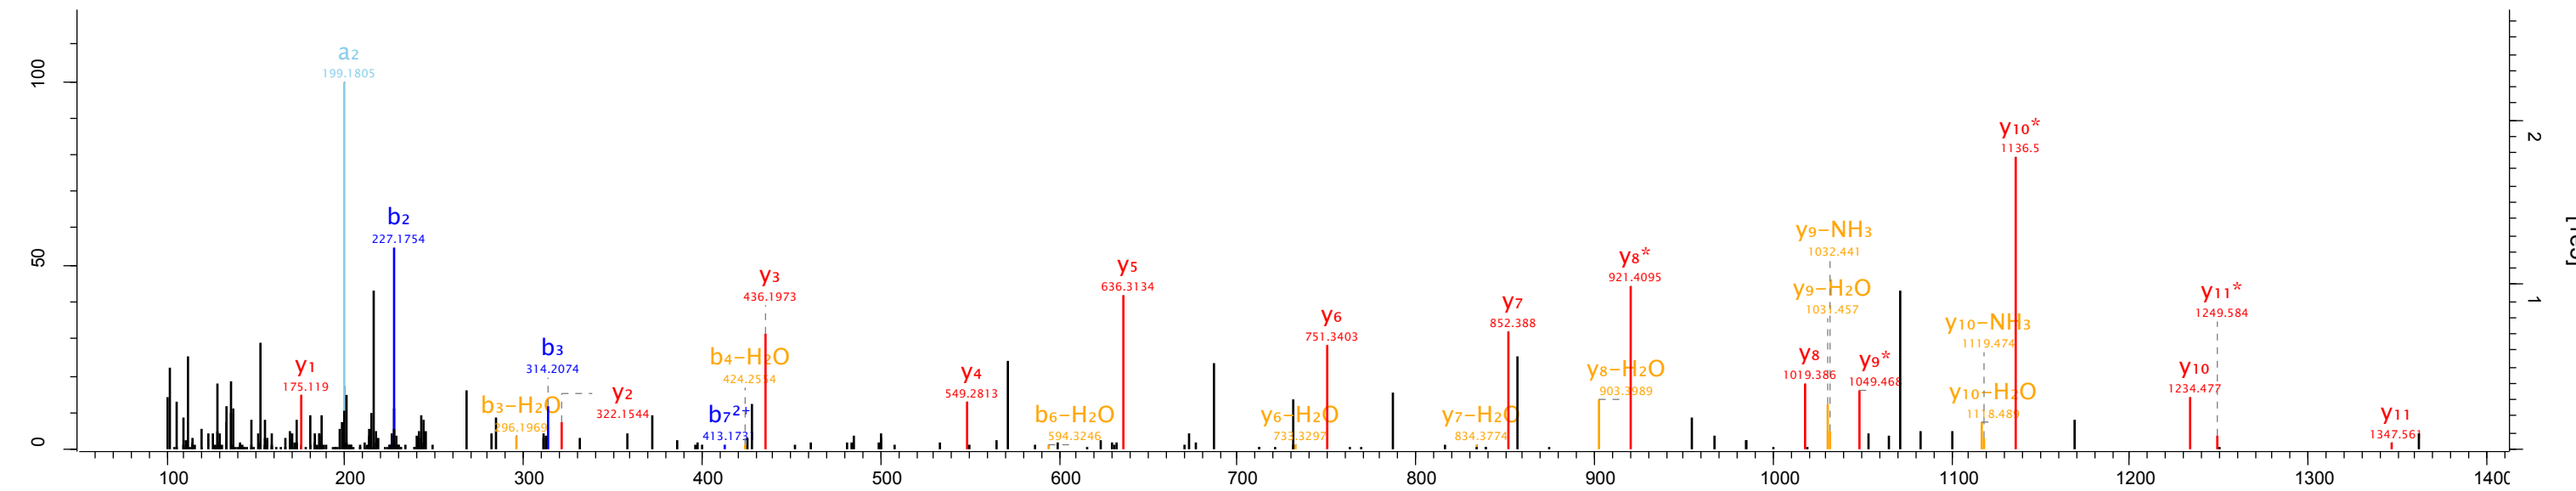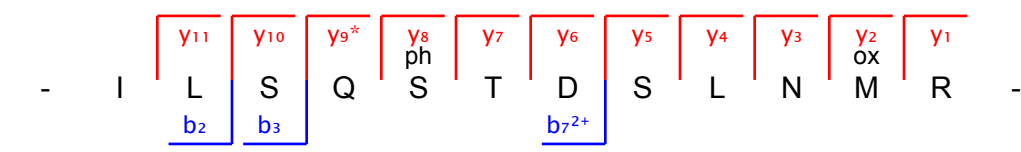



20171215\_MaS\_33SR\_LMH\_phospho\_05 7689 FTMS; HCD 52.86 655.79 NSD1

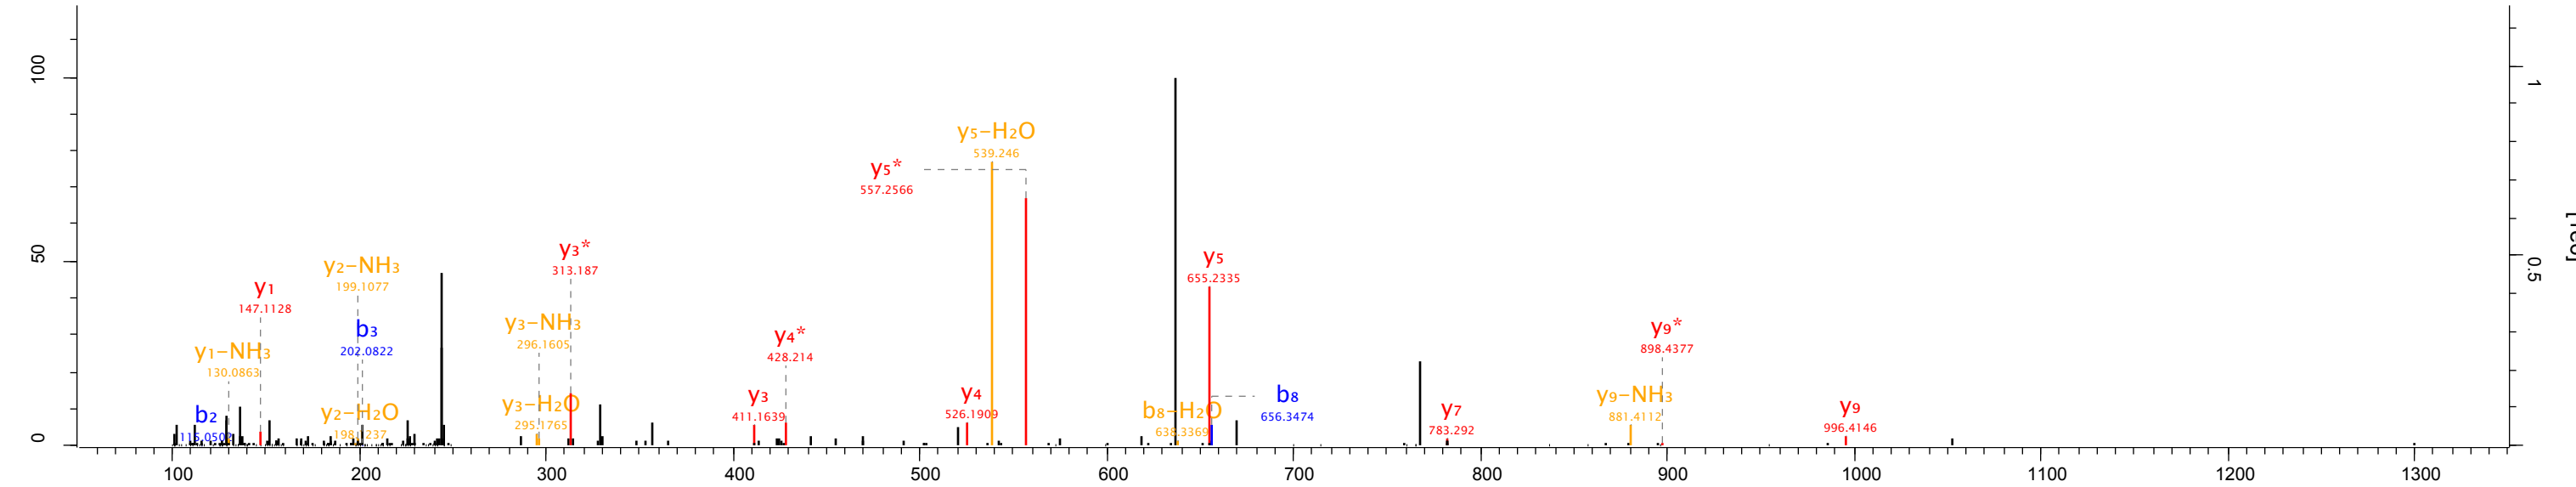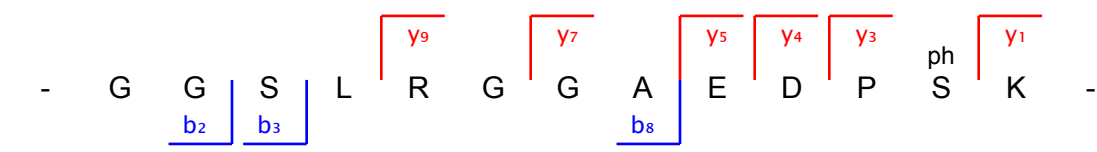

Raw file 20171215\_MaS\_33SR\_LMH\_phospho\_05 Scan 7879 Method FTMS; HCD Score 142.54 m/z 601.79 Gene names SRSF6

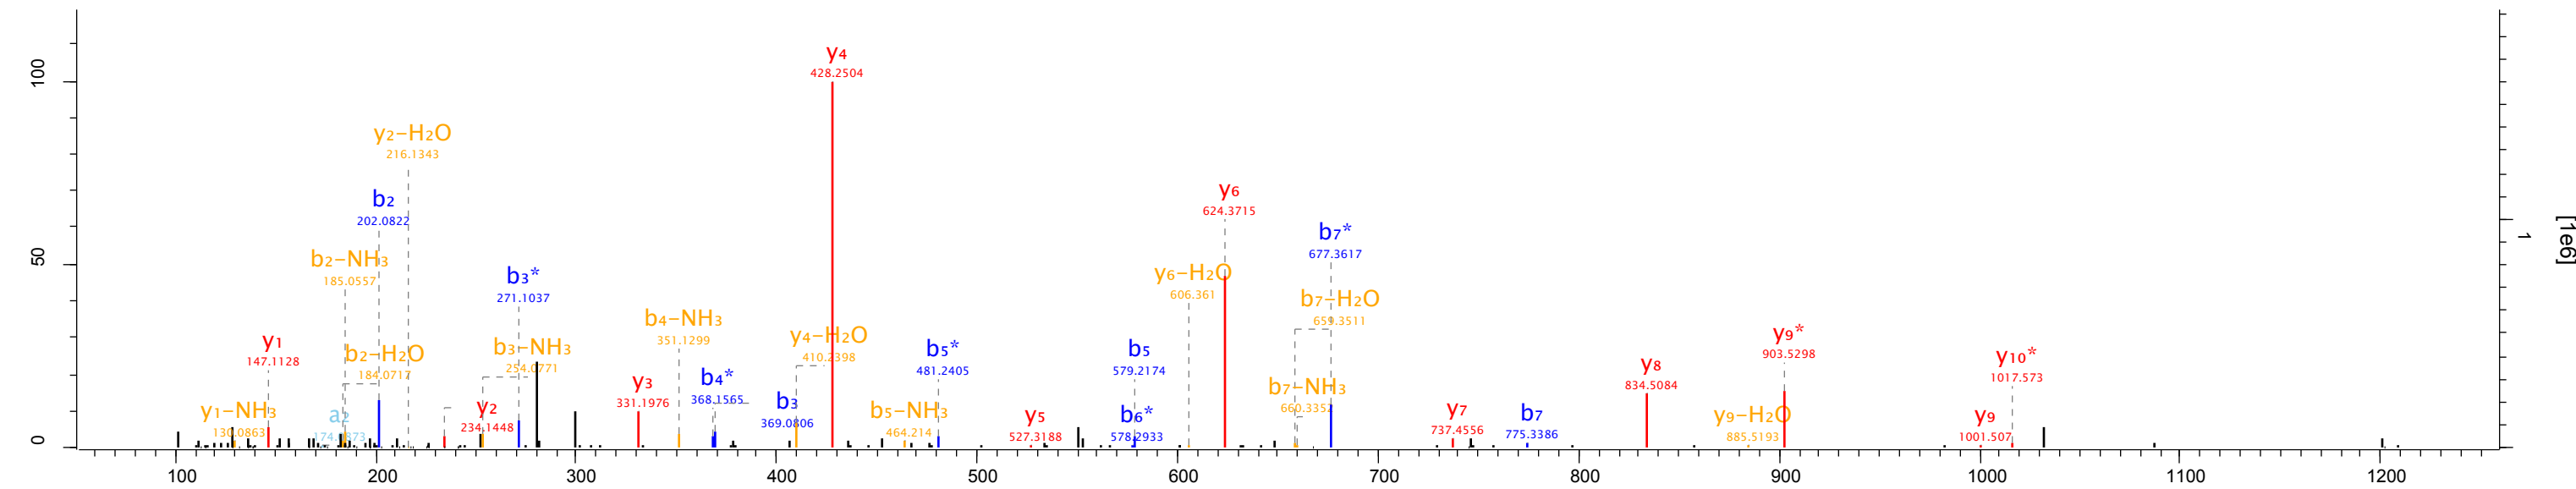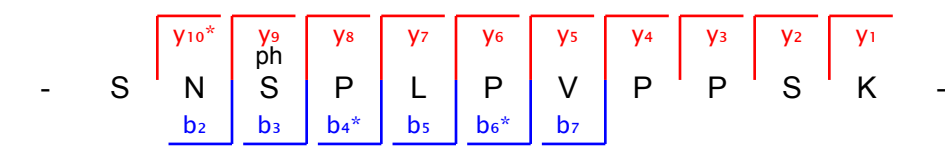

Raw file 20171215\_MaS\_33SR\_LMH\_phospho\_05 Scan 9789 Method FTMS; HCD Score 202.07 m/z 851.85 Gene names GRIPAP1

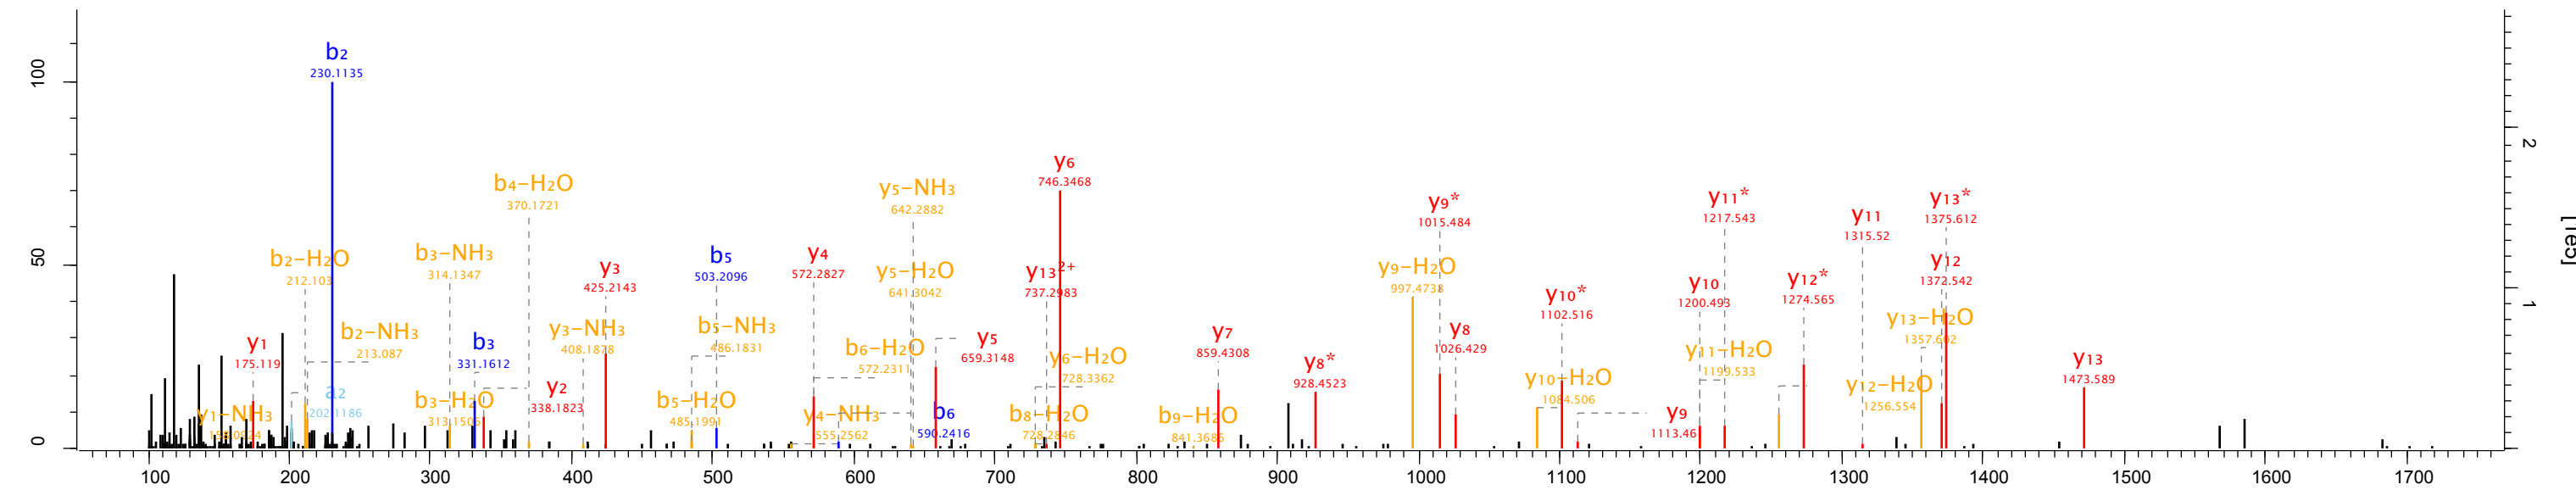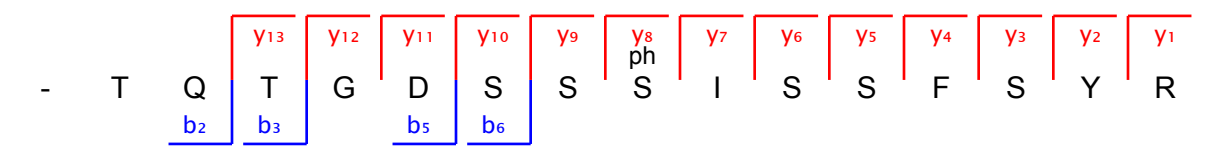

Raw file 20171215\_MaS\_33SR\_LMH\_phospho\_06 Scan 10159 Method FTMS; HCD Score 202.65 m/z 999.41 Gene names ELMO1

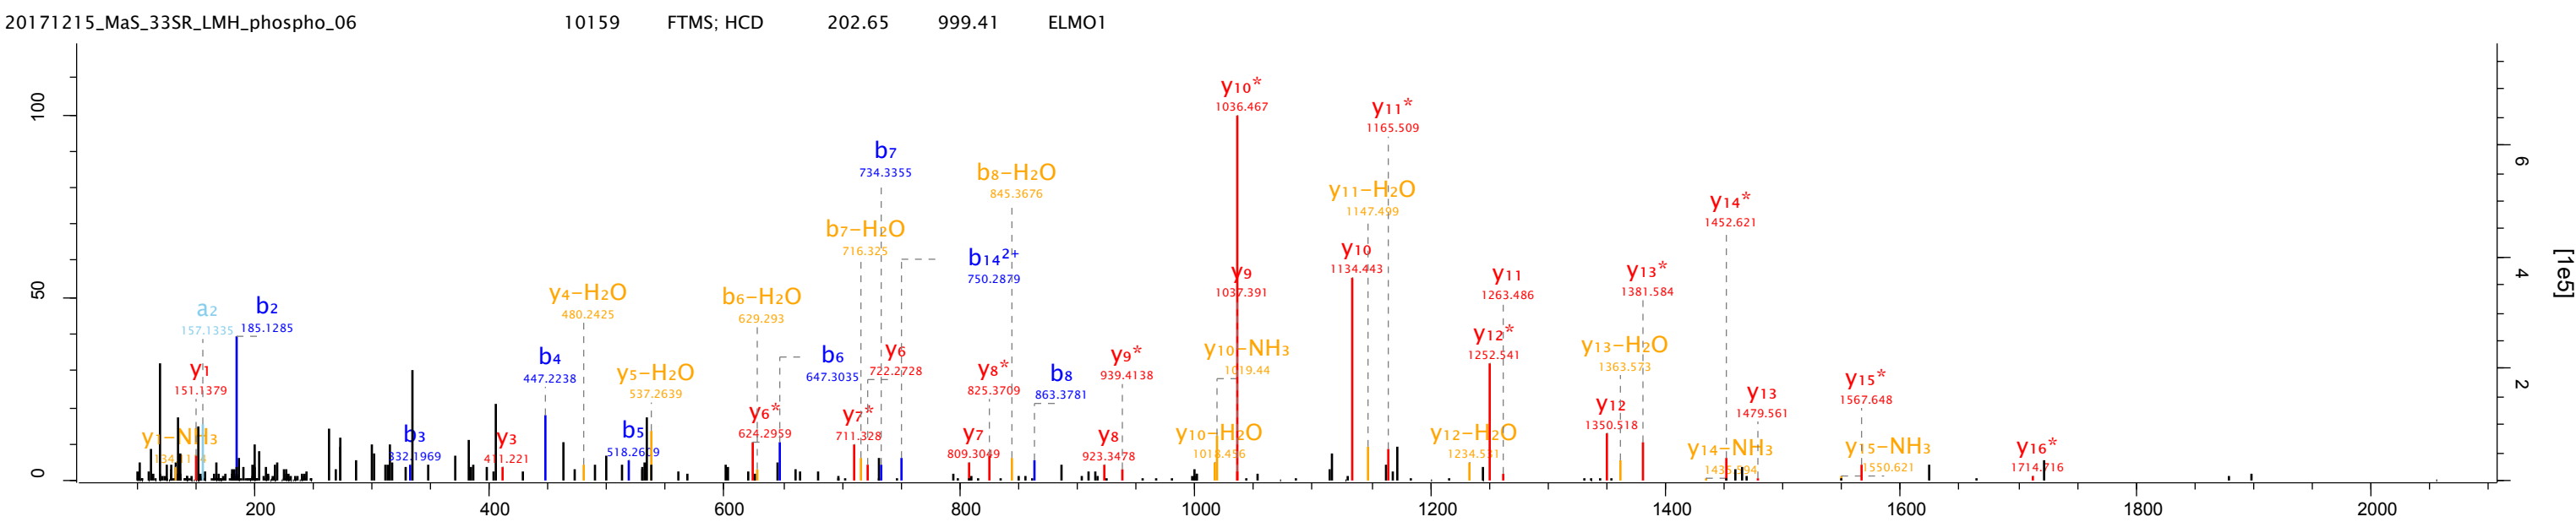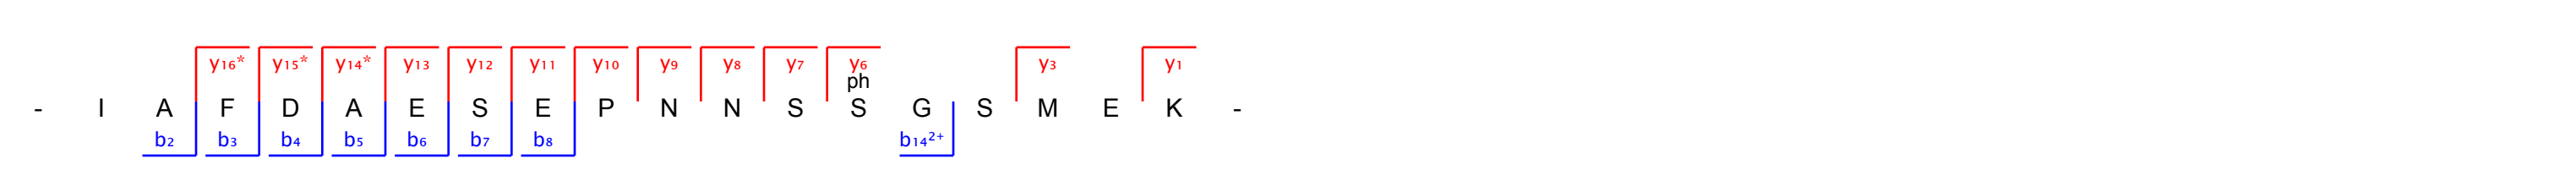

20171215\_MaS\_33SR\_LMH\_phospho\_06 10189 FTMS; HCD 210.34 934.89 PLEC

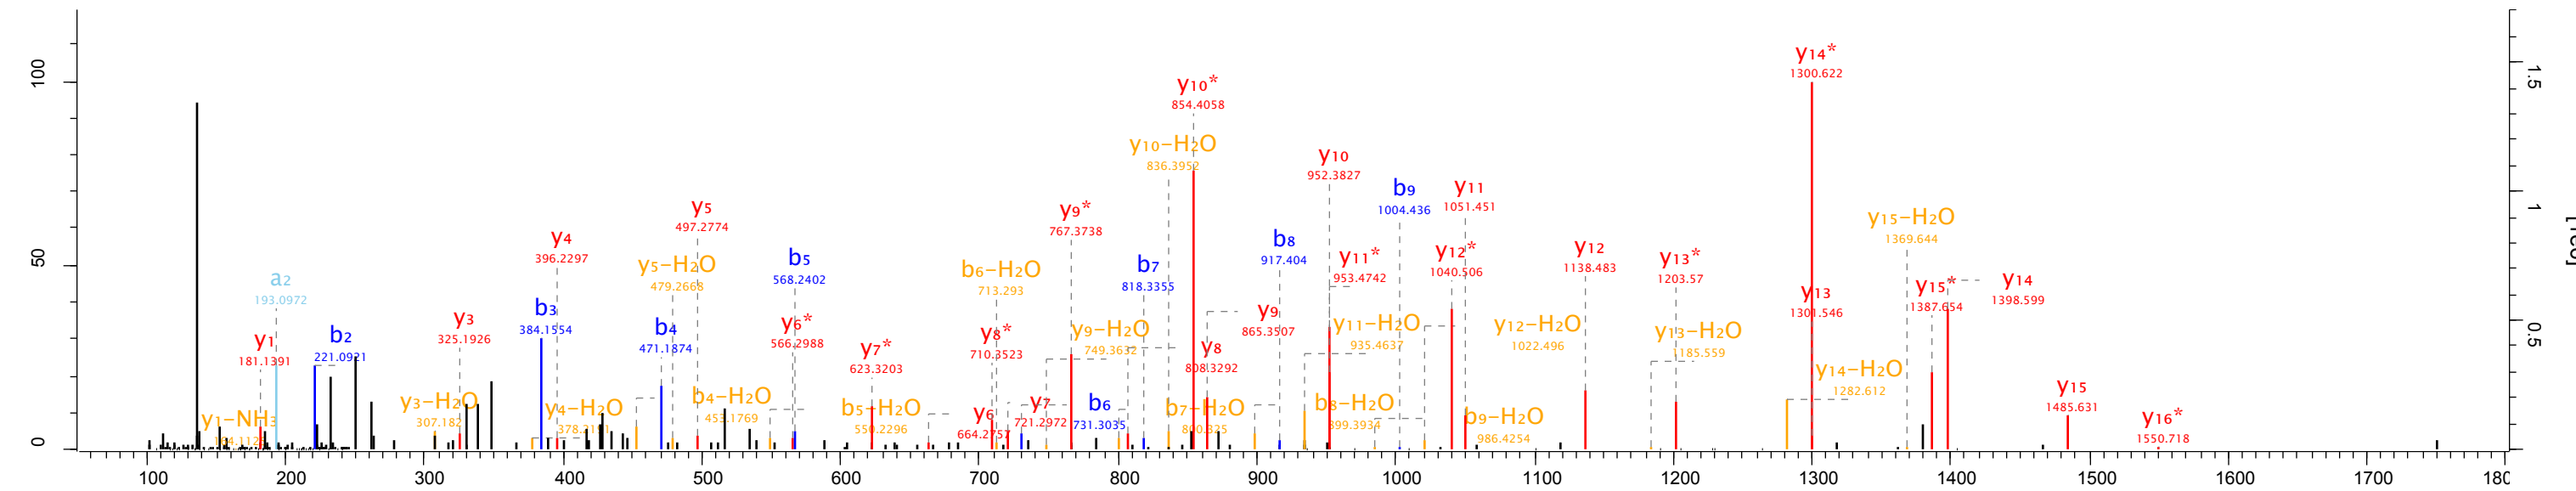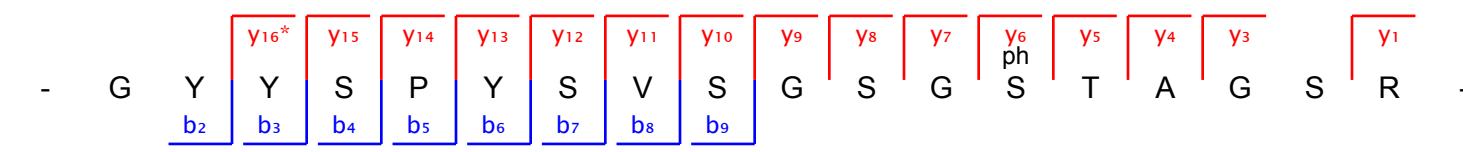

Raw file 20171215\_MaS\_33SR\_LMH\_phospho\_06 Scan 10519 Method FTMS; HCD Score 168.12 m/z 912.42 Gene names DAXX

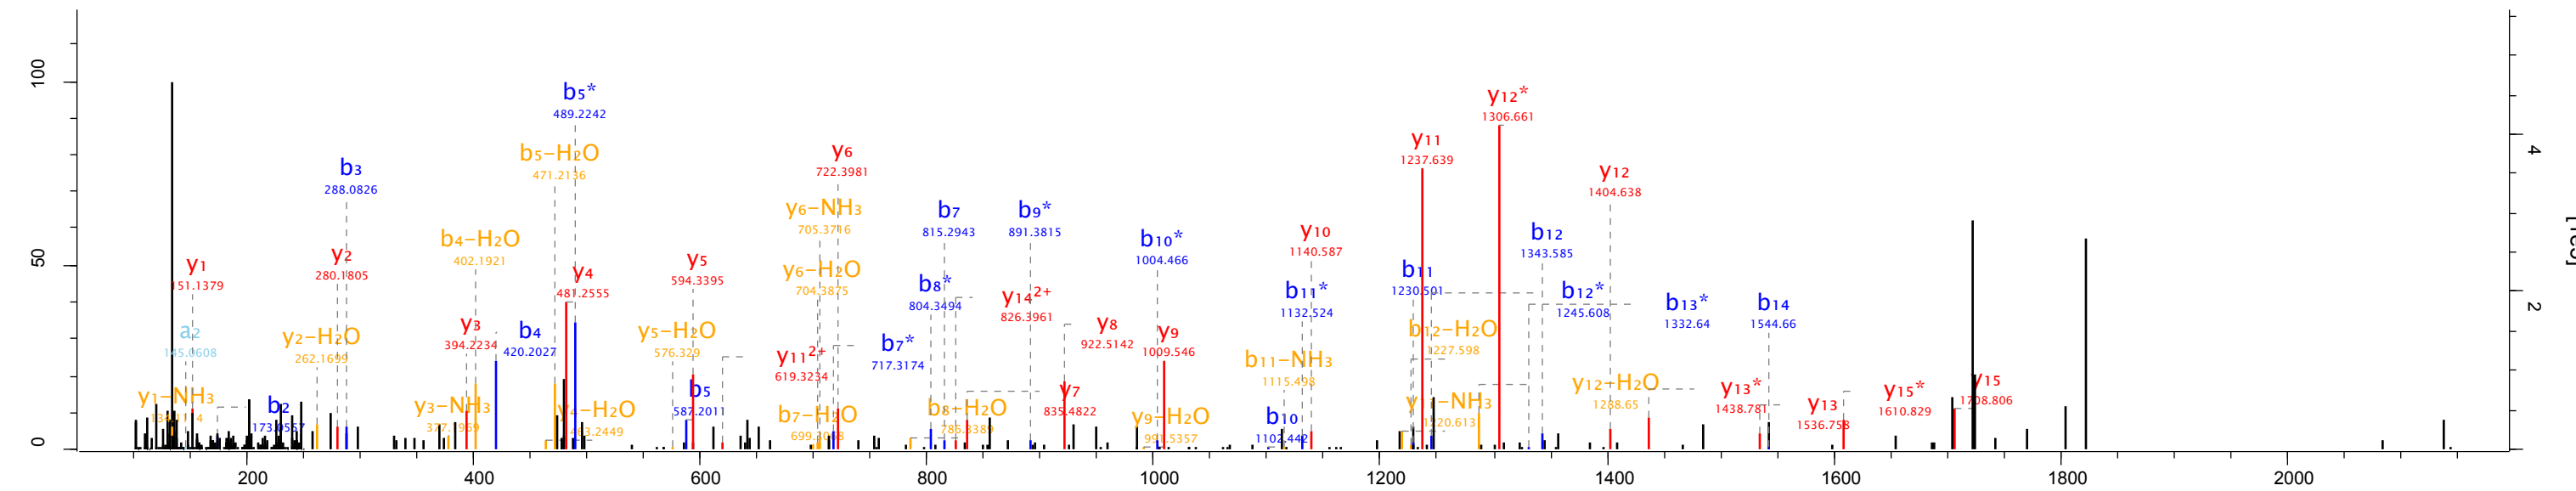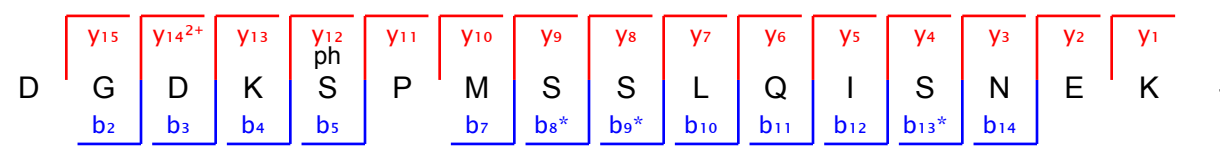

Raw file: 20171215\_MaS\_33SR\_LMH\_phospho\_06  
 Scan: 10669 Method: FTMS; HCD Score: 216.25 m/z: 1056.46 Gene names: ARHGEF12

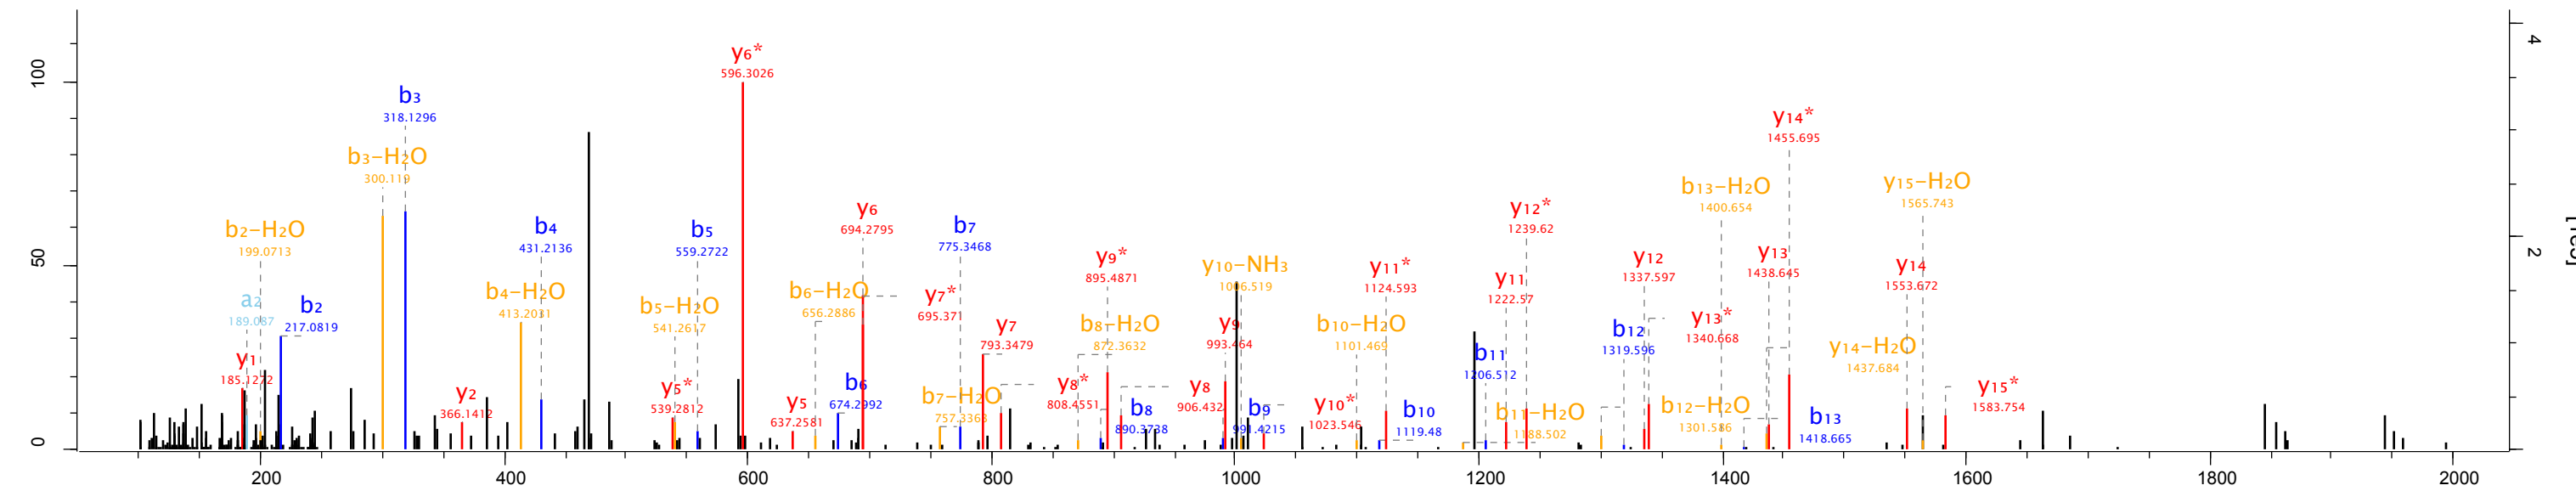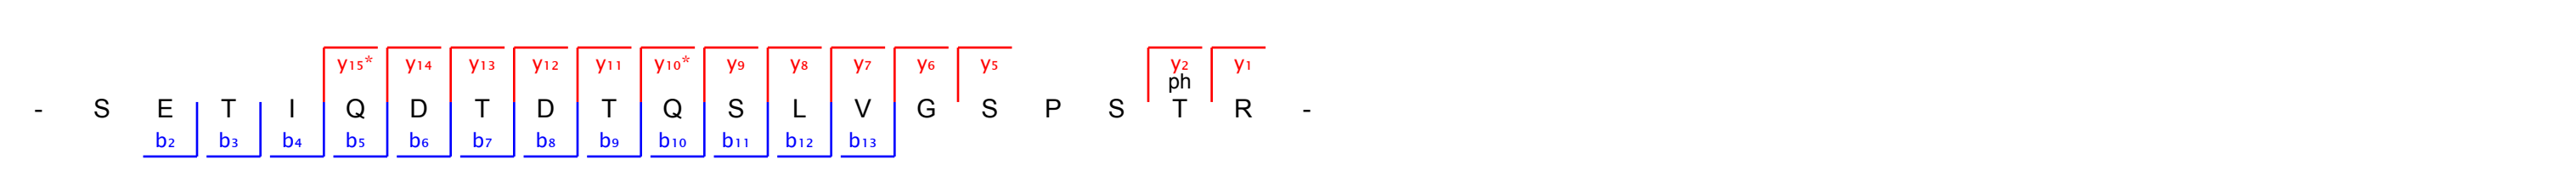

Raw file 20171215\_MaS\_33SR\_LMH\_phospho\_06 Scan 10739 Method FTMS; HCD Score 138.73 m/z 713.29 Gene names MPHOSPH8

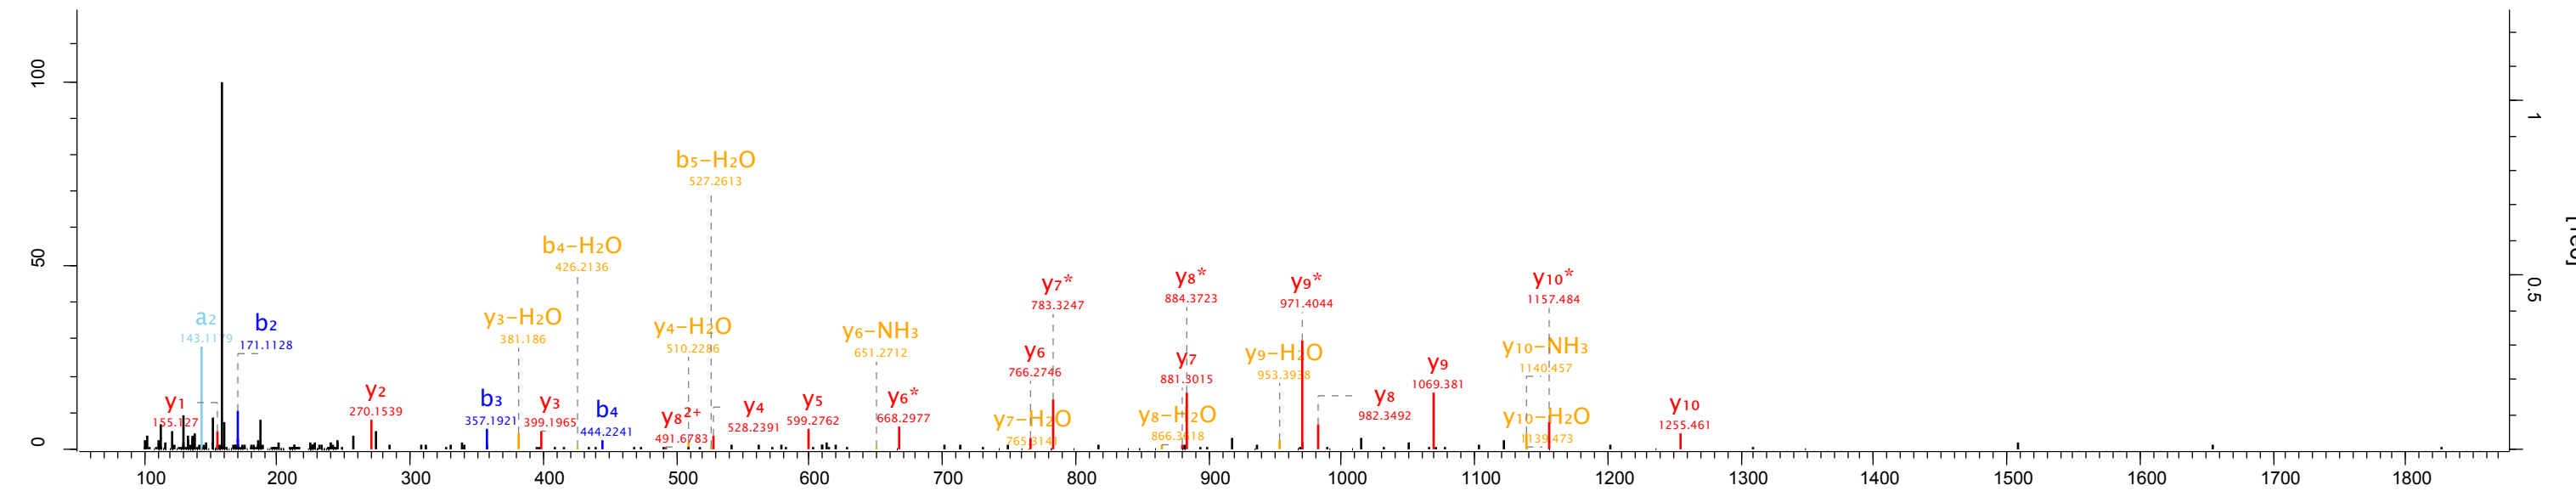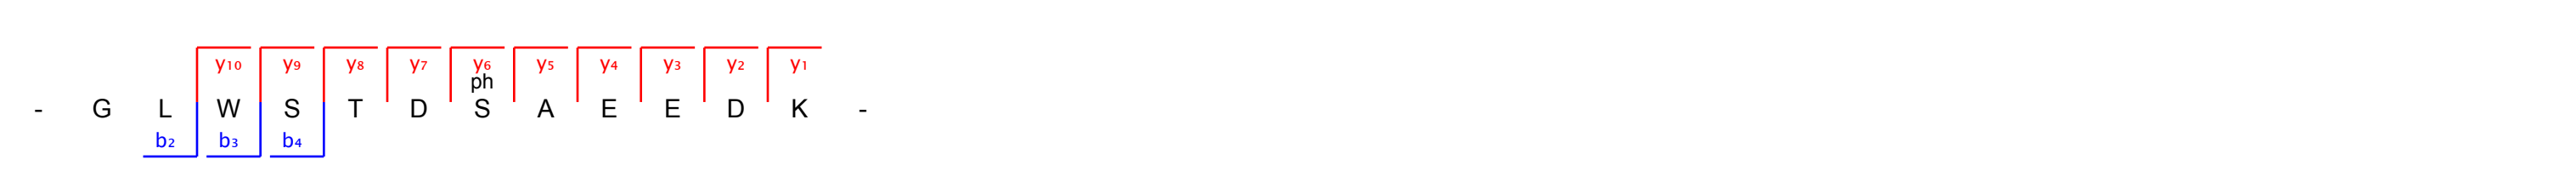



Raw file 20171215\_MaS\_33SR\_LMH\_phospho\_06 Scan 10759 Method FTMS; HCD Score 118.54 m/z 895.39 Gene names ZC3H13

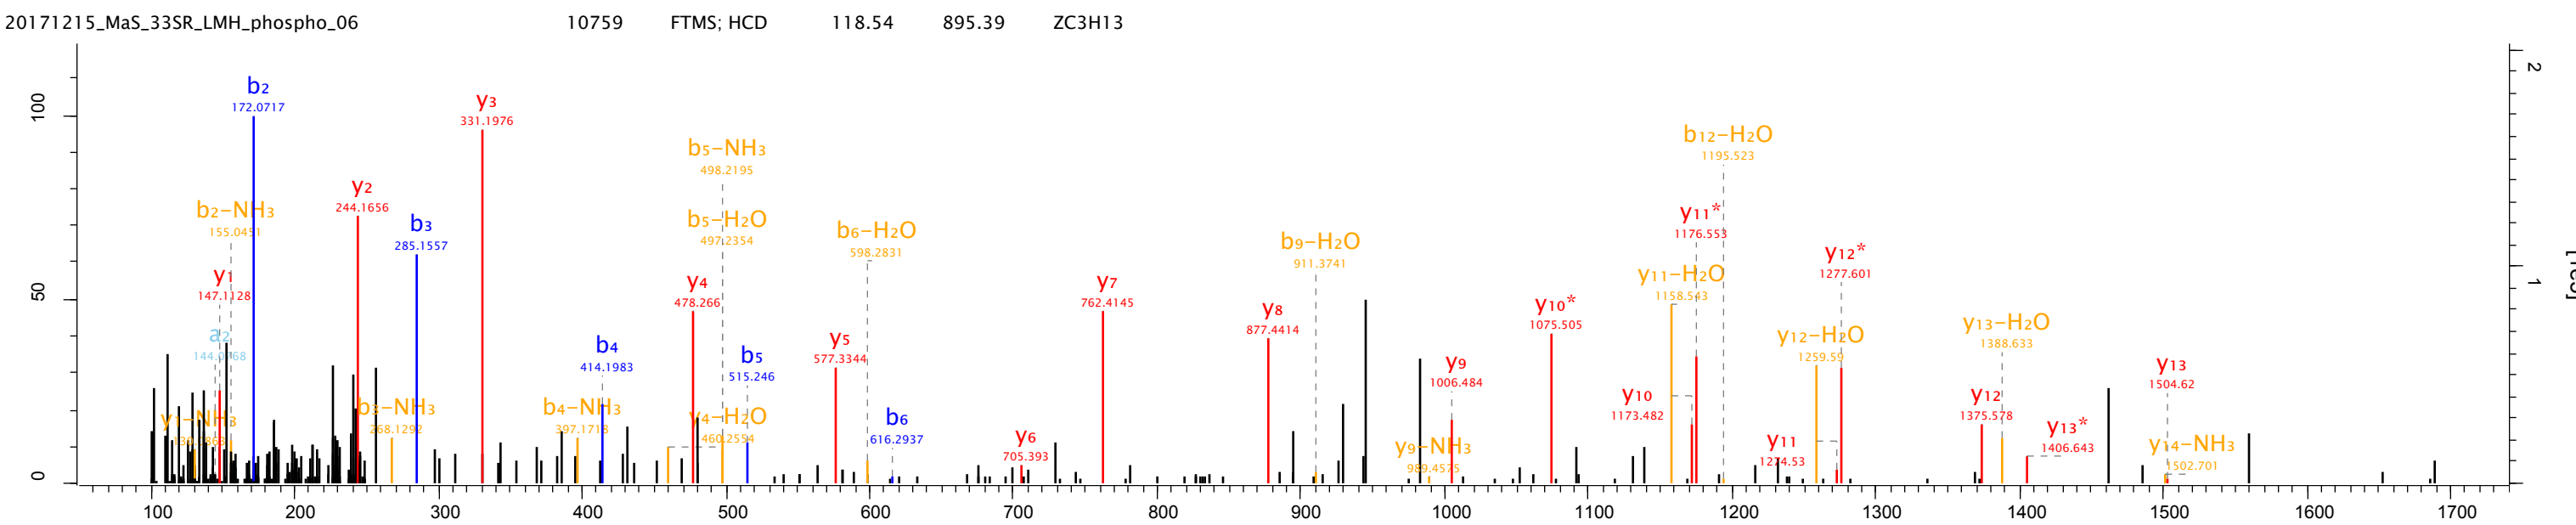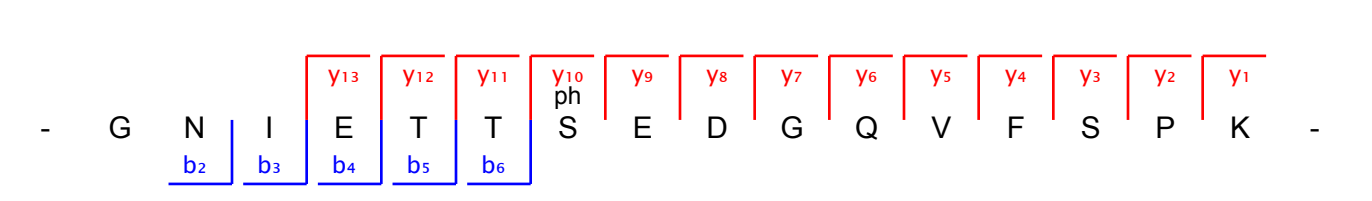

Raw file: 20171215\_MaS\_33SR\_LMH\_phospho\_06  
 Scan: 11219 Method: FTMS; HCD Score: 286.82 m/z: 1506.13 Gene names: NUCKS1

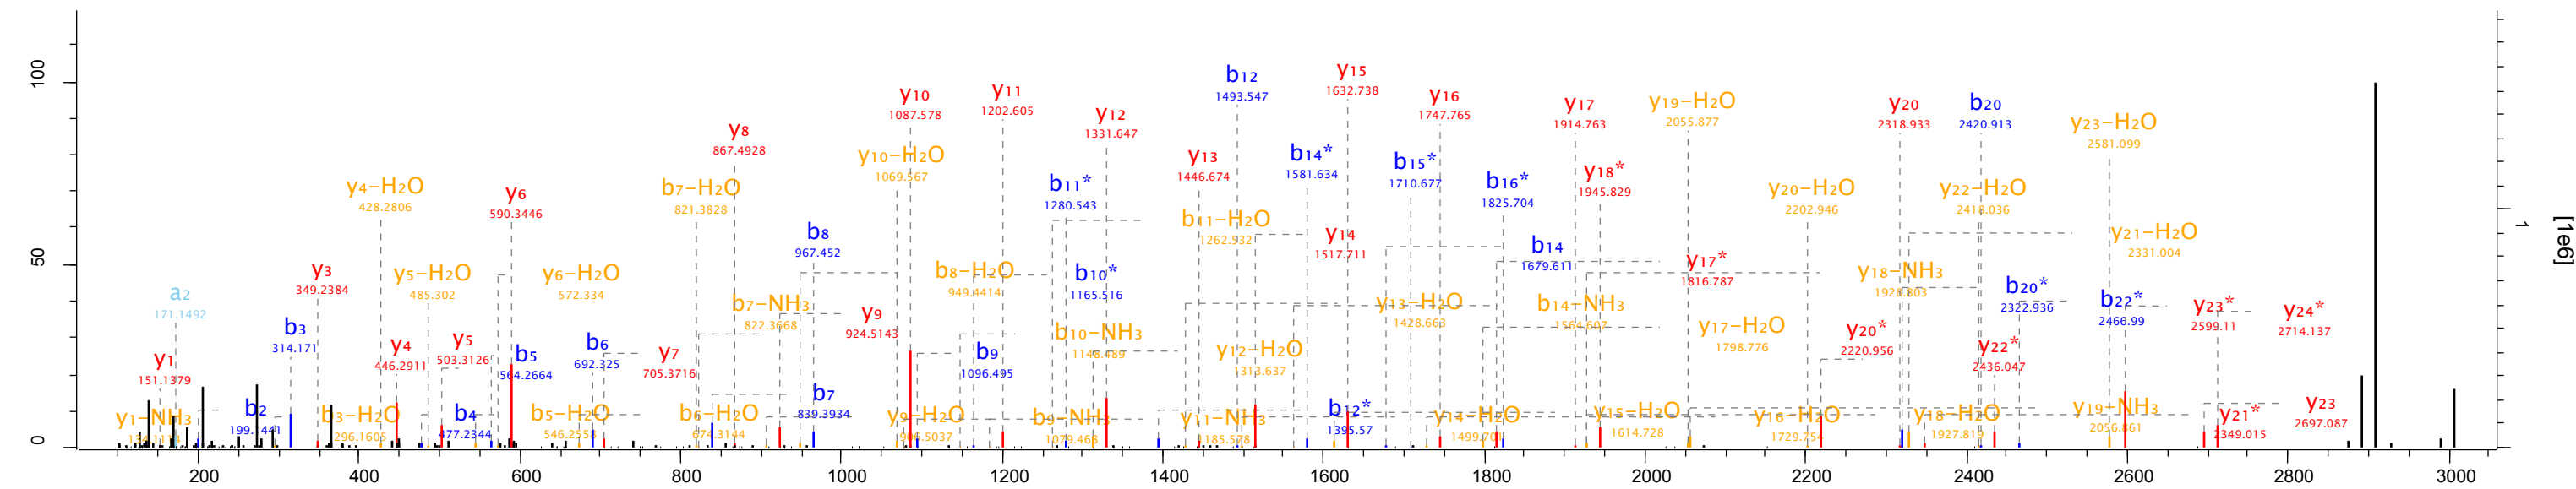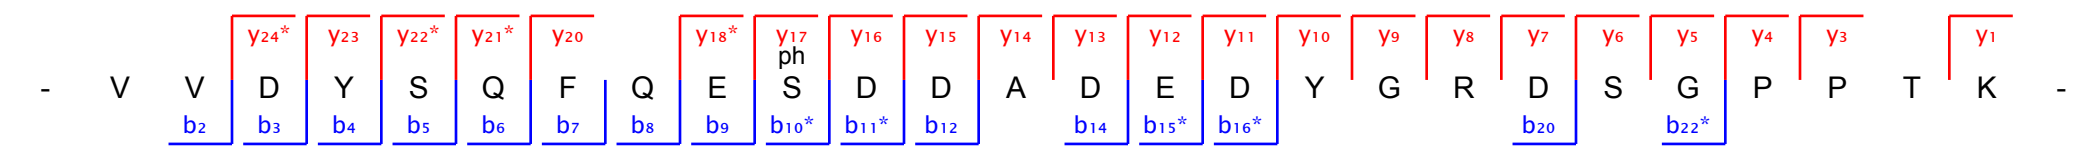

Raw file 20171215\_MaS\_33SR\_LMH\_phospho\_06 Scan 11299 Method FTMS; HCD Score 94.2 m/z 647.3 Gene names DAB2

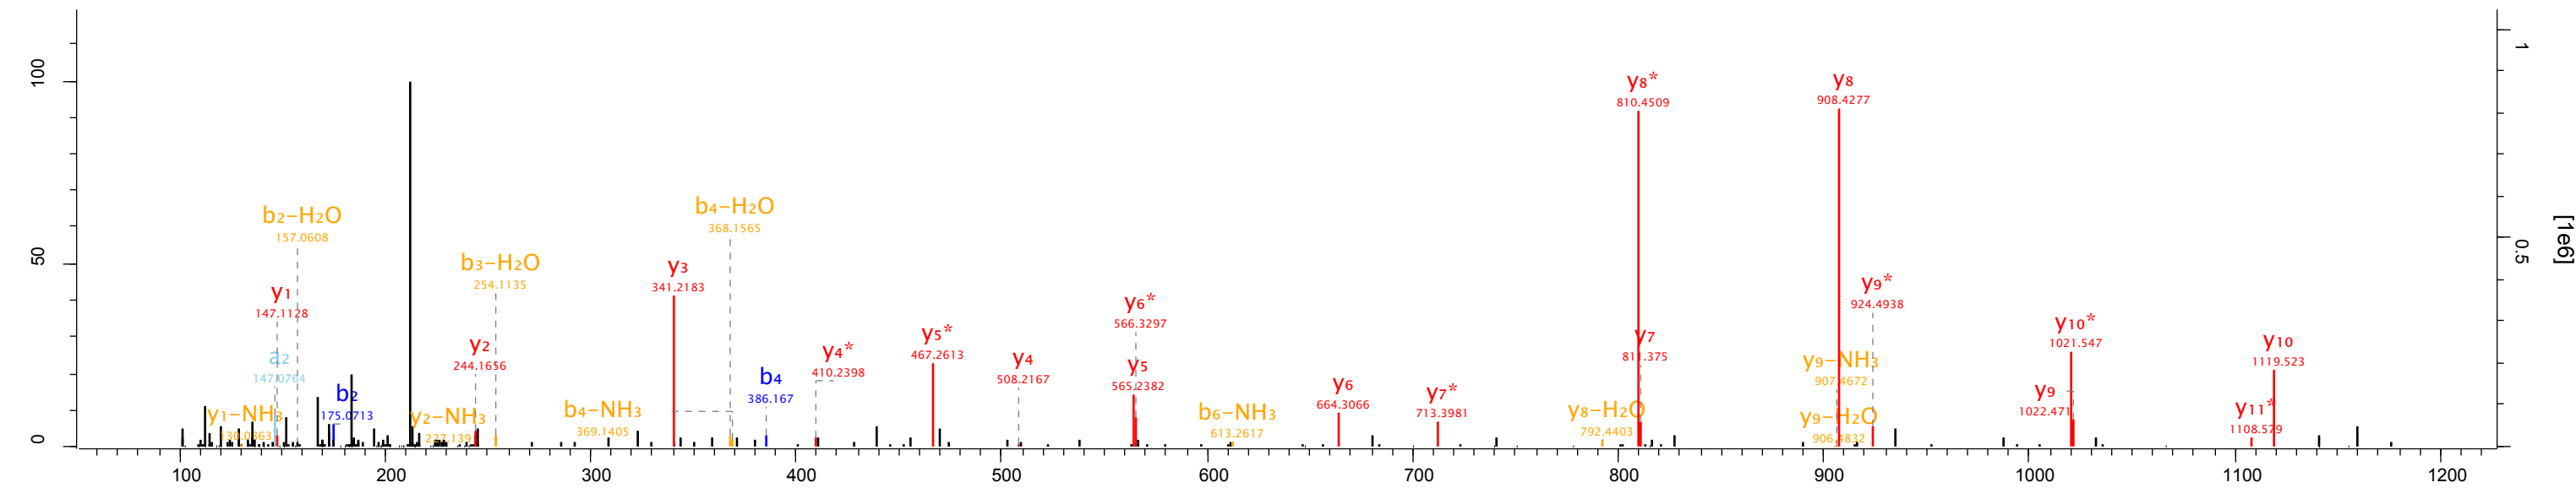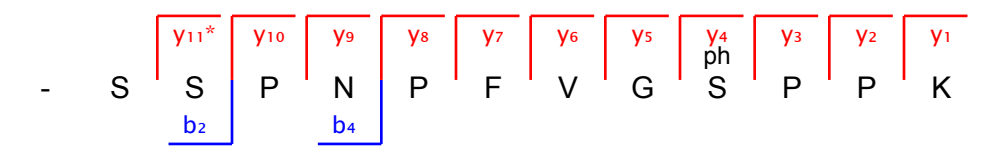

Raw file: 20171215\_MaS\_33SR\_LMH\_phospho\_06  
 Scan: 11379 Method: FTMS; HCD Score: 207.13 m/z: 1170.93 Gene names: CAAP1

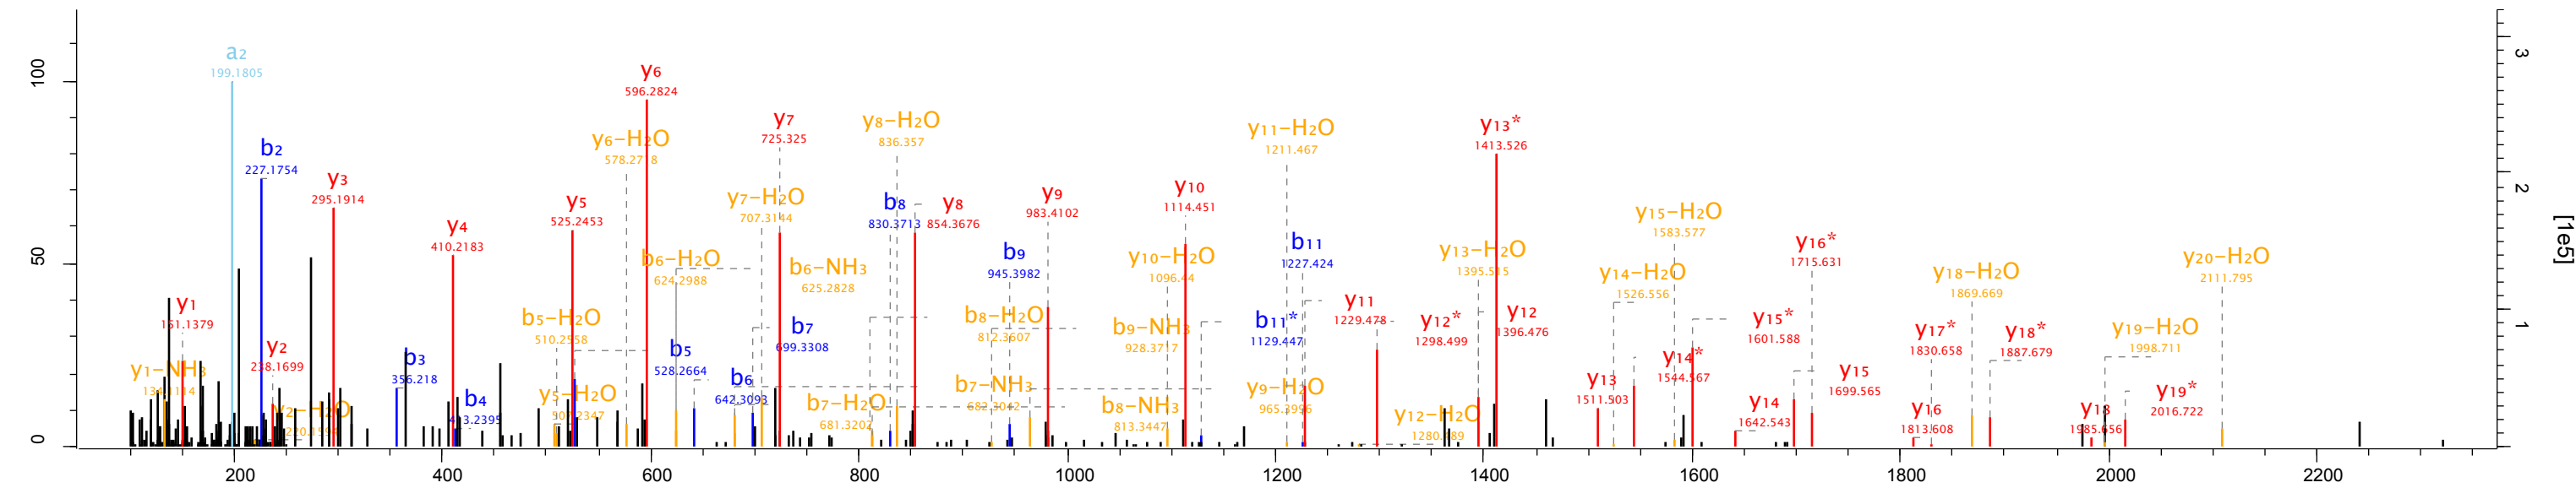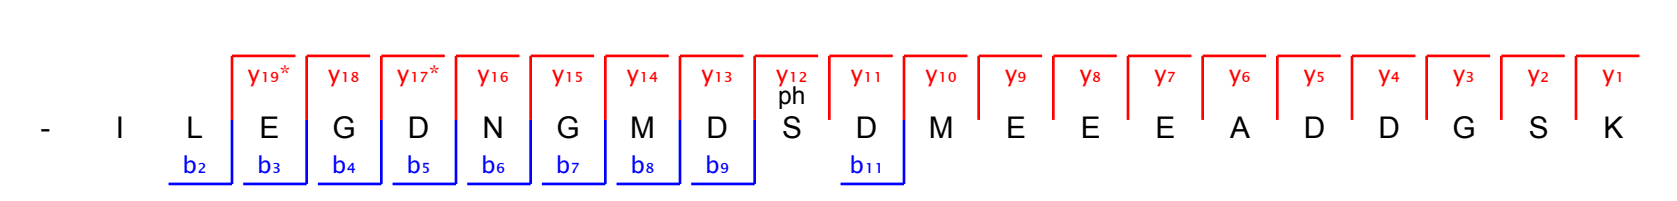

Raw file 20171215\_MaS\_33SR\_LMH\_phospho\_06 Scan 11659 Method FTMS; HCD Score 163.75 m/z 864.08 Gene names RPRD2

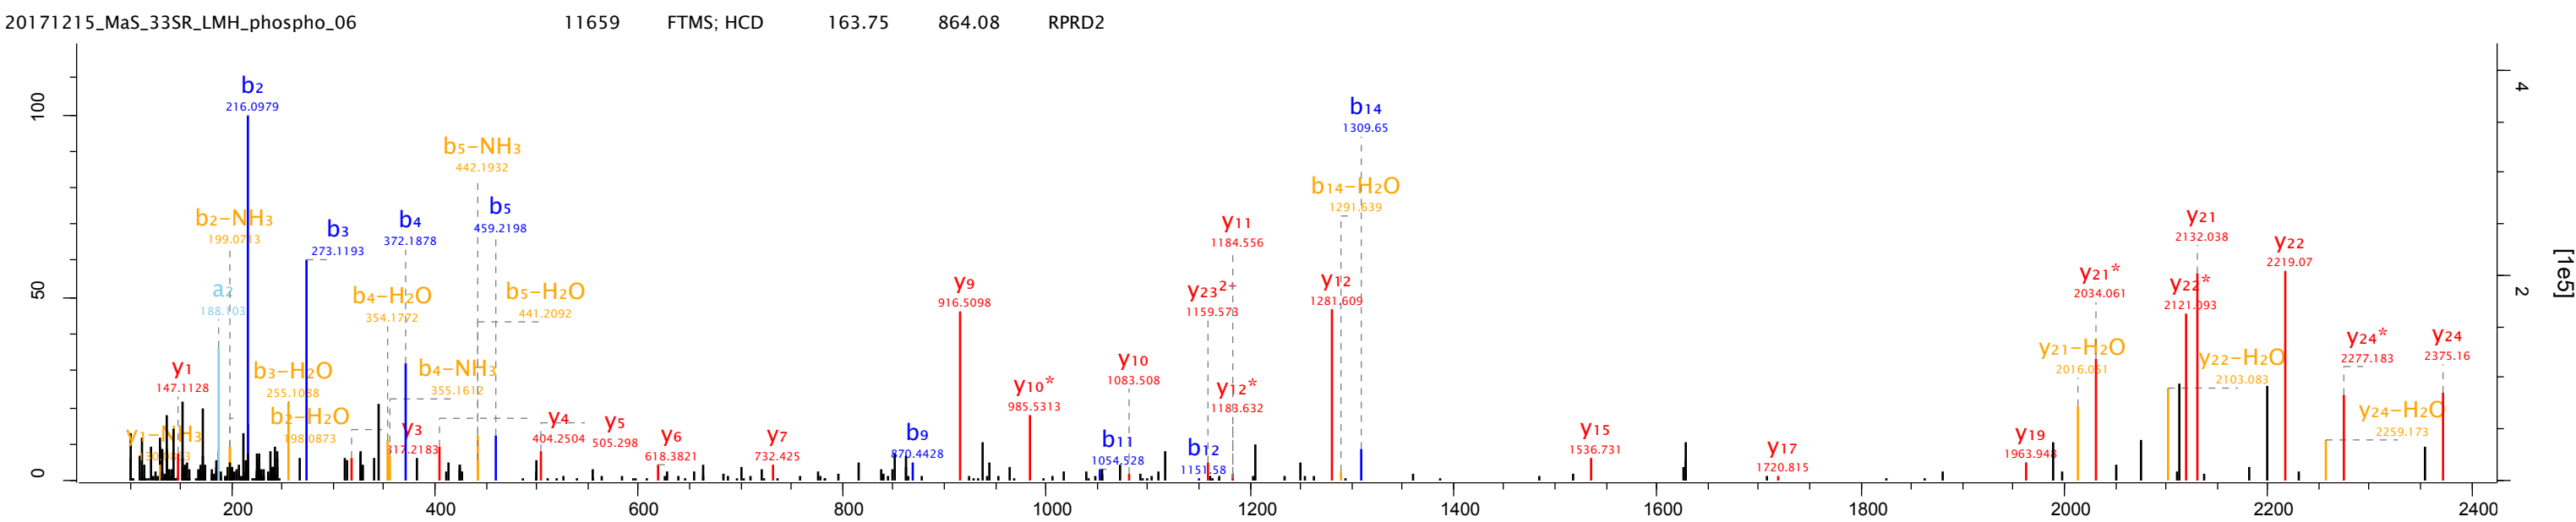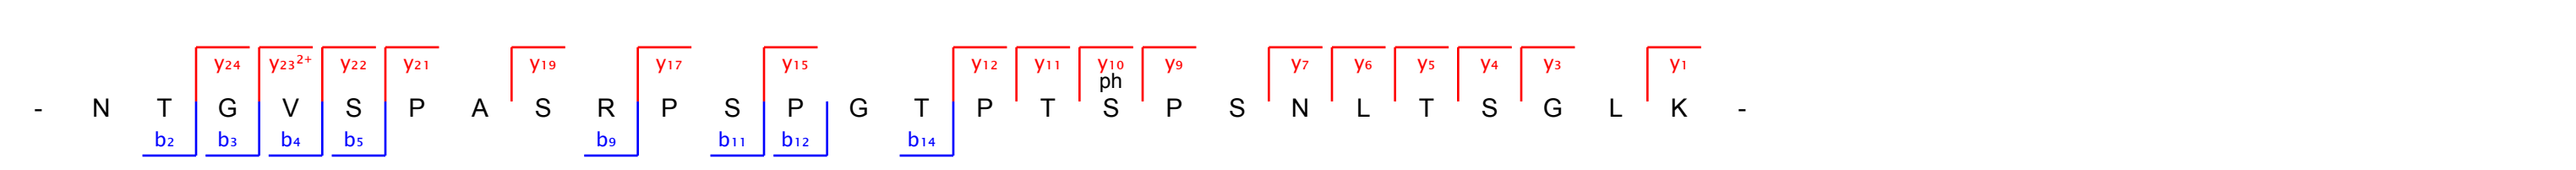

Raw file 20171215\_MaS\_33SR\_LMH\_phospho\_06 Scan 11939 Method FTMS; HCD Score 88.18 m/z 465.22 Gene names CEP170

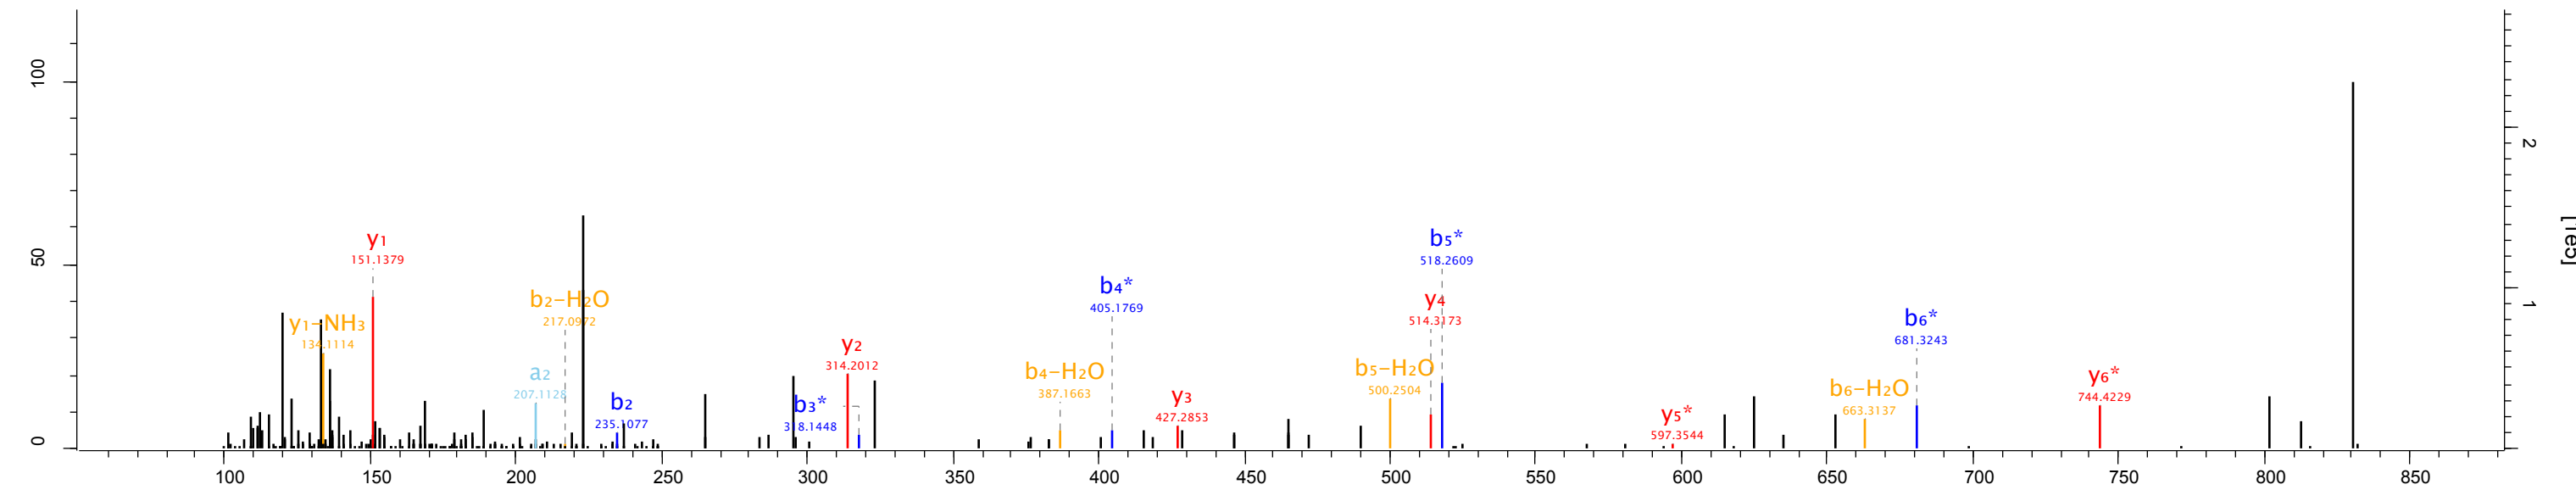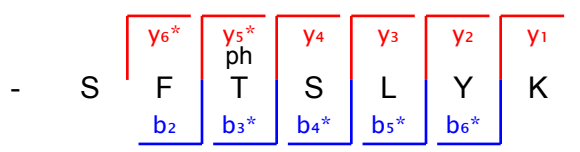

Raw file 20171215\_MaS\_33SR\_LMH\_phospho\_06 Scan 11979 Method FTMS; HCD Score 66.83 m/z 532.25 Gene names RBL1

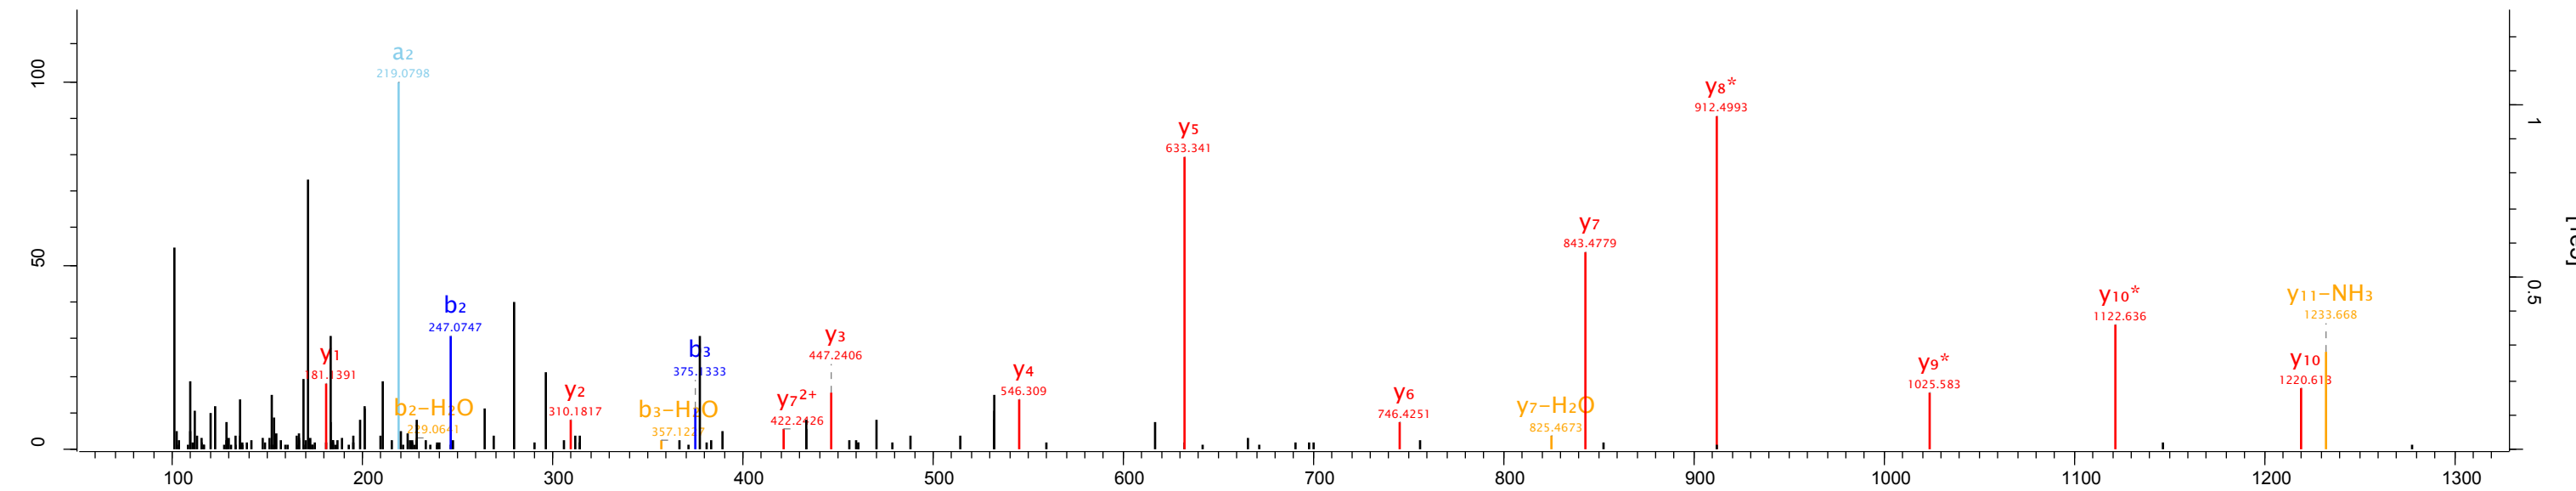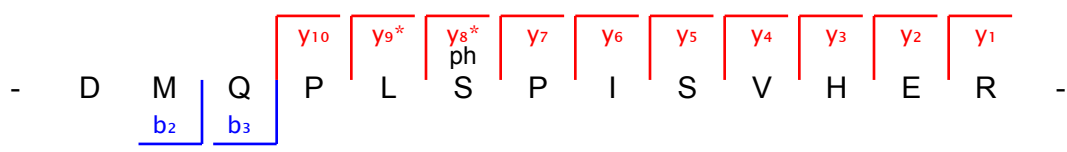

Raw file: 20171215\_MaS\_33SR\_LMH\_phospho\_06  
 Scan: 12269 Method: FTMS; HCD Score: 46.81 m/z: 1411.62 Gene names: AKAP12

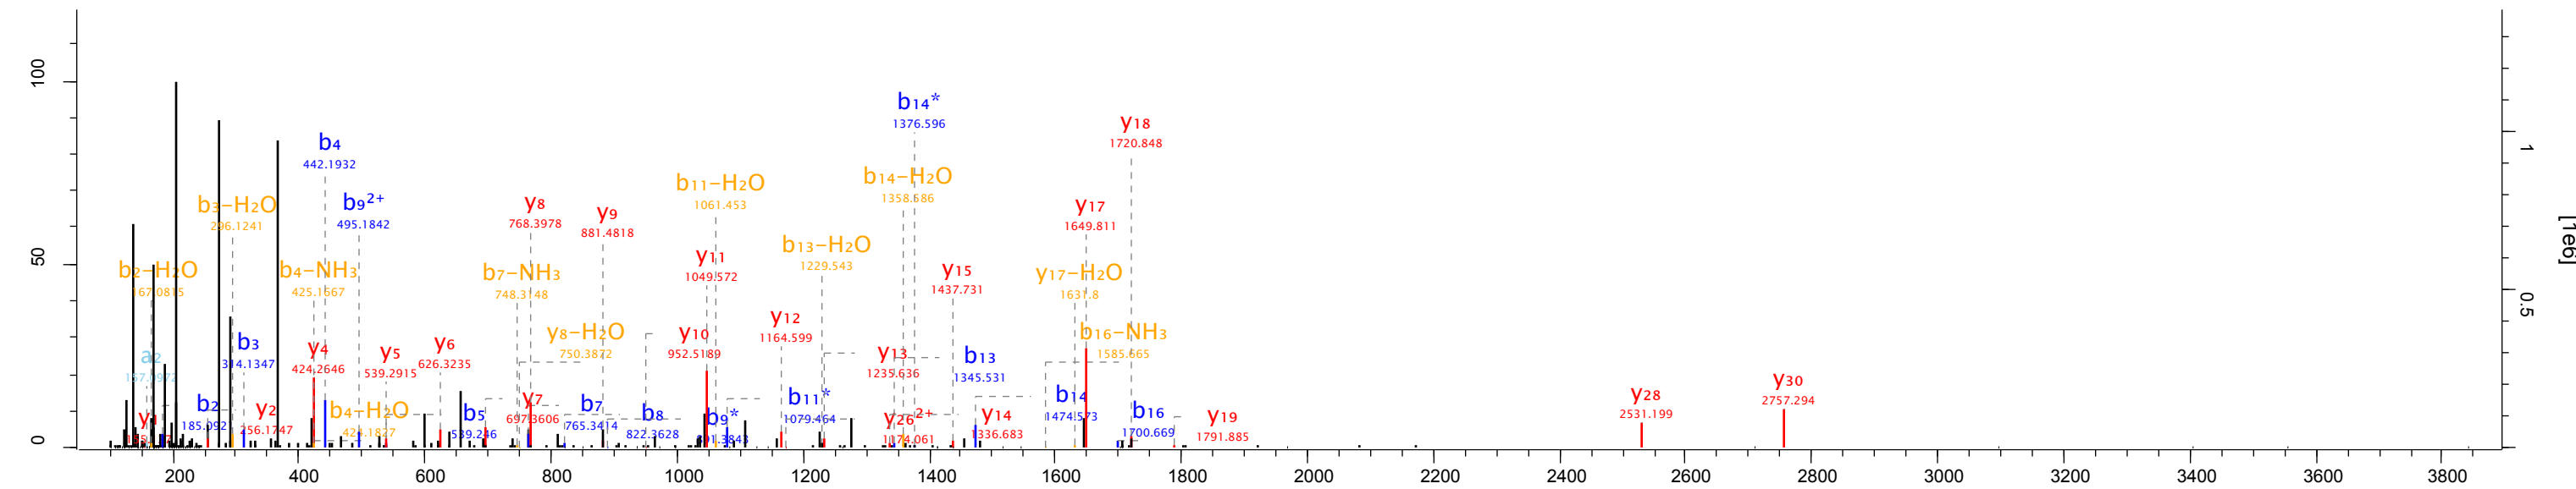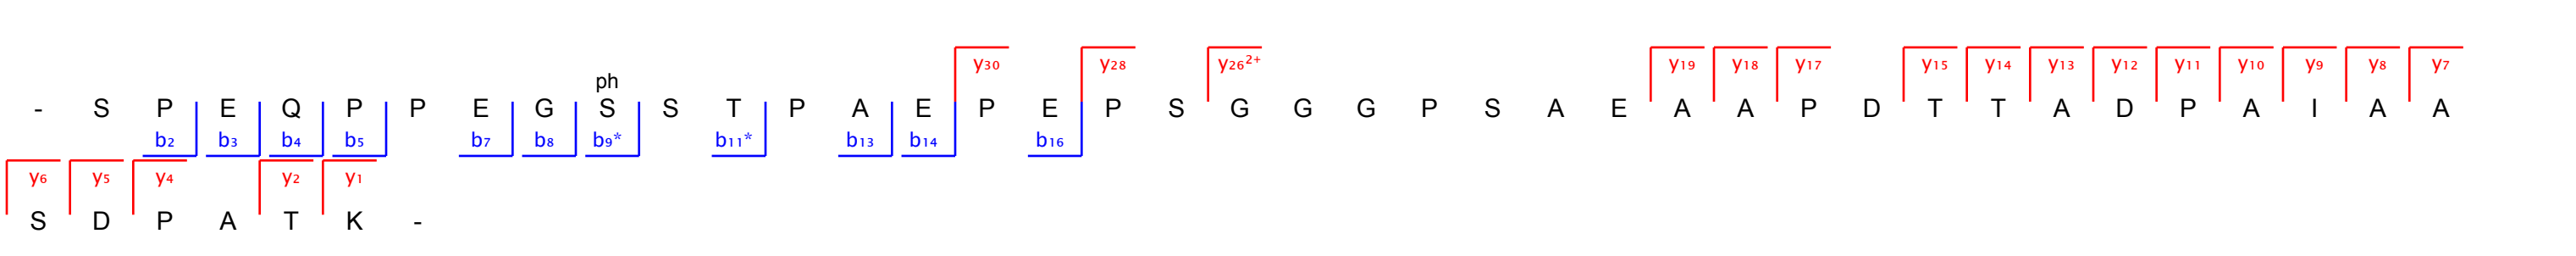



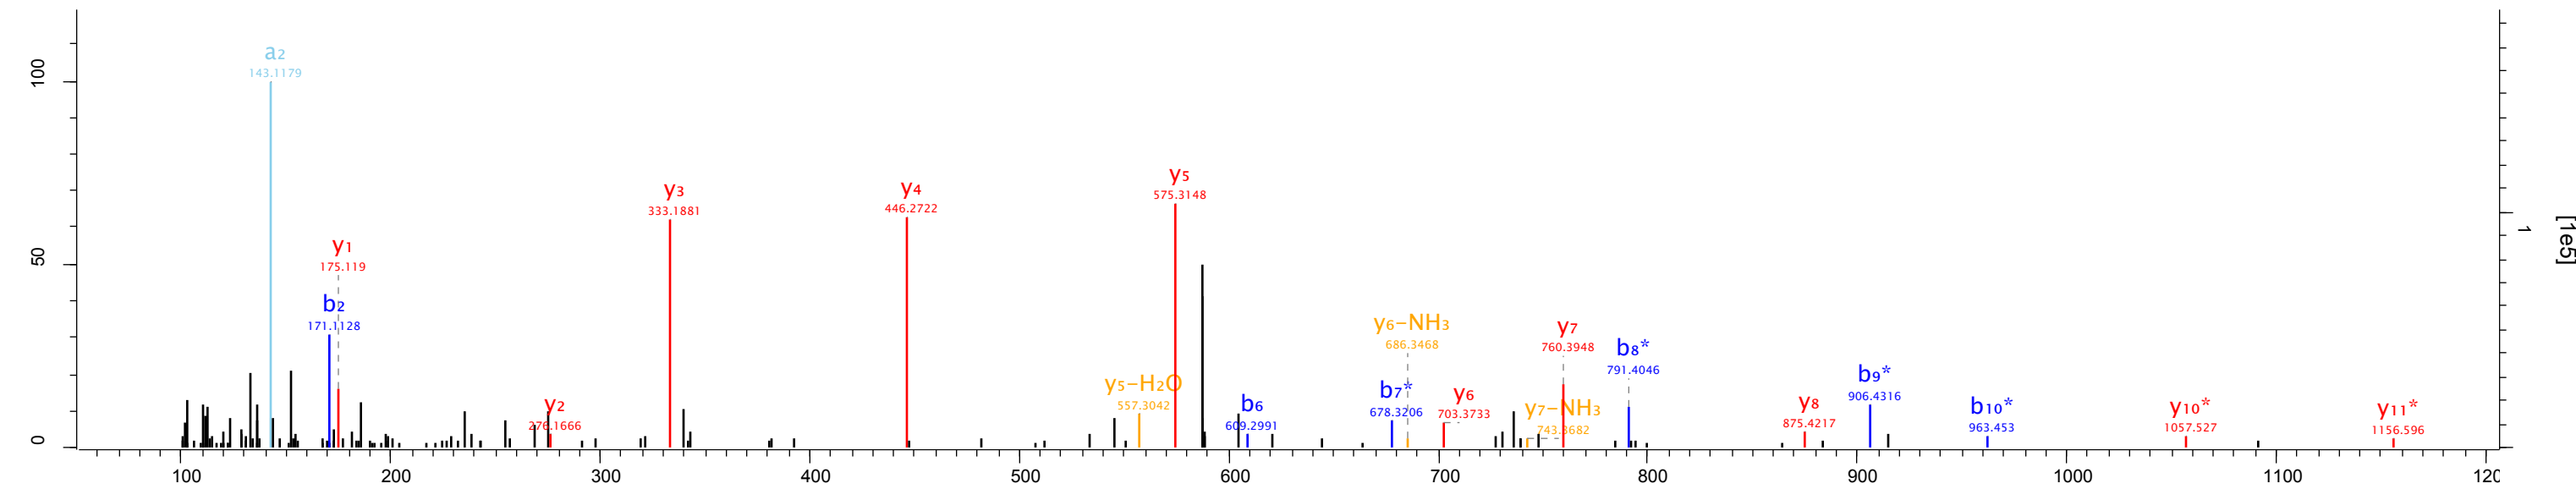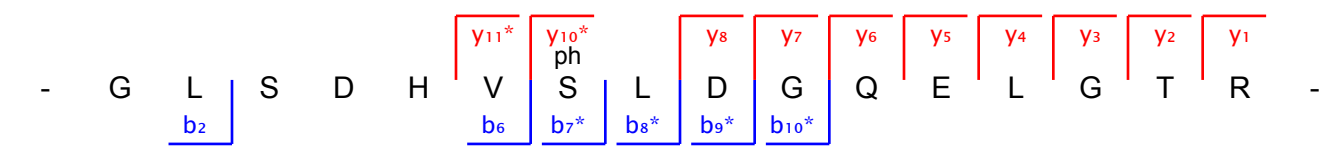

Raw file 20171215\_MaS\_33SR\_LMH\_phospho\_06 Scan 12559 Method FTMS; HCD Score 107.62 m/z 795.37 Gene names UBR1

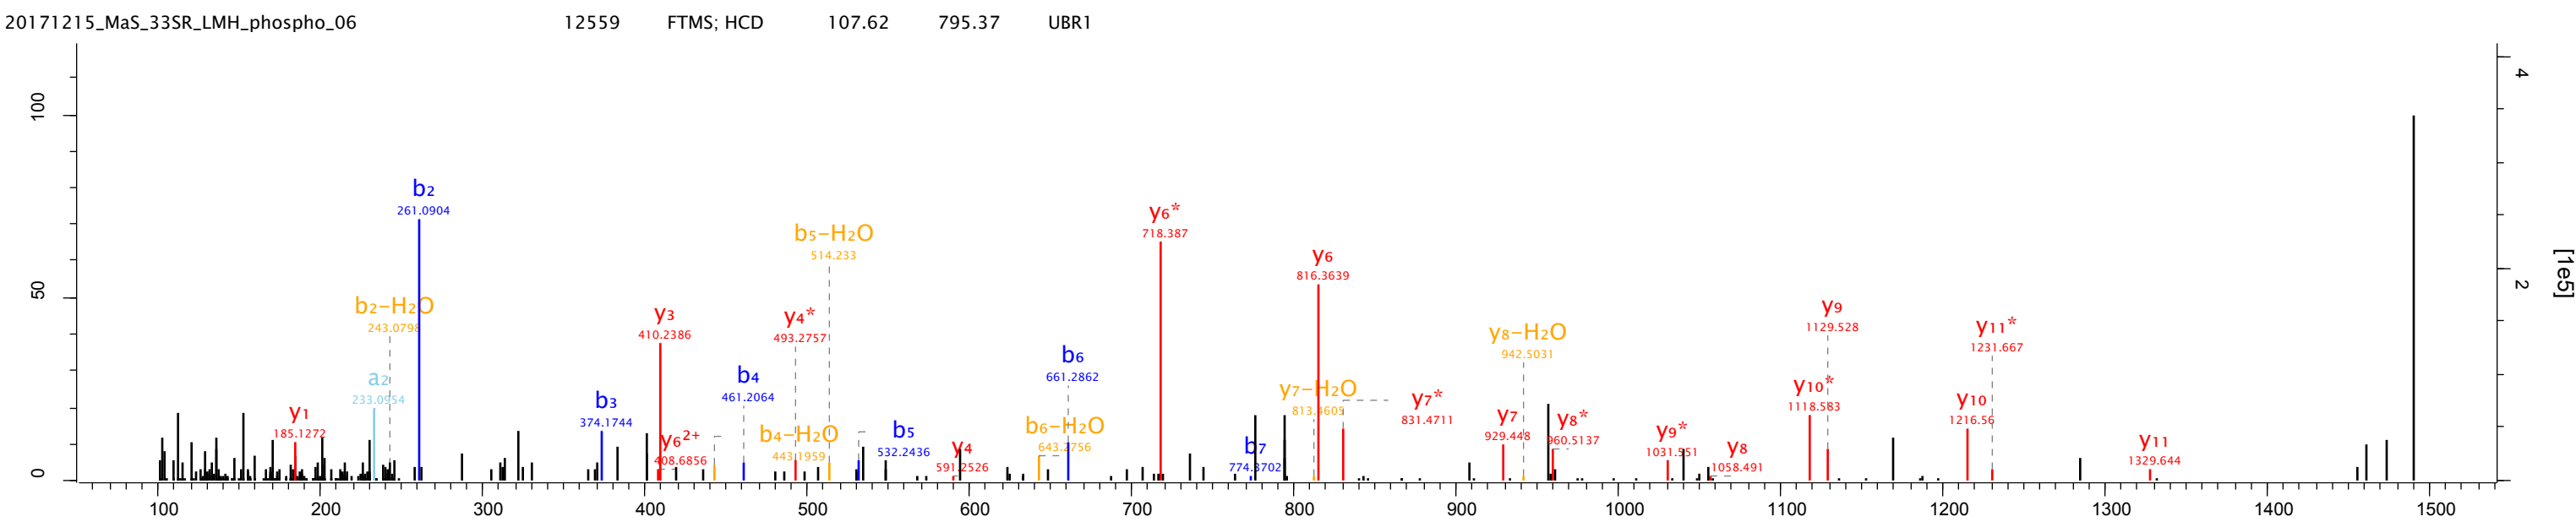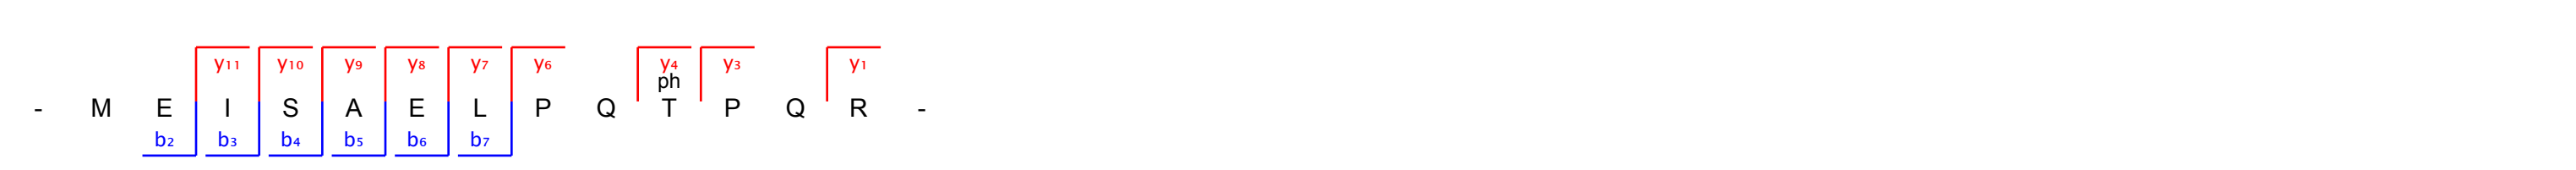

Raw file 20171215\_MaS\_33SR\_LMH\_phospho\_06 Scan 12799 Method FTMS; HCD Score 91.31 m/z 665.31 Gene names AKAP12

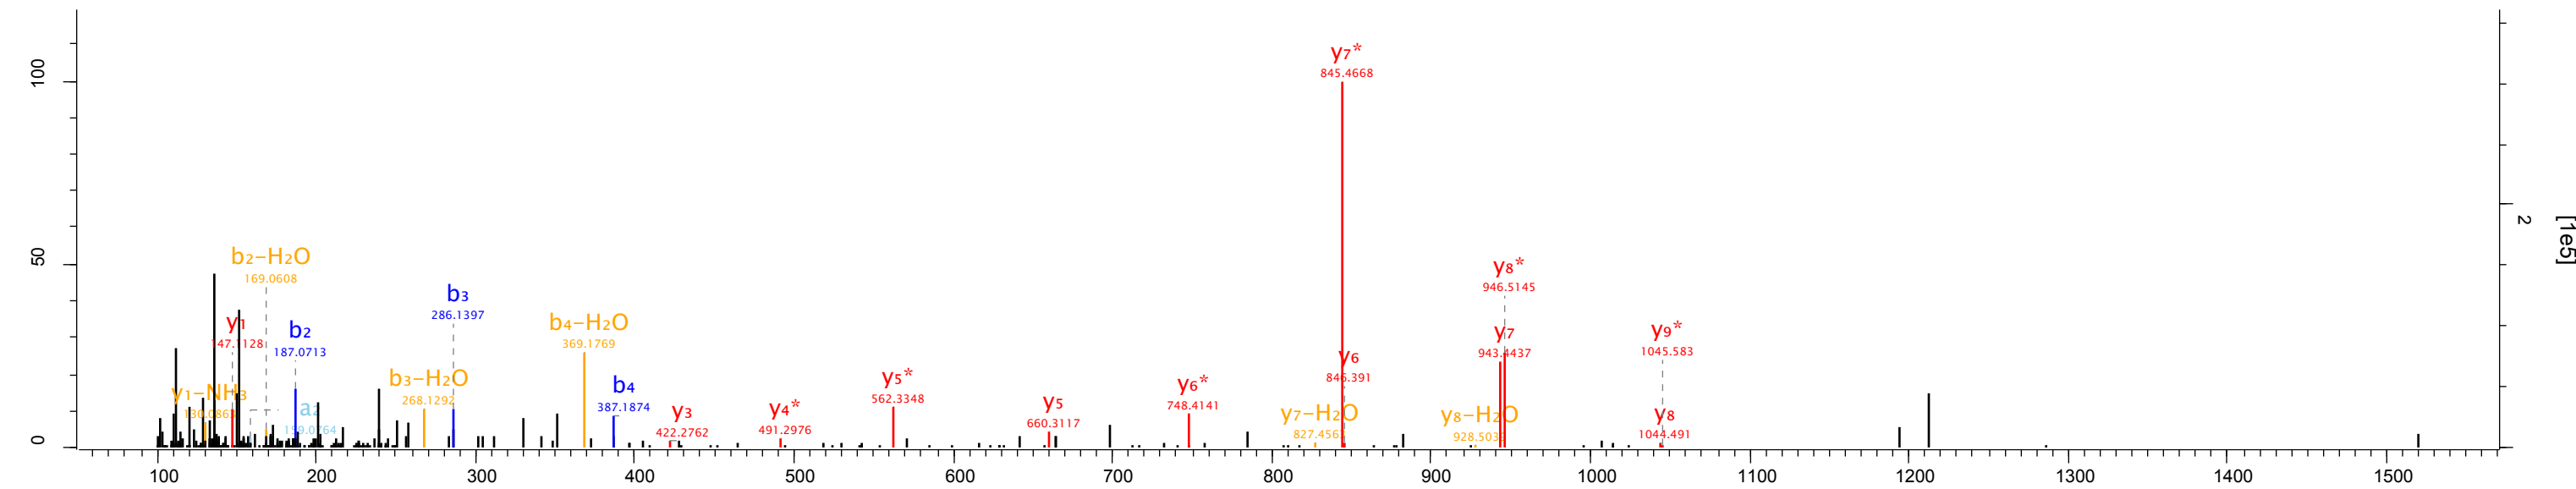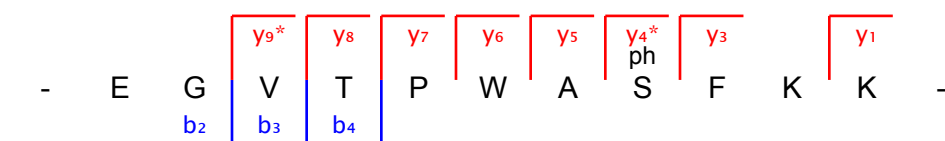

Raw file 20171215\_MaS\_33SR\_LMH\_phospho\_06 Scan 12969 Method FTMS; HCD Score 88.39 m/z 976.13 Gene names DBN1

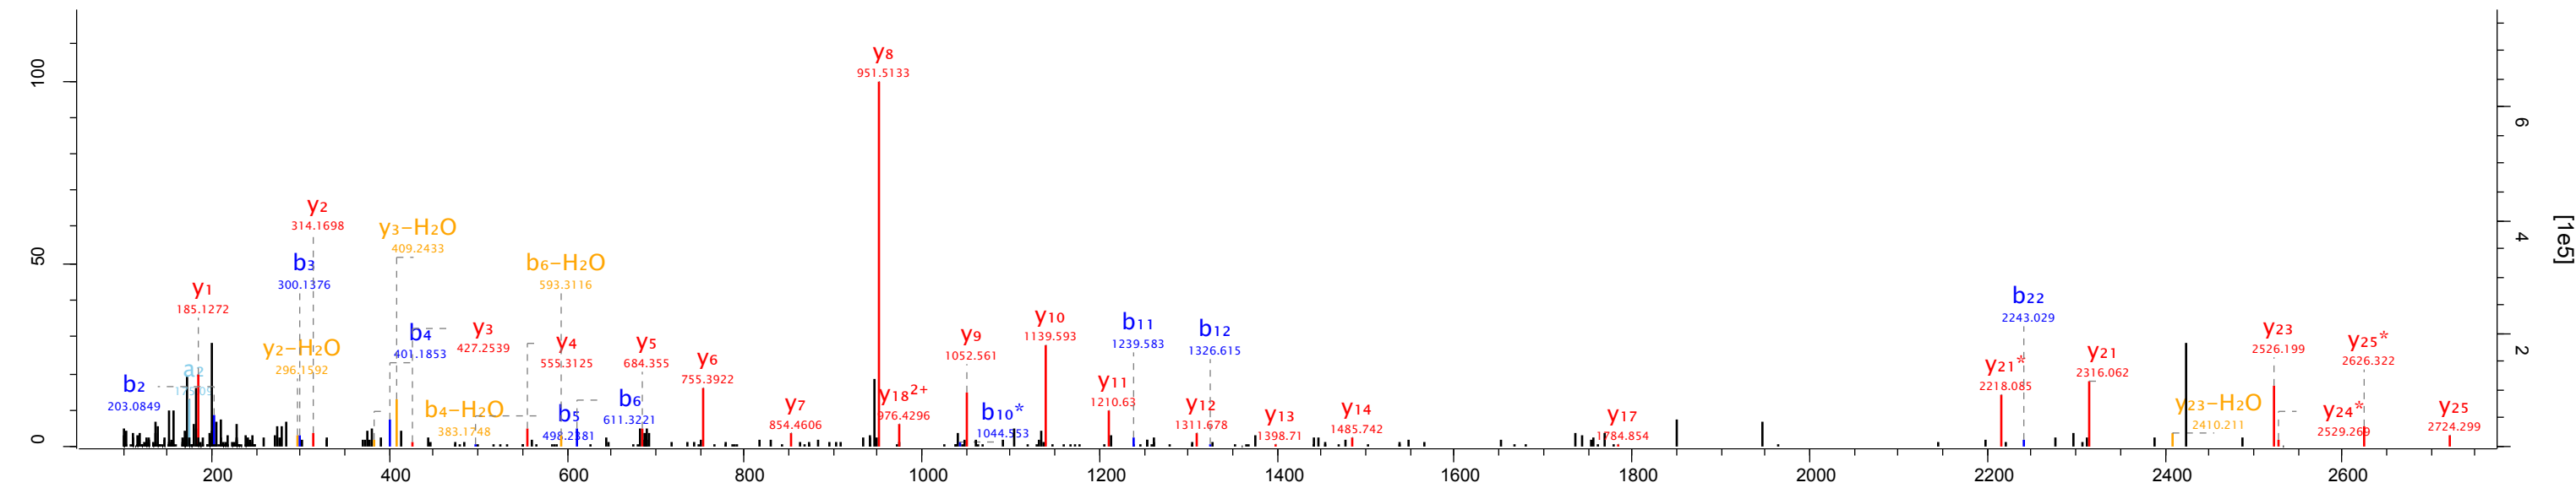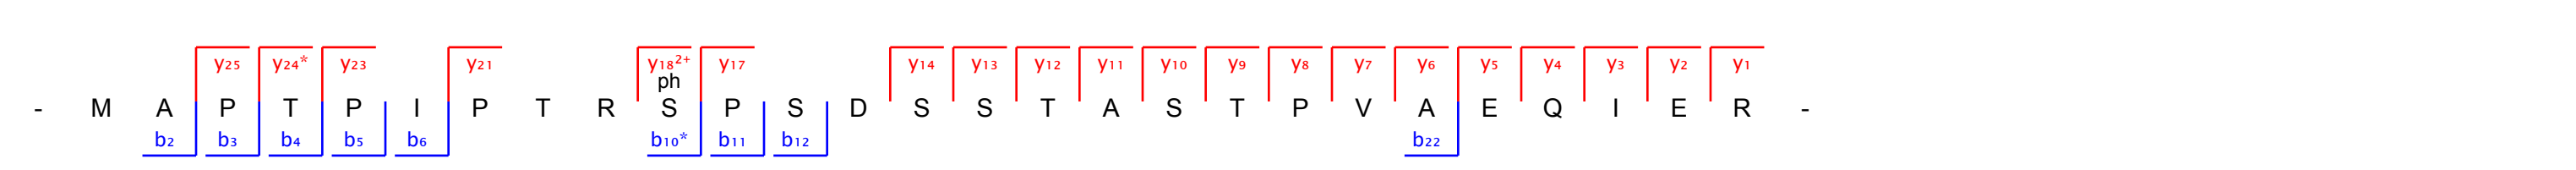

Raw file: 20171215\_MaS\_33SR\_LMH\_phospho\_06  
 Scan: 12999 Method: FTMS; HCD Score: 145.69 m/z: 637.81 Gene names: MKI67

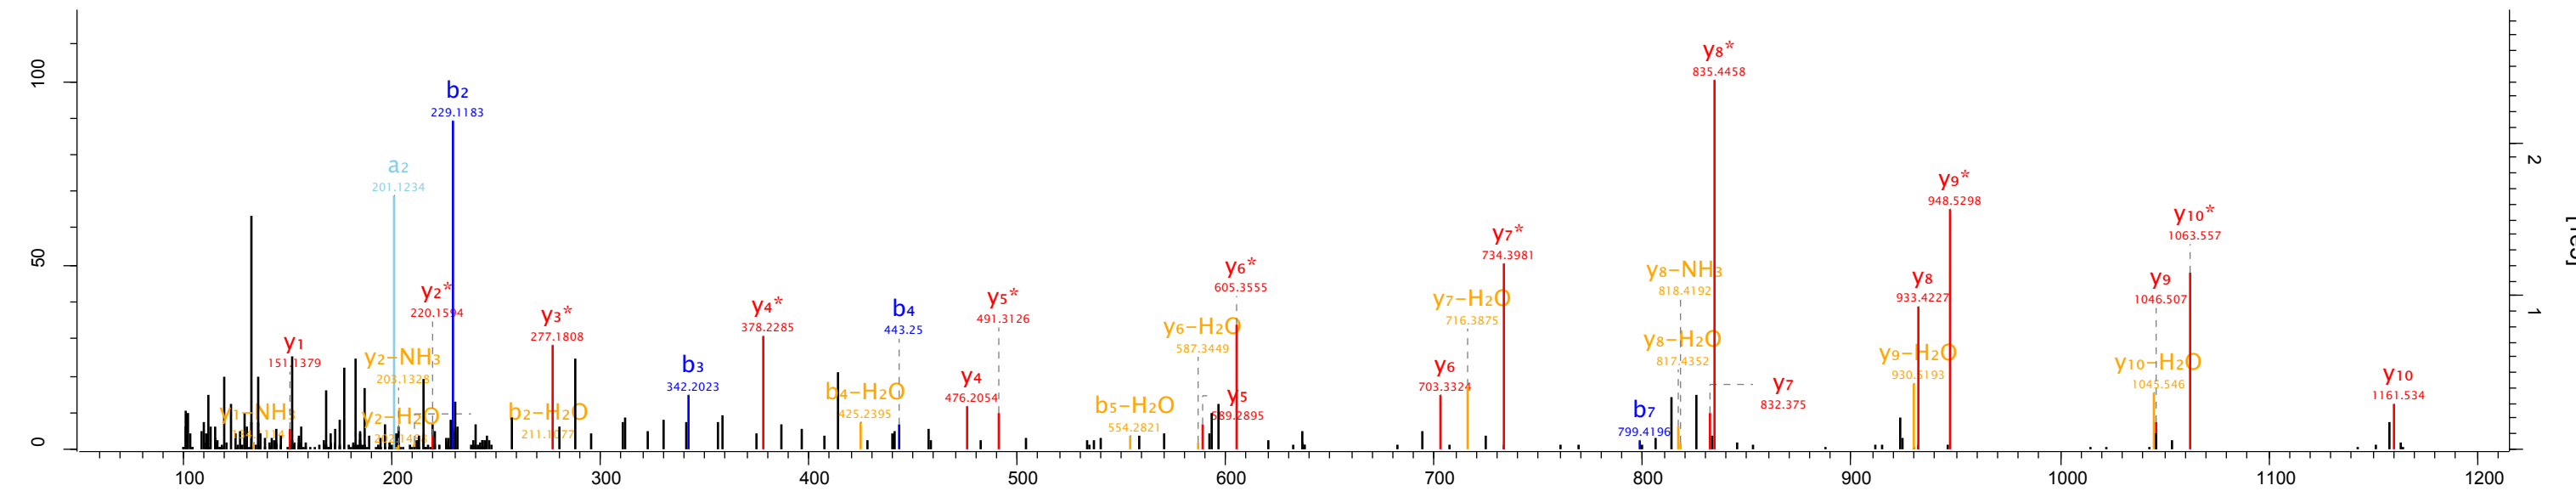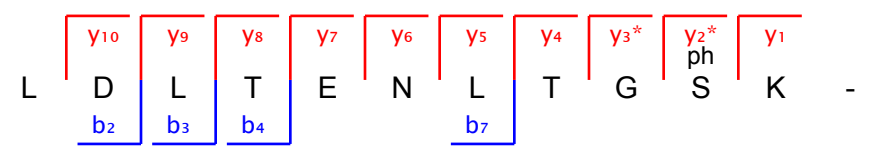

Raw file 20171215\_MaS\_33SR\_LMH\_phospho\_06 Scan 13119 Method FTMS; HCD Score 75.1 m/z 1201.07 Gene names ZBTB21

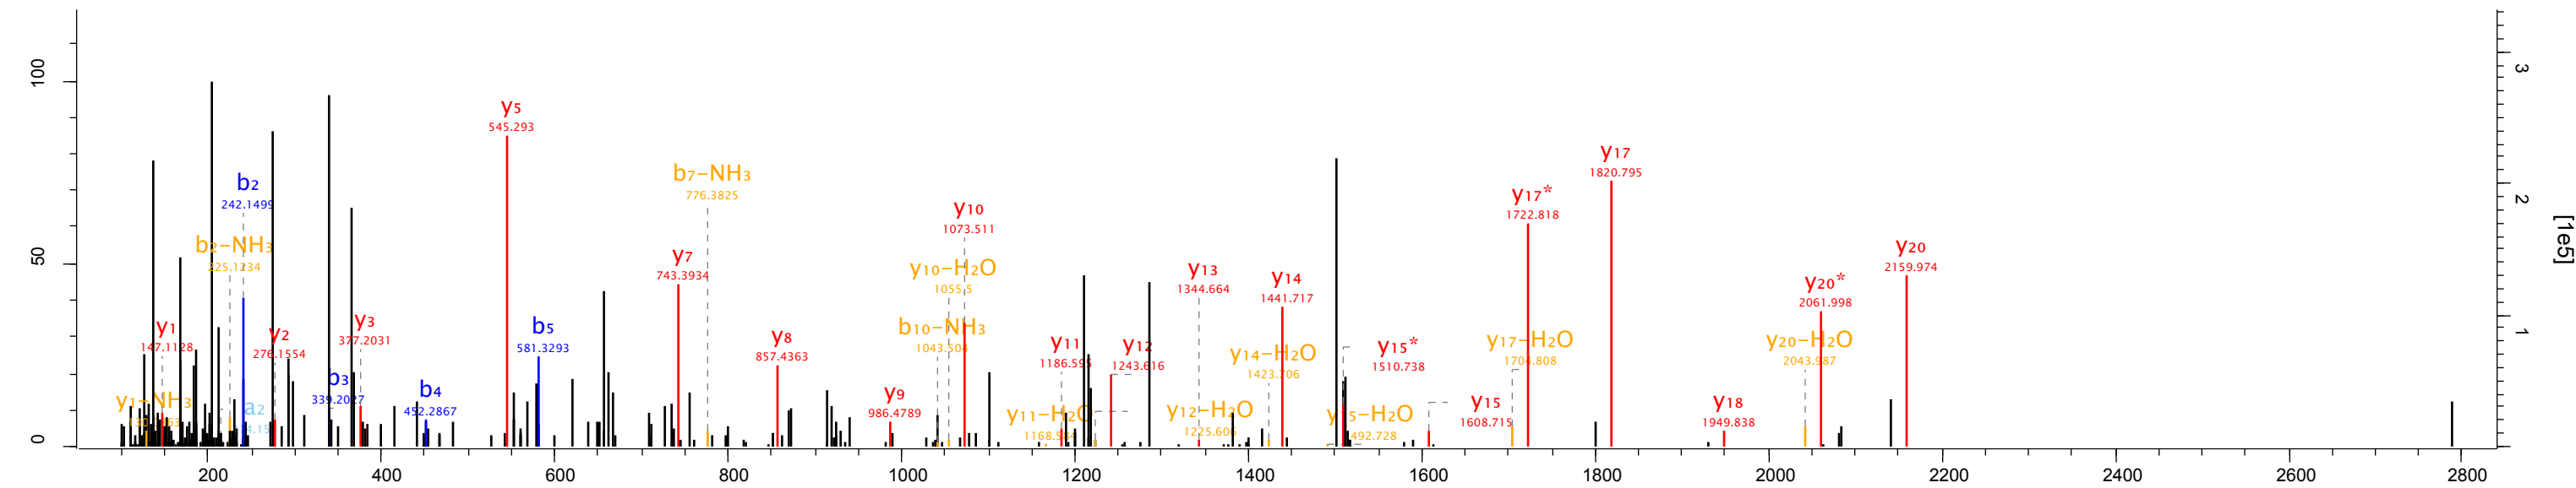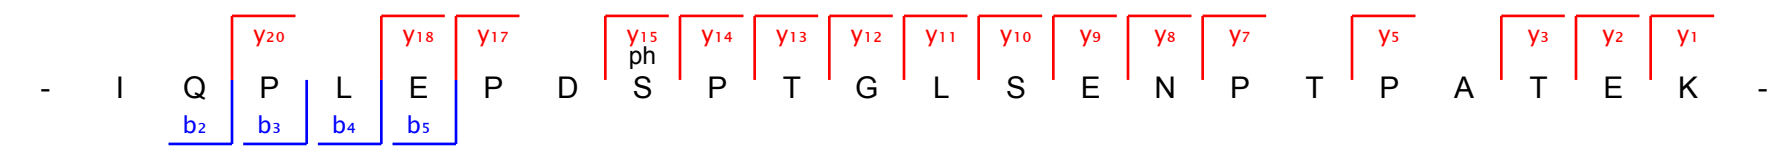

Raw file 20171215\_MaS\_33SR\_LMH\_phospho\_06 Scan 13129 Method FTMS; HCD Score 144.2 m/z 1018.8 Gene names MAP1B

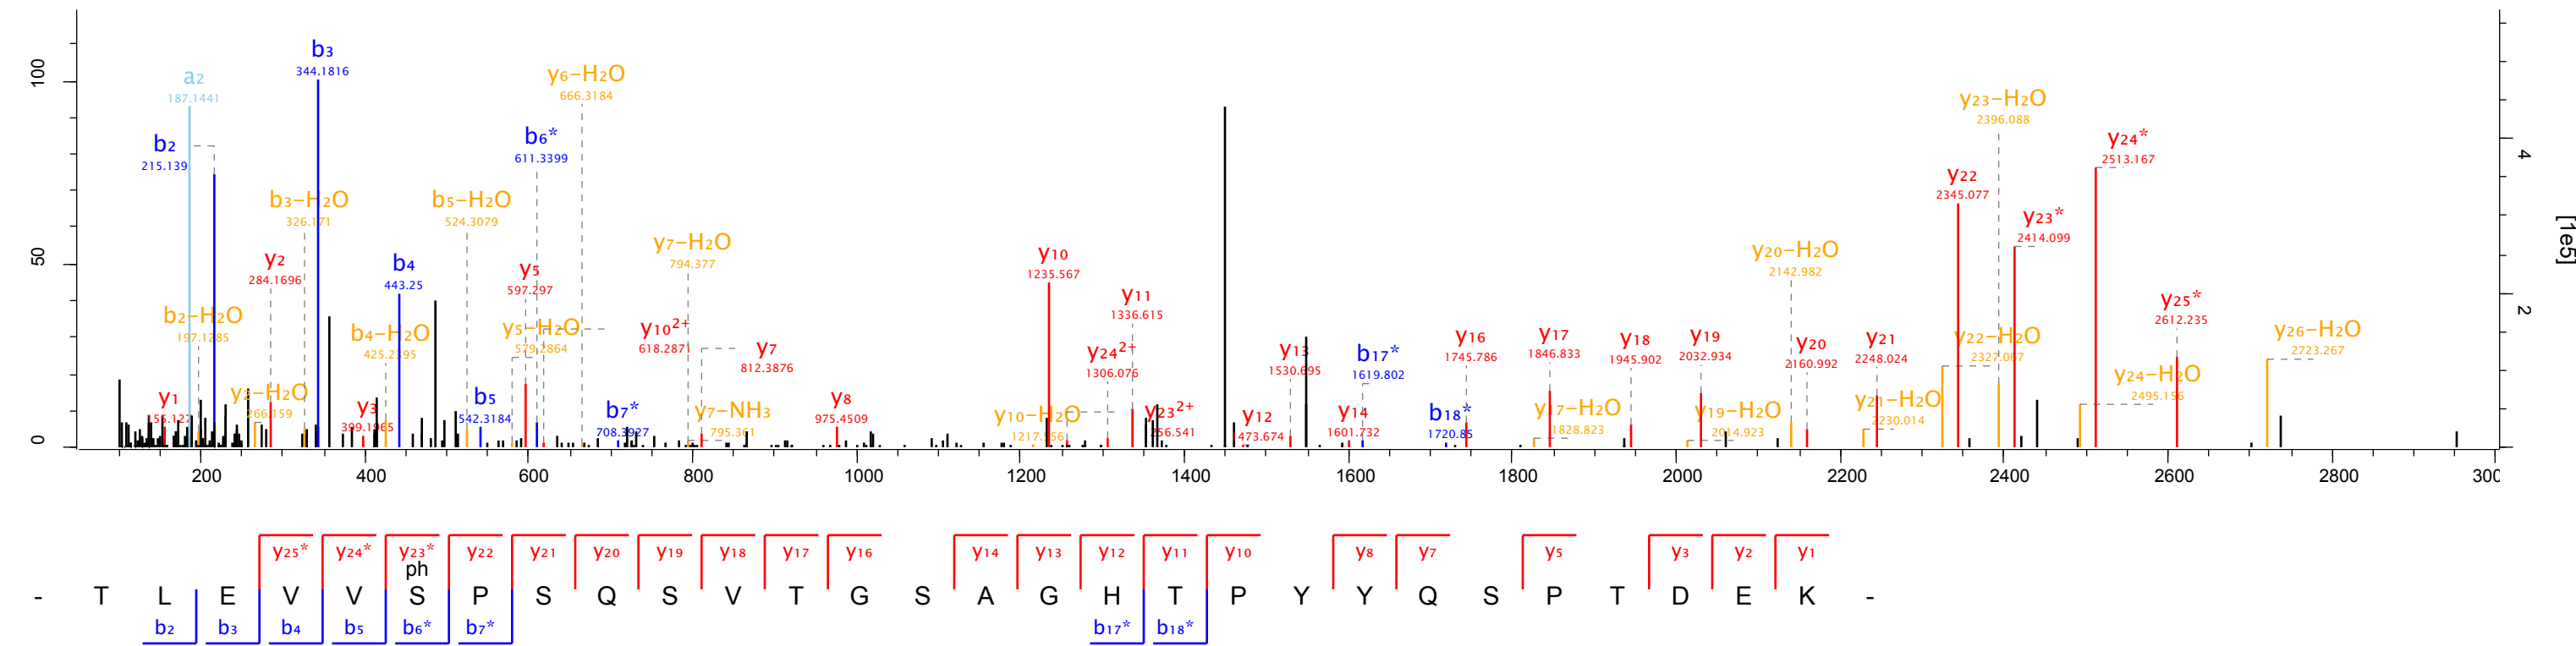

Raw file 20171215\_MaS\_33SR\_LMH\_phospho\_06 Scan 13309 Method FTMS; HCD Score 54.93 m/z 891.75 Gene names PML

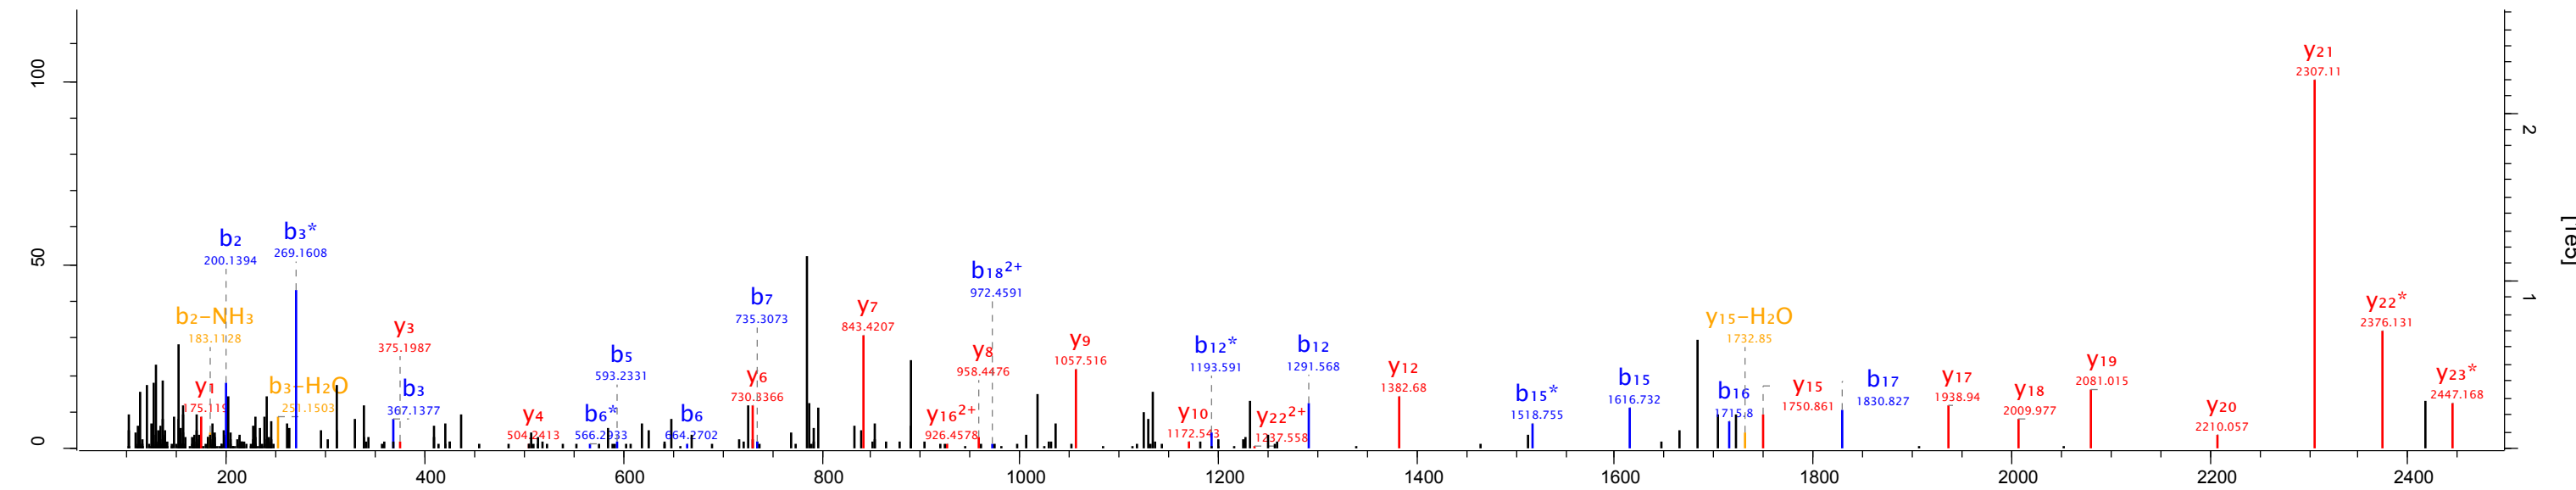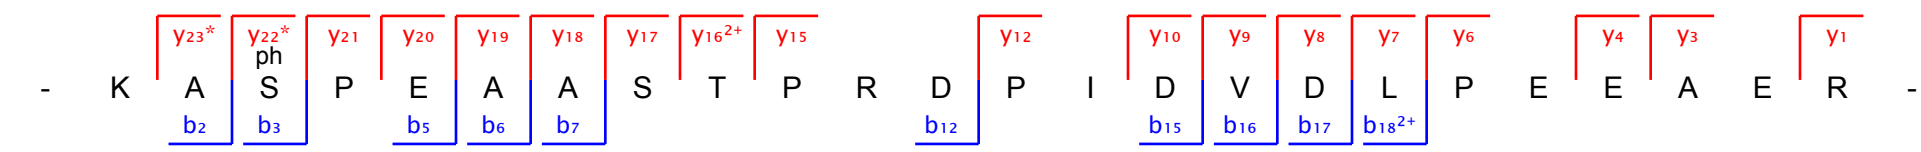



Raw file: 20171215\_MaS\_33SR\_LMH\_phospho\_06  
 Scan: 13549 Method: FTMS; HCD Score: 125.79 m/z: 785.35 Gene names: SNAPIN

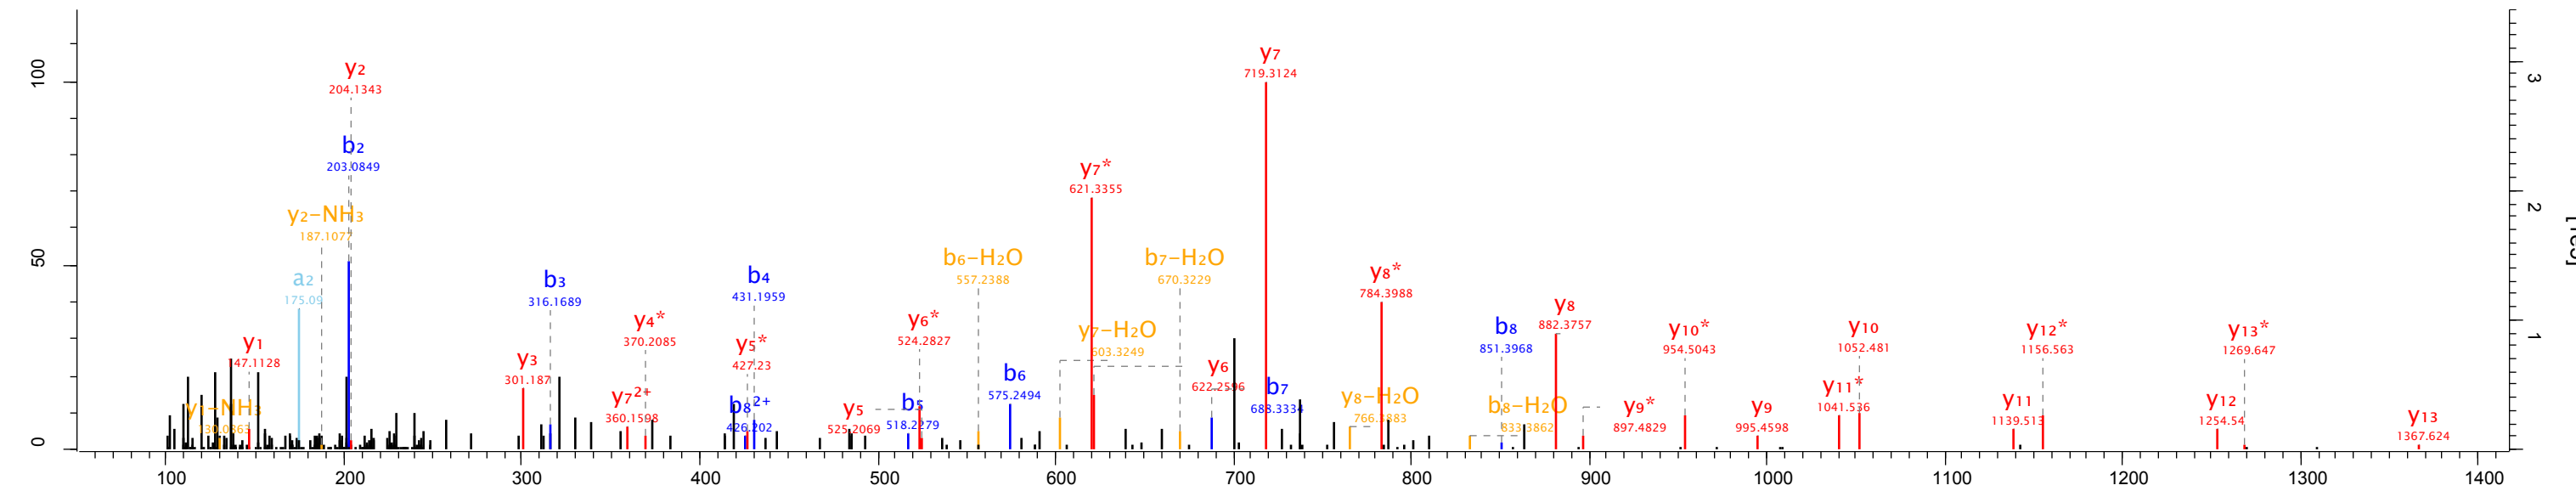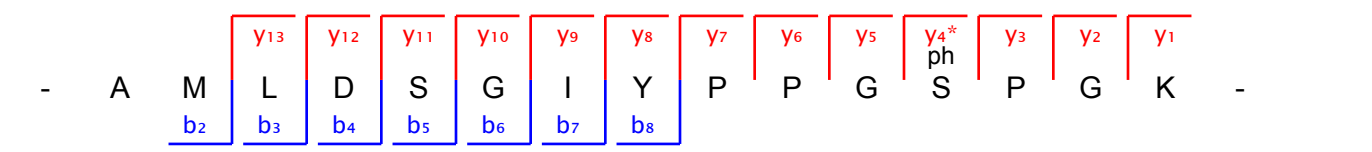

Raw file 20171215\_MaS\_33SR\_LMH\_phospho\_06 Scan 13749 Method FTMS; HCD Score 114.46 m/z 867.41 Gene names URGCP;URGCP-MRPS24

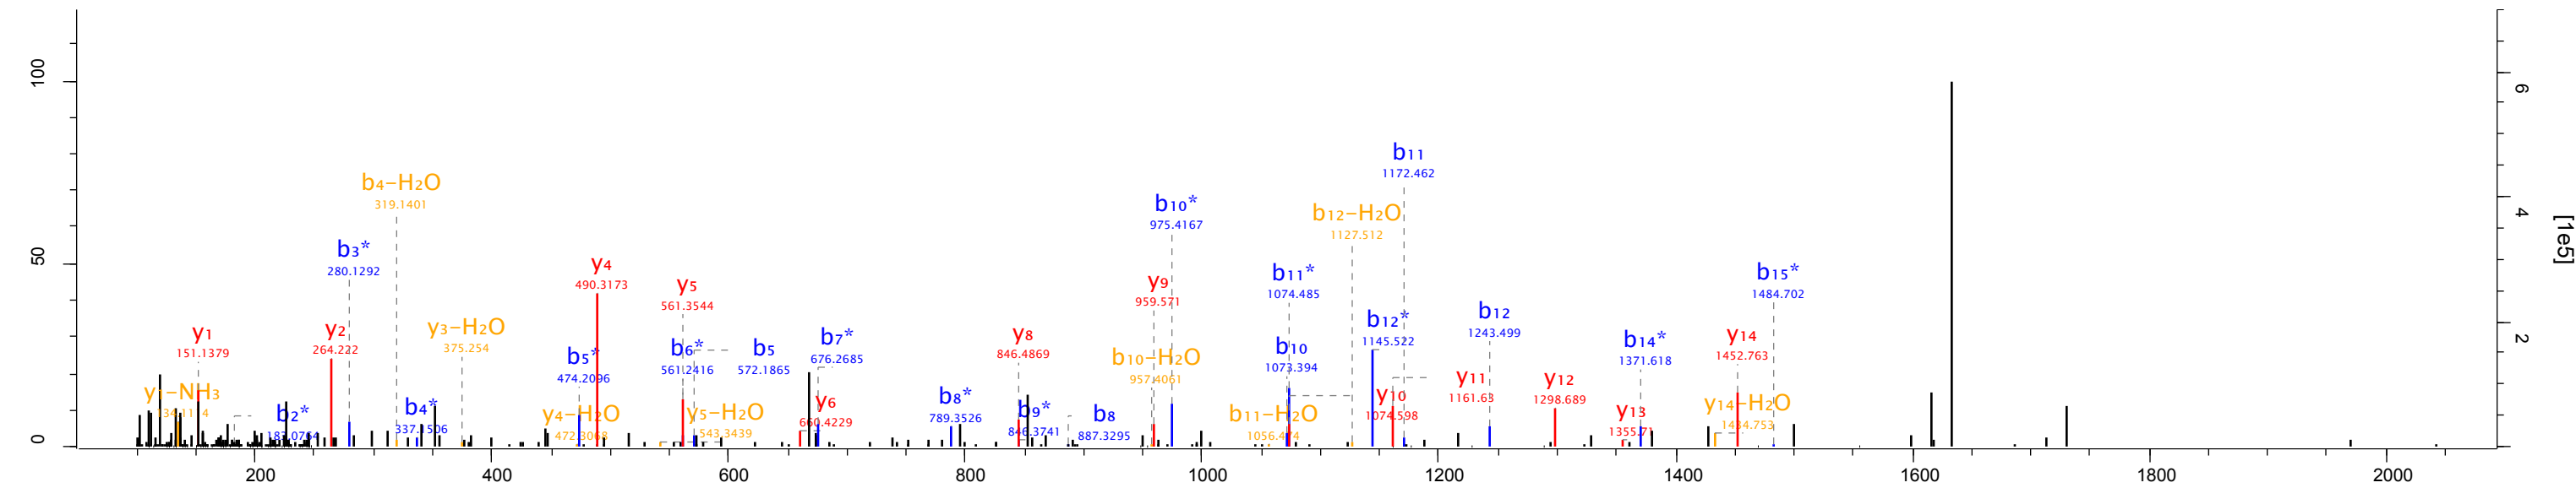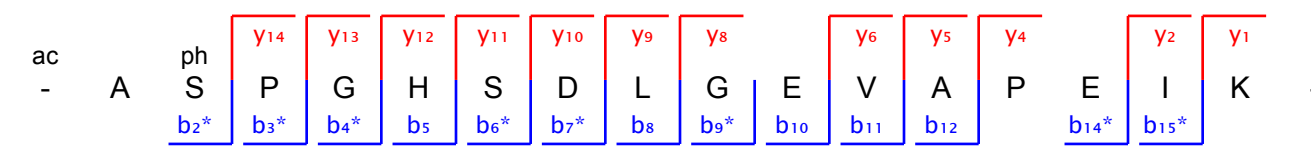

Raw file: 20171215\_MaS\_33SR\_LMH\_phospho\_06  
 Scan: 14119 Method: FTMS; HCD Score: 101.38 m/z: 916.38 Gene names: LPIN1

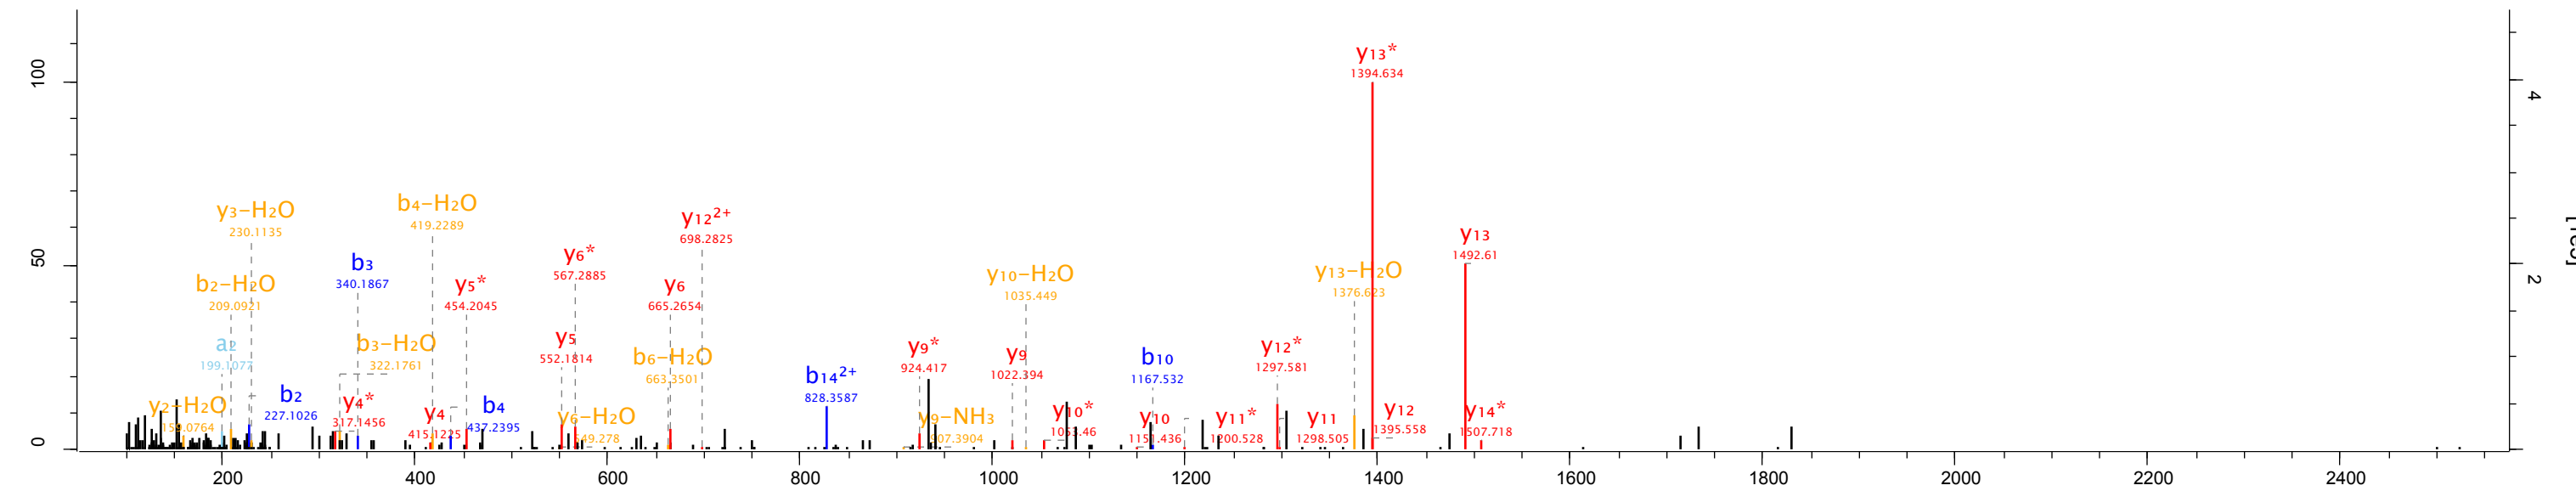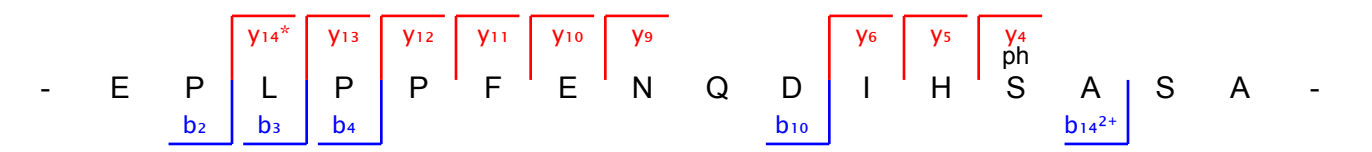

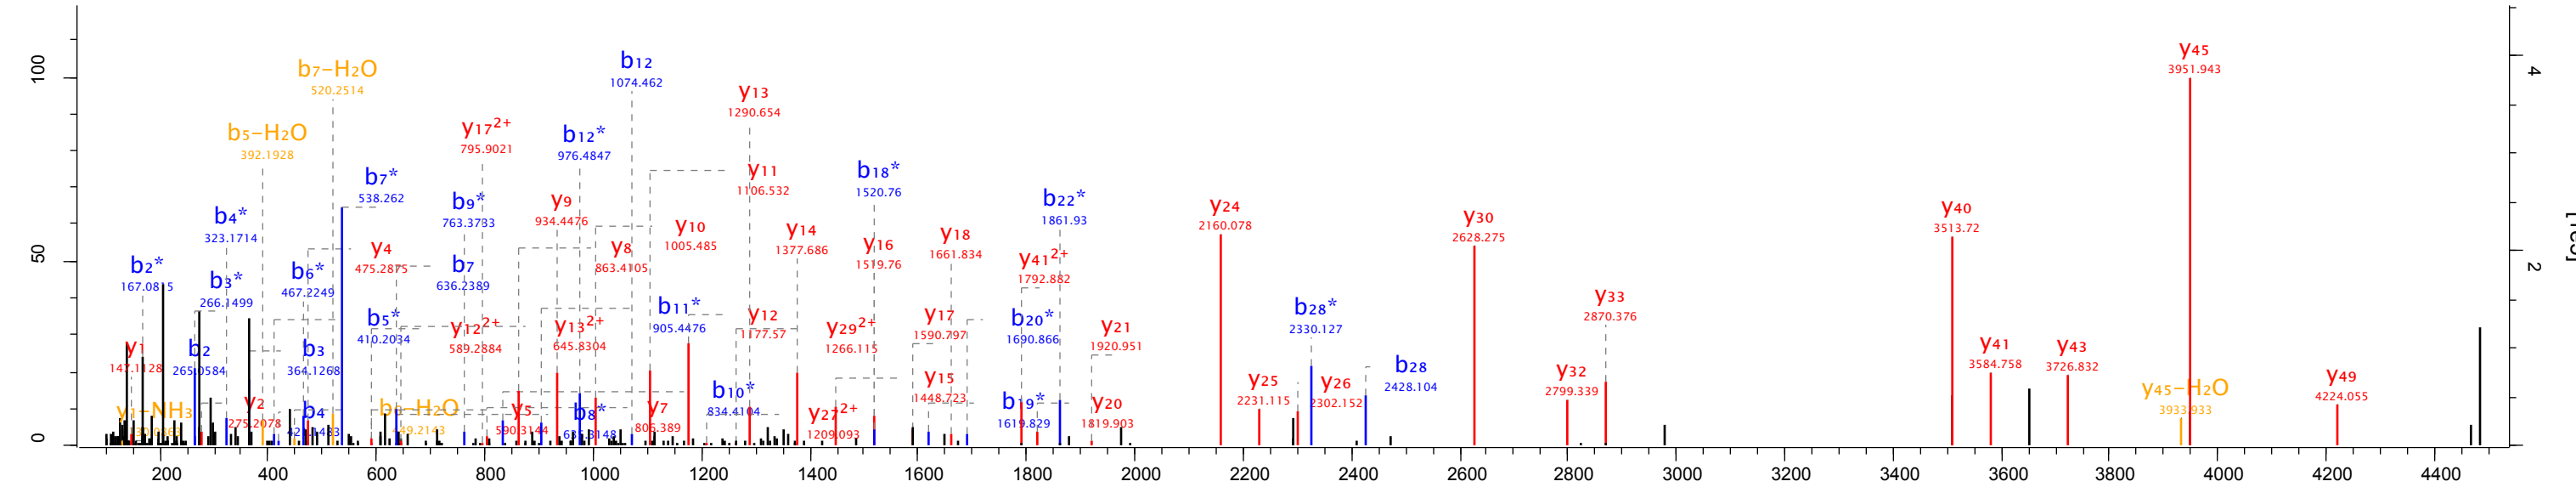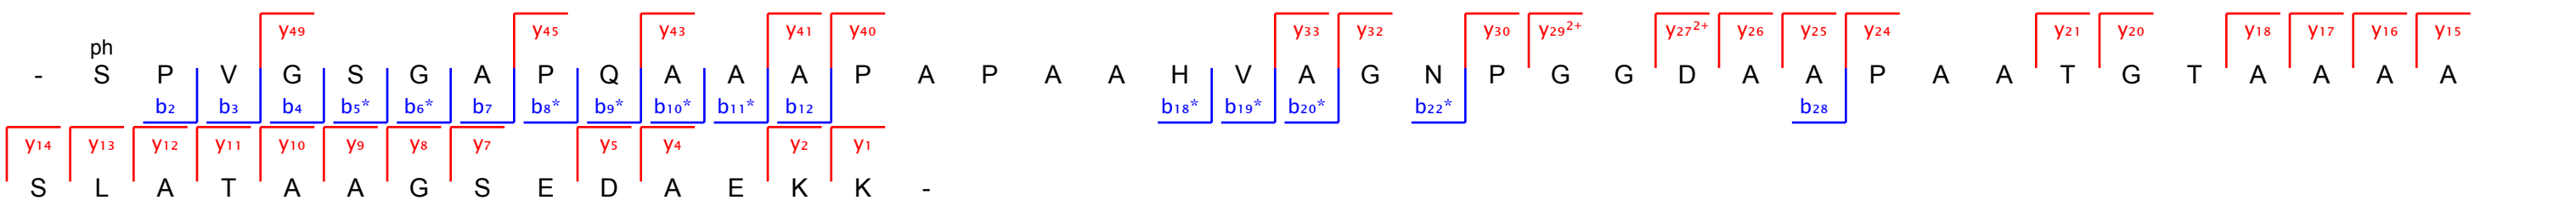

Raw file 20171215\_MaS\_33SR\_LMH\_phospho\_06 Scan 14419 Method FTMS; HCD Score 85.94 m/z 850.4 Gene names ZBTB21

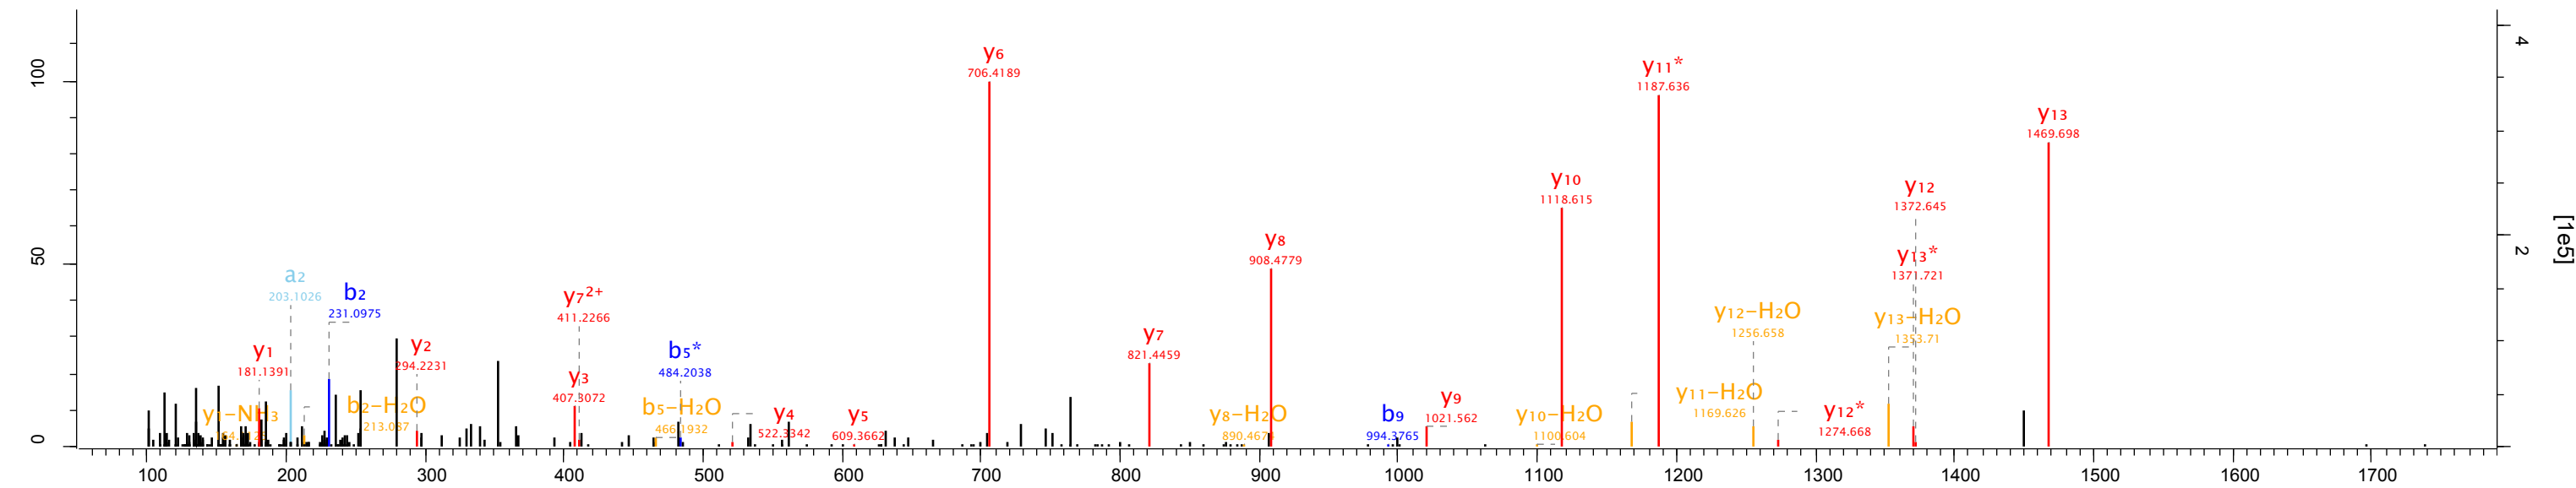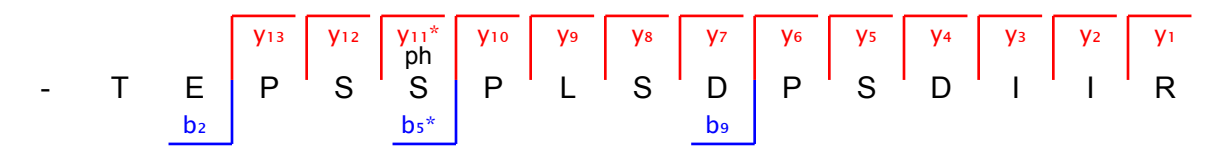

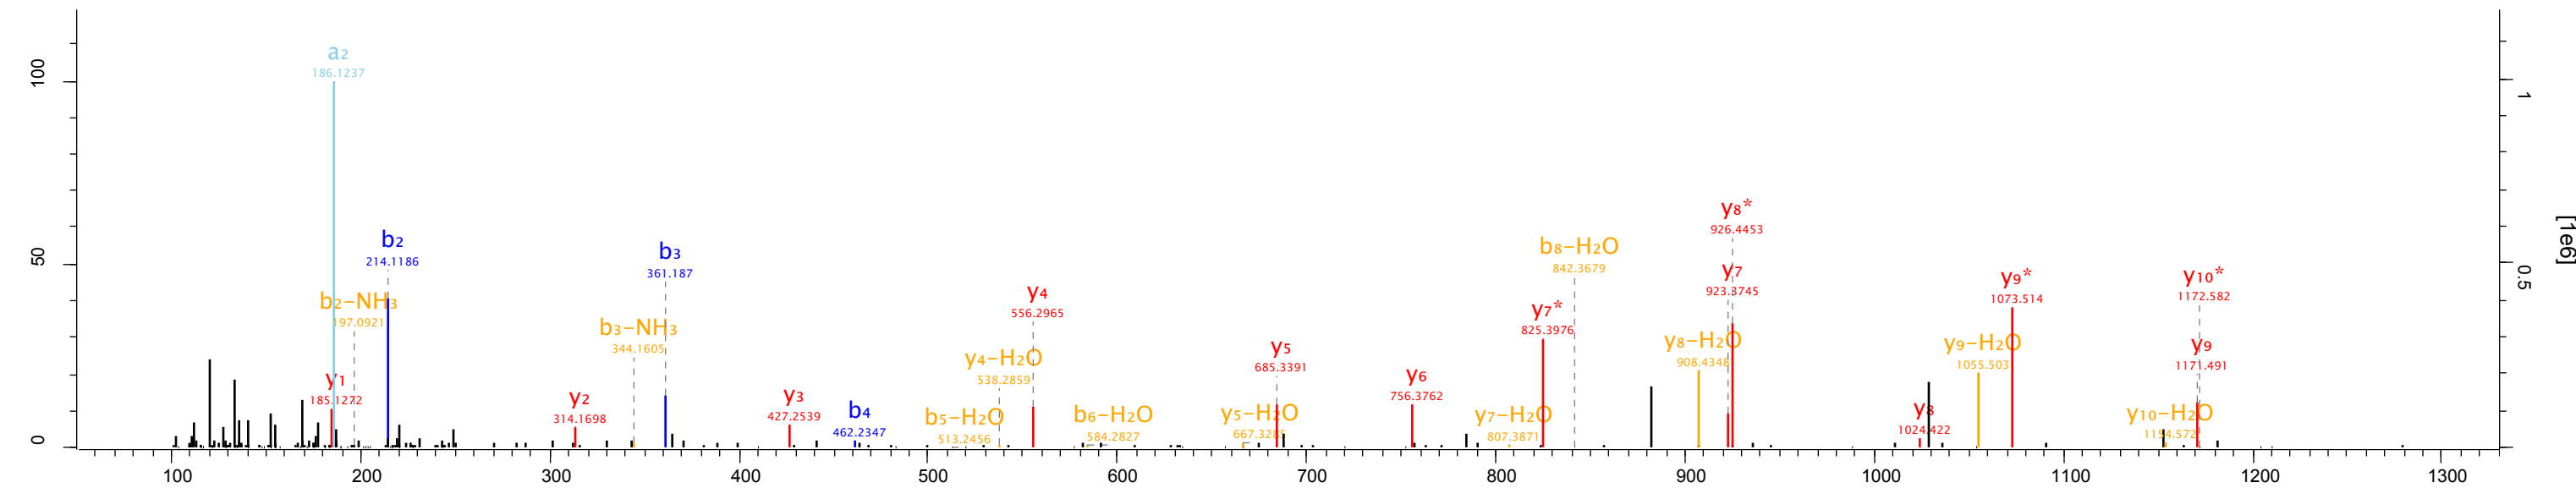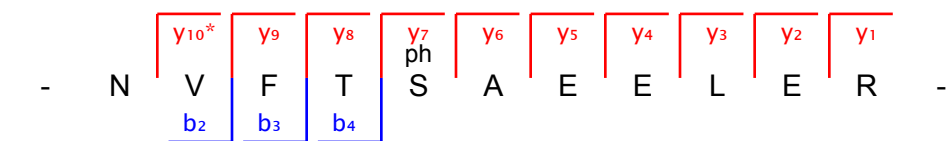

Raw file 20171215\_MaS\_33SR\_LMH\_phospho\_06 Scan 14979 Method FTMS; HCD Score 219.74 m/z 845.87 Gene names RRAGC;RRAGD

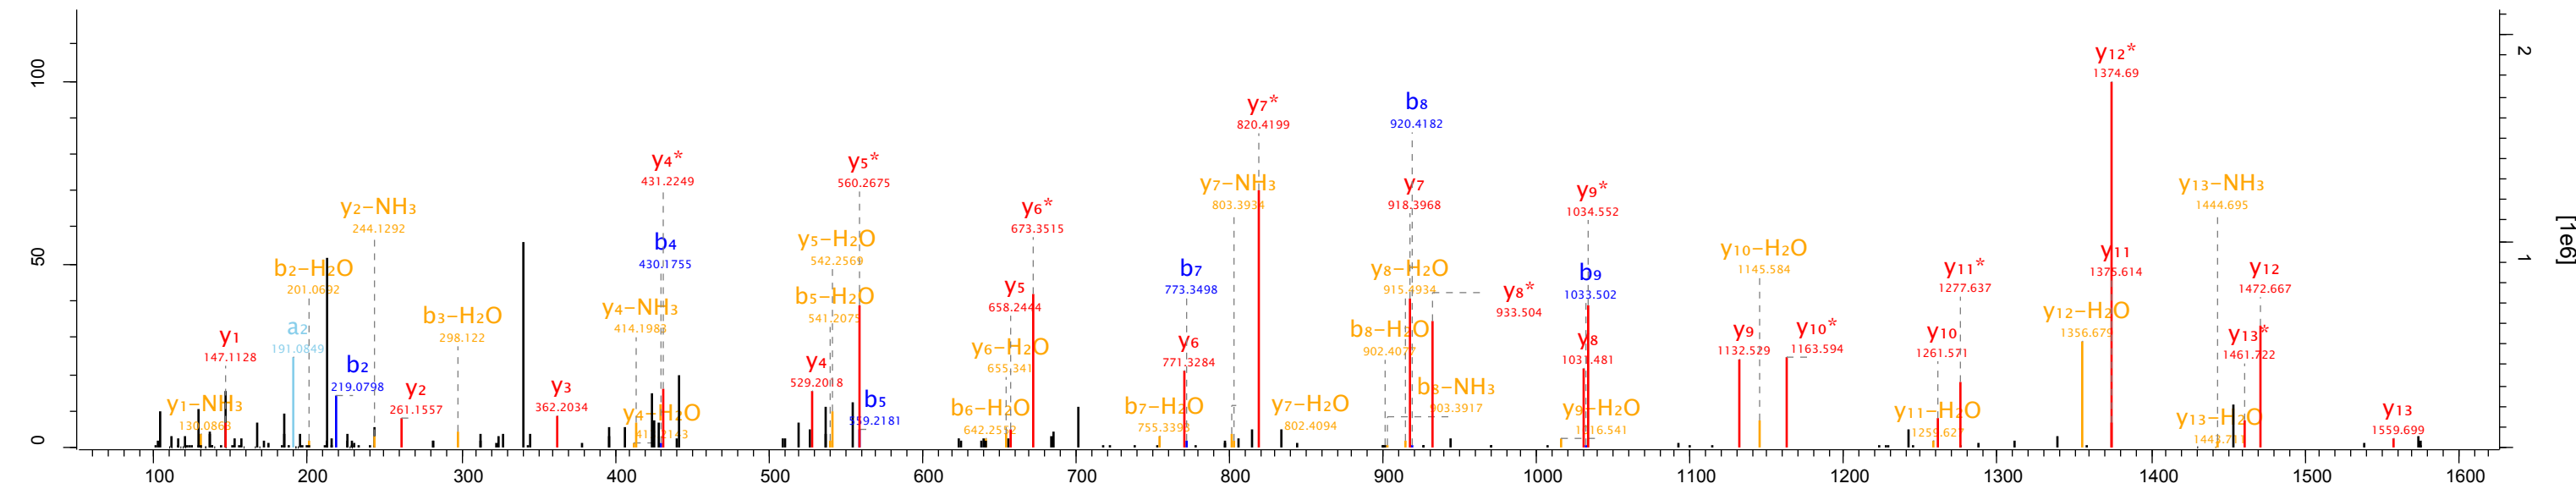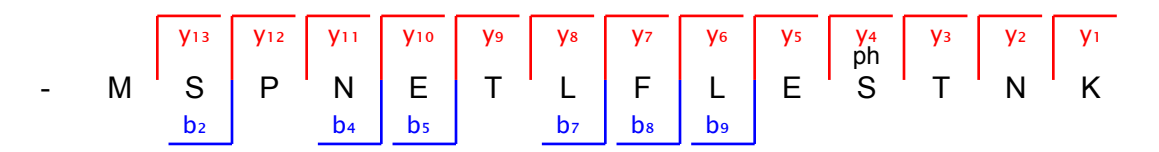

Raw file 20171215\_MaS\_33SR\_LMH\_phospho\_06 Scan 15029 Method FTMS; HCD Score 169.83 m/z 1116.27 Gene names YBX3

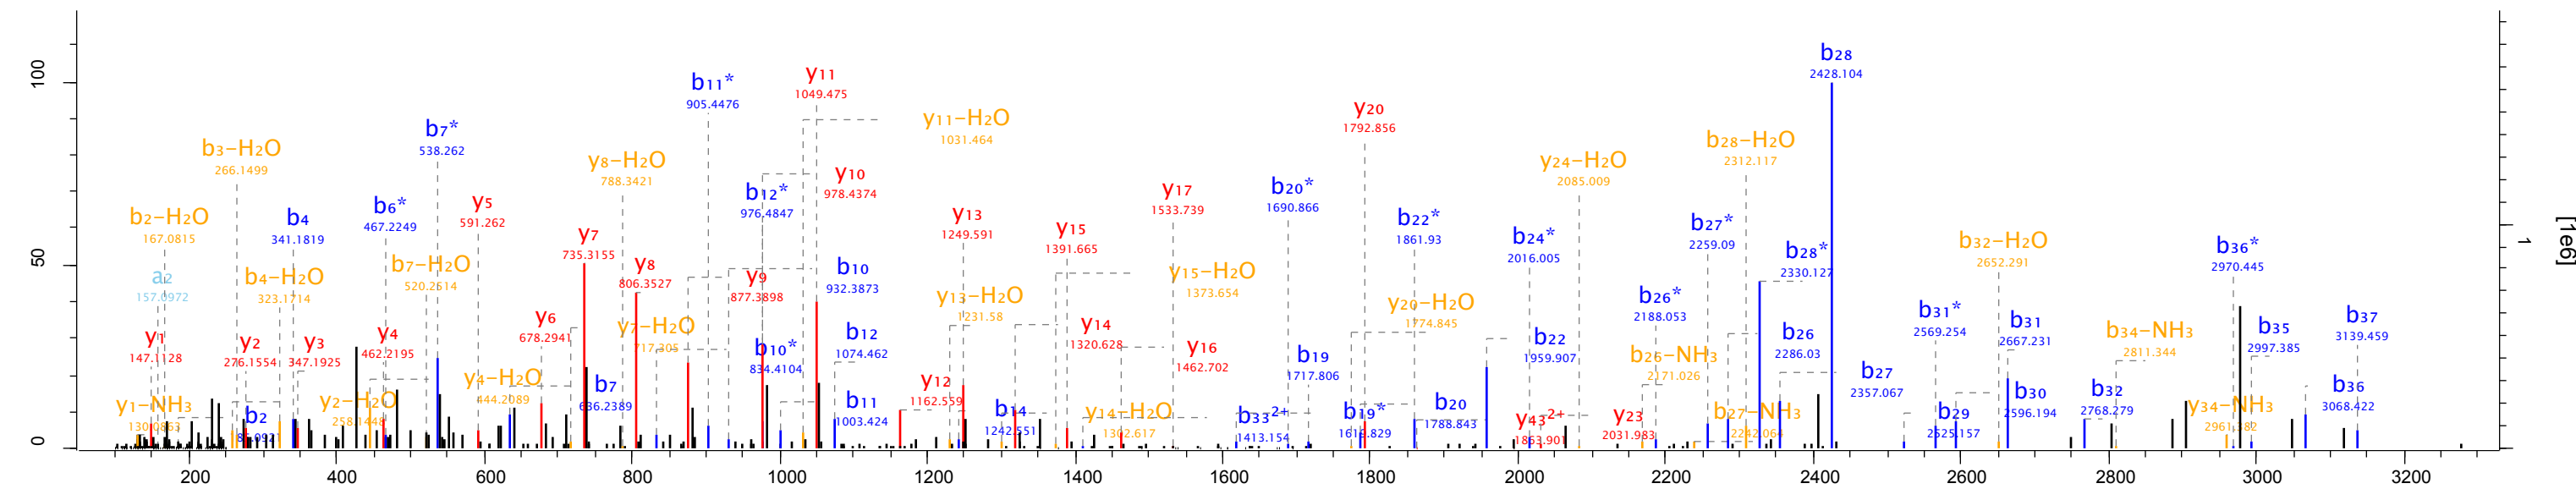

- S P V G S G A P Q A A A P A P A A H V A G N P G G D A A P A A T G T A A A A  
 b<sub>2</sub> b<sub>4</sub> b<sub>6</sub><sup>\*</sup> b<sub>7</sub> b<sub>10</sub> b<sub>11</sub> b<sub>12</sub> b<sub>14</sub> b<sub>19</sub> b<sub>20</sub> b<sub>22</sub> b<sub>24</sub><sup>\*</sup> b<sub>26</sub> b<sub>27</sub> b<sub>28</sub> b<sub>29</sub> b<sub>30</sub> b<sub>31</sub> b<sub>32</sub> b<sub>33</sub><sup>2+</sup> b<sub>35</sub> b<sub>36</sub> b<sub>37</sub>  
 y<sub>13</sub> y<sub>12</sub> y<sub>11</sub> y<sub>10</sub> y<sub>9</sub> y<sub>8</sub> y<sub>7</sub> y<sub>6</sub> y<sub>5</sub> y<sub>4</sub> y<sub>3</sub> y<sub>2</sub> y<sub>1</sub> y<sub>43</sub><sup>2+</sup> y<sub>23</sub> y<sub>20</sub> y<sub>17</sub> y<sub>16</sub> y<sub>15</sub> y<sub>14</sub>  
 S L A T A A G S E D A E K -



Raw file: 20171215\_MaS\_33SR\_LMH\_phospho\_06  
 Scan: 15989 Method: FTMS; HCD Score: 68.29 m/z: 1004.51 Gene names: HCFC1

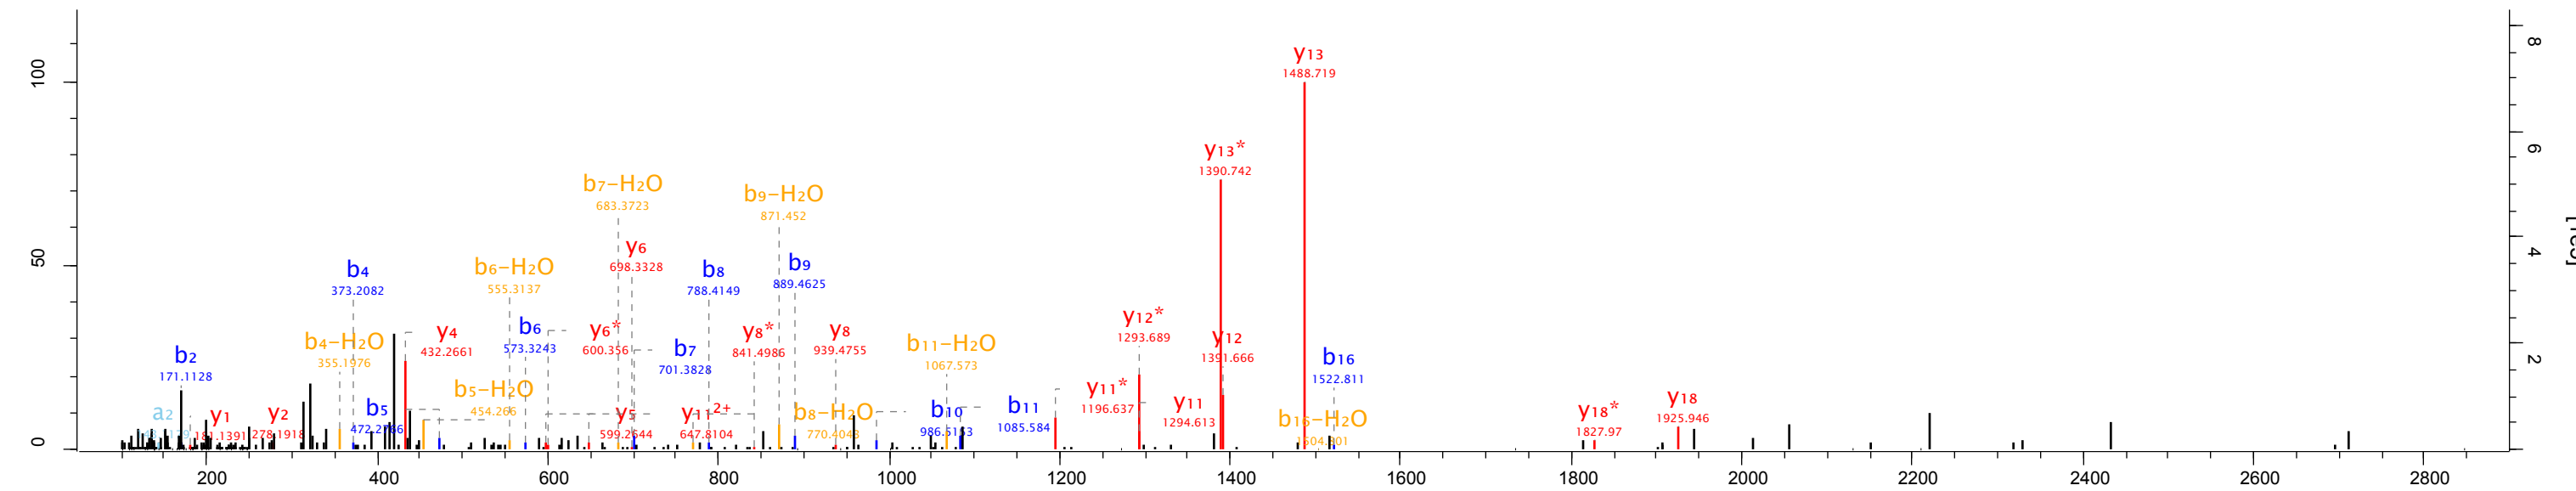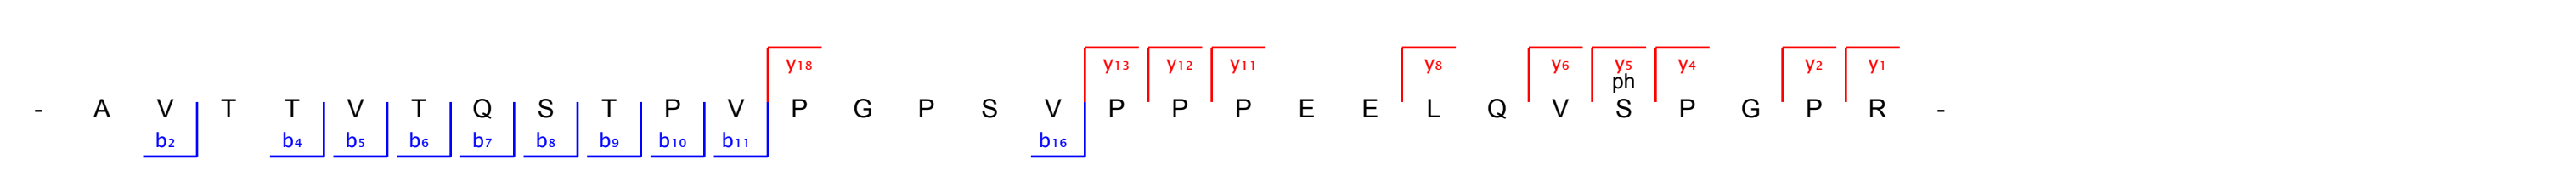

Raw file 20171215\_MaS\_33SR\_LMH\_phospho\_06 Scan 16109 Method FTMS; HCD Score 66.92 m/z 964.44 Gene names XRN2

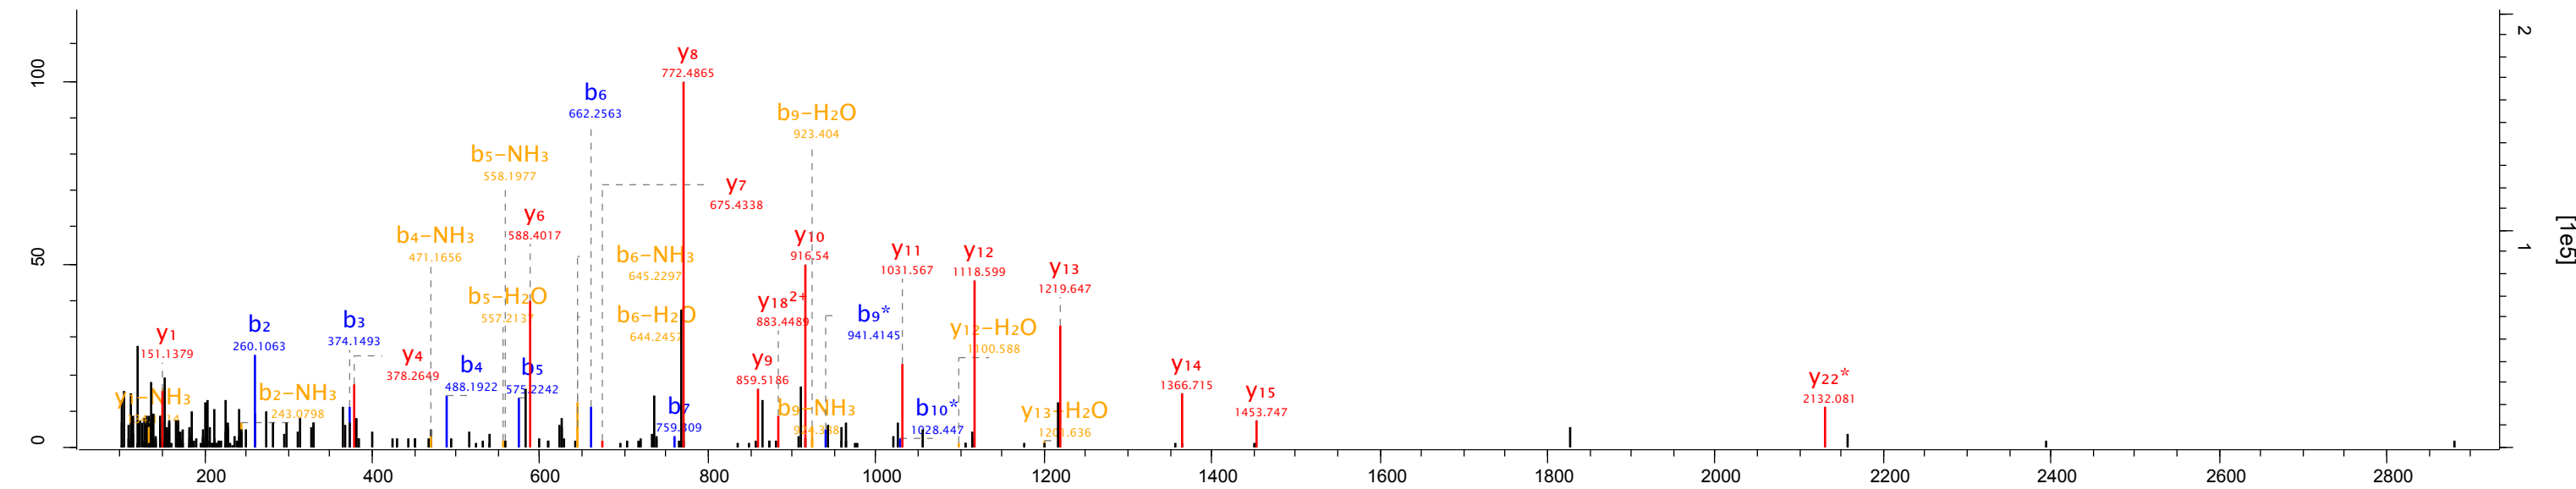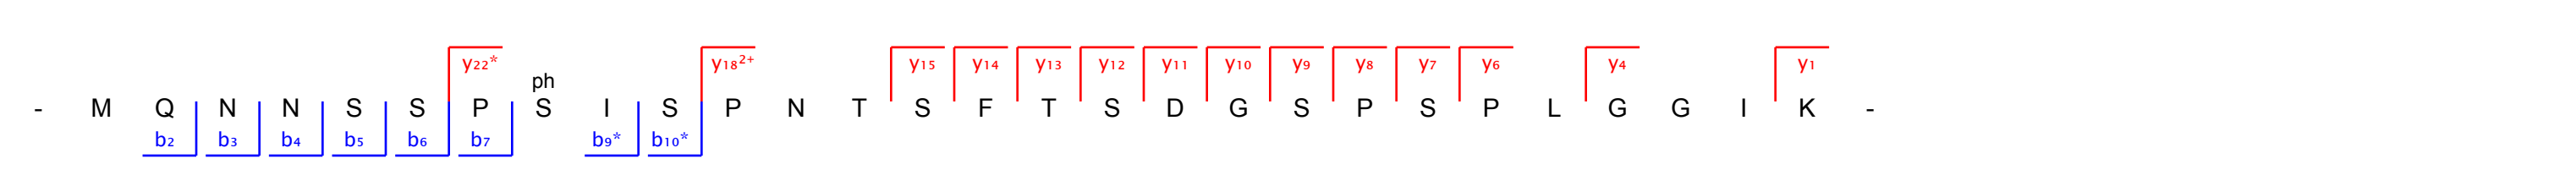

Raw file: 20171215\_MaS\_33SR\_LMH\_phospho\_06  
 Scan: 16179 Method: FTMS; HCD Score: 180.05 m/z: 869.94 Gene names: NEDD4L

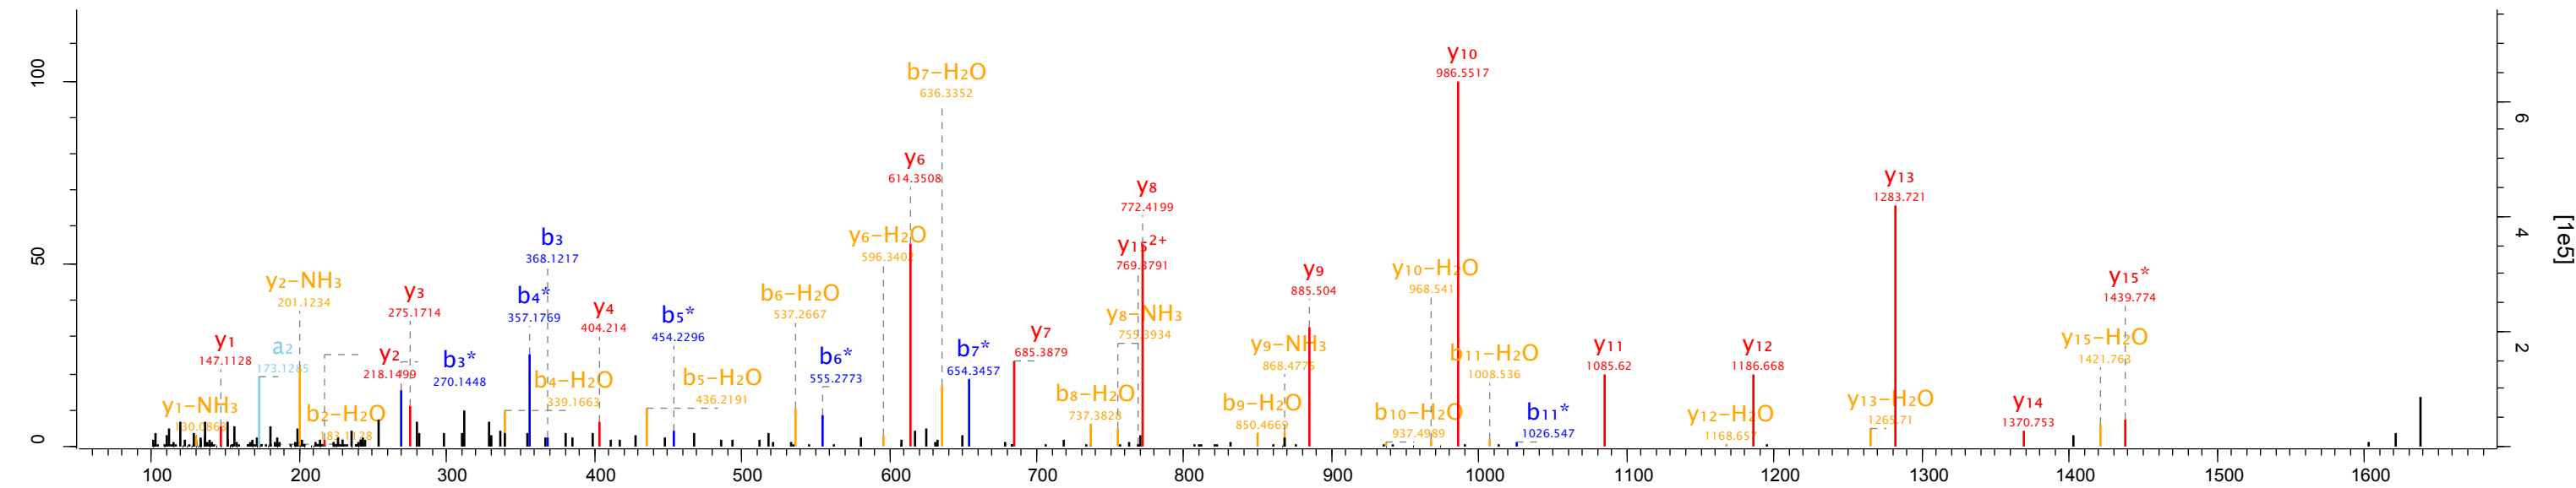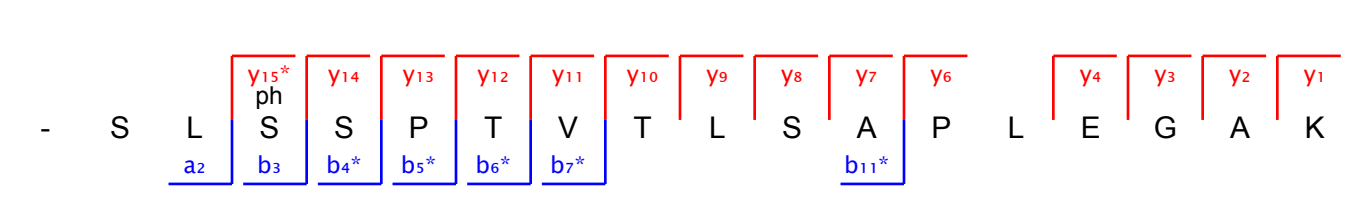

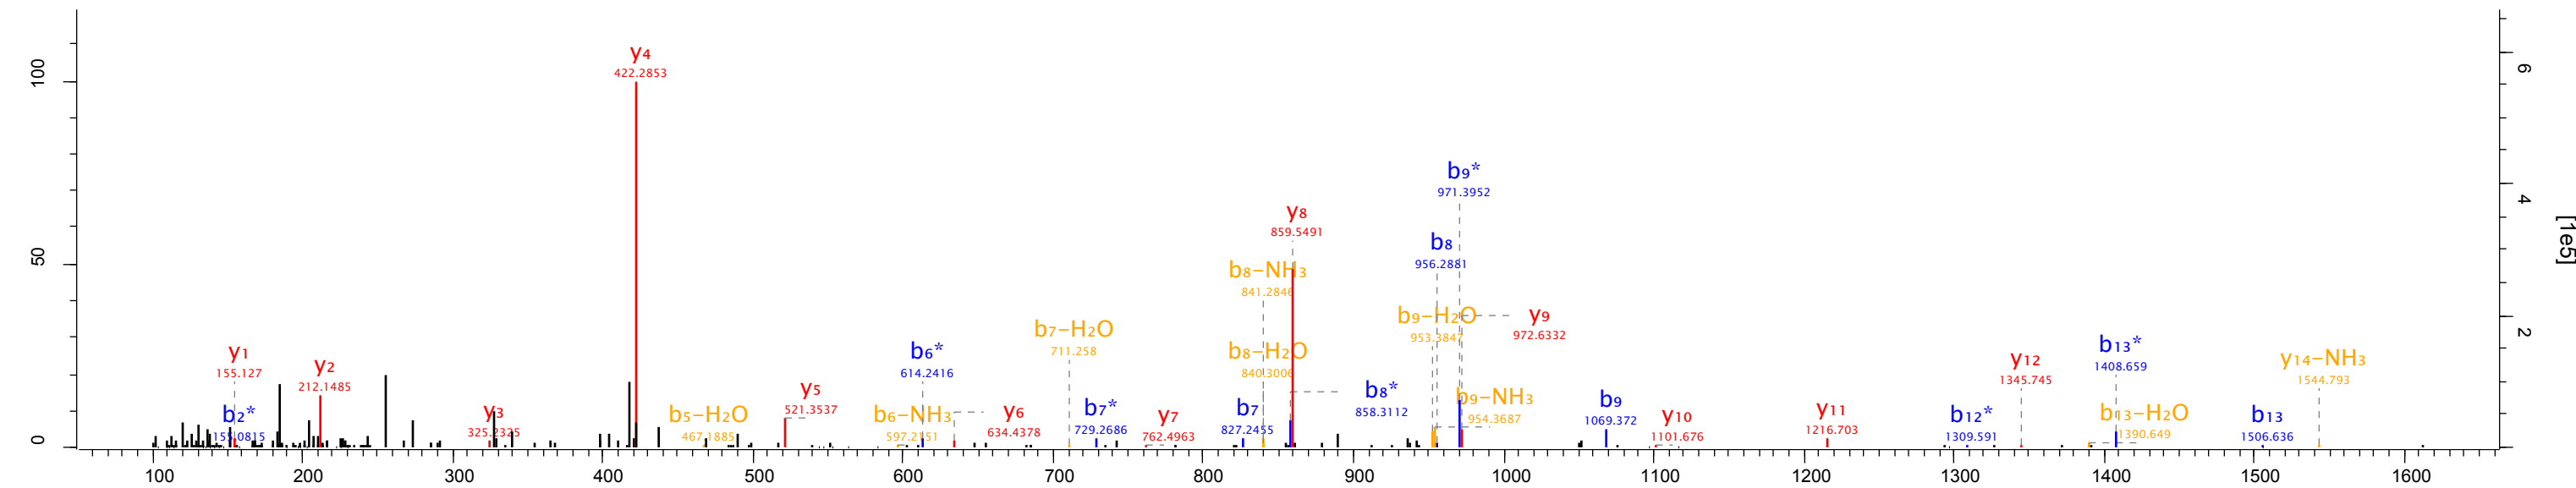

- A ph T N E S E D E I P Q L V P I G K -

b<sub>2</sub>\* b<sub>6</sub>\* b<sub>7</sub> b<sub>8</sub> b<sub>9</sub> b<sub>12</sub>\* b<sub>13</sub> y<sub>1</sub> y<sub>2</sub> y<sub>3</sub> y<sub>4</sub> y<sub>5</sub> y<sub>6</sub> y<sub>7</sub> y<sub>8</sub> y<sub>9</sub> y<sub>10</sub> y<sub>11</sub> y<sub>12</sub>

Raw file: 20171215\_MaS\_33SR\_LMH\_phospho\_06  
 Scan: 2039 Method: FTMS; HCD Score: 105.99 m/z: 565.27 Gene names: LMNB1

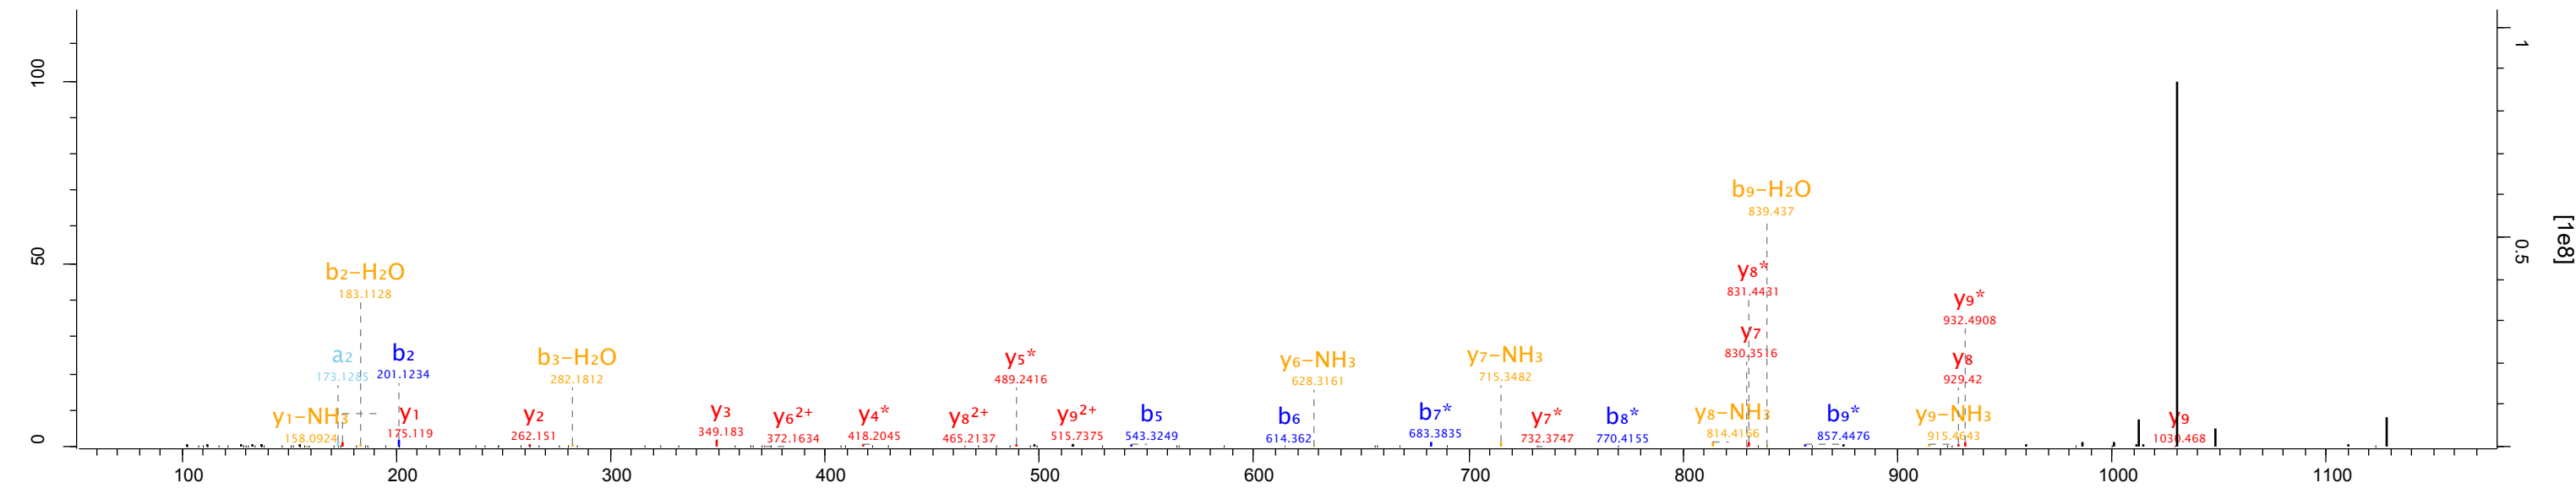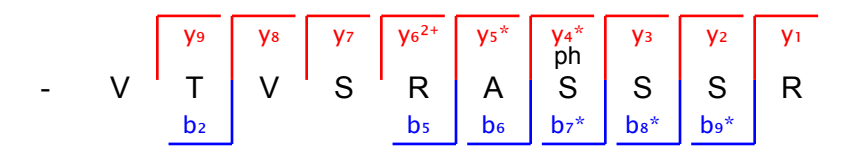

Raw file 20171215\_MaS\_33SR\_LMH\_phospho\_06 Scan 21359 Method FTMS; HCD Score 43.79 m/z 943.8 Gene names FAM122A

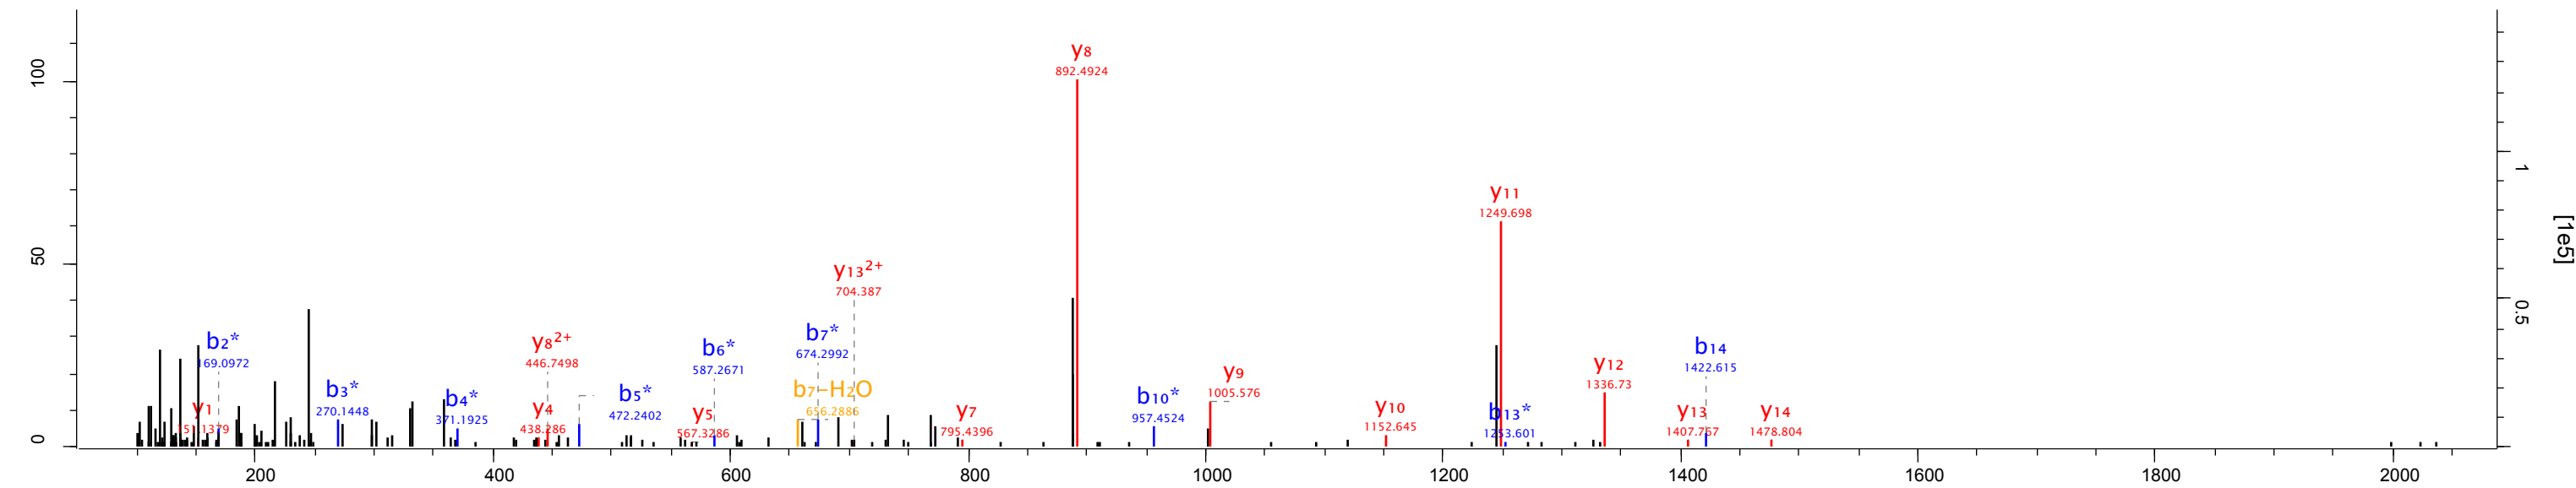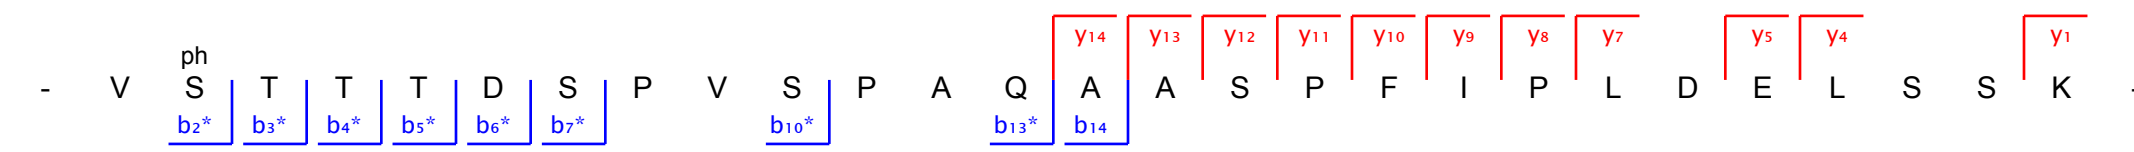

Raw file 20171215\_MaS\_33SR\_LMH\_phospho\_06 Scan 2529 Method FTMS; HCD Score 125.95 m/z 565.31 Gene names RRP36

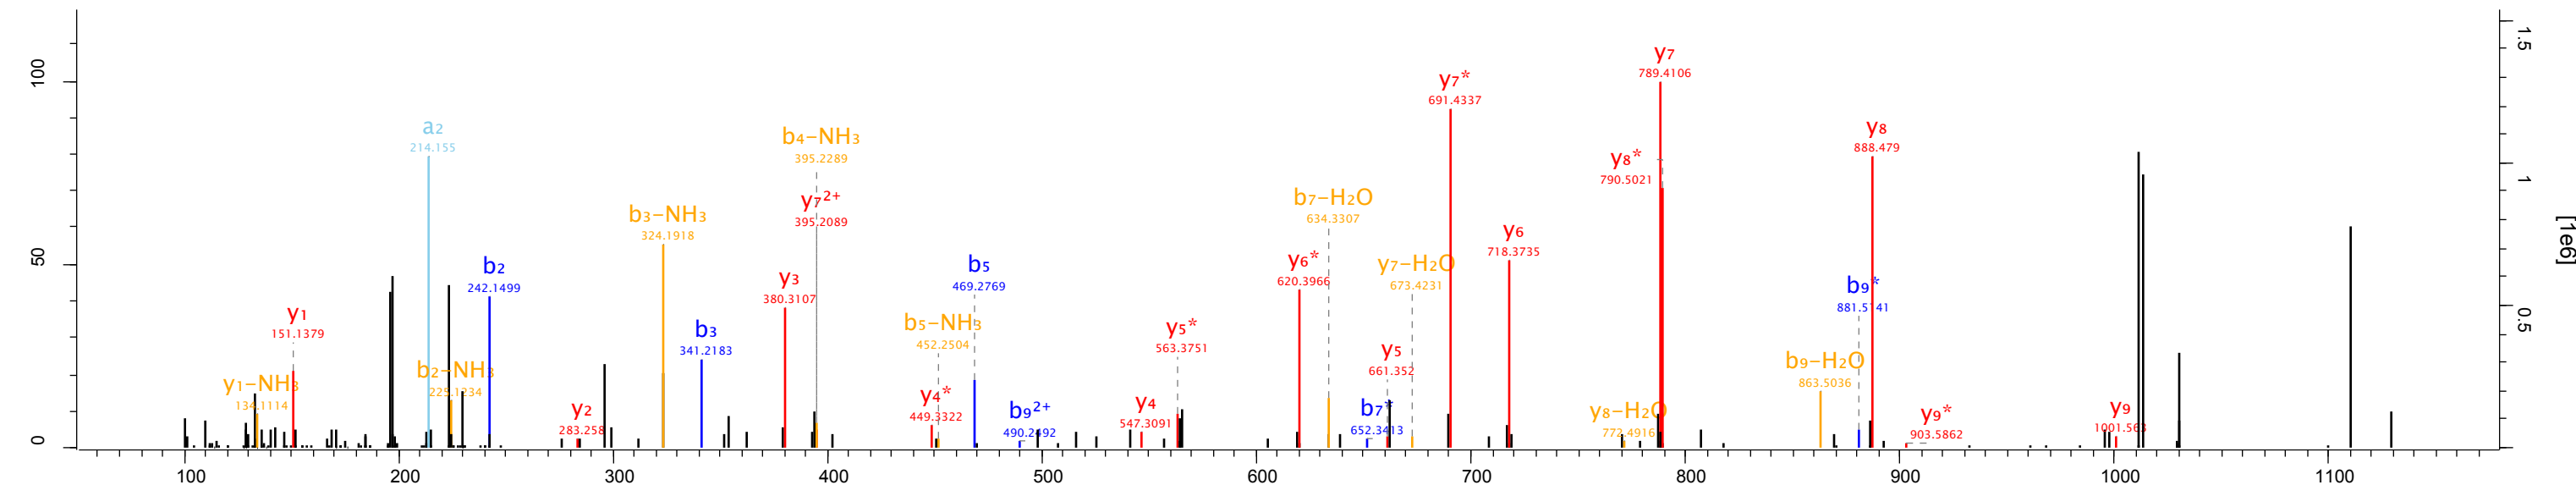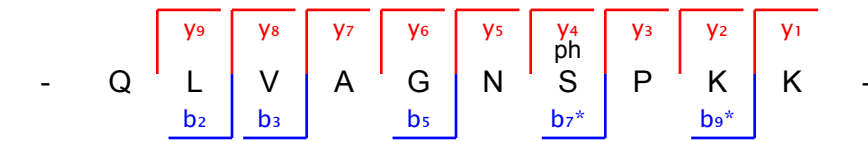

Raw file 20171215\_MaS\_33SR\_LMH\_phospho\_06 Scan 2599 Method FTMS; HCD Score 85.42 m/z 568.26 Gene names ZC3H13

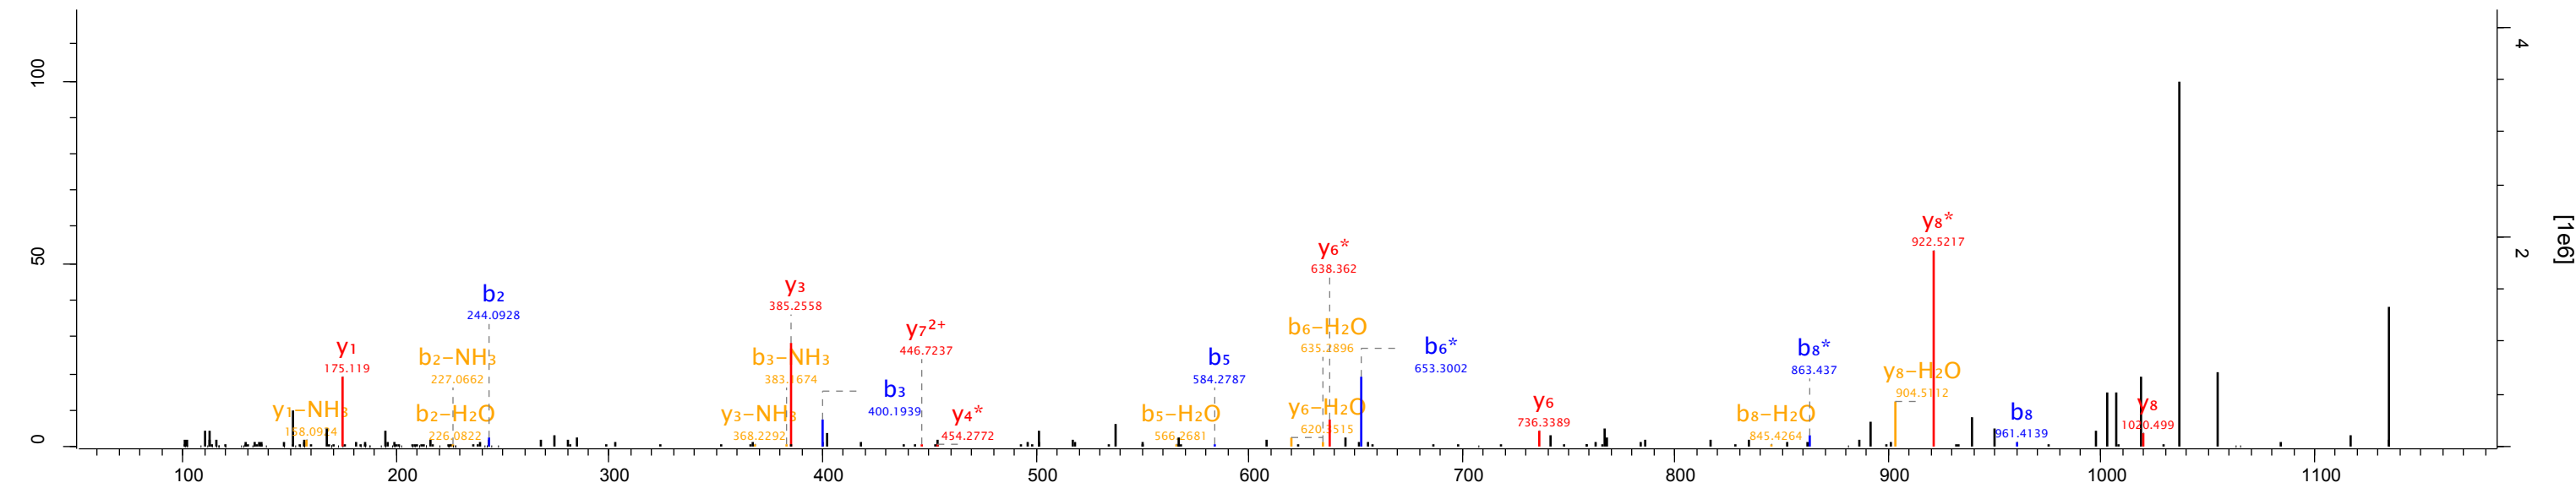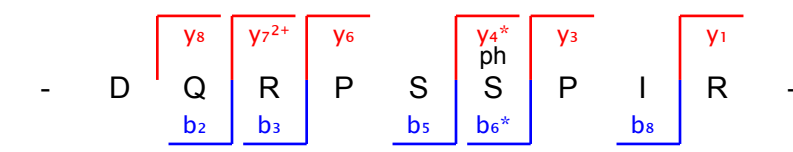



Raw file 20171215\_MaS\_33SR\_LMH\_phospho\_06 Scan 3469 Method FTMS; HCD Score 61.28 m/z 583.27 Gene names EPB41L2

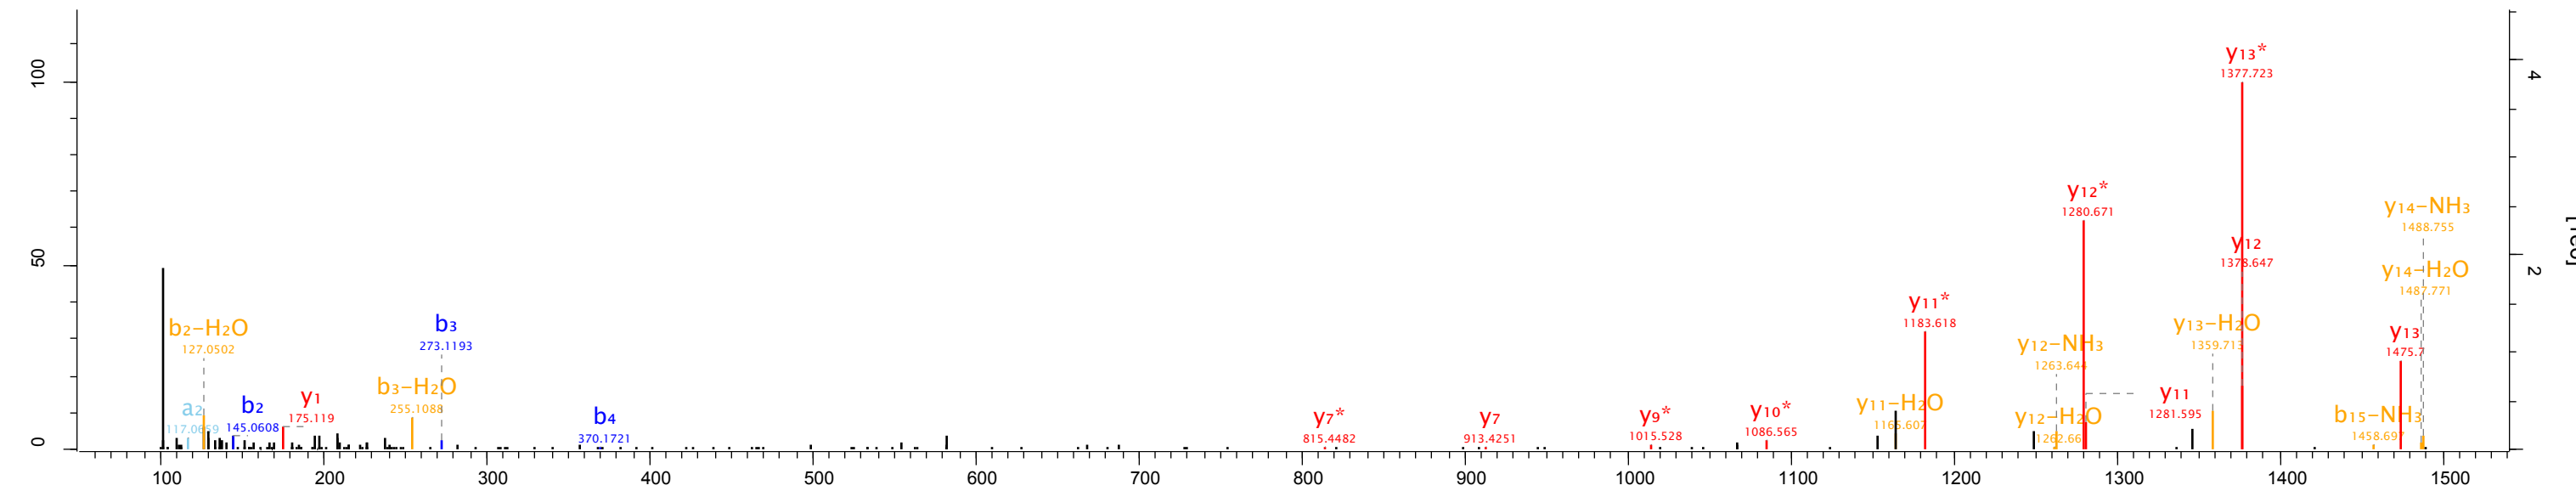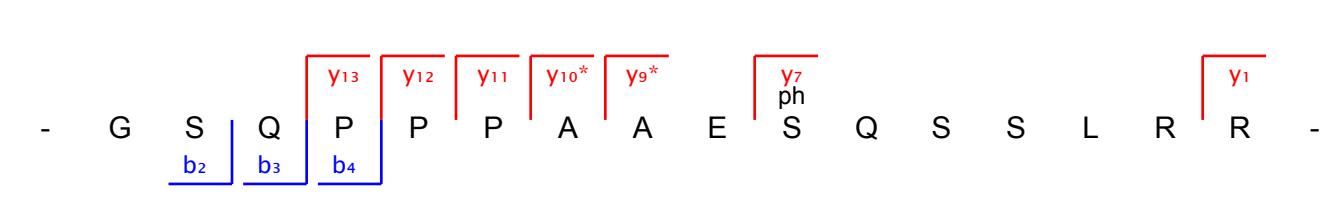

Raw file 20171215\_MaS\_33SR\_LMH\_phospho\_06 Scan 4039 Method FTMS; HCD Score 109.42 m/z 741.84 Gene names LIMCH1

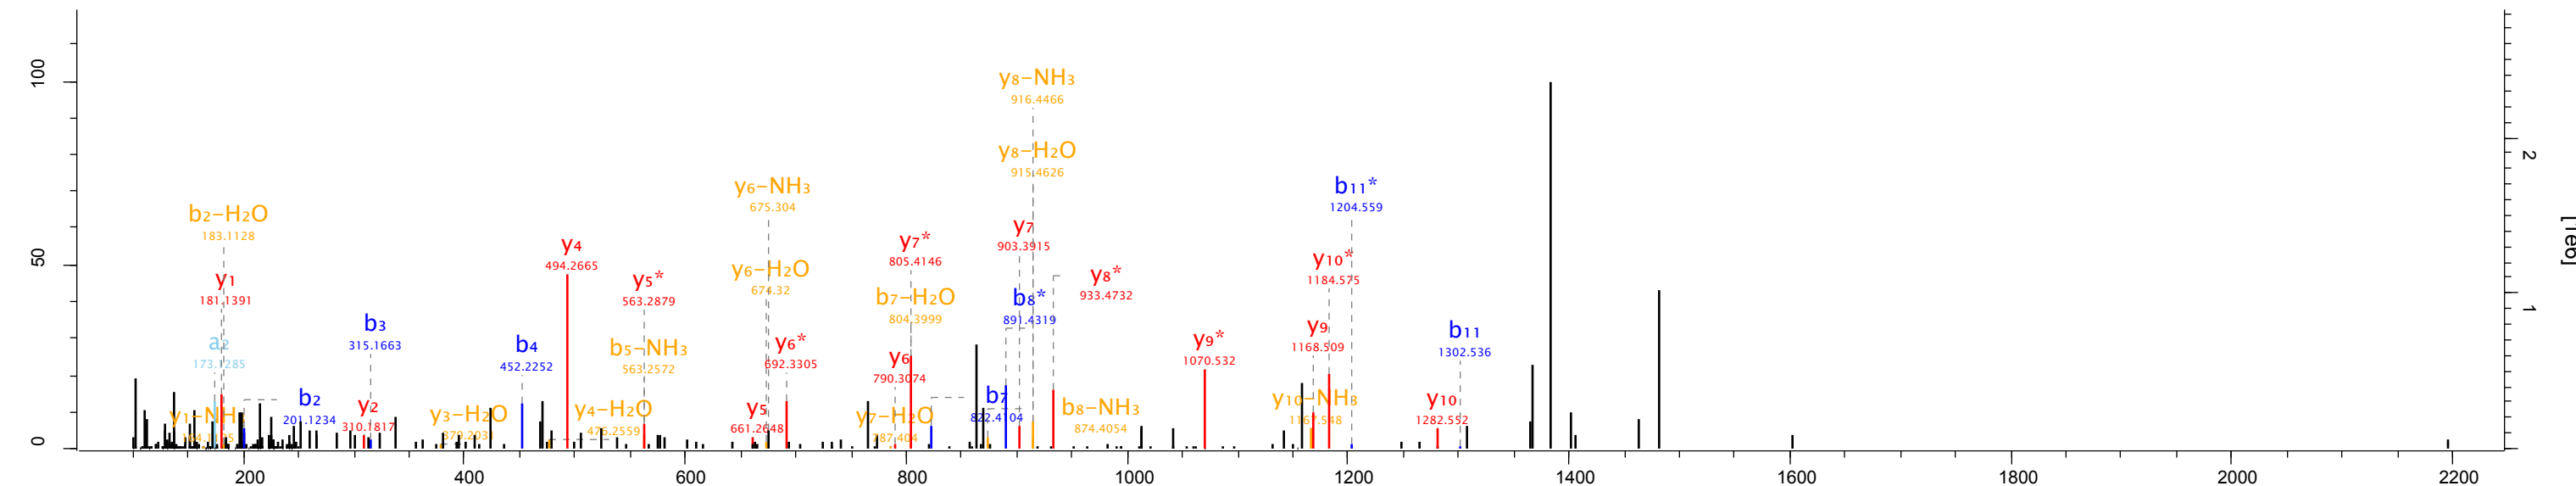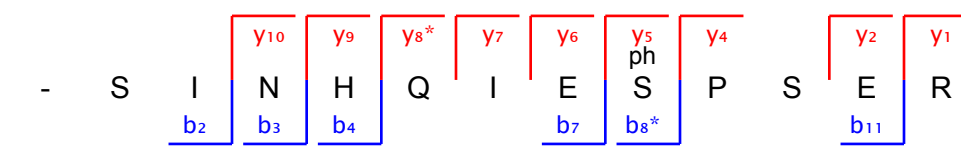

Raw file 20171215\_MaS\_33SR\_LMH\_phospho\_06 Scan 4199 Method FTMS; HCD Score 126.97 m/z 665.97 Gene names C12orf45

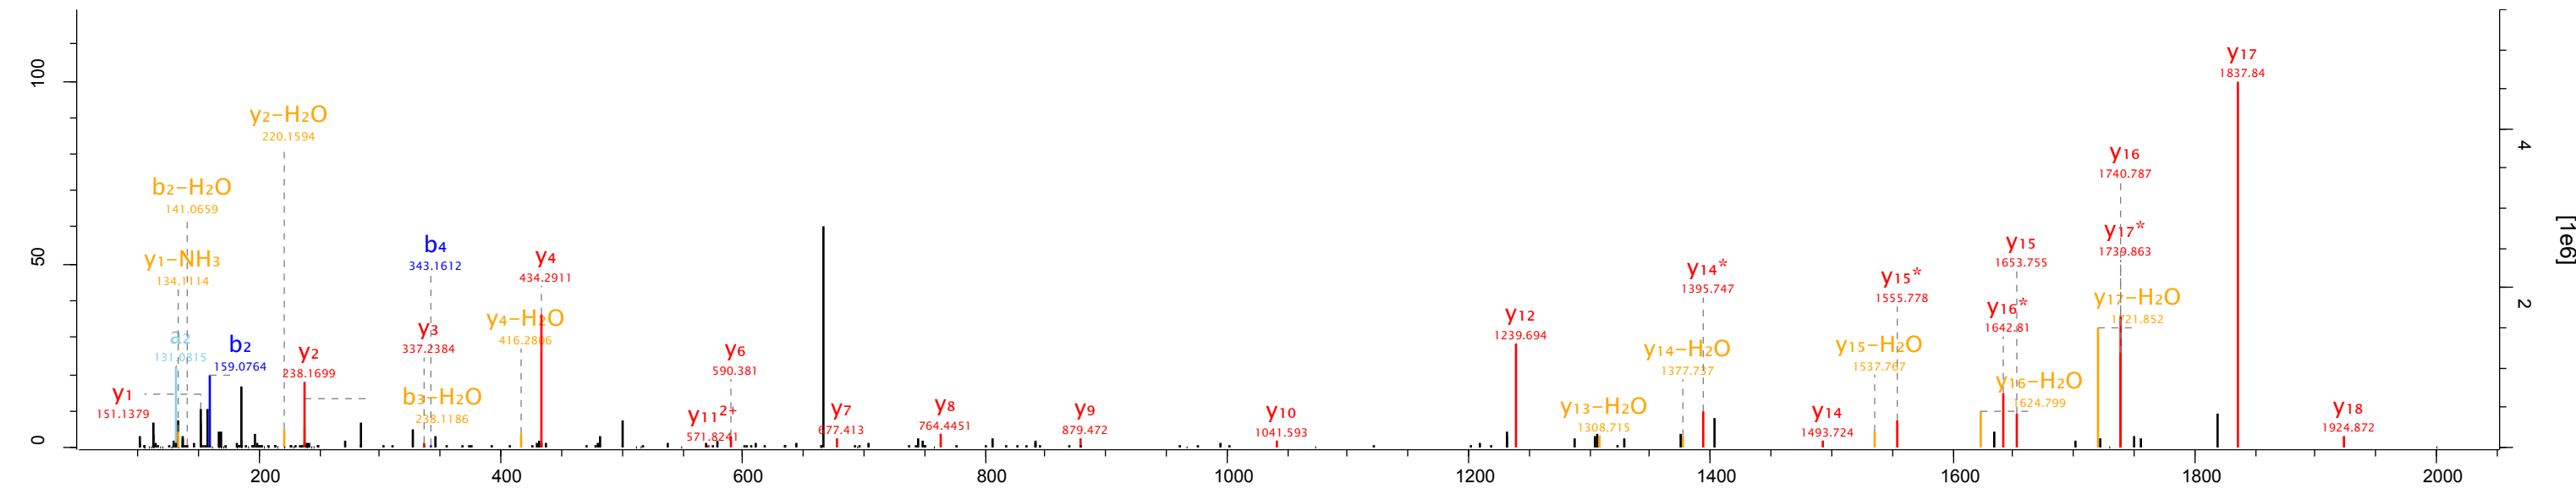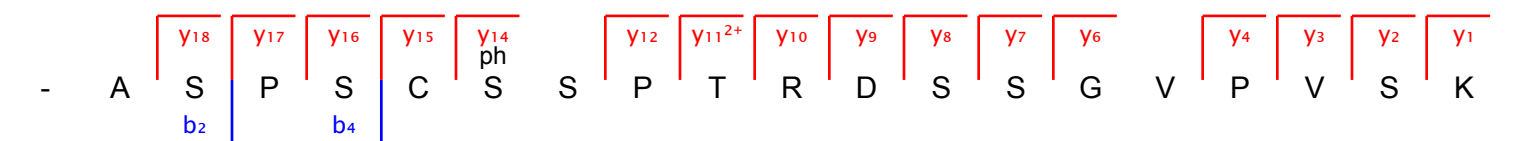

Raw file 20171215\_MaS\_33SR\_LMH\_phospho\_06 Scan 4749 Method FTMS; HCD Score 229.17 m/z 630.29 Gene names RALBP1

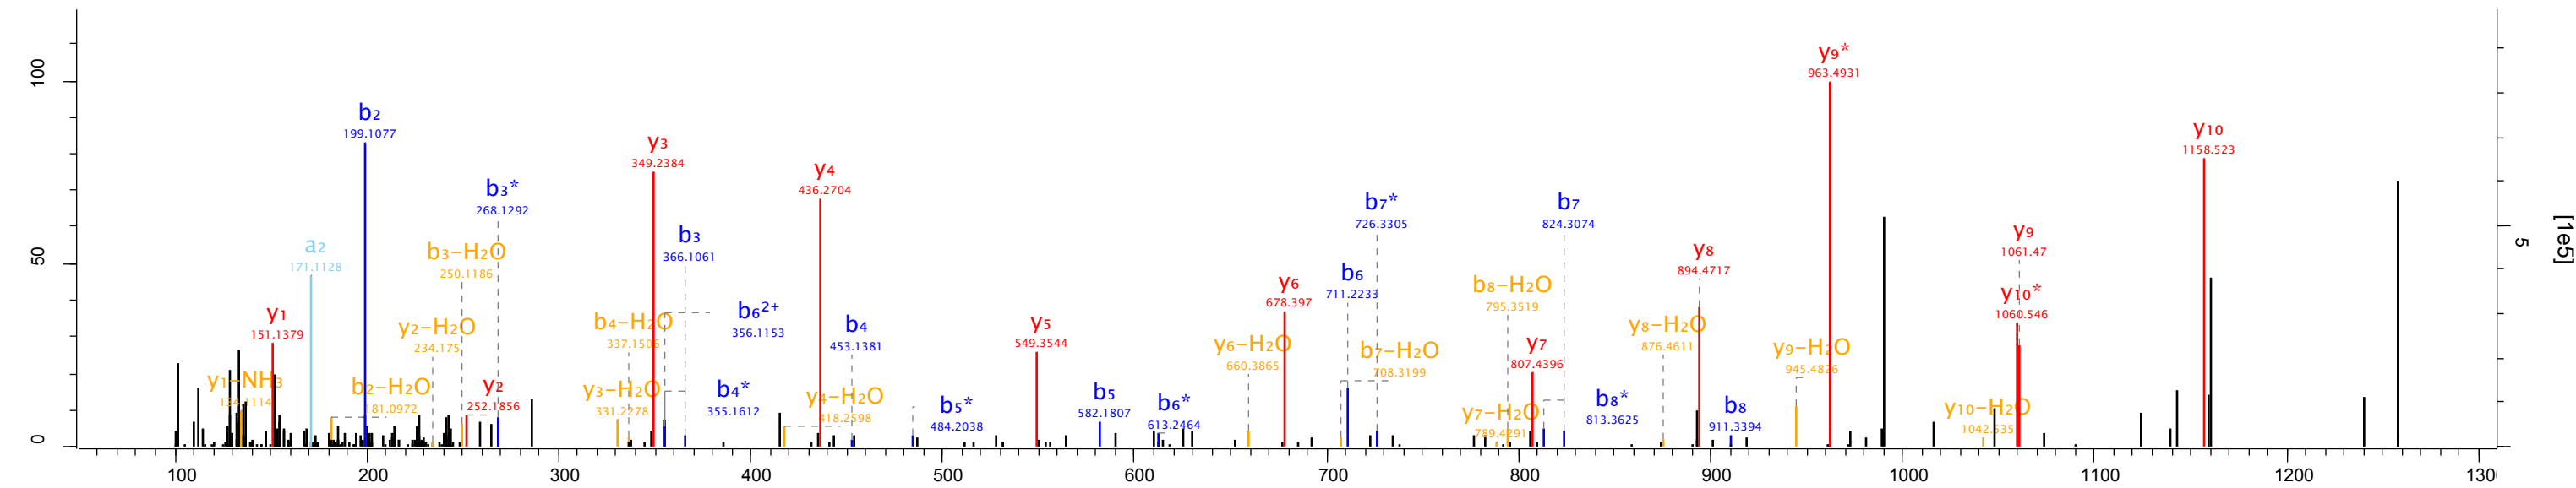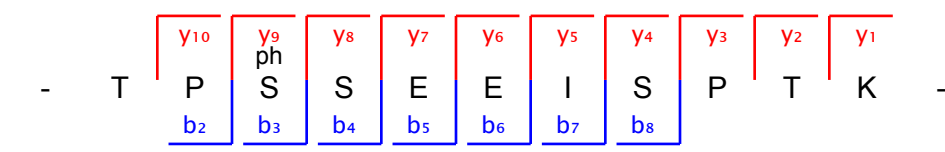

Raw file 20171215\_MaS\_33SR\_LMH\_phospho\_06 Scan 5269 Method FTMS; HCD Score 179.79 m/z 844.7 Gene names PGRMC1

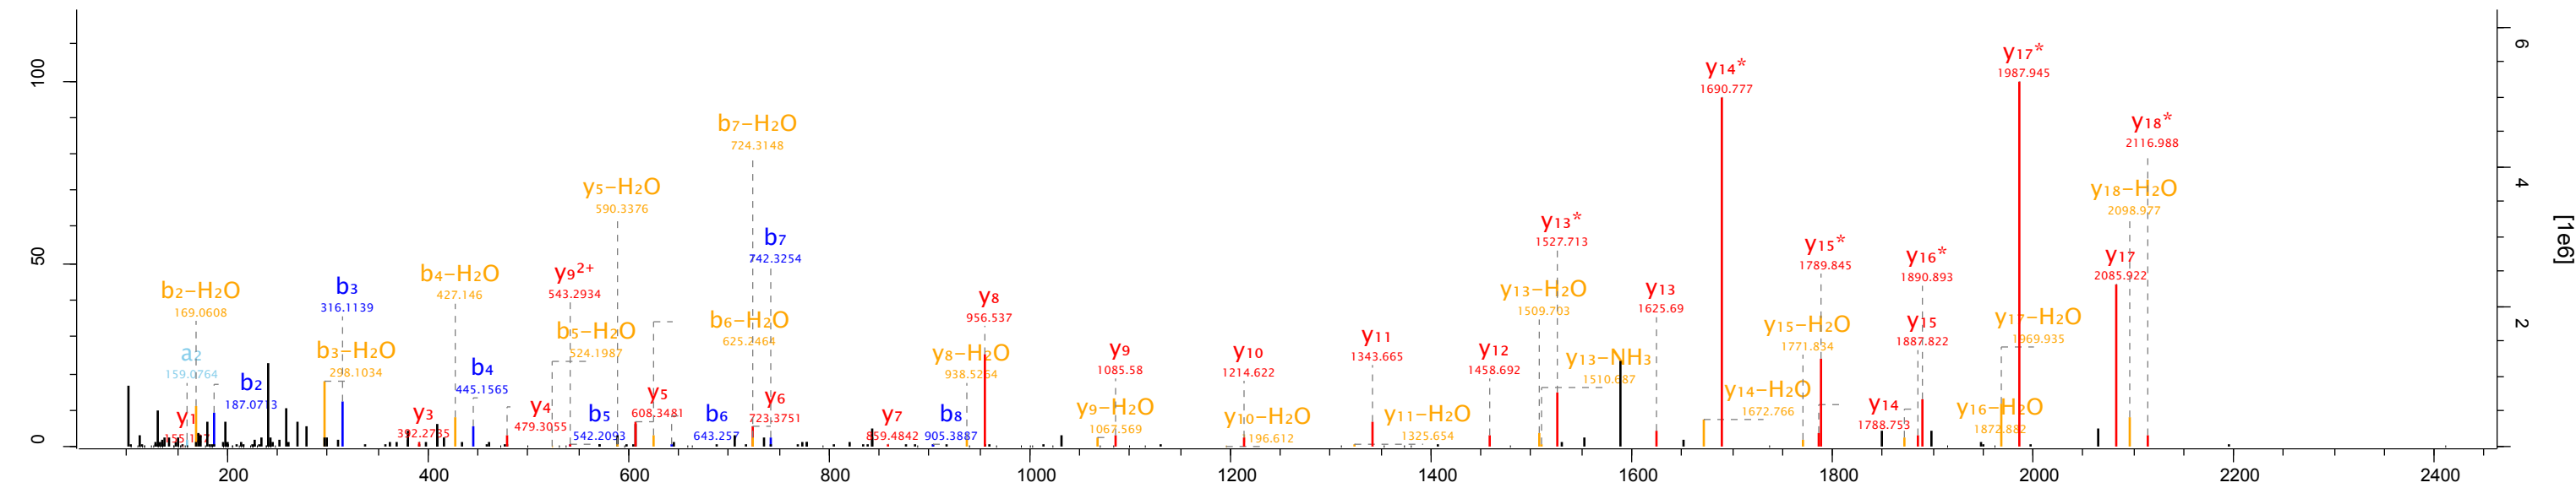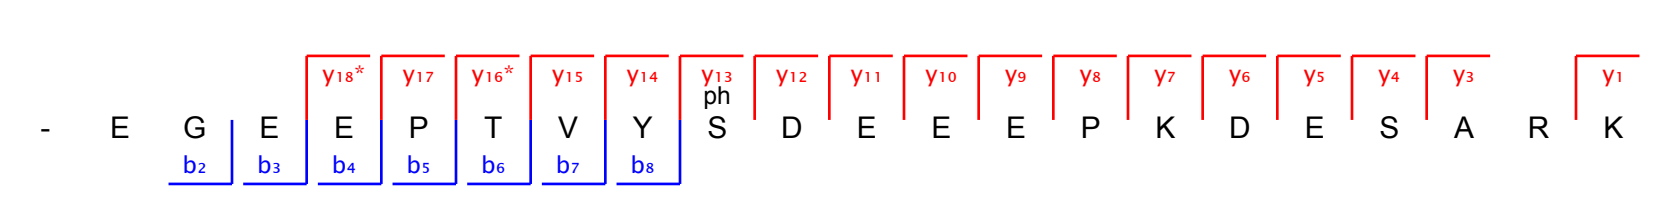

Raw file 20171215\_MaS\_33SR\_LMH\_phospho\_06 Scan 5569 Method FTMS; HCD Score 47.92 m/z 506.24 Gene names RAVER1

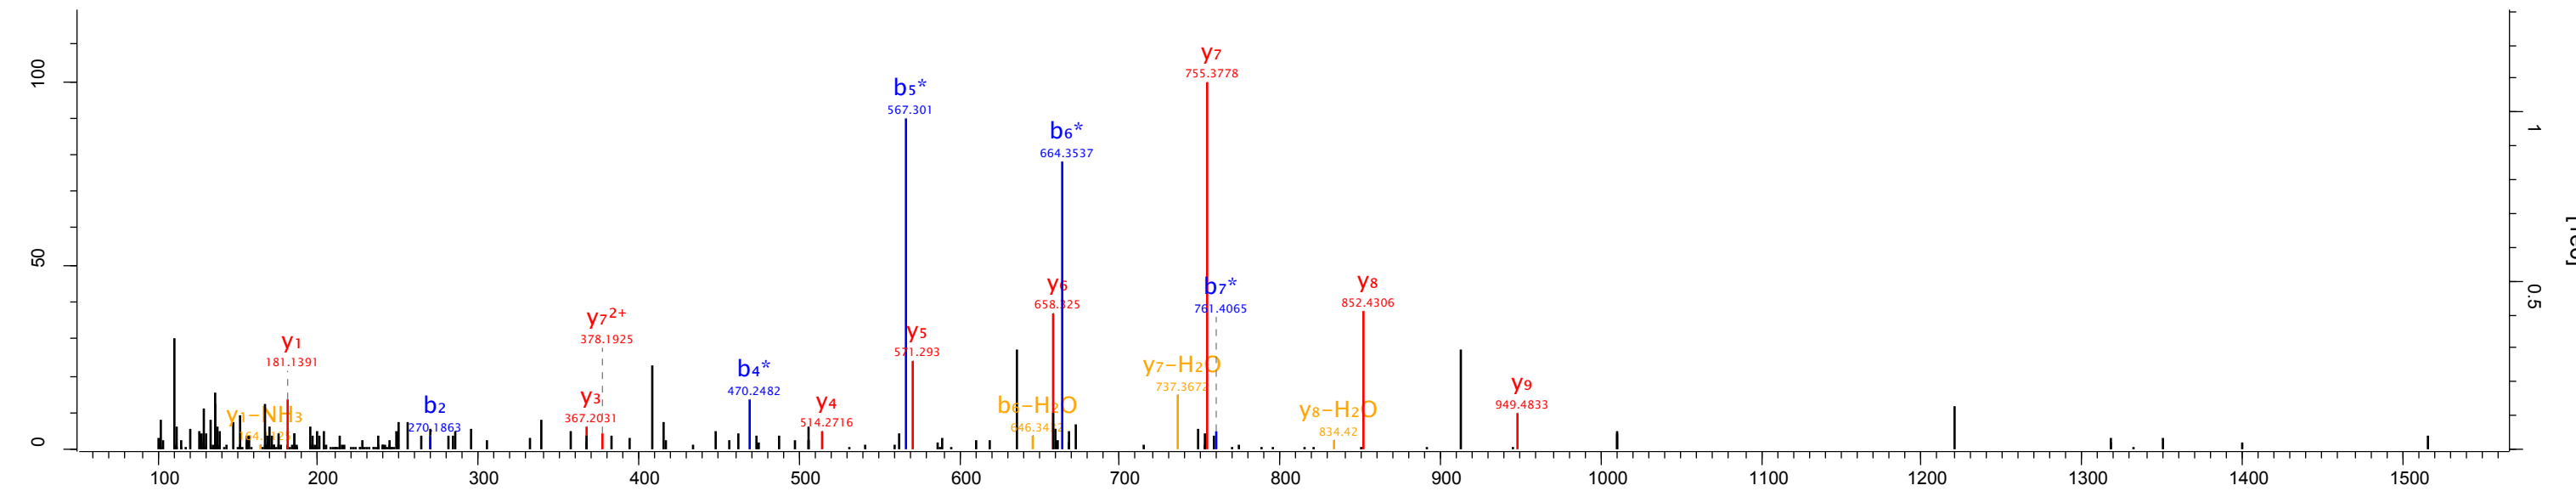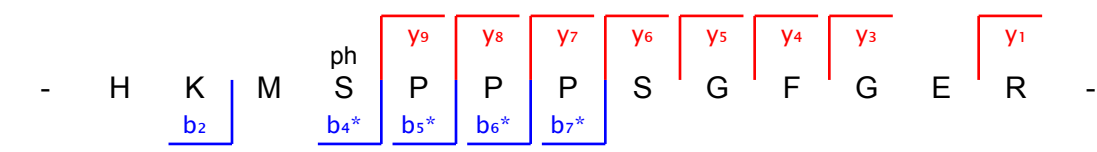

Raw file  
 20171215\_MaS\_33SR\_LMH\_phospho\_06  
 Scan Method Score m/z Gene names  
 5749 FTMS; HCD 200.13 768.32 ADD1

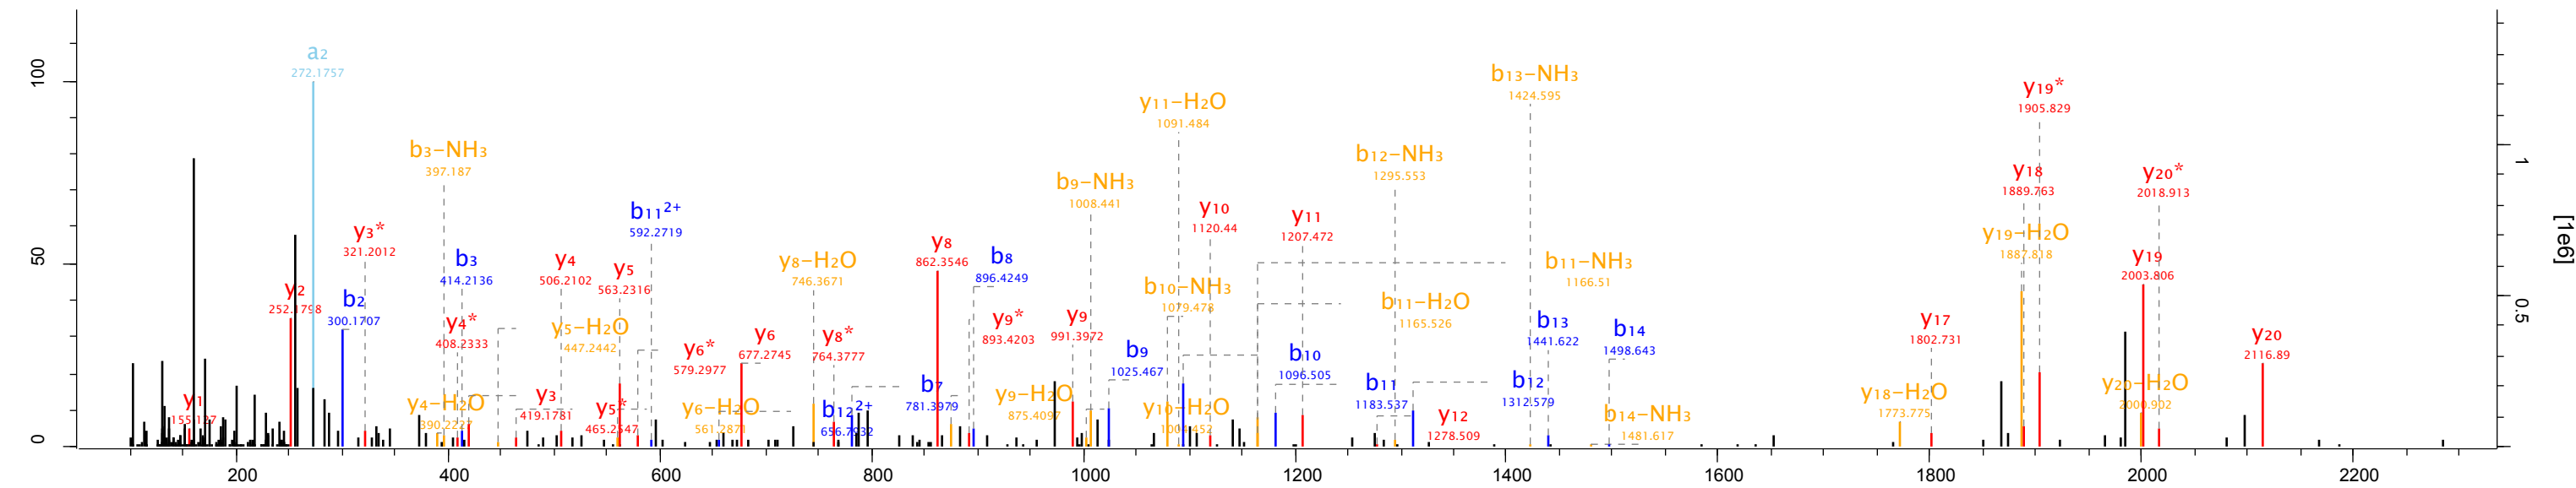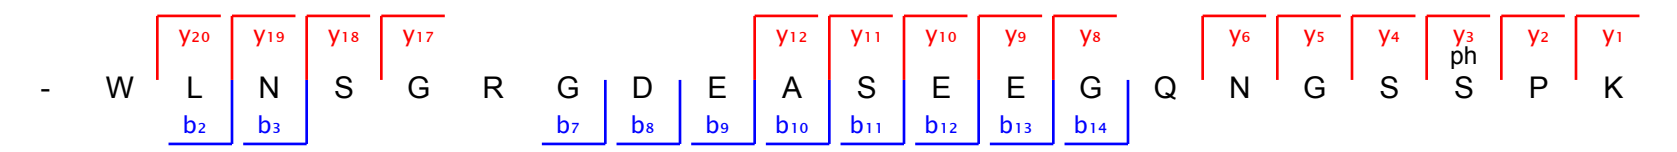

Raw file 20171215\_MaS\_33SR\_LMH\_phospho\_06 Scan 6189 Method FTMS; HCD Score 76.3 m/z 586.92 Gene names RBMX

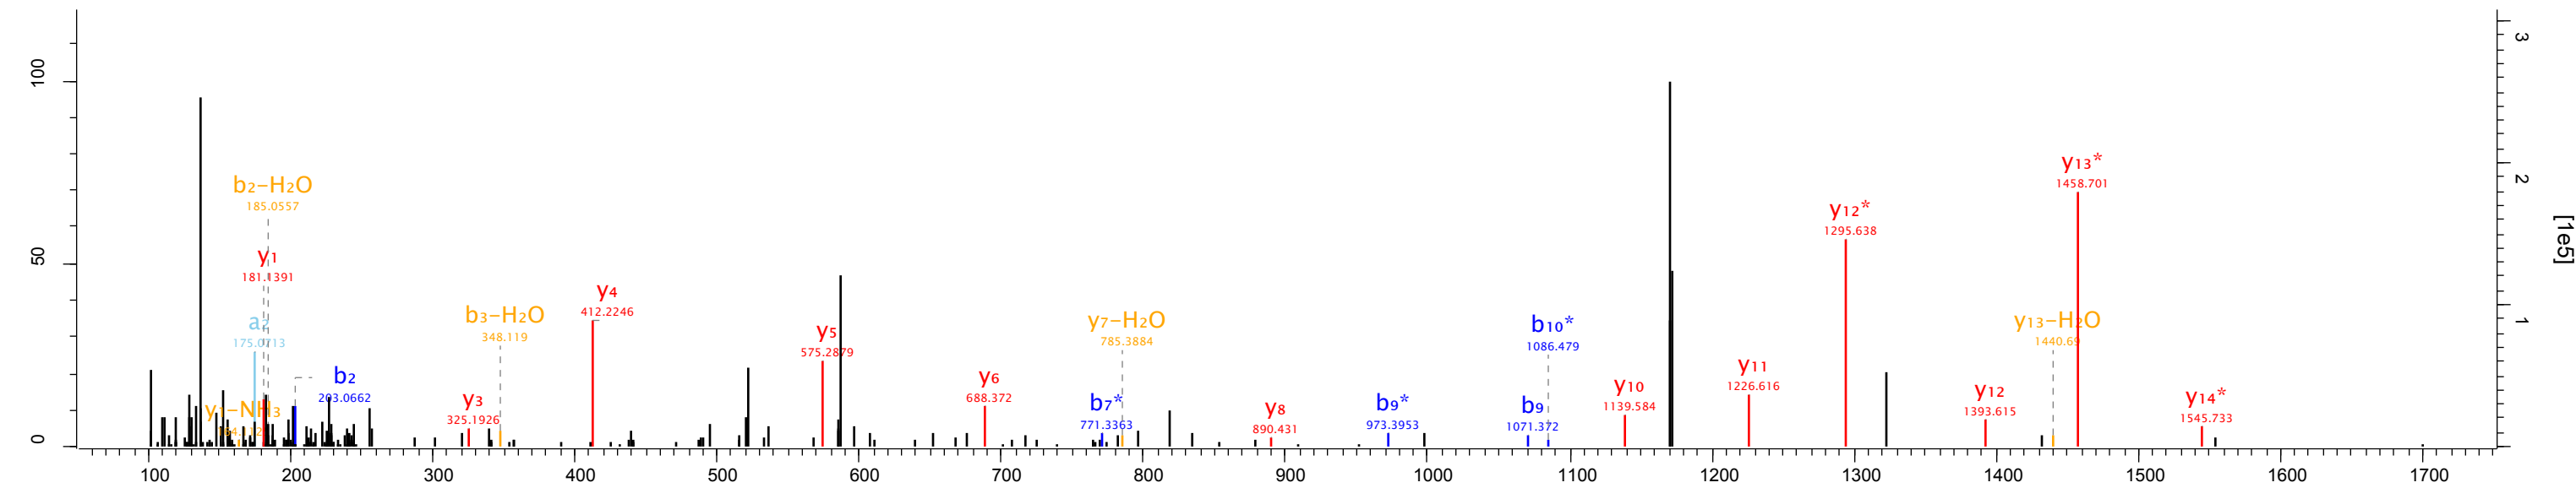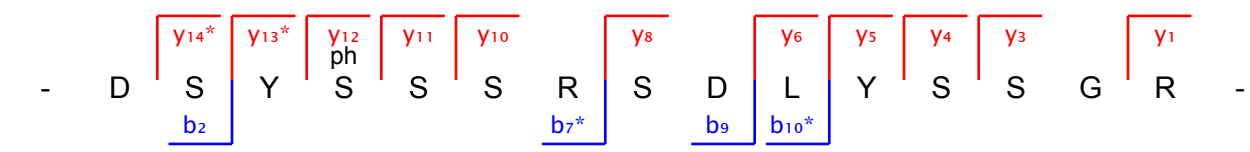



Raw file 20171215\_MaS\_33SR\_LMH\_phospho\_06 Scan 6689 Method FTMS; HCD Score 122.96 m/z 461.71 Gene names SSRP1

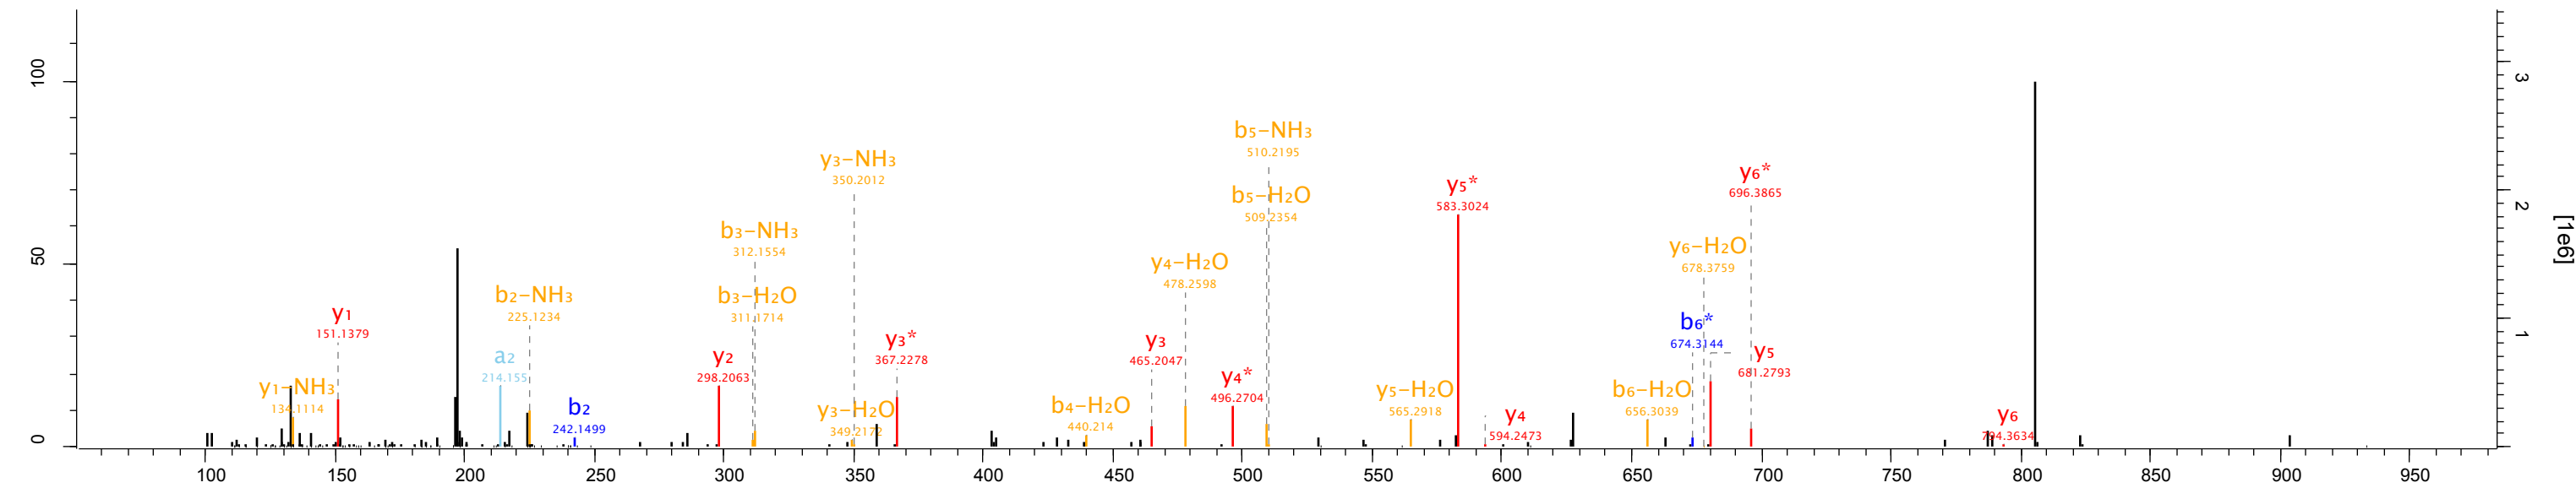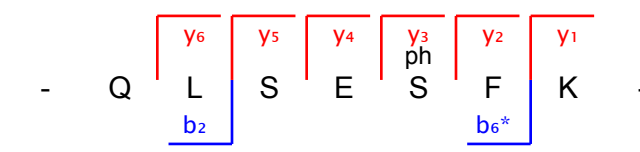

Raw file: 20171215\_MaS\_33SR\_LMH\_phospho\_06  
 Scan: 6889 Method: FTMS; HCD Score: 288.49 m/z: 777.36 Gene names: PNN

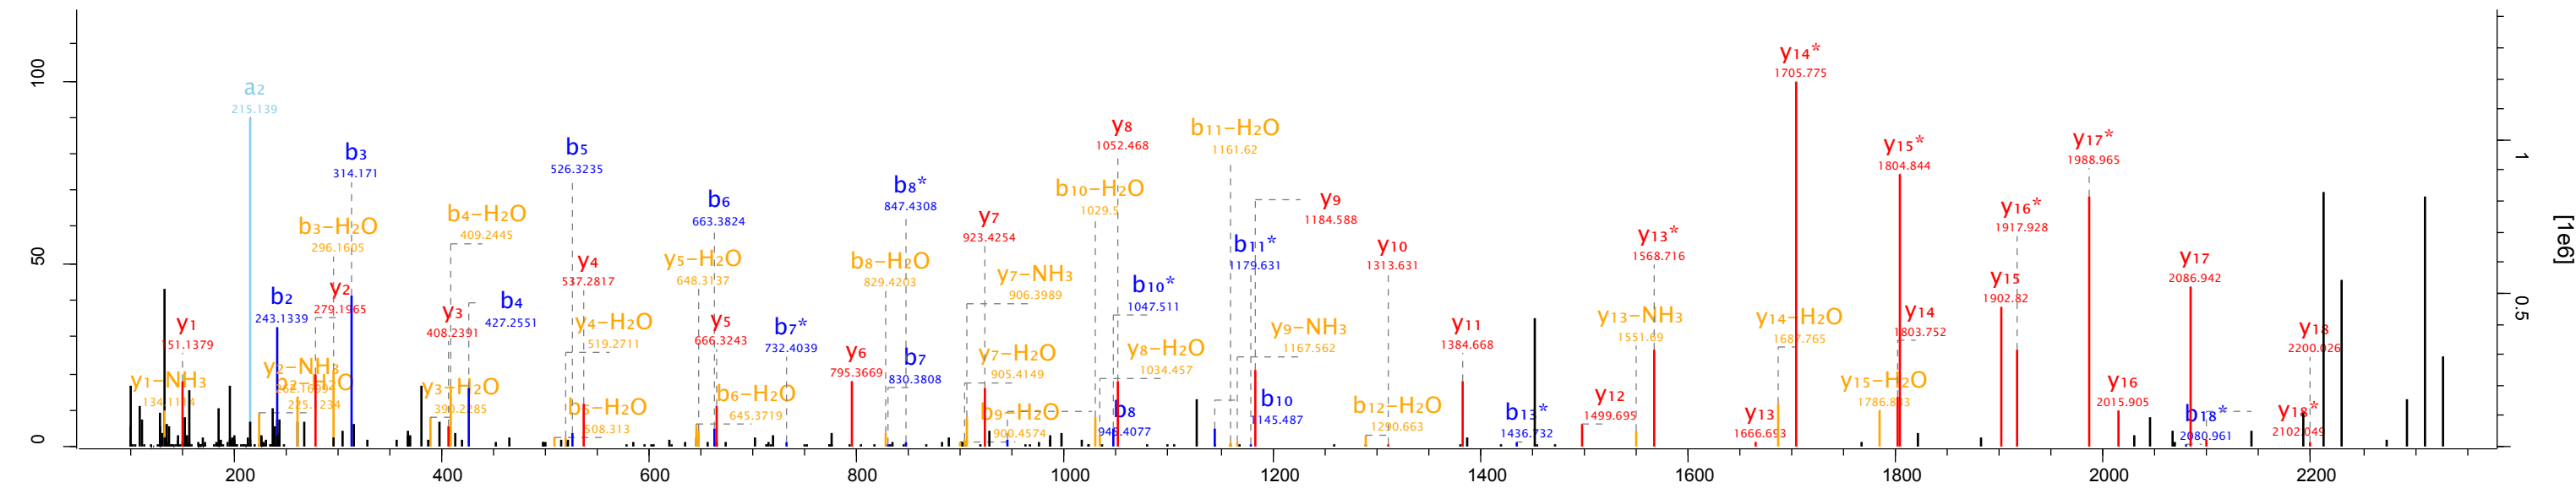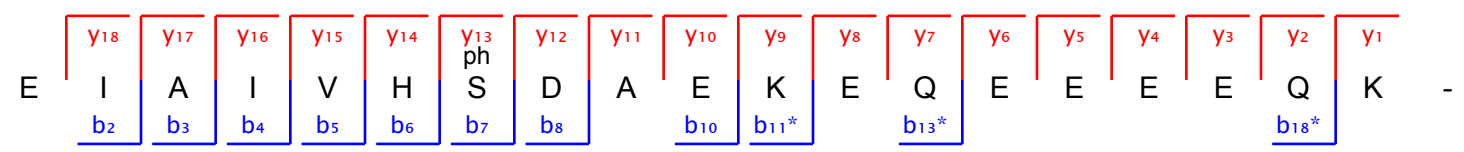

Raw file 20171215\_MaS\_33SR\_LMH\_phospho\_06 Scan 7189 Method FTMS; HCD Score 82.53 m/z 606.29 Gene names TCOF1

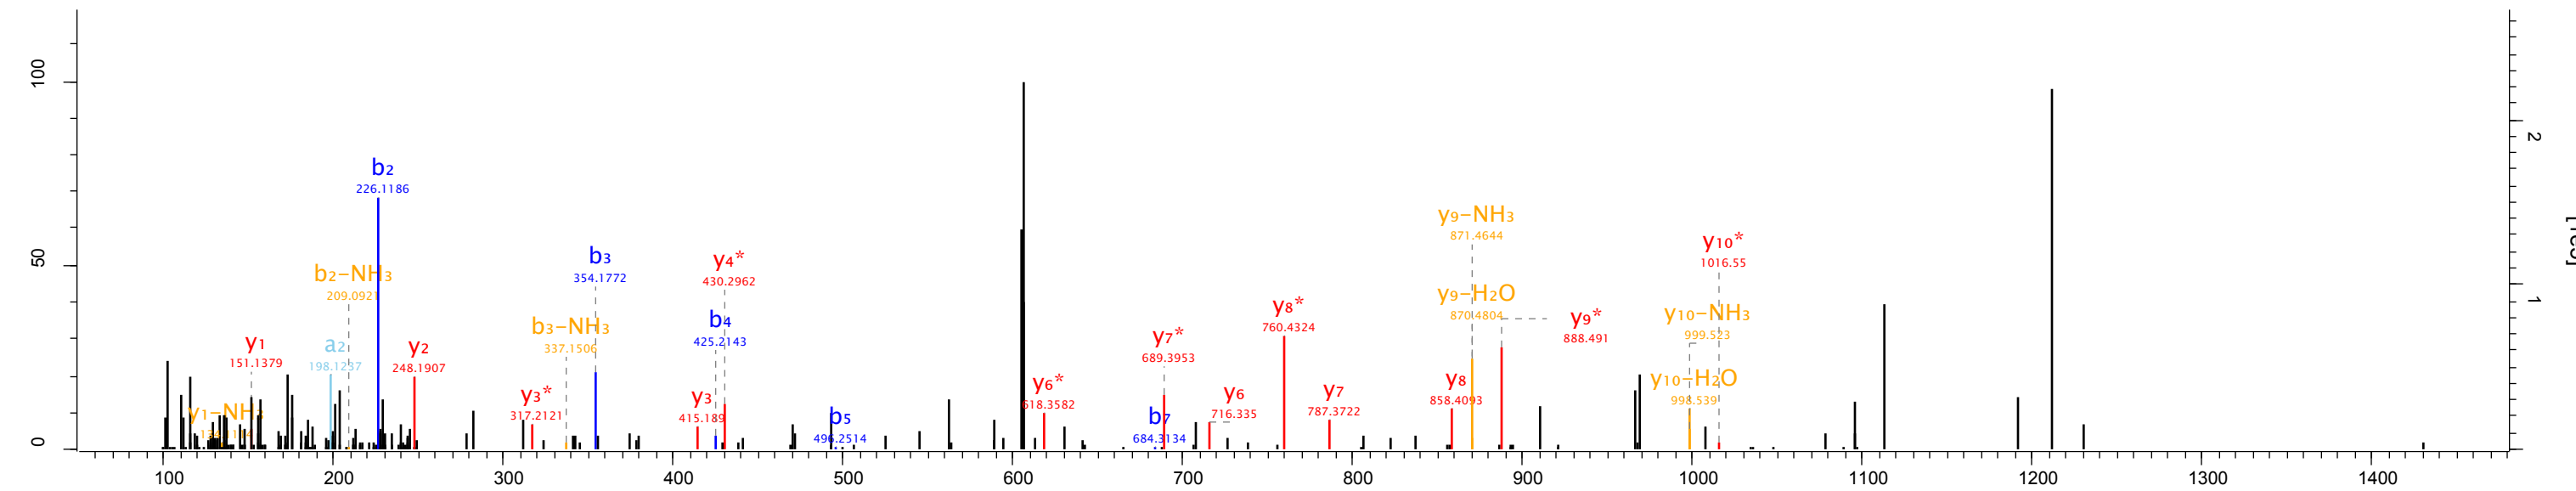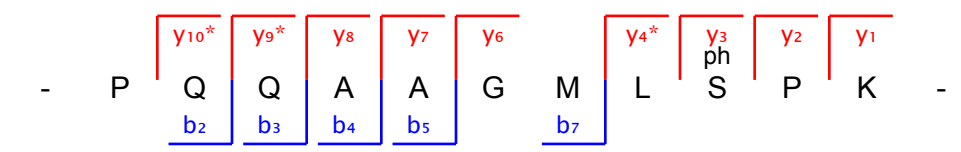

Raw file 20171215\_MaS\_33SR\_LMH\_phospho\_06 Scan 7239 Method FTMS; HCD Score 65.92 m/z 636.61 Gene names ARHGEF18

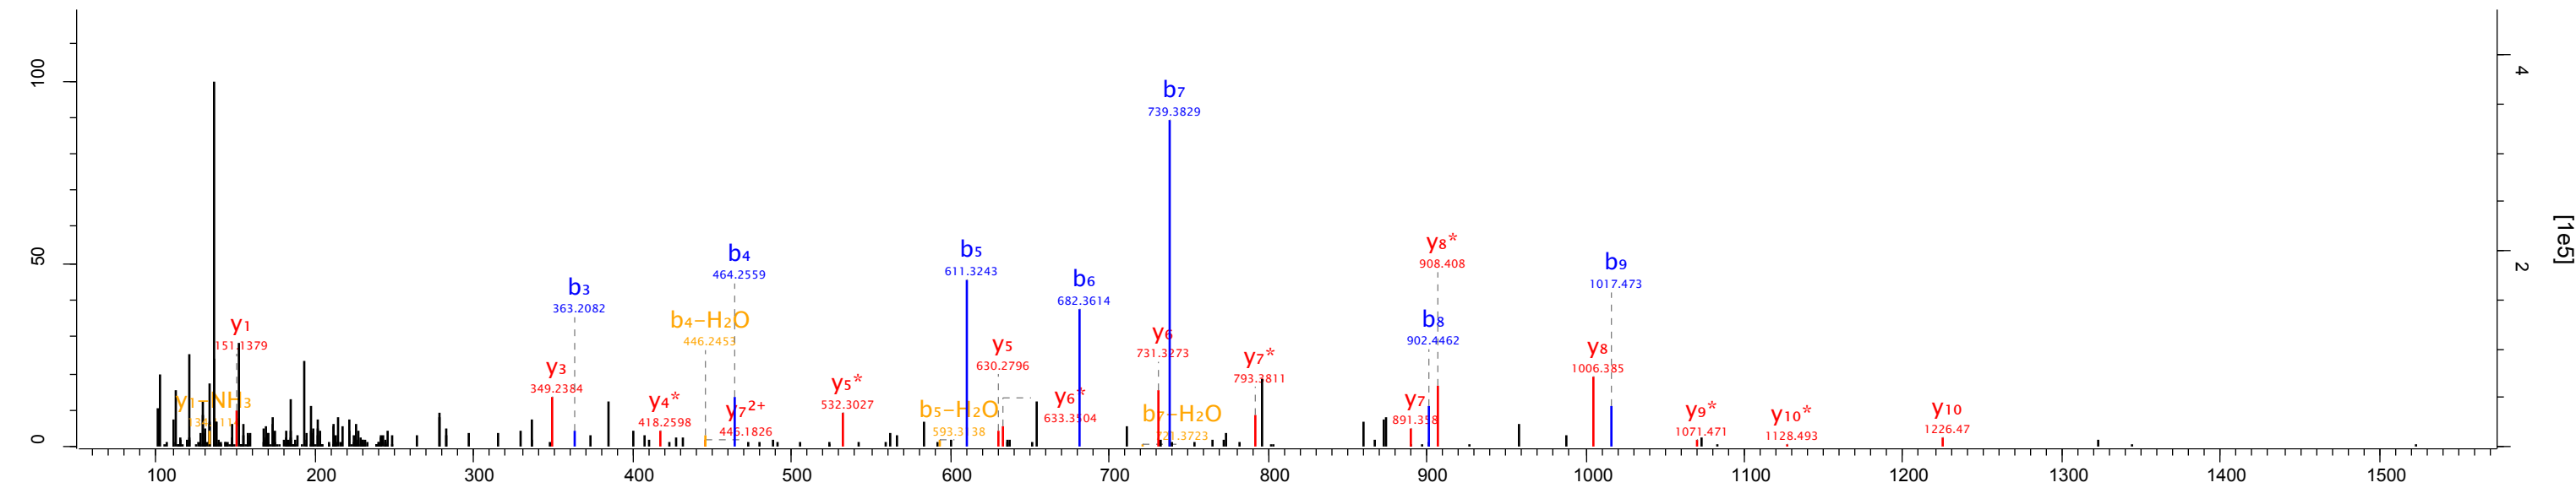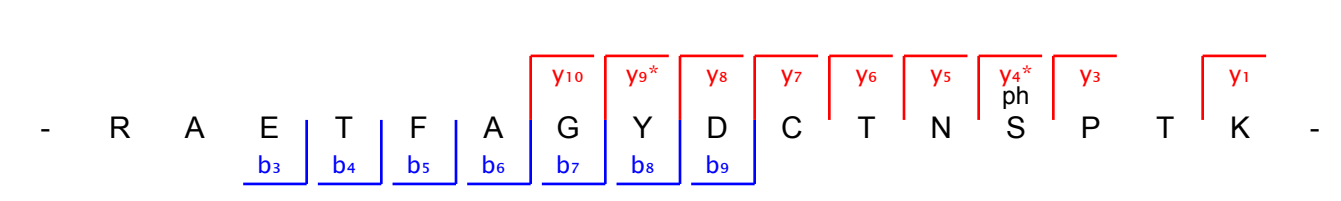

Raw file 20171215\_MaS\_33SR\_LMH\_phospho\_06 Scan 7279 Method FTMS; HCD Score 81.92 m/z 550.26 Gene names C11orf96

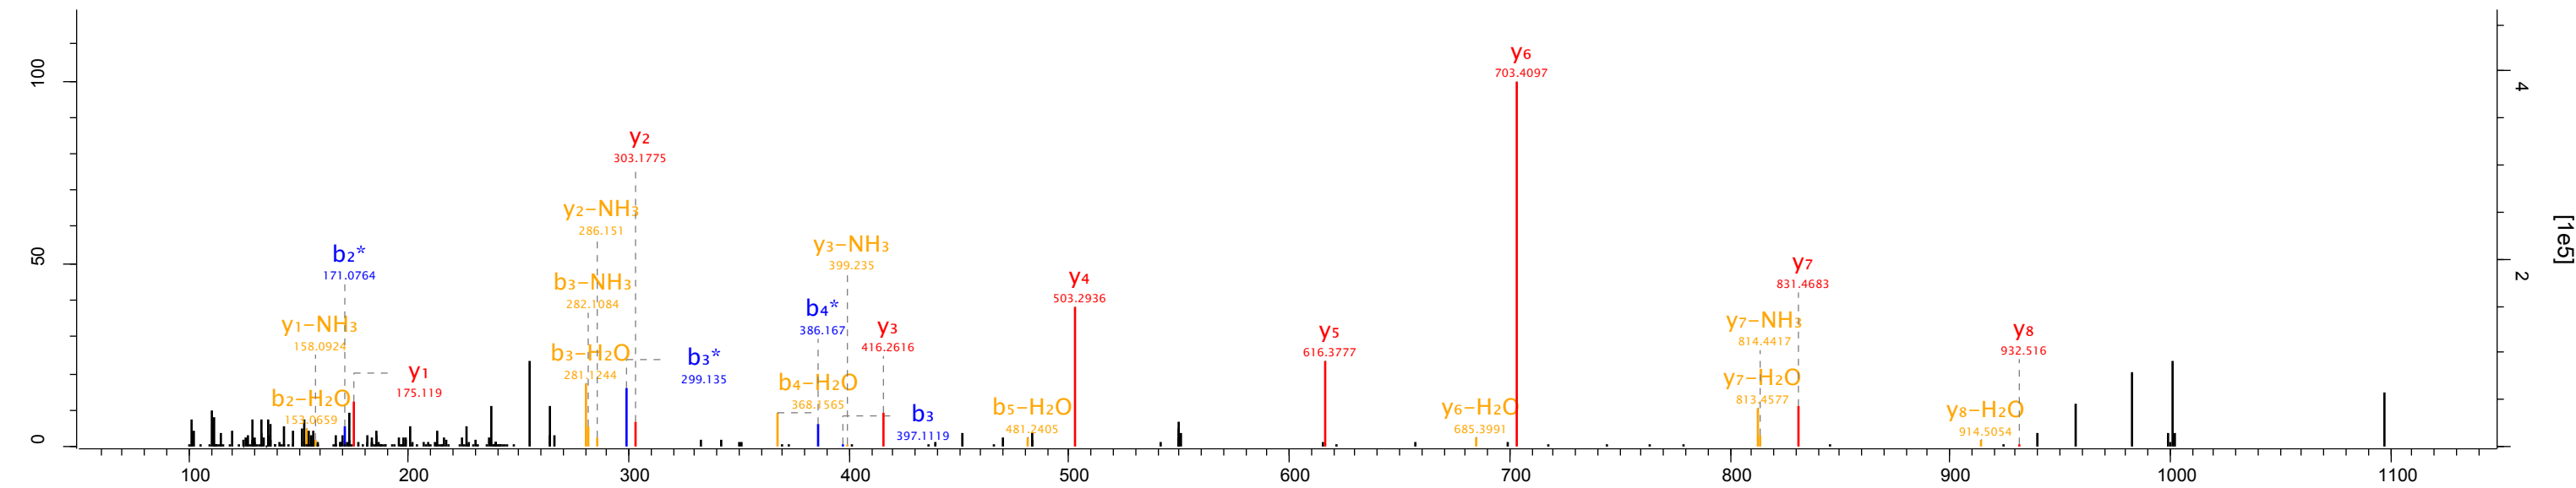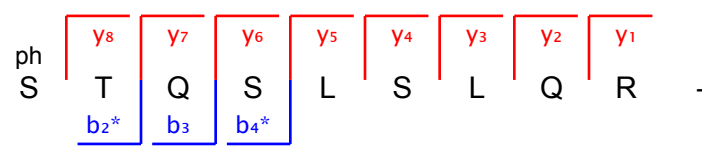

Raw file 20171215\_MaS\_33SR\_LMH\_phospho\_06 Scan 7309 Method FTMS; HCD Score 96.62 m/z 450.73 Gene names ADD3;ADD2;ADD1

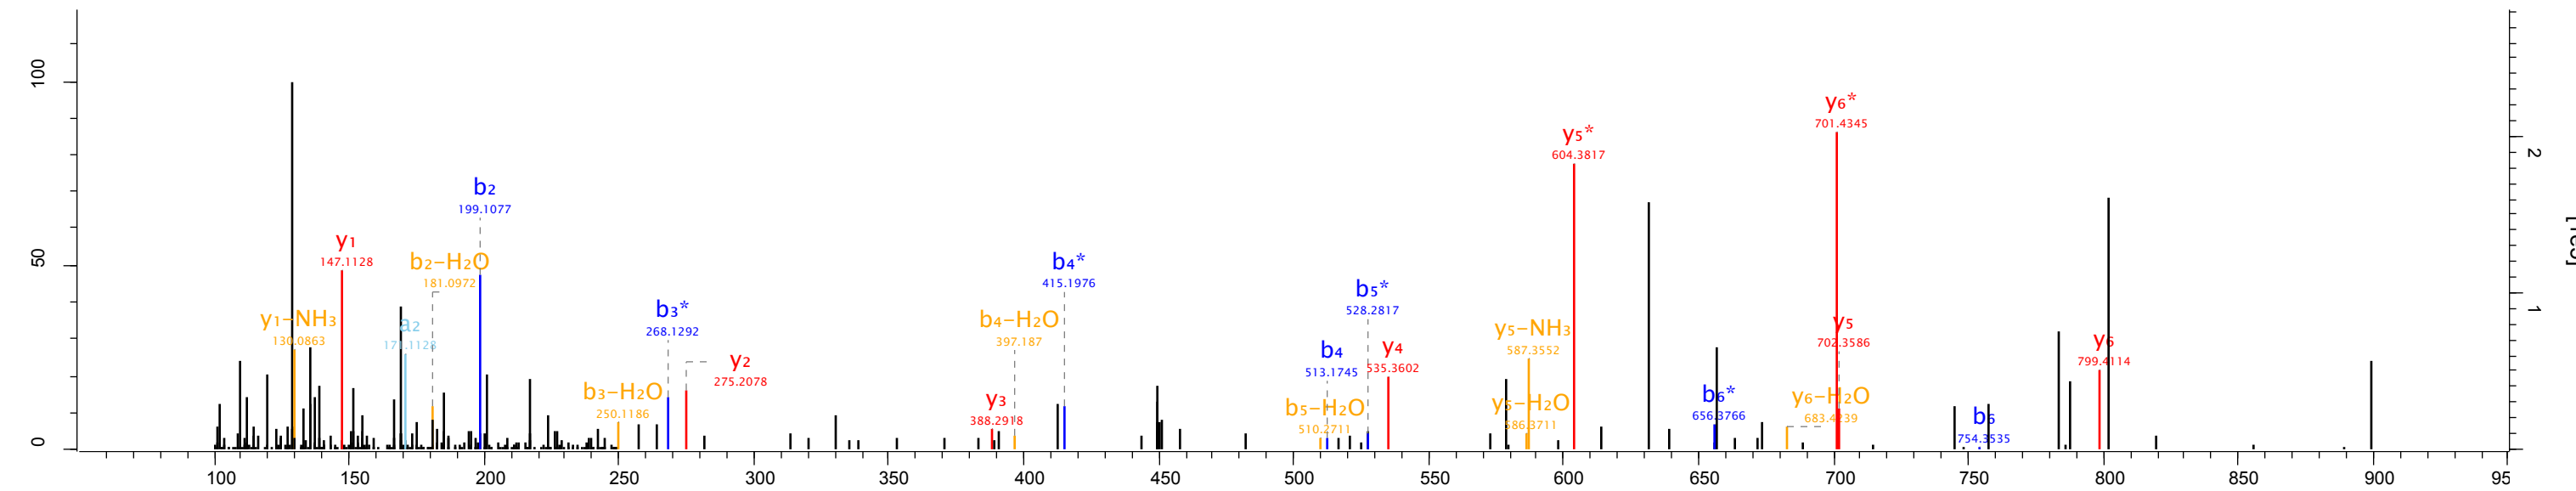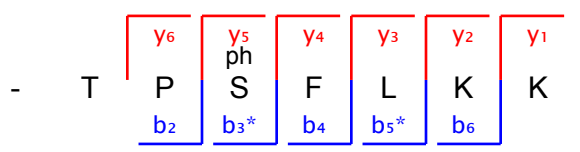

Raw file 20171215\_MaS\_33SR\_LMH\_phospho\_06 Scan 7409 Method FTMS; HCD Score 98.18 m/z 545.77 Gene names MAPKAP1

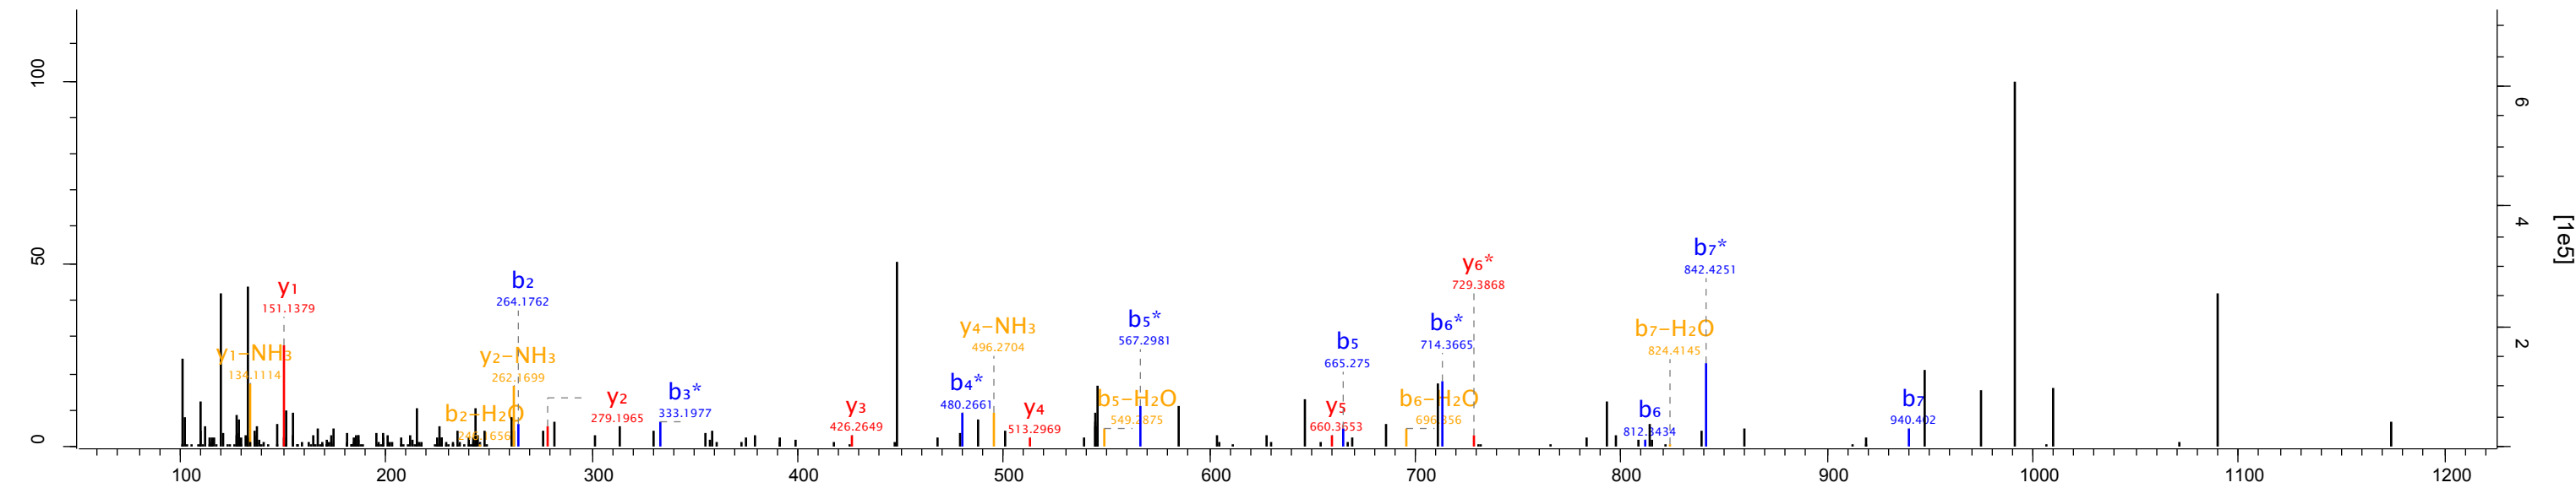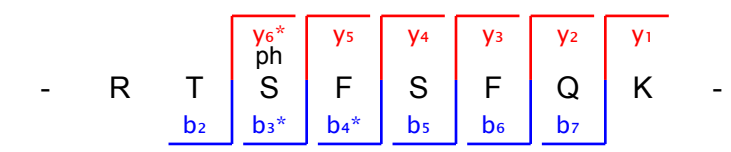

Raw file 20171215\_MaS\_33SR\_LMH\_phospho\_06 Scan 7589 Method FTMS; HCD Score 180.78 m/z 716.34 Gene names PUM1

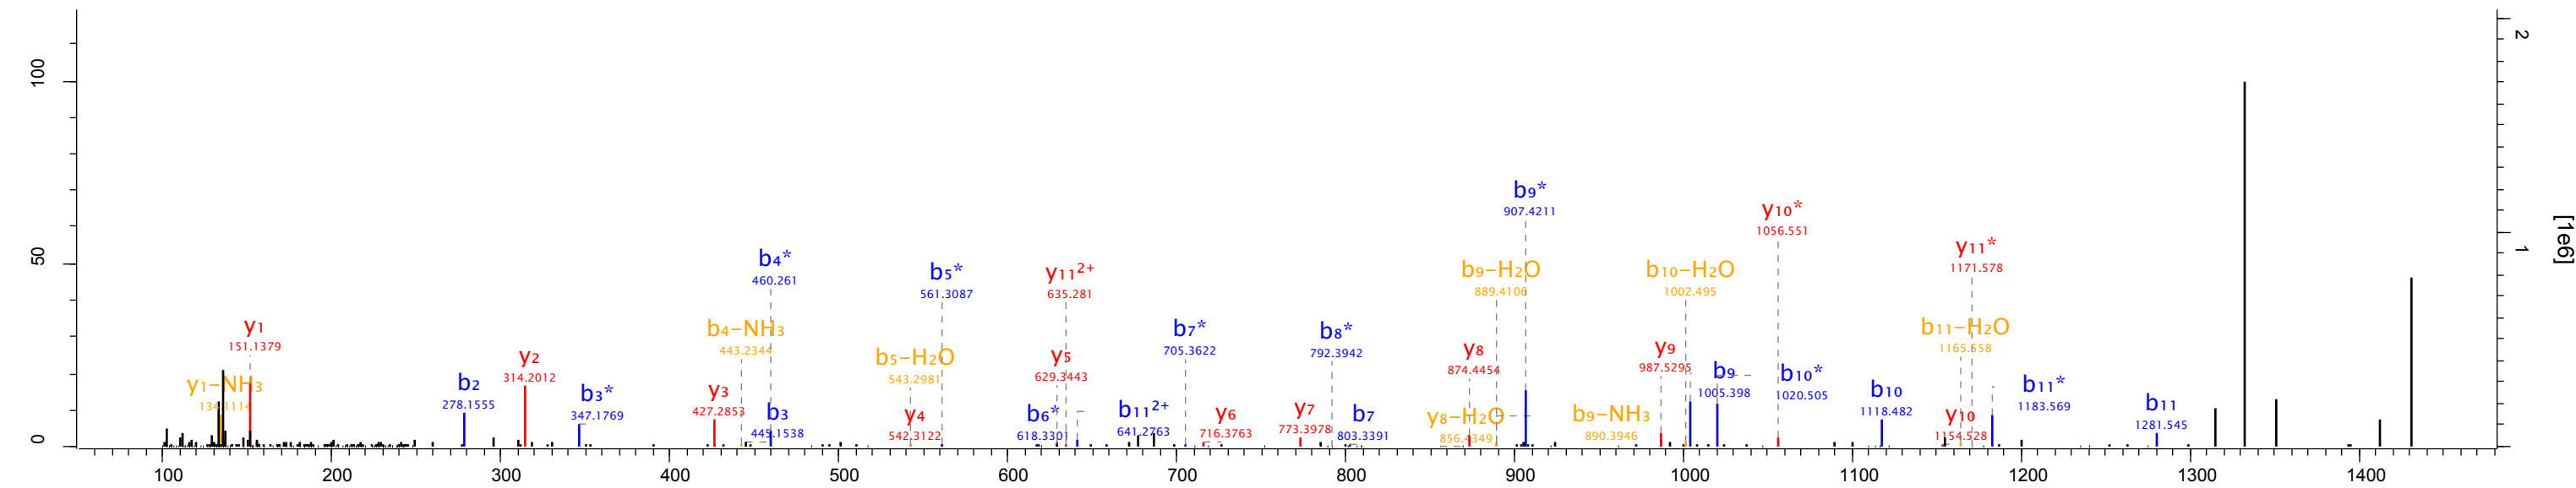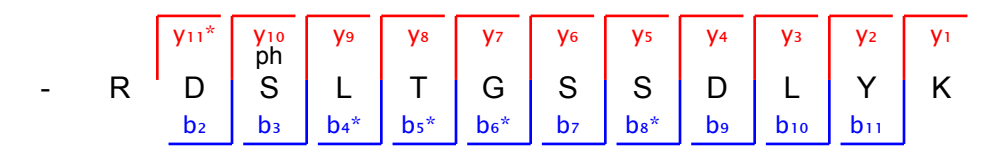



Raw file 20171215\_MaS\_33SR\_LMH\_phospho\_06 Scan 7929 Method FTMS; HCD Score 60.55 m/z 588.28 Gene names ZNF608

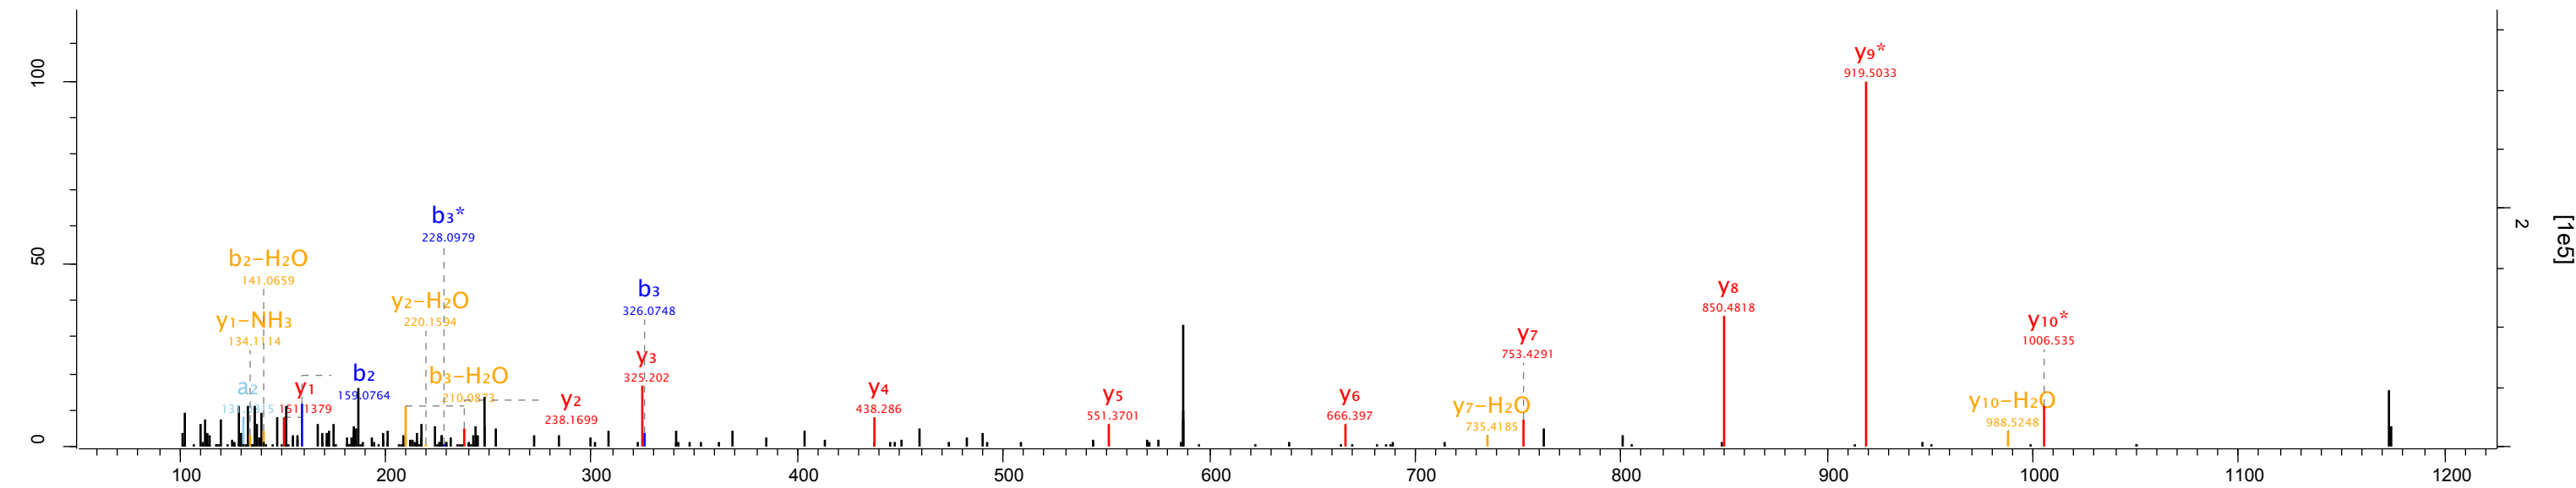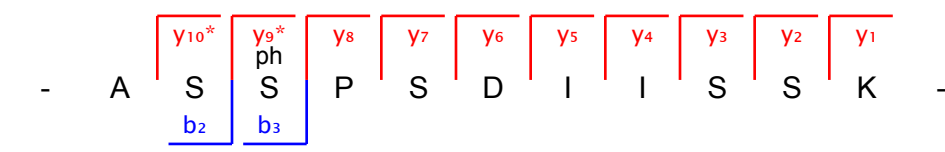

Raw file 20171215\_MaS\_33SR\_LMH\_phospho\_06 Scan 8109 Method FTMS; HCD Score 125.54 m/z 786.73 Gene names MAPRE3

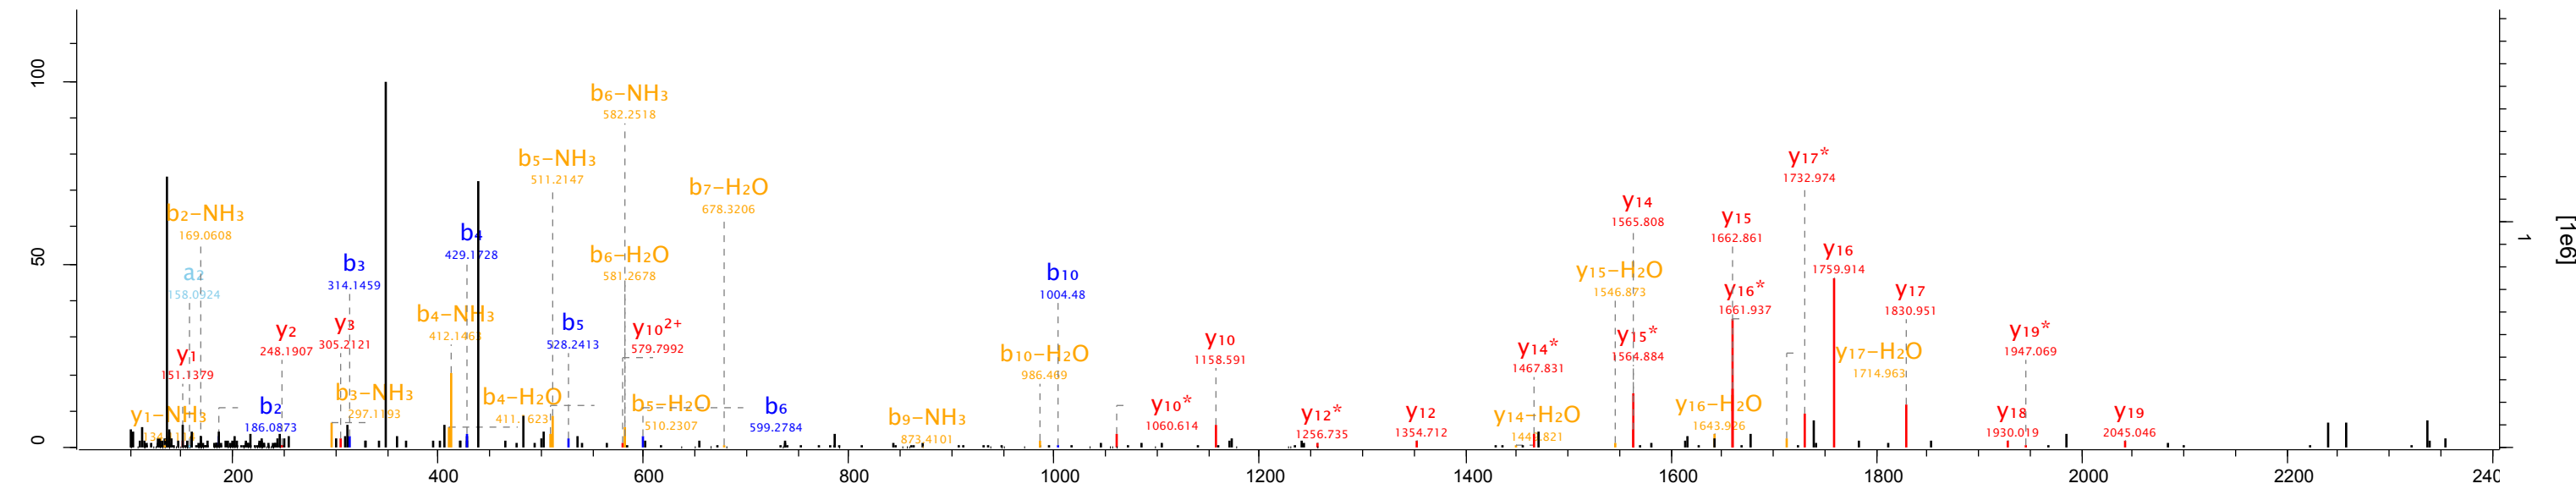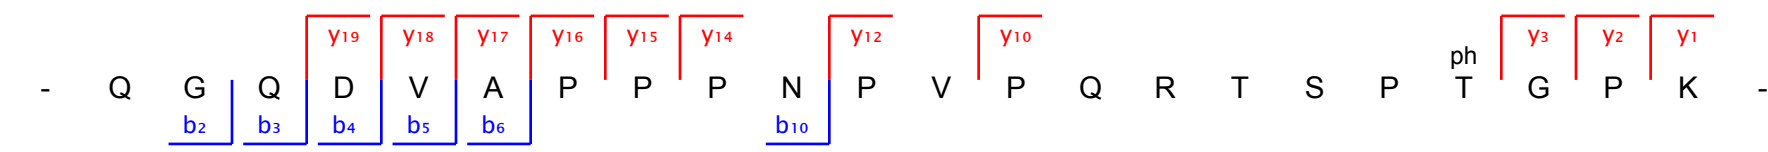

Raw file 20171215\_MaS\_33SR\_LMH\_phospho\_06 Scan 8389 Method FTMS; HCD Score 80.36 m/z 693.36 Gene names ELK3

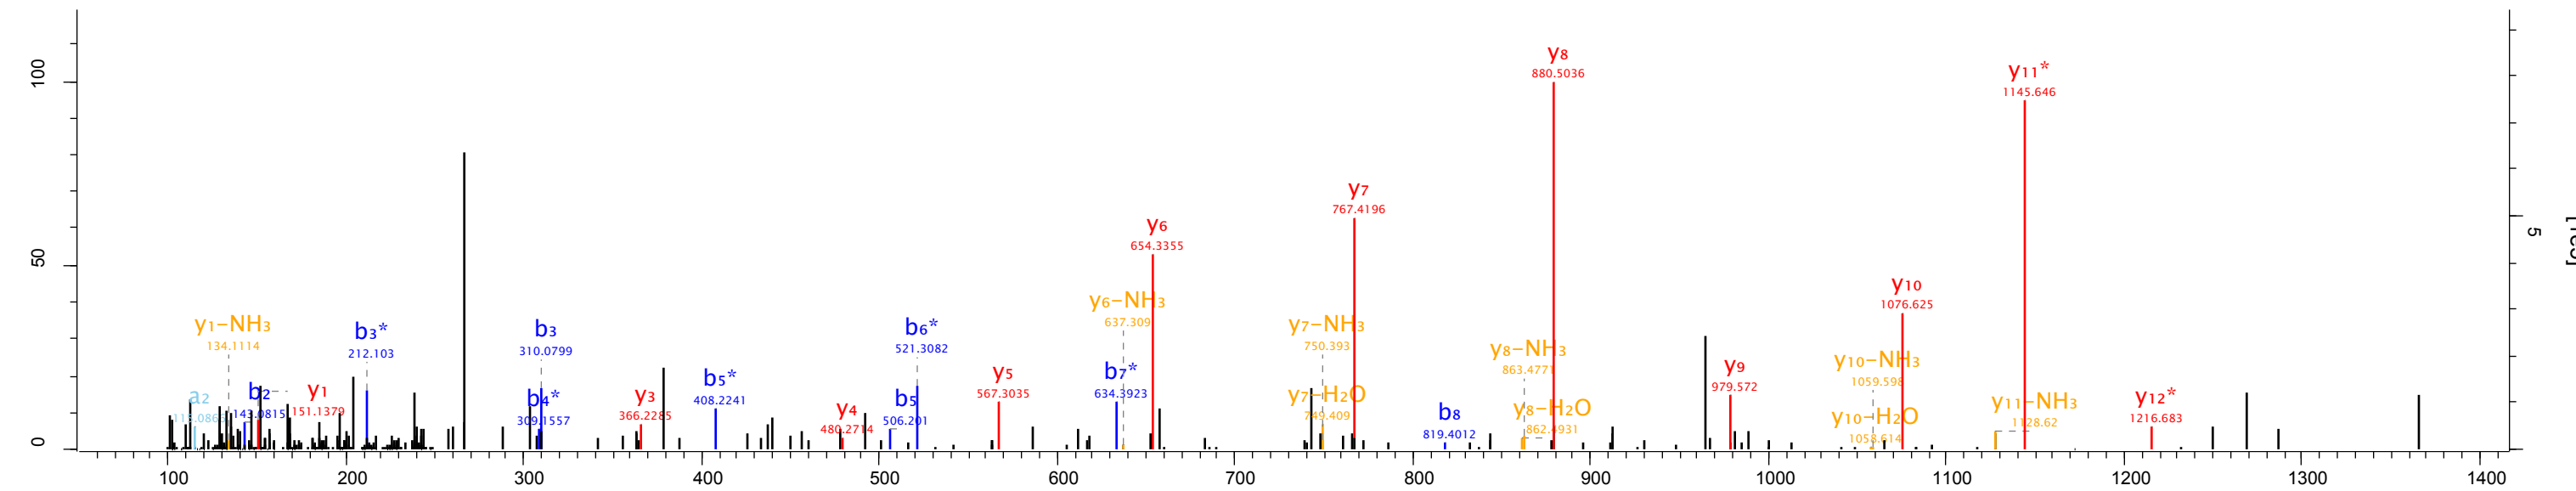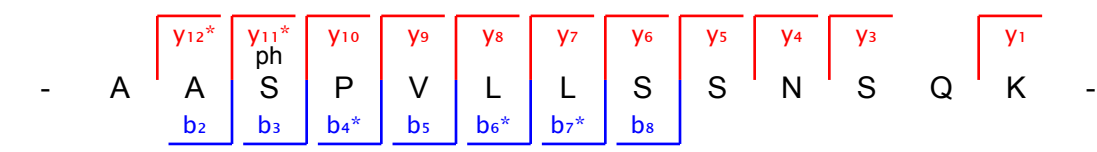

Raw file 20171215\_MaS\_33SR\_LMH\_phospho\_06 Scan 8519 Method FTMS; HCD Score 53.76 m/z 413.18 Gene names SLC4A7;SLC4A10

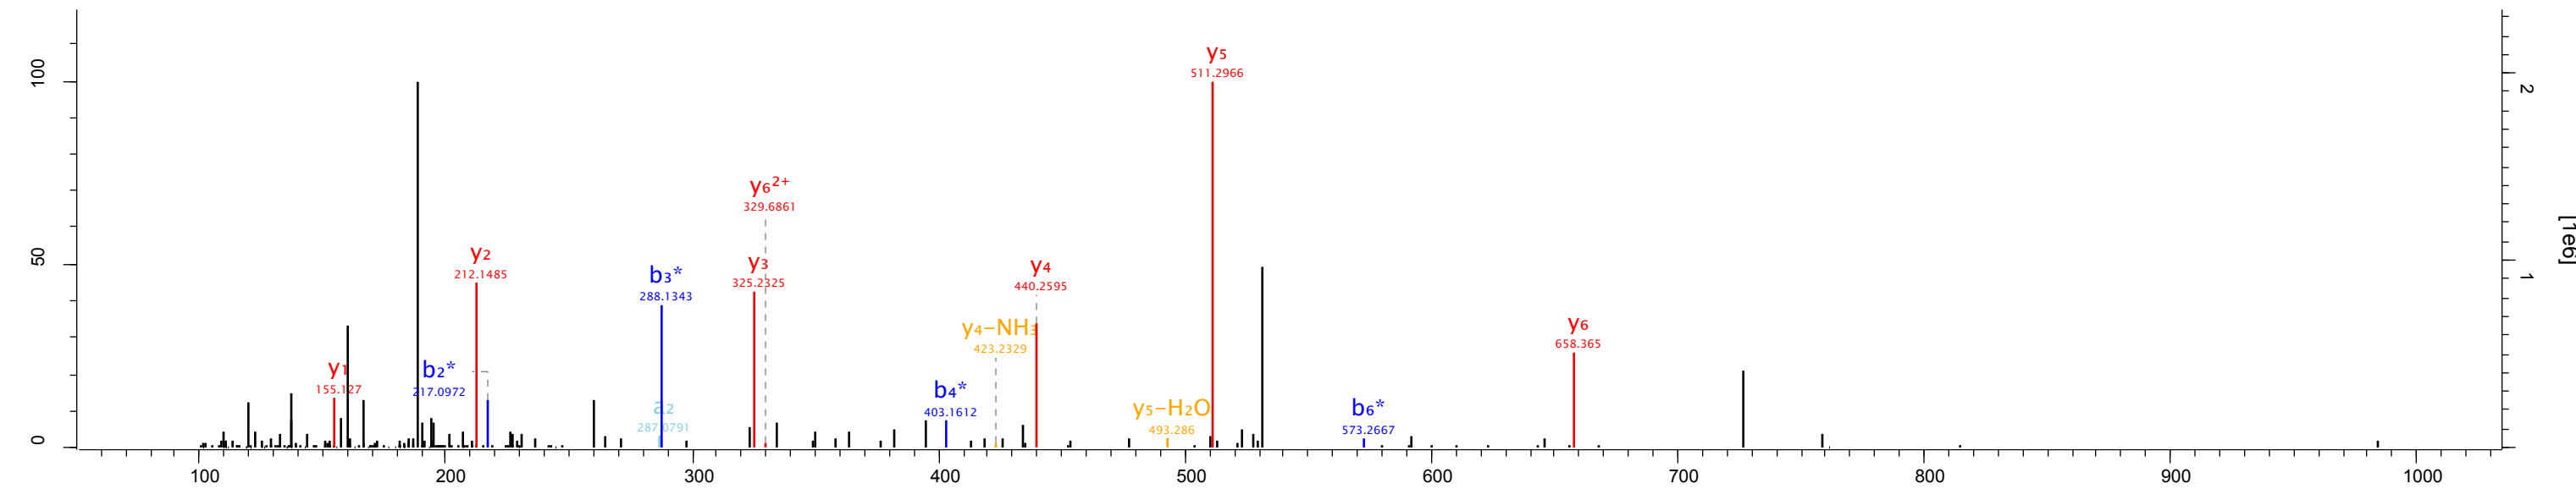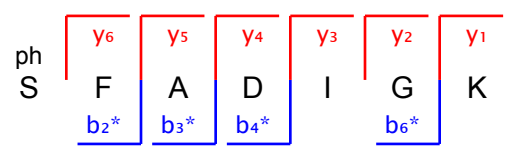

Raw file 20171215\_MaS\_33SR\_LMH\_phospho\_06 Scan 8689 Method FTMS; HCD Score 76.16 m/z 524.24 Gene names MAP1B

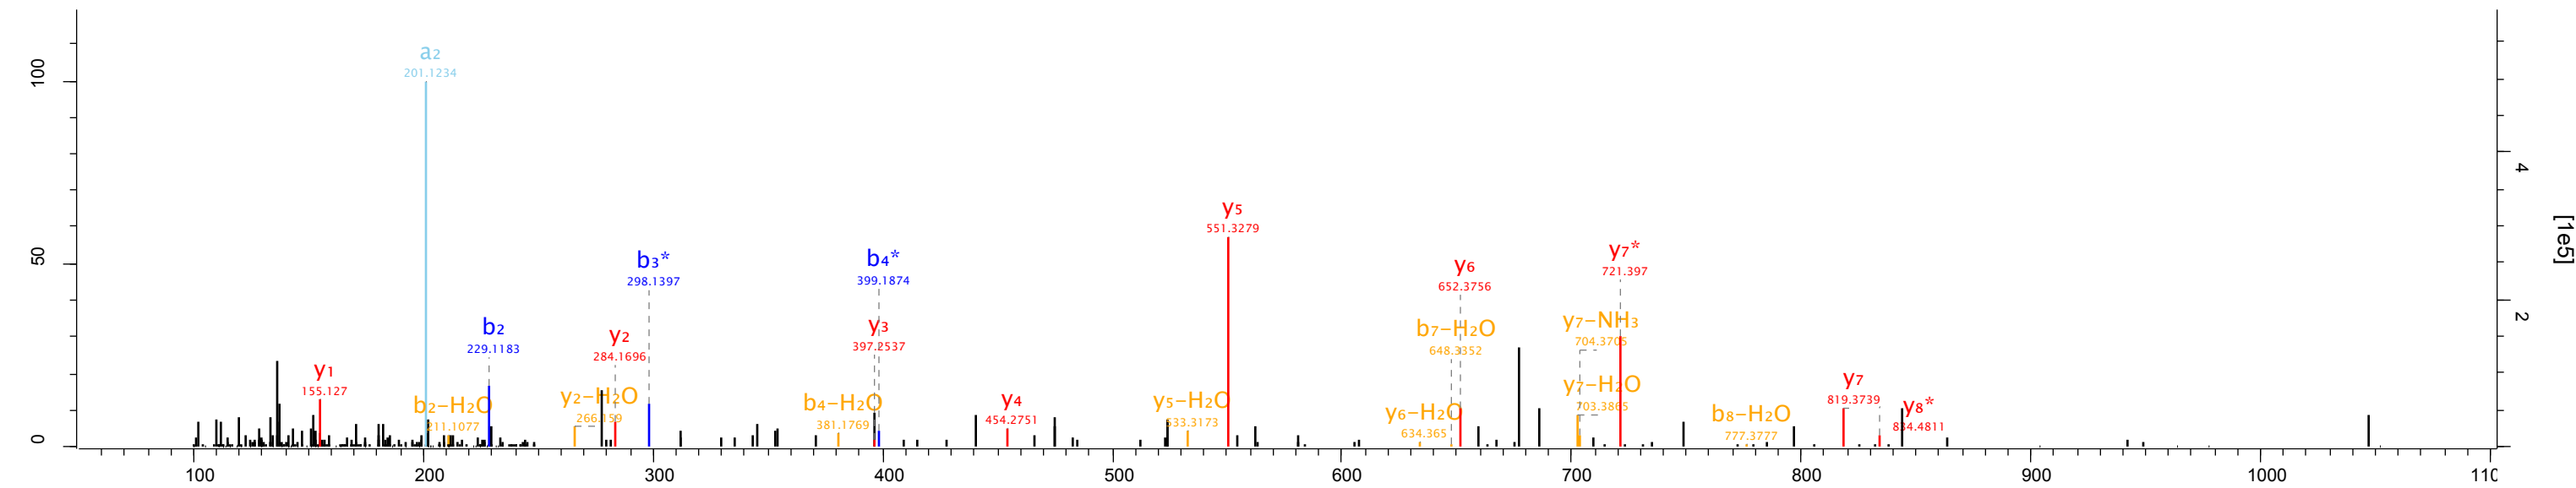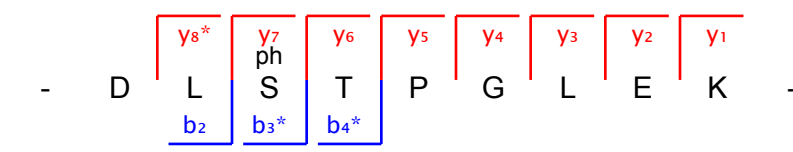

Raw file 20171215\_MaS\_33SR\_LMH\_phospho\_06 Scan 8929 Method FTMS; HCD Score 71.88 m/z 589.32 Gene names RALY

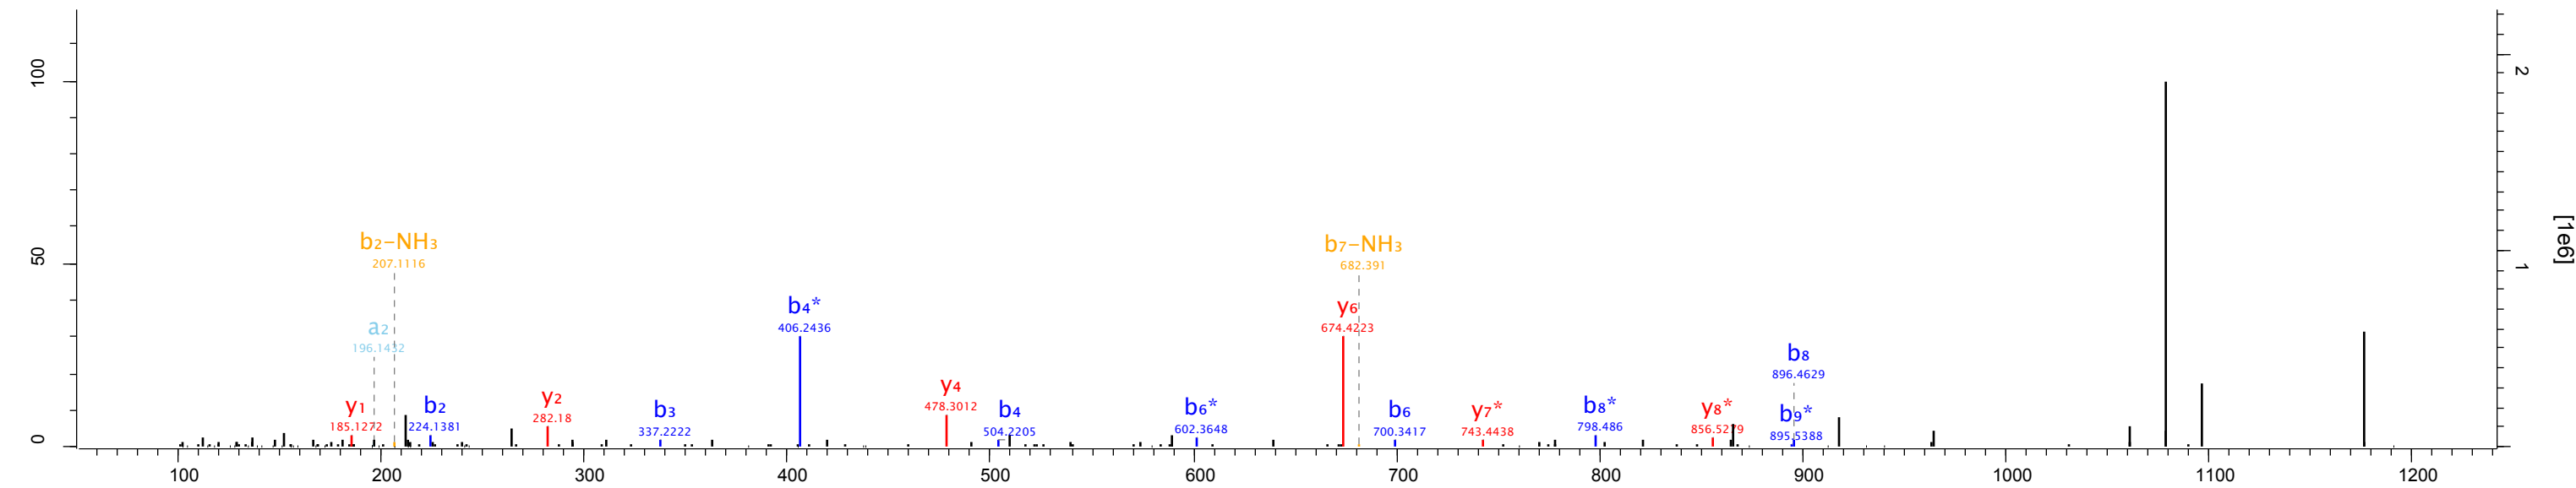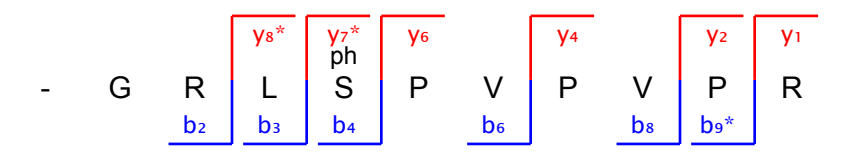

Raw file 20171215\_MaS\_33SR\_LMH\_phospho\_06 Scan 9329 Method FTMS; HCD Score 137.61 m/z 783.31 Gene names CAPZA1

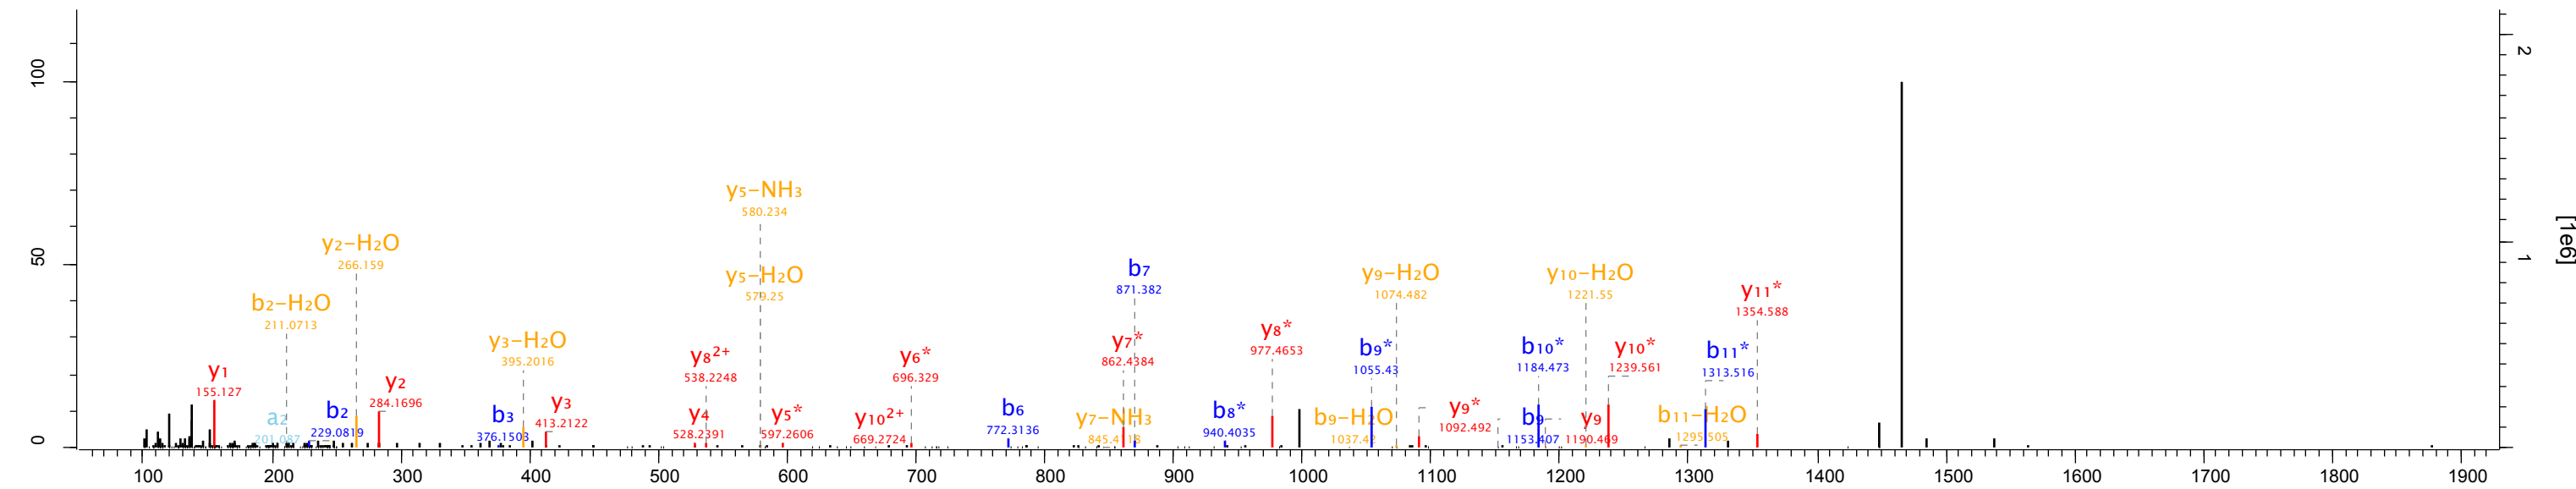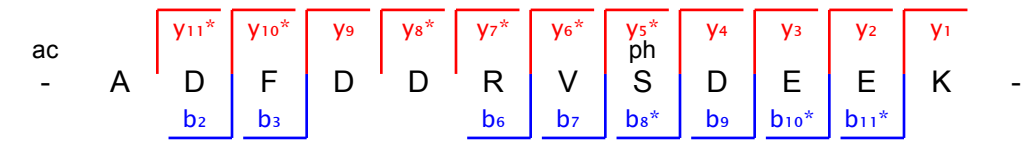

Raw file 20171215\_MaS\_33SR\_LMH\_phospho\_06 Scan 9419 Method FTMS; HCD Score 54.34 m/z 589.8 Gene names ZZZ3

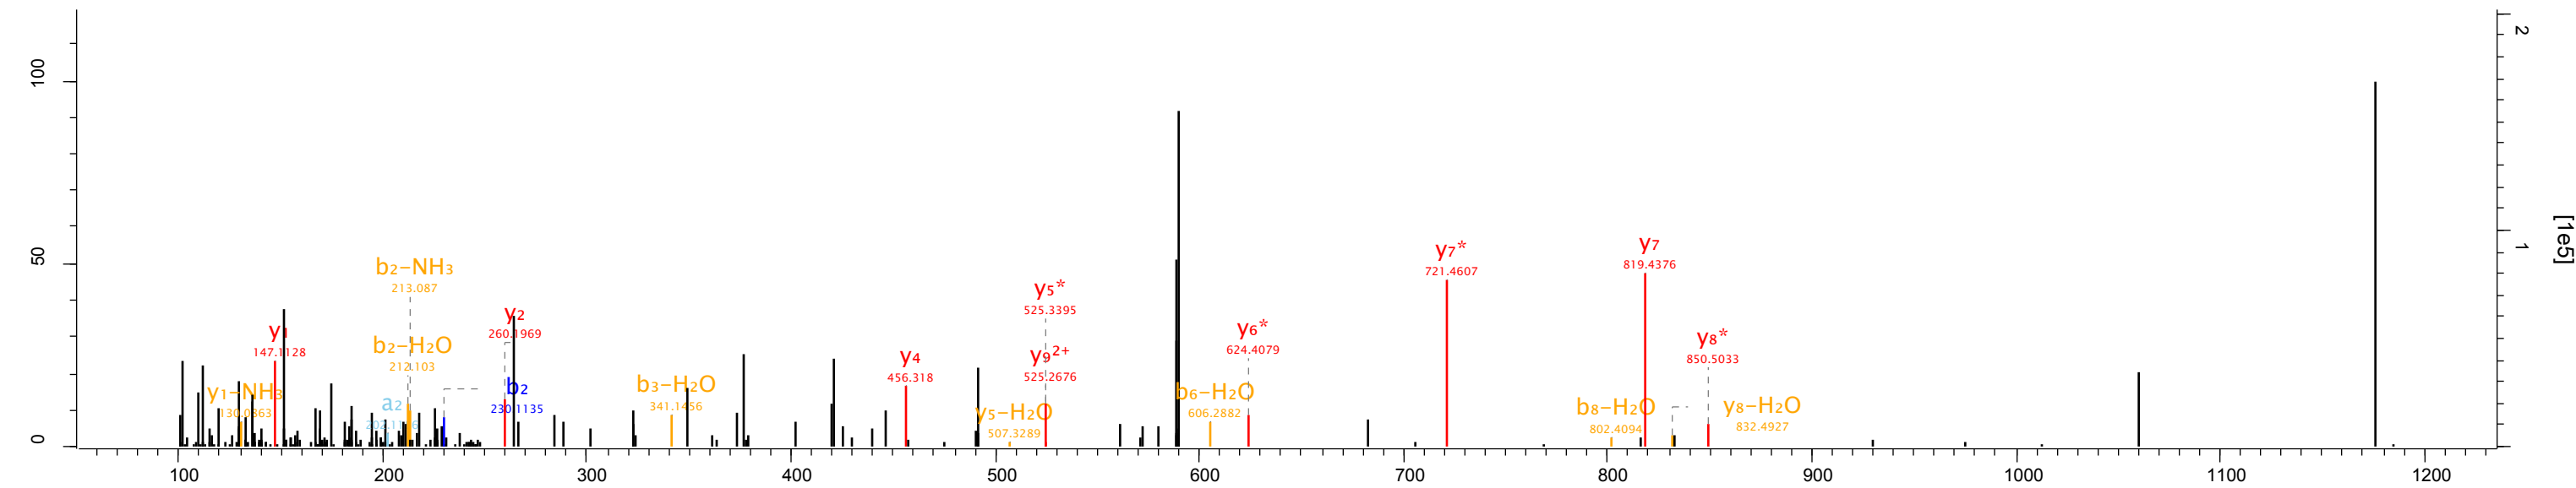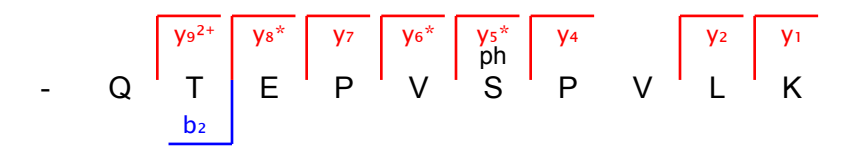



Raw file 20171215\_MaS\_33SR\_LMH\_phospho\_06 Scan 9719 Method FTMS; HCD Score 288.96 m/z 974.43 Gene names ZHX3

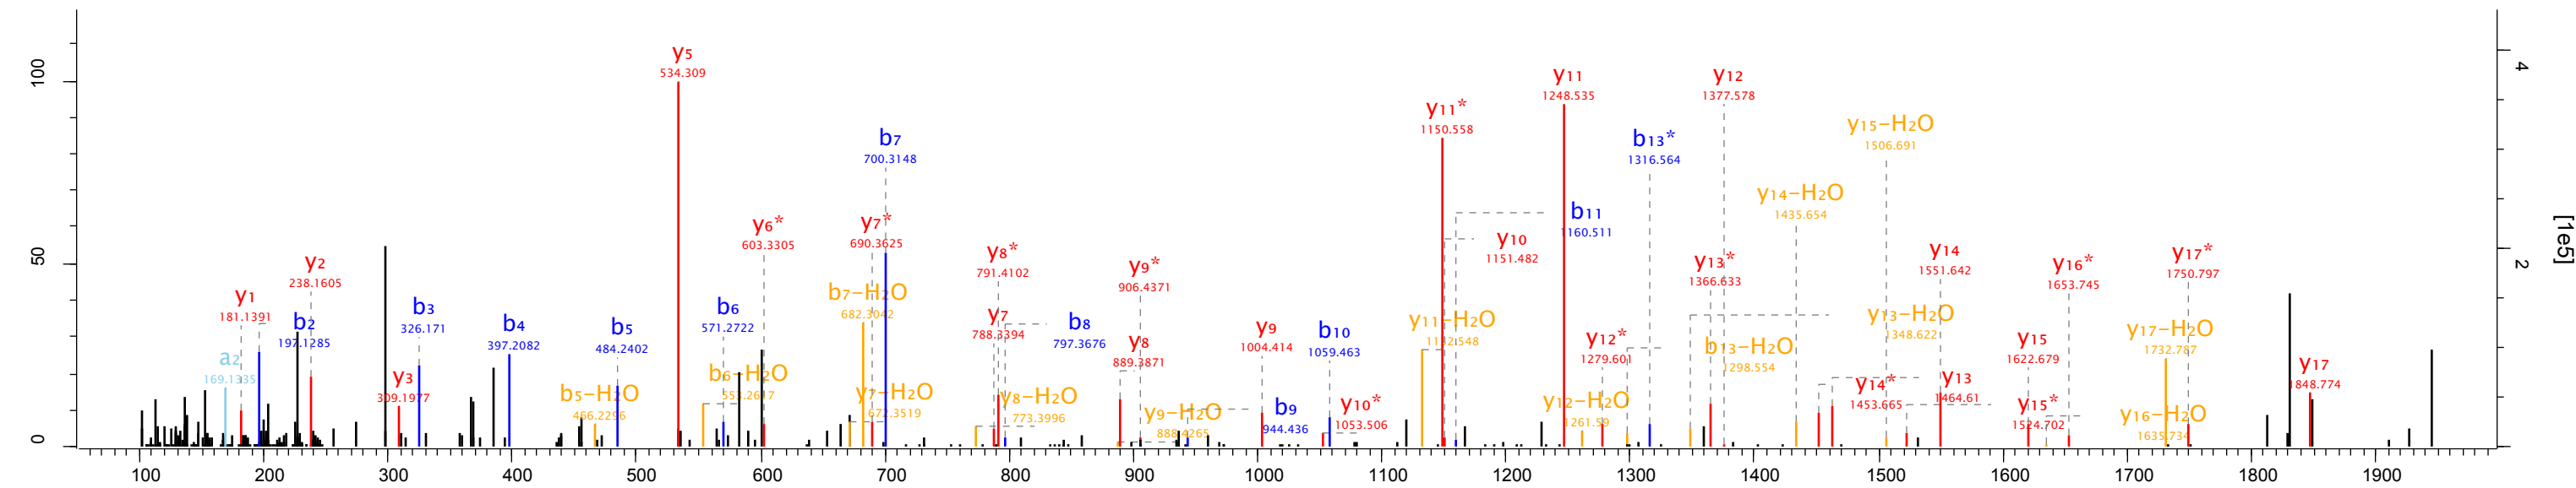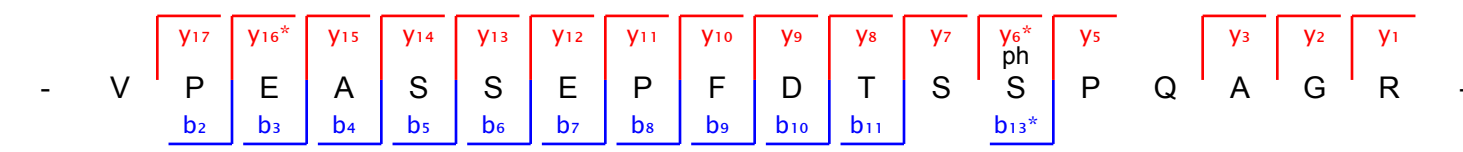

Raw file 20171215\_MaS\_33SR\_LMH\_phospho\_07 Scan 1929 Method FTMS; HCD Score 119.38 m/z 583.93 Gene names NOC2L

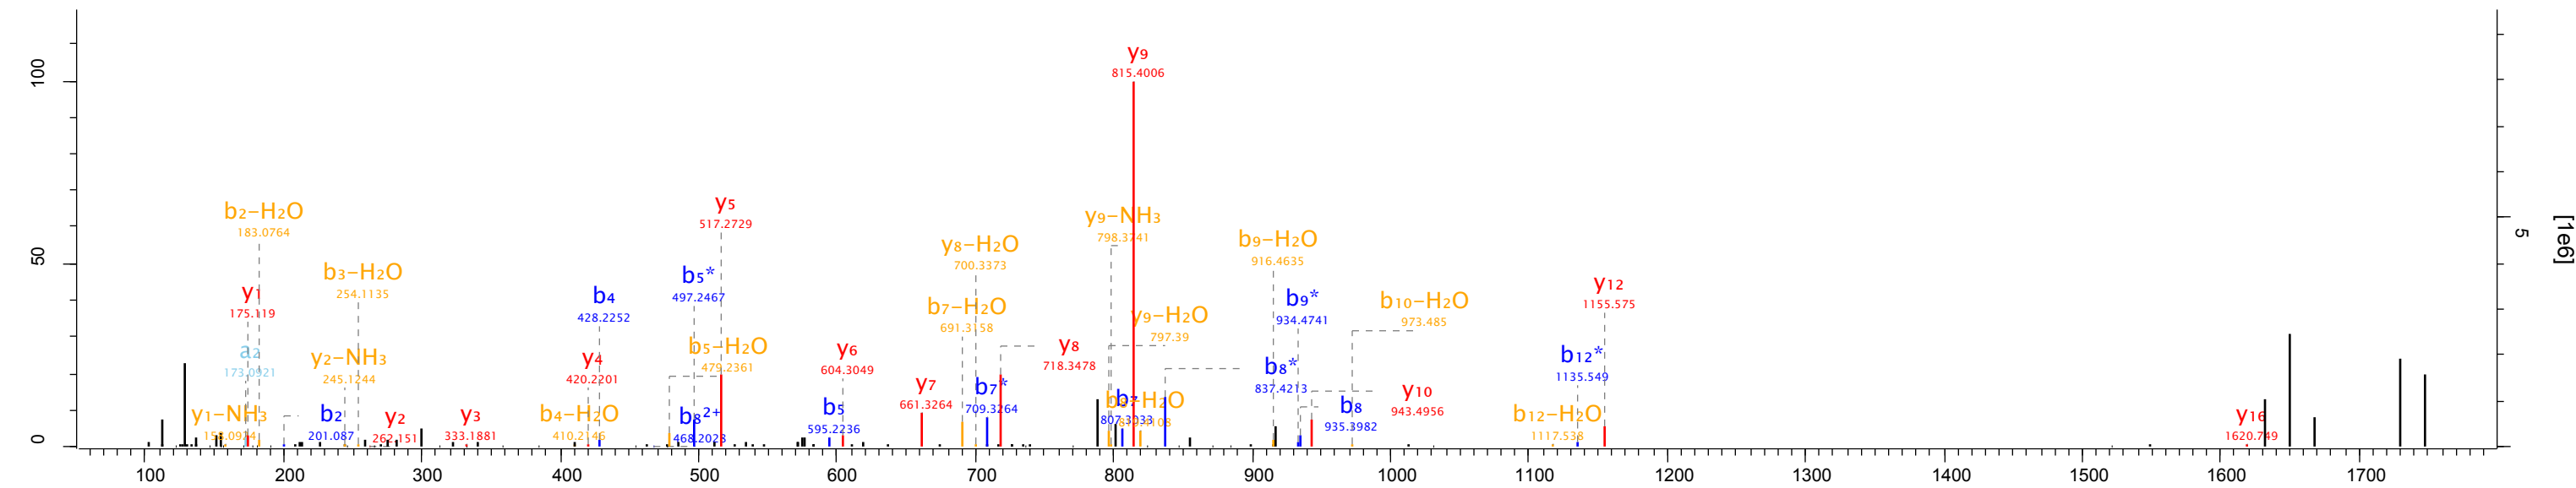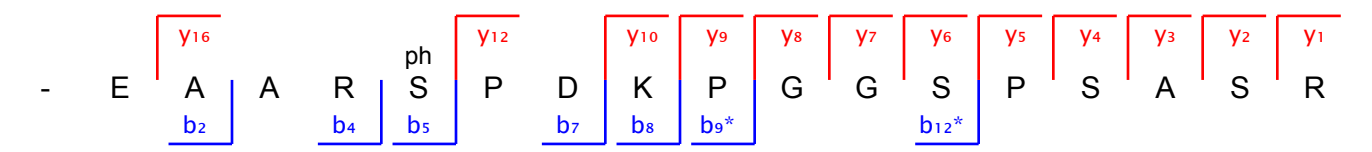

Raw file 20171215\_MaS\_33SR\_LMH\_phospho\_07 Scan 2339 Method FTMS; HCD Score 253.82 m/z 677.78 Gene names BNIP3

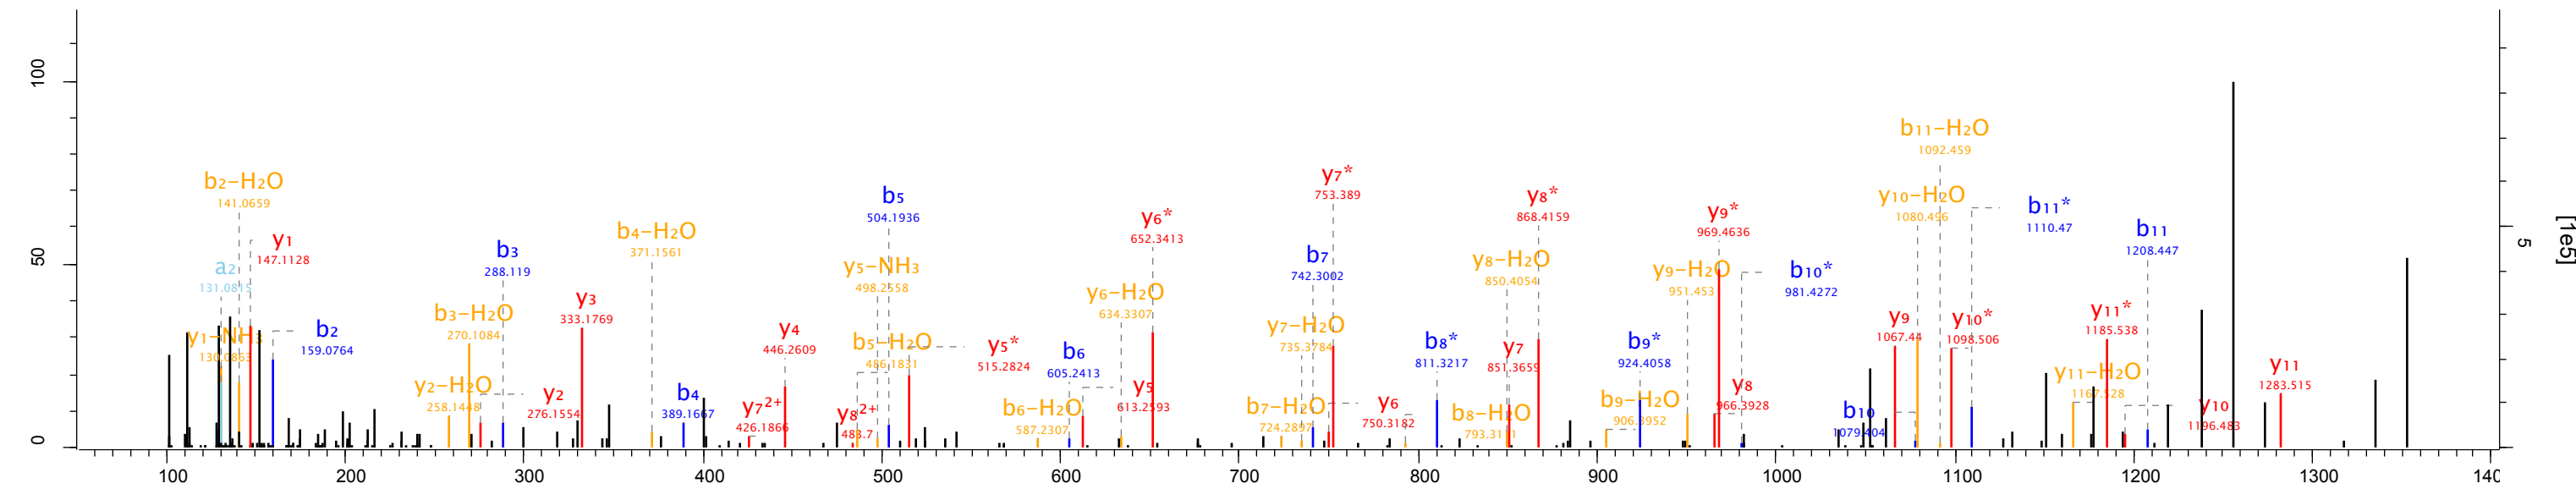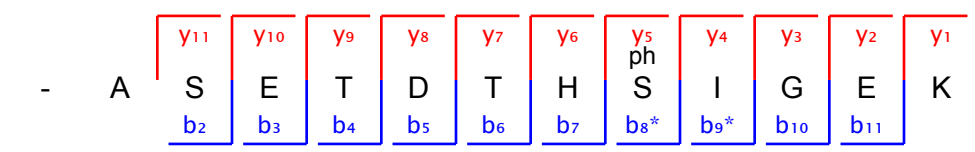

Raw file 20171215\_MaS\_33SR\_LMH\_phospho\_07 Scan 2779 Method FTMS; HCD Score 49.59 m/z 401.2 Gene names FMNL1

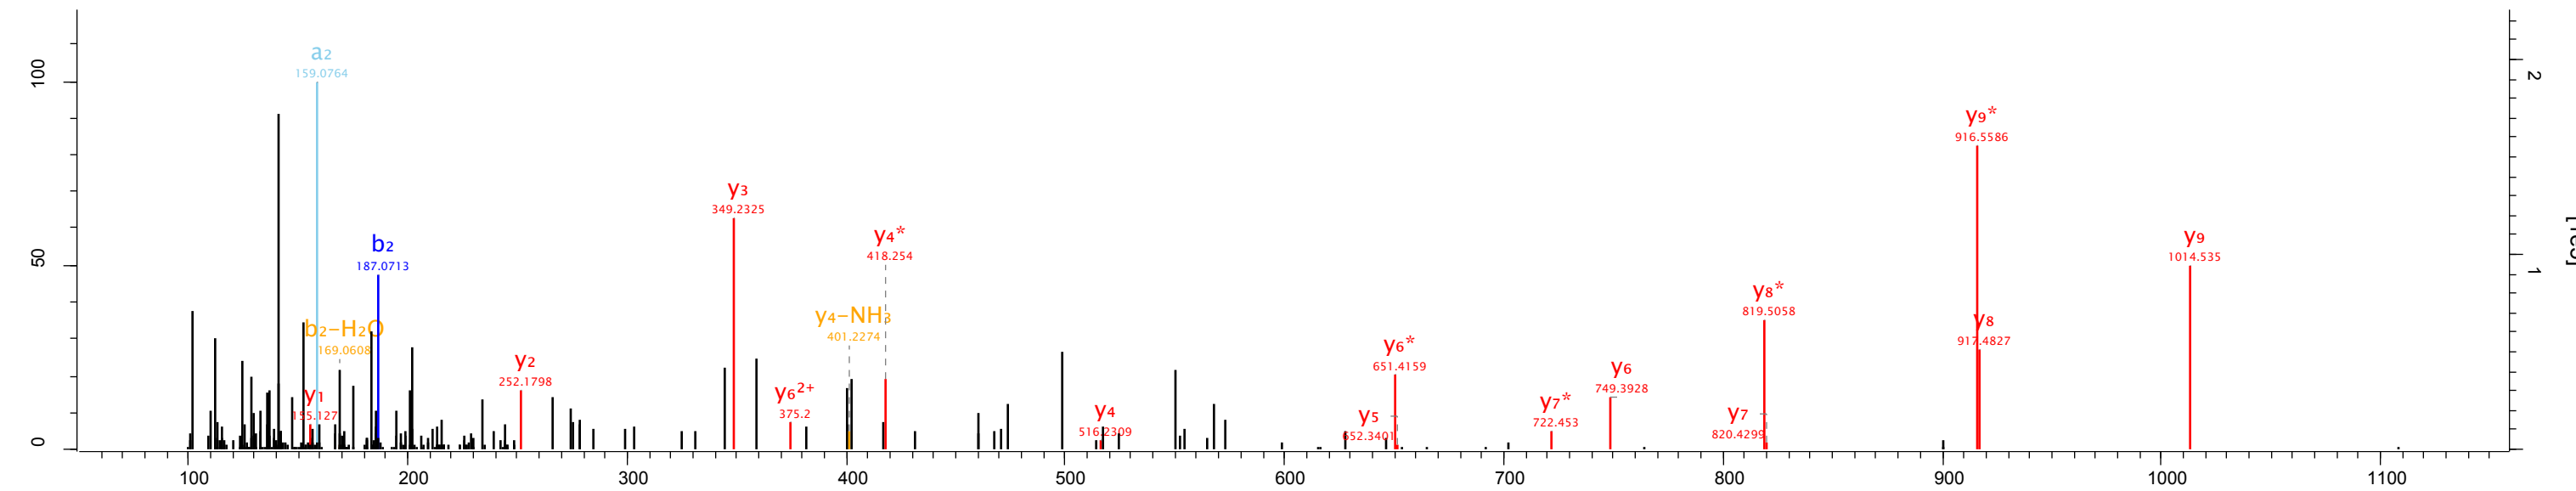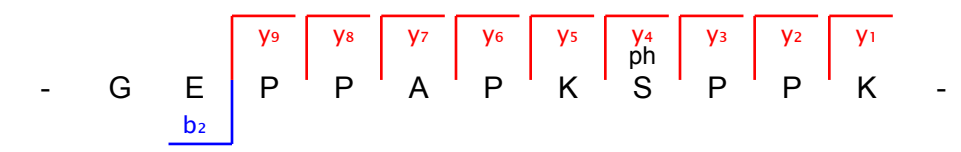

Raw file 20171215\_MaS\_33SR\_LMH\_phospho\_07 Scan 5759 Method FTMS; HCD Score 64.52 m/z 669.32 Gene names MYBBP1A

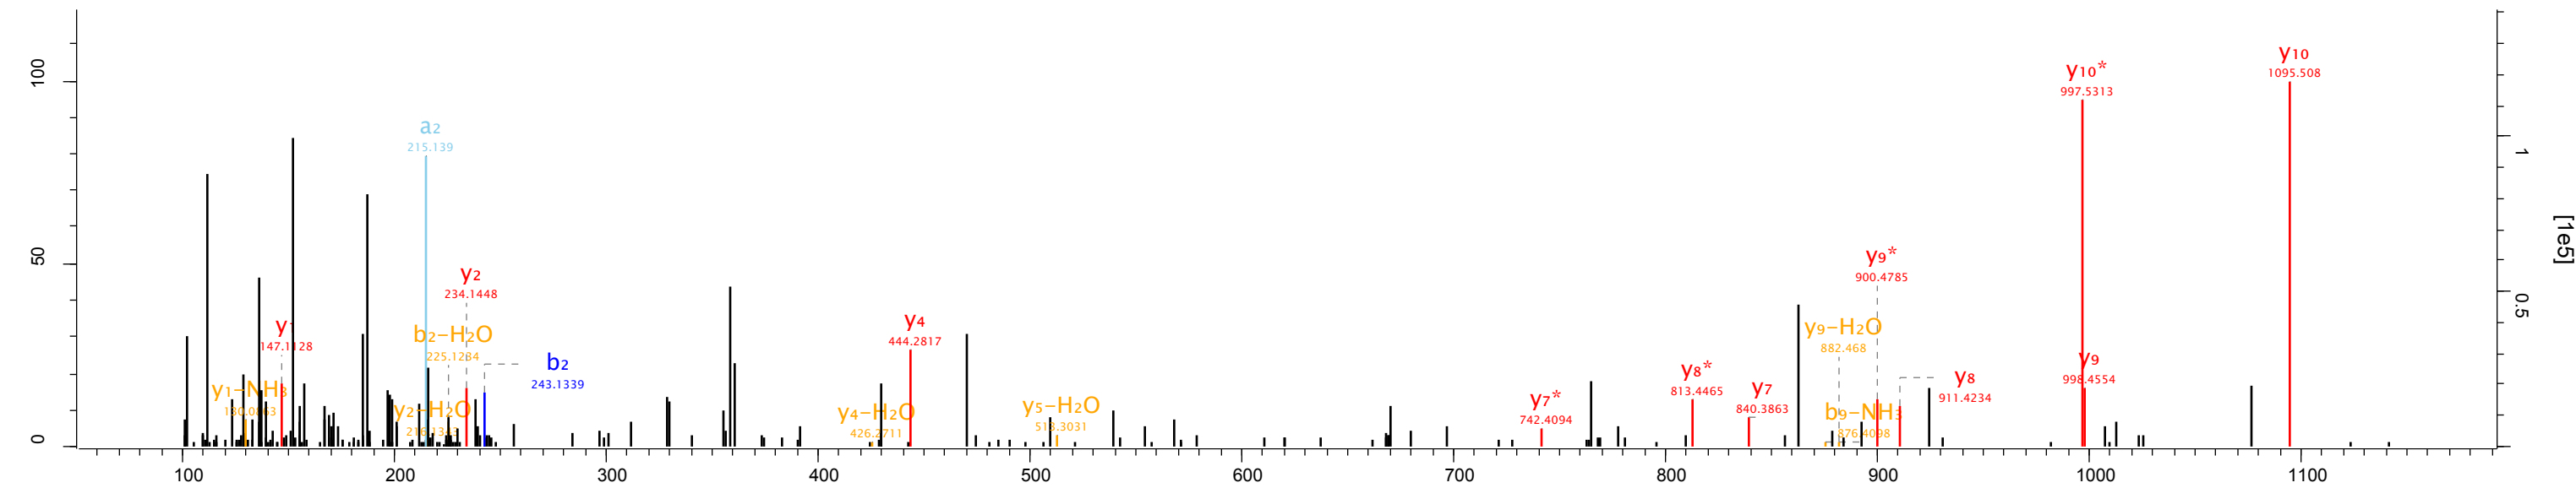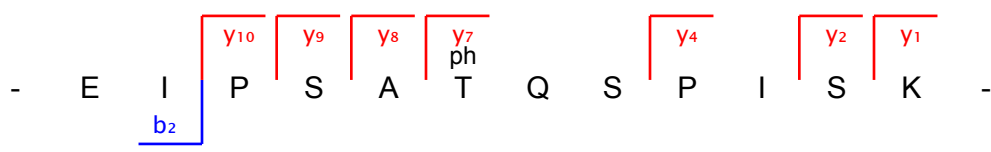

Raw file 20171215\_MaS\_33SR\_LMH\_phospho\_08 Scan 3089 Method FTMS; HCD Score 160.09 m/z 795.33 Gene names MARCKS

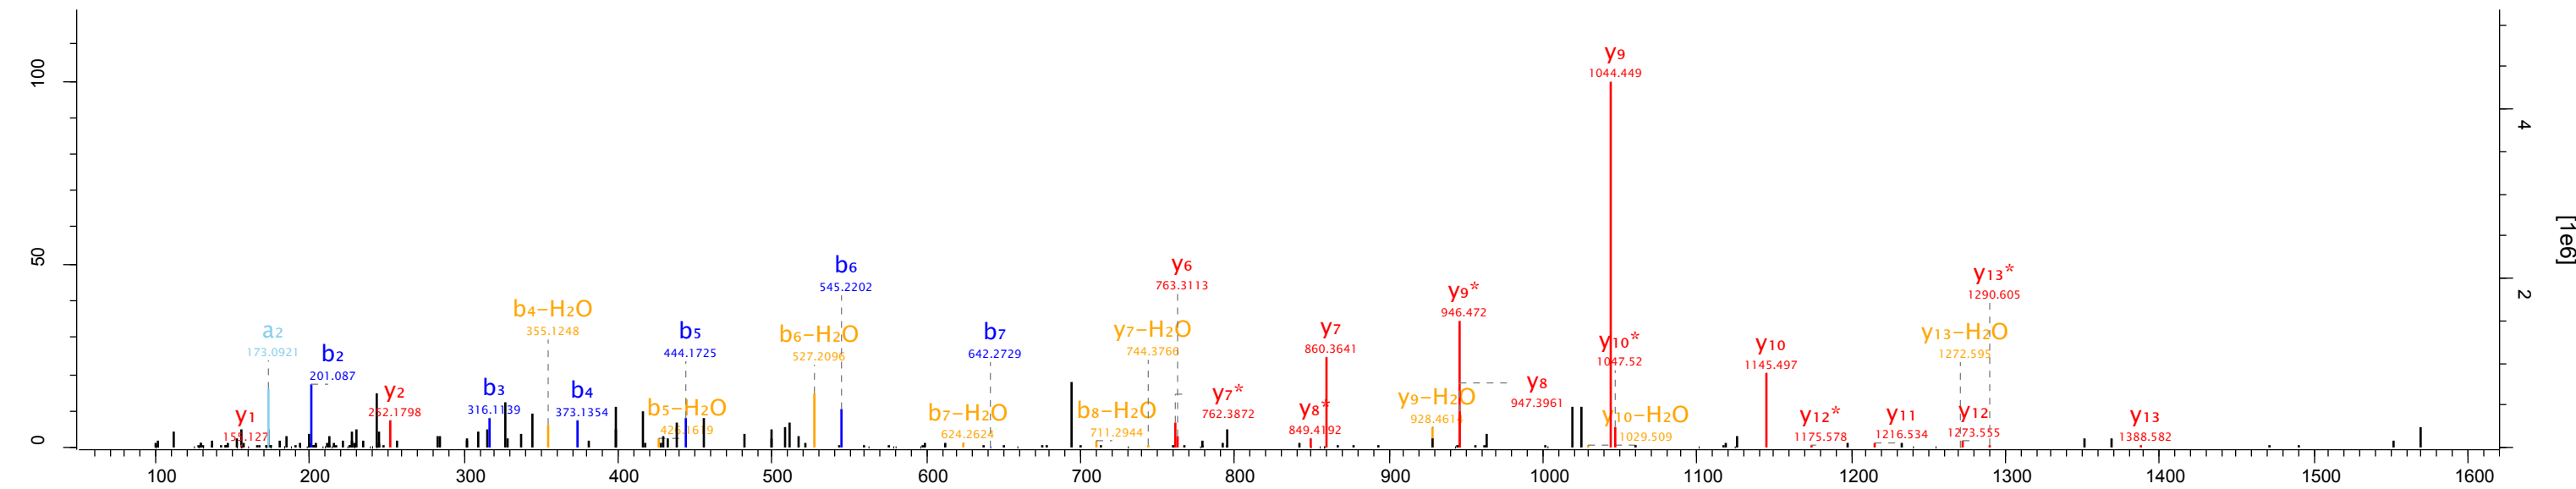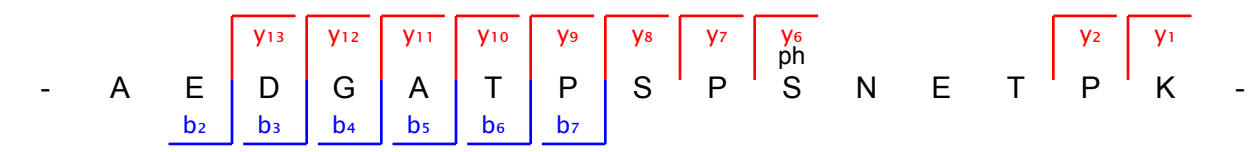

Raw file 20171215\_MaS\_33SR\_LMH\_phospho\_08 Scan 3209 Method FTMS; HCD Score 66 m/z 393.54 Gene names SRRM2

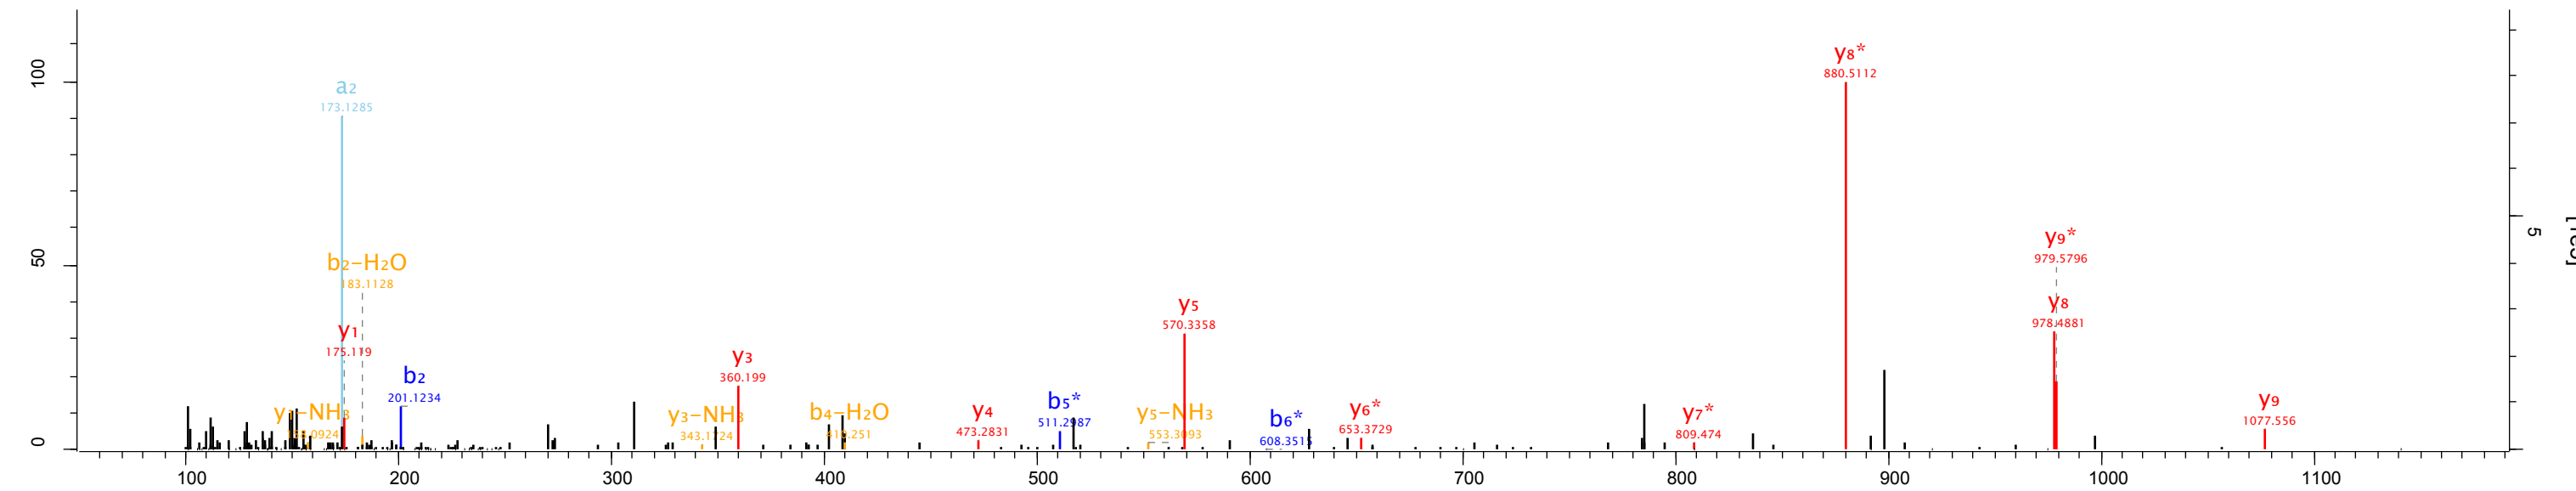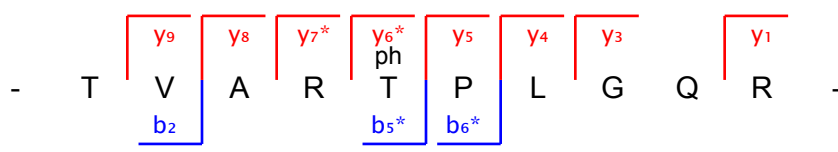

Raw file 20171215\_MaS\_33SR\_LMH\_phospho\_08 Scan 3309 Method FTMS; HCD Score 165.58 m/z 707.36 Gene names MAP1B

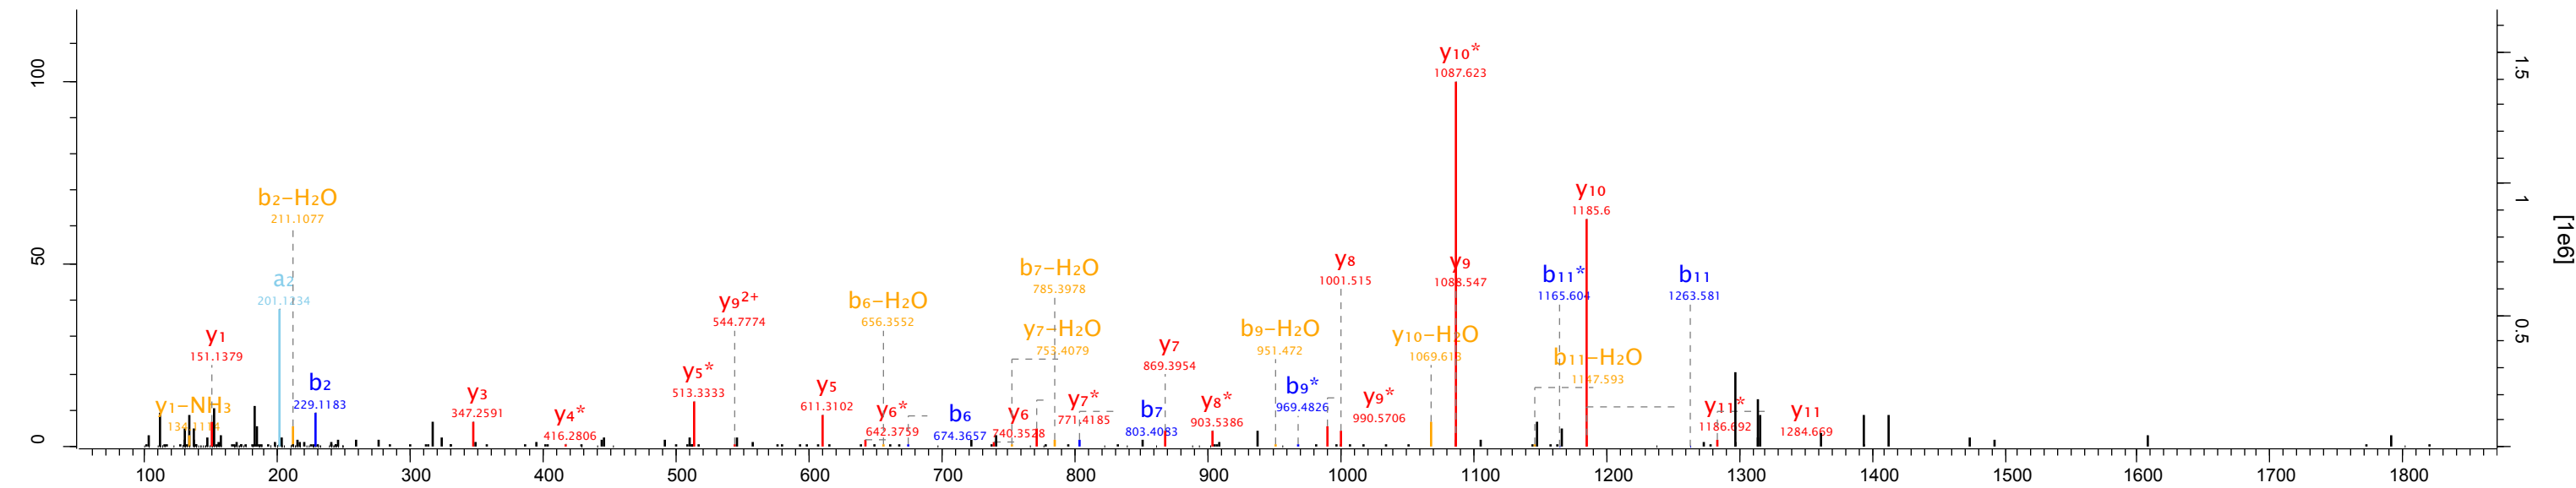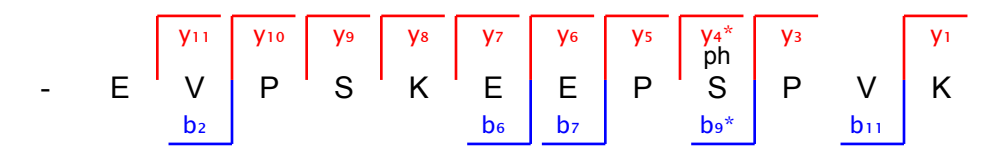



Raw file 20171215\_MaS\_33SR\_LMH\_phospho\_08 Scan 3979 Method FTMS; HCD Score 109.84 m/z 622.3 Gene names BBX

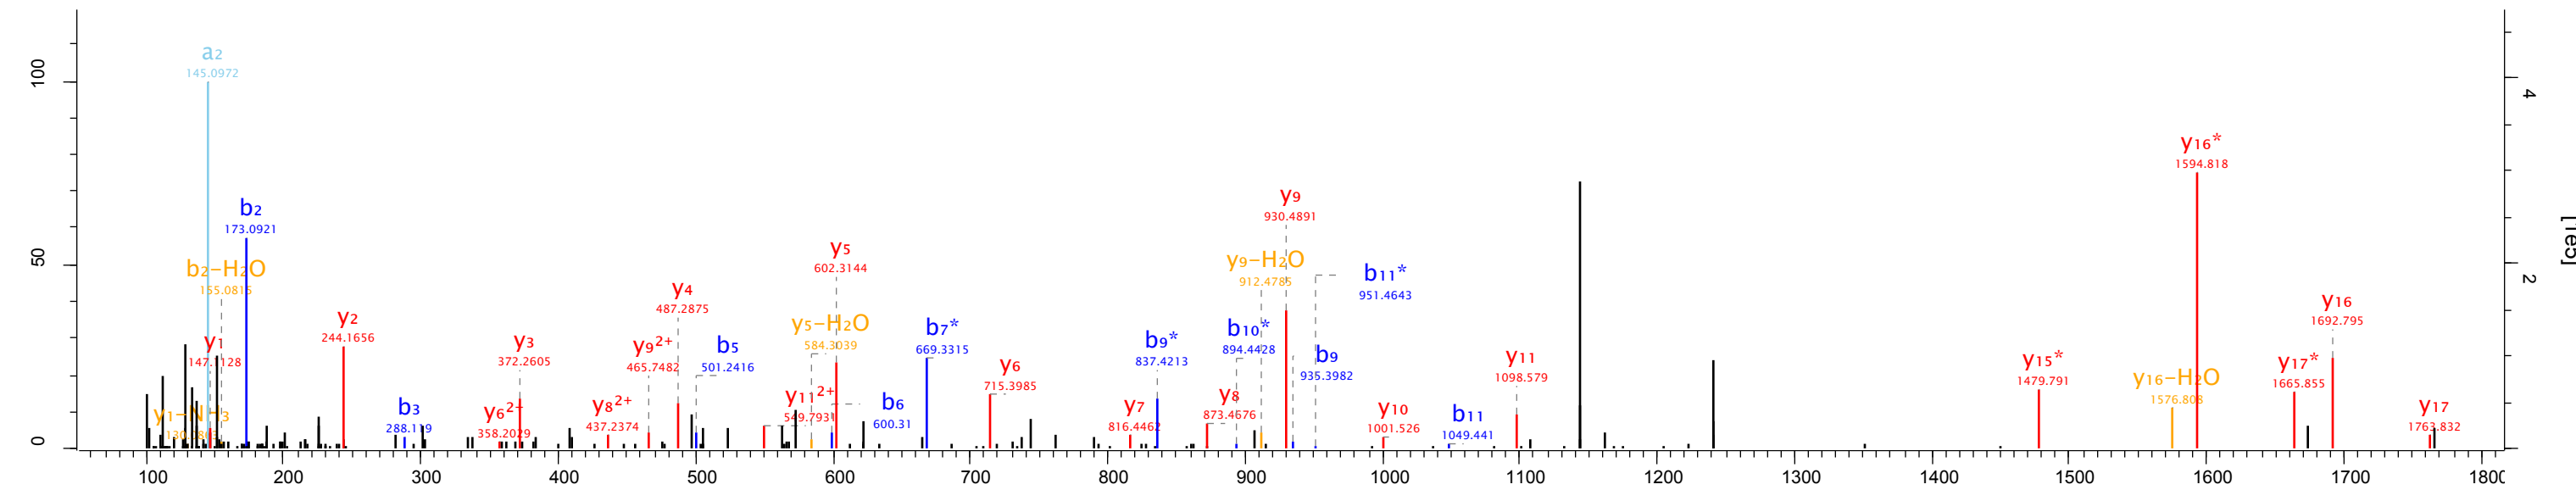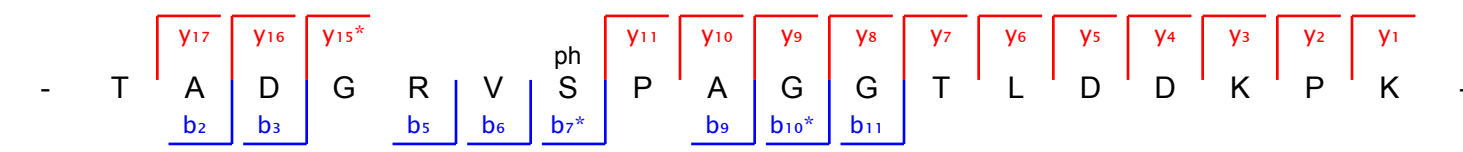

Raw file 20171215\_MaS\_33SR\_LMH\_phospho\_08 Scan 4309 Method FTMS; HCD Score 46.73 m/z 501.24

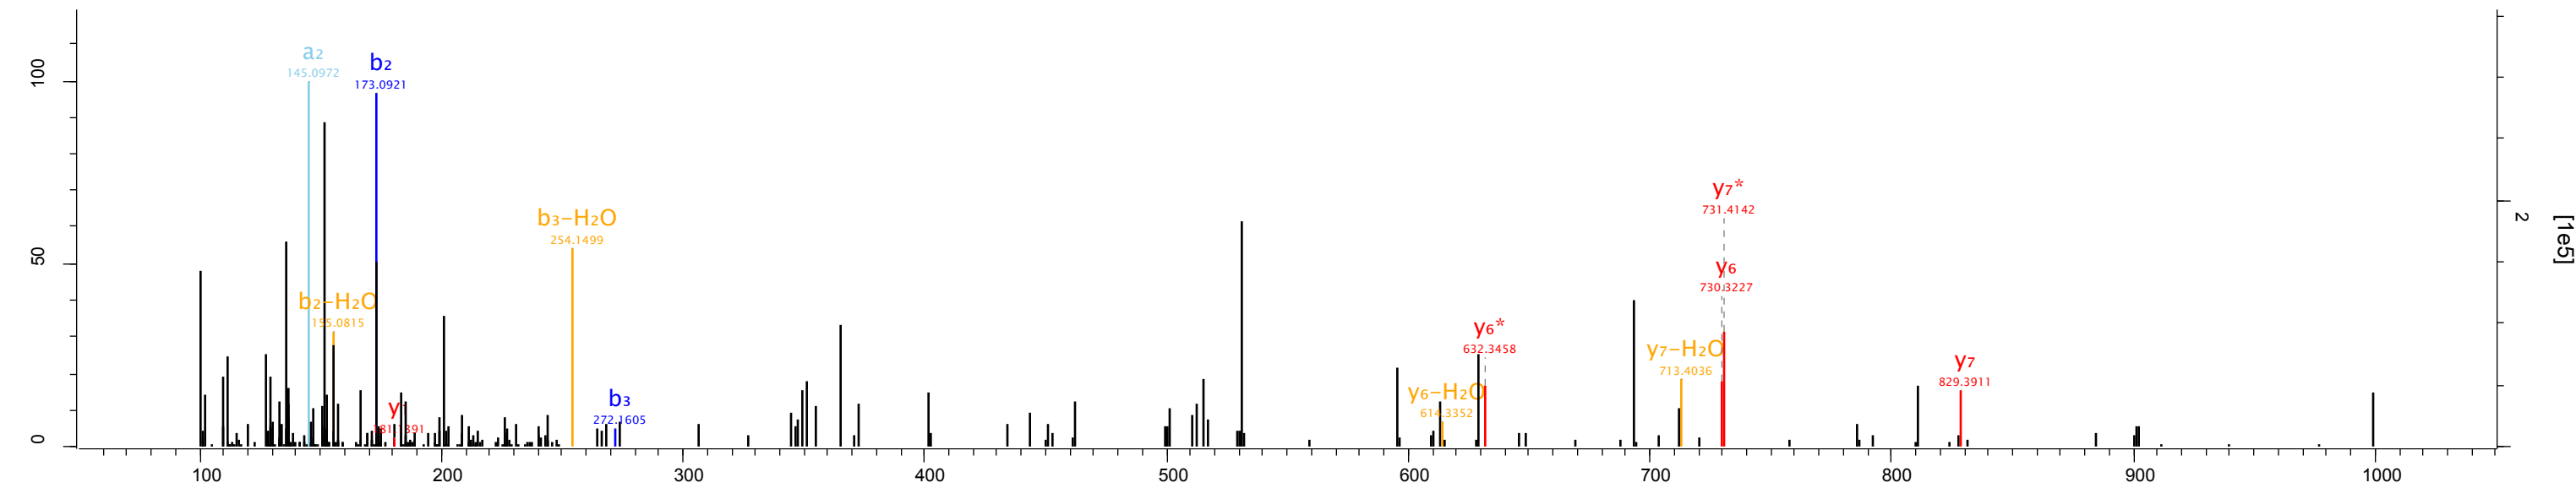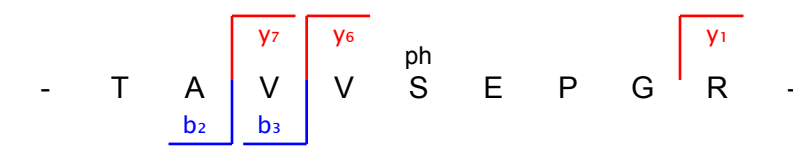

Raw file 20171215\_MaS\_33SR\_LMH\_phospho\_08 Scan 4769 Method FTMS; HCD Score 96.63 m/z 471.2 Gene names ZNF148

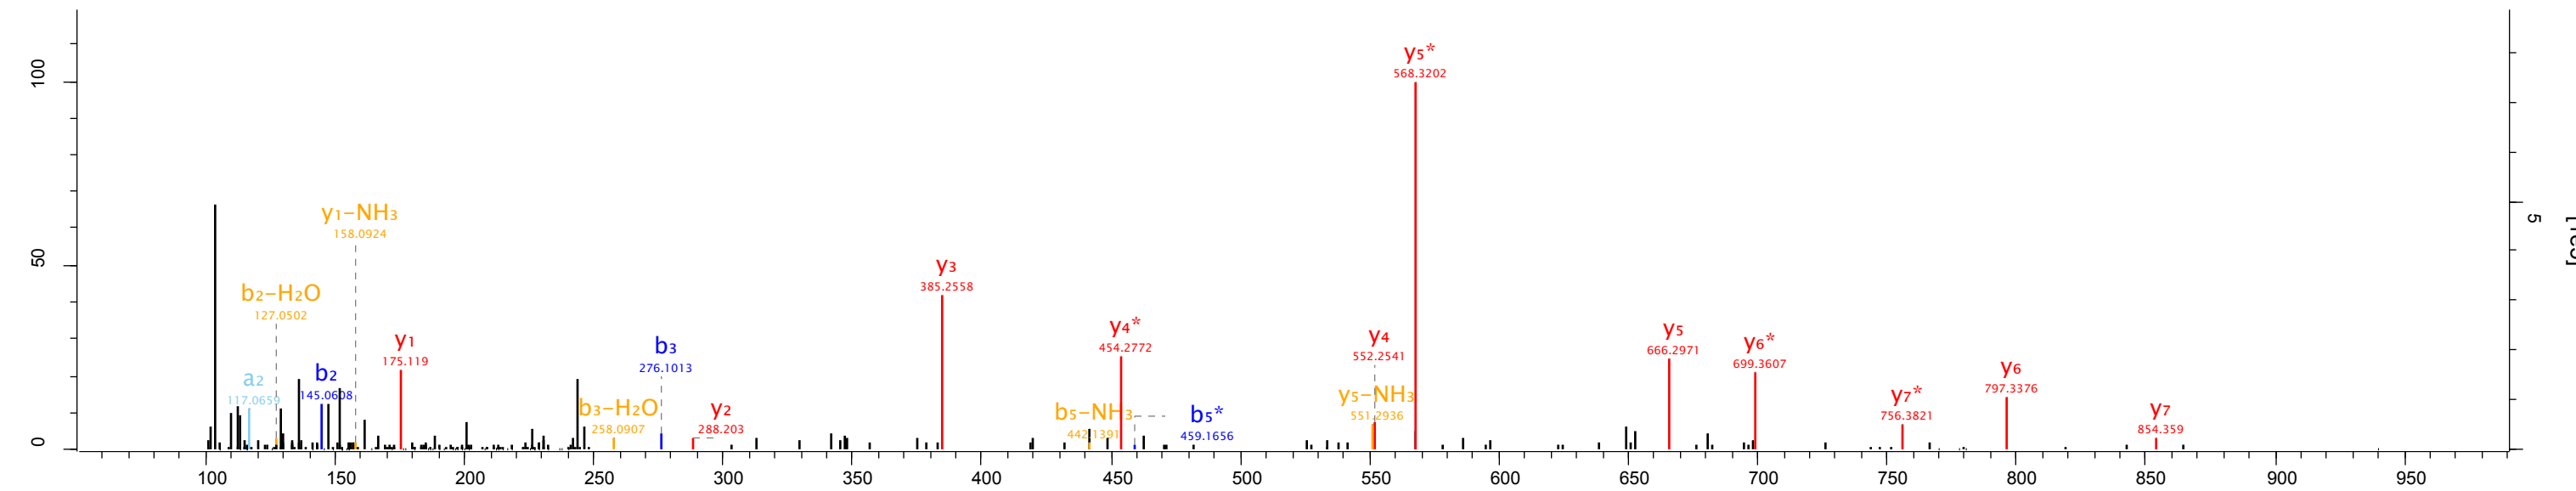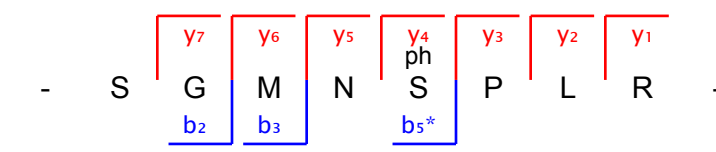

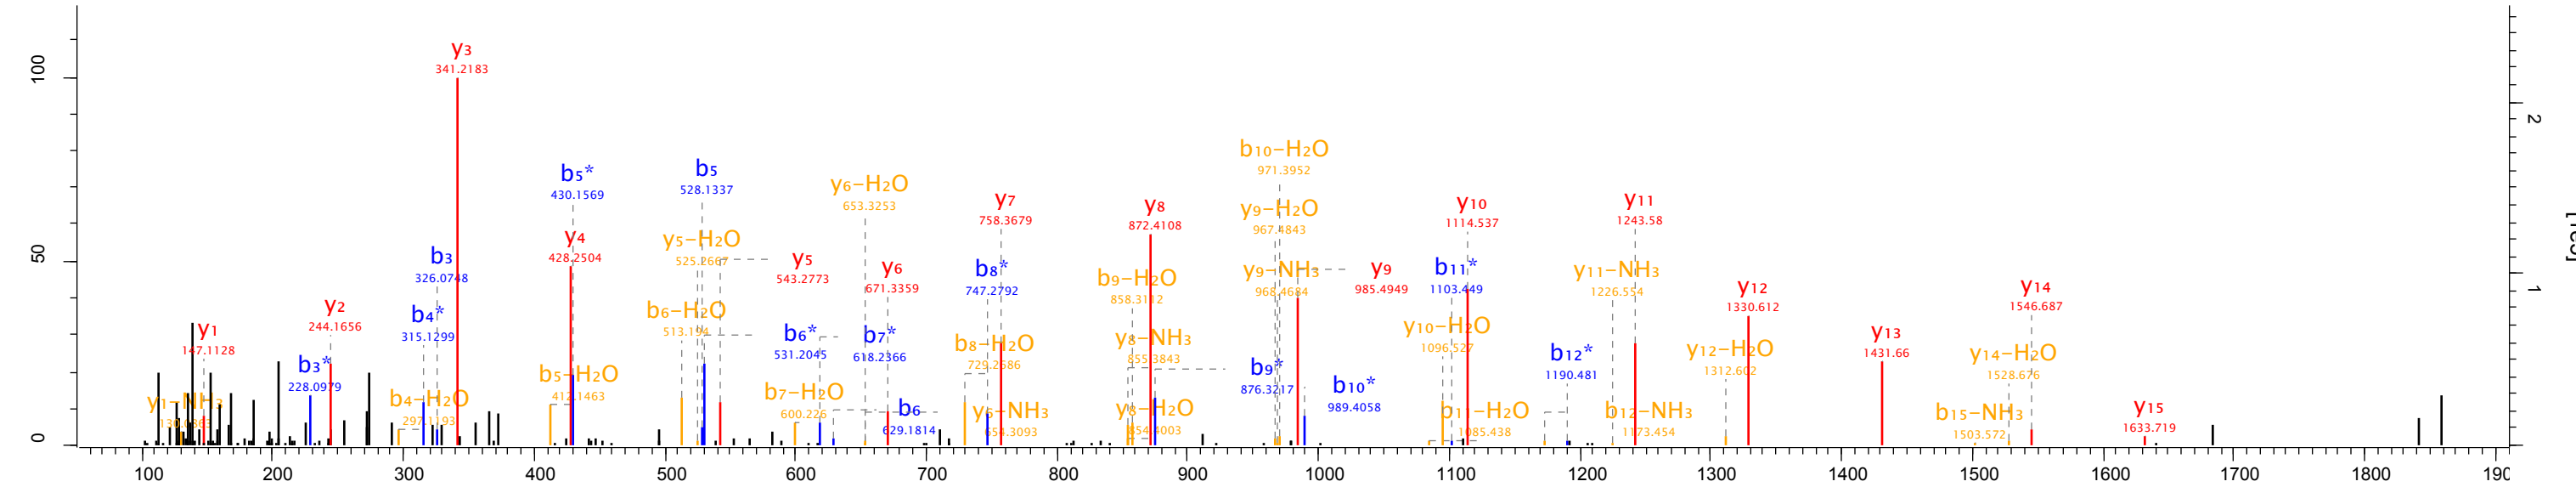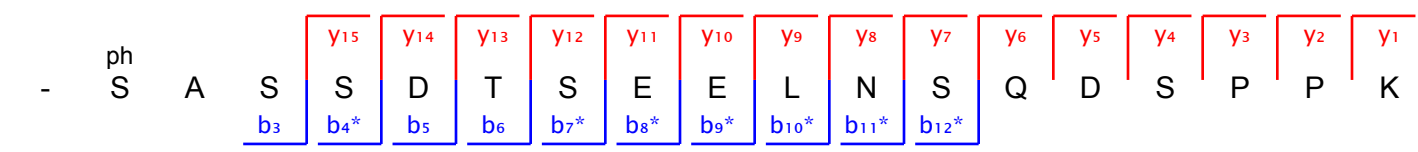

Raw file 20171215\_MaS\_33SR\_LMH\_phospho\_08 Scan 5919 Method FTMS; HCD Score 130.47 m/z 595.79 Gene names PLEC

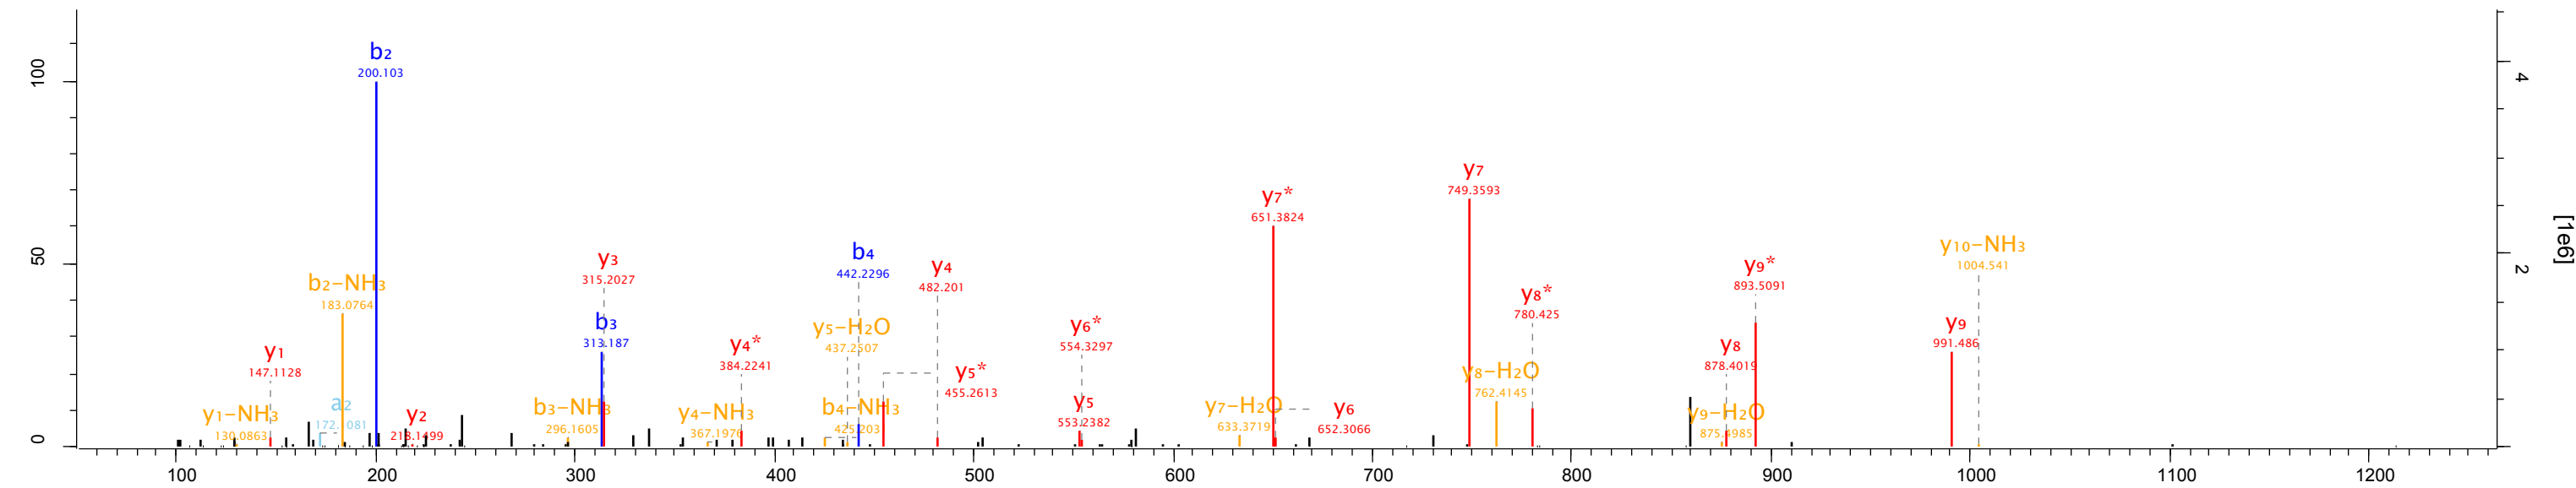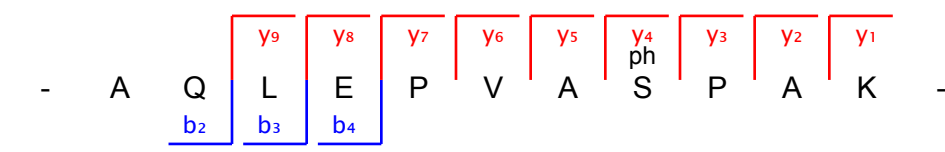

Raw file 20171215\_MaS\_33SR\_LMH\_phospho\_08 Scan 6659 Method FTMS; HCD Score 117.29 m/z 785.35 Gene names NUP214

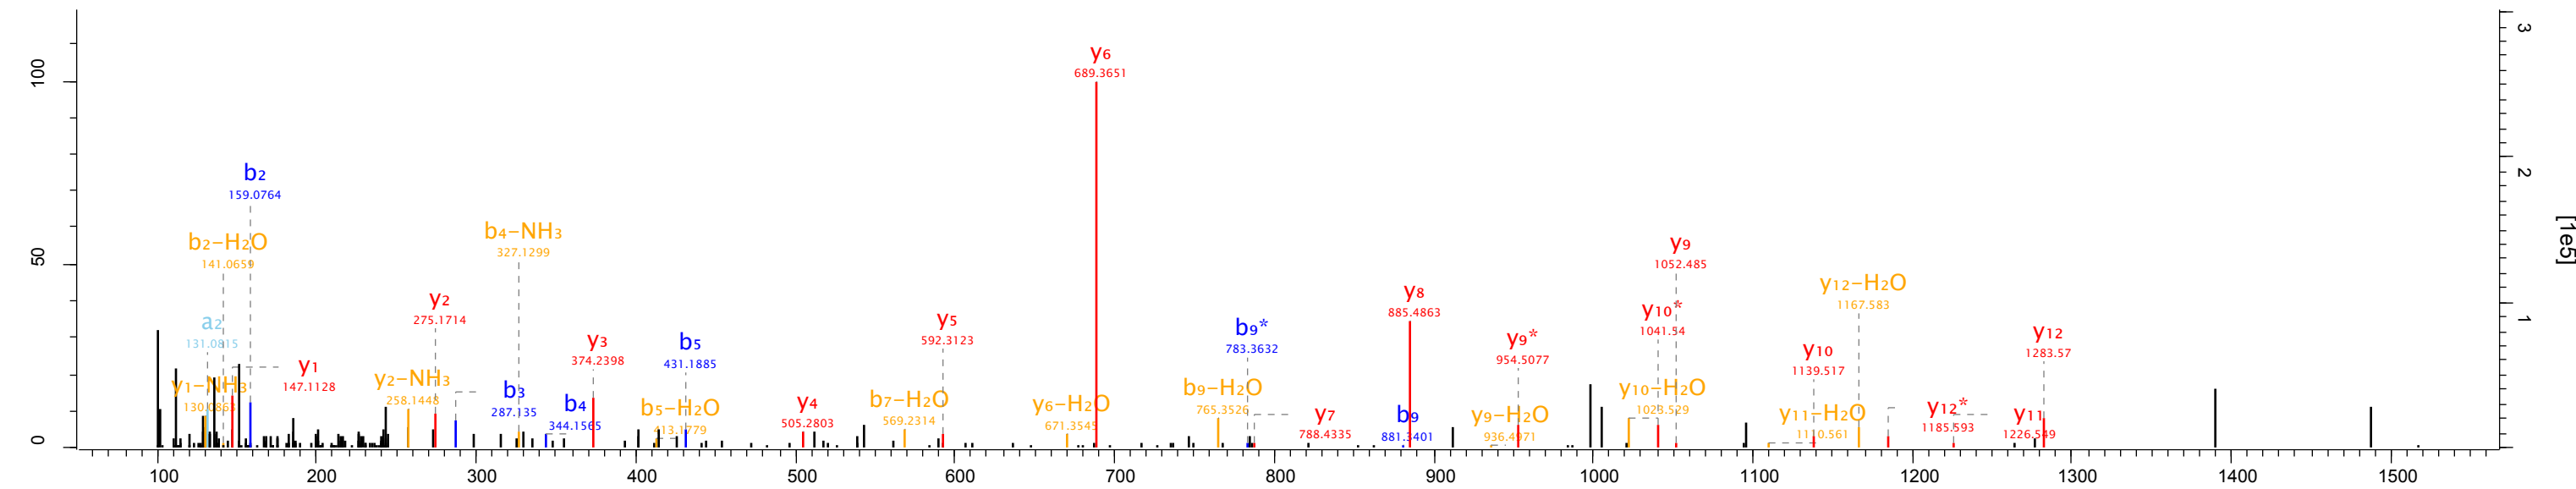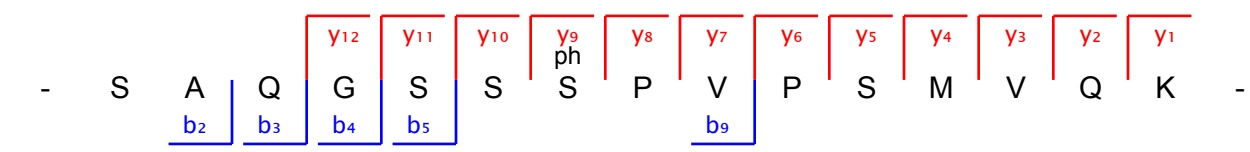

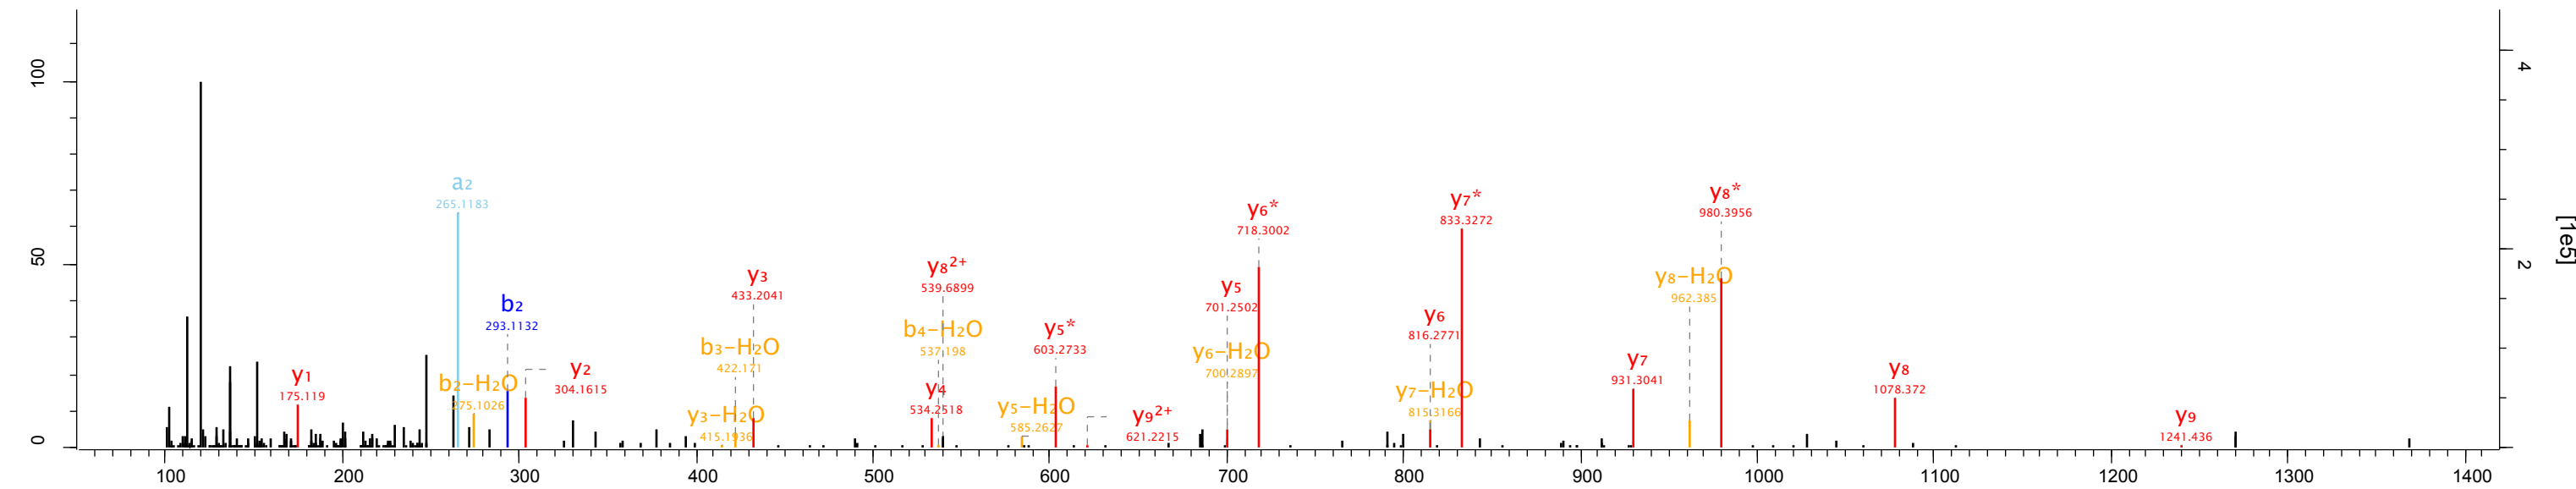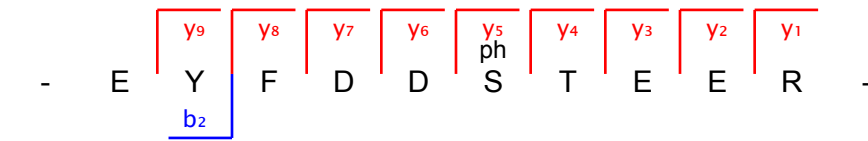

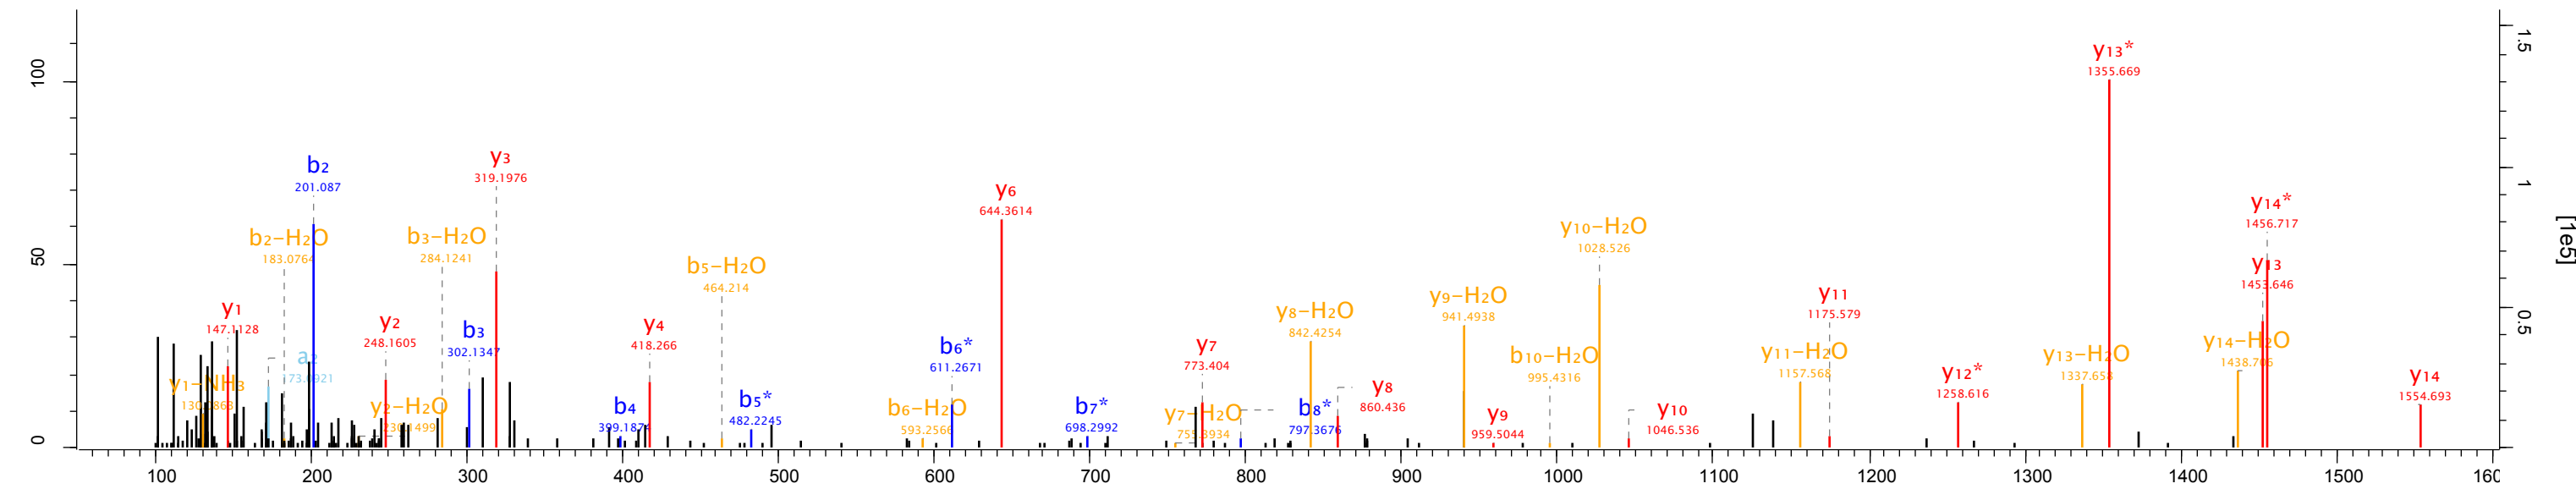

- A E T P T E S V S E P E V A T K -

b<sub>2</sub> b<sub>3</sub> b<sub>4</sub> b<sub>5</sub>\* b<sub>6</sub>\* b<sub>7</sub>\* b<sub>8</sub>\*

y<sub>14</sub> y<sub>13</sub> y<sub>12</sub>\* y<sub>11</sub> y<sub>10</sub> y<sub>9</sub> y<sub>8</sub> y<sub>7</sub> y<sub>6</sub> y<sub>4</sub> y<sub>3</sub> y<sub>2</sub> y<sub>1</sub>

ph



Raw file 20171215\_MaS\_33SR\_LMH\_phospho\_08 Scan 7159 Method FTMS; HCD Score 177.69 m/z 983.96 Gene names DYNC1LI1

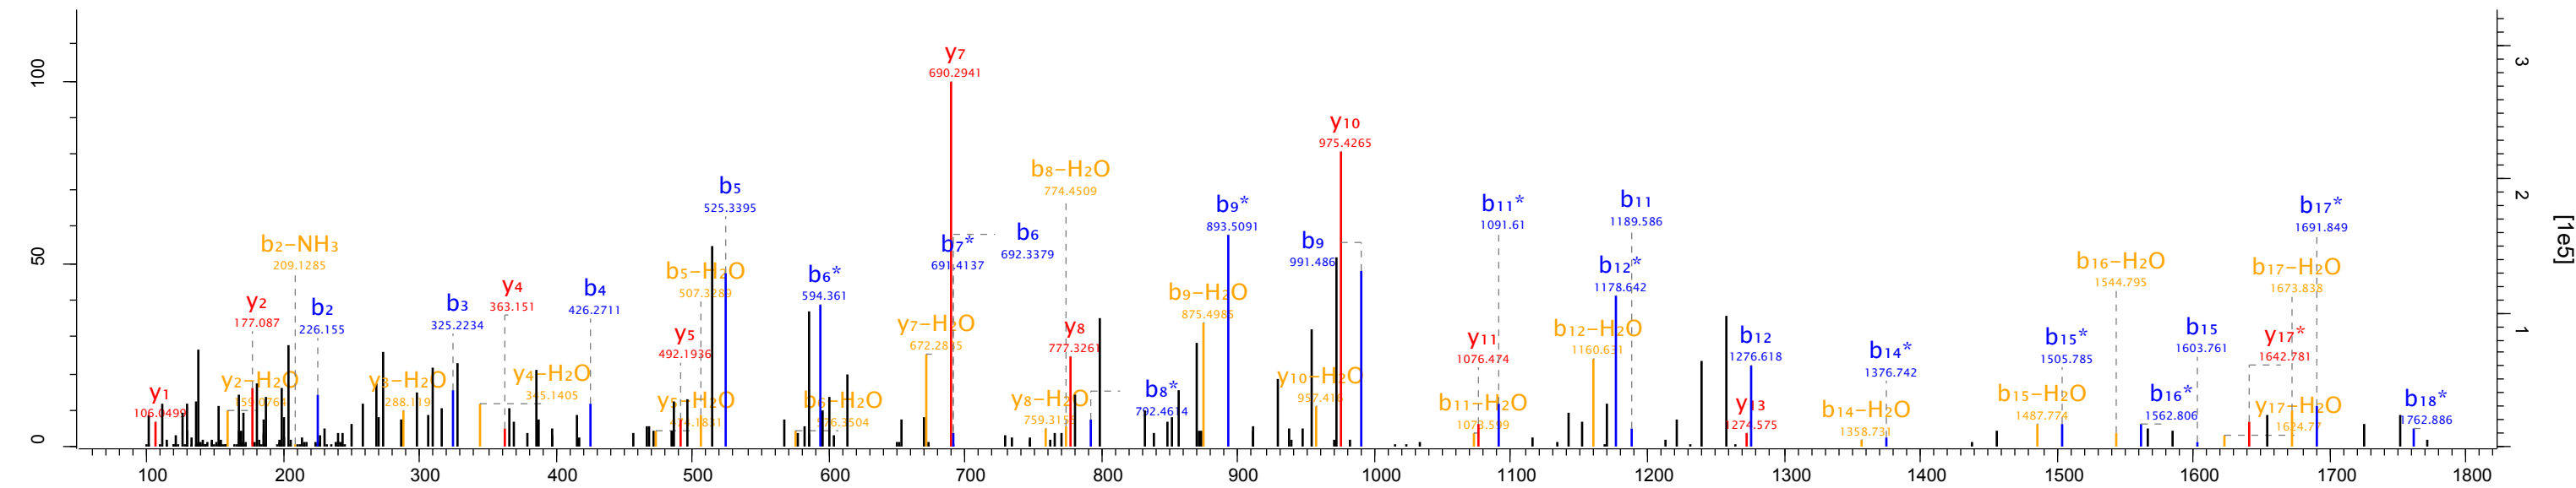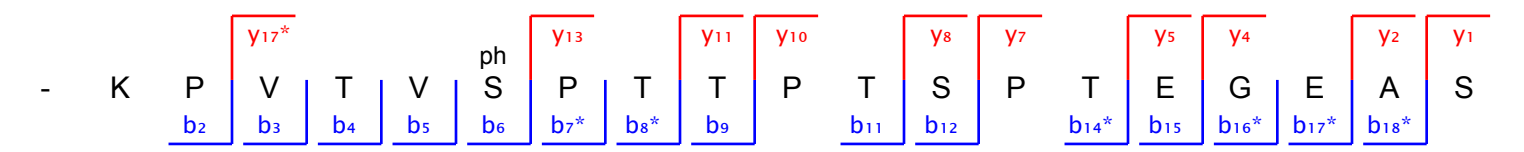

Raw file 20171215\_MaS\_33SR\_LMH\_phospho\_08 Scan 8209 Method FTMS; HCD Score 92.86 m/z 575.77 Gene names ZNF609

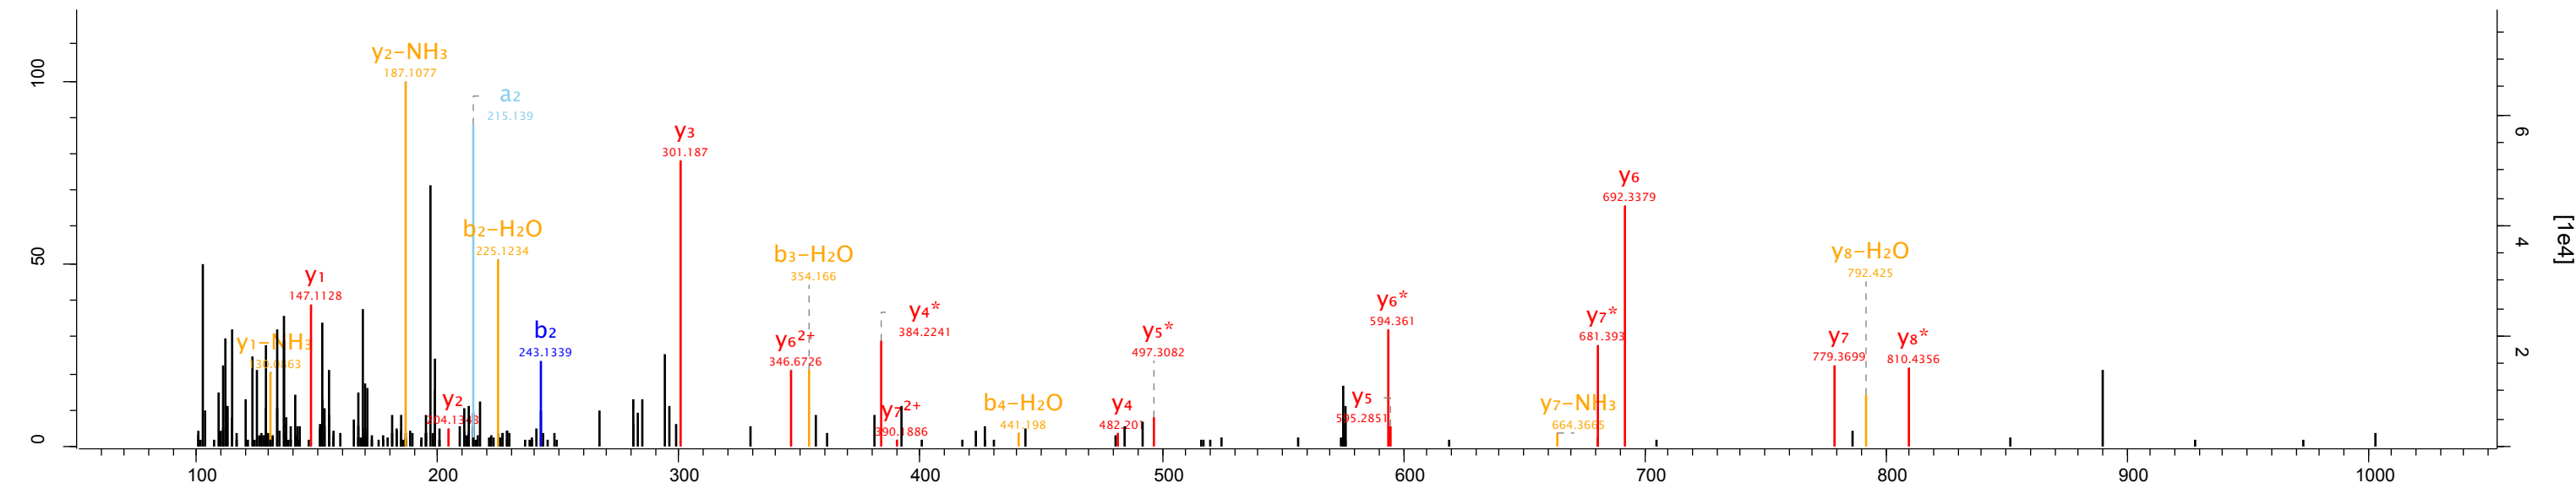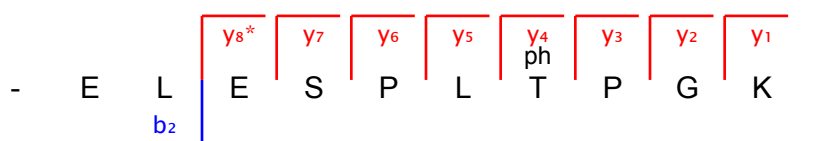

Raw file 20171215\_MaS\_33SR\_LMH\_phospho\_08 Scan 8309 Method FTMS; HCD Score 97.8 m/z 662.3 Gene names NUP88

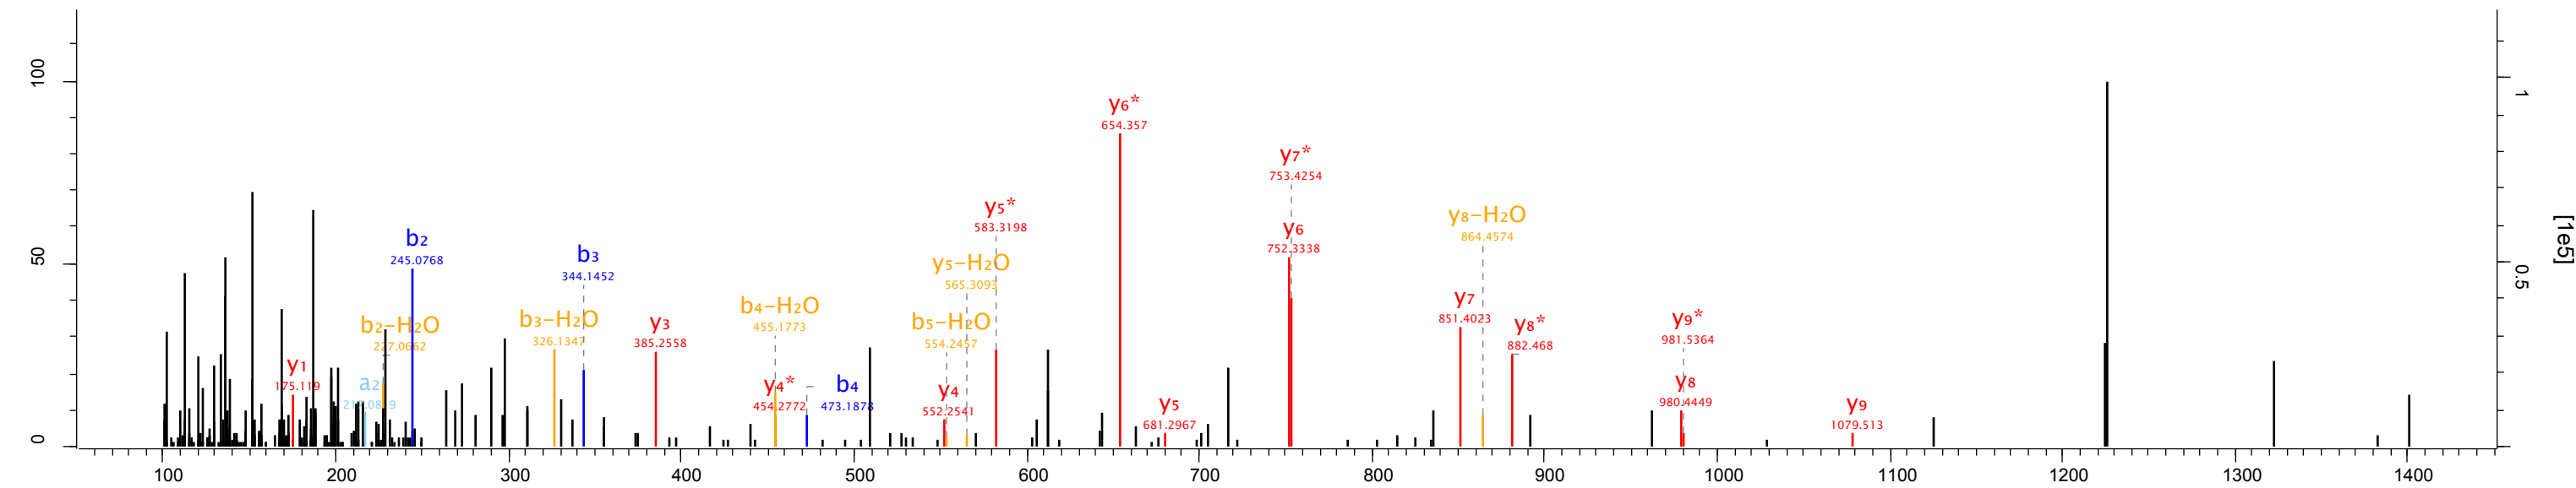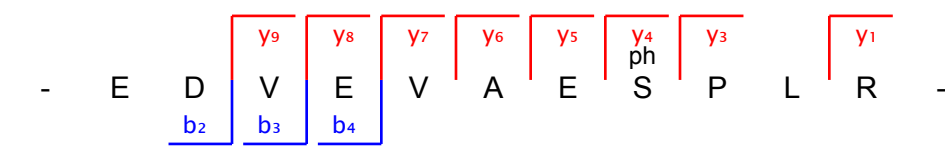

Raw file 20171215\_MaS\_33SR\_LMH\_phospho\_08 Scan 9679 Method FTMS; HCD Score 49.48 m/z 605.26 Gene names PRRC2B

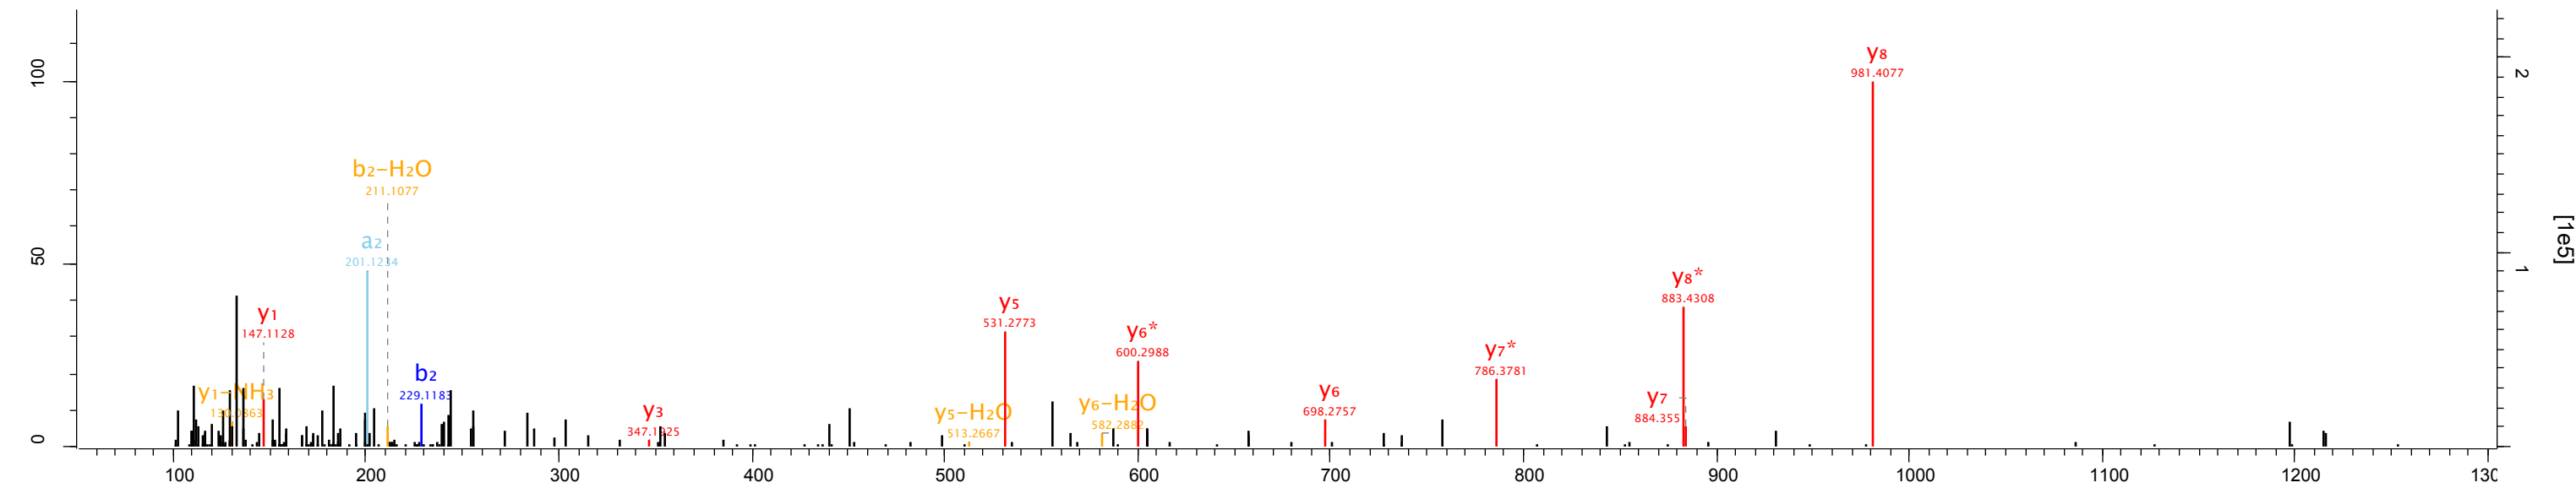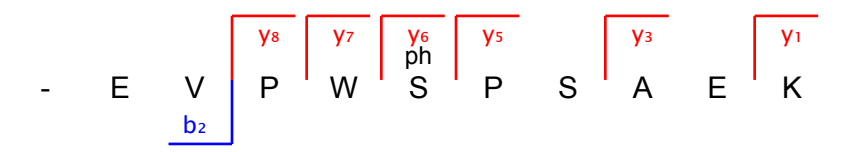

Raw file 20171215\_MaS\_33SR\_LMH\_phospho\_09 Scan 2649 Method FTMS; HCD Score 62.69 m/z 560.76 Gene names CSNK1E

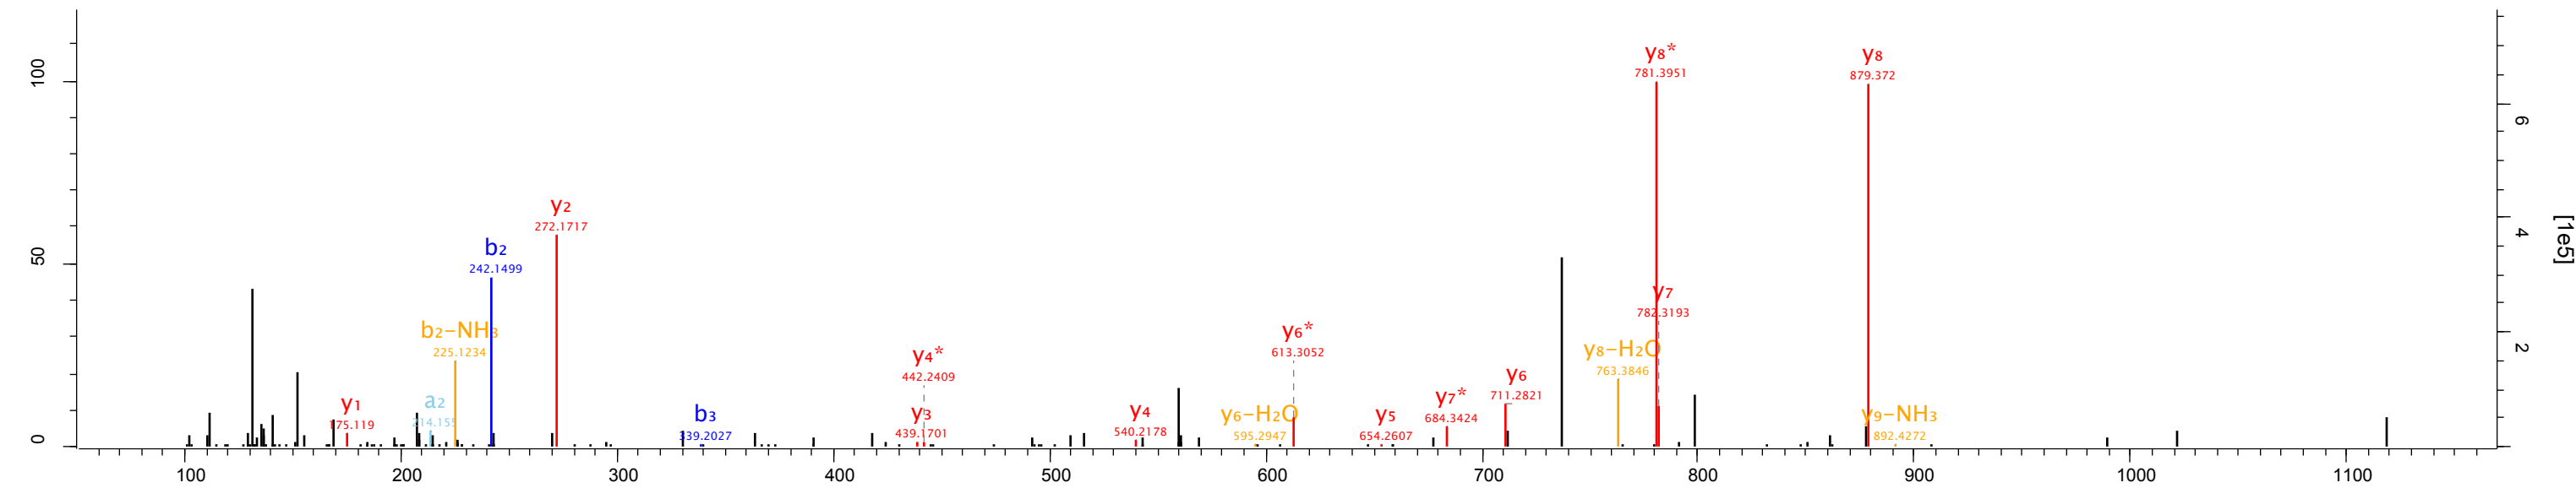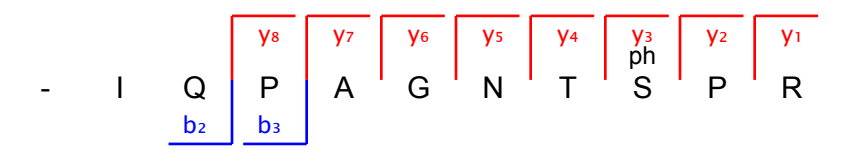

Raw file 20171215\_MaS\_33SR\_LMH\_phospho\_09 Scan 2789 Method FTMS; HCD Score 139.34 m/z 630.8 Gene names MCM2

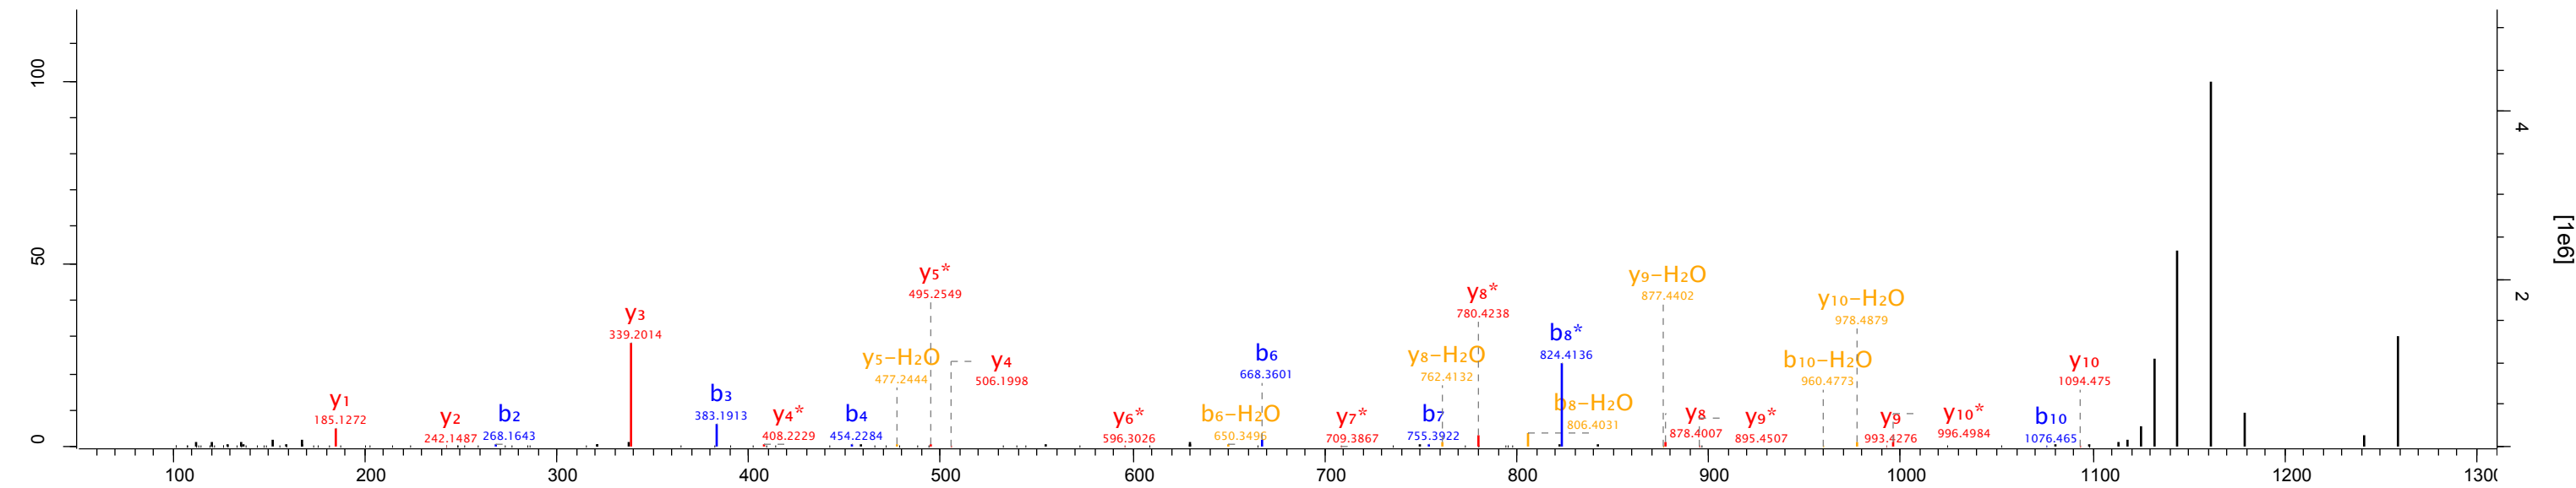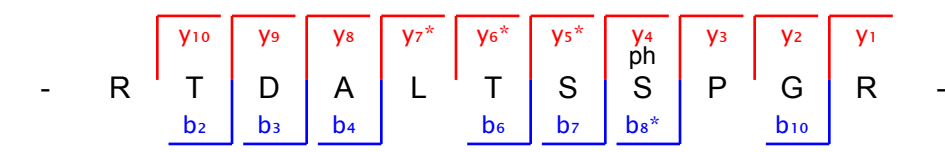

Raw file 20171215\_MaS\_33SR\_LMH\_phospho\_09 Scan 2849 Method FTMS; HCD Score 41.4 m/z 463.2 Gene names ZNF622

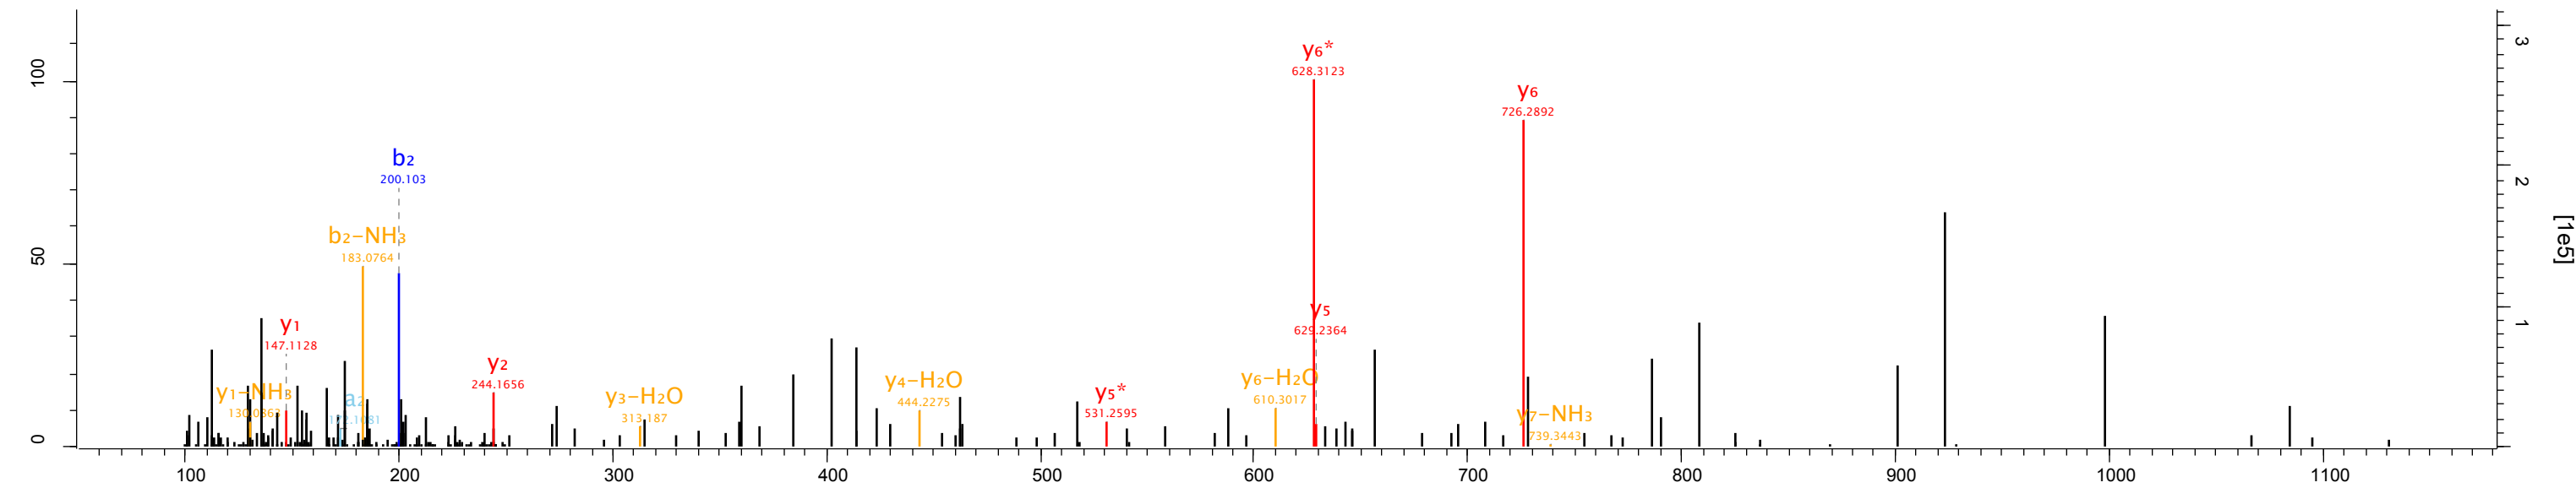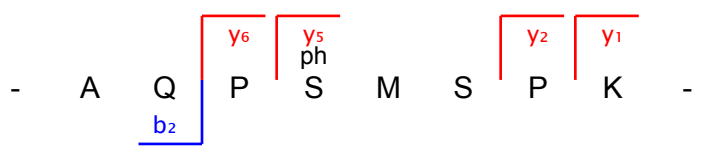

Raw file 20171215\_MaS\_33SR\_LMH\_phospho\_09 Scan 3879 Method FTMS; HCD Score 182.28 m/z 755.35 Gene names EEF1D

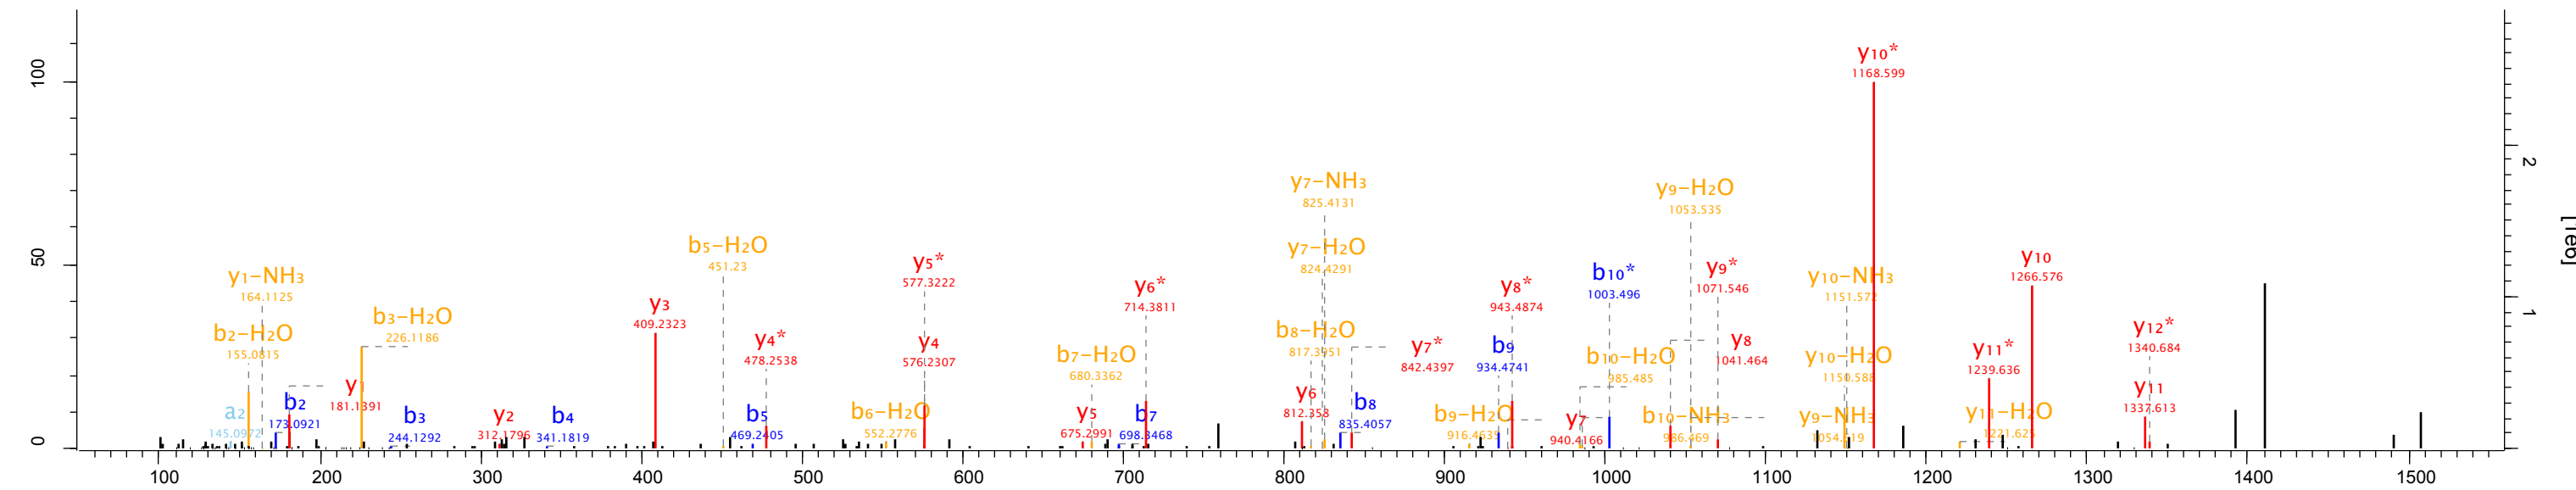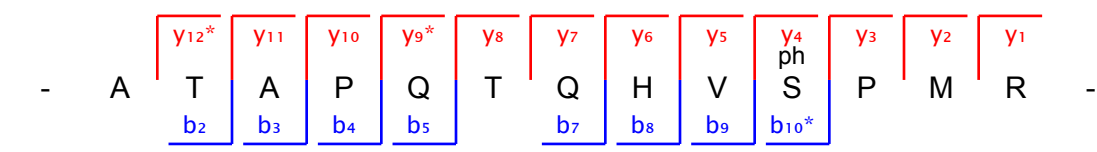



Raw file 20171215\_MaS\_33SR\_LMH\_phospho\_09 Scan 4369 Method FTMS; HCD Score 72.43 m/z 482.71 Gene names TTC4

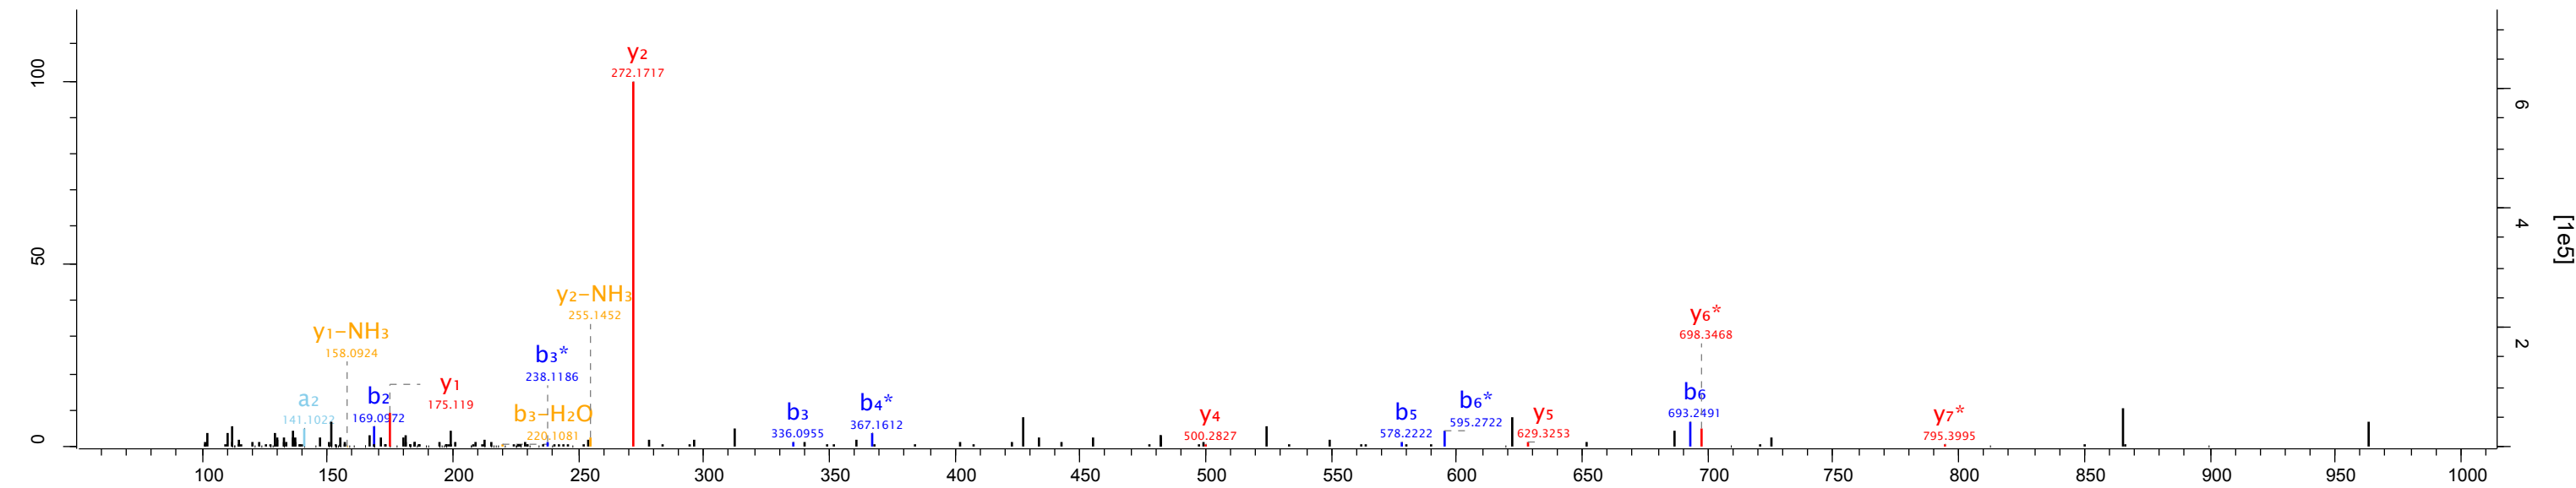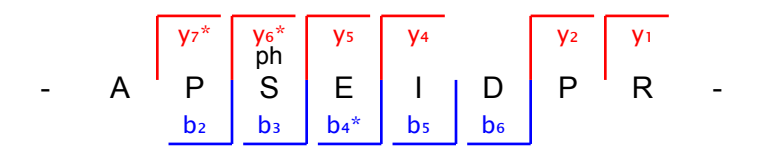

Raw file 20171215\_MaS\_33SR\_LMH\_phospho\_09 Scan 4379 Method FTMS; HCD Score 53.32 m/z 485.69 Gene names LMNA

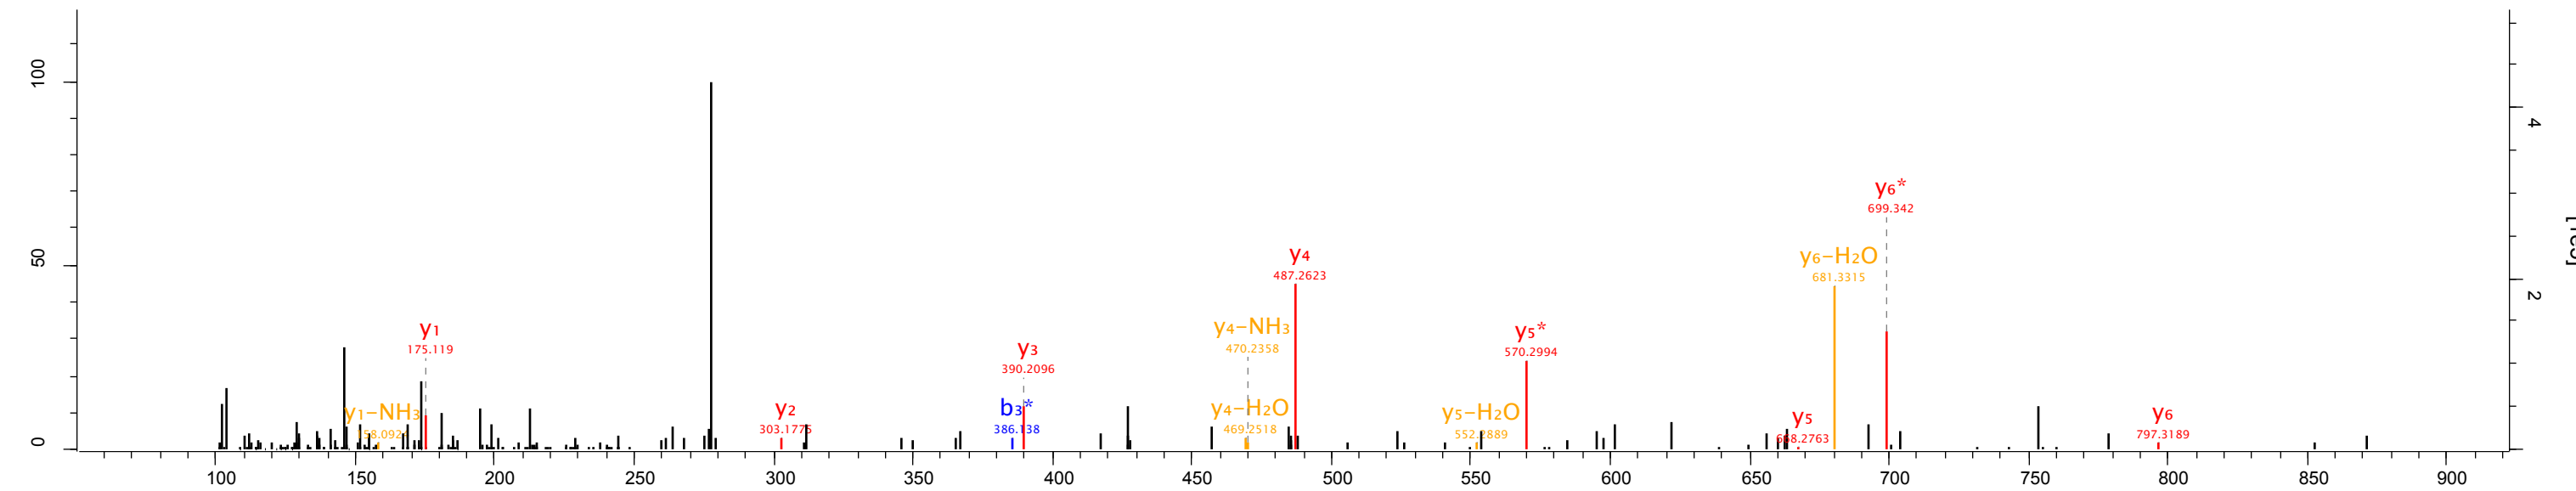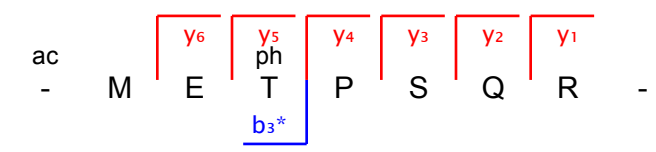

Raw file 20171215\_MaS\_33SR\_LMH\_phospho\_09 Scan 4519 Method FTMS; HCD Score 81.63 m/z 585.26 Gene names CDC20

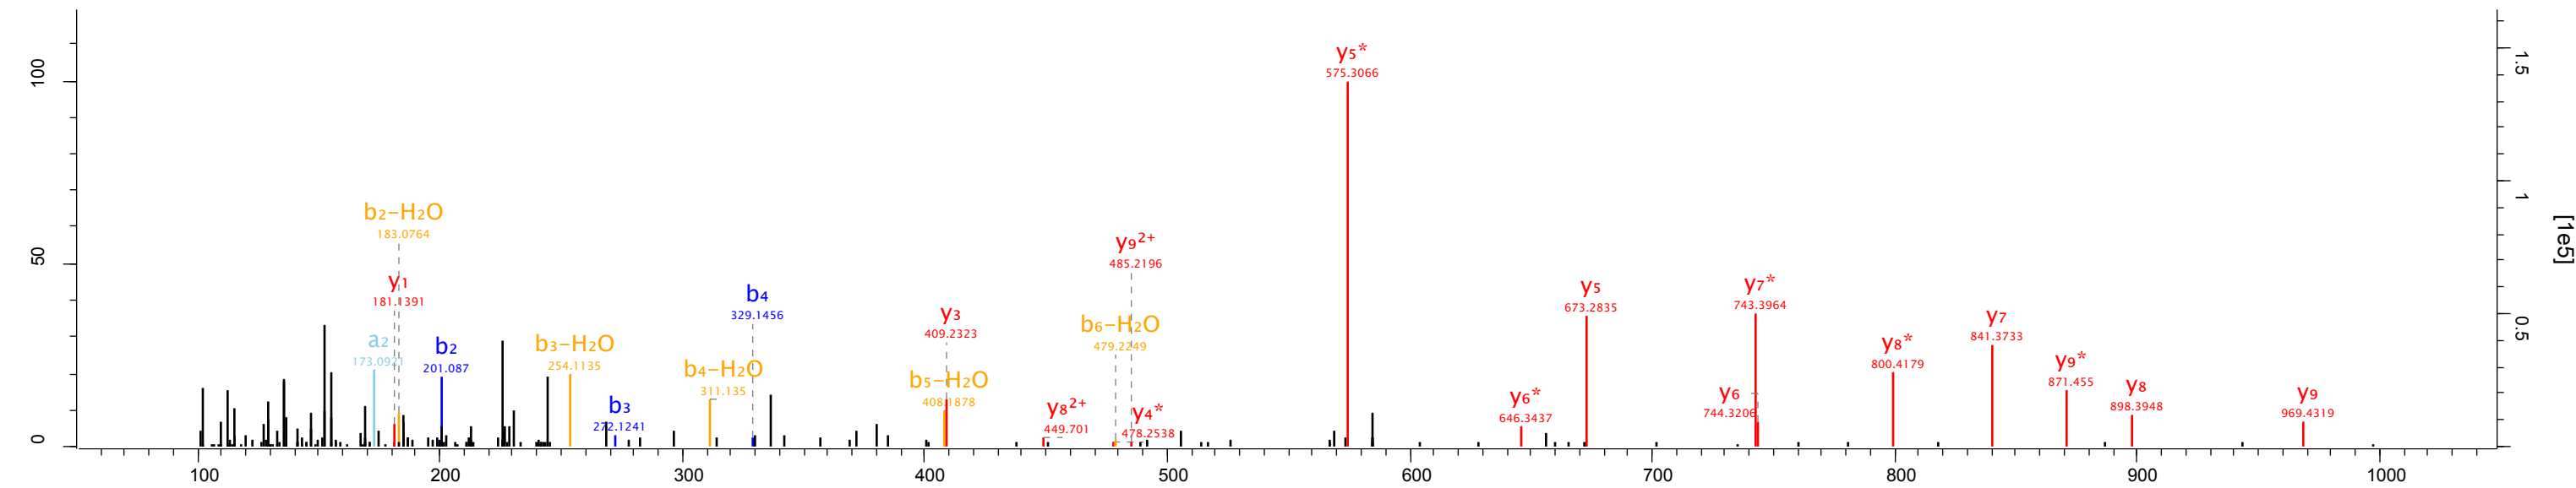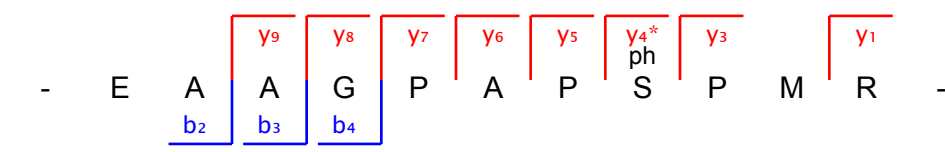

Raw file 20171215\_MaS\_33SR\_LMH\_phospho\_09 Scan 4529 Method FTMS; HCD Score 59.73 m/z 654.8 Gene names SLAIN2

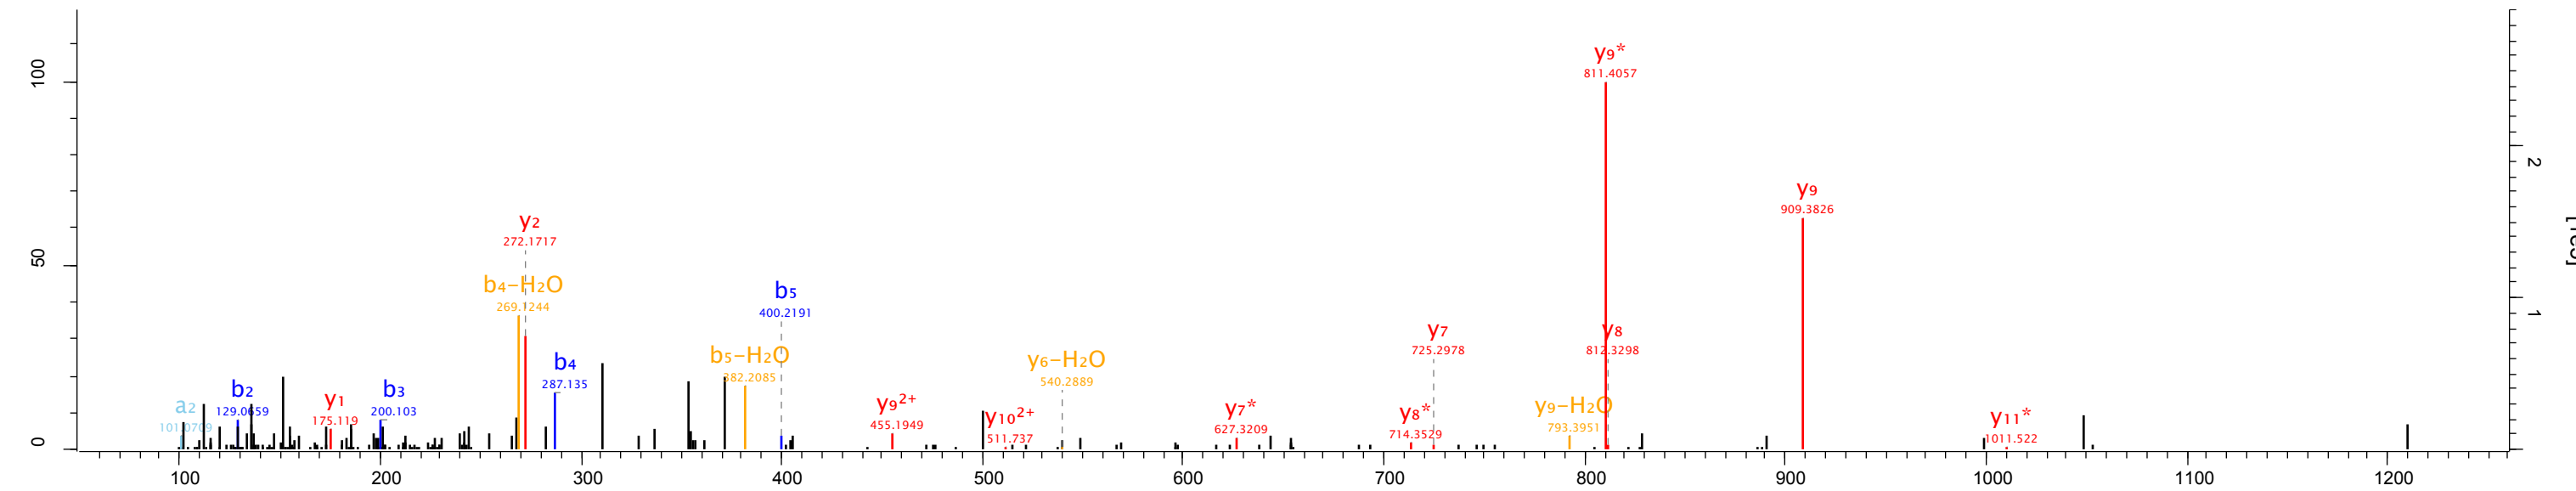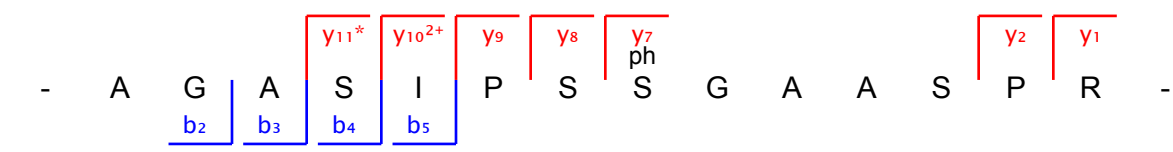

Raw file 20171215\_MaS\_33SR\_LMH\_phospho\_09 Scan 4589 Method FTMS; HCD Score 119.21 m/z 483.19 Gene names TJP2

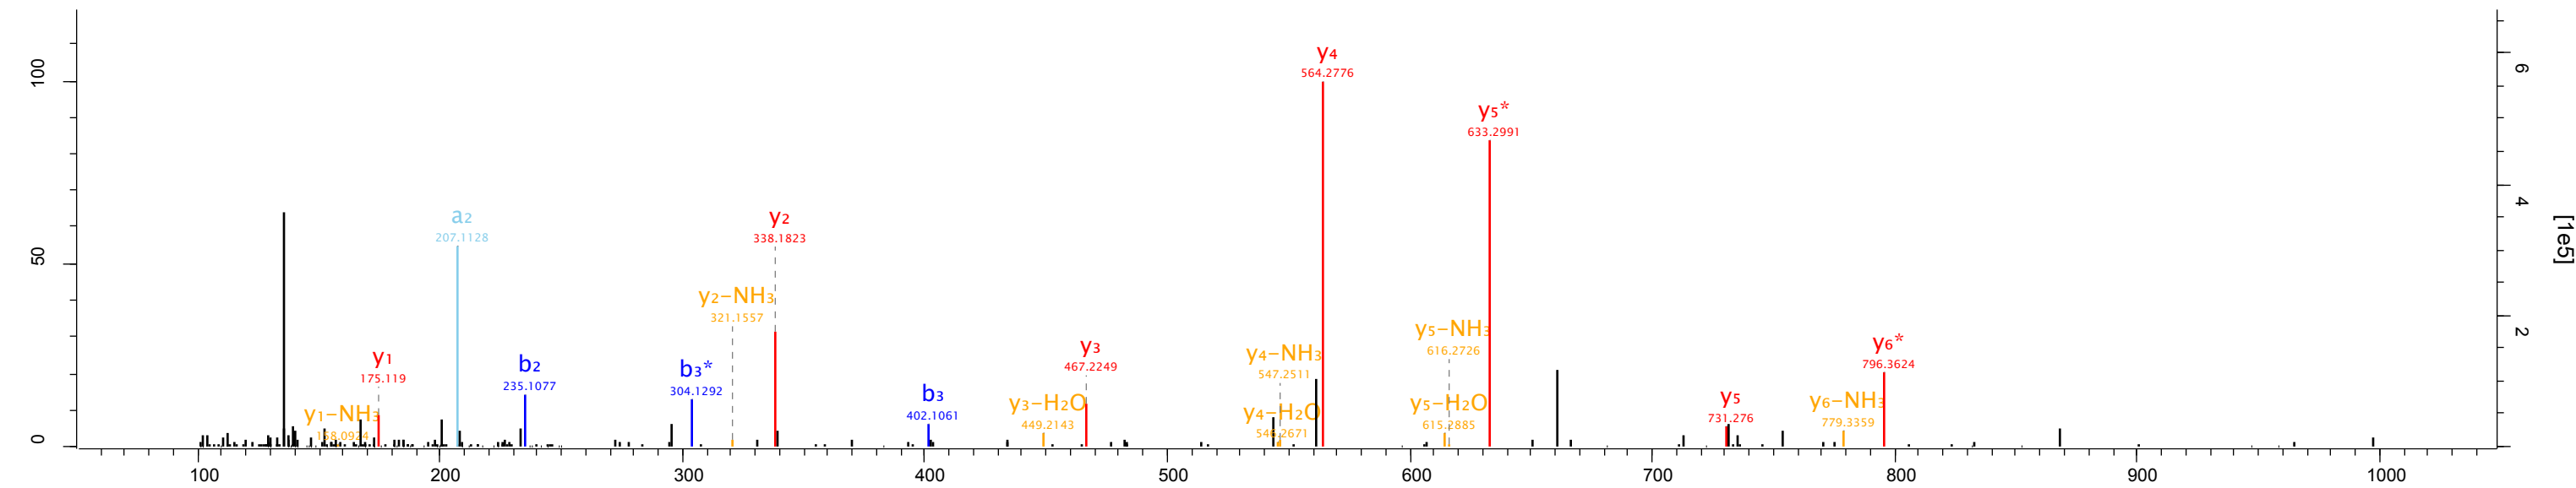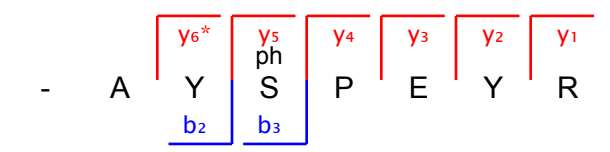

Raw file 20171215\_MaS\_33SR\_LMH\_phospho\_09 Scan 6229 Method FTMS; HCD Score 199.15 m/z 635.8 Gene names MAP7D1

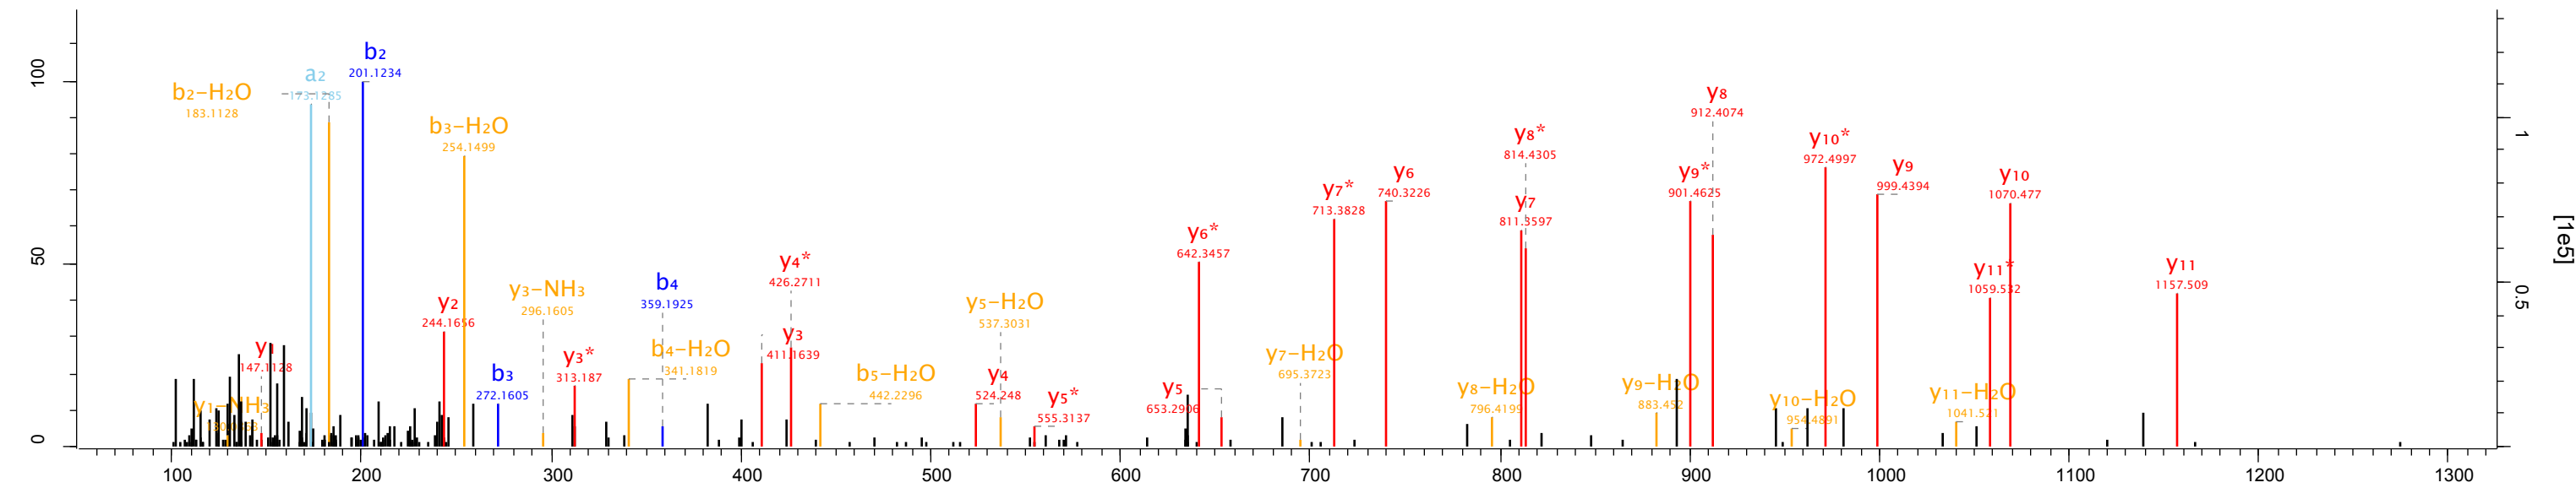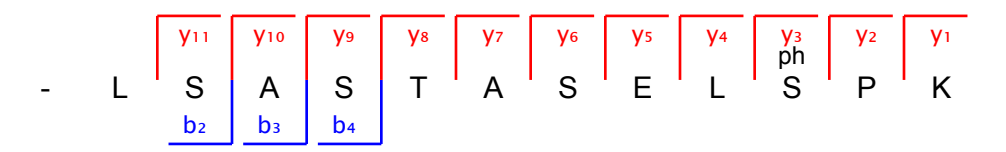

Raw file 20171215\_MaS\_33SR\_LMH\_phospho\_09 Scan 7539 Method FTMS; HCD Score 132.81 m/z 763.33 Gene names RPRD2

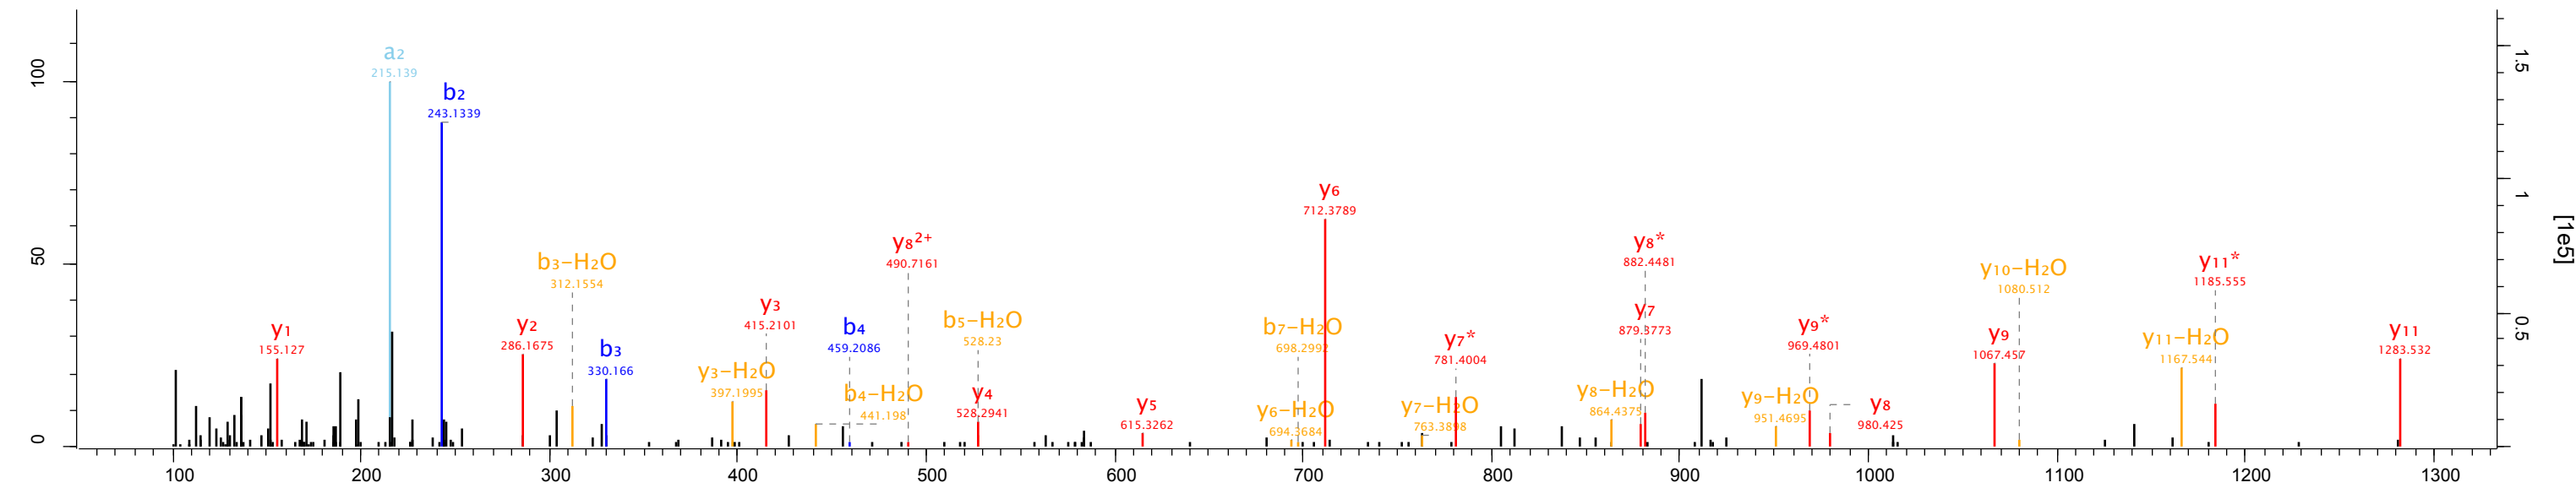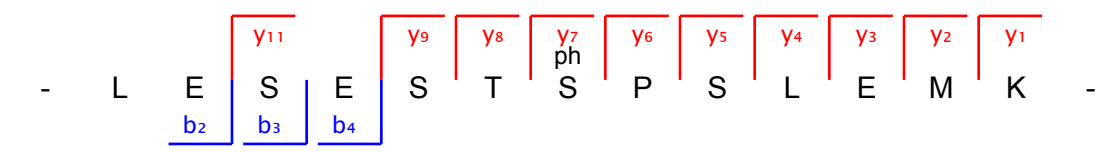

Raw file 20171215\_MaS\_33SR\_LMH\_phospho\_09 Scan 7589 Method FTMS; HCD Score 72.82 m/z 570.29 Gene names RALBP1

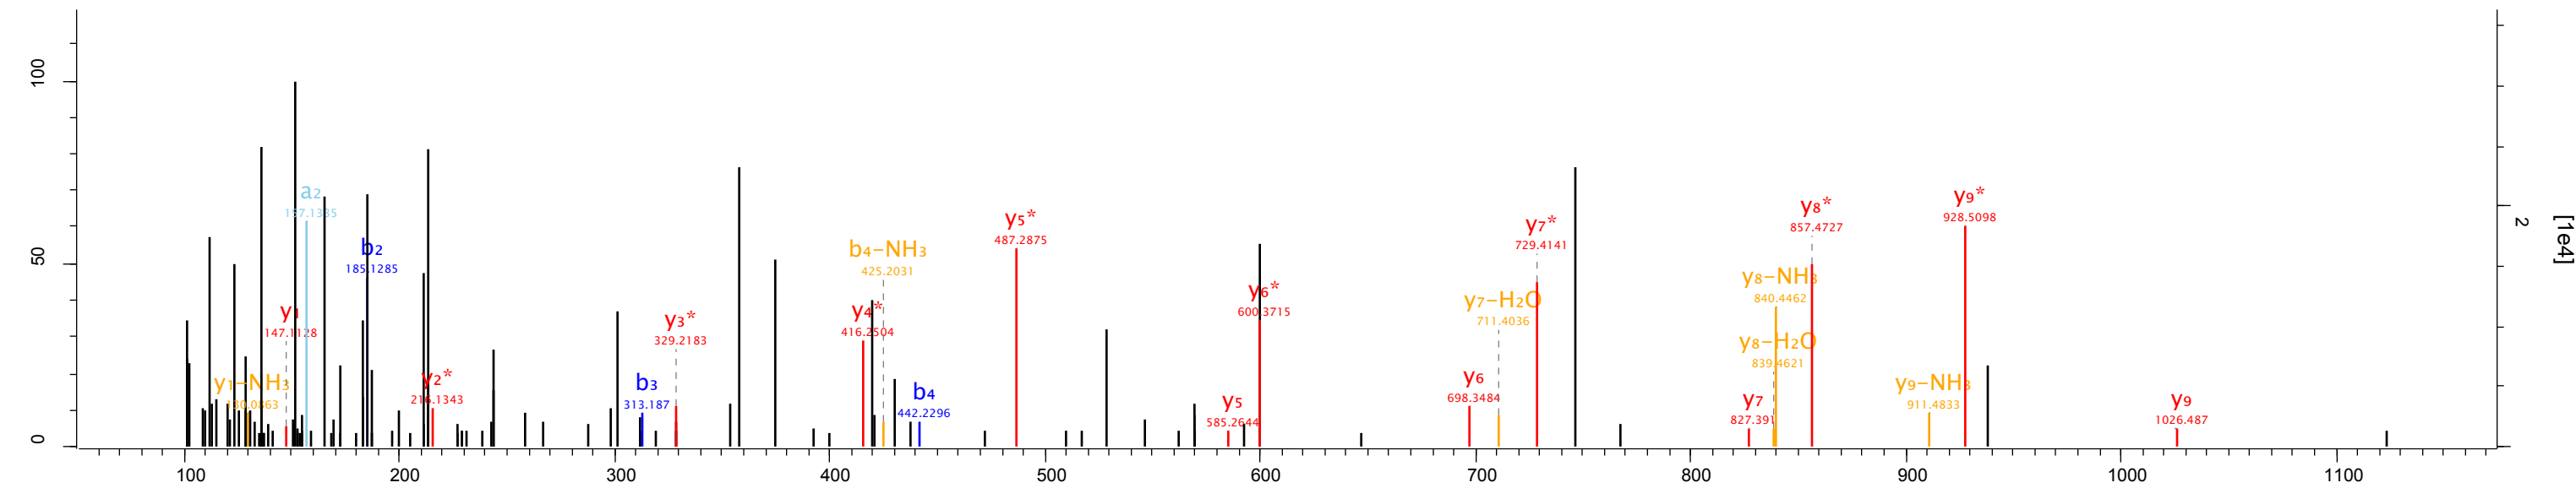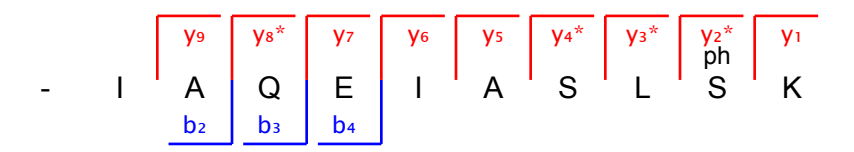



Raw file: 20171215\_MaS\_33SR\_LMH\_phospho2\_01  
 Scan: 10739 Method: FTMS; HCD Score: 142.19 m/z: 665.31 Gene names: COPA

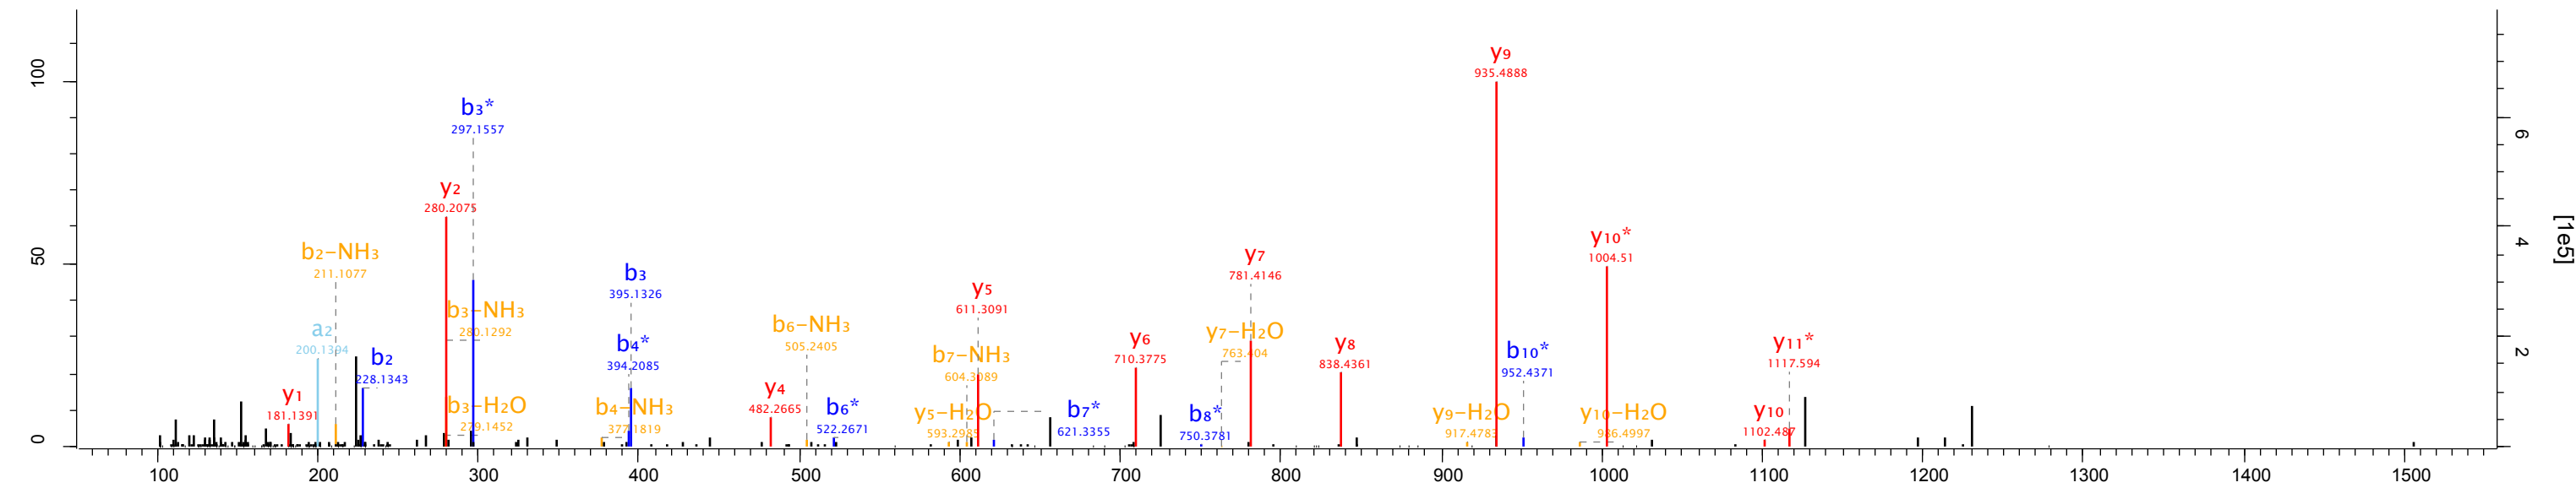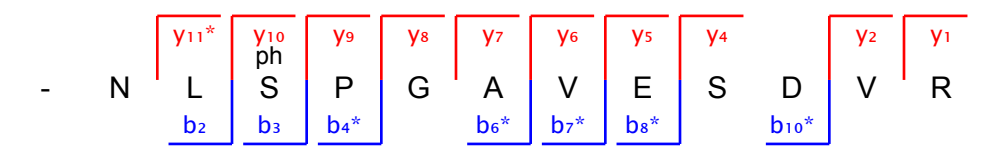

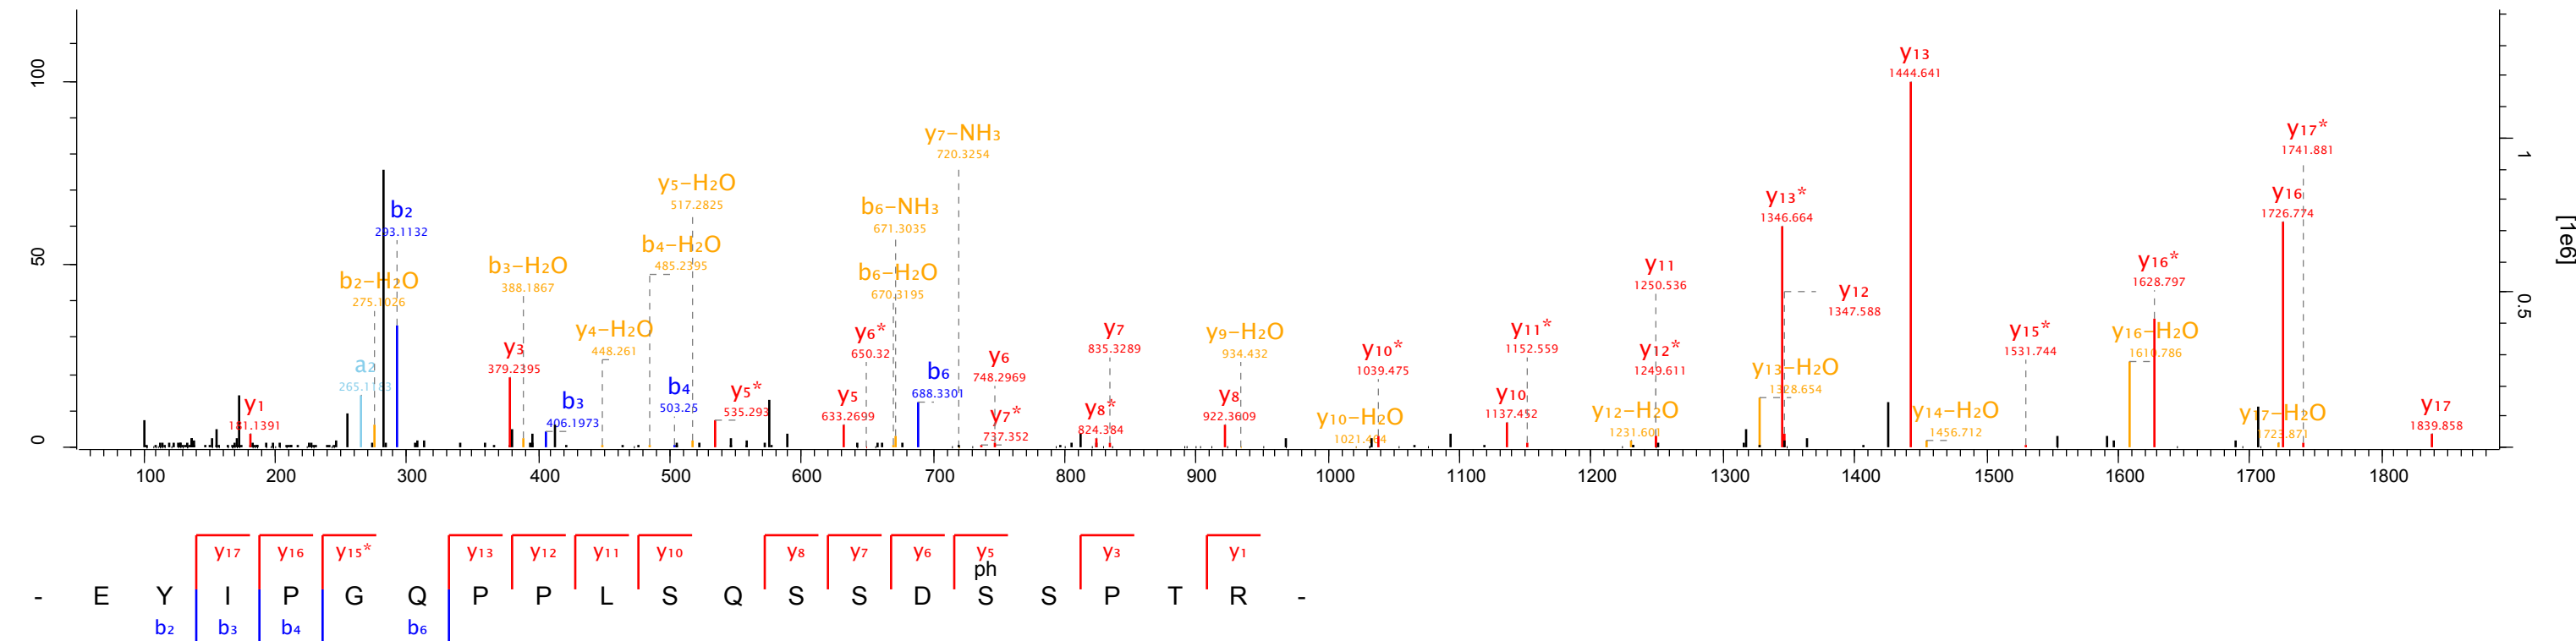

Raw file: 20171215\_MaS\_33SR\_LMH\_phospho2\_01  
 Scan: 1999 Method: FTMS; HCD Score: 154.92 m/z: 631.28 Gene names: CDKN1A

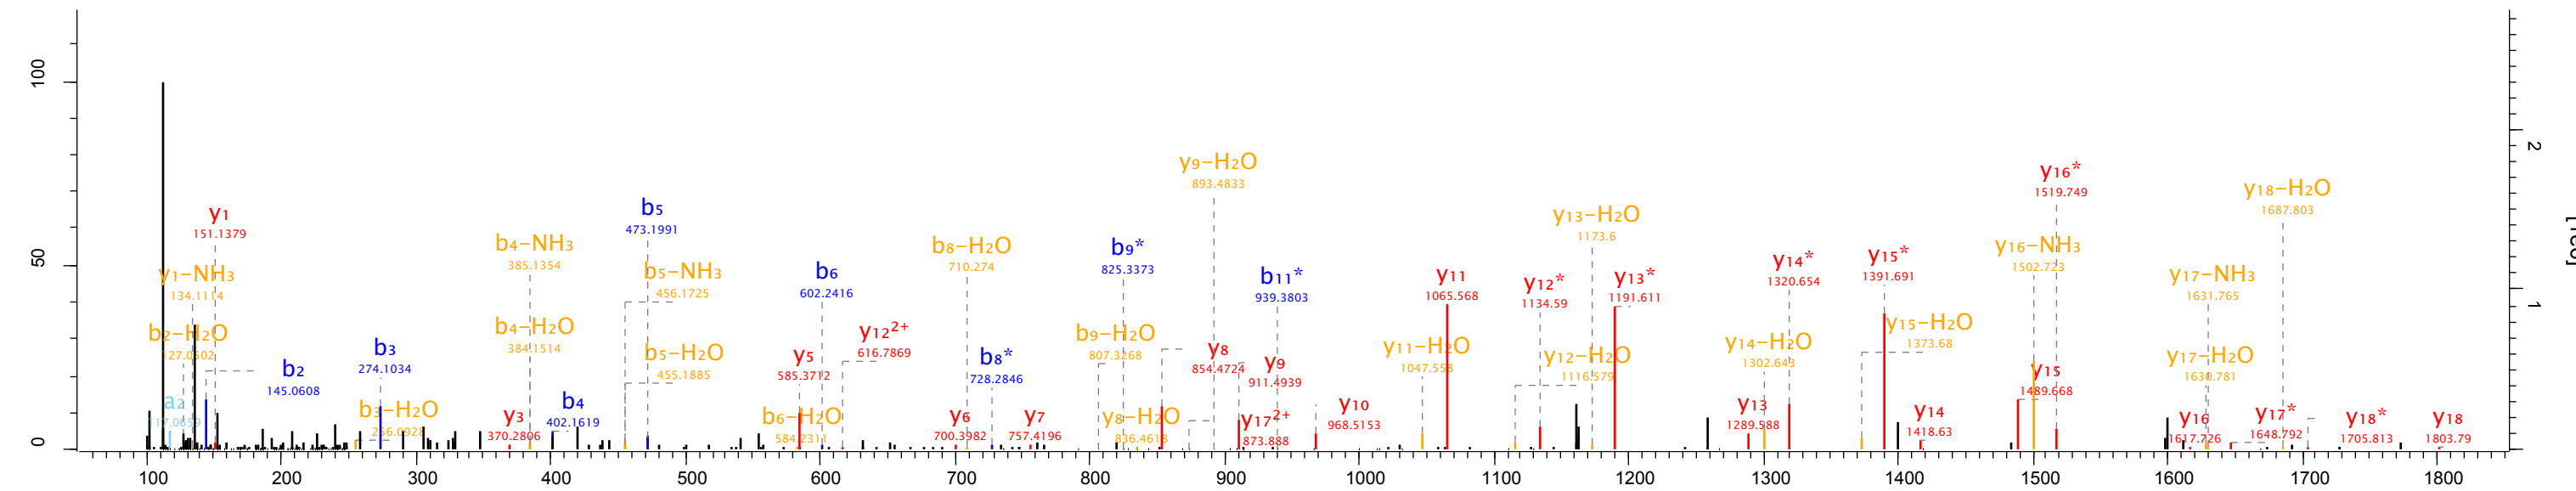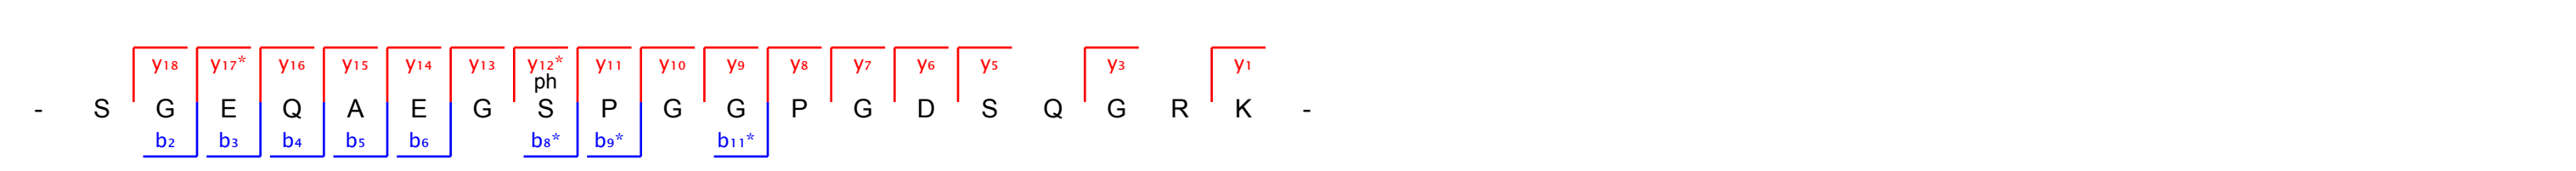

20171215\_MaS\_33SR\_LMH\_phospho2\_01 2409 FTMS; HCD 54.1 533.92 HIRIP3

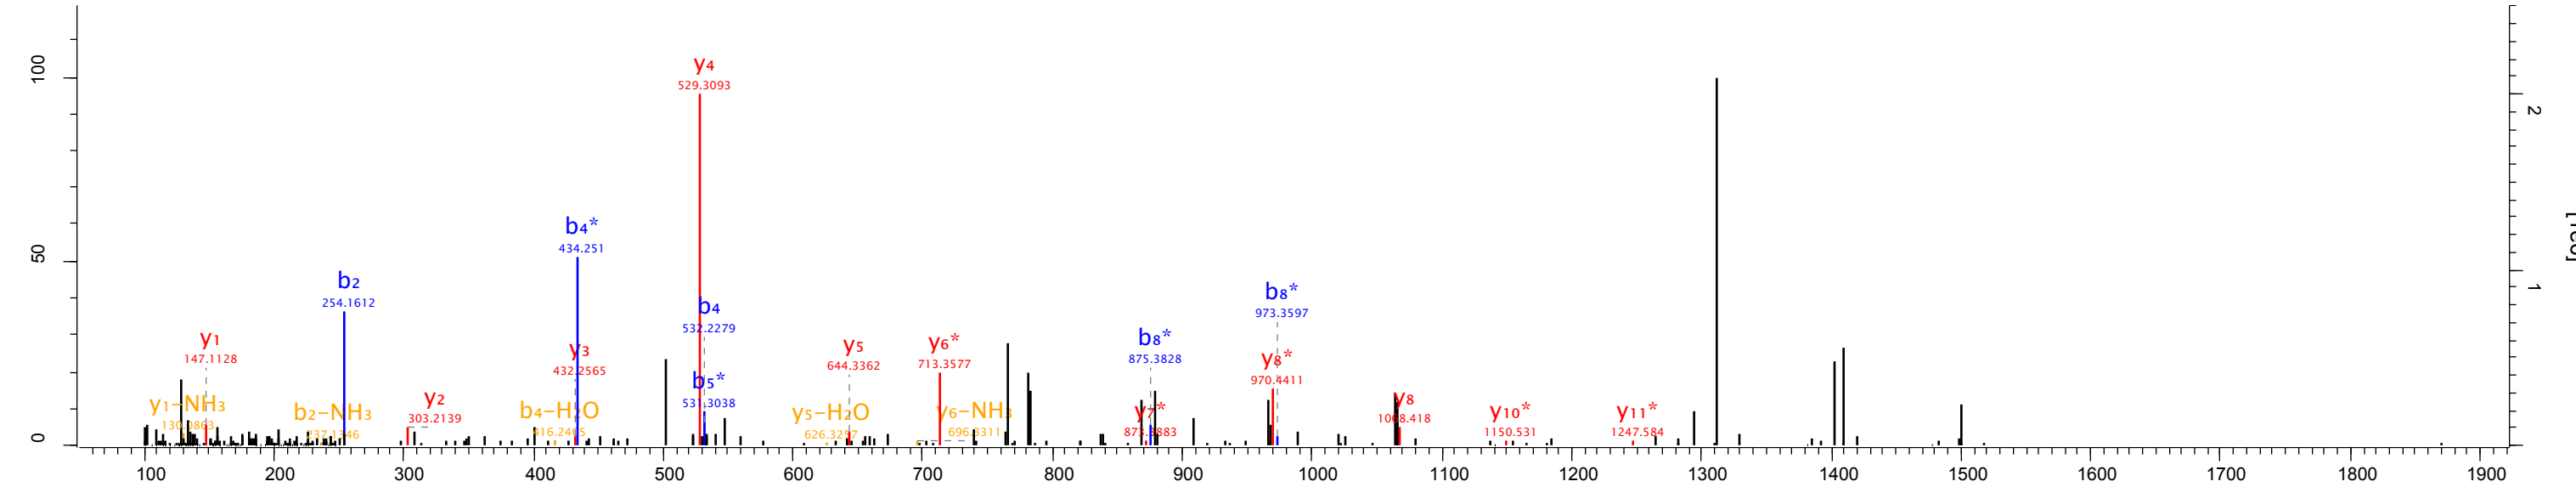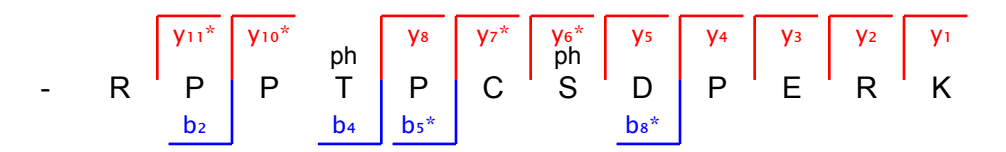

[1e6]

Raw file  
20171215\_MaS\_33SR\_LMH\_phospho2\_01

Scan 2659 Method FTMS; HCD Score 165.35 m/z 529.7 Gene names SRRM2

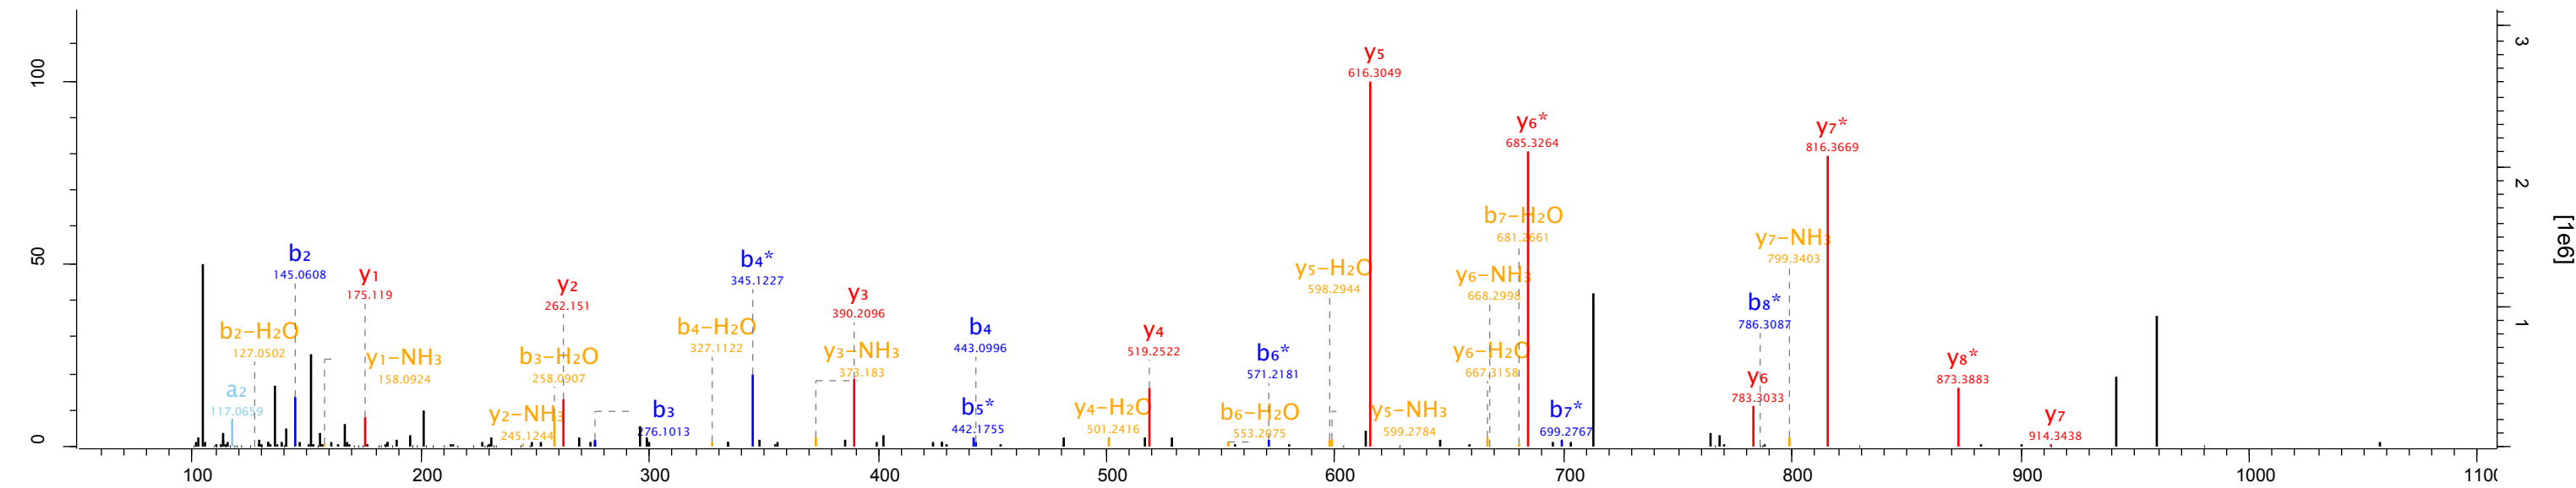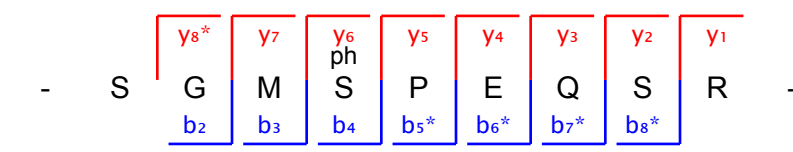

Raw file 20171215\_MaS\_33SR\_LMH\_phospho2\_01 Scan 2709 Method FTMS; HCD Score 68.68 m/z 574.29 Gene names ZC3H13

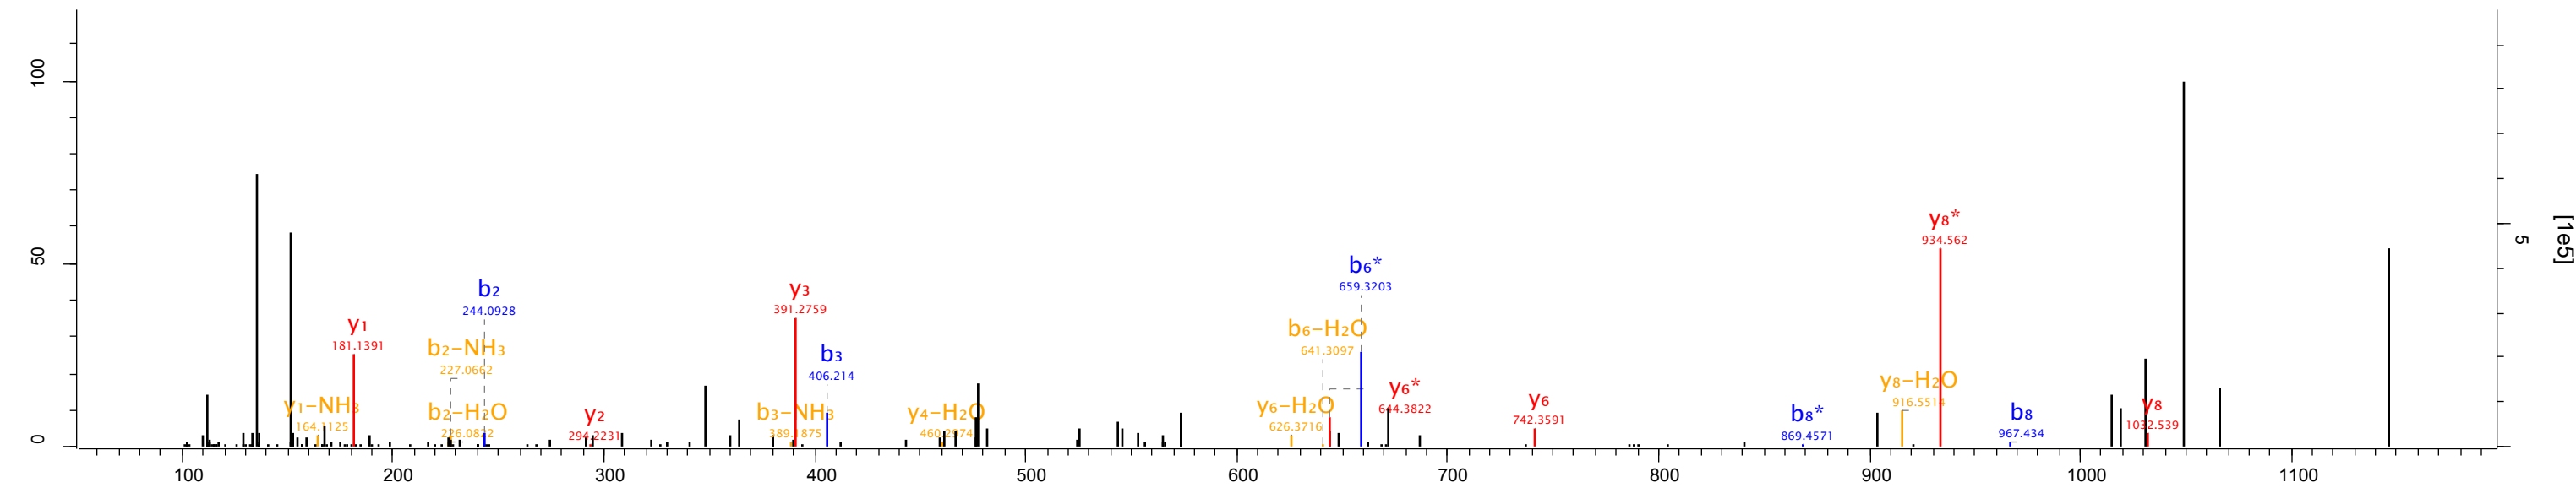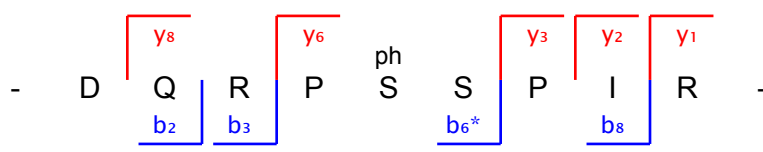

Raw file  
20171215\_MaS\_33SR\_LMH\_phospho2\_01

Scan Method Score m/z Gene names  
2969 FTMS; HCD 148.44 779.83 TGOLN2

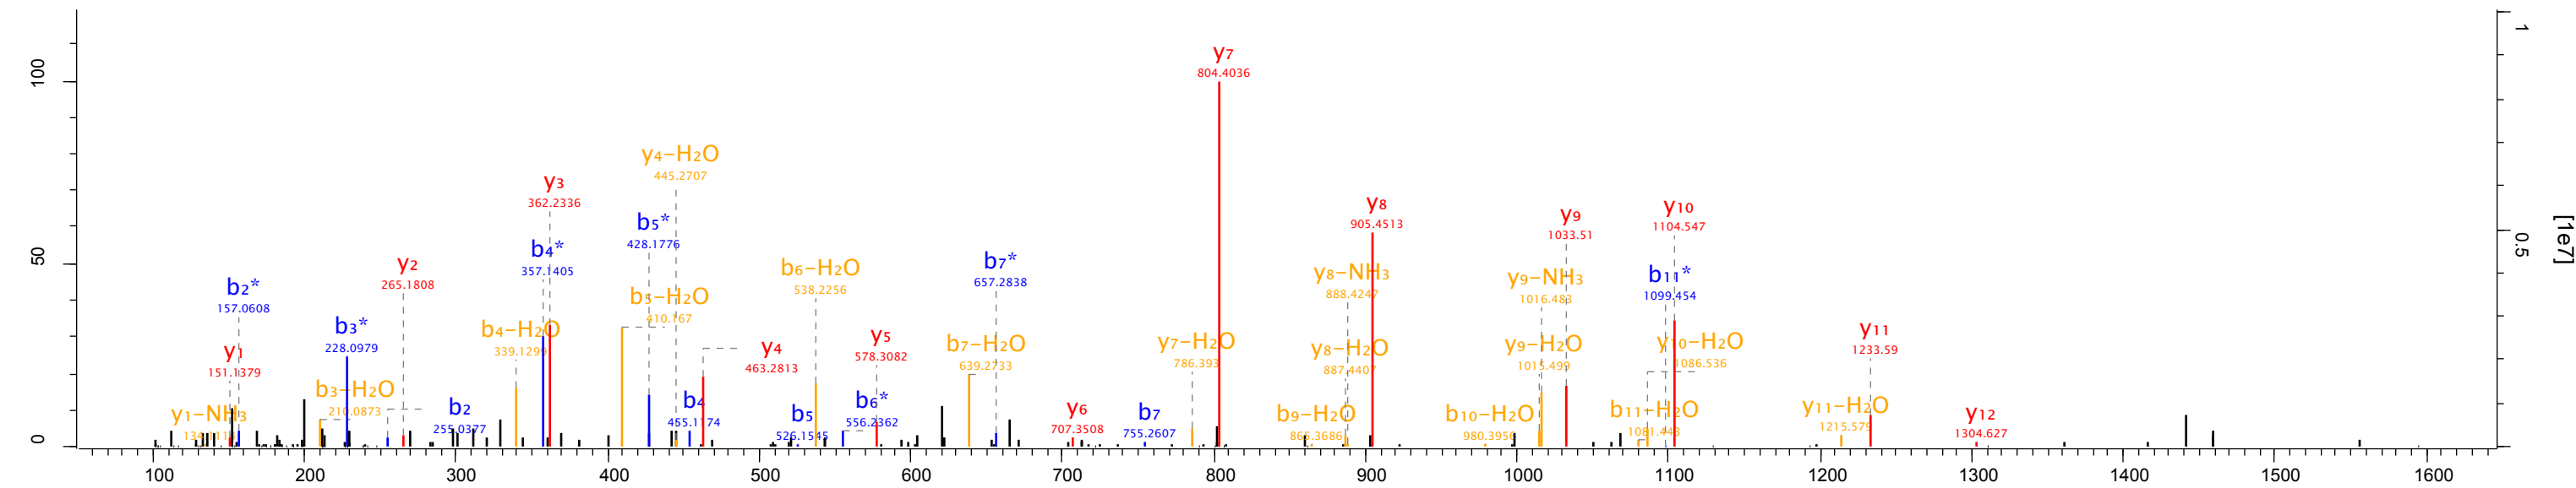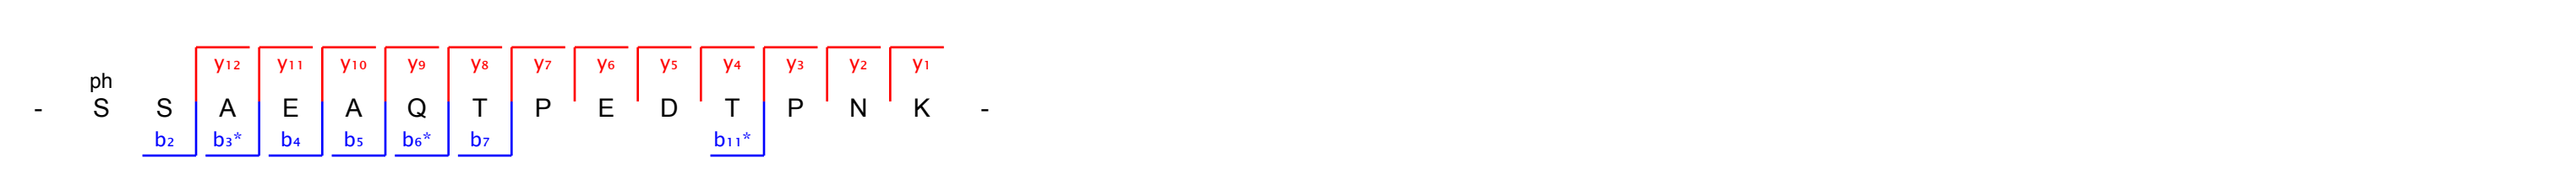

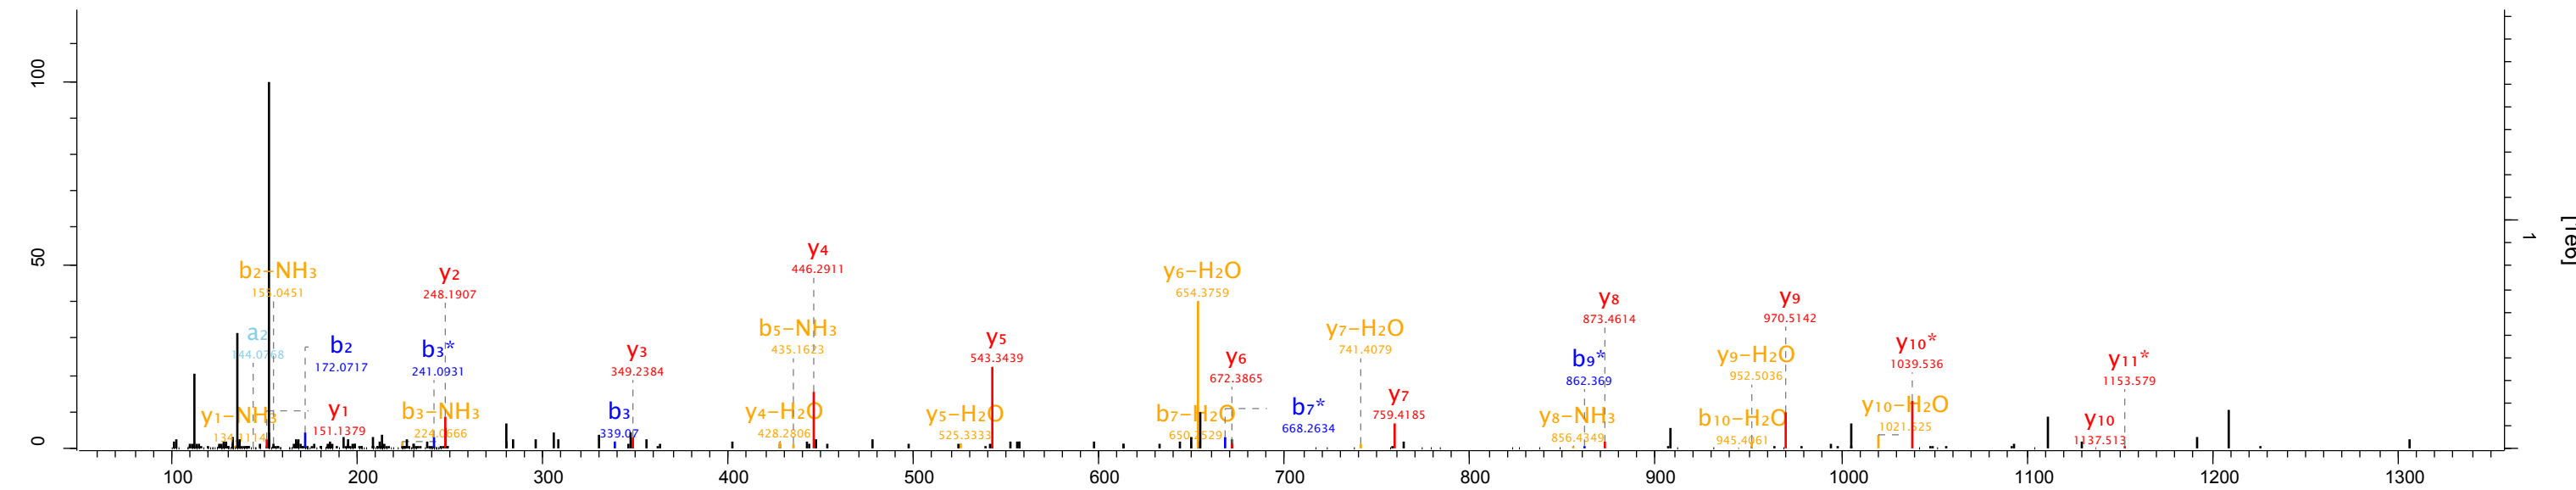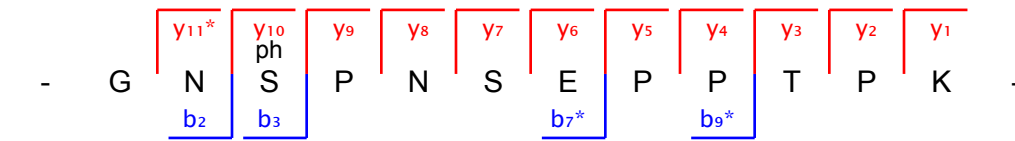



Raw file: 20171215\_MaS\_33SR\_LMH\_phospho2\_01  
 Scan: 3309 Method: FTMS; HCD Score: 45.82 m/z: 738.81 Gene names: LRRFIP1

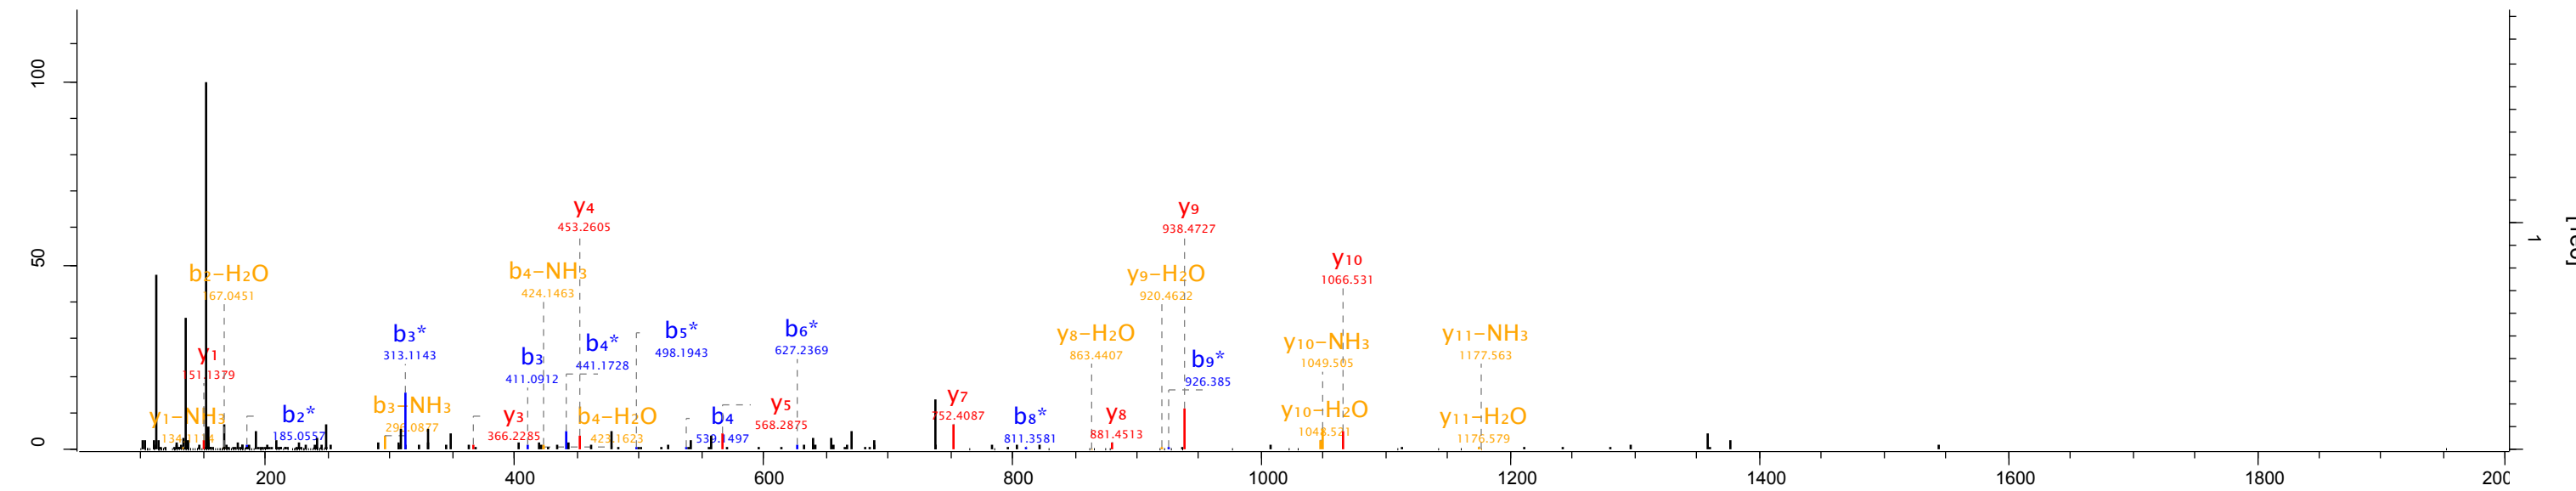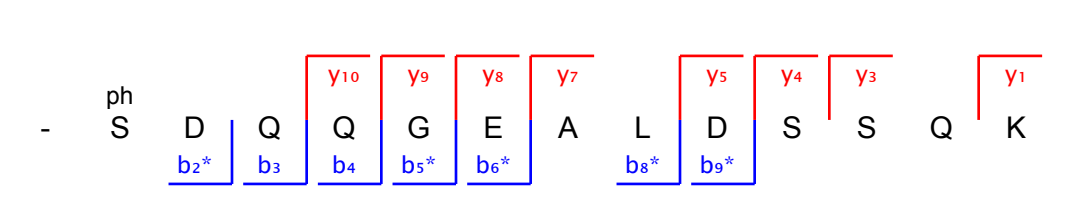

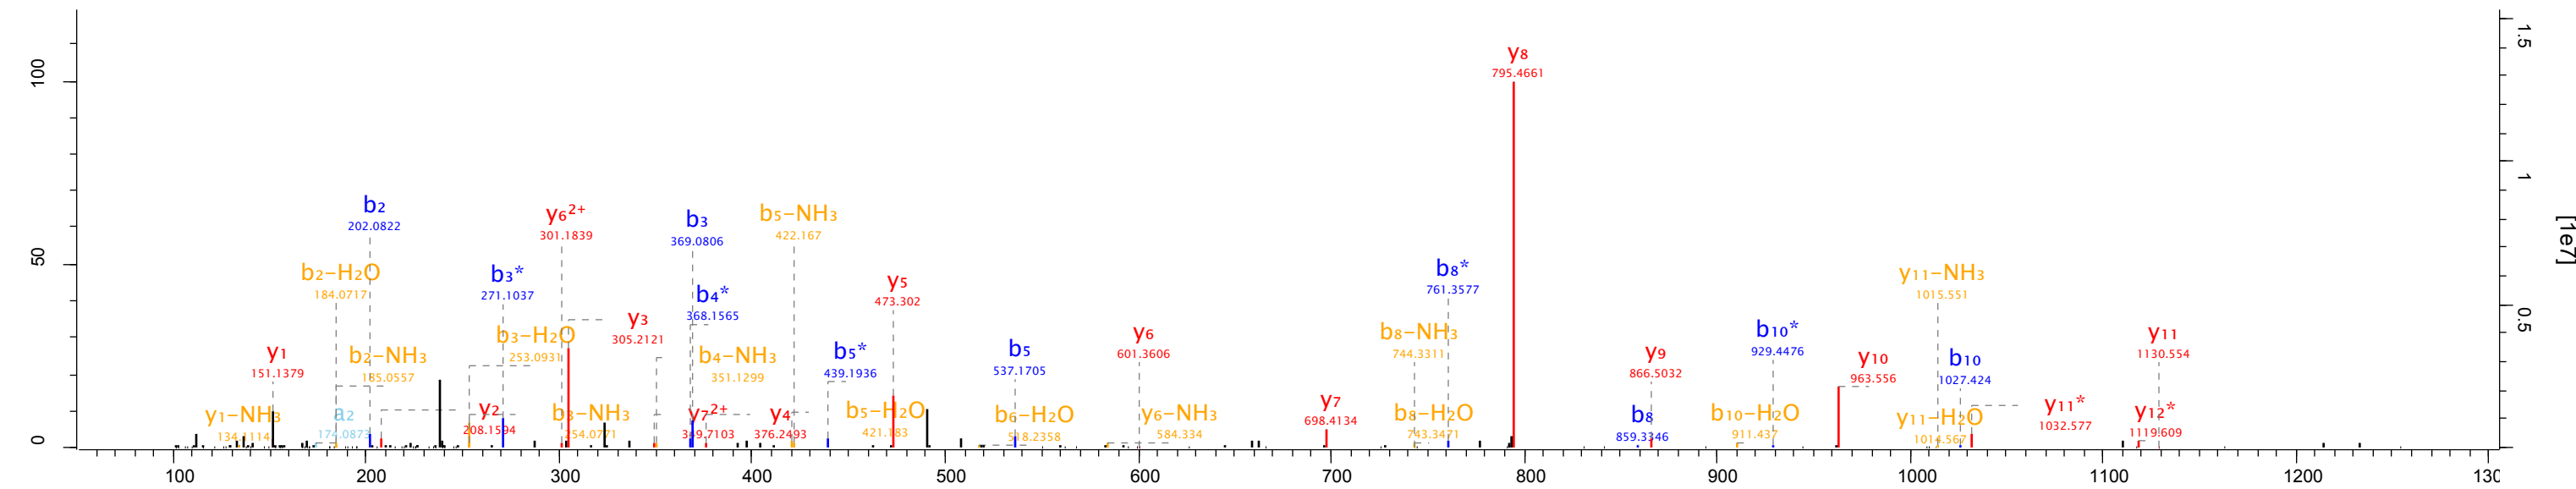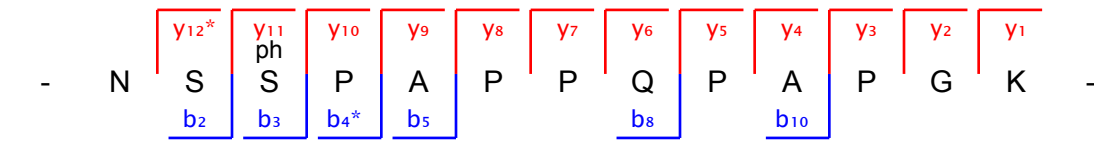

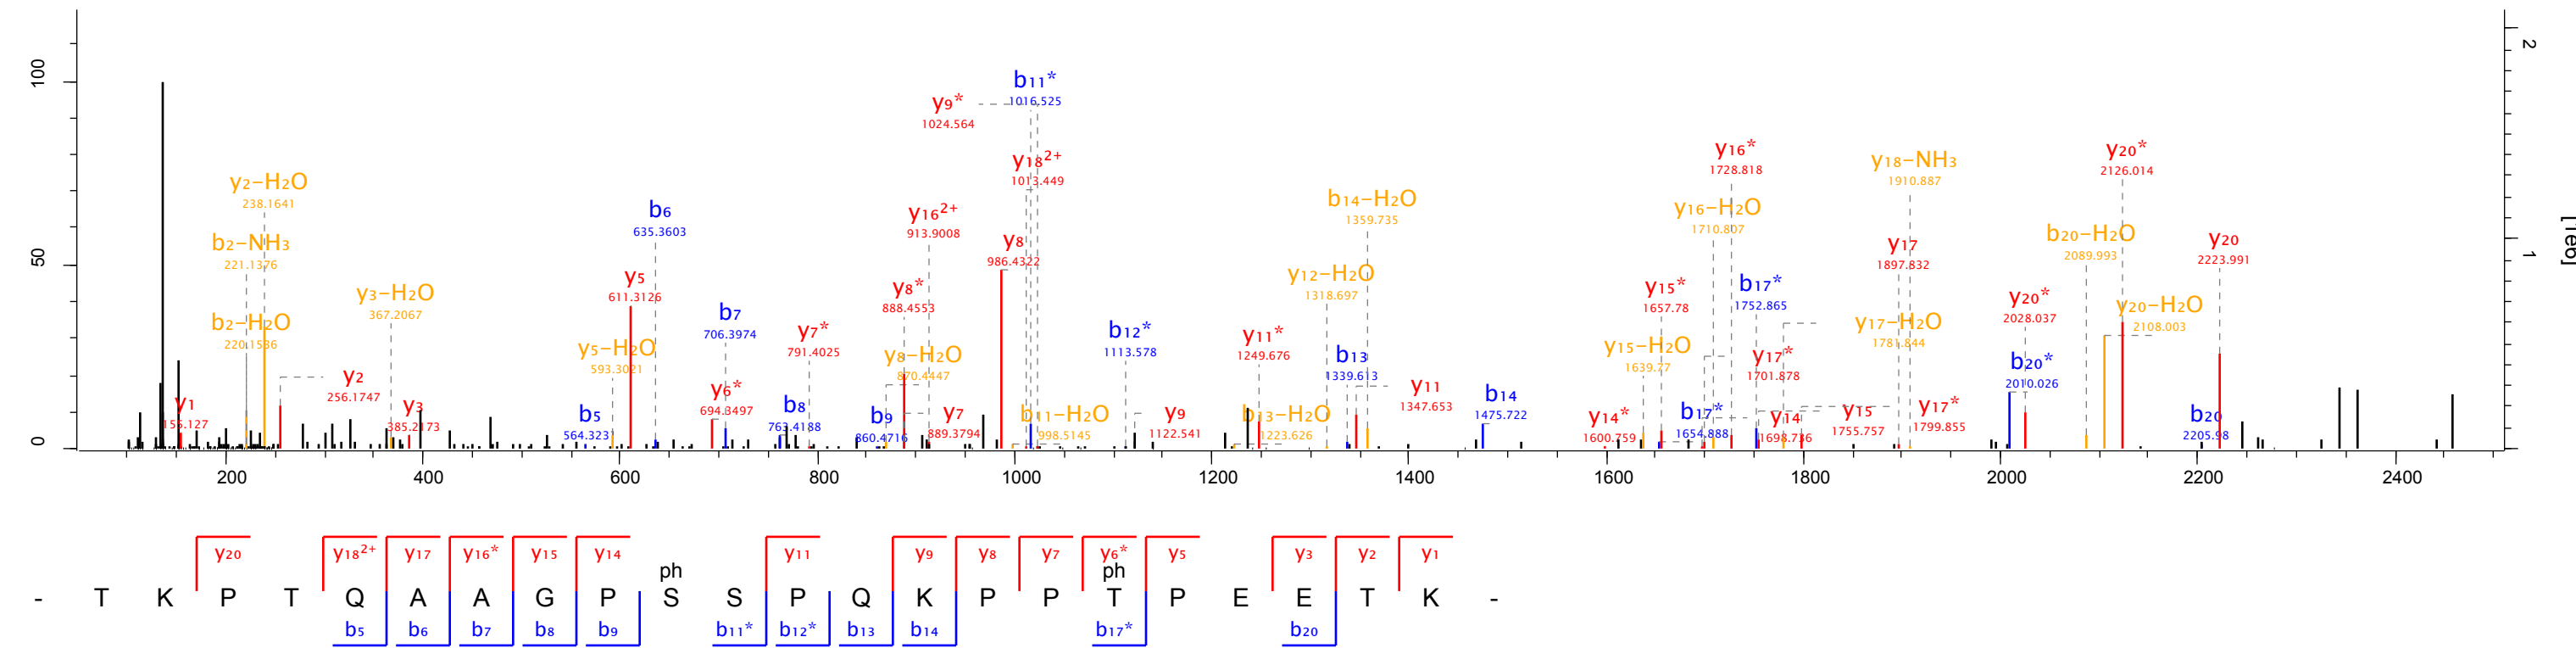

Raw file 20171215\_MaS\_33SR\_LMH\_phospho2\_01 Scan 4239 Method FTMS; HCD Score 63.3 m/z 513.91 Gene names WDR20

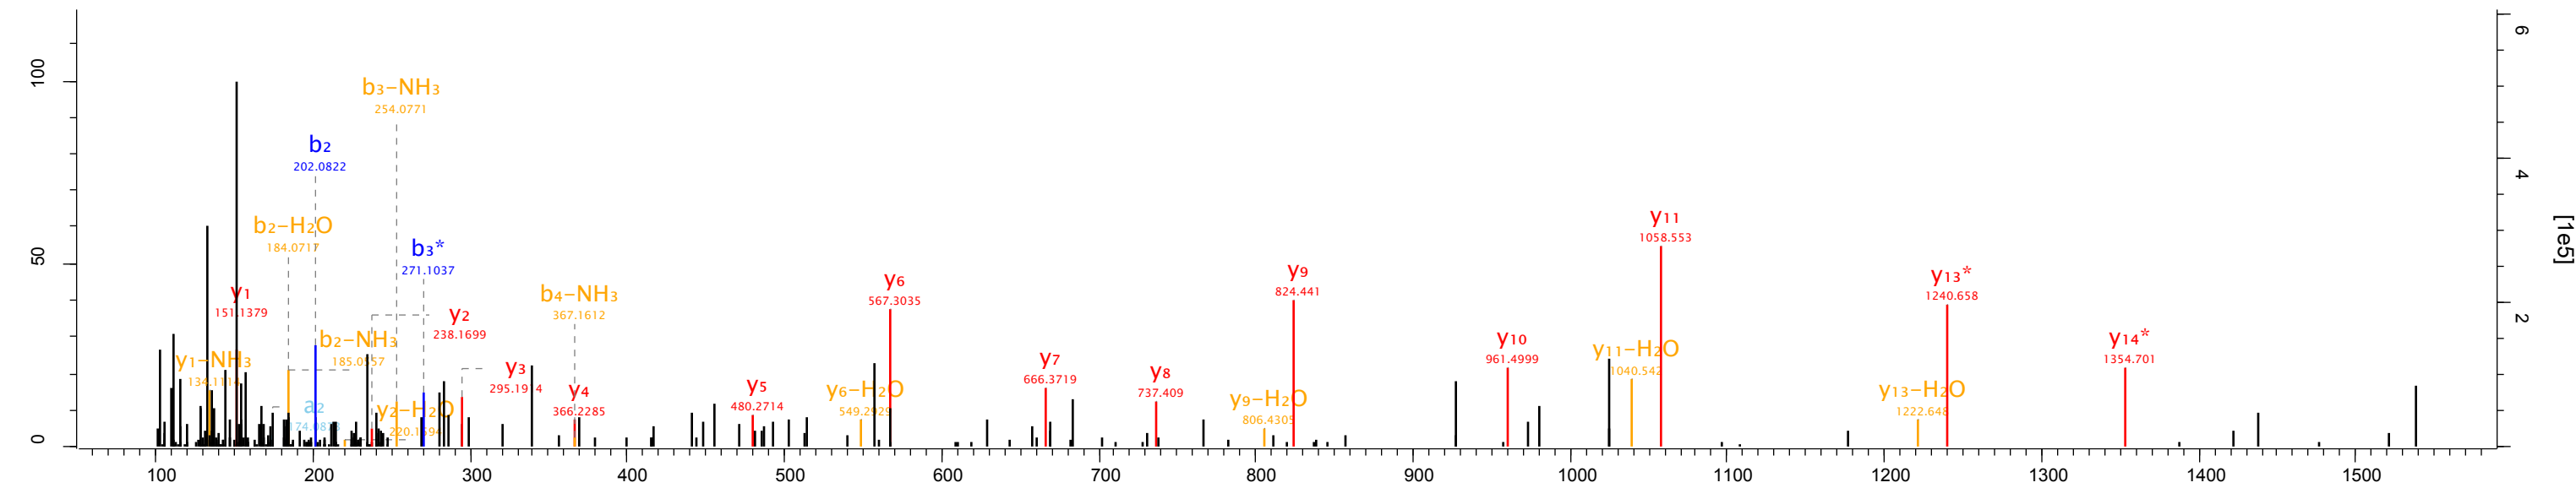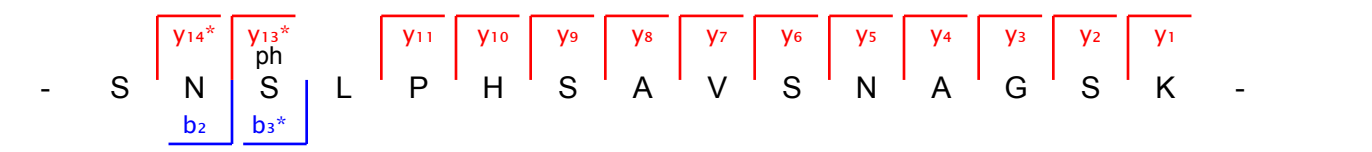

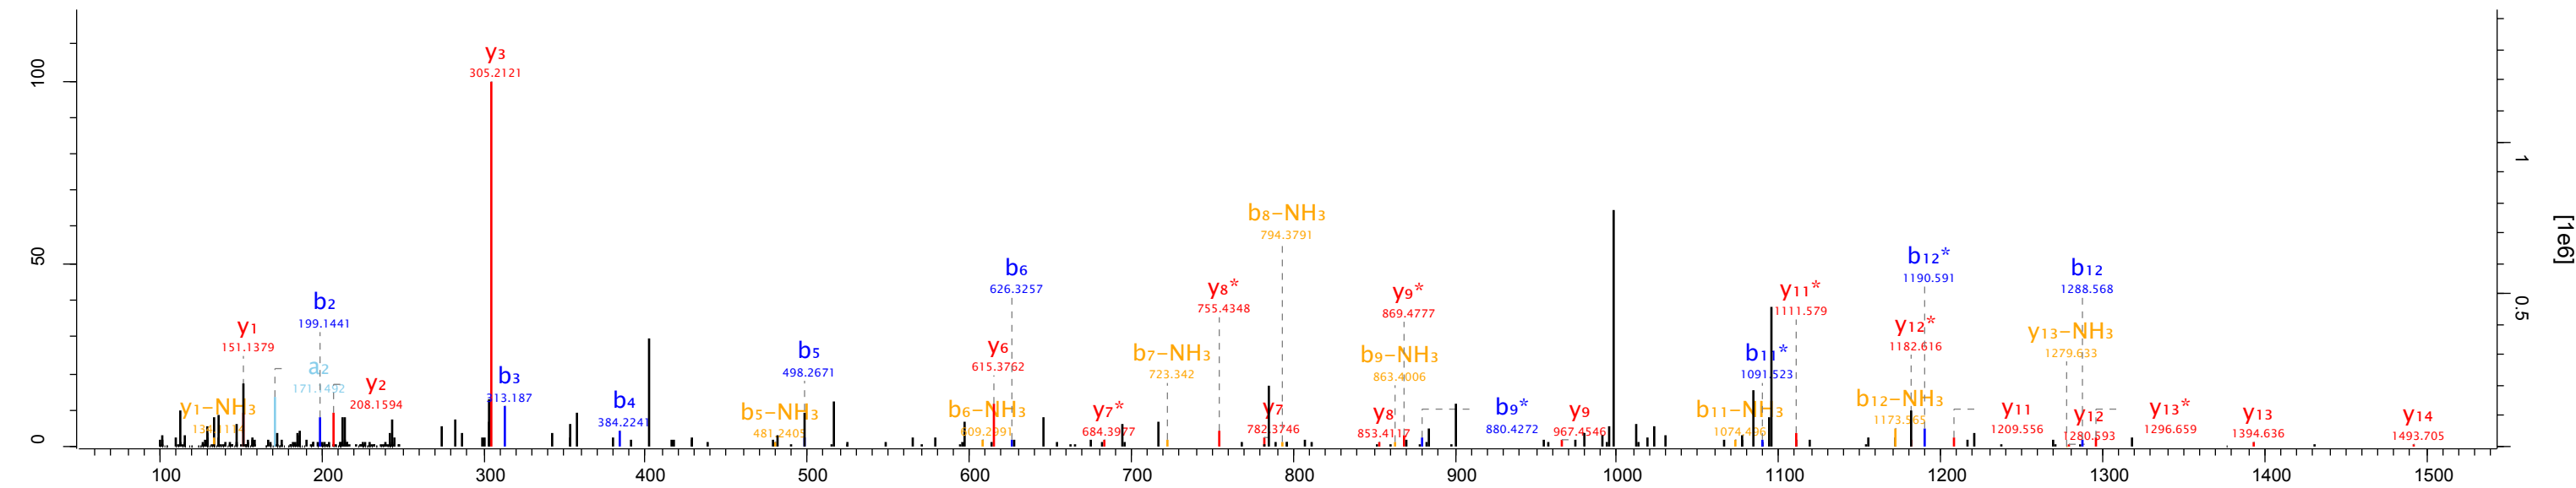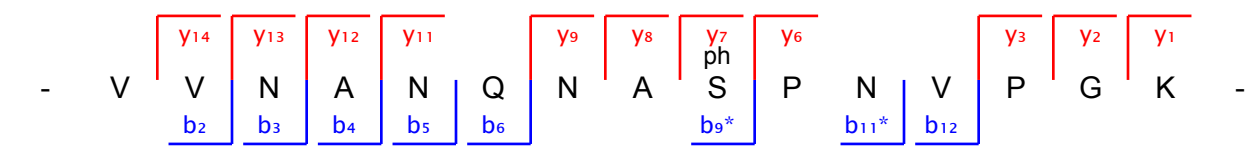

Raw file 20171215\_MaS\_33SR\_LMH\_phospho2\_01 Scan 4519 Method FTMS; HCD Score 98.96 m/z 562.28 Gene names MAPT

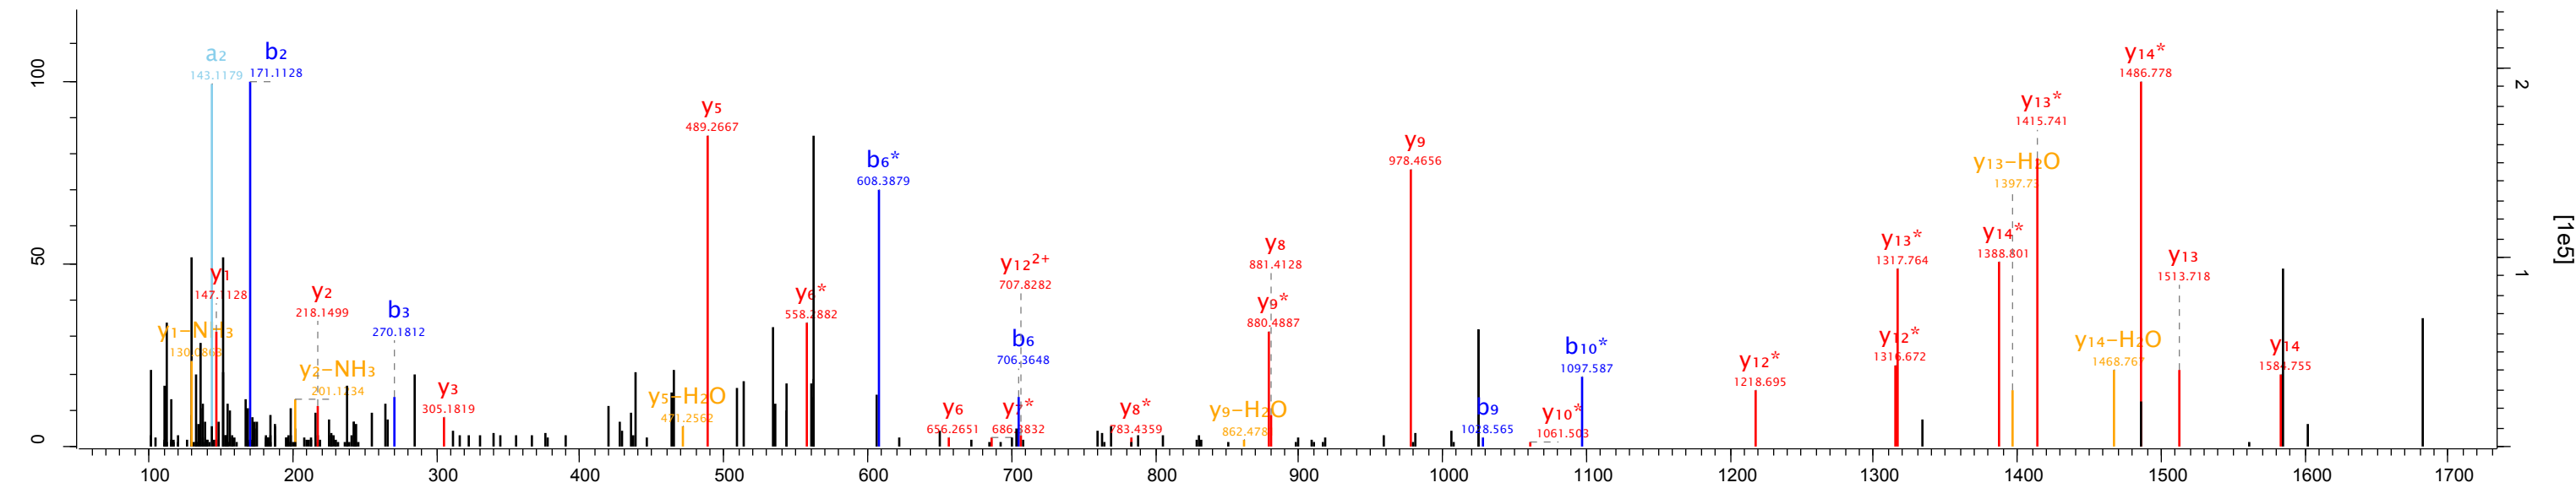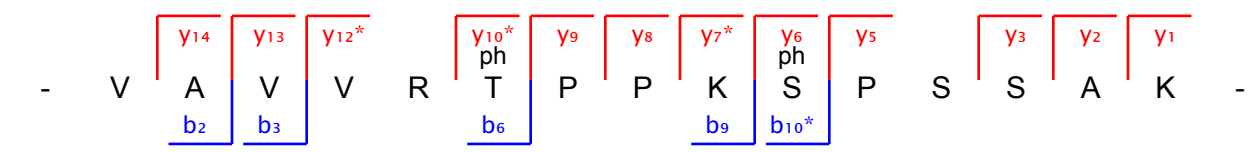

Raw file 20171215\_MaS\_33SR\_LMH\_phospho2\_01 Scan 6329 Method FTMS; HCD Score 45.49 m/z 826 Gene names THRAP3

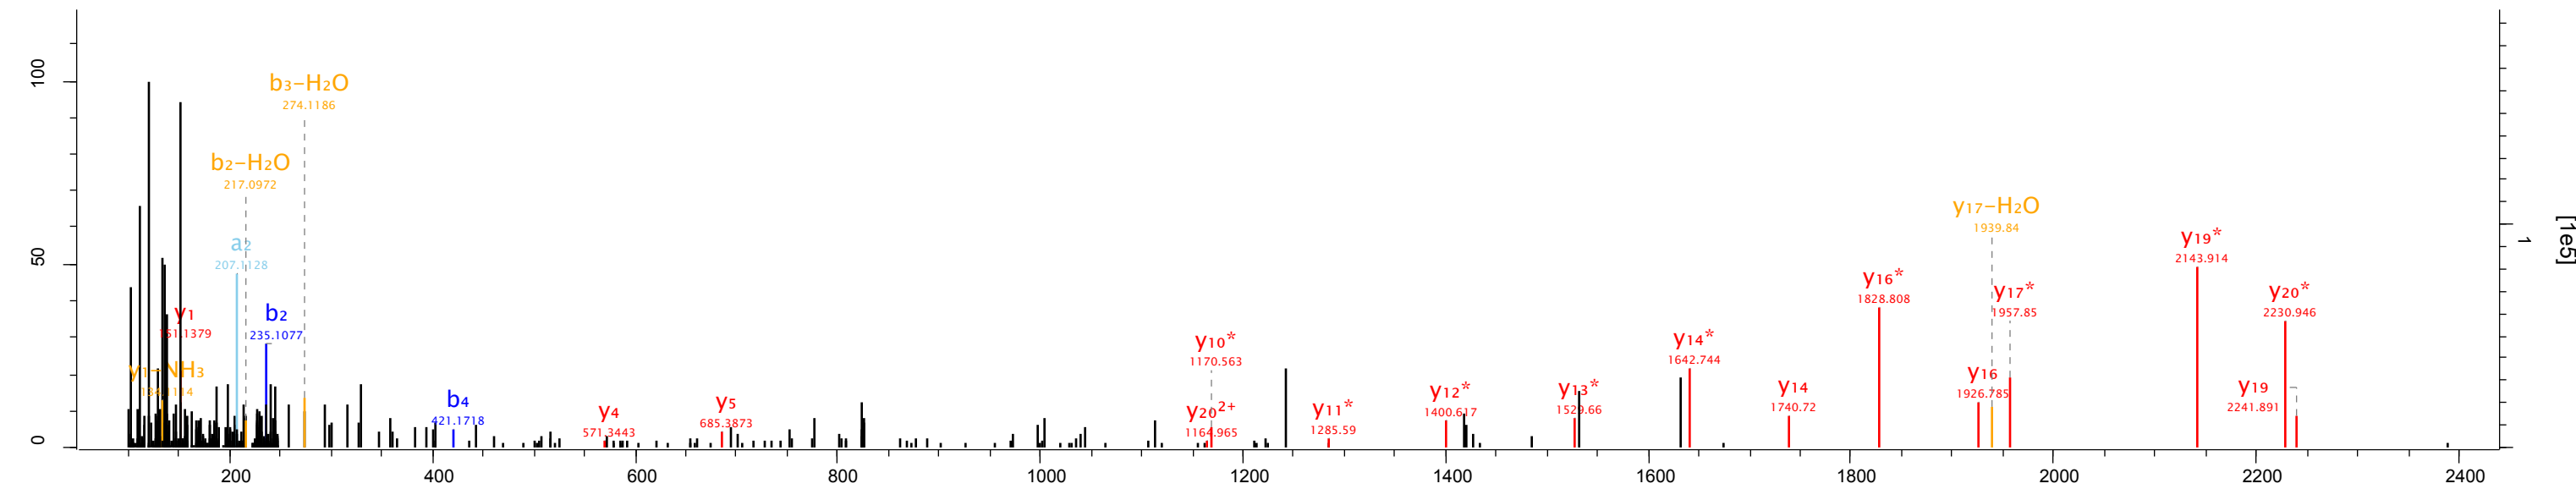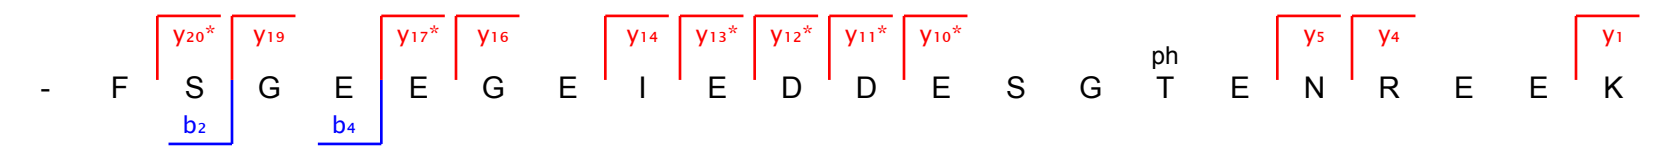

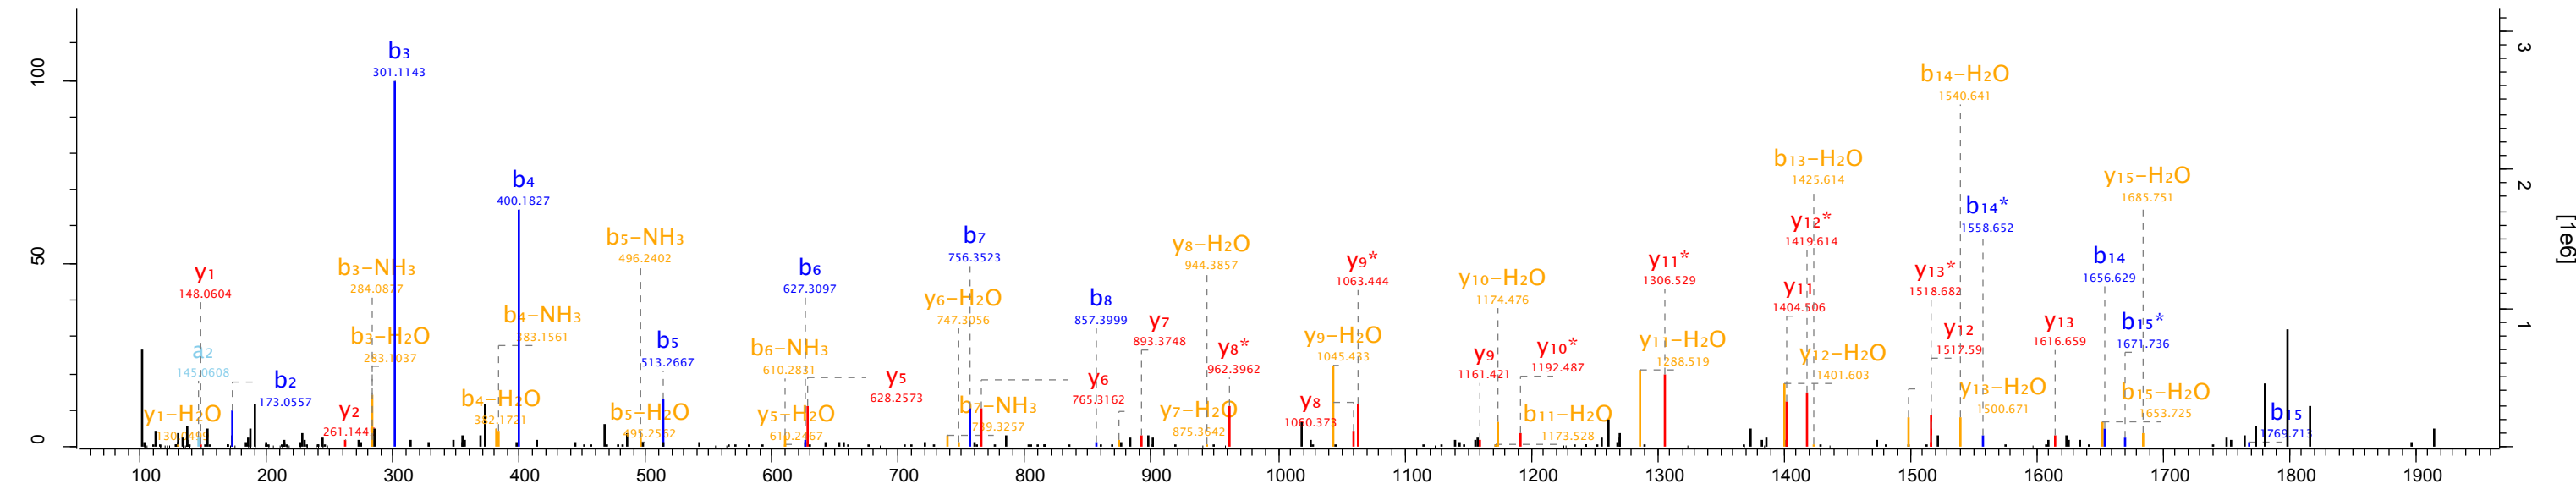

- D G Q V I N E T S<sub>ph</sub> Q H H D D L E -

Fragmentation mapping (b and y ions) is shown below the sequence:

- b<sub>2</sub> (under G)
- b<sub>3</sub> (under Q)
- b<sub>4</sub> (under V)
- b<sub>5</sub> (under I)
- b<sub>6</sub> (under N)
- b<sub>7</sub> (under E)
- b<sub>8</sub> (under T)
- b<sub>14</sub> (under D)
- b<sub>15</sub> (under L)
- y<sub>1</sub> (under E)
- y<sub>5</sub> (under H)
- y<sub>6</sub> (under H)
- y<sub>7</sub> (under Q)
- y<sub>8</sub> (under S<sub>ph</sub>)
- y<sub>9</sub> (under T)
- y<sub>10</sub><sup>\*</sup> (under E)
- y<sub>11</sub> (under N)
- y<sub>12</sub> (under I)
- y<sub>13</sub> (under V)
- y<sub>2</sub> (under L)



Raw file 20171215\_MaS\_33SR\_LMH\_phospho2\_01 Scan 8649 Method FTMS; HCD Score 261.16 m/z 873.37 Gene names TPD52L2

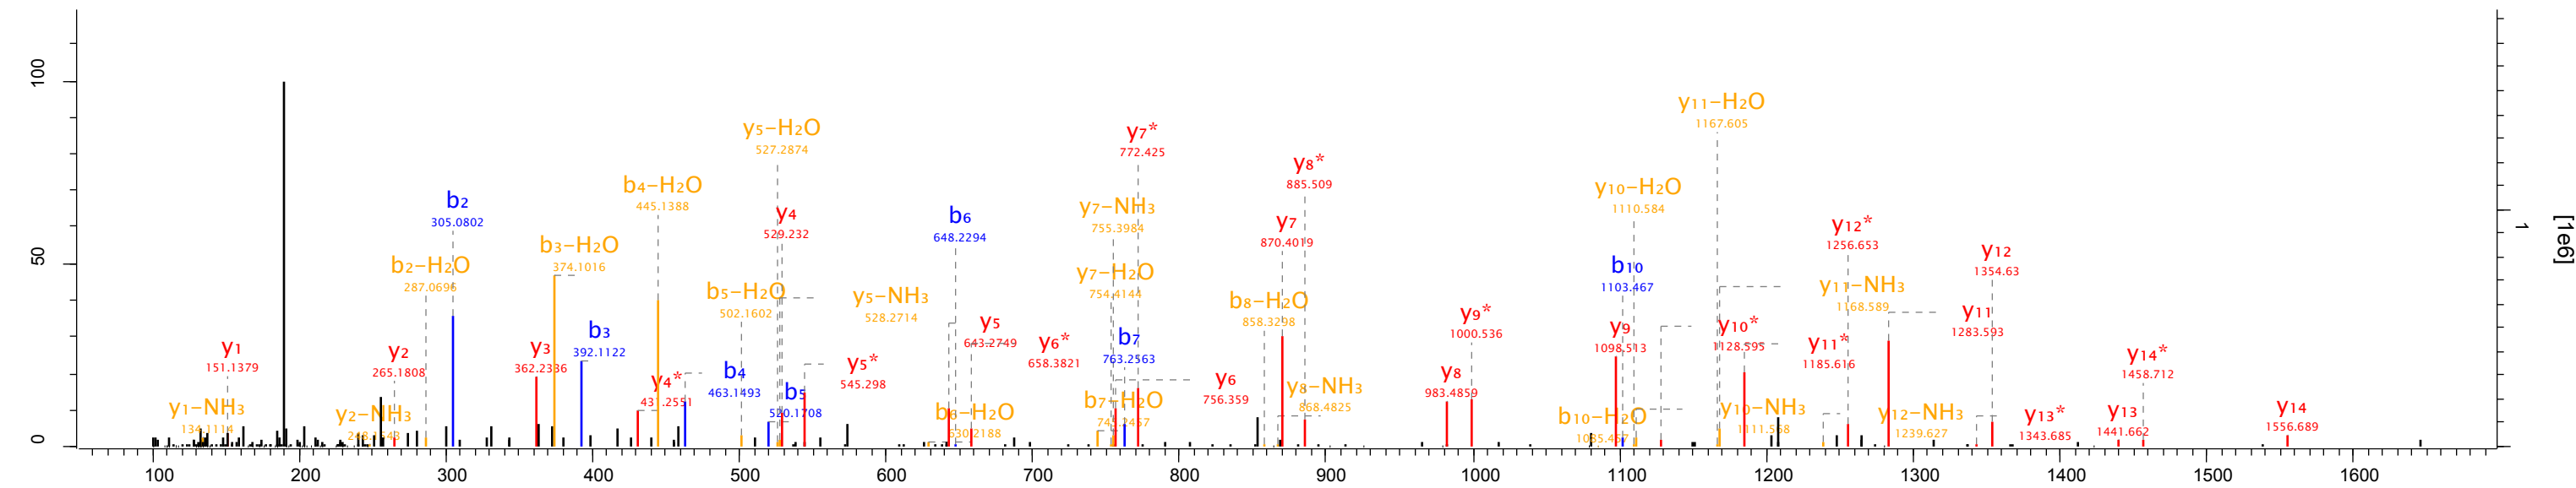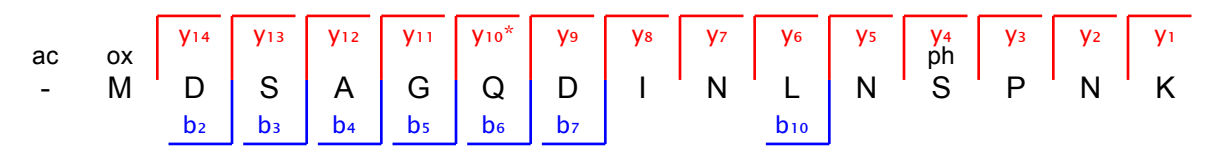

Raw file 20171215\_MaS\_33SR\_LMH\_phospho2\_01 Scan 8739 Method FTMS; HCD Score 105.58 m/z 761.68 Gene names MARK2

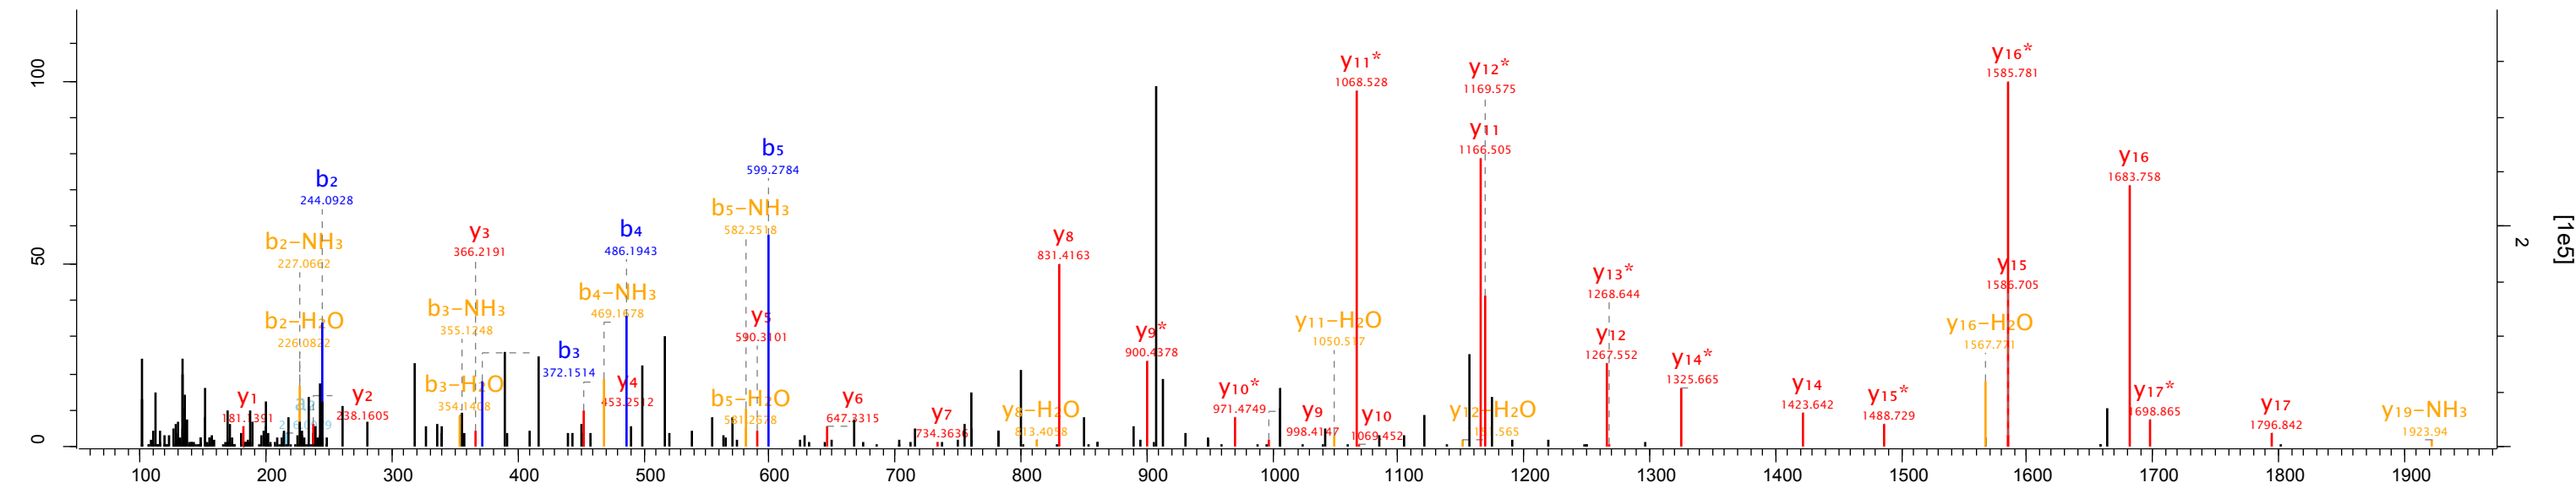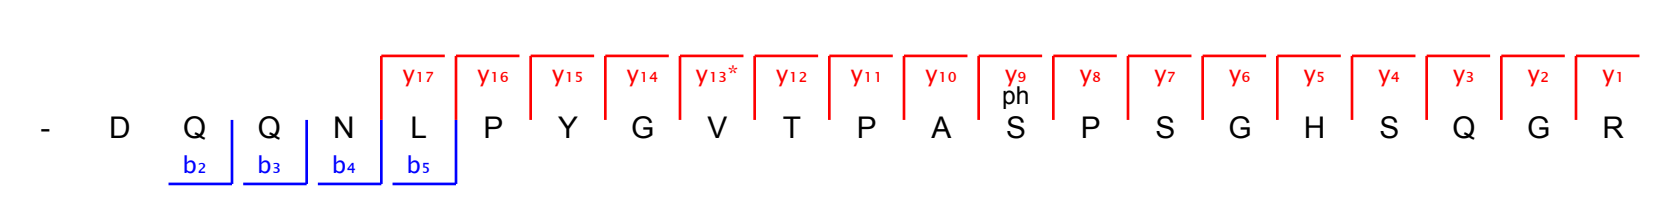

Raw file  
20171215\_MaS\_33SR\_LMH\_phospho2\_02

Scan Method Score m/z Gene names  
10589 FTMS; HCD 179.55 1024.47 NES

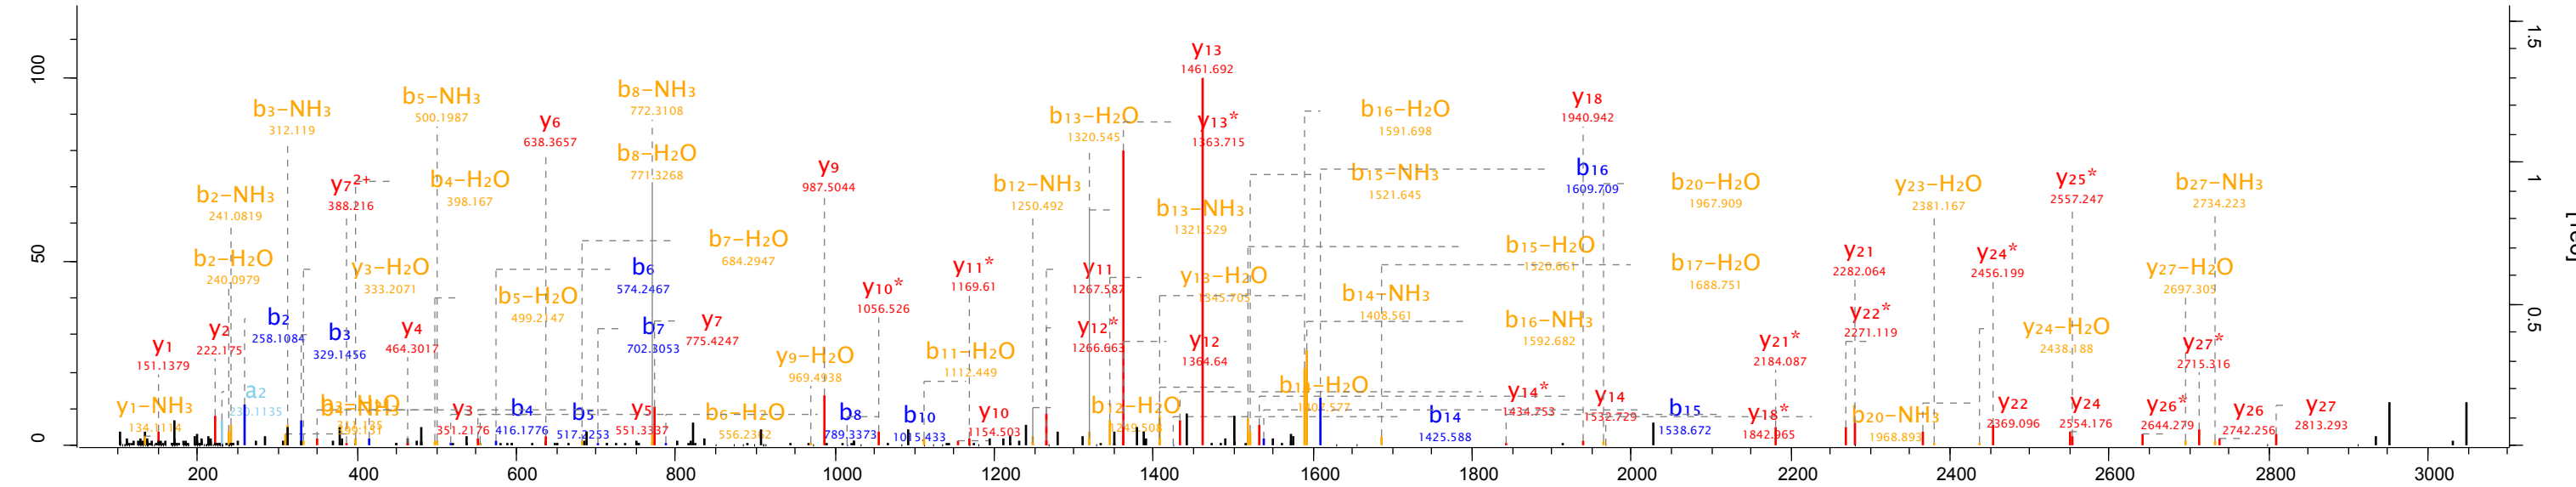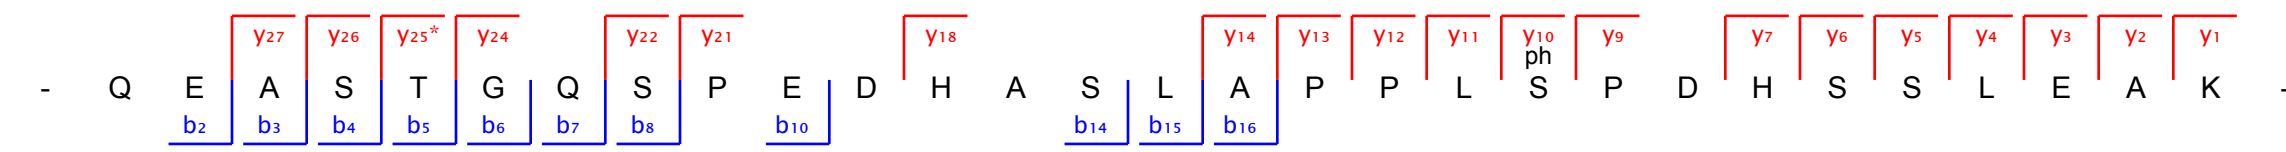

Raw file 20171215\_MaS\_33SR\_LMH\_phospho2\_02 Scan 10849 Method FTMS; HCD Score 109.42 m/z 984.44 Gene names RNF20

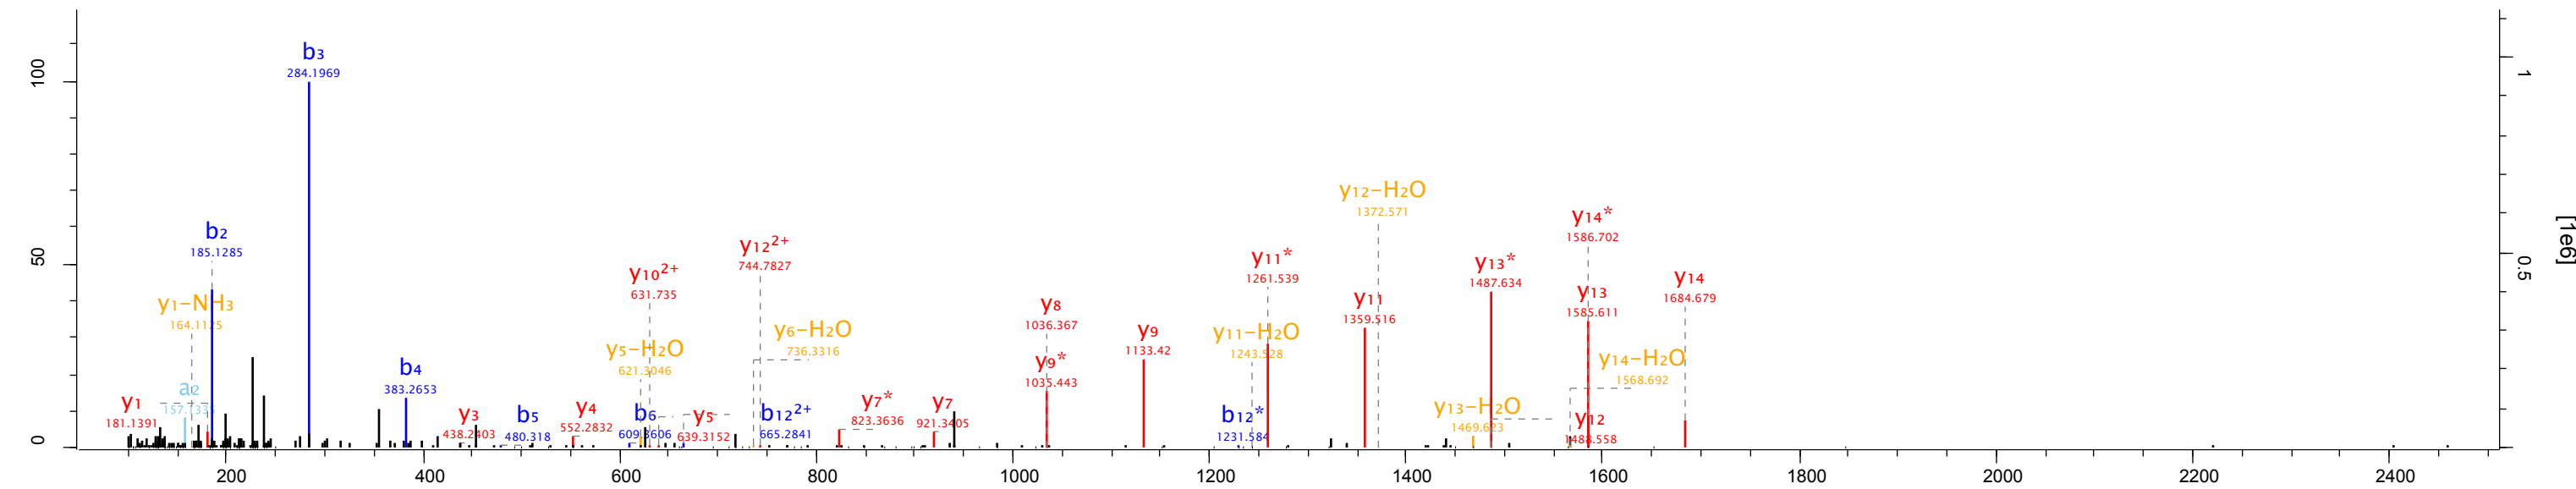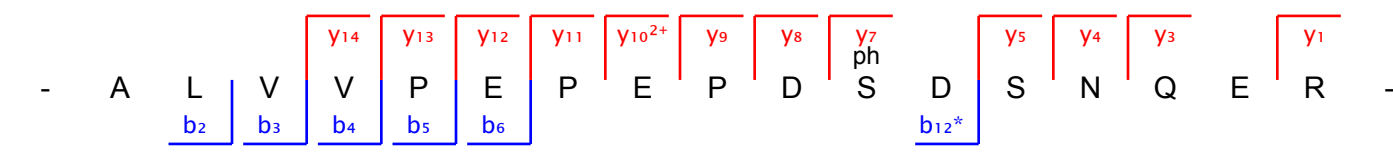

Raw file: 20171215\_MaS\_33SR\_LMH\_phospho2\_02  
 Scan: 11329 Method: FTMS; HCD Score: 329.86 m/z: 1265.56

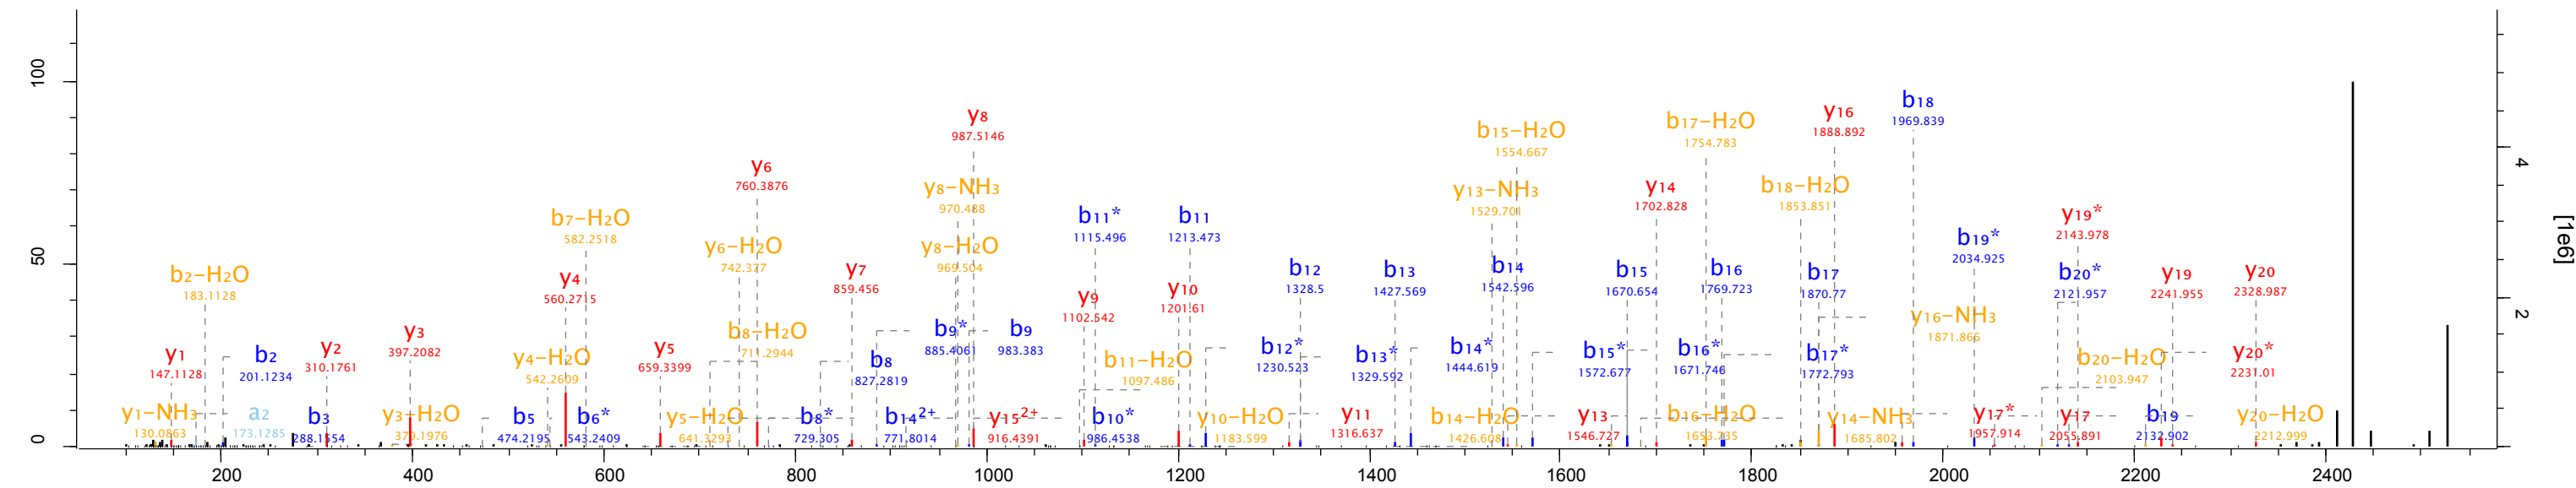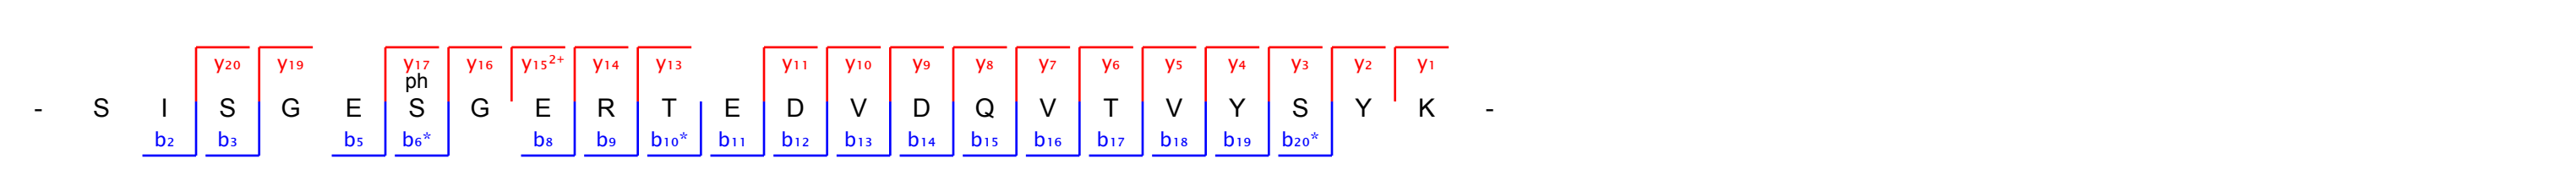

Raw file: 20171215\_MaS\_33SR\_LMH\_phospho2\_02  
 Scan: 11599 Method: FTMS; HCD Score: 162.09 m/z: 889.89 Gene names: IBTK

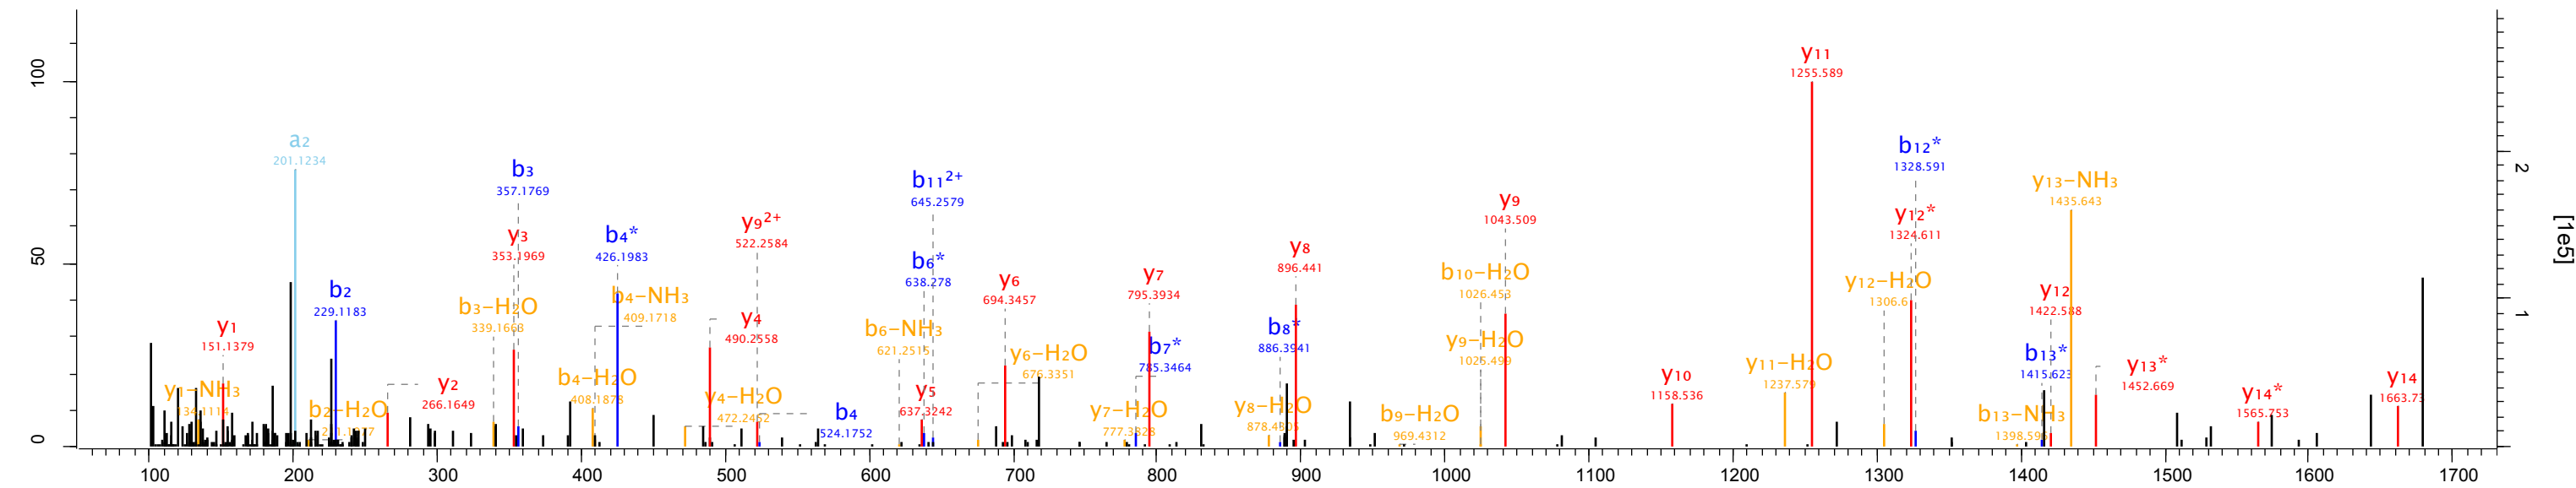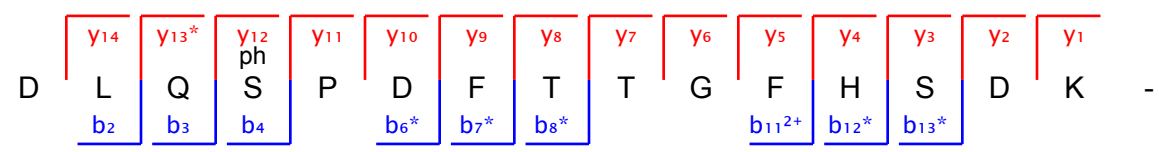

Raw file: 20171215\_MaS\_33SR\_LMH\_phospho2\_02  
 Scan: 12249 Method: FTMS; HCD Score: 143.75 m/z: 1513.68 Gene names: EIF3B

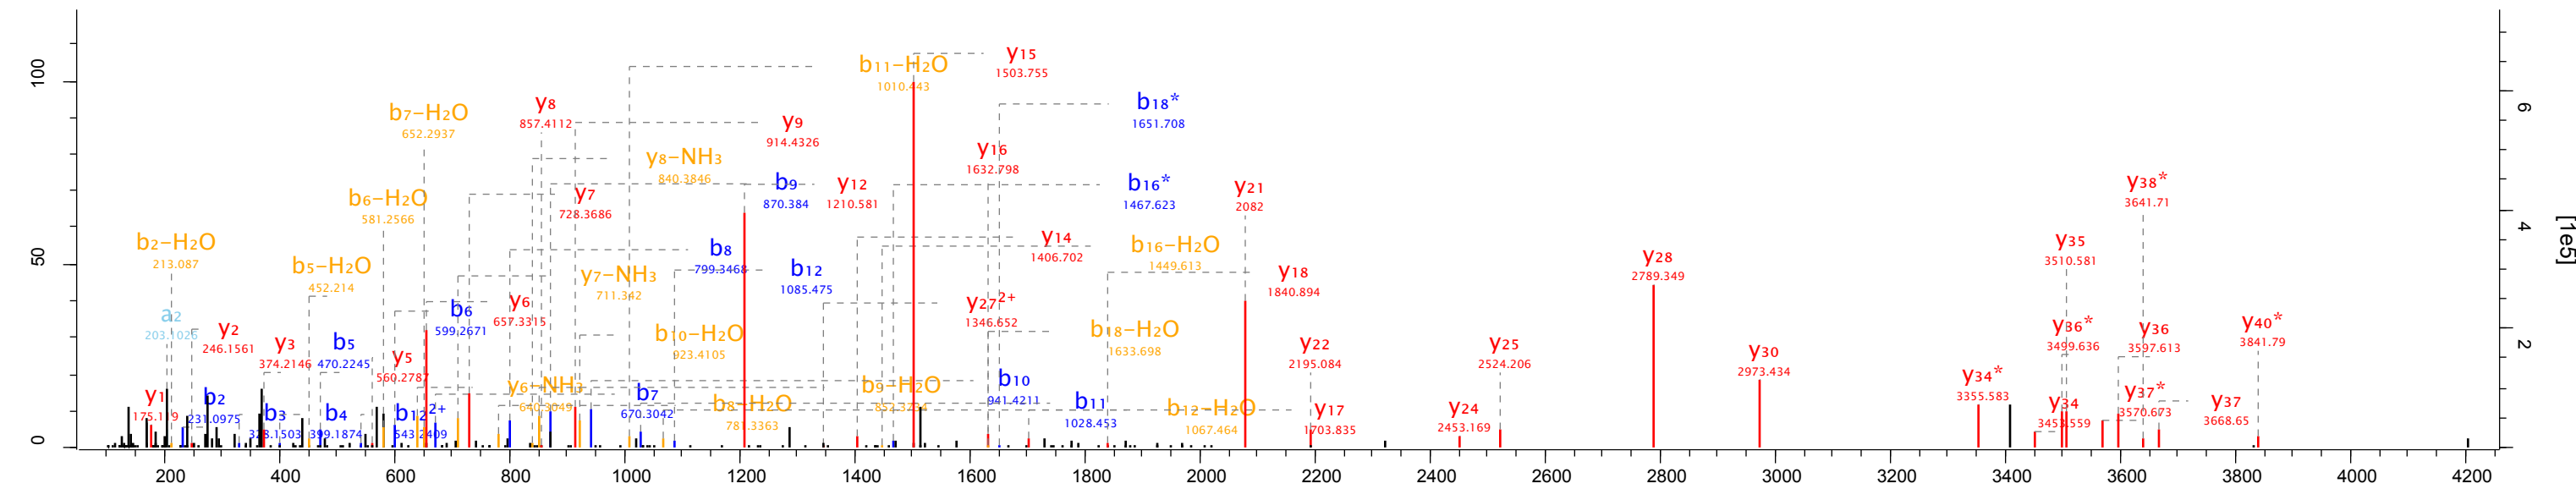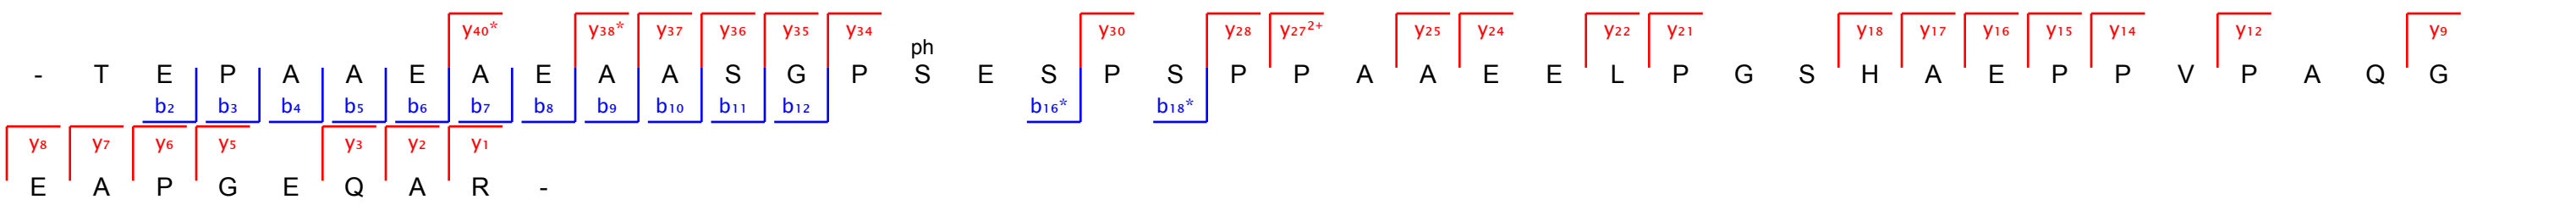

Raw file 20171215\_MaS\_33SR\_LMH\_phospho2\_02 Scan 12849 Method FTMS; HCD Score 125.36 m/z 720.83 Gene names MLPH

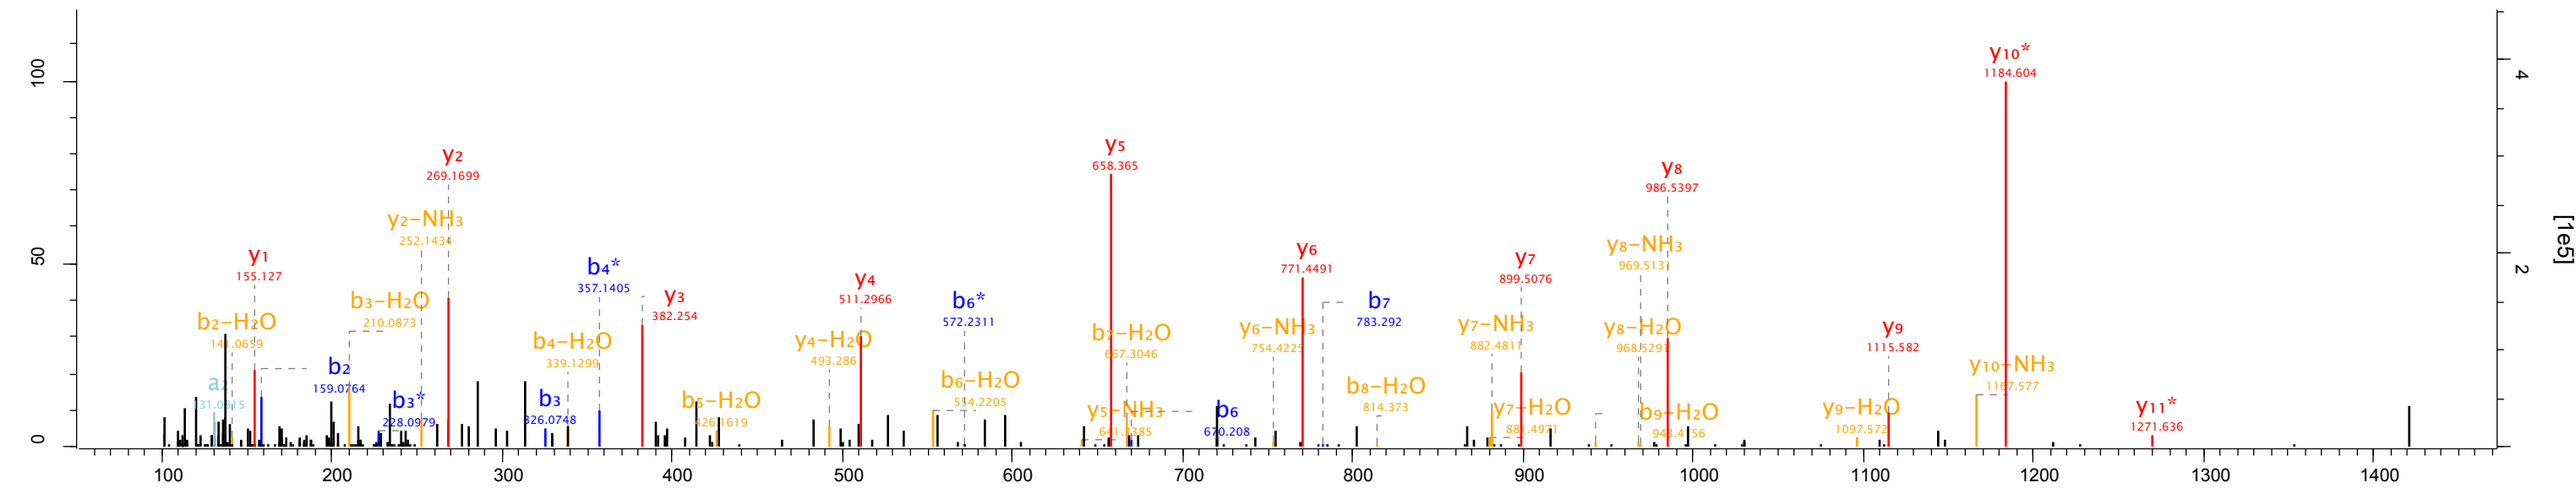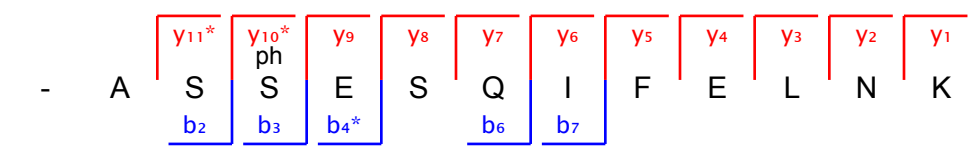



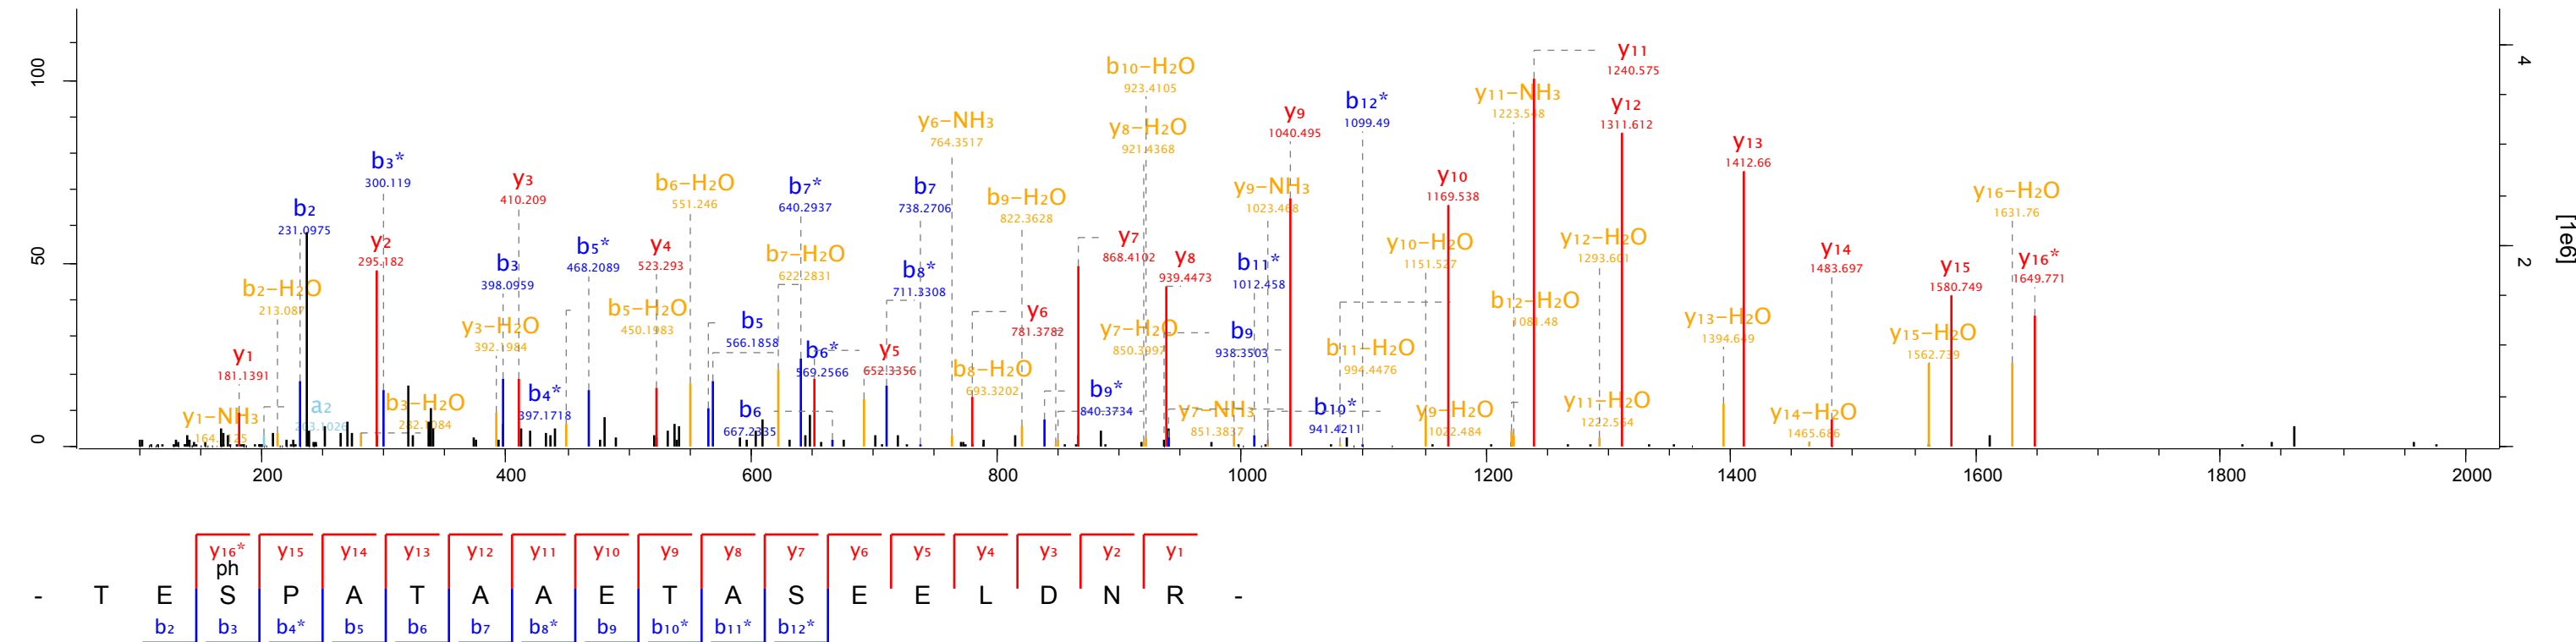

Raw file 20171215\_MaS\_33SR\_LMH\_phospho2\_02 Scan 13889 Method FTMS; HCD Score 182.24 m/z 844.7 Gene names GIT1

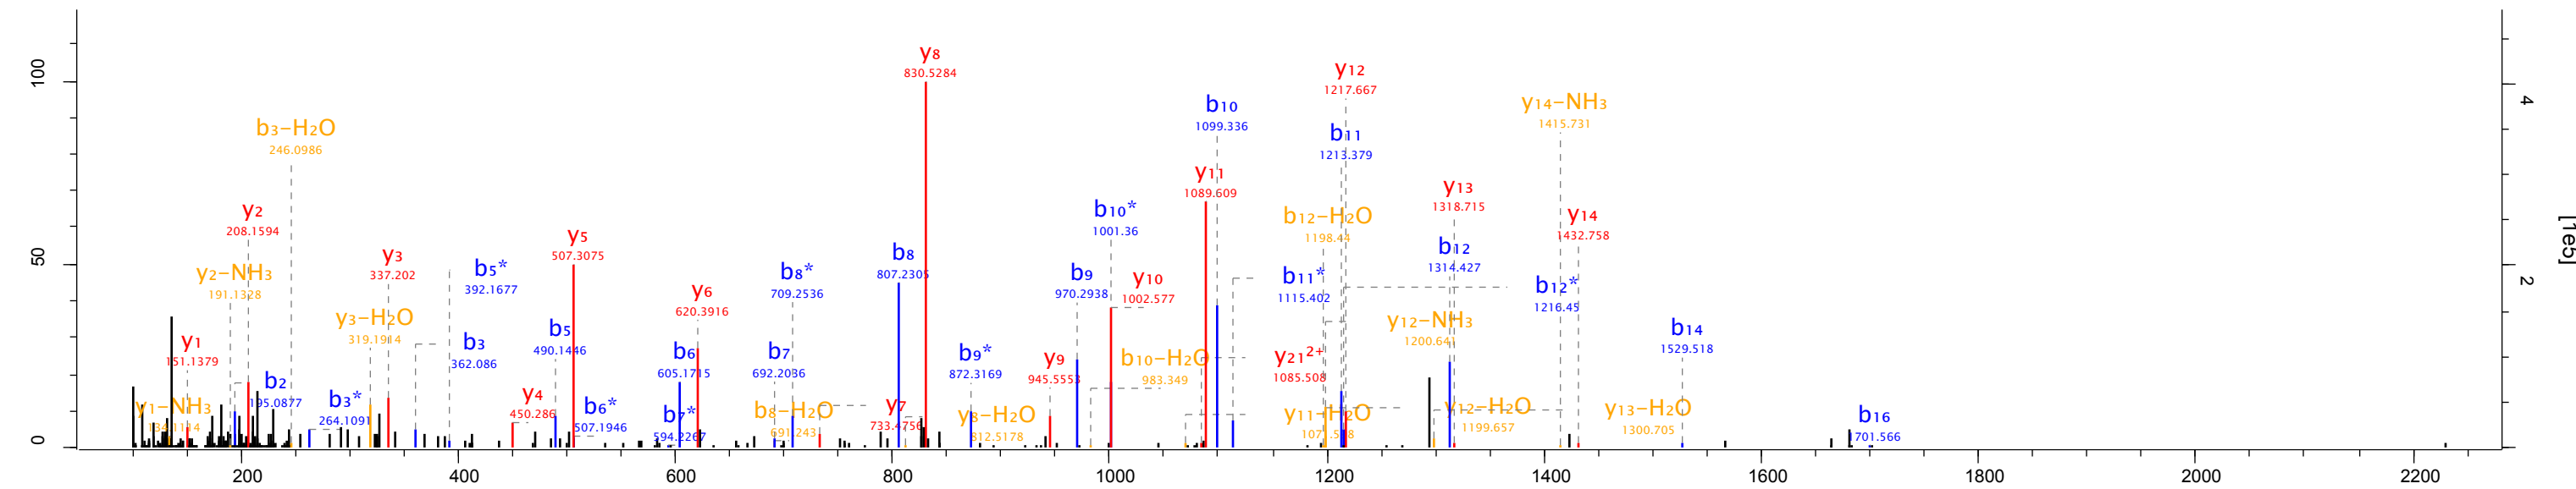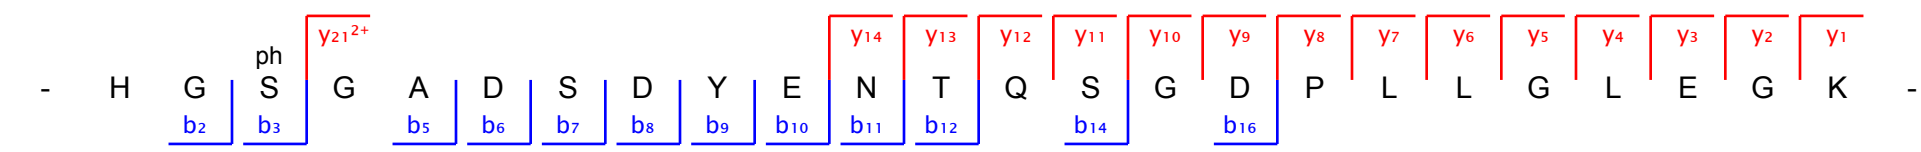

Raw file 20171215\_MaS\_33SR\_LMH\_phospho2\_02 Scan 16629 Method FTMS; HCD Score 127.35 m/z 1204.55 Gene names SQSTM1

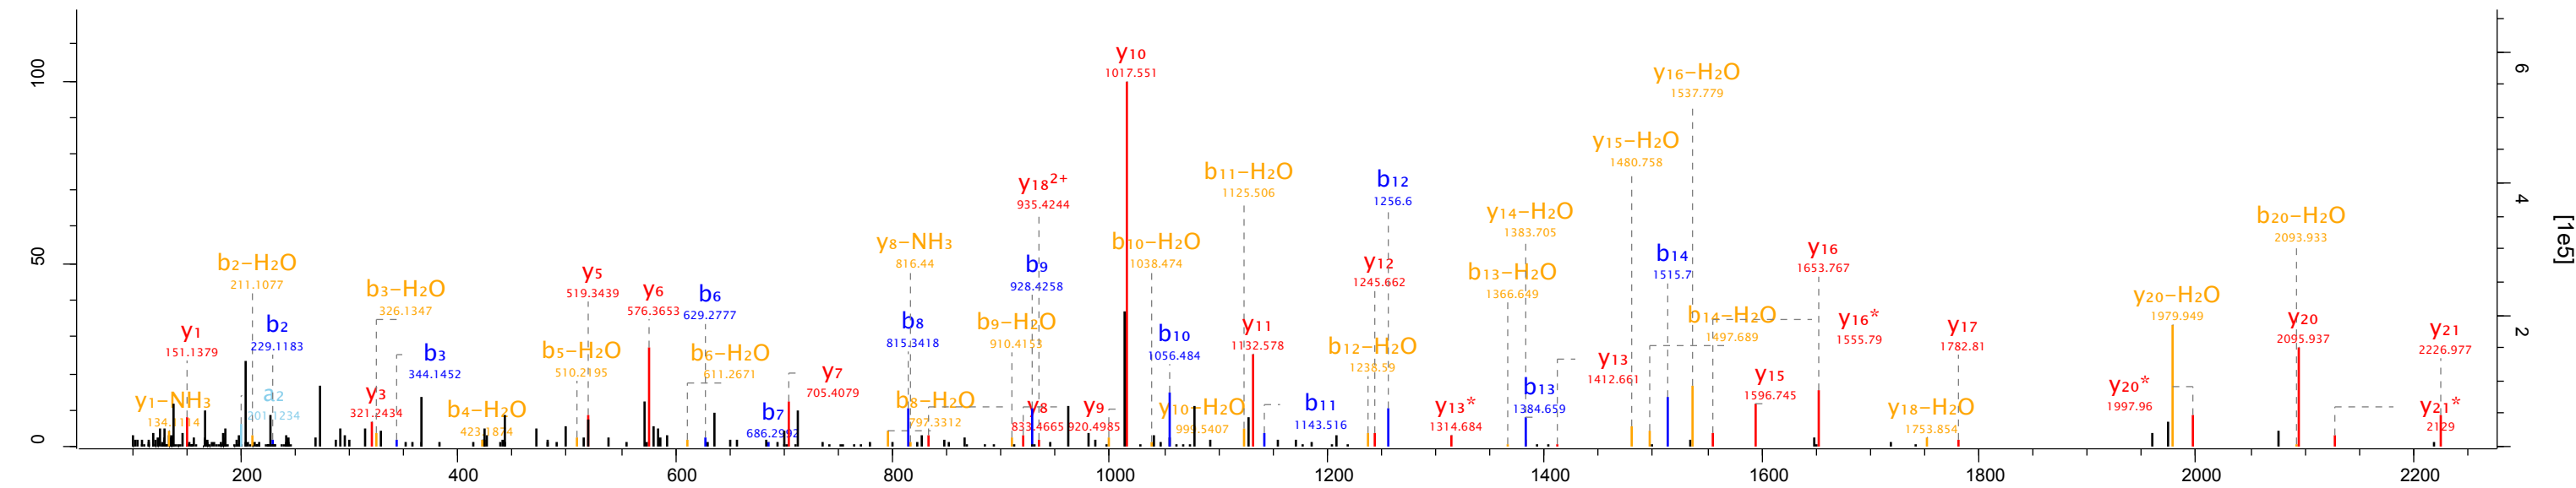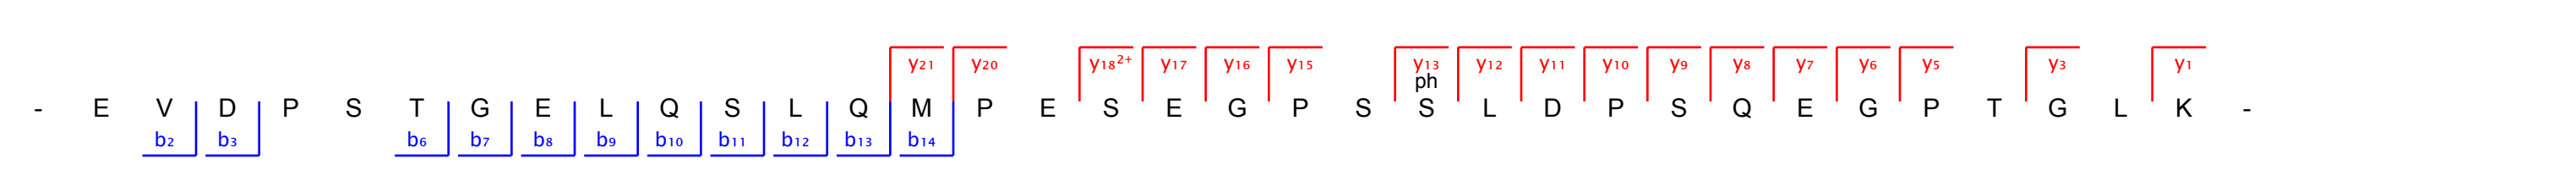

Raw file 20171215\_MaS\_33SR\_LMH\_phospho2\_02 Scan 2699 Method FTMS; HCD Score 114.7 m/z 589.26 Gene names ATXN2L

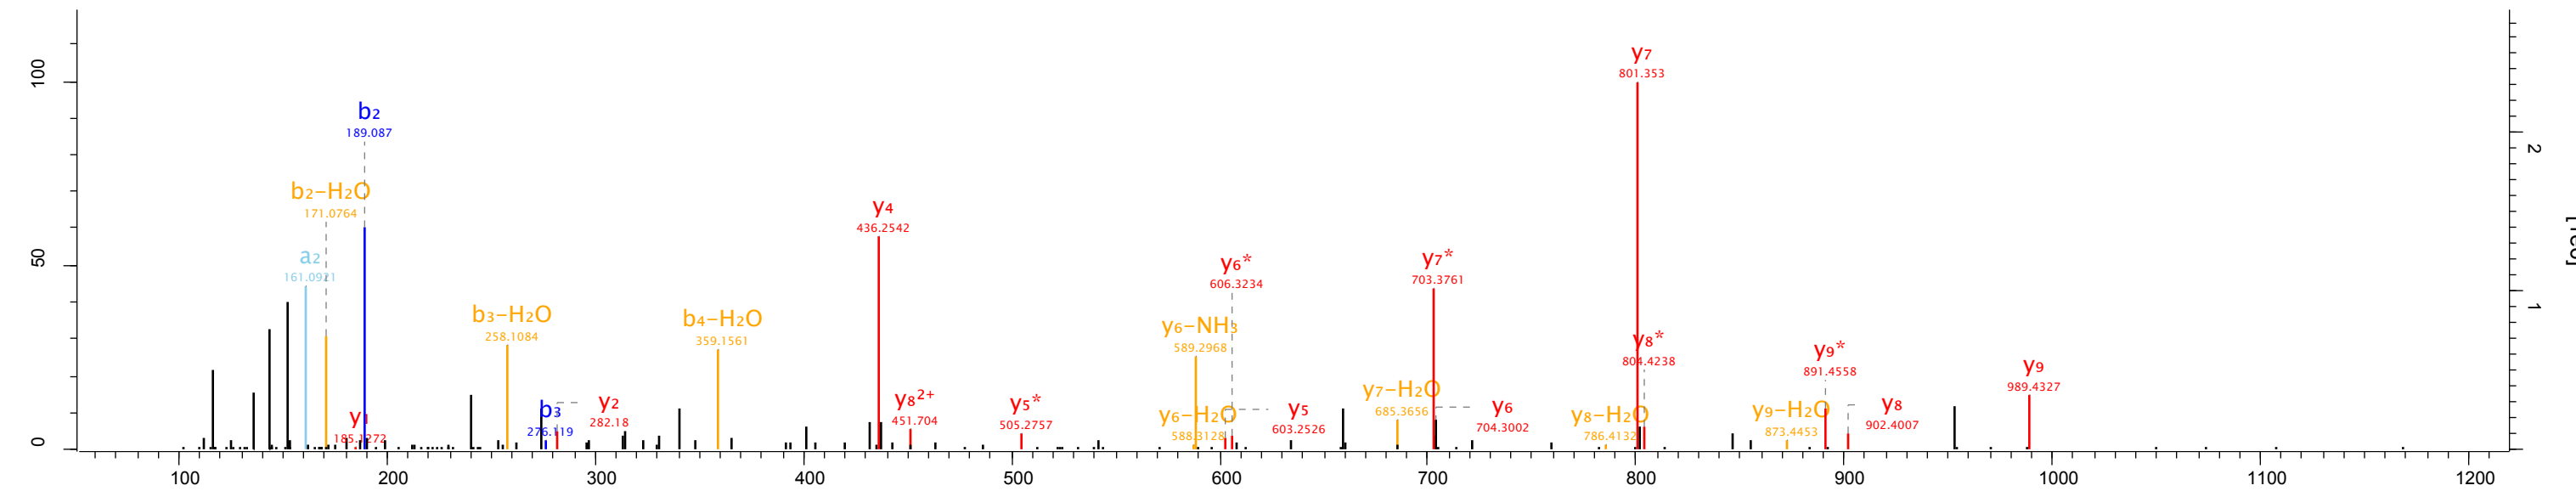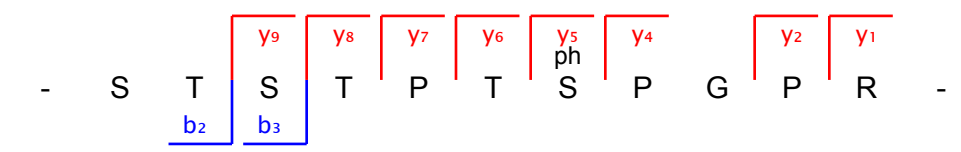

Raw file 20171215\_MaS\_33SR\_LMH\_phospho2\_02 Scan 3379 Method FTMS; HCD Score 208.66 m/z 718.31 Gene names TOR1AIP1

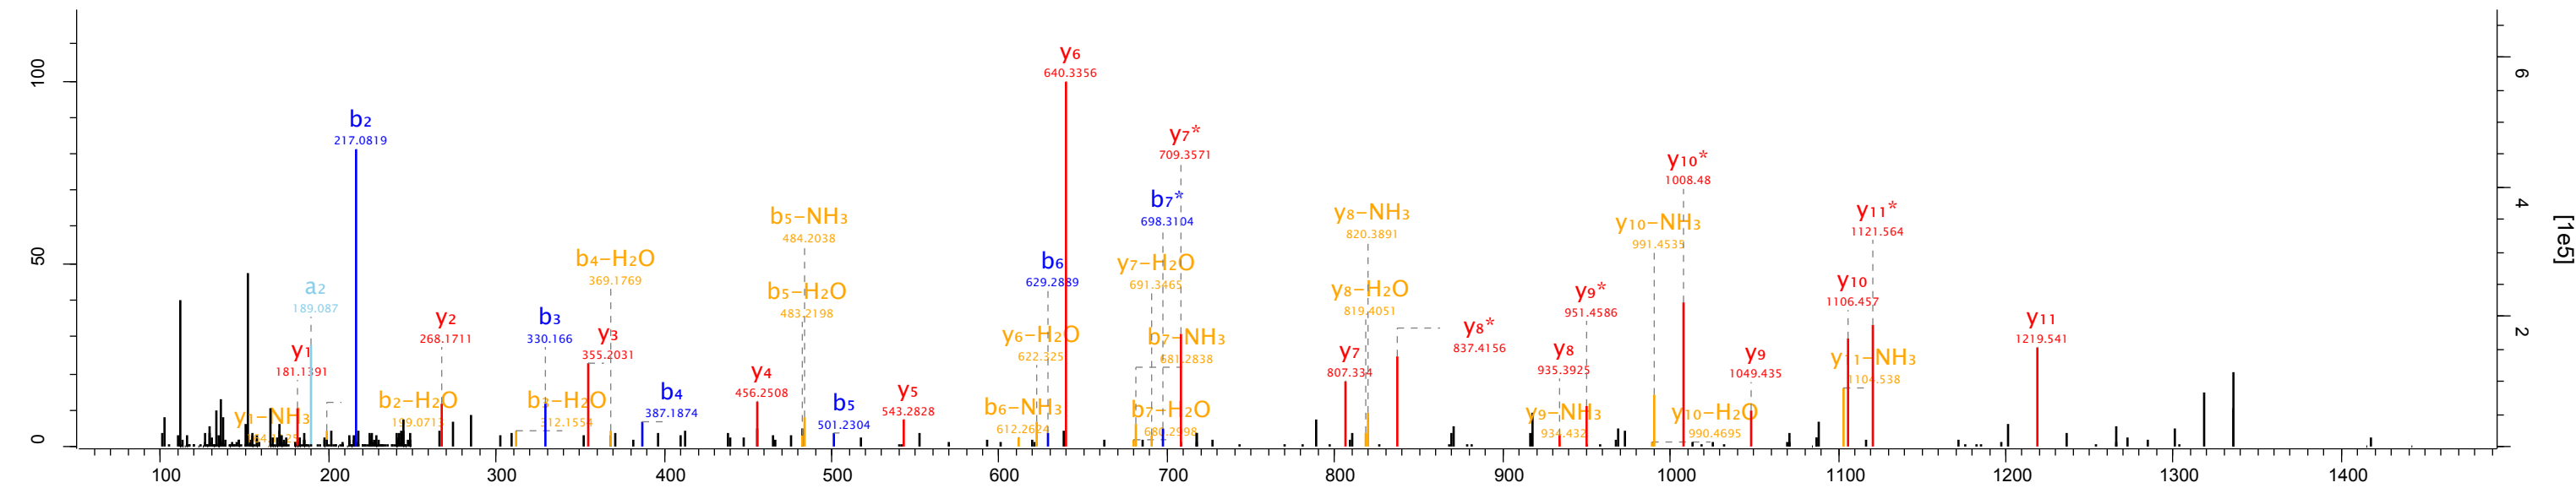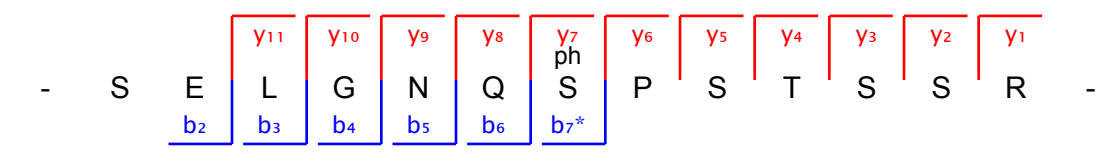

Raw file 20171215\_MaS\_33SR\_LMH\_phospho2\_02 Scan 3519 Method FTMS; HCD Score 50.04 m/z 661.82 Gene names RRP1

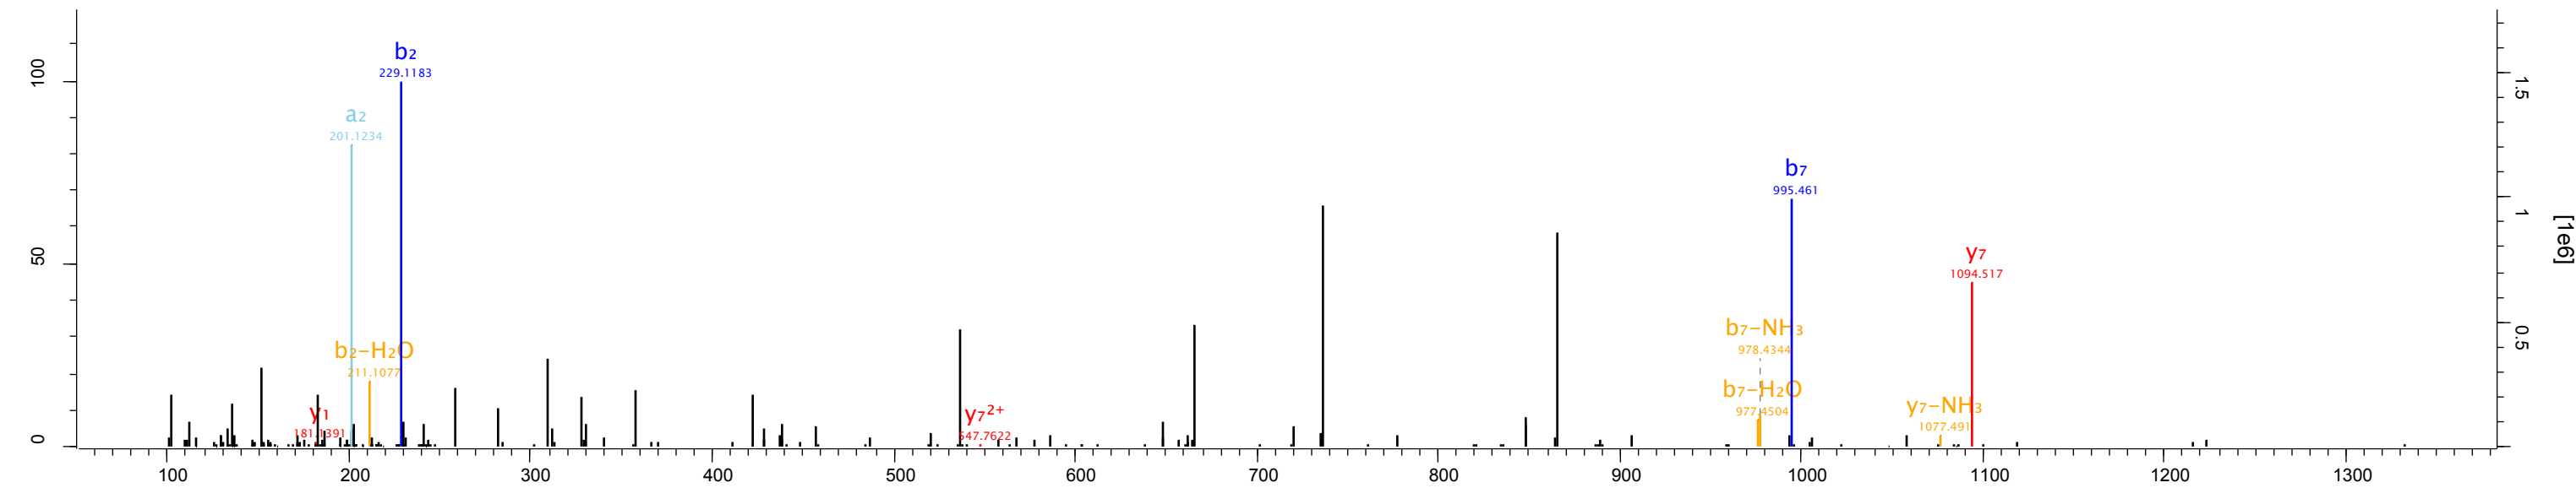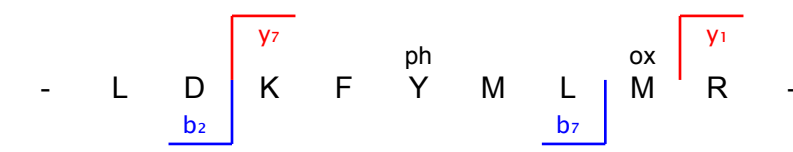

20171215\_MaS\_33SR\_LMH\_phospho2\_02 3629 FTMS; HCD 45.28 916.33 MYH11

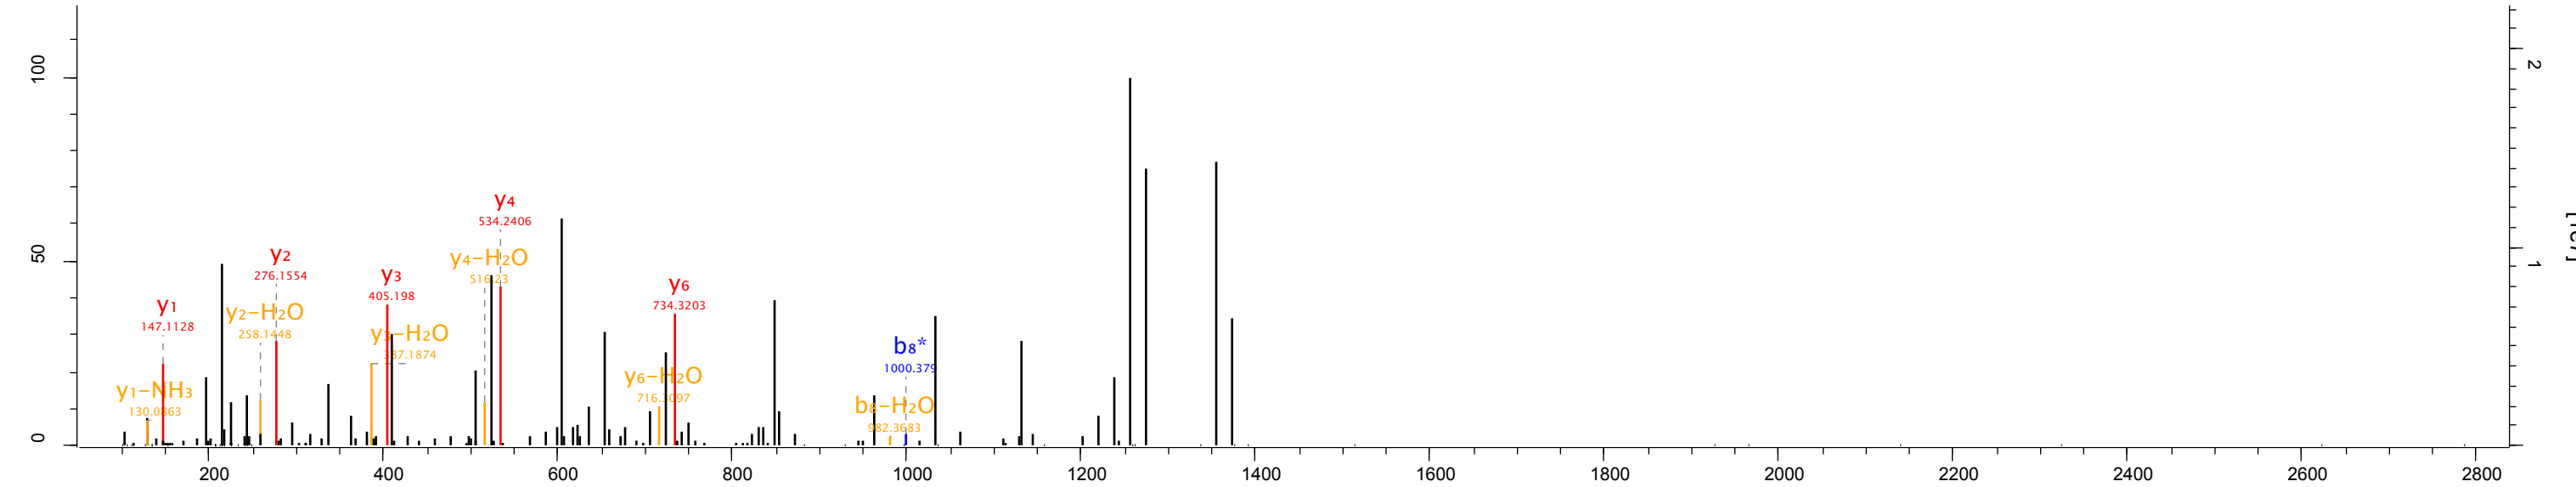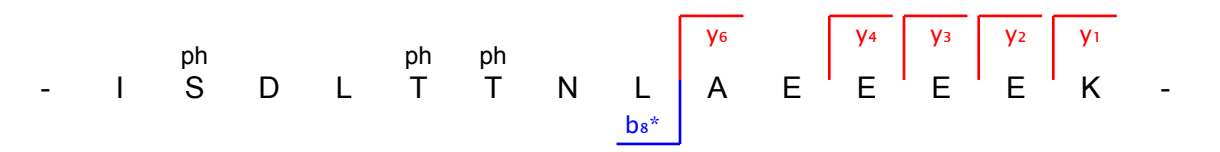

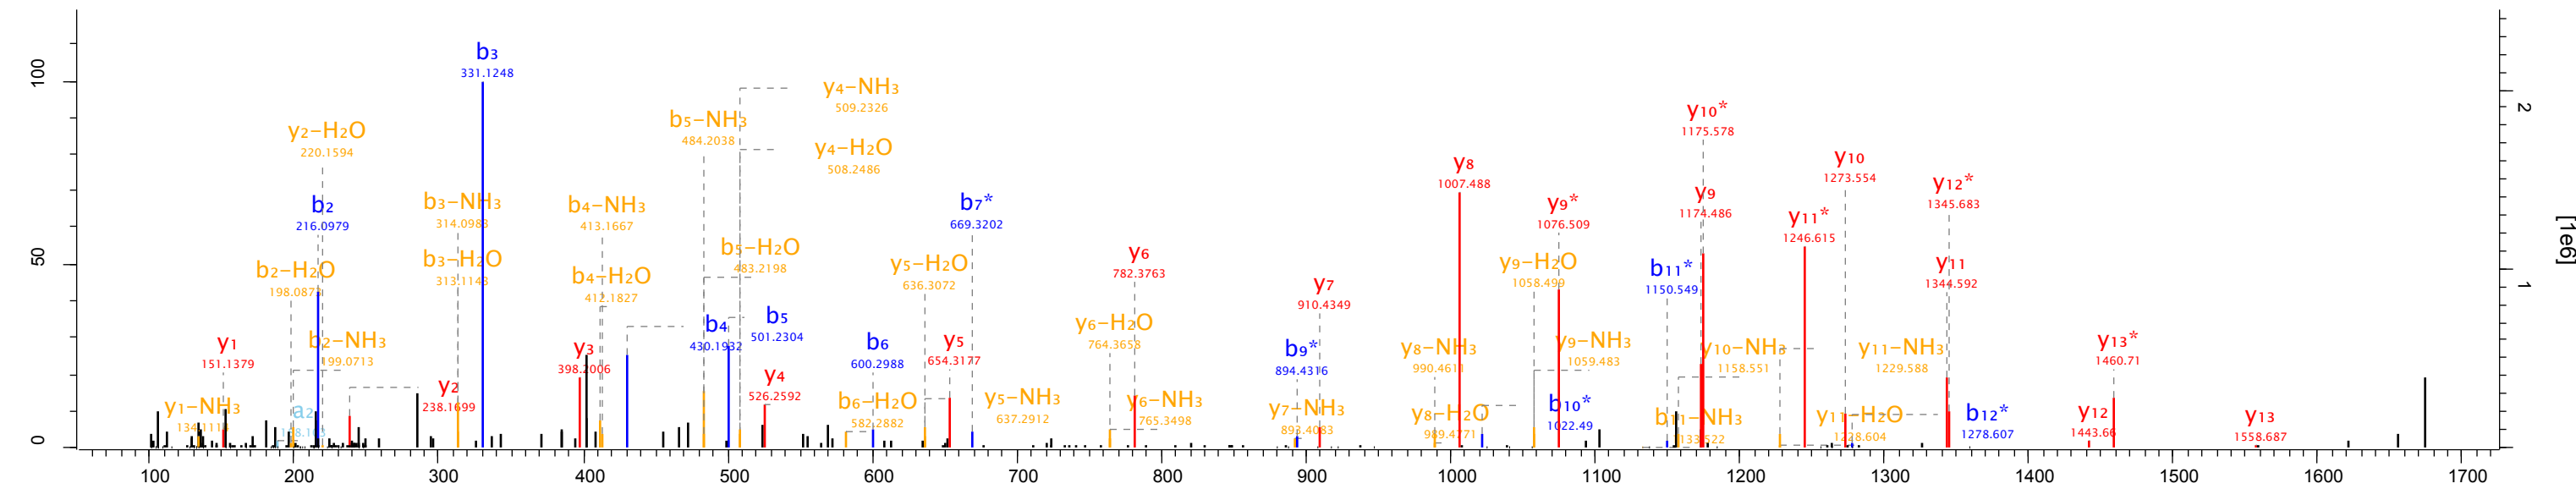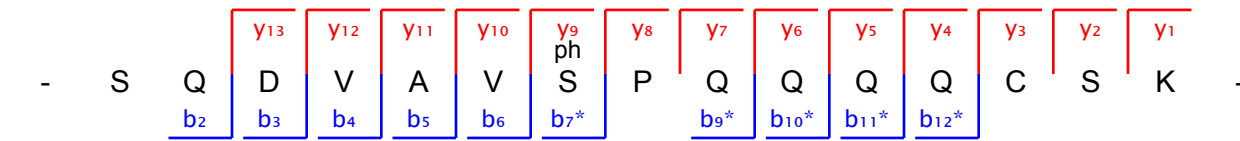



Raw file

20171215\_MaS\_33SR\_LMH\_phospho2\_02

| Scan | Method    | Score  | m/z    | Gene names |
|------|-----------|--------|--------|------------|
| 3749 | FTMS; HCD | 117.79 | 532.72 | CCP110     |

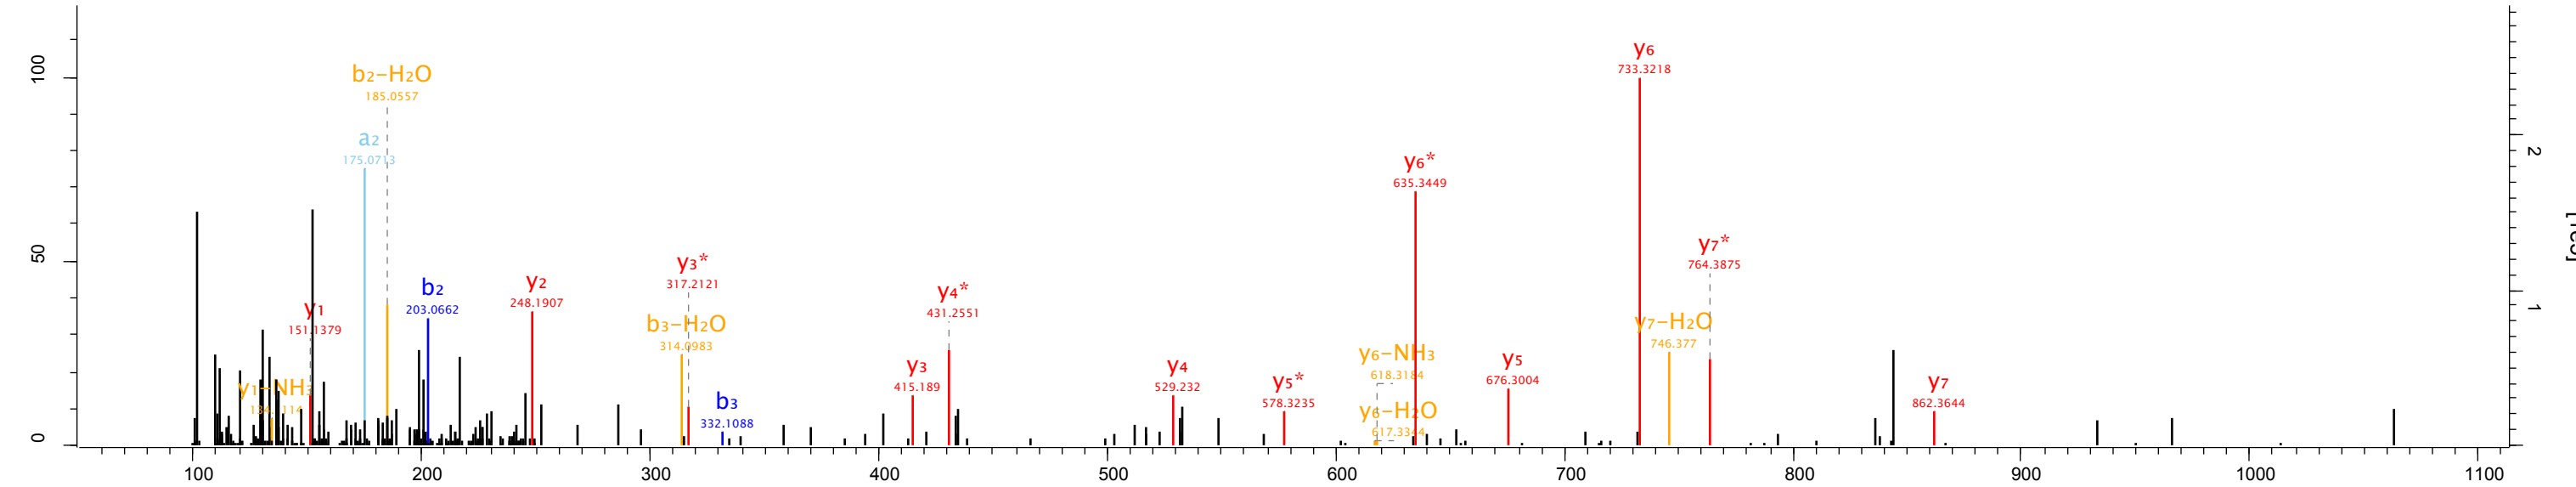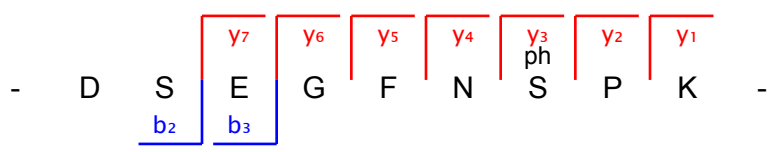

Raw file  
20171215\_MaS\_33SR\_LMH\_phospho2\_02

Scan 3889 Method FTMS; HCD Score 167.71 m/z 565.74 Gene names ARHGEF2

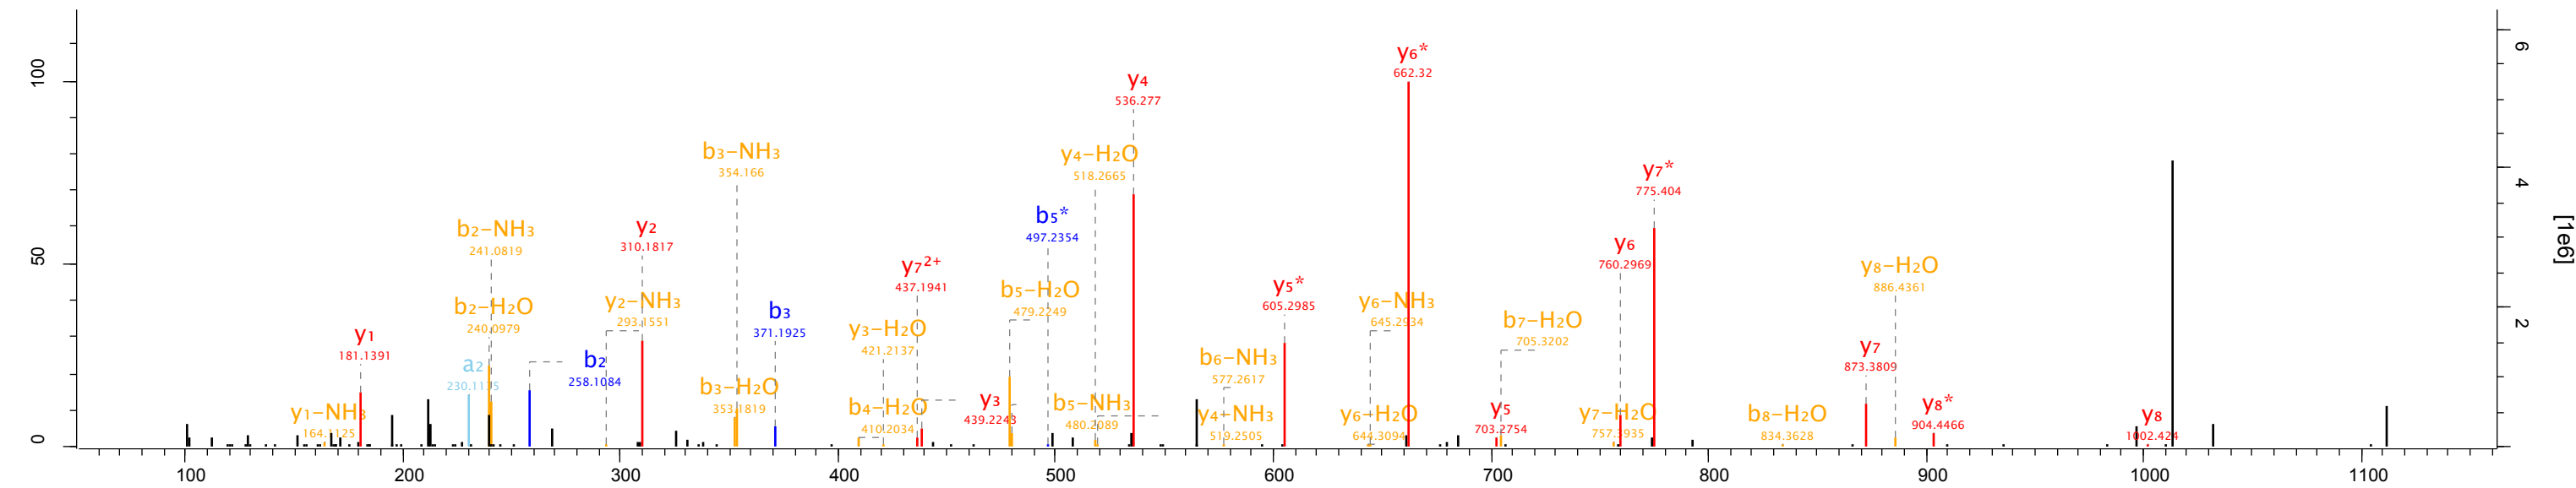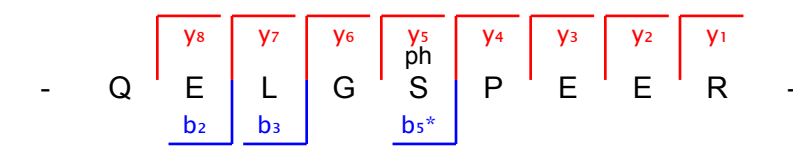

Raw file 20171215\_MaS\_33SR\_LMH\_phospho2\_02 Scan 4339 Method FTMS; HCD Score 146.69 m/z 481.18 Gene names EIF3F

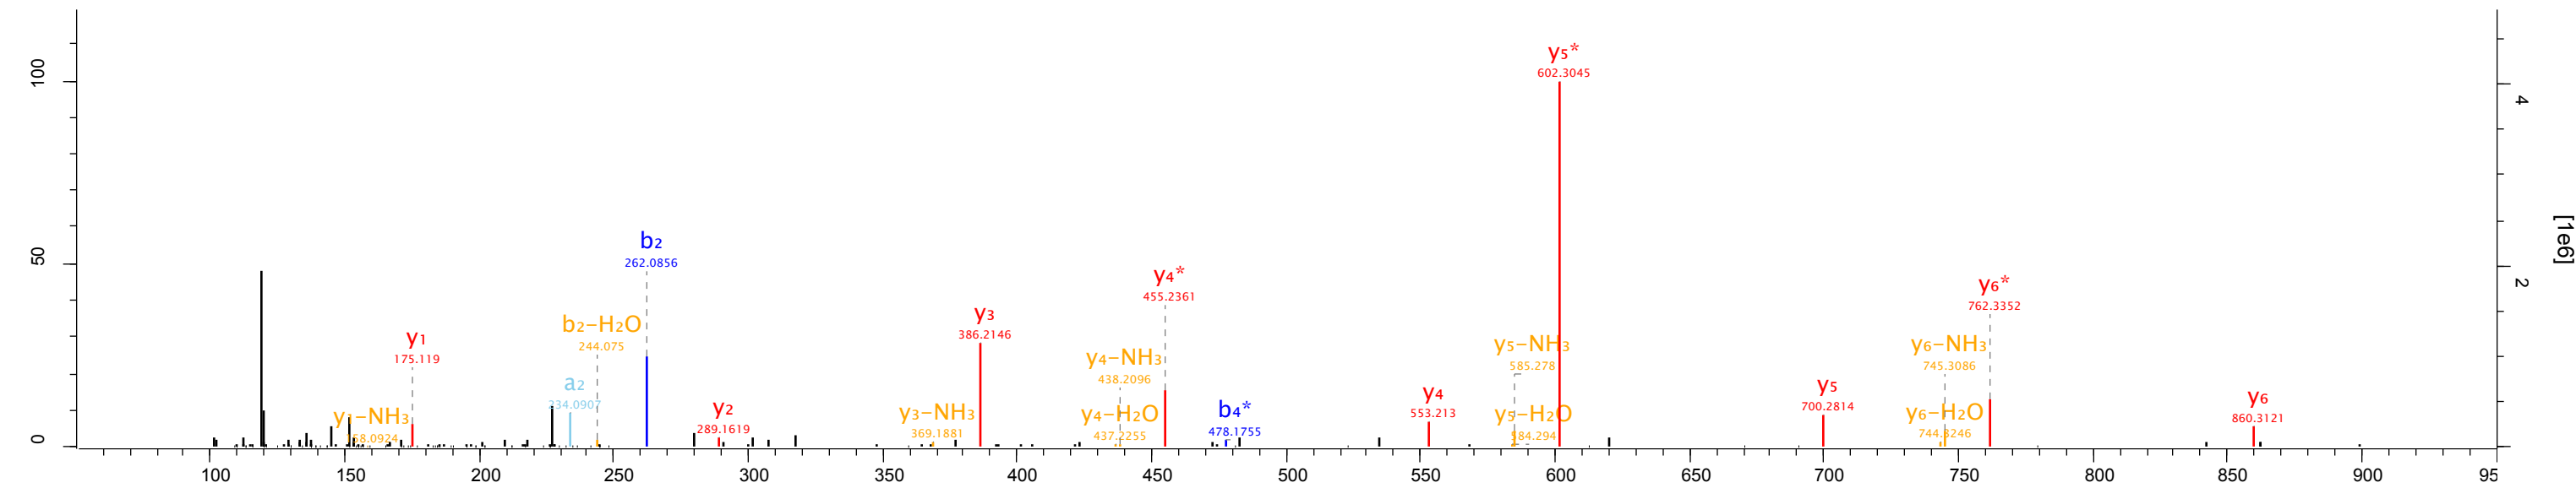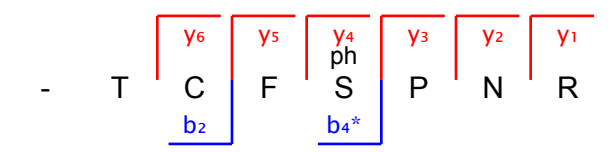

Raw file: 20171215\_MaS\_33SR\_LMH\_phospho2\_02  
 Scan: 4459 Method: FTMS; HCD Score: 141.34 m/z: 561.76 Gene names: HIRIP3

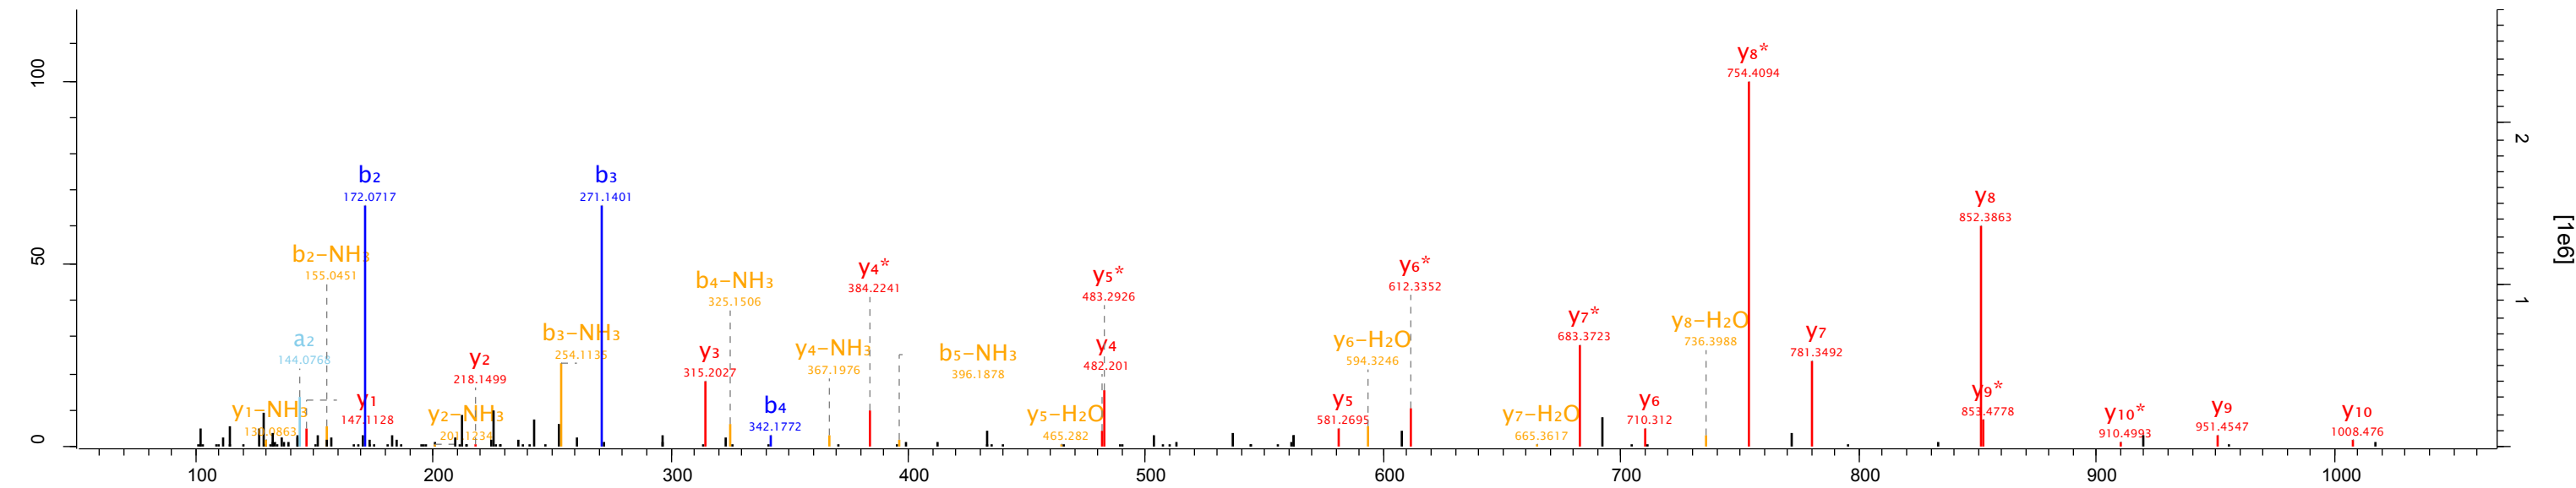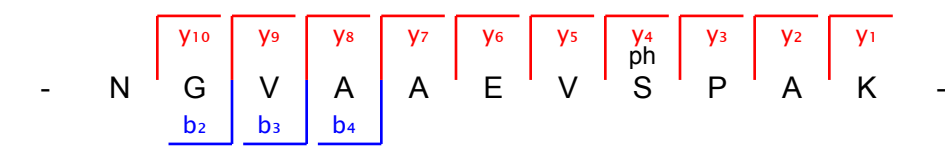

Raw file: 20171215\_MaS\_33SR\_LMH\_phospho2\_02  
 Scan: 4849 Method: FTMS; HCD Score: 78.04 m/z: 491.74 Gene names: FOXK1

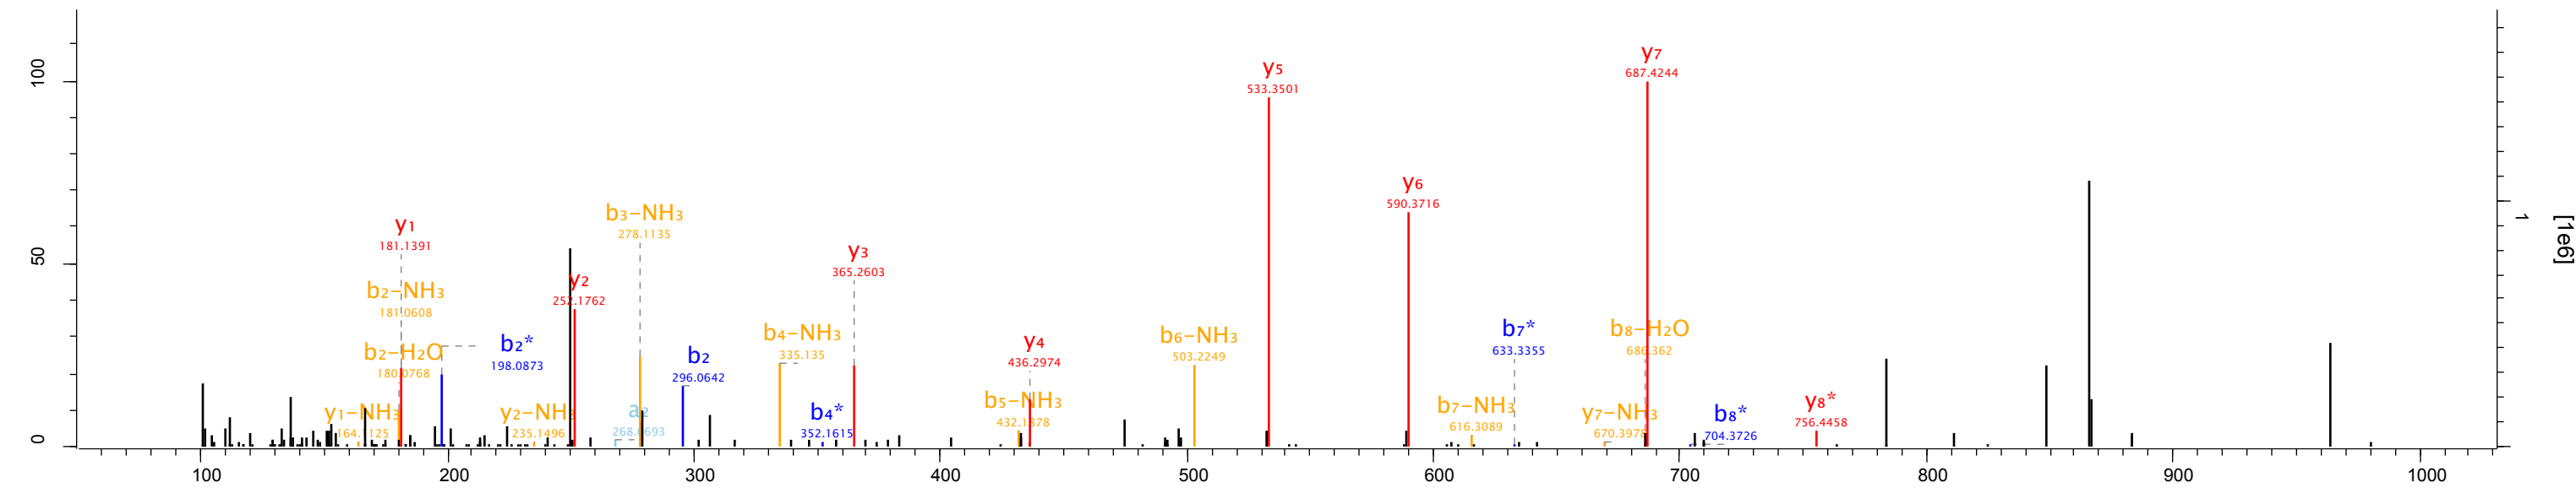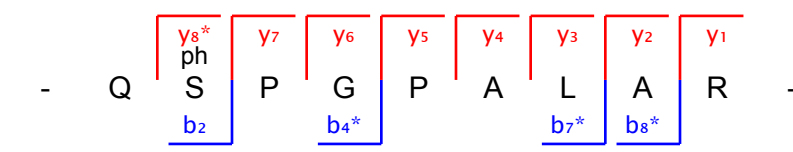

Raw file: 20171215\_MaS\_33SR\_LMH\_phospho2\_02  
 Scan: 4929 Method: FTMS; HCD Score: 151.22 m/z: 494.75 Gene names: DBN1

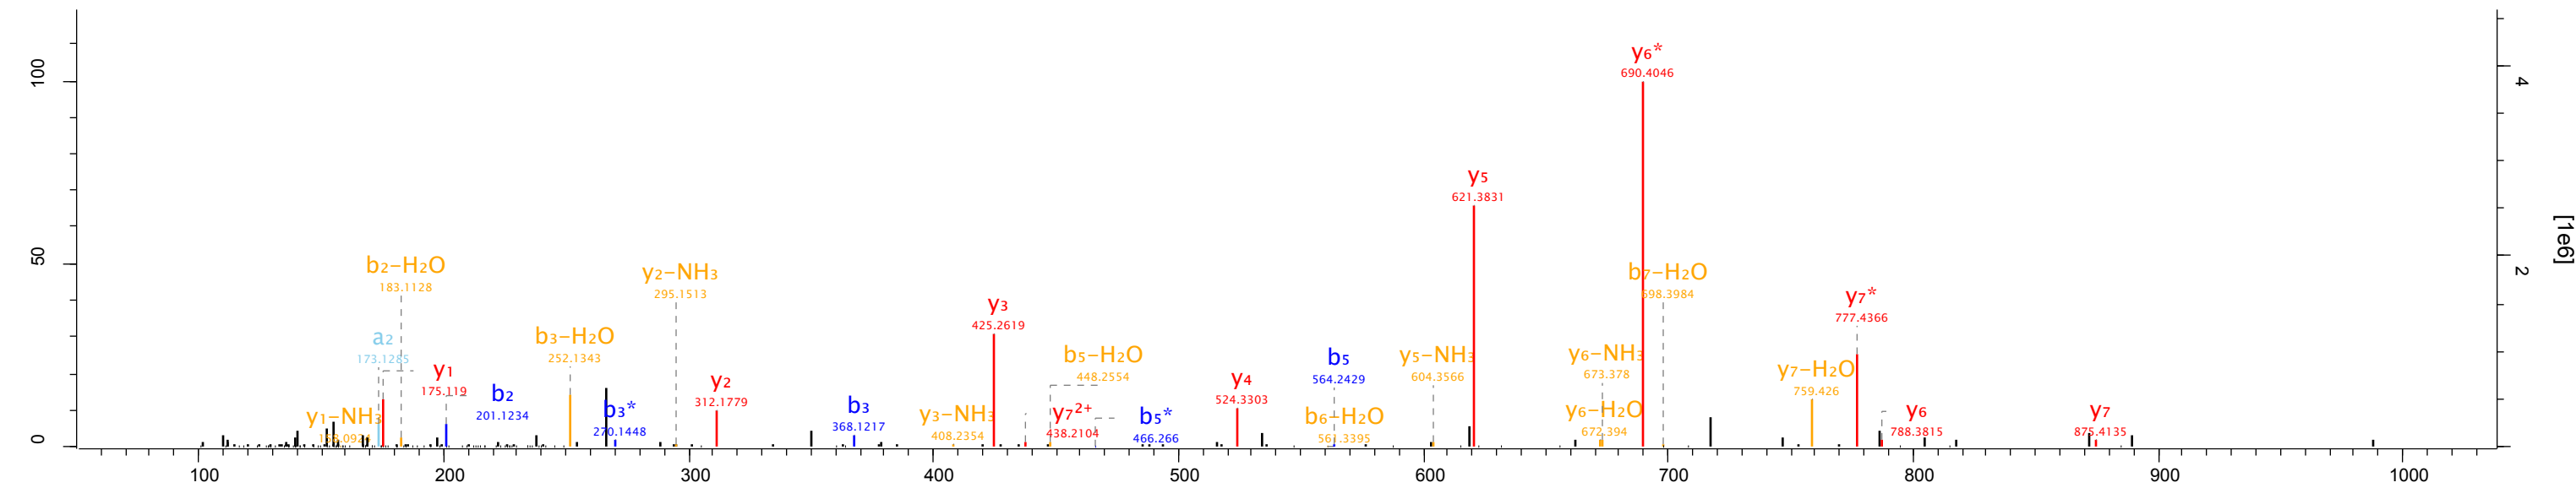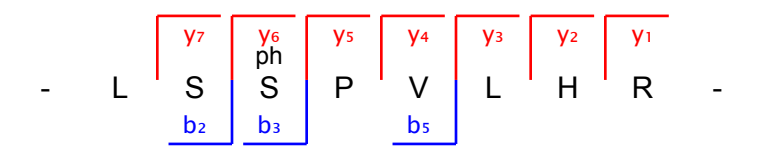

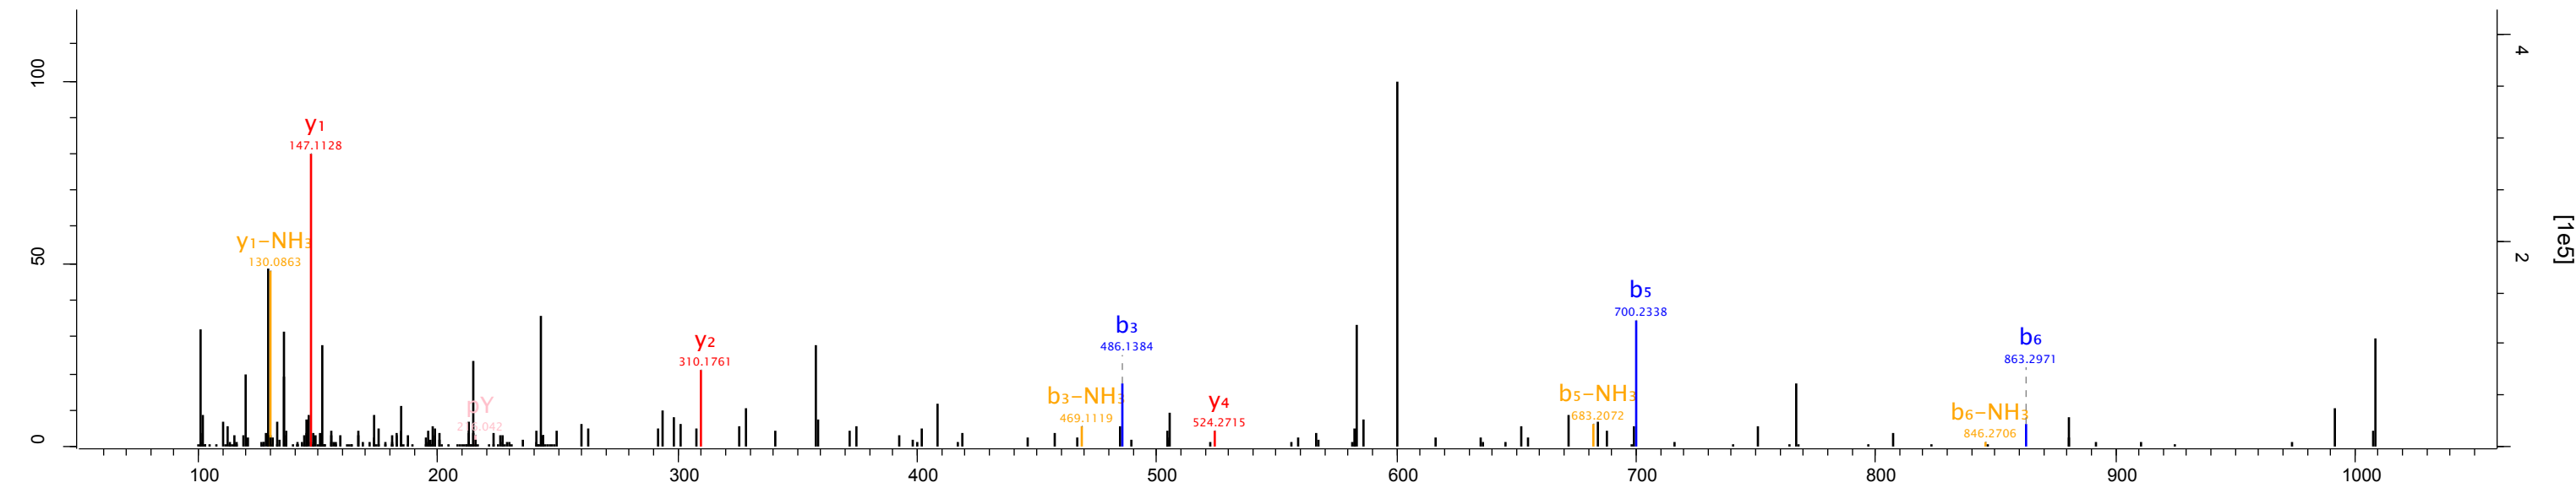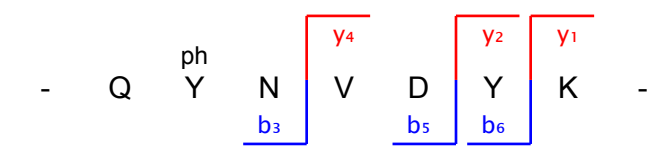

Raw file Scan Method Score m/z Gene names

20171215\_MaS\_33SR\_LMH\_phospho2\_02 6939 FTMS; HCD 199.31 641.78 SLK

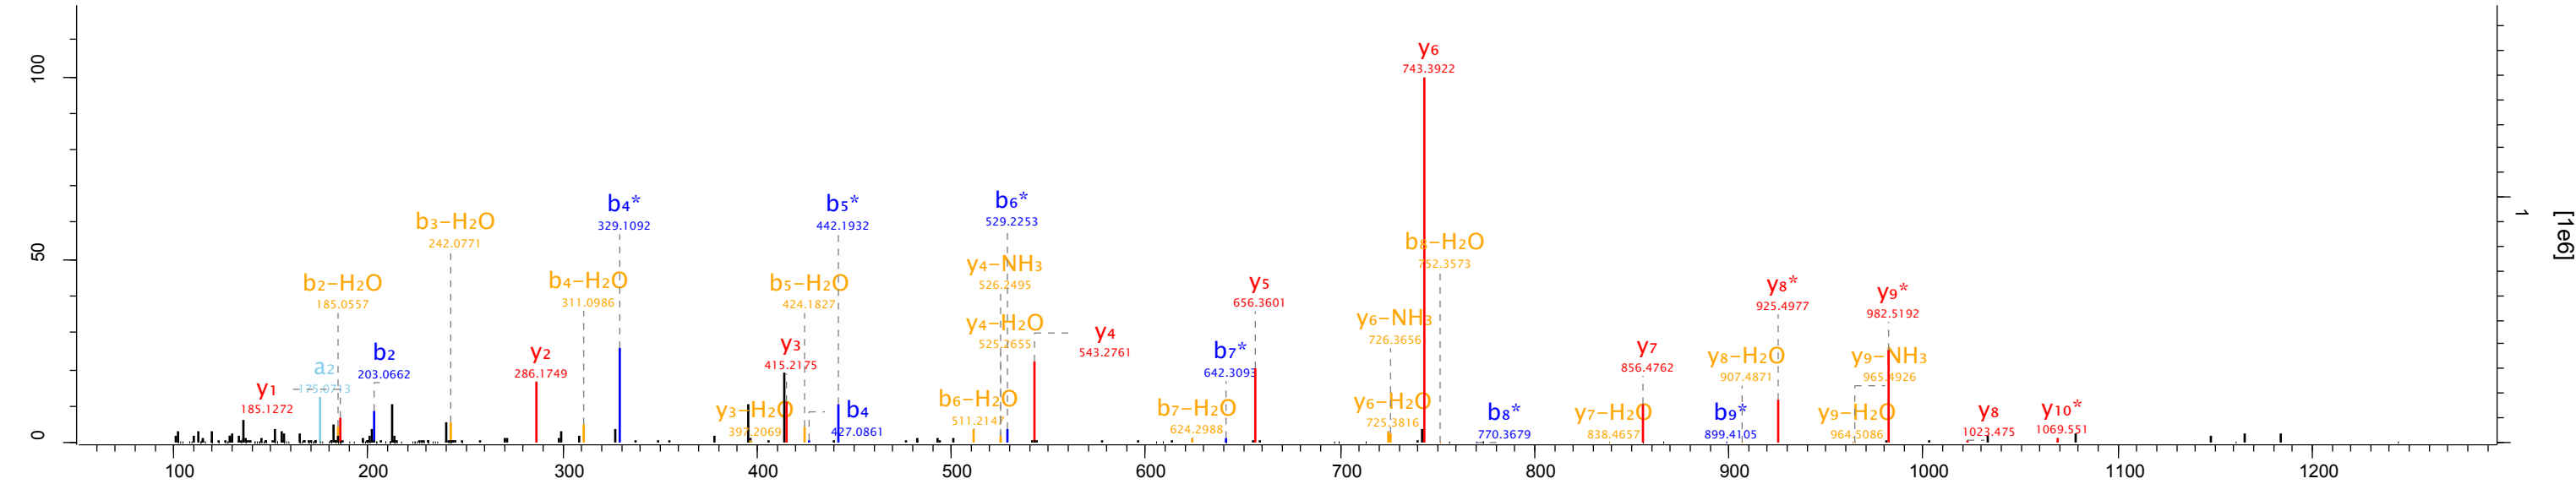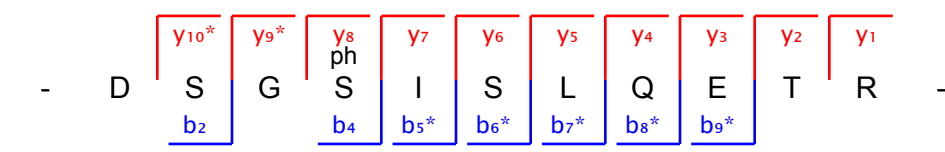



Raw file 20171215\_MaS\_33SR\_LMH\_phospho2\_02 Scan 7069 Method FTMS; HCD Score 275.23 m/z 987.9 Gene names MSH6

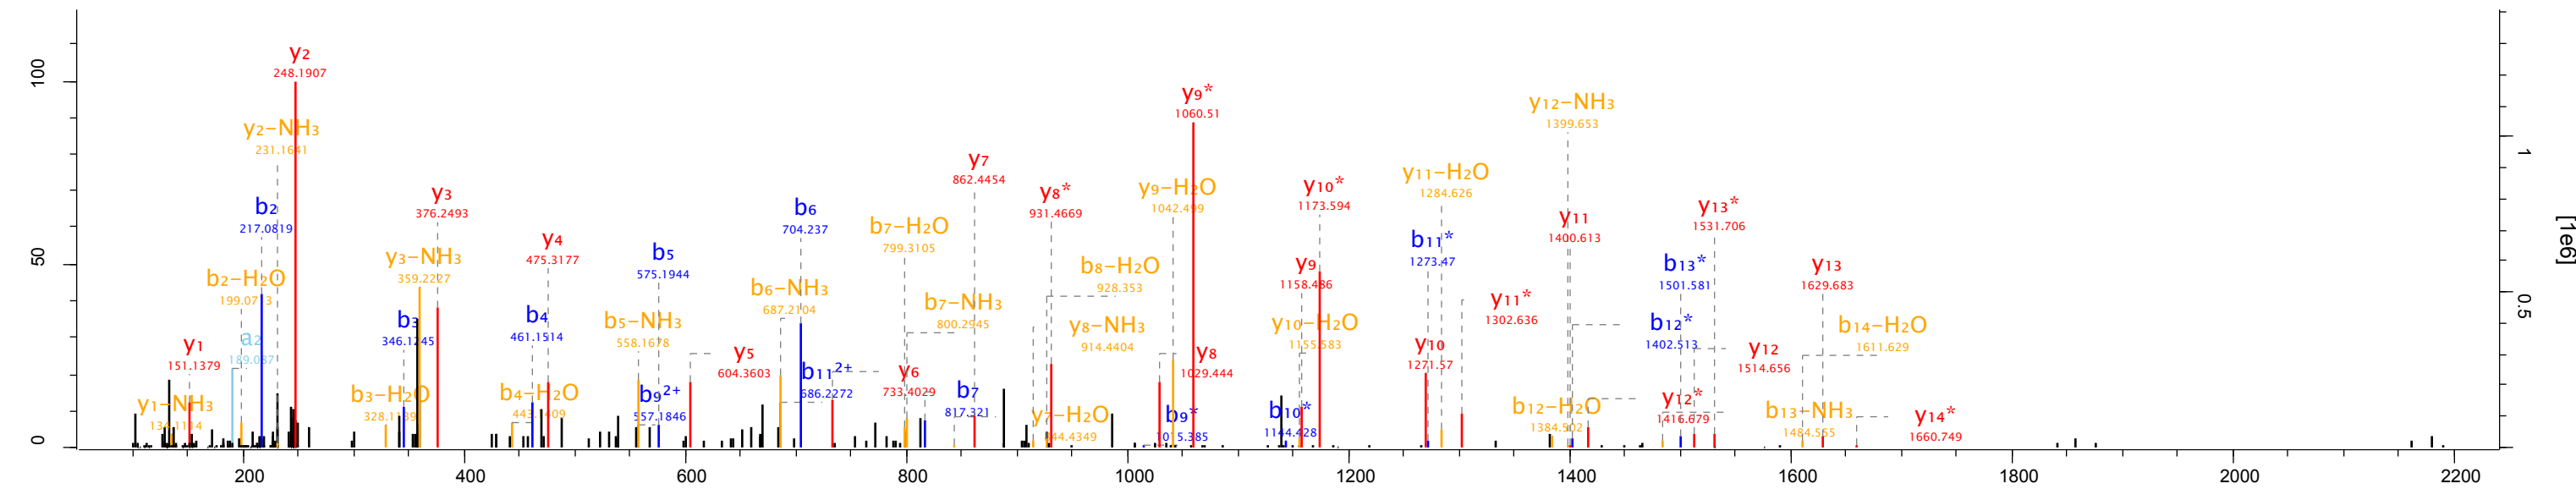

- S E E E D N E I E E S E E E V Q P K -

b2 b3 b4 b5 b6 b7 b9\* b10\* b11\* b12\* b13\*

y14\* y13 y12 y11 y10 y9 y8 ph y7 y6 y5 y4 y3 y2 y1

Raw file: 20171215\_MaS\_33SR\_LMH\_phospho2\_02  
 Scan: 9049 Method: FTMS; HCD Score: 178.14 m/z: 744.36 Gene names: ZC3H13

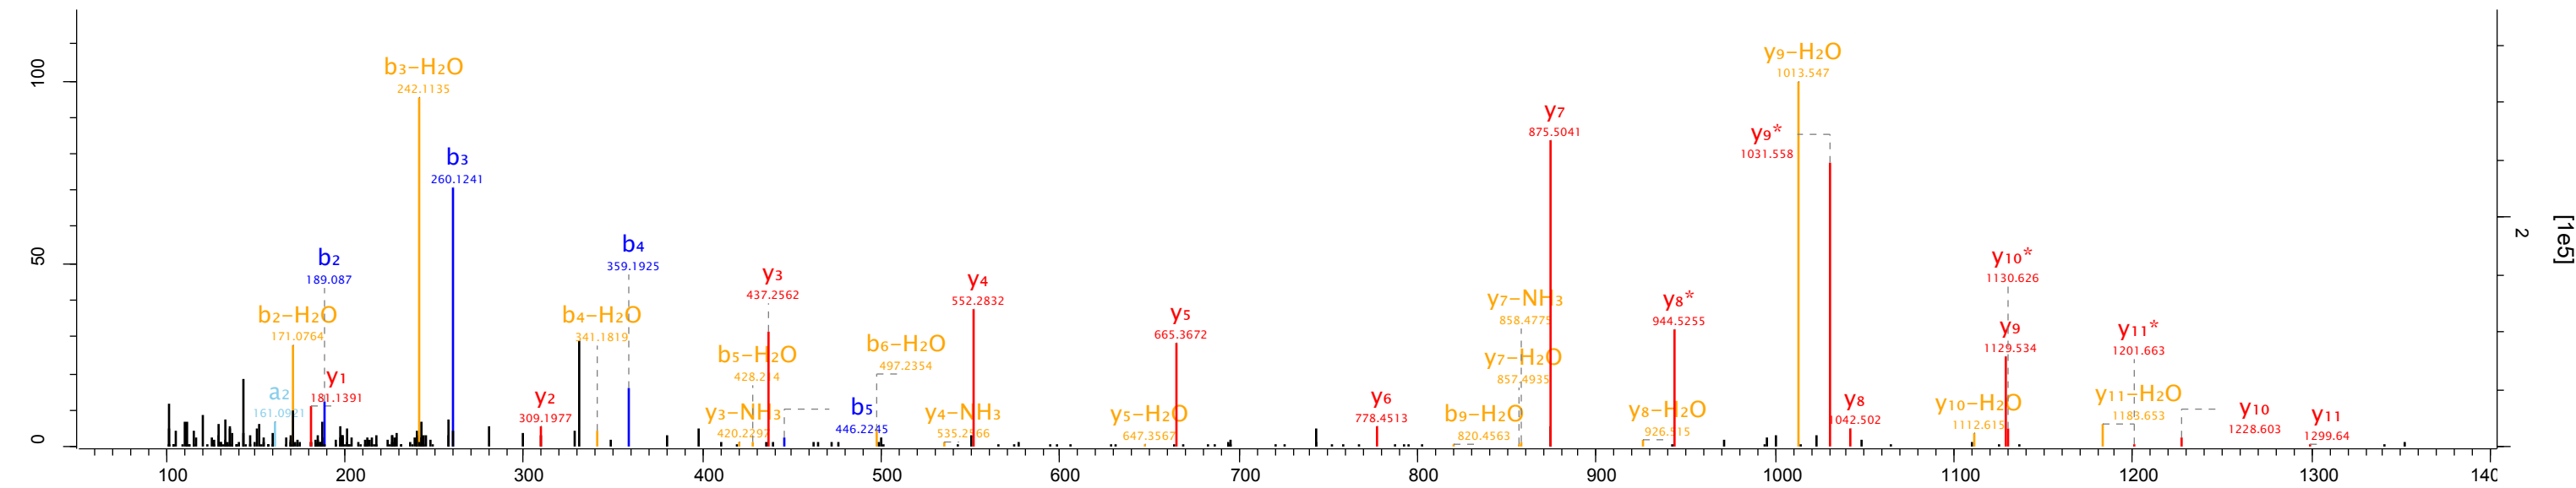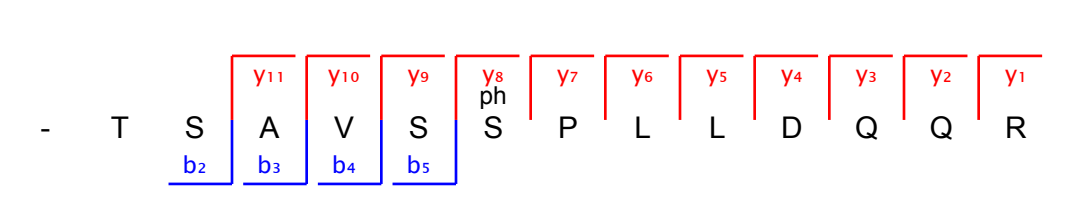

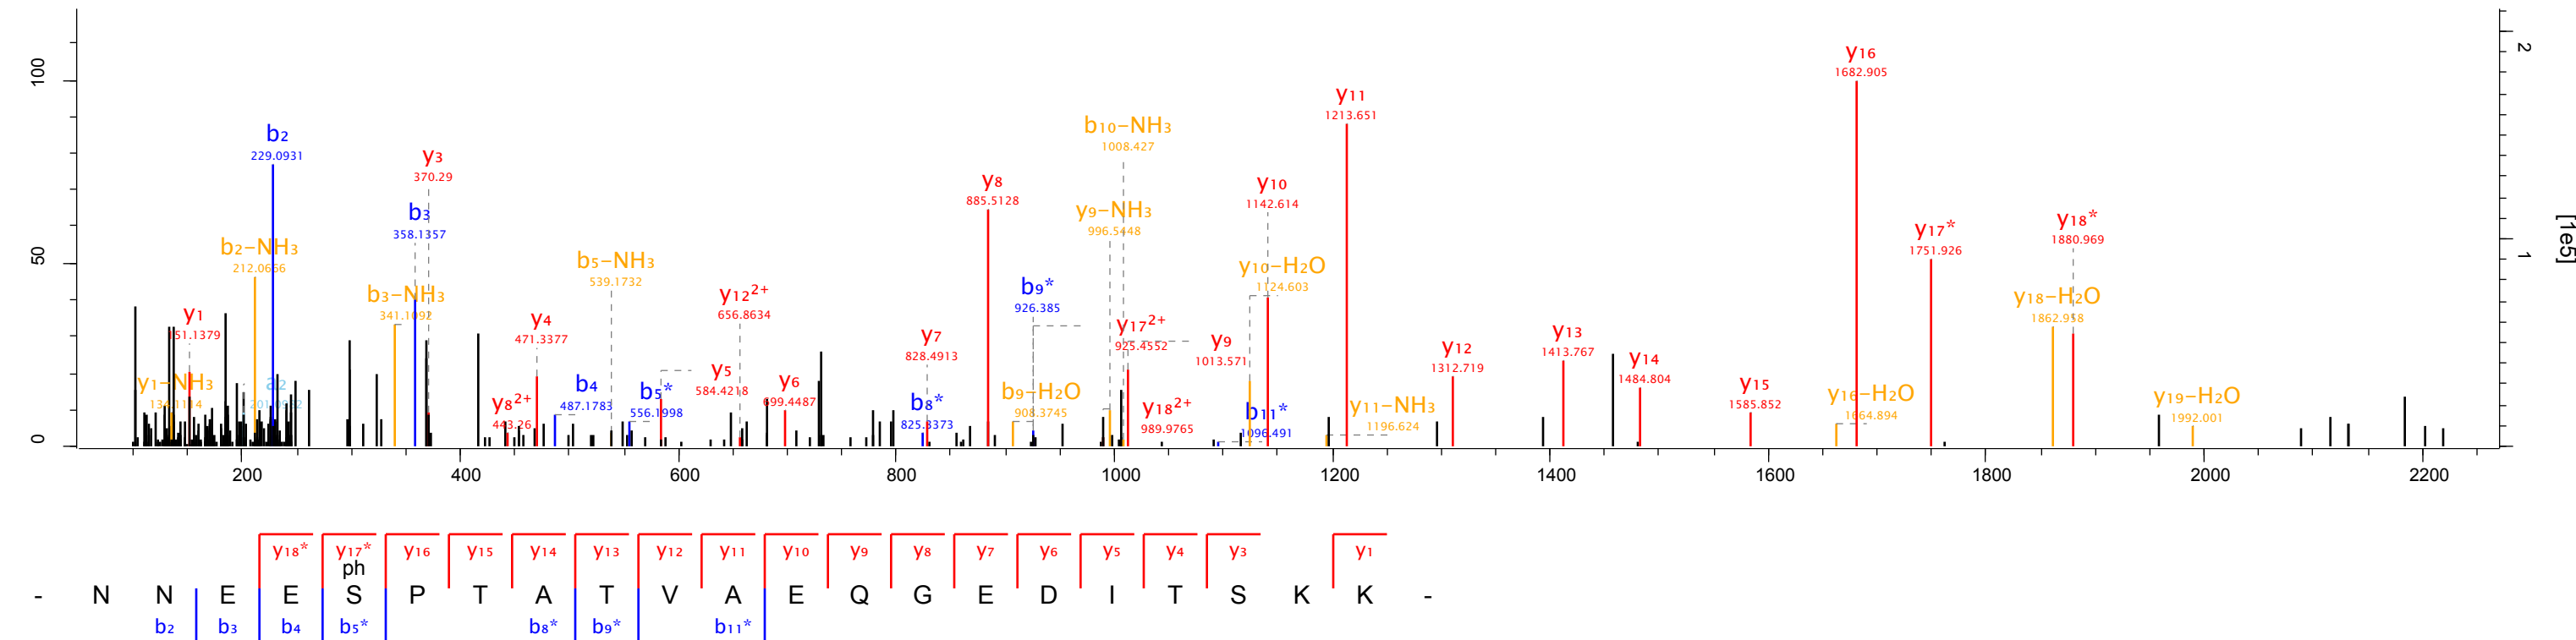

Raw file  
20171215\_MaS\_33SR\_LMH\_phospho2\_02

Scan Method Score m/z Gene names  
9359 FTMS; HCD 260.41 698.02 RBM39

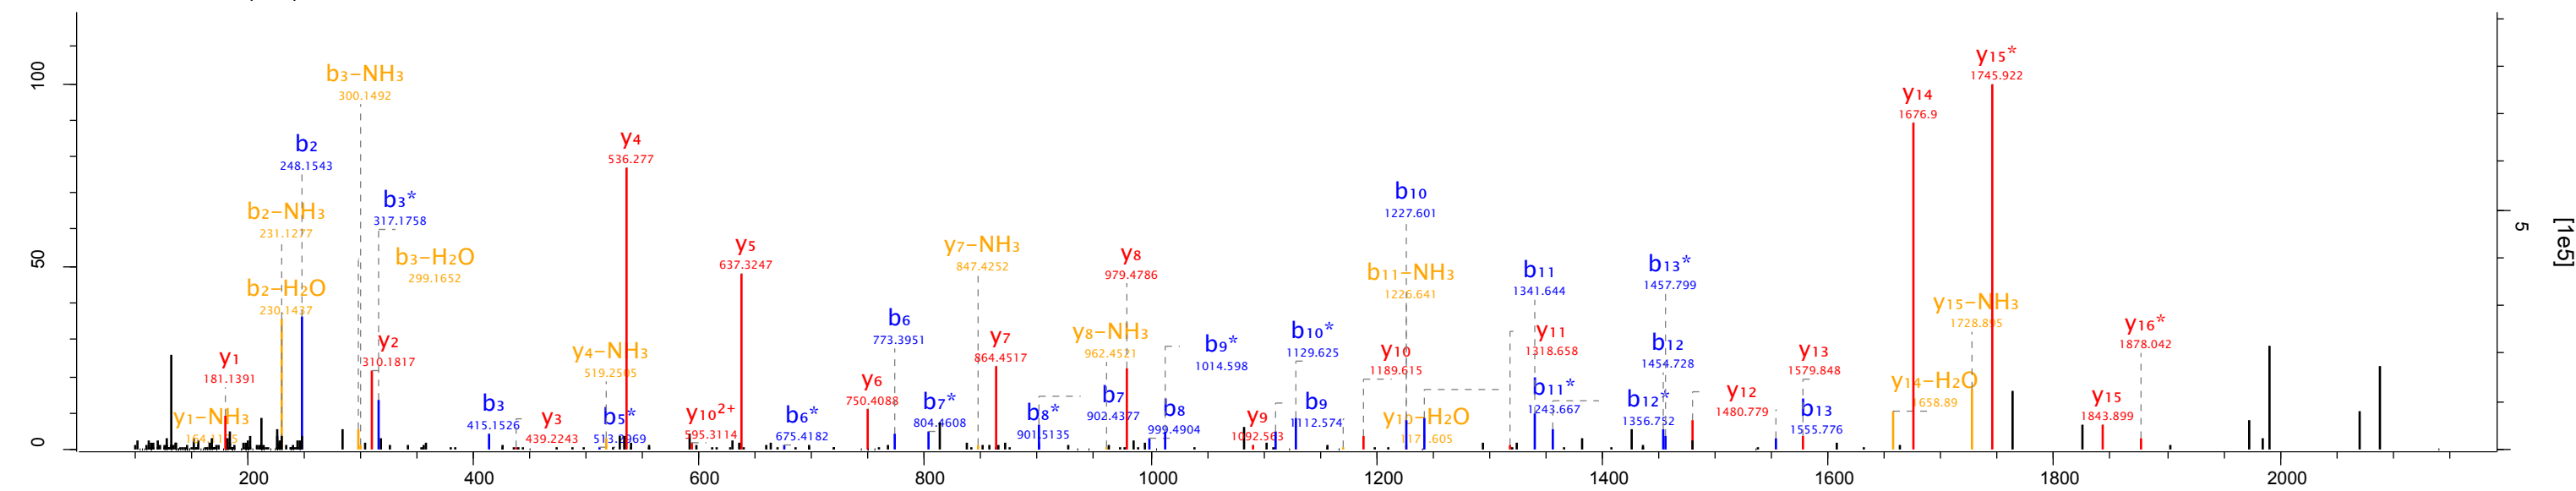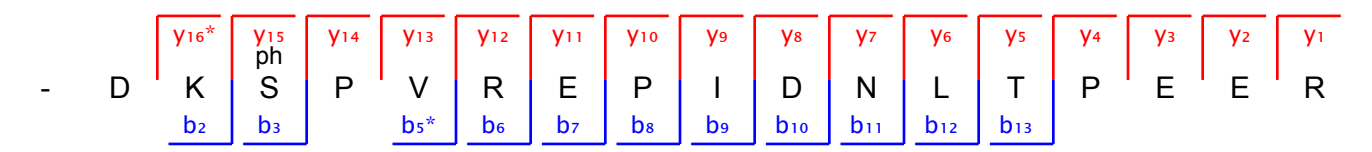

Raw file 20171215\_MaS\_33SR\_LMH\_phospho2\_03 Scan 10189 Method FTMS; HCD Score 140.51 m/z 998.91 Gene names ELMO1

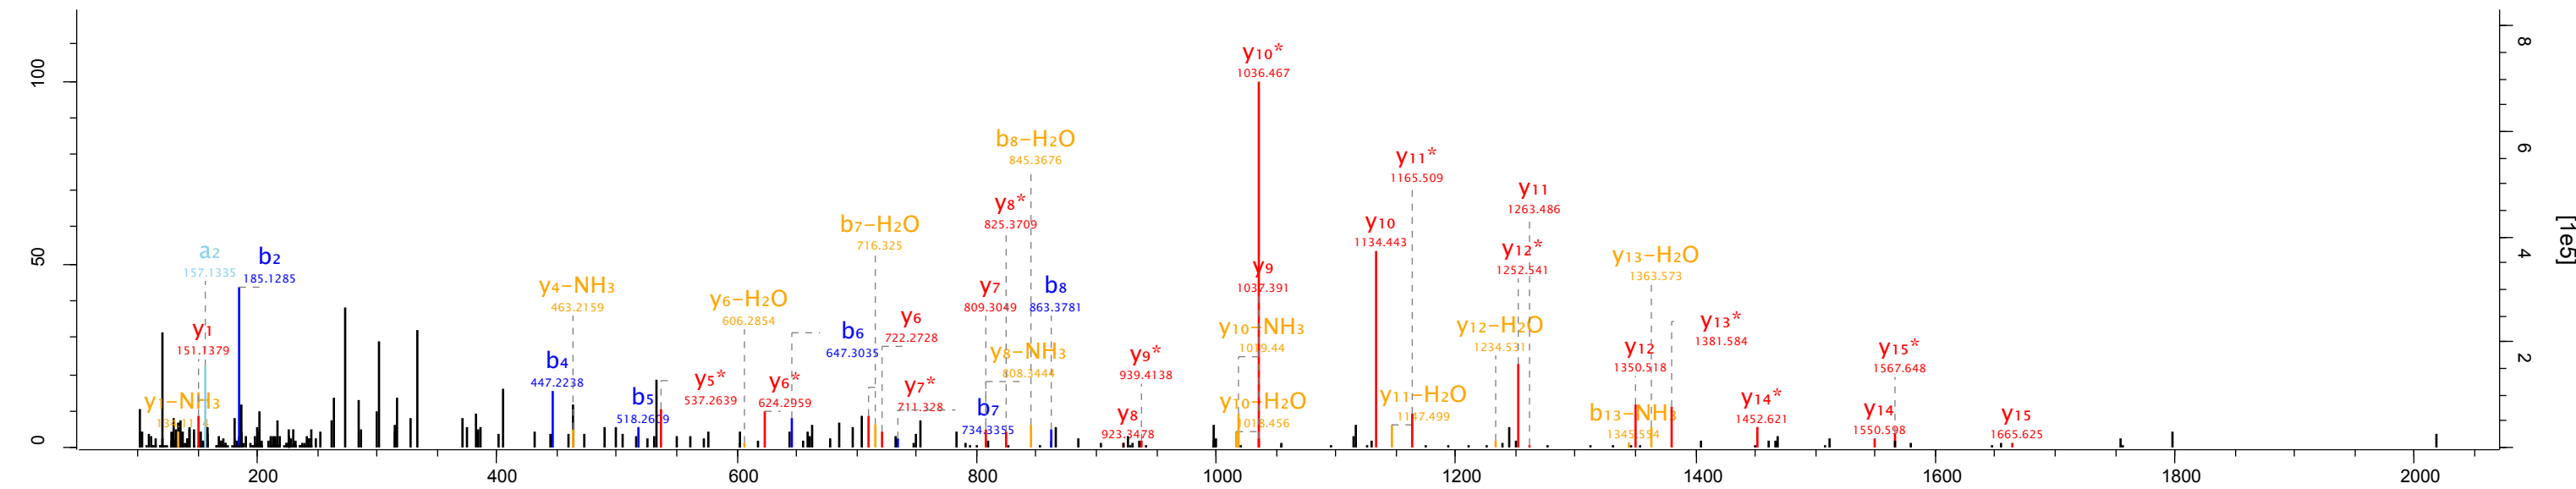

- I A F D A E S E P N N S S G ph S M E K -

b2
b4
b5
b6
b7
b8
y15
y14
y13\*
y12
y11
y10
y9
y8
y7
y6
y5\*
y1

Raw file: 20171215\_MaS\_33SR\_LMH\_phospho2\_03  
 Scan: 10229 Method: FTMS; HCD Score: 227.57 m/z: 902.36 Gene names: NAA10

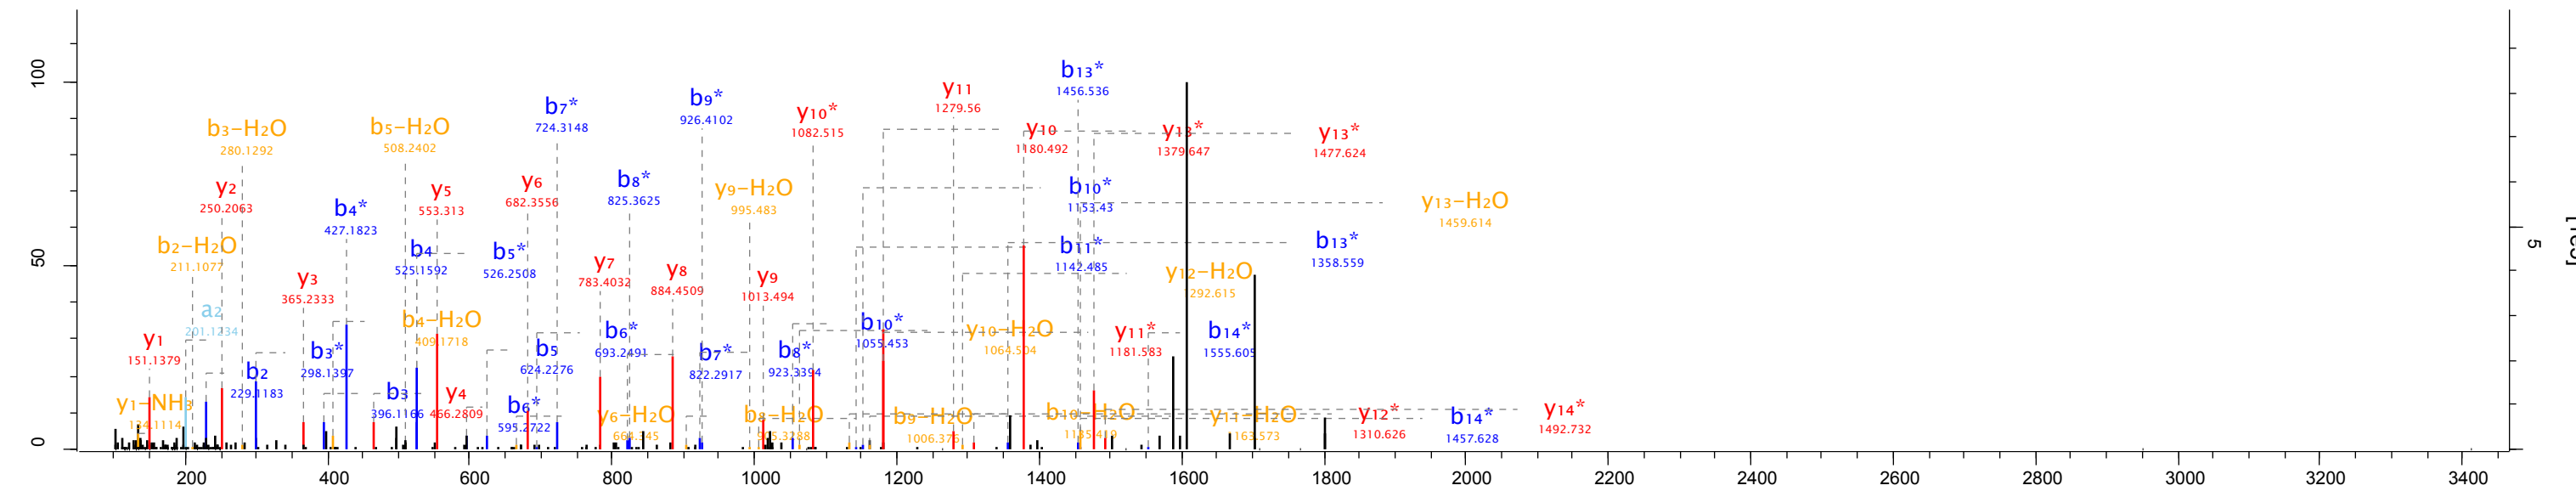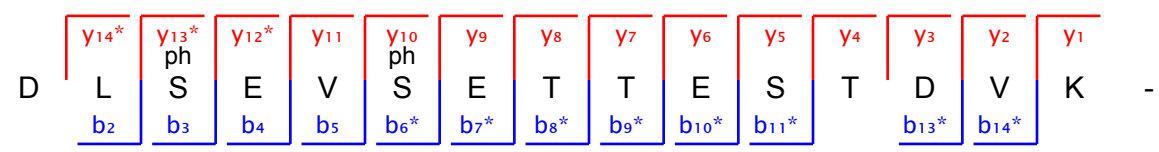

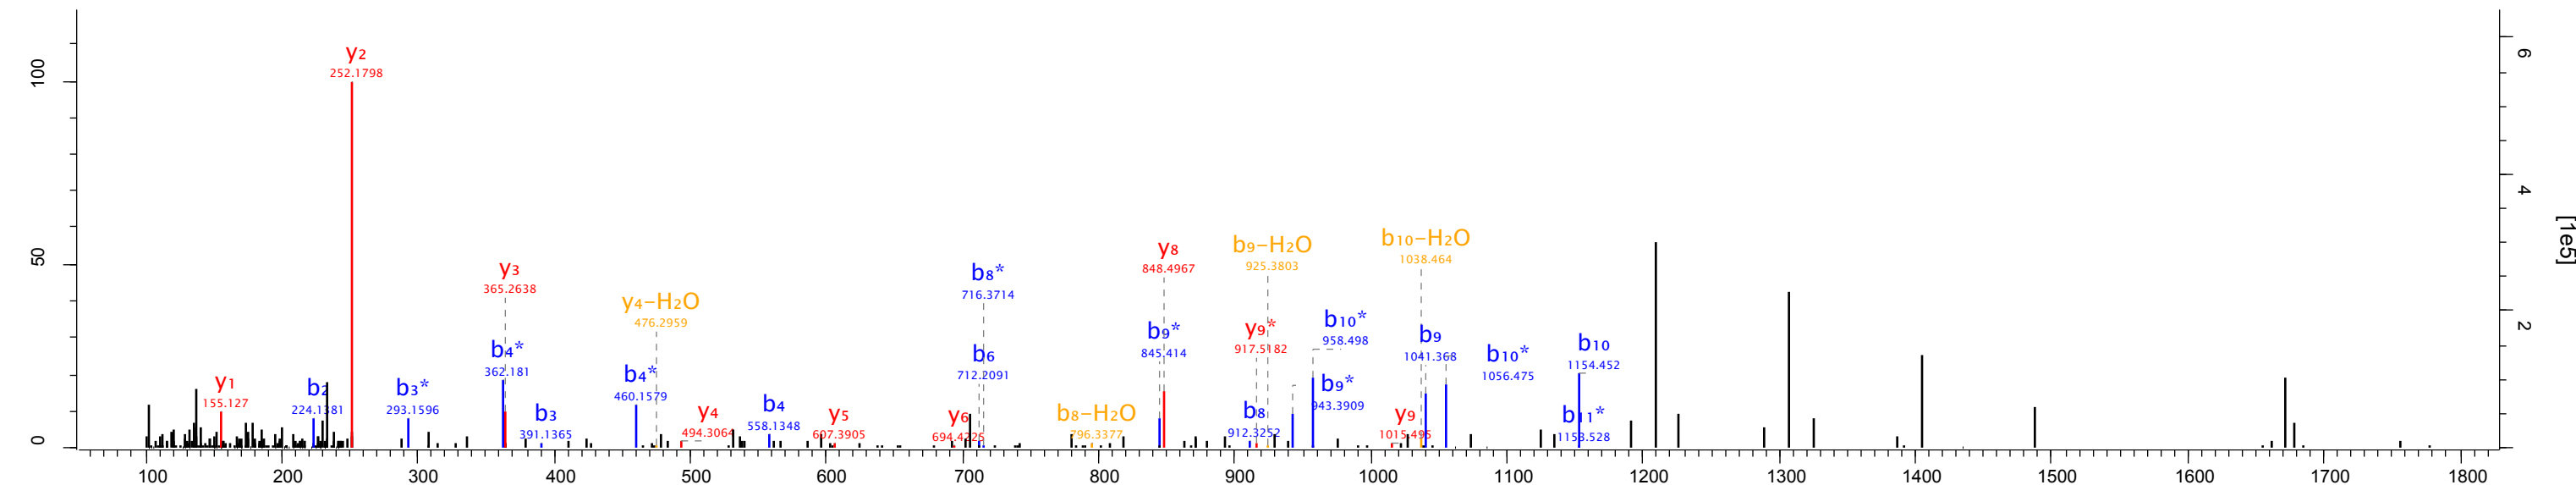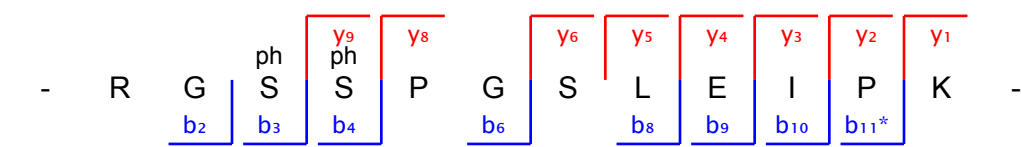

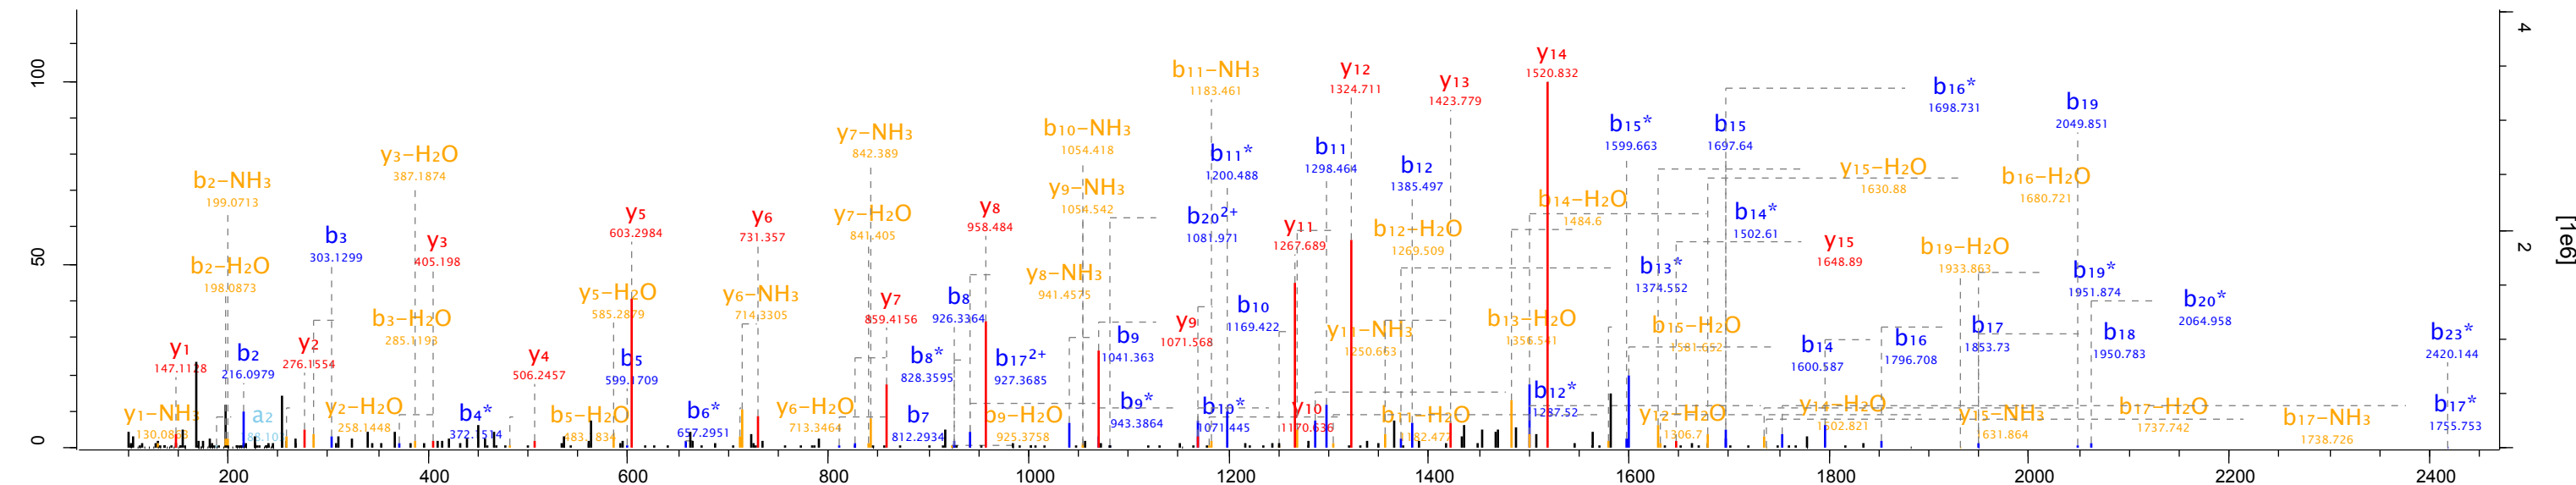

- S Q S S E R G N D Q E S S Q P V G P V I V Q Q P T E E K -

ph

b<sub>2</sub> b<sub>3</sub> b<sub>4</sub><sup>\*</sup> b<sub>5</sub> b<sub>6</sub><sup>\*</sup> b<sub>7</sub> b<sub>8</sub> b<sub>9</sub> b<sub>10</sub> b<sub>11</sub> b<sub>12</sub> b<sub>13</sub><sup>\*</sup> b<sub>14</sub> b<sub>15</sub> b<sub>16</sub> b<sub>17</sub> b<sub>18</sub> b<sub>19</sub> b<sub>20</sub><sup>\*</sup> b<sub>23</sub><sup>\*</sup>

y<sub>15</sub> y<sub>14</sub> y<sub>13</sub> y<sub>12</sub> y<sub>11</sub> y<sub>10</sub> y<sub>9</sub> y<sub>8</sub> y<sub>7</sub> y<sub>6</sub> y<sub>5</sub> y<sub>4</sub> y<sub>3</sub> y<sub>2</sub> y<sub>1</sub>



Raw file: 20171215\_MaS\_33SR\_LMH\_phospho2\_03  
 Scan: 10349 Method: FTMS; HCD Score: 357.94 m/z: 1072.98 Gene names: HIRIP3

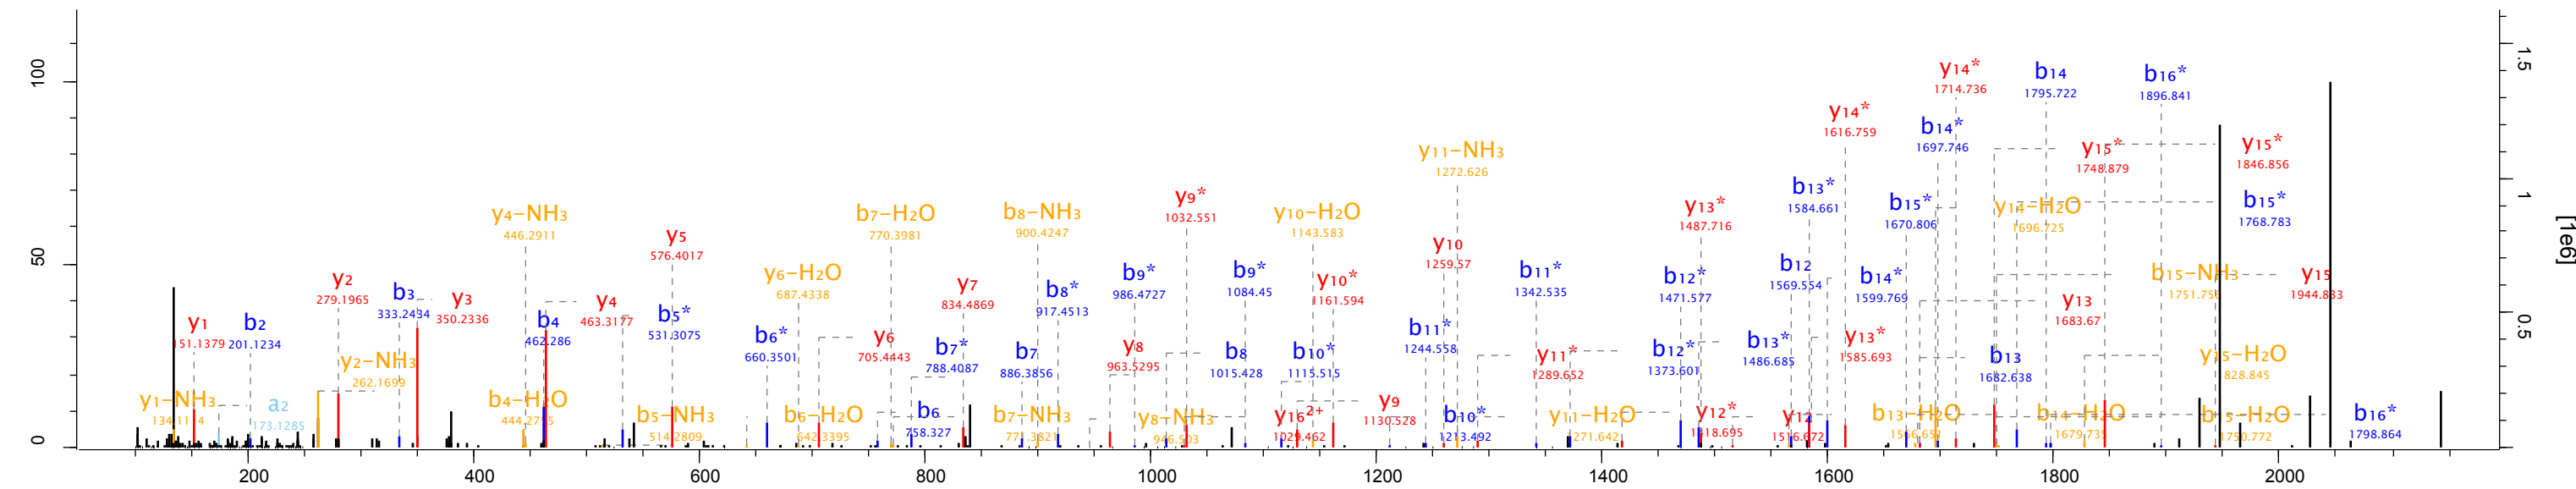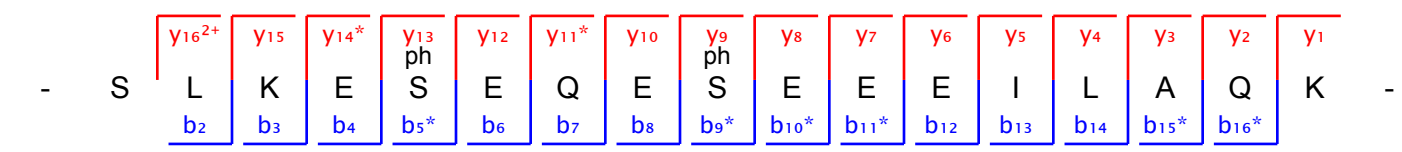

Raw file: 20171215\_MaS\_33SR\_LMH\_phospho2\_03  
 Scan: 10369 Method: FTMS; HCD Score: 281.37 m/z: 1566.23 Gene names: PAGE5

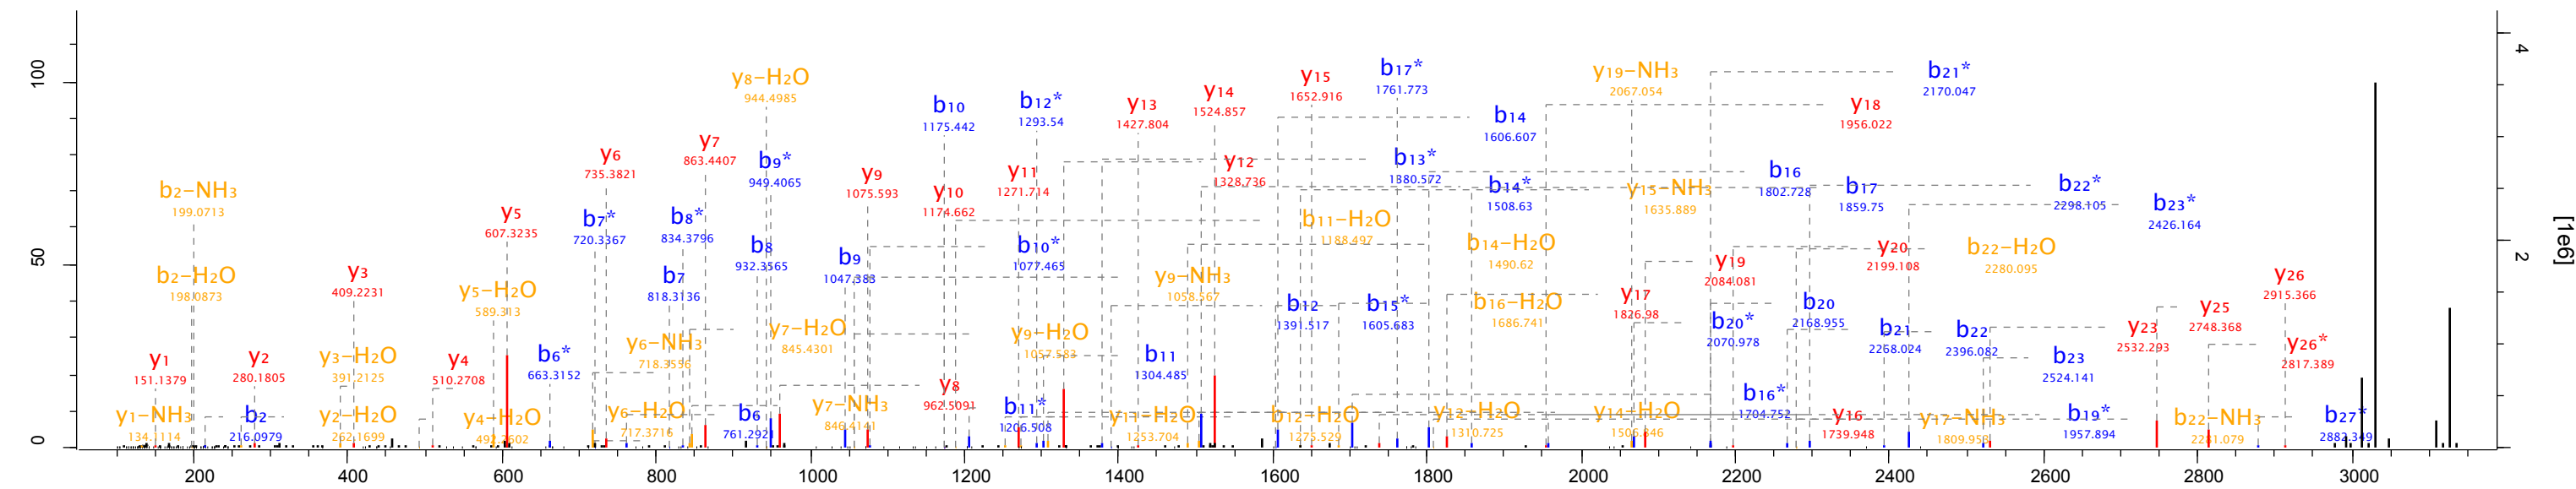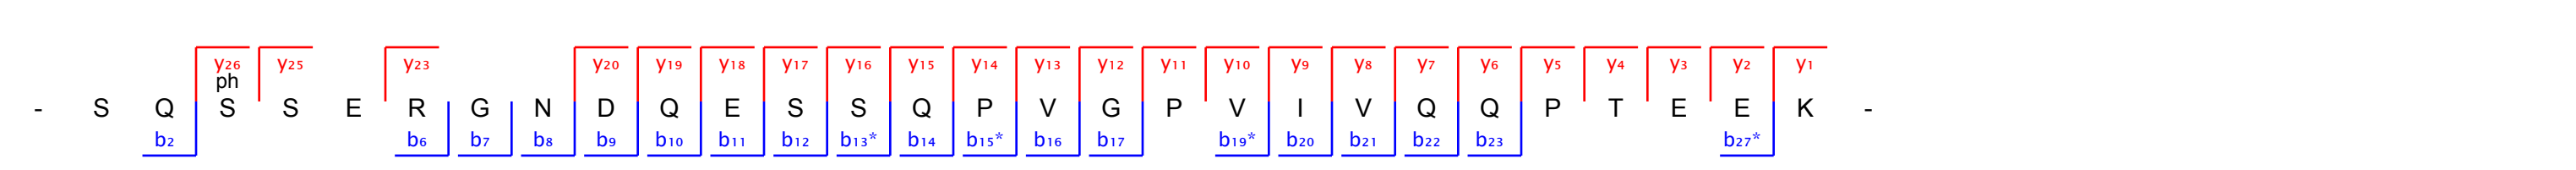

Raw file: 20171215\_MaS\_33SR\_LMH\_phospho2\_03  
 Scan: 10399 Method: FTMS; HCD Score: 264.21 m/z: 1096.46 Gene names: ARHGEF12

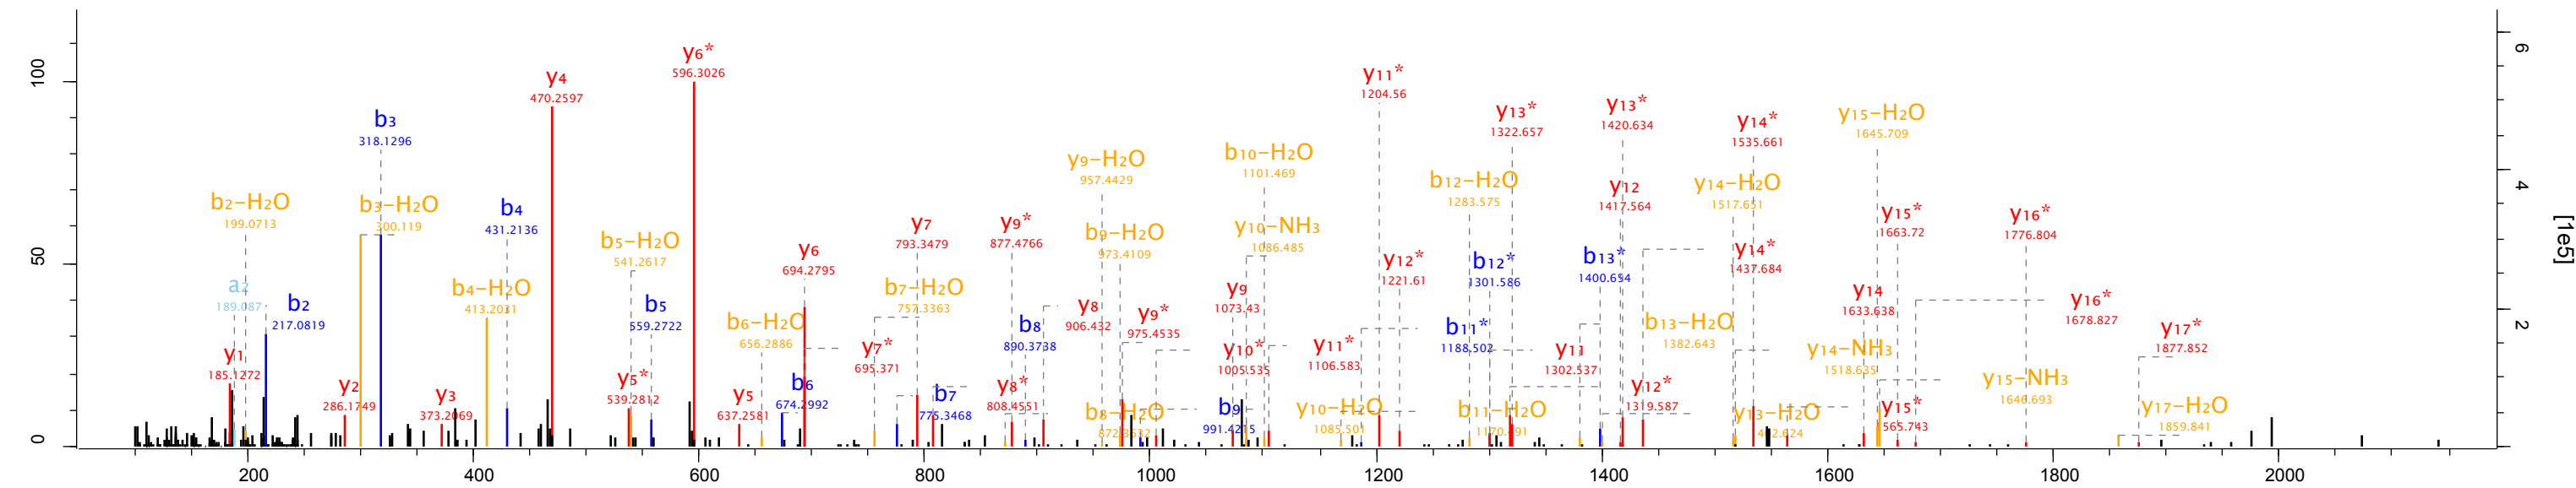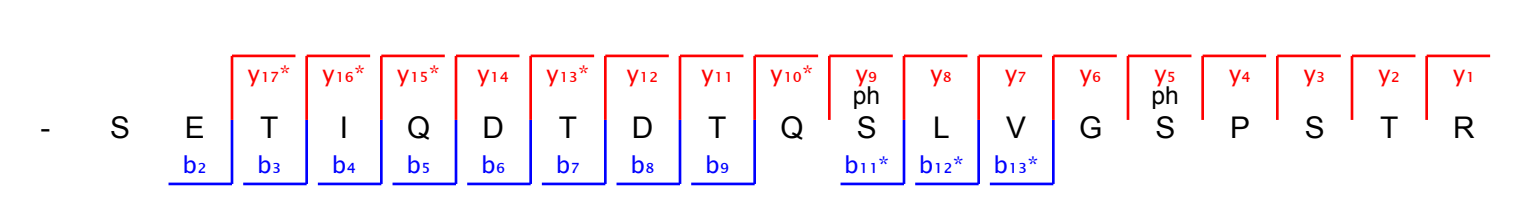

Raw file: 20171215\_MaS\_33SR\_LMH\_phospho2\_03  
 Scan: 10539 Method: FTMS; HCD Score: 102.97 m/z: 676.99 Gene names: NES

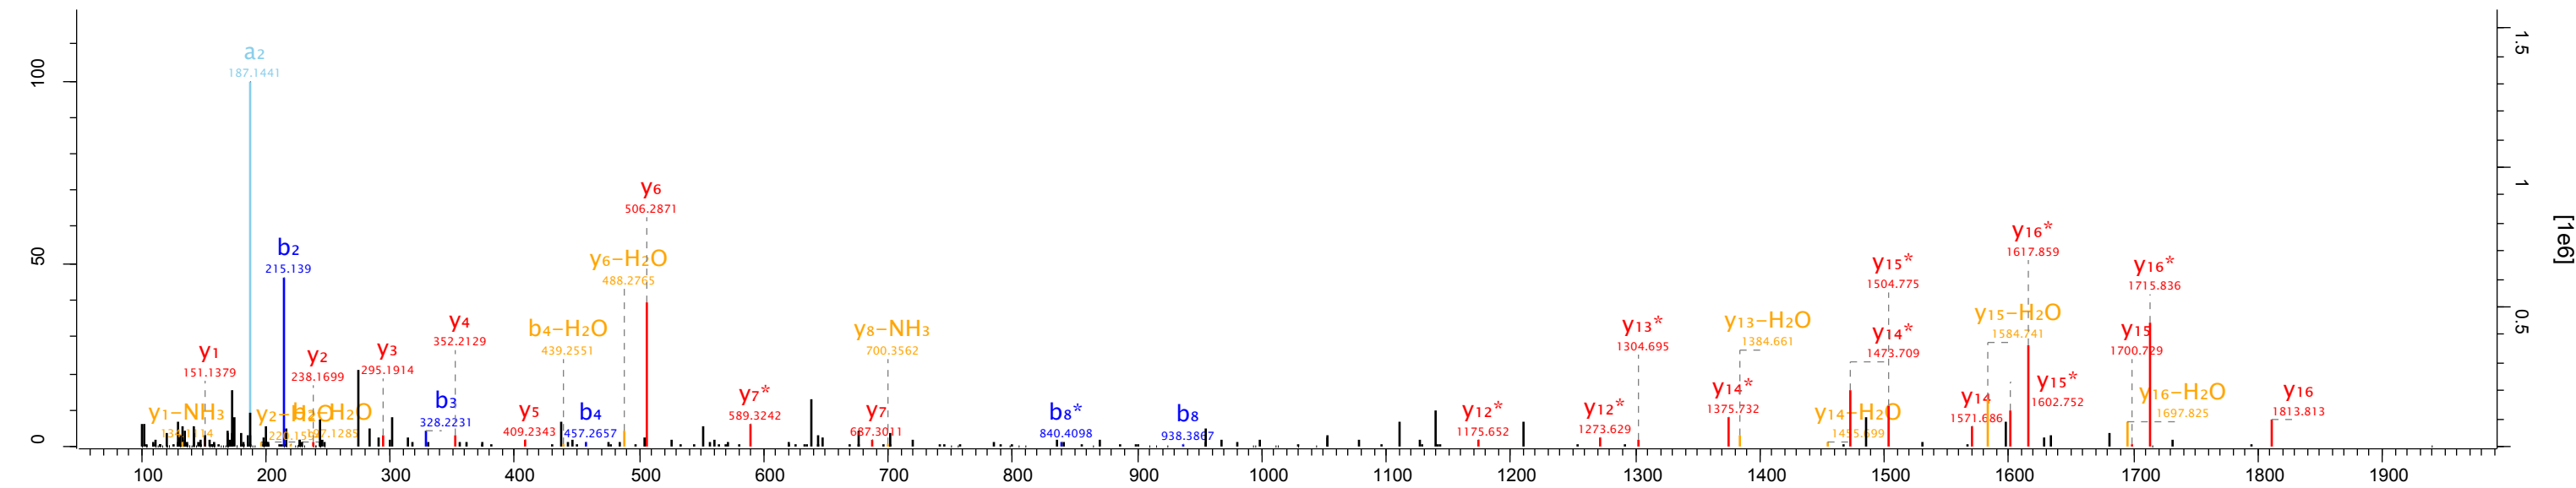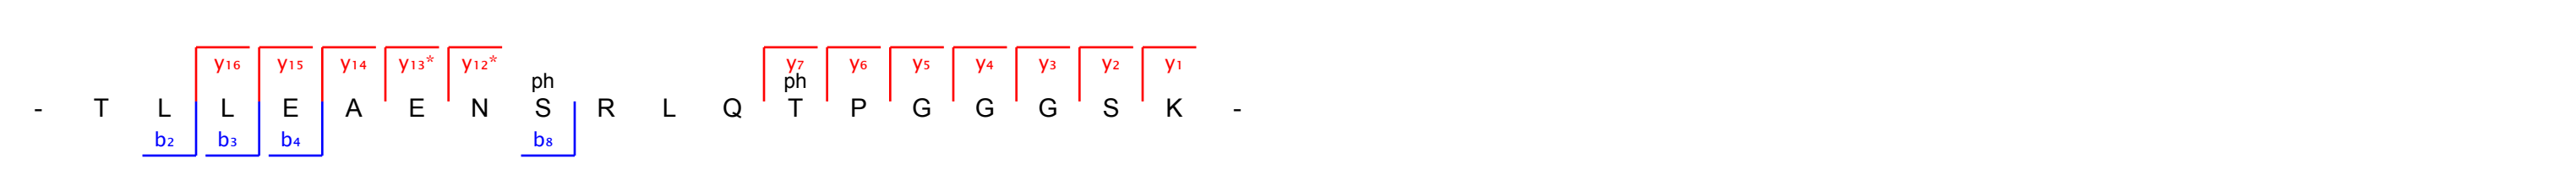

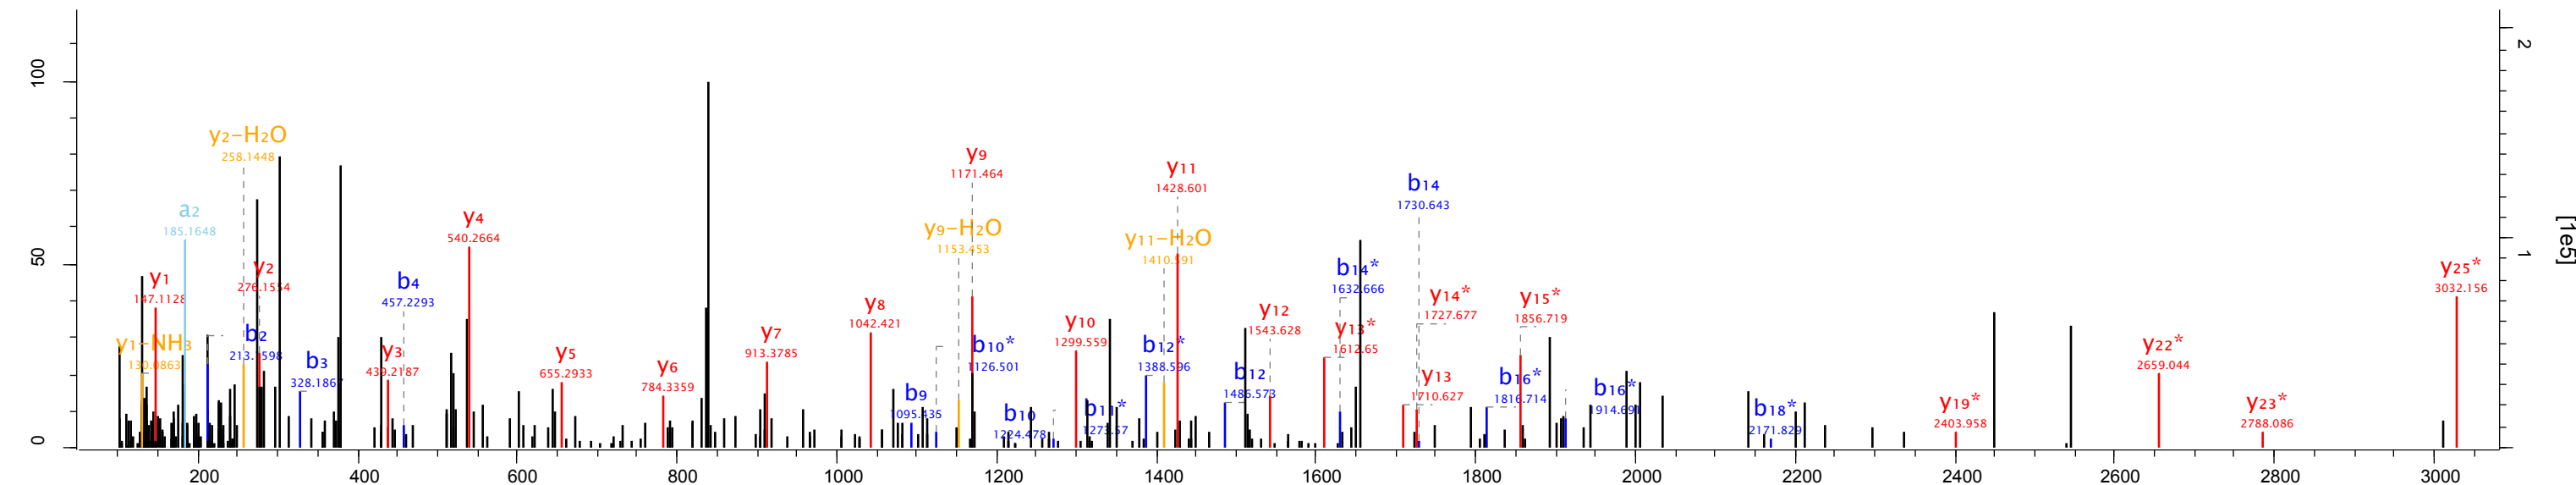

- V L D E E G S E R E F D E D S D E K E E E E D T Y E K -

b<sub>2</sub> b<sub>3</sub> b<sub>4</sub> y<sub>25</sub>\* y<sub>23</sub>\* y<sub>22</sub>\* ph y<sub>19</sub>\* b<sub>9</sub> b<sub>10</sub> b<sub>11</sub>\* b<sub>12</sub> y<sub>15</sub>\* y<sub>14</sub>\* b<sub>14</sub> b<sub>13</sub> y<sub>13</sub> y<sub>12</sub> y<sub>11</sub> b<sub>16</sub>\* b<sub>18</sub>\* y<sub>10</sub> y<sub>9</sub> y<sub>8</sub> y<sub>7</sub> y<sub>6</sub> y<sub>5</sub> y<sub>4</sub> y<sub>3</sub> y<sub>2</sub> y<sub>1</sub>

Raw file 20171215\_MaS\_33SR\_LMH\_phospho2\_03 Scan 10649 Method FTMS; HCD Score 164.56 m/z 601.25 Gene names TRIM28

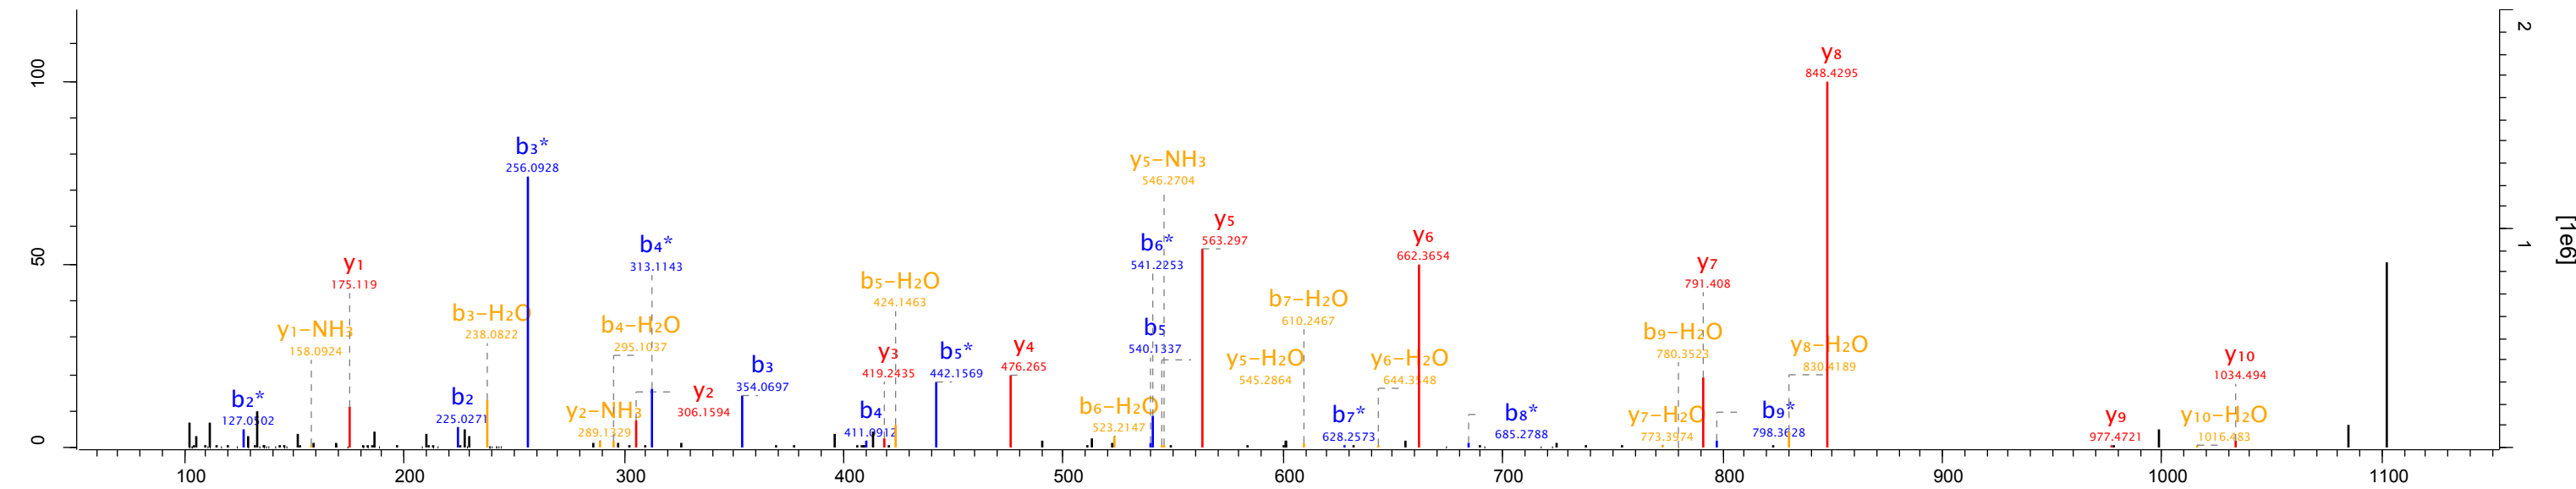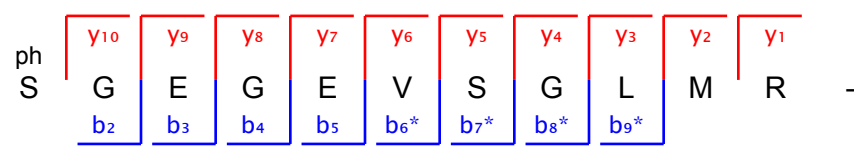

Raw file 20171215\_MaS\_33SR\_LMH\_phospho2\_03 Scan 10659 Method FTMS; HCD Score 105.45 m/z 1153.49 Gene names HUWE1

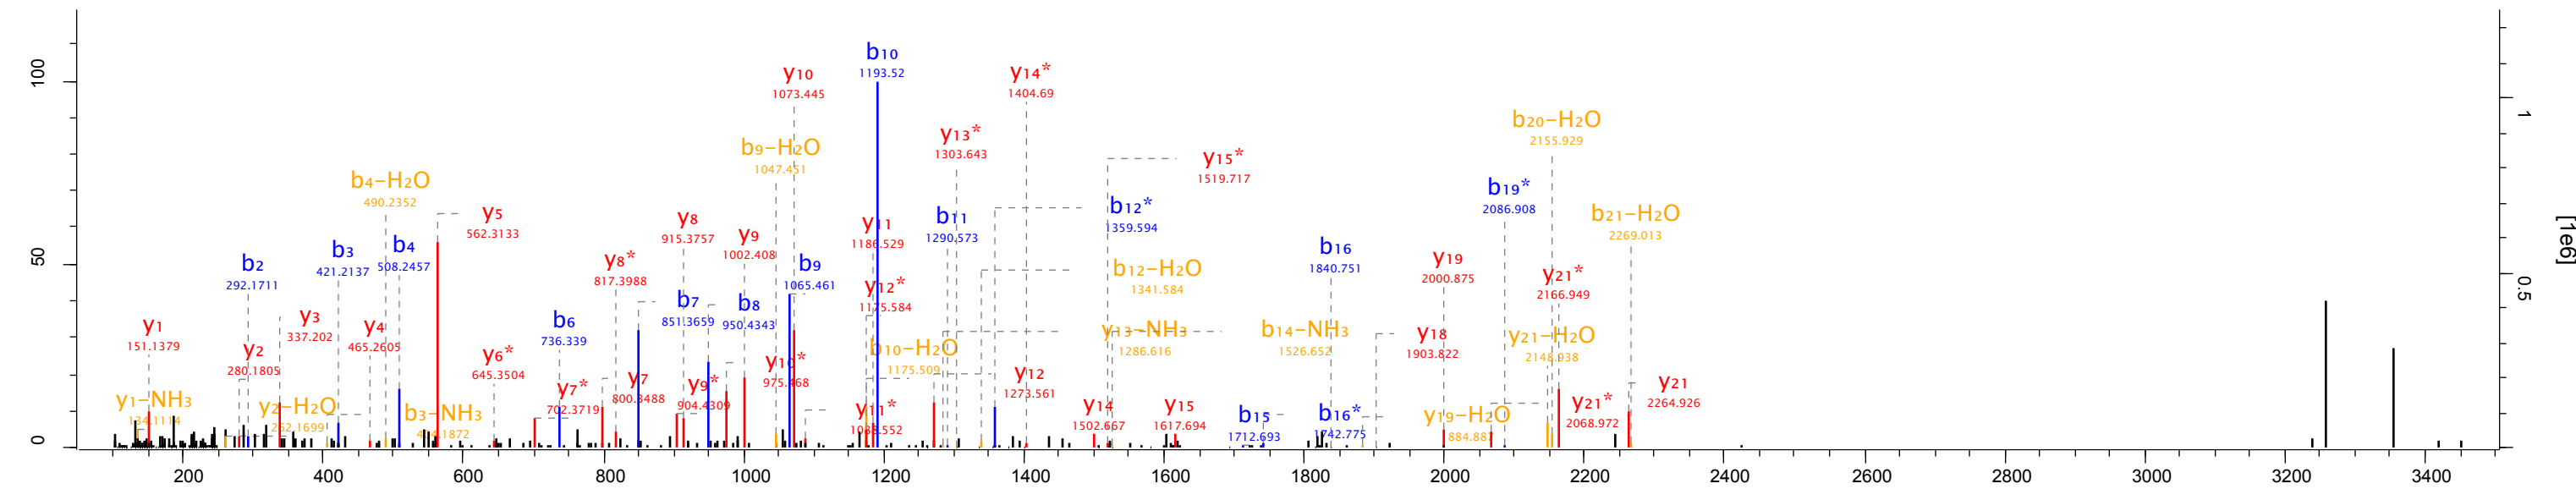

- R E E S P M D V D Q P S ph y19 y18 A Q D T Q S I A S D G T ph y5 y4 y3 y2 y1 -

Fragmentation mapping (b and y ions) is shown below the sequence:

- b2 (E), b3 (E), b4 (S)
- b6 (M), b7 (D), b8 (V), b9 (D), b10 (Q), b11 (P), b12\* (S)
- b15 (A), b16 (Q)
- b19\* (Q)

Raw file 20171215\_MaS\_33SR\_LMH\_phospho2\_03 Scan 10749 Method FTMS; HCD Score 108.94 m/z 957.09 Gene names KCTD3

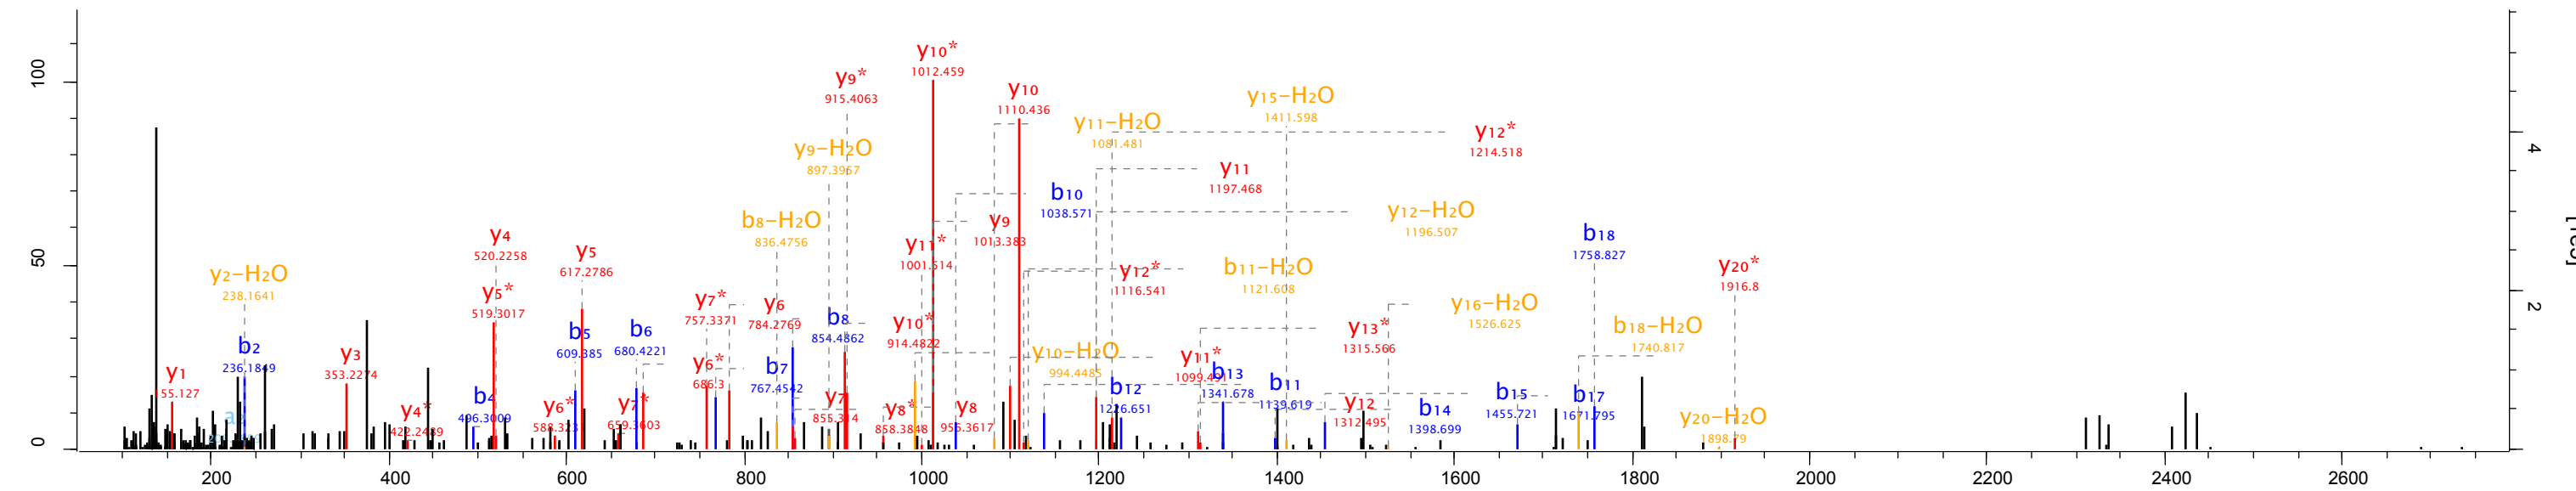

- K V P Y L A S S P S T S D G G T D S P G T A S P S P T K -

Fragmentation mapping: b2 (V), b4 (Y), b5 (L), b6 (A), b7 (S), b8 (S), y20\* (P), b10 (S), b11 (T), b12 (S), b13 (D), b14 (G), b15 (G), y13\* (T), y12 (D), y11 (S), y10 (P), y9 (G), y8 (T), y7 (A), y6-ph (S), y5 (P), y4-ph (S), y3 (P), y1 (K)



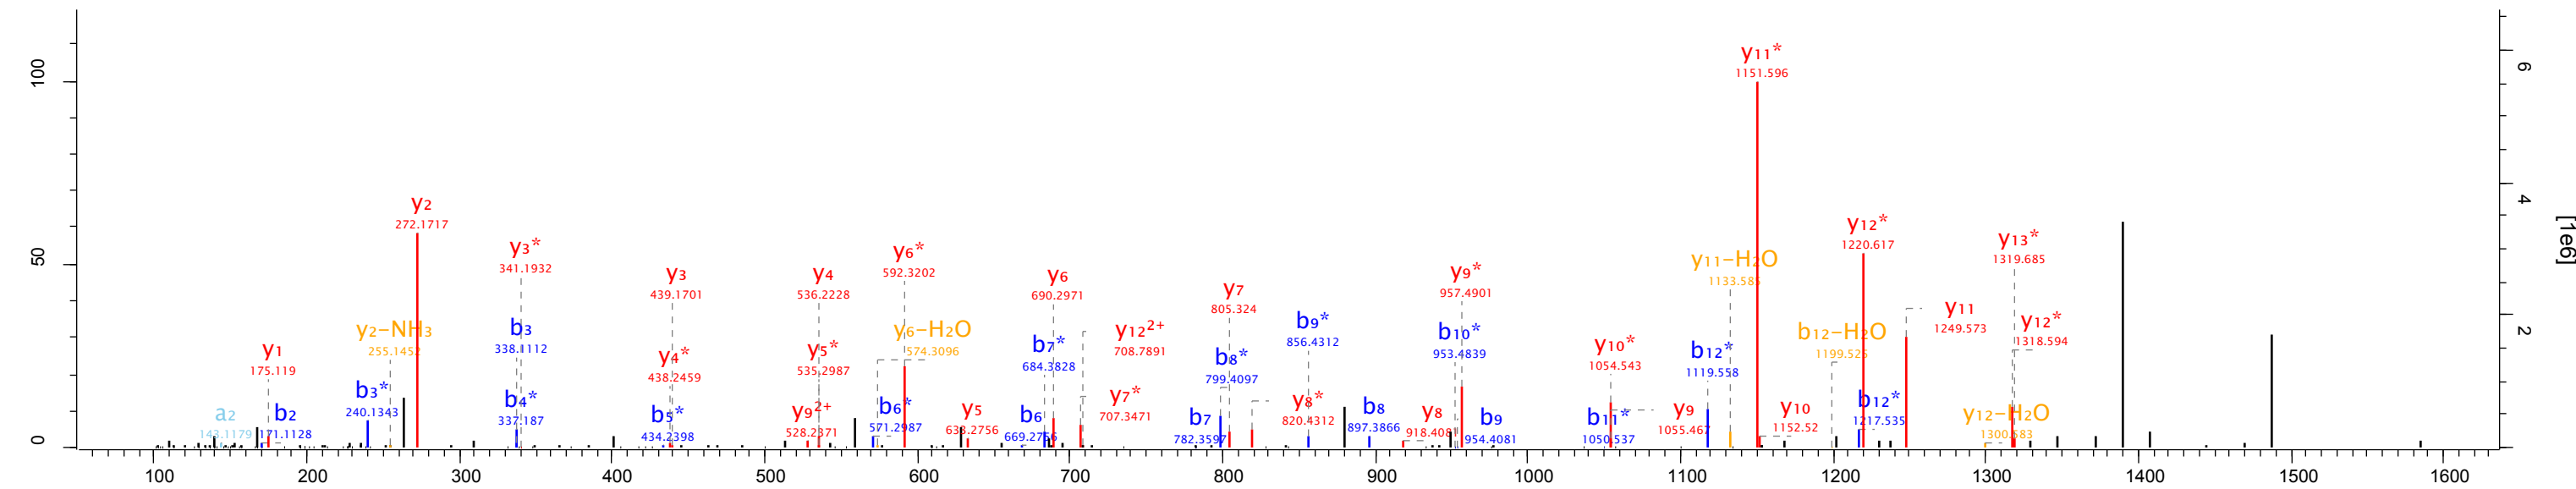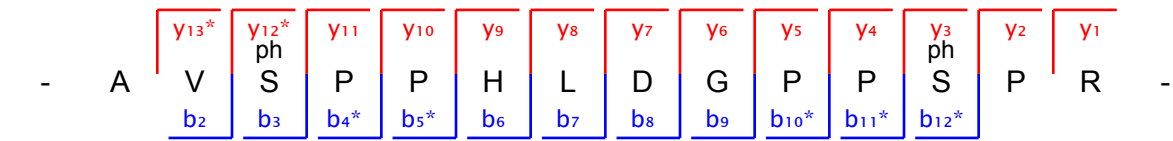

Raw file 20171215\_MaS\_33SR\_LMH\_phospho2\_03 Scan 11019 Method FTMS; HCD Score 173.77 m/z 731.79 Gene names TMF1

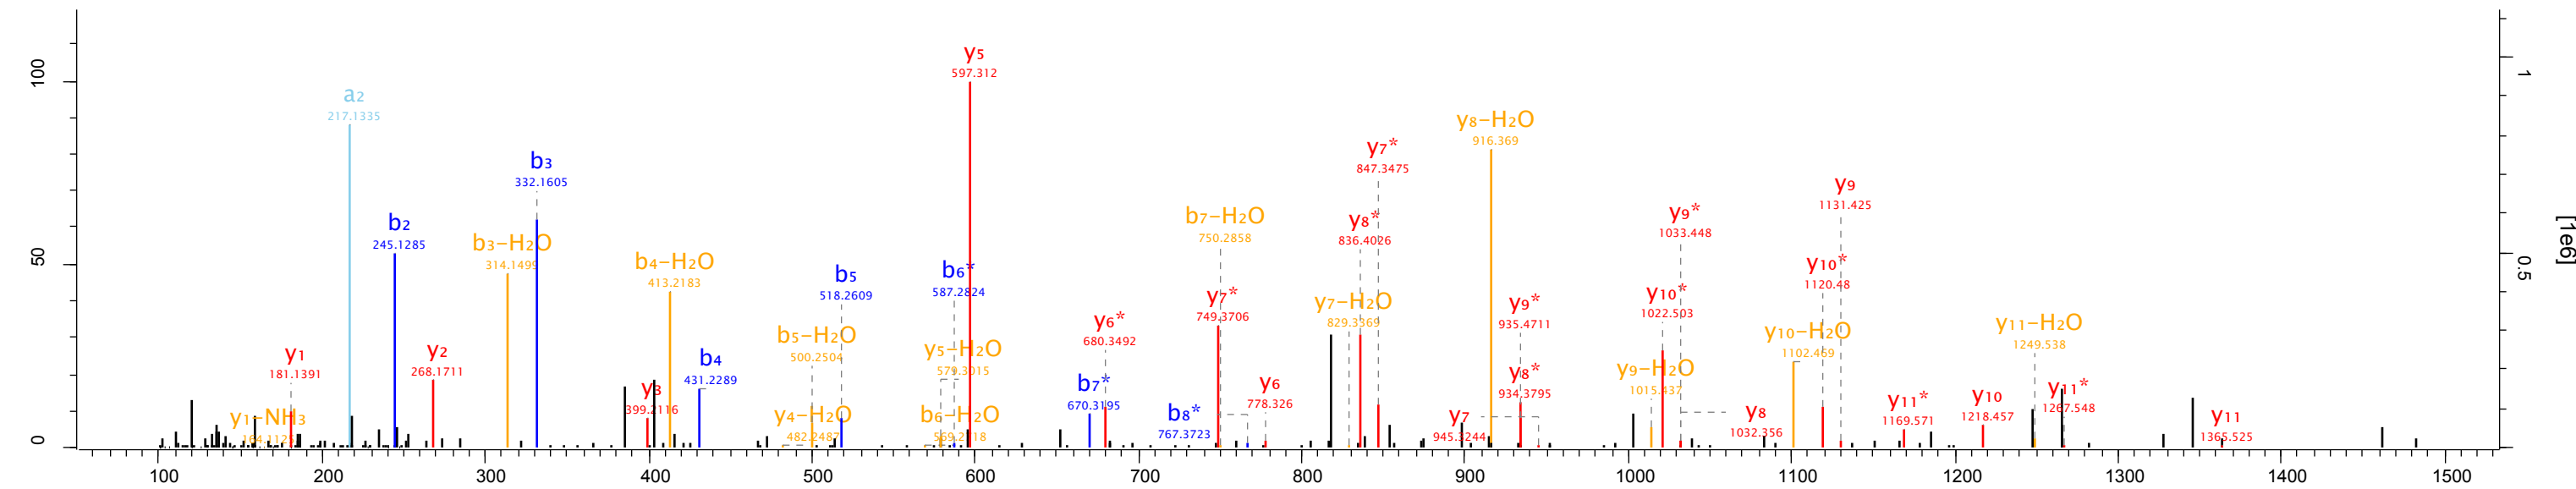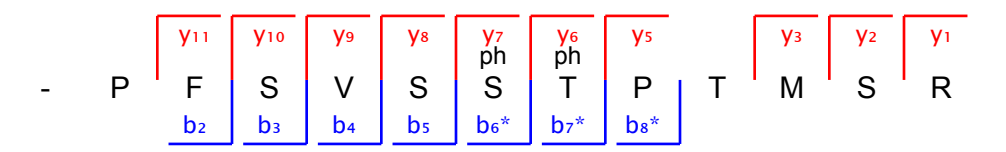

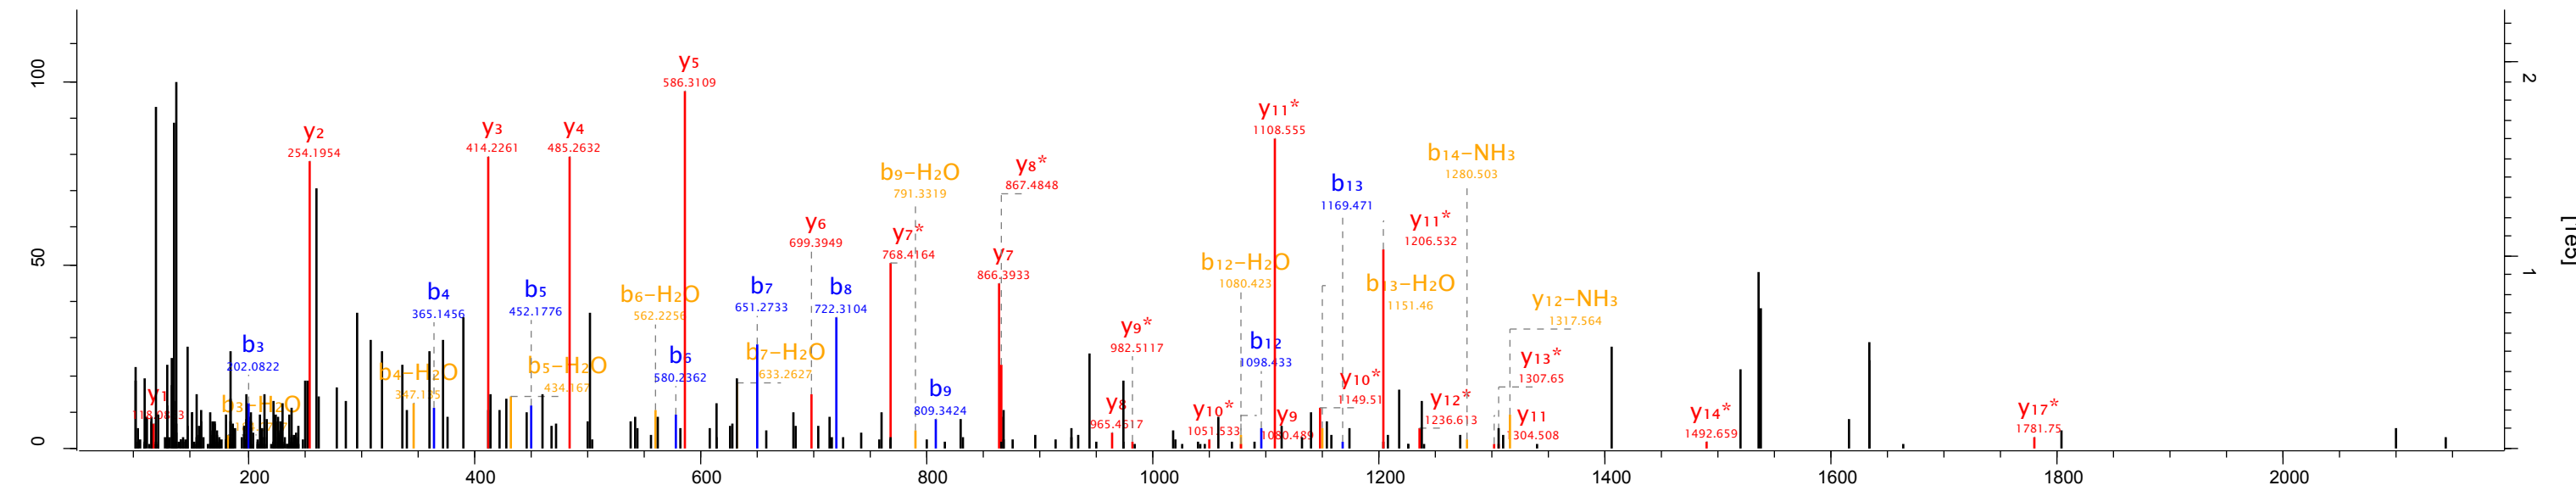

- G G S Y S Q A A S S D S A Q G S D V S L T A C K V -

b<sub>3</sub>
b<sub>4</sub>
b<sub>5</sub>
b<sub>6</sub>
b<sub>7</sub>
b<sub>8</sub>
b<sub>9</sub>
y<sub>17</sub>\*
y<sub>14</sub>\*
y<sub>13</sub>\*
y<sub>12</sub>\*
y<sub>11</sub>
y<sub>10</sub>\*
y<sub>9</sub>
y<sub>8</sub>
y<sub>7</sub>
y<sub>6</sub>
y<sub>5</sub>
y<sub>4</sub>
y<sub>3</sub>
y<sub>2</sub>
y<sub>1</sub>

Raw file 20171215\_MaS\_33SR\_LMH\_phospho2\_03 Scan 11349 Method FTMS; HCD Score 161.5 m/z 1220 Gene names POLR2A

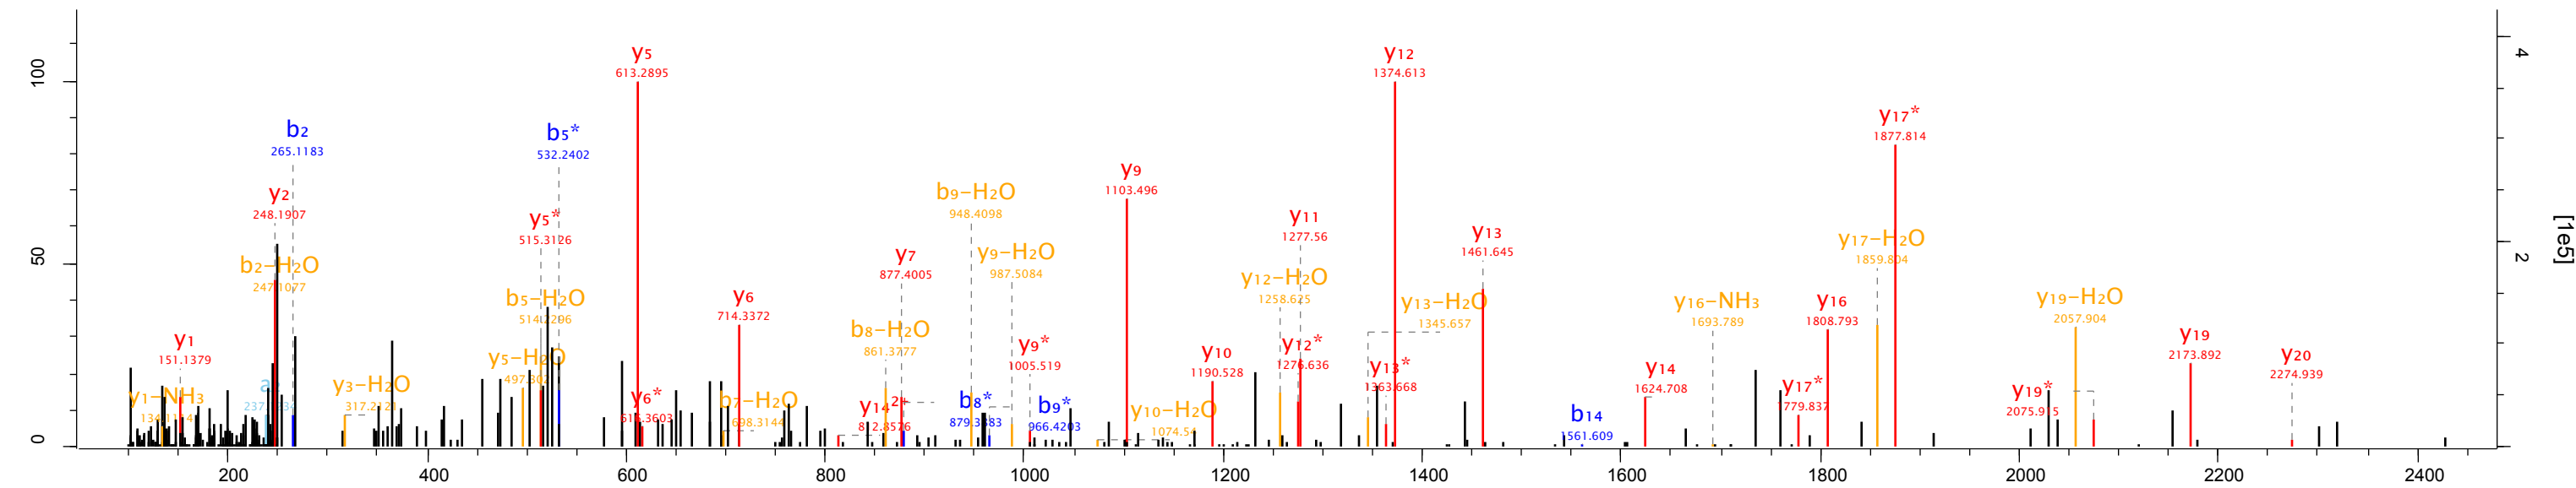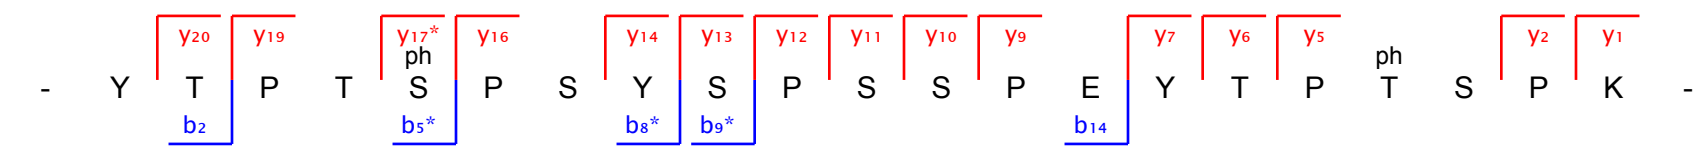

Raw file: 20171215\_MaS\_33SR\_LMH\_phospho2\_03  
 Scan: 11379 Method: FTMS; HCD Score: 147.11 m/z: 715.3 Gene names: CHD9

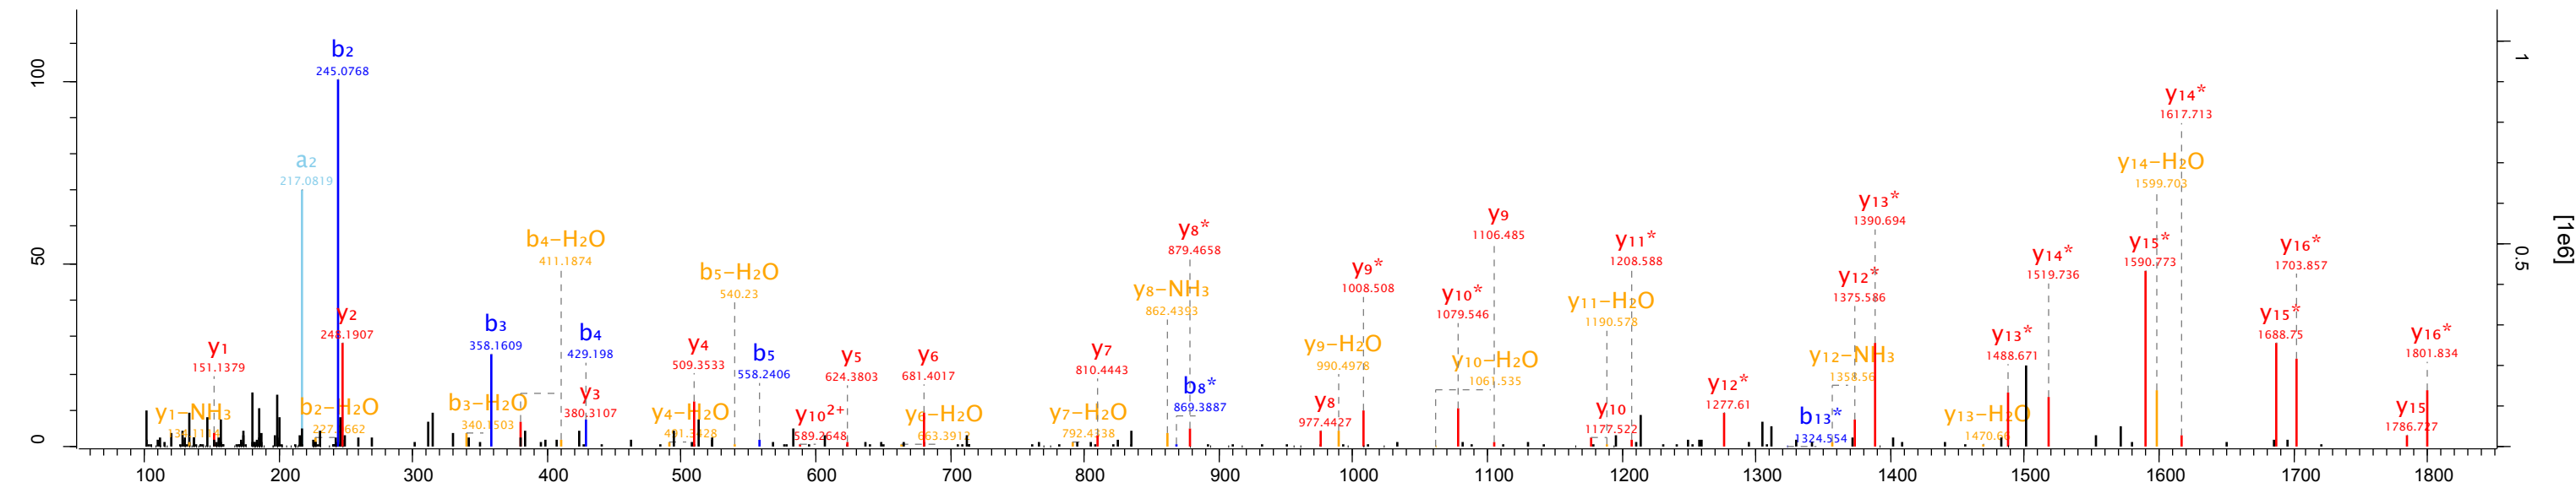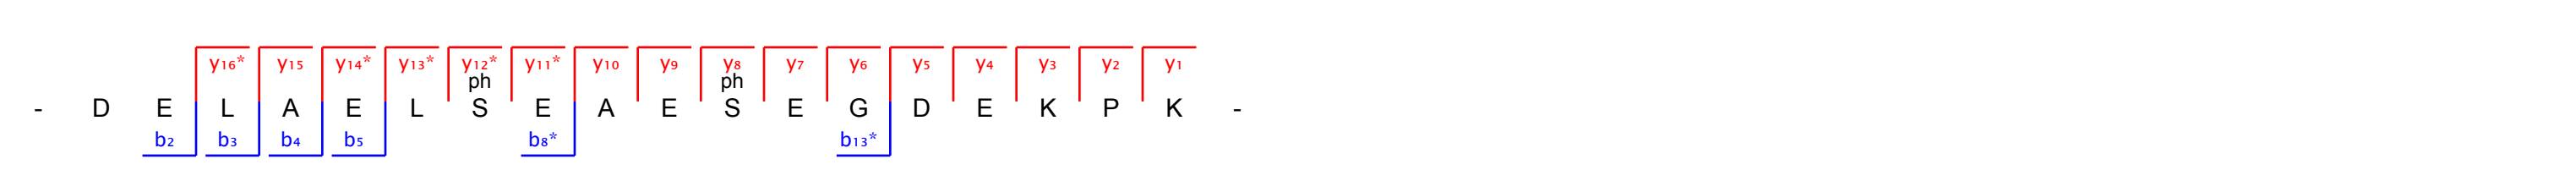

Raw file 20171215\_MaS\_33SR\_LMH\_phospho2\_03 Scan 11459 Method FTMS; HCD Score 101.17 m/z 587.28 Gene names SRRM2

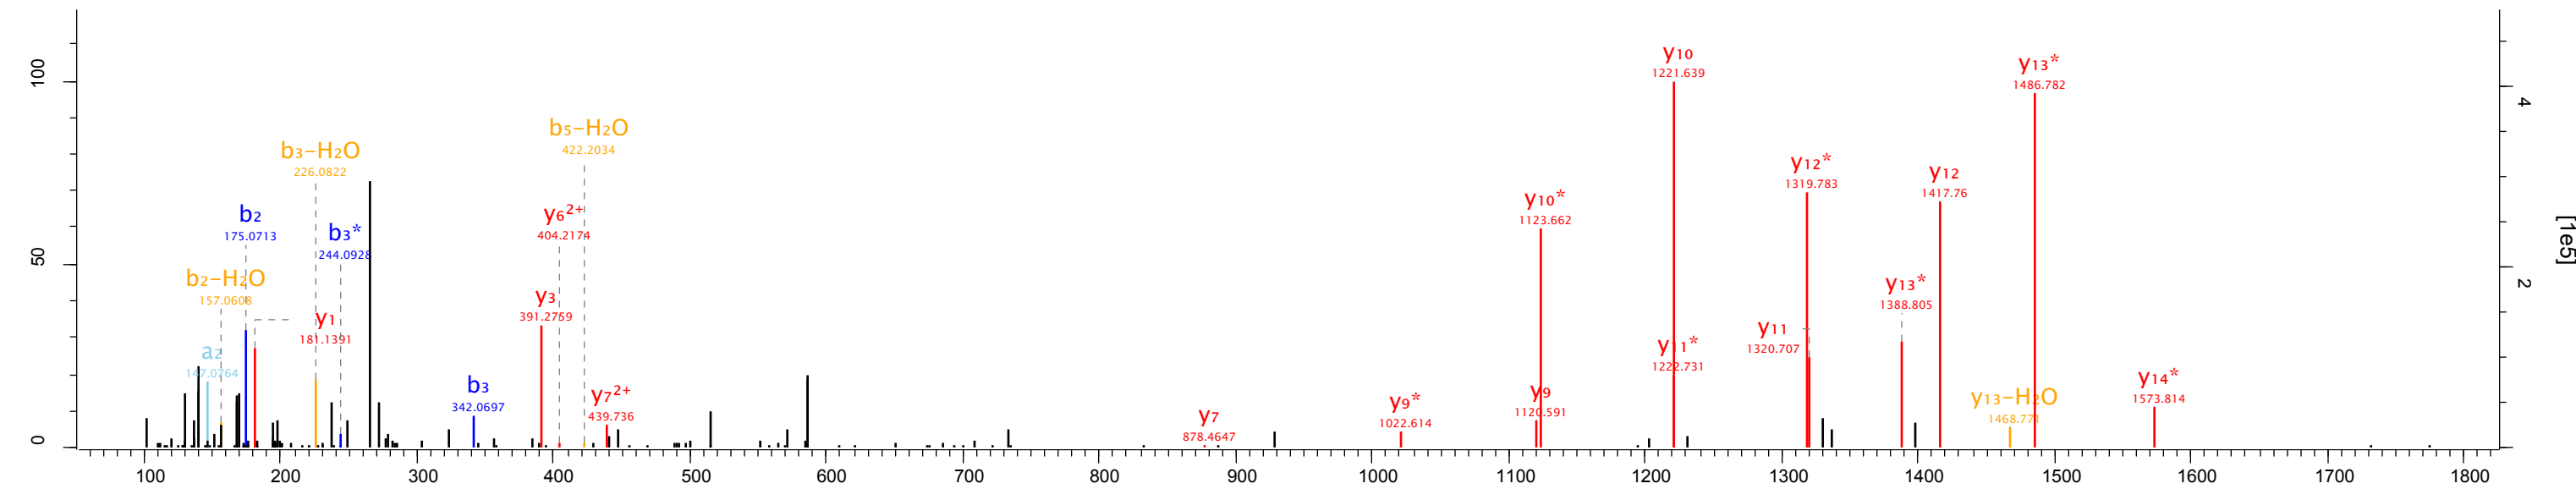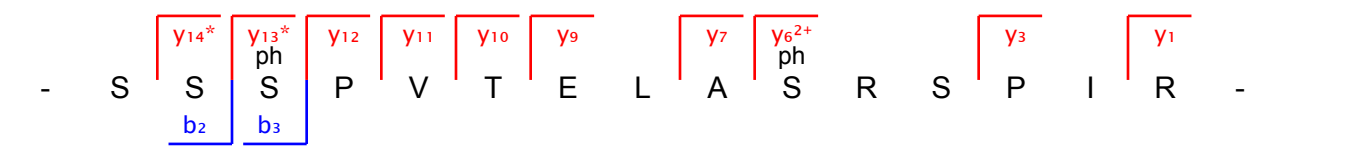

Raw file 20171215\_MaS\_33SR\_LMH\_phospho2\_03 Scan 11649 Method FTMS; HCD Score 135.82 m/z 920.86 Gene names OXR1

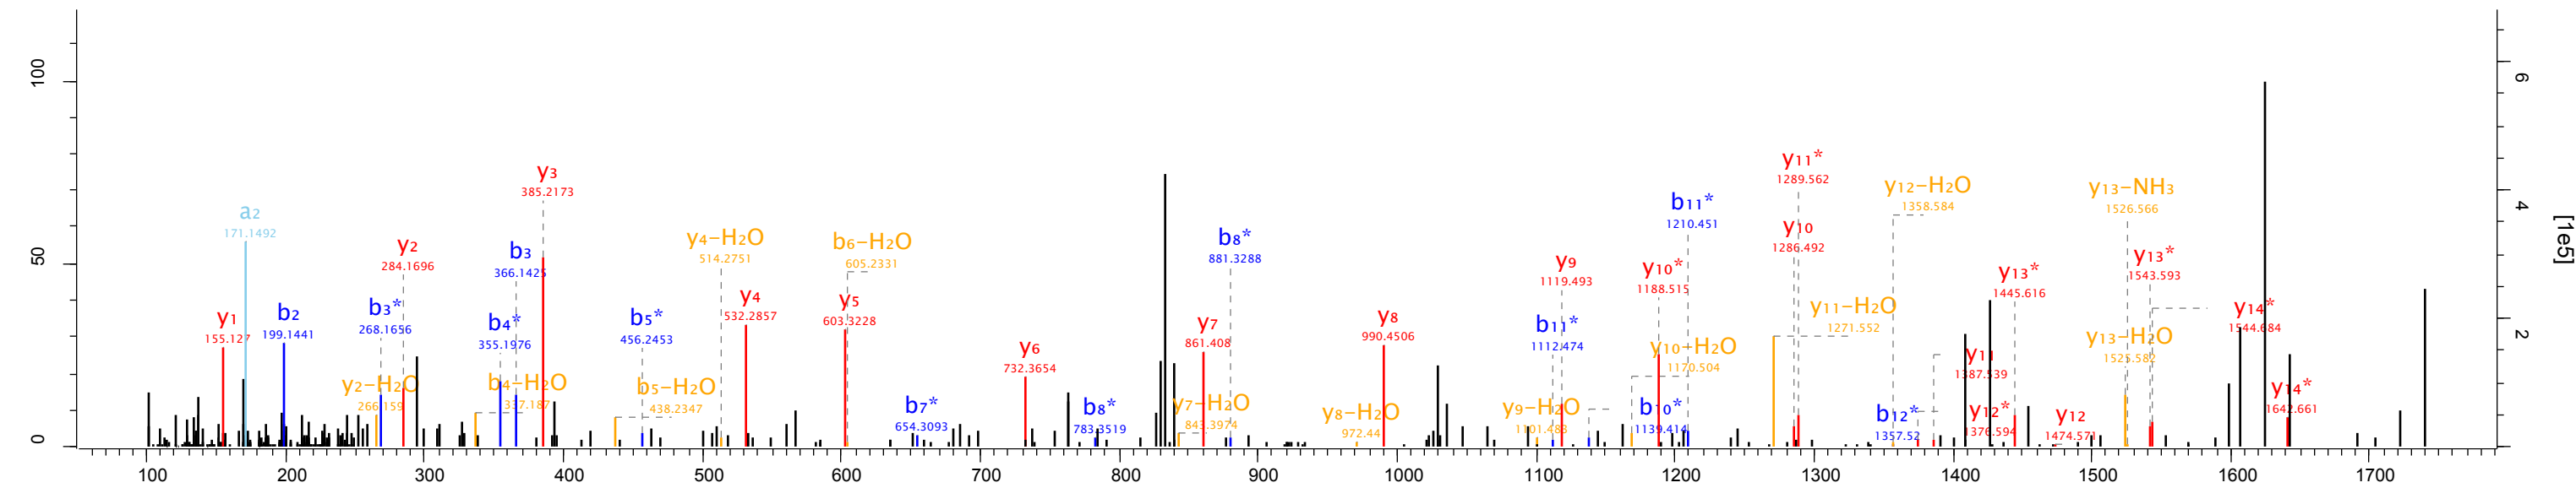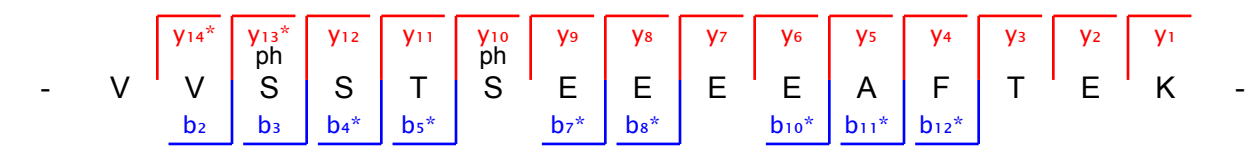

Raw file 20171215\_MaS\_33SR\_LMH\_phospho2\_03 Scan 11749 Method FTMS; HCD Score 138.41 m/z 763.32 Gene names OSBP

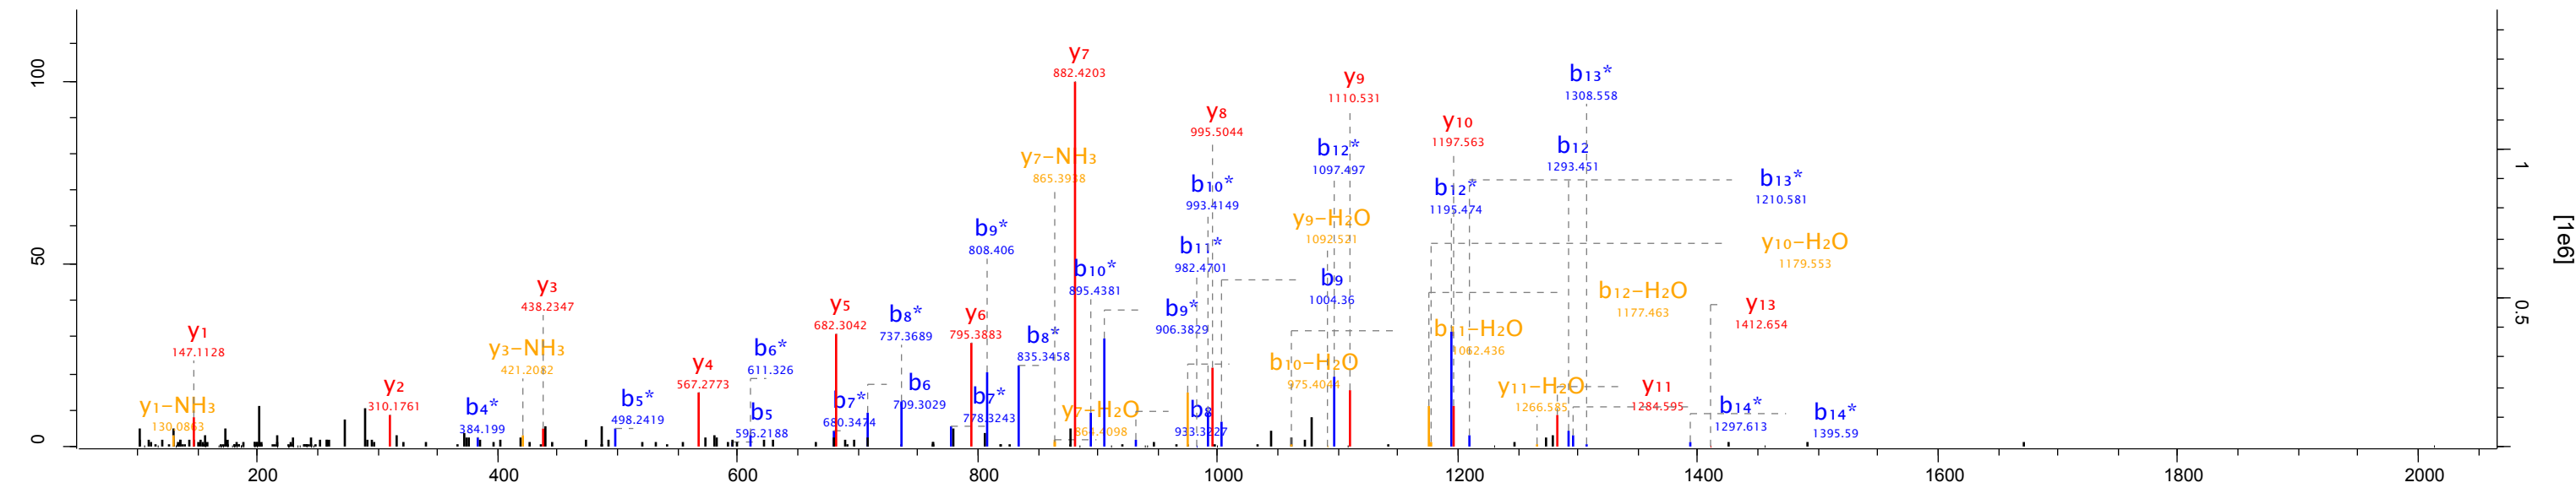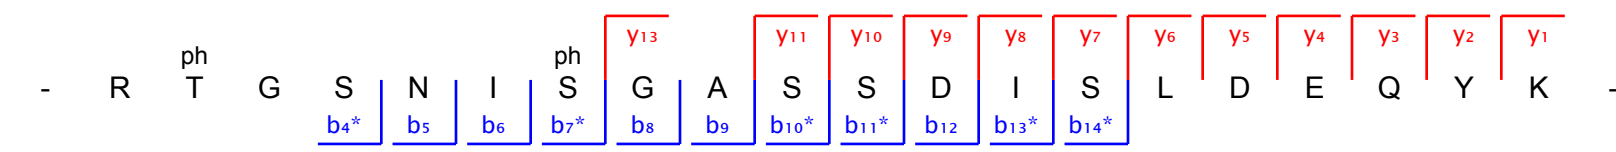



Raw file 20171215\_MaS\_33SR\_LMH\_phospho2\_03 Scan 11779 Method FTMS; HCD Score 181.35 m/z 851.68 Gene names IL1A

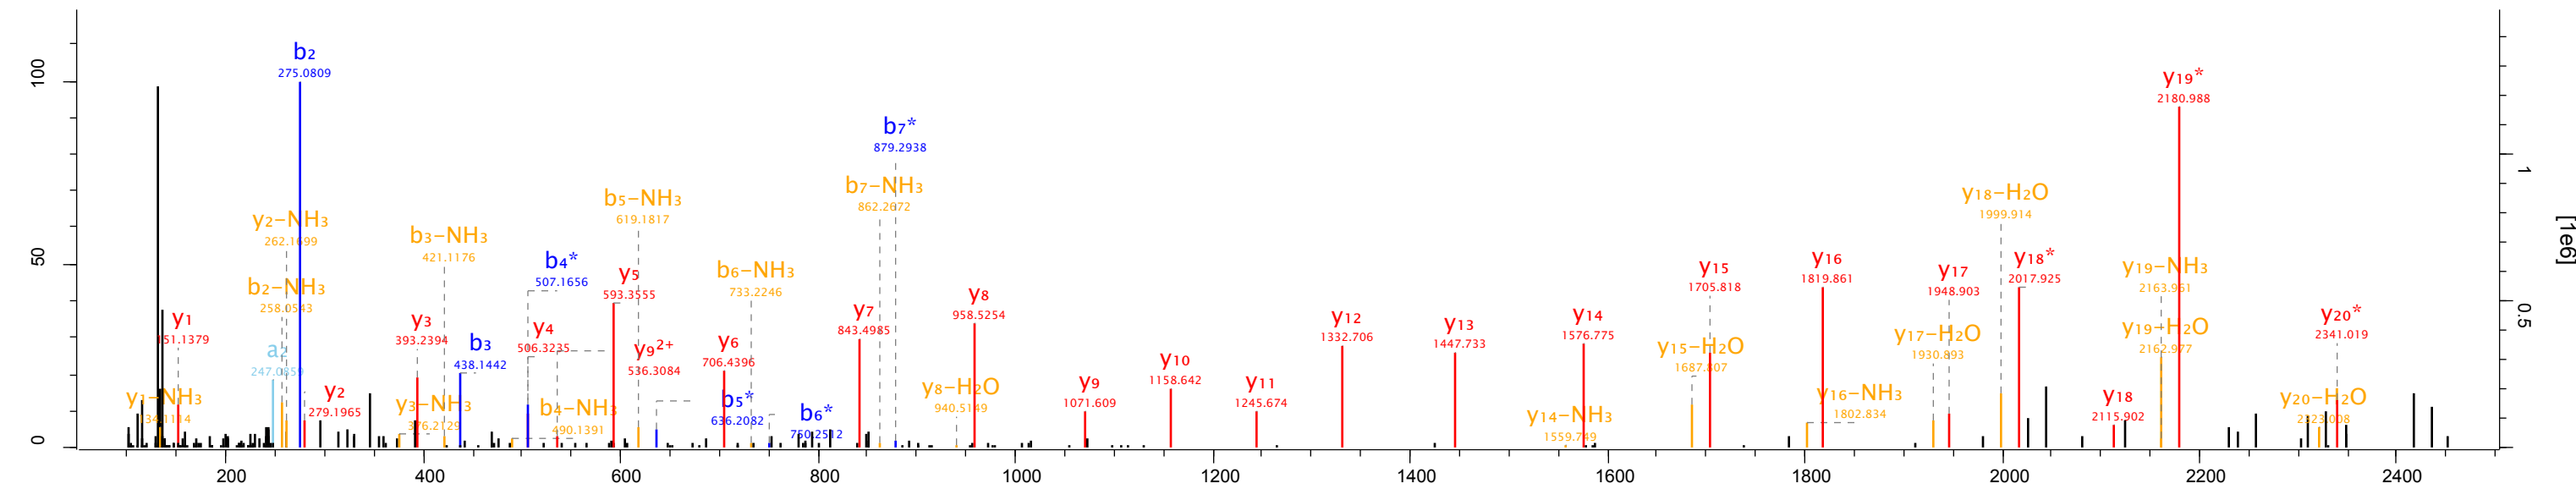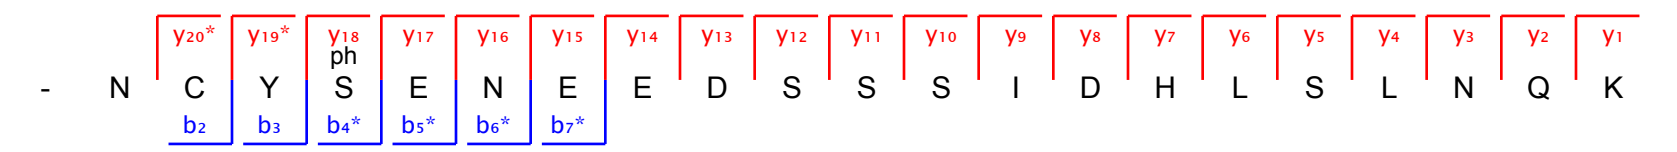

Raw file 20171215\_MaS\_33SR\_LMH\_phospho2\_03 Scan 11849 Method FTMS; HCD Score 247.01 m/z 1112.82 Gene names RABL6

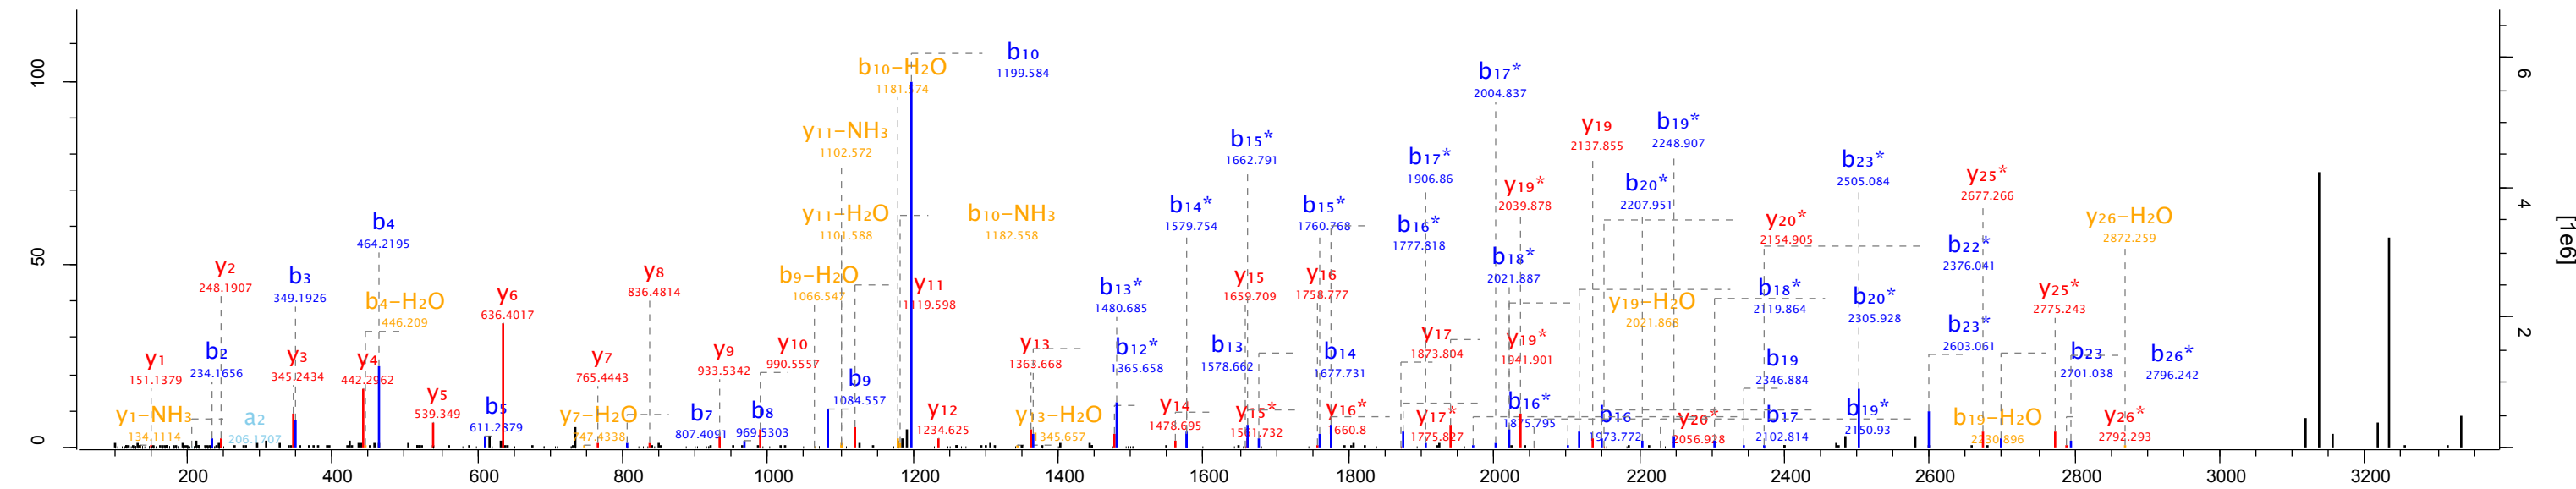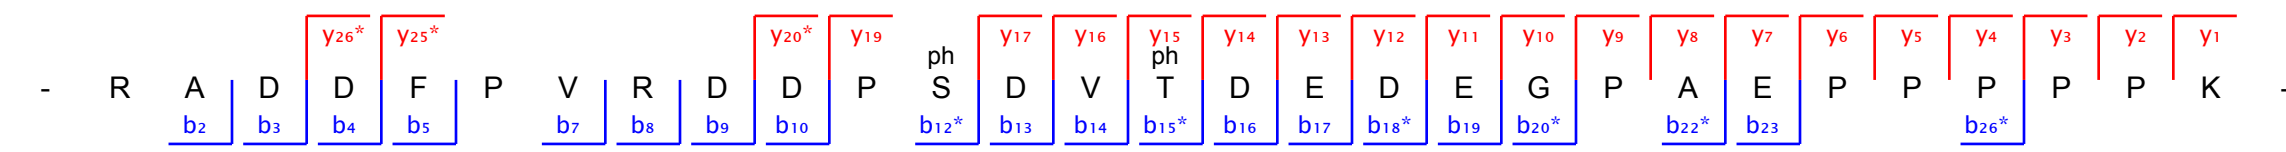

20171215\_MaS\_33SR\_LMH\_phospho2\_03 11879 FTMS; HCD 169.05 941.4 ZC3H4

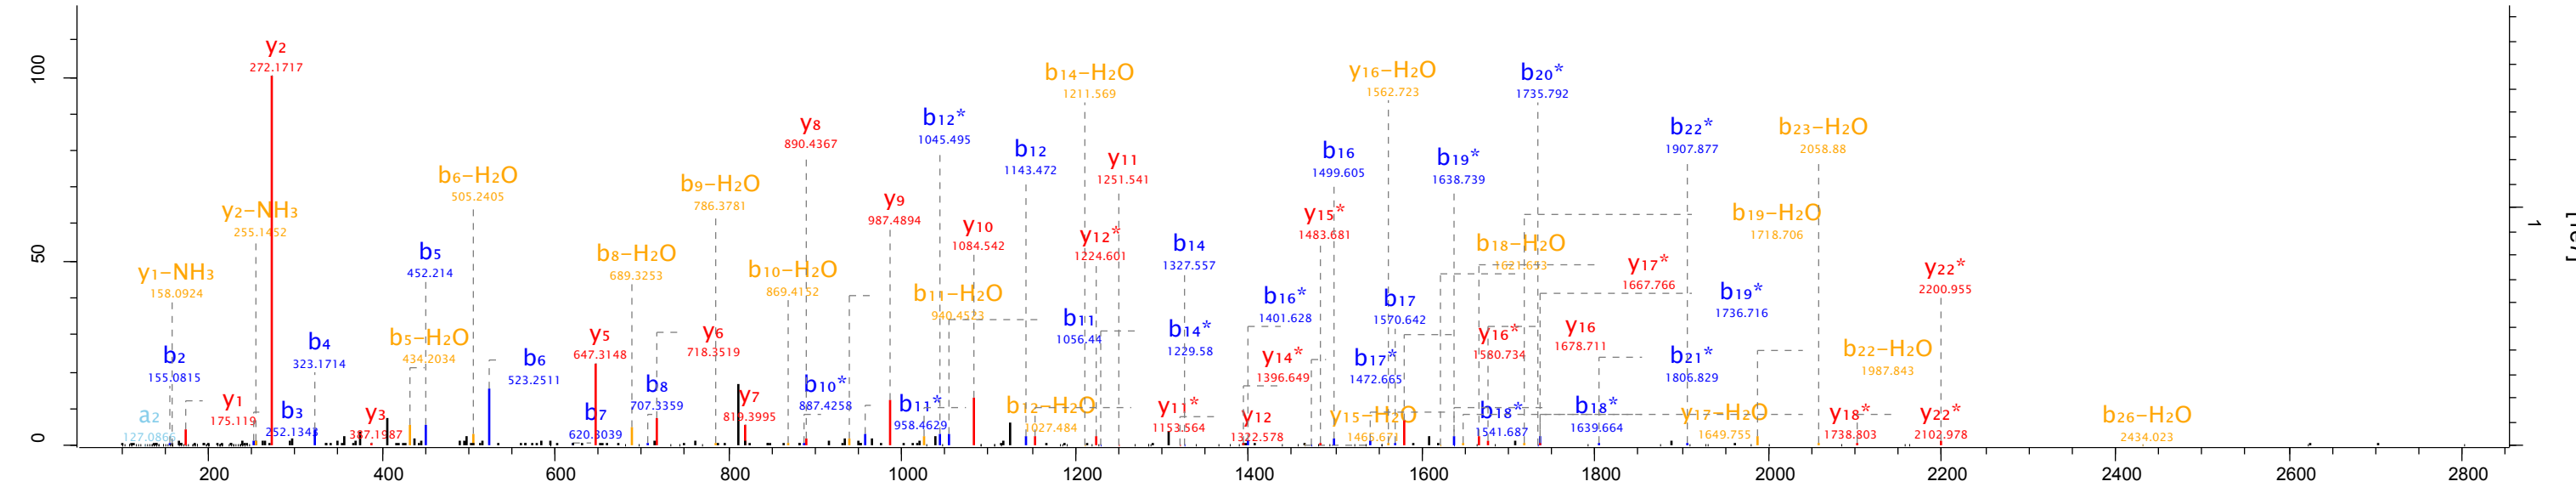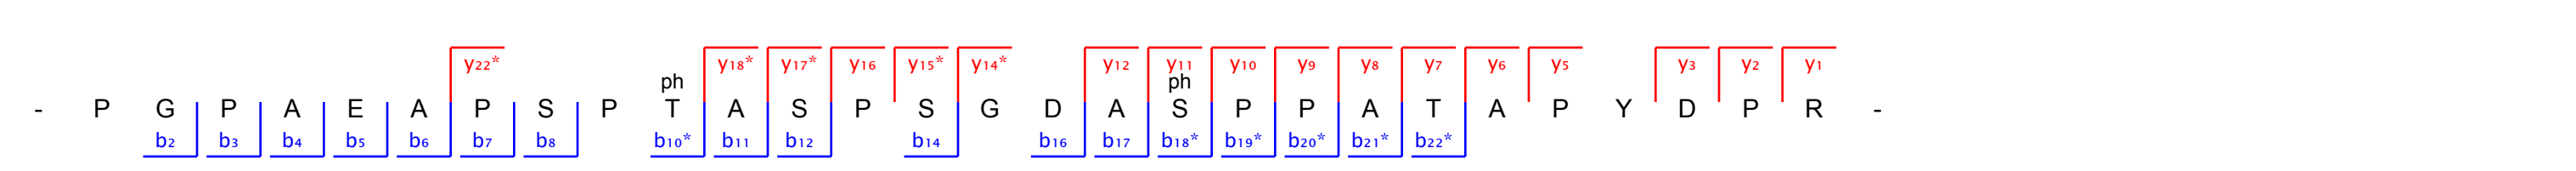

Raw file 20171215\_MaS\_33SR\_LMH\_phospho2\_03 Scan 11899 Method FTMS; HCD Score 156.67 m/z 762.81 Gene names ARHGEF2

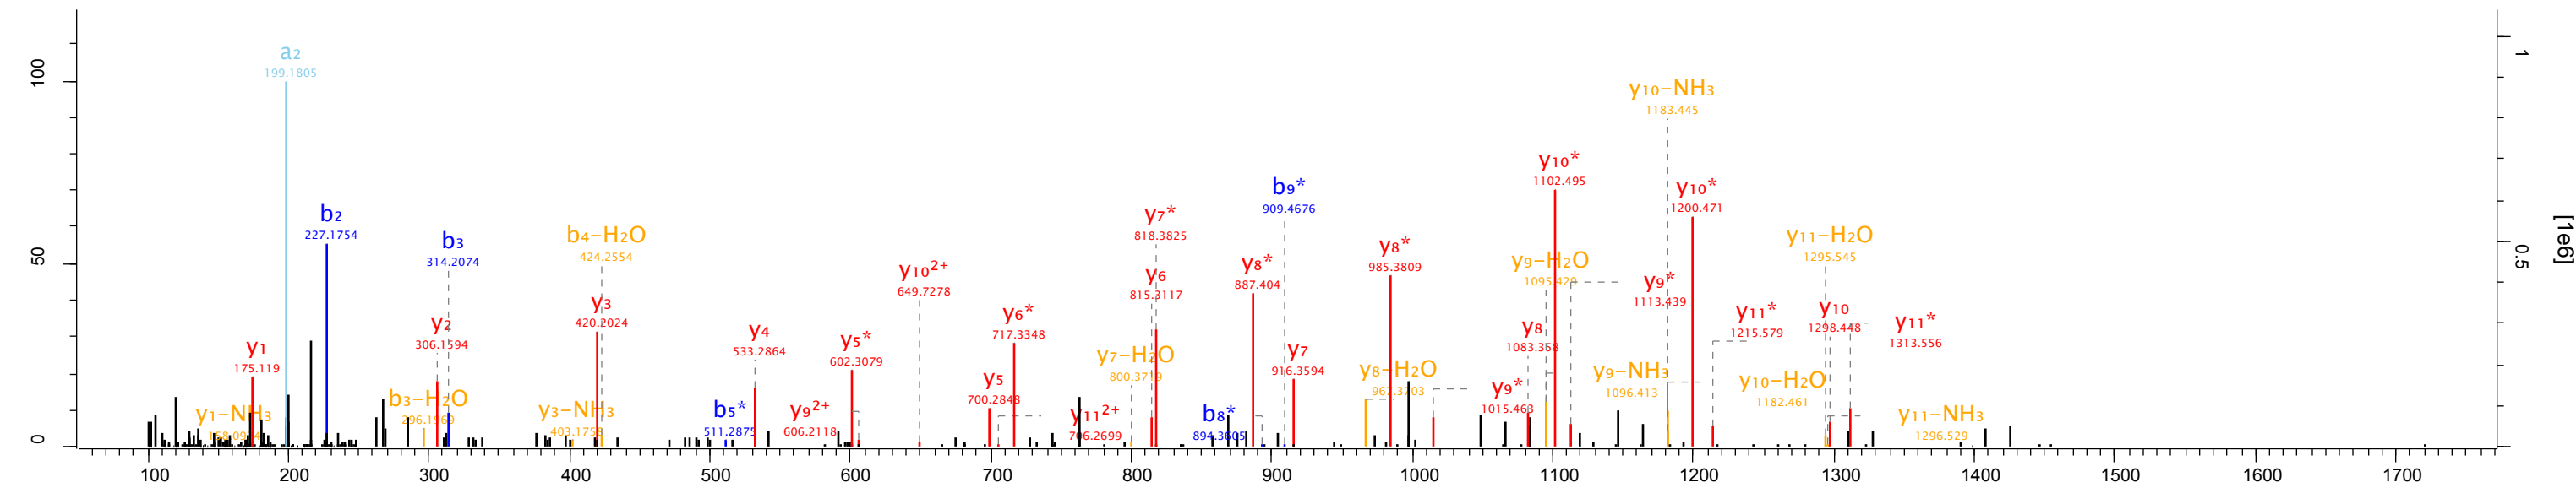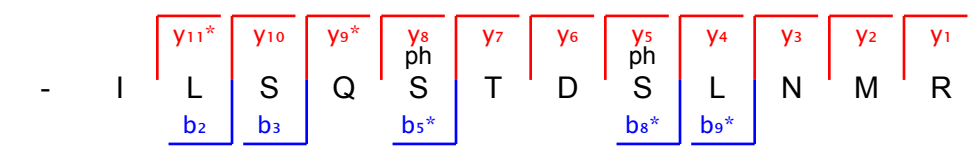

Raw file 20171215\_MaS\_33SR\_LMH\_phospho2\_03 Scan 11989 Method FTMS; HCD Score 151.1 m/z 697.31 Gene names DGCR14

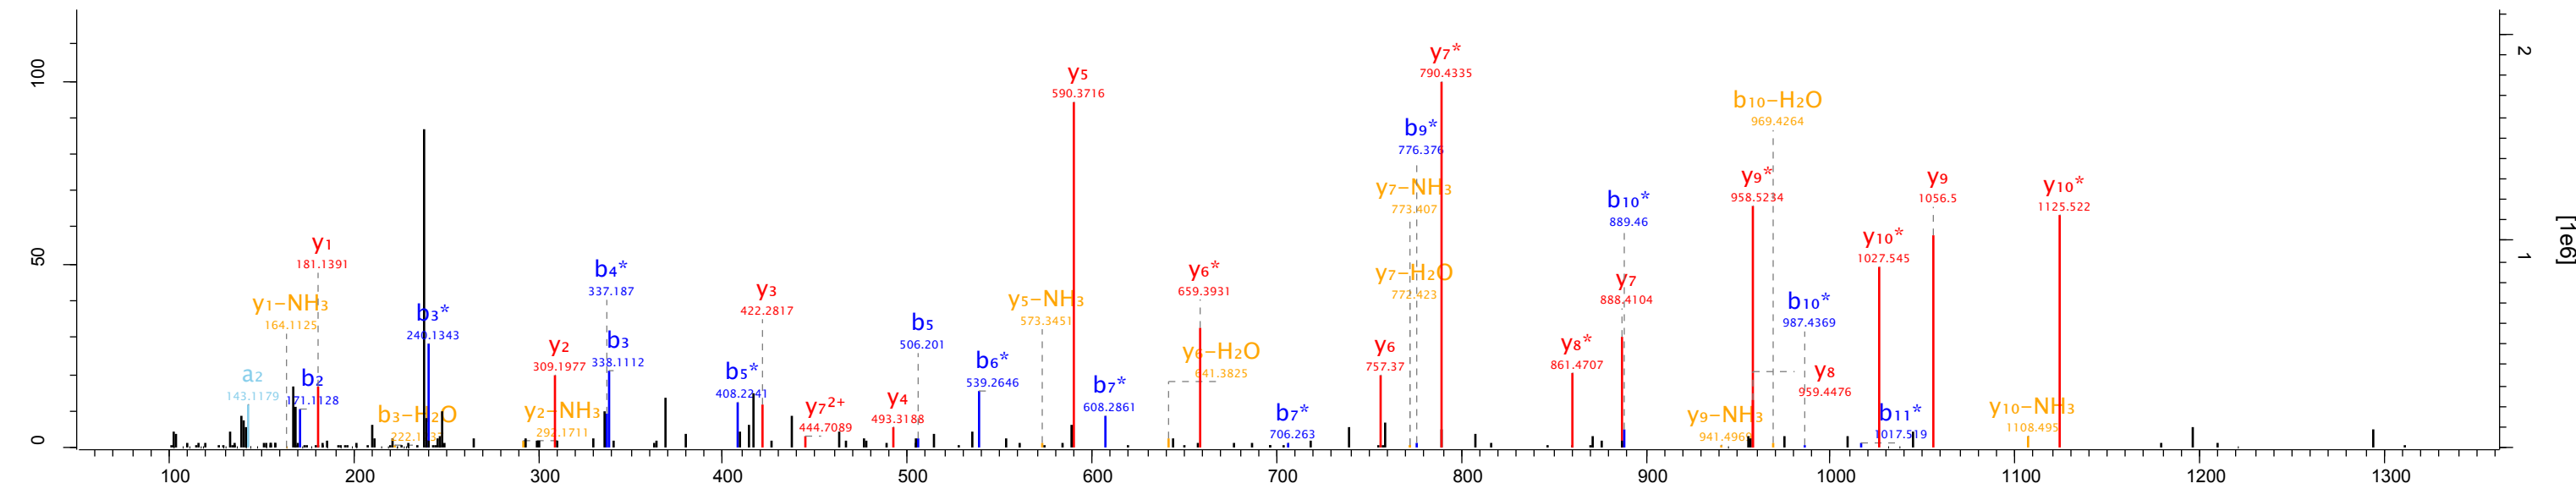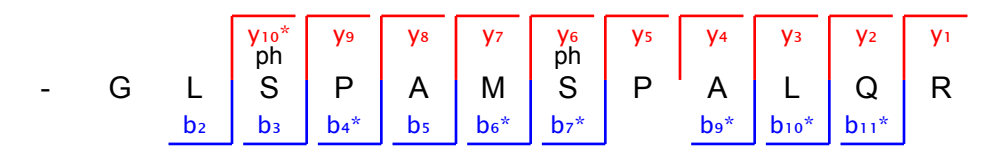

Raw file  
20171215\_MaS\_33SR\_LMH\_phospho2\_03

Scan 12009 Method FTMS; HCD Score 163.39 m/z 778.64 Gene names CTPS1

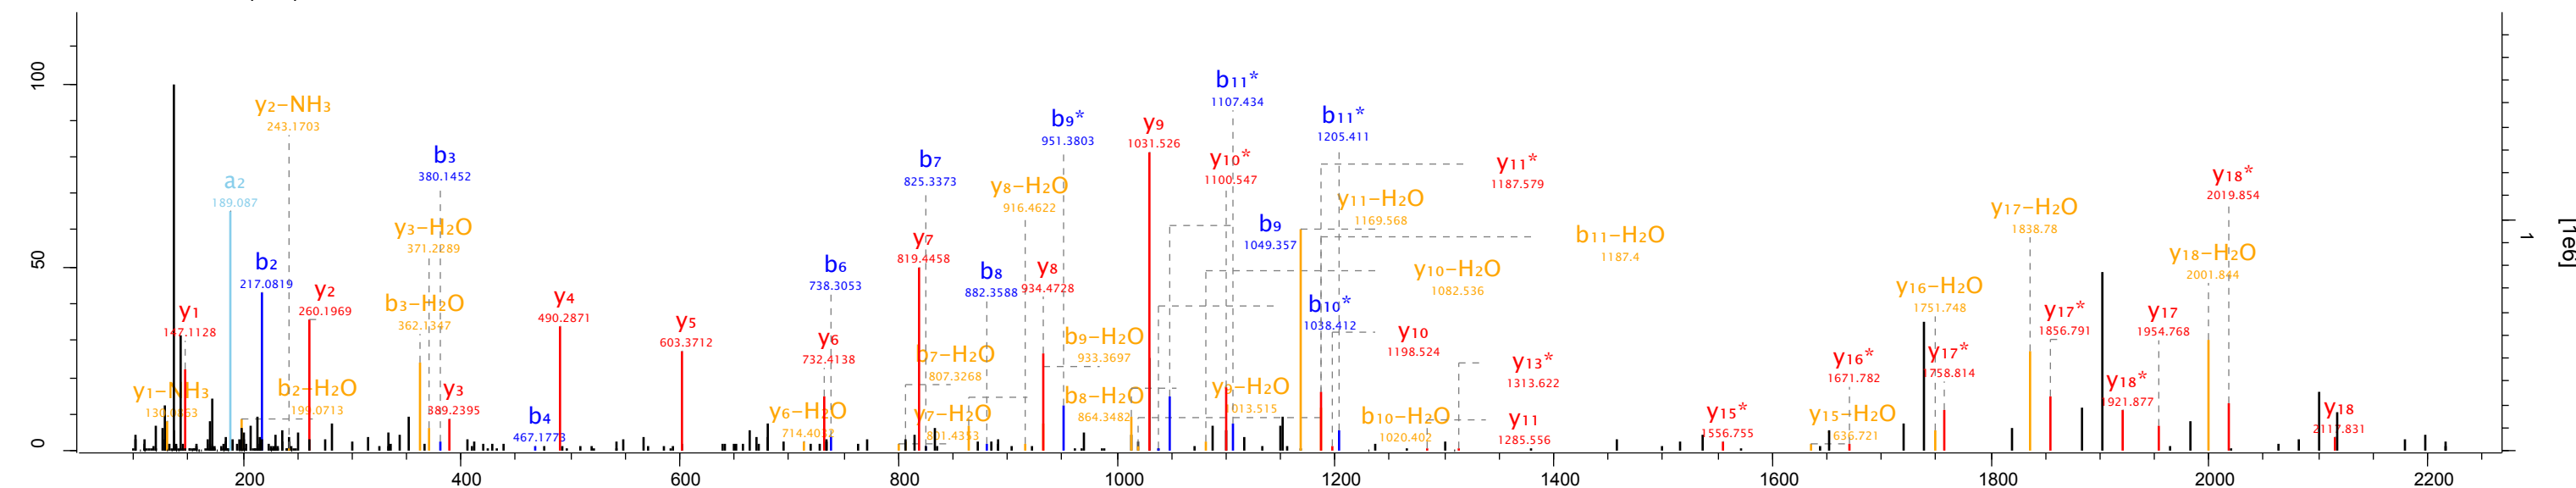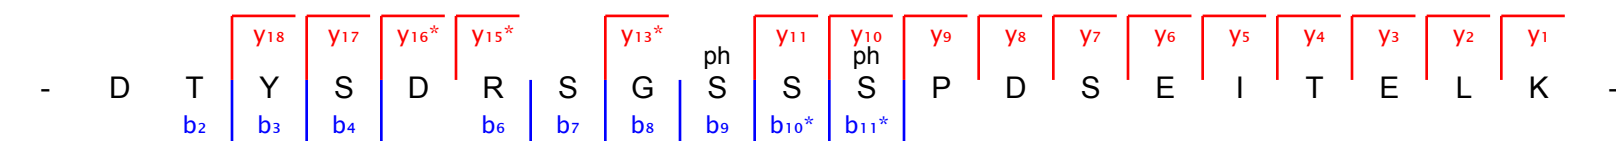

Raw file 20171215\_MaS\_33SR\_LMH\_phospho2\_03 Scan 12269 Method FTMS; HCD Score 57.53 m/z 801.71 Gene names CHAMP1

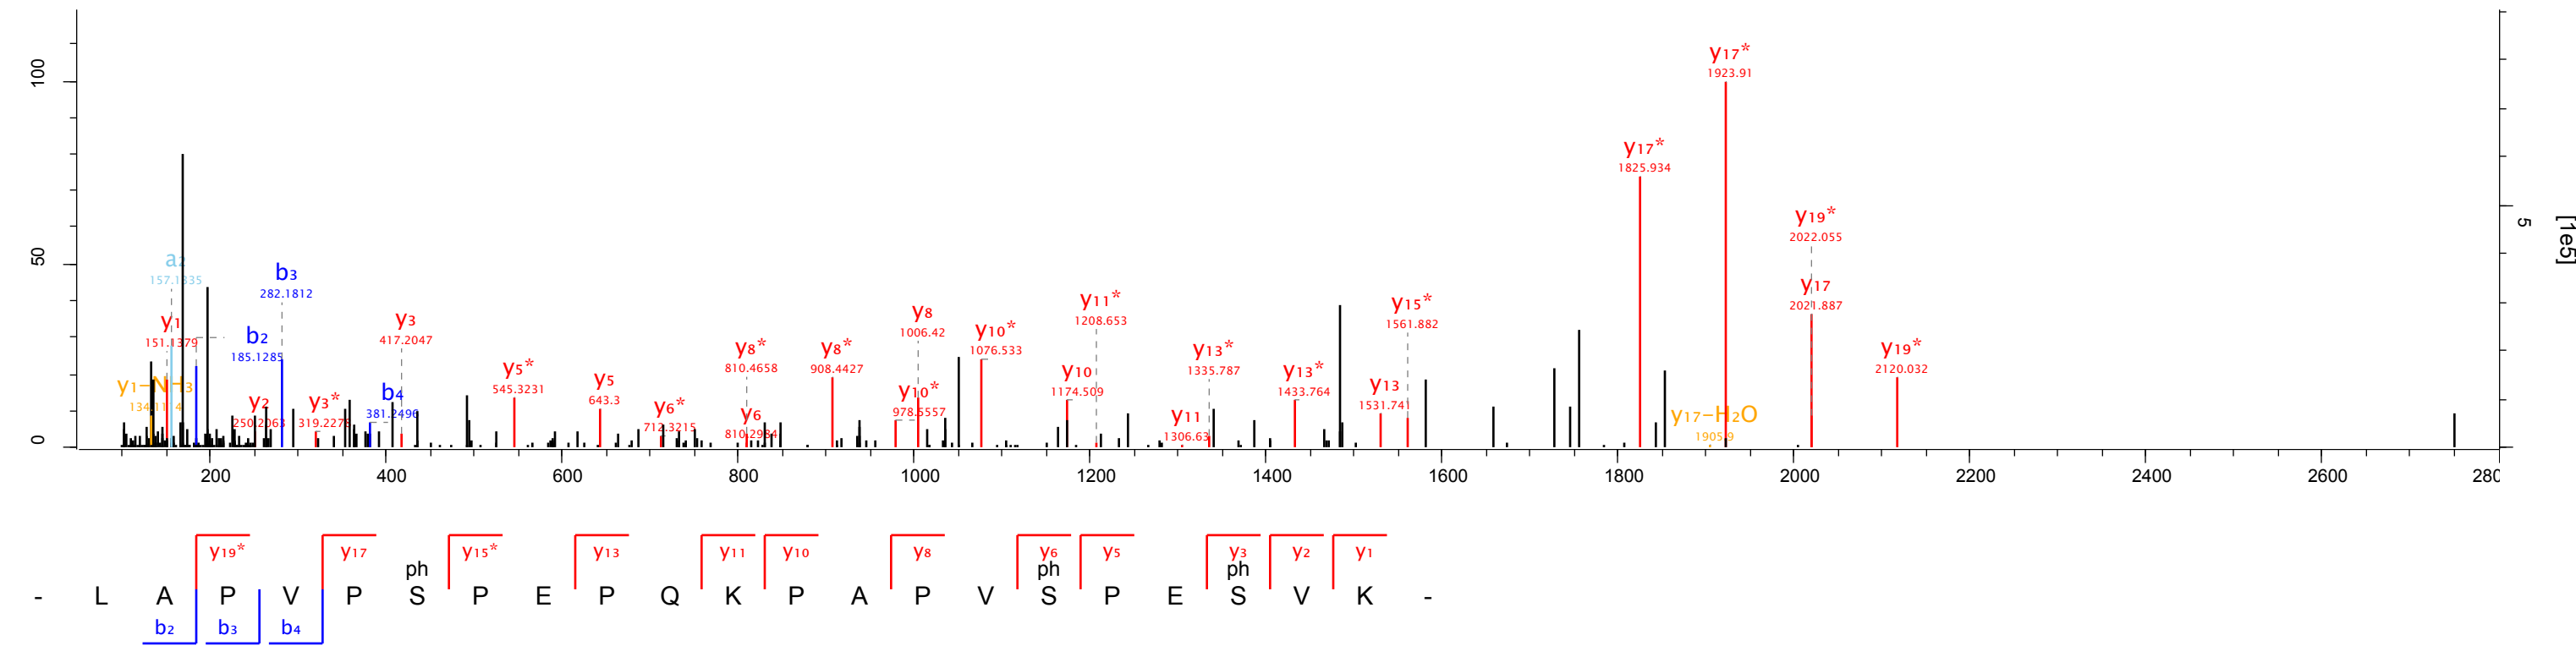

20171215\_MaS\_33SR\_LMH\_phospho2\_03

12299 FTMS; HCD 171.4 727.68 C2orf49

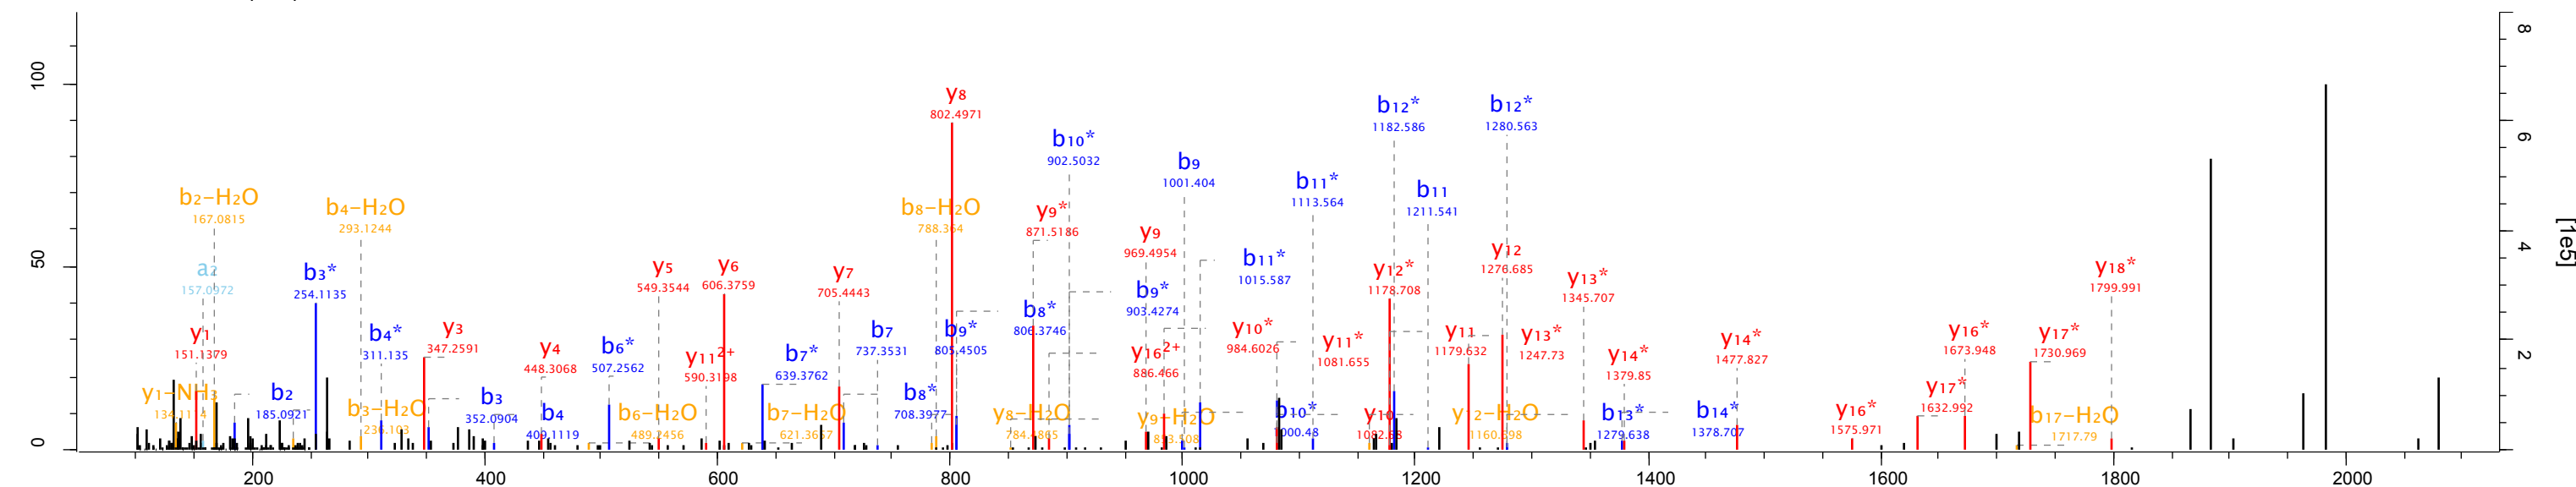

- S P S G P V K S P P L S P V G T T P V K -

b<sub>2</sub>
b<sub>3</sub>
b<sub>4</sub>
b<sub>6</sub>\*
b<sub>7</sub>
b<sub>8</sub>\*
b<sub>9</sub>
b<sub>10</sub>\*
b<sub>11</sub>
b<sub>12</sub>\*
b<sub>13</sub>\*
b<sub>14</sub>\*
y<sub>1</sub>
y<sub>3</sub>
y<sub>4</sub>
y<sub>5</sub>
y<sub>6</sub>
y<sub>7</sub>
y<sub>8</sub>
y<sub>9</sub>
y<sub>10</sub>
y<sub>11</sub>
y<sub>12</sub>
y<sub>13</sub>\*
y<sub>14</sub>\*
y<sub>16</sub>\*
y<sub>17</sub>\*
y<sub>18</sub>\*



Raw file: 20171215\_MaS\_33SR\_LMH\_phospho2\_03  
 Scan: 12389 Method: FTMS; HCD Score: 145.01 m/z: 1130.12 Gene names: PPP1R12A

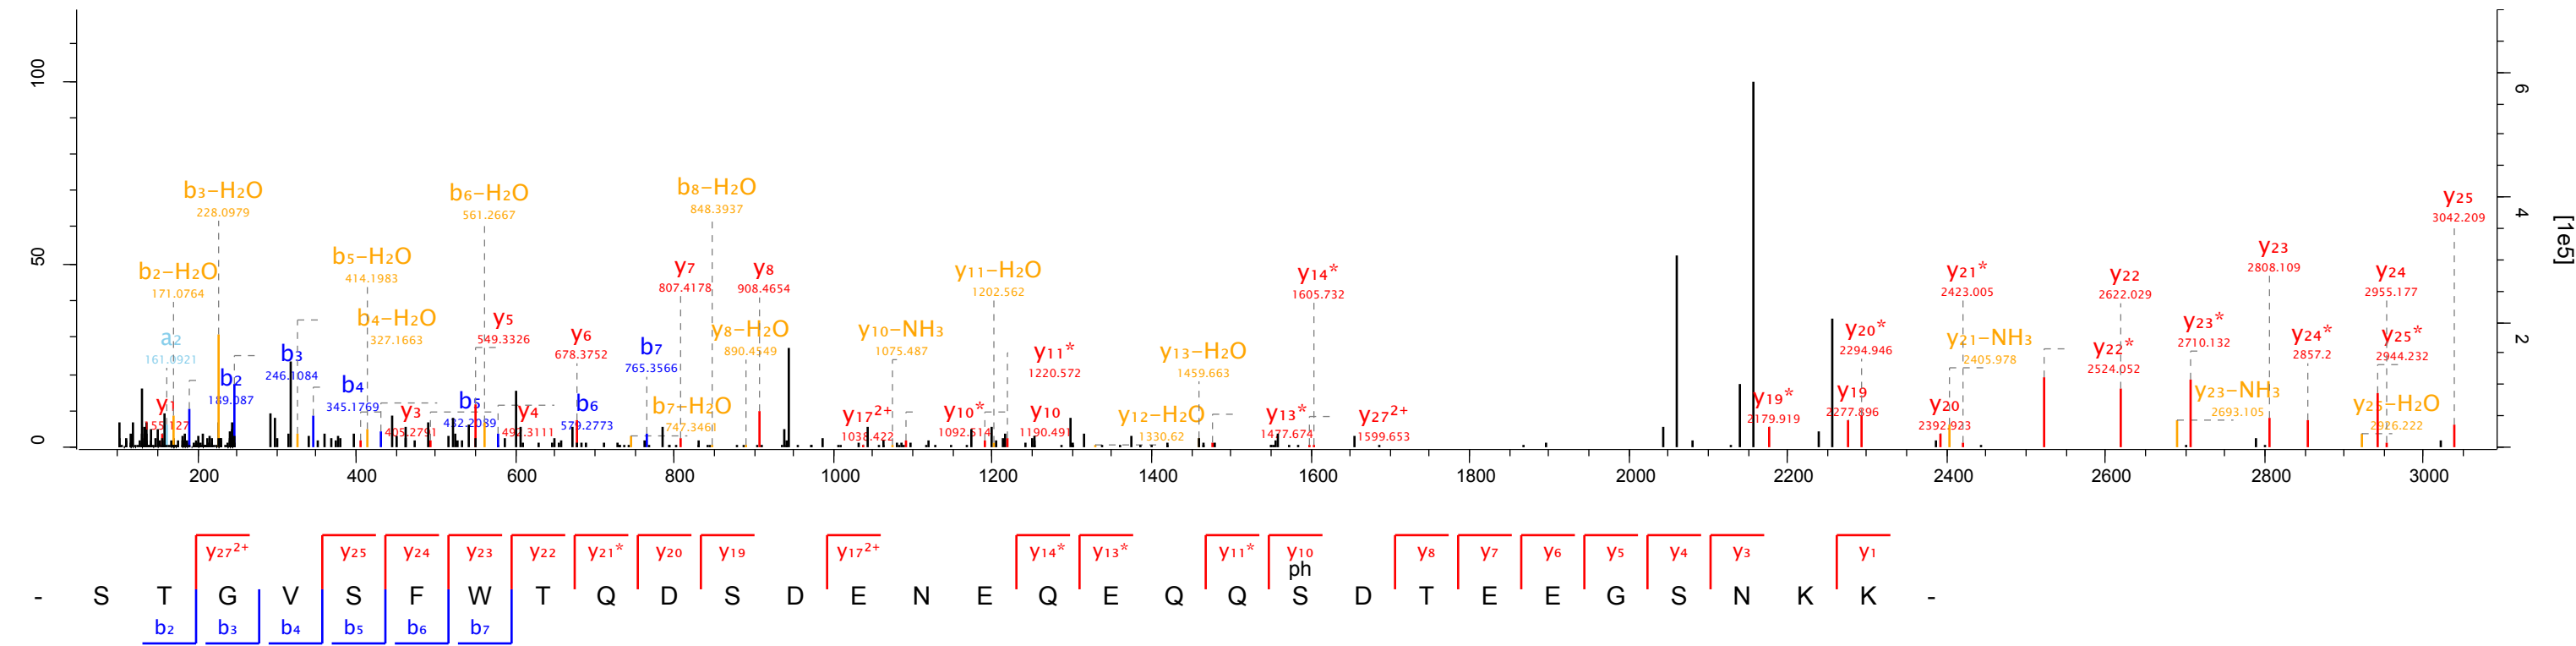

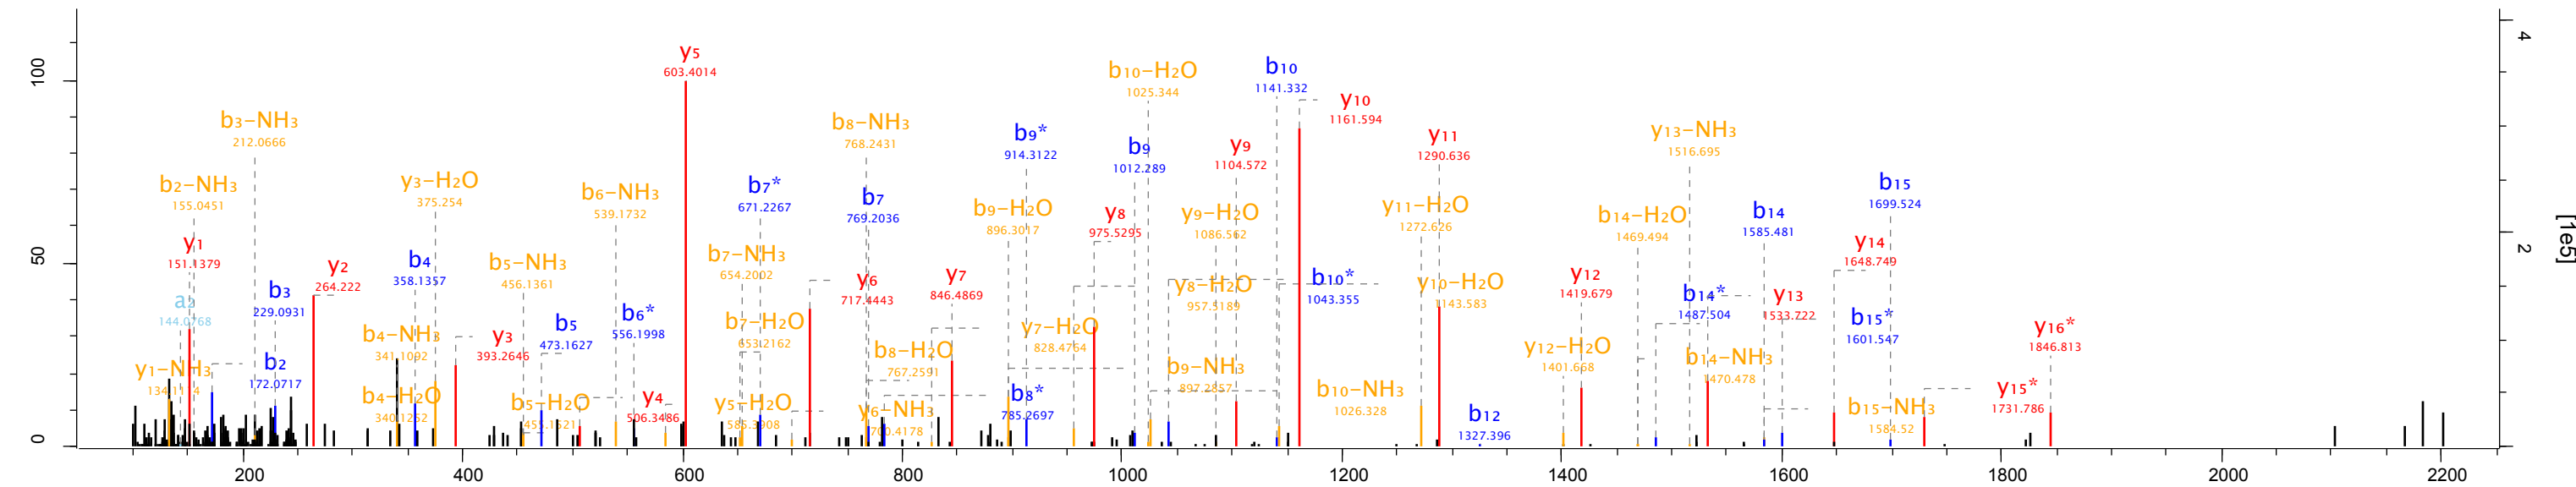

- N G G E D T D N E E G E E E N P L E I K -

Fragmentation mapping (b and y ions) is shown below the sequence:

- b<sub>2</sub> (under G), b<sub>3</sub> (under G), b<sub>4</sub> (under E), b<sub>5</sub> (under D), b<sub>6</sub>\* (under T), b<sub>7</sub> (under D), b<sub>8</sub>\* (under N), b<sub>9</sub> (under E), b<sub>10</sub> (under E), b<sub>12</sub> (under G), b<sub>14</sub> (under E), b<sub>15</sub> (under N)
- y<sub>1</sub> (under K), y<sub>2</sub> (under I), y<sub>3</sub> (under L), y<sub>4</sub> (under P), y<sub>5</sub> (under E), y<sub>6</sub> (under N), y<sub>7</sub> (under E), y<sub>8</sub> (under E), y<sub>9</sub> (under G), y<sub>10</sub> (under G), y<sub>11</sub> (under E), y<sub>12</sub> (under E), y<sub>13</sub> (under D), y<sub>14</sub> (under T), y<sub>15</sub>\* (under D), y<sub>16</sub>\* (under G)

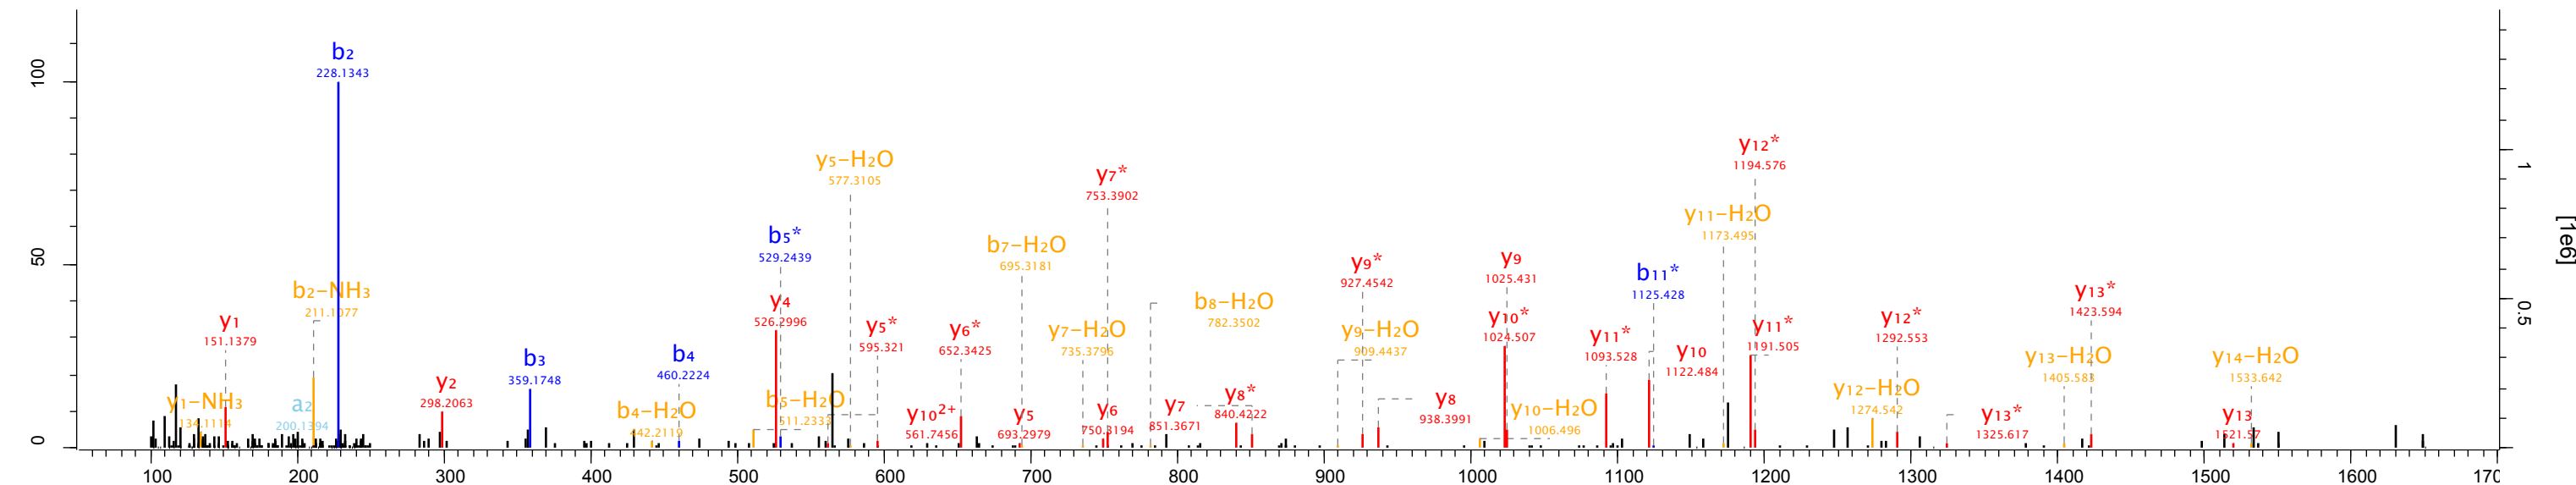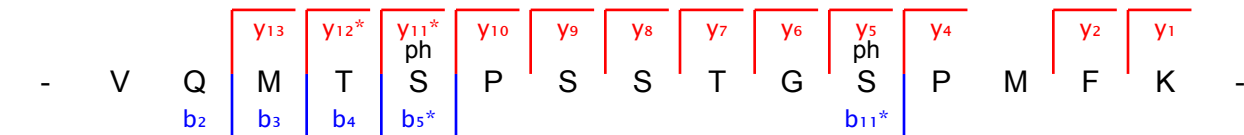

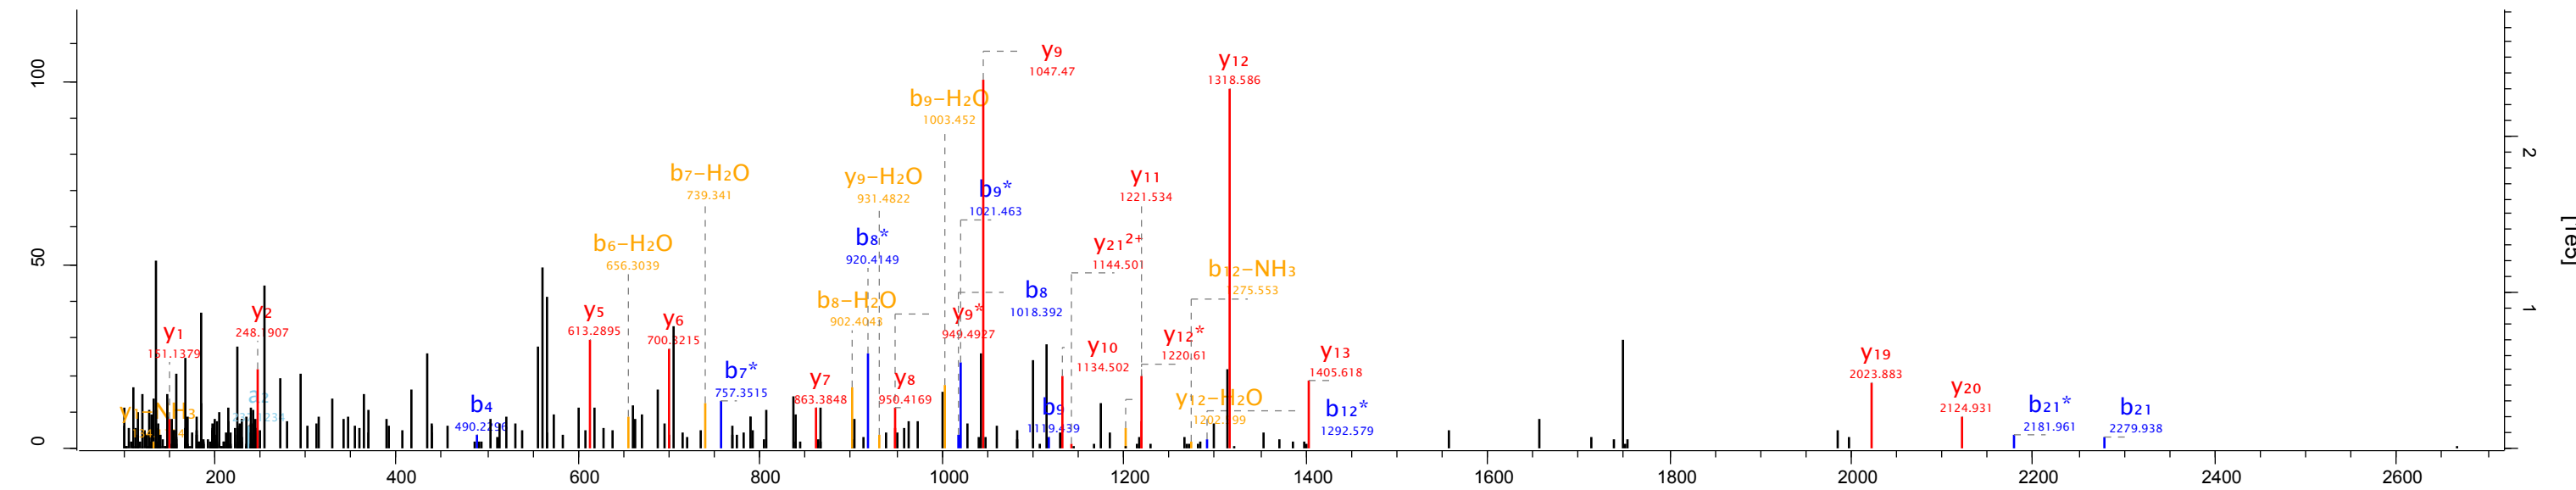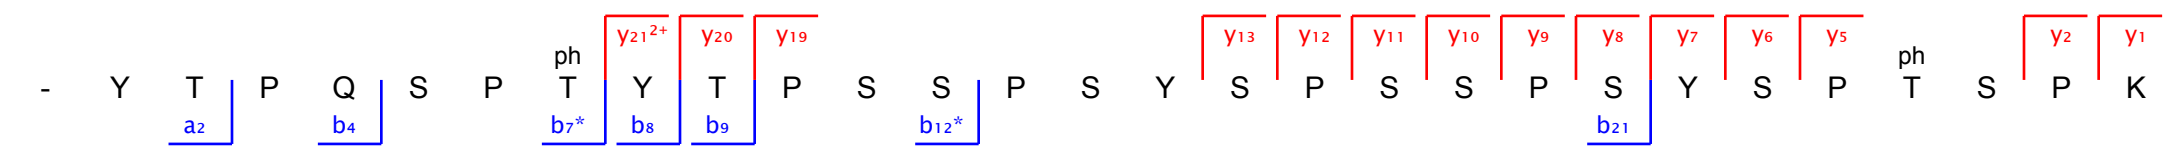

Raw file 20171215\_MaS\_33SR\_LMH\_phospho2\_03 Scan 12949 Method FTMS; HCD Score 115.44 m/z 873.05 Gene names DENND4C

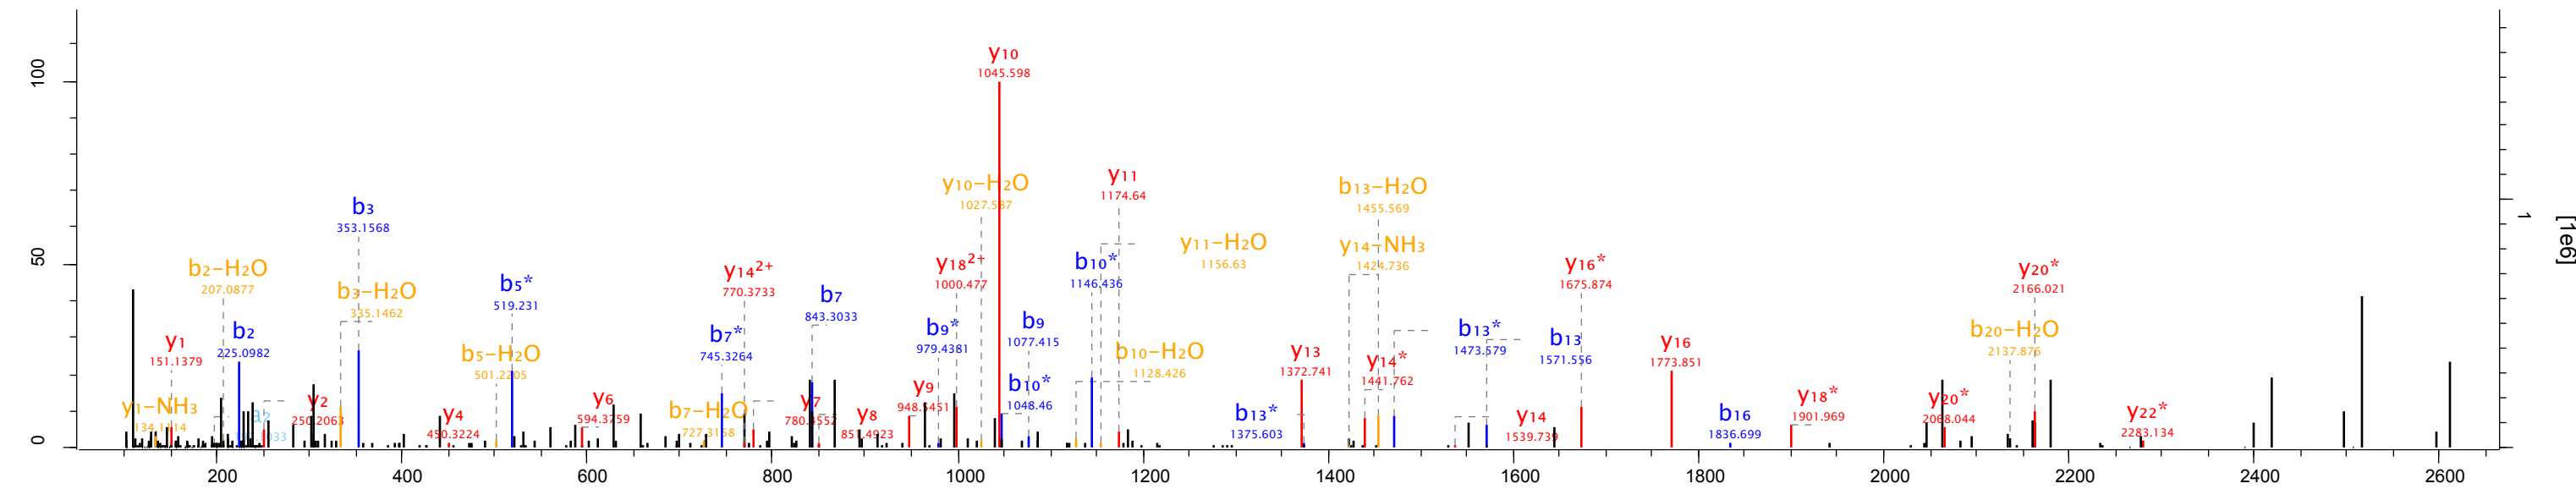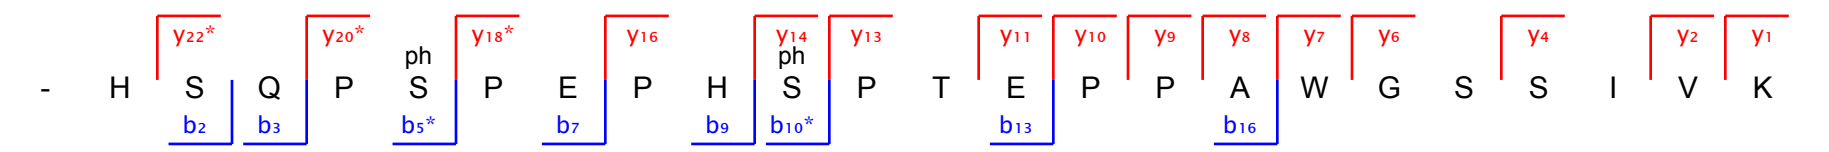

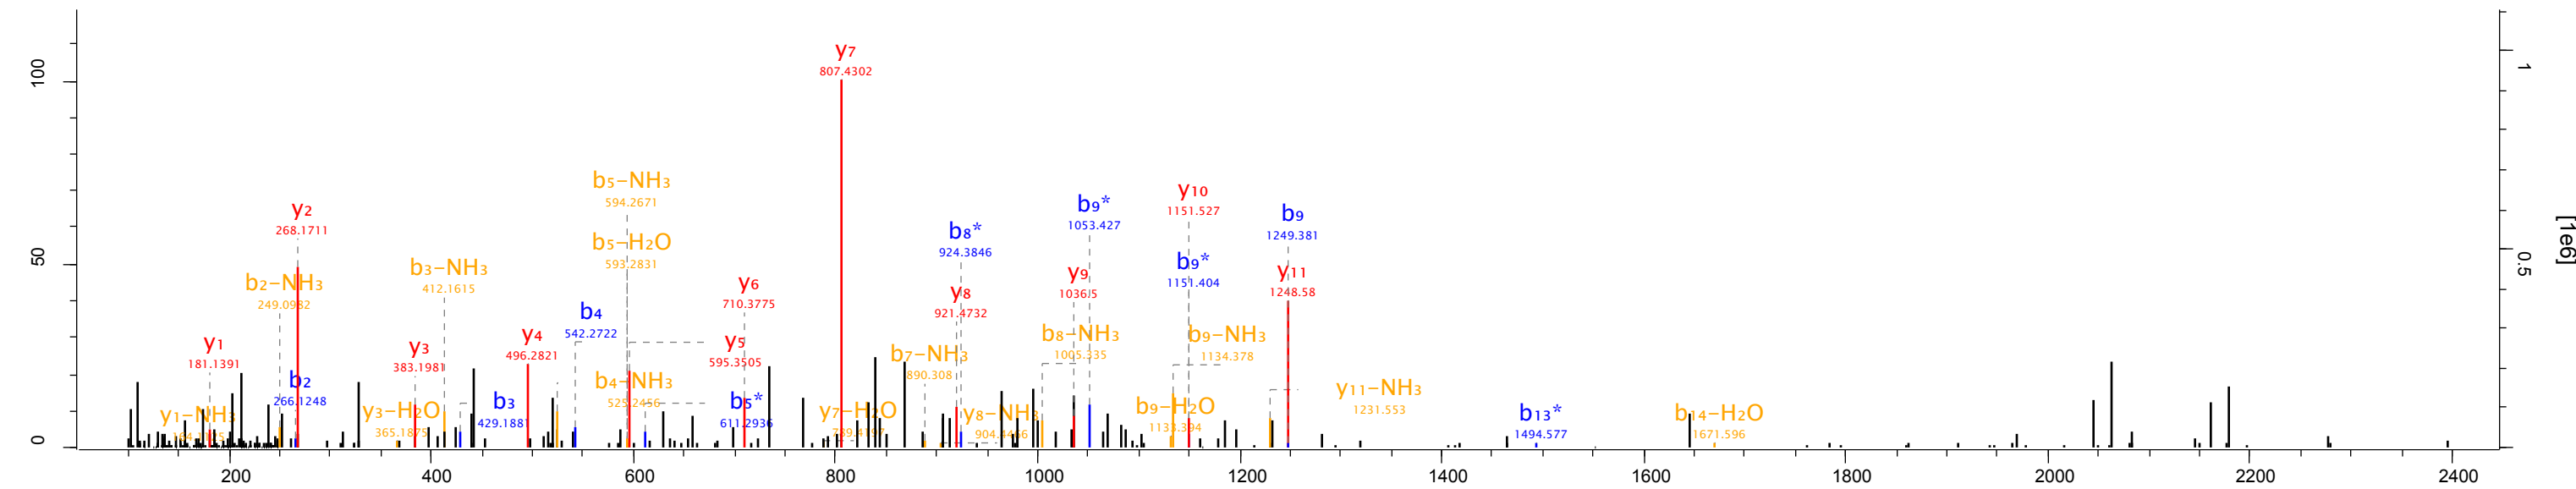

- Q H Y L ph S ph S E D E P D D N P D V L D S R -

b<sub>2</sub>
b<sub>3</sub>
b<sub>4</sub>
b<sub>5</sub>\*
b<sub>8</sub>\*
b<sub>9</sub>
b<sub>13</sub>\*
y<sub>11</sub>
y<sub>10</sub>
y<sub>9</sub>
y<sub>8</sub>
y<sub>7</sub>
y<sub>6</sub>
y<sub>5</sub>
y<sub>4</sub>
y<sub>3</sub>
y<sub>2</sub>
y<sub>1</sub>

Raw file 20171215\_MaS\_33SR\_LMH\_phospho2\_03 Scan 13099 Method FTMS; HCD Score 101.45 m/z 831.02 Gene names PTPRK

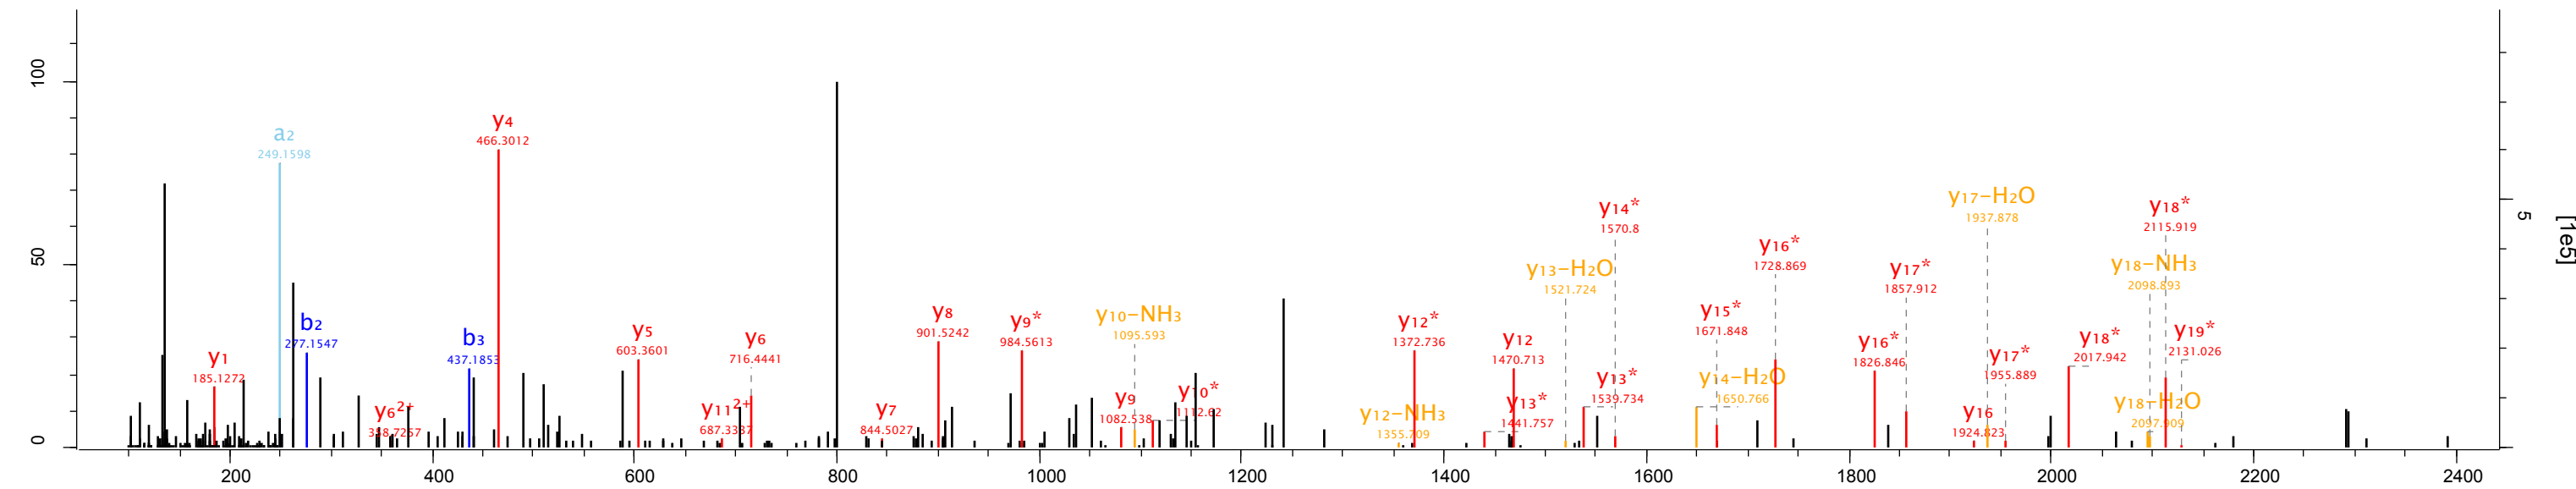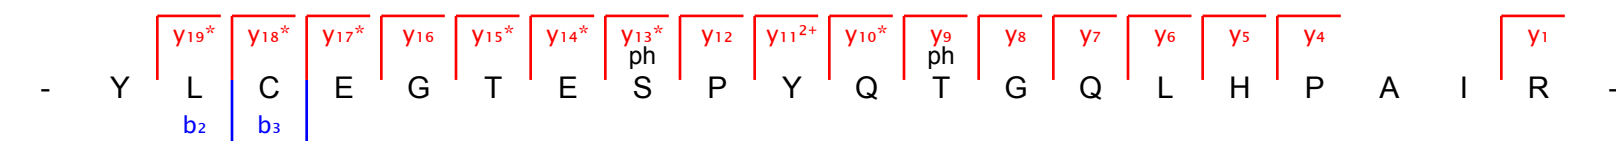

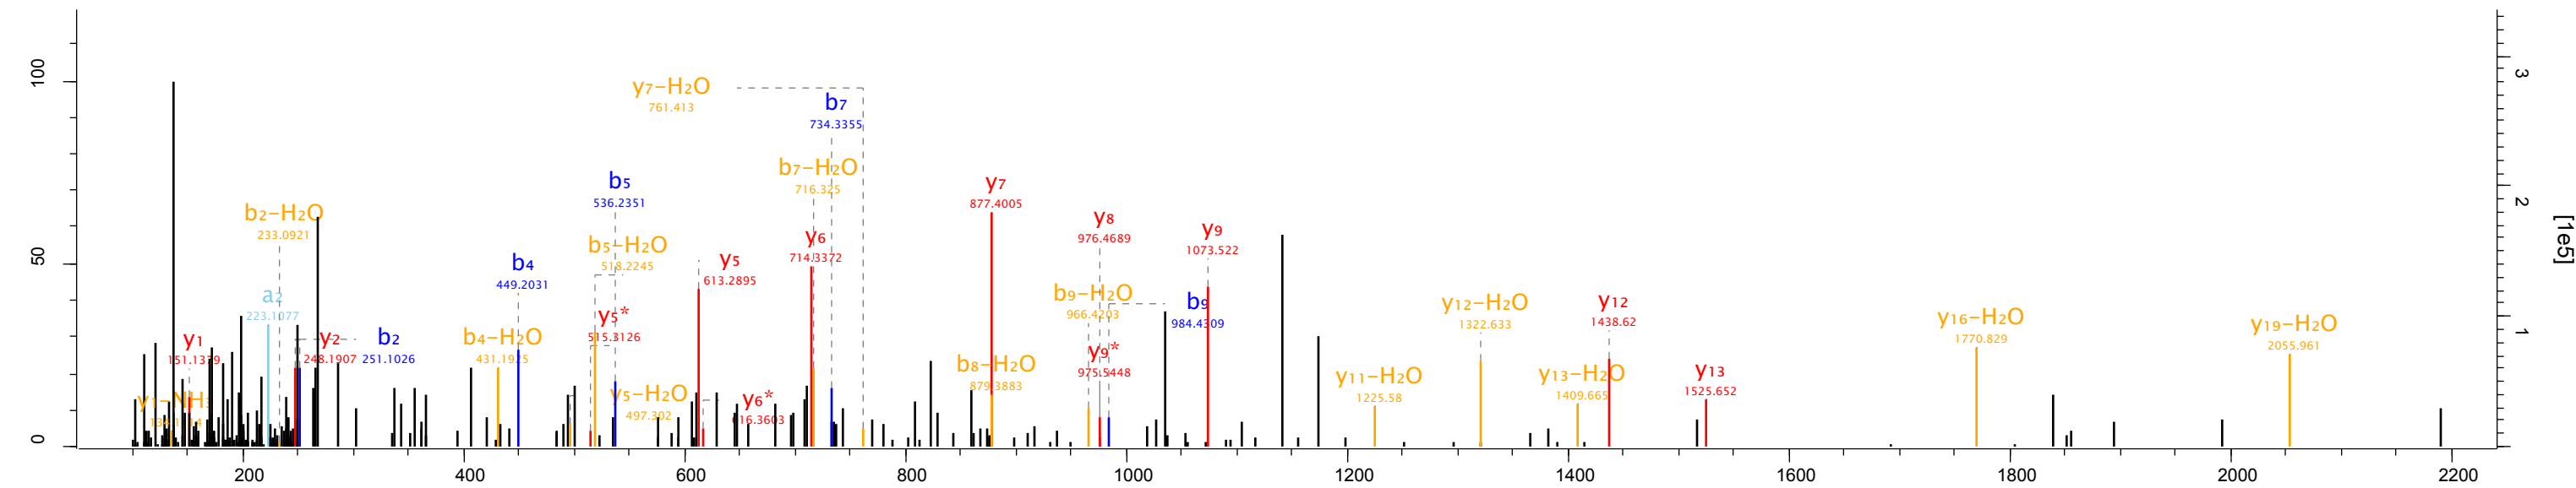

- Y S P T S P T Y S P T S P V Y T P T S P K -

b<sub>2</sub>
b<sub>4</sub>
b<sub>5</sub>
b<sub>7</sub>
b<sub>9</sub>
y<sub>13</sub>
y<sub>12</sub>
y<sub>9</sub>
y<sub>8</sub>
y<sub>7</sub>
y<sub>6</sub>
y<sub>5</sub>
y<sub>2</sub>
y<sub>1</sub>



Raw file: 20171215\_MaS\_33SR\_LMH\_phospho2\_03  
 Scan: 13349 Method: FTMS; HCD Score: 71.79 m/z: 747.28 Gene names: CEP170

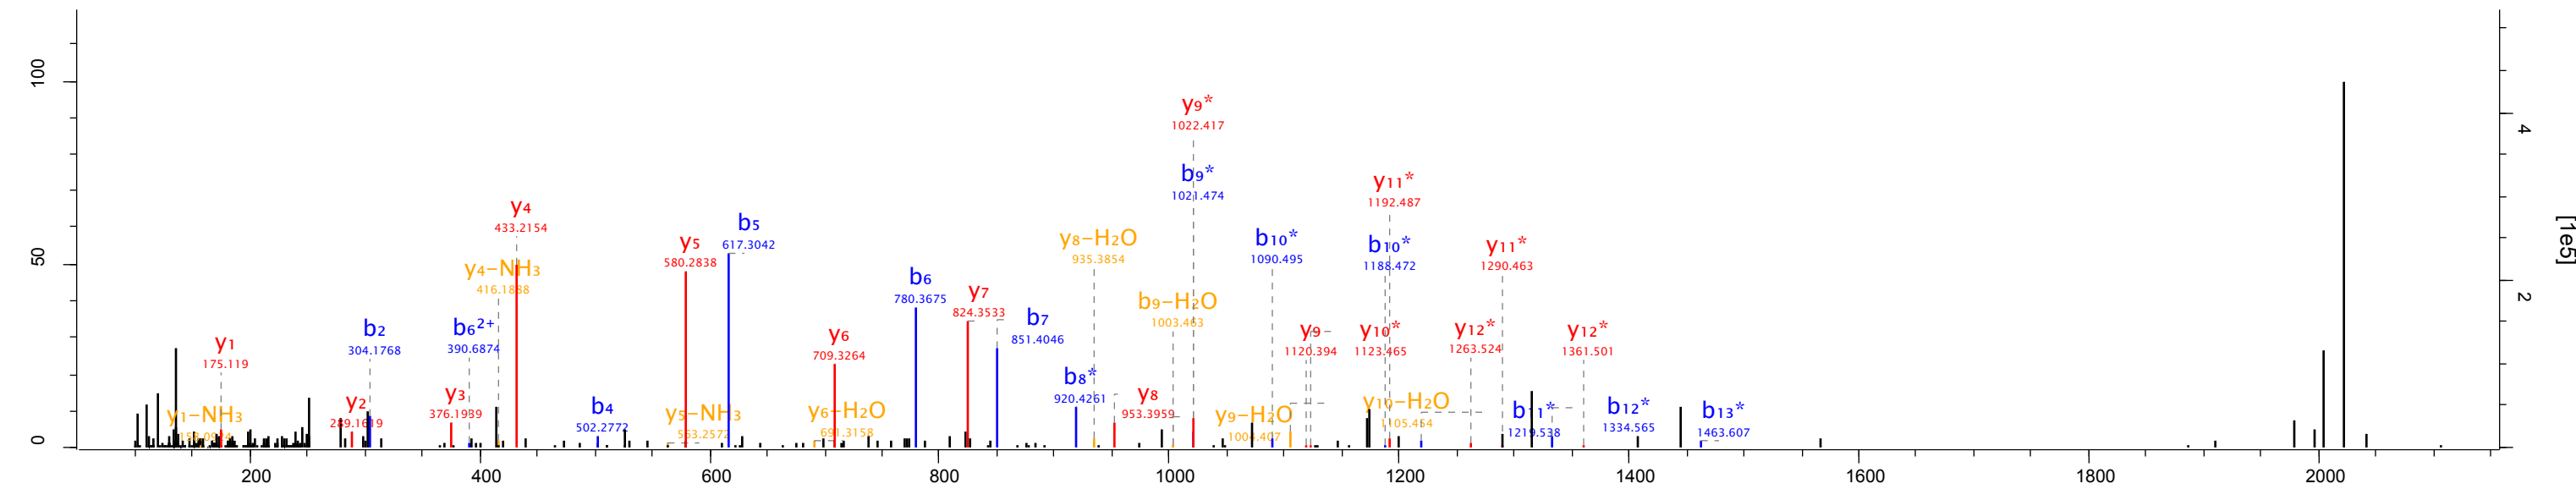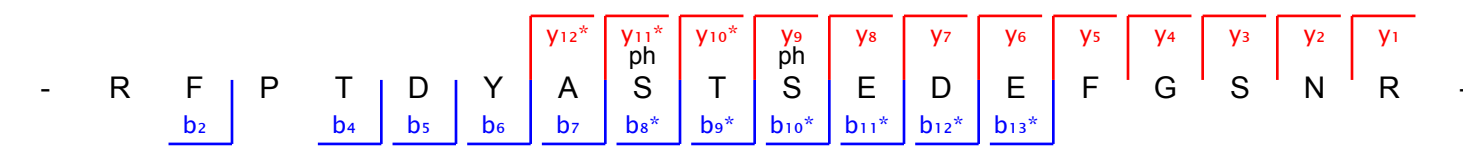

Raw file 20171215\_MaS\_33SR\_LMH\_phospho2\_03 Scan 13429 Method FTMS; HCD Score 138.28 m/z 677.32 Gene names CFL2

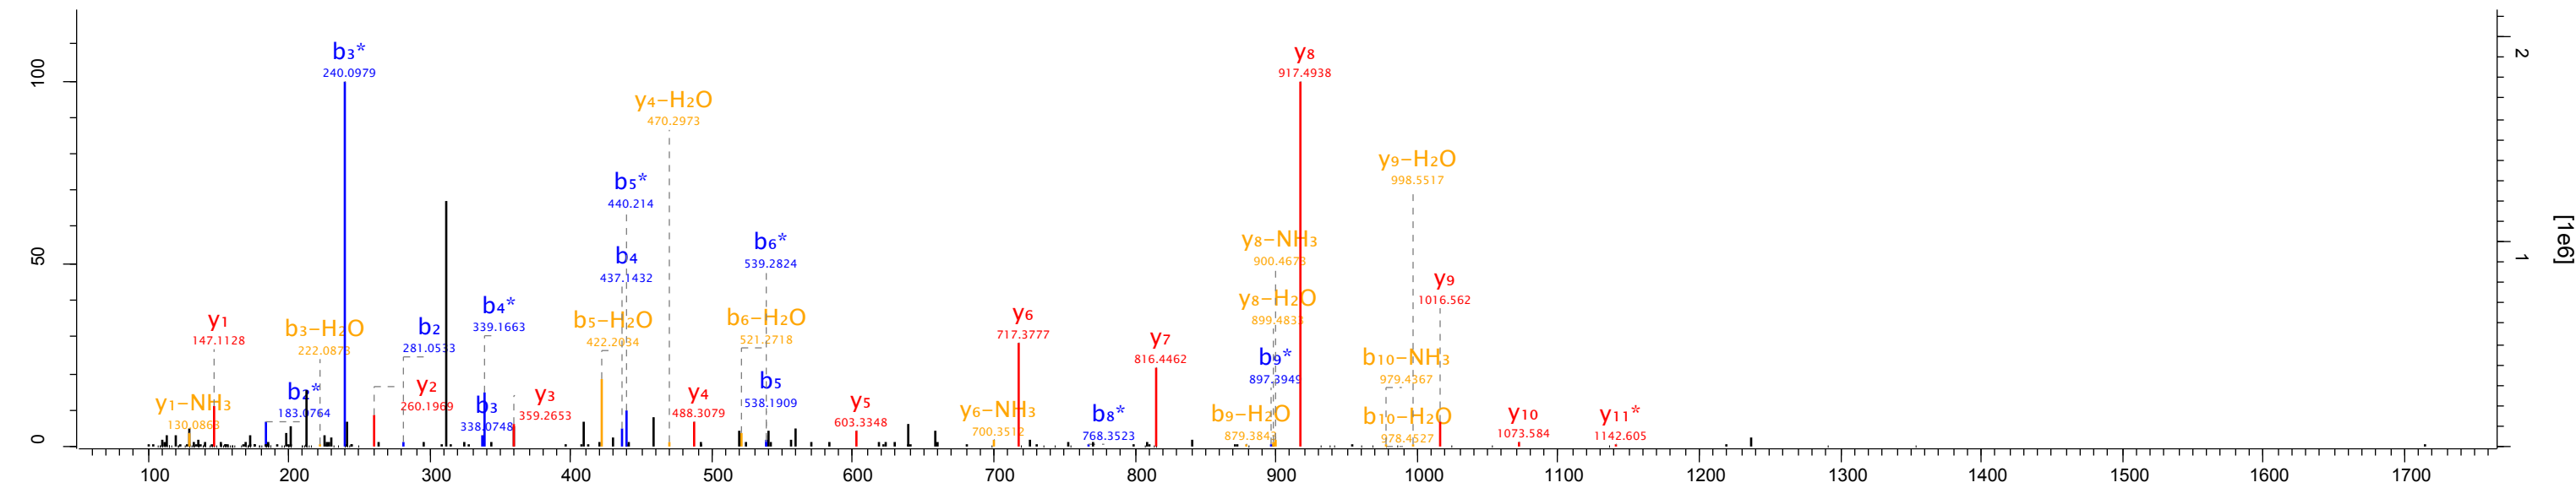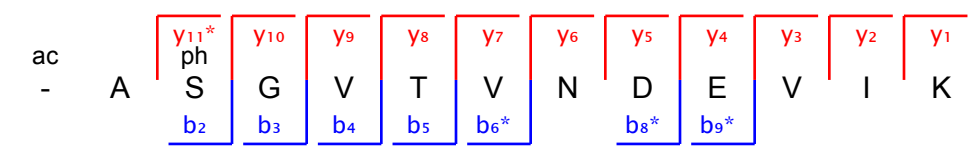

Raw file 20171215\_MaS\_33SR\_LMH\_phospho2\_03 Scan 13789 Method FTMS; HCD Score 171.79 m/z 811.01 Gene names GATAD2A

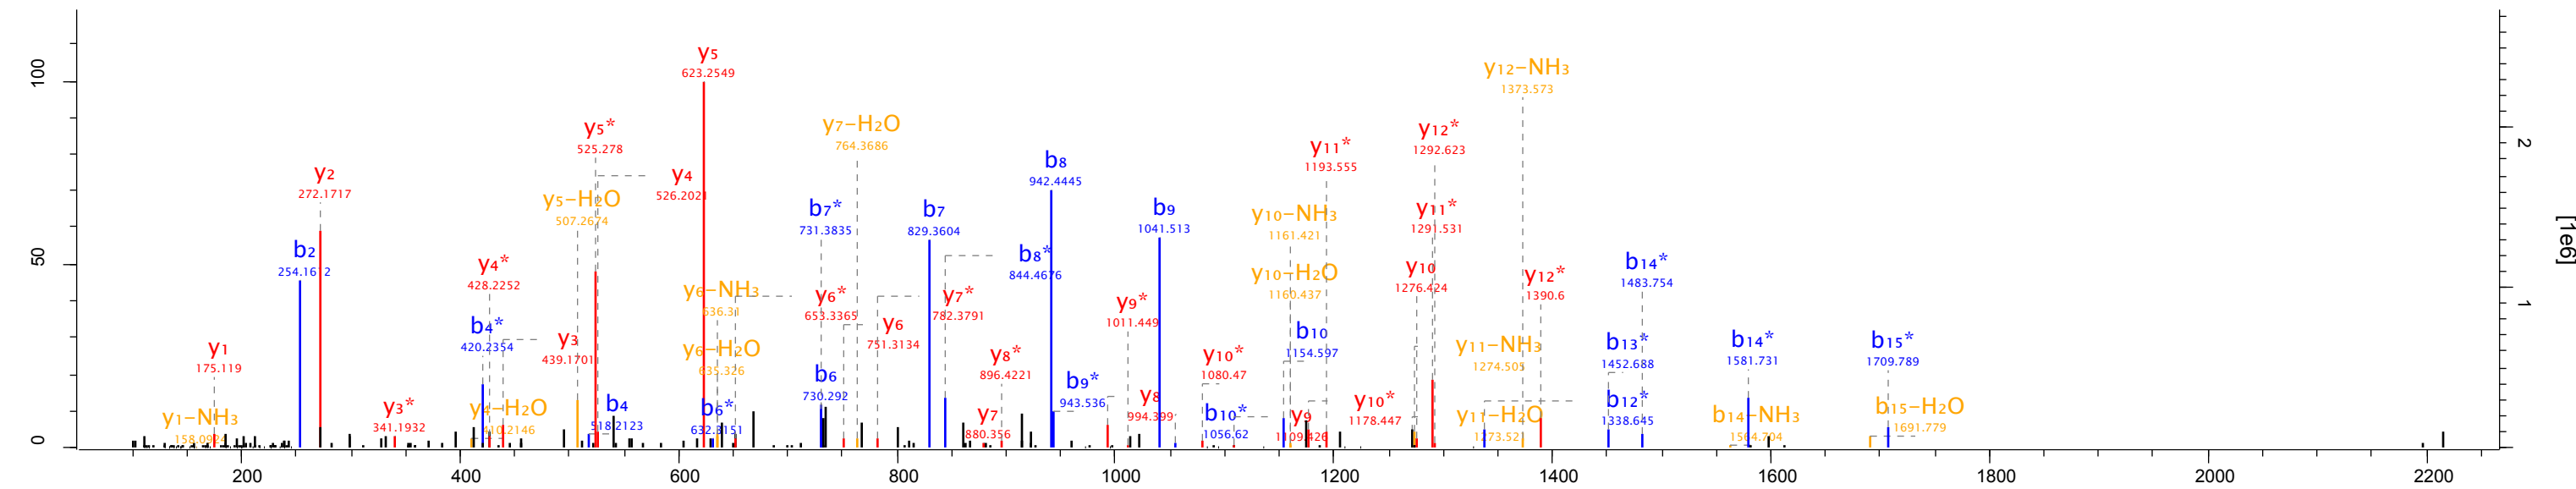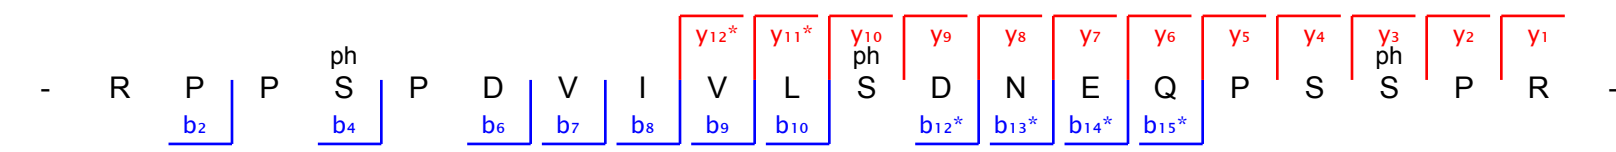

Raw file 20171215\_MaS\_33SR\_LMH\_phospho2\_03 Scan 13799 Method FTMS; HCD Score 95.36 m/z 914.69 Gene names FAM134C

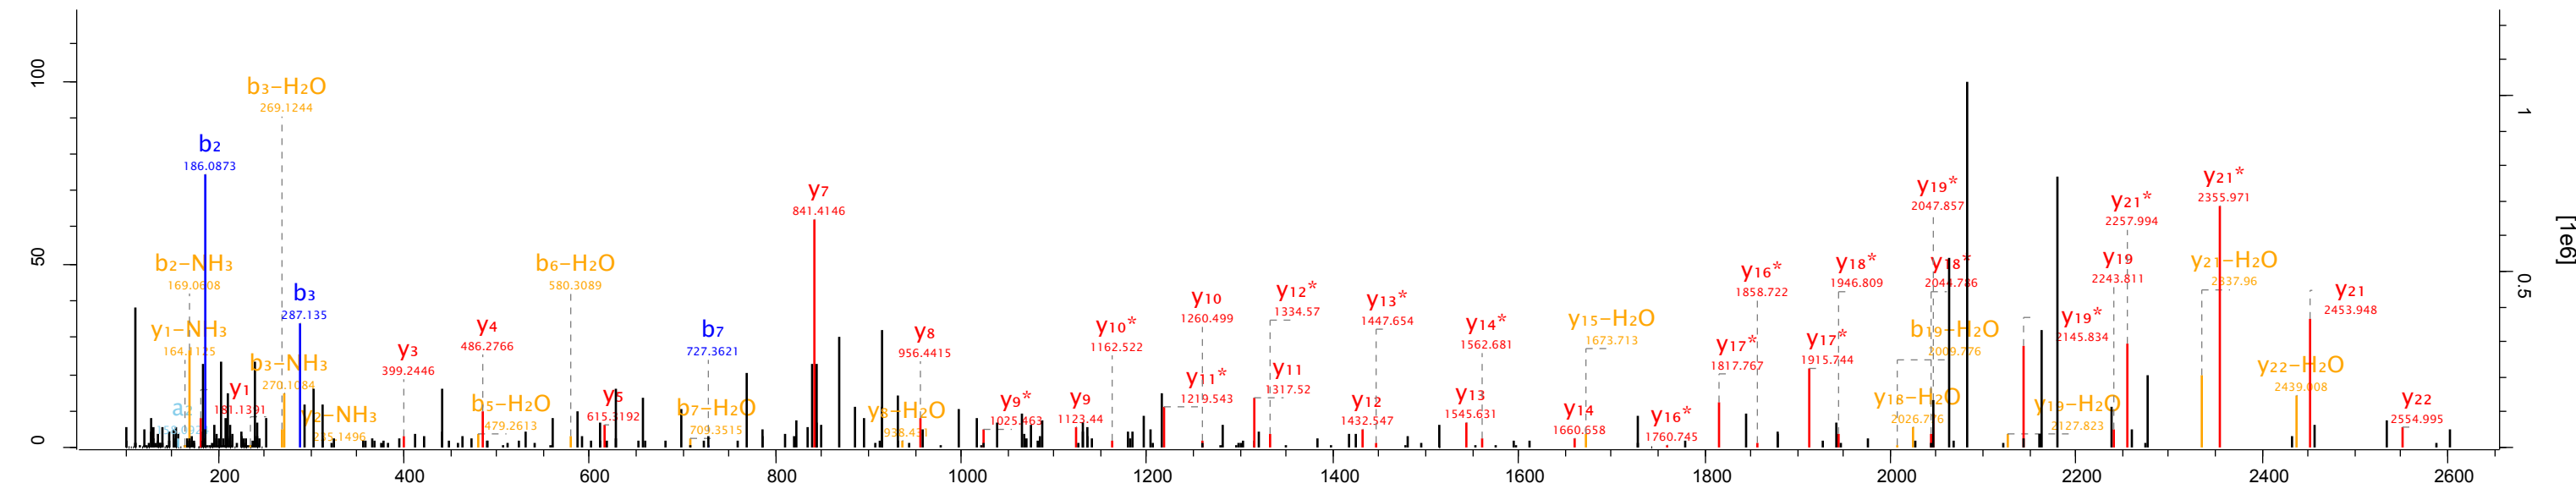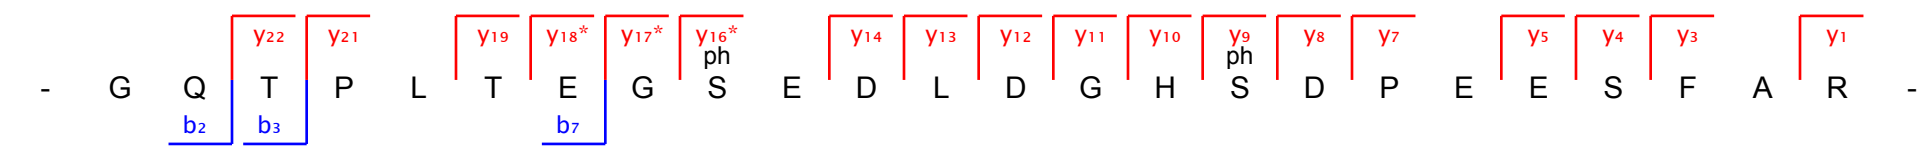

Raw file 20171215\_MaS\_33SR\_LMH\_phospho2\_03 Scan 13919 Method FTMS; HCD Score 130.17 m/z 800.84 Gene names FAM21A;FAM21C

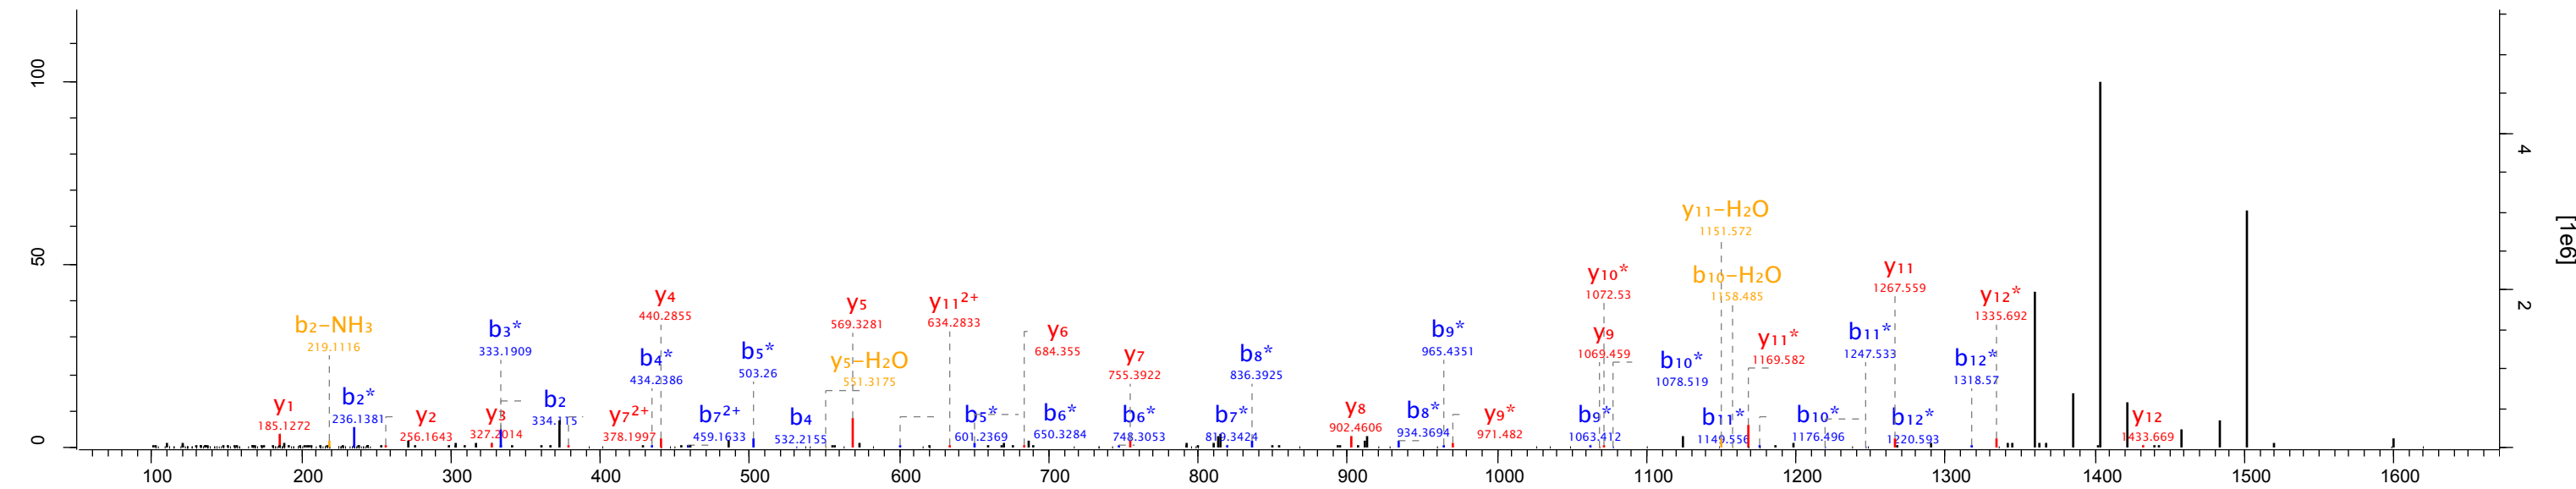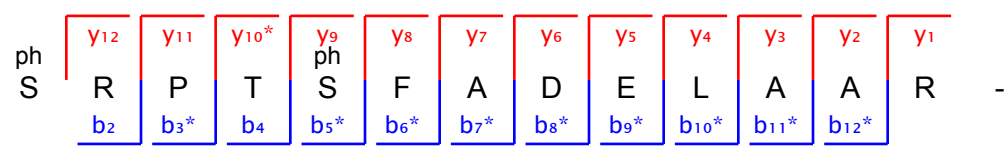

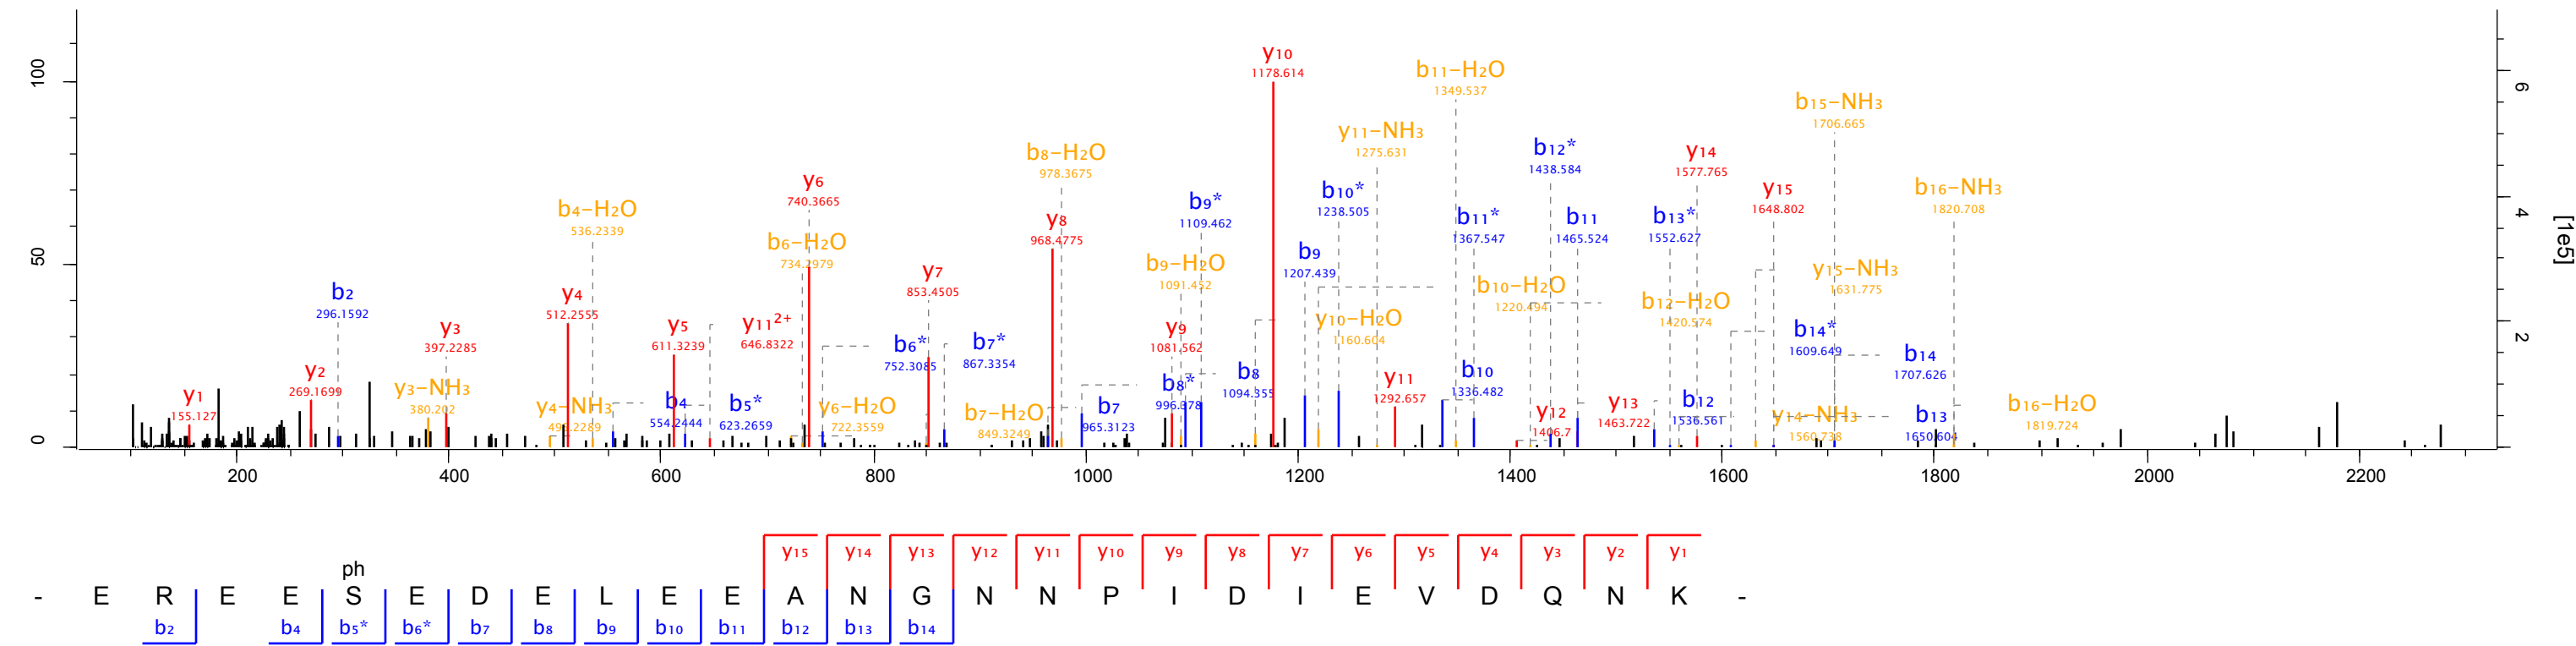

Raw file 20171215\_MaS\_33SR\_LMH\_phospho2\_03 Scan 14249 Method FTMS; HCD Score 246.12 m/z 830.35 Gene names PTPN12

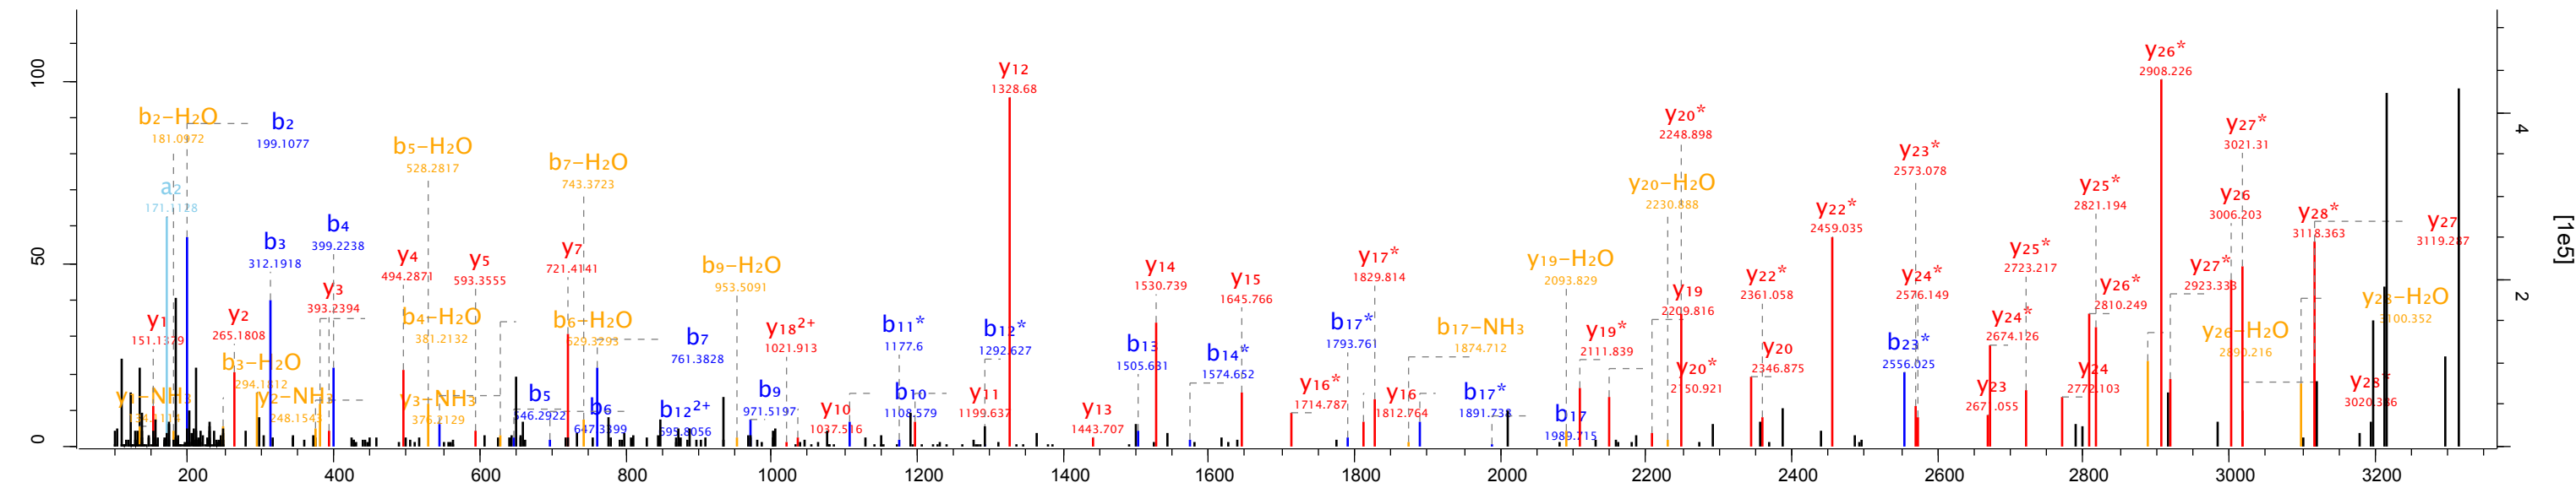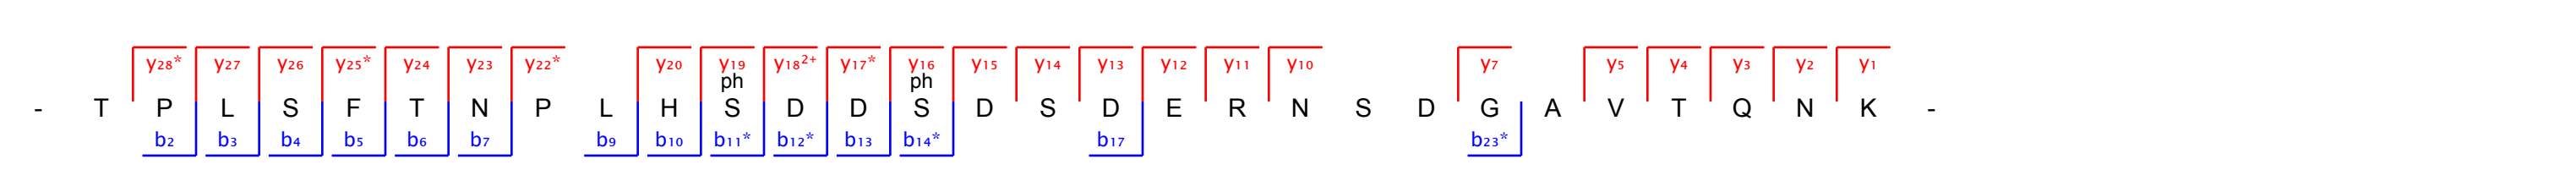

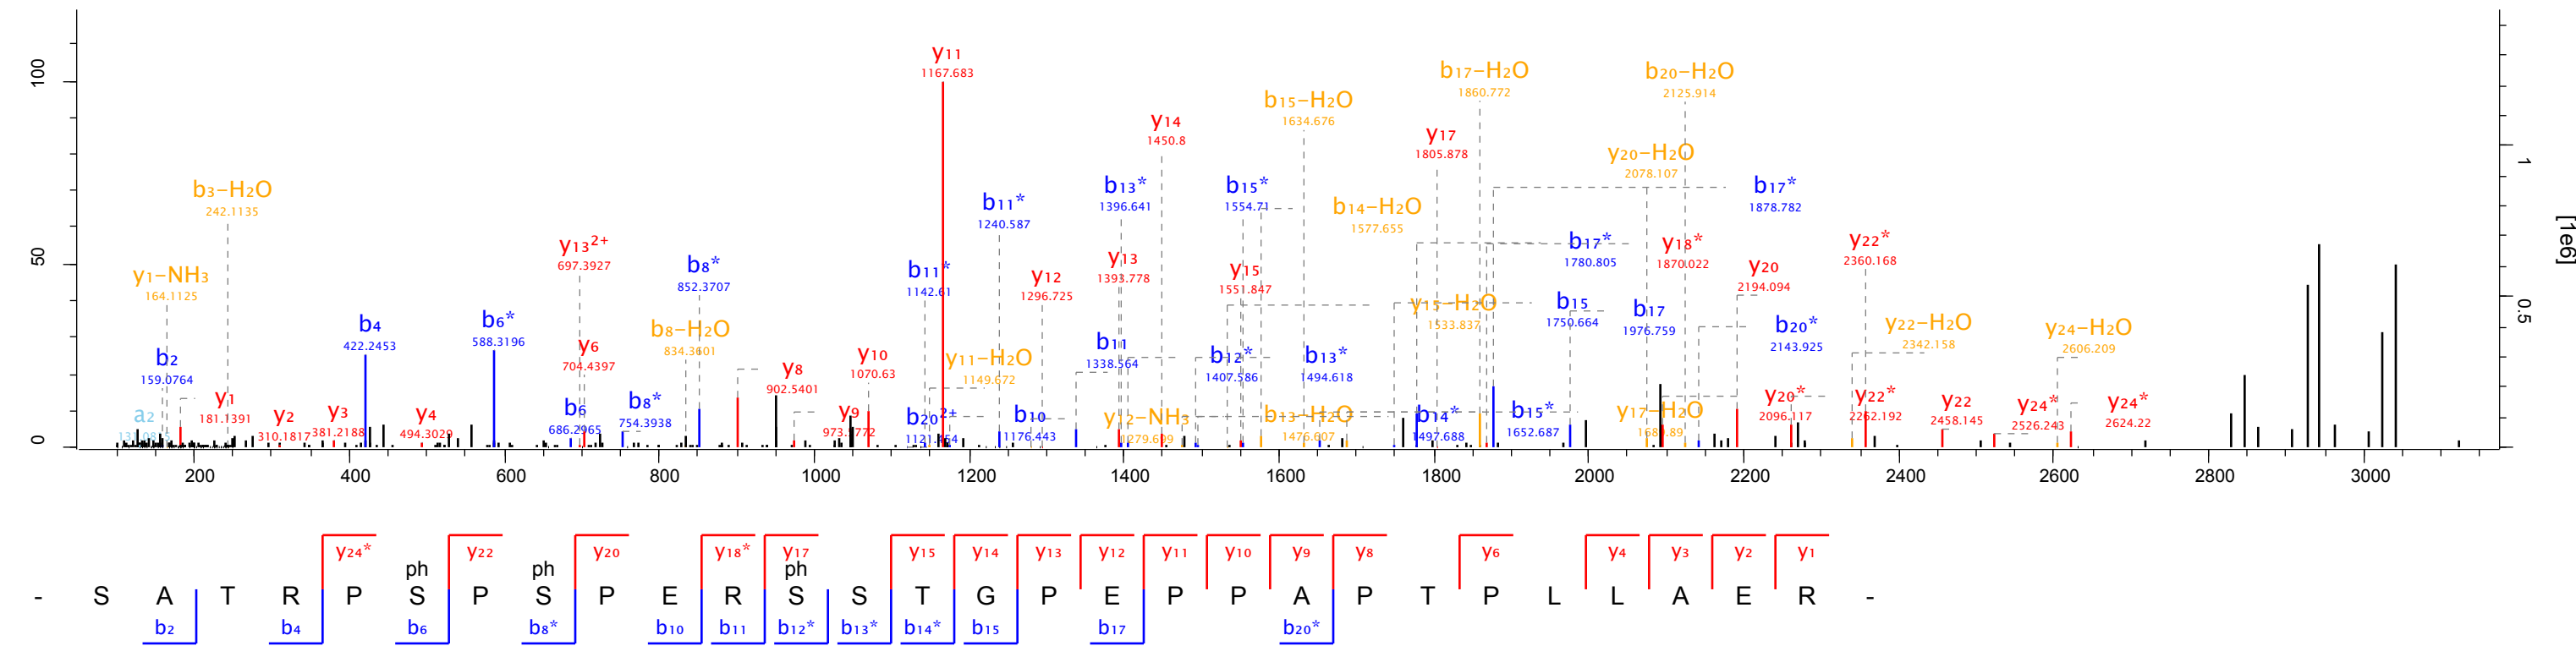



Raw file 20171215\_MaS\_33SR\_LMH\_phospho2\_03 Scan 14509 Method FTMS; HCD Score 118.72 m/z 581.25 Gene names RPS6KC1

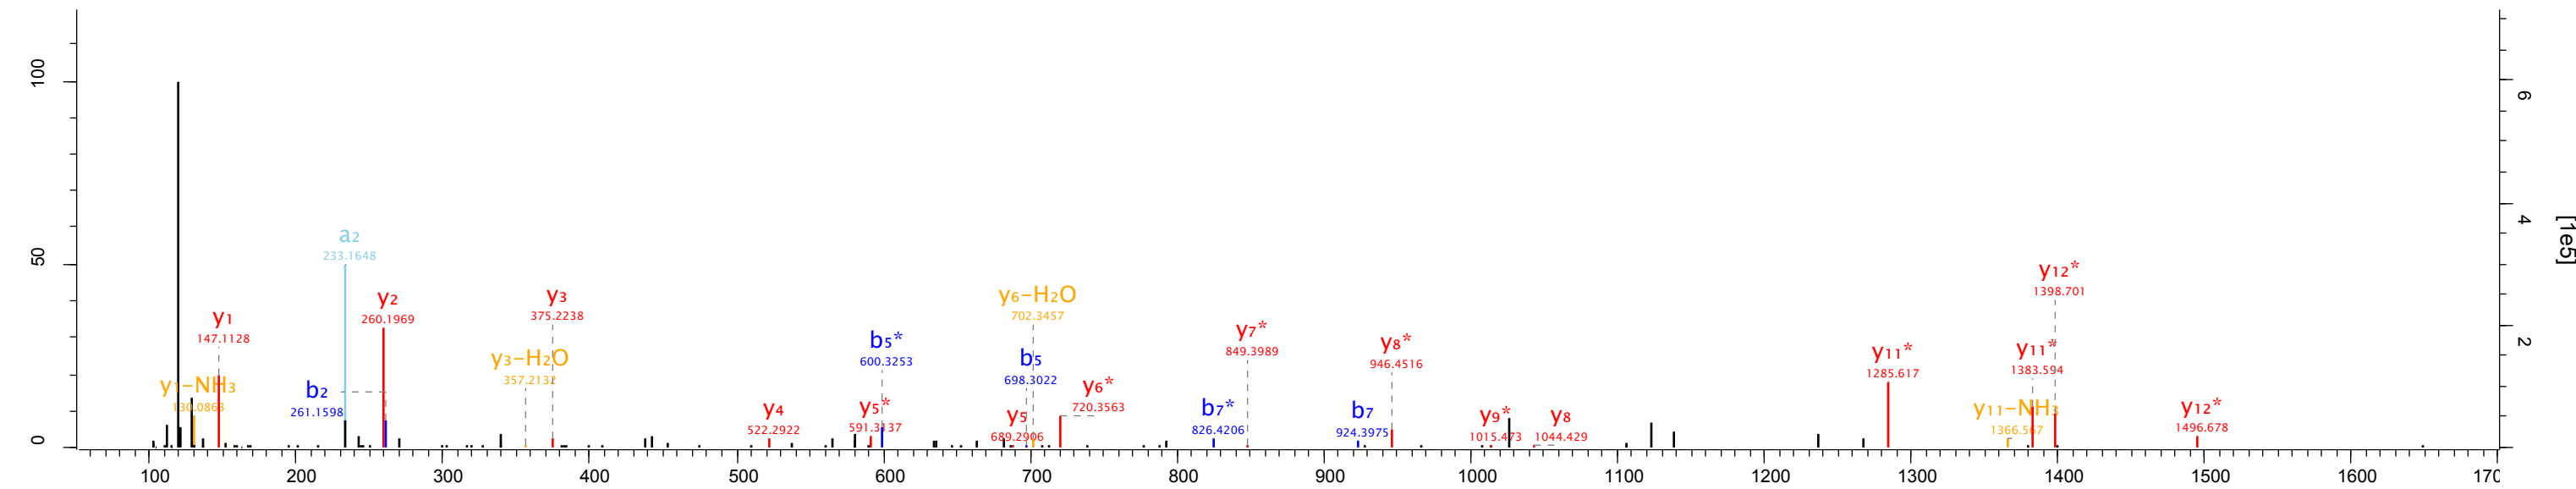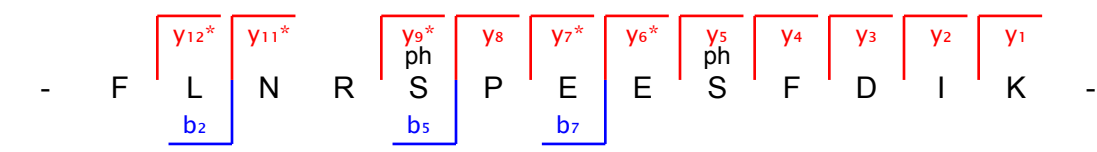

Raw file: 20171215\_MaS\_33SR\_LMH\_phospho2\_03  
 Scan: 14639 Method: FTMS; HCD Score: 113.42 m/z: 1007.13 Gene names: SOX10

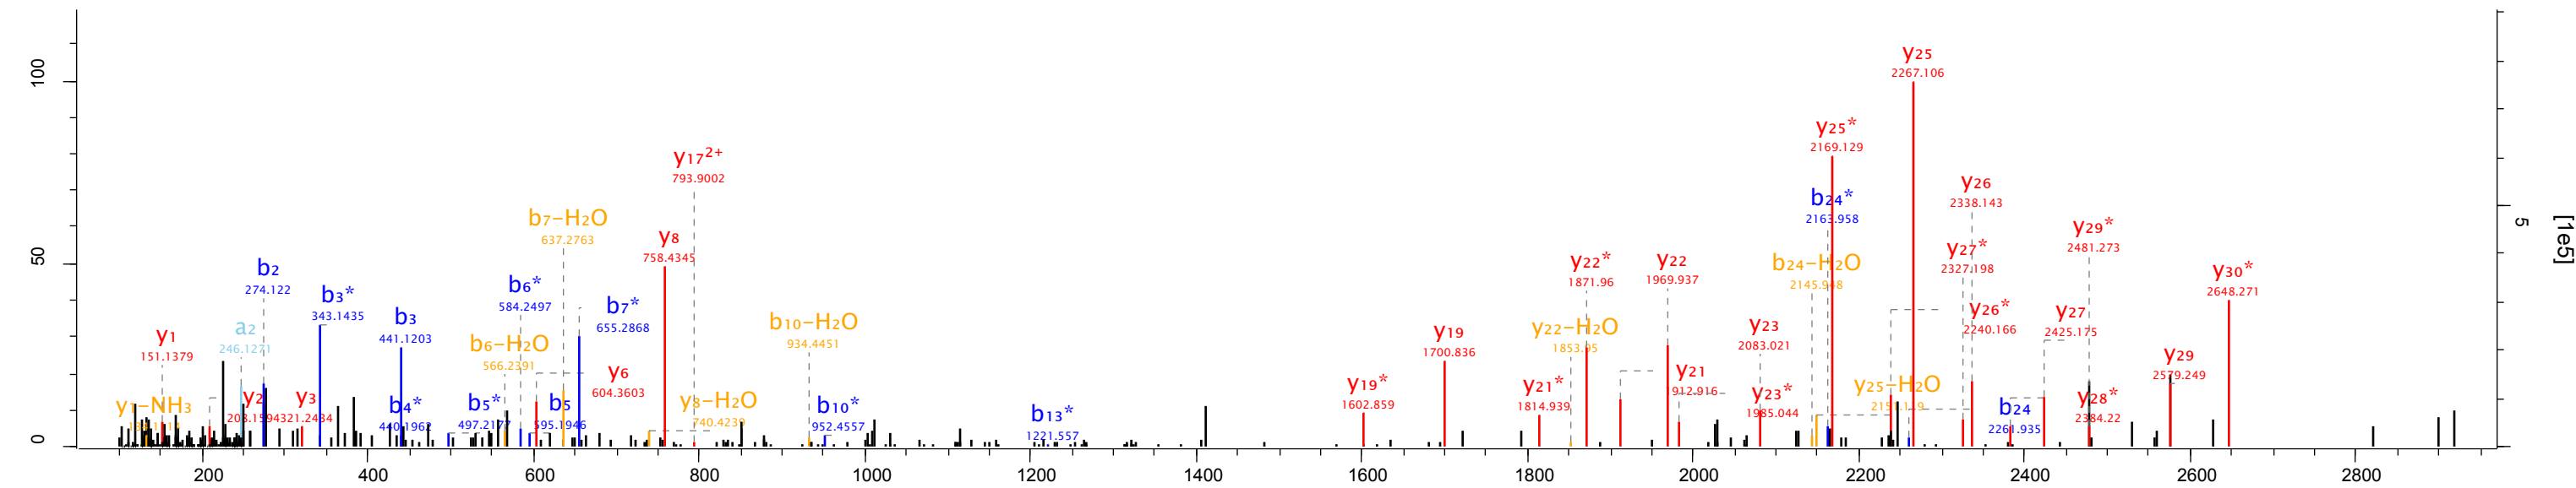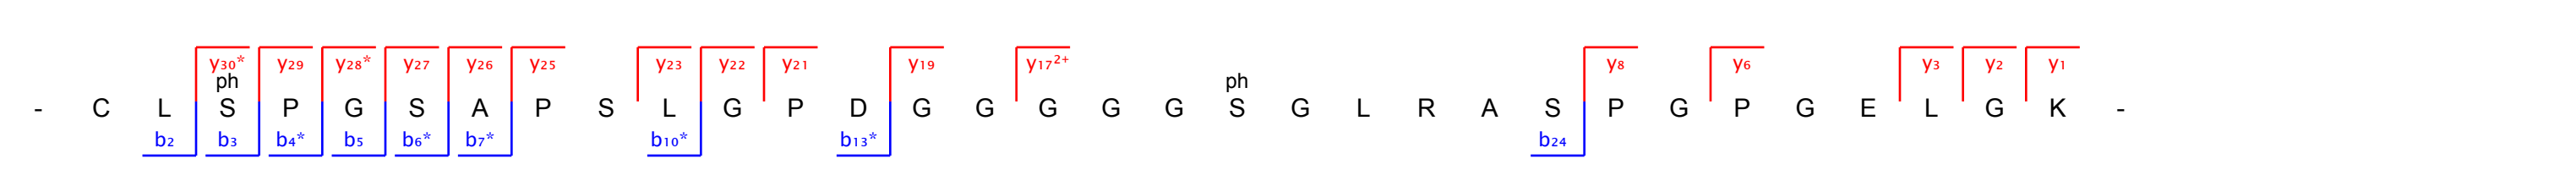

Raw file: 20171215\_MaS\_33SR\_LMH\_phospho2\_03  
 Scan: 14689 Method: FTMS; HCD Score: 153.83 m/z: 898.88 Gene names: HN1

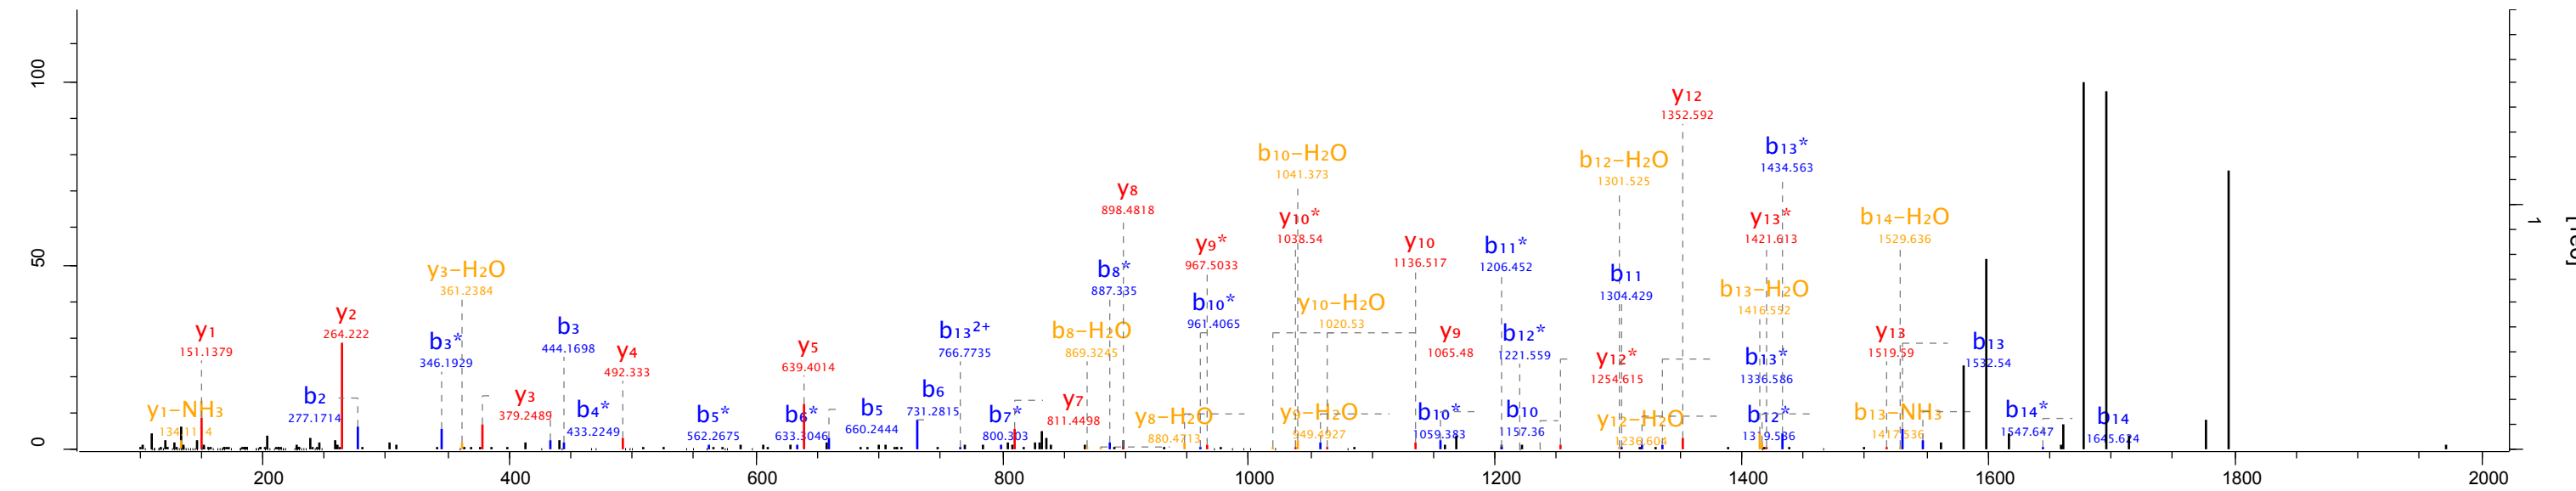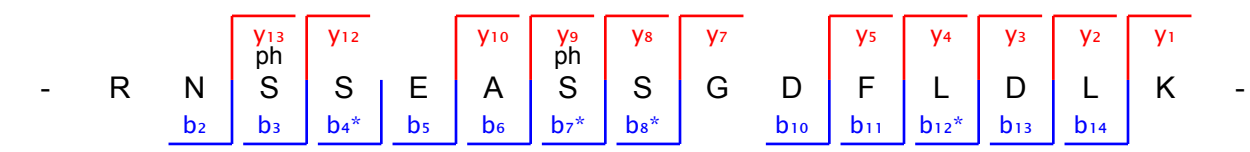

Raw file  
20171215\_MaS\_33SR\_LMH\_phospho2\_03

Scan 14799 Method FTMS; HCD Score 131.35 m/z 724.66 Gene names MYH10

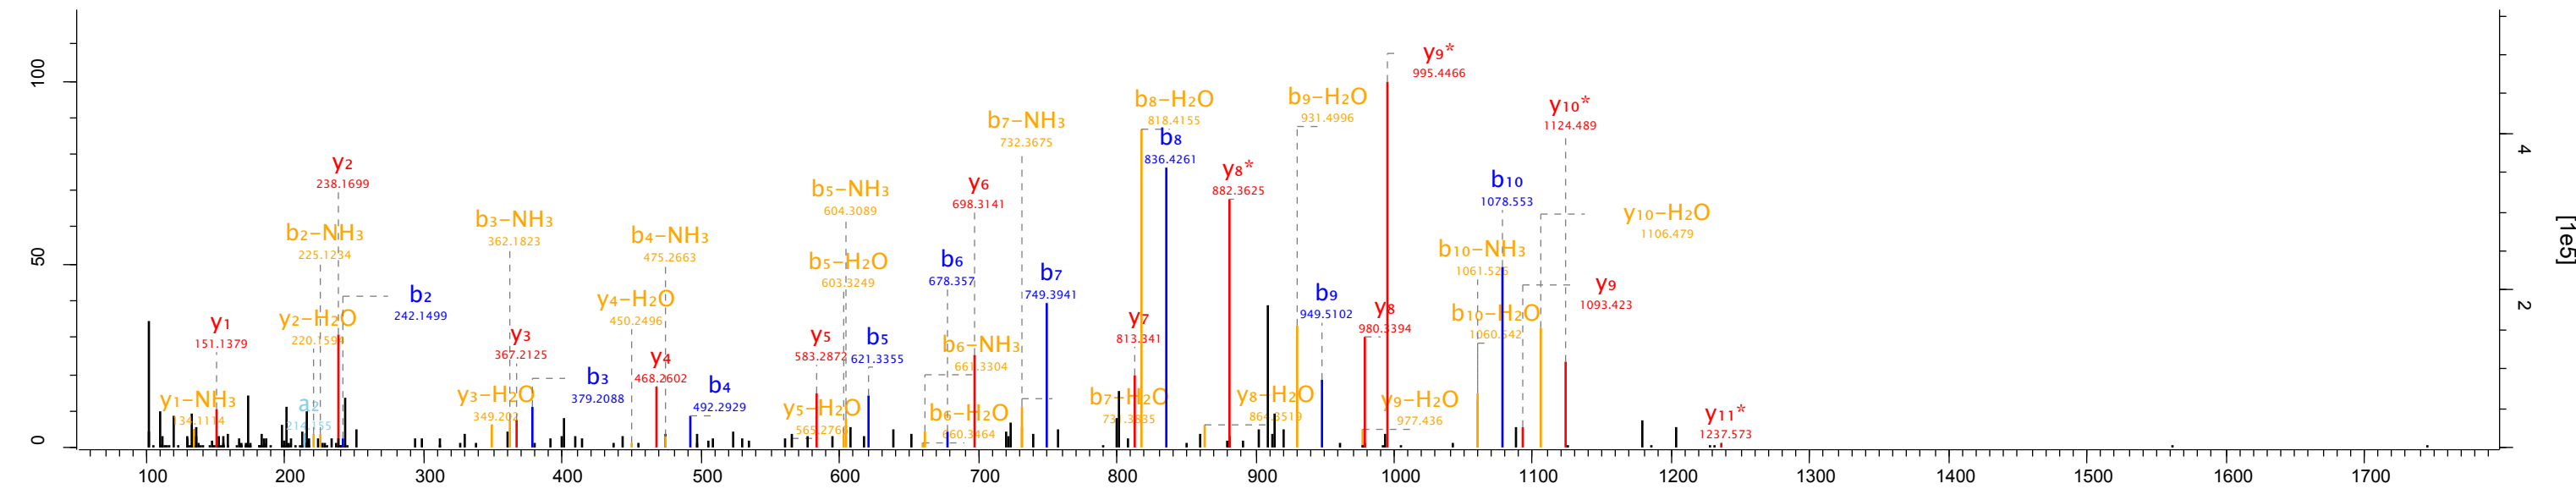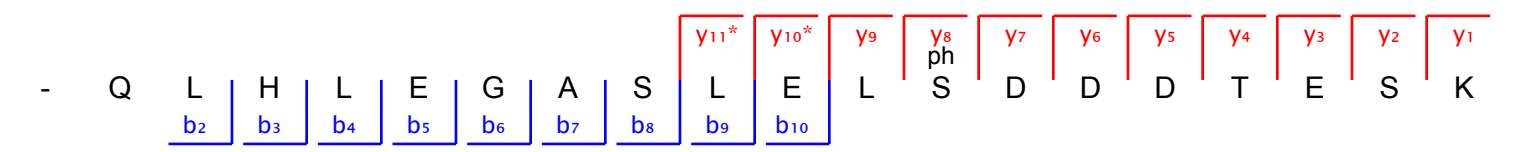

Raw file 20171215\_MaS\_33SR\_LMH\_phospho2\_03 Scan 15109 Method FTMS; HCD Score 132.79 m/z 1044.97 Gene names EHBP1

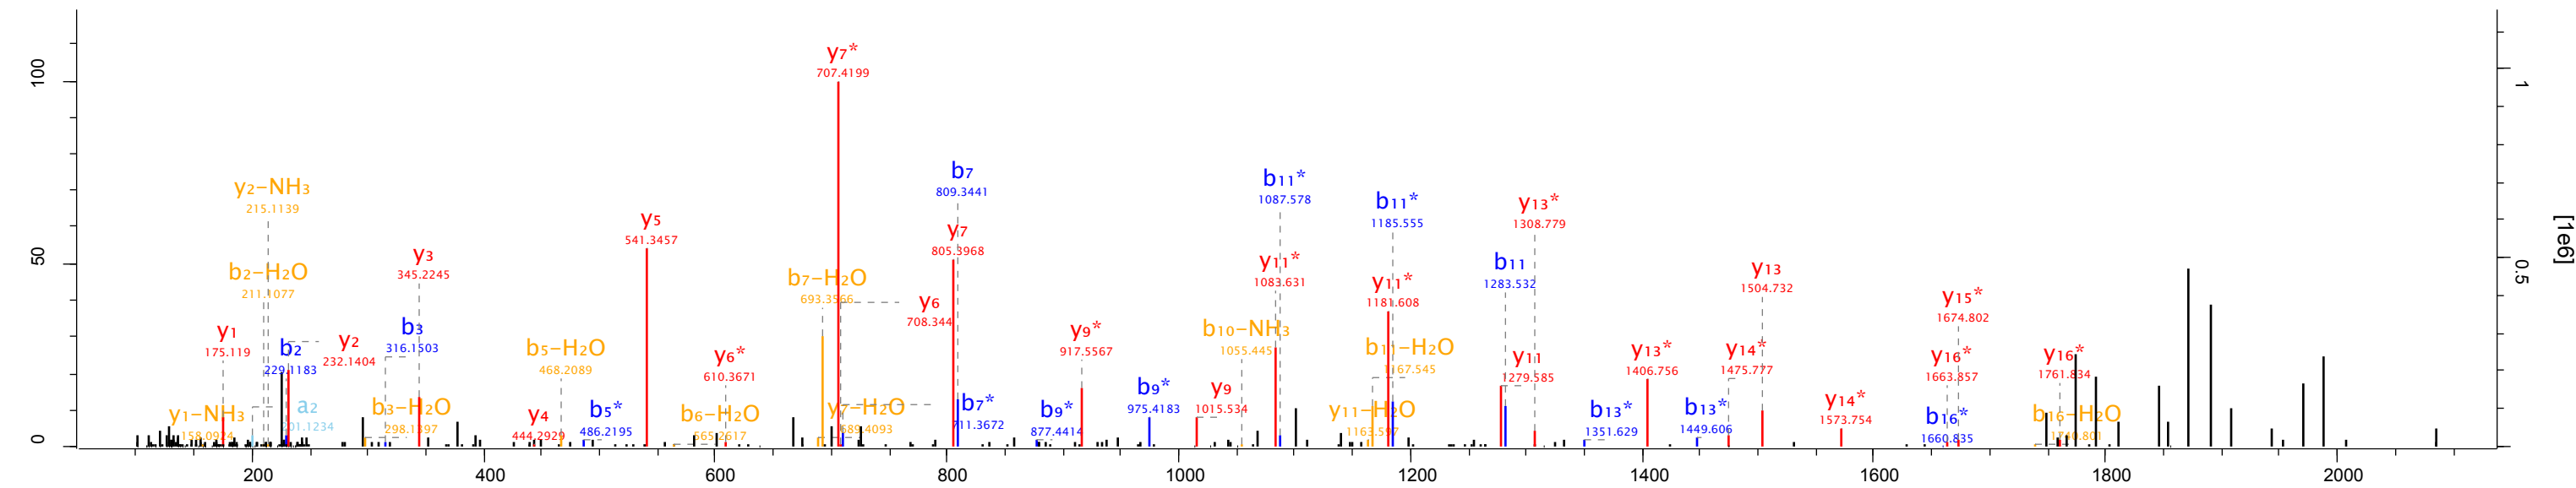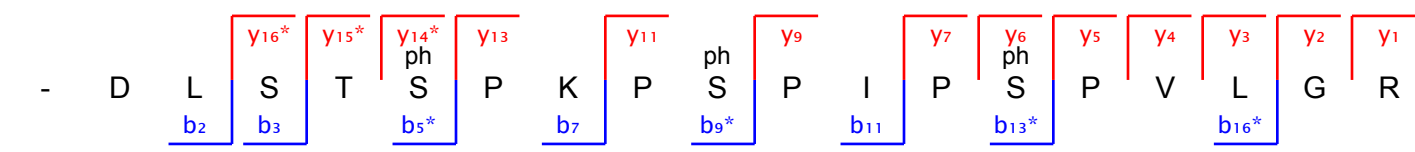

Raw file: 20171215\_MaS\_33SR\_LMH\_phospho2\_03  
 Scan: 15149 Method: FTMS; HCD Score: 169.09 m/z: 1150.87 Gene names: SIRT1

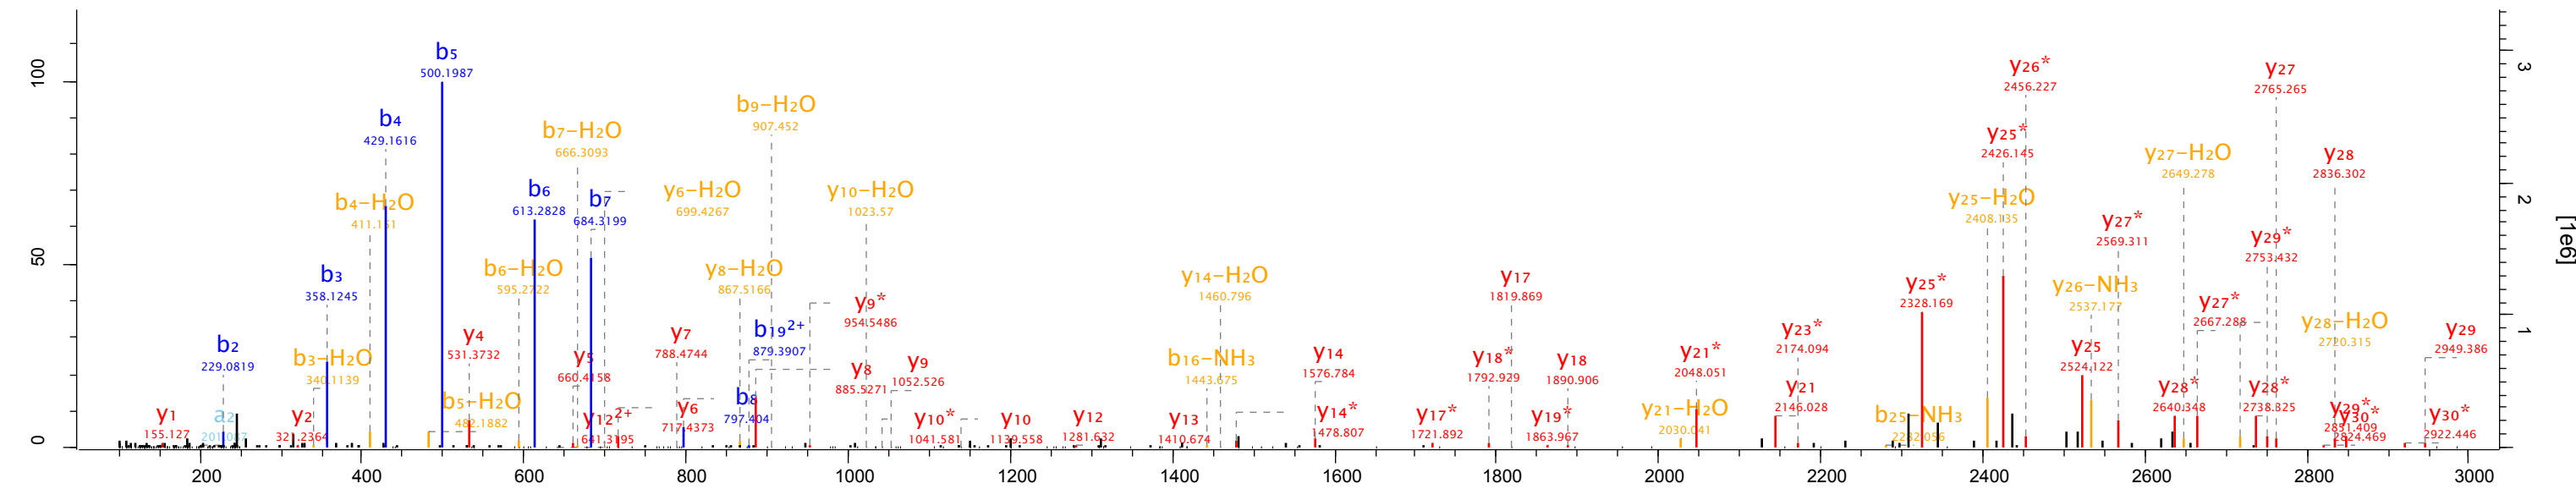

ac - A D E A A L A L Q P G G S P S A A G A D R E A A S S P A G E P L R K -

Fragmentation sites are indicated by brackets below the amino acid sequence:

- Blue brackets (b ions): b2 (D-E), b3 (E-A), b4 (A-A), b5 (A-L), b6 (L-A), b7 (A-L), b8 (L-Q), b19<sup>2+</sup> (A-D).
- Red brackets (y ions): y1 (K), y2 (R), y4 (E), y5 (G), y6 (A), y7 (P), y8 (S), y9 (S), y10 (S), y12 (A), y13 (A), y14 (R), y17 (G), y18 (A), y19 (A), y21 (P), y23 (G), y25 (P), y26 (Q), y27 (L), y28 (A), y29 (L), y30 (A).

Raw file 20171215\_MaS\_33SR\_LMH\_phospho2\_03 Scan 15199 Method FTMS; HCD Score 52.65 m/z 696.29 Gene names CTNND1

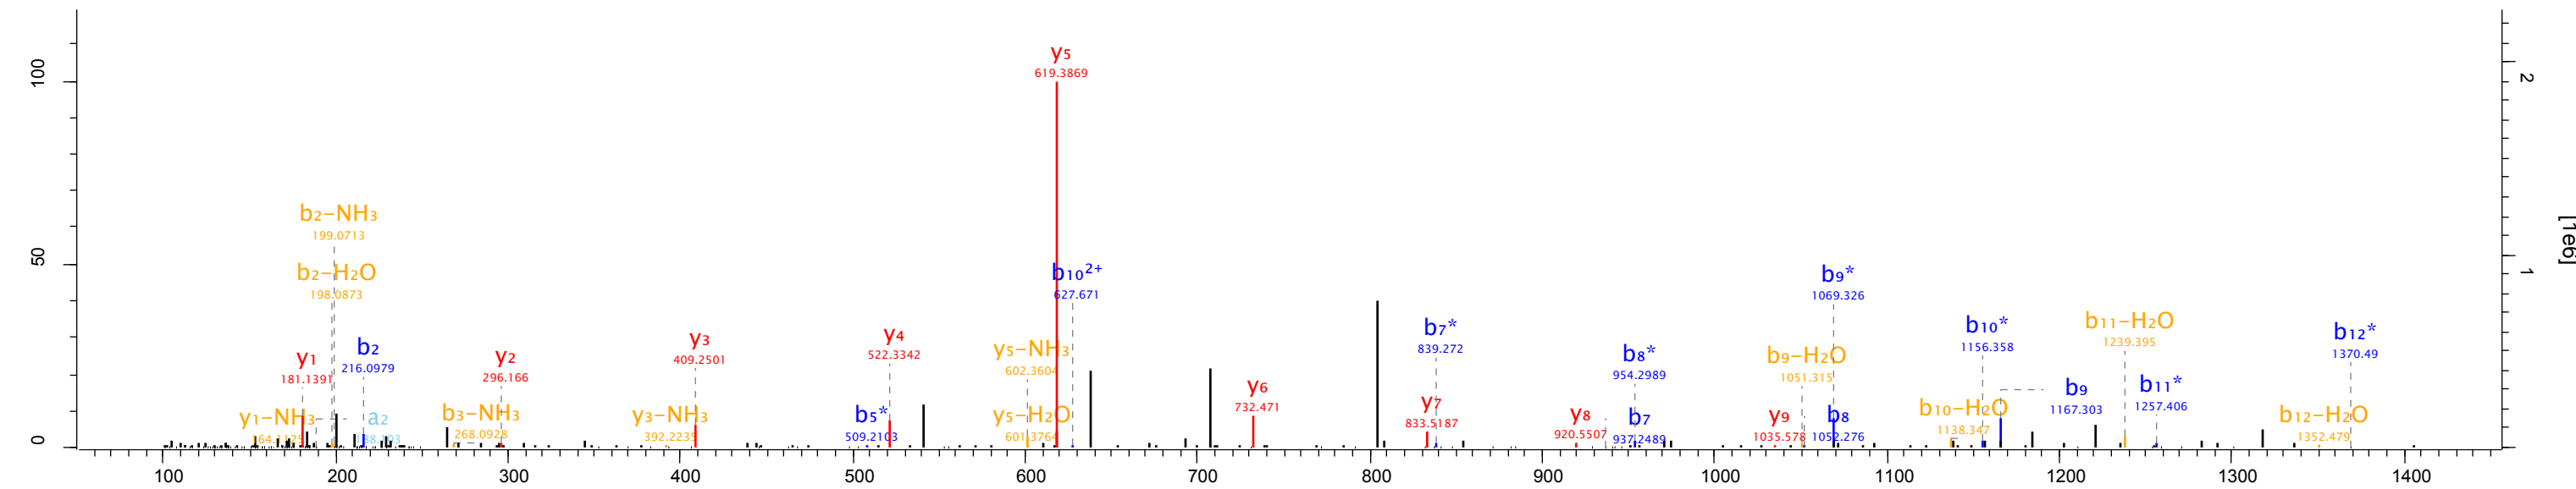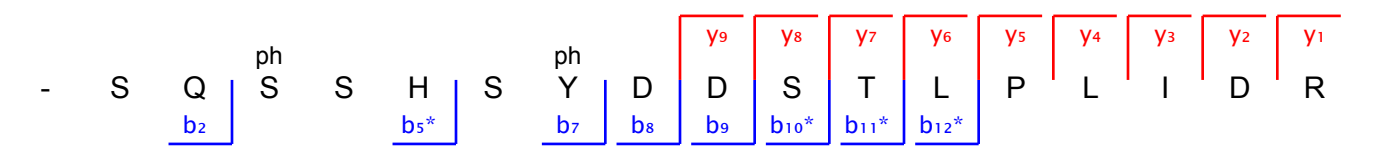

Raw file 20171215\_MaS\_33SR\_LMH\_phospho2\_03 Scan 15479 Method FTMS; HCD Score 64.17 m/z 1269.55 Gene names WRAP53

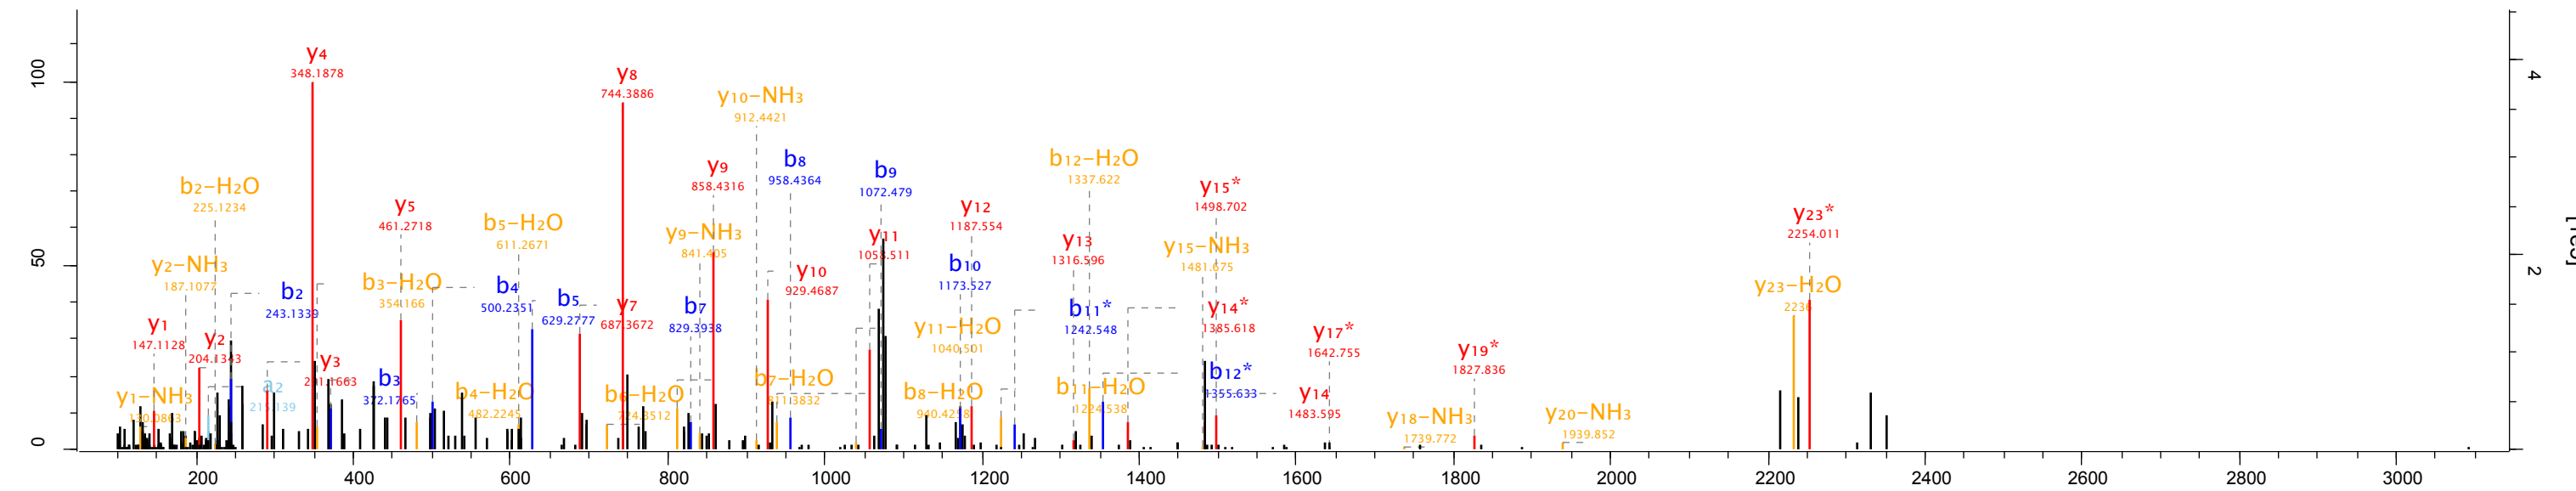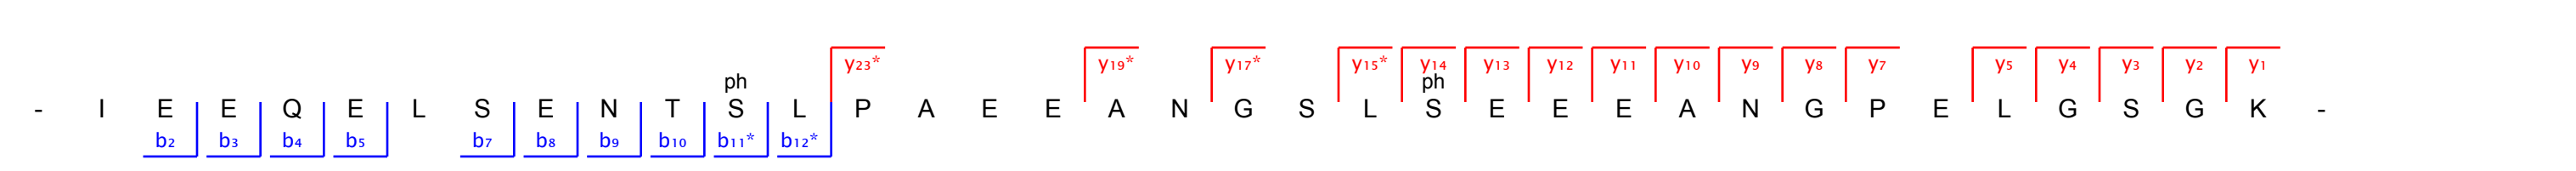



Raw file 20171215\_MaS\_33SR\_LMH\_phospho2\_03 Scan 15839 Method FTMS; HCD Score 205.59 m/z 940.71 Gene names LARP1

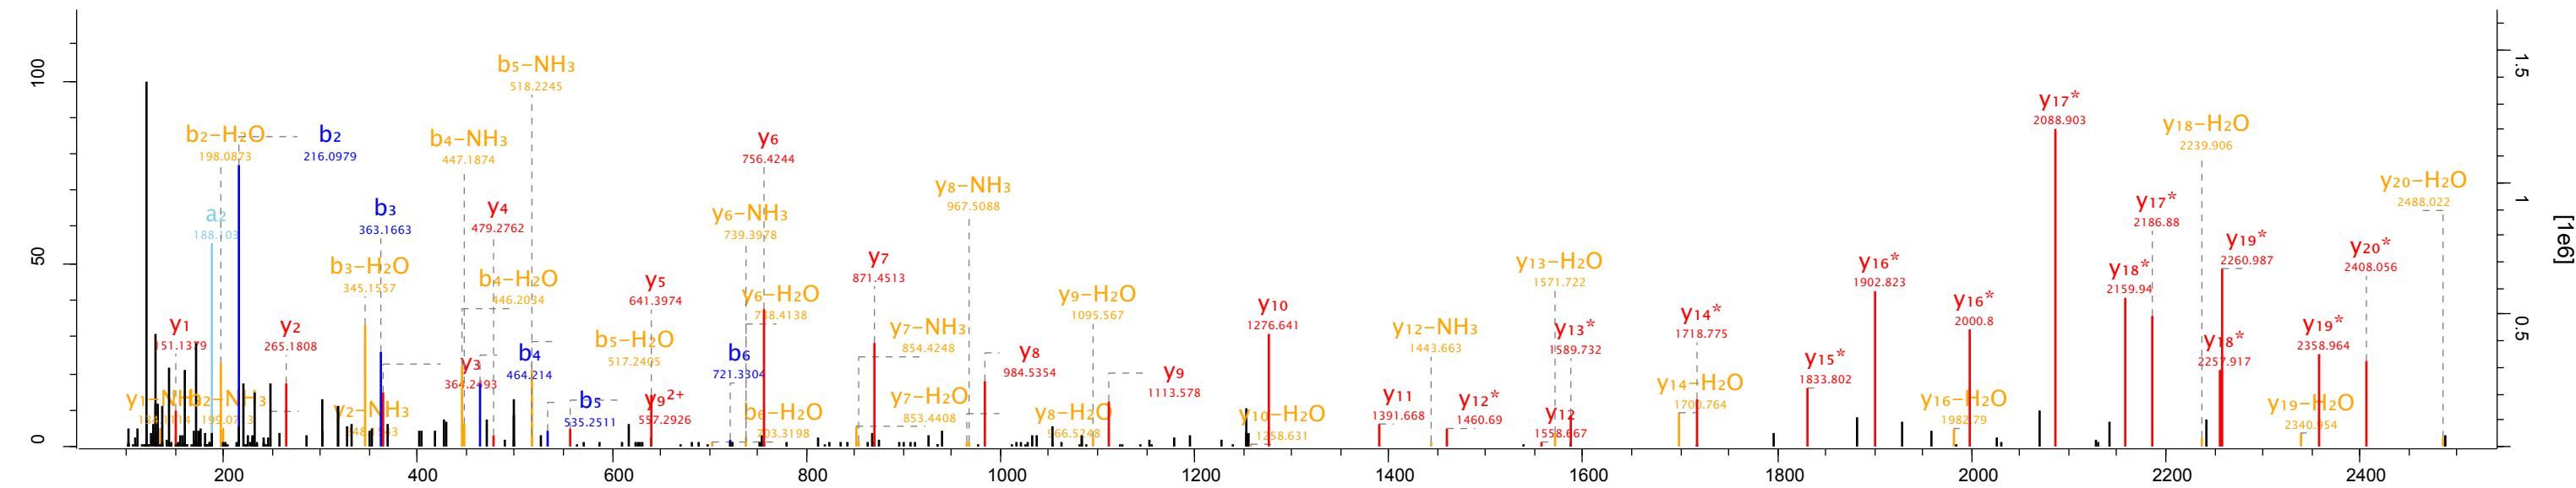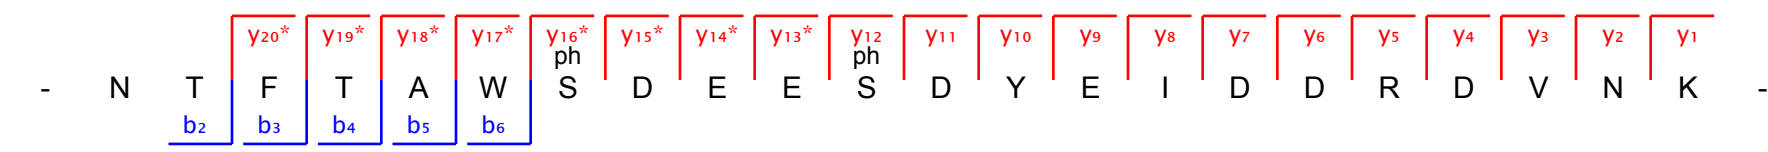

Raw file  
20171215\_MaS\_33SR\_LMH\_phospho2\_03

Scan 16239 Method FTMS; HCD Score 105.94 m/z 1191.5 Gene names HDAC1

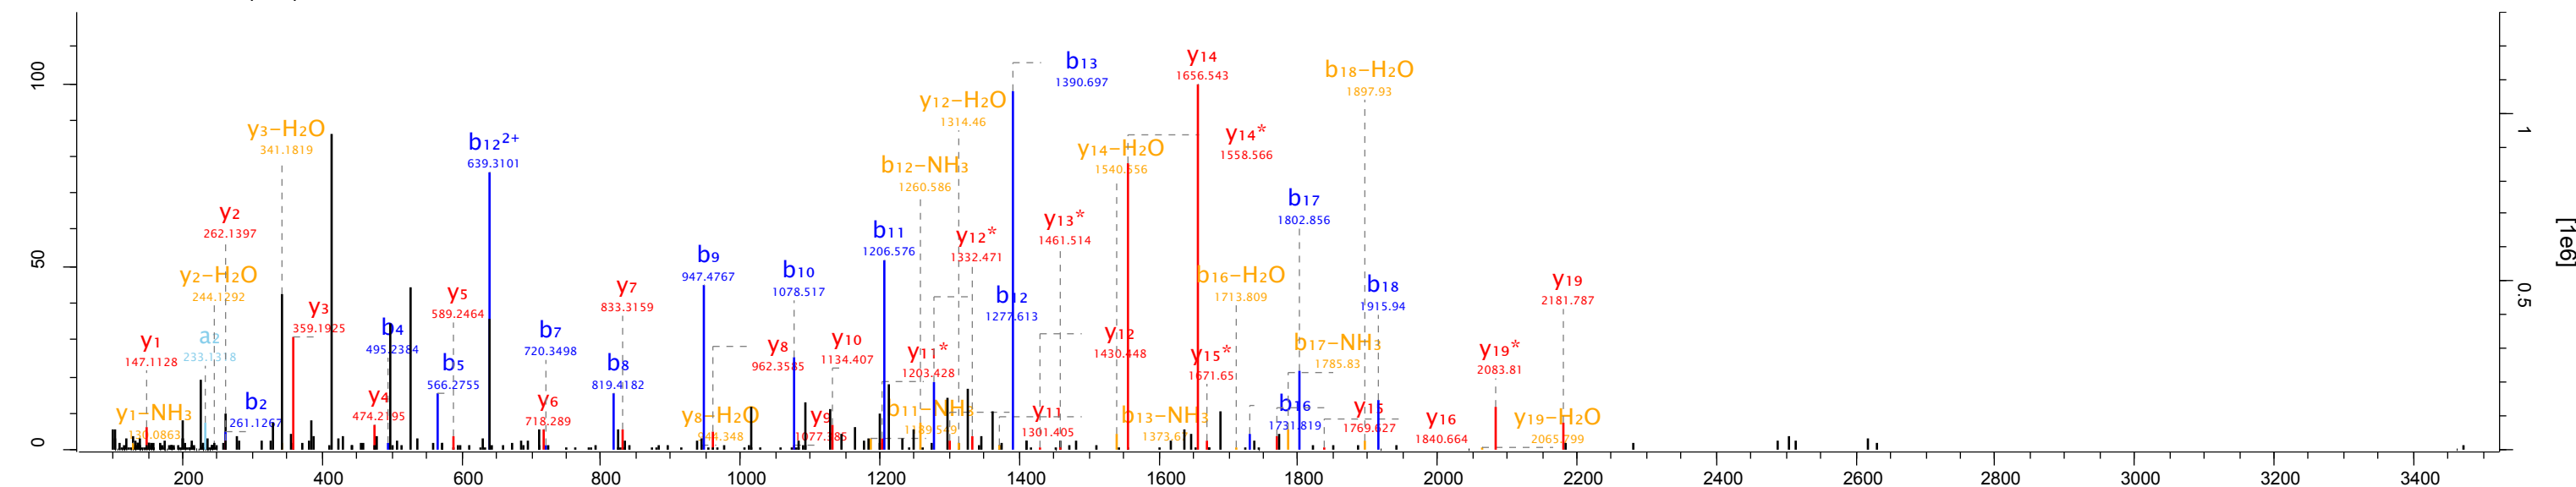

ox  
- M L P H A P G V Q M Q A I P E D A I P E E S G D E D D P D K -

b2 b4 b5 b7 b8 b9 b10 b11 b12 b13 b16 b17 b18 y19 y16 y15 y14 y13\* y12 y11 ph y10 y9 y8 y7 y6 y5 y4 y3 y2 y1

Raw file 20171215\_MaS\_33SR\_LMH\_phospho2\_03 Scan 16269 Method FTMS; HCD Score 166.74 m/z 955.75 Gene names MAP1A

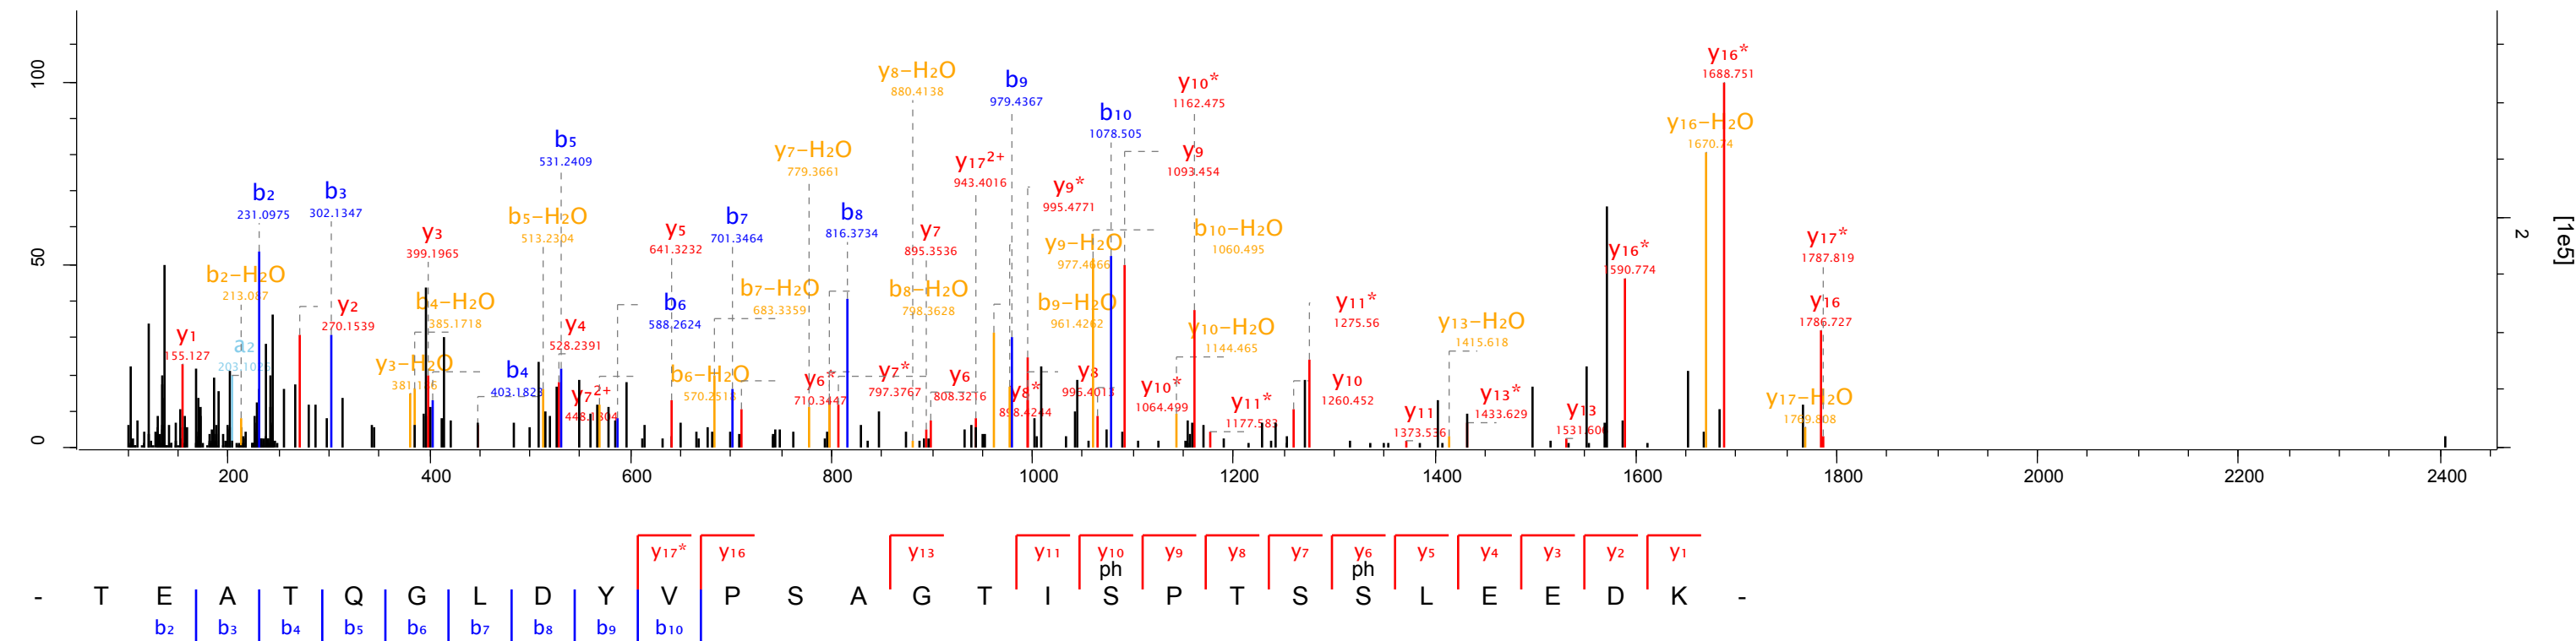

Raw file  
 20171215\_MaS\_33SR\_LMH\_phospho2\_03  
 Scan 16609 Method FTMS; HCD Score 160.83 m/z 681.97 Gene names CDC42EP3

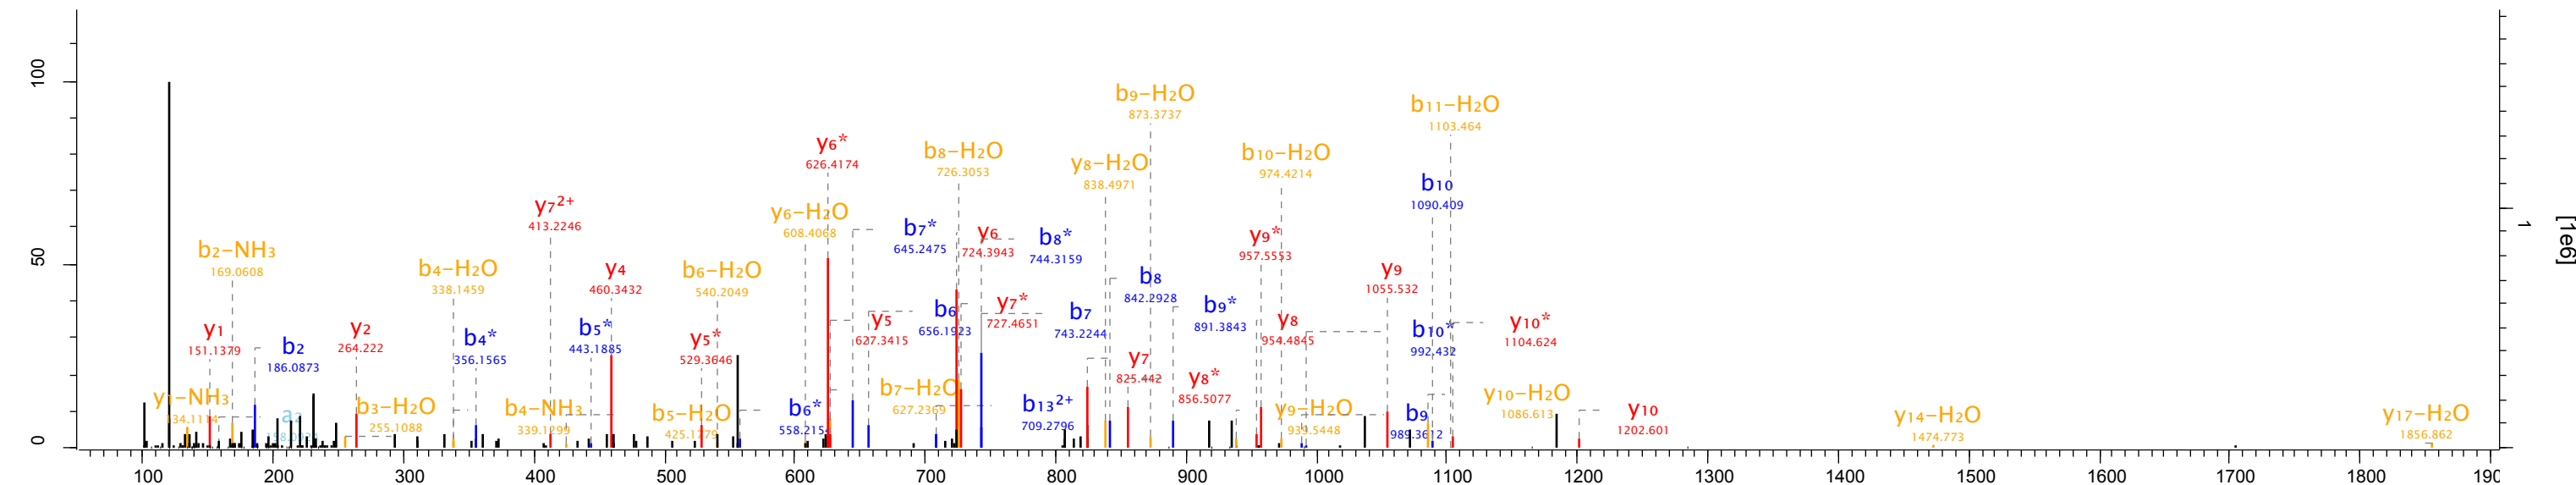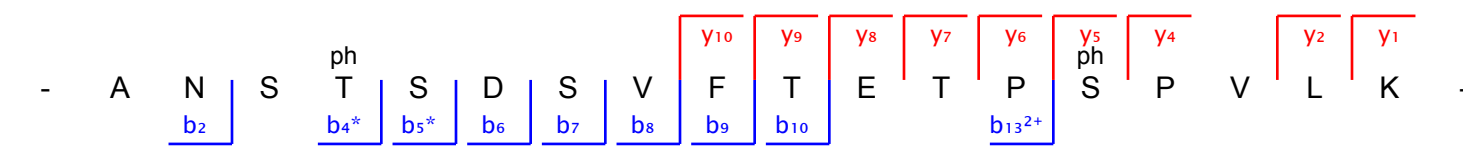

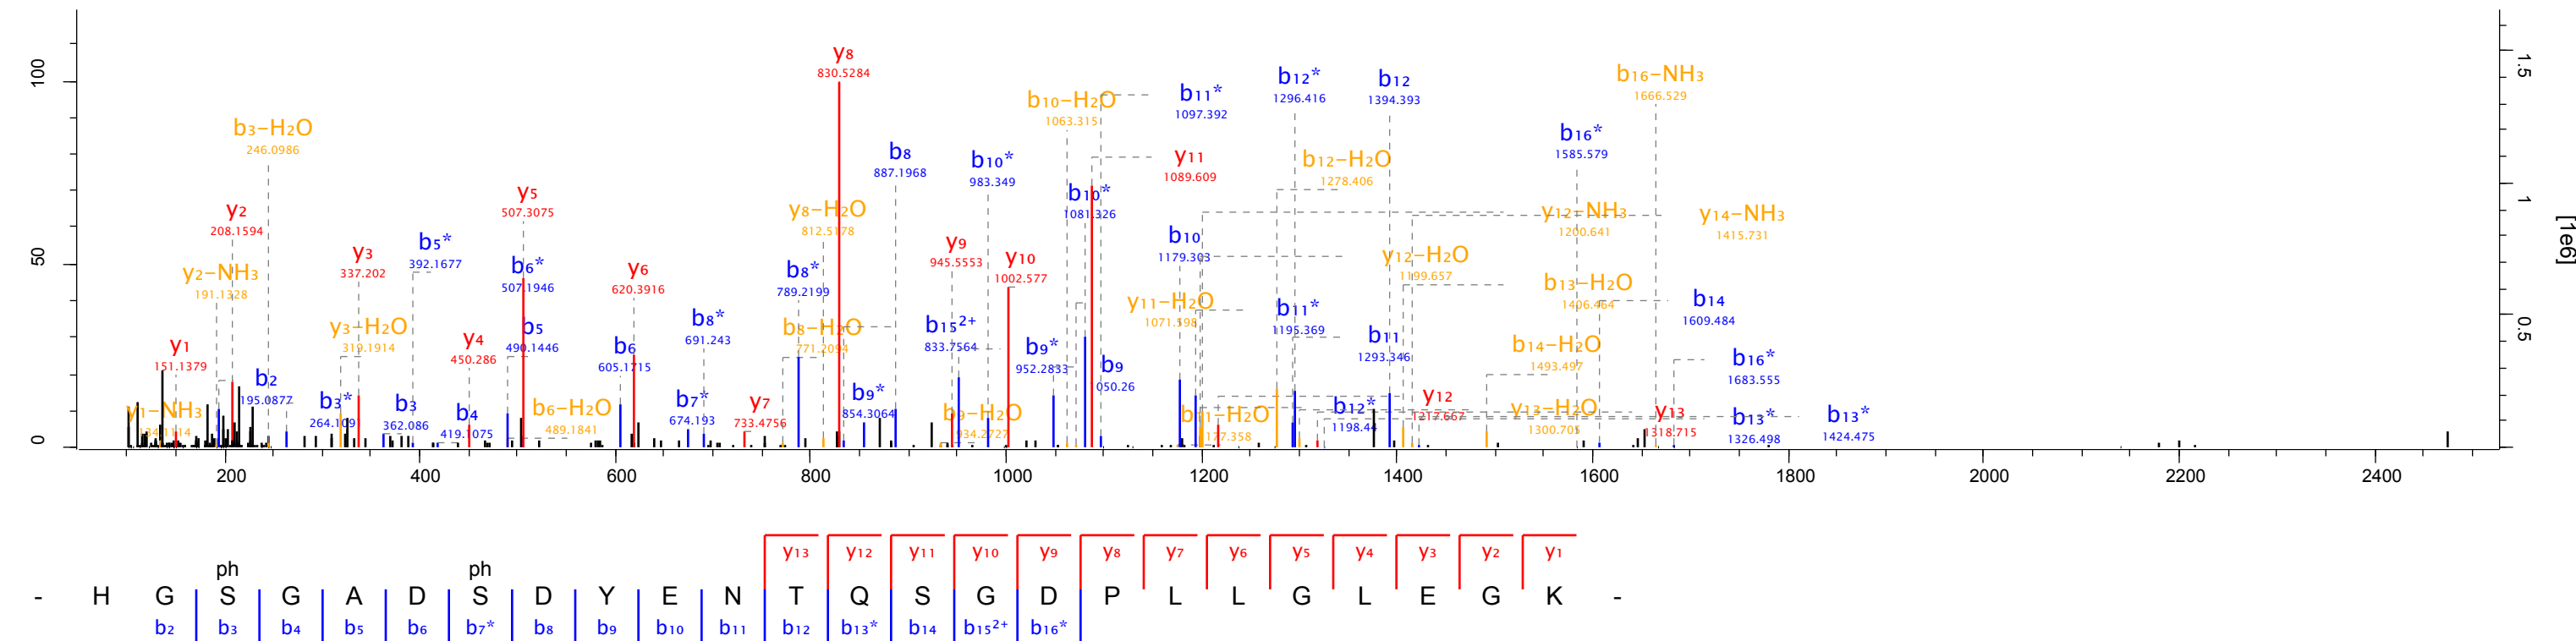

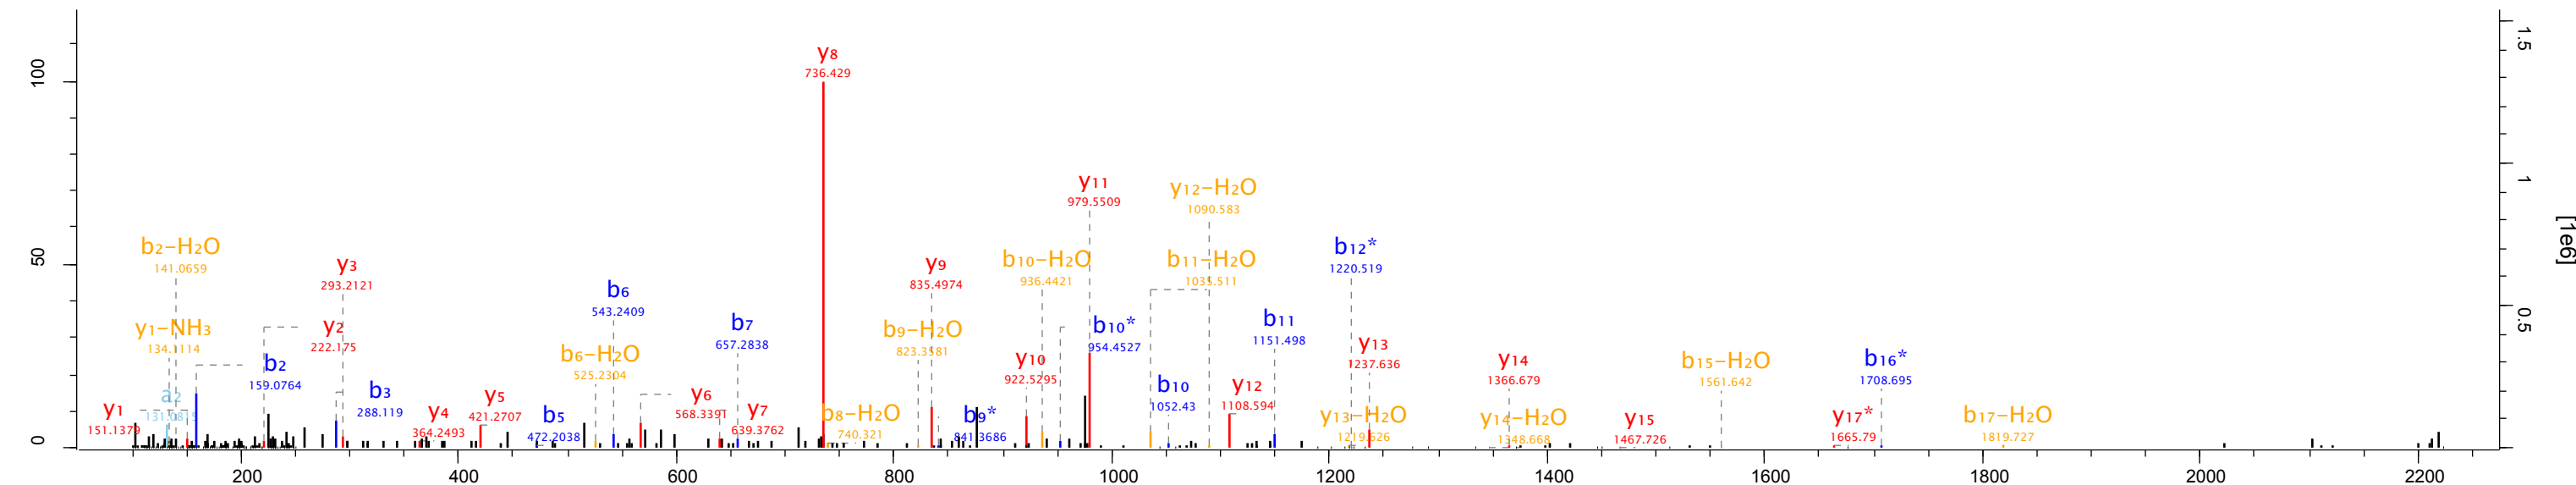

- S A E P S A N T ph T L V S E T E E E G S V P A F G A A A K -

b<sub>2</sub>
b<sub>3</sub>
b<sub>5</sub>
b<sub>6</sub>
b<sub>7</sub>
b<sub>9</sub>\*
b<sub>10</sub>
b<sub>11</sub>
b<sub>12</sub>\*
b<sub>16</sub>\*
y<sub>15</sub>
y<sub>14</sub>
y<sub>13</sub>
y<sub>12</sub>
y<sub>11</sub>
y<sub>10</sub>
y<sub>9</sub>
y<sub>8</sub>
y<sub>7</sub>
y<sub>6</sub>
y<sub>5</sub>
y<sub>4</sub>
y<sub>3</sub>
y<sub>2</sub>
y<sub>1</sub>

Raw file: 20171215\_MaS\_33SR\_LMH\_phospho2\_03  
 Scan: 16979 Method: FTMS; HCD Score: 92.52 m/z: 879.37 Gene names: BCL9L

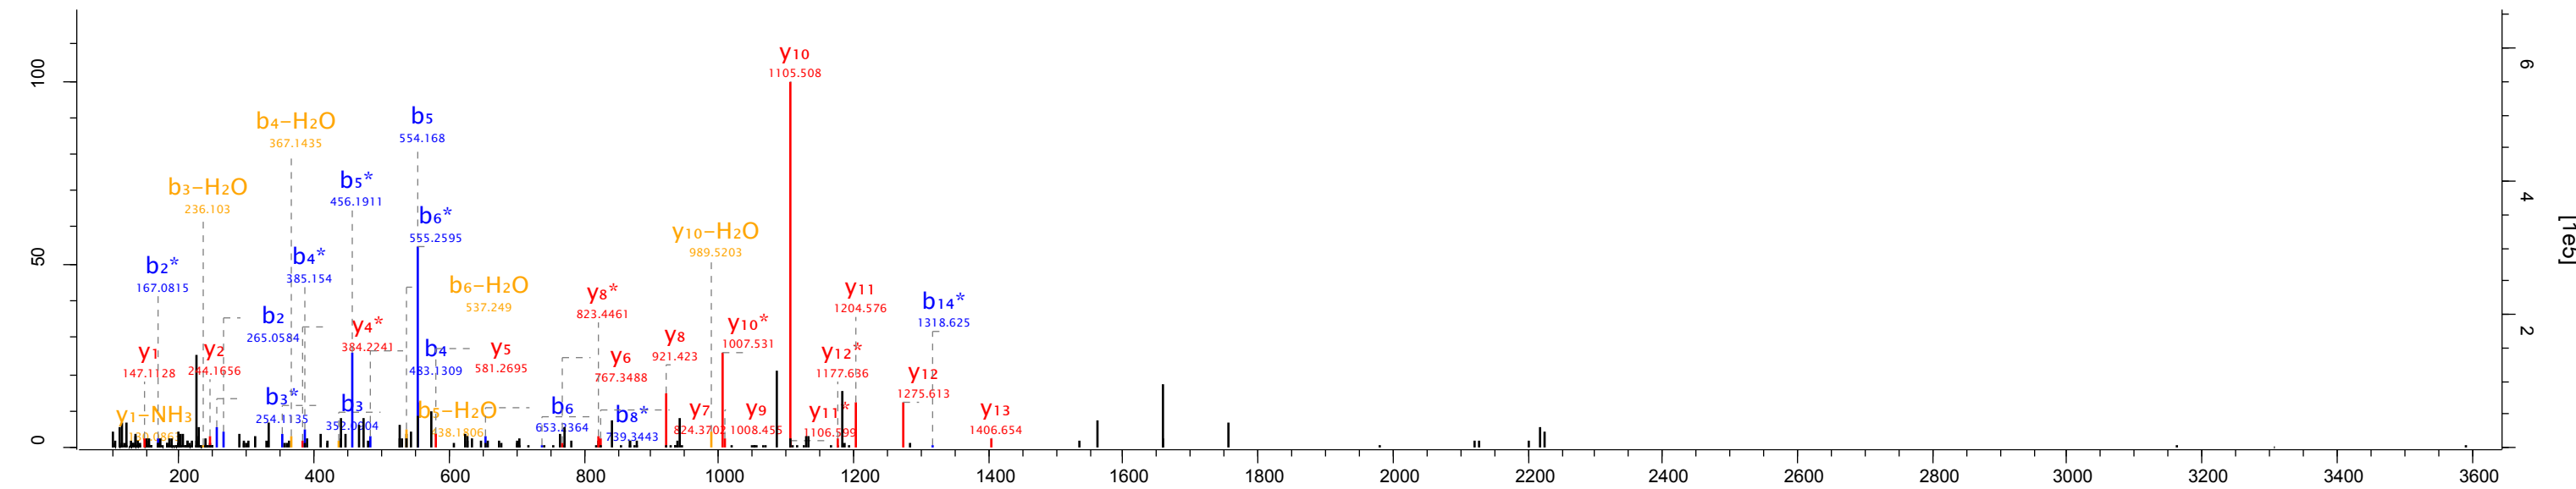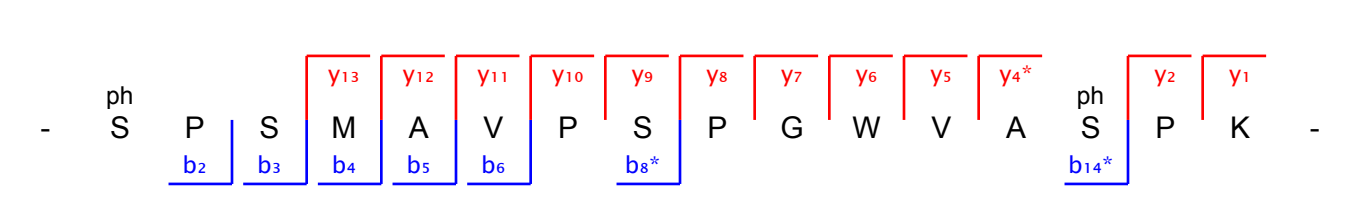

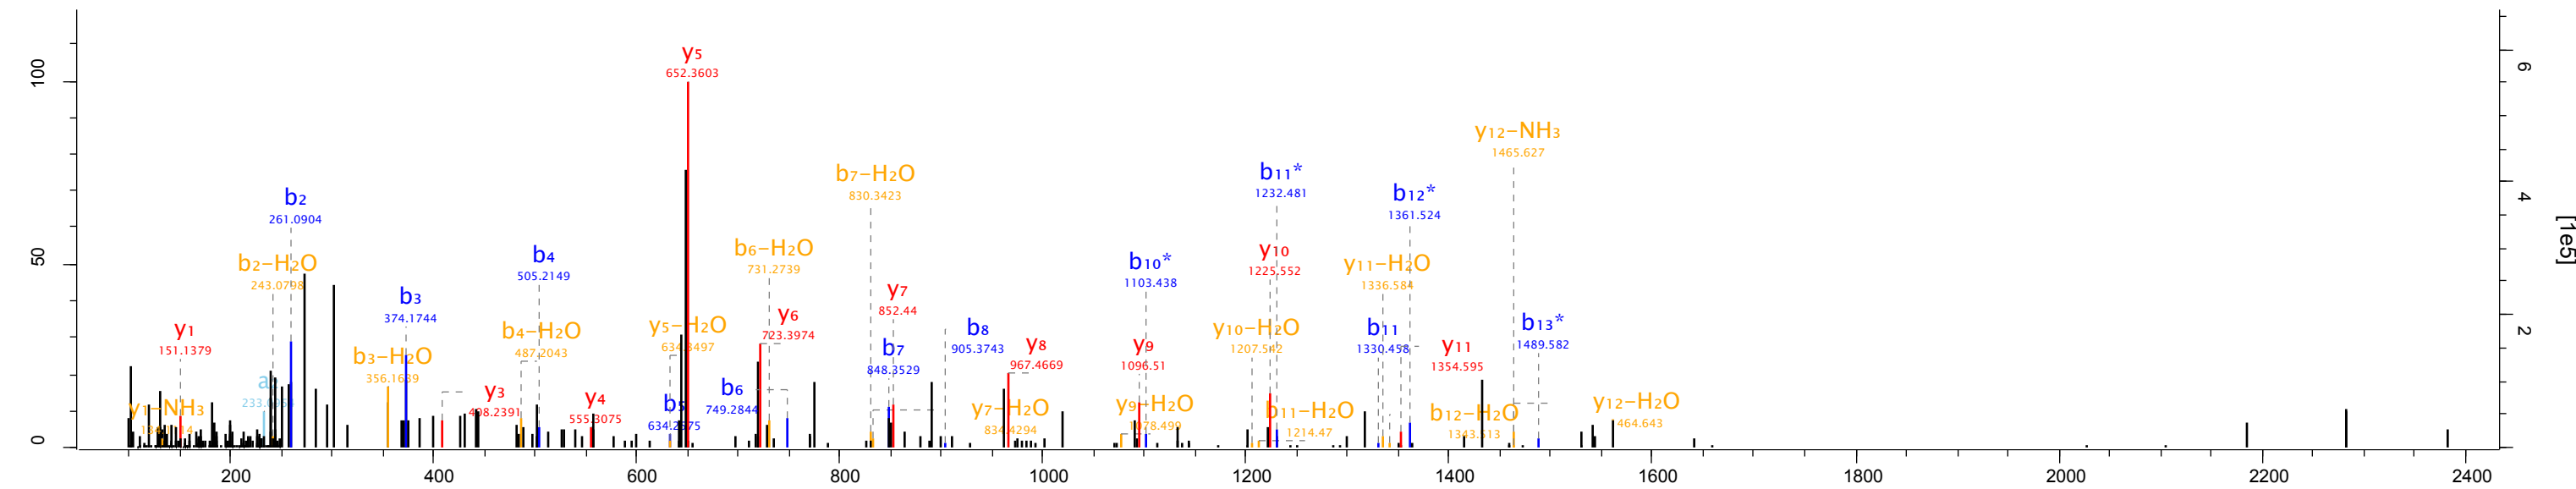

- E M L M E D V G S E E E Q E E E D E A P F Q E K -

b<sub>2</sub> b<sub>3</sub> b<sub>4</sub> b<sub>5</sub> b<sub>6</sub> b<sub>7</sub> b<sub>8</sub> b<sub>10</sub><sup>\*</sup> b<sub>11</sub> b<sub>12</sub><sup>\*</sup> b<sub>13</sub><sup>\*</sup> y<sub>11</sub> y<sub>10</sub> y<sub>9</sub> y<sub>8</sub> y<sub>7</sub> y<sub>6</sub> y<sub>5</sub> y<sub>4</sub> y<sub>3</sub> y<sub>1</sub>



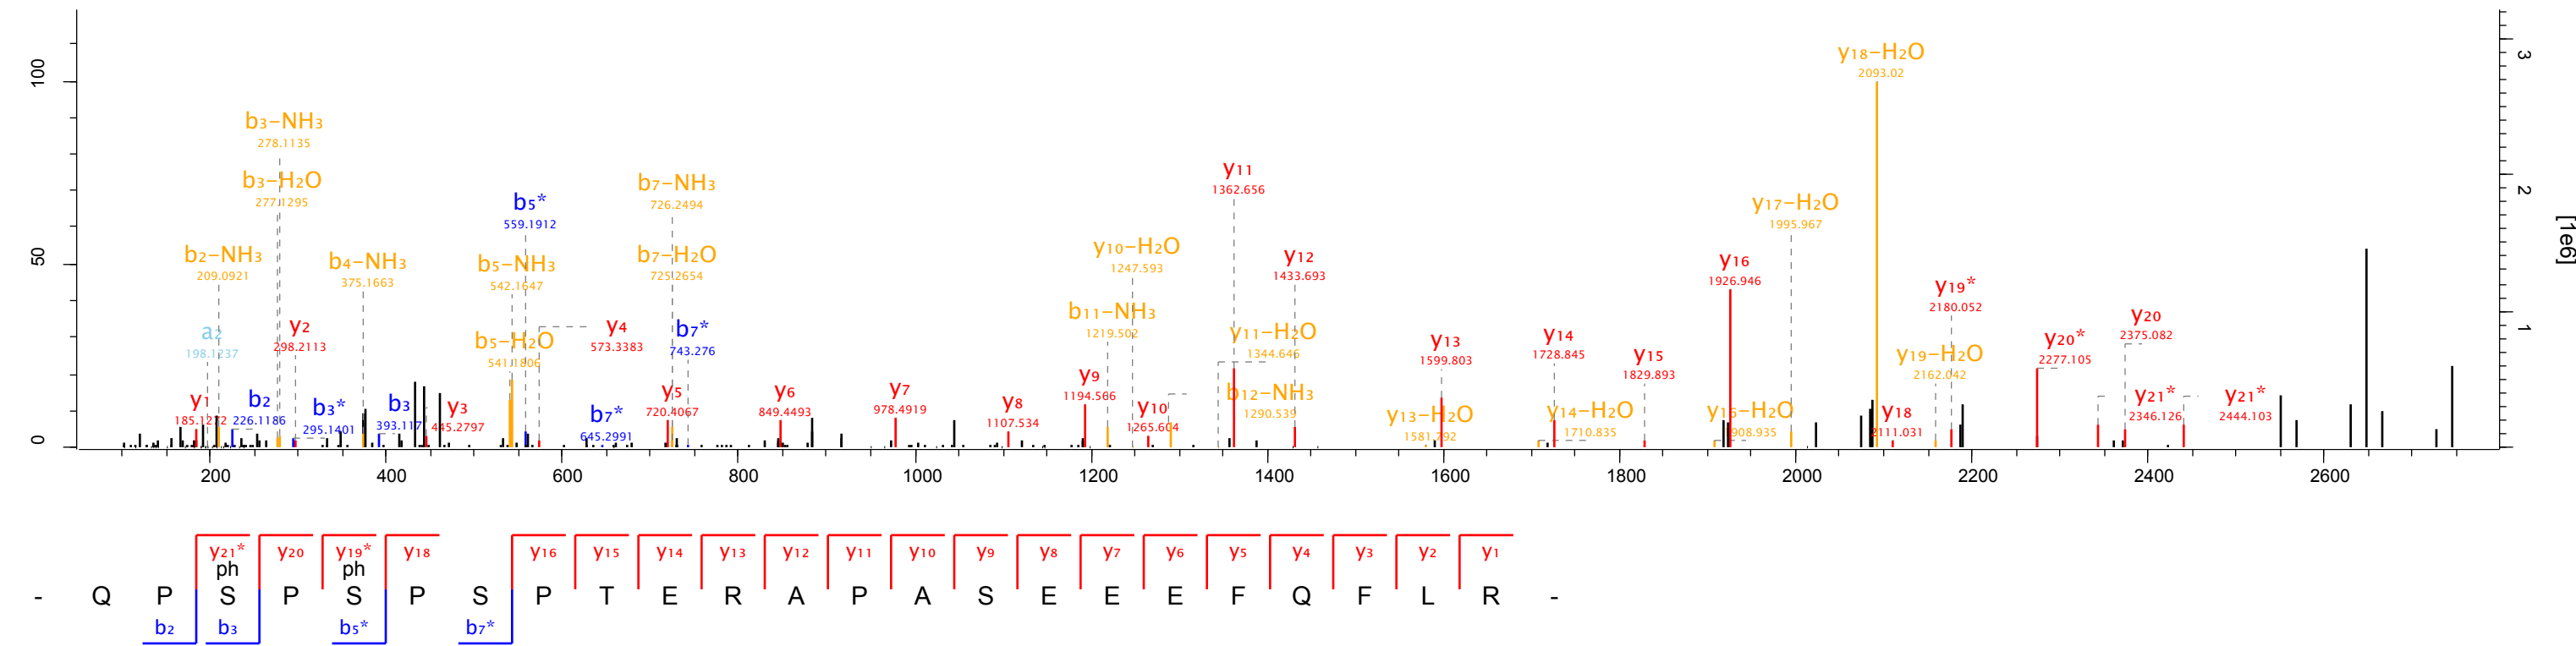

Raw file 20171215\_MaS\_33SR\_LMH\_phospho2\_03 Scan 18479 Method FTMS; HCD Score 171.32 m/z 969.37 Gene names EHBP1

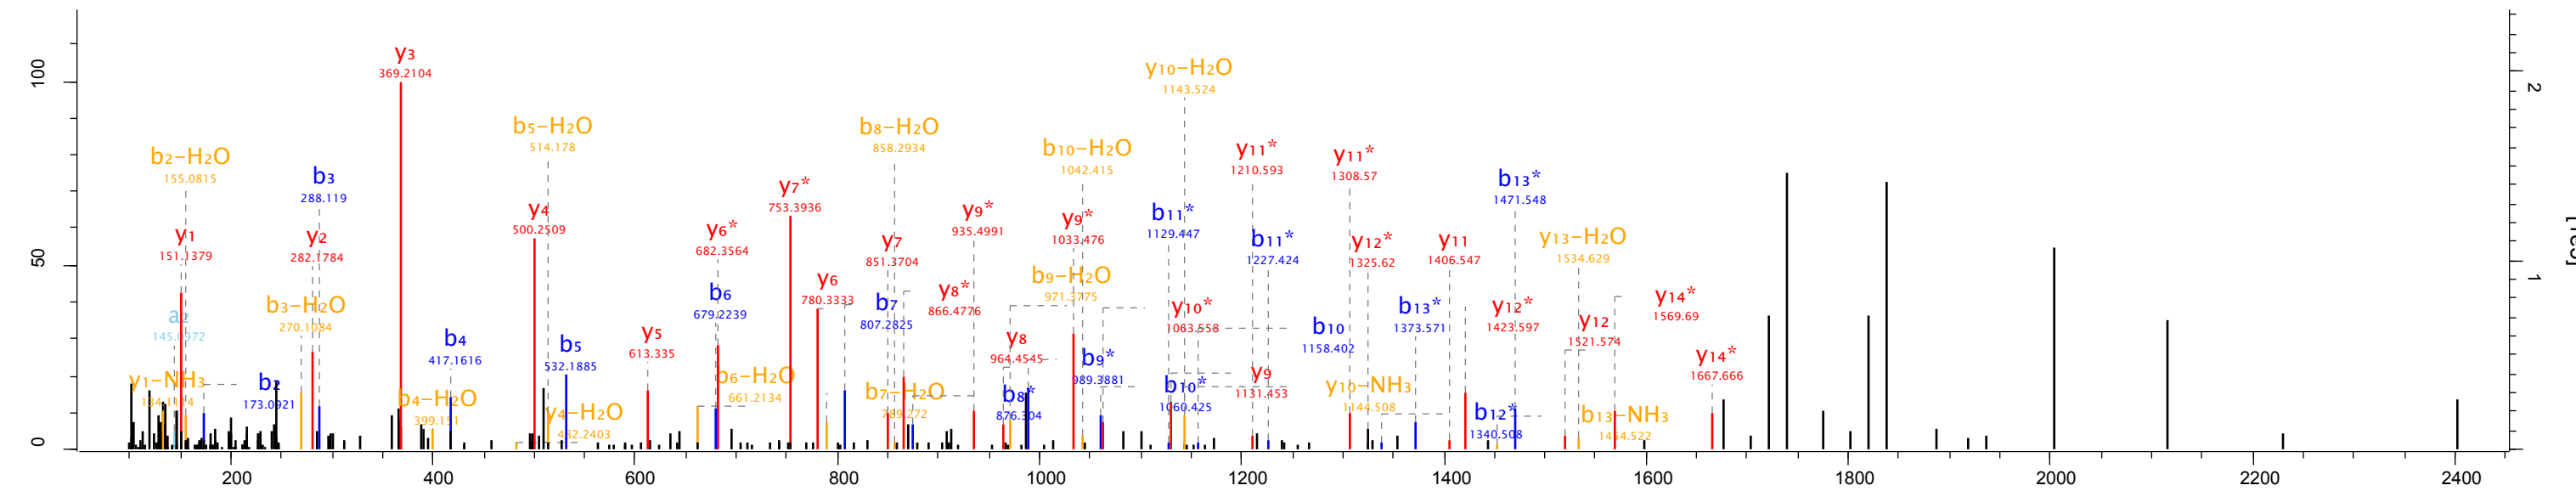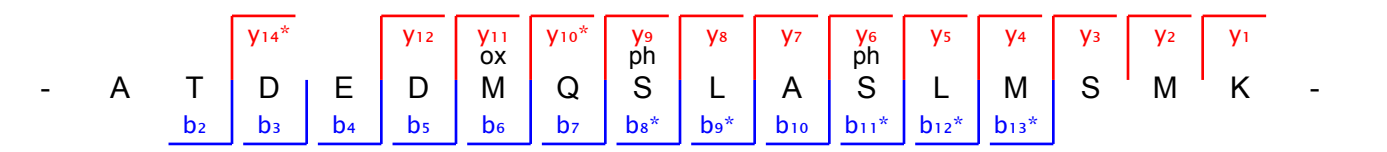

Raw file 20171215\_MaS\_33SR\_LMH\_phospho2\_03 Scan 18569 Method FTMS; HCD Score 113.51 m/z 1230.19 Gene names SQSTM1

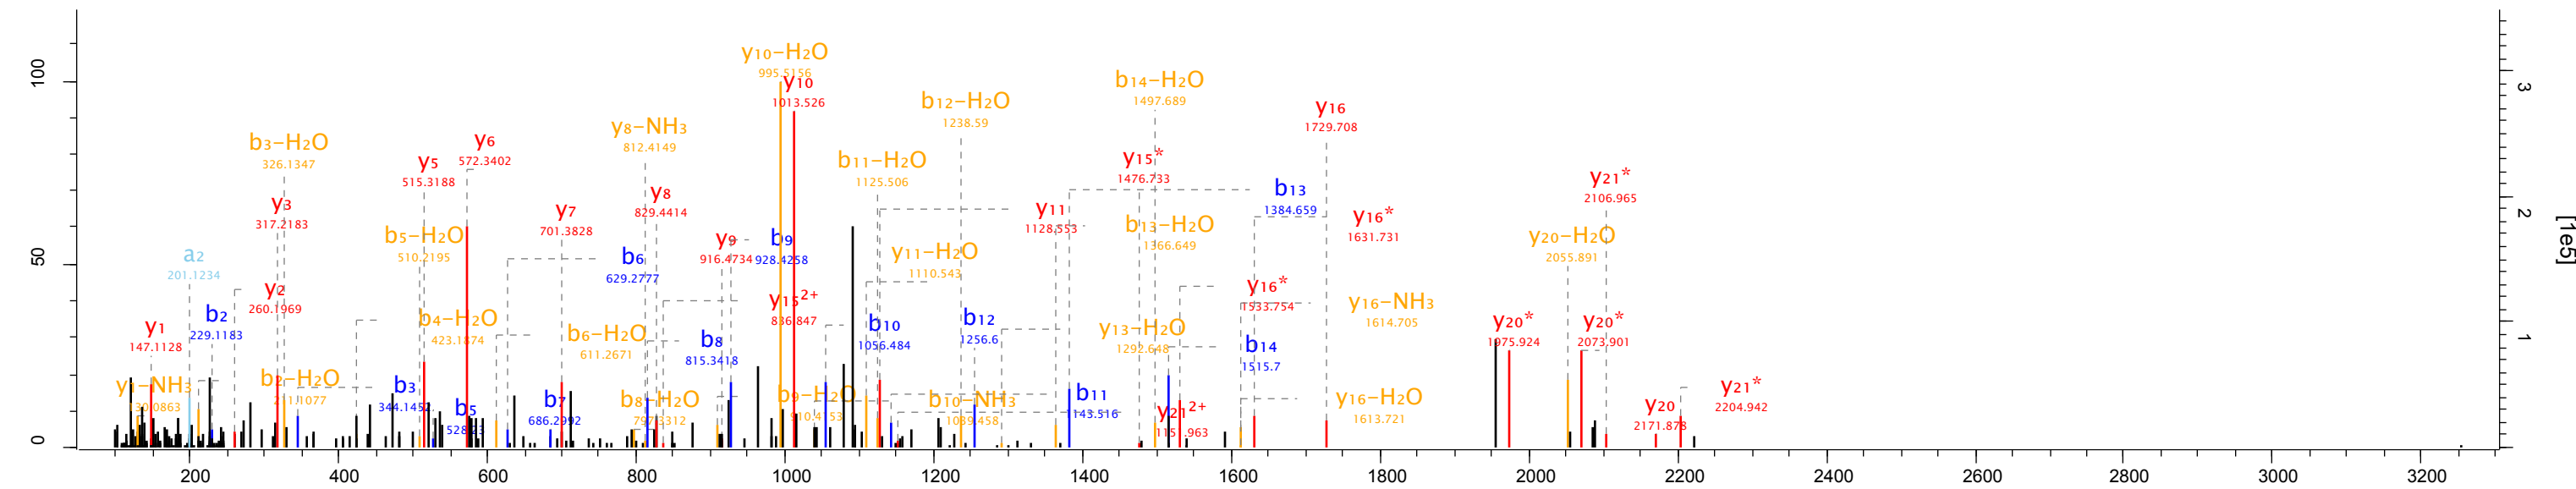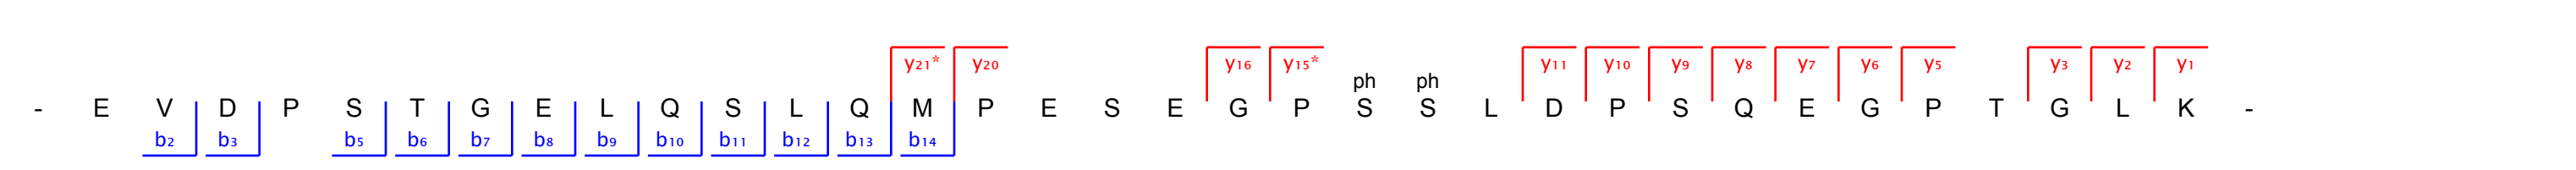

- E V D P S T G E L Q S L Q M P E S E G P S S L D P S Q E G P T G L K -

Raw file 20171215\_MaS\_33SR\_LMH\_phospho2\_03 Scan 18609 Method FTMS; HCD Score 100.75 m/z 1137.48 Gene names PRKRIR

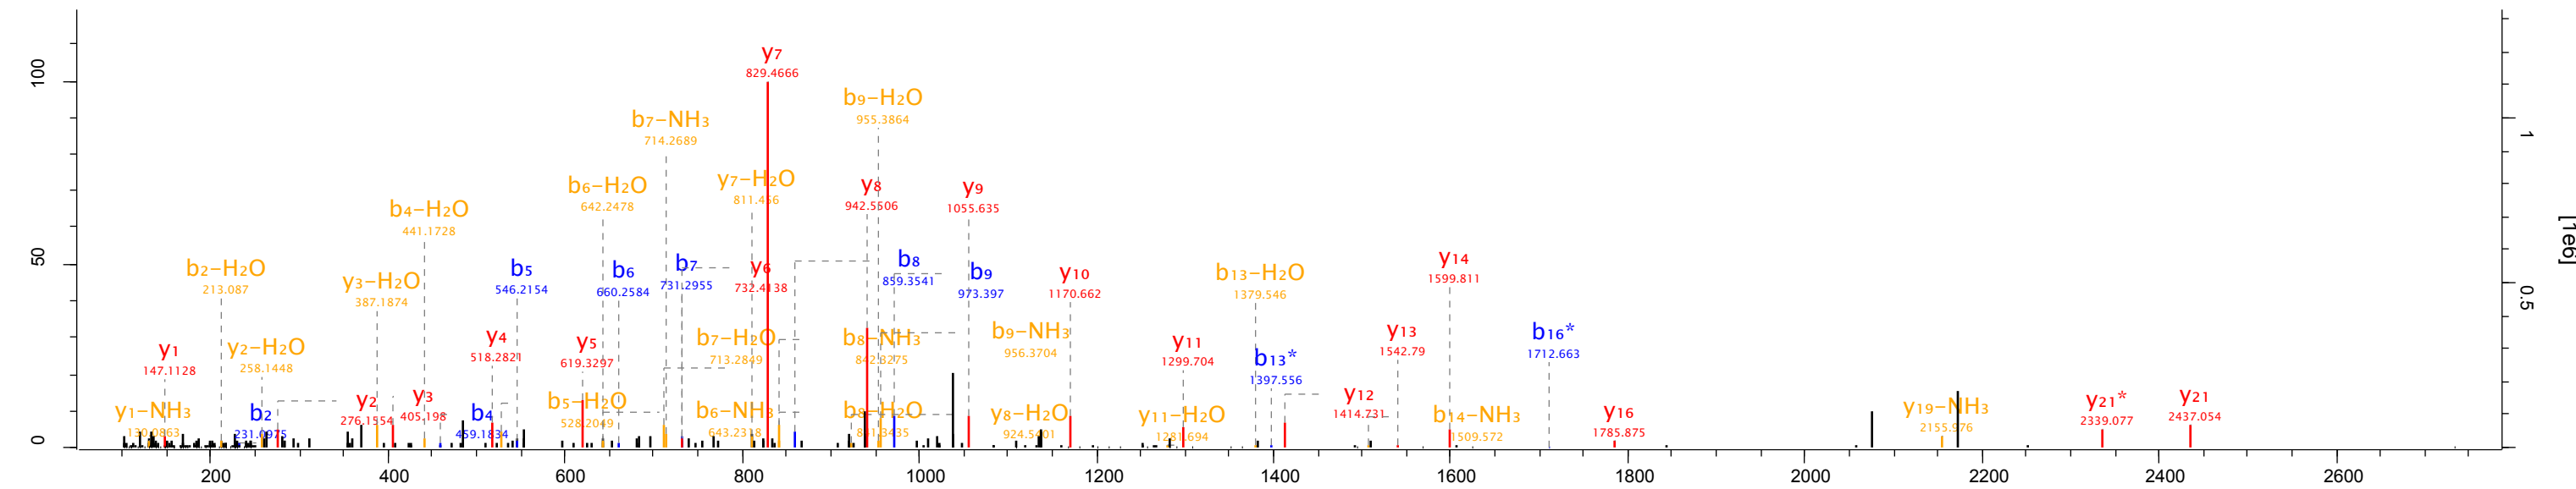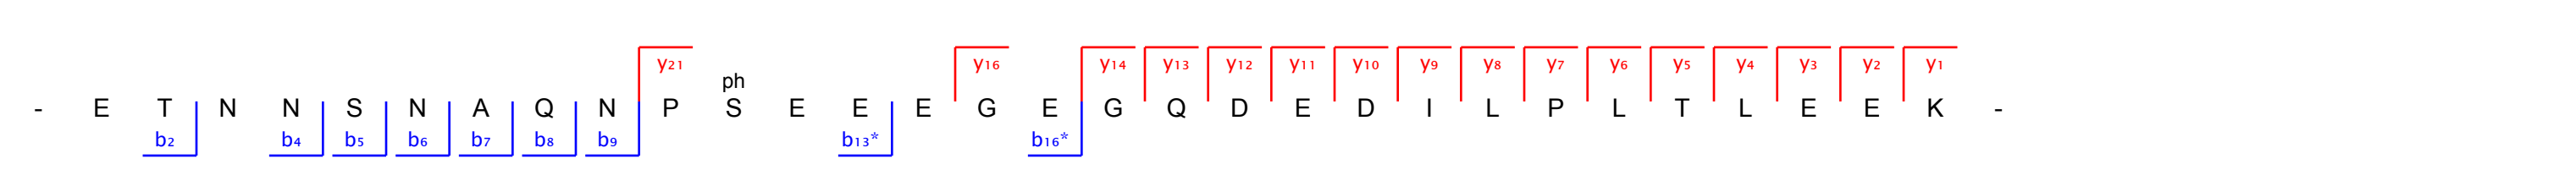

Raw file Scan Method Score m/z Gene names

20171215\_MaS\_33SR\_LMH\_phospho2\_03 18909 FTMS; HCD 43.44 1252.55 AKAP12

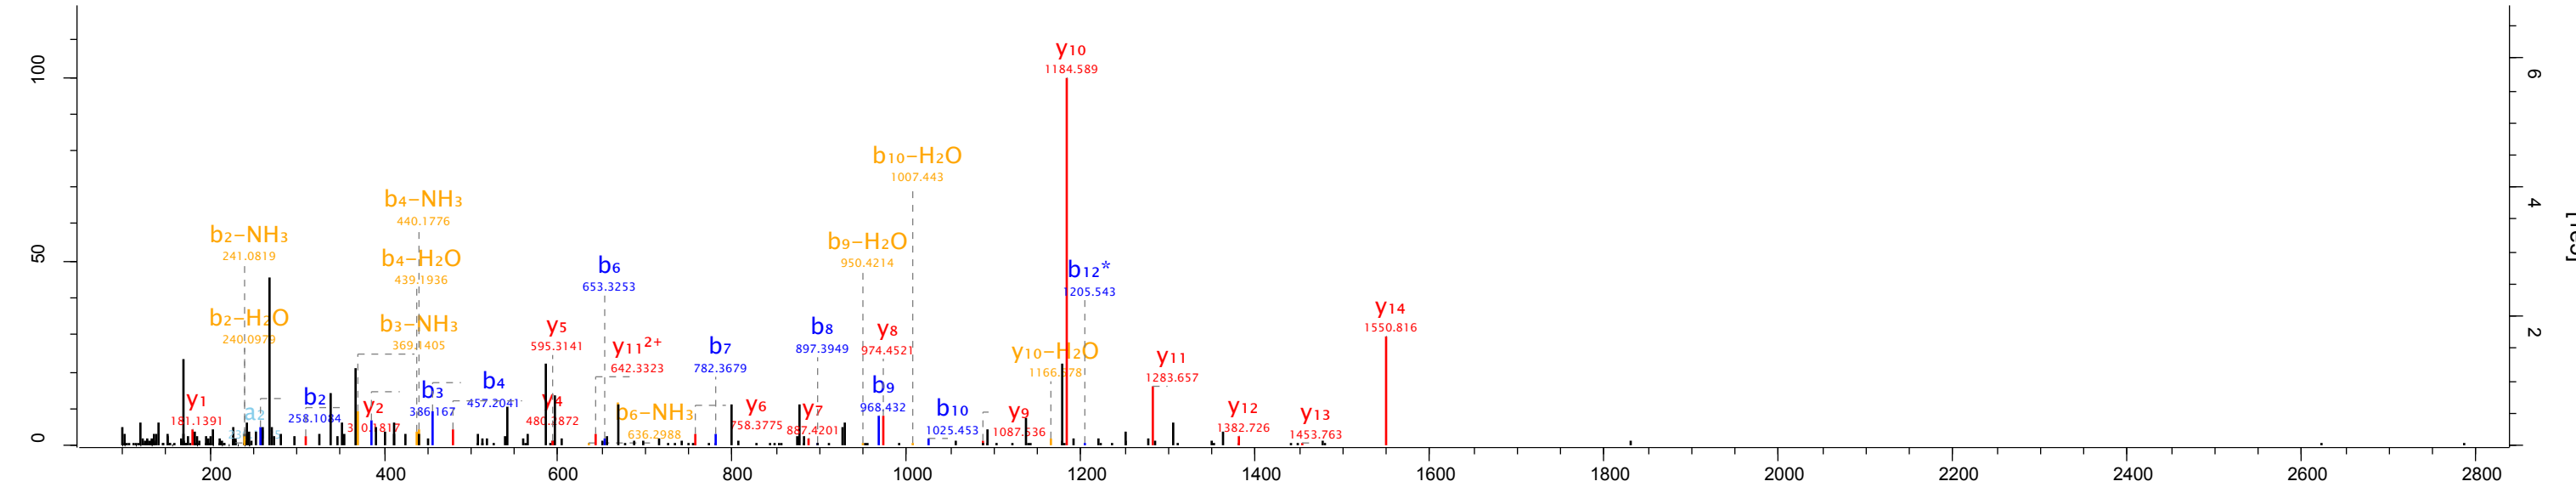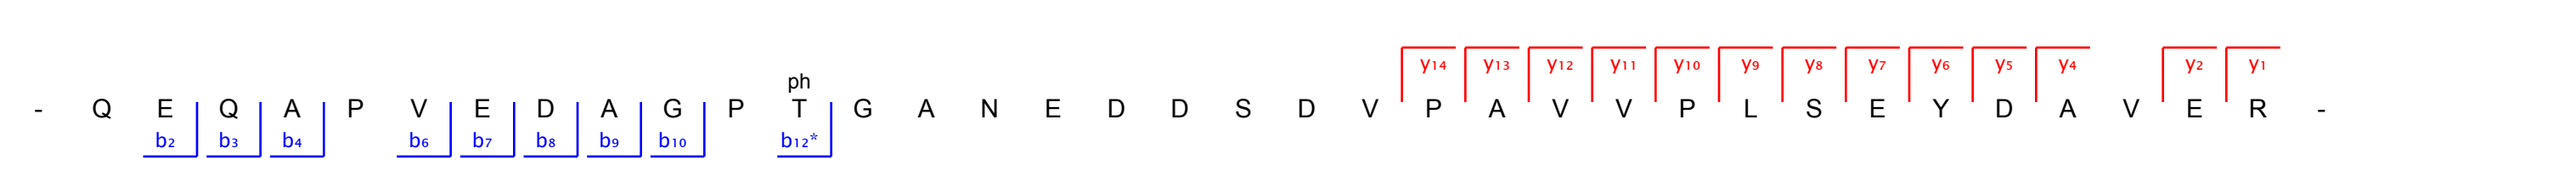

Raw file 20171215\_MaS\_33SR\_LMH\_phospho2\_03 Scan 19089 Method FTMS; HCD Score 49.12 m/z 1142.93 Gene names SCNM1

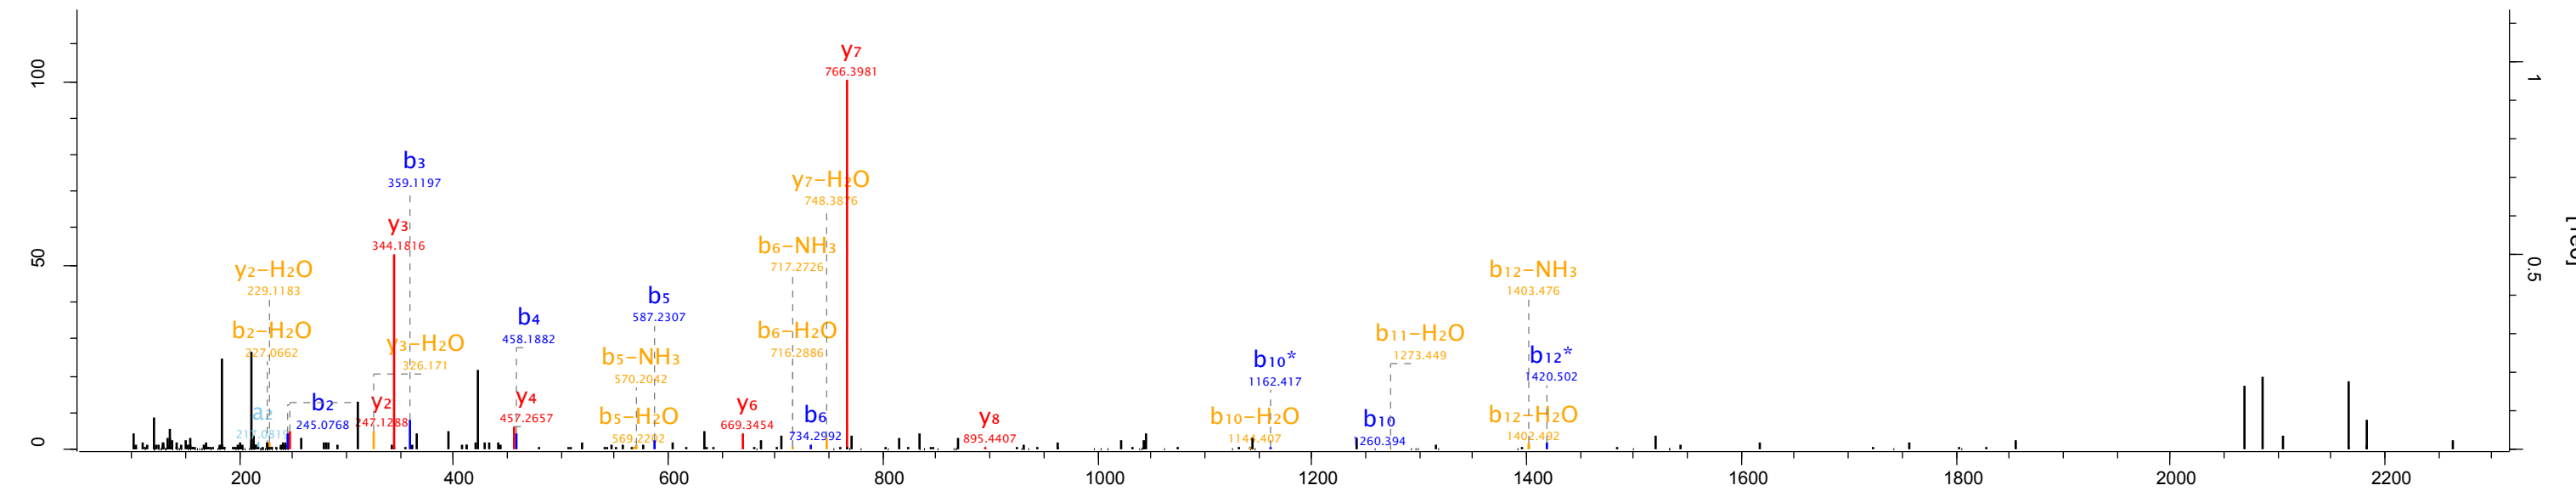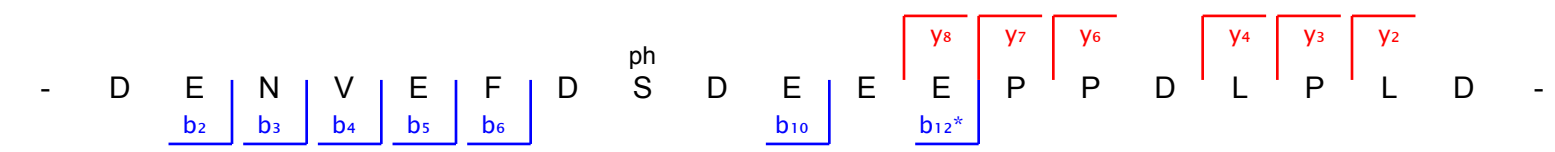

Raw file 20171215\_MaS\_33SR\_LMH\_phospho2\_03 Scan 19889 Method FTMS; HCD Score 46.81 m/z 1499.63 Gene names GNLI

20171215\_MaS\_33SR\_LMH\_phospho2\_03

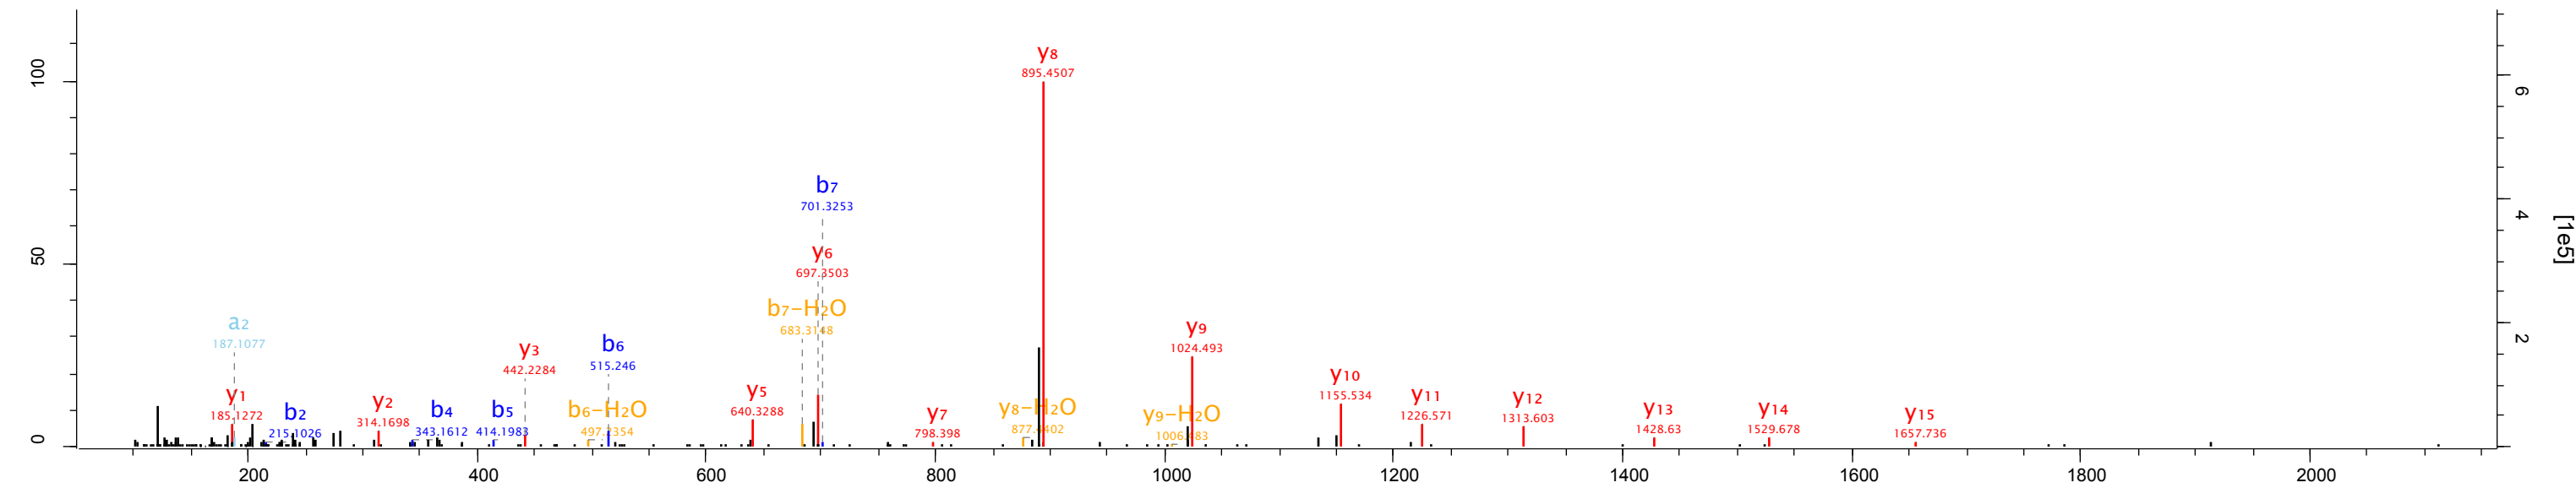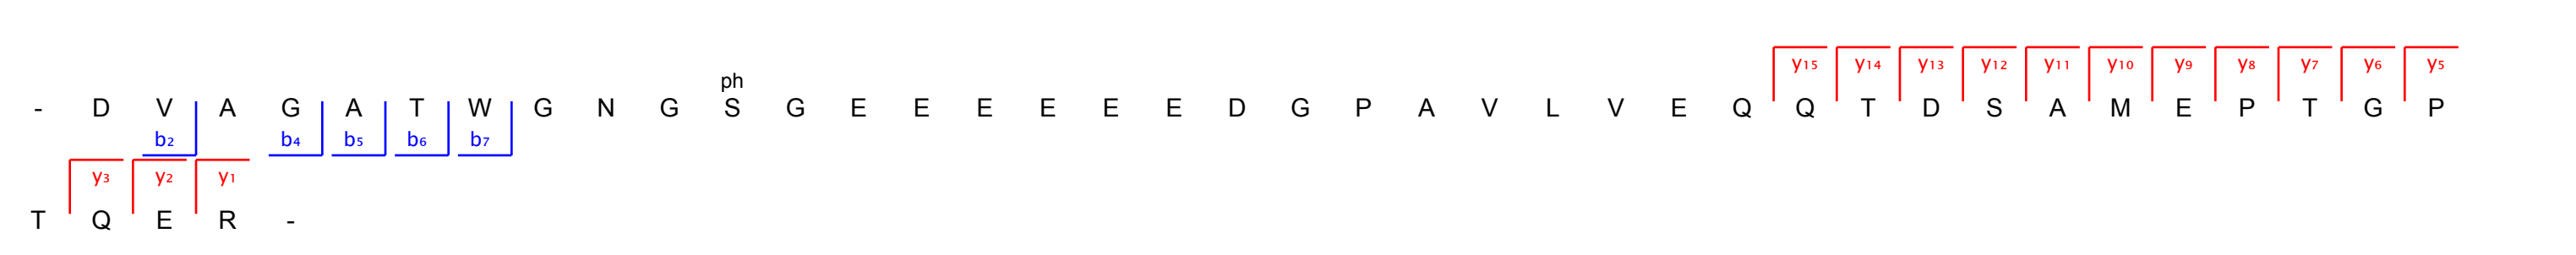

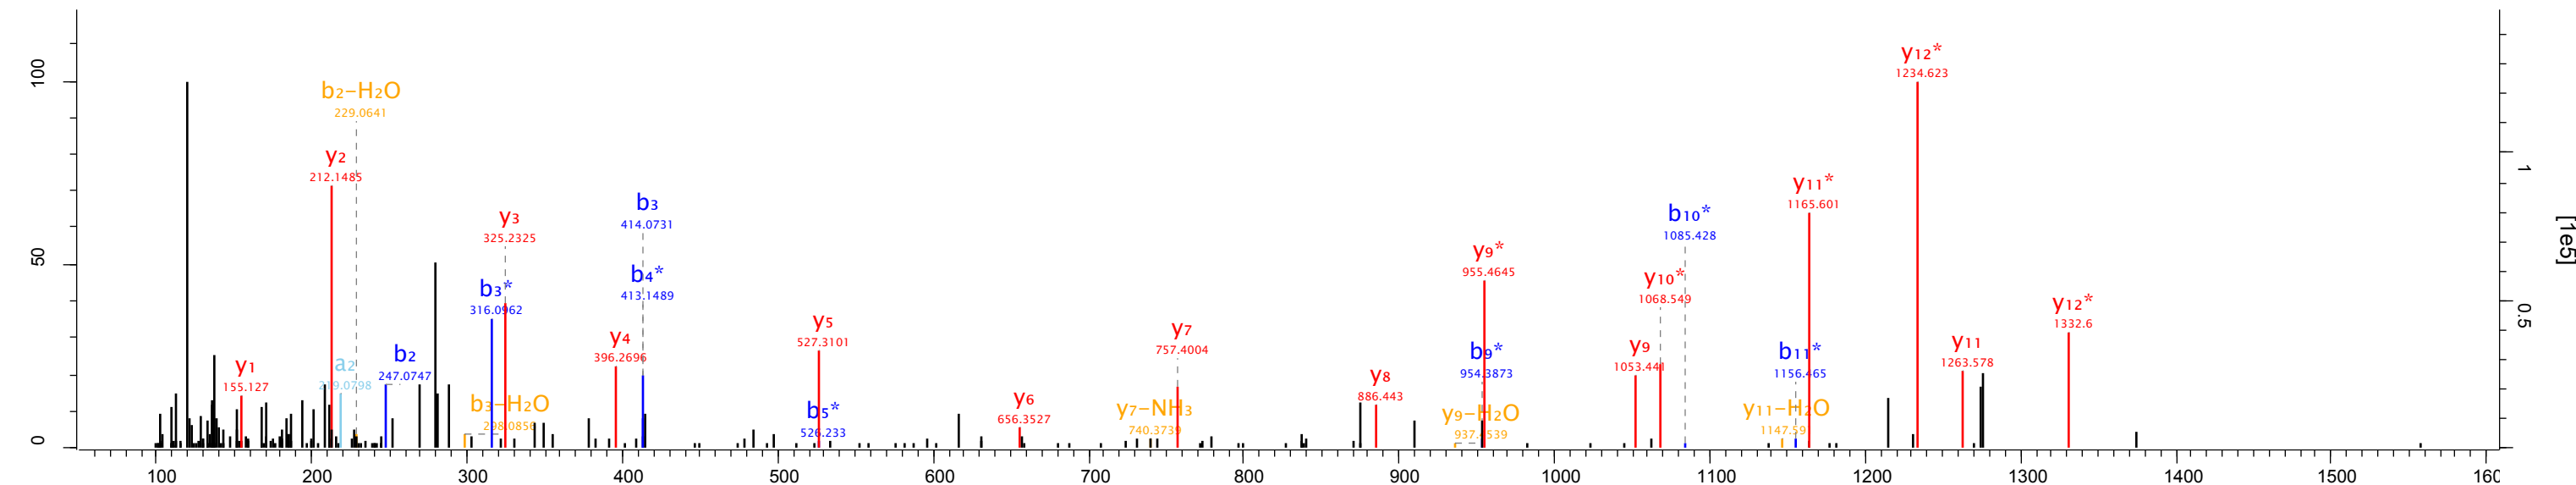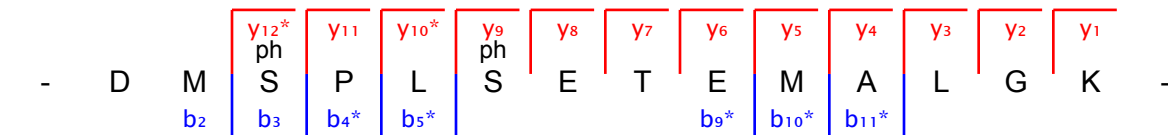



Raw file 20171215\_MaS\_33SR\_LMH\_phospho2\_03 Scan 2119 Method FTMS; HCD Score 100.58 m/z 686.3 Gene names SRRM2

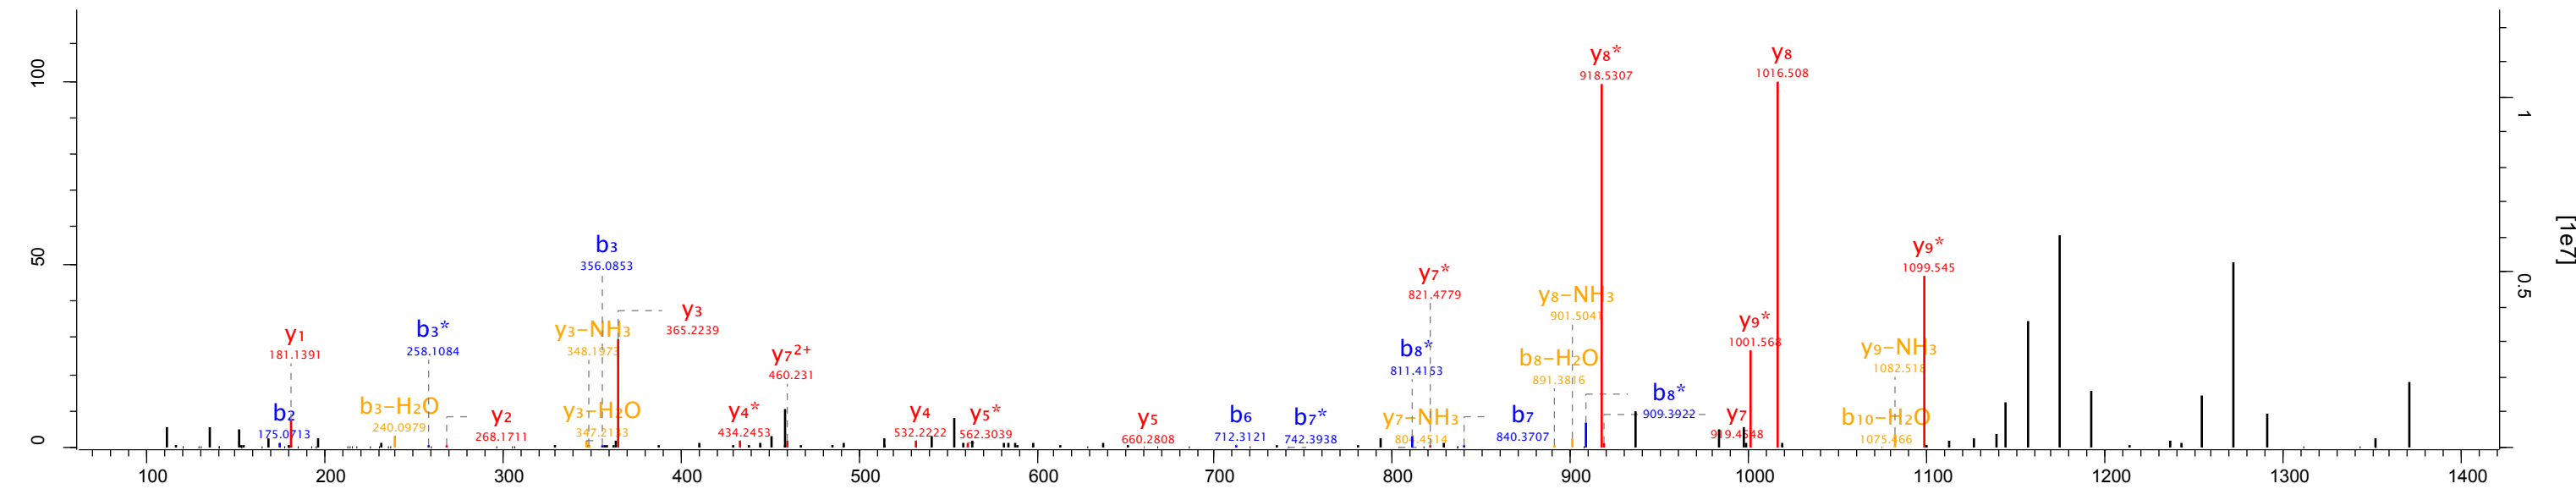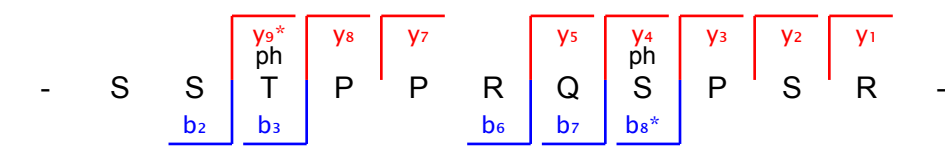

Raw file 20171215\_MaS\_33SR\_LMH\_phospho2\_03 Scan 23279 Method FTMS; HCD Score 161.31 m/z 813.91 Gene names BRD8

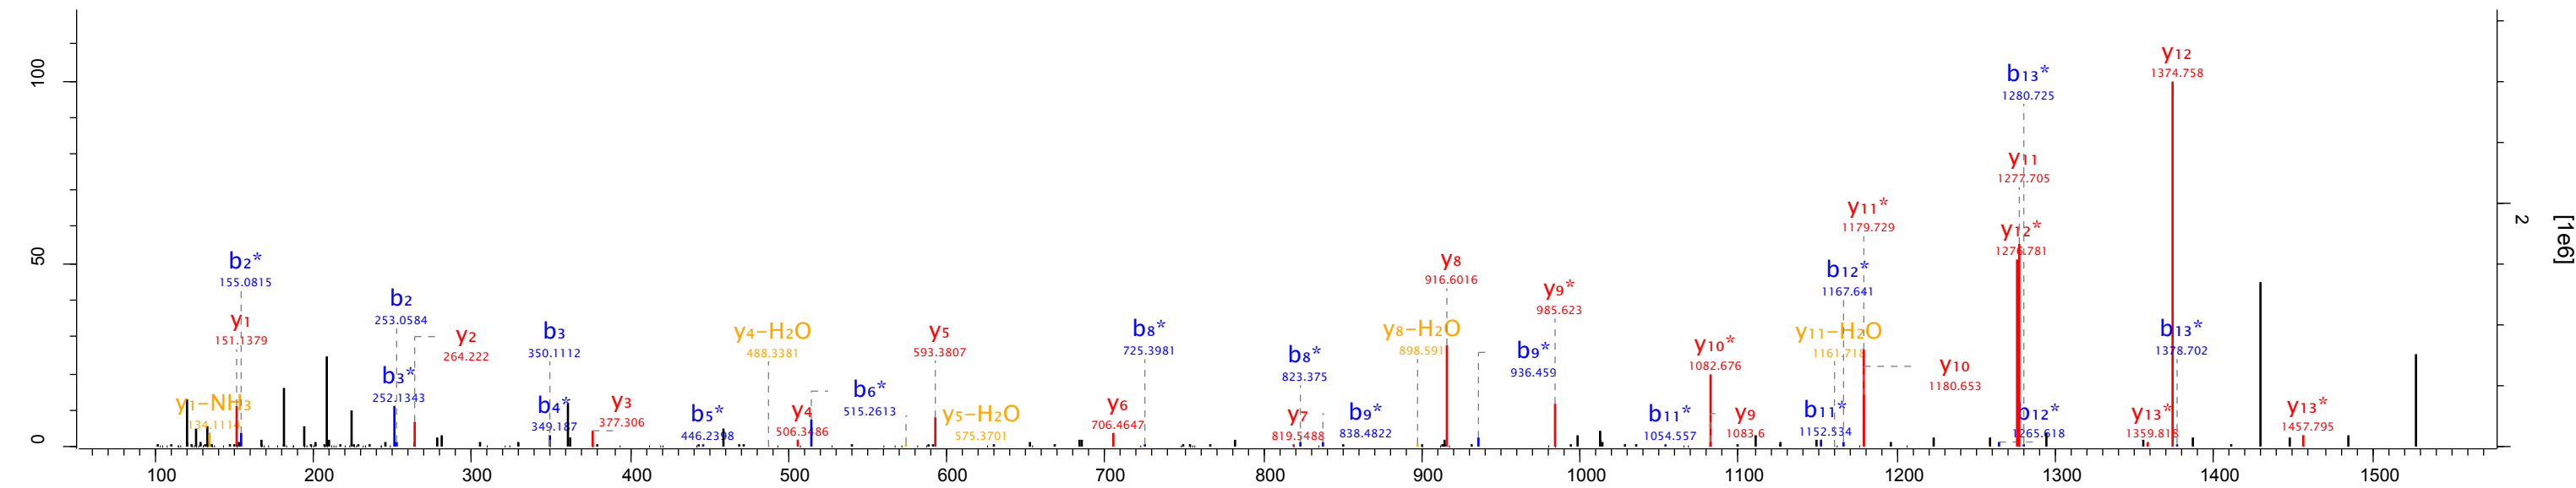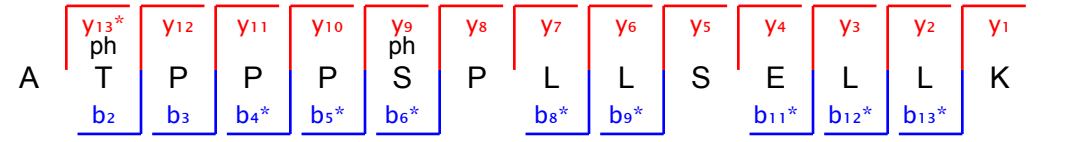

20171215\_MaS\_33SR\_LMH\_phospho2\_03 2349 FTMS; HCD 42 552.73 SRRM2

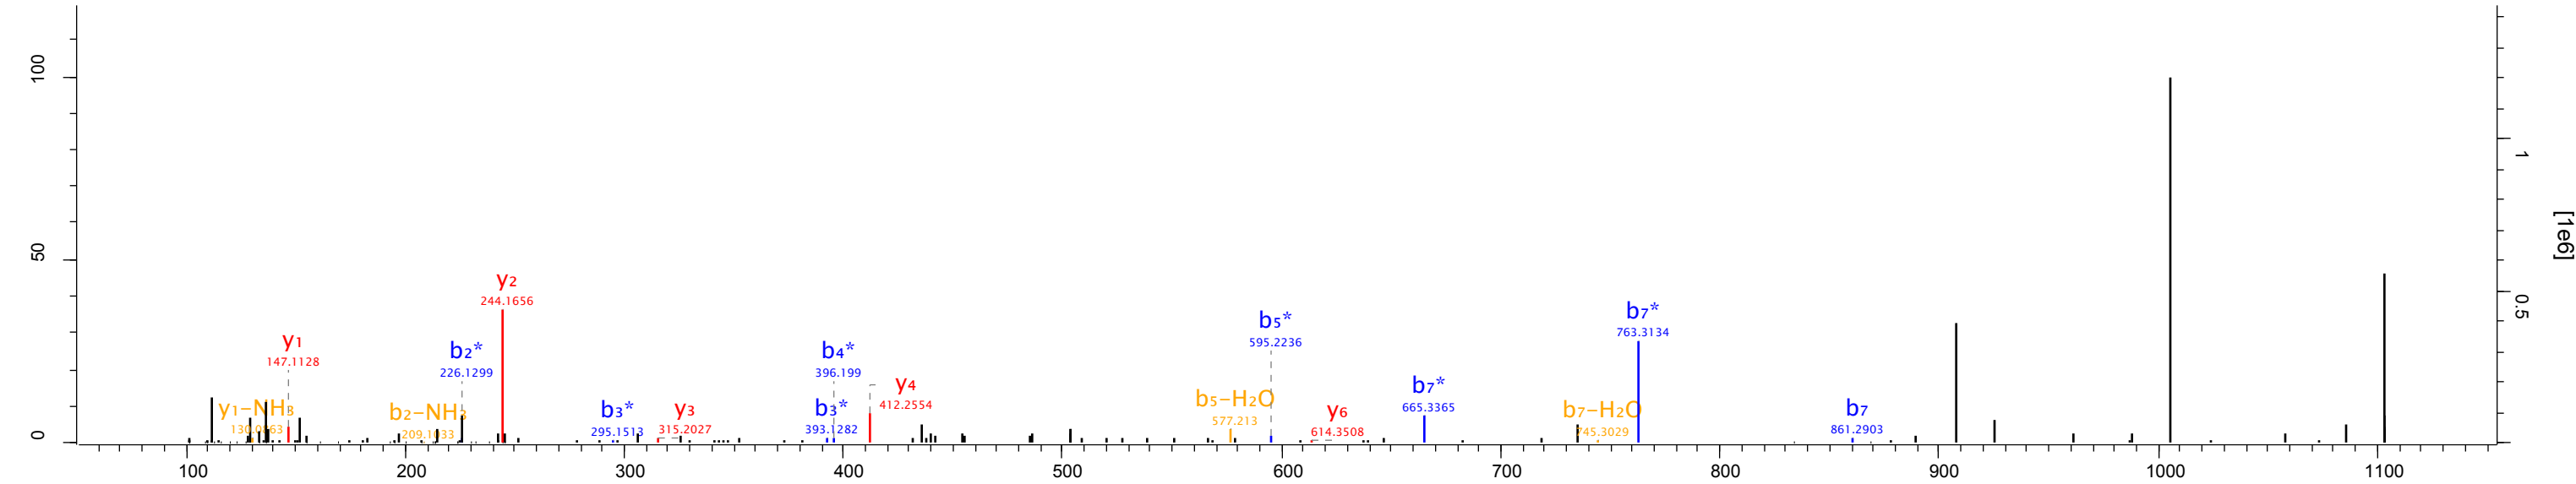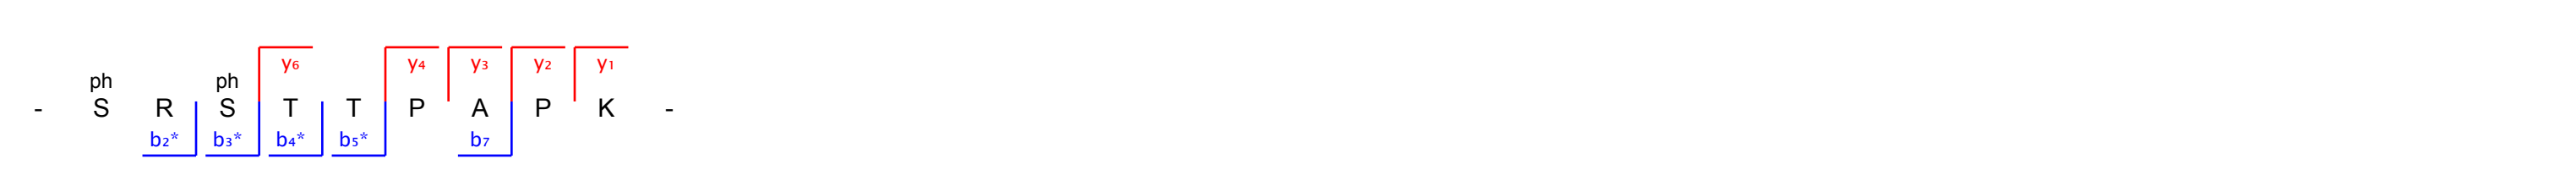

20171215\_MaS\_33SR\_LMH\_phospho2\_03 2419 FTMS; HCD 172.67 818.83 BAG3

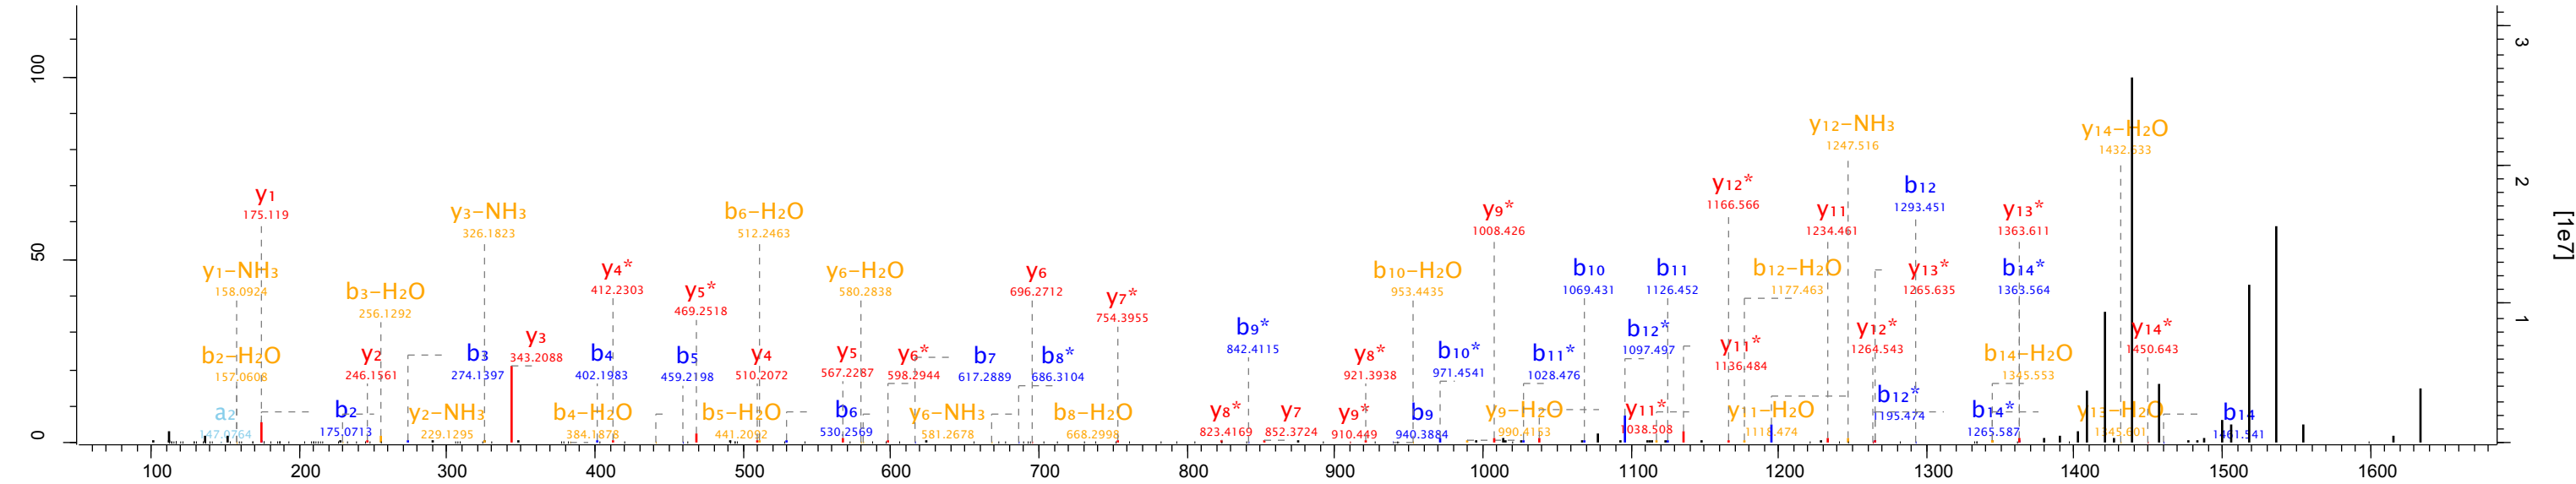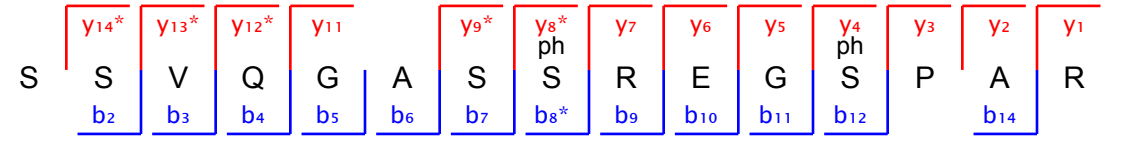

Raw file 20171215\_MaS\_33SR\_LMH\_phospho2\_03 Scan 2749 Method FTMS; HCD Score 100.07 m/z 646.76 Gene names VCIPI1

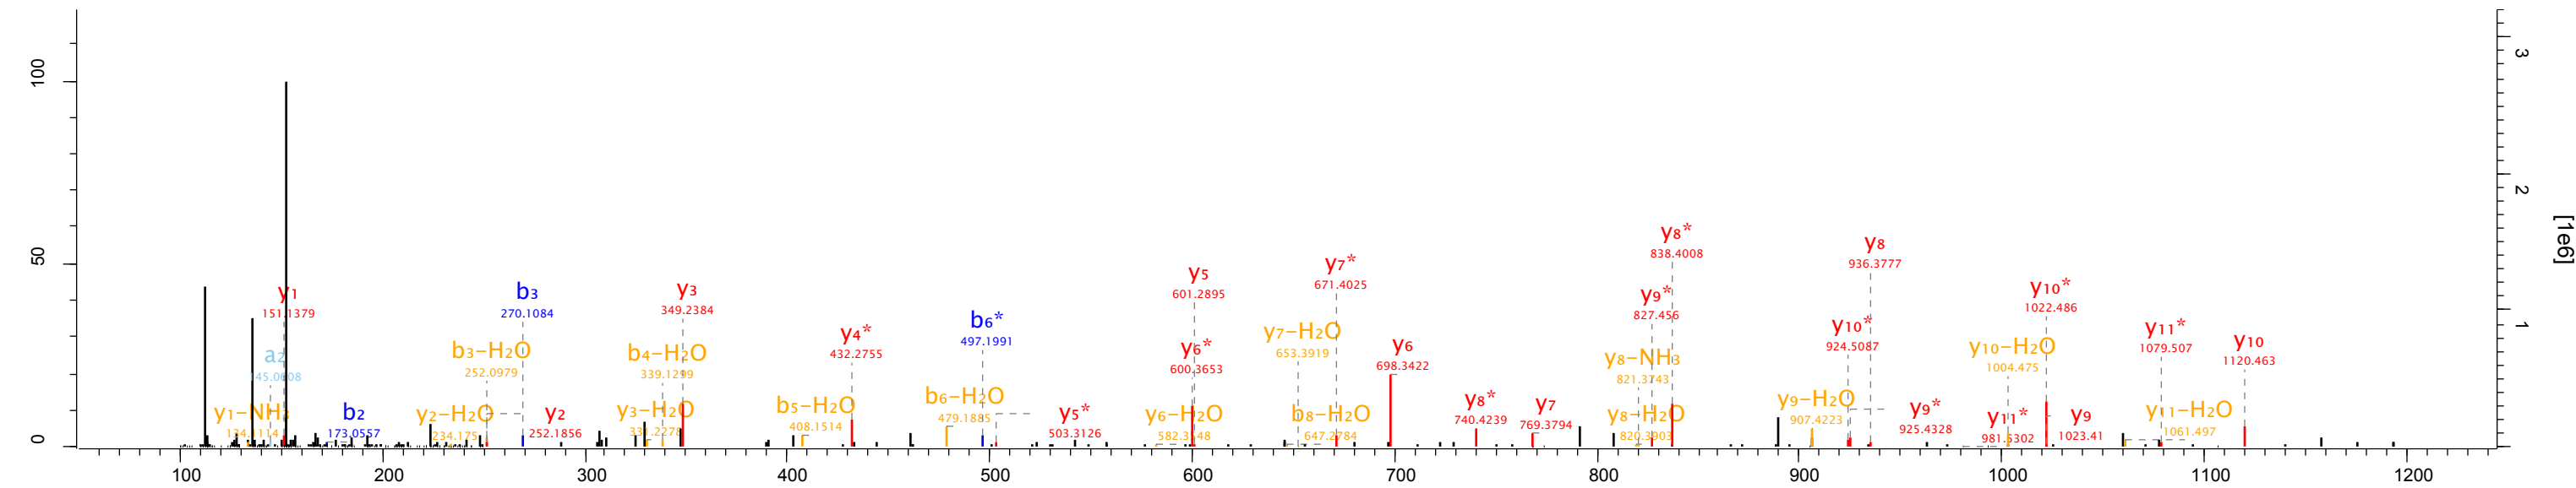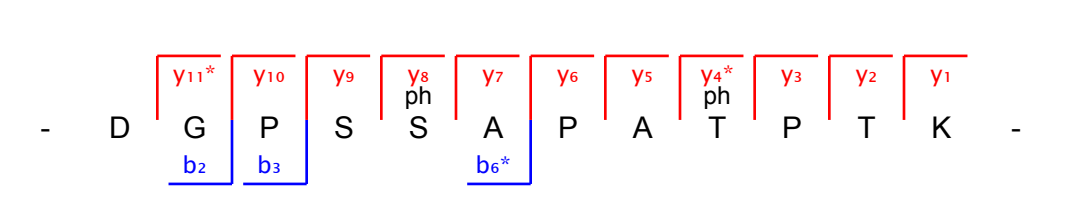

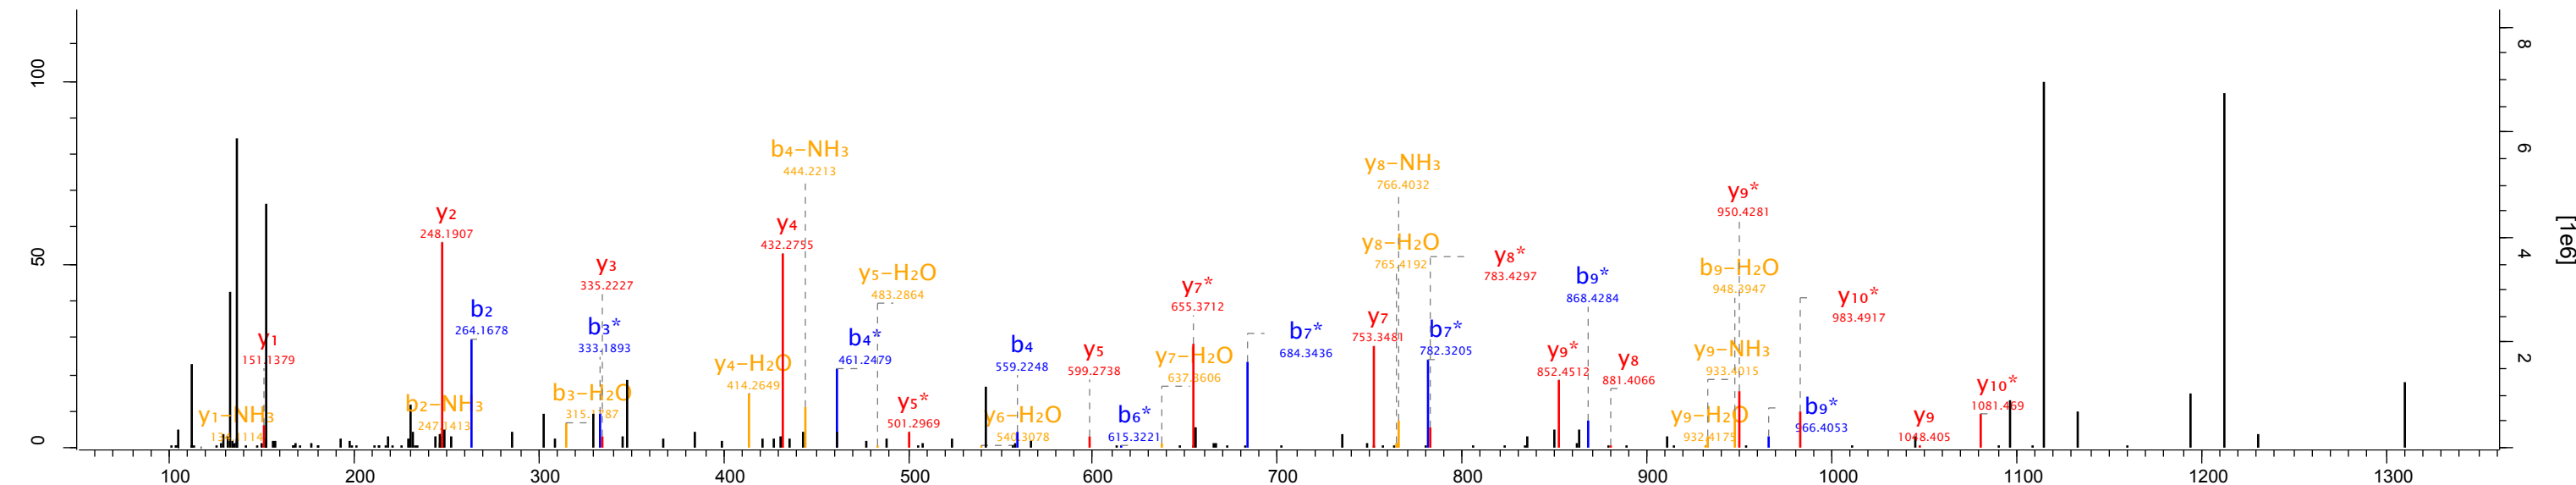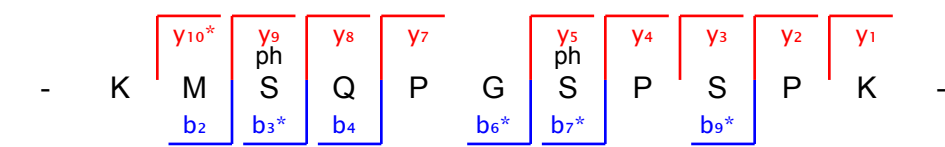

Raw file 20171215\_MaS\_33SR\_LMH\_phospho2\_03 Scan 2889 Method FTMS; HCD Score 128.72 m/z 739.84 Gene names NSUN5P2

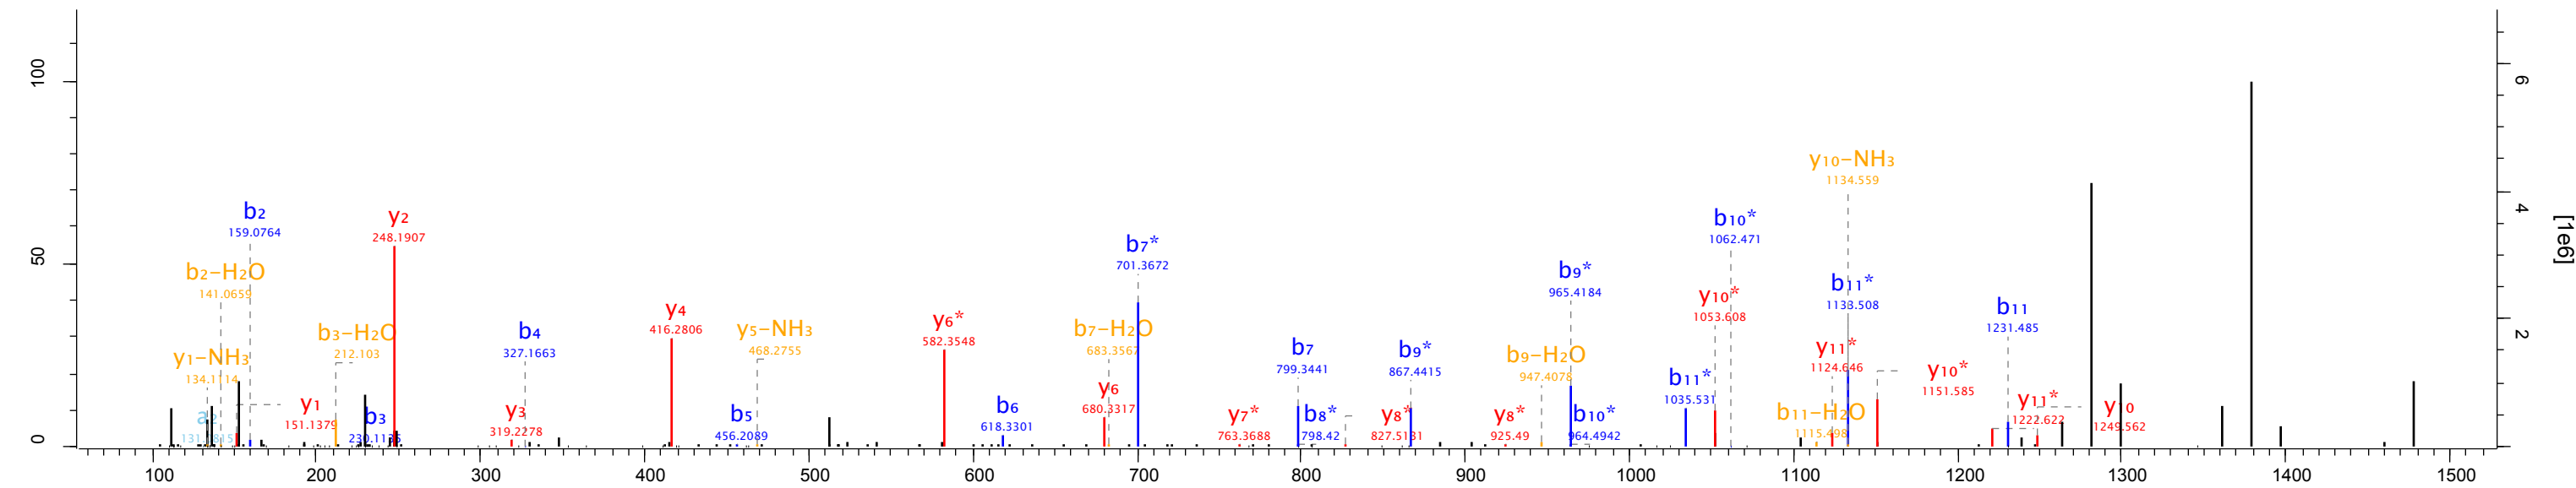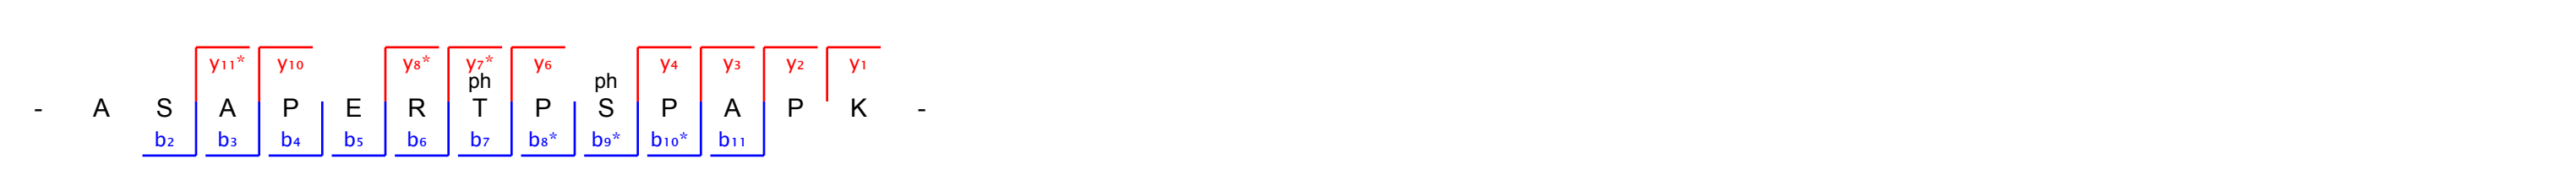

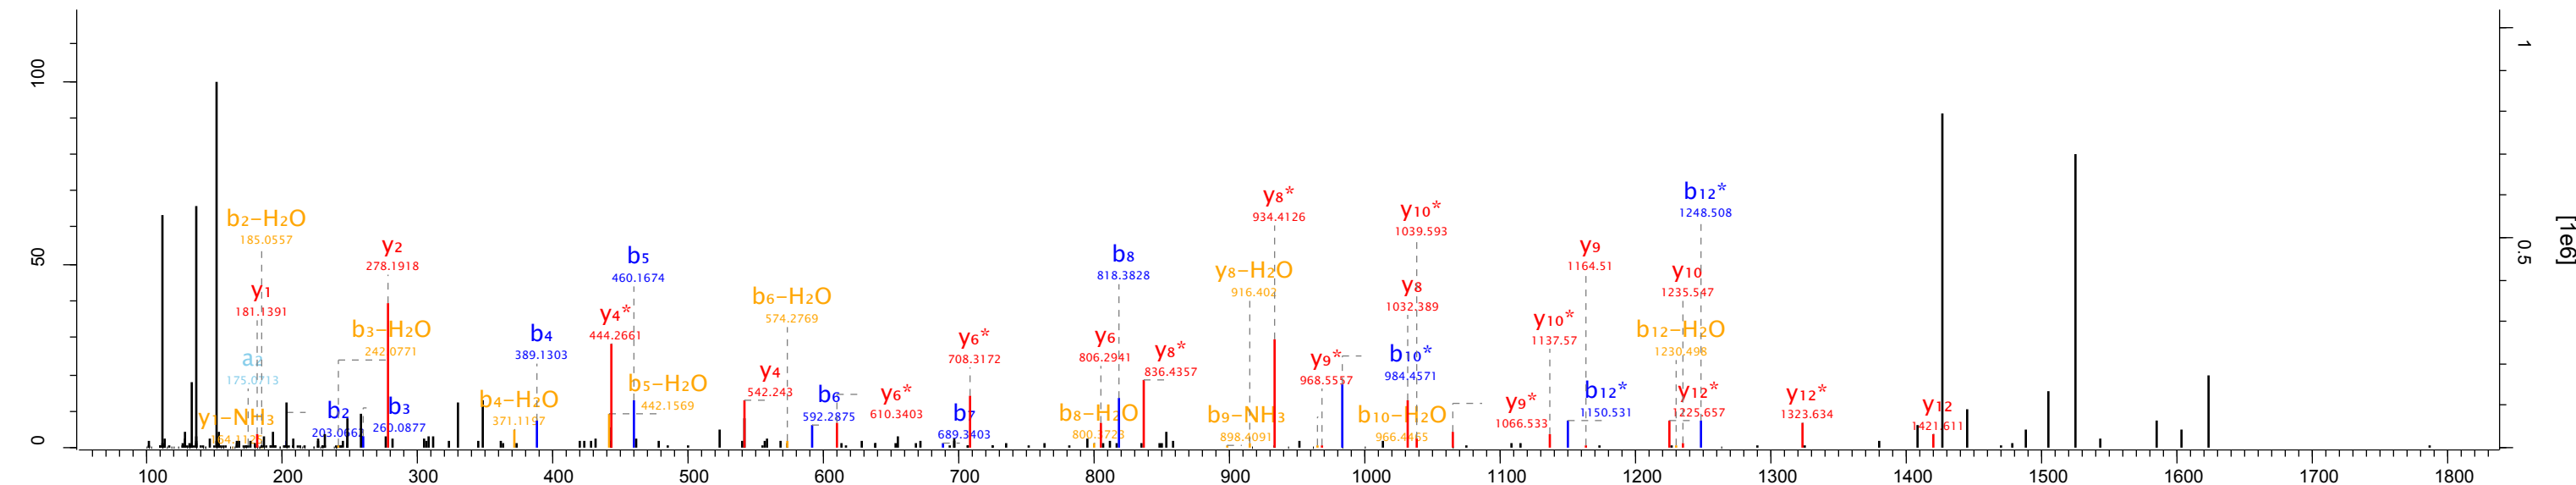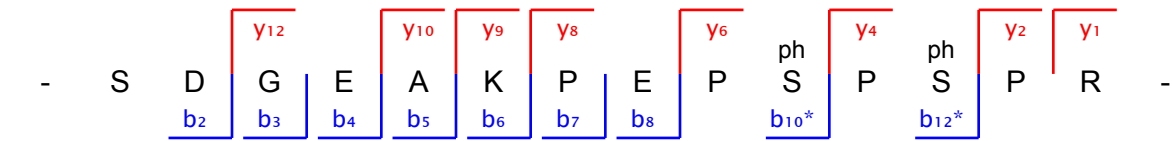



Raw file  
20171215\_MaS\_33SR\_LMH\_phospho2\_03

Scan 2959 Method FTMS; HCD Score 189.84 m/z 778.78 Gene names MATR3

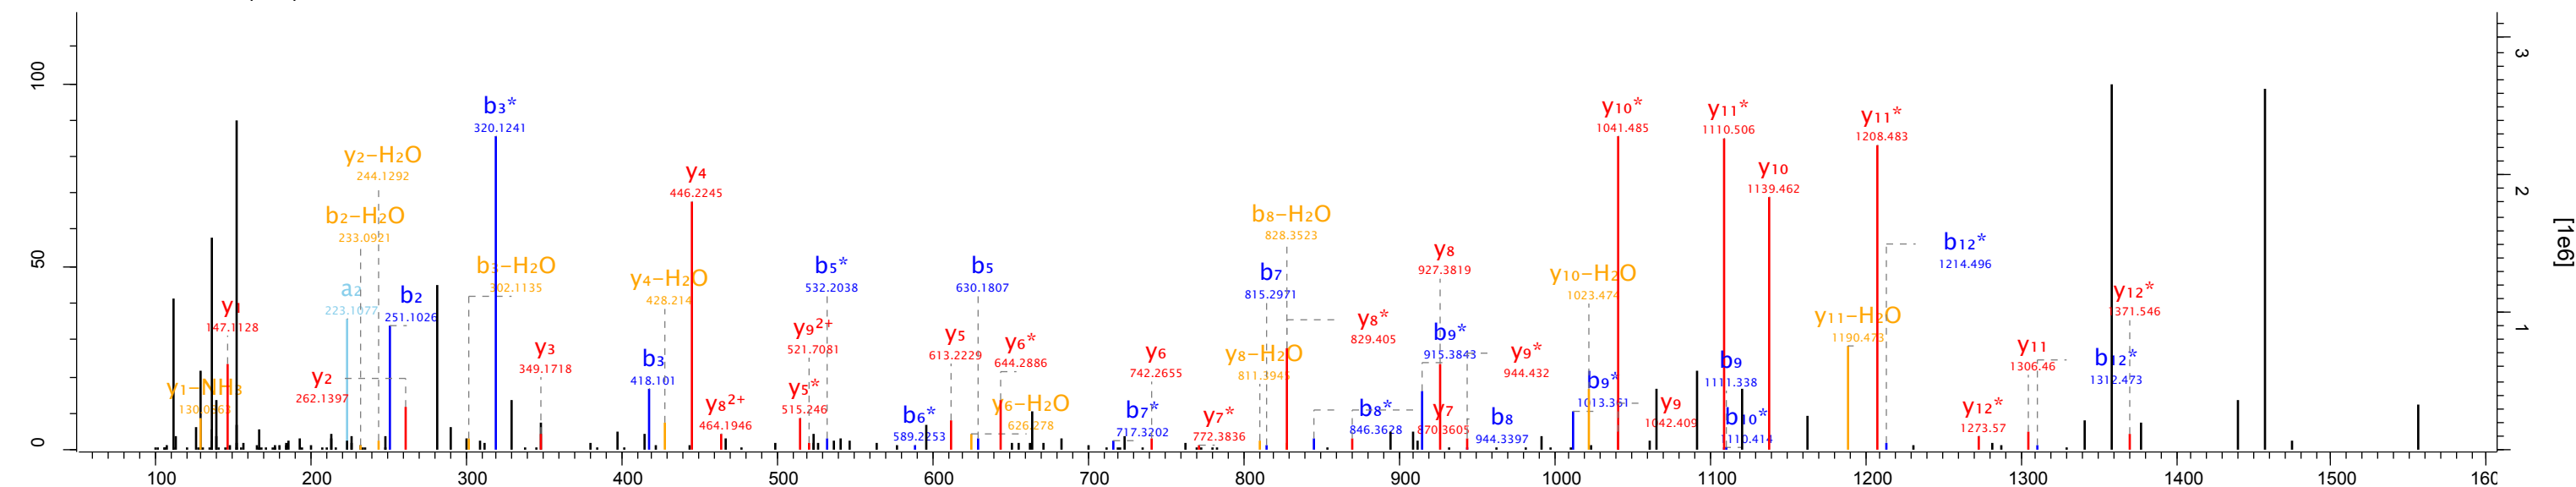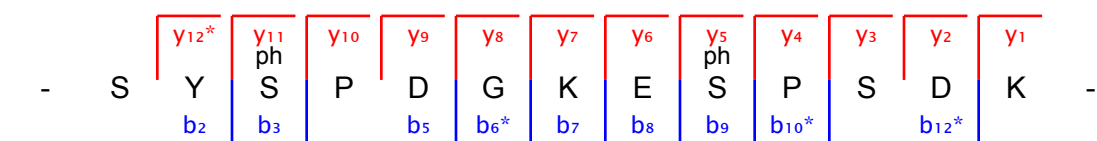

Raw file 20171215\_MaS\_33SR\_LMH\_phospho2\_03 Scan 2969 Method FTMS; HCD Score 85.99 m/z 455.21 Gene names SRRM1

20171215\_MaS\_33SR\_LMH\_phospho2\_03

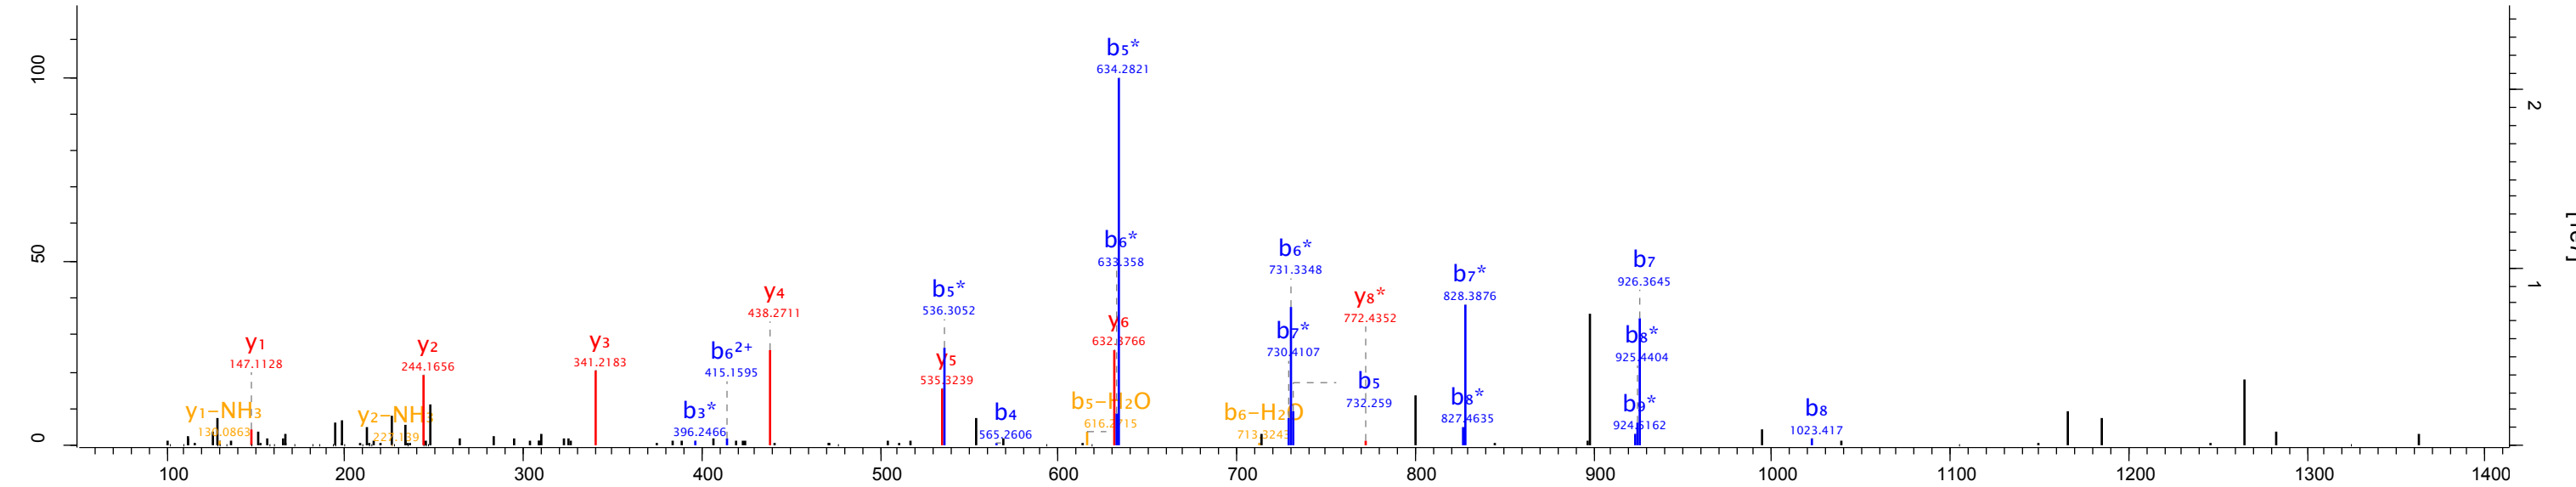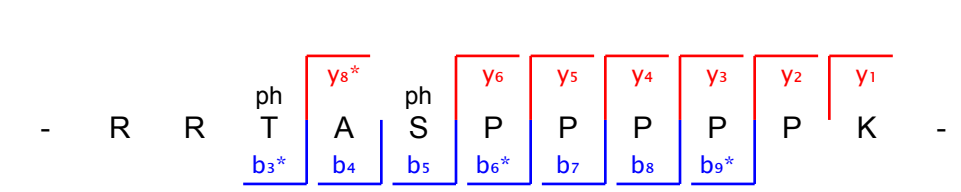

Raw file 20171215\_MaS\_33SR\_LMH\_phospho2\_03 Scan 3039 Method FTMS; HCD Score 68.28 m/z 556.76 Gene names CABLES1

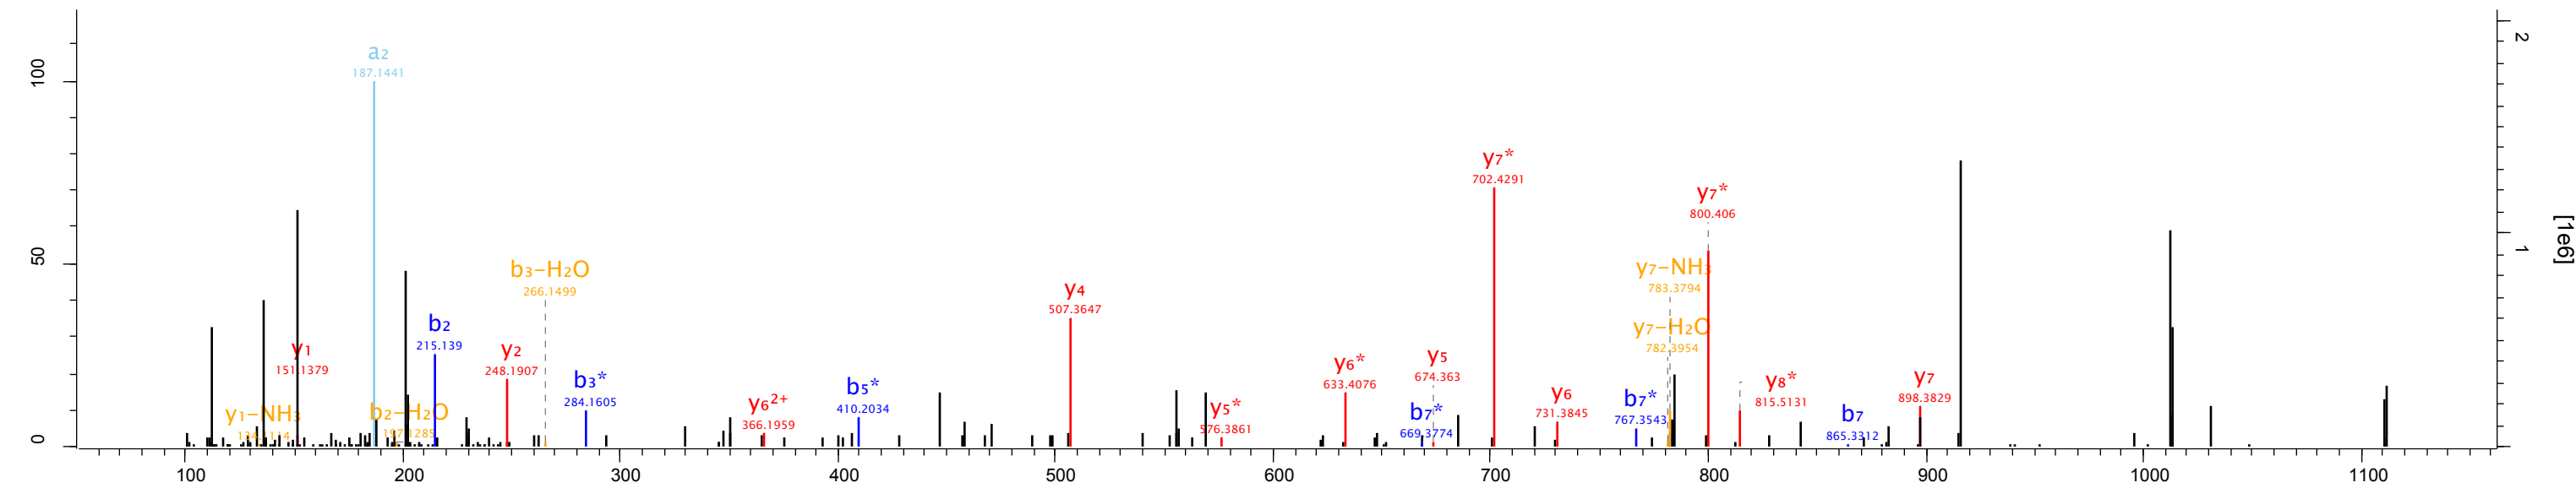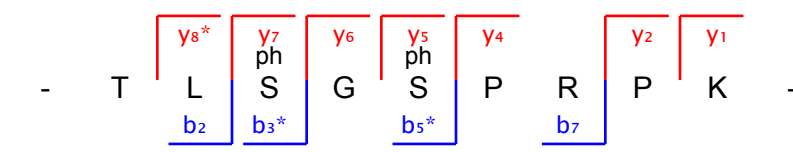

Raw file  
20171215\_MaS\_33SR\_LMH\_phospho2\_03

Scan 3119 Method FTMS; HCD Score 270.96 m/z 1198.96 Gene names PSIP1

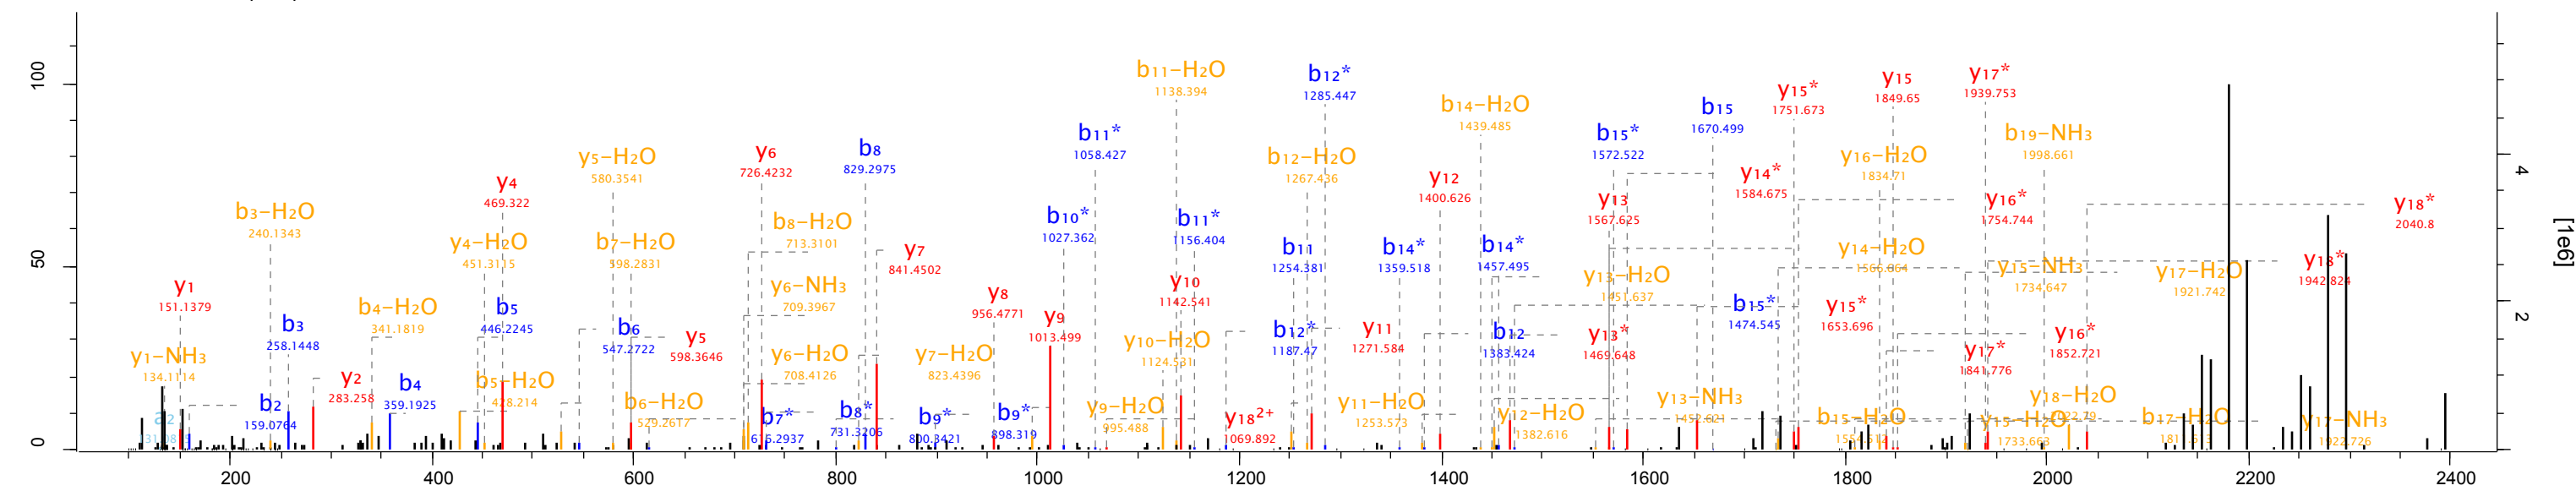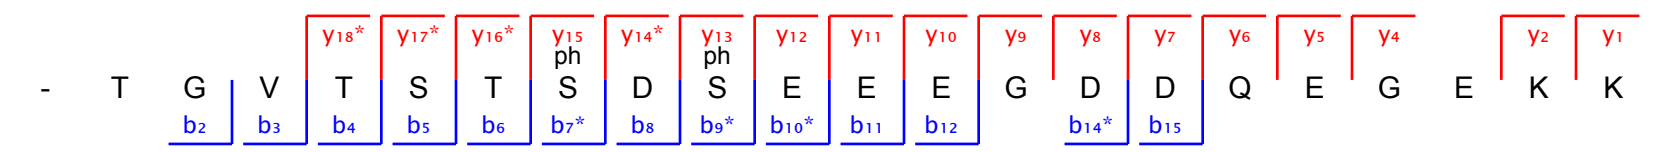

Raw file 20171215\_MaS\_33SR\_LMH\_phospho2\_03 Scan 3209 Method FTMS; HCD Score 160.57 m/z 697.62 Gene names SGTA

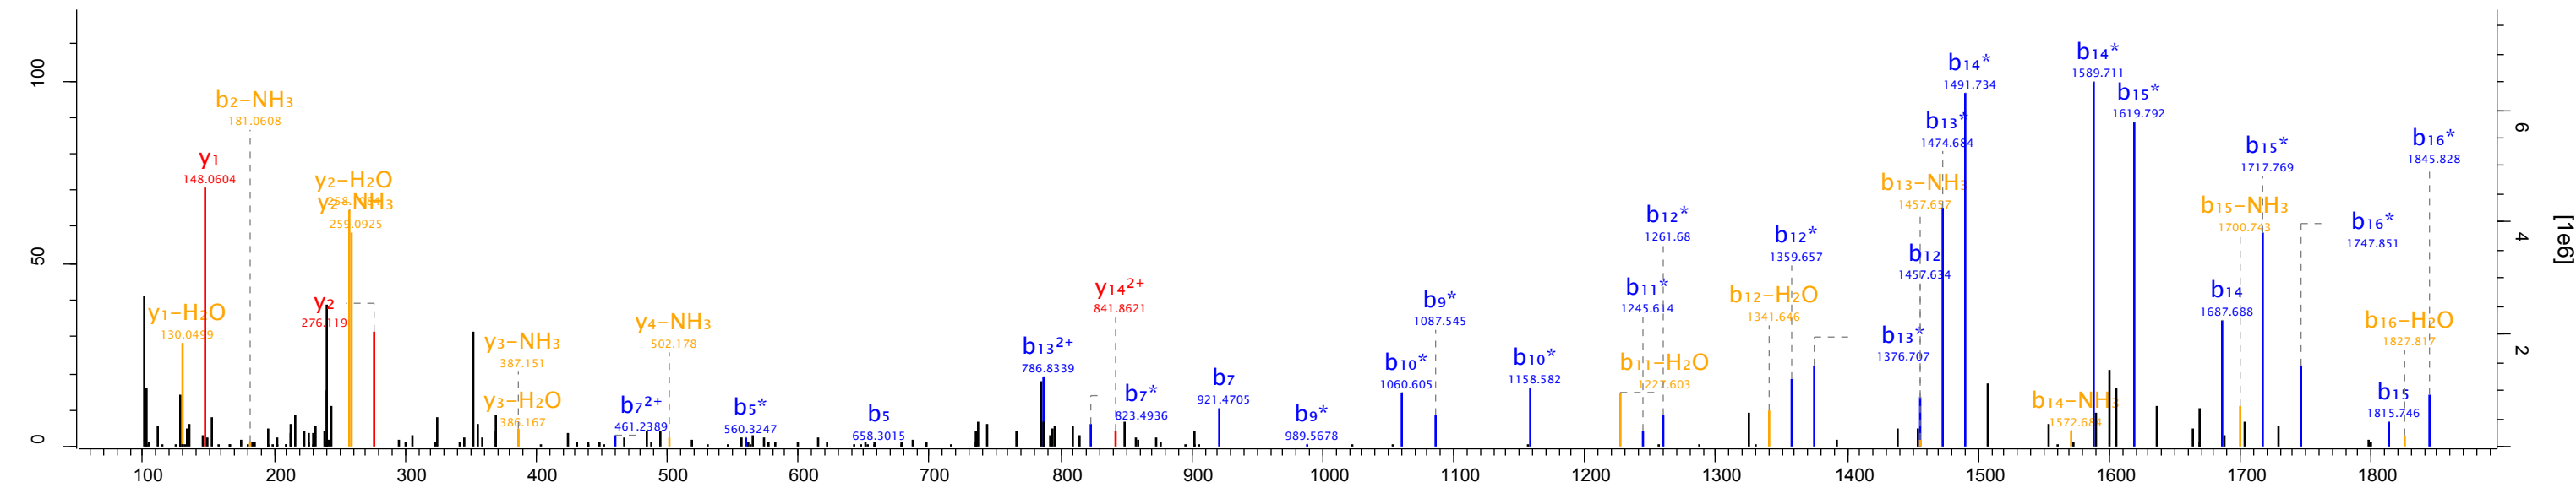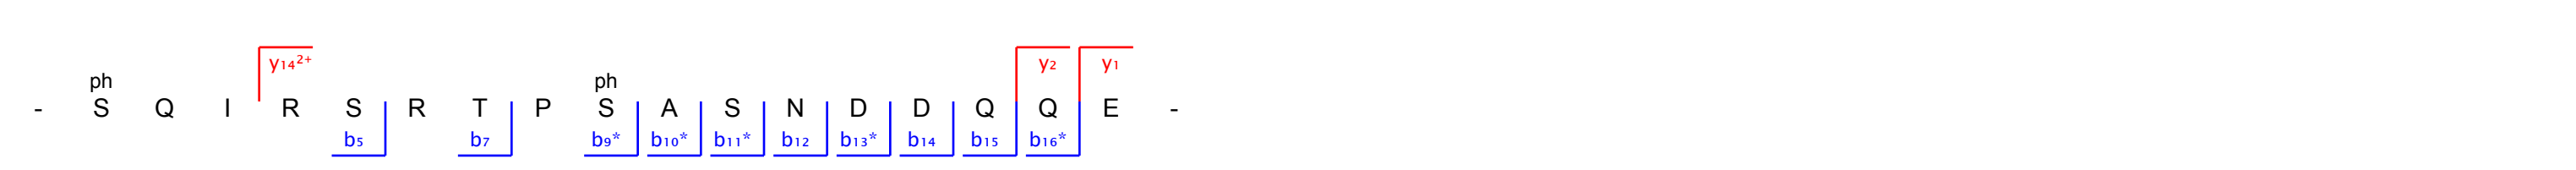

Raw file  
20171215\_MaS\_33SR\_LMH\_phospho2\_03

Scan 3509 Method FTMS; HCD Score 209.49 m/z 768.8 Gene names LEO1

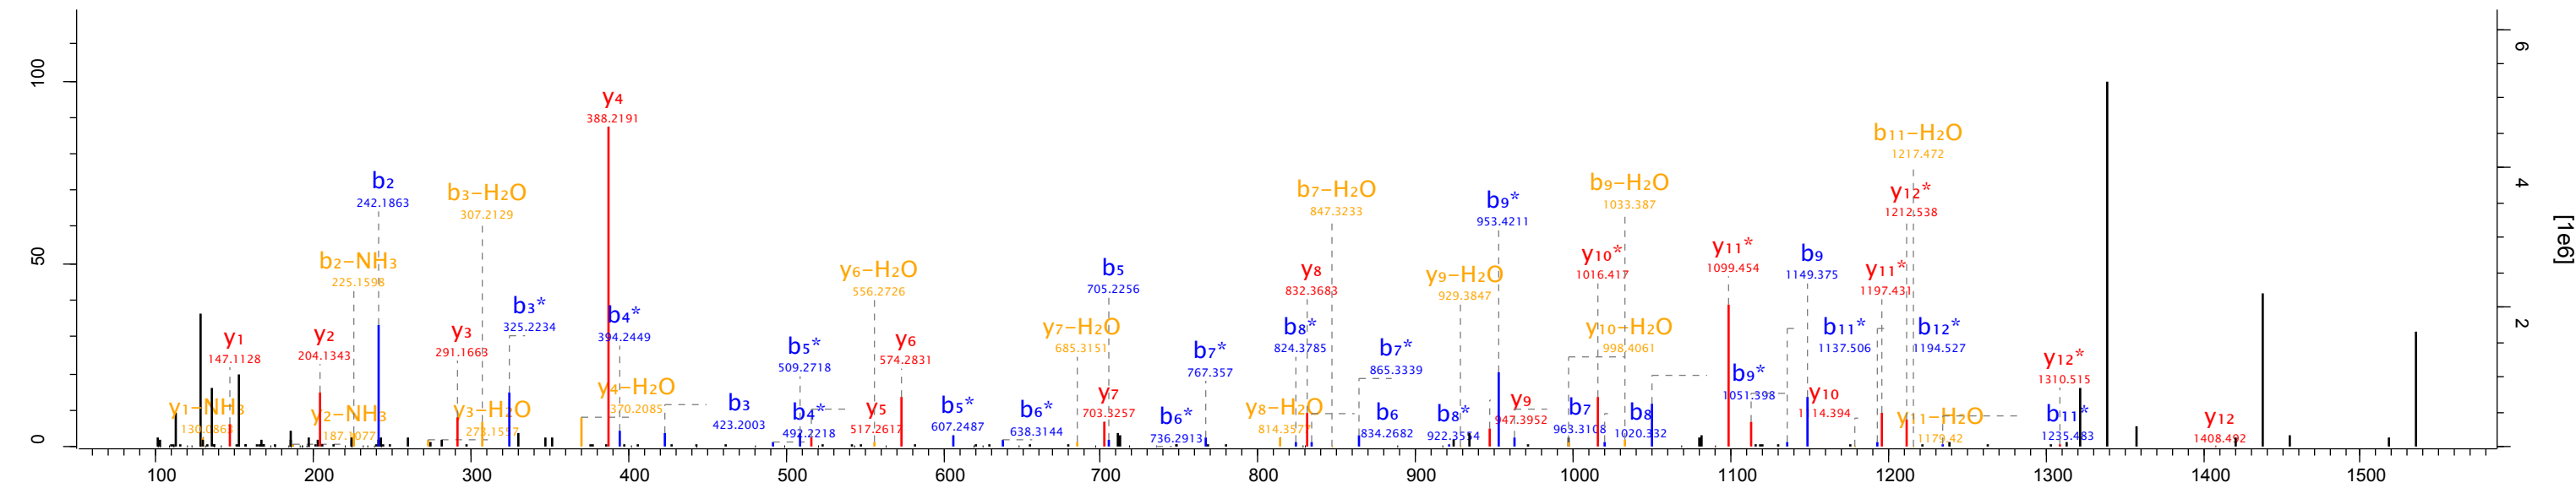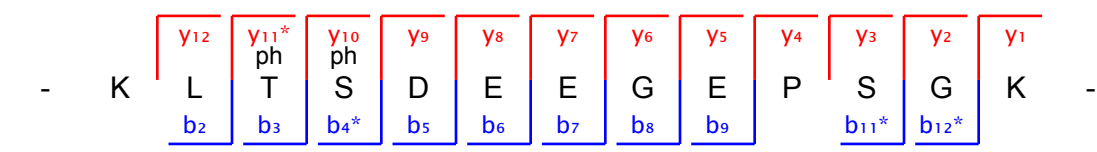

Raw file  
20171215\_MaS\_33SR\_LMH\_phospho2\_03

Scan 3609 Method FTMS; HCD Score 116.45 m/z 741.82 Gene names ZNF608

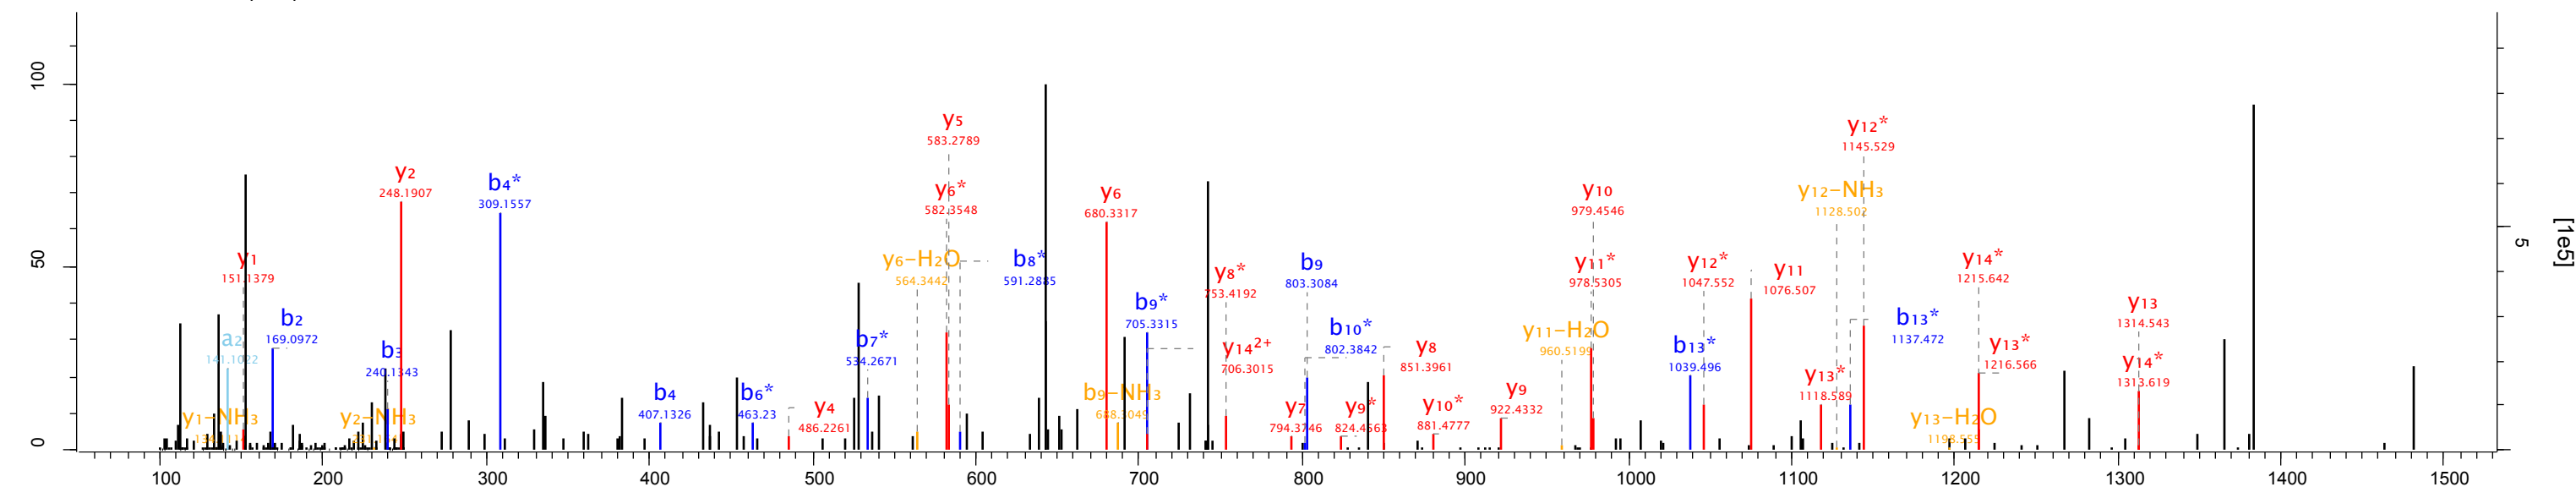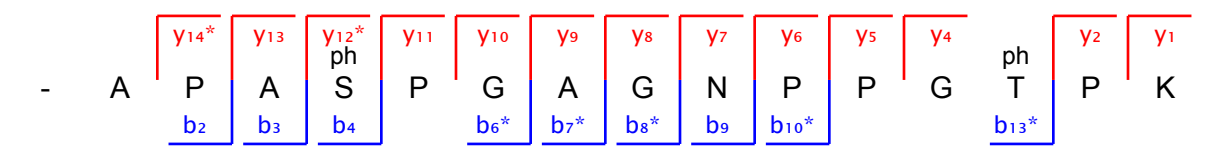

Raw file: 20171215\_MaS\_33SR\_LMH\_phospho2\_03  
 Scan: 3979 Method: FTMS; HCD Score: 89.88 m/z: 427.86 Gene names: PCF11

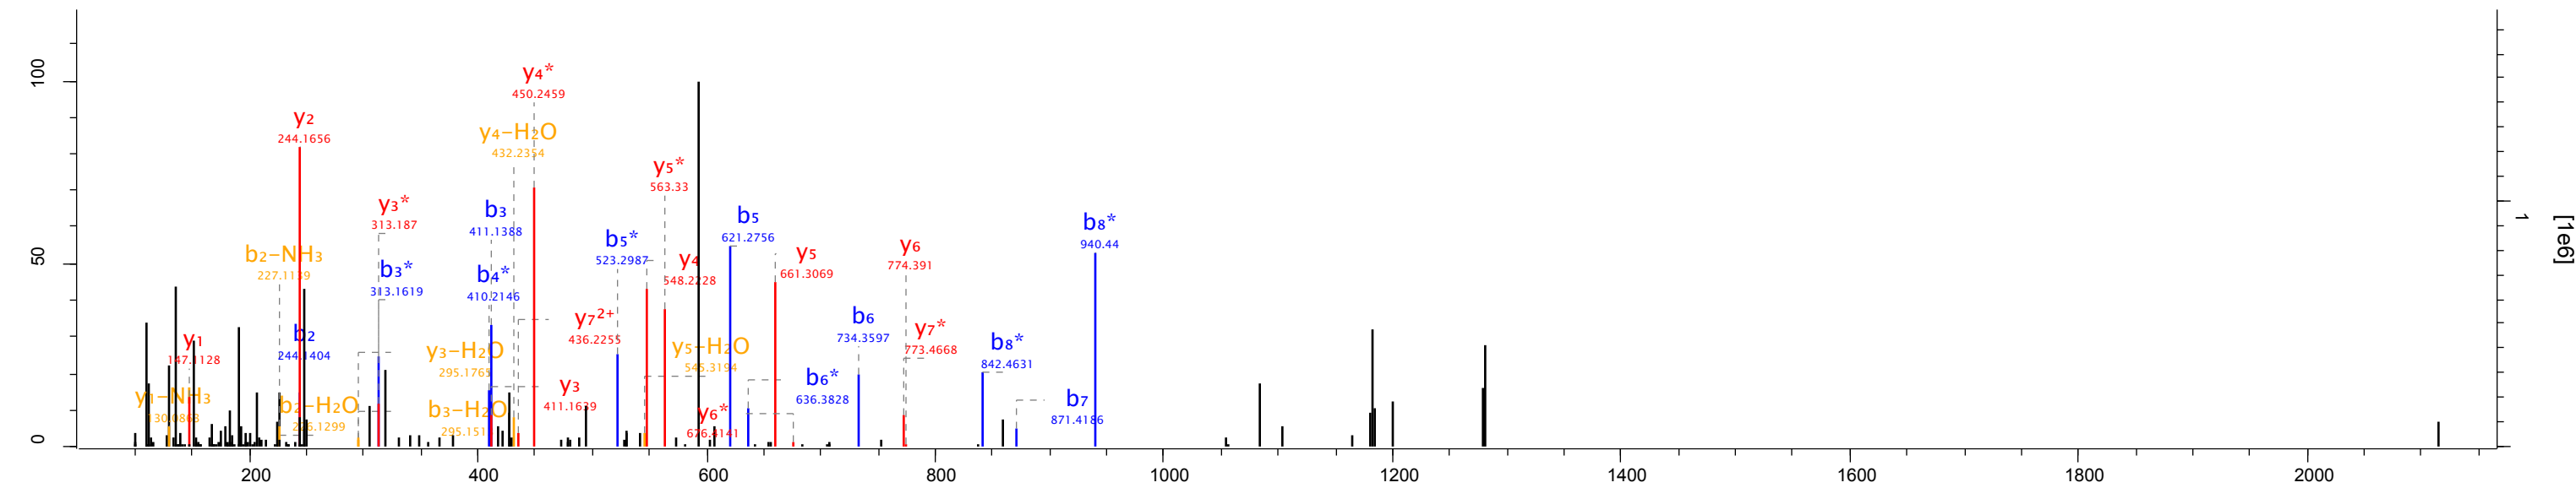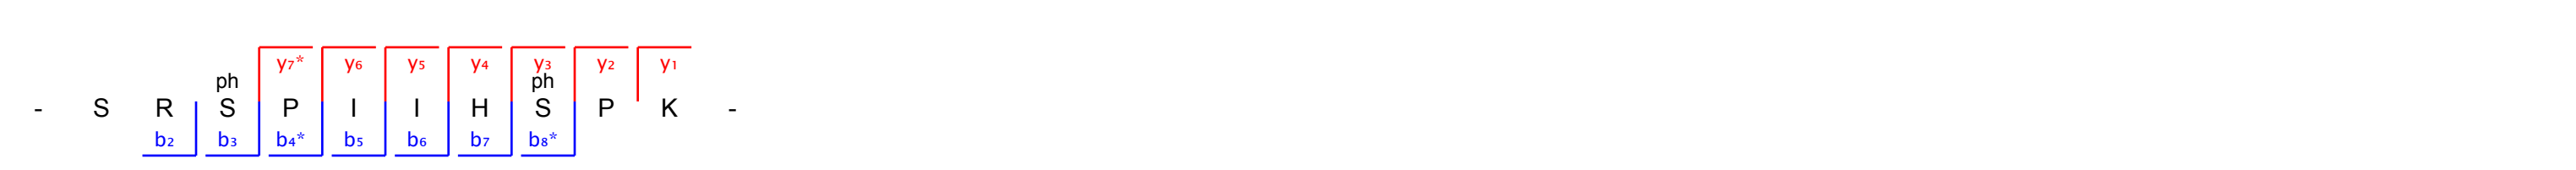



Raw file  
20171215\_MaS\_33SR\_LMH\_phospho2\_03

Scan 4049 Method FTMS; HCD Score 87.65 m/z 746.3 Gene names ATXN2L

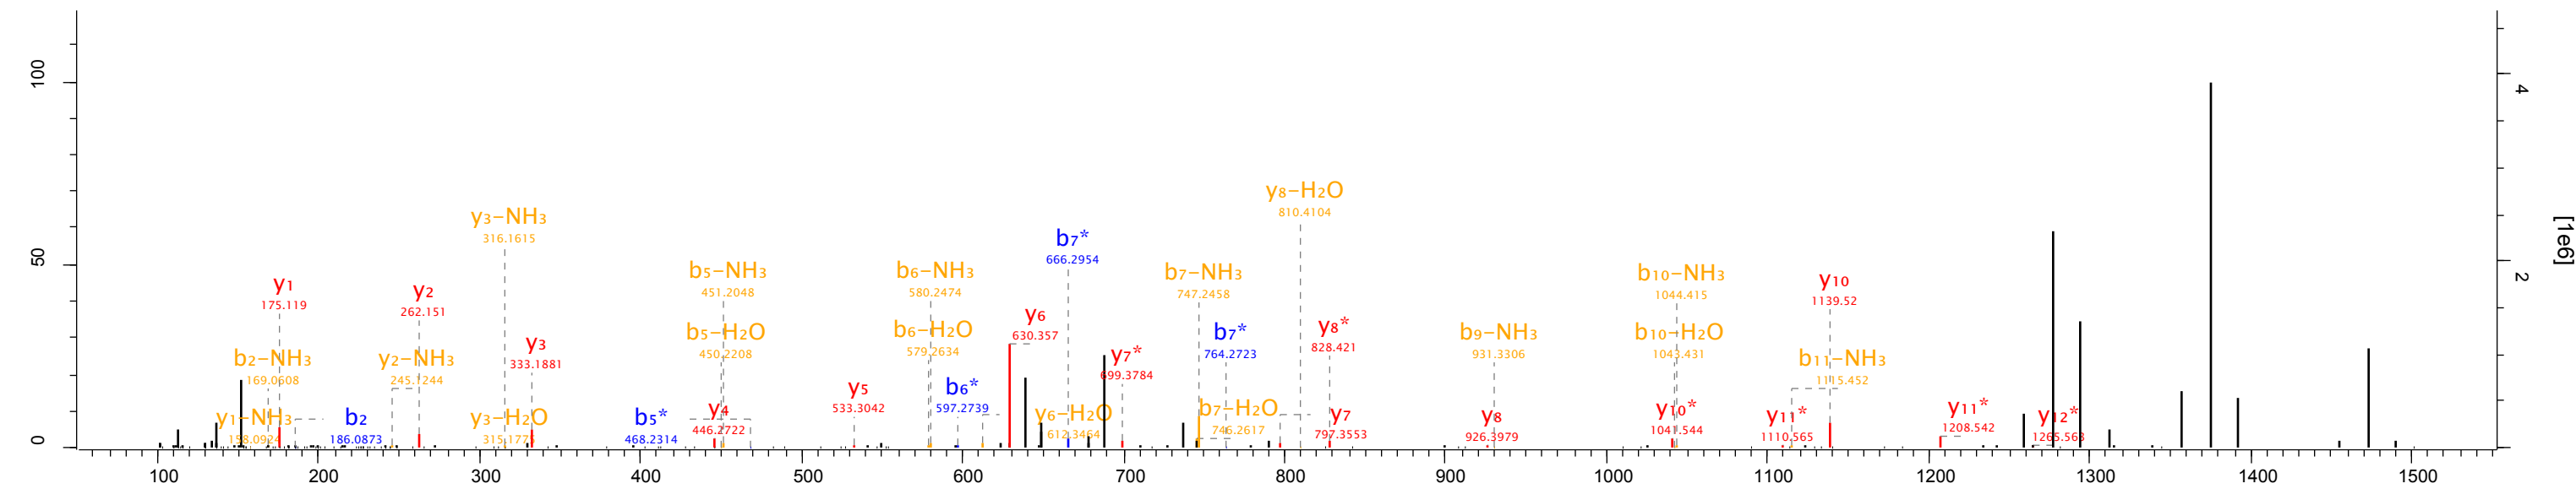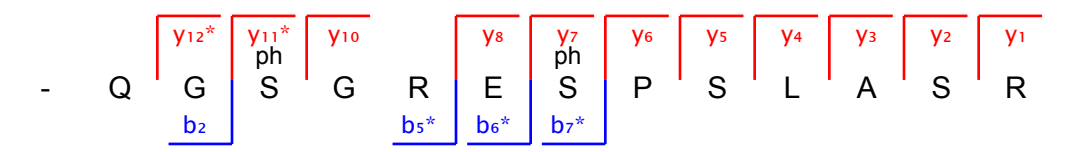

Raw file  
20171215\_MaS\_33SR\_LMH\_phospho2\_03

Scan 4249 Method FTMS; HCD Score 272.41 m/z 962.85 Gene names UBE2O

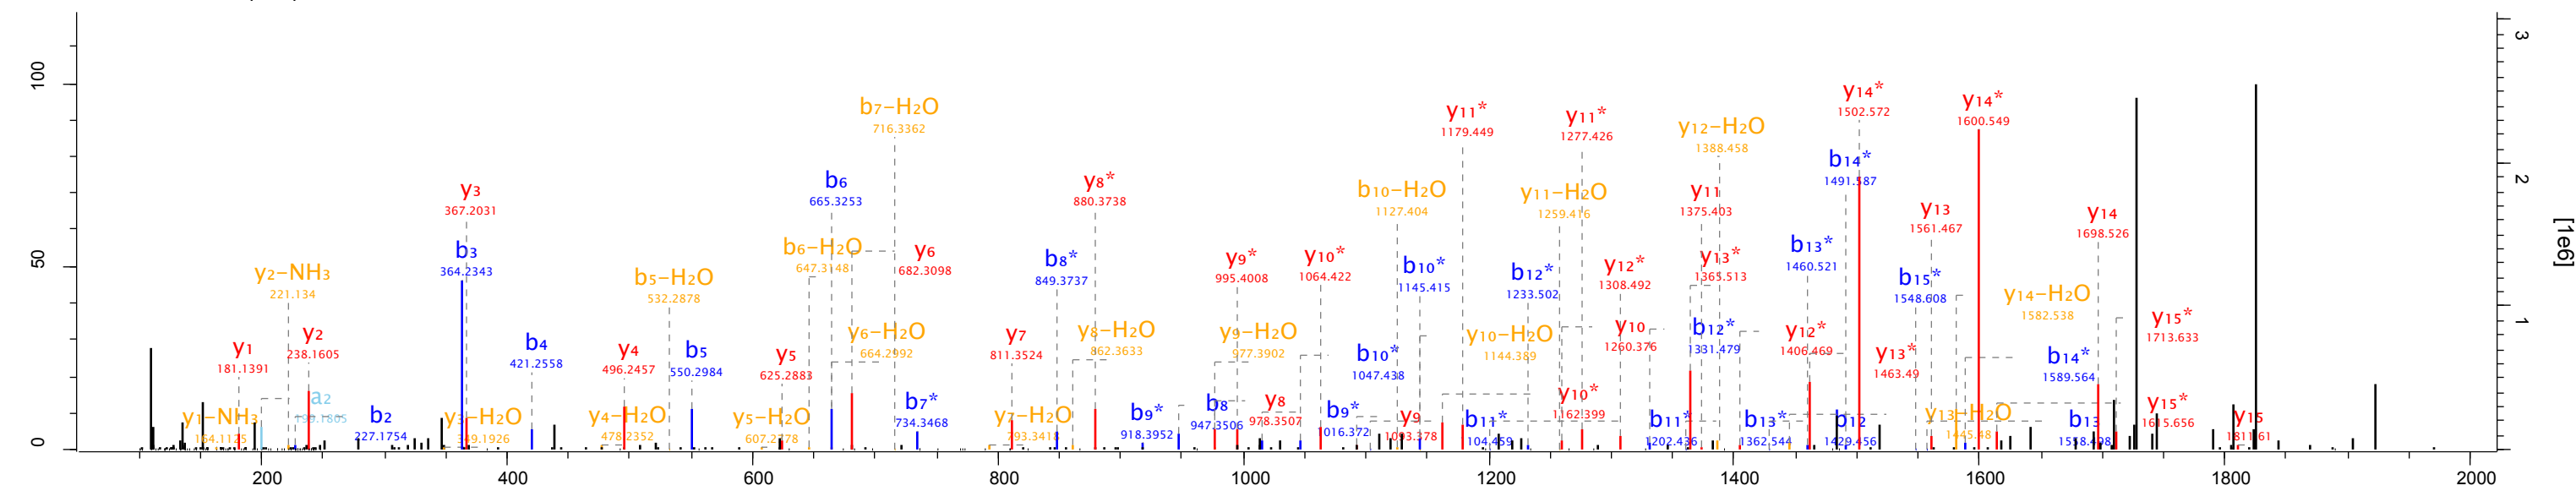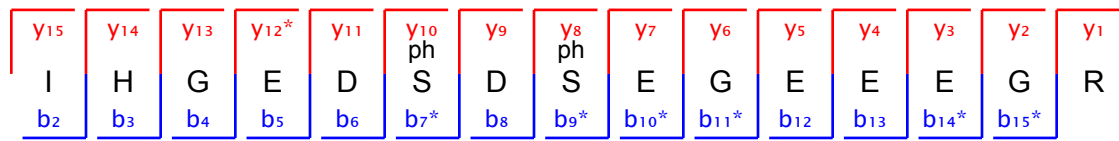

Raw file 20171215\_MaS\_33SR\_LMH\_phospho2\_03 Scan 4499 Method FTMS; HCD Score 234.77 m/z 726.78 Gene names SRRM1

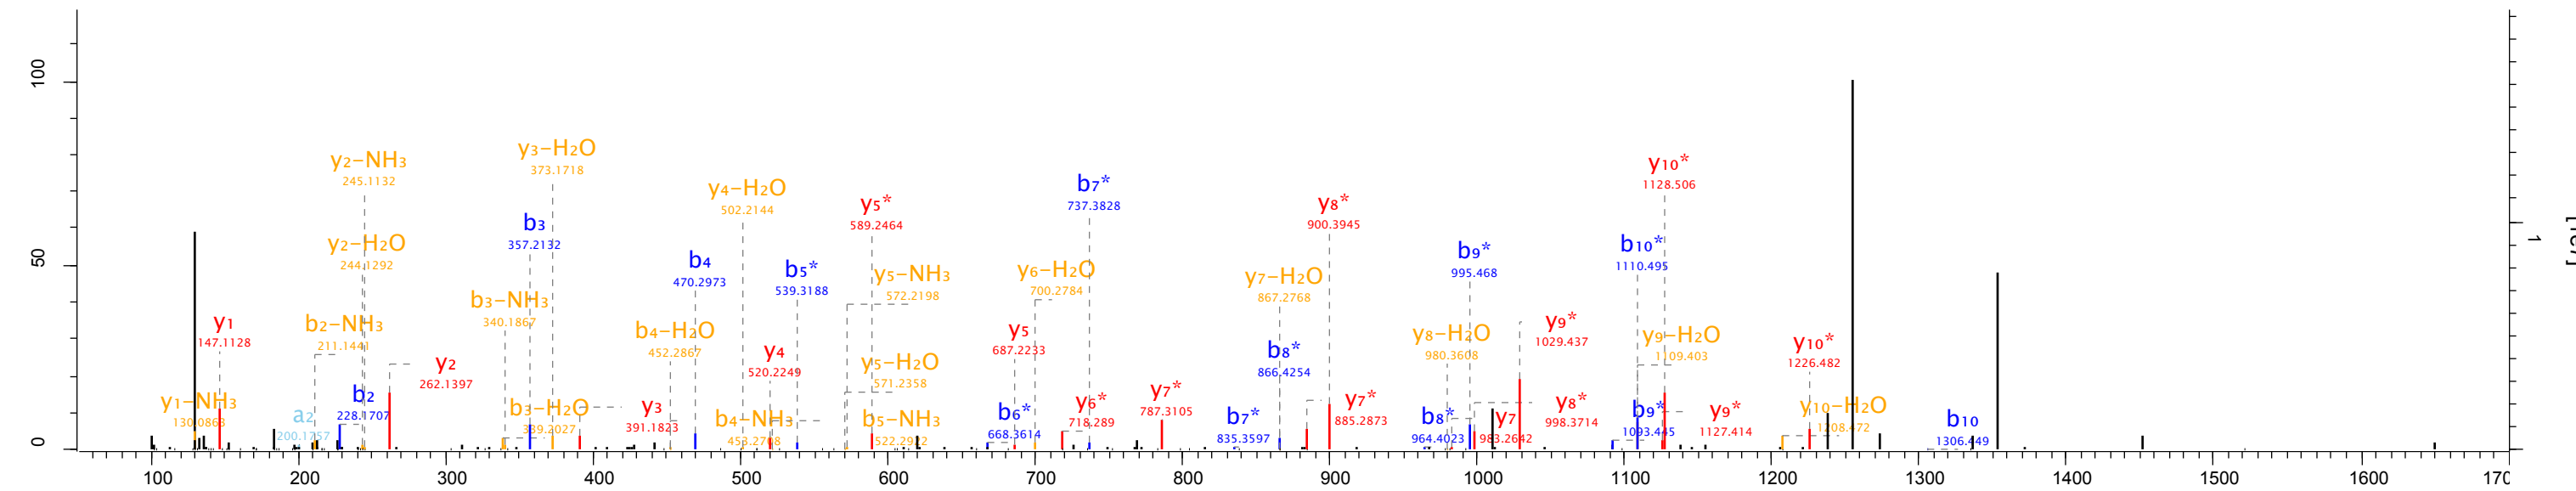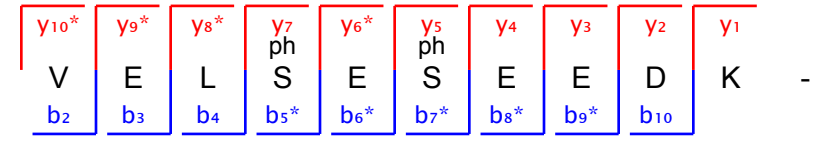

- K V E L S E S E E D K -

Raw file 20171215\_MaS\_33SR\_LMH\_phospho2\_03 Scan 4559 Method FTMS; HCD Score 71.56 m/z 617.76 Gene names PCYT1A

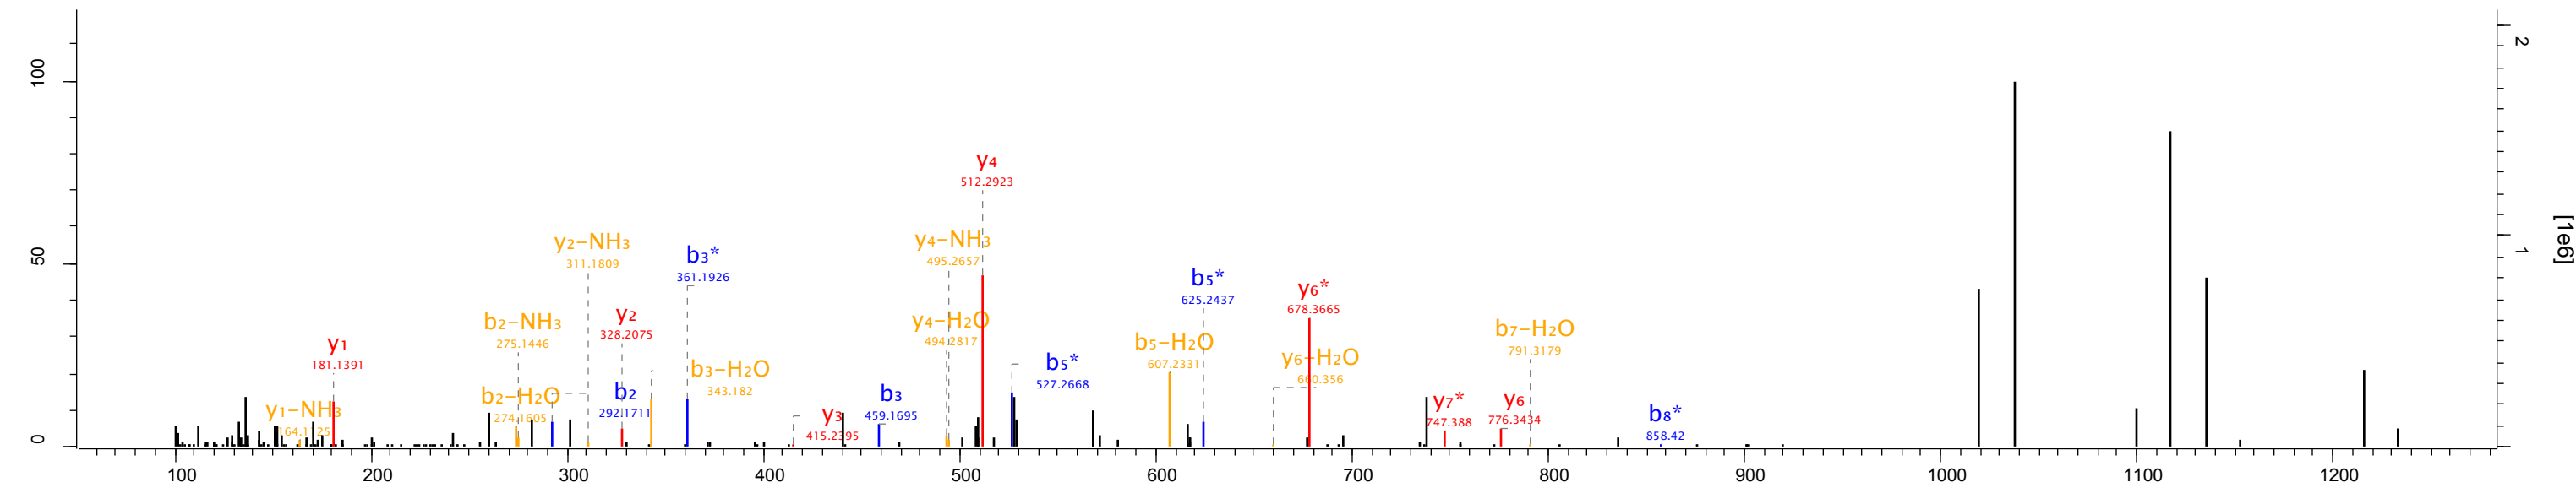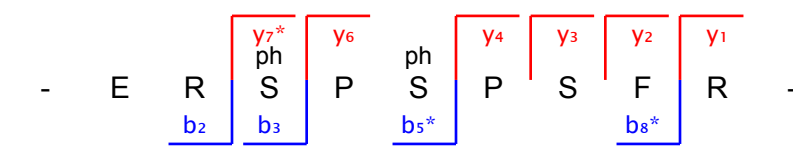

Raw file

20171215\_MaS\_33SR\_LMH\_phospho2\_03

| Scan | Method    | Score  | m/z    | Gene names |
|------|-----------|--------|--------|------------|
| 4769 | FTMS; HCD | 103.43 | 535.25 | SRRM2      |

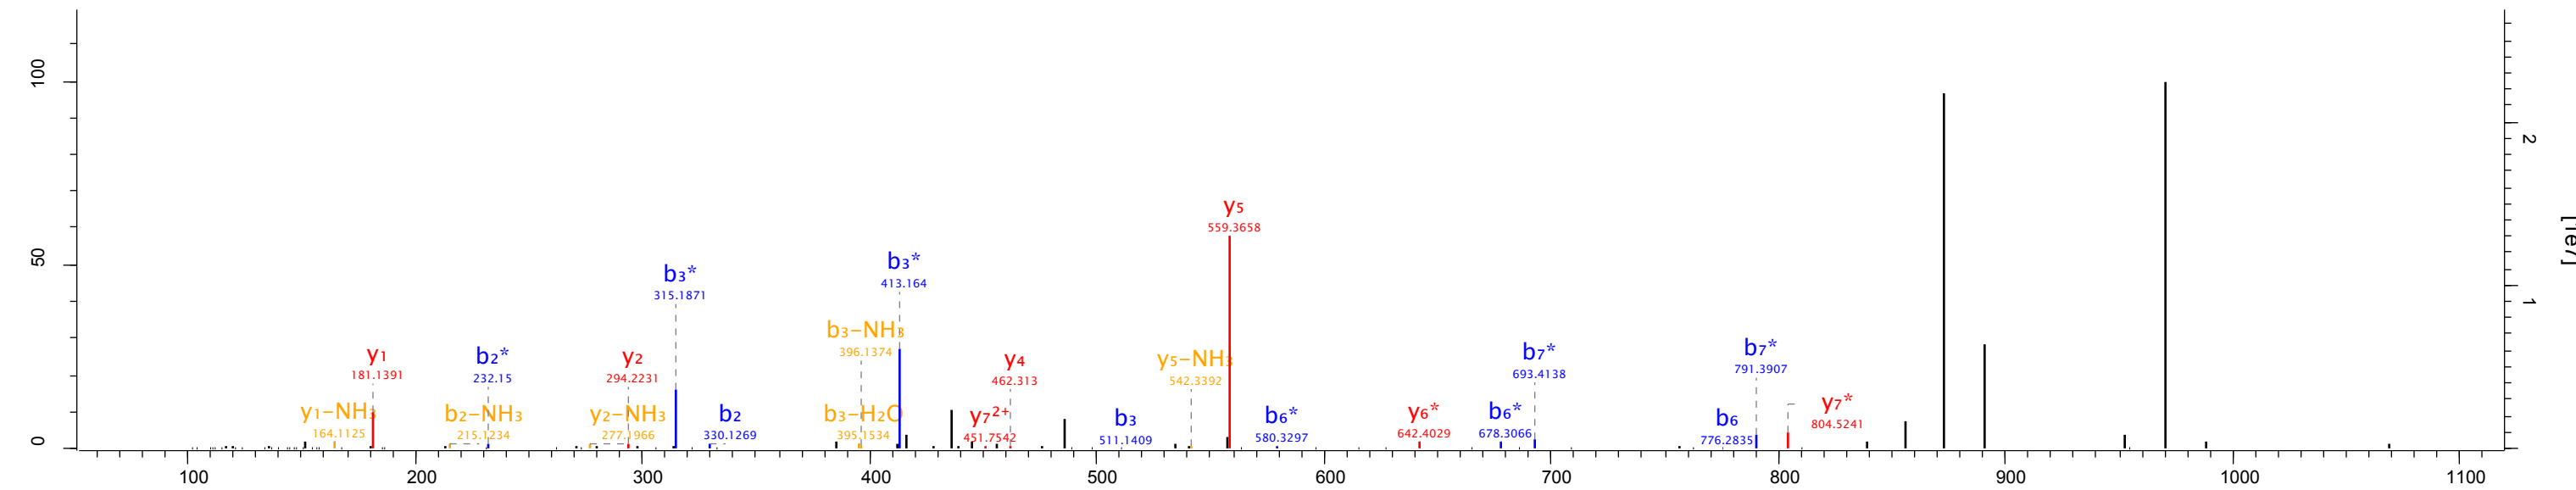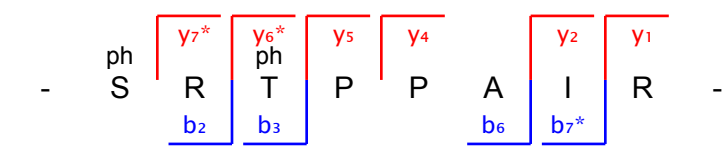

Raw file 20171215\_MaS\_33SR\_LMH\_phospho2\_03 Scan 4939 Method FTMS; HCD Score 130.61 m/z 593.74 Gene names CTNND1

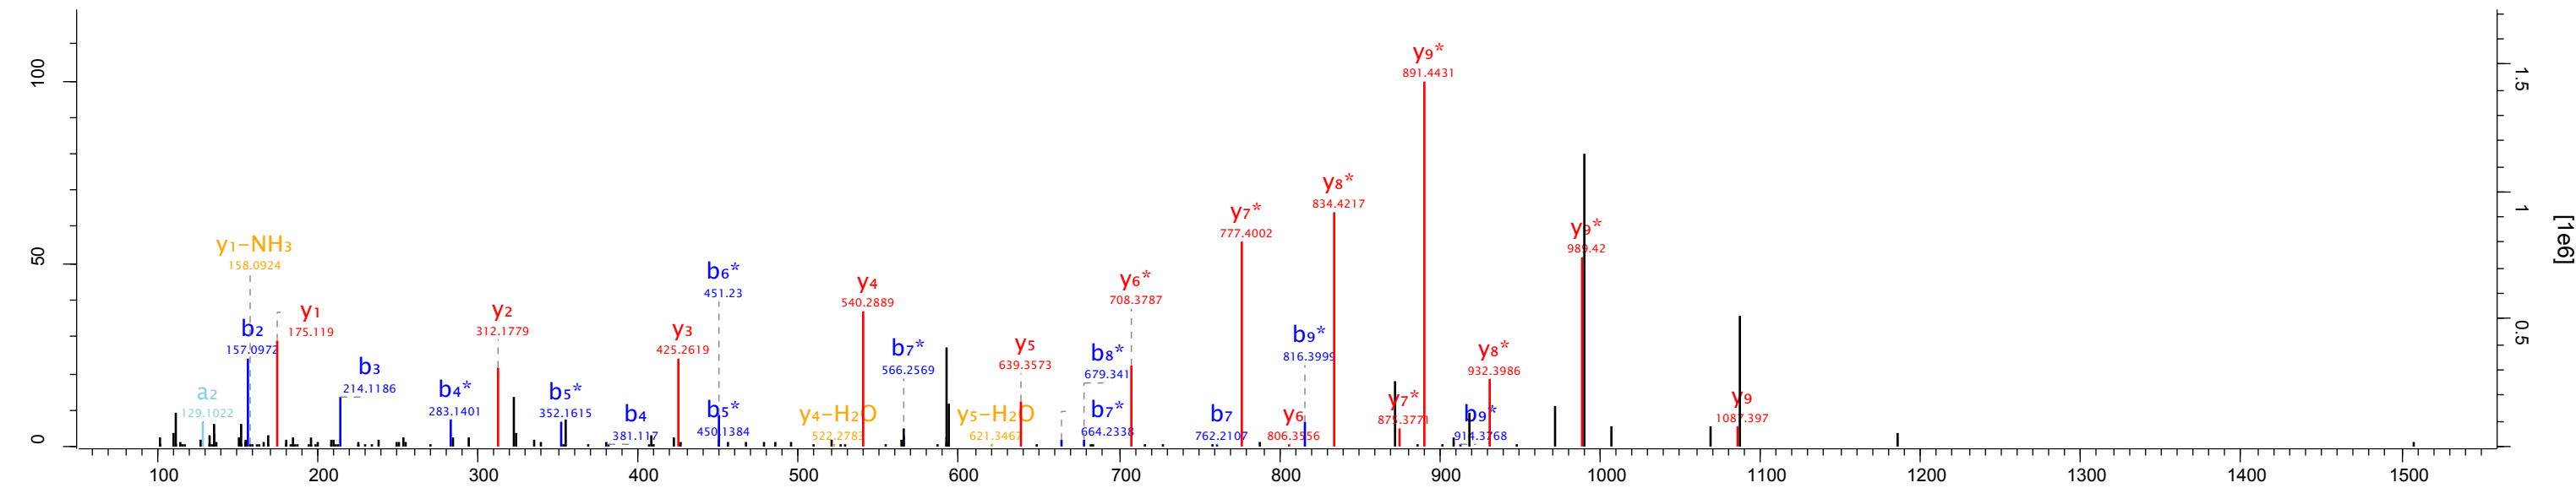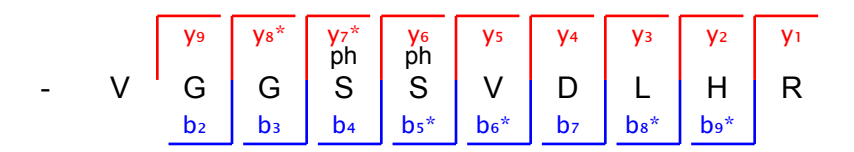

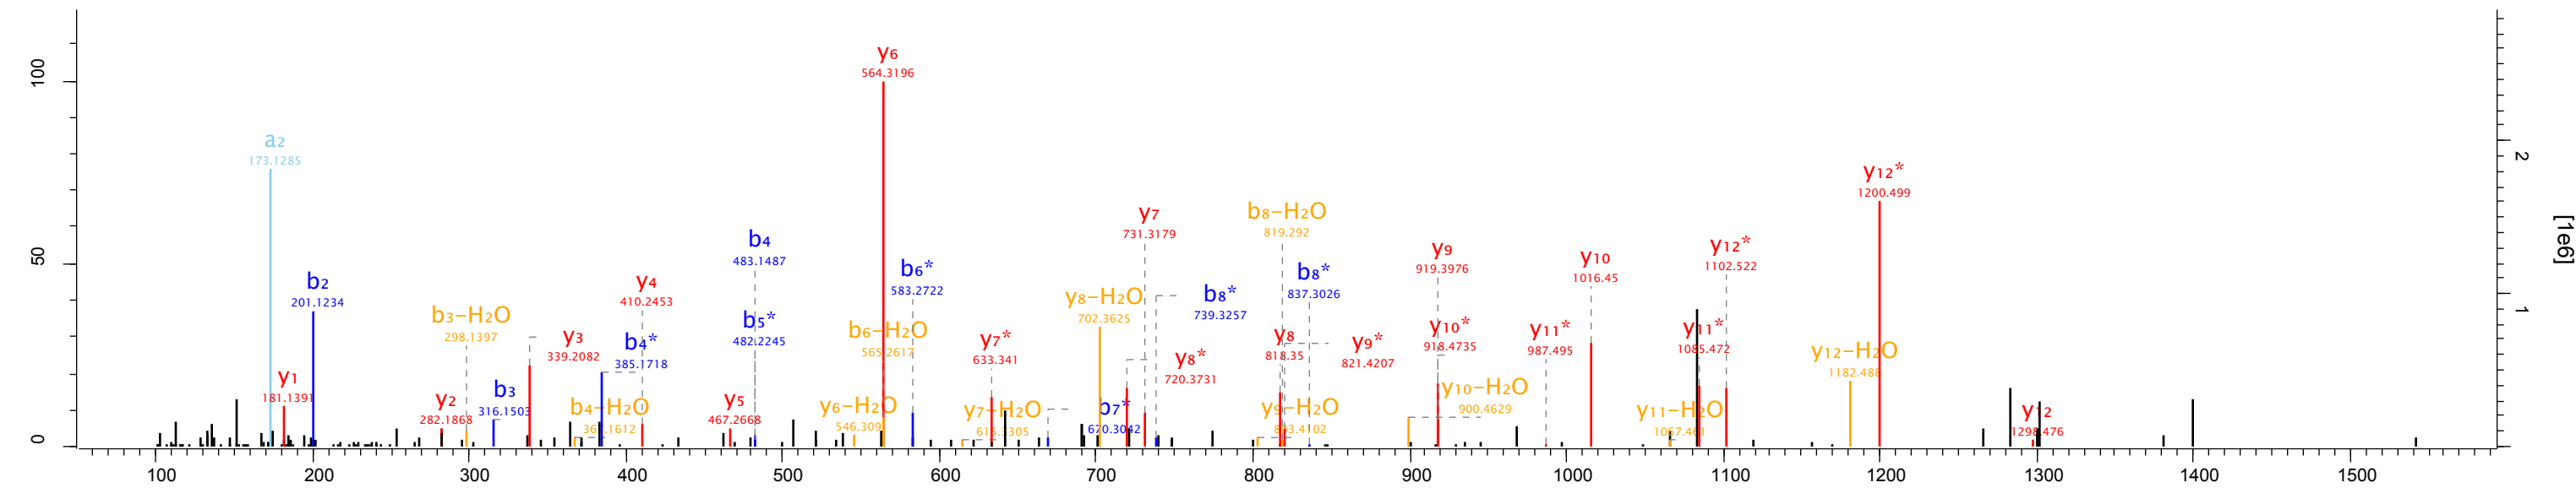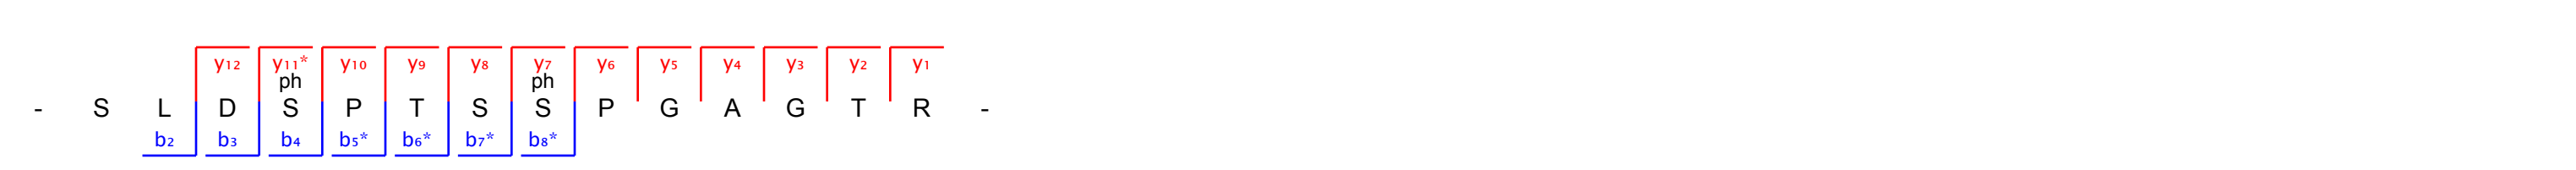

Raw file: 20171215\_MaS\_33SR\_LMH\_phospho2\_03  
 Scan: 5089 Method: FTMS; HCD Score: 81.88 m/z: 854.86 Gene names: PRDM2

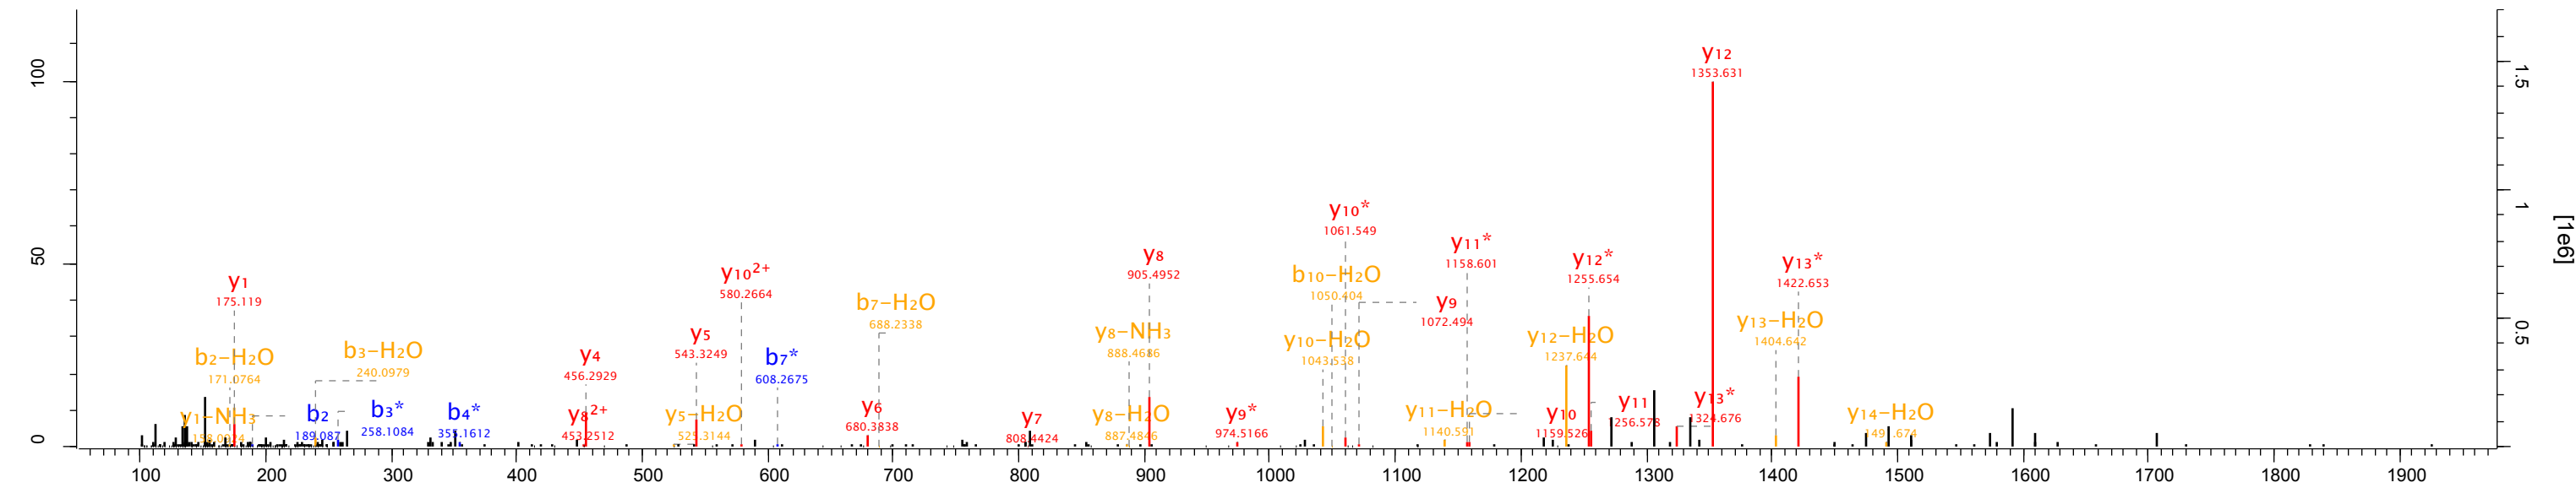

- T S S P P S S P Q H S P A L R -

b<sub>2</sub> b<sub>3</sub><sup>\*</sup> b<sub>4</sub><sup>\*</sup> b<sub>7</sub><sup>\*</sup> y<sub>13</sub><sup>\*</sup> ph y<sub>12</sub> y<sub>11</sub> y<sub>10</sub> y<sub>9</sub> ph y<sub>8</sub> y<sub>7</sub> y<sub>6</sub> y<sub>5</sub> y<sub>4</sub> y<sub>1</sub>



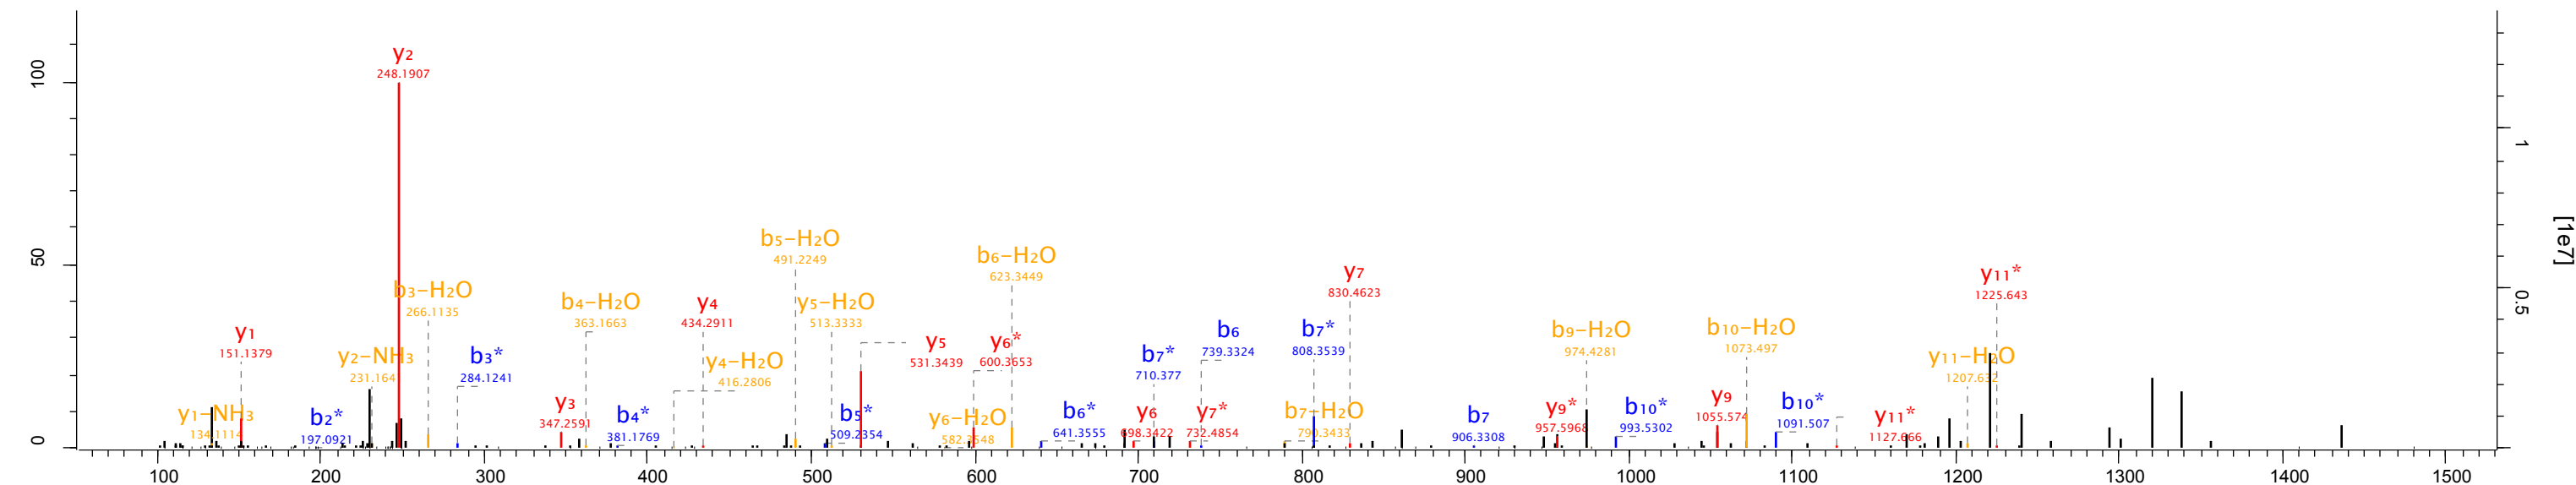

ac

-

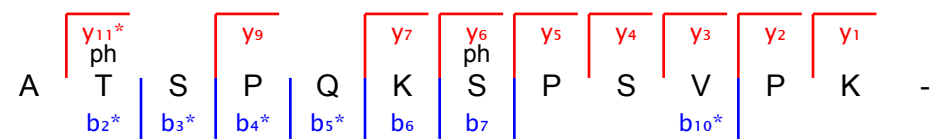

Raw file 20171215\_MaS\_33SR\_LMH\_phospho2\_03 Scan 5239 Method FTMS; HCD Score 70.34 m/z 960.85 Gene names LRRFIP1

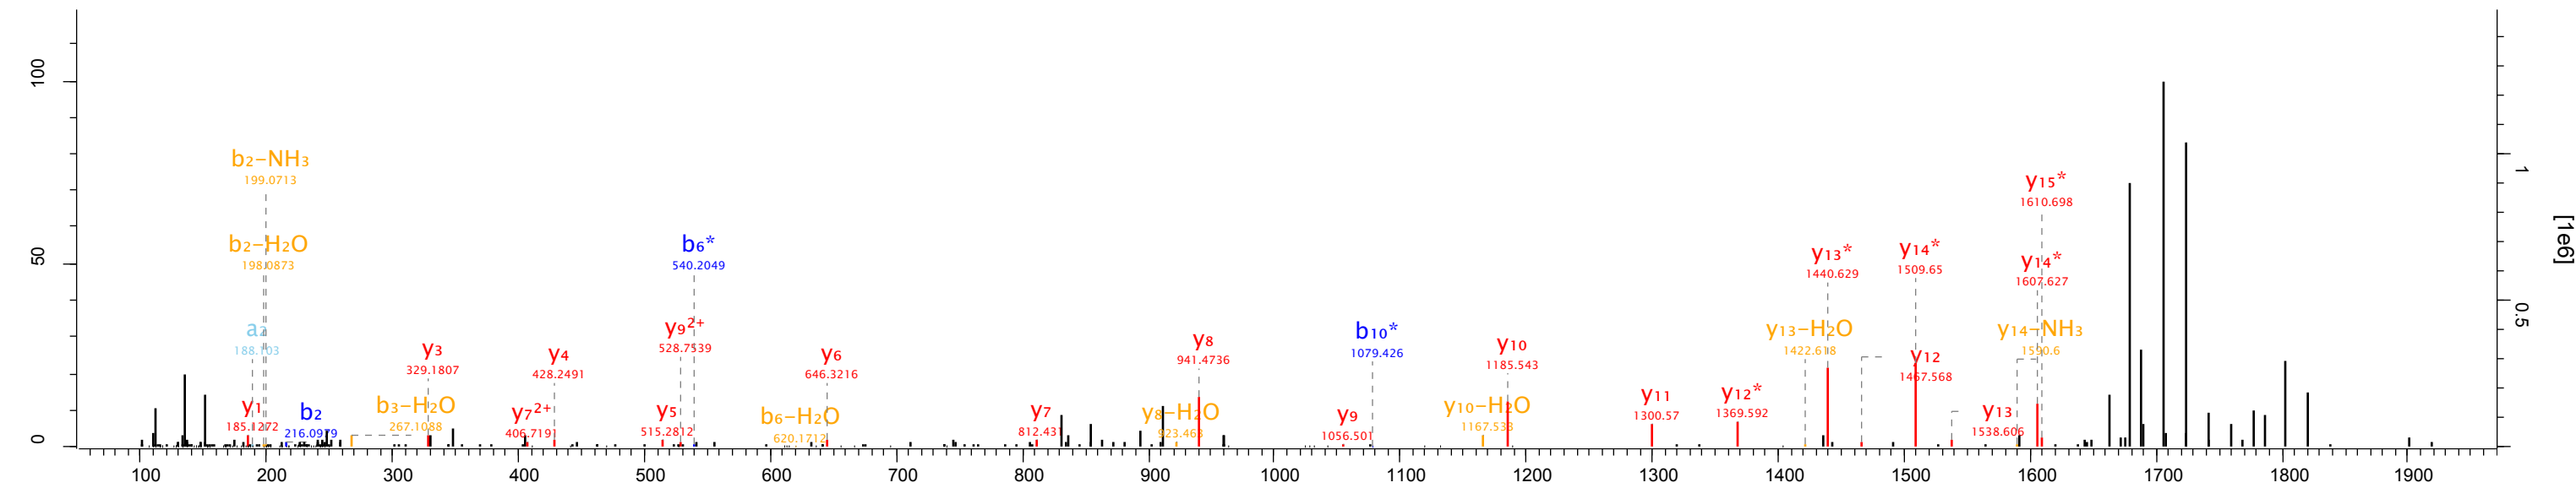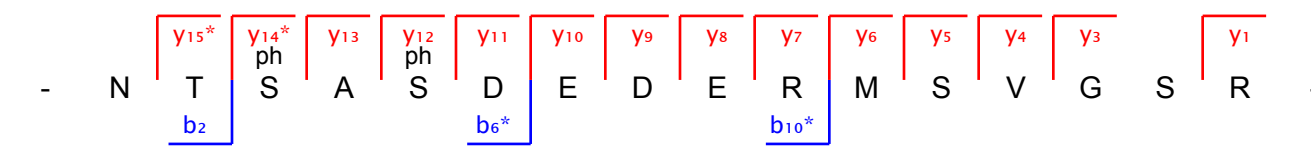

Raw file 20171215\_MaS\_33SR\_LMH\_phospho2\_03 Scan 5609 Method FTMS; HCD Score 243.15 m/z 952.92 Gene names SQSTM1

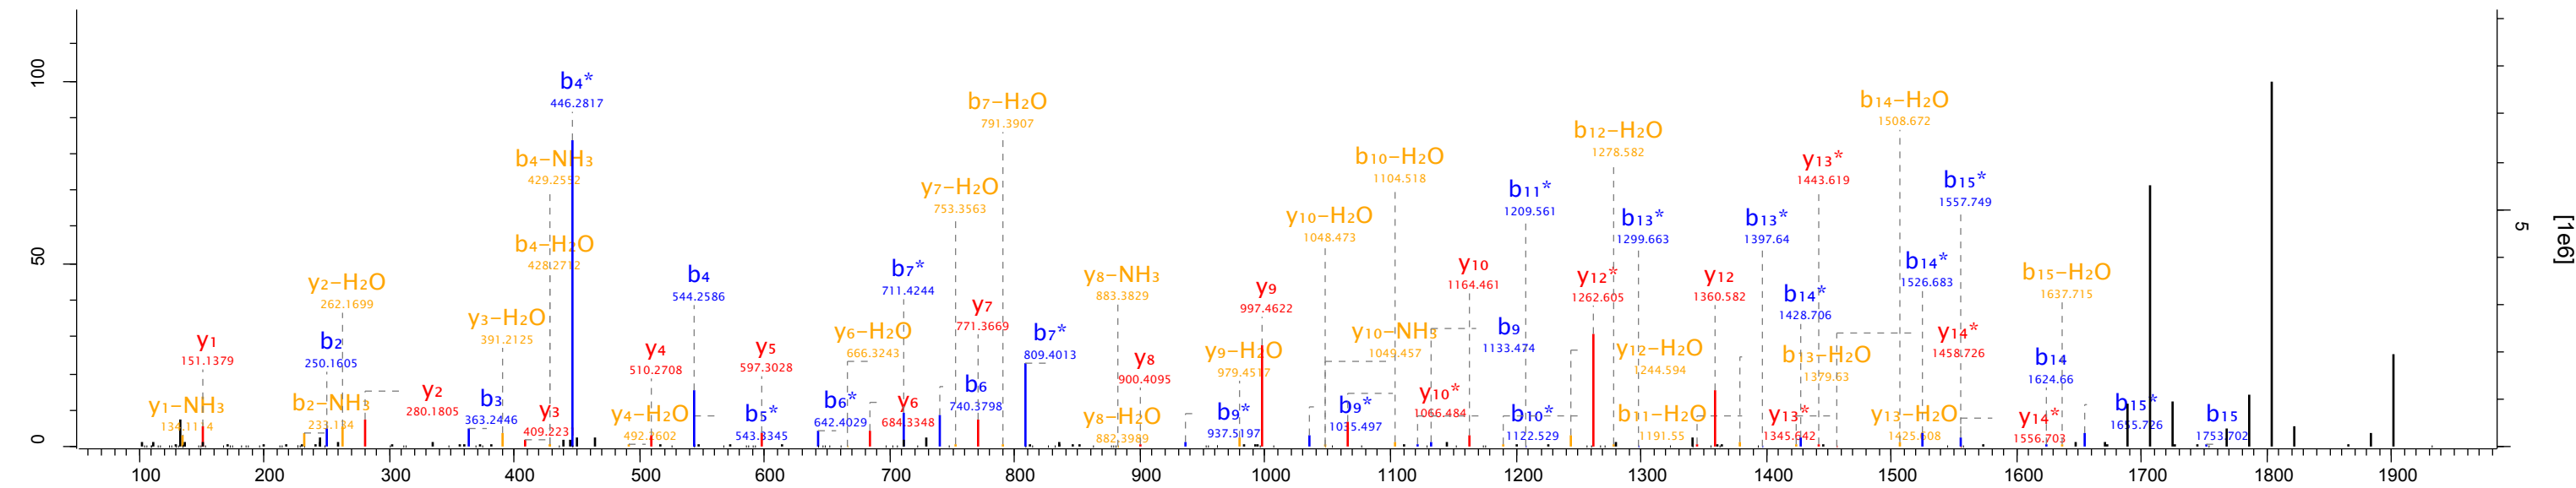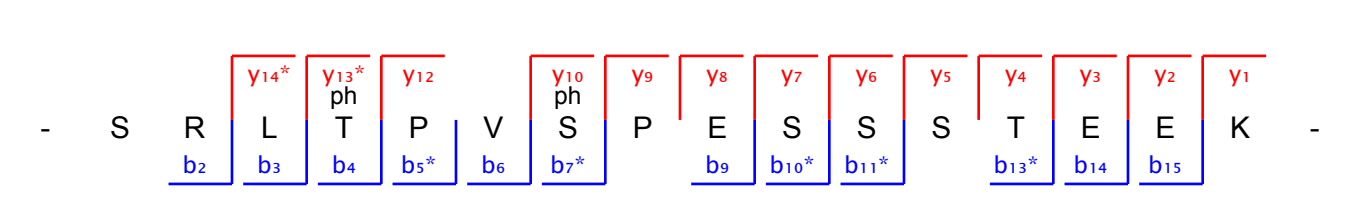

Raw file  
20171215\_MaS\_33SR\_LMH\_phospho2\_03

Scan 5959 Method FTMS; HCD Score 117.17 m/z 967.39 Gene names ZNF8;RANBP3

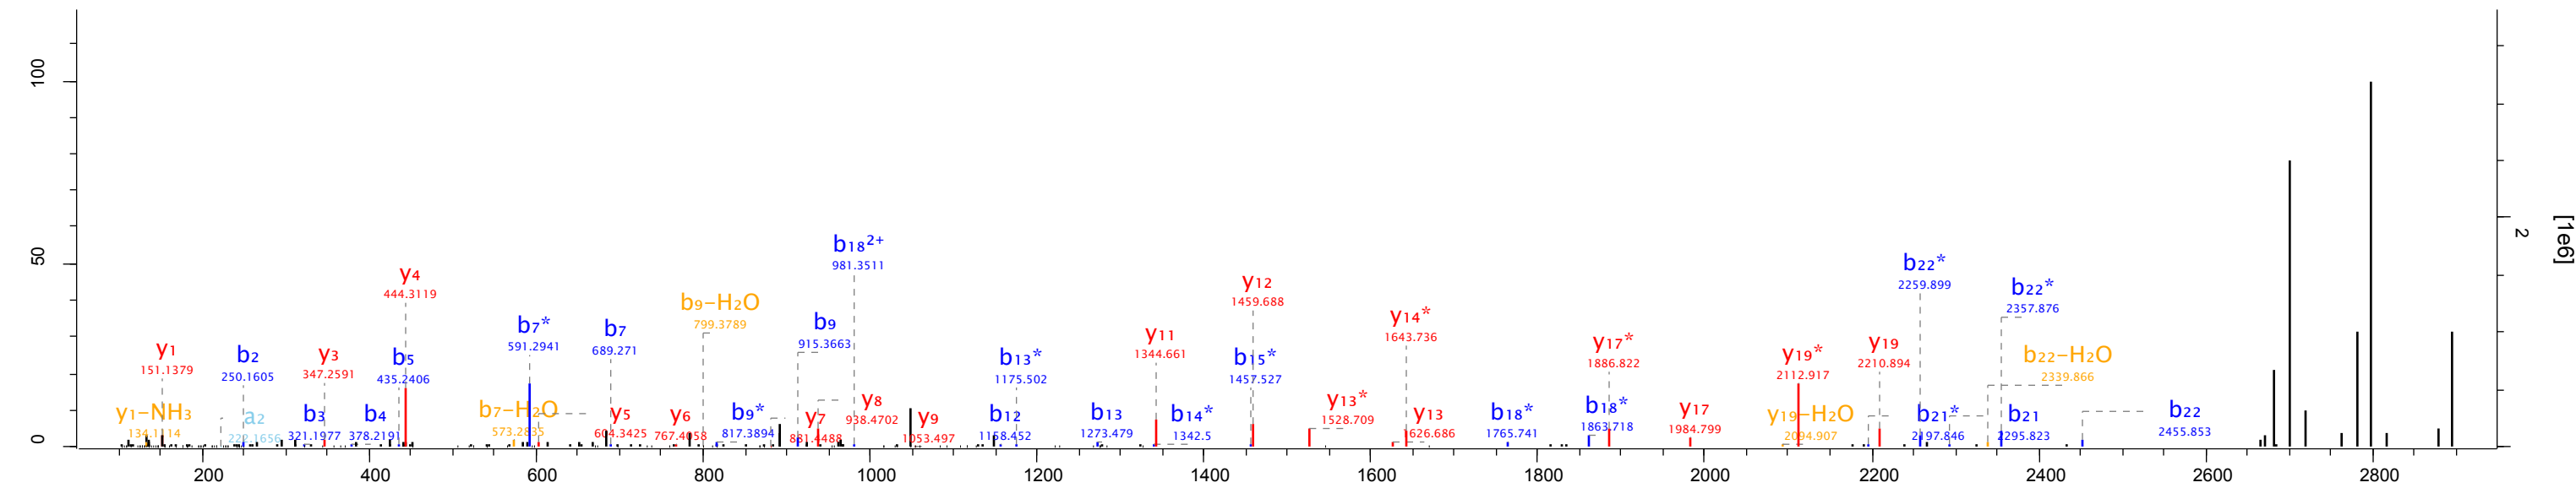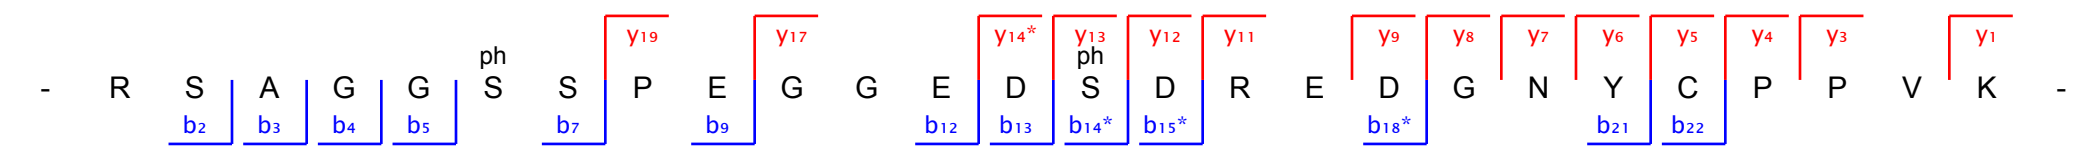

Raw file 20171215\_MaS\_33SR\_LMH\_phospho2\_03 Scan 6049 Method FTMS; HCD Score 403.7 m/z 1221.01 Gene names HSP90AB2P;HSP90AB1

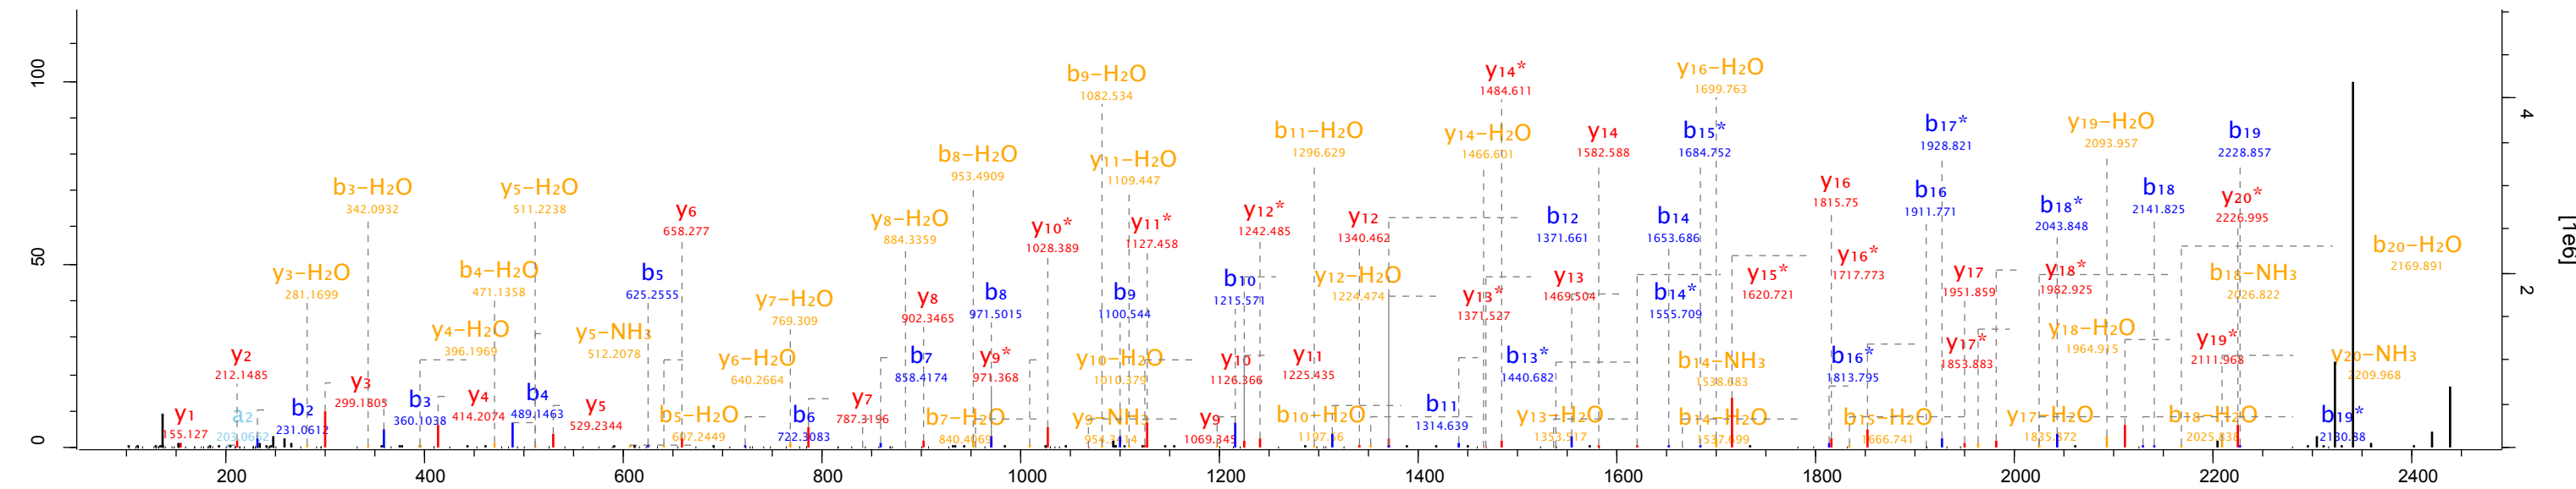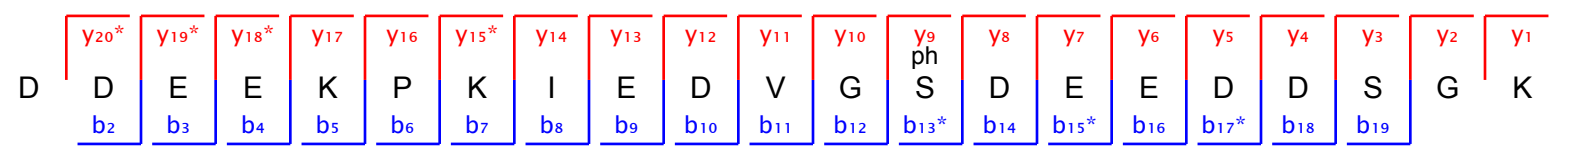

Raw file 20171215\_MaS\_33SR\_LMH\_phospho2\_03 Scan 6059 Method FTMS; HCD Score 62.1 m/z 612.75 Gene names EI24

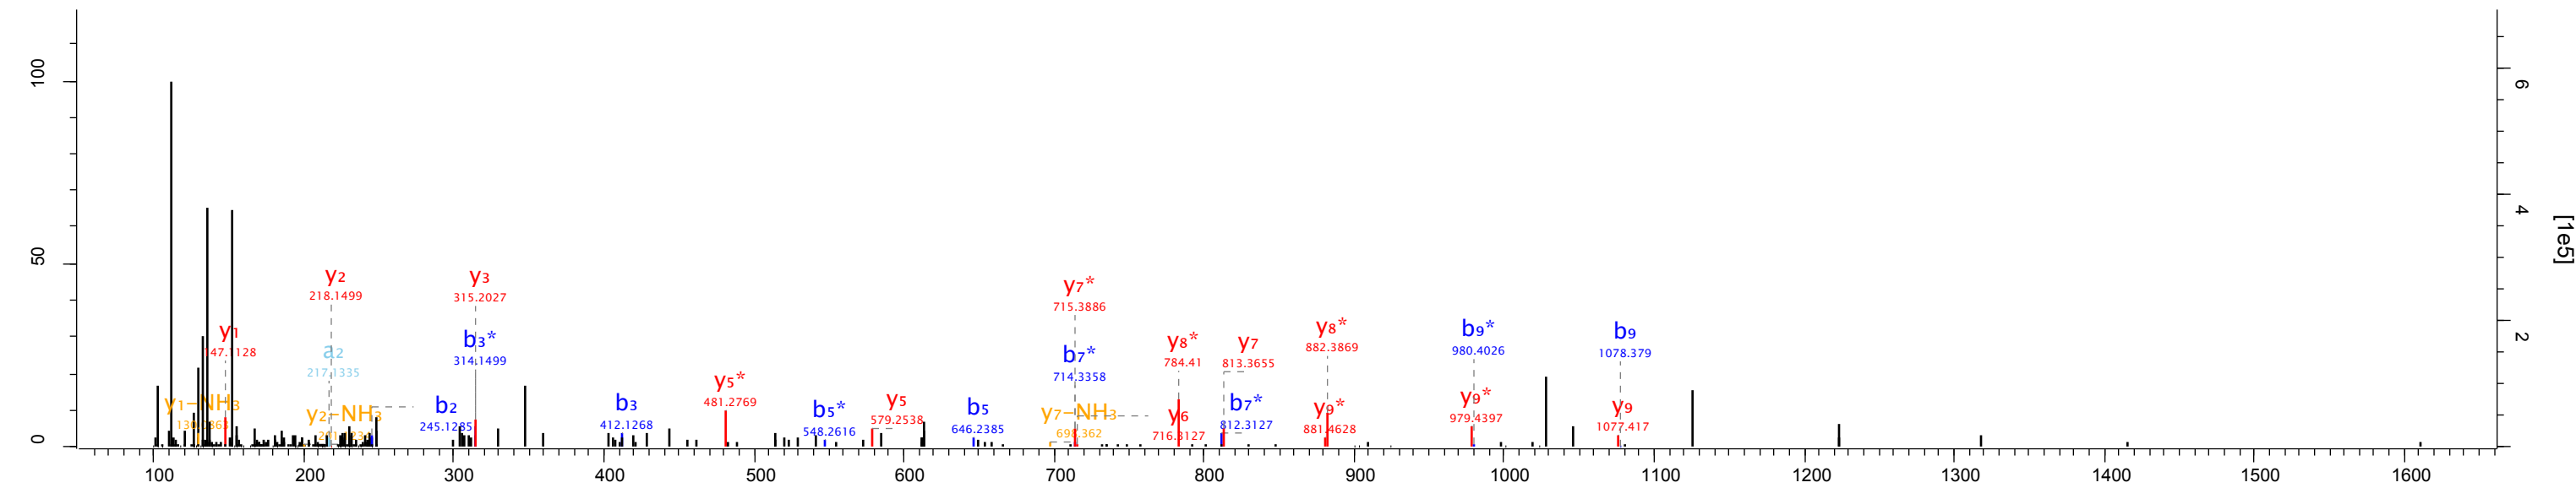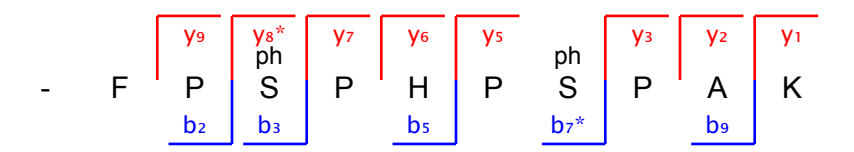

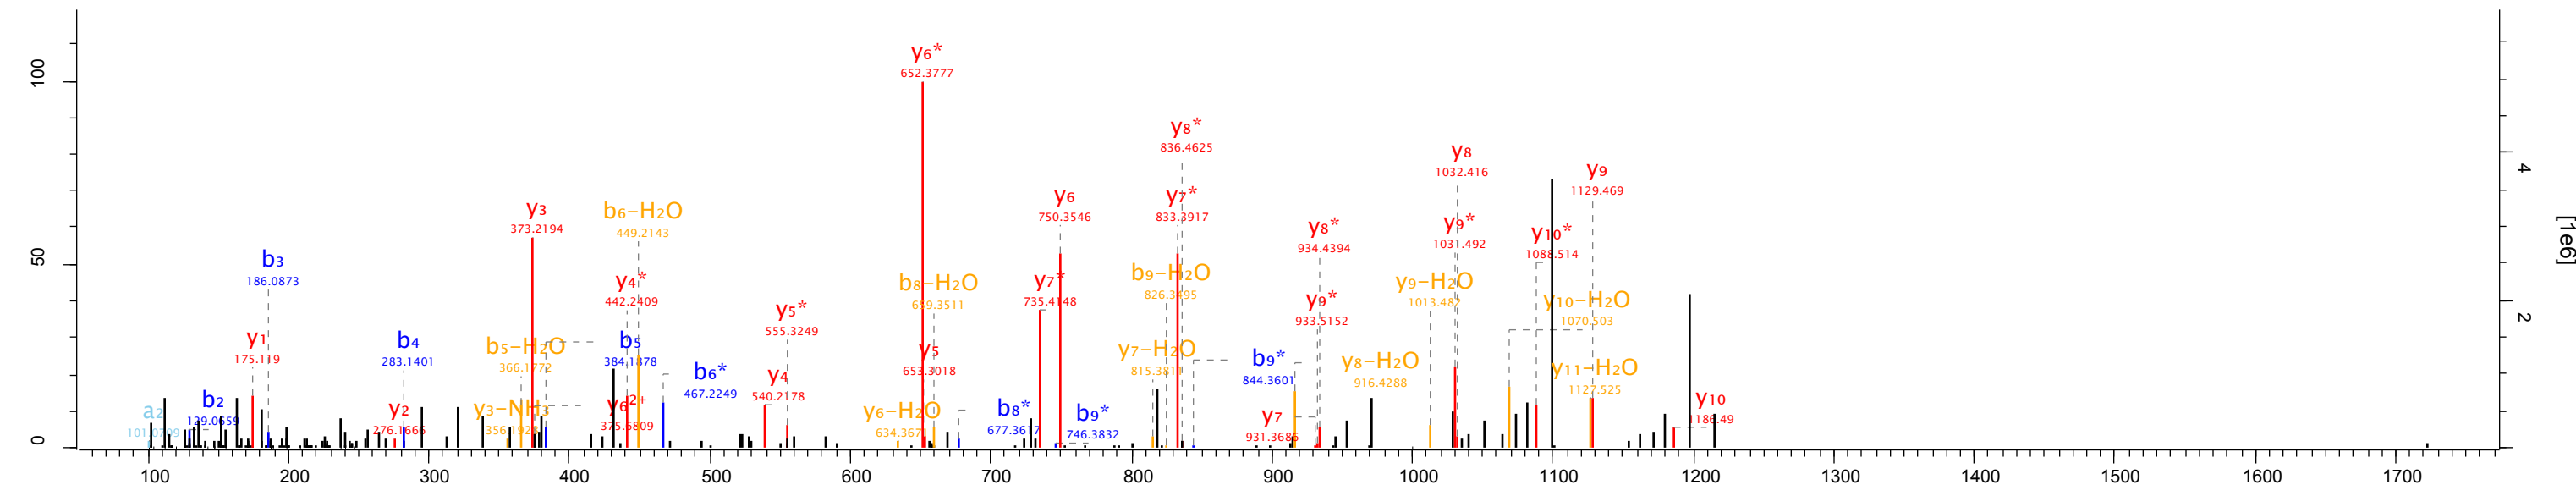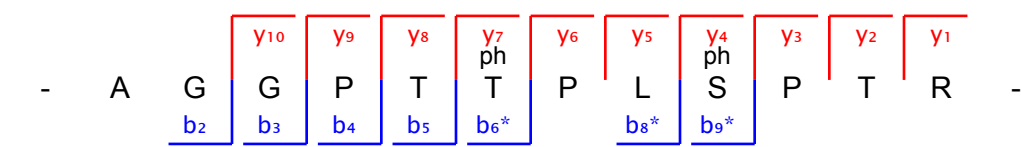

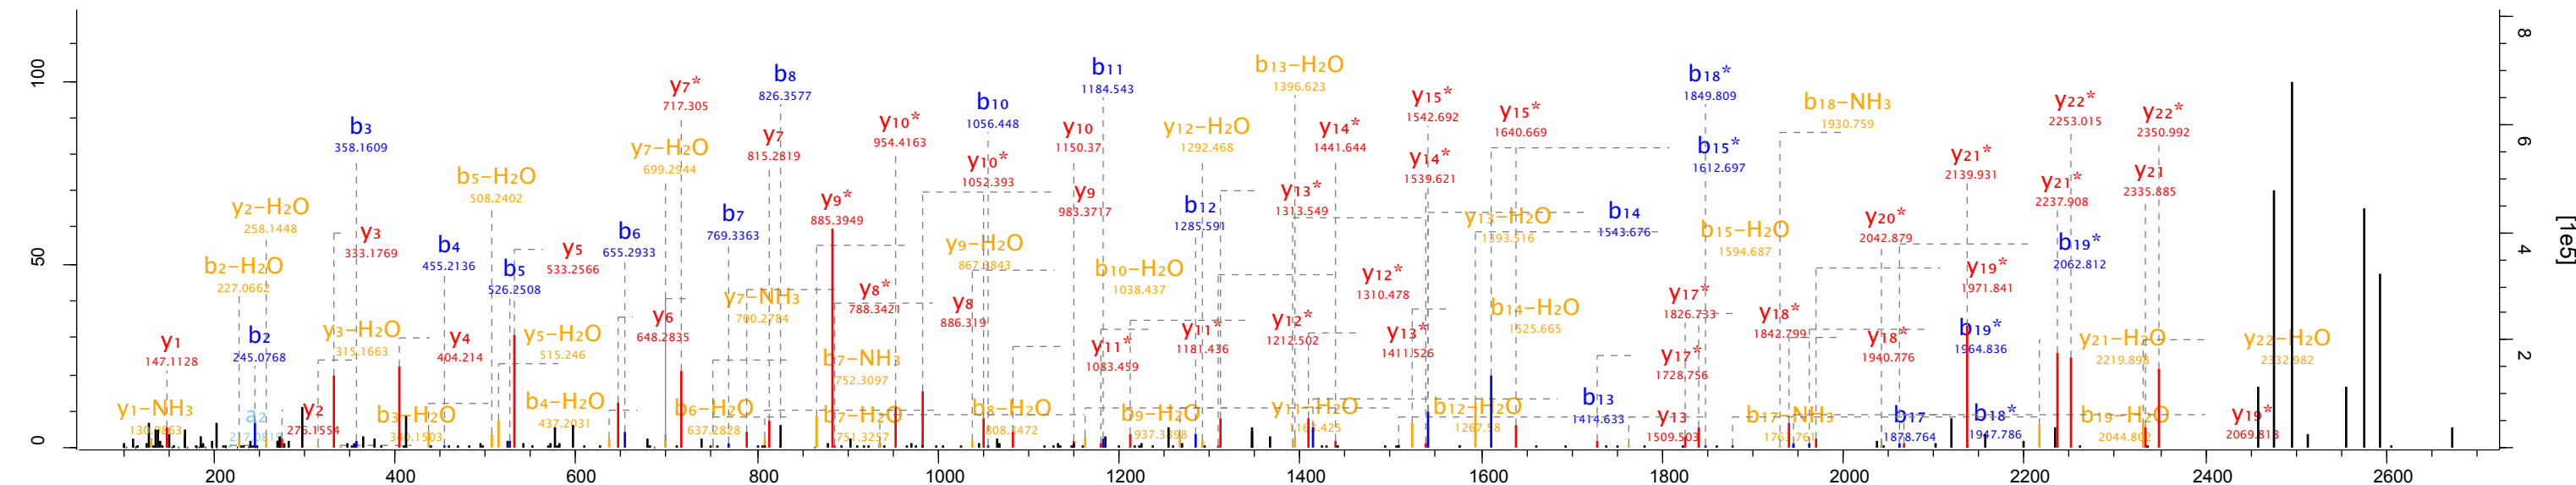

- E D L P A E N G E T K T E E S P A ph S D E A G E K -

b<sub>2</sub>
b<sub>3</sub>
b<sub>4</sub>
b<sub>5</sub>
b<sub>6</sub>
b<sub>7</sub>
b<sub>8</sub>
b<sub>10</sub>
b<sub>11</sub>
b<sub>12</sub>
b<sub>13</sub>
b<sub>14</sub>
b<sub>15</sub>\*
b<sub>17</sub>
b<sub>18</sub>\*
b<sub>19</sub>\*
y<sub>17</sub>\*
y<sub>18</sub>\*
y<sub>19</sub>\*
y<sub>20</sub>\*
y<sub>21</sub>
y<sub>22</sub>\*
y<sub>1</sub>
y<sub>2</sub>
y<sub>3</sub>
y<sub>4</sub>
y<sub>5</sub>
y<sub>6</sub>
y<sub>7</sub>
y<sub>8</sub>
y<sub>9</sub>
y<sub>10</sub>
y<sub>11</sub>\*
y<sub>12</sub>\*
y<sub>13</sub>
y<sub>14</sub>\*
y<sub>15</sub>\*



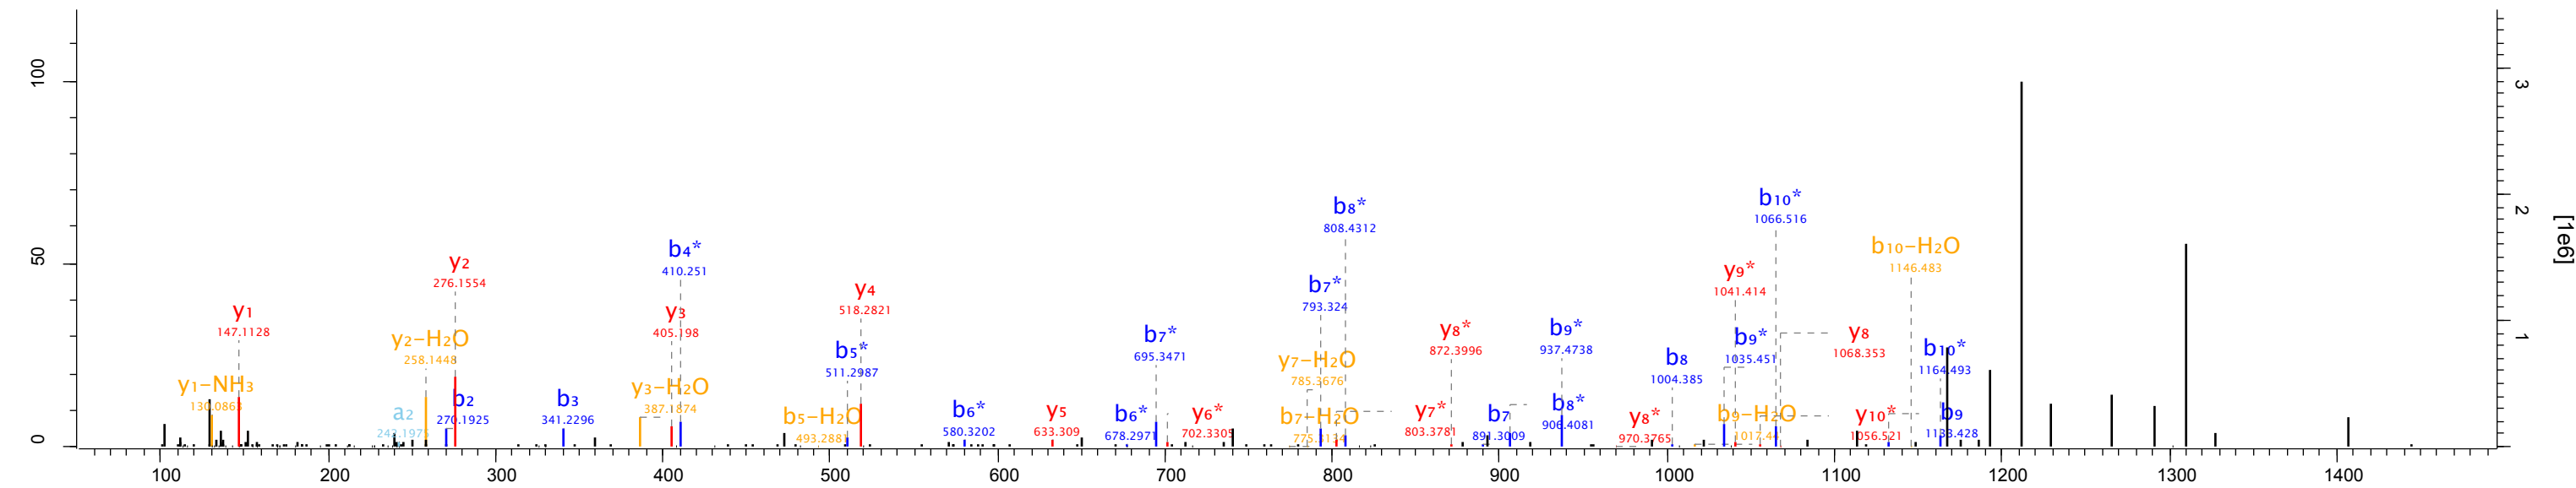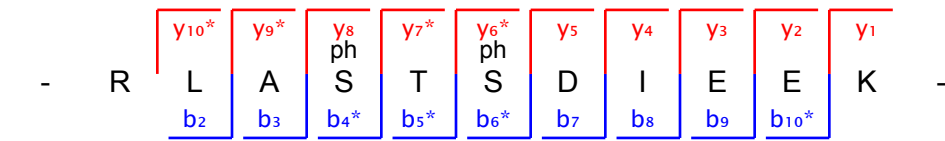

Raw file 20171215\_MaS\_33SR\_LMH\_phospho2\_03 Scan 6629 Method FTMS; HCD Score 92.1 m/z 854.88 Gene names POLR2A

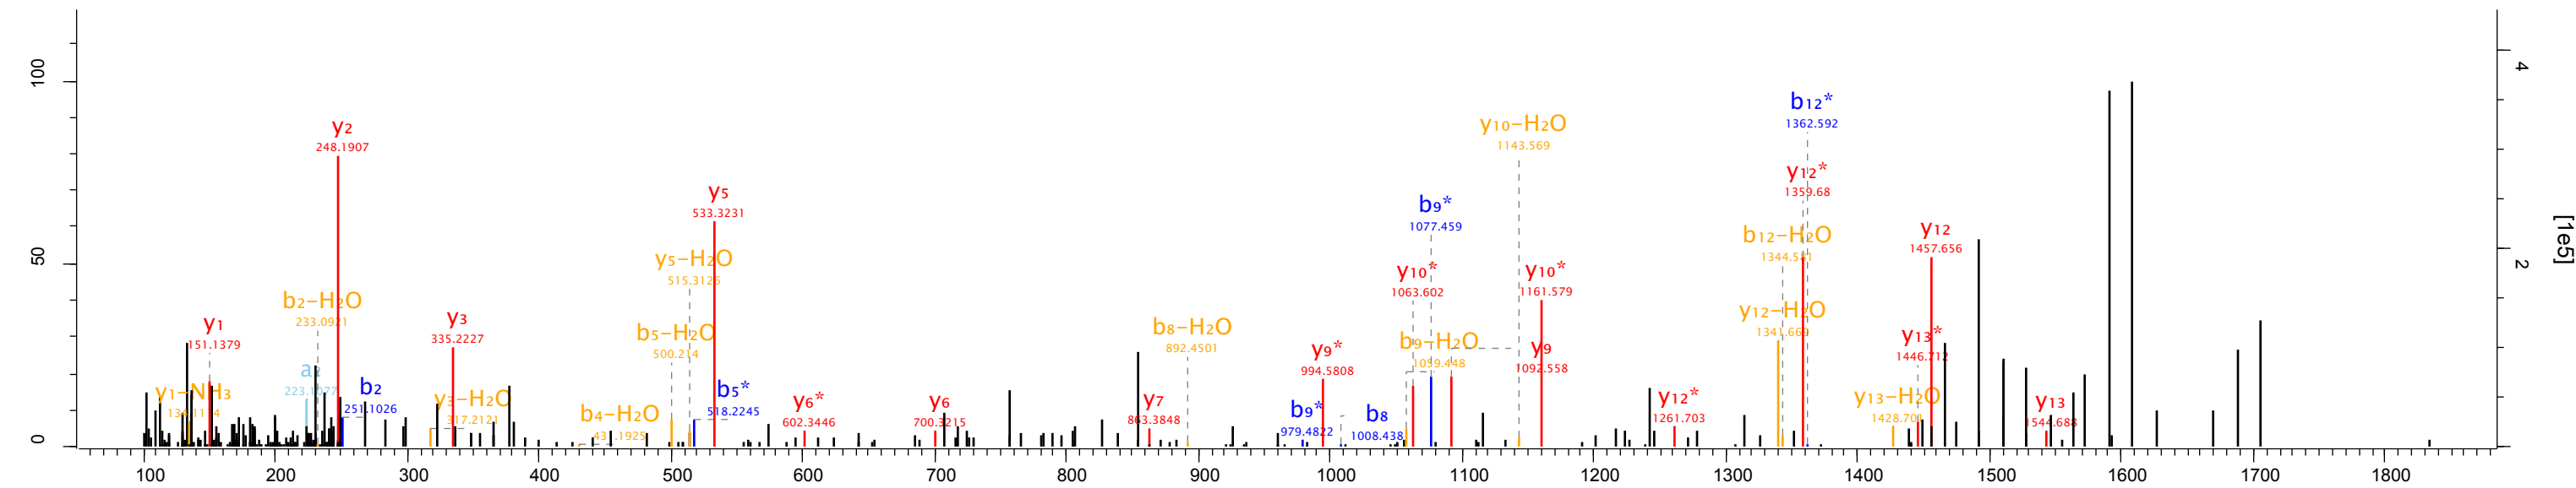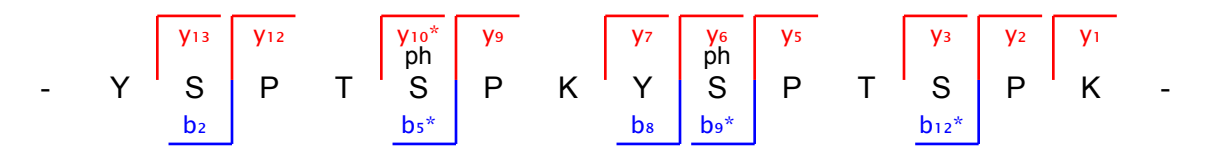

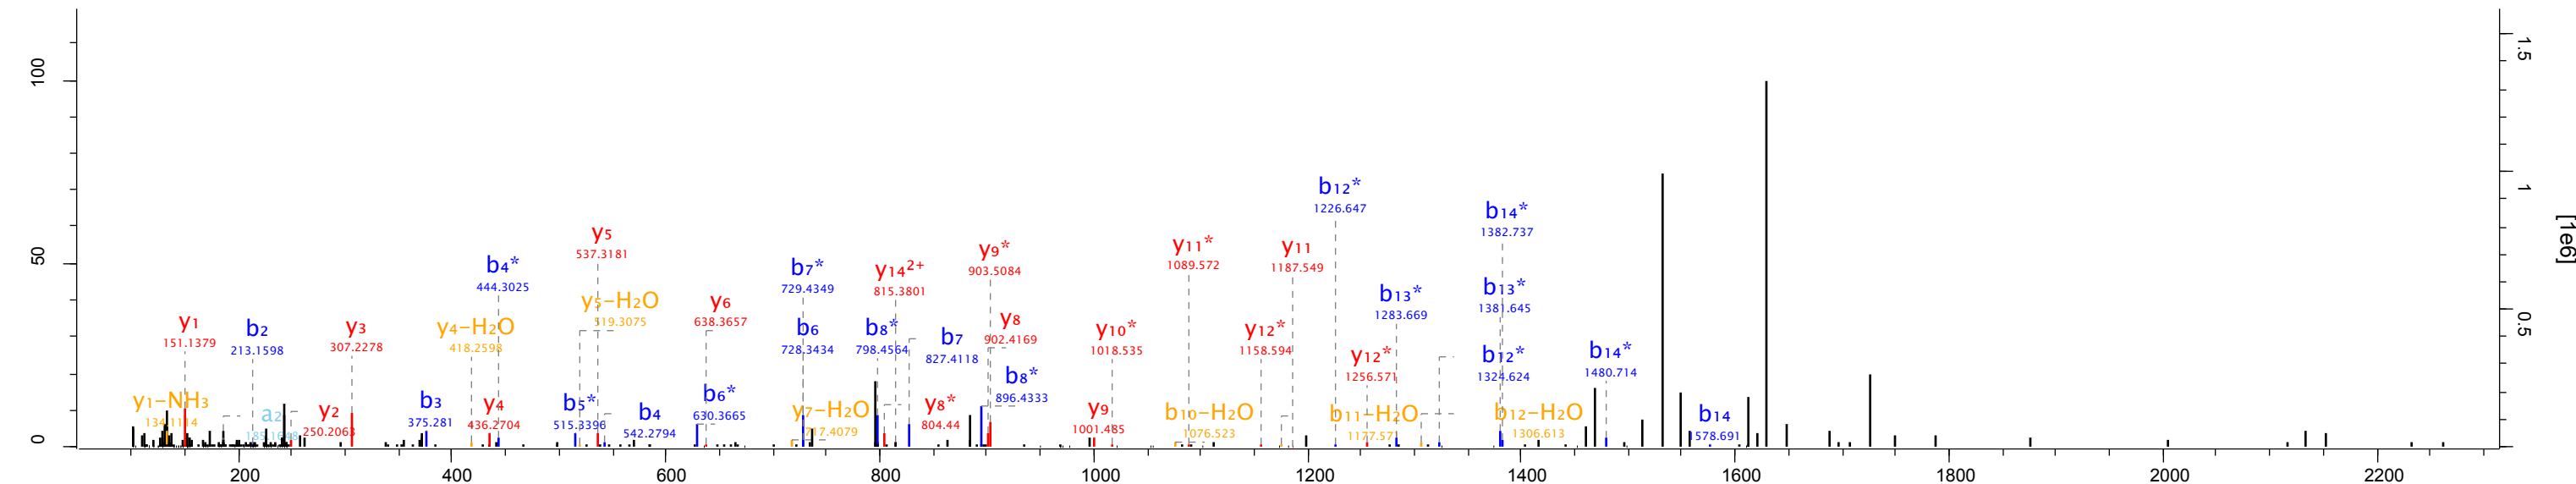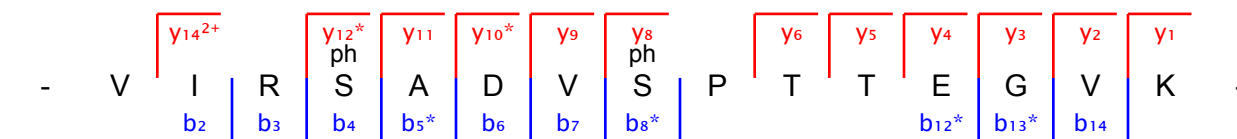

Raw file 20171215\_MaS\_33SR\_LMH\_phospho2\_03 Scan 7259 Method FTMS; HCD Score 138.81 m/z 600.3 Gene names ZC3H18

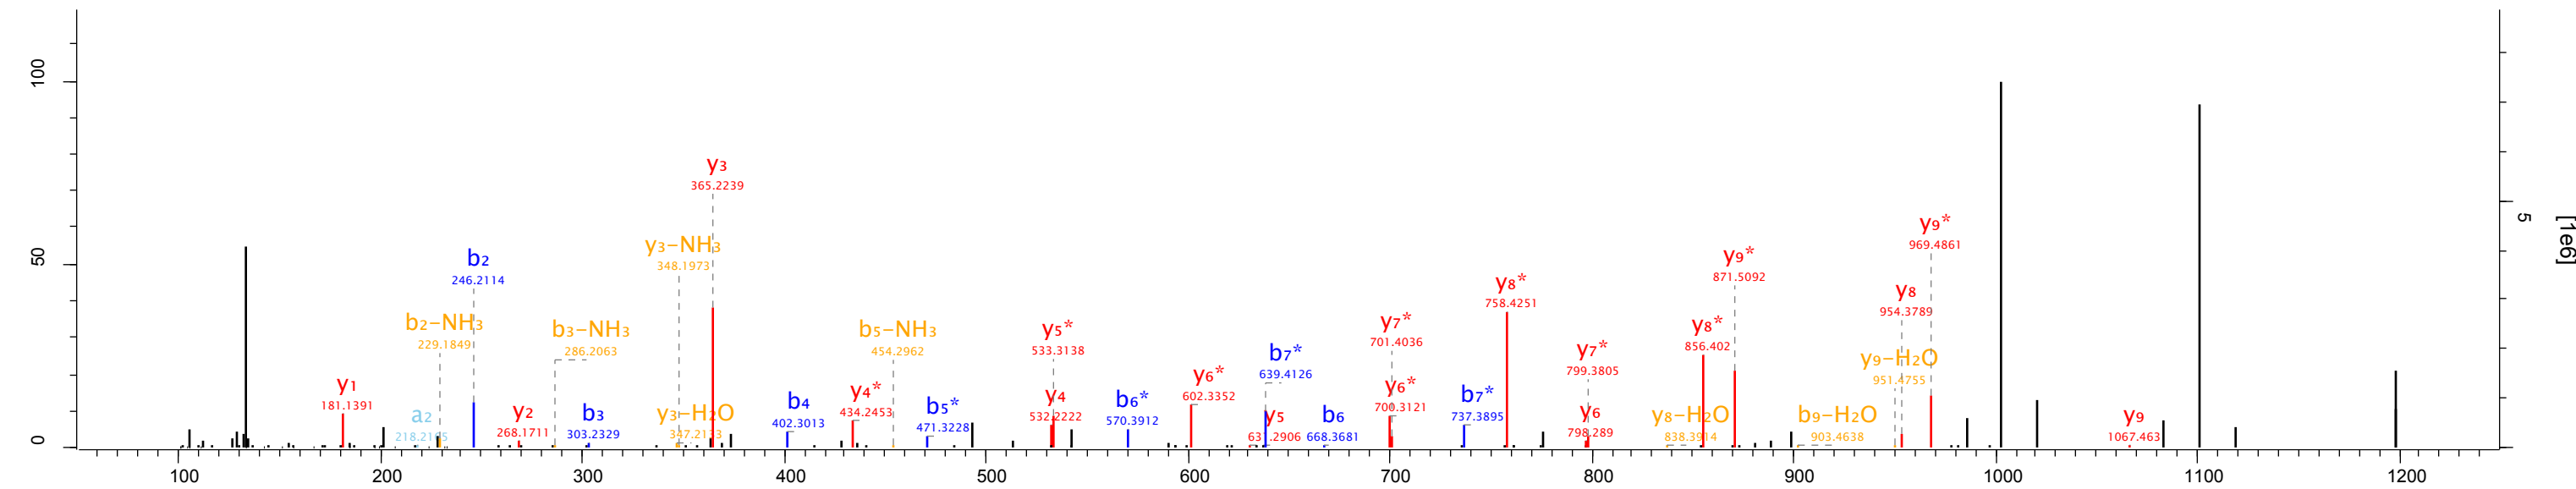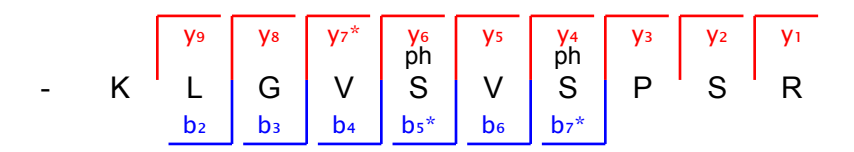

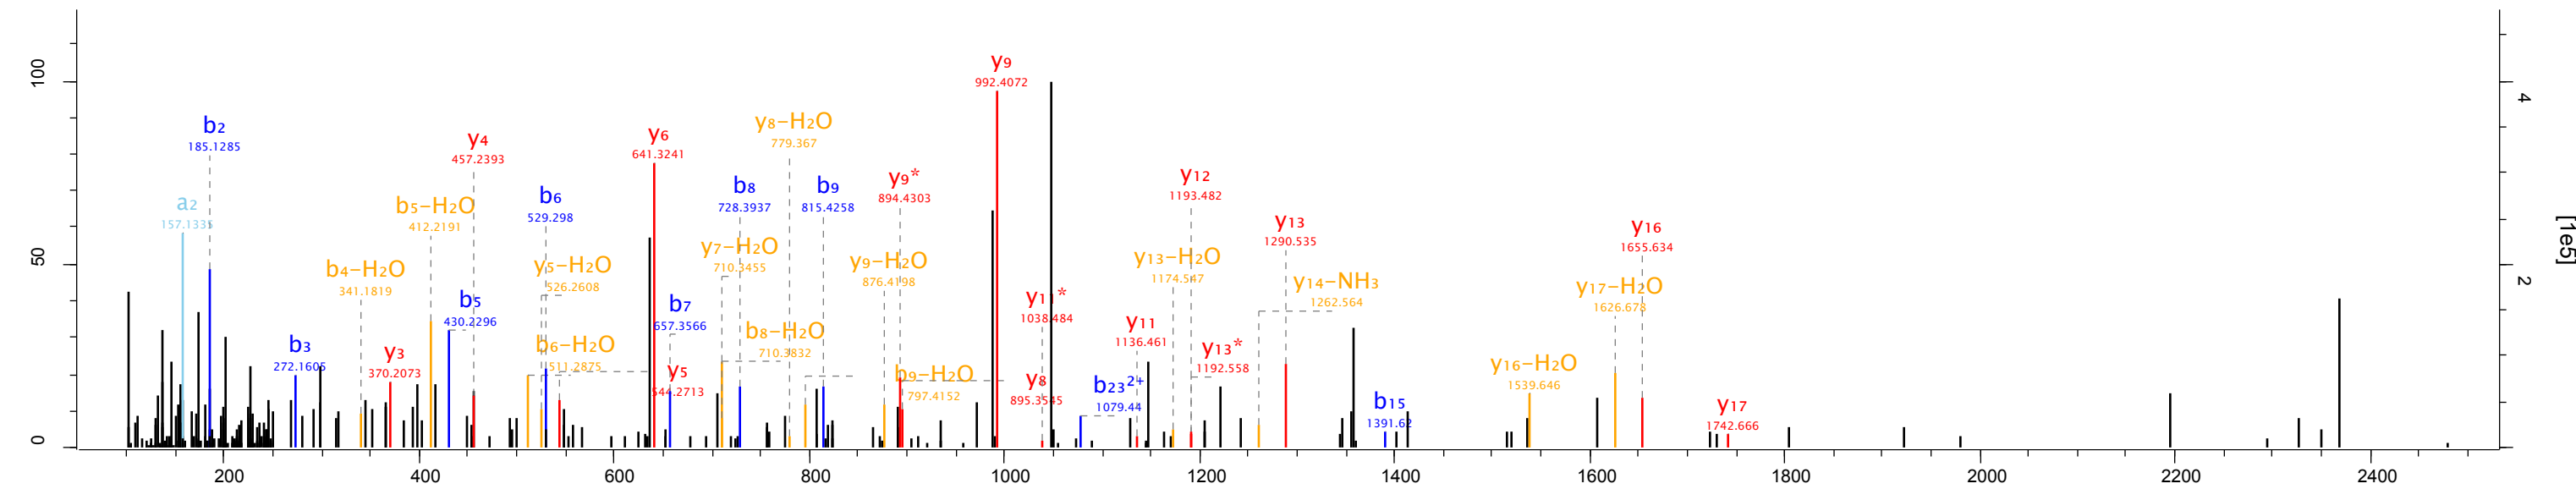

- A L S S A V Q A S P T S P G G S P S S P S S G Q R -

b<sub>2</sub>
b<sub>3</sub>
b<sub>5</sub>
b<sub>6</sub>
b<sub>7</sub>
b<sub>8</sub>
b<sub>9</sub>
b<sub>15</sub>
b<sub>23</sub><sup>2+</sup>
y<sub>3</sub>
y<sub>4</sub>
y<sub>5</sub>
y<sub>6</sub>
y<sub>8</sub>
y<sub>9</sub>
y<sub>11</sub>
y<sub>12</sub>
y<sub>13</sub>
y<sub>16</sub>
y<sub>17</sub>

Raw file

20171215\_MaS\_33SR\_LMH\_phospho2\_03

Scan 8479 Method FTMS; HCD Score 132.62 m/z 773.32 Gene names CHAMP1

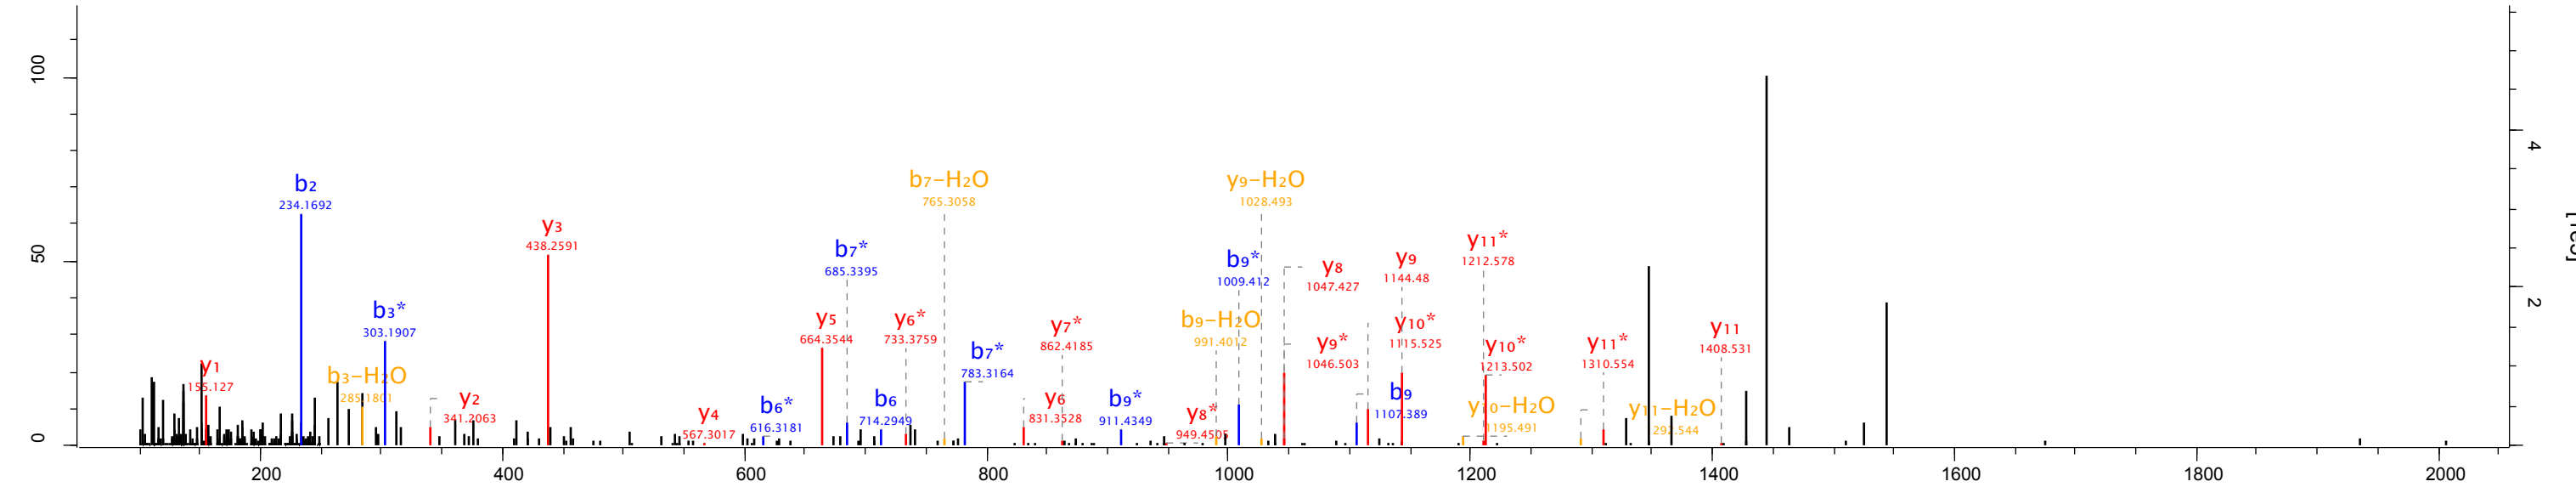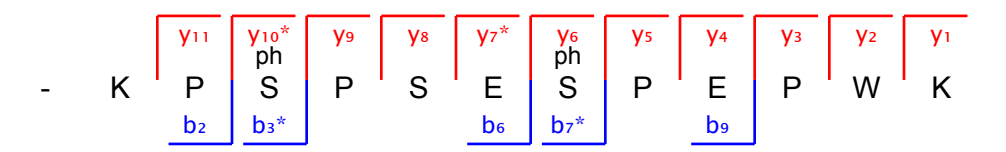

Raw file: 20171215\_MaS\_33SR\_LMH\_phospho2\_03  
 Scan: 8549 Method: FTMS; HCD Score: 219.16 m/z: 1095.37 Gene names: HDAC1

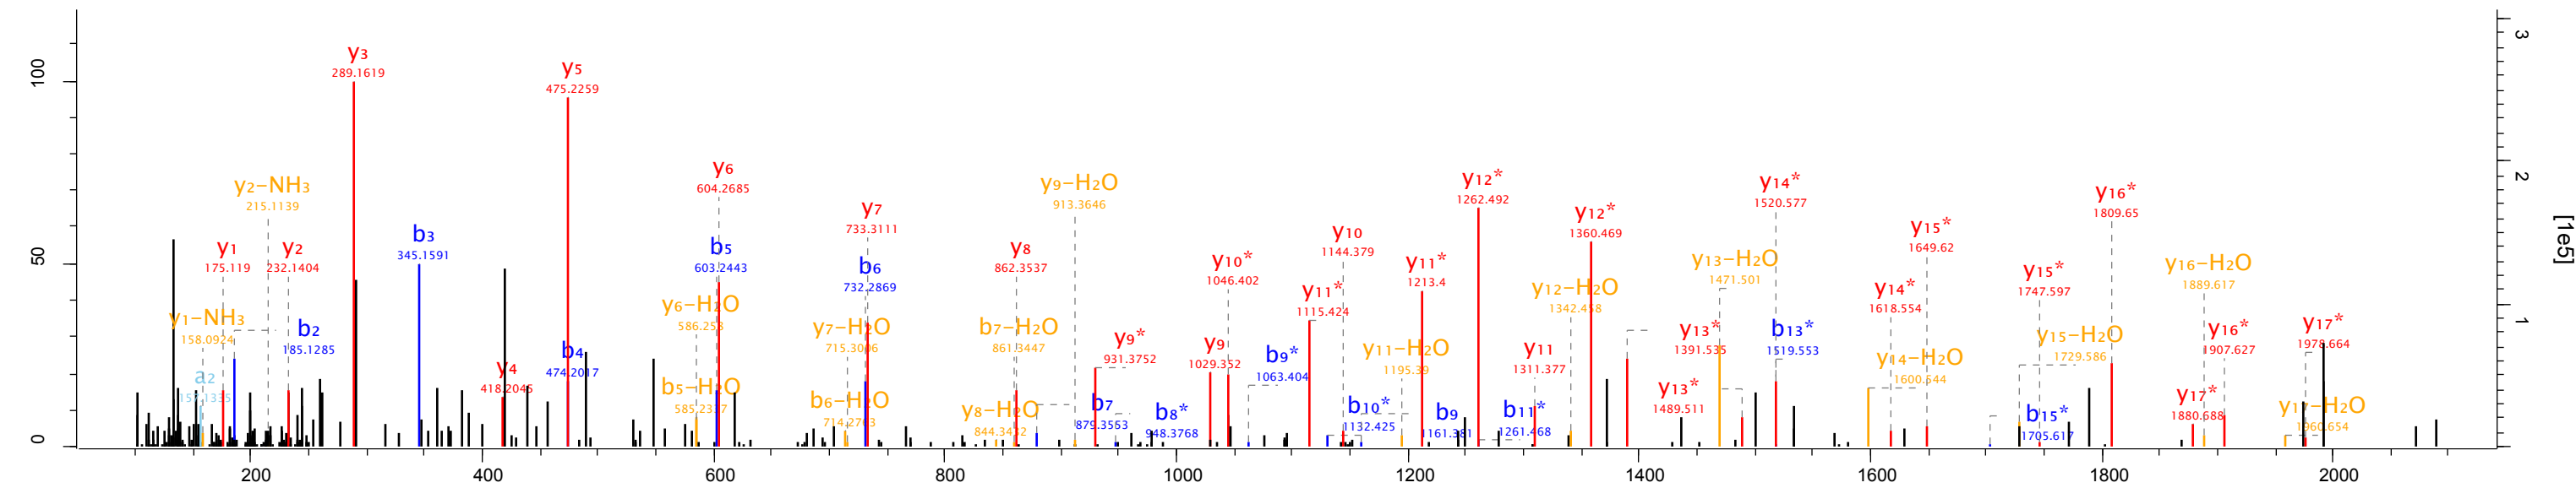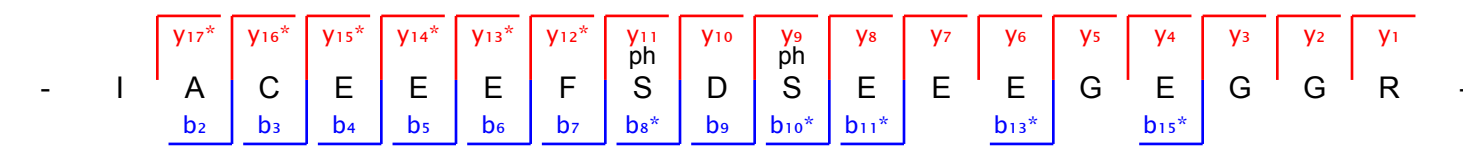

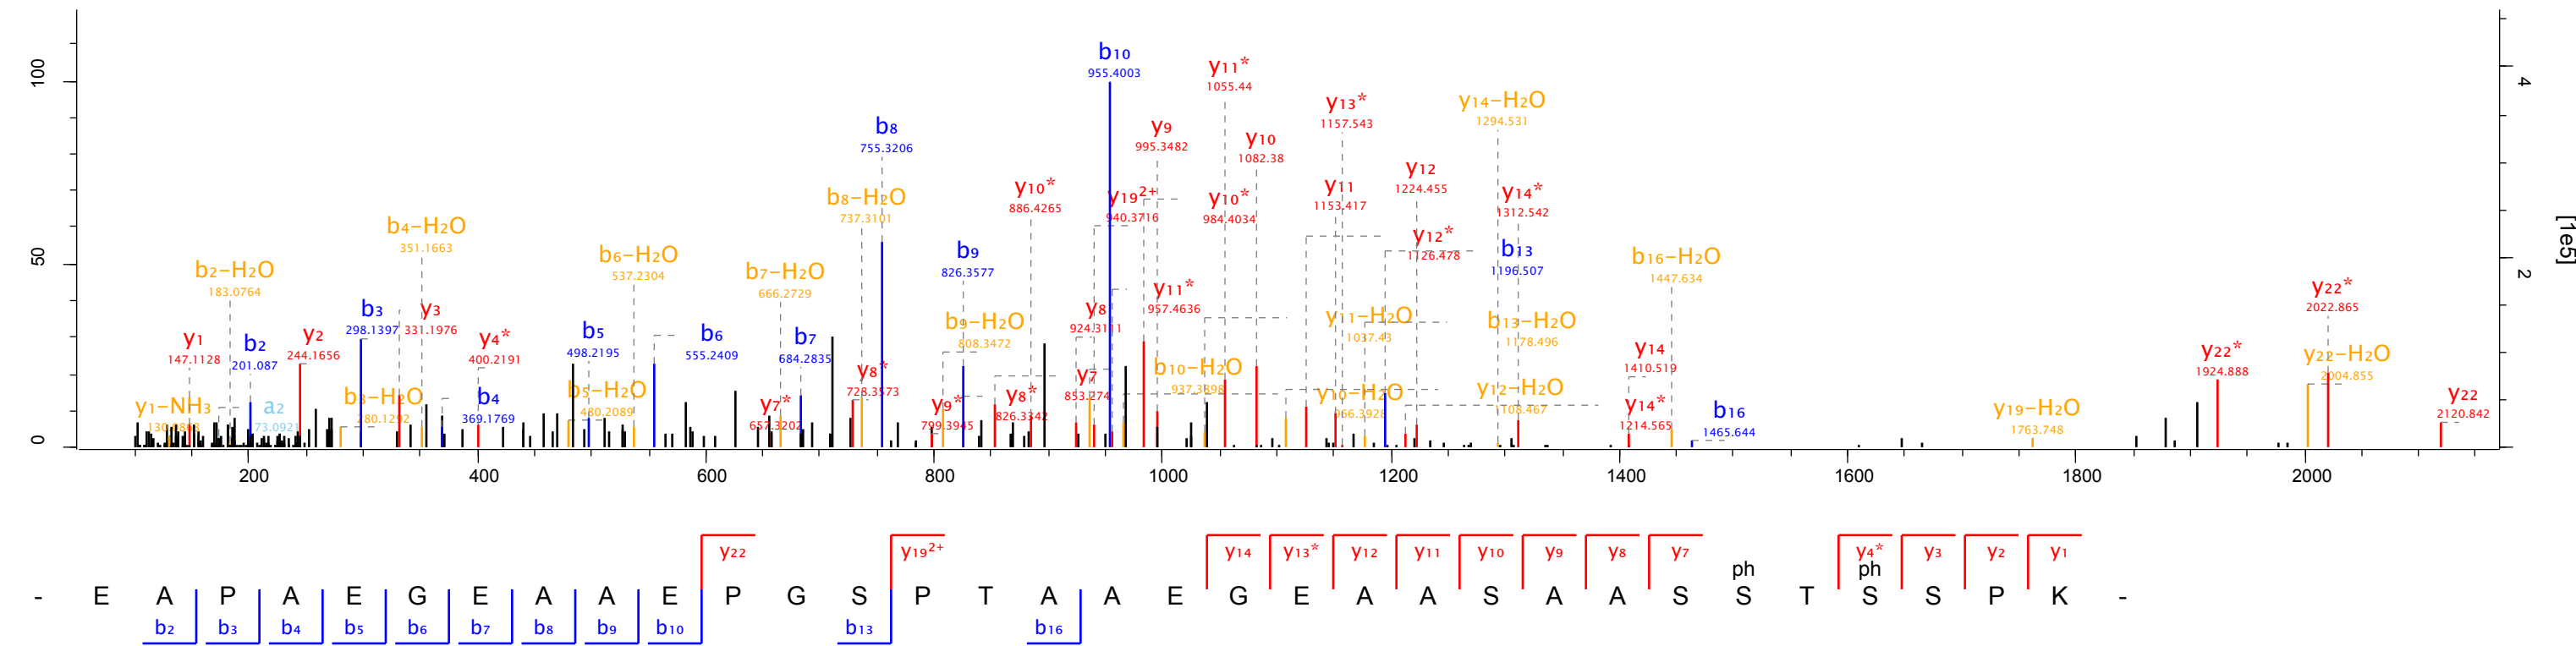



Raw file 20171215\_MaS\_33SR\_LMH\_phospho2\_03 Scan 9149 Method FTMS; HCD Score 185.44 m/z 757.98 Gene names ZBTB21

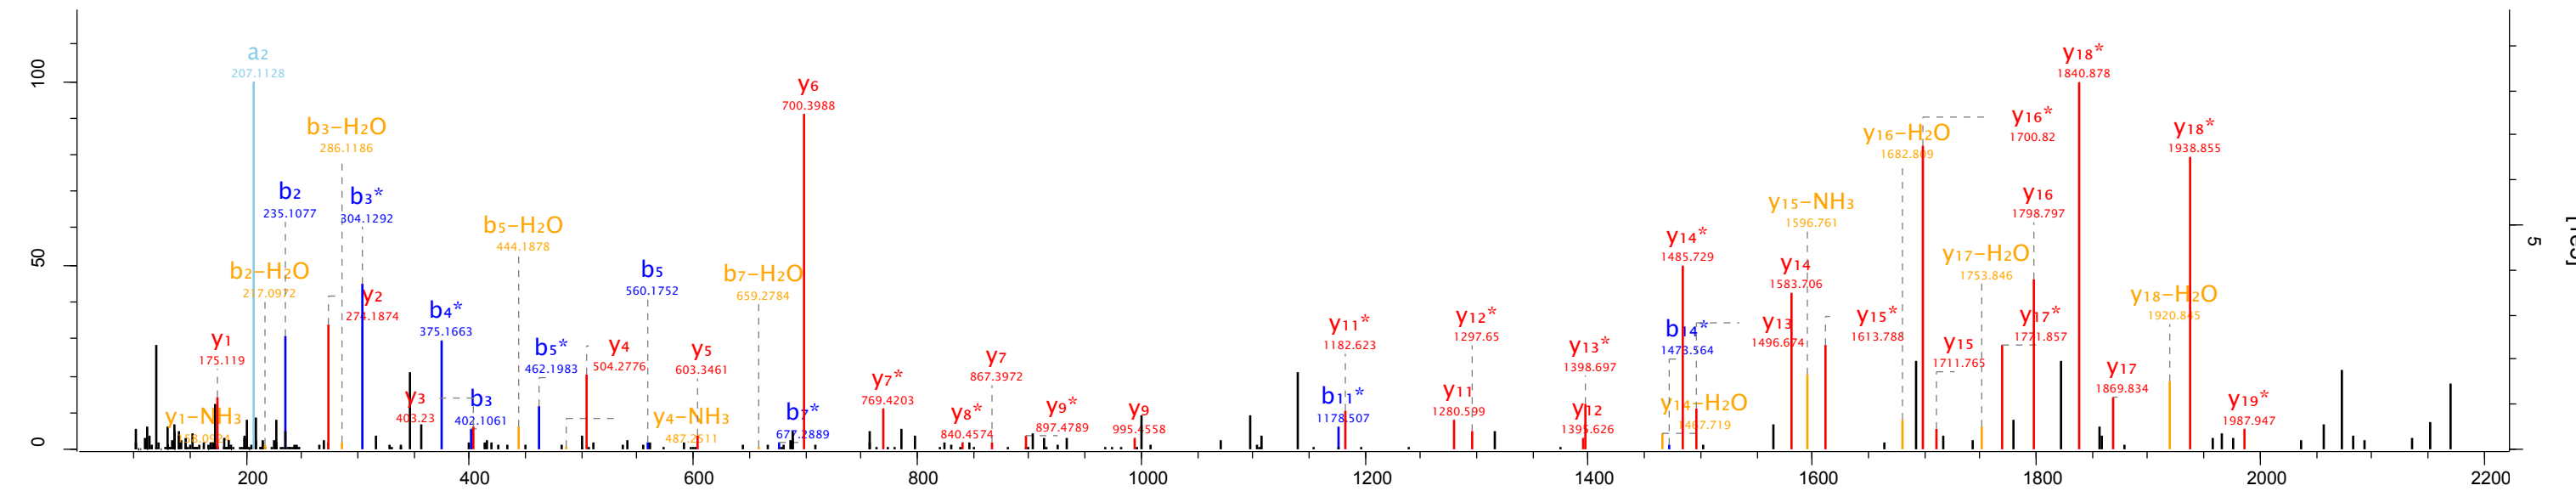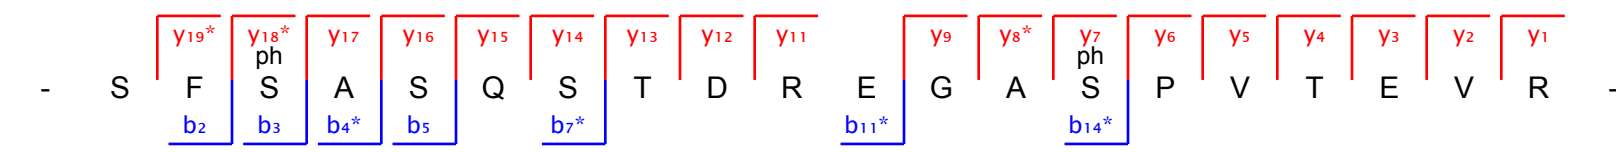

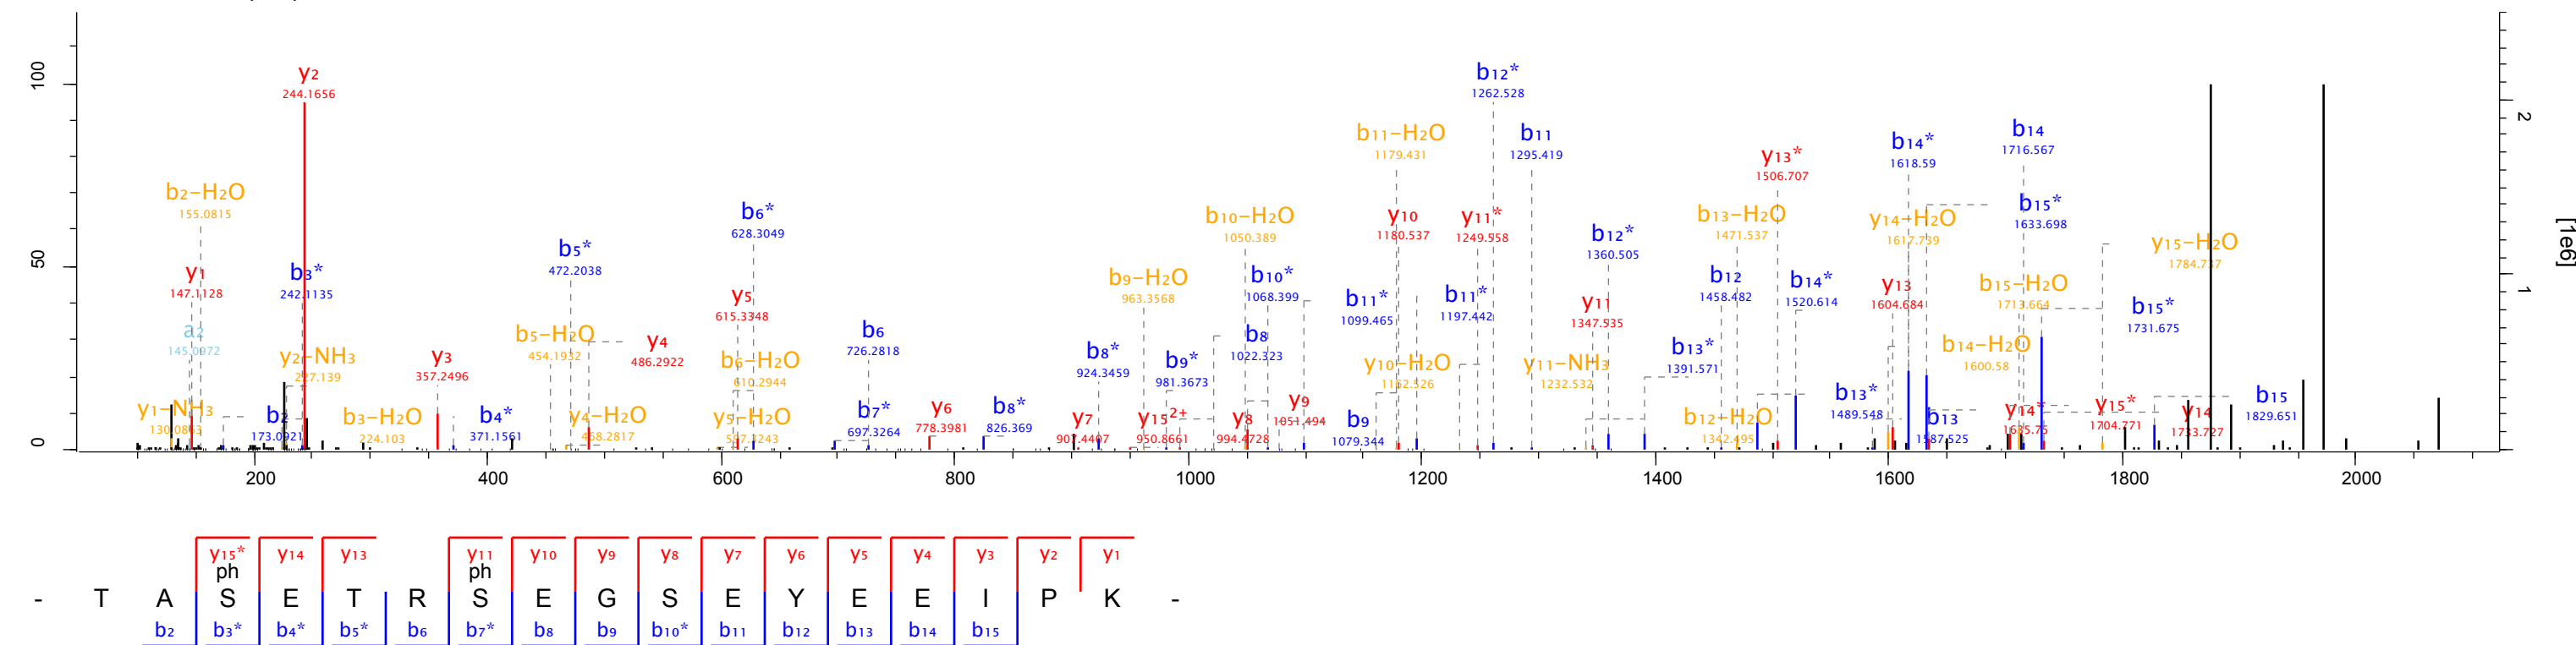

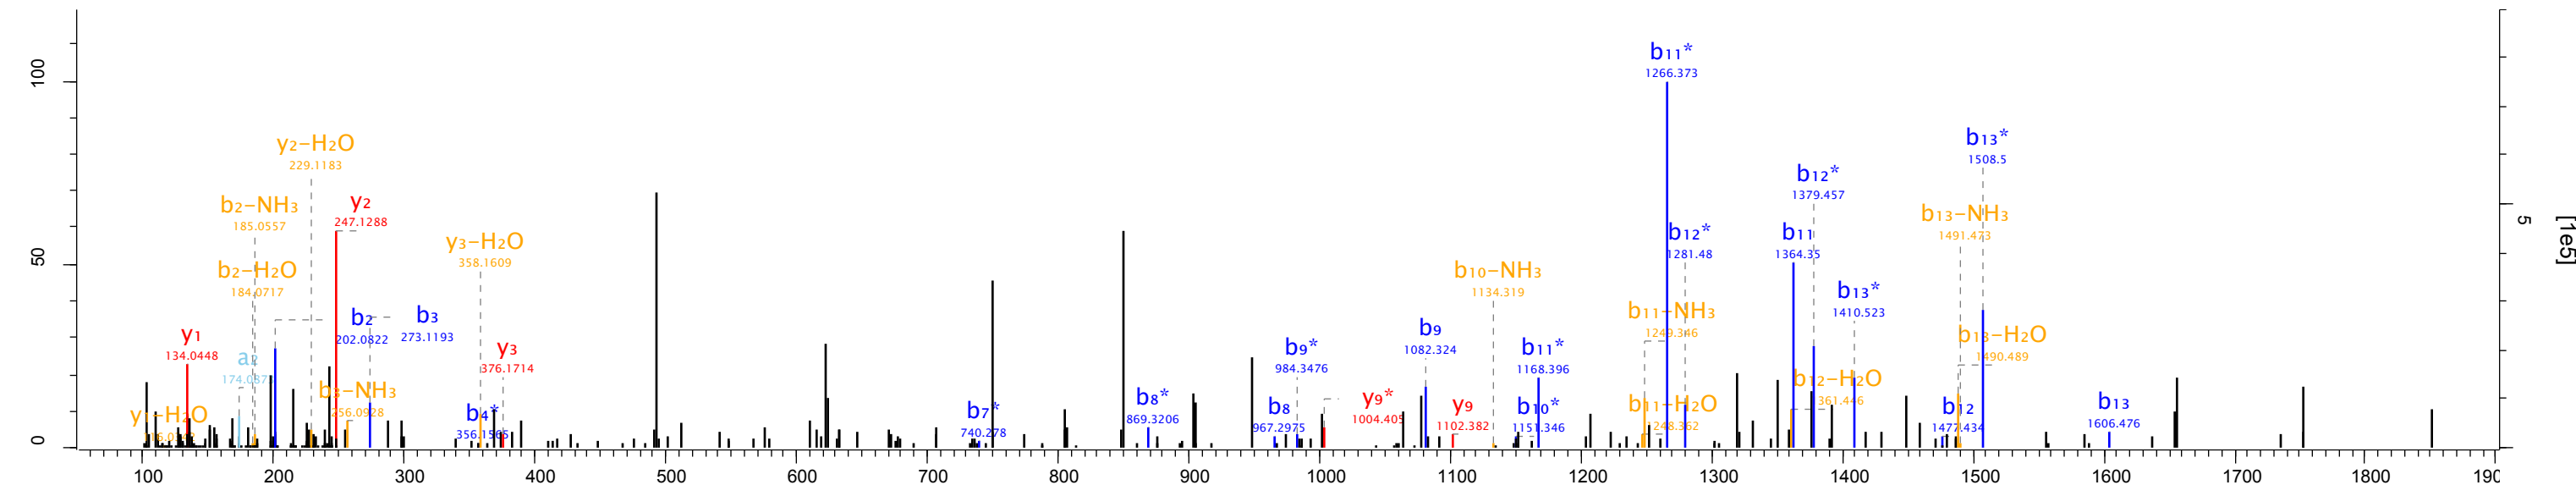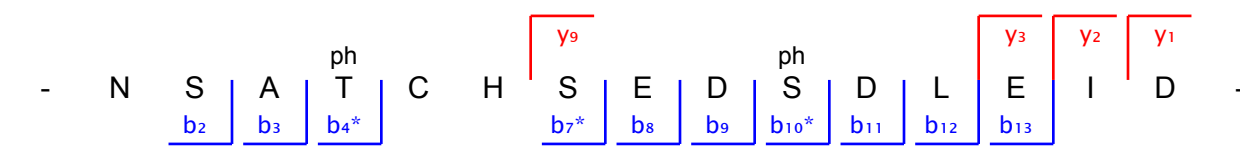

Raw file 20171215\_MaS\_33SR\_LMH\_phospho2\_03 Scan 9569 Method FTMS; HCD Score 187.49 m/z 936.4 Gene names SRRM2

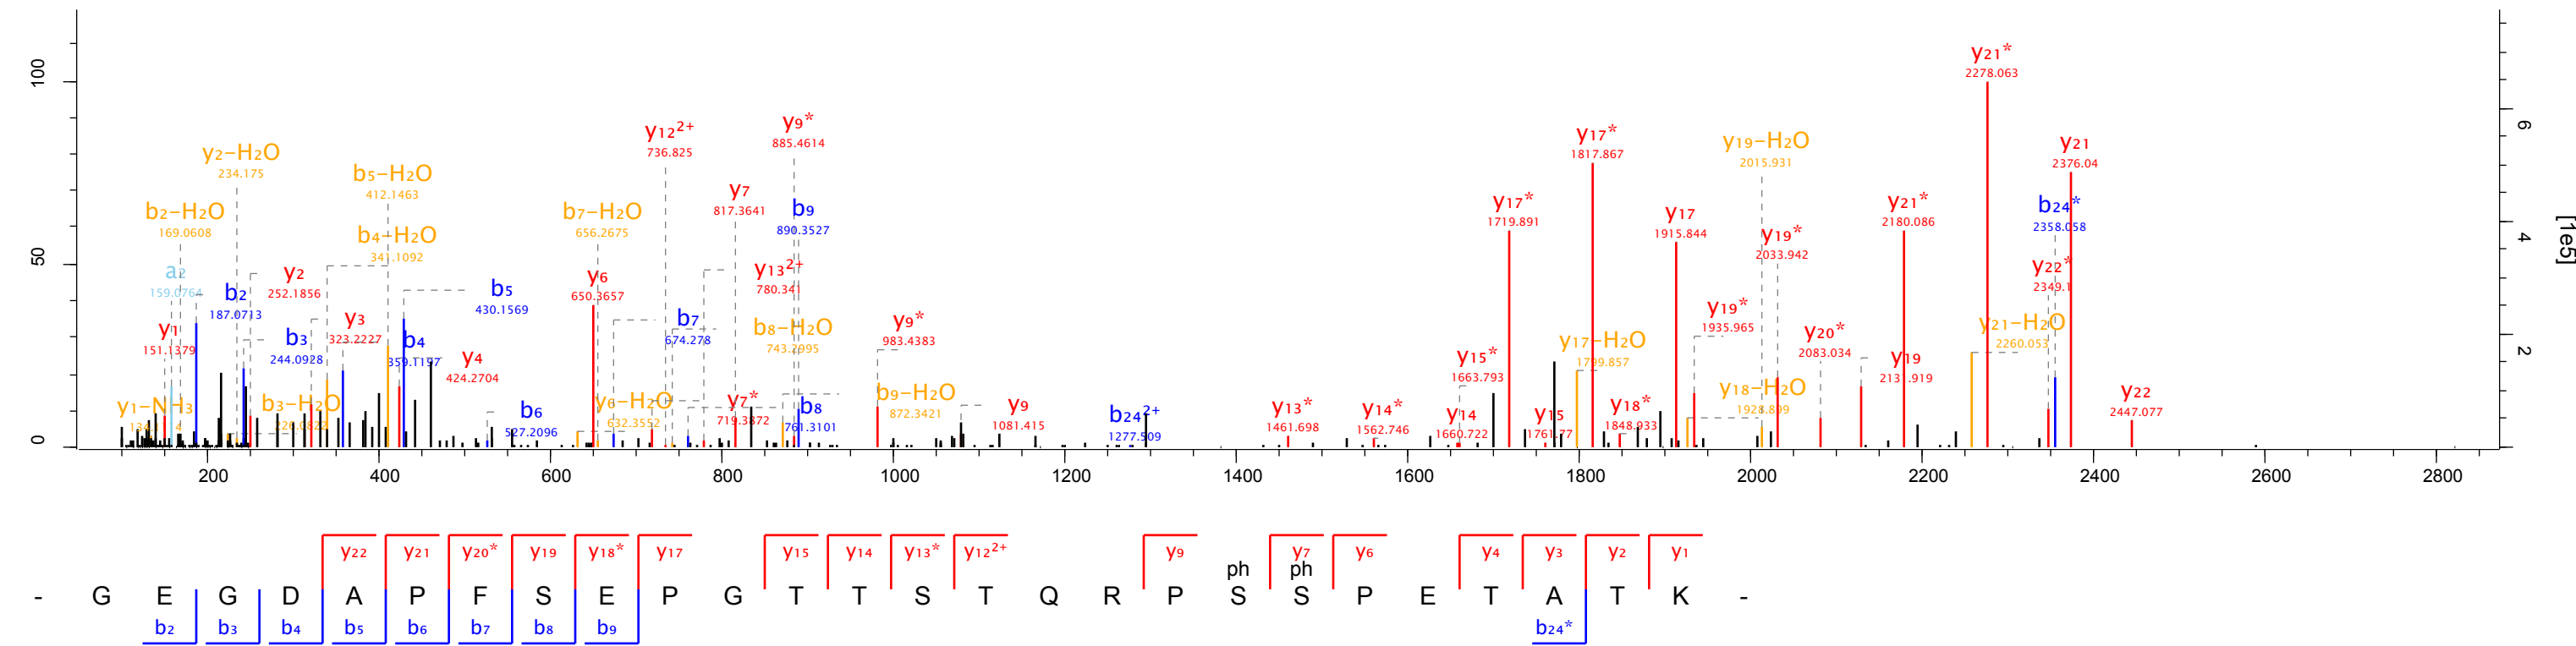

Raw file 20171215\_MaS\_33SR\_LMH\_phospho2\_03 Scan 9889 Method FTMS; HCD Score 269.51 m/z 846.74 Gene names TP53BP1

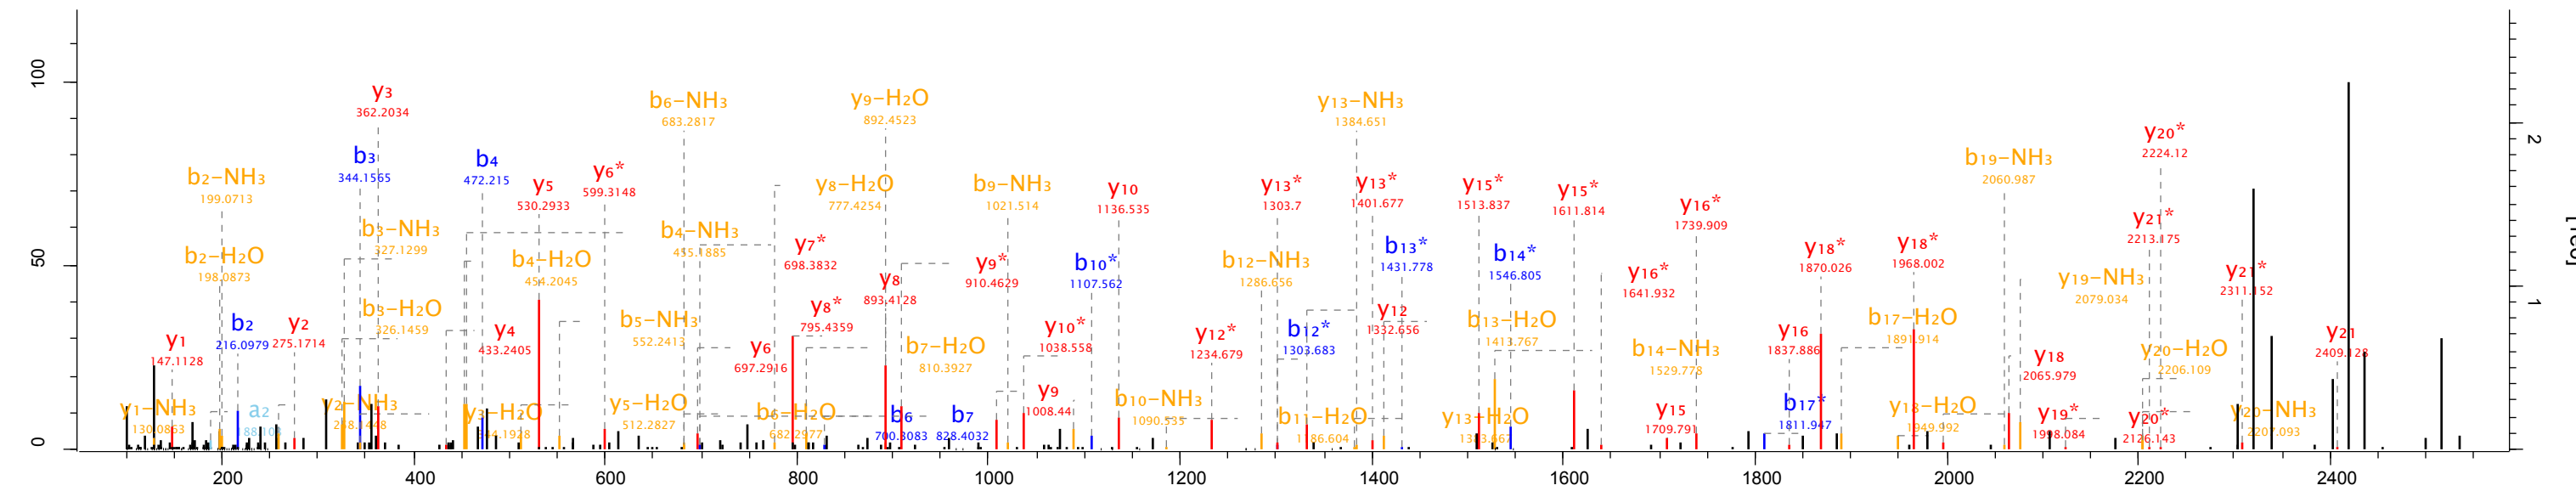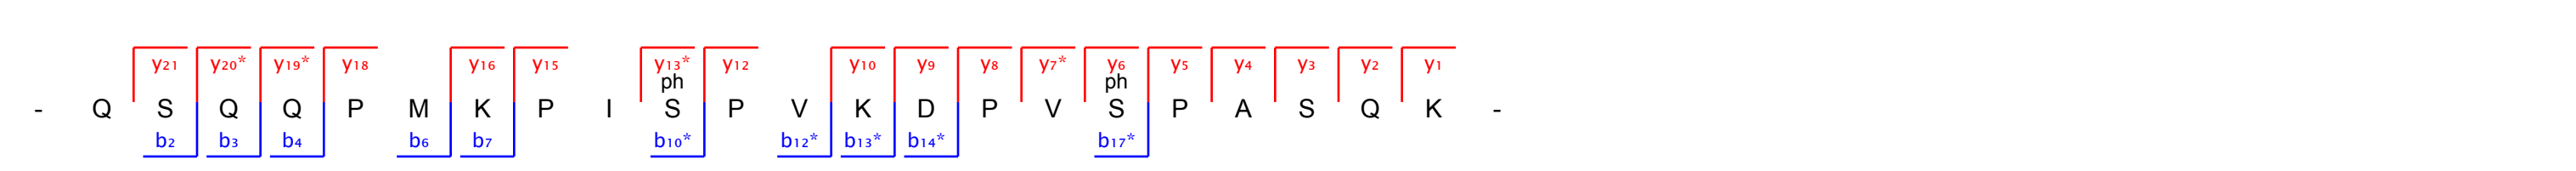

Raw file 20171215\_MaS\_33SR\_LMH\_phospho2\_03 Scan 9929 Method FTMS; HCD Score 112.09 m/z 1362.27 Gene names HSPH1

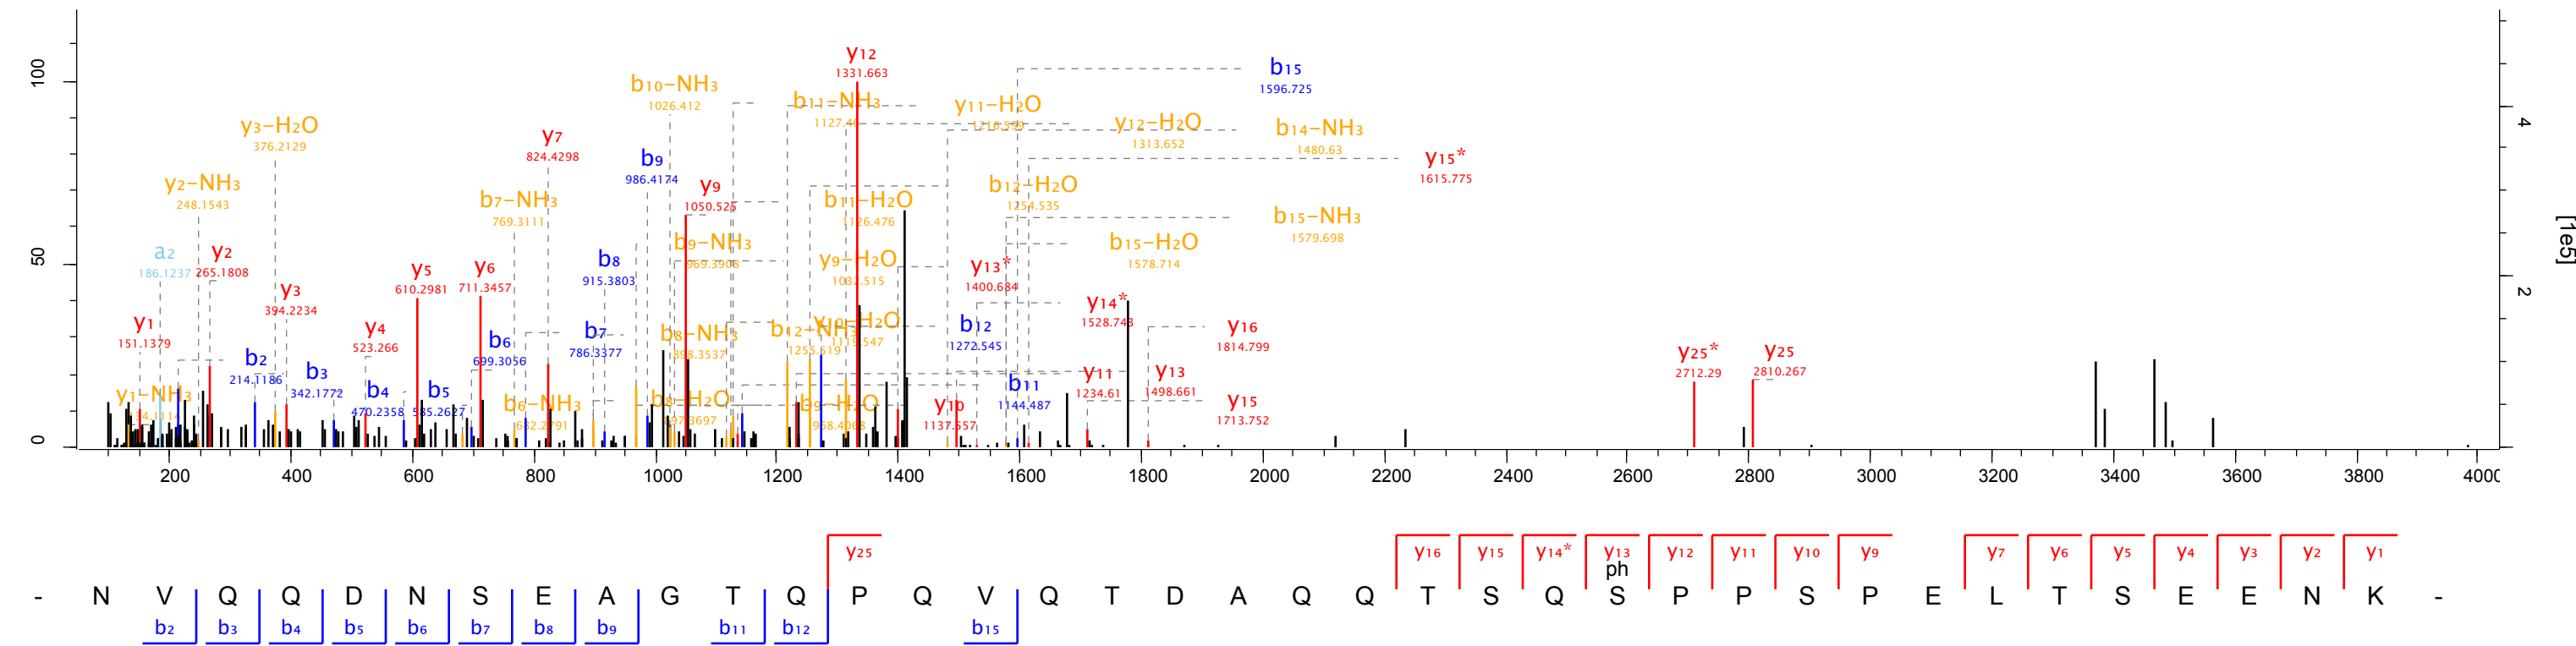

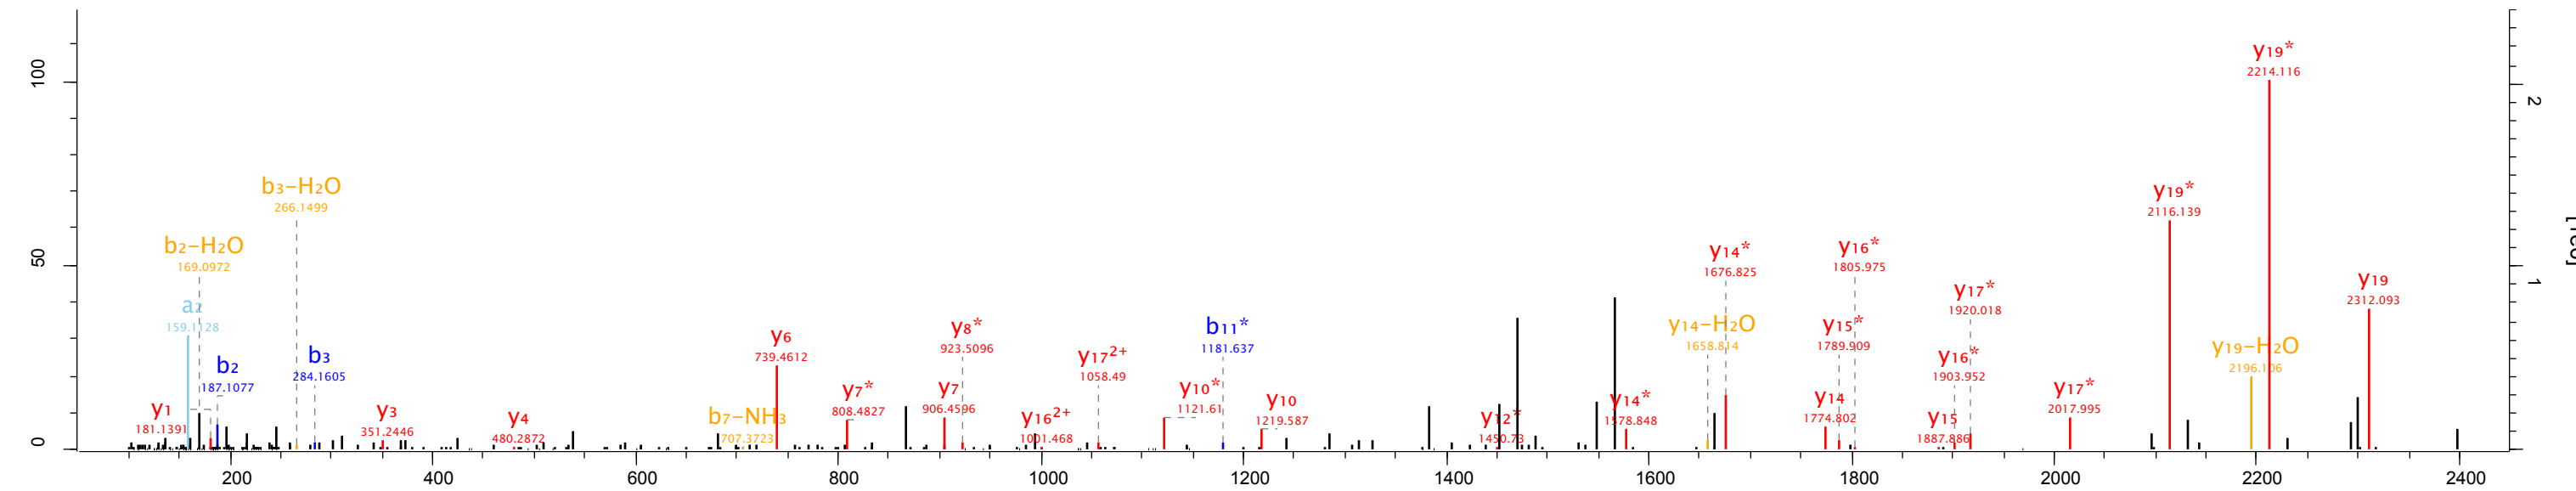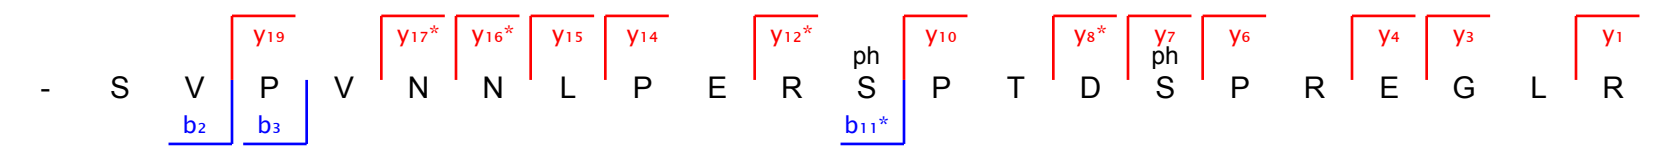

Raw file 20171215\_MaS\_33SR\_LMH\_phospho2\_04 Scan 10619 Method FTMS; HCD Score 140.97 m/z 1169.86 Gene names MPRIP

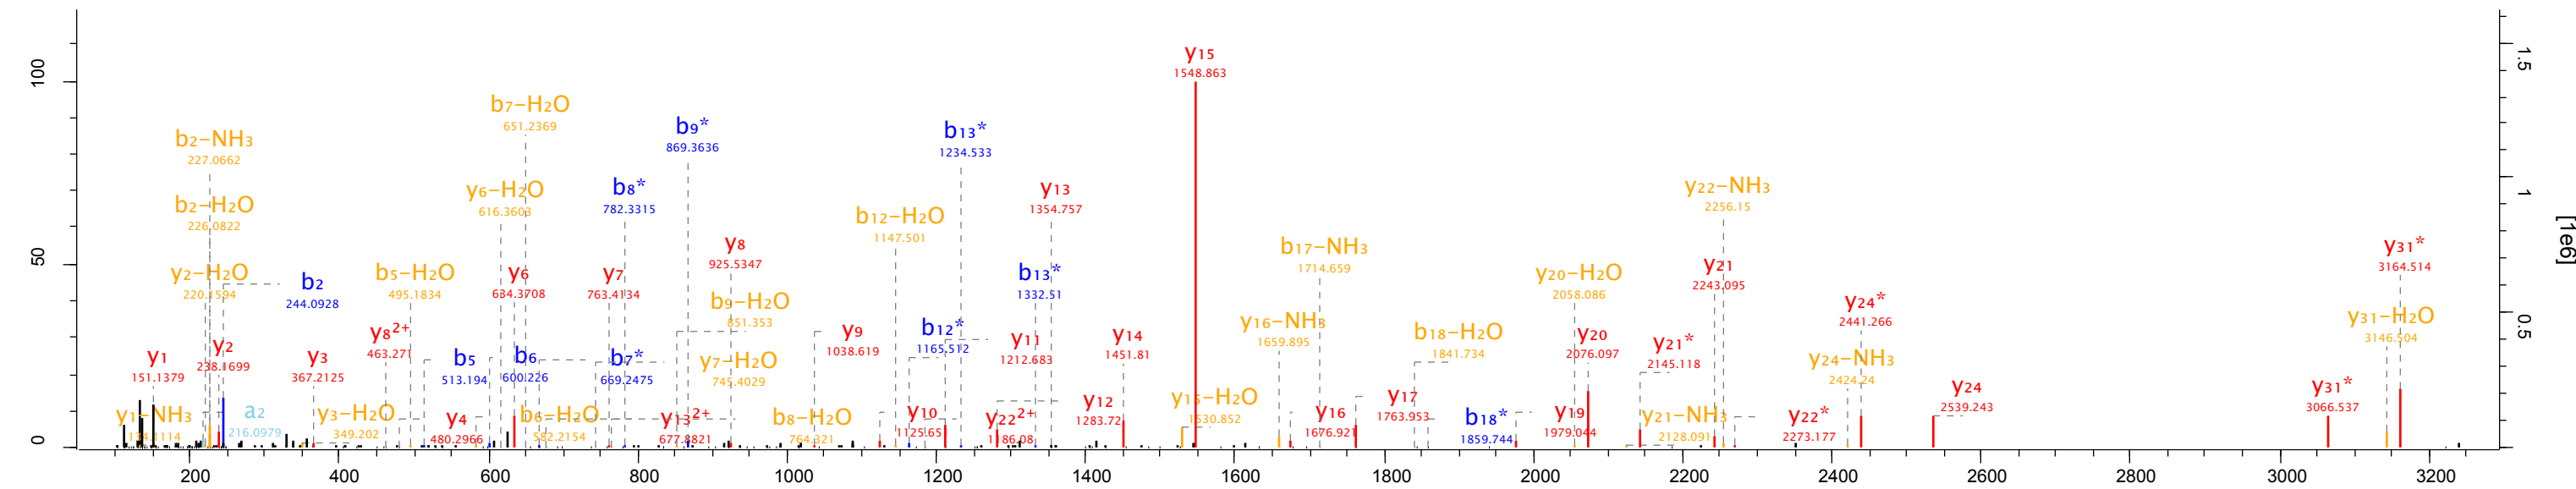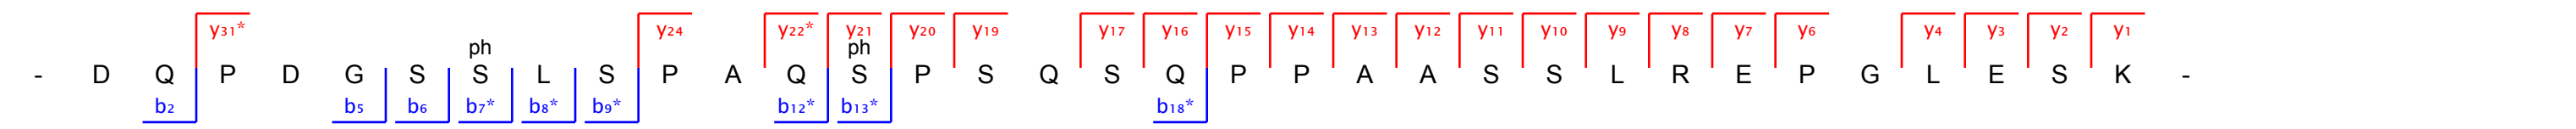



Raw file: 20171215\_MaS\_33SR\_LMH\_phospho2\_04  
 Scan: 11579 Method: FTMS; HCD Score: 76.02 m/z: 776.35 Gene names: USP32

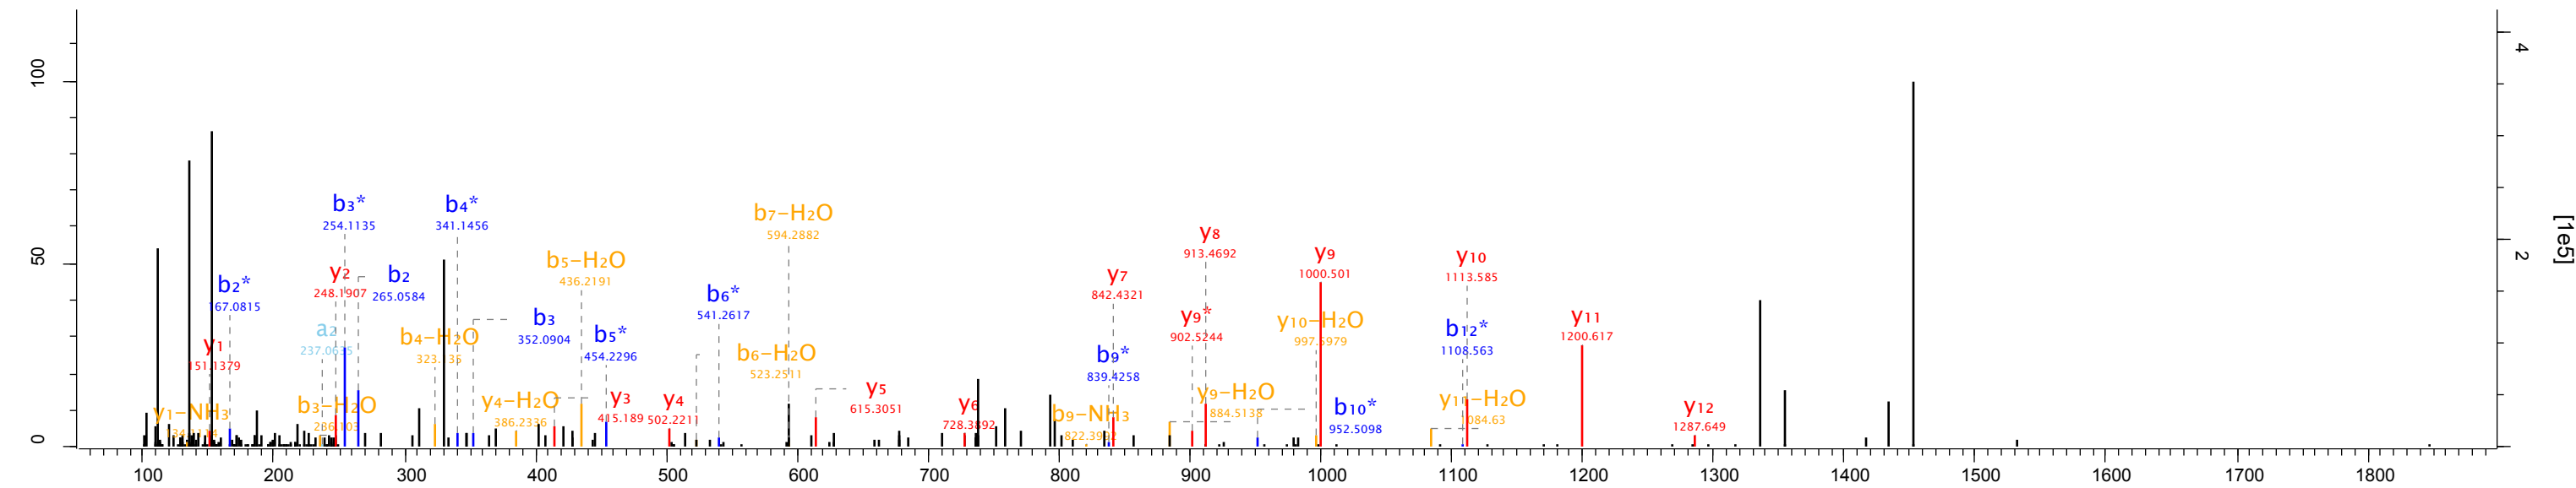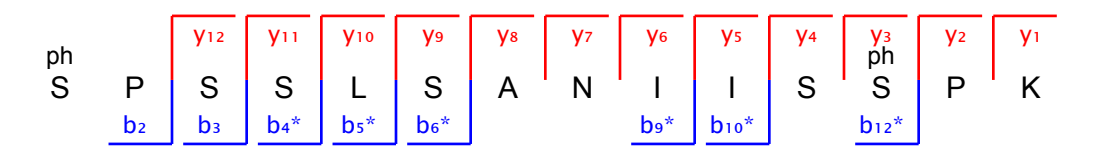

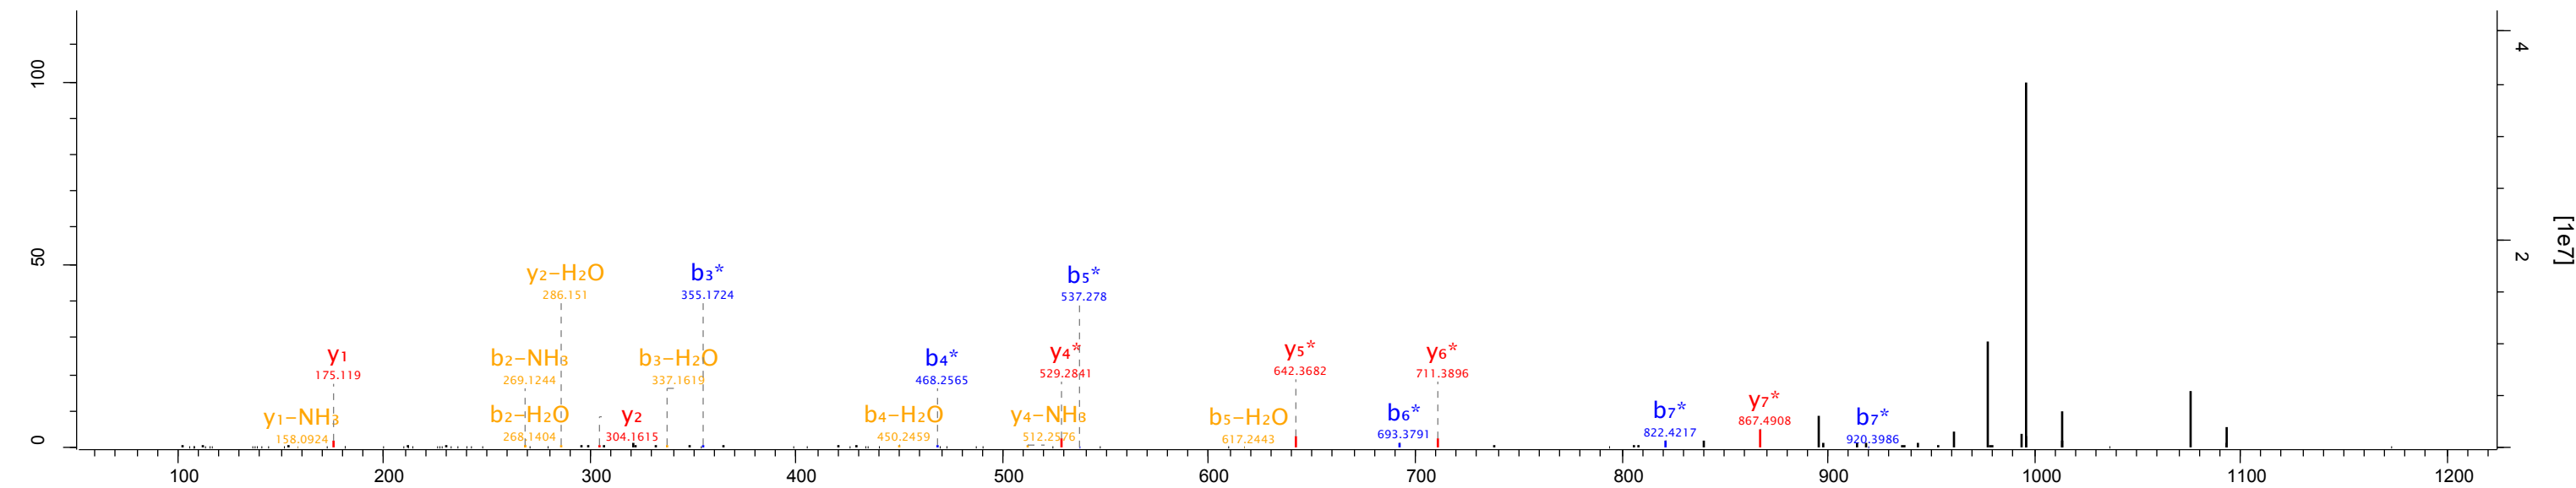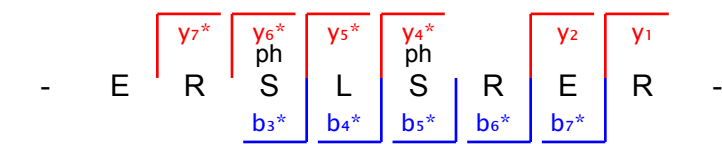

Raw file 20171215\_MaS\_33SR\_LMH\_phospho2\_04 Scan 2699 Method FTMS; HCD Score 95.62 m/z 761.35 Gene names DPYSL2

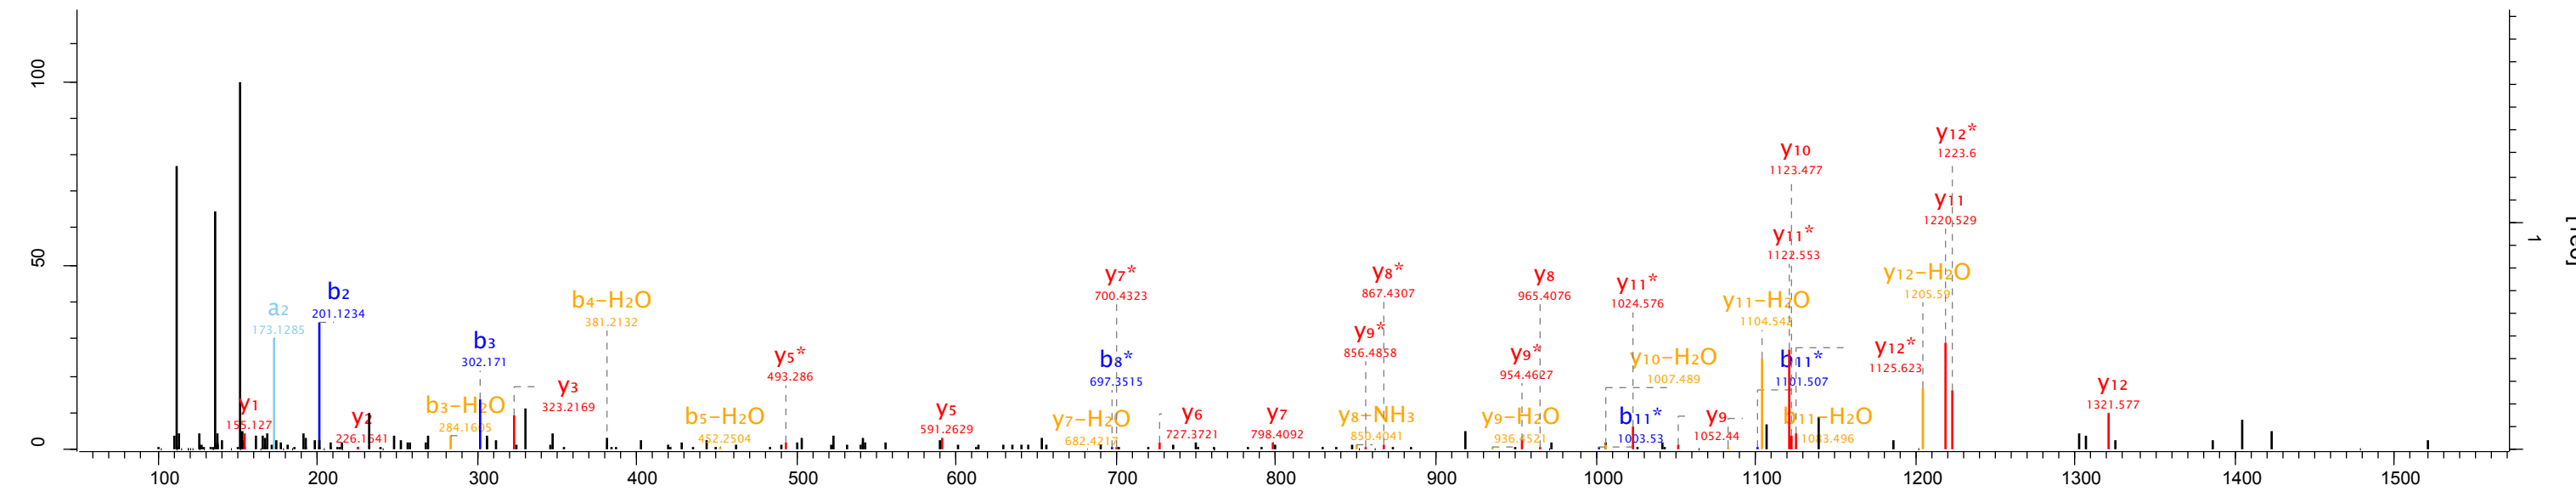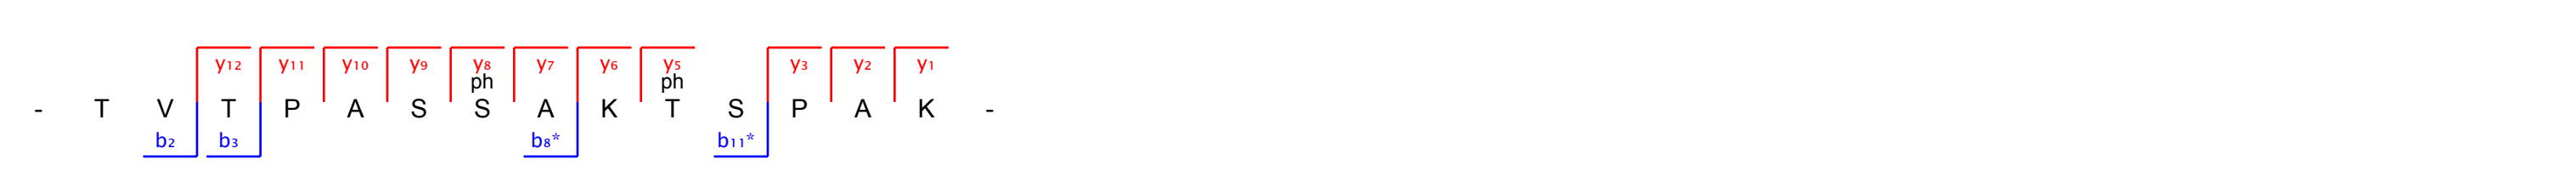

Raw file 20171215\_MaS\_33SR\_LMH\_phospho2\_04 Scan 2729 Method FTMS; HCD Score 62.73 m/z 571.22 Gene names SRRM2

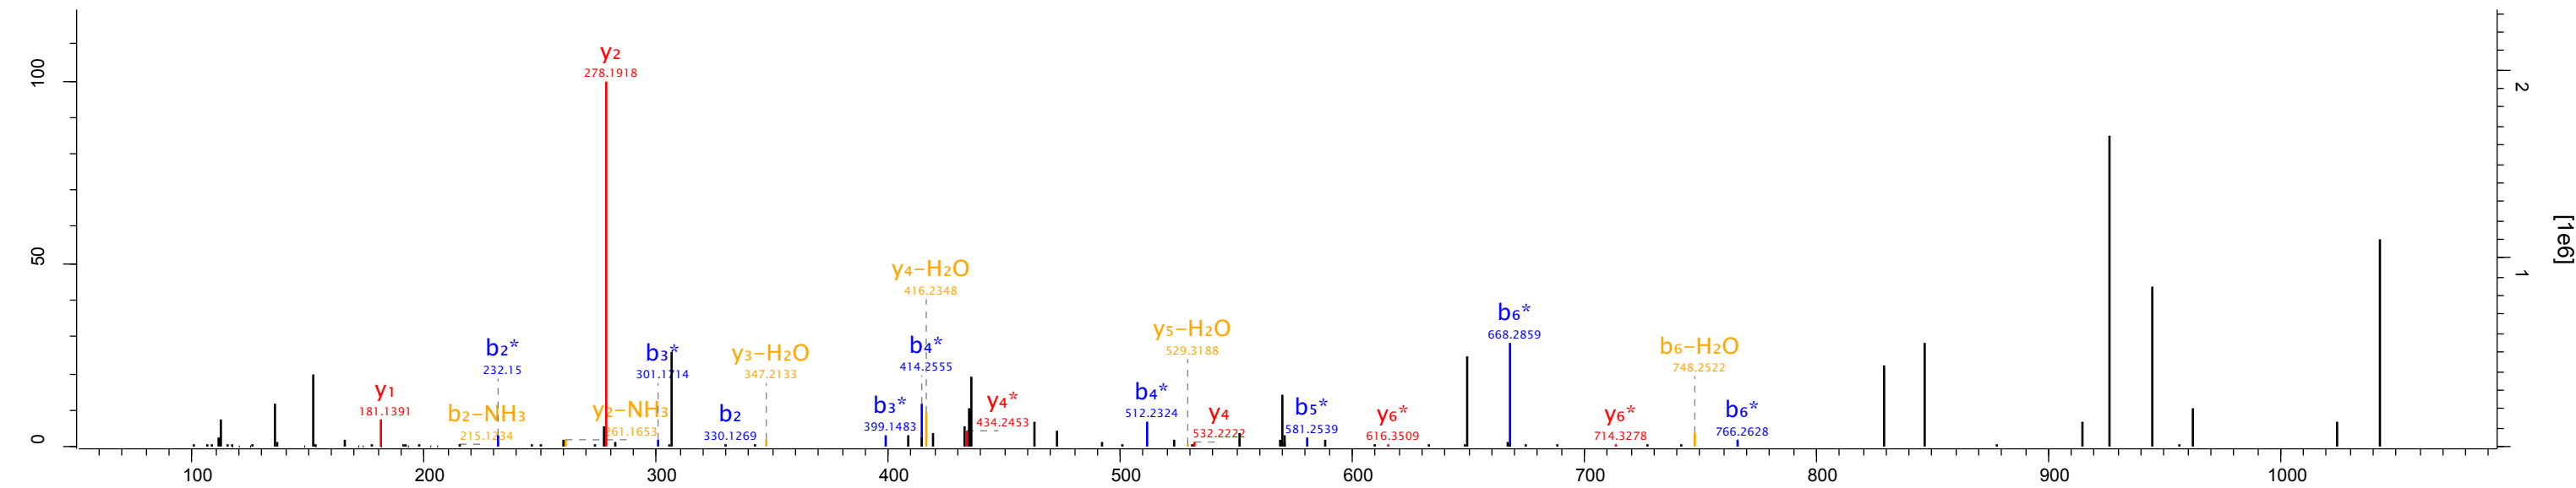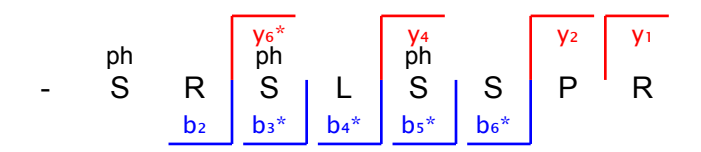

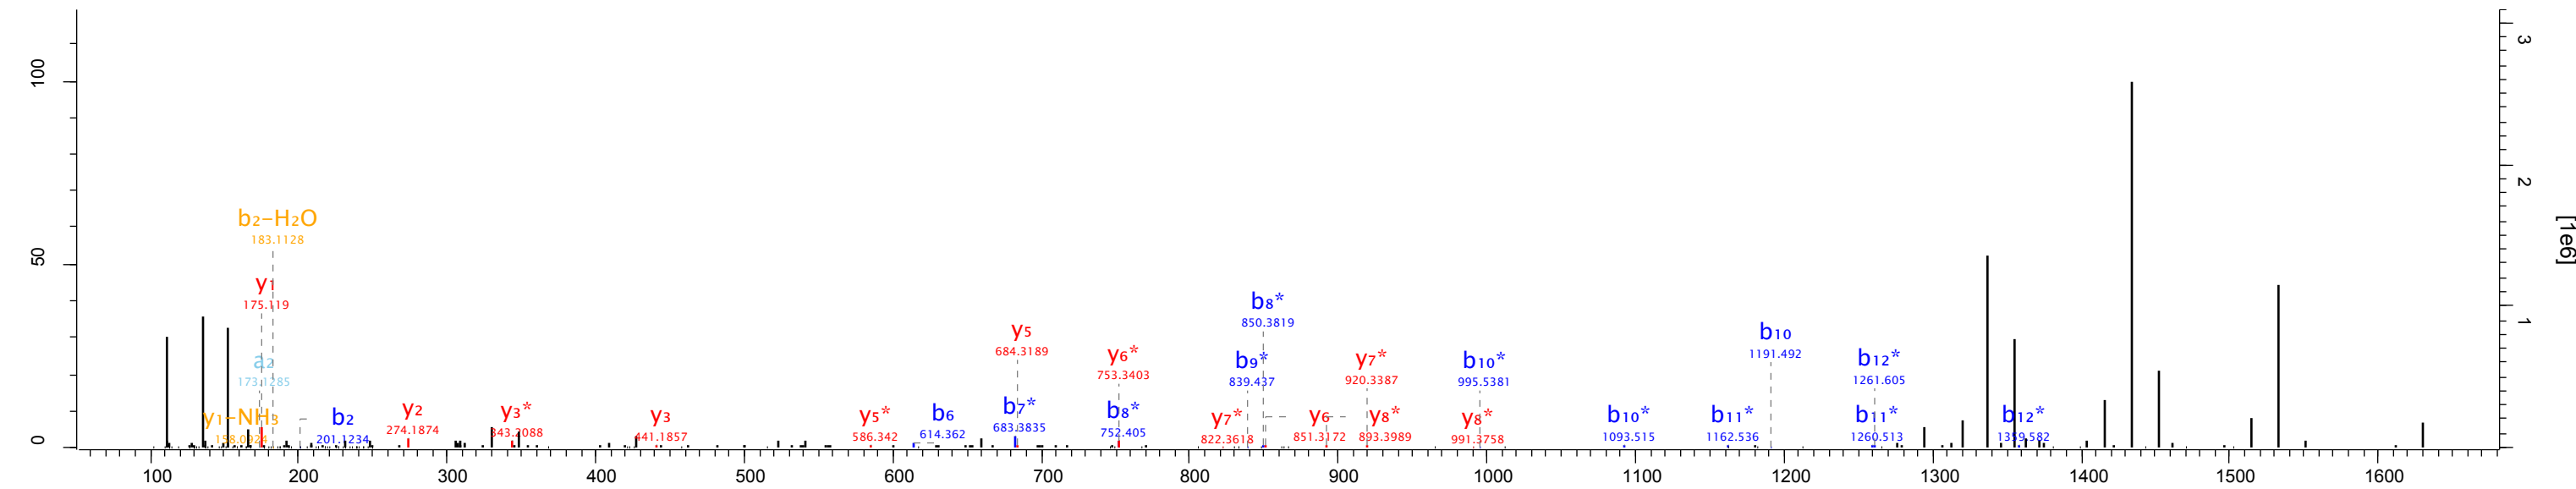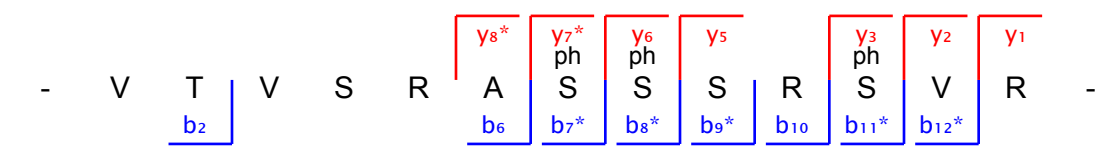

Raw file 20171215\_MaS\_33SR\_LMH\_phospho2\_04 Scan 3419 Method FTMS; HCD Score 130.1 m/z 592.22 Gene names SRRM2

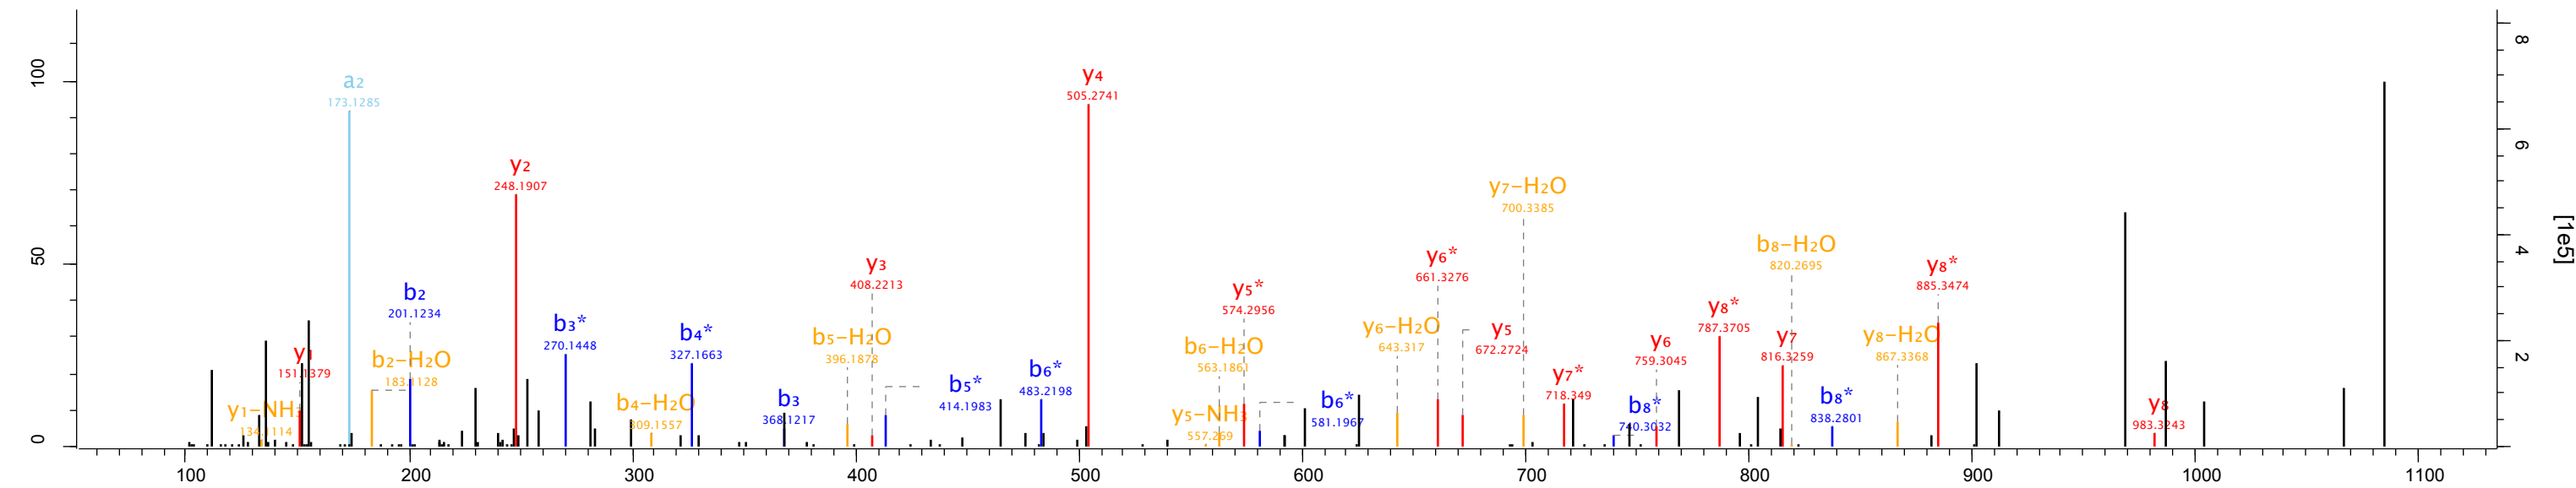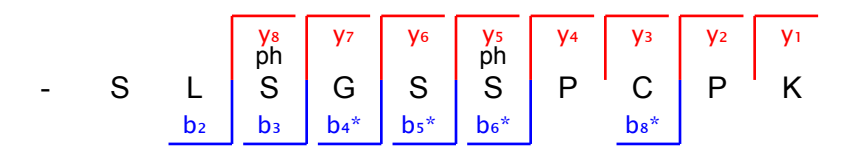

20171215\_MaS\_33SR\_LMH\_phospho2\_04 3489 FTMS; HCD 186.98 695.23 SLBP

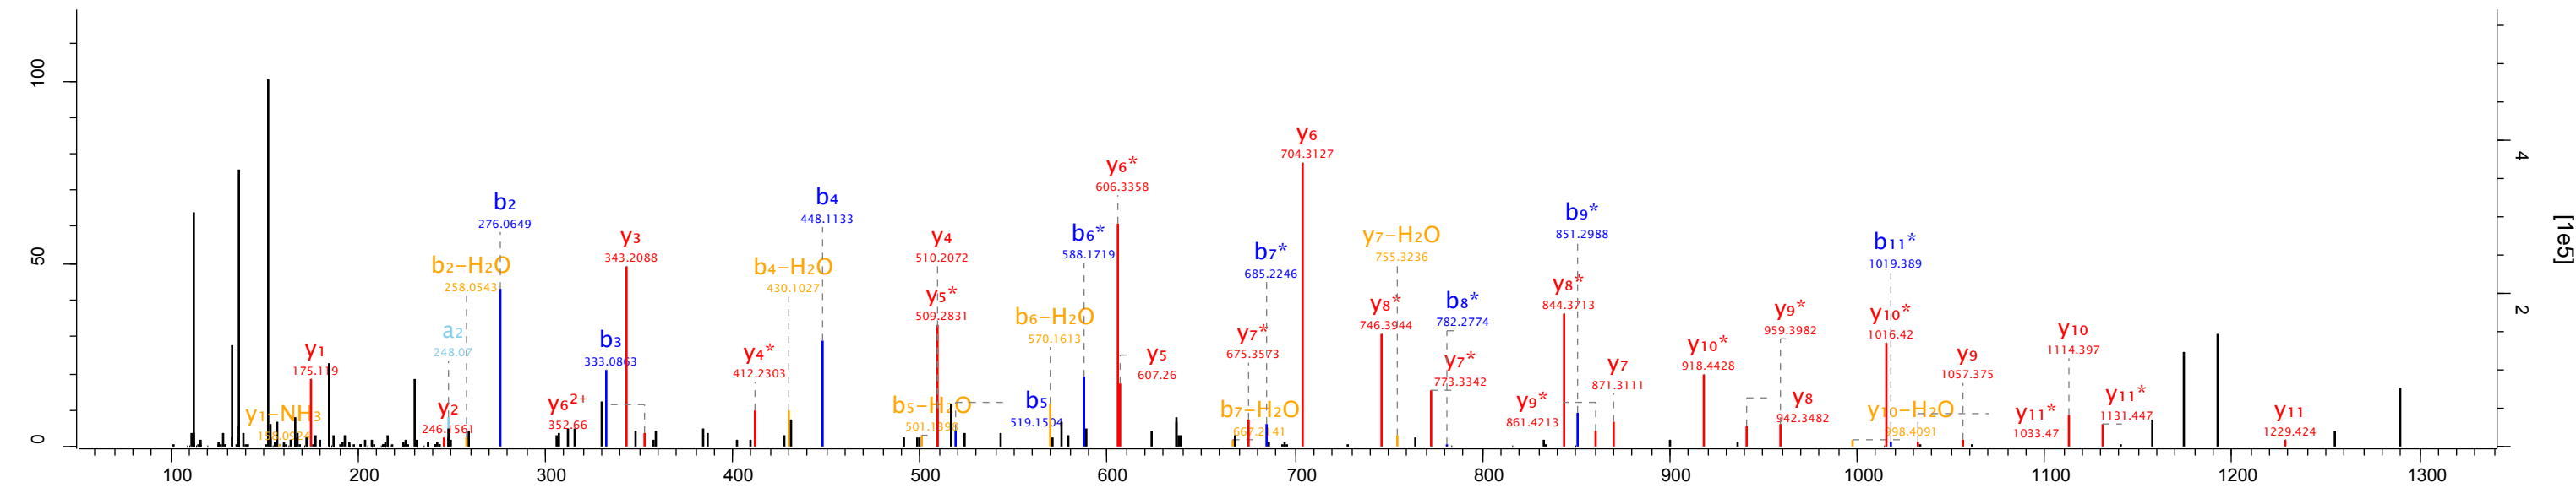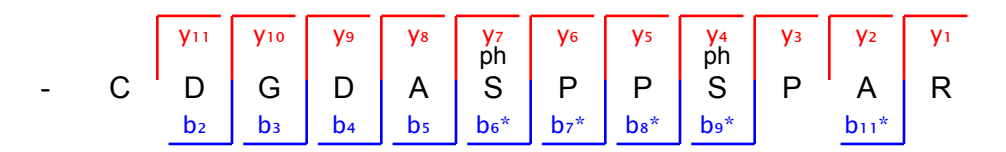

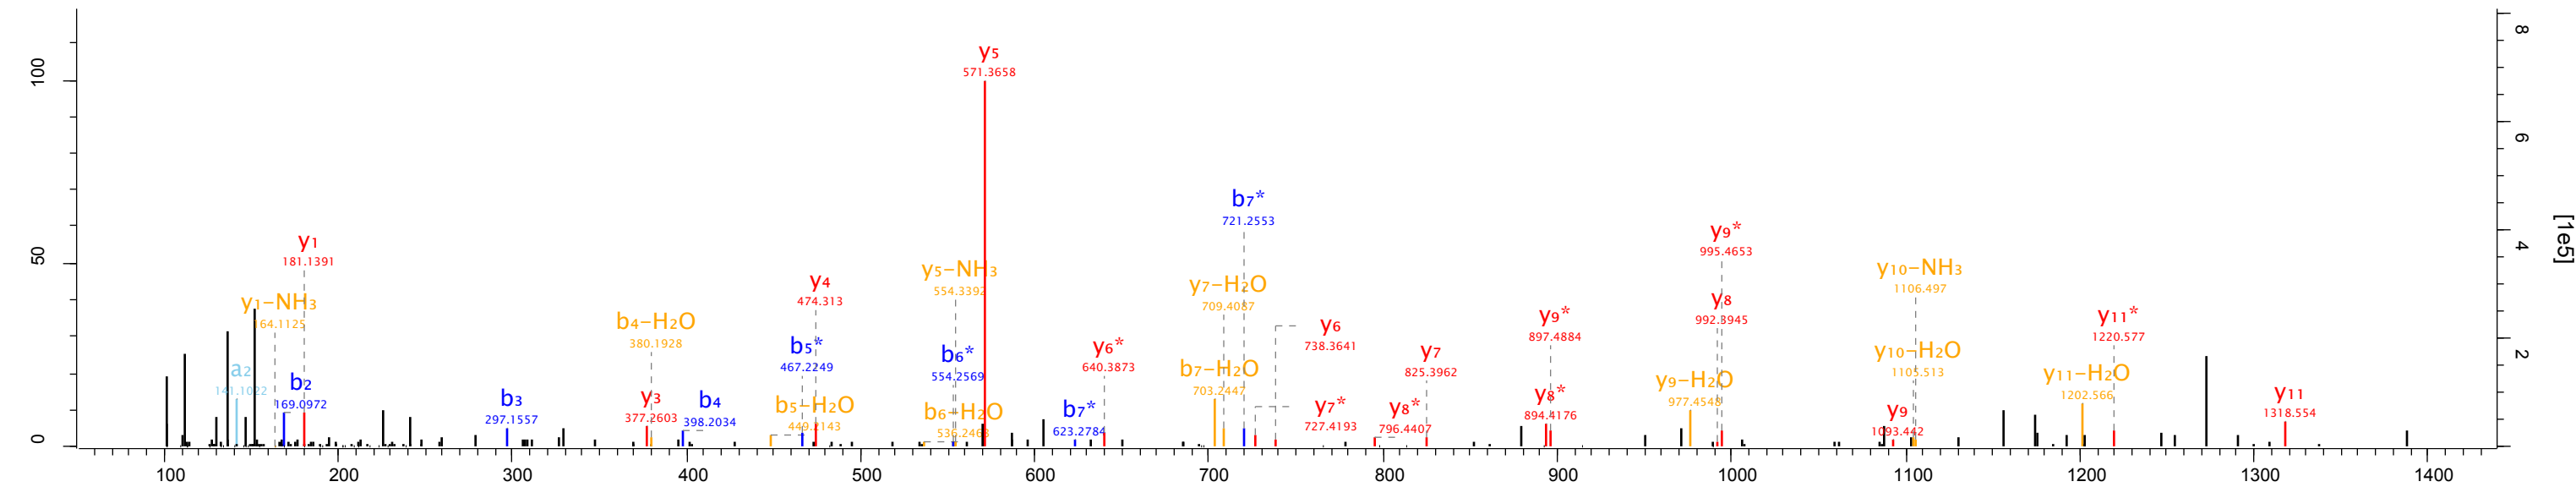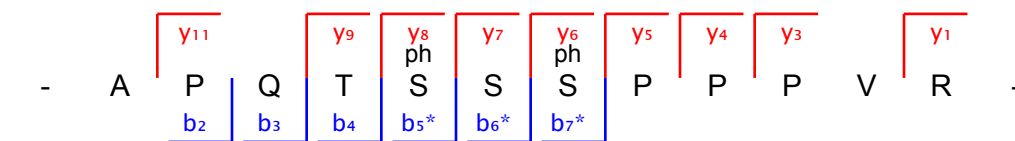



Raw file 20171215\_MaS\_33SR\_LMH\_phospho2\_04 Scan 4329 Method FTMS; HCD Score 385.27 m/z 1094.41 Gene names LUC7L3

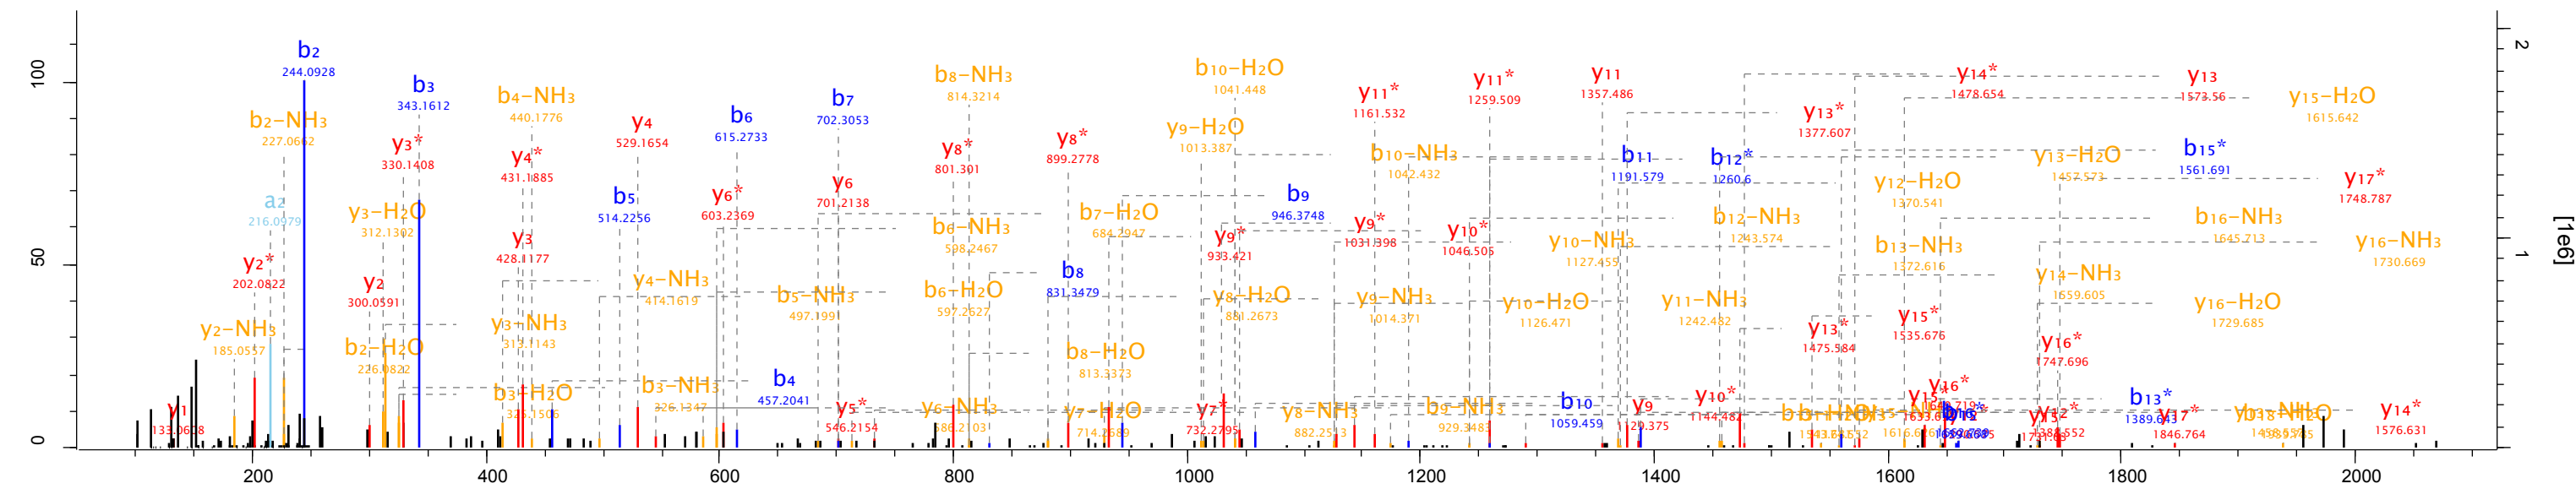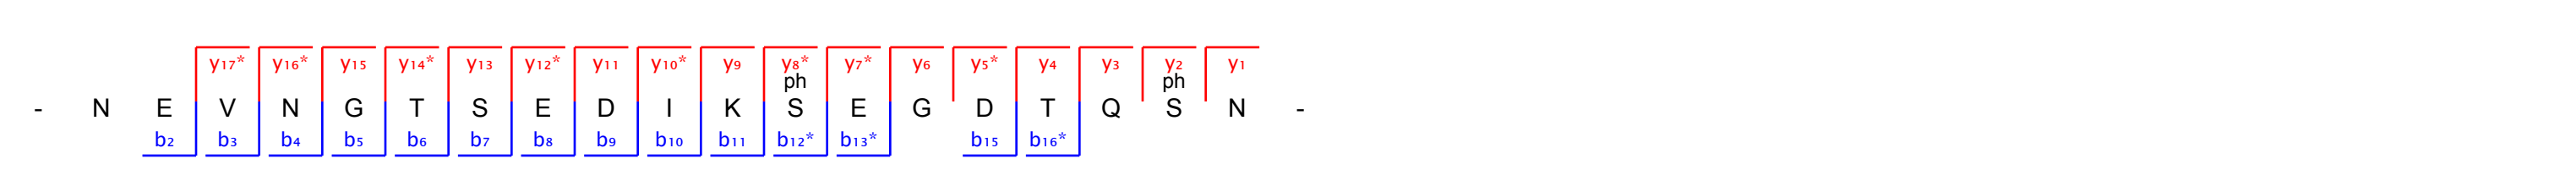

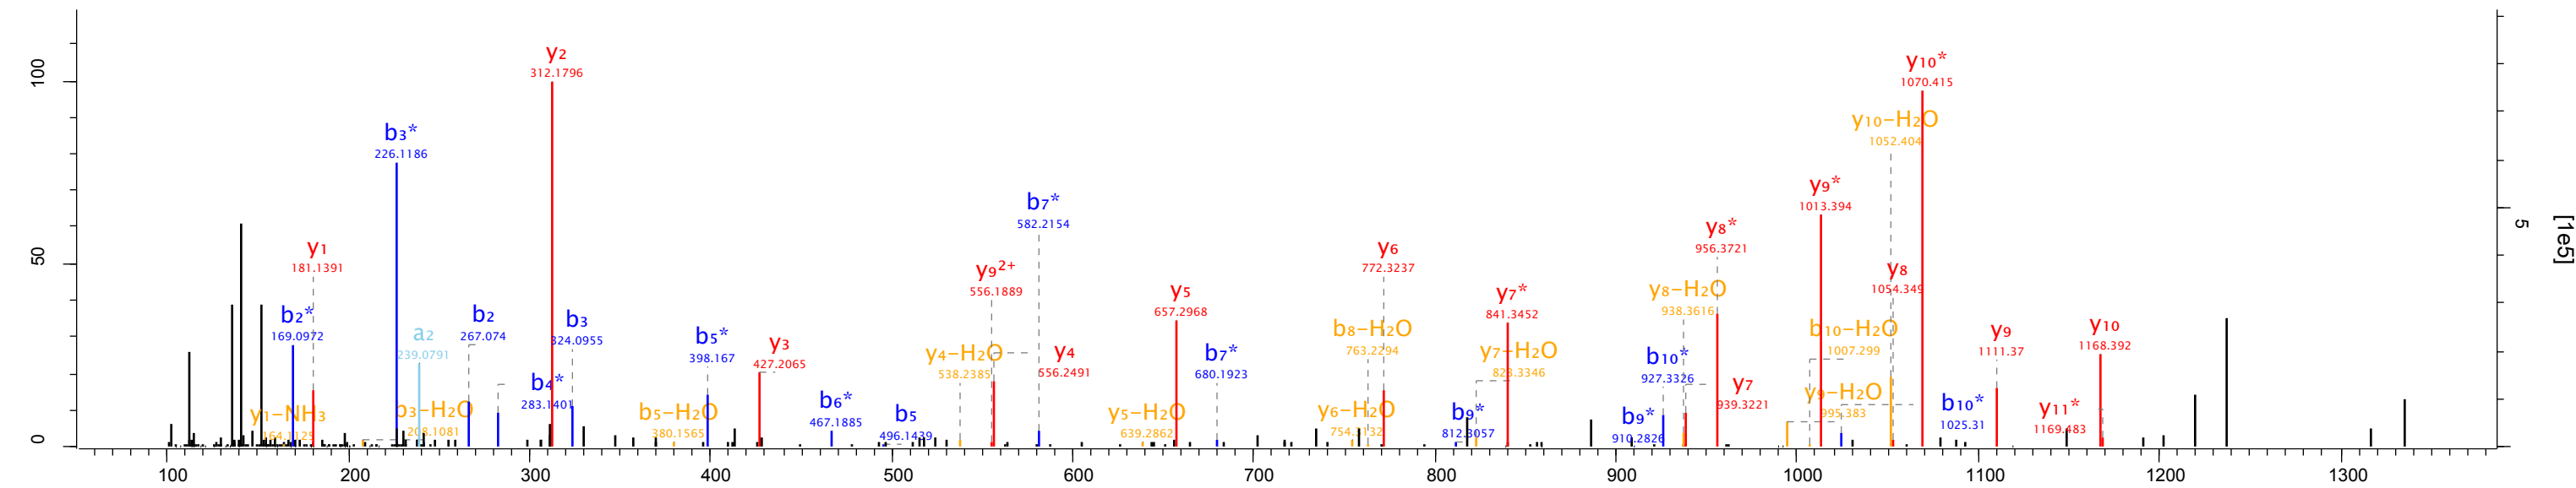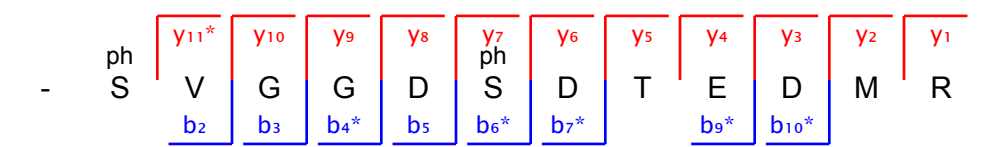

Raw file 20171215\_MaS\_33SR\_LMH\_phospho2\_04 Scan 4609 Method FTMS; HCD Score 102.19 m/z 637.57 Gene names IRF2BP2

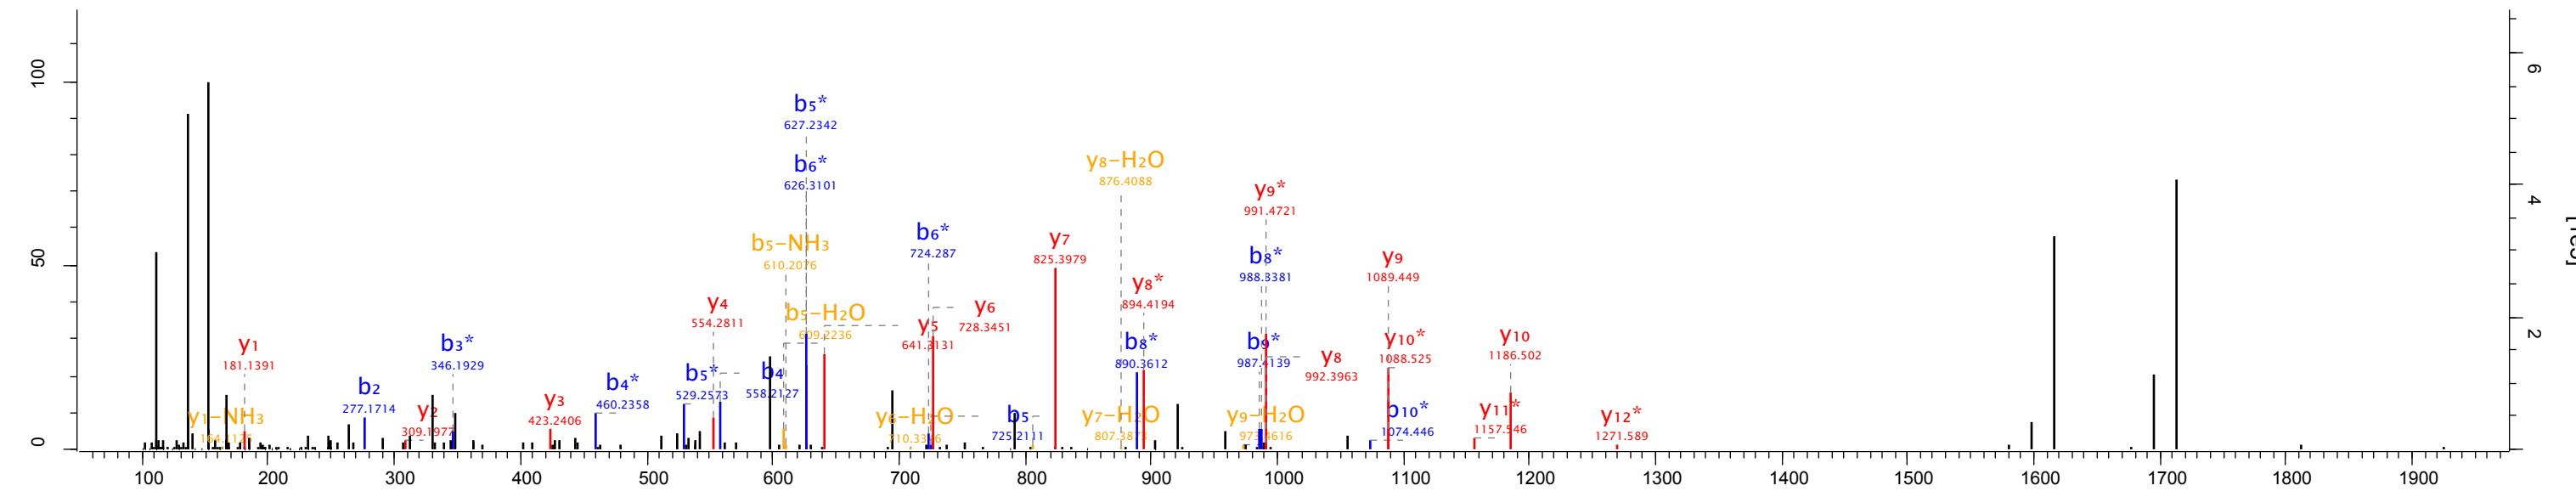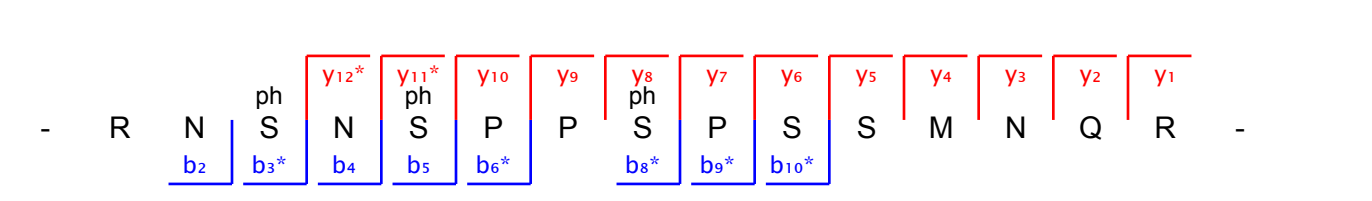

Raw file: 20171215\_MaS\_33SR\_LMH\_phospho2\_04  
 Scan: 5019 Method: FTMS; HCD Score: 72.8 m/z: 951.87 Gene names: RAP1GAP2

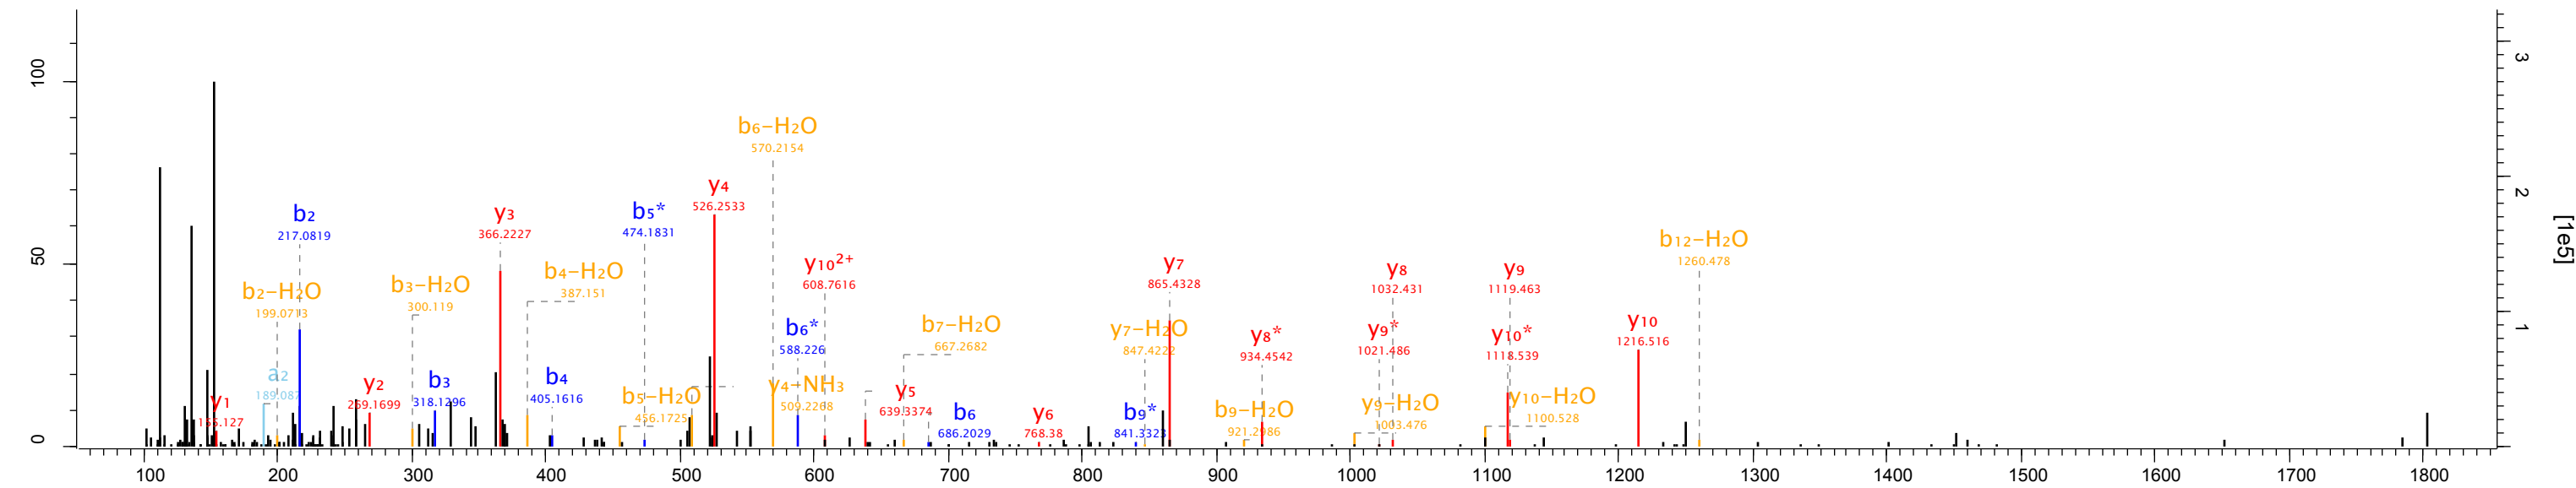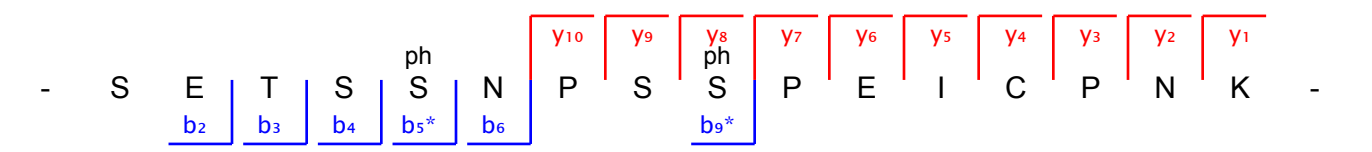

Raw file Scan Method Score m/z Gene names

20171215\_MaS\_33SR\_LMH\_phospho2\_04 5429 FTMS; HCD 145.91 819.76 FAM175A

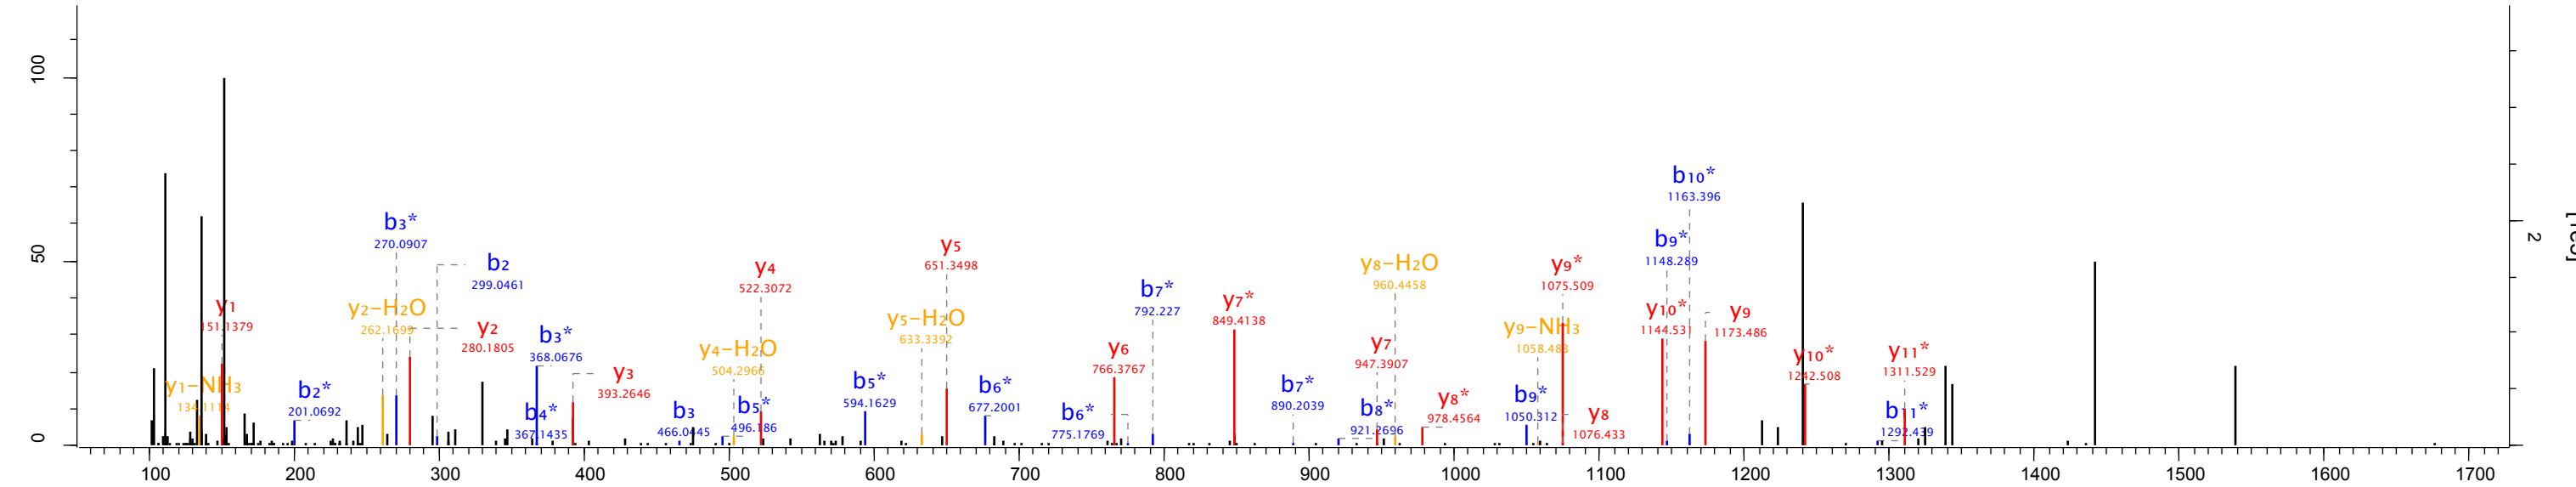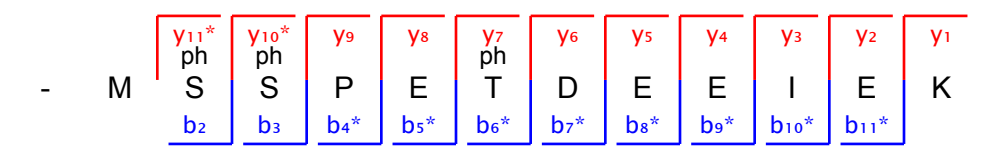

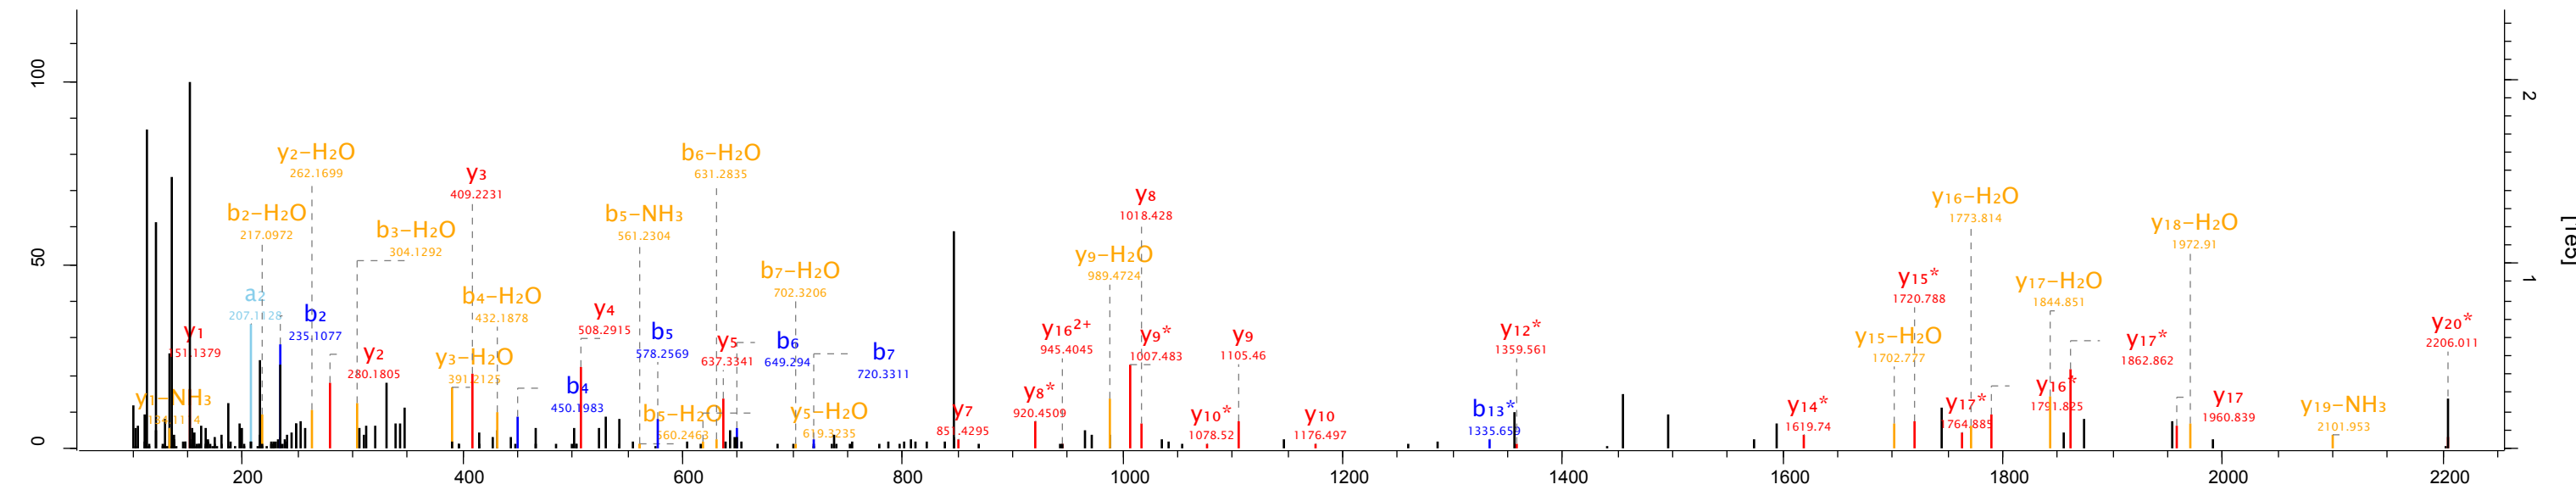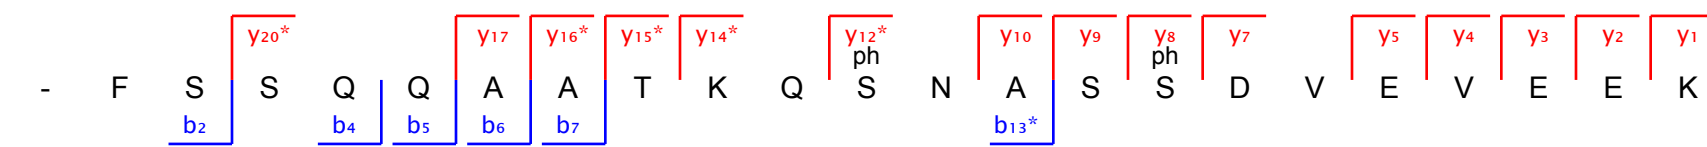

Raw file: 20171215\_MaS\_33SR\_LMH\_phospho2\_04  
 Scan: 5729 Method: FTMS; HCD Score: 185.79 m/z: 1075.43 Gene names: MAP7D1

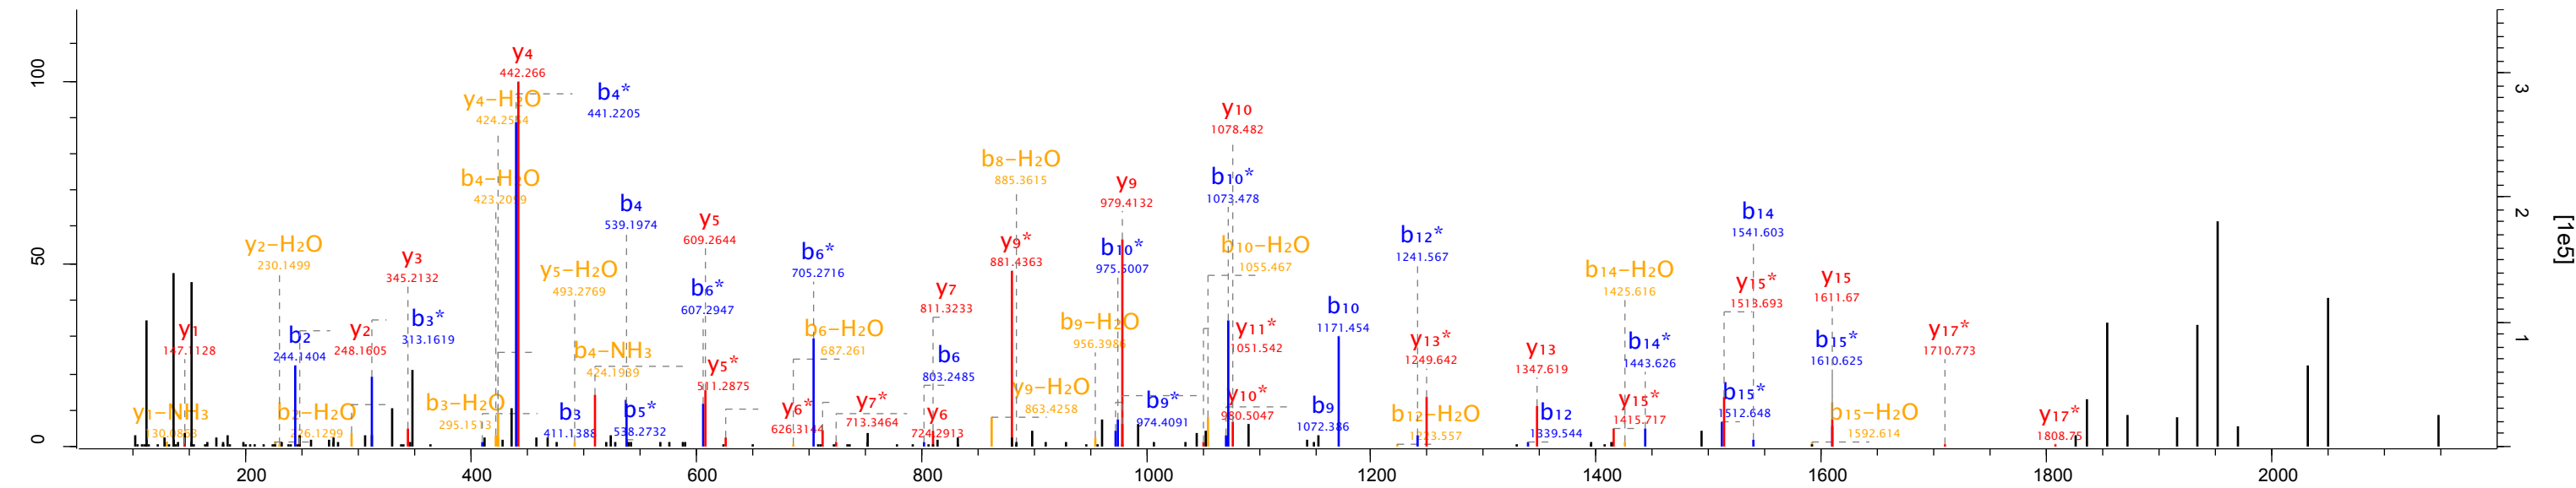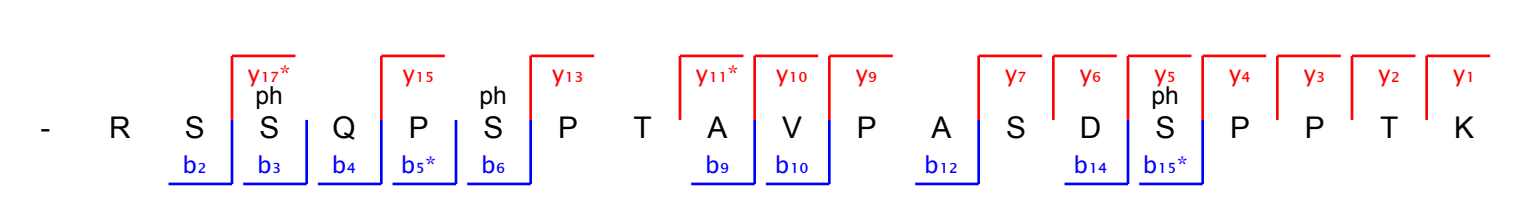

Raw file 20171215\_MaS\_33SR\_LMH\_phospho2\_04 Scan 5949 Method FTMS; HCD Score 159.42 m/z 867.83 Gene names SQSTM1

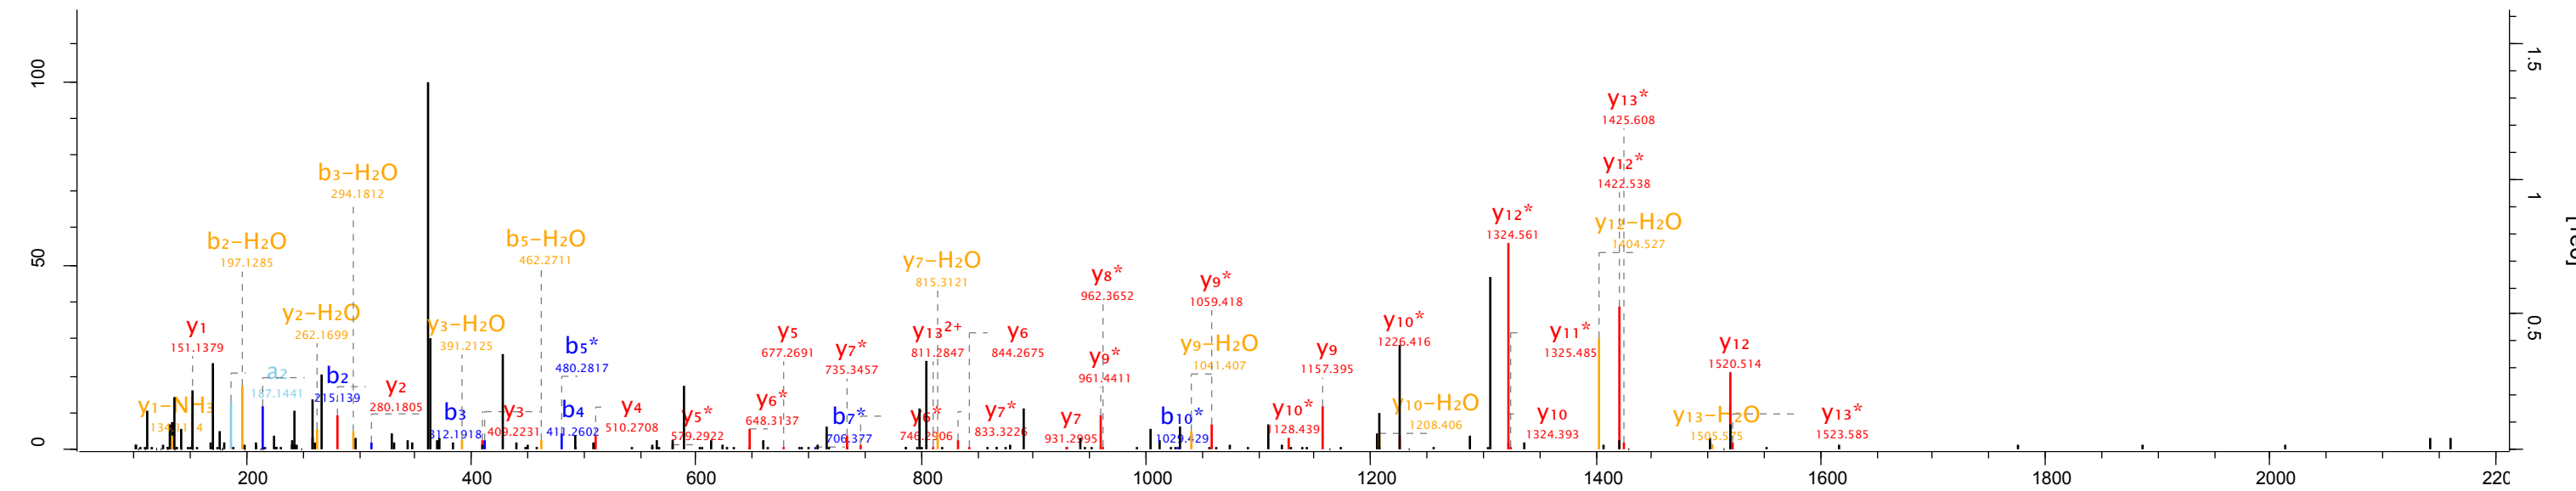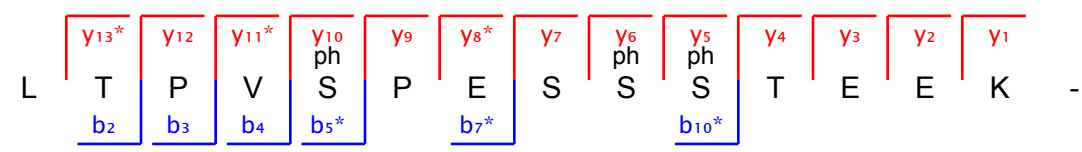



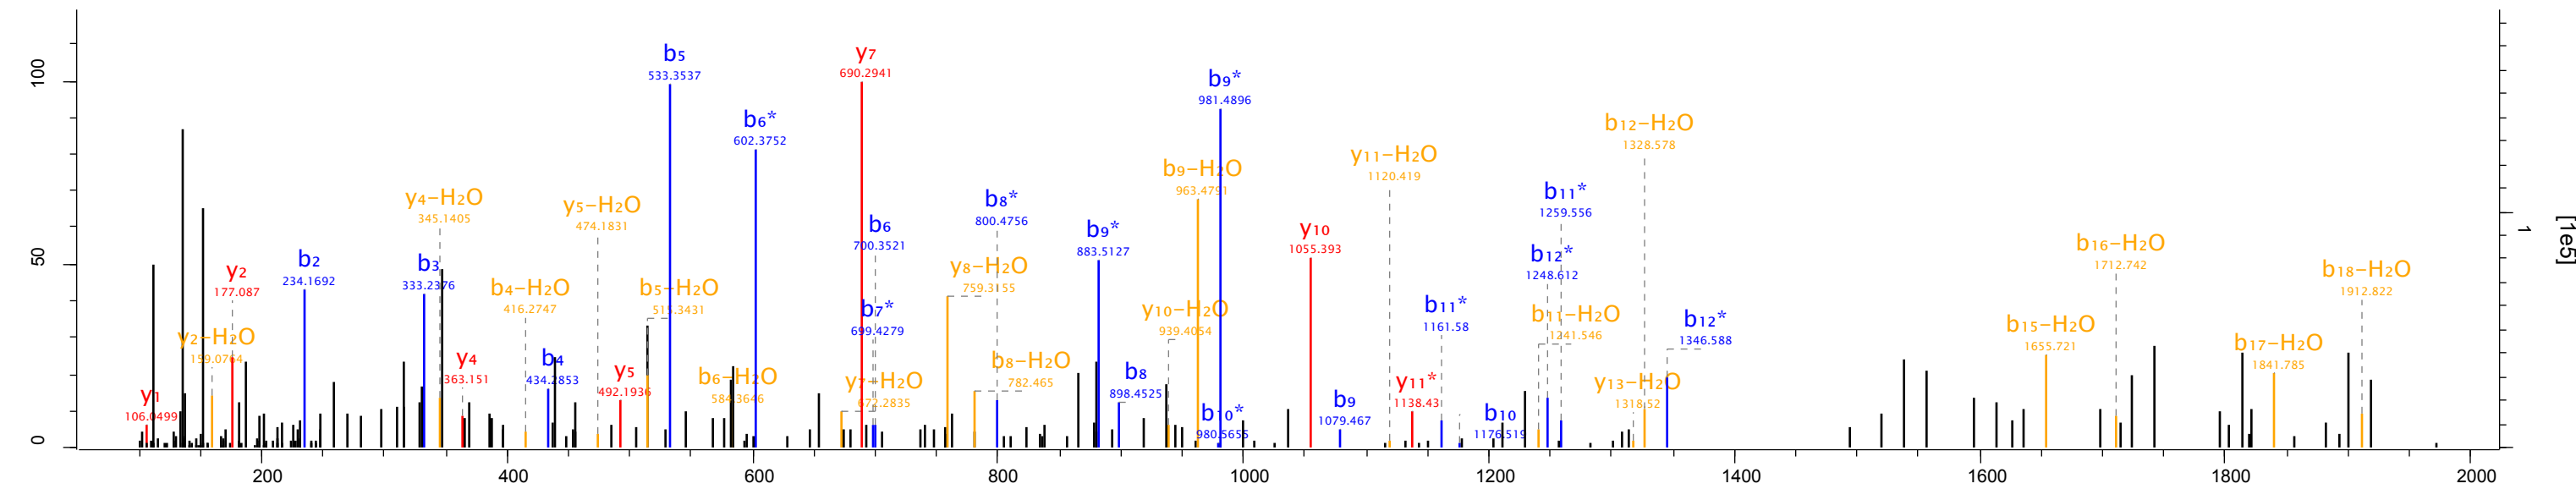

- K P V T V S P T  $y_{11}^*$   $y_{10}$  ph  $y_7$   $y_5$   $y_4$   $y_2$   $y_1$   
 - K P V T V S P T P T E G E A S -  
 b<sub>2</sub> b<sub>3</sub> b<sub>4</sub> b<sub>5</sub> b<sub>6</sub> b<sub>7</sub>\* b<sub>8</sub> b<sub>9</sub> b<sub>10</sub> b<sub>11</sub>\* b<sub>12</sub>\*

Raw file 20171215\_MaS\_33SR\_LMH\_phospho2\_04 Scan 7369 Method FTMS; HCD Score 90.31 m/z 929.85 Gene names CHD7

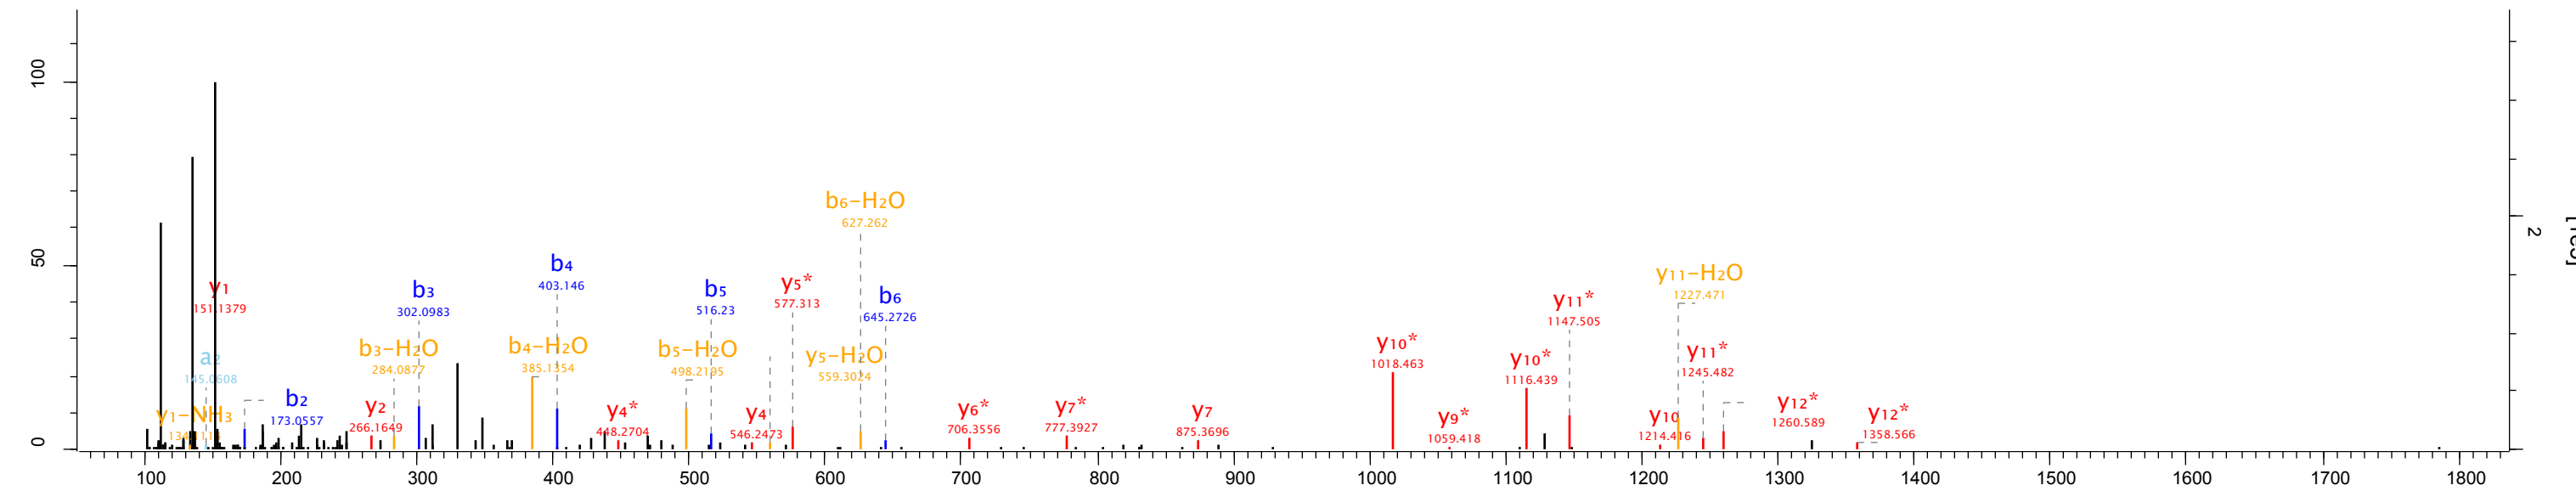

- D G E T L E G S D A E E S L D K -

Fragmentation mapping: b2 (G), b3 (E), b4 (T), b5 (L), b6 (E), y12\* (L), y11\* (E), y10 (G), y9\* (S), y7 (A), y6\* (E), y5\* (E), y4 (S), y2 (D), y1 (K).

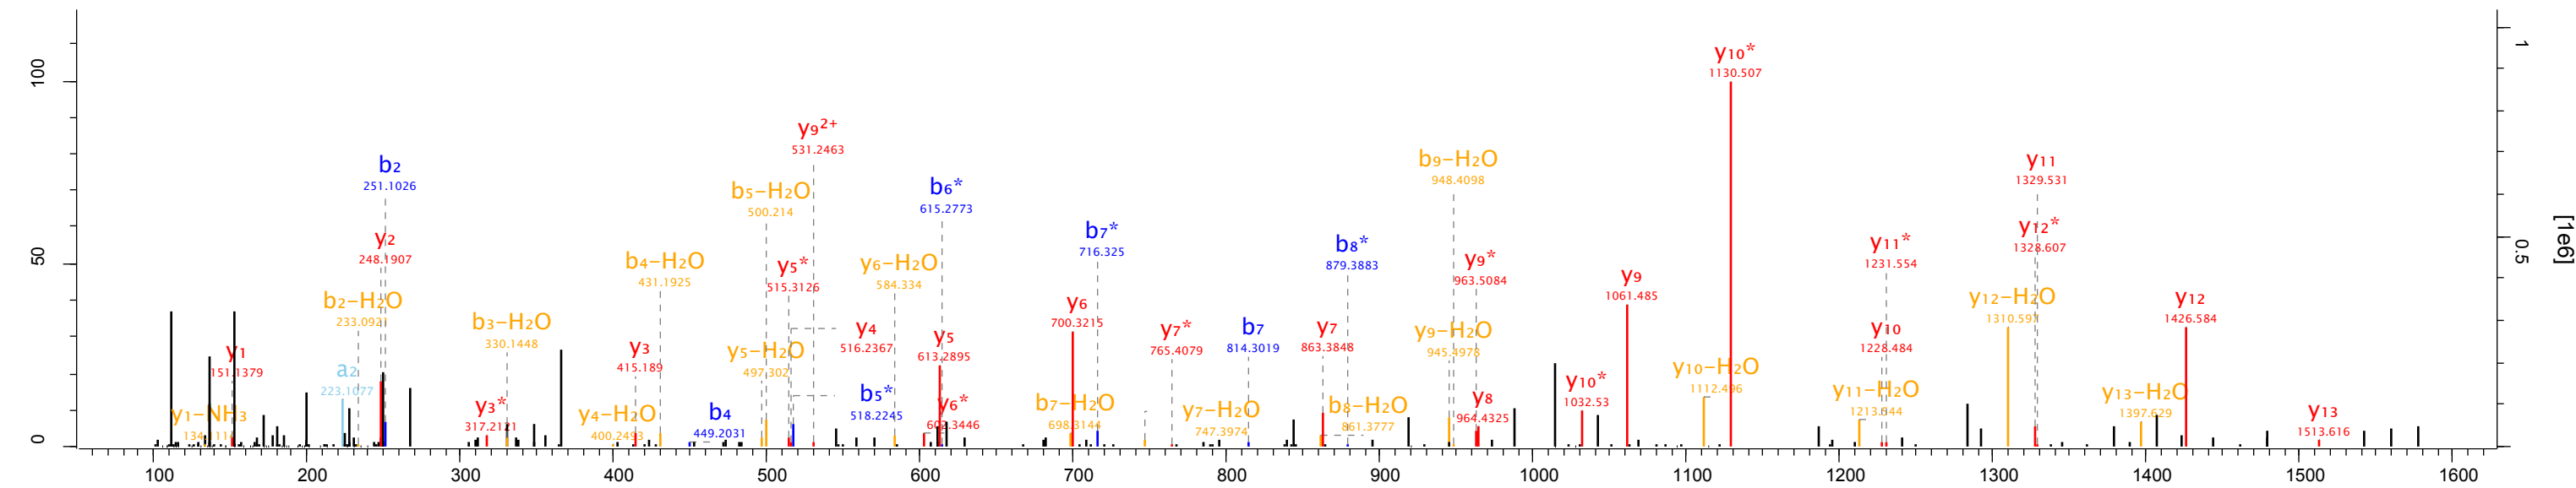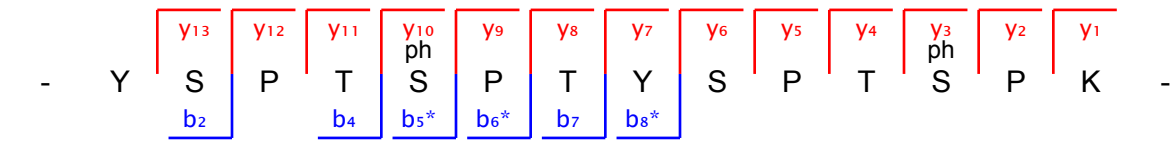

Raw file 20171215\_MaS\_33SR\_LMH\_phospho2\_04  
 Scan 8409 Method FTMS; HCD Score 111.63 m/z 786.34 Gene names PRPF4B

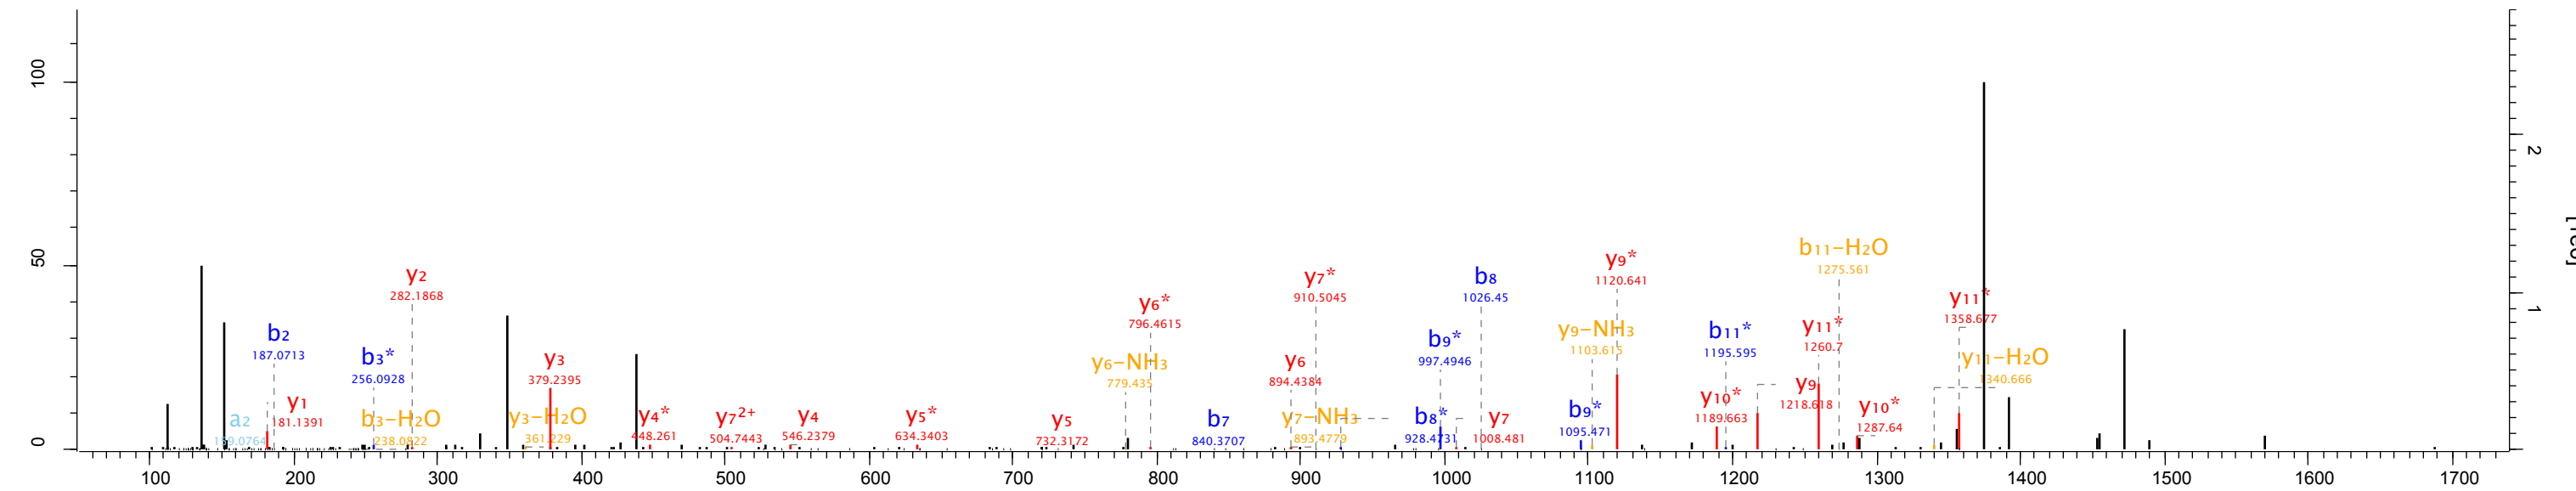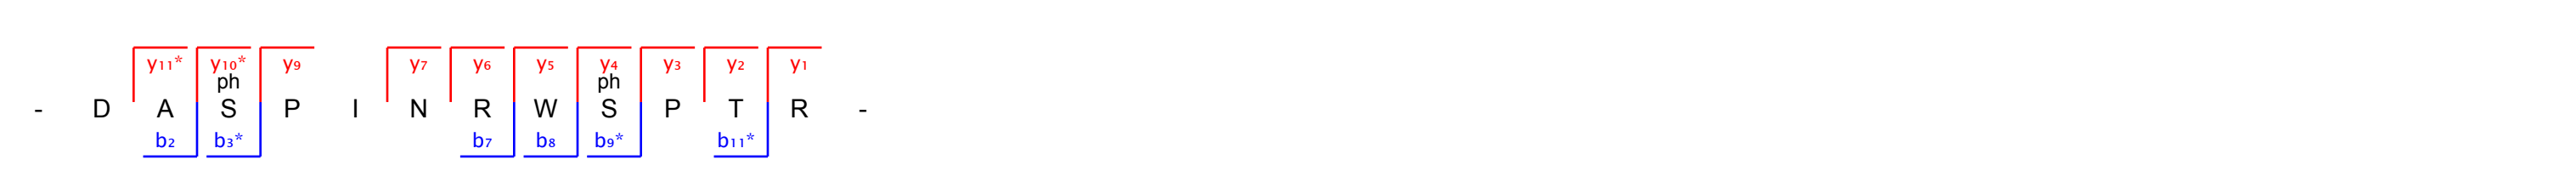

Raw file 20171215\_MaS\_33SR\_LMH\_phospho2\_04 Scan 9689 Method FTMS; HCD Score 55.66 m/z 962.9 Gene names PLEC

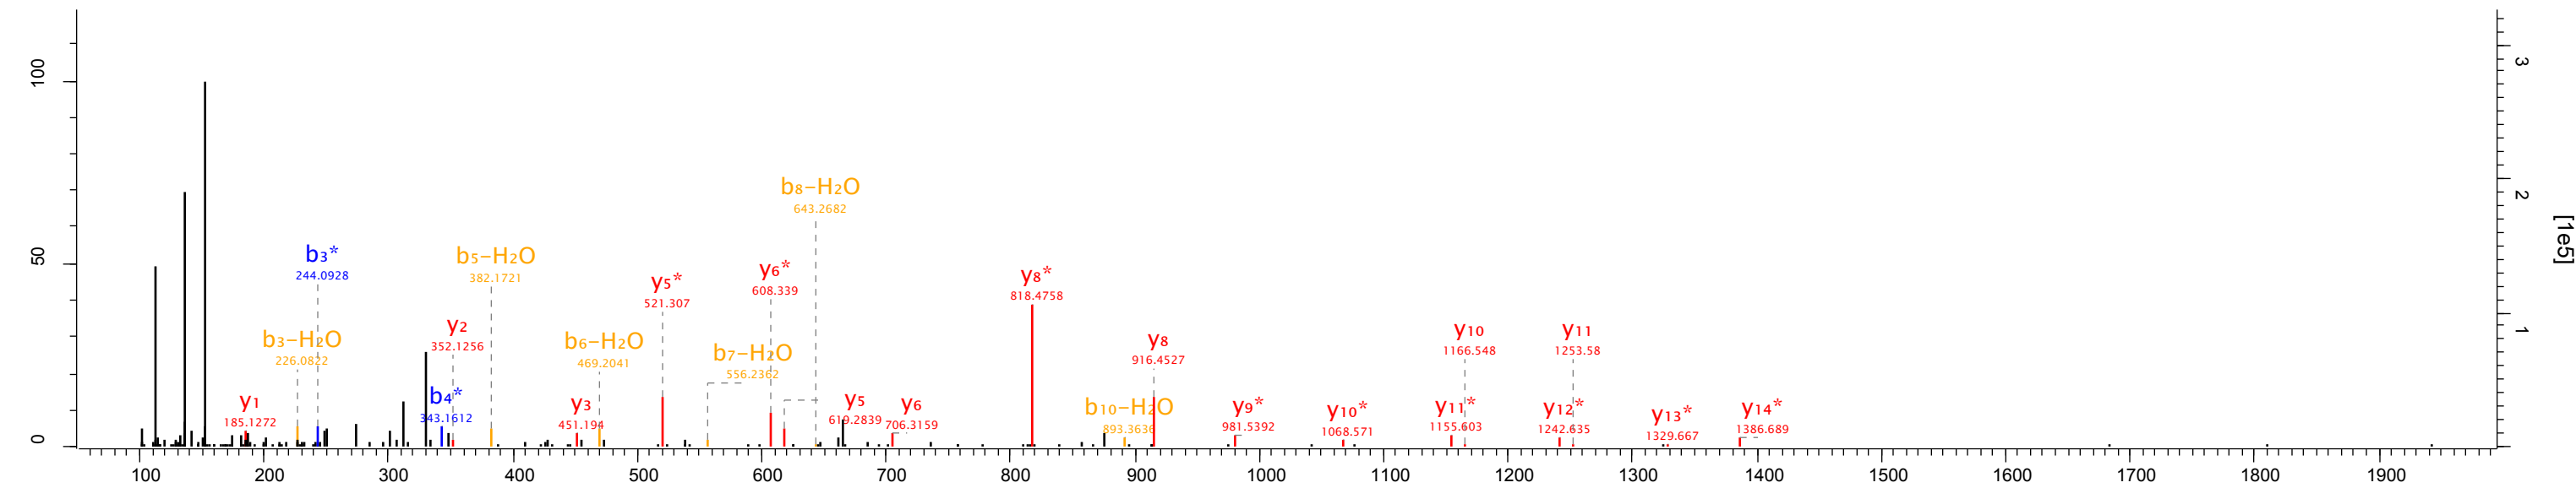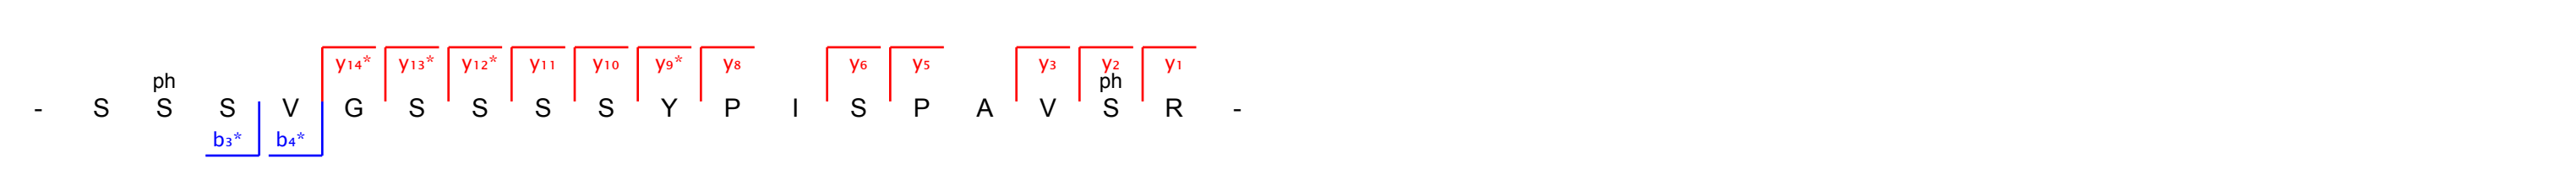

Raw file: 20171215\_MaS\_33SR\_LMH\_phospho2\_05  
 Scan: 11699 Method: FTMS; HCD Score: 121.28 m/z: 1086.49 Gene names: MAP1B

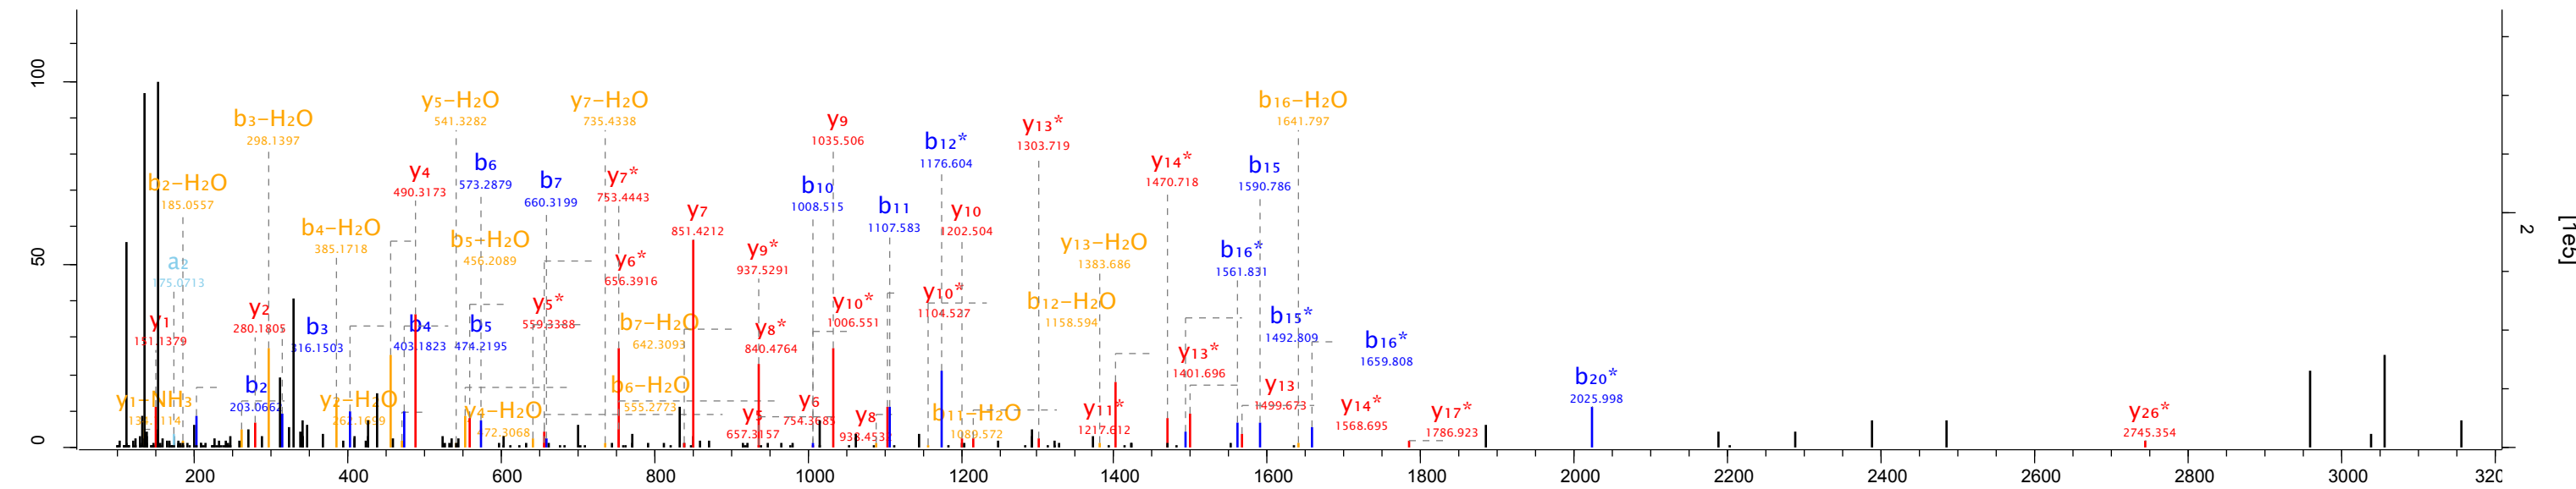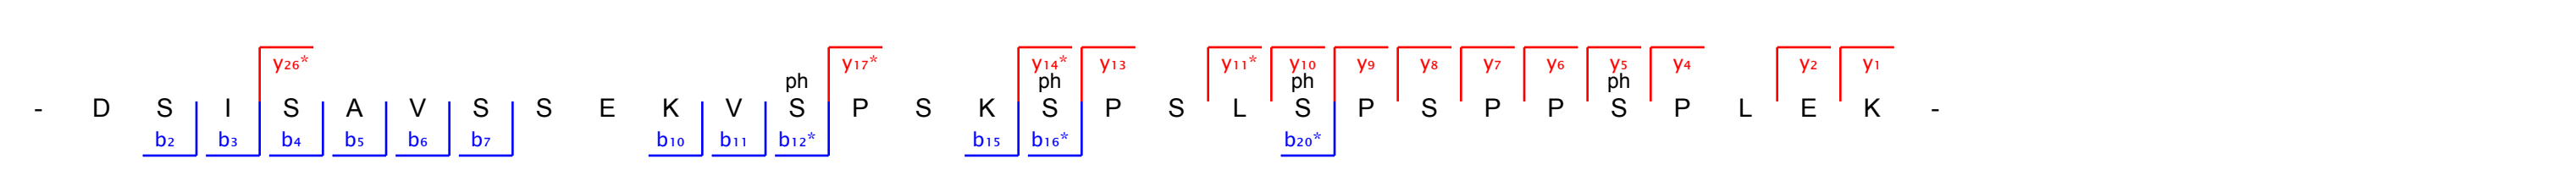

Raw file  
20171215\_MaS\_33SR\_LMH\_phospho2\_05

Scan 3739 Method FTMS; HCD Score 149.8 m/z 1109.31 Gene names EIF5B

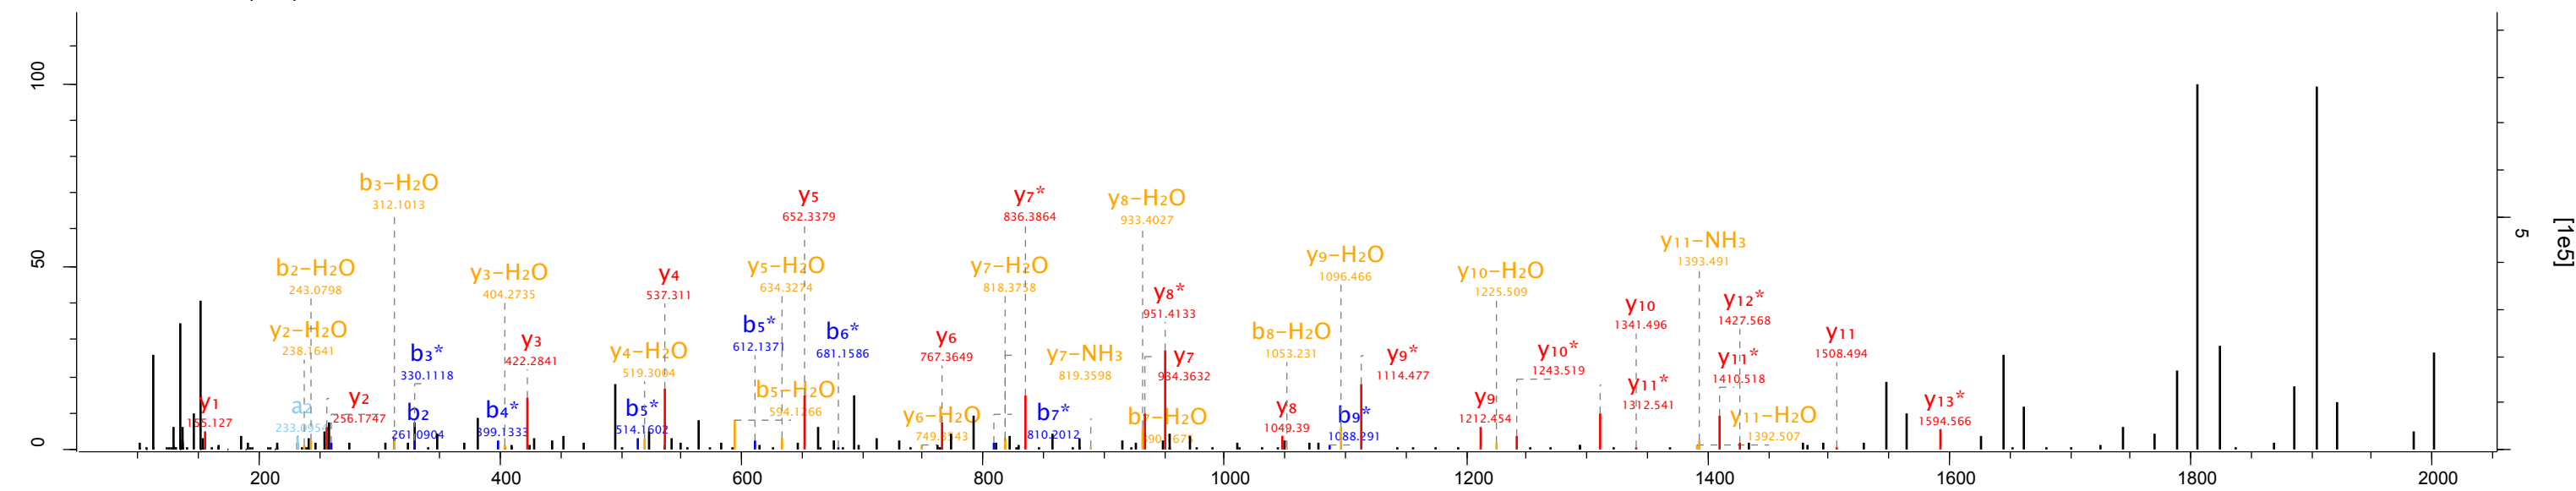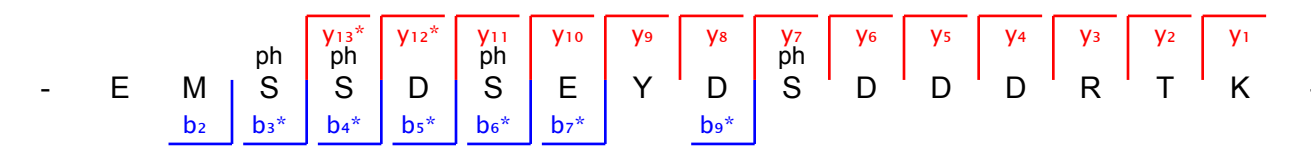

Raw file

20171215\_MaS\_33SR\_LMH\_phospho2\_05

| Scan | Method    | Score | m/z    | Gene names |
|------|-----------|-------|--------|------------|
| 4179 | FTMS; HCD | 66.02 | 719.78 | VIM        |

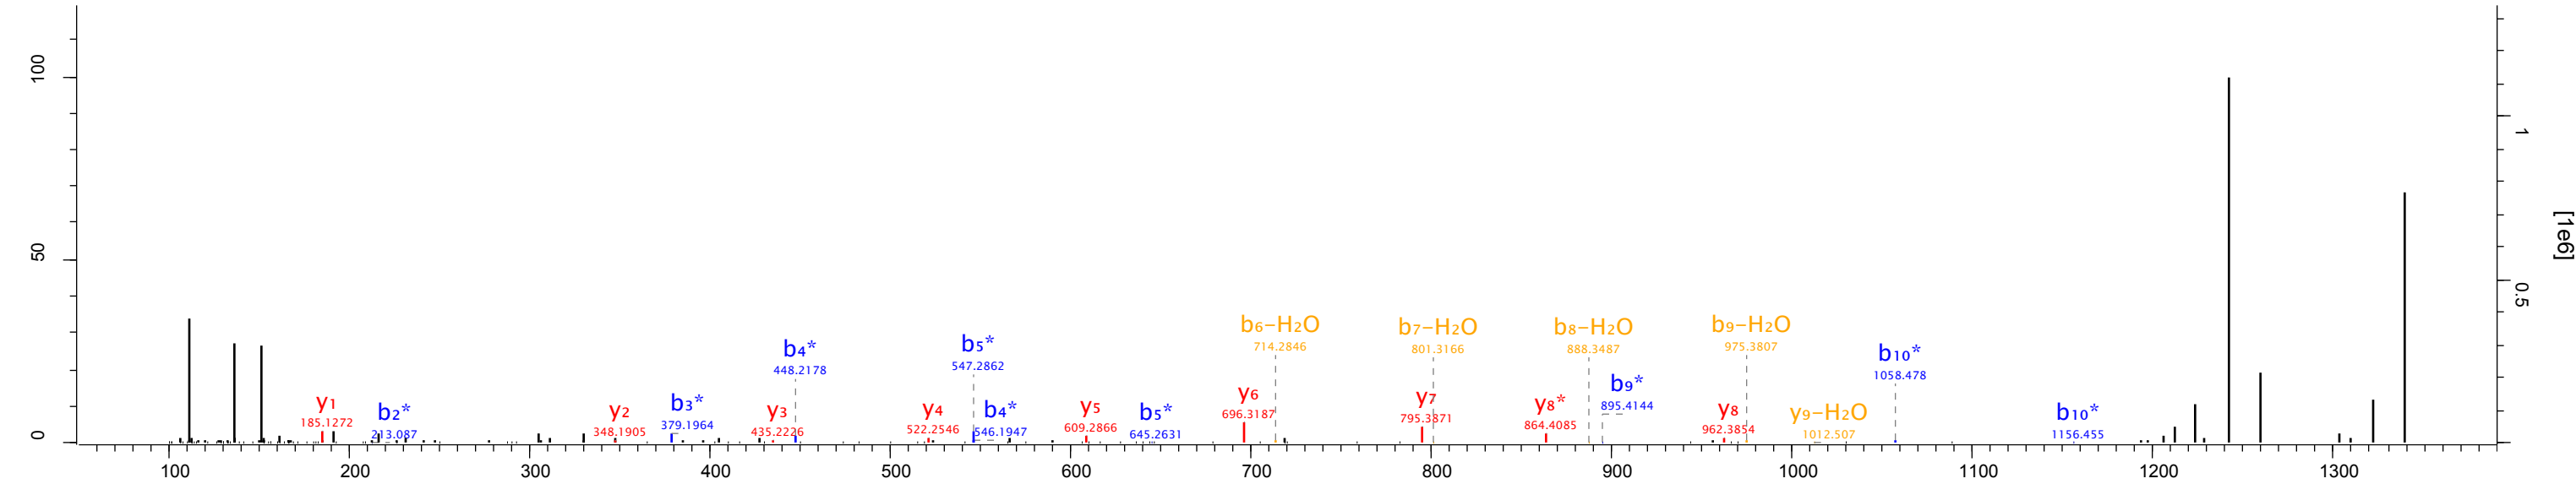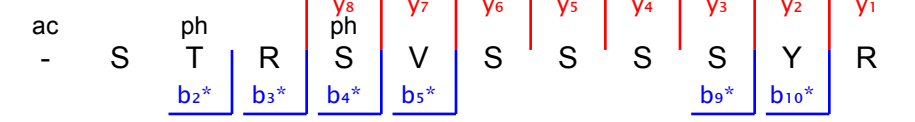



Raw file  
20171215\_MaS\_33SR\_LMH\_phospho2\_05

Scan 5919 Method FTMS; HCD Score 45.28 m/z 943.33 Gene names PWP1

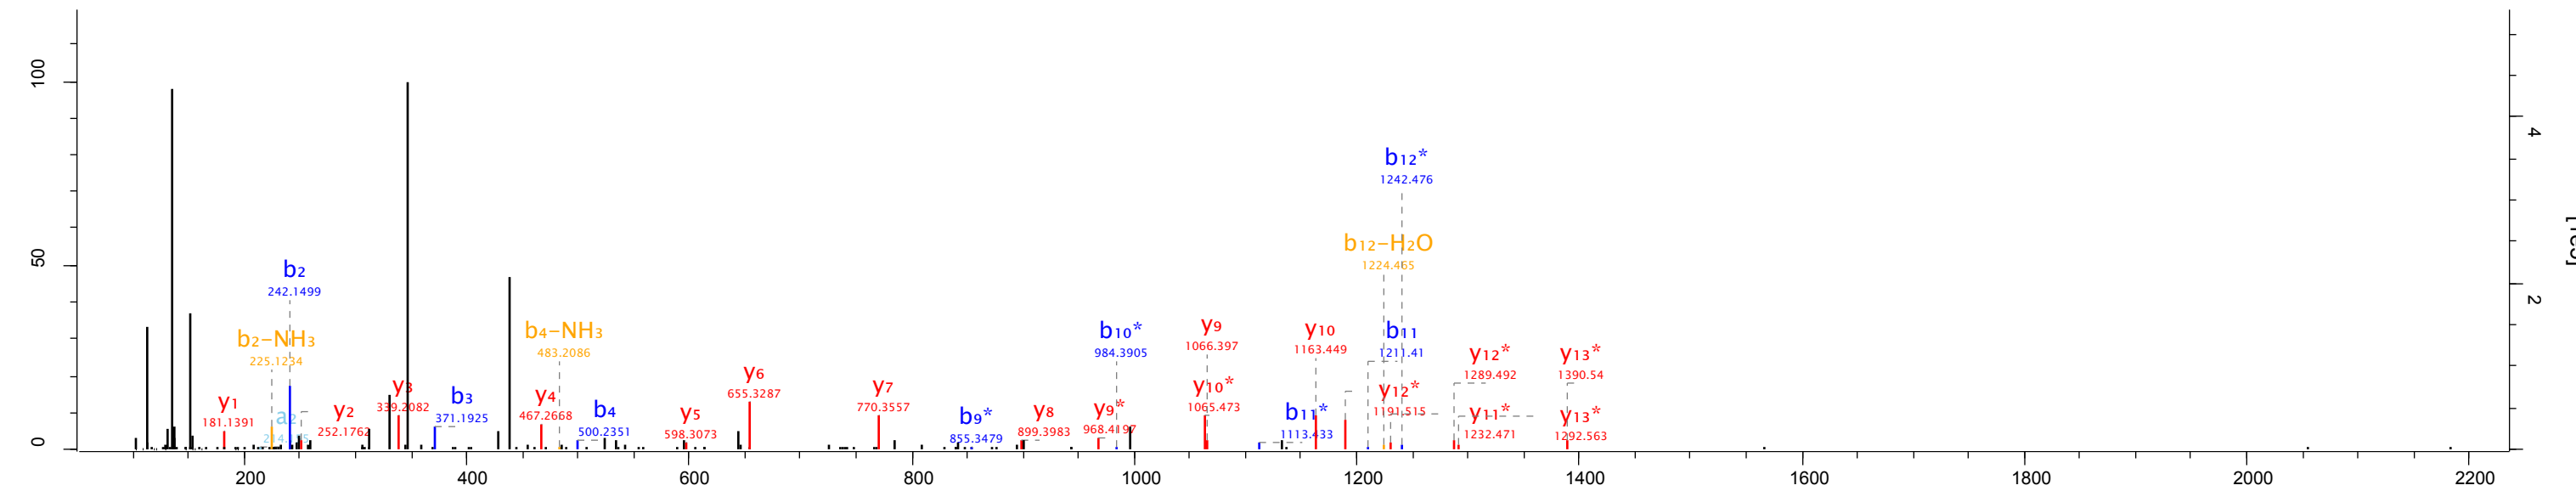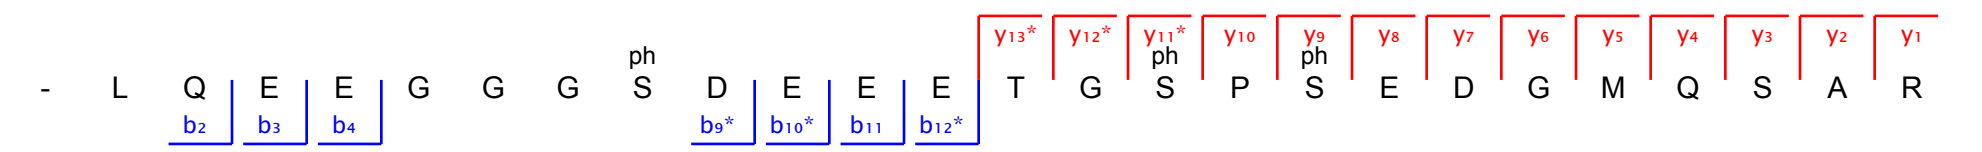

Raw file

20171215\_MaS\_33SR\_LMH\_phospho2\_05

| Scan | Method    | Score  | m/z    | Gene names |
|------|-----------|--------|--------|------------|
| 6699 | FTMS; HCD | 118.23 | 815.83 | PTMA       |

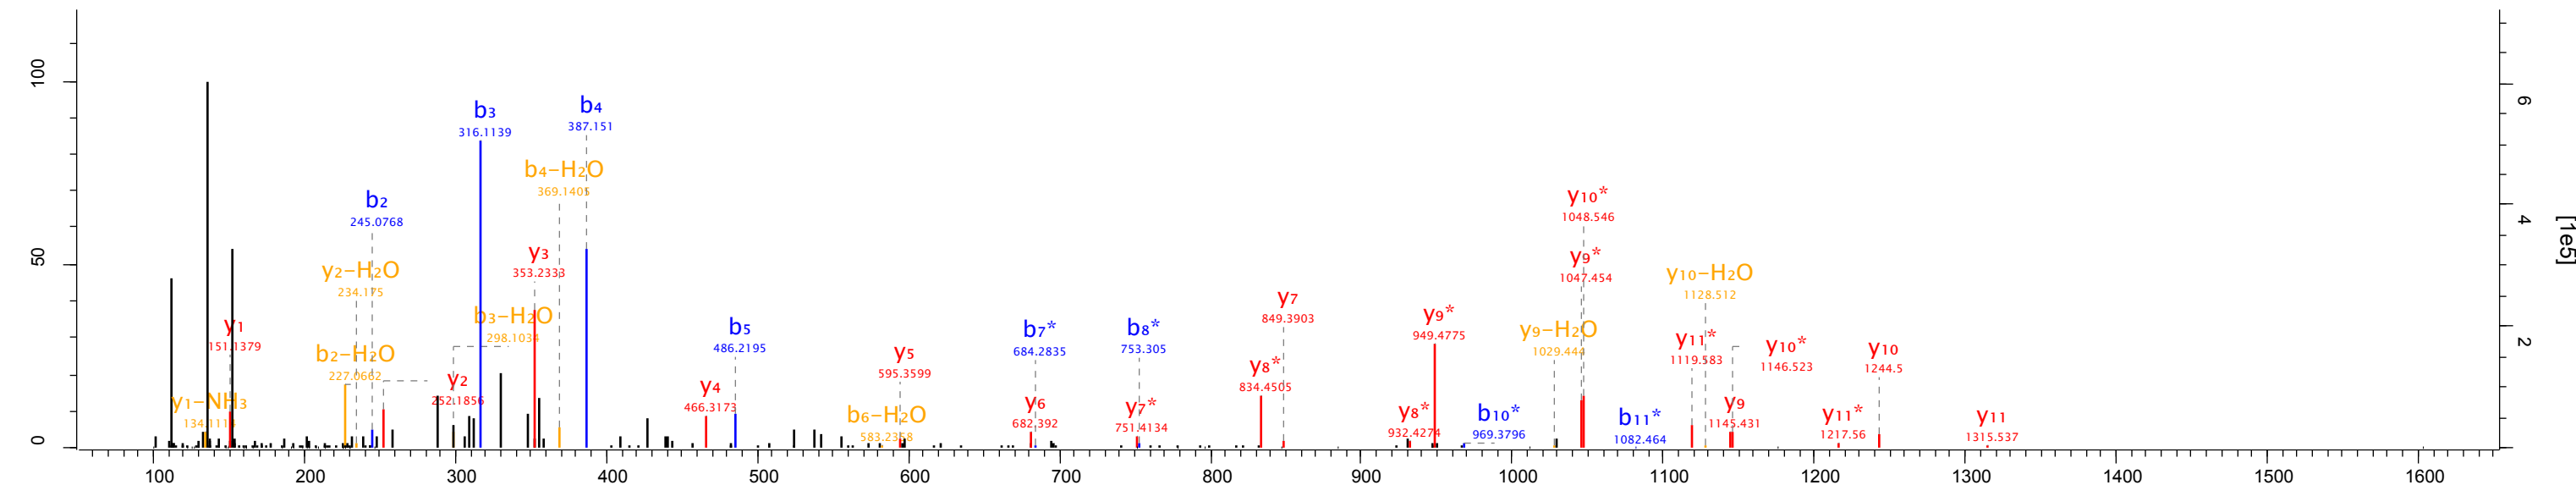

ac

- S D A A V D T ph S E I T T K -

b<sub>2</sub> b<sub>3</sub> b<sub>4</sub> b<sub>5</sub> b<sub>7</sub>\* b<sub>8</sub>\* b<sub>10</sub>\* b<sub>11</sub>\*

y<sub>11</sub> y<sub>10</sub> y<sub>9</sub> y<sub>8</sub>\* y<sub>7</sub> y<sub>6</sub> y<sub>5</sub> y<sub>4</sub> y<sub>3</sub> y<sub>2</sub> y<sub>1</sub>

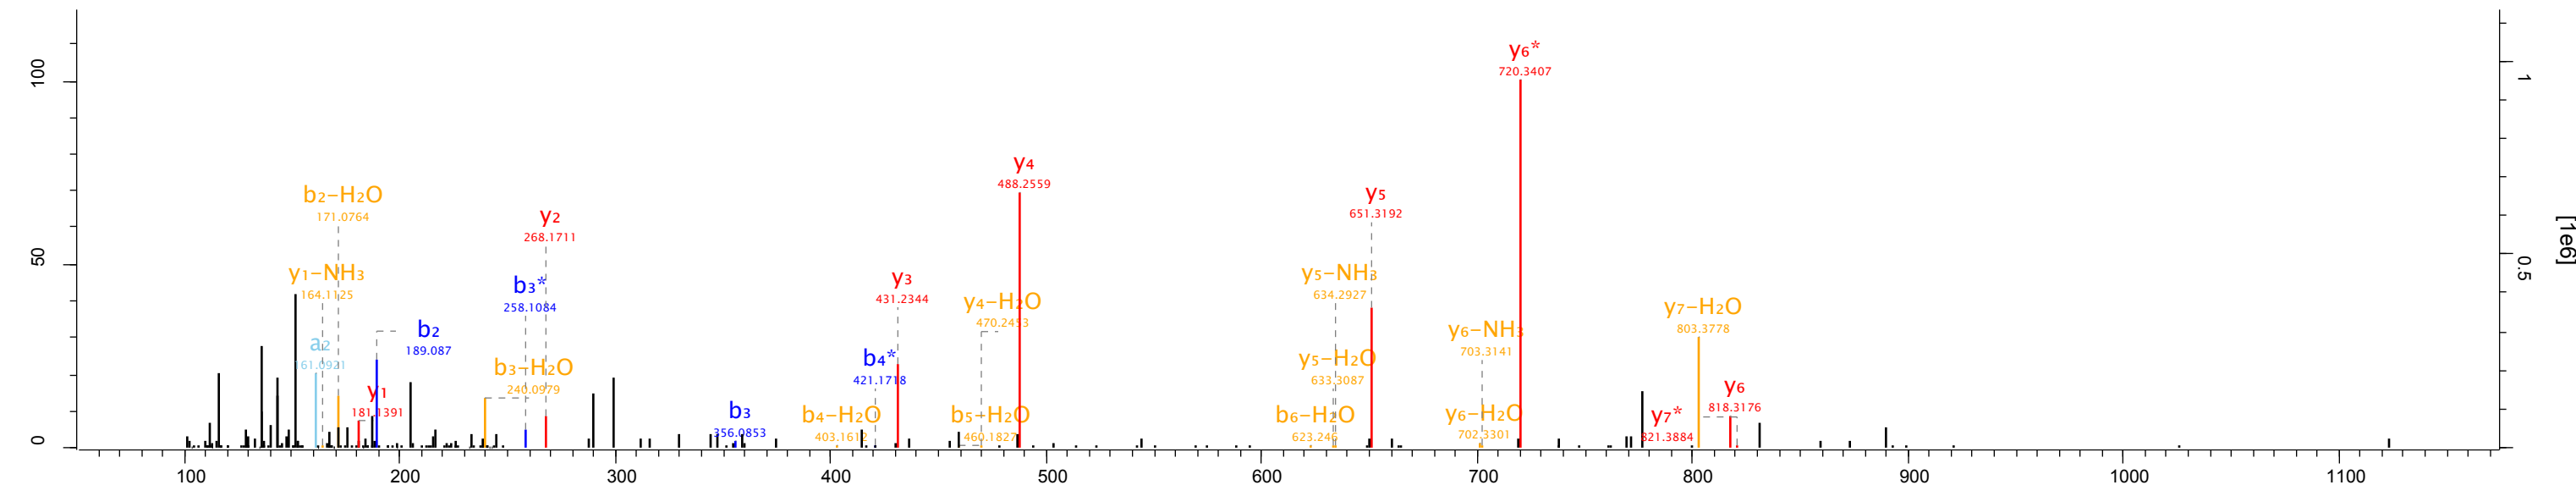

- S -

|     |          |     |    |    |    |    |
|-----|----------|-----|----|----|----|----|
| y7* | y6<br>ph | y5  | y4 | y3 | y2 | y1 |
| b2  | b3       | b4* | G  | Y  | S  | R  |

-

Raw file 20171215\_MaS\_33SR\_LMH\_phospho2\_06 Scan 5919 Method FTMS; HCD Score 177.58 m/z 723.33 Gene names PKN1

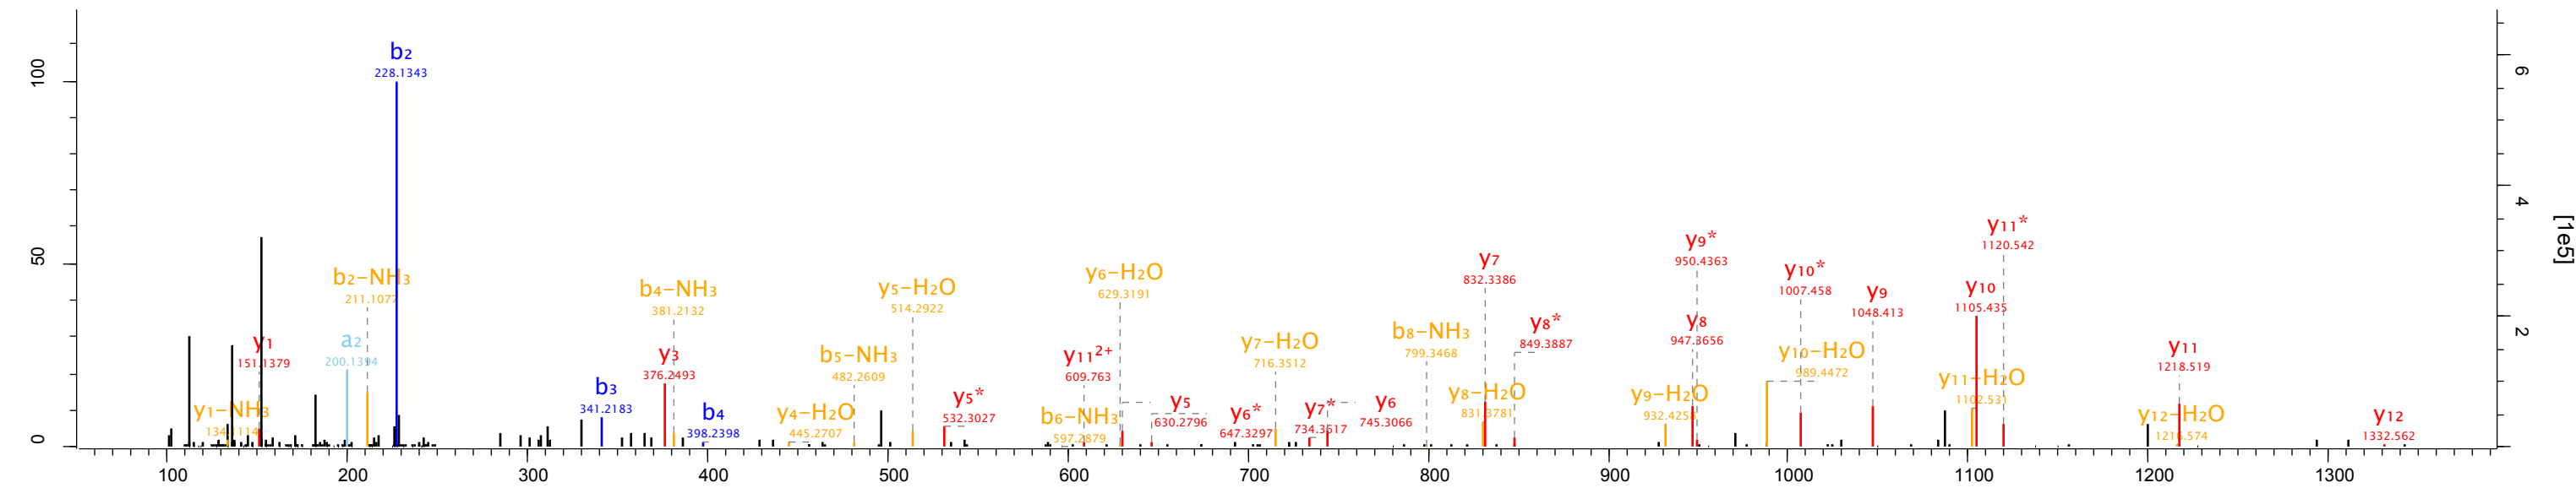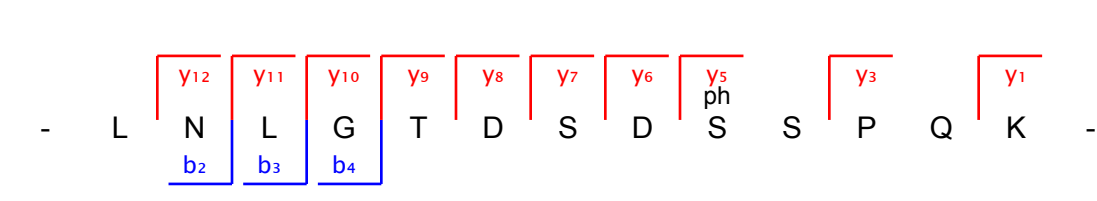

Raw file 20171215\_MaS\_33SR\_LMH\_phospho2\_06  
 Scan 9009 Method FTMS; HCD Score 67.4 m/z 1123.48 Gene names HUWE1

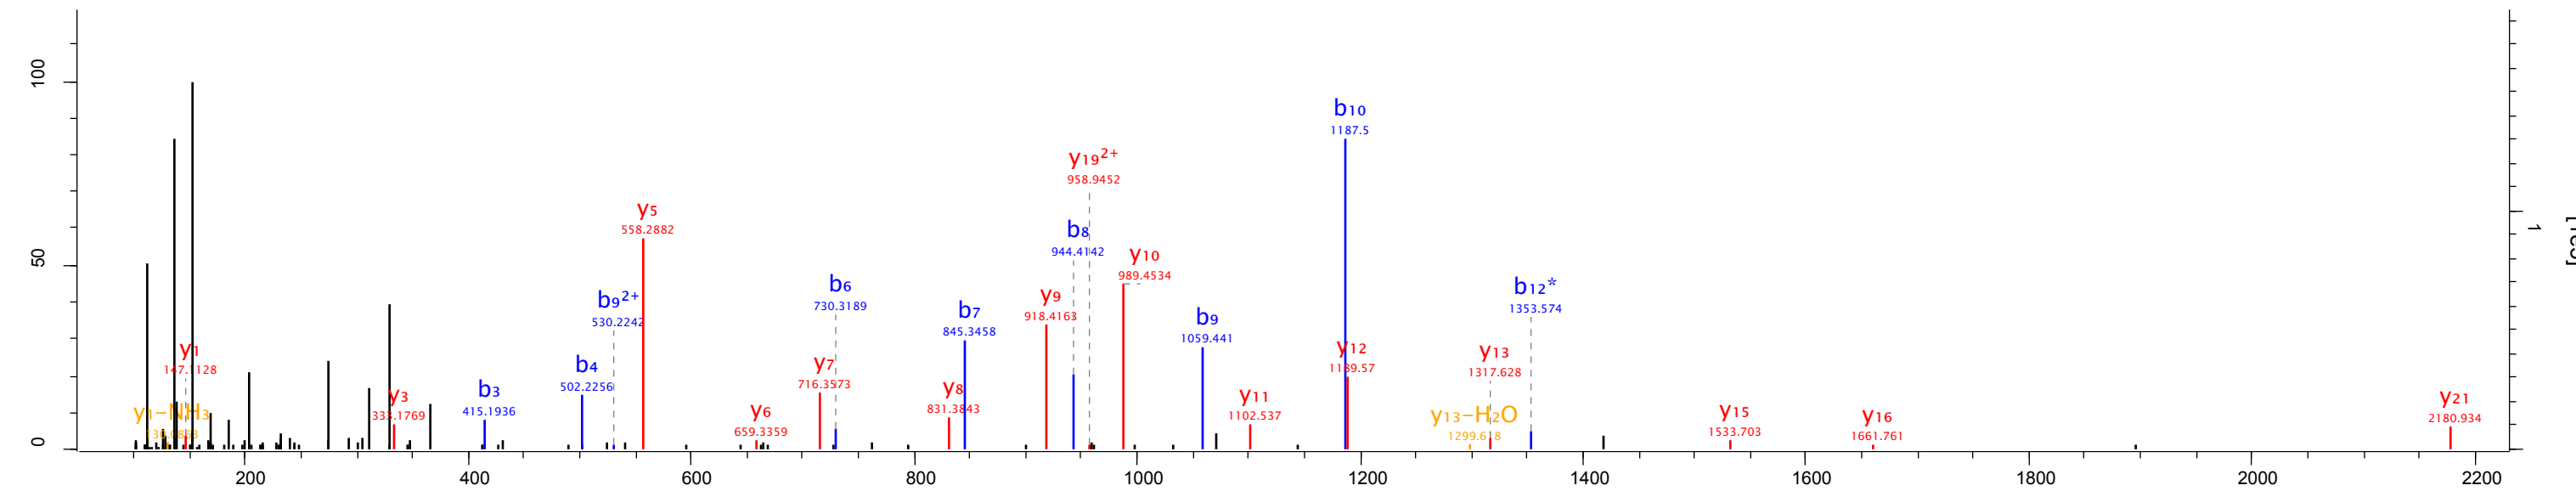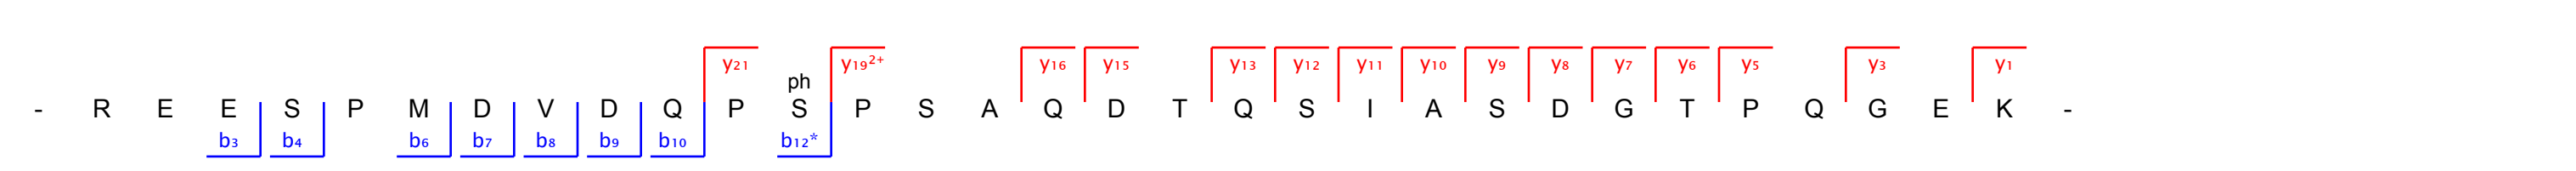

Raw file 20171215\_MaS\_33SR\_LMH\_phospho2\_08 Scan 2209 Method FTMS; HCD Score 164.97 m/z 692.8 Gene names TRIO

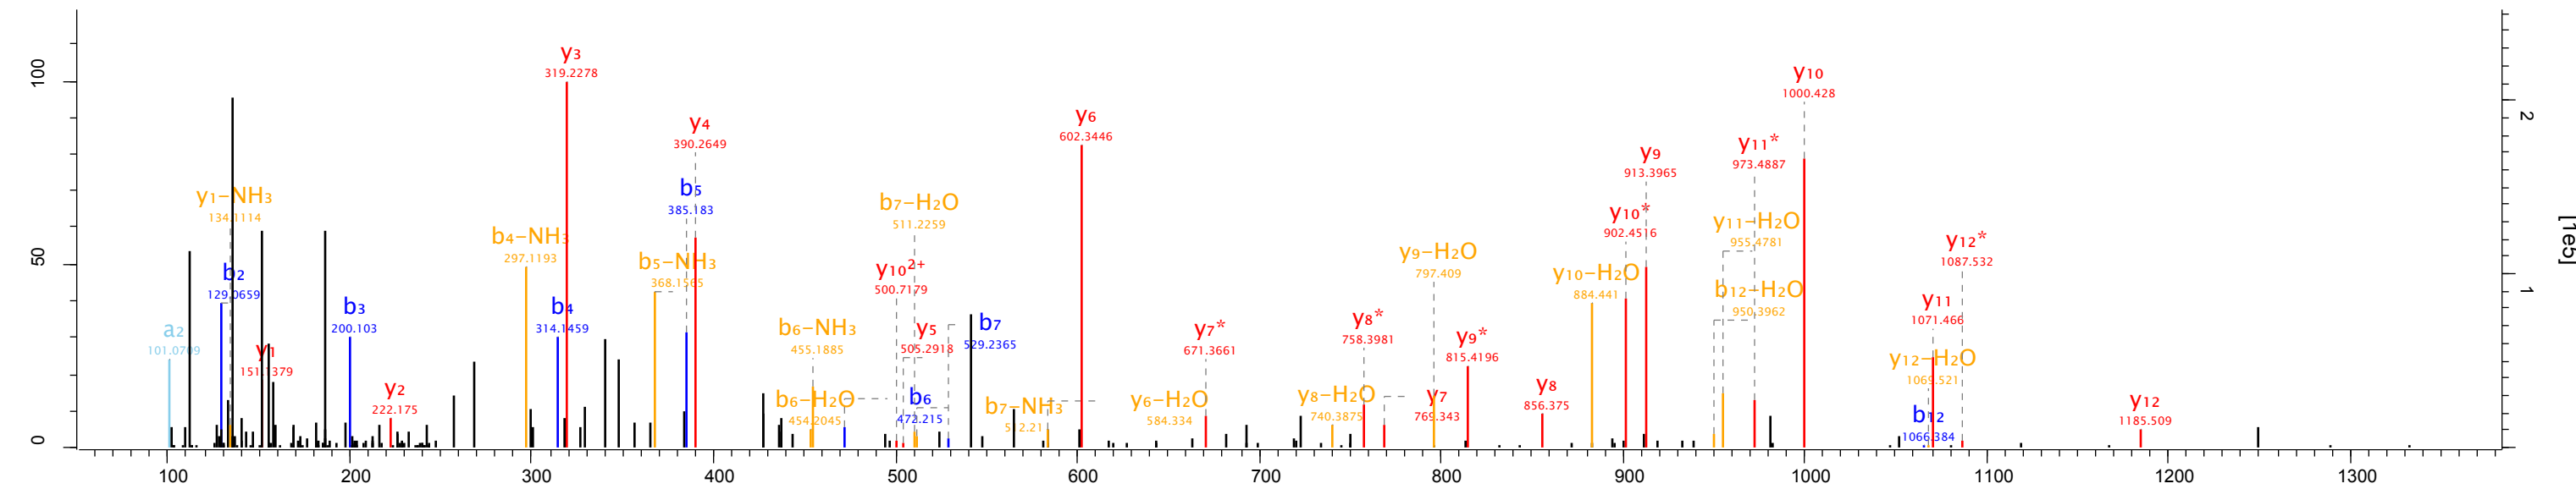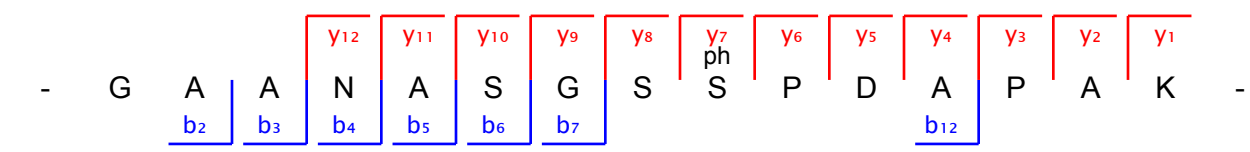

Raw file  
20171215\_MaS\_33SR\_LMH\_phospho2\_08

Scan 2529 Method FTMS; HCD Score 119.37 m/z 749.86 Gene names TXLNA

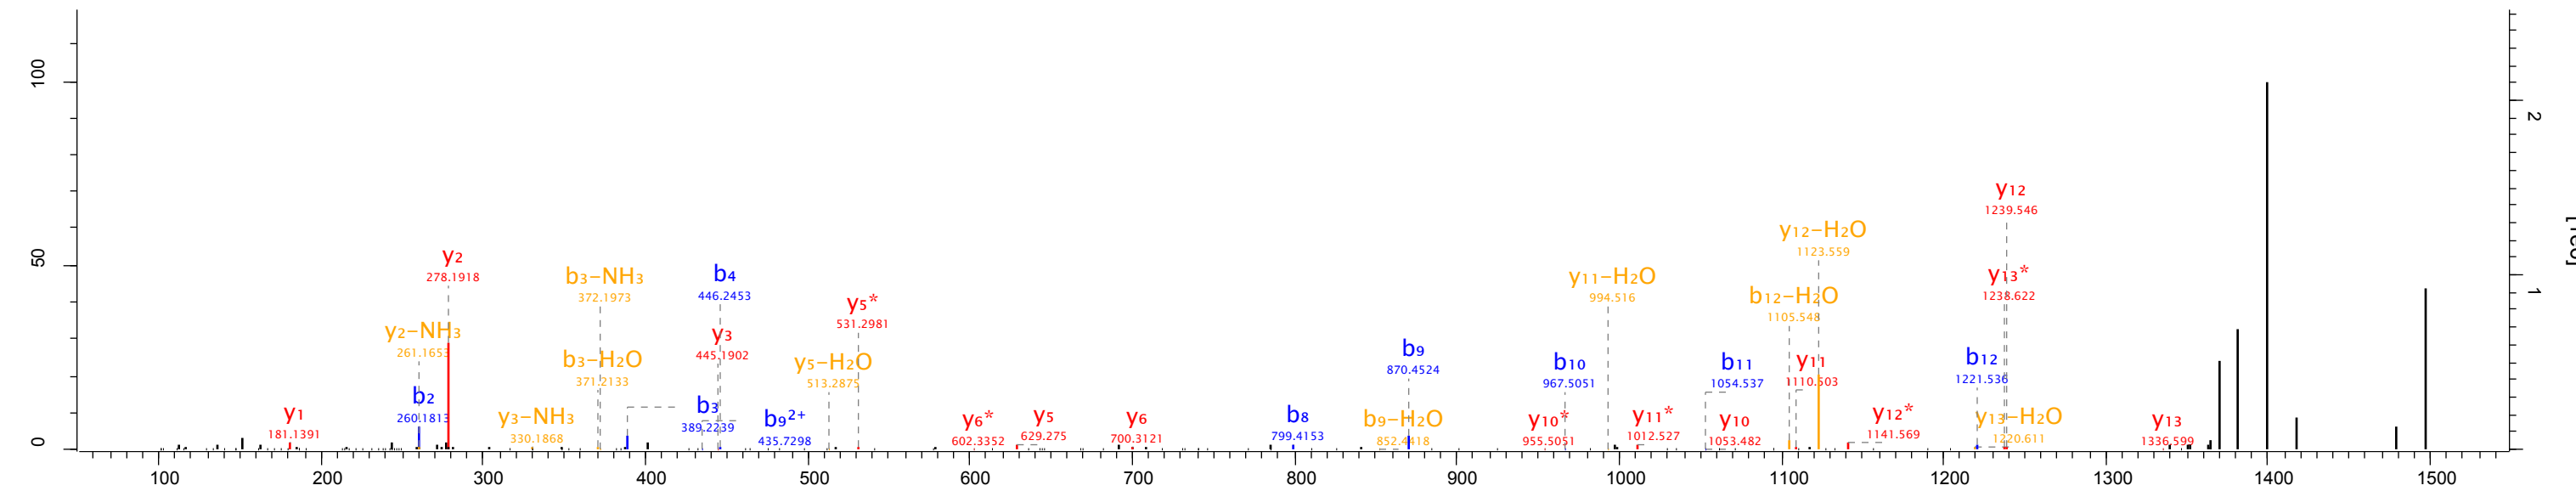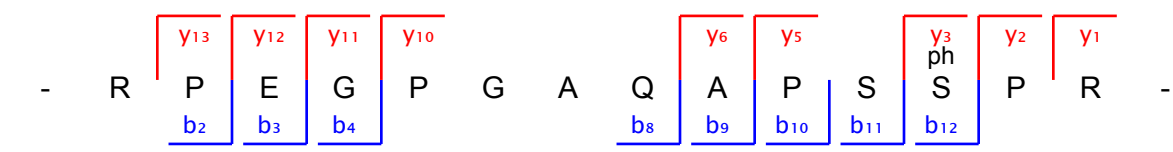

Raw file

20171215\_MaS\_33SR\_LMH\_phospho2\_08

Scan 2609 Method FTMS; HCD Score 55.2 m/z 588.31 Gene names RERE

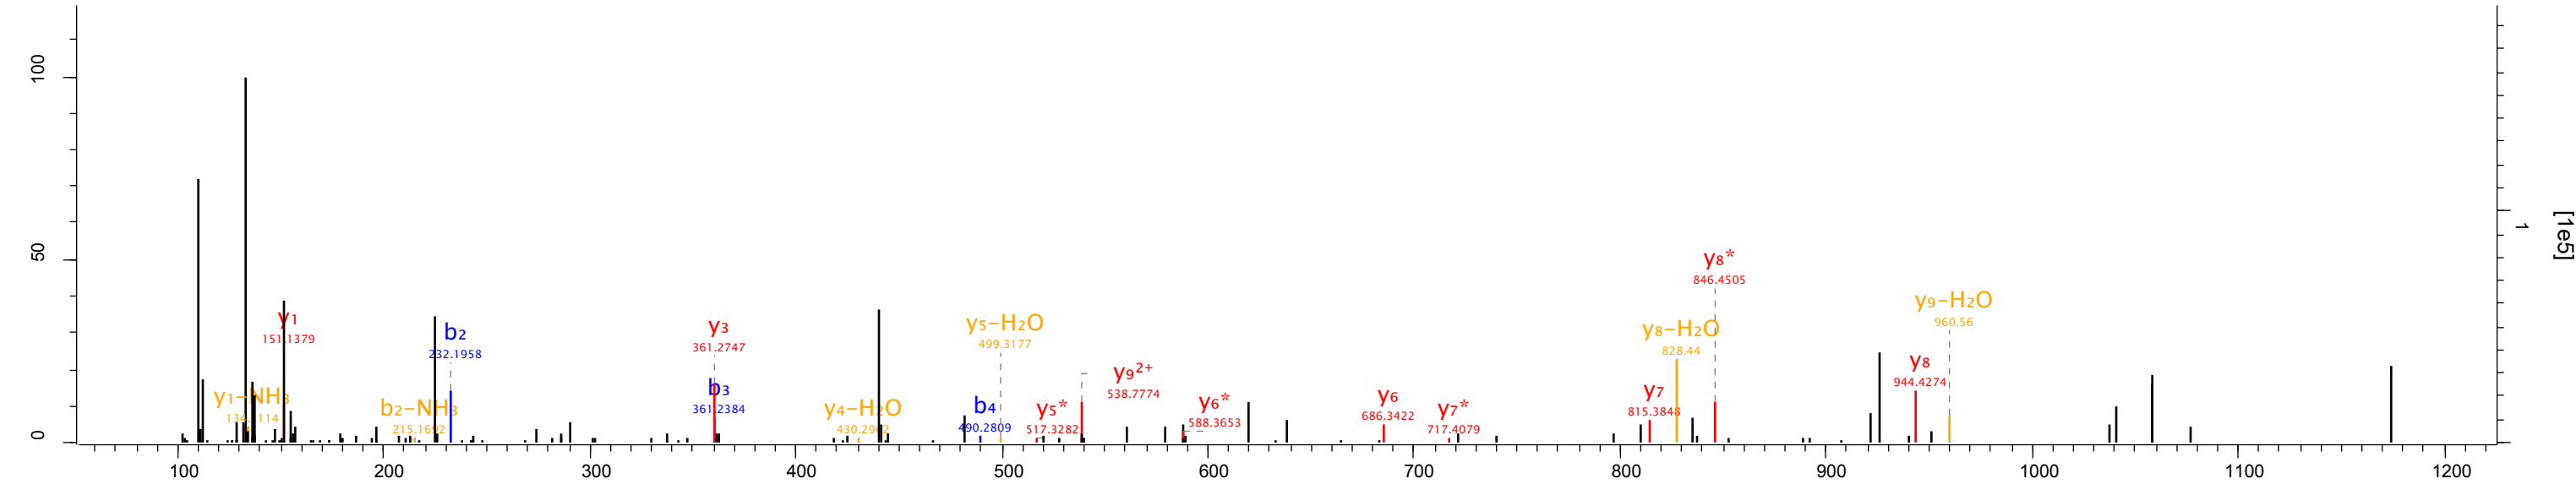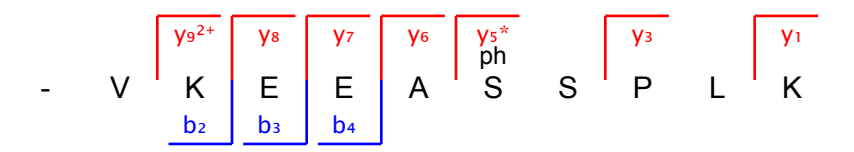



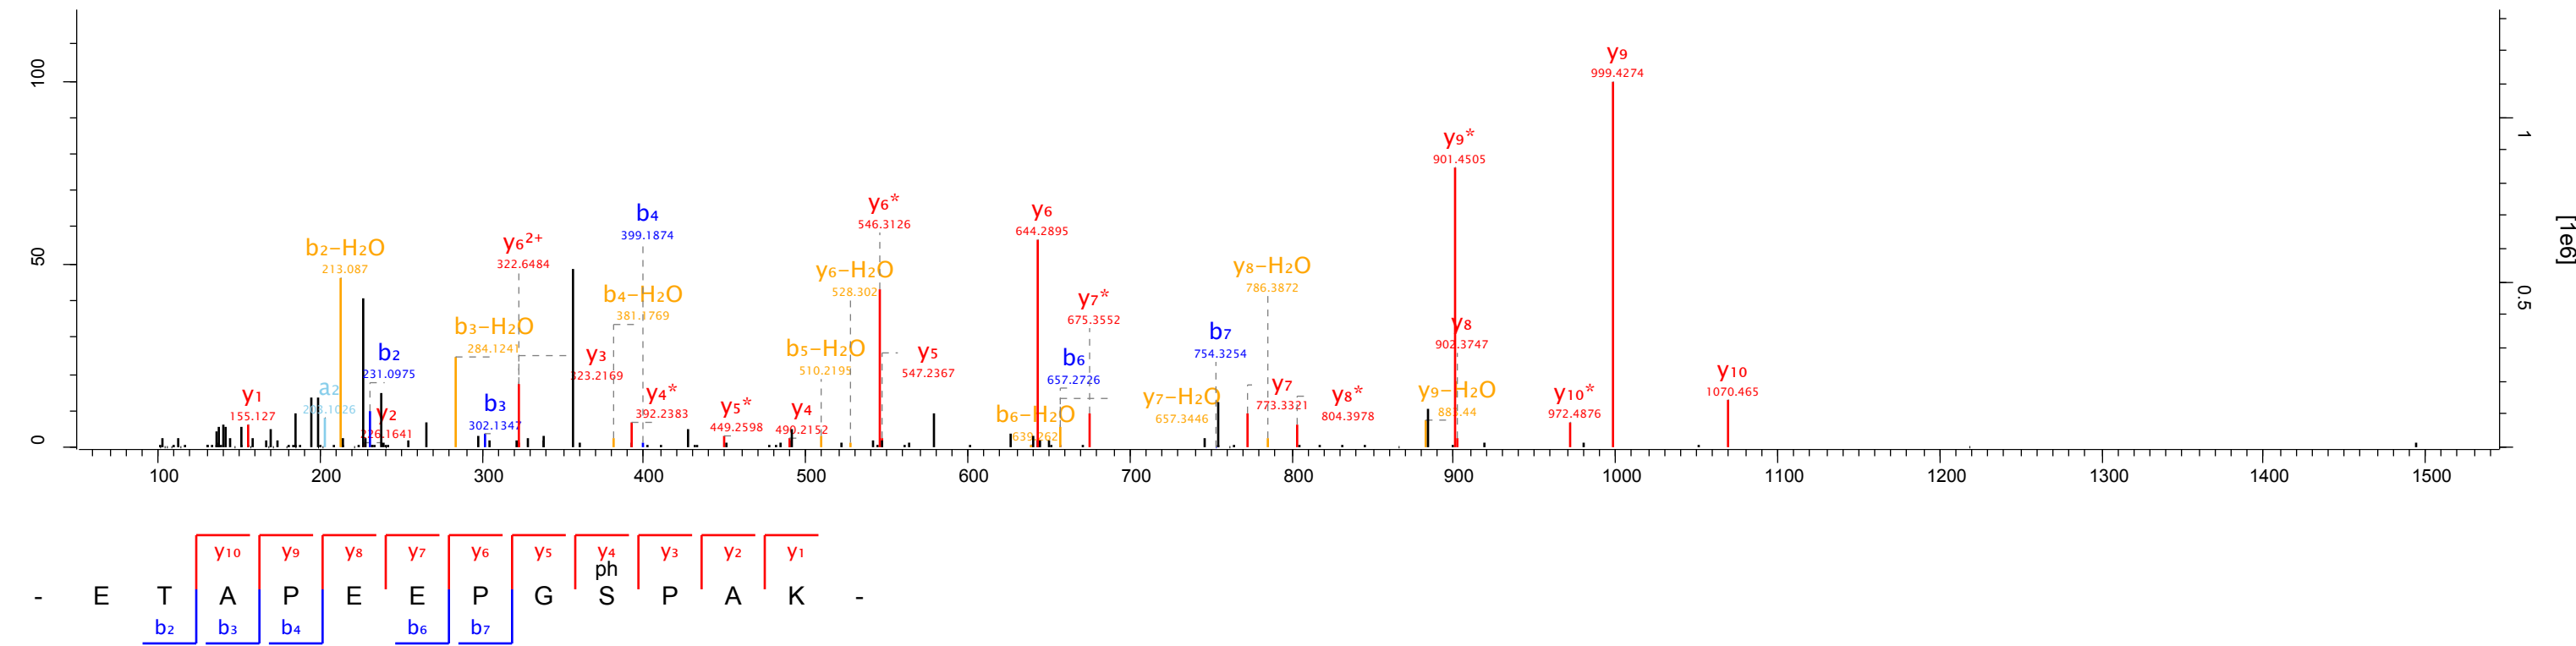

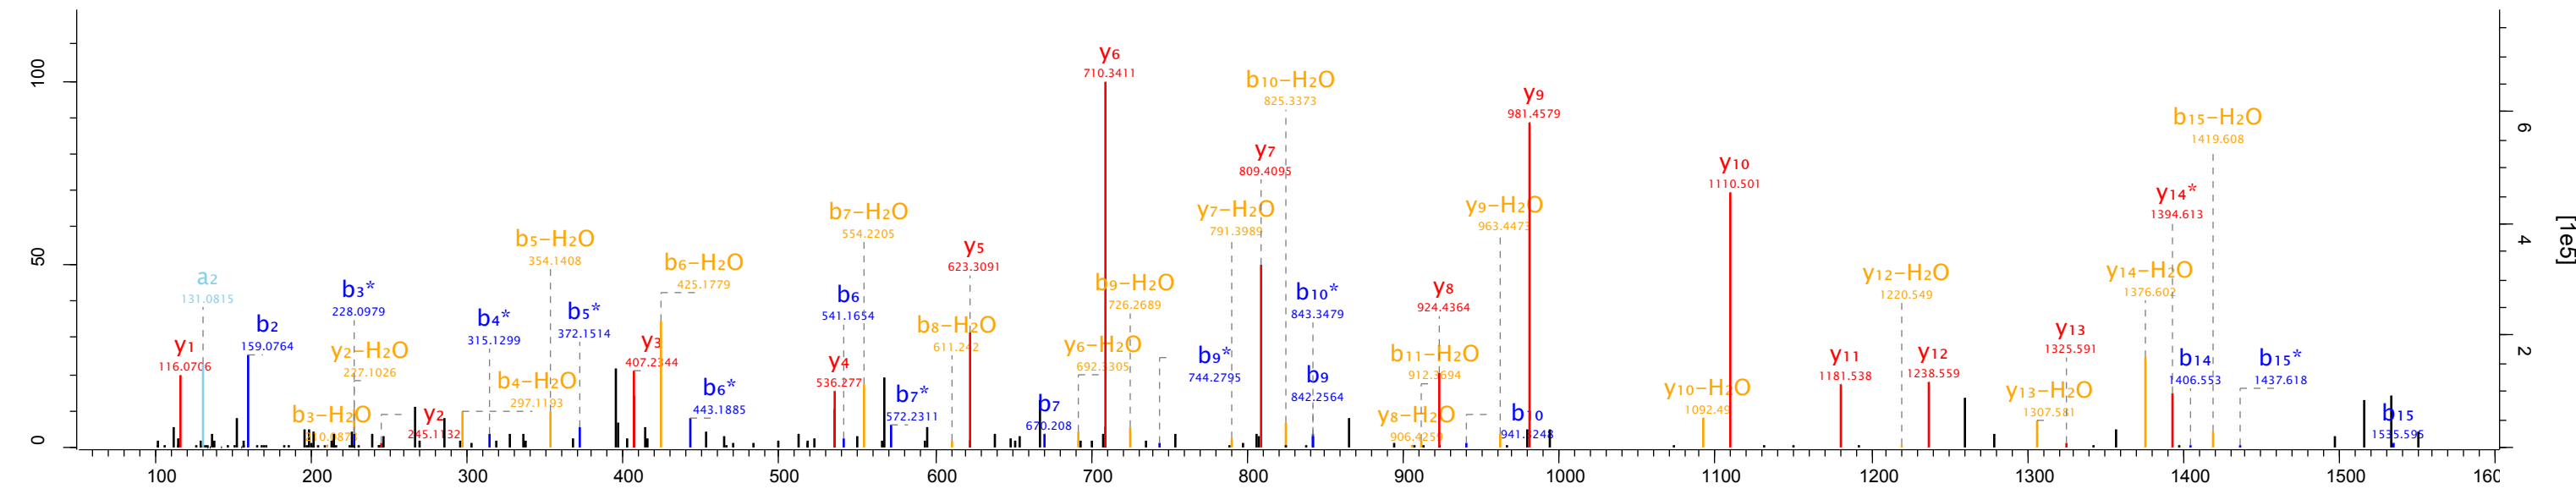

- S A S ph S S G A E G D V S S E R E P -

b2 b3\* b4\* b5\* b6 b7 b9 b10 b14 b15

Raw file

20171215\_MaS\_33SR\_LMH\_phospho2\_08

| Scan | Method    | Score | m/z    | Gene names |
|------|-----------|-------|--------|------------|
| 4369 | FTMS; HCD | 94.45 | 718.31 | MKI67      |

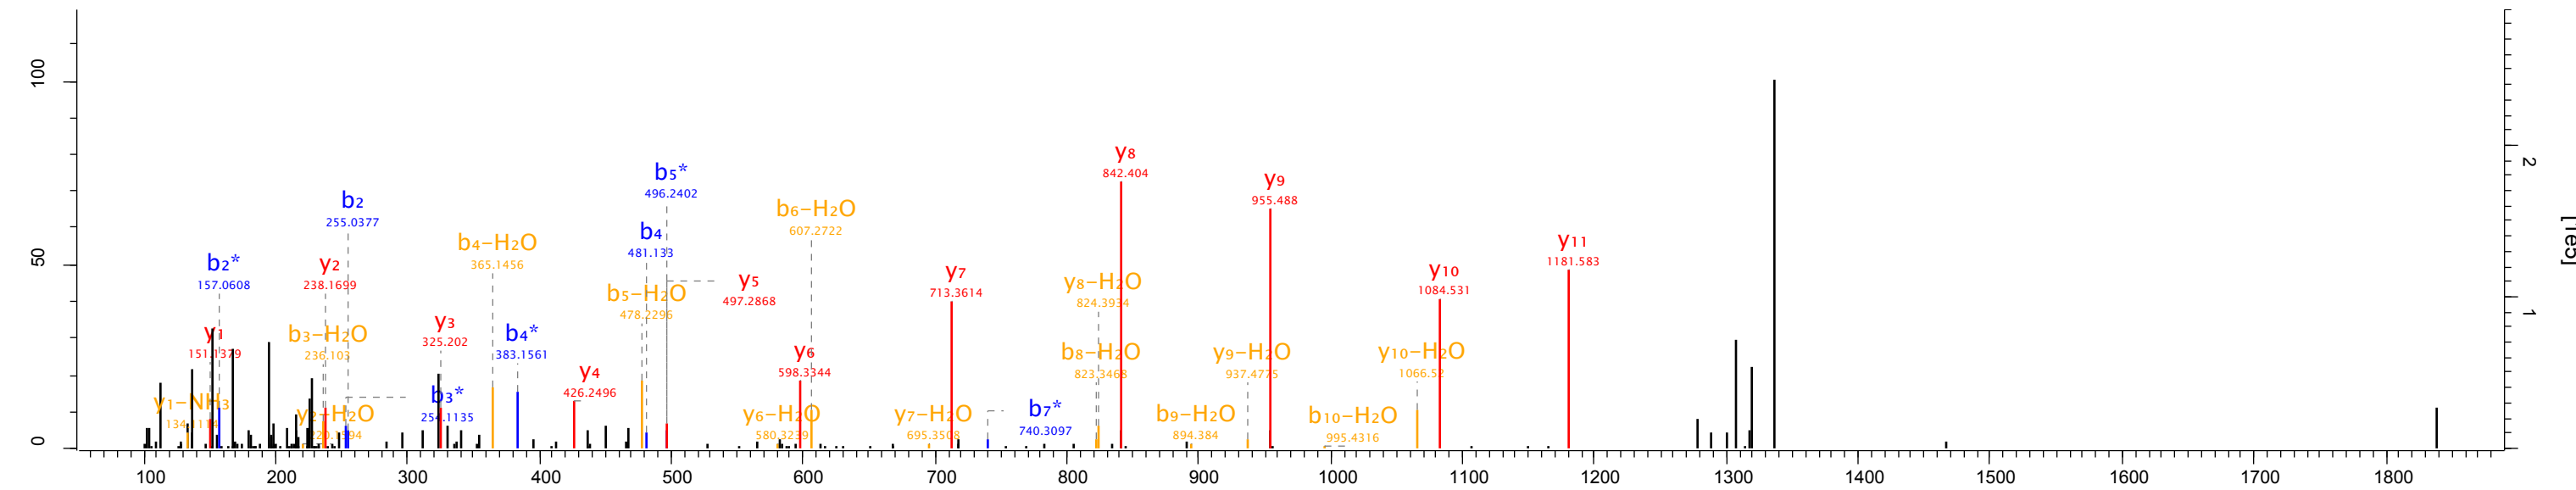

ph S - S P E L E D T A T S S K -

b<sub>2</sub> b<sub>3</sub><sup>\*</sup> b<sub>4</sub> b<sub>5</sub><sup>\*</sup> b<sub>7</sub><sup>\*</sup> y<sub>11</sub> y<sub>10</sub> y<sub>9</sub> y<sub>8</sub> y<sub>7</sub> y<sub>6</sub> y<sub>5</sub> y<sub>4</sub> y<sub>3</sub> y<sub>2</sub> y<sub>1</sub>

Raw file

20171215\_MaS\_33SR\_LMH\_phospho2\_08

| Scan | Method    | Score  | m/z    | Gene names |
|------|-----------|--------|--------|------------|
| 4619 | FTMS; HCD | 102.52 | 462.72 | SH3GL1     |

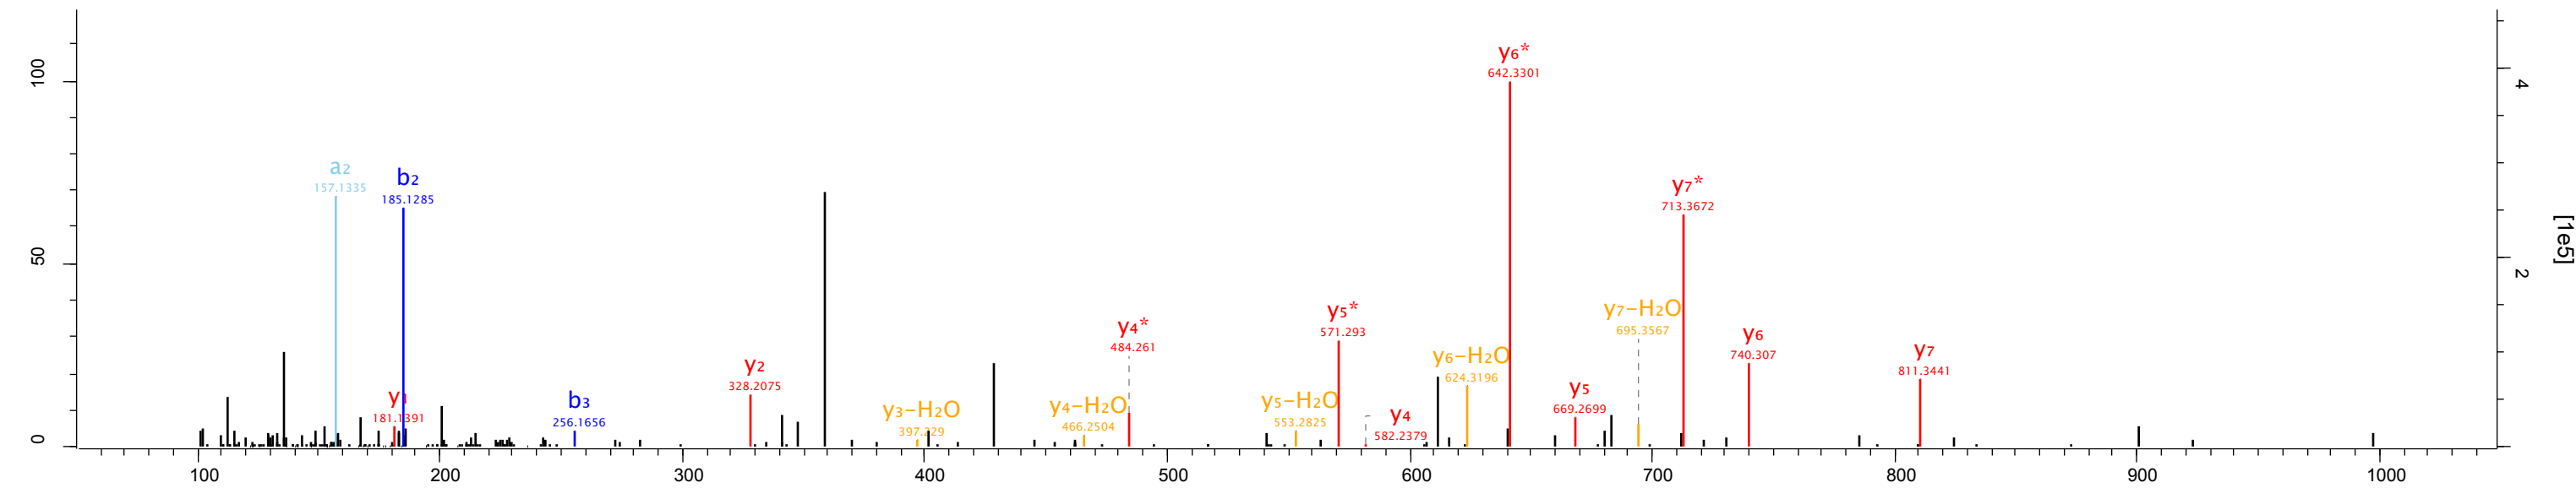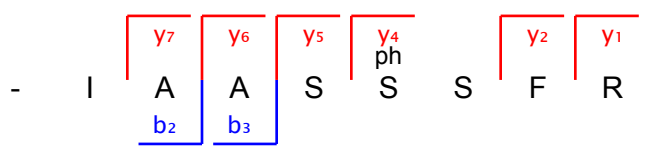

Raw file 20171215\_MaS\_33SR\_LMH\_phospho2\_08 Scan 5379 Method FTMS; HCD Score 49.72 m/z 454.22 Gene names PIK3C2A

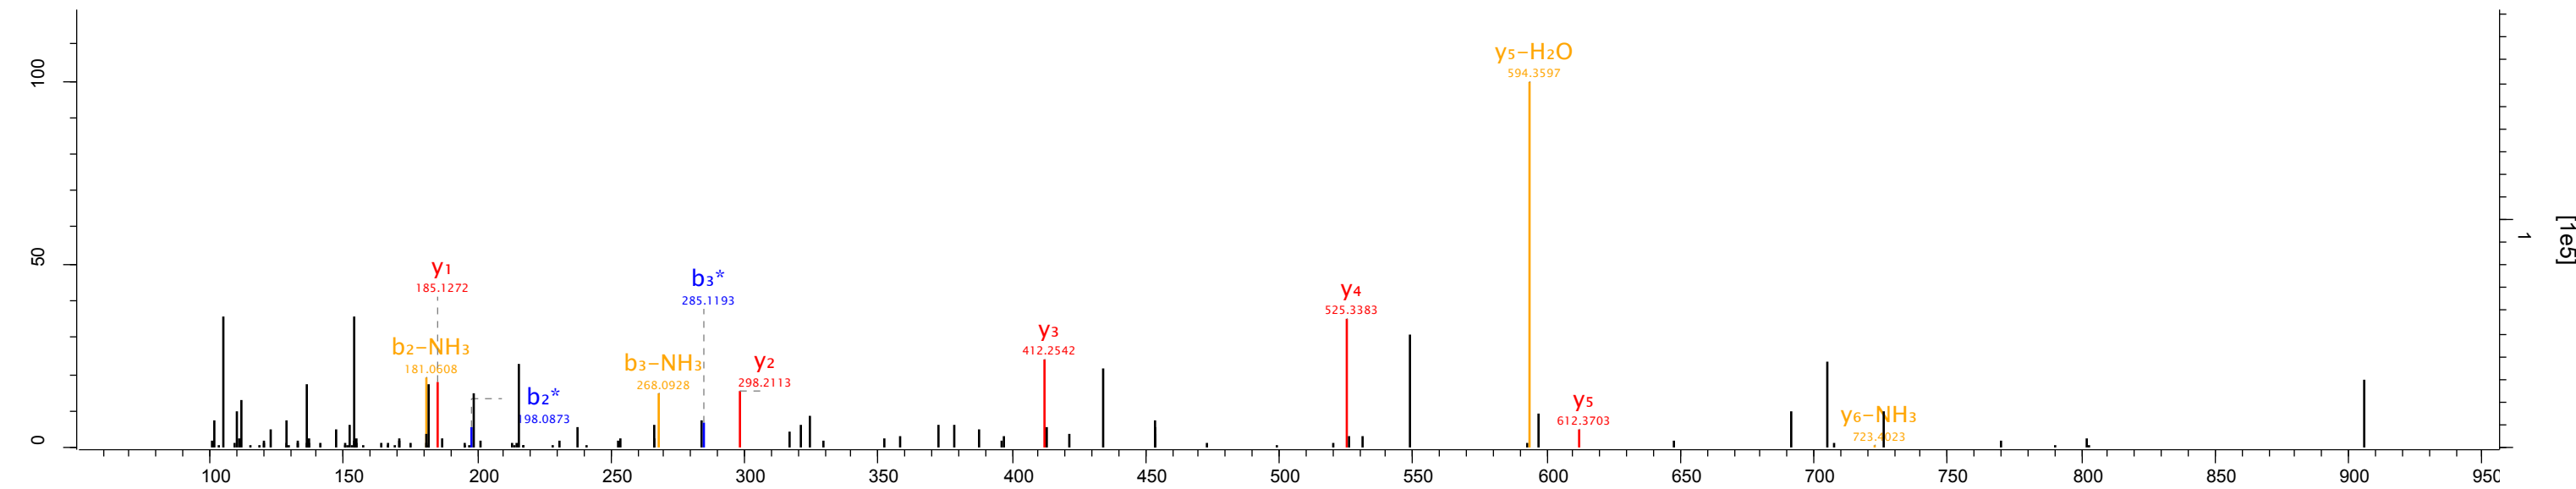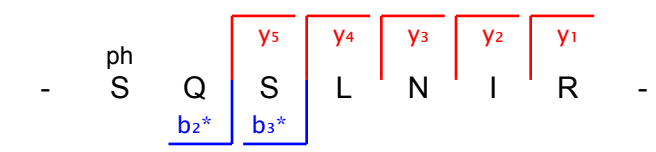

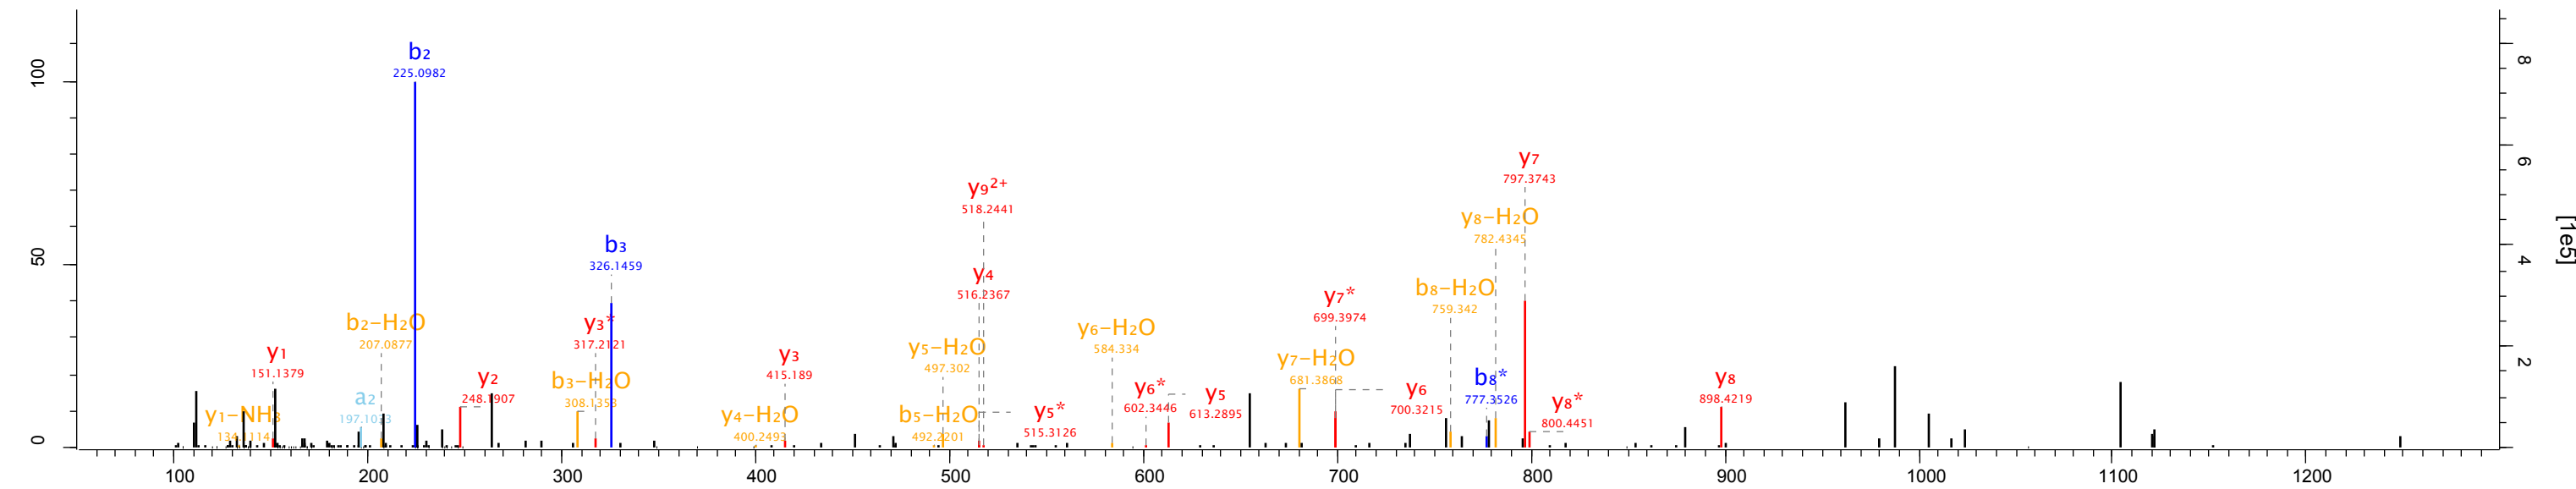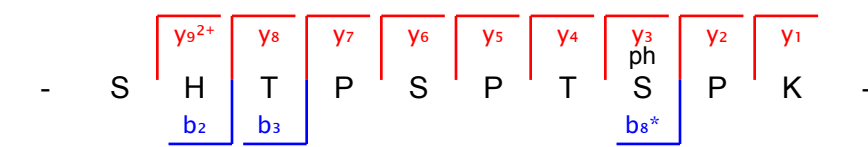

Raw file 20171215\_MaS\_33SR\_LMH\_phospho2\_09 Scan 2629 Method FTMS; HCD Score 89.45 m/z 588.31 Gene names RERE

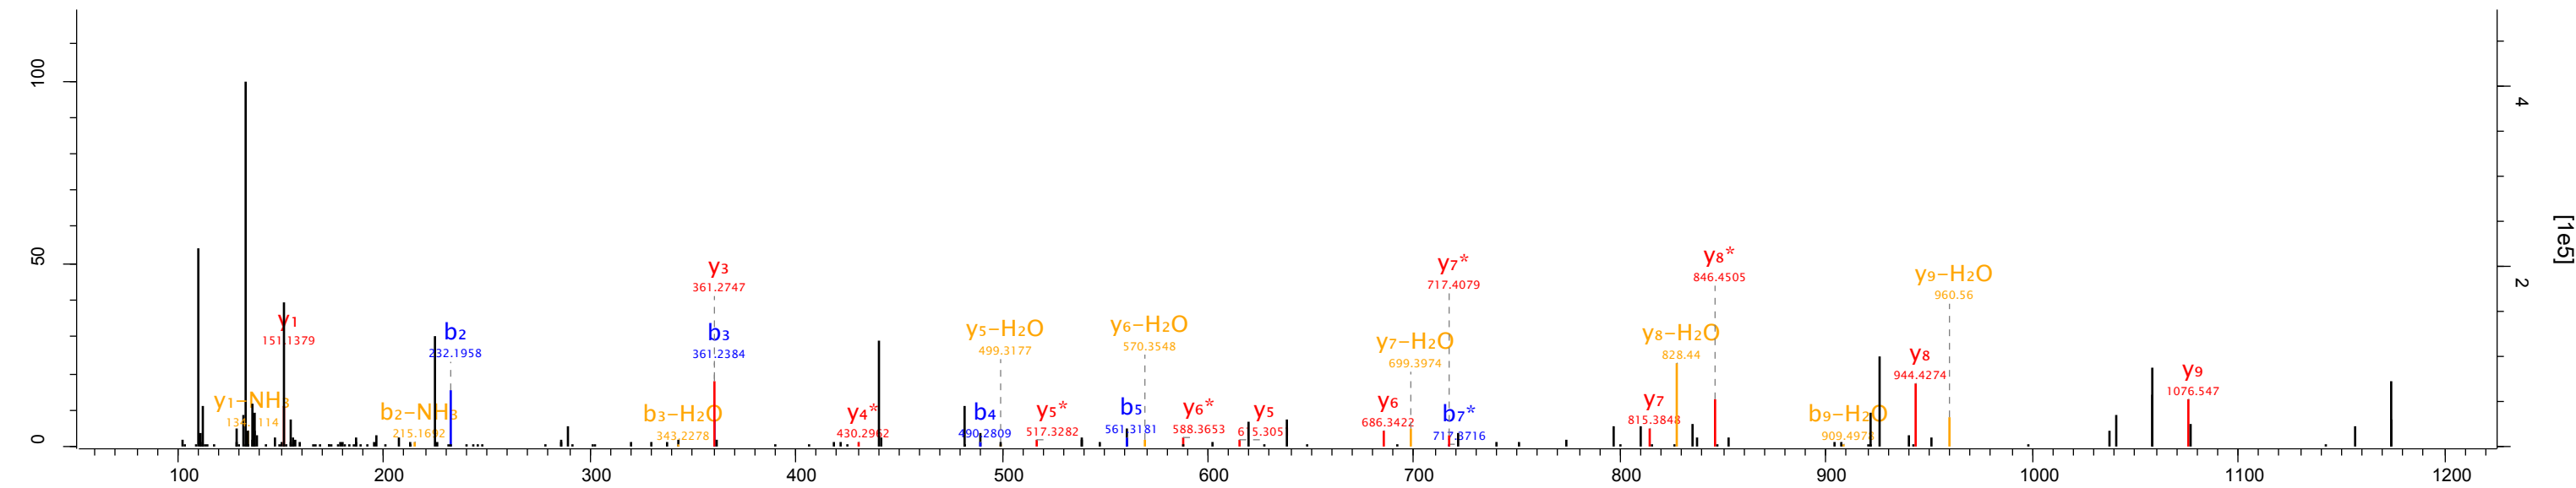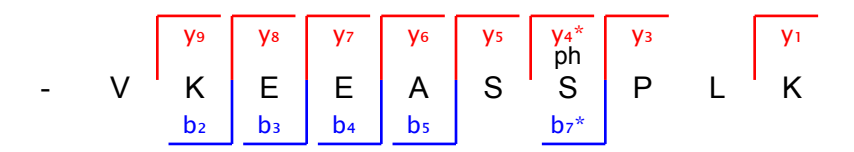

Raw file 20171215\_MaS\_33SR\_LMH\_phospho2\_09 Scan 3349 Method FTMS; HCD Score 117.84 m/z 437.19 Gene names FIP1L1

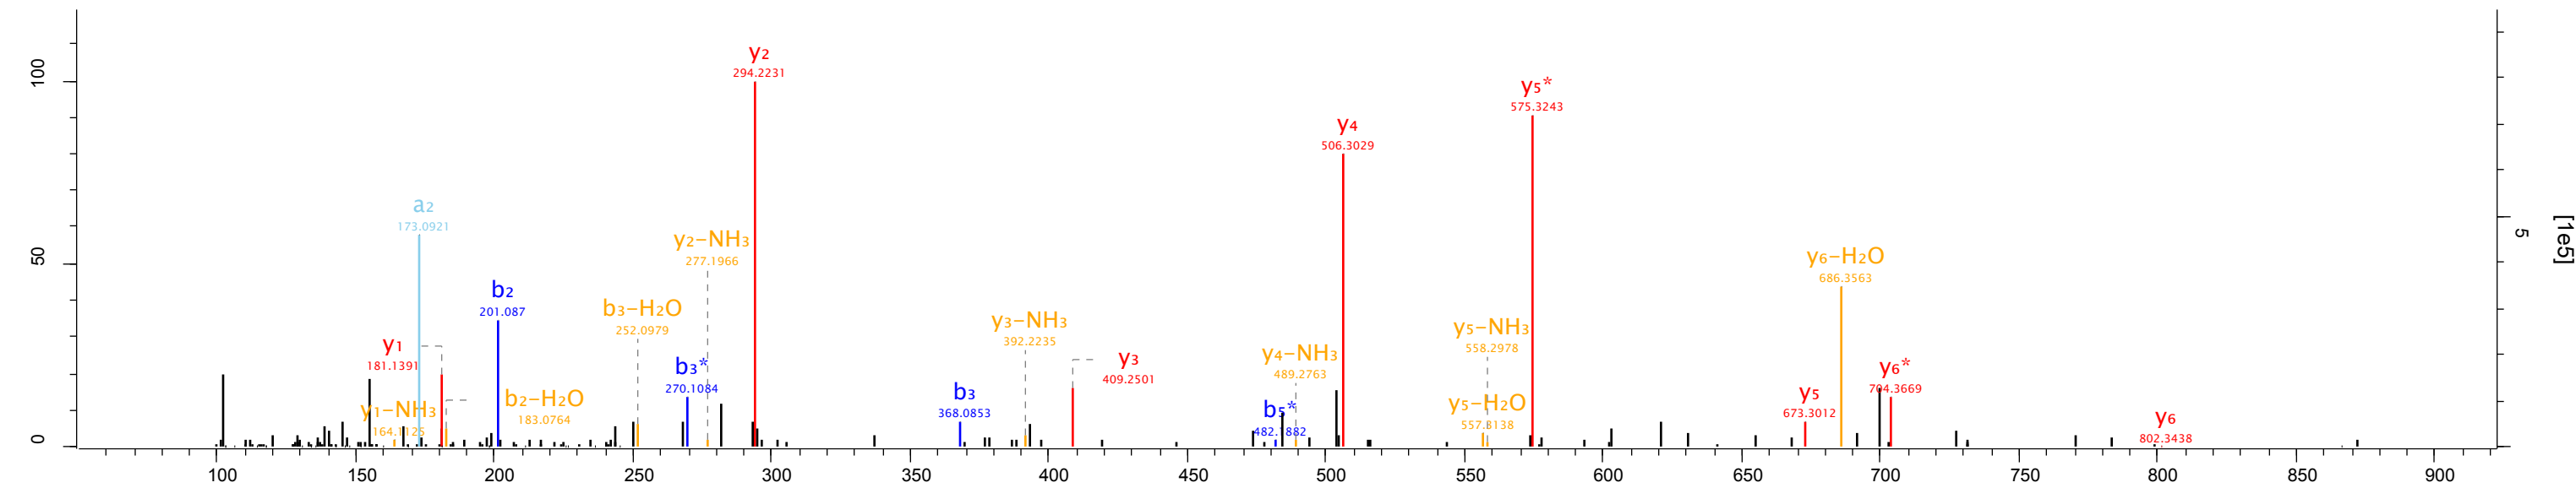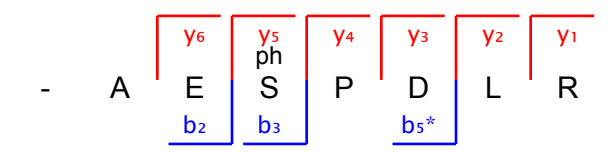



Raw file  
20171215\_MaS\_33SR\_LMH\_phospho2\_09

Scan 3479 Method FTMS; HCD Score 173.51 m/z 797.81 Gene names C17orf75

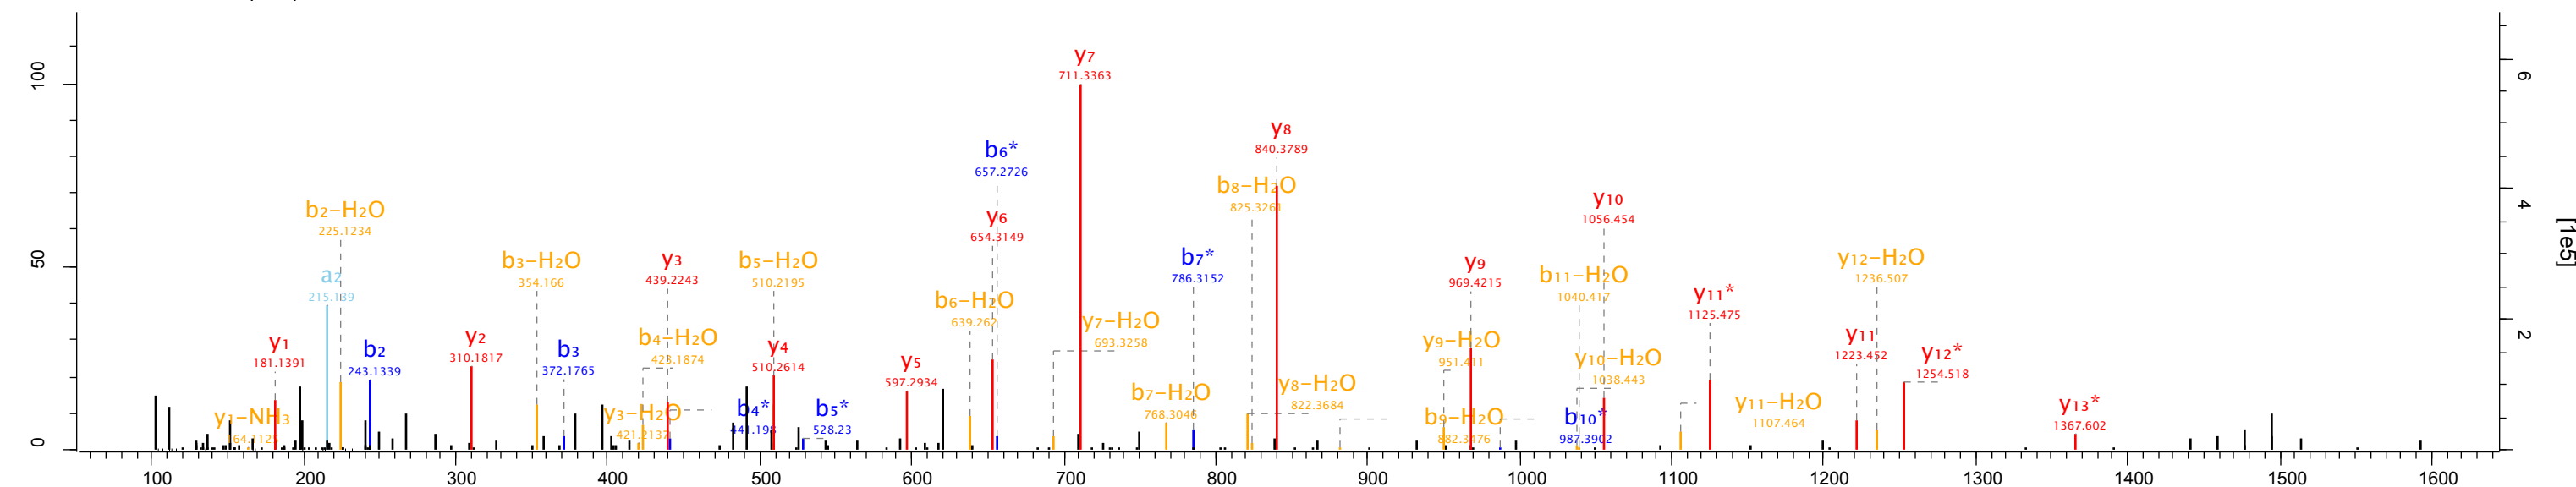

- E L E S S E E G G S A E E R -

Phosphorylation sites (y ions) are indicated by red boxes above the sequence: y13\*, y12\*, y11-ph, y10, y9, y8, y7, y6, y5, y4, y3, y2, y1.

Other labeled ions (b ions) are indicated by blue boxes below the sequence: b2, b3, b4\*, b5\*, b6\*, b7\*, b10\*.

Raw file

20171215\_MaS\_33SR\_LMH\_phospho2\_09

| Scan | Method    | Score | m/z    | Gene names |
|------|-----------|-------|--------|------------|
| 3529 | FTMS; HCD | 75.11 | 324.17 | USP4       |

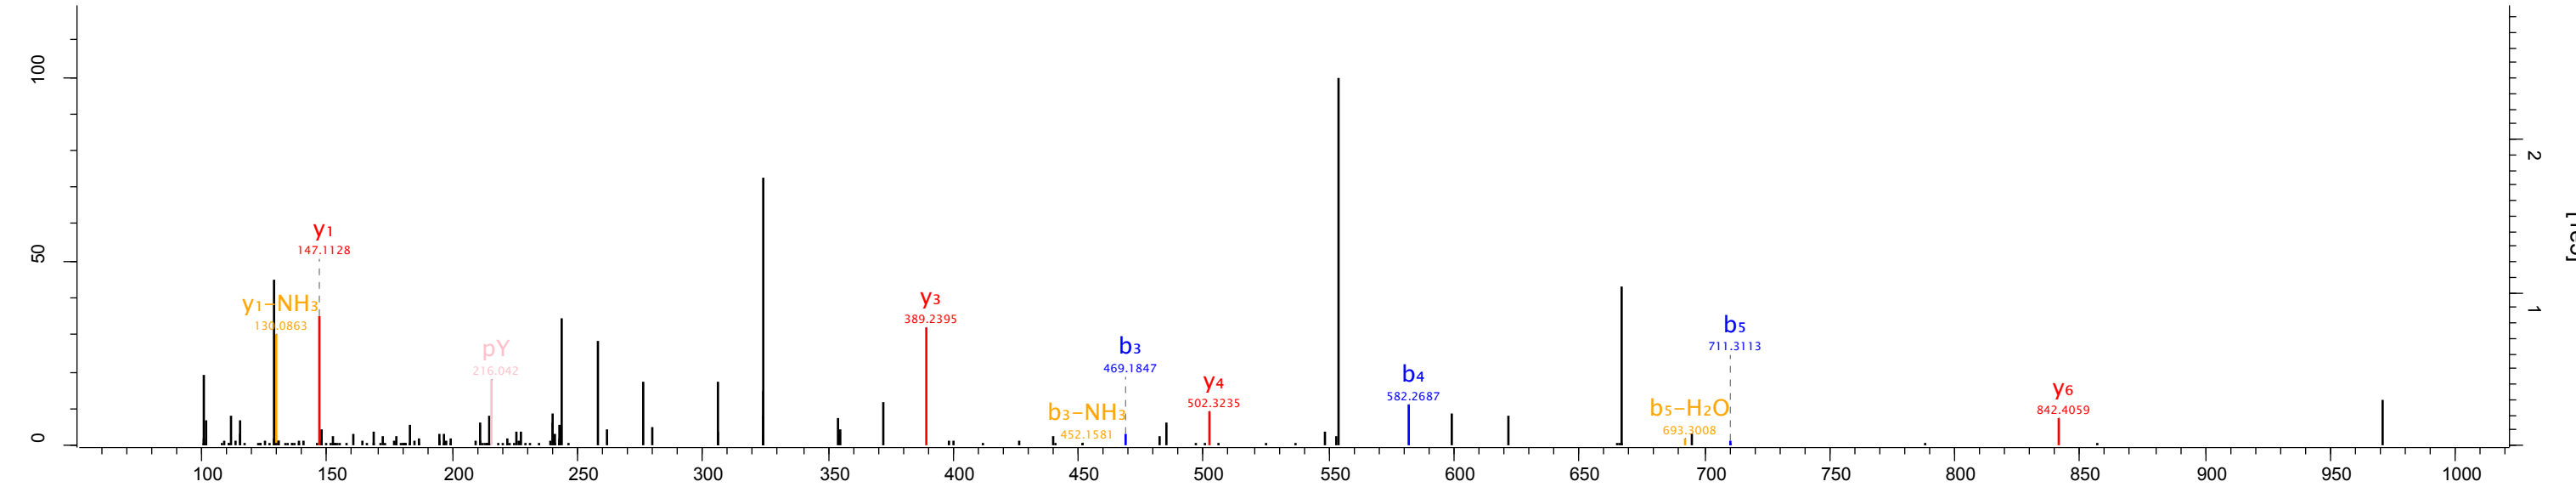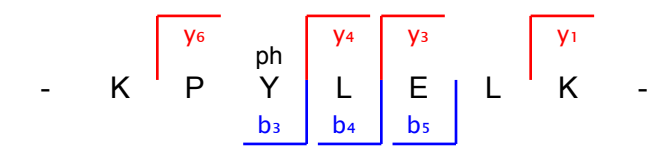

Raw file 20171215\_MaS\_33SR\_LMH\_phospho2\_09 Scan 3999 Method FTMS; HCD Score 91.66 m/z 546.28 Gene names SEPT7;DKFZp586I031

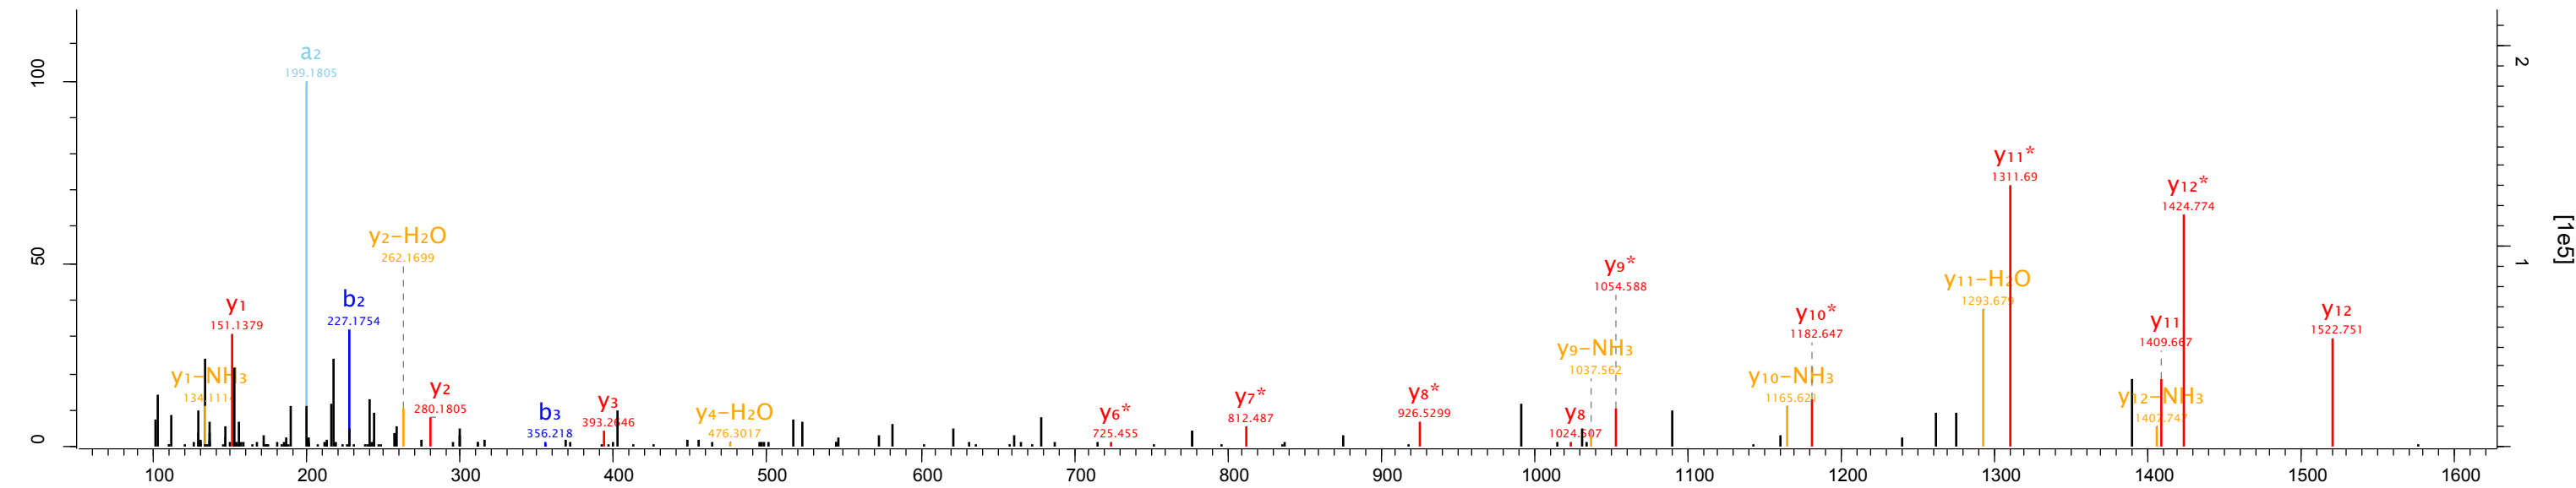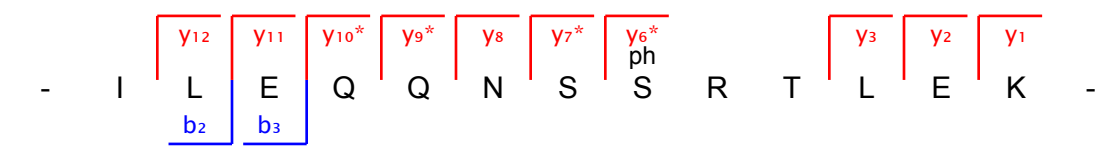

Raw file 20171215\_MaS\_33SR\_LMH\_phospho2\_09 Scan 4189 Method FTMS; HCD Score 60.51 m/z 499.25 Gene names LIN52

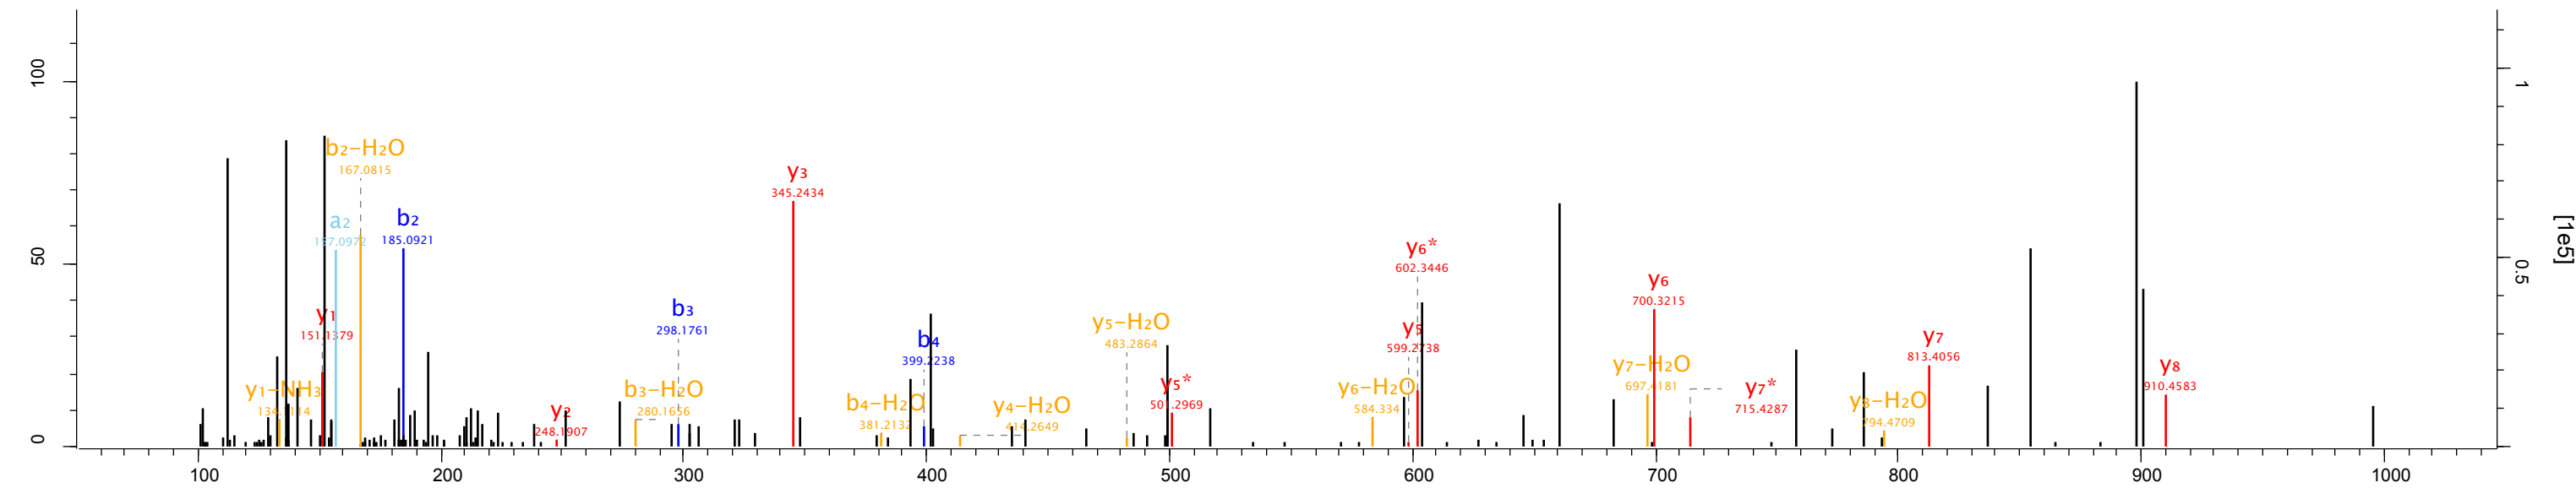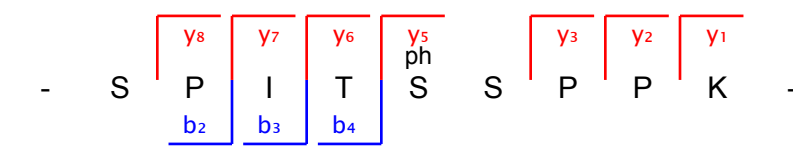

Raw file: 20171215\_MaS\_33SR\_LMH\_proteome\_01  
 Scan: 102919 Method: FTMS; HCD Score: 46.35 m/z: 778.89 Gene names: FMN2

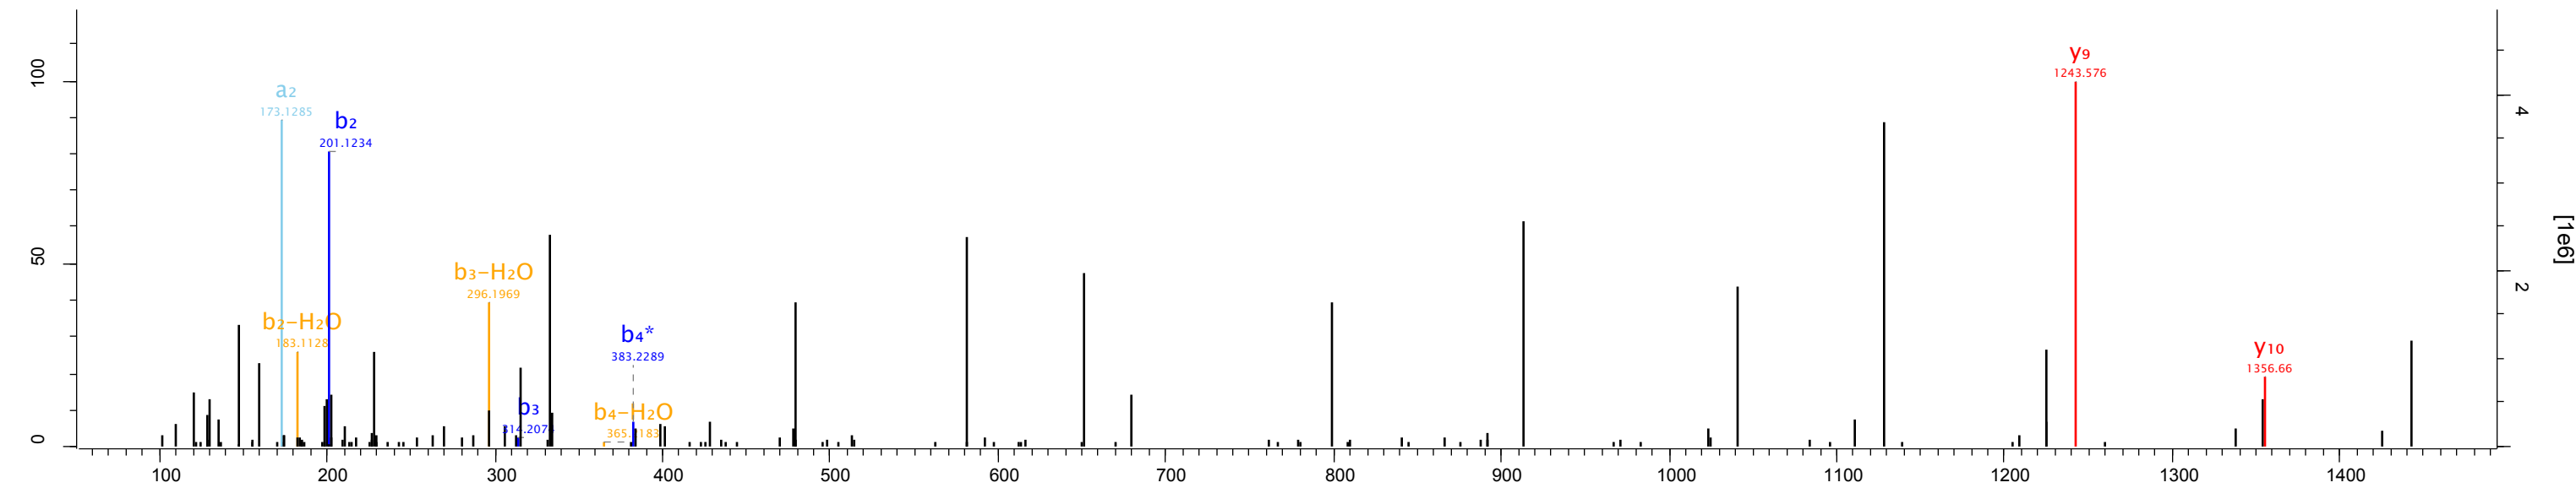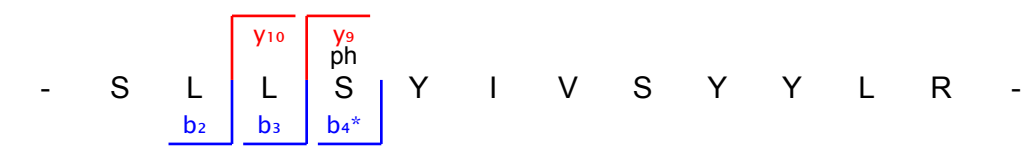

Raw file: 20171215\_MaS\_33SR\_LMH\_proteome\_01  
 Scan: 23919 Method: FTMS; HCD Score: 42.34 m/z: 632.77 Gene names: PIGG

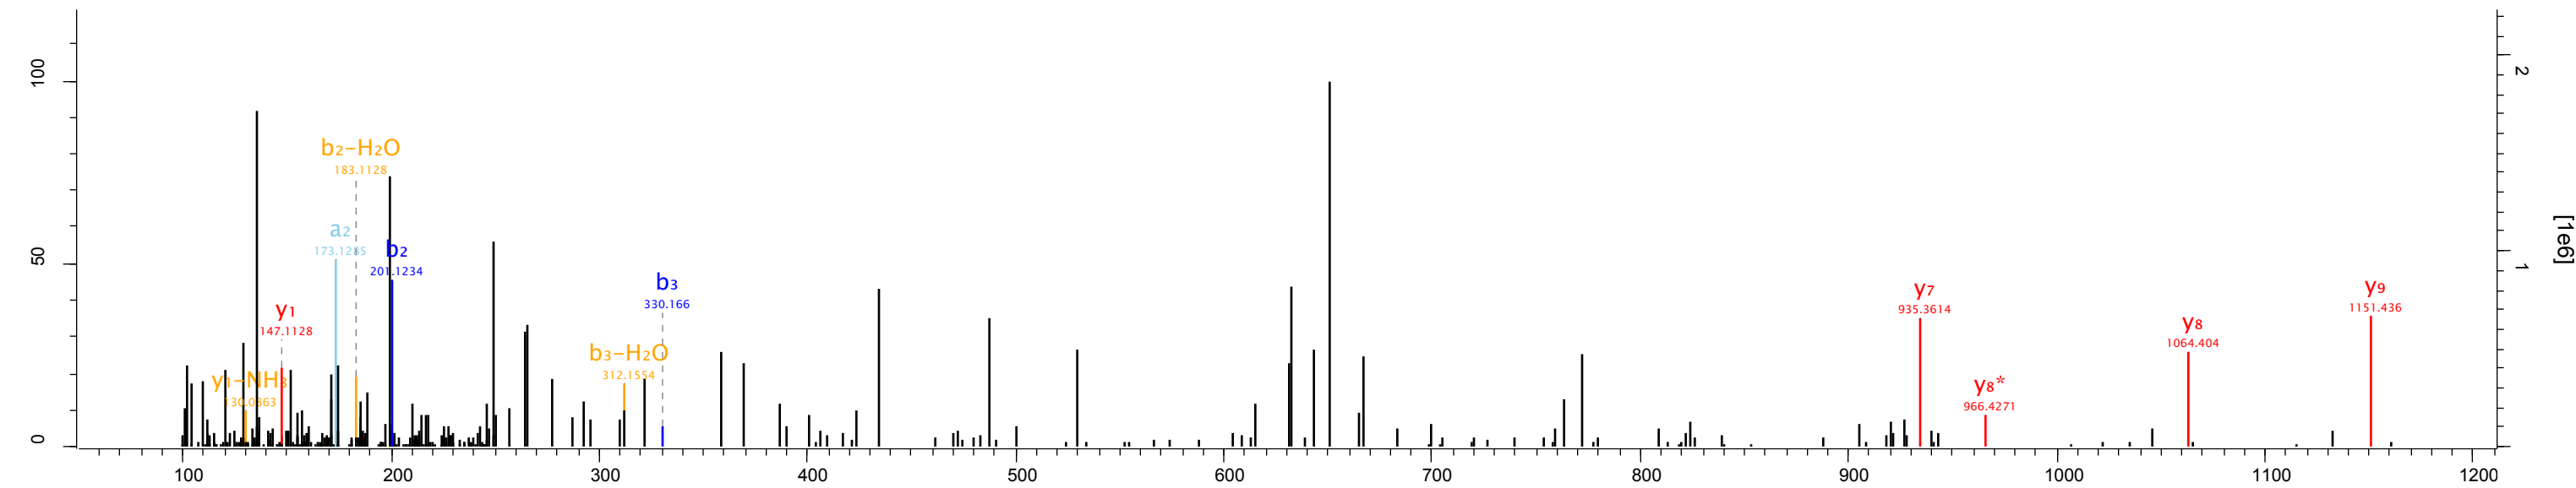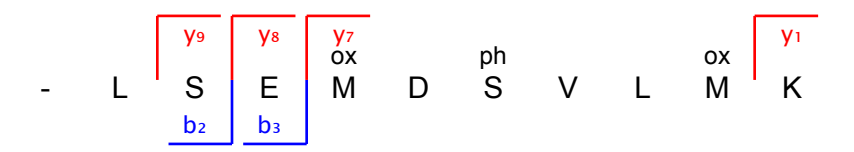

Raw file 20171215\_MaS\_33SR\_LMH\_proteome\_01 Scan 32189 Method FTMS; HCD Score 44.32 m/z 675.81 Gene names AKAP8

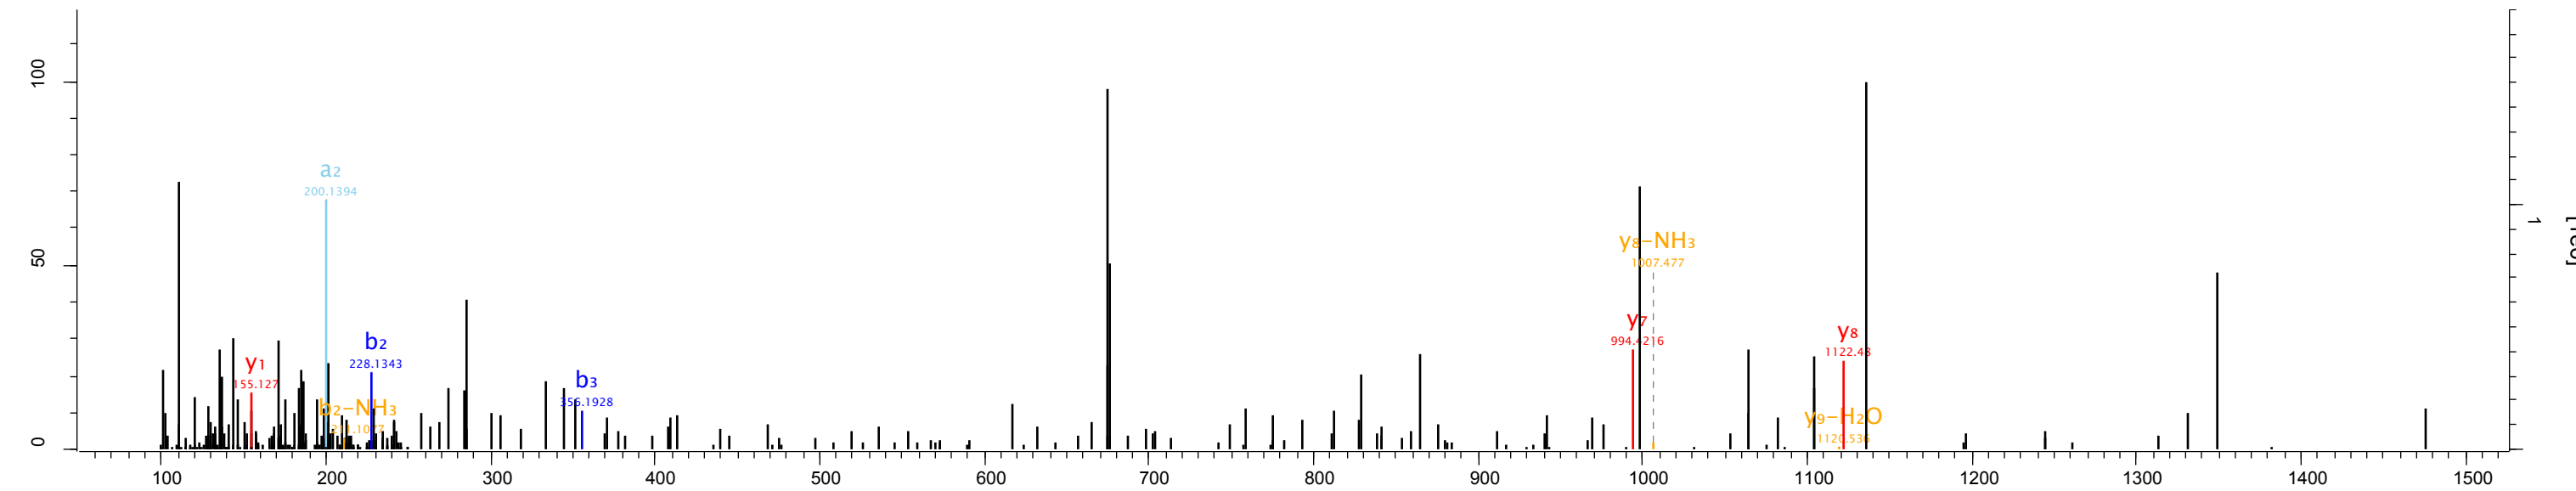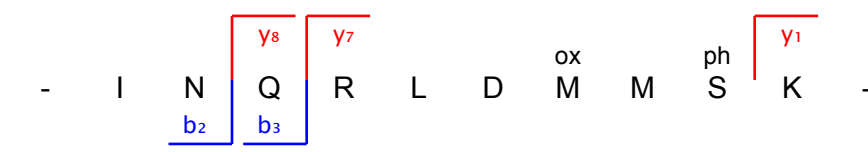

Raw file 20171215\_MaS\_33SR\_LMH\_proteome\_01 Scan 42869 Method FTMS; HCD Score 45.28 m/z 779.38 Gene names WDR72

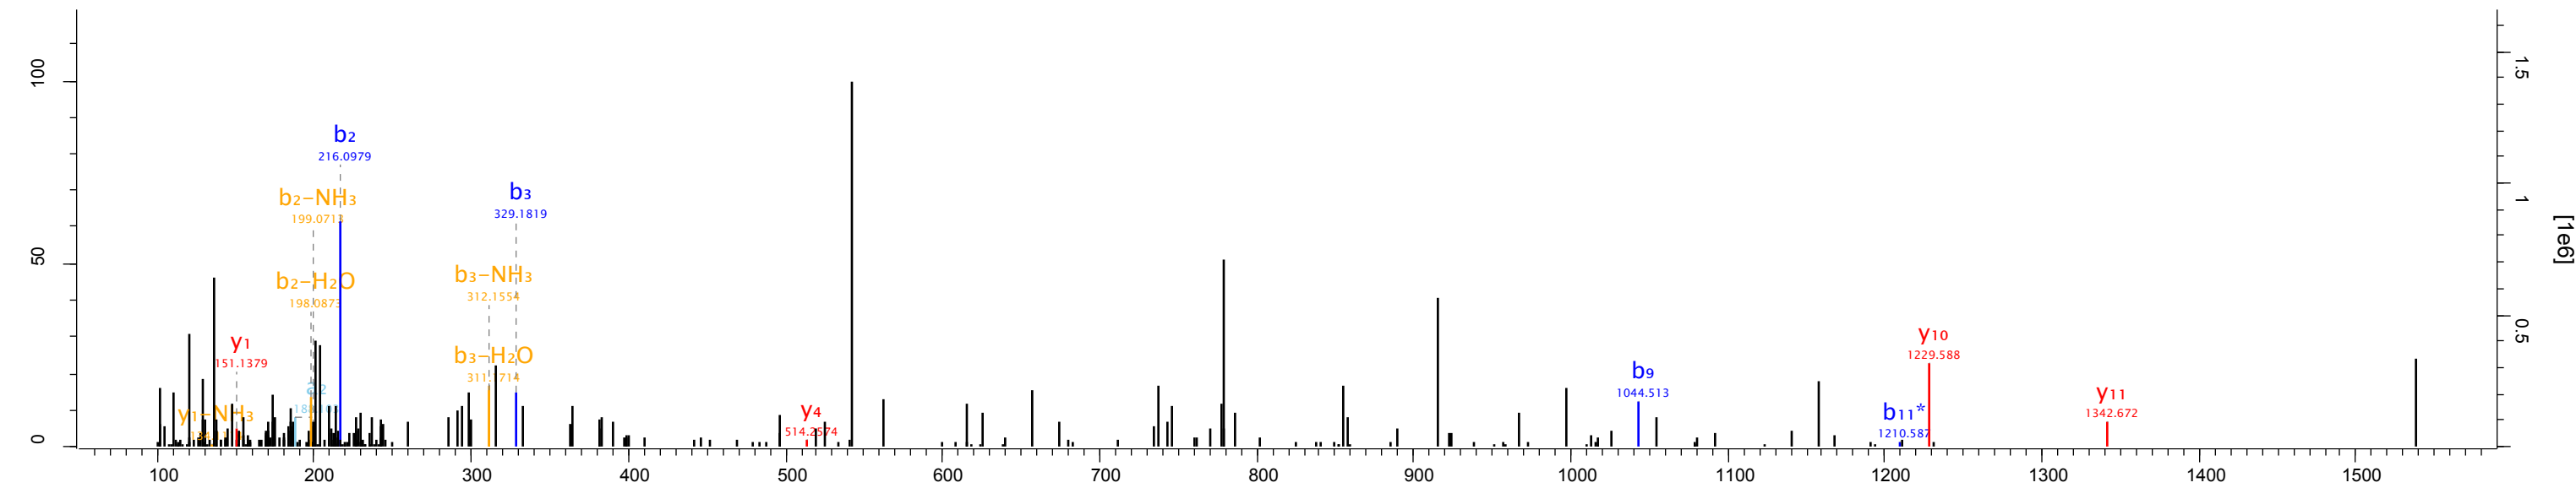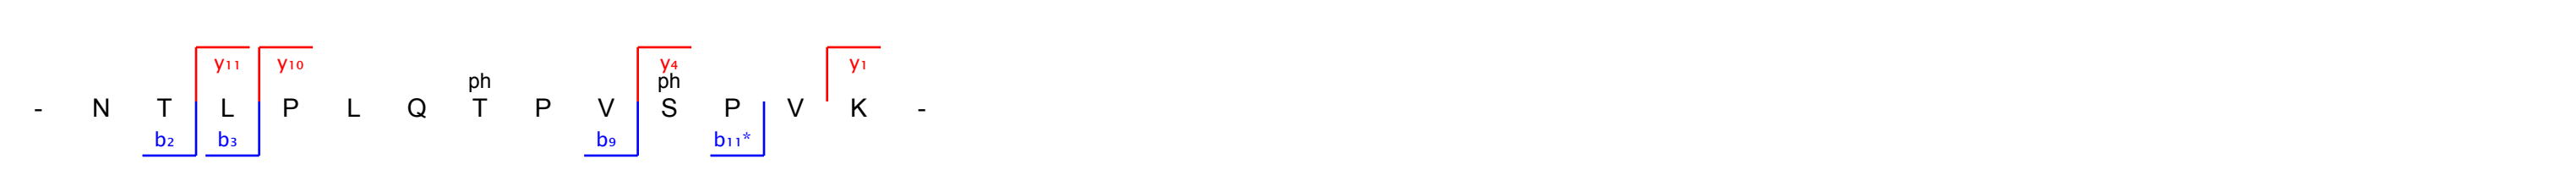



Raw file 20171215\_MaS\_33SR\_LMH\_proteome\_01 Scan 72519 Method FTMS; HCD Score 50.1 m/z 794.4 Gene names TRIM68

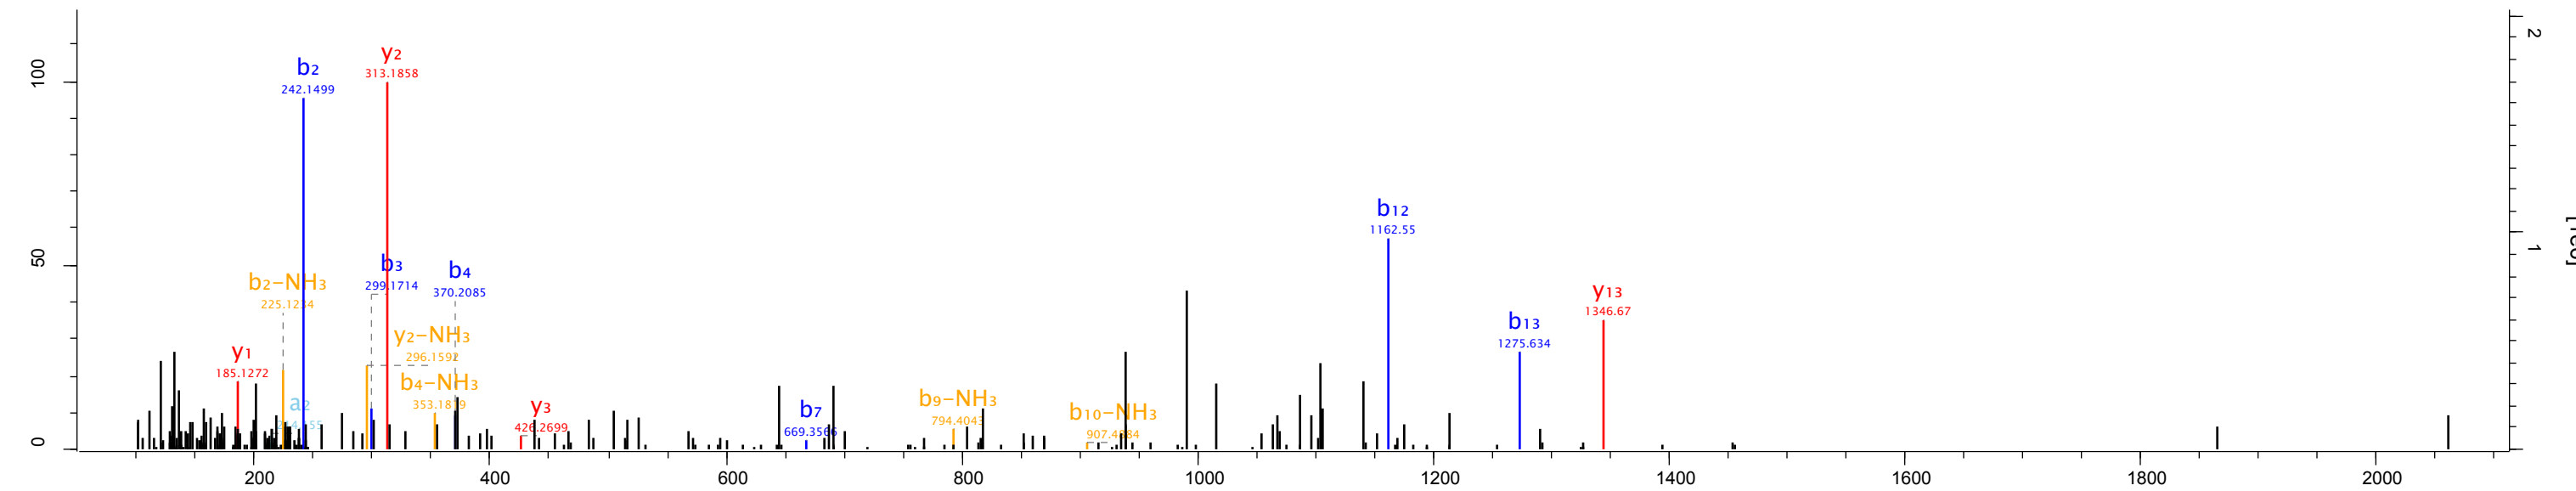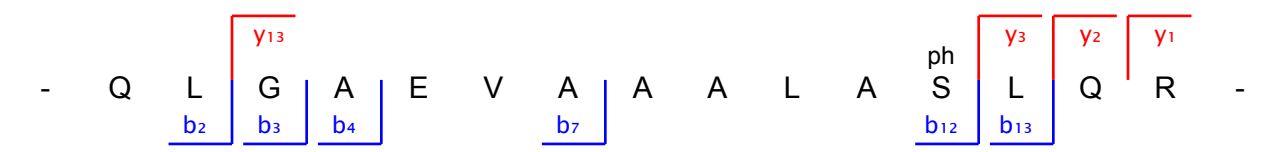

Raw file 20171215\_MaS\_33SR\_LMH\_proteome\_02 Scan 38489 Method FTMS; HCD Score 41.23 m/z 884.92 Gene names C17orf97

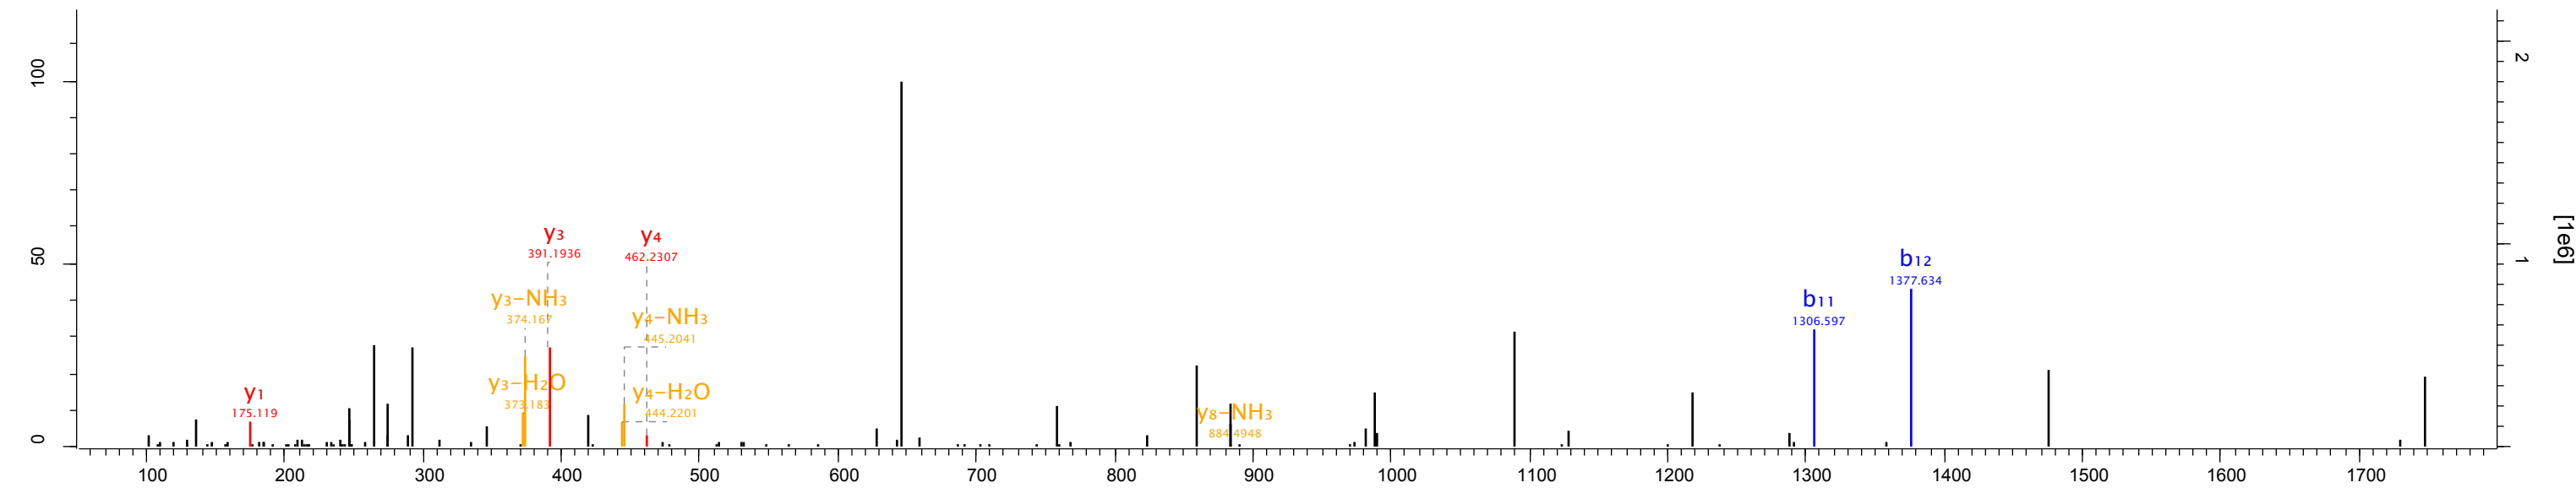

ac ox ph  
 - M E T R G P G L A V R A E S R -  
 b11 b12 y4 y3 y1

Raw file 20171215\_MaS\_33SR\_LMH\_proteome\_02 Scan 6979 Method FTMS; HCD Score 46 m/z 398.2

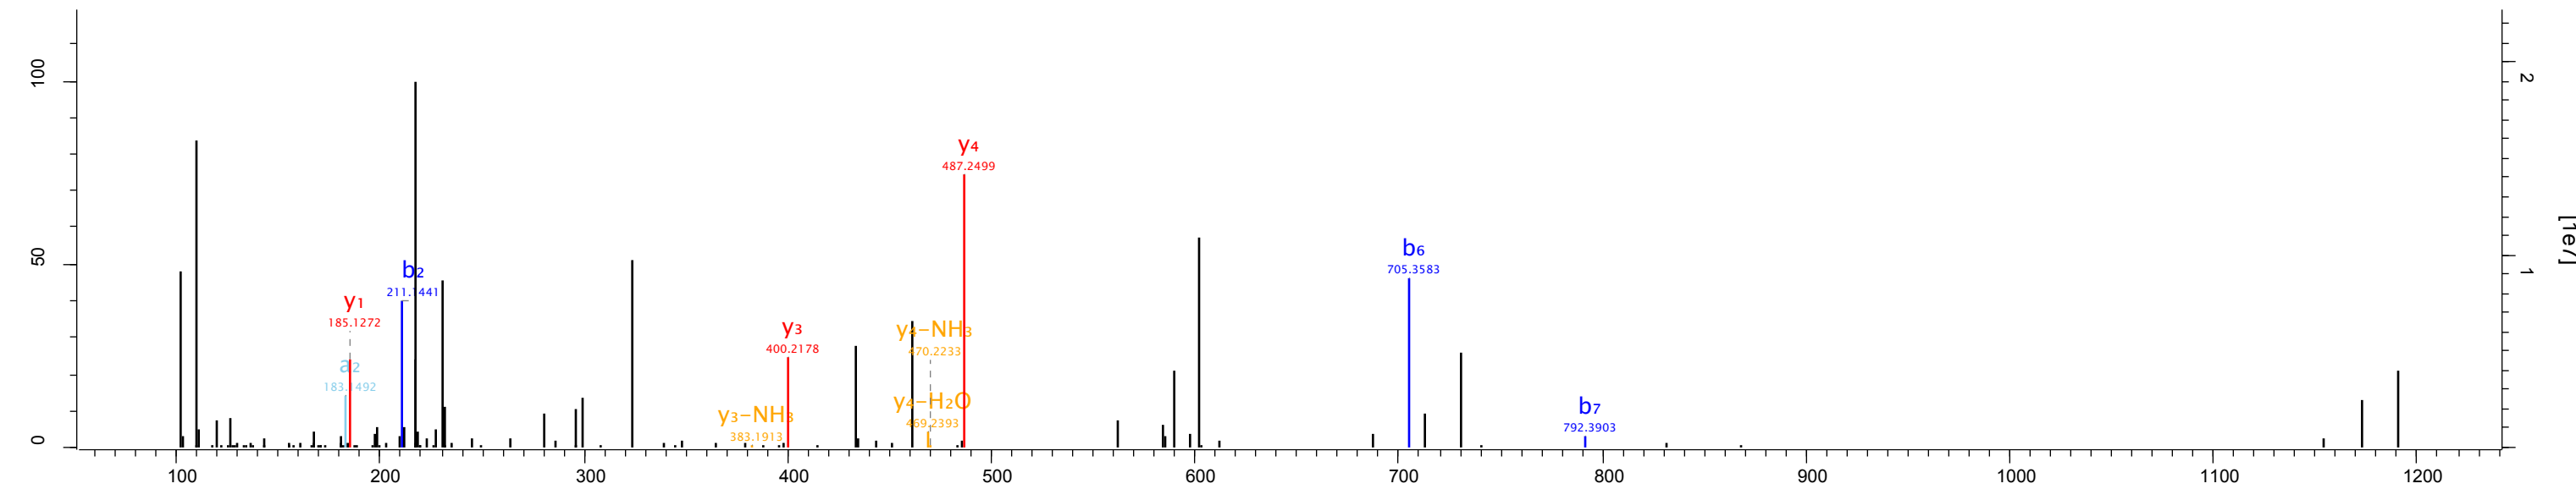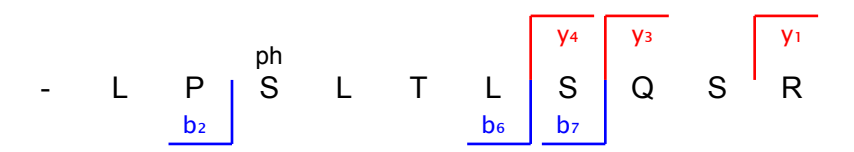
