# Supplementary material
Source: PubMed Central journal article supplement (PMC6553926)
Supplement: 142829_1_supp_287120_pmz4jg.pdf [file 142829_1_supp_287120_pmz4jg.pdf]

## Supplementary Information

**Table I1: List of all used patient derived melanoma cell lines in this study.** ATCC: American Type Culture Collection

| Name    | Tissue | Morphology | Source                 | BRAF mutation |
|---------|--------|------------|------------------------|---------------|
| A375    | skin   | epithelial | ATCC (CRL-1619)        | BRAF V600E    |
| Mel1617 | skin   | epithelial | M. Herlyn <sup>1</sup> | BRAF V600E    |
| 451lu   | skin   | epithelial | M. Herlyn <sup>1</sup> | BRAF V600E    |
| SKMel28 | skin   | polygonal  | ATCC (HTB-72)          | BRAF V600E    |
| SKMel19 | skin   | epithelial | C. Garbe <sup>2</sup>  | BRAF V600E    |

- 1 Herlyn, D. *et al.* Properties of Human Melanoma Cells Metastatic in Nude Mice. *Cancer Research* **50**, 2296-2302 (1990).
- 2 Sinnberg, T. *et al.* A Nexus Consisting of Beta-Catenin and Stat3 Attenuates BRAF Inhibitor Efficacy and Mediates Acquired Resistance to Vemurafenib. *EBioMedicine* **8**, 132-149, doi:10.1016/j.ebiom.2016.04.037 (2016).

**Table I2: Top five down-and up-regulated proteins of vemurafenib-resistant and -sensitive A375 proteome.**

| Uniprot ID | Gene name | Protein name                                              | SILAC ratio (log <sub>2</sub> ) | Intensity (log <sub>10</sub> ) |
|------------|-----------|-----------------------------------------------------------|---------------------------------|--------------------------------|
| P02751     | FN1       | Fibronectin                                               | -2.81                           | 10.22                          |
| P48681     | NES       | Nestin                                                    | -2.71                           | 10.20                          |
| P35625     | TIMP3     | Metalloproteinase inhibitor 3                             | -1.92                           | 9.44                           |
| Q13938     | CAPS      | Calcyphosin                                               | -1.79                           | 9.58                           |
| P04233     | CD74      | HLA class II histocompatibility antigen gamma chain       | -1.38                           | 9.96                           |
| A0A0G2JJ56 | SPANXB1   | Sperm protein associated with nucleus on X chromosome B/F | 2.10                            | 8.29                           |
| Q9GZP8     | IMUP      | Immortalization up-regulated protein                      | 2.01                            | 7.69                           |
| P80723     | BASP1     | Brain acid soluble protein 1                              | 2.00                            | 8.21                           |
| P00533     | EGFR      | Epidermal growth factor receptor                          | 1.65                            | 7.83                           |
| Q52LW3     | ARHGAP29  | Rho GTPase-activating protein 29                          | 1.34                            | 7.61                           |

**Table I3: List of FFPE specimens used in this study.**

| Patient | Surgery date | Localisation             | Treatment                                     | Remarks                             |
|---------|--------------|--------------------------|-----------------------------------------------|-------------------------------------|
| #1      | 09.11.2011   | Abdomen                  |                                               | Immunohistochemistry                |
|         | 05.06.2014   | Buttocks (gluteal, left) | Vemurafenib (12 months)/Ipilimumab (3 months) | Immunohistochemistry                |
| #2      | 23.11. 2011  | Tight (left)             |                                               | Immunohistochemistry and proteomics |
|         | 25.02.2013   | Lower leg (right)        | Vemurafenib (3 months)                        | Immunohistochemistry and proteomics |

**Table I4: Predicted off-target effects of crRNA guide CCTCGACGGCGCGCCGGTTG using cas-offinder. Chr: chromosome.**

| crRNA                       | DNA                         | Chr   | Position | Direction | mismatch |
|-----------------------------|-----------------------------|-------|----------|-----------|----------|
| CCTCGACGGCGCG<br>CCGGTTGNGG | CCTCGACGGCGCG<br>CCGGTTGCGG | chr1  | 1570000  | +         | 0        |
| CCTCGACGGCGCG<br>CCGGTTGNGG | CCcCGACGGCGCG<br>gCGGTTcCGG | chr17 | 7478944  | +         | 3        |
| CCTCGACGGCGCG<br>CCGGTTGNGG | CCcCaACGGCGCGC<br>CGGcTGTGG | chr20 | 62861781 | -         | 3        |
