# Supplementary material
Source: PubMed Central journal article supplement (PMC6553926)
Supplement: 142829_1_supp_287121_pmz4jz.pdf [file 142829_1_supp_287121_pmz4jz.pdf]

up-regulated phosphorylation sites in A375 R vs. A375 S. [D] NES expression profile in human patients with melanoma metastases in vemurafenib, dabrafenib and dabrafenib plus trametinib treated tumors and pre-treatment control tumors (FDR  $\leq 0.1$ ). [E] mRNA expression levels of nestin protein in thirty patients with melanoma metastases after BRAF inhibitor therapy compared to control tumors. [F] Immunohistochemical staining for nestin of melanoma metastases obtained before treatment with a BRAF inhibitor vemurafenib and after resistance acquisition for two patients. Nestin levels are shown in red (Fast red substrate). [G] Proteomics of FFPE specimens pre-and post-BRAF inhibitor therapy using quantitative proteomics based dimethyl-labelling. Ratios ( $\log_2$ ) of post-BRAF vs. pre-BRAF inhibitor therapy are plotted against intensity ( $\log_{10}$ ) ( $p$ -value  $< 0.05$ ). Nestin is highlighted in magenta.

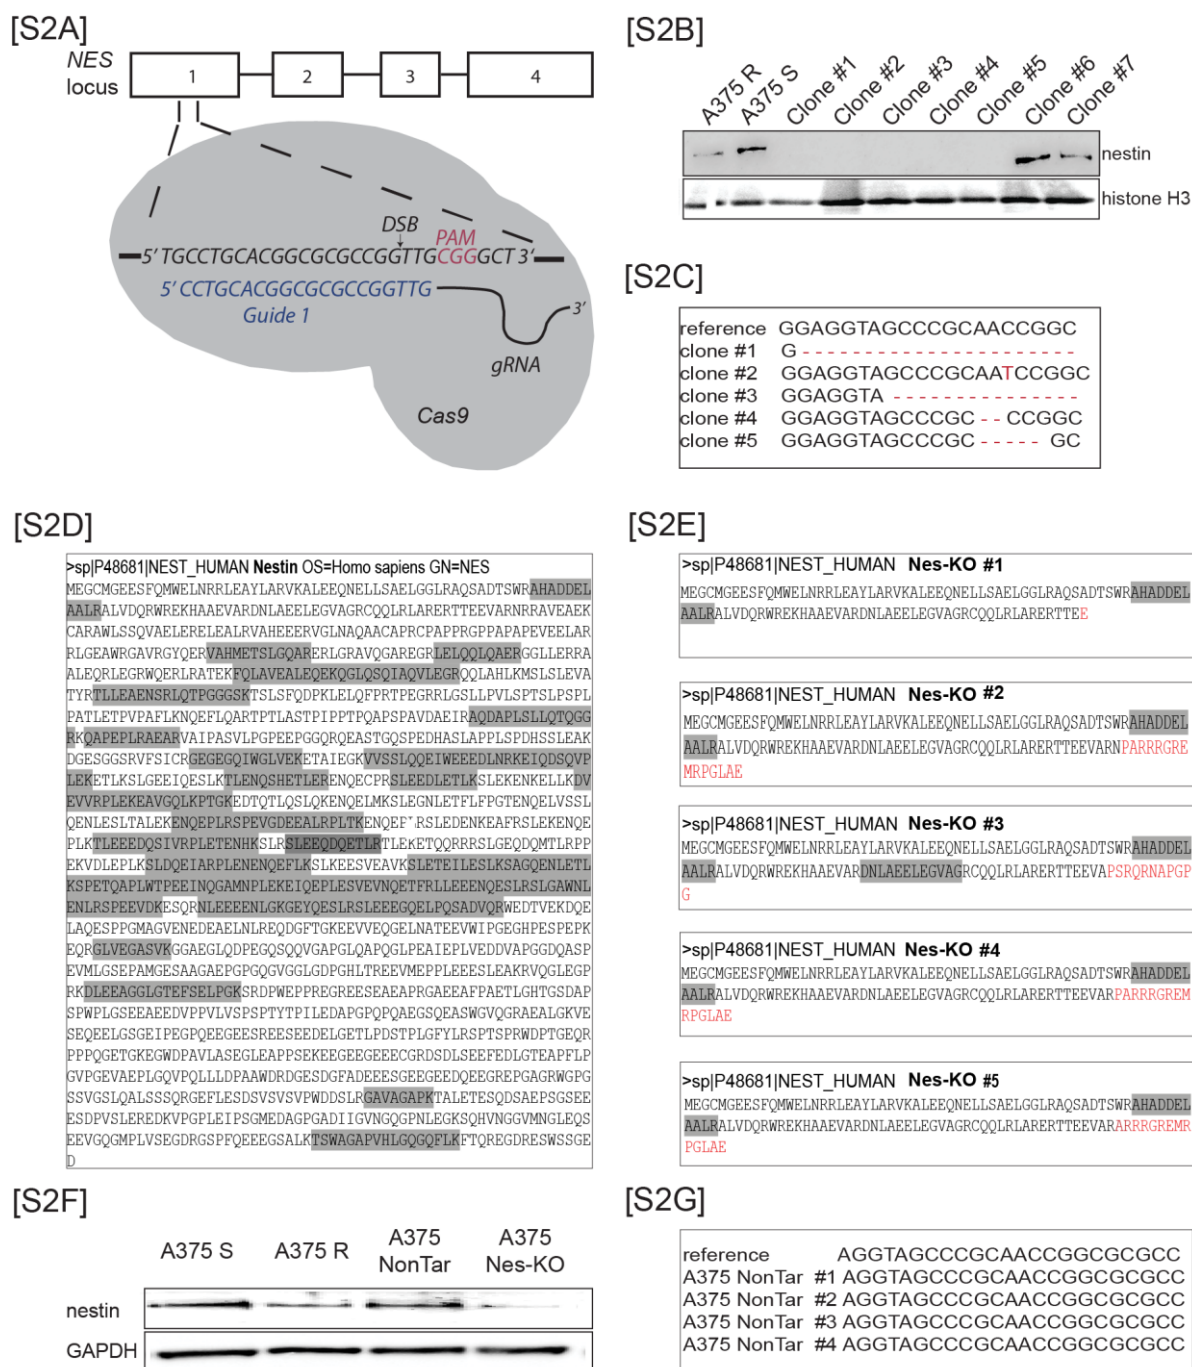

**Figure S2: Nestin expression correlates with invasive properties in melanoma cell lines.** [A] Schematic overview of the establishment of NES knockout cells using CRISPR/Cas9 genome editing system. Blue: guide sequence targeting Exon1 in the genomic sequence of NES; red: protospacer adjacent sequence (PAM) sequence; DSB: double strand break. [B] Western blot analysis of A375 S, A375 R and CRISPR/Cas9 genome edited cell clones Nes-KO #1-7. [C] Sanger sequencing result of reference DNA (A375 S and R) and CRISPR/Cas9 genome-edited cell clones Nes-KO #1 - 5. [D] Amino acid sequence of human nestin from Uniprot database. Grey: peptide sequences identified by LC-MS/MS. [E] Amino acid sequence of CRISPR/Cas9 genome edited cell clones Nes-KO #1-5. Grey: peptide sequences identified by LC-MS/MS. Red: truncated amino acid sequence compared to A375 S. [F] Western blot analysis of nestin and GAPDH protein in A375 S, A375 R, A375 NonTar and A375 Nes-KO cells. [G] Sanger sequencing results of reference DNA (A375 S and R) and CRISPR/Cas9 genome-edited control cell clones A375 NonTar #1 - 4.

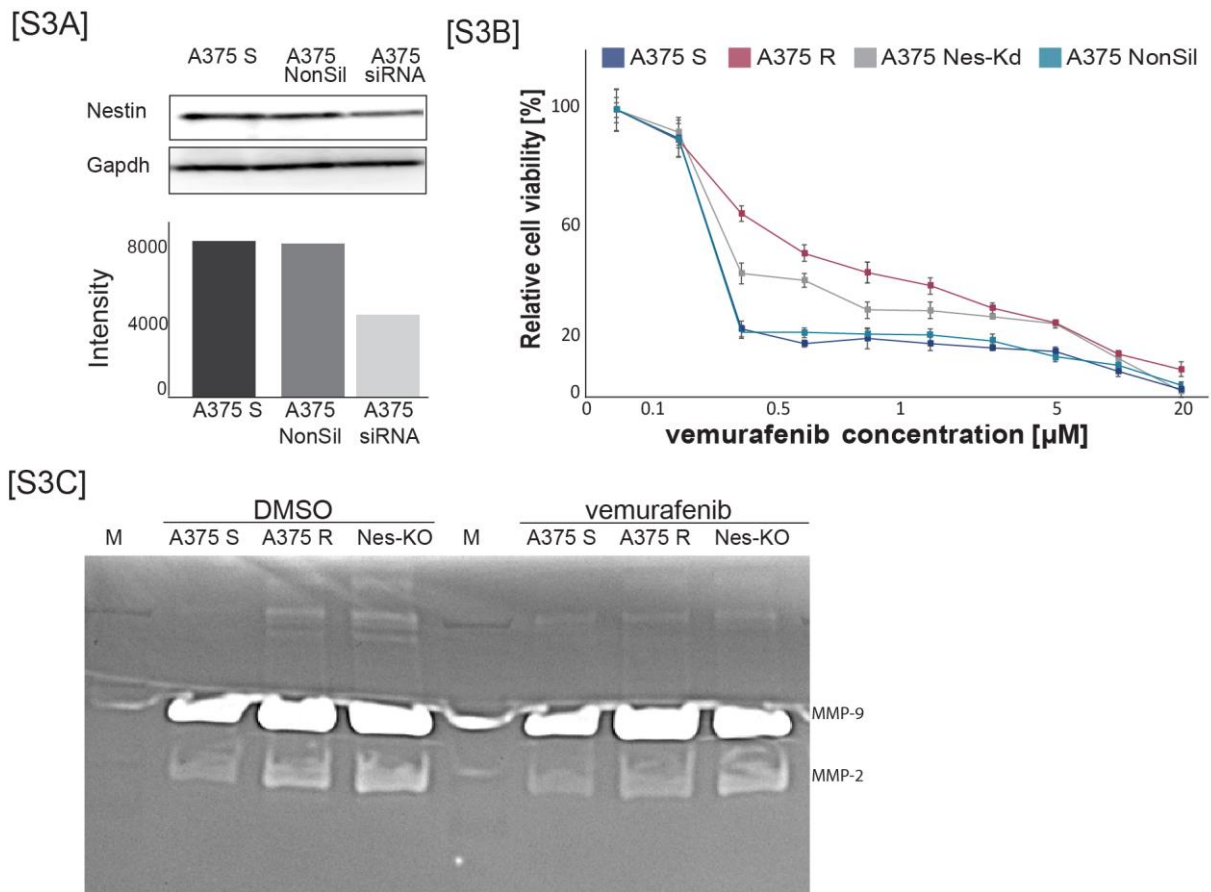

**Figure S3: Depletion of nestin affects cell proliferation and colony formation upon treatment with signaling pathway inhibitors.** [A] Western blot analysis of A375 S, A375 NonSil and A375 siRNA against nestin and quantification of bands intensities using ImageJ software. Nestin was down-regulated in A375 S cells by transfection of a pool of four siRNA oligos (siRNA) against human nestin. Untreated A375 S and NonSilencing siRNA (NonSil) treated A375 S cells were included as control. Cells were harvested 48 h post-transfection. [B] A375 S, A375 R, A375 NonSil and A375 Nes-Kd were cultured for 24 h, and then treated with PLX4720 at the indicated concentrations (0, 0.1, 0.25, 0.5, 1, 2.5, 5, 10 and 20  $\mu\text{M}$ ) or DMSO as control, respectively. Cell viability was determined by MTS assay 96 h later. Results expressed as % control represent the mean of three biological experiments (n=24). Error bar represents standard deviations of three biological replicates [C] Gelatine zymography of supernatants of A375 S, A375 R and A375 Nes-KO cell lines treated with DMSO or PLX4720 for 24 h. Image is a representative of three independent experiments.

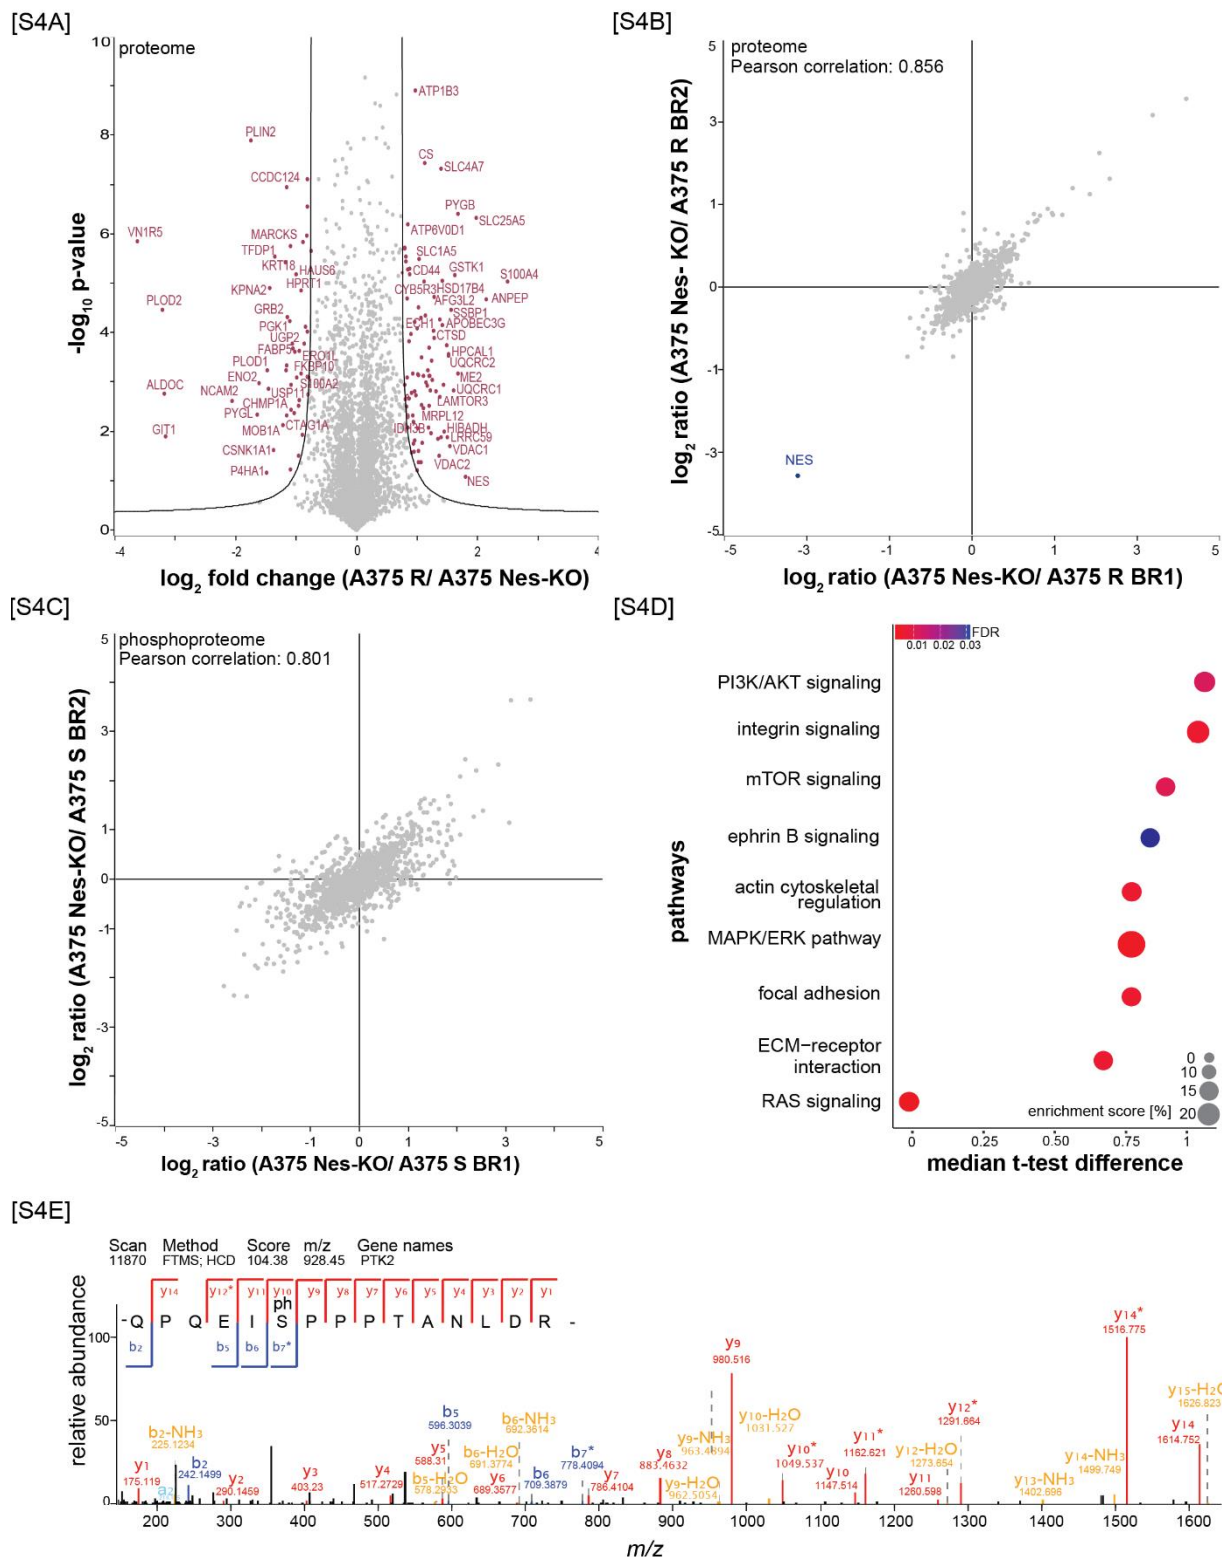

**Figure S4: Quantitative proteomics comparison between nestin knockout and BRAF inhibitor sensitive and resistant cell lines. [A]** Volcano plot of A375 Nes-KO and A375 R proteomes. t-test difference of SILAC Ratios between A375 Nes-KO and A375 R ( $\log_2$ ) are plotted against p-value ( $-\log_{10}$ ) ( $n=3$ ). Black lines indicate the significance threshold ( $FDR < 0.01$ ;  $s_0 = 1$ ). Significantly up- and downregulated proteins are highlighted in magenta. **[B]** Proteome correlation of A375 Nes-KO relative to A375 R in biological replicate 1 and 2. **[C]** Phosphoproteome correlation of A375 Nes-KO relative to A375 S in biological replicate 1 and 2. **[D]** Over-representation of selected signaling KEGG pathways of A375 Nes-KO compared to A375 S cells using String database analysis. The t-test difference of SILAC ratios between A375 Nes-KO and A375 S ( $\log_2$ ) were plotted for each pathway (t-test,  $FDR < 0.1$ ;  $s_0 = 1$ ). Enrichment score [%] identified significantly changing proteins mapped to the pathway by the total protein count involved in that pathway. Colour of the dots represents the FDR. **[E]** Annotated spectra of phosphorylated peptide LQPQE|pSPPPTANLDR containing a phosphosite at S910 on focal adhesion kinase FAK.
